# Supplementary material for: Comprehensive Analysis of GDF10 Methylation Site-Associated Genes as Prognostic Markers for Endometrial Cancer
Source: Hindawi journal article supplement (doi:10.1155/2022/7117083), 2022-10-10
Supplement: f1 [file 7117083.f1.zip]

| probes   | module  | Col          | GS.cg02974931 | p.GS.cg02974931 | GS.cg04110601 | p.GS.cg04110601 |
|----------|---------|--------------|---------------|-----------------|---------------|-----------------|
| ACVR1C   | bisque4 | -0.123305307 | 0.007637327   | -0.117436074    | 0.011091346   |                 |
| ADRB3    | bisque4 | -0.160004233 | 0.000518831   | -0.164111384    | 0.00036924    |                 |
| AMHR2    | bisque4 | -0.129158428 | 0.005183963   | -0.128238138    | 0.005515251   |                 |
| ANGPTL   | bisque4 | -0.08996741  | 0.052022997   | -0.091843254    | 0.047297706   |                 |
| ASIP     | bisque4 | -0.275507906 | 1.40E-09      | -0.27693963     | 1.14E-09      |                 |
| C21orf62 | bisque4 | -0.13098366  | 0.004579423   | -0.130048549    | 0.004880698   |                 |
| C2orf71  | bisque4 | -0.126055441 | 0.006378359   | -0.138451856    | 0.002713973   |                 |
| CDK15    | bisque4 | -0.137826499 | 0.002838286   | -0.136539732    | 0.003110522   |                 |
| CRYGD    | bisque4 | -0.103562646 | 0.025219051   | -0.102170224    | 0.027259587   |                 |
| CYP11A1  | bisque4 | -0.260122833 | 1.17E-08      | -0.261170052    | 1.01E-08      |                 |
| DCAF8L2  | bisque4 | -0.097207432 | 0.035727416   | -0.087733898    | 0.058156151   |                 |
| DPF3     | bisque4 | -0.17910641  | 9.96E-05      | -0.163707192    | 0.000381945   |                 |
| DUSP26   | bisque4 | -0.222317118 | 1.22E-06      | -0.22715569     | 7.02E-07      |                 |
| EML5     | bisque4 | -0.071310521 | 0.123837721   | -0.105149289    | 0.023055808   |                 |
| ENPP6    | bisque4 | -0.134705431 | 0.003539701   | -0.135578102    | 0.003329235   |                 |
| FAM153F  | bisque4 | -0.129897344 | 0.004931059   | -0.145432802    | 0.001626144   |                 |
| FRMPD3   | bisque4 | -0.105361724 | 0.022778731   | -0.098623255    | 0.033109597   |                 |
| FSHR     | bisque4 | -0.085119016 | 0.066085331   | -0.068502778    | 0.139373781   |                 |
| GATA4    | bisque4 | -0.097227695 | 0.035688744   | -0.115727299    | 0.012328497   |                 |
| GPR88    | bisque4 | -0.066078947 | 0.153952131   | -0.042648373    | 0.357788296   |                 |
| HPCAL4   | bisque4 | -0.194678247 | 2.27E-05      | -0.198707661    | 1.52E-05      |                 |
| INHA     | bisque4 | -0.10643882  | 0.021417834   | -0.116314697    | 0.011890123   |                 |
| LRRTM3   | bisque4 | -0.028381081 | 0.540670142   | -0.028800165    | 0.534706432   |                 |
| MCF2     | bisque4 | -0.043981885 | 0.342941966   | -0.057178173    | 0.21745322    |                 |
| NR5A1    | bisque4 | 0.008775091  | 0.84999347    | -0.001902266    | 0.967297337   |                 |
| NRK      | bisque4 | -0.191980084 | 2.96E-05      | -0.193328415    | 2.59E-05      |                 |
| NT5C1A   | bisque4 | -0.085582081 | 0.064619785   | -0.083596002    | 0.071099147   |                 |
| NXPH2    | bisque4 | -0.20679784  | 6.61E-06      | -0.205983603    | 7.20E-06      |                 |
| PCSK2    | bisque4 | -0.13444679  | 0.003604357   | -0.136530608    | 0.003112534   |                 |
| PLA2G1E  | bisque4 | -0.075526049 | 0.103083204   | -0.063310085    | 0.171987173   |                 |
| PLA2G5   | bisque4 | -0.118472558 | 0.010395682   | -0.117793652    | 0.010846825   |                 |
| PLCXD3   | bisque4 | -0.200384134 | 1.28E-05      | -0.213992047    | 3.07E-06      |                 |
| PON3     | bisque4 | -0.19687709  | 1.83E-05      | -0.196226       | 1.95E-05      |                 |
| PROK1    | bisque4 | -0.10195057  | 0.027594114   | -0.079478863    | 0.08622343    |                 |
| RGAG1    | bisque4 | -0.008661632 | 0.851910498   | -0.012705855    | 0.784199089   |                 |
| SCUBE1   | bisque4 | -0.036463998 | 0.431783514   | -0.026299534    | 0.570773513   |                 |
| SGCZ     | bisque4 | -0.13137697  | 0.004457801   | -0.126567003    | 0.00616586    |                 |
| SIGLEC1  | bisque4 | -0.033828359 | 0.465826354   | -0.032693492    | 0.480930146   |                 |
| STAR     | bisque4 | -0.02553216  | 0.582068571   | -0.036665816    | 0.42923738    |                 |
| STXBP5L  | bisque4 | -0.121979135 | 0.008320316   | -0.145164867    | 0.001659119   |                 |
| VIT      | bisque4 | -0.109589032 | 0.017834736   | -0.097071186    | 0.035988369   |                 |
| WFIKKN   | bisque4 | -0.186180238 | 5.16E-05      | -0.195867304    | 2.02E-05      |                 |
| ABCC4    | black   | -0.230914837 | 4.53E-07      | -0.234439173    | 2.99E-07      |                 |
| ABHD16   | black   | -0.10442609  | 0.024021051   | -0.138253571    | 0.002752842   |                 |

|         |       |              |             |              |             |
|---------|-------|--------------|-------------|--------------|-------------|
| ABHD2   | black | 0.164874735  | 0.000346313 | 0.136418234  | 0.003137416 |
| ABL1    | black | 0.129641367  | 0.005017383 | 0.103499128  | 0.025309181 |
| ABTB2   | black | -0.025110126 | 0.588324578 | -0.031954155 | 0.490911089 |
| AC02504 | black | 0.023458156  | 0.613105147 | 0.010828311  | 0.81546517  |
| AC13126 | black | 0.009075545  | 0.844921209 | -0.017822422 | 0.700871615 |
| ACAD8   | black | 0.211930988  | 3.83E-06    | 0.180071175  | 9.12E-05    |
| ACBD7   | black | -0.039032478 | 0.40003475  | -0.048178814 | 0.298820479 |
| ACER2   | black | 0.131095826  | 0.004544436 | 0.096011444  | 0.03807393  |
| ACO1    | black | 0.100602889  | 0.029724829 | 0.100277958  | 0.03025916  |
| ACOX1   | black | 0.248534537  | 5.27E-08    | 0.247271195  | 6.18E-08    |
| ACTR8   | black | 0.126385527  | 0.006240505 | 0.122318902  | 0.008140332 |
| ACVR1   | black | 0.094034736  | 0.042238314 | 0.080793977  | 0.081133684 |
| ADAM17  | black | -0.135168124 | 0.003426654 | -0.162812708 | 0.000411523 |
| ADAM9   | black | 0.250116759  | 4.30E-08    | 0.233951166  | 3.17E-07    |
| ADAR    | black | -0.017160563 | 0.711474663 | -0.023463815 | 0.613019475 |
| ADAT1   | black | 0.341555657  | 3.18E-14    | 0.349596107  | 7.17E-15    |
| ADCY6   | black | 0.140176277  | 0.002396437 | 0.112598397  | 0.014912489 |
| ADNP    | black | -0.173775988 | 0.000160639 | -0.199360546 | 1.42E-05    |
| AFAP1   | black | -0.043472474 | 0.348566404 | -0.052885935 | 0.254032166 |
| AGER    | black | -0.084018756 | 0.069677218 | -0.09046497  | 0.050732814 |
| AGFG1   | black | -0.119532312 | 0.009724685 | -0.126089695 | 0.006363927 |
| AHCYL1  | black | 0.205438243  | 7.62E-06    | 0.221547383  | 1.33E-06    |
| AHCYL2  | black | 0.03799863   | 0.412642321 | 0.005095434  | 0.912553028 |
| AIFM3   | black | -0.007749916 | 0.867345833 | -0.018353755 | 0.692401342 |
| AJUBA   | black | -0.208915205 | 5.29E-06    | -0.221494791 | 1.34E-06    |
| AKAP12  | black | -0.166774591 | 0.000294885 | -0.159690628 | 0.000532307 |
| ALKBH5  | black | 0.190494663  | 3.42E-05    | 0.203328973  | 9.49E-06    |
| AMER1   | black | 0.007217216  | 0.87638821  | 0.005479083  | 0.90599828  |
| AMMECI  | black | -0.121460011 | 0.008602167 | -0.162040157 | 0.000438772 |
| AMOTL1  | black | 0.002467722  | 0.957584435 | -0.003611574 | 0.937957033 |
| ANGEL1  | black | -0.167138655 | 0.000285883 | -0.211807617 | 3.89E-06    |
| ANKRD1  | black | 0.096480959  | 0.037137617 | 0.067064454  | 0.147891156 |
| ANKS1A  | black | -0.110529135 | 0.016872291 | -0.147738924 | 0.001366214 |
| ANKS3   | black | -0.016373484 | 0.724156374 | -0.006544325 | 0.887833166 |
| ANO6    | black | -0.054171604 | 0.242653922 | -0.08135632  | 0.079032827 |
| APAF1   | black | 0.081392823  | 0.078897994 | 0.072007025  | 0.120200538 |
| APLP2   | black | 0.116189216  | 0.011982595 | 0.082950107  | 0.073317321 |
| APOPT1  | black | 0.054713705  | 0.237964998 | 0.062826134  | 0.17529494  |
| AREL1   | black | -0.032038911 | 0.489761289 | -0.0537193   | 0.246615403 |
| ARHGAP  | black | 0.075181591  | 0.104668327 | 0.079908015  | 0.084535006 |
| ARID1B  | black | 0.003188952  | 0.945205078 | -0.016923529 | 0.715285671 |
| ARIH2   | black | -0.006637864 | 0.886240742 | -0.032160713 | 0.488111466 |
| ARL2BP  | black | 0.03028235   | 0.513883255 | 0.012234118  | 0.792024296 |
| ARNT    | black | -0.090141239 | 0.05156918  | -0.11981414  | 0.009552846 |
| ARNT2   | black | 0.012150133  | 0.793419667 | -0.020525232 | 0.658191153 |



|                |              |             |              |             |
|----------------|--------------|-------------|--------------|-------------|
| ARPC4-Tblack   | 0.000374674  | 0.993557093 | -0.019223597 | 0.678617493 |
| ARSB black     | 0.107080931  | 0.020640576 | 0.093343744  | 0.04378187  |
| ASAP1 black    | -0.223260824 | 1.10E-06    | -0.255508739 | 2.14E-08    |
| ASAP2 black    | -0.070922044 | 0.12590325  | -0.072491568 | 0.117719783 |
| ASCC3 black    | 0.122951184  | 0.00781462  | 0.1241053    | 0.007249973 |
| ASH1L black    | -0.015210457 | 0.743033542 | -0.046389941 | 0.317142565 |
| ATG16L1black   | 0.046250445  | 0.318601557 | 0.036599553  | 0.430072389 |
| ATP10D black   | -0.16040942  | 0.00050189  | -0.163238988 | 0.000397171 |
| ATRN black     | -0.08037128  | 0.082742397 | -0.116172118 | 0.011995244 |
| ATXN7Lblack    | -0.145498049 | 0.001618206 | -0.169570041 | 0.000232037 |
| B3GNT9 black   | 0.028241597  | 0.542662369 | 0.045638689  | 0.325051529 |
| B4GALTblack    | -0.05929599  | 0.200865797 | -0.082538732 | 0.074759275 |
| BACE1 black    | -0.116020398 | 0.012108005 | -0.128813934 | 0.005305816 |
| BAG5 black     | -0.012944165 | 0.78025418  | -0.012175689 | 0.792995004 |
| BAG6 black     | -0.085335049 | 0.06539825  | -0.09126118  | 0.048723863 |
| BAHD1 black    | 0.094569882  | 0.041074653 | 0.066106432  | 0.153780584 |
| BCL2L11 black  | 0.074677391  | 0.107023261 | 0.034389075  | 0.458461936 |
| BCL2L2 black   | -0.131045379 | 0.004560142 | -0.142392391 | 0.002038186 |
| BCL9 black     | 0.098700331  | 0.03297191  | 0.047951976  | 0.301104003 |
| BCORL1 black   | -0.210247699 | 4.59E-06    | -0.230704922 | 4.65E-07    |
| BGLAP black    | 0.027064078  | 0.559624639 | 0.022799793  | 0.623107393 |
| BICD2 black    | 0.006593587  | 0.886994465 | -0.010434169 | 0.82206785  |
| BLOC1S1black   | 0.081655321  | 0.077933879 | 0.096070216  | 0.037955642 |
| BPTF black     | -0.077275205 | 0.095325501 | -0.111767479 | 0.015674048 |
| BRD1 black     | 0.164673108  | 0.000352236 | 0.127970127  | 0.005615248 |
| BRD4 black     | -0.094589222 | 0.041033112 | -0.089606862 | 0.052974905 |
| BTD black      | 0.139724667  | 0.002476145 | 0.13880583   | 0.002645826 |
| BTRC black     | 0.089764802  | 0.052556146 | 0.05717591   | 0.217471456 |
| C12orf49 black | 0.052116553  | 0.261015608 | 0.050858369  | 0.27271872  |
| C19orf43 black | 0.030733932  | 0.507623621 | 0.049359911  | 0.287117196 |
| C19orf71 black | 0.139471113  | 0.002521948 | 0.115382024  | 0.012592782 |
| C1orf123 black | -0.179664854 | 9.46E-05    | -0.18866956  | 4.08E-05    |
| C1orf233 black | 0.014427377  | 0.755831878 | 0.032170611  | 0.487977521 |
| C1orf86 black  | -0.003931472 | 0.932474088 | -0.007703824 | 0.868127554 |
| C2CD3 black    | 0.044473754  | 0.337566383 | 0.028637194  | 0.537021635 |
| C3orf62 black  | 0.092684842  | 0.045297698 | 0.078029765  | 0.092126175 |
| C6orf89 black  | -0.004248474 | 0.927043929 | -0.01838588  | 0.691890428 |
| C7orf61 black  | -0.262579755 | 8.38E-09    | -0.255277998 | 2.21E-08    |
| C8G black      | -0.099856157 | 0.03096504  | -0.070316904 | 0.12917393  |
| C9orf16 black  | 0.197448326  | 1.72E-05    | 0.218541351  | 1.86E-06    |
| CACHD1 black   | -0.17303341  | 0.000171521 | -0.201826422 | 1.11E-05    |
| CAMKK2black    | 0.061272926  | 0.186230503 | 0.042620185  | 0.358106403 |
| CASK black     | -0.037996467 | 0.412668939 | -0.064184514 | 0.166128921 |
| CASP2 black    | 0.21013013   | 4.65E-06    | 0.203487561  | 9.33E-06    |
| CBLL1 black    | -0.081042108 | 0.080201188 | -0.084450836 | 0.068248056 |

|               |              |             |              |             |
|---------------|--------------|-------------|--------------|-------------|
| CCDC101black  | -0.090610973 | 0.050359333 | -0.0723354   | 0.11851492  |
| CCDC117black  | 0.076238908  | 0.099863244 | 0.04637053   | 0.317345322 |
| CCDC12 black  | 0.027548966  | 0.552608818 | 0.04593692   | 0.321896662 |
| CCDC13(black  | 0.030092181  | 0.516531214 | 0.022370162  | 0.629672349 |
| CCDC155black  | 0.275542495  | 1.39E-09    | 0.270420107  | 2.86E-09    |
| CCDC28Fblack  | -0.161897728 | 0.000443975 | -0.148069163 | 0.001332291 |
| CCDC61 black  | 0.010548163  | 0.820156903 | 0.032676157  | 0.481162892 |
| CCDC93 black  | -0.162772814 | 0.000412891 | -0.187773631 | 4.44E-05    |
| CCER2 black   | -0.087395597 | 0.059135361 | -0.100642998 | 0.029659436 |
| CCNI black    | 0.033573391  | 0.469196634 | 0.024878149  | 0.591776422 |
| CCNK black    | -0.042146278 | 0.363481191 | -0.061536537 | 0.184339932 |
| CCS black     | -0.014309714 | 0.757760803 | -0.017405791 | 0.707539472 |
| CDK10 black   | 0.218115822  | 1.95E-06    | 0.229829554  | 5.15E-07    |
| CDK12 black   | 0.034120253  | 0.461984486 | 0.008724867  | 0.850841963 |
| CDK5R1 black  | 0.123736536  | 0.007426289 | 0.083636776  | 0.070960979 |
| CERK black    | -0.045431758 | 0.327252325 | -0.093941209 | 0.042444513 |
| CERS2 black   | 0.001904353  | 0.967261479 | -0.02827491  | 0.542186234 |
| CHADL black   | 0.22772229   | 6.58E-07    | 0.242119028  | 1.18E-07    |
| CHMP1B black  | -0.074990695 | 0.105555061 | -0.084115929 | 0.069353688 |
| CHMP4A black  | -0.055984229 | 0.227226427 | -0.047865809 | 0.301974457 |
| CIPC black    | 0.026272266  | 0.571173079 | 0.011270355  | 0.80807556  |
| CIRH1A black  | 0.102419625  | 0.026883989 | 0.109774481  | 0.017641171 |
| CITED2 black  | -0.111901988 | 0.0155485   | -0.114970083 | 0.012914626 |
| CLASRP black  | -0.0941738   | 0.041933281 | -0.114350586 | 0.013412289 |
| CMTM4 black   | 0.137009887  | 0.003008416 | 0.139398689  | 0.002535173 |
| CNN3 black    | -0.07342073  | 0.113074885 | -0.067712388 | 0.144006443 |
| CNNM4 black   | -0.083919509 | 0.070008927 | -0.104056374 | 0.024527861 |
| CNOT1 black   | 0.135182926  | 0.003423092 | 0.127402701  | 0.005832357 |
| CNPY2 black   | 0.091095558  | 0.049136177 | 0.081872326  | 0.077144091 |
| CORO1C black  | 0.049707881  | 0.283728853 | 0.052126256  | 0.260926727 |
| CORO7 black   | 0.150714406  | 0.001087256 | 0.201966757  | 1.09E-05    |
| CPSF7 black   | -0.108593858 | 0.018905473 | -0.13326476  | 0.003913685 |
| CRADD black   | 0.132220005  | 0.004206887 | 0.115306616  | 0.012651162 |
| CREB3L2black  | 0.040819701  | 0.378792131 | 0.041408594  | 0.371947083 |
| CRISPLDblack  | 0.046409907  | 0.316934107 | 0.017681832  | 0.703119118 |
| CRTC3 black   | -0.015200643 | 0.743193508 | -0.042972438 | 0.354143824 |
| CRYBB3 black  | -0.054641801 | 0.238583235 | -0.051513204 | 0.266583794 |
| CSDE1 black   | -0.149057633 | 0.001235326 | -0.180600045 | 8.69E-05    |
| CSNK1A black  | 0.134512769  | 0.003587762 | 0.118162731  | 0.01059946  |
| CSNK1G black  | 0.182036108  | 7.61E-05    | 0.183531844  | 6.62E-05    |
| CSNK2A'black  | -0.071797465 | 0.121285991 | -0.099833379 | 0.031003557 |
| CTB-102Iblack | 0.050080099  | 0.280134374 | 0.048556931  | 0.295039733 |
| CTBP2 black   | 0.125866294  | 0.006458578 | 0.107460624  | 0.020192598 |
| CTNNB1 black  | 0.034213291  | 0.460763646 | 0.013406677  | 0.772614067 |
| CTNND1 black  | 0.023914004  | 0.606221301 | -0.000929092 | 0.984024184 |

|         |       |              |             |              |             |
|---------|-------|--------------|-------------|--------------|-------------|
| CYTH3   | black | -0.229016713 | 5.66E-07    | -0.21695174  | 2.22E-06    |
| DAGLA   | black | -0.213525385 | 3.23E-06    | -0.210055852 | 4.69E-06    |
| DAZAP2  | black | 0.111656854  | 0.015777969 | 0.116791929  | 0.011544168 |
| DCP1A   | black | -0.052268006 | 0.259630564 | -0.076823208 | 0.097284047 |
| DCTN1   | black | -0.103211698 | 0.025720517 | -0.112923018 | 0.014623909 |
| DDX42   | black | -0.05701485  | 0.218772049 | -0.085600795 | 0.064561123 |
| DENND5  | black | 0.100746323  | 0.029491546 | 0.079513491  | 0.086086195 |
| DEPDC5  | black | 0.021965723  | 0.635879124 | -0.00497457  | 0.914619266 |
| DGKD    | black | -0.028862912 | 0.533816381 | -0.063340328 | 0.171782022 |
| DHX35   | black | -0.21845956  | 1.88E-06    | -0.243794243 | 9.55E-08    |
| DIAPH1  | black | 0.068712527  | 0.138163808 | 0.081807238  | 0.077380293 |
| DIDO1   | black | -0.200015596 | 1.33E-05    | -0.218552329 | 1.86E-06    |
| DIP2B   | black | 0.113382167  | 0.014224122 | 0.093748214  | 0.042872694 |
| DMAP1   | black | -0.18652742  | 5.00E-05    | -0.18572724  | 5.39E-05    |
| DOCK1   | black | 0.047244789  | 0.308297281 | 0.012244065  | 0.791859081 |
| DOCK7   | black | 0.013292295  | 0.774501498 | -0.024681611 | 0.594708153 |
| DOCK9   | black | -0.009584272 | 0.836347602 | -0.021830912 | 0.637953725 |
| DOPEY2  | black | 0.200558356  | 1.26E-05    | 0.186375852  | 5.07E-05    |
| DPAGT1  | black | 0.181108874  | 8.29E-05    | 0.1671723    | 0.000285064 |
| DUSP16  | black | 0.034269654  | 0.460024931 | 0.025519907  | 0.582249767 |
| DUSP7   | black | -0.059855072 | 0.196644587 | -0.070837008 | 0.12635893  |
| DVL2    | black | -0.00377048  | 0.935233049 | -0.036032287 | 0.437259192 |
| DYM     | black | 0.048452443  | 0.296081287 | 0.028732723  | 0.535663913 |
| DYNC1I2 | black | -0.029694715 | 0.522088323 | -0.059458451 | 0.199632437 |
| DYNC1L1 | black | 0.047392031  | 0.306790326 | 0.032545916  | 0.482913555 |
| EDEM1   | black | 0.13775191   | 0.002853454 | 0.139765446  | 0.002468849 |
| EEF2K   | black | 0.035294055  | 0.446714386 | 0.044868568  | 0.333290778 |
| EGFR    | black | 0.024223501  | 0.601567274 | 0.000686584  | 0.988193774 |
| EHF     | black | 0.167658015  | 0.000273484 | 0.168381304  | 0.000257053 |
| EHMT1   | black | 0.224958408  | 9.04E-07    | 0.232989947  | 3.55E-07    |
| EIF2S3L | black | 0.05103112   | 0.271091004 | 0.043353349  | 0.349890058 |
| ELF1    | black | 0.078884274  | 0.0886075   | 0.065981675  | 0.154560428 |
| ELK1    | black | -0.134124937 | 0.003686309 | -0.127297563 | 0.005873404 |
| ELMO2   | black | -0.184032266 | 6.32E-05    | -0.203453191 | 9.37E-06    |
| EMG1    | black | -0.101171772 | 0.028808799 | -0.089638221 | 0.052891541 |
| EMP1    | black | -0.12485468  | 0.006903166 | -0.122891174 | 0.007845025 |
| ENDOD1  | black | 0.052777629  | 0.255007315 | 0.037581101  | 0.417799818 |
| ENOX2   | black | -0.139875742 | 0.002449215 | -0.147001743 | 0.001444824 |
| ENTPD7  | black | 0.265878356  | 5.36E-09    | 0.239936748  | 1.54E-07    |
| EPHA4   | black | -0.116714457 | 0.011599717 | -0.123068452 | 0.007755506 |
| EPN2    | black | -0.043767888 | 0.345297635 | -0.064502314 | 0.164037292 |
| ERAP1   | black | -0.052935518 | 0.253586612 | -0.068729949 | 0.13806367  |
| ERC1    | black | -0.026797249 | 0.563503661 | -0.044102477 | 0.34161901  |
| ERCC3   | black | -0.119153408 | 0.009960039 | -0.147762888 | 0.001363726 |
| ERCC5   | black | 0.033153497  | 0.474776164 | 0.02201982   | 0.635047428 |

|               |              |             |              |             |
|---------------|--------------|-------------|--------------|-------------|
| ERCC6-P black | -0.057153494 | 0.217652139 | -0.075997348 | 0.100945282 |
| ERMP1 black   | 0.023062925  | 0.619101276 | 0.025243844  | 0.586339072 |
| ESYT2 black   | -0.108879397 | 0.018592665 | -0.110118683 | 0.017286763 |
| ETV2 black    | 0.06126142   | 0.186313351 | 0.050025862  | 0.280656206 |
| ETV3 black    | -0.009857563 | 0.831749737 | -0.048631732 | 0.294295605 |
| EVC black     | -0.205051007 | 7.94E-06    | -0.234239174 | 3.06E-07    |
| EXOC2 black   | 0.127966605  | 0.005616573 | 0.121877544  | 0.008374817 |
| EXOC4 black   | -0.017851101 | 0.700413482 | -0.023518307 | 0.612194822 |
| EXOC6B black  | -0.152794618 | 0.000924525 | -0.177246362 | 0.000117833 |
| EXOSC1 black  | 0.182926054  | 7.01E-05    | 0.175712572  | 0.000135227 |
| EYA3 black    | 0.016779213  | 0.717609437 | 0.004842144  | 0.916883823 |
| FAM168A black | 0.04769298   | 0.303725388 | 0.020607259  | 0.656912195 |
| FAM193A black | 0.149049128  | 0.001236132 | 0.137213584  | 0.002965132 |
| FAM193F black | -0.05622313  | 0.225246306 | -0.060270242 | 0.193552103 |
| FAM222F black | 0.173338213  | 0.000166973 | 0.160505578  | 0.000497946 |
| FAN1 black    | -0.01098406  | 0.812859629 | -0.057847171 | 0.212110605 |
| FARP1 black   | 0.086818999  | 0.060835738 | 0.059036855  | 0.202844537 |
| FARP2 black   | 0.117063942  | 0.011350991 | 0.107771956  | 0.019831609 |
| FAT1 black    | 0.172472542  | 0.000180194 | 0.182457281  | 7.32E-05    |
| FBF1 black    | 0.115334718  | 0.012629379 | 0.118383457  | 0.010453926 |
| FBXL20 black  | 0.02722821   | 0.557244995 | 0.021926654  | 0.636480068 |
| FBXO11 black  | -0.1221572   | 0.008225552 | -0.141712463 | 0.002142517 |
| FBXO21 black  | -0.1764072   | 0.00012707  | -0.196103422 | 1.97E-05    |
| FBXO7 black   | -0.033088679 | 0.475640687 | -0.022706834 | 0.62452534  |
| FBXW11 black  | -0.097556153 | 0.035066828 | -0.117930978 | 0.010754195 |
| FKBP15 black  | 0.202749127  | 1.01E-05    | 0.198725074  | 1.52E-05    |
| FKBP2 black   | 0.03126803   | 0.500272016 | 0.025996014  | 0.57522861  |
| FKBP9 black   | -0.069476434 | 0.133825186 | -0.101537878 | 0.028232187 |
| FLCN black    | 0.062619507  | 0.176721551 | 0.048205413  | 0.298553464 |
| FLNB black    | 0.084299583  | 0.068745588 | 0.088103886  | 0.057100639 |
| FOCAD black   | 0.1711578    | 0.000202164 | 0.153642631  | 0.00086489  |
| FOXJ3 black   | -0.02030591  | 0.661615698 | -0.038103251 | 0.411355914 |
| FRAS1 black   | 0.170435864  | 0.00021527  | 0.145704485  | 0.001593323 |
| FRG1B black   | -0.236690315 | 2.28E-07    | -0.241981727 | 1.20E-07    |
| FRRS1 black   | 0.182419068  | 7.34E-05    | 0.157742373  | 0.000623574 |
| FZD1 black    | 0.186469272  | 5.03E-05    | 0.172787518  | 0.000175274 |
| FZD5 black    | 0.016734587  | 0.718328539 | 0.036275791  | 0.434165783 |
| GALK2 black   | 0.175189505  | 0.00014169  | 0.167930787  | 0.000267176 |
| GALNT4 black  | 0.262293071  | 8.71E-09    | 0.217585319  | 2.07E-06    |
| GATAD2 black  | 0.026060515  | 0.574280482 | -0.011150784 | 0.810072771 |
| GGCX black    | -0.183842811 | 6.43E-05    | -0.195487152 | 2.10E-05    |
| GID4 black    | 0.07480294   | 0.106432991 | 0.053989581  | 0.244242764 |
| GIGYF2 black  | -0.068467143 | 0.139580158 | -0.112295807 | 0.015185974 |
| GLCE black    | 0.07008766   | 0.13043     | 0.028376334  | 0.540737879 |
| GLTSCR1 black | -0.027611012 | 0.551714179 | -0.053584148 | 0.247807837 |

|          |       |              |             |              |             |
|----------|-------|--------------|-------------|--------------|-------------|
| GLUD2    | black | -0.092395188 | 0.045977879 | -0.107311359 | 0.020367689 |
| GMEB1    | black | 0.158695573  | 0.000577246 | 0.145955013  | 0.001563597 |
| GNB1     | black | 0.178057745  | 0.000109505 | 0.174345743  | 0.000152732 |
| GNE      | black | 0.083812833  | 0.070366904 | 0.088689476  | 0.055462545 |
| GNS      | black | 0.042716933  | 0.357015308 | 0.014314361  | 0.757684581 |
| GOLGA2   | black | 0.113636968  | 0.014006436 | 0.098177154  | 0.033916178 |
| GPATCH   | black | -0.011542283 | 0.803538182 | -0.04582258  | 0.323103852 |
| GPHN     | black | 0.260433789  | 1.12E-08    | 0.238468375  | 1.84E-07    |
| GRB10    | black | 0.043754878  | 0.345441186 | 0.054997201  | 0.235538448 |
| GSTO1    | black | 0.107104981  | 0.020611947 | 0.109956051  | 0.017453434 |
| GTF2I    | black | -0.004551224 | 0.921861066 | -0.037869588 | 0.414232281 |
| GTPBP1   | black | 0.006565565  | 0.887471533 | 0.010869343  | 0.814778539 |
| HAGHL    | black | -0.007645271 | 0.869120815 | 0.014333251  | 0.757374826 |
| HBP1     | black | -0.12403876  | 0.007281508 | -0.132368518 | 0.004164031 |
| HCFC1R1  | black | -0.01619086  | 0.727109858 | 0.003723709  | 0.936034731 |
| HDAC10   | black | 0.222482764  | 1.20E-06    | 0.237775602  | 2.00E-07    |
| HDAC4    | black | -0.093053909 | 0.044443304 | -0.125363362 | 0.006676294 |
| HDHD2    | black | 0.018677506  | 0.687258892 | -0.021996827 | 0.635400865 |
| HEATR1   | black | -0.024607794 | 0.595810991 | -0.060972432 | 0.18840297  |
| HECTD1   | black | 0.001594785  | 0.972581113 | -0.017070828 | 0.712916578 |
| HIF1AN   | black | -0.019075282 | 0.680960346 | -0.025716945 | 0.579339214 |
| HIP1     | black | 0.051887412  | 0.263120787 | 0.037074238  | 0.424111408 |
| HIPK1    | black | 0.156485096  | 0.00068996  | 0.140927345  | 0.002269046 |
| HIST1H4. | black | -0.034686633 | 0.454580402 | -0.018649077 | 0.687709875 |
| HMG20A   | black | 0.009615709  | 0.835818429 | -0.034312465 | 0.45946427  |
| HSD11B1  | black | 0.054872117  | 0.236606922 | 0.053088133  | 0.252218585 |
| HSD3B7   | black | -0.107001239 | 0.02073569  | -0.102247734 | 0.027142376 |
| HSPG2    | black | -0.072941723 | 0.115451145 | -0.077421513 | 0.094698319 |
| HYOU1    | black | 0.136755898  | 0.003063191 | 0.112450892  | 0.01504526  |
| ICMT     | black | 0.212872751  | 3.46E-06    | 0.205196213  | 7.82E-06    |
| IGSF3    | black | 0.005012412  | 0.913972277 | -0.04115369  | 0.374900552 |
| INAFM1   | black | -0.001943053 | 0.966596567 | 0.019628017  | 0.672244879 |
| INO80B   | black | -0.060665935 | 0.190637979 | -0.054389825 | 0.240758682 |
| INPP5B   | black | -0.118828088 | 0.010166131 | -0.131225692 | 0.004504231 |
| IPO9     | black | 0.118207752  | 0.010569631 | 0.086045705  | 0.063179358 |
| IPP      | black | 0.161968446  | 0.000441385 | 0.14787017   | 0.001352638 |
| IQGAP1   | black | 0.057871629  | 0.211917085 | 0.043124471  | 0.352442129 |
| ISY1     | black | -0.219069177 | 1.76E-06    | -0.200037849 | 1.33E-05    |
| ITGA2    | black | 0.121834962  | 0.008397755 | 0.103798512  | 0.024886784 |
| ITGA6    | black | 0.202554349  | 1.03E-05    | 0.164319069  | 0.000362866 |
| ITGB1    | black | 0.065004799  | 0.160770596 | 0.029203447  | 0.528998993 |
| ITPR3    | black | 0.093233694  | 0.044032033 | 0.097705823  | 0.03478651  |
| ITPRIPL2 | black | -0.079496117 | 0.086155026 | -0.076695883 | 0.097841511 |
| JAG1     | black | 0.078197469  | 0.091426923 | 0.080217609  | 0.083333592 |
| JAK1     | black | -0.27107202  | 2.62E-09    | -0.274840871 | 1.54E-09    |

|         |       |              |             |              |             |
|---------|-------|--------------|-------------|--------------|-------------|
| JARID2  | black | -0.031868263 | 0.492077777 | -0.058239148 | 0.209024534 |
| JOSD1   | black | 0.054364125  | 0.24098134  | 0.033264662  | 0.47329549  |
| JUND    | black | -0.128593191 | 0.005385246 | -0.136919781 | 0.003027745 |
| KANK1   | black | -0.028902597 | 0.533253842 | -0.070940245 | 0.125805882 |
| KANSL1  | black | 0.047171574  | 0.309048424 | 0.017584457  | 0.704677282 |
| KAT6B   | black | -0.091438013 | 0.048286841 | -0.123045751 | 0.007766918 |
| KAT7    | black | -0.061397227 | 0.185337269 | -0.08357876  | 0.071157641 |
| KCTD18  | black | -0.01115562  | 0.809991965 | -0.046034384 | 0.320869963 |
| KCTD20  | black | 0.032146926  | 0.488298061 | 0.020521183  | 0.658254313 |
| KDM2A   | black | -0.051154749 | 0.269930214 | -0.068784428 | 0.137750891 |
| KDM2B   | black | 0.05770901   | 0.213206134 | 0.056437666  | 0.223478627 |
| KDM4A   | black | 0.00035591   | 0.993879748 | -0.024091962 | 0.603543321 |
| KDM6A   | black | -0.005026601 | 0.913729688 | -0.022321013 | 0.630425246 |
| KDM6B   | black | 0.239095023  | 1.70E-07    | 0.230173342  | 4.95E-07    |
| KIAA010 | black | 0.002033783  | 0.965037782 | -0.006626603 | 0.886432423 |
| KIAA092 | black | -0.053773767 | 0.246135972 | -0.042159681 | 0.363328494 |
| KIAA114 | black | 0.084388343  | 0.068453261 | 0.075163353  | 0.104752791 |
| KIAA121 | black | -0.065290255 | 0.158936781 | -0.092498391 | 0.045734554 |
| KIAA121 | black | 0.035616644  | 0.442568516 | 0.022110467  | 0.633654836 |
| KIAA146 | black | 0.097455498  | 0.035256425 | 0.070214682  | 0.129732861 |
| KIAA154 | black | 0.043002702  | 0.35380466  | 0.016312763  | 0.725137941 |
| KIAA167 | black | 0.066153165  | 0.153489232 | 0.070266757  | 0.129447892 |
| KIAA195 | black | 0.088497999  | 0.055993821 | 0.070069897  | 0.130527717 |
| KIDINS2 | black | -0.127487532 | 0.005799427 | -0.1590928   | 0.0005589   |
| KIF13A  | black | -0.176294078 | 0.000128366 | -0.196755671 | 1.85E-05    |
| KIF13B  | black | 0.362114813  | 6.46E-16    | 0.355845169  | 2.19E-15    |
| KIF1B   | black | -0.178370947 | 0.000106441 | -0.203078008 | 9.74E-06    |
| KIF3C   | black | -0.282286335 | 5.28E-10    | -0.307137234 | 1.17E-11    |
| KLF10   | black | -0.039276098 | 0.397097808 | -0.072730494 | 0.116511373 |
| KLF11   | black | -0.196889607 | 1.82E-05    | -0.225719482 | 8.29E-07    |
| KLHL18  | black | 0.233480069  | 3.35E-07    | 0.237415608  | 2.09E-07    |
| KLHL20  | black | -0.011698482 | 0.800934815 | -0.035503077 | 0.44402556  |
| KMT2E   | black | -0.027232763 | 0.557179058 | -0.045689715 | 0.324510335 |
| KRTCAP  | black | 0.113042384  | 0.014519038 | 0.090652481  | 0.050253576 |
| LAMC1   | black | -0.115686467 | 0.012359494 | -0.132258898 | 0.004195625 |
| LANCL1  | black | -0.060543141 | 0.19153884  | -0.087660429 | 0.058367659 |
| LARGE   | black | 0.098756119  | 0.032872556 | 0.080431526  | 0.082511551 |
| LASP1   | black | -0.065878991 | 0.155204533 | -0.080611669 | 0.081824387 |
| LDLR    | black | 0.182461073  | 7.32E-05    | 0.169386652  | 0.000235741 |
| LENG8   | black | -0.111136711 | 0.016274728 | -0.12479321  | 0.006931044 |
| LIMD1   | black | 0.2527237    | 3.08E-08    | 0.243433309  | 9.99E-08    |
| LIN7B   | black | 0.162584771  | 0.000419395 | 0.173259828  | 0.000168132 |
| LMO7    | black | -0.037202894 | 0.422504113 | -0.033439597 | 0.470970546 |
| LMTK2   | black | -0.031444367 | 0.49785725  | -0.032817049 | 0.479272946 |
| LNK2    | black | 0.171403444  | 0.000197877 | 0.166459235  | 0.000302896 |

|         |       |              |             |              |             |
|---------|-------|--------------|-------------|--------------|-------------|
| LPIN2   | black | -0.238466775 | 1.84E-07    | -0.237431182 | 2.08E-07    |
| LRBA    | black | 0.288098154  | 2.24E-10    | 0.278083395  | 9.70E-10    |
| LRIG3   | black | -0.020759611 | 0.6545394   | -0.010368038 | 0.823176931 |
| LRP10   | black | 0.190828928  | 3.31E-05    | 0.193805713  | 2.48E-05    |
| LRRC16A | black | 0.070646266  | 0.127385718 | 0.080998552  | 0.080364244 |
| LRRC8A  | black | 0.147980184  | 0.001341354 | 0.152644128  | 0.000935497 |
| LRRC8E  | black | 0.260922677  | 1.05E-08    | 0.237317954  | 2.11E-07    |
| LTBP1   | black | 0.028233778  | 0.542774159 | 0.021567522  | 0.642015175 |
| LUC7L   | black | 0.06115551   | 0.187077175 | 0.054356769  | 0.241045103 |
| LUZP1   | black | -0.064352195 | 0.16502284  | -0.078265031 | 0.091146424 |
| LYSMD1  | black | -0.040216758 | 0.385879983 | -0.070198341 | 0.129822385 |
| MAFK    | black | -0.020091434 | 0.6649714   | -0.038162477 | 0.41062874  |
| MAGIX   | black | 0.093365026  | 0.04373363  | 0.117736581  | 0.010885529 |
| MAML2   | black | -0.092748906 | 0.045148406 | -0.110170094 | 0.017234365 |
| MAML3   | black | 0.09882367   | 0.032752594 | 0.075773345  | 0.101956984 |
| MAP1LC  | black | 0.004907292  | 0.915769673 | 0.0305818    | 0.509727937 |
| MAP2    | black | 0.03010794   | 0.516311525 | 0.017792879  | 0.701343687 |
| MAP2K5  | black | 0.009959932  | 0.830028942 | -0.00924505  | 0.842062443 |
| MAP4    | black | -0.032259642 | 0.486773658 | -0.035329054 | 0.446263531 |
| MAP4K4  | black | 0.07457802   | 0.107492289 | 0.076183523  | 0.100110517 |
| MAPK1   | black | 0.119556311  | 0.009709946 | 0.098100736  | 0.034056013 |
| 8-Mar   | black | -0.173109031 | 0.000170382 | -0.193937267 | 2.44E-05    |
| MARK2   | black | 0.07393227   | 0.110579832 | 0.062564517  | 0.177102661 |
| MAU2    | black | -0.092034279 | 0.046837361 | -0.107494569 | 0.020152963 |
| MBLAC1  | black | -0.011016486 | 0.812317424 | 0.009776275  | 0.833116741 |
| MBOAT1  | black | 0.072046234  | 0.119998287 | 0.055389644  | 0.232208256 |
| MBP     | black | -0.016721585 | 0.718538085 | 0.017698185  | 0.702857564 |
| MED1    | black | 0.017805277  | 0.701145562 | -0.019734132 | 0.670576636 |
| MED14   | black | 0.100699156  | 0.029568085 | 0.085764109  | 0.064051059 |
| METTTL2 | black | -0.192289911 | 2.87E-05    | -0.1884002   | 4.18E-05    |
| METTTL3 | black | -0.004011138 | 0.931109119 | -0.017792593 | 0.701348251 |
| MFAP3   | black | 0.015775621  | 0.733840274 | -0.010929688 | 0.813768987 |
| MFN2    | black | -0.056263619 | 0.22491193  | -0.065635092 | 0.156742583 |
| MFSD2B  | black | -0.199777441 | 1.36E-05    | -0.183149898 | 6.86E-05    |
| MFSD9   | black | 0.139675848  | 0.002484904 | 0.138150658  | 0.002773215 |
| MGMT    | black | 0.07362584   | 0.112069194 | 0.097713497  | 0.034772188 |
| MIIP    | black | -0.036128933 | 0.436029917 | -0.033515168 | 0.46996814  |
| MINOS1  | black | -0.007040209 | 0.879396452 | 0.006215688  | 0.893431467 |
| MMS19   | black | 0.071072477  | 0.125100248 | 0.042440789  | 0.360135123 |
| MOAP1   | black | -0.040923649 | 0.3775783   | -0.028078346 | 0.544998688 |
| MRPS21  | black | -0.067564282 | 0.14488747  | -0.081000511 | 0.080356905 |
| MSRB2   | black | 0.169260174  | 0.000238328 | 0.193525075  | 2.54E-05    |
| MTERF4  | black | -0.123854216 | 0.007369611 | -0.138350796 | 0.002733721 |
| MTF1    | black | -0.084021428 | 0.069668304 | -0.090427482 | 0.05082908  |
| MTG1    | black | 0.010809582  | 0.815778637 | 0.015812344  | 0.733244227 |

|        |       |              |             |              |             |
|--------|-------|--------------|-------------|--------------|-------------|
| MTMR1  | black | 0.006477004  | 0.888979527 | -0.000948441 | 0.983691538 |
| MTMR12 | black | -0.136595253 | 0.003098302 | -0.14544913  | 0.001624154 |
| MTOR   | black | 0.165363847  | 0.000332328 | 0.122406671  | 0.008094407 |
| MYC    | black | -0.194523138 | 2.31E-05    | -0.240770178 | 1.39E-07    |
| MYH10  | black | -0.078315862 | 0.09093584  | -0.096164572 | 0.037766386 |
| MYH9   | black | 0.028622042  | 0.53723713  | 0.0378057    | 0.415020792 |
| MYL5   | black | 0.093704365  | 0.042970484 | 0.098303103  | 0.033686775 |
| MYO1E  | black | 0.186612114  | 4.96E-05    | 0.202146234  | 1.07E-05    |
| MYOF   | black | 0.136677984  | 0.003080175 | 0.123256167  | 0.007661712 |
| NATD1  | black | 0.019676665  | 0.671479884 | 0.027884529  | 0.547778889 |
| NAV2   | black | 0.173323418  | 0.000167191 | 0.142676224  | 0.001996025 |
| NBAS   | black | 0.13894305   | 0.00261983  | 0.134075239  | 0.003699113 |
| NBPF3  | black | 0.036301988  | 0.433833738 | 0.010612596  | 0.819077249 |
| NCOA1  | black | -0.11953477  | 0.009723175 | -0.146192823 | 0.001535852 |
| NCOA4  | black | 0.041226452  | 0.374056015 | -0.002602263 | 0.955274278 |
| NCOA6  | black | -0.013445    | 0.771981987 | -0.039977244 | 0.388717844 |
| NCOR1  | black | 0.190187449  | 3.52E-05    | 0.175493205  | 0.000137903 |
| NDEL1  | black | 0.158027341  | 0.000609374 | 0.142914172  | 0.001961296 |
| NDUFA7 | black | 0.114214966  | 0.013523465 | 0.125482087  | 0.006624314 |
| NDUFB1 | black | 0.141561842  | 0.002166279 | 0.164933397  | 0.000344607 |
| NDUFB8 | black | 0.137094793  | 0.002990304 | 0.147535917  | 0.00138746  |
| NDUFV2 | black | -0.020689392 | 0.655632602 | -0.013372766 | 0.773173501 |
| NEDD9  | black | -0.08991207  | 0.052168172 | -0.112612739 | 0.014899634 |
| NENF   | black | 0.186663613  | 4.93E-05    | 0.195910319  | 2.01E-05    |
| NEO1   | black | -0.282494912 | 5.12E-10    | -0.287716467 | 2.37E-10    |
| NFATC3 | black | 0.121786785  | 0.008423775 | 0.128369194  | 0.005466939 |
| NFKB1  | black | 0.056591133  | 0.222220209 | 0.049828885  | 0.282556925 |
| NFRKB  | black | 0.054159181  | 0.242762129 | 0.038825514  | 0.402539985 |
| NFX1   | black | 0.057681282  | 0.213426492 | 0.05542548   | 0.231905827 |
| NHEJ1  | black | 0.039225618  | 0.397705299 | -0.003074393 | 0.947170598 |
| NIPAL3 | black | 0.007617558  | 0.869590995 | 0.016358304  | 0.724401714 |
| NME3   | black | 0.181952126  | 7.67E-05    | 0.224049835  | 1.00E-06    |
| NOL6   | black | 0.001343088  | 0.97690718  | 0.009996771  | 0.829409878 |
| NOL9   | black | -0.008687051 | 0.851480939 | -0.021969923 | 0.635814537 |
| NOTCH2 | black | -0.161597839 | 0.000455119 | -0.176961816 | 0.000120892 |
| NOTCH3 | black | -0.06818105  | 0.141245511 | -0.075488279 | 0.103256083 |
| NPEPL1 | black | -0.016537207 | 0.721512057 | -0.006542468 | 0.887864781 |
| NPTN   | black | -0.004448241 | 0.923623691 | -0.020339075 | 0.6610974   |
| NSD1   | black | -0.026074452 | 0.574075716 | -0.045528278 | 0.326224602 |
| NT5C2  | black | 0.086343647  | 0.062267727 | 0.054171886  | 0.242651465 |
| NUMB   | black | 0.143572978  | 0.001868008 | 0.147528583  | 0.001388233 |
| NUP153 | black | -0.150389456 | 0.00111494  | -0.168451081 | 0.000255517 |
| NUP160 | black | -0.024756675 | 0.593587651 | -0.056680738 | 0.2214878   |
| NUP188 | black | 0.385713284  | 5.15E-18    | 0.381130648  | 1.36E-17    |
| NUP214 | black | -0.042378223 | 0.360844347 | -0.058206619 | 0.209279399 |



|         |       |              |             |              |             |
|---------|-------|--------------|-------------|--------------|-------------|
| NUP98   | black | 0.076601393  | 0.098256852 | 0.056702046  | 0.221313884 |
| NUPR1   | black | 0.000562235  | 0.990331919 | 0.021716689  | 0.639713715 |
| OCEL1   | black | -0.015947049 | 0.731059165 | -0.001908834 | 0.967184494 |
| OCLN    | black | 0.181894168  | 7.71E-05    | 0.181398318  | 8.07E-05    |
| OGFR    | black | -0.199491891 | 1.40E-05    | -0.165802136 | 0.000320245 |
| ORAI3   | black | -0.070726995 | 0.126950357 | -0.03783719  | 0.414632026 |
| OSBPL10 | black | -0.091190009 | 0.048900686 | -0.083901746 | 0.070068432 |
| P2RY11  | black | 0.267288603  | 4.42E-09    | 0.272434333  | 2.16E-09    |
| PABPN1  | black | -0.068286575 | 0.140629486 | -0.084547426 | 0.067931879 |
| PARD3   | black | -0.120176975 | 0.009335592 | -0.134745866 | 0.003529689 |
| PARP4   | black | 0.108674002  | 0.018817215 | 0.08938192   | 0.053576105 |
| PATL1   | black | 0.043165831  | 0.351980083 | 0.036160819  | 0.435624779 |
| PCDH7   | black | 0.184517522  | 6.04E-05    | 0.169166501  | 0.000240262 |
| PCDHAC  | black | 0.042053925  | 0.364534435 | 0.046520855  | 0.315777327 |
| PCDHGB  | black | -0.065423007 | 0.15808935  | -0.083069179 | 0.072904205 |
| PCDHGC  | black | -0.067155214 | 0.147342244 | -0.067823987 | 0.143345288 |
| PCGF3   | black | 0.147668819  | 0.001373517 | 0.140013501  | 0.002424893 |
| PCP2    | black | 0.114936245  | 0.012941383 | 0.100679774  | 0.029599586 |
| PDK2    | black | -0.158024848 | 0.000609497 | -0.165595003 | 0.000325903 |
| PDP2    | black | 0.173300337  | 0.000167532 | 0.177604948  | 0.000114082 |
| PERM1   | black | -0.069007704 | 0.136474709 | -0.05403744  | 0.243824303 |
| PET100  | black | 0.099878179  | 0.030927841 | 0.108969428  | 0.018494977 |
| PEX26   | black | 0.090415739  | 0.050859268 | 0.074737171  | 0.106741885 |
| PEX5    | black | -0.087715247 | 0.058209784 | -0.131998637 | 0.004271506 |
| PFAS    | black | 0.170296076  | 0.000217898 | 0.138894623  | 0.002628978 |
| PFKM    | black | -0.306203847 | 1.36E-11    | -0.330185534 | 2.43E-13    |
| PGS1    | black | -0.233302975 | 3.42E-07    | -0.256841824 | 1.80E-08    |
| PHACTR  | black | 0.010297479  | 0.824360655 | -0.006398043 | 0.890324388 |
| PHC1    | black | -0.06901901  | 0.136410329 | -0.106196983 | 0.02171709  |
| PHF12   | black | 0.004728504  | 0.91882767  | -0.009522388 | 0.837389538 |
| PHF2    | black | 0.096517979  | 0.03706463  | 0.072818932  | 0.116066551 |
| PHF8    | black | 0.131278967  | 0.00448783  | 0.114154926  | 0.013572942 |
| PHKA1   | black | 0.088166516  | 0.056923548 | 0.074694721  | 0.10694163  |
| PHKG2   | black | 0.025133789  | 0.587973    | 0.047533929  | 0.305342663 |
| PHLDB1  | black | -0.188233945 | 4.25E-05    | -0.198324419 | 1.58E-05    |
| PHRF1   | black | 0.12517631   | 0.00675893  | 0.116353281  | 0.011861816 |
| PI4KB   | black | -0.00731613  | 0.874707931 | -0.021759734 | 0.639050228 |
| PIAS3   | black | 0.245259627  | 7.96E-08    | 0.207179559  | 6.35E-06    |
| PIGG    | black | 0.155560831  | 0.000742876 | 0.138999702  | 0.002609166 |
| PIGO    | black | 0.133350403  | 0.00389049  | 0.122755114  | 0.007914355 |
| PIK3C2B | black | -0.103820956 | 0.024855364 | -0.09949622  | 0.031578486 |
| PIK3R2  | black | 0.016885248  | 0.715901819 | 0.04396596   | 0.343116908 |
| PIK3R4  | black | -0.165425925 | 0.000330591 | -0.191446228 | 3.12E-05    |
| PIP4K2C | black | 0.017852054  | 0.700398256 | 0.017477332  | 0.706392905 |
| PIP5K1B | black | 0.08129019   | 0.07927757  | 0.073529552  | 0.112540434 |

|               |              |             |              |             |
|---------------|--------------|-------------|--------------|-------------|
| PITPNA black  | 0.234055457  | 3.13E-07    | 0.226445385  | 7.62E-07    |
| PITPNM3black  | 0.080709503  | 0.08145314  | 0.070186449  | 0.129887564 |
| PKP2 black    | 0.079243964  | 0.087159036 | 0.075124032  | 0.104935075 |
| PLAGL2 black  | -0.179565836 | 9.55E-05    | -0.21225127  | 3.70E-06    |
| PLCG1 black   | 0.077306369  | 0.095191632 | 0.057425163  | 0.215469637 |
| PLEKHA1black  | 0.048811049  | 0.292516865 | 0.033806004  | 0.466121313 |
| PLEKHB1black  | 0.075407176  | 0.10362807  | 0.085454363  | 0.065021301 |
| PLK2 black    | 0.044508008  | 0.337194049 | 0.020380209  | 0.660454778 |
| PNMA1 black   | -0.263879973 | 7.03E-09    | -0.270897752 | 2.68E-09    |
| POFUT1 black  | -0.198325432 | 1.58E-05    | -0.223541564 | 1.06E-06    |
| POLD4 black   | 0.035252454  | 0.447250636 | 0.040479559  | 0.382780772 |
| POLH black    | 0.036943902  | 0.425743323 | 0.029198283  | 0.529071879 |
| PPAP2B black  | -0.126906548 | 0.006028346 | -0.133841123 | 0.003759972 |
| PPFIA1 black  | -0.016157286 | 0.727653265 | -0.046922764 | 0.31161006  |
| PPRC1 black   | 0.05959809   | 0.198576753 | 0.01402761   | 0.762391592 |
| PRDM10 black  | 0.093805573  | 0.042745058 | 0.067650817  | 0.144372207 |
| PREP black    | 0.206320173  | 6.95E-06    | 0.184234821  | 6.20E-05    |
| PROSER1black  | 0.130004557  | 0.004895302 | 0.122448899  | 0.008072393 |
| PROSER2black  | -0.037729034 | 0.415968177 | -0.051977989 | 0.262287244 |
| PRPF40B black | -0.090713053 | 0.050099577 | -0.141815415 | 0.002126412 |
| PRR14L black  | 0.117444533  | 0.011085506 | 0.093111065  | 0.044312206 |
| PRR22 black   | 0.242412093  | 1.13E-07    | 0.236909498  | 2.22E-07    |
| PRR5 black    | 0.026112879  | 0.573511314 | 0.054191136  | 0.242483863 |
| PRRC2A black  | -0.101729513 | 0.027934337 | -0.117881424 | 0.010787539 |
| PRUNE black   | -0.058177681 | 0.209506316 | -0.094775336 | 0.04063515  |
| PTPLAD1black  | 0.100344951  | 0.030148325 | 0.082456354  | 0.075050783 |
| PTPN1 black   | -0.065777648 | 0.155842216 | -0.062926767 | 0.174603259 |
| PTPRA black   | -0.144552788 | 0.001736761 | -0.164347898 | 0.000361989 |
| PTPRJ black   | 0.079616212  | 0.085680125 | 0.075840053  | 0.10165486  |
| PTPRK black   | -0.075962786 | 0.101100858 | -0.054015807 | 0.244013392 |
| PUM1 black    | 0.013742935  | 0.767073224 | 0.001971102  | 0.966114659 |
| RAB11F1black  | 0.205392511  | 7.66E-06    | 0.20437355   | 8.52E-06    |
| RAB4B black   | 0.068206036  | 0.141099462 | 0.09705895   | 0.036011883 |
| RAF1 black    | 0.005191208  | 0.910916122 | -0.019716478 | 0.670854064 |
| RANGRF black  | 0.271318748  | 2.53E-09    | 0.247074984  | 6.33E-08    |
| RAP2B black   | -0.062724024 | 0.175998865 | -0.05374502  | 0.24638893  |
| RASA1 black   | 0.009907482  | 0.830910505 | -0.027825206 | 0.548631229 |
| RBL2 black    | 0.02737223   | 0.55516101  | -0.005544515 | 0.904880992 |
| RBSN black    | -0.120667789 | 0.009048704 | -0.147362367 | 0.001405864 |
| RC3H2 black   | -0.008324673 | 0.857608958 | -0.011063    | 0.811539809 |
| RCN3 black    | -0.158218689 | 0.000600009 | -0.137991402 | 0.002805012 |
| RCOR1 black   | -0.001707308 | 0.970647347 | -0.0257593   | 0.578714449 |
| REPS1 black   | 0.005585137  | 0.904187441 | 0.008560964  | 0.853612144 |
| RERE black    | -0.189806151 | 3.65E-05    | -0.211619342 | 3.96E-06    |
| RHBDD1 black  | -0.112149445 | 0.01531983  | -0.122255666 | 0.008173565 |

|          |       |              |             |              |             |
|----------|-------|--------------|-------------|--------------|-------------|
| RILP     | black | 0.01264111   | 0.785271812 | 0.026569112  | 0.566830403 |
| RIN2     | black | -0.247206895 | 6.23E-08    | -0.251625702 | 3.55E-08    |
| RIPK1    | black | -0.034854105 | 0.452403925 | -0.03103752  | 0.503437961 |
| RNASEH   | black | -0.118080614 | 0.01065406  | -0.102783896 | 0.026343404 |
| RNASET   | black | -0.076877634 | 0.097046527 | -0.070420658 | 0.128608535 |
| RNF111   | black | 0.062400841  | 0.178240644 | 0.046224971  | 0.318868461 |
| RNF214   | black | 0.049143301  | 0.289240128 | 0.003132413  | 0.946175085 |
| RNF38    | black | -0.138450067 | 0.002714322 | -0.152455936 | 0.000949386 |
| RNMT     | black | -0.149135247 | 0.001227995 | -0.18531619  | 5.60E-05    |
| ROBO1    | black | 0.086081202  | 0.063070173 | 0.085423345  | 0.065119124 |
| RP11-514 | black | 0.125491069  | 0.006620396 | 0.146131264  | 0.00154299  |
| RP11-544 | black | 0.161058756  | 0.000475809 | 0.140477804  | 0.00234453  |
| RP11-729 | black | -0.000840413 | 0.985548856 | -0.026490188 | 0.567983475 |
| RPRD2    | black | 0.005855287  | 0.899576929 | -0.014870627 | 0.74857912  |
| RREB1    | black | 0.283671267  | 4.31E-10    | 0.273536001  | 1.85E-09    |
| S100A1   | black | -0.181206341 | 8.21E-05    | -0.184214522 | 6.21E-05    |
| S100A13  | black | -0.115983139 | 0.01213584  | -0.099395139 | 0.031752619 |
| SALL1    | black | 0.299827851  | 3.72E-11    | 0.275287931  | 1.45E-09    |
| SALL2    | black | -0.259047109 | 1.34E-08    | -0.27326866  | 1.92E-09    |
| SAP25    | black | -0.147836365 | 0.001356123 | -0.145321314 | 0.001639791 |
| SARM1    | black | -0.099525619 | 0.031527994 | -0.107497943 | 0.020149028 |
| SARS2    | black | -0.132437463 | 0.004144271 | -0.144897672 | 0.001692612 |
| SBNO1    | black | -0.002565001 | 0.955914054 | -0.01020312  | 0.825944286 |
| SCAF4    | black | -0.080881807 | 0.080802613 | -0.10533223  | 0.022817027 |
| SCFD2    | black | 0.204534387  | 8.37E-06    | 0.201056371  | 1.20E-05    |
| SCT      | black | -0.033018954 | 0.47657162  | -0.045225667 | 0.329453745 |
| SEC16A   | black | 0.41002939   | 2.31E-20    | 0.418943997  | 2.85E-21    |
| SEC23B   | black | 0.250072004  | 4.33E-08    | 0.251257624  | 3.72E-08    |
| SEC24B   | black | 0.092531535  | 0.04565664  | 0.074606068  | 0.107359739 |
| SEC24D   | black | 0.16224522   | 0.00043138  | 0.166433773  | 0.000303552 |
| SELK     | black | 0.060446157  | 0.192252561 | 0.079858258  | 0.084729386 |
| SERGEF   | black | 0.194913714  | 2.22E-05    | 0.183250299  | 6.80E-05    |
| SETD2    | black | 0.021503606  | 0.643002368 | -0.004257039 | 0.926897255 |
| SETD5    | black | 0.031158587  | 0.501773846 | -0.003006877 | 0.948329133 |
| SETDB1   | black | -0.034113222 | 0.462076813 | -0.069680107 | 0.132686355 |
| SETSIP   | black | 0.091291491  | 0.048648719 | 0.073737067  | 0.111526778 |
| SF3B3    | black | 0.120372325  | 0.009220452 | 0.136517285  | 0.003115475 |
| SFXN4    | black | 0.063635247  | 0.169791006 | 0.043102155  | 0.352691585 |
| SGPL1    | black | 0.118985423  | 0.010065991 | 0.116932907  | 0.011443689 |
| SH3BP4   | black | 0.241427844  | 1.28E-07    | 0.237799697  | 1.99E-07    |
| SH3PXD2  | black | 0.109947737  | 0.017461991 | 0.089556564  | 0.053108845 |
| SH3RF1   | black | 0.138521955  | 0.002700352 | 0.138663516  | 0.002673035 |
| SHROOM   | black | 0.033210664  | 0.474014407 | 0.049180268  | 0.288877082 |
| SIN3A    | black | -0.020748223 | 0.654716642 | -0.044415432 | 0.338200939 |
| SIN3B    | black | -0.213231786 | 3.33E-06    | -0.232110066 | 3.94E-07    |

|               |              |             |              |             |
|---------------|--------------|-------------|--------------|-------------|
| SIPA1L3 black | 0.142946602  | 0.001956606 | 0.144534748  | 0.001739099 |
| SKI black     | -0.152983872 | 0.000910896 | -0.175440931 | 0.000138548 |
| SLC12A2 black | 0.337769599  | 6.32E-14    | 0.319701199  | 1.47E-12    |
| SLC12A6 black | 0.088527246  | 0.0559124   | 0.066067143  | 0.154025853 |
| SLC24A1 black | 0.102422014  | 0.026880412 | 0.082087952  | 0.076365776 |
| SLC25A1 black | 0.183751119  | 6.49E-05    | 0.153766491  | 0.000856484 |
| SLC25A2 black | 0.120300651  | 0.009262549 | 0.125672323  | 0.00654178  |
| SLC25A5 black | 0.06702844   | 0.148109401 | 0.060482077  | 0.191987993 |
| SLC2A12 black | -0.046011846 | 0.321107187 | -0.05647601  | 0.22316373  |
| SLC35C2 black | -0.136660838 | 0.003083924 | -0.137639676 | 0.002876416 |
| SLC35E1 black | -0.039742385 | 0.391512802 | -0.044073533 | 0.341936238 |
| SLC35E2 black | 0.03374594   | 0.466914336 | -0.003203829 | 0.944949859 |
| SLC36A1 black | 0.048805043  | 0.292576325 | 0.02343339   | 0.613480116 |
| SLC39A1 black | 0.09546337   | 0.039192144 | 0.065544843  | 0.157314614 |
| SLC39A1 black | -0.073722253 | 0.111598902 | -0.095116908 | 0.039913259 |
| SLC39A6 black | 0.17578986   | 0.000134295 | 0.147247399  | 0.001418178 |
| SLC41A1 black | 0.002699578  | 0.953603551 | -0.013785621 | 0.766370686 |
| SLC7A1 black  | 0.167092804  | 0.000287003 | 0.159512906  | 0.000540087 |
| SLC7A6C black | 0.045542539  | 0.326072924 | 0.037536239  | 0.41835622  |
| SMAD1 black   | -0.061632424 | 0.183655769 | -0.081251268 | 0.079421907 |
| SMAD7 black   | -0.178073646 | 0.000109347 | -0.190293574 | 3.49E-05    |
| SMARCC black  | 0.134348293  | 0.00362926  | 0.099552231  | 0.031482349 |
| SMCR8 black   | 0.067585882  | 0.144758722 | 0.052886228  | 0.254029531 |
| SMDT1 black   | 0.28958892   | 1.79E-10    | 0.315012043  | 3.23E-12    |
| SMIM22 black  | 0.143642021  | 0.00185847  | 0.175066838  | 0.000143248 |
| SMURF1 black  | -0.139026063 | 0.002604217 | -0.151746665 | 0.001003462 |
| SNN black     | -0.138234162 | 0.002756674 | -0.131677263 | 0.004366915 |
| SNRNP35 black | 0.085728095  | 0.064163252 | 0.093702642  | 0.042974331 |
| SNX1 black    | 0.038035922  | 0.412183514 | 0.025550356  | 0.58179954  |
| SNX18 black   | 0.018400043  | 0.691665219 | 0.008259981  | 0.858703845 |
| SNX19 black   | 0.050681963  | 0.274387735 | 0.030489055  | 0.511013044 |
| SNX22 black   | 0.154960165  | 0.000779253 | 0.167078381  | 0.000287355 |
| SNX27 black   | 0.079638482  | 0.085592291 | 0.057264867  | 0.216755494 |
| SNX29 black   | -0.016581965 | 0.720789736 | -0.037400849 | 0.420038016 |
| SNX30 black   | 0.088627566  | 0.055633863 | 0.042367703  | 0.360963683 |
| SON black     | -0.032282217 | 0.486468653 | -0.050603132 | 0.275135815 |
| SORL1 black   | 0.081884043  | 0.077101634 | 0.06082354   | 0.189486287 |
| SOWAHF black  | 0.042806019  | 0.356012459 | 0.026581195  | 0.566653967 |
| SPG11 black   | 0.291986463  | 1.25E-10    | 0.271343047  | 2.52E-09    |
| SPG7 black    | 0.240186857  | 1.49E-07    | 0.261852103  | 9.24E-09    |
| SPIDR black   | -0.0194951   | 0.67433676  | -0.062607407 | 0.176805354 |
| SPRED2 black  | -0.054637973 | 0.238616187 | -0.085247748 | 0.065675195 |
| SPRN black    | 0.024121907  | 0.603093216 | 0.035185749  | 0.448111252 |
| SPRY1 black   | 0.074196898  | 0.109306219 | 0.052723412  | 0.255496435 |
| SPRY2 black   | 0.236317187  | 2.38E-07    | 0.211651065  | 3.95E-06    |

|         |       |              |             |              |             |
|---------|-------|--------------|-------------|--------------|-------------|
| SPSB2   | black | 0.023634539  | 0.61043747  | 0.041225759  | 0.374064054 |
| SPTBN1  | black | 0.065220155  | 0.159385648 | 0.051211899  | 0.269394758 |
| SRCAP   | black | 0.034166029  | 0.461383581 | 0.027395413  | 0.554825904 |
| SREBF2  | black | 0.290278681  | 1.61E-10    | 0.252113581  | 3.33E-08    |
| SRPR    | black | 0.172192536  | 0.000184677 | 0.16926213   | 0.000238288 |
| SSH1    | black | -0.128163956 | 0.005542768 | -0.148066178 | 0.001332594 |
| ST20    | black | -0.003747349 | 0.935629511 | -0.001969728 | 0.966138255 |
| STAG1   | black | -0.065808182 | 0.155649879 | -0.089013729 | 0.054572419 |
| STAT3   | black | 0.101470629  | 0.028337355 | 0.116612055  | 0.011673503 |
| STIM1   | black | 0.244629137  | 8.61E-08    | 0.254129123  | 2.57E-08    |
| STK35   | black | -0.046930046 | 0.311534887 | -0.054397631 | 0.240691083 |
| STK40   | black | -0.018258371 | 0.693919123 | -0.003123343 | 0.946330697 |
| STRADA  | black | -0.070712456 | 0.127028678 | -0.087752763 | 0.058101946 |
| STT3A   | black | 0.265509948  | 5.63E-09    | 0.240684421  | 1.40E-07    |
| SUFU    | black | 0.136408549  | 0.003139569 | 0.081247962  | 0.079434175 |
| SUMF2   | black | 0.183708856  | 6.51E-05    | 0.163262135  | 0.000396405 |
| SUPT6H  | black | 0.000165892  | 0.997147297 | 0.005728993  | 0.901731917 |
| SUSD1   | black | 0.038957836  | 0.400937189 | 0.025542934  | 0.581909276 |
| SYNRG   | black | 0.086769557  | 0.060983403 | 0.068202399  | 0.141120717 |
| SYT11   | black | -0.362938621 | 5.50E-16    | -0.356494152 | 1.93E-15    |
| TACC2   | black | 0.121761687  | 0.008437358 | 0.114896569  | 0.012972819 |
| TAF1    | black | -0.085287313 | 0.065549564 | -0.123492022 | 0.007545302 |
| TAF8    | black | -0.191071858 | 3.23E-05    | -0.185420184 | 5.55E-05    |
| TANGO6  | black | 0.2286744    | 5.89E-07    | 0.211837623  | 3.87E-06    |
| TAX1BP3 | black | -0.062645557 | 0.176541218 | -0.039843332 | 0.390309984 |
| TAZ     | black | 0.031400164  | 0.498461982 | 0.040586526  | 0.381523673 |
| TBC1D14 | black | -0.012404316 | 0.789198589 | -0.042449146 | 0.36004046  |
| TBC1D5  | black | 0.063176117  | 0.172898141 | 0.037667334  | 0.416731544 |
| TCF15   | black | -0.215283216 | 2.67E-06    | -0.241863215 | 1.21E-07    |
| TCF20   | black | 0.083233911  | 0.072335809 | 0.045535752  | 0.326145099 |
| TCHP    | black | 0.044591601  | 0.33628651  | 0.009751392  | 0.833535296 |
| TET3    | black | 0.069798148  | 0.132029758 | 0.055439044  | 0.231791432 |
| TEX2    | black | -0.161629353 | 0.000453936 | -0.177597541 | 0.000114158 |
| TEX261  | black | 0.043006625  | 0.353760716 | 0.050895313  | 0.272370062 |
| TFE3    | black | -0.144367501 | 0.001760913 | -0.136505846 | 0.003118002 |
| TGFB2   | black | -0.054574541 | 0.23916257  | -0.05135446  | 0.268062246 |
| TGFBRA1 | black | -0.029326196 | 0.52726794  | -0.050972283 | 0.271644631 |
| TGOLN2  | black | 0.000473009  | 0.99186617  | -0.02753055  | 0.552874482 |
| TIMM23F | black | 0.002812972  | 0.951657034 | -0.032481548 | 0.483780038 |
| TIMP1   | black | 0.0003253    | 0.994406113 | 0.04114838   | 0.374962227 |
| TIRAP   | black | 0.334099683  | 1.22E-13    | 0.308907257  | 8.78E-12    |
| TJP1    | black | -0.072924938 | 0.11553512  | -0.096014424 | 0.038067925 |
| TJP2    | black | 0.192000082  | 2.95E-05    | 0.193030646  | 2.67E-05    |
| TM9SF4  | black | -0.174932314 | 0.000144974 | -0.19769863  | 1.68E-05    |
| TMCO3   | black | 0.040864954  | 0.378263403 | 0.042522879  | 0.359205914 |

|               |              |             |              |             |
|---------------|--------------|-------------|--------------|-------------|
| TMED4 black   | -0.101430032 | 0.028401004 | -0.112160732 | 0.015309471 |
| TMEFF1 black  | -0.171371118 | 0.000198437 | -0.19593087  | 2.01E-05    |
| TMEM13 black  | 0.15069486   | 0.001088903 | 0.132432714  | 0.004145629 |
| TMEM18 black  | -0.182593407 | 7.23E-05    | -0.193969576 | 2.44E-05    |
| TMEM18 black  | -0.171799457 | 0.000191146 | -0.192770523 | 2.74E-05    |
| TMEM21 black  | 0.146290456  | 0.001524592 | 0.186205901  | 5.15E-05    |
| TMEM24 black  | 0.14648475   | 0.001502411 | 0.11864344   | 0.010284783 |
| TMEM24 black  | -0.112191052 | 0.015281673 | -0.095100547 | 0.039947588 |
| TMEM86 black  | -0.045356277 | 0.328057482 | -0.032753265 | 0.480128055 |
| TMEM91 black  | 0.03295432   | 0.477435461 | 0.027429277  | 0.554336587 |
| TMSB10 black  | 0.153183007  | 0.000896756 | 0.187640973  | 4.50E-05    |
| TNFAIP1 black | 0.0267448    | 0.564267656 | 0.017966068  | 0.698577964 |
| TNFRSF1black  | 0.262272198  | 8.74E-09    | 0.249222     | 4.82E-08    |
| TNNI3 black   | -0.161121076 | 0.000473373 | -0.1559929   | 0.000717688 |
| TOB2 black    | 0.215370312  | 2.64E-06    | 0.180689876  | 8.61E-05    |
| TP53BP1 black | 0.091163404  | 0.048966924 | 0.056173524  | 0.225656452 |
| TPP1 black    | 0.081207862  | 0.07958312  | 0.083556758  | 0.071232339 |
| TPR black     | 0.083694047  | 0.07076728  | 0.047589912  | 0.304772762 |
| TRAK1 black   | 0.004649495  | 0.920179434 | -0.009905821 | 0.830938432 |
| TRAPPC1black  | -0.072510291 | 0.117624738 | -0.086124867 | 0.062936076 |
| TRAPPC2black  | -0.033539187 | 0.469649777 | -0.014088175 | 0.761396682 |
| TRIM35 black  | 0.138682796  | 0.002669334 | 0.130309697  | 0.004794812 |
| TRIM68 black  | 0.266315499  | 5.05E-09    | 0.244614217  | 8.63E-08    |
| TRIP12 black  | 0.011263911  | 0.808183163 | -0.018581368 | 0.688784443 |
| TRRAP black   | -0.043187265 | 0.351740778 | -0.050903554 | 0.272292331 |
| TSC22D1 black | -0.037563312 | 0.418020397 | -0.067480709 | 0.145386429 |
| TSHZ1 black   | 0.163930517  | 0.000374876 | 0.152731744  | 0.000929094 |
| TSPYL1 black  | 0.00290265   | 0.950117826 | -0.01305174  | 0.778475258 |
| TSTD2 black   | 0.025632993  | 0.580578485 | 0.0020959    | 0.963970644 |
| TTC5 black    | -0.00415135  | 0.928707284 | -0.016599212 | 0.720511457 |
| TTC7B black   | -0.216759865 | 2.27E-06    | -0.248211249 | 5.49E-08    |
| TUBGCP:black  | 0.282396105  | 5.19E-10    | 0.25282939   | 3.04E-08    |
| TULP3 black   | 0.11143039   | 0.015992594 | 0.091919806  | 0.047112772 |
| TXLNA black   | 0.036770615  | 0.42791867  | 0.048046778  | 0.300148246 |
| U2AF1L4black  | -0.148957446 | 0.00124485  | -0.156009175 | 0.000716755 |
| UBAP2 black   | 0.082308686  | 0.075575648 | 0.088995358  | 0.054622529 |
| UBE4B black   | -0.123596432 | 0.007494275 | -0.178521499 | 0.000104997 |
| UBQLN2 black  | -0.078663592 | 0.08950571  | -0.099614804 | 0.031375245 |
| UBR4 black    | -0.074519548 | 0.107769029 | -0.08687064  | 0.060681823 |
| UCN black     | 0.26430616   | 6.64E-09    | 0.292420969  | 1.17E-10    |
| UGGT1 black   | 0.15218522   | 0.0009697   | 0.137381273  | 0.002929925 |
| UHRF1BIblack  | 0.011031722  | 0.812062697 | 0.008220026  | 0.859380209 |
| ULBP3 black   | 0.193476605  | 2.56E-05    | 0.183254061  | 6.80E-05    |
| UNC13B black  | 0.312180411  | 5.15E-12    | 0.293535273  | 9.84E-11    |
| UNC5B black   | 0.144551997  | 0.001736863 | 0.14157276   | 0.002164549 |

|         |       |              |             |              |             |
|---------|-------|--------------|-------------|--------------|-------------|
| UNKL    | black | -0.139641939 | 0.002491005 | -0.141760607 | 0.002134972 |
| UPF1    | black | 0.113898934  | 0.01378569  | 0.111302773  | 0.016114664 |
| URB2    | black | 0.112057817  | 0.015404155 | 0.093827249  | 0.042696908 |
| USMG5   | black | 0.107999183  | 0.019571696 | 0.117861897  | 0.010800704 |
| USP10   | black | 0.147071     | 0.001437266 | 0.139117661  | 0.002587088 |
| USP30   | black | -0.085411694 | 0.065155902 | -0.108542365 | 0.018962369 |
| USP36   | black | -0.146451368 | 0.001506201 | -0.185783929 | 5.36E-05    |
| USP54   | black | 0.285627957  | 3.23E-10    | 0.257976567  | 1.55E-08    |
| USP6NL  | black | 0.151314371  | 0.001037801 | 0.117323052  | 0.011169643 |
| USP9X   | black | -0.058209013 | 0.209260636 | -0.033086451 | 0.475670422 |
| UTP14C  | black | -0.003976639 | 0.931700197 | -0.028100913 | 0.544675424 |
| VANGL1  | black | 0.047609749  | 0.304570994 | 0.040449082  | 0.383139407 |
| VCL     | black | -0.116012285 | 0.012114061 | -0.116912697 | 0.011458046 |
| VEZF1   | black | 0.092452664  | 0.045842234 | 0.071369249  | 0.123527776 |
| VGLL4   | black | 0.006688844  | 0.885373042 | -0.0155442   | 0.73760018  |
| VHL     | black | 0.14884838   | 0.001255294 | 0.13808944   | 0.002785398 |
| VPS11   | black | 0.023860337  | 0.607029954 | 0.007859154  | 0.865493652 |
| WDR37   | black | -0.107836806 | 0.019757125 | -0.139912175 | 0.002442761 |
| WDR45B  | black | 0.145407019  | 0.001629291 | 0.140112318  | 0.002407582 |
| WDR82   | black | 0.27241782   | 2.17E-09    | 0.254577376  | 2.42E-08    |
| WDR83   | black | -0.024161265 | 0.602501849 | -0.020434562 | 0.659606043 |
| WIPF2   | black | 0.195518702  | 2.09E-05    | 0.179411672  | 9.68E-05    |
| WLS     | black | -0.036007628 | 0.437573158 | -0.044372213 | 0.338671665 |
| WNK1    | black | -0.055561134 | 0.230763534 | -0.081990127 | 0.076718088 |
| YLPM1   | black | -0.013751409 | 0.766933733 | -0.050764802 | 0.27360311  |
| ZBED3   | black | 0.13031115   | 0.004794338 | 0.136441817  | 0.003132179 |
| ZBED4   | black | 0.29067574   | 1.52E-10    | 0.266798105  | 4.72E-09    |
| ZBTB40  | black | 0.071126952  | 0.124810444 | 0.054808932  | 0.23714796  |
| ZBTB48  | black | -0.017688731 | 0.703008768 | -0.035076749 | 0.449519563 |
| ZBTB49  | black | -0.101078256 | 0.028957695 | -0.133957768 | 0.003729537 |
| ZBTB9   | black | -0.014443857 | 0.755561826 | 0.009140775  | 0.843820843 |
| ZC3H14  | black | 0.09930703   | 0.031905072 | 0.057629862  | 0.213835568 |
| ZCCHC2  | black | -0.056250324 | 0.225021689 | -0.064334591 | 0.1651387   |
| ZDHHC3  | black | -0.048316097 | 0.297444087 | -0.03870308  | 0.404026407 |
| ZDHHC5  | black | 0.15046707   | 0.001108269 | 0.137610328  | 0.002882448 |
| ZDHHC7  | black | 0.170996844  | 0.000205019 | 0.180148023  | 9.05E-05    |
| ZFAT    | black | -0.213207425 | 3.34E-06    | -0.217161138 | 2.17E-06    |
| ZFP36L1 | black | 0.069968602  | 0.131086054 | 0.037244585  | 0.421984029 |
| ZFR     | black | -0.091352934 | 0.048496692 | -0.123029191 | 0.007775252 |
| ZFYVE1  | black | 0.018907145  | 0.68362002  | 0.033663039  | 0.468010107 |
| ZFYVE9  | black | -0.118877532 | 0.010134566 | -0.161874924 | 0.000444814 |
| ZGLP1   | black | 0.046010848  | 0.3211177   | 0.040876421  | 0.378129498 |
| ZHX1-C8 | black | -0.210613028 | 4.42E-06    | -0.211757201 | 3.91E-06    |
| ZHX2    | black | -0.184408762 | 6.10E-05    | -0.213544837 | 3.22E-06    |
| ZMIZ1   | black | -0.148561962 | 0.001283107 | -0.167076654 | 0.000287398 |

|         |       |              |             |              |             |
|---------|-------|--------------|-------------|--------------|-------------|
| ZMYM3   | black | -0.148846541 | 0.001255471 | -0.162668106 | 0.000416501 |
| ZNF142  | black | 0.047011375  | 0.310696166 | 0.033602523  | 0.468810883 |
| ZNF143  | black | 0.122874173  | 0.007853658 | 0.100122677  | 0.030517401 |
| ZNF28   | black | 0.130576535  | 0.004708465 | 0.127216416  | 0.005905262 |
| ZNF317  | black | 0.02473033   | 0.593980803 | 0.013493759  | 0.771178002 |
| ZNF318  | black | -0.133643987 | 0.003811921 | -0.172625417 | 0.00017779  |
| ZNF398  | black | 0.183951691  | 6.37E-05    | 0.166545928  | 0.000300674 |
| ZNF425  | black | -0.067139328 | 0.147438212 | -0.105919508 | 0.022064907 |
| ZNF468  | black | 0.186510054  | 5.01E-05    | 0.182454464  | 7.32E-05    |
| ZNF511  | black | 0.210476411  | 4.48E-06    | 0.217488791  | 2.09E-06    |
| ZNF512B | black | -0.15777737  | 0.000621813 | -0.158921686 | 0.000566735 |
| ZNF532  | black | -0.167996488 | 0.000265676 | -0.192369332 | 2.85E-05    |
| ZNF608  | black | -0.167132562 | 0.000286032 | -0.161241892 | 0.000468684 |
| ZNF609  | black | 0.098422358  | 0.033470784 | 0.090470054  | 0.050719769 |
| ZNF618  | black | -0.119750156 | 0.009591621 | -0.144946936 | 0.001686391 |
| ZNF619  | black | -0.027737487 | 0.549892764 | -0.051732413 | 0.264551409 |
| ZNF687  | black | 0.02805029   | 0.5454007   | 0.006426977  | 0.889831546 |
| ZNF688  | black | 0.084956105  | 0.066607372 | 0.114469404  | 0.01331555  |
| ZNF689  | black | -0.083338219 | 0.071977776 | -0.094484164 | 0.041259203 |
| ZNF692  | black | 0.118010698  | 0.010700744 | 0.09473289   | 0.040725623 |
| ZNF746  | black | 0.151113837  | 0.001054095 | 0.132366554  | 0.004164595 |
| ZNF770  | black | -0.03573033  | 0.441112675 | -0.061237802 | 0.186483484 |
| ZNF775  | black | 0.035949116  | 0.438318657 | 0.027197587  | 0.557688609 |
| ZNF786  | black | 0.070293966  | 0.129299188 | 0.048871342  | 0.291920405 |
| ZNF79   | black | 0.107913401  | 0.019669467 | 0.091242422  | 0.048770415 |
| ZNF792  | black | -0.03346824  | 0.470590474 | -0.066560516 | 0.150967329 |
| ZNF821  | black | 0.043082056  | 0.35291635  | 0.043876455  | 0.344101246 |
| ZNF860  | black | 0.021399389  | 0.644613369 | 0.032838706  | 0.478982792 |
| ZRANB1  | black | -0.118652987 | 0.010278618 | -0.159484348 | 0.000541347 |
| ZRSR2   | black | 0.22648801   | 7.59E-07    | 0.227007933  | 7.14E-07    |
| ZSCAN22 | black | 0.104293372  | 0.024201931 | 0.087745109  | 0.058123933 |
| ZSCAN25 | black | -0.190625066 | 3.38E-05    | -0.211028811 | 4.22E-06    |
| ZXDC    | black | -0.228637008 | 5.92E-07    | -0.253990714 | 2.61E-08    |
| AAED1   | blue  | -0.095779348 | 0.03854412  | -0.082580116 | 0.074613179 |
| AASDH   | blue  | -0.038752539 | 0.403425553 | -0.072391877 | 0.11822688  |
| ABCA5   | blue  | 0.101598083  | 0.028138321 | 0.089062858  | 0.054438591 |
| ABI2    | blue  | -0.176332655 | 0.000127923 | -0.201391231 | 1.16E-05    |
| AC02406 | blue  | -0.070514156 | 0.128100668 | -0.073819883 | 0.111124257 |
| AC08735 | blue  | -0.223349082 | 1.09E-06    | -0.250701418 | 3.99E-08    |
| ACADSB  | blue  | 0.034474509  | 0.457345577 | 0.019281856  | 0.677698061 |
| ACAP2   | blue  | -0.182835826 | 7.07E-05    | -0.200477023 | 1.27E-05    |
| ACER3   | blue  | 0.041449539  | 0.371474012 | 0.028813475  | 0.534517571 |
| ACOT8   | blue  | -0.113091598 | 0.014475992 | -0.070753628 | 0.126806982 |
| ACP2    | blue  | 0.132619426  | 0.004092525 | 0.136455604  | 0.003129121 |
| ACSL1   | blue  | -0.017935771 | 0.699061502 | -0.078054222 | 0.092023932 |



|              |              |             |              |             |
|--------------|--------------|-------------|--------------|-------------|
| ACSL4 blue   | 0.067002967  | 0.148263915 | 0.037666255  | 0.416744897 |
| ACTL10 blue  | -0.046573042 | 0.315234161 | -0.026888742 | 0.562172127 |
| ACVR2A blue  | -0.14366852  | 0.001854821 | -0.15846254  | 0.000588267 |
| ACVR2B blue  | -0.248239336 | 5.47E-08    | -0.268958241 | 3.51E-09    |
| ADAMTSblue   | -0.172242604 | 0.000183868 | -0.189120822 | 3.90E-05    |
| ADCK1 blue   | 0.124387912  | 0.007117393 | 0.138476499  | 0.002709178 |
| ADD3 blue    | 0.092966737  | 0.044643876 | 0.06738268   | 0.145973359 |
| ADRBK2 blue  | -0.093429768 | 0.043587156 | -0.124525979 | 0.007053415 |
| ADRM1 blue   | -0.071689921 | 0.121845998 | -0.050851928 | 0.272779539 |
| AFF1 blue    | 0.074878135  | 0.106080696 | 0.03802137   | 0.412362517 |
| AFF4 blue    | 0.051904949  | 0.262959259 | 0.021444041  | 0.643922928 |
| AGAP3 blue   | -0.057544479 | 0.214516073 | -0.056288882 | 0.224703485 |
| AGK blue     | 0.069225349  | 0.135239485 | 0.036384436  | 0.432789663 |
| AGO4 blue    | -0.123930624 | 0.007333018 | -0.152729914 | 0.000929228 |
| AGPAT2 blue  | 0.149993269  | 0.001149571 | 0.152187917  | 0.000969496 |
| AGTPBP1blue  | 0.037481368  | 0.419037343 | 0.002902652  | 0.950117787 |
| AGTRAP blue  | 0.041795002  | 0.36749745  | 0.055805633  | 0.228714777 |
| AHR blue     | -0.04173554  | 0.368180016 | -0.007839533 | 0.865826283 |
| AIP blue     | -0.132180258 | 0.004218424 | -0.116117928 | 0.012035412 |
| AKAP10 blue  | 0.010868072  | 0.814799805 | -0.013649732 | 0.768607834 |
| AKAP11 blue  | -0.057024604 | 0.218693124 | -0.077915784 | 0.092603866 |
| AKAP5 blue   | -0.061795544 | 0.182496211 | -0.057288999 | 0.21656156  |
| AKAP9 blue   | -0.0411143   | 0.375358231 | -0.052416781 | 0.25827495  |
| AL365181blue | -0.169456074 | 0.000234332 | -0.178844199 | 0.000101963 |
| ALG10B blue  | -0.08936786  | 0.053613873 | -0.104949146 | 0.023319516 |
| ALG11 blue   | -0.006227606 | 0.893228339 | -0.019852388 | 0.66871943  |
| ALG9 blue    | 0.125768049  | 0.0065006   | 0.073965779  | 0.110417919 |
| ALKBH8 blue  | -0.042180164 | 0.363095214 | -0.072335409 | 0.118514872 |
| ALMS1 blue   | -0.050697412 | 0.274241293 | -0.06966035  | 0.132796497 |
| ALS2 blue    | -0.030682323 | 0.508336975 | -0.047704361 | 0.303609878 |
| AMDHD2blue   | 0.0059795    | 0.89745819  | 0.046670411  | 0.314222383 |
| AMN1 blue    | -0.164438407 | 0.00035925  | -0.162323473 | 0.00042859  |
| ANK3 blue    | 0.17389685   | 0.00015893  | 0.147088628  | 0.001435348 |
| ANKIB1 blue  | -0.035087481 | 0.449380786 | -0.057923003 | 0.211511024 |
| ANKMY2blue   | 0.005477603  | 0.906023562 | 0.006856716  | 0.882516771 |
| ANKRD1 blue  | -0.074765761 | 0.106607522 | -0.095231572 | 0.039673368 |
| ANKRD1 blue  | -0.244801421 | 8.43E-08    | -0.230935489 | 4.52E-07    |
| ANKRD1 blue  | 0.01050059   | 0.820954275 | -0.029220519 | 0.52875806  |
| ANKRD2 blue  | -0.117075673 | 0.011342724 | -0.132298564 | 0.004184168 |
| ANKRD4 blue  | -0.111366874 | 0.016053248 | -0.135828926 | 0.003270881 |
| ANKRD5 blue  | 0.051388493  | 0.267744814 | 0.054663635  | 0.238395386 |
| ANKS1B blue  | -0.219116829 | 1.75E-06    | -0.228317432 | 6.14E-07    |
| AP4E1 blue   | 0.114462747  | 0.013320953 | 0.109089896  | 0.018364963 |
| AP5Z1 blue   | 0.067409105  | 0.145814971 | 0.109344498  | 0.018092808 |
| APBB2 blue   | -0.052951002 | 0.253447574 | -0.092397311 | 0.045972862 |

|        |      |              |             |              |             |
|--------|------|--------------|-------------|--------------|-------------|
| APC    | blue | -0.005204082 | 0.910696121 | -0.030952435 | 0.504609223 |
| APH1B  | blue | -0.140719582 | 0.002303652 | -0.148848871 | 0.001255247 |
| APOOL  | blue | -0.019110825 | 0.680398618 | -0.045004879 | 0.331822728 |
| APPBP2 | blue | -0.06871644  | 0.138141313 | -0.100639446 | 0.029665223 |
| APPL1  | blue | 0.019398198  | 0.675863392 | -0.006486238 | 0.888822272 |
| APPL2  | blue | 0.027356751  | 0.555384812 | -0.007332085 | 0.874436947 |
| AQR    | blue | 0.186293341  | 5.11E-05    | 0.152860298  | 0.000919774 |
| ARAP2  | blue | -0.037554706 | 0.418127128 | -0.038930696 | 0.401265613 |
| ARFGAP | blue | -0.123527911 | 0.007527728 | -0.097647835 | 0.034894888 |
| ARFRP1 | blue | -0.225300963 | 8.69E-07    | -0.194023312 | 2.42E-05    |
| ARHGAP | blue | 0.049760868  | 0.283215266 | 0.017339638  | 0.708600272 |
| ARHGAP | blue | -0.074579345 | 0.10748602  | -0.111564468 | 0.015865219 |
| ARHGAP | blue | -0.279812133 | 7.56E-10    | -0.300855095 | 3.17E-11    |
| ARHGAP | blue | -0.068080856 | 0.141832327 | -0.064299778 | 0.165368004 |
| ARHGAP | blue | -0.071594468 | 0.12234473  | -0.106980161 | 0.020760909 |
| ARHGEF | blue | 0.055216504  | 0.233673351 | 0.032663632  | 0.481331103 |
| ARHGEF | blue | -0.020438138 | 0.659550205 | -0.033689508 | 0.467660086 |
| ARHGEF | blue | 0.079267744  | 0.08706395  | 0.06801913   | 0.142194775 |
| ARID2  | blue | 0.031852166  | 0.49229658  | -0.000852459 | 0.985341752 |
| ARID4A | blue | -0.069625196 | 0.132992649 | -0.096575262 | 0.036951934 |
| ARID5B | blue | -0.178073701 | 0.000109347 | -0.193767418 | 2.49E-05    |
| ARIH1  | blue | 0.015492633  | 0.738438852 | -0.008963116 | 0.846818497 |
| ARL13B | blue | -0.127143692 | 0.005933944 | -0.147289342 | 0.001413674 |
| ARL2   | blue | -0.193608772 | 2.52E-05    | -0.193694353 | 2.50E-05    |
| ARL8B  | blue | -0.026109579 | 0.573559765 | -0.045261852 | 0.329066532 |
| ARMC5  | blue | -0.066887339 | 0.148966829 | -0.045746065 | 0.323913335 |
| ARMCX3 | blue | 0.08798301   | 0.057443716 | 0.081080645  | 0.080057142 |
| ARNTL  | blue | 0.002702017  | 0.953561686 | -0.005346074 | 0.908270077 |
| ARPC1B | blue | 0.014445258  | 0.755538884 | 0.054494909  | 0.239849748 |
| ARPIN  | blue | 0.122666061  | 0.007960028 | 0.120705749  | 0.009026845 |
| ARPP19 | blue | 0.12127863   | 0.008702633 | 0.107096195  | 0.020622402 |
| ARRDC1 | blue | 0.258040041  | 1.54E-08    | 0.294349985  | 8.69E-11    |
| ARRDC3 | blue | 0.052983994  | 0.253151519 | 0.047808876  | 0.30255051  |
| ASB7   | blue | -0.135044009 | 0.003456652 | -0.154557796 | 0.000804536 |
| ASB8   | blue | -0.107857346 | 0.019733586 | -0.120367977 | 0.009223    |
| ATAD2B | blue | 0.005045279  | 0.913410384 | -0.014840984 | 0.749063478 |
| ATE1   | blue | 0.048929916  | 0.291341729 | 0.014899532  | 0.748106921 |
| ATF2   | blue | -0.036143384 | 0.435846278 | -0.062657391 | 0.176459342 |
| ATF7   | blue | 0.192251153  | 2.88E-05    | 0.171055508  | 0.000203974 |
| ATF7IP | blue | -0.103634893 | 0.025116871 | -0.114450011 | 0.013331297 |
| ATG2B  | blue | -0.099900248 | 0.0308906   | -0.126896017 | 0.006032569 |
| ATG4B  | blue | 0.00934661   | 0.840350591 | 0.018933836  | 0.683197547 |
| ATL3   | blue | 0.046592661  | 0.315030131 | 0.042657338  | 0.357687158 |
| ATM    | blue | -0.128967665 | 0.005251124 | -0.157000814 | 0.000661975 |
| ATP11B | blue | -0.22646169  | 7.61E-07    | -0.213404663 | 3.27E-06    |

|               |              |             |              |             |
|---------------|--------------|-------------|--------------|-------------|
| ATP11C blue   | -0.148222117 | 0.001316843 | -0.155616551 | 0.000739582 |
| ATP2B1 blue   | -0.053707759 | 0.246717064 | -0.070680406 | 0.127201467 |
| ATP2B4 blue   | -0.013680391 | 0.768102927 | -0.03386109  | 0.465394672 |
| ATP7A blue    | -0.012930248 | 0.780484405 | -0.01947791  | 0.674607477 |
| ATP8A1 blue   | 0.059262398  | 0.201121511 | 0.03660673   | 0.429981905 |
| ATR blue      | -0.071883564 | 0.120839105 | -0.087823973 | 0.057897707 |
| ATRX blue     | 0.003069672  | 0.947251588 | -0.019802203 | 0.669507346 |
| ATXN1 blue    | -0.032076949 | 0.48924574  | -0.031875755 | 0.491975947 |
| ATXN7 blue    | 0.083745723  | 0.070592874 | 0.059119501  | 0.202211922 |
| B3GNT5 blue   | -0.053405736 | 0.249388105 | -0.078221247 | 0.091328125 |
| B4GALT(blue   | -0.289618848 | 1.78E-10    | -0.322078468 | 9.86E-13    |
| B4GALT'blue   | 0.082888102  | 0.073533199 | 0.111407133  | 0.016014779 |
| BACH1 blue    | -0.18192619  | 7.69E-05    | -0.197214128 | 1.77E-05    |
| BAZ2B blue    | -0.0350461   | 0.449915997 | -0.064116404 | 0.166579783 |
| BBIP1 blue    | 0.024055095  | 0.604097681 | 0.016018089  | 0.729907714 |
| BBS10 blue    | -0.279762093 | 7.61E-10    | -0.303714344 | 2.02E-11    |
| BBS9 blue     | -0.062282394 | 0.179067544 | -0.091620709 | 0.047838783 |
| BBX blue      | 0.010413151  | 0.822420309 | -0.009817888 | 0.832416876 |
| BCAP29 blue   | 0.069863203  | 0.131668969 | 0.061967336  | 0.18128086  |
| BCAP31 blue   | -0.029061688 | 0.531001701 | -0.00898999  | 0.846364903 |
| BDP1 blue     | -0.040553685 | 0.381909369 | -0.069426176 | 0.134107364 |
| BEND7 blue    | -0.509802663 | 2.94E-32    | -0.523690075 | 3.01E-34    |
| BHLHB9 blue   | -0.239156646 | 1.69E-07    | -0.256223995 | 1.95E-08    |
| BICD1 blue    | -0.146719846 | 0.001475968 | -0.16804058  | 0.000264675 |
| BIVM blue     | -0.119899138 | 0.009501553 | -0.148301943 | 0.001308846 |
| BLOC1S6(blue  | 0.059761221  | 0.197348621 | 0.039994288  | 0.388515475 |
| BLVRB blue    | 0.067020551  | 0.148157239 | 0.103254748  | 0.025658544 |
| BMPR1A blue   | 0.086560949  | 0.061609695 | 0.038938552  | 0.40117054  |
| BMPR2 blue    | -0.098167503 | 0.033933812 | -0.116654242 | 0.011643055 |
| BNIP2 blue    | -0.078378602 | 0.090676459 | -0.10388467  | 0.024766358 |
| BOLA2B blue   | 0.046838013  | 0.312485795 | 0.086386099  | 0.062138721 |
| BRAF blue     | -0.082303104 | 0.075595545 | -0.115145495 | 0.012776703 |
| BRI3 blue     | -0.063827301 | 0.168503738 | -0.013499738 | 0.771079434 |
| BRWD3 blue    | 0.026321837  | 0.570446786 | -0.002020884 | 0.965259382 |
| BTAF1 blue    | 0.030887436  | 0.505504942 | -0.007548027 | 0.870770851 |
| BTBD3 blue    | -0.005726938 | 0.901766989 | -0.005145103 | 0.911704079 |
| BTBD7 blue    | 0.004748215  | 0.918490467 | -0.031711856 | 0.494206064 |
| BTC blue      | -0.110924324 | 0.016481474 | -0.134942    | 0.003481486 |
| BTG2 blue     | 0.145109861  | 0.001665964 | 0.098095771  | 0.034065116 |
| C11orf24 blue | 0.163986171  | 0.000373133 | 0.179617503  | 9.50E-05    |
| C11orf30 blue | -0.026559264 | 0.56697422  | -0.059151575 | 0.2019668   |
| C11orf54 blue | 0.025495002  | 0.58261814  | -0.001093836 | 0.981191892 |
| C12orf57 blue | 0.118987896  | 0.010064424 | 0.145876658  | 0.001572839 |
| C14orf37 blue | -0.169743555 | 0.000228582 | -0.186670223 | 4.93E-05    |
| C15orf41 blue | -0.068383861 | 0.140063383 | -0.130320867 | 0.004791169 |

|               |              |             |              |             |
|---------------|--------------|-------------|--------------|-------------|
| C17orf67 blue | -0.062128846 | 0.18014372  | -0.050608914 | 0.275080902 |
| C17orf80 blue | -0.151808708 | 0.000998621 | -0.178537059 | 0.000104849 |
| C17orf85 blue | 0.167370965  | 0.000280274 | 0.126624818  | 0.006142248 |
| C18orf25 blue | -0.106997878 | 0.020739709 | -0.115423249 | 0.012560966 |
| C20orf19 blue | -0.162662643 | 0.00041669  | -0.179606141 | 9.51E-05    |
| C21orf91 blue | -0.154679256 | 0.000796825 | -0.170447445 | 0.000215054 |
| C2orf42 blue  | -0.220020189 | 1.58E-06    | -0.241593022 | 1.25E-07    |
| C3orf58 blue  | -0.112523561 | 0.014979721 | -0.093463014 | 0.0435121   |
| C4orf29 blue  | 0.126477423  | 0.006202605 | 0.142269697  | 0.002056662 |
| C4orf48 blue  | 0.102410589  | 0.026897518 | 0.127357168  | 0.005850102 |
| C5orf24 blue  | -0.010626991 | 0.818836093 | -0.039188376 | 0.398153834 |
| C6orf1 blue   | 0.112324627  | 0.015159737 | 0.138986685  | 0.002611613 |
| C6orf120 blue | -0.079427673 | 0.086426628 | -0.100458195 | 0.029961762 |
| C7orf60 blue  | -0.087243155 | 0.059581041 | -0.099775852 | 0.031101014 |
| C8orf37 blue  | 0.026103848  | 0.573643936 | 0.006500583  | 0.888577993 |
| C9orf72 blue  | 0.003225862  | 0.944571874 | -0.010382121 | 0.822940711 |
| C9orf89 blue  | 0.011895399  | 0.797655966 | 0.04858786   | 0.2947319   |
| CA13 blue     | 0.022285432  | 0.630970524 | -0.01011168  | 0.827479595 |
| CACFD1 blue   | 0.189982096  | 3.59E-05    | 0.203021328  | 9.79E-06    |
| CALCOC blue   | -0.093364024 | 0.043735902 | -0.11277604  | 0.014753956 |
| CAMK2E blue   | 0.161630772  | 0.000453883 | 0.137605214  | 0.002883501 |
| CAP2 blue     | -0.126043576 | 0.006383364 | -0.152958057 | 0.000912744 |
| CAPN2 blue    | 0.181081979  | 8.31E-05    | 0.191379105  | 3.14E-05    |
| CAPN7 blue    | -0.046153273 | 0.31962046  | -0.076629004 | 0.09813534  |
| CAPNS1 blue   | 0.177633591  | 0.000113787 | 0.210093403  | 4.67E-06    |
| CARF blue     | -0.100533142 | 0.029838837 | -0.121047582 | 0.008832121 |
| CASD1 blue    | 0.059380381  | 0.200224435 | 0.033644549  | 0.468254693 |
| CASP8A1 blue  | -0.064953143 | 0.161104138 | -0.091872283 | 0.047227506 |
| CBLB blue     | 0.104218266  | 0.024304812 | 0.098822568  | 0.032754549 |
| CCDC121 blue  | -0.033155401 | 0.474750789 | -0.06144462  | 0.18499753  |
| CCDC122 blue  | -0.014338838 | 0.757283211 | -0.019105022 | 0.680490314 |
| CCDC124 blue  | 0.018641018  | 0.687837753 | 0.03460209   | 0.45568135  |
| CCDC132 blue  | -0.036001571 | 0.437650289 | -0.066300032 | 0.152576326 |
| CCDC169 blue  | -0.066233819 | 0.152987385 | -0.07315475  | 0.114389575 |
| CCDC171 blue  | 0.014029268  | 0.762364365 | -0.008343778 | 0.857285657 |
| CCDC186 blue  | 0.071504617  | 0.122815643 | 0.054433371  | 0.240381734 |
| CCDC50 blue   | -0.271318828 | 2.53E-09    | -0.283072117 | 4.70E-10    |
| CCDC68 blue   | -0.09009666  | 0.051685247 | -0.094369546 | 0.041507068 |
| CCDC711 blue  | -0.142601487 | 0.002007048 | -0.133971901 | 0.003725865 |
| CCDC82 blue   | -0.096035431 | 0.038025615 | -0.124361225 | 0.007129819 |
| CCDC851 blue  | -0.121519722 | 0.00856932  | -0.127166756 | 0.005924834 |
| CCDC881 blue  | -0.202671251 | 1.02E-05    | -0.208073331 | 5.78E-06    |
| CCDC91 blue   | -0.132301891 | 0.004183208 | -0.15156067  | 0.001018106 |
| CCM2 blue     | -0.010601398 | 0.819264869 | 0.030969405  | 0.504375499 |
| CCNG2 blue    | -0.03241437  | 0.484685251 | -0.050168831 | 0.279282074 |

|        |      |              |             |              |             |
|--------|------|--------------|-------------|--------------|-------------|
| CCNT1  | blue | -0.117905751 | 0.010771159 | -0.15397385  | 0.000842579 |
| CCP110 | blue | 0.061854925  | 0.182075437 | 0.039792736  | 0.390912579 |
| CCSER2 | blue | 0.231374661  | 4.29E-07    | 0.217072502  | 2.19E-06    |
| CD109  | blue | -0.074900697 | 0.10597517  | -0.080819103 | 0.081038862 |
| CD151  | blue | 0.143260697  | 0.001911709 | 0.160804726  | 0.000485858 |
| CDC14A | blue | 0.089054258  | 0.054461999 | 0.067145154  | 0.147403012 |
| CDC14B | blue | -0.087190139 | 0.059736689 | -0.110634245 | 0.01676756  |
| CDK13  | blue | -0.128208695 | 0.005526158 | -0.150802408 | 0.001079868 |
| CDK14  | blue | -0.080494458 | 0.082270967 | -0.096500684 | 0.037098714 |
| CDK17  | blue | -0.184420552 | 6.09E-05    | -0.209707356 | 4.86E-06    |
| CDK19  | blue | -0.111025537 | 0.016382664 | -0.132731326 | 0.004060994 |
| CDK2AP | blue | 0.162976373  | 0.000405957 | 0.181327081  | 8.12E-05    |
| CDS2   | blue | -0.180575311 | 8.71E-05    | -0.187014266 | 4.77E-05    |
| CENPB  | blue | 0.015896301  | 0.731882094 | 0.019714381  | 0.67088703  |
| CENPC  | blue | -0.08832544  | 0.056476219 | -0.120107163 | 0.009377049 |
| CEP120 | blue | 0.022680364  | 0.624929358 | -0.003485432 | 0.940119873 |
| CEP128 | blue | -0.05237039  | 0.258697133 | -0.065596192 | 0.15698895  |
| CEP135 | blue | -0.103717405 | 0.025000612 | -0.128935273 | 0.005262605 |
| CEP152 | blue | 0.083339498  | 0.071973395 | 0.061690656  | 0.183241196 |
| CEP192 | blue | -0.096380034 | 0.037337218 | -0.125537977 | 0.00659997  |
| CEP295 | blue | -0.029338831 | 0.527089919 | -0.059073605 | 0.202563057 |
| CEP44  | blue | -0.141754756 | 0.002135887 | -0.158782925 | 0.000573164 |
| CEP68  | blue | -0.171134038 | 0.000202583 | -0.207418231 | 6.20E-06    |
| CEP85L | blue | -0.183356024 | 6.73E-05    | -0.202753615 | 1.01E-05    |
| CEP97  | blue | -0.01050716  | 0.820844142 | -0.023822101 | 0.607606381 |
| CEPT1  | blue | -0.044071498 | 0.34195855  | -0.071632577 | 0.122145426 |
| CFAP97 | blue | 0.095370393  | 0.039384571 | 0.057172107  | 0.217502104 |
| CFLAR  | blue | -0.079076931 | 0.087829289 | -0.065898769 | 0.155080314 |
| CGGBP1 | blue | -0.040504925 | 0.382482438 | -0.069858092 | 0.13169729  |
| CHD1   | blue | 0.015440557  | 0.739286116 | -0.017144744 | 0.711728778 |
| CHD2   | blue | 0.023353681  | 0.614687675 | -0.011969241 | 0.796427325 |
| CHD6   | blue | -0.088440266 | 0.056154835 | -0.120824556 | 0.008958739 |
| CHD9   | blue | 0.047428217  | 0.306420716 | 0.027662624  | 0.550970545 |
| CHIC1  | blue | -0.10166865  | 0.028028639 | -0.109647349 | 0.017773668 |
| CHID1  | blue | 0.144700714  | 0.001717697 | 0.144459187  | 0.001748923 |
| CHM    | blue | -0.188129362 | 4.29E-05    | -0.215286691 | 2.66E-06    |
| CHMP4B | blue | -0.14871433  | 0.001268241 | -0.130249703 | 0.004814421 |
| CHORDC | blue | -0.046811422 | 0.312760896 | -0.072493384 | 0.117710561 |
| CHPF   | blue | 0.212622395  | 3.56E-06    | 0.210881859  | 4.29E-06    |
| CHSY1  | blue | -0.058561579 | 0.206510422 | -0.092141196 | 0.046581351 |
| CHURC1 | blue | 0.035961495  | 0.438160877 | 0.016151187  | 0.727751996 |
| CIB1   | blue | 0.365345864  | 3.41E-16    | 0.408999469  | 2.94E-20    |
| CLASP2 | blue | 0.04707911   | 0.309998762 | 0.011865641  | 0.798151226 |
| CLCN5  | blue | -0.086252426 | 0.062545683 | -0.121528422 | 0.008564544 |
| CLCN6  | blue | -0.322730084 | 8.82E-13    | -0.352498292 | 4.14E-15    |

|              |              |             |              |             |
|--------------|--------------|-------------|--------------|-------------|
| CLDN12 blue  | 0.083453832  | 0.071582632 | 0.076514226  | 0.09864125  |
| CLDND1 blue  | -0.136984266 | 0.0030139   | -0.168672367 | 0.000250704 |
| CLIC4 blue   | -0.150279379 | 0.001124464 | -0.170537147 | 0.000213384 |
| CLIP1 blue   | 0.068883338  | 0.137184424 | 0.056117179  | 0.226122955 |
| CLIP4 blue   | -0.356868587 | 1.79E-15    | -0.385830181 | 5.02E-18    |
| CLOCK blue   | -0.023742548 | 0.60880645  | -0.033619326 | 0.468588464 |
| CLTB blue    | 0.147715193  | 0.001368682 | 0.197247442  | 1.76E-05    |
| CMTR2 blue   | 0.052089179  | 0.261266494 | 0.040552616  | 0.381921926 |
| CNFN blue    | 0.160842631  | 0.000484346 | 0.180793867  | 8.53E-05    |
| CNKS3 blue   | 0.052213687  | 0.260126726 | 0.041397792  | 0.372071952 |
| CNOT2 blue   | -0.074161247 | 0.109477127 | -0.098325177 | 0.033646707 |
| CNOT4 blue   | -0.112796642 | 0.014735666 | -0.129510536 | 0.005062027 |
| CNOT6L blue  | 0.033764007  | 0.466675725 | 0.006508365  | 0.888445478 |
| CNTLN blue   | -0.042316226 | 0.361547985 | -0.055062683 | 0.234980449 |
| CNTRL blue   | 0.061786974  | 0.182556997 | 0.044061521  | 0.342067949 |
| COG5 blue    | -0.035624264 | 0.442470846 | -0.062128406 | 0.180146811 |
| COL4A3F blue | 0.180703918  | 8.60E-05    | 0.185054645  | 5.74E-05    |
| COL4A5 blue  | 0.100018122  | 0.030692344 | 0.05225448   | 0.259754055 |
| COMT blue    | 0.301906629  | 2.69E-11    | 0.305853399  | 1.43E-11    |
| COPE blue    | 0.230291006  | 4.88E-07    | 0.266144712  | 5.17E-09    |
| CORO1B blue  | 0.248198428  | 5.49E-08    | 0.271617983  | 2.42E-09    |
| CPEB2 blue   | -0.028971318 | 0.53228042  | -0.043918225 | 0.343641655 |
| CPEB3 blue   | 0.120293995  | 0.009266467 | 0.124280317  | 0.00716761  |
| CPEB4 blue   | 0.098245083  | 0.033792288 | 0.080215     | 0.083343659 |
| CPNE8 blue   | -0.333322146 | 1.40E-13    | -0.330867609 | 2.16E-13    |
| CPSF3L blue  | 0.0679136    | 0.142816072 | 0.072135097  | 0.119540904 |
| CPTP blue    | 0.065356268  | 0.158514954 | 0.090076204  | 0.05173858  |
| CRAMP1 blue  | -0.098321601 | 0.033653195 | -0.127734661 | 0.005704445 |
| CRBN blue    | -0.2126343   | 3.55E-06    | -0.235910276 | 2.50E-07    |
| CREB1 blue   | -0.176945063 | 0.000121074 | -0.202173651 | 1.07E-05    |
| CREB5 blue   | 0.10807746   | 0.019482849 | 0.103399523  | 0.025451077 |
| CREBL2 blue  | -0.068615376 | 0.138723236 | -0.067126379 | 0.147516467 |
| CREBZF blue  | -0.107313618 | 0.020365029 | -0.140172853 | 0.002397033 |
| CRIP2 blue   | 0.121224467  | 0.008732835 | 0.153672186  | 0.000862877 |
| CRK blue     | 0.090288336  | 0.051187737 | 0.094200235  | 0.041875507 |
| CRLF3 blue   | 0.058782227  | 0.204802605 | 0.044111375  | 0.341521517 |
| CROT blue    | -0.001847294 | 0.968241891 | -0.030749575 | 0.5074075   |
| CSGALN blue  | -0.068973495 | 0.136669647 | -0.101290893 | 0.028620085 |
| CSNK1G blue  | -0.022971313 | 0.620494775 | -0.065314823 | 0.158779691 |
| CSRNP2 blue  | 0.008311788  | 0.857827013 | -0.02711229  | 0.558925139 |
| CSRNP3 blue  | -0.11358222  | 0.01405296  | -0.134915944 | 0.003487855 |
| CTBS blue    | -0.100872325 | 0.029287911 | -0.100886884 | 0.029264459 |
| CTD-310 blue | -0.129681195 | 0.005003862 | -0.132678214 | 0.004075932 |
| CTDSPL2 blue | 0.026122804  | 0.573365571 | -0.009475234 | 0.838183646 |
| CTTNBP2 blue | -0.154145688 | 0.000831215 | -0.174768552 | 0.000147102 |

|         |      |              |             |              |             |
|---------|------|--------------|-------------|--------------|-------------|
| CUL4B   | blue | -0.134761638 | 0.00352579  | -0.144014217 | 0.001807818 |
| CUTA    | blue | -0.00691055  | 0.881601129 | 0.011158062  | 0.809951168 |
| CWF19L2 | blue | -0.174224342 | 0.000154385 | -0.207573664 | 6.10E-06    |
| CXXC1   | blue | 0.135737205  | 0.003292111 | 0.135942506  | 0.003244763 |
| CYB561E | blue | 0.303174622  | 2.20E-11    | 0.338145774  | 5.91E-14    |
| CYBA    | blue | 0.151374703  | 0.001032944 | 0.195614761  | 2.07E-05    |
| CYP20A1 | blue | 0.111527316  | 0.015900424 | 0.109468695  | 0.017961331 |
| CYP39A1 | blue | 0.044676544  | 0.335365915 | 0.029779472  | 0.520900747 |
| DAAM1   | blue | 0.044553485  | 0.336700121 | 0.025571653  | 0.581484747 |
| DACH1   | blue | -0.032955754 | 0.477416286 | -0.037702233 | 0.416299663 |
| DCAF10  | blue | -0.015272567 | 0.742021404 | -0.034317925 | 0.459392795 |
| DCAF16  | blue | -0.062178659 | 0.179794074 | -0.079862142 | 0.084714202 |
| DCAF17  | blue | -0.108058627 | 0.019504194 | -0.137337602 | 0.002939057 |
| DCAF5   | blue | 0.028850017  | 0.533999234 | 0.021003537  | 0.650747639 |
| DCBLD2  | blue | -0.008510387 | 0.854467335 | -0.007961986 | 0.863750768 |
| DCP2    | blue | 0.017210135  | 0.710678552 | -0.004923091 | 0.915499506 |
| DCTN4   | blue | 0.110674527  | 0.016727574 | 0.078408007  | 0.090555097 |
| DCUN1D  | blue | 0.005921496  | 0.898447495 | -0.009026895 | 0.845742103 |
| DCUN1D  | blue | 0.063761761  | 0.16894221  | 0.022847249  | 0.622384072 |
| DDAH2   | blue | -0.139885038 | 0.002447567 | -0.154444425 | 0.000811795 |
| DDHD1   | blue | 0.012089395  | 0.794429206 | -8.80E-05    | 0.998486746 |
| DDI2    | blue | 0.064504217  | 0.164024833 | 0.039051361  | 0.399806644 |
| DDRKG1  | blue | 0.078746645  | 0.089166817 | 0.104993741  | 0.023260533 |
| DDX41   | blue | 0.07810917   | 0.091794559 | 0.111360979  | 0.016058887 |
| DDX49   | blue | 0.063639225  | 0.169764271 | 0.092700481  | 0.045261216 |
| DDX5    | blue | 0.060668814  | 0.190616897 | 0.033504656  | 0.470107506 |
| DDX6    | blue | 0.039179891  | 0.39825607  | 0.003130368  | 0.946210176 |
| DEAF1   | blue | 0.162049948  | 0.000438416 | 0.151146488  | 0.001051426 |
| DECR2   | blue | 0.383928901  | 7.53E-18    | 0.394802236  | 7.19E-19    |
| DENND2  | blue | -0.139495809 | 0.002517453 | -0.156569245 | 0.00068532  |
| DENND4  | blue | -0.00724046  | 0.875993302 | -0.020208001 | 0.663146748 |
| DENND4  | blue | -0.045270957 | 0.32896914  | -0.056719598 | 0.2211707   |
| DENND5  | blue | -0.277369771 | 1.07E-09    | -0.283982711 | 4.12E-10    |
| DENND6  | blue | -0.03416017  | 0.461460476 | -0.053543012 | 0.248171572 |
| DGKE    | blue | 0.040191661  | 0.386176749 | 0.052718003  | 0.255545271 |
| DGKZ    | blue | 0.019209895  | 0.678833807 | 0.03711209   | 0.423638152 |
| DHFRL1  | blue | 0.055035168  | 0.235214795 | 0.037377217  | 0.420331983 |
| DHPS    | blue | 0.018389977  | 0.691825275 | 0.029806174  | 0.520526893 |
| DHRS1   | blue | 0.023191455  | 0.617148521 | 0.037680653  | 0.416566693 |
| DHRS4   | blue | 0.075768777  | 0.101977696 | 0.095110329  | 0.03992706  |
| DHX40   | blue | -0.007455057 | 0.872348888 | -0.043413652 | 0.349219603 |
| DIAPH2  | blue | -0.097316714 | 0.035519273 | -0.117680369 | 0.010923769 |
| DICER1  | blue | -0.016549671 | 0.721310873 | -0.038760814 | 0.403325072 |
| DIS3L   | blue | 0.135605029  | 0.003322926 | 0.115209322  | 0.01272684  |
| DMXL1   | blue | -0.004148527 | 0.928755642 | -0.03439531  | 0.458380408 |

|              |              |             |              |             |
|--------------|--------------|-------------|--------------|-------------|
| DNAJB14blue  | 0.003583307  | 0.938441655 | -0.009268531 | 0.841666602 |
| DNAJB2 blue  | 0.056475138  | 0.223170892 | 0.073430687  | 0.113025902 |
| DNAJB4 blue  | -0.183810195 | 6.45E-05    | -0.191462973 | 3.11E-05    |
| DNAJB6 blue  | -0.208002244 | 5.83E-06    | -0.226892596 | 7.24E-07    |
| DNAJC13blue  | -0.163880276 | 0.000376456 | -0.19810116  | 1.62E-05    |
| DNAJC16blue  | 0.042839473  | 0.355636324 | 0.025729168  | 0.57915888  |
| DNAJC24blue  | -0.019159955 | 0.679622435 | -0.041234974 | 0.373957181 |
| DNAJC27blue  | -0.176306229 | 0.000128226 | -0.207760202 | 5.98E-06    |
| DNAJC4 blue  | 0.231314205  | 4.33E-07    | 0.236950991  | 2.21E-07    |
| DNASE11blue  | 0.131586435  | 0.004394226 | 0.16189221   | 0.000444178 |
| DOCK11 blue  | -0.122586214 | 0.00800118  | -0.125547836 | 0.006595684 |
| DOPEY1 blue  | -0.041114521 | 0.375355657 | -0.059321618 | 0.200670869 |
| DPH6 blue    | -0.028658979 | 0.536711856 | -0.017997783 | 0.698071929 |
| DPM3 blue    | 0.287797473  | 2.34E-10    | 0.299329797  | 4.02E-11    |
| DPP7 blue    | 0.216133624  | 2.43E-06    | 0.217801831  | 2.02E-06    |
| DPP8 blue    | 0.025958358  | 0.575782466 | 0.004563779  | 0.921646189 |
| DST blue     | -0.116998513 | 0.011397194 | -0.117390978 | 0.011122528 |
| DSTYK blue   | -0.161401993 | 0.000462537 | -0.186590497 | 4.97E-05    |
| DTWD1 blue   | 0.096926778  | 0.03626672  | 0.070153375  | 0.130068972 |
| DTWD2 blue   | 0.123863704  | 0.007365058 | 0.110094248  | 0.017311716 |
| DTX2 blue    | 0.179792948  | 9.35E-05    | 0.219303916  | 1.71E-06    |
| DVL1 blue    | 0.004760831  | 0.918274664 | 0.003447085  | 0.940777463 |
| DYRK1Ablue   | -0.085404441 | 0.065178804 | -0.102497141 | 0.026768161 |
| ECSIT blue   | -0.057111082 | 0.217994288 | -0.051932336 | 0.262707142 |
| EDRF1 blue   | 0.178834888  | 0.00010205  | 0.14104391   | 0.002249839 |
| EEA1 blue    | -0.023016646 | 0.619805048 | -0.04178004  | 0.367669124 |
| EEFSEC blue  | -0.078703261 | 0.089343712 | -0.073755025 | 0.111439396 |
| EFCAB14blue  | -0.003377347 | 0.94197347  | -0.034678839 | 0.454681826 |
| EFCAB7 blue  | -0.060286189 | 0.193434036 | -0.080984652 | 0.080416335 |
| EFR3A blue   | -0.125856753 | 0.006462648 | -0.15728245  | 0.000647139 |
| EHBP1 blue   | -0.216957454 | 2.22E-06    | -0.249795465 | 4.48E-08    |
| EID1 blue    | -0.003935912 | 0.932398009 | -0.024500367 | 0.597417598 |
| EIF2AK4 blue | 0.140830751  | 0.002285076 | 0.12372918   | 0.007429845 |
| EIF2B4 blue  | 0.132936661  | 0.004003706 | 0.142750578  | 0.001985113 |
| EIF3G blue   | -0.044157924 | 0.34101182  | -0.028948673 | 0.532601073 |
| EIF3K blue   | -0.157142001 | 0.000654499 | -0.14146826  | 0.002181164 |
| EIF4A1 blue  | 0.005962862  | 0.897741955 | -0.037501324 | 0.418789554 |
| EIF4A2 blue  | -0.234766026 | 2.87E-07    | -0.269753912 | 3.14E-09    |
| EIF4E3 blue  | -0.174351884 | 0.000152648 | -0.187044791 | 4.76E-05    |
| EIF4G3 blue  | -0.043574765 | 0.347432335 | -0.072827663 | 0.116022708 |
| EIF6 blue    | -0.070429264 | 0.128561719 | -0.057313153 | 0.216367581 |
| ELF2 blue    | -0.033656784 | 0.468092839 | -0.057101663 | 0.218070322 |
| ELK4 blue    | -0.06341777  | 0.171257524 | -0.074483265 | 0.107941034 |
| ELOF1 blue   | -0.069313503 | 0.134741632 | -0.047081981 | 0.309969232 |
| ELP2 blue    | -0.016930706 | 0.715170174 | -0.051040202 | 0.271005612 |



|         |      |              |             |              |             |
|---------|------|--------------|-------------|--------------|-------------|
| EMC10   | blue | 0.18334789   | 6.74E-05    | 0.165896673  | 0.000317693 |
| EML4    | blue | -0.073942002 | 0.110532787 | -0.077244386 | 0.095458033 |
| ENTPD5  | blue | 0.204269606  | 8.61E-06    | 0.175540513  | 0.000137322 |
| EOGT    | blue | 0.106655627  | 0.021152602 | 0.093378584  | 0.043702923 |
| EPB41L2 | blue | -0.050046136 | 0.280461072 | -0.052053259 | 0.261595949 |
| EPB41L5 | blue | -0.067659572 | 0.144320154 | -0.108533417 | 0.018972272 |
| EPC1    | blue | -0.042440436 | 0.360139127 | -0.066750793 | 0.149800164 |
| EPM2AIP | blue | -0.540263414 | 9.60E-37    | -0.539680075 | 1.18E-36    |
| EPN1    | blue | -0.02470862  | 0.594304873 | 0.010783173  | 0.816220677 |
| EPS15   | blue | -0.145032886 | 0.001675586 | -0.153354956 | 0.00088471  |
| EPS8    | blue | 0.1615638    | 0.000456401 | 0.144533077  | 0.001739316 |
| ERCC2   | blue | 0.079787646  | 0.085005861 | 0.073528305  | 0.112546546 |
| ERCC4   | blue | -0.093471761 | 0.043492373 | -0.103619305 | 0.025138888 |
| ERCC6   | blue | 0.012367535  | 0.789809018 | 0.012789552  | 0.782812957 |
| ERCC6L2 | blue | -0.002051031 | 0.964741469 | -0.024686093 | 0.594641228 |
| ERGIC3  | blue | 0.019933504  | 0.667446685 | 0.026640019  | 0.565795422 |
| ERMAP   | blue | -0.071757528 | 0.121493721 | -0.114879876 | 0.012986065 |
| ERN1    | blue | 0.131522221  | 0.004413628 | 0.108679769  | 0.018810879 |
| ERRFI1  | blue | 0.107569611  | 0.020065582 | 0.084256018  | 0.068889439 |
| ERV3-1  | blue | 0.064706477  | 0.162704053 | 0.051273956  | 0.268814161 |
| ETAA1   | blue | 0.049308941  | 0.287615793 | 0.033982522  | 0.463795081 |
| ETFB    | blue | 0.132553619  | 0.004111171 | 0.158896058  | 0.000567917 |
| EVI5    | blue | -0.027641318 | 0.551277467 | -0.03794124  | 0.413348991 |
| EXOC1   | blue | -0.040951862 | 0.377249257 | -0.061711352 | 0.183094019 |
| EXPH5   | blue | 0.254704947  | 2.38E-08    | 0.252116187  | 3.33E-08    |
| EXTL2   | blue | -0.037463028 | 0.419265144 | -0.071577988 | 0.122430997 |
| FAM102E | blue | 0.0918705    | 0.047231816 | 0.060417439  | 0.192464267 |
| FAM120E | blue | 0.035890569  | 0.439065337 | 0.016495292  | 0.722188724 |
| FAM120C | blue | -0.12518689  | 0.006754232 | -0.117060534 | 0.011353393 |
| FAM122A | blue | 0.027789639  | 0.549142567 | 0.022552893  | 0.62687653  |
| FAM122E | blue | -0.145560411 | 0.001610651 | -0.157628152 | 0.000629351 |
| FAM122C | blue | -0.074514623 | 0.107792362 | -0.080306901 | 0.082989662 |
| FAM126A | blue | -0.033253168 | 0.473448474 | -0.050739055 | 0.273846819 |
| FAM135A | blue | -0.160350766 | 0.00050431  | -0.177906186 | 0.000111017 |
| FAM13A  | blue | 0.159726665  | 0.000530742 | 0.143304317  | 0.001905549 |
| FAM13B  | blue | -0.059211888 | 0.201506455 | -0.084301445 | 0.068739444 |
| FAM160E | blue | 0.033914408  | 0.464691952 | 0.017950379  | 0.698828347 |
| FAM161A | blue | -0.142335325 | 0.002046761 | -0.174562092 | 0.000149826 |
| FAM171E | blue | -0.004493336 | 0.922851814 | -0.011226152 | 0.808813748 |
| FAM172A | blue | -0.041945557 | 0.365772738 | -0.07142493  | 0.123234462 |
| FAM175A | blue | -0.132058291 | 0.004254005 | -0.168725765 | 0.000249556 |
| FAM178A | blue | -0.002997079 | 0.948497265 | -0.042181782 | 0.363076793 |
| FAM184A | blue | -0.319612095 | 1.50E-12    | -0.313461306 | 4.17E-12    |
| FAM188A | blue | -0.035002203 | 0.450484144 | -0.065389837 | 0.158300776 |
| FAM19A  | blue | -0.048911286 | 0.291525703 | -0.040037801 | 0.38799915  |

|             |              |             |              |             |
|-------------|--------------|-------------|--------------|-------------|
| FAM207#blue | -0.0170502   | 0.713248172 | -0.002309829 | 0.960296015 |
| FAM208#blue | -0.06013611  | 0.194547294 | -0.090500599 | 0.05064146  |
| FAM208Eblue | -0.068214388 | 0.141050671 | -0.097770465 | 0.034666031 |
| FAM214#blue | 0.187991462  | 4.35E-05    | 0.189452937  | 3.78E-05    |
| FAM217Eblue | -0.161510633 | 0.000458409 | -0.183501197 | 6.64E-05    |
| FAM227Eblue | 0.019628544  | 0.672236601 | 0.006955849  | 0.880830778 |
| FAM3A blue  | -0.076847332 | 0.09717871  | -0.075301121 | 0.104116104 |
| FAM58A blue | -0.06660088  | 0.150719159 | -0.026844444 | 0.56281662  |
| FAM63B blue | -0.148173258 | 0.001321759 | -0.155121174 | 0.000769344 |
| FAM73A blue | -0.183449464 | 6.67E-05    | -0.193625346 | 2.52E-05    |
| FAM76A blue | -0.00806909  | 0.861936172 | -0.023569053 | 0.611427309 |
| FAM8A1 blue | -0.04682211  | 0.312650301 | -0.061737422 | 0.182908758 |
| FAS blue    | 0.11424686   | 0.013497247 | 0.100717277  | 0.029538659 |
| FBL blue    | -0.145826128 | 0.001578825 | -0.142390741 | 0.002038434 |
| FBXL15 blue | 0.174984206  | 0.000144306 | 0.200968054  | 1.21E-05    |
| FBXL17 blue | 0.021997152  | 0.635395867 | -0.0141857   | 0.759795466 |
| FBXL3 blue  | -0.182026539 | 7.62E-05    | -0.199549353 | 1.40E-05    |
| FBXL4 blue  | -0.010192202 | 0.826127557 | -0.018386848 | 0.691875036 |
| FBXL5 blue  | 0.146735007  | 0.001474277 | 0.143632674  | 0.001859758 |
| FBXO3 blue  | 0.008443349  | 0.85560112  | -0.011242574 | 0.80853947  |
| FBXO30 blue | -0.109185941 | 0.01826188  | -0.126774695 | 0.006081415 |
| FBXO38 blue | 0.029851172  | 0.519897188 | -0.000952199 | 0.983626913 |
| FBXO42 blue | 0.030864217  | 0.505825121 | 0.009283441  | 0.841415256 |
| FBXO44 blue | -0.157829339 | 0.000619208 | -0.165816906 | 0.000319845 |
| FBXO48 blue | -0.140568403 | 0.002329135 | -0.139174797 | 0.002576455 |
| FBXO8 blue  | -0.056573632 | 0.222363456 | -0.063125297 | 0.173244651 |
| FBXO9 blue  | 0.009286505  | 0.841363615 | -0.002968745 | 0.948983508 |
| FBXW5 blue  | 0.261893736  | 9.19E-09    | 0.29619177   | 6.55E-11    |
| FCHO2 blue  | 0.051596459  | 0.265810649 | 0.043605353  | 0.347093672 |
| FCHSD2 blue | -0.106908125 | 0.020847304 | -0.101705734 | 0.027971149 |
| FEM1B blue  | -0.113150653 | 0.014424487 | -0.130056299 | 0.00487813  |
| FEM1C blue  | 0.097625348  | 0.034936994 | 0.075295752  | 0.10414086  |
| FER blue    | -0.064463522 | 0.164291545 | -0.098923919 | 0.032575256 |
| FEZ2 blue   | -0.224300075 | 9.75E-07    | -0.222319428 | 1.22E-06    |
| FGD4 blue   | 0.008192947  | 0.859838655 | -0.000297776 | 0.994879417 |
| FGD6 blue   | 0.086249149  | 0.062555686 | 0.089610793  | 0.052964449 |
| FIS1 blue   | -0.060487414 | 0.191948704 | -0.026273323 | 0.571157592 |
| FIZ1 blue   | -0.001745188 | 0.969996412 | -0.000836662 | 0.985613344 |
| FKBP14 blue | 0.144748733  | 0.00171155  | 0.135794586  | 0.003278815 |
| FKBP8 blue  | 0.018524147  | 0.689693059 | 0.04487202   | 0.333253553 |
| FKTN blue   | 0.106540718  | 0.021292819 | 0.074452651  | 0.108086333 |
| FLOT1 blue  | -0.203825862 | 9.01E-06    | -0.210714901 | 4.37E-06    |
| FLOT2 blue  | 0.111240683  | 0.016174349 | 0.128095539  | 0.005568255 |
| FMNL2 blue  | -0.105249282 | 0.022925027 | -0.114369695 | 0.01339669  |
| FNDC3A blue | 0.10200015   | 0.027518299 | 0.070779236  | 0.126669247 |

|        |      |              |             |              |             |
|--------|------|--------------|-------------|--------------|-------------|
| FNDC3B | blue | 0.046744076  | 0.313458337 | 0.026306956  | 0.570664768 |
| FNIP1  | blue | -0.026093456 | 0.57379656  | -0.03924523  | 0.397469215 |
| FNIP2  | blue | 0.129755675  | 0.004978667 | 0.112724144  | 0.014800115 |
| FOXN2  | blue | -0.094779665 | 0.040625932 | -0.123555969 | 0.007514013 |
| FOXO3  | blue | -0.042405397 | 0.360536206 | -0.06981449  | 0.131939057 |
| FPGS   | blue | 0.117150291  | 0.011290268 | 0.154456311  | 0.000811031 |
| FRMD4B | blue | 0.056169749  | 0.225687683 | 0.017997133  | 0.698082298 |
| FRS2   | blue | -0.044981916 | 0.33206975  | -0.070724276 | 0.126965001 |
| FRYL   | blue | 0.112807962  | 0.014725625 | 0.100836727  | 0.029345319 |
| FUT11  | blue | 0.142602924  | 0.002006836 | 0.156068714  | 0.000713351 |
| FZD6   | blue | 0.062867193  | 0.175012487 | 0.031180908  | 0.501467356 |
| G6PC3  | blue | 0.279433613  | 7.98E-10    | 0.280711128  | 6.64E-10    |
| GAB1   | blue | -0.056500738 | 0.222960828 | -0.087689575 | 0.058283675 |
| GABPB2 | blue | 0.097114038  | 0.035906119 | 0.089443167  | 0.053411851 |
| GALNT1 | blue | 0.08471361   | 0.067390702 | 0.045219229  | 0.329522661 |
| GANC   | blue | 0.20622121   | 7.03E-06    | 0.211131794  | 4.18E-06    |
| GAPVD1 | blue | 0.115617181  | 0.012412248 | 0.112359635  | 0.015127921 |
| GAREM  | blue | 0.048388459  | 0.296720303 | 0.037093115  | 0.423875354 |
| GATAD1 | blue | 0.088564244  | 0.055809541 | 0.059216744  | 0.201469422 |
| GCC2   | blue | -0.071834424 | 0.121094006 | -0.090656614 | 0.050243055 |
| GCLC   | blue | -0.063734516 | 0.169124732 | -0.098434012 | 0.03344974  |
| GDAP1  | blue | -0.248708395 | 5.15E-08    | -0.271948004 | 2.31E-09    |
| GDAP2  | blue | -0.053481321 | 0.248717759 | -0.053326707 | 0.250090338 |
| GK5    | blue | 0.106823525  | 0.020949165 | 0.091184887  | 0.048913432 |
| GLCCII | blue | -0.026750241 | 0.564188363 | -0.038537606 | 0.406040568 |
| GLS    | blue | -0.207076697 | 6.42E-06    | -0.217934176 | 1.99E-06    |
| GNA13  | blue | -0.159968581 | 0.000520347 | -0.185295762 | 5.61E-05    |
| GNAI1  | blue | -0.130979315 | 0.004580783 | -0.139692935 | 0.002481835 |
| GNAQ   | blue | 0.072921597  | 0.115551838 | 0.069394417  | 0.13428591  |
| GNB1L  | blue | -0.06189234  | 0.181810686 | -0.041438775 | 0.37159834  |
| GNG12  | blue | 0.020435227  | 0.659595649 | -0.014190261 | 0.7597206   |
| GNPDA2 | blue | -0.027745397 | 0.54977896  | -0.043555877 | 0.347641568 |
| GNPTAB | blue | 0.162255534  | 0.000431011 | 0.169639469  | 0.000230648 |
| GOLGA1 | blue | 0.292869254  | 1.09E-10    | 0.285810523  | 3.14E-10    |
| GOLGA8 | blue | -0.144568451 | 0.001734733 | -0.154164641 | 0.00082997  |
| GOLGA8 | blue | -0.086679383 | 0.06125348  | -0.091087466 | 0.049156394 |
| GOLGB1 | blue | -0.003010489 | 0.948267141 | -0.023695422 | 0.60951785  |
| GOLIM4 | blue | 0.062791401  | 0.17553415  | 0.046786235  | 0.313021612 |
| GOSR1  | blue | 0.084926026  | 0.066704128 | 0.071644499  | 0.122083123 |
| GPATCH | blue | 0.13357485   | 0.003830293 | 0.115694867  | 0.012353111 |
| GPC6   | blue | -0.016236906 | 0.72636479  | -0.060435973 | 0.192327616 |
| GPD1L  | blue | 0.134503118  | 0.003590185 | 0.116316844  | 0.011888546 |
| GPM6B  | blue | -0.00057685  | 0.99008062  | 0.006172249  | 0.89417185  |
| GPR125 | blue | -0.122196958 | 0.008204526 | -0.169567331 | 0.000232091 |
| GPR126 | blue | -0.037401596 | 0.420028728 | -0.029176682 | 0.529376826 |

|         |      |              |             |              |             |
|---------|------|--------------|-------------|--------------|-------------|
| GPX1    | blue | 0.038301818  | 0.408920893 | 0.091366542  | 0.048463076 |
| GPX8    | blue | -0.170130722 | 0.000221045 | -0.144812634 | 0.001703401 |
| GRIP1   | blue | 0.063953612  | 0.167661115 | 0.038065566  | 0.411819013 |
| GRN     | blue | 0.062508424  | 0.177492048 | 0.076827492  | 0.097265334 |
| GSDMD   | blue | 0.016545199  | 0.721383061 | 0.042584731  | 0.358506773 |
| GSTP1   | blue | -0.032974732 | 0.47716256  | -0.002891812 | 0.950303829 |
| GTF3C3  | blue | -0.081905879 | 0.07702256  | -0.106610062 | 0.021208105 |
| GTF3C5  | blue | 0.197019719  | 1.80E-05    | 0.191092855  | 3.23E-05    |
| GTPBP6  | blue | 0.064455578  | 0.164342318 | 0.072112758  | 0.119655754 |
| GUK1    | blue | 0.15611151   | 0.000710914 | 0.208298244  | 5.65E-06    |
| GULP1   | blue | 0.052867808  | 0.254195195 | 0.047930618  | 0.301319608 |
| GVQW1   | blue | -0.099033255 | 0.032382778 | -0.110660583 | 0.016741407 |
| GXYLT2  | blue | -0.062071517 | 0.180546751 | -0.076004399 | 0.100913569 |
| GZF1    | blue | -0.141729385 | 0.002139862 | -0.159040061 | 0.000561304 |
| HACE1   | blue | -0.096919689 | 0.036280431 | -0.137150792 | 0.002978414 |
| HCFC2   | blue | -0.078727502 | 0.089244839 | -0.09221536  | 0.04640446  |
| HDAC9   | blue | 0.04101798   | 0.376478838 | 0.034189425  | 0.461076643 |
| HDX     | blue | -0.394124691 | 8.35E-19    | -0.414521915 | 8.11E-21    |
| HEATR5  | blue | 0.045349816  | 0.328126462 | 0.025870216  | 0.577079868 |
| HEATR5I | blue | 0.125115179  | 0.006786135 | 0.104162554  | 0.024381373 |
| HEATR6  | blue | -0.097319494 | 0.035513991 | -0.132776329 | 0.004048375 |
| HECA    | blue | -0.126648727 | 0.006132507 | -0.124891844 | 0.00688636  |
| HECTD2  | blue | -0.134231095 | 0.003659093 | -0.155232342 | 0.00076257  |
| HELZ    | blue | -0.031912337 | 0.49147892  | -0.051596701 | 0.2658084   |
| HERC3   | blue | 0.077303751  | 0.09520287  | 0.079640918  | 0.085582687 |
| HERC4   | blue | 0.038606235  | 0.405204486 | 0.006258546  | 0.892701071 |
| HERPUD  | blue | -0.13149565  | 0.004421679 | -0.152166053 | 0.000971154 |
| HFM1    | blue | -0.289069886 | 1.93E-10    | -0.312165016 | 5.16E-12    |
| HIATL2  | blue | 0.116816475  | 0.011526618 | 0.121632973  | 0.008507329 |
| HIPK3   | blue | -0.091430806 | 0.048304588 | -0.093114156 | 0.044305127 |
| HM13    | blue | -0.089859985 | 0.052305114 | -0.076083212 | 0.100559606 |
| HOOK3   | blue | -0.01471764  | 0.751079937 | -0.045542288 | 0.326075597 |
| HP1BP3  | blue | -0.089278128 | 0.05385542  | -0.130606178 | 0.00469896  |
| HPS5    | blue | -0.004524167 | 0.922324131 | -0.017209124 | 0.710694793 |
| HS6ST2  | blue | -0.034915333 | 0.451609685 | -0.040060346 | 0.387731779 |
| HSD17B8 | blue | -0.029839236 | 0.52006419  | -0.016699726 | 0.71889045  |
| HSPB1   | blue | 0.062310919  | 0.178868146 | 0.10238529   | 0.026935432 |
| HYAL2   | blue | 0.087327389  | 0.059334433 | 0.083679985  | 0.070814801 |
| IBTK    | blue | 0.105261777  | 0.02290873  | 0.091919748  | 0.047112911 |
| ICE2    | blue | 0.10831425   | 0.019216219 | 0.087120026  | 0.059943045 |
| ICK     | blue | 0.144168205  | 0.001787234 | 0.12075388   | 0.008999199 |
| IDS     | blue | -0.150688834 | 0.001089411 | -0.167113163 | 0.000286505 |
| IFNAR1  | blue | -0.056721514 | 0.221155072 | -0.05263657  | 0.256281234 |
| IFNGR1  | blue | -0.109002089 | 0.018459649 | -0.112906135 | 0.014638797 |
| IKZF2   | blue | 0.037455663  | 0.419356646 | 0.035388371  | 0.445499981 |

|          |      |              |             |              |             |
|----------|------|--------------|-------------|--------------|-------------|
| IKZF4    | blue | -0.214059125 | 3.05E-06    | -0.216547698 | 2.32E-06    |
| IKZF5    | blue | -0.04133748  | 0.3727696   | -0.072738604 | 0.116470521 |
| IL1R1    | blue | 0.003612545  | 0.937940386 | 0.013337152  | 0.773761147 |
| IL1RAP   | blue | -0.123436718 | 0.007572455 | -0.118681965 | 0.010259926 |
| IL6ST    | blue | 0.040661537  | 0.380643645 | 0.011774243  | 0.799672909 |
| IMPDH1   | blue | 0.18970667   | 3.69E-05    | 0.223981843  | 1.01E-06    |
| INADL    | blue | 0.127711143  | 0.005713423 | 0.092501225  | 0.045727889 |
| ING3     | blue | -0.099503779 | 0.031565497 | -0.122908874 | 0.007836046 |
| INO80D   | blue | -0.029228248 | 0.528649002 | -0.0461472   | 0.319684202 |
| INPP4B   | blue | -0.07241941  | 0.118086658 | -0.052340446 | 0.258969889 |
| INPP5F   | blue | -0.010495658 | 0.821036947 | -0.023149119 | 0.617791432 |
| INTS6    | blue | -0.02084285  | 0.653244465 | -0.031778434 | 0.493299514 |
| INVS     | blue | 0.099825027  | 0.031017689 | 0.06708126   | 0.147789401 |
| IRAK1BP  | blue | -0.046958073 | 0.311245682 | -0.058602295 | 0.206194505 |
| IRAK4    | blue | 0.164211264  | 0.000366162 | 0.155346316  | 0.000755683 |
| ITCH     | blue | -0.11108557  | 0.016324302 | -0.133127255 | 0.003951187 |
| ITFG3    | blue | 0.160328369  | 0.000505237 | 0.196250417  | 1.94E-05    |
| ITGAV    | blue | -0.109504913 | 0.017923148 | -0.122101914 | 0.008254871 |
| ITGB8    | blue | -0.121982782 | 0.008318365 | -0.127883433 | 0.005647942 |
| ITPR2    | blue | 0.024283546  | 0.600666214 | 0.00105714   | 0.981822747 |
| ITSN1    | blue | -0.143284829 | 0.001908299 | -0.18018908  | 9.02E-05    |
| ITSN2    | blue | -0.012464384 | 0.78820197  | -0.017615786 | 0.704175837 |
| JAK2     | blue | -0.042936651 | 0.354545133 | -0.032186559 | 0.487761761 |
| JMJD1C   | blue | -0.043543213 | 0.34778189  | -0.078449721 | 0.090383159 |
| JMJD7-PI | blue | 0.151942095  | 0.000988285 | 0.130867771  | 0.004615826 |
| JMJD8    | blue | 0.118229298  | 0.010555382 | 0.145340207  | 0.001637471 |
| JMY      | blue | -0.20688386  | 6.55E-06    | -0.236349629 | 2.38E-07    |
| JOSD2    | blue | 0.075040689  | 0.105322261 | 0.098074796  | 0.034103593 |
| JRKL     | blue | -0.013663853 | 0.768375267 | -0.05197975  | 0.262271053 |
| KANSL1   | blue | -0.166348961 | 0.000305745 | -0.188128001 | 4.29E-05    |
| KANSL3   | blue | -0.323759926 | 7.40E-13    | -0.370119045 | 1.31E-16    |
| KAT2B    | blue | 0.01405536   | 0.761935694 | 0.00331986   | 0.942959472 |
| KBTBD2   | blue | -0.149111885 | 0.001230197 | -0.176511089 | 0.000125891 |
| KBTBD3   | blue | 0.015545384  | 0.737580929 | -0.001516016 | 0.973934881 |
| KBTBD6   | blue | 0.053411566  | 0.249336355 | 0.05855026   | 0.206598308 |
| KBTBD7   | blue | 0.136759956  | 0.003062309 | 0.1248462    | 0.006907006 |
| KCNIP4   | blue | -0.192624871 | 2.78E-05    | -0.212121258 | 3.76E-06    |
| KCNT2    | blue | -0.348807286 | 8.31E-15    | -0.336711952 | 7.64E-14    |
| KCTD6    | blue | -0.068047547 | 0.142027829 | -0.06788393  | 0.142991125 |
| KDELC2   | blue | 0.150429862  | 0.001111462 | 0.124629123  | 0.007005956 |
| KDM3A    | blue | -0.078782597 | 0.089020435 | -0.10424858  | 0.024263243 |
| KDM4C    | blue | 0.117996241  | 0.01071042  | 0.106141985  | 0.02178565  |
| KDM7A    | blue | 0.321289349  | 1.13E-12    | 0.302696804  | 2.37E-11    |
| KIAA023  | blue | 0.056872615  | 0.219925241 | 0.033137891  | 0.474984243 |
| KIAA039  | blue | 0.175583711  | 0.000136793 | 0.169041638  | 0.000242861 |

|              |              |             |              |             |
|--------------|--------------|-------------|--------------|-------------|
| KIAA043\blue | -0.105604138 | 0.022466082 | -0.11096737  | 0.016439386 |
| KIAA058\blue | 0.191790344  | 3.02E-05    | 0.164326804  | 0.000362631 |
| KIAA075\blue | 0.062125297  | 0.180168651 | 0.031762479  | 0.493516684 |
| KIAA089\blue | 0.037106674  | 0.42370585  | 0.020672864  | 0.655890013 |
| KIAA102\blue | 0.007391835  | 0.873422293 | -0.002477863 | 0.957410292 |
| KIAA103\blue | -0.037456332 | 0.419348342 | -0.060027937 | 0.195352608 |
| KIAA110\blue | -0.033586875 | 0.469018059 | -0.068582688 | 0.13891185  |
| KIAA132\blue | -0.190787452 | 3.32E-05    | -0.219319519 | 1.71E-06    |
| KIAA132\blue | -0.174983831 | 0.00014431  | -0.207341469 | 6.25E-06    |
| KIAA146\blue | 0.137498245  | 0.002905592 | 0.118583578  | 0.010323512 |
| KIAA155\blue | -0.164297583 | 0.000363521 | -0.163158395 | 0.000399848 |
| KIAA201\blue | 0.139121181  | 0.002586432 | 0.159449404  | 0.000542892 |
| KIAA202\blue | -0.031564451 | 0.496216347 | -0.046638529 | 0.314553442 |
| KIF16B\blue  | -0.004281905 | 0.926471464 | -0.019827877 | 0.669104219 |
| KIF21A\blue  | 0.009519346  | 0.837440759 | -0.010478474 | 0.821325027 |
| KIF3A\blue   | 0.066194313  | 0.153233046 | 0.042959782  | 0.354285707 |
| KITLG\blue   | -0.045264888 | 0.329034058 | -0.040628526 | 0.38103078  |
| KLF12\blue   | -0.26084253  | 1.06E-08    | -0.271120456 | 2.60E-09    |
| KLF3\blue    | 0.043777314  | 0.345193658 | 0.02534727   | 0.584805467 |
| KLF6\blue    | -0.0886621   | 0.055538247 | -0.123403952 | 0.007588584 |
| KLF8\blue    | -0.22031132  | 1.53E-06    | -0.208569291 | 5.49E-06    |
| KLHDC10\blue | 0.031095004  | 0.50264746  | 0.010769393  | 0.816451358 |
| KLHDC3\blue  | -0.121390849 | 0.008640353 | -0.096502055 | 0.037096011 |
| KLHL15\blue  | -0.083582506 | 0.071144929 | -0.103251915 | 0.025662618 |
| KLHL28\blue  | 0.022464306  | 0.62823126  | -0.001446383 | 0.975131687 |
| KLHL42\blue  | -0.066361505 | 0.15219544  | -0.109559454 | 0.01786578  |
| KLHL5\blue   | -0.330954875 | 2.12E-13    | -0.321338351 | 1.12E-12    |
| KLHL9\blue   | -0.023472747 | 0.612884266 | -0.032214761 | 0.487380336 |
| KMT2C\blue   | 0.08910223   | 0.05433154  | 0.063659477  | 0.169628199 |
| KPNA5\blue   | -0.130861289 | 0.00461787  | -0.154371906 | 0.00081647  |
| KRBOX4\blue  | -0.296459205 | 6.28E-11    | -0.301222603 | 2.99E-11    |
| KRIT1\blue   | -0.115010307 | 0.012882883 | -0.149055003 | 0.001235575 |
| L3MBTL1\blue | -0.064287598 | 0.165448286 | -0.084441985 | 0.068277086 |
| L3MBTL2\blue | -0.089132001 | 0.054250713 | -0.148466983 | 0.001292454 |
| LACE1\blue   | -0.029245811 | 0.528401237 | -0.03177373  | 0.49336353  |
| LAPTM4\blue  | -0.179700357 | 9.43E-05    | -0.189396472 | 3.80E-05    |
| LARP4\blue   | -0.007844097 | 0.865748913 | -0.021263247 | 0.646720383 |
| LATS1\blue   | 0.046687955  | 0.314040312 | 0.023342093  | 0.614863303 |
| LCMT1\blue   | -0.013639657 | 0.768773772 | 0.003403635  | 0.941522615 |
| LCOR\blue    | -0.056229325 | 0.22519512  | -0.070410973 | 0.128661229 |
| LDLRAD\blue  | -0.090770755 | 0.049953242 | -0.152764693 | 0.000926697 |
| LEMD3\blue   | 0.032259088  | 0.486781148 | -0.007671121 | 0.868682282 |
| LEPROT\blue  | -0.114040072 | 0.013668034 | -0.132922354 | 0.004007674 |
| LHFPL2\blue  | -0.041275711 | 0.37348494  | -0.055680748 | 0.229759619 |
| LIG4\blue    | 0.065424643  | 0.158078928 | 0.046351527  | 0.317543906 |

|         |      |              |             |              |             |
|---------|------|--------------|-------------|--------------|-------------|
| LIMA1   | blue | 0.14266559   | 0.00199759  | 0.119716285  | 0.009612203 |
| LIMCH1  | blue | -0.070320487 | 0.129154374 | -0.082698775 | 0.074195571 |
| LIMS1   | blue | 0.020659596  | 0.656096689 | 0.006699385  | 0.885193655 |
| LINS    | blue | 0.018884265  | 0.683982243 | 0.012205589  | 0.79249822  |
| LMAN2   | blue | 0.143217226  | 0.001917866 | 0.152720976  | 0.000929879 |
| LMBRD2  | blue | 0.028348257  | 0.541138639 | 0.016361172  | 0.724355373 |
| LNPEP   | blue | -0.091372086 | 0.048449386 | -0.08332816  | 0.07201224  |
| LONP2   | blue | 0.183388182  | 6.71E-05    | 0.197688998  | 1.68E-05    |
| LPIN1   | blue | -0.003134644 | 0.946136802 | -0.038217571 | 0.409952971 |
| LRCH1   | blue | -0.07101065  | 0.125429789 | -0.082098599 | 0.07632751  |
| LRCH3   | blue | -0.224571197 | 9.45E-07    | -0.231894416 | 4.04E-07    |
| LRIG2   | blue | -0.197401097 | 1.73E-05    | -0.210025134 | 4.70E-06    |
| LRP12   | blue | -0.120728418 | 0.009013815 | -0.158140391 | 0.000603825 |
| LRP6    | blue | -0.097044622 | 0.036039434 | -0.120356899 | 0.009229498 |
| LRRC37E | blue | -0.100186346 | 0.030411288 | -0.128231727 | 0.005517625 |
| LRRFIP1 | blue | 0.091338978  | 0.048531188 | 0.102291286  | 0.027076708 |
| LRRFIP2 | blue | 0.059830303  | 0.196830218 | 0.040672669  | 0.380513143 |
| LSM11   | blue | -0.070468276 | 0.128349687 | -0.087637047 | 0.058435103 |
| LTN1    | blue | -0.143873767 | 0.001826781 | -0.180175219 | 9.03E-05    |
| LYRM7   | blue | 0.086893088  | 0.060615014 | 0.065655752  | 0.156611857 |
| LYSMD3  | blue | 0.081865755  | 0.077167911 | 0.074696213  | 0.106934607 |
| LYST    | blue | 0.105903609  | 0.022084983 | 0.100179796  | 0.030422191 |
| MACROI  | blue | 0.206013137  | 7.18E-06    | 0.207166149  | 6.36E-06    |
| MAD1L1  | blue | 0.02772439   | 0.550081252 | 0.052313363  | 0.259216758 |
| MAGI3   | blue | 0.040340782  | 0.384415469 | 0.013441657  | 0.772037115 |
| MALT1   | blue | -0.092806243 | 0.045015142 | -0.102890402 | 0.026187128 |
| MAN1A2  | blue | 0.124065509  | 0.007268816 | 0.093933479  | 0.042461595 |
| MAN1B1  | blue | 0.217067891  | 2.19E-06    | 0.218655213  | 1.84E-06    |
| MAN2A1  | blue | 0.192352934  | 2.85E-05    | 0.155996678  | 0.000717472 |
| MANEA   | blue | -0.030146883 | 0.515768806 | -0.041684967 | 0.368761162 |
| MAP1S   | blue | -0.020664353 | 0.656022592 | -0.004465444 | 0.92332923  |
| MAP2K4  | blue | 0.238338157  | 1.87E-07    | 0.211907221  | 3.84E-06    |
| MAP3K1  | blue | -0.035886258 | 0.439120351 | -0.049741724 | 0.283400748 |
| MAP3K2  | blue | -0.067830847 | 0.143304725 | -0.077675568 | 0.093617092 |
| MAP3K4  | blue | 0.001601451  | 0.972466535 | -0.005639929 | 0.903252059 |
| MAP3K5  | blue | -0.091221276 | 0.048822938 | -0.084347861 | 0.068586459 |
| MAP3K7  | blue | -0.108578892 | 0.018921994 | -0.113280395 | 0.014311898 |
| MAP4K3  | blue | -0.117994097 | 0.010711855 | -0.15908858  | 0.000559092 |
| MAP4K5  | blue | -0.064395424 | 0.164738581 | -0.098457758 | 0.033406896 |
| MAP9    | blue | -0.008126421 | 0.860965156 | -0.017318031 | 0.708946866 |
| MAPK14  | blue | -0.198812497 | 1.50E-05    | -0.230049716 | 5.02E-07    |
| MAPK8   | blue | 0.129755235  | 0.004978816 | 0.088693818  | 0.055450547 |
| MBLAC2  | blue | -0.022824705 | 0.622727637 | -0.042652617 | 0.357740418 |
| MBNL1   | blue | -0.104049774 | 0.024536992 | -0.114348696 | 0.013413833 |
| MBNL2   | blue | -0.292051457 | 1.23E-10    | -0.304100224 | 1.90E-11    |

|        |      |              |             |              |             |
|--------|------|--------------|-------------|--------------|-------------|
| MBNL3  | blue | -0.076313162 | 0.09953249  | -0.068880657 | 0.137199753 |
| MBTPS2 | blue | -0.093914536 | 0.042503476 | -0.119762123 | 0.009584358 |
| MCC    | blue | 0.106469925  | 0.021379606 | 0.070907884  | 0.125979035 |
| MCM9   | blue | 0.056548356  | 0.222570464 | 0.034441882  | 0.457771736 |
| MDK    | blue | 0.034623632  | 0.455400672 | 0.050685215  | 0.274356902 |
| MDN1   | blue | -0.161329638 | 0.000465306 | -0.194720344 | 2.26E-05    |
| MECOM  | blue | -0.040381913 | 0.383930533 | -0.050403694 | 0.277034612 |
| MED13  | blue | -0.059096147 | 0.202390545 | -0.076786457 | 0.097444691 |
| MED13L | blue | -0.171120829 | 0.000202816 | -0.187745    | 4.45E-05    |
| MED23  | blue | 0.060125109  | 0.194629082 | 0.0428461    | 0.355561844 |
| MED28  | blue | -0.095644921 | 0.038818691 | -0.119727646 | 0.009605295 |
| MERTK  | blue | 0.08023425   | 0.083269411 | 0.047753272  | 0.303113806 |
| METTL1 | blue | 0.128122281  | 0.00555828  | 0.129493153  | 0.005067986 |
| METTL2 | blue | 0.039991906  | 0.388543761 | 0.008616649  | 0.852670786 |
| METTL2 | blue | 0.008859472  | 0.848568327 | -0.004762418 | 0.918247502 |
| MEX3C  | blue | -0.041940011 | 0.365836184 | -0.072476172 | 0.117797988 |
| MFSD10 | blue | 0.158736019  | 0.000575352 | 0.167009256  | 0.000289053 |
| MFSD5  | blue | 0.078485489  | 0.090235931 | 0.096463735  | 0.037171617 |
| MFSD8  | blue | -0.085010457 | 0.066432829 | -0.100667435 | 0.029619656 |
| MGA    | blue | -0.045177192 | 0.329972928 | -0.0774009   | 0.094786482 |
| MGEA5  | blue | 0.060052969  | 0.195166035 | 0.027367196  | 0.55523379  |
| MIB1   | blue | -0.078843155 | 0.08877431  | -0.107936721 | 0.019642845 |
| MID1   | blue | 0.034687986  | 0.454562796 | 0.016237377  | 0.726357177 |
| MIER1  | blue | -0.036818771 | 0.427313504 | -0.048487647 | 0.295730094 |
| MIER3  | blue | 0.003431088  | 0.941051806 | -0.018646847 | 0.687745259 |
| MIF    | blue | 0.189832516  | 3.64E-05    | 0.176465757  | 0.000126404 |
| MKLN1  | blue | -0.101800687 | 0.027824403 | -0.114503676 | 0.01328776  |
| MLH3   | blue | -0.086113038 | 0.062972381 | -0.121869561 | 0.008379113 |
| MLLT10 | blue | -0.11413333  | 0.013590778 | -0.152643496 | 0.000935543 |
| MLLT4  | blue | 0.139257361  | 0.002561161 | 0.100849723  | 0.029324348 |
| MOB1B  | blue | -0.045148455 | 0.330280961 | -0.078317046 | 0.09093094  |
| MOB2   | blue | 0.02137004   | 0.645067354 | 0.036547186  | 0.430732958 |
| MOB3B  | blue | -0.247024433 | 6.37E-08    | -0.255508576 | 2.14E-08    |
| MON1A  | blue | 0.225324257  | 8.67E-07    | 0.254812585  | 2.35E-08    |
| MON2   | blue | -0.056250383 | 0.225021202 | -0.084795556 | 0.067125153 |
| MORC3  | blue | -0.109487383 | 0.01794162  | -0.132791587 | 0.004044105 |
| MOSPD1 | blue | -0.144467186 | 0.001747881 | -0.166428335 | 0.000303692 |
| MOSPD2 | blue | 0.120814127  | 0.008964699 | 0.110352221  | 0.017049859 |
| MPDZ   | blue | -0.097979274 | 0.034279285 | -0.110046719 | 0.017360341 |
| MPHOSP | blue | 0.055018203  | 0.235359377 | 0.041410379  | 0.371926453 |
| MPP7   | blue | -0.06535457  | 0.158525797 | -0.083194146 | 0.072472685 |
| MPST   | blue | 0.246110192  | 7.15E-08    | 0.259050582  | 1.34E-08    |
| MRPL2  | blue | -0.183348158 | 6.74E-05    | -0.158210967 | 0.000600384 |
| MRPL43 | blue | 0.261302242  | 9.95E-09    | 0.266551253  | 4.89E-09    |
| MRPL55 | blue | 0.172207806  | 0.00018443  | 0.199557476  | 1.39E-05    |



|         |      |              |             |              |             |
|---------|------|--------------|-------------|--------------|-------------|
| MRPS2   | blue | 0.10985849   | 0.01755409  | 0.117014216  | 0.01138609  |
| MSANTE  | blue | -0.05415079  | 0.242835234 | -0.066176099 | 0.153346404 |
| MSANTE  | blue | -0.198541206 | 1.55E-05    | -0.216578239 | 2.31E-06    |
| MSI2    | blue | 0.14100586   | 0.002256092 | 0.116994778  | 0.011399836 |
| MSL2    | blue | -0.177579065 | 0.000114349 | -0.202517155 | 1.03E-05    |
| MSRB1   | blue | 0.022306833  | 0.630642529 | 0.051254712  | 0.268994113 |
| MT1X    | blue | 0.095215242  | 0.039707458 | 0.088256105  | 0.056671019 |
| MT2A    | blue | 0.107723632  | 0.019887269 | 0.121771479  | 0.008432056 |
| MTCP1   | blue | -0.077688989 | 0.093560252 | -0.068804467 | 0.137635983 |
| MTM1    | blue | -0.181997814 | 7.64E-05    | -0.19454376  | 2.30E-05    |
| MTMR10  | blue | -0.090807963 | 0.049859069 | -0.133355963 | 0.003888989 |
| MTMR3   | blue | -0.109536067 | 0.017890359 | -0.124356565 | 0.00713199  |
| MTMR6   | blue | 0.156113494  | 0.000710801 | 0.128062788  | 0.005580493 |
| MTR     | blue | -0.035761529 | 0.440713623 | -0.060655356 | 0.190715467 |
| MTRR    | blue | -0.2411595   | 1.32E-07    | -0.26728508  | 4.42E-09    |
| MTURN   | blue | -0.057071267 | 0.21831584  | -0.073962121 | 0.110435582 |
| MTUS1   | blue | 0.270511615  | 2.83E-09    | 0.239420029  | 1.64E-07    |
| MTX3    | blue | -0.126953034 | 0.006009735 | -0.153894392 | 0.000847882 |
| MXD1    | blue | 0.02788695   | 0.547744113 | 0.006953893  | 0.880864039 |
| MXI1    | blue | -0.099535317 | 0.031511354 | -0.126783269 | 0.006077952 |
| MYEF2   | blue | 0.04533402   | 0.328295151 | 0.010370778  | 0.823130977 |
| MYLIP   | blue | -0.096690754 | 0.036725602 | -0.099973544 | 0.030767193 |
| MYO6    | blue | 0.096998468  | 0.036128306 | 0.086260691  | 0.062520455 |
| MYO9A   | blue | -0.113130587 | 0.014441969 | -0.135372565 | 0.003377756 |
| MYRIP   | blue | 0.001020747  | 0.982448427 | 0.005369966  | 0.907861951 |
| N4BP2   | blue | 0.039090095  | 0.399338985 | 0.015805451  | 0.733356094 |
| N6AMT1  | blue | -0.017578519 | 0.704772346 | -0.031673474 | 0.494729091 |
| NAA60   | blue | 0.227849145  | 6.48E-07    | 0.268529738  | 3.72E-09    |
| NAALAD  | blue | 0.019879298  | 0.668297096 | 0.011969787  | 0.796418249 |
| NAB1    | blue | -0.230894851 | 4.54E-07    | -0.246118036 | 7.14E-08    |
| NAGLU   | blue | 0.185211281  | 5.66E-05    | 0.193768698  | 2.48E-05    |
| NAGPA   | blue | 0.022949995  | 0.620819235 | 0.029034025  | 0.531392966 |
| NAPEPLI | blue | 0.096871689  | 0.036373386 | 0.094197668  | 0.041881114 |
| NAPG    | blue | -0.051783453 | 0.264079732 | -0.086330078 | 0.062309008 |
| NBPF1   | blue | -0.05662225  | 0.221965668 | -0.07166839  | 0.121958358 |
| NBPF10  | blue | -0.040865627 | 0.378255543 | -0.056826671 | 0.220298666 |
| NBPF11  | blue | -0.021895981 | 0.636952025 | -0.059389917 | 0.20015206  |
| NBPF12  | blue | -0.059463185 | 0.199596583 | -0.08726308  | 0.059522629 |
| NBPF14  | blue | -0.124019065 | 0.007290865 | -0.145191845 | 0.001655771 |
| NBPF15  | blue | 0.264285453  | 6.66E-09    | 0.226888159  | 7.24E-07    |
| NBPF19  | blue | -0.052738632 | 0.255359062 | -0.076816587 | 0.097312972 |
| NBPF8   | blue | 0.021816521  | 0.638175358 | -0.003280306 | 0.943637931 |
| NBR1    | blue | 0.114043176  | 0.013665457 | 0.099298999  | 0.031918999 |
| NCKAP1  | blue | 0.006884861  | 0.882038046 | -0.01440099  | 0.756264332 |
| NCKAP5  | blue | 0.013729128  | 0.767300491 | -0.001204912 | 0.979282388 |

|        |      |              |             |              |             |
|--------|------|--------------|-------------|--------------|-------------|
| NCOA3  | blue | -0.039891762 | 0.389733725 | -0.049935582 | 0.281526286 |
| NCOA7  | blue | -0.139536607 | 0.002510044 | -0.153115696 | 0.000901513 |
| NDUFAB | blue | 0.117713654  | 0.010901111 | 0.141493517  | 0.002177137 |
| NEK1   | blue | 0.04881514   | 0.292476366 | 0.014077295  | 0.761575389 |
| NEK7   | blue | -0.015704611 | 0.734993312 | -0.020355474 | 0.660841168 |
| NEK9   | blue | -0.072456189 | 0.117899554 | -0.091013148 | 0.049342418 |
| NEMF   | blue | -0.033931252 | 0.46447008  | -0.059502121 | 0.199301854 |
| NEU3   | blue | -0.052832779 | 0.25451044  | -0.090999707 | 0.049376124 |
| NF1    | blue | 0.001282554  | 0.977947723 | -0.026708899 | 0.564790882 |
| NFE2L2 | blue | -0.044300757 | 0.339450861 | -0.057857528 | 0.21202864  |
| NFIA   | blue | 0.246932122  | 6.45E-08    | 0.253483142  | 2.79E-08    |
| NFKB2  | blue | 0.00595121   | 0.897940683 | 0.008573574  | 0.853398964 |
| NFKBIB | blue | 0.084722324  | 0.067362425 | 0.11541806   | 0.012564967 |
| NFXL1  | blue | 0.072335602  | 0.118513885 | 0.03882896   | 0.402498189 |
| NHLRC2 | blue | 0.056315438  | 0.224484514 | 0.037011986  | 0.424890397 |
| NHLRC3 | blue | 0.000752778  | 0.987055624 | -0.026948488 | 0.561303439 |
| NHS    | blue | 0.07566835   | 0.102433948 | 0.06010766   | 0.194758863 |
| NIN    | blue | 0.065442949  | 0.157962346 | 0.041705858  | 0.368521034 |
| NIPAL1 | blue | 0.12868294   | 0.005352823 | 0.098063503  | 0.034124323 |
| NIPBL  | blue | -0.197962944 | 1.64E-05    | -0.229086732 | 5.61E-07    |
| NME4   | blue | 0.258667703  | 1.41E-08    | 0.259871292  | 1.20E-08    |
| NPAT   | blue | -0.041961473 | 0.365590704 | -0.071318242 | 0.123796936 |
| NPM3   | blue | 0.126006132  | 0.006399184 | 0.116694158  | 0.01161431  |
| NPRL3  | blue | 0.197773934  | 1.67E-05    | 0.210636035  | 4.41E-06    |
| NR1D2  | blue | -0.199488568 | 1.40E-05    | -0.220921912 | 1.43E-06    |
| NR2C2  | blue | -0.054518904 | 0.239642543 | -0.088074392 | 0.057184194 |
| NRDE2  | blue | -0.05678621  | 0.220627905 | -0.07789855  | 0.092676265 |
| NRIP1  | blue | 0.132272962  | 0.00419156  | 0.104932134  | 0.023342051 |
| NSDHL  | blue | 0.03714887   | 0.423178593 | 0.046361836  | 0.317436166 |
| NSMAF  | blue | -0.087842675 | 0.057844166 | -0.117793719 | 0.01084678  |
| NSMCE1 | blue | 0.087656195  | 0.058379865 | 0.115094298  | 0.012816823 |
| NSUN3  | blue | 0.00176701   | 0.969621431 | -0.007320234 | 0.874638228 |
| NUBPL  | blue | -0.086615852 | 0.06144435  | -0.122096512 | 0.008257741 |
| NUDT14 | blue | 0.019020631  | 0.681824415 | 0.042164966  | 0.363268292 |
| NUDT22 | blue | 0.228534557  | 5.99E-07    | 0.249939658  | 4.40E-08    |
| NUDT8  | blue | 0.220963613  | 1.42E-06    | 0.257487185  | 1.65E-08    |
| NUFIP2 | blue | -0.012596621 | 0.786009166 | -0.032744935 | 0.480239787 |
| OAT    | blue | -0.05449113  | 0.239882395 | -0.10616669  | 0.02175483  |
| OCRL   | blue | -0.026048795 | 0.574452709 | -0.073131192 | 0.114506591 |
| OGFOD3 | blue | 0.071564586  | 0.122501185 | 0.062798147  | 0.175487666 |
| OGFRL1 | blue | -0.065443432 | 0.157959271 | -0.082164311 | 0.07609169  |
| OPHN1  | blue | 0.02627035   | 0.571201164 | -0.030647841 | 0.508813891 |
| OR2A7  | blue | 0.009245492  | 0.842054999 | -0.017873897 | 0.700049389 |
| OSBPL8 | blue | -0.055585416 | 0.230559486 | -0.069333143 | 0.134630908 |
| OSBPL9 | blue | -0.198619334 | 1.53E-05    | -0.20964596  | 4.90E-06    |

|         |      |              |             |              |             |
|---------|------|--------------|-------------|--------------|-------------|
| OST4    | blue | 0.049066242  | 0.289997894 | 0.077751267  | 0.093296842 |
| OSTM1   | blue | 0.027216946  | 0.557408152 | 0.021754024  | 0.63913821  |
| OTUD1   | blue | -0.337571688 | 6.55E-14    | -0.353789808 | 3.24E-15    |
| OTUD3   | blue | -0.044511936 | 0.337151372 | -0.076436965 | 0.098982965 |
| OTUD4   | blue | -0.096630253 | 0.036844019 | -0.116982232 | 0.011408717 |
| OXR1    | blue | -0.011861735 | 0.798216246 | -0.059894553 | 0.196348962 |
| P4HB    | blue | 0.280489442  | 6.85E-10    | 0.269692871  | 3.17E-09    |
| PABPC4I | blue | -0.223439359 | 1.07E-06    | -0.230443805 | 4.79E-07    |
| PAIP2B  | blue | -0.236347758 | 2.38E-07    | -0.256435356 | 1.90E-08    |
| PAPD4   | blue | 0.081888619  | 0.077085057 | 0.057983578  | 0.21103296  |
| PAPOLG  | blue | -0.177962057 | 0.000110457 | -0.192639972 | 2.78E-05    |
| PAQR3   | blue | 0.02992181   | 0.518909483 | 0.002316185  | 0.960186847 |
| PARD6G  | blue | -0.065245781 | 0.159221443 | -0.073671542 | 0.111846072 |
| PARP10  | blue | -0.005442258 | 0.906627183 | 0.00853235   | 0.854095954 |
| PARP11  | blue | -0.222306989 | 1.22E-06    | -0.227886811 | 6.45E-07    |
| PARP8   | blue | -0.018123133 | 0.696073187 | -0.014303751 | 0.757858586 |
| PAWR    | blue | -0.084744342 | 0.067291013 | -0.11880411  | 0.01018147  |
| PBX1    | blue | -0.125462117 | 0.006633031 | -0.143708806 | 0.001849287 |
| PCBD2   | blue | -0.00455618  | 0.921776243 | -0.006800584 | 0.883471671 |
| PCBP4   | blue | 0.075023585  | 0.105401861 | 0.088873985  | 0.054954571 |
| PCGF5   | blue | -0.019274841 | 0.677808744 | -0.019600582 | 0.67267646  |
| PCNXL4  | blue | 0.013903976  | 0.764423769 | -0.01326605  | 0.774934763 |
| PCYOX1  | blue | -0.044335463 | 0.339072265 | -0.072863747 | 0.115841651 |
| PDCD4   | blue | 0.000787283  | 0.986462349 | -0.009169865 | 0.843330219 |
| PDCD6IP | blue | 0.082663142  | 0.074320778 | 0.066343787  | 0.152305148 |
| PDE3A   | blue | -0.022128696 | 0.633374942 | -0.012755778 | 0.783372213 |
| PDE4D   | blue | 0.07515749   | 0.104779955 | 0.055885359  | 0.228049522 |
| PDE8A   | blue | 0.012160457  | 0.793248102 | 0.004900132  | 0.915892105 |
| PDGFC   | blue | -0.077292752 | 0.095250105 | -0.082146311 | 0.076156228 |
| PDLIM5  | blue | 0.128570455  | 0.005393487 | 0.145802725  | 0.001581605 |
| PDP1    | blue | 0.091234283  | 0.048790626 | 0.066349428  | 0.152270215 |
| PDPK1   | blue | -0.006270398 | 0.892499101 | -0.008890369 | 0.848046607 |
| PDPR    | blue | -0.060191236 | 0.194137839 | -0.073857634 | 0.11094115  |
| PDS5B   | blue | -0.156102461 | 0.000711428 | -0.184554276 | 6.02E-05    |
| PDXK    | blue | -0.034214373 | 0.460749449 | -0.008470185 | 0.855147215 |
| PELI1   | blue | -0.050783706 | 0.27342427  | -0.060692959 | 0.190440142 |
| PELI2   | blue | -0.376965728 | 3.24E-17    | -0.382446664 | 1.03E-17    |
| PEX1    | blue | 0.141002233  | 0.002256689 | 0.103716612  | 0.025001726 |
| PEX12   | blue | -0.015982982 | 0.730476669 | -0.028411063 | 0.540242388 |
| PEX14   | blue | 0.011033398  | 0.812034665 | 0.017947055  | 0.698881395 |
| PEX16   | blue | 0.12183145   | 0.008399649 | 0.14662041   | 0.0014871   |
| PFKL    | blue | 0.204432097  | 8.46E-06    | 0.229235453  | 5.52E-07    |
| PFN1    | blue | 0.249945115  | 4.40E-08    | 0.289661126  | 1.77E-10    |
| PGAP1   | blue | -0.068683675 | 0.138329763 | -0.100904179 | 0.029236622 |
| PGBD4   | blue | -0.009008658 | 0.846049853 | -0.004018682 | 0.930979885 |

|              |              |             |              |             |
|--------------|--------------|-------------|--------------|-------------|
| PGM2L1 blue  | 0.047510137  | 0.305585084 | 0.055451402  | 0.231687234 |
| PHACTR\blue  | -0.156039311 | 0.00071503  | -0.142778344 | 0.001981052 |
| PHF20L1 blue | -0.100344584 | 0.030148931 | -0.127244404 | 0.005894256 |
| PHF21A blue  | -0.119755588 | 0.009588323 | -0.153544363 | 0.000871614 |
| PHF3 blue    | -0.173169767 | 0.000169472 | -0.203133843 | 9.68E-06    |
| PHIP blue    | -0.11067362  | 0.016728474 | -0.118866935 | 0.010141324 |
| PHKB blue    | 0.369955146  | 1.36E-16    | 0.372562279  | 7.99E-17    |
| PIAS1 blue   | -0.106302738 | 0.021585782 | -0.114925831 | 0.012949628 |
| PICALM blue  | -0.046830843 | 0.312559958 | -0.059976966 | 0.195732912 |
| PIGQ blue    | 0.216118222  | 2.43E-06    | 0.236597297  | 2.31E-07    |
| PIK3C2A blue | 0.030073564  | 0.51679083  | -9.79E-05    | 0.998316804 |
| PIK3C3 blue  | -0.157574109 | 0.000632101 | -0.18498592  | 5.78E-05    |
| PIKFYVE\blue | 0.004131422  | 0.929048617 | -0.023359405 | 0.614600916 |
| PIN1 blue    | 0.063580109  | 0.170161929 | 0.085812906  | 0.063899299 |
| PJA2 blue    | 0.032682944  | 0.481071762 | 0.012637844  | 0.785325947 |
| PKN2 blue    | -0.094959849 | 0.040243834 | -0.128704732 | 0.005344977 |
| PLA2G4E\blue | 0.050602376  | 0.275143    | 0.017523556  | 0.705652437 |
| PLAGL1 blue  | -0.331090477 | 2.07E-13    | -0.348798082 | 8.33E-15    |
| PLCB1 blue   | 0.096220286  | 0.037655012 | 0.069532276  | 0.133512203 |
| PLCB4 blue   | 0.206082316  | 7.13E-06    | 0.175315478  | 0.000140108 |
| PLCE1 blue   | 0.207568243  | 6.10E-06    | 0.204323891  | 8.56E-06    |
| PLCL2 blue   | -0.059722353 | 0.197640738 | -0.083737386 | 0.070620988 |
| PLD1 blue    | -0.199328575 | 1.43E-05    | -0.19469938  | 2.27E-05    |
| PLEKHA blue  | 0.150896915  | 0.001071986 | 0.111026568  | 0.01638166  |
| PLEKHA\blue  | -0.147705068 | 0.001369737 | -0.154780855 | 0.000790428 |
| PLEKHA\blue  | 0.186002358  | 5.25E-05    | 0.1541408    | 0.000831536 |
| PLEKHF1\blue | -0.309917754 | 7.45E-12    | -0.260719954 | 1.08E-08    |
| PLEKHG blue  | 0.021214872  | 0.647469752 | 0.028163095  | 0.543785201 |
| PLOD3 blue   | 0.026240081  | 0.57164487  | 0.0285438    | 0.538350664 |
| PM20D2 blue  | -0.241105022 | 1.33E-07    | -0.266673013 | 4.81E-09    |
| PNRC1 blue   | -0.248053614 | 5.60E-08    | -0.246321022 | 6.96E-08    |
| POGLUT blue  | -0.206388768 | 6.90E-06    | -0.263462946 | 7.44E-09    |
| POLK blue    | 0.109534756  | 0.017891738 | 0.086429979  | 0.062005608 |
| POLR2M blue  | -0.067239797 | 0.146832088 | -0.090394127 | 0.050914863 |
| POU2F1 blue  | -0.074238229 | 0.10910835  | -0.097375364 | 0.035407991 |
| PPDPF blue   | 0.067594882  | 0.144705103 | 0.095192095  | 0.03975582  |
| PPFIBP1 blue | -0.23539486  | 2.66E-07    | -0.26684475  | 4.69E-09    |
| PPIP5K2 blue | 0.029414022  | 0.526031159 | -0.001057111 | 0.981823246 |
| PPM1A blue   | -0.036162193 | 0.435607325 | -0.059845182 | 0.196718686 |
| PPM1D blue   | -0.048258449 | 0.298021554 | -0.064259855 | 0.165631257 |
| PPM1L blue   | 0.105272921  | 0.022894203 | 0.097231152  | 0.03568215  |
| PPP1R12\blue | -0.113939907 | 0.013751442 | -0.138066054 | 0.002790066 |
| PPP1R21 blue | -0.200065834 | 1.32E-05    | -0.223618868 | 1.05E-06    |
| PPP1R3B blue | 0.187922088  | 4.38E-05    | 0.159176115  | 0.000555121 |
| PPP1R3D\blue | 0.054955981  | 0.235890173 | 0.040921669  | 0.377601399 |

|              |              |             |              |             |
|--------------|--------------|-------------|--------------|-------------|
| PPP1R9A blue | 0.056985108  | 0.219012827 | 0.029481826  | 0.525077337 |
| PPP2R1A blue | 0.187230457  | 4.68E-05    | 0.204465782  | 8.43E-06    |
| PPP2R3A blue | -0.289361276 | 1.85E-10    | -0.311708739 | 5.56E-12    |
| PPP2R3B blue | -0.009808589 | 0.832573264 | -0.006458945 | 0.889287081 |
| PPP3CA blue  | -0.009840198 | 0.83204172  | -0.03069414  | 0.508173594 |
| PPP3CB blue  | -0.012806503 | 0.782532308 | -0.038444624 | 0.407174972 |
| PPP4R1 blue  | -0.110914926 | 0.016490675 | -0.126664622 | 0.006126039 |
| PPP6R3 blue  | 0.044547284  | 0.336767447 | 0.011747812  | 0.8001131   |
| PQLC3 blue   | -0.089769442 | 0.052543885 | -0.057912331 | 0.211595332 |
| PRDM2 blue   | -0.119820323 | 0.009549107 | -0.157387919 | 0.000641663 |
| PREPL blue   | -0.061553927 | 0.184215716 | -0.074326629 | 0.108686083 |
| PREX2 blue   | 0.048482499  | 0.295781433 | 0.033332108  | 0.472398374 |
| PRKAA1 blue  | -0.086473124 | 0.061874952 | -0.105774991 | 0.022247967 |
| PRKAA2 blue  | -0.152196648 | 0.000968835 | -0.161799564 | 0.000447595 |
| PRKAB2 blue  | 0.01102624   | 0.81215435  | -0.028332417 | 0.541364785 |
| PRKACB blue  | -0.070872308 | 0.126169611 | -0.089337335 | 0.05369594  |
| PRKAR1A blue | -0.034337733 | 0.459133535 | -0.058615726 | 0.206090369 |
| PRKCSH blue  | -0.079711077 | 0.085306485 | -0.086879113 | 0.060656599 |
| PRKD2 blue   | -0.008189304 | 0.859900338 | 0.03910575   | 0.399150064 |
| PRKD3 blue   | -0.15554312  | 0.000743926 | -0.172871714 | 0.00017398  |
| PRKRIR blue  | -0.156312896 | 0.000699546 | -0.191197596 | 3.19E-05    |
| PRMT1 blue   | 0.023533672  | 0.611962381 | 0.032702385  | 0.480810764 |
| PRMT9 blue   | 0.016131938  | 0.728063639 | -0.006800681 | 0.88347002  |
| PRPF4B blue  | -0.069852528 | 0.131728121 | -0.099518751 | 0.031539785 |
| PRPF6 blue   | -0.215798843 | 2.52E-06    | -0.199730604 | 1.37E-05    |
| PRRG1 blue   | -0.289509169 | 1.81E-10    | -0.311240446 | 6.00E-12    |
| PRTG blue    | -0.103753285 | 0.024950201 | -0.124459287 | 0.007084254 |
| PSD3 blue    | -0.067687764 | 0.144152636 | -0.101486022 | 0.028313252 |
| PTAR1 blue   | -0.027673478 | 0.550814223 | -0.047415754 | 0.30654798  |
| PTCD1 blue   | 0.093293779  | 0.0438953   | 0.097631149  | 0.034926127 |
| PTDSS2 blue  | 0.01136417   | 0.806509438 | 0.008710438  | 0.851085753 |
| PTEN blue    | 0.004767628  | 0.918158394 | 0.008377183  | 0.856720439 |
| PTPDC1 blue  | -0.000189576 | 0.996740021 | -0.040196072 | 0.386124589 |
| PTPN12 blue  | 0.089650392  | 0.052859215 | 0.074626203  | 0.107264664 |
| PTPN13 blue  | -0.257777369 | 1.59E-08    | -0.266791127 | 4.73E-09    |
| PTPN4 blue   | 0.062009605  | 0.180982748 | 0.034685523  | 0.454594842 |
| PTPRG blue   | 0.010243798  | 0.825261503 | -0.003382858 | 0.94187895  |
| PUM2 blue    | -0.046663749 | 0.314291542 | -0.0778421   | 0.092913728 |
| PURA blue    | -0.05868671  | 0.205540644 | -0.052500244 | 0.257516597 |
| PUS1 blue    | 0.078978412  | 0.088226552 | 0.084772073  | 0.067201162 |
| PUS7L blue   | 0.013515149  | 0.770825386 | -0.013855254 | 0.76522505  |
| PUSL1 blue   | 0.086161577  | 0.062823519 | 0.11461333   | 0.013199191 |
| PVRL2 blue   | -0.080477288 | 0.08233655  | -0.06884869  | 0.137382655 |
| PWWP2A blue  | -0.007371125 | 0.873773959 | -0.040636203 | 0.380940729 |
| PWWP2B blue  | 0.115112493  | 0.012802552 | 0.125721275  | 0.006520693 |

|         |      |              |             |              |             |
|---------|------|--------------|-------------|--------------|-------------|
| PXK     | blue | -0.132948767 | 0.004000352 | -0.15745469  | 0.000638219 |
| PYGO1   | blue | -0.177022627 | 0.000120232 | -0.198032093 | 1.63E-05    |
| QARS    | blue | 0.182456264  | 7.32E-05    | 0.176119998  | 0.000130385 |
| QKI     | blue | -0.239974556 | 1.53E-07    | -0.24692087  | 6.46E-08    |
| QSER1   | blue | 0.001783111  | 0.969344751 | -0.01487423  | 0.748520251 |
| QTRT1   | blue | -0.043510993 | 0.348139081 | -0.048033894 | 0.300278019 |
| R3HDM2  | blue | -0.100443289 | 0.029986263 | -0.146382195 | 0.001514082 |
| RAB11F1 | blue | -0.000332238 | 0.994286817 | -0.057361937 | 0.215976165 |
| RAB2B   | blue | -0.099006844 | 0.032429183 | -0.112602289 | 0.014908999 |
| RAB30   | blue | 0.019327497  | 0.676978086 | -0.006479144 | 0.888943077 |
| RAB33B  | blue | -0.015903298 | 0.731768619 | -0.034665914 | 0.454850069 |
| RAB3GA  | blue | -0.152584124 | 0.000939905 | -0.174572878 | 0.000149682 |
| RAB8B   | blue | -0.125864249 | 0.00645945  | -0.140747217 | 0.002299022 |
| RABAC1  | blue | -0.124522575 | 0.007054986 | -0.103790213 | 0.024898411 |
| RABEP1  | blue | 0.097565755  | 0.035048786 | 0.070732847  | 0.126918844 |
| RABGAP  | blue | 0.018932705  | 0.683215445 | -0.015915919 | 0.731563942 |
| RABGGT  | blue | 0.172699625  | 0.000176634 | 0.182948745  | 6.99E-05    |
| RAD50   | blue | -0.014500223 | 0.754638433 | -0.036667745 | 0.429213078 |
| RAD51B  | blue | 0.086738913  | 0.061075073 | 0.050561483  | 0.275531616 |
| RAD9B   | blue | -0.256016873 | 2.01E-08    | -0.264603246 | 6.37E-09    |
| RAG1    | blue | -0.098006999 | 0.034228211 | -0.119188708 | 0.009937901 |
| RAI14   | blue | -0.216801731 | 2.26E-06    | -0.221327759 | 1.36E-06    |
| RALGAP  | blue | 0.04507691   | 0.331048657 | 0.009160901  | 0.843481405 |
| RALGPS2 | blue | -0.1055791   | 0.022498201 | -0.112148582 | 0.015320622 |
| RALY    | blue | -0.040846588 | 0.378477928 | -0.021204702 | 0.647627324 |
| RANBP2  | blue | 0.091105915  | 0.049110307 | 0.044791615  | 0.334121384 |
| RANBP6  | blue | 0.033790795  | 0.466322049 | 0.028527971  | 0.538576073 |
| RAP1B   | blue | -0.085272076 | 0.065597924 | -0.088858793 | 0.054996249 |
| RAP2C   | blue | -0.155130069 | 0.0007688   | -0.16075125  | 0.000487999 |
| RAPGEF2 | blue | 0.079534089  | 0.086004642 | 0.045991236  | 0.321324223 |
| RAPGEF3 | blue | -0.206272068 | 6.99E-06    | -0.209523244 | 4.96E-06    |
| RAPGEF4 | blue | -0.072738978 | 0.116468638 | -0.081645362 | 0.077970283 |
| RARB    | blue | -0.141058194 | 0.002247496 | -0.12737944  | 0.005841416 |
| RASSF3  | blue | -0.018007168 | 0.697922204 | -0.040304539 | 0.384843094 |
| RASSF9  | blue | -0.231892514 | 4.04E-07    | -0.213752998 | 3.15E-06    |
| RAVER2  | blue | 0.146885785  | 0.001457561 | 0.125258261  | 0.006722614 |
| RBAK    | blue | -0.019418662 | 0.675540887 | -0.027530905 | 0.552869361 |
| RBCK1   | blue | -0.104994619 | 0.023259373 | -0.072220162 | 0.119104343 |
| RBM10   | blue | -0.017179972 | 0.711162932 | -0.008344155 | 0.857279285 |
| RBM12B  | blue | -0.140894826 | 0.002274431 | -0.17326044  | 0.000168123 |
| RBM26   | blue | -0.018931198 | 0.683239289 | -0.045550637 | 0.325986826 |
| RBM41   | blue | -0.040849948 | 0.378438679 | -0.055291518 | 0.233037793 |
| RBM42   | blue | -0.173080868 | 0.000170805 | -0.152647855 | 0.000935223 |
| RBM43   | blue | -0.109568273 | 0.01785652  | -0.123395225 | 0.007592885 |
| RBM48   | blue | -0.167600374 | 0.000274835 | -0.189375063 | 3.81E-05    |

|          |      |              |             |              |             |
|----------|------|--------------|-------------|--------------|-------------|
| RBMS1    | blue | -0.388695113 | 2.72E-18    | -0.385211873 | 5.73E-18    |
| RBMXL1   | blue | -0.110392672 | 0.017009116 | -0.127243512 | 0.005894607 |
| RBPJ     | blue | 0.101536926  | 0.028233674 | 0.094374822  | 0.041495631 |
| RCBTB1   | blue | 0.14198441   | 0.002100216 | 0.123689893  | 0.007448861 |
| RCHY1    | blue | 0.054217942  | 0.242250607 | 0.036352417  | 0.43319497  |
| REV1     | blue | -0.027468841 | 0.553765171 | -0.065012095 | 0.160723528 |
| REV3L    | blue | 0.013175919  | 0.776423201 | -0.031975417 | 0.490622513 |
| RFX7     | blue | 0.109276534  | 0.018165111 | 0.095462699  | 0.039193529 |
| RFXANK   | blue | -0.068744916 | 0.137977684 | -0.052366618 | 0.258731483 |
| RHBDD2   | blue | 0.091362945  | 0.048471962 | 0.141993887  | 0.002098756 |
| RHOBTB   | blue | 0.004669828  | 0.919831524 | 0.000420194  | 0.992774343 |
| RHOBTB   | blue | -0.170859642 | 0.000207483 | -0.207030113 | 6.45E-06    |
| RHOG     | blue | 0.10725137   | 0.020438428 | 0.149344033  | 0.001208471 |
| RHOQ     | blue | -0.342284419 | 2.78E-14    | -0.355956443 | 2.14E-15    |
| RHOU     | blue | 0.000720372  | 0.987612815 | -0.013987457 | 0.763051416 |
| RIC1     | blue | -0.098848023 | 0.03270944  | -0.108699625 | 0.018789074 |
| RIC8B    | blue | -0.083798712 | 0.070414404 | -0.110362653 | 0.017039344 |
| RICTOR   | blue | -0.299373311 | 4.00E-11    | -0.312109605 | 5.21E-12    |
| RIF1     | blue | -0.201000403 | 1.20E-05    | -0.23108761  | 4.44E-07    |
| RINT1    | blue | 0.042857864  | 0.355429647 | 0.010023862  | 0.828954712 |
| RLF      | blue | -0.115161847 | 0.012763912 | -0.145272619 | 0.001645785 |
| RLIM     | blue | -0.062453754 | 0.177872172 | -0.069423114 | 0.134124567 |
| RMDN2    | blue | -0.259835952 | 1.21E-08    | -0.273545402 | 1.85E-09    |
| RMND5A   | blue | -0.045820257 | 0.323128416 | -0.05996378  | 0.195831384 |
| RNASEL   | blue | 0.057655304  | 0.213633089 | 0.067983802  | 0.142402533 |
| RND3     | blue | -0.196962995 | 1.81E-05    | -0.212068025 | 3.78E-06    |
| RNF103   | blue | 0.016884183  | 0.715918949 | 0.009961259  | 0.830006637 |
| RNF11    | blue | -0.095657661 | 0.038792599 | -0.110924192 | 0.016481602 |
| RNF125   | blue | -0.026385399 | 0.569516149 | -0.01566548  | 0.735628957 |
| RNF13    | blue | -0.061011374 | 0.188120391 | -0.086850636 | 0.060741406 |
| RNF141   | blue | 0.157210328  | 0.000650909 | 0.136780224  | 0.003057906 |
| RNF146   | blue | -0.192499776 | 2.81E-05    | -0.214253567 | 2.98E-06    |
| RNF150   | blue | -0.321690624 | 1.05E-12    | -0.314500353 | 3.51E-12    |
| RNF170   | blue | -0.030114889 | 0.516214653 | -0.05664489  | 0.221780602 |
| RNF180   | blue | -0.026433117 | 0.568817975 | -0.027672907 | 0.550822438 |
| RNF187   | blue | 0.113131075  | 0.014441544 | 0.133232614  | 0.003922423 |
| RNF19A   | blue | -0.19011437  | 3.55E-05    | -0.206775196 | 6.63E-06    |
| RNF208   | blue | 0.194148201  | 2.39E-05    | 0.216200345  | 2.41E-06    |
| RNF217   | blue | -0.304334585 | 1.83E-11    | -0.304050379 | 1.91E-11    |
| RNPEPL1  | blue | 0.239472554  | 1.63E-07    | 0.280814262  | 6.54E-10    |
| ROCK1    | blue | -0.083345162 | 0.071953995 | -0.120553061 | 0.009115052 |
| ROCK2    | blue | -0.087584927 | 0.058585681 | -0.114900624 | 0.012969602 |
| ROR1     | blue | -0.027417308 | 0.554509501 | -0.037049677 | 0.424418648 |
| RORA     | blue | -0.062612289 | 0.176771536 | -0.084677704 | 0.067507329 |
| RP11-111 | blue | -0.087711598 | 0.058220284 | -0.103766171 | 0.024932118 |

|          |      |              |             |              |             |
|----------|------|--------------|-------------|--------------|-------------|
| RP2      | blue | -0.001018715 | 0.982483361 | -0.000979271 | 0.98316148  |
| RPAP2    | blue | -0.00191352  | 0.967103972 | -0.02407896  | 0.603738804 |
| RPL8     | blue | 0.004414149  | 0.92420729  | -0.009875522 | 0.831447793 |
| RPP14    | blue | -0.080426667 | 0.082530151 | -0.093180878 | 0.044152521 |
| RPRD1B   | blue | -0.2484331   | 5.33E-08    | -0.289456327 | 1.82E-10    |
| RPS21    | blue | -0.13203578  | 0.004260601 | -0.122346187 | 0.00812603  |
| RPS6KA3  | blue | -0.129652256 | 0.005013683 | -0.134794869 | 0.003517589 |
| RPS6KA4  | blue | 0.039103027  | 0.399182918 | 0.060072676  | 0.195019249 |
| RPS6KA5  | blue | 0.142016573  | 0.002095264 | 0.113508937  | 0.014115448 |
| RRAGB    | blue | -0.247031906 | 6.37E-08    | -0.277303019 | 1.08E-09    |
| RRP9     | blue | 0.057920182  | 0.211533306 | 0.059981312  | 0.195700468 |
| RSBN1    | blue | -0.091504171 | 0.048124186 | -0.114310771 | 0.013444845 |
| RSBN1L   | blue | -0.019312943 | 0.677207646 | -0.032766767 | 0.479946975 |
| RSF1     | blue | -0.135065073 | 0.003451545 | -0.175748943 | 0.000134788 |
| RSPRY1   | blue | 0.280082427  | 7.27E-10    | 0.280752906  | 6.60E-10    |
| RTN4     | blue | -0.046141205 | 0.319747142 | -0.05333284  | 0.25003579  |
| RTTN     | blue | 0.106165316  | 0.021756543 | 0.088096864  | 0.057120522 |
| RUFY2    | blue | 0.028122252  | 0.544369853 | -0.008069916 | 0.861922176 |
| RUFY3    | blue | -0.283295187 | 4.55E-10    | -0.298367071 | 4.67E-11    |
| RYBP     | blue | 0.065880409  | 0.155195621 | 0.021778804  | 0.638756371 |
| RYK      | blue | -0.168788935 | 0.000248203 | -0.211349375 | 4.08E-06    |
| S100PBP  | blue | -0.118609159 | 0.010306946 | -0.14350109  | 0.001877986 |
| SACM1L   | blue | 0.037902399  | 0.41382767  | 0.009202476  | 0.842780293 |
| SACS     | blue | -0.08323712  | 0.072324774 | -0.112010489 | 0.01544787  |
| SAMD8    | blue | -0.071930841 | 0.120594263 | -0.095745503 | 0.038613093 |
| SART1    | blue | -0.130016711 | 0.004891264 | -0.124389539 | 0.007116636 |
| SASH1    | blue | -0.179675809 | 9.45E-05    | -0.193122786 | 2.65E-05    |
| SBF2     | blue | 0.075977932  | 0.101032661 | 0.039812768  | 0.390673927 |
| SCAF11   | blue | -0.060541892 | 0.191548022 | -0.088500528 | 0.055986777 |
| SCAF8    | blue | -0.115302274 | 0.012654532 | -0.153093565 | 0.000903082 |
| SCAI     | blue | -0.11930457  | 0.009865546 | -0.145820354 | 0.001579511 |
| SCAMP1   | blue | 0.08487167   | 0.066879271 | 0.056684984  | 0.221453135 |
| SCAPER   | blue | -0.031771366 | 0.49339571  | -0.061468457 | 0.184826828 |
| SCO2     | blue | 0.202837027  | 9.98E-06    | 0.228210093  | 6.22E-07    |
| SCRN3    | blue | 0.083120293  | 0.072727453 | 0.077304621  | 0.095199135 |
| SDC2     | blue | -0.059943909 | 0.19597985  | -0.08538005  | 0.06525587  |
| SDSL     | blue | 0.1751882    | 0.000141707 | 0.205577451  | 7.51E-06    |
| SEC23A   | blue | -0.00580545  | 0.900427234 | -0.018701889 | 0.686872174 |
| SEC24A   | blue | 0.141692777  | 0.002145609 | 0.132305545  | 0.004182154 |
| SEC31A   | blue | -0.028849612 | 0.534004971 | -0.036608981 | 0.429953525 |
| SECISBP' | blue | 0.05413785   | 0.242948007 | 0.017101836  | 0.712418211 |
| SECISBP' | blue | 0.10031039   | 0.03020546  | 0.072029489  | 0.120084628 |
| SEL1L    | blue | -0.052424705 | 0.258202883 | -0.070727974 | 0.126945084 |
| SEMA3C   | blue | 0.036798976  | 0.427562195 | 0.024022028  | 0.604595078 |
| SENP8    | blue | 0.006239772  | 0.893021015 | 0.002804675  | 0.95179944  |



|         |      |              |             |              |             |
|---------|------|--------------|-------------|--------------|-------------|
| SEPP1   | blue | -0.247222097 | 6.22E-08    | -0.280692584 | 6.65E-10    |
| SEPT10  | blue | -0.054789527 | 0.23731429  | -0.079446547 | 0.086351664 |
| SEPT11  | blue | -0.061334414 | 0.185788249 | -0.061114525 | 0.187373377 |
| SEPT2   | blue | 0.011282671  | 0.807869918 | -0.010045524 | 0.828590786 |
| SERAC1  | blue | 0.16029758   | 0.000506514 | 0.148924603  | 0.001247986 |
| SERINC1 | blue | -0.170076055 | 0.000222095 | -0.180726975 | 8.58E-05    |
| SERINC3 | blue | -0.096862161 | 0.036391861 | -0.100722114 | 0.029530809 |
| SERTAD  | blue | -0.012475068 | 0.788024738 | 0.006774139  | 0.883921589 |
| SERTAD  | blue | -0.078873743 | 0.088650196 | -0.113120789 | 0.014450513 |
| SESN1   | blue | 0.179024968  | 0.000100301 | 0.158019464  | 0.000609763 |
| SESN3   | blue | 0.18547749   | 5.52E-05    | 0.140765276  | 0.002296    |
| SESTD1  | blue | 0.144215635  | 0.001780938 | 0.125996502  | 0.006403259 |
| SETDB2  | blue | -0.034700797 | 0.454396101 | -0.05190203  | 0.262986144 |
| SETMAR  | blue | 0.07982987   | 0.08484045  | 0.047819934  | 0.302438566 |
| SETX    | blue | 0.033172958  | 0.47451677  | 0.018105083  | 0.696360871 |
| SF3B1   | blue | -0.066570131 | 0.150908185 | -0.11020488  | 0.017198991 |
| SFT2D2  | blue | -0.045116405 | 0.330624723 | -0.036007274 | 0.437577659 |
| SGK494  | blue | -0.08127635  | 0.07932887  | -0.092121823 | 0.046627654 |
| SGMS1   | blue | 0.034620019  | 0.455447748 | 0.019660402  | 0.67173558  |
| SGMS2   | blue | 0.025379701  | 0.584324965 | 0.051830949  | 0.263641321 |
| SGPP1   | blue | 0.011431007  | 0.805394135 | 0.001470757  | 0.974712763 |
| SGTB    | blue | -0.143424418 | 0.001888682 | -0.156552366 | 0.000686249 |
| SH2B2   | blue | -0.082700056 | 0.074191072 | -0.082385089 | 0.075303713 |
| SH3BGR1 | blue | -0.05093777  | 0.271969748 | -0.061380075 | 0.185460337 |
| SH3D19  | blue | -0.107386165 | 0.020279775 | -0.114591209 | 0.013217017 |
| SHB     | blue | 0.211665142  | 3.95E-06    | 0.209259371  | 5.10E-06    |
| SHISA5  | blue | 0.057447841  | 0.215288163 | 0.089711829  | 0.052696288 |
| SHKBP1  | blue | -0.1109308   | 0.016475136 | -0.094749148 | 0.040690948 |
| SHOC2   | blue | 0.105783247  | 0.022237473 | 0.08369351   | 0.070769093 |
| SIGIRR  | blue | 0.144027206  | 0.001806073 | 0.170073959  | 0.000222135 |
| SIMC1   | blue | -0.325336542 | 5.65E-13    | -0.364575498 | 3.98E-16    |
| SIPA1   | blue | 0.056283909  | 0.224744509 | 0.088344028  | 0.056424093 |
| SIRT1   | blue | -0.041079768 | 0.375759743 | -0.078601745 | 0.089758743 |
| SKIL    | blue | -0.175297964 | 0.000140327 | -0.204335585 | 8.55E-06    |
| SLAIN2  | blue | 0.093072088  | 0.044401572 | 0.086732605  | 0.061093958 |
| SLC10A7 | blue | 0.132605817  | 0.004096374 | 0.126621314  | 0.006143676 |
| SLC15A4 | blue | 0.047684467  | 0.30381181  | 0.03426718   | 0.46005734  |
| SLC16A4 | blue | -0.157652746 | 0.000628103 | -0.176079642 | 0.000130857 |
| SLC19A2 | blue | 0.043892217  | 0.343927778 | 0.014322856  | 0.757545276 |
| SLC25A1 | blue | 0.278986064  | 8.52E-10    | 0.28620724   | 2.96E-10    |
| SLC25A1 | blue | 0.170056608  | 0.00022247  | 0.206941092  | 6.51E-06    |
| SLC25A1 | blue | -0.237871758 | 1.98E-07    | -0.248124711 | 5.55E-08    |
| SLC25A1 | blue | 0.050458017  | 0.276516542 | 0.056998048  | 0.218908045 |
| SLC25A3 | blue | 0.066345071  | 0.152297197 | 0.047252498  | 0.308218263 |
| SLC25A4 | blue | -0.134337951 | 0.003631883 | -0.126624218 | 0.006142493 |

|              |              |             |              |             |
|--------------|--------------|-------------|--------------|-------------|
| SLC25A6 blue | 0.132716911  | 0.004065043 | 0.132654321  | 0.004082668 |
| SLC27A5 blue | 0.071767115  | 0.121443829 | 0.05844309   | 0.207431769 |
| SLC2A13 blue | -0.203723244 | 9.11E-06    | -0.211740106 | 3.91E-06    |
| SLC2A4R blue | 0.013792937  | 0.766250289 | 0.029292693  | 0.527740132 |
| SLC30A4 blue | -0.150697689 | 0.001088664 | -0.147785834 | 0.001361348 |
| SLC30A7 blue | 0.07351505   | 0.112611542 | 0.061134889  | 0.187226166 |
| SLC35B4 blue | -0.143121036 | 0.001931555 | -0.175002093 | 0.000144076 |
| SLC35D1 blue | 0.013170562  | 0.776511687 | 0.003425401  | 0.941149327 |
| SLC35F5 blue | -0.175483744 | 0.000138019 | -0.200769358 | 1.23E-05    |
| SLC36A4 blue | -0.243978311 | 9.34E-08    | -0.243766904 | 9.59E-08    |
| SLC37A3 blue | 0.142424312  | 0.002033404 | 0.117322699  | 0.011169888 |
| SLC38A2 blue | -0.252935112 | 3.00E-08    | -0.262171271 | 8.86E-09    |
| SLC38A9 blue | -0.244620785 | 8.62E-08    | -0.251558661 | 3.58E-08    |
| SLC39A1 blue | -0.104116955 | 0.024444189 | -0.140440738 | 0.002350855 |
| SLC4A7 blue  | 0.094507246  | 0.041209439 | 0.085862911  | 0.063744088 |
| SLC5A3 blue  | -0.13673114  | 0.003068579 | -0.145853229 | 0.001575612 |
| SLC9A6 blue  | -0.010223351 | 0.825604691 | -0.012445591 | 0.788513731 |
| SLC9B1 blue  | -0.041756199 | 0.36794279  | -0.060534792 | 0.191600204 |
| SLFN12 blue  | -0.048335583 | 0.297249072 | -0.057022403 | 0.218710932 |
| SLK blue     | 0.091446     | 0.04826718  | 0.071263222  | 0.124087793 |
| SLMAP blue   | -0.066048829 | 0.154140281 | -0.080686566 | 0.081540054 |
| SLTM blue    | 0.053625252  | 0.24744475  | 0.027847641  | 0.548308806 |
| SMAD2 blue   | -0.016056169 | 0.729290725 | -0.034326834 | 0.459276175 |
| SMAD4 blue   | -0.058526512 | 0.206782785 | -0.086223624 | 0.062633655 |
| SMAD5 blue   | 0.032032322  | 0.489850628 | 0.005016652  | 0.913899778 |
| SMARCA blue  | -0.057531234 | 0.214621774 | -0.040782354 | 0.379228822 |
| SMARCA blue  | 0.05689515   | 0.219742249 | 0.021826301  | 0.638024736 |
| SMC5 blue    | 0.006153732  | 0.89448747  | -0.024508334 | 0.597298383 |
| SMCHD1 blue  | -0.166002151 | 0.000314868 | -0.201008204 | 1.20E-05    |
| SMG1 blue    | -0.141401289 | 0.002191873 | -0.159612806 | 0.000535701 |
| SMIM17 blue  | -0.109493461 | 0.017935213 | -0.105912414 | 0.022073862 |
| SMURF2 blue  | -0.006854093 | 0.882561392 | -0.024046212 | 0.604231275 |
| SNRK blue    | -0.109523653 | 0.017903419 | -0.117660533 | 0.010937291 |
| SNTB2 blue   | -0.180946116 | 8.41E-05    | -0.163378544 | 0.000392575 |
| SNX13 blue   | -0.054602793 | 0.238919106 | -0.065648526 | 0.156657569 |
| SNX16 blue   | -0.123306351 | 0.007636809 | -0.180269188 | 8.95E-05    |
| SNX8 blue    | 0.005204565  | 0.910687864 | 0.036533934  | 0.430900218 |
| SNX9 blue    | -0.075602949 | 0.102731942 | -0.087844828 | 0.057838004 |
| SOCS5 blue   | -0.19461517  | 2.29E-05    | -0.219778471 | 1.62E-06    |
| SOCS6 blue   | 0.115155979  | 0.012768501 | 0.103664648  | 0.025074892 |
| SOS1 blue    | -0.209229661 | 5.12E-06    | -0.22934088  | 5.45E-07    |
| SOS2 blue    | -0.117806012 | 0.010838459 | -0.1369629   | 0.003018481 |
| SOWAH blue   | -0.21293115  | 3.44E-06    | -0.239691934 | 1.58E-07    |
| SOX5 blue    | -0.092252894 | 0.04631515  | -0.099707495 | 0.03121716  |
| SP1 blue     | 0.047724899  | 0.303401515 | 0.017302505  | 0.709195963 |

|         |      |              |             |              |             |
|---------|------|--------------|-------------|--------------|-------------|
| SP3     | blue | -0.158633146 | 0.000580179 | -0.189465031 | 3.78E-05    |
| SP4     | blue | -0.116624029 | 0.011664854 | -0.135160379 | 0.003428519 |
| SPAG9   | blue | -0.004351128 | 0.9252862   | -0.022050723 | 0.634572524 |
| SPATA13 | blue | -0.0095871   | 0.836300002 | -0.033374747 | 0.471831691 |
| SPATA5  | blue | -0.029276778 | 0.527964501 | -0.038041197 | 0.41211864  |
| SPG20   | blue | -0.175219997 | 0.000141306 | -0.182167425 | 7.52E-05    |
| SPICE1  | blue | -0.095381895 | 0.039360724 | -0.11986669  | 0.009521105 |
| SPIN1   | blue | 0.015743405  | 0.73436332  | -0.01741025  | 0.70746798  |
| SPIN3   | blue | -0.122482264 | 0.008055038 | -0.148494078 | 0.001289781 |
| SPOPL   | blue | -0.201533783 | 1.14E-05    | -0.202940693 | 9.87E-06    |
| SPRED1  | blue | 0.037382191  | 0.420270102 | 0.024319952  | 0.600120196 |
| SPTLC3  | blue | -0.187981121 | 4.35E-05    | -0.159039537 | 0.000561328 |
| SRGAP2C | blue | -0.211559602 | 3.99E-06    | -0.252895929 | 3.01E-08    |
| SRSF8   | blue | 0.066191418  | 0.15325106  | 0.05579097   | 0.228837281 |
| SS18    | blue | -0.015790706 | 0.733595406 | -0.032059426 | 0.489483208 |
| SS18L1  | blue | -0.060854407 | 0.189261331 | -0.084211906 | 0.069035348 |
| SSFA2   | blue | 0.143985656  | 0.00181166  | 0.142526643  | 0.002018144 |
| SSH2    | blue | 0.043444518  | 0.348876747 | 0.034864725  | 0.452266116 |
| STAG2   | blue | -0.031058528 | 0.503148984 | -0.051626442 | 0.265532587 |
| STAP2   | blue | 0.348313172  | 9.12E-15    | 0.37385059   | 6.14E-17    |
| STARD1C | blue | 0.221922673  | 1.28E-06    | 0.239219195  | 1.68E-07    |
| STIM2   | blue | 0.230479973  | 4.77E-07    | 0.215743315  | 2.54E-06    |
| STK26   | blue | -0.218957952 | 1.78E-06    | -0.205402352 | 7.65E-06    |
| STK4    | blue | -0.175993371 | 0.000131872 | -0.186003319 | 5.25E-05    |
| STOX2   | blue | -0.177635376 | 0.000113768 | -0.207281145 | 6.29E-06    |
| STRN    | blue | 0.01750064   | 0.706019501 | -0.01306112  | 0.778320197 |
| STRN3   | blue | -0.030059587 | 0.516985768 | -0.042096182 | 0.36405228  |
| STX17   | blue | 0.100672295  | 0.02961175  | 0.073223509  | 0.114048567 |
| STX4    | blue | -0.126245649 | 0.006298592 | -0.088765522 | 0.055252713 |
| STX5    | blue | 0.053053783  | 0.252526053 | 0.067086663  | 0.147756695 |
| STX7    | blue | -0.137058827 | 0.002997964 | -0.158929601 | 0.00056637  |
| STXBP4  | blue | -0.001606416 | 0.972381216 | -0.015754986 | 0.734175277 |
| STXBP5  | blue | 0.123312976  | 0.007633527 | 0.094208676  | 0.041857074 |
| SUGP1   | blue | -0.042933689 | 0.354578366 | -0.042395714 | 0.360645983 |
| SULT1C4 | blue | -0.165143925 | 0.00033855  | -0.198358789 | 1.57E-05    |
| SUN1    | blue | -0.018876813 | 0.684100249 | -0.032422121 | 0.484580765 |
| SUV420H | blue | -0.023245258 | 0.616331889 | -0.047637271 | 0.304291205 |
| SWAP70  | blue | 0.25070858   | 3.99E-08    | 0.21984924   | 1.61E-06    |
| SWI5    | blue | -0.049368838 | 0.287029931 | -0.044785897 | 0.334183165 |
| SYMPK   | blue | 0.048281156  | 0.297794009 | 0.046792141  | 0.31296046  |
| SYNJ1   | blue | -0.019244076 | 0.678294245 | -0.027665252 | 0.550932689 |
| SYNJ2BP | blue | 0.026123394  | 0.573356912 | 0.031301422  | 0.49981427  |
| SYTL2   | blue | -0.068529456 | 0.139219439 | -0.081178432 | 0.079692577 |
| TAB2    | blue | -0.223639894 | 1.05E-06    | -0.231958655 | 4.01E-07    |
| TAB3    | blue | -0.134597609 | 0.003566526 | -0.149994867 | 0.001149429 |

|         |      |              |             |              |             |
|---------|------|--------------|-------------|--------------|-------------|
| TAF4    | blue | -0.168417561 | 0.000256254 | -0.183059832 | 6.92E-05    |
| TAF9B   | blue | -0.021765807 | 0.638956641 | -0.04312656  | 0.352418776 |
| TAOK1   | blue | 0.019453852  | 0.674986431 | -0.006903281 | 0.881724755 |
| TAOK3   | blue | -0.113180474 | 0.01439854  | -0.123803484 | 0.007393997 |
| TAPT1   | blue | 0.176850762  | 0.000122106 | 0.165241369  | 0.00033578  |
| TARSL2  | blue | -0.058605825 | 0.206167137 | -0.101123726 | 0.028885217 |
| TAS2R5  | blue | -0.175123366 | 0.000142528 | -0.186291387 | 5.11E-05    |
| TASP1   | blue | -0.171777869 | 0.000191507 | -0.184541026 | 6.03E-05    |
| TBC1D12 | blue | 0.106674367  | 0.02112981  | 0.082920242  | 0.073421234 |
| TBC1D15 | blue | -0.210573975 | 4.43E-06    | -0.228815935 | 5.79E-07    |
| TBC1D19 | blue | -0.057533785 | 0.214601419 | -0.074515716 | 0.107787186 |
| TBC1D23 | blue | -0.130034976 | 0.0048852   | -0.154943502 | 0.000780285 |
| TBC1D4  | blue | -0.003734747 | 0.935845516 | -0.039557664 | 0.393719615 |
| TBC1D8E | blue | -0.082815756 | 0.073785732 | -0.104940966 | 0.02333035  |
| TBCB    | blue | -0.107227494 | 0.020466641 | -0.104316466 | 0.024170373 |
| TBCEL   | blue | -0.135963167 | 0.003240033 | -0.150326501 | 0.001120378 |
| TBCK    | blue | 0.013797143  | 0.766181086 | -0.02843866  | 0.539848816 |
| TCAF1   | blue | 0.049566753  | 0.285099812 | 0.013093971  | 0.777777216 |
| TCEANC  | blue | 0.00715166   | 0.877502133 | 0.011297835  | 0.807616728 |
| TCEANC  | blue | 0.062464523  | 0.177797244 | 0.052502467  | 0.257496415 |
| TCF12   | blue | 0.158621896  | 0.000580709 | 0.117979859  | 0.010721393 |
| TDRD3   | blue | 0.145899912  | 0.001570091 | 0.128732352  | 0.005335048 |
| TDRD7   | blue | -0.056598941 | 0.222156314 | -0.035544596 | 0.443492562 |
| TEAD1   | blue | -0.174067937 | 0.00015654  | -0.198261687 | 1.59E-05    |
| TECR    | blue | 0.120860989  | 0.008937945 | 0.127058414  | 0.005967737 |
| TET2    | blue | 0.187037456  | 4.76E-05    | 0.150316157  | 0.001121273 |
| TGFBR1  | blue | -0.070391192 | 0.128768912 | -0.090668484 | 0.050212851 |
| THAP2   | blue | -0.164035483 | 0.000371595 | -0.190842139 | 3.31E-05    |
| THAP4   | blue | 0.041738935  | 0.368141028 | 0.040114044  | 0.387095429 |
| THAP6   | blue | 0.077217652  | 0.095573121 | 0.076372516  | 0.09926873  |
| THAP8   | blue | -0.210040983 | 4.69E-06    | -0.211428211 | 4.05E-06    |
| THSD7A  | blue | -0.113348337 | 0.014253247 | -0.110931581 | 0.016474371 |
| THUMPC  | blue | 0.055634831  | 0.23014463  | 0.042556626  | 0.358824349 |
| TIGD7   | blue | -0.380472804 | 1.56E-17    | -0.400850232 | 1.88E-19    |
| TIPARP  | blue | -0.147015437 | 0.001443327 | -0.176086132 | 0.000130781 |
| TMCC1   | blue | -0.001959418 | 0.966315399 | -0.028295409 | 0.541893346 |
| TMCC3   | blue | -0.313319504 | 4.27E-12    | -0.313641876 | 4.05E-12    |
| TMED8   | blue | 0.014463167  | 0.755245446 | -0.015971592 | 0.730661289 |
| TMED9   | blue | 0.103200182  | 0.025737117 | 0.108650354  | 0.01884322  |
| TMEM10  | blue | -0.089541959 | 0.053147791 | -0.093324493 | 0.043825544 |
| TMEM12  | blue | 0.003402554  | 0.941541155 | 0.015872165  | 0.732273602 |
| TMEM13  | blue | -0.042893866 | 0.355025295 | -0.031873344 | 0.49200871  |
| TMEM16  | blue | 0.129034658  | 0.005227449 | 0.107281464  | 0.020402914 |
| TMEM16  | blue | -0.008220476 | 0.859372576 | -0.031272827 | 0.500206245 |
| TMEM16  | blue | 0.044842373  | 0.333573374 | 0.008612162  | 0.852746633 |

|              |              |             |              |             |
|--------------|--------------|-------------|--------------|-------------|
| TMEM17 blue  | -0.292561242 | 1.14E-10    | -0.328050078 | 3.53E-13    |
| TMEM18 blue  | 0.145712777  | 0.00159233  | 0.134386347  | 0.00361962  |
| TMEM18 blue  | 0.163977511  | 0.000373404 | 0.171216641  | 0.000201129 |
| TMEM19 blue  | 0.06751139   | 0.145203098 | 0.069299078  | 0.134822998 |
| TMEM20 blue  | 0.100602717  | 0.02972511  | 0.105693423  | 0.022351868 |
| TMEM22 blue  | 0.180601225  | 8.68E-05    | 0.217926398  | 1.99E-06    |
| TMEM24 blue  | -0.199274675 | 1.44E-05    | -0.229179241 | 5.55E-07    |
| TMEM30 blue  | 0.061272339  | 0.186234733 | 0.058127431  | 0.209900768 |
| TMEM39 blue  | -0.120736522 | 0.009009161 | -0.148860761 | 0.001254104 |
| TMEM45 blue  | -0.224322076 | 9.72E-07    | -0.234058406 | 3.13E-07    |
| TMEM53 blue  | 0.140743385  | 0.002299663 | 0.145783182  | 0.00158393  |
| TMEM54 blue  | 0.031671233  | 0.494759646 | 0.060786273  | 0.189758156 |
| TMEM56 blue  | 0.182056802  | 7.59E-05    | 0.154529911  | 0.000806316 |
| TMEM56 blue  | -0.124840248 | 0.006909702 | -0.156789807 | 0.000673295 |
| TMEM64 blue  | -0.176399695 | 0.000127156 | -0.208579419 | 5.48E-06    |
| TMEM9 blue   | 0.313063388  | 4.45E-12    | 0.316471214  | 2.53E-12    |
| TMF1 blue    | 0.108323691  | 0.019205655 | 0.091667608  | 0.047724328 |
| TMTC1 blue   | -0.260894965 | 1.05E-08    | -0.264664876 | 6.32E-09    |
| TMTC2 blue   | 0.168001798  | 0.000265556 | 0.142474601  | 0.002025891 |
| TMX3 blue    | 0.074220891  | 0.109191318 | 0.040537983  | 0.382093855 |
| TNIP2 blue   | 0.15537973   | 0.000753675 | 0.159919823  | 0.000522427 |
| TNKS2 blue   | 0.048905718  | 0.291580696 | 0.024489147  | 0.597585513 |
| TNRC6A blue  | -0.106037255 | 0.021916724 | -0.113618539 | 0.014022081 |
| TOP1MT blue  | -0.112651443 | 0.014864993 | -0.165428911 | 0.000330508 |
| TOPORS blue  | -0.057972024 | 0.211124086 | -0.088257084 | 0.056668264 |
| TOR2A blue   | 0.266228926  | 5.11E-09    | 0.27153961   | 2.45E-09    |
| TP53INP1blue | 0.04356434   | 0.347547805 | 0.030717438  | 0.507851545 |
| TPP2 blue    | -0.015092513 | 0.744956743 | -0.030438221 | 0.511718128 |
| TPRA1 blue   | -0.157768061 | 0.000622281 | -0.150198758 | 0.001131487 |
| TPST1 blue   | -0.436652122 | 3.66E-23    | -0.427619211 | 3.48E-22    |
| TRABD blue   | 0.314567198  | 3.48E-12    | 0.329285704  | 2.85E-13    |
| TRAF2 blue   | 0.09833748   | 0.03362439  | 0.100793531  | 0.02941511  |
| TRAF6 blue   | -0.012640813 | 0.785276734 | -0.044604346 | 0.336148277 |
| TRAK2 blue   | -0.151393708 | 0.001031419 | -0.164179891 | 0.000367126 |
| TRAPPC1blue  | 0.077276345  | 0.0953206   | 0.053478067  | 0.248746594 |
| TRAPPC1blue  | 0.010577364  | 0.819667566 | -0.02464998  | 0.595180611 |
| TRDMT1 blue  | 0.001934704  | 0.966740011 | -0.00612209  | 0.895026873 |
| TRIM13 blue  | 0.173036561  | 0.000171473 | 0.151922404  | 0.000989805 |
| TRIM23 blue  | -0.073370315 | 0.113323165 | -0.095044083 | 0.040066254 |
| TRIM28 blue  | 0.000247404  | 0.9957456   | 0.000806957  | 0.986124085 |
| TRIM33 blue  | -0.028158919 | 0.543844974 | -0.077303908 | 0.095202197 |
| TRIM44 blue  | -0.18064497  | 8.65E-05    | -0.201632629 | 1.13E-05    |
| TRIM5 blue   | 0.045537665  | 0.326124763 | 0.050155175  | 0.279413125 |
| TRIM6 blue   | -0.047561285 | 0.305064096 | -0.038641412 | 0.404776338 |
| TRIM66 blue  | 0.099897437  | 0.030895341 | 0.087221265  | 0.059645266 |

|         |      |              |             |              |             |
|---------|------|--------------|-------------|--------------|-------------|
| TRIP11  | blue | -0.000606989 | 0.989562375 | -0.01993573  | 0.667411773 |
| TRIQQ   | blue | 0.009507761  | 0.837635844 | -0.034710364 | 0.454271634 |
| TRMT1   | blue | -0.184413486 | 6.10E-05    | -0.197039073 | 1.80E-05    |
| TRMT11  | blue | -0.138875032 | 0.002632687 | -0.174174993 | 0.000155062 |
| TRMT61  | blue | -0.180198717 | 9.01E-05    | -0.158368163 | 0.000592786 |
| TRPM7   | blue | 0.109334348  | 0.01810359  | 0.08178735   | 0.077452584 |
| TRPS1   | blue | 0.24688299   | 6.49E-08    | 0.211940974  | 3.83E-06    |
| TRPT1   | blue | 0.241681568  | 1.24E-07    | 0.262925278  | 8.00E-09    |
| TSC1    | blue | -0.005192935 | 0.910886611 | -0.035201632 | 0.447906254 |
| TSC22D2 | blue | -0.289985052 | 1.69E-10    | -0.31061157  | 6.65E-12    |
| TSPO    | blue | 0.293485211  | 9.91E-11    | 0.302034573  | 2.63E-11    |
| TSPYL4  | blue | -0.224764283 | 9.24E-07    | -0.241965656 | 1.20E-07    |
| TSSC4   | blue | -0.005926468 | 0.898362689 | 0.014186987  | 0.75977434  |
| TST     | blue | 0.136775305  | 0.003058974 | 0.151000185  | 0.001063434 |
| TTBK2   | blue | -0.053299381 | 0.250333465 | -0.07615263  | 0.10024865  |
| TTC17   | blue | -0.177219743 | 0.000118116 | -0.224605745 | 9.41E-07    |
| TTC21B  | blue | -0.097636446 | 0.034916207 | -0.121035905 | 0.008838711 |
| TTC3    | blue | 0.066296559  | 0.152597864 | 0.031700768  | 0.494357131 |
| TTC33   | blue | -0.082548467 | 0.074724887 | -0.120768051 | 0.008991073 |
| TTC37   | blue | -0.040386189 | 0.383880142 | -0.074036764 | 0.110075533 |
| TTC39B  | blue | -0.00322624  | 0.944565381 | 0.013446576  | 0.771956001 |
| TUBGCP  | blue | -0.057514039 | 0.21475906  | -0.083135218 | 0.072675906 |
| TWF2    | blue | 0.153446713  | 0.000878343 | 0.16923051   | 0.000238939 |
| TWSG1   | blue | -0.23138736  | 4.29E-07    | -0.261761255 | 9.36E-09    |
| TXNRD2  | blue | 0.20425775   | 8.62E-06    | 0.212437235  | 3.63E-06    |
| UACA    | blue | -0.049461518 | 0.286125006 | -0.070125491 | 0.130222069 |
| UBA6    | blue | 0.068846797  | 0.137393493 | 0.038166741  | 0.410576406 |
| UBALD1  | blue | 0.000364705  | 0.993728521 | 0.026459933  | 0.568425787 |
| UBALD2  | blue | -0.063496496 | 0.170725564 | -0.035527343 | 0.443714001 |
| UBE2F-S | blue | 0.042270055  | 0.362072552 | 0.040973418  | 0.376997978 |
| UBE3A   | blue | 0.0444302    | 0.338040196 | 0.018299706  | 0.693261229 |
| UBE4A   | blue | 0.010673363  | 0.818059338 | -0.01468929  | 0.751543638 |
| UBL3    | blue | -0.025496466 | 0.582596486 | -0.049403702 | 0.286689294 |
| UBR1    | blue | 0.166528771  | 0.000301112 | 0.146833481  | 0.00146334  |
| UBR2    | blue | -0.164117989 | 0.000369036 | -0.176423557 | 0.000126884 |
| UBR3    | blue | 0.035168498  | 0.448333969 | 0.00526925   | 0.90958258  |
| UBTD1   | blue | -0.02246336  | 0.628245738 | 6.94E-06     | 0.999880601 |
| UEVLD   | blue | 0.179573108  | 9.54E-05    | 0.159041064  | 0.000561258 |
| UFSP1   | blue | -0.093965191 | 0.04239156  | -0.077617472 | 0.093863468 |
| UGGT2   | blue | -0.085097663 | 0.066153562 | -0.117579152 | 0.010992926 |
| UHRF1BI | blue | 0.135205051  | 0.003417775 | 0.117721214  | 0.010895971 |
| UHRF2   | blue | -0.092873866 | 0.044858398 | -0.128505868 | 0.005416961 |
| ULK2    | blue | 0.029700447  | 0.522007958 | -0.004779097 | 0.917962203 |
| UQCRC1  | blue | 0.192363218  | 2.85E-05    | 0.223403385  | 1.08E-06    |
| UROD    | blue | -0.081031096 | 0.080242385 | -0.056392883 | 0.223846799 |

|        |      |              |             |              |             |
|--------|------|--------------|-------------|--------------|-------------|
| USF2   | blue | -0.187964741 | 4.36E-05    | -0.190543736 | 3.40E-05    |
| USP12  | blue | -0.111943633 | 0.015509808 | -0.142487338 | 0.002023993 |
| USP13  | blue | -0.073189693 | 0.114216177 | -0.08863883  | 0.055602661 |
| USP15  | blue | -0.027963206 | 0.546649461 | -0.041869097 | 0.366648013 |
| USP25  | blue | -0.118707494 | 0.010243485 | -0.142382162 | 0.002039721 |
| USP3   | blue | 0.131550926  | 0.004404946 | 0.100373649  | 0.030100954 |
| USP33  | blue | -0.121244015 | 0.008721924 | -0.141032415 | 0.002251727 |
| USP4   | blue | -0.183903562 | 6.40E-05    | -0.167596254 | 0.000274932 |
| USP46  | blue | -0.006430206 | 0.889776548 | -0.041445423 | 0.371521551 |
| USP47  | blue | 0.044911313  | 0.332829974 | 0.018915956  | 0.683480538 |
| USP49  | blue | -0.157910777 | 0.000615146 | -0.173860671 | 0.000159439 |
| USP53  | blue | 0.074769027  | 0.106592182 | 0.033205038  | 0.474089346 |
| USP8   | blue | 0.094652204  | 0.040898072 | 0.072468766  | 0.117835623 |
| UTP20  | blue | 0.063737132  | 0.1691072   | 0.053361595  | 0.249780161 |
| UTRN   | blue | -0.033313436 | 0.472646639 | -0.049807226 | 0.282766455 |
| UVRAG  | blue | -0.364476807 | 4.06E-16    | -0.389897748 | 2.10E-18    |
| UVSSA  | blue | 0.152331837  | 0.000958649 | 0.147183127  | 0.001425106 |
| VAMP3  | blue | -0.187359487 | 4.62E-05    | -0.199629762 | 1.38E-05    |
| VAX2   | blue | 0.058092695  | 0.210173759 | 0.071385388  | 0.123442703 |
| VCPIP1 | blue | -0.111800012 | 0.015643602 | -0.123348848 | 0.007615778 |
| VEGFB  | blue | -0.081150554 | 0.079796374 | -0.061303985 | 0.186007015 |
| VMP1   | blue | -0.097787564 | 0.034634224 | -0.113983746 | 0.013714882 |
| VPS13A | blue | 0.013369     | 0.773235628 | 0.003405114  | 0.941497258 |
| VPS13C | blue | 0.094911825  | 0.040345375 | 0.075267546  | 0.104270985 |
| VPS13D | blue | -0.016685786 | 0.719115195 | -0.028942473 | 0.532688893 |
| VPS16  | blue | -0.014948091 | 0.747313858 | -0.017634271 | 0.703880029 |
| VPS36  | blue | 0.080017036  | 0.084110355 | 0.055017246  | 0.235367534 |
| VPS41  | blue | -0.056653983 | 0.221706303 | -0.085134364 | 0.066036323 |
| VPS54  | blue | 0.021086347  | 0.649462404 | -0.008635874 | 0.852345846 |
| VPS8   | blue | -0.185082863 | 5.73E-05    | -0.213596028 | 3.20E-06    |
| VWA8   | blue | 0.188487902  | 4.15E-05    | 0.154438017  | 0.000812207 |
| VWDE   | blue | -0.055783218 | 0.228902059 | -0.060338578 | 0.193046519 |
| WASF3  | blue | -0.07492984  | 0.105838989 | -0.107505629 | 0.020140064 |
| WASL   | blue | 0.019452858  | 0.67500209  | 0.018595783  | 0.68855562  |
| WDFY1  | blue | -0.075402829 | 0.103648037 | -0.083366876 | 0.071879667 |
| WDFY2  | blue | 0.120971049  | 0.00887539  | 0.118448613  | 0.010411306 |
| WDFY3  | blue | 0.059719482  | 0.197662324 | 0.028463379  | 0.539496397 |
| WDR11  | blue | 0.051675851  | 0.265074805 | 0.01412685   | 0.760761577 |
| WDR20  | blue | -0.05544392  | 0.231750314 | -0.073333276 | 0.11350584  |
| WDR35  | blue | -0.158646634 | 0.000579544 | -0.186452801 | 5.03E-05    |
| WDR36  | blue | 0.016167138  | 0.7274938   | -0.015504918 | 0.738239021 |
| WDR44  | blue | -0.042879569 | 0.355185843 | -0.074361008 | 0.10852221  |
| WDR47  | blue | -0.051277935 | 0.268776966 | -0.067877983 | 0.143026232 |
| WDR48  | blue | -0.074749173 | 0.106685461 | -0.106626283 | 0.021188332 |
| WDR73  | blue | -0.000459291 | 0.992102061 | -0.025172409 | 0.587399381 |

|         |      |              |             |              |             |
|---------|------|--------------|-------------|--------------|-------------|
| WDR83O  | blue | -0.02018975  | 0.663432303 | -0.000280924 | 0.9951692   |
| WHAMM   | blue | 0.143026763  | 0.001945057 | 0.149027262  | 0.001238206 |
| WRN     | blue | 0.020796087  | 0.653971818 | -0.02446807  | 0.597901003 |
| WWC2    | blue | -0.289375637 | 1.85E-10    | -0.297877055 | 5.04E-11    |
| WWP1    | blue | 0.03488657   | 0.451982694 | -0.022730309 | 0.624167138 |
| XIAP    | blue | 0.107908189  | 0.019675422 | 0.099924512  | 0.030849701 |
| XPO4    | blue | -0.018041347 | 0.697377046 | -0.040285789 | 0.385064433 |
| XRN1    | blue | -0.149327545 | 0.001210002 | -0.160358465 | 0.000503992 |
| YAP1    | blue | -0.077149446 | 0.095867236 | -0.113288208 | 0.014305142 |
| YPEL2   | blue | -0.225258937 | 8.73E-07    | -0.237105739 | 2.17E-07    |
| YPEL5   | blue | -0.196652046 | 1.87E-05    | -0.218037434 | 1.97E-06    |
| YTHDC1  | blue | -0.095976759 | 0.038143886 | -0.139600051 | 0.00249856  |
| YTHDC2  | blue | 0.233444695  | 3.36E-07    | 0.183272998  | 6.78E-05    |
| YTHDF3  | blue | -0.122326609 | 0.00813629  | -0.156369456 | 0.000696384 |
| YY2     | blue | 0.022347808  | 0.630014727 | 0.013130683  | 0.777170553 |
| ZBTB1   | blue | -0.020178548 | 0.663607606 | -0.056625544 | 0.221938737 |
| ZBTB11  | blue | -0.113302308 | 0.014292958 | -0.153160411 | 0.00089835  |
| ZBTB14  | blue | -0.106914438 | 0.02083972  | -0.141160104 | 0.002230841 |
| ZBTB17  | blue | 0.112985901  | 0.014568579 | 0.135697062  | 0.003301442 |
| ZBTB21  | blue | -0.007653597 | 0.868979561 | -0.04014433  | 0.386736805 |
| ZBTB26  | blue | -0.108781288 | 0.01869963  | -0.122050046 | 0.008282462 |
| ZBTB34  | blue | -0.111211185 | 0.016202773 | -0.145836676 | 0.001577574 |
| ZBTB43  | blue | -0.015851638 | 0.732606608 | -0.036133606 | 0.435970529 |
| ZBTB44  | blue | -0.128649008 | 0.005365061 | -0.161428651 | 0.000461521 |
| ZBTB45  | blue | 0.210646544  | 4.40E-06    | 0.21191459   | 3.84E-06    |
| ZBTB8A  | blue | -0.009292025 | 0.841270572 | -0.000261888 | 0.995496544 |
| ZC2HC1  | blue | -0.10088855  | 0.029261777 | -0.150720563 | 0.001086737 |
| ZC3H12C | blue | -0.243785734 | 9.56E-08    | -0.26040402  | 1.12E-08    |
| ZC3H13  | blue | -0.031330451 | 0.499416517 | -0.073513768 | 0.11261783  |
| ZC3H6   | blue | -0.10340724  | 0.025440059 | -0.110196595 | 0.01720741  |
| ZC3H7A  | blue | -0.004503442 | 0.922678835 | -0.017718758 | 0.702528559 |
| ZC3HAV  | blue | 0.038547678  | 0.405917808 | 0.025256498  | 0.586151334 |
| ZCCHC4  | blue | 0.068089027  | 0.141784404 | 0.044918197  | 0.332755803 |
| ZCCHC6  | blue | 0.149895043  | 0.001158309 | 0.131676305  | 0.004367202 |
| ZCWPW2  | blue | 0.053583883  | 0.247810178 | 0.038605438  | 0.405214199 |
| ZDHHC1  | blue | 0.289459484  | 1.82E-10    | 0.319223589  | 1.60E-12    |
| ZDHHC2  | blue | 0.109148518  | 0.018301986 | 0.106917972  | 0.020835477 |
| ZDHHC2  | blue | -0.072419345 | 0.118086991 | -0.09117909  | 0.048927862 |
| ZDHHC2  | blue | 0.223536422  | 1.06E-06    | 0.257425166  | 1.67E-08    |
| ZFAND2I | blue | 0.041295791  | 0.373252308 | 0.047148394  | 0.309286485 |
| ZFAND4  | blue | -0.033887126 | 0.465051449 | -0.046679455 | 0.31412851  |
| ZFAND5  | blue | 0.038625767  | 0.404966724 | 0.009727856  | 0.833931232 |
| ZFP1    | blue | 0.031038319  | 0.503426961 | 0.015896641  | 0.731876592 |
| ZFP2    | blue | 0.031916189  | 0.491426602 | -0.002056781 | 0.964642683 |
| ZFP3    | blue | -0.416942062 | 4.58E-21    | -0.408959379 | 2.96E-20    |



|              |              |             |              |             |
|--------------|--------------|-------------|--------------|-------------|
| ZFP36L2 blue | -0.032467454 | 0.483969884 | -0.047629945 | 0.30436567  |
| ZFP37 blue   | 0.074734909  | 0.106752522 | 0.035438296  | 0.444857908 |
| ZFP90 blue   | 0.094800631  | 0.040581315 | 0.079089313  | 0.087779459 |
| ZFX blue     | -0.1027433   | 0.026403183 | -0.123166907 | 0.007706185 |
| ZFYVE16blue  | 0.051448531  | 0.267185452 | 0.012986559  | 0.779552993 |
| ZHX1 blue    | -0.141045359 | 0.002249601 | -0.160215884 | 0.000509917 |
| ZKSCAN blue  | 0.028432714  | 0.539933602 | 0.003433663  | 0.941007643 |
| ZKSCAN blue  | -0.027216322 | 0.557417189 | -0.046337974 | 0.317685575 |
| ZKSCAN blue  | -0.352086503 | 4.48E-15    | -0.362653943 | 5.81E-16    |
| ZKSCAN blue  | -0.22257808  | 1.18E-06    | -0.243349342 | 1.01E-07    |
| ZMAT3 blue   | 0.050858336  | 0.272719027 | 0.053251562  | 0.25075933  |
| ZMYM1 blue   | -0.130432386 | 0.004754935 | -0.158243947 | 0.000598782 |
| ZMYM2 blue   | 0.034765844  | 0.453550238 | -0.002657927 | 0.9543186   |
| ZMYM4 blue   | -0.081407745 | 0.078842929 | -0.113900539 | 0.013784347 |
| ZNF106 blue  | 0.085482598  | 0.064932362 | 0.062877387  | 0.17494241  |
| ZNF107 blue  | -0.038833315 | 0.402445388 | -0.047224438 | 0.30850595  |
| ZNF117 blue  | 0.036179888  | 0.435382604 | 0.02410608   | 0.603331091 |
| ZNF12 blue   | -0.156071012 | 0.00071322  | -0.161217704 | 0.000469619 |
| ZNF121 blue  | 0.092246851  | 0.046329518 | 0.086381422  | 0.062152923 |
| ZNF131 blue  | -0.086230685 | 0.062612079 | -0.117222906 | 0.011239427 |
| ZNF136 blue  | -0.138460787 | 0.002712234 | -0.151308372 | 0.001038285 |
| ZNF148 blue  | -0.143500418 | 0.001878079 | -0.16072547  | 0.000489034 |
| ZNF160 blue  | 0.01383572   | 0.765546383 | -0.004951347 | 0.915016342 |
| ZNF169 blue  | -0.056430189 | 0.223540064 | -0.070613373 | 0.127563439 |
| ZNF175 blue  | -0.184278017 | 6.18E-05    | -0.19397345  | 2.44E-05    |
| ZNF182 blue  | -0.140480838 | 0.002344013 | -0.158126364 | 0.000604511 |
| ZNF189 blue  | 0.032134871  | 0.488461247 | -0.007915059 | 0.864546041 |
| ZNF197 blue  | -0.020635235 | 0.656476229 | -0.052129098 | 0.260900694 |
| ZNF2 blue    | -0.0858591   | 0.063755908 | -0.112144696 | 0.01532419  |
| ZNF200 blue  | 0.147652367  | 0.001375236 | 0.127795652  | 0.005681219 |
| ZNF205 blue  | 0.133233521  | 0.003922176 | 0.141374639  | 0.002196148 |
| ZNF214 blue  | -0.261273245 | 9.99E-09    | -0.280221296 | 7.12E-10    |
| ZNF217 blue  | -0.084125433 | 0.069322112 | -0.097514004 | 0.035146115 |
| ZNF23 blue   | -0.014352334 | 0.75706193  | 0.000106503  | 0.998168556 |
| ZNF24 blue   | -0.024045952 | 0.604235183 | -0.057293857 | 0.216522538 |
| ZNF248 blue  | -0.303338903 | 2.14E-11    | -0.336753988 | 7.59E-14    |
| ZNF267 blue  | -0.107234358 | 0.020458527 | -0.10125737  | 0.028673086 |
| ZNF274 blue  | -0.213338446 | 3.29E-06    | -0.223836985 | 1.03E-06    |
| ZNF280C blue | -0.01294162  | 0.780296275 | -0.03736123  | 0.420530914 |
| ZNF280Dblue  | 0.022915542  | 0.621343775 | -0.004048677 | 0.930466024 |
| ZNF286A blue | 0.000786477  | 0.986476205 | -0.036732233 | 0.428401359 |
| ZNF286B blue | -0.095807133 | 0.038487574 | -0.134648771 | 0.003553774 |
| ZNF287 blue  | 0.050843496  | 0.272859169 | 0.018715537  | 0.68665575  |
| ZNF292 blue  | -0.013222206 | 0.775658698 | -0.035227135 | 0.447577185 |
| ZNF320 blue  | 0.023531595  | 0.61199381  | 0.020632377  | 0.656520771 |

|         |      |              |             |              |             |
|---------|------|--------------|-------------|--------------|-------------|
| ZNF333  | blue | -0.194154737 | 2.39E-05    | -0.221462962 | 1.34E-06    |
| ZNF337  | blue | -0.102822582 | 0.026286547 | -0.133587761 | 0.003826856 |
| ZNF33A  | blue | -0.03048289  | 0.511098524 | -0.065245297 | 0.159224544 |
| ZNF33B  | blue | 0.026727496  | 0.564519816 | 8.95E-05     | 0.998460277 |
| ZNF354C | blue | -0.363882897 | 4.56E-16    | -0.380895819 | 1.43E-17    |
| ZNF37A  | blue | -0.132742634 | 0.00405782  | -0.161926111 | 0.000442934 |
| ZNF397  | blue | -0.038410973 | 0.407585987 | -0.065166095 | 0.159732456 |
| ZNF408  | blue | 0.001090593  | 0.981247641 | 0.003617843  | 0.937849542 |
| ZNF41   | blue | -0.04893324  | 0.291308913 | -0.071970762 | 0.12038782  |
| ZNF426  | blue | 0.028988662  | 0.532034879 | 0.020028741  | 0.665953574 |
| ZNF436  | blue | -0.000584912 | 0.989941988 | -0.026411657 | 0.569131905 |
| ZNF441  | blue | -0.203850452 | 8.99E-06    | -0.211794157 | 3.89E-06    |
| ZNF442  | blue | -0.05427456  | 0.241758456 | -0.051009712 | 0.271292353 |
| ZNF445  | blue | -0.012295927 | 0.790997799 | -0.042080966 | 0.364225851 |
| ZNF451  | blue | -0.133457883 | 0.003861557 | -0.136901156 | 0.003031755 |
| ZNF484  | blue | -0.002515256 | 0.956768208 | -0.016303505 | 0.725287626 |
| ZNF491  | blue | 0.177472099  | 0.000115458 | 0.171397799  | 0.000197975 |
| ZNF510  | blue | 0.07935907   | 0.086699553 | 0.041104307  | 0.375474394 |
| ZNF518A | blue | 0.070093587  | 0.130397408 | 0.053025949  | 0.252775376 |
| ZNF518B | blue | -0.076273844 | 0.099707517 | -0.102069411 | 0.027412688 |
| ZNF519  | blue | -0.232583822 | 3.72E-07    | -0.258702295 | 1.41E-08    |
| ZNF525  | blue | 0.056473193  | 0.223186852 | 0.044071469  | 0.341958871 |
| ZNF555  | blue | 0.05961875   | 0.198420904 | 0.032396628  | 0.484924478 |
| ZNF558  | blue | -0.04678508  | 0.313033571 | -0.079521682 | 0.086053755 |
| ZNF561  | blue | 0.120501057  | 0.009145269 | 0.096915565  | 0.036288409 |
| ZNF562  | blue | 0.165113206  | 0.000339427 | 0.156808276  | 0.000672297 |
| ZNF579  | blue | -0.141615154 | 0.002157841 | -0.123523091 | 0.007530086 |
| ZNF580  | blue | 0.09378021   | 0.042801456 | 0.116211174  | 0.011966368 |
| ZNF594  | blue | -0.064530702 | 0.163851425 | -0.087026468 | 0.060219324 |
| ZNF595  | blue | -0.13508273  | 0.003447268 | -0.153426909 | 0.000879714 |
| ZNF597  | blue | 0.167331649  | 0.000281216 | 0.165870818  | 0.000318389 |
| ZNF621  | blue | 0.102874542  | 0.026210347 | 0.078175565  | 0.09151801  |
| ZNF624  | blue | -0.013640804 | 0.768754887 | -0.021887018 | 0.637089958 |
| ZNF627  | blue | -0.120524203 | 0.009131809 | -0.138015211 | 0.002800237 |
| ZNF628  | blue | -0.030308658 | 0.513517481 | -0.017241256 | 0.710178921 |
| ZNF630  | blue | -0.040490893 | 0.38264746  | -0.045086517 | 0.330945503 |
| ZNF641  | blue | 0.00109656   | 0.981145061 | -0.029547056 | 0.524160561 |
| ZNF644  | blue | -0.207281979 | 6.29E-06    | -0.231500415 | 4.23E-07    |
| ZNF652  | blue | 0.179276782  | 9.80E-05    | 0.186926437  | 4.81E-05    |
| ZNF653  | blue | 0.086659495  | 0.061313179 | 0.094659754  | 0.04088191  |
| ZNF654  | blue | 0.057918986  | 0.211542753 | 0.051053964  | 0.270876252 |
| ZNF655  | blue | -0.101601798 | 0.028132537 | -0.119550584 | 0.009713461 |
| ZNF658  | blue | -0.03525602  | 0.447204654 | -0.086898725 | 0.060598248 |
| ZNF660  | blue | -0.371694064 | 9.53E-17    | -0.401683964 | 1.56E-19    |
| ZNF674  | blue | -0.167854764 | 0.00026892  | -0.161917204 | 0.00044326  |

|         |       |              |             |              |             |
|---------|-------|--------------|-------------|--------------|-------------|
| ZNF697  | blue  | -0.042845584 | 0.355567647 | -0.078756252 | 0.089127683 |
| ZNF701  | blue  | 0.03667515   | 0.429119835 | 0.039544998  | 0.393871203 |
| ZNF704  | blue  | 0.082430562  | 0.075142243 | 0.039098288  | 0.399240104 |
| ZNF711  | blue  | -0.218735138 | 1.82E-06    | -0.236638018 | 2.29E-07    |
| ZNF713  | blue  | 0.049982331  | 0.281075518 | 0.046127079  | 0.319895477 |
| ZNF717  | blue  | -0.420998028 | 1.74E-21    | -0.417792361 | 3.74E-21    |
| ZNF718  | blue  | -0.275496864 | 1.40E-09    | -0.272148027 | 2.25E-09    |
| ZNF720  | blue  | -0.047469337 | 0.306001075 | -0.049250131 | 0.288191803 |
| ZNF730  | blue  | -0.174631845 | 0.0001489   | -0.167263735 | 0.00028285  |
| ZNF737  | blue  | 0.002400117  | 0.958745396 | 0.003741694  | 0.935726448 |
| ZNF75D  | blue  | 0.015746358  | 0.734315368 | 0.000487768  | 0.991612383 |
| ZNF761  | blue  | 0.066618591  | 0.150610366 | 0.052244943  | 0.259841147 |
| ZNF772  | blue  | -0.333588245 | 1.33E-13    | -0.332266223 | 1.69E-13    |
| ZNF774  | blue  | -0.101947854 | 0.027598273 | -0.128641293 | 0.005367847 |
| ZNF791  | blue  | -0.104173467 | 0.024366359 | -0.116249205 | 0.011938307 |
| ZNF800  | blue  | 0.02271296   | 0.624431861 | -0.003625039 | 0.937726177 |
| ZNF816  | blue  | 0.251084048  | 3.80E-08    | 0.25297179   | 2.98E-08    |
| ZNF839  | blue  | 0.04021719   | 0.38587488  | 0.01653427   | 0.721559462 |
| ZNF841  | blue  | 0.05849896   | 0.206996965 | 0.054364468  | 0.240978371 |
| ZNF844  | blue  | -0.041067231 | 0.37590558  | -0.048633692 | 0.29427613  |
| ZNF846  | blue  | -0.130125272 | 0.004855323 | -0.165192459 | 0.000337167 |
| ZNF865  | blue  | -0.019093162 | 0.680677733 | 0.000710006  | 0.987791046 |
| ZNF91   | blue  | -0.034978659 | 0.450789046 | -0.03812729  | 0.411060674 |
| ZP3     | blue  | -0.041645668 | 0.369213159 | -0.017900034 | 0.699632024 |
| ZSCAN12 | blue  | -0.394747471 | 7.28E-19    | -0.418584911 | 3.10E-21    |
| ZSCAN21 | blue  | -0.014587277 | 0.753212978 | -0.053755619 | 0.246295647 |
| ZSCAN26 | blue  | -0.273818364 | 1.78E-09    | -0.301485715 | 2.87E-11    |
| ZSCAN29 | blue  | 0.146511561  | 0.001499373 | 0.116011951  | 0.012114311 |
| ZSCAN32 | blue  | 0.035058491  | 0.449755697 | 0.00356396   | 0.938773363 |
| ZSWIM6  | blue  | 0.035819363  | 0.439974452 | 0.028055497  | 0.545326076 |
| ZXDA    | blue  | -0.222496773 | 1.20E-06    | -0.241081594 | 1.34E-07    |
| ZXDB    | blue  | -0.108356684 | 0.019168775 | -0.139265414 | 0.002559673 |
| ZYG11B  | blue  | -0.206858234 | 6.57E-06    | -0.227660706 | 6.63E-07    |
| ZZZ3    | blue  | -0.134453523 | 0.00360266  | -0.176181928 | 0.000129663 |
| ABAT    | brown | 0.067898754  | 0.142903645 | 0.0807202    | 0.081412628 |
| ABCB11  | brown | -0.060076673 | 0.194989486 | -0.04812815  | 0.2993295   |
| ABCC11  | brown | -0.066297292 | 0.152593318 | -0.080250137 | 0.083208171 |
| ABCC6   | brown | -0.095221614 | 0.039694152 | -0.086460345 | 0.061913628 |
| ABCD1   | brown | -0.216144547 | 2.43E-06    | -0.204711535 | 8.22E-06    |
| ABHD6   | brown | 0.194301311  | 2.36E-05    | 0.15921113   | 0.00055354  |
| ABLM2   | brown | -0.106879911 | 0.020881227 | -0.081766217 | 0.077529459 |
| AC00239 | brown | 0.132449811  | 0.004140741 | 0.10668528   | 0.021116547 |
| AC00654 | brown | 0.061290734  | 0.186102342 | 0.076492821  | 0.09873583  |
| AC00699 | brown | -0.050276978 | 0.27824566  | -0.053679243 | 0.246968404 |
| AC01054 | brown | -0.100330933 | 0.030171487 | -0.106956801 | 0.020788892 |

|         |       |              |             |              |             |
|---------|-------|--------------|-------------|--------------|-------------|
| AC09238 | brown | -0.061668504 | 0.183398826 | -0.037447469 | 0.419458467 |
| AC10453 | brown | 0.167402079  | 0.00027953  | 0.185370988  | 5.57E-05    |
| AC10480 | brown | 0.089184586  | 0.054108185 | 0.101017209  | 0.029055252 |
| AC10893 | brown | -0.030882728 | 0.505569857 | -0.039598173 | 0.393235024 |
| AC24510 | brown | -0.021429075 | 0.644154311 | -0.014018928 | 0.76253425  |
| ACAD10  | brown | 0.132486786  | 0.004130186 | 0.116628914  | 0.011661326 |
| ACADL   | brown | 0.047722554  | 0.3034253   | 0.014247248  | 0.758785448 |
| ACCS    | brown | -0.080915431 | 0.08067616  | -0.081562226 | 0.078274703 |
| ACOT7   | brown | 0.032468017  | 0.483962295 | 0.037960127  | 0.41311635  |
| ACSBG1  | brown | 0.00776398   | 0.867107332 | 0.000771634  | 0.986731423 |
| ACSM1   | brown | 0.079081832  | 0.087809565 | 0.07275444   | 0.116390796 |
| ACSS1   | brown | -0.096701565 | 0.036704476 | -0.072696525 | 0.116682582 |
| ACYP2   | brown | -0.131582287 | 0.004395477 | -0.125512832 | 0.006610912 |
| ADAMTS  | brown | -0.037928333 | 0.413508023 | -0.037708054 | 0.416227654 |
| ADAMTS  | brown | 0.114146126  | 0.013580207 | 0.091605221  | 0.047876632 |
| ADCYAP  | brown | -0.005447841 | 0.906531835 | 0.002370719  | 0.959250266 |
| ADGB    | brown | 0.030183124  | 0.515264022 | 0.042856154  | 0.355448863 |
| ADH1C   | brown | 0.065470725  | 0.157785575 | 0.08144497   | 0.0787057   |
| ADH6    | brown | 0.147668758  | 0.001373524 | 0.156505545  | 0.00068883  |
| ADH7    | brown | 0.11105915   | 0.016349964 | 0.097128813  | 0.035877798 |
| ADPRHL  | brown | 0.09254201   | 0.04563204  | 0.100690536  | 0.029582092 |
| AGBL2   | brown | -0.001633734 | 0.971911728 | 0.008076394  | 0.861812451 |
| AGPAT4  | brown | -0.145293331 | 0.001643233 | -0.142199963 | 0.002067231 |
| AGPAT6  | brown | -0.068453712 | 0.139658002 | -0.096273364 | 0.037549169 |
| AGR2    | brown | 0.302186429  | 2.57E-11    | 0.340387653  | 3.93E-14    |
| AGR3    | brown | 0.065406157  | 0.158196724 | 0.079954501  | 0.084353724 |
| AK7     | brown | 0.126007227  | 0.006398721 | 0.122490966  | 0.008050517 |
| AK8     | brown | 0.132395446  | 0.004156303 | 0.140040118  | 0.002420219 |
| AK9     | brown | 0.109394983  | 0.018039263 | 0.115795757  | 0.012276683 |
| AKAP14  | brown | 0.081199743  | 0.079613305 | 0.097218484  | 0.035706318 |
| AKNA    | brown | 0.017766303  | 0.70176844  | 0.040540703  | 0.38206189  |
| AKR1C3  | brown | 0.081836586  | 0.077273719 | 0.079489922  | 0.086179583 |
| AKR1C4  | brown | 0.002015409  | 0.965353437 | 0.019299063  | 0.677426594 |
| ALDH3A  | brown | 0.163015888  | 0.000404623 | 0.197907918  | 1.65E-05    |
| ALDH3B  | brown | -0.189064639 | 3.92E-05    | -0.161010462 | 0.000477704 |
| ALDOC   | brown | 0.058977707  | 0.203298166 | 0.031725377  | 0.494021889 |
| ALG14   | brown | 0.15286801   | 0.000919218 | 0.156005153  | 0.000716986 |
| ALG1L   | brown | 0.050803707  | 0.273235143 | 0.066689834  | 0.15017334  |
| ALOX15  | brown | 0.129100235  | 0.005204368 | 0.132578801  | 0.004104027 |
| ALPK1   | brown | 0.086629512  | 0.061403271 | 0.089495697  | 0.053271308 |
| ALPP    | brown | 0.109192146  | 0.018255238 | 0.126809287  | 0.006067452 |
| ALS2CR1 | brown | -0.117522058 | 0.011032107 | -0.113704705 | 0.013949061 |
| AMPD3   | brown | 0.052185762  | 0.260382056 | 0.062363323  | 0.178502264 |
| AMT     | brown | -0.008469546 | 0.855158022 | -0.017282671 | 0.709514223 |
| ANAPC4  | brown | 0.144585229  | 0.001732564 | 0.12800351   | 0.005602704 |

|               |              |             |              |             |
|---------------|--------------|-------------|--------------|-------------|
| ANKDD1 brown  | 0.029840054  | 0.520052742 | 0.042512353  | 0.359324976 |
| ANKFN1 brown  | 0.26049975   | 1.11E-08    | 0.253755734  | 2.69E-08    |
| ANKK1 brown   | 0.087978565  | 0.057456366 | 0.092789662  | 0.045053648 |
| ANKMY1 brown  | 0.114710062  | 0.013121492 | 0.119432453  | 0.009786228 |
| ANKRD3 brown  | -0.152815794 | 0.000922991 | -0.155357966 | 0.000754982 |
| ANKRD3 brown  | 0.209226995  | 5.12E-06    | 0.214520554  | 2.90E-06    |
| ANKRD3 brown  | 0.299084269  | 4.18E-11    | 0.314658394  | 3.42E-12    |
| ANKRD4 brown  | 0.102692911  | 0.026477543 | 0.094528741  | 0.041163143 |
| ANKRD4 brown  | -0.04780709  | 0.302568587 | -0.049567926 | 0.285088405 |
| ANKRD5 brown  | -0.204709726 | 8.22E-06    | -0.198103472 | 1.61E-05    |
| ANKRD5 brown  | 0.218711515  | 1.83E-06    | 0.245265031  | 7.95E-08    |
| ANKRD6 brown  | -0.147016866 | 0.001443171 | -0.110866673 | 0.016537988 |
| ANKRD6 brown  | 0.075250845  | 0.104348095 | 0.08467519   | 0.0675155   |
| ANKS4B brown  | 0.003106288  | 0.946623332 | 0.017962359  | 0.698637156 |
| ANKUB1 brown  | 0.021015622  | 0.650560002 | 0.035629398  | 0.442405052 |
| ANXA13 brown  | -0.167746611 | 0.00027142  | -0.168013134 | 0.000265298 |
| ANXA8 brown   | 0.046097077  | 0.320210668 | 0.07148328   | 0.122927677 |
| ANXA8L brown  | -0.031026613 | 0.503588016 | -0.006435527 | 0.889685914 |
| APLN brown    | 0.195674033  | 2.06E-05    | 0.150008438  | 0.001148227 |
| APOBEC brown  | 0.116825618  | 0.011520087 | 0.126401236  | 0.006234012 |
| APOO brown    | 0.261997883  | 9.07E-09    | 0.269091776  | 3.44E-09    |
| AQP10 brown   | -0.045539721 | 0.326102891 | -0.036845505 | 0.426977745 |
| AQP3 brown    | 0.19967043   | 1.38E-05    | 0.216148406  | 2.43E-06    |
| AQP7 brown    | -0.066620143 | 0.150600833 | -0.045717302 | 0.324217974 |
| ARHGAP brown  | 0.102606054  | 0.026606144 | 0.117566262  | 0.011001761 |
| ARHGAP brown  | 0.217341896  | 2.13E-06    | 0.22927844   | 5.49E-07    |
| ARHGAP brown  | -0.090433463 | 0.050813711 | -0.146510807 | 0.001499459 |
| ARHGEF brown  | -0.217980557 | 1.98E-06    | -0.214213142 | 3.00E-06    |
| ARHGEF brown  | 0.231209421  | 4.38E-07    | 0.239704372  | 1.58E-07    |
| ARL3 brown    | 0.112120497  | 0.015346426 | 0.092169992  | 0.046512602 |
| ARL6 brown    | -0.012338516 | 0.790290708 | -0.025997242 | 0.575210552 |
| ARMC2 brown   | 0.018021801  | 0.697688784 | 0.024112908  | 0.603228456 |
| ARMC3 brown   | 0.146215881  | 0.001533186 | 0.157249468  | 0.00064886  |
| ARMC4 brown   | 0.034768916  | 0.453510308 | 0.031341588  | 0.499263961 |
| ART3 brown    | 0.159539445  | 0.000538918 | 0.146498855  | 0.001500812 |
| ASB12 brown   | 0.072085814  | 0.119794397 | 0.068656641  | 0.138485405 |
| ASRGL1 brown  | 0.24721205   | 6.23E-08    | 0.243792379  | 9.56E-08    |
| ASTN2 brown   | 0.023704495  | 0.609380866 | 0.009289985  | 0.841304957 |
| ATF7IP2 brown | -0.117385399 | 0.011126391 | -0.120218034 | 0.009311286 |
| ATG9B brown   | -0.038553961 | 0.405841234 | -0.026775522 | 0.563820082 |
| ATP2B3 brown  | -0.149093668 | 0.001231917 | -0.150129403 | 0.001137561 |
| ATP4B brown   | -0.020779659 | 0.654227425 | -0.012308508 | 0.79078891  |
| ATP5S brown   | -0.020670792 | 0.655922286 | -0.022621047 | 0.625835129 |
| ATP6AP1 brown | 0.093984969  | 0.042347931 | 0.074466422  | 0.108020955 |
| ATXN7L brown  | 0.075315709  | 0.104048868 | 0.072233804  | 0.119034448 |

|          |       |              |             |              |             |
|----------|-------|--------------|-------------|--------------|-------------|
| AVPI1    | brown | -0.007787923 | 0.866701327 | -0.024073456 | 0.603821558 |
| AXDND1   | brown | 0.080537619  | 0.082106292 | 0.087389517  | 0.059153084 |
| AZU1     | brown | 0.151743334  | 0.001003723 | 0.167722441  | 0.000271982 |
| B3GALT1  | brown | 0.139955721  | 0.002435067 | 0.159676461  | 0.000532923 |
| B3GNTL1  | brown | 0.016211026  | 0.726783518 | 0.00023998   | 0.995873262 |
| B9D1     | brown | 0.113857222  | 0.013820632 | 0.122941905  | 0.007819314 |
| B9D2     | brown | 0.166471301  | 0.000302586 | 0.182215562  | 7.48E-05    |
| BAIAP3   | brown | 0.095573516  | 0.038965211 | 0.094339434  | 0.041572395 |
| BARX1    | brown | 8.24E-05     | 0.998583452 | 0.006821505  | 0.88311575  |
| BBOX1    | brown | 0.055649087  | 0.230025047 | 0.063543742  | 0.170406904 |
| BBS12    | brown | -0.044453442 | 0.337787301 | -0.039797833 | 0.39085185  |
| BBS4     | brown | 0.233707155  | 3.26E-07    | 0.211226001  | 4.14E-06    |
| BBS5     | brown | 0.033247022  | 0.473530277 | 0.038443688  | 0.407186401 |
| BCAS1    | brown | -0.042485938 | 0.359623879 | -0.029656856 | 0.52261924  |
| BCAS3    | brown | -0.054726768 | 0.237852799 | -0.058120001 | 0.209959139 |
| BCO2     | brown | -0.126035469 | 0.006386787 | -0.117722815 | 0.010894883 |
| BEST4    | brown | 0.03427843   | 0.459909967 | 0.041269976  | 0.373551409 |
| BLCAP    | brown | -0.376119286 | 3.85E-17    | -0.350123062 | 6.49E-15    |
| BMP15    | brown | 0.047632346  | 0.304341263 | 0.07212159   | 0.119610336 |
| BMP2     | brown | 0.02453636   | 0.596879088 | 0.016113343  | 0.728364719 |
| BMPR1B   | brown | 0.197143847  | 1.78E-05    | 0.207294359  | 6.28E-06    |
| BTBD9    | brown | -0.077831756 | 0.092957293 | -0.064352984 | 0.165017644 |
| BTG4     | brown | -0.005550365 | 0.904781111 | -0.007093515 | 0.878490332 |
| C10orf10 | brown | 0.048864162  | 0.291991391 | 0.051545121  | 0.266287219 |
| C10orf53 | brown | -0.123398032 | 0.007591501 | -0.121264706 | 0.008710388 |
| C10orf67 | brown | -0.097852199 | 0.034514208 | -0.093731662 | 0.042909585 |
| C11orf16 | brown | 0.121003252  | 0.008857161 | 0.139538852  | 0.002509637 |
| C11orf49 | brown | 0.198644041  | 1.53E-05    | 0.194070842  | 2.41E-05    |
| C11orf52 | brown | 0.062775426  | 0.175644247 | 0.07476141   | 0.106627962 |
| C11orf63 | brown | 0.152698686  | 0.000931505 | 0.138095179  | 0.002784254 |
| C11orf70 | brown | -0.023432149 | 0.613498913 | -0.021517269 | 0.642791288 |
| C11orf74 | brown | 0.008576423  | 0.853350787 | -0.002684678 | 0.953859346 |
| C11orf88 | brown | -0.056973112 | 0.219109998 | -0.061094513 | 0.187518132 |
| C11orf91 | brown | -0.061617492 | 0.183762187 | -0.04483107  | 0.333695357 |
| C12orf60 | brown | -0.078437506 | 0.09043348  | -0.062867636 | 0.175009439 |
| C12orf74 | brown | 0.151208591  | 0.001046367 | 0.144691608  | 0.001718865 |
| C12orf76 | brown | -0.073851335 | 0.110971686 | -0.072459826 | 0.11788106  |
| C14orf10 | brown | -0.180068668 | 9.12E-05    | -0.171233364 | 0.000200836 |
| C14orf14 | brown | 0.101732744  | 0.027929338 | 0.129933194  | 0.004919076 |
| C14orf15 | brown | 0.042138526  | 0.363569526 | 0.060594134  | 0.191164358 |
| C14orf79 | brown | 0.002220221  | 0.961835109 | 0.004416678  | 0.924164003 |
| C14orf93 | brown | -7.78E-05    | 0.998661583 | -0.010502738 | 0.820918263 |
| C15orf26 | brown | 0.119330956  | 0.009849133 | 0.122923084  | 0.007828844 |
| C15orf65 | brown | 0.280189376  | 7.16E-10    | 0.295978563  | 6.76E-11    |
| C16orf46 | brown | 0.173860014  | 0.000159449 | 0.164522809  | 0.000356713 |

|                |              |             |              |             |
|----------------|--------------|-------------|--------------|-------------|
| C16orf71 brown | 0.122230688  | 0.008186724 | 0.14732945   | 0.00140938  |
| C16orf93 brown | 0.13743792   | 0.002918118 | 0.148049408  | 0.001334298 |
| C17orf50 brown | 0.053508888  | 0.248473592 | 0.075499211  | 0.103206023 |
| C17orf97 brown | 0.173887604  | 0.00015906  | 0.183201048  | 6.83E-05    |
| C18orf65 brown | 0.260866088  | 1.06E-08    | 0.257395495  | 1.67E-08    |
| C19orf18 brown | 0.125948539  | 0.006423586 | 0.125341216  | 0.00668603  |
| C19orf26 brown | 0.288200419  | 2.20E-10    | 0.279312498  | 8.12E-10    |
| C19orf44 brown | -0.145099551 | 0.00166725  | -0.161045848 | 0.000476315 |
| C1orf101 brown | -0.01199789  | 0.795950787 | -0.015483256 | 0.738591386 |
| C1orf110 brown | 0.075216394  | 0.104507302 | 0.088341602  | 0.056430893 |
| C1orf137 brown | 0.139209963  | 0.002569931 | 0.13506112   | 0.003452503 |
| C1orf158 brown | 0.098455553  | 0.033410873 | 0.111477893  | 0.015947364 |
| C1orf168 brown | 0.039145706  | 0.398668117 | 0.036591998  | 0.430167658 |
| C1orf186 brown | -0.024689312 | 0.594593162 | -0.004679162 | 0.919671838 |
| C1orf189 brown | 0.11607489   | 0.012067398 | 0.119511327  | 0.009737589 |
| C1orf194 brown | 0.139086759  | 0.002592855 | 0.14916031   | 0.001225636 |
| C1orf228 brown | 0.11030212   | 0.017100442 | 0.121194884  | 0.00874937  |
| C1orf87 brown  | -0.044263018 | 0.339862853 | -0.036656665 | 0.429352631 |
| C1QL1 brown    | -0.099573168 | 0.031446476 | -0.100335324 | 0.03016423  |
| C1QTNF8 brown  | 0.107921385  | 0.019660349 | 0.113626145  | 0.014015623 |
| C20orf19 brown | -0.114104582 | 0.013614552 | -0.109022865 | 0.018437207 |
| C20orf85 brown | 0.056626664  | 0.221929575 | 0.069381762  | 0.134357104 |
| C20orf96 brown | -0.022335222 | 0.630207545 | -0.028265335 | 0.542323062 |
| C21orf58 brown | 0.095993982  | 0.038109134 | 0.097248695  | 0.035648703 |
| C21orf59 brown | 0.102646187  | 0.026546656 | 0.099016261  | 0.03241263  |
| C22orf15 brown | 0.104249701  | 0.024261707 | 0.107708782  | 0.019904402 |
| C22orf23 brown | -0.079729966 | 0.085232243 | -0.081011105 | 0.080317222 |
| C22orf42 brown | -0.024967475 | 0.590446144 | -0.039865652 | 0.390044344 |
| C2CD2L brown   | 0.233445797  | 3.36E-07    | 0.256445394  | 1.90E-08    |
| C2orf50 brown  | 0.06111471   | 0.187372042 | 0.086642679  | 0.061363692 |
| C2orf70 brown  | -0.037787752 | 0.415242468 | -0.02461627  | 0.595684306 |
| C2orf73 brown  | 0.019370443  | 0.67630091  | 0.031082617  | 0.502817751 |
| C2orf81 brown  | 0.100725733  | 0.029524937 | 0.124967806  | 0.006852123 |
| C2orf88 brown  | 0.097558816  | 0.035061823 | 0.116880224  | 0.011481147 |
| C4orf22 brown  | 0.034144233  | 0.461669648 | 0.045204784  | 0.329677342 |
| C4orf33 brown  | 0.183664155  | 6.54E-05    | 0.210659021  | 4.39E-06    |
| C4orf47 brown  | 0.123020501  | 0.007779629 | 0.129645324  | 0.005016038 |
| C5orf49 brown  | 0.034631219  | 0.455301849 | 0.055337105  | 0.232652145 |
| C5orf52 brown  | -0.004360508 | 0.925125614 | 0.01466674   | 0.751912544 |
| C6 brown       | -0.043053865 | 0.35323177  | -0.035040516 | 0.449988251 |
| C6orf118 brown | 0.096190235  | 0.037715051 | 0.102949938  | 0.026100118 |
| C6orf165 brown | 0.024129088  | 0.602985299 | 0.040539553  | 0.382075405 |
| C6orf201 brown | 0.000605714  | 0.989584308 | 0.011738221  | 0.800272845 |
| C6orf223 brown | 0.07772047   | 0.093427028 | 0.050210074  | 0.278886517 |
| C6orf229 brown | -0.028671212 | 0.536537947 | -0.025023628 | 0.5896106   |

|          |       |              |             |              |             |
|----------|-------|--------------|-------------|--------------|-------------|
| C6orf52  | brown | 0.297100366  | 5.69E-11    | 0.318578982  | 1.78E-12    |
| C6orf57  | brown | 0.008951871  | 0.847008315 | 0.031338794  | 0.499302236 |
| C7orf57  | brown | 0.07862722   | 0.08965445  | 0.088166941  | 0.056922348 |
| C8B      | brown | 0.031179476  | 0.501487023 | 0.027766497  | 0.549475407 |
| C8orf34  | brown | 0.137423413  | 0.002921137 | 0.134399305  | 0.003616343 |
| C8orf48  | brown | -0.181686228 | 7.86E-05    | -0.194087921 | 2.41E-05    |
| C9orf116 | brown | 0.25185467   | 3.44E-08    | 0.272342915  | 2.19E-09    |
| C9orf117 | brown | 0.119663342  | 0.009644453 | 0.123510644  | 0.007536178 |
| C9orf135 | brown | -0.07813776  | 0.091675395 | -0.064557232 | 0.163677862 |
| C9orf171 | brown | 0.087456831  | 0.058957115 | 0.101879763  | 0.027702701 |
| C9orf24  | brown | 0.109047807  | 0.018410296 | 0.122547888  | 0.008020999 |
| C9orf43  | brown | 0.031779975  | 0.493278545 | 0.019539619  | 0.673635824 |
| C9orf50  | brown | -0.037703981 | 0.416278041 | -0.035392747 | 0.445443676 |
| C9orf9   | brown | 0.188670003  | 4.08E-05    | 0.187886916  | 4.39E-05    |
| CABYR    | brown | 0.061682272  | 0.183300846 | 0.074131995  | 0.109617512 |
| CACNA2   | brown | -0.258154132 | 1.51E-08    | -0.288273885 | 2.18E-10    |
| CACNG6   | brown | -0.266504687 | 4.92E-09    | -0.280285653 | 7.06E-10    |
| CALM1    | brown | 0.15296537   | 0.00091222  | 0.178533423  | 0.000104883 |
| CALML4   | brown | 0.324098956  | 6.98E-13    | 0.324121416  | 6.96E-13    |
| CALN1    | brown | 0.062423816  | 0.178080581 | 0.066847512  | 0.149209524 |
| CAPN9    | brown | 0.069650164  | 0.13285331  | 0.076595877  | 0.098281142 |
| CAPS     | brown | 0.305981683  | 1.41E-11    | 0.313687009  | 4.02E-12    |
| CAPS2    | brown | -0.041653359 | 0.369124678 | -0.044130481 | 0.341312252 |
| CAPSL    | brown | 0.108862583  | 0.018610959 | 0.122620783  | 0.00798334  |
| CARKD    | brown | 0.042937938  | 0.354530701 | 0.034844799  | 0.452524711 |
| CASC1    | brown | 0.096708428  | 0.03669107  | 0.109459085  | 0.017971474 |
| CASP16   | brown | 0.024469727  | 0.597876198 | 0.02312464   | 0.618163312 |
| CATIP    | brown | 0.089559958  | 0.053099799 | 0.105718493  | 0.022319889 |
| CATSPEF  | brown | 0.031319246  | 0.499570032 | 0.053414325  | 0.24931187  |
| CBY1     | brown | 0.259191927  | 1.32E-08    | 0.259160939  | 1.32E-08    |
| CC2D2A   | brown | 0.025516905  | 0.582294161 | 0.03021892   | 0.514765681 |
| CCDC103  | brown | 0.000892484  | 0.984653594 | 0.001022961  | 0.98241035  |
| CCDC108  | brown | 0.067870651  | 0.143069523 | 0.071777739  | 0.121388559 |
| CCDC113  | brown | 0.162045594  | 0.000438575 | 0.178885028  | 0.000101586 |
| CCDC114  | brown | 0.106641112  | 0.021170269 | 0.115617473  | 0.012412026 |
| CCDC125  | brown | 0.390634649  | 1.79E-18    | 0.405209313  | 7.00E-20    |
| CCDC13   | brown | 0.058873064  | 0.204102507 | 0.070033884  | 0.130726011 |
| CCDC138  | brown | 0.094009543  | 0.042293774 | 0.09141523   | 0.048342963 |
| CCDC146  | brown | 0.130572202  | 0.004709856 | 0.11964159   | 0.009657731 |
| CCDC148  | brown | 0.074976986  | 0.10561897  | 0.058572976  | 0.206421955 |
| CCDC151  | brown | -0.037532898 | 0.418397674 | -0.029737798 | 0.521484487 |
| CCDC153  | brown | -0.023520074 | 0.612168089 | -0.011631289 | 0.802054461 |
| CCDC157  | brown | 0.043024663  | 0.353558691 | 0.046425531  | 0.316771038 |
| CCDC160  | brown | 0.284402394  | 3.87E-10    | 0.292322012  | 1.18E-10    |
| CCDC17   | brown | 0.036499072  | 0.431340401 | 0.046148512  | 0.319670431 |



|               |              |             |              |             |
|---------------|--------------|-------------|--------------|-------------|
| CCDC17(brown  | 0.109108389  | 0.018345076 | 0.117915209  | 0.010764796 |
| CCDC173brown  | 0.080515132  | 0.082192055 | 0.087595379  | 0.058555459 |
| CCDC176brown  | 0.088382371  | 0.056316688 | 0.093640611  | 0.043112999 |
| CCDC18(brown  | -0.098013111 | 0.03421696  | -0.094370083 | 0.041505904 |
| CCDC24 brown  | 0.013522908  | 0.770697493 | 0.026721629  | 0.56460532  |
| CCDC28/brown  | 0.074270686  | 0.10895316  | 0.088690517  | 0.055459669 |
| CCDC30 brown  | -0.057380994 | 0.215823401 | -0.054883267 | 0.236511542 |
| CCDC33 brown  | 0.011985857  | 0.796150927 | 0.025208739  | 0.586860027 |
| CCDC37 brown  | 0.081867519  | 0.077161519 | 0.095789901  | 0.038522635 |
| CCDC39 brown  | -0.112709212 | 0.01481342  | -0.109316644 | 0.01812241  |
| CCDC40 brown  | 0.14257231   | 0.002011367 | 0.151888498  | 0.000992426 |
| CCDC42fbrown  | 0.120227767  | 0.009305533 | 0.135726486  | 0.003294601 |
| CCDC57 brown  | 0.134905287  | 0.003490463 | 0.131228804  | 0.004503271 |
| CCDC60 brown  | 0.068593479  | 0.138849565 | 0.092123622  | 0.046623353 |
| CCDC65 brown  | 0.029564215  | 0.523919538 | 0.033119823  | 0.475225194 |
| CCDC67 brown  | -0.30077487  | 3.21E-11    | -0.296002984 | 6.74E-11    |
| CCDC74/brown  | -0.003905017 | 0.932927395 | -0.006798715 | 0.883503459 |
| CCDC74fbrown  | -0.055906869 | 0.227870269 | -0.064495152 | 0.164084216 |
| CCDC78 brown  | 0.090178092  | 0.051473394 | 0.11209379   | 0.015371001 |
| CCDC81 brown  | -0.216476344 | 2.34E-06    | -0.209865521 | 4.78E-06    |
| CCDC87 brown  | 2.06E-05     | 0.999645282 | 0.001907607  | 0.967205575 |
| CCDC88(brown  | 0.24279337   | 1.08E-07    | 0.23665103   | 2.29E-07    |
| CCDC89 brown  | -0.226885363 | 7.25E-07    | -0.220963253 | 1.42E-06    |
| CCDC96 brown  | 0.143841424  | 0.001831174 | 0.166834243  | 0.000293392 |
| CCL15 brown   | -0.057727597 | 0.213058519 | -0.042017422 | 0.364951263 |
| CCL15-C(brown | -0.07937871  | 0.086621347 | -0.077285916 | 0.095279471 |
| CCL20 brown   | 0.211092669  | 4.20E-06    | 0.227309052  | 6.90E-07    |
| CCNA1 brown   | 0.16749828   | 0.000277243 | 0.18521241   | 5.66E-05    |
| CCNO brown    | 0.246987157  | 6.40E-08    | 0.277761643  | 1.02E-09    |
| CCT6B brown   | 0.162965388  | 0.000406328 | 0.146933936  | 0.00145226  |
| CD164L2 brown | 0.080884495  | 0.080792498 | 0.091535849  | 0.048046466 |
| CDC20B brown  | 0.18950712   | 3.76E-05    | 0.196823203  | 1.84E-05    |
| CDC25B brown  | -0.215208275 | 2.69E-06    | -0.226607794 | 7.48E-07    |
| CDHR2 brown   | -0.003811197 | 0.934535197 | 0.011059808  | 0.811593171 |
| CDHR3 brown   | 0.084185762  | 0.069121945 | 0.09655229   | 0.036997093 |
| CDHR4 brown   | 0.137094913  | 0.002990279 | 0.148631078  | 0.001276344 |
| CDK20 brown   | 0.163378768  | 0.000392567 | 0.155567223  | 0.000742497 |
| CDKL1 brown   | -0.079160175 | 0.087494739 | -0.075300834 | 0.10411743  |
| CDKN1A brown  | 0.417207433  | 4.30E-21    | 0.440846302  | 1.26E-23    |
| CDNF brown    | -0.038776771 | 0.403131362 | -0.032965292 | 0.477288757 |
| CDRT1 brown   | 0.118462738  | 0.010402087 | 0.136821428  | 0.003048973 |
| CDS1 brown    | 0.180242802  | 8.97E-05    | 0.176359854  | 0.000127611 |
| CEACAMbrown   | -0.025274648 | 0.585882108 | -0.010107908 | 0.827542942 |
| CEL brown     | 0.155751389  | 0.000731668 | 0.182647181  | 7.19E-05    |
| CELF3 brown   | -0.029349512 | 0.526939462 | -0.026321519 | 0.57045145  |

|          |       |              |             |              |             |
|----------|-------|--------------|-------------|--------------|-------------|
| CEP164   | brown | -0.180159002 | 9.04E-05    | -0.22440496  | 9.63E-07    |
| CEP19    | brown | -0.132662801 | 0.004080276 | -0.132017588 | 0.004265939 |
| CEP41    | brown | 0.033100369  | 0.475484708 | 0.033838844  | 0.46568805  |
| CEP83    | brown | 0.092845529  | 0.044924025 | 0.083069839  | 0.07290192  |
| CERCAM   | brown | -0.117019393 | 0.011382431 | -0.131341472 | 0.004468657 |
| CERKL    | brown | 0.238692267  | 1.79E-07    | 0.263787786  | 7.12E-09    |
| CES4A    | brown | -0.134537286 | 0.003581614 | -0.142681462 | 0.001995254 |
| CETN2    | brown | -0.030406928 | 0.51215242  | -0.024308453 | 0.60029263  |
| CFAP221  | brown | 0.039424772  | 0.395311864 | 0.051807138  | 0.263861047 |
| CFAP36   | brown | 0.081974611  | 0.076774087 | 0.066893138  | 0.148931515 |
| CFAP43   | brown | 0.089228932  | 0.053988233 | 0.094907539  | 0.040354449 |
| CFAP45   | brown | 0.146953176  | 0.001450147 | 0.158756152  | 0.000574412 |
| CFAP46   | brown | 0.005082305  | 0.912777439 | 0.012530232  | 0.787109845 |
| CFAP52   | brown | -0.049105065 | 0.28961596  | -0.037192239 | 0.422637093 |
| CFAP53   | brown | 0.05814446   | 0.209767036 | 0.06423417   | 0.165800793 |
| CFAP54   | brown | -0.073729283 | 0.111564671 | -0.06560008  | 0.156964314 |
| CFAP57   | brown | 0.065606541  | 0.156923378 | 0.080236326  | 0.083261404 |
| CFAP58   | brown | -0.01014883  | 0.826855742 | -0.006983839 | 0.880354832 |
| CFAP61   | brown | 0.03532395   | 0.446329264 | 0.052748735  | 0.255267901 |
| CFAP69   | brown | 0.007499834  | 0.871588792 | 0.006590708  | 0.887043471 |
| CFAP70   | brown | -0.003552345 | 0.938972517 | 0.005459393  | 0.906334544 |
| CFAP74   | brown | 0.081553512  | 0.078306668 | 0.089437503  | 0.053427023 |
| CFAP99   | brown | 0.104555495  | 0.023845814 | 0.124110964  | 0.007247294 |
| CFI      | brown | -0.173724033 | 0.000161378 | -0.180837354 | 8.50E-05    |
| CFP      | brown | 0.021769235  | 0.638903816 | 0.046563524  | 0.315333181 |
| CH507-35 | brown | 0.101336303  | 0.028548427 | 0.09981661   | 0.031031937 |
| CHGA     | brown | 0.109482358  | 0.017946919 | 0.145099924  | 0.001667203 |
| CHIA     | brown | 0.042749132  | 0.356652635 | 0.053256177  | 0.250718212 |
| CHN2     | brown | -0.076129996 | 0.100349957 | -0.074350602 | 0.108571789 |
| CHRM4    | brown | 0.145297411  | 0.001642731 | 0.146368571  | 0.001515639 |
| CHST4    | brown | 0.077233521  | 0.095504792 | 0.117238841  | 0.011228297 |
| CHST5    | brown | 0.016765475  | 0.717830777 | 0.033677745  | 0.467815614 |
| CHST6    | brown | 0.319021455  | 1.65E-12    | 0.366681002  | 2.62E-16    |
| CHST9    | brown | -0.096373281 | 0.037350605 | -0.096506148 | 0.037087942 |
| CLEC19A  | brown | -0.076850753 | 0.097163781 | -0.072331972 | 0.118532416 |
| CLGN     | brown | 0.058921947  | 0.203726483 | 0.050975476  | 0.271614573 |
| CLHC1    | brown | 0.085336439  | 0.065393848 | 0.075107627  | 0.105011196 |
| CLIC6    | brown | -0.079282576 | 0.087004687 | -0.069370023 | 0.134423175 |
| CLMN     | brown | 0.101801828  | 0.027822645 | 0.088627974  | 0.055632732 |
| CLUAP1   | brown | 0.000749931  | 0.98710458  | -0.002085349 | 0.964151908 |
| CNGA4    | brown | 0.101233358  | 0.028711101 | 0.107984672  | 0.019588205 |
| CNIH2    | brown | 0.101546518  | 0.028218701 | 0.102568405  | 0.026662054 |
| CNTD1    | brown | 0.062021436  | 0.18089937  | 0.089904254  | 0.052188701 |
| CNTF     | brown | -0.025906743 | 0.576542045 | -0.023322946 | 0.615153563 |
| CNTN3    | brown | -0.08190715  | 0.077017957 | -0.101825247 | 0.027786555 |

|         |       |              |             |              |             |
|---------|-------|--------------|-------------|--------------|-------------|
| CNTN5   | brown | -0.095829499 | 0.038442107 | -0.085297182 | 0.065518258 |
| CNTNAP  | brown | -0.030879376 | 0.50561607  | -0.044853383 | 0.333454573 |
| CNTNAP  | brown | -0.015193323 | 0.743312819 | -0.006158663 | 0.894403424 |
| COBL    | brown | 0.132865903  | 0.004023364 | 0.155273975  | 0.000760048 |
| COG7    | brown | 0.245206905  | 8.01E-08    | 0.272165736  | 2.24E-09    |
| COL21A1 | brown | 0.02956689   | 0.523881967 | 0.044332377  | 0.339105926 |
| COL28A1 | brown | 0.096022361  | 0.038051934 | 0.081409368  | 0.078836944 |
| COLCA2  | brown | -0.008944603 | 0.847131002 | -0.025702854 | 0.579547134 |
| COLQ    | brown | -0.166460664 | 0.000302859 | -0.182947428 | 6.99E-05    |
| COQ10A  | brown | 0.007494413  | 0.871680816 | -0.008245395 | 0.858950736 |
| COQ4    | brown | 0.216190308  | 2.41E-06    | 0.24720285   | 6.23E-08    |
| COX19   | brown | 0.012949218  | 0.780170602 | 0.018474436  | 0.690482783 |
| CPM     | brown | 0.09766811   | 0.034856961 | 0.095533844  | 0.039046818 |
| CPNE2   | brown | 0.243088369  | 1.04E-07    | 0.254429056  | 2.47E-08    |
| CPXCR1  | brown | 0.073542599  | 0.112476492 | 0.075433601  | 0.103506751 |
| CR1L    | brown | -0.073914669 | 0.110664955 | -0.045431357 | 0.327256601 |
| CRISP2  | brown | -0.142735501 | 0.001987321 | -0.14270278  | 0.001992122 |
| CRISP3  | brown | -0.052402061 | 0.258408857 | -0.045176275 | 0.329982755 |
| CRLF1   | brown | -0.016553241 | 0.721253257 | 0.007801323  | 0.866474107 |
| CROCC   | brown | -0.086481194 | 0.06185054  | -0.097159919 | 0.035818234 |
| CSPP1   | brown | -0.016695825 | 0.718953337 | -0.03489782  | 0.451836773 |
| CT62    | brown | -0.077222342 | 0.095552921 | -0.064391593 | 0.164763758 |
| CTD-250 | brown | -0.021320537 | 0.645833391 | -0.007212203 | 0.87647339  |
| CTNNA2  | brown | 0.020171899  | 0.663711646 | 0.030939859  | 0.504782461 |
| CTXN1   | brown | 0.062405268  | 0.178209795 | 0.071692454  | 0.121832786 |
| CUBN    | brown | 0.010315631  | 0.824056103 | 0.014868756  | 0.748609692 |
| CUEDC1  | brown | 0.274353725  | 1.65E-09    | 0.294382814  | 8.64E-11    |
| CWH43   | brown | 0.104183334  | 0.024352792 | 0.130543378  | 0.004719117 |
| CXCL1   | brown | -0.069487249 | 0.133764527 | -0.048023028 | 0.300387494 |
| CXCL17  | brown | 0.142595418  | 0.002007946 | 0.166136706  | 0.000311299 |
| CXCL2   | brown | 0.11974794   | 0.009592966 | 0.118277223  | 0.010523748 |
| CXCL3   | brown | 0.245312884  | 7.90E-08    | 0.258452648  | 1.45E-08    |
| CXCL5   | brown | 0.132980284  | 0.00399163  | 0.147577183  | 0.001383117 |
| CXCR2   | brown | 0.080969223  | 0.080474192 | 0.110619     | 0.016782715 |
| CXorf22 | brown | 0.00172442   | 0.970353298 | 0.027261441  | 0.556763808 |
| CXorf58 | brown | -0.011256739 | 0.808302923 | 0.014765137  | 0.750303243 |
| CXXC4   | brown | 0.068897013  | 0.137106248 | 0.04350214   | 0.34823727  |
| CYP2C8  | brown | -0.177514917 | 0.000115013 | -0.18539198  | 5.56E-05    |
| CYP4B1  | brown | -0.026767817 | 0.56393231  | -0.03324043  | 0.473618035 |
| CYSTM1  | brown | 0.205930219  | 7.24E-06    | 0.247167259  | 6.26E-08    |
| CYTH1   | brown | 0.12270989   | 0.00793752  | 0.127001316  | 0.00599046  |
| DAW1    | brown | -0.132938744 | 0.004003129 | -0.132381981 | 0.004160166 |
| DCAKD   | brown | 0.341545185  | 3.19E-14    | 0.330956806  | 2.12E-13    |
| DCDC1   | brown | 0.019956463  | 0.667086615 | 0.020493507  | 0.658686085 |
| DCDC2   | brown | -0.12891785  | 0.005268791 | -0.119797754 | 0.009562763 |

|               |              |             |              |             |
|---------------|--------------|-------------|--------------|-------------|
| DCDC2B brown  | -0.029660761 | 0.522564456 | -0.027243808 | 0.557019115 |
| DDO brown     | -0.078534987 | 0.090032514 | -0.049700892 | 0.283796636 |
| DENND6 brown  | 0.220749949  | 1.46E-06    | 0.236199801  | 2.42E-07    |
| DFNB31 brown  | 0.18979558   | 3.66E-05    | 0.168816038  | 0.000247625 |
| DHRS3 brown   | 0.07802286   | 0.092155057 | 0.120431426  | 0.009185867 |
| DHRS7B brown  | 0.382045841  | 1.12E-17    | 0.39494704   | 6.97E-19    |
| DIO1 brown    | -0.109100076 | 0.018354013 | -0.089767988 | 0.052547726 |
| DIS3L2 brown  | 0.100721734  | 0.029531425 | 0.109371741  | 0.018063897 |
| DLEC1 brown   | 0.055822668  | 0.228572515 | 0.056367338  | 0.224057    |
| DMBT1 brown   | 0.097830371  | 0.034554698 | 0.089675766  | 0.052791874 |
| DNAAF1 brown  | 0.142939399  | 0.001957647 | 0.151355549  | 0.001034484 |
| DNAAF3 brown  | 0.113546179  | 0.014083662 | 0.119957216  | 0.009466646 |
| DNAH10 brown  | 0.034605536  | 0.455636443 | 0.038103427  | 0.411353759 |
| DNAH11 brown  | 0.123383079  | 0.007598875 | 0.132435642  | 0.004144792 |
| DNAH12 brown  | 0.066240361  | 0.152946733 | 0.075317401  | 0.10404107  |
| DNAH2 brown   | -0.077376952 | 0.09488899  | -0.072752517 | 0.116400477 |
| DNAH3 brown   | 0.089085403  | 0.054377273 | 0.097138051  | 0.0358601   |
| DNAH5 brown   | 0.039568675  | 0.393587857 | 0.048009738  | 0.300521435 |
| DNAH6 brown   | 0.02765058   | 0.551144039 | 0.032016471  | 0.49006557  |
| DNAH7 brown   | -0.030440061 | 0.511692596 | -0.023147377 | 0.617817902 |
| DNAH9 brown   | 0.07543015   | 0.103522588 | 0.081967322  | 0.076800406 |
| DNAI1 brown   | 0.075308544  | 0.104081889 | 0.091881155  | 0.047206069 |
| DNAI2 brown   | 0.009445666  | 0.838681661 | 0.016262843  | 0.72594523  |
| DNAJA4 brown  | 0.100839408  | 0.029340992 | 0.10546461   | 0.022645578 |
| DNAJB13 brown | 0.122787925  | 0.007897586 | 0.138928518  | 0.002622572 |
| DNAJC1 brown  | 0.118155475  | 0.010604274 | 0.091823843  | 0.047344693 |
| DNAL1 brown   | 0.075417942  | 0.103578632 | 0.068975648  | 0.136657374 |
| DNAL4 brown   | 0.165663079  | 0.000324034 | 0.175222001  | 0.00014128  |
| DNALI1 brown  | -0.076310993 | 0.099542137 | -0.057337897 | 0.216168987 |
| DOC2A brown   | -0.029578882 | 0.523713572 | -0.024054055 | 0.604113315 |
| DPCD brown    | 0.274040538  | 1.72E-09    | 0.288284761  | 2.17E-10    |
| DPP10 brown   | -0.084316011 | 0.068691406 | -0.093254546 | 0.043984541 |
| DRC1 brown    | 0.043029727  | 0.353501983 | 0.055411435  | 0.232024323 |
| DRC7 brown    | 0.122343634  | 0.008127368 | 0.138259298  | 0.002751712 |
| DRICH1 brown  | 0.045156241  | 0.330197482 | 0.028258842  | 0.542415866 |
| DTHD1 brown   | 0.036056213  | 0.436954689 | 0.049748435  | 0.283335724 |
| DUOX1 brown   | 0.093669628  | 0.043048086 | 0.10435377   | 0.02411947  |
| DUOX2 brown   | 0.095477445  | 0.039163082 | 0.11075472   | 0.016648219 |
| DUOXA1 brown  | 0.082470098  | 0.075002083 | 0.085625594  | 0.064483456 |
| DUOXA2 brown  | 0.013956157  | 0.763565871 | 0.059970682  | 0.195779837 |
| DUSP14 brown  | 0.25760628   | 1.63E-08    | 0.239419019  | 1.64E-07    |
| DUSP18 brown  | 0.012963129  | 0.779940494 | 0.02426491   | 0.600945821 |
| DUSP19 brown  | -0.052746431 | 0.255288688 | -0.055508471 | 0.231206512 |
| DUSP5 brown   | -0.065552108 | 0.157268508 | -0.06306253  | 0.17367333  |
| DYDC1 brown   | 0.048220174  | 0.29840536  | 0.07233604   | 0.118511652 |

|          |       |              |             |              |             |
|----------|-------|--------------|-------------|--------------|-------------|
| DYDC2    | brown | -0.032534974 | 0.483060788 | -0.019257845 | 0.678076941 |
| DYNC2H   | brown | -0.137919275 | 0.002819521 | -0.142095107 | 0.002083217 |
| DYNC2L   | brown | -0.023798767 | 0.607958271 | -0.03246088  | 0.484058445 |
| DYNLL1   | brown | 0.103435526  | 0.025399708 | 0.135387891  | 0.003374116 |
| DYNLRB   | brown | 0.075769674  | 0.10197363  | 0.087351221  | 0.059264814 |
| DYNLT1   | brown | 0.340627202  | 3.77E-14    | 0.379105977  | 2.07E-17    |
| DYRK3    | brown | 0.043418821  | 0.349162173 | 0.013137742  | 0.777053914 |
| DYX1C1   | brown | 0.137505089  | 0.002904174 | 0.142353133  | 0.002044081 |
| DZANK1   | brown | -0.068534703 | 0.139189096 | -0.084855832 | 0.066930373 |
| DZIP1L   | brown | -0.058228634 | 0.209106887 | -0.053055283 | 0.252512616 |
| DZIP3    | brown | 0.078540326  | 0.090010593 | 0.062787965  | 0.175557823 |
| ECEL1    | brown | 0.150078929  | 0.001142    | 0.168319711  | 0.000258415 |
| ECHDC2   | brown | -0.029280357 | 0.527914046 | -0.044452668 | 0.337795721 |
| ECI2     | brown | 0.062260355  | 0.179221721 | 0.072260275  | 0.118898912 |
| ECT2L    | brown | -0.04095198  | 0.377247883 | -0.027295311 | 0.556273565 |
| EEPD1    | brown | 0.196056297  | 1.98E-05    | 0.18331797   | 6.76E-05    |
| EFCAB1   | brown | 0.00055013   | 0.990540059 | 0.003393566  | 0.941695301 |
| EFCAB1C  | brown | 0.077410024  | 0.094747451 | 0.085093707  | 0.066166213 |
| EFCAB11  | brown | 0.227550177  | 6.71E-07    | 0.228765271  | 5.83E-07    |
| EFCAB12  | brown | 0.068223058  | 0.141000032 | 0.079209644  | 0.087296416 |
| EFCAB2   | brown | 0.011729119  | 0.800424451 | 0.012103179  | 0.794200082 |
| EFCAB6   | brown | 0.006037579  | 0.896467759 | 0.005539215  | 0.904971491 |
| EFHB     | brown | 0.019097007  | 0.680616976 | 0.029718082  | 0.521760778 |
| EFHC1    | brown | 0.00606836   | 0.895942912 | 0.014485194  | 0.7548846   |
| EFHC2    | brown | -0.107597438 | 0.020033264 | -0.096382045 | 0.037333232 |
| EGLN3    | brown | 0.197421954  | 1.73E-05    | 0.21994972   | 1.59E-06    |
| EIF4EBP1 | brown | -0.239738807 | 1.57E-07    | -0.231100495 | 4.44E-07    |
| ELL3     | brown | 0.244206628  | 9.08E-08    | 0.251058811  | 3.82E-08    |
| ELMOD1   | brown | -0.155960464 | 0.000719551 | -0.137981855 | 0.002806928 |
| ELP3     | brown | 0.354631889  | 2.76E-15    | 0.331675443  | 1.87E-13    |
| ENKD1    | brown | 0.192569472  | 2.79E-05    | 0.213801953  | 3.13E-06    |
| ENKUR    | brown | 0.098191994  | 0.03388908  | 0.106664655  | 0.021141619 |
| ENO4     | brown | 0.091154001  | 0.048990351 | 0.098852456  | 0.032701588 |
| ENPP5    | brown | 0.116261003  | 0.011929614 | 0.098397939  | 0.033514916 |
| EPPIN    | brown | 0.077434786  | 0.094641584 | 0.08468642   | 0.067479002 |
| EPX      | brown | -0.114323155 | 0.013434711 | -0.11616926  | 0.01199736  |
| ERICH2   | brown | 0.158400599  | 0.000591229 | 0.160729986  | 0.000488852 |
| ERICH3   | brown | 0.161558349  | 0.000456606 | 0.148863178  | 0.001253872 |
| ERICH5   | brown | -0.17059268  | 0.000212357 | -0.149908343 | 0.001157122 |
| ERMAR1   | brown | 0.09631407   | 0.037468167 | 0.105131984  | 0.023078507 |
| ERP27    | brown | -0.329588428 | 2.70E-13    | -0.321099919 | 1.16E-12    |
| ETV4     | brown | 0.135477547  | 0.003352894 | 0.118915947  | 0.010110102 |
| ETV5     | brown | 0.049318914  | 0.287518197 | 0.033845438  | 0.465601079 |
| EYA2     | brown | 0.238277255  | 1.88E-07    | 0.24979563   | 4.48E-08    |
| F7       | brown | -0.094146223 | 0.041993622 | -0.082147543 | 0.076151807 |

|         |       |              |             |              |             |
|---------|-------|--------------|-------------|--------------|-------------|
| FABP6   | brown | -0.14579073  | 0.001583031 | -0.143220503 | 0.001917401 |
| FAIM    | brown | -0.081471372 | 0.078608488 | -0.082773244 | 0.073934457 |
| FAM101A | brown | -0.107465772 | 0.020186582 | -0.097713847 | 0.034771536 |
| FAM102A | brown | 0.020348785  | 0.660945676 | 0.034887153  | 0.451975133 |
| FAM104E | brown | -0.021969944 | 0.635814215 | -0.020366118 | 0.660674881 |
| FAM110C | brown | 0.070731913  | 0.126923872 | 0.086880451  | 0.060652617 |
| FAM149A | brown | 0.261361866  | 9.87E-09    | 0.260828609  | 1.06E-08    |
| FAM150E | brown | 0.086372839  | 0.062178991 | 0.07629952   | 0.099593192 |
| FAM151E | brown | 0.228195939  | 6.23E-07    | 0.220451987  | 1.51E-06    |
| FAM154A | brown | -0.018262242 | 0.693857507 | -0.0149487   | 0.747303909 |
| FAM154E | brown | 0.080141608  | 0.083627237 | 0.084608513  | 0.067732537 |
| FAM160A | brown | 0.140696181  | 0.00230758  | 0.12622746   | 0.006306181 |
| FAM161E | brown | -0.052768378 | 0.255090728 | -0.080848637 | 0.080927515 |
| FAM163A | brown | -0.017070576 | 0.71292062  | -0.014379477 | 0.756616941 |
| FAM166E | brown | 0.107975493  | 0.019598655 | 0.128934404  | 0.005262914 |
| FAM170A | brown | 0.084152348  | 0.069232753 | 0.121509886  | 0.008574723 |
| FAM174A | brown | 0.206951863  | 6.51E-06    | 0.228950707  | 5.70E-07    |
| FAM179A | brown | 0.019141259  | 0.679917771 | 0.030266685  | 0.514101114 |
| FAM179E | brown | -0.320175574 | 1.36E-12    | -0.338836836 | 5.21E-14    |
| FAM181A | brown | -0.023925889 | 0.606042298 | -0.006107269 | 0.895279538 |
| FAM181E | brown | 0.020922538  | 0.652005745 | 0.015631893  | 0.736174688 |
| FAM182E | brown | -0.049898158 | 0.281887489 | -0.052726018 | 0.255472906 |
| FAM183A | brown | 0.087029818  | 0.060209412 | 0.100717469  | 0.029538348 |
| FAM188E | brown | -0.048580405 | 0.294806073 | -0.027972606 | 0.546514603 |
| FAM206A | brown | 0.120736348  | 0.00900926  | 0.110205638  | 0.01719822  |
| FAM216E | brown | 0.119224589  | 0.009915444 | 0.127759911  | 0.005694819 |
| FAM221A | brown | -0.024542299 | 0.596790252 | -0.018301779 | 0.693228249 |
| FAM222A | brown | 0.028520484  | 0.538682713 | 0.011375892  | 0.806313794 |
| FAM227A | brown | 0.028755533  | 0.535339983 | 0.034060975  | 0.462763258 |
| FAM229E | brown | -0.025204385 | 0.586924658 | -0.01465855  | 0.752046556 |
| FAM27C  | brown | -0.026649545 | 0.565656433 | -0.022909831 | 0.621430727 |
| FAM47E  | brown | 0.090990086  | 0.049400263 | 0.10414769   | 0.024401833 |
| FAM81A  | brown | 0.174035725  | 0.000156987 | 0.169047057  | 0.000242748 |
| FAM81B  | brown | 0.069972975  | 0.131061914 | 0.084514301  | 0.068040172 |
| FAM83C  | brown | -0.002330808 | 0.959935703 | 0.002476213  | 0.957438633 |
| FAM86B1 | brown | 0.121142322  | 0.008778819 | 0.114935149  | 0.012942251 |
| FAM86B2 | brown | 0.033765806  | 0.466651963 | 0.01764154   | 0.703763716 |
| FAM92B  | brown | 0.116218473  | 0.011960978 | 0.130034657  | 0.004885306 |
| FANCF   | brown | 0.097788455  | 0.034632567 | 0.060927219  | 0.188731456 |
| FANK1   | brown | 0.14613267   | 0.001542827 | 0.15592722   | 0.000721466 |
| FBXL13  | brown | -0.037029866 | 0.42466657  | -0.029413041 | 0.526044962 |
| FBXL2   | brown | -0.187706025 | 4.47E-05    | -0.180039347 | 9.14E-05    |
| FBXO15  | brown | 0.004397883  | 0.924485747 | 0.000751872  | 0.98707121  |
| FBXO16  | brown | 0.346010789  | 1.40E-14    | 0.339136092  | 4.94E-14    |
| FBXO36  | brown | 0.158620016  | 0.000580798 | 0.155478263  | 0.000747781 |

|              |              |             |              |             |
|--------------|--------------|-------------|--------------|-------------|
| FBXW10 brown | 0.016298474  | 0.725368985 | 0.012593463  | 0.786061516 |
| FBXW9 brown  | 0.114536264  | 0.013261384 | 0.125362254  | 0.00667678  |
| FCGBP brown  | 0.083130663  | 0.072691635 | 0.097054186  | 0.036021041 |
| FER1L6 brown | 0.008722389  | 0.850883834 | 0.021788682  | 0.638604188 |
| FFAR4 brown  | -0.037821723 | 0.414822954 | -0.01641957  | 0.723411708 |
| FGF14 brown  | 0.043776078  | 0.345207295 | 0.032540645  | 0.482984477 |
| FGFR1OFbrown | -0.047445517 | 0.306244124 | -0.052962712 | 0.253342464 |
| FGGY brown   | 0.11011096   | 0.017294646 | 0.093347576  | 0.043773181 |
| FHAD1 brown  | 0.041528283  | 0.370565278 | 0.056373838  | 0.2240035   |
| FHIT brown   | 0.099733552  | 0.031172843 | 0.086226886  | 0.062623686 |
| FHOD3 brown  | -0.166325468 | 0.000306355 | -0.167690017 | 0.000272737 |
| FKBP6 brown  | -0.062559971 | 0.177134197 | -0.032465568 | 0.483995292 |
| FMN1 brown   | 0.06209891   | 0.180354088 | 0.038452989  | 0.407072834 |
| FMO2 brown   | -0.06787608  | 0.143037469 | -0.066807477 | 0.149453793 |
| FMO4 brown   | -0.012361455 | 0.789909923 | -0.004672105 | 0.919792575 |
| FMO6P brown  | 0.047067026  | 0.310123106 | 0.055072184  | 0.234899562 |
| FOSL1 brown  | 0.097787724  | 0.034633925 | 0.084190051  | 0.069107734 |
| FOXA1 brown  | 0.181448744  | 8.03E-05    | 0.215866101  | 2.50E-06    |
| FOXB1 brown  | 0.070380348  | 0.128827972 | 0.072431262  | 0.118026337 |
| FOXB2 brown  | -0.021025068 | 0.650413375 | -0.015303854 | 0.741511724 |
| FOXD4L2brown | 0.112286796  | 0.015194185 | 0.108916211  | 0.018552665 |
| FOXJ1 brown  | 0.130604032  | 0.004699647 | 0.146887726  | 0.001457347 |
| FOXN4 brown  | 0.109390282  | 0.018044244 | 0.11562376   | 0.012407231 |
| FRAT1 brown  | 0.062781065  | 0.175605379 | 0.056784455  | 0.220642188 |
| FRMPD2 brown | 0.153627473  | 0.000865924 | 0.155794017  | 0.000729182 |
| FSD1L brown  | 0.117532063  | 0.011025232 | 0.106080613  | 0.021862378 |
| FSIP1 brown  | -0.114748473 | 0.01309075  | -0.119943795 | 0.009474702 |
| FST brown    | -0.078760988 | 0.089108396 | -0.07604469  | 0.100732491 |
| FUCA1 brown  | 0.244499539  | 8.75E-08    | 0.255815725  | 2.06E-08    |
| FUZ brown    | -0.261497515 | 9.70E-09    | -0.256301598 | 1.93E-08    |
| GABRP brown  | 0.022603608  | 0.626101532 | 0.029265549  | 0.528122852 |
| GALC brown   | -0.191050984 | 3.24E-05    | -0.204666884 | 8.26E-06    |
| GALNS brown  | 0.149593653  | 0.001185503 | 0.158376836  | 0.000592369 |
| GALR2 brown  | 0.028009963  | 0.545978807 | 0.046129135  | 0.319873888 |
| GAS2L2 brown | 0.140774931  | 0.002294386 | 0.153529757  | 0.000872617 |
| GAS8 brown   | 0.275854559  | 1.33E-09    | 0.283543239  | 4.39E-10    |
| GATS brown   | -0.213766004 | 3.14E-06    | -0.226173444 | 7.86E-07    |
| GEMIN8 brown | 0.248906932  | 5.02E-08    | 0.255144532  | 2.25E-08    |
| GFOD2 brown  | 0.251038418  | 3.83E-08    | 0.269036444  | 3.47E-09    |
| GIPR brown   | 0.016699515  | 0.718893858 | 0.039182623  | 0.398223154 |
| GJB7 brown   | -0.101833884 | 0.027773256 | -0.095658748 | 0.038790374 |
| GK brown     | 0.018876843  | 0.684099775 | 0.028960838  | 0.532428802 |
| GLB1L brown  | 0.030682867  | 0.508329463 | 0.017472343  | 0.706472834 |
| GLB1L2 brown | 0.097007491  | 0.036110918 | 0.084390961  | 0.068444654 |
| GLRA2 brown  | -0.089739281 | 0.052623623 | -0.103252529 | 0.025661735 |

|         |       |              |             |              |             |
|---------|-------|--------------|-------------|--------------|-------------|
| GLRB    | brown | 0.139466911  | 0.002522714 | 0.134443149  | 0.003605275 |
| GLT8D1  | brown | 0.11656007   | 0.01171112  | 0.110698272  | 0.016704043 |
| GLYATL  | brown | 0.215321706  | 2.65E-06    | 0.196881002  | 1.83E-05    |
| GLYCTK  | brown | 0.176410643  | 0.000127031 | 0.179237123  | 9.84E-05    |
| GMNC    | brown | 0.039973617  | 0.388760916 | 0.04824922   | 0.298114063 |
| GMPR    | brown | 0.116910021  | 0.011459948 | 0.116653182  | 0.011643819 |
| GNL1    | brown | -0.234964248 | 2.81E-07    | -0.235905904 | 2.51E-07    |
| GNMT    | brown | -0.001925563 | 0.966897058 | 0.030211692  | 0.514866288 |
| GOLGA8  | brown | -0.036919036 | 0.426055075 | -0.035680384 | 0.441751934 |
| GOLGA8  | brown | -0.051222246 | 0.269297897 | -0.056528787 | 0.222730826 |
| GOLGA8  | brown | -0.035217139 | 0.447706151 | -0.045767482 | 0.323686632 |
| GOLGA8  | brown | -0.004619247 | 0.920696996 | -0.002240371 | 0.961489004 |
| GOLGA8  | brown | -0.095522108 | 0.039070986 | -0.115368006 | 0.012603617 |
| GOLM1   | brown | 0.305983137  | 1.41E-11    | 0.297966008  | 4.97E-11    |
| GORASP  | brown | 0.269682866  | 3.17E-09    | 0.271328343  | 2.52E-09    |
| GP2     | brown | 0.070400139  | 0.128720194 | 0.076755465  | 0.097580327 |
| GP6     | brown | -0.08361763  | 0.071025832 | -0.079280347 | 0.087013591 |
| GPC1    | brown | 0.038449008  | 0.407121437 | 0.022678335  | 0.624960337 |
| GPR123  | brown | -0.151666101 | 0.001009781 | -0.155397398 | 0.000752615 |
| GPR135  | brown | -0.172339292 | 0.000182315 | -0.168213032 | 0.000260791 |
| GPR162  | brown | -0.1382316   | 0.00275718  | -0.13784832  | 0.002833862 |
| GPR3    | brown | 0.016363874  | 0.724311696 | -0.012757439 | 0.783344709 |
| GPR97   | brown | -0.011269469 | 0.808090358 | 0.011821064  | 0.798893301 |
| GRAMD1  | brown | -0.058379794 | 0.207925161 | -0.088625565 | 0.055639408 |
| GRAMD2  | brown | -0.05628856  | 0.224706141 | -0.039626269 | 0.392899137 |
| GRIA2   | brown | -0.009454032 | 0.838540749 | 0.001738476  | 0.970111755 |
| GRIK4   | brown | -0.034875694 | 0.452123785 | -0.058217418 | 0.209194764 |
| GRIN3B  | brown | 0.026089606  | 0.573853105 | 0.035915847  | 0.43874287  |
| GRIP2   | brown | -0.111159999 | 0.016252197 | -0.097860774 | 0.034498312 |
| GSAP    | brown | 0.119194783  | 0.009934096 | 0.11208802   | 0.015376314 |
| GSTA1   | brown | -0.079394047 | 0.086560317 | -0.068824273 | 0.137522479 |
| GSTA3   | brown | 0.002411404  | 0.958551567 | 0.008588493  | 0.853146751 |
| GTF2IRD | brown | -0.104314863 | 0.024172562 | -0.113242228 | 0.014344938 |
| GUCY2F  | brown | -0.016129622 | 0.728101123 | -0.00714772  | 0.877569084 |
| H1FOO   | brown | 0.035242943  | 0.447373289 | 0.045452638  | 0.32702982  |
| HABP2   | brown | -0.013124271 | 0.777276498 | -0.008916777 | 0.847600746 |
| HCN4    | brown | -0.150435794 | 0.001110952 | -0.168678473 | 0.000250573 |
| HEATR9  | brown | -0.096211583 | 0.037672392 | -0.086531506 | 0.061698517 |
| HES5    | brown | 0.231242885  | 4.36E-07    | 0.217777857  | 2.03E-06    |
| HEY2    | brown | -0.07703788  | 0.09634989  | -0.084479994 | 0.068152482 |
| HHAT    | brown | 0.136163881  | 0.003194402 | 0.091027166  | 0.049307284 |
| HHATL   | brown | -0.093849083 | 0.042648453 | -0.088140486 | 0.056997094 |
| HHLA2   | brown | -0.10274702  | 0.026397699 | -0.095428106 | 0.039265033 |
| HIVEP3  | brown | 0.073851059  | 0.110973023 | 0.049466452  | 0.28607688  |
| HMGXB3  | brown | 0.23250831   | 3.76E-07    | 0.197861127  | 1.65E-05    |



|         |       |              |             |              |             |
|---------|-------|--------------|-------------|--------------|-------------|
| HNFI1A  | brown | 0.215263604  | 2.67E-06    | 0.227246857  | 6.95E-07    |
| HOMER2  | brown | 0.181240628  | 8.19E-05    | 0.196638545  | 1.87E-05    |
| HOXB1   | brown | -0.041109148 | 0.375418111 | 0.001983981  | 0.965893375 |
| HOXB2   | brown | -0.16007566  | 0.000515807 | -0.120969793 | 0.008876102 |
| HOXB3   | brown | -0.108188724 | 0.019357165 | -0.092317739 | 0.046161194 |
| HOXB4   | brown | -0.15055623  | 0.001100651 | -0.133300459 | 0.003904001 |
| HOXB5   | brown | -0.026943678 | 0.561373345 | 0.007280273  | 0.875316984 |
| HOXB6   | brown | -0.03149847  | 0.4971176   | 0.007037824  | 0.879437012 |
| HRASLS2 | brown | -0.134696078 | 0.003542021 | -0.090388465 | 0.050929437 |
| HS3ST6  | brown | -0.165380246 | 0.000331868 | -0.15499495  | 0.000777102 |
| HSBP1   | brown | 0.318982943  | 1.66E-12    | 0.358425316  | 1.33E-15    |
| HSD17B3 | brown | -0.025141401 | 0.587859915 | -0.018476519 | 0.690449676 |
| HSPA1L  | brown | -0.119117858 | 0.009982378 | -0.113517095 | 0.01410848  |
| HYDIN   | brown | -0.069933251 | 0.131281345 | -0.060174404 | 0.194262792 |
| ICA1L   | brown | -0.095697815 | 0.038710458 | -0.090115533 | 0.051636082 |
| IDNK    | brown | 0.330747313  | 2.20E-13    | 0.341171393  | 3.41E-14    |
| IFT122  | brown | -0.003723871 | 0.936031938 | -0.001507721 | 0.97407745  |
| IFT140  | brown | 0.098496422  | 0.033337238 | 0.099942826  | 0.03081886  |
| IFT172  | brown | -0.026813993 | 0.563259864 | -0.02890613  | 0.533203763 |
| IFT22   | brown | 0.048754361  | 0.293078404 | 0.060803613  | 0.18963162  |
| IFT27   | brown | 0.065029646  | 0.160610344 | 0.06088999   | 0.189002248 |
| IFT43   | brown | 0.08885815   | 0.054998015 | 0.111652847  | 0.015781744 |
| IFT46   | brown | 0.037272473  | 0.421636347 | 0.023541501  | 0.611843961 |
| IFT57   | brown | -0.184831345 | 5.86E-05    | -0.19434148  | 2.35E-05    |
| IFT74   | brown | -0.048894161 | 0.29169488  | -0.058050618 | 0.210504775 |
| IFT88   | brown | 0.078767896  | 0.089080269 | 0.069487445  | 0.133763431 |
| IGSF5   | brown | 0.135198977  | 0.003419234 | 0.12222309   | 0.008190731 |
| IK      | brown | 0.004247769  | 0.927055995 | -0.001329492 | 0.977140881 |
| IL12A   | brown | -0.139733312 | 0.002474596 | -0.144862006 | 0.00169713  |
| IL18R1  | brown | 0.154015578  | 0.000839806 | 0.147326764  | 0.001409667 |
| IL1R2   | brown | 0.155017097  | 0.000775736 | 0.172444719  | 0.000180635 |
| IL2     | brown | 0.068829023  | 0.137495273 | 0.071544263  | 0.12260768  |
| IL4     | brown | 0.036552224  | 0.430669384 | 0.061508016  | 0.184543797 |
| IL5RA   | brown | 0.057310865  | 0.21638595  | 0.070149393  | 0.130090825 |
| IL7     | brown | -0.033214736 | 0.473960176 | -0.018438534 | 0.691053329 |
| INPP5E  | brown | 0.080525181  | 0.08215372  | 0.070371362  | 0.128876927 |
| INSL5   | brown | -0.015146134 | 0.744082196 | 0.021126002  | 0.648847327 |
| INTU    | brown | 0.056863796  | 0.219996888 | 0.041641612  | 0.369259828 |
| IPCEF1  | brown | -0.0216958   | 0.640035789 | -0.001870059 | 0.96785073  |
| IQCC    | brown | -0.01279152  | 0.782780373 | -0.030300916 | 0.513625116 |
| IQCD    | brown | 0.083257609  | 0.072254339 | 0.0989984    | 0.032444032 |
| IQCE    | brown | 0.117913155  | 0.010766177 | 0.126638597  | 0.006136632 |
| IQCG    | brown | 0.045886112  | 0.322432728 | 0.056983917  | 0.219022468 |
| IQCH    | brown | 0.101660097  | 0.028041914 | 0.087204604  | 0.059694187 |
| IQCK    | brown | 0.040642607  | 0.380865612 | 0.021271913  | 0.646586185 |

|         |       |              |             |              |             |
|---------|-------|--------------|-------------|--------------|-------------|
| IQGAP2  | brown | 0.163392656  | 0.000392113 | 0.166007124  | 0.000314736 |
| IQUB    | brown | 0.122098506  | 0.008256681 | 0.132947691  | 0.00400065  |
| IRX3    | brown | 0.030470089  | 0.511276049 | 0.058707803  | 0.205377497 |
| ITIH2   | brown | 0.002271188  | 0.960959692 | 0.008263181  | 0.858649672 |
| ITIH4   | brown | -0.042192403 | 0.36295587  | -0.047015925 | 0.310649286 |
| KATNAL  | brown | -0.066746407 | 0.149826994 | -0.079902748 | 0.084555564 |
| KATNB1  | brown | 0.247587523  | 5.94E-08    | 0.266534204  | 4.90E-09    |
| KCNC3   | brown | -0.116181344 | 0.011988417 | -0.115011457 | 0.012881977 |
| KCNE1   | brown | 0.078366092  | 0.09072813  | 0.093019754  | 0.044521799 |
| KCNH3   | brown | 0.15108614   | 0.001056364 | 0.149375486  | 0.001205554 |
| KCNH6   | brown | -0.017893796 | 0.699731626 | -0.017572268 | 0.704872423 |
| KCNMB2  | brown | -0.192231144 | 2.89E-05    | -0.198835837 | 1.50E-05    |
| KCNN3   | brown | -0.120318901 | 0.009251814 | -0.118291393 | 0.010514411 |
| KCNRG   | brown | 0.170702022  | 0.000210348 | 0.182411257  | 7.35E-05    |
| KHK     | brown | -0.16081839  | 0.000485313 | -0.174165421 | 0.000155194 |
| KIAA022 | brown | 0.037895035  | 0.413918449 | 0.029298014  | 0.527665123 |
| KIAA031 | brown | -0.070822515 | 0.126436721 | -0.051498635 | 0.26671925  |
| KIAA055 | brown | 0.05763763   | 0.213773727 | 0.065530821  | 0.157403634 |
| KIAA082 | brown | 0.008073515  | 0.861861221 | 0.004750074  | 0.918458665 |
| KIAA121 | brown | -0.051849493 | 0.26347029  | -0.028297733 | 0.541860149 |
| KIAA125 | brown | 0.08300646   | 0.073121569 | 0.090720292  | 0.050081199 |
| KIAA137 | brown | -0.062378194 | 0.178398529 | -0.067249258 | 0.146775113 |
| KIAA140 | brown | 0.03200984   | 0.490155514 | 0.001161369  | 0.980030914 |
| KIAA145 | brown | -0.015913893 | 0.731596803 | -0.040392621 | 0.383804349 |
| KIAA184 | brown | 0.125429458  | 0.00664731  | 0.127455647  | 0.005811785 |
| KIAA187 | brown | -0.027337473 | 0.555663608 | -0.027117332 | 0.558852006 |
| KIAA201 | brown | -0.096816202 | 0.036481093 | -0.092663882 | 0.045346633 |
| KIF17   | brown | -0.160033612 | 0.000517585 | -0.150659033 | 0.001091928 |
| KIF19   | brown | 0.025610702  | 0.580907746 | 0.04246246   | 0.359889673 |
| KIF24   | brown | 0.11913957   | 0.00996873  | 0.128022515  | 0.005595575 |
| KIF27   | brown | 0.142821048  | 0.001974821 | 0.125228777  | 0.006735659 |
| KIF6    | brown | 0.003178193  | 0.945389664 | -0.009127682 | 0.844041682 |
| KIF9    | brown | 0.185044663  | 5.75E-05    | 0.212654172  | 3.55E-06    |
| KLB     | brown | -0.010996786 | 0.812646827 | 0.013607441  | 0.769304474 |
| KLHDC9  | brown | 0.219507605  | 1.67E-06    | 0.249736402  | 4.52E-08    |
| KLHL3   | brown | 0.042733402  | 0.35682978  | 0.011931862  | 0.797049203 |
| KLHL32  | brown | -0.166936961 | 0.000290838 | -0.155891879 | 0.000723506 |
| KLHL41  | brown | -0.017320585 | 0.708905894 | -0.006870695 | 0.88227899  |
| KLHL6   | brown | 0.003185562  | 0.945263233 | 0.035864414  | 0.439399146 |
| KLK11   | brown | 0.104584165  | 0.023807138 | 0.105562803  | 0.022519128 |
| KLLN    | brown | 0.194323867  | 2.35E-05    | 0.186253733  | 5.13E-05    |
| KNCN    | brown | 0.060150496  | 0.194440382 | 0.068567744  | 0.138998148 |
| KNDC1   | brown | -0.138660926 | 0.002673532 | -0.137132831 | 0.002982223 |
| KPNA7   | brown | 0.036097716  | 0.436426755 | 0.059776026  | 0.197237437 |
| LAMB4   | brown | 0.128309201  | 0.005489007 | 0.134964946  | 0.003475886 |

|         |       |              |             |              |             |
|---------|-------|--------------|-------------|--------------|-------------|
| LBHD1   | brown | 0.088480782  | 0.056041799 | 0.077680026  | 0.093598209 |
| LCA5    | brown | -0.099765238 | 0.031119024 | -0.111536431 | 0.01589178  |
| LCA5L   | brown | 0.094237322  | 0.041794567 | 0.087299521  | 0.059415926 |
| LDLRAD  | brown | 0.082367435  | 0.075366475 | 0.103717212  | 0.025000882 |
| LEKR1   | brown | -0.178107186 | 0.000109016 | -0.166663452 | 0.000297686 |
| LPT2    | brown | -0.08633698  | 0.062288007 | -0.071014346 | 0.125410071 |
| LKAAEA  | brown | -0.056074788 | 0.226474381 | -0.042855479 | 0.355456445 |
| LMLN    | brown | 0.096281127  | 0.037533709 | 0.091771093  | 0.047472587 |
| LMNTD1  | brown | 0.032071478  | 0.489319882 | 0.033988392  | 0.463717837 |
| LMX1A   | brown | 0.093802605  | 0.042751655 | 0.096747408  | 0.036615007 |
| LPA     | brown | -0.072363857 | 0.118369715 | -0.056252208 | 0.225006133 |
| LPAR3   | brown | -0.164759821 | 0.000349677 | -0.156517996 | 0.000688143 |
| LPPR3   | brown | 0.089412719  | 0.053493456 | 0.103635599  | 0.025115875 |
| LRGUK   | brown | 0.10755127   | 0.020086908 | 0.121516163  | 0.008571275 |
| LRIG1   | brown | 0.088818458  | 0.055107034 | 0.096235515  | 0.037624618 |
| LRP11   | brown | 0.173439822  | 0.000165482 | 0.167296225  | 0.000282067 |
| LRP2BP  | brown | 0.096179628  | 0.037736261 | 0.09546162   | 0.039195756 |
| LRRC10E | brown | 0.051852969  | 0.263438237 | 0.056874973  | 0.219906084 |
| LRRC17  | brown | 0.088821562  | 0.055098503 | 0.075491074  | 0.103243279 |
| LRRC18  | brown | 0.091093594  | 0.049141082 | 0.108114072  | 0.019441414 |
| LRRC23  | brown | 0.076400629  | 0.099143998 | 0.095969569  | 0.038158401 |
| LRRC27  | brown | 0.078316675  | 0.090932476 | 0.073066773  | 0.114827058 |
| LRRC34  | brown | -0.232094303 | 3.95E-07    | -0.22494378  | 9.06E-07    |
| LRRC36  | brown | 0.152894725  | 0.000917293 | 0.147129616  | 0.001430897 |
| LRRC3B  | brown | 0.034385368  | 0.458510404 | 0.059889161  | 0.196389311 |
| LRRC43  | brown | 0.105200198  | 0.022989144 | 0.121224589  | 0.008732767 |
| LRRC46  | brown | 0.162223552  | 0.000432156 | 0.173920243  | 0.000158601 |
| LRRC48  | brown | 0.119982661  | 0.009451388 | 0.127543114  | 0.005777941 |
| LRRC49  | brown | 0.014254841  | 0.75866087  | -0.013181179 | 0.776336308 |
| LRRC56  | brown | 0.206953284  | 6.51E-06    | 0.210132209  | 4.65E-06    |
| LRRC6   | brown | 0.080670366  | 0.081601485 | 0.087717822  | 0.058202378 |
| LRRC63  | brown | -0.035149901 | 0.448574146 | -0.029241865 | 0.528456899 |
| LRRC71  | brown | 0.125894904  | 0.006446386 | 0.134617991  | 0.003561441 |
| LRRC73  | brown | 0.059461065  | 0.199612642 | 0.083547085  | 0.0712652   |
| LRRC74E | brown | 0.084995986  | 0.066479263 | 0.088212585  | 0.056793573 |
| LRRIQ1  | brown | -0.077279569 | 0.095306744 | -0.074210607 | 0.109240559 |
| LRRIQ3  | brown | -0.021985903 | 0.635568812 | -0.020404912 | 0.660068973 |
| LRTOMT  | brown | 0.203940679  | 8.91E-06    | 0.209021468  | 5.23E-06    |
| LRWD1   | brown | 0.16816939   | 0.000261769 | 0.179517909  | 9.59E-05    |
| LTF     | brown | 0.104737991  | 0.02360056  | 0.130534317  | 0.004722032 |
| LY6G5C  | brown | 0.271504987  | 2.46E-09    | 0.300215972  | 3.50E-11    |
| LY75    | brown | -0.005778694 | 0.900883767 | 0.031640331  | 0.495180967 |
| LZTFL1  | brown | -0.005970975 | 0.897603572 | -0.027754507 | 0.549647881 |
| MAATS1  | brown | -0.212425323 | 3.64E-06    | -0.222619563 | 1.18E-06    |
| MAGI1   | brown | 0.242926655  | 1.06E-07    | 0.218979777  | 1.77E-06    |

|         |       |              |             |              |             |
|---------|-------|--------------|-------------|--------------|-------------|
| MAK     | brown | -0.000507351 | 0.991275654 | 0.017596567  | 0.704483435 |
| MAP1A   | brown | -0.023967455 | 0.605416394 | -0.017263979 | 0.709814195 |
| MAP3K1  | brown | 0.091939608  | 0.047065034 | 0.100920697  | 0.029210056 |
| MAP6    | brown | -0.116083688 | 0.012060854 | -0.107994775 | 0.01957671  |
| MAPK12  | brown | 0.088199378  | 0.05683081  | 0.088418153  | 0.056216608 |
| MAPK15  | brown | -0.000782419 | 0.986545988 | -0.010452194 | 0.821765619 |
| MAPK8   | brown | -0.035469862 | 0.444452211 | -0.061762814 | 0.18272844  |
| MAPRE3  | brown | 0.040747334  | 0.379638587 | 0.043547414  | 0.347735344 |
| 10-Mar  | brown | -0.089367961 | 0.053613601 | -0.084429084 | 0.068319423 |
| 4-Mar   | brown | -0.04553826  | 0.326118436 | -0.056780342 | 0.22067568  |
| MARK4   | brown | -0.158464991 | 0.00058815  | -0.170825806 | 0.000208095 |
| MAST2   | brown | -0.005960489 | 0.897782417 | -0.032533217 | 0.483084434 |
| MB      | brown | 0.178612898  | 0.000104129 | 0.184500733  | 6.05E-05    |
| MBD3L1  | brown | -0.08369729  | 0.070756325 | -0.063007307 | 0.174051144 |
| MBOAT4  | brown | 0.055878677  | 0.228105225 | 0.035374485  | 0.445678651 |
| MCIDAS  | brown | 0.166178569  | 0.000310196 | 0.179212179  | 9.86E-05    |
| MDH1B   | brown | -0.004947018 | 0.915090367 | -0.018465162 | 0.690630145 |
| MDM1    | brown | 0.018769831  | 0.685795033 | 0.012829484  | 0.782151876 |
| MDM2    | brown | 0.35791118   | 1.47E-15    | 0.36968689   | 1.43E-16    |
| MED25   | brown | -0.011950318 | 0.796742139 | -0.014226241 | 0.759130131 |
| MEIG1   | brown | -0.026730974 | 0.564469123 | -0.019508568 | 0.674124681 |
| MEIS1   | brown | -0.23978006  | 1.57E-07    | -0.214152876 | 3.02E-06    |
| METTL2  | brown | 0.053902243  | 0.245007694 | 0.047977074  | 0.300850777 |
| MFAP3L  | brown | 0.216206675  | 2.41E-06    | 0.221713983  | 1.31E-06    |
| MGC5072 | brown | 0.030974364  | 0.504307211 | 0.034551058  | 0.456346629 |
| MGST2   | brown | 0.2564813    | 1.89E-08    | 0.268538983  | 3.72E-09    |
| MID1IP1 | brown | 0.105613766  | 0.022453741 | 0.104945924  | 0.023323783 |
| MIPEP   | brown | 0.230485229  | 4.77E-07    | 0.221517622  | 1.34E-06    |
| MKS1    | brown | 0.025510466  | 0.582389398 | 0.022455971  | 0.628358793 |
| MKX     | brown | -0.02882328  | 0.534378461 | -0.04354874  | 0.347720642 |
| MMP1    | brown | 0.072389387  | 0.11823957  | 0.071021603  | 0.125371362 |
| MNS1    | brown | -0.031878571 | 0.491937679 | -0.033044835 | 0.476225956 |
| MOBP    | brown | -0.189076408 | 3.92E-05    | -0.169269751 | 0.000238132 |
| MOK     | brown | 0.024493424  | 0.597521498 | 0.035567919  | 0.443193305 |
| MORN1   | brown | -0.089942975 | 0.052087055 | -0.081105398 | 0.079964733 |
| MORN2   | brown | 0.092163494  | 0.046528108 | 0.109504932  | 0.017923128 |
| MORN3   | brown | 0.110234279  | 0.017169144 | 0.117511614  | 0.011039287 |
| MORN4   | brown | 0.149810534  | 0.001165876 | 0.127501707  | 0.005793941 |
| MORN5   | brown | 0.040015019  | 0.388269423 | 0.050949373  | 0.271860417 |
| MPPED2  | brown | 0.143909142  | 0.001821988 | 0.144023165  | 0.001806616 |
| MRAP2   | brown | 0.256274275  | 1.94E-08    | 0.266273491  | 5.08E-09    |
| MROH9   | brown | 0.060597875  | 0.191136906 | 0.067923555  | 0.142757375 |
| MS4A8   | brown | -0.002028733 | 0.96512454  | 0.010753946  | 0.816709954 |
| MSH5-SA | brown | -0.122116688 | 0.008247027 | -0.125789794 | 0.006491278 |
| MSMB    | brown | 0.137199238  | 0.002968161 | 0.140108649  | 0.002408223 |

|         |       |              |             |              |             |
|---------|-------|--------------|-------------|--------------|-------------|
| MSX1    | brown | 0.333979615  | 1.25E-13    | 0.341292801  | 3.34E-14    |
| MTHFSD  | brown | 0.190051946  | 3.57E-05    | 0.190127328  | 3.54E-05    |
| MTMR8   | brown | 0.00634061   | 0.891302788 | 0.008289914  | 0.858197199 |
| MUC13   | brown | 0.182221023  | 7.48E-05    | 0.196906356  | 1.82E-05    |
| MUC4    | brown | -0.174669012 | 0.000148409 | -0.141614443 | 0.002157953 |
| MYB     | brown | 0.221444039  | 1.35E-06    | 0.213513773  | 3.23E-06    |
| MYCBP   | brown | 0.210499261  | 4.47E-06    | 0.230130332  | 4.97E-07    |
| MYCBPA  | brown | 0.10141733   | 0.028420945 | 0.102293166  | 0.027073876 |
| MYLK3   | brown | 0.029533872  | 0.5243458   | 0.029387156  | 0.526409336 |
| N4BP3   | brown | -0.220470591 | 1.50E-06    | -0.225381809 | 8.61E-07    |
| N6AMT2  | brown | 0.093862084  | 0.042619624 | 0.086991665  | 0.060322364 |
| NCBP2L  | brown | -0.071336918 | 0.12369833  | -0.059165136 | 0.201863227 |
| NCKAP5  | brown | -0.100248791 | 0.030307523 | -0.09247819  | 0.045782099 |
| NDRG1   | brown | -0.073262373 | 0.113856179 | -0.068494015 | 0.139424509 |
| NEIL1   | brown | 0.264793699  | 6.21E-09    | 0.260300487  | 1.14E-08    |
| NEK10   | brown | 0.101145404  | 0.028850716 | 0.107075841  | 0.02064664  |
| NEK11   | brown | 0.021479001  | 0.643382567 | 0.017809574  | 0.701076911 |
| NEK5    | brown | 0.077247599  | 0.09544421  | 0.09100056   | 0.049373984 |
| NGB     | brown | -0.21547911  | 2.61E-06    | -0.21603486  | 2.46E-06    |
| NHLRC4  | brown | 0.099859259  | 0.030959798 | 0.107024948  | 0.020707353 |
| NICN1   | brown | 0.083382569  | 0.071825984 | 0.091182979  | 0.04891818  |
| NMBR    | brown | -0.080589605 | 0.081908301 | -0.070195516 | 0.129837867 |
| NME5    | brown | 0.156820748  | 0.000671624 | 0.166422655  | 0.000303838 |
| NME7    | brown | 0.002993886  | 0.948552061 | -0.013351851 | 0.773518589 |
| NME9    | brown | 0.033089015  | 0.475636206 | 0.042092805  | 0.364090793 |
| NOX5    | brown | 0.018234465  | 0.694299718 | 0.029614612  | 0.523211971 |
| NOXRED  | brown | -0.041609157 | 0.369633384 | -0.032071903 | 0.489314116 |
| NPAS3   | brown | 0.089850253  | 0.052330734 | 0.092136723  | 0.04659204  |
| NPHP1   | brown | 0.01258756   | 0.786159362 | 0.012238121  | 0.791957808 |
| NPHP4   | brown | 0.06200866   | 0.180989406 | 0.044191328  | 0.340646349 |
| NQO1    | brown | 0.349509922  | 7.29E-15    | 0.384311856  | 6.94E-18    |
| NR2E3   | brown | -0.084274934 | 0.068826948 | -0.067825553 | 0.14333603  |
| NRF1    | brown | -0.088430671 | 0.056181633 | -0.088600567 | 0.055708713 |
| NRG4    | brown | -0.18707615  | 4.74E-05    | -0.173119307 | 0.000170228 |
| NRM     | brown | -0.041160876 | 0.374817089 | -0.036182688 | 0.435347049 |
| NRTN    | brown | 0.210485795  | 4.48E-06    | 0.220474827  | 1.50E-06    |
| NSUN7   | brown | -0.050632952 | 0.274852672 | -0.060617191 | 0.190995212 |
| NTN1    | brown | 0.093578158  | 0.043252992 | 0.080813612  | 0.081059575 |
| NUCB2   | brown | 0.199507303  | 1.40E-05    | 0.192071046  | 2.93E-05    |
| NUP62CI | brown | 0.135497941  | 0.003348083 | 0.140474585  | 0.002345079 |
| NWD1    | brown | 0.185892433  | 5.31E-05    | 0.195898077  | 2.01E-05    |
| NXF3    | brown | 0.050832992  | 0.272958388 | 0.073253875  | 0.113898222 |
| NXNL2   | brown | 0.051226268  | 0.269260248 | 0.072368602  | 0.118345517 |
| ODF2    | brown | 0.286005545  | 3.05E-10    | 0.278691055  | 8.88E-10    |
| ODF2L   | brown | 0.092554368  | 0.045603029 | 0.070850077  | 0.126288815 |

|         |       |              |             |              |             |
|---------|-------|--------------|-------------|--------------|-------------|
| ODF3B   | brown | 0.076155048  | 0.100237833 | 0.115298646  | 0.012657347 |
| ODF3L1  | brown | -0.07522153  | 0.104483556 | -0.064127995 | 0.166502987 |
| OLFM4   | brown | 0.116098898  | 0.012049546 | 0.12385698   | 0.007368284 |
| OMG     | brown | 0.158805768  | 0.000572101 | 0.175815289  | 0.00013399  |
| OR2C1   | brown | -0.028591315 | 0.537674296 | -0.003690145 | 0.936610059 |
| OR6B3   | brown | 0.107138755  | 0.0205718   | 0.105899023  | 0.022090775 |
| OSCP1   | brown | 0.132029656  | 0.004262397 | 0.147798175  | 0.00136007  |
| OTUB2   | brown | 0.138400492  | 0.002723994 | 0.108651767  | 0.018841666 |
| OVGP1   | brown | 0.034879917  | 0.452068996 | 0.040942369  | 0.377359951 |
| OXTR    | brown | -0.231579645 | 4.19E-07    | -0.246240059 | 7.04E-08    |
| P2RX2   | brown | -0.172663551 | 0.000177195 | -0.168000652 | 0.000265582 |
| P4HTM   | brown | 0.205808235  | 7.34E-06    | 0.209799039  | 4.82E-06    |
| PACRG   | brown | -0.024306024 | 0.600329063 | -0.033764651 | 0.466667218 |
| PAK7    | brown | 0.063282439  | 0.172174866 | 0.035424179  | 0.445039404 |
| PALMD   | brown | 0.126171148  | 0.006329728 | 0.128958865  | 0.005254241 |
| PAM     | brown | 0.105123096  | 0.023090172 | 0.090234981  | 0.051325821 |
| PAPSS1  | brown | 0.198121569  | 1.61E-05    | 0.174899184  | 0.000145402 |
| PBLD    | brown | 0.204475654  | 8.43E-06    | 0.199055531  | 1.47E-05    |
| PCDHB1  | brown | -0.252757469 | 3.07E-08    | -0.250772409 | 3.96E-08    |
| PCSK4   | brown | 0.183206142  | 6.83E-05    | 0.190730463  | 3.34E-05    |
| PCYOX1  | brown | 0.072849216  | 0.115914534 | 0.055967496  | 0.227365587 |
| PCYT1B  | brown | 0.066929924  | 0.148707654 | 0.075430742  | 0.103519871 |
| PDLIM1  | brown | 0.24861739   | 5.21E-08    | 0.269164883  | 3.41E-09    |
| PEX11A  | brown | 0.154728812  | 0.000793699 | 0.131250675  | 0.004496533 |
| PEX6    | brown | -0.039015009 | 0.400245845 | -0.028859505 | 0.533864684 |
| PF4V1   | brown | 0.101931214  | 0.027623761 | 0.123002611  | 0.007788646 |
| PFN4    | brown | -0.047977816 | 0.300843297 | -0.066264445 | 0.15279715  |
| PHF19   | brown | -0.132981921 | 0.003991178 | -0.133964513 | 0.003727784 |
| PHF7    | brown | 0.291225066  | 1.40E-10    | 0.308877798  | 8.82E-12    |
| PHTF1   | brown | 0.031494387  | 0.497173395 | 0.028602186  | 0.537519615 |
| PHYHIP1 | brown | 0.122694357  | 0.00794549  | 0.127776152  | 0.005688635 |
| PIFO    | brown | 0.076082399  | 0.10056325  | 0.09412715   | 0.042035399 |
| PIH1D2  | brown | 0.080030742  | 0.084057088 | 0.08764949   | 0.058399203 |
| PIH1D3  | brown | 0.06587511   | 0.155228916 | 0.077639955  | 0.093768061 |
| PIK3R1  | brown | 0.167990436  | 0.000265814 | 0.1674934    | 0.000277359 |
| PIP4K2A | brown | 0.196550114  | 1.89E-05    | 0.175946032  | 0.000132432 |
| PITPNM1 | brown | 0.061289437  | 0.186111674 | 0.083978669  | 0.069811046 |
| PKHD1L1 | brown | 0.02072875   | 0.655019771 | 0.018091394  | 0.696579076 |
| PKP4    | brown | 0.152886205  | 0.000917906 | 0.119953553  | 0.009468844 |
| PLA2G10 | brown | 0.224682586  | 9.33E-07    | 0.265044228  | 6.00E-09    |
| PLAC8   | brown | 0.003630782  | 0.937627721 | 0.043500548  | 0.34825493  |
| PLCB3   | brown | 0.129158573  | 0.005183912 | 0.119649625  | 0.009652825 |
| PLCH1   | brown | 0.191173489  | 3.20E-05    | 0.191189005  | 3.20E-05    |
| PLEKHB1 | brown | 0.102862515  | 0.026227968 | 0.100413224  | 0.030035731 |
| PLEKHG1 | brown | 0.17713424   | 0.00011903  | 0.175130635  | 0.000142436 |

|               |              |             |              |             |
|---------------|--------------|-------------|--------------|-------------|
| PLEKHH brown  | 0.213825661  | 3.12E-06    | 0.172568965  | 0.000178675 |
| PLEKHS1brown  | 0.314375519  | 3.59E-12    | 0.33432434   | 1.17E-13    |
| PLG brown     | 0.028061128  | 0.545245383 | 0.028011716  | 0.545953669 |
| PLIN2 brown   | -0.216471033 | 2.34E-06    | -0.221753478 | 1.30E-06    |
| PLXNB1 brown  | -0.009401754 | 0.839421423 | -0.030766782 | 0.507169827 |
| PNLDC1 brown  | -0.023201569 | 0.616994976 | -0.002523805 | 0.956621409 |
| PODXL brown   | 0.012382108  | 0.789567142 | 0.02217406   | 0.632678639 |
| POFUT2 brown  | -0.072030231 | 0.120080801 | -0.087595927 | 0.058553873 |
| PPAPDC1brown  | 0.330444568  | 2.32E-13    | 0.336725404  | 7.62E-14    |
| PPIL6 brown   | 0.048463309  | 0.295972856 | 0.064630565  | 0.163198822 |
| PPM1E brown   | -0.048445956 | 0.296146028 | -0.042998622 | 0.353850381 |
| PPOX brown    | 0.09915702   | 0.032166072 | 0.099107992  | 0.032251769 |
| PPP1R131brown | -0.018457839 | 0.690746513 | -0.008274707 | 0.858454591 |
| PPP1R14(brown | -0.077372558 | 0.094907806 | -0.085199299 | 0.065829306 |
| PPP1R32 brown | 0.108750513  | 0.018733294 | 0.120397801  | 0.00920553  |
| PPP1R36 brown | 0.081255413  | 0.079406525 | 0.093481031  | 0.043471471 |
| PPP1R42 brown | 0.02193706   | 0.636319982 | 0.029086955  | 0.530644464 |
| PRM2 brown    | 0.03613744   | 0.435921807 | 0.037793892  | 0.415166626 |
| PRMT8 brown   | -0.078889086 | 0.088587995 | -0.088456997 | 0.056108135 |
| PROC brown    | -0.000216587 | 0.996275542 | 0.025092575  | 0.588585415 |
| PRR18 brown   | -0.083163961 | 0.072576724 | -0.069904108 | 0.131442505 |
| PRR29 brown   | 0.015361054  | 0.740580215 | 0.029991722  | 0.517932884 |
| PRR32 brown   | 0.043245614  | 0.351089877 | 0.031671502  | 0.494755977 |
| PRRX2 brown   | -0.153673289 | 0.000862802 | -0.143835971 | 0.001831915 |
| PRSS12 brown  | -0.194632128 | 2.28E-05    | -0.165645576 | 0.000324513 |
| PSENEN brown  | -0.000176552 | 0.996963976 | 0.010310631  | 0.824139977 |
| PTGR2 brown   | -0.009042683 | 0.845475683 | -0.0033471   | 0.942492238 |
| PTPLAD2brown  | -0.068064115 | 0.14193056  | -0.030366581 | 0.512712651 |
| PTPRQ brown   | -0.070786439 | 0.126630521 | -0.077315111 | 0.095154105 |
| PTPRT brown   | -0.256118276 | 1.98E-08    | -0.258854381 | 1.38E-08    |
| PYY brown     | 0.149991317  | 0.001149744 | 0.141485843  | 0.00217836  |
| PZP brown     | 0.098847927  | 0.032709609 | 0.092516168  | 0.045692752 |
| QRICH2 brown  | 0.169703812  | 0.000229369 | 0.140921811  | 0.002269962 |
| RAB36 brown   | 0.073185016  | 0.114239374 | 0.074484619  | 0.107934614 |
| RAB44 brown   | -0.066451345 | 0.151640096 | -0.060833896 | 0.189410794 |
| RABL2A brown  | -0.101950835 | 0.027593709 | -0.105564508 | 0.022516938 |
| RABL2B brown  | 0.147025936  | 0.00144218  | 0.140276039  | 0.002379149 |
| RAET1E brown  | 0.067451826  | 0.145559172 | 0.091256319  | 0.048735924 |
| RALGPS1brown  | 0.107097272  | 0.02062112  | 0.090835808  | 0.049788693 |
| RASGEF1brown  | -0.203031314 | 9.78E-06    | -0.218927322 | 1.78E-06    |
| RBKS brown    | 0.063991188  | 0.167411058 | 0.069340508  | 0.134589402 |
| RCAN3 brown   | 0.166766755  | 0.000295082 | 0.163401482  | 0.000391824 |
| RDH12 brown   | 0.026211798  | 0.572059629 | 0.032903353  | 0.478117253 |
| REM2 brown    | 0.092049484  | 0.046800883 | 0.076733477  | 0.097676647 |
| RFX2 brown    | 0.034746668  | 0.453799506 | 0.041103808  | 0.375480195 |

|          |       |              |             |              |             |
|----------|-------|--------------|-------------|--------------|-------------|
| RFX3     | brown | 0.115393888  | 0.012583619 | 0.108666263  | 0.018825723 |
| RGS12    | brown | 0.105244362  | 0.022931447 | 0.08132563   | 0.079146334 |
| RGS22    | brown | -0.180462219 | 8.80E-05    | -0.181360192 | 8.10E-05    |
| RGS6     | brown | -0.040492816 | 0.382624839 | -0.049290318 | 0.287798118 |
| RGS7BP   | brown | -0.061617262 | 0.18376383  | -0.081948019 | 0.076870145 |
| RHEBL1   | brown | -0.10340047  | 0.025449724 | -0.097094438 | 0.03594372  |
| RIBC1    | brown | 0.176893156  | 0.000121641 | 0.188807904  | 4.02E-05    |
| RIBC2    | brown | 0.119185506  | 0.009939908 | 0.125470509  | 0.006629367 |
| RIIAD1   | brown | 0.092623871  | 0.045440166 | 0.101368866  | 0.028497135 |
| RILPL2   | brown | 0.141985773  | 0.002100006 | 0.163471121  | 0.000389553 |
| RNF122   | brown | 0.059006097  | 0.203080337 | 0.059465166  | 0.199581582 |
| RNF135   | brown | 0.131795576  | 0.004331568 | 0.151493682  | 0.001023428 |
| RNF32    | brown | -0.194911418 | 2.22E-05    | -0.184674329 | 5.95E-05    |
| ROBO2    | brown | 0.139509036  | 0.002515049 | 0.157188974  | 0.000652029 |
| ROPN1B   | brown | 0.049762163  | 0.283202722 | 0.057689706  | 0.213359532 |
| ROPN1L   | brown | 0.127566574  | 0.005768894 | 0.142509126  | 0.002020748 |
| RP1      | brown | -0.058741585 | 0.205116401 | -0.057493356 | 0.21492427  |
| RP11-190 | brown | 0.093403664  | 0.043646166 | 0.087195485  | 0.059720978 |
| RP11-307 | brown | -0.08349452  | 0.071443987 | -0.076051918 | 0.100700035 |
| RP11-444 | brown | -0.135912707 | 0.003251597 | -0.139518453 | 0.002513338 |
| RP11-505 | brown | 0.006329118  | 0.891498587 | 0.041918384  | 0.366083658 |
| RP11-569 | brown | 0.184555511  | 6.02E-05    | 0.190711451  | 3.35E-05    |
| RP11-697 | brown | 0.023745778  | 0.60875771  | 0.014628117  | 0.752544529 |
| RP11-723 | brown | -0.012176935 | 0.792974288 | -0.008685623 | 0.851505069 |
| RP11-766 | brown | 0.138919427  | 0.002624289 | 0.117213601  | 0.011245931 |
| RP11-77K | brown | -0.041704879 | 0.368532285 | -0.025996074 | 0.575227723 |
| RP5-877J | brown | -0.105492717 | 0.02260932  | -0.131443146 | 0.004437627 |
| RP5-966M | brown | -0.010386758 | 0.822862949 | -0.020634792 | 0.656483128 |
| RPGR     | brown | -0.054416294 | 0.240529511 | -0.055464735 | 0.231574866 |
| RPGRIP1  | brown | 0.126423246  | 0.006224924 | 0.121393992  | 0.008638614 |
| RRAD     | brown | -0.063506687 | 0.170656789 | -0.029166742 | 0.52951717  |
| RSPH1    | brown | 0.141137965  | 0.002234449 | 0.1589423    | 0.000565786 |
| RSPH10B  | brown | -0.000873003 | 0.984988535 | 0.011162695  | 0.809873759 |
| RSPH10B  | brown | -0.005391814 | 0.907488749 | 0.00297206   | 0.948926617 |
| RSPH14   | brown | 0.048924864  | 0.291391607 | 0.056706702  | 0.221275899 |
| RSPH3    | brown | 0.09709298   | 0.035946518 | 0.100932068  | 0.029191781 |
| RSPH4A   | brown | 0.102939706  | 0.026115054 | 0.115076473  | 0.012830818 |
| RSPH9    | brown | -0.079496432 | 0.086153778 | -0.073903082 | 0.110721022 |
| RTN1     | brown | -0.021636923 | 0.64094397  | -0.021898777 | 0.63690899  |
| RUFY1    | brown | 0.125051667  | 0.006814503 | 0.095393901  | 0.039335844 |
| RUNDC1   | brown | 0.263956529  | 6.96E-09    | 0.276473404  | 1.22E-09    |
| SAMD15   | brown | 0.048903215  | 0.291605425 | 0.046865809  | 0.312198399 |
| SAT1     | brown | 0.375219075  | 4.64E-17    | 0.384261248  | 7.01E-18    |
| SCAMP4   | brown | 0.398375416  | 3.26E-19    | 0.416540095  | 5.04E-21    |
| SCGB1A1  | brown | 0.105691629  | 0.022354158 | 0.129886355  | 0.004934737 |



|                |              |             |              |             |
|----------------|--------------|-------------|--------------|-------------|
| SCGB1D1brown   | 0.169898943  | 0.000225528 | 0.180523321  | 8.75E-05    |
| SCGB1D4brown   | 0.069236969  | 0.135173778 | 0.080343328  | 0.082849682 |
| SCGB2A1brown   | 0.293411417  | 1.00E-10    | 0.294626402  | 8.33E-11    |
| SCGB3A1brown   | 0.217381402  | 2.12E-06    | 0.234773866  | 2.87E-07    |
| SCN1A brown    | -0.067413105 | 0.145791002 | -0.073262939 | 0.113853378 |
| SCNN1B brown   | 0.169302536  | 0.000237459 | 0.195155433  | 2.17E-05    |
| SCNN1G brown   | 0.067351374  | 0.14616118  | 0.074603408  | 0.107372303 |
| SDC3 brown     | -0.293796323 | 9.45E-11    | -0.298678226 | 4.45E-11    |
| SDR42E2 brown  | 0.091247295  | 0.048758317 | 0.101633684  | 0.028082941 |
| SEC14L3 brown  | 0.042100819  | 0.363999398 | 0.047884372  | 0.301786794 |
| SEC14L5 brown  | 0.042680399  | 0.357427082 | 0.04946566   | 0.286084609 |
| SEMA3D brown   | 0.039237786  | 0.39755881  | 0.053419778  | 0.249263478 |
| SEMA3E brown   | -0.028359659 | 0.54097587  | 0.003385945  | 0.941826    |
| SERPINA brown  | 0.07024588   | 0.129562078 | 0.068960681  | 0.136742723 |
| SERPINA brown  | 0.204332606  | 8.55E-06    | 0.207641545  | 6.05E-06    |
| SERPINA brown  | 0.092306762  | 0.046187225 | 0.103230674  | 0.025693184 |
| SERPINE brown  | 0.004821591  | 0.917235346 | 0.019070615  | 0.681034109 |
| SERPINH brown  | -0.142011727 | 0.002096009 | -0.122349956 | 0.008124056 |
| SERPINI2 brown | -0.11397876  | 0.013719036 | -0.103155869 | 0.025801078 |
| SFI1 brown     | 0.149623499  | 0.001182784 | 0.140971721  | 0.002261716 |
| SGK3 brown     | 0.024676439  | 0.594785398 | 0.008000455  | 0.863098928 |
| SH2D5 brown    | -0.100428798 | 0.030010097 | -0.120204068 | 0.009319547 |
| SH3BGR brown   | 0.101169845  | 0.02881186  | 0.094940219  | 0.040285314 |
| SH3BP1 brown   | -0.082477422 | 0.074976143 | -0.069881834 | 0.131565784 |
| SH3GL3 brown   | -0.069538869 | 0.133475285 | -0.066053419 | 0.154111597 |
| SH3RF2 brown   | 0.275704748  | 1.36E-09    | 0.297261438  | 5.55E-11    |
| SH3RF3 brown   | -0.095899521 | 0.038300058 | -0.094154561 | 0.04197537  |
| SH3YL1 brown   | 0.209756709  | 4.84E-06    | 0.177273956  | 0.00011754  |
| SHANK2 brown   | 0.095535604  | 0.039043194 | 0.087446505  | 0.058987141 |
| SHISA8 brown   | 0.235652788  | 2.58E-07    | 0.237523049  | 2.06E-07    |
| SIAH3 brown    | -0.100294252 | 0.030232169 | -0.08867086  | 0.055514013 |
| SIDT1 brown    | 0.193056448  | 2.66E-05    | 0.208764928  | 5.38E-06    |
| SIPA1L1 brown  | 0.240863464  | 1.37E-07    | 0.232537368  | 3.74E-07    |
| SLAIN1 brown   | -0.002515502 | 0.956763978 | -0.008749799 | 0.850420729 |
| SLC15A2 brown  | 0.204234772  | 8.64E-06    | 0.206994504  | 6.48E-06    |
| SLC17A8 brown  | 0.048339756  | 0.29720732  | 0.043939678  | 0.343405761 |
| SLC22A2 brown  | 0.165041647  | 0.00034148  | 0.149056359  | 0.001235447 |
| SLC22A4 brown  | 0.047766504  | 0.302979702 | 0.04676163   | 0.313276443 |
| SLC22A5 brown  | 0.189466822  | 3.78E-05    | 0.161701097  | 0.000451253 |
| SLC23A1 brown  | 0.054648649  | 0.238524309 | 0.077123591  | 0.09597892  |
| SLC25A1 brown  | 0.048256512  | 0.298040961 | 0.05977903   | 0.197214886 |
| SLC27A2 brown  | 0.27012013   | 2.99E-09    | 0.261785221  | 9.33E-09    |
| SLC27A6 brown  | -0.121065216 | 0.008822178 | -0.120710705 | 0.009023995 |
| SLC28A3 brown  | 0.107234814  | 0.020457988 | 0.113136017  | 0.014437237 |
| SLC32A1 brown  | 0.048530063  | 0.295307323 | 0.057426389  | 0.215459825 |

|               |              |             |              |             |
|---------------|--------------|-------------|--------------|-------------|
| SLC35F3 brown | 0.032039254  | 0.489756642 | 0.054086128  | 0.243399115 |
| SLC38A3 brown | -0.171262913 | 0.000200319 | -0.17866316  | 0.000103655 |
| SLC3A2 brown  | -0.001284997 | 0.977905714 | -0.031493802 | 0.497181397 |
| SLC40A1 brown | 0.134901091  | 0.00349149  | 0.142136753  | 0.002076855 |
| SLC44A4 brown | -0.002852623 | 0.950976444 | 0.028494623  | 0.539051126 |
| SLC46A1 brown | -0.123556248 | 0.007513877 | -0.121730927 | 0.008454033 |
| SLC46A2 brown | 0.114219424  | 0.013519798 | 0.098346878  | 0.033607354 |
| SLC47A2 brown | 0.040152243  | 0.38664314  | 0.046610044  | 0.314849417 |
| SLC48A1 brown | -0.160790569 | 0.000486424 | -0.184075234 | 6.29E-05    |
| SLC4A4 brown  | -0.011231295 | 0.808727851 | -0.003898037 | 0.933047011 |
| SLC4A8 brown  | 0.007570593  | 0.870387897 | 0.025775042  | 0.578482329 |
| SLC51A brown  | -0.049214793 | 0.288538299 | -0.040949747 | 0.377273913 |
| SLC52A1 brown | 0.052345361  | 0.258925102 | 0.072272657  | 0.118835555 |
| SLC6A16 brown | 0.06175211   | 0.182804434 | 0.07027536   | 0.129400861 |
| SLC9A3R brown | 0.179919515  | 9.24E-05    | 0.203760845  | 9.07E-06    |
| SLC9C2 brown  | -0.113904602 | 0.013780948 | -0.111568615 | 0.015861293 |
| SLCO4A1 brown | 0.021262206  | 0.6467365   | 0.031219354  | 0.500939681 |
| SLITRK5 brown | -0.018360575 | 0.692292854 | -0.018204532 | 0.694776368 |
| SMIM5 brown   | -0.01500766  | 0.74634135  | -0.009843793 | 0.83198127  |
| SMIM6 brown   | 0.156934644  | 0.000665506 | 0.170494187  | 0.000214182 |
| SMKR1 brown   | -0.126363652 | 0.006249557 | -0.112757537 | 0.014770399 |
| SMOC1 brown   | -0.088367142 | 0.056359324 | -0.063281025 | 0.172184471 |
| SMOX brown    | 0.031453158  | 0.497737021 | 0.059466449  | 0.199571863 |
| SMPD2 brown   | 0.148381973  | 0.001300874 | 0.172313089  | 0.000182734 |
| SMPD3 brown   | 0.298733555  | 4.41E-11    | 0.281564079  | 5.86E-10    |
| SNAPC4 brown  | 0.063869913  | 0.168219119 | 0.054422675  | 0.240474281 |
| SNTN brown    | 0.043642347  | 0.346684362 | 0.057204033  | 0.217244933 |
| SNX31 brown   | 0.009554782  | 0.836844088 | -0.002336214 | 0.959842861 |
| SORBS2 brown  | 0.324761138  | 6.23E-13    | 0.316634155  | 2.47E-12    |
| SOWAH/ brown  | -0.148149226 | 0.001324184 | -0.151800103 | 0.000999291 |
| SOX17 brown   | 0.203139938  | 9.67E-06    | 0.201465627  | 1.15E-05    |
| SOX3 brown    | -0.133719756 | 0.003791878 | -0.140505008 | 0.002339898 |
| SOX30 brown   | -0.226903672 | 7.23E-07    | -0.222504485 | 1.19E-06    |
| SPA17 brown   | 0.269265913  | 3.36E-09    | 0.27090876   | 2.68E-09    |
| SPAG1 brown   | 0.007784596  | 0.866757746 | 0.010612983  | 0.819070776 |
| SPAG16 brown  | -0.338026074 | 6.03E-14    | -0.342750318 | 2.56E-14    |
| SPAG17 brown  | -0.12229454  | 0.008153121 | -0.124134236 | 0.007236297 |
| SPAG6 brown   | -0.245246054 | 7.97E-08    | -0.257774905 | 1.59E-08    |
| SPAG8 brown   | 0.052353298  | 0.258852794 | 0.064111587  | 0.166611701 |
| SPATA17 brown | 0.123390523  | 0.007595203 | 0.127458096  | 0.005810835 |
| SPATA18 brown | 0.291348566  | 1.37E-10    | 0.302907793  | 2.29E-11    |
| SPATA24 brown | -0.078113632 | 0.091775953 | -0.067733011 | 0.14388409  |
| SPATA33 brown | 0.265280855  | 5.81E-09    | 0.2862849    | 2.93E-10    |
| SPATA4 brown  | -0.078783046 | 0.089018611 | -0.069712547 | 0.132505656 |
| SPATA6 brown  | 0.157031077  | 0.000660365 | 0.134250368  | 0.003654172 |

|         |       |              |             |              |             |
|---------|-------|--------------|-------------|--------------|-------------|
| SPATA6I | brown | -0.015614966 | 0.73644978  | 0.002669724  | 0.954116074 |
| SPATA7  | brown | -0.117717106 | 0.010898764 | -0.137587632 | 0.002887121 |
| SPATS1  | brown | 0.074583205  | 0.107467776 | 0.078736985  | 0.089206179 |
| SPECC1  | brown | 0.123713977  | 0.007437199 | 0.141036201  | 0.002251105 |
| SPEF1   | brown | 0.071921144  | 0.120644455 | 0.08841652   | 0.056221174 |
| SPEF2   | brown | -0.041509907 | 0.370777215 | -0.049661964 | 0.284174418 |
| SPIRE2  | brown | -0.026651674 | 0.565625386 | -0.038528787 | 0.406148086 |
| SPNS3   | brown | -0.049203463 | 0.288649444 | -0.0286862   | 0.536324918 |
| SPPL2B  | brown | 0.332291071  | 1.68E-13    | 0.334257397  | 1.19E-13    |
| SPRY3   | brown | 0.251837585  | 3.45E-08    | 0.235727016  | 2.56E-07    |
| SRCIN1  | brown | -0.039715211 | 0.391836976 | -0.054287583 | 0.241645353 |
| SRD5A2  | brown | 0.05675197   | 0.220906797 | 0.066850699  | 0.149190093 |
| SRGAP3  | brown | -0.003993313 | 0.931414506 | -0.007194088 | 0.876781173 |
| SSUH2   | brown | -0.177600574 | 0.000114127 | -0.175546006 | 0.000137254 |
| ST3GAL6 | brown | -0.17213216  | 0.000185657 | -0.14645029  | 0.001506323 |
| ST6GALN | brown | 0.145311228  | 0.001641031 | 0.140916618  | 0.002270821 |
| STAG3   | brown | -0.166879361 | 0.000292268 | -0.166813776 | 0.000293904 |
| STK33   | brown | -0.080931247 | 0.080616733 | -0.081791377 | 0.077437943 |
| STK36   | brown | 0.052327292  | 0.259089769 | 0.031865778  | 0.492111548 |
| STMND1  | brown | 0.094818313  | 0.040543717 | 0.101211019  | 0.028746506 |
| STOML3  | brown | 0.058069479  | 0.210356352 | 0.076111503  | 0.100432786 |
| STOX1   | brown | 0.062047941  | 0.180712687 | 0.04061496   | 0.381189939 |
| STPG1   | brown | 0.242851199  | 1.07E-07    | 0.248462184  | 5.31E-08    |
| STX18   | brown | 0.286859825  | 2.69E-10    | 0.286265916  | 2.94E-10    |
| SUGCT   | brown | -0.283766141 | 4.25E-10    | -0.297898749 | 5.03E-11    |
| SULT1A1 | brown | -0.011492587 | 0.804366914 | 0.023600845  | 0.610946672 |
| SUOX    | brown | 0.147759114  | 0.001364118 | 0.137850001  | 0.002833522 |
| SVOPL   | brown | -0.217498445 | 2.09E-06    | -0.211913474 | 3.84E-06    |
| SYBU    | brown | -0.090739328 | 0.050032899 | -0.061232262 | 0.186523408 |
| SYS1    | brown | -0.224046347 | 1.00E-06    | -0.217247599 | 2.15E-06    |
| SYT5    | brown | -0.047452781 | 0.306169995 | -0.05322596  | 0.25098754  |
| SYT8    | brown | 0.174602203  | 0.000149293 | 0.194896278  | 2.22E-05    |
| SYTL3   | brown | 0.209438158  | 5.00E-06    | 0.221719958  | 1.31E-06    |
| TAAR1   | brown | -0.105981242 | 0.021987109 | -0.108826474 | 0.018650299 |
| TACR1   | brown | -0.078534159 | 0.090035911 | -0.087922727 | 0.057615453 |
| TAS2R1  | brown | 0.003458099  | 0.940588584 | -0.003596186 | 0.938220851 |
| TBC1D8  | brown | 0.226109266  | 7.92E-07    | 0.216856351  | 2.24E-06    |
| TCF7    | brown | 0.120662041  | 0.009052017 | 0.102919999  | 0.026143842 |
| TCP10L  | brown | -0.193661572 | 2.51E-05    | -0.184929513 | 5.81E-05    |
| TCTE1   | brown | 0.08100969   | 0.080322521 | 0.090419679  | 0.050849138 |
| TCTEX1I | brown | -0.194845523 | 2.23E-05    | -0.19174904  | 3.03E-05    |
| TCTEX1I | brown | 0.098324223  | 0.033648436 | 0.105319332  | 0.022833792 |
| TCTEX1I | brown | 0.100701465  | 0.029564335 | 0.119198757  | 0.009931607 |
| TCTN1   | brown | 0.089800751  | 0.052461217 | 0.097763655  | 0.034678707 |
| TCTN2   | brown | 0.079703425  | 0.085336573 | 0.070928952  | 0.125866287 |

|          |       |              |             |              |             |
|----------|-------|--------------|-------------|--------------|-------------|
| TDRP     | brown | -0.264495458 | 6.47E-09    | -0.287472484 | 2.46E-10    |
| TEKT1    | brown | 0.016543158  | 0.721415996 | 0.025939997  | 0.576052609 |
| TEKT2    | brown | 0.070366952  | 0.12890096  | 0.08311343   | 0.072751163 |
| TEKT3    | brown | 0.044904495  | 0.33290345  | 0.046912921  | 0.311711681 |
| TEKT4    | brown | 0.141413642  | 0.002189894 | 0.159953558  | 0.000520987 |
| TEX26    | brown | -0.068789011 | 0.137724607 | -0.060703528 | 0.190362806 |
| TEX9     | brown | 0.055478468  | 0.231459156 | 0.056923638  | 0.219511067 |
| TFF1     | brown | 0.248601904  | 5.22E-08    | 0.303900081  | 1.96E-11    |
| TGM3     | brown | 0.24238396   | 1.14E-07    | 0.23142946   | 4.27E-07    |
| THSD4    | brown | -0.212053718 | 3.78E-06    | -0.203802081 | 9.03E-06    |
| TIGD4    | brown | 0.063199033  | 0.172742056 | 0.059447508  | 0.199715343 |
| TMC1     | brown | 0.099026765  | 0.032394176 | 0.121112435  | 0.008795603 |
| TMC3     | brown | -0.064214887 | 0.165928162 | -0.070929758 | 0.125861972 |
| TMCO5A   | brown | 0.027219989  | 0.557364071 | 0.046864419  | 0.31221277  |
| TMED6    | brown | 0.199023508  | 1.47E-05    | 0.210294315  | 4.57E-06    |
| TMEM10   | brown | 0.117693084  | 0.010915109 | 0.107560593  | 0.020076066 |
| TMEM10   | brown | 0.269761798  | 3.14E-09    | 0.280709655  | 6.64E-10    |
| TMEM11   | brown | 0.024183533  | 0.602167389 | 0.05390494   | 0.244984048 |
| TMEM11   | brown | 0.036391357  | 0.432702089 | 0.036798398  | 0.427569465 |
| TMEM12   | brown | 0.028228095  | 0.54285541  | -0.001700873 | 0.970757942 |
| TMEM13   | brown | 0.026097463  | 0.573737701 | 0.054935914  | 0.236061539 |
| TMEM15   | brown | 0.224649993  | 9.36E-07    | 0.219913863  | 1.60E-06    |
| TMEM17   | brown | -0.078305361 | 0.090979313 | -0.077843745 | 0.092906798 |
| TMEM17   | brown | -0.117538407 | 0.011020874 | -0.112367273 | 0.015120987 |
| TMEM17   | brown | -0.011673457 | 0.801351761 | -0.02513712  | 0.587923509 |
| TMEM19   | brown | -0.033728751 | 0.467141425 | -0.030518567 | 0.510603934 |
| TMEM20   | brown | -0.097760747 | 0.034684121 | -0.104173131 | 0.024366821 |
| TMEM21   | brown | -0.051989485 | 0.26218158  | -0.037062418 | 0.424259251 |
| TMEM23   | brown | 0.145692734  | 0.00159473  | 0.153014879  | 0.000908681 |
| TMEM23   | brown | 0.031245947  | 0.500574867 | 0.033938592  | 0.464373412 |
| TMEM23   | brown | -0.076712965 | 0.097766571 | -0.070530257 | 0.128013366 |
| TMEM25   | brown | 0.34237764   | 2.74E-14    | 0.310618042  | 6.65E-12    |
| TMEM25   | brown | -0.100439139 | 0.029993086 | -0.109805445 | 0.017609031 |
| TMEM31   | brown | -0.105431669 | 0.022688137 | -0.114942818 | 0.012936182 |
| TMEM40   | brown | -0.000194113 | 0.996662002 | 0.036856696  | 0.426837247 |
| TMEM45   | brown | 0.114710787  | 0.013120911 | 0.125727987  | 0.006517806 |
| TMEM67   | brown | -0.05177834  | 0.264126959 | -0.086007682 | 0.063296489 |
| TMPRSS2  | brown | 0.304833787  | 1.69E-11    | 0.299893615  | 3.68E-11    |
| TMPRSS2  | brown | -0.074955102 | 0.105721054 | -0.055951748 | 0.227496604 |
| TMPRSS2  | brown | -0.101420824 | 0.028415458 | -0.092370583 | 0.04603605  |
| TNFAIP8  | brown | 0.047515285  | 0.305532614 | 0.066865779  | 0.149098171 |
| TNNC2    | brown | -0.067400358 | 0.145867385 | -0.060956532 | 0.188518439 |
| TNNI2    | brown | 0.04365239   | 0.346573297 | 0.075304795  | 0.104099168 |
| TP53AIP1 | brown | 0.127187173  | 0.00591678  | 0.142307947  | 0.002050886 |
| TP73     | brown | 0.339715653  | 4.45E-14    | 0.347760658  | 1.01E-14    |

|         |       |              |             |              |             |
|---------|-------|--------------|-------------|--------------|-------------|
| TPCN2   | brown | -0.151578525 | 0.001016692 | -0.187382889 | 4.61E-05    |
| TPPP    | brown | -0.107169439 | 0.020535386 | -0.093411188 | 0.04362915  |
| TPPP3   | brown | 0.093273019  | 0.043942503 | 0.118183504  | 0.010585687 |
| TPRXL   | brown | -0.036359529 | 0.433104928 | -0.016945992 | 0.714924212 |
| TRAF3IP | brown | 0.064827585  | 0.161917044 | 0.062738992  | 0.175895545 |
| TREH    | brown | 0.206238473  | 7.01E-06    | 0.205369784  | 7.68E-06    |
| TRIB3   | brown | -0.109424585 | 0.018007931 | -0.09116014  | 0.048975053 |
| TRIM10  | brown | 0.007445588  | 0.872509648 | 0.009682682  | 0.834691302 |
| TRIM15  | brown | 0.056743128  | 0.220978853 | 0.056276689  | 0.224804076 |
| TRIM31  | brown | 0.069277432  | 0.13494517  | 0.092678173  | 0.045313262 |
| TRIM41  | brown | 0.061170746  | 0.186967151 | 0.044489055  | 0.337400034 |
| TRIM55  | brown | 0.021607218  | 0.641402381 | 0.041540281  | 0.370426936 |
| TRIM73  | brown | 0.022558885  | 0.626784949 | 0.022131162  | 0.633337078 |
| TRIM74  | brown | -0.056000651 | 0.227089919 | -0.055169059 | 0.234075967 |
| TSGA10  | brown | -0.010432175 | 0.822101296 | -0.020579969 | 0.657337593 |
| TSNAXIF | brown | 0.111081143  | 0.016328599 | 0.125986512  | 0.006407488 |
| TSPAN1  | brown | 0.139189462  | 0.002573733 | 0.172914392  | 0.000173328 |
| TSPAN19 | brown | -0.103471162 | 0.025348952 | -0.102369458 | 0.026959181 |
| TSPAN3  | brown | 0.021806729  | 0.638326179 | 0.023829883  | 0.607489044 |
| TTC12   | brown | 0.225148182  | 8.85E-07    | 0.21038147   | 4.53E-06    |
| TTC16   | brown | 0.029856402  | 0.519824034 | 0.042530114  | 0.359124089 |
| TTC21A  | brown | 0.110798478  | 0.016605059 | 0.120476962  | 0.009159299 |
| TTC23L  | brown | 0.01800317   | 0.697985987 | 0.01578719   | 0.73365249  |
| TTC25   | brown | 0.099081588  | 0.032298    | 0.107411168  | 0.020250465 |
| TTC26   | brown | 0.088710681  | 0.055403969 | 0.079700586  | 0.085347739 |
| TTC29   | brown | 0.063098484  | 0.173427677 | 0.07401458   | 0.110182441 |
| TTC30A  | brown | -0.280584342 | 6.76E-10    | -0.271405768 | 2.50E-09    |
| TTC30B  | brown | -0.142333516 | 0.002047033 | -0.125526729 | 0.006604862 |
| TTC34   | brown | -0.169960358 | 0.000224332 | -0.163833655 | 0.000377927 |
| TTC39C  | brown | -0.055650431 | 0.230013778 | -0.044540531 | 0.336840771 |
| TTC6    | brown | 0.065498881  | 0.15760654  | 0.077710096  | 0.09347091  |
| TTC8    | brown | 0.114822929  | 0.013031342 | 0.086370567  | 0.062185893 |
| TTLL1   | brown | 0.258310575  | 1.48E-08    | 0.252393612  | 3.21E-08    |
| TTLL10  | brown | 0.088979786  | 0.054665038 | 0.104954515  | 0.023312408 |
| TTLL5   | brown | 0.03820466   | 0.410111277 | 0.017822245  | 0.70087445  |
| TTLL6   | brown | -0.10084506  | 0.029331872 | -0.093121879 | 0.044287439 |
| TTLL7   | brown | 0.064681586  | 0.162866163 | 0.03703902   | 0.424552013 |
| TTLL9   | brown | -0.020577117 | 0.657382052 | -0.013193435 | 0.776133874 |
| TUBA4A  | brown | 0.065159932  | 0.159772029 | 0.066307644  | 0.152529124 |
| UBE3D   | brown | -0.136748114 | 0.003064884 | -0.146188189 | 0.001536388 |
| UBXN10  | brown | 0.17159095   | 0.000194663 | 0.173808013  | 0.000160184 |
| UBXN11  | brown | 0.072145153  | 0.119489231 | 0.089978958  | 0.051992746 |
| UCN3    | brown | -0.014762309 | 0.75034947  | 0.006939916  | 0.881101718 |
| UFC1    | brown | 0.243178852  | 1.03E-07    | 0.229099378  | 5.61E-07    |
| UGT2B7  | brown | -0.156508854 | 0.000688647 | -0.127995837 | 0.005605585 |

|         |       |              |             |              |             |
|---------|-------|--------------|-------------|--------------|-------------|
| ULBP2   | brown | 0.217656028  | 2.05E-06    | 0.227461584  | 6.78E-07    |
| ULK4    | brown | -0.112497994 | 0.015002751 | -0.106423392 | 0.021436818 |
| UMODL1  | brown | -0.039486041 | 0.39457729  | -0.04170334  | 0.368549972 |
| UNC79   | brown | -0.106728242 | 0.021064407 | -0.118840797 | 0.01015801  |
| UPK1B   | brown | 0.160869888  | 0.000483262 | 0.178163462  | 0.000108461 |
| UROC1   | brown | -0.067664531 | 0.144290678 | -0.046357236 | 0.317484236 |
| USH1C   | brown | 0.038693664  | 0.404140861 | 0.026958666  | 0.56115552  |
| USH1G   | brown | 0.009515067  | 0.837512814 | -0.014498025 | 0.754674434 |
| USP2    | brown | -0.127089211 | 0.005955514 | -0.118371824 | 0.010461552 |
| USP40   | brown | 0.095601267  | 0.038908211 | 0.055705426  | 0.229552887 |
| VEPH1   | brown | -0.090060588 | 0.051779324 | -0.081031866 | 0.080239505 |
| VGF     | brown | -0.05229285  | 0.259403846 | -0.040646917 | 0.380815066 |
| VNN3    | brown | 0.001208595  | 0.979219069 | 0.006734573  | 0.884594835 |
| VRK3    | brown | 0.040191277  | 0.386181297 | 0.062431008  | 0.178030496 |
| VSIG10L | brown | -0.111263649 | 0.016152249 | -0.128853574 | 0.005291665 |
| VWA3A   | brown | 0.093344385  | 0.043780417 | 0.089785897  | 0.052500424 |
| VWA3B   | brown | 0.062307651  | 0.178890986 | 0.077913262  | 0.092614455 |
| VWA5B1  | brown | -0.093415362 | 0.043619714 | -0.100873752 | 0.029285611 |
| VWA5B2  | brown | 0.174219928  | 0.000154446 | 0.181381691  | 8.08E-05    |
| VWA7    | brown | -0.17250457  | 0.000179688 | -0.170709724 | 0.000210207 |
| WBSCR2  | brown | 0.058145849  | 0.209756131 | 0.082149516  | 0.076144734 |
| WBSCR2  | brown | 0.002138461  | 0.963239515 | 0.024441835  | 0.598293798 |
| WDR19   | brown | -0.085798508 | 0.063944045 | -0.100008751 | 0.030708066 |
| WDR31   | brown | 0.307390823  | 1.12E-11    | 0.289160188  | 1.91E-10    |
| WDR38   | brown | 0.096141365  | 0.037812858 | 0.108892682  | 0.018578222 |
| WDR49   | brown | 0.033266247  | 0.47327439  | 0.047930736  | 0.301318414 |
| WDR54   | brown | 0.07518514   | 0.1046519   | 0.093829731  | 0.042691397 |
| WDR5B   | brown | -0.104390254 | 0.024069776 | -0.108282504 | 0.019251781 |
| WDR60   | brown | 0.001952403  | 0.966435914 | -0.015669335 | 0.735566332 |
| WDR63   | brown | 0.052594087  | 0.256665766 | 0.058875757  | 0.204081782 |
| WDR66   | brown | 0.113770371  | 0.013893638 | 0.121653835  | 0.008495953 |
| WDR77   | brown | 0.045986739  | 0.321371591 | 0.049084579  | 0.289817453 |
| WDR78   | brown | 0.071017341  | 0.125394094 | 0.074853316  | 0.106196873 |
| WDR90   | brown | 0.215163671  | 2.70E-06    | 0.224974502  | 9.02E-07    |
| WDR92   | brown | -0.118654101 | 0.010277899 | -0.111233042 | 0.016181707 |
| WDR93   | brown | 0.065183535  | 0.15962051  | 0.080940227  | 0.080583008 |
| WFDC3   | brown | -6.46E-05    | 0.998889269 | 0.025315838  | 0.585271344 |
| WFDC6   | brown | 0.129548261  | 0.005049117 | 0.131707143  | 0.004357963 |
| WNT9A   | brown | -0.120483628 | 0.009155416 | -0.104255178 | 0.024254203 |
| WRB     | brown | 0.118335052  | 0.010485689 | 0.104799019  | 0.023519033 |
| XG      | brown | 0.264848892  | 6.17E-09    | 0.264566195  | 6.41E-09    |
| XPNPEP3 | brown | 0.203479382  | 9.34E-06    | 0.215436063  | 2.62E-06    |
| ZBBX    | brown | 0.023497721  | 0.612506309 | 0.033904308  | 0.464825031 |
| ZBTB18  | brown | 0.226561683  | 7.52E-07    | 0.219907549  | 1.60E-06    |
| ZC2HC1C | brown | 0.022053335  | 0.634532393 | 0.043498625  | 0.348276252 |

|               |              |             |              |             |
|---------------|--------------|-------------|--------------|-------------|
| ZCWPW1brown   | -0.248516777 | 5.28E-08    | -0.256160267 | 1.97E-08    |
| ZDHHC1 brown  | 0.266785013  | 4.73E-09    | 0.28404228   | 4.08E-10    |
| ZDHHC1 brown  | -0.114013486 | 0.013690129 | -0.110123126 | 0.017282229 |
| ZDHHC1 brown  | -0.243616544 | 9.77E-08    | -0.242072762 | 1.18E-07    |
| ZDHHC1brown   | 0.142561338  | 0.002012993 | 0.127717368  | 0.005711045 |
| ZFHX2 brown   | 0.096270456  | 0.03755496  | 0.100582494  | 0.029758128 |
| ZFYVE27brown  | 0.081496955  | 0.078514384 | 0.055609904  | 0.230353839 |
| ZFYVE28brown  | -0.077419608 | 0.094706464 | -0.072607543 | 0.117131998 |
| ZMYND1brown   | 0.155050559  | 0.000773675 | 0.173761307  | 0.000160847 |
| ZMYND1brown   | 0.101276899  | 0.0286422   | 0.099238356  | 0.03202433  |
| ZNF132 brown  | -0.290285012 | 1.61E-10    | -0.293394413 | 1.01E-10    |
| ZNF19 brown   | 0.064267606  | 0.165580121 | 0.079721315  | 0.08526624  |
| ZNF20 brown   | 0.022582337  | 0.626426538 | 0.030684883  | 0.508301585 |
| ZNF3 brown    | -0.00310053  | 0.946722117 | -0.014737774 | 0.750750668 |
| ZNF391 brown  | 0.054259814  | 0.241886565 | 0.045237944  | 0.329322335 |
| ZNF396 brown  | 0.038489871  | 0.406622717 | 0.032414467  | 0.484683951 |
| ZNF440 brown  | 0.046775322  | 0.313134617 | 0.049390772  | 0.286815599 |
| ZNF446 brown  | 0.149158752  | 0.001225782 | 0.142164659  | 0.002072601 |
| ZNF473 brown  | -0.070293332 | 0.129302652 | -0.066484828 | 0.151433515 |
| ZNF474 brown  | 0.109073904  | 0.018382176 | 0.120093662  | 0.009385085 |
| ZNF487 brown  | 0.087381013  | 0.059177879 | 0.101718006  | 0.027952145 |
| ZNF497 brown  | 0.16753178   | 0.000276451 | 0.161827498  | 0.000446562 |
| ZNF584 brown  | 0.021627363  | 0.641091481 | 0.011603903  | 0.802510912 |
| ZNF599 brown  | -0.204987932 | 7.99E-06    | -0.215771031 | 2.53E-06    |
| ZNF671 brown  | 0.071727944  | 0.121647774 | 0.081426588  | 0.078773442 |
| ZNF69 brown   | 0.164319058  | 0.000362866 | 0.165511019  | 0.000328224 |
| ZNF812 brown  | 0.164301513  | 0.000363401 | 0.171579688  | 0.000194855 |
| ZSCAN4 brown  | -0.035417806 | 0.445121362 | -0.022444166 | 0.628539435 |
| ZSCAN5brown   | -0.099519411 | 0.031538651 | -0.101825353 | 0.027786393 |
| AGPAT5 brown4 | 0.160373159  | 0.000503385 | 0.113871706  | 0.01380849  |
| ASAH1 brown4  | 0.196643661  | 1.87E-05    | 0.177054802  | 0.000119884 |
| ASH2L brown4  | 0.080704376  | 0.08147256  | 0.056201531  | 0.225424823 |
| ATP6V1Ebrown4 | 0.30173682   | 2.76E-11    | 0.285280787  | 3.40E-10    |
| BAG4 brown4   | 0.035837228  | 0.439746266 | 0.015687148  | 0.735276953 |
| BIN3 brown4   | 0.135722399  | 0.00329555  | 0.119415953  | 0.00979643  |
| BNIP3L brown4 | 0.243498897  | 9.91E-08    | 0.216243805  | 2.40E-06    |
| CCAR2 brown4  | 0.2555343    | 2.14E-08    | 0.24663417   | 6.70E-08    |
| CCDC25 brown4 | 0.225431001  | 8.56E-07    | 0.200335117  | 1.29E-05    |
| CHMP7 brown4  | 0.29045647   | 1.57E-10    | 0.285913873  | 3.09E-10    |
| CLN8 brown4   | 0.254122057  | 2.57E-08    | 0.258926612  | 1.37E-08    |
| CNOT7 brown4  | 0.123754055  | 0.007417827 | 0.097864979  | 0.03449052  |
| DCTN6 brown4  | 0.179735757  | 9.40E-05    | 0.155622686  | 0.000739221 |
| DDHD2 brown4  | 0.081399998  | 0.078871516 | 0.050973963  | 0.271628819 |
| ENTPD4 brown4 | 0.279774342  | 7.60E-10    | 0.246821135  | 6.54E-08    |
| ERICH1 brown4 | 0.072027052  | 0.120097199 | 0.053121198  | 0.251922873 |

|         |        |              |             |              |             |
|---------|--------|--------------|-------------|--------------|-------------|
| ERLIN2  | brown4 | 0.227768522  | 6.54E-07    | 0.205236498  | 7.79E-06    |
| FBXO25  | brown4 | 0.190823671  | 3.31E-05    | 0.195334356  | 2.13E-05    |
| FDFT1   | brown4 | 0.382185116  | 1.09E-17    | 0.361230133  | 7.69E-16    |
| FUT10   | brown4 | 0.25408035   | 2.58E-08    | 0.217988169  | 1.98E-06    |
| GTF2E2  | brown4 | 0.263994213  | 6.92E-09    | 0.262673647  | 8.28E-09    |
| HMBOX1  | brown4 | 0.069125302  | 0.13580622  | 0.045987754  | 0.321360901 |
| INTS10  | brown4 | 0.322509938  | 9.16E-13    | 0.302795226  | 2.33E-11    |
| INTS9   | brown4 | 0.339682167  | 4.47E-14    | 0.321784638  | 1.04E-12    |
| KCTD9   | brown4 | 0.143454591  | 0.001884466 | 0.121063836  | 0.008822956 |
| LEPROTI | brown4 | 0.211796288  | 3.89E-06    | 0.206384753  | 6.91E-06    |
| LONRF1  | brown4 | 0.016848792  | 0.716488751 | -0.021200565 | 0.647691442 |
| LSM1    | brown4 | 0.146629927  | 0.001486031 | 0.133289241  | 0.003907042 |
| MAK16   | brown4 | 0.103714142  | 0.0250052   | 0.08255361   | 0.074706725 |
| MCPH1   | brown4 | 0.253685331  | 2.72E-08    | 0.218379036  | 1.90E-06    |
| MTMR9   | brown4 | -0.024544881 | 0.596751631 | -0.057426584 | 0.215458264 |
| NEIL2   | brown4 | 0.228414429  | 6.07E-07    | 0.217907178  | 2.00E-06    |
| PCM1    | brown4 | 0.177250825  | 0.000117786 | 0.15184155   | 0.000996067 |
| PLEKHA7 | brown4 | 0.040839065  | 0.378565832 | 0.019730803  | 0.670628956 |
| POLR3D  | brown4 | 0.111768023  | 0.015673539 | 0.10058453   | 0.029754802 |
| PPP2CB  | brown4 | 0.095231678  | 0.039673147 | 0.080627348  | 0.0817648   |
| PPP2R2A | brown4 | 0.203098272  | 9.72E-06    | 0.161939402  | 0.000442447 |
| PPP3CC  | brown4 | 0.072760824  | 0.116358669 | 0.068146628  | 0.141446905 |
| PROSC   | brown4 | 0.084764173  | 0.067226747 | 0.06804614   | 0.142036091 |
| SARAF   | brown4 | 0.136853524  | 0.003042031 | 0.125461069  | 0.006633489 |
| TM2D2   | brown4 | 0.117355475  | 0.011147131 | 0.10928323   | 0.018157977 |
| TNFRSF1 | brown4 | 0.413097246  | 1.13E-20    | 0.386757438  | 4.12E-18    |
| TNKS    | brown4 | 0.15428096   | 0.000822369 | 0.126943571  | 0.00601352  |
| TTI2    | brown4 | 0.302384816  | 2.49E-11    | 0.288067883  | 2.25E-10    |
| UBXN8   | brown4 | 0.051530642  | 0.26642173  | 0.025369958  | 0.58446931  |
| VPS37A  | brown4 | 0.187166896  | 4.70E-05    | 0.167049606  | 0.000288061 |
| WHSC1L  | brown4 | 0.048031567  | 0.30030146  | 0.017970395  | 0.698508912 |
| XPO7    | brown4 | 0.21385622   | 3.11E-06    | 0.187046545  | 4.76E-05    |
| ZNF395  | brown4 | 0.156929898  | 0.00066576  | 0.143315426  | 0.001903983 |
| AC01115 | cyan   | -0.015986352 | 0.73042205  | 0.001793595  | 0.969164602 |
| AC01326 | cyan   | -0.062658171 | 0.176453949 | -0.046862433 | 0.3122333   |
| AC01675 | cyan   | -0.012156669 | 0.793311054 | 0.001129742  | 0.980574614 |
| AC10982 | cyan   | -0.062807539 | 0.175422978 | -0.034391977 | 0.458423986 |
| ADAM18  | cyan   | -0.102156366 | 0.027280589 | -0.090065176 | 0.051767352 |
| ADAM2   | cyan   | 0.019721716  | 0.670771746 | 0.029252079  | 0.528312817 |
| ADAM29  | cyan   | -0.116544194 | 0.011722629 | -0.10194956  | 0.027595661 |
| AKAP4   | cyan   | -0.060671802 | 0.190595014 | -0.040703758 | 0.380148848 |
| AL13347 | cyan   | -0.03644545  | 0.432017957 | -0.017102606 | 0.712405823 |
| AL13584 | cyan   | -0.035925804 | 0.438615883 | -0.015976404 | 0.730583298 |
| ALDOB   | cyan   | 0.008884506  | 0.848145609 | 0.00910874   | 0.844361217 |
| AMY1C   | cyan   | -0.053606748 | 0.247608162 | -0.043058468 | 0.353180262 |



|               |              |             |              |             |
|---------------|--------------|-------------|--------------|-------------|
| ANKRD3 cyan   | -0.043095477 | 0.352766252 | -0.023991341 | 0.605056858 |
| ANKRD6 cyan   | -0.012152081 | 0.793387289 | 0.020909611  | 0.652206631 |
| AP005242 cyan | -0.047712719 | 0.303525074 | -0.030958522 | 0.504525376 |
| AQPEP cyan    | -0.101762778 | 0.027882911 | -0.099764764 | 0.031119829 |
| ASAH2 cyan    | 0.03954382   | 0.393885309 | 0.038924877  | 0.401336061 |
| ASIC5 cyan    | -0.0490657   | 0.290003229 | -0.040335231 | 0.38448095  |
| ATP1B4 cyan   | -0.04943167  | 0.286416232 | -0.042774922 | 0.356362319 |
| BMP10 cyan    | -0.041149272 | 0.374951859 | -0.026906777 | 0.56190983  |
| BTNL3 cyan    | -0.066626855 | 0.150559621 | -0.047132001 | 0.309454914 |
| C11orf44 cyan | -0.041671019 | 0.368921545 | -0.017853945 | 0.70036805  |
| C12orf42 cyan | -0.150405629 | 0.001113546 | -0.131154576 | 0.004526208 |
| C4orf17 cyan  | 0.011345405  | 0.806822635 | 0.026671314  | 0.565338909 |
| C7orf34 cyan  | -0.127737836 | 0.005703234 | -0.133651912 | 0.00380982  |
| C7orf62 cyan  | -0.068913397 | 0.137012628 | -0.055770752 | 0.229006268 |
| C7orf72 cyan  | -0.02062144  | 0.656691186 | -0.006396621 | 0.890348607 |
| CCDC102 cyan  | -0.155521781 | 0.000745192 | -0.144765703 | 0.001709383 |
| CCDC172 cyan  | -0.052463945 | 0.257846227 | -0.033557312 | 0.469409631 |
| CCER1 cyan    | -0.038780823 | 0.403082177 | -0.029240099 | 0.528481809 |
| CLDN25 cyan   | 0.013272874  | 0.774822101 | 0.010345763  | 0.823550578 |
| CLEC12B cyan  | -0.117001576 | 0.011395027 | -0.111571874 | 0.015858208 |
| CLEC4C cyan   | -0.054557328 | 0.23931099  | -0.006789731 | 0.883656319 |
| CLRN1 cyan    | -0.059017672 | 0.202991573 | -0.020506584 | 0.65848205  |
| CNGB3 cyan    | -0.235556253 | 2.61E-07    | -0.2321145   | 3.94E-07    |
| CSN1S1 cyan   | -0.038706628 | 0.403983289 | -0.028906436 | 0.533199436 |
| CTAGE6 cyan   | 0.038769443  | 0.403220311 | 0.031228421  | 0.500815279 |
| CTAGE9 cyan   | 0.017386124  | 0.707854785 | 0.031749054  | 0.493699457 |
| CTC-554I cyan | -0.021020155 | 0.65048963  | -0.022353556 | 0.629926687 |
| CTXN2 cyan    | -0.178320185 | 0.000106932 | -0.17672225  | 0.000123525 |
| CYLC1 cyan    | -0.043044474 | 0.353336883 | -0.024955626 | 0.59062252  |
| DEFB112 cyan  | -0.040994241 | 0.376755342 | -0.019484932 | 0.674496875 |
| DEFB114 cyan  | -0.013659001 | 0.768455181 | 0.016796327  | 0.71733373  |
| DEFB115 cyan  | -0.038562406 | 0.405738324 | -0.017466807 | 0.70656154  |
| DEFB127 cyan  | -0.008148599 | 0.86058957  | 0.011308123  | 0.807444982 |
| DEFB129 cyan  | -0.01963951  | 0.672064123 | -0.028084474 | 0.544910896 |
| DEFB131 cyan  | -0.016806561 | 0.717168877 | -0.007507706 | 0.871455175 |
| DYTN cyan     | -0.142858093 | 0.001969431 | -0.134157059 | 0.003678055 |
| EBLN1 cyan    | -0.097322386 | 0.035508497 | -0.114191529 | 0.01354276  |
| EVX2 cyan     | -0.059169585 | 0.201829257 | -0.057582411 | 0.214213558 |
| EXD1 cyan     | -0.040493022 | 0.382622419 | -0.020431236 | 0.659657957 |
| F13B cyan     | -0.050605867 | 0.275109837 | -0.04339855  | 0.349387437 |
| F9 cyan       | -0.042879481 | 0.355186829 | -0.032099387 | 0.488941757 |
| FAM156A cyan  | -0.075645453 | 0.102538195 | -0.076243185 | 0.099844169 |
| FAM25G cyan   | 0.094114571  | 0.04206297  | 0.069467781  | 0.133873739 |
| FAM71A cyan   | -0.040866744 | 0.378242503 | -0.039413701 | 0.395444692 |
| FAM71B cyan   | -0.049956486 | 0.281324663 | -0.03069693  | 0.508135023 |

|         |      |              |             |              |             |
|---------|------|--------------|-------------|--------------|-------------|
| FSHB    | cyan | -0.055987538 | 0.227198924 | -0.038571408 | 0.405628641 |
| GABRA4  | cyan | -0.069509783 | 0.133638206 | -0.05088679  | 0.272450468 |
| GALNTL  | cyan | -0.10113477  | 0.028867636 | -0.079357818 | 0.08670454  |
| GC      | cyan | -0.034051918 | 0.462882316 | -0.025490173 | 0.582689581 |
| GJD3    | cyan | 0.018045505  | 0.697310733 | 0.015051759  | 0.745621653 |
| GKN2    | cyan | -0.066057394 | 0.154086757 | -0.050689465 | 0.274316617 |
| GLRA1   | cyan | -0.052985539 | 0.253137656 | -0.035629853 | 0.442399219 |
| GLRA3   | cyan | -0.138579555 | 0.002689206 | -0.124987925 | 0.006843081 |
| GOLGA6  | cyan | -0.094444217 | 0.041345448 | -0.082150645 | 0.076140684 |
| GPR179  | cyan | -0.148698844 | 0.001269745 | -0.142596732 | 0.002007752 |
| GPRC6A  | cyan | -0.116887897 | 0.011475684 | -0.105634719 | 0.022426906 |
| GPX6    | cyan | -0.104625894 | 0.023750945 | -0.106426638 | 0.021432823 |
| GRXCR2  | cyan | 0.002263748  | 0.961087476 | 0.014049927  | 0.762024953 |
| GSTA5   | cyan | -0.012963892 | 0.77992788  | -0.001658323 | 0.971489153 |
| HHLA1   | cyan | -0.045285305 | 0.328815717 | -0.030126291 | 0.516055747 |
| HIST1H2 | cyan | -0.005130915 | 0.911946561 | -0.019515389 | 0.674017283 |
| HIST1H2 | cyan | 0.024192615  | 0.602031    | 0.037665949  | 0.416748692 |
| IFNA10  | cyan | -0.01707484  | 0.712852089 | 0.009621238  | 0.835725357 |
| IFNA14  | cyan | -0.024532359 | 0.596938944 | 0.00213933   | 0.963224591 |
| IFNA16  | cyan | -0.032276851 | 0.486541145 | -0.012269724 | 0.791432929 |
| IFNA17  | cyan | -0.037074282 | 0.424110857 | -0.041429808 | 0.37170194  |
| IFNA4   | cyan | -0.03481771  | 0.452876425 | -0.025073207 | 0.588873318 |
| IFNA5   | cyan | -0.056969902 | 0.219135999 | -0.062659599 | 0.176444068 |
| IFNA7   | cyan | -0.057581298 | 0.214222431 | -0.044579856 | 0.336413923 |
| IL9     | cyan | 0.044576144  | 0.336454196 | 0.049808502  | 0.28275411  |
| IQCJ    | cyan | -0.087601508 | 0.058537742 | -0.080882288 | 0.080800803 |
| KCNA10  | cyan | -0.018928807 | 0.683277139 | -0.014197182 | 0.75960701  |
| KCNH7   | cyan | -0.041134032 | 0.37512891  | -0.025225997 | 0.58660389  |
| KRBOX1  | cyan | -0.245533902 | 7.69E-08    | -0.242445822 | 1.13E-07    |
| KRT12   | cyan | -0.070939166 | 0.125811649 | -0.055924135 | 0.227726456 |
| KRTAP1  | cyan | -0.058672276 | 0.205652343 | -0.044208624 | 0.340457218 |
| KRTAP1  | cyan | -0.086184333 | 0.062753832 | -0.087966704 | 0.057490128 |
| KRTAP1  | cyan | -0.038932594 | 0.401242645 | -0.018770825 | 0.68577927  |
| KRTAP1  | cyan | -0.076761709 | 0.097552988 | -0.066045942 | 0.154158327 |
| KRTAP1  | cyan | -0.04544306  | 0.327131873 | -0.014177784 | 0.759925398 |
| KRTAP1  | cyan | -0.041661081 | 0.36903585  | -0.029842848 | 0.52001365  |
| KRTAP2  | cyan | -0.013364869 | 0.773303789 | -0.005324694 | 0.908635318 |
| KRTAP2  | cyan | -0.084426535 | 0.068327792 | -0.089035118 | 0.054514123 |
| KRTAP2  | cyan | -0.038064905 | 0.411827142 | -0.025958452 | 0.575781089 |
| LACRT   | cyan | 0.05560957   | 0.230356639 | 0.055882395  | 0.228074229 |
| LCE1B   | cyan | 0.023073048  | 0.618947388 | 0.03515585   | 0.448497304 |
| LCE3B   | cyan | -0.058604762 | 0.206175374 | -0.04919704  | 0.288712467 |
| LCE6A   | cyan | 0.017162291  | 0.711446911 | 0.037612617  | 0.417409212 |
| LGALS1  | cyan | -0.030264675 | 0.514129072 | 0.042725337  | 0.356920618 |
| LRIT1   | cyan | -0.025024419 | 0.589598821 | 0.019878129  | 0.668315447 |

|              |              |             |              |             |
|--------------|--------------|-------------|--------------|-------------|
| LRRC72 cyan  | -0.001051503 | 0.981919655 | 0.018344106  | 0.692554819 |
| LRRC74A cyan | -0.049511033 | 0.285642322 | -0.017151085 | 0.71162692  |
| LUZP4 cyan   | -0.101281071 | 0.028635606 | -0.087176652 | 0.059776336 |
| MBD3L4 cyan  | -0.060120403 | 0.194664077 | -0.042750521 | 0.356636992 |
| MC2R cyan    | -0.006383837 | 0.890566385 | 0.01622744   | 0.72651794  |
| MEPE cyan    | -0.08267399  | 0.074282641 | -0.063680465 | 0.169487267 |
| MGAT4C cyan  | -0.069802793 | 0.132003973 | -0.059411794 | 0.199986081 |
| MTNR1B cyan  | 0.023348631  | 0.614764212 | 0.032421904  | 0.484583684 |
| MTRNR2 cyan  | 0.047107063  | 0.309711265 | 0.069519435  | 0.133584126 |
| NEUROD cyan  | -0.016279184 | 0.725680936 | 0.006962804  | 0.880712515 |
| NMS cyan     | 0.008443877  | 0.855592188 | 0.02140774   | 0.644484225 |
| NPY2R cyan   | 0.021220579  | 0.647381314 | -0.001446166 | 0.975135429 |
| OR10A7 cyan  | -0.04163001  | 0.36939334  | -0.027051782 | 0.559803098 |
| OR10AG1 cyan | -0.040022259 | 0.388183524 | -0.020196337 | 0.66332924  |
| OR10D3 cyan  | -0.023989134 | 0.605090078 | 0.003343791  | 0.942549008 |
| OR10G6 cyan  | -0.019469104 | 0.674746177 | -0.010769502 | 0.816449522 |
| OR10G8 cyan  | -0.039179898 | 0.398255982 | -0.016770485 | 0.717750068 |
| OR10H4 cyan  | -0.023657484 | 0.61009083  | -0.007759728 | 0.867179444 |
| OR10J1 cyan  | -0.001099776 | 0.981089775 | 0.015405106  | 0.739863071 |
| OR10T2 cyan  | -0.039414192 | 0.395438803 | -0.039104715 | 0.399162547 |
| OR10Z1 cyan  | 0.047098709  | 0.309797165 | 0.052898549  | 0.253918765 |
| OR11H2 cyan  | -0.039113557 | 0.39905586  | -0.025428775 | 0.583598228 |
| OR13C3 cyan  | -0.076142504 | 0.100293963 | -0.050434258 | 0.276743044 |
| OR13C5 cyan  | 0.019811145  | 0.669366933 | -0.0065357   | 0.887980019 |
| OR14A16 cyan | -0.002833534 | 0.951304086 | 0.011064687  | 0.811511609 |
| OR14C36 cyan | -0.064612222 | 0.16331855  | -0.04668732  | 0.3140469   |
| OR1C1 cyan   | -0.107458047 | 0.020195609 | -0.095148031 | 0.039848024 |
| OR1J1 cyan   | -0.064438158 | 0.164457944 | -0.048658098 | 0.294033617 |
| OR1J2 cyan   | -0.028432983 | 0.53992977  | -0.011978326 | 0.796276208 |
| OR1J4 cyan   | -0.049856449 | 0.282290431 | -0.062528238 | 0.177354431 |
| OR1L1 cyan   | -0.063859677 | 0.168287458 | -0.060528927 | 0.191643326 |
| OR1L3 cyan   | -0.073077183 | 0.114775222 | -0.055810831 | 0.228671362 |
| OR1S2 cyan   | -0.066121243 | 0.1536882   | -0.061838938 | 0.182188651 |
| OR2A14 cyan  | -0.042317276 | 0.361536061 | -0.031011141 | 0.503800929 |
| OR2A25 cyan  | -0.094734918 | 0.040721296 | -0.090218212 | 0.051369283 |
| OR2A4 cyan   | 0.03961303   | 0.393057379 | 0.049377603  | 0.286944273 |
| OR2AJ1 cyan  | -0.042932766 | 0.354588719 | -0.019789806 | 0.669702031 |
| OR2AK2 cyan  | -0.03281507  | 0.479299465 | -0.030556418 | 0.510079473 |
| OR2AP1 cyan  | -0.019572513 | 0.673118109 | -0.009556427 | 0.836816397 |
| OR2C3 cyan   | -0.110452751 | 0.016948758 | -0.088337068 | 0.056443605 |
| OR2J3 cyan   | -0.064313201 | 0.165279562 | -0.057791602 | 0.212550745 |
| OR2L3 cyan   | -0.09310779  | 0.04431971  | -0.077946459 | 0.092475114 |
| OR2L5 cyan   | -0.072007869 | 0.12019618  | -0.068459042 | 0.139627105 |
| OR2M2 cyan   | -0.056865791 | 0.219980681 | -0.041492437 | 0.370978779 |
| OR2T1 cyan   | -0.032546752 | 0.482902309 | -0.007755867 | 0.867244915 |

|        |      |              |             |              |             |
|--------|------|--------------|-------------|--------------|-------------|
| OR2T5  | cyan | -0.03898085  | 0.400658809 | -0.01223622  | 0.791989384 |
| OR2V2  | cyan | -0.049046994 | 0.290187384 | -0.055361998 | 0.232441755 |
| OR2W1  | cyan | -0.067378124 | 0.146000683 | -0.060210119 | 0.193997728 |
| OR4A15 | cyan | -0.051147986 | 0.269993621 | -0.030035062 | 0.517327933 |
| OR4A16 | cyan | -0.052142405 | 0.260778831 | -0.032182635 | 0.487814842 |
| OR4A47 | cyan | -0.027498969 | 0.553330218 | -0.003352665 | 0.942396796 |
| OR4A5  | cyan | -0.021984045 | 0.635597392 | 0.006489038  | 0.888774586 |
| OR4C13 | cyan | -0.021244596 | 0.64700926  | -0.013554756 | 0.770172589 |
| OR4C3  | cyan | -0.003669833 | 0.936958263 | 0.013982374  | 0.763134945 |
| OR4D6  | cyan | -0.043105081 | 0.352658871 | -0.026417681 | 0.569043769 |
| OR4E2  | cyan | -0.031362008 | 0.498984313 | -0.021512792 | 0.642860446 |
| OR4F15 | cyan | -0.050262548 | 0.278383795 | -0.030110595 | 0.516274515 |
| OR4F17 | cyan | -0.027745878 | 0.549772035 | -0.015420684 | 0.73960952  |
| OR4F21 | cyan | -0.008169843 | 0.86022984  | 0.001771494  | 0.969544379 |
| OR4F5  | cyan | -0.043279305 | 0.350714384 | -0.044751784 | 0.334551838 |
| OR4F6  | cyan | -0.066289677 | 0.152640557 | -0.048017978 | 0.300438386 |
| OR4K1  | cyan | -0.038839026 | 0.402376135 | -0.009214581 | 0.842576169 |
| OR4N5  | cyan | -0.061236874 | 0.186490168 | -0.040769017 | 0.379384849 |
| OR4P4  | cyan | -0.017423979 | 0.70724791  | 0.000684793  | 0.988224576 |
| OR4S1  | cyan | -0.026589726 | 0.566529419 | -0.013250223 | 0.775196072 |
| OR51A4 | cyan | -0.05522187  | 0.233627846 | -0.032346592 | 0.485599476 |
| OR51B5 | cyan | -0.068723482 | 0.138100831 | -0.04963069  | 0.284478156 |
| OR51G2 | cyan | 0.048996716  | 0.290682729 | 0.055739683  | 0.229266127 |
| OR51T1 | cyan | -0.008123407 | 0.861016189 | 0.006089139  | 0.895588631 |
| OR52E2 | cyan | -0.084796251 | 0.067122904 | -0.070654046 | 0.127343712 |
| OR52J3 | cyan | 0.043730489  | 0.345710378 | 0.054720138  | 0.237909735 |
| OR52K2 | cyan | -0.054392021 | 0.240739662 | -0.038547553 | 0.405919331 |
| OR52L1 | cyan | -0.087269967 | 0.059502452 | -0.072553338 | 0.117406437 |
| OR52N4 | cyan | -0.12030564  | 0.009259614 | -0.112519357 | 0.014983505 |
| OR56A4 | cyan | -0.107009195 | 0.020726176 | -0.087462034 | 0.05894199  |
| OR5A2  | cyan | -0.047774754 | 0.302896099 | -0.034285247 | 0.45982067  |
| OR5AC2 | cyan | 0.048808098  | 0.292546081 | 0.043652869  | 0.346568009 |
| OR5AK2 | cyan | -0.044694036 | 0.335176543 | -0.040978714 | 0.376936256 |
| OR5B17 | cyan | -0.035395232 | 0.445411707 | -0.013938865 | 0.76385013  |
| OR5B2  | cyan | -0.059710736 | 0.197728103 | -0.042819466 | 0.355861241 |
| OR5B3  | cyan | -0.059088289 | 0.20245067  | -0.036010587 | 0.437535473 |
| OR5D14 | cyan | -0.04943274  | 0.286405788 | -0.029231776 | 0.528599235 |
| OR5H1  | cyan | -0.035273266 | 0.446982324 | -0.023911416 | 0.606260289 |
| OR5H14 | cyan | -0.036810315 | 0.427419731 | -0.019744659 | 0.670411241 |
| OR5H15 | cyan | -0.037261459 | 0.421773638 | -0.013597659 | 0.769465637 |
| OR5I1  | cyan | -0.058453935 | 0.207347313 | -0.051251344 | 0.269025614 |
| OR5K1  | cyan | -0.019786995 | 0.669746179 | -0.007100386 | 0.878373552 |
| OR5K4  | cyan | 0.045717604  | 0.324214775 | 0.042975747  | 0.354106725 |
| OR5M1  | cyan | -0.018661484 | 0.687513042 | -0.001332429 | 0.977090394 |
| OR5M10 | cyan | -0.072695699 | 0.116686747 | -0.021455406 | 0.643747241 |

|          |      |              |             |              |             |
|----------|------|--------------|-------------|--------------|-------------|
| OR5M3    | cyan | -0.034920927 | 0.451537157 | -0.019609818 | 0.672531157 |
| OR5P2    | cyan | -0.062532043 | 0.177328012 | -0.031252184 | 0.500489319 |
| OR5W2    | cyan | 0.003816977  | 0.934436138 | 0.014460166  | 0.755294614 |
| OR6C1    | cyan | -0.027773523 | 0.549374346 | -0.012373068 | 0.789717176 |
| OR6C3    | cyan | -0.006551809 | 0.887705741 | -8.43E-05    | 0.998550581 |
| OR6C4    | cyan | 0.024781793  | 0.593212919 | 0.046965259  | 0.311171566 |
| OR6C65   | cyan | -0.05666646  | 0.221604385 | -0.04179467  | 0.367501256 |
| OR6C74   | cyan | 0.004179628  | 0.928222956 | 0.02323018   | 0.616560699 |
| OR6F1    | cyan | 0.05585112   | 0.22833505  | 0.056238618  | 0.225118357 |
| OR6K3    | cyan | 0.078524929  | 0.090073819 | 0.075817256  | 0.10175803  |
| OR6P1    | cyan | -0.011283014 | 0.807864184 | 0.011485322  | 0.804488096 |
| OR8A1    | cyan | -0.066781662 | 0.149611463 | -0.056511388 | 0.22287348  |
| OR8B2    | cyan | -0.035852707 | 0.439548602 | -0.009692024 | 0.834534097 |
| OR8B8    | cyan | -0.040831376 | 0.378655683 | -0.011846639 | 0.798467534 |
| OR8G1    | cyan | -0.032221014 | 0.487295788 | -0.007905886 | 0.864701517 |
| OR8G5    | cyan | -0.094457161 | 0.041317486 | -0.070811741 | 0.126494578 |
| OR8H3    | cyan | -0.036806147 | 0.4274721   | -0.020037039 | 0.665823536 |
| OR8I2    | cyan | -0.045970698 | 0.321540597 | -0.051032701 | 0.271076133 |
| OR8J1    | cyan | -0.053429722 | 0.249175239 | -0.031182405 | 0.501446808 |
| OR8U1    | cyan | -0.025314443 | 0.585292029 | 0.002118526  | 0.963581977 |
| OR9G1    | cyan | -0.059858113 | 0.1966218   | -0.045140322 | 0.330368174 |
| OR9I1    | cyan | -0.017176147 | 0.711224352 | -0.008846074 | 0.84879457  |
| OR9K2    | cyan | -0.038138044 | 0.410928631 | -0.025369394 | 0.584477668 |
| OR9Q2    | cyan | -0.016706561 | 0.71878027  | -0.001629958 | 0.971976627 |
| OTOL1    | cyan | -0.067425265 | 0.145718167 | -0.065286688 | 0.158959598 |
| PDHA2    | cyan | 0.007948181  | 0.863984713 | 0.032479358  | 0.483809545 |
| PLSCR5   | cyan | -0.046253622 | 0.318568273 | -0.037750051 | 0.415708333 |
| PM20D1   | cyan | -0.148155333 | 0.001323567 | -0.131906957 | 0.00429853  |
| POTEB3   | cyan | -0.04053636  | 0.382112926 | -0.016284241 | 0.725599151 |
| POTED    | cyan | 0.040960234  | 0.377151653 | 0.059192884  | 0.201651422 |
| PPIAL4D  | cyan | -0.013803569 | 0.766075336 | -0.003206301 | 0.944907451 |
| PPP1R3A  | cyan | -0.036134403 | 0.435960405 | -0.023503941 | 0.61241218  |
| PSKH2    | cyan | -0.026771429 | 0.563879696 | 0.000543596  | 0.990652409 |
| PYDC2    | cyan | 0.003706777  | 0.936324962 | 0.014486098  | 0.754869802 |
| RBP3     | cyan | -0.074092705 | 0.109806299 | -0.053740876 | 0.246425404 |
| RNASE12  | cyan | 0.010541707  | 0.820265111 | 0.026199334  | 0.572242447 |
| RNASE8   | cyan | -0.089221415 | 0.05400855  | -0.076607221 | 0.098231194 |
| RNASE9   | cyan | -0.029170718 | 0.529461034 | -0.02086972  | 0.652826684 |
| RP11-148 | cyan | -0.150412384 | 0.001112965 | -0.126999963 | 0.005991    |
| RP11-166 | cyan | -0.052656199 | 0.256103703 | -0.00440173  | 0.924419885 |
| RP11-457 | cyan | -0.00236472  | 0.959353282 | 0.001999531  | 0.965626235 |
| RP11-500 | cyan | 0.050721951  | 0.274008787 | 0.060228705  | 0.193859891 |
| SCP2D1   | cyan | -0.050951553 | 0.271839877 | -0.032540123 | 0.482991499 |
| SI       | cyan | -0.046264258 | 0.318456883 | -0.044770524 | 0.334349269 |
| SLC17A6  | cyan | -0.057970626 | 0.211135109 | -0.044265268 | 0.339838277 |

|         |           |              |             |              |             |
|---------|-----------|--------------|-------------|--------------|-------------|
| SLC6A5  | cyan      | -0.058714228 | 0.205327822 | -0.058843691 | 0.204328701 |
| SLC7A13 | cyan      | 0.014543982  | 0.753921799 | 0.04182781   | 0.367121181 |
| SPACA5  | cyan      | -0.025455857 | 0.583197361 | -0.010414398 | 0.82239939  |
| SPANXN  | cyan      | 0.036064769  | 0.436845821 | 0.044637923  | 0.335784282 |
| SPATA31 | cyan      | 0.002103677  | 0.963837056 | 0.006331708  | 0.891454457 |
| SSX4    | cyan      | -0.03579116  | 0.440334829 | -0.034238416 | 0.460434259 |
| SYT10   | cyan      | -0.004528264 | 0.922254009 | 0.007841111  | 0.865799526 |
| TAAR2   | cyan      | -0.017595712 | 0.704497132 | -0.009816209 | 0.832445124 |
| TAS2R16 | cyan      | -0.013963725 | 0.763441477 | -0.015540754 | 0.73765622  |
| TECRL   | cyan      | 0.019180298  | 0.679301153 | 0.027538764  | 0.552755983 |
| TEX33   | cyan      | -0.028578564 | 0.537855761 | -0.016702072 | 0.718852632 |
| TMEM17  | cyan      | -0.064160975 | 0.166284634 | -0.058150632 | 0.209718579 |
| TMEM78  | cyan      | 0.047959326  | 0.301029832 | 0.061878536  | 0.181908331 |
| TNP1    | cyan      | -0.06810125  | 0.141712736 | -0.070000446 | 0.130910333 |
| TRIM72  | cyan      | -0.110295329 | 0.017107308 | -0.109766455 | 0.01764951  |
| TSPY4   | cyan      | -0.043279305 | 0.350714384 | -0.044751784 | 0.334551838 |
| UBTFL1  | cyan      | -0.053332686 | 0.25003716  | -0.032492985 | 0.483626021 |
| UGT2A1  | cyan      | -0.077137832 | 0.095917391 | -0.057023692 | 0.218700499 |
| UGT2B28 | cyan      | 0.002881552  | 0.950479921 | 0.025024311  | 0.589600436 |
| UNC5D   | cyan      | -0.112531741 | 0.014972358 | -0.088664792 | 0.0555308   |
| VN1R2   | cyan      | -0.069250063 | 0.135099769 | -0.06186399  | 0.182011268 |
| VN1R4   | cyan      | -0.036827181 | 0.427207859 | -0.024658785 | 0.595049079 |
| XIRP2   | cyan      | -0.075960556 | 0.101110904 | -0.06143458  | 0.185069464 |
| ZNF479  | cyan      | -0.062156657 | 0.179948448 | -0.055987631 | 0.227198149 |
| ZNF705B | cyan      | 0.035158757  | 0.448459758 | 0.047290838  | 0.307825466 |
| ZNF705D | cyan      | 0.013453824  | 0.771836478 | 0.043848286  | 0.344411418 |
| ZNF705G | cyan      | -0.049596046 | 0.284814886 | -0.027197646 | 0.55768776  |
| A2M     | darkgreen | -0.145699478 | 0.001593922 | -0.106626558 | 0.021187997 |
| ABCB1   | darkgreen | -0.2077847   | 5.96E-06    | -0.196441345 | 1.91E-05    |
| ABCG2   | darkgreen | -0.247009179 | 6.39E-08    | -0.244833325 | 8.39E-08    |
| AC00933 | darkgreen | -0.132506017 | 0.004124707 | -0.164373548 | 0.000361211 |
| ACKR1   | darkgreen | -0.110030182 | 0.017377289 | -0.081094305 | 0.080006134 |
| ACVRL1  | darkgreen | -0.123374136 | 0.007603287 | -0.075022545 | 0.105406706 |
| ADAMTS  | darkgreen | 0.066287939  | 0.152651337 | 0.070023711  | 0.130782066 |
| ADCY4   | darkgreen | -0.12062691  | 0.009072295 | -0.09142758  | 0.048312534 |
| ADPRH   | darkgreen | -0.343269575 | 2.32E-14    | -0.305116681 | 1.61E-11    |
| ADRB2   | darkgreen | -0.038936888 | 0.401190668 | -0.029721986 | 0.521706054 |
| APLNR   | darkgreen | 0.05160658   | 0.265716762 | 0.064279395  | 0.165502369 |
| AQP1    | darkgreen | -0.145880291 | 0.001572409 | -0.115930088 | 0.012175569 |
| ARHGAP  | darkgreen | -0.163149481 | 0.000400146 | -0.148184686 | 0.001320608 |
| ARHGEF  | darkgreen | -0.128196333 | 0.005530743 | -0.116978892 | 0.011411082 |
| ARHGEF  | darkgreen | -0.142136272 | 0.002076928 | -0.114642373 | 0.013175821 |
| ARID5A  | darkgreen | -0.224227174 | 9.83E-07    | -0.20873479  | 5.39E-06    |
| ARL15   | darkgreen | 0.178493007  | 0.000105269 | 0.175439402  | 0.000138567 |
| BCL6B   | darkgreen | -0.173704196 | 0.000161662 | -0.166380929 | 0.000304917 |

|                    |              |             |              |             |
|--------------------|--------------|-------------|--------------|-------------|
| BDKRB2 darkgreen   | -0.164048396 | 0.000371194 | -0.14782497  | 0.0013573   |
| BMP8A darkgreen    | -0.052453959 | 0.257936955 | -0.047043548 | 0.310364784 |
| C10orf10 darkgreen | -0.198846285 | 1.50E-05    | -0.170616602 | 0.000211916 |
| C10orf12 darkgreen | 0.03236398   | 0.485364845 | 0.041412791  | 0.371898572 |
| C10orf54 darkgreen | -0.23899297  | 1.72E-07    | -0.191272414 | 3.17E-05    |
| CALCRL darkgreen   | -0.07879888  | 0.088954202 | -0.060216195 | 0.193952657 |
| CAPN11 darkgreen   | -0.091817033 | 0.047361188 | -0.09884206  | 0.032720001 |
| CBFA2T3 darkgreen  | -0.161371354 | 0.000463708 | -0.148048806 | 0.001334359 |
| CCDC69 darkgreen   | -0.184824183 | 5.87E-05    | -0.150639685 | 0.001093565 |
| CCM2L darkgreen    | -0.319216771 | 1.60E-12    | -0.316063454 | 2.71E-12    |
| CD34 darkgreen     | -0.162574692 | 0.000419746 | -0.148655852 | 0.001273928 |
| CD93 darkgreen     | -0.066538379 | 0.151103565 | -0.054204965 | 0.242363505 |
| CD97 darkgreen     | -0.171720408 | 0.000192472 | -0.131373774 | 0.004458777 |
| CDH5 darkgreen     | 0.001385609  | 0.976176298 | 0.009111991  | 0.844306364 |
| CLDN15 darkgreen   | -0.113971191 | 0.013725344 | -0.100296563 | 0.030228343 |
| CLDN5 darkgreen    | -0.184516119 | 6.04E-05    | -0.150660646 | 0.001091792 |
| CLEC14A darkgreen  | -0.130089991 | 0.004866977 | -0.099843893 | 0.030985773 |
| CLEC1A darkgreen   | -0.186797723 | 4.87E-05    | -0.177671129 | 0.000113402 |
| CLEC2B darkgreen   | -0.218901206 | 1.79E-06    | -0.182096675 | 7.57E-05    |
| CLEC3B darkgreen   | -0.170302351 | 0.000217779 | -0.16083918  | 0.000484484 |
| CLEC9A darkgreen   | -0.186357867 | 5.08E-05    | -0.169312175 | 0.000237261 |
| CLIC2 darkgreen    | -0.209202682 | 5.13E-06    | -0.183689791 | 6.53E-05    |
| COL5A3 darkgreen   | -0.078331916 | 0.090869413 | -0.047563949 | 0.305036975 |
| CSPG4 darkgreen    | 0.016233248  | 0.726423982 | 0.012902967  | 0.780935766 |
| CXorf36 darkgreen  | -0.207394835 | 6.21E-06    | -0.194578656 | 2.29E-05    |
| CYGB darkgreen     | 0.101756052  | 0.027893302 | 0.117048999  | 0.011361529 |
| CYYR1 darkgreen    | -0.328470876 | 3.28E-13    | -0.313841308 | 3.92E-12    |
| DHH darkgreen      | -0.036195985 | 0.435178229 | -0.004692785 | 0.919438757 |
| DLL4 darkgreen     | -0.022053723 | 0.634526424 | -0.023489509 | 0.612630578 |
| DYSF darkgreen     | -0.107755814 | 0.019850187 | -0.091091424 | 0.049146505 |
| ECSCR darkgreen    | -0.122904587 | 0.00783822  | -0.099641    | 0.031330498 |
| EDN1 darkgreen     | -0.144489036 | 0.001745037 | -0.148820451 | 0.001257981 |
| EGFL7 darkgreen    | -0.16806004  | 0.000264234 | -0.160076115 | 0.000515788 |
| ELFN1 darkgreen    | -0.083193524 | 0.072474827 | -0.065216731 | 0.159407598 |
| ELMO1 darkgreen    | -0.108237484 | 0.019302308 | -0.086993599 | 0.060316635 |
| ELTD1 darkgreen    | -0.122396539 | 0.008099697 | -0.110578335 | 0.016823197 |
| EMCN darkgreen     | -0.206402452 | 6.89E-06    | -0.19198754  | 2.96E-05    |
| ENG darkgreen      | -0.160503981 | 0.000498011 | -0.114653102 | 0.013167196 |
| ENPP2 darkgreen    | -0.278830055 | 8.71E-10    | -0.270914364 | 2.67E-09    |
| ENTPD1 darkgreen   | 0.019109521  | 0.680419216 | 0.012414676  | 0.789026685 |
| EPAS1 darkgreen    | 0.084639504  | 0.06763159  | 0.092984667  | 0.044602558 |
| ERG darkgreen      | -0.003653566 | 0.937237123 | -0.013559433 | 0.770095499 |
| ESAM darkgreen     | -0.080194581 | 0.083422478 | -0.055720473 | 0.229426896 |
| ETS1 darkgreen     | -0.059640036 | 0.198260432 | -0.047500313 | 0.305685213 |
| EXOC3L1 darkgreen  | 0.086678393  | 0.06125645  | 0.118385501  | 0.010452587 |

|         |           |              |             |              |             |
|---------|-----------|--------------|-------------|--------------|-------------|
| EXOC3L2 | darkgreen | -0.058858125 | 0.204217528 | -0.029325545 | 0.527277115 |
| FAM110I | darkgreen | -0.161149127 | 0.00047228  | -0.148132789 | 0.001325844 |
| FAM124E | darkgreen | -0.131520746 | 0.004414075 | -0.141983532 | 0.002100351 |
| FAM167E | darkgreen | -0.051850138 | 0.263464335 | -0.034796439 | 0.453152689 |
| FAM212A | darkgreen | -0.154757709 | 0.000791881 | -0.124702477 | 0.006972378 |
| FGD5    | darkgreen | -0.21771771  | 2.04E-06    | -0.210858346 | 4.30E-06    |
| FLI1    | darkgreen | -0.194852747 | 2.23E-05    | -0.168687089 | 0.000250387 |
| FLT1    | darkgreen | 0.015075109  | 0.74524066  | 0.012278569  | 0.791286033 |
| FLT4    | darkgreen | -0.186676007 | 4.93E-05    | -0.176492596 | 0.0001261   |
| FOXF1   | darkgreen | 0.023446819  | 0.613276776 | 0.030231239  | 0.514594248 |
| FOXS1   | darkgreen | 0.040515378  | 0.382359545 | 0.075825126  | 0.101722404 |
| GIMAP1  | darkgreen | -0.169596477 | 0.000231507 | -0.140112641 | 0.002407525 |
| GIMAP2  | darkgreen | -0.043880714 | 0.344054375 | -0.023022745 | 0.619712275 |
| GIMAP4  | darkgreen | -0.121695097 | 0.008473493 | -0.086980108 | 0.060356614 |
| GIMAP5  | darkgreen | -0.160220694 | 0.000509716 | -0.160175628 | 0.000511601 |
| GIMAP6  | darkgreen | -0.15012425  | 0.001138013 | -0.124716666 | 0.006965899 |
| GIMAP7  | darkgreen | -0.125641906 | 0.006554915 | -0.099294576 | 0.031926671 |
| GIMAP8  | darkgreen | -0.182416943 | 7.35E-05    | -0.16259279  | 0.000419115 |
| GIPC3   | darkgreen | -0.117300982 | 0.011184988 | -0.091241308 | 0.048773181 |
| GJA4    | darkgreen | -0.113264383 | 0.014325751 | -0.102046317 | 0.027447863 |
| GJA5    | darkgreen | -0.058067568 | 0.210371384 | -0.051323596 | 0.268350352 |
| GNAI2   | darkgreen | 0.075974333  | 0.101048864 | 0.109673797  | 0.017746033 |
| GPR116  | darkgreen | -0.125495049 | 0.006618661 | -0.111293534 | 0.016123533 |
| GPR4    | darkgreen | 0.067195022  | 0.147101978 | 0.094341391  | 0.041568147 |
| GPR85   | darkgreen | -0.242847409 | 1.07E-07    | -0.217349928 | 2.12E-06    |
| GRAP    | darkgreen | -0.054056508 | 0.243657729 | -0.057884182 | 0.211817818 |
| GUCY1A  | darkgreen | 0.12132359   | 0.008677632 | 0.112722146  | 0.014801894 |
| GYPC    | darkgreen | -0.221387739 | 1.36E-06    | -0.18297045  | 6.98E-05    |
| HEG1    | darkgreen | -0.209914359 | 4.76E-06    | -0.184598729 | 5.99E-05    |
| HEYL    | darkgreen | -0.075808214 | 0.101798972 | -0.068804364 | 0.137636573 |
| HHEX    | darkgreen | -0.337878055 | 6.20E-14    | -0.319499454 | 1.53E-12    |
| HIGD1B  | darkgreen | -0.098019025 | 0.034206077 | -0.085329892 | 0.065414584 |
| HOXD1   | darkgreen | -0.120106954 | 0.009377173 | -0.139487493 | 0.002518966 |
| HOXD10  | darkgreen | -0.130321457 | 0.004790977 | -0.134003687 | 0.003717618 |
| HOXD11  | darkgreen | -0.097963384 | 0.034308587 | -0.112783325 | 0.014747486 |
| HOXD3   | darkgreen | -0.146042329 | 0.001553357 | -0.163788792 | 0.000379348 |
| HOXD4   | darkgreen | -0.15060659  | 0.00109637  | -0.179913211 | 9.25E-05    |
| HOXD8   | darkgreen | -0.138819757 | 0.002643177 | -0.153073261 | 0.000904524 |
| HOXD9   | darkgreen | -0.125786916 | 0.006492511 | -0.133093066 | 0.003960562 |
| HPCAL1  | darkgreen | -0.137212686 | 0.002965321 | -0.103672358 | 0.025064025 |
| HVCN1   | darkgreen | -0.264940577 | 6.09E-09    | -0.243827065 | 9.51E-08    |
| HYAL1   | darkgreen | -0.146590072 | 0.001490511 | -0.141020936 | 0.002253613 |
| ICAM2   | darkgreen | -0.23934433  | 1.65E-07    | -0.211236952 | 4.13E-06    |
| IFFO1   | darkgreen | -0.208160796 | 5.73E-06    | -0.167510547 | 0.000276953 |
| IGFBP7  | darkgreen | -0.107960009 | 0.019616293 | -0.077432339 | 0.094652041 |



|          |           |              |             |              |             |
|----------|-----------|--------------|-------------|--------------|-------------|
| IL33     | darkgreen | 0.002013964  | 0.965378272 | 0.002600416  | 0.955305999 |
| IL34     | darkgreen | -0.16918802  | 0.000239816 | -0.144339733 | 0.001764559 |
| IL3RA    | darkgreen | -0.041587975 | 0.369877321 | -0.02040012  | 0.660143808 |
| INSR     | darkgreen | -0.202581562 | 1.02E-05    | -0.202763347 | 1.01E-05    |
| IRAK3    | darkgreen | -0.203720331 | 9.11E-06    | -0.196193165 | 1.95E-05    |
| ITGA1    | darkgreen | 0.010773993  | 0.816374338 | 0.006462925  | 0.889219292 |
| ITGA5    | darkgreen | -0.090486789 | 0.050676854 | -0.070355815 | 0.128961662 |
| KANK3    | darkgreen | -0.157808287 | 0.000620262 | -0.134466353 | 0.003599429 |
| KDR      | darkgreen | -0.11663735  | 0.011655238 | -0.114128742 | 0.01359457  |
| KL       | darkgreen | -0.227459622 | 6.78E-07    | -0.236408031 | 2.36E-07    |
| LHX6     | darkgreen | -0.247823761 | 5.76E-08    | -0.238450002 | 1.84E-07    |
| LYL1     | darkgreen | -0.2047734   | 8.17E-06    | -0.157611578 | 0.000630193 |
| MAPK11   | darkgreen | 0.122254156  | 0.008174359 | 0.131468855  | 0.004429811 |
| MCAM     | darkgreen | -0.171957317 | 0.000188523 | -0.188637732 | 4.09E-05    |
| MFNG     | darkgreen | 0.008942263  | 0.847170509 | 0.042163914  | 0.363280274 |
| MMRN1    | darkgreen | -0.201457792 | 1.15E-05    | -0.180276517 | 8.95E-05    |
| MMRN2    | darkgreen | -0.165429427 | 0.000330493 | -0.146872396 | 0.001459039 |
| MYCT1    | darkgreen | -0.208725775 | 5.40E-06    | -0.197834841 | 1.66E-05    |
| NOS3     | darkgreen | -0.032612552 | 0.482017422 | -0.002361487 | 0.959408821 |
| NOTCH4   | darkgreen | -0.081194264 | 0.079633679 | -0.065402818 | 0.158218006 |
| NOVA2    | darkgreen | -0.277137434 | 1.11E-09    | -0.270584797 | 2.80E-09    |
| NRP1     | darkgreen | -0.093775403 | 0.042812152 | -0.050431815 | 0.276766341 |
| OR51E1   | darkgreen | 0.222108764  | 1.25E-06    | 0.246797358  | 6.56E-08    |
| OR51E2   | darkgreen | 0.101540855  | 0.02822754  | 0.093442793  | 0.043557739 |
| P2RX7    | darkgreen | -0.186184487 | 5.16E-05    | -0.168216938 | 0.000260704 |
| PCDH12   | darkgreen | -0.088349167 | 0.056409687 | -0.077411983 | 0.094739071 |
| PCDH17   | darkgreen | -0.111400872 | 0.016020757 | -0.088337157 | 0.056443358 |
| PECAM1   | darkgreen | -0.067363782 | 0.146086721 | -0.033688544 | 0.467672833 |
| PLA2G4C  | darkgreen | -0.255555517 | 2.13E-08    | -0.271992118 | 2.30E-09    |
| PLVAP    | darkgreen | 0.099005327  | 0.03243185  | 0.123635174  | 0.00747542  |
| PLXND1   | darkgreen | -0.1833714   | 6.72E-05    | -0.174385321 | 0.000152196 |
| PPAP2A   | darkgreen | -0.051730901 | 0.264565395 | -0.035760828 | 0.440722585 |
| PPM1M    | darkgreen | 0.097886109  | 0.034451384 | 0.119163381  | 0.00995378  |
| PPP1R16l | darkgreen | -0.15492217  | 0.000781609 | -0.143124195 | 0.001931104 |
| PRKCH    | darkgreen | 0.119051299  | 0.010024323 | 0.137623803  | 0.002879677 |
| PTGIR    | darkgreen | -0.134641454 | 0.003555596 | -0.07193096  | 0.120593649 |
| PTPRB    | darkgreen | -0.092993994 | 0.044581079 | -0.088851346 | 0.055016689 |
| RAMP2    | darkgreen | -0.159687249 | 0.000532454 | -0.127497783 | 0.005795459 |
| RAMP3    | darkgreen | 0.047978415  | 0.30083725  | 0.090308957  | 0.051134453 |
| RASGRP1  | darkgreen | -0.195695269 | 2.05E-05    | -0.165293698 | 0.000334301 |
| RASIP1   | darkgreen | -0.155740753 | 0.00073229  | -0.142247854 | 0.002059967 |
| RBP5     | darkgreen | -0.1715411   | 0.000195513 | -0.147133426 | 0.001430484 |
| RFTN1    | darkgreen | -0.273238833 | 1.93E-09    | -0.241272215 | 1.31E-07    |
| RGCC     | darkgreen | -0.068494699 | 0.139420551 | -0.057701861 | 0.213262936 |
| RGS5     | darkgreen | -0.018383305 | 0.691931376 | -0.020168335 | 0.663767429 |

|          |           |              |             |              |             |
|----------|-----------|--------------|-------------|--------------|-------------|
| RHOJ     | darkgreen | -0.238707071 | 1.79E-07    | -0.219443808 | 1.68E-06    |
| ROBO4    | darkgreen | -0.110844201 | 0.016560063 | -0.098529101 | 0.033278457 |
| S1PR1    | darkgreen | -0.04765647  | 0.304096135 | -0.050446477 | 0.276626538 |
| SCARF1   | darkgreen | -0.124709107 | 0.00696935  | -0.113944973 | 0.013747213 |
| SELP     | darkgreen | -0.118289764 | 0.010515484 | -0.090879245 | 0.049679073 |
| SEMA3G   | darkgreen | 0.048077028  | 0.29984371  | 0.036343438  | 0.433308664 |
| SEMA6B   | darkgreen | -0.072220528 | 0.119102466 | -0.05655812  | 0.222490486 |
| SERPINE  | darkgreen | 0.017311646  | 0.709049309 | 0.023340215  | 0.614891782 |
| SFMBT2   | darkgreen | -0.132027815 | 0.004262937 | -0.127830436 | 0.005668012 |
| SH2B3    | darkgreen | -0.172668918 | 0.000177112 | -0.147951833 | 0.001344254 |
| SH2D3C   | darkgreen | -0.111270498 | 0.016145664 | -0.072694023 | 0.116695201 |
| SHE      | darkgreen | -0.225186294 | 8.81E-07    | -0.214668351 | 2.85E-06    |
| SLC16A1  | darkgreen | -0.172485604 | 0.000179988 | -0.162385373 | 0.000426395 |
| SLC2A1   | darkgreen | 0.038184938  | 0.410353159 | 0.046739935  | 0.313501247 |
| SLC9A9   | darkgreen | -0.210849333 | 4.31E-06    | -0.19863567  | 1.53E-05    |
| SOX18    | darkgreen | -0.257089555 | 1.74E-08    | -0.230576237 | 4.72E-07    |
| STARD8   | darkgreen | -0.195559241 | 2.08E-05    | -0.203267332 | 9.55E-06    |
| STOM     | darkgreen | -0.135748232 | 0.003289552 | -0.11023177  | 0.017171689 |
| SULT1B1  | darkgreen | -0.021887342 | 0.637084972 | -0.01548915  | 0.738495513 |
| TAGAP    | darkgreen | -0.165305532 | 0.000333967 | -0.134819346 | 0.003511559 |
| TBXA2R   | darkgreen | -0.104837788 | 0.023467368 | -0.077504185 | 0.094345389 |
| TEK      | darkgreen | -0.073592702 | 0.112231202 | -0.066134559 | 0.153605177 |
| TGFB1    | darkgreen | -0.147808292 | 0.001359023 | -0.09981188  | 0.031039947 |
| TGFBR2   | darkgreen | -0.145409186 | 0.001629026 | -0.145529382 | 0.001614406 |
| THBD     | darkgreen | -0.093688004 | 0.043007018 | -0.098571009 | 0.033203207 |
| THSD1    | darkgreen | -0.027232263 | 0.557186302 | -0.043779534 | 0.345169175 |
| TIE1     | darkgreen | -0.239331426 | 1.66E-07    | -0.21137329  | 4.07E-06    |
| TLR4     | darkgreen | 0.141237763  | 0.002218225 | 0.11221669   | 0.015258202 |
| TM4SF18  | darkgreen | -0.123870745 | 0.007361681 | -0.125194946 | 0.006750656 |
| TMEM20   | darkgreen | -0.09697179  | 0.036179761 | -0.070668159 | 0.127267537 |
| TMEM25   | darkgreen | -0.170870596 | 0.000207286 | -0.137884855 | 0.00282647  |
| TP53INP2 | darkgreen | -0.021358935 | 0.645239171 | 0.009533265  | 0.837206372 |
| USHBP1   | darkgreen | -0.160245478 | 0.000508682 | -0.156145286 | 0.000708995 |
| VEGFC    | darkgreen | -0.086065836 | 0.063117418 | -0.080645263 | 0.081696755 |
| VWF      | darkgreen | -0.000790426 | 0.986408315 | 0.026790532  | 0.563601471 |
| WFDC1    | darkgreen | -0.002707938 | 0.953460041 | 0.022930128  | 0.621121679 |
| ZNF366   | darkgreen | -0.120231964 | 0.009303052 | -0.112399081 | 0.015092142 |
| ABCB7    | darkgrey  | -0.041201086 | 0.3743503   | -0.043750324 | 0.345491441 |
| ABHD17I  | darkgrey  | 0.152237116  | 0.000965775 | 0.137115865  | 0.002985825 |
| ADNP2    | darkgrey  | 0.182857431  | 7.05E-05    | 0.156720346  | 0.000677061 |
| ANAPC1   | darkgrey  | -0.128001443 | 0.00560348  | -0.161959035 | 0.000441729 |
| BAZ1B    | darkgrey  | 0.004385308  | 0.92470103  | -0.017619626 | 0.704114376 |
| BCL7A    | darkgrey  | 0.104801673  | 0.023515493 | 0.073008436  | 0.115117871 |
| BCOR     | darkgrey  | 0.094485455  | 0.04125642  | 0.063838301  | 0.168430233 |
| BPHL     | darkgrey  | 0.038654852  | 0.404612835 | 0.024303894  | 0.600361015 |

|          |          |              |             |              |             |
|----------|----------|--------------|-------------|--------------|-------------|
| BRD8     | darkgrey | -0.172194542 | 0.000184644 | -0.200027566 | 1.33E-05    |
| C1orf109 | darkgrey | -0.07726413  | 0.095373111 | -0.107407883 | 0.020254314 |
| CAMSAP   | darkgrey | 0.034200653  | 0.460929371 | 0.007148988  | 0.877547538 |
| CAND1    | darkgrey | -0.028453046 | 0.539643709 | -0.05794986  | 0.211298966 |
| CAPRIN1  | darkgrey | 0.104659201  | 0.023706176 | 0.074848406  | 0.106219867 |
| CCDC97   | darkgrey | 0.085518351  | 0.064819881 | 0.08205929   | 0.076468866 |
| CDC23    | darkgrey | -0.06542849  | 0.158054426 | -0.090729197 | 0.050058599 |
| CDC40    | darkgrey | -0.052323825 | 0.259121372 | -0.074597915 | 0.107398254 |
| CDK5RA   | darkgrey | 0.069224431  | 0.135244676 | 0.038640364  | 0.404789093 |
| CHAMP1   | darkgrey | 0.071520386  | 0.122732891 | 0.050076233  | 0.280171556 |
| CHD4     | darkgrey | -0.201950353 | 1.09E-05    | -0.212989478 | 3.42E-06    |
| CHERP    | darkgrey | -0.138612877 | 0.002682778 | -0.165238314 | 0.000335866 |
| CLTC     | darkgrey | 0.125885378  | 0.006450443 | 0.111134546  | 0.016276825 |
| CPSF6    | darkgrey | -0.039001098 | 0.400413989 | -0.057794146 | 0.212530576 |
| CS       | darkgrey | 0.145799042  | 0.001582043 | 0.10374267   | 0.024965106 |
| CTCF     | darkgrey | 0.112585809  | 0.014923779 | 0.109815732  | 0.017598364 |
| CUL3     | darkgrey | -0.021413468 | 0.644395648 | -0.045407913 | 0.327506546 |
| DBR1     | darkgrey | -0.013859372 | 0.765157319 | -0.017442618 | 0.706949166 |
| DCAF7    | darkgrey | 0.048395491  | 0.296650028 | 0.030107439  | 0.5163185   |
| DDX31    | darkgrey | 0.054514357  | 0.239681795 | 0.022016934  | 0.635091777 |
| DHX15    | darkgrey | 0.07599126   | 0.100972675 | 0.046844828  | 0.31241531  |
| DHX33    | darkgrey | 0.032178755  | 0.487867336 | -0.004381173 | 0.924771814 |
| DHX9     | darkgrey | 0.037586355  | 0.417734694 | 0.003156215  | 0.945766727 |
| DIABLO   | darkgrey | -0.030937597 | 0.504813621 | -0.05630506  | 0.224570069 |
| DNAJC11  | darkgrey | -0.025978097 | 0.575492104 | -0.060532321 | 0.19161837  |
| DNAJC14  | darkgrey | -0.06076285  | 0.189929171 | -0.094222197 | 0.04182756  |
| DSCR3    | darkgrey | 0.020304228  | 0.661641985 | 0.004234183  | 0.927288664 |
| EIF3A    | darkgrey | 0.068528618  | 0.139224283 | 0.027955347  | 0.546762222 |
| EPB41    | darkgrey | -0.074931994 | 0.105828929 | -0.095319352 | 0.039490546 |
| EPS15L1  | darkgrey | -0.087883046 | 0.05772873  | -0.103732863 | 0.024978883 |
| FAM104A  | darkgrey | 0.179647482  | 9.48E-05    | 0.165653776  | 0.000324288 |
| FAM53C   | darkgrey | -0.029388519 | 0.526390141 | -0.066489162 | 0.151406788 |
| FBXW2    | darkgrey | 0.022517042  | 0.62742464  | 0.011159871  | 0.809920934 |
| FCF1     | darkgrey | -0.106146283 | 0.021780285 | -0.110820645 | 0.016583231 |
| FIP1L1   | darkgrey | 0.003018992  | 0.948121228 | -0.043774342 | 0.34522644  |
| FUBP1    | darkgrey | -0.063145021 | 0.173110104 | -0.087874103 | 0.057754283 |
| FUBP3    | darkgrey | -0.008180129 | 0.86005568  | -0.035220869 | 0.447658021 |
| GEMIN4   | darkgrey | 0.074014035  | 0.110185067 | 0.059310812  | 0.200753044 |
| GEMIN5   | darkgrey | -0.07941617  | 0.086472342 | -0.109048304 | 0.018409761 |
| GLE1     | darkgrey | 0.306513703  | 1.29E-11    | 0.300541317  | 3.33E-11    |
| GLOD4    | darkgrey | 0.171352003  | 0.000198768 | 0.158934812  | 0.000566131 |
| GNAI3    | darkgrey | -0.054299454 | 0.241542286 | -0.072690984 | 0.116710527 |
| GPR107   | darkgrey | 0.008327038  | 0.857568938 | 0.005232712  | 0.910206885 |
| GRB2     | darkgrey | -0.050673091 | 0.274471859 | -0.054089011 | 0.243373962 |
| GSTCD    | darkgrey | 0.133142754  | 0.003946944 | 0.107582452  | 0.020050663 |

|                  |              |             |              |             |
|------------------|--------------|-------------|--------------|-------------|
| GTF2H2C darkgrey | 0.147389118  | 0.001403013 | 0.131850689  | 0.004315192 |
| GTF3C4 darkgrey  | 0.031083781  | 0.502801749 | 0.005071082  | 0.912969281 |
| HMGN4 darkgrey   | -0.154149468 | 0.000830967 | -0.171910409 | 0.000189299 |
| HMGXB4 darkgrey  | 0.060553732  | 0.191461019 | 0.024876696  | 0.591798069 |
| HNRNPA darkgrey  | 0.007564617  | 0.870489309 | -0.029546309 | 0.524171055 |
| HNRNPF darkgrey  | 0.279814104  | 7.56E-10    | 0.258714808  | 1.41E-08    |
| HNRNPK darkgrey  | 0.123234708  | 0.007672383 | 0.09382579   | 0.042700147 |
| HNRNPU darkgrey  | -0.074917613 | 0.105896106 | -0.09329001  | 0.043903867 |
| IARS darkgrey    | 0.129055904  | 0.005219961 | 0.107428022  | 0.020230728 |
| IDH3A darkgrey   | 0.068219326  | 0.141021826 | 0.043686715  | 0.346193869 |
| IKBKAP darkgrey  | 0.109569696  | 0.017855025 | 0.061759428  | 0.182752479 |
| INIP darkgrey    | 0.163700188  | 0.000382169 | 0.136140587  | 0.003199667 |
| INTS2 darkgrey   | 0.038276884  | 0.409226196 | 0.015270305  | 0.742058252 |
| KDM1B darkgrey   | -0.023276551 | 0.615857139 | -0.04352715  | 0.347959943 |
| KDM3B darkgrey   | 0.085298821  | 0.065513061 | 0.052525303  | 0.257289205 |
| KDM4D darkgrey   | -0.155550384 | 0.000743495 | -0.170324607 | 0.000217359 |
| KHSRP darkgrey   | 0.218053362  | 1.97E-06    | 0.184785472  | 5.89E-05    |
| KIAA019 darkgrey | -0.104834257 | 0.02347207  | -0.141138465 | 0.002234368 |
| KIAA036 darkgrey | 0.167097981  | 0.000286876 | 0.135594357  | 0.003325425 |
| KIF2A darkgrey   | 0.193407617  | 2.57E-05    | 0.162629417  | 0.000417842 |
| KPNA6 darkgrey   | -0.039936385 | 0.38920322  | -0.04480322  | 0.333996045 |
| LARP1 darkgrey   | 0.06953947   | 0.133471922 | 0.050872917  | 0.272581388 |
| LSM14B darkgrey  | 0.00560788   | 0.903799169 | -0.017773934 | 0.701646459 |
| MAML1 darkgrey   | 0.023014408  | 0.619839096 | -0.002952614 | 0.949260332 |
| MAPKAP darkgrey  | -0.093491995 | 0.043446762 | -0.088714679 | 0.055392929 |
| MARS2 darkgrey   | 0.029198392  | 0.529070345 | 0.016804364  | 0.717204271 |
| MAT2A darkgrey   | -0.07685398  | 0.097149697 | -0.100270355 | 0.030271761 |
| MCMBP darkgrey   | 0.059527877  | 0.199107064 | 0.02555515   | 0.581728672 |
| MIEF1 darkgrey   | -0.033598265 | 0.468867256 | -0.047612833 | 0.304539641 |
| MTMR4 darkgrey   | 0.005925102  | 0.898385993 | -0.014287952 | 0.758117725 |
| NAA35 darkgrey   | 0.158498625  | 0.000586548 | 0.133945497  | 0.003732729 |
| NCBP1 darkgrey   | 0.159547954  | 0.000538544 | 0.136353907  | 0.00315174  |
| NDE1 darkgrey    | 0.164657947  | 0.000352685 | 0.162641845  | 0.000417411 |
| NDUFS1 darkgrey  | 0.101026022  | 0.029041151 | 0.095946072  | 0.038205869 |
| NEK4 darkgrey    | 0.122256848  | 0.008172942 | 0.100843576  | 0.029334266 |
| NFYA darkgrey    | -0.010533432 | 0.8204038   | -0.035569603 | 0.443171703 |
| NIPA2 darkgrey   | 0.11770996   | 0.010903624 | 0.094035203  | 0.042237286 |
| NOM1 darkgrey    | 0.076896005  | 0.09696646  | 0.059323585  | 0.200655918 |
| NONO darkgrey    | -0.019178293 | 0.679332818 | -0.046411586 | 0.316916576 |
| NUP205 darkgrey  | 0.024678594  | 0.594753218 | -0.01098454  | 0.812851595 |
| PALB2 darkgrey   | -0.049992331 | 0.280979155 | -0.075064012 | 0.105213795 |
| PARG darkgrey    | 0.046949756  | 0.31133149  | 0.026328552  | 0.570348443 |
| PAXIP1 darkgrey  | 0.155347442  | 0.000755615 | 0.118721725  | 0.010234329 |
| PDCL darkgrey    | 0.152063494  | 0.000978965 | 0.13868164   | 0.002669556 |
| PMS2 darkgrey    | -0.060876732 | 0.189098753 | -0.080944911 | 0.080565424 |

|         |          |              |             |              |             |
|---------|----------|--------------|-------------|--------------|-------------|
| POLR1B  | darkgrey | -0.129433057 | 0.005088634 | -0.15773034  | 0.00062418  |
| POLR2B  | darkgrey | 0.00942692   | 0.83899746  | -0.015048281 | 0.745678406 |
| POLR3B  | darkgrey | -0.049692995 | 0.283873243 | -0.074860361 | 0.106163885 |
| PPP1R8  | darkgrey | 0.043589707  | 0.347266882 | 0.022278406  | 0.631078226 |
| PPP6C   | darkgrey | 0.196519643  | 1.89E-05    | 0.182002532  | 7.63E-05    |
| PRKDC   | darkgrey | -0.103141026 | 0.025822532 | -0.139414854 | 0.002532215 |
| PSMC1   | darkgrey | -0.068043297 | 0.142052783 | -0.079556349 | 0.08591658  |
| PSMD5   | darkgrey | 0.140969854  | 0.002262024 | 0.117972975  | 0.010726007 |
| RAB14   | darkgrey | 0.150284693  | 0.001124002 | 0.134091433  | 0.003694936 |
| RAD23B  | darkgrey | 0.194153121  | 2.39E-05    | 0.181410137  | 8.06E-05    |
| RALBP1  | darkgrey | -0.070534688 | 0.12798935  | -0.096794005 | 0.036524256 |
| RBBP4   | darkgrey | 0.028948369  | 0.532605376 | -0.002142305 | 0.963173489 |
| RBM12   | darkgrey | -0.026359644 | 0.569893158 | -0.047127729 | 0.309498821 |
| RBM18   | darkgrey | 0.109758944  | 0.017657317 | 0.09485568   | 0.040464362 |
| RFC1    | darkgrey | 0.009350892  | 0.840278434 | -0.012850761 | 0.781799691 |
| RNF20   | darkgrey | 0.054380544  | 0.24083907  | 0.029210459  | 0.528900024 |
| RNF4    | darkgrey | 0.116952527  | 0.011429766 | 0.10570149   | 0.022341574 |
| RNF41   | darkgrey | -0.047724648 | 0.303404061 | -0.074662712 | 0.107092446 |
| RPA1    | darkgrey | 0.135478174  | 0.003352746 | 0.103468062  | 0.025353363 |
| SART3   | darkgrey | 0.000789199  | 0.986429419 | -0.030419379 | 0.511979591 |
| SDAD1   | darkgrey | -0.065228529 | 0.159331976 | -0.096077796 | 0.037940408 |
| SDR39U1 | darkgrey | -0.013890658 | 0.764642769 | -0.056593549 | 0.222200439 |
| SLC31A1 | darkgrey | 0.296964597  | 5.81E-11    | 0.293168342  | 1.04E-10    |
| SMC1A   | darkgrey | 0.101161755  | 0.028824718 | 0.081124493  | 0.079893505 |
| SMC3    | darkgrey | -0.011158985 | 0.809935746 | -0.050693788 | 0.274275638 |
| SMG8    | darkgrey | -0.015221991 | 0.742845548 | -0.043601262 | 0.347138954 |
| SPTLC1  | darkgrey | -0.020342186 | 0.661048788 | -0.051387583 | 0.267753301 |
| STAMBP  | darkgrey | 0.009672223  | 0.834867298 | 0.011979018  | 0.796264699 |
| STK24   | darkgrey | 0.006839639  | 0.882807253 | -0.013895972 | 0.764555387 |
| TFDP1   | darkgrey | 0.140925812  | 0.0022693   | 0.123619456  | 0.007483065 |
| TGS1    | darkgrey | -0.156104803 | 0.000711295 | -0.19631361  | 1.93E-05    |
| THRAP3  | darkgrey | 0.033199943  | 0.47415721  | 0.002726328  | 0.953144343 |
| TMEM16  | darkgrey | -0.004590502 | 0.921188882 | -0.02190369  | 0.636833398 |
| TMEM20  | darkgrey | 0.037734121  | 0.415905269 | 0.001730592  | 0.97024724  |
| TNPO3   | darkgrey | 0.051169793  | 0.269789188 | 0.035022149  | 0.45022594  |
| TOR1A   | darkgrey | 0.144226138  | 0.001779546 | 0.133708234  | 0.003794919 |
| TOR1B   | darkgrey | 0.129491405  | 0.005068585 | 0.120695099  | 0.009032973 |
| TRIM32  | darkgrey | 0.1138448    | 0.013831054 | 0.103634815  | 0.025116982 |
| TRIM37  | darkgrey | 0.090488546  | 0.05067235  | 0.054561722  | 0.239273098 |
| TRMT61I | darkgrey | -0.094245279 | 0.041777219 | -0.124113256 | 0.007246211 |
| TSR1    | darkgrey | 0.149778179  | 0.001168785 | 0.114282648  | 0.013467882 |
| UBE3C   | darkgrey | 0.113259694  | 0.01432981  | 0.094303503  | 0.041650458 |
| UBFD1   | darkgrey | -0.010672349 | 0.818076324 | -0.009427302 | 0.838991015 |
| UBQLN1  | darkgrey | 0.123783925  | 0.007403419 | 0.110407938  | 0.016993761 |
| UBXN2B  | darkgrey | -0.087158251 | 0.059830467 | -0.122718692 | 0.007933007 |

|          |            |              |             |              |             |
|----------|------------|--------------|-------------|--------------|-------------|
| USP32    | darkgrey   | -0.158046573 | 0.000608427 | -0.184924653 | 5.81E-05    |
| USP42    | darkgrey   | -0.07140088  | 0.123361086 | -0.063747438 | 0.169038141 |
| WBP11    | darkgrey   | -0.144613792 | 0.001728876 | -0.154074352 | 0.000835915 |
| WIZ      | darkgrey   | -0.126274856 | 0.006286423 | -0.144452128 | 0.001749844 |
| XRN2     | darkgrey   | -0.125854813 | 0.006463476 | -0.156491183 | 0.000689624 |
| YWHAG    | darkgrey   | 0.078906491  | 0.088517475 | 0.065789593  | 0.155766952 |
| YWHAQ    | darkgrey   | -0.027119031 | 0.558827366 | -0.047587224 | 0.304800114 |
| ZBTB5    | darkgrey   | -0.008319707 | 0.857692983 | -0.024507261 | 0.597314435 |
| ZBTB6    | darkgrey   | 0.02082489   | 0.653523785 | 0.005889558  | 0.898992299 |
| ZC3H18   | darkgrey   | 0.162214088  | 0.000432495 | 0.15571671   | 0.000733696 |
| ZNF207   | darkgrey   | 0.09711805   | 0.035898428 | 0.087935777  | 0.05757824  |
| A2ML1    | darkmagent | 0.159256924  | 0.000551479 | 0.1532148    | 0.000894517 |
| C15orf62 | darkmagent | 0.176248594  | 0.000128891 | 0.178316093  | 0.000106972 |
| C1orf204 | darkmagent | -0.02251776  | 0.627413652 | -0.03613965  | 0.43589372  |
| C1orf68  | darkmagent | 0.01837868   | 0.692004925 | 0.012418529  | 0.788962744 |
| C6orf15  | darkmagent | 0.181276241  | 8.16E-05    | 0.166327112  | 0.000306312 |
| CALML5   | darkmagent | 0.049097673  | 0.289688653 | 0.044519335  | 0.337070983 |
| CCL24    | darkmagent | 0.218936797  | 1.78E-06    | 0.217502943  | 2.09E-06    |
| CCR3     | darkmagent | 0.035438492  | 0.444855384 | -0.010659251 | 0.818295702 |
| CDSN     | darkmagent | 0.081352025  | 0.079048703 | 0.111660833  | 0.01577422  |
| CRCT1    | darkmagent | 0.069170758  | 0.135548496 | 0.066340537  | 0.152325278 |
| CYP4F22  | darkmagent | 0.04194673   | 0.365759325 | 0.055653239  | 0.229990231 |
| DSG1     | darkmagent | 0.151946526  | 0.000987944 | 0.127785747  | 0.005684985 |
| DSG3     | darkmagent | 0.171564967  | 0.000195105 | 0.140587435  | 0.002325913 |
| DSG4     | darkmagent | 0.118084     | 0.010651803 | 0.101857841  | 0.027736395 |
| ENDOU    | darkmagent | 0.022955259  | 0.620739111 | 0.010650278  | 0.818446001 |
| FABP4    | darkmagent | 0.146972142  | 0.001448066 | 0.113210972  | 0.014372046 |
| FABP9    | darkmagent | 0.095678767  | 0.038749404 | 0.099361886  | 0.031810083 |
| FAM25A   | darkmagent | 0.199216303  | 1.44E-05    | 0.166883504  | 0.000292165 |
| FGFBP1   | darkmagent | 0.250983921  | 3.85E-08    | 0.2658173    | 5.40E-09    |
| GJB2     | darkmagent | 0.237781819  | 2.00E-07    | 0.251110599  | 3.79E-08    |
| GJB6     | darkmagent | 0.098277491  | 0.033733317 | 0.075590473  | 0.102788864 |
| GPR87    | darkmagent | 0.073604365  | 0.11217416  | 0.069072898  | 0.136103799 |
| GRHL3    | darkmagent | 0.058223508  | 0.209147049 | 0.050281115  | 0.278206061 |
| IL1RN    | darkmagent | -0.013912176 | 0.764288941 | 0.01984945   | 0.668765559 |
| IL36RN   | darkmagent | -0.00802519  | 0.862679858 | 0.000962349  | 0.983452416 |
| IVL      | darkmagent | 0.185671778  | 5.42E-05    | 0.167816723  | 0.000269797 |
| KPRP     | darkmagent | 0.075223174  | 0.104475954 | 0.070343482  | 0.129028911 |
| KRT1     | darkmagent | 0.079939141  | 0.084413589 | 0.071745815  | 0.121554694 |
| KRT13    | darkmagent | 0.071645804  | 0.12207631  | 0.082624515  | 0.074456695 |
| KRT14    | darkmagent | 0.058455701  | 0.207333563 | 0.052522006  | 0.257319122 |
| KRT16    | darkmagent | 0.231245044  | 4.36E-07    | 0.208581296  | 5.48E-06    |
| KRT17    | darkmagent | -0.006329974 | 0.891483998 | -0.003165507 | 0.945607296 |
| KRT25    | darkmagent | 0.052266334  | 0.259645821 | 0.042077555  | 0.364264768 |
| KRT27    | darkmagent | 0.098939323  | 0.032548079 | 0.109044062  | 0.018414335 |

|         |            |              |             |              |             |
|---------|------------|--------------|-------------|--------------|-------------|
| KRT28   | darkmagent | 0.034147105  | 0.461631945 | 0.035238705  | 0.44742795  |
| KRT5    | darkmagent | 0.061414308  | 0.18521477  | 0.05444016   | 0.240323003 |
| KRT6A   | darkmagent | 0.192642635  | 2.77E-05    | 0.183067982  | 6.91E-05    |
| KRT6B   | darkmagent | 0.13346266   | 0.003860276 | 0.121267274  | 0.008708957 |
| KRT6C   | darkmagent | 0.122948328  | 0.007816064 | 0.094671515  | 0.040856742 |
| KRT71   | darkmagent | 0.03245615   | 0.484122174 | 0.089921394  | 0.052143688 |
| KRT77   | darkmagent | 0.040098805  | 0.387275965 | 0.070816883  | 0.126466961 |
| KRT78   | darkmagent | 0.127174455  | 0.005921796 | 0.133891433  | 0.003746818 |
| KRT9    | darkmagent | 0.163865121  | 0.000376933 | 0.125329428  | 0.006691218 |
| KRTAP3- | darkmagent | 0.089293092  | 0.053815075 | 0.101280986  | 0.028635741 |
| LCE1A   | darkmagent | 0.090162235  | 0.051514589 | 0.092486126  | 0.045763415 |
| LCE2B   | darkmagent | 0.027965703  | 0.546613643 | 0.043424472  | 0.349099398 |
| LCE3D   | darkmagent | 0.077770897  | 0.093213941 | 0.07652224   | 0.098605862 |
| LCE3E   | darkmagent | 0.102622568  | 0.026581652 | 0.092689033  | 0.045287919 |
| LIPK    | darkmagent | 0.146047379  | 0.001552766 | 0.139956526  | 0.002434925 |
| LY6D    | darkmagent | 0.032096366  | 0.488982687 | 0.052897921  | 0.253924412 |
| LYPD3   | darkmagent | 0.0682701    | 0.140725528 | 0.037979435  | 0.412878607 |
| MANSC4  | darkmagent | -0.020274409 | 0.662108146 | -0.026097222 | 0.573741242 |
| MT4     | darkmagent | 0.212652386  | 3.55E-06    | 0.177801468  | 0.000112074 |
| NCCRP1  | darkmagent | -0.098336951 | 0.03362535  | -0.072968513 | 0.115317224 |
| PGLYRP3 | darkmagent | 0.112274968  | 0.015204969 | 0.107847731  | 0.019744602 |
| PGLYRP4 | darkmagent | 0.030420742  | 0.511960685 | 0.036242687  | 0.434585587 |
| PI3     | darkmagent | 0.076735464  | 0.097667941 | 0.080197539  | 0.083411057 |
| PKP1    | darkmagent | 0.085053072  | 0.066296239 | 0.071489162  | 0.122896783 |
| PLA2G4E | darkmagent | 0.066016454  | 0.154342728 | 0.068186072  | 0.141216147 |
| PRSS27  | darkmagent | 0.007718442  | 0.867879625 | 0.039314607  | 0.396634759 |
| PSORS1C | darkmagent | 0.108762419  | 0.018720265 | 0.093731433  | 0.042910096 |
| RAET1L  | darkmagent | 0.23333111   | 3.41E-07    | 0.227990166  | 6.38E-07    |
| RHCG    | darkmagent | 0.019344425  | 0.676711134 | 0.00923131   | 0.842294103 |
| RNASE7  | darkmagent | 0.170778353  | 0.000208956 | 0.183197782  | 6.83E-05    |
| RPTN    | darkmagent | 0.183734644  | 6.50E-05    | 0.149269659  | 0.001215393 |
| S100A12 | darkmagent | 0.021140304  | 0.648625557 | 0.025652174  | 0.580295222 |
| S100A2  | darkmagent | 0.085546903  | 0.064730172 | 0.120149433  | 0.009351928 |
| S100A3  | darkmagent | 0.133882261  | 0.003749213 | 0.141067363  | 0.002245993 |
| S100A7  | darkmagent | 0.11033141   | 0.017070854 | 0.113707268  | 0.013946894 |
| S100A7A | darkmagent | 0.011523959  | 0.803843724 | 0.018645752  | 0.687762629 |
| S100A8  | darkmagent | 0.117229846  | 0.011234579 | 0.120733715  | 0.009010773 |
| S100A9  | darkmagent | 0.09251618   | 0.045692724 | 0.099749358  | 0.031145986 |
| S100P   | darkmagent | 0.242016808  | 1.19E-07    | 0.276275598  | 1.26E-09    |
| SBSN    | darkmagent | 0.096931346  | 0.036257886 | 0.093775927  | 0.042810987 |
| SDR9C7  | darkmagent | 0.05324408   | 0.250826011 | 0.006453617  | 0.88937782  |
| SERPINB | darkmagent | 0.144079003  | 0.001799132 | 0.111799996  | 0.015643616 |
| SERPINB | darkmagent | 0.09913355   | 0.03220707  | 0.055532443  | 0.231004796 |
| SERPINB | darkmagent | 0.089944902  | 0.052082003 | 0.074408118  | 0.108297972 |
| SERPINB | darkmagent | 0.115337839  | 0.012626961 | 0.104285381  | 0.02421286  |

|          |             |              |             |              |             |
|----------|-------------|--------------|-------------|--------------|-------------|
| SLC6A14  | darkmagent  | 0.294363233  | 8.67E-11    | 0.285875341  | 3.11E-10    |
| SLURP1   | darkmagent  | 0.054057299  | 0.243650816 | 0.071902511  | 0.120740937 |
| SPINK13  | darkmagent  | 0.188745546  | 4.05E-05    | 0.192290423  | 2.87E-05    |
| SPINK5   | darkmagent  | 0.201144411  | 1.19E-05    | 0.183692344  | 6.52E-05    |
| SPINK6   | darkmagent  | 0.18012136   | 9.07E-05    | 0.130682     | 0.004674726 |
| SPINK7   | darkmagent  | 0.142123186  | 0.002078925 | 0.112308938  | 0.015174015 |
| SPINK9   | darkmagent  | 0.123002794  | 0.007788554 | 0.092779922  | 0.045076278 |
| SPRR1A   | darkmagent  | 0.202046832  | 1.08E-05    | 0.180125945  | 9.07E-05    |
| SPRR1B   | darkmagent  | 0.213624496  | 3.19E-06    | 0.188435405  | 4.17E-05    |
| SPRR2A   | darkmagent  | 0.15745556   | 0.000638174 | 0.132639914  | 0.004086735 |
| SPRR2B   | darkmagent  | 0.119804585  | 0.009558628 | 0.069038879  | 0.13629725  |
| SPRR2D   | darkmagent  | 0.224591248  | 9.43E-07    | 0.195503855  | 2.09E-05    |
| SPRR2E   | darkmagent  | 0.157180198  | 0.000652489 | 0.125582949  | 0.006580439 |
| SPRR2F   | darkmagent  | 0.119026314  | 0.010040109 | 0.078194057  | 0.091441106 |
| SPRR2G   | darkmagent  | 0.084582827  | 0.067816299 | 0.072188218  | 0.119268136 |
| SPRR3    | darkmagent  | 0.193957724  | 2.44E-05    | 0.179254094  | 9.82E-05    |
| SPTSSB   | darkmagent  | 0.224830777  | 9.17E-07    | 0.206837381  | 6.59E-06    |
| TCHH     | darkmagent  | 0.050198     | 0.279002281 | 0.060466865  | 0.192100003 |
| TCHHL1   | darkmagent  | 0.099909894  | 0.030874336 | 0.067289881  | 0.146530648 |
| TGM6     | darkmagent  | 0.08445357   | 0.068239088 | 0.079372332  | 0.086646739 |
| TMPRSS   | darkmagent  | 0.119875699  | 0.009515673 | 0.130733012  | 0.004658485 |
| TNS4     | darkmagent  | 0.266167226  | 5.15E-09    | 0.273797418  | 1.78E-09    |
| TRIM29   | darkmagent  | -0.077532494 | 0.094224779 | -0.083816899 | 0.070353233 |
| VSIG8    | darkmagent  | 0.144307784  | 0.001768762 | 0.125593277  | 0.006575962 |
| XKRX     | darkmagent  | 0.201485066  | 1.15E-05    | 0.17962359   | 9.50E-05    |
| ZNF750   | darkmagent  | 0.263933221  | 6.98E-09    | 0.236452975  | 2.35E-07    |
| ABCB10   | darkolivegr | 0.174351252  | 0.000152657 | 0.143553738  | 0.001870673 |
| ABL2     | darkolivegr | 0.06003605   | 0.195292125 | 0.032512355  | 0.483365235 |
| ACBD3    | darkolivegr | 0.097486845  | 0.035197285 | 0.070131786  | 0.130187492 |
| ADIPOR1  | darkolivegr | 0.287577504  | 2.42E-10    | 0.281919346  | 5.57E-10    |
| ALDH9A   | darkolivegr | 0.346863916  | 1.20E-14    | 0.31396615   | 3.84E-12    |
| ANGEL2   | darkolivegr | 0.077167233  | 0.095790469 | 0.04746821   | 0.306012581 |
| ARHGEF   | darkolivegr | 0.161305964  | 0.000466215 | 0.138290012  | 0.002745661 |
| ARHGEF   | darkolivegr | -0.006104076 | 0.895333986 | -0.04562863  | 0.32515829  |
| ARID4B   | darkolivegr | 0.063892249  | 0.168070076 | 0.042661518  | 0.357640008 |
| ATF6     | darkolivegr | 0.046891656  | 0.311931314 | 0.013654038  | 0.768536923 |
| ATP1B1   | darkolivegr | 0.05520603   | 0.233762198 | 0.036612573  | 0.429908246 |
| BLZF1    | darkolivegr | 0.020869953  | 0.652823062 | -0.001674982 | 0.971202867 |
| BROX     | darkolivegr | 0.154526936  | 0.000806506 | 0.15108946   | 0.001056092 |
| C1orf198 | darkolivegr | 0.115485518  | 0.012513045 | 0.100980868  | 0.029113459 |
| C1orf27  | darkolivegr | 0.149355043  | 0.001207449 | 0.114439983  | 0.013339446 |
| CAMSAP   | darkolivegr | -0.038893253 | 0.401718993 | -0.071292243 | 0.12393431  |
| CD46     | darkolivegr | 0.162605492  | 0.000418673 | 0.139180456  | 0.002575404 |
| CDC42B   | darkolivegr | 0.08742375   | 0.059053355 | 0.055374814  | 0.23233349  |
| CDC42SE  | darkolivegr | 0.086423651  | 0.062024788 | 0.061490908  | 0.18466616  |



|         |             |              |             |              |             |
|---------|-------------|--------------|-------------|--------------|-------------|
| CDC73   | darkolivegr | 0.142625044  | 0.002003568 | 0.117012736  | 0.011387136 |
| CEP170  | darkolivegr | 0.058421386  | 0.207600856 | 0.016710993  | 0.71870883  |
| CEP350  | darkolivegr | 0.085705521  | 0.064233659 | 0.056992763  | 0.218950838 |
| CNST    | darkolivegr | 0.019759342  | 0.670180546 | -0.013669858 | 0.768276381 |
| COPA    | darkolivegr | 0.160867129  | 0.000483371 | 0.137081452  | 0.002993144 |
| DCAF6   | darkolivegr | 0.117212903  | 0.011246419 | 0.083230647  | 0.072347036 |
| DCAF8   | darkolivegr | -0.052488265 | 0.25762534  | -0.083581337 | 0.071148896 |
| DDX59   | darkolivegr | 0.123132776  | 0.007723251 | 0.090554053  | 0.050504663 |
| DENND1  | darkolivegr | 0.251911637  | 3.42E-08    | 0.239682333  | 1.59E-07    |
| DESI2   | darkolivegr | 0.136383214  | 0.003145206 | 0.115864937  | 0.012224518 |
| DIEXF   | darkolivegr | -0.031734143 | 0.493902493 | -0.061095215 | 0.187513056 |
| DISC1   | darkolivegr | 0.102971554  | 0.02606859  | 0.114771339  | 0.01307248  |
| DISP1   | darkolivegr | 0.128722317  | 0.005338653 | 0.102755367  | 0.026385401 |
| EDEM3   | darkolivegr | 0.137963917  | 0.002810533 | 0.109763927  | 0.017652137 |
| EGLN1   | darkolivegr | 0.084287897  | 0.068784151 | 0.072805233  | 0.116135364 |
| ENAH    | darkolivegr | 0.161916543  | 0.000443285 | 0.126496666  | 0.006194695 |
| ESRRG   | darkolivegr | 0.041144016  | 0.375012915 | 0.05123795   | 0.26915093  |
| ETV6    | darkolivegr | 0.142719277  | 0.0019897   | 0.151650034  | 0.001011046 |
| EXOC8   | darkolivegr | -0.004810808 | 0.917419791 | -0.013810414 | 0.765962712 |
| FAM20B  | darkolivegr | -0.018986492 | 0.682364374 | -0.056118637 | 0.226110873 |
| FBXO28  | darkolivegr | 0.120085517  | 0.009389936 | 0.093133046  | 0.044261875 |
| FMO5    | darkolivegr | 0.317706284  | 2.06E-12    | 0.281506381  | 5.91E-10    |
| GLUL    | darkolivegr | 0.14626388   | 0.00152765  | 0.13023612   | 0.004818871 |
| GOLPH3  | darkolivegr | 0.086140849  | 0.062887055 | 0.073789242  | 0.111273049 |
| GON4L   | darkolivegr | -0.075023369 | 0.105402868 | -0.118198392 | 0.010575826 |
| GORAB   | darkolivegr | 0.163110954  | 0.000401432 | 0.13302432   | 0.003979473 |
| GPATCH  | darkolivegr | 0.123056929  | 0.007761297 | 0.1055044    | 0.022594265 |
| INTS3   | darkolivegr | -0.031461596 | 0.49762164  | -0.08084088  | 0.080956749 |
| IRF2BP2 | darkolivegr | 0.065636644  | 0.15673276  | 0.058294824  | 0.208588836 |
| IVNS1A  | darkolivegr | 0.209942353  | 4.74E-06    | 0.172448736  | 0.000180572 |
| KCTD3   | darkolivegr | 0.102014052  | 0.027497073 | 0.07681792   | 0.097307148 |
| KDM5B   | darkolivegr | 0.16448501   | 0.000357847 | 0.145742446  | 0.001588785 |
| KIFAP3  | darkolivegr | 0.172397789  | 0.000181381 | 0.139545625  | 0.002508408 |
| KLHL12  | darkolivegr | 0.265230192  | 5.85E-09    | 0.241043693  | 1.34E-07    |
| LGALS8  | darkolivegr | 0.170176234  | 0.000220175 | 0.178256103  | 0.000107555 |
| LPGAT1  | darkolivegr | 0.195463673  | 2.10E-05    | 0.194130984  | 2.40E-05    |
| MARK1   | darkolivegr | 0.115787305  | 0.012283069 | 0.092345561  | 0.04609527  |
| MDM4    | darkolivegr | 0.047205334  | 0.308701914 | 0.03171755   | 0.494128496 |
| MIA3    | darkolivegr | 0.169738275  | 0.000228686 | 0.159406143  | 0.000544811 |
| MPZL1   | darkolivegr | 0.300271162  | 3.47E-11    | 0.273546345  | 1.85E-09    |
| MR1     | darkolivegr | 0.086844483  | 0.060759743 | 0.090061168  | 0.051777811 |
| NAV1    | darkolivegr | 0.087989735  | 0.057424585 | 0.088206486  | 0.056810766 |
| NBPF9   | darkolivegr | 0.154814381  | 0.000788327 | 0.110814174  | 0.0165896   |
| NCSTN   | darkolivegr | 0.239682798  | 1.59E-07    | 0.211155341  | 4.17E-06    |
| NUCKS1  | darkolivegr | -0.002595592 | 0.955388817 | -0.029929174 | 0.518806567 |

|                     |              |             |              |             |
|---------------------|--------------|-------------|--------------|-------------|
| OTUD7B darkolivegr  | 0.114869541  | 0.012994271 | 0.09065438   | 0.050248741 |
| PCNXL2 darkolivegr  | 0.028094394  | 0.544768806 | 0.002537143  | 0.956392396 |
| PDE4DIP darkolivegr | 0.091915784  | 0.047122473 | 0.0751173    | 0.104966307 |
| PFKFB2 darkolivegr  | 0.291678282  | 1.30E-10    | 0.291401885  | 1.36E-10    |
| PGBD2 darkolivegr   | 0.156854861  | 0.000669786 | 0.12578483   | 0.006493405 |
| PIP5K1A darkolivegr | 0.028992202  | 0.531984774 | -0.013372388 | 0.773179735 |
| POGK darkolivegr    | 0.041535473  | 0.370482367 | 0.003840429  | 0.934034219 |
| POGZ darkolivegr    | -0.054421842 | 0.240481488 | -0.095302428 | 0.039525739 |
| PPP1R15Idarkolivegr | 0.012938598  | 0.780346271 | -0.014401898 | 0.756249441 |
| PPP2R5A darkolivegr | 0.13531948   | 0.003390392 | 0.123444466  | 0.007568646 |
| RAB29 darkolivegr   | -0.106805943 | 0.020970389 | -0.128229531 | 0.005518438 |
| RAB3GA darkolivegr  | 0.099924288  | 0.030850078 | 0.069955812  | 0.131156687 |
| RABGAP darkolivegr  | 0.232071363  | 3.96E-07    | 0.211234015  | 4.13E-06    |
| RASAL2 darkolivegr  | 0.115022096  | 0.012873593 | 0.078820249  | 0.088867342 |
| RBBP5 darkolivegr   | 0.063797679  | 0.168701805 | 0.038366852  | 0.40812525  |
| RC3H1 darkolivegr   | 0.000377861  | 0.993502296 | -0.002061528 | 0.964561123 |
| RCOR3 darkolivegr   | 0.030317127  | 0.513399765 | -0.002535983 | 0.956412297 |
| RIT1 darkolivegr    | 0.080726426  | 0.081389058 | 0.070563116  | 0.127835344 |
| RNF115 darkolivegr  | -0.026419952 | 0.569010556 | -0.058975922 | 0.203311861 |
| RNF2 darkolivegr    | 0.013549389  | 0.770261035 | -0.02165607  | 0.640648569 |
| RPS6KC1darkolivegr  | -0.000461275 | 0.992067949 | -0.029582247 | 0.523666315 |
| SCYL3 darkolivegr   | 0.194581576  | 2.29E-05    | 0.147077754  | 0.001436531 |
| SDCCAG darkolivegr  | 0.126733976  | 0.006097888 | 0.09280997   | 0.045006491 |
| SDE2 darkolivegr    | 0.072139684  | 0.119517331 | 0.04665339   | 0.314399098 |
| SHC1 darkolivegr    | -0.010872925 | 0.814718601 | -0.032401141 | 0.484863622 |
| SIPA1L2 darkolivegr | 0.34654115   | 1.27E-14    | 0.314268052  | 3.65E-12    |
| SLC30A1 darkolivegr | 0.242820174  | 1.08E-07    | 0.211059639  | 4.21E-06    |
| SMG7 darkolivegr    | 0.097976411  | 0.034284562 | 0.07420182   | 0.109282639 |
| SPRTN darkolivegr   | 0.152280083  | 0.000962537 | 0.143152914  | 0.001927008 |
| SRGAP2 darkolivegr  | 0.014953399  | 0.747227183 | -0.02500844  | 0.58983654  |
| SUCO darkolivegr    | 0.100503194  | 0.029887905 | 0.058551421  | 0.206589291 |
| SWT1 darkolivegr    | 0.050527911  | 0.27585093  | 0.016172541  | 0.727406334 |
| TADA1 darkolivegr   | 0.073830583  | 0.111072332 | 0.029187427  | 0.529225118 |
| TAF5L darkolivegr   | 0.161926742  | 0.000442911 | 0.145072871  | 0.001670582 |
| TOR1AIP darkolivegr | 0.107327726  | 0.020348425 | 0.070803056  | 0.126541228 |
| TOR1AIP darkolivegr | 0.090178169  | 0.051473193 | 0.088807779  | 0.055136398 |
| TP53BP2 darkolivegr | -0.042851104 | 0.355505609 | -0.073333067 | 0.113506868 |
| TRAF5 darkolivegr   | 0.159760207  | 0.000529289 | 0.123017609  | 0.007781086 |
| TROVE2 darkolivegr  | 0.079948706  | 0.084376305 | 0.058809467  | 0.204592481 |
| TUFT1 darkolivegr   | 0.116631613  | 0.011659378 | 0.095291204  | 0.039549093 |
| UAP1 darkolivegr    | 0.280717914  | 6.63E-10    | 0.24267377   | 1.10E-07    |
| UBAP2L darkolivegr  | 0.073365596  | 0.113346422 | 0.057029419  | 0.218654173 |
| UHMK1 darkolivegr   | 0.164598271  | 0.000354459 | 0.145330823  | 0.001638623 |
| VAMP4 darkolivegr   | 0.068707634  | 0.138191938 | 0.040692838  | 0.380276781 |
| WDR26 darkolivegr   | 0.062487693  | 0.177636124 | 0.05355682   | 0.248049441 |

|          |             |              |             |              |             |
|----------|-------------|--------------|-------------|--------------|-------------|
| XPR1     | darkolivegr | 0.105959793  | 0.022014112 | 0.079369986  | 0.086656078 |
| YOD1     | darkolivegr | 0.140305539  | 0.002374058 | 0.122036975  | 0.008289428 |
| YY1AP1   | darkolivegr | 0.120709895  | 0.009024461 | 0.094463931  | 0.041302866 |
| ZBTB37   | darkolivegr | 0.033714934  | 0.467323995 | 0.014237767  | 0.758941006 |
| ZBTB41   | darkolivegr | 0.150085341  | 0.001141435 | 0.120623557  | 0.009074232 |
| ZC3H11A  | darkolivegr | 0.116428625  | 0.011806712 | 0.072957365  | 0.115372938 |
| ZNF124   | darkolivegr | 0.082176043  | 0.076049648 | 0.068430651  | 0.139791735 |
| ZNF281   | darkolivegr | 0.009551889  | 0.836892796 | -0.018499132 | 0.690090413 |
| ZNF669   | darkolivegr | 0.094347466  | 0.041554961 | 0.091305592  | 0.048613793 |
| ZNF678   | darkolivegr | 0.041657866  | 0.369072829 | 0.013912532  | 0.764283077 |
| ALDH3B1  | darkorange  | 0.20208551   | 1.08E-05    | 0.200097032  | 1.32E-05    |
| AP1M2    | darkorange  | 0.190547607  | 3.40E-05    | 0.212471378  | 3.62E-06    |
| ARHGAP   | darkorange  | 0.288846581  | 2.00E-10    | 0.283153781  | 4.65E-10    |
| ARHGEF   | darkorange  | 0.269108459  | 3.44E-09    | 0.265613807  | 5.56E-09    |
| BCR      | darkorange  | 0.123849224  | 0.007372007 | 0.14738991   | 0.001402928 |
| BSPRY    | darkorange  | 0.398917228  | 2.89E-19    | 0.41232134   | 1.36E-20    |
| C1orf106 | darkorange  | -0.105652789 | 0.022403784 | -0.094239551 | 0.041789708 |
| C1orf210 | darkorange  | 0.12621488   | 0.006311435 | 0.131127781  | 0.004534513 |
| C6orf132 | darkorange  | -0.117792776 | 0.010847418 | -0.095891836 | 0.038315625 |
| CAMSAP   | darkorange  | 0.256529262  | 1.87E-08    | 0.264892777  | 6.13E-09    |
| CAPN1    | darkorange  | 0.116779528  | 0.011553044 | 0.140262126  | 0.002381553 |
| CBLC     | darkorange  | 0.066546486  | 0.151053662 | 0.089596642  | 0.053002097 |
| CCDC64   | darkorange  | 0.229754295  | 5.19E-07    | 0.241415446  | 1.28E-07    |
| CD24     | darkorange  | 0.150428567  | 0.001111573 | 0.163680892  | 0.000382786 |
| CD82     | darkorange  | 0.093390712  | 0.043675468 | 0.125676224  | 0.006540098 |
| CD9      | darkorange  | 0.010784699  | 0.816195132 | -0.00116281  | 0.980006154 |
| CDC42B   | darkorange  | 0.188412304  | 4.18E-05    | 0.206931074  | 6.52E-06    |
| CDCP1    | darkorange  | 0.25638894   | 1.91E-08    | 0.265190436  | 5.89E-09    |
| CDH1     | darkorange  | 0.241900931  | 1.21E-07    | 0.267313498  | 4.40E-09    |
| CELSR1   | darkorange  | 0.098206379  | 0.03386283  | 0.101108273  | 0.028909831 |
| CELSR2   | darkorange  | 0.005373889  | 0.907794934 | -0.004610613 | 0.920844751 |
| CGN      | darkorange  | -0.045953051 | 0.321726586 | -0.058360713 | 0.208074062 |
| CHMP4C   | darkorange  | 0.101966774  | 0.027569317 | 0.079589358  | 0.085786134 |
| CLDN3    | darkorange  | 0.037761715  | 0.415564175 | 0.049942518  | 0.281459375 |
| CLDN4    | darkorange  | 0.080950951  | 0.080542749 | 0.096914314  | 0.03629083  |
| CLDN7    | darkorange  | 0.167481298  | 0.000277646 | 0.183953126  | 6.37E-05    |
| CNDP2    | darkorange  | 0.193255816  | 2.61E-05    | 0.215278602  | 2.67E-06    |
| CNKSR1   | darkorange  | 0.101865163  | 0.027725137 | 0.111833412  | 0.015612396 |
| CORO2A   | darkorange  | 0.182265409  | 7.45E-05    | 0.205381621  | 7.67E-06    |
| CRB3     | darkorange  | 0.259508867  | 1.26E-08    | 0.285903781  | 3.10E-10    |
| DDR1     | darkorange  | 0.016672582  | 0.719328085 | 0.019377263  | 0.676193386 |
| EFNA1    | darkorange  | 0.043895322  | 0.343893611 | 0.025332809  | 0.585019793 |
| ELF3     | darkorange  | 0.103427582  | 0.025411035 | 0.111983344  | 0.015472992 |
| ELMO3    | darkorange  | 0.087211978  | 0.059672532 | 0.11931687   | 0.009857893 |
| EPCAM    | darkorange  | 0.134497158  | 0.003591682 | 0.145733262  | 0.001589882 |

|         |            |              |             |              |             |
|---------|------------|--------------|-------------|--------------|-------------|
| EPHA1   | darkorange | 0.148619951  | 0.00127743  | 0.155913722  | 0.000722244 |
| EPN3    | darkorange | 0.265208099  | 5.87E-09    | 0.271478775  | 2.47E-09    |
| EPS8L1  | darkorange | -0.044162562 | 0.340961065 | -0.014783908 | 0.749996365 |
| EPS8L2  | darkorange | 0.095586495  | 0.038938544 | 0.101669522  | 0.028027287 |
| ERBB3   | darkorange | 0.065226987  | 0.159341857 | 0.062450829  | 0.177892526 |
| ESRP1   | darkorange | 0.044541323  | 0.336832166 | 0.052981987  | 0.253169518 |
| ESRP2   | darkorange | 0.182562769  | 7.25E-05    | 0.215647773  | 2.56E-06    |
| EVPL    | darkorange | 0.144481065  | 0.001746074 | 0.163887012  | 0.000376243 |
| F11R    | darkorange | 0.222217302  | 1.23E-06    | 0.229218148  | 5.53E-07    |
| F2RL1   | darkorange | 0.168700366  | 0.000250101 | 0.168917263  | 0.000245477 |
| FAM129E | darkorange | 0.250448859  | 4.13E-08    | 0.274743047  | 1.56E-09    |
| FAM83E  | darkorange | 0.093042347  | 0.044469863 | 0.125918607  | 0.006436301 |
| FAM83H  | darkorange | 0.14183256   | 0.002123741 | 0.159478201  | 0.000541618 |
| FUT2    | darkorange | 0.26301699   | 7.90E-09    | 0.281858998  | 5.62E-10    |
| FXYD3   | darkorange | 0.192394823  | 2.84E-05    | 0.218918075  | 1.79E-06    |
| GGT6    | darkorange | 0.063988982  | 0.167425725 | 0.075846818  | 0.101624262 |
| GPR39   | darkorange | 0.104950305  | 0.023317982 | 0.122912237  | 0.007834341 |
| GPR56   | darkorange | 0.075489464  | 0.103250654 | 0.09395938   | 0.042404386 |
| GRHL2   | darkorange | 0.262915712  | 8.01E-09    | 0.257970857  | 1.55E-08    |
| GYLTL1  | darkorange | 0.277778619  | 1.01E-09    | 0.238948077  | 1.73E-07    |
| ICA1    | darkorange | 0.218678327  | 1.83E-06    | 0.206549344  | 6.79E-06    |
| ILDR1   | darkorange | 0.184430886  | 6.09E-05    | 0.208388895  | 5.59E-06    |
| IRF6    | darkorange | 0.2218743    | 1.28E-06    | 0.209212619  | 5.13E-06    |
| ITGA3   | darkorange | -0.152274709 | 0.000962941 | -0.137323566 | 0.002941997 |
| JUP     | darkorange | 0.045111664  | 0.330675593 | 0.06560583   | 0.156927883 |
| KDF1    | darkorange | 0.170429089  | 0.000215397 | 0.190708198  | 3.35E-05    |
| KIAA152 | darkorange | 0.039172606  | 0.398343855 | 0.06234766   | 0.178611561 |
| KLF5    | darkorange | 0.13392671   | 0.003737619 | 0.14312817   | 0.001930536 |
| KRT18   | darkorange | 0.198841505  | 1.50E-05    | 0.232758446  | 3.65E-07    |
| KRT19   | darkorange | 0.03915488   | 0.398557519 | 0.060802931  | 0.189636601 |
| KRT8    | darkorange | 0.162194545  | 0.000433196 | 0.196092265  | 1.97E-05    |
| KRT80   | darkorange | 0.013383555  | 0.772995488 | 0.015817827  | 0.733155235 |
| KRTCAP  | darkorange | 0.085653365  | 0.064396573 | 0.106209546  | 0.021701455 |
| LAD1    | darkorange | 0.282370244  | 5.21E-10    | 0.296397951  | 6.34E-11    |
| LAMB3   | darkorange | -0.012482319 | 0.787904465 | 0.006554954  | 0.887652186 |
| LAMC2   | darkorange | 0.205536809  | 7.55E-06    | 0.208339274  | 5.62E-06    |
| LCN2    | darkorange | 0.0947999    | 0.040582868 | 0.123053077  | 0.007763233 |
| LLGL2   | darkorange | 0.195395359  | 2.12E-05    | 0.210028491  | 4.70E-06    |
| LRG1    | darkorange | 0.130951896  | 0.004589375 | 0.152627394  | 0.000936724 |
| LSR     | darkorange | 0.057058326  | 0.21842042  | 0.086585992  | 0.061534232 |
| LZTS3   | darkorange | -0.046868977 | 0.31216565  | -0.057899039 | 0.211700369 |
| MAL2    | darkorange | -0.087292653 | 0.059436025 | -0.095808015 | 0.038485781 |
| MAP7    | darkorange | 0.091901574  | 0.047156762 | 0.098843656  | 0.032717175 |
| MAPK13  | darkorange | 0.199310208  | 1.43E-05    | 0.210277698  | 4.58E-06    |
| MARVEL  | darkorange | 0.293399478  | 1.00E-10    | 0.314589103  | 3.46E-12    |

|          |            |              |             |              |             |
|----------|------------|--------------|-------------|--------------|-------------|
| MARVEL   | darkorange | 0.261550056  | 9.63E-09    | 0.284107381  | 4.04E-10    |
| MISP     | darkorange | 0.034422234  | 0.458028464 | 0.063976892  | 0.167506159 |
| MPZL3    | darkorange | 0.165878374  | 0.000318186 | 0.170380061  | 0.000216315 |
| MUC1     | darkorange | 0.039379415  | 0.395856201 | 0.05384245   | 0.245532353 |
| MUC20    | darkorange | -0.14830241  | 0.001308799 | -0.125559991 | 0.006590403 |
| MYH14    | darkorange | -0.000343094 | 0.994100127 | 0.013368839  | 0.773238293 |
| MYO5B    | darkorange | 0.1327417    | 0.004058082 | 0.129829394  | 0.004953842 |
| OVOL2    | darkorange | 0.195392973  | 2.12E-05    | 0.210927392  | 4.27E-06    |
| PDZK1IP  | darkorange | 0.074387027  | 0.108398316 | 0.091955438  | 0.047026901 |
| PERP     | darkorange | 0.274365661  | 1.65E-09    | 0.299239828  | 4.08E-11    |
| PKP3     | darkorange | 0.196041235  | 1.98E-05    | 0.213412732  | 3.27E-06    |
| PPL      | darkorange | -0.007619463 | 0.869558672 | 0.004156009  | 0.928627487 |
| PPP1R13I | darkorange | 0.262079063  | 8.97E-09    | 0.27427206   | 1.67E-09    |
| PROM2    | darkorange | 0.155613362  | 0.000739771 | 0.151898301  | 0.000991668 |
| PRR15    | darkorange | 0.2583464    | 1.48E-08    | 0.247004069  | 6.39E-08    |
| PRR15L   | darkorange | 0.202119274  | 1.07E-05    | 0.219186568  | 1.73E-06    |
| PRRG2    | darkorange | 0.247174156  | 6.26E-08    | 0.255820115  | 2.06E-08    |
| PRSS22   | darkorange | 0.016767827  | 0.71779289  | 0.017746468  | 0.70208551  |
| PRSS8    | darkorange | 0.170054514  | 0.00022251  | 0.185032362  | 5.75E-05    |
| PSD4     | darkorange | 0.09563701   | 0.038834902 | 0.109302979  | 0.018136948 |
| PTPN3    | darkorange | 0.346980335  | 1.17E-14    | 0.331120375  | 2.06E-13    |
| PTPRF    | darkorange | 0.115103539  | 0.012809573 | 0.101268866  | 0.0286549   |
| PVRL4    | darkorange | 0.222479615  | 1.20E-06    | 0.220054474  | 1.57E-06    |
| RAB25    | darkorange | 0.213956155  | 3.08E-06    | 0.227240286  | 6.96E-07    |
| RAB3D    | darkorange | 0.184722137  | 5.92E-05    | 0.188217545  | 4.26E-05    |
| RAP1GAI  | darkorange | 0.255126186  | 2.25E-08    | 0.258084688  | 1.53E-08    |
| RBBP8NI  | darkorange | 0.152579868  | 0.000940218 | 0.157514628  | 0.000635142 |
| RIPK4    | darkorange | 0.076038161  | 0.100761816 | 0.079916458  | 0.084502055 |
| SCNN1A   | darkorange | 0.089784646  | 0.052503728 | 0.119275989  | 0.009883351 |
| SEL1L3   | darkorange | 0.314952319  | 3.26E-12    | 0.327698582  | 3.75E-13    |
| SEMA4B   | darkorange | 0.242913866  | 1.07E-07    | 0.243249278  | 1.02E-07    |
| SGPP2    | darkorange | 0.107587427  | 0.020044886 | 0.107099882  | 0.020618014 |
| SH2D3A   | darkorange | 0.138158405  | 0.002771676 | 0.144390326  | 0.001757921 |
| SLC34A2  | darkorange | -0.009200275 | 0.842817404 | -0.003016047 | 0.948171766 |
| SLC37A1  | darkorange | 0.32550264   | 5.49E-13    | 0.338119034  | 5.93E-14    |
| SLC52A3  | darkorange | 0.085815165  | 0.063892279 | 0.095552326  | 0.039008781 |
| SLPI     | darkorange | 0.093063532  | 0.044421208 | 0.128047419  | 0.005586244 |
| SMPDL3I  | darkorange | 0.142350459  | 0.002044483 | 0.152112257  | 0.000975244 |
| SPACA4   | darkorange | 0.128756479  | 0.005326388 | 0.161667611  | 0.000452504 |
| SPINT1   | darkorange | 0.237320144  | 2.11E-07    | 0.256994111  | 1.76E-08    |
| SPINT2   | darkorange | 0.065799865  | 0.155702254 | 0.077905774  | 0.092645912 |
| ST14     | darkorange | 0.176221002  | 0.00012921  | 0.194703483  | 2.27E-05    |
| STXBP2   | darkorange | 0.294194305  | 8.90E-11    | 0.328032598  | 3.54E-13    |
| SYNE4    | darkorange | 0.159520247  | 0.000539763 | 0.15130224   | 0.00103878  |
| SYNGR2   | darkorange | 0.128295313  | 0.005494127 | 0.158456317  | 0.000588564 |

|         |            |              |             |              |             |
|---------|------------|--------------|-------------|--------------|-------------|
| SYTL1   | darkorange | 0.400566945  | 2.00E-19    | 0.423723411  | 9.01E-22    |
| TACSTD1 | darkorange | 0.123512632  | 0.007535205 | 0.137955667  | 0.002812192 |
| TAGLN2  | darkorange | 0.223691906  | 1.04E-06    | 0.24735351   | 6.11E-08    |
| TJP3    | darkorange | 0.393918791  | 8.74E-19    | 0.408871097  | 3.02E-20    |
| TMC4    | darkorange | 0.164921443  | 0.000344954 | 0.173750263  | 0.000161004 |
| TMEM10  | darkorange | 0.222958667  | 1.14E-06    | 0.226397403  | 7.66E-07    |
| TMEM12  | darkorange | 0.069828993  | 0.131858604 | 0.095592284  | 0.038926655 |
| TMEM13  | darkorange | 0.063529333  | 0.170504044 | 0.06999869   | 0.130920018 |
| TMEM18  | darkorange | 0.234376511  | 3.01E-07    | 0.233929808  | 3.17E-07    |
| TMEM30  | darkorange | -0.017038769 | 0.71343196  | 0.002428764  | 0.958253435 |
| TNK1    | darkorange | 0.314833419  | 3.33E-12    | 0.317336698  | 2.19E-12    |
| TSPAN15 | darkorange | 0.125335829  | 0.0066884   | 0.139453839  | 0.002525097 |
| TSTD1   | darkorange | 0.216197138  | 2.41E-06    | 0.235299155  | 2.69E-07    |
| USP43   | darkorange | 0.290186149  | 1.63E-10    | 0.26003285   | 1.18E-08    |
| VAMP8   | darkorange | 0.075087987  | 0.105102391 | 0.122481674  | 0.008055344 |
| VTCN1   | darkorange | -0.026909165 | 0.56187511  | -0.01868947  | 0.687069131 |
| WFDC2   | darkorange | 0.03026031   | 0.514189777 | 0.067412044  | 0.145797361 |
| WWC1    | darkorange | 0.093738814  | 0.042893642 | 0.103786404  | 0.024903747 |
| YIPF2   | darkorange | -0.002537244 | 0.956390645 | 0.002884902  | 0.950422434 |
| ZBTB42  | darkorange | 0.044009099  | 0.342643125 | 0.038604397  | 0.405226874 |
| ZBTB7B  | darkorange | 0.264543325  | 6.43E-09    | 0.256985831  | 1.77E-08    |
| ZFP28   | darkorange | -0.176099404 | 0.000130626 | -0.204891777 | 8.07E-06    |
| ZNF112  | darkorange | -0.070872533 | 0.126168408 | -0.088816333 | 0.055112877 |
| ZNF134  | darkorange | -0.09879524  | 0.032803037 | -0.122566894 | 0.008011165 |
| ZNF155  | darkorange | 0.040430497  | 0.383358203 | 0.00214089   | 0.963197791 |
| ZNF17   | darkorange | -0.223168469 | 1.11E-06    | -0.235573852 | 2.61E-07    |
| ZNF180  | darkorange | -0.090017308 | 0.051892389 | -0.120678658 | 0.00904244  |
| ZNF211  | darkorange | -0.035027367 | 0.450158406 | -0.044449056 | 0.337835016 |
| ZNF222  | darkorange | -0.045262354 | 0.32906116  | -0.065340692 | 0.158614411 |
| ZNF223  | darkorange | -0.131717292 | 0.004354927 | -0.153204214 | 0.000895262 |
| ZNF225  | darkorange | 0.007314287  | 0.874739226 | -0.015578129 | 0.737048544 |
| ZNF226  | darkorange | 0.032512462  | 0.483363787 | 0.025432558  | 0.583542223 |
| ZNF227  | darkorange | -0.041332498 | 0.372827266 | -0.063876027 | 0.168178313 |
| ZNF230  | darkorange | -0.011729756 | 0.800413849 | -0.032091675 | 0.489046233 |
| ZNF234  | darkorange | -0.027424244 | 0.554409294 | -0.041859257 | 0.366760756 |
| ZNF235  | darkorange | -0.103677482 | 0.025056804 | -0.121528018 | 0.008564766 |
| ZNF256  | darkorange | -0.181363759 | 8.10E-05    | -0.16981049  | 0.000227262 |
| ZNF283  | darkorange | 0.002049876  | 0.964761309 | -0.01233213  | 0.790396731 |
| ZNF284  | darkorange | 0.020174944  | 0.663663993 | -0.001398923 | 0.975947444 |
| ZNF304  | darkorange | -0.143559222 | 0.001869913 | -0.154155903 | 0.000830544 |
| ZNF329  | darkorange | 0.043149617  | 0.35216117  | 0.025750638  | 0.57884219  |
| ZNF347  | darkorange | 0.039481194  | 0.394635376 | 0.012646692  | 0.785179315 |
| ZNF350  | darkorange | -0.066642542 | 0.150463333 | -0.07027318  | 0.129412775 |
| ZNF415  | darkorange | 0.155192876  | 0.000764969 | 0.133320278  | 0.003898635 |
| ZNF416  | darkorange | -0.065883597 | 0.155175595 | -0.08146266  | 0.078640554 |

|          |             |              |             |              |             |
|----------|-------------|--------------|-------------|--------------|-------------|
| ZNF419   | darkorange. | -0.049364969 | 0.287067753 | -0.063346494 | 0.171740213 |
| ZNF45    | darkorange. | -0.022628738 | 0.625717657 | -0.060035542 | 0.19529591  |
| ZNF470   | darkorange. | 0.084021264  | 0.069668851 | 0.053965242  | 0.244455764 |
| ZNF471   | darkorange. | -0.191611658 | 3.07E-05    | -0.221398279 | 1.35E-06    |
| ZNF528   | darkorange. | 0.094357333  | 0.041533553 | 0.06081649   | 0.189537696 |
| ZNF547   | darkorange. | 0.120190471  | 0.009327597 | 0.108604331  | 0.018893919 |
| ZNF548   | darkorange. | -0.104526442 | 0.02388506  | -0.124659152 | 0.006992192 |
| ZNF549   | darkorange. | -0.003670141 | 0.936952983 | -0.012023208 | 0.79552971  |
| ZNF550   | darkorange. | -0.119541906 | 0.00971879  | -0.154811389 | 0.000788514 |
| ZNF583   | darkorange. | -0.020284824 | 0.661945304 | -0.042563888 | 0.35874228  |
| ZNF606   | darkorange. | -0.140676683 | 0.002310857 | -0.150087134 | 0.001141277 |
| ZNF610   | darkorange. | 0.005161359  | 0.911426246 | -0.008457989 | 0.85535349  |
| ZNF613   | darkorange. | 0.040168239  | 0.386453834 | 0.026165059  | 0.572745327 |
| ZNF614   | darkorange. | -0.053180604 | 0.251392191 | -0.09623424  | 0.037627162 |
| ZNF615   | darkorange. | 0.00175968   | 0.969747381 | -0.029126086 | 0.530091443 |
| ZNF616   | darkorange. | 0.040476056  | 0.382821987 | 0.030440718  | 0.511683476 |
| ZNF649   | darkorange. | -0.04550182  | 0.326506113 | -0.054663717 | 0.238394683 |
| ZNF665   | darkorange. | -0.009139385 | 0.84384429  | -0.036277238 | 0.43414744  |
| ZNF766   | darkorange. | 0.058353688  | 0.208128905 | 0.057977588  | 0.211080198 |
| ZNF773   | darkorange. | -0.100767079 | 0.029457918 | -0.091114433 | 0.049089039 |
| ZNF776   | darkorange. | 0.02462565   | 0.595544123 | 0.00676951   | 0.884000362 |
| ZNF814   | darkorange. | 0.040576874  | 0.381637002 | 0.037270187  | 0.42166484  |
| ZNF836   | darkorange. | 0.068702356  | 0.138222296 | 0.056397308  | 0.223810401 |
| ZNF880   | darkorange. | 0.10022021   | 0.030354979 | 0.10498392   | 0.023273511 |
| ZSCAN1   | darkorange. | -0.18657813  | 4.97E-05    | -0.199252387 | 1.44E-05    |
| AKAP7    | darkred     | 0.138413482  | 0.002721456 | 0.129279178  | 0.005141852 |
| ALDH3A   | darkred     | 0.328560111  | 3.23E-13    | 0.315938151  | 2.77E-12    |
| ALDH6A   | darkred     | 0.184596144  | 6.00E-05    | 0.183957382  | 6.36E-05    |
| ALG2     | darkred     | 0.215344177  | 2.65E-06    | 0.21528353   | 2.67E-06    |
| ANKRA2   | darkred     | 0.093268978  | 0.043951696 | 0.080393826  | 0.082655948 |
| ANXA5    | darkred     | 0.156938184  | 0.000665316 | 0.140664619  | 0.002312887 |
| AP1G1    | darkred     | 0.268934615  | 3.52E-09    | 0.277707168  | 1.02E-09    |
| ARFGAP   | darkred     | 0.374041105  | 5.91E-17    | 0.348046076  | 9.59E-15    |
| ARFIP1   | darkred     | 0.213719955  | 3.16E-06    | 0.197988382  | 1.63E-05    |
| ARHGEF   | darkred     | 0.127553388  | 0.005773978 | 0.115574655  | 0.012444726 |
| ARL1     | darkred     | 0.193165446  | 2.64E-05    | 0.184942638  | 5.80E-05    |
| ARL6IP5  | darkred     | 0.341529506  | 3.20E-14    | 0.338067676  | 5.99E-14    |
| ARRDC4   | darkred     | 0.187900701  | 4.39E-05    | 0.182082842  | 7.58E-05    |
| ATG4A    | darkred     | 0.178868559  | 0.000101738 | 0.214532835  | 2.89E-06    |
| ATP8B1   | darkred     | 0.215145573  | 2.71E-06    | 0.226746807  | 7.36E-07    |
| BANK1    | darkred     | 0.024006285  | 0.604831958 | 0.033182767  | 0.474386059 |
| BHLHE4   | darkred     | 0.154172021  | 0.000829486 | 0.134033625  | 0.003709865 |
| C10orf32 | darkred     | 0.193842658  | 2.47E-05    | 0.15581816   | 0.000727778 |
| C15orf57 | darkred     | 0.181028587  | 8.35E-05    | 0.167316834  | 0.000281571 |
| C20orf27 | darkred     | -0.241255063 | 1.31E-07    | -0.248001642 | 5.63E-08    |

|                  |              |             |              |             |
|------------------|--------------|-------------|--------------|-------------|
| C9orf156 darkred | 0.20708448   | 6.42E-06    | 0.21201011   | 3.80E-06    |
| CADPS2 darkred   | 0.018957882  | 0.682817017 | 0.030624925  | 0.509130974 |
| CASC4 darkred    | 0.07526594   | 0.104278402 | 0.057322084  | 0.216295881 |
| CASP7 darkred    | 0.155534237  | 0.000744453 | 0.173864702  | 0.000159383 |
| CAT darkred      | 0.23232981   | 3.84E-07    | 0.227213416  | 6.98E-07    |
| CCNDBP darkred   | 0.024455528  | 0.598088774 | 0.048377554  | 0.296829302 |
| CCPG1 darkred    | 0.135585266  | 0.003327555 | 0.144011704  | 0.001808156 |
| CDC42SE darkred  | 0.218215185  | 1.93E-06    | 0.210182392  | 4.62E-06    |
| CDK7 darkred     | 0.254325075  | 2.50E-08    | 0.226964493  | 7.18E-07    |
| CDYL2 darkred    | 0.230174218  | 4.94E-07    | 0.221588022  | 1.32E-06    |
| CHP1 darkred     | 0.432712327  | 9.86E-23    | 0.431216658  | 1.43E-22    |
| CLCN3 darkred    | 0.268899457  | 3.54E-09    | 0.244356556  | 8.91E-08    |
| CMPK1 darkred    | 0.156852967  | 0.000669888 | 0.148042019  | 0.00133505  |
| CMTM6 darkred    | 0.03881875   | 0.402622015 | 0.019057824  | 0.681236317 |
| COG3 darkred     | 0.164346066  | 0.000362045 | 0.149649921  | 0.001180382 |
| COG6 darkred     | 0.105635186  | 0.022426308 | 0.081577664  | 0.0782181   |
| COX18 darkred    | 0.343664899  | 2.16E-14    | 0.360928468  | 8.16E-16    |
| CPD darkred      | 0.226958116  | 7.19E-07    | 0.209486072  | 4.98E-06    |
| CPNE1 darkred    | -0.220455578 | 1.50E-06    | -0.21946574  | 1.68E-06    |
| CRYZ darkred     | 0.108806249  | 0.018672365 | 0.071093089  | 0.12499053  |
| CTAGE5 darkred   | 0.123847501  | 0.007372834 | 0.107061811  | 0.020663361 |
| CYP4V2 darkred   | 0.159489176  | 0.000541134 | 0.170111137  | 0.000221421 |
| DDAH1 darkred    | 0.349668997  | 7.07E-15    | 0.356391313  | 1.97E-15    |
| DIMT1 darkred    | 0.251824742  | 3.46E-08    | 0.221271724  | 1.37E-06    |
| DNAJB9 darkred   | 0.085367954  | 0.065294115 | 0.078269886  | 0.091126294 |
| DNAJC3 darkred   | 0.20178419   | 1.11E-05    | 0.20071575   | 1.24E-05    |
| DRAM2 darkred    | 0.076783839  | 0.097456142 | 0.055088774  | 0.234758375 |
| DYNLT3 darkred   | 0.005477342  | 0.90602802  | -0.000510711 | 0.991217881 |
| EHMT2 darkred    | -0.110761075 | 0.016641945 | -0.110499935 | 0.016901487 |
| ELL2 darkred     | 0.140346146  | 0.002367067 | 0.151197563  | 0.001047263 |
| ELOVL5 darkred   | 0.224773567  | 9.23E-07    | 0.213515934  | 3.23E-06    |
| ENPP4 darkred    | 0.215394168  | 2.63E-06    | 0.202994155  | 9.82E-06    |
| ERBB2IP darkred  | 0.17645388   | 0.000126539 | 0.152758178  | 0.000927171 |
| ERLEC1 darkred   | 0.149187335  | 0.001223097 | 0.137275457  | 0.002952097 |
| ERO1L darkred    | 0.274529297  | 1.61E-09    | 0.283661354  | 4.31E-10    |
| ETFDH darkred    | 0.287013079  | 2.63E-10    | 0.292887635  | 1.09E-10    |
| FAM107E darkred  | 0.142000332  | 0.002097763 | 0.150241857  | 0.001127727 |
| FAM114A darkred  | 0.095978757  | 0.038139852 | 0.075212231  | 0.104526551 |
| FAM120A darkred  | 0.376888722  | 3.29E-17    | 0.378010593  | 2.61E-17    |
| FBXO4 darkred    | 0.156052777  | 0.000714261 | 0.140821588  | 0.002286602 |
| FPGT darkred     | 0.140409986  | 0.002356115 | 0.115630287  | 0.012402254 |
| GABARA darkred   | 0.050555658  | 0.275587    | 0.07212251   | 0.119605606 |
| GALNT3 darkred   | 0.0568282    | 0.220286235 | 0.044719786  | 0.334897895 |
| GALNT7 darkred   | 0.312005804  | 5.30E-12    | 0.313233575  | 4.33E-12    |
| GFPT1 darkred    | 0.1487691    | 0.001262936 | 0.168342605  | 0.000257908 |



|         |         |              |             |              |             |
|---------|---------|--------------|-------------|--------------|-------------|
| GRAMD3  | darkred | 0.099222543  | 0.032051846 | 0.074590289  | 0.107434292 |
| HERPUD  | darkred | 0.174385646  | 0.000152192 | 0.189357871  | 3.81E-05    |
| HFE     | darkred | 0.217216286  | 2.16E-06    | 0.23694865   | 2.21E-07    |
| HIATL1  | darkred | 0.206382502  | 6.91E-06    | 0.198164109  | 1.61E-05    |
| HIF1A   | darkred | 0.178839378  | 0.000102008 | 0.16740472   | 0.000279467 |
| HNF4G   | darkred | 0.244598075  | 8.64E-08    | 0.226493211  | 7.58E-07    |
| HSD17B4 | darkred | 0.291290395  | 1.38E-10    | 0.263718946  | 7.19E-09    |
| HSDL2   | darkred | 0.357717787  | 1.52E-15    | 0.334909916  | 1.06E-13    |
| IDH1    | darkred | 0.374306566  | 5.59E-17    | 0.383234469  | 8.72E-18    |
| ILVBL   | darkred | -0.257747491 | 1.60E-08    | -0.250869838 | 3.91E-08    |
| ISOC1   | darkred | 0.141195346  | 0.002225108 | 0.120875391  | 0.008929737 |
| IST1    | darkred | 0.159354588  | 0.000547106 | 0.170199657  | 0.000219728 |
| ISYNA1  | darkred | -0.163864748 | 0.000376945 | -0.152383492 | 0.000954783 |
| ITM2B   | darkred | -0.159202222 | 0.000553942 | -0.164012943 | 0.000372298 |
| KDELR2  | darkred | 0.030693316  | 0.508184984 | 0.062476738  | 0.177712289 |
| KIAA014 | darkred | 0.165640425  | 0.000324655 | 0.151626985  | 0.001012862 |
| KIAA124 | darkred | 0.305171628  | 1.60E-11    | 0.33380305   | 1.28E-13    |
| KLHL2   | darkred | 0.2139748    | 3.07E-06    | 0.209241994  | 5.11E-06    |
| LACC1   | darkred | 0.132270254  | 0.004192342 | 0.118823861  | 0.010168834 |
| LAMTOR  | darkred | 0.099279052  | 0.031953613 | 0.092607781  | 0.045477825 |
| LIN7C   | darkred | 0.123213925  | 0.00768273  | 0.124575274  | 0.007030697 |
| LIPA    | darkred | 0.085023355  | 0.066391464 | 0.056556933  | 0.222500202 |
| LMAN1   | darkred | 0.037951696  | 0.413220193 | 0.01651481   | 0.721873592 |
| LMBRD1  | darkred | -0.079208854 | 0.08729958  | -0.091512833 | 0.048102923 |
| LNX1    | darkred | 0.246056795  | 7.20E-08    | 0.240241554  | 1.48E-07    |
| LPCAT2  | darkred | 0.293865643  | 9.35E-11    | 0.263679086  | 7.23E-09    |
| MAP1LC  | darkred | 0.201613269  | 1.13E-05    | 0.210773776  | 4.34E-06    |
| MAPK6   | darkred | 0.278636456  | 8.95E-10    | 0.259319202  | 1.30E-08    |
| MCCC2   | darkred | 0.326610228  | 4.53E-13    | 0.318506732  | 1.80E-12    |
| MCEE    | darkred | 0.161282076  | 0.000467134 | 0.13956594   | 0.002504728 |
| MEGF9   | darkred | 0.190634958  | 3.37E-05    | 0.171498372  | 0.000196244 |
| METAP1  | darkred | 0.29874571   | 4.41E-11    | 0.255938681  | 2.03E-08    |
| MFSD6   | darkred | 0.287519121  | 2.44E-10    | 0.289439132  | 1.83E-10    |
| MKRN1   | darkred | 0.224090564  | 9.98E-07    | 0.22699184   | 7.16E-07    |
| MMAA    | darkred | 0.126191434  | 0.006321236 | 0.134443977  | 0.003605066 |
| MOCS2   | darkred | 0.177548098  | 0.000114669 | 0.157281535  | 0.000647187 |
| MPZL2   | darkred | 0.281615887  | 5.82E-10    | 0.272530069  | 2.13E-09    |
| MRRF    | darkred | 0.26085447   | 1.06E-08    | 0.252390573  | 3.21E-08    |
| MYLPF   | darkred | -0.261686262 | 9.45E-09    | -0.244931322 | 8.29E-08    |
| MYO5C   | darkred | 0.337137637  | 7.08E-14    | 0.328411228  | 3.32E-13    |
| NEURL2  | darkred | -0.287108575 | 2.59E-10    | -0.281310122 | 6.08E-10    |
| NIPSNAP | darkred | 0.281294257  | 6.10E-10    | 0.284219049  | 3.97E-10    |
| NUDT12  | darkred | 0.016257286  | 0.726035119 | 0.031872301  | 0.492022885 |
| NUDT9   | darkred | 0.132201508  | 0.004212252 | 0.113239797  | 0.014347045 |
| OMA1    | darkred | 0.157452049  | 0.000638355 | 0.141598777  | 0.00216043  |

|         |         |              |             |              |             |
|---------|---------|--------------|-------------|--------------|-------------|
| PACS2   | darkred | -0.071229465 | 0.124266505 | -0.061342967 | 0.185726792 |
| PAFAH2  | darkred | 0.297833966  | 5.08E-11    | 0.306491707  | 1.30E-11    |
| PCED1A  | darkred | -0.219738511 | 1.63E-06    | -0.239728688 | 1.58E-07    |
| PEX7    | darkred | 0.3128207    | 4.63E-12    | 0.306200764  | 1.36E-11    |
| PGGT1B  | darkred | 0.136843131  | 0.003044277 | 0.115563945  | 0.012452917 |
| PIBF1   | darkred | 0.029511665  | 0.524657863 | 0.000483607  | 0.99168393  |
| PIGB    | darkred | 0.215641358  | 2.56E-06    | 0.183761252  | 6.48E-05    |
| PIGV    | darkred | 0.176838694  | 0.000122239 | 0.165087819  | 0.000340154 |
| PKN1    | darkred | -0.289731144 | 1.75E-10    | -0.293657082 | 9.66E-11    |
| PNPLA8  | darkred | 0.009063625  | 0.845122332 | -0.003739885 | 0.935757453 |
| POC1B   | darkred | 0.310613935  | 6.65E-12    | 0.296394693  | 6.34E-11    |
| PPIP5K1 | darkred | 0.360539704  | 8.80E-16    | 0.330174518  | 2.44E-13    |
| PPM1H   | darkred | 0.256132197  | 1.98E-08    | 0.23190151   | 4.04E-07    |
| PRKAG2  | darkred | 0.096025015  | 0.038046588 | 0.064774642  | 0.162260736 |
| PRRC1   | darkred | 0.183252814  | 6.80E-05    | 0.168206737  | 0.000260932 |
| PRRG4   | darkred | 0.139966853  | 0.002433104 | 0.162124456  | 0.000435719 |
| PYROXD  | darkred | 0.20873883   | 5.39E-06    | 0.186225589  | 5.14E-05    |
| RAB11A  | darkred | 0.240470681  | 1.44E-07    | 0.247576995  | 5.94E-08    |
| RASEF   | darkred | 0.218920218  | 1.79E-06    | 0.216625849  | 2.30E-06    |
| RASSF6  | darkred | 0.409106398  | 2.86E-20    | 0.384309287  | 6.94E-18    |
| RB1     | darkred | 0.163556872  | 0.000386773 | 0.156208831  | 0.000705399 |
| REEP5   | darkred | 0.167677541  | 0.000273028 | 0.186097601  | 5.21E-05    |
| REPS2   | darkred | 0.238581564  | 1.81E-07    | 0.22629172   | 7.76E-07    |
| RMDN3   | darkred | 0.291640066  | 1.31E-10    | 0.293373829  | 1.01E-10    |
| RNF6    | darkred | 0.126503614  | 0.006191841 | 0.119437051  | 0.009783386 |
| SAR1B   | darkred | 0.247491616  | 6.01E-08    | 0.266665383  | 4.81E-09    |
| SCP2    | darkred | 0.208965767  | 5.26E-06    | 0.193002877  | 2.68E-05    |
| SERINC5 | darkred | 0.357792629  | 1.50E-15    | 0.349273502  | 7.62E-15    |
| SGCB    | darkred | 0.289799542  | 1.73E-10    | 0.26178377   | 9.33E-09    |
| SH3GLB1 | darkred | 0.076377621  | 0.099246074 | 0.056117223  | 0.226122594 |
| SIAE    | darkred | 0.279566172  | 7.83E-10    | 0.258605649  | 1.43E-08    |
| SLC11A2 | darkred | 0.303027208  | 2.25E-11    | 0.271003657  | 2.64E-09    |
| SLC18B1 | darkred | 0.040337156  | 0.384458246 | 0.023419737  | 0.61368689  |
| SLC26A2 | darkred | 0.29332687   | 1.02E-10    | 0.259202892  | 1.32E-08    |
| SLC30A5 | darkred | 0.150016104  | 0.001147548 | 0.139485043  | 0.002519412 |
| SLC35A3 | darkred | 0.143887154  | 0.001824966 | 0.140824273  | 0.002286154 |
| SLC41A2 | darkred | 0.078669503  | 0.089481555 | 0.062550766  | 0.177198058 |
| SLC44A1 | darkred | 0.24531538   | 7.90E-08    | 0.216888851  | 2.24E-06    |
| SLFN5   | darkred | 0.11293502   | 0.014613335 | 0.111696427  | 0.015740725 |
| SMIM14  | darkred | 0.286676174  | 2.76E-10    | 0.290969005  | 1.45E-10    |
| SMIM15  | darkred | 0.141242694  | 0.002217426 | 0.127238704  | 0.005896496 |
| SNAP23  | darkred | 0.115805242  | 0.012269519 | 0.097723769  | 0.034753027 |
| SOAT1   | darkred | 0.282848275  | 4.86E-10    | 0.272801715  | 2.05E-09    |
| SPCS3   | darkred | 0.075106282  | 0.105017439 | 0.071666077  | 0.12197043  |
| SPPL2A  | darkred | 0.213428174  | 3.26E-06    | 0.209169053  | 5.15E-06    |

|         |         |              |             |              |             |
|---------|---------|--------------|-------------|--------------|-------------|
| SPRYD7  | darkred | 0.154748648  | 0.000792451 | 0.145500266  | 0.001617936 |
| STAM2   | darkred | 0.065016747  | 0.160693525 | 0.043058645  | 0.353178273 |
| STEAP2  | darkred | 0.163931705  | 0.000374839 | 0.148802952  | 0.001259668 |
| STS     | darkred | 0.182459094  | 7.32E-05    | 0.207613757  | 6.07E-06    |
| STX12   | darkred | 0.120051076  | 0.009410473 | 0.104079438  | 0.024495977 |
| SUCLG2  | darkred | 0.222987104  | 1.13E-06    | 0.220001626  | 1.58E-06    |
| SVIP    | darkred | 0.228256685  | 6.18E-07    | 0.216628244  | 2.30E-06    |
| SYAP1   | darkred | 0.31832077   | 1.86E-12    | 0.332475294  | 1.63E-13    |
| TADA2B  | darkred | 0.207287414  | 6.28E-06    | 0.207375681  | 6.22E-06    |
| TANK    | darkred | 0.100901904  | 0.029240282 | 0.078440277  | 0.090422061 |
| TC2N    | darkred | 0.08087278   | 0.080836588 | 0.088857223  | 0.055000559 |
| TCEA2   | darkred | -0.309975322 | 7.38E-12    | -0.308290252 | 9.70E-12    |
| TERF2IP | darkred | 0.086418259  | 0.062041139 | 0.091870687  | 0.047231363 |
| TLR3    | darkred | 0.126673403  | 0.006122469 | 0.143184162  | 0.001922561 |
| TMBIM6  | darkred | 0.185107242  | 5.71E-05    | 0.168673468  | 0.000250681 |
| TMED10  | darkred | 0.212527836  | 3.60E-06    | 0.200384424  | 1.28E-05    |
| TMED7   | darkred | 0.041509129  | 0.370786194 | 0.026281545  | 0.571037094 |
| TMEM11  | darkred | 0.152599283  | 0.000938789 | 0.124212476  | 0.007199436 |
| TMEM14  | darkred | 0.35589894   | 2.16E-15    | 0.350405715  | 6.16E-15    |
| TMEM16  | darkred | 0.213996315  | 3.07E-06    | 0.195815384  | 2.03E-05    |
| TMEM16  | darkred | 0.025072786  | 0.588879582 | 0.009564876  | 0.836674139 |
| TMEM17  | darkred | 0.215952259  | 2.48E-06    | 0.211117189  | 4.18E-06    |
| TMEM2   | darkred | 0.228587277  | 5.95E-07    | 0.208213855  | 5.70E-06    |
| TMEM39  | darkred | -0.151546229 | 0.001019251 | -0.172031772 | 0.000187297 |
| TMEM41  | darkred | 0.279224111  | 8.23E-10    | 0.274380697  | 1.64E-09    |
| TMEM50  | darkred | 0.100641263  | 0.029662263 | 0.103985298  | 0.024626343 |
| TMEM59  | darkred | 0.001217066  | 0.979073448 | 0.010227072  | 0.825542235 |
| TMEM87  | darkred | 0.243985044  | 9.33E-08    | 0.204563772  | 8.35E-06    |
| TMEM87  | darkred | 0.136354374  | 0.003151636 | 0.139111842  | 0.002588173 |
| TMEM9B  | darkred | 0.269767014  | 3.14E-09    | 0.284033992  | 4.08E-10    |
| TMOD3   | darkred | 0.240866512  | 1.37E-07    | 0.227813255  | 6.51E-07    |
| TMX4    | darkred | 0.177757762  | 0.000112517 | 0.15419942   | 0.000827691 |
| TOB1    | darkred | 0.091109377  | 0.049101663 | 0.086489145  | 0.061826496 |
| TRIM2   | darkred | 0.329663553  | 2.66E-13    | 0.336595303  | 7.80E-14    |
| TSPAN13 | darkred | 0.276881522  | 1.15E-09    | 0.297587692  | 5.28E-11    |
| TVP23B  | darkred | 0.216989149  | 2.21E-06    | 0.199903225  | 1.35E-05    |
| TWF1    | darkred | 0.203283305  | 9.53E-06    | 0.17802957   | 0.000109785 |
| UBE2J1  | darkred | 0.077921512  | 0.092579814 | 0.087480519  | 0.058888283 |
| UBXN4   | darkred | 0.052826001  | 0.254571474 | 0.040543039  | 0.382034445 |
| UCKL1   | darkred | -0.157257485 | 0.000648442 | -0.149833656 | 0.001163801 |
| UFL1    | darkred | 0.048505341  | 0.29555368  | 0.034058782  | 0.462792087 |
| UGCG    | darkred | 0.075602991  | 0.102731749 | 0.047239796  | 0.308348472 |
| UGDH    | darkred | 0.284959409  | 3.56E-10    | 0.273435886  | 1.88E-09    |
| USO1    | darkred | 0.057083972  | 0.218213191 | 0.029291486  | 0.527757147 |
| ZSWIM1  | darkred | -0.114245115 | 0.01349868  | -0.084341974 | 0.068605847 |

|         |             |              |             |              |             |
|---------|-------------|--------------|-------------|--------------|-------------|
| DPY19L3 | darkslatebl | -0.090277783 | 0.051215022 | -0.124905041 | 0.006880401 |
| EID2B   | darkslatebl | -0.196967102 | 1.81E-05    | -0.196512044 | 1.89E-05    |
| HKR1    | darkslatebl | -0.079677966 | 0.085436748 | -0.082460942 | 0.075034522 |
| ZFP14   | darkslatebl | -0.106772435 | 0.021010888 | -0.119961957 | 0.009463801 |
| ZFP30   | darkslatebl | -0.00995461  | 0.830118383 | -0.021887972 | 0.637075282 |
| ZFP82   | darkslatebl | -0.366767846 | 2.57E-16    | -0.362134143 | 6.44E-16    |
| ZNF181  | darkslatebl | -0.293056254 | 1.06E-10    | -0.317486601 | 2.14E-12    |
| ZNF260  | darkslatebl | -0.079521168 | 0.086055791 | -0.085646389 | 0.064418388 |
| ZNF30   | darkslatebl | 0.079834824  | 0.08482106  | 0.043522705  | 0.348009219 |
| ZNF302  | darkslatebl | -0.443436201 | 6.45E-24    | -0.464830003 | 2.08E-26    |
| ZNF311  | darkslatebl | -0.498228427 | 1.14E-30    | -0.505037341 | 1.35E-31    |
| ZNF334  | darkslatebl | -0.464034262 | 2.59E-26    | -0.467171973 | 1.08E-26    |
| ZNF345  | darkslatebl | -0.214528582 | 2.89E-06    | -0.216924825 | 2.23E-06    |
| ZNF382  | darkslatebl | -0.192887531 | 2.71E-05    | -0.207963637 | 5.85E-06    |
| ZNF383  | darkslatebl | -0.176849232 | 0.000122123 | -0.195789499 | 2.03E-05    |
| ZNF404  | darkslatebl | -0.289062656 | 1.94E-10    | -0.286505772 | 2.83E-10    |
| ZNF420  | darkslatebl | -0.166543814 | 0.000300728 | -0.189141893 | 3.89E-05    |
| ZNF461  | darkslatebl | -0.158555715 | 0.000583837 | -0.17852749  | 0.00010494  |
| ZNF507  | darkslatebl | -0.279712888 | 7.67E-10    | -0.315496782 | 2.98E-12    |
| ZNF527  | darkslatebl | -0.137164744 | 0.002975458 | -0.157860141 | 0.000617669 |
| ZNF529  | darkslatebl | -0.188282502 | 4.23E-05    | -0.200357329 | 1.29E-05    |
| ZNF546  | darkslatebl | -0.134104182 | 0.003691651 | -0.152331902 | 0.000958644 |
| ZNF565  | darkslatebl | -0.121736191 | 0.008451177 | -0.144363835 | 0.001761394 |
| ZNF566  | darkslatebl | -0.20822502  | 5.69E-06    | -0.228725332 | 5.86E-07    |
| ZNF567  | darkslatebl | -0.096857734 | 0.036400448 | -0.12165786  | 0.008493759 |
| ZNF568  | darkslatebl | -0.346330622 | 1.32E-14    | -0.345537183 | 1.53E-14    |
| ZNF569  | darkslatebl | -0.072696075 | 0.11668485  | -0.092619829 | 0.045449624 |
| ZNF570  | darkslatebl | -0.031511331 | 0.496941859 | -0.048792667 | 0.292698878 |
| ZNF571  | darkslatebl | -0.100131025 | 0.030503469 | -0.12083372  | 0.008953504 |
| ZNF585A | darkslatebl | -0.167461776 | 0.000278109 | -0.18937445  | 3.81E-05    |
| ZNF585B | darkslatebl | -0.172173887 | 0.000184979 | -0.181933548 | 7.68E-05    |
| ZNF607  | darkslatebl | -0.162058975 | 0.000438089 | -0.169059747 | 0.000242483 |
| ZNF667  | darkslatebl | -0.409202983 | 2.80E-20    | -0.430649285 | 1.65E-22    |
| ZNF780A | darkslatebl | -0.099888214 | 0.030910902 | -0.111098182 | 0.016312064 |
| ZNF780B | darkslatebl | -0.119731988 | 0.009602656 | -0.123570179 | 0.007507076 |
| ZNF790  | darkslatebl | -0.014253567 | 0.758681785 | -0.010957888 | 0.81329732  |
| ZNF793  | darkslatebl | -0.181729944 | 7.83E-05    | -0.19602515  | 1.99E-05    |
| ZNF829  | darkslatebl | -0.40373153  | 9.80E-20    | -0.402736889 | 1.23E-19    |
| ZNF850  | darkslatebl | -0.18681192  | 4.86E-05    | -0.187648974 | 4.49E-05    |
| ZNF879  | darkslatebl | -0.229242712 | 5.51E-07    | -0.260053766 | 1.18E-08    |
| ABCB4   | darkturquoi | -0.019245565 | 0.67827074  | -0.023014305 | 0.619840662 |
| ABHD12I | darkturquoi | 0.11173837   | 0.015701335 | 0.079675427  | 0.085446742 |
| ADAM23  | darkturquoi | 0.090161003  | 0.051517792 | 0.0357036    | 0.44145473  |
| ADAMTS  | darkturquoi | 0.212164209  | 3.74E-06    | 0.152715148  | 0.000930304 |
| ADAMTS  | darkturquoi | 0.121575166  | 0.008538921 | 0.07247663   | 0.117795661 |

|          |             |              |             |              |             |
|----------|-------------|--------------|-------------|--------------|-------------|
| ADAMTS   | darkturquoi | 0.035554943  | 0.443359783 | 0.021452485  | 0.6437924   |
| AMBN     | darkturquoi | 0.061251235  | 0.186386706 | 0.056675293  | 0.221532254 |
| AMOT     | darkturquoi | 0.155601975  | 0.000740443 | 0.131120672  | 0.004536719 |
| ANKRD3   | darkturquoi | 0.014070006  | 0.76169511  | -0.020394937 | 0.660224757 |
| APCDD1   | darkturquoi | -0.008824098 | 0.849165712 | -0.020611761 | 0.656842034 |
| ASCL5    | darkturquoi | 0.100156914  | 0.030460302 | 0.082289396  | 0.07564443  |
| AXIN2    | darkturquoi | 0.059581955  | 0.198698526 | 0.028455863  | 0.539603543 |
| BAMBI    | darkturquoi | 0.171936644  | 0.000188864 | 0.136351858  | 0.003152197 |
| BEST3    | darkturquoi | 0.079327835  | 0.086824043 | 0.066888398  | 0.148960381 |
| BMP4     | darkturquoi | 0.052623346  | 0.256400891 | 0.038477758  | 0.406770513 |
| BSX      | darkturquoi | -0.007703276 | 0.868136861 | -0.023257674 | 0.616143506 |
| C10orf12 | darkturquoi | 0.016915712  | 0.715411471 | 0.015510886  | 0.738141952 |
| C3orf36  | darkturquoi | 0.153518922  | 0.000873362 | 0.142169297  | 0.002071895 |
| CA6      | darkturquoi | 0.165240882  | 0.000335793 | 0.130100816  | 0.004863399 |
| CACNA1   | darkturquoi | 0.071749522  | 0.121535393 | 0.021385548  | 0.64482746  |
| CACNA1   | darkturquoi | 0.092774072  | 0.045089874 | 0.070124157  | 0.130229397 |
| CALML3   | darkturquoi | 0.133040843  | 0.003974921 | 0.092236671  | 0.046353733 |
| CD36     | darkturquoi | 0.003582069  | 0.938462883 | -0.020835697 | 0.653355711 |
| CDX2     | darkturquoi | 0.154842044  | 0.000786598 | 0.120744675  | 0.00900448  |
| CEMIP    | darkturquoi | 0.151833868  | 0.000996664 | 0.142173138  | 0.00207131  |
| CHRNA3   | darkturquoi | 0.065441699  | 0.157970307 | 0.043728167  | 0.345736018 |
| CORIN    | darkturquoi | -0.013997932 | 0.762879267 | -0.015804594 | 0.733369992 |
| CPNE9    | darkturquoi | -0.011343036 | 0.806862166 | -0.017689169 | 0.703001763 |
| CRYBA4   | darkturquoi | 0.125701819  | 0.006529067 | 0.100219815  | 0.030355635 |
| CRYBB1   | darkturquoi | 0.088561084  | 0.05581832  | 0.060191688  | 0.194134481 |
| CST1     | darkturquoi | 0.153677435  | 0.00086252  | 0.127234114  | 0.0058983   |
| CST2     | darkturquoi | 0.085712896  | 0.06421065  | 0.079949948  | 0.084371467 |
| CST4     | darkturquoi | 0.052564313  | 0.256935501 | 0.023635916  | 0.61041667  |
| CST5     | darkturquoi | -0.029306392 | 0.52754703  | -0.06395783  | 0.167633034 |
| CTD-253  | darkturquoi | -0.008451965 | 0.855455388 | -0.013624339 | 0.769026102 |
| CXCL14   | darkturquoi | 0.269635325  | 3.19E-09    | 0.25651559   | 1.88E-08    |
| DBH      | darkturquoi | 0.10831449   | 0.01921595  | 0.078336713  | 0.090849571 |
| DCHS2    | darkturquoi | 0.04966609   | 0.284134356 | 0.020900971  | 0.652340911 |
| DEFA5    | darkturquoi | 0.054651415  | 0.238500511 | 0.014448664  | 0.755483071 |
| DEFA6    | darkturquoi | 0.049156049  | 0.289114903 | 0.015483151  | 0.738593093 |
| DEFB133  | darkturquoi | -0.072059066 | 0.119932155 | -0.080218585 | 0.083329829 |
| DEPDC7   | darkturquoi | -0.003667354 | 0.937000761 | -0.025033766 | 0.589459795 |
| DKK1     | darkturquoi | 0.174664744  | 0.000148466 | 0.162884554  | 0.000409071 |
| DKK4     | darkturquoi | 0.163069483  | 0.000402821 | 0.139266625  | 0.00255945  |
| DLX3     | darkturquoi | -0.049258074 | 0.288113966 | -0.090899707 | 0.049627505 |
| DPEP1    | darkturquoi | 0.055619872  | 0.230270164 | 0.049140505  | 0.289267603 |
| DRAXIN   | darkturquoi | 0.024479306  | 0.597732815 | -0.000294127 | 0.994942169 |
| DYNC1I1  | darkturquoi | 0.251469303  | 3.62E-08    | 0.20401937   | 8.83E-06    |
| EDAR     | darkturquoi | 0.088996771  | 0.054618675 | 0.088921278  | 0.054824992 |
| EDN3     | darkturquoi | 0.032897264  | 0.478198732 | 0.027454598  | 0.55397084  |

|         |             |              |             |              |             |
|---------|-------------|--------------|-------------|--------------|-------------|
| EPHA7   | darkturquoi | 0.21695399   | 2.22E-06    | 0.184964689  | 5.79E-05    |
| ERVMER  | darkturquoi | 0.018640295  | 0.687849218 | -0.021621246 | 0.641185886 |
| EVX1    | darkturquoi | -0.041515993 | 0.370707016 | -0.029032225 | 0.531418427 |
| FAM159E | darkturquoi | 0.063735362  | 0.169119057 | 0.05267088   | 0.255970975 |
| FAM163E | darkturquoi | 0.058055884  | 0.210463331 | 0.039152343  | 0.398588101 |
| FAM178E | darkturquoi | -0.091439058 | 0.048284268 | -0.092422431 | 0.045913541 |
| FAM84A  | darkturquoi | 0.223778796  | 1.03E-06    | 0.187353104  | 4.62E-05    |
| FGF19   | darkturquoi | 0.149359921  | 0.001206997 | 0.11964131   | 0.009657903 |
| FGF20   | darkturquoi | 0.168093016  | 0.000263488 | 0.149313897  | 0.001211271 |
| FGF3    | darkturquoi | 0.047200679  | 0.308749684 | 0.031012385  | 0.503783811 |
| FGF4    | darkturquoi | 0.150055389  | 0.001144076 | 0.104370011  | 0.024097337 |
| FGF8    | darkturquoi | 0.028976522  | 0.532206731 | 0.009298662  | 0.841158697 |
| FOXL1   | darkturquoi | 0.241336974  | 1.29E-07    | 0.235883687  | 2.51E-07    |
| FRMPD1  | darkturquoi | -0.070335445 | 0.129072752 | -0.087358295 | 0.059244161 |
| FSTL4   | darkturquoi | -0.129678916 | 0.005004635 | -0.135621978 | 0.00331896  |
| FZD10   | darkturquoi | 0.240209928  | 1.49E-07    | 0.204796184  | 8.15E-06    |
| GAD1    | darkturquoi | 0.317656113  | 2.08E-12    | 0.291650181  | 1.31E-10    |
| GDNF    | darkturquoi | -0.044645287 | 0.33570448  | -0.056613725 | 0.22203538  |
| GLB1L3  | darkturquoi | -0.063017387 | 0.17398213  | -0.051274207 | 0.268811817 |
| GNAT3   | darkturquoi | -0.012838279 | 0.78200629  | -0.024886952 | 0.591645253 |
| GOLGA7  | darkturquoi | 0.035046566  | 0.449909967 | 0.029404861  | 0.526160095 |
| GPCPD1  | darkturquoi | 0.169883632  | 0.000225828 | 0.157030443  | 0.000660399 |
| GPR155  | darkturquoi | -0.096407119 | 0.037283562 | -0.096872821 | 0.036371192 |
| GPR83   | darkturquoi | 0.043919918  | 0.343623036 | 0.021521482  | 0.642726209 |
| GPX2    | darkturquoi | 0.185752241  | 5.38E-05    | 0.181632365  | 7.90E-05    |
| GREM2   | darkturquoi | 0.057604514  | 0.214037427 | 0.015132626  | 0.744302477 |
| GRM3    | darkturquoi | -0.091862126 | 0.047252057 | -0.051944369 | 0.262596427 |
| GRM8    | darkturquoi | 0.067861808  | 0.143121751 | 0.04683156   | 0.312552542 |
| GSDMA   | darkturquoi | 0.021456091  | 0.643736663 | 0.003056287  | 0.947481277 |
| HAO2    | darkturquoi | 0.082667366  | 0.074305925 | 0.069874855  | 0.131604432 |
| HPS4    | darkturquoi | 0.161998202  | 0.000440299 | 0.118967671  | 0.010077246 |
| HSPA12A | darkturquoi | -0.049533056 | 0.285427817 | -0.101188199 | 0.028782712 |
| HUNK    | darkturquoi | -0.101915674 | 0.027647584 | -0.144725187 | 0.001714562 |
| IGFBPL1 | darkturquoi | 0.008100962  | 0.861396333 | -0.007058612 | 0.879083623 |
| IGFL4   | darkturquoi | -0.01023513  | 0.825406979 | -0.023839748 | 0.607340311 |
| IL10    | darkturquoi | -0.110893065 | 0.016512096 | -0.119849849 | 0.009531267 |
| IL17RD  | darkturquoi | 0.00037766   | 0.993505747 | -0.035572425 | 0.443135503 |
| IL23A   | darkturquoi | -0.10055793  | 0.029798277 | -0.125001768 | 0.006836865 |
| IL31RA  | darkturquoi | 0.027261743  | 0.556759434 | -0.001475605 | 0.97462943  |
| KCNA2   | darkturquoi | -0.06644895  | 0.151654879 | -0.088161934 | 0.056936487 |
| KCNJ9   | darkturquoi | 0.040392393  | 0.383807039 | 0.000250448  | 0.995693259 |
| KIF26B  | darkturquoi | 0.254246887  | 2.53E-08    | 0.240480354  | 1.44E-07    |
| KIZ     | darkturquoi | 0.099031227  | 0.032386339 | 0.062951201  | 0.174435618 |
| KLK4    | darkturquoi | 0.069298019  | 0.134828976 | 0.044872824  | 0.333244875 |
| KRT31   | darkturquoi | 0.120122048  | 0.009368196 | 0.08362891   | 0.070987619 |

|          |             |              |             |              |             |
|----------|-------------|--------------|-------------|--------------|-------------|
| KRT74    | darkturquoi | 0.0712935    | 0.123927667 | 0.09452479   | 0.041171648 |
| LAMP5    | darkturquoi | 0.056256845  | 0.224967849 | 0.030610383  | 0.509332231 |
| LEF1     | darkturquoi | 0.210120259  | 4.65E-06    | 0.198490909  | 1.55E-05    |
| LRP4     | darkturquoi | 0.270723362  | 2.75E-09    | 0.243862234  | 9.47E-08    |
| LRRC15   | darkturquoi | 0.022426789  | 0.628805379 | 0.037116234  | 0.42358636  |
| LY6G6C   | darkturquoi | 0.080276457  | 0.083106794 | 0.05062299   | 0.27494724  |
| LY6G6D   | darkturquoi | 0.015047208  | 0.745695916 | -0.008573567 | 0.853399082 |
| MSX2     | darkturquoi | 0.192853737  | 2.72E-05    | 0.168634805  | 0.000251515 |
| MUCL1    | darkturquoi | 0.14951904   | 0.001192326 | 0.152891054  | 0.000917557 |
| MYH7B    | darkturquoi | 0.05689029   | 0.2197817   | 0.026480284  | 0.568128254 |
| NAT16    | darkturquoi | -0.0208009   | 0.653896944 | -0.016531638 | 0.721601948 |
| NKD1     | darkturquoi | 0.060887743  | 0.189018602 | 0.038287821  | 0.409092257 |
| NKD2     | darkturquoi | -0.0952663   | 0.039600955 | -0.097304418 | 0.035542641 |
| NODAL    | darkturquoi | -0.016916745 | 0.715394849 | -0.066754452 | 0.149777787 |
| NOTUM    | darkturquoi | 0.014582088  | 0.753297913 | -0.012456643 | 0.788330378 |
| NOX3     | darkturquoi | -0.006338418 | 0.891340126 | -0.031928784 | 0.491255558 |
| NRSN1    | darkturquoi | 0.040046202  | 0.387899509 | 0.025150613  | 0.587723085 |
| NTNG2    | darkturquoi | -0.092057745 | 0.046781072 | -0.06253562  | 0.177303179 |
| OSBPL6   | darkturquoi | -0.027569422 | 0.552313782 | -0.039043139 | 0.399905956 |
| PHLDA1   | darkturquoi | 0.263080393  | 7.84E-09    | 0.255956218  | 2.02E-08    |
| PLA2G4E  | darkturquoi | 0.098343866  | 0.033612813 | 0.056112659  | 0.226160407 |
| PMCH     | darkturquoi | 0.053662818  | 0.247113248 | 0.0278729    | 0.547945914 |
| PROX1    | darkturquoi | 0.052405066  | 0.258381515 | 0.030006488  | 0.517726733 |
| PRR9     | darkturquoi | 0.107465859  | 0.020186481 | 0.109253995  | 0.018189145 |
| PTPRE    | darkturquoi | -0.003478944 | 0.940231124 | -0.009458146 | 0.83847145  |
| RASGRF1  | darkturquoi | 0.119962854  | 0.009463263 | 0.08116438   | 0.079744883 |
| RASL11B  | darkturquoi | -0.107131299 | 0.020580657 | -0.145281341 | 0.00164471  |
| RNF43    | darkturquoi | 0.10831145   | 0.019219353 | 0.078873023  | 0.088653115 |
| RP11-520 | darkturquoi | -0.049635802 | 0.28442849  | -0.046691978 | 0.313998564 |
| RUNX2    | darkturquoi | -0.02394602  | 0.605739131 | -0.038739856 | 0.403579586 |
| SCML1    | darkturquoi | -0.02166251  | 0.640549231 | -0.053978772 | 0.244337342 |
| SEZ6L    | darkturquoi | 0.033253342  | 0.473446148 | 0.015974808  | 0.730609157 |
| SHISA6   | darkturquoi | 0.073938746  | 0.110548526 | 0.069333299  | 0.134630028 |
| SLC30A1  | darkturquoi | 0.114676825  | 0.013148144 | 0.106781201  | 0.021000287 |
| SLC35D3  | darkturquoi | -0.01547617  | 0.738706663 | -0.018841875 | 0.684653542 |
| SLC6A2   | darkturquoi | 0.186103533  | 5.20E-05    | 0.134125871  | 0.003686069 |
| SLC8A3   | darkturquoi | -0.066118268 | 0.153706753 | -0.078182325 | 0.091489891 |
| SLCO2A1  | darkturquoi | 0.029738162  | 0.521479389 | 0.020954377  | 0.651511086 |
| SLCO5A1  | darkturquoi | 0.115702044  | 0.012347661 | 0.106484028  | 0.021362292 |
| SMPX     | darkturquoi | 0.049306082  | 0.287643778 | 0.044558185  | 0.336649109 |
| SOX14    | darkturquoi | 0.190391893  | 3.45E-05    | 0.152113677  | 0.000975135 |
| SP5      | darkturquoi | 0.188832238  | 4.01E-05    | 0.151457218  | 0.001026336 |
| SP6      | darkturquoi | -0.006120024 | 0.895062088 | -0.027785446 | 0.549202872 |
| SP7      | darkturquoi | 0.062354081  | 0.17856675  | 0.055755201  | 0.229136309 |
| SSTR2    | darkturquoi | -0.072292272 | 0.118735243 | -0.084193599 | 0.069095977 |

|          |             |              |             |              |             |
|----------|-------------|--------------|-------------|--------------|-------------|
| STRIP2   | darkturquoi | 0.157186179  | 0.000652175 | 0.132703527  | 0.004068806 |
| SYT6     | darkturquoi | -0.065101312 | 0.160148809 | -0.09177701  | 0.047458226 |
| TDGF1    | darkturquoi | 0.186448973  | 5.03E-05    | 0.168213619  | 0.000260778 |
| TMEM16   | darkturquoi | -0.145274794 | 0.001645517 | -0.147188382 | 0.001424538 |
| TMEM89   | darkturquoi | 0.073015342  | 0.115083412 | 0.066684131  | 0.150208289 |
| TNFRSF1  | darkturquoi | 0.008622686  | 0.852568739 | -0.018700334 | 0.686896836 |
| TPH1     | darkturquoi | 0.073825544  | 0.111096782 | 0.060331082  | 0.193101931 |
| TPST2    | darkturquoi | 0.177405893  | 0.00011615  | 0.169032298  | 0.000243057 |
| TRAF3IP1 | darkturquoi | 0.314633362  | 3.44E-12    | 0.273409029  | 1.88E-09    |
| TSPAN11  | darkturquoi | 0.186625215  | 4.95E-05    | 0.165851433  | 0.000318912 |
| TTC9     | darkturquoi | 0.366490891  | 2.72E-16    | 0.353113473  | 3.69E-15    |
| VSNL1    | darkturquoi | 0.088046484  | 0.057263348 | 0.076542747  | 0.098515345 |
| VWA2     | darkturquoi | 0.135154033  | 0.003430048 | 0.119914473  | 0.009492325 |
| WIF1     | darkturquoi | 0.127120335  | 0.005943183 | 0.111409694  | 0.016012335 |
| WNT16    | darkturquoi | -0.068897846 | 0.137101488 | -0.099557385 | 0.031473516 |
| WNT6     | darkturquoi | -0.173424094 | 0.000165712 | -0.184749165 | 5.91E-05    |
| XXbac-B1 | darkturquoi | 0.037006823  | 0.424955043 | 0.01412612   | 0.760773563 |
| HIST1H1  | floralwhite | -0.055913432 | 0.227815601 | -0.053064265 | 0.2524322   |
| HIST1H1  | floralwhite | 0.000965851  | 0.983392215 | 0.004511858  | 0.92253479  |
| HIST1H1  | floralwhite | -0.084597012 | 0.067770031 | -0.087105226 | 0.05998668  |
| HIST1H1  | floralwhite | 0.056014925  | 0.226971321 | 0.036081837  | 0.436628701 |
| HIST1H1  | floralwhite | -0.118796517 | 0.010186332 | -0.122555861 | 0.008016873 |
| HIST1H2  | floralwhite | -0.046593716 | 0.315019153 | -0.039474289 | 0.394718118 |
| HIST1H2  | floralwhite | 0.057267259  | 0.21673627  | 0.058762305  | 0.204956381 |
| HIST1H2  | floralwhite | 0.053303605  | 0.250295873 | 0.043531471  | 0.347912037 |
| HIST1H2  | floralwhite | 0.121361711  | 0.008656485 | 0.130692188  | 0.004671478 |
| HIST1H2  | floralwhite | 0.088220167  | 0.056772208 | 0.096714616  | 0.036678985 |
| HIST1H2  | floralwhite | -0.021206641 | 0.647597286 | -0.021348469 | 0.645401108 |
| HIST1H2  | floralwhite | -0.038496814 | 0.406538014 | -0.04938848  | 0.286837986 |
| HIST1H2  | floralwhite | 0.008419736  | 0.856000542 | 0.029181285  | 0.529311832 |
| HIST1H2  | floralwhite | 0.02378054   | 0.608233201 | 0.026785003  | 0.563681994 |
| HIST1H2  | floralwhite | 0.075512945  | 0.103143158 | 0.09020872   | 0.051393899 |
| HIST1H2  | floralwhite | 0.049156969  | 0.289105861 | 0.062377603  | 0.178402654 |
| HIST1H2  | floralwhite | 0.047109226  | 0.309689024 | 0.066039271  | 0.154200029 |
| HIST1H2  | floralwhite | 0.099042111  | 0.032367231 | 0.097575752  | 0.035030013 |
| HIST1H2  | floralwhite | -0.017624391 | 0.704038123 | -0.038407162 | 0.407632551 |
| HIST1H2  | floralwhite | 0.048528139  | 0.295326492 | 0.041170923  | 0.374700418 |
| HIST1H2  | floralwhite | -0.019202636 | 0.678948421 | 0.01447658   | 0.755025705 |
| HIST1H2  | floralwhite | -0.095399388 | 0.039324476 | -0.086867636 | 0.060690767 |
| HIST1H2  | floralwhite | -0.038230171 | 0.409798508 | -0.041196524 | 0.374403242 |
| HIST1H2  | floralwhite | -0.079050065 | 0.087937479 | -0.068634069 | 0.138615457 |
| HIST1H2  | floralwhite | -0.027178679 | 0.557962594 | -0.026106851 | 0.573599835 |
| HIST1H2  | floralwhite | -0.016567594 | 0.721021629 | -0.029916985 | 0.518976915 |
| HIST1H2  | floralwhite | -0.064791177 | 0.162153333 | -0.054391246 | 0.240746372 |
| HIST1H2  | floralwhite | -0.099496117 | 0.031578665 | -0.098255755 | 0.033772859 |



|                     |              |             |              |             |
|---------------------|--------------|-------------|--------------|-------------|
| HIST1H3.floralwhite | 0.041908172  | 0.366200539 | 0.05599426   | 0.227143039 |
| HIST1H3]floralwhite | -0.056431806 | 0.223526776 | -0.063102062 | 0.173403246 |
| HIST1H3(floralwhite | -0.082249795 | 0.075785798 | -0.06210237  | 0.180329763 |
| HIST1H3]floralwhite | 0.099279708  | 0.031952473 | 0.107172982  | 0.020531184 |
| HIST1H3]floralwhite | -0.108923463 | 0.018544795 | -0.093689994 | 0.043002573 |
| HIST1H3(floralwhite | -0.106132493 | 0.021797502 | -0.10073425  | 0.02951112  |
| HIST1H3]floralwhite | 0.081306111  | 0.079218592 | 0.084194517  | 0.069092938 |
| HIST1H3]floralwhite | -0.094420386 | 0.04139697  | -0.09114701  | 0.049007776 |
| HIST1H3.floralwhite | 0.01708735   | 0.712651014 | 0.020177215  | 0.663628467 |
| HIST1H4.floralwhite | 0.011195669  | 0.809322894 | 0.029535113  | 0.524328358 |
| HIST1H4]floralwhite | -0.010821107 | 0.815585745 | -0.012906111 | 0.780883734 |
| HIST1H4(floralwhite | -0.088457921 | 0.056105556 | -0.091379061 | 0.048432168 |
| HIST1H4]floralwhite | 0.004338902  | 0.925495526 | 0.019138327  | 0.679964078 |
| HIST1H4]floralwhite | 0.03930042   | 0.396805311 | 0.034891584  | 0.451917654 |
| HIST1H4]floralwhite | -0.0578703   | 0.211927599 | -0.050154373 | 0.279420829 |
| HIST1H4]floralwhite | -0.073265228 | 0.113842054 | -0.065268772 | 0.159074239 |
| HIST1H4]floralwhite | -0.072402497 | 0.118172779 | -0.05490829  | 0.236297579 |
| HIST1H4]floralwhite | -0.063563718 | 0.170272309 | -0.054193847 | 0.242460266 |
| HIST1H4]floralwhite | -0.076501441 | 0.098697734 | -0.07058057  | 0.127740864 |
| HIST2H2.floralwhite | -0.041388878 | 0.372175014 | -0.039872102 | 0.389967597 |
| HIST2H2.floralwhite | 0.065030307  | 0.160606082 | 0.082188543  | 0.076004876 |
| HIST2H2]floralwhite | 0.188143945  | 4.29E-05    | 0.171500191  | 0.000196213 |
| HIST2H2]floralwhite | 0.054018612  | 0.243988867 | 0.031334436  | 0.499361924 |
| HIST2H3]floralwhite | -0.052533409 | 0.257215687 | -0.057823507 | 0.212297958 |
| HIST3H2]floralwhite | -0.098567664 | 0.033209209 | -0.08768205  | 0.058305349 |
| OR2B6 floralwhite   | -0.131833374 | 0.004320331 | -0.123084032 | 0.007747682 |
| AAGAB green         | 0.264300048  | 6.64E-09    | 0.268790592  | 3.59E-09    |
| AARS2 green         | -0.156195744 | 0.000706138 | -0.18050069  | 8.76E-05    |
| ABHD3 green         | 0.091156678  | 0.048983679 | 0.107536104  | 0.020104558 |
| ABTB1 green         | -0.218515008 | 1.87E-06    | -0.22254808  | 1.19E-06    |
| AC00438 green       | 0.142670348  | 0.00199689  | 0.164202136  | 0.000366442 |
| ACAD9 green         | -0.076100614 | 0.100481583 | -0.068475036 | 0.139534424 |
| ACAT2 green         | 0.116475202  | 0.011772761 | 0.100427525  | 0.030012191 |
| ACOXL green         | -0.23310883  | 3.50E-07    | -0.24654667  | 6.77E-08    |
| ACP1 green          | 0.004548545  | 0.921906904 | 0.004732287  | 0.918762948 |
| ACTL6A green        | -0.144453599 | 0.001749652 | -0.163897089 | 0.000375926 |
| ADA green           | -0.272515423 | 2.14E-09    | -0.27181067  | 2.36E-09    |
| ADD2 green          | -0.321183624 | 1.15E-12    | -0.313456956 | 4.17E-12    |
| AGFG2 green         | -0.182102487 | 7.56E-05    | -0.150174968 | 0.001133567 |
| AK2 green           | -0.168400042 | 0.000256639 | -0.151358929 | 0.001034212 |
| ALG8 green          | -0.020788961 | 0.654082699 | -0.054617424 | 0.238793092 |
| ALYREF green        | 0.019878993  | 0.668301879 | 0.020123866  | 0.664463538 |
| ANAPC5 green        | 0.144947041  | 0.001686378 | 0.135789886  | 0.003279902 |
| ANKLE1 green        | -0.310087992 | 7.25E-12    | -0.315928381 | 2.77E-12    |
| ANKRD2 green        | 0.0790855    | 0.087794802 | 0.081784291  | 0.077463709 |

|         |       |              |             |              |             |
|---------|-------|--------------|-------------|--------------|-------------|
| ANKRD9  | green | 0.111349818  | 0.016069569 | 0.098742282  | 0.032897174 |
| ANLN    | green | 0.061319817  | 0.185893169 | 0.049912759  | 0.281746525 |
| AP5B1   | green | 0.008103894  | 0.861346665 | 0.022947466  | 0.62085774  |
| APH1A   | green | 0.002685778  | 0.953840462 | -0.009856729 | 0.831763753 |
| APLP1   | green | -0.192418574 | 2.84E-05    | -0.180645882 | 8.65E-05    |
| APOBEC  | green | -0.027063623 | 0.559631239 | -0.023647069 | 0.610248157 |
| ARHGAP  | green | 0.07819731   | 0.091427584 | 0.072010067  | 0.120184834 |
| ARHGAP  | green | -0.030893773 | 0.505417574 | -0.052430026 | 0.2581545   |
| ARHGAP  | green | -0.050243744 | 0.278563877 | -0.062362776 | 0.17850608  |
| ARHGEF  | green | -0.073559111 | 0.112395606 | -0.074399732 | 0.108337861 |
| ARHGEF  | green | 0.094509066  | 0.041205518 | 0.088863033  | 0.054984614 |
| ARID3B  | green | 0.149588002  | 0.001186019 | 0.125808024  | 0.006483472 |
| ARL4C   | green | -0.173544117 | 0.000163965 | -0.166841854 | 0.000293202 |
| ARL6IP1 | green | 0.021276195  | 0.646519873 | 0.019955481  | 0.667102018 |
| ARNTL2  | green | -0.157760023 | 0.000622685 | -0.138629368 | 0.002679601 |
| ASF1B   | green | 0.15678597   | 0.000673503 | 0.172237014  | 0.000183958 |
| ASNA1   | green | 0.070429434  | 0.128560798 | 0.089650931  | 0.052857784 |
| ASNS    | green | -0.011989675 | 0.796087427 | -0.022942693 | 0.620930392 |
| ASPM    | green | 0.027741791  | 0.549830838 | 0.010458234  | 0.821664358 |
| ATAD2   | green | -0.079715103 | 0.085290655 | -0.113822249 | 0.013849989 |
| ATAD5   | green | -0.017763431 | 0.701814349 | -0.034371029 | 0.458697923 |
| ATAT1   | green | 0.077513945  | 0.09430379  | 0.06742392   | 0.145726223 |
| ATF5    | green | -0.139751484 | 0.002471345 | -0.11347093  | 0.014147953 |
| ATG4D   | green | 0.041720857  | 0.368348689 | 0.061945276  | 0.181436586 |
| ATP1B3  | green | 0.073484231  | 0.112762776 | 0.081055985  | 0.080149292 |
| ATP5C1  | green | 0.080407392  | 0.082603962 | 0.085371573  | 0.065282668 |
| ATPAF1  | green | 0.033767531  | 0.466629195 | 0.023706984  | 0.609343276 |
| AUNIP   | green | -0.026723616 | 0.564576368 | -0.028590496 | 0.537685959 |
| AURKA   | green | -0.051148217 | 0.269991455 | -0.054077556 | 0.243473937 |
| AURKB   | green | 0.131699184  | 0.004360346 | 0.146211555  | 0.001533686 |
| BAK1    | green | -0.176374036 | 0.000127449 | -0.160639791 | 0.000492488 |
| BARD1   | green | 0.066341506  | 0.152319275 | 0.038949242  | 0.401041167 |
| BCL2L12 | green | 0.024321894  | 0.600091075 | 0.031976444  | 0.490608575 |
| BCL6    | green | -0.206409963 | 6.89E-06    | -0.209963236 | 4.73E-06    |
| BEND3   | green | -0.038979318 | 0.400677342 | -0.05893665  | 0.203613479 |
| BIRC5   | green | 0.052379456  | 0.258614593 | 0.058758111  | 0.204988764 |
| BLM     | green | 0.016980515  | 0.714368804 | 0.001537077  | 0.973572908 |
| BNIP3   | green | 0.273657016  | 1.82E-09    | 0.268521154  | 3.73E-09    |
| BOLA3   | green | 0.064717712  | 0.162630924 | 0.080438773  | 0.082483816 |
| BORA    | green | -0.000524128 | 0.990987172 | -0.008516473 | 0.854364425 |
| BRCA1   | green | 0.21785369   | 2.01E-06    | 0.206280913  | 6.98E-06    |
| BRCA2   | green | -0.008854382 | 0.848654273 | -0.010525879 | 0.820530383 |
| BRI3BP  | green | 0.29961114   | 3.85E-11    | 0.297983372  | 4.96E-11    |
| BRIP1   | green | 0.105300228  | 0.022858643 | 0.082582971  | 0.074603108 |
| BUB1    | green | -0.010702704 | 0.817567946 | -0.015480346 | 0.738638728 |

|          |       |              |             |              |             |
|----------|-------|--------------|-------------|--------------|-------------|
| BUB1B    | green | 0.068266932  | 0.140744002 | 0.062079299  | 0.180492001 |
| BUB3     | green | 0.238421899  | 1.85E-07    | 0.233731191  | 3.25E-07    |
| BYSL     | green | -0.094043861 | 0.042218241 | -0.097465379 | 0.035237775 |
| BZW2     | green | -0.05212474  | 0.26094061  | -0.058717422 | 0.205303128 |
| C10orf35 | green | 0.128123604  | 0.005557787 | 0.123738067  | 0.007425549 |
| C11orf84 | green | -0.017403746 | 0.707572249 | -0.025846225 | 0.577433238 |
| C12orf73 | green | -0.037174167 | 0.422862694 | -0.035155405 | 0.448503059 |
| C16orf59 | green | 0.125055009  | 0.006813008 | 0.136017627  | 0.003227594 |
| C16orf89 | green | -0.062375899 | 0.178414534 | -0.029570957 | 0.52382486  |
| C17orf53 | green | -0.008934791 | 0.847296629 | 0.000665728  | 0.988552382 |
| C17orf96 | green | -0.163962543 | 0.000373872 | -0.173316975 | 0.000167286 |
| C18orf54 | green | -0.101119393 | 0.028892116 | -0.135415423 | 0.003367586 |
| C19orf40 | green | -0.096101617 | 0.037892568 | -0.105829782 | 0.022178408 |
| C19orf52 | green | -0.062231539 | 0.179423447 | -0.03955976  | 0.39369453  |
| C19orf57 | green | -0.16057717  | 0.000495028 | -0.183998329 | 6.34E-05    |
| C1orf112 | green | -0.005983052 | 0.897397617 | -0.031461717 | 0.497619984 |
| C1orf115 | green | 0.19036319   | 3.46E-05    | 0.154783462  | 0.000790264 |
| C20orf24 | green | -0.149331569 | 0.001209628 | -0.15031436  | 0.001121429 |
| C2orf68  | green | -0.245896916 | 7.35E-08    | -0.249697124 | 4.54E-08    |
| C4orf46  | green | 0.068257609  | 0.140798373 | 0.040067347  | 0.38764878  |
| C5orf34  | green | -0.194876545 | 2.23E-05    | -0.196556326 | 1.89E-05    |
| C9orf40  | green | 0.089198812  | 0.054069681 | 0.082574944  | 0.074631422 |
| CABLES2  | green | -0.155140253 | 0.000768177 | -0.166519093 | 0.00030136  |
| CADM4    | green | 0.115396954  | 0.012581252 | 0.089972296  | 0.052010197 |
| CAMK2N   | green | 0.20544346   | 7.62E-06    | 0.170275157  | 0.000218294 |
| CARS     | green | 0.068307414  | 0.140508077 | 0.073121968  | 0.114552436 |
| CASC5    | green | 0.182611904  | 7.21E-05    | 0.174501492  | 0.000150635 |
| CBS      | green | -0.190214049 | 3.51E-05    | -0.202949654 | 9.87E-06    |
| CBX2     | green | 0.029066427  | 0.530934688 | 0.017024345  | 0.713663887 |
| CBX5     | green | -0.027800799 | 0.548982099 | -0.053005683 | 0.252957021 |
| CCDC12   | green | -0.021262718 | 0.64672858  | 0.003090424  | 0.946895523 |
| CCDC142  | green | -0.13088092  | 0.004611683 | -0.164893114 | 0.000345778 |
| CCDC15   | green | -0.192087811 | 2.93E-05    | -0.19804751  | 1.62E-05    |
| CCDC18   | green | -0.050468368 | 0.276417903 | -0.070974913 | 0.12562058  |
| CCDC34   | green | 0.067534114  | 0.145067428 | 0.072143556  | 0.119497434 |
| CCDC77   | green | -0.181290801 | 8.15E-05    | -0.20340528  | 9.41E-06    |
| CCNA2    | green | 0.120075864  | 0.009395688 | 0.114750619  | 0.013089035 |
| CCNB1    | green | 0.125539043  | 0.006599506 | 0.134558985  | 0.00357618  |
| CCNB2    | green | 0.108346945  | 0.019179654 | 0.12140067   | 0.008634921 |
| CCNE1    | green | -0.190680556 | 3.36E-05    | -0.166837926 | 0.0002933   |
| CCNE2    | green | 0.078559389  | 0.089932367 | 0.061265588  | 0.186283338 |
| CCNF     | green | 0.0724217    | 0.118075001 | 0.084960614  | 0.066592877 |
| CCT3     | green | 0.084636434  | 0.067641585 | 0.055493578  | 0.231331902 |
| CCT6A    | green | 0.056653376  | 0.22171126  | 0.046543831  | 0.315538116 |
| CD3EAP   | green | -0.058471649 | 0.20720943  | -0.078346745 | 0.09080809  |

|        |       |              |             |              |             |
|--------|-------|--------------|-------------|--------------|-------------|
| CD59   | green | -0.011946628 | 0.796803524 | 0.013374904  | 0.773138218 |
| CD81   | green | -0.107228941 | 0.020464931 | -0.114118557 | 0.01360299  |
| CDC123 | green | 0.060745854  | 0.190053336 | 0.041336532  | 0.372780569 |
| CDC20  | green | 0.059434148  | 0.199816589 | 0.072380631  | 0.118284194 |
| CDC25A | green | 0.039592429  | 0.393303711 | 0.032075991  | 0.489258718 |
| CDC25C | green | -0.001424949 | 0.975500108 | 0.002331841  | 0.959917961 |
| CDC45  | green | 0.127381728  | 0.005840525 | 0.12843663   | 0.005442228 |
| CDC6   | green | 0.222126382  | 1.25E-06    | 0.211445127  | 4.04E-06    |
| CDC7   | green | -0.021333061 | 0.645639553 | -0.046719658 | 0.313711458 |
| CDCA2  | green | 0.15235554   | 0.000956873 | 0.146571196  | 0.001492638 |
| CDCA3  | green | 0.065633618  | 0.156751915 | 0.071626262  | 0.122178435 |
| CDCA4  | green | 0.032145634  | 0.488315552 | 0.025330363  | 0.585056042 |
| CDCA5  | green | 0.015899412  | 0.73183165  | 0.017131739  | 0.711937718 |
| CDCA7  | green | 0.294894065  | 7.99E-11    | 0.26870969   | 3.63E-09    |
| CDCA8  | green | 0.046094621  | 0.320236477 | 0.051650248  | 0.265311953 |
| CDH24  | green | 0.14851906   | 0.001287321 | 0.124053045  | 0.007274727 |
| CDK1   | green | 0.12939416   | 0.005102039 | 0.120197462  | 0.009323457 |
| CDK16  | green | 0.004965921  | 0.91476714  | 0.034215633  | 0.460732933 |
| CDK2   | green | 0.001062664  | 0.981727788 | -0.039725752 | 0.391711206 |
| CDK5RA | green | -0.165493016 | 0.000328723 | -0.178635231 | 0.000103918 |
| CDKN2A | green | -0.365279225 | 3.46E-16    | -0.352999634 | 3.77E-15    |
| CDKN3  | green | 0.078075291  | 0.091935929 | 0.076737087  | 0.097660829 |
| CDR2L  | green | -0.138094715 | 0.002784347 | -0.132438094 | 0.00414409  |
| CDT1   | green | 0.263618289  | 7.29E-09    | 0.285302252  | 3.39E-10    |
| CELSR3 | green | 0.020094238  | 0.664927486 | -0.001565439 | 0.973085454 |
| CENPA  | green | -0.057374034 | 0.215879188 | -0.053699857 | 0.246786696 |
| CENPE  | green | 0.00994015   | 0.830361408 | 0.001611425  | 0.972295137 |
| CENPF  | green | 0.072416503  | 0.118101458 | 0.068089608  | 0.141780995 |
| CENPH  | green | 0.134532277  | 0.003582869 | 0.128369088  | 0.005466978 |
| CENPI  | green | -0.015847401 | 0.73267535  | -0.016144248 | 0.727864338 |
| CENPK  | green | 0.137625384  | 0.002879352 | 0.126033308  | 0.006387699 |
| CENPL  | green | 0.013924883  | 0.76408001  | 0.002915571  | 0.949896061 |
| CENPN  | green | 0.162415371  | 0.000425335 | 0.173810386  | 0.00016015  |
| CENPO  | green | -0.031798246 | 0.49302991  | -0.031381588 | 0.498716236 |
| CENPP  | green | -0.059629201 | 0.198342104 | -0.062206837 | 0.179596507 |
| CENPU  | green | 0.174194142  | 0.000154799 | 0.165944431  | 0.000316411 |
| CENPW  | green | -0.063466783 | 0.170926192 | -0.052752141 | 0.255237177 |
| CEP55  | green | 0.121138671  | 0.008780868 | 0.11741113   | 0.011108584 |
| CEP72  | green | -0.152177925 | 0.000970253 | -0.157134249 | 0.000654907 |
| CEP85  | green | 0.098082705  | 0.034089079 | 0.065542976  | 0.157326466 |
| CEP89  | green | -0.122771107 | 0.007906178 | -0.125709697 | 0.006525675 |
| CERS1  | green | -0.00051338  | 0.99117199  | -0.023756095 | 0.608602022 |
| CH25H  | green | -0.009861329 | 0.831686415 | -0.026693253 | 0.565018993 |
| CHAC2  | green | 0.059576659  | 0.198738509 | 0.0429863    | 0.353988451 |
| CHAF1A | green | 0.302332336  | 2.51E-11    | 0.306421938  | 1.31E-11    |

|         |       |              |             |              |             |
|---------|-------|--------------|-------------|--------------|-------------|
| CHAF1B  | green | 0.188054633  | 4.32E-05    | 0.183591641  | 6.59E-05    |
| CHEK1   | green | 0.074290193  | 0.108859974 | 0.049713099  | 0.283678246 |
| CHEK2   | green | 0.00399613   | 0.93136624  | -0.016129556 | 0.728102206 |
| CHRA1   | green | -0.171319147 | 0.000199339 | -0.211890505 | 3.85E-06    |
| CHRNA5  | green | 0.107424672  | 0.02023465  | 0.074181246  | 0.109381227 |
| CIAO1   | green | -0.236950867 | 2.21E-07    | -0.237287368 | 2.12E-07    |
| CILP2   | green | -0.216324742 | 2.38E-06    | -0.230791222 | 4.60E-07    |
| CIRBP   | green | 0.145476403  | 0.001620835 | 0.13092528   | 0.004597729 |
| CIT     | green | 0.033514218  | 0.469980736 | 0.027056515  | 0.559734408 |
| CKAP2   | green | 0.059791147  | 0.197123927 | 0.035143811  | 0.448652804 |
| CKAP2L  | green | 0.015928071  | 0.731366877 | 0.002654228  | 0.954382106 |
| CKAP5   | green | 0.05512423   | 0.234456837 | 0.022124724  | 0.633435925 |
| CKS1B   | green | -0.069328632 | 0.134656331 | -0.078057877 | 0.092008663 |
| CKS2    | green | 0.138330434  | 0.002737715 | 0.147733642  | 0.001366763 |
| CLCN2   | green | -0.164728157 | 0.00035061  | -0.171299412 | 0.000199682 |
| CLIC1   | green | 0.012085712  | 0.794490438 | 0.03274998   | 0.48017212  |
| CLPB    | green | 0.16471119   | 0.00035111  | 0.183541968  | 6.62E-05    |
| CLPTM11 | green | -0.058688792 | 0.205524537 | -0.04348478  | 0.348429843 |
| CLSPN   | green | 0.08617207   | 0.062791379 | 0.067278547  | 0.146598822 |
| CLU     | green | -0.034718759 | 0.454162431 | -0.03855958  | 0.405772761 |
| CMC2    | green | 0.186163146  | 5.17E-05    | 0.208682608  | 5.42E-06    |
| CNOT10  | green | 0.0931019    | 0.044333205 | 0.062923726  | 0.174624129 |
| COLGAL  | green | -0.033989612 | 0.463701782 | -0.050247206 | 0.278530712 |
| COPS3   | green | 0.235157888  | 2.74E-07    | 0.221443007  | 1.35E-06    |
| COPS7B  | green | 0.113105177  | 0.014464135 | 0.098149731  | 0.033966303 |
| COQ2    | green | 0.186763587  | 4.89E-05    | 0.175155141  | 0.000142125 |
| COQ3    | green | 0.000700531  | 0.987953968 | 0.007811042  | 0.866309323 |
| CPSF3   | green | 0.023174168  | 0.617411011 | 0.027532337  | 0.552848706 |
| CPSF4   | green | 0.015004211  | 0.746397644 | 0.010545152  | 0.820207374 |
| CRY2    | green | -0.053756946 | 0.246283964 | -0.072665854 | 0.116837335 |
| CSE1L   | green | -0.103075049 | 0.025918086 | -0.129015525 | 0.005234201 |
| CSNK2B  | green | -0.054286427 | 0.241655392 | -0.080117127 | 0.083722002 |
| CSPG5   | green | 0.048796115  | 0.29266473  | 0.03474974   | 0.453759575 |
| CSTF2   | green | 0.086052241  | 0.063159245 | 0.09858898   | 0.033170983 |
| CTPS1   | green | -0.136133699 | 0.003201226 | -0.167591131 | 0.000275052 |
| CUL1    | green | -0.108343752 | 0.019183223 | -0.113899447 | 0.013785261 |
| CWF19L1 | green | -0.025781933 | 0.578380728 | -0.040456703 | 0.383049714 |
| CX3CR1  | green | -0.130968729 | 0.004584099 | -0.136334843 | 0.003155996 |
| CYB5D2  | green | 0.19831497   | 1.58E-05    | 0.187447735  | 4.58E-05    |
| CYP27A1 | green | -0.086074757 | 0.063089987 | -0.080426696 | 0.082530038 |
| DARS2   | green | 0.145178186  | 0.001657465 | 0.114204067  | 0.013532435 |
| DAXX    | green | -0.03416903  | 0.461344204 | -0.02457863  | 0.596246943 |
| DAZAP1  | green | 0.253112933  | 2.93E-08    | 0.252610313  | 3.12E-08    |
| DBF4    | green | -0.018710587 | 0.686734236 | -0.023300449 | 0.61549469  |
| DBF4B   | green | -0.036800378 | 0.427544586 | -0.037939436 | 0.413371224 |

|         |       |              |             |              |             |
|---------|-------|--------------|-------------|--------------|-------------|
| DBN1    | green | -0.058595379 | 0.206248139 | -0.051384532 | 0.267781748 |
| DCAF15  | green | -0.133189106 | 0.003934278 | -0.136495197 | 0.003120356 |
| DCLRE1I | green | 0.067013714  | 0.148198714 | 0.036245101  | 0.434554965 |
| DCUN1D  | green | -0.050450381 | 0.276589328 | -0.058065051 | 0.21039119  |
| DDIAS   | green | -0.02772846  | 0.550022669 | -0.044877985 | 0.333189221 |
| DDX11   | green | 0.118180861  | 0.010587439 | 0.109231808  | 0.01821283  |
| DDX27   | green | -0.312060192 | 5.25E-12    | -0.318649276 | 1.76E-12    |
| DEPDC1  | green | -0.003176152 | 0.945424669 | -0.012483456 | 0.787885602 |
| DEPDC1I | green | 0.003907116  | 0.932891429 | -0.014113229 | 0.760985242 |
| DDFA    | green | -0.047833151 | 0.302304806 | -0.05309059  | 0.252196611 |
| DGAT2   | green | -0.174390826 | 0.000152122 | -0.197236787 | 1.76E-05    |
| DHCR24  | green | 0.037825571  | 0.414775444 | 0.033548818  | 0.469522171 |
| DHCR7   | green | 0.177811913  | 0.000111968 | 0.165471368  | 0.000329325 |
| DHFR    | green | 0.17993518   | 9.23E-05    | 0.157064364  | 0.0006586   |
| DHRS12  | green | -0.002486514 | 0.957261739 | -0.017148964 | 0.711660982 |
| DHX37   | green | 0.046254405  | 0.318560074 | 0.052429702  | 0.258157451 |
| DIAPH3  | green | 0.082377641  | 0.075330185 | 0.086364512  | 0.062204295 |
| DLGAP5  | green | 0.017794046  | 0.701325031 | 0.012835045  | 0.782059829 |
| DNA2    | green | 0.068657677  | 0.138479438 | 0.046840934  | 0.312455584 |
| DNAJB1I | green | -0.178281176 | 0.000107311 | -0.173959621 | 0.000158049 |
| DNAJC1C | green | -0.250615418 | 4.04E-08    | -0.239738192 | 1.58E-07    |
| DNAJC9  | green | 0.079147072  | 0.087547331 | 0.049789735  | 0.282935733 |
| DNASE2  | green | 0.119920512  | 0.009488693 | 0.121427459  | 0.008620121 |
| DNMT1   | green | 0.106664299  | 0.021142052 | 0.098923882  | 0.032575322 |
| DNMT3A  | green | -0.157364133 | 0.000642895 | -0.152831055 | 0.000921886 |
| DNMT3B  | green | 0.036130583  | 0.436008948 | 0.015644379  | 0.735971803 |
| DONSON  | green | 0.108290734  | 0.019242555 | 0.083241567  | 0.072309481 |
| DPF1    | green | -0.068715172 | 0.138148602 | -0.070270642 | 0.129426653 |
| DPH2    | green | -0.116688869 | 0.011618116 | -0.117609817 | 0.010971933 |
| DRG1    | green | 0.02379742   | 0.607978582 | 0.015083284  | 0.745107304 |
| DROSHA  | green | -0.222508072 | 1.19E-06    | -0.258897676 | 1.37E-08    |
| DSCC1   | green | -0.009567019 | 0.836638062 | -0.040340905 | 0.384414024 |
| DSN1    | green | -0.066755978 | 0.149768454 | -0.080034212 | 0.084043607 |
| DTD1    | green | -0.023239407 | 0.616420678 | -0.020712576 | 0.65527158  |
| DTL     | green | 0.224068348  | 1.00E-06    | 0.212246421  | 3.71E-06    |
| DTYMK   | green | 0.20059447   | 1.26E-05    | 0.205677487  | 7.44E-06    |
| DUSP9   | green | -0.25549046  | 2.15E-08    | -0.26135468  | 9.88E-09    |
| E2F1    | green | -0.056714776 | 0.221210028 | -0.049265729 | 0.28803896  |
| E2F2    | green | 0.106868936  | 0.020894436 | 0.10192811   | 0.027628519 |
| E2F3    | green | -0.09362479  | 0.043148427 | -0.106049977 | 0.021900766 |
| E2F7    | green | 0.269022733  | 3.48E-09    | 0.259074183  | 1.34E-08    |
| E2F8    | green | 0.073799714  | 0.111222182 | 0.076185428  | 0.100102001 |
| EBP     | green | 0.070837957  | 0.126353838 | 0.081998715  | 0.076687107 |
| ECT2    | green | 0.007789977  | 0.866666504 | -0.005374732 | 0.90778054  |
| EIF1AD  | green | -0.05989498  | 0.196345762 | -0.054612978 | 0.238831375 |

|         |       |              |             |              |             |
|---------|-------|--------------|-------------|--------------|-------------|
| EIF2AK1 | green | 0.13869784   | 0.002666449 | 0.140040073  | 0.002420227 |
| EIF2S2  | green | -0.094220381 | 0.041831523 | -0.097849806 | 0.034518644 |
| ELAVL1  | green | 0.221846965  | 1.29E-06    | 0.215582387  | 2.58E-06    |
| ELOVL6  | green | 0.132080318  | 0.004247559 | 0.126027489  | 0.006390157 |
| EMC1    | green | -0.005202529 | 0.910722658 | -0.026389503 | 0.569456097 |
| EME1    | green | 0.01798444   | 0.698284811 | 0.01453458   | 0.754075751 |
| ENTPD2  | green | 0.305094477  | 1.62E-11    | 0.298741051  | 4.41E-11    |
| EPHX2   | green | -0.042499236 | 0.359473387 | -0.054801696 | 0.237209971 |
| EPT1    | green | 0.008761033  | 0.850230957 | -0.008294621 | 0.858117544 |
| ERAL1   | green | 0.059629893  | 0.198336889 | 0.051808437  | 0.263849052 |
| ERCC6L  | green | -0.008768933 | 0.850097494 | -0.00627587  | 0.892405863 |
| ERH     | green | 0.142222692  | 0.002063781 | 0.142596318  | 0.002007813 |
| ESCO2   | green | 0.223652535  | 1.05E-06    | 0.200231753  | 1.30E-05    |
| ESM1    | green | 0.087461194  | 0.058944432 | 0.073389474  | 0.11322876  |
| ESPL1   | green | -0.041421294 | 0.371800313 | -0.06349697  | 0.170722361 |
| EVA1C   | green | -0.251405674 | 3.65E-08    | -0.231222809 | 4.37E-07    |
| EWSR1   | green | 0.093963219  | 0.042395912 | 0.078377421  | 0.090681337 |
| EXO1    | green | 0.127528617  | 0.005783538 | 0.121350524  | 0.008662687 |
| EXOSC1  | green | -0.096804565 | 0.036503716 | -0.114130783 | 0.013592883 |
| EXOSC2  | green | 0.007557877  | 0.870603698 | -0.01948606  | 0.674479111 |
| EXOSC3  | green | -0.075976336 | 0.101039845 | -0.082043087 | 0.076527193 |
| EZH2    | green | 0.046521357  | 0.315772098 | 0.03399446   | 0.46363799  |
| FABP5   | green | 0.050374871  | 0.277309763 | 0.029685632  | 0.522215669 |
| FADS1   | green | 0.124521284  | 0.007055582 | 0.090108969  | 0.051653176 |
| FADS2   | green | 0.36763789   | 2.16E-16    | 0.351311585  | 5.19E-15    |
| FAF1    | green | -0.010681573 | 0.817921841 | -0.004821291 | 0.91724049  |
| FAM111E | green | 0.185698065  | 5.41E-05    | 0.158198113  | 0.000601009 |
| FAM132E | green | -0.050720751 | 0.274020158 | -0.023976053 | 0.605286971 |
| FAM136A | green | 0.086809337  | 0.060864571 | 0.099754781  | 0.031136777 |
| FAM32A  | green | -0.151439066 | 0.001027786 | -0.136192682 | 0.003187902 |
| FAM63A  | green | 0.030809517  | 0.506579804 | 0.005976027  | 0.897517414 |
| FAM64A  | green | 0.066618399  | 0.150611545 | 0.055470385  | 0.231527256 |
| FAM72A  | green | -0.065011971 | 0.16072433  | -0.075667602 | 0.102437353 |
| FAM72B  | green | -0.113791671 | 0.013875702 | -0.132909053 | 0.004011366 |
| FAM72C  | green | -0.037972863 | 0.412959513 | -0.012137502 | 0.793629587 |
| FAM72D  | green | -0.075024272 | 0.105398663 | -0.073547172 | 0.112454086 |
| FAM83D  | green | 0.004440327  | 0.92375916  | 0.004871314  | 0.916384941 |
| FANCA   | green | 0.182697254  | 7.16E-05    | 0.175026879  | 0.000143758 |
| FANCB   | green | -0.057917919 | 0.211551185 | -0.062379893 | 0.178386682 |
| FANCC   | green | 0.219813478  | 1.62E-06    | 0.198769939  | 1.51E-05    |
| FANCD2  | green | 0.070853404  | 0.126270969 | 0.055731479  | 0.22933478  |
| FANCE   | green | -0.116869728 | 0.011488623 | -0.140717373 | 0.002304023 |
| FANCG   | green | 0.091821766  | 0.047349724 | 0.079314252  | 0.086878229 |
| FANCI   | green | 0.180983014  | 8.39E-05    | 0.166553864  | 0.000300471 |
| FARSA   | green | -0.00027305  | 0.99530459  | 0.00596256   | 0.897747103 |

|        |       |              |             |              |             |
|--------|-------|--------------|-------------|--------------|-------------|
| FARSB  | green | 0.08141424   | 0.078818972 | 0.059553538  | 0.19891313  |
| FASN   | green | 0.15344598   | 0.000878394 | 0.134159075  | 0.003677537 |
| FASTKD | green | -0.045255223 | 0.329137439 | -0.058549568 | 0.206603677 |
| FBN2   | green | 0.004786833  | 0.917829883 | 0.008158266  | 0.860425875 |
| FBXL19 | green | -0.045089749 | 0.330910807 | -0.054682525 | 0.238232949 |
| FBXO31 | green | 0.079545045  | 0.08596129  | 0.086799629  | 0.060893552 |
| FBXO41 | green | -0.13568278  | 0.003304768 | -0.134373684 | 0.003622825 |
| FBXO43 | green | -0.001129956 | 0.980570944 | -0.017771129 | 0.701691305 |
| FBXO45 | green | -0.073463002 | 0.112867044 | -0.080185669 | 0.083456897 |
| FBXO5  | green | -0.060997985 | 0.188217514 | -0.077527442 | 0.094246293 |
| FEN1   | green | 0.170974974  | 0.00020541  | 0.17509532   | 0.000142885 |
| FIGNL1 | green | -0.078296187 | 0.091017305 | -0.104838741 | 0.023466099 |
| FKBP4  | green | -0.098633549 | 0.033091181 | -0.097348944 | 0.035458083 |
| FOXK2  | green | -0.005599537 | 0.903941598 | -0.038999954 | 0.400427818 |
| FOXM1  | green | 0.098780977  | 0.032828367 | 0.095128189  | 0.039889604 |
| FOXRED | green | 0.162273249  | 0.000430379 | 0.141701768  | 0.002144196 |
| FTSJ1  | green | 0.065912959  | 0.154991238 | 0.074787633  | 0.106504822 |
| FUS    | green | -0.082564102 | 0.074669683 | -0.095937601 | 0.038222995 |
| GADD45 | green | 0.08624239   | 0.062576324 | 0.069555288  | 0.133383387 |
| GADD45 | green | 0.090244449  | 0.051301295 | 0.08842912   | 0.056185966 |
| GARS   | green | 0.02539201   | 0.584142652 | 0.032459218  | 0.484080831 |
| GAS2L3 | green | -0.012879758 | 0.781319809 | -0.02412519  | 0.603043875 |
| GATAD2 | green | 0.027358925  | 0.555353377 | 0.022244392  | 0.631599722 |
| GATB   | green | 0.003191171  | 0.945167003 | -0.005484966 | 0.905897819 |
| GATC   | green | -0.038518904 | 0.406268584 | -0.03764531  | 0.417004236 |
| GCDH   | green | -0.096265069 | 0.037565694 | -0.091360039 | 0.048479138 |
| GEMIN2 | green | -0.05485422  | 0.236760083 | -0.079382033 | 0.08660812  |
| GEN1   | green | -0.046442169 | 0.316597449 | -0.065393568 | 0.158276981 |
| GGH    | green | 0.0742515    | 0.109044874 | 0.058701009  | 0.205430042 |
| GID8   | green | -0.195028062 | 2.19E-05    | -0.194836923 | 2.24E-05    |
| GIN51  | green | 0.038936713  | 0.401192793 | 0.037189119  | 0.422676035 |
| GIN52  | green | 0.262411174  | 8.58E-09    | 0.26689001   | 4.67E-09    |
| GIN53  | green | 0.289783829  | 1.74E-10    | 0.269009158  | 3.48E-09    |
| GIN54  | green | -0.015490776 | 0.738469064 | -0.040023464 | 0.388169229 |
| GLA    | green | 0.109706333  | 0.017712087 | 0.102716236  | 0.026443099 |
| GLDC   | green | -0.219415857 | 1.69E-06    | -0.225237155 | 8.76E-07    |
| GMEB2  | green | -0.128488921 | 0.005423136 | -0.123344026 | 0.007618161 |
| GMNN   | green | -0.002971396 | 0.948938015 | -0.000345134 | 0.994065051 |
| GMPS   | green | -0.075221996 | 0.1044814   | -0.109860841 | 0.017551659 |
| GNPDA1 | green | 0.138784077  | 0.002649969 | 0.120005408  | 0.009437767 |
| GPC2   | green | -0.092680504 | 0.045307822 | -0.114588365 | 0.01321931  |
| GPB1   | green | 0.017792933  | 0.70134283  | -0.003113643 | 0.94649713  |
| GPR19  | green | -0.324246961 | 6.81E-13    | -0.311732561 | 5.54E-12    |
| GPRIN1 | green | 0.090213011  | 0.051382769 | 0.075508589  | 0.103163094 |
| GPSM2  | green | 0.013825716  | 0.765710953 | -0.00088995  | 0.984697158 |



|         |       |              |             |              |             |
|---------|-------|--------------|-------------|--------------|-------------|
| GRK6    | green | 0.002922983  | 0.949768848 | 0.010593307  | 0.819400429 |
| GSG2    | green | 0.140440979  | 0.002350814 | 0.137568502  | 0.002891065 |
| GTF2IRD | green | -0.055179373 | 0.233988404 | -0.073984231 | 0.110328836 |
| GTF3C2  | green | -0.029718273 | 0.5217581   | -0.046215795 | 0.318964632 |
| GTPBP2  | green | -0.025034617 | 0.589447145 | -0.029884946 | 0.519424821 |
| GTPBP3  | green | -0.131200293 | 0.004512069 | -0.149092093 | 0.001232066 |
| GTPBP4  | green | -0.047272766 | 0.308010578 | -0.085220047 | 0.065763274 |
| GTSE1   | green | 0.151830852  | 0.000996898 | 0.14491968   | 0.00168983  |
| H2AFV   | green | 0.019490652  | 0.674406794 | 0.025345371  | 0.584833615 |
| H2AFX   | green | 0.217917829  | 2.00E-06    | 0.226599684  | 7.49E-07    |
| H2AFY   | green | 0.177866687  | 0.000111415 | 0.168982002  | 0.000244112 |
| H2AFZ   | green | 0.252580522  | 3.14E-08    | 0.258236378  | 1.50E-08    |
| HAPLN1  | green | 0.104700734  | 0.02365045  | 0.108413038  | 0.019105925 |
| HAUS5   | green | -0.132533711 | 0.004116827 | -0.163092113 | 0.000402063 |
| HAUS8   | green | -0.049112947 | 0.289538457 | -0.047332438 | 0.307399648 |
| HDAC1   | green | 0.043870815  | 0.344163333 | 0.028204271  | 0.543196118 |
| HDAC8   | green | 0.134979445  | 0.003472352 | 0.116211862  | 0.011965859 |
| HDGF    | green | -0.042961821 | 0.354262845 | -0.053849221 | 0.245472901 |
| HELLS   | green | 0.157172848  | 0.000652876 | 0.134458714  | 0.003601353 |
| HENMT1  | green | -0.45529767  | 2.82E-25    | -0.435281585 | 5.18E-23    |
| HINFP   | green | -0.003339873 | 0.942616194 | -0.030026836 | 0.51744272  |
| HJURP   | green | 0.025984347  | 0.575400184 | 0.016410697  | 0.723555053 |
| HMCES   | green | 0.02498232   | 0.5902252   | 0.02860786   | 0.537438885 |
| HMGA1   | green | -0.111063129 | 0.016346097 | -0.093085105 | 0.044371711 |
| HMGB2   | green | -0.021595847 | 0.641577887 | -0.038565392 | 0.405701944 |
| HMGB3   | green | 0.118208549  | 0.010569104 | 0.12637901   | 0.006243201 |
| HMMR    | green | 0.046573401  | 0.315230427 | 0.030775608  | 0.507047943 |
| HN1     | green | 0.177394757  | 0.000116267 | 0.19289633   | 2.71E-05    |
| HNRNPA  | green | 0.137088734  | 0.002991594 | 0.143350861  | 0.001898996 |
| HPDL    | green | -0.389750051 | 2.17E-18    | -0.387444148 | 3.56E-18    |
| HPRT1   | green | 0.097251245  | 0.035643843 | 0.0946264    | 0.040953353 |
| HSF2BP  | green | -0.226327403 | 7.73E-07    | -0.251382711 | 3.66E-08    |
| HSPA14  | green | 0.026558547  | 0.566984691 | 0.004478939  | 0.923098236 |
| HSPA9   | green | 0.066428448  | 0.151781485 | 0.058612441  | 0.206115838 |
| HSPD1   | green | -0.025433017 | 0.583535439 | -0.040484863 | 0.382718382 |
| HTT     | green | 0.112307995  | 0.015174873 | 0.11599011   | 0.012130628 |
| IFRD2   | green | 0.090798129  | 0.049883944 | 0.086136722  | 0.06289971  |
| IGFBP4  | green | -0.056643325 | 0.221793388 | -0.050143833 | 0.279522009 |
| ILF2    | green | 0.113796168  | 0.013871918 | 0.088290681  | 0.056573808 |
| ILF3    | green | -0.034741482 | 0.453866935 | -0.068155162 | 0.141396956 |
| ILKAP   | green | -0.077386327 | 0.094848851 | -0.065930144 | 0.154883408 |
| IMPA2   | green | 0.059086686  | 0.202462933 | 0.070049301  | 0.130641092 |
| INA     | green | -0.118035863 | 0.01068392  | -0.114975578 | 0.012910286 |
| INCENP  | green | 0.05036548   | 0.277399452 | 0.039525819  | 0.394100808 |
| INTS8   | green | 0.02084815   | 0.653162056 | 0.005434184  | 0.906765081 |

|         |       |              |             |              |             |
|---------|-------|--------------|-------------|--------------|-------------|
| IQGAP3  | green | 0.094544872  | 0.041128429 | 0.082996329  | 0.073156729 |
| IRAK1   | green | -0.048908108 | 0.291557085 | -0.042454139 | 0.359983908 |
| KCNC4   | green | -0.149983469 | 0.00115044  | -0.158605589 | 0.000581479 |
| KCNK6   | green | 0.153954604  | 0.000843861 | 0.150647172  | 0.001092931 |
| KCTD1   | green | -0.140858893 | 0.002280395 | -0.15650498  | 0.000688861 |
| KDM1A   | green | 0.067605604  | 0.144641245 | 0.05646177   | 0.223280637 |
| KIAA010 | green | 0.297038218  | 5.74E-11    | 0.305626662  | 1.49E-11    |
| KIAA152 | green | -0.091466724 | 0.048216197 | -0.107346357 | 0.020326517 |
| KIAA168 | green | -0.194469744 | 2.32E-05    | -0.195555087 | 2.08E-05    |
| KIF11   | green | 0.130255887  | 0.004812397 | 0.120457274  | 0.009170778 |
| KIF14   | green | 0.084480818  | 0.068149784 | 0.072833093  | 0.115995445 |
| KIF15   | green | 0.050068426  | 0.28024663  | 0.031546332  | 0.496463759 |
| KIF18A  | green | -0.014308851 | 0.757774947 | -0.010441297 | 0.821948336 |
| KIF18B  | green | 0.068294481  | 0.140583415 | 0.071140494  | 0.124738485 |
| KIF1A   | green | -0.230444368 | 4.79E-07    | -0.253560855 | 2.76E-08    |
| KIF20A  | green | 0.070940148  | 0.125806397 | 0.075967249  | 0.101080759 |
| KIF20B  | green | 0.048292778  | 0.29767759  | 0.023398887  | 0.6140027   |
| KIF22   | green | -0.013625754 | 0.769002796 | 0.000490466  | 0.991565992 |
| KIF23   | green | 0.008022111  | 0.862732015 | -0.008251845 | 0.858841552 |
| KIF2C   | green | -0.028217326 | 0.5430094   | -0.023967464 | 0.605416266 |
| KIF4A   | green | 0.049297673  | 0.287726099 | 0.044896951  | 0.332984753 |
| KIF4B   | green | 0.072884731  | 0.115736462 | 0.075026339  | 0.105389045 |
| KIFC1   | green | 0.028624088  | 0.537208034 | 0.038004183  | 0.412573979 |
| KLC3    | green | -0.099533886 | 0.03151381  | -0.111441406 | 0.015982095 |
| KLHL14  | green | -0.079380548 | 0.086614031 | -0.064878012 | 0.161590192 |
| KLRG2   | green | -0.256399505 | 1.91E-08    | -0.262094232 | 8.95E-09    |
| KNOP1   | green | -0.02088007  | 0.652665776 | -0.025769057 | 0.578570571 |
| KNSTRN  | green | 0.058400925  | 0.207760351 | 0.05138205   | 0.267804893 |
| KNTC1   | green | 0.009320536  | 0.840790014 | -0.015627603 | 0.736244405 |
| KPNA2   | green | 0.106686377  | 0.021115215 | 0.103054058  | 0.02594855  |
| KRI1    | green | -0.13431656  | 0.003637316 | -0.146698278 | 0.001478376 |
| KXD1    | green | 0.121569853  | 0.00854183  | 0.120938767  | 0.008893697 |
| L2HGDH  | green | 0.066544517  | 0.151065777 | 0.044168078  | 0.340900698 |
| LAPTM4  | green | -0.030013125 | 0.517634086 | -0.034445586 | 0.457723342 |
| LDHA    | green | 0.306551089  | 1.28E-11    | 0.312982769  | 4.51E-12    |
| LEMD2   | green | -0.248757012 | 5.12E-08    | -0.24287073  | 1.07E-07    |
| LETM1   | green | 0.151321189  | 0.001037251 | 0.165601772  | 0.000325717 |
| LIG1    | green | 0.114219069  | 0.01352009  | 0.089723002  | 0.052666704 |
| LIMK1   | green | -0.070617157 | 0.127542983 | -0.064252208 | 0.165681722 |
| LIPG    | green | 0.070213442  | 0.129739655 | 0.051495136  | 0.266751793 |
| LMNB1   | green | 0.165289127  | 0.00033443  | 0.156808617  | 0.000672279 |
| LMNB2   | green | 0.217901859  | 2.00E-06    | 0.210066813  | 4.68E-06    |
| LPCAT1  | green | 0.037049968  | 0.424415018 | 0.029893419  | 0.51930635  |
| LRP8    | green | -0.167819634 | 0.00026973  | -0.177117815 | 0.000119206 |
| LRR1    | green | 0.054703406  | 0.238053479 | 0.051489185  | 0.266807139 |

|         |       |              |             |              |             |
|---------|-------|--------------|-------------|--------------|-------------|
| LRRC1   | green | 0.020648907  | 0.656263208 | 0.032689977  | 0.480977328 |
| LRRC14E | green | -0.174059342 | 0.000156659 | -0.188061109 | 4.32E-05    |
| LRRC20  | green | 0.286543354  | 2.82E-10    | 0.278887085  | 8.64E-10    |
| LRRC29  | green | 0.06830279   | 0.14053501  | 0.096362031  | 0.037372917 |
| LRRC8D  | green | -0.126845172 | 0.006052997 | -0.130668717 | 0.004678963 |
| LSG1    | green | -0.248068576 | 5.59E-08    | -0.238277271 | 1.88E-07    |
| LSM2    | green | 0.033545456  | 0.469566716 | 0.049884282  | 0.282021501 |
| LSM4    | green | 0.085206874  | 0.065805193 | 0.099291441  | 0.031932111 |
| LSM8    | green | -0.084960084 | 0.066594582 | -0.08750739  | 0.058810279 |
| LSS     | green | 0.081111407  | 0.079942311 | 0.064963087  | 0.161039891 |
| LYNX1   | green | -0.09618135  | 0.037732817 | -0.076205349 | 0.100013012 |
| LYRM9   | green | 0.023254793  | 0.61618722  | 0.003501847  | 0.939838397 |
| MAD2L1  | green | 0.057554229  | 0.214438291 | 0.059897715  | 0.196325297 |
| MAD2L2  | green | 0.010335567  | 0.823721624 | -0.00696236  | 0.880720067 |
| MAGEF1  | green | -0.236130193 | 2.44E-07    | -0.218569717 | 1.86E-06    |
| MAGOH   | green | -0.119307879 | 0.009863486 | -0.124120967 | 0.007242566 |
| MAP4K2  | green | 0.012003246  | 0.795861697 | 0.001335081  | 0.977044809 |
| MAP6D1  | green | -0.171299733 | 0.000199677 | -0.162950804 | 0.000406822 |
| MAP7D2  | green | -0.212607168 | 3.56E-06    | -0.222322222 | 1.22E-06    |
| MARS    | green | 0.046829582  | 0.312572997 | 0.042120337  | 0.36377685  |
| MAST1   | green | -0.16559483  | 0.000325908 | -0.17890958  | 0.000101359 |
| MASTL   | green | -0.025571578 | 0.581485852 | -0.047327063 | 0.307454644 |
| MCM10   | green | 0.021434615  | 0.644068659 | 0.005954326  | 0.897887534 |
| MCM2    | green | 0.008740598  | 0.850576177 | 0.005254164  | 0.909840345 |
| MCM3    | green | -0.055545672 | 0.23089353  | -0.063313399 | 0.171964684 |
| MCM4    | green | 0.071909274  | 0.12070591  | 0.057766308  | 0.212751306 |
| MCM5    | green | 0.100028758  | 0.030674509 | 0.10554882   | 0.022537098 |
| MCM6    | green | 0.044987202  | 0.332012876 | 0.028217814  | 0.543002428 |
| MCM7    | green | -0.007835669 | 0.865891798 | -0.014500249 | 0.754638007 |
| MCM8    | green | -0.165185622 | 0.000337362 | -0.180809228 | 8.52E-05    |
| MCUR1   | green | -0.195372327 | 2.12E-05    | -0.206972994 | 6.49E-06    |
| MDC1    | green | -0.096420965 | 0.037256159 | -0.110893065 | 0.016512095 |
| MED26   | green | -0.1597997   | 0.000527583 | -0.174649819 | 0.000148663 |
| MED8    | green | -0.082953003 | 0.073307251 | -0.06072779  | 0.190185365 |
| MELK    | green | 0.114447309  | 0.013333492 | 0.115675777  | 0.01236762  |
| MEST    | green | -0.126473693 | 0.006204139 | -0.124220734 | 0.007195555 |
| METTL1  | green | -0.065322662 | 0.158729594 | -0.079743168 | 0.085180386 |
| METTL2  | green | 0.146980688  | 0.00144713  | 0.148699915  | 0.001269641 |
| MEX3A   | green | 0.077580888  | 0.09401888  | 0.04545009   | 0.327056969 |
| MEX3D   | green | 0.318593927  | 1.78E-12    | 0.326642964  | 4.51E-13    |
| MGLL    | green | 0.057356772  | 0.216017586 | 0.026219515  | 0.571946446 |
| MGME1   | green | -0.124319503 | 0.007149285 | -0.130552184 | 0.004716286 |
| MICB    | green | 0.05455966   | 0.239290877 | 0.057716362  | 0.213147737 |
| MIS18A  | green | -0.02430031  | 0.600414759 | -0.034255882 | 0.46020536  |
| MKI67   | green | 0.150405171  | 0.001113586 | 0.145112526  | 0.001665632 |

|        |       |              |             |              |             |
|--------|-------|--------------|-------------|--------------|-------------|
| MMACH1 | green | 0.080256088  | 0.083185242 | 0.081318344  | 0.0791733   |
| MMS22L | green | -0.069454787 | 0.133946671 | -0.081917625 | 0.07698005  |
| MND1   | green | 0.195493438  | 2.10E-05    | 0.194843151  | 2.24E-05    |
| MORC2  | green | -0.022118658 | 0.633529055 | -0.06842721  | 0.139811702 |
| MRGBP  | green | -0.232090521 | 3.95E-07    | -0.238018432 | 1.94E-07    |
| MRPL11 | green | -0.127668481 | 0.005729742 | -0.128847005 | 0.005294007 |
| MRPL15 | green | -0.083485632 | 0.071474255 | -0.103492412 | 0.025318727 |
| MRPL3  | green | -0.098888274 | 0.032638217 | -0.108011839 | 0.019557308 |
| MRPL37 | green | 0.066595819  | 0.150750259 | 0.07944481   | 0.086358561 |
| MRPL47 | green | -0.144029905 | 0.001805711 | -0.129863861 | 0.004942274 |
| MRPL48 | green | 0.076416247  | 0.099074758 | 0.041500709  | 0.37088333  |
| MRPS16 | green | 0.073290723  | 0.113715993 | 0.069279136  | 0.134935549 |
| MRPS7  | green | 0.033902869  | 0.464843989 | 0.0383825    | 0.407933948 |
| MRT04  | green | -0.034932966 | 0.451381089 | -0.031732324 | 0.493927272 |
| MSH2   | green | -0.055571011 | 0.230680517 | -0.075764526 | 0.101996976 |
| MSI1   | green | -0.041169793 | 0.374713536 | -0.049788061 | 0.282951945 |
| MTA2   | green | 0.255175548  | 2.24E-08    | 0.234727922  | 2.89E-07    |
| MTBP   | green | -0.193358796 | 2.59E-05    | -0.240575501 | 1.42E-07    |
| MTCH2  | green | 0.243732392  | 9.63E-08    | 0.25359141   | 2.75E-08    |
| MTFR2  | green | -0.033139469 | 0.47496319  | -0.02279229  | 0.62322179  |
| MTHFD1 | green | 0.137891875  | 0.002825051 | 0.113403179  | 0.014206059 |
| MTHFD1 | green | -0.107598226 | 0.02003235  | -0.098298604 | 0.033694946 |
| MTHFD2 | green | 0.013820074  | 0.765803779 | -0.001784083 | 0.969328039 |
| MTIF2  | green | -0.084638899 | 0.067633557 | -0.084370783 | 0.068511013 |
| MYBL1  | green | -0.060921742 | 0.188771272 | -0.087940985 | 0.057563393 |
| MYBL2  | green | 0.078756904  | 0.089125025 | 0.094070431  | 0.04215984  |
| MYCL   | green | -0.219938618 | 1.59E-06    | -0.222841367 | 1.15E-06    |
| MYO19  | green | 0.218590458  | 1.85E-06    | 0.195698315  | 2.05E-05    |
| MYO9B  | green | -0.098932758 | 0.032559659 | -0.083209693 | 0.072419145 |
| NAA40  | green | 0.041948587  | 0.365738083 | 0.024392629  | 0.599030839 |
| NANP   | green | 0.033465811  | 0.470622697 | 0.022847143  | 0.622385679 |
| NAPIL4 | green | 0.202042607  | 1.08E-05    | 0.197866087  | 1.65E-05    |
| NASP   | green | -0.068881213 | 0.137196577 | -0.086690691 | 0.061219556 |
| NAT10  | green | 0.018603731  | 0.688429471 | -0.014685069 | 0.751612687 |
| NCAPD2 | green | -0.02260849  | 0.626026949 | -0.040762796 | 0.379457636 |
| NCAPD3 | green | 0.181349009  | 8.11E-05    | 0.156319209  | 0.000699193 |
| NCAPG  | green | 0.104708399  | 0.023640179 | 0.097546165  | 0.035085602 |
| NCAPG2 | green | 0.027936307  | 0.547035478 | 0.008493099  | 0.854759685 |
| NCAPH  | green | 0.050175696  | 0.279216206 | 0.046888699  | 0.31196186  |
| NCBP2  | green | -0.223104937 | 1.12E-06    | -0.232254893 | 3.87E-07    |
| NDC1   | green | -0.01220893  | 0.792442713 | -0.039374914 | 0.395910245 |
| NDC80  | green | -0.119737467 | 0.009599327 | -0.123124537 | 0.007727376 |
| NDOR1  | green | 0.064012383  | 0.16727013  | 0.060396075  | 0.192621881 |
| NDRG2  | green | -0.032759338 | 0.480046603 | -0.045073726 | 0.33108285  |
| NDUFAF | green | -0.047709726 | 0.303555439 | -0.042650836 | 0.357760507 |

|         |       |              |             |              |             |
|---------|-------|--------------|-------------|--------------|-------------|
| NDUFB5  | green | -0.173156719 | 0.000169667 | -0.16455415  | 0.000355775 |
| NEIL3   | green | -0.005454326 | 0.906421075 | -0.016715149 | 0.718641827 |
| NEK2    | green | 0.181365383  | 8.09E-05    | 0.182629001  | 7.20E-05    |
| NELFCD  | green | -0.085947517 | 0.063482189 | -0.095537422 | 0.039039453 |
| NETO2   | green | 0.021268246  | 0.646642971 | 0.037960442  | 0.413112465 |
| NFIC    | green | 0.235710623  | 2.57E-07    | 0.247791523  | 5.79E-08    |
| NHSL1   | green | 0.198697439  | 1.52E-05    | 0.195880351  | 2.02E-05    |
| NIF3L1  | green | -0.151881698 | 0.000992953 | -0.159264832 | 0.000551123 |
| NIPSNAP | green | 0.021194503  | 0.647785375 | 0.006189748  | 0.893873569 |
| NKIRAS2 | green | 0.181306639  | 8.14E-05    | 0.194750744  | 2.26E-05    |
| NMU     | green | -0.101219539 | 0.028732999 | -0.114220519 | 0.013518897 |
| NOMO1   | green | -0.04914152  | 0.28925763  | -0.049491053 | 0.285837021 |
| NOP2    | green | 0.026952755  | 0.561241414 | 0.023824538  | 0.607569633 |
| NOP56   | green | -0.147185594 | 0.00142484  | -0.17229587  | 0.000183011 |
| NPDC1   | green | 0.304305404  | 1.84E-11    | 0.31079226   | 6.46E-12    |
| NPLOC4  | green | -0.132833763 | 0.004032322 | -0.138732259 | 0.00265986  |
| NR1D1   | green | 0.009466098  | 0.838337522 | 0.009665062  | 0.834987797 |
| NR2C2AI | green | 0.008499796  | 0.854646434 | 0.001981308  | 0.96593931  |
| NR6A1   | green | -0.21241961  | 3.64E-06    | -0.233351418 | 3.40E-07    |
| NRD1    | green | -0.069807065 | 0.131980264 | -0.074463682 | 0.108033959 |
| NSUN2   | green | -0.099812169 | 0.031039458 | -0.115852273 | 0.012234052 |
| NSUN4   | green | -0.008987003 | 0.846415331 | -0.011911505 | 0.797387936 |
| NT5DC2  | green | -0.049661207 | 0.284181768 | -0.052694688 | 0.255755836 |
| NUDT15  | green | 0.0568424    | 0.220170774 | 0.045809138  | 0.323245968 |
| NUDT19  | green | -0.024468433 | 0.597895562 | -0.016674966 | 0.719289651 |
| NUDT3   | green | -0.115676295 | 0.012367226 | -0.096766725 | 0.036577362 |
| NUDT5   | green | 0.162753733  | 0.000413547 | 0.153468032  | 0.00087687  |
| NUF2    | green | 0.016572916  | 0.720935749 | 0.000983633  | 0.983086483 |
| NUP107  | green | -0.130538302 | 0.00472075  | -0.15880186  | 0.000572283 |
| NUP155  | green | -0.117243596 | 0.011224978 | -0.132873468 | 0.004021258 |
| NUP210  | green | 0.188418087  | 4.17E-05    | 0.164618481  | 0.000353857 |
| NUP43   | green | 0.098395433  | 0.033519447 | 0.098545401  | 0.033249172 |
| NUP62   | green | 0.044851318  | 0.333476858 | 0.033368964  | 0.471908535 |
| NUP85   | green | -0.068631667 | 0.138629306 | -0.084566477 | 0.067869657 |
| NUP88   | green | 0.206671013  | 6.70E-06    | 0.195698267  | 2.05E-05    |
| NUP93   | green | 0.170013969  | 0.000223293 | 0.176451073  | 0.000126571 |
| NUSAP1  | green | 0.166814176  | 0.000293894 | 0.153645269  | 0.00086471  |
| NXPH4   | green | -0.140496885 | 0.00234128  | -0.136606576 | 0.003095816 |
| NXT1    | green | -0.12715698  | 0.005928694 | -0.113347483 | 0.014253983 |
| ODC1    | green | -0.112615726 | 0.014896958 | -0.118324655 | 0.010492522 |
| OIP5    | green | 0.135391799  | 0.003373189 | 0.135482147  | 0.003351808 |
| ORC1    | green | 0.106935827  | 0.020814044 | 0.102644645  | 0.02654894  |
| ORC6    | green | 0.102520105  | 0.02673393  | 0.110441747  | 0.016959799 |
| OTX1    | green | 0.180674601  | 8.63E-05    | 0.190196255  | 3.52E-05    |
| OXNAD1  | green | -0.136391151 | 0.003143439 | -0.12435064  | 0.007134753 |

|        |       |              |             |              |             |
|--------|-------|--------------|-------------|--------------|-------------|
| PA2G4  | green | -0.042742048 | 0.356732399 | -0.062510405 | 0.177478289 |
| PAICS  | green | 0.175401114  | 0.000139041 | 0.148146492  | 0.00132446  |
| PARL   | green | -0.319146109 | 1.62E-12    | -0.295652561 | 7.11E-11    |
| PARP2  | green | -0.030359722 | 0.512807921 | -0.048941586 | 0.291226528 |
| PARPBP | green | -0.000538581 | 0.990738656 | -0.01362451  | 0.769023287 |
| PASK   | green | 0.165948443  | 0.000316304 | 0.150936881  | 0.001068669 |
| PBK    | green | 0.226703655  | 7.40E-07    | 0.217553665  | 2.08E-06    |
| PBXIP1 | green | -0.014192351 | 0.759686299 | -0.033814748 | 0.466005934 |
| PCCB   | green | 0.148818189  | 0.001258199 | 0.169861667  | 0.000226257 |
| PCK2   | green | 0.216121052  | 2.43E-06    | 0.214361305  | 2.95E-06    |
| PCNA   | green | 0.144550808  | 0.001737017 | 0.145898174  | 0.001570296 |
| PCNT   | green | -0.04361041  | 0.347037709 | -0.070457998 | 0.128405523 |
| PCNXL3 | green | -0.004965337 | 0.914777133 | 0.005893705  | 0.898921557 |
| PDCD2L | green | -0.053322681 | 0.250126148 | -0.05377653  | 0.246111673 |
| PDCD5  | green | -0.186461327 | 5.03E-05    | -0.197851914 | 1.66E-05    |
| PDE7A  | green | 0.095041512  | 0.040071664 | 0.073664321  | 0.111881304 |
| PDHA1  | green | -0.153808677 | 0.000853638 | -0.145141215 | 0.001662059 |
| PDK3   | green | 0.257612295  | 1.63E-08    | 0.265610455  | 5.56E-09    |
| PDLIM4 | green | -0.198673771 | 1.52E-05    | -0.167406    | 0.000279437 |
| PDRG1  | green | -0.182183122 | 7.51E-05    | -0.178986505 | 0.000100652 |
| PDSS1  | green | 0.056828209  | 0.220286158 | 0.02411695   | 0.603167717 |
| PGAM5  | green | 0.188612049  | 4.10E-05    | 0.198265561  | 1.59E-05    |
| PHF5A  | green | 0.140030922  | 0.002421833 | 0.123628595  | 0.007478619 |
| PHGDH  | green | 0.024743294  | 0.593787326 | -0.001859694 | 0.968028827 |
| PIF1   | green | -0.022138205 | 0.63322896  | -0.01959868  | 0.67270638  |
| PIGX   | green | -0.136719003 | 0.003071223 | -0.140716769 | 0.002304124 |
| PKMYT1 | green | 0.1536058    | 0.000867405 | 0.168118836  | 0.000262906 |
| PKN3   | green | 0.217986826  | 1.98E-06    | 0.229979261  | 5.06E-07    |
| PLA2G3 | green | 0.286677736  | 2.76E-10    | 0.260388054  | 1.12E-08    |
| PLCD1  | green | 0.007551432  | 0.870713073 | -0.014567365 | 0.753538952 |
| PLCXD1 | green | 0.011496832  | 0.804296113 | 0.008704124  | 0.85119245  |
| PLK1   | green | 0.090312597  | 0.051125051 | 0.101948855  | 0.027596741 |
| PLK4   | green | 0.15610952   | 0.000711027 | 0.158967242  | 0.000564639 |
| PNP    | green | 0.230582373  | 4.71E-07    | 0.212978243  | 3.42E-06    |
| PNPLA7 | green | 0.037193658  | 0.422619374 | 0.032207878  | 0.487473415 |
| POC1A  | green | 0.132549535  | 0.004112331 | 0.154563853  | 0.00080415  |
| POLA1  | green | 0.012090921  | 0.79440384  | -0.025436461 | 0.583484443 |
| POLA2  | green | 0.089957088  | 0.05205005  | 0.099804723  | 0.03105207  |
| POLD1  | green | 0.03426598   | 0.460073058 | 0.023437325  | 0.61342053  |
| POLD3  | green | 0.054617938  | 0.238788662 | 0.022318971  | 0.630456525 |
| POLE   | green | 0.13026909   | 0.004808077 | 0.108255024  | 0.019282609 |
| POLE2  | green | 0.095094418  | 0.039960454 | 0.081278006  | 0.079322731 |
| POLQ   | green | -0.085189049 | 0.065861947 | -0.093650965 | 0.043089826 |
| POLR2D | green | 0.026385512  | 0.569514503 | 0.009260104  | 0.841808653 |
| POMT2  | green | 0.012953229  | 0.780104255 | -0.009454269 | 0.838536758 |

|         |       |              |             |              |             |
|---------|-------|--------------|-------------|--------------|-------------|
| POP1    | green | -0.004948623 | 0.915062913 | -0.033242747 | 0.473587193 |
| POP4    | green | -0.217868429 | 2.01E-06    | -0.189556423 | 3.74E-05    |
| PPIA    | green | 0.132095015  | 0.004243263 | 0.145144719  | 0.001661623 |
| PPIF    | green | 0.048517199  | 0.295435496 | 0.054441093  | 0.240314932 |
| PPIH    | green | 0.03344447   | 0.470905874 | 0.039564521  | 0.393637563 |
| PPM1G   | green | 0.117608797  | 0.010972631 | 0.130586076  | 0.004705403 |
| PRC1    | green | 0.10914645   | 0.018304204 | 0.091181049  | 0.048922984 |
| PRDX2   | green | 0.216571479  | 2.31E-06    | 0.227793341  | 6.52E-07    |
| PRELID1 | green | 0.041660001  | 0.369048273 | 0.06657449   | 0.150881378 |
| PRICKLE | green | -0.010685332 | 0.817858877 | 0.008877394  | 0.848265693 |
| PRIM1   | green | 0.032753456  | 0.480125492 | 0.007755587  | 0.867249667 |
| PRIM2   | green | -0.143625041 | 0.001860811 | -0.145383662 | 0.001632146 |
| PRPF4   | green | 0.140553406  | 0.002331677 | 0.14044562   | 0.002350021 |
| PRPSAP1 | green | 0.010131066  | 0.827154043 | -0.019426119 | 0.675423377 |
| PRR11   | green | -0.030627572 | 0.509094332 | -0.020131284 | 0.6643474   |
| PRR19   | green | 0.036557912  | 0.43059761  | 0.049753578  | 0.283285886 |
| PSAT1   | green | -0.011489062 | 0.804425712 | -0.023484527 | 0.612705977 |
| PSMA5   | green | 0.018395228  | 0.691741778 | 0.054910535  | 0.236278396 |
| PSMA7   | green | -0.049773534 | 0.283092599 | -0.014441595 | 0.755598899 |
| PSMB2   | green | -0.009563626 | 0.836695193 | 0.035470967  | 0.444438017 |
| PSMC2   | green | -0.001581525 | 0.972809001 | 0.019264648  | 0.677969591 |
| PSMC3IP | green | 0.139592862  | 0.002499859 | 0.117321721  | 0.011170567 |
| PSMD11  | green | 0.055572588  | 0.230667267 | 0.054700201  | 0.238081023 |
| PSMD14  | green | 0.07538437   | 0.103732866 | 0.081514296  | 0.078450647 |
| PSMD2   | green | -0.117818269 | 0.010830169 | -0.088709137 | 0.055408233 |
| PSRC1   | green | -0.001096765 | 0.981141531 | -0.011971967 | 0.796381989 |
| PTBP1   | green | 0.297415745  | 5.42E-11    | 0.293871033  | 9.35E-11    |
| PTDSS1  | green | -0.021802374 | 0.638393263 | -0.061407601 | 0.185262862 |
| PTMA    | green | 0.086784259  | 0.060939462 | 0.079441547  | 0.08637152  |
| PTTG1   | green | 0.09395698   | 0.042409684 | 0.108827909  | 0.018648734 |
| PUS7    | green | 0.01948341   | 0.674520858 | -0.021644512 | 0.640826882 |
| PVR     | green | 0.166426389  | 0.000303742 | 0.143789378  | 0.001838263 |
| PVRL1   | green | 0.259910249  | 1.20E-08    | 0.250765888  | 3.96E-08    |
| PXMP2   | green | 0.105771348  | 0.022252597 | 0.0901796    | 0.051469478 |
| R3HDM1  | green | 0.084469302  | 0.068187516 | 0.067961775  | 0.14253219  |
| RAB15   | green | 0.157127251  | 0.000655276 | 0.114398454  | 0.013373242 |
| RAB8A   | green | -0.041531208 | 0.370531544 | -0.026756693 | 0.564094361 |
| RAC3    | green | 0.043083457  | 0.352900686 | 0.041714603  | 0.368420543 |
| RACGAP  | green | 0.053040015  | 0.252649353 | 0.037813192  | 0.414928281 |
| RAD18   | green | -0.058179476 | 0.209492237 | -0.079066579 | 0.087870963 |
| RAD23A  | green | -0.077627979 | 0.093818871 | -0.080147656 | 0.083603842 |
| RAD51   | green | 0.140769343  | 0.00229532  | 0.148917953  | 0.001248622 |
| RAD51A  | green | -0.045712677 | 0.324266978 | -0.058408786 | 0.207699066 |
| RAD54B  | green | -0.102721784 | 0.026434912 | -0.12337554  | 0.007602595 |
| RAD54L  | green | -0.010621619 | 0.818926088 | -0.015328807 | 0.741105314 |

|          |       |              |             |              |             |
|----------|-------|--------------|-------------|--------------|-------------|
| RAE1     | green | -0.253350645 | 2.84E-08    | -0.272625309 | 2.10E-09    |
| RANBP1   | green | -0.000249454 | 0.99571036  | -0.007897661 | 0.864840934 |
| RARA     | green | 0.169684335  | 0.000229755 | 0.155014728  | 0.000775882 |
| RASD1    | green | 0.150423383  | 0.001112019 | 0.156986796  | 0.000662721 |
| RBL1     | green | -0.016687939 | 0.719080477 | -0.031108399 | 0.502463345 |
| RBM15    | green | -0.042936835 | 0.354543074 | -0.056306186 | 0.224560787 |
| RBM28    | green | -0.157177874 | 0.000652612 | -0.175837482 | 0.000133724 |
| RBPMS    | green | -0.025686288 | 0.579791612 | -0.007970619 | 0.863604472 |
| RCC1     | green | 0.078456939  | 0.090353431 | 0.081098777  | 0.079989441 |
| RCC2     | green | 0.141201915  | 0.002224041 | 0.137059288  | 0.002997866 |
| RCCD1    | green | 0.136608372  | 0.003095421 | 0.112327799  | 0.015156852 |
| RCE1     | green | -0.034900479 | 0.451802289 | -0.054687969 | 0.238186145 |
| RCOR2    | green | -0.015414846 | 0.739704533 | -0.031324176 | 0.499502483 |
| RDM1     | green | -0.034244592 | 0.460353313 | -0.013958308 | 0.763530511 |
| RECQL4   | green | 0.099060471  | 0.032335018 | 0.101630265  | 0.028088255 |
| REEP4    | green | 0.144452063  | 0.001749852 | 0.15677732   | 0.000673971 |
| RELT     | green | 0.015927726  | 0.731372475 | 0.008764101  | 0.850179122 |
| RFC2     | green | 0.152017565  | 0.000982481 | 0.157988613  | 0.000611286 |
| RFC3     | green | 0.093699968  | 0.042980299 | 0.06911488   | 0.135865359 |
| RFC4     | green | -0.180041141 | 9.14E-05    | -0.187056831 | 4.75E-05    |
| RFC5     | green | 0.003845454  | 0.933948092 | -0.023361304 | 0.614572145 |
| RFT1     | green | -0.005325256 | 0.908625708 | -0.012109977 | 0.794087075 |
| RFWD3    | green | 0.242527709  | 1.12E-07    | 0.232184319  | 3.90E-07    |
| RHNO1    | green | 0.069967259  | 0.131093472 | 0.052347224  | 0.258908134 |
| RMI2     | green | -0.035719683 | 0.441248905 | -0.027266055 | 0.556697005 |
| RNASEH   | green | -0.103742591 | 0.024965217 | -0.104192811 | 0.024339767 |
| RNASEH   | green | 0.05310274   | 0.25208792  | 0.056311734  | 0.224515048 |
| RNF34    | green | 0.17277925   | 0.000175402 | 0.164285416  | 0.000363892 |
| RNF8     | green | 0.008579334  | 0.853301574 | 0.021338609  | 0.645553689 |
| RNFT2    | green | 0.115447163  | 0.012542543 | 0.115187815  | 0.012743623 |
| RNPS1    | green | -0.03365487  | 0.468118157 | -0.027510677 | 0.55316125  |
| RP11-103 | green | 0.075566184  | 0.102899757 | 0.050537783  | 0.275757008 |
| RPA3     | green | 0.053105388  | 0.252064238 | 0.074120724  | 0.109671641 |
| RPAIN    | green | 0.157630688  | 0.000629222 | 0.148216999  | 0.001317357 |
| RPIA     | green | 0.083015748  | 0.073089346 | 0.06161513   | 0.183779027 |
| RPL39L   | green | -0.230505763 | 4.76E-07    | -0.20549934  | 7.58E-06    |
| RPP38    | green | 0.037496475  | 0.418849754 | 0.033231064  | 0.47374274  |
| RPP40    | green | -0.089798548 | 0.05246703  | -0.102194258 | 0.027223196 |
| RQCD1    | green | 0.204857665  | 8.10E-06    | 0.203904795  | 8.94E-06    |
| RRM1     | green | 0.202857338  | 9.96E-06    | 0.184907457  | 5.82E-05    |
| RRM2     | green | 0.224878062  | 9.12E-07    | 0.221343996  | 1.36E-06    |
| RRP36    | green | 0.016785409  | 0.717509615 | 0.026059592  | 0.574294047 |
| RRS1     | green | -0.139122682 | 0.002586152 | -0.170644935 | 0.000211395 |
| RTKN2    | green | 0.040968428  | 0.377056134 | 0.024709062  | 0.594298269 |
| RUVBL1   | green | -0.059701315 | 0.197798978 | -0.061973274 | 0.181238955 |



|               |              |             |              |             |
|---------------|--------------|-------------|--------------|-------------|
| SAPCD2 green  | 0.330000987  | 2.51E-13    | 0.340237153  | 4.04E-14    |
| SASS6 green   | -0.063068332 | 0.17363367  | -0.086515207 | 0.061747732 |
| SCD green     | 0.364021529  | 4.44E-16    | 0.358735115  | 1.25E-15    |
| SDCCAG green  | 0.190814928  | 3.31E-05    | 0.175059219  | 0.000143345 |
| SEC61A2 green | -0.101126589 | 0.028880658 | -0.127032745 | 0.005977943 |
| SEMA4D green  | -0.016472007 | 0.722564724 | -0.017822211 | 0.700874995 |
| SENP1 green   | -0.05484601  | 0.236830364 | -0.097111556 | 0.03591088  |
| SEPHS1 green  | 0.042676881  | 0.357466747 | 0.017986483  | 0.698252216 |
| SEPT3 green   | -0.072045291 | 0.120003151 | -0.082525507 | 0.074806009 |
| SERPINB green | -0.086819787 | 0.060833388 | -0.07776476  | 0.093239854 |
| SETD8 green   | 0.065216002  | 0.159412269 | 0.054616362  | 0.238802238 |
| SFMBT1 green  | -0.193905022 | 2.45E-05    | -0.192939701 | 2.70E-05    |
| SFXN1 green   | 0.187197503  | 4.69E-05    | 0.180684508  | 8.62E-05    |
| SFXN3 green   | 0.001043457  | 0.982057989 | 0.018189384  | 0.695017631 |
| SFXN5 green   | -0.084970131 | 0.066562293 | -0.086379796 | 0.062157861 |
| SGOL1 green   | 0.005206661  | 0.910652043 | -0.004550695 | 0.921870106 |
| SGOL2 green   | -0.007491792 | 0.87172531  | -0.022068366 | 0.634301458 |
| SHCBP1 green  | 0.205931514  | 7.24E-06    | 0.211741589  | 3.91E-06    |
| SHMT2 green   | 0.097899824  | 0.034426004 | 0.086822777  | 0.060824466 |
| SIGMAR green  | 0.160804579  | 0.000485864 | 0.148029359  | 0.001336338 |
| SKA1 green    | 0.106496044  | 0.02134755  | 0.108458473  | 0.019055383 |
| SKA3 green    | 0.141303108  | 0.002207661 | 0.13757623   | 0.002889471 |
| SKP2 green    | 0.083624236  | 0.07100345  | 0.066521333  | 0.151208533 |
| SLBP green    | 0.096921848  | 0.036276254 | 0.083481212  | 0.071489311 |
| SLC16A1 green | -0.192236006 | 2.89E-05    | -0.191799016 | 3.01E-05    |
| SLC16A1 green | -0.218252822 | 1.92E-06    | -0.225710261 | 8.29E-07    |
| SLC20A1 green | 0.199681442  | 1.38E-05    | 0.17330675   | 0.000167437 |
| SLC25A1 green | -0.119333267 | 0.009847698 | -0.143709544 | 0.001849185 |
| SLC25A3 green | 0.083763094  | 0.070534328 | 0.095578745  | 0.038954465 |
| SLC27A1 green | 0.046502682  | 0.315966607 | 0.058976723  | 0.203305715 |
| SLC29A2 green | -0.057217874 | 0.217133507 | -0.059019385 | 0.202978444 |
| SLC35A2 green | -0.053897594 | 0.245048459 | -0.02698015  | 0.560843347 |
| SLC44A2 green | -0.120802993 | 0.008971066 | -0.131768546 | 0.004339621 |
| SLC5A6 green  | 0.012960649  | 0.779981527 | -0.013663273 | 0.768384819 |
| SLMO1 green   | -0.308659669 | 9.13E-12    | -0.32810086  | 3.50E-13    |
| SLX4 green    | 0.239345465  | 1.65E-07    | 0.241305987  | 1.30E-07    |
| SMARCE1 green | 0.020210757  | 0.663103635 | 0.00020843   | 0.996415809 |
| SMC1B green   | -0.252148537 | 3.32E-08    | -0.254460143 | 2.46E-08    |
| SMC2 green    | 0.19923434   | 1.44E-05    | 0.167530181  | 0.000276489 |
| SMC4 green    | -0.036901353 | 0.426276861 | -0.073647694 | 0.111962461 |
| SMG5 green    | -0.082874617 | 0.073580215 | -0.075446943 | 0.103445544 |
| SMPD4 green   | -0.093663289 | 0.04306226  | -0.120950596 | 0.008886985 |
| SNRPA1 green  | 0.093132167  | 0.044263888 | 0.104126595  | 0.024430898 |
| SNRPB green   | 0.027539711  | 0.55274232  | 0.030942622  | 0.504744387 |
| SNRPC green   | -0.088233341 | 0.056735095 | -0.074339793 | 0.108623311 |

|         |       |              |             |              |             |
|---------|-------|--------------|-------------|--------------|-------------|
| SNRPD1  | green | 0.028360944  | 0.54095753  | 0.024633942  | 0.595420223 |
| SNRPD3  | green | 0.088425827  | 0.056195165 | 0.085832975  | 0.06383697  |
| SOD3    | green | 0.026043498  | 0.57453055  | 0.04851664   | 0.295441074 |
| SOX12   | green | -0.205553122 | 7.53E-06    | -0.193868891 | 2.46E-05    |
| SPAG5   | green | 0.065668619  | 0.156530481 | 0.060987046  | 0.188296889 |
| SPC24   | green | 0.044423967  | 0.338108031 | 0.063966848  | 0.167572999 |
| SPC25   | green | 0.012557208  | 0.786662546 | 0.010742523  | 0.816901204 |
| SPDL1   | green | -0.066013617 | 0.154360473 | -0.098170779 | 0.033927825 |
| SPRYD3  | green | 0.073169444  | 0.114316632 | 0.077472306  | 0.094481358 |
| SRD5A1  | green | -0.102079829 | 0.027396831 | -0.128924445 | 0.005266448 |
| SRRT    | green | 0.023635666  | 0.61042045  | 0.021713439  | 0.639763813 |
| STIL    | green | 0.08347124   | 0.071523286 | 0.079026429  | 0.088032751 |
| STIP1   | green | 0.015725238  | 0.734658318 | 0.017302233  | 0.709200338 |
| STMN1   | green | 0.021379078  | 0.644927531 | 0.003329545  | 0.94279335  |
| SUMO3   | green | -0.201860896 | 1.10E-05    | -0.212144625 | 3.75E-06    |
| SUV39H1 | green | -0.059946627 | 0.195959536 | -0.029360438 | 0.526785563 |
| SUV39H2 | green | 0.013360052  | 0.77338327  | -0.007063645 | 0.878998068 |
| SYCE2   | green | -0.08809226  | 0.057133562 | -0.089513869 | 0.053222761 |
| SYNGR3  | green | -0.067856704 | 0.143151906 | -0.067166974 | 0.147271237 |
| SYT13   | green | -0.379813454 | 1.79E-17    | -0.382050304 | 1.12E-17    |
| TACC3   | green | 0.037367542  | 0.42045236  | 0.050238048  | 0.278618439 |
| TAF11   | green | -0.122712738 | 0.00793606  | -0.119200626 | 0.009930437 |
| TAF5    | green | -0.008007112 | 0.862986145 | -0.02730312  | 0.55616057  |
| TARS    | green | -0.055073932 | 0.234884686 | -0.061058567 | 0.187778354 |
| TATDN2  | green | 0.043243283  | 0.351115865 | 0.040312965  | 0.384743655 |
| TBC1D31 | green | -0.127309313 | 0.005868804 | -0.148673406 | 0.001272218 |
| TCF19   | green | 0.083687424  | 0.070789659 | 0.090316703  | 0.051114449 |
| TCF3    | green | 0.304175232  | 1.87E-11    | 0.312930409  | 4.55E-12    |
| TCOF1   | green | -0.053862861 | 0.245353169 | -0.072079525 | 0.119826775 |
| TDP1    | green | 0.190469373  | 3.43E-05    | 0.180082122  | 9.11E-05    |
| TDRKH   | green | -0.029087246 | 0.530640348 | -0.059040194 | 0.202818952 |
| TEAD2   | green | -0.067522988 | 0.145133843 | -0.087180986 | 0.059763592 |
| TEAD4   | green | -0.136569942 | 0.003103868 | -0.127011203 | 0.00598652  |
| TERT    | green | 0.086968786  | 0.060390183 | 0.066529111  | 0.151160626 |
| TFAP4   | green | -0.215595219 | 2.58E-06    | -0.209330124 | 5.06E-06    |
| TFG     | green | -0.089895273 | 0.052212302 | -0.078818305 | 0.088875242 |
| TFRC    | green | 0.08115402   | 0.079783461 | 0.073733858  | 0.111542399 |
| THOC3   | green | -0.043504685 | 0.348209037 | -0.049597518 | 0.284800577 |
| THOC5   | green | -0.096879471 | 0.036358303 | -0.107018582 | 0.020714958 |
| TICRR   | green | 0.026341458  | 0.570159438 | 0.014493221  | 0.754753117 |
| TIGD3   | green | 0.145958105  | 0.001563233 | 0.136705446  | 0.003074179 |
| TIMELES | green | 0.0791651    | 0.087474981 | 0.046753012  | 0.313365738 |
| TIMM23  | green | 0.204297972  | 8.58E-06    | 0.213221004  | 3.34E-06    |
| TIMM8A  | green | -0.144993215 | 0.001680565 | -0.145249115 | 0.001648685 |
| TIPIN   | green | 0.236709395  | 2.27E-07    | 0.210058556  | 4.69E-06    |

|         |       |              |             |              |             |
|---------|-------|--------------|-------------|--------------|-------------|
| TK1     | green | 0.140852047  | 0.002281533 | 0.160556117  | 0.000495884 |
| TMEM10  | green | 0.081422346  | 0.078789081 | 0.094804475  | 0.040573139 |
| TMEM10  | green | 0.17389878   | 0.000158903 | 0.154856292  | 0.000785709 |
| TMEM17  | green | -0.12224768  | 0.00817777  | -0.10136076  | 0.028509897 |
| TMEM18  | green | 0.263799072  | 7.11E-09    | 0.255007866  | 2.29E-08    |
| TMEM18  | green | 0.026322382  | 0.570438809 | 0.03764689   | 0.416984667 |
| TMEM19  | green | -0.109744679 | 0.017672153 | -0.144269658 | 0.001773791 |
| TMEM20  | green | -0.026872089 | 0.562414363 | -0.03830317  | 0.408904342 |
| TMEM20  | green | 0.163098112  | 0.000401862 | 0.144983735  | 0.001681757 |
| TMEM38  | green | -0.134217757 | 0.003662503 | -0.128447472 | 0.005438265 |
| TMEM41  | green | -0.341155089 | 3.42E-14    | -0.333912533 | 1.26E-13    |
| TMEM97  | green | 0.12818805   | 0.005533817 | 0.089265546  | 0.053889359 |
| TMPO    | green | 0.029384887  | 0.526441284 | 0.016209072  | 0.726815136 |
| TMSB15  | green | -0.075632795 | 0.102595865 | -0.110664636 | 0.016737385 |
| TNFSF12 | green | 0.112181338  | 0.015290574 | 0.12511593   | 0.0067858   |
| TNPO2   | green | -0.020602275 | 0.656989884 | -0.044209592 | 0.340446632 |
| TOM1L2  | green | 0.00873358   | 0.850694748 | 0.02326986   | 0.61595864  |
| TOMM34  | green | -0.033061182 | 0.476007696 | -0.03937031  | 0.395965529 |
| TOMM40  | green | 0.001994493  | 0.965712784 | 0.010099738  | 0.82768015  |
| TOMM5   | green | -0.027281253 | 0.556477012 | -0.030451056 | 0.511540045 |
| TONSL   | green | 0.054346125  | 0.241137377 | 0.036672239  | 0.429156483 |
| TOP2A   | green | 0.132527905  | 0.004118478 | 0.12060765   | 0.009083429 |
| TOP3A   | green | 0.311888807  | 5.40E-12    | 0.302946478  | 2.28E-11    |
| TOPBP1  | green | -0.155535791 | 0.00074436  | -0.182216512 | 7.48E-05    |
| TPCN1   | green | -0.170231    | 0.000219131 | -0.172501792 | 0.000179732 |
| TPGS2   | green | 0.125431458  | 0.006646435 | 0.114744649  | 0.013093808 |
| TPMT    | green | 0.089290767  | 0.053821343 | 0.088159074  | 0.056944566 |
| TPRG1L  | green | 0.026043788  | 0.574526293 | 0.045946296  | 0.321797802 |
| TPX2    | green | -0.015484306 | 0.738574315 | -0.016066428 | 0.729124546 |
| TRA2B   | green | -0.120945505 | 0.008889873 | -0.145212338 | 0.001653232 |
| TRAIP   | green | -0.0724552   | 0.11790458  | -0.066417089 | 0.151851669 |
| TRIM59  | green | 0.033878249  | 0.465168459 | 0.025995756  | 0.575232399 |
| TRIP13  | green | -0.07901028  | 0.088097892 | -0.081578946 | 0.0782134   |
| TROAP   | green | 0.022032219  | 0.63485687  | 0.026900426  | 0.562002188 |
| TRPC4A  | green | 0.039668819  | 0.392390773 | 0.040068588  | 0.387634073 |
| TTC31   | green | 0.02889657   | 0.533339248 | 0.009552141  | 0.836888545 |
| TTF2    | green | 0.037454728  | 0.419368264 | 0.020911018  | 0.65218476  |
| TTI1    | green | -0.158628603 | 0.000580393 | -0.187596003 | 4.52E-05    |
| TTK     | green | -0.103830633 | 0.024841828 | -0.105641295 | 0.022418488 |
| TTL     | green | -0.029184802 | 0.529262174 | -0.055481194 | 0.231436199 |
| TTLL4   | green | 0.001939696  | 0.966654235 | -0.021260727 | 0.646759416 |
| TTYH3   | green | 0.109683893  | 0.017735493 | 0.131602587  | 0.004389358 |
| TUBA1C  | green | 0.089522404  | 0.053199973 | 0.090843608  | 0.049768992 |
| TUBB    | green | -0.059945193 | 0.195970252 | -0.052768568 | 0.255089007 |
| TUBB3   | green | 0.013559286  | 0.77009792  | 0.00292163   | 0.949792068 |

|        |       |              |             |              |             |
|--------|-------|--------------|-------------|--------------|-------------|
| TYMS   | green | 0.116030268  | 0.012100642 | 0.106053555  | 0.02189628  |
| U2AF2  | green | 0.056086167  | 0.226380011 | 0.033707999  | 0.467415663 |
| UBA1   | green | 0.093570113  | 0.043271055 | 0.117113316  | 0.011316235 |
| UBE2C  | green | 0.018881398  | 0.684027639 | 0.021866619  | 0.637403947 |
| UBE2O  | green | 0.021430318  | 0.6441351   | 0.00881035   | 0.849397911 |
| UBE2S  | green | -0.002068988 | 0.964432977 | -0.000895455 | 0.98460251  |
| UBE2T  | green | 0.243747287  | 9.61E-08    | 0.243495726  | 9.91E-08    |
| UBL4A  | green | 0.058041634  | 0.210575506 | 0.046491912  | 0.316078831 |
| UCHL1  | green | -0.41323228  | 1.10E-20    | -0.403796961 | 9.65E-20    |
| UCK2   | green | 0.126630982  | 0.006139735 | 0.094951536  | 0.040261397 |
| UFD1L  | green | 0.138523071  | 0.002700136 | 0.158995884  | 0.000563325 |
| UHRF1  | green | 0.302194798  | 2.57E-11    | 0.296549448  | 6.19E-11    |
| ULBP1  | green | 0.138264843  | 0.002750619 | 0.121395108  | 0.008637997 |
| UMPS   | green | -0.125158407 | 0.006766888 | -0.138547006 | 0.0026955   |
| UNC119 | green | 0.021583007  | 0.641776104 | 0.015242571  | 0.74251016  |
| UNG    | green | 0.039515874  | 0.39421991  | 0.004472297  | 0.923211924 |
| USP39  | green | -0.02446666  | 0.597922113 | -0.037639985 | 0.417070184 |
| VDAC1  | green | 0.226402433  | 7.66E-07    | 0.223091576  | 1.12E-06    |
| VDAC3  | green | 0.122317505  | 0.008141065 | 0.095142594  | 0.039859415 |
| VRK1   | green | -0.105429943 | 0.022690369 | -0.11076119  | 0.016641832 |
| VSIG2  | green | -0.18596644  | 5.27E-05    | -0.168151429 | 0.000262172 |
| WBP1L  | green | 0.132033905  | 0.004261151 | 0.108426259  | 0.019091206 |
| WDHD1  | green | 0.040884394  | 0.378036413 | 0.015909499  | 0.731668048 |
| WDR53  | green | -0.312417072 | 4.95E-12    | -0.319054105 | 1.64E-12    |
| WDR62  | green | 0.072005183  | 0.120210045 | 0.076669041  | 0.097959353 |
| WDR70  | green | -0.275603654 | 1.38E-09    | -0.288496987 | 2.11E-10    |
| WDR76  | green | 0.240210383  | 1.49E-07    | 0.216431352  | 2.35E-06    |
| WFS1   | green | 0.103402784  | 0.02544642  | 0.077703127  | 0.093500402 |
| WHSC1  | green | 0.161036456  | 0.000476683 | 0.142829723  | 0.001973558 |
| WRAP73 | green | 0.236669028  | 2.29E-07    | 0.235248764  | 2.71E-07    |
| WRNIP1 | green | -0.07007105  | 0.130521374 | -0.071811619 | 0.121212441 |
| XPO5   | green | -0.142475899 | 0.002025698 | -0.159878207 | 0.000524208 |
| XRCC2  | green | 0.006122143  | 0.895025964 | -0.003199936 | 0.945016644 |
| XRCC3  | green | 0.023337605  | 0.614931337 | 0.027612551  | 0.551691999 |
| XXYLT1 | green | -0.105999109 | 0.021964636 | -0.09976015  | 0.031127661 |
| XYLB   | green | 0.147959997  | 0.001343418 | 0.13590545   | 0.003253263 |
| YARS   | green | 0.09290548   | 0.044785274 | 0.108845885  | 0.018629142 |
| YARS2  | green | 0.205715943  | 7.41E-06    | 0.193252779  | 2.61E-05    |
| YBX1   | green | -0.088961728 | 0.054714364 | -0.098063672 | 0.034124013 |
| YBX2   | green | -0.227569741 | 6.70E-07    | -0.223109798 | 1.12E-06    |
| YKT6   | green | -0.028786619 | 0.534898675 | -0.002303813 | 0.960399341 |
| YRDC   | green | -0.008057995 | 0.862124121 | -0.010561289 | 0.819936933 |
| YTHDF1 | green | -0.138262868 | 0.002751008 | -0.130395337 | 0.004766945 |
| ZBTB24 | green | -0.19244125  | 2.83E-05    | -0.208427567 | 5.57E-06    |
| ZBTB7A | green | 0.263771519  | 7.14E-09    | 0.287925139  | 2.29E-10    |

|          |             |              |             |              |             |
|----------|-------------|--------------|-------------|--------------|-------------|
| ZC3HC1   | green       | -0.053503714 | 0.248519403 | -0.069745288 | 0.132323481 |
| ZCCHC1   | green       | -0.009146311 | 0.843727465 | 0.016055499  | 0.729301577 |
| ZER1     | green       | 0.081451957  | 0.078679967 | 0.096134632  | 0.037826351 |
| ZFP69B   | green       | 0.009725412  | 0.833972354 | -0.020900975 | 0.652340844 |
| ZGRF1    | green       | -0.037574464 | 0.417882113 | -0.051741439 | 0.264467961 |
| ZNF367   | green       | 0.155932511  | 0.000721161 | 0.133615704  | 0.003819427 |
| ZNF48    | green       | -0.016538613 | 0.721489351 | -0.02000184  | 0.666375188 |
| ZNF492   | green       | -0.288562581 | 2.09E-10    | -0.276496872 | 1.22E-09    |
| ZNF530   | green       | -0.078743068 | 0.089181393 | -0.087977554 | 0.057459241 |
| ZNF620   | green       | -0.087050174 | 0.06014922  | -0.105612444 | 0.022455435 |
| ZNF629   | green       | -0.160444693 | 0.00050044  | -0.165315719 | 0.00033368  |
| ZNF695   | green       | -0.033052963 | 0.476117429 | -0.042716403 | 0.357021271 |
| ZNF726   | green       | -0.183490319 | 6.65E-05    | -0.170342161 | 0.000217028 |
| ZNF862   | green       | 0.040240978  | 0.385593723 | 0.024539586  | 0.596830834 |
| ZPR1     | green       | -0.133975077 | 0.00372504  | -0.1401099   | 0.002408004 |
| ZSCAN1   | green       | 0.084604527  | 0.067745529 | 0.076666503  | 0.097970502 |
| ZWILCH   | green       | 0.13573987   | 0.003291493 | 0.120951821  | 0.008886291 |
| ZWINT    | green       | 0.209636851  | 4.90E-06    | 0.203851116  | 8.99E-06    |
| ZYG11A   | green       | -0.182662522 | 7.18E-05    | -0.19457012  | 2.30E-05    |
| ABCC5    | greenyellow | -0.225314818 | 8.68E-07    | -0.264591791 | 6.38E-09    |
| ACIN1    | greenyellow | 0.049479769  | 0.285947023 | 0.013573985  | 0.769855706 |
| ACTB     | greenyellow | 0.219619523  | 1.65E-06    | 0.257708488  | 1.61E-08    |
| ADAT2    | greenyellow | -0.038207406 | 0.410077603 | -0.075592697 | 0.102778715 |
| AGAP10   | greenyellow | 0.052805116  | 0.254759582 | 0.03438059   | 0.458572886 |
| AGAP4    | greenyellow | -0.08626862  | 0.062496264 | -0.119393418 | 0.009810378 |
| AGAP6    | greenyellow | 0.055764516  | 0.229058411 | 0.045742373  | 0.32395243  |
| AHI1     | greenyellow | 0.016843014  | 0.716581794 | -0.002168862 | 0.962717295 |
| AHSA2    | greenyellow | -0.131695408 | 0.004361477 | -0.151490913 | 0.001023649 |
| ALG13    | greenyellow | 0.053858016  | 0.245395688 | 0.059757492  | 0.197376638 |
| ANKRD1   | greenyellow | -0.053132203 | 0.251824506 | -0.083182425 | 0.072513069 |
| ANKRD2   | greenyellow | -0.036236417 | 0.43466512  | -0.062184152 | 0.179755544 |
| ANKRD4   | greenyellow | -0.054964233 | 0.235819726 | -0.057222477 | 0.217096458 |
| ARGLU1   | greenyellow | -0.155713335 | 0.000733894 | -0.18786597  | 4.40E-05    |
| ATG101   | greenyellow | -0.027883581 | 0.547792494 | -0.018670741 | 0.687366204 |
| ATG14    | greenyellow | -0.211193106 | 4.15E-06    | -0.240973165 | 1.35E-07    |
| ATG16L2  | greenyellow | 0.027051912  | 0.559801211 | 0.011295112  | 0.807662204 |
| ATG9A    | greenyellow | 0.062114736  | 0.180242852 | 0.069730445  | 0.132406042 |
| ATP6V0L  | greenyellow | 0.242945779  | 1.06E-07    | 0.299008442  | 4.23E-11    |
| ATXN3    | greenyellow | -0.196168054 | 1.96E-05    | -0.213080742 | 3.39E-06    |
| BRWD1    | greenyellow | -0.11952398  | 0.009729807 | -0.141628793 | 0.002155687 |
| C12orf29 | greenyellow | 0.004667589  | 0.919869847 | -0.027576849 | 0.552206681 |
| C16orf52 | greenyellow | -0.202356164 | 1.05E-05    | -0.22416023  | 9.90E-07    |
| C1orf52  | greenyellow | -0.226033716 | 7.99E-07    | -0.244620367 | 8.62E-08    |
| C2CD5    | greenyellow | -0.09424707  | 0.041773315 | -0.12664746  | 0.006133023 |
| C5orf28  | greenyellow | -0.097893151 | 0.034438351 | -0.10504177  | 0.023197152 |

|           |             |              |             |              |             |
|-----------|-------------|--------------|-------------|--------------|-------------|
| C5orf45   | greenyellow | -0.035477936 | 0.444348473 | -0.057136497 | 0.217789216 |
| C5orf63   | greenyellow | 0.114417104  | 0.013358056 | 0.118008417  | 0.01070227  |
| C7orf55-I | greenyellow | -0.022743141 | 0.623971371 | -0.052659051 | 0.256077916 |
| C8orf44   | greenyellow | -0.244779534 | 8.45E-08    | -0.267794962 | 4.12E-09    |
| CAPN3     | greenyellow | -0.027694128 | 0.550516869 | -0.041295287 | 0.373258141 |
| CAPRN2    | greenyellow | -0.14257254  | 0.002011333 | -0.161698879 | 0.000451336 |
| CARD8     | greenyellow | -0.107883131 | 0.019704068 | -0.143554377 | 0.001870585 |
| CATSPEI   | greenyellow | -0.038225074 | 0.409860989 | -0.052346481 | 0.258914899 |
| CBWD7     | greenyellow | -0.024183495 | 0.602167953 | -0.040425756 | 0.383414038 |
| CCAR1     | greenyellow | 0.100959645  | 0.029147498 | 0.068741139  | 0.137999377 |
| CCDC14    | greenyellow | -0.005484467 | 0.905906341 | -0.044122654 | 0.341397969 |
| CCDC66    | greenyellow | -0.039725591 | 0.391713125 | -0.061904404 | 0.181725376 |
| CCDC84    | greenyellow | -0.035140176 | 0.448699768 | -0.045541304 | 0.326086057 |
| CCNL1     | greenyellow | -0.244703546 | 8.53E-08    | -0.27630513  | 1.25E-09    |
| CCNL2     | greenyellow | -0.01777772  | 0.701585951 | -0.033034291 | 0.476366759 |
| CCNT2     | greenyellow | -0.093473181 | 0.043489169 | -0.12179987  | 0.008416701 |
| CDC16     | greenyellow | -0.00846195  | 0.855286501 | -0.022797568 | 0.623141318 |
| CEBPZO    | greenyellow | 0.057798331  | 0.212497408 | 0.055811113  | 0.228669004 |
| CENPJ     | greenyellow | 0.031416957  | 0.4982322   | -0.005365134 | 0.907944488 |
| CEP162    | greenyellow | 0.082605638  | 0.074523195 | 0.063403919  | 0.171351247 |
| CEP290    | greenyellow | -0.086770015 | 0.060982034 | -0.137905706 | 0.002822259 |
| CEP57L1   | greenyellow | -0.093471302 | 0.043493406 | -0.102164756 | 0.027267872 |
| CEP95     | greenyellow | -0.147404118 | 0.001401416 | -0.175685538 | 0.000135554 |
| CFAP44    | greenyellow | 0.011261552  | 0.808222556 | -0.012712496 | 0.784089078 |
| CLK1      | greenyellow | -0.133334475 | 0.003894794 | -0.147389247 | 0.001402999 |
| CLK4      | greenyellow | -0.174929722 | 0.000145007 | -0.186774522 | 4.88E-05    |
| CSAD      | greenyellow | -0.037804173 | 0.415039649 | -0.057961158 | 0.211209807 |
| CXorf23   | greenyellow | 0.022108253  | 0.633688835 | -0.009381088 | 0.839769625 |
| DBNL      | greenyellow | 0.046640921  | 0.314528599 | 0.09197511   | 0.046979547 |
| DDX17     | greenyellow | -0.004679095 | 0.919672974 | -0.042521907 | 0.359216901 |
| DDX20     | greenyellow | -0.098686837 | 0.03299598  | -0.132617508 | 0.004093067 |
| DDX26B    | greenyellow | -0.144576465 | 0.001733697 | -0.168277595 | 0.000259351 |
| DDX39B    | greenyellow | -0.063358347 | 0.171659878 | -0.088647492 | 0.055578675 |
| DDX47     | greenyellow | -0.122282323 | 0.008159541 | -0.140982807 | 0.002259889 |
| DFNB59    | greenyellow | -0.108999227 | 0.018462742 | -0.120789561 | 0.008978752 |
| DMTF1     | greenyellow | -0.071109861 | 0.124901309 | -0.096793802 | 0.03652465  |
| DMXL2     | greenyellow | 0.051253179  | 0.269008453 | 0.010151393  | 0.82681272  |
| DPY19L2   | greenyellow | -0.11488156  | 0.012984727 | -0.124517947 | 0.007057122 |
| EGFL8     | greenyellow | -0.152323383 | 0.000959283 | -0.179940621 | 9.23E-05    |
| EHD1      | greenyellow | 0.000259187  | 0.995542987 | 0.034584592  | 0.455909403 |
| ENOSF1    | greenyellow | 0.102754669  | 0.02638643  | 0.083022164  | 0.073067095 |
| EP400NL   | greenyellow | 0.103772239  | 0.024923608 | 0.093192633  | 0.04412568  |
| ESF1      | greenyellow | -0.161596287 | 0.000455178 | -0.186970557 | 4.79E-05    |
| ETHE1     | greenyellow | 0.309729632  | 7.68E-12    | 0.313990065  | 3.82E-12    |
| ETNK1     | greenyellow | -0.014740806 | 0.75070108  | -0.043645473 | 0.346649798 |

|         |             |              |             |              |             |
|---------|-------------|--------------|-------------|--------------|-------------|
| EXOG    | greenyellow | 0.009804553  | 0.83264114  | -0.009624635 | 0.835668185 |
| FAM111A | greenyellow | 0.117193367  | 0.011260084 | 0.110893167  | 0.016511996 |
| FAM126E | greenyellow | -0.05760569  | 0.214028063 | -0.053024692 | 0.252786637 |
| FAM133E | greenyellow | -0.006978122 | 0.880452046 | -0.040402117 | 0.383692462 |
| FAM76B  | greenyellow | -0.072087032 | 0.11978813  | -0.104230474 | 0.024288064 |
| FAM92A  | greenyellow | -0.025428492 | 0.583602428 | -0.053371052 | 0.249696128 |
| FANCL   | greenyellow | -0.084030983 | 0.069636443 | -0.12231093  | 0.008144515 |
| FASTKD1 | greenyellow | -0.192079434 | 2.93E-05    | -0.208988937 | 5.25E-06    |
| FBXW7   | greenyellow | 0.02395725   | 0.605570038 | 0.000802622  | 0.986198628 |
| FNBP4   | greenyellow | -0.060479251 | 0.1920088   | -0.106241887 | 0.021661252 |
| GCFC2   | greenyellow | -0.113977846 | 0.013719798 | -0.134249967 | 0.003654275 |
| GIN1    | greenyellow | -0.043966339 | 0.343112742 | -0.06013466  | 0.194558079 |
| GLMN    | greenyellow | -0.061448281 | 0.184971305 | -0.092149518 | 0.046561475 |
| GNRH1   | greenyellow | 0.027023757  | 0.560209978 | 0.032942626  | 0.477591848 |
| GOLGA6  | greenyellow | -0.001241502 | 0.978653388 | -0.019376655 | 0.67620298  |
| GOLGA8  | greenyellow | -0.061982845 | 0.181171434 | -0.088831299 | 0.055071744 |
| GOLGA8  | greenyellow | -0.036205516 | 0.435057249 | -0.057832547 | 0.212226368 |
| GOPC    | greenyellow | -0.171350046 | 0.000198802 | -0.200548535 | 1.26E-05    |
| GPR75-A | greenyellow | -0.165223664 | 0.000336281 | -0.172518766 | 0.000179464 |
| GTDC1   | greenyellow | -0.091428598 | 0.048310026 | -0.116202959 | 0.011972436 |
| HAUS3   | greenyellow | -0.062817031 | 0.17535761  | -0.085346963 | 0.065360529 |
| HNRNPA  | greenyellow | -0.180765665 | 8.55E-05    | -0.209690104 | 4.87E-06    |
| HNRNPH  | greenyellow | -0.021273245 | 0.646565555 | -0.069082399 | 0.136049809 |
| HSPBAP1 | greenyellow | -0.267587308 | 4.24E-09    | -0.29275493  | 1.11E-10    |
| IFT80   | greenyellow | -0.118331459 | 0.01048805  | -0.141247132 | 0.002216708 |
| IQCB1   | greenyellow | -0.061751941 | 0.182805634 | -0.100537316 | 0.029832004 |
| KATNBL  | greenyellow | 0.069171554  | 0.135543991 | 0.045372802  | 0.327881108 |
| KIAA090 | greenyellow | -0.088008319 | 0.057371741 | -0.119819657 | 0.00954951  |
| KIAA110 | greenyellow | -0.154758662 | 0.000791821 | -0.195258775 | 2.14E-05    |
| KIN     | greenyellow | -0.09880776  | 0.032780816 | -0.114570487 | 0.013233734 |
| KLHL31  | greenyellow | -0.095771273 | 0.038560567 | -0.099096918 | 0.032271152 |
| L3HYPD1 | greenyellow | -0.08587612  | 0.063703142 | -0.088563161 | 0.05581255  |
| L3MBTL1 | greenyellow | -0.303112409 | 2.22E-11    | -0.312944342 | 4.54E-12    |
| LCORL   | greenyellow | 0.087818558  | 0.057913215 | 0.079433035  | 0.086405328 |
| LIPT1   | greenyellow | -0.215535367 | 2.59E-06    | -0.22849376  | 6.02E-07    |
| LRRC39  | greenyellow | -0.153348497 | 0.00088516  | -0.159552581 | 0.000538341 |
| LUC7L3  | greenyellow | -0.122691146 | 0.007947139 | -0.148298385 | 0.001309201 |
| 6-Mar   | greenyellow | -0.112787949 | 0.014743381 | -0.132217812 | 0.004207523 |
| MARK3   | greenyellow | -0.077450359 | 0.094575056 | -0.0828499   | 0.07366646  |
| METAP11 | greenyellow | -0.099337871 | 0.031851637 | -0.133492627 | 0.003852247 |
| MIPOL1  | greenyellow | -0.05337235  | 0.2496846   | -0.084601826 | 0.067754335 |
| MITD1   | greenyellow | -0.090905771 | 0.04961223  | -0.097605617 | 0.034973973 |
| MSANTE  | greenyellow | -0.126674939 | 0.006121844 | -0.162016476 | 0.000439633 |
| MSH5    | greenyellow | -0.039903726 | 0.389591441 | -0.049344349 | 0.287269367 |
| MSS51   | greenyellow | -0.04545078  | 0.327049616 | -0.054459434 | 0.240156324 |

|         |             |              |             |              |             |
|---------|-------------|--------------|-------------|--------------|-------------|
| MTERF1  | greenyellow | -0.220374349 | 1.52E-06    | -0.232138363 | 3.92E-07    |
| MTERF2  | greenyellow | 0.100528056  | 0.029847166 | 0.076470083  | 0.098836375 |
| MTF2    | greenyellow | -0.15668084  | 0.000679212 | -0.177875647 | 0.000111324 |
| MTRF1   | greenyellow | 0.067578972  | 0.144799897 | 0.055378466  | 0.232302646 |
| MYSM1   | greenyellow | -0.044560166 | 0.3366276   | -0.072764947 | 0.116337921 |
| N4BP2L2 | greenyellow | -0.045599542 | 0.32546714  | -0.063692428 | 0.16940698  |
| NAA16   | greenyellow | -0.00499857  | 0.914208921 | -0.031411232 | 0.498310524 |
| NAPB    | greenyellow | -0.243812766 | 9.53E-08    | -0.259016532 | 1.35E-08    |
| NEK3    | greenyellow | -0.127239654 | 0.005896123 | -0.151805063 | 0.000998905 |
| NFATC2I | greenyellow | 0.019852972  | 0.668710263 | 0.006905909  | 0.881680064 |
| NIPSNAP | greenyellow | -0.094722469 | 0.04074786  | -0.107789842 | 0.019811041 |
| NKTR    | greenyellow | -0.027091213 | 0.559230892 | -0.055840922 | 0.22842015  |
| NPHP3   | greenyellow | -0.161394232 | 0.000462833 | -0.184005762 | 6.34E-05    |
| NR2C1   | greenyellow | -0.021822689 | 0.638080355 | -0.058204549 | 0.209295625 |
| NSUN6   | greenyellow | -0.0528517   | 0.254340129 | -0.094864916 | 0.040444768 |
| NUPL2   | greenyellow | 0.000459799  | 0.99209332  | -0.02322892  | 0.616579817 |
| OFD1    | greenyellow | -0.066776487 | 0.149643082 | -0.09098086  | 0.049423422 |
| OGT     | greenyellow | -0.236062594 | 2.46E-07    | -0.268680328 | 3.65E-09    |
| ORAI1   | greenyellow | 0.136564083  | 0.003105157 | 0.161302684  | 0.000466341 |
| ORC3    | greenyellow | -0.191339719 | 3.15E-05    | -0.197386017 | 1.74E-05    |
| ORMDL1  | greenyellow | -0.060597321 | 0.191140977 | -0.06969035  | 0.132629275 |
| OSGEPL1 | greenyellow | -0.11002329  | 0.017384355 | -0.136302041 | 0.003163333 |
| PAN3    | greenyellow | -0.035762886 | 0.440696272 | -0.082126933 | 0.076225754 |
| PAXBP1  | greenyellow | -0.023421843 | 0.613654992 | -0.059612379 | 0.198468956 |
| PCF11   | greenyellow | -0.10058202  | 0.029758902 | -0.135010918 | 0.003464691 |
| PCMTD1  | greenyellow | -0.089098205 | 0.054342477 | -0.125046906 | 0.006816634 |
| PCMTD2  | greenyellow | -0.236861928 | 2.23E-07    | -0.291554155 | 1.33E-10    |
| PHYKPL  | greenyellow | -0.155560927 | 0.00074287  | -0.144513554 | 0.001741849 |
| PIAS2   | greenyellow | -0.056199139 | 0.225444597 | -0.069112353 | 0.135879702 |
| PIGL    | greenyellow | 0.016410543  | 0.723557536 | 0.026328249  | 0.570352873 |
| PMS1    | greenyellow | -0.046437519 | 0.316645954 | -0.086709191 | 0.061164093 |
| PNISR   | greenyellow | -0.145391431 | 0.001631196 | -0.168010282 | 0.000265363 |
| POC5    | greenyellow | -0.049090146 | 0.289762696 | -0.057513334 | 0.214764688 |
| POLG2   | greenyellow | -0.103769466 | 0.024927497 | -0.116004652 | 0.012119761 |
| POLI    | greenyellow | 0.091942254  | 0.047058658 | 0.071299606  | 0.123895392 |
| PPWD1   | greenyellow | -0.008070429 | 0.861913501 | -0.046115216 | 0.320020078 |
| PRPF38B | greenyellow | -0.068610011 | 0.138754177 | -0.099051853 | 0.032350135 |
| PRPF39  | greenyellow | -0.054939943 | 0.236027122 | -0.088074241 | 0.057184622 |
| PTBP2   | greenyellow | -0.342507931 | 2.67E-14    | -0.375166686 | 4.69E-17    |
| PUS10   | greenyellow | -0.072024591 | 0.120109892 | -0.086483831 | 0.061842563 |
| RAD52   | greenyellow | -0.156847589 | 0.000670178 | -0.190698099 | 3.35E-05    |
| RANBP1  | greenyellow | 0.13660992   | 0.003095082 | 0.118864607  | 0.010142809 |
| RASA2   | greenyellow | -0.213656151 | 3.18E-06    | -0.242865686 | 1.07E-07    |
| RBBP6   | greenyellow | -0.088417276 | 0.05621906  | -0.113306181 | 0.014289613 |
| RBM25   | greenyellow | 0.011447144  | 0.80512492  | -0.025771987 | 0.578527362 |



|          |             |              |             |              |             |
|----------|-------------|--------------|-------------|--------------|-------------|
| RBM39    | greenyellow | -0.189097471 | 3.91E-05    | -0.226487141 | 7.59E-07    |
| RBM5     | greenyellow | 0.083487139  | 0.071469121 | 0.05336745   | 0.249728132 |
| RBM6     | greenyellow | -0.100572815 | 0.029773942 | -0.127246196 | 0.005893552 |
| RIMKLB   | greenyellow | -0.169920103 | 0.000225116 | -0.200289648 | 1.29E-05    |
| RNPC3    | greenyellow | -0.28620509  | 2.96E-10    | -0.29535844  | 7.44E-11    |
| RP3-509I | greenyellow | -0.146083033 | 0.001548604 | -0.137309941 | 0.002944854 |
| RSRC2    | greenyellow | -0.022053672 | 0.634527209 | -0.065218099 | 0.159398826 |
| RSRP1    | greenyellow | 0.00036656   | 0.993696612 | -0.001040236 | 0.982113365 |
| SCLT1    | greenyellow | -0.038843466 | 0.402322309 | -0.047625557 | 0.304410271 |
| SENP6    | greenyellow | -0.134633001 | 0.0035577   | -0.171991086 | 0.000187966 |
| SENP7    | greenyellow | -0.105587009 | 0.022488051 | -0.128582139 | 0.005389251 |
| SEPSECS  | greenyellow | 0.110774792  | 0.016628409 | 0.089779224  | 0.052518046 |
| SETD4    | greenyellow | -0.070326518 | 0.129121459 | -0.07459096  | 0.107431118 |
| SLC25A2  | greenyellow | -0.230058953 | 5.01E-07    | -0.251613386 | 3.55E-08    |
| SLC25A3  | greenyellow | -0.029680847 | 0.522282772 | -0.067273527 | 0.146629023 |
| SLC35A1  | greenyellow | -0.032623051 | 0.481876309 | -0.030010261 | 0.517674068 |
| SLX4IP   | greenyellow | 0.0320303    | 0.489878051 | 0.023396739  | 0.614035237 |
| SMIM8    | greenyellow | -0.049849178 | 0.282360708 | -0.050281281 | 0.278204476 |
| SNX15    | greenyellow | -0.166953548 | 0.000290428 | -0.201451785 | 1.15E-05    |
| SREK1    | greenyellow | 0.033907667  | 0.464780767 | 0.008119203  | 0.861087386 |
| SRRM5    | greenyellow | 0.003646099  | 0.937365138 | -0.00951508  | 0.837512591 |
| SRSF10   | greenyellow | 0.011192839  | 0.809370183 | -0.021636393 | 0.640952152 |
| SRSF11   | greenyellow | -0.092049744 | 0.04680026  | -0.135113939 | 0.003439722 |
| SRSF5    | greenyellow | -0.152816174 | 0.000922963 | -0.180014037 | 9.16E-05    |
| SRSF6    | greenyellow | -0.100029203 | 0.030673762 | -0.145696261 | 0.001594307 |
| STX16    | greenyellow | -0.206158016 | 7.07E-06    | -0.234249516 | 3.06E-07    |
| SUPT20H  | greenyellow | 0.059976731  | 0.195734666 | 0.043048616  | 0.353290517 |
| SUPT7L   | greenyellow | -0.195298917 | 2.14E-05    | -0.218183925 | 1.94E-06    |
| TARBP1   | greenyellow | 0.035747228  | 0.44089651  | 0.019589358  | 0.672853049 |
| TBC1D32  | greenyellow | -0.154171714 | 0.000829506 | -0.167141089 | 0.000285824 |
| TBRG1    | greenyellow | -0.0313586   | 0.499030981 | -0.047977612 | 0.30084535  |
| TCERG1   | greenyellow | -0.054991617 | 0.235586074 | -0.088822126 | 0.055096952 |
| TCTE3    | greenyellow | -0.184908415 | 5.82E-05    | -0.183725288 | 6.50E-05    |
| THAP9    | greenyellow | 0.005065481  | 0.913065026 | -0.028308051 | 0.541712758 |
| THOC1    | greenyellow | -0.090154355 | 0.051535072 | -0.124598777 | 0.007019889 |
| THOC2    | greenyellow | 0.039338496  | 0.396347669 | 0.006617778  | 0.886582657 |
| THUMPC   | greenyellow | -0.057017907 | 0.218747308 | -0.087819571 | 0.057910313 |
| TIA1     | greenyellow | -0.070654719 | 0.127340076 | -0.101524443 | 0.028253171 |
| TIAM2    | greenyellow | -0.116443798 | 0.011795643 | -0.123799306 | 0.007396009 |
| TIGD1    | greenyellow | -0.12287657  | 0.00785244  | -0.135249604 | 0.00340709  |
| TMEM26   | greenyellow | 0.091112006  | 0.049095098 | 0.066078127  | 0.153957251 |
| TRA2A    | greenyellow | 0.105399857  | 0.022729302 | 0.087892566  | 0.057701537 |
| TRIM45   | greenyellow | 0.020210415  | 0.663108984 | -0.029366431 | 0.526701158 |
| TRIM52   | greenyellow | -0.083521355 | 0.071352668 | -0.101239421 | 0.028701498 |
| TRMT10I  | greenyellow | 0.079768829  | 0.085079661 | 0.06046355   | 0.192124419 |

|        |             |              |             |              |             |
|--------|-------------|--------------|-------------|--------------|-------------|
| TRMT13 | greenyellow | -0.088405328 | 0.056252463 | -0.109837333 | 0.017575985 |
| TSEN2  | greenyellow | -0.115079257 | 0.012828631 | -0.134308327 | 0.003639409 |
| TTC14  | greenyellow | -0.347376617 | 1.09E-14    | -0.35850153  | 1.31E-15    |
| TTLL3  | greenyellow | -0.058926052 | 0.203694926 | -0.072072138 | 0.119864816 |
| TUBE1  | greenyellow | -0.091116498 | 0.049083885 | -0.125207781 | 0.006744963 |
| TXK    | greenyellow | 0.073475245  | 0.1128069   | 0.089588002  | 0.053025095 |
| TYW5   | greenyellow | -0.08996126  | 0.052039115 | -0.1006287   | 0.029682734 |
| U2SURP | greenyellow | -0.139164622 | 0.002578346 | -0.174436089 | 0.000151512 |
| UBN2   | greenyellow | -0.020897871 | 0.652389088 | -0.037549327 | 0.418193859 |
| UPF3A  | greenyellow | -0.036597342 | 0.430100274 | -0.065487388 | 0.157679607 |
| USP45  | greenyellow | -0.11367668  | 0.013972774 | -0.106874091 | 0.020888231 |
| USPL1  | greenyellow | -0.003555441 | 0.938919438 | -0.04214628  | 0.363481172 |
| VCPKMT | greenyellow | -0.070077458 | 0.130486117 | -0.095067497 | 0.04001701  |
| VPS18  | greenyellow | 0.255994112  | 2.01E-08    | 0.273222283  | 1.94E-09    |
| WDR27  | greenyellow | -0.142617284 | 0.002004714 | -0.178985607 | 0.00010066  |
| WDR75  | greenyellow | -0.012995711 | 0.779401646 | -0.037730841 | 0.415945834 |
| WSB1   | greenyellow | -0.081635406 | 0.078006686 | -0.111422483 | 0.016000134 |
| YAF2   | greenyellow | -0.077910738 | 0.092625057 | -0.088067967 | 0.057202409 |
| ZBED5  | greenyellow | -0.133695439 | 0.0037983   | -0.156420084 | 0.000693565 |
| ZBED8  | greenyellow | -0.095463475 | 0.039191926 | -0.116454742 | 0.011787664 |
| ZBTB25 | greenyellow | 0.020983764  | 0.651054663 | 0.023828577  | 0.607508728 |
| ZCCHC8 | greenyellow | -0.068692038 | 0.138281642 | -0.092573479 | 0.045558199 |
| ZDHHC1 | greenyellow | -0.172786685 | 0.000175287 | -0.198381088 | 1.57E-05    |
| ZFC3H1 | greenyellow | -0.145695674 | 0.001594377 | -0.173553112 | 0.000163835 |
| ZFP62  | greenyellow | 0.010380828  | 0.822962402 | -0.023191441 | 0.61714874  |
| ZMAT1  | greenyellow | -0.099588494 | 0.031420241 | -0.122345856 | 0.008126204 |
| ZMYM5  | greenyellow | 0.023282277  | 0.615770282 | 0.003673445  | 0.936896338 |
| ZMYM6  | greenyellow | -0.143443822 | 0.00188597  | -0.141192798 | 0.002225522 |
| ZNF10  | greenyellow | -0.050926818 | 0.272072973 | -0.083434174 | 0.071649691 |
| ZNF100 | greenyellow | -0.040451888 | 0.383106377 | -0.054039744 | 0.243804171 |
| ZNF138 | greenyellow | 0.039390051  | 0.395728519 | 0.021102631  | 0.649209798 |
| ZNF140 | greenyellow | 0.020134158  | 0.66430241  | -0.016990603 | 0.714206533 |
| ZNF141 | greenyellow | -0.036369308 | 0.432981129 | -0.052500512 | 0.25751416  |
| ZNF18  | greenyellow | 0.188557655  | 4.12E-05    | 0.168395019  | 0.00025675  |
| ZNF195 | greenyellow | -0.021246859 | 0.646974198 | -0.034576212 | 0.456018633 |
| ZNF202 | greenyellow | -0.081643004 | 0.077978902 | -0.131968399 | 0.004280402 |
| ZNF224 | greenyellow | 0.037689865  | 0.416452696 | 0.030069904  | 0.516841871 |
| ZNF251 | greenyellow | -0.208199191 | 5.71E-06    | -0.244923175 | 8.30E-08    |
| ZNF254 | greenyellow | 0.036808452  | 0.427443133 | 0.023434653  | 0.613460994 |
| ZNF26  | greenyellow | -0.090955387 | 0.049487405 | -0.112972044 | 0.014580757 |
| ZNF266 | greenyellow | 0.040238588  | 0.38562197  | 0.029968549  | 0.518256475 |
| ZNF268 | greenyellow | 0.045028232  | 0.331571646 | 0.033439168  | 0.470976251 |
| ZNF273 | greenyellow | -0.170454184 | 0.000214928 | -0.173259916 | 0.00016813  |
| ZNF326 | greenyellow | -0.097570565 | 0.035039752 | -0.129372194 | 0.005109624 |
| ZNF331 | greenyellow | -0.186945504 | 4.80E-05    | -0.202841962 | 9.98E-06    |

|         |             |              |             |              |             |
|---------|-------------|--------------|-------------|--------------|-------------|
| ZNF354A | greenyellow | -0.090708198 | 0.050111904 | -0.123661644 | 0.007462562 |
| ZNF354B | greenyellow | -0.115255766 | 0.012690665 | -0.153607514 | 0.000867287 |
| ZNF429  | greenyellow | 0.022037653  | 0.634773352 | 0.035294435  | 0.446709501 |
| ZNF43   | greenyellow | -0.056384454 | 0.223916145 | -0.059561563 | 0.198852505 |
| ZNF430  | greenyellow | -0.121469035 | 0.008597196 | -0.134140315 | 0.003682355 |
| ZNF431  | greenyellow | -0.064542235 | 0.163775953 | -0.077297741 | 0.09522868  |
| ZNF432  | greenyellow | 0.163460559  | 0.000389897 | 0.148147775  | 0.00132433  |
| ZNF433  | greenyellow | 0.059353852  | 0.200425892 | 0.052126573  | 0.260923821 |
| ZNF439  | greenyellow | -0.18113574  | 8.27E-05    | -0.202146171 | 1.07E-05    |
| ZNF44   | greenyellow | -0.133192389 | 0.003933382 | -0.146998821 | 0.001445144 |
| ZNF443  | greenyellow | 0.118355482  | 0.010472272 | 0.095339713  | 0.039448242 |
| ZNF449  | greenyellow | -0.096735335 | 0.03663855  | -0.122510449 | 0.008040403 |
| ZNF493  | greenyellow | -0.048684089 | 0.293775501 | -0.064435118 | 0.164477892 |
| ZNF514  | greenyellow | -0.194257364 | 2.37E-05    | -0.225861818 | 8.15E-07    |
| ZNF577  | greenyellow | -0.087550694 | 0.058684755 | -0.109213195 | 0.018232721 |
| ZNF596  | greenyellow | 0.08584432   | 0.063801758 | 0.066488117  | 0.151413236 |
| ZNF600  | greenyellow | 0.011016189  | 0.812322385 | -0.012908875 | 0.780838011 |
| ZNF605  | greenyellow | -0.055398864 | 0.232130418 | -0.083678032 | 0.070821401 |
| ZNF638  | greenyellow | -0.108536571 | 0.018968781 | -0.149386012 | 0.00120458  |
| ZNF66   | greenyellow | -0.046088143 | 0.320304566 | -0.041332265 | 0.372829963 |
| ZNF675  | greenyellow | -0.021793393 | 0.638531608 | -0.028771605 | 0.535111798 |
| ZNF680  | greenyellow | -0.004457939 | 0.923457682 | -0.0192052   | 0.678907937 |
| ZNF681  | greenyellow | 0.048708582  | 0.293532409 | 0.036338024  | 0.433377229 |
| ZNF682  | greenyellow | 0.035562603  | 0.44326151  | 0.025672661  | 0.579992754 |
| ZNF684  | greenyellow | -0.269739648 | 3.15E-09    | -0.284991634 | 3.55E-10    |
| ZNF700  | greenyellow | 0.021195952  | 0.647762926 | -0.006456471 | 0.889329209 |
| ZNF708  | greenyellow | -0.041114452 | 0.375356462 | -0.04956838  | 0.285083984 |
| ZNF709  | greenyellow | -0.114362211 | 0.013402797 | -0.101417528 | 0.028420634 |
| ZNF721  | greenyellow | 0.076479041  | 0.098796752 | 0.052557109  | 0.257000795 |
| ZNF736  | greenyellow | -0.187678698 | 4.48E-05    | -0.190449558 | 3.43E-05    |
| ZNF738  | greenyellow | -0.112128301 | 0.015339253 | -0.113066781 | 0.014497684 |
| ZNF75A  | greenyellow | -0.249907779 | 4.42E-08    | -0.265601967 | 5.56E-09    |
| ZNF763  | greenyellow | -0.082058792 | 0.076470657 | -0.082660706 | 0.074329341 |
| ZNF782  | greenyellow | 0.016429097  | 0.72325779  | 0.000272781  | 0.995309222 |
| ZNF789  | greenyellow | -0.006988038 | 0.880283452 | -0.00822472  | 0.859300737 |
| ZNF799  | greenyellow | 0.094588034  | 0.041035663 | 0.077481507  | 0.094442098 |
| ZNF823  | greenyellow | -0.061595386 | 0.183919821 | -0.085715381 | 0.064202898 |
| ZNF83   | greenyellow | -0.014831284 | 0.749221999 | -0.029560708 | 0.523968804 |
| ZNF84   | greenyellow | -0.001280403 | 0.977984694 | -0.035951662 | 0.438286205 |
| ZNF85   | greenyellow | -0.083022896 | 0.073064558 | -0.078022819 | 0.092155231 |
| ZNF92   | greenyellow | -0.021560709 | 0.642120375 | -0.034727014 | 0.454055069 |
| ZNF93   | greenyellow | 0.072210141  | 0.119155706 | 0.066230459  | 0.153008267 |
| ZRANB2  | greenyellow | -0.165460054 | 0.00032964  | -0.19880876  | 1.50E-05    |
| ZSCAN3C | greenyellow | -0.091722049 | 0.047591753 | -0.145038402 | 0.001674895 |
| ZSCAN9  | greenyellow | -0.013415003 | 0.772476722 | -0.035607705 | 0.442683102 |

|         |      |              |             |              |             |
|---------|------|--------------|-------------|--------------|-------------|
| A1BG    | grey | -0.170981411 | 0.000205295 | -0.156410058 | 0.000694123 |
| A4GALT  | grey | 0.142895954  | 0.001963936 | 0.143243426  | 0.001914153 |
| AADAC   | grey | -0.039931585 | 0.389260263 | -0.04177904  | 0.367680601 |
| AADACL  | grey | 0.075654708  | 0.102496047 | 0.058231529  | 0.209084213 |
| AADAT   | grey | 0.255602848  | 2.12E-08    | 0.210002463  | 4.71E-06    |
| AANAT   | grey | -0.220469228 | 1.50E-06    | -0.218214618 | 1.93E-06    |
| AARD    | grey | -0.313127931 | 4.41E-12    | -0.333923989 | 1.26E-13    |
| AATF    | grey | -0.00706873  | 0.878911617 | -0.017344065 | 0.708529258 |
| AATK    | grey | -0.156466608 | 0.000690984 | -0.177739169 | 0.000112706 |
| ABCA2   | grey | 0.051167165  | 0.269813825 | 0.057387961  | 0.215767575 |
| ABCA3   | grey | -0.25156715  | 3.57E-08    | -0.268200265 | 3.90E-09    |
| ABCA4   | grey | -0.090787371 | 0.049911169 | -0.095040558 | 0.040073671 |
| ABCB5   | grey | -0.153592493 | 0.000868315 | -0.149118827 | 0.001229542 |
| ABCB6   | grey | 0.000652922  | 0.988772585 | 0.000850439  | 0.985376475 |
| ABCB9   | grey | 0.09193637   | 0.047072837 | 0.100953444  | 0.029157452 |
| ABCC12  | grey | -0.054937204 | 0.23605052  | -0.051579556 | 0.265967492 |
| ABCC2   | grey | 0.002823746  | 0.951472094 | -0.004965494 | 0.914774453 |
| ABCC3   | grey | 0.246807681  | 6.55E-08    | 0.257651415  | 1.62E-08    |
| ABCC8   | grey | -0.101424935 | 0.028409004 | -0.091954109 | 0.047030101 |
| ABCD4   | grey | -0.122839473 | 0.007871306 | -0.144692543 | 0.001718745 |
| ABCG1   | grey | 0.150559706  | 0.001100355 | 0.175701784  | 0.000135357 |
| ABCG4   | grey | -0.237003562 | 2.20E-07    | -0.257462451 | 1.66E-08    |
| ABHD1   | grey | -0.218797023 | 1.81E-06    | -0.226195088 | 7.85E-07    |
| ABHD10  | grey | 0.146433896  | 0.001508188 | 0.139089273  | 0.002592386 |
| ABHD14  | grey | -0.040659447 | 0.380668148 | -0.061103481 | 0.187453256 |
| ABHD15  | grey | 0.16390105   | 0.000375802 | 0.164705235  | 0.000351286 |
| ABHD4   | grey | 0.029403866  | 0.526174102 | -0.001895042 | 0.967421471 |
| ABHD8   | grey | -0.046159835 | 0.319551585 | -0.029645698 | 0.522775761 |
| ABLM1   | grey | -0.086981807 | 0.060351577 | -0.070488217 | 0.128241405 |
| ABO     | grey | -0.207857098 | 5.92E-06    | -0.248183919 | 5.51E-08    |
| ABR     | grey | 0.230369855  | 4.83E-07    | 0.224625659  | 9.39E-07    |
| AC00231 | grey | 0.021318031  | 0.645872181 | 0.02303283   | 0.619558905 |
| AC00298 | grey | -0.005423529 | 0.906947056 | -0.017740154 | 0.702186453 |
| AC00300 | grey | 0.059812556  | 0.196963297 | 0.046485566  | 0.316144957 |
| AC00300 | grey | -0.161147324 | 0.000472351 | -0.151316355 | 0.001037641 |
| AC00407 | grey | -0.057834524 | 0.212210718 | -0.049143113 | 0.289241975 |
| AC00407 | grey | -0.196665929 | 1.86E-05    | -0.189859619 | 3.64E-05    |
| AC00415 | grey | -0.116105273 | 0.012044809 | -0.126337995 | 0.00626019  |
| AC00475 | grey | -0.102142257 | 0.027301985 | -0.121019059 | 0.008848225 |
| AC00481 | grey | -0.075257702 | 0.104316434 | -0.084143698 | 0.069261461 |
| AC00482 | grey | -0.035782717 | 0.44044274  | -0.042207275 | 0.362786591 |
| AC00638 | grey | -0.107925584 | 0.019655555 | -0.104859413 | 0.023438594 |
| AC00648 | grey | -0.000372839 | 0.993588647 | -0.008099644 | 0.861418648 |
| AC00653 | grey | 0.032205266  | 0.487508733 | 0.022695384  | 0.624700093 |
| AC00716 | grey | -0.109485319 | 0.017943796 | -0.114519845 | 0.013274668 |

|              |              |             |              |             |
|--------------|--------------|-------------|--------------|-------------|
| AC00732\grey | 0.09581343   | 0.03847477  | 0.091668855  | 0.047721287 |
| AC00868\grey | -0.07358679  | 0.112260124 | -0.075978964 | 0.101028014 |
| AC00875\grey | 0.116604248  | 0.011679145 | 0.113454137  | 0.014162336 |
| AC00881\grey | -0.102995019 | 0.0260344   | -0.106376353 | 0.021494788 |
| AC00891\grey | 0.026025035  | 0.574801929 | 0.036318474  | 0.433624861 |
| AC00902\grey | -0.123951843 | 0.007322885 | -0.124112716 | 0.007246466 |
| AC00906\grey | -0.050058594 | 0.280341201 | -0.01400975  | 0.76268507  |
| AC00913\grey | 0.090334267  | 0.051069113 | 0.080861273  | 0.080879916 |
| AC00949\grey | 0.028362981  | 0.540928462 | 0.047792549  | 0.302715833 |
| AC00997\grey | -0.005084507 | 0.912739795 | 0.022540548  | 0.627065251 |
| AC01018\grey | -0.031501041 | 0.497082465 | -0.016626685 | 0.720068281 |
| AC01064\grey | -0.08295012  | 0.073317275 | -0.09244331  | 0.045864285 |
| AC01151\grey | 0.057420697  | 0.21550539  | 0.074325947  | 0.108689335 |
| AC01153\grey | -0.08750578  | 0.058814949 | -0.092315461 | 0.046166596 |
| AC01200\grey | -0.057605409 | 0.214030303 | -0.054801657 | 0.237210305 |
| AC01614\grey | -0.023018731 | 0.619773333 | -0.025801887 | 0.578086577 |
| AC01708\grey | -0.050854542 | 0.272754856 | -0.052020371 | 0.261897844 |
| AC01851\grey | -0.023634547 | 0.610437356 | -0.003240561 | 0.94431971  |
| AC02221\grey | -0.140722417 | 0.002303177 | -0.143606716 | 0.001863341 |
| AC02243\grey | -0.209467692 | 4.99E-06    | -0.207602284 | 6.08E-06    |
| AC02436\grey | 0.02593966   | 0.576057581 | 0.031598889  | 0.495746298 |
| AC02459\grey | -0.008271808 | 0.85850365  | -0.006963704 | 0.880697205 |
| AC02526\grey | 0.014658765  | 0.752043023 | 0.007883094  | 0.865087833 |
| AC03745\grey | -0.058999665 | 0.203129674 | -0.060897308 | 0.188948993 |
| AC05573\grey | -0.034833882 | 0.452666433 | -0.037026064 | 0.424714168 |
| AC05586\grey | 0.18249597   | 7.29E-05    | 0.20859794   | 5.47E-06    |
| AC06482\grey | -0.017852527 | 0.700390702 | -0.008487137 | 0.854860521 |
| AC06853\grey | -0.034160807 | 0.461452108 | -0.064097316 | 0.166706304 |
| AC07307\grey | -0.072224814 | 0.119080505 | -0.074305685 | 0.108786011 |
| AC07310\grey | 0.066012482  | 0.154367576 | 0.036152484  | 0.43573067  |
| AC07333\grey | -0.038390208 | 0.407839729 | -0.03948898  | 0.394542066 |
| AC07361\grey | 0.092175335  | 0.046499856 | 0.08872521   | 0.055363861 |
| AC07935\grey | 0.119571686  | 0.009700513 | 0.125994795  | 0.006403981 |
| AC07990\grey | -0.05157754  | 0.265986202 | -0.059882808 | 0.19643687  |
| AC08421\grey | -0.152095473 | 0.000976523 | -0.159069055 | 0.000559981 |
| AC08765\grey | -0.071677641 | 0.121910072 | -0.074666151 | 0.107076232 |
| AC08765\grey | -0.000404243 | 0.993048636 | -0.003885392 | 0.933263692 |
| AC09229\grey | 0.057510103  | 0.214790494 | 0.054265701  | 0.241835412 |
| AC10405\grey | 0.109842843  | 0.017570281 | 0.067079391  | 0.147800717 |
| AC10438\grey | 0.042417848  | 0.360395071 | 0.049919598  | 0.281680518 |
| AC10438\grey | -0.042892082 | 0.355045324 | -0.04405528  | 0.34213639  |
| AC10453\grey | -0.048418832 | 0.296416846 | -0.062906462 | 0.174742654 |
| AC10458\grey | -0.168063657 | 0.000264152 | -0.177372147 | 0.000116504 |
| AC10498\grey | -0.161622943 | 0.000454177 | -0.164080894 | 0.000370185 |
| AC10892\grey | -0.114477028 | 0.013309363 | -0.119940846 | 0.009476473 |

|              |              |             |              |             |
|--------------|--------------|-------------|--------------|-------------|
| AC10982'grey | -0.296523303 | 6.22E-11    | -0.317185289 | 2.25E-12    |
| AC11061'grey | -0.0303882   | 0.51241242  | -0.034826805 | 0.452758324 |
| AC13896'grey | -0.089142011 | 0.054223558 | -0.100073051 | 0.030600329 |
| AC23458'grey | 0.031299157  | 0.499845312 | 0.046070276  | 0.320492408 |
| AC23458'grey | -0.025909886 | 0.576495779 | -0.021543039 | 0.642393243 |
| AC24137'grey | 0.00278168   | 0.952194152 | 0.004706154  | 0.919210037 |
| AC24158'grey | -0.008719392 | 0.850934458 | -0.007475773 | 0.871997218 |
| AC24394'grey | -0.101779144 | 0.027857639 | -0.096950152 | 0.036221542 |
| AC24423'grey | -0.029286237 | 0.527831138 | -0.043504908 | 0.348206562 |
| AC25357'grey | -0.058197072 | 0.209354243 | -0.047188374 | 0.308875959 |
| ACAA1 grey   | 0.203665958  | 9.16E-06    | 0.213481109  | 3.24E-06    |
| ACAN grey    | 0.174041084  | 0.000156913 | 0.188007785  | 4.34E-05    |
| ACAP3 grey   | 0.065486574  | 0.157684782 | 0.092042453  | 0.046817749 |
| ACBD4 grey   | 0.010202108  | 0.825961277 | -0.001155408 | 0.980133397 |
| ACE grey     | 0.04106083   | 0.375980052 | 0.021959031  | 0.635982044 |
| ACE2 grey    | 0.038622064  | 0.405011798 | 0.066559099  | 0.150976043 |
| ACHE grey    | -0.254405612 | 2.48E-08    | -0.231675789 | 4.15E-07    |
| ACKR3 grey   | -0.29058347  | 1.54E-10    | -0.278936696 | 8.58E-10    |
| ACOT1 grey   | 0.0909131    | 0.049593776 | 0.088858948  | 0.054995824 |
| ACOT11 grey  | 0.041002717  | 0.376656599 | 0.021379969  | 0.644913755 |
| ACOT2 grey   | 0.102193751  | 0.027223963 | 0.086794402  | 0.060909162 |
| ACOT4 grey   | 0.11429427   | 0.013458357 | 0.144820656  | 0.001702381 |
| ACOT9 grey   | 0.045375006  | 0.327857581 | 0.046860167  | 0.312256716 |
| ACOX3 grey   | 0.32401541   | 7.08E-13    | 0.300568254  | 3.31E-11    |
| ACP6 grey    | 0.222910653  | 1.14E-06    | 0.208820779  | 5.34E-06    |
| ACPP grey    | -0.079901366 | 0.08456096  | -0.087662798 | 0.058360828 |
| ACR grey     | -0.30273324  | 2.36E-11    | -0.312747646 | 4.69E-12    |
| ACRBP grey   | 0.003482982  | 0.940161883 | -0.000317917 | 0.994533069 |
| ACRC grey    | -0.200579901 | 1.26E-05    | -0.224370841 | 9.67E-07    |
| ACSF2 grey   | -0.199500112 | 1.40E-05    | -0.177237766 | 0.000117924 |
| ACSM3 grey   | -0.018100609 | 0.696432176 | -0.018290211 | 0.693412338 |
| ACSM4 grey   | -0.075648689 | 0.10252346  | -0.072373168 | 0.118322239 |
| ACSS2 grey   | -0.029418881 | 0.525962775 | -0.055911399 | 0.227832532 |
| ACTA1 grey   | 0.038387258  | 0.407875788 | 0.057920707  | 0.211529161 |
| ACTBL2 grey  | -0.007100842 | 0.878365807 | -0.007296624 | 0.875039237 |
| ACTG1 grey   | 0.206168112  | 7.06E-06    | 0.205420179  | 7.64E-06    |
| ACTL8 grey   | -0.270637526 | 2.78E-09    | -0.274377099 | 1.64E-09    |
| ACTN2 grey   | -0.186628464 | 4.95E-05    | -0.185628883 | 5.44E-05    |
| ACTN4 grey   | -0.067986314 | 0.142387756 | -0.067336904 | 0.146248058 |
| ACTR1A grey  | 0.290953857  | 1.46E-10    | 0.313343091  | 4.25E-12    |
| ACTR5 grey   | -0.025766717 | 0.578605082 | -0.036299273 | 0.433868149 |
| ACTRT2 grey  | -0.155684782 | 0.000735568 | -0.150599878 | 0.00109694  |
| ACTRT3 grey  | -0.313832095 | 3.92E-12    | -0.311555841 | 5.70E-12    |
| ACYPI grey   | 0.022169128  | 0.632754325 | 0.018537941  | 0.689473974 |
| AD00067 grey | 0.016063125  | 0.729178049 | -0.021709403 | 0.639826042 |

|              |              |             |              |             |
|--------------|--------------|-------------|--------------|-------------|
| ADAD2 grey   | -0.039050152 | 0.399821249 | -0.040909242 | 0.377746386 |
| ADAL grey    | -0.120948778 | 0.008888017 | -0.104112619 | 0.02445017  |
| ADAM15 grey  | 0.278088313  | 9.69E-10    | 0.28259819   | 5.04E-10    |
| ADAM21 grey  | -0.212811473 | 3.49E-06    | -0.232539167 | 3.74E-07    |
| ADAMTSgrey   | -0.001187274 | 0.979585588 | -0.02360738  | 0.610847894 |
| ADAMTSgrey   | -0.168550315 | 0.000253348 | -0.170305704 | 0.000217716 |
| ADAMTSgrey   | -0.179931998 | 9.23E-05    | -0.212821175 | 3.48E-06    |
| ADAMTSgrey   | -0.31396064  | 3.84E-12    | -0.326383187 | 4.71E-13    |
| ADAMTSgrey   | -0.085651281 | 0.064403091 | -0.105710105 | 0.022330584 |
| ADAMTSgrey   | -0.140039157 | 0.002420387 | -0.14102873  | 0.002252332 |
| ADAMTSgrey   | -0.053379476 | 0.249621295 | -0.056552797 | 0.222534086 |
| ADAMTSgrey   | -0.125074132 | 0.006804457 | -0.128408801 | 0.005452413 |
| ADARB2 grey  | -0.249476684 | 4.67E-08    | -0.245385419 | 7.83E-08    |
| ADCK2 grey   | 0.05650233   | 0.22294777  | 0.050742892  | 0.273810484 |
| ADCK3 grey   | -0.123991621 | 0.007303922 | -0.133978893 | 0.003724049 |
| ADCK4 grey   | -0.024553555 | 0.596621908 | -0.019281662 | 0.677701123 |
| ADCY1 grey   | -0.017454236 | 0.706762991 | 0.011321582  | 0.807220294 |
| ADCY8 grey   | -0.190057089 | 3.57E-05    | -0.193628699 | 2.52E-05    |
| ADI1 grey    | 0.139229787  | 0.002566259 | 0.141694292  | 0.002145371 |
| ADIG grey    | -0.119743325 | 0.009595769 | -0.107659543 | 0.019961298 |
| ADIPOQ grey  | -0.086584973 | 0.061537301 | -0.089486799 | 0.053295095 |
| ADIRF grey   | -0.014531265 | 0.754130033 | 0.026260435  | 0.57134649  |
| ADM grey     | 0.357566743  | 1.57E-15    | 0.371196943  | 1.05E-16    |
| ADM5 grey    | -0.079695658 | 0.085367123 | -0.102493354 | 0.02677381  |
| ADORA1 grey  | -0.137174618 | 0.002973368 | -0.126026163 | 0.006390717 |
| ADORA2 grey  | 0.167223901  | 0.000283813 | 0.178495646  | 0.000105243 |
| ADRA1B grey  | -0.297086747 | 5.70E-11    | -0.300386819 | 3.41E-11    |
| ADRA2B grey  | -0.262150183 | 8.88E-09    | -0.274471069 | 1.62E-09    |
| ADRB1 grey   | -0.016333866 | 0.724796747 | 0.029986537  | 0.518005273 |
| ADSSL1 grey  | -0.143425039 | 0.001888595 | -0.142898258 | 0.001963602 |
| AEN grey     | 0.365594888  | 3.25E-16    | 0.360748294  | 8.45E-16    |
| AF131216grey | -0.115449908 | 0.01254043  | -0.117144267 | 0.011294496 |
| AF196779grey | -0.014071581 | 0.761669238 | -0.02270093  | 0.624615452 |
| AFF2 grey    | 0.137003894  | 0.003009698 | 0.106478221  | 0.021369419 |
| AFM grey     | -0.064107052 | 0.166641761 | -0.056740339 | 0.221001589 |
| AFMID grey   | 0.117596056  | 0.010981349 | 0.10372134   | 0.024995079 |
| AGA grey     | 0.237294074  | 2.12E-07    | 0.228357285  | 6.11E-07    |
| AGMO grey    | -0.136023237 | 0.003226315 | -0.139234222 | 0.002565439 |
| AGPAT3 grey  | 0.155958363  | 0.000719672 | 0.170584773  | 0.000212503 |
| AGPAT9 grey  | -0.127593416 | 0.005758559 | -0.10544525  | 0.022670583 |
| AGT grey     | -0.079854645 | 0.084743517 | -0.079852313 | 0.084752638 |
| AGTR2 grey   | -0.020093066 | 0.664945842 | -0.032809256 | 0.47937738  |
| AHDC1 grey   | -0.229092538 | 5.61E-07    | -0.222325153 | 1.22E-06    |
| AHNAK2grey   | -0.168529252 | 0.000253807 | -0.176021145 | 0.000131544 |
| AHRR grey    | -0.110773666 | 0.01662952  | -0.099901331 | 0.030888774 |

|          |      |              |             |              |             |
|----------|------|--------------|-------------|--------------|-------------|
| AIF1L    | grey | -0.250153673 | 4.28E-08    | -0.295395468 | 7.40E-11    |
| AIFM2    | grey | 0.176217587  | 0.000129249 | 0.212519125  | 3.60E-06    |
| AIG1     | grey | -0.124670975 | 0.00698678  | -0.118389464 | 0.01044999  |
| AIM1     | grey | 0.102643748  | 0.026550267 | 0.071460049  | 0.123049746 |
| AIM1L    | grey | -0.008952703 | 0.846994262 | -0.007664301 | 0.868797981 |
| AIRE     | grey | -0.249965427 | 4.39E-08    | -0.235568467 | 2.61E-07    |
| AJ239318 | grey | -0.076715548 | 0.097755243 | -0.083873348 | 0.07016365  |
| AJAP1    | grey | -0.242812713 | 1.08E-07    | -0.26288838  | 8.04E-09    |
| AK5      | grey | -0.058792271 | 0.204725106 | -0.079918574 | 0.084493801 |
| AKAP17   | grey | 0.05426039   | 0.241881559 | 0.037503089  | 0.418767639 |
| AKAP3    | grey | -0.103534921 | 0.025258357 | -0.117917333 | 0.010763367 |
| AKAP6    | grey | -0.130393064 | 0.004767683 | -0.110579124 | 0.016822411 |
| AKAP8    | grey | -0.153964721 | 0.000843187 | -0.183135069 | 6.87E-05    |
| AKAP8L   | grey | -0.275270913 | 1.45E-09    | -0.285025621 | 3.53E-10    |
| AKIP1    | grey | 0.26072286   | 1.08E-08    | 0.261407488  | 9.81E-09    |
| AKR1B1   | grey | -0.379028946 | 2.11E-17    | -0.377435922 | 2.93E-17    |
| AKR1B1   | grey | 0.083799585  | 0.070411465 | 0.083082014  | 0.07285979  |
| AKR1B1   | grey | 0.031485663  | 0.497292625 | 0.055438538  | 0.231795696 |
| AKR1C1   | grey | 0.10498748   | 0.023268807 | 0.093627752  | 0.043141793 |
| AKR1C2   | grey | 0.105942583  | 0.0220358   | 0.109075411  | 0.018380554 |
| AKR1E2   | grey | -0.166030046 | 0.000314125 | -0.150106237 | 0.001139596 |
| AKR7A2   | grey | 0.138402442  | 0.002723613 | 0.13845024   | 0.002714288 |
| AKR7A3   | grey | 0.00552006   | 0.905298546 | 0.010474875  | 0.821385366 |
| AKT2     | grey | -0.207169862 | 6.36E-06    | -0.220958874 | 1.42E-06    |
| AL00872  | grey | -0.064011604 | 0.167275305 | -0.063261949 | 0.172314076 |
| AL02154  | grey | -0.029962023 | 0.518347624 | -0.033403533 | 0.471449342 |
| AL13574  | grey | -0.12515113  | 0.006770124 | -0.147844745 | 0.001355258 |
| AL15883  | grey | 0.027283746  | 0.556440933 | 0.022675658  | 0.625001199 |
| AL16242  | grey | 0.064325167  | 0.165200747 | 0.066245078  | 0.152917427 |
| AL35885  | grey | 0.096694665  | 0.036717958 | 0.115841563  | 0.012242121 |
| AL58974  | grey | -0.182193479 | 7.50E-05    | -0.190256477 | 3.50E-05    |
| AL59180  | grey | 0.008638085  | 0.852308463 | 0.023877174  | 0.606776197 |
| AL64572  | grey | -0.008734204 | 0.850684199 | -0.015881297 | 0.732125464 |
| AL64592  | grey | -0.055163759 | 0.234120974 | -0.058311988 | 0.208454653 |
| ALAD     | grey | 0.309942596  | 7.42E-12    | 0.291982272  | 1.25E-10    |
| ALAS2    | grey | 0.002608912  | 0.955160131 | -0.006463971 | 0.889201482 |
| ALCAM    | grey | 0.12052807   | 0.009129562 | 0.102746186  | 0.026398929 |
| ALDH1L   | grey | 0.059287561  | 0.200929938 | 0.04428362   | 0.339637908 |
| ALDH1L   | grey | -0.111980293 | 0.015475818 | -0.117287286 | 0.011194521 |
| ALDH2    | grey | 0.12848768   | 0.005423588 | 0.140021095  | 0.002423558 |
| ALDH4A   | grey | 0.115709446  | 0.012342041 | 0.101643787  | 0.028067241 |
| ALDH7A   | grey | 0.124759527  | 0.006946363 | 0.121611584  | 0.008519006 |
| ALDH8A   | grey | -0.074107472 | 0.109735315 | -0.072547768 | 0.117434665 |
| ALG1L2   | grey | -0.254888824 | 2.32E-08    | -0.282672252 | 4.99E-10    |
| ALK      | grey | -0.252609208 | 3.12E-08    | -0.249870511 | 4.44E-08    |



|             |              |             |              |             |
|-------------|--------------|-------------|--------------|-------------|
| ALKBH3 grey | -0.490320824 | 1.28E-29    | -0.48731455  | 3.17E-29    |
| ALKBH6 grey | -0.093456938 | 0.043525809 | -0.092273212 | 0.046266865 |
| ALLC grey   | -0.056568024 | 0.222409375 | -0.055577156 | 0.230628882 |
| ALOX12 grey | -0.138887486 | 0.002630329 | -0.160818665 | 0.000485302 |
| ALOXE3 grey | -0.186914977 | 4.82E-05    | -0.160736839 | 0.000488577 |
| ALPI grey   | 0.044634884  | 0.335817211 | 0.05027948   | 0.278221717 |
| ALPK2 grey  | -0.124157981 | 0.007225092 | -0.116254209 | 0.01193462  |
| ALPK3 grey  | -0.067723696 | 0.143939345 | -0.058155044 | 0.209683944 |
| ALPL grey   | 0.031665901  | 0.494832326 | 0.016113525  | 0.728361768 |
| ALPPL2 grey | 0.127920213  | 0.005634051 | 0.147052637  | 0.001439267 |
| ALS2CL grey | -0.057086195 | 0.218195234 | -0.062901311 | 0.174778033 |
| ALS2CR1grey | -0.321699278 | 1.05E-12    | -0.317002766 | 2.32E-12    |
| ALX1 grey   | -0.234489583 | 2.97E-07    | -0.223562518 | 1.06E-06    |
| ALX3 grey   | -0.174027626 | 0.0001571   | -0.171448028 | 0.000197109 |
| ALX4 grey   | -0.061544303 | 0.18428445  | -0.084575031 | 0.067841735 |
| AMACR grey  | 0.186747849  | 4.89E-05    | 0.147348765  | 0.001407316 |
| AMBP grey   | 0.198279123  | 1.59E-05    | 0.208453173  | 5.56E-06    |
| AMDHD1grey  | -0.135679288 | 0.003305581 | -0.142096507 | 0.002083003 |
| AMELX grey  | -0.088970172 | 0.054691294 | -0.09560814  | 0.038894105 |
| AMELY grey  | -0.000806164 | 0.986137721 | 0.007802824  | 0.86644866  |
| AMER2 grey  | -0.14736261  | 0.001405838 | -0.145323185 | 0.001639561 |
| AMER3 grey  | -0.074762501 | 0.106622835 | -0.076144831 | 0.10028355  |
| AMH grey    | 0.417015937  | 4.50E-21    | 0.425788452  | 5.45E-22    |
| AMIGO3 grey | -0.021797353 | 0.638470598 | -0.01354555  | 0.770324294 |
| AMN grey    | -0.14276499  | 0.001983004 | -0.140958723 | 0.002263861 |
| AMPD2 grey  | -0.344166825 | 1.97E-14    | -0.351938289 | 4.61E-15    |
| AMTN grey   | -0.068024368 | 0.142163991 | -0.066218185 | 0.153084568 |
| AMY1A grey  | -0.061516488 | 0.184483222 | -0.049435608 | 0.286377799 |
| AMY1B grey  | -0.077018627 | 0.096433378 | -0.068300367 | 0.140549121 |
| AMY2A grey  | -0.045735565 | 0.324024525 | -0.033994522 | 0.463637175 |
| AMY2B grey  | -0.189401848 | 3.80E-05    | -0.204720636 | 8.21E-06    |
| ANAPC7 grey | -0.010076319 | 0.828073484 | -0.022358956 | 0.629843975 |
| ANGPT2 grey | -0.023214343 | 0.616801067 | -0.022262977 | 0.631314765 |
| ANGPT4 grey | -0.087048921 | 0.060152924 | -0.109616622 | 0.017805823 |
| ANGPTL grey | 0.287976877  | 2.28E-10    | 0.294995781  | 7.87E-11    |
| ANHx grey   | -0.07576711  | 0.101985255 | -0.075728907 | 0.102158638 |
| ANK1 grey   | 0.111577523  | 0.015852864 | 0.133349904  | 0.003890625 |
| ANKH grey   | -0.139022407 | 0.002604903 | -0.108808547 | 0.018669858 |
| ANKRD1 grey | 0.043469772  | 0.34859639  | 0.013142705  | 0.776971919 |
| ANKRD1 grey | -0.027195399 | 0.557720309 | -0.053175807 | 0.251435017 |
| ANKRD1 grey | 0.008905849  | 0.847785245 | -0.014873297 | 0.748535504 |
| ANKRD1 grey | -0.074070863 | 0.109911355 | -0.083067638 | 0.072909541 |
| ANKRD2 grey | -0.184639756 | 5.97E-05    | -0.18771674  | 4.46E-05    |
| ANKRD2 grey | 0.016838234  | 0.716658772 | 0.014588799  | 0.753188059 |
| ANKRD2 grey | -0.080182599 | 0.083468757 | -0.081467272 | 0.078623577 |

|              |              |             |              |             |
|--------------|--------------|-------------|--------------|-------------|
| ANKRD2 grey  | -0.065324346 | 0.158718831 | -0.0656078   | 0.156915406 |
| ANKRD3 grey  | -0.281099932 | 6.27E-10    | -0.28347524  | 4.43E-10    |
| ANKRD3 grey  | -0.092085407 | 0.04671479  | -0.12342133  | 0.007580026 |
| ANKRD6 grey  | -0.169660387 | 0.000230232 | -0.182292947 | 7.43E-05    |
| ANKRD7 grey  | -0.422586242 | 1.19E-21    | -0.412101815 | 1.43E-20    |
| ANKS6 grey   | 0.029266698  | 0.528106642 | 0.005039838  | 0.913503394 |
| ANO10 grey   | 0.268208364  | 3.89E-09    | 0.282678396  | 4.98E-10    |
| ANO2 grey    | -0.343591816 | 2.19E-14    | -0.353949951 | 3.14E-15    |
| ANO3 grey    | -0.058952342 | 0.203492923 | -0.051725137 | 0.264618704 |
| ANO7 grey    | 0.003504237  | 0.939797422 | -0.004775438 | 0.918024786 |
| ANO8 grey    | 0.230292973  | 4.88E-07    | 0.203675299  | 9.15E-06    |
| ANP32D grey  | 0.041441674  | 0.371564863 | 0.049091499  | 0.289749382 |
| ANPEP grey   | 0.045842201  | 0.322896488 | 0.095139446  | 0.039866009 |
| ANTXRL grey  | -0.1784943   | 0.000105256 | -0.177189754 | 0.000118436 |
| ANXA1 grey   | 0.302738243  | 2.35E-11    | 0.325697915  | 5.31E-13    |
| ANXA11 grey  | -0.068276364 | 0.140689006 | -0.039276802 | 0.397089346 |
| ANXA2 grey   | 0.347725042  | 1.02E-14    | 0.386195251  | 4.65E-18    |
| ANXA2R grey  | 0.115307047  | 0.012650829 | 0.136125399  | 0.003203105 |
| ANXA3 grey   | 0.052548286  | 0.257080777 | 0.065398898  | 0.158242997 |
| ANXA4 grey   | 0.003942824  | 0.93227958  | -0.012090713 | 0.794407298 |
| ANXA9 grey   | -0.121913949 | 0.00835525  | -0.123362705 | 0.007608931 |
| AOC1 grey    | -0.170624388 | 0.000211773 | -0.163387136 | 0.000392293 |
| AOC2 grey    | 0.135142216  | 0.003432897 | 0.131826366  | 0.004322412 |
| AP00027 grey | -0.193408109 | 2.57E-05    | -0.198220189 | 1.60E-05    |
| AP00029 grey | -0.14013406  | 0.002403788 | -0.174977908 | 0.000144387 |
| AP00030 grey | 0.042922221  | 0.354707035 | 0.027234132  | 0.557159236 |
| AP00032 grey | -0.029481725 | 0.525078755 | -0.04209869  | 0.364023669 |
| AP00035 grey | 0.024301993  | 0.600389516 | 0.006250409  | 0.892839735 |
| AP00072 grey | 0.042431334  | 0.360242251 | 0.070472575  | 0.128326337 |
| AP00341 grey | -0.078771528 | 0.089065484 | -0.07605011  | 0.100708149 |
| AP00628 grey | 0.165385306  | 0.000331727 | 0.163190886  | 0.000398767 |
| AP1B1 grey   | 0.28031879   | 7.02E-10    | 0.30297034   | 2.27E-11    |
| AP1G2 grey   | 0.13860783   | 0.002683751 | 0.133306817  | 0.003902279 |
| AP1M1 grey   | -0.129769082 | 0.004974144 | -0.11486721  | 0.012996123 |
| AP2A2 grey   | 0.265296458  | 5.80E-09    | 0.271972507  | 2.31E-09    |
| AP3B2 grey   | -0.347008393 | 1.16E-14    | -0.363950524 | 4.50E-16    |
| AP3S2 grey   | 0.211692842  | 3.93E-06    | 0.221354322  | 1.36E-06    |
| AP4B1 grey   | 0.148694337  | 0.001270183 | 0.153694783  | 0.000861341 |
| AP5S1 grey   | -0.114413121 | 0.013361297 | -0.087867794 | 0.057772319 |
| APBA2 grey   | 0.138792677  | 0.00264833  | 0.113859378  | 0.013818825 |
| APBB3 grey   | 0.022394389  | 0.629301368 | 0.000120143  | 0.997934003 |
| APC2 grey    | 0.016812536  | 0.717072641 | 0.018410252  | 0.691502912 |
| APCDD1 grey  | -0.203561021 | 9.26E-06    | -0.198302763 | 1.58E-05    |
| APCS grey    | -0.068191516 | 0.141184321 | -0.070651762 | 0.12735604  |
| APELA grey   | -0.037137491 | 0.423320745 | -0.037766542 | 0.415504523 |

|         |      |              |             |              |             |
|---------|------|--------------|-------------|--------------|-------------|
| APOA1   | grey | -0.287860885 | 2.32E-10    | -0.281443162 | 5.97E-10    |
| APOA4   | grey | 0.034721848  | 0.454122257 | 0.03427048   | 0.460014109 |
| APOBEC  | grey | -0.126348168 | 0.006255972 | -0.113823968 | 0.013848546 |
| APOL4   | grey | 0.080344898  | 0.082843651 | 0.069965036  | 0.131105744 |
| APOM    | grey | -0.12077706  | 0.008985911 | -0.112609007 | 0.014902978 |
| APTX    | grey | 0.237969415  | 1.95E-07    | 0.234550932  | 2.95E-07    |
| AQP11   | grey | -0.145673138 | 0.001597078 | -0.159699626 | 0.000531916 |
| AQP12A  | grey | 0.01965898   | 0.671757952 | 0.033880764  | 0.465135313 |
| AQP12B  | grey | 0.045552973  | 0.325961984 | 0.052090325  | 0.261255987 |
| AQP2    | grey | 0.187374474  | 4.61E-05    | 0.18864777   | 4.08E-05    |
| AQP4    | grey | -0.014883469 | 0.748369314 | -0.039473247 | 0.394730613 |
| AQP6    | grey | 0.074887401  | 0.106037347 | 0.089564562  | 0.05308753  |
| ARAF    | grey | -0.081397006 | 0.078882555 | -0.067433201 | 0.145670649 |
| ARAP1   | grey | -0.165341859 | 0.000332945 | -0.170913032 | 0.000206521 |
| ARAP3   | grey | -0.18718401  | 4.70E-05    | -0.192650257 | 2.77E-05    |
| ARC     | grey | -0.163716262 | 0.000381656 | -0.16923191  | 0.00023891  |
| AREG    | grey | 0.078786067  | 0.089006319 | 0.060262947  | 0.193606135 |
| ARF3    | grey | 0.022473323  | 0.628093316 | 0.02096372   | 0.65136597  |
| ARFGAP  | grey | -0.013817916 | 0.765839291 | -0.024509074 | 0.597287309 |
| ARG2    | grey | 0.101645011  | 0.028065341 | 0.079643342  | 0.085573135 |
| ARHGAP  | grey | 0.166899056  | 0.000291778 | 0.182614519  | 7.21E-05    |
| ARHGAP  | grey | -0.197401944 | 1.73E-05    | -0.186111475 | 5.20E-05    |
| ARHGAP  | grey | -0.14686487  | 0.00145987  | -0.144952532 | 0.001685685 |
| ARHGAP  | grey | -0.135518777 | 0.003343175 | -0.122995936 | 0.007792013 |
| ARHGDI  | grey | 0.014085345  | 0.761443164 | 0.011450626  | 0.805066839 |
| ARHGEF  | grey | -0.055526259 | 0.231056823 | -0.02554175  | 0.581926786 |
| ARHGEF  | grey | -0.041566907 | 0.370120038 | -0.041143305 | 0.375021173 |
| ARHGEF  | grey | 0.003170375  | 0.945523778 | -0.0016698   | 0.971291924 |
| ARHGEF  | grey | -0.15762342  | 0.000629591 | -0.192100318 | 2.93E-05    |
| ARID3A  | grey | 0.030458634  | 0.511434926 | 0.015913694  | 0.731600029 |
| ARID3C  | grey | -0.093225325 | 0.044051107 | -0.096060293 | 0.037975591 |
| ARIH2OS | grey | 0.077293713  | 0.095245978 | 0.074050081  | 0.110011391 |
| ARL14   | grey | -0.034204039 | 0.460884964 | -0.04039926  | 0.383726126 |
| ARL14EP | grey | -0.205354048 | 7.69E-06    | -0.200185285 | 1.31E-05    |
| ARL2-SN | grey | -0.070175943 | 0.129945166 | -0.091817522 | 0.047360003 |
| ARL4A   | grey | 0.148306671  | 0.001308374 | 0.158126358  | 0.000604511 |
| ARL4D   | grey | 0.278601788  | 9.00E-10    | 0.292755519  | 1.11E-10    |
| ARL8A   | grey | 0.126835386  | 0.006056936 | 0.121044559  | 0.008833826 |
| ARL9    | grey | 0.079269056  | 0.087058706 | 0.105133339  | 0.023076729 |
| ARMC12  | grey | -0.115275142 | 0.0126756   | -0.119298176 | 0.009869527 |
| ARMC7   | grey | 0.057993732  | 0.210952893 | 0.06936635   | 0.134443855 |
| ARMCX2  | grey | -0.291097954 | 1.42E-10    | -0.322826526 | 8.68E-13    |
| ARMS2   | grey | 0.004687872  | 0.919522808 | 0.004400948  | 0.924433287 |
| ARPC1A  | grey | 0.03812016   | 0.411148233 | 0.060315603  | 0.193216393 |
| ARSE    | grey | 0.030414918  | 0.512041514 | 0.040663916  | 0.38061575  |

|        |      |              |             |              |             |
|--------|------|--------------|-------------|--------------|-------------|
| ARSF   | grey | 0.150757407  | 0.00108364  | 0.129363708  | 0.005112556 |
| ARSG   | grey | -0.266304417 | 5.06E-09    | -0.2845497   | 3.79E-10    |
| ARSH   | grey | 0.260290664  | 1.14E-08    | 0.23594818   | 2.49E-07    |
| ARSJ   | grey | 0.110065866  | 0.017340738 | 0.086795328  | 0.060906398 |
| ART5   | grey | -0.323901643 | 7.22E-13    | -0.33871003  | 5.33E-14    |
| ARX    | grey | 0.041019189  | 0.376464756 | 0.045476856  | 0.326771868 |
| AS3MT  | grey | 0.146640871  | 0.001484803 | 0.106051585  | 0.02189875  |
| ASAP3  | grey | -0.30873088  | 9.03E-12    | -0.337632517 | 6.48E-14    |
| ASB10  | grey | -0.153480504 | 0.000876009 | -0.137107485 | 0.002987606 |
| ASB13  | grey | 0.074988286  | 0.105566291 | 0.034222467  | 0.460643332 |
| ASB16  | grey | 0.033876906  | 0.465186168 | 0.040598999  | 0.381377257 |
| ASB4   | grey | -0.019012368 | 0.681955091 | 0.017521779  | 0.705680908 |
| ASB6   | grey | -0.039031988 | 0.400040664 | -0.044588074 | 0.336324763 |
| ASB9   | grey | -0.075114078 | 0.104981258 | -0.090195859 | 0.051427266 |
| ASCL1  | grey | 0.048437452  | 0.296230918 | 0.025283553  | 0.585750042 |
| ASCL2  | grey | 0.190646641  | 3.37E-05    | 0.169740756  | 0.000228637 |
| ASCL3  | grey | -0.037975637 | 0.412925365 | -0.043824544 | 0.344672969 |
| ASCL4  | grey | 0.006484289  | 0.888855468 | -0.007608473 | 0.869745134 |
| ASGR1  | grey | -0.192953886 | 2.69E-05    | -0.178601567 | 0.000104236 |
| ASIC1  | grey | 0.191893498  | 2.99E-05    | 0.142244965  | 0.002060405 |
| ASIC2  | grey | 0.007861154  | 0.865459752 | 0.003142103  | 0.946008831 |
| ASIC3  | grey | -0.009375108 | 0.839870373 | -0.007251179 | 0.875811209 |
| ASL    | grey | 0.088374416  | 0.056338957 | 0.104678743  | 0.023679942 |
| ASMTL  | grey | 0.00527304   | 0.909517814 | 0.008949111  | 0.847054896 |
| ASPG   | grey | -0.194169676 | 2.39E-05    | -0.201633244 | 1.13E-05    |
| ASPHD1 | grey | -0.131362815 | 0.004462127 | -0.135333239 | 0.003387113 |
| ASPHD2 | grey | 0.020679793  | 0.655782092 | 0.034404347  | 0.45826226  |
| ASPRV1 | grey | -0.175838342 | 0.000133714 | -0.17014038  | 0.00022086  |
| ASS1   | grey | -0.326608072 | 4.53E-13    | -0.296539372 | 6.20E-11    |
| ASTL   | grey | -0.203501241 | 9.32E-06    | -0.234697071 | 2.90E-07    |
| ASTN1  | grey | -0.196149894 | 1.96E-05    | -0.207203062 | 6.34E-06    |
| ASXL3  | grey | -0.218702857 | 1.83E-06    | -0.221793234 | 1.29E-06    |
| ATAD3C | grey | -0.104573104 | 0.023822054 | -0.098524574 | 0.033286595 |
| ATCAY  | grey | 0.042289954  | 0.361846406 | 0.048526894  | 0.295338899 |
| ATF3   | grey | -0.157615499 | 0.000629994 | -0.191042842 | 3.24E-05    |
| ATF4   | grey | 0.087590097  | 0.05857073  | 0.065272975  | 0.159047341 |
| ATG10  | grey | 0.198831777  | 1.50E-05    | 0.20679088   | 6.62E-06    |
| ATG13  | grey | -0.106813407 | 0.020961377 | -0.097385335 | 0.0353891   |
| ATG7   | grey | 0.169474707  | 0.000233956 | 0.193083557  | 2.66E-05    |
| ATHL1  | grey | -0.059873373 | 0.196507512 | -0.052989475 | 0.253102354 |
| ATOH1  | grey | 0.078365829  | 0.090729217 | 0.065105757  | 0.160120215 |
| ATOH7  | grey | -0.142008128 | 0.002096563 | -0.142940643 | 0.001957467 |
| ATP10A | grey | -0.217414698 | 2.11E-06    | -0.213628431 | 3.19E-06    |
| ATP10B | grey | -0.028181646 | 0.543519756 | -0.002538765 | 0.956364535 |
| ATP12A | grey | -0.011473436 | 0.804686344 | -0.001379444 | 0.976282253 |

|                           |              |             |              |             |
|---------------------------|--------------|-------------|--------------|-------------|
| ATP13A4grey               | -0.003775035 | 0.935154977 | -0.010672812 | 0.818068572 |
| ATP13A5grey               | -0.022441002 | 0.628587854 | -0.012623598 | 0.785562035 |
| ATP1A1 grey               | 0.093581365  | 0.043245795 | 0.089282158  | 0.053844552 |
| ATP1A2 grey               | -0.056343731 | 0.224251389 | -0.070247536 | 0.129553018 |
| ATP1A3 grey               | -0.117165902 | 0.011279321 | -0.098388347 | 0.033532263 |
| ATP1A4 grey               | 0.045336132  | 0.328272589 | 0.030387336  | 0.512424425 |
| ATP2B2 grey               | -0.180974969 | 8.39E-05    | -0.197289419 | 1.75E-05    |
| ATP4A grey                | -0.036361119 | 0.433084793 | -0.050482409 | 0.276284131 |
| ATP5EP2 grey              | 0.127024028  | 0.005981412 | 0.165313681  | 0.000333738 |
| ATP5J2-Pgrey              | -0.027057038 | 0.559726812 | -0.022345809 | 0.630045358 |
| ATP5SL grey               | 0.049301533  | 0.287688309 | 0.048905202  | 0.291585799 |
| ATP6V0A <sup>Δ</sup> grey | 0.175696771  | 0.000135418 | 0.186939551  | 4.81E-05    |
| ATP6V0A <sup>Δ</sup> grey | 0.166899642  | 0.000291764 | 0.185391289  | 5.56E-05    |
| ATP6V0Egrey               | 0.113113484  | 0.014456885 | 0.157661271  | 0.00062767  |
| ATP6V0Egrey               | 0.251982588  | 3.39E-08    | 0.233057308  | 3.52E-07    |
| ATP6V1Egrey               | -0.185781244 | 5.36E-05    | -0.173907743 | 0.000158777 |
| ATP6V1Cgrey               | 0.230798383  | 4.60E-07    | 0.210664155  | 4.39E-06    |
| ATP6V1Egrey               | 0.023176288  | 0.617378817 | 0.034799543  | 0.453112373 |
| ATP6V1Egrey               | -0.079530129 | 0.086020318 | -0.08231756  | 0.075544021 |
| ATP6V1Cgrey               | -0.076391299 | 0.099185379 | -0.091717277 | 0.047603362 |
| ATP6V1Cgrey               | 0.100128639  | 0.030507451 | 0.104777163  | 0.023548202 |
| ATP7B grey                | 0.06295424   | 0.174414776 | 0.054793107  | 0.237283596 |
| ATP8B3 grey               | 0.098929421  | 0.032565546 | 0.097491457  | 0.035188591 |
| ATXN7L <sup>Δ</sup> grey  | -0.228795624 | 5.81E-07    | -0.241519452 | 1.27E-07    |
| AUTS2 grey                | -0.02790349  | 0.547506588 | -0.038936828 | 0.401191399 |
| AVEN grey                 | 0.107904824  | 0.019679266 | 0.114663735  | 0.013158654 |
| AVP grey                  | -0.063383307 | 0.171490787 | -0.081801989 | 0.077399366 |
| AVPR1B grey               | 0.135871676  | 0.003261028 | 0.154401975  | 0.000814529 |
| AWAT2 grey                | -0.034564786 | 0.456167605 | -0.025055997 | 0.589129195 |
| AZGP1 grey                | -0.088447347 | 0.056135066 | -0.074095735 | 0.109791729 |
| AZIN2 grey                | -0.276452869 | 1.22E-09    | -0.267842331 | 4.09E-09    |
| B3GALT <sup>1</sup> grey  | -0.0608265   | 0.189464708 | -0.054445298 | 0.24027856  |
| B3GALT <sup>2</sup> grey  | -0.11427353  | 0.013475357 | -0.059161905 | 0.201887901 |
| B3GAT1 grey               | -0.080447722 | 0.082449578 | -0.078862577 | 0.088695489 |
| B3GNT3 grey               | -0.064361517 | 0.16496151  | -0.033381923 | 0.471736355 |
| B3GNT6 grey               | 0.002979734  | 0.948794917 | 0.039353063  | 0.39617266  |
| B3GNT7 grey               | -0.182666654 | 7.18E-05    | -0.163564927 | 0.000386513 |
| B3GNT8 grey               | -0.18469822  | 5.94E-05    | -0.190493669 | 3.42E-05    |
| B4GALN <sup>+</sup> grey  | 0.031012046  | 0.503788472 | 0.03348807   | 0.470327445 |
| B4GALN <sup>+</sup> grey  | -0.124106514 | 0.007249398 | -0.141481006 | 0.002179131 |
| B4GALT <sup>2</sup> grey  | 0.17387544   | 0.000159231 | 0.190633302  | 3.37E-05    |
| BAALC grey                | -0.189343171 | 3.82E-05    | -0.182051119 | 7.60E-05    |
| BAAT grey                 | -0.02408341  | 0.603671886 | -0.030441485 | 0.511672832 |
| BAG1 grey                 | 0.121310556  | 0.008684873 | 0.155660497  | 0.000736994 |
| BAG3 grey                 | 0.154144328  | 0.000831304 | 0.151567193  | 0.001017589 |

|              |              |             |              |             |
|--------------|--------------|-------------|--------------|-------------|
| BAHCC1 grey  | 0.141593438  | 0.002161274 | 0.135052755  | 0.003454531 |
| BAI1 grey    | -0.070747504 | 0.126839939 | -0.088159822 | 0.056942452 |
| BAI2 grey    | -0.149296464 | 0.001212894 | -0.158420397 | 0.000590281 |
| BAIAP2 grey  | -0.204120876 | 8.74E-06    | -0.208470185 | 5.55E-06    |
| BAIAP2L grey | 0.1365978    | 0.003097743 | 0.149767149  | 0.001169778 |
| BARHL1 grey  | 0.003953437  | 0.932097723 | -0.002621511 | 0.954943813 |
| BARHL2 grey  | -0.124782241 | 0.006936029 | -0.1216153   | 0.008516976 |
| BARX2 grey   | -0.216871579 | 2.24E-06    | -0.212636526 | 3.55E-06    |
| BASP1 grey   | 0.101972506  | 0.027560549 | 0.083969608  | 0.069841324 |
| BATF3 grey   | -0.094049914 | 0.042204932 | -0.079493754 | 0.086164394 |
| BBC3 grey    | 0.362471177  | 6.03E-16    | 0.38442833   | 6.77E-18    |
| BCAM grey    | -0.325726082 | 5.28E-13    | -0.333448226 | 1.37E-13    |
| BCAR3 grey   | -0.00099221  | 0.982939028 | -0.020527642 | 0.658153562 |
| BCAT1 grey   | -0.019104764 | 0.680494384 | -0.017632244 | 0.703912459 |
| BCL11A grey  | -0.218933701 | 1.78E-06    | -0.218803957 | 1.81E-06    |
| BCL2L1 grey  | -0.074221857 | 0.109186696 | -0.054173304 | 0.242639118 |
| BCL2L10 grey | -0.01787369  | 0.700052699 | -0.018420445 | 0.691340867 |
| BCL2L15 grey | 0.19662856   | 1.87E-05    | 0.215139388  | 2.71E-06    |
| BCO1 grey    | 0.000159225  | 0.997261943 | 0.031164112  | 0.501697977 |
| BDKRB1 grey  | -0.180596427 | 8.69E-05    | -0.174926682 | 0.000145046 |
| BDNF grey    | 0.103143438  | 0.025819045 | 0.116366605  | 0.011852055 |
| BEAN1 grey   | -0.032986993 | 0.476998681 | -0.008034945 | 0.862514588 |
| BEND4 grey   | -0.079879192 | 0.08464756  | -0.081325442 | 0.07914703  |
| BEND5 grey   | -0.206595058 | 6.76E-06    | -0.208103795 | 5.76E-06    |
| BET1L grey   | 0.215881208  | 2.50E-06    | 0.229741895  | 5.20E-07    |
| BEX1 grey    | -0.223410775 | 1.08E-06    | -0.252313453 | 3.25E-08    |
| BEX2 grey    | -0.514081791 | 7.33E-33    | -0.508290446 | 4.78E-32    |
| BEX4 grey    | -0.486371561 | 4.20E-29    | -0.481241787 | 1.92E-28    |
| BEX5 grey    | 0.292349077  | 1.18E-10    | 0.269521313  | 3.25E-09    |
| BFSP1 grey   | 0.00295677   | 0.949189015 | 0.012508034  | 0.787477965 |
| BHLHA1:grey  | 0.239137165  | 1.69E-07    | 0.239425712  | 1.64E-07    |
| BHLHA9 grey  | -0.140098054 | 0.002410074 | -0.101115502 | 0.028898313 |
| BHLHE2:grey  | 0.051664865  | 0.265176545 | 0.083363034  | 0.071892811 |
| BHLHE2:grey  | -0.077772454 | 0.093207367 | -0.024034759 | 0.604403561 |
| BHMT grey    | -0.193349212 | 2.59E-05    | -0.188370741 | 4.19E-05    |
| BICC1 grey   | -0.1996052   | 1.39E-05    | -0.210633375 | 4.41E-06    |
| BID grey     | 0.029332985  | 0.527172281 | 0.057989188  | 0.210988723 |
| BIN1 grey    | -0.292905224 | 1.08E-10    | -0.2827915   | 4.90E-10    |
| BIRC7 grey   | -0.174951803 | 0.000144722 | -0.170394744 | 0.00021604  |
| BIVM-ERgrey  | 0.020552319  | 0.657768712 | 0.008059433  | 0.862099753 |
| BLACE grey   | 0.022974305  | 0.62044925  | 0.064300194  | 0.165365262 |
| BLMH grey    | -0.061087936 | 0.187565722 | -0.061116155 | 0.187361592 |
| BLNK grey    | 0.198051673  | 1.62E-05    | 0.179321723  | 9.76E-05    |
| BLOC1S3grey  | -0.045739558 | 0.323982244 | -0.045423049 | 0.327345162 |
| BLOC1S4grey  | 0.049409097  | 0.286636605 | 0.069481329  | 0.133797729 |

|          |      |              |             |              |             |
|----------|------|--------------|-------------|--------------|-------------|
| BLOC1S5  | grey | -0.180838731 | 8.50E-05    | -0.194105631 | 2.40E-05    |
| BLVRA    | grey | -0.044007245 | 0.342663483 | -0.046712367 | 0.31378707  |
| BMF      | grey | -0.130196635 | 0.004831827 | -0.132497727 | 0.004127068 |
| BMP1     | grey | -0.052392322 | 0.258497484 | -0.073739401 | 0.11151542  |
| BMP3     | grey | -0.181425229 | 8.05E-05    | -0.191348668 | 3.15E-05    |
| BMP5     | grey | 0.134631609  | 0.003558047 | 0.119025937  | 0.010040347 |
| BMP7     | grey | -0.319736424 | 1.47E-12    | -0.346542817 | 1.27E-14    |
| BMP8B    | grey | -0.097863691 | 0.034492906 | -0.119698411 | 0.00962308  |
| BMX      | grey | 0.084070959  | 0.069503259 | 0.073437289  | 0.112993431 |
| BNC1     | grey | -0.167824177 | 0.000269625 | -0.169998816 | 0.000223586 |
| BNIP1    | grey | 0.016463507  | 0.722701993 | -0.001192221 | 0.97950055  |
| BOLA1    | grey | 0.048475614  | 0.295850108 | 0.042119776  | 0.363783244 |
| BPIFA1   | grey | 0.041100743  | 0.375515831 | 0.066785501  | 0.149588008 |
| BPIFA2   | grey | -0.133992034 | 0.003720639 | -0.1008105   | 0.029387677 |
| BPIFB1   | grey | 0.024406615  | 0.598821314 | 0.065095966  | 0.160183204 |
| BPIFB2   | grey | 0.270697673  | 2.76E-09    | 0.271470677  | 2.47E-09    |
| BPIFB3   | grey | -0.048807566 | 0.292551342 | -0.046366971 | 0.317382505 |
| BPIFB4   | grey | -0.012692464 | 0.784420918 | -0.004147953 | 0.928765465 |
| BPIFB6   | grey | 0.147277775  | 0.001414915 | 0.139818048  | 0.002459468 |
| BRD9     | grey | -0.188631015 | 4.09E-05    | -0.201862058 | 1.10E-05    |
| BRDT     | grey | -0.093075691 | 0.044393304 | -0.059563921 | 0.198834696 |
| BRINP1   | grey | -0.303923365 | 1.95E-11    | -0.310105164 | 7.22E-12    |
| BRINP2   | grey | -0.001445012 | 0.97515526  | -0.012547168 | 0.786829012 |
| BRINP3   | grey | 0.019801842  | 0.669513014 | 0.002028455  | 0.965129312 |
| BRSK1    | grey | -0.146450192 | 0.001506334 | -0.162341508 | 0.000427949 |
| BRSK2    | grey | -0.054424975 | 0.240454378 | -0.07865438  | 0.089543362 |
| BSCL2    | grey | 0.076438443  | 0.09897642  | 0.047384276  | 0.306869575 |
| BSN      | grey | -0.191946547 | 2.97E-05    | -0.218686208 | 1.83E-06    |
| BSPH1    | grey | -0.060439096 | 0.192304594 | -0.05244774  | 0.257993469 |
| BTBD11   | grey | 0.099991602  | 0.030736854 | 0.116243903  | 0.011942216 |
| BTBD16   | grey | 0.082839816  | 0.073701668 | 0.105191519  | 0.023000496 |
| BTBD17   | grey | -0.209409235 | 5.02E-06    | -0.193414697 | 2.57E-05    |
| BTNL8    | grey | -0.09325326  | 0.043987468 | -0.077896807 | 0.092683588 |
| BTNL9    | grey | -0.144575233 | 0.001733856 | -0.171697942 | 0.000192851 |
| BZRAP1   | grey | -0.161358808 | 0.000464188 | -0.198259718 | 1.59E-05    |
| C10orf11 | grey | 0.093881435  | 0.042576741 | 0.098733008  | 0.032913684 |
| C10orf32 | grey | 0.022627649  | 0.625734294 | 0.010801602  | 0.815912189 |
| C10orf55 | grey | -0.074569244 | 0.107533787 | -0.061643315 | 0.183578183 |
| C10orf71 | grey | 0.010037044  | 0.828733246 | 0.025445364  | 0.583352665 |
| C10orf82 | grey | -0.10805638  | 0.019506741 | -0.136289758 | 0.003166083 |
| C10orf90 | grey | -0.037783733 | 0.415292117 | -0.041525244 | 0.370600316 |
| C10orf99 | grey | 0.10282657   | 0.026280693 | 0.154174428  | 0.000829328 |
| C11orf45 | grey | -0.256654552 | 1.84E-08    | -0.260075878 | 1.17E-08    |
| C11orf71 | grey | 0.147503125  | 0.001390921 | 0.140259341  | 0.002382035 |
| C11orf80 | grey | 0.070882268  | 0.126116234 | 0.05311845   | 0.251947443 |

|               |              |             |              |             |
|---------------|--------------|-------------|--------------|-------------|
| C11orf85 grey | -0.208513375 | 5.52E-06    | -0.219167213 | 1.74E-06    |
| C11orf86 grey | 0.052704876  | 0.255663805 | 0.028092536  | 0.544795417 |
| C11orf94 grey | 0.131268086  | 0.004491175 | 0.126642614  | 0.006134996 |
| C12orf43 grey | 0.026779923  | 0.563755976 | 0.031083922  | 0.502799806 |
| C12orf54 grey | -0.054869219 | 0.236631718 | -0.070352669 | 0.128978816 |
| C12orf56 grey | -0.039222422 | 0.397743781 | -0.030310061 | 0.513497984 |
| C12orf65 grey | 0.072418025  | 0.118093708 | 0.086941612  | 0.060470815 |
| C12orf75 grey | 0.127632335  | 0.005743602 | 0.144757597  | 0.001710418 |
| C14orf11 grey | -0.034922411 | 0.451517909 | -0.026811618 | 0.563294433 |
| C14orf16 grey | -0.229486937 | 5.36E-07    | -0.22800952  | 6.36E-07    |
| C14orf17 grey | -0.089133516 | 0.0542466   | -0.083131695 | 0.072688071 |
| C14orf18 grey | -0.073819199 | 0.111127574 | -0.074161521 | 0.10947581  |
| C15orf27 grey | -0.166021108 | 0.000314363 | -0.171730962 | 0.000192295 |
| C15orf38 grey | 0.0802097    | 0.083364113 | 0.029179833  | 0.529332333 |
| C15orf40 grey | 0.067654009  | 0.144353224 | 0.072293365  | 0.118729657 |
| C15orf59 grey | -0.090889464 | 0.049653314 | -0.104722018 | 0.023621938 |
| C15orf61 grey | 0.059348934  | 0.200463258 | 0.086956746  | 0.060425896 |
| C16orf62 grey | 0.071207226  | 0.124384352 | 0.064866716  | 0.161663366 |
| C16orf74 grey | -0.13562961  | 0.003317175 | -0.117556543 | 0.011008427 |
| C16orf90 grey | -0.131040415 | 0.00456169  | -0.123365246 | 0.007607676 |
| C17orf10 grey | -0.165250712 | 0.000335515 | -0.171377442 | 0.000198327 |
| C17orf49 grey | 0.078813957  | 0.088892909 | 0.05477252   | 0.237460132 |
| C17orf58 grey | -0.097938227 | 0.03435502  | -0.100618766 | 0.029698929 |
| C17orf74 grey | 0.036329268  | 0.433488128 | 0.036066199  | 0.436827628 |
| C18orf42 grey | -0.068756491 | 0.137911218 | -0.072086908 | 0.119788769 |
| C19orf12 grey | -0.277542182 | 1.05E-09    | -0.259011033 | 1.35E-08    |
| C19orf33 grey | -0.202858361 | 9.96E-06    | -0.181217492 | 8.21E-05    |
| C19orf45 grey | 0.195102109  | 2.18E-05    | 0.172754154  | 0.000175789 |
| C19orf47 grey | -0.059648552 | 0.198196254 | -0.054578049 | 0.23913233  |
| C19orf68 grey | -0.175911647 | 0.00013284  | -0.186581013 | 4.97E-05    |
| C19orf81 grey | -0.122929319 | 0.007825686 | -0.125863631 | 0.006459713 |
| C19orf83 grey | -0.02659858  | 0.566400165 | -0.014349951 | 0.757101001 |
| C19orf84 grey | -0.21478849  | 2.81E-06    | -0.209835278 | 4.80E-06    |
| C1orf116 grey | 0.192845892  | 2.72E-05    | 0.211380344  | 4.07E-06    |
| C1orf127 grey | 0.057111145  | 0.21799132  | 0.024544993  | 0.596749959 |
| C1orf145 grey | -0.185365184 | 5.58E-05    | -0.211500524 | 4.02E-06    |
| C1orf216 grey | -0.118051229 | 0.010673658 | -0.124291226 | 0.007162504 |
| C1orf226 grey | 0.082989263  | 0.073181262 | 0.071556545  | 0.122543314 |
| C1orf234 grey | 0.003311601  | 0.943101128 | 0.019184743  | 0.679230948 |
| C1orf56 grey  | 0.063385843  | 0.171473617 | 0.060072861  | 0.19501787  |
| C1orf61 grey  | -0.120494491 | 0.00914909  | -0.116052537 | 0.012084041 |
| C1orf94 grey  | -0.076129381 | 0.100352709 | -0.07766154  | 0.093676536 |
| C1orf95 grey  | -0.140691881 | 0.002308302 | -0.138102868 | 0.002782722 |
| C1QL2 grey    | -0.196078304 | 1.98E-05    | -0.196986535 | 1.81E-05    |
| C1QL4 grey    | -0.072820779 | 0.116057273 | -0.067991254 | 0.142358689 |



|                |              |             |              |             |
|----------------|--------------|-------------|--------------|-------------|
| C1QTNF3 grey   | -0.176802044 | 0.000122642 | -0.175615016 | 0.000136411 |
| C1QTNF6 grey   | 0.118557855  | 0.010340194 | 0.12660776   | 0.006149206 |
| C1QTNF9 grey   | -0.145946724 | 0.001564572 | -0.13685842  | 0.003040973 |
| C1QTNF9 grey   | -0.024584623 | 0.596157351 | -0.051059659 | 0.270822736 |
| C1RL grey      | 0.011314805  | 0.807333428 | -0.007671636 | 0.868673546 |
| C2orf141 grey  | -0.160342654 | 0.000504646 | -0.162966476 | 0.000406292 |
| C2orf196 grey  | 0.115055339  | 0.012847428 | 0.113345979  | 0.014255279 |
| C2orf202 grey  | -0.092608715 | 0.045475638 | -0.097686094 | 0.034823351 |
| C21orf146 grey | -0.009743035 | 0.833675877 | -0.001616522 | 0.972207532 |
| C21orf33 grey  | -0.059732098 | 0.197567468 | -0.049291033 | 0.287791113 |
| C22orf29 grey  | 0.018678263  | 0.687246882 | -0.019332567 | 0.676898132 |
| C22orf39 grey  | 0.139995234  | 0.002428105 | 0.147519556  | 0.001389186 |
| C22orf46 grey  | 0.190007392  | 3.58E-05    | 0.174478863  | 0.000150938 |
| C2CD2 grey     | -0.070312564 | 0.129197624 | -0.091684258 | 0.047683748 |
| C2CD4A grey    | 0.131915925  | 0.004295879 | 0.123194765  | 0.00769228  |
| C2CD4B grey    | -0.115032275 | 0.012865576 | -0.095765613 | 0.038572099 |
| C2CD4D grey    | 0.035621481  | 0.442506518 | 0.033321142  | 0.472544169 |
| C2orf43 grey   | -0.465696044 | 1.63E-26    | -0.446053296 | 3.27E-24    |
| C2orf54 grey   | -0.092709782 | 0.04523953  | -0.079792109 | 0.084988366 |
| C2orf66 grey   | 0.081916858  | 0.076982826 | 0.060255627  | 0.193660359 |
| C2orf72 grey   | -0.038097083 | 0.411431693 | -0.070823942 | 0.126429061 |
| C2orf80 grey   | -0.036373215 | 0.432931681 | -0.041405306 | 0.371985094 |
| C2orf82 grey   | -0.00956424  | 0.836684846 | -0.020099217 | 0.664849512 |
| C2orf91 grey   | 0.085019397  | 0.066404155 | 0.10591065   | 0.02207609  |
| C3orf14 grey   | -0.337854689 | 6.22E-14    | -0.314788874 | 3.35E-12    |
| C3orf52 grey   | 0.100698963  | 0.029568399 | 0.089540605  | 0.053151403 |
| C3orf56 grey   | -0.108706593 | 0.018781428 | -0.103846291 | 0.02481994  |
| C3orf67 grey   | -0.341448029 | 3.24E-14    | -0.346302901 | 1.33E-14    |
| C4A grey       | -0.169747387 | 0.000228506 | -0.169480682 | 0.000233835 |
| C4B grey       | -0.119732273 | 0.009602483 | -0.114059834 | 0.013651631 |
| C4BPB grey     | 0.165851278  | 0.000318916 | 0.179339522  | 9.75E-05    |
| C4orf19 grey   | 0.071713899  | 0.121720965 | 0.103859382  | 0.024801651 |
| C4orf36 grey   | -0.108211189 | 0.019331874 | -0.10200596  | 0.027509427 |
| C5 grey        | 0.030058006  | 0.517007828 | 0.011193249  | 0.809363328 |
| C5orf38 grey   | -0.121403901 | 0.008633135 | -0.134926315 | 0.003485319 |
| C5orf46 grey   | 0.069576631  | 0.133263999 | 0.11079484   | 0.016608643 |
| C6orf141 grey  | 0.135032251  | 0.003459507 | 0.112826347  | 0.01470933  |
| C6orf195 grey  | -0.232040033 | 3.97E-07    | -0.233566256 | 3.31E-07    |
| C6orf222 grey  | -0.118339505 | 0.010482763 | -0.1385948   | 0.002686264 |
| C6orf25 grey   | -0.148402284 | 0.001298857 | -0.16558785  | 0.0003261   |
| C6orf58 grey   | -0.063428236 | 0.171186731 | -0.068901553 | 0.137080299 |
| C7orf43 grey   | 0.19197234   | 2.96E-05    | 0.19474243   | 2.26E-05    |
| C8orf22 grey   | 0.006120172  | 0.895059566 | 0.00362878   | 0.937662046 |
| C8orf4 grey    | 0.11195902   | 0.015495534 | 0.092490633  | 0.045752808 |
| C8orf58 grey   | 0.12317969   | 0.007699802 | 0.099298417  | 0.031920008 |

|          |      |              |             |              |             |
|----------|------|--------------|-------------|--------------|-------------|
| C8orf86  | grey | -0.02143495  | 0.644063485 | -0.025457036 | 0.583179907 |
| C8orf89  | grey | -0.216702223 | 2.28E-06    | -0.239776884 | 1.57E-07    |
| C9       | grey | -0.128390105 | 0.005459266 | -0.127511832 | 0.005790025 |
| C9orf129 | grey | -0.037239594 | 0.422046276 | -0.029850979 | 0.519899895 |
| C9orf172 | grey | 0.288345954  | 2.15E-10    | 0.284598508  | 3.76E-10    |
| C9orf173 | grey | -0.048797887 | 0.292647176 | -0.074447121 | 0.108112594 |
| C9orf66  | grey | -0.147419317 | 0.0013998   | -0.136413033 | 0.003138571 |
| C9orf78  | grey | 0.052114651  | 0.261033035 | 0.063488542  | 0.170779252 |
| C9orf91  | grey | 0.257321147  | 1.69E-08    | 0.226345877  | 7.71E-07    |
| C9orf92  | grey | -0.197923665 | 1.64E-05    | -0.190000926 | 3.59E-05    |
| CA10     | grey | 0.140432609  | 0.002352244 | 0.16630069   | 0.000307    |
| CA12     | grey | 0.179716497  | 9.42E-05    | 0.16654961   | 0.00030058  |
| CA14     | grey | -0.026658371 | 0.565527695 | -0.022582484 | 0.626424285 |
| CA2      | grey | 0.168002403  | 0.000265542 | 0.147898052  | 0.00134977  |
| CA4      | grey | -0.152560375 | 0.000941655 | -0.16194296  | 0.000442317 |
| CA9      | grey | 0.088232832  | 0.056736529 | 0.103077472  | 0.025914571 |
| CABIN1   | grey | 0.210446445  | 4.50E-06    | 0.204227691  | 8.65E-06    |
| CABLES1  | grey | -0.027561991 | 0.552420957 | -0.049074979 | 0.289911914 |
| CABP4    | grey | 0.026678571  | 0.56523307  | 0.020492496  | 0.658701858 |
| CABP7    | grey | -0.024350917 | 0.599655958 | -0.047439221 | 0.306308386 |
| CACNA1   | grey | -0.336546016 | 7.87E-14    | -0.339278277 | 4.81E-14    |
| CACNA1   | grey | -0.244072635 | 9.23E-08    | -0.259703907 | 1.23E-08    |
| CACNA1   | grey | 0.038901531  | 0.401618731 | 0.033954533  | 0.464163507 |
| CACNA1   | grey | -0.248430085 | 5.34E-08    | -0.228340091 | 6.12E-07    |
| CACNA1   | grey | -0.049764606 | 0.283179062 | -0.069493927 | 0.133727083 |
| CACNA2   | grey | -0.30969367  | 7.72E-12    | -0.308313715 | 9.66E-12    |
| CACNB1   | grey | -0.039675792 | 0.392307503 | -0.061069724 | 0.187697552 |
| CACNB3   | grey | 0.097508836  | 0.035155847 | 0.065636416  | 0.156734202 |
| CACNG1   | grey | -0.162493467 | 0.000422587 | -0.151527679 | 0.001020724 |
| CACNG3   | grey | -0.054926871 | 0.236138791 | -0.055375466 | 0.23232798  |
| CACNG4   | grey | -0.207105651 | 6.40E-06    | -0.209553495 | 4.94E-06    |
| CACNG5   | grey | 0.070873522  | 0.126163108 | 0.05976582   | 0.197314082 |
| CACNG7   | grey | -0.064479382 | 0.164187559 | -0.057230796 | 0.217029511 |
| CACNG8   | grey | -0.223824744 | 1.03E-06    | -0.205915545 | 7.25E-06    |
| CADM1    | grey | 0.195704426  | 2.05E-05    | 0.162509417  | 0.000422027 |
| CADM2    | grey | -0.091756829 | 0.047507219 | -0.093807088 | 0.042741691 |
| CADPS    | grey | -0.081064415 | 0.080117784 | -0.064498902 | 0.164059645 |
| CAGE1    | grey | -0.104395626 | 0.024062467 | -0.084650908 | 0.067594473 |
| CALB1    | grey | -0.043283301 | 0.350669865 | -0.05147911  | 0.266900855 |
| CALB2    | grey | -0.041990642 | 0.365257246 | -0.045520218 | 0.326310344 |
| CALCA    | grey | -0.112236577 | 0.015240019 | -0.120698447 | 0.009031047 |
| CALCB    | grey | -0.186972558 | 4.79E-05    | -0.186197233 | 5.16E-05    |
| CALHM3   | grey | -0.146474994 | 0.001503518 | -0.174622399 | 0.000149025 |
| CALML6   | grey | 0.158884071  | 0.000568471 | 0.147861631  | 0.001353518 |
| CALY     | grey | -0.05638725  | 0.223893135 | -0.053414496 | 0.249310348 |

|             |              |             |              |             |
|-------------|--------------|-------------|--------------|-------------|
| CAMK1Egrey  | -0.16713347  | 0.000286009 | -0.167299998 | 0.000281976 |
| CAMK1Ggrey  | -0.094686972 | 0.040823688 | -0.105850886 | 0.022151667 |
| CAMK2Bgrey  | -0.174289728 | 0.000153492 | -0.192404479 | 2.84E-05    |
| CAMK2Ngrey  | -0.020398117 | 0.660175095 | -0.020082769 | 0.665107117 |
| CAMK4 grey  | -0.072293499 | 0.11872897  | -0.066585884 | 0.150811324 |
| CAMKK1grey  | -0.082323164 | 0.075524054 | -0.107036056 | 0.020694088 |
| CAMKV grey  | -0.104478154 | 0.023950414 | -0.115320411 | 0.012640465 |
| CAMP grey   | 0.122353282  | 0.008122315 | 0.14483343   | 0.001700757 |
| CANT1 grey  | 0.305494182  | 1.52E-11    | 0.286721698  | 2.75E-10    |
| CAPN10 grey | 0.067493885  | 0.145307674 | 0.055365387  | 0.232413121 |
| CAPN12 grey | -0.056615278 | 0.222022685 | -0.082667991 | 0.074303728 |
| CAPN13 grey | 0.157869043  | 0.000617224 | 0.171270428  | 0.000200188 |
| CAPN14 grey | 0.006144929  | 0.894637534 | -0.000690376 | 0.988128584 |
| CAPN5 grey  | -0.283281029 | 4.56E-10    | -0.275494296 | 1.40E-09    |
| CAPN8 grey  | 0.235758607  | 2.55E-07    | 0.25856141   | 1.43E-08    |
| CAPNS2 grey | 0.120909868  | 0.008910115 | 0.145357314  | 0.001635373 |
| CAPZA3 grey | -0.017669395 | 0.703318061 | -0.024223232 | 0.601571309 |
| CARD10 grey | 0.222506618  | 1.19E-06    | 0.237180423  | 2.15E-07    |
| CARD14 grey | -0.006076314 | 0.895807295 | -0.03055958  | 0.510035681 |
| CARD6 grey  | -0.06331836  | 0.171931017 | -0.05077479  | 0.273508612 |
| CARNS1 grey | -0.240492023 | 1.44E-07    | -0.232918152 | 3.58E-07    |
| CARTPT grey | -0.083141021 | 0.072655874 | -0.073890692 | 0.110780997 |
| CASC10 grey | -0.230080345 | 5.00E-07    | -0.250241399 | 4.24E-08    |
| CASKIN1grey | 0.048525698  | 0.295350814 | 0.03333122   | 0.472410174 |
| CASP14 grey | 0.098047119  | 0.034154419 | 0.089041667  | 0.054496282 |
| CASP9 grey  | -0.10279717  | 0.026323884 | -0.115473691 | 0.012522134 |
| CASQ1 grey  | -0.023110575 | 0.618377016 | -0.021799879 | 0.638431683 |
| CASR grey   | -0.131928523 | 0.004292159 | -0.128711451 | 0.00534256  |
| CASZ1 grey  | 0.163955108  | 0.000374105 | 0.144347914  | 0.001763484 |
| CATSPEIgrey | -0.004307416 | 0.92603464  | 0.007660633  | 0.868860197 |
| CATSPEIgrey | 0.07908109   | 0.087812549 | 0.098161666  | 0.03394448  |
| CATSPEIgrey | -0.078891788 | 0.088577043 | -0.070838804 | 0.126349292 |
| CBLN2 grey  | -0.10534678  | 0.022798128 | -0.120012015 | 0.009433814 |
| CBLN3 grey  | -0.260403214 | 1.12E-08    | -0.276556001 | 1.21E-09    |
| CBR1 grey   | -0.221231326 | 1.38E-06    | -0.172568758 | 0.000178678 |
| CBR3 grey   | -0.008994878 | 0.846282416 | 0.027546561  | 0.552643501 |
| CBX4 grey   | 0.206931833  | 6.52E-06    | 0.200428079  | 1.28E-05    |
| CBY3 grey   | -0.209764483 | 4.83E-06    | -0.205145552 | 7.86E-06    |
| CC2D1B grey | 0.040041193  | 0.387958913 | 0.051887722  | 0.263117931 |
| CCBL1 grey  | 0.144249532  | 0.00177645  | 0.132116344  | 0.004237035 |
| CCDC102grey | -0.156799148 | 0.00067279  | -0.160504975 | 0.00049797  |
| CCDC109grey | -0.017254365 | 0.709968502 | 0.011559737  | 0.803247166 |
| CCDC110grey | -0.18331392  | 6.76E-05    | -0.183162169 | 6.85E-05    |
| CCDC116grey | -0.012629014 | 0.785472279 | -0.023055091 | 0.619220391 |
| CCDC127grey | -0.201256548 | 1.17E-05    | -0.218271348 | 1.92E-06    |

|             |              |             |              |             |
|-------------|--------------|-------------|--------------|-------------|
| CCDC146grey | -0.090778296 | 0.049934145 | -0.096231113 | 0.037633401 |
| CCDC154grey | -0.107949482 | 0.019628292 | -0.103237842 | 0.025682866 |
| CCDC155grey | -0.082796204 | 0.073854105 | -0.0922745   | 0.046263803 |
| CCDC163grey | -0.012954146 | 0.780089091 | -0.034928663 | 0.451436869 |
| CCDC166grey | -0.178900626 | 0.000101442 | -0.189905329 | 3.62E-05    |
| CCDC169grey | -0.093003411 | 0.044559401 | -0.09035412  | 0.051017913 |
| CCDC174grey | 0.034124443  | 0.461929468 | 0.014245779  | 0.758809559 |
| CCDC178grey | -0.064775069 | 0.162257962 | -0.071691374 | 0.121838421 |
| CCDC183grey | 0.135569661  | 0.003331215 | 0.10862749   | 0.018868393 |
| CCDC185grey | -0.187174919 | 4.70E-05    | -0.193910774 | 2.45E-05    |
| CCDC42 grey | -0.159949629 | 0.000521155 | -0.150626859 | 0.001094651 |
| CCDC53 grey | 0.067565639  | 0.144879378 | 0.062308618  | 0.178884229 |
| CCDC8 grey  | -0.380059235 | 1.70E-17    | -0.387292451 | 3.68E-18    |
| CCDC92 grey | 0.094639568  | 0.040925135 | 0.096321817  | 0.037452767 |
| CCK grey    | -0.135835733 | 0.00326931  | -0.135857609 | 0.003264267 |
| CCKBR grey  | -0.065236785 | 0.159279074 | -0.066565536 | 0.150936447 |
| CCL11 grey  | -0.003069484 | 0.947254827 | 0.00097219   | 0.983283217 |
| CCL22 grey  | 0.246630607  | 6.70E-08    | 0.280058529  | 7.29E-10    |
| CCL26 grey  | 0.004050816  | 0.930429373 | 0.014836491  | 0.749136894 |
| CCL27 grey  | 0.017001444  | 0.714032175 | 0.019236436  | 0.678414828 |
| CCL28 grey  | -0.082951429 | 0.073312724 | -0.065908685 | 0.155018064 |
| CCNB3 grey  | 0.031582636  | 0.495968116 | 0.019384847  | 0.676073837 |
| CCND1 grey  | 0.265368463  | 5.74E-09    | 0.25476719   | 2.36E-08    |
| CCND3 grey  | -0.255042475 | 2.28E-08    | -0.223901418 | 1.02E-06    |
| CCNI2 grey  | -0.222680887 | 1.17E-06    | -0.217250799 | 2.15E-06    |
| CCNJL grey  | -0.053833287 | 0.245612816 | -0.050405932 | 0.277013259 |
| CCR10 grey  | -0.020016529 | 0.666144965 | -0.012970492 | 0.779818713 |
| CCR9 grey   | 0.094974484  | 0.040212933 | 0.109743508  | 0.017673371 |
| CD177 grey  | -0.01899278  | 0.682264911 | -0.00367855  | 0.936808822 |
| CD1A grey   | 0.05622731   | 0.225211767 | 0.082159296  | 0.076109667 |
| CD207 grey  | 0.067135174  | 0.147463315 | 0.072365975  | 0.118358914 |
| CD22 grey   | -0.389824996 | 2.13E-18    | -0.383984224 | 7.44E-18    |
| CD276 grey  | 0.244320141  | 8.95E-08    | 0.252623418  | 3.12E-08    |
| CD2BP2 grey | -0.028022271 | 0.545802327 | -0.012510866 | 0.787431002 |
| CD44 grey   | 0.248537835  | 5.26E-08    | 0.261320229  | 9.93E-09    |
| CD55 grey   | -0.041122842 | 0.37525895  | -0.022747926 | 0.623898378 |
| CD58 grey   | 0.177484721  | 0.000115327 | 0.152797308  | 0.00092433  |
| CD5L grey   | 0.010001537  | 0.829329796 | 0.006436134  | 0.889675588 |
| CD83 grey   | -0.202465785 | 1.04E-05    | -0.231051029 | 4.46E-07    |
| CD99 grey   | 0.159478732  | 0.000541595 | 0.181341241  | 8.11E-05    |
| CDA grey    | -0.00904859  | 0.845376015 | -0.011438282 | 0.80527276  |
| CDAN1 grey  | 0.080607076  | 0.08184185  | 0.052796872  | 0.254833867 |
| CDC42EFgrey | 0.040534049  | 0.382140082 | 0.051390432  | 0.267726732 |
| CDC42EFgrey | -0.242683208 | 1.10E-07    | -0.251965264 | 3.40E-08    |
| CDH10 grey  | 0.036524642  | 0.43101752  | 0.016209498  | 0.726808239 |

|        |      |              |             |              |             |
|--------|------|--------------|-------------|--------------|-------------|
| CDH12  | grey | -0.073696914 | 0.111722356 | -0.070985739 | 0.125562759 |
| CDH15  | grey | -0.014400987 | 0.756264368 | 0.02504143   | 0.58934581  |
| CDH16  | grey | -0.096192181 | 0.037711116 | -0.06823114  | 0.140952842 |
| CDH17  | grey | -0.014358719 | 0.756957239 | -0.018918211 | 0.683444852 |
| CDH18  | grey | -0.143936095 | 0.001818344 | -0.139436073 | 0.002528339 |
| CDH19  | grey | -0.223318233 | 1.09E-06    | -0.229220749 | 5.53E-07    |
| CDH2   | grey | -0.049061408 | 0.29004548  | -0.060985199 | 0.188310298 |
| CDH20  | grey | -0.141771393 | 0.002133285 | -0.139065705 | 0.002596791 |
| CDH22  | grey | -0.107151136 | 0.020557101 | -0.127261416 | 0.005887576 |
| CDH26  | grey | 0.117376693  | 0.011132422 | 0.122121502  | 0.008244473 |
| CDH3   | grey | -0.064928343 | 0.16126446  | -0.054793304 | 0.237281903 |
| CDH4   | grey | -0.06577519  | 0.155857708 | -0.09556472  | 0.038983292 |
| CDH6   | grey | -0.287029647 | 2.62E-10    | -0.290925957 | 1.46E-10    |
| CDHR1  | grey | 0.13565008   | 0.003312394 | 0.140665293  | 0.002312774 |
| CDHR5  | grey | 0.062246482  | 0.179318816 | 0.047718351  | 0.303467941 |
| CDIPT  | grey | -0.223792024 | 1.03E-06    | -0.209378607 | 5.04E-06    |
| CDK11A | grey | 0.023869007  | 0.606899285 | -0.007227364 | 0.876215798 |
| CDK11B | grey | 0.050813961  | 0.273138219 | 0.044664974  | 0.335491218 |
| CDK18  | grey | 0.056389982  | 0.223870661 | 0.041687319  | 0.368734125 |
| CDK3   | grey | -0.134174542 | 0.003673569 | -0.167214825 | 0.000284032 |
| CDK5R2 | grey | -0.110491367 | 0.016910062 | -0.12646774  | 0.006206589 |
| CDKN1C | grey | -0.22624143  | 7.80E-07    | -0.245672267 | 7.56E-08    |
| CDKN2B | grey | -0.21311892  | 3.37E-06    | -0.216027845 | 2.46E-06    |
| CDKN2C | grey | -0.131850353 | 0.004315291 | -0.116176798 | 0.011991781 |
| CDRT15 | grey | 0.066421568  | 0.151823993 | 0.041153957  | 0.374897442 |
| CDX1   | grey | -0.21811674  | 1.95E-06    | -0.186192844 | 5.16E-05    |
| CDX4   | grey | 0.066422564  | 0.15181784  | 0.0650651    | 0.160381894 |
| CDY2A  | grey | -0.058957775 | 0.203451191 | -0.064006956 | 0.167306208 |
| CEACAM | grey | -0.221509356 | 1.34E-06    | -0.241915433 | 1.21E-07    |
| CEACAM | grey | 0.070971547  | 0.125638563 | 0.080954178  | 0.080530636 |
| CEACAM | grey | 0.1604926    | 0.000498476 | 0.186600267  | 4.96E-05    |
| CEACAM | grey | 0.085574516  | 0.06464351  | 0.1145548    | 0.013246402 |
| CEACAM | grey | 0.032857459  | 0.478731626 | 0.073408197  | 0.113136566 |
| CEBPA  | grey | -0.20294951  | 9.87E-06    | -0.221357879 | 1.36E-06    |
| CEBPB  | grey | -0.194363519 | 2.34E-05    | -0.192491437 | 2.82E-05    |
| CEBPD  | grey | -0.077696873 | 0.093526873 | -0.081458858 | 0.078654552 |
| CECR6  | grey | 0.093155176  | 0.044211254 | 0.069658891  | 0.132804634 |
| CELA3A | grey | 0.217049616  | 2.20E-06    | 0.219114847  | 1.75E-06    |
| CELA3B | grey | 0.203358339  | 9.46E-06    | 0.202691356  | 1.01E-05    |
| CELF4  | grey | -0.355120724 | 2.51E-15    | -0.376444865 | 3.60E-17    |
| CELF5  | grey | -0.162124654 | 0.000435712 | -0.16297126  | 0.00040613  |
| CEND1  | grey | -0.136868913 | 0.003038707 | -0.123474235 | 0.007554025 |
| CENPV  | grey | -0.215847547 | 2.51E-06    | -0.225751689 | 8.26E-07    |
| CEP250 | grey | 0.249672628  | 4.56E-08    | 0.230614266  | 4.70E-07    |
| CER1   | grey | -0.129945873 | 0.004914845 | -0.134959788 | 0.003477144 |

|          |      |              |             |              |             |
|----------|------|--------------|-------------|--------------|-------------|
| CERS4    | grey | 0.024108271  | 0.603298159 | 0.011209481  | 0.809092191 |
| CERS5    | grey | -0.213860843 | 3.11E-06    | -0.231525001 | 4.22E-07    |
| CETP     | grey | -0.078628304 | 0.089650012 | -0.051276422 | 0.268791107 |
| CFC1     | grey | -0.061056778 | 0.187791305 | -0.045080897 | 0.331005845 |
| CFC1B    | grey | -0.053194052 | 0.251272167 | -0.051202779 | 0.269480159 |
| CFH      | grey | -0.013179375 | 0.776366117 | -0.01318273  | 0.776310689 |
| CFHR1    | grey | -0.012151289 | 0.793400461 | -0.009169789 | 0.843331508 |
| CFHR2    | grey | 0.113157985  | 0.014418104 | 0.128162525  | 0.0055433   |
| CFHR3    | grey | -0.064597732 | 0.163413171 | -0.068455599 | 0.13964706  |
| CFHR5    | grey | 0.041070831  | 0.375863706 | 0.048672745  | 0.293888143 |
| CFTR     | grey | -0.070515914 | 0.128091133 | -0.076725775 | 0.097710404 |
| CGA      | grey | 0.071753023  | 0.121517169 | 0.067989943  | 0.142366402 |
| CGB      | grey | -0.001150675 | 0.980214757 | -0.003181875 | 0.945326495 |
| CGB1     | grey | -0.106851266 | 0.020915716 | -0.109039186 | 0.018419594 |
| CGB2     | grey | -0.134736517 | 0.003532001 | -0.128623992 | 0.005374099 |
| CGB5     | grey | 0.011265342  | 0.808159267 | 0.031368317  | 0.498897925 |
| CGB8     | grey | -0.004510768 | 0.922553443 | 0.020851633  | 0.653107894 |
| CGREF1   | grey | -0.120774607 | 0.008987316 | -0.155432448 | 0.000750516 |
| CH17-14C | grey | 0.012029278  | 0.795428774 | 0.005400235  | 0.907344916 |
| CH17-27C | grey | -0.043183867 | 0.351778714 | -0.042332713 | 0.361360783 |
| CH17-33C | grey | -0.056264434 | 0.224905206 | -0.066797204 | 0.149516524 |
| CH507-42 | grey | -0.087816488 | 0.057919146 | -0.128821491 | 0.005303116 |
| CH507-9I | grey | -0.044432803 | 0.338011867 | -0.037041792 | 0.424517324 |
| CH507-9I | grey | 0.074044128  | 0.110040062 | 0.072873345  | 0.115793529 |
| CH507-9I | grey | -0.033238752 | 0.473640371 | -0.037993798 | 0.412701801 |
| CH507-9I | grey | -0.011774092 | 0.799675432 | -0.035161599 | 0.448423054 |
| CH507-9I | grey | -0.014305864 | 0.757823939 | -0.021163294 | 0.648269115 |
| CHAC1    | grey | 0.003044367  | 0.947685801 | 0.000985572  | 0.983053151 |
| CHAD     | grey | -0.163053476 | 0.000403359 | -0.144122408 | 0.001793333 |
| CHAT     | grey | 0.03596912   | 0.438063702 | 0.044529812  | 0.336957176 |
| CHCHD5   | grey | -0.326282987 | 4.80E-13    | -0.309093008 | 8.52E-12    |
| CHD3     | grey | 0.124398863  | 0.007112299 | 0.115253286  | 0.012692594 |
| CHD5     | grey | -0.169158423 | 0.000240429 | -0.207183223 | 6.35E-06    |
| CHFR     | grey | 0.081826382  | 0.077310759 | 0.08797315   | 0.057471776 |
| CHGB     | grey | -0.152170976 | 0.00097078  | -0.161462433 | 0.000460236 |
| CHI3L1   | grey | -0.035907137 | 0.438853969 | -0.016330206 | 0.724855915 |
| CHI3L2   | grey | 0.036972195  | 0.425388767 | 0.040211274  | 0.385944819 |
| CHKB-CI  | grey | 0.196542541  | 1.89E-05    | 0.167045804  | 0.000288154 |
| CHL1     | grey | -0.337821667 | 6.26E-14    | -0.344824073 | 1.74E-14    |
| CHMP6    | grey | 0.018779929  | 0.68563499  | 0.018877366  | 0.684091484 |
| CHODL    | grey | -0.29969559  | 3.80E-11    | -0.29464483  | 8.30E-11    |
| CHP2     | grey | -0.101700776 | 0.027978828 | -0.115269972 | 0.012679619 |
| CHRFAM   | grey | -0.071410715 | 0.12330929  | -0.072666516 | 0.116833996 |
| CHRM1    | grey | -0.055280941 | 0.233127328 | -0.047900082 | 0.301628035 |
| CHRM2    | grey | -0.007900777 | 0.864788107 | -0.000392223 | 0.993255322 |

|             |              |             |              |             |
|-------------|--------------|-------------|--------------|-------------|
| CHRM3 grey  | 0.052186779  | 0.260372754 | 0.002118473  | 0.963582874 |
| CHRNA1 grey | 0.063581419  | 0.170153109 | 0.070397267  | 0.128735833 |
| CHRNA1 grey | 0.127721644  | 0.005709413 | 0.125864897  | 0.006459173 |
| CHRNA2 grey | 0.019541254  | 0.673610089 | -0.015878688 | 0.73216778  |
| CHRNA4 grey | -0.17157488  | 0.000194936 | -0.172931308 | 0.00017307  |
| CHRNA6 grey | -0.145637297 | 0.001601382 | -0.15019548  | 0.001131773 |
| CHRNA7 grey | -0.145923118 | 0.001567353 | -0.160881138 | 0.000482815 |
| CHRNA9 grey | 0.17842853   | 0.000105886 | 0.169122266  | 0.00024118  |
| CHRNA1 grey | -0.137339037 | 0.002938756 | -0.153042031 | 0.000906745 |
| CHRNA2 grey | -0.029657747 | 0.522606731 | -0.040760821 | 0.379480746 |
| CHRNA4 grey | -0.156988064 | 0.000662654 | -0.173605505 | 0.000163078 |
| CHRNA6 grey | -0.08667697  | 0.06126072  | -0.080955731 | 0.080524808 |
| CHRNA7 grey | -0.177945663 | 0.000110621 | -0.182507554 | 7.28E-05    |
| CHST1 grey  | 0.056347549  | 0.224219937 | 0.08434907   | 0.068582477 |
| CHST10 grey | -0.088427831 | 0.056189567 | -0.105876119 | 0.02211973  |
| CHST13 grey | -0.24564966  | 7.58E-08    | -0.239421934 | 1.64E-07    |
| CHST14 grey | 0.075600759  | 0.102741932 | 0.050896153  | 0.272362134 |
| CHST15 grey | -0.25300362  | 2.97E-08    | -0.265265661 | 5.83E-09    |
| CHST2 grey  | 0.226008517  | 8.02E-07    | 0.219420346  | 1.69E-06    |
| CHST3 grey  | 0.218268534  | 1.92E-06    | 0.219649998  | 1.65E-06    |
| CHST7 grey  | 0.014413139  | 0.756065214 | 0.034814807  | 0.452914117 |
| CHST8 grey  | -0.156827463 | 0.000671262 | -0.166376133 | 0.000305041 |
| CHURC1 grey | -0.087857374 | 0.057802112 | -0.117623449 | 0.010962612 |
| CIART grey  | 0.007882951  | 0.865090269 | -0.004285608 | 0.926408042 |
| CIB2 grey   | -0.04493708  | 0.332552398 | -0.089762957 | 0.052561022 |
| CIDEA grey  | -0.115286288 | 0.012666941 | -0.120842479 | 0.008948504 |
| CITED1 grey | 0.060672081  | 0.190592974 | 0.059728952  | 0.197591121 |
| CKAP4 grey  | 0.157613519  | 0.000630094 | 0.160430967  | 0.000501003 |
| CKB grey    | -0.151805398 | 0.000998879 | -0.116297892 | 0.01190247  |
| CKM grey    | -0.034559686 | 0.456234108 | -0.010486916 | 0.821183492 |
| CKMT1A grey | 0.110532195  | 0.016869234 | 0.111053709  | 0.016355254 |
| CKMT1B grey | 0.066987385  | 0.148358492 | 0.078700133  | 0.089356479 |
| CKMT2 grey  | -0.198065363 | 1.62E-05    | -0.196789441 | 1.84E-05    |
| CLC grey    | -0.063339292 | 0.171789046 | -0.097623988 | 0.034939542 |
| CLCA4 grey  | 0.186541368  | 4.99E-05    | 0.166705966  | 0.000296611 |
| CLCF1 grey  | -0.101986349 | 0.027539384 | -0.13046877  | 0.004743167 |
| CLCN4 grey  | -0.336199199 | 8.38E-14    | -0.323721873 | 7.45E-13    |
| CLCNKA grey | -0.213798327 | 3.13E-06    | -0.200503045 | 1.27E-05    |
| CLCNKB grey | -0.323921162 | 7.20E-13    | -0.329961584 | 2.53E-13    |
| CLDN1 grey  | -0.250377681 | 4.16E-08    | -0.263482288 | 7.42E-09    |
| CLDN10 grey | -0.15108521  | 0.00105644  | -0.151028227 | 0.001061123 |
| CLDN14 grey | 0.021615572  | 0.641273448 | 0.04733499   | 0.307373537 |
| CLDN16 grey | -0.240108214 | 1.51E-07    | -0.253799401 | 2.68E-08    |
| CLDN17 grey | 0.048147185  | 0.299138186 | 0.019863093  | 0.668551411 |
| CLDN19 grey | -0.210284396 | 4.57E-06    | -0.21602244  | 2.46E-06    |

|         |      |              |             |              |             |
|---------|------|--------------|-------------|--------------|-------------|
| CLDN2   | grey | -0.040898882 | 0.377867291 | -0.043851375 | 0.344377389 |
| CLDN23  | grey | 0.108303374  | 0.019228396 | 0.105700656  | 0.022342637 |
| CLDN24  | grey | -0.15522905  | 0.00076277  | -0.144740203 | 0.001712641 |
| CLDN8   | grey | 0.082116358  | 0.076263719 | 0.06034333   | 0.193011402 |
| CLDN9   | grey | -0.28460406  | 3.76E-10    | -0.285072867 | 3.50E-10    |
| CLEC18A | grey | -0.090741558 | 0.050027241 | -0.080965868 | 0.080486775 |
| CLEC18B | grey | -0.160296787 | 0.000506547 | -0.171727216 | 0.000192358 |
| CLEC18C | grey | -0.107441122 | 0.020215399 | -0.107328115 | 0.020347968 |
| CLEC2A  | grey | 0.016610992  | 0.720321414 | 0.01380626   | 0.766031073 |
| CLEC2L  | grey | -0.130464951 | 0.004744401 | -0.137277839 | 0.002951596 |
| CLEC3A  | grey | -0.062931165 | 0.174573075 | -0.064812398 | 0.162015576 |
| CLEC4F  | grey | 0.043805988  | 0.344877488 | 0.045672116  | 0.324696927 |
| CLIC3   | grey | 0.121646993  | 0.008499682 | 0.159406803  | 0.000544782 |
| CLIC5   | grey | 0.00573158   | 0.901687757 | -0.011668179 | 0.801439716 |
| CLK2    | grey | 0.04022017   | 0.385839647 | 0.012699263  | 0.784308297 |
| CLK3    | grey | 0.127255027  | 0.005890084 | 0.131752248  | 0.004344483 |
| CLNK    | grey | 0.02023313   | 0.662753665 | 0.040729247  | 0.379850328 |
| CLPS    | grey | 0.062874249  | 0.174963977 | 0.056824478  | 0.220316507 |
| CLPSL1  | grey | 0.124787345  | 0.006933709 | 0.119707529  | 0.00961753  |
| CLPSL2  | grey | 0.160295339  | 0.000506607 | 0.150341977  | 0.001119038 |
| CLPTM1  | grey | 0.033154903  | 0.474757421 | 0.036805041  | 0.427485985 |
| CLRN3   | grey | 0.093437402  | 0.043569913 | 0.100066093  | 0.030611972 |
| CLSTN1  | grey | 0.007718458  | 0.867879345 | -0.006994881 | 0.880167091 |
| CLSTN3  | grey | -0.147907233 | 0.001348827 | -0.160270244 | 0.00050765  |
| CLTCL1  | grey | -0.123702353 | 0.007442825 | -0.146917216 | 0.001454099 |
| CLUL1   | grey | 0.051410887  | 0.267536079 | 0.036874671  | 0.42661163  |
| CLYBL   | grey | 0.02689862   | 0.562028463 | -0.002366438 | 0.959323792 |
| CMBL    | grey | 0.152403441  | 0.000953294 | 0.164341963  | 0.00036217  |
| CMC4    | grey | 0.043314339  | 0.350324205 | 0.032890355  | 0.478291209 |
| CMTM2   | grey | 0.051787553  | 0.264041867 | 0.074879384  | 0.106074851 |
| CMTM7   | grey | 0.071239284  | 0.124214502 | 0.043608037  | 0.347063972 |
| CMTM8   | grey | 0.161039899  | 0.000476548 | 0.133255168  | 0.00391629  |
| CNGA1   | grey | 0.153774202  | 0.000855963 | 0.122275018  | 0.008163382 |
| CNGA2   | grey | -0.072452528 | 0.117918168 | -0.07240595  | 0.118155191 |
| CNGB1   | grey | -0.118758022 | 0.010211011 | -0.122604267 | 0.007991859 |
| CNKSR2  | grey | -0.303727362 | 2.01E-11    | -0.281323204 | 6.07E-10    |
| CNN2    | grey | 0.199174866  | 1.45E-05    | 0.220867298  | 1.44E-06    |
| CNNM2   | grey | 0.20196167   | 1.09E-05    | 0.177647828  | 0.000113641 |
| CNPY1   | grey | 0.042129783  | 0.363669167 | -0.022032907 | 0.634846295 |
| CNR1    | grey | -0.246608733 | 6.72E-08    | -0.236474257 | 2.34E-07    |
| CNTD2   | grey | -0.084938946 | 0.066662554 | -0.065809117 | 0.15564399  |
| CNTFR   | grey | -0.363594891 | 4.83E-16    | -0.378763844 | 2.23E-17    |
| CNTN6   | grey | -0.048559434 | 0.295014813 | -0.03993743  | 0.389190798 |
| CNTNAP  | grey | -0.077022331 | 0.096417312 | -0.085358589 | 0.065323739 |
| CNTNAP  | grey | -0.083659683 | 0.070883451 | -0.08629883  | 0.062404159 |



|             |              |             |              |             |
|-------------|--------------|-------------|--------------|-------------|
| CNTROB grey | 0.074399149  | 0.108340636 | 0.060572847  | 0.191320622 |
| COCH grey   | 0.028979532  | 0.532164125 | 0.053928046  | 0.244781531 |
| COG1 grey   | 0.131974918  | 0.004278482 | 0.123327941  | 0.007626118 |
| COL11A1grey | -0.082181551 | 0.076029917 | -0.081851124 | 0.07722097  |
| COL11A2grey | -0.256646232 | 1.85E-08    | -0.264530425 | 6.44E-09    |
| COL13A1grey | -0.031840618 | 0.492453587 | -0.024395347 | 0.598990111 |
| COL17A1grey | 0.279466668  | 7.95E-10    | 0.276485753  | 1.22E-09    |
| COL18A1grey | -0.116028244 | 0.012102151 | -0.138952093 | 0.002618125 |
| COL19A1grey | -0.062761624 | 0.175739416 | -0.054691011 | 0.238159998 |
| COL22A1grey | -0.348565142 | 8.70E-15    | -0.334984833 | 1.04E-13    |
| COL23A1grey | -0.252318943 | 3.24E-08    | -0.243122964 | 1.04E-07    |
| COL25A1grey | -0.235045648 | 2.78E-07    | -0.228945292 | 5.71E-07    |
| COL26A1grey | -0.153895915 | 0.000847781 | -0.170250812 | 0.000218755 |
| COL27A1grey | -0.070651148 | 0.127359356 | -0.107388338 | 0.020277227 |
| COL2A1 grey | 0.077808891  | 0.093053649 | 0.082029429  | 0.076576384 |
| COL4A3 grey | -0.216849509 | 2.25E-06    | -0.237513315 | 2.06E-07    |
| COL4A4 grey | -0.272134653 | 2.25E-09    | -0.288828647 | 2.00E-10    |
| COL7A1 grey | -0.205157764 | 7.85E-06    | -0.18402295  | 6.33E-05    |
| COL8A2 grey | -0.383497204 | 8.25E-18    | -0.37622354  | 3.77E-17    |
| COL9A1 grey | -0.297853999 | 5.06E-11    | -0.294974978 | 7.89E-11    |
| COL9A2 grey | -0.179167647 | 9.90E-05    | -0.177184737 | 0.000118489 |
| COL9A3 grey | -0.227035733 | 7.12E-07    | -0.231040361 | 4.47E-07    |
| COLEC1(grey | -0.154725944 | 0.000793879 | -0.156811186 | 0.00067214  |
| COLEC1lgrey | -0.048585853 | 0.294751871 | -0.039527282 | 0.394083295 |
| COLGAL grey | 0.210514218  | 4.46E-06    | 0.151267745  | 0.001041568 |
| COMMD grey  | 0.021931133  | 0.636411153 | -0.03841828  | 0.407496715 |
| COMP grey   | -0.164932066 | 0.000344646 | -0.139797845 | 0.002463067 |
| COQ5 grey   | 0.181936243  | 7.68E-05    | 0.191256048  | 3.18E-05    |
| COQ6 grey   | 0.184162866  | 6.24E-05    | 0.194555386  | 2.30E-05    |
| CORO6 grey  | -0.200708079 | 1.24E-05    | -0.212144569 | 3.75E-06    |
| CORO7-Pgrey | 0.013501827  | 0.771044991 | 0.012962239  | 0.779955227 |
| CORT grey   | 0.007892542  | 0.864927689 | 0.011147314  | 0.810130745 |
| COX6A2 grey | -0.255219793 | 2.23E-08    | -0.252696176 | 3.09E-08    |
| COX6B2 grey | -0.13765109  | 0.002874073 | -0.143783164 | 0.001839111 |
| COX7B2 grey | -0.137793258 | 0.002845036 | -0.136423349 | 0.003136279 |
| COX8C grey  | -0.152767818 | 0.00092647  | -0.150811035 | 0.001079147 |
| CP grey     | -0.104317501 | 0.024168959 | -0.105920577 | 0.022063558 |
| CPA1 grey   | -0.0575246   | 0.214674735 | -0.04074265  | 0.379693415 |
| CPA2 grey   | -0.072996457 | 0.11517766  | -0.06399204  | 0.16740539  |
| CPA4 grey   | 0.047562609  | 0.30505062  | 0.076654129  | 0.098024872 |
| CPA5 grey   | -0.044825827 | 0.333751951 | -0.029718028 | 0.521761531 |
| CPA6 grey   | 0.054274398  | 0.241759863 | 0.040946352  | 0.377313502 |
| CPAMD8 grey | -0.267828909 | 4.10E-09    | -0.255904836 | 2.04E-08    |
| CPB2 grey   | -0.005780041 | 0.900860788 | -0.02177155  | 0.638868147 |
| CPLX1 grey  | 0.020337683  | 0.66111915  | 0.036954451  | 0.425611108 |

|        |      |              |             |              |             |
|--------|------|--------------|-------------|--------------|-------------|
| CPLX2  | grey | 0.027119495  | 0.558820628 | 0.00876731   | 0.850124906 |
| CPLX3  | grey | 0.05562802   | 0.23020178  | 0.062497165  | 0.177570284 |
| CPN1   | grey | 0.114073974  | 0.013639905 | 0.101975764  | 0.027555566 |
| CPNE4  | grey | 0.019464481  | 0.674818997 | 0.022250246  | 0.631509967 |
| CPNE7  | grey | 0.204864362  | 8.09E-06    | 0.198754337  | 1.51E-05    |
| CPO    | grey | -0.08243266  | 0.075134797 | -0.086957672 | 0.060423149 |
| CPPED1 | grey | -0.005998449 | 0.897135031 | 0.014148335  | 0.760408814 |
| CPS1   | grey | -0.093863918 | 0.042615557 | -0.090059785 | 0.051781419 |
| CPSF4L | grey | -0.035623036 | 0.442486587 | -0.042709151 | 0.357102989 |
| CPT1A  | grey | -0.018259228 | 0.693905487 | -0.021500021 | 0.643057756 |
| CPT1B  | grey | 0.169039544  | 0.000242905 | 0.153005364  | 0.00090936  |
| CPT1C  | grey | -0.189616985 | 3.72E-05    | -0.198199934 | 1.60E-05    |
| CPXM2  | grey | -0.384536936 | 6.62E-18    | -0.390106365 | 2.00E-18    |
| CR2    | grey | -0.208340845 | 5.62E-06    | -0.205569408 | 7.52E-06    |
| CRABP1 | grey | -0.103875152 | 0.024779637 | -0.124568038 | 0.007034028 |
| CRABP2 | grey | -0.284069095 | 4.06E-10    | -0.300252826 | 3.48E-11    |
| CRACR2 | grey | -0.059347035 | 0.200477685 | -0.049527719 | 0.28547979  |
| CRAT   | grey | 0.325652916  | 5.35E-13    | 0.329379206  | 2.80E-13    |
| CRB2   | grey | -0.309299921 | 8.23E-12    | -0.319255962 | 1.59E-12    |
| CREG2  | grey | 0.053837997  | 0.245571449 | 0.033668445  | 0.467938605 |
| CRELD1 | grey | -0.026748463 | 0.564214278 | -0.0364235   | 0.432295495 |
| CRH    | grey | -0.086220185 | 0.062644168 | -0.041256725 | 0.373704986 |
| CRHR1  | grey | -0.22823782  | 6.20E-07    | -0.223658769 | 1.05E-06    |
| CRIP3  | grey | -0.252494075 | 3.17E-08    | -0.266546701 | 4.89E-09    |
| CRISP1 | grey | -0.032225612 | 0.487233626 | -0.041825322 | 0.367149712 |
| CRNN   | grey | -0.063881677 | 0.16814061  | -0.056589201 | 0.22223602  |
| CRP    | grey | -0.040185973 | 0.386244032 | -0.041398858 | 0.372059631 |
| CRTAC1 | grey | -0.367901546 | 2.05E-16    | -0.359600879 | 1.06E-15    |
| CRTC1  | grey | -0.120757458 | 0.008997147 | -0.123581986 | 0.007501316 |
| CRTC2  | grey | -0.032645942 | 0.481568725 | -0.0525642   | 0.256936523 |
| CRYAB  | grey | -0.228595218 | 5.94E-07    | -0.225971571 | 8.05E-07    |
| CRYBA2 | grey | 0.101655651  | 0.028048816 | 0.077631999  | 0.093801814 |
| CRYBB2 | grey | 0.070820118  | 0.126449591 | 0.085423143  | 0.065119763 |
| CRYGB  | grey | -0.067541266 | 0.145024752 | -0.063075308 | 0.173585994 |
| CRYGC  | grey | -0.067065696 | 0.147883635 | -0.054827365 | 0.236990033 |
| CRYGN  | grey | -0.285340061 | 3.37E-10    | -0.265253048 | 5.84E-09    |
| CRYGS  | grey | 0.048719438  | 0.293424708 | 0.050484714  | 0.276262178 |
| CRYM   | grey | 0.006671542  | 0.885667514 | 0.010243642  | 0.825264109 |
| CSAG1  | grey | -0.132463065 | 0.004136955 | -0.134344784 | 0.00363015  |
| CSF2   | grey | 0.062286308  | 0.179040175 | 0.095532608  | 0.039049362 |
| CSF3   | grey | 0.221772192  | 1.30E-06    | 0.198211341  | 1.60E-05    |
| CSH1   | grey | -0.037316069 | 0.421093163 | -0.100711249 | 0.029548445 |
| CSH2   | grey | -0.066929668 | 0.148709211 | -0.113007327 | 0.014549769 |
| CSHL1  | grey | -0.064107503 | 0.166638772 | -0.063482339 | 0.170821134 |
| CSN2   | grey | 0.096681303  | 0.036744077 | 0.089408558  | 0.053504615 |

|          |      |              |             |              |             |
|----------|------|--------------|-------------|--------------|-------------|
| CSN3     | grey | -0.06317401  | 0.172912495 | -0.057842585 | 0.212146902 |
| CSRP2    | grey | 0.069189441  | 0.135442679 | 0.033319241  | 0.472569449 |
| CSRP2BP  | grey | -0.130116853 | 0.004858102 | -0.148819435 | 0.001258079 |
| CSRP3    | grey | -0.069920774 | 0.131350324 | -0.065420716 | 0.158103951 |
| CST6     | grey | -0.100108482 | 0.030541102 | -0.071037331 | 0.125287495 |
| CST8     | grey | -0.050451704 | 0.276576714 | -0.035407603 | 0.445252579 |
| CST9     | grey | -0.080613341 | 0.081818031 | -0.07560327  | 0.102730476 |
| CT45A1   | grey | -0.120706109 | 0.009026639 | -0.123554114 | 0.007514919 |
| CT45A10  | grey | -0.057060395 | 0.2184037   | -0.076190518 | 0.100079261 |
| CT45A3   | grey | -0.088200886 | 0.056826558 | -0.086735412 | 0.061085554 |
| CT45A5   | grey | -0.094097665 | 0.042100051 | -0.093838259 | 0.042672468 |
| CT45A7   | grey | 0.04479839   | 0.334048212 | 0.052280603  | 0.259515591 |
| CT47A6   | grey | -0.041532377 | 0.370518069 | -0.041563051 | 0.370164481 |
| CT55     | grey | -0.106949502 | 0.020797642 | -0.113329999 | 0.014269056 |
| CT83     | grey | 0.014541725  | 0.753958752 | 0.010963768  | 0.813198973 |
| CTAG1A   | grey | -0.1147867   | 0.013060219 | -0.136689625 | 0.003077632 |
| CTAG1B   | grey | -0.079271193 | 0.087050166 | -0.082785865 | 0.073890278 |
| CTAG2    | grey | -0.091467615 | 0.048214007 | -0.131344535 | 0.004467719 |
| CTAGE1   | grey | 0.09649944   | 0.037101165 | 0.114793941  | 0.013054443 |
| CTAGE4   | grey | 0.11867921   | 0.010261703 | 0.144114782  | 0.001794351 |
| CTAGE8   | grey | -0.056345431 | 0.224237382 | -0.10172737  | 0.027937652 |
| CTB-50L  | grey | 0.091000204  | 0.049374878 | 0.060045543  | 0.195221375 |
| CTB-54O  | grey | 0.192841926  | 2.72E-05    | 0.18004016   | 9.14E-05    |
| CTB-60B  | grey | -0.087066703 | 0.06010038  | -0.078490415 | 0.090215673 |
| CTB-96E  | grey | 0.046634662  | 0.314593612 | 0.049616159  | 0.284619357 |
| CTC-260I | grey | -0.112635928 | 0.014878871 | -0.108868336 | 0.018604698 |
| CTC-273I | grey | 0.038191949  | 0.410267153 | 0.034894767  | 0.451876368 |
| CTC-326I | grey | 0.081505925  | 0.078481409 | 0.066755368  | 0.149772187 |
| CTC-360  | grey | -0.132592033 | 0.004100277 | -0.149351114 | 0.001207814 |
| CTC-398  | grey | -0.03022163  | 0.514727971 | -0.052729393 | 0.255442441 |
| CTC-429I | grey | 0.00206852   | 0.964441011 | 0.010993717  | 0.812698143 |
| CTC-435I | grey | -0.01336356  | 0.773325389 | 0.008684316  | 0.851527163 |
| CTC-490I | grey | 0.055419796  | 0.231953776 | 0.06132387   | 0.185864036 |
| CTC-512I | grey | -0.004451477 | 0.923568312 | -0.008432004 | 0.855793018 |
| CTC1     | grey | 0.273805162  | 1.78E-09    | 0.244690522  | 8.54E-08    |
| CTCFL    | grey | -0.275436708 | 1.41E-09    | -0.283753797 | 4.26E-10    |
| CTD-200  | grey | 0.012595252  | 0.786031859 | 0.02420734   | 0.601809897 |
| CTD-200  | grey | -0.016292942 | 0.725458433 | -0.013241962 | 0.775332475 |
| CTD-210  | grey | -0.118228249 | 0.010556075 | -0.139793846 | 0.00246378  |
| CTD-213  | grey | 0.044246015  | 0.340048577 | 0.063222225  | 0.172584208 |
| CTD-213  | grey | -0.013105133 | 0.777592746 | -0.038195561 | 0.410222861 |
| CTD-214  | grey | 0.010789999  | 0.816106412 | -0.005301901 | 0.909024723 |
| CTD-219  | grey | 0.09865817   | 0.033047165 | 0.11464118   | 0.01317678  |
| CTD-219  | grey | 0.038921453  | 0.401377514 | 0.032231467  | 0.487154469 |
| CTD-220  | grey | -0.038667687 | 0.404456717 | -0.032445572 | 0.484264693 |

|               |              |             |              |             |
|---------------|--------------|-------------|--------------|-------------|
| CTD-220f_grey | -0.042198985 | 0.362880949 | -0.060291132 | 0.19339745  |
| CTD-227f_grey | -0.045947304 | 0.321787174 | -0.057366328 | 0.215940962 |
| CTD-234f_grey | -0.024934744 | 0.590933431 | -0.048465094 | 0.295955046 |
| CTD-236f_grey | 0.050488969  | 0.276221645 | 0.025203063  | 0.586944269 |
| CTD-236f_grey | -0.065556906 | 0.157238062 | -0.075505364 | 0.103177857 |
| CTD-241f_grey | 0.002288687  | 0.96065914  | -0.021251275 | 0.646905801 |
| CTD-251f_grey | -0.072471731 | 0.117820555 | -0.074612474 | 0.107329482 |
| CTD-254f_grey | 0.114396848  | 0.01337455  | 0.145473644  | 0.001621171 |
| CTD-256f_grey | -0.013777241 | 0.766508586 | 0.00677805   | 0.883855057 |
| CTD-257f_grey | -0.052129112 | 0.260900562 | -0.063331583 | 0.171841322 |
| CTD-258f_grey | -0.039319872 | 0.396571477 | -0.037942264 | 0.413336371 |
| CTD-258f_grey | 0.09246849   | 0.045804941 | 0.100563075  | 0.029789864 |
| CTD-261f_grey | -0.064282092 | 0.165484584 | -0.073871928 | 0.110871878 |
| CTD-310f_grey | 0.012939915  | 0.780324487 | -0.001503659 | 0.974147263 |
| CTD-314f_grey | 0.025263427  | 0.586048554 | 0.02300526   | 0.619978257 |
| CTD-321f_grey | 0.019485792  | 0.674483334 | 0.024792996  | 0.59304582  |
| CTD-321f_grey | 0.032282515  | 0.486464636 | 0.052351608  | 0.258868192 |
| CTDP1_grey    | 0.109694729  | 0.017724188 | 0.124174651  | 0.007217236 |
| CTDSPL_grey   | 0.254191705  | 2.55E-08    | 0.238335019  | 1.87E-07    |
| CTH_grey      | 0.219400302  | 1.69E-06    | 0.183813522  | 6.45E-05    |
| CTHRC1_grey   | -0.167641271 | 0.000273876 | -0.162574733 | 0.000419744 |
| CTNND2_grey   | 0.046624805  | 0.314696017 | 0.008393271  | 0.856448261 |
| CTNS_grey     | 0.041416741  | 0.371852928 | 0.03276602   | 0.479956997 |
| CTRB1_grey    | 0.023063465  | 0.619093062 | 0.024305713  | 0.600333727 |
| CTRB2_grey    | -0.010535622 | 0.820367096 | -0.016182702 | 0.727241883 |
| CTSA_grey     | -0.095145932 | 0.039852421 | -0.080461489 | 0.082396934 |
| CTSE_grey     | 0.031978835  | 0.490576131 | 0.079230978  | 0.087211    |
| CTSH_grey     | 0.18927786   | 3.84E-05    | 0.165010689  | 0.000342372 |
| CTSV_grey     | 0.344754897  | 1.77E-14    | 0.353058945  | 3.72E-15    |
| CTTN_grey     | 0.12204814   | 0.008283478 | 0.131079583  | 0.004549488 |
| CTTNBP2_grey  | -0.220114084 | 1.56E-06    | -0.23959955  | 1.60E-07    |
| CTXN3_grey    | 0.084485576  | 0.068134199 | 0.076330631  | 0.099454801 |
| CUL9_grey     | 0.003063331  | 0.947360393 | -0.007392189 | 0.873416273 |
| CUX2_grey     | -0.065836765 | 0.155469991 | -0.057573046 | 0.214288218 |
| CUZD1_grey    | -0.336210035 | 8.36E-14    | -0.352122766 | 4.45E-15    |
| CWC25_grey    | -0.068379078 | 0.14009117  | -0.088843971 | 0.055036939 |
| CX3CL1_grey   | 0.117302952  | 0.011183618 | 0.105156099  | 0.02304688  |
| CXCL6_grey    | -0.083619094 | 0.071020869 | -0.06722525  | 0.146919734 |
| CXCL8_grey    | 0.17185665   | 0.000190192 | 0.171821521  | 0.000190777 |
| CXCR1_grey    | 0.080204802  | 0.083383017 | 0.097956776  | 0.034320778 |
| CXCR4_grey    | 0.053914585  | 0.244899501 | 0.05578605   | 0.228878397 |
| CXorf38_grey  | -0.098907548 | 0.032604161 | -0.087661037 | 0.058365905 |
| CXorf49_grey  | -0.087907783 | 0.057658091 | -0.086465516 | 0.061897974 |
| CXorf49E_grey | -0.044697644 | 0.335137492 | -0.058748395 | 0.205063797 |
| CXorf67_grey  | -0.196559323 | 1.88E-05    | -0.200284675 | 1.30E-05    |

|         |      |              |             |              |             |
|---------|------|--------------|-------------|--------------|-------------|
| CXXC5   | grey | -0.239166922 | 1.69E-07    | -0.2350727   | 2.77E-07    |
| CYB561E | grey | -0.162750245 | 0.000413667 | -0.16250612  | 0.000422143 |
| CYB5A   | grey | 0.213052049  | 3.40E-06    | 0.196390887  | 1.92E-05    |
| CYB5B   | grey | 0.214285507  | 2.97E-06    | 0.232771522  | 3.64E-07    |
| CYB5R2  | grey | 0.080687784  | 0.081535436 | 0.105205814  | 0.022981799 |
| CYB5R3  | grey | 0.03991427   | 0.389466077 | 0.047790209  | 0.302739538 |
| CYFIP2  | grey | -0.263898996 | 7.01E-09    | -0.261431747 | 9.78E-09    |
| CYP17A1 | grey | -0.040788527 | 0.379156621 | -0.041971006 | 0.365481704 |
| CYP1A1  | grey | 0.008653301  | 0.852051296 | 0.02109983   | 0.649253252 |
| CYP1A2  | grey | -0.199936446 | 1.34E-05    | -0.199542867 | 1.40E-05    |
| CYP21A2 | grey | -0.040960218 | 0.377151838 | -0.056052415 | 0.226660019 |
| CYP24A1 | grey | 0.129467106  | 0.005076926 | 0.103042671  | 0.025965089 |
| CYP26A1 | grey | 0.0195883    | 0.672869691 | 0.014204282  | 0.759490477 |
| CYP26B1 | grey | -0.081320793 | 0.079164233 | -0.098289746 | 0.03371104  |
| CYP26C1 | grey | -0.296050617 | 6.69E-11    | -0.297872363 | 5.05E-11    |
| CYP27B1 | grey | 0.130306399  | 0.004795888 | 0.145424126  | 0.001627202 |
| CYP27C1 | grey | -0.142792616 | 0.001978968 | -0.128405378 | 0.005453667 |
| CYP2A6  | grey | -0.111677237 | 0.015758776 | -0.095900928 | 0.038297207 |
| CYP2B6  | grey | 0.082295297  | 0.075623384 | 0.068226655  | 0.140979027 |
| CYP2C18 | grey | -0.011323764 | 0.80718386  | -0.012741317 | 0.783611712 |
| CYP2C9  | grey | -0.034039577 | 0.46304457  | -0.038228827 | 0.409814991 |
| CYP2D6  | grey | 0.126798945  | 0.006071624 | 0.139204156  | 0.002571007 |
| CYP2E1  | grey | 0.046257681  | 0.318525766 | 0.029556821  | 0.52402339  |
| CYP2R1  | grey | -0.152021419 | 0.000982186 | -0.180852641 | 8.49E-05    |
| CYP2S1  | grey | -0.312347431 | 5.01E-12    | -0.301557735 | 2.84E-11    |
| CYP2W1  | grey | -0.115566476 | 0.012450981 | -0.104363944 | 0.024105603 |
| CYP3A5  | grey | 0.002293075  | 0.96058377  | -0.006914587 | 0.881532469 |
| CYP3A7  | grey | -0.020894017 | 0.652448985 | -0.021712841 | 0.639773044 |
| CYP4A11 | grey | 0.002252377  | 0.961282779 | 0.002430178  | 0.958229152 |
| CYP4F11 | grey | 0.063093813  | 0.173459576 | 0.055759087  | 0.229103804 |
| CYP4F12 | grey | -0.09416298  | 0.041956948 | -0.088935603 | 0.054785794 |
| CYP4F3  | grey | 0.016325573  | 0.724930824 | 0.015897303  | 0.731865858 |
| CYP4F8  | grey | -0.066695529 | 0.150138445 | -0.090393678 | 0.050916019 |
| CYP4Z1  | grey | 0.035540294  | 0.443547765 | 0.028717468  | 0.53588062  |
| CYSLTR2 | grey | -0.074130214 | 0.109626067 | -0.058402859 | 0.207745268 |
| CYSRT1  | grey | 0.231306371  | 4.33E-07    | 0.248765207  | 5.11E-08    |
| CYTH2   | grey | 0.209570377  | 4.93E-06    | 0.190522273  | 3.41E-05    |
| D4S234E | grey | -0.113558413 | 0.014073234 | -0.133980221 | 0.003723705 |
| DAB1    | grey | -0.179255935 | 9.82E-05    | -0.19175396  | 3.03E-05    |
| DAB2IP  | grey | 0.014331843  | 0.757397909 | 0.014193342  | 0.759670036 |
| DACH2   | grey | -0.146235421 | 0.00153093  | -0.14414525  | 0.001790289 |
| DAP     | grey | 0.187732651  | 4.46E-05    | 0.207684402  | 6.03E-06    |
| DAPK1   | grey | 0.102619532  | 0.026586153 | 0.088238649  | 0.05672015  |
| DAPK2   | grey | 0.240184958  | 1.49E-07    | 0.240065375  | 1.51E-07    |
| DAPL1   | grey | 0.008676173  | 0.85166476  | -0.010432867 | 0.822089698 |

|         |      |              |             |              |             |
|---------|------|--------------|-------------|--------------|-------------|
| DAZ1    | grey | 0.000949501  | 0.983673301 | -0.016883512 | 0.71592975  |
| DAZ2    | grey | -0.043200072 | 0.351597855 | -0.044901885 | 0.332931574 |
| DBP     | grey | -0.177839073 | 0.000111693 | -0.181781952 | 7.79E-05    |
| DBX1    | grey | -0.100087092 | 0.030576846 | -0.093245156 | 0.044005922 |
| DBX2    | grey | -0.062084696 | 0.180454041 | -0.043307862 | 0.350396321 |
| DCAF12I | grey | -0.432065769 | 1.16E-22    | -0.433396646 | 8.31E-23    |
| DCAF4   | grey | -0.24012946  | 1.50E-07    | -0.271330698 | 2.52E-09    |
| DCAF4L2 | grey | -0.119689102 | 0.00962875  | -0.115294698 | 0.012660412 |
| DCAF8L1 | grey | -0.113118017 | 0.014452931 | -0.114369926 | 0.013396501 |
| DCANP1  | grey | 0.012915995  | 0.780720209 | -0.01742286  | 0.707265846 |
| DCBLD1  | grey | 0.200558963  | 1.26E-05    | 0.214370475  | 2.94E-06    |
| DCC     | grey | -0.131186642 | 0.004516286 | -0.134860152 | 0.003501528 |
| DCD     | grey | 0.094989191  | 0.040181901 | 0.055290487  | 0.233046515 |
| DCLK3   | grey | -0.014892918 | 0.748214966 | -0.032809841 | 0.479369536 |
| DCPS    | grey | 0.220714386  | 1.46E-06    | 0.22280103   | 1.16E-06    |
| DCT     | grey | -0.077844138 | 0.092905143 | -0.091699432 | 0.047646792 |
| DCTD    | grey | 0.227874394  | 6.46E-07    | 0.208512352  | 5.52E-06    |
| DCUN1D  | grey | -0.24478053  | 8.45E-08    | -0.267281928 | 4.42E-09    |
| DCX     | grey | 0.031495245  | 0.497161674 | 0.025302627  | 0.585467205 |
| DDA1    | grey | -0.125895155 | 0.006446279 | -0.1042389   | 0.02427651  |
| DDB2    | grey | 0.360444773  | 8.97E-16    | 0.376649771  | 3.45E-17    |
| DDC     | grey | -0.046559765 | 0.315372296 | -0.056350968 | 0.224191782 |
| DDIT3   | grey | -0.089564025 | 0.053088961 | -0.08337792  | 0.071841884 |
| DDIT4   | grey | 0.279239712  | 8.21E-10    | 0.287301598  | 2.52E-10    |
| DDIT4L  | grey | 0.242244854  | 1.16E-07    | 0.22209119   | 1.25E-06    |
| DDN     | grey | 0.087282813  | 0.059464831 | 0.06045294   | 0.192202582 |
| DDTL    | grey | -0.080700711 | 0.081486443 | -0.091183908 | 0.048915868 |
| DDX19B  | grey | 0.186486587  | 5.02E-05    | 0.206814043  | 6.60E-06    |
| DDX25   | grey | -0.306291757 | 1.34E-11    | -0.300939491 | 3.13E-11    |
| DDX43   | grey | -0.076554192 | 0.098464858 | -0.094306054 | 0.041644911 |
| 1-Dec   | grey | -0.031937729 | 0.491134086 | -0.038100096 | 0.411394679 |
| DEDD2   | grey | -0.025880745 | 0.576924824 | 0.002204589  | 0.962103612 |
| DEF8    | grey | 0.097847854  | 0.034522265 | 0.087657531  | 0.058376014 |
| DEFA3   | grey | -0.023141721 | 0.617903814 | 0.037240192  | 0.422038817 |
| DEFA4   | grey | -0.024084184 | 0.603660249 | 0.043748866  | 0.345507528 |
| DEFB1   | grey | 0.234853633  | 2.84E-07    | 0.213910623  | 3.10E-06    |
| DEFB103 | grey | -0.029861876 | 0.519747461 | -0.030505778 | 0.510781195 |
| DEFB104 | grey | 0.026564744  | 0.566894197 | 0.019878592  | 0.668308184 |
| DEFB104 | grey | 0.128053963  | 0.005583794 | 0.115378942  | 0.012595163 |
| DEFB105 | grey | -0.004647635 | 0.920211261 | -0.015748584 | 0.734279219 |
| DEFB105 | grey | 0.030575178  | 0.509819638 | 0.0396833    | 0.392217862 |
| DEFB106 | grey | -0.027523679 | 0.552973627 | -0.042004839 | 0.365095008 |
| DEFB107 | grey | -0.035857037 | 0.439493318 | -0.042391264 | 0.360696447 |
| DEFB107 | grey | 0.034377973  | 0.458607103 | -0.00704579  | 0.879301587 |
| DEFB126 | grey | -0.11191328  | 0.015538001 | -0.129920559 | 0.004923296 |

|              |              |             |              |             |
|--------------|--------------|-------------|--------------|-------------|
| DEFB132 grey | 0.030103853  | 0.516368487 | 0.019735054  | 0.670562157 |
| DEFB136 grey | 0.026753727  | 0.564137575 | 0.031372894  | 0.498835258 |
| DEFB4A grey  | 0.280716784  | 6.63E-10    | 0.284993218  | 3.55E-10    |
| DEFB4B grey  | 0.142516794  | 0.002019608 | 0.145215694  | 0.001652817 |
| DEGS2 grey   | 0.209938033  | 4.75E-06    | 0.21871075   | 1.83E-06    |
| DENND1 grey  | 0.000324738  | 0.994415784 | 0.012365936  | 0.789835553 |
| DENND4 grey  | -0.022122296 | 0.633473192 | -0.051549517 | 0.266246381 |
| DESI1 grey   | 0.165082403  | 0.000340309 | 0.164824084  | 0.000347792 |
| DGCR6 grey   | 0.003923363  | 0.93261303  | -0.004298825 | 0.926181735 |
| DGCR8 grey   | 0.030391875  | 0.5123614   | 0.014191811  | 0.759695154 |
| DGKA grey    | 0.210037218  | 4.70E-06    | 0.211219704  | 4.14E-06    |
| DGKG grey    | -0.222359747 | 1.21E-06    | -0.237581364 | 2.05E-07    |
| DGKK grey    | -0.045531697 | 0.326188232 | -0.03878707  | 0.403006364 |
| DGKQ grey    | 0.208624113  | 5.46E-06    | 0.231821168  | 4.07E-07    |
| DHDDS grey   | 0.113166189  | 0.014410964 | 0.130290317  | 0.004801139 |
| DHDH grey    | 0.009237953  | 0.842182106 | 0.00734418   | 0.874231547 |
| DHODH grey   | 0.26118014   | 1.01E-08    | 0.26638341   | 5.00E-09    |
| DHRS11 grey  | 0.093898046  | 0.04253996  | 0.105857443  | 0.022143363 |
| DHRS2 grey   | 0.066559514  | 0.150973492 | 0.037699961  | 0.416327773 |
| DHRS7 grey   | 0.254361194  | 2.49E-08    | 0.250396858  | 4.15E-08    |
| DHRS9 grey   | -0.025123241 | 0.588129708 | 0.010549892  | 0.820127942 |
| DHRSX grey   | 0.318051831  | 1.95E-12    | 0.328126227  | 3.48E-13    |
| DIRAS2 grey  | 0.039852452  | 0.39020143  | 0.038334338  | 0.408522918 |
| DIRAS3 grey  | 0.081324727  | 0.079149676 | 0.046345922  | 0.317602487 |
| DIRC3 grey   | -0.279542496 | 7.86E-10    | -0.278519745 | 9.11E-10    |
| DISP2 grey   | -0.027071606 | 0.559515381 | -0.033806559 | 0.466113989 |
| DKFZp43 grey | 0.01271112   | 0.784111875 | 0.006576365  | 0.887287656 |
| DKK2 grey    | -0.193938693 | 2.44E-05    | -0.171721041 | 0.000192461 |
| DKKL1 grey   | -0.004451581 | 0.923566525 | -0.007650579 | 0.869030767 |
| DLG3 grey    | 0.184445884  | 6.08E-05    | 0.21594783   | 2.48E-06    |
| DLGAP1 grey  | -0.030248288 | 0.514357022 | -0.054474493 | 0.240026148 |
| DLGAP2 grey  | -0.098199318 | 0.033875713 | -0.025368318 | 0.584493606 |
| DLGAP3 grey  | -0.335737228 | 9.10E-14    | -0.34968496  | 7.05E-15    |
| DLGAP4 grey  | -0.048626936 | 0.294343281 | -0.050046497 | 0.280457598 |
| DLK1 grey    | -0.209264817 | 5.10E-06    | -0.197841827 | 1.66E-05    |
| DLK2 grey    | -0.195708015 | 2.05E-05    | -0.195946667 | 2.00E-05    |
| DLL3 grey    | -0.133570247 | 0.003831519 | -0.143269433 | 0.001910474 |
| DLX1 grey    | 0.093615533  | 0.043169167 | 0.104543461  | 0.023862063 |
| DLX2 grey    | 0.088115675  | 0.057067269 | 0.102688506  | 0.026484052 |
| DLX4 grey    | -0.122086789 | 0.008262909 | -0.146325615 | 0.001520556 |
| DLX5 grey    | 0.351005109  | 5.50E-15    | 0.337801089  | 6.28E-14    |
| DLX6 grey    | 0.290207401  | 1.63E-10    | 0.269412963  | 3.29E-09    |
| DMBX1 grey   | -0.0757074   | 0.102256348 | -0.071666068 | 0.121970479 |
| DMC1 grey    | 0.040347349  | 0.384338027 | 0.010089795  | 0.827847145 |
| DMGDH grey   | -0.363356912 | 5.06E-16    | -0.356363205 | 1.98E-15    |

|         |      |              |             |              |             |
|---------|------|--------------|-------------|--------------|-------------|
| DMKN    | grey | -0.163133858 | 0.000400667 | -0.16839951  | 0.000256651 |
| DMRT1   | grey | -0.181290098 | 8.15E-05    | -0.180525482 | 8.74E-05    |
| DMRT2   | grey | -0.036569433 | 0.430452262 | -0.035560846 | 0.443284048 |
| DMRT3   | grey | -0.078067681 | 0.091967706 | -0.085594027 | 0.064582335 |
| DMRTA1  | grey | 0.078136453  | 0.091680837 | 0.077786927  | 0.093146285 |
| DMRTA2  | grey | 0.259696117  | 1.23E-08    | 0.270905709  | 2.68E-09    |
| DMRTB1  | grey | -0.109089077 | 0.018365844 | -0.100145471 | 0.030479376 |
| DMRTC1  | grey | -0.127952821 | 0.005621761 | -0.133062277 | 0.003969022 |
| DMRTC1  | grey | -0.109346183 | 0.018091018 | -0.112976023 | 0.014577259 |
| DMTN    | grey | 0.198337858  | 1.58E-05    | 0.169883605  | 0.000225828 |
| DMWD    | grey | -0.260702375 | 1.08E-08    | -0.261064365 | 1.03E-08    |
| DNAH1   | grey | 0.087961879  | 0.057503867 | 0.085305404  | 0.065492187 |
| DNAH10  | grey | 0.009214347  | 0.842580111 | -0.01284769  | 0.781850534 |
| DNAJB1  | grey | 0.040978854  | 0.376934623 | 0.038276668  | 0.409228836 |
| DNAJB12 | grey | 0.115258393  | 0.012688622 | 0.116684875  | 0.01162099  |
| DNAJC1  | grey | 0.130193201  | 0.004832955 | 0.113142536  | 0.014431557 |
| DNAJC12 | grey | -0.162438551 | 0.000424517 | -0.186380197 | 5.07E-05    |
| DNAJC15 | grey | 0.241027079  | 1.34E-07    | 0.224565584  | 9.46E-07    |
| DNAJC25 | grey | -0.002183793 | 0.962460833 | -0.025845582 | 0.57744271  |
| DNAJC30 | grey | 0.017698326  | 0.702855301 | 0.045568375  | 0.325798275 |
| DNASE1  | grey | 0.007405682  | 0.873187176 | 0.022535295  | 0.627145559 |
| DNER    | grey | -0.19517214  | 2.16E-05    | -0.210790033 | 4.33E-06    |
| DNLZ    | grey | -0.088117162 | 0.057063062 | -0.072121992 | 0.119608271 |
| DNM1    | grey | -0.34798401  | 9.70E-15    | -0.340272985 | 4.02E-14    |
| DNMBP   | grey | 0.261441993  | 9.77E-09    | 0.248651111  | 5.19E-08    |
| DOC2B   | grey | -0.163934284 | 0.000374758 | -0.164047686 | 0.000371216 |
| DOCK3   | grey | -0.35135674  | 5.14E-15    | -0.362736168 | 5.72E-16    |
| DOCK6   | grey | -0.098846569 | 0.032712015 | -0.097731804 | 0.034738045 |
| DOK4    | grey | -0.032442743 | 0.484302817 | -0.033333588 | 0.472378694 |
| DOK5    | grey | -0.432210605 | 1.12E-22    | -0.43296611  | 9.26E-23    |
| DOK7    | grey | -0.126095856 | 0.006361335 | -0.126160182 | 0.006334323 |
| DPCR1   | grey | -0.045125171 | 0.330530672 | -0.035369849 | 0.445738318 |
| DPEP3   | grey | -0.109589343 | 0.017834411 | -0.113903437 | 0.013781923 |
| DPP4    | grey | -0.07808539  | 0.091893771 | -0.03958117  | 0.393438383 |
| DPPA2   | grey | -0.074285985 | 0.10888007  | -0.087412637 | 0.059085716 |
| DPPA3   | grey | 0.028781805  | 0.534967002 | 0.040224022  | 0.385794116 |
| DPPA4   | grey | -0.013443855 | 0.772000868 | -0.004820239 | 0.917258485 |
| DPPA5   | grey | -0.112821729 | 0.014713422 | -0.120857049 | 0.008940192 |
| DPRX    | grey | -0.02258401  | 0.626400965 | -0.029341532 | 0.527051867 |
| DPYS    | grey | -0.116098346 | 0.012049956 | -0.105760067 | 0.022266945 |
| DPYSL5  | grey | -0.163010566 | 0.000404803 | -0.164553958 | 0.000355781 |
| DQX1    | grey | -0.014961933 | 0.747087839 | -0.012763557 | 0.783243396 |
| DRD1    | grey | -0.153621867 | 0.000866307 | -0.156726107 | 0.000676748 |
| DRD2    | grey | -0.216163355 | 2.42E-06    | -0.241909452 | 1.21E-07    |
| DRD5    | grey | -0.153134388 | 0.000900189 | -0.168565136 | 0.000253026 |



|          |      |              |             |              |             |
|----------|------|--------------|-------------|--------------|-------------|
| DRGX     | grey | -0.121088961 | 0.008808806 | -0.122904263 | 0.007838384 |
| DSC1     | grey | 0.054075886  | 0.243488521 | 0.074947971  | 0.105754333 |
| DSC3     | grey | -0.153339839 | 0.000885763 | -0.155287911 | 0.000759205 |
| DSCR4    | grey | -0.174943593 | 0.000144828 | -0.157144841 | 0.000654349 |
| DSCR8    | grey | -0.201293569 | 1.17E-05    | -0.188096556 | 4.30E-05    |
| DTNBP1   | grey | -0.122567316 | 0.008010947 | -0.112001802 | 0.015455906 |
| DTX1     | grey | -0.289808125 | 1.73E-10    | -0.257401878 | 1.67E-08    |
| DTX3     | grey | -0.14717387  | 0.001426106 | -0.153607361 | 0.000867298 |
| DTX4     | grey | -0.120899049 | 0.008916269 | -0.126437045 | 0.006219232 |
| DUPD1    | grey | -0.000702977 | 0.987911915 | 0.010724424  | 0.817204243 |
| DUSP10   | grey | 0.174987608  | 0.000144262 | 0.191844559  | 3.00E-05    |
| DUSP13   | grey | -0.041495409 | 0.370944484 | -0.035130847 | 0.448820289 |
| DUSP15   | grey | -0.338335335 | 5.71E-14    | -0.337061323 | 7.18E-14    |
| DUSP2    | grey | -0.184107022 | 6.28E-05    | -0.19199882  | 2.95E-05    |
| DUSP22   | grey | -0.081679045 | 0.077847219 | -0.093897092 | 0.042542073 |
| DUSP27   | grey | -0.03121852  | 0.500951129 | -0.043805146 | 0.344886767 |
| DUSP28   | grey | 0.010989826  | 0.812763207 | 0.020049339  | 0.665630816 |
| DUSP4    | grey | 0.347447222  | 1.07E-14    | 0.332356581  | 1.66E-13    |
| DUSP6    | grey | 0.322299709  | 9.50E-13    | 0.311171777  | 6.07E-12    |
| DUSP8    | grey | 0.176634218  | 0.000124506 | 0.16598989   | 0.000315196 |
| DYNAP    | grey | 0.026131029  | 0.573244823 | 0.001033338  | 0.982231956 |
| DYNLL2   | grey | -0.030879176 | 0.505618828 | -0.01761082  | 0.704255317 |
| DYRK1B   | grey | -0.130583373 | 0.004706271 | -0.119371857 | 0.009823741 |
| E2F4     | grey | 0.112015284  | 0.015443437 | 0.130410961  | 0.004761877 |
| ECE1     | grey | 0.118814427  | 0.010174868 | 0.11948084   | 0.009756364 |
| ECHDC3   | grey | -0.125705178 | 0.00652762  | -0.117281456 | 0.011198581 |
| EDA      | grey | -0.084494297 | 0.06810564  | -0.120132015 | 0.009362272 |
| EDARAD   | grey | -0.125097694 | 0.006793934 | -0.094799581 | 0.040583547 |
| EDC3     | grey | 0.049428635  | 0.286445853 | 0.033197625  | 0.474188102 |
| EDDM3A   | grey | -0.132576089 | 0.004104795 | -0.107095153 | 0.020623642 |
| EDN2     | grey | 0.058905502  | 0.203852925 | 0.049450195  | 0.286235459 |
| EEF1A2   | grey | -0.199676537 | 1.38E-05    | -0.197464485 | 1.72E-05    |
| EEF1E1-1 | grey | -0.063519288 | 0.170571787 | -0.083607905 | 0.071058791 |
| EFNA2    | grey | -0.084992709 | 0.066489783 | -0.085226985 | 0.065741204 |
| EFNA5    | grey | 0.074656877  | 0.107119956 | 0.07221222   | 0.119145049 |
| EFNB1    | grey | -0.291452102 | 1.35E-10    | -0.3091342   | 8.46E-12    |
| EFNB2    | grey | -0.32818298  | 3.45E-13    | -0.316911739 | 2.35E-12    |
| EFNB3    | grey | -0.2466001   | 6.72E-08    | -0.253868442 | 2.65E-08    |
| EFR3B    | grey | 0.062057975  | 0.180642051 | 0.047217559  | 0.308576506 |
| EGF      | grey | 0.010245281  | 0.8252366   | 0.009188415  | 0.84301739  |
| EGFL6    | grey | -0.251666029 | 3.53E-08    | -0.247773301 | 5.80E-08    |
| EGFLAM   | grey | -0.230371028 | 4.83E-07    | -0.234936211 | 2.81E-07    |
| EGR3     | grey | 0.095774293  | 0.038554416 | 0.068332076  | 0.140364501 |
| EGR4     | grey | -0.039168354 | 0.398395106 | -0.048677505 | 0.293840873 |
| EHD3     | grey | -0.242337574 | 1.14E-07    | -0.241327834 | 1.30E-07    |

|         |      |              |             |              |             |
|---------|------|--------------|-------------|--------------|-------------|
| EHD4    | grey | 0.109165765  | 0.018283492 | 0.120766824  | 0.008991776 |
| EIF1AY  | grey | 0.056068168  | 0.226529297 | 0.050838182  | 0.272909354 |
| EIF2D   | grey | 0.251461994  | 3.62E-08    | 0.232834276  | 3.61E-07    |
| EIF3CL  | grey | -0.0098537   | 0.831814681 | -0.02096836  | 0.651293892 |
| EIF5A2  | grey | -0.239180892 | 1.69E-07    | -0.285662687 | 3.21E-10    |
| EIF5AL1 | grey | 0.25593026   | 2.03E-08    | 0.259397815  | 1.28E-08    |
| ELAC2   | grey | 0.358283825  | 1.37E-15    | 0.354420907  | 2.87E-15    |
| ELANE   | grey | -0.137425728 | 0.002920655 | -0.100589822 | 0.029746161 |
| ELAVL2  | grey | 0.125468706  | 0.006630154 | 0.086028456  | 0.063232473 |
| ELAVL3  | grey | -0.115981739 | 0.012136886 | -0.112287752 | 0.015193314 |
| ELAVL4  | grey | -0.04246792  | 0.359827846 | -0.039177087 | 0.398289856 |
| ELF4    | grey | -0.247092322 | 6.32E-08    | -0.250576216 | 4.06E-08    |
| ELF5    | grey | 0.299659586  | 3.82E-11    | 0.303707938  | 2.02E-11    |
| ELFN2   | grey | -0.163499485 | 0.000388631 | -0.163815984 | 0.000378486 |
| ELMOD3  | grey | -0.023159287 | 0.617636996 | -0.025678116 | 0.579912233 |
| ELOVL2  | grey | -0.31502413  | 3.22E-12    | -0.307438152 | 1.11E-11    |
| ELOVL3  | grey | -0.232139177 | 3.92E-07    | -0.246247865 | 7.03E-08    |
| ELOVL4  | grey | -0.31137158  | 5.88E-12    | -0.318631594 | 1.77E-12    |
| ELSPBP1 | grey | -0.104744411 | 0.023591972 | -0.103507074 | 0.02529789  |
| EMC4    | grey | 0.03391687   | 0.464659524 | 0.033598038  | 0.46887026  |
| EMC7    | grey | 0.211023864  | 4.23E-06    | 0.216339746  | 2.37E-06    |
| EME2    | grey | 0.16502332   | 0.000342008 | 0.16086535   | 0.000483442 |
| EMID1   | grey | -0.120573869 | 0.009102986 | -0.157240804 | 0.000649313 |
| EMILIN2 | grey | -0.185970509 | 5.27E-05    | -0.155683913 | 0.000735619 |
| EML2    | grey | 0.153545742  | 0.000871519 | 0.158594269  | 0.000582013 |
| EML3    | grey | -0.004049958 | 0.930444066 | -0.009554591 | 0.836847295 |
| EMP2    | grey | 0.146583376  | 0.001491265 | 0.156501512  | 0.000689053 |
| EMX1    | grey | -0.044411574 | 0.338242943 | -0.042999342 | 0.353842307 |
| EMX2    | grey | 0.000840038  | 0.985555306 | -0.056298273 | 0.22462603  |
| EN1     | grey | -0.081190611 | 0.079647265 | -0.092482446 | 0.045772078 |
| EN2     | grey | 0.221253376  | 1.38E-06    | 0.217602736  | 2.07E-06    |
| ENC1    | grey | 0.189895942  | 3.62E-05    | 0.175261821  | 0.00014078  |
| ENDOV   | grey | -0.128953783 | 0.005256042 | -0.120113752 | 0.009373129 |
| ENGASE  | grey | 0.013727117  | 0.767333604 | -0.014007443 | 0.762722971 |
| ENHO    | grey | -0.284694779 | 3.71E-10    | -0.308344242 | 9.61E-12    |
| ENO2    | grey | 0.13541624   | 0.003367392 | 0.131559586  | 0.004402329 |
| ENPP3   | grey | 0.200537005  | 1.26E-05    | 0.190639352  | 3.37E-05    |
| ENPP7   | grey | -0.048566557 | 0.2949439   | -0.030865353 | 0.505809443 |
| ENTHD1  | grey | -0.083653833 | 0.070903244 | -0.056718184 | 0.221182236 |
| ENTPD8  | grey | 0.207395596  | 6.21E-06    | 0.20683444   | 6.59E-06    |
| EPB41L1 | grey | -0.264288077 | 6.65E-09    | -0.253044181 | 2.95E-08    |
| EPHA10  | grey | -0.156273577 | 0.000701752 | -0.139541794 | 0.002509103 |
| EPHA2   | grey | -0.061422259 | 0.185157765 | -0.066527953 | 0.151167761 |
| EPHA8   | grey | -0.045027526 | 0.331579234 | -0.034217983 | 0.460702125 |
| EPHB1   | grey | -0.273040066 | 1.99E-09    | -0.280414732 | 6.93E-10    |

|        |      |              |             |              |             |
|--------|------|--------------|-------------|--------------|-------------|
| EPHB3  | grey | 0.204220845  | 8.65E-06    | 0.172761536  | 0.000175675 |
| EPHB4  | grey | 0.035487665  | 0.444223504 | 0.024595723  | 0.595991415 |
| EPHX3  | grey | -0.180779121 | 8.54E-05    | -0.177814438 | 0.000111942 |
| EPHX4  | grey | -0.245121372 | 8.10E-08    | -0.261126695 | 1.02E-08    |
| EPOR   | grey | -0.055707126 | 0.229538654 | -0.08111229  | 0.079939019 |
| EPPK1  | grey | -0.182506072 | 7.28E-05    | -0.179470667 | 9.63E-05    |
| EPS8L3 | grey | 0.163995244  | 0.00037285  | 0.153095967  | 0.000902911 |
| EPYC   | grey | -0.073639937 | 0.112000335 | -0.05068909  | 0.274320169 |
| ERAP2  | grey | -0.099251305 | 0.032001815 | -0.062795547 | 0.175505581 |
| ERAS   | grey | -0.155075175 | 0.000772163 | -0.148449086 | 0.001294222 |
| ERBB2  | grey | -0.112178271 | 0.015293386 | -0.115458695 | 0.012533667 |
| EREG   | grey | 0.053144074  | 0.251718431 | 0.020613928  | 0.656808261 |
| ERICH4 | grey | -0.119006321 | 0.010052756 | -0.123472503 | 0.007554875 |
| ERN2   | grey | 0.14625387   | 0.001528803 | 0.148377732  | 0.001301295 |
| ERO1LB | grey | -0.218632955 | 1.84E-06    | -0.185817705 | 5.34E-05    |
| ERVV-2 | grey | -0.05968056  | 0.197955183 | -0.059552799 | 0.198918711 |
| ESPNL  | grey | -0.261684297 | 9.46E-09    | -0.277247714 | 1.09E-09    |
| ESRRB  | grey | -0.036407061 | 0.432503414 | -0.038841745 | 0.402343176 |
| ESX1   | grey | -0.126115791 | 0.006352953 | -0.13014121  | 0.004850067 |
| ETNK2  | grey | -0.239885919 | 1.55E-07    | -0.25095501  | 3.87E-08    |
| ETNPPL | grey | 0.053622388  | 0.247470036 | 0.039799869  | 0.390827591 |
| ETS2   | grey | 0.167385841  | 0.000279918 | 0.127860367  | 0.005656669 |
| EVA1A  | grey | -0.001711075 | 0.970582621 | 0.003752293  | 0.935544766 |
| EVI5L  | grey | 0.126637878  | 0.006136925 | 0.149039364  | 0.001237058 |
| EVL    | grey | -0.037248051 | 0.421940807 | -0.059922033 | 0.196143389 |
| EVPLL  | grey | -0.179208209 | 9.86E-05    | -0.179404127 | 9.69E-05    |
| EXOC3  | grey | -0.197848617 | 1.66E-05    | -0.170738731 | 0.000209678 |
| EXOC3L | grey | -0.204608809 | 8.31E-06    | -0.187390671 | 4.60E-05    |
| EXOSC6 | grey | 0.024163445  | 0.6024691   | 0.050244636  | 0.278555332 |
| EXTL3  | grey | 0.275260521  | 1.45E-09    | 0.267340749  | 4.39E-09    |
| EYA1   | grey | 0.098035896  | 0.034175047 | 0.107824998  | 0.019770669 |
| EYA4   | grey | -0.342570573 | 2.64E-14    | -0.347535239 | 1.05E-14    |
| F2RL2  | grey | 0.053670222  | 0.247047951 | 0.056249137  | 0.225031494 |
| F2RL3  | grey | -0.038901869 | 0.401614636 | 0.002689347  | 0.953779197 |
| F3     | grey | 0.06542101   | 0.158102075 | 0.077558069  | 0.094115921 |
| F5     | grey | 0.112684051  | 0.014835863 | 0.112839478  | 0.014697702 |
| F8A1   | grey | 0.013052251  | 0.778466808 | 0.035663672  | 0.441965945 |
| F8A2   | grey | 0.020059033  | 0.665478932 | 0.028676881  | 0.536457369 |
| F8A3   | grey | -0.062135624 | 0.180096113 | -0.073617444 | 0.112110226 |
| FA2H   | grey | 0.311623685  | 5.64E-12    | 0.340814205  | 3.64E-14    |
| FABP1  | grey | -0.029335598 | 0.527135475 | -0.020751818 | 0.654660686 |
| FABP2  | grey | 0.053775946  | 0.246116813 | 0.063803215  | 0.168664782 |
| FABP3  | grey | -0.347910172 | 9.83E-15    | -0.352340907 | 4.27E-15    |
| FABP7  | grey | -0.03870509  | 0.40400198  | -0.023666869 | 0.609949054 |
| FADS3  | grey | -0.262702091 | 8.25E-09    | -0.266574134 | 4.87E-09    |

|         |      |              |             |              |             |
|---------|------|--------------|-------------|--------------|-------------|
| FADS6   | grey | -0.047637868 | 0.304285139 | -0.05509444  | 0.234710169 |
| FAH     | grey | -0.069590336 | 0.13318738  | -0.067300032 | 0.146469607 |
| FAHD1   | grey | 0.146050606  | 0.001552389 | 0.160236264  | 0.000509066 |
| FAHD2A  | grey | -0.094516659 | 0.041189159 | -0.121666346 | 0.008489137 |
| FAHD2B  | grey | -0.165507159 | 0.000328331 | -0.195519561 | 2.09E-05    |
| FAIM2   | grey | 0.191150814  | 3.21E-05    | 0.204824402  | 8.13E-06    |
| FAM107  | grey | -0.299310561 | 4.03E-11    | -0.283420903 | 4.47E-10    |
| FAM109  | grey | 0.069866959  | 0.131648166 | 0.084753964  | 0.067259826 |
| FAM109E | grey | -0.006823637 | 0.88307947  | 0.016756698  | 0.717972213 |
| FAM118  | grey | -0.078963273 | 0.088287727 | -0.084161433 | 0.069202611 |
| FAM124  | grey | -0.184320122 | 6.15E-05    | -0.198310739 | 1.58E-05    |
| FAM127C | grey | -0.096721448 | 0.036665648 | -0.09486946  | 0.04043513  |
| FAM131C | grey | -0.286510853 | 2.83E-10    | -0.285571498 | 3.26E-10    |
| FAM132  | grey | -0.176552651 | 0.000125422 | -0.166418788 | 0.000303938 |
| FAM133  | grey | -0.255924018 | 2.03E-08    | -0.257647546 | 1.62E-08    |
| FAM134  | grey | -0.047309806 | 0.307631262 | -0.05083445  | 0.272944611 |
| FAM134E | grey | -0.099314257 | 0.031892544 | -0.107773043 | 0.019830358 |
| FAM134C | grey | 0.29944241   | 3.95E-11    | 0.318656794  | 1.76E-12    |
| FAM135E | grey | -0.15863447  | 0.000580117 | -0.13319602  | 0.003932392 |
| FAM153  | grey | -0.10442584  | 0.024021392 | -0.12673324  | 0.006098187 |
| FAM153C | grey | -0.155015629 | 0.000775826 | -0.161599347 | 0.000455063 |
| FAM155  | grey | 0.041273659  | 0.373508716 | 0.019476242  | 0.674633751 |
| FAM155E | grey | -0.00398864  | 0.93149458  | -0.041282129 | 0.373410574 |
| FAM156E | grey | -0.091903383 | 0.047152396 | -0.086837614 | 0.060780219 |
| FAM160E | grey | 0.295481156  | 7.30E-11    | 0.284037417  | 4.08E-10    |
| FAM166  | grey | 0.175343775  | 0.000139754 | 0.162738868  | 0.000414058 |
| FAM167  | grey | -0.100282984 | 0.030250832 | -0.12364811  | 0.007469134 |
| FAM170E | grey | 0.095380903  | 0.039362779 | 0.068789642  | 0.137720987 |
| FAM171  | grey | -0.168448461 | 0.000255575 | -0.193246642 | 2.62E-05    |
| FAM171  | grey | 0.033441611  | 0.470943828 | 0.016017981  | 0.729909462 |
| FAM177E | grey | -0.02154518  | 0.642360174 | -0.010793392 | 0.816049621 |
| FAM183E | grey | 0.041512618  | 0.370745945 | 0.021720357  | 0.639657162 |
| FAM189  | grey | 0.131237544  | 0.004500577 | 0.107105084  | 0.020611825 |
| FAM192  | grey | 0.240492851  | 1.44E-07    | 0.246594538  | 6.73E-08    |
| FAM19A  | grey | -0.105489326 | 0.022613692 | -0.10055652  | 0.029800581 |
| FAM19A  | grey | -0.229496341 | 5.35E-07    | -0.2300236   | 5.03E-07    |
| FAM19A  | grey | -0.142251568 | 0.002059405 | -0.139750772 | 0.002471472 |
| FAM209  | grey | -0.136988993 | 0.003012888 | -0.153722823 | 0.000859439 |
| FAM209E | grey | -0.099088381 | 0.032286101 | -0.09250689  | 0.045714565 |
| FAM20A  | grey | -0.27667722  | 1.19E-09    | -0.252854498 | 3.03E-08    |
| FAM20C  | grey | -0.267276171 | 4.42E-09    | -0.243863734 | 9.47E-08    |
| FAM210E | grey | 0.225198267  | 8.80E-07    | 0.223132045  | 1.11E-06    |
| FAM213  | grey | -0.075722195 | 0.102189122 | -0.08963931  | 0.052888646 |
| FAM213E | grey | -0.053909954 | 0.244940098 | -0.050273626 | 0.278277742 |
| FAM214E | grey | 0.03534154   | 0.446102744 | 0.064755736  | 0.162383601 |

|              |              |             |              |             |
|--------------|--------------|-------------|--------------|-------------|
| FAM215A grey | -0.137117551 | 0.002985467 | -0.146652248 | 0.001483527 |
| FAM218A grey | -0.523132826 | 3.64E-34    | -0.526899774 | 1.01E-34    |
| FAM228A grey | -0.096156636 | 0.037782272 | -0.091068066 | 0.049204897 |
| FAM231A grey | 0.000910741  | 0.984339699 | -0.003849678 | 0.933875712 |
| FAM231C grey | 0.004359371  | 0.925145082 | 0.038294423  | 0.409011426 |
| FAM231I grey | 0.085969137  | 0.063415407 | 0.074522819  | 0.10775353  |
| FAM24B grey  | -0.440280048 | 1.45E-23    | -0.457646702 | 1.49E-25    |
| FAM25C grey  | 0.03186584   | 0.4921107   | 0.002199635  | 0.962188704 |
| FAM3B grey   | -0.138088664 | 0.002785553 | -0.134810505 | 0.003513736 |
| FAM3D grey   | 0.211684659  | 3.94E-06    | 0.23784211   | 1.98E-07    |
| FAM43B grey  | -0.166184831 | 0.000310032 | -0.185091079 | 5.72E-05    |
| FAM46A grey  | -0.176269092 | 0.000128654 | -0.171710308 | 0.000192642 |
| FAM46B grey  | -0.066274038 | 0.152737597 | -0.054994761 | 0.235559254 |
| FAM47E grey  | -0.056789173 | 0.22060378  | -0.073839111 | 0.111030962 |
| FAM50B grey  | -0.394909459 | 7.03E-19    | -0.377862224 | 2.69E-17    |
| FAM53A grey  | -0.080264257 | 0.083153773 | -0.106090997 | 0.021849379 |
| FAM53B grey  | -0.049327423 | 0.287434936 | -0.047972786 | 0.300894033 |
| FAM57A grey  | 0.370893893  | 1.12E-16    | 0.381117714  | 1.36E-17    |
| FAM57B grey  | 0.012998899  | 0.779348928 | 0.01958019   | 0.672997299 |
| FAM69B grey  | -0.12402316  | 0.007288919 | -0.168156538 | 0.000262057 |
| FAM69C grey  | -0.048398502 | 0.296619943 | 0.015919647  | 0.731503489 |
| FAM71E2 grey | -0.129910948 | 0.004926508 | -0.156629885 | 0.000681995 |
| FAM71F1 grey | 0.059109558  | 0.202287957 | 0.048889631  | 0.291739636 |
| FAM71F2 grey | -0.031558479 | 0.496297886 | -0.02605185  | 0.574407815 |
| FAM83A grey  | -0.052950243 | 0.253454392 | -0.041041125 | 0.376209372 |
| FAM83F grey  | -0.07037503  | 0.128856942 | -0.05367016  | 0.247048491 |
| FAM86C1 grey | 0.152432328  | 0.000951142 | 0.150192823  | 0.001132006 |
| FAM90A grey  | -0.340820909 | 3.64E-14    | -0.350399747 | 6.16E-15    |
| FAM90A2 grey | -0.078954115 | 0.088324748 | -0.08160424  | 0.078120741 |
| FAM98C grey  | 0.115643276  | 0.012392356 | 0.127628811  | 0.005744955 |
| FAM9C grey   | 0.014241709  | 0.758876328 | 0.015094168  | 0.744929746 |
| FAT2 grey    | 0.027192146  | 0.557767447 | 0.053066155  | 0.252415278 |
| FATE1 grey   | -0.057909714 | 0.211616011 | -0.061670033 | 0.18338794  |
| FAXC grey    | -0.062161507 | 0.17991441  | -0.043972688 | 0.343042994 |
| FBLIM1 grey  | 0.049877888  | 0.282083264 | 0.045316537  | 0.328481911 |
| FBLL1 grey   | -0.124253207 | 0.007180313 | -0.120966168 | 0.008878156 |
| FBLN2 grey   | -0.30932749  | 8.20E-12    | -0.292971015 | 1.07E-10    |
| FBLN7 grey   | 0.09690024   | 0.036318071 | 0.1078084    | 0.019789721 |
| FBN3 grey    | -0.268816087 | 3.58E-09    | -0.283482105 | 4.43E-10    |
| FBP2 grey    | -0.009079165 | 0.844860137 | 0.004538498  | 0.922078857 |
| FBRS grey    | -0.081893781 | 0.07706636  | -0.085311632 | 0.065472443 |
| FBXL16 grey  | -0.181654916 | 7.88E-05    | -0.167518183 | 0.000276772 |
| FBXO10 grey  | 0.012596148  | 0.78601701  | -0.002321002 | 0.960104124 |
| FBXO2 grey   | -0.259949551 | 1.19E-08    | -0.255582615 | 2.12E-08    |
| FBXO24 grey  | 0.0432953    | 0.350536212 | 0.027897882  | 0.547587122 |

|        |      |              |             |              |             |
|--------|------|--------------|-------------|--------------|-------------|
| FBXO27 | grey | -0.31616495  | 2.67E-12    | -0.315327393 | 3.06E-12    |
| FBXO46 | grey | -0.009020763 | 0.845845572 | -0.025557957 | 0.581687176 |
| FCGR3B | grey | 0.047041738  | 0.310383424 | 0.074449157  | 0.108102927 |
| FCGRT  | grey | -0.062166028 | 0.179882686 | -0.06286449  | 0.175031068 |
| FCHSD1 | grey | -0.146771143 | 0.001470255 | -0.171547668 | 0.0001954   |
| FCN2   | grey | -0.086961528 | 0.060411711 | -0.092846874 | 0.044920908 |
| FCN3   | grey | 0.090645131  | 0.050272289 | 0.121126096  | 0.008787927 |
| FCRL2  | grey | 0.153791693  | 0.000854783 | 0.185237944  | 5.64E-05    |
| FCRLB  | grey | -0.22278654  | 1.16E-06    | -0.22681967  | 7.30E-07    |
| FDCSP  | grey | -0.084688547 | 0.067472093 | -0.068639851 | 0.138582133 |
| FDXACB | grey | 0.204226504  | 8.65E-06    | 0.204608405  | 8.31E-06    |
| FEM1A  | grey | 0.109822242  | 0.017591617 | 0.144739223  | 0.001712766 |
| FER1L5 | grey | -0.24753855  | 5.97E-08    | -0.238211917 | 1.90E-07    |
| FERD3L | grey | -0.04272667  | 0.356905606 | -0.044792343 | 0.334113519 |
| FERMT1 | grey | 0.07126697   | 0.124067963 | 0.073436592  | 0.112996861 |
| FETUB  | grey | 0.082135744  | 0.076194135 | 0.094603828  | 0.04100176  |
| FEV    | grey | 0.018954085  | 0.68287711  | 0.000773562  | 0.986698279 |
| FEZF1  | grey | 0.138965209  | 0.002615654 | 0.147117331  | 0.00143223  |
| FEZF2  | grey | -0.001915489 | 0.967070151 | -0.00584796  | 0.899701946 |
| FFAR1  | grey | -0.289123206 | 1.92E-10    | -0.295454372 | 7.33E-11    |
| FGD1   | grey | -0.13039009  | 0.004768648 | -0.150309102 | 0.001121885 |
| FGF11  | grey | -0.095740798 | 0.038622692 | -0.134747797 | 0.003529211 |
| FGF12  | grey | -0.369932257 | 1.36E-16    | -0.364089144 | 4.38E-16    |
| FGF16  | grey | -0.142909715 | 0.001961942 | -0.144370911 | 0.001760466 |
| FGF17  | grey | -0.069811908 | 0.131953386 | -0.103735149 | 0.02497567  |
| FGF18  | grey | 0.034405596  | 0.458245933 | 0.013607466  | 0.76930406  |
| FGF21  | grey | -0.077267179 | 0.09536     | -0.058158441 | 0.209657281 |
| FGF22  | grey | 0.102095445  | 0.027373079 | 0.134467406  | 0.003599164 |
| FGF23  | grey | 0.026157147  | 0.572861436 | 0.013005514  | 0.77923954  |
| FGF5   | grey | 0.035904426  | 0.438888547 | 0.050755463  | 0.273691487 |
| FGF9   | grey | -0.073478476 | 0.112791035 | -0.087632867 | 0.05844717  |
| FGFBP2 | grey | 0.098626773  | 0.033103302 | 0.096726286  | 0.036656205 |
| FGFBP3 | grey | -0.036041283 | 0.43714468  | -0.044993405 | 0.331946142 |
| FGFR1  | grey | 0.103021827  | 0.025995387 | 0.072160687  | 0.119409442 |
| FGFR2  | grey | -0.075354469 | 0.103870384 | -0.088757023 | 0.05527613  |
| FGFR3  | grey | -0.133050454 | 0.003972275 | -0.12910681  | 0.005202059 |
| FGFR4  | grey | -0.066684247 | 0.150207579 | -0.079246496 | 0.08714891  |
| FGFRL1 | grey | 0.012256783  | 0.791647848 | 0.025210497  | 0.586833931 |
| FGL1   | grey | 0.224781073  | 9.23E-07    | 0.200965505  | 1.21E-05    |
| FHDC1  | grey | 0.040355086  | 0.384246783 | 0.028841117  | 0.534125446 |
| FHL2   | grey | 0.052476043  | 0.25773633  | 0.082043116  | 0.076527088 |
| FHOD1  | grey | 0.235429046  | 2.65E-07    | 0.246771963  | 6.58E-08    |
| FIBCD1 | grey | 0.116822381  | 0.011522399 | 0.117699272  | 0.010910896 |
| FICD   | grey | 0.245179173  | 8.04E-08    | 0.252022685  | 3.37E-08    |
| FIGLA  | grey | 0.012902615  | 0.780941593 | 0.034337737  | 0.459133483 |

|          |      |              |             |              |             |
|----------|------|--------------|-------------|--------------|-------------|
| FJX1     | grey | -0.325725084 | 5.28E-13    | -0.3318807   | 1.81E-13    |
| FKBP10   | grey | -0.092531794 | 0.045656031 | -0.122145683 | 0.008231652 |
| FKBP11   | grey | 0.150564453  | 0.001099951 | 0.149609775  | 0.001184034 |
| FKBP1B   | grey | -0.276044563 | 1.30E-09    | -0.24732454  | 6.14E-08    |
| FKBP1C   | grey | -0.176476443 | 0.000126283 | -0.170613621 | 0.000211971 |
| FKBP5    | grey | -0.05746576  | 0.215144849 | -0.078241904 | 0.091242362 |
| FKRP     | grey | -0.088637015 | 0.055607688 | -0.103186443 | 0.025756933 |
| FKSG48   | grey | -0.128046233 | 0.005586688 | -0.10900272  | 0.018458967 |
| FKSG51   | grey | -0.123505108 | 0.007538889 | -0.123604742 | 0.007490227 |
| FKSG52   | grey | -0.107543699 | 0.020095718 | -0.117667619 | 0.01093246  |
| FKSG54   | grey | -0.079839034 | 0.084804585 | -0.082082289 | 0.076386135 |
| FKSG56   | grey | -0.04008945  | 0.387386803 | -0.006484536 | 0.888851254 |
| FKSG59   | grey | -0.052027239 | 0.261834775 | -0.063622181 | 0.16987885  |
| FKSG63   | grey | -0.005850201 | 0.899663703 | -0.000393186 | 0.99323876  |
| FKSG66   | grey | -0.10754278  | 0.020096787 | -0.129128164 | 0.005194566 |
| FLG      | grey | -0.139109743 | 0.002588564 | -0.144350073 | 0.0017632   |
| FLRT1    | grey | -0.188515071 | 4.14E-05    | -0.192479112 | 2.82E-05    |
| FLRT3    | grey | -0.163959483 | 0.000373968 | -0.178285838 | 0.000107265 |
| FLYWCH   | grey | 0.099216273  | 0.032062762 | 0.109128348  | 0.018323632 |
| FMN2     | grey | -0.042556452 | 0.358826314 | -0.039620003 | 0.392974032 |
| FMO3     | grey | 0.002678162  | 0.953971204 | 0.031335485  | 0.499347561 |
| FMR1NB   | grey | -0.130663697 | 0.004680565 | -0.1416925   | 0.002145652 |
| FN3K     | grey | 0.275787916  | 1.35E-09    | 0.279375864  | 8.05E-10    |
| FNDC4    | grey | -0.251776783 | 3.48E-08    | -0.249655887 | 4.57E-08    |
| FNDC8    | grey | 0.005378129  | 0.907722513 | -0.002654881 | 0.954370893 |
| FNTB     | grey | 0.125924104  | 0.006433964 | 0.127286517  | 0.005877731 |
| FO082796 | grey | -0.0751617   | 0.104760448 | -0.069154097 | 0.135642918 |
| FO538757 | grey | -0.063166025 | 0.172966905 | -0.064623223 | 0.16324674  |
| FOLR1    | grey | -0.124635628 | 0.007002972 | -0.092856731 | 0.04489807  |
| FOLR3    | grey | -0.256136957 | 1.97E-08    | -0.260066786 | 1.17E-08    |
| FOXA3    | grey | -0.049564372 | 0.285122978 | -0.041416108 | 0.37186024  |
| FOXC1    | grey | 0.013230858  | 0.77551583  | 0.042455381  | 0.359969844 |
| FOXC2    | grey | 0.167307241  | 0.000281802 | 0.145478625  | 0.001620565 |
| FOXD1    | grey | -0.051931908 | 0.262711087 | -0.024416017 | 0.598680473 |
| FOXD2    | grey | 0.024792826  | 0.593048363 | 0.017355056  | 0.708352981 |
| FOXD3    | grey | -0.168352911 | 0.00025768  | -0.174875159 | 0.000145713 |
| FOXD4    | grey | 0.183299009  | 6.77E-05    | 0.197894062  | 1.65E-05    |
| FOXD4L1  | grey | 0.149513008  | 0.001192879 | 0.134900263  | 0.003491693 |
| FOXD4L2  | grey | 0.055050445  | 0.235084662 | 0.063744986  | 0.169054568 |
| FOXD4L3  | grey | 0.105495346  | 0.022605931 | 0.114843249  | 0.01301517  |
| FOX E1   | grey | -0.132867074 | 0.004023038 | -0.117816428 | 0.010831414 |
| FOX F2   | grey | 0.135721687  | 0.003295716 | 0.152085336  | 0.000977296 |
| FOX G1   | grey | 0.010797215  | 0.815985618 | 0.038899809  | 0.401639585 |
| FOX H1   | grey | -0.030522204 | 0.510553531 | -0.039376176 | 0.39589509  |
| FOX I1   | grey | 0.048750326  | 0.2931184   | 0.074430457  | 0.108191768 |

|        |      |              |             |              |             |
|--------|------|--------------|-------------|--------------|-------------|
| FOXI3  | grey | -0.232943414 | 3.57E-07    | -0.24703128  | 6.37E-08    |
| FOXN1  | grey | -0.164567009 | 0.000355391 | -0.179812683 | 9.33E-05    |
| FOXO6  | grey | -0.352920087 | 3.82E-15    | -0.357601188 | 1.56E-15    |
| FOXQ1  | grey | 0.088645351  | 0.055584603 | 0.07577452   | 0.101951653 |
| FOXR2  | grey | -0.083839676 | 0.070276687 | -0.080341417 | 0.08285702  |
| FREM3  | grey | -0.184821873 | 5.87E-05    | -0.190605386 | 3.38E-05    |
| FRG2   | grey | 0.12308711   | 0.007746138 | 0.104148721  | 0.024400414 |
| FRG2B  | grey | 0.050516797  | 0.275956699 | 0.045699415  | 0.324407517 |
| FRMD1  | grey | -0.171977688 | 0.000188187 | -0.173411491 | 0.000165897 |
| FRMD4A | grey | -0.09794216  | 0.034347757 | -0.119215311 | 0.009921246 |
| FRMD5  | grey | -0.076908362 | 0.096912633 | -0.081582402 | 0.078200736 |
| FRMPD4 | grey | -0.022845061 | 0.622417406 | -0.006769039 | 0.884008374 |
| FRRS1L | grey | -0.170488848 | 0.000214282 | -0.151298213 | 0.001039105 |
| FRS3   | grey | -0.101583184 | 0.028161524 | -0.121877238 | 0.008374981 |
| FRZB   | grey | -0.088218299 | 0.056777471 | -0.060322644 | 0.193164322 |
| FSCN1  | grey | -0.149496797 | 0.001194367 | -0.143787313 | 0.001838545 |
| FSCN2  | grey | 0.064914984  | 0.161350872 | 0.082152464  | 0.076134162 |
| FSCN3  | grey | 0.00300523   | 0.948357384 | 0.00299095   | 0.948602442 |
| FSD1   | grey | -0.270208848 | 2.95E-09    | -0.28269865  | 4.97E-10    |
| FSTL5  | grey | -0.061528853 | 0.184394841 | -0.046363826 | 0.317415373 |
| FTCD   | grey | -0.151694747 | 0.00100753  | -0.166340084 | 0.000305975 |
| FTCDNL | grey | -0.151059013 | 0.001058591 | -0.151635236 | 0.001012212 |
| FTHL17 | grey | -0.093949945 | 0.042425216 | -0.090231732 | 0.051334239 |
| FTMT   | grey | 0.014650138  | 0.75218419  | 0.020524629  | 0.658200556 |
| FURIN  | grey | 0.086238894  | 0.062587003 | 0.092339645  | 0.046109283 |
| FUT1   | grey | -0.139403456 | 0.0025343   | -0.152831786 | 0.000921834 |
| FUT3   | grey | 0.279231604  | 8.22E-10    | 0.320254007  | 1.34E-12    |
| FUT4   | grey | -0.065762531 | 0.155937511 | -0.062704744 | 0.176132006 |
| FUT5   | grey | -0.084440282 | 0.068282676 | -0.069054224 | 0.136209965 |
| FUT6   | grey | 0.255968275  | 2.02E-08    | 0.288441319  | 2.12E-10    |
| FXYD2  | grey | -0.109538927 | 0.017887352 | -0.113857864 | 0.013820094 |
| FXYD4  | grey | -0.009937837 | 0.830400287 | -0.0105542   | 0.820055739 |
| FXYD7  | grey | -0.333966068 | 1.25E-13    | -0.329755014 | 2.62E-13    |
| FZD2   | grey | 0.021929639  | 0.636434141 | 0.031846771  | 0.492369929 |
| FZD8   | grey | 0.199722144  | 1.37E-05    | 0.206547508  | 6.79E-06    |
| FZD9   | grey | -0.047375713 | 0.306957096 | -0.049921558 | 0.281661603 |
| G0S2   | grey | 0.159272068  | 0.000550799 | 0.1722766    | 0.00018332  |
| G6PD   | grey | 0.093423294  | 0.043601786 | 0.094096546  | 0.042102506 |
| GAA    | grey | 0.052891833  | 0.253979142 | 0.026417372  | 0.569048302 |
| GABBR2 | grey | -0.063827517 | 0.168502299 | -0.034148181 | 0.461617825 |
| GABRA2 | grey | -0.169274576 | 0.000238032 | -0.178923702 | 0.000101229 |
| GABRA3 | grey | -0.239611717 | 1.60E-07    | -0.241766784 | 1.23E-07    |
| GABRA5 | grey | -0.094022392 | 0.042265481 | -0.109642634 | 0.017778599 |
| GABRD  | grey | 0.126186799  | 0.006323176 | 0.144649642  | 0.001724257 |
| GABRE  | grey | -0.375633458 | 4.26E-17    | -0.39605423  | 5.46E-19    |



|              |              |             |              |             |
|--------------|--------------|-------------|--------------|-------------|
| GABRG1 grey  | -0.098537508 | 0.033263351 | -0.113833287 | 0.013840718 |
| GABRG2 grey  | -0.189041765 | 3.93E-05    | -0.189151076 | 3.89E-05    |
| GABRG3 grey  | -0.091714322 | 0.04761055  | -0.114402766 | 0.013369729 |
| GABRQ grey   | -0.312531162 | 4.86E-12    | -0.327294919 | 4.03E-13    |
| GABRR1 grey  | -0.141161356 | 0.002230637 | -0.14976938  | 0.001169577 |
| GAD2 grey    | -0.001243488 | 0.978619253 | 0.001391822  | 0.976069494 |
| GADD45 grey  | 0.144025309  | 0.001806328 | 0.113787293  | 0.013879387 |
| GADL1 grey   | -0.089084969 | 0.054378451 | -0.079258701 | 0.087100099 |
| GAGE1 grey   | -0.101855453 | 0.027740067 | -0.102798569 | 0.026321827 |
| GAGE12I grey | -0.081423277 | 0.078785648 | -0.085458681 | 0.065007693 |
| GAGE13 grey  | -0.089988666 | 0.051967325 | -0.070272883 | 0.129414401 |
| GAGE2A grey  | -0.113641271 | 0.014002785 | -0.115211009 | 0.012725524 |
| GAK grey     | 0.216426923  | 2.35E-06    | 0.251764309  | 3.48E-08    |
| GAL grey     | -0.196308944 | 1.93E-05    | -0.213226995 | 3.33E-06    |
| GAL3ST1 grey | -0.069924853 | 0.131327768 | -0.071391969 | 0.123408025 |
| GAL3ST2 grey | -0.026207298 | 0.572125627 | -0.021450207 | 0.643827619 |
| GAL3ST3 grey | -0.390296384 | 1.92E-18    | -0.397136966 | 4.30E-19    |
| GALNT1 grey  | -0.257110978 | 1.74E-08    | -0.246315951 | 6.97E-08    |
| GALNT1 grey  | -0.123777232 | 0.007406645 | -0.123662646 | 0.007462076 |
| GALNT1 grey  | 0.199570296  | 1.39E-05    | 0.179705302  | 9.43E-05    |
| GALNT5 grey  | 0.118423537  | 0.01042769  | 0.139258714  | 0.002560911 |
| GALNT8 grey  | -0.228666104 | 5.90E-07    | -0.234976379 | 2.80E-07    |
| GALNT9 grey  | -0.161848377 | 0.000445792 | -0.165440393 | 0.000330187 |
| GALP grey    | -0.059109315 | 0.202289814 | -0.047992478 | 0.300695436 |
| GALR1 grey   | -0.192591904 | 2.79E-05    | -0.185317008 | 5.60E-05    |
| GALR3 grey   | 0.062355487  | 0.178556935 | 0.074797564  | 0.106458213 |
| GALT grey    | -0.150301947 | 0.001122505 | -0.148820763 | 0.001257951 |
| GAMT grey    | 0.152269115  | 0.000963362 | 0.165600916  | 0.000325741 |
| GAP43 grey   | -0.066927411 | 0.148722938 | -0.067813443 | 0.143407655 |
| GAREML grey  | -0.177984941 | 0.000110229 | -0.189069839 | 3.92E-05    |
| GAS2 grey    | -0.023979432 | 0.605236098 | -0.056199094 | 0.225444966 |
| GAS2L1 grey  | 0.20542644   | 7.63E-06    | 0.229597572  | 5.29E-07    |
| GAST grey    | 0.026087976  | 0.573877045 | 0.017020937  | 0.713718686 |
| GATA2 grey   | -0.065629552 | 0.156777655 | -0.096713481 | 0.036681201 |
| GATA3 grey   | -0.040872104 | 0.378179909 | -0.008978226 | 0.846563463 |
| GATA5 grey   | -0.212327977 | 3.67E-06    | -0.198840786 | 1.50E-05    |
| GATM grey    | 0.022510366  | 0.627526721 | 0.000566123  | 0.990265066 |
| GATSL3 grey  | -0.129641458 | 0.005017352 | -0.144980349 | 0.001682183 |
| GBGT1 grey   | -0.215875631 | 2.50E-06    | -0.248493313 | 5.29E-08    |
| GBP6 grey    | -0.099464836 | 0.031632465 | -0.123806847 | 0.007392379 |
| GBX1 grey    | -0.141014352 | 0.002254695 | -0.14456616  | 0.00173503  |
| GCG grey     | 0.063331257  | 0.171843536 | 0.072268955  | 0.118854492 |
| GCGR grey    | -0.223012395 | 1.13E-06    | -0.239447092 | 1.63E-07    |
| GCK grey     | -0.361873425 | 6.78E-16    | -0.345374308 | 1.58E-14    |
| GCM1 grey    | -0.0974117   | 0.035339196 | -0.086435591 | 0.061988598 |

|         |      |              |             |              |             |
|---------|------|--------------|-------------|--------------|-------------|
| GCNT4   | grey | -0.168044924 | 0.000264576 | -0.169255869 | 0.000238417 |
| GDA     | grey | 0.178089698  | 0.000109189 | 0.180897879  | 8.45E-05    |
| GDF11   | grey | -0.130879997 | 0.004611973 | -0.144359695 | 0.001761937 |
| GDF3    | grey | 0.078849906  | 0.088746906 | 0.071093502  | 0.124988333 |
| GDF5OS  | grey | 0.043006079  | 0.353766834 | 0.03172386   | 0.494042545 |
| GDF6    | grey | -0.109278642 | 0.018162865 | -0.115295448 | 0.012659829 |
| GDF9    | grey | 0.029412848  | 0.52604768  | 0.024726384  | 0.594039699 |
| GDPD2   | grey | -0.215916952 | 2.49E-06    | -0.216417041 | 2.35E-06    |
| GDPD3   | grey | -0.067275507 | 0.146617111 | -0.061529649 | 0.184389154 |
| GDPD5   | grey | -0.331466357 | 1.94E-13    | -0.318874192 | 1.69E-12    |
| GDPGP1  | grey | 0.25016212   | 4.28E-08    | 0.274986022  | 1.51E-09    |
| GFAP    | grey | -0.064661351 | 0.162998032 | -0.055563138 | 0.230746692 |
| GFOD1   | grey | -0.425707746 | 5.56E-22    | -0.415715464 | 6.12E-21    |
| GFRA2   | grey | -0.221002061 | 1.42E-06    | -0.244084641 | 9.21E-08    |
| GFRA3   | grey | 0.027343271  | 0.555579743 | 0.012473055  | 0.788058126 |
| GFRA4   | grey | -0.070688192 | 0.127159472 | -0.076674406 | 0.09793579  |
| GFY     | grey | 0.081420717  | 0.078795088 | 0.059449517  | 0.199700124 |
| GGA2    | grey | 0.124370624  | 0.00712544  | 0.133990161  | 0.003721125 |
| GGA3    | grey | -0.187653943 | 4.49E-05    | -0.212751031 | 3.51E-06    |
| GGACT   | grey | 0.307853045  | 1.04E-11    | 0.29047485   | 1.57E-10    |
| GGN     | grey | -0.116110705 | 0.012040775 | -0.115022937 | 0.012872931 |
| GGT1    | grey | 0.272059519  | 2.28E-09    | 0.253322413  | 2.85E-08    |
| GGT2    | grey | -0.050665715 | 0.274541809 | -0.061729782 | 0.182963034 |
| GGT7    | grey | -0.189693735 | 3.69E-05    | -0.239669138 | 1.59E-07    |
| GGTLC3  | grey | 0.098483533  | 0.033360445 | 0.098448299  | 0.033423958 |
| GH1     | grey | -0.173661086 | 0.000162279 | -0.165672191 | 0.000323784 |
| GH2     | grey | -0.071564476 | 0.122501764 | -0.118767823 | 0.010204722 |
| GHRH    | grey | -0.076831497 | 0.097247843 | -0.078885282 | 0.088603412 |
| GHRHR   | grey | -0.04543427  | 0.327225551 | -0.043977451 | 0.342990666 |
| GIGYF1  | grey | -0.178099106 | 0.000109096 | -0.203805805 | 9.03E-06    |
| GIMAP1- | grey | -0.019290632 | 0.677559604 | -0.021471456 | 0.643499176 |
| GIPC2   | grey | -0.050406456 | 0.277008254 | -0.073094558 | 0.114688749 |
| GIT1    | grey | -0.052491455 | 0.257596384 | -0.059360435 | 0.200375885 |
| GJA3    | grey | -0.104222825 | 0.024298557 | -0.099097845 | 0.032269529 |
| GJB1    | grey | 0.163966924  | 0.000373735 | 0.176685197  | 0.000123937 |
| GJB3    | grey | -0.141285944 | 0.002210431 | -0.126794148 | 0.006073559 |
| GJB4    | grey | 0.045635509  | 0.325085278 | 0.077693397  | 0.093541587 |
| GJB5    | grey | 0.063029842  | 0.173896894 | 0.076688148  | 0.097875454 |
| GJD4    | grey | -0.069228316 | 0.135222706 | -0.072224452 | 0.119082357 |
| GLB1    | grey | 0.237741623  | 2.01E-07    | 0.225290093  | 8.70E-07    |
| GLDN    | grey | -0.167044293 | 0.000288191 | -0.182124263 | 7.55E-05    |
| GLOD5   | grey | -0.172806091 | 0.000174988 | -0.161279016 | 0.000467252 |
| GLP1R   | grey | -0.128389918 | 0.005459334 | -0.14194562  | 0.002106203 |
| GLRX    | grey | -0.026265972 | 0.57126533  | -0.006501365 | 0.88856467  |
| GLS2    | grey | -0.012896437 | 0.781043812 | -0.042149293 | 0.363446839 |

|        |      |              |             |              |             |
|--------|------|--------------|-------------|--------------|-------------|
| GLTP   | grey | 0.312393724  | 4.97E-12    | 0.317686966  | 2.07E-12    |
| GLTPD2 | grey | 0.064205001  | 0.165993481 | 0.06576833   | 0.15590095  |
| GLYATL | grey | 0.267327078  | 4.39E-09    | 0.236736726  | 2.27E-07    |
| GML    | grey | -0.089487265 | 0.053293848 | -0.063937885 | 0.167765859 |
| GNAS   | grey | 0.086365385  | 0.062201639 | 0.085045262  | 0.066321254 |
| GNAT2  | grey | 0.052534928  | 0.257201908 | 0.040041172  | 0.38795916  |
| GNB3   | grey | -0.152229605 | 0.000966342 | -0.167254323 | 0.000283077 |
| GNG3   | grey | -0.060301174 | 0.193323138 | -0.075484764 | 0.103272181 |
| GNG4   | grey | -0.079686771 | 0.085402093 | -0.083958504 | 0.069878442 |
| GNG8   | grey | -0.168125276 | 0.000262761 | -0.139484826 | 0.002519452 |
| GNGT1  | grey | -0.162853847 | 0.000410118 | -0.159417763 | 0.000544295 |
| GNRH2  | grey | 0.12044198   | 0.009179703 | 0.122157422  | 0.008225435 |
| GOLGA6 | grey | -0.023249027 | 0.616274695 | -0.018708528 | 0.686766886 |
| GOLGA6 | grey | -0.041111978 | 0.375385218 | -0.038083787 | 0.41159506  |
| GOLGA6 | grey | -0.029875639 | 0.519554969 | -0.03757058  | 0.417930273 |
| GOLGA6 | grey | -0.026358787 | 0.569905705 | -0.01133496  | 0.806996978 |
| GOLGA6 | grey | -0.088524838 | 0.055919101 | -0.082917478 | 0.073430857 |
| GOLGA8 | grey | 0.056132126  | 0.225999134 | 0.022676907  | 0.624982132 |
| GOLGA8 | grey | -0.118187131 | 0.010583284 | -0.116605124 | 0.011678512 |
| GOT2   | grey | 0.354400203  | 2.88E-15    | 0.393533508  | 9.50E-19    |
| GP5    | grey | -0.14349029  | 0.001879489 | -0.160324162 | 0.000505411 |
| GP9    | grey | 0.018796228  | 0.685376703 | 0.038518191  | 0.406277285 |
| GPA33  | grey | 0.081599075  | 0.078139654 | 0.099431732  | 0.031689485 |
| GPAT2  | grey | -0.028289071 | 0.541983899 | -0.044026614 | 0.342450887 |
| GPBAR1 | grey | -0.224099386 | 9.97E-07    | -0.211213175 | 4.14E-06    |
| GPC3   | grey | -0.131699139 | 0.004360359 | -0.149796983 | 0.001167093 |
| GPC4   | grey | 0.267098956  | 4.53E-09    | 0.267659226  | 4.20E-09    |
| GPD1   | grey | -0.045414201 | 0.327439493 | -0.040249972 | 0.385487453 |
| GPHA2  | grey | -0.146049782 | 0.001552485 | -0.155780025 | 0.000729997 |
| GPHB5  | grey | -0.026221573 | 0.571916265 | -0.031337985 | 0.499313307 |
| GPN2   | grey | 0.081703752  | 0.07775705  | 0.107867845  | 0.019721563 |
| GPR110 | grey | -0.070615602 | 0.12755139  | -0.050460808 | 0.27648994  |
| GPR111 | grey | -0.05249943  | 0.257523983 | -0.049289895 | 0.287802258 |
| GPR115 | grey | -0.067388082 | 0.14594097  | -0.064845505 | 0.161800836 |
| GPR132 | grey | 0.071966698  | 0.120408824 | 0.105791793  | 0.022226616 |
| GPR139 | grey | -0.085007056 | 0.06644374  | -0.081771172 | 0.077511427 |
| GPR142 | grey | -0.232262457 | 3.87E-07    | -0.233461008 | 3.36E-07    |
| GPR143 | grey | -0.180570457 | 8.71E-05    | -0.19815371  | 1.61E-05    |
| GPR15  | grey | 0.04610941   | 0.320081074 | 0.092582668  | 0.045536658 |
| GPR151 | grey | -0.087232292 | 0.059612906 | -0.032105049 | 0.488865073 |
| GPR156 | grey | -0.326194383 | 4.87E-13    | -0.327109763 | 4.16E-13    |
| GPR157 | grey | 0.244447004  | 8.81E-08    | 0.239917632  | 1.54E-07    |
| GPR158 | grey | -0.324216192 | 6.84E-13    | -0.325042658 | 5.94E-13    |
| GPR160 | grey | -0.033657099 | 0.468088673 | -0.025685527 | 0.57980284  |
| GPR27  | grey | -0.283765967 | 4.25E-10    | -0.307671317 | 1.07E-11    |

|         |      |              |             |              |             |
|---------|------|--------------|-------------|--------------|-------------|
| GPR31   | grey | -0.173877214 | 0.000159206 | -0.151740651 | 0.001003933 |
| GPR35   | grey | 0.184642494  | 5.97E-05    | 0.192608201  | 2.78E-05    |
| GPR37   | grey | 0.15399395   | 0.000841243 | 0.139247229  | 0.002563033 |
| GPR37L1 | grey | -0.0303371   | 0.513122209 | -0.042587808 | 0.358472015 |
| GPR45   | grey | -0.043749112 | 0.34550481  | -0.042304763 | 0.361678168 |
| GPR50   | grey | -0.028861751 | 0.533832831 | -0.024492106 | 0.597541224 |
| GPR55   | grey | 0.038676174  | 0.404353504 | 0.058725954  | 0.205237184 |
| GPR6    | grey | -0.000672822 | 0.988430406 | -0.007425972 | 0.872842675 |
| GPR62   | grey | -0.227657125 | 6.63E-07    | -0.209594033 | 4.92E-06    |
| GPR63   | grey | -0.058299735 | 0.208550436 | -0.049277689 | 0.287921792 |
| GPR64   | grey | -0.142756105 | 0.001984304 | -0.181018751 | 8.36E-05    |
| GPR89A  | grey | 0.044940075  | 0.332520142 | 0.04080952   | 0.378911146 |
| GPR89B  | grey | -0.016660836 | 0.719517489 | -0.020419231 | 0.659845398 |
| GPR98   | grey | 0.153897536  | 0.000847672 | 0.149574865  | 0.001187218 |
| GPRC5A  | grey | 0.123996143  | 0.007301769 | 0.115641547  | 0.012393673 |
| GPRC5B  | grey | -0.340901182 | 3.58E-14    | -0.358298854 | 1.36E-15    |
| GPRC5C  | grey | -0.140146931 | 0.002401545 | -0.121203153 | 0.008744746 |
| GPRIN2  | grey | -0.396078313 | 5.43E-19    | -0.411008424 | 1.84E-20    |
| GPS2    | grey | 0.000905596  | 0.98442815  | -0.00622557  | 0.893263036 |
| GPSM1   | grey | -0.171606601 | 0.000194397 | -0.185991793 | 5.26E-05    |
| GPX3    | grey | -0.191018111 | 3.25E-05    | -0.177198886 | 0.000118338 |
| GPX7    | grey | -0.075651352 | 0.102511333 | -0.07535405  | 0.103872316 |
| GRAMD1  | grey | -0.017755487 | 0.701941336 | -0.027504942 | 0.553244021 |
| GRAMD1  | grey | -0.199380362 | 1.42E-05    | -0.181579222 | 7.94E-05    |
| GRAMD4  | grey | 0.2102399    | 4.60E-06    | 0.211497745  | 4.02E-06    |
| GRAPL   | grey | -0.06564106  | 0.156704814 | -0.079201115 | 0.087330583 |
| GRB14   | grey | 0.125565214  | 0.006588135 | 0.109059129  | 0.018398092 |
| GRB7    | grey | -0.199384057 | 1.42E-05    | -0.208499916 | 5.53E-06    |
| GRHL1   | grey | 0.113807726  | 0.013862196 | 0.130526636  | 0.004724504 |
| GRIA1   | grey | -0.087423207 | 0.059054935 | -0.096300445 | 0.037495263 |
| GRID2   | grey | -0.207277018 | 6.29E-06    | -0.201562122 | 1.14E-05    |
| GRID2IP | grey | -0.210832446 | 4.31E-06    | -0.214492604 | 2.91E-06    |
| GRIK2   | grey | 0.002142641  | 0.963167718 | 0.020860092  | 0.652976365 |
| GRIK3   | grey | -0.045342794 | 0.328201448 | -0.047675019 | 0.303907734 |
| GRIK5   | grey | -0.451730525 | 7.31E-25    | -0.445337587 | 3.94E-24    |
| GRIN2A  | grey | -0.177046954 | 0.000119969 | -0.182947331 | 6.99E-05    |
| GRIN2C  | grey | -0.068688679 | 0.138300968 | -0.063215415 | 0.172630543 |
| GRIN2D  | grey | 0.214217667  | 2.99E-06    | 0.225908751  | 8.11E-07    |
| GRIN3A  | grey | -0.071515357 | 0.122759277 | -0.054885545 | 0.236492058 |
| GRIPAP1 | grey | -0.133343549 | 0.003892342 | -0.125172566 | 0.006760594 |
| GRK1    | grey | -0.226985516 | 7.16E-07    | -0.233468055 | 3.35E-07    |
| GRK4    | grey | -0.026869505 | 0.562451968 | -0.037376956 | 0.420335226 |
| GRM1    | grey | -0.036355449 | 0.433156582 | -0.043111174 | 0.352590756 |
| GRM2    | grey | 0.1168401    | 0.011509748 | 0.136458336  | 0.003128516 |
| GRM4    | grey | -0.12051151  | 0.009139188 | -0.121262505 | 0.008711614 |

|         |      |              |             |              |             |
|---------|------|--------------|-------------|--------------|-------------|
| GRM6    | grey | -0.063097184 | 0.173436551 | -0.06702705  | 0.148117831 |
| GRP     | grey | 0.032187334  | 0.487751275 | 0.06616345   | 0.153425165 |
| GRPR    | grey | 0.152968169  | 0.00091202  | 0.138223639  | 0.002758753 |
| GRTP1   | grey | 0.24732907   | 6.13E-08    | 0.202983254  | 9.83E-06    |
| GSC     | grey | 0.054919893  | 0.236198415 | 0.04249537   | 0.35951713  |
| GSDMB   | grey | -0.16468626  | 0.000351847 | -0.15393777  | 0.000844983 |
| GSDMC   | grey | -0.048976684 | 0.290880246 | -0.042884254 | 0.355133222 |
| GSG1L   | grey | -0.11894459  | 0.010091896 | -0.117924428 | 0.010758597 |
| GSR     | grey | 0.431647113  | 1.29E-22    | 0.442815367  | 7.57E-24    |
| GSTA2   | grey | 6.22E-05     | 0.998931041 | -0.00556576  | 0.904518259 |
| GSTM1   | grey | -0.025617418 | 0.580808528 | -0.025868639 | 0.577103103 |
| GSTM3   | grey | -0.149454204 | 0.001198284 | -0.126678197 | 0.00612052  |
| GSTM4   | grey | -0.316014918 | 2.73E-12    | -0.289353783 | 1.85E-10    |
| GSTO2   | grey | 0.110250249  | 0.017152949 | 0.092270769  | 0.046272667 |
| GSTT2B  | grey | -0.017194395 | 0.710931298 | -0.035618726 | 0.442541819 |
| GSX1    | grey | -0.026324053 | 0.570414329 | -0.024150714 | 0.602660365 |
| GSX2    | grey | 0.069356609  | 0.134498703 | 0.050855448  | 0.272746296 |
| GTF2A1L | grey | -0.13377662  | 0.003776899 | -0.123847217 | 0.007372971 |
| GTF2H2  | grey | 0.026272415  | 0.571170891 | 0.030220069  | 0.514749688 |
| GTSF1   | grey | -0.092278722 | 0.046253777 | -0.088144269 | 0.0569864   |
| GTSF1L  | grey | -0.148883076 | 0.001251963 | -0.126948484 | 0.006011555 |
| GUCA1B  | grey | -0.15243866  | 0.000950671 | -0.172209724 | 0.000184399 |
| GUCA1C  | grey | -0.097991008 | 0.034257662 | -0.103111626 | 0.025865074 |
| GUCA2A  | grey | -0.04262135  | 0.358093256 | -0.036972968 | 0.425379079 |
| GUCA2B  | grey | 0.003607269  | 0.938030825 | -0.012638427 | 0.785316279 |
| GUCD1   | grey | 0.041921346  | 0.366049757 | 0.066524194  | 0.151190911 |
| GUCY2D  | grey | -0.265394545 | 5.72E-09    | -0.246991559 | 6.40E-08    |
| GUSB    | grey | 0.023185676  | 0.61723627  | 0.017221729  | 0.710492404 |
| GYG2    | grey | 0.047790128  | 0.302740357 | 0.04642338   | 0.316793484 |
| GYS2    | grey | -0.024683886 | 0.594674177 | -0.037621227 | 0.417302535 |
| H1F0    | grey | 0.139172428  | 0.002576895 | 0.0969393    | 0.03624251  |
| H2AFB1  | grey | 0.021433798  | 0.644081287 | 0.00132077   | 0.977290805 |
| H2AFB2  | grey | -0.058002247 | 0.210885775 | -0.060034795 | 0.195301483 |
| H2AFB3  | grey | 0.03252023   | 0.483259227 | 0.021642744  | 0.640854155 |
| H2AFJ   | grey | -0.122217681 | 0.008193585 | -0.087857587 | 0.057801505 |
| H2AFY2  | grey | 0.033053189  | 0.47611441  | 0.012867704  | 0.781519277 |
| H2BFM   | grey | -0.21618388  | 2.42E-06    | -0.217166314 | 2.17E-06    |
| H2BFS   | grey | -0.009720737 | 0.834051002 | -0.003990931 | 0.931455329 |
| H2BFWT  | grey | -0.2231022   | 1.12E-06    | -0.233314497 | 3.41E-07    |
| H3F3C   | grey | -0.002444473 | 0.957983675 | 0.012097969  | 0.794286681 |
| HADHA   | grey | 0.121612721  | 0.008518385 | 0.129093665  | 0.005206676 |
| HAL     | grey | -0.068790957 | 0.137713445 | -0.094990109 | 0.040179963 |
| HAND1   | grey | 0.002086562  | 0.964131061 | 0.005023954  | 0.913774947 |
| HAO1    | grey | 0.064499321  | 0.164056902 | 0.060441357  | 0.192287933 |
| HAP1    | grey | 0.00543264   | 0.906791446 | -0.043500701 | 0.348253228 |

|        |      |              |             |              |             |
|--------|------|--------------|-------------|--------------|-------------|
| HAPLN3 | grey | 0.049452487  | 0.286213095 | 0.060431704  | 0.192359083 |
| HAPLN4 | grey | -0.121606135 | 0.008521983 | -0.13870637  | 0.002664815 |
| HARS   | grey | 0.189401834  | 3.80E-05    | 0.185590122  | 5.46E-05    |
| HAS2   | grey | -0.026621687 | 0.566062905 | -0.042187185 | 0.363015274 |
| HAS3   | grey | 0.329291235  | 2.84E-13    | 0.306306119  | 1.33E-11    |
| HAVCR1 | grey | 0.018183402  | 0.695112914 | 0.012976362  | 0.779721638 |
| HBA1   | grey | 0.056767607  | 0.220779396 | 0.060260825  | 0.193621855 |
| HBA2   | grey | 0.051127571  | 0.270185102 | 0.02968457   | 0.522230563 |
| HBB    | grey | 0.045015353  | 0.331710098 | 0.015937184  | 0.731219123 |
| HBD    | grey | -0.112973119 | 0.014579812 | -0.109527896 | 0.017898954 |
| HBE1   | grey | -0.168083712 | 0.000263698 | -0.181346207 | 8.11E-05    |
| HBM    | grey | -0.079916481 | 0.084501968 | -0.088601917 | 0.055704966 |
| HBQ1   | grey | 0.035504355  | 0.444009149 | 0.038380457  | 0.407958913 |
| HBZ    | grey | -0.093659058 | 0.043071722 | -0.10058417  | 0.029755391 |
| HCAR1  | grey | -0.26975383  | 3.14E-09    | -0.273402079 | 1.89E-09    |
| HCAR2  | grey | -0.004925254 | 0.915462523 | -0.000868089 | 0.985073018 |
| HCAR3  | grey | 0.065228983  | 0.159329064 | 0.07541137   | 0.103608806 |
| HCG27  | grey | -0.023904076 | 0.606370867 | 0.006477156  | 0.888976936 |
| HCN1   | grey | 0.022586925  | 0.626356421 | 0.008022241  | 0.862729825 |
| HCN2   | grey | 0.028112452  | 0.544510182 | 0.03436687   | 0.458752322 |
| HCN3   | grey | 0.165179303  | 0.000337541 | 0.138767712  | 0.002653089 |
| HCRTR2 | grey | -0.00029438  | 0.994937811 | -0.001702792 | 0.970724965 |
| HDAC11 | grey | -0.159648042 | 0.000534161 | -0.161871587 | 0.000444937 |
| HDAC6  | grey | -0.124599677 | 0.007019475 | -0.14043383  | 0.002352036 |
| HDAC7  | grey | -0.32266643  | 8.92E-13    | -0.328794581 | 3.10E-13    |
| HDC    | grey | 0.013090386  | 0.777836469 | -0.010190747 | 0.826151984 |
| HDDC3  | grey | 0.116031721  | 0.012099558 | 0.093527381  | 0.043367094 |
| HDGFL1 | grey | 0.085160865  | 0.065951771 | 0.088555307  | 0.055834374 |
| HDHD1  | grey | 0.044236957  | 0.340147544 | 0.073061879  | 0.114851432 |
| HDLBP  | grey | 0.275558058  | 1.39E-09    | 0.281554207  | 5.87E-10    |
| HEBP1  | grey | -0.232605848 | 3.71E-07    | -0.23987343  | 1.55E-07    |
| HECTD3 | grey | 0.118749489  | 0.010216488 | 0.139912784  | 0.002442654 |
| HECW1  | grey | -0.089664107 | 0.052822807 | -0.070592527 | 0.127676169 |
| HELT   | grey | -0.111032985 | 0.016375413 | -0.11377066  | 0.013893395 |
| HEMK1  | grey | 0.120324262  | 0.009248662 | 0.111020773  | 0.016387303 |
| HES1   | grey | 0.073040993  | 0.114955499 | 0.097571448  | 0.035038094 |
| HES2   | grey | 0.210964216  | 4.25E-06    | 0.233605038  | 3.30E-07    |
| HES7   | grey | -0.077774468 | 0.093198865 | -0.053789297 | 0.245999396 |
| HEXA   | grey | 0.148087309  | 0.001330449 | 0.145411526  | 0.00162874  |
| HEXIM1 | grey | 0.199083822  | 1.46E-05    | 0.20584337   | 7.31E-06    |
| HEXIM2 | grey | 0.195644439  | 2.06E-05    | 0.185172257  | 5.68E-05    |
| HEY1   | grey | 0.181723313  | 7.83E-05    | 0.182102028  | 7.56E-05    |
| HGFAC  | grey | 0.055672711  | 0.22982698  | 0.058876295  | 0.20407764  |
| HHIP   | grey | 0.113858849  | 0.013819268 | 0.128334653  | 0.005479635 |
| HIRIP3 | grey | -0.031256696 | 0.500427446 | -0.03386244  | 0.465376877 |

|              |              |             |              |             |
|--------------|--------------|-------------|--------------|-------------|
| HIST1H3]grey | 0.016050744  | 0.729378616 | 0.014772745  | 0.750178854 |
| HIST2H2.grey | 0.09002498   | 0.051872332 | 0.08199516   | 0.076699928 |
| HIST2H3.grey | 0.013989066  | 0.763024969 | 0.00416776   | 0.928426226 |
| HIST2H3(grey | -0.058289793 | 0.208628178 | -0.063204609 | 0.172704095 |
| HIST2H3]grey | -0.014925371 | 0.747684891 | -0.015808134 | 0.733312545 |
| HIST2H4.grey | -0.068722518 | 0.138106371 | -0.067896648 | 0.142916071 |
| HIST2H4]grey | -0.061088253 | 0.187563429 | -0.088819834 | 0.055103254 |
| HIST3H2.grey | 0.04299474   | 0.353893871 | 0.057289612  | 0.216556638 |
| HK1 grey     | 0.170444271  | 0.000215113 | 0.169809781  | 0.000227276 |
| HKDC1 grey   | 0.079067393  | 0.087867686 | 0.093328152  | 0.043817241 |
| HLCS grey    | 0.258425112  | 1.46E-08    | 0.260898064  | 1.05E-08    |
| HMGCLI grey  | -0.204309483 | 8.57E-06    | -0.199877834 | 1.35E-05    |
| HMGCS2 grey  | 0.033744081  | 0.466938902 | 0.032475645  | 0.483859552 |
| HMGNS grey   | 0.225857213  | 8.16E-07    | 0.20628344   | 6.98E-06    |
| HMHB1 grey   | -0.043991604 | 0.342835214 | -0.036547453 | 0.430729589 |
| HMP19 grey   | 0.001276498  | 0.978051808 | -0.028531619 | 0.538524129 |
| HMSD grey    | -0.030346288 | 0.512994548 | -0.026775457 | 0.563821031 |
| HMX1 grey    | -0.055648226 | 0.230032273 | -0.062529818 | 0.17734346  |
| HMX2 grey    | 0.100567407  | 0.029782782 | 0.130281726  | 0.004803946 |
| HMX3 grey    | 0.085671485  | 0.064339936 | 0.097856069  | 0.034507033 |
| HNF1B grey   | 0.060369452  | 0.192818416 | 0.054583122  | 0.239088606 |
| HNF4A grey   | 0.012655429  | 0.785034541 | 0.017279253  | 0.709569074 |
| HNRNPC grey  | -0.016307669 | 0.725220301 | -0.029851485 | 0.519892811 |
| HNRNPC grey  | -0.013587751 | 0.76962887  | -0.010247057 | 0.825206792 |
| HOGA1 grey   | -0.117631213 | 0.010957307 | -0.114936004 | 0.012941574 |
| HOMER3 grey  | -0.018421232 | 0.691328359 | -0.018757047 | 0.685997661 |
| HOMEZ grey   | 0.085247949  | 0.065674558 | 0.089095647  | 0.05434943  |
| HORMAI grey  | -0.130139578 | 0.004850605 | -0.129173378 | 0.005178732 |
| HOXA1 grey   | -0.041546894 | 0.370350697 | -0.052526143 | 0.25728159  |
| HOXA10.grey  | 0.164658735  | 0.000352662 | 0.141910476  | 0.00211164  |
| HOXA2 grey   | -0.156260528 | 0.000702486 | -0.174840432 | 0.000146164 |
| HOXA3 grey   | -0.140030826 | 0.00242185  | -0.150849889 | 0.001075902 |
| HOXA5 grey   | -0.102040618 | 0.02745655  | -0.112229523 | 0.015246467 |
| HOXA6 grey   | -0.021666291 | 0.6404909   | -0.043960517 | 0.343176723 |
| HOXA7 grey   | 0.006668458  | 0.885720002 | -0.003495552 | 0.939946337 |
| HOXA9 grey   | 0.123926726  | 0.007334881 | 0.10521536   | 0.022969322 |
| HOXB13 grey  | 0.334758622  | 1.08E-13    | 0.323280741  | 8.03E-13    |
| HOXB7 grey   | -0.088262005 | 0.056654421 | -0.059303767 | 0.200806632 |
| HOXB8 grey   | -0.058098249 | 0.210130087 | -0.036476212 | 0.43162918  |
| HOXB9 grey   | -0.088330121 | 0.056463088 | -0.06664001  | 0.150478874 |
| HOXC10 grey  | 0.189236158  | 3.86E-05    | 0.171003923  | 0.000204893 |
| HOXC11 grey  | 0.236956938  | 2.21E-07    | 0.224138518  | 9.93E-07    |
| HOXC12 grey  | 0.049196991  | 0.288712951 | 0.025401549  | 0.584001365 |
| HOXC13 grey  | 0.077469217  | 0.094494539 | 0.058871029  | 0.204118173 |
| HOXC4 grey   | -0.106929495 | 0.020821642 | -0.112769336 | 0.014759911 |

|         |      |              |             |              |             |
|---------|------|--------------|-------------|--------------|-------------|
| HOXC6   | grey | 0.122611892  | 0.007987925 | 0.098035294  | 0.034176155 |
| HOXC8   | grey | 0.079420808  | 0.08645391  | 0.059386537  | 0.200177707 |
| HOXC9   | grey | 0.163497695  | 0.00038869  | 0.147708919  | 0.001369336 |
| HOXD12  | grey | 0.066752033  | 0.149792579 | 0.043190254  | 0.351707416 |
| HOXD13  | grey | 0.039441995  | 0.395105289 | 0.011334669  | 0.807001833 |
| HP      | grey | 0.198769292  | 1.51E-05    | 0.188762188  | 4.04E-05    |
| HPD     | grey | -0.208580372 | 5.48E-06    | -0.206002374 | 7.19E-06    |
| HPGD    | grey | -0.026324878 | 0.570402249 | -0.035491651 | 0.444172296 |
| HPN     | grey | -0.101124303 | 0.028884298 | -0.111250786 | 0.016164624 |
| HPR     | grey | 0.031708164  | 0.494256362 | 0.046417521  | 0.316854633 |
| HPS1    | grey | 0.228359721  | 6.11E-07    | 0.256596805  | 1.86E-08    |
| HPS6    | grey | 0.191819684  | 3.01E-05    | 0.197940423  | 1.64E-05    |
| HPSE    | grey | -0.27889518  | 8.63E-10    | -0.262908694 | 8.02E-09    |
| HR      | grey | -0.113284413 | 0.014308424 | -0.121242735 | 0.008722638 |
| HRASLS  | grey | -0.269459481 | 3.27E-09    | -0.290463567 | 1.57E-10    |
| HRASLS' | grey | -0.040352706 | 0.384274847 | -0.022840263 | 0.622490527 |
| HRH1    | grey | -0.191496543 | 3.10E-05    | -0.166468769 | 0.000302651 |
| HRH3    | grey | 0.024317141  | 0.600162351 | 0.004941396  | 0.915186497 |
| HRK     | grey | -0.151410532 | 0.00103007  | -0.157860409 | 0.000617655 |
| HS1BP3  | grey | 0.133977057  | 0.003724526 | 0.130195914  | 0.004832064 |
| HS3ST1  | grey | 0.228955467  | 5.70E-07    | 0.224215582  | 9.84E-07    |
| HS3ST3A | grey | 0.121421167  | 0.008623595 | 0.102179395  | 0.027245695 |
| HS3ST3B | grey | 0.133550428  | 0.003836802 | 0.120889639  | 0.008921623 |
| HS3ST4  | grey | -0.100318854 | 0.030191459 | -0.102385005 | 0.026935859 |
| HS3ST5  | grey | -0.038120851 | 0.411139738 | -0.06159244  | 0.183940833 |
| HSBP1L1 | grey | 0.093772064  | 0.042819584 | 0.116496517  | 0.011757252 |
| HSD11B2 | grey | 0.220521088  | 1.49E-06    | 0.231683653  | 4.14E-07    |
| HSD17B1 | grey | 0.069401433  | 0.134246451 | 0.087541124  | 0.058712476 |
| HSD17B1 | grey | -0.326636572 | 4.51E-13    | -0.324284645 | 6.76E-13    |
| HSD17B2 | grey | 0.216713109  | 2.28E-06    | 0.22613149   | 7.90E-07    |
| HSD3B2  | grey | -0.054420685 | 0.240491506 | -0.049367891 | 0.287039194 |
| HSDL1   | grey | 0.233348646  | 3.40E-07    | 0.222334662  | 1.22E-06    |
| HSF4    | grey | 0.225310575  | 8.68E-07    | 0.212348976  | 3.67E-06    |
| HSFX1   | grey | 0.011195942  | 0.809318339 | -0.014819444 | 0.74941549  |
| HSFX2   | grey | -0.102153144 | 0.027285474 | -0.08493793  | 0.066665824 |
| HSFY1   | grey | -0.014779678 | 0.750065514 | -0.012535824 | 0.78701712  |
| HSFY2   | grey | -0.087353646 | 0.059257734 | -0.091220325 | 0.048825301 |
| HSPA1A  | grey | -0.274752399 | 1.56E-09    | -0.281532121 | 5.89E-10    |
| HSPA1B  | grey | -0.017484651 | 0.706275641 | -0.006457784 | 0.889306846 |
| HSPA2   | grey | -0.093872654 | 0.042596195 | -0.108591926 | 0.018907606 |
| HSPA6   | grey | 0.054159257  | 0.242761466 | 0.046154137  | 0.319611389 |
| HSPB9   | grey | -0.131850919 | 0.004315123 | -0.102614629 | 0.026593423 |
| HTATIP2 | grey | 0.032684297  | 0.48105359  | 0.05921039   | 0.201517879 |
| HTN1    | grey | -0.037070262 | 0.424161139 | -0.023217202 | 0.616757667 |
| HTN3    | grey | 0.009538904  | 0.837111433 | 0.027840475  | 0.548411785 |



|         |      |              |             |              |             |
|---------|------|--------------|-------------|--------------|-------------|
| HTR1D   | grey | 0.129914151  | 0.004925438 | 0.108149199  | 0.019401732 |
| HTR2C   | grey | -0.18143217  | 8.05E-05    | -0.171882585 | 0.00018976  |
| HTR3A   | grey | -0.170945588 | 0.000205937 | -0.171837531 | 0.00019051  |
| HTR3B   | grey | -0.11879219  | 0.010189103 | -0.114548978 | 0.013251106 |
| HTR5A   | grey | -0.00668243  | 0.885482208 | -0.033413245 | 0.47132038  |
| HTR6    | grey | -0.14678481  | 0.001468737 | -0.128722664 | 0.005338529 |
| HTR7    | grey | 0.088089052  | 0.057142651 | 0.074251361  | 0.109045536 |
| HUS1B   | grey | -0.037500697 | 0.418797342 | -0.043425863 | 0.349083939 |
| HYAL3   | grey | 0.094010839  | 0.04229092  | 0.095865637  | 0.038368741 |
| HYAL4   | grey | 0.109186976  | 0.018260771 | 0.10671764   | 0.021077263 |
| HYI     | grey | -0.023023543 | 0.619700147 | -0.035867936 | 0.439354186 |
| HYKK    | grey | 0.10691203   | 0.020842612 | 0.106060503  | 0.021887569 |
| HYPK    | grey | 0.111755531  | 0.015685243 | 0.08474762   | 0.067280385 |
| HYPM    | grey | -0.040369281 | 0.384079429 | -0.005171301 | 0.911256328 |
| IAH1    | grey | 0.111818291  | 0.015626517 | 0.13071993   | 0.004662645 |
| IBA57   | grey | 0.004136789  | 0.928956686 | 0.008577614  | 0.853330664 |
| IBSP    | grey | 0.039485616  | 0.39458238  | 0.039820129  | 0.390586261 |
| ICAM5   | grey | -0.052261921 | 0.259686111 | -0.061028476 | 0.187996388 |
| ICOSLG  | grey | -0.16237004  | 0.000426938 | -0.189574286 | 3.74E-05    |
| ID1     | grey | 0.124589217  | 0.007024283 | 0.144108167  | 0.001795234 |
| ID2     | grey | 0.169992189  | 0.000223715 | 0.157215647  | 0.00065063  |
| ID3     | grey | 0.134367616  | 0.003624362 | 0.141259202  | 0.002214754 |
| ID4     | grey | -0.11098452  | 0.016422644 | -0.103644993 | 0.025102615 |
| IDO2    | grey | -0.090230544 | 0.051337317 | -0.088711379 | 0.055402041 |
| IER2    | grey | -0.057520363 | 0.214708566 | -0.071865039 | 0.120935148 |
| IER3    | grey | 0.220852523  | 1.44E-06    | 0.212111584  | 3.76E-06    |
| IER5    | grey | 0.242205737  | 1.16E-07    | 0.2322113    | 3.89E-07    |
| IER5L   | grey | 0.118532996  | 0.010356338 | 0.114226953  | 0.013513606 |
| IFFO2   | grey | 0.010564962  | 0.819875385 | 0.009254292  | 0.841906638 |
| IFITM10 | grey | 0.027815817  | 0.548766195 | 0.0514892    | 0.266806994 |
| IFITM5  | grey | 0.02572638   | 0.579200015 | 0.024583898  | 0.596168192 |
| IFNA1   | grey | -0.045837037 | 0.322951053 | -0.044718781 | 0.334908763 |
| IFNE    | grey | -0.145368621 | 0.001633988 | -0.148053229 | 0.00133391  |
| IFNGR2  | grey | 0.11316879   | 0.014408701 | 0.11547148   | 0.012523834 |
| IFNLR1  | grey | -0.007731592 | 0.867656591 | -0.032781282 | 0.479752354 |
| IGDCC3  | grey | -0.257589621 | 1.63E-08    | -0.284610779 | 3.75E-10    |
| IGF1    | grey | -0.081583511 | 0.078196671 | -0.080286934 | 0.083066471 |
| IGF2BP1 | grey | -0.204521753 | 8.39E-06    | -0.204221691 | 8.65E-06    |
| IGFALS  | grey | -0.181273583 | 8.16E-05    | -0.174996439 | 0.000144148 |
| IGFBP1  | grey | -0.162119869 | 0.000435885 | -0.180420863 | 8.83E-05    |
| IGFBP2  | grey | -0.192446596 | 2.83E-05    | -0.179930475 | 9.23E-05    |
| IGFBP3  | grey | 0.024927625  | 0.591039435 | 0.032566399  | 0.482638004 |
| IGFL1   | grey | 0.032669981  | 0.481245833 | 0.029065234  | 0.530951564 |
| IGFL2   | grey | 0.010737463  | 0.816985928 | 0.031979288  | 0.490569988 |
| IGFL3   | grey | -0.003440596 | 0.940888742 | 0.036040791  | 0.437150943 |

|          |      |              |             |              |             |
|----------|------|--------------|-------------|--------------|-------------|
| IGHMBP1  | grey | 0.028856036  | 0.533913879 | 0.002837663  | 0.951233225 |
| IGLON5   | grey | -0.226694509 | 7.41E-07    | -0.232329627 | 3.84E-07    |
| IGSF1    | grey | -0.145322444 | 0.001639652 | -0.150779996 | 0.001081745 |
| IGSF10   | grey | -0.180018311 | 9.16E-05    | -0.200115785 | 1.32E-05    |
| IGSF11   | grey | -0.068990155 | 0.136574685 | -0.048370958 | 0.29689524  |
| IGSF22   | grey | -0.157707594 | 0.000625327 | -0.159786313 | 0.000528161 |
| IGSF23   | grey | -0.173105396 | 0.000170436 | -0.157812344 | 0.000620059 |
| IKBKB    | grey | -0.207986484 | 5.84E-06    | -0.238112645 | 1.92E-07    |
| IL10RB   | grey | -0.108544893 | 0.018959572 | -0.065754674 | 0.155987054 |
| IL11     | grey | -0.057378073 | 0.21584681  | -0.059848231 | 0.196695838 |
| IL12RB2  | grey | -0.203097778 | 9.72E-06    | -0.188864751 | 4.00E-05    |
| IL13RA2  | grey | -0.140294824 | 0.002375906 | -0.136942326 | 0.003022898 |
| IL17A    | grey | 0.067726427  | 0.14392314  | 0.109221322  | 0.018224033 |
| IL17B    | grey | -0.024495689 | 0.597487605 | 0.013221665  | 0.775667645 |
| IL17C    | grey | 0.148221195  | 0.001316935 | 0.134242761  | 0.003656114 |
| IL17RA   | grey | 0.11407861   | 0.013636062 | 0.095228786  | 0.039679181 |
| IL17RB   | grey | 0.236496225  | 2.33E-07    | 0.20134373   | 1.16E-05    |
| IL17RC   | grey | 0.149989021  | 0.001149948 | 0.145037084  | 0.00167506  |
| IL17RE   | grey | 0.149141313  | 0.001227423 | 0.162123033  | 0.000435771 |
| IL17REL  | grey | -0.083205323 | 0.072434192 | -0.07983163  | 0.084833561 |
| IL19     | grey | 0.28547636   | 3.30E-10    | 0.285840174  | 3.13E-10    |
| IL1A     | grey | 0.130580147  | 0.004707306 | 0.158285064  | 0.000596791 |
| IL1RL2   | grey | -0.257087211 | 1.74E-08    | -0.225413108 | 8.58E-07    |
| IL20     | grey | 0.042610241  | 0.358218667 | 0.032326136  | 0.485875578 |
| IL20RB   | grey | -0.093866852 | 0.042609054 | -0.071502499 | 0.122826761 |
| IL22RA1  | grey | -0.174507735 | 0.000150551 | -0.177767764 | 0.000112416 |
| IL22RA2  | grey | -0.051079216 | 0.270639013 | -0.031879922 | 0.491919317 |
| IL27RA   | grey | -0.124081497 | 0.00726124  | -0.120643277 | 0.009062843 |
| IL36A    | grey | 0.063879953  | 0.168152115 | 0.043094018  | 0.35278257  |
| IL36B    | grey | -0.054141277 | 0.242918131 | -0.04507137  | 0.331108151 |
| IL6      | grey | -0.115682195 | 0.012362741 | -0.128599834 | 0.00538284  |
| IL6R     | grey | -0.086200205 | 0.062705261 | -0.087272576 | 0.05949481  |
| ILD2     | grey | 0.044358615  | 0.338819864 | 0.012496594  | 0.787667694 |
| IMPG2    | grey | -0.202149073 | 1.07E-05    | -0.190281707 | 3.49E-05    |
| INCA1    | grey | -0.216514672 | 2.33E-06    | -0.231630051 | 4.17E-07    |
| INF2     | grey | -0.06364771  | 0.169707251 | -0.043289556 | 0.350600191 |
| ING1     | grey | 0.017159474  | 0.711492157 | 0.016007294  | 0.730082643 |
| ING4     | grey | -0.218889196 | 1.79E-06    | -0.227680422 | 6.61E-07    |
| ING5     | grey | -0.140696334 | 0.002307554 | -0.169627526 | 0.000230887 |
| INHBB    | grey | -0.036696673 | 0.428848848 | -0.066925872 | 0.148732301 |
| INHBE    | grey | -0.091367781 | 0.048460017 | -0.096467149 | 0.037164877 |
| INO80B-1 | grey | 0.116095048  | 0.012052408 | 0.092976057  | 0.044622395 |
| INO80E   | grey | 0.16724274   | 0.000283357 | 0.166880455  | 0.000292241 |
| INPP1    | grey | -0.150516508 | 0.001104039 | -0.129399436 | 0.005100219 |
| INPP5J   | grey | 0.016108977  | 0.728435421 | -0.004228726 | 0.927382102 |

|          |      |              |             |              |             |
|----------|------|--------------|-------------|--------------|-------------|
| INPP5K   | grey | 0.166397325  | 0.000304492 | 0.207059909  | 6.43E-06    |
| INPPL1   | grey | -0.070782908 | 0.126649501 | -0.07931631  | 0.086870017 |
| INS      | grey | -0.08100335  | 0.080346268 | -0.084999639 | 0.06646754  |
| INS-IGF2 | grey | -0.120847239 | 0.008945787 | -0.122077898 | 0.008267636 |
| INSC     | grey | 0.047517059  | 0.305514542 | 0.054717174  | 0.237935196 |
| INSL4    | grey | 0.086010155  | 0.063288864 | 0.102619212  | 0.026586627 |
| INSM1    | grey | 0.029836609  | 0.520100941 | 0.018526634  | 0.689653553 |
| INSM2    | grey | 0.01906057   | 0.681192906 | 0.02878899   | 0.53486503  |
| INSRR    | grey | -0.162765646 | 0.000413137 | -0.161882091 | 0.00044455  |
| INTS5    | grey | 0.170290602  | 0.000218001 | 0.164379198  | 0.00036104  |
| IP6K2    | grey | 0.097989103  | 0.03426117  | 0.107257229  | 0.020431509 |
| IP6K3    | grey | -0.18460383  | 5.99E-05    | -0.183586586 | 6.59E-05    |
| IQCA1    | grey | -0.46987294  | 5.05E-27    | -0.483569184 | 9.66E-29    |
| IQCF5    | grey | 0.000391279  | 0.993271563 | 0.018842472  | 0.684644094 |
| IQSEC2   | grey | 0.076438624  | 0.098975618 | 0.08338373   | 0.071822014 |
| IRAK2    | grey | -0.19705675  | 1.79E-05    | -0.222935539 | 1.14E-06    |
| IRGQ     | grey | 0.045797991  | 0.323363852 | 0.054246348  | 0.242003599 |
| IRX2     | grey | -0.120019471 | 0.009429355 | -0.125703884 | 0.006528178 |
| IRX4     | grey | -0.096807638 | 0.03649774  | -0.101870798 | 0.027716477 |
| IRX5     | grey | 0.17832936   | 0.000106843 | 0.188524598  | 4.13E-05    |
| IRX6     | grey | -0.101322014 | 0.028570959 | -0.080065678 | 0.083921445 |
| ISL1     | grey | 0.018331596  | 0.692753824 | 0.017878772  | 0.699971539 |
| ISL2     | grey | 0.094768056  | 0.040650655 | 0.107157721  | 0.020549286 |
| ISLR2    | grey | 0.030702593  | 0.508056739 | 0.020407883  | 0.660022584 |
| ISM1     | grey | -0.12774983  | 0.00569866  | -0.100687213 | 0.029587492 |
| ISM2     | grey | -0.283047006 | 4.72E-10    | -0.304879709 | 1.68E-11    |
| ISY1-RAI | grey | -0.055598239 | 0.230451785 | -0.082986277 | 0.07319163  |
| ITFG2    | grey | -0.205219429 | 7.80E-06    | -0.217108144 | 2.18E-06    |
| ITGA10   | grey | 0.079968315  | 0.084299915 | 0.039645418  | 0.392670305 |
| ITGA2B   | grey | -0.014506909 | 0.754528921 | -0.039813095 | 0.390670035 |
| ITGAD    | grey | -0.116972522 | 0.011415594 | -0.109938611 | 0.01747139  |
| ITGB3    | grey | -0.099216503 | 0.03206236  | -0.097103716 | 0.035925917 |
| ITGB4    | grey | 0.064189406  | 0.166096573 | 0.079317322  | 0.086865977 |
| ITGB5    | grey | -0.060009679 | 0.195488773 | -0.067156735 | 0.147333059 |
| ITGB6    | grey | 0.081431914  | 0.078753809 | 0.080592302  | 0.081898042 |
| ITIH5    | grey | -0.10337595  | 0.025484758 | -0.085859874 | 0.063753505 |
| ITLN1    | grey | -0.083261976 | 0.072239336 | -0.065906238 | 0.155033424 |
| ITLN2    | grey | 0.097785295  | 0.034638443 | 0.080869417  | 0.08084925  |
| ITPKA    | grey | 0.000372281  | 0.993598243 | -0.014421134 | 0.755934181 |
| ITPKC    | grey | -0.097142289 | 0.035851984 | -0.107471293 | 0.020180133 |
| ITPRIPL1 | grey | -0.169741134 | 0.000228629 | -0.156097832 | 0.000711692 |
| IVD      | grey | 0.229390895  | 5.42E-07    | 0.22296893   | 1.13E-06    |
| IYD      | grey | 0.112762041  | 0.014766395 | 0.144970394  | 0.001683436 |
| IZUMO2   | grey | -0.09772611  | 0.03474866  | -0.091882834 | 0.047202012 |
| JADE1    | grey | -0.110432804 | 0.016968776 | -0.106923649 | 0.020828659 |

|         |      |              |             |              |             |
|---------|------|--------------|-------------|--------------|-------------|
| JAG2    | grey | -0.08569426  | 0.064268806 | -0.070633083 | 0.127456924 |
| JAKMIP2 | grey | -0.219784998 | 1.62E-06    | -0.217286228 | 2.14E-06    |
| JAKMIP3 | grey | -0.050487384 | 0.276236746 | -0.065256089 | 0.159155433 |
| JDP2    | grey | -0.133283147 | 0.003908694 | -0.155144877 | 0.000767895 |
| JMJD6   | grey | 0.100270869  | 0.030270908 | 0.107869157  | 0.01972006  |
| JPH1    | grey | -0.132743707 | 0.004057519 | -0.166119552 | 0.000311752 |
| JPH3    | grey | -0.248798631 | 5.09E-08    | -0.253885079 | 2.65E-08    |
| JUN     | grey | -0.091764541 | 0.047488492 | -0.125378506 | 0.006669643 |
| JUNB    | grey | -0.056680182 | 0.221492339 | -0.063323137 | 0.17189861  |
| KAAG1   | grey | -0.068645259 | 0.13855097  | -0.053274534 | 0.25055469  |
| KAL1    | grey | -0.008655813 | 0.852008852 | -0.020569917 | 0.657494315 |
| KANK4   | grey | 0.074207909  | 0.109253477 | 0.06382749   | 0.168502476 |
| KARS    | grey | 0.212384196  | 3.65E-06    | 0.241501386  | 1.27E-07    |
| KAT8    | grey | -0.212879448 | 3.46E-06    | -0.193310327 | 2.60E-05    |
| KAZALD  | grey | 0.230641925  | 4.68E-07    | 0.231776767  | 4.10E-07    |
| KAZN    | grey | -0.190013492 | 3.58E-05    | -0.188429233 | 4.17E-05    |
| KBTBD1  | grey | -0.100790972 | 0.029419248 | -0.117203528 | 0.011252975 |
| KBTBD1  | grey | -0.114585993 | 0.013221223 | -0.108415212 | 0.019103504 |
| KCNC1   | grey | 0.036521518  | 0.431056962 | 0.008342366  | 0.857309556 |
| KCNC2   | grey | -0.121996836 | 0.008310852 | -0.107083929 | 0.020637005 |
| KCND1   | grey | -0.32097503  | 1.19E-12    | -0.312991704 | 4.51E-12    |
| KCNE2   | grey | -0.286290126 | 2.93E-10    | -0.282332534 | 5.24E-10    |
| KCNE3   | grey | -0.127361284 | 0.005848496 | -0.081473402 | 0.078601017 |
| KCNE5   | grey | -0.108413163 | 0.019105786 | -0.089731304 | 0.052644731 |
| KCNF1   | grey | -0.189116051 | 3.90E-05    | -0.195690539 | 2.06E-05    |
| KCNG1   | grey | -0.295853502 | 6.90E-11    | -0.275606728 | 1.38E-09    |
| KCNG2   | grey | -0.105435408 | 0.022683302 | -0.124909205 | 0.006878522 |
| KCNIP1  | grey | -0.276284121 | 1.25E-09    | -0.284702579 | 3.70E-10    |
| KCNIP2  | grey | -0.165607709 | 0.000325554 | -0.183315938 | 6.76E-05    |
| KCNIP3  | grey | -0.34357148  | 2.20E-14    | -0.365357749 | 3.41E-16    |
| KCNJ1   | grey | -0.042209566 | 0.362760521 | -0.045888048 | 0.322412294 |
| KCNJ11  | grey | 0.084986796  | 0.066508766 | 0.085711529  | 0.064214913 |
| KCNJ12  | grey | -0.324872538 | 6.11E-13    | -0.332947875 | 1.50E-13    |
| KCNJ14  | grey | -0.09116228  | 0.048969723 | -0.092859899 | 0.044890734 |
| KCNJ15  | grey | 0.120306058  | 0.009259367 | 0.127963023  | 0.005617921 |
| KCNJ16  | grey | -0.206970833 | 6.49E-06    | -0.197340641 | 1.74E-05    |
| KCNJ18  | grey | 0.069534436  | 0.133500106 | 0.081948569  | 0.076868154 |
| KCNJ2   | grey | -0.030328795 | 0.51323761  | -0.03489038  | 0.451933272 |
| KCNJ3   | grey | -0.045946896 | 0.321791469 | -0.058031652 | 0.210654107 |
| KCNJ4   | grey | -0.272553487 | 2.13E-09    | -0.280254932 | 7.09E-10    |
| KCNJ5   | grey | -0.074296848 | 0.108828194 | -0.089728619 | 0.052651837 |
| KCNK1   | grey | 0.282571882  | 5.06E-10    | 0.285049544  | 3.52E-10    |
| KCNK12  | grey | -0.08758929  | 0.058573062 | -0.033055468 | 0.476083984 |
| KCNK15  | grey | -0.140758229 | 0.002297179 | -0.165966528 | 0.00031582  |
| KCNK16  | grey | 0.045068412  | 0.331139917 | 0.045525969  | 0.326249159 |

|              |              |             |              |             |
|--------------|--------------|-------------|--------------|-------------|
| KCNK17 grey  | -0.069372711 | 0.134408047 | -0.086653413 | 0.061331443 |
| KCNK18 grey  | -0.066518348 | 0.151226921 | -0.054890047 | 0.236453554 |
| KCNK2 grey   | -0.238732475 | 1.78E-07    | -0.268305378 | 3.84E-09    |
| KCNK5 grey   | 0.008334186  | 0.857447976 | -0.004419864 | 0.924109453 |
| KCNK7 grey   | -0.136071985 | 0.003215221 | -0.133548666 | 0.003837271 |
| KCNK9 grey   | -0.322768004 | 8.77E-13    | -0.321806302 | 1.03E-12    |
| KCNMB4grey   | -0.161977429 | 0.000441057 | -0.166978262 | 0.000289817 |
| KCNN1 grey   | 0.004085499  | 0.929835241 | -0.028363602 | 0.540919598 |
| KCNN4 grey   | 0.225950693  | 8.07E-07    | 0.230041784  | 5.02E-07    |
| KCNQ1 grey   | -0.010257693 | 0.825028297 | -0.036014817 | 0.437481611 |
| KCNQ2 grey   | -0.10373172  | 0.024980489 | -0.114150183 | 0.013576858 |
| KCNQ3 grey   | -0.200232906 | 1.30E-05    | -0.20982448  | 4.80E-06    |
| KCNQ4 grey   | -0.153798505 | 0.000854323 | -0.178137443 | 0.000108717 |
| KCNS1 grey   | -0.246565063 | 6.75E-08    | -0.247440415 | 6.05E-08    |
| KCNS3 grey   | -0.086823112 | 0.060823468 | -0.120605622 | 0.009084601 |
| KCNT1 grey   | -0.332666283 | 1.57E-13    | -0.337507354 | 6.63E-14    |
| KCNU1 grey   | -0.063438263 | 0.171118934 | -0.05350843  | 0.248477649 |
| KCNV1 grey   | -0.122822649 | 0.007879874 | -0.12559163  | 0.006576675 |
| KCP grey     | -0.227757205 | 6.55E-07    | -0.205166389 | 7.84E-06    |
| KCTD11 grey  | 0.122171181  | 0.008218153 | 0.109120269  | 0.018332309 |
| KCTD13 grey  | 0.155454696  | 0.000749187 | 0.169930108  | 0.000224921 |
| KCTD14 grey  | 0.234191014  | 3.08E-07    | 0.243915238  | 9.41E-08    |
| KCTD16 grey  | -0.118617295 | 0.010301682 | -0.116636765 | 0.01165566  |
| KCTD2 grey   | -0.21874304  | 1.82E-06    | -0.229731422 | 5.21E-07    |
| KCTD21 grey  | -0.009099041 | 0.844524822 | -0.036478729 | 0.431597375 |
| KDELR3 grey  | 0.187287352  | 4.65E-05    | 0.184982083  | 5.78E-05    |
| KDM5D grey   | -0.059885487 | 0.196416813 | -0.058561917 | 0.206507801 |
| KDM8 grey    | -0.139331088 | 0.002547573 | -0.138364363 | 0.002731062 |
| KEAP1 grey   | -0.017341518 | 0.708570108 | -0.008942616 | 0.847164545 |
| KEL grey     | -0.180500132 | 8.77E-05    | -0.185333955 | 5.59E-05    |
| KERA grey    | -0.04543306  | 0.327238446 | -0.073157627 | 0.114375289 |
| KHDC1 grey   | -0.4303232   | 1.79E-22    | -0.413561256 | 1.02E-20    |
| KHDRBS grey  | -0.12822568  | 0.005519864 | -0.133264964 | 0.003913629 |
| KHDRBS grey  | -0.032463136 | 0.484028051 | -0.021786459 | 0.638638433 |
| KIAA004 grey | 0.054755579  | 0.23760548  | 0.053781055  | 0.246071875 |
| KIAA031 grey | 0.174169785  | 0.000155134 | 0.171361866  | 0.000198597 |
| KIAA089 grey | 0.239002382  | 1.72E-07    | 0.232256547  | 3.87E-07    |
| KIAA093 grey | 0.084685127  | 0.067483206 | 0.094547116  | 0.0411236   |
| KIAA104 grey | -0.023627563 | 0.610542875 | -0.033448181 | 0.470856632 |
| KIAA116 grey | -0.040015634 | 0.388262137 | -0.02517624  | 0.587342494 |
| KIAA154 grey | -0.153908382 | 0.000846947 | -0.161607361 | 0.000454762 |
| KIAA202 grey | 0.092678301  | 0.045312963 | 0.084481287  | 0.068148245 |
| KIF12 grey   | 0.047392293  | 0.306787644 | 0.05109146   | 0.270524029 |
| KIF1C grey   | 0.10632877   | 0.021553566 | 0.127067936  | 0.005963956 |
| KIF25 grey   | -0.17659436  | 0.000124953 | -0.171906885 | 0.000189357 |

|         |      |              |             |              |             |
|---------|------|--------------|-------------|--------------|-------------|
| KIF5A   | grey | -0.33835697  | 5.68E-14    | -0.360859063 | 8.27E-16    |
| KIF5C   | grey | -0.115175804 | 0.012753003 | -0.126097797 | 0.006360518 |
| KIF7    | grey | -0.331660156 | 1.88E-13    | -0.365027308 | 3.64E-16    |
| KIFC3   | grey | -0.125297117 | 0.006705455 | -0.126080021 | 0.006368    |
| KIR2DL1 | grey | -0.107499133 | 0.020147639 | -0.097934114 | 0.034362616 |
| KIR2DL3 | grey | -0.104469654 | 0.023961935 | -0.092970963 | 0.044634135 |
| KIR3DL1 | grey | -0.092765714 | 0.045109308 | -0.074329446 | 0.108672646 |
| KIR3DL2 | grey | -0.036239107 | 0.434631007 | -0.012328221 | 0.790461612 |
| KIRREL2 | grey | -0.161968599 | 0.000441379 | -0.160811679 | 0.000485581 |
| KIRREL3 | grey | 0.058192505  | 0.209390051 | 0.047982455  | 0.300796508 |
| KISS1   | grey | 0.159259535  | 0.000551361 | 0.163069637  | 0.000402816 |
| KISS1R  | grey | 0.27304895   | 1.98E-09    | 0.286015866  | 3.05E-10    |
| KLC2    | grey | 0.145827696  | 0.001578639 | 0.13384946   | 0.003757789 |
| KLC4    | grey | -0.225656566 | 8.35E-07    | -0.239829486 | 1.56E-07    |
| KLF1    | grey | -0.120424153 | 0.009190117 | -0.104346087 | 0.024129947 |
| KLF14   | grey | -0.061206938 | 0.186705985 | -0.066382926 | 0.152062887 |
| KLF15   | grey | -0.218742737 | 1.82E-06    | -0.251679944 | 3.52E-08    |
| KLHDC7  | grey | 0.184847032  | 5.86E-05    | 0.207199317  | 6.34E-06    |
| KLHDC8  | grey | 0.011103484  | 0.810863155 | -0.011637143 | 0.801956899 |
| KLHDC8  | grey | -0.298083661 | 4.88E-11    | -0.284854513 | 3.62E-10    |
| KLHL1   | grey | -0.163007376 | 0.00040491  | -0.164638534 | 0.000353261 |
| KLHL17  | grey | 0.169222617  | 0.000239102 | 0.159334748  | 0.000547992 |
| KLHL22  | grey | 0.187095127  | 4.74E-05    | 0.187978391  | 4.35E-05    |
| KLHL25  | grey | 0.251744396  | 3.49E-08    | 0.224975252  | 9.02E-07    |
| KLHL29  | grey | -0.235117513 | 2.75E-07    | -0.271615466 | 2.42E-09    |
| KLHL30  | grey | -0.219563591 | 1.66E-06    | -0.210494266 | 4.47E-06    |
| KLHL34  | grey | -0.077180869 | 0.095731645 | -0.055687186 | 0.229705673 |
| KLHL35  | grey | -0.109069236 | 0.018387203 | -0.092888342 | 0.044824901 |
| KLHL40  | grey | -0.12686943  | 0.006043243 | -0.126233025 | 0.006303859 |
| KLK1    | grey | -0.176648658 | 0.000124345 | -0.19494934  | 2.21E-05    |
| KLK10   | grey | -0.040597408 | 0.381395938 | -0.015722454 | 0.73470352  |
| KLK12   | grey | 0.22534424   | 8.65E-07    | 0.206147684  | 7.08E-06    |
| KLK13   | grey | -0.067347135 | 0.146186626 | -0.044174269 | 0.340832957 |
| KLK14   | grey | 0.12692925   | 0.006019251 | 0.127920442  | 0.005633964 |
| KLK15   | grey | 0.02285127   | 0.622322795 | 0.00782145   | 0.866132854 |
| KLK2    | grey | 0.052050043  | 0.261625457 | 0.033778857  | 0.466479651 |
| KLK3    | grey | -0.015228581 | 0.742738139 | -0.044611156 | 0.336074433 |
| KLK5    | grey | -0.25601724  | 2.01E-08    | -0.250665947 | 4.01E-08    |
| KLK6    | grey | -0.364218656 | 4.27E-16    | -0.36460704  | 3.95E-16    |
| KLK7    | grey | -0.343559747 | 2.20E-14    | -0.347104685 | 1.14E-14    |
| KLK8    | grey | -0.342506021 | 2.67E-14    | -0.357188309 | 1.69E-15    |
| KLK9    | grey | -0.015416709 | 0.739674224 | -0.01620408  | 0.726895921 |
| KLKB1   | grey | 0.126514927  | 0.006187197 | 0.116795141  | 0.01154187  |
| KLRF1   | grey | -0.21268131  | 3.54E-06    | -0.207129677 | 6.39E-06    |
| KMO     | grey | 0.114133987  | 0.013590235 | 0.087295676  | 0.059427177 |

|          |      |              |             |              |             |
|----------|------|--------------|-------------|--------------|-------------|
| KRBA1    | grey | -0.135898564 | 0.003254845 | -0.170512683 | 0.000213838 |
| KREMEN   | grey | -0.122656004 | 0.007965201 | -0.122408764 | 0.008093314 |
| KRT10    | grey | 0.077899173  | 0.092673647 | 0.065137616  | 0.159915389 |
| KRT15    | grey | 0.068116233  | 0.141624919 | 0.068010442  | 0.142245849 |
| KRT20    | grey | 0.04003742   | 0.388003667 | 0.010026686  | 0.828907254 |
| KRT23    | grey | 0.235413055  | 2.66E-07    | 0.223504213  | 1.07E-06    |
| KRT24    | grey | 0.079627986  | 0.08563368  | 0.068408063  | 0.139922822 |
| KRT26    | grey | -0.04140349  | 0.37200608  | 0.05427375   | 0.241765493 |
| KRT3     | grey | -0.008990533 | 0.84635575  | -0.002654027 | 0.954385556 |
| KRT4     | grey | 0.00511063   | 0.912293282 | 0.016665935  | 0.719435266 |
| KRT40    | grey | 0.137408506  | 0.002924243 | 0.141056304  | 0.002247806 |
| KRT72    | grey | -0.086815266 | 0.060846876 | -0.006799287 | 0.883493735 |
| KRT73    | grey | -0.049576852 | 0.28500156  | 0.041489122  | 0.371017038 |
| KRT75    | grey | 0.056248504  | 0.225036718 | 0.069686628  | 0.132650014 |
| KRT76    | grey | -0.08346283  | 0.071551952 | -0.089149016 | 0.05420456  |
| KRT79    | grey | 0.098265938  | 0.03375433  | 0.107057514  | 0.020668485 |
| KRT81    | grey | -0.079226599 | 0.087228525 | -0.044228151 | 0.340243767 |
| KRT86    | grey | -0.067178613 | 0.147200984 | -0.007687687 | 0.868401271 |
| KRTAP1   | grey | -0.063430808 | 0.171169339 | -0.060046551 | 0.195213864 |
| KRTAP2   | grey | -0.193769682 | 2.48E-05    | -0.184498782 | 6.05E-05    |
| KRTAP2   | grey | -0.007504579 | 0.871508257 | 0.005738899  | 0.901562856 |
| KRTAP2   | grey | 0.06181267   | 0.182374782 | 0.056185865  | 0.225554361 |
| KRTAP2   | grey | 0.001971222  | 0.96611259  | 0.005076626  | 0.912874512 |
| KRTAP4   | grey | -0.055646101 | 0.230050092 | -0.033320301 | 0.472555347 |
| KRTAP5   | grey | 0.16727381   | 0.000282607 | 0.157567726  | 0.000632427 |
| KRTAP5   | grey | 0.014183251  | 0.759835652 | -0.004171497 | 0.928362221 |
| KRTAP5   | grey | -0.195882097 | 2.02E-05    | -0.190376022 | 3.46E-05    |
| KRTAP5   | grey | 0.061460469  | 0.184884021 | 0.04701932   | 0.310614314 |
| KRTDAP   | grey | -0.169969708 | 0.000224151 | -0.144594697 | 0.00173134  |
| KSR2     | grey | -0.130497034 | 0.004734043 | -0.158140409 | 0.000603824 |
| L1TD1    | grey | -0.005279273 | 0.90941132  | -0.003591988 | 0.938292817 |
| L34079.2 | grey | -0.07279623  | 0.11618061  | -0.07607751  | 0.100585179 |
| L3MBTL   | grey | 0.289167955  | 1.91E-10    | 0.300449766  | 3.38E-11    |
| LA16c-30 | grey | -0.075866137 | 0.101536919 | -0.101227105 | 0.028721007 |
| LAMA1    | grey | -0.031578447 | 0.496025298 | -0.030184576 | 0.515243805 |
| LAMA3    | grey | -0.056413676 | 0.223675799 | -0.037102877 | 0.42375331  |
| LAMA5    | grey | -0.135067584 | 0.003450936 | -0.150031605 | 0.001146177 |
| LAMB2    | grey | -0.11357473  | 0.014059336 | -0.121912474 | 0.008356042 |
| LAMC3    | grey | -0.280460819 | 6.88E-10    | -0.258002948 | 1.54E-08    |
| LAMP1    | grey | 0.002502122  | 0.956993735 | 0.006224202  | 0.893286351 |
| LANCL2   | grey | -0.193913461 | 2.45E-05    | -0.212335153 | 3.67E-06    |
| LARP6    | grey | -0.127704695 | 0.005715887 | -0.129990123 | 0.004900102 |
| LBP      | grey | -0.125405528 | 0.006657791 | -0.12928567  | 0.005139597 |
| LBX1     | grey | 0.01114818   | 0.810116276 | -0.012634728 | 0.785377582 |
| LBX2     | grey | 0.182827112  | 7.07E-05    | 0.184823439  | 5.87E-05    |

|         |      |              |             |              |             |
|---------|------|--------------|-------------|--------------|-------------|
| LCE1C   | grey | 0.072772697  | 0.116298933 | 0.088497717  | 0.055994608 |
| LCE1D   | grey | 0.03644878   | 0.431975862 | 0.02316907   | 0.617488424 |
| LCE1E   | grey | 0.094332196  | 0.041588109 | 0.083676162  | 0.070827723 |
| LCE1F   | grey | 0.009303816  | 0.841071815 | 0.036750381  | 0.42817309  |
| LCE2A   | grey | -0.006020411 | 0.896760518 | 0.001221706  | 0.978993689 |
| LCE2D   | grey | 0.035146032  | 0.448624114 | 0.033776582  | 0.466509681 |
| LCE4A   | grey | 0.011450606  | 0.805067165 | 0.004177611  | 0.928257499 |
| LCE5A   | grey | -0.199334013 | 1.43E-05    | -0.204582325 | 8.33E-06    |
| LCMT2   | grey | -0.071113518 | 0.124881867 | -0.059966717 | 0.195809446 |
| LCN1    | grey | -0.170690028 | 0.000210568 | -0.167307568 | 0.000281794 |
| LCN12   | grey | -0.123222983 | 0.007678219 | -0.119682298 | 0.009632895 |
| LCN15   | grey | 0.161207891  | 0.000469999 | 0.109522209  | 0.017904937 |
| LCN8    | grey | 0.049347191  | 0.287241572 | 0.04402557   | 0.342462339 |
| LCN9    | grey | 0.033352746  | 0.472124038 | 0.0300304    | 0.517392988 |
| LCNL1   | grey | -0.192537303 | 2.80E-05    | -0.202100353 | 1.08E-05    |
| LDHC    | grey | -0.130026948 | 0.004887864 | -0.125178814 | 0.006757818 |
| LDHD    | grey | 0.297391612  | 5.44E-11    | 0.31739081   | 2.17E-12    |
| LDLRAP  | grey | 0.095217509  | 0.039702723 | 0.103683243  | 0.025048689 |
| LDOC1   | grey | -0.296162543 | 6.58E-11    | -0.298352681 | 4.68E-11    |
| LEAP2   | grey | 0.158043503  | 0.000608578 | 0.140393135  | 0.002359001 |
| LECT1   | grey | -0.169255787 | 0.000238419 | -0.174027522 | 0.000157102 |
| LEFTY1  | grey | 0.227257558  | 6.94E-07    | 0.239030229  | 1.72E-07    |
| LEMD1   | grey | 0.003890273  | 0.93318004  | 0.017909842  | 0.699475424 |
| LETM2   | grey | 0.07516143   | 0.104761698 | 0.060808262  | 0.189597711 |
| LETMD1  | grey | -0.062765779 | 0.175710759 | -0.088273329 | 0.056622575 |
| LFNG    | grey | 0.249902175  | 4.42E-08    | 0.251682604  | 3.52E-08    |
| LGALS12 | grey | 0.07632706   | 0.099470679 | 0.111885872  | 0.015563495 |
| LGALS14 | grey | -0.10767098  | 0.01994807  | -0.122853384 | 0.007864226 |
| LGALS3  | grey | 0.035529063  | 0.443691912 | 0.07347156   | 0.112824998 |
| LGALS4  | grey | -0.073624096 | 0.112077719 | -0.05067583  | 0.274445882 |
| LGALS7  | grey | -0.041389925 | 0.372162907 | -0.028610205 | 0.537405522 |
| LGALS7E | grey | -0.031342636 | 0.499249607 | -0.035385401 | 0.445538195 |
| LGALS9E | grey | 0.02899623   | 0.531927762 | 0.054173026  | 0.242641541 |
| LGALS9C | grey | -0.058918956 | 0.203749475 | -0.022405407 | 0.629132684 |
| LGI1    | grey | -0.065531996 | 0.157396172 | -0.066654133 | 0.150392222 |
| LGR5    | grey | -0.00095971  | 0.983497786 | 0.010306118  | 0.824215699 |
| LGR6    | grey | -0.179312568 | 9.77E-05    | -0.174419087 | 0.000151741 |
| LHFPL1  | grey | 0.027236854  | 0.557119814 | 0.008741984  | 0.850552756 |
| LHFPL3  | grey | -0.15683023  | 0.000671113 | -0.148881933 | 0.001252072 |
| LHFPL4  | grey | -0.043418822 | 0.349162164 | -0.057671524 | 0.213504079 |
| LHX1    | grey | -0.195967346 | 2.00E-05    | -0.195995543 | 1.99E-05    |
| LHX2    | grey | 0.084808392  | 0.067083633 | 0.079871511  | 0.084677576 |
| LHX3    | grey | -0.06224059  | 0.179360066 | -0.071254354 | 0.124134723 |
| LHX5    | grey | -0.020710312 | 0.655306828 | -0.020635589 | 0.656470718 |
| LHX8    | grey | -0.095167502 | 0.039807259 | -0.099646055 | 0.03132187  |



|           |      |              |             |              |             |
|-----------|------|--------------|-------------|--------------|-------------|
| LHX9      | grey | 0.054062855  | 0.243602297 | 0.058344169  | 0.208203236 |
| LIF       | grey | 0.044011673  | 0.342614874 | 0.044877003  | 0.333199817 |
| LIM2      | grey | -0.119021034 | 0.010043447 | -0.119364515 | 0.009828295 |
| LIME1     | grey | -0.00988128  | 0.831350982 | 0.001589119  | 0.972678479 |
| LIMK2     | grey | -0.049762251 | 0.283201871 | -0.041337454 | 0.372769897 |
| LIMS3     | grey | 0.006486029  | 0.888825826 | 0.034263921  | 0.460100035 |
| LIMS3L    | grey | -0.020345756 | 0.660993001 | -0.026841778 | 0.562855419 |
| LIN28A    | grey | 0.01933901   | 0.676796524 | 0.000553163  | 0.990487906 |
| LIN37     | grey | -0.218094124 | 1.96E-06    | -0.2396496   | 1.59E-07    |
| LINC0011  | grey | -0.00156688  | 0.973060693 | 0.002960516  | 0.949124719 |
| LINGO1    | grey | -0.153347883 | 0.000885202 | -0.159241655 | 0.000552165 |
| LINGO3    | grey | -0.032369637 | 0.485288532 | -0.023211705 | 0.61684111  |
| LINGO4    | grey | 0.176062219  | 0.000131061 | 0.175213714  | 0.000141385 |
| LIPC      | grey | -0.204996165 | 7.98E-06    | -0.179773766 | 9.37E-05    |
| LIPE      | grey | -0.104626308 | 0.023750389 | -0.108130953 | 0.019422335 |
| LIPF      | grey | -0.010267793 | 0.824858793 | -0.012094952 | 0.794336825 |
| LIPH      | grey | -0.084667081 | 0.067541865 | -0.062717051 | 0.176047008 |
| LIPM      | grey | 0.323850654  | 7.29E-13    | 0.314945462  | 3.26E-12    |
| LIX1      | grey | -0.29967415  | 3.81E-11    | -0.300493073 | 3.35E-11    |
| LLfos-48I | grey | 0.048364997  | 0.296954847 | 0.058103336  | 0.210090106 |
| LMAN1L    | grey | 0.131670588  | 0.004368917 | 0.132620398  | 0.00409225  |
| LMAN2L    | grey | -0.159295388 | 0.000549753 | -0.195470244 | 2.10E-05    |
| LMBR1L    | grey | -0.001534714 | 0.973613514 | -0.006841179 | 0.88278107  |
| LMNA      | grey | 0.011185466  | 0.809493334 | 0.028245844  | 0.542601655 |
| LMNTD2    | grey | 0.279284389  | 8.16E-10    | 0.276262924  | 1.26E-09    |
| LMO1      | grey | -0.161476925 | 0.000459686 | -0.158694146 | 0.000577313 |
| LMO2      | grey | -0.017940967 | 0.698978575 | -0.034741048 | 0.453872574 |
| LMO3      | grey | -0.286082999 | 3.02E-10    | -0.272287453 | 2.21E-09    |
| LMO4      | grey | -0.044238557 | 0.340130061 | -0.025953596 | 0.575852517 |
| LMO7DN    | grey | -0.142318337 | 0.002049319 | -0.141209522 | 0.002222805 |
| LMTK3     | grey | 0.128084156  | 0.005572506 | 0.116486247  | 0.011764722 |
| LMX1B     | grey | -0.078249045 | 0.091212732 | -0.086929591 | 0.060506512 |
| LOH12CF   | grey | 0.044581317  | 0.336398075 | 0.061052185  | 0.187824576 |
| LOX       | grey | 0.039962125  | 0.388897405 | 0.055746667  | 0.229207695 |
| LOXL1     | grey | -0.163626842 | 0.000384519 | -0.154707207 | 0.00079506  |
| LOXL3     | grey | -0.284559843 | 3.78E-10    | -0.29266518  | 1.12E-10    |
| LPCAT4    | grey | -0.116639747 | 0.011653509 | -0.124806896 | 0.006924828 |
| LPHN1     | grey | -0.235571855 | 2.61E-07    | -0.242886973 | 1.07E-07    |
| LPHN3     | grey | -0.091072698 | 0.049193313 | -0.106482598 | 0.021364047 |
| LPIN3     | grey | -0.029126729 | 0.530082361 | -0.05688423  | 0.219830907 |
| LPL       | grey | -0.173508497 | 0.000164482 | -0.168429786 | 0.000255985 |
| LPO       | grey | -0.008403632 | 0.856272965 | -0.02983419  | 0.52013479  |
| LPPR2     | grey | 0.179236222  | 9.84E-05    | 0.180290768  | 8.94E-05    |
| LPPR4     | grey | -0.048025511 | 0.300362475 | -0.015645341 | 0.735956168 |
| LPPR5     | grey | -0.081350029 | 0.079056083 | -0.081819538 | 0.077335614 |

|         |      |              |             |              |             |
|---------|------|--------------|-------------|--------------|-------------|
| LRAT    | grey | 0.09092002   | 0.049576355 | 0.098898846  | 0.032619534 |
| LRCOL1  | grey | -0.157657163 | 0.000627879 | -0.172503028 | 0.000179713 |
| LRFN1   | grey | -0.308841717 | 8.87E-12    | -0.325979821 | 5.05E-13    |
| LRFN2   | grey | -0.042331618 | 0.361373214 | -0.011954111 | 0.796679031 |
| LRIT2   | grey | 0.079934158  | 0.084433018 | 0.077824516  | 0.092987792 |
| LRP2    | grey | -0.14401064  | 0.001808299 | -0.140259205 | 0.002382058 |
| LRPAP1  | grey | 0.047227841  | 0.308471051 | 0.039788202  | 0.390966607 |
| LRRC16E | grey | -0.050490346 | 0.276208531 | -0.069867567 | 0.131644795 |
| LRRC24  | grey | 0.014044046  | 0.762121562 | 0.001612359  | 0.972279084 |
| LRRC28  | grey | 0.012740151  | 0.783631026 | 0.012459931  | 0.788275841 |
| LRRC31  | grey | 0.111326002  | 0.016092384 | 0.126867239  | 0.006044124 |
| LRRC37A | grey | -0.136631712 | 0.003090302 | -0.134024913 | 0.003712119 |
| LRRC38  | grey | -0.1756747   | 0.000135685 | -0.180691776 | 8.61E-05    |
| LRRC4   | grey | 0.101403193  | 0.028443152 | 0.100642245  | 0.029660663 |
| LRRC41  | grey | -0.048880649 | 0.291828405 | -0.056933729 | 0.219429213 |
| LRRC4C  | grey | -0.173555757 | 0.000163796 | -0.178138591 | 0.000108706 |
| LRRC52  | grey | -0.059859641 | 0.196610358 | -0.082955178 | 0.073299688 |
| LRRC53  | grey | 0.046102623  | 0.320152389 | 0.027950098  | 0.546837554 |
| LRRC55  | grey | -0.04394148  | 0.343385957 | -0.07162982  | 0.122159836 |
| LRRC61  | grey | 0.147976122  | 0.001341769 | 0.149163056  | 0.001225378 |
| LRRC66  | grey | 0.216029241  | 2.46E-06    | 0.193091854  | 2.66E-05    |
| LRRIQ4  | grey | -0.097913892 | 0.034399985 | -0.102572121 | 0.026656532 |
| LRRK1   | grey | -0.196065976 | 1.98E-05    | -0.209256007 | 5.10E-06    |
| LRRN1   | grey | -0.338547704 | 5.49E-14    | -0.363259097 | 5.16E-16    |
| LRRN2   | grey | -0.302432704 | 2.47E-11    | -0.323128761 | 8.24E-13    |
| LRRN4   | grey | -0.21847177  | 1.88E-06    | -0.189691551 | 3.69E-05    |
| LRRTM1  | grey | -0.137422315 | 0.002921366 | -0.150590712 | 0.001097718 |
| LRTM1   | grey | -0.006185904 | 0.893939091 | 0.018824836  | 0.684923449 |
| LRTM2   | grey | 0.157515566  | 0.000635093 | 0.119062963  | 0.010016961 |
| LTB4R   | grey | 0.056651533  | 0.221726321 | 0.065214209  | 0.159423762 |
| LTBP3   | grey | -0.245001443 | 8.22E-08    | -0.255001712 | 2.29E-08    |
| LTBR    | grey | 0.11343424   | 0.014179394 | 0.103398004  | 0.025453245 |
| LTK     | grey | 0.062960335  | 0.174372982 | 0.080871179  | 0.080842615 |
| LUC7L2  | grey | 0.026299401  | 0.570775451 | -0.015728493 | 0.734605451 |
| LURAP1I | grey | 0.144153025  | 0.001789254 | 0.15719036   | 0.000651956 |
| LUZP2   | grey | 0.062613035  | 0.176766375 | 0.025436466  | 0.583484369 |
| LXN     | grey | -0.034114712 | 0.462057248 | -0.035167795 | 0.448343046 |
| LY6H    | grey | -0.209823703 | 4.80E-06    | -0.223133824 | 1.11E-06    |
| LY6K    | grey | -0.193253923 | 2.61E-05    | -0.180407444 | 8.84E-05    |
| LY75-CD | grey | -0.042796461 | 0.356119973 | -0.054222755 | 0.242208743 |
| LYG1    | grey | 0.091409586  | 0.048356873 | 0.108469996  | 0.019042584 |
| LYPD1   | grey | -0.172272287 | 0.00018339  | -0.180702471 | 8.60E-05    |
| LYPD2   | grey | -0.198068888 | 1.62E-05    | -0.164601245 | 0.00035437  |
| LYPD5   | grey | 0.035390655  | 0.44547059  | 0.061491334  | 0.184663112 |
| LYPD6B  | grey | -0.272637005 | 2.10E-09    | -0.252443209 | 3.19E-08    |

|        |      |              |             |              |             |
|--------|------|--------------|-------------|--------------|-------------|
| LYPD8  | grey | -0.207341008 | 6.25E-06    | -0.208068733 | 5.79E-06    |
| LYRM1  | grey | 0.067089308  | 0.147740687 | 0.062924423  | 0.174619344 |
| LYZL2  | grey | -0.07080482  | 0.12653175  | -0.029599313 | 0.523426718 |
| LZTR1  | grey | 0.058807289  | 0.204609276 | 0.028112161  | 0.544514344 |
| LZTS1  | grey | -0.011847992 | 0.798445004 | -0.018741073 | 0.686250869 |
| M1AP   | grey | 0.021734336  | 0.63944167  | 0.031118214  | 0.502328466 |
| MACROI | grey | -0.323490883 | 7.75E-13    | -0.323666474 | 7.52E-13    |
| MADCA1 | grey | -0.019406756 | 0.675728518 | 0.005063633  | 0.913096631 |
| MADD   | grey | 0.180660902  | 8.64E-05    | 0.178653173  | 0.000103749 |
| MAEL   | grey | 0.056509357  | 0.222890131 | 0.035235283  | 0.447472082 |
| MAFA   | grey | -0.125267818 | 0.00671839  | -0.135391792 | 0.00337319  |
| MAFF   | grey | 0.084818379  | 0.067051347 | 0.056588975  | 0.222237871 |
| MAG    | grey | -0.348126764 | 9.44E-15    | -0.356618193 | 1.88E-15    |
| MAGEA1 | grey | -0.131660105 | 0.004372062 | -0.130948751 | 0.004590361 |
| MAGEA1 | grey | -0.24263846  | 1.10E-07    | -0.241971155 | 1.20E-07    |
| MAGEA1 | grey | -0.214375428 | 2.94E-06    | -0.210133172 | 4.65E-06    |
| MAGEA1 | grey | -0.098884791 | 0.032644375 | -0.103584672 | 0.025187862 |
| MAGEA3 | grey | -0.069916504 | 0.131373939 | -0.073909102 | 0.110691893 |
| MAGEA4 | grey | -0.253543268 | 2.77E-08    | -0.257443782 | 1.66E-08    |
| MAGEA6 | grey | -0.085367556 | 0.065295375 | -0.08986323  | 0.052296573 |
| MAGEA8 | grey | -0.039061313 | 0.399686458 | -0.045570404 | 0.325776705 |
| MAGEA9 | grey | -0.165708677 | 0.000322787 | -0.151970435 | 0.000986102 |
| MAGEA9 | grey | -0.118816626 | 0.010173461 | -0.120586327 | 0.009095769 |
| MAGEB1 | grey | -0.118976506 | 0.010071643 | -0.123906228 | 0.007344684 |
| MAGEB1 | grey | 0.034838879  | 0.452601559 | 0.038856527  | 0.402163982 |
| MAGEB1 | grey | 0.013395759  | 0.772794159 | -0.008521614 | 0.854277491 |
| MAGEB1 | grey | -0.123598072 | 0.007493476 | -0.098842064 | 0.032719995 |
| MAGEB2 | grey | -0.064985779 | 0.160893349 | -0.063326669 | 0.17187465  |
| MAGEB4 | grey | 0.052720359  | 0.255523996 | 0.047728212  | 0.30336791  |
| MAGEB6 | grey | -0.100903983 | 0.029236937 | -0.092667226 | 0.045338821 |
| MAGEC1 | grey | -0.085034609 | 0.066355389 | -0.083314326 | 0.072059661 |
| MAGEC2 | grey | -0.151940741 | 0.00098839  | -0.133651702 | 0.003809875 |
| MAGEC3 | grey | -0.023067242 | 0.619035643 | -0.021160658 | 0.648309973 |
| MAGED1 | grey | -0.120856433 | 0.008940543 | -0.104647992 | 0.023721234 |
| MAGED2 | grey | -0.280446906 | 6.89E-10    | -0.295543496 | 7.23E-11    |
| MAGED4 | grey | -0.160788757 | 0.000486497 | -0.185615392 | 5.45E-05    |
| MAGED4 | grey | -0.119713091 | 0.009614146 | -0.113903673 | 0.013781725 |
| MALSU1 | grey | 0.222891358  | 1.14E-06    | 0.259713877  | 1.23E-08    |
| MAMDC1 | grey | 0.292666131  | 1.12E-10    | 0.275444809  | 1.41E-09    |
| MAMSTF | grey | -0.275179065 | 1.47E-09    | -0.286647061 | 2.78E-10    |
| MAN2B1 | grey | 0.066555299  | 0.150999428 | 0.080774435  | 0.081207495 |
| MAN2B2 | grey | 0.213545461  | 3.22E-06    | 0.216997852  | 2.21E-06    |
| MAN2C1 | grey | -0.022586299 | 0.626365988 | -0.047418    | 0.306525044 |
| MANBA1 | grey | -0.150579185 | 0.001098698 | -0.14322243  | 0.001917128 |
| MANEA1 | grey | 0.083394121  | 0.071786489 | 0.064389996  | 0.16477425  |

|             |              |             |              |             |
|-------------|--------------|-------------|--------------|-------------|
| MAOA grey   | 0.007363764  | 0.873898959 | -0.007380265 | 0.873618751 |
| MAP1LC grey | -0.051272821 | 0.268824776 | -0.059714883 | 0.197696912 |
| MAP1LC grey | -0.163798528 | 0.000379039 | -0.162332936 | 0.000428254 |
| MAP2K7 grey | 0.029253435  | 0.528293699 | -0.00830267  | 0.857981321 |
| MAP3K1 grey | -0.093107524 | 0.04432032  | -0.118388618 | 0.010450544 |
| MAP3K1 grey | -0.00822138  | 0.859357279 | -8.70E-05    | 0.998503822 |
| MAP3K1 grey | -0.264678862 | 6.31E-09    | -0.275939693 | 1.32E-09    |
| MAP3K6 grey | 0.081454775  | 0.078669586 | 0.087867     | 0.057774588 |
| MAP3K8 grey | -0.170821894 | 0.000208166 | -0.175395312 | 0.000139113 |
| MAPK4 grey  | -0.188819798 | 4.02E-05    | -0.20867315  | 5.43E-06    |
| MAPK8I grey | 0.003195724  | 0.94508889  | -0.015864632 | 0.732395807 |
| MAPK8I grey | 0.031670689  | 0.494767056 | 0.043028053  | 0.353520724 |
| MAPKAP grey | 0.096747621  | 0.036614591 | 0.110551066  | 0.016850392 |
| MAPT grey   | -0.057704489 | 0.213242059 | -0.080553224 | 0.082046819 |
| MARC2 grey  | 0.241084709  | 1.34E-07    | 0.220673491  | 1.47E-06    |
| 11-Mar grey | -0.213079592 | 3.39E-06    | -0.219077891 | 1.75E-06    |
| 3-Mar grey  | 0.134852323  | 0.003503451 | 0.164421447  | 0.000359762 |
| MAST3 grey  | -0.049066079 | 0.289999501 | -0.041648655 | 0.369178786 |
| MAT1A grey  | 0.007771981  | 0.866971647 | 0.002372293  | 0.959223226 |
| MATN1 grey  | 0.08467716   | 0.067509098 | 0.063773082  | 0.168866406 |
| MATN3 grey  | -0.092264447 | 0.046287688 | -0.118256547 | 0.010537385 |
| MATN4 grey  | -0.160581765 | 0.000494841 | -0.157429983 | 0.000639491 |
| MAVS grey   | -0.139887451 | 0.002447139 | -0.137009181 | 0.003008567 |
| MBD6 grey   | 0.210367682  | 4.53E-06    | 0.197167817  | 1.77E-05    |
| MC4R grey   | -0.153745857 | 0.000857879 | -0.154107341 | 0.000833739 |
| MC5R grey   | 0.01759062   | 0.704578631 | -0.017461851 | 0.70664096  |
| MCCD1 grey  | -0.150370845 | 0.001116545 | -0.138700659 | 0.002665909 |
| MCOLN3 grey | -0.374121753 | 5.81E-17    | -0.38150487  | 1.26E-17    |
| MCTP2 grey  | 0.025916979  | 0.576391374 | 0.019428954  | 0.675378712 |
| MDFI grey   | -0.083210777 | 0.072415414 | -0.089098631 | 0.05434132  |
| MDP1 grey   | -0.055435515 | 0.231821186 | -0.07438859  | 0.108390877 |
| ME1 grey    | -0.233437862 | 3.36E-07    | -0.232710851 | 3.67E-07    |
| ME3 grey    | -0.15309097  | 0.000903266 | -0.161510843 | 0.000458401 |
| MECR grey   | 0.035031847  | 0.450100424 | 0.022706086  | 0.624536764 |
| MED10 grey  | -0.193241969 | 2.62E-05    | -0.173503927 | 0.000164548 |
| MED12L grey | -0.054406564 | 0.240613736 | -0.083786479 | 0.070455572 |
| MED18 grey  | 0.242319537  | 1.15E-07    | 0.267725258  | 4.16E-09    |
| MED29 grey  | -0.116149197 | 0.01201222  | -0.107512269 | 0.020132323 |
| MED9 grey   | 0.157570471  | 0.000632287 | 0.151965804  | 0.000986459 |
| MEF2B grey  | -0.057278243 | 0.216647986 | -0.040217694 | 0.385868927 |
| MEF2BN grey | -0.133791846 | 0.003772897 | -0.145432735 | 0.001626152 |
| MEGF10 grey | -0.121742686 | 0.008447655 | -0.120444935 | 0.009177978 |
| MEGF11 grey | -0.008612479 | 0.852741285 | 0.012621088  | 0.785603627 |
| MEGF6 grey  | -0.19413084  | 2.40E-05    | -0.191376529 | 3.14E-05    |
| MEGF8 grey  | -0.076149722 | 0.100261662 | -0.096355246 | 0.037386381 |

|         |      |              |             |              |             |
|---------|------|--------------|-------------|--------------|-------------|
| MEI4    | grey | -0.16706401  | 0.000287708 | -0.163164897 | 0.000399632 |
| MEPCE   | grey | -0.186907328 | 4.82E-05    | -0.193269693 | 2.61E-05    |
| MESDC1  | grey | 0.088868912  | 0.054968486 | 0.090680407  | 0.050182526 |
| MESP2   | grey | 0.103260768  | 0.025649889 | 0.144949028  | 0.001686127 |
| MET     | grey | -0.064015876 | 0.167246915 | -0.066832118 | 0.149303412 |
| METRNL  | grey | 0.02277812   | 0.623437863 | 0.044030984  | 0.342402926 |
| METRNL  | grey | -0.354699168 | 2.72E-15    | -0.34170411  | 3.10E-14    |
| METTTL1 | grey | 0.068687792  | 0.138306073 | 0.065454049  | 0.157891688 |
| METTTL2 | grey | -0.133384382 | 0.003881322 | -0.114778797 | 0.013066526 |
| METTTL7 | grey | -0.113132159 | 0.0144406   | -0.113283323 | 0.014309366 |
| MFAP2   | grey | -0.160434795 | 0.000500846 | -0.178640693 | 0.000103867 |
| MFGE8   | grey | -0.090659069 | 0.050236806 | -0.096740896 | 0.036627704 |
| MFI2    | grey | -0.199367725 | 1.42E-05    | -0.185753535 | 5.38E-05    |
| MFRP    | grey | -0.031880588 | 0.491910274 | -0.018599201 | 0.688501375 |
| MFSD2A  | grey | -0.040733931 | 0.379795487 | -0.060872776 | 0.189127548 |
| MFSD4   | grey | 0.138919021  | 0.002624366 | 0.180239787  | 8.98E-05    |
| MFSD6L  | grey | -0.211655065 | 3.95E-06    | -0.22039044  | 1.52E-06    |
| MFSD7   | grey | -0.084113605 | 0.069361411 | -0.06531701  | 0.158765712 |
| MGAT1   | grey | -0.064765111 | 0.162322665 | -0.038154937 | 0.410721264 |
| MGAT3   | grey | -0.262107584 | 8.93E-09    | -0.252582657 | 3.14E-08    |
| MGAT5B  | grey | -0.005260144 | 0.909738151 | -0.061556564 | 0.184196883 |
| MGST1   | grey | 0.081862905  | 0.077178245 | 0.096994234  | 0.03613647  |
| MGST3   | grey | 0.206587193  | 6.76E-06    | 0.201356386  | 1.16E-05    |
| MIA     | grey | 0.096731567  | 0.036645902 | 0.119804107  | 0.009558917 |
| MIA-RAE | grey | 0.048241485  | 0.298191621 | 0.052799499  | 0.254810196 |
| MICA    | grey | 0.0215447    | 0.642367592 | 0.021627157  | 0.641094673 |
| MICALL1 | grey | 0.094553397  | 0.041110091 | 0.110168114  | 0.017236381 |
| MIDN    | grey | 0.174487448  | 0.000150823 | 0.18152496   | 7.98E-05    |
| MIEF2   | grey | 0.0265374    | 0.56729358  | 0.047931285  | 0.301312869 |
| MIF4GD  | grey | 0.109241252  | 0.018202745 | 0.097858732  | 0.034502096 |
| MINOS1  | grey | -0.007594891 | 0.869975594 | -0.025775659 | 0.578473234 |
| MIOX    | grey | -0.00352908  | 0.939371424 | 0.004112725  | 0.929368871 |
| MIXL1   | grey | -0.202552499 | 1.03E-05    | -0.192873632 | 2.71E-05    |
| MKNK1   | grey | -0.081130115 | 0.079872543 | -0.084454274 | 0.06823678  |
| MKNK2   | grey | 0.440523278  | 1.37E-23    | 0.460849188  | 6.23E-26    |
| MKRN2C  | grey | 0.233806745  | 3.22E-07    | 0.282738217  | 4.94E-10    |
| MKRN3   | grey | -0.268784825 | 3.59E-09    | -0.264939454 | 6.09E-09    |
| MLC1    | grey | -0.137907156 | 0.002821966 | -0.141350762 | 0.002199985 |
| MLEC    | grey | 0.250660139  | 4.02E-08    | 0.237196877  | 2.14E-07    |
| MLF1    | grey | -0.433549739 | 8.00E-23    | -0.438698443 | 2.18E-23    |
| MLH1    | grey | -0.44292025  | 7.37E-24    | -0.44238807  | 8.46E-24    |
| MLLT1   | grey | 0.051179519  | 0.269698051 | 0.037424435  | 0.419744758 |
| MLLT3   | grey | 0.093129409  | 0.044270201 | 0.091661836  | 0.047738402 |
| MLLT6   | grey | -0.038515546 | 0.406309535 | -0.072124777 | 0.119593953 |
| MLNR    | grey | 0.035514124  | 0.443883708 | 0.02820207   | 0.543227593 |

|        |      |              |             |              |             |
|--------|------|--------------|-------------|--------------|-------------|
| MLXIP  | grey | -0.000988004 | 0.983011346 | -0.026977189 | 0.56088636  |
| MLXIPL | grey | -0.17038092  | 0.000216299 | -0.17288725  | 0.000173743 |
| MMEL1  | grey | 0.01932788   | 0.676972055 | 0.029209545  | 0.528912931 |
| MMP10  | grey | 0.059909212  | 0.196239276 | 0.056517707  | 0.222821664 |
| MMP13  | grey | -0.063601465 | 0.170018191 | -0.030978803 | 0.504246086 |
| MMP17  | grey | 0.032784028  | 0.479715536 | 0.035812935  | 0.440056574 |
| MMP20  | grey | -0.126387775 | 0.006239576 | -0.150768592 | 0.001082701 |
| MMP23B | grey | -0.086255487 | 0.062536339 | -0.091750265 | 0.047523164 |
| MMP27  | grey | -0.120552108 | 0.009115605 | -0.122084329 | 0.008264216 |
| MMP3   | grey | -0.018904474 | 0.683662304 | 0.002918741  | 0.949841665 |
| MMP7   | grey | -0.105281453 | 0.022883088 | -0.110709783 | 0.016692646 |
| MMP8   | grey | -0.084030353 | 0.069638543 | -0.090632702 | 0.050303946 |
| MNX1   | grey | 0.477481417  | 5.73E-28    | 0.483637223  | 9.47E-29    |
| MOCOS  | grey | 0.170730626  | 0.000209825 | 0.177684585  | 0.000113264 |
| MOCS1  | grey | -0.028509223 | 0.538843125 | -0.072093295 | 0.11975589  |
| MOGAT1 | grey | 0.046802091  | 0.312857462 | 0.04602656   | 0.320952304 |
| MOGAT2 | grey | -0.024881211 | 0.591730795 | 0.004092278  | 0.92971912  |
| MON1B  | grey | 0.387757304  | 3.33E-18    | 0.41428321   | 8.58E-21    |
| MORC4  | grey | 0.057140512  | 0.21775683  | 0.027306303  | 0.556114506 |
| MOS    | grey | -0.064479173 | 0.164188929 | -0.06064468  | 0.19079369  |
| MOV10L | grey | -0.052118245 | 0.261000111 | -0.066958495 | 0.148533966 |
| MPC1   | grey | -0.020366238 | 0.66067302  | 0.020419712  | 0.659837883 |
| MPI    | grey | 0.27476625   | 1.56E-09    | 0.26573754   | 5.46E-09    |
| MPO    | grey | -0.108747033 | 0.018737104 | -0.095657239 | 0.038793463 |
| MPP2   | grey | -0.166880336 | 0.000292244 | -0.203119271 | 9.69E-06    |
| MPP3   | grey | -0.325125552 | 5.85E-13    | -0.33603416  | 8.63E-14    |
| MPPED1 | grey | -0.163065064 | 0.00040297  | -0.162651837 | 0.000417064 |
| MPV17  | grey | -0.000160039 | 0.997247934 | 0.019845498  | 0.668827596 |
| MPV17L | grey | -0.403186349 | 1.11E-19    | -0.390627449 | 1.79E-18    |
| MPZ    | grey | -0.270453861 | 2.85E-09    | -0.259780295 | 1.22E-08    |
| MRFAP1 | grey | -0.076492361 | 0.098737862 | -0.082614572 | 0.074491718 |
| MRGPRC | grey | -0.028319259 | 0.541552689 | -0.029804257 | 0.520553726 |
| MRI1   | grey | 0.021954305  | 0.636054721 | 0.005052448  | 0.913287821 |
| MRM1   | grey | 0.067876348  | 0.143035886 | 0.067021782  | 0.148149776 |
| MRO    | grey | -0.023069809 | 0.618996613 | -0.040973295 | 0.376999408 |
| MROH2A | grey | -0.024634873 | 0.595406312 | -0.040824875 | 0.378731653 |
| MROH6  | grey | -0.134065527 | 0.003701619 | -0.105863412 | 0.022135808 |
| MROH7  | grey | -0.154489855 | 0.000808879 | -0.182824831 | 7.07E-05    |
| MROH8  | grey | -0.184378444 | 6.12E-05    | -0.186642737 | 4.94E-05    |
| MRPL38 | grey | -0.05917422  | 0.201793869 | -0.086348578 | 0.062252732 |
| MS4A15 | grey | -0.279326899 | 8.11E-10    | -0.286471994 | 2.85E-10    |
| MS4A6E | grey | -0.066896987 | 0.148908081 | -0.046128829 | 0.319877101 |
| MSGN1  | grey | 0.128215637  | 0.005523585 | 0.126975943  | 0.006000583 |
| MSH4   | grey | 0.114446419  | 0.013334216 | 0.097294349  | 0.035561785 |
| MSLN   | grey | -0.183447207 | 6.67E-05    | -0.154383805 | 0.000815701 |

|        |      |              |             |              |             |
|--------|------|--------------|-------------|--------------|-------------|
| MSLNL  | grey | -0.188851932 | 4.00E-05    | -0.184563311 | 6.01E-05    |
| MSRA   | grey | 0.22123881   | 1.38E-06    | 0.219601927  | 1.66E-06    |
| MST1   | grey | -0.024122833 | 0.603079293 | -0.046790251 | 0.312980034 |
| MST1R  | grey | 0.32779818   | 3.69E-13    | 0.342916957  | 2.48E-14    |
| MSTN   | grey | 0.023202052  | 0.616987644 | 0.016452604  | 0.722878088 |
| MT1A   | grey | -0.009465079 | 0.83835468  | -0.028709154 | 0.535998731 |
| MT1B   | grey | 0.089635371  | 0.052899112 | 0.117213231  | 0.011246189 |
| MT1E   | grey | -0.116428979 | 0.011806454 | -0.098097062 | 0.034062749 |
| MT1G   | grey | 0.061261091  | 0.186315716 | 0.082979369  | 0.07321562  |
| MT1H   | grey | -0.07851403  | 0.090118594 | -0.076805858 | 0.09735986  |
| MT1HL1 | grey | 0.019523748  | 0.673885678 | 0.04477635   | 0.33428631  |
| MT1M   | grey | -0.065927597 | 0.154899387 | -0.066511404 | 0.151269698 |
| MT3    | grey | 0.134011427  | 0.003715612 | 0.123033842  | 0.007772911 |
| MTA1   | grey | 0.009785192  | 0.832966768 | -0.004474925 | 0.923166947 |
| MTCL1  | grey | -0.066589808 | 0.150787199 | -0.115835231 | 0.012246893 |
| MTFR1L | grey | 0.045774108  | 0.323616505 | 0.043703402  | 0.346009507 |
| MTHFR  | grey | -0.14527109  | 0.001645973 | -0.157694886 | 0.000625969 |
| MTRNR2 | grey | -0.04670379  | 0.313876025 | -0.039820752 | 0.390578842 |
| MTRNR2 | grey | -0.033651367 | 0.468164492 | -0.028858619 | 0.533877243 |
| MTRNR2 | grey | 0.033869307  | 0.465286343 | 0.03907647   | 0.399503452 |
| MTRNR2 | grey | -0.042237261 | 0.362445436 | -0.030402935 | 0.512207842 |
| MTRNR2 | grey | 0.041737055  | 0.368162624 | 0.032812665  | 0.479331699 |
| MTRNR2 | grey | 0.052720538  | 0.255522382 | 0.061459556  | 0.18489056  |
| MTRNR2 | grey | 0.060614533  | 0.191014703 | 0.039420284  | 0.395365705 |
| MTRNR2 | grey | -0.067692672 | 0.144123487 | -0.081658264 | 0.077923126 |
| MTSS1  | grey | -0.074447293 | 0.108111781 | -0.106251859 | 0.021648869 |
| MTSS1L | grey | 0.135352552  | 0.003382515 | 0.126971518  | 0.006002349 |
| MUC12  | grey | -0.082635269 | 0.074418836 | -0.063634533 | 0.169795804 |
| MUC15  | grey | -0.113075755 | 0.014489837 | -0.127616339 | 0.005749745 |
| MUC16  | grey | -0.027734399 | 0.549937205 | 0.002757265  | 0.952613268 |
| MUC21  | grey | -0.026757995 | 0.564075399 | 0.003161822  | 0.945670523 |
| MUC3A  | grey | -0.133003099 | 0.003985328 | -0.11970406  | 0.009619641 |
| MUC6   | grey | 0.204056979  | 8.80E-06    | 0.216792541  | 2.26E-06    |
| MUC7   | grey | 0.107749527  | 0.019857426 | 0.092436152  | 0.045881167 |
| MUS81  | grey | 0.043531622  | 0.347910366 | 0.020173057  | 0.663693526 |
| MXD4   | grey | 0.127796222  | 0.005681003 | 0.153130272  | 0.000900481 |
| MXRA5  | grey | -0.108187833 | 0.019358169 | -0.092280094 | 0.046250518 |
| MYADM  | grey | 0.119104766  | 0.009990617 | 0.091639549  | 0.047792775 |
| MYBPC1 | grey | -0.048738812 | 0.293232552 | -0.043155192 | 0.352098896 |
| MYBPC2 | grey | 0.012512116  | 0.787410259 | 0.016348986  | 0.724552342 |
| MYBPC3 | grey | 0.014962184  | 0.747083738 | 0.040954239  | 0.377221548 |
| MYBPH  | grey | -0.109707049 | 0.01771134  | -0.09975181  | 0.031141821 |
| MYBPHL | grey | -0.149410777 | 0.00120229  | -0.162827254 | 0.000411026 |
| MYCN   | grey | 0.166203811  | 0.000309533 | 0.158494722  | 0.000586733 |
| MYEOV  | grey | 0.208076395  | 5.78E-06    | 0.214669006  | 2.85E-06    |

|        |      |              |             |              |             |
|--------|------|--------------|-------------|--------------|-------------|
| MYF6   | grey | -0.022014286 | 0.635132481 | 0.004039391  | 0.930625099 |
| MYH15  | grey | -0.026753172 | 0.564145665 | -0.056535267 | 0.222677716 |
| MYH3   | grey | -0.192193874 | 2.90E-05    | -0.204101774 | 8.76E-06    |
| MYH6   | grey | -0.121918491 | 0.008352811 | -0.11055076  | 0.016850697 |
| MYH7   | grey | -0.064270606 | 0.165560334 | -0.061288439 | 0.186118856 |
| MYH8   | grey | -0.090903558 | 0.049617803 | -0.083984328 | 0.069792139 |
| MYL1   | grey | -0.051667729 | 0.265150021 | -0.052969636 | 0.253280331 |
| MYL10  | grey | 0.019169348  | 0.679474074 | 0.032036779  | 0.489790193 |
| MYL12A | grey | 0.067141223  | 0.14742676  | 0.08143344   | 0.078748184 |
| MYL12B | grey | -0.03593042  | 0.438557023 | -0.013780528 | 0.76645449  |
| MYL2   | grey | 0.057015589  | 0.218766067 | 0.058405573  | 0.207724111 |
| MYL4   | grey | 0.002738181  | 0.952940864 | -0.00785737  | 0.865523898 |
| MYLK2  | grey | -0.166546637 | 0.000300656 | -0.173169181 | 0.000169481 |
| MYLK4  | grey | -0.208514067 | 5.52E-06    | -0.200642812 | 1.25E-05    |
| MYO15A | grey | -0.175864376 | 0.000133403 | -0.173738635 | 0.00016117  |
| MYO18B | grey | -0.003777076 | 0.935119997 | -0.002837734 | 0.951232004 |
| MYO1A  | grey | 0.039670257  | 0.392373607 | 0.043267165  | 0.350849656 |
| MYO1C  | grey | 0.228957565  | 5.70E-07    | 0.233084413  | 3.51E-07    |
| MYO3A  | grey | -0.219581037 | 1.66E-06    | -0.182279962 | 7.44E-05    |
| MYO3B  | grey | 0.10024164   | 0.03031939  | 0.079407014  | 0.086508744 |
| MYO7B  | grey | -0.178571906 | 0.000104517 | -0.192091979 | 2.93E-05    |
| MYOC   | grey | -0.185776218 | 5.37E-05    | -0.17284073  | 0.000174455 |
| MYOD1  | grey | -0.205803638 | 7.34E-06    | -0.210807048 | 4.33E-06    |
| MYOG   | grey | -0.068115376 | 0.141629942 | -0.065294764 | 0.158907942 |
| MYOM3  | grey | -0.185316862 | 5.60E-05    | -0.181715714 | 7.84E-05    |
| MYOT   | grey | -0.170963878 | 0.000205609 | -0.184337509 | 6.14E-05    |
| MYOZ1  | grey | -0.310326705 | 6.97E-12    | -0.297510104 | 5.34E-11    |
| MYPOP  | grey | 0.066876676  | 0.149031777 | 0.069697039  | 0.132592015 |
| MYRF   | grey | -0.152394319 | 0.000953975 | -0.147547888 | 0.001386199 |
| MYRFL  | grey | 0.00152634   | 0.973757438 | -0.002240729 | 0.961482843 |
| MYT1   | grey | -0.308497109 | 9.38E-12    | -0.335128281 | 1.01E-13    |
| MYT1L  | grey | -0.07713171  | 0.095943839 | -0.05667452  | 0.221538561 |
| NAB2   | grey | -0.25970465  | 1.23E-08    | -0.289299897 | 1.87E-10    |
| NACA2  | grey | 0.09843192   | 0.033453518 | 0.108772226  | 0.018709538 |
| NAGA   | grey | 0.277329765  | 1.08E-09    | 0.266088027  | 5.21E-09    |
| NAGS   | grey | 0.062188067  | 0.179728092 | 0.045721472  | 0.3241738   |
| NAIF1  | grey | 0.116473416  | 0.011774061 | 0.122600974  | 0.007993559 |
| NALCN  | grey | 0.071055734  | 0.125189423 | 0.049136817  | 0.289303835 |
| NANOS1 | grey | -0.069612319 | 0.133064557 | -0.065715107 | 0.156236737 |
| NANOS3 | grey | 0.053970974  | 0.244405586 | 0.069242456  | 0.135142762 |
| NAP1L6 | grey | -0.286396707 | 2.88E-10    | -0.288256059 | 2.18E-10    |
| NAPSA  | grey | -0.102346473 | 0.026993692 | -0.105913195 | 0.022072877 |
| NAT1   | grey | 0.230225581  | 4.91E-07    | 0.243684456  | 9.68E-08    |
| NAT6   | grey | -0.006494109 | 0.888688225 | -0.025472289 | 0.582954186 |
| NBPF4  | grey | -0.214591806 | 2.87E-06    | -0.227138224 | 7.04E-07    |



|         |      |              |             |              |             |
|---------|------|--------------|-------------|--------------|-------------|
| NBPF6   | grey | -0.232552998 | 3.74E-07    | -0.246897436 | 6.48E-08    |
| NCALD   | grey | 0.129609419  | 0.005028251 | 0.112738851  | 0.014787021 |
| NCAM2   | grey | -0.054178547 | 0.242593464 | -0.061449892 | 0.184959768 |
| NCAN    | grey | -0.062899223 | 0.174792373 | -0.060710176 | 0.190314177 |
| NCDN    | grey | 0.044544058  | 0.336802468 | 0.048523673  | 0.295370991 |
| NCEH1   | grey | -0.029218895 | 0.528780975 | -0.04186492  | 0.366695867 |
| NCKIPSE | grey | 0.18611302   | 5.20E-05    | 0.182503427  | 7.29E-05    |
| NCR2    | grey | -0.021003188 | 0.650753058 | -0.006354607 | 0.891064325 |
| NDRG3   | grey | -0.087569828 | 0.058629361 | -0.114200219 | 0.013535603 |
| NDST4   | grey | 0.089742213  | 0.05261587  | 0.060691355  | 0.190451875 |
| NDUFA1  | grey | 0.050548856  | 0.275651686 | 0.046721962  | 0.313687572 |
| NDUFA4  | grey | 0.025283696  | 0.585747924 | 0.036768878  | 0.42794051  |
| NEBL    | grey | -0.136107393 | 0.003207185 | -0.142162746 | 0.002072892 |
| NECAB2  | grey | -0.104021095 | 0.0245767   | -0.107925125 | 0.01965608  |
| NEDD4L  | grey | 0.11968057   | 0.009633949 | 0.127017775  | 0.005983902 |
| NEDD8   | grey | 0.180081705  | 9.11E-05    | 0.154708897  | 0.000794954 |
| NEFH    | grey | -0.318438269 | 1.82E-12    | -0.33616201  | 8.44E-14    |
| NEFL    | grey | -0.165462598 | 0.000329569 | -0.151487466 | 0.001023923 |
| NEK8    | grey | 0.09245404   | 0.04583899  | 0.094740404  | 0.040709593 |
| NELL1   | grey | -0.218331873 | 1.91E-06    | -0.223893035 | 1.02E-06    |
| NELL2   | grey | -0.098929892 | 0.032564716 | -0.09291769  | 0.044757059 |
| NETO1   | grey | -0.063907956 | 0.167965324 | -0.066046393 | 0.154155508 |
| NEU4    | grey | -0.118409115 | 0.010437124 | -0.113515767 | 0.014109614 |
| NEUROD  | grey | 0.000742307  | 0.987235671 | -0.021926005 | 0.636490052 |
| NEUROD  | grey | -0.029049276 | 0.531177241 | -0.038256112 | 0.409480626 |
| NEUROG  | grey | 0.054573785  | 0.239169093 | 0.054633478  | 0.238654872 |
| NEUROG  | grey | 0.144179085  | 0.001785788 | 0.13613346   | 0.00320128  |
| NEUROG  | grey | 0.05349313   | 0.248613147 | 0.051499471  | 0.266711475 |
| NF2     | grey | 0.123908122  | 0.007343778 | 0.127055812  | 0.005968771 |
| NFATC1  | grey | -0.137806871 | 0.00284227  | -0.11182694  | 0.015618439 |
| NFE2    | grey | -0.10090353  | 0.029237665 | -0.116728701 | 0.011589486 |
| NFE2L3  | grey | 0.017451034  | 0.706814294 | -0.003494272 | 0.939968289 |
| NFIB    | grey | 0.066379299  | 0.152085327 | 0.074645877  | 0.10717183  |
| NFIX    | grey | -0.06167617  | 0.183344261 | -0.071991528 | 0.120280546 |
| NFKBIA  | grey | -0.158122992 | 0.000604676 | -0.153601077 | 0.000867728 |
| NFKBID  | grey | -0.211479835 | 4.02E-06    | -0.228176801 | 6.24E-07    |
| NFKBIZ  | grey | 0.101834238  | 0.027772712 | 0.077947026  | 0.092472735 |
| NFS1    | grey | -0.017624023 | 0.704044012 | -0.027222669 | 0.557325252 |
| NGEF    | grey | 0.106780597  | 0.021001017 | 0.098879532  | 0.032653675 |
| NGFRAP  | grey | -0.291359367 | 1.37E-10    | -0.277718642 | 1.02E-09    |
| NHLH1   | grey | -0.016341058 | 0.72468049  | -0.025560321 | 0.581652241 |
| NHLH2   | grey | -0.052179611 | 0.260438324 | -0.038652675 | 0.404639316 |
| NHLRC1  | grey | -0.417205887 | 4.30E-21    | -0.397591996 | 3.88E-19    |
| NIM1K   | grey | 0.034897259  | 0.451844057 | 0.015175036  | 0.743610953 |
| NINJ2   | grey | -0.068564147 | 0.139018924 | -0.036429522 | 0.432219344 |

|        |      |              |             |              |             |
|--------|------|--------------|-------------|--------------|-------------|
| NIPA1  | grey | 0.398697444  | 3.04E-19    | 0.386800525  | 4.08E-18    |
| NIPAL4 | grey | -0.151089255 | 0.001056109 | -0.14027026  | 0.002380147 |
| NIT1   | grey | 0.15126528   | 0.001041768 | 0.137271207  | 0.00295299  |
| NKAIN1 | grey | -0.047783657 | 0.302805899 | -0.074338923 | 0.108627458 |
| NKAIN2 | grey | -0.113331726 | 0.014267567 | -0.115806445 | 0.012268611 |
| NKAIN3 | grey | -0.049151389 | 0.289160668 | -0.052268846 | 0.259622891 |
| NKAIN4 | grey | -0.289320864 | 1.86E-10    | -0.280036453 | 7.32E-10    |
| NKPD1  | grey | -0.013937679 | 0.763869635 | -0.04673387  | 0.313564121 |
| NKX1-1 | grey | -0.042909267 | 0.354852413 | -0.03431703  | 0.459404504 |
| NKX1-2 | grey | 0.1065759    | 0.021249803 | 0.081897838  | 0.077051671 |
| NKX2-1 | grey | 0.004569612  | 0.921546376 | 0.029541291  | 0.524241564 |
| NKX2-2 | grey | 0.260141972  | 1.16E-08    | 0.240366905  | 1.46E-07    |
| NKX2-3 | grey | 0.018707749  | 0.68677924  | 0.017314795  | 0.708998786 |
| NKX2-4 | grey | -0.100642112 | 0.02966088  | -0.102224314 | 0.027177746 |
| NKX2-5 | grey | -0.08699409  | 0.060315182 | -0.101565088 | 0.028189731 |
| NKX2-8 | grey | -0.09306603  | 0.044415475 | -0.07582322  | 0.101731031 |
| NKX3-1 | grey | 0.149537914  | 0.001190597 | 0.132716274  | 0.004065222 |
| NKX3-2 | grey | -0.049236603 | 0.288324418 | -0.041209615 | 0.374251332 |
| NKX6-1 | grey | -0.096603058 | 0.036897353 | -0.081152356 | 0.079789662 |
| NKX6-2 | grey | -0.154341046 | 0.000818467 | -0.162748172 | 0.000413738 |
| NKX6-3 | grey | 0.122134544  | 0.008237556 | 0.102817445  | 0.026294092 |
| NLE1   | grey | 0.163171404  | 0.000399415 | 0.153320686  | 0.000887099 |
| NLGN4X | grey | -0.070959824 | 0.125701205 | -0.048968569 | 0.290960281 |
| NLGN4Y | grey | -0.017451489 | 0.706807011 | 0.000517321  | 0.991104216 |
| NLRP11 | grey | -0.040087135 | 0.387414243 | -0.050059641 | 0.280331132 |
| NLRP2  | grey | 0.002846074  | 0.951088852 | -0.014727227 | 0.750923136 |
| NLRP4  | grey | -0.065654884 | 0.156617345 | -0.084553081 | 0.067913402 |
| NLRP7  | grey | -0.19329436  | 2.60E-05    | -0.185755463 | 5.38E-05    |
| NLRX1  | grey | 0.265267547  | 5.82E-09    | 0.280981046  | 6.38E-10    |
| NMB    | grey | 0.062210109  | 0.179573577 | 0.071812235  | 0.121209239 |
| NME2   | grey | 0.075401264  | 0.103655229 | 0.064025844  | 0.167180671 |
| NME6   | grey | -0.064786669 | 0.162182611 | -0.065957492 | 0.154711934 |
| NMNAT2 | grey | 0.016959076  | 0.714713686 | 0.021159224  | 0.648332208 |
| NMNAT3 | grey | -0.307971437 | 1.02E-11    | -0.3218653   | 1.02E-12    |
| NMRK1  | grey | 0.318952627  | 1.67E-12    | 0.310185779  | 7.13E-12    |
| NMUR2  | grey | 0.035687965  | 0.441654876 | 0.067868835  | 0.143080249 |
| NNMT   | grey | -0.029881512 | 0.519472835 | -0.019131385 | 0.680073752 |
| NOG    | grey | 0.233441241  | 3.36E-07    | 0.220424744  | 1.51E-06    |
| NOL3   | grey | 0.30674058   | 1.24E-11    | 0.295121716  | 7.72E-11    |
| NOL4   | grey | -0.049824645 | 0.282597937 | -0.06326192  | 0.172314276 |
| NOL4L  | grey | -0.392657456 | 1.15E-18    | -0.397117861 | 4.31E-19    |
| NOS1   | grey | -0.211807387 | 3.89E-06    | -0.23303116  | 3.53E-07    |
| NOS2   | grey | -0.017831061 | 0.70073361  | 0.001847551  | 0.968237476 |
| NOV    | grey | -0.085279545 | 0.065574215 | -0.075198904 | 0.104588198 |
| NOX4   | grey | -0.156497995 | 0.000689247 | -0.131324736 | 0.004473783 |

|         |      |              |             |              |             |
|---------|------|--------------|-------------|--------------|-------------|
| NOXO1   | grey | 0.023836234  | 0.607393285 | 0.063344984  | 0.171750449 |
| NPAS1   | grey | 0.025784521  | 0.578342579 | 0.03971582   | 0.39182971  |
| NPB     | grey | -0.009876402 | 0.831432998 | -0.031322491 | 0.499525569 |
| NPBWR1  | grey | 0.003276317  | 0.943706354 | -0.007263532 | 0.875601359 |
| NPC1L1  | grey | -0.043777492 | 0.345191695 | -0.033099855 | 0.475491565 |
| NPFFR1  | grey | -0.243526117 | 9.88E-08    | -0.255198269 | 2.23E-08    |
| NPIPA1  | grey | -0.106546464 | 0.021285788 | -0.116603263 | 0.011679857 |
| NPIPA2  | grey | 0.025970801  | 0.575599419 | 0.033711238  | 0.467372854 |
| NPIPA3  | grey | -0.010290979 | 0.824469728 | -0.003608216 | 0.938014594 |
| NPIPA5  | grey | -0.03776278  | 0.41555101  | -0.040785399 | 0.379193213 |
| NPIPA7  | grey | -0.081826345 | 0.077310893 | -0.087025016 | 0.060223618 |
| NPIPA8  | grey | -0.018066512 | 0.696975761 | 0.000500894  | 0.991386683 |
| NPIPB11 | grey | 0.020626666  | 0.656609755 | 0.035200271  | 0.447923818 |
| NPIPB15 | grey | -0.036838512 | 0.427065558 | -0.039838499 | 0.390367521 |
| NPIPB6  | grey | 0.040724262  | 0.379908707 | 0.021172225  | 0.648130665 |
| NPIPB7  | grey | 0.012830683  | 0.782132026 | 0.000131226  | 0.99774342  |
| NPIPB9  | grey | -0.120157087 | 0.009347385 | -0.112539304 | 0.014965555 |
| NPM2    | grey | 0.120940146  | 0.008892915 | 0.115360529  | 0.012609399 |
| NPNT    | grey | -0.01958688  | 0.672892036 | -0.033584521 | 0.469049244 |
| NPPA    | grey | -0.085277278 | 0.065581411 | -0.092730262 | 0.045191812 |
| NPPB    | grey | 0.007391375  | 0.873430097 | -0.010585576 | 0.819529963 |
| NPPC    | grey | 0.039473204  | 0.394731124 | 0.030563699  | 0.509978618 |
| NPS     | grey | 0.074724653  | 0.106800755 | 0.069542516  | 0.133454867 |
| NPSR1   | grey | 0.02381906   | 0.607652228 | 0.036927917  | 0.425943722 |
| NPTX1   | grey | 0.001465457  | 0.974803849 | 0.007798905  | 0.866515112 |
| NPTX2   | grey | -0.247759356 | 5.81E-08    | -0.236165884 | 2.43E-07    |
| NPTXR   | grey | -0.40169018  | 1.55E-19    | -0.397472509 | 3.99E-19    |
| NPVF    | grey | -0.097917603 | 0.034393125 | -0.095552181 | 0.03900908  |
| NPW     | grey | -0.207121069 | 6.39E-06    | -0.185139791 | 5.70E-05    |
| NPY     | grey | -0.259721924 | 1.23E-08    | -0.264732104 | 6.26E-09    |
| NQO2    | grey | 0.051230381  | 0.269221755 | 0.08480418   | 0.067097254 |
| NR0B1   | grey | -0.151758357 | 0.001002548 | -0.147052145 | 0.00143932  |
| NR0B2   | grey | -0.059745898 | 0.197463745 | -0.050510275 | 0.276018776 |
| NR1H4   | grey | -0.18973439  | 3.68E-05    | -0.190821826 | 3.31E-05    |
| NR2E1   | grey | 0.030967103  | 0.504407206 | 0.020040019  | 0.665776842 |
| NR5A2   | grey | 0.018876068  | 0.684112041 | 0.012485791  | 0.787846874 |
| NRAP    | grey | -0.058758914 | 0.204982562 | -0.062353346 | 0.17857188  |
| NRARP   | grey | -0.079857036 | 0.084734166 | -0.086647136 | 0.0613503   |
| NRBP1   | grey | -0.066759192 | 0.149748807 | -0.061708262 | 0.183115987 |
| NRBP2   | grey | -0.16689426  | 0.000291897 | -0.205441068 | 7.62E-06    |
| NRCAM   | grey | 0.010709685  | 0.81745105  | -0.003974795 | 0.931731777 |
| NRG1    | grey | -0.14544068  | 0.001625183 | -0.138682304 | 0.002669428 |
| NRG2    | grey | -0.131398075 | 0.004451358 | -0.153310581 | 0.000887804 |
| NRG3    | grey | -0.263955632 | 6.96E-09    | -0.266137679 | 5.17E-09    |
| NRGN    | grey | 0.031872552  | 0.492019472 | 0.036537898  | 0.430850177 |

|        |      |              |             |              |             |
|--------|------|--------------|-------------|--------------|-------------|
| NRIP3  | grey | -0.387576648 | 3.46E-18    | -0.365546823 | 3.28E-16    |
| NRL    | grey | -0.099789633 | 0.031077644 | -0.070431731 | 0.128548306 |
| NRN1   | grey | 0.218151655  | 1.94E-06    | 0.236176261  | 2.43E-07    |
| NRSN2  | grey | -0.139217926 | 0.002568455 | -0.141954327 | 0.002104858 |
| NRXN1  | grey | -0.101887202 | 0.027691277 | -0.108844121 | 0.018631064 |
| NRXN3  | grey | -0.174199046 | 0.000154732 | -0.16627795  | 0.000307593 |
| NSFL1C | grey | -0.092762559 | 0.045116644 | -0.081230113 | 0.079500444 |
| NSMF   | grey | -0.093145704 | 0.044232914 | -0.112194708 | 0.015278324 |
| NT5C1B | grey | 0.043687114  | 0.346189467 | 0.041158927  | 0.374839717 |
| NT5C3B | grey | 0.102443578  | 0.026848151 | 0.092325812  | 0.046142058 |
| NT5M   | grey | -0.053281325 | 0.250494209 | -0.06862439  | 0.138671257 |
| NTF3   | grey | -0.30969616  | 7.72E-12    | -0.316478695 | 2.53E-12    |
| NTF4   | grey | -0.269037489 | 3.47E-09    | -0.267634763 | 4.21E-09    |
| NTN3   | grey | -0.209423614 | 5.01E-06    | -0.224122577 | 9.94E-07    |
| NTN5   | grey | -0.16193994  | 0.000442427 | -0.164704157 | 0.000351318 |
| NTNG1  | grey | -0.129175085 | 0.005178136 | -0.126093825 | 0.006362189 |
| NTRK1  | grey | -0.214851056 | 2.79E-06    | -0.197076577 | 1.79E-05    |
| NTRK2  | grey | 0.071273872  | 0.124031454 | 0.071152176  | 0.124676432 |
| NTS    | grey | 0.024239576  | 0.601325995 | 0.03748384   | 0.419006645 |
| NTSR1  | grey | -0.148584713 | 0.001280877 | -0.11939888  | 0.009806996 |
| NUBP1  | grey | 0.194902525  | 2.22E-05    | 0.199860519  | 1.35E-05    |
| NUDCD3 | grey | -0.034700814 | 0.454395877 | -0.028573553 | 0.537927083 |
| NUDT16 | grey | -0.22005065  | 1.57E-06    | -0.171290617 | 0.000199835 |
| NUDT17 | grey | -0.039035426 | 0.399999129 | -0.065596548 | 0.156986694 |
| NUDT6  | grey | 0.074300864  | 0.108809024 | 0.052625857  | 0.256378166 |
| NUPR1L | grey | -0.371322686 | 1.03E-16    | -0.33870975  | 5.33E-14    |
| NUTM2B | grey | -0.052441307 | 0.258051941 | -0.05477207  | 0.23746399  |
| NUTM2D | grey | -0.034087901 | 0.462409425 | -0.044370471 | 0.33869065  |
| NUTM2E | grey | 0.085250801  | 0.065665496 | 0.082399644  | 0.075251997 |
| NUTM2F | grey | 0.065226013  | 0.159348097 | 0.053208699  | 0.251141486 |
| NWD2   | grey | -0.038229383 | 0.40980817  | -0.01939745  | 0.675875186 |
| NXF1   | grey | 0.168294451  | 0.000258976 | 0.133767795  | 0.00377922  |
| NXF2B  | grey | -0.065871732 | 0.155250146 | -0.046521441 | 0.315771223 |
| NXN    | grey | -0.065028653 | 0.160616747 | -0.072210826 | 0.119152194 |
| NXPE2  | grey | 0.245719153  | 7.51E-08    | 0.202101328  | 1.08E-05    |
| NXPH1  | grey | 0.006104359  | 0.895329147 | 0.008236678  | 0.859098295 |
| NYAP2  | grey | 0.019034698  | 0.681601962 | 0.041822347  | 0.367183817 |
| NYNRIN | grey | -0.31143295  | 5.82E-12    | -0.310951056 | 6.29E-12    |
| NYX    | grey | -0.067828251 | 0.143320075 | -0.071467206 | 0.123012128 |
| OAZ2   | grey | 0.036427889  | 0.432239986 | 0.044719058  | 0.33490577  |
| OAZ3   | grey | 0.372445781  | 8.18E-17    | 0.382229529  | 1.08E-17    |
| OBFC1  | grey | 0.193238617  | 2.62E-05    | 0.210211234  | 4.61E-06    |
| OBP2A  | grey | 0.06332453   | 0.171889164 | 0.039805982  | 0.390754759 |
| OBP2B  | grey | 0.246846114  | 6.52E-08    | 0.195530884  | 2.09E-05    |
| OBSCN  | grey | -0.254170918 | 2.55E-08    | -0.286490782 | 2.84E-10    |

|        |      |              |             |              |             |
|--------|------|--------------|-------------|--------------|-------------|
| OBSL1  | grey | -0.154436711 | 0.000812291 | -0.164446649 | 0.000359002 |
| OC90   | grey | -0.033781822 | 0.466440506 | -0.045212804 | 0.329591458 |
| OCA2   | grey | -0.204667453 | 8.26E-06    | -0.204579165 | 8.34E-06    |
| ODAM   | grey | -0.050720529 | 0.274022264 | -0.050926021 | 0.272080485 |
| ODF3L2 | grey | 0.168456335  | 0.000255402 | 0.175317151  | 0.000140087 |
| OGDHL  | grey | -0.122153317 | 0.008227609 | -0.127684992 | 0.005723421 |
| OLFM2  | grey | -0.25272272  | 3.08E-08    | -0.256397685 | 1.91E-08    |
| OLFM3  | grey | 0.030266442  | 0.514104488 | 0.000709611  | 0.987797852 |
| OLIG1  | grey | 0.027328395  | 0.555794908 | 0.046779364  | 0.313092762 |
| OLIG3  | grey | -0.03636155  | 0.433079343 | -0.02160957  | 0.641366084 |
| OMP    | grey | -0.122425413 | 0.00808463  | -0.123543912 | 0.007519904 |
| ONECUT | grey | 0.157461658  | 0.00063786  | 0.172481218  | 0.000180057 |
| ONECUT | grey | -0.074514104 | 0.107794822 | -0.076882989 | 0.097023186 |
| ONECUT | grey | 0.281115909  | 6.26E-10    | 0.296852857  | 5.91E-11    |
| OOEP   | grey | -0.043011544 | 0.353705618 | -0.063179092 | 0.172877868 |
| OPA3   | grey | -0.068924537 | 0.136949002 | -0.044651834 | 0.335633547 |
| OPN4   | grey | 0.034773645  | 0.453448856 | 0.061377722  | 0.18547722  |
| OPN5   | grey | -0.137196988 | 0.002968637 | -0.138464925 | 0.002711429 |
| OPRK1  | grey | 0.06846494   | 0.13959292  | 0.040894127  | 0.377922791 |
| OPRL1  | grey | -0.189190048 | 3.88E-05    | -0.194867041 | 2.23E-05    |
| OPTC   | grey | 0.029501985  | 0.524793933 | 0.008735195  | 0.850667467 |
| OR10A3 | grey | -0.032044816 | 0.489681238 | -0.036933137 | 0.425878279 |
| OR10G4 | grey | 0.033991194  | 0.463680968 | 0.016996704  | 0.71410841  |
| OR10G9 | grey | -0.052391039 | 0.258509156 | -0.053460834 | 0.248899334 |
| OR10H1 | grey | 0.029754168  | 0.521255149 | 0.032182041  | 0.487822879 |
| OR10Q1 | grey | 0.044871726  | 0.333256717 | 0.041626061  | 0.369438785 |
| OR10R2 | grey | -0.042980483 | 0.354053642 | -0.04294675  | 0.354431855 |
| OR13A1 | grey | -0.159785204 | 0.000528209 | -0.183885454 | 6.41E-05    |
| OR13C2 | grey | -0.015516205 | 0.738055444 | -0.037767078 | 0.415497893 |
| OR14A2 | grey | 0.018667811  | 0.68741268  | 0.041358182  | 0.372530041 |
| OR14K1 | grey | -0.081352363 | 0.079047454 | -0.11965579  | 0.009649061 |
| OR1E1  | grey | -0.026024609 | 0.574808188 | -0.052184218 | 0.260396182 |
| OR1F1  | grey | 0.137229363  | 0.002961802 | 0.150945206  | 0.001067979 |
| OR1N1  | grey | -0.057792766 | 0.212541515 | -0.038987352 | 0.400580183 |
| OR1Q1  | grey | -0.039879669 | 0.389877573 | -0.033350892 | 0.472148678 |
| OR2A1  | grey | 0.026819232  | 0.563183585 | -0.004275708 | 0.926577567 |
| OR2L13 | grey | -0.189944974 | 3.61E-05    | -0.177315027 | 0.000117106 |
| OR2T10 | grey | -0.117799916 | 0.010842585 | -0.096061496 | 0.037973172 |
| OR2T29 | grey | -0.09163509  | 0.047803661 | -0.097553533 | 0.035071751 |
| OR2T33 | grey | -0.089179003 | 0.054123302 | -0.107897934 | 0.01968714  |
| OR2T8  | grey | -0.080785078 | 0.08116729  | -0.100614254 | 0.029706288 |
| OR2V1  | grey | -0.171227181 | 0.000200944 | -0.182402096 | 7.36E-05    |
| OR2W3  | grey | -0.214211692 | 3.00E-06    | -0.241225548 | 1.31E-07    |
| OR3A2  | grey | -0.041676843 | 0.36885457  | -0.037584753 | 0.417754543 |
| OR3A3  | grey | 0.030615506  | 0.509261326 | 0.022470889  | 0.628130542 |

|        |      |              |             |              |             |
|--------|------|--------------|-------------|--------------|-------------|
| OR4C46 | grey | 0.071899477  | 0.120756653 | 0.078866892  | 0.088677983 |
| OR4C6  | grey | -0.044951652 | 0.332395483 | -0.022768238 | 0.623588571 |
| OR4F16 | grey | 0.005711117  | 0.902036086 | -0.004349628 | 0.925311885 |
| OR4F3  | grey | -0.043633459 | 0.346782678 | -0.044785917 | 0.334182944 |
| OR4L1  | grey | -0.069436464 | 0.134049566 | -0.060931385 | 0.188701173 |
| OR4M2  | grey | -0.074048606 | 0.110018493 | -0.076764215 | 0.097542018 |
| OR51A2 | grey | 0.006313759  | 0.891760256 | -0.003715746 | 0.936171211 |
| OR52A5 | grey | -0.02714045  | 0.558516763 | -0.034283861 | 0.459838831 |
| OR56A3 | grey | -0.215291471 | 2.66E-06    | -0.208060455 | 5.79E-06    |
| OR5AN1 | grey | -0.076342121 | 0.09940373  | -0.077105796 | 0.096055846 |
| OR5AU1 | grey | 0.148770881  | 0.001262764 | 0.128776219  | 0.005319312 |
| OR5F1  | grey | -0.054682946 | 0.238229332 | -0.061224125 | 0.186582061 |
| OR5M11 | grey | -0.169993682 | 0.000223686 | -0.167705936 | 0.000272366 |
| OR5T2  | grey | -0.071402097 | 0.123354678 | -0.064928753 | 0.161261806 |
| OR7A5  | grey | 0.099577065  | 0.031439804 | 0.07087748   | 0.126141894 |
| OR7C1  | grey | 0.096177692  | 0.037740133 | 0.066693254  | 0.150152384 |
| OR7D2  | grey | -0.010322881 | 0.823934457 | -0.007044334 | 0.879326341 |
| OR7E24 | grey | -0.036305252 | 0.433792382 | -0.044556593 | 0.336666389 |
| OR9G4  | grey | 0.036985783  | 0.425218546 | 0.032275196  | 0.486563498 |
| ORAI2  | grey | -0.114341766 | 0.013419496 | -0.107029356 | 0.020702088 |
| ORAOV1 | grey | -0.085123362 | 0.066071452 | -0.105135722 | 0.023073602 |
| ORM1   | grey | 0.168928057  | 0.000245249 | 0.159175749  | 0.000555138 |
| ORM2   | grey | 0.246271262  | 7.01E-08    | 0.225367638  | 8.63E-07    |
| ORMDL3 | grey | 0.013766315  | 0.766688396 | 0.000355011  | 0.993895206 |
| OSBP2  | grey | -0.007197386 | 0.876725132 | -0.029953198 | 0.518470906 |
| OSBPL2 | grey | -0.229631163 | 5.27E-07    | -0.228605851 | 5.94E-07    |
| OSBPL7 | grey | -0.061470632 | 0.184811256 | -0.046932495 | 0.31150961  |
| OSGEP  | grey | 0.119248213  | 0.009900682 | 0.123842674  | 0.007375153 |
| OSGIN1 | grey | 0.270067266  | 3.01E-09    | 0.287510893  | 2.44E-10    |
| OSTF1  | grey | 0.39111818   | 1.61E-18    | 0.398868659  | 2.92E-19    |
| OSTN   | grey | -0.15972272  | 0.000530913 | -0.171055472 | 0.000203975 |
| OTOA   | grey | 0.027307993  | 0.556090055 | 0.057932638  | 0.211434935 |
| OTOF   | grey | -0.131688963 | 0.004363408 | -0.13278854  | 0.004044957 |
| OTOG   | grey | -0.077162029 | 0.095812922 | -0.047520643 | 0.305478017 |
| OTOP1  | grey | -0.03393571  | 0.464411363 | -0.040825157 | 0.378728353 |
| OTOR   | grey | -0.024361833 | 0.599492334 | -0.016524776 | 0.721712714 |
| OTOS   | grey | 0.063377967  | 0.171526952 | 0.085159472  | 0.065956213 |
| OTP    | grey | -0.052731689 | 0.255421722 | -0.033007976 | 0.476718285 |
| OTUD5  | grey | -0.219510524 | 1.67E-06    | -0.201590347 | 1.13E-05    |
| OTX2   | grey | -0.024500848 | 0.59741041  | -0.025434046 | 0.583520194 |
| OVCH2  | grey | -0.090261436 | 0.051257315 | -0.091221736 | 0.048821796 |
| OVOL3  | grey | -0.103946455 | 0.024680309 | -0.10784923  | 0.019742884 |
| OXA1L  | grey | 0.027008042  | 0.560438184 | 0.039357991  | 0.396113468 |
| OXCT2  | grey | -0.318575783 | 1.78E-12    | -0.329396881 | 2.79E-13    |
| OXGR1  | grey | -0.137734151 | 0.002857076 | -0.165345874 | 0.000332832 |

|         |      |              |             |              |             |
|---------|------|--------------|-------------|--------------|-------------|
| OXT     | grey | -0.203068088 | 9.75E-06    | -0.196143518 | 1.96E-05    |
| P2RX5-T | grey | -0.042534847 | 0.359070562 | -0.046555964 | 0.315411839 |
| P2RY2   | grey | -0.011295676 | 0.807652784 | 0.005455995  | 0.906392575 |
| P3H1    | grey | -0.018925697 | 0.683326366 | -0.010654009 | 0.818383504 |
| P3H4    | grey | 0.161820186  | 0.000446832 | 0.135019512  | 0.003462601 |
| P4HA2   | grey | 0.180385865  | 8.86E-05    | 0.185156525  | 5.69E-05    |
| PAAF1   | grey | 0.128768203  | 0.005322184 | 0.107547287  | 0.020091542 |
| PABPC1I | grey | -0.155654037 | 0.000737374 | -0.167477354 | 0.000277739 |
| PABPC1I | grey | -0.15158164  | 0.001016445 | -0.144706793 | 0.001716918 |
| PABPC1I | grey | -0.131128681 | 0.004534234 | -0.120429862 | 0.009186781 |
| PABPC3  | grey | 0.10093608   | 0.029185335 | 0.093896833  | 0.042542647 |
| PABPC4  | grey | -0.148937144 | 0.001246788 | -0.17466275  | 0.000148492 |
| PABPN1I | grey | -0.071646517 | 0.122072581 | -0.050437688 | 0.276710338 |
| PACS1   | grey | -0.025202511 | 0.586952465 | -0.017453591 | 0.706773314 |
| PACSIN2 | grey | 0.20512862   | 7.87E-06    | 0.209764013  | 4.83E-06    |
| PACSIN3 | grey | 0.155364232  | 0.000754606 | 0.155705173  | 0.000734372 |
| PADI1   | grey | 0.078211505  | 0.091368592 | 0.072443974  | 0.117961667 |
| PADI2   | grey | 0.130979751  | 0.004580647 | 0.12717024   | 0.005923459 |
| PADI3   | grey | -0.036144464 | 0.435832559 | -0.031553391 | 0.49636736  |
| PAEP    | grey | -0.172081263 | 0.000186487 | -0.180258644 | 8.96E-05    |
| PAF1    | grey | -0.045851693 | 0.322796205 | -0.046514776 | 0.315840631 |
| PAGE1   | grey | 0.003825119  | 0.934296594 | 0.007960993  | 0.863767593 |
| PAGE2   | grey | -0.189445332 | 3.78E-05    | -0.17977482  | 9.37E-05    |
| PAGE2B  | grey | -0.196111395 | 1.97E-05    | -0.201835174 | 1.11E-05    |
| PAGE3   | grey | -0.075357301 | 0.103857357 | -0.075939242 | 0.101206948 |
| PAGE5   | grey | -0.146054868 | 0.001551891 | -0.147627914 | 0.001377795 |
| PAGR1   | grey | 0.009305929  | 0.841036205 | -0.007641508 | 0.869184654 |
| PAK1    | grey | 0.218426217  | 1.89E-06    | 0.184165832  | 6.24E-05    |
| PAK4    | grey | 0.028778167  | 0.535018646 | 0.036126264  | 0.436063843 |
| PALD1   | grey | -0.171223735 | 0.000201005 | -0.192707989 | 2.76E-05    |
| PALM3   | grey | -0.093543346 | 0.043331192 | -0.098053588 | 0.034142533 |
| PAN2    | grey | -0.102987606 | 0.026045196 | -0.130951776 | 0.004589412 |
| PANK4   | grey | -0.05413934  | 0.242935017 | -0.069218437 | 0.135278583 |
| PANX2   | grey | -0.078043391 | 0.092069203 | -0.061707461 | 0.183121684 |
| PAOX    | grey | 0.04745645   | 0.306132553 | 0.078720489  | 0.089273434 |
| PAPL    | grey | -0.037403474 | 0.420005376 | -0.033625426 | 0.468507723 |
| PAPPA2  | grey | -0.100092992 | 0.030566984 | -0.109431693 | 0.018000415 |
| PAPSS2  | grey | -0.001393688 | 0.97603743  | 0.014517476  | 0.754355851 |
| PAQR5   | grey | -0.140612462 | 0.002321682 | -0.168045492 | 0.000264563 |
| PAQR6   | grey | 0.2838166    | 4.22E-10    | 0.270084945  | 3.00E-09    |
| PAQR7   | grey | -0.074057144 | 0.109977385 | -0.08308341  | 0.072854959 |
| PAQR8   | grey | -0.193298888 | 2.60E-05    | -0.215937574 | 2.48E-06    |
| PARN    | grey | 0.019726257  | 0.670700395 | 0.051829392  | 0.263655684 |
| PARP3   | grey | -0.019542437 | 0.673591463 | 0.001909309  | 0.967176334 |
| PARP6   | grey | -0.172353271 | 0.000182091 | -0.165362478 | 0.000332366 |

|        |      |              |             |              |             |
|--------|------|--------------|-------------|--------------|-------------|
| PARVB  | grey | -0.01543566  | 0.739365806 | -0.004615161 | 0.92076691  |
| PASD1  | grey | -0.113069337 | 0.014495449 | -0.102344372 | 0.026996848 |
| PATZ1  | grey | 0.107044153  | 0.020684424 | 0.084154842  | 0.069224475 |
| PAX2   | grey | -0.108423181 | 0.019094632 | -0.117163222 | 0.0112812   |
| PAX3   | grey | -0.107014515 | 0.020719818 | -0.11641984  | 0.011813125 |
| PAX4   | grey | 0.090935168  | 0.049538239 | 0.053910635  | 0.244934124 |
| PAX5   | grey | 0.07522803   | 0.104453505 | 0.077814073  | 0.093031803 |
| PAX6   | grey | 0.258640862  | 1.42E-08    | 0.264248281  | 6.69E-09    |
| PAX7   | grey | 0.012709675  | 0.78413581  | -0.006718442 | 0.884869334 |
| PAX9   | grey | 0.255955508  | 2.02E-08    | 0.255908096  | 2.03E-08    |
| PBX4   | grey | -0.129085134 | 0.005209675 | -0.124863306 | 0.006899262 |
| PC     | grey | 0.115620889  | 0.01240942  | 0.120829148  | 0.008956115 |
| PCCA   | grey | 0.182025746  | 7.62E-05    | 0.169834647  | 0.000226787 |
| PCDH1  | grey | -0.038239638 | 0.409682486 | -0.013663134 | 0.768387118 |
| PCDH10 | grey | -0.292141183 | 1.22E-10    | -0.286775725 | 2.72E-10    |
| PCDH11 | grey | -0.001554014 | 0.973281805 | -0.022134086 | 0.633292182 |
| PCDH11 | grey | -0.081424084 | 0.078782673 | -0.092124259 | 0.046621829 |
| PCDH15 | grey | -0.045888401 | 0.322408558 | -0.039176325 | 0.398299046 |
| PCDH19 | grey | 0.118129045  | 0.010621828 | 0.123850861  | 0.007371221 |
| PCDH8  | grey | -0.034748695 | 0.453773159 | -0.048739964 | 0.293221128 |
| PCDHA1 | grey | 0.053442706  | 0.249060071 | 0.039139581  | 0.398741982 |
| PCDHA1 | grey | -0.169418478 | 0.000235094 | -0.182079992 | 7.58E-05    |
| PCDHA1 | grey | -0.130758397 | 0.004650422 | -0.144670255 | 0.001721607 |
| PCDHA1 | grey | -0.066335012 | 0.152359505 | -0.042202566 | 0.362840189 |
| PCDHA2 | grey | -0.024619382 | 0.595637802 | -0.027533067 | 0.552838165 |
| PCDHA3 | grey | -0.071672743 | 0.121935632 | -0.061009456 | 0.188134302 |
| PCDHA4 | grey | 0.113667482  | 0.013980565 | 0.111110463  | 0.016300156 |
| PCDHA6 | grey | -0.024521888 | 0.59709559  | -0.007049295 | 0.879241993 |
| PCDHA7 | grey | -0.077699648 | 0.093515127 | -0.059268238 | 0.201077037 |
| PCDHB1 | grey | 0.03666777   | 0.429212772 | 0.033752357  | 0.466829583 |
| PCDHB1 | grey | -0.067633438 | 0.144475574 | -0.077986463 | 0.092307418 |
| PCDHB2 | grey | -0.011232319 | 0.808710746 | -0.019479524 | 0.67458205  |
| PCDHB3 | grey | -0.105883151 | 0.022110837 | -0.129746549 | 0.004981748 |
| PCDHB6 | grey | -0.307055889 | 1.18E-11    | -0.328281861 | 3.39E-13    |
| PCDHB8 | grey | 0.057947636  | 0.211316525 | 0.033557455  | 0.469407736 |
| PCDHGA | grey | -0.144658645 | 0.001723099 | -0.180455296 | 8.80E-05    |
| PCDHGA | grey | 0.091575372  | 0.047949644 | 0.05665915   | 0.221664097 |
| PCDHGB | grey | -0.009744228 | 0.833655809 | -0.019561522 | 0.673291081 |
| PCDHGB | grey | -0.137503811 | 0.002904439 | -0.143292497 | 0.001907216 |
| PCDHGB | grey | -0.077307559 | 0.095186521 | -0.080171003 | 0.083513566 |
| PCGF2  | grey | 0.082644059  | 0.074387902 | 0.081752794  | 0.077578319 |
| PCK1   | grey | -0.181247484 | 8.18E-05    | -0.164182327 | 0.000367051 |
| PCOLCE | grey | -0.280349327 | 6.99E-10    | -0.291819899 | 1.28E-10    |
| PCP4   | grey | -0.034818701 | 0.452863547 | -0.054358077 | 0.241033764 |
| PCP4L1 | grey | 0.135792409  | 0.003279319 | 0.110290051  | 0.017112647 |



|         |      |              |             |              |             |
|---------|------|--------------|-------------|--------------|-------------|
| PCSK1   | grey | -0.077039075 | 0.096344711 | -0.069826224 | 0.131873959 |
| PCSK1N  | grey | -0.364373515 | 4.14E-16    | -0.365655042 | 3.21E-16    |
| PCSK5   | grey | -0.14852037  | 0.001287192 | -0.17085566  | 0.000207555 |
| PCSK6   | grey | 0.012887897  | 0.781185127 | -0.021708732 | 0.639836393 |
| PCSK9   | grey | 0.363140309  | 5.28E-16    | 0.362170632  | 6.39E-16    |
| PCTP    | grey | 0.13254406   | 0.004113886 | 0.128490421  | 0.005422589 |
| PDCL2   | grey | -0.226442296 | 7.63E-07    | -0.241051415 | 1.34E-07    |
| PDE11A  | grey | -0.136687371 | 0.003078124 | -0.1435874   | 0.001866012 |
| PDE3B   | grey | -0.118001511 | 0.010706891 | -0.121710395 | 0.00846518  |
| PDE4A   | grey | -0.195622555 | 2.07E-05    | -0.167966669 | 0.000266356 |
| PDE4C   | grey | -0.121855937 | 0.008386449 | -0.101427045 | 0.028405693 |
| PDE6A   | grey | 0.009081422  | 0.844822072 | 0.022567029  | 0.626660463 |
| PDE6B   | grey | -0.505618394 | 1.12E-31    | -0.501335857 | 4.33E-31    |
| PDE6D   | grey | 0.075598705  | 0.102751303 | 0.056106221  | 0.22621376  |
| PDE6G   | grey | -0.281999164 | 5.50E-10    | -0.271023523 | 2.63E-09    |
| PDE9A   | grey | -0.11702461  | 0.011378745 | -0.134999478 | 0.003467474 |
| PDGFA   | grey | -0.049695203 | 0.28385183  | -0.059810004 | 0.196982444 |
| PDIA2   | grey | 0.03935041   | 0.396204539 | 0.039183018  | 0.398218396 |
| PDIA5   | grey | 0.191075669  | 3.23E-05    | 0.156384404  | 0.000695551 |
| PDILT   | grey | -0.048920557 | 0.291434141 | -0.043314749 | 0.350319633 |
| PDX1    | grey | 0.128608298  | 0.005379776 | 0.129872996  | 0.004939211 |
| PDYN    | grey | -0.142150732 | 0.002074723 | -0.142472807 | 0.002026159 |
| PDZD7   | grey | -0.021990725 | 0.635494674 | -0.041741057 | 0.368116662 |
| PDZK1   | grey | 0.033928905  | 0.464500983 | 0.006972754  | 0.880543315 |
| PEA15   | grey | 0.055227217  | 0.233582513 | 0.033700559  | 0.467513991 |
| PEBP4   | grey | 0.009766457  | 0.833281887 | 0.009764225  | 0.833319432 |
| PECR    | grey | -0.01350016  | 0.771072473 | -0.024056964 | 0.604069571 |
| PEPD    | grey | -0.199220174 | 1.44E-05    | -0.212459149 | 3.62E-06    |
| PF4     | grey | -0.006179361 | 0.894050616 | -0.004055455 | 0.930349907 |
| PFKFB3  | grey | 0.041063275  | 0.375951608 | 0.032673534  | 0.48119812  |
| PFKP    | grey | 0.168336661  | 0.000258039 | 0.181727619  | 7.83E-05    |
| PFN3    | grey | -0.143368768 | 0.00189648  | -0.151761021 | 0.00100234  |
| PGA4    | grey | -0.118810421 | 0.010177432 | -0.121250546 | 0.008718281 |
| PGA5    | grey | -0.270744721 | 2.74E-09    | -0.275221735 | 1.46E-09    |
| PGAP3   | grey | -0.06550818  | 0.157547445 | -0.061666257 | 0.183414816 |
| PGBD5   | grey | -0.172484857 | 0.00018     | -0.182083176 | 7.58E-05    |
| PGF     | grey | -0.208748705 | 5.38E-06    | -0.194632973 | 2.28E-05    |
| PGK2    | grey | 0.073564345  | 0.112369976 | 0.058616068  | 0.20608772  |
| PGPEP1  | grey | 0.002910211  | 0.949988061 | 0.035754511  | 0.440803376 |
| PGPEP1L | grey | -0.085188231 | 0.065864554 | -0.098959729 | 0.032512108 |
| PHACTR  | grey | -0.137082833 | 0.00299285  | -0.168537773 | 0.000253622 |
| PHACTR  | grey | -0.275093262 | 1.49E-09    | -0.269596607 | 3.21E-09    |
| PHC2    | grey | -0.078132511 | 0.091697262 | -0.06066173  | 0.190668778 |
| PHEX    | grey | 0.035193183  | 0.448015292 | 0.017377861  | 0.707987274 |
| PHF11   | grey | 0.113360656  | 0.014242635 | 0.129994952  | 0.004898496 |

|         |      |              |             |              |             |
|---------|------|--------------|-------------|--------------|-------------|
| PHGR1   | grey | -0.022542076 | 0.627041878 | -0.012191885 | 0.792725899 |
| PHKA2   | grey | -0.09359709  | 0.043210514 | -0.120946761 | 0.008889161 |
| PHLDA3  | grey | 0.255318989  | 2.20E-08    | 0.258984291  | 1.36E-08    |
| PHLDB3  | grey | 0.190189857  | 3.52E-05    | 0.135145396  | 0.00343213  |
| PHLPP1  | grey | 0.234081348  | 3.12E-07    | 0.202876055  | 9.94E-06    |
| PHOSPH  | grey | -0.26344079  | 7.46E-09    | -0.254528676 | 2.44E-08    |
| PHOX2A  | grey | -0.166541915 | 0.000300776 | -0.181386434 | 8.08E-05    |
| PHOX2B  | grey | -0.052402551 | 0.258404403 | -0.062123996 | 0.180177793 |
| PHYH    | grey | -0.016335831 | 0.724764988 | -0.022220916 | 0.631959763 |
| PHYHD1  | grey | 0.192768134  | 2.74E-05    | 0.208472675  | 5.54E-06    |
| PI4K2A  | grey | 0.100542874  | 0.029822908 | 0.122204709  | 0.008200432 |
| PIEZO1  | grey | -0.147821708 | 0.001357637 | -0.128712754 | 0.005342092 |
| PIGBOS1 | grey | 0.100860809  | 0.029306472 | 0.117781111  | 0.01085532  |
| PIGH    | grey | 0.214229935  | 2.99E-06    | 0.194914433  | 2.22E-05    |
| PIGZ    | grey | 0.013745977  | 0.76702315  | 0.014761421  | 0.750363988 |
| PIK3C2G | grey | 0.019483232  | 0.674523663 | 0.005448331  | 0.906523462 |
| PILRB   | grey | -0.103800259 | 0.024884337 | -0.115219463 | 0.012718934 |
| PIM1    | grey | -0.210395813 | 4.52E-06    | -0.219656038 | 1.65E-06    |
| PIM3    | grey | 0.127983111  | 0.005610366 | 0.12353578   | 0.007523879 |
| PIP     | grey | 0.160684652  | 0.000490677 | 0.19438887   | 2.34E-05    |
| PIP4K2B | grey | -0.028201102 | 0.543241441 | -0.071248054 | 0.124168067 |
| PIP5KL1 | grey | -0.232775303 | 3.64E-07    | -0.256043726 | 2.00E-08    |
| PIPOX   | grey | -0.299080316 | 4.18E-11    | -0.28548511  | 3.30E-10    |
| PIR     | grey | 0.23478265   | 2.87E-07    | 0.214711362  | 2.84E-06    |
| PISD    | grey | -0.195686281 | 2.06E-05    | -0.217054717 | 2.20E-06    |
| PITPNC1 | grey | 0.2628613    | 8.07E-09    | 0.25874098   | 1.40E-08    |
| PITPNM2 | grey | -0.136488934 | 0.003121741 | -0.132719911 | 0.0040642   |
| PITRM1  | grey | 0.184013812  | 6.33E-05    | 0.189428408  | 3.79E-05    |
| PITX2   | grey | -0.066456632 | 0.151607461 | -0.06069692  | 0.190411155 |
| PITX3   | grey | -0.07006281  | 0.130566722 | -0.062711114 | 0.176088013 |
| PIWIL1  | grey | 0.015996548  | 0.730256797 | 0.015519863  | 0.737995953 |
| PIWIL4  | grey | -0.269449972 | 3.28E-09    | -0.269796197 | 3.12E-09    |
| PKD1L1  | grey | 0.144986112  | 0.001681458 | 0.122147585  | 0.008230645 |
| PKDCC   | grey | 0.226770912  | 7.34E-07    | 0.230084935  | 5.00E-07    |
| PKDREJ  | grey | 0.030317548  | 0.513393926 | 0.010213655  | 0.825767432 |
| PKIA    | grey | -0.374826673 | 5.03E-17    | -0.385059464 | 5.92E-18    |
| PKIB    | grey | -0.173696609 | 0.00016177  | -0.164950634 | 0.000344107 |
| PKNOX1  | grey | -0.184945166 | 5.80E-05    | -0.19619595  | 1.95E-05    |
| PLA1A   | grey | -0.055714542 | 0.22947655  | -0.05450426  | 0.239768985 |
| PLA2G15 | grey | 0.041300154  | 0.373201766 | 0.051108044  | 0.270368334 |
| PLA2G16 | grey | -0.176706099 | 0.000123705 | -0.136812337 | 0.003050942 |
| PLA2G2A | grey | -0.106963814 | 0.020780487 | -0.111434222 | 0.015988941 |
| PLA2G2C | grey | 0.224450418  | 9.58E-07    | 0.208467748  | 5.55E-06    |
| PLA2G4A | grey | 0.283141669  | 4.66E-10    | 0.262157029  | 8.87E-09    |
| PLA2G4F | grey | 0.064868694  | 0.161650551 | 0.033748466  | 0.466880976 |

|         |      |              |             |              |             |
|---------|------|--------------|-------------|--------------|-------------|
| PLA2G6  | grey | 0.092556723  | 0.045597503 | 0.081741687  | 0.077618767 |
| PLAC1   | grey | -0.193492393 | 2.55E-05    | -0.205506496 | 7.57E-06    |
| PLAC8L1 | grey | 0.001205737  | 0.979268199 | -0.003143615 | 0.945982888 |
| PLAU    | grey | 0.044316336  | 0.339280886 | 0.08377703   | 0.070487386 |
| PLAUR   | grey | 0.212561758  | 3.58E-06    | 0.223416552  | 1.08E-06    |
| PLB1    | grey | -0.019923885 | 0.667597561 | -0.021909702 | 0.63674088  |
| PLBD1   | grey | -0.231990487 | 3.99E-07    | -0.212672314 | 3.54E-06    |
| PLCD3   | grey | -0.212393238 | 3.65E-06    | -0.208711722 | 5.41E-06    |
| PLCD4   | grey | -0.12440835  | 0.007107889 | -0.125612672 | 0.00656756  |
| PLCG2   | grey | -0.137344185 | 0.002937679 | -0.144911352 | 0.001690883 |
| PLCH2   | grey | -0.106063196 | 0.021884195 | -0.118946352 | 0.010090777 |
| PLCXD2  | grey | 0.017173958  | 0.71125952  | 0.01662613   | 0.720077224 |
| PLD3    | grey | -0.170820732 | 0.000208187 | -0.183769013 | 6.48E-05    |
| PLD5    | grey | 0.151405542  | 0.00103047  | 0.093873887  | 0.042593464 |
| PLD6    | grey | 0.105327683  | 0.022822936 | 0.087312455  | 0.059378092 |
| PLEK2   | grey | 0.049244604  | 0.288245984 | 0.04476988   | 0.334356233 |
| PLEKHA  | grey | -0.253079348 | 2.94E-08    | -0.231738953 | 4.11E-07    |
| PLEKHA  | grey | 0.095499732  | 0.039117104 | 0.107243243  | 0.020448027 |
| PLEKHD  | grey | 0.109203201  | 0.018243409 | 0.09583185   | 0.038437332 |
| PLEKHG  | grey | -0.145396354 | 0.001630594 | -0.144189494 | 0.001784406 |
| PLEKHG  | grey | -0.113813665 | 0.013857204 | -0.137005161 | 0.003009427 |
| PLEKHG  | grey | -0.045019849 | 0.331661764 | -0.07356646  | 0.112359624 |
| PLEKHG  | grey | -0.14031801  | 0.002371909 | -0.141114935 | 0.002238209 |
| PLEKHG  | grey | 0.073708766  | 0.111664596 | 0.052903037  | 0.253878424 |
| PLEKHH  | grey | 0.27376086   | 1.79E-09    | 0.269822733  | 3.11E-09    |
| PLEKHM  | grey | 0.322682428  | 8.90E-13    | 0.33460306   | 1.11E-13    |
| PLEKHN  | grey | -0.068976543 | 0.136652269 | -0.050801201 | 0.273258834 |
| PLGLB1  | grey | -0.077825437 | 0.092983913 | -0.077488204 | 0.094413531 |
| PLGLB2  | grey | -0.035233553 | 0.447494403 | -0.056536239 | 0.222669748 |
| PLIN1   | grey | 0.01432451   | 0.757518148 | -0.010421761 | 0.822275929 |
| PLIN3   | grey | 0.397931183  | 3.60E-19    | 0.399499357  | 2.54E-19    |
| PLIN5   | grey | 0.05946127   | 0.199611085 | 0.036079057  | 0.436664057 |
| PLK3    | grey | -0.091991614 | 0.046939851 | -0.07109624  | 0.124973767 |
| PLP2    | grey | -0.028914995 | 0.533078151 | 0.005297398  | 0.909101642 |
| PLTP    | grey | -0.310456658 | 6.82E-12    | -0.292605831 | 1.13E-10    |
| PLXNA2  | grey | 0.122283159  | 0.008159102 | 0.13299298   | 0.003988122 |
| PLXNA4  | grey | -0.206338086 | 6.94E-06    | -0.21029363  | 4.57E-06    |
| PLXNB3  | grey | 0.045584514  | 0.325626775 | 0.024488856  | 0.597589874 |
| PMAIP1  | grey | 0.050175015  | 0.279222735 | 0.010872996  | 0.814717427 |
| PMEL    | grey | -0.073337214 | 0.113486404 | -0.083811581 | 0.070371116 |
| PMFBP1  | grey | 0.010290116  | 0.824484203 | 0.008216835  | 0.859434222 |
| PNCK    | grey | -0.137524879 | 0.002900077 | -0.131639941 | 0.004378119 |
| PNMA2   | grey | -0.215916051 | 2.49E-06    | -0.216042144 | 2.45E-06    |
| PNMA3   | grey | -0.493292179 | 5.21E-30    | -0.504443736 | 1.63E-31    |
| PNMA6A  | grey | -0.353389633 | 3.50E-15    | -0.354462387 | 2.85E-15    |

|              |              |             |              |             |
|--------------|--------------|-------------|--------------|-------------|
| PNMAL1 grey  | -0.345086352 | 1.66E-14    | -0.360054098 | 9.68E-16    |
| PNMT grey    | -0.178254884 | 0.000107567 | -0.196623886 | 1.87E-05    |
| PNOC grey    | -0.336395175 | 8.09E-14    | -0.318503916 | 1.80E-12    |
| PNPLA3 grey  | 0.120806771  | 0.008968905 | 0.089114303  | 0.054298751 |
| PNPLA4 grey  | 0.027748663  | 0.549731963 | 0.053598969  | 0.247676874 |
| PNPLA5 grey  | -0.223822824 | 1.03E-06    | -0.227756974 | 6.55E-07    |
| PODNL1 grey  | -0.07253625  | 0.117493056 | -0.040057111 | 0.387770145 |
| POF1B grey   | -0.020603704 | 0.656967614 | -0.016756361 | 0.717977642 |
| POLM grey    | -0.097896779 | 0.034431637 | -0.114838977 | 0.013018568 |
| POLN grey    | 0.095615586  | 0.038878828 | 0.090579894  | 0.050438641 |
| POLR2F grey  | -0.180077464 | 9.11E-05    | -0.184385604 | 6.11E-05    |
| POLR2J2 grey | -0.03235529  | 0.485482101 | -0.048021236 | 0.300405557 |
| POLR2J3 grey | -0.109985651 | 0.017422995 | -0.111582874 | 0.015847802 |
| POM121I grey | 0.0373527    | 0.420637077 | 0.031956922  | 0.490873532 |
| POM121I grey | -0.13062532  | 0.004692831 | -0.118498415 | 0.010378834 |
| POM121I grey | 0.048356363  | 0.297041187 | 0.052651314  | 0.256147871 |
| POMC grey    | 0.064176121  | 0.166184427 | 0.054228766  | 0.242156464 |
| POMGNT grey  | 0.068000173  | 0.142306229 | 0.055348117  | 0.232559056 |
| POMT1 grey   | 0.124718556  | 0.006965037 | 0.123006464  | 0.007786703 |
| POMZP3 grey  | 0.061700777  | 0.18316921  | 0.078764321  | 0.089094824 |
| PON1 grey    | -0.023480912 | 0.612760687 | -0.012528841 | 0.787132912 |
| POPDC3 grey  | -0.081724959 | 0.077679722 | -0.10085171  | 0.029321145 |
| POTEB2 grey  | 0.024660063  | 0.595029987 | 0.03455172   | 0.456337999 |
| POU3F2 grey  | -0.017520613 | 0.705699582 | -0.023873515 | 0.606831341 |
| POU3F3 grey  | -0.025987111 | 0.575359533 | -0.032718054 | 0.480600461 |
| POU3F4 grey  | -0.073605763 | 0.112167324 | -0.072254069 | 0.118930674 |
| POU4F2 grey  | -0.075363509 | 0.103828795 | -0.069393688 | 0.13429001  |
| POU4F3 grey  | -0.065187904 | 0.159592475 | -0.079192633 | 0.087364573 |
| POU5F1 grey  | -0.023179785 | 0.617325706 | -0.022409482 | 0.629070288 |
| POU5F1E grey | 0.100025417  | 0.03068011  | 0.057056755  | 0.218433121 |
| PPAN-P2 grey | 0.163461997  | 0.00038985  | 0.128915111  | 0.005269763 |
| PPAPDC1 grey | -0.187468158 | 4.57E-05    | -0.178379241 | 0.000106361 |
| PPARG grey   | 0.107936614  | 0.019642968 | 0.066620423  | 0.150599112 |
| PPARGC grey  | -0.312547691 | 4.85E-12    | -0.333397988 | 1.38E-13    |
| PPARGC grey  | -0.195123435 | 2.17E-05    | -0.185897241 | 5.30E-05    |
| PPBP grey    | 0.054875456  | 0.236578356 | 0.050411559  | 0.27695957  |
| PPFIA2 grey  | -0.125208952 | 0.006744444 | -0.127701052 | 0.005717279 |
| PPFIBP2 grey | 0.031716967  | 0.494136444 | 0.04193796   | 0.365859655 |
| PPIAL4B grey | 0.011596998  | 0.802625998 | 0.008307205  | 0.857904559 |
| PPIAL4C grey | 0.140975261  | 0.002261133 | 0.123607153  | 0.007489053 |
| PPIAL4E grey | -0.065058429 | 0.160424857 | -0.046106721 | 0.320109329 |
| PPIAL4F grey | -0.025343975 | 0.584854309 | -0.019515199 | 0.674020267 |
| PPIC grey    | 0.059197611  | 0.201615353 | 0.100177947  | 0.030425268 |
| PPIL3 grey   | 0.115554792  | 0.012459921 | 0.087138851  | 0.059887581 |
| PPM1J grey   | 0.130922654  | 0.004598554 | 0.118618582  | 0.01030085  |

|               |              |             |              |             |
|---------------|--------------|-------------|--------------|-------------|
| PPM1N grey    | -0.069680626 | 0.132683463 | -0.081549482 | 0.078321453 |
| PPME1 grey    | 0.335131536  | 1.01E-13    | 0.340617424  | 3.77E-14    |
| PPP1R10 grey  | 0.222547779  | 1.19E-06    | 0.186543931  | 4.99E-05    |
| PPP1R11 grey  | -0.112431437 | 0.015062849 | -0.107837661 | 0.019756146 |
| PPP1R14l grey | -0.01681962  | 0.71695855  | -0.02204345  | 0.634684283 |
| PPP1R15l grey | -0.036223608 | 0.434827642 | -0.051188107 | 0.269617587 |
| PPP1R17 grey  | -0.029117646 | 0.5302107   | -0.051054117 | 0.270874814 |
| PPP1R1A grey  | -0.050619319 | 0.27498209  | -0.059101354 | 0.202350708 |
| PPP1R1B grey  | 0.199302514  | 1.43E-05    | 0.201523713  | 1.14E-05    |
| PPP1R1C grey  | -0.088980645 | 0.054662692 | -0.060327372 | 0.193129362 |
| PPP1R26 grey  | 0.082349477  | 0.075430363 | 0.066443828  | 0.151686505 |
| PPP1R37 grey  | 0.125731919  | 0.006516116 | 0.125238751  | 0.006731244 |
| PPP1R3E grey  | -0.115851896 | 0.012234336 | -0.118374431 | 0.010459842 |
| PPP1R3F grey  | -0.229907535 | 5.10E-07    | -0.208174968 | 5.72E-06    |
| PPP1R3G grey  | -0.104101294 | 0.024465796 | -0.102740213 | 0.026407733 |
| PPP1R9B grey  | 0.118297147  | 0.010510621 | 0.108665178  | 0.018826915 |
| PPP2R2B grey  | -0.298302399 | 4.72E-11    | -0.30517263  | 1.60E-11    |
| PPP2R2C grey  | -0.005267327 | 0.909615422 | -0.023644026 | 0.610294136 |
| PPP2R2D grey  | -0.011164174 | 0.809849041 | 0.009562653  | 0.836711566 |
| PPP2R5B grey  | 0.16312187   | 0.000401067 | 0.162449677  | 0.000424126 |
| PPP4R4 grey   | -0.21233027  | 3.67E-06    | -0.213323207 | 3.30E-06    |
| PPP6R2 grey   | 0.218463981  | 1.88E-06    | 0.220256451  | 1.54E-06    |
| PPT2-EGl grey | -0.137975425 | 0.00280822  | -0.161266349 | 0.00046774  |
| PPY grey      | -0.13328693  | 0.003907668 | -0.13325103  | 0.003917415 |
| PQLC2L grey   | -0.225774776 | 8.23E-07    | -0.200596129 | 1.26E-05    |
| PRAC1 grey    | -0.027757574 | 0.549603764 | -0.032891266 | 0.478279012 |
| PRAC2 grey    | 0.246693564  | 6.65E-08    | 0.246168568  | 7.10E-08    |
| PRAMEF grey   | -0.052551813 | 0.257048804 | -0.064653672 | 0.163048097 |
| PRAP1 grey    | -0.19549282  | 2.10E-05    | -0.197937594 | 1.64E-05    |
| PRCD grey     | 0.00412958   | 0.929080164 | -0.009647707 | 0.835279869 |
| PRDM12 grey   | -0.026092492 | 0.573810724 | -0.014500674 | 0.754631039 |
| PRDM13 grey   | 0.033506422  | 0.470084088 | 0.047085171  | 0.309936409 |
| PRDM15 grey   | -0.206526871 | 6.80E-06    | -0.209971015 | 4.73E-06    |
| PRDM16 grey   | -0.041953854 | 0.365677844 | -0.070368215 | 0.128894076 |
| PRDM6 grey    | -0.236626433 | 2.30E-07    | -0.229816871 | 5.16E-07    |
| PRG2 grey     | -0.178378851 | 0.000106365 | -0.185824196 | 5.34E-05    |
| PRG4 grey     | -0.051870207 | 0.263279331 | -0.0553563   | 0.2324899   |
| PRH1-PR grey  | -0.053042048 | 0.252631148 | -0.102734574 | 0.026416047 |
| PRICKLE grey  | -0.170048966 | 0.000222617 | -0.184395679 | 6.11E-05    |
| PRKAB1 grey   | 0.169305694  | 0.000237394 | 0.176834397  | 0.000122286 |
| PRKACA grey   | -0.071922325 | 0.120638342 | -0.076117522 | 0.100405821 |
| PRKAR1l grey  | -0.2215146   | 1.34E-06    | -0.214263132 | 2.98E-06    |
| PRKCG grey    | -0.203250586 | 9.56E-06    | -0.20736602  | 6.23E-06    |
| PRKCQ grey    | -0.156185441 | 0.000706721 | -0.183672014 | 6.54E-05    |
| PRKG2 grey    | -0.017606199 | 0.704329269 | -0.034298203 | 0.459651004 |

|         |      |              |             |              |             |
|---------|------|--------------|-------------|--------------|-------------|
| PRKX    | grey | 0.07120132   | 0.124415661 | 0.077204358  | 0.095630388 |
| PRL     | grey | -0.106696413 | 0.021103025 | -0.113152156 | 0.014423178 |
| PRLH    | grey | 0.202312876  | 1.05E-05    | 0.221628986  | 1.32E-06    |
| PRM3    | grey | -0.10310915  | 0.02586866  | -0.095319314 | 0.039490626 |
| PRMT2   | grey | -0.104304193 | 0.024187139 | -0.085550905 | 0.064717609 |
| PROCA1  | grey | -0.123833129 | 0.007379738 | -0.116814029 | 0.011528366 |
| PRODH   | grey | 0.152758452  | 0.000927151 | 0.144510905  | 0.001742194 |
| PROK2   | grey | -0.109234513 | 0.018209941 | -0.127899692 | 0.005641797 |
| PROKR1  | grey | -0.023692888 | 0.609556108 | -0.025875364 | 0.577004051 |
| PROKR2  | grey | -0.195178506 | 2.16E-05    | -0.195607094 | 2.07E-05    |
| PROL1   | grey | 0.024649237  | 0.59519171  | 0.013167595  | 0.7765607   |
| PROM1   | grey | 0.051373226  | 0.267887179 | 0.035744441  | 0.440932161 |
| PRORY   | grey | -0.06705503  | 0.147948245 | -0.075275263 | 0.104235373 |
| PROZ    | grey | 0.013377325  | 0.773098284 | 0.04080229   | 0.378995676 |
| PRPH    | grey | 0.022890578  | 0.621723948 | 0.032872343  | 0.478532326 |
| PRPS1L1 | grey | -0.017672602 | 0.703266752 | -0.029034857 | 0.531381195 |
| PRR14   | grey | 0.066070213  | 0.154006675 | 0.050959683  | 0.2717633   |
| PRR23D1 | grey | -0.066980168 | 0.148402313 | -0.079023891 | 0.088042987 |
| PRR23D2 | grey | -0.061100791 | 0.187472717 | -0.060193902 | 0.19411805  |
| PRR27   | grey | 0.042044917  | 0.364637263 | 0.038987932  | 0.400573174 |
| PRR35   | grey | -0.003433868 | 0.941004122 | -0.043821067 | 0.344711285 |
| PRR5L   | grey | 0.145930173  | 0.001566521 | 0.161648762  | 0.000453209 |
| PRRT3   | grey | -0.005053744 | 0.913265665 | -0.008554294 | 0.853724926 |
| PRRT4   | grey | -0.206234034 | 7.02E-06    | -0.206726015 | 6.66E-06    |
| PRSS1   | grey | -0.236449172 | 2.35E-07    | -0.224846593 | 9.16E-07    |
| PRSS16  | grey | 0.09667351   | 0.03675932  | 0.111126682  | 0.01628444  |
| PRSS21  | grey | -0.29295605  | 1.07E-10    | -0.30285999  | 2.31E-11    |
| PRSS3   | grey | -0.131318028 | 0.004475839 | -0.125206082 | 0.006745716 |
| PRSS33  | grey | -0.002664545 | 0.954204988 | -0.005353726 | 0.908139355 |
| PRSS36  | grey | 0.001246392  | 0.978569327 | 0.017072766  | 0.712885424 |
| PRSS45  | grey | -0.127531064 | 0.005782593 | -0.148794115 | 0.00126052  |
| PRSS50  | grey | -0.294064398 | 9.07E-11    | -0.314605183 | 3.45E-12    |
| PRSS53  | grey | 0.06343011   | 0.171174059 | 0.047720292  | 0.303448245 |
| PRSS56  | grey | 0.090920499  | 0.049575149 | 0.108779881  | 0.018701169 |
| PRSS57  | grey | -0.192518146 | 2.81E-05    | -0.184870879 | 5.84E-05    |
| PRTN3   | grey | -0.04705015  | 0.310296814 | -0.027145195 | 0.558447961 |
| PRY     | grey | 0.078070746  | 0.091954908 | 0.06391107   | 0.167944565 |
| PSAP    | grey | 0.044246518  | 0.340043082 | 0.041380101  | 0.372276508 |
| PSAPL1  | grey | -0.125424072 | 0.006649668 | -0.108003946 | 0.01956628  |
| PSCA    | grey | 0.123503043  | 0.007539901 | 0.166578633  | 0.000299839 |
| PSD2    | grey | -0.144557797 | 0.001736112 | -0.149485296 | 0.001195423 |
| PSEN2   | grey | 0.048145649  | 0.299153621 | 0.039112871  | 0.39906414  |
| PSG4    | grey | -0.065986289 | 0.154531531 | -0.087379837 | 0.059181308 |
| PSMF1   | grey | -0.125787946 | 0.00649207  | -0.115036418 | 0.012862315 |
| PSORS1C | grey | -0.059520053 | 0.199166215 | -0.065848393 | 0.155396857 |

|         |      |              |             |              |             |
|---------|------|--------------|-------------|--------------|-------------|
| PSPN    | grey | 0.174010117  | 0.000157344 | 0.194565196  | 2.30E-05    |
| PSTK    | grey | -0.254556516 | 2.43E-08    | -0.283047293 | 4.72E-10    |
| PSTPIP2 | grey | 0.117741148  | 0.010882427 | 0.100842569  | 0.029335891 |
| PTCHD2  | grey | 0.124497267  | 0.007066677 | 0.095356362  | 0.03941368  |
| PTCHD4  | grey | 0.139288134  | 0.002555481 | 0.129783801  | 0.004969183 |
| PTF1A   | grey | 0.095828531  | 0.038444074 | 0.078344761  | 0.090816291 |
| PTGER1  | grey | -0.179342253 | 9.74E-05    | -0.188881926 | 3.99E-05    |
| PTGES   | grey | -0.270859839 | 2.69E-09    | -0.24811297  | 5.55E-08    |
| PTGES3L | grey | -0.071276862 | 0.124015635 | -0.089489087 | 0.053288976 |
| PTGR1   | grey | 0.094462238  | 0.041306522 | 0.090089398  | 0.051704175 |
| PTGS1   | grey | -0.340879091 | 3.60E-14    | -0.329994234 | 2.51E-13    |
| PTGS2   | grey | 0.237335217  | 2.11E-07    | 0.207311112  | 6.27E-06    |
| PTH     | grey | -0.029990731 | 0.517946711 | -0.01703803  | 0.713443839 |
| PTH2    | grey | 0.060443041  | 0.192275523 | 0.053030071  | 0.252738441 |
| PTH2R   | grey | -0.053034955 | 0.252694685 | -0.053633912 | 0.247368306 |
| PTHLH   | grey | 0.079409706  | 0.08649804  | 0.057490434  | 0.214947618 |
| PTK6    | grey | 0.140048132  | 0.002418813 | 0.151298531  | 0.001039079 |
| PTK7    | grey | -0.00435032  | 0.925300037 | -0.025892074 | 0.576758004 |
| PTP4A3  | grey | -0.348944979 | 8.10E-15    | -0.343307239 | 2.31E-14    |
| PTPLA   | grey | -0.253342845 | 2.84E-08    | -0.219447478 | 1.68E-06    |
| PTPN18  | grey | 0.189859372  | 3.64E-05    | 0.219913926  | 1.60E-06    |
| PTPN20A | grey | -0.293614317 | 9.72E-11    | -0.301966291 | 2.66E-11    |
| PTPN5   | grey | -0.162718054 | 0.000414775 | -0.167853081 | 0.000268959 |
| PTPRH   | grey | 0.108756818  | 0.018726394 | 0.129265441  | 0.005146627 |
| PTPRM   | grey | -0.268480199 | 3.75E-09    | -0.264027678 | 6.89E-09    |
| PTPRN   | grey | -0.004709238 | 0.919157277 | 0.018403191  | 0.691615172 |
| PTPRS   | grey | 0.004120422  | 0.929237033 | 0.011405587  | 0.805818274 |
| PTPRU   | grey | -0.201661974 | 1.13E-05    | -0.193324818 | 2.60E-05    |
| PTPRZ1  | grey | 0.018123071  | 0.696074164 | 0.024003433  | 0.604874878 |
| PTRH1   | grey | -0.149963493 | 0.001152213 | -0.173821979 | 0.000159986 |
| PTTG1IP | grey | -0.047111979 | 0.309660715 | -0.055585305 | 0.230560415 |
| PTX3    | grey | -0.391260143 | 1.56E-18    | -0.406444941 | 5.28E-20    |
| PVALB   | grey | -0.232678133 | 3.68E-07    | -0.232152278 | 3.92E-07    |
| PWP2    | grey | -0.079352853 | 0.086724321 | -0.085694106 | 0.064269284 |
| PXDC1   | grey | -0.446418995 | 2.97E-24    | -0.446541785 | 2.88E-24    |
| PXDNL   | grey | -0.121755875 | 0.008440507 | -0.115645819 | 0.012390419 |
| PXMP4   | grey | -0.05235592  | 0.258828914 | -0.004424731 | 0.924026149 |
| PXN     | grey | -0.160581063 | 0.000494869 | -0.157237053 | 0.00064951  |
| PYCR2   | grey | 0.158184028  | 0.000601695 | 0.144857094  | 0.001697753 |
| PYDC1   | grey | -0.1816331   | 7.90E-05    | -0.184137786 | 6.26E-05    |
| PYGB    | grey | 0.211634564  | 3.96E-06    | 0.223194183  | 1.11E-06    |
| PYGL    | grey | 0.189681166  | 3.70E-05    | 0.159511889  | 0.000540132 |
| PYROXD  | grey | 0.00918791   | 0.843025916 | 0.010741482  | 0.816918629 |
| QDPR    | grey | 0.092058929  | 0.046778233 | 0.049165836  | 0.289018785 |
| QPCT    | grey | -0.123776835 | 0.007406836 | -0.131757247 | 0.004342991 |

|         |      |              |             |              |             |
|---------|------|--------------|-------------|--------------|-------------|
| QPRT    | grey | -0.231323579 | 4.32E-07    | -0.193132311 | 2.64E-05    |
| QRFP    | grey | -0.131753031 | 0.004344249 | -0.134869283 | 0.003499287 |
| QSOX1   | grey | 0.113874517  | 0.013806135 | 0.126570024  | 0.006164624 |
| QSOX2   | grey | 0.023829925  | 0.607488412 | -0.024040148 | 0.604322484 |
| RAB11F1 | grey | 0.270813426  | 2.71E-09    | 0.249231774  | 4.82E-08    |
| RAB34   | grey | -0.017648376 | 0.703654334 | -0.015797976 | 0.733477404 |
| RAB38   | grey | -0.026261234 | 0.571334776 | -0.020561619 | 0.657623697 |
| RAB3A   | grey | 0.023545295  | 0.611786577 | 0.024373686  | 0.599314698 |
| RAB3B   | grey | 0.094241445  | 0.041785578 | 0.093529316  | 0.043362742 |
| RAB40B  | grey | -0.028216803 | 0.543016877 | -0.053245698 | 0.250811591 |
| RAB4B-E | grey | 0.075334015  | 0.103964544 | 0.086515054  | 0.061748196 |
| RAB6B   | grey | -0.24707976  | 6.33E-08    | -0.267209004 | 4.47E-09    |
| RAB7B   | grey | -0.054108797 | 0.243201328 | -0.021887301 | 0.637085604 |
| RABGEF  | grey | -0.055384603 | 0.232250823 | -0.064824155 | 0.16193929  |
| RAC1    | grey | 0.079260994  | 0.087090932 | 0.117351824  | 0.011149664 |
| RAD51A  | grey | 0.077323665  | 0.0951174   | 0.088352374  | 0.056400699 |
| RAD51D  | grey | 0.303285658  | 2.16E-11    | 0.27593687   | 1.32E-09    |
| RAD51L3 | grey | -0.028861378 | 0.533838129 | -0.041212123 | 0.374222236 |
| RAET1G  | grey | 0.043259306  | 0.350937245 | 0.060483728  | 0.191975838 |
| RAG2    | grey | -0.076102599 | 0.100472687 | -0.083278393 | 0.07218295  |
| RAI2    | grey | -0.218695258 | 1.83E-06    | -0.19767216  | 1.69E-05    |
| RALGDS  | grey | 0.195346333  | 2.13E-05    | 0.177235478  | 0.000117949 |
| RALYL   | grey | -0.157633168 | 0.000629096 | -0.169086029 | 0.000241934 |
| RAP1GA  | grey | 0.062410484  | 0.17817345  | 0.087291679  | 0.059438874 |
| RAPGEF1 | grey | -0.171748705 | 0.000191996 | -0.18436062  | 6.13E-05    |
| RAPGEF1 | grey | 0.239022405  | 1.72E-07    | 0.241239851  | 1.31E-07    |
| RAPSN   | grey | -0.125443162 | 0.006641316 | -0.123137814 | 0.00772073  |
| RARG    | grey | -0.223144302 | 1.11E-06    | -0.23186538  | 4.05E-07    |
| RARRES  | grey | -0.24608148  | 7.18E-08    | -0.233290722 | 3.42E-07    |
| RASAL1  | grey | -0.188233714 | 4.25E-05    | -0.162019029 | 0.00043954  |
| RASGEF1 | grey | 0.008364717  | 0.856931364 | -0.010854504 | 0.815026846 |
| RASGEF1 | grey | -0.127895002 | 0.005643569 | -0.142500565 | 0.002022023 |
| RASL10A | grey | -0.004870665 | 0.916396033 | 0.008900842  | 0.847869789 |
| RASL10B | grey | -0.260480674 | 1.11E-08    | -0.26462352  | 6.36E-09    |
| RASSF1  | grey | 0.072514301  | 0.117604386 | 0.081877251  | 0.077126242 |
| RASSF10 | grey | -0.252943311 | 2.99E-08    | -0.279635505 | 7.75E-10    |
| RAX     | grey | -0.143760926 | 0.001842149 | -0.132178449 | 0.004218949 |
| RAX2    | grey | -0.098891256 | 0.032632946 | -0.083453209 | 0.071584754 |
| RBAK-R1 | grey | -0.004968924 | 0.914715803 | -0.029928454 | 0.518816632 |
| RBFA    | grey | 0.117743618  | 0.01088075  | 0.123284966  | 0.007647412 |
| RBM11   | grey | -0.395943904 | 5.59E-19    | -0.405754393 | 6.18E-20    |
| RBM19   | grey | -0.039441452 | 0.395111805 | -0.051059576 | 0.270823521 |
| RBM3    | grey | 0.203501709  | 9.32E-06    | 0.203366721  | 9.45E-06    |
| RBM4B   | grey | 0.108632185  | 0.018863221 | 0.093432667  | 0.043580608 |
| RBP1    | grey | -0.1448602   | 0.001697359 | -0.123983049 | 0.007308005 |



|        |      |              |             |              |             |
|--------|------|--------------|-------------|--------------|-------------|
| RBP2   | grey | -0.115566372 | 0.01245106  | -0.092689587 | 0.045286626 |
| RBP4   | grey | -0.100249323 | 0.030306639 | -0.081408211 | 0.078841212 |
| RCAN1  | grey | 0.142490746  | 0.002023485 | 0.15605531   | 0.000714116 |
| RCVRN  | grey | -0.17161707  | 0.000194219 | -0.169417048 | 0.000235123 |
| RD3    | grey | -0.082594944 | 0.074560888 | -0.085996884 | 0.063329784 |
| RDH10  | grey | 0.173008903  | 0.000171892 | 0.167787601  | 0.00027047  |
| RDH11  | grey | 0.209546108  | 4.95E-06    | 0.193828557  | 2.47E-05    |
| RDH13  | grey | -0.057390882 | 0.215744169 | -0.053826901 | 0.245668914 |
| RDH16  | grey | -0.284527498 | 3.80E-10    | -0.277368486 | 1.07E-09    |
| RDH5   | grey | -0.002702449 | 0.953554266 | -0.011825337 | 0.798822151 |
| REC8   | grey | -0.023533399 | 0.611966524 | -0.015029775 | 0.745980404 |
| RECQL5 | grey | -0.208222297 | 5.69E-06    | -0.22160188  | 1.32E-06    |
| REEP2  | grey | -0.211880114 | 3.86E-06    | -0.2220522   | 1.26E-06    |
| REG1A  | grey | -0.113970334 | 0.013726059 | -0.11493941  | 0.012938879 |
| REG1B  | grey | -0.007850037 | 0.865648203 | -0.003176831 | 0.945413026 |
| REG3A  | grey | 0.035192478  | 0.448024399 | 0.022608239  | 0.626030773 |
| REG3G  | grey | -0.11454185  | 0.013256868 | -0.11866414  | 0.010271421 |
| REG4   | grey | -0.010811324 | 0.815749478 | -1.50E-05    | 0.999742692 |
| RELA   | grey | 0.100358641  | 0.030125718 | 0.096260548  | 0.037574701 |
| RELL2  | grey | 0.001476443  | 0.974615027 | -0.012504518 | 0.787536268 |
| RELN   | grey | -0.230178436 | 4.94E-07    | -0.248804483 | 5.09E-08    |
| REN    | grey | -0.006245714 | 0.892919752 | 0.037116037  | 0.423588829 |
| REP15  | grey | -0.247886926 | 5.72E-08    | -0.261058259 | 1.03E-08    |
| REPIN1 | grey | 0.225977145  | 8.04E-07    | 0.229123165  | 5.59E-07    |
| RET    | grey | 0.019503938  | 0.67419758  | -0.011490927 | 0.804394603 |
| REXO1  | grey | 0.179395321  | 9.70E-05    | 0.179696318  | 9.43E-05    |
| RFPL2  | grey | 0.011060229  | 0.811586132 | -0.003426747 | 0.941126247 |
| RFPL3  | grey | -0.038707359 | 0.403974411 | -0.040109601 | 0.387148058 |
| RFPL3S | grey | -0.091806741 | 0.047386126 | -0.107827869 | 0.019767376 |
| RFX4   | grey | -0.075147507 | 0.104826219 | -0.065980341 | 0.154568778 |
| RFX8   | grey | -0.081247439 | 0.079436114 | -0.065414113 | 0.158146018 |
| RGL2   | grey | 0.141927487  | 0.002109006 | 0.117800221  | 0.010842378 |
| RGL3   | grey | 0.038774019  | 0.403164763 | 0.011997538  | 0.795956636 |
| RGPD2  | grey | -0.007854158 | 0.865578352 | -0.028781813 | 0.534966886 |
| RGPD3  | grey | 0.041728352  | 0.368262589 | -0.002763304 | 0.952509598 |
| RGPD4  | grey | -0.049312626 | 0.287579734 | -0.054477178 | 0.240002945 |
| RGR    | grey | 0.274051375  | 1.72E-09    | 0.285227231  | 3.43E-10    |
| RGS10  | grey | 0.154698184  | 0.00079563  | 0.136966493  | 0.003017711 |
| RGS11  | grey | -0.065377397 | 0.158380121 | -0.054502493 | 0.239784239 |
| RGS14  | grey | -0.045715401 | 0.324238119 | -0.040325849 | 0.38459163  |
| RGS16  | grey | -0.049554357 | 0.285220446 | -0.032876806 | 0.478472586 |
| RGS20  | grey | 0.002271637  | 0.96095198  | -0.011830493 | 0.798736324 |
| RGS3   | grey | 0.254589607  | 2.42E-08    | 0.26537534   | 5.74E-09    |
| RGS7   | grey | 0.06490093   | 0.161441809 | 0.05556028   | 0.230770711 |
| RGS8   | grey | -0.104695103 | 0.023657999 | -0.093602563 | 0.043198241 |

|              |              |             |              |             |
|--------------|--------------|-------------|--------------|-------------|
| RGS9BP grey  | -0.15463253  | 0.000799783 | -0.153038443 | 0.000907001 |
| RHBDF1 grey  | 0.207590682  | 6.08E-06    | 0.222777936  | 1.16E-06    |
| RHBDF2 grey  | -0.153302166 | 0.000888392 | -0.138998638 | 0.002609366 |
| RHBDL2 grey  | 0.112876759  | 0.014664731 | 0.112222323  | 0.01525305  |
| RHBDL3 grey  | -0.056146271 | 0.225882001 | -0.102656005 | 0.026532121 |
| RHBG grey    | -0.094225407 | 0.041820557 | -0.099151908 | 0.032174997 |
| RHCE grey    | -0.166222198 | 0.000309051 | -0.148911365 | 0.001249253 |
| RHO grey     | -0.147109122 | 0.001433121 | -0.148857642 | 0.001254404 |
| RHOD grey    | 0.129464473  | 0.005077831 | 0.128873693  | 0.005284495 |
| RHOF grey    | -0.164972745 | 0.000343467 | -0.158478906 | 0.000587487 |
| RHOXF1 grey  | -0.157581312 | 0.000631734 | -0.15739827  | 0.000641128 |
| RHOXF2 grey  | -0.097180891 | 0.035778124 | -0.098068831 | 0.034114541 |
| RHOXF2]grey  | -0.068261073 | 0.140778173 | -0.069179316 | 0.135500018 |
| RIC8A grey   | 0.128924698  | 0.005266359 | 0.125278339  | 0.006713743 |
| RIMBP2 grey  | 0.043928909  | 0.343524164 | 0.04854982   | 0.295110537 |
| RIMBP3 grey  | 0.025357632  | 0.58465193  | -0.003980818 | 0.931628591 |
| RIMBP3Egrey  | 0.055641724  | 0.23008681  | 0.043010526  | 0.353717013 |
| RIMBP3Cgrey  | 0.037288923  | 0.421431343 | 0.061265095  | 0.186286883 |
| RIMKLA grey  | 0.324450899  | 6.57E-13    | 0.292049876  | 1.23E-10    |
| RIMS1 grey   | -0.185135223 | 5.70E-05    | -0.200290061 | 1.29E-05    |
| RIMS2 grey   | 0.07560722   | 0.102712457 | 0.037263459  | 0.421748709 |
| RIMS4 grey   | -0.195418629 | 2.11E-05    | -0.227755781 | 6.55E-07    |
| RINL grey    | -0.196148785 | 1.96E-05    | -0.191365166 | 3.14E-05    |
| RIPK2 grey   | 0.141750411  | 0.002136568 | 0.132998811  | 0.003986511 |
| RIPK3 grey   | 0.00034474   | 0.994071822 | 0.005794683  | 0.900610948 |
| RIPPLY1 grey | -0.004487677 | 0.922948679 | -0.004867264 | 0.916454212 |
| RIPPLY2 grey | -0.138031179 | 0.002797039 | -0.122815649 | 0.007883442 |
| RIPPLY3 grey | 0.204403149  | 8.49E-06    | 0.226407455  | 7.66E-07    |
| RLBP1 grey   | 0.005672881  | 0.902689601 | -0.011843048 | 0.798527309 |
| RLN1 grey    | -0.220914152 | 1.43E-06    | -0.193237255 | 2.62E-05    |
| RLN2 grey    | -0.194728259 | 2.26E-05    | -0.183393568 | 6.71E-05    |
| RMND5Bgrey   | 0.054848724  | 0.236807127 | 0.053943887  | 0.244642758 |
| RNASE1 grey  | -0.144862662 | 0.001697047 | -0.10801949  | 0.019548614 |
| RNASE1(grey  | -0.012397197 | 0.789316723 | -0.047591397 | 0.304757662 |
| RNASE1]grey  | -0.161067816 | 0.000475454 | -0.154403404 | 0.000814437 |
| RNASEK grey  | 0.216237521  | 2.40E-06    | 0.220384707  | 1.52E-06    |
| RNASEK.grey  | 0.196956936  | 1.81E-05    | 0.218329775  | 1.91E-06    |
| RND1 grey    | 0.060368394  | 0.192826228 | 0.036453188  | 0.431920145 |
| RND2 grey    | -0.158104484 | 0.000605582 | -0.167962952 | 0.000266441 |
| RNF10 grey   | 0.101347853  | 0.028530224 | 0.12156236   | 0.008545934 |
| RNF103-(grey | -0.051683067 | 0.265007989 | -0.035517792 | 0.443836612 |
| RNF128 grey  | 0.067646058  | 0.144400508 | 0.047976665  | 0.300854903 |
| RNF130 grey  | -0.066137172 | 0.153588894 | -0.08381877  | 0.070346944 |
| RNF144Bgrey  | -0.011344198 | 0.80684278  | -0.024212627 | 0.601730524 |
| RNF151 grey  | -0.070171122 | 0.129971605 | -0.058829276 | 0.204439773 |

|          |      |              |             |              |             |
|----------|------|--------------|-------------|--------------|-------------|
| RNF157   | grey | -0.181444453 | 8.04E-05    | -0.197798142 | 1.67E-05    |
| RNF165   | grey | -0.316709783 | 2.43E-12    | -0.326886725 | 4.32E-13    |
| RNF17    | grey | -0.066891505 | 0.148941457 | -0.074973124 | 0.105636981 |
| RNF175   | grey | 0.151556219  | 0.001018459 | 0.146073585  | 0.001549706 |
| RNF182   | grey | -0.28965422  | 1.77E-10    | -0.312493368 | 4.89E-12    |
| RNF186   | grey | -0.041369971 | 0.372393669 | -0.042381234 | 0.360810191 |
| RNF207   | grey | -0.148198592 | 0.001319208 | -0.15880602  | 0.000572089 |
| RNF212   | grey | -0.389789021 | 2.15E-18    | -0.402007498 | 1.45E-19    |
| RNF215   | grey | -0.063576835 | 0.170183973 | -0.088759549 | 0.055269168 |
| RNF223   | grey | 0.305257129  | 1.58E-11    | 0.30284408   | 2.32E-11    |
| RNF224   | grey | 0.015836933  | 0.732845197 | 0.013691343  | 0.767922587 |
| RNF225   | grey | 0.037278131  | 0.421565821 | 0.031622995  | 0.495417414 |
| RNF24    | grey | 0.037165082  | 0.422976131 | 0.047724134  | 0.303409268 |
| RNF39    | grey | 0.146093088  | 0.001547432 | 0.177137059  | 0.000118999 |
| RNLS     | grey | -0.46813991  | 8.24E-27    | -0.447955741 | 1.98E-24    |
| ROBO3    | grey | -0.369931284 | 1.36E-16    | -0.375929106 | 4.01E-17    |
| ROM1     | grey | -0.174133186 | 0.000155638 | -0.184949771 | 5.80E-05    |
| ROPN1    | grey | 0.027925681  | 0.547187999 | 0.022257126  | 0.63140447  |
| ROR2     | grey | 0.003454981  | 0.940642063 | -0.009633288 | 0.835522544 |
| RORC     | grey | 0.123122682  | 0.007728304 | 0.106596014  | 0.021225243 |
| ROS1     | grey | 0.017633943  | 0.703885268 | 0.019285298  | 0.67764375  |
| RP1-130F | grey | -0.153913457 | 0.000846607 | -0.17608295  | 0.000130818 |
| RP1-138E | grey | -0.023196403 | 0.617073394 | -0.032311901 | 0.486067759 |
| RP1-309K | grey | 0.021346728  | 0.64542805  | 0.014640115  | 0.752348195 |
| RP1-317E | grey | 0.107506235  | 0.020139357 | 0.092311403  | 0.046176217 |
| RP1-4G17 | grey | -0.005019887 | 0.913844477 | 0.004545826  | 0.921953439 |
| RP11-101 | grey | 0.017452657  | 0.706788285 | 0.036229852  | 0.434748413 |
| RP11-102 | grey | -0.066116885 | 0.153715378 | -0.066829053 | 0.149322115 |
| RP11-106 | grey | -0.056298997 | 0.224620059 | -0.054074672 | 0.243499115 |
| RP11-108 | grey | 0.07758084   | 0.094019083 | 0.113487724  | 0.014133583 |
| RP11-108 | grey | 0.032839084  | 0.478977734 | 0.029988785  | 0.517973885 |
| RP11-109 | grey | 0.062871924  | 0.174979963 | 0.042393228  | 0.360674177 |
| RP11-121 | grey | -0.015147369 | 0.744062062 | -0.021429258 | 0.644151487 |
| RP11-122 | grey | -0.077181237 | 0.09573006  | -0.069703163 | 0.13255791  |
| RP11-123 | grey | 0.158523713  | 0.000585355 | 0.131044737  | 0.004560342 |
| RP11-125 | grey | 0.060436901  | 0.192320775 | 0.056364068  | 0.224083917 |
| RP11-145 | grey | 0.043248196  | 0.351061092 | 0.034486844  | 0.457184536 |
| RP11-152 | grey | -0.008330838 | 0.857504634 | -0.014183495 | 0.759831643 |
| RP11-155 | grey | 0.06941419   | 0.134174725 | 0.065256179  | 0.159154856 |
| RP11-156 | grey | -0.039833499 | 0.390427047 | -0.041439905 | 0.371585288 |
| RP11-159 | grey | 0.043013297  | 0.353685985 | 0.042512972  | 0.359317975 |
| RP11-162 | grey | 0.041380061  | 0.372276965 | 0.007928195  | 0.864323407 |
| RP11-166 | grey | -0.103057435 | 0.025943647 | -0.102381953 | 0.026940435 |
| RP11-176 | grey | -0.203008862 | 9.81E-06    | -0.18257821  | 7.24E-05    |
| RP11-178 | grey | 0.099070472  | 0.032317481 | 0.060989419  | 0.188279672 |

|               |              |             |              |             |
|---------------|--------------|-------------|--------------|-------------|
| RP11-178 grey | 0.130942736  | 0.004592248 | 0.112793988  | 0.014738021 |
| RP11-192 grey | 0.030065022  | 0.516909955 | 0.014562405  | 0.753620153 |
| RP11-195 grey | -0.056132858 | 0.225993071 | -0.059552777 | 0.19891888  |
| RP11-195 grey | -0.074895871 | 0.105997733 | -0.075612541 | 0.102688192 |
| RP11-196 grey | 0.11258549   | 0.014924066 | 0.100231456  | 0.030336298 |
| RP11-201 grey | -0.013180096 | 0.776354212 | 0.010042659  | 0.828638909 |
| RP11-20L grey | 0.043357998  | 0.349838337 | 0.039699875  | 0.392019997 |
| RP11-20L grey | 0.016235749  | 0.726383515 | -0.002721453 | 0.953228015 |
| RP11-212 grey | -0.119507773 | 0.009739776 | -0.110572423 | 0.01682909  |
| RP11-214 grey | -0.01698017  | 0.714374356 | -0.019217149 | 0.678719292 |
| RP11-215 grey | -0.062997955 | 0.174115187 | -0.061167048 | 0.186993853 |
| RP11-216 grey | 0.13215253   | 0.004226489 | 0.108146622  | 0.019404641 |
| RP11-229 grey | 0.062571645  | 0.177053224 | 0.050747587  | 0.273766041 |
| RP11-234 grey | -0.028741952 | 0.535532834 | -0.039023827 | 0.400139277 |
| RP11-240 grey | -0.096919548 | 0.036280704 | -0.117033464 | 0.011372492 |
| RP11-249 grey | -0.027528796 | 0.552899799 | 0.01519933   | 0.743214914 |
| RP11-257 grey | -0.071088652 | 0.125014144 | -0.028445809 | 0.539746879 |
| RP11-26J grey | 0.111178805  | 0.016234023 | 0.082199096  | 0.075967094 |
| RP11-277 grey | -0.026982508 | 0.560809087 | -0.014373933 | 0.756707833 |
| RP11-295 grey | -0.025662394 | 0.580144332 | -0.026665907 | 0.565417772 |
| RP11-298 grey | 0.035602196  | 0.442753728 | 0.04032213   | 0.384635507 |
| RP11-302 grey | -0.107813667 | 0.019783674 | -0.121012591 | 0.00885188  |
| RP11-302 grey | -0.040877175 | 0.378120689 | -0.042898048 | 0.354978345 |
| RP11-315 grey | -0.026347867 | 0.570065583 | -0.019536783 | 0.673680473 |
| RP11-318 grey | -0.036743089 | 0.428264809 | -0.029280233 | 0.527915787 |
| RP11-322 grey | 0.08578523   | 0.063985333 | 0.076109138  | 0.100443382 |
| RP11-330 grey | -0.072741227 | 0.116457316 | -0.064185713 | 0.166120995 |
| RP11-343 grey | -0.035717722 | 0.441273993 | -0.037081242 | 0.424023817 |
| RP11-343 grey | 0.098522193  | 0.033290875 | 0.066995015  | 0.148312173 |
| RP11-345 grey | -0.075005222 | 0.105487375 | -0.087101467 | 0.059997767 |
| RP11-347 grey | -0.187247933 | 4.67E-05    | -0.155872845 | 0.000724607 |
| RP11-350 grey | 0.01759275   | 0.704544538 | 0.014355334  | 0.757012743 |
| RP11-35N grey | 0.07599576   | 0.100952428 | 0.059038853  | 0.202829228 |
| RP11-38C grey | 0.02100841   | 0.650671974 | 0.026285727  | 0.570975808 |
| RP11-392 grey | 0.012638079  | 0.785322055 | -0.000801809 | 0.986212597 |
| RP11-403 grey | 0.031146782  | 0.501935981 | 0.037533663  | 0.41838818  |
| RP11-404 grey | -0.081310314 | 0.079203029 | -0.071899328 | 0.120757421 |
| RP11-407 grey | 0.022549653  | 0.626926056 | 0.00993615   | 0.830428642 |
| RP11-411 grey | 0.026209407  | 0.57209469  | 0.023041017  | 0.619434394 |
| RP11-426 grey | 0.110219878  | 0.017183759 | 0.086641644  | 0.061366802 |
| RP11-432 grey | 0.000865343  | 0.985120223 | -0.026327011 | 0.57037101  |
| RP11-438 grey | -0.024070983 | 0.60385875  | -0.007702973 | 0.868141999 |
| RP11-447 grey | -0.002903968 | 0.950095197 | -0.007410557 | 0.873104392 |
| RP11-45N grey | -0.008917694 | 0.847585265 | -0.02068302  | 0.655731834 |
| RP11-463 grey | 0.069122193  | 0.135823858 | 0.045377017  | 0.327836119 |

|               |              |             |              |             |
|---------------|--------------|-------------|--------------|-------------|
| RP11-468 grey | 0.00967083   | 0.834890739 | 0.017511259  | 0.705849391 |
| RP11-468 grey | -0.024320583 | 0.600110738 | -0.021032373 | 0.650299973 |
| RP11-468 grey | 0.069578476  | 0.133253684 | 0.055817127  | 0.228618788 |
| RP11-475 grey | 0.117016605  | 0.011384401 | 0.106989446  | 0.020749797 |
| RP11-47L grey | 0.060044402  | 0.195229873 | 0.064093121  | 0.166734115 |
| RP11-512 grey | -0.101725257 | 0.027940922 | -0.092095272 | 0.046691171 |
| RP11-514 grey | -0.066452701 | 0.151631726 | -0.083055949 | 0.072950013 |
| RP11-514 grey | 0.0164577    | 0.722795777 | 0.014764038  | 0.750321211 |
| RP11-51L grey | 0.027394933  | 0.554832844 | 0.0310545    | 0.503204388 |
| RP11-529 grey | 0.072382316  | 0.118275605 | 0.055521253  | 0.231098941 |
| RP11-540 grey | 0.176908848  | 0.00012147  | 0.141981251  | 0.002100703 |
| RP11-542 grey | 0.098603197  | 0.033145509 | 0.084836805  | 0.066991808 |
| RP11-548 grey | -0.009151063 | 0.843647323 | -0.061697295 | 0.183193976 |
| RP11-54C grey | -0.088243161 | 0.056707448 | -0.072163868 | 0.11939311  |
| RP11-552 grey | 0.136564749  | 0.003105011 | 0.140274846  | 0.002379355 |
| RP11-565 grey | 0.001890808  | 0.967494214 | -0.031456442 | 0.497692123 |
| RP11-574 grey | 0.017650968  | 0.70361286  | -0.013262595 | 0.774991797 |
| RP11-598 grey | 0.058718675  | 0.205293445 | 0.046044998  | 0.320758274 |
| RP11-5A1 grey | 0.100291466  | 0.030236783 | 0.08888541   | 0.054923244 |
| RP11-603 grey | 0.059773355  | 0.197257495 | 0.063710491  | 0.169285804 |
| RP11-613 grey | 0.005980593  | 0.897439548 | -0.003594691 | 0.938246486 |
| RP11-618 grey | 0.000117825  | 0.997973854 | -0.027706095 | 0.550344589 |
| RP11-637 grey | 0.00755292   | 0.870687809 | -0.016776656 | 0.717650633 |
| RP11-644 grey | -0.132759809 | 0.004053003 | -0.136348104 | 0.003153035 |
| RP11-683 grey | -0.016184687 | 0.727209765 | -0.05264546  | 0.256200816 |
| RP11-724 grey | -0.013442525 | 0.772022809 | 0.001007212  | 0.982681121 |
| RP11-73Λ grey | 0.061785933  | 0.182564377 | 0.08981137   | 0.052433203 |
| RP11-745 grey | 0.029041075  | 0.531293241 | 0.015678921  | 0.735410604 |
| RP11-762 grey | 0.062221781  | 0.179491792 | 0.054747179  | 0.237677568 |
| RP11-77K grey | 0.119295115  | 0.009871433 | 0.094916497  | 0.040335488 |
| RP11-793 grey | 0.164736187  | 0.000350373 | 0.170121295  | 0.000221226 |
| RP11-795 grey | -0.093432366 | 0.043581288 | -0.124253577 | 0.007180139 |
| RP11-831 grey | 0.008937182  | 0.847256281 | 0.007040814  | 0.879386168 |
| RP11-834 grey | 0.046977468  | 0.311045662 | 0.032117777  | 0.488692703 |
| RP11-864 grey | 0.097538244  | 0.035100499 | 0.102533979  | 0.026713267 |
| RP11-872 grey | -0.167894569 | 0.000268005 | -0.178294726 | 0.000107179 |
| RP11-87C grey | 0.065696098  | 0.156356797 | 0.04703466   | 0.31045631  |
| RP11-886 grey | 0.012685849  | 0.784530511 | -0.003306763 | 0.943184117 |
| RP11-934 grey | 0.01921822   | 0.678702379 | 0.012883341  | 0.781260516 |
| RP11-944 grey | -0.042586773 | 0.358483702 | -0.041930882 | 0.365940638 |
| RP11-96C grey | 0.038885689  | 0.401810623 | 0.042092852  | 0.364090258 |
| RP11-977 grey | 0.124394822  | 0.007114178 | 0.102574562  | 0.026652905 |
| RP13-512 grey | 0.034339326  | 0.459112686 | 0.027379037  | 0.5550626   |
| RP13-672 grey | 0.046908109  | 0.311761378 | 0.024147249  | 0.602712411 |
| RP3-468K grey | -0.040739201 | 0.379733796 | -0.035106923 | 0.449129448 |

|              |              |             |              |             |
|--------------|--------------|-------------|--------------|-------------|
| RP4-539Ngrey | 0.010834954  | 0.815354004 | -0.010023506 | 0.828960679 |
| RP4-559Agrey | -0.146123055 | 0.001543944 | -0.139668037 | 0.002486308 |
| RP4-576Fgrey | -0.04829153  | 0.297690085 | -0.061541554 | 0.184304089 |
| RP4-583Pgrey | -0.067415024 | 0.145779509 | -0.049811931 | 0.282720925 |
| RP4-583Pgrey | -0.068982926 | 0.136615883 | -0.08920927  | 0.054041389 |
| RP4-613Egrey | 0.053988548  | 0.244251799 | 0.039984805  | 0.388628064 |
| RP4-734Pgrey | -0.121293838 | 0.008694169 | -0.128930346 | 0.005264354 |
| RP4-777Cgrey | 0.122870357  | 0.007855597 | 0.095417138  | 0.039287727 |
| RP5-850Egrey | 0.025301303  | 0.585486834 | 0.000473628  | 0.991855521 |
| RP5-874Cgrey | 0.060413242  | 0.192495229 | 0.024130253  | 0.602967797 |
| RP5-972Egrey | -0.054120286 | 0.243101129 | -0.064644803 | 0.163105939 |
| RPGRIP1 grey | -0.070439031 | 0.128508609 | -0.077462501 | 0.094523206 |
| RPH3AL grey  | 0.148668171  | 0.001272728 | 0.169338479  | 0.000236723 |
| RPL10L grey  | 0.106044101  | 0.021908136 | 0.091155051  | 0.048987735 |
| RPL17-C1grey | -0.013907067 | 0.764372939 | -0.011068288 | 0.811451422 |
| RPRML grey   | -0.018367608 | 0.692181009 | -0.009487412 | 0.837978542 |
| RPS10-N1grey | -0.101717214 | 0.027953371 | -0.080618884 | 0.081796962 |
| RPS4Y1 grey  | -0.005564326 | 0.90454274  | -0.010420037 | 0.822304842 |
| RPS4Y2 grey  | -0.015375037 | 0.740352552 | -0.01514832  | 0.744046556 |
| RPS6KL1grey  | 0.020650027  | 0.656245769 | 0.016973167  | 0.714487003 |
| RRAGA grey   | -0.253044121 | 2.95E-08    | -0.244803551 | 8.42E-08    |
| RRAGD grey   | -0.089760083 | 0.052568618 | -0.064673414 | 0.16291941  |
| RRBP1 grey   | 0.159673194  | 0.000533065 | 0.163590619  | 0.000385684 |
| RRNAD1 grey  | 0.153052125  | 0.000906027 | 0.13361068   | 0.003820761 |
| RRP8 grey    | 0.102777332  | 0.026353062 | 0.108672907  | 0.018818419 |
| RS1 grey     | 0.01454111   | 0.753968822 | 0.009741011  | 0.833709922 |
| RSG1 grey    | 0.029989446  | 0.517964652 | 0.047958496  | 0.301038208 |
| RSPO2 grey   | 0.047220195  | 0.308549469 | 0.03033398   | 0.513165558 |
| RTBDN grey   | -0.104943376 | 0.023327157 | -0.100613567 | 0.029707409 |
| RTEL1-T1grey | -0.084077425 | 0.069481737 | -0.090426977 | 0.050830378 |
| RTL1 grey    | 0.002920096  | 0.949818395 | 0.038949679  | 0.401035882 |
| RTN2 grey    | -0.191076764 | 3.23E-05    | -0.198455893 | 1.56E-05    |
| RTN4R grey   | -0.091326705 | 0.048561541 | -0.08887918  | 0.054940324 |
| RTN4RL1grey  | 0.09143108   | 0.048303913 | 0.068462115  | 0.139609293 |
| RTN4RL2grey  | 0.11825131   | 0.010540842 | 0.105106701  | 0.023111705 |
| RTP1 grey    | -0.052998465 | 0.253021739 | -0.037473364 | 0.419136757 |
| RTP3 grey    | -0.100783699 | 0.029431015 | -0.093034522 | 0.044487845 |
| RUNDC3grey   | -0.201092894 | 1.19E-05    | -0.222374317 | 1.21E-06    |
| RUNX1 grey   | 0.230200182  | 4.93E-07    | 0.223016923  | 1.13E-06    |
| RUNX3 grey   | -0.155941839 | 0.000720623 | -0.119075619 | 0.010008979 |
| RUSC1 grey   | 0.212650831  | 3.55E-06    | 0.205718097  | 7.40E-06    |
| RWDD2Egrey   | -0.000155134 | 0.997332286 | 0.001084046  | 0.981360189 |
| RXFP1 grey   | -0.017609238 | 0.704280629 | -0.044289452 | 0.339574238 |
| RXFP3 grey   | -0.063678003 | 0.169503794 | -0.059464781 | 0.199584492 |
| RXFP4 grey   | 0.147051541  | 0.001439386 | 0.138249464  | 0.002753652 |

|         |      |              |             |              |             |
|---------|------|--------------|-------------|--------------|-------------|
| RXRA    | grey | -0.091500301 | 0.048133687 | -0.089537566 | 0.05315951  |
| RXRB    | grey | -0.228235104 | 6.20E-07    | -0.235369535 | 2.67E-07    |
| RXRG    | grey | 0.01787991   | 0.699953361 | -0.002461205 | 0.957696339 |
| RYR1    | grey | -0.371568134 | 9.78E-17    | -0.362218938 | 6.33E-16    |
| S100A10 | grey | 0.12989649   | 0.004931344 | 0.158289596  | 0.000596572 |
| S100A14 | grey | -0.075037466 | 0.105337261 | -0.038172449 | 0.410506368 |
| S100A16 | grey | -0.037456015 | 0.419352277 | 0.004698066  | 0.919348411 |
| S100A4  | grey | 0.001081421  | 0.981405322 | 0.047836481  | 0.30227111  |
| S100A5  | grey | -0.271144955 | 2.59E-09    | -0.257803245 | 1.59E-08    |
| S100A6  | grey | -0.001945495 | 0.966554612 | 0.041550268  | 0.370311809 |
| S1PR2   | grey | -0.10446665  | 0.023966007 | -0.095304458 | 0.039521517 |
| S1PR5   | grey | -0.091910255 | 0.047135811 | -0.089391239 | 0.053551088 |
| SAA1    | grey | 0.082096914  | 0.076333566 | 0.105354362  | 0.022788286 |
| SAA2    | grey | 0.122946065  | 0.007817209 | 0.150055229  | 0.00114409  |
| SAA2-SA | grey | 0.094496008  | 0.041233663 | 0.106163684  | 0.021758577 |
| SAA4    | grey | 0.067923562  | 0.142757332 | 0.097117967  | 0.035898586 |
| SAFB    | grey | 0.075259908  | 0.104306247 | 0.057622971  | 0.213890427 |
| SAFB2   | grey | 0.095021936  | 0.040112879 | 0.068920443  | 0.136972383 |
| SAGE1   | grey | -0.031207106 | 0.501107758 | -0.05430765  | 0.24147114  |
| SALL3   | grey | -0.046141244 | 0.319746732 | -0.01379873  | 0.766154972 |
| SALL4   | grey | -0.193757773 | 2.49E-05    | -0.192151705 | 2.91E-05    |
| SAMD11  | grey | -0.242613834 | 1.11E-07    | -0.23604805  | 2.46E-07    |
| SAMD13  | grey | -0.035433478 | 0.444919839 | -0.071599678 | 0.122317467 |
| SAMD14  | grey | -0.095308993 | 0.039512085 | -0.098045756 | 0.034156924 |
| SAMD4B  | grey | -0.192951672 | 2.69E-05    | -0.201336001 | 1.16E-05    |
| SAMM50  | grey | 0.338493764  | 5.55E-14    | 0.320426673  | 1.30E-12    |
| SAP30BP | grey | -0.183371264 | 6.72E-05    | -0.175646641 | 0.000136026 |
| SAPCD1  | grey | 0.020512623  | 0.658387849 | 0.023055948  | 0.619207357 |
| SARDH   | grey | -0.085113883 | 0.066101727 | -0.095631192 | 0.038846826 |
| SATB2   | grey | 0.279686185  | 7.70E-10    | 0.274578336  | 1.60E-09    |
| SAYSD1  | grey | -0.109315898 | 0.018123203 | -0.119046893 | 0.010027105 |
| SBK2    | grey | -0.164977301 | 0.000343336 | -0.161705377 | 0.000451094 |
| SBNO2   | grey | 0.182800854  | 7.09E-05    | 0.187875903  | 4.40E-05    |
| SBSPON  | grey | -0.013161603 | 0.776659689 | -0.046701059 | 0.313904356 |
| SCAMP2  | grey | 0.253200177  | 2.89E-08    | 0.270703804  | 2.75E-09    |
| SCAMP5  | grey | -0.232248053 | 3.87E-07    | -0.254935351 | 2.31E-08    |
| SCARB1  | grey | 0.102971681  | 0.026068403 | 0.083081993  | 0.07285986  |
| SCD5    | grey | 0.150773989  | 0.001082249 | 0.149766896  | 0.001169801 |
| SCEL    | grey | -0.094797491 | 0.040587995 | -0.076650166 | 0.098042288 |
| SCG2    | grey | 0.002682824  | 0.953891178 | -0.012672608 | 0.7847499   |
| SCG3    | grey | -0.110687451 | 0.016714763 | -0.10408845  | 0.024483528 |
| SCG5    | grey | -0.296472639 | 6.27E-11    | -0.304504372 | 1.78E-11    |
| SCGB1C1 | grey | -0.002420654 | 0.958392711 | -0.016275145 | 0.725746249 |
| SCGB1C2 | grey | -0.021096473 | 0.649305322 | -0.029254827 | 0.528274065 |
| SCGB1D1 | grey | 0.125544835  | 0.006596988 | 0.151942842  | 0.000988228 |

|               |              |             |              |             |
|---------------|--------------|-------------|--------------|-------------|
| SCGB3A2 grey  | -0.069806542 | 0.131983166 | -0.062134294 | 0.180105458 |
| SCGN grey     | 0.034207189  | 0.460843663 | 0.001672754  | 0.971241168 |
| SCIN grey     | -0.152977237 | 0.000911371 | -0.147331367 | 0.001409175 |
| SCMH1 grey    | 0.118355632  | 0.010472174 | 0.094608537  | 0.040991658 |
| SCN4A grey    | -0.184364587 | 6.13E-05    | -0.184761899 | 5.90E-05    |
| SCN5A grey    | -0.312424131 | 4.95E-12    | -0.314470954 | 3.53E-12    |
| SCN8A grey    | -0.332303615 | 1.68E-13    | -0.33244238  | 1.63E-13    |
| SCN9A grey    | -0.108776265 | 0.018705121 | -0.103909651 | 0.024731535 |
| SCNN1D grey   | -0.174258781 | 0.000153914 | -0.184096387 | 6.28E-05    |
| SCPEP1 grey   | -0.060993746 | 0.188248273 | -0.066086755 | 0.153903388 |
| SCRT1 grey    | -0.093822089 | 0.042708365 | -0.109082364 | 0.018373068 |
| SCRT2 grey    | -0.018303454 | 0.693201598 | -0.025584293 | 0.581297941 |
| SCTR grey     | -0.002857022 | 0.950900946 | 0.004775782  | 0.918018903 |
| SCUBE2 grey   | -0.006414372 | 0.890046241 | -0.004862974 | 0.916527581 |
| SCUBE3 grey   | -0.033598921 | 0.468858573 | -0.060759396 | 0.189954401 |
| SCX grey      | -0.172288939 | 0.000183122 | -0.18052091  | 8.75E-05    |
| SDC4 grey     | 0.01228128   | 0.791241023 | 0.024824421  | 0.592577217 |
| SDCBP2 grey   | 0.194398891  | 2.34E-05    | 0.232653278  | 3.69E-07    |
| SDF2 grey     | -0.029297662 | 0.527670073 | -0.031558442 | 0.496298399 |
| SDK1 grey     | -0.166424236 | 0.000303798 | -0.204539475 | 8.37E-06    |
| SDK2 grey     | -0.256429095 | 1.90E-08    | -0.264344407 | 6.60E-09    |
| SDR16C5 grey  | -0.23852578  | 1.83E-07    | -0.251309768 | 3.69E-08    |
| SDR42E1 grey  | -0.3113735   | 5.88E-12    | -0.280438078 | 6.90E-10    |
| SEC11C grey   | 0.210145898  | 4.64E-06    | 0.211971164  | 3.82E-06    |
| SEC14L2 grey  | 0.067550938  | 0.144967049 | 0.062128134  | 0.180148719 |
| SEC14L4 grey  | -0.209331476 | 5.06E-06    | -0.218030583 | 1.97E-06    |
| SEC14L6 grey  | -0.20224325  | 1.06E-05    | -0.223518785 | 1.07E-06    |
| SEC31B grey   | 0.115473962  | 0.012521926 | 0.113051431  | 0.014511116 |
| SELV grey     | -0.206378342 | 6.91E-06    | -0.204597687 | 8.32E-06    |
| SEMA3A grey   | 0.088321514  | 0.056487236 | 0.126542359  | 0.006175949 |
| SEMA3B grey   | -0.141843376 | 0.002122057 | -0.157269703 | 0.000647804 |
| SEMA3F grey   | -0.014243407 | 0.758848476 | -0.006511226 | 0.888396757 |
| SEMA4F grey   | 0.042404161  | 0.36055022  | 0.004955969  | 0.914937307 |
| SEMA4G grey   | 0.010033298  | 0.828796178 | -0.001902207 | 0.967298366 |
| SEMA5B grey   | 0.018710184  | 0.686740624 | -0.002223973 | 0.961770658 |
| SEMA6A grey   | -0.076742007 | 0.097639273 | -0.107438677 | 0.02021826  |
| SEMA6C grey   | -0.265541615 | 5.61E-09    | -0.270838634 | 2.70E-09    |
| SEMA6D grey   | -0.302598603 | 2.41E-11    | -0.319460949 | 1.54E-12    |
| SEMA7A grey   | 0.050630385  | 0.274877036 | 0.02147338   | 0.643469444 |
| SEMG1 grey    | -0.029724219 | 0.521674769 | -0.011497203 | 0.804289926 |
| SEMG2 grey    | 0.025714165  | 0.579380228 | 0.031790227  | 0.49313903  |
| SENP3-E1 grey | 0.177510924  | 0.000115054 | 0.157164969  | 0.00065329  |
| SEPN1 grey    | 0.362321829  | 6.21E-16    | 0.333589568  | 1.33E-13    |
| SEPT14 grey   | -0.048436061 | 0.296244807 | -0.052438227 | 0.258079946 |
| SEPT5 grey    | -0.160207602 | 0.000510263 | -0.169736321 | 0.000228725 |



|          |      |              |             |              |             |
|----------|------|--------------|-------------|--------------|-------------|
| SEPT6    | grey | -0.084575704 | 0.067839538 | -0.062176061 | 0.179812293 |
| SERF1A   | grey | -0.005733988 | 0.901646662 | -0.003548403 | 0.939040109 |
| SERHL2   | grey | 0.024661596  | 0.595007096 | -0.002565187 | 0.955910868 |
| SERINC4  | grey | 0.109260898  | 0.018181781 | 0.108029049  | 0.019537756 |
| SERPINA  | grey | 0.137289627  | 0.002949119 | 0.153054817  | 0.000905835 |
| SERPINA  | grey | -0.074456603 | 0.108067569 | -0.066846326 | 0.149216756 |
| SERPINA  | grey | 0.219062387  | 1.76E-06    | 0.207535846  | 6.12E-06    |
| SERPINA  | grey | 0.152918918  | 0.000915553 | 0.14672618   | 0.001475261 |
| SERPINA  | grey | -0.091755473 | 0.047510512 | -0.044529309 | 0.336962646 |
| SERPINB  | grey | 0.228634255  | 5.92E-07    | 0.256672292  | 1.84E-08    |
| SERPINB  | grey | 0.033034106  | 0.476369235 | 0.03693607   | 0.425841507 |
| SERPINB  | grey | 0.138435073  | 0.002717244 | 0.120780012  | 0.00898422  |
| SERPINB  | grey | 0.024023882  | 0.60456719  | 0.007292677  | 0.875106277 |
| SERPINB  | grey | -0.001587948 | 0.972698606 | -0.012884234 | 0.781245735 |
| SERPINB  | grey | 0.033441442  | 0.470946067 | 0.041444853  | 0.371528143 |
| SERPINF  | grey | -0.015476319 | 0.738704235 | -0.022010873 | 0.635184942 |
| SERPINI1 | grey | -0.188456218 | 4.16E-05    | -0.220841096 | 1.44E-06    |
| SERTAD1  | grey | -0.111132166 | 0.016279129 | -0.106706495 | 0.021090786 |
| SESN2    | grey | 0.247182385  | 6.25E-08    | 0.249583302  | 4.61E-08    |
| SETD6    | grey | 0.064163894  | 0.166265319 | 0.068917242  | 0.136990665 |
| SEZ6     | grey | -0.021575109 | 0.641898035 | -0.033875519 | 0.465204448 |
| SEZ6L2   | grey | -0.105228638 | 0.022951975 | -0.096921054 | 0.036277791 |
| SF3B4    | grey | 0.083618066  | 0.071024352 | 0.073261122  | 0.113862365 |
| SFRP2    | grey | 0.002274187  | 0.960908175 | 0.035729781  | 0.441119704 |
| SFRP5    | grey | -0.248083284 | 5.58E-08    | -0.265341884 | 5.77E-09    |
| SFSWAP   | grey | -0.084669827 | 0.067532936 | -0.108816641 | 0.018661024 |
| SFTA2    | grey | 0.073995454  | 0.110274679 | 0.101366122  | 0.028501454 |
| SFTA3    | grey | -0.001518541 | 0.973891473 | 0.02096396   | 0.651362243 |
| SFTPA1   | grey | -0.053706149 | 0.246731253 | -0.061803594 | 0.182439122 |
| SFTPA2   | grey | 0.051336559  | 0.268229322 | 0.046584793  | 0.315111943 |
| SFTPb    | grey | 0.016354263  | 0.72446703  | 0.033437339  | 0.471000525 |
| SFTPC    | grey | -0.047529954 | 0.305383158 | -0.04540444  | 0.327543581 |
| SFTPD    | grey | -0.094725937 | 0.040740457 | -0.118427247 | 0.010425265 |
| SFXN2    | grey | 0.140517278  | 0.002337811 | 0.09447635   | 0.041276063 |
| SGCD     | grey | 0.059595758  | 0.198594353 | 0.041422145  | 0.371790483 |
| SGCG     | grey | -0.257415273 | 1.67E-08    | -0.272544636 | 2.13E-09    |
| SGK1     | grey | -0.072339275 | 0.118495139 | -0.092695105 | 0.045273754 |
| SGK2     | grey | 0.053661365  | 0.247126068 | 0.060607262  | 0.191068042 |
| SGK223   | grey | 0.174561919  | 0.000149828 | 0.179188654  | 9.88E-05    |
| SGSH     | grey | 0.15538416   | 0.000753409 | 0.171450739  | 0.000197062 |
| SGSM1    | grey | -0.344769954 | 1.76E-14    | -0.346541269 | 1.27E-14    |
| SGSM2    | grey | 0.214517523  | 2.90E-06    | 0.195225448  | 2.15E-05    |
| SH2B1    | grey | -0.03048363  | 0.511088269 | -0.04299451  | 0.353896454 |
| SH3BP2   | grey | -0.146823347 | 0.001464462 | -0.130461024 | 0.00474567  |
| SH3D21   | grey | -0.016941007 | 0.715004409 | -0.030531007 | 0.510431529 |

|         |      |              |             |              |             |
|---------|------|--------------|-------------|--------------|-------------|
| SH3GL2  | grey | -0.097546222 | 0.035085495 | -0.094556646 | 0.041103104 |
| SH3KBP1 | grey | -0.171403902 | 0.000197869 | -0.178598338 | 0.000104267 |
| SH3TC1  | grey | -0.031430254 | 0.498050288 | -0.021612498 | 0.641320884 |
| SH3TC2  | grey | -0.060649386 | 0.190759211 | -0.06834571  | 0.140285171 |
| SHANK1  | grey | -0.168003983 | 0.000265506 | -0.1757981   | 0.000134196 |
| SHBG    | grey | -0.07583573  | 0.101674418 | -0.053521323 | 0.248363505 |
| SHC3    | grey | -0.000311425 | 0.994644711 | -0.013168101 | 0.776552345 |
| SHC4    | grey | -0.03694651  | 0.425710632 | -0.035678137 | 0.441780701 |
| SHD     | grey | -0.016343471 | 0.724641481 | -0.018479735 | 0.690398586 |
| SHH     | grey | 0.175061853  | 0.000143311 | 0.195054238  | 2.19E-05    |
| SHISA2  | grey | -0.020637612 | 0.656439189 | -0.021030022 | 0.650336474 |
| SHISA3  | grey | 0.018673301  | 0.687325594 | 0.010683876  | 0.817883259 |
| SHISA4  | grey | -0.128830918 | 0.005299748 | -0.151674155 | 0.001009148 |
| SHISA9  | grey | -0.105028628 | 0.023214479 | -0.078216218 | 0.091349013 |
| SHOX2   | grey | -0.053818519 | 0.245742548 | -0.034839947 | 0.452587695 |
| SHPK    | grey | 0.26138787   | 9.84E-09    | 0.259299088  | 1.30E-08    |
| SHROOM  | grey | -0.045770727 | 0.323652289 | -0.07392012  | 0.110638587 |
| SHROOM  | grey | -0.012279713 | 0.791267041 | -0.03401556  | 0.463360403 |
| SIAH2   | grey | -0.009099111 | 0.844523644 | -0.008937478 | 0.847251282 |
| SIGLEC1 | grey | 0.099558551  | 0.031471517 | 0.121955892  | 0.008332757 |
| SIK1    | grey | -0.027157132 | 0.558274914 | -0.079180962 | 0.087411358 |
| SIM1    | grey | -0.059138376 | 0.202067646 | -0.033410867 | 0.471351946 |
| SIM2    | grey | 0.067666373  | 0.14427973  | 0.085481047  | 0.064937244 |
| SIRT2   | grey | -0.041781893 | 0.367647869 | -0.040286492 | 0.385056126 |
| SIRT3   | grey | 0.16152229   | 0.000457968 | 0.146435258  | 0.001508033 |
| SIRT4   | grey | -0.148526155 | 0.001286623 | -0.147093571 | 0.001434811 |
| SIX1    | grey | 0.023298616  | 0.615522481 | 0.039870412  | 0.389987701 |
| SIX2    | grey | 0.002083171  | 0.964189321 | 0.036015317  | 0.437475244 |
| SIX3    | grey | -0.142060178 | 0.002088567 | -0.126220619 | 0.006309038 |
| SKAP1   | grey | -0.165767156 | 0.000321194 | -0.126187209 | 0.006323004 |
| SKIDA1  | grey | -0.125072968 | 0.006804977 | -0.153478614 | 0.00087614  |
| SKOR1   | grey | 0.021723614  | 0.639606958 | -0.013131567 | 0.777155939 |
| SLAMF9  | grey | 0.036686044  | 0.428982663 | 0.062223922  | 0.1794768   |
| SLC10A2 | grey | -0.052666496 | 0.256010604 | -0.04537622  | 0.32784463  |
| SLC10A4 | grey | -0.139645367 | 0.002490388 | -0.129744918 | 0.004982299 |
| SLC12A1 | grey | 0.00419522   | 0.927955919 | -0.012984857 | 0.779581143 |
| SLC12A3 | grey | -0.048549071 | 0.295118001 | -0.06247304  | 0.177738002 |
| SLC12A5 | grey | -0.181976577 | 7.65E-05    | -0.194617896 | 2.29E-05    |
| SLC12A9 | grey | 0.052423683  | 0.258212176 | 0.053839992  | 0.24555393  |
| SLC13A2 | grey | 0.061187063  | 0.186849377 | 0.059433295  | 0.199823058 |
| SLC13A3 | grey | -0.08022164  | 0.083318044 | -0.073270727 | 0.113814856 |
| SLC13A5 | grey | -0.315593108 | 2.93E-12    | -0.315850366 | 2.81E-12    |
| SLC14A1 | grey | -0.003980452 | 0.931634851 | 0.018250586  | 0.694043057 |
| SLC14A2 | grey | -0.123610816 | 0.00748727  | -0.124890744 | 0.006886857 |
| SLC15A1 | grey | -0.083397924 | 0.071773491 | -0.093342472 | 0.043784755 |

|              |              |             |              |             |
|--------------|--------------|-------------|--------------|-------------|
| SLC16A1 grey | 0.158131819  | 0.000604244 | 0.145448457  | 0.001624236 |
| SLC16A1 grey | 0.054117819  | 0.243122643 | 0.035958597  | 0.438197811 |
| SLC16A5 grey | -0.254549884 | 2.43E-08    | -0.230262072 | 4.89E-07    |
| SLC16A6 grey | -0.1948536   | 2.23E-05    | -0.188979382 | 3.96E-05    |
| SLC16A8 grey | 0.093392744  | 0.043670871 | 0.07749212   | 0.094396828 |
| SLC16A9 grey | -0.138339737 | 0.00273589  | -0.110639962 | 0.01676188  |
| SLC17A3 grey | -0.106195669 | 0.021718726 | -0.104696236 | 0.023656481 |
| SLC17A4 grey | -0.089809186 | 0.052438965 | -0.087292704 | 0.059435875 |
| SLC17A7 grey | -0.104973816 | 0.02328687  | -0.106617679 | 0.021198818 |
| SLC17A9 grey | -0.223794252 | 1.03E-06    | -0.223852194 | 1.03E-06    |
| SLC18A1 grey | -0.022411522 | 0.629039062 | -0.037343479 | 0.420751853 |
| SLC18A2 grey | 0.005253991  | 0.909843296 | -0.005864958 | 0.899411948 |
| SLC18A3 grey | -0.057816114 | 0.212356509 | -0.048599336 | 0.294617727 |
| SLC19A3 grey | -0.196540234 | 1.89E-05    | -0.20901503  | 5.23E-06    |
| SLC1A1 grey  | 0.205756558  | 7.37E-06    | 0.213341473  | 3.29E-06    |
| SLC1A3 grey  | -0.115183922 | 0.012746662 | -0.109210324 | 0.018235791 |
| SLC1A4 grey  | 0.144024226  | 0.001806474 | 0.148552726  | 0.001284013 |
| SLC1A5 grey  | -0.043224689 | 0.351323214 | -0.004604769 | 0.920944746 |
| SLC1A6 grey  | -0.107842093 | 0.019751064 | -0.113365697 | 0.014238295 |
| SLC20A2 grey | -0.048882861 | 0.291806547 | -0.077441219 | 0.094614097 |
| SLC22A1 grey | -0.026160354 | 0.572814372 | -0.010820918 | 0.815588894 |
| SLC22A1 grey | 0.026184112  | 0.572465754 | 0.026989882  | 0.56070196  |
| SLC22A1 grey | -0.20867831  | 5.42E-06    | -0.197028943 | 1.80E-05    |
| SLC22A1 grey | 0.259674595  | 1.24E-08    | 0.285796884  | 3.15E-10    |
| SLC22A3 grey | -0.114833124 | 0.013023226 | -0.086914275 | 0.060552018 |
| SLC22A8 grey | -0.057733752 | 0.213009652 | -0.069813768 | 0.131943065 |
| SLC23A3 grey | 0.001123529  | 0.980681431 | 0.009726659  | 0.833951378 |
| SLC24A2 grey | -0.132117475 | 0.004236705 | -0.139845016 | 0.002454671 |
| SLC25A1 grey | -0.136108325 | 0.003206973 | -0.137182878 | 0.00297162  |
| SLC25A2 grey | 0.144577407  | 0.001733575 | 0.177388405  | 0.000116333 |
| SLC25A2 grey | -0.000125637 | 0.99783952  | -0.015550977 | 0.737489989 |
| SLC25A2 grey | -0.043325214 | 0.350203133 | -0.073729506 | 0.111563588 |
| SLC25A2 grey | -0.025212932 | 0.586797791 | -0.020642992 | 0.656355376 |
| SLC25A2 grey | -0.068393964 | 0.140004691 | -0.061263987 | 0.186294861 |
| SLC25A3 grey | -0.096263872 | 0.037568078 | -0.1061803   | 0.021737868 |
| SLC25A3 grey | 0.15280915   | 0.000923472 | 0.122408894  | 0.008093246 |
| SLC25A3 grey | 0.06208526   | 0.180450072 | 0.078689561  | 0.089399632 |
| SLC25A4 grey | -0.111703574 | 0.015734006 | -0.109344055 | 0.018093279 |
| SLC25A4 grey | 0.261734388  | 9.39E-09    | 0.262832434  | 8.10E-09    |
| SLC25A4 grey | -0.006047371 | 0.896300793 | 0.011888718  | 0.79776715  |
| SLC25A4 grey | 0.162427236  | 0.000424916 | 0.150221521  | 0.0011295   |
| SLC26A1 grey | 0.047756819  | 0.303077854 | 0.054588486  | 0.239042379 |
| SLC26A1 grey | -0.101635099 | 0.028080741 | -0.130859695 | 0.004618372 |
| SLC26A3 grey | -0.025840306 | 0.577520447 | -0.022646931 | 0.625439804 |
| SLC26A4 grey | 0.053050388  | 0.252556452 | 0.039403872  | 0.395562641 |

|              |              |             |              |             |
|--------------|--------------|-------------|--------------|-------------|
| SLC26A7 grey | -0.102580532 | 0.026644035 | -0.112763948 | 0.014764699 |
| SLC26A9 grey | 0.034520124  | 0.456750172 | 0.068957521  | 0.136760749 |
| SLC27A3 grey | -0.0896152   | 0.052952728 | -0.082054791 | 0.076485056 |
| SLC28A2 grey | 0.065556142  | 0.157242912 | 0.058480401  | 0.207141327 |
| SLC29A3 grey | -0.248150583 | 5.53E-08    | -0.239731515 | 1.58E-07    |
| SLC29A4 grey | -0.028875001 | 0.533644982 | -0.015004944 | 0.746385675 |
| SLC2A10 grey | -0.195381985 | 2.12E-05    | -0.189856039 | 3.64E-05    |
| SLC2A11 grey | -0.112832237 | 0.014704113 | -0.13776681  | 0.002850418 |
| SLC2A14 grey | -0.047776327 | 0.302880164 | -0.025798067 | 0.578142896 |
| SLC2A9 grey  | 0.037929891  | 0.413488818 | 0.041938025  | 0.365858911 |
| SLC30A2 grey | -0.094718791 | 0.040755712 | -0.07272241  | 0.116552095 |
| SLC30A3 grey | -0.12970885  | 0.004994494 | -0.121771255 | 0.008432177 |
| SLC30A8 grey | -0.125220996 | 0.006739106 | -0.115523405 | 0.012483966 |
| SLC34A3 grey | -0.055729017 | 0.229355378 | -0.050724363 | 0.273985943 |
| SLC35C1 grey | 0.199965626  | 1.34E-05    | 0.213206189  | 3.34E-06    |
| SLC35D2 grey | 0.204677143  | 8.25E-06    | 0.184249215  | 6.19E-05    |
| SLC35E3 grey | 0.182827367  | 7.07E-05    | 0.187405221  | 4.60E-05    |
| SLC35E4 grey | -0.207861123 | 5.91E-06    | -0.185550085 | 5.48E-05    |
| SLC35F2 grey | -0.028823718 | 0.534372242 | -0.025586747 | 0.581261677 |
| SLC35F6 grey | 0.058416767  | 0.207636851 | 0.105675073  | 0.0223753   |
| SLC35G5 grey | 0.081556736  | 0.078294842 | 0.077578214  | 0.094030246 |
| SLC35G6 grey | -0.131286091 | 0.004485641 | -0.148637533 | 0.001275714 |
| SLC38A1 grey | 0.291583086  | 1.32E-10    | 0.270090648  | 3.00E-09    |
| SLC38A1 grey | 0.044302416  | 0.339432756 | 0.036524118  | 0.431024128 |
| SLC38A5 grey | -0.073213352 | 0.11409889  | -0.069943316 | 0.131225722 |
| SLC38A8 grey | -0.02297749  | 0.620400772 | -0.015616243 | 0.736429016 |
| SLC39A1 grey | -0.222582256 | 1.18E-06    | -0.216279694 | 2.39E-06    |
| SLC39A2 grey | -0.078045519 | 0.092060305 | -0.08677494  | 0.060967312 |
| SLC39A5 grey | -0.177995513 | 0.000110123 | -0.174243905 | 0.000154118 |
| SLC39A8 grey | 0.042119669  | 0.363784465 | 0.033211614  | 0.474001751 |
| SLC3A1 grey  | -0.026490842 | 0.567973917 | -0.023755726 | 0.608607579 |
| SLC41A3 grey | -0.058924056 | 0.203710265 | -0.077985121 | 0.09231304  |
| SLC43A2 grey | 0.182101906  | 7.56E-05    | 0.205678674  | 7.44E-06    |
| SLC43A3 grey | -0.387286733 | 3.68E-18    | -0.385062662 | 5.92E-18    |
| SLC44A5 grey | -0.187049181 | 4.76E-05    | -0.195987716 | 2.00E-05    |
| SLC45A2 grey | 0.003400732  | 0.941572405 | -0.003844748 | 0.933960206 |
| SLC45A3 grey | 0.019882579  | 0.668245618 | 0.039817475  | 0.390617871 |
| SLC4A11 grey | 0.040786614  | 0.379178996 | 0.066535411  | 0.151121838 |
| SLC4A3 grey  | -0.264838077 | 6.17E-09    | -0.286226428 | 2.95E-10    |
| SLC5A2 grey  | -0.117604477 | 0.010975587 | -0.111373463 | 0.016046946 |
| SLC5A5 grey  | -0.033057524 | 0.476056526 | -0.024074795 | 0.603801421 |
| SLC5A7 grey  | 0.014315232  | 0.757670301 | 0.011488087  | 0.804441969 |
| SLC5A8 grey  | -0.132637709 | 0.004087358 | -0.106498204 | 0.0213449   |
| SLC6A11 grey | -0.409881011 | 2.39E-20    | -0.413828376 | 9.54E-21    |
| SLC6A13 grey | -0.254771626 | 2.36E-08    | -0.2659282   | 5.32E-09    |

|              |              |             |              |             |
|--------------|--------------|-------------|--------------|-------------|
| SLC6A15 grey | -0.327016344 | 4.22E-13    | -0.336540397 | 7.88E-14    |
| SLC6A18 grey | -0.016567578 | 0.72102188  | -0.011113282 | 0.810699411 |
| SLC6A20 grey | 0.159340099  | 0.000547753 | 0.168523067  | 0.000253942 |
| SLC6A3 grey  | -0.192572077 | 2.79E-05    | -0.185032578 | 5.75E-05    |
| SLC6A4 grey  | -0.039461585 | 0.394870407 | -0.052354963 | 0.258837628 |
| SLC6A8 grey  | -0.042778253 | 0.356324832 | -0.020702389 | 0.655430191 |
| SLC6A9 grey  | -0.209937112 | 4.75E-06    | -0.174419691 | 0.000151733 |
| SLC7A10 grey | -0.310786958 | 6.47E-12    | -0.316487762 | 2.53E-12    |
| SLC7A11 grey | 0.251316828  | 3.69E-08    | 0.221235269  | 1.38E-06    |
| SLC7A14 grey | -0.066183575 | 0.153299868 | -0.066121359 | 0.153687479 |
| SLC7A2 grey  | -0.141127839 | 0.002236102 | -0.150223929 | 0.00112929  |
| SLC7A4 grey  | -0.039739366 | 0.391548811 | -0.092950308 | 0.044681761 |
| SLC7A6 grey  | -0.015854572 | 0.732559002 | -0.021560669 | 0.642120985 |
| SLC7A8 grey  | -0.287873685 | 2.31E-10    | -0.304868314 | 1.68E-11    |
| SLC7A9 grey  | -0.266427612 | 4.97E-09    | -0.271676404 | 2.40E-09    |
| SLC8B1 grey  | -0.024385282 | 0.599140924 | -0.019788921 | 0.669715927 |
| SLC9A2 grey  | 0.160751327  | 0.000487996 | 0.155847642  | 0.000726067 |
| SLC9A3 grey  | -0.061964655 | 0.181299781 | -0.073762858 | 0.111401301 |
| SLC9A4 grey  | 0.110459667  | 0.016941822 | 0.10036868   | 0.03010915  |
| SLC9A5 grey  | 0.040096705  | 0.387300844 | 0.039962011  | 0.38889875  |
| SLC9A8 grey  | -0.0090687   | 0.845036707 | -0.012050413 | 0.795077317 |
| SLCO1B3 grey | 0.09370037   | 0.042979402 | 0.101202573  | 0.028759902 |
| SLCO1C1 grey | 0.016252881  | 0.726106365 | 0.085483563  | 0.064929324 |
| SLCO4C1 grey | -0.176407015 | 0.000127072 | -0.174018102 | 0.000157233 |
| SLFN11 grey  | -0.155691601 | 0.000735168 | -0.155175202 | 0.000766045 |
| SLFN13 grey  | -0.327453514 | 3.92E-13    | -0.323042828 | 8.37E-13    |
| SLIT1 grey   | -0.124157699 | 0.007225225 | -0.117966198 | 0.010730552 |
| SLITRK2 grey | -0.204603384 | 8.32E-06    | -0.213097081 | 3.38E-06    |
| SLITRK4 grey | -0.198762433 | 1.51E-05    | -0.223837256 | 1.03E-06    |
| SLITRK6 grey | 0.215357845  | 2.64E-06    | 0.191784263  | 3.02E-05    |
| SLN grey     | -0.091440851 | 0.048279854 | -0.083230824 | 0.072346428 |
| SLX1A grey   | -0.077389023 | 0.094837308 | -0.06419756  | 0.166042666 |
| SLX1A-S grey | -0.13614821  | 0.003197944 | -0.162271067 | 0.000430457 |
| SMAD6 grey   | -0.2244012   | 9.63E-07    | -0.209950677 | 4.74E-06    |
| SMAGP grey   | -0.007070167 | 0.878887201 | -0.004725379 | 0.918881128 |
| SMARCB1 grey | -0.290322954 | 1.60E-10    | -0.303299587 | 2.15E-11    |
| SMCO2 grey   | -0.159531333 | 0.000539275 | -0.157024676 | 0.000660706 |
| SMIM11 grey  | -0.087706035 | 0.05823629  | -0.089598915 | 0.052996049 |
| SMIM19 grey  | 0.077035318  | 0.096360998 | 0.04088374   | 0.37804404  |
| SMIM2 grey   | -0.13648325  | 0.003122998 | -0.134798474 | 0.003516701 |
| SMIM23 grey  | 0.058991162  | 0.203194908 | 0.061122618  | 0.18731486  |
| SMIM24 grey  | -0.070986636 | 0.125557968 | -0.06875568  | 0.137915872 |
| SMIM3 grey   | -0.121130255 | 0.008785592 | -0.113480493 | 0.014139769 |
| SMN2 grey    | -0.009574919 | 0.836505062 | -0.001003895 | 0.982738146 |
| SMO grey     | -0.152208629 | 0.000967928 | -0.167210657 | 0.000284133 |

|         |      |              |             |              |             |
|---------|------|--------------|-------------|--------------|-------------|
| SMPD1   | grey | 0.129269134  | 0.005145343 | 0.147874759  | 0.001352166 |
| SMR3A   | grey | 0.096454654  | 0.037189553 | 0.096881477  | 0.036354416 |
| SMR3B   | grey | -0.008581902 | 0.85325816  | -0.013808681 | 0.76599124  |
| SMTNL2  | grey | -0.097176869 | 0.035785814 | -0.127667899 | 0.005729965 |
| SMYD1   | grey | -0.021271457 | 0.64659324  | -0.019714296 | 0.670888358 |
| SMYD3   | grey | 0.088137261  | 0.05700621  | 0.077513953  | 0.094303758 |
| SNAI1   | grey | -0.2467356   | 6.61E-08    | -0.239868461 | 1.55E-07    |
| SNAP29  | grey | 0.091507448  | 0.048116141 | 0.072932086  | 0.115499351 |
| SNAP91  | grey | -0.097219796 | 0.035703814 | -0.101893434 | 0.027681707 |
| SNAPC5  | grey | -0.108809794 | 0.018668496 | -0.087251284 | 0.059557204 |
| SNCB    | grey | -0.091463041 | 0.048225253 | -0.082414337 | 0.075199823 |
| SNCG    | grey | -0.299215674 | 4.10E-11    | -0.298013403 | 4.94E-11    |
| SND1    | grey | 0.173815326  | 0.00016008  | 0.152965936  | 0.00091218  |
| SNRPN   | grey | -0.012660821 | 0.784945197 | -0.012815641 | 0.782381032 |
| SNTA1   | grey | -0.229362817 | 5.44E-07    | -0.21831028  | 1.91E-06    |
| SNTB1   | grey | 0.069130141  | 0.135778764 | 0.025508446  | 0.582419282 |
| SNTG1   | grey | -0.082048337 | 0.076508289 | -0.083632266 | 0.070976253 |
| SNX11   | grey | 0.126250413  | 0.006296606 | 0.145568699  | 0.00160965  |
| SNX32   | grey | -0.405371905 | 6.75E-20    | -0.415660661 | 6.20E-21    |
| SOCS3   | grey | -0.252421496 | 3.20E-08    | -0.257316225 | 1.69E-08    |
| SOHLH1  | grey | -0.094967875 | 0.040226885 | -0.08166528  | 0.07789749  |
| SOHLH2  | grey | -0.102254565 | 0.027132067 | -0.09098649  | 0.049409287 |
| SORCS2  | grey | -0.295726828 | 7.03E-11    | -0.299923494 | 3.67E-11    |
| SORCS3  | grey | -0.2069714   | 6.49E-06    | -0.207402736 | 6.21E-06    |
| SORD    | grey | 0.276214631  | 1.27E-09    | 0.259105549  | 1.33E-08    |
| SOST    | grey | -0.099773233 | 0.031105457 | -0.10244267  | 0.02684951  |
| SOSTDC  | grey | -0.202023329 | 1.08E-05    | -0.19547445  | 2.10E-05    |
| SOX1    | grey | -0.10278417  | 0.026343001 | -0.102153866 | 0.027284378 |
| SOX11   | grey | -0.303835457 | 1.98E-11    | -0.307930824 | 1.03E-11    |
| SOX13   | grey | 0.090789739  | 0.049905176 | 0.074340518  | 0.108619854 |
| SOX2    | grey | 0.002290648  | 0.960625458 | 0.021278264  | 0.646487838 |
| SOX21   | grey | 0.066381889  | 0.152069302 | 0.085779511  | 0.064003125 |
| SOX8    | grey | -0.114548347 | 0.013251616 | -0.10858664  | 0.018913439 |
| SOX9    | grey | 0.181720243  | 7.83E-05    | 0.16547532   | 0.000329215 |
| SP8     | grey | -0.012467645 | 0.788147868 | -0.005861833 | 0.899465263 |
| SP9     | grey | 0.067749001  | 0.143789278 | 0.016818333  | 0.716979266 |
| SPACA5  | grey | 0.014262944  | 0.758527935 | 0.012814212  | 0.782404683 |
| SPAG11A | grey | 0.094416993  | 0.041404312 | 0.075408971  | 0.103619827 |
| SPAG11E | grey | 0.08256697   | 0.074659562 | 0.062852974  | 0.175110261 |
| SPANXA  | grey | -0.042637663 | 0.357909136 | -0.043798149 | 0.344963907 |
| SPANXA  | grey | -0.071516263 | 0.122754524 | -0.076101265 | 0.100478663 |
| SPANXB  | grey | -0.040847961 | 0.378461896 | -0.014456903 | 0.755348078 |
| SPANXN  | grey | 0.080879816  | 0.080810104 | 0.040057497  | 0.387765565 |
| SPANXN  | grey | 0.089896693  | 0.052208569 | 0.051166444  | 0.269820579 |
| SPANXN  | grey | -0.005528001 | 0.905162967 | 0.013821554  | 0.765779436 |

|              |              |             |              |             |
|--------------|--------------|-------------|--------------|-------------|
| SPANXN grey  | -0.008575381 | 0.853368415 | 0.001002531  | 0.982761593 |
| SPATA20 grey | 0.131665415  | 0.004370469 | 0.12942549   | 0.00509124  |
| SPATA22 grey | -0.03999037  | 0.38856199  | -0.05495195  | 0.235924586 |
| SPATA25 grey | -0.337989077 | 6.07E-14    | -0.358870949 | 1.22E-15    |
| SPATA31 grey | -0.080362563 | 0.082775842 | -0.067898558 | 0.142904802 |
| SPATA31 grey | -0.043403224 | 0.34933548  | -0.044664053 | 0.335501191 |
| SPATA31 grey | -0.076293495 | 0.099620009 | -0.081519075 | 0.078433089 |
| SPATA31 grey | -0.017496947 | 0.706078653 | -0.020114632 | 0.664608127 |
| SPATA45 grey | 0.08813089   | 0.057024226 | 0.079199229  | 0.08733814  |
| SPATA8 grey  | -0.051592989 | 0.265842841 | -0.050093961 | 0.280001114 |
| SPATC1L grey | -0.081593529 | 0.078159969 | -0.068994342 | 0.136550827 |
| SPATS2L grey | -0.144256106 | 0.001775581 | -0.114329894 | 0.0134292   |
| SPDYC grey   | 0.131783519  | 0.004335159 | 0.153115801  | 0.000901505 |
| SPDYE3 grey  | -0.136863004 | 0.003039983 | -0.143989637 | 0.001811124 |
| SPDYE4 grey  | 0.000837219  | 0.98560378  | 0.022769318  | 0.623572088 |
| SPECC1L grey | 0.057248054  | 0.216890684 | 0.044608174  | 0.336106771 |
| SPEM1 grey   | 0.019575202  | 0.673075792 | 0.017721166  | 0.702490054 |
| SPERT grey   | -0.192247083 | 2.88E-05    | -0.167435063 | 0.000278744 |
| SPESP1 grey  | -0.134127481 | 0.003685654 | -0.130384342 | 0.004770515 |
| SPHK2 grey   | 0.062297974  | 0.178958618 | 0.053021709  | 0.252813376 |
| SPIN2B grey  | -0.065416608 | 0.158130121 | -0.048388699 | 0.2967179   |
| SPINK1 grey  | -0.014595182 | 0.753083578 | 0.007087577  | 0.878591261 |
| SPINK2 grey  | -0.041818179 | 0.367231617 | -0.049880359 | 0.282059396 |
| SPINK8 grey  | 0.034271119  | 0.460005731 | 0.061583162  | 0.184007027 |
| SPNS2 grey   | 0.040569814  | 0.38171991  | 0.053078081  | 0.25230854  |
| SPOCD1 grey  | -0.088815363 | 0.055115544 | -0.064059618 | 0.166956386 |
| SPOCK3 grey  | -0.203127915 | 9.69E-06    | -0.213452164 | 3.25E-06    |
| SPON1 grey   | -0.374802285 | 5.05E-17    | -0.379680404 | 1.84E-17    |
| SPP2 grey    | -0.086544624 | 0.061658931 | -0.087740053 | 0.058138463 |
| SPR grey     | 0.022179853  | 0.632589744 | 0.036317463  | 0.433637669 |
| SPRED3 grey  | 0.017253698  | 0.709979204 | 0.003458694  | 0.940578396 |
| SPRY4 grey   | 0.180677296  | 8.62E-05    | 0.160331715  | 0.000505098 |
| SPRYD4 grey  | -0.161667869 | 0.000452494 | -0.170922551 | 0.00020635  |
| SPSB4 grey   | -0.209483702 | 4.98E-06    | -0.220055322 | 1.57E-06    |
| SPTBN5 grey  | 0.088067353  | 0.057204149 | 0.091964787  | 0.04700439  |
| SPX grey     | 0.04644513   | 0.316566555 | 0.02169619   | 0.640029784 |
| SQSTM1 grey  | -0.015418007 | 0.739653096 | -0.0188184   | 0.685025405 |
| SRC grey     | -0.020011858 | 0.666218159 | -0.025082917 | 0.588728971 |
| SRMS grey    | 0.261458107  | 9.75E-09    | 0.270681811  | 2.76E-09    |
| SRPK3 grey   | 0.162763948  | 0.000413196 | 0.176294966  | 0.000128356 |
| SRR grey     | 0.274225692  | 1.68E-09    | 0.25125394   | 3.72E-08    |
| SRRM3 grey   | -0.090418206 | 0.050852925 | -0.077591613 | 0.093973297 |
| SRRM4 grey   | -0.155685067 | 0.000735551 | -0.160423128 | 0.000501326 |
| SRXN1 grey   | 0.12610199   | 0.006358754 | 0.088933808  | 0.054790705 |
| SRY grey     | -0.066005256 | 0.154412793 | -0.068104936 | 0.141691125 |

|         |      |              |             |              |             |
|---------|------|--------------|-------------|--------------|-------------|
| SSBP3   | grey | -0.288312873 | 2.17E-10    | -0.292851214 | 1.09E-10    |
| SSC4D   | grey | -0.294202709 | 8.88E-11    | -0.304795541 | 1.70E-11    |
| SSH3    | grey | 0.164710697  | 0.000351125 | 0.168111584  | 0.000263069 |
| SSPO    | grey | -0.064128031 | 0.166502753 | -0.065896615 | 0.155093837 |
| SST     | grey | -0.314149055 | 3.72E-12    | -0.312362885 | 5.00E-12    |
| SSTR4   | grey | -0.073944161 | 0.110522353 | -0.081807708 | 0.077378587 |
| SSTR5   | grey | 0.06999481   | 0.130941421 | 0.086844652  | 0.06075924  |
| SSX2    | grey | -0.069639531 | 0.132912637 | -0.074957197 | 0.105711274 |
| SSX2B   | grey | -0.081167502 | 0.07973326  | -0.079420547 | 0.086454946 |
| SSX3    | grey | -0.082730021 | 0.074085919 | -0.077995592 | 0.092269187 |
| SSX5    | grey | -0.042724917 | 0.356925356 | -0.045222212 | 0.329490729 |
| ST20-MT | grey | -0.023587719 | 0.611145092 | -0.040304751 | 0.384840591 |
| ST3GAL1 | grey | -0.16663831  | 0.000298322 | -0.169287761 | 0.000237762 |
| ST3GAL4 | grey | -0.063263572 | 0.172303051 | -0.073341631 | 0.113464612 |
| ST6GAL1 | grey | -0.117010162 | 0.011388956 | -0.105543811 | 0.022543538 |
| ST6GAL1 | grey | -0.069158949 | 0.135615416 | -0.038256272 | 0.409478672 |
| ST6GAL1 | grey | -0.227419783 | 6.81E-07    | -0.228396838 | 6.08E-07    |
| ST7     | grey | 0.010627953  | 0.818819973 | -0.007558315 | 0.870596251 |
| ST8SIA2 | grey | -0.179567993 | 9.55E-05    | -0.195753329 | 2.04E-05    |
| ST8SIA5 | grey | -0.194723218 | 2.26E-05    | -0.203405124 | 9.41E-06    |
| ST8SIA6 | grey | 0.010944378  | 0.813523271 | 0.011767416  | 0.799786609 |
| STAC    | grey | -0.283145501 | 4.65E-10    | -0.276214061 | 1.27E-09    |
| STAC2   | grey | -0.033645652 | 0.468240099 | -0.034087627 | 0.462413022 |
| STAG3L5 | grey | -0.065971613 | 0.154623449 | -0.084164564 | 0.069192226 |
| STARD3  | grey | -0.043769348 | 0.345281531 | -0.055420233 | 0.231950085 |
| STARD6  | grey | 0.040117056  | 0.387059758 | 0.013504504  | 0.771000861 |
| STAT6   | grey | 0.055392095  | 0.232187564 | 0.05348287   | 0.248704037 |
| STATH   | grey | -0.052132176 | 0.260872503 | -0.045384124 | 0.327760291 |
| STC1    | grey | 0.24799159   | 5.64E-08    | 0.222034305  | 1.26E-06    |
| STEAP1B | grey | -0.167647098 | 0.00027374  | -0.176864943 | 0.00012195  |
| STEAP3  | grey | 0.216074428  | 2.44E-06    | 0.210574328  | 4.43E-06    |
| STK11IP | grey | 0.041804557  | 0.367387842 | 0.036986217  | 0.425213102 |
| STK16   | grey | 0.197873306  | 1.65E-05    | 0.204678224  | 8.25E-06    |
| STK25   | grey | 0.102157736  | 0.027278512 | 0.094859465  | 0.040456332 |
| STK32A  | grey | 0.012691797  | 0.784431981 | 0.032022222  | 0.489987587 |
| STK32B  | grey | 0.063136513  | 0.173168131 | 0.046799624  | 0.312882997 |
| STK32C  | grey | -0.155174815 | 0.000766068 | -0.160738996 | 0.000488491 |
| STK39   | grey | 0.104004726  | 0.024599391 | 0.117193074  | 0.01126029  |
| STKLD1  | grey | 0.016104591  | 0.72850644  | 0.017364971  | 0.708193974 |
| STMN2   | grey | -0.011905313 | 0.797490974 | 0.015901981  | 0.731789978 |
| STMN4   | grey | -0.030891081 | 0.505454689 | -0.051475916 | 0.266930572 |
| STOML1  | grey | 0.149017627  | 0.001239121 | 0.177260999  | 0.000117678 |
| STON2   | grey | -0.085975987 | 0.063394261 | -0.080525551 | 0.08215231  |
| STRA6   | grey | 0.005578061  | 0.904308234 | 0.003655349  | 0.93720656  |
| STRA8   | grey | 0.020244654  | 0.662573429 | 0.015094563  | 0.744923295 |



|         |      |              |             |              |             |
|---------|------|--------------|-------------|--------------|-------------|
| STRC    | grey | 0.061743248  | 0.182867374 | 0.052209525  | 0.26016477  |
| STX16-N | grey | -0.069842888 | 0.131781554 | -0.088947788 | 0.054752469 |
| STX1A   | grey | -0.199527971 | 1.40E-05    | -0.200535459 | 1.26E-05    |
| STYK1   | grey | 0.134977703  | 0.003472776 | 0.173217758  | 0.000168757 |
| SULT1A2 | grey | -0.099471038 | 0.031621792 | -0.041170023 | 0.374710873 |
| SULT1A3 | grey | -0.067987422 | 0.142381233 | -0.071424398 | 0.123237261 |
| SULT1A4 | grey | -0.050883681 | 0.272479799 | -0.025858809 | 0.577247875 |
| SULT1C2 | grey | -0.226349709 | 7.71E-07    | -0.197209941 | 1.77E-05    |
| SULT1E1 | grey | -0.066030357 | 0.154255765 | -0.048959876 | 0.291046047 |
| SULT2B1 | grey | 0.292124858  | 1.22E-10    | 0.301064239  | 3.07E-11    |
| SULT4A1 | grey | -0.159617293 | 0.000535504 | -0.170997969 | 0.000204999 |
| SUMF1   | grey | 0.079843035  | 0.084788931 | 0.05528535   | 0.233090001 |
| SUPT3H  | grey | -0.190789706 | 3.32E-05    | -0.218173939 | 1.94E-06    |
| SUPT5H  | grey | -0.131015335 | 0.004569518 | -0.115947252 | 0.012162703 |
| SUSD2   | grey | 0.055657197  | 0.229957041 | 0.051724023  | 0.264629    |
| SUSD3   | grey | -0.410537699 | 2.06E-20    | -0.39531534  | 6.43E-19    |
| SUSD4   | grey | -0.170778754 | 0.000208949 | -0.183019707 | 6.95E-05    |
| SV2A    | grey | -0.279747791 | 7.63E-10    | -0.288601024 | 2.07E-10    |
| SV2B    | grey | -0.208349904 | 5.62E-06    | -0.20742907  | 6.19E-06    |
| SV2C    | grey | -0.211513103 | 4.01E-06    | -0.208299445 | 5.65E-06    |
| SVOP    | grey | 0.023418885  | 0.61369979  | 0.007873991  | 0.865242136 |
| SYCE1   | grey | -0.017094036 | 0.71254356  | -0.031980515 | 0.490553331 |
| SYCE3   | grey | 0.153594817  | 0.000868156 | 0.160196     | 0.000510748 |
| SYN1    | grey | -0.286672033 | 2.77E-10    | -0.272334178 | 2.19E-09    |
| SYN2    | grey | -0.040470243 | 0.382890375 | -0.071224409 | 0.124293289 |
| SYNDIG1 | grey | -0.325654102 | 5.35E-13    | -0.340022587 | 4.20E-14    |
| SYNDIG1 | grey | -0.09010485  | 0.051663908 | -0.07657628  | 0.098367478 |
| SYNGR1  | grey | -0.165464209 | 0.000329524 | -0.187381085 | 4.61E-05    |
| SYNGR4  | grey | -0.001304204 | 0.97757557  | 0.007873299  | 0.865253881 |
| SYNJ2BP | grey | 0.04376535   | 0.345325639 | 0.031122121  | 0.502274791 |
| SYP     | grey | -0.080878229 | 0.08081608  | -0.077673549 | 0.093625647 |
| SYS1-DB | grey | -0.14159237  | 0.002161443 | -0.15695462  | 0.000664438 |
| SYT12   | grey | -0.135321866 | 0.003389823 | -0.118840805 | 0.010158005 |
| SYT14   | grey | -0.207914585 | 5.88E-06    | -0.243797782 | 9.55E-08    |
| SYT17   | grey | -0.055226181 | 0.233591293 | -0.04728811  | 0.307853402 |
| SYT2    | grey | 0.038015715  | 0.412432086 | 0.037516588  | 0.418600075 |
| SYT3    | grey | -0.168039948 | 0.000264689 | -0.161576065 | 0.000455939 |
| SYT4    | grey | 0.002116147  | 0.963622835 | 0.001273641  | 0.97810093  |
| SYT7    | grey | -0.035815584 | 0.440022725 | -0.027795725 | 0.54905506  |
| SYVN1   | grey | 0.082851364  | 0.07366135  | 0.106411284  | 0.021451727 |
| T       | grey | 0.013883195  | 0.764765496 | 0.042236264  | 0.362456771 |
| TAAR6   | grey | -0.092011764 | 0.046891425 | -0.08181501  | 0.077352059 |
| TAC1    | grey | 0.04476261   | 0.334434801 | 0.022350882  | 0.629967645 |
| TAC3    | grey | 0.148745336  | 0.001265235 | 0.123141436  | 0.007718917 |
| TADA2A  | grey | 0.097428756  | 0.035306943 | 0.070920704  | 0.125910415 |

|         |      |              |             |              |             |
|---------|------|--------------|-------------|--------------|-------------|
| TAF15   | grey | 0.264819085  | 6.19E-09    | 0.241322705  | 1.30E-07    |
| TAF1C   | grey | 0.089571287  | 0.053069611 | 0.095805186  | 0.038491535 |
| TAF6L   | grey | 0.067813565  | 0.143406934 | 0.029834113  | 0.520135874 |
| TAF7L   | grey | -0.15007765  | 0.001142113 | -0.158438179 | 0.00058943  |
| TAGLN3  | grey | -0.044156785 | 0.341024287 | -0.052662558 | 0.256046202 |
| TAL2    | grey | -0.045491472 | 0.326616255 | -0.057970506 | 0.211136059 |
| TAMM41  | grey | 0.089676977  | 0.052788662 | 0.056385146  | 0.223910447 |
| TAS1R1  | grey | 0.020680198  | 0.655775783 | 0.026151835  | 0.572939411 |
| TAS1R3  | grey | -0.08119543  | 0.079629341 | -0.057192791 | 0.217335462 |
| TBATA   | grey | 0.053184072  | 0.251361236 | 0.065063555  | 0.160391845 |
| TBC1D10 | grey | -0.15355183  | 0.000871101 | -0.17668449  | 0.000123945 |
| TBC1D10 | grey | 0.034783873  | 0.453315944 | 0.064478263  | 0.164194894 |
| TBC1D13 | grey | -0.042229368 | 0.362535219 | -0.036136836 | 0.435929488 |
| TBC1D16 | grey | 0.113975209  | 0.013721995 | 0.090048843  | 0.051809988 |
| TBC1D2  | grey | 0.228571541  | 5.96E-07    | 0.251930831  | 3.41E-08    |
| TBC1D20 | grey | -0.018678064 | 0.687250039 | -0.02027255  | 0.662137202 |
| TBC1D22 | grey | 0.125533328  | 0.006601992 | 0.139157571  | 0.002579657 |
| TBC1D24 | grey | 0.073981498  | 0.110342027 | 0.082881709  | 0.073555487 |
| TBC1D25 | grey | -0.167702092 | 0.000272456 | -0.171012469 | 0.00020474  |
| TBC1D26 | grey | -0.071229854 | 0.124264443 | -0.101184119 | 0.02878919  |
| TBC1D28 | grey | -0.025238218 | 0.586422544 | -0.014373568 | 0.75671381  |
| TBC1D3  | grey | -0.06393749  | 0.16776849  | -0.079951365 | 0.084365945 |
| TBC1D3E | grey | -0.070467407 | 0.128354407 | -0.070797925 | 0.126568792 |
| TBC1D3C | grey | -0.054649309 | 0.238518629 | -0.048346617 | 0.297138674 |
| TBC1D3I | grey | -0.108627486 | 0.018868396 | -0.107504073 | 0.020141878 |
| TBC1D3F | grey | -0.06804017  | 0.142071155 | -0.09314772  | 0.044228303 |
| TBC1D3F | grey | -0.03980585  | 0.390756332 | -0.043006879 | 0.353757871 |
| TBC1D3C | grey | -0.054990881 | 0.235592347 | -0.054745678 | 0.237690452 |
| TBC1D3F | grey | -0.060648936 | 0.190762503 | -0.0587468   | 0.205076118 |
| TBC1D3I | grey | -0.057123758 | 0.217891984 | -0.058902471 | 0.20387624  |
| TBC1D3k | grey | -0.064311471 | 0.165290959 | -0.066858558 | 0.149142181 |
| TBC1D3I | grey | -0.079435741 | 0.086394579 | -0.104940366 | 0.023331144 |
| TBCC    | grey | -0.062280022 | 0.179084134 | -0.042752172 | 0.356618405 |
| TBKBP1  | grey | -0.292132843 | 1.22E-10    | -0.294110943 | 9.01E-11    |
| TBR1    | grey | -0.05266349  | 0.25603778  | -0.018212361 | 0.694651691 |
| TBX1    | grey | -0.091336223 | 0.048538001 | -0.117329068 | 0.011165462 |
| TBX10   | grey | 0.091469036  | 0.048210512 | 0.107887465  | 0.019699112 |
| TBX15   | grey | 0.013663664  | 0.768378377 | -0.007155743 | 0.877432752 |
| TBX18   | grey | 0.231102832  | 4.43E-07    | 0.215797731  | 2.52E-06    |
| TBX19   | grey | -0.137322499 | 0.002942221 | -0.132210049 | 0.004209774 |
| TBX20   | grey | -0.012557067 | 0.78666489  | -0.047906864 | 0.301559514 |
| TBX22   | grey | -0.031346075 | 0.499202502 | -0.026960974 | 0.561121971 |
| TBX4    | grey | -0.122179185 | 0.008213919 | -0.120519239 | 0.009134694 |
| TBX5    | grey | -0.081305894 | 0.079219396 | -0.031214026 | 0.50101279  |
| TBX6    | grey | 0.036449378  | 0.4319683   | 0.048401329  | 0.296591697 |

|         |      |              |             |              |             |
|---------|------|--------------|-------------|--------------|-------------|
| TCAP    | grey | -0.162823127 | 0.000411167 | -0.18312084  | 6.88E-05    |
| TCEA3   | grey | -0.002001178 | 0.965597922 | -0.003975321 | 0.931722769 |
| TCEB3C1 | grey | -0.022805048 | 0.623027278 | -0.032395289 | 0.484942537 |
| TCERG1I | grey | -0.137225236 | 0.002962673 | -0.140921366 | 0.002270035 |
| TCF24   | grey | 0.020882645  | 0.652625753 | 0.011755473  | 0.799985506 |
| TCF7L1  | grey | -0.077665372 | 0.093660296 | -0.082858913 | 0.073635001 |
| TCL1B   | grey | 0.019936571  | 0.667398579 | -0.015372303 | 0.740397068 |
| TCN1    | grey | 0.258100525  | 1.52E-08    | 0.273875832  | 1.76E-09    |
| TCN2    | grey | -0.036836123 | 0.427095561 | -0.059629192 | 0.198342175 |
| TCP10L2 | grey | -0.183629038 | 6.56E-05    | -0.180435673 | 8.82E-05    |
| TCP11   | grey | -0.06706459  | 0.147890335 | -0.068215829 | 0.141042253 |
| TCP11X2 | grey | -0.074812919 | 0.106386186 | -0.051131042 | 0.270152543 |
| TCTA    | grey | 0.154587276  | 0.000802658 | 0.196430657  | 1.91E-05    |
| TDO2    | grey | -0.106721801 | 0.021072216 | -0.073722141 | 0.111599448 |
| TDRD12  | grey | -0.186931969 | 4.81E-05    | -0.197305624 | 1.75E-05    |
| TDRD5   | grey | -0.235616883 | 2.59E-07    | -0.242382534 | 1.14E-07    |
| TDRD9   | grey | -0.045432636 | 0.32724297  | -0.041342871 | 0.372707204 |
| TEC     | grey | 0.123574336  | 0.007505048 | 0.134406661  | 0.003614484 |
| TECPR1  | grey | 0.195323219  | 2.13E-05    | 0.221257912  | 1.38E-06    |
| TECTA   | grey | -0.262382051 | 8.61E-09    | -0.283369342 | 4.50E-10    |
| TECTB   | grey | 0.034371938  | 0.458686037 | 0.032802571  | 0.479466969 |
| TEKT5   | grey | 0.11900957   | 0.0100507   | 0.120504683  | 0.009143159 |
| TEN1    | grey | -0.016209699 | 0.72680499  | -0.026672201 | 0.56532598  |
| TEN1-CD | grey | -0.162097426 | 0.000436696 | -0.188627891 | 4.09E-05    |
| TENM1   | grey | -0.15089902  | 0.001071811 | -0.157742385 | 0.000623573 |
| TENM2   | grey | -0.081535092 | 0.07837427  | -0.078614057 | 0.089708326 |
| TENM3   | grey | -0.122210676 | 0.008197282 | -0.130766395 | 0.004647884 |
| TENM4   | grey | -0.279211321 | 8.24E-10    | -0.289671242 | 1.77E-10    |
| TEPP    | grey | -0.34272526  | 2.57E-14    | -0.343700413 | 2.15E-14    |
| TESC    | grey | 0.227404001  | 6.82E-07    | 0.224577294  | 9.44E-07    |
| TESK1   | grey | 0.143534528  | 0.001873339 | 0.149765444  | 0.001169931 |
| TESK2   | grey | -0.186862952 | 4.84E-05    | -0.209237238 | 5.11E-06    |
| TEX13B  | grey | -0.070210113 | 0.129757889 | -0.069298004 | 0.134829061 |
| TEX19   | grey | -0.027109843 | 0.558960631 | -0.0236601   | 0.610051302 |
| TEX22   | grey | 0.032586577  | 0.48236663  | 0.049122045  | 0.289449019 |
| TEX29   | grey | -0.026661042 | 0.565488736 | -0.02096552  | 0.651338003 |
| TEX35   | grey | -0.053406498 | 0.249381343 | -0.04966599  | 0.284135331 |
| TEX36   | grey | 0.127429277  | 0.005822023 | 0.140005821  | 0.002426243 |
| TEX43   | grey | -0.03663416  | 0.429636173 | -0.000869393 | 0.985050594 |
| TFAP2C  | grey | -0.023672545 | 0.609863329 | -0.02402973  | 0.604479208 |
| TFAP2E  | grey | -0.158076927 | 0.000606934 | -0.1675182   | 0.000276772 |
| TFB1M   | grey | 0.245608464  | 7.62E-08    | 0.239523051  | 1.62E-07    |
| TFCP2L1 | grey | 0.085642186  | 0.064431535 | 0.079494451  | 0.086161632 |
| TFF2    | grey | 0.082115255  | 0.076267682 | 0.098299207  | 0.033693852 |
| TFPI2   | grey | 0.13970395   | 0.002479858 | 0.122237363  | 0.008183206 |

|          |      |              |             |              |             |
|----------|------|--------------|-------------|--------------|-------------|
| TG       | grey | 0.047074055  | 0.310050774 | 0.051033017  | 0.271073168 |
| TGFA     | grey | 0.20598767   | 7.20E-06    | 0.204242553  | 8.63E-06    |
| TGFB3I   | grey | 0.031210248  | 0.501064635 | 0.041069118  | 0.375883632 |
| TGIF1    | grey | 0.150663188  | 0.001091577 | 0.109669745  | 0.017750264 |
| TGIF2    | grey | -0.358313309 | 1.36E-15    | -0.350970528 | 5.53E-15    |
| TGIF2-C2 | grey | -0.193476134 | 2.56E-05    | -0.192526484 | 2.81E-05    |
| TGIF2LY  | grey | -0.030621633 | 0.509176526 | -0.034247982 | 0.460308885 |
| TGM1     | grey | -0.229453609 | 5.38E-07    | -0.229508803 | 5.34E-07    |
| TGM5     | grey | 0.063025681  | 0.173925364 | 0.061749994  | 0.182819465 |
| TGM7     | grey | 0.013929342  | 0.764006687 | 0.027248228  | 0.556955116 |
| TH       | grey | -0.182122484 | 7.55E-05    | -0.198073472 | 1.62E-05    |
| THADA    | grey | -0.291846966 | 1.27E-10    | -0.297608583 | 5.26E-11    |
| THBS3    | grey | -0.273397308 | 1.89E-09    | -0.289883168 | 1.71E-10    |
| THEG     | grey | -0.036621233 | 0.429799093 | -0.031458001 | 0.497670805 |
| THEM4    | grey | -0.084199992 | 0.069074801 | -0.110376636 | 0.017025258 |
| THEM5    | grey | -0.056378096 | 0.223968458 | -0.062660045 | 0.176440987 |
| THNSL2   | grey | -0.219755544 | 1.63E-06    | -0.217181475 | 2.16E-06    |
| THRSP    | grey | -0.002178008 | 0.962560188 | 0.002562173  | 0.955962607 |
| THSD7B   | grey | -0.199011508 | 1.47E-05    | -0.190798477 | 3.32E-05    |
| TICAM1   | grey | 0.256398355  | 1.91E-08    | 0.255554439  | 2.13E-08    |
| TIGD6    | grey | 0.175877356  | 0.000133248 | 0.153775607  | 0.000855868 |
| TIMP4    | grey | -0.156907329 | 0.000666968 | -0.158606122 | 0.000581453 |
| TINAG    | grey | -0.047277739 | 0.307959628 | -0.047282832 | 0.307907462 |
| TINAGL1  | grey | 0.132285771  | 0.00418786  | 0.131036652  | 0.004562864 |
| TJAP1    | grey | -0.254666989 | 2.39E-08    | -0.277926684 | 9.92E-10    |
| TKTL1    | grey | -0.179674073 | 9.45E-05    | -0.184269522 | 6.18E-05    |
| TLCD2    | grey | -0.072894968 | 0.115685171 | -0.050285487 | 0.278164224 |
| TLDC1    | grey | 0.069999034  | 0.13091812  | 0.086916072  | 0.060546676 |
| TLDC2    | grey | -0.223790892 | 1.03E-06    | -0.222584207 | 1.18E-06    |
| TLE1     | grey | 0.185600235  | 5.46E-05    | 0.159152274  | 0.0005562   |
| TLE3     | grey | 0.232912024  | 3.58E-07    | 0.229895543  | 5.11E-07    |
| TLE6     | grey | 0.438958264  | 2.04E-23    | 0.4313351    | 1.39E-22    |
| TLL2     | grey | -0.054184309 | 0.242543295 | -0.060083438 | 0.194939119 |
| TLN2     | grey | 0.015629779  | 0.736209044 | -0.004998514 | 0.914209885 |
| TLR5     | grey | 0.157913732  | 0.000614999 | 0.13109881   | 0.004543509 |
| TLX1     | grey | -0.011555664 | 0.803315079 | -0.006519779 | 0.888251117 |
| TLX1NB   | grey | -0.113630037 | 0.014012318 | -0.10320978  | 0.025723281 |
| TLX2     | grey | -0.046705691 | 0.313856311 | -0.062238365 | 0.179375643 |
| TLX3     | grey | 0.044065847  | 0.342020516 | 0.039159491  | 0.398501938 |
| TM4SF1   | grey | 0.028746826  | 0.53546362  | 0.031908898  | 0.491525637 |
| TM4SF19  | grey | -0.043740888 | 0.345595584 | -0.032781324 | 0.479751787 |
| TM4SF20  | grey | -0.095929944 | 0.038238478 | -0.092254437 | 0.04631148  |
| TM4SF4   | grey | -0.020174866 | 0.663665218 | -0.021229384 | 0.64724491  |
| TM6SF2   | grey | -0.170486613 | 0.000214323 | -0.182985511 | 6.97E-05    |
| TMBIM1   | grey | -0.159344502 | 0.000547556 | -0.146178242 | 0.00153754  |

|        |      |              |             |              |             |
|--------|------|--------------|-------------|--------------|-------------|
| TMC7   | grey | -0.118559604 | 0.010339059 | -0.134856246 | 0.003502487 |
| TMCC2  | grey | -0.342450116 | 2.70E-14    | -0.349578229 | 7.19E-15    |
| TMCO1  | grey | -0.200245474 | 1.30E-05    | -0.208816734 | 5.35E-06    |
| TMCO4  | grey | 0.091279552  | 0.048678305 | 0.11126778   | 0.016148278 |
| TMCO6  | grey | -0.089916472 | 0.052156612 | -0.121245055 | 0.008721344 |
| TMEM10 | grey | -0.169629781 | 0.000230842 | -0.164963109 | 0.000343746 |
| TMEM10 | grey | 0.103507366  | 0.025297475 | 0.104481919  | 0.023945313 |
| TMEM10 | grey | -0.377734711 | 2.76E-17    | -0.373096564 | 7.17E-17    |
| TMEM11 | grey | 0.099378128  | 0.031782004 | 0.113295273  | 0.014299036 |
| TMEM11 | grey | 0.118904529  | 0.010117368 | 0.112199315  | 0.015274105 |
| TMEM12 | grey | -0.209968706 | 4.73E-06    | -0.218689333 | 1.83E-06    |
| TMEM12 | grey | 0.090042344  | 0.05182696  | 0.10272274   | 0.026433502 |
| TMEM13 | grey | -0.27985513  | 7.51E-10    | -0.263056113 | 7.86E-09    |
| TMEM13 | grey | -0.184967617 | 5.79E-05    | -0.166490652 | 0.000302089 |
| TMEM13 | grey | -0.129232176 | 0.005158207 | -0.114299151 | 0.013454359 |
| TMEM13 | grey | 0.101673439  | 0.02802121  | 0.111493132  | 0.015932878 |
| TMEM14 | grey | 0.066164753  | 0.153417054 | 0.050113009  | 0.279818056 |
| TMEM14 | grey | 0.028162465  | 0.543794222 | 0.031051092  | 0.503251259 |
| TMEM15 | grey | -0.187231963 | 4.67E-05    | -0.190881807 | 3.29E-05    |
| TMEM15 | grey | 0.200957046  | 1.21E-05    | 0.175314958  | 0.000140114 |
| TMEM15 | grey | -0.082261325 | 0.075744615 | -0.07683651  | 0.097225951 |
| TMEM15 | grey | -0.095707187 | 0.038691306 | -0.102044192 | 0.027451101 |
| TMEM15 | grey | -0.081930595 | 0.076933135 | -0.120534292 | 0.009125947 |
| TMEM15 | grey | 0.17931934   | 9.76E-05    | 0.165869177  | 0.000318434 |
| TMEM16 | grey | -0.169983731 | 0.000223879 | -0.182435348 | 7.33E-05    |
| TMEM17 | grey | -0.373978479 | 5.98E-17    | -0.340450084 | 3.89E-14    |
| TMEM17 | grey | -0.121161154 | 0.008768258 | -0.119074095 | 0.01000994  |
| TMEM18 | grey | -0.075574167 | 0.102863301 | -0.080432666 | 0.082507188 |
| TMEM19 | grey | 0.065615416  | 0.15686716  | 0.050735548  | 0.273880021 |
| TMEM19 | grey | -0.082134247 | 0.076199508 | -0.120649583 | 0.009059203 |
| TMEM20 | grey | -0.04982094  | 0.282633777 | -0.042763241 | 0.356493789 |
| TMEM20 | grey | -0.083854908 | 0.070225533 | -0.08248639  | 0.074944389 |
| TMEM21 | grey | 0.221418727  | 1.35E-06    | 0.245446988  | 7.77E-08    |
| TMEM21 | grey | -0.209551837 | 4.94E-06    | -0.21481131  | 2.81E-06    |
| TMEM21 | grey | 0.015092345  | 0.744959484 | 0.002384392  | 0.959015441 |
| TMEM22 | grey | -0.288163899 | 2.21E-10    | -0.270661838 | 2.77E-09    |
| TMEM22 | grey | -0.194265533 | 2.37E-05    | -0.167255832 | 0.000283041 |
| TMEM22 | grey | 0.247728128  | 5.83E-08    | 0.244204116  | 9.08E-08    |
| TMEM23 | grey | 0.005683414  | 0.902509811 | 0.013919694  | 0.764165326 |
| TMEM23 | grey | 0.003091746  | 0.946872838 | 0.013322367  | 0.774005151 |
| TMEM25 | grey | -0.049215748 | 0.288528929 | -0.065081729 | 0.160274824 |
| TMEM25 | grey | -0.037208843 | 0.422429874 | -0.020815044 | 0.65367693  |
| TMEM25 | grey | 0.100312781  | 0.030201504 | 0.065299897  | 0.158875115 |
| TMEM26 | grey | -0.007792218 | 0.866628498 | -0.033451689 | 0.470810076 |
| TMEM26 | grey | 0.028695085  | 0.536198639 | 0.054102561  | 0.24325573  |

|              |              |             |              |             |
|--------------|--------------|-------------|--------------|-------------|
| TMEM26 grey  | -0.033080975 | 0.475743499 | -0.032893383 | 0.47825068  |
| TMEM27 grey  | 0.068101496  | 0.14171129  | 0.050937197  | 0.27197515  |
| TMEM37 grey  | 0.142720478  | 0.001989524 | 0.15815357   | 0.000603181 |
| TMEM42 grey  | -0.119033868 | 0.010035333 | -0.112722267 | 0.014801787 |
| TMEM44 grey  | -0.138606121 | 0.00268408  | -0.138687507 | 0.00266843  |
| TMEM51 grey  | -0.026866707 | 0.562492664 | -0.015200697 | 0.743192631 |
| TMEM59 grey  | -0.186513831 | 5.00E-05    | -0.172013338 | 0.0001876   |
| TMEM61 grey  | -0.002340766 | 0.959764683 | -0.011990839 | 0.79606806  |
| TMEM63 grey  | -0.295937857 | 6.81E-11    | -0.303162538 | 2.20E-11    |
| TMEM72 grey  | 0.136763317  | 0.003061578 | 0.127793929  | 0.005681874 |
| TMEM74 grey  | -0.029814335 | 0.520412653 | -0.045976715 | 0.321477196 |
| TMEM74 grey  | -0.120688085 | 0.009037011 | -0.132101459 | 0.004241381 |
| TMEM79 grey  | 0.14448536   | 0.001745515 | 0.116909204  | 0.011460529 |
| TMEM80 grey  | 0.08127947   | 0.079317302 | 0.064566367  | 0.163618128 |
| TMEM81 grey  | 0.068331646  | 0.140367    | 0.047316032  | 0.307567531 |
| TMEM82 grey  | -0.068433217 | 0.139776851 | -0.061033101 | 0.187962861 |
| TMEM88 grey  | -0.194552078 | 2.30E-05    | -0.192292078 | 2.87E-05    |
| TMEM8C grey  | -0.06489891  | 0.161454885 | -0.080952872 | 0.080535537 |
| TMEM92 grey  | 0.013376718  | 0.773108299 | 0.036171203  | 0.435492891 |
| TMEM98 grey  | -0.001089094 | 0.981273419 | -0.037854987 | 0.414412408 |
| TMEM99 grey  | 0.020973788  | 0.651209594 | 0.025754332  | 0.578787712 |
| TMIE grey    | -0.271129392 | 2.59E-09    | -0.289960389 | 1.69E-10    |
| TMIGD1 grey  | -0.063130063 | 0.173212132 | -0.058424886 | 0.207573581 |
| TMOD4 grey   | -0.059646851 | 0.198209076 | -0.062982868 | 0.17421854  |
| TMPRSS1 grey | 0.030923885  | 0.505002553 | 0.022671757  | 0.625060759 |
| TMPRSS4 grey | -0.08442974  | 0.06831727  | -0.077946313 | 0.092475727 |
| TMPRSS6 grey | -0.257491062 | 1.65E-08    | -0.251336862 | 3.68E-08    |
| TMSB4X grey  | 0.191927269  | 2.98E-05    | 0.211667843  | 3.94E-06    |
| TMSB4Y grey  | 0.100674084  | 0.029608839 | 0.095133434  | 0.039878609 |
| TMUB2 grey   | 0.146587569  | 0.001490793 | 0.150054779  | 0.00114413  |
| TMX2-C1 grey | -0.099427918 | 0.031696061 | -0.107636031 | 0.019988517 |
| TNF grey     | -0.106558559 | 0.021270996 | -0.104607847 | 0.023775234 |
| TNFAIP2 grey | -0.104786495 | 0.023535744 | -0.075932534 | 0.10123719  |
| TNFAIP3 grey | -0.043593048 | 0.347229884 | -0.052827357 | 0.254559259 |
| TNFAIP6 grey | -0.15321976  | 0.000894169 | -0.140713878 | 0.002304609 |
| TNFRSF1 grey | 0.176643677  | 0.0001244   | 0.187194853  | 4.69E-05    |
| TNFRSF1 grey | 0.049674119  | 0.284056415 | 0.032405911  | 0.484799305 |
| TNFRSF1 grey | -0.109722292 | 0.017695458 | -0.094749492 | 0.040690214 |
| TNFRSF1 grey | -0.032753605 | 0.480123494 | -0.052985519 | 0.253137842 |
| TNFRSF1 grey | -0.00187589  | 0.96775053  | 0.003559406  | 0.93885146  |
| TNFRSF1 grey | -0.18794     | 4.37E-05    | -0.178146659 | 0.000108627 |
| TNFRSF1 grey | 0.163880086  | 0.000376462 | 0.197664212  | 1.69E-05    |
| TNFRSF1 grey | -0.00651407  | 0.888348327 | -0.001601887 | 0.972459051 |
| TNFRSF2 grey | 0.113777094  | 0.013887975 | 0.114981836  | 0.012905344 |
| TNFRSF2 grey | -0.032012381 | 0.490121045 | -0.034927232 | 0.451455415 |

|              |              |             |              |             |
|--------------|--------------|-------------|--------------|-------------|
| TNFSF11 grey | 0.077648595  | 0.093731416 | 0.107154938  | 0.020552588 |
| TNFSF12 grey | -0.017396521 | 0.707688079 | -0.007086421 | 0.878610913 |
| TNFSF15 grey | 0.172649264  | 0.000177418 | 0.174104077  | 0.00015604  |
| TNFSF18 grey | 0.070199171  | 0.129817836 | 0.05436028   | 0.241014665 |
| TNFSF4 grey  | -0.064147635 | 0.166372933 | -0.066578048 | 0.150859501 |
| TNFSF9 grey  | 0.14393168   | 0.00181894  | 0.167944296  | 0.000266867 |
| TNIK grey    | -0.18818109  | 4.27E-05    | -0.186577843 | 4.97E-05    |
| TNIP1 grey   | 0.136901751  | 0.003031627 | 0.165287117  | 0.000334486 |
| TNK2 grey    | -0.327933466 | 3.60E-13    | -0.329267389 | 2.86E-13    |
| TNKS1BI grey | 0.08841626   | 0.056221899 | 0.088721314  | 0.055374613 |
| TNMD grey    | -0.173417852 | 0.000165803 | -0.168269969 | 0.00025952  |
| TNN grey     | -0.100634278 | 0.029673642 | -0.108690643 | 0.018798935 |
| TNNC1 grey   | 0.061925497  | 0.181576297 | 0.073604344  | 0.112174267 |
| TNNI1 grey   | 0.053630438  | 0.247398974 | 0.040922104  | 0.37759632  |
| TNNI3K grey  | -0.018787739 | 0.685511217 | -0.036149271 | 0.43577148  |
| TNNT2 grey   | 0.132863118  | 0.00402414  | 0.115094332  | 0.012816797 |
| TNNT3 grey   | -0.24515132  | 8.07E-08    | -0.243976541 | 9.34E-08    |
| TOMM40 grey  | -0.109896744 | 0.017514563 | -0.108959184 | 0.018506069 |
| TOR4A grey   | -0.079665856 | 0.085484429 | -0.061019313 | 0.188062819 |
| TOX grey     | -0.139775276 | 0.002467094 | -0.126064946 | 0.006374351 |
| TOX2 grey    | -0.279265812 | 8.18E-10    | -0.260926138 | 1.05E-08    |
| TOX3 grey    | 0.264268139  | 6.67E-09    | 0.259898595  | 1.20E-08    |
| TP53 grey    | 0.261705041  | 9.43E-09    | 0.24914235   | 4.87E-08    |
| TP53I3 grey  | 0.242843553  | 1.07E-07    | 0.252070596  | 3.35E-08    |
| TP53TG3 grey | -0.0906901   | 0.050157885 | -0.099912965 | 0.030869159 |
| TP53TG3 grey | 0.051137188  | 0.270094885 | 0.056690734  | 0.221406202 |
| TP53TG3 grey | -0.304178631 | 1.87E-11    | -0.306802437 | 1.23E-11    |
| TP63 grey    | 0.14280813   | 0.001976704 | 0.137120123  | 0.002984921 |
| TPBG grey    | 0.136152583  | 0.003196955 | 0.162104798  | 0.000436429 |
| TPBGL grey   | -0.20666653  | 6.71E-06    | -0.199153442 | 1.45E-05    |
| TPD52L1 grey | -0.065967674 | 0.154648127 | -0.055382866 | 0.232265488 |
| TPD52L2 grey | -0.261502041 | 9.69E-09    | -0.249137842 | 4.88E-08    |
| TPK1 grey    | -0.074573398 | 0.107514144 | -0.070609018 | 0.12758698  |
| TPO grey     | -0.066113279 | 0.15373787  | -0.074437565 | 0.108157992 |
| TPRG1 grey   | 0.042290029  | 0.361845564 | 0.032390969  | 0.485000789 |
| TPTE grey    | -0.122049361 | 0.008282827 | -0.118847409 | 0.010153787 |
| TPTE2 grey   | -0.029493151 | 0.524918116 | 0.032873921  | 0.478511201 |
| TRABD2 grey  | -0.005237933 | 0.91011767  | -0.016594909 | 0.720580891 |
| TRABD2 grey  | -0.102377005 | 0.026947857 | -0.132296071 | 0.004184887 |
| TRAPPC2 grey | 0.054710746  | 0.237990419 | 0.010526127  | 0.82052623  |
| TRAPPC4 grey | 0.112523062  | 0.01498017  | 0.111001067  | 0.016406506 |
| TREM1 grey   | 0.028464466  | 0.539480902 | 0.05627324   | 0.224832532 |
| TREML2 grey  | -0.160142398 | 0.000512996 | -0.174959372 | 0.000144625 |
| TREX1 grey   | 0.103153276  | 0.025804825 | 0.063463834  | 0.170946112 |
| TREX2 grey   | -0.033277585 | 0.473123519 | -0.039380684 | 0.395840974 |

|          |      |              |             |              |             |
|----------|------|--------------|-------------|--------------|-------------|
| TRHDE    | grey | -0.246411406 | 6.89E-08    | -0.243425842 | 1.00E-07    |
| TRIB1    | grey | -0.150229022 | 0.001128846 | -0.178279315 | 0.000107329 |
| TRIB2    | grey | -0.209750458 | 4.84E-06    | -0.223861433 | 1.02E-06    |
| TRIL     | grey | -0.192377106 | 2.85E-05    | -0.191249455 | 3.18E-05    |
| TRIM11   | grey | 0.159541709  | 0.000538819 | 0.170153879  | 0.000220602 |
| TRIM16   | grey | 0.231069834  | 4.45E-07    | 0.239648548  | 1.59E-07    |
| TRIM16L  | grey | 0.162208681  | 0.000432689 | 0.147555816  | 0.001385364 |
| TRIM17   | grey | -0.161028035 | 0.000477014 | -0.162986168 | 0.000405626 |
| TRIM25   | grey | 0.002750254  | 0.952733618 | -0.008847887 | 0.84876395  |
| TRIM26   | grey | 0.162499662  | 0.000422369 | 0.185273515  | 5.63E-05    |
| TRIM27   | grey | -0.040938379 | 0.377406488 | -0.009458374 | 0.838467617 |
| TRIM36   | grey | 0.204518734  | 8.39E-06    | 0.230002583  | 5.04E-07    |
| TRIM39   | grey | -0.280227774 | 7.12E-10    | -0.296192091 | 6.55E-11    |
| TRIM39-I | grey | 0.091976387  | 0.046976475 | 0.100860596  | 0.029306815 |
| TRIM46   | grey | -0.186184522 | 5.16E-05    | -0.193534268 | 2.54E-05    |
| TRIM47   | grey | -0.152390779 | 0.000954239 | -0.146418675 | 0.001509921 |
| TRIM49D  | grey | -0.083775301 | 0.070493207 | -0.085152592 | 0.065978157 |
| TRIM50   | grey | -0.210551157 | 4.45E-06    | -0.201356857 | 1.16E-05    |
| TRIM54   | grey | -0.067876009 | 0.143037886 | -0.033705581 | 0.467447615 |
| TRIM58   | grey | -0.192561473 | 2.80E-05    | -0.228603722 | 5.94E-07    |
| TRIM6-T  | grey | -0.075175986 | 0.104694282 | -0.0770969   | 0.09609432  |
| TRIM62   | grey | -0.067232238 | 0.146877627 | -0.047398299 | 0.306726283 |
| TRIM64   | grey | 0.011132159  | 0.810383965 | 0.047818156  | 0.302456561 |
| TRIM65   | grey | 0.110803892  | 0.016599725 | 0.091953979  | 0.047030413 |
| TRIM7    | grey | -0.034287273 | 0.459794137 | -0.004485666 | 0.922983091 |
| TRIM8    | grey | -0.065972625 | 0.15461711  | -0.081132474 | 0.079863749 |
| TRIP10   | grey | 0.150813209  | 0.001078965 | 0.139041788  | 0.002601269 |
| TRIP6    | grey | -0.152950752 | 0.000913268 | -0.148372992 | 0.001301766 |
| TRMT44   | grey | -0.066673738 | 0.15027199  | -0.101503184 | 0.028286402 |
| TRNP1    | grey | -0.246471495 | 6.83E-08    | -0.203848009 | 8.99E-06    |
| TRPC3    | grey | -0.139764941 | 0.002468939 | -0.130179439 | 0.004837479 |
| TRPC6    | grey | 0.07900638   | 0.088113629 | 0.06147816   | 0.184757376 |
| TRPC7    | grey | -0.112914606 | 0.014631325 | -0.092404133 | 0.045956745 |
| TRPM1    | grey | -0.095825034 | 0.038451181 | -0.099503781 | 0.031565495 |
| TRPM6    | grey | 0.104813411  | 0.023499842 | 0.110431206  | 0.016970381 |
| TRPM8    | grey | 0.086856123  | 0.060725056 | 0.100889571  | 0.029260133 |
| TRPV3    | grey | -0.177426832 | 0.000115931 | -0.193255469 | 2.61E-05    |
| TRPV4    | grey | 0.137662737  | 0.002871685 | 0.14722749   | 0.001420321 |
| TRPV6    | grey | 0.016067576  | 0.729105949 | -0.006665878 | 0.885763912 |
| TSC22D4  | grey | -0.118414569 | 0.010433555 | -0.105032313 | 0.02320962  |
| TSHR     | grey | -0.185922834 | 5.29E-05    | -0.174661349 | 0.00014851  |
| TSKS     | grey | -0.098008102 | 0.034226181 | -0.087298928 | 0.059417661 |
| TSPAN10  | grey | -0.072586709 | 0.117237424 | -0.099170872 | 0.032141895 |
| TSPAN12  | grey | -0.154575898 | 0.000803382 | -0.172579393 | 0.000178511 |
| TSPAN14  | grey | 0.16119324   | 0.000470567 | 0.171205695  | 0.000201321 |



|        |      |              |             |              |             |
|--------|------|--------------|-------------|--------------|-------------|
| TSPEAR | grey | -0.175613465 | 0.00013643  | -0.203515038 | 9.31E-06    |
| TSPY2  | grey | 0.047109171  | 0.309689586 | 0.042366958  | 0.360972132 |
| TSPY8  | grey | -0.043008401 | 0.353740821 | -0.044187299 | 0.34069042  |
| TSR2   | grey | -0.247138301 | 6.28E-08    | -0.237738724 | 2.01E-07    |
| TTBK1  | grey | -0.195749437 | 2.04E-05    | -0.183081447 | 6.91E-05    |
| TTC22  | grey | -0.20140316  | 1.16E-05    | -0.176276521 | 0.000128568 |
| TTC23  | grey | 0.10004894   | 0.030640689 | 0.088664613  | 0.055531294 |
| TTC36  | grey | -0.067536729 | 0.145051826 | -0.070491158 | 0.128225443 |
| TTC38  | grey | 0.458704725  | 1.12E-25    | 0.436451705  | 3.85E-23    |
| TTC39A | grey | 0.05230503   | 0.259292751 | 0.079839228  | 0.084803825 |
| TTC7A  | grey | 0.070626098  | 0.127494663 | 0.11536854   | 0.012603204 |
| TTC9B  | grey | 0.101493312  | 0.028301844 | 0.089620147  | 0.052939575 |
| TTLL11 | grey | 0.065226525  | 0.159344819 | 0.078462082  | 0.090332257 |
| TTLL2  | grey | -0.148498832 | 0.001289313 | -0.156960056 | 0.000664147 |
| TTPA   | grey | 0.01968183   | 0.671398689 | 0.030889522  | 0.505476186 |
| TTYH1  | grey | -0.192407698 | 2.84E-05    | -0.187529727 | 4.54E-05    |
| TUBA1A | grey | -0.028785241 | 0.534918235 | -0.025732738 | 0.57910622  |
| TUBA3C | grey | -0.006698329 | 0.885211616 | -0.006393616 | 0.890399807 |
| TUBA3E | grey | 0.045207538  | 0.329647846 | 0.026604615  | 0.566312074 |
| TUBB2A | grey | -0.201566701 | 1.14E-05    | -0.186789969 | 4.87E-05    |
| TUBB2B | grey | -0.238983929 | 1.73E-07    | -0.252458495 | 3.19E-08    |
| TUBB8  | grey | -0.016225883 | 0.726543135 | -0.03178476  | 0.493213417 |
| TUBGCP | grey | 0.16507069   | 0.000340645 | 0.162381716  | 0.000426524 |
| TULP1  | grey | -0.259601174 | 1.25E-08    | -0.264811568 | 6.20E-09    |
| TUSC3  | grey | -0.02427658  | 0.600770722 | -0.052349638 | 0.258886139 |
| TXNDC1 | grey | 0.223275243  | 1.10E-06    | 0.262136858  | 8.90E-09    |
| TXNL4B | grey | 0.190683213  | 3.36E-05    | 0.180080838  | 9.11E-05    |
| TXNRD3 | grey | -0.166414104 | 0.000304059 | -0.175266483 | 0.000140721 |
| TYRO3  | grey | -0.09487923  | 0.040414418 | -0.113936229 | 0.013754514 |
| TYRP1  | grey | -0.084291272 | 0.06877301  | -0.068137197 | 0.141502121 |
| TYW1B  | grey | 0.047305614  | 0.307674178 | 0.043363286  | 0.349779519 |
| UAP1L1 | grey | 0.279976411  | 7.38E-10    | 0.300545158  | 3.33E-11    |
| UBAC1  | grey | 0.004857273  | 0.916625082 | 0.020787272  | 0.654108963 |
| UBAC2  | grey | 0.060015588  | 0.195444702 | 0.065767662  | 0.155905159 |
| UBASH3 | grey | 0.059697454  | 0.19782803  | 0.084508161  | 0.068060264 |
| UBB    | grey | 0.16768793   | 0.000272786 | 0.175257814  | 0.00014083  |
| UBBP4  | grey | 0.204622358  | 8.30E-06    | 0.227114569  | 7.06E-07    |
| UBC    | grey | 0.083551899  | 0.071248844 | 0.095360419  | 0.039405261 |
| UBE2D2 | grey | 0.202297852  | 1.05E-05    | 0.219973296  | 1.59E-06    |
| UBE2D4 | grey | 0.00850875   | 0.854495012 | 0.008606575  | 0.852841082 |
| UBE2E2 | grey | -0.403595351 | 1.01E-19    | -0.394158184 | 8.29E-19    |
| UBE2I  | grey | 0.051151495  | 0.269960719 | 0.063208702  | 0.172676232 |
| UBE2L3 | grey | 0.205200402  | 7.81E-06    | 0.205897584  | 7.27E-06    |
| UBE2Q2 | grey | -0.036405068 | 0.43252863  | -0.039003066 | 0.400390205 |
| UBE2U  | grey | -0.175833414 | 0.000133773 | -0.183874604 | 6.41E-05    |

|         |      |              |             |              |             |
|---------|------|--------------|-------------|--------------|-------------|
| UBIAD1  | grey | 0.092186523  | 0.046473173 | 0.043351346  | 0.349912334 |
| UBOX5   | grey | -0.15051369  | 0.00110428  | -0.153551295 | 0.000871138 |
| UBQLNL  | grey | -0.021810066 | 0.638274781 | -0.027039114 | 0.559987008 |
| UCMA    | grey | -0.069974058 | 0.131055936 | -0.078638692 | 0.089607512 |
| UCN2    | grey | -0.160185562 | 0.000511185 | -0.142617841 | 0.002004632 |
| UCP1    | grey | -0.109699481 | 0.017719232 | -0.110100671 | 0.017305153 |
| UCP3    | grey | -0.051366482 | 0.267950088 | -0.06298128  | 0.174229419 |
| UGT1A1  | grey | -0.063828901 | 0.168493049 | -0.065935239 | 0.154851454 |
| UGT1A6  | grey | -0.019947348 | 0.667229554 | -0.020748713 | 0.654709022 |
| UGT1A8  | grey | -0.047129659 | 0.309478986 | -0.048962827 | 0.291016929 |
| UGT1A9  | grey | -0.101706276 | 0.027970309 | -0.09964617  | 0.031321673 |
| UGT2A2  | grey | -0.049226501 | 0.288423468 | -0.046584484 | 0.315115155 |
| UGT2A3  | grey | -0.099792206 | 0.031073282 | -0.092089109 | 0.046705926 |
| UGT2B1  | grey | -0.134158048 | 0.003677801 | -0.120227155 | 0.009305894 |
| UGT2B15 | grey | -0.078495599 | 0.090194354 | -0.069017059 | 0.136421436 |
| UGT2B17 | grey | -0.133074559 | 0.003965645 | -0.121124941 | 0.008788576 |
| UGT2B4  | grey | 0.041218985  | 0.374142629 | 0.030489256  | 0.511010252 |
| UGT3A1  | grey | -0.134569788 | 0.003573477 | -0.168819437 | 0.000247553 |
| UGT3A2  | grey | -0.088763931 | 0.055257095 | -0.080715349 | 0.081430997 |
| UGT8    | grey | 0.113290394  | 0.014303253 | 0.114309368  | 0.013445993 |
| ULK3    | grey | 0.251245695  | 3.72E-08    | 0.24064329   | 1.41E-07    |
| UNC13A  | grey | -0.030543712 | 0.5102555   | -0.037737559 | 0.415862766 |
| UNC45B  | grey | 0.006254671  | 0.892767115 | 0.014344704  | 0.75718703  |
| UNC5A   | grey | -0.112449308 | 0.015046691 | -0.096086512 | 0.037922898 |
| UNC5C   | grey | 0.05753045   | 0.214628035 | 0.060361838  | 0.192874654 |
| UNC5CL  | grey | -0.084339508 | 0.068613968 | -0.09747023  | 0.03522862  |
| UNC80   | grey | -0.222645695 | 1.18E-06    | -0.215251806 | 2.68E-06    |
| UNC93A  | grey | 0.197696048  | 1.68E-05    | 0.188856153  | 4.00E-05    |
| UNCX    | grey | -0.021708564 | 0.639838979 | -0.027982603 | 0.546371188 |
| UNK     | grey | -0.117798717 | 0.010843396 | -0.144963075 | 0.001684357 |
| UPK1A   | grey | -0.118331532 | 0.010488002 | -0.127251273 | 0.005891558 |
| UPK2    | grey | -0.169677425 | 0.000229893 | -0.177795726 | 0.000112132 |
| UPK3A   | grey | 0.05587165   | 0.228163812 | 0.027034126  | 0.560059412 |
| UPK3B   | grey | -0.269172187 | 3.41E-09    | -0.266342815 | 5.03E-09    |
| UPK3BL  | grey | -0.092813523 | 0.044998246 | -0.090398274 | 0.050904192 |
| UPP1    | grey | 0.040477593  | 0.382803907 | 0.066969468  | 0.148467298 |
| UQCC1   | grey | -0.256237571 | 1.95E-08    | -0.254264868 | 2.52E-08    |
| UQCRH   | grey | 0.244700366  | 8.53E-08    | 0.263579118  | 7.32E-09    |
| UQCRHL  | grey | 0.186781111  | 4.88E-05    | 0.202379966  | 1.05E-05    |
| URAD    | grey | -0.09794595  | 0.034340759 | -0.106391309 | 0.021476341 |
| URGCP   | grey | -0.007533078 | 0.871024558 | -0.011234719 | 0.808670664 |
| URGCP-M | grey | 0.002802122  | 0.951843268 | 0.005320835  | 0.90870124  |
| USB1    | grey | 0.306975255  | 1.20E-11    | 0.342605125  | 2.62E-14    |
| USH2A   | grey | 0.050316355  | 0.277868941 | 0.058697169  | 0.205459734 |
| USP11   | grey | -0.356492095 | 1.93E-15    | -0.352196412 | 4.39E-15    |

|         |      |              |             |              |             |
|---------|------|--------------|-------------|--------------|-------------|
| USP17L1 | grey | 0.024173097  | 0.602324131 | 0.022439501  | 0.62861082  |
| USP17L3 | grey | -0.006936608 | 0.88115798  | -0.026477777 | 0.5681649   |
| USP17L4 | grey | -0.022582529 | 0.626423593 | -0.033006699 | 0.47673534  |
| USP17L8 | grey | -0.072217592 | 0.119117514 | -0.074222369 | 0.109184244 |
| USP20   | grey | 0.067974451  | 0.142457568 | 0.077410914  | 0.094743642 |
| USP35   | grey | -0.0929927   | 0.044584058 | -0.121108529 | 0.008797799 |
| USP44   | grey | -0.287454797 | 2.46E-10    | -0.312323329 | 5.03E-12    |
| USP6    | grey | -0.143720838 | 0.001847637 | -0.147682684 | 0.00137207  |
| UTF1    | grey | -0.102235367 | 0.027161048 | -0.103281766 | 0.025619715 |
| UTS2    | grey | -0.042080731 | 0.364228524 | -0.034227003 | 0.46058387  |
| UTS2R   | grey | -0.060190669 | 0.194142044 | -0.072204709 | 0.119183556 |
| VAMP1   | grey | -0.096798801 | 0.036514926 | -0.086703843 | 0.061180124 |
| VANGL2  | grey | 0.007940306  | 0.86411816  | -0.017040922 | 0.713397344 |
| VASN    | grey | -0.385380172 | 5.53E-18    | -0.364156143 | 4.32E-16    |
| VASP    | grey | -0.014182361 | 0.759850261 | -0.002513216 | 0.956803238 |
| VAT1    | grey | 0.010898011  | 0.814298901 | 0.007989471  | 0.863285033 |
| VAV2    | grey | 0.170698609  | 0.000210411 | 0.157141838  | 0.000654507 |
| VAX1    | grey | 0.129545615  | 0.005050022 | 0.101788581  | 0.027843076 |
| VCY     | grey | -0.043795329 | 0.344994995 | -0.040738018 | 0.379747639 |
| VCY1B   | grey | -0.011006903 | 0.812477649 | 0.007306634  | 0.874869215 |
| VDR     | grey | 0.188804806  | 4.02E-05    | 0.21506963   | 2.73E-06    |
| VEGFA   | grey | 0.023820089  | 0.607636706 | 0.008499474  | 0.854651875 |
| VGLL1   | grey | -0.242022474 | 1.19E-07    | -0.242417548 | 1.13E-07    |
| VGLL2   | grey | -0.082013788 | 0.076632752 | -0.090692315 | 0.050152256 |
| VIL1    | grey | 0.071422213  | 0.123248762 | 0.054334846  | 0.241235191 |
| VILL    | grey | -0.129815018 | 0.004958675 | -0.109116497 | 0.018336362 |
| VIMP    | grey | 0.223156986  | 1.11E-06    | 0.21764158   | 2.06E-06    |
| VIPR1   | grey | 0.28547998   | 3.30E-10    | 0.257693464  | 1.61E-08    |
| VLDLR   | grey | 0.197060385  | 1.79E-05    | 0.173325106  | 0.000167166 |
| VNN1    | grey | 0.035818758  | 0.439982176 | 0.022894082  | 0.621670577 |
| VOPP1   | grey | -0.001332887 | 0.97708252  | -0.000367048 | 0.993688233 |
| VPREB1  | grey | 0.041962208  | 0.365582308 | 0.050322726  | 0.277808027 |
| VPS26B  | grey | 0.365120054  | 3.57E-16    | 0.365077428  | 3.60E-16    |
| VPS33B  | grey | 0.019260588  | 0.67803365  | 0.015997576  | 0.730240126 |
| VPS37D  | grey | 0.050859528  | 0.272707779 | 0.048248619  | 0.298120094 |
| VPS39   | grey | 0.179170589  | 9.90E-05    | 0.171518613  | 0.000195897 |
| VPS53   | grey | 0.288105459  | 2.23E-10    | 0.309971656  | 7.38E-12    |
| VSIG1   | grey | -0.017163672 | 0.711424718 | -0.000432167 | 0.992568474 |
| VSIG10  | grey | 0.119167444  | 0.009951232 | 0.083281083  | 0.072173712 |
| VSTM1   | grey | -0.08862515  | 0.055640558 | -0.097996642 | 0.034247282 |
| VSTM2A  | grey | -0.02865266  | 0.536801693 | -0.042890105 | 0.355067525 |
| VSTM2B  | grey | -0.164741535 | 0.000350216 | -0.178706348 | 0.000103249 |
| VSTM2L  | grey | -0.223713811 | 1.04E-06    | -0.215205943 | 2.69E-06    |
| VSTM5   | grey | -0.222401659 | 1.21E-06    | -0.229801813 | 5.16E-07    |
| VSX1    | grey | -0.122826632 | 0.007877845 | -0.122490713 | 0.008050648 |

|          |      |              |             |              |             |
|----------|------|--------------|-------------|--------------|-------------|
| VSX2     | grey | -0.047328882 | 0.30743603  | -0.023028757 | 0.619620844 |
| VWA5A    | grey | 0.036440278  | 0.432083348 | 0.028623454  | 0.537217044 |
| VWCE     | grey | -0.239211834 | 1.68E-07    | -0.268259891 | 3.86E-09    |
| WBP1     | grey | 0.122974596  | 0.007802786 | 0.096067056  | 0.037961993 |
| WDR25    | grey | -0.028727172 | 0.53574276  | 0.022722067  | 0.624292902 |
| WDR59    | grey | 0.170435338  | 0.00021528  | 0.173195689  | 0.000169085 |
| WDR72    | grey | -0.072103539 | 0.119703179 | -0.086341813 | 0.062273305 |
| WDR86    | grey | -0.137620078 | 0.002880443 | -0.151541023 | 0.001019664 |
| WDR91    | grey | -0.000758497 | 0.986957296 | -0.013178639 | 0.776378263 |
| WFDC10   | grey | 0.037256172  | 0.421839558 | 0.052646583  | 0.256190666 |
| WFIKKN   | grey | 0.082092204  | 0.076350493 | 0.067691452  | 0.144130735 |
| WIPI1    | grey | 0.162777461  | 0.000412732 | 0.163558695  | 0.000386714 |
| WIPI2    | grey | -0.203155079 | 9.66E-06    | -0.180228326 | 8.99E-05    |
| WISP3    | grey | -0.239959958 | 1.53E-07    | -0.2257873   | 8.22E-07    |
| WNK2     | grey | 0.202743938  | 1.01E-05    | 0.194488626  | 2.31E-05    |
| WNK4     | grey | 0.019626282  | 0.672272179 | 0.02459404   | 0.596016568 |
| WNT1     | grey | -0.036834854 | 0.427111494 | -0.015827079 | 0.733005104 |
| WNT10A   | grey | -0.293372385 | 1.01E-10    | -0.299025755 | 4.22E-11    |
| WNT10B   | grey | -0.031501083 | 0.497081894 | -0.028923784 | 0.532953631 |
| WNT11    | grey | -0.198985798 | 1.48E-05    | -0.199835989 | 1.36E-05    |
| WNT3     | grey | -0.157840546 | 0.000618648 | -0.150604474 | 0.001096549 |
| WNT3A    | grey | 0.046686778  | 0.314052524 | 0.060731809  | 0.190155982 |
| WNT5B    | grey | -0.150564754 | 0.001099925 | -0.185846122 | 5.33E-05    |
| WNT7A    | grey | -0.322260218 | 9.56E-13    | -0.312562307 | 4.84E-12    |
| WNT7B    | grey | -0.044848522 | 0.333507016 | -0.03285498  | 0.478764831 |
| WNT8B    | grey | -0.100752702 | 0.029481207 | -0.100851011 | 0.029322271 |
| WSCD1    | grey | -0.109309439 | 0.018130074 | -0.133848987 | 0.003757913 |
| WTIP     | grey | -0.369662945 | 1.44E-16    | -0.362720593 | 5.74E-16    |
| WWOX     | grey | -0.035217435 | 0.447702329 | -0.036834637 | 0.427114221 |
| XAGE1A   | grey | -0.091087795 | 0.049155572 | -0.09685089  | 0.036413728 |
| XAGE1B   | grey | -0.103229256 | 0.025695225 | -0.111881665 | 0.015567412 |
| XAGE2B   | grey | -0.285824806 | 3.14E-10    | -0.310269281 | 7.03E-12    |
| XAGE3    | grey | -0.138455578 | 0.002713248 | -0.136567252 | 0.00310446  |
| XAGE5    | grey | -0.098393401 | 0.033523121 | -0.096780632 | 0.036550281 |
| XCL1     | grey | -0.215574751 | 2.58E-06    | -0.211972848 | 3.82E-06    |
| XDH      | grey | 0.12573861   | 0.006513239 | 0.12246654   | 0.008063213 |
| XIRP1    | grey | 0.067810401  | 0.143425655 | 0.052193851  | 0.26030808  |
| XK       | grey | -0.195595619 | 2.07E-05    | -0.181427378 | 8.05E-05    |
| XKR4     | grey | -0.011356901 | 0.806630748 | -0.008111775 | 0.861213198 |
| XKR7     | grey | -0.176333906 | 0.000127908 | -0.177813622 | 0.00011195  |
| XKR8     | grey | 0.027994892  | 0.54619493  | 0.038578525  | 0.405541942 |
| XKR9     | grey | -0.170764241 | 0.000209213 | -0.177752799 | 0.000112568 |
| XRCC6B   | grey | 0.229455543  | 5.38E-07    | 0.198253701  | 1.59E-05    |
| XXbac-BI | grey | 0.011438987  | 0.805261005 | -0.021514131 | 0.642839773 |
| XXbac-BI | grey | 0.18565282   | 5.43E-05    | 0.196885085  | 1.82E-05    |

|              |              |             |              |             |
|--------------|--------------|-------------|--------------|-------------|
| XXbac-BIgrey | -0.127454314 | 0.005812302 | -0.142792328 | 0.00197901  |
| XXcos-LIgrey | 0.09978561   | 0.031084465 | 0.099433829  | 0.03168587  |
| XYLT2 grey   | 0.075111609  | 0.104992718 | 0.052979495  | 0.253191879 |
| YBX3 grey    | -0.191062473 | 3.24E-05    | -0.169761989 | 0.000228217 |
| YIPF7 grey   | -0.028971509 | 0.532277703 | -0.036341838 | 0.433328917 |
| YJEFN3 grey  | -0.041457607 | 0.371380846 | -0.042950216 | 0.354392977 |
| YPEL1 grey   | -0.048995673 | 0.290693009 | -0.068713637 | 0.138157423 |
| YWHAH grey   | 0.127947697  | 0.005623691 | 0.15186098   | 0.000994559 |
| ZAR1 grey    | -0.13710047  | 0.002989097 | -0.136584286 | 0.003100713 |
| ZBED1 grey   | 0.342006482  | 2.93E-14    | 0.331517014  | 1.92E-13    |
| ZBED6CIgrey  | -0.034393668 | 0.458401871 | -0.022177547 | 0.632625125 |
| ZBTB12 grey  | -0.131892671 | 0.004302754 | -0.154723648 | 0.000794024 |
| ZBTB22 grey  | -0.240689498 | 1.40E-07    | -0.255256067 | 2.22E-08    |
| ZBTB3 grey   | 0.017220805  | 0.710507237 | 0.025638663  | 0.580494737 |
| ZBTB7C grey  | -0.033490209 | 0.470299076 | -0.013473668 | 0.771509259 |
| ZBTB8B grey  | -0.135603629 | 0.003323253 | -0.150437798 | 0.00111078  |
| ZC3H10 grey  | -0.118392328 | 0.010448114 | -0.132672722 | 0.00407748  |
| ZC3H12Agrey  | 0.234123681  | 3.10E-07    | 0.226405072  | 7.66E-07    |
| ZC4H2 grey   | -0.172072485 | 0.00018663  | -0.192764103 | 2.74E-05    |
| ZDHHC1'grey  | -0.277255592 | 1.09E-09    | -0.279182487 | 8.28E-10    |
| ZDHHC9 grey  | 0.198072548  | 1.62E-05    | 0.163593186  | 0.000385602 |
| ZFAND2, grey | 0.00886118   | 0.848539485 | 0.021810733  | 0.638264499 |
| ZFHX4 grey   | -0.173861124 | 0.000159433 | -0.191003127 | 3.25E-05    |
| ZFP36 grey   | -0.002195862 | 0.962253517 | -0.017064085 | 0.71302496  |
| ZFP91-C'grey | -0.024305535 | 0.600336396 | -0.047216397 | 0.308588422 |
| ZFP92 grey   | -0.388238998 | 3.00E-18    | -0.410006966 | 2.33E-20    |
| ZFR2 grey    | -0.126043003 | 0.006383606 | -0.119984553 | 0.009450255 |
| ZFY grey     | -0.058785995 | 0.204773532 | -0.066692781 | 0.150155283 |
| ZGPAT grey   | -0.263023107 | 7.90E-09    | -0.271136581 | 2.59E-09    |
| ZIC1 grey    | 0.075438934  | 0.103482284 | 0.075039223  | 0.105329082 |
| ZIC2 grey    | 0.044744945  | 0.334625777 | 0.067561585  | 0.144903551 |
| ZIC3 grey    | -0.046222936 | 0.318889788 | -0.040594804 | 0.381426504 |
| ZIC4 grey    | 0.019215848  | 0.67873983  | 0.036532119  | 0.430923134 |
| ZIC5 grey    | -0.002115658 | 0.963631244 | 0.009176172  | 0.843223855 |
| ZIK1 grey    | -0.398309841 | 3.31E-19    | -0.405184893 | 7.04E-20    |
| ZKSCAN grey  | -0.089737393 | 0.052628619 | -0.10060193  | 0.029726394 |
| ZMIZ2 grey   | 0.068414519  | 0.139885348 | 0.075048576  | 0.105285573 |
| ZMYND8grey   | 0.095063236  | 0.040025968 | 0.078348921  | 0.090799095 |
| ZNF114 grey  | -0.078502073 | 0.090167737 | -0.094322929 | 0.041608238 |
| ZNF133 grey  | -0.179701543 | 9.43E-05    | -0.192111325 | 2.92E-05    |
| ZNF135 grey  | -0.467369885 | 1.02E-26    | -0.475427644 | 1.04E-27    |
| ZNF185 grey  | -0.19953469  | 1.40E-05    | -0.206738342 | 6.66E-06    |
| ZNF212 grey  | -0.024612748 | 0.595736943 | -0.063219959 | 0.172599622 |
| ZNF215 grey  | -0.02053711  | 0.658005895 | -0.049818072 | 0.282661522 |
| ZNF219 grey  | -0.089737749 | 0.052627678 | -0.105894577 | 0.022096393 |

|          |      |              |             |              |             |
|----------|------|--------------|-------------|--------------|-------------|
| ZNF232   | grey | 0.140483363  | 0.002343583 | 0.114204916  | 0.013531736 |
| ZNF253   | grey | -0.050368407 | 0.277371499 | -0.060352634 | 0.192942648 |
| ZNF263   | grey | 0.047535588  | 0.305325767 | 0.046681349  | 0.314108854 |
| ZNF276   | grey | 0.173110238  | 0.000170364 | 0.168991986  | 0.000243902 |
| ZNF280A  | grey | 0.132933402  | 0.00400461  | 0.1059953    | 0.021969425 |
| ZNF282   | grey | 0.289983212  | 1.69E-10    | 0.255916386  | 2.03E-08    |
| ZNF285   | grey | -0.410667782 | 2.00E-20    | -0.447300342 | 2.36E-24    |
| ZNF300   | grey | -0.501066712 | 4.71E-31    | -0.515407918 | 4.75E-33    |
| ZNF321P  | grey | 0.045935489  | 0.321911752 | 0.016828957  | 0.716808175 |
| ZNF324   | grey | -0.020673957 | 0.655872987 | -0.034866724 | 0.452240169 |
| ZNF324B  | grey | 0.061879518  | 0.181901379 | 0.044036836  | 0.342338718 |
| ZNF335   | grey | -0.031399676 | 0.498468669 | -0.034780469 | 0.453360182 |
| ZNF346   | grey | -0.110097801 | 0.017308085 | -0.111646014 | 0.015788185 |
| ZNF362   | grey | -0.157492496 | 0.000636276 | -0.171519957 | 0.000195874 |
| ZNF365   | grey | -0.10090498  | 0.029235334 | -0.107576888 | 0.020057126 |
| ZNF385A  | grey | -0.015411693 | 0.739755858 | -0.018238936 | 0.694228532 |
| ZNF385B  | grey | 0.28793972   | 2.29E-10    | 0.248662523  | 5.18E-08    |
| ZNF385C  | grey | -0.184246361 | 6.19E-05    | -0.199933354 | 1.34E-05    |
| ZNF394   | grey | -0.217671193 | 2.05E-06    | -0.203314427 | 9.50E-06    |
| ZNF418   | grey | -0.281229191 | 6.15E-10    | -0.281060368 | 6.31E-10    |
| ZNF423   | grey | -0.12657776  | 0.00616146  | -0.117989203 | 0.010715133 |
| ZNF467   | grey | -0.099824341 | 0.03101885  | -0.084173071 | 0.069164014 |
| ZNF486   | grey | -0.140253249 | 0.002383088 | -0.142019696 | 0.002094784 |
| ZNF488   | grey | -0.142800287 | 0.001977848 | -0.152843531 | 0.000920985 |
| ZNF503   | grey | -0.165473907 | 0.000329254 | -0.166420034 | 0.000303906 |
| ZNF513   | grey | 0.07936621   | 0.086671117 | 0.056096413  | 0.226295065 |
| ZNF526   | grey | -0.071708545 | 0.121748873 | -0.054769765 | 0.237483764 |
| ZNF536   | grey | -0.178518158 | 0.000105029 | -0.184248225 | 6.19E-05    |
| ZNF541   | grey | -0.061610527 | 0.183811844 | -0.063092156 | 0.17347089  |
| ZNF544   | grey | -0.318151448 | 1.91E-12    | -0.309661439 | 7.77E-12    |
| ZNF552   | grey | 0.159790667  | 0.000527973 | 0.177297156  | 0.000117295 |
| ZNF554   | grey | 0.038831114  | 0.402472069 | 0.018465638  | 0.69062257  |
| ZNF556   | grey | 0.051396957  | 0.267665908 | 0.044764914  | 0.334409907 |
| ZNF563   | grey | -0.076184809 | 0.10010477  | -0.076566535 | 0.098410431 |
| ZNF574   | grey | -0.036409006 | 0.432478806 | -0.031970703 | 0.490686493 |
| ZNF576   | grey | -0.063425656 | 0.171204186 | -0.059118685 | 0.202218163 |
| ZNF586   | grey | 0.203295367  | 9.52E-06    | 0.220045682  | 1.58E-06    |
| ZNF589   | grey | 0.037077469  | 0.424071006 | 0.028646962  | 0.53688272  |
| ZNF625-2 | grey | -0.086363829 | 0.062206369 | -0.091789323 | 0.047428354 |
| ZNF626   | grey | -0.21042668  | 4.50E-06    | -0.2189838   | 1.77E-06    |
| ZNF648   | grey | -0.096593704 | 0.036915713 | -0.096066858 | 0.037962391 |
| ZNF679   | grey | -0.176719185 | 0.000123559 | -0.175301536 | 0.000140282 |
| ZNF703   | grey | -0.022835527 | 0.6225627   | -0.009958658 | 0.830050351 |
| ZNF71    | grey | -0.027941903 | 0.546955163 | -0.031931475 | 0.491219011 |
| ZNF747   | grey | -0.050947681 | 0.271876357 | -0.034851432 | 0.452438627 |

|          |        |              |             |              |             |
|----------|--------|--------------|-------------|--------------|-------------|
| ZNF76    | grey   | -0.013349936 | 0.773550192 | 0.000314457  | 0.994592566 |
| ZNF764   | grey   | -0.026119556 | 0.573413264 | -0.024067414 | 0.603912406 |
| ZNF768   | grey   | 0.001546705  | 0.97340743  | -0.016324419 | 0.724949483 |
| ZNF77    | grey   | 0.253704055  | 2.71E-08    | 0.244371257  | 8.89E-08    |
| ZNF771   | grey   | -0.14139764  | 0.002192458 | -0.133755065 | 0.00378257  |
| ZNF783   | grey   | -0.197440889 | 1.73E-05    | -0.222060373 | 1.26E-06    |
| ZNF785   | grey   | -0.085077034 | 0.066219537 | -0.085036723 | 0.066348613 |
| ZNF788   | grey   | 0.04314184   | 0.352248046 | 0.027036951  | 0.560018399 |
| ZNF804A  | grey   | -0.065135606 | 0.159928305 | -0.051350785 | 0.268096541 |
| ZNF853   | grey   | -0.256942057 | 1.78E-08    | -0.246588662 | 6.73E-08    |
| ZNF90    | grey   | -0.18377339  | 6.47E-05    | -0.158035228 | 0.000608986 |
| ZNRF1    | grey   | 0.289084229  | 1.93E-10    | 0.335338779  | 9.77E-14    |
| ZP2      | grey   | -0.117773696 | 0.010860344 | -0.102025197 | 0.027480066 |
| ZPLD1    | grey   | -0.127784863 | 0.005685321 | -0.122426915 | 0.008083847 |
| ZSCAN1   | grey   | -0.158323061 | 0.000594957 | -0.15288319  | 0.000918123 |
| ZSCAN1C  | grey   | -0.028649224 | 0.536850555 | -0.034180271 | 0.461196725 |
| ZSCAN2   | grey   | 0.056645657  | 0.221774337 | 0.041587909  | 0.36987808  |
| ZSCAN31  | grey   | -0.036062994 | 0.436868406 | -0.047812423 | 0.302514594 |
| ZSCAN5I  | grey   | 0.036324156  | 0.433552877 | 0.051582637  | 0.265938901 |
| ZSWIM3   | grey   | -0.248122895 | 5.55E-08    | -0.235289715 | 2.70E-07    |
| ZSWIM4   | grey   | -0.152683706 | 0.0009326   | -0.160112597 | 0.000514249 |
| ZSWIM5   | grey   | 0.156549133  | 0.000686427 | 0.099282688  | 0.0319473   |
| ACAP1    | grey60 | -0.007127749 | 0.877908491 | 0.055163288  | 0.234124972 |
| AGAP2    | grey60 | 0.002185145  | 0.962437595 | 0.046406234  | 0.316972441 |
| AMIGO2   | grey60 | 0.103318907  | 0.025566423 | 0.080325287  | 0.082918985 |
| AMPD1    | grey60 | -0.073697586 | 0.111719076 | -0.038820739 | 0.402597894 |
| ANKRD2   | grey60 | 0.361252762  | 7.65E-16    | 0.362829964  | 5.62E-16    |
| APOBEC1  | grey60 | -0.224969749 | 9.03E-07    | -0.205540265 | 7.54E-06    |
| APOBEC1  | grey60 | -0.161544104 | 0.000457143 | -0.108206707 | 0.019336918 |
| APOBEC1  | grey60 | -0.257731217 | 1.60E-08    | -0.209555405 | 4.94E-06    |
| APOBEC1  | grey60 | 0.026178381  | 0.572549836 | 0.081969298  | 0.076793273 |
| ARHGAP   | grey60 | -0.007753512 | 0.867284843 | 0.021873351  | 0.637300321 |
| ARHGAP   | grey60 | -0.001116354 | 0.980804769 | 0.064554794  | 0.163693807 |
| ARHGDI   | grey60 | -0.128607328 | 0.005380127 | -0.06906402  | 0.136154266 |
| ARHGEF   | grey60 | 0.067005028  | 0.148251405 | 0.07372831   | 0.111569409 |
| ARRDC5   | grey60 | 0.116286371  | 0.011910943 | 0.160596746  | 0.000494233 |
| ATP2A3   | grey60 | 0.123555543  | 0.007514221 | 0.174935004  | 0.000144939 |
| BATF     | grey60 | 0.088996335  | 0.054619865 | 0.144083306  | 0.001798556 |
| BCL11B   | grey60 | -0.040190784 | 0.386187125 | -0.000405569 | 0.993025837 |
| BFSP2    | grey60 | -0.071981435 | 0.120332674 | -0.053451727 | 0.248980076 |
| BIN2     | grey60 | -0.061187089 | 0.186849186 | -0.007415709 | 0.873016921 |
| BLK      | grey60 | -0.086591156 | 0.06151868  | -0.057613736 | 0.213963974 |
| C11orf21 | grey60 | -0.143676441 | 0.001853732 | -0.115930317 | 0.012175397 |
| C16orf54 | grey60 | -0.026222925 | 0.571896438 | 0.035955392  | 0.438238666 |
| CCL17    | grey60 | 0.105576576  | 0.022501441 | 0.166896716  | 0.000291836 |

|         |        |              |             |              |             |
|---------|--------|--------------|-------------|--------------|-------------|
| CCL19   | grey60 | -0.047529349 | 0.305389316 | -0.007118015 | 0.878073925 |
| CCL5    | grey60 | -0.044429901 | 0.338043444 | 0.024597365  | 0.595966873 |
| CCR2    | grey60 | -0.063367408 | 0.171598478 | -0.025086863 | 0.588670315 |
| CCR5    | grey60 | -0.031994584 | 0.490362457 | 0.019669912  | 0.67158605  |
| CCR7    | grey60 | 0.04076545   | 0.379426588 | 0.091077958  | 0.049180162 |
| CD101   | grey60 | 0.105218307  | 0.02296547  | 0.150254066  | 0.001126665 |
| CD19    | grey60 | -0.049999467 | 0.280910407 | -0.006446607 | 0.889497211 |
| CD2     | grey60 | 0.030971688  | 0.504344056 | 0.099231365  | 0.032036493 |
| CD244   | grey60 | -0.024597525 | 0.595964482 | 0.020983787  | 0.651054305 |
| CD247   | grey60 | -0.001332168 | 0.977094886 | 0.065932263  | 0.154870118 |
| CD27    | grey60 | 0.079231166  | 0.087210244 | 0.141778489  | 0.002132175 |
| CD28    | grey60 | -0.021201627 | 0.647674985 | 0.017225654  | 0.710429383 |
| CD37    | grey60 | -0.035108574 | 0.449108118 | 0.028213922  | 0.54305809  |
| CD38    | grey60 | -0.063217394 | 0.172617075 | -0.003435628 | 0.94097394  |
| CD3D    | grey60 | 0.075302307  | 0.104110638 | 0.149540899  | 0.001190324 |
| CD3E    | grey60 | 0.045411655  | 0.327466637 | 0.110331751  | 0.01707051  |
| CD3G    | grey60 | 0.025894109  | 0.576728043 | 0.085367984  | 0.065294021 |
| CD40LG  | grey60 | -0.034617417 | 0.455481644 | 0.011035583  | 0.811998144 |
| CD48    | grey60 | -0.052930226 | 0.253634139 | 0.006474631  | 0.88901993  |
| CD5     | grey60 | 0.065656179  | 0.156609154 | 0.100549952  | 0.029811326 |
| CD52    | grey60 | 0.017253043  | 0.70998972  | 0.085627745  | 0.064476724 |
| CD6     | grey60 | -0.033073312 | 0.475845781 | 0.031748257  | 0.493710308 |
| CD7     | grey60 | 0.001633361  | 0.971918151 | 0.069512073  | 0.133625374 |
| CD70    | grey60 | -0.049424291 | 0.286488259 | -0.013524985 | 0.77066326  |
| CD79A   | grey60 | 0.017326337  | 0.708813627 | 0.076690605  | 0.097864671 |
| CD79B   | grey60 | -0.165172453 | 0.000337736 | -0.126273086 | 0.00628716  |
| CD8A    | grey60 | 0.01903755   | 0.681556869 | 0.066859778  | 0.149134747 |
| CD8B    | grey60 | -0.009441351 | 0.838754349 | 0.002389572  | 0.958926485 |
| CD96    | grey60 | 0.017731067  | 0.702331745 | 0.081580633  | 0.078207221 |
| CLEC2D  | grey60 | -0.126643028 | 0.006134828 | -0.112474548 | 0.015023897 |
| CNR2    | grey60 | 0.004044207  | 0.930542591 | 0.033661032  | 0.468036651 |
| CORO1A  | grey60 | -0.001607031 | 0.972370644 | 0.071931252  | 0.120592139 |
| CPNE5   | grey60 | -0.162001185 | 0.00044019  | -0.129954994 | 0.004911803 |
| CRTAM   | grey60 | -0.037304571 | 0.421236385 | 0.000627939  | 0.989202147 |
| CST7    | grey60 | -0.006112102 | 0.895197148 | 0.052283379  | 0.259490262 |
| CTLA4   | grey60 | 0.094439889  | 0.041354802 | 0.136320893  | 0.003159114 |
| CTSW    | grey60 | -0.051865506 | 0.263322653 | 0.002425667  | 0.958306623 |
| CXCL13  | grey60 | 0.08367195   | 0.070841965 | 0.133395672  | 0.00387828  |
| CXCL9   | grey60 | 0.122255686  | 0.008173554 | 0.162389716  | 0.000426241 |
| CXCR3   | grey60 | 0.048428096  | 0.296324333 | 0.115177556  | 0.012751635 |
| CXCR5   | grey60 | -0.018112074 | 0.696249436 | 0.00781142   | 0.866302909 |
| CXCR6   | grey60 | 0.01596682   | 0.730738654 | 0.072494992  | 0.117702396 |
| CXorf65 | grey60 | -0.030136293 | 0.515916364 | 0.01305094   | 0.778488483 |
| CYTIP   | grey60 | -0.038111344 | 0.411256509 | 0.007457976  | 0.872299334 |
| DEF6    | grey60 | 0.161229366  | 0.000469168 | 0.185030703  | 5.76E-05    |



|          |        |              |             |              |             |
|----------|--------|--------------|-------------|--------------|-------------|
| DENND1   | grey60 | 0.083819758  | 0.070343621 | 0.091084883  | 0.049162851 |
| DERL3    | grey60 | 0.072210232  | 0.119155241 | 0.100574207  | 0.029771668 |
| DPP9     | grey60 | 0.264178729  | 6.75E-09    | 0.280705948  | 6.64E-10    |
| EAF2     | grey60 | 0.197756368  | 1.67E-05    | 0.215954105  | 2.48E-06    |
| EOMES    | grey60 | -0.03624497  | 0.434556623 | 0.000942122  | 0.98380017  |
| FAIM3    | grey60 | 0.040910447  | 0.377732332 | 0.083098747  | 0.072801918 |
| FAM159A  | grey60 | -0.141869118 | 0.002118055 | -0.110577374 | 0.016824155 |
| FAM78A   | grey60 | -0.075476447 | 0.103310283 | -0.027885356 | 0.547767007 |
| FASLG    | grey60 | 0.081512282  | 0.078458047 | 0.113648152  | 0.013996948 |
| FBXO6    | grey60 | 0.185300776  | 5.61E-05    | 0.220806541  | 1.45E-06    |
| FCER2    | grey60 | -0.002640088 | 0.954624862 | 0.023599274  | 0.610970426 |
| FCRL1    | grey60 | -0.005259938 | 0.909741675 | 0.034353585  | 0.45892612  |
| FCRL3    | grey60 | 0.038132036  | 0.411002403 | 0.081457905  | 0.078658061 |
| FCRL4    | grey60 | -0.038891529 | 0.401739882 | 0.016794988  | 0.717355305 |
| FCRL5    | grey60 | -0.012760631 | 0.78329185  | 0.029396791  | 0.526273687 |
| FCRL6    | grey60 | 0.036029393  | 0.437296032 | 0.049782613  | 0.283004687 |
| FCRLA    | grey60 | 0.006780396  | 0.883815146 | 0.055340365  | 0.232624585 |
| FMNL1    | grey60 | -0.079067294 | 0.087868084 | -0.030797828 | 0.506741162 |
| FOXP3    | grey60 | 0.07505501   | 0.10525565  | 0.134127747  | 0.003685586 |
| GBP5     | grey60 | 0.04713214   | 0.309453486 | 0.083631942  | 0.07097735  |
| GFI1     | grey60 | 0.019954842  | 0.66711204  | 0.072188789  | 0.119265206 |
| GMFG     | grey60 | -0.107632543 | 0.019992557 | -0.05366158  | 0.247124169 |
| GNGT2    | grey60 | -0.145973497 | 0.001561424 | -0.099437955 | 0.03167876  |
| GNLY     | grey60 | -0.052203308 | 0.260221611 | -0.008079449 | 0.861760702 |
| GPR114   | grey60 | 0.126622644  | 0.006143134 | 0.15745128   | 0.000638394 |
| GPR171   | grey60 | -0.021914113 | 0.636673014 | 0.015794883  | 0.733527622 |
| GPR174   | grey60 | -0.019191142 | 0.679129906 | 0.023720942  | 0.609132565 |
| GPR25    | grey60 | 0.063265746  | 0.172288276 | 0.111045233  | 0.016363496 |
| GPR68    | grey60 | 0.220921538  | 1.43E-06    | 0.267035684  | 4.57E-09    |
| GPSM3    | grey60 | -0.08598933  | 0.063353086 | -0.030894829 | 0.505403016 |
| GRAP2    | grey60 | -0.047881793 | 0.301812863 | 0.016045507  | 0.729463466 |
| GZMA     | grey60 | 0.016479383  | 0.722445596 | 0.067956351  | 0.142564131 |
| GZMB     | grey60 | 0.052677748  | 0.255908899 | 0.101808784  | 0.027811921 |
| GZMH     | grey60 | -0.014337104 | 0.757311633 | 0.034078554  | 0.462532234 |
| GZMK     | grey60 | -0.041083286 | 0.375718825 | -0.00728608  | 0.875218336 |
| GZMM     | grey60 | -0.057833099 | 0.212222002 | -0.001231073 | 0.978832664 |
| HCST     | grey60 | -0.073813692 | 0.111154306 | -0.023656837 | 0.610100596 |
| HLA-DQA1 | grey60 | -0.063683236 | 0.169468669 | -0.054548527 | 0.239386906 |
| ICAM3    | grey60 | 0.016592638  | 0.720617532 | 0.064214699  | 0.165929401 |
| ICOS     | grey60 | 0.054217763  | 0.242252159 | 0.107201296  | 0.020497639 |
| IFNG     | grey60 | 0.083580965  | 0.071150159 | 0.124058698  | 0.007272046 |
| IGJ      | grey60 | 0.001021849  | 0.98242947  | 0.069270615  | 0.134983667 |
| IGLL1    | grey60 | 0.008488594  | 0.854835876 | 0.027628242  | 0.551465876 |
| IGLL5    | grey60 | 0.072854111  | 0.115889978 | 0.132897422  | 0.004014597 |
| IKZF3    | grey60 | 0.03369628   | 0.467570567 | 0.052225037  | 0.260023003 |

|         |        |              |             |              |             |
|---------|--------|--------------|-------------|--------------|-------------|
| IL12RB1 | grey60 | 0.013721596  | 0.767424491 | 0.07114542   | 0.124712316 |
| IL16    | grey60 | -0.093087448 | 0.044366338 | -0.039098803 | 0.399233891 |
| IL18BP  | grey60 | -0.027798277 | 0.549018368 | 0.007978873  | 0.863464605 |
| IL18RAP | grey60 | -0.003902926 | 0.932963227 | 0.038008725  | 0.41251809  |
| IL21R   | grey60 | 0.023328315  | 0.615072162 | 0.069964561  | 0.131108366 |
| IL2RB   | grey60 | 0.039436698  | 0.395168815 | 0.094252154  | 0.041762233 |
| IL2RG   | grey60 | -0.015040568 | 0.745804259 | 0.053438731  | 0.249095323 |
| IL9R    | grey60 | 0.06703034   | 0.14809788  | 0.12452442   | 0.007054134 |
| IRF4    | grey60 | -0.015827264 | 0.7330021   | 0.024301583  | 0.600395668 |
| ISG20   | grey60 | 0.071520912  | 0.122730132 | 0.112469097  | 0.015028818 |
| ITGAE   | grey60 | 0.199520322  | 1.40E-05    | 0.221992779  | 1.27E-06    |
| ITGAL   | grey60 | 0.020394812  | 0.660226712 | 0.074164637  | 0.109460863 |
| ITK     | grey60 | -0.015949674 | 0.731016612 | 0.023572698  | 0.611372188 |
| JAKMIP1 | grey60 | 0.101670755  | 0.028025373 | 0.129334414  | 0.005122692 |
| KIF21B  | grey60 | 0.040181556  | 0.386296277 | 0.050167144  | 0.279298257 |
| KIR2DL4 | grey60 | -0.016352309 | 0.724498626 | 0.031771083  | 0.493399569 |
| KLRB1   | grey60 | -0.045342063 | 0.328209256 | 0.019358174  | 0.676494342 |
| KLRC1   | grey60 | -0.108209252 | 0.019334054 | -0.060838276 | 0.189378867 |
| KLRC2   | grey60 | -0.004921649 | 0.915524168 | 0.035116838  | 0.449001311 |
| KLRD1   | grey60 | -0.040457745 | 0.383037452 | 0.001931045  | 0.966802875 |
| KLRF2   | grey60 | -0.036358378 | 0.433119496 | -0.040143087 | 0.386751518 |
| LAG3    | grey60 | -0.041968833 | 0.365506549 | 0.010289938  | 0.824487193 |
| LAIR2   | grey60 | 0.031477635  | 0.497402365 | 0.061871136  | 0.181960691 |
| LAT     | grey60 | -0.105154412 | 0.023049091 | -0.086347183 | 0.062256973 |
| LAX1    | grey60 | 0.023248378  | 0.616284556 | 0.060186518  | 0.194172858 |
| LCK     | grey60 | 0.050743566  | 0.273804106 | 0.101349403  | 0.028527783 |
| LPXN    | grey60 | -0.014104348 | 0.761131088 | 0.026411404  | 0.569135617 |
| LTA     | grey60 | 0.036441067  | 0.43207337  | 0.089443107  | 0.053412012 |
| LY9     | grey60 | 0.012088371  | 0.794446228 | 0.057255669  | 0.216829449 |
| MAP4K1  | grey60 | -0.254263264 | 2.52E-08    | -0.206752594 | 6.65E-06    |
| MATK    | grey60 | -0.136571795 | 0.00310346  | -0.096845201 | 0.036424768 |
| MEI1    | grey60 | -0.036197094 | 0.435164143 | 0.013728053  | 0.767318196 |
| MICAL1  | grey60 | -0.112942113 | 0.014607089 | -0.088592776 | 0.055730325 |
| MLKL    | grey60 | 0.146198292  | 0.001535219 | 0.164108219  | 0.000369338 |
| MS4A1   | grey60 | -0.017411961 | 0.707440562 | 0.027460851  | 0.553880541 |
| MYO1G   | grey60 | -0.006172721 | 0.894163804 | 0.050759452  | 0.273653739 |
| MYO7A   | grey60 | -0.150822627 | 0.001078177 | -0.121289582 | 0.008696537 |
| MZB1    | grey60 | 0.040637433  | 0.380926296 | 0.097811366  | 0.034589986 |
| NCR1    | grey60 | -0.066801317 | 0.149491408 | -0.030599597 | 0.50948154  |
| NCR3    | grey60 | 0.00498608   | 0.914422461 | 0.077415873  | 0.094722434 |
| NKG7    | grey60 | -0.044671609 | 0.335419357 | 0.022544641  | 0.62700268  |
| NLRC3   | grey60 | 0.002142037  | 0.96317809  | 0.050931938  | 0.272024715 |
| NLRP6   | grey60 | 0.067526504  | 0.145112853 | 0.097730667  | 0.034740164 |
| NUGGC   | grey60 | 0.028714361  | 0.535924759 | 0.063956097  | 0.167644573 |
| P2RX1   | grey60 | -0.117493835 | 0.01105152  | -0.085247046 | 0.065677428 |

|          |        |              |             |              |             |
|----------|--------|--------------|-------------|--------------|-------------|
| P2RX5    | grey60 | -0.109704948 | 0.017713531 | -0.105747854 | 0.022282487 |
| P2RY10   | grey60 | 0.021804856  | 0.638355017 | 0.067080604  | 0.147793368 |
| P2RY8    | grey60 | -0.027299356 | 0.556215033 | 0.012973904  | 0.779762291 |
| PARP15   | grey60 | -0.093740524 | 0.04288983  | -0.053972926 | 0.2443885   |
| PCED1B   | grey60 | 0.201546289  | 1.14E-05    | 0.208544631  | 5.50E-06    |
| PDCD1    | grey60 | 0.081852348  | 0.077216529 | 0.125998081  | 0.006402591 |
| PIM2     | grey60 | 0.006254986  | 0.892761735 | 0.064603865  | 0.163373119 |
| PLA2G2I  | grey60 | 0.016304481  | 0.725271841 | 0.051681897  | 0.265018826 |
| POU2AF1  | grey60 | 0.002066024  | 0.964483895 | 0.045543052  | 0.32606747  |
| PRF1     | grey60 | -0.012750471 | 0.7834601   | 0.038441054  | 0.407218568 |
| PSTPIP1  | grey60 | -0.028051794 | 0.54537914  | 0.0258356    | 0.57758977  |
| PTPN7    | grey60 | 0.004984962  | 0.91444159  | 0.073005729  | 0.115131379 |
| PYHIN1   | grey60 | 0.010263862  | 0.824924763 | 0.059359569  | 0.200382468 |
| RAB33A   | grey60 | -0.175695503 | 0.000135433 | -0.138759573 | 0.002654642 |
| RAB37    | grey60 | -0.015864884 | 0.732391711 | 0.026171932  | 0.572644466 |
| RAC2     | grey60 | -0.104426329 | 0.024020727 | -0.039039881 | 0.399945315 |
| RASAL3   | grey60 | 0.001087746  | 0.981296583 | 0.067987102  | 0.142383119 |
| RHOH     | grey60 | 0.037931103  | 0.413473894 | 0.08617257   | 0.062789847 |
| RLTPR    | grey60 | -0.101131079 | 0.02887351  | -0.060669639 | 0.190610855 |
| RP11-812 | grey60 | 0.00816603   | 0.860294414 | 0.062467332  | 0.177777703 |
| RTP5     | grey60 | 0.002457301  | 0.95776339  | 0.02783981   | 0.548421343 |
| S1PR4    | grey60 | 0.045775837  | 0.32359821  | 0.121082236  | 0.008812591 |
| SASH3    | grey60 | 0.00290741   | 0.950036133 | 0.059777836  | 0.197223853 |
| SCML4    | grey60 | -0.103703428 | 0.025020272 | -0.05831076  | 0.208464253 |
| SELL     | grey60 | -0.004851344 | 0.916726473 | 0.032961536  | 0.477338986 |
| SELPLG   | grey60 | 0.002075669  | 0.9643182   | 0.078530918  | 0.090049221 |
| SEPT1    | grey60 | -0.012381529 | 0.789576746 | 0.040426273  | 0.383407943 |
| SH2D1A   | grey60 | 0.000339392  | 0.99416379  | 0.049571451  | 0.285054108 |
| SH2D1B   | grey60 | -0.040789066 | 0.379150325 | -0.011823013 | 0.798860848 |
| SH2D2A   | grey60 | -0.229641558 | 5.26E-07    | -0.190831078 | 3.31E-05    |
| SIRPG    | grey60 | 0.072011773  | 0.120176031 | 0.133239893  | 0.003920443 |
| SIT1     | grey60 | 0.074746433  | 0.106698343 | 0.13864671   | 0.002676265 |
| SLA2     | grey60 | -0.000743186 | 0.98722056  | 0.048079405  | 0.299819788 |
| SLAMF1   | grey60 | 0.014880184  | 0.748422986 | 0.065985845  | 0.154534312 |
| SLAMF6   | grey60 | -0.027748518 | 0.54973405  | 0.029738893  | 0.521469148 |
| SLAMF7   | grey60 | -0.004106972 | 0.929467422 | 0.045118721  | 0.330599876 |
| SNAI3    | grey60 | -0.06190881  | 0.181694229 | -0.028813122 | 0.534522584 |
| SNX20    | grey60 | 0.00036943   | 0.993647273 | 0.057814976  | 0.212365528 |
| SOCS1    | grey60 | -0.121111145 | 0.008796328 | -0.075625463 | 0.102629281 |
| SP140    | grey60 | -0.07363567  | 0.112021177 | -0.025162905 | 0.587540515 |
| SPN      | grey60 | -0.013863977 | 0.765081578 | 0.035223706  | 0.447621428 |
| SPOCK2   | grey60 | -0.235442807 | 2.65E-07    | -0.198379216 | 1.57E-05    |
| STAT4    | grey60 | -0.056208435 | 0.225367749 | -0.004923292 | 0.915496059 |
| TBC1D10  | grey60 | -0.120151974 | 0.009350419 | -0.053830426 | 0.245637951 |
| TBX21    | grey60 | -0.008776726 | 0.849965846 | 0.050954275  | 0.271814241 |

|          |        |              |             |              |             |
|----------|--------|--------------|-------------|--------------|-------------|
| TCL1A    | grey60 | -0.06171271  | 0.183084367 | -0.035217349 | 0.447703438 |
| TESPA1   | grey60 | -0.091982027 | 0.046962908 | -0.042347851 | 0.361188945 |
| THEMIS   | grey60 | 0.024134825  | 0.602899084 | 0.06026904   | 0.193561006 |
| TIGIT    | grey60 | 0.068761324  | 0.137883471 | 0.132792663  | 0.004043804 |
| TMC8     | grey60 | -0.068109577 | 0.141663926 | -0.009496761 | 0.837821094 |
| TMEM15   | grey60 | -0.05911513  | 0.202245348 | -0.015945589 | 0.731082841 |
| TMIGD2   | grey60 | -0.057157148 | 0.217622681 | -0.005005893 | 0.914083724 |
| TNFRSF1  | grey60 | -0.00056866  | 0.990221433 | 0.031637145  | 0.495224427 |
| TNFRSF1  | grey60 | 0.014082886  | 0.761483564 | 0.066643659  | 0.150456479 |
| TNFRSF8  | grey60 | -0.131704642 | 0.004358712 | -0.113980621 | 0.013717486 |
| TNFRSF9  | grey60 | -0.009528841 | 0.837280868 | 0.03923495   | 0.397592954 |
| TRAF1    | grey60 | -0.004608151 | 0.920886864 | 0.027716528  | 0.55019441  |
| TRAF3IP  | grey60 | 0.005746854  | 0.901427108 | 0.057349275  | 0.216077711 |
| TRAT1    | grey60 | -0.010587181 | 0.819503069 | 0.026753353  | 0.564143022 |
| TSPAN32  | grey60 | -0.260823566 | 1.06E-08    | -0.231459404 | 4.25E-07    |
| TTC24    | grey60 | 0.047951489  | 0.30110892  | 0.097315278  | 0.035522001 |
| UBASH3   | grey60 | 0.006571985  | 0.887362234 | 0.064511496  | 0.163977159 |
| VPREB3   | grey60 | -0.015647268 | 0.735924855 | 0.031529102  | 0.496699085 |
| WAS      | grey60 | 0.004760731  | 0.918276365 | 0.05608567   | 0.226384137 |
| XCL2     | grey60 | -0.138337961 | 0.002736238 | -0.084922517 | 0.066715424 |
| ZAP70    | grey60 | 0.04795578   | 0.301065616 | 0.0956213    | 0.038867109 |
| ZBED2    | grey60 | -0.11715133  | 0.01128954  | -0.096391644 | 0.037314209 |
| ZBP1     | grey60 | -0.160638167 | 0.000492554 | -0.119139332 | 0.009968879 |
| ZBTB32   | grey60 | -0.076340143 | 0.099412523 | -0.058252369 | 0.208921014 |
| ZC3H12C  | grey60 | -0.044735205 | 0.334731108 | -0.001718515 | 0.970454774 |
| ZNF683   | grey60 | 0.036528395  | 0.430970133 | 0.099299951  | 0.031917348 |
| ZNF831   | grey60 | 0.004008621  | 0.931152238 | 0.041873349  | 0.3665993   |
| ABCG8    | ivory  | -0.1894252   | 3.79E-05    | -0.191065839 | 3.24E-05    |
| ADRA1A   | ivory  | 2.95E-05     | 0.999492268 | -0.009671332 | 0.834882285 |
| BMPER    | ivory  | -0.139335886 | 0.002546691 | -0.164805263 | 0.000348343 |
| C10orf10 | ivory  | -0.063511554 | 0.170623951 | -0.061203675 | 0.186729525 |
| C11orf87 | ivory  | -0.093899608 | 0.042536505 | -0.109471124 | 0.017958768 |
| CCDC144  | ivory  | -0.107593893 | 0.020037379 | -0.122927317 | 0.0078267   |
| CDH7     | ivory  | -0.094142856 | 0.042000995 | -0.085605803 | 0.064545435 |
| CDH8     | ivory  | -0.112233597 | 0.015242742 | -0.110023526 | 0.017384114 |
| DHRS7C   | ivory  | 0.011131671  | 0.810392124 | 0.003457772  | 0.940594193 |
| FAM196E  | ivory  | -0.039944434 | 0.389107567 | -0.040901641 | 0.377835088 |
| FRG2C    | ivory  | -0.067457855 | 0.145523101 | -0.075313312 | 0.104059916 |
| GAGE12J  | ivory  | 0.004711925  | 0.919111304 | -0.010170647 | 0.826489432 |
| GBX2     | ivory  | 0.080053119  | 0.083970185 | 0.051030748  | 0.271094496 |
| HBG1     | ivory  | 0.036535074  | 0.43088583  | 0.043169709  | 0.351936778 |
| KDM4E    | ivory  | -0.095919596 | 0.038259415 | -0.093279789 | 0.043927105 |
| KHDC1L   | ivory  | -0.122969997 | 0.007805109 | -0.10130262  | 0.028601566 |
| KRTAP1   | ivory  | -0.057135471 | 0.217797487 | -0.067093798 | 0.14771352  |
| KRTAP12  | ivory  | -0.076743102 | 0.097634477 | -0.083535139 | 0.071305797 |

|                    |              |             |              |             |
|--------------------|--------------|-------------|--------------|-------------|
| LEUTX ivory        | -0.043293752 | 0.350553454 | -0.048054751 | 0.300067957 |
| MBD3L2 ivory       | 0.040153623  | 0.386626803 | 0.031598383  | 0.495753212 |
| MBD3L3 ivory       | 0.009160521  | 0.843487808 | -0.009229607 | 0.842322825 |
| MBD3L5 ivory       | -0.027028633 | 0.560139176 | -0.027795768 | 0.549054436 |
| MC3R ivory         | 0.025621471  | 0.580748654 | 0.020413605  | 0.659933235 |
| MYF5 ivory         | 0.054852246  | 0.236776984 | 0.041562337  | 0.370172698 |
| NDST3 ivory        | -0.218985037 | 1.77E-06    | -0.21979799  | 1.62E-06    |
| PAX1 ivory         | 0.00716145   | 0.877335774 | -0.005844921 | 0.899753782 |
| PMP2 ivory         | -0.019345436 | 0.676695187 | -0.034589267 | 0.455848469 |
| PRAMEF ivory       | -0.091912279 | 0.047130929 | -0.089138048 | 0.054234305 |
| PRAMEF ivory       | -0.028342539 | 0.541220265 | -0.034033155 | 0.46312901  |
| PRAMEF ivory       | -0.054426213 | 0.240443668 | -0.04524734  | 0.329221787 |
| PRAMEF ivory       | -0.047854306 | 0.302090787 | -0.051767796 | 0.264224365 |
| PRAMEF ivory       | -0.070766366 | 0.126738453 | -0.06939966  | 0.134256421 |
| PRAMEF ivory       | -0.061919049 | 0.18162186  | -0.06087732  | 0.18909447  |
| PRAMEF ivory       | -0.113791368 | 0.013875958 | -0.110986947 | 0.016420277 |
| PRAMEF ivory       | -0.02122117  | 0.647372158 | -0.022303501 | 0.630693598 |
| PRAMEF ivory       | 0.041502393  | 0.370863906 | 0.03483841   | 0.452607653 |
| PRAMEF ivory       | -0.028699562 | 0.536135029 | -0.030311529 | 0.513477581 |
| PRAMEF ivory       | -0.052506359 | 0.257461094 | -0.049367572 | 0.287042311 |
| PRAMEF ivory       | -0.037737252 | 0.415866558 | -0.02801819  | 0.545860845 |
| PRAMEF ivory       | -0.048999029 | 0.290659932 | -0.047117577 | 0.309603171 |
| RFPL4B ivory       | -0.00969007  | 0.834566989 | -0.022579097 | 0.626476049 |
| SLITRK1 ivory      | -0.051615741 | 0.265631805 | -0.050287094 | 0.278148848 |
| ST8SIA3 ivory      | -0.117236112 | 0.011230203 | -0.117925622 | 0.010757794 |
| TMEM23 ivory       | -0.090035483 | 0.051844883 | -0.080417289 | 0.082566056 |
| TRIM43 ivory       | -0.096341293 | 0.037414077 | -0.085925634 | 0.063549843 |
| TRIM48 ivory       | -0.013860208 | 0.765143576 | 0.010057071  | 0.828396804 |
| TRIM49 ivory       | 0.011172534  | 0.809709381 | 0.035816959  | 0.440005159 |
| TRIM49B ivory      | -0.014142856 | 0.760498774 | -0.011537133 | 0.803624047 |
| TRIM49C ivory      | 0.015983962  | 0.730460784 | 0.026314418  | 0.570555458 |
| TRIM51 ivory       | -0.011369477 | 0.806420857 | 0.002260585  | 0.961141801 |
| TRIM64B ivory      | 0.024792172  | 0.593058113 | 0.02966461   | 0.522510477 |
| USP17L1 ivory      | -0.070949376 | 0.125757056 | -0.074893711 | 0.106007835 |
| WI2-3308 ivory     | -0.079429182 | 0.086420632 | -0.082533881 | 0.074776414 |
| ZDHHC2 ivory       | -0.091356431 | 0.048488052 | -0.093725136 | 0.042924137 |
| ZNF705A ivory      | -0.048388339 | 0.296721503 | -0.032473103 | 0.483893791 |
| ZNF804B ivory      | -0.002833391 | 0.951306546 | -0.012443139 | 0.788554424 |
| ACSM5 lightcyan    | -0.227335497 | 6.88E-07    | -0.220289202 | 1.53E-06    |
| ADAM19 lightcyan   | -0.038874166 | 0.401950223 | -0.023168059 | 0.617503778 |
| ADAMDI lightcyan   | -0.073524373 | 0.112565825 | -0.043020434 | 0.353606043 |
| AF165138 lightcyan | -0.047542973 | 0.305250547 | -0.040754092 | 0.379559491 |
| AIM2 lightcyan     | -0.08472566  | 0.0673516   | -0.056389908 | 0.223871269 |
| ANKRD4 lightcyan   | -0.130820356 | 0.004630795 | -0.108454693 | 0.019059585 |
| AOAH lightcyan     | -0.136072161 | 0.003215181 | -0.10093126  | 0.029193078 |

|                   |              |             |              |             |
|-------------------|--------------|-------------|--------------|-------------|
| APBB1IP lightcyan | -0.087109153 | 0.059975098 | -0.035050866 | 0.449854344 |
| APOL3 lightcyan   | -0.172535328 | 0.000179203 | -0.132045704 | 0.004257692 |
| AQP9 lightcyan    | -0.038143317 | 0.410863894 | -0.025361026 | 0.584601633 |
| ARHGAPlightcyan   | -0.209100826 | 5.19E-06    | -0.180995284 | 8.38E-05    |
| ARHGAPlightcyan   | -0.007992404 | 0.863235344 | 0.048891931  | 0.291716907 |
| ARL11 lightcyan   | -0.160951205 | 0.00048004  | -0.139041045 | 0.002601409 |
| BCL2L14 lightcyan | 0.01567532   | 0.735469103 | 0.060827912  | 0.189454415 |
| BIRC3 lightcyan   | -0.050395893 | 0.277109063 | -0.039697789 | 0.392044896 |
| BTK lightcyan     | -0.114537839 | 0.01326011  | -0.07672439  | 0.097716475 |
| BTLA lightcyan    | -0.06465953  | 0.163009907 | -0.032913239 | 0.477984961 |
| C3AR1 lightcyan   | -0.108564296 | 0.018938119 | -0.079757342 | 0.085124739 |
| C5orf56 lightcyan | -0.210951762 | 4.26E-06    | -0.176307537 | 0.000128211 |
| CARD17 lightcyan  | -0.057972179 | 0.211122859 | -0.043498352 | 0.34827928  |
| CASP10 lightcyan  | -0.337351099 | 6.81E-14    | -0.306265391 | 1.34E-11    |
| CASP4 lightcyan   | -0.025489097 | 0.582705496 | 0.003280259  | 0.943638731 |
| CASP5 lightcyan   | 0.012191221  | 0.792736927 | 0.012301215  | 0.790909999 |
| CASS4 lightcyan   | -0.181705679 | 7.84E-05    | -0.1611426   | 0.000472535 |
| CCL13 lightcyan   | 0.069095223  | 0.135976964 | 0.092366842  | 0.0460449   |
| CCR1 lightcyan    | -0.146417977 | 0.00151     | -0.111644019 | 0.015790065 |
| CCR4 lightcyan    | 0.073387872  | 0.113236652 | 0.110669438  | 0.016732622 |
| CCR8 lightcyan    | 0.022314671  | 0.630522424 | 0.038091404  | 0.411501462 |
| CCRL2 lightcyan   | -0.074919369 | 0.1058879   | -0.035978225 | 0.437947692 |
| CD163 lightcyan   | -0.177328896 | 0.000116959 | -0.156507906 | 0.0006887   |
| CD163L1 lightcyan | -0.180240924 | 8.98E-05    | -0.153282343 | 0.000889779 |
| CD180 lightcyan   | 0.006403882  | 0.890224932 | 0.040704126  | 0.380144545 |
| CD1D lightcyan    | -0.014249197 | 0.75875347  | 0.022072507  | 0.634237852 |
| CD200R1 lightcyan | -0.130077286 | 0.00487118  | -0.089440386 | 0.053419301 |
| CD209 lightcyan   | -0.030553794 | 0.510115822 | -0.005934422 | 0.898227017 |
| CD226 lightcyan   | -0.043334626 | 0.350098377 | -0.016732758 | 0.718358005 |
| CD274 lightcyan   | -0.092001639 | 0.046915752 | -0.060520881 | 0.191702484 |
| CD4 lightcyan     | -0.055746096 | 0.229212473 | -0.009596534 | 0.836141197 |
| CD53 lightcyan    | -0.014794254 | 0.749827229 | 0.038372338  | 0.408058174 |
| CD69 lightcyan    | -0.056460501 | 0.223291056 | -0.033894392 | 0.464955693 |
| CD80 lightcyan    | -0.066041939 | 0.154183348 | -0.053485759 | 0.248678445 |
| CD84 lightcyan    | -0.062424562 | 0.178075387 | -0.022219148 | 0.631986878 |
| CD86 lightcyan    | -0.066316721 | 0.152472849 | -0.025619104 | 0.58078362  |
| CECR1 lightcyan   | -0.011416303 | 0.805639475 | 0.017004554  | 0.713982161 |
| CLEC12A lightcyan | -0.066132603 | 0.153617373 | -0.059114025 | 0.2022538   |
| CLEC1B lightcyan  | -0.114849685 | 0.013010051 | -0.108110725 | 0.019445199 |
| CLEC4A lightcyan  | -0.103900667 | 0.024744054 | -0.071912574 | 0.120688821 |
| CLEC4D lightcyan  | -0.054323059 | 0.241337437 | -0.041519199 | 0.370670037 |
| CLEC5A lightcyan  | -0.00869262  | 0.851386835 | 0.01319388   | 0.776126526 |
| CLEC6A lightcyan  | -0.015651999 | 0.735847992 | 0.002063616  | 0.964525263 |
| CLEC7A lightcyan  | 0.001497124  | 0.974259582 | 0.028541218  | 0.538387425 |
| CLECL1 lightcyan  | -0.055389591 | 0.232208703 | -0.01437978  | 0.756611983 |

|         |           |              |             |              |             |
|---------|-----------|--------------|-------------|--------------|-------------|
| CMKLR1  | lightcyan | -0.162289475 | 0.0004298   | -0.134552088 | 0.003577906 |
| CR1     | lightcyan | -0.035618407 | 0.44254591  | -0.019365504 | 0.67637877  |
| CSF2RA  | lightcyan | -0.067925277 | 0.142747223 | -0.03712312  | 0.423500311 |
| CSF2RB  | lightcyan | -0.047207312 | 0.308681627 | -0.0142799   | 0.758249789 |
| CTSC    | lightcyan | 0.041143949  | 0.375013697 | 0.064275764  | 0.165526317 |
| CTSL    | lightcyan | -0.283895742 | 4.17E-10    | -0.267781494 | 4.13E-09    |
| CTSS    | lightcyan | 0.079852826  | 0.084750629 | 0.110395653  | 0.017006116 |
| CXCL10  | lightcyan | -0.048543562 | 0.295172858 | -0.012456711 | 0.78832925  |
| CXCL11  | lightcyan | -0.077837893 | 0.092931441 | -0.046002488 | 0.321205722 |
| CXorf21 | lightcyan | -0.154326467 | 0.000819412 | -0.118258021 | 0.010536413 |
| CYBB    | lightcyan | -0.060428993 | 0.192379072 | -0.030632375 | 0.509027869 |
| CYLD    | lightcyan | 0.045170293  | 0.330046856 | 0.071009455  | 0.125436169 |
| CYSLTR1 | lightcyan | -0.049724557 | 0.283567146 | -0.022472769 | 0.628101794 |
| DAPP1   | lightcyan | -0.006371587 | 0.890775056 | 0.010903975  | 0.81419912  |
| DENND3  | lightcyan | -0.27442885  | 1.63E-09    | -0.259835602 | 1.21E-08    |
| DNAJC5  | lightcyan | -0.018335357 | 0.692694    | 0.001370283  | 0.976439717 |
| DOCK10  | lightcyan | -0.106758604 | 0.021027625 | -0.08319936  | 0.072454724 |
| DOCK2   | lightcyan | -0.047471812 | 0.305975831 | -0.008089214 | 0.861595304 |
| DOCK8   | lightcyan | -0.074588358 | 0.107443415 | -0.050750864 | 0.273735019 |
| DRAM1   | lightcyan | 0.039950873  | 0.389031065 | 0.073291391  | 0.113712695 |
| EMB     | lightcyan | -0.129773728 | 0.004972577 | -0.123689339 | 0.00744913  |
| EMR2    | lightcyan | -0.0666749   | 0.150264868 | -0.056641193 | 0.221810817 |
| EMR3    | lightcyan | 0.015873257  | 0.732255879 | 0.047122149  | 0.309556173 |
| EVI2A   | lightcyan | -0.093858514 | 0.042627538 | -0.045931008 | 0.321959004 |
| EVI2B   | lightcyan | -0.076221081 | 0.099942782 | -0.025822183 | 0.577787468 |
| FAM105A | lightcyan | -0.209450214 | 5.00E-06    | -0.159444189 | 0.000543123 |
| FCAR    | lightcyan | -0.035151158 | 0.448557904 | -0.02860486  | 0.537481567 |
| FCGR2A  | lightcyan | -0.040616473 | 0.381172193 | -0.005403271 | 0.907293058 |
| FCGR3A  | lightcyan | -0.054540656 | 0.239454813 | -0.016649453 | 0.719701052 |
| FGD2    | lightcyan | -0.179803306 | 9.34E-05    | -0.143828947 | 0.001832871 |
| FGL2    | lightcyan | -0.088914452 | 0.054843679 | -0.077284716 | 0.095284626 |
| FGR     | lightcyan | -0.103855924 | 0.024806481 | -0.072485301 | 0.117751615 |
| FLT3    | lightcyan | -0.162164455 | 0.000434277 | -0.14845743  | 0.001293398 |
| FLVCR2  | lightcyan | -0.07249903  | 0.117681899 | -0.077162084 | 0.095812684 |
| FPR2    | lightcyan | -0.011514991 | 0.803993276 | -0.00247639  | 0.957435593 |
| FPR3    | lightcyan | -0.101121624 | 0.028888563 | -0.068167567 | 0.141324373 |
| FYB     | lightcyan | -0.07294521  | 0.115433707 | -0.031944836 | 0.491037598 |
| GAB3    | lightcyan | -0.171215592 | 0.000201148 | -0.132401575 | 0.004154546 |
| GAPT    | lightcyan | -0.137586905 | 0.002887271 | -0.117461657 | 0.011073691 |
| GBP1    | lightcyan | -0.181237644 | 8.19E-05    | -0.155934526 | 0.000721045 |
| GBP2    | lightcyan | -0.123742054 | 0.007423622 | -0.084576967 | 0.067835418 |
| GBP4    | lightcyan | -0.103422834 | 0.025417807 | -0.057655618 | 0.213630591 |
| GNB4    | lightcyan | -0.249160962 | 4.86E-08    | -0.209103708 | 5.19E-06    |
| GPNMB   | lightcyan | -0.272888415 | 2.03E-09    | -0.252588941 | 3.13E-08    |
| GPR183  | lightcyan | -0.142465721 | 0.002027216 | -0.102619658 | 0.026585967 |

|         |           |              |             |              |             |
|---------|-----------|--------------|-------------|--------------|-------------|
| GPR34   | lightcyan | -0.165271085 | 0.000334939 | -0.147378843 | 0.001404107 |
| GPR65   | lightcyan | -0.1037144   | 0.025004837 | -0.058568571 | 0.206456147 |
| GPRIN3  | lightcyan | -0.027675493 | 0.550785204 | -0.012553995 | 0.78671583  |
| HCLS1   | lightcyan | -0.184492192 | 6.05E-05    | -0.144789579 | 0.001706337 |
| HRH2    | lightcyan | -0.214368466 | 2.95E-06    | -0.187152794 | 4.71E-05    |
| HSD11B1 | lightcyan | -0.03527177  | 0.447001604 | -0.017680121 | 0.703146485 |
| HTRA4   | lightcyan | -0.036230409 | 0.434741352 | -0.022388686 | 0.629388687 |
| ICAM1   | lightcyan | -0.081296833 | 0.079252956 | -0.07123978  | 0.124211874 |
| IKZF1   | lightcyan | -0.040936473 | 0.37742871  | 0.01125566   | 0.80832095  |
| IL10RA  | lightcyan | -0.048572712 | 0.294882638 | 0.003774168  | 0.935169843 |
| IL12B   | lightcyan | -0.051312078 | 0.268457916 | -0.0229002   | 0.62157741  |
| IL15    | lightcyan | -0.232250702 | 3.87E-07    | -0.196162221 | 1.96E-05    |
| IL15RA  | lightcyan | -0.204870715 | 8.09E-06    | -0.173050419 | 0.000171264 |
| IL1B    | lightcyan | 0.054634921  | 0.238642451 | 0.066491803  | 0.151390507 |
| IL21    | lightcyan | 0.122895297  | 0.007842933 | 0.153507641  | 0.000874139 |
| IL24    | lightcyan | -0.056229414 | 0.225194387 | -0.026358628 | 0.569908026 |
| IL2RA   | lightcyan | 0.031999876  | 0.490290657 | 0.061298149  | 0.186048994 |
| IL4R    | lightcyan | 0.031813075  | 0.492828174 | 0.057157842  | 0.217617086 |
| IL7R    | lightcyan | -0.02061653  | 0.656767709 | 0.010991191  | 0.812740382 |
| INPP5D  | lightcyan | -0.071799527 | 0.121275273 | -0.021404667 | 0.644531748 |
| IRF8    | lightcyan | -0.114566803 | 0.013236708 | -0.095052487 | 0.040048573 |
| IRG1    | lightcyan | -0.038878121 | 0.401902307 | -0.028063089 | 0.545217288 |
| ITGB7   | lightcyan | 0.127773176  | 0.005689768 | 0.152021859  | 0.000982152 |
| KBTBD8  | lightcyan | -0.050259128 | 0.278416541 | -0.032689449 | 0.480984424 |
| KCNA3   | lightcyan | -0.048395394 | 0.296650994 | -0.011159504 | 0.809927066 |
| KCNJ10  | lightcyan | -0.027863865 | 0.548075711 | -0.039773601 | 0.39114062  |
| KIAA051 | lightcyan | 0.065898643  | 0.155081102 | 0.099846482  | 0.030981395 |
| KLRC3   | lightcyan | -0.049634411 | 0.284442004 | -0.004157244 | 0.928606343 |
| KLRC4   | lightcyan | -0.02140032  | 0.644598967 | 0.007602068  | 0.869853822 |
| KLRC4-K | lightcyan | -0.066522878 | 0.151199017 | -0.034735414 | 0.45394583  |
| KLRG1   | lightcyan | -0.088222969 | 0.056764312 | -0.092105827 | 0.046665912 |
| KLRK1   | lightcyan | -0.029519037 | 0.524554261 | -0.005395839 | 0.907420006 |
| KYNU    | lightcyan | 0.092944913  | 0.044694209 | 0.103693282  | 0.025034553 |
| LACTB   | lightcyan | 0.106860387  | 0.020904729 | 0.120241163  | 0.009297619 |
| LCP1    | lightcyan | 0.004848118  | 0.916781658 | 0.039676307  | 0.392301359 |
| LCP2    | lightcyan | -0.029079184 | 0.530754319 | 0.018886218  | 0.683951323 |
| LILRB5  | lightcyan | -0.01402772  | 0.762389785 | -0.018512797 | 0.689873339 |
| LITAF   | lightcyan | -0.153784367 | 0.000855277 | -0.118908849 | 0.010114619 |
| LY96    | lightcyan | -0.210125568 | 4.65E-06    | -0.162381962 | 0.000426516 |
| LYN     | lightcyan | 0.102385064  | 0.02693577  | 0.113248752  | 0.014339285 |
| LYSMD2  | lightcyan | -0.155341198 | 0.000755991 | -0.141312227 | 0.00220619  |
| LYZ     | lightcyan | 0.059370685  | 0.200298049 | 0.095763614  | 0.038576173 |
| MAFB    | lightcyan | -0.135929384 | 0.003247771 | -0.110612071 | 0.016789606 |
| 1-Mar   | lightcyan | -0.163970086 | 0.000373636 | -0.147583748 | 0.001382427 |
| MCOLN2  | lightcyan | -0.211277934 | 4.11E-06    | -0.188546514 | 4.12E-05    |



|         |           |              |             |              |             |
|---------|-----------|--------------|-------------|--------------|-------------|
| MEFV    | lightcyan | -0.023991757 | 0.605050599 | -0.00770462  | 0.868114059 |
| MMP12   | lightcyan | 0.077039843  | 0.096341381 | 0.099243606  | 0.032015201 |
| MNDA    | lightcyan | -0.071254727 | 0.124132748 | -0.039302038 | 0.396785857 |
| MPEG1   | lightcyan | -0.119615659 | 0.009673582 | -0.078511067 | 0.090130769 |
| MPP1    | lightcyan | -0.138604945 | 0.002684307 | -0.159510581 | 0.000540189 |
| MRC1    | lightcyan | -0.123596487 | 0.007494248 | -0.114326128 | 0.013432279 |
| MS4A14  | lightcyan | -0.104896137 | 0.023389797 | -0.091386382 | 0.048414102 |
| MS4A4A  | lightcyan | -0.129879003 | 0.004937199 | -0.094347578 | 0.041554719 |
| MS4A6A  | lightcyan | -0.098632631 | 0.033092822 | -0.060081014 | 0.194957161 |
| MS4A7   | lightcyan | -0.141297721 | 0.00220853  | -0.11487788  | 0.012987649 |
| MSR1    | lightcyan | -0.136666881 | 0.003082602 | -0.116742096 | 0.011579872 |
| NCF2    | lightcyan | 0.118936042  | 0.010097326 | 0.144854682  | 0.001698059 |
| NCKAP1  | lightcyan | -0.027632539 | 0.551403953 | 0.018287941  | 0.693448468 |
| NECAP2  | lightcyan | -0.015609598 | 0.736537022 | -0.006345142 | 0.891225584 |
| NLRC4   | lightcyan | -0.199689365 | 1.38E-05    | -0.181014737 | 8.36E-05    |
| NLRP3   | lightcyan | -0.148549152 | 0.001284364 | -0.124844381 | 0.00690783  |
| NOD2    | lightcyan | 0.146257477  | 0.001528387 | 0.188256321  | 4.24E-05    |
| NPL     | lightcyan | -0.056074701 | 0.226475105 | -0.030445628 | 0.511615348 |
| NRROS   | lightcyan | -0.257609086 | 1.63E-08    | -0.247230979 | 6.21E-08    |
| NUB1    | lightcyan | -0.118914984 | 0.010110715 | -0.101781351 | 0.027854233 |
| OLR1    | lightcyan | -0.10362218  | 0.025134826 | -0.081155724 | 0.079777114 |
| P2RY12  | lightcyan | -0.152002024 | 0.000983674 | -0.144052242 | 0.001802715 |
| P2RY13  | lightcyan | -0.036209682 | 0.435004374 | -0.00770084  | 0.868178176 |
| PAG1    | lightcyan | -0.005572774 | 0.904398496 | 0.018709159  | 0.686756885 |
| PATL2   | lightcyan | -0.185111673 | 5.71E-05    | -0.133654894 | 0.00380903  |
| PDCD1L  | lightcyan | -0.150719614 | 0.001086817 | -0.118821022 | 0.010170649 |
| PDE4B   | lightcyan | -0.048987422 | 0.290774357 | -0.032989501 | 0.476965158 |
| PIK3AP1 | lightcyan | -0.116876489 | 0.011483807 | -0.100131964 | 0.030501904 |
| PIK3CD  | lightcyan | -0.311026891 | 6.22E-12    | -0.266340493 | 5.03E-09    |
| PIK3R5  | lightcyan | -0.119026196 | 0.010040183 | -0.081437747 | 0.078732314 |
| PLA2G7  | lightcyan | -0.107500943 | 0.020145528 | -0.102315874 | 0.027039693 |
| PLEK    | lightcyan | -0.056967363 | 0.219156577 | -0.023078621 | 0.618862662 |
| PLXNC1  | lightcyan | -0.187633393 | 4.50E-05    | -0.175155183 | 0.000142124 |
| PREX1   | lightcyan | -0.238524835 | 1.83E-07    | -0.221710344 | 1.31E-06    |
| PRKCB   | lightcyan | -0.165669896 | 0.000323847 | -0.141631752 | 0.00215522  |
| PRR33   | lightcyan | -0.137594691 | 0.002885667 | -0.100620007 | 0.029696906 |
| PTGER4  | lightcyan | -0.17078691  | 0.000208801 | -0.162004679 | 0.000440063 |
| PTPN22  | lightcyan | 0.092144176  | 0.046574234 | 0.110927629  | 0.016478239 |
| PTPRC   | lightcyan | -0.023496257 | 0.612528456 | 0.017363713  | 0.708214142 |
| RAB27A  | lightcyan | 0.009785219  | 0.8329663   | 0.0265738    | 0.566761944 |
| RASGRP  | lightcyan | -0.125798938 | 0.006487361 | -0.128978431 | 0.005247313 |
| RASGRP1 | lightcyan | -0.121710407 | 0.008465173 | -0.105242507 | 0.022933868 |
| RASSF5  | lightcyan | 0.026128079  | 0.573288127 | 0.040100945  | 0.387250607 |
| RCSD1   | lightcyan | -0.055173375 | 0.23403932  | -0.025643665 | 0.580420878 |
| RGS1    | lightcyan | -0.076385676 | 0.099210327 | -0.051590993 | 0.265861357 |

|         |           |              |             |              |             |
|---------|-----------|--------------|-------------|--------------|-------------|
| RGS18   | lightcyan | -0.111867336 | 0.015580758 | -0.08772382  | 0.058185128 |
| SAMD3   | lightcyan | -0.177573848 | 0.000114402 | -0.15050138  | 0.001105332 |
| SAMSN1  | lightcyan | -0.060877948 | 0.189089898 | -0.027408129 | 0.554642141 |
| SCIMP   | lightcyan | -0.034065231 | 0.462707317 | -0.003838333 | 0.934070137 |
| SERPINB | lightcyan | -0.178923128 | 0.000101234 | -0.143049206 | 0.001941835 |
| SIRPB1  | lightcyan | -0.044201523 | 0.340534857 | -0.015262084 | 0.742192212 |
| SIRPB2  | lightcyan | -0.068217915 | 0.141030068 | -0.056069449 | 0.226518675 |
| SIRPD   | lightcyan | -0.060951059 | 0.188558197 | -0.046968121 | 0.311142041 |
| SLA     | lightcyan | -0.070648767 | 0.127372215 | -0.017856063 | 0.700334224 |
| SLC2A3  | lightcyan | -0.065422389 | 0.158093292 | -0.045877721 | 0.322521316 |
| SLC31A2 | lightcyan | 0.037461701  | 0.41928163  | 0.032724052  | 0.480519975 |
| SLC46A3 | lightcyan | -0.110081844 | 0.017324394 | -0.113936536 | 0.013754258 |
| SLCO2B1 | lightcyan | -0.139881743 | 0.002448151 | -0.114784923 | 0.013061637 |
| SLFN12L | lightcyan | -0.141649678 | 0.002152393 | -0.109408409 | 0.018025046 |
| SMAP2   | lightcyan | 0.22216046   | 1.24E-06    | 0.235015006  | 2.79E-07    |
| SNX10   | lightcyan | -0.149202978 | 0.001221629 | -0.143607288 | 0.001863262 |
| SOD2    | lightcyan | 0.034198556  | 0.460956871 | 0.040884981  | 0.37802955  |
| SRGN    | lightcyan | -0.143283998 | 0.001908416 | -0.101244286 | 0.028693794 |
| ST8SIA4 | lightcyan | -0.176361731 | 0.00012759  | -0.144401229 | 0.001756494 |
| STAMBP  | lightcyan | 0.032430637  | 0.484465973 | 0.023462537  | 0.613038822 |
| STAP1   | lightcyan | -0.056658795 | 0.221666996 | -0.030815355 | 0.50649924  |
| STK10   | lightcyan | -0.017828947 | 0.700767373 | 0.029656721  | 0.522621133 |
| STK17B  | lightcyan | -0.061459344 | 0.184892074 | -0.047044256 | 0.31035749  |
| STX11   | lightcyan | -0.113959512 | 0.013735082 | -0.084595467 | 0.067775068 |
| SUCNR1  | lightcyan | -0.062347932 | 0.178609666 | -0.039417865 | 0.39539473  |
| TFEC    | lightcyan | -0.096038248 | 0.038019944 | -0.064652532 | 0.163055537 |
| TLR1    | lightcyan | -0.086398272 | 0.062101769 | -0.079263337 | 0.087081565 |
| TLR10   | lightcyan | -0.051543659 | 0.266300794 | -0.016870972 | 0.716131639 |
| TLR2    | lightcyan | 0.108270197  | 0.019265582 | 0.101567665  | 0.028185712 |
| TLR6    | lightcyan | -0.02646773  | 0.568311793 | -0.015851196 | 0.732613782 |
| TLR7    | lightcyan | -0.114834895 | 0.013021816 | -0.081361765 | 0.079012704 |
| TLR8    | lightcyan | -0.050935809 | 0.271988232 | -0.027799463 | 0.549001305 |
| TM6SF1  | lightcyan | -0.176265315 | 0.000128698 | -0.157238385 | 0.00064944  |
| TMEM10  | lightcyan | -0.115866858 | 0.012223071 | -0.086657696 | 0.061318582 |
| TMEM14  | lightcyan | -0.203484666 | 9.34E-06    | -0.175269466 | 0.000140684 |
| TMEM71  | lightcyan | -0.078211203 | 0.091369846 | -0.061993363 | 0.181097256 |
| TNFAIP8 | lightcyan | -0.06376222  | 0.168939137 | -0.043678706 | 0.346282381 |
| TNFSF13 | lightcyan | -0.08877485  | 0.055227019 | -0.054465746 | 0.240101755 |
| TNFSF8  | lightcyan | 0.026232976  | 0.571749045 | 0.010187265  | 0.826210451 |
| TNIP3   | lightcyan | 0.079410449  | 0.086495085 | 0.113138736  | 0.014434867 |
| VCAM1   | lightcyan | -0.13556246  | 0.003332905 | -0.110959293 | 0.016447276 |
| VNN2    | lightcyan | -0.033331213 | 0.472410264 | -0.011185104 | 0.809499395 |
| VSIG4   | lightcyan | -0.119679266 | 0.009634743 | -0.102080792 | 0.027395366 |
| WDFY4   | lightcyan | 0.029986579  | 0.518004691 | 0.059815284  | 0.196942839 |
| WIPF1   | lightcyan | -0.179187497 | 9.88E-05    | -0.13991815  | 0.002441704 |

|         |            |              |             |              |             |
|---------|------------|--------------|-------------|--------------|-------------|
| XCR1    | lightcyan  | -0.098575935 | 0.033194371 | -0.063757139 | 0.168973159 |
| ZNF80   | lightcyan  | -0.043101765 | 0.352695938 | -0.026184138 | 0.572465367 |
| A1CF    | lightcyan1 | -0.081057958 | 0.080141918 | -0.084906876 | 0.066765788 |
| AFP     | lightcyan1 | -0.125037602 | 0.0068208   | -0.123471705 | 0.007555267 |
| AGXT    | lightcyan1 | -0.011833318 | 0.798689283 | -0.013809897 | 0.765971223 |
| AHSG    | lightcyan1 | -0.081025038 | 0.080265059 | -0.077238017 | 0.095485441 |
| ALB     | lightcyan1 | -0.061472938 | 0.184794754 | -0.061099481 | 0.18748219  |
| APOA2   | lightcyan1 | -0.053085358 | 0.252243415 | -0.047629928 | 0.30436584  |
| APOA5   | lightcyan1 | -0.01168149  | 0.801217924 | -0.011180872 | 0.809570093 |
| APOB    | lightcyan1 | -0.062713789 | 0.176069538 | -0.064213956 | 0.16593431  |
| APOC3   | lightcyan1 | -0.031669029 | 0.494789686 | -0.026114141 | 0.573492778 |
| APOH    | lightcyan1 | 0.006700048  | 0.885182366 | -0.011319999 | 0.807246722 |
| ATP6V0I | lightcyan1 | 0.027492362  | 0.553425594 | 0.045581535  | 0.325658424 |
| C8A     | lightcyan1 | 0.021800317  | 0.638424946 | 0.023517601  | 0.61220551  |
| CPN2    | lightcyan1 | -0.036862587 | 0.426763296 | -0.037225889 | 0.422217216 |
| CREB3L3 | lightcyan1 | -0.048952976 | 0.291114127 | -0.037179265 | 0.422799043 |
| CYP3A4  | lightcyan1 | -0.027597858 | 0.551903792 | -0.020898558 | 0.652378406 |
| DCSTAM  | lightcyan1 | 0.046734018  | 0.313562579 | 0.045989269  | 0.321344941 |
| DNASE2I | lightcyan1 | -0.076110963 | 0.100435205 | -0.062549532 | 0.177206626 |
| F11     | lightcyan1 | 0.002912176  | 0.949954333 | -0.003410057 | 0.941412471 |
| F2      | lightcyan1 | 0.001276173  | 0.978057402 | -0.005648801 | 0.903100621 |
| FAM169F | lightcyan1 | -0.065284607 | 0.158972909 | -0.059912788 | 0.196212529 |
| FAM9B   | lightcyan1 | -0.129722847 | 0.004989758 | -0.13535743  | 0.003381354 |
| FGA     | lightcyan1 | 0.021446903  | 0.643878685 | 0.026453935  | 0.568513501 |
| FGB     | lightcyan1 | 0.054605726  | 0.238893839 | 0.051091609  | 0.270522622 |
| FGG     | lightcyan1 | -0.058261422 | 0.208850151 | -0.058483327 | 0.207118558 |
| GCKR    | lightcyan1 | -0.152126855 | 0.000974132 | -0.15342642  | 0.000879747 |
| GP1BA   | lightcyan1 | 0.01314069   | 0.777005201 | 0.03408844   | 0.46240234  |
| GPR128  | lightcyan1 | -0.025568921 | 0.581525118 | -0.029484272 | 0.525042951 |
| GPR150  | lightcyan1 | -0.116672522 | 0.011629883 | -0.084042885 | 0.06959677  |
| HFE2    | lightcyan1 | -0.10011677  | 0.030527262 | -0.097820672 | 0.034572704 |
| HRG     | lightcyan1 | -0.131752654 | 0.004344361 | -0.123496095 | 0.007543306 |
| ISX     | lightcyan1 | -0.05477459  | 0.23744238  | -0.048198782 | 0.298620015 |
| ITIH1   | lightcyan1 | -0.03146392  | 0.497589868 | -0.024620619 | 0.595619311 |
| ITIH3   | lightcyan1 | -0.07310757  | 0.114624023 | -0.064961877 | 0.161047712 |
| KNG1    | lightcyan1 | -0.134240332 | 0.003656734 | -0.147232009 | 0.001419834 |
| LECT2   | lightcyan1 | -0.138978006 | 0.002613246 | -0.1256598   | 0.006547185 |
| MTTP    | lightcyan1 | -0.0319718   | 0.4906716   | -0.036293522 | 0.433941025 |
| NAT8    | lightcyan1 | -0.078607228 | 0.089736286 | -0.057067351 | 0.218347484 |
| OCSTAM  | lightcyan1 | 0.047477897  | 0.305913768 | 0.048973593  | 0.290910735 |
| PAH     | lightcyan1 | -0.033044586 | 0.476229275 | -0.043092119 | 0.352803811 |
| PAQR9   | lightcyan1 | -0.035394854 | 0.445416572 | -0.04937018  | 0.287016821 |
| PGC     | lightcyan1 | -0.071435442 | 0.123179152 | -0.090524949 | 0.050579107 |
| PLA2G12 | lightcyan1 | -0.026730334 | 0.564478448 | -0.044366121 | 0.33873806  |
| PSMA8   | lightcyan1 | -0.101159116 | 0.028828912 | -0.095457981 | 0.039203274 |

|          |            |              |             |              |             |
|----------|------------|--------------|-------------|--------------|-------------|
| RBM46    | lightcyan1 | -0.028862718 | 0.533819128 | -0.02104832  | 0.650052473 |
| SERPINA  | lightcyan1 | -0.112400098 | 0.015091221 | -0.100106087 | 0.030545102 |
| SERPINA  | lightcyan1 | -0.07650152  | 0.098697383 | -0.073935743 | 0.110563044 |
| SERPINC  | lightcyan1 | 0.029649668  | 0.522720065 | 0.018718676  | 0.686605967 |
| SERPIND  | lightcyan1 | -0.02646646  | 0.568330356 | -0.0468686   | 0.312169549 |
| SIGLECL  | lightcyan1 | -0.066059457 | 0.154073872 | -0.063263948 | 0.172300494 |
| SLC2A2   | lightcyan1 | -0.09290106  | 0.044795491 | -0.088208465 | 0.056805188 |
| SLC6A19  | lightcyan1 | -0.053466398 | 0.248850015 | -0.056549288 | 0.222562828 |
| SMLR1    | lightcyan1 | -0.094623545 | 0.040959472 | -0.087760135 | 0.058080772 |
| SULT2A1  | lightcyan1 | -0.016631154 | 0.719996185 | 0.001028277  | 0.982318956 |
| TF       | lightcyan1 | -0.024920036 | 0.591152457 | -0.016919521 | 0.715350165 |
| TFR2     | lightcyan1 | 0.047818354  | 0.302454557 | 0.056624982  | 0.221943326 |
| TM4SF5   | lightcyan1 | -0.071391025 | 0.123413    | -0.077781769 | 0.093168053 |
| TTR      | lightcyan1 | -0.065256579 | 0.159152293 | -0.064546865 | 0.163745668 |
| UGT1A1   | lightcyan1 | -0.058718418 | 0.205295435 | -0.056056519 | 0.226625954 |
| UGT2B1C  | lightcyan1 | 0.008191297  | 0.859866598 | 0.024728763  | 0.594004195 |
| VCX      | lightcyan1 | -0.164354741 | 0.000361782 | -0.165317272 | 0.000333637 |
| VCX3A    | lightcyan1 | -0.145494687 | 0.001618614 | -0.149339852 | 0.001208859 |
| VCX3B    | lightcyan1 | -0.134324207 | 0.003635373 | -0.131655403 | 0.004373474 |
| VTN      | lightcyan1 | -0.170390538 | 0.000216119 | -0.163138653 | 0.000400507 |
| AAMP     | lightgreen | -0.08630636  | 0.062381218 | -0.084719927 | 0.067370202 |
| AAR2     | lightgreen | -0.166235542 | 0.000308701 | -0.172685455 | 0.000176855 |
| AARS     | lightgreen | 0.062883888  | 0.174897727 | 0.07534429   | 0.103917237 |
| ABCF1    | lightgreen | -0.181801244 | 7.78E-05    | -0.186351967 | 5.08E-05    |
| ABCF2    | lightgreen | 0.074702245  | 0.106906206 | 0.073313329  | 0.113604315 |
| ABT1     | lightgreen | -0.15646813  | 0.000690899 | -0.14786554  | 0.001353115 |
| ADSL     | lightgreen | 0.087024073  | 0.06022641  | 0.076245036  | 0.099835914 |
| AGBL5    | lightgreen | -0.03853203  | 0.406108541 | -0.046338193 | 0.317683292 |
| AGPAT1   | lightgreen | -0.114939768 | 0.012938595 | -0.124968786 | 0.006851683 |
| AHSA1    | lightgreen | 0.01979007   | 0.669697886 | 0.039216165  | 0.397819115 |
| AIMP2    | lightgreen | 0.064662249  | 0.162992183 | 0.064954952  | 0.161092449 |
| ALAS1    | lightgreen | 0.23933229   | 1.66E-07    | 0.248740738  | 5.13E-08    |
| ALG1     | lightgreen | 0.206671034  | 6.70E-06    | 0.214506019  | 2.90E-06    |
| ANKRD2   | lightgreen | -0.012772457 | 0.783096012 | -0.011879847 | 0.797914791 |
| ANP32B   | lightgreen | 0.034687917  | 0.454563682 | 0.022584329  | 0.626396087 |
| APEX1    | lightgreen | 0.083067864  | 0.072908759 | 0.057691434  | 0.213345792 |
| APMAP    | lightgreen | -0.017443146 | 0.706940705 | -0.043813724 | 0.34479221  |
| ARPC2    | lightgreen | -0.069800739 | 0.132015378 | -0.042707085 | 0.357126268 |
| ATP5A1   | lightgreen | 0.120585457  | 0.009096273 | 0.122445145  | 0.008074348 |
| ATP5B    | lightgreen | 0.026072844  | 0.574099341 | 0.028992692  | 0.531977844 |
| ATP5F1   | lightgreen | 0.074636858  | 0.107214379 | 0.067899958  | 0.142896541 |
| ATP5G3   | lightgreen | 0.011797035  | 0.799293377 | 0.024140341  | 0.602816202 |
| ATP6V0C  | lightgreen | 0.033857112  | 0.465447132 | 0.016501739  | 0.722084631 |
| C10orf2  | lightgreen | -0.004723583 | 0.918911852 | -0.035853095 | 0.439543648 |
| C16orf91 | lightgreen | 0.026518052  | 0.567576252 | 0.055988188  | 0.227193519 |

|          |            |              |             |              |             |
|----------|------------|--------------|-------------|--------------|-------------|
| C1QBP    | lightgreen | 0.211641443  | 3.96E-06    | 0.210168636  | 4.63E-06    |
| C2orf47  | lightgreen | -0.130905143 | 0.004604058 | -0.138170303 | 0.002769315 |
| C6orf106 | lightgreen | -0.20726738  | 6.30E-06    | -0.175942063 | 0.000132479 |
| C6orf47  | lightgreen | -0.097854758 | 0.034509462 | -0.102333234 | 0.027013586 |
| C8orf33  | lightgreen | 0.039540239  | 0.393928173 | 0.016510835  | 0.721937766 |
| CALM3    | lightgreen | 0.078624193  | 0.089666836 | 0.086770503  | 0.060980574 |
| CCDC22   | lightgreen | 0.067919243  | 0.1427828   | 0.077154324  | 0.095846177 |
| CCDC51   | lightgreen | 0.04023339   | 0.385683394 | 0.027345119  | 0.555553021 |
| CCDC86   | lightgreen | -0.078038212 | 0.092090854 | -0.091648135 | 0.047771821 |
| CCT2     | lightgreen | 0.051141115  | 0.270058055 | 0.025755881  | 0.578764863 |
| CCT5     | lightgreen | 0.009929643  | 0.83053801  | 0.001046454  | 0.98200647  |
| CCT7     | lightgreen | 0.067240984  | 0.14682494  | 0.081628906  | 0.078030464 |
| CDK4     | lightgreen | -0.025168638 | 0.587455378 | -0.045131736 | 0.330460255 |
| CECR5    | lightgreen | 0.238506398  | 1.83E-07    | 0.218301364  | 1.91E-06    |
| CHCHD2   | lightgreen | 0.113500658  | 0.014122523 | 0.134428934  | 0.00360886  |
| CHCHD3   | lightgreen | -0.078710523 | 0.089314085 | -0.09319338  | 0.044123975 |
| CIAPIN1  | lightgreen | 0.249910092  | 4.42E-08    | 0.273075405  | 1.98E-09    |
| CLP1     | lightgreen | -0.10897128  | 0.018492972 | -0.107245394 | 0.020445486 |
| CNP      | lightgreen | 0.180453491  | 8.80E-05    | 0.195069427  | 2.19E-05    |
| CPT2     | lightgreen | 0.228866426  | 5.76E-07    | 0.230153165  | 4.96E-07    |
| CSTF1    | lightgreen | -0.196516822 | 1.89E-05    | -0.194176069 | 2.39E-05    |
| CTD-310  | lightgreen | -0.002059352 | 0.964598518 | 0.008175791  | 0.860129136 |
| CXorf40A | lightgreen | 0.103790864  | 0.024897498 | 0.099158687  | 0.03216316  |
| CXorf40B | lightgreen | 0.002419989  | 0.958404124 | 0.006189783  | 0.89387298  |
| DCAF11   | lightgreen | 0.064435251  | 0.164477018 | 0.072926859  | 0.115525508 |
| DCTN2    | lightgreen | -0.01125995  | 0.808249302 | -0.027056023 | 0.559741548 |
| DCTN3    | lightgreen | -0.002102692 | 0.963853981 | 0.038359912  | 0.408210109 |
| DCTPP1   | lightgreen | 0.073583713  | 0.112275176 | 0.069897898  | 0.131476869 |
| DDOST    | lightgreen | 0.091056315  | 0.049234298 | 0.074480183  | 0.107955657 |
| DDX23    | lightgreen | 0.066802285  | 0.149485496 | 0.059767912  | 0.19729837  |
| DHRS13   | lightgreen | 0.239600196  | 1.60E-07    | 0.227290869  | 6.91E-07    |
| DHX16    | lightgreen | -0.061954804 | 0.181369316 | -0.065692628 | 0.156378722 |
| DKC1     | lightgreen | -0.065570878 | 0.157149432 | -0.094763579 | 0.040660191 |
| DOLK     | lightgreen | 0.247198352  | 6.24E-08    | 0.263241882  | 7.67E-09    |
| DOLPP1   | lightgreen | 0.39598339   | 5.55E-19    | 0.409871709  | 2.40E-20    |
| EEF2KM   | lightgreen | 0.264684137  | 6.31E-09    | 0.265576185  | 5.58E-09    |
| EIF2B1   | lightgreen | -0.010871409 | 0.814743983 | 0.001028243  | 0.982319548 |
| EIF2B2   | lightgreen | 0.016933299  | 0.715128444 | 0.031270875  | 0.500233013 |
| EIF2B3   | lightgreen | -0.079033565 | 0.088003978 | -0.068054793 | 0.14198528  |
| EIF4A3   | lightgreen | -0.074132588 | 0.109614665 | -0.08509494  | 0.06616227  |
| EIF4G1   | lightgreen | -0.073466339 | 0.112850649 | -0.067473512 | 0.145429459 |
| EMC6     | lightgreen | 0.10383805   | 0.024831458 | 0.090626076  | 0.050320831 |
| EMC8     | lightgreen | 0.22755865   | 6.70E-07    | 0.26889454   | 3.54E-09    |
| ESYT1    | lightgreen | -0.036489996 | 0.431455033 | -0.050130457 | 0.279650452 |
| ETFA     | lightgreen | 0.249929448  | 4.41E-08    | 0.26049247   | 1.11E-08    |

|         |            |              |             |              |             |
|---------|------------|--------------|-------------|--------------|-------------|
| FADD    | lightgreen | 0.053873853  | 0.245256706 | 0.041635753  | 0.369327248 |
| FARS2   | lightgreen | -0.013403133 | 0.772672521 | 0.002790773  | 0.95203808  |
| FDPS    | lightgreen | 0.120028344  | 0.00942405  | 0.090852001  | 0.049747804 |
| FN3KRP  | lightgreen | -0.014896407 | 0.748157972 | -0.043875554 | 0.344111171 |
| FTH1    | lightgreen | 0.10823958   | 0.019299953 | 0.103641335  | 0.025107778 |
| FTSJ3   | lightgreen | -0.078325596 | 0.09089556  | -0.073130255 | 0.114511248 |
| FXR2    | lightgreen | 0.169064528  | 0.000242383 | 0.14299898   | 0.001949053 |
| GANAB   | lightgreen | 0.060877468  | 0.189093393 | 0.020758606  | 0.654555049 |
| GET4    | lightgreen | -0.130838693 | 0.004625001 | -0.138355089 | 0.002732879 |
| GOSR2   | lightgreen | -0.098297238 | 0.033697428 | -0.103451404 | 0.025377082 |
| GPATCH  | lightgreen | 0.143057702  | 0.001940616 | 0.128698949  | 0.005347059 |
| GPKOW   | lightgreen | -0.089373034 | 0.053599972 | -0.065449081 | 0.157923308 |
| GPN1    | lightgreen | -0.154523826 | 0.000806705 | -0.17350268  | 0.000164566 |
| GRHPR   | lightgreen | 0.211632622  | 3.96E-06    | 0.235577138  | 2.61E-07    |
| HCCS    | lightgreen | -0.022387528 | 0.629406409 | 0.001649235  | 0.971645347 |
| HDAC3   | lightgreen | -0.001006366 | 0.982695656 | -0.010276287 | 0.824716262 |
| HINT1   | lightgreen | 0.254900852  | 2.32E-08    | 0.260521675  | 1.10E-08    |
| HIRA    | lightgreen | 0.018048193  | 0.697267875 | 0.007260991  | 0.87564453  |
| HMGN2   | lightgreen | 0.004921151  | 0.915532681 | -0.006070449 | 0.895907304 |
| HNRNPM  | lightgreen | 0.07422441   | 0.109174474 | 0.062016884  | 0.180931442 |
| HSP90A  | lightgreen | -0.163571346 | 0.000386306 | -0.164267418 | 0.000364442 |
| HSPA5   | lightgreen | 0.076363162  | 0.099310262 | 0.065259295  | 0.159134909 |
| HSPA8   | lightgreen | 0.049980033  | 0.281097659 | 0.044681461  | 0.335312679 |
| HTRA2   | lightgreen | -0.104168559 | 0.02437311  | -0.114227463 | 0.013513187 |
| IMMT    | lightgreen | -0.029805917 | 0.520530494 | -0.042379125 | 0.360834117 |
| KTI12   | lightgreen | -0.13890261  | 0.002627467 | -0.138660973 | 0.002673523 |
| LDHB    | lightgreen | -0.075489834 | 0.103248961 | -0.097934286 | 0.034362298 |
| LGMN    | lightgreen | -0.109939743 | 0.017470224 | -0.095530726 | 0.039053237 |
| LRRC42  | lightgreen | -0.081656409 | 0.077929904 | -0.098992829 | 0.032453832 |
| LRRC47  | lightgreen | -0.066024122 | 0.154294761 | -0.078053261 | 0.09202795  |
| MAD2L1  | lightgreen | 0.042411479  | 0.360467266 | 0.046052242  | 0.320682074 |
| MAP7D1  | lightgreen | -0.194285872 | 2.36E-05    | -0.173045365 | 0.00017134  |
| MDH1    | lightgreen | 0.032635657  | 0.481706918 | 0.02775516   | 0.549638492 |
| MDH2    | lightgreen | 0.111172458  | 0.016240155 | 0.131093227  | 0.004545244 |
| MED22   | lightgreen | 0.043044549  | 0.353336047 | 0.033795668  | 0.466257731 |
| MED24   | lightgreen | 0.110677845  | 0.016724285 | 0.083014908  | 0.073092261 |
| MOCS3   | lightgreen | -0.227432003 | 6.80E-07    | -0.217906784 | 2.00E-06    |
| MRPL4   | lightgreen | -0.028562223 | 0.538088364 | -0.016286832 | 0.725557248 |
| MRPL44  | lightgreen | 0.094382362  | 0.041479291 | 0.077447804  | 0.094585967 |
| MRPL45  | lightgreen | 0.05850245   | 0.206969828 | 0.033203594  | 0.474108579 |
| MRPL49  | lightgreen | 0.062106069  | 0.180303765 | 0.049298307  | 0.287719897 |
| MRPS18A | lightgreen | -0.080877623 | 0.080818359 | -0.089574386 | 0.053061355 |
| MRPS18E | lightgreen | -0.064919084 | 0.161324344 | -0.05266108  | 0.256059572 |
| MRPS24  | lightgreen | 0.06769201   | 0.144127418 | 0.05702621   | 0.218680133 |
| MT-ATP6 | lightgreen | 0.012529121  | 0.787128268 | 0.021505152  | 0.642978491 |

|                   |              |             |              |             |
|-------------------|--------------|-------------|--------------|-------------|
| MT-ATP8lightgreen | 0.010227676  | 0.825532084 | 0.00160331   | 0.972434598 |
| MT-CO1 lightgreen | -0.011541211 | 0.803556063 | -0.015247961 | 0.742422327 |
| MT-CO2 lightgreen | -0.029650181 | 0.522712868 | -0.007687958 | 0.868396675 |
| MT-CO3 lightgreen | 0.006295408  | 0.892072949 | 0.011922514  | 0.797204754 |
| MT-CYB lightgreen | -0.020623012 | 0.656666689 | -0.016783606 | 0.71753867  |
| MT-ND1 lightgreen | 0.004227399  | 0.927404838 | 0.009239215  | 0.84216083  |
| MT-ND2 lightgreen | -0.064483884 | 0.164158054 | -0.066204192 | 0.153171587 |
| MT-ND3 lightgreen | -0.068813053 | 0.137586768 | -0.071162308 | 0.124622637 |
| MT-ND4 lightgreen | 0.014179867  | 0.759891205 | 0.018348676  | 0.692482121 |
| MT-ND4Ilightgreen | 0.041398047  | 0.372069001 | 0.046236689  | 0.318745664 |
| MT-ND5 lightgreen | -0.081950595 | 0.076860832 | -0.082044551 | 0.07652192  |
| MT-ND6 lightgreen | -0.125279152 | 0.006713383 | -0.131350161 | 0.004465997 |
| MTCH1 lightgreen  | -0.216162947 | 2.42E-06    | -0.20376482  | 9.07E-06    |
| MTHFS lightgreen  | 0.036730359  | 0.428424939 | 0.006729795  | 0.884676146 |
| NADK lightgreen   | 0.072404648  | 0.118161822 | 0.063479585  | 0.170839728 |
| NCL lightgreen    | -0.082579984 | 0.074613643 | -0.121472761 | 0.008595144 |
| NHP2 lightgreen   | -0.05599235  | 0.227158916 | -0.072482333 | 0.117766687 |
| NOB1 lightgreen   | 0.156474728  | 0.000690534 | 0.160641981  | 0.0004924   |
| NOC2L lightgreen  | -0.065379748 | 0.15836512  | -0.065008416 | 0.160747264 |
| NOLC1 lightgreen  | 0.084358282  | 0.068552149 | 0.056943571  | 0.21934941  |
| NOP14 lightgreen  | 0.164319198  | 0.000362862 | 0.134801807  | 0.003515879 |
| NTMT1 lightgreen  | 0.150157691  | 0.00113508  | 0.155554227  | 0.000743267 |
| NUP37 lightgreen  | 0.082551538  | 0.07471404  | 0.062219526  | 0.179507595 |
| OGFOD2 lightgreen | 0.040610759  | 0.381239244 | 0.040082506  | 0.387469101 |
| OS9 lightgreen    | 0.022064617  | 0.634359053 | 0.013694337  | 0.767873294 |
| PARS2 lightgreen  | -0.160971777 | 0.000479228 | -0.16344921  | 0.000390266 |
| PDCD11 lightgreen | 0.009102729  | 0.844462607 | -0.023530956 | 0.612003467 |
| PDF lightgreen    | 0.102802157  | 0.026316553 | 0.110790635  | 0.016612787 |
| PDIA6 lightgreen  | -0.014721677 | 0.751013906 | -0.034944313 | 0.451234023 |
| PDXP lightgreen   | 0.116396672  | 0.011830054 | 0.106714494  | 0.02108108  |
| PES1 lightgreen   | -0.023054763 | 0.619225369 | -0.020364518 | 0.660699883 |
| PEX10 lightgreen  | -0.001119305 | 0.980754038 | -0.018360694 | 0.692290968 |
| PGAM1 lightgreen  | 0.212932366  | 3.44E-06    | 0.192546135  | 2.80E-05    |
| PGK1 lightgreen   | 0.121883124  | 0.008371815 | 0.123984398  | 0.007307362 |
| PGM1 lightgreen   | 0.154036067  | 0.000838448 | 0.146732745  | 0.001474529 |
| PHB lightgreen    | 0.03017439   | 0.515385657 | 0.031975075  | 0.490627162 |
| PHF23 lightgreen  | 0.232917588  | 3.58E-07    | 0.232985874  | 3.55E-07    |
| PIGS lightgreen   | 0.149681215  | 0.001177543 | 0.136563333  | 0.003105322 |
| PIGT lightgreen   | -0.041391182 | 0.372148373 | -0.039590513 | 0.393326632 |
| PNO1 lightgreen   | -0.078400944 | 0.090584238 | -0.084038962 | 0.069609843 |
| POLR3A lightgreen | 0.01936906   | 0.676322711 | -0.00882299  | 0.849184427 |
| PPIL1 lightgreen  | -0.038111403 | 0.411255778 | -0.042099558 | 0.364013774 |
| PPP2R5Dlightgreen | 0.040969225  | 0.377046844 | 0.038795946  | 0.40289866  |
| PPP5C lightgreen  | -0.015396172 | 0.740008487 | -0.020190831 | 0.663415396 |
| PRDX4 lightgreen  | 0.178680566  | 0.000103491 | 0.173611989  | 0.000162985 |

|          |            |              |             |              |             |
|----------|------------|--------------|-------------|--------------|-------------|
| PRKAG1   | lightgreen | 0.117983746  | 0.010718788 | 0.100730884  | 0.029516581 |
| PSMB5    | lightgreen | 0.173394228  | 0.00016615  | 0.187212144  | 4.68E-05    |
| PSMD1    | lightgreen | -0.014592937 | 0.75312033  | -0.02619337  | 0.572329925 |
| PSMD3    | lightgreen | -0.00585627  | 0.899560169 | -0.004847667 | 0.916789361 |
| PSMD7    | lightgreen | 0.21607517   | 2.44E-06    | 0.21707826   | 2.19E-06    |
| PSMD9    | lightgreen | 0.044291496  | 0.339551933 | 0.047037971  | 0.31042221  |
| RABEPK   | lightgreen | 0.173558262  | 0.00016376  | 0.17503144   | 0.0001437   |
| RAN      | lightgreen | 0.054259921  | 0.24188564  | 0.03640942   | 0.43247357  |
| RBM15B   | lightgreen | 0.131791034  | 0.00433292  | 0.114947922  | 0.012932144 |
| RNF121   | lightgreen | -0.086690218 | 0.061220976 | -0.083836579 | 0.070287088 |
| RNF26    | lightgreen | -0.086958482 | 0.060420746 | -0.104021701 | 0.024575861 |
| RP11-345 | lightgreen | -0.113354526 | 0.014247914 | -0.126299793 | 0.00627605  |
| RPN2     | lightgreen | 0.040155217  | 0.386607941 | 0.044438461  | 0.337950295 |
| RPUSD4   | lightgreen | 0.120947118  | 0.008888959 | 0.092483724  | 0.04576907  |
| RRP12    | lightgreen | 0.154423006  | 0.000813173 | 0.158044134  | 0.000608547 |
| RTCB     | lightgreen | 0.065047522  | 0.160495132 | 0.060939867  | 0.188639525 |
| SAE1     | lightgreen | 0.100740674  | 0.029500703 | 0.088008667  | 0.057370753 |
| SAP30    | lightgreen | 0.178889739  | 0.000101542 | 0.1957578    | 2.04E-05    |
| SARS     | lightgreen | -0.013556697 | 0.770140593 | -0.008383413 | 0.856615033 |
| SDHA     | lightgreen | 0.077595485  | 0.093956846 | 0.084098493  | 0.069411649 |
| SDHB     | lightgreen | 0.016143933  | 0.727869426 | 0.023624296  | 0.610592256 |
| SENP3    | lightgreen | -0.030416833 | 0.512014928 | -0.055054101 | 0.235053525 |
| SF3A3    | lightgreen | -0.182092201 | 7.57E-05    | -0.198326091 | 1.58E-05    |
| SF3B2    | lightgreen | -0.023070537 | 0.618985556 | -0.048092118 | 0.299691864 |
| SLC25A3  | lightgreen | 0.055831378  | 0.228499803 | 0.04247928   | 0.359699241 |
| SLC25A4  | lightgreen | 0.259659187  | 1.24E-08    | 0.264415515  | 6.54E-09    |
| SLC25A5  | lightgreen | 0.059865932  | 0.196563232 | 0.055795863  | 0.228796394 |
| SLC29A1  | lightgreen | -0.079250762 | 0.087131846 | -0.090044312 | 0.05182182  |
| SLC35B2  | lightgreen | 0.055915243  | 0.227800513 | 0.037279692  | 0.421546368 |
| SLC39A7  | lightgreen | 0.100748074  | 0.029488708 | 0.113211663  | 0.014371446 |
| SLC4A2   | lightgreen | -0.094989711 | 0.040180803 | -0.118360114 | 0.010469233 |
| SMARCA   | lightgreen | -0.067799637 | 0.143489349 | -0.082020496 | 0.076608574 |
| SMARCB   | lightgreen | 0.071336069  | 0.123702812 | 0.06368686   | 0.169444343 |
| SMARCC   | lightgreen | 0.026282429  | 0.571024147 | 0.030418351  | 0.511993866 |
| SMIM12   | lightgreen | -0.116071952 | 0.012069585 | -0.101227846 | 0.028719834 |
| SNRNP4C  | lightgreen | 0.028169165  | 0.543698346 | 0.019961214  | 0.667012117 |
| SPATA2   | lightgreen | -0.242115493 | 1.18E-07    | -0.256329805 | 1.92E-08    |
| SPSB3    | lightgreen | -0.064483283 | 0.164161987 | -0.077294137 | 0.095244155 |
| SRP68    | lightgreen | 0.10926852   | 0.018173654 | 0.088992028  | 0.054631617 |
| SRSF9    | lightgreen | 0.112668626  | 0.014849636 | 0.108963908  | 0.018500954 |
| SSRP1    | lightgreen | 0.039439545  | 0.395134673 | 0.012316007  | 0.79066439  |
| STARD7   | lightgreen | -0.199676476 | 1.38E-05    | -0.205792338 | 7.35E-06    |
| STK19    | lightgreen | -0.088347054 | 0.056415609 | -0.086888413 | 0.060628923 |
| STOML2   | lightgreen | 0.095987176  | 0.038122863 | 0.104281048  | 0.024218788 |
| SURF4    | lightgreen | 0.235115873  | 2.75E-07    | 0.2501003    | 4.31E-08    |



|          |              |              |             |              |             |
|----------|--------------|--------------|-------------|--------------|-------------|
| TBL2     | lightgreen   | 0.093384489  | 0.043689554 | 0.097398925  | 0.03536337  |
| THAP11   | lightgreen   | 0.109158852  | 0.018290903 | 0.141815316  | 0.002126427 |
| TMED1    | lightgreen   | -0.077475455 | 0.094467919 | -0.095766783 | 0.038569714 |
| TMEM18   | lightgreen   | -0.054148328 | 0.24285669  | -0.049368601 | 0.287032254 |
| TMX2     | lightgreen   | -0.059399366 | 0.200080358 | -0.060350672 | 0.192957143 |
| TOE1     | lightgreen   | 0.039568674  | 0.393587868 | 0.017656985  | 0.703516589 |
| TRAFD1   | lightgreen   | -0.092193458 | 0.04645664  | -0.081667721 | 0.077888574 |
| TUBA1B   | lightgreen   | 0.075816039  | 0.10176354  | 0.05397899   | 0.244335434 |
| UBE2Z    | lightgreen   | -0.04428012  | 0.339676107 | -0.032288989 | 0.486377178 |
| UBTF     | lightgreen   | 0.130681576  | 0.004674861 | 0.117170943  | 0.011275789 |
| UQCRFS   | lightgreen   | -0.170416422 | 0.000215634 | -0.153260307 | 0.000891322 |
| USP5     | lightgreen   | 0.021732506  | 0.639469875 | 0.034727949  | 0.454042905 |
| VCP      | lightgreen   | 0.192015024  | 2.95E-05    | 0.213307052  | 3.31E-06    |
| WDR5     | lightgreen   | 0.00985603   | 0.831775513 | -0.007659387 | 0.868881336 |
| WDR61    | lightgreen   | 0.194750218  | 2.26E-05    | 0.173389291  | 0.000166222 |
| XRCC6    | lightgreen   | 0.149944958  | 0.001153861 | 0.133559013  | 0.003834512 |
| ZDHHC4   | lightgreen   | 0.022537225  | 0.627116039 | 0.038814494  | 0.402673637 |
| ZFPL1    | lightgreen   | 0.013807647  | 0.766008237 | 2.44E-05     | 0.999579686 |
| ZMAT2    | lightgreen   | -0.126349553 | 0.006255398 | -0.124641675 | 0.007000199 |
| ZNF622   | lightgreen   | -0.124222215 | 0.00719486  | -0.110747264 | 0.016655584 |
| APOBEC   | lightsteelbl | -0.14632242  | 0.001520923 | -0.146155626 | 0.001540161 |
| BST2     | lightsteelbl | -0.235600835 | 2.60E-07    | -0.209661845 | 4.89E-06    |
| C19orf66 | lightsteelbl | -0.280410869 | 6.93E-10    | -0.256616348 | 1.85E-08    |
| CMPK2    | lightsteelbl | -0.237247993 | 2.13E-07    | -0.212204471 | 3.72E-06    |
| DDX58    | lightsteelbl | -0.185576707 | 5.47E-05    | -0.174062644 | 0.000156614 |
| DDX60    | lightsteelbl | -0.149432623 | 0.001200273 | -0.143103939 | 0.001933997 |
| DDX60L   | lightsteelbl | -0.079380074 | 0.086615919 | -0.07494828  | 0.105752889 |
| DTX3L    | lightsteelbl | -0.198198697 | 1.60E-05    | -0.185205785 | 5.66E-05    |
| EIF2AK2  | lightsteelbl | -0.230493771 | 4.76E-07    | -0.241295144 | 1.30E-07    |
| EPSTI1   | lightsteelbl | -0.219256359 | 1.72E-06    | -0.195146824 | 2.17E-05    |
| FBXO39   | lightsteelbl | -0.090096215 | 0.051686407 | -0.084612006 | 0.067721151 |
| HELZ2    | lightsteelbl | -0.184887005 | 5.83E-05    | -0.179400207 | 9.69E-05    |
| HERC5    | lightsteelbl | -0.442456087 | 8.31E-24    | -0.417869882 | 3.68E-21    |
| HERC6    | lightsteelbl | -0.184329039 | 6.15E-05    | -0.167457993 | 0.000278199 |
| HSH2D    | lightsteelbl | -0.068460852 | 0.139616616 | -0.029740943 | 0.521440424 |
| IFI16    | lightsteelbl | -0.291528823 | 1.33E-10    | -0.27341592  | 1.88E-09    |
| IFI27    | lightsteelbl | -0.174257698 | 0.000153929 | -0.143930027 | 0.001819163 |
| IFI44    | lightsteelbl | -0.252516993 | 3.16E-08    | -0.241888978 | 1.21E-07    |
| IFI44L   | lightsteelbl | -0.29671221  | 6.04E-11    | -0.276956645 | 1.14E-09    |
| IFI6     | lightsteelbl | -0.164694791 | 0.000351595 | -0.155300499 | 0.000758445 |
| IFIH1    | lightsteelbl | -0.177966269 | 0.000110415 | -0.171249639 | 0.000200551 |
| IFIT1    | lightsteelbl | -0.264192045 | 6.74E-09    | -0.250428055 | 4.14E-08    |
| IFIT2    | lightsteelbl | -0.282977242 | 4.77E-10    | -0.266155637 | 5.16E-09    |
| IFIT3    | lightsteelbl | -0.269729701 | 3.15E-09    | -0.239981398 | 1.53E-07    |
| IFIT5    | lightsteelbl | -0.199042687 | 1.47E-05    | -0.192835243 | 2.72E-05    |

|         |              |              |             |              |             |
|---------|--------------|--------------|-------------|--------------|-------------|
| IFNB1   | lightsteelbl | -0.19612845  | 1.97E-05    | -0.190584194 | 3.39E-05    |
| IRF7    | lightsteelbl | -0.04437577  | 0.33863291  | -0.018219654 | 0.694535558 |
| IRF9    | lightsteelbl | -0.217206611 | 2.16E-06    | -0.218441423 | 1.88E-06    |
| ISG15   | lightsteelbl | -0.072696912 | 0.116680629 | -0.037752034 | 0.415683827 |
| LAMP3   | lightsteelbl | -0.232646538 | 3.70E-07    | -0.197206667 | 1.77E-05    |
| LAP3    | lightsteelbl | -0.060548005 | 0.191503103 | -0.054337398 | 0.241213052 |
| LY6E    | lightsteelbl | -0.251636235 | 3.54E-08    | -0.234439922 | 2.99E-07    |
| MX1     | lightsteelbl | -0.227940301 | 6.41E-07    | -0.208398882 | 5.59E-06    |
| MX2     | lightsteelbl | -0.483554332 | 9.70E-29    | -0.470719289 | 3.98E-27    |
| NMI     | lightsteelbl | -0.139118799 | 0.002586876 | -0.12421108  | 0.007200093 |
| OAS1    | lightsteelbl | -0.216581268 | 2.31E-06    | -0.186962055 | 4.80E-05    |
| OAS2    | lightsteelbl | -0.122947888 | 0.007816286 | -0.085537286 | 0.064760379 |
| OAS3    | lightsteelbl | -0.107222816 | 0.020472173 | -0.085615004 | 0.064516614 |
| OASL    | lightsteelbl | -0.145861537 | 0.001574628 | -0.107954142 | 0.01962298  |
| OPTN    | lightsteelbl | -0.333246709 | 1.42E-13    | -0.312623823 | 4.79E-12    |
| PARP12  | lightsteelbl | -0.234414789 | 3.00E-07    | -0.197967437 | 1.64E-05    |
| PARP14  | lightsteelbl | -0.213480811 | 3.24E-06    | -0.191258498 | 3.18E-05    |
| PARP9   | lightsteelbl | -0.1450947   | 0.001667855 | -0.134852491 | 0.00350341  |
| PLSCR1  | lightsteelbl | -0.264472497 | 6.49E-09    | -0.252217634 | 3.29E-08    |
| RNF213  | lightsteelbl | -0.208214801 | 5.70E-06    | -0.197574859 | 1.70E-05    |
| RSAD2   | lightsteelbl | -0.264100912 | 6.82E-09    | -0.237505819 | 2.07E-07    |
| RTP4    | lightsteelbl | -0.369260418 | 1.56E-16    | -0.32156989  | 1.07E-12    |
| RUFY4   | lightsteelbl | -0.165843898 | 0.000319116 | -0.150561692 | 0.001100186 |
| SAMD9   | lightsteelbl | -0.225318944 | 8.67E-07    | -0.214568732 | 2.88E-06    |
| SAMD9L  | lightsteelbl | -0.193738065 | 2.49E-05    | -0.16817086  | 0.000261736 |
| SMTNL1  | lightsteelbl | -0.249792223 | 4.49E-08    | -0.232644116 | 3.70E-07    |
| SP100   | lightsteelbl | -0.25135004  | 3.67E-08    | -0.233694384 | 3.26E-07    |
| SP110   | lightsteelbl | -0.25654204  | 1.87E-08    | -0.229794737 | 5.17E-07    |
| SP140L  | lightsteelbl | -0.278349526 | 9.33E-10    | -0.247171744 | 6.26E-08    |
| STAT1   | lightsteelbl | -0.192543333 | 2.80E-05    | -0.176300602 | 0.000128291 |
| STAT2   | lightsteelbl | -0.22938263  | 5.42E-07    | -0.222156896 | 1.24E-06    |
| THEMIS2 | lightsteelbl | -0.262256212 | 8.76E-09    | -0.250446386 | 4.13E-08    |
| TNFSF10 | lightsteelbl | -0.349971041 | 6.68E-15    | -0.326618921 | 4.53E-13    |
| TRIM14  | lightsteelbl | -0.009708278 | 0.834260619 | 0.011703539  | 0.800850583 |
| TRIM21  | lightsteelbl | 0.010428813  | 0.822157667 | 0.030642725  | 0.508884664 |
| TRIM38  | lightsteelbl | -0.131135641 | 0.004532076 | -0.122083153 | 0.008264841 |
| TRIM69  | lightsteelbl | -0.151501418 | 0.001022812 | -0.132570814 | 0.004106291 |
| UBE2L6  | lightsteelbl | -0.308743896 | 9.01E-12    | -0.261901608 | 9.18E-09    |
| USP18   | lightsteelbl | -0.011024082 | 0.812190426 | -0.016401938 | 0.723696577 |
| XAF1    | lightsteelbl | -0.249517546 | 4.65E-08    | -0.23849473  | 1.83E-07    |
| ZNFX1   | lightsteelbl | -0.209249462 | 5.11E-06    | -0.17948802  | 9.62E-05    |
| AASDHP  | lightyellow  | -0.025036504 | 0.58941907  | -0.053056674 | 0.252500162 |
| ABCA7   | lightyellow  | 0.291667969  | 1.31E-10    | 0.304072689  | 1.91E-11    |
| ABCD3   | lightyellow  | 0.248590415  | 5.23E-08    | 0.230809789  | 4.59E-07    |
| ABCE1   | lightyellow  | -0.014379355 | 0.756618947 | -0.034908599 | 0.451697    |

|         |             |              |             |              |             |
|---------|-------------|--------------|-------------|--------------|-------------|
| ABHD13  | lightyellow | -0.074725149 | 0.106798424 | -0.088331805 | 0.056458366 |
| ABHD14  | lightyellow | 0.2139065    | 3.10E-06    | 0.212125061  | 3.75E-06    |
| ABHD5   | lightyellow | 0.359410147  | 1.10E-15    | 0.371553826  | 9.81E-17    |
| ABI1    | lightyellow | 0.054007476  | 0.244086241 | 0.02975843   | 0.521195439 |
| ACADM   | lightyellow | -0.040948757 | 0.377285457 | -0.065840698 | 0.155445256 |
| ACAT1   | lightyellow | 0.099071133  | 0.032316323 | 0.090497825  | 0.050648569 |
| ACBD5   | lightyellow | 0.255008004  | 2.29E-08    | 0.227406655  | 6.82E-07    |
| ACN9    | lightyellow | 0.126559802  | 0.006168806 | 0.131403177  | 0.004449802 |
| ACSL3   | lightyellow | 0.212114031  | 3.76E-06    | 0.194779889  | 2.25E-05    |
| ACTR2   | lightyellow | 0.008786875  | 0.849794423 | -0.005712173 | 0.902018976 |
| ACTR3   | lightyellow | -0.056449409 | 0.223382156 | -0.059176924 | 0.201773227 |
| ACTR6   | lightyellow | 0.091590487  | 0.047912661 | 0.080477845  | 0.08233442  |
| ADAM10  | lightyellow | 0.080068659  | 0.083909878 | 0.062565663  | 0.177094715 |
| ADH5    | lightyellow | 0.23669514   | 2.28E-07    | 0.236892072  | 2.23E-07    |
| ADIPOR2 | lightyellow | -0.10295335  | 0.02609514  | -0.140454565 | 0.002348494 |
| ADK     | lightyellow | 0.253480006  | 2.79E-08    | 0.233086418  | 3.51E-07    |
| ADO     | lightyellow | -0.083547362 | 0.071264257 | -0.093483717 | 0.043465418 |
| ADPGK   | lightyellow | 0.162078435  | 0.000437383 | 0.137649245  | 0.002874452 |
| AEBP2   | lightyellow | -0.123800836 | 0.007395272 | -0.141372196 | 0.002196541 |
| AFG3L2  | lightyellow | -0.144523091 | 0.001740611 | -0.167726242 | 0.000271893 |
| AFTPH   | lightyellow | 0.015000109  | 0.746464592 | 0.002117511  | 0.963599406 |
| AGGF1   | lightyellow | 0.109581743  | 0.017842383 | 0.091016061  | 0.049335116 |
| AGL     | lightyellow | 0.0598837    | 0.19643019  | 0.022536447  | 0.627127936 |
| AGPS    | lightyellow | 0.103917122  | 0.024721129 | 0.082143697  | 0.076165603 |
| AIDA    | lightyellow | -0.009814179 | 0.832479255 | -0.033303744 | 0.472775532 |
| AK4     | lightyellow | 0.038290351  | 0.409061284 | 0.028295967  | 0.541885379 |
| AKIRIN1 | lightyellow | -0.127331075 | 0.005860293 | -0.147625237 | 0.001378075 |
| AKIRIN2 | lightyellow | -0.187247041 | 4.67E-05    | -0.192496062 | 2.81E-05    |
| AKTIP   | lightyellow | -0.014425991 | 0.755854596 | -0.011238153 | 0.808613309 |
| ALDH5A  | lightyellow | -0.110981236 | 0.016425849 | -0.127225291 | 0.00590177  |
| ALG6    | lightyellow | 0.04708403   | 0.309948147 | 0.029100734  | 0.530449701 |
| ALKBH1  | lightyellow | -0.143838228 | 0.001831608 | -0.157292312 | 0.000646625 |
| AMD1    | lightyellow | 0.101439738  | 0.028385776 | 0.071783452  | 0.121358846 |
| AMMECH  | lightyellow | 0.103965872  | 0.02465332  | 0.105354165  | 0.022788541 |
| AMZ2    | lightyellow | -0.038362154 | 0.408182695 | -0.059648539 | 0.198196354 |
| ANKEF1  | lightyellow | 0.037113544  | 0.423619977 | 0.018148952  | 0.69566175  |
| ANKRD1  | lightyellow | 0.1216992    | 0.008471263 | 0.137531063  | 0.002898798 |
| ANKRD3  | lightyellow | 0.114038492  | 0.013669346 | 0.092047691  | 0.046805184 |
| ANXA7   | lightyellow | 0.063344911  | 0.171750947 | 0.057542011  | 0.214535767 |
| AP1AR   | lightyellow | 0.081925754  | 0.076950643 | 0.049822126  | 0.282622303 |
| AP1S2   | lightyellow | 0.085243789  | 0.065687778 | 0.055299472  | 0.232970472 |
| AP1S3   | lightyellow | 0.223337353  | 1.09E-06    | 0.226023329  | 8.00E-07    |
| AP3B1   | lightyellow | 0.206921264  | 6.53E-06    | 0.168823364  | 0.000247469 |
| AP3M1   | lightyellow | 0.111499916  | 0.015926432 | 0.079981148  | 0.084249953 |
| AP5M1   | lightyellow | 0.046663526  | 0.314293857 | 0.043852029  | 0.344370188 |

|          |             |              |             |              |             |
|----------|-------------|--------------|-------------|--------------|-------------|
| API5     | lightyellow | 0.069726167  | 0.132429847 | 0.037857939  | 0.414375987 |
| APIP     | lightyellow | 0.116636623  | 0.011655763 | 0.085639553  | 0.064439774 |
| ARCN1    | lightyellow | 0.123252605  | 0.007663482 | 0.103412168  | 0.025433024 |
| ARF4     | lightyellow | 0.147399381  | 0.00140192  | 0.150325767  | 0.001120441 |
| ARF6     | lightyellow | 0.107895865  | 0.019689507 | 0.095674274  | 0.038758595 |
| ARHGAP   | lightyellow | 0.175279533  | 0.000140557 | 0.152927978  | 0.000914902 |
| ARL5A    | lightyellow | -0.110621003 | 0.016780723 | -0.124105147 | 0.007250045 |
| ARL5B    | lightyellow | -0.004730363 | 0.918795864 | -0.03356482  | 0.469310167 |
| ARMC10   | lightyellow | 0.088222268  | 0.056765128 | 0.08901671   | 0.054564289 |
| ARMCX5   | lightyellow | 0.021493488  | 0.643158705 | 0.003366448  | 0.942160396 |
| ARMCX6   | lightyellow | -0.043289634 | 0.350599325 | -0.077499315 | 0.094366151 |
| ARSK     | lightyellow | 0.058513165  | 0.206886519 | 0.041182248  | 0.374568943 |
| ASAH2B   | lightyellow | 0.148569717  | 0.001282346 | 0.145894167  | 0.001570769 |
| ASCC1    | lightyellow | -0.000614152 | 0.98943922  | -0.024470216 | 0.597868878 |
| ASNSD1   | lightyellow | -0.10276929  | 0.026364898 | -0.118910909 | 0.010113308 |
| ASPH     | lightyellow | 0.096376602  | 0.03734402  | 0.062823913  | 0.175310232 |
| ASUN     | lightyellow | -0.000159405 | 0.997258843 | -0.028897433 | 0.533327017 |
| ATAD1    | lightyellow | 0.039473733  | 0.39472479  | 0.012230804  | 0.792079351 |
| ATF1     | lightyellow | -0.106781161 | 0.021000336 | -0.141735311 | 0.002138933 |
| ATG3     | lightyellow | 0.083779675  | 0.070478479 | 0.090459703  | 0.050746331 |
| ATG5     | lightyellow | -0.031490811 | 0.497222273 | -0.050750953 | 0.273734176 |
| ATMIN    | lightyellow | 0.15925364   | 0.000551626 | 0.155869056  | 0.000724826 |
| ATP2C1   | lightyellow | 0.159122511  | 0.000557549 | 0.125276482  | 0.006714563 |
| ATP6AP2  | lightyellow | -0.138488222 | 0.002706899 | -0.142523487 | 0.002018613 |
| ATP6V1A  | lightyellow | 0.078366701  | 0.090725614 | 0.076078904  | 0.100578927 |
| ATP6V1I  | lightyellow | 0.136962082  | 0.003018657 | 0.1528765    | 0.000918605 |
| AUH      | lightyellow | 0.038541863  | 0.405988681 | 0.012041068  | 0.795232705 |
| AVL9     | lightyellow | 0.110108823  | 0.017296828 | 0.094236573  | 0.041796199 |
| AZI2     | lightyellow | 0.032502715  | 0.483495005 | 0.008676249  | 0.851663482 |
| B3GALN   | lightyellow | -0.006033188 | 0.896542644 | -0.003574656 | 0.938589974 |
| B3GNT2   | lightyellow | -0.078519833 | 0.090094753 | -0.069462327 | 0.133904349 |
| BAZ1A    | lightyellow | 0.23909916   | 1.70E-07    | 0.23169934   | 4.13E-07    |
| BBS7     | lightyellow | 0.020078096  | 0.665180318 | -0.010350149 | 0.823477006 |
| BCAS2    | lightyellow | -0.047338924 | 0.307333292 | -0.067775361 | 0.14363308  |
| BCKDHB   | lightyellow | 0.040432874  | 0.383330216 | 0.032811215  | 0.47935113  |
| BCL10    | lightyellow | 0.092454499  | 0.045837906 | 0.095342234  | 0.039443006 |
| BCL2L13  | lightyellow | 0.130410399  | 0.004762059 | 0.10639738   | 0.021468858 |
| BCL2L2-I | lightyellow | 0.100012036  | 0.030702554 | 0.085419594  | 0.065130963 |
| BCL3     | lightyellow | 0.128729108  | 0.005336213 | 0.136254702  | 0.003173947 |
| BCLAF1   | lightyellow | 0.036361865  | 0.433075354 | 6.03E-05     | 0.998963392 |
| BFAR     | lightyellow | 0.069870512  | 0.131628485 | 0.079186382  | 0.087389629 |
| BIRC2    | lightyellow | -0.012698862 | 0.784314941 | -0.049320619 | 0.287501508 |
| BLOC1S5  | lightyellow | -0.209772332 | 4.83E-06    | -0.238255677 | 1.89E-07    |
| BMI1     | lightyellow | -0.090863135 | 0.049719705 | -0.12302356  | 0.007778088 |
| BMS1     | lightyellow | 0.038181309  | 0.410397671 | 0.003333176  | 0.942731075 |

|          |             |              |             |              |             |
|----------|-------------|--------------|-------------|--------------|-------------|
| BOD1     | lightyellow | -0.171668035 | 0.000193356 | -0.200589099 | 1.26E-05    |
| BPGM     | lightyellow | 0.061875169  | 0.181932152 | 0.060717553  | 0.190260221 |
| BRCC3    | lightyellow | 0.168672255  | 0.000250707 | 0.161472168  | 0.000459866 |
| BRD7     | lightyellow | 0.118168463  | 0.010595658 | 0.098073011  | 0.034106869 |
| BRMS1L   | lightyellow | -0.235397143 | 2.66E-07    | -0.258191184 | 1.51E-08    |
| BSDC1    | lightyellow | 0.028382166  | 0.540654661 | 0.001012466  | 0.982590789 |
| BTBD1    | lightyellow | 0.046951187  | 0.311316726 | 0.029376686  | 0.526556753 |
| BTBD10   | lightyellow | 0.077032675  | 0.096372455 | 0.064252429  | 0.165680261 |
| BTG3     | lightyellow | 0.023726212  | 0.609053005 | 0.006286846  | 0.892218825 |
| BUD13    | lightyellow | 0.041001523  | 0.376670508 | 0.008075019  | 0.861835744 |
| BZW1     | lightyellow | -0.058790626 | 0.204737802 | -0.080443186 | 0.082466931 |
| C1orf76  | lightyellow | 0.279440442  | 7.98E-10    | 0.261846464  | 9.25E-09    |
| C1orf88  | lightyellow | -0.030753749 | 0.507349847 | -0.073442535 | 0.112967635 |
| C11orf57 | lightyellow | -0.062774249 | 0.175652362 | -0.088656159 | 0.055554686 |
| C11orf58 | lightyellow | -0.005013152 | 0.913959611 | -0.032396086 | 0.484931785 |
| C12orf4  | lightyellow | -0.034244915 | 0.46034909  | -0.037348171 | 0.420693446 |
| C12orf5  | lightyellow | 0.144298395  | 0.001769999 | 0.146789631  | 0.001468201 |
| C12orf66 | lightyellow | -0.077526407 | 0.094250702 | -0.082487682 | 0.074939814 |
| C16orf72 | lightyellow | 0.044105562  | 0.341585204 | 0.046159264  | 0.319557579 |
| C16orf87 | lightyellow | 0.10596325   | 0.022009758 | 0.111256418  | 0.016159205 |
| C17orf75 | lightyellow | -0.017903754 | 0.699572619 | -0.033764106 | 0.466674419 |
| C18orf32 | lightyellow | 0.078455134  | 0.090360866 | 0.083444357  | 0.071614946 |
| C1D      | lightyellow | -0.088213489 | 0.056791025 | -0.095298617 | 0.039533669 |
| C1GALT1  | lightyellow | -0.026177452 | 0.572563472 | -0.012766813 | 0.78318948  |
| C1GALT1  | lightyellow | 0.103260337  | 0.025650507 | 0.097924533  | 0.034380316 |
| C1orf174 | lightyellow | 0.098229172  | 0.033821271 | 0.079195913  | 0.087351429 |
| C21orf2  | lightyellow | -0.020816036 | 0.653661492 | -0.017257594 | 0.709916677 |
| C2orf49  | lightyellow | -0.155244764 | 0.000761817 | -0.188028045 | 4.33E-05    |
| C2orf69  | lightyellow | -0.041456313 | 0.371395787 | -0.056425054 | 0.223582268 |
| C3orf33  | lightyellow | -0.146800218 | 0.001467026 | -0.175067872 | 0.000143234 |
| C3orf38  | lightyellow | 0.025754403  | 0.578786658 | 0.022153401  | 0.632995696 |
| C4orf3   | lightyellow | 0.091680087  | 0.047693911 | 0.107157583  | 0.020549449 |
| C5orf15  | lightyellow | 0.081466726  | 0.078625587 | 0.07397112   | 0.110392124 |
| C5orf22  | lightyellow | -0.039022649 | 0.400153512 | -0.0521028   | 0.261141631 |
| C5orf51  | lightyellow | -0.114504435 | 0.013287146 | -0.129140591 | 0.00519021  |
| C6orf211 | lightyellow | 0.138508598  | 0.002702943 | 0.106782908  | 0.020998223 |
| C7orf49  | lightyellow | -0.077921701 | 0.092579018 | -0.095394639 | 0.039334314 |
| C9orf41  | lightyellow | 0.1373724    | 0.002931778 | 0.120400989  | 0.009203664 |
| C9orf85  | lightyellow | 0.034573122  | 0.456058919 | -0.000835263 | 0.985637411 |
| CAB39    | lightyellow | -0.124647568 | 0.006997499 | -0.124910564 | 0.006877909 |
| CACUL1   | lightyellow | -0.043417113 | 0.349181151 | -0.053467931 | 0.248836424 |
| CALU     | lightyellow | -0.100438879 | 0.029993514 | -0.11809343  | 0.010645522 |
| CANX     | lightyellow | 0.032290455  | 0.486357384 | -0.000200268 | 0.996556158 |
| CAP1     | lightyellow | -0.057975412 | 0.211097359 | -0.044857643 | 0.333408618 |
| CAPZA1   | lightyellow | 0.120970172  | 0.008875887 | 0.105678017  | 0.02237154  |

|         |             |              |             |              |             |
|---------|-------------|--------------|-------------|--------------|-------------|
| CAPZA2  | lightyellow | -0.047282278 | 0.307913136 | -0.058682589 | 0.205572533 |
| CASC3   | lightyellow | 0.09793403   | 0.03436277  | 0.064072222  | 0.166872741 |
| CASP3   | lightyellow | 0.258594954  | 1.43E-08    | 0.258904393  | 1.37E-08    |
| CASP8   | lightyellow | -0.033963665 | 0.464043284 | -0.028776093 | 0.535048085 |
| CAST    | lightyellow | 0.019611092  | 0.672511119 | 0.033925195  | 0.464549852 |
| CBFB    | lightyellow | 0.313780495  | 3.96E-12    | 0.307433187  | 1.11E-11    |
| CBWD2   | lightyellow | -0.116544149 | 0.011722662 | -0.148863641 | 0.001253828 |
| CBWD5   | lightyellow | -0.038310633 | 0.408812998 | -0.052241402 | 0.259873488 |
| CBX1    | lightyellow | -0.036694867 | 0.42887159  | -0.066648811 | 0.150424865 |
| CCBL2   | lightyellow | 0.171486876  | 0.000196441 | 0.151178566  | 0.00104881  |
| CCDC115 | lightyellow | -0.140010981 | 0.002425336 | -0.157038015 | 0.000659997 |
| CCDC126 | lightyellow | 0.04576878   | 0.323672896 | 0.024650151  | 0.595178063 |
| CCDC15  | lightyellow | 0.007322577  | 0.87459843  | -0.021637062 | 0.640941834 |
| CCDC47  | lightyellow | 0.027972476  | 0.546516464 | 0.014102663  | 0.761158752 |
| CCNC    | lightyellow | 0.063096098  | 0.173443969 | 0.066701234  | 0.150103497 |
| CCNG1   | lightyellow | 0.110830391  | 0.016573643 | 0.084469548  | 0.06818671  |
| CCNJ    | lightyellow | 0.169665357  | 0.000230133 | 0.158357513  | 0.000593298 |
| CCNY    | lightyellow | -0.143069611 | 0.001938909 | -0.159014638 | 0.000562466 |
| CCNYL1  | lightyellow | -0.099428597 | 0.03169489  | -0.097046109 | 0.036036574 |
| CCT4    | lightyellow | -0.068807384 | 0.137619265 | -0.083204663 | 0.072436464 |
| CCZ1    | lightyellow | -0.066551572 | 0.151022359 | -0.064093534 | 0.16673138  |
| CCZ1B   | lightyellow | -0.055661063 | 0.229924623 | -0.061825828 | 0.18228153  |
| CD164   | lightyellow | -0.01166016  | 0.801573337 | -0.010178413 | 0.826359054 |
| CD2AP   | lightyellow | 0.006126852  | 0.894945694 | -0.002236621 | 0.961553402 |
| CDADC1  | lightyellow | 0.067250042  | 0.146770391 | 0.041188478  | 0.374496627 |
| CDC27   | lightyellow | 0.002686014  | 0.953836406 | -0.021381583 | 0.644888788 |
| CDC42E  | lightyellow | -0.113161249 | 0.014415263 | -0.087737563 | 0.058145618 |
| CDC5L   | lightyellow | -0.070700376 | 0.127093783 | -0.109856454 | 0.017556196 |
| CDCA7L  | lightyellow | -0.138290128 | 0.002745638 | -0.16540022  | 0.000331309 |
| CDK2AP  | lightyellow | 0.13030983   | 0.004794769 | 0.13246884   | 0.004135306 |
| CDK8    | lightyellow | -0.00617394  | 0.894143021 | -0.028228559 | 0.542848781 |
| CDK9    | lightyellow | -0.003984786 | 0.931560598 | 0.01182124   | 0.798890367 |
| CDKN1B  | lightyellow | -0.224468827 | 9.56E-07    | -0.230721779 | 4.64E-07    |
| CDKN2A  | lightyellow | -0.082127368 | 0.076224194 | -0.116446708 | 0.01179352  |
| CDR2    | lightyellow | -0.008020874 | 0.862752973 | -0.014923812 | 0.747710343 |
| CDV3    | lightyellow | -0.150570879 | 0.001099404 | -0.174325494 | 0.000153006 |
| CDYL    | lightyellow | -0.214984521 | 2.75E-06    | -0.238455291 | 1.84E-07    |
| CEBPZ   | lightyellow | -0.176088937 | 0.000130748 | -0.201940416 | 1.09E-05    |
| CELF1   | lightyellow | -0.031758331 | 0.493573147 | -0.061720648 | 0.183027944 |
| CEP104  | lightyellow | 0.09871402   | 0.032947507 | 0.090757747  | 0.049986198 |
| CEP57   | lightyellow | -0.042887964 | 0.355091569 | -0.08163545  | 0.078006528 |
| CEP63   | lightyellow | -0.11169473  | 0.01574232  | -0.142031025 | 0.002093042 |
| CEP70   | lightyellow | -0.064141651 | 0.166412547 | -0.065547502 | 0.157297735 |
| CEP76   | lightyellow | -0.086053211 | 0.063156259 | -0.099068576 | 0.032320805 |
| CEP78   | lightyellow | 0.14849129   | 0.001290056 | 0.146107569  | 0.001545746 |

|         |             |              |             |              |             |
|---------|-------------|--------------|-------------|--------------|-------------|
| CERS6   | lightyellow | 0.03293672   | 0.477670842 | 0.004675651  | 0.919731908 |
| CFAP20  | lightyellow | 0.083669943  | 0.070848752 | 0.099476104  | 0.031613075 |
| CHIC2   | lightyellow | 0.017482451  | 0.706310888 | 0.012322821  | 0.790551274 |
| CHML    | lightyellow | -0.000244427 | 0.995796793 | -0.027697768 | 0.550464459 |
| CHMP2B  | lightyellow | 0.010932648  | 0.813719475 | -0.00660406  | 0.886816173 |
| CHMP3   | lightyellow | 0.070449725  | 0.128450477 | 0.051335868  | 0.26823577  |
| CHMP5   | lightyellow | -0.06341007  | 0.171309622 | -0.062940201 | 0.174511071 |
| CHST12  | lightyellow | -0.16324936  | 0.000396828 | -0.136518312 | 0.003115248 |
| CHUK    | lightyellow | 0.128647366  | 0.005365654 | 0.09875032   | 0.032882872 |
| CLCC1   | lightyellow | 0.146067563  | 0.001550409 | 0.121370446  | 0.008651646 |
| CLEC11A | lightyellow | -0.111429195 | 0.015993733 | -0.085887883 | 0.063666696 |
| CLINT1  | lightyellow | -0.044362441 | 0.338778158 | -0.04421492  | 0.340388384 |
| CLN5    | lightyellow | -0.008340815 | 0.857335798 | -0.024478545 | 0.597744201 |
| CLNS1A  | lightyellow | -0.060441626 | 0.192285948 | -0.096227318 | 0.037640975 |
| CLPX    | lightyellow | 0.064576851  | 0.163549598 | 0.038694985  | 0.404124812 |
| CMAS    | lightyellow | -0.025264109 | 0.586038425 | -0.030961589 | 0.504483142 |
| CNBP    | lightyellow | -0.291748067 | 1.29E-10    | -0.317002179 | 2.32E-12    |
| CNEP1R1 | lightyellow | 0.213622423  | 3.19E-06    | 0.209175242  | 5.15E-06    |
| CNIH1   | lightyellow | 0.056275351  | 0.224815114 | 0.038018845  | 0.41239358  |
| CNOT11  | lightyellow | 0.25445911   | 2.46E-08    | 0.245740701  | 7.49E-08    |
| CNOT6   | lightyellow | 0.129966719  | 0.004907895 | 0.104120016  | 0.024439968 |
| CNOT8   | lightyellow | 0.067167943  | 0.147265387 | 0.06025786   | 0.193643815 |
| COA1    | lightyellow | -0.05239098  | 0.258509693 | -0.071832648 | 0.121103223 |
| COA7    | lightyellow | -0.160557814 | 0.000495815 | -0.177905367 | 0.000111025 |
| COG8    | lightyellow | 0.140808647  | 0.002288759 | 0.149332684  | 0.001209524 |
| COIL    | lightyellow | -0.014942765 | 0.747400836 | -0.044759802 | 0.33446516  |
| COMMD8  | lightyellow | 0.117005915  | 0.011391959 | 0.107163516  | 0.020542411 |
| COPB1   | lightyellow | 0.118172134  | 0.010593224 | 0.095544185  | 0.039025531 |
| COPB2   | lightyellow | 0.060684114  | 0.190504872 | 0.058404983  | 0.207728713 |
| COPG2   | lightyellow | 0.076100198  | 0.100483448 | 0.031814414  | 0.492809958 |
| COPS4   | lightyellow | 0.086512613  | 0.061755569 | 0.065368842  | 0.158434705 |
| COPS8   | lightyellow | -0.077360662 | 0.094958768 | -0.103917729 | 0.024720284 |
| COQ10B  | lightyellow | 0.035843351  | 0.439668073 | 0.043675251  | 0.34632057  |
| COX10   | lightyellow | 0.282047336  | 5.46E-10    | 0.274044131  | 1.72E-09    |
| COX11   | lightyellow | 0.071326698  | 0.123752282 | 0.05419868   | 0.242418196 |
| COX15   | lightyellow | 0.285003811  | 3.54E-10    | 0.283234001  | 4.59E-10    |
| CPOX    | lightyellow | 0.072541778  | 0.117465027 | 0.056279487  | 0.224780989 |
| CPSF2   | lightyellow | 0.135976408  | 0.003237004 | 0.130303623  | 0.004796794 |
| CRCP    | lightyellow | -0.039972076 | 0.388779213 | -0.045653493 | 0.324894458 |
| CREM    | lightyellow | -0.171412138 | 0.000197727 | -0.180503594 | 8.76E-05    |
| CRNKL1  | lightyellow | -0.098362744 | 0.033578607 | -0.100597506 | 0.029733616 |
| CRY1    | lightyellow | -0.034637791 | 0.455216259 | -0.067412556 | 0.145794295 |
| CSNK2A  | lightyellow | -0.151163224 | 0.00105006  | -0.179178754 | 9.89E-05    |
| CSNK2A1 | lightyellow | 0.072836859  | 0.115976545 | 0.085013188  | 0.066424067 |
| CST3    | lightyellow | 0.035668394  | 0.441905478 | 0.057914121  | 0.211581189 |

|         |             |              |             |              |             |
|---------|-------------|--------------|-------------|--------------|-------------|
| CSTF2T  | lightyellow | 0.043262744  | 0.35089893  | 0.017365667  | 0.708182809 |
| CTC-534 | lightyellow | 0.065893254  | 0.155114945 | 0.062451757  | 0.177886067 |
| CTNNAL  | lightyellow | 0.100446543  | 0.029980914 | 0.080905683  | 0.080712804 |
| CTPS2   | lightyellow | -0.004229251 | 0.927373122 | -0.025327469 | 0.585098943 |
| CTR9    | lightyellow | 0.140324844  | 0.002370732 | 0.08562122   | 0.064497152 |
| CUL2    | lightyellow | -0.000966011 | 0.983389451 | -0.022804566 | 0.623034627 |
| CUL4A   | lightyellow | 0.048093793  | 0.299675014 | 0.03141178   | 0.498303026 |
| CUL5    | lightyellow | -0.016144162 | 0.727865732 | -0.046437155 | 0.316649754 |
| CWC22   | lightyellow | -0.117328123 | 0.011166119 | -0.151745256 | 0.001003572 |
| CWC27   | lightyellow | -0.020814229 | 0.653689609 | -0.03643757  | 0.432117583 |
| CXADR   | lightyellow | 0.234016099  | 3.14E-07    | 0.23453812   | 2.95E-07    |
| CXorf56 | lightyellow | -0.215702537 | 2.55E-06    | -0.227475668 | 6.77E-07    |
| CYB5R4  | lightyellow | 0.213763003  | 3.15E-06    | 0.216747689  | 2.27E-06    |
| D2HGDH  | lightyellow | 0.181337194  | 8.12E-05    | 0.170464492  | 0.000214735 |
| DBT     | lightyellow | 0.06215727   | 0.179944144 | 0.044534897  | 0.336901951 |
| DCAF12  | lightyellow | 0.12977854   | 0.004970955 | 0.117451546  | 0.011080666 |
| DCK     | lightyellow | 0.05420687   | 0.24234693  | 0.029730166  | 0.521591426 |
| DCLRE1  | lightyellow | 0.166851298  | 0.000292967 | 0.135041642  | 0.003457227 |
| DDX1    | lightyellow | -0.008762583 | 0.850204773 | -0.04680835  | 0.312792681 |
| DDX10   | lightyellow | -0.051377255 | 0.267849605 | -0.091574847 | 0.047950929 |
| DDX18   | lightyellow | -0.132696174 | 0.004070875 | -0.159254529 | 0.000551586 |
| DDX19A  | lightyellow | 0.035753234  | 0.440819704 | 0.050411698  | 0.276958245 |
| DDX21   | lightyellow | 0.068973059  | 0.136672135 | 0.030988636  | 0.504110711 |
| DDX3X   | lightyellow | 0.054417472  | 0.240519315 | 0.02014134   | 0.664189964 |
| DDX46   | lightyellow | 0.005423426  | 0.90694881  | -0.036509716 | 0.431205976 |
| DDX50   | lightyellow | -0.022068101 | 0.634305528 | -0.053052478 | 0.252537735 |
| DDX52   | lightyellow | -0.020279602 | 0.662026948 | -0.048234644 | 0.298260225 |
| DEK     | lightyellow | -0.15139537  | 0.001031285 | -0.179244281 | 9.83E-05    |
| DERA    | lightyellow | 0.089058788  | 0.054449669 | 0.089142818  | 0.054221368 |
| DFFB    | lightyellow | 0.23516041   | 2.74E-07    | 0.20230748   | 1.05E-05    |
| DHTKD1  | lightyellow | 0.168092507  | 0.0002635   | 0.149080715  | 0.001233142 |
| DHX29   | lightyellow | 0.143312294  | 0.001904424 | 0.124296834  | 0.007159881 |
| DHX32   | lightyellow | 0.260003266  | 1.18E-08    | 0.238697731  | 1.79E-07    |
| DIS3    | lightyellow | 0.039008589  | 0.400323445 | 0.014603605  | 0.752945705 |
| DLAT    | lightyellow | 0.11197231   | 0.015483214 | 0.109724749  | 0.017692898 |
| DLD     | lightyellow | 0.067400659  | 0.145865578 | 0.058981511  | 0.203268964 |
| DNAAF2  | lightyellow | 0.038026597  | 0.412298215 | 0.021939525  | 0.636282065 |
| DNAJA1  | lightyellow | -0.107263311 | 0.020424329 | -0.100195133 | 0.030396668 |
| DNAJA2  | lightyellow | 0.126118279  | 0.006351907 | 0.131100004  | 0.004543138 |
| DNAJC21 | lightyellow | -0.132506384 | 0.004124602 | -0.155242307 | 0.000761966 |
| DNAJC28 | lightyellow | 0.008694123  | 0.851361442 | -0.000832157 | 0.985690802 |
| DNM1L   | lightyellow | -0.044937921 | 0.332543332 | -0.071056729 | 0.125184119 |
| DPH3    | lightyellow | -0.166968905 | 0.000290048 | -0.175516074 | 0.000137622 |
| DPM1    | lightyellow | -0.157451158 | 0.000638401 | -0.182278607 | 7.44E-05    |
| DPY19L1 | lightyellow | 0.177264489  | 0.000117641 | 0.170966257  | 0.000205566 |



|          |             |              |             |              |             |
|----------|-------------|--------------|-------------|--------------|-------------|
| DR1      | lightyellow | -0.138068956 | 0.002789486 | -0.16116786  | 0.000471552 |
| DRD4     | lightyellow | -0.100034097 | 0.030665559 | -0.099482912 | 0.031601366 |
| DSC2     | lightyellow | 0.241077783  | 1.34E-07    | 0.225939451  | 8.08E-07    |
| DSG2     | lightyellow | 0.191086386  | 3.23E-05    | 0.181413756  | 8.06E-05    |
| DTD2     | lightyellow | 0.07633554   | 0.099432983 | 0.070171487  | 0.129969605 |
| DUS4L    | lightyellow | -0.071517766 | 0.122746638 | -0.076650844 | 0.098039307 |
| DUSP23   | lightyellow | 0.146258384  | 0.001528283 | 0.166583839  | 0.000299707 |
| DYNC1L1  | lightyellow | 0.171394027  | 0.00019804  | 0.164100637  | 0.000369573 |
| E4F1     | lightyellow | 0.098196195  | 0.033881412 | 0.123069523  | 0.007754968 |
| EAF1     | lightyellow | 0.148057287  | 0.001333497 | 0.134482329  | 0.00359541  |
| ECD      | lightyellow | 0.072092601  | 0.119759462 | 0.053607692  | 0.247599819 |
| ECHDC1   | lightyellow | -0.054404061 | 0.240635404 | -0.048597905 | 0.294631961 |
| EFTUD1   | lightyellow | 0.266529389  | 4.90E-09    | 0.236106079  | 2.45E-07    |
| EI24     | lightyellow | 0.271055703  | 2.62E-09    | 0.259191629  | 1.32E-08    |
| EIF2AK3  | lightyellow | 0.019303012  | 0.6773643   | -2.50E-05    | 0.99957053  |
| EIF2S1   | lightyellow | 0.079778751  | 0.085040742 | 0.058199422  | 0.209335821 |
| EIF2S3   | lightyellow | 0.007001548  | 0.880053736 | -0.035299744 | 0.446641086 |
| EIF3J    | lightyellow | 0.084818708  | 0.067050283 | 0.063859148  | 0.16829099  |
| EIF4E    | lightyellow | 0.177014985  | 0.000120315 | 0.152858252  | 0.000919922 |
| EIF4EBP2 | lightyellow | 0.000467868  | 0.991954572 | -0.034369318 | 0.458720308 |
| EIF4G2   | lightyellow | 0.094844144  | 0.040488846 | 0.069870794  | 0.131626922 |
| EIF5     | lightyellow | -0.101204517 | 0.028756818 | -0.124231413 | 0.007190539 |
| ELAC1    | lightyellow | 0.138539608  | 0.002696932 | 0.133216403  | 0.003926836 |
| ENOPH1   | lightyellow | 0.302298621  | 2.52E-11    | 0.296931439  | 5.84E-11    |
| EPB41L4  | lightyellow | 0.181540573  | 7.97E-05    | 0.185104665  | 5.72E-05    |
| ERCC8    | lightyellow | 0.030929939  | 0.504919138 | 0.006318295  | 0.891682977 |
| ERGIC2   | lightyellow | 0.039381746  | 0.39582822  | 0.027232627  | 0.557181032 |
| ERI1     | lightyellow | 0.255662708  | 2.10E-08    | 0.235252871  | 2.71E-07    |
| ERI2     | lightyellow | 0.144358179  | 0.001762136 | 0.131538598  | 0.004408673 |
| ERLIN1   | lightyellow | 0.216936397  | 2.22E-06    | 0.187894985  | 4.39E-05    |
| ETF1     | lightyellow | 0.005780973  | 0.900844881 | -0.013685967 | 0.768011103 |
| EVA1B    | lightyellow | -0.206850392 | 6.58E-06    | -0.176373825 | 0.000127451 |
| EXD2     | lightyellow | 0.052602076  | 0.256593427 | 0.024553597  | 0.596621277 |
| EXD3     | lightyellow | 0.20032244   | 1.29E-05    | 0.190743873  | 3.34E-05    |
| EXOC5    | lightyellow | 0.069652431  | 0.132840661 | 0.055700178  | 0.229596838 |
| EXOC6    | lightyellow | 0.214466723  | 2.91E-06    | 0.205856957  | 7.30E-06    |
| EXT2     | lightyellow | -0.150696563 | 0.001088759 | -0.187860217 | 4.40E-05    |
| FAF2     | lightyellow | 0.037160342  | 0.423035314 | 0.008929359  | 0.847388329 |
| FAM117E  | lightyellow | -0.00550218  | 0.905603872 | -0.028544518 | 0.538340444 |
| FAM118E  | lightyellow | 0.113127732  | 0.014444459 | 0.111348885  | 0.016070462 |
| FAM120A  | lightyellow | 0.151611421  | 0.001014091 | 0.143238627  | 0.001914832 |
| FAM127A  | lightyellow | -0.195205962 | 2.16E-05    | -0.185335765 | 5.59E-05    |
| FAM149E  | lightyellow | 0.031812636  | 0.492834144 | 0.000377307  | 0.993511814 |
| FAM173E  | lightyellow | 0.045977468  | 0.321469259 | 0.036035534  | 0.437217863 |
| FAM175E  | lightyellow | -0.034977321 | 0.450806365 | -0.067582762 | 0.144777316 |

|                    |              |             |              |             |
|--------------------|--------------|-------------|--------------|-------------|
| FAM177/lightyellow | 0.143902273  | 0.001822918 | 0.143384454  | 0.001894279 |
| FAM185/lightyellow | 0.125982888  | 0.006409023 | 0.104276309  | 0.024225271 |
| FAM199/lightyellow | 0.048106317  | 0.299549033 | 0.023173693  | 0.617418215 |
| FAM200/lightyellow | -0.046498896 | 0.316006059 | -0.062509314 | 0.177485867 |
| FAM200/lightyellow | 0.100964588  | 0.029139568 | 0.118862801  | 0.010143962 |
| FAM204/lightyellow | 0.122285092  | 0.008158085 | 0.084525997  | 0.068001918 |
| FAM210/lightyellow | -0.146756369 | 0.001471898 | -0.174823731 | 0.000146381 |
| FAM21A lightyellow | -0.09378929  | 0.042781258 | -0.131994127 | 0.004272832 |
| FAM21C lightyellow | -0.160537251 | 0.000496653 | -0.202055558 | 1.08E-05    |
| FAM220/lightyellow | -0.045364148 | 0.327973462 | -0.054398242 | 0.240685787 |
| FAM35A lightyellow | 0.120360825  | 0.009227194 | 0.085723054  | 0.064178968 |
| FAM3C lightyellow  | 0.108176718  | 0.019370693 | 0.09701789   | 0.036090885 |
| FAM45A lightyellow | 0.085106238  | 0.066126156 | 0.046092261  | 0.320261281 |
| FAM49B lightyellow | -0.124056312 | 0.007273177 | -0.150246883 | 0.00112729  |
| FAM96A lightyellow | 0.084838257  | 0.066987117 | 0.077674218  | 0.093622811 |
| FAM98A lightyellow | 0.16955289   | 0.000232381 | 0.173287007  | 0.000167729 |
| FAM98B lightyellow | 0.088866404  | 0.054975366 | 0.054278064  | 0.241728021 |
| FAR1 lightyellow   | -0.046747959 | 0.313418088 | -0.052054358 | 0.261585862 |
| FASTKD/lightyellow | -0.005566297 | 0.90450909  | -0.01069768  | 0.817652088 |
| FBXO22 lightyellow | 0.266048322  | 5.24E-09    | 0.271657481  | 2.41E-09    |
| FBXO33 lightyellow | -0.13212332  | 0.004235    | -0.123252977 | 0.007663297 |
| FBXO34 lightyellow | 0.033456655  | 0.470744188 | 0.038791114  | 0.402957293 |
| FDX1 lightyellow   | 0.047301531  | 0.30771598  | 0.056112301  | 0.226163375 |
| FECH lightyellow   | 0.214622147  | 2.87E-06    | 0.20032391   | 1.29E-05    |
| FGFR1O/lightyellow | -0.10300479  | 0.026020175 | -0.123597855 | 0.007493582 |
| FIG4 lightyellow   | 0.055440724  | 0.231777265 | 0.031223099  | 0.500888294 |
| FITM1 lightyellow  | -0.029019314 | 0.531601097 | 0.013641336  | 0.768746118 |
| FNBP1L lightyellow | 0.188112586  | 4.30E-05    | 0.157323449  | 0.000645005 |
| FREM2 lightyellow  | 0.15448841   | 0.000808971 | 0.110865589  | 0.016539053 |
| FZD3 lightyellow   | 0.150486203  | 0.00110663  | 0.124214321  | 0.007198569 |
| G3BP1 lightyellow  | 0.054608848  | 0.238866951 | 0.023660495  | 0.610045345 |
| G3BP2 lightyellow  | 0.106250172  | 0.021650963 | 0.084293949  | 0.068764178 |
| GABPA lightyellow  | -0.121200316 | 0.008746332 | -0.156148315 | 0.000708824 |
| GABPB1 lightyellow | -0.138924615 | 0.002623309 | -0.144359656 | 0.001761942 |
| GALNT1 lightyellow | 0.235760709  | 2.55E-07    | 0.233012478  | 3.54E-07    |
| GART lightyellow   | -0.055208802 | 0.233738682 | -0.081701273 | 0.077766094 |
| GBAS lightyellow   | 0.107851264  | 0.019740553 | 0.103410917  | 0.02543481  |
| GBE1 lightyellow   | 0.313675907  | 4.03E-12    | 0.281381074  | 6.02E-10    |
| GCA lightyellow    | 0.04157166   | 0.370065273 | 0.039058933  | 0.399715196 |
| GCH1 lightyellow   | 0.152528379  | 0.000944017 | 0.158948374  | 0.000565506 |
| GCLM lightyellow   | 0.036292929  | 0.433948546 | 0.039482391  | 0.39462103  |
| GDE1 lightyellow   | 0.187221227  | 4.68E-05    | 0.199995728  | 1.33E-05    |
| GDI2 lightyellow   | 0.097744767  | 0.034713885 | 0.074085886  | 0.10983909  |
| GDPD1 lightyellow  | 0.027938195  | 0.547008381 | -0.000352336 | 0.993941214 |
| GFM2 lightyellow   | 0.204830008  | 8.12E-06    | 0.189295017  | 3.84E-05    |

|         |             |              |             |              |             |
|---------|-------------|--------------|-------------|--------------|-------------|
| GGNBP2  | lightyellow | 0.051351042  | 0.268094149 | 0.020339346  | 0.661093155 |
| GHITM   | lightyellow | 0.128051634  | 0.005584666 | 0.132466305  | 0.00413603  |
| GINM1   | lightyellow | -0.150491437 | 0.001106182 | -0.161526825 | 0.000457796 |
| GLUD1   | lightyellow | 0.029835518  | 0.520116207 | 0.006448239  | 0.889469421 |
| GMCL1   | lightyellow | 0.020480926  | 0.658882392 | -0.006380389 | 0.890625123 |
| GMFB    | lightyellow | 0.028072667  | 0.545080041 | -0.000983363 | 0.983091141 |
| GNG10   | lightyellow | -0.062981721 | 0.174226398 | -0.090245083 | 0.051299652 |
| GNPNAT  | lightyellow | 0.306431672  | 1.31E-11    | 0.310432019  | 6.85E-12    |
| GOLGA4  | lightyellow | 0.026314352  | 0.570556433 | -0.003358694 | 0.942293394 |
| GOLGA5  | lightyellow | 0.016982444  | 0.714337773 | -0.009749371 | 0.833569292 |
| GOLGA7  | lightyellow | -0.191566332 | 3.08E-05    | -0.223158665 | 1.11E-06    |
| GOLPH3  | lightyellow | 0.015058894  | 0.745505222 | 0.004033093  | 0.930732991 |
| GOLT1B  | lightyellow | -0.08261018  | 0.074507189 | -0.096576754 | 0.036949003 |
| GPALPP1 | lightyellow | -0.093711354 | 0.042954884 | -0.11770076  | 0.010909883 |
| GPAM    | lightyellow | 0.064503024  | 0.164032644 | 0.011936671  | 0.796969187 |
| GPD2    | lightyellow | 0.053252368  | 0.250752148 | 0.042587872  | 0.358471297 |
| GPN3    | lightyellow | -0.086052096 | 0.06315969  | -0.09341019  | 0.043631408 |
| GPR180  | lightyellow | 0.090283049  | 0.051201404 | 0.079093026  | 0.087764525 |
| GRPEL2  | lightyellow | -0.005941171 | 0.898111902 | -0.026014824 | 0.574952034 |
| GRSF1   | lightyellow | 0.112710042  | 0.01481268  | 0.085784476  | 0.063987678 |
| GSKIP   | lightyellow | 0.220338533  | 1.52E-06    | 0.21809703   | 1.96E-06    |
| GSPT1   | lightyellow | 0.169680718  | 0.000229827 | 0.149654729  | 0.001179945 |
| GSTA4   | lightyellow | 0.159859186  | 0.000525024 | 0.130079025  | 0.004870605 |
| GTF2A1  | lightyellow | -0.01695094  | 0.714844591 | -0.040894831 | 0.377914577 |
| GTF2E1  | lightyellow | -0.025615865 | 0.580831474 | -0.040216389 | 0.385884351 |
| GTF2H1  | lightyellow | -0.012520386 | 0.787273125 | -0.016376539 | 0.72410701  |
| GTF2H3  | lightyellow | 0.043530523  | 0.347922547 | 0.017488826  | 0.706208756 |
| GTPBP10 | lightyellow | -0.064658907 | 0.163013965 | -0.088417125 | 0.056219482 |
| GTPBP8  | lightyellow | -0.128047113 | 0.005586358 | -0.137558962 | 0.002893034 |
| GUF1    | lightyellow | 0.19272261   | 2.75E-05    | 0.17872163   | 0.000103106 |
| GYG1    | lightyellow | -0.019960018 | 0.667030873 | -0.008324727 | 0.857608047 |
| HACL1   | lightyellow | 0.102657455  | 0.026529974 | 0.122773941  | 0.007904729 |
| HADHB   | lightyellow | 0.145387536  | 0.001631672 | 0.151441183  | 0.001027617 |
| HAT1    | lightyellow | -0.004955634 | 0.914943032 | -0.024796523 | 0.59299322  |
| HAUS2   | lightyellow | 0.166663032  | 0.000297696 | 0.131917351  | 0.004295458 |
| HAUS4   | lightyellow | 0.158814542  | 0.000571693 | 0.115591822  | 0.012431606 |
| HAUS6   | lightyellow | -0.090164551 | 0.05150857  | -0.125718111 | 0.006522054 |
| HBS1L   | lightyellow | -0.024608943 | 0.595793812 | -0.045252613 | 0.329165363 |
| HDAC2   | lightyellow | -0.049841273 | 0.282437132 | -0.070094312 | 0.130393422 |
| HDGFRP  | lightyellow | -0.193077085 | 2.66E-05    | -0.204125626 | 8.74E-06    |
| HEATR3  | lightyellow | 0.314821618  | 3.33E-12    | 0.323002395  | 8.42E-13    |
| HELQ    | lightyellow | -0.048116794 | 0.299443676 | -0.069472601 | 0.133846691 |
| HEXB    | lightyellow | 0.265145348  | 5.92E-09    | 0.2577958    | 1.59E-08    |
| HEXDC   | lightyellow | 0.062939666  | 0.174514742 | 0.062365997  | 0.178483607 |
| HIAT1   | lightyellow | -0.036880326 | 0.426540669 | -0.072294209 | 0.118725342 |

|         |             |              |             |              |             |
|---------|-------------|--------------|-------------|--------------|-------------|
| HIBADH  | lightyellow | -0.101729322 | 0.027934633 | -0.078299369 | 0.091004124 |
| HIBCH   | lightyellow | 0.069438074  | 0.134040517 | 0.071799399  | 0.12127594  |
| HIGD1A  | lightyellow | 0.012473631  | 0.78804857  | 0.025724022  | 0.579234792 |
| HINT3   | lightyellow | 0.159125393  | 0.000557419 | 0.142572539  | 0.002011333 |
| HLX     | lightyellow | -0.00709056  | 0.878540571 | 0.041981211  | 0.365365044 |
| HMGCR   | lightyellow | 0.225513322  | 8.48E-07    | 0.217312918  | 2.13E-06    |
| HMGCS1  | lightyellow | 0.068760994  | 0.137885366 | 0.028758054  | 0.535304187 |
| HNRNPA  | lightyellow | -0.044661285 | 0.33553117  | -0.067577293 | 0.144809909 |
| HNRNPD  | lightyellow | 0.043921477  | 0.343605889 | -0.007634927 | 0.869296299 |
| HNRNPH  | lightyellow | -0.068486606 | 0.139467411 | -0.083506392 | 0.071403574 |
| HNRNPH  | lightyellow | -0.151352654 | 0.001034717 | -0.180737585 | 8.58E-05    |
| HNRNPL  | lightyellow | -0.023441332 | 0.613359862 | -0.048224467 | 0.298362291 |
| HNRNPR  | lightyellow | -0.00834042  | 0.857342478 | -0.043835925 | 0.344547571 |
| HNRNPUL | lightyellow | 0.068522156  | 0.139261658 | 0.035544257  | 0.443496905 |
| HOMER1  | lightyellow | 0.014247916  | 0.758774492 | -0.021938947 | 0.636290949 |
| HOOK1   | lightyellow | 0.065991193  | 0.154500826 | 0.039178894  | 0.398268082 |
| HS2ST1  | lightyellow | 0.033945671  | 0.464280185 | 0.006435277  | 0.889690174 |
| HSD17B1 | lightyellow | 0.120497226  | 0.009147498 | 0.104327737  | 0.024154983 |
| HSF2    | lightyellow | -0.089470087 | 0.053339789 | -0.113547476 | 0.014082556 |
| HSP90AA | lightyellow | 0.095394781  | 0.039334019 | 0.099025043  | 0.032397201 |
| HSPA13  | lightyellow | -0.078246665 | 0.091222605 | -0.106099516 | 0.02183872  |
| HSPA4L  | lightyellow | 0.174553062  | 0.000149946 | 0.180904128  | 8.45E-05    |
| HSPH1   | lightyellow | -0.019461111 | 0.674872087 | -0.030796409 | 0.506760742 |
| HTATSF1 | lightyellow | -0.096277045 | 0.037541837 | -0.124799556 | 0.006928161 |
| HUS1    | lightyellow | 0.019693228  | 0.671219513 | 0.031034882  | 0.50347425  |
| IDE     | lightyellow | 0.331970418  | 1.78E-13    | 0.312015971  | 5.29E-12    |
| IDH3G   | lightyellow | 0.085395615  | 0.06520668  | 0.12991766   | 0.004924265 |
| IDI1    | lightyellow | 0.161933025  | 0.000442681 | 0.12198302   | 0.008318238 |
| IDUA    | lightyellow | 0.08503688   | 0.066348109 | 0.090249624  | 0.051287893 |
| IFRD1   | lightyellow | -0.120776986 | 0.008985953 | -0.122825969 | 0.007878183 |
| IFT20   | lightyellow | -0.032389984 | 0.485014072 | -0.041419538 | 0.371820609 |
| IFT52   | lightyellow | -0.22842295  | 6.06E-07    | -0.234707648 | 2.89E-07    |
| IFT81   | lightyellow | -0.042461423 | 0.359901417 | -0.062758732 | 0.175759358 |
| IKBIP   | lightyellow | -0.138123266 | 0.00277866  | -0.127038934 | 0.005975481 |
| IL13RA1 | lightyellow | -0.059105638 | 0.202317937 | -0.081388637 | 0.078913447 |
| IMMP2L  | lightyellow | -0.124866251 | 0.00689793  | -0.160990151 | 0.000478504 |
| IMPACT  | lightyellow | -0.086620377 | 0.061430741 | -0.107261204 | 0.020426817 |
| ING2    | lightyellow | 0.047087281  | 0.309914703 | 0.043587035  | 0.347296464 |
| INSIG1  | lightyellow | 0.284739001  | 3.68E-10    | 0.257695201  | 1.61E-08    |
| INSIG2  | lightyellow | -0.054751129 | 0.237643661 | -0.064247103 | 0.165715412 |
| INTS12  | lightyellow | 0.111618456  | 0.01581418  | 0.095695436  | 0.038715319 |
| INTS4   | lightyellow | 0.048604331  | 0.294568047 | 0.010199628  | 0.826002894 |
| IPMK    | lightyellow | 0.13942984   | 0.002529477 | 0.126857998  | 0.006047838 |
| IPO11   | lightyellow | 0.091776129  | 0.047460364 | 0.077033591  | 0.096368483 |
| IPO5    | lightyellow | 0.061452425  | 0.184941623 | 0.01588985   | 0.731986734 |

|         |             |              |             |              |             |
|---------|-------------|--------------|-------------|--------------|-------------|
| IPO7    | lightyellow | 0.158149295  | 0.00060339  | 0.115117591  | 0.012798556 |
| IPO8    | lightyellow | 0.013808996  | 0.765986052 | -0.016113619 | 0.728360246 |
| IREB2   | lightyellow | 0.074850253  | 0.106211219 | 0.059093583  | 0.202410157 |
| ITFG1   | lightyellow | 0.064486544  | 0.164140615 | 0.05941593   | 0.19995471  |
| IWS1    | lightyellow | -0.048625133 | 0.294361201 | -0.078856788 | 0.088718975 |
| JKAMP   | lightyellow | 0.168054203  | 0.000264366 | 0.15946364   | 0.000542262 |
| KANSL2  | lightyellow | -0.127533057 | 0.005781824 | -0.15553741  | 0.000744264 |
| KATNA1  | lightyellow | -0.151078208 | 0.001057015 | -0.153482292 | 0.000875886 |
| KCMF1   | lightyellow | -0.033462067 | 0.47067238  | -0.031784661 | 0.49321477  |
| KDELC1  | lightyellow | -0.08927056  | 0.053875833 | -0.114314122 | 0.013442102 |
| KDSR    | lightyellow | -0.102058374 | 0.027429493 | -0.117722079 | 0.010895383 |
| KHDRBS  | lightyellow | -0.051737489 | 0.264504478 | -0.074750078 | 0.106681209 |
| KIAA002 | lightyellow | 0.025394079  | 0.584112003 | 0.006586259  | 0.887119216 |
| KIAA114 | lightyellow | 0.033031291  | 0.476406833 | 0.003285382  | 0.943550856 |
| KIAA119 | lightyellow | 0.052492426  | 0.257587562 | 0.033285759  | 0.473014774 |
| KIAA127 | lightyellow | 0.152720579  | 0.000929908 | 0.132218378  | 0.004207358 |
| KIAA158 | lightyellow | -0.066540806 | 0.151088624 | -0.086555132 | 0.061627235 |
| KIAA159 | lightyellow | 0.231263843  | 4.35E-07    | 0.220010594  | 1.58E-06    |
| KIAA171 | lightyellow | 0.197943241  | 1.64E-05    | 0.18567023   | 5.42E-05    |
| KIF5B   | lightyellow | 0.148608069  | 0.001278592 | 0.120932774  | 0.0088971   |
| KLHL23  | lightyellow | -0.133490658 | 0.003852774 | -0.150021094 | 0.001147107 |
| KLHL7   | lightyellow | 0.015889944  | 0.731985208 | 0.000233337  | 0.995987511 |
| KLHL8   | lightyellow | 0.128848586  | 0.005293444 | 0.088366454  | 0.056361254 |
| KPNA3   | lightyellow | 0.091159997  | 0.04897541  | 0.069747741  | 0.132309837 |
| KPNB1   | lightyellow | 0.153906268  | 0.000847088 | 0.117897704  | 0.010776574 |
| KRAS    | lightyellow | 0.011624339  | 0.80217029  | 0.00203176   | 0.965072527 |
| KRCC1   | lightyellow | -0.104935619 | 0.023337433 | -0.13108876  | 0.004546633 |
| KRR1    | lightyellow | -0.094495188 | 0.041235429 | -0.126991361 | 0.00599443  |
| KTN1    | lightyellow | -0.048570894 | 0.294900734 | -0.07151893  | 0.122740534 |
| LAMP2   | lightyellow | 0.14443326   | 0.001752306 | 0.122631901  | 0.007977611 |
| LARP1B  | lightyellow | 0.094314392  | 0.041626789 | 0.086162861  | 0.062819585 |
| LARS    | lightyellow | 0.128212335  | 0.005524808 | 0.077487529  | 0.094416408 |
| LBR     | lightyellow | -0.044078454 | 0.341882289 | -0.076636112 | 0.098104076 |
| LCAT    | lightyellow | -0.014759475 | 0.750395808 | -0.010069943 | 0.828180585 |
| LEO1    | lightyellow | 0.278197106  | 9.54E-10    | 0.274225889  | 1.68E-09    |
| LGALSL  | lightyellow | 0.085037785  | 0.066345211 | 0.063475747  | 0.170865646 |
| LGR4    | lightyellow | 0.085311025  | 0.065474364 | 0.084380766  | 0.068478175 |
| LHB     | lightyellow | 0.074850386  | 0.106210596 | 0.089642744  | 0.052879524 |
| LHPP    | lightyellow | 0.054617172  | 0.23879526  | 0.051230783  | 0.269217997 |
| LIN52   | lightyellow | -0.076693036 | 0.097854002 | -0.11362215  | 0.014019015 |
| LIN54   | lightyellow | 0.025954869  | 0.575833791 | 0.027525982  | 0.552940391 |
| LMBR1   | lightyellow | 0.037411813  | 0.419901682 | -0.009155437 | 0.843573548 |
| LMF1    | lightyellow | 0.206782555  | 6.62E-06    | 0.235746221  | 2.55E-07    |
| LRIF1   | lightyellow | -0.2289497   | 5.70E-07    | -0.234499637 | 2.97E-07    |
| LRPPRC  | lightyellow | -0.0615761   | 0.184057422 | -0.085018146 | 0.066408166 |

|          |             |              |             |              |             |
|----------|-------------|--------------|-------------|--------------|-------------|
| LRRC40   | lightyellow | 0.005387631  | 0.907560208 | -0.022577449 | 0.62650122  |
| LRRC57   | lightyellow | 0.200026474  | 1.33E-05    | 0.180945933  | 8.41E-05    |
| LRRC75E  | lightyellow | 0.190696954  | 3.35E-05    | 0.161731939  | 0.000450104 |
| LRRC8B   | lightyellow | 0.12846351   | 0.005432406 | 0.099044952  | 0.032362244 |
| LRRCC1   | lightyellow | 0.007860172  | 0.865476393 | -0.026127043 | 0.573303336 |
| LRSAM1   | lightyellow | 0.096842805  | 0.036429419 | 0.085341123  | 0.065379019 |
| LTA4H    | lightyellow | -0.121984919 | 0.008317222 | -0.155698483 | 0.000734764 |
| LYRM2    | lightyellow | -0.00520653  | 0.910654286 | -0.008049044 | 0.862275738 |
| LZIC     | lightyellow | -0.007358705 | 0.873984877 | -0.036520535 | 0.431069363 |
| MAGT1    | lightyellow | -0.02743517  | 0.554251453 | -0.035947138 | 0.438343878 |
| MANBA    | lightyellow | 0.041150654  | 0.374935813 | 0.023659493  | 0.610060472 |
| MAP2K1   | lightyellow | 0.117905818  | 0.010771114 | 0.097014543  | 0.036097332 |
| MAPK1I   | lightyellow | 0.060559916  | 0.191415594 | 0.057119373  | 0.217927376 |
| MAPK9    | lightyellow | 0.131566003  | 0.004400391 | 0.115660051  | 0.012379584 |
| MAPRE1   | lightyellow | -0.167696292 | 0.000272591 | -0.190347395 | 3.47E-05    |
| 5-Mar    | lightyellow | 0.199729071  | 1.37E-05    | 0.180200444  | 9.01E-05    |
| 7-Mar    | lightyellow | -0.101960545 | 0.027578847 | -0.127351034 | 0.005852496 |
| MARCKS   | lightyellow | -0.066099722 | 0.153822455 | -0.071602838 | 0.122300934 |
| MAT2B    | lightyellow | -0.027688537 | 0.550597369 | -0.031970543 | 0.490688662 |
| MAX      | lightyellow | -0.189922695 | 3.61E-05    | -0.184204015 | 6.22E-05    |
| MBD4     | lightyellow | -0.102845023 | 0.026253614 | -0.13196996  | 0.004279942 |
| MBIP     | lightyellow | -0.047600463 | 0.304665435 | -0.054641953 | 0.23858193  |
| MC1R     | lightyellow | -0.000345852 | 0.994052713 | 3.15E-05     | 0.999458012 |
| MCFD2    | lightyellow | -0.12858871  | 0.005386869 | -0.154616267 | 0.000800815 |
| MCL1     | lightyellow | -0.052670152 | 0.255977549 | -0.065396481 | 0.158258407 |
| MCOLN1   | lightyellow | 0.059634257  | 0.198303988 | 0.076805387  | 0.097361918 |
| MCU      | lightyellow | 0.027958102  | 0.54672269  | 0.043447822  | 0.348840067 |
| ME2      | lightyellow | 0.185452816  | 5.53E-05    | 0.171967002  | 0.000188363 |
| MED17    | lightyellow | 0.01008199   | 0.827978236 | -0.018713939 | 0.686681083 |
| MED21    | lightyellow | -0.031767545 | 0.493447725 | -0.056984966 | 0.219013976 |
| MESDC2   | lightyellow | 0.311817456  | 5.46E-12    | 0.283529884  | 4.40E-10    |
| METAP2   | lightyellow | 0.067555452  | 0.144940125 | 0.033695132  | 0.467585742 |
| METTTL1  | lightyellow | -0.089159156 | 0.054177071 | -0.106145889 | 0.021780777 |
| METTTL14 | lightyellow | -0.016841224 | 0.716610623 | -0.028384237 | 0.540625108 |
| METTTL21 | lightyellow | -0.023733789 | 0.608938647 | -0.033754516 | 0.466801067 |
| METTTL24 | lightyellow | 0.097416226  | 0.035330634 | 0.094954671  | 0.040254773 |
| METTTL6  | lightyellow | -0.127864381 | 0.005655149 | -0.149369398 | 0.001206118 |
| METTTL8  | lightyellow | -0.100728586 | 0.029520307 | -0.115069846 | 0.012836024 |
| METTTL9  | lightyellow | 0.019638678  | 0.672077214 | 0.007731795  | 0.867653159 |
| MFAP1    | lightyellow | 0.123274263  | 0.007652724 | 0.104451039  | 0.02398718  |
| MFHAS1   | lightyellow | 0.104321445  | 0.024163573 | 0.067922671  | 0.142762584 |
| MFSD1    | lightyellow | -0.048136321 | 0.299247365 | -0.060154072 | 0.194413815 |
| MFSD11   | lightyellow | 0.016938709  | 0.715041393 | 0.005343552  | 0.908313165 |
| MIB2     | lightyellow | -0.072323671 | 0.118574807 | -0.072791291 | 0.116205434 |
| MICALL2  | lightyellow | 0.120486328  | 0.009153843 | 0.155371104  | 0.000754193 |

|        |             |              |             |              |             |
|--------|-------------|--------------|-------------|--------------|-------------|
| MICU1  | lightyellow | 0.03507437   | 0.449550329 | 0.037971205  | 0.412979927 |
| MINA   | lightyellow | -0.125486771 | 0.00662227  | -0.127461394 | 0.005809556 |
| MINPP1 | lightyellow | 0.126814117  | 0.006065505 | 0.093576637  | 0.043256406 |
| MIOS   | lightyellow | 0.127882672  | 0.00564823  | 0.097222009  | 0.035699593 |
| MIS12  | lightyellow | -0.092951995 | 0.044677871 | -0.121871326 | 0.008378162 |
| MKRN2  | lightyellow | -0.063403436 | 0.171354518 | -0.080113346 | 0.083736649 |
| MLLT11 | lightyellow | -0.141660502 | 0.002150687 | -0.144541531 | 0.00173822  |
| MMADH  | lightyellow | -0.022907106 | 0.621472226 | -0.044662583 | 0.335517116 |
| MMD    | lightyellow | -0.093104278 | 0.044327757 | -0.129611916 | 0.005027401 |
| MOB1A  | lightyellow | -0.048441221 | 0.296193296 | -0.05157276  | 0.266030566 |
| MPHOSP | lightyellow | 0.188398053  | 4.18E-05    | 0.188333119  | 4.21E-05    |
| MPHOSP | lightyellow | 0.047948236  | 0.301141747 | 0.046666734  | 0.314260556 |
| MPP5   | lightyellow | 0.092382107  | 0.046008798 | 0.067710196  | 0.144019451 |
| MRFAP1 | lightyellow | 0.121317943  | 0.008680769 | 0.112321038  | 0.015163003 |
| MRPL19 | lightyellow | 0.114879965  | 0.012985994 | 0.094573061  | 0.041067822 |
| MRPL30 | lightyellow | 0.102342729  | 0.026999316 | 0.093203227  | 0.044101503 |
| MRPL42 | lightyellow | 0.075912941  | 0.101325562 | 0.056571702  | 0.222379259 |
| MRPS23 | lightyellow | -0.050743005 | 0.273809418 | -0.055692448 | 0.229661591 |
| MRPS27 | lightyellow | 0.302015385  | 2.64E-11    | 0.274978574  | 1.51E-09    |
| MRPS30 | lightyellow | -0.033011326 | 0.476673521 | -0.046745074 | 0.313447991 |
| MRPS35 | lightyellow | 0.052937358  | 0.253570084 | 0.041268106  | 0.373573073 |
| MRS2   | lightyellow | -0.051517417 | 0.266544634 | -0.056136134 | 0.225965943 |
| MSH3   | lightyellow | 0.059043882  | 0.202790695 | 0.026404691  | 0.569233841 |
| MSH6   | lightyellow | -0.212209883 | 3.72E-06    | -0.240549992 | 1.43E-07    |
| MSL1   | lightyellow | 0.060739095  | 0.190102729 | 0.013384112  | 0.772986313 |
| MSL3   | lightyellow | 0.028039446  | 0.545556131 | 0.037969324  | 0.413003099 |
| MSMO1  | lightyellow | 0.234228983  | 3.06E-07    | 0.194809469  | 2.24E-05    |
| MTAP   | lightyellow | -0.111890762 | 0.015558944 | -0.124577378 | 0.007029729 |
| MTFMT  | lightyellow | 0.038368796  | 0.408101477 | 0.028346506  | 0.541163633 |
| MTHFD2 | lightyellow | 0.069687348  | 0.132646005 | 0.080934001  | 0.080606389 |
| MTMR2  | lightyellow | 0.042455343  | 0.359970276 | 0.021960082  | 0.635965878 |
| MTO1   | lightyellow | -0.009555654 | 0.836829412 | -0.019083586 | 0.680829094 |
| MTPN   | lightyellow | -0.074518861 | 0.107772282 | -0.09664593  | 0.036813304 |
| MTRF1L | lightyellow | -0.141882507 | 0.002115977 | -0.14718767  | 0.001424615 |
| MTX2   | lightyellow | -0.003346593 | 0.942500945 | -0.01361622  | 0.769159846 |
| MUT    | lightyellow | 0.066834179  | 0.149290842 | 0.038559695  | 0.405771358 |
| MYO1B  | lightyellow | 0.004173334  | 0.928330756 | -0.007989933 | 0.863277211 |
| MZF1   | lightyellow | 0.107309191  | 0.020370241 | 0.105796119  | 0.022221122 |
| NAA15  | lightyellow | 0.01828613   | 0.693477279 | -0.006038202 | 0.896457141 |
| NAA30  | lightyellow | -0.131481226 | 0.004426055 | -0.139043481 | 0.002600952 |
| NAA50  | lightyellow | -0.085875086 | 0.063706347 | -0.104154456 | 0.024392517 |
| NADK2  | lightyellow | -0.15955507  | 0.000538231 | -0.183318348 | 6.76E-05    |
| NADSYN | lightyellow | 0.28839637   | 2.14E-10    | 0.309075474  | 8.54E-12    |
| NAE1   | lightyellow | 0.156069216  | 0.000713323 | 0.147293631  | 0.001413215 |
| NAF1   | lightyellow | -0.035234378 | 0.447483757 | -0.051207941 | 0.269431823 |

|         |             |              |             |              |             |
|---------|-------------|--------------|-------------|--------------|-------------|
| NAMPT   | lightyellow | -0.057412682 | 0.215569561 | -0.071687771 | 0.121857217 |
| NARS    | lightyellow | 0.122662375  | 0.007961924 | 0.11628175   | 0.011914342 |
| NARS2   | lightyellow | -0.030161595 | 0.515563866 | -0.072047028 | 0.119994198 |
| NCK1    | lightyellow | -0.054727393 | 0.23784743  | -0.066790904 | 0.149555001 |
| NCOA5   | lightyellow | -0.088533504 | 0.055894993 | -0.120740424 | 0.00900692  |
| NDFIP2  | lightyellow | 0.088888199  | 0.0549156   | 0.076376717  | 0.099250086 |
| NDST2   | lightyellow | -0.065018684 | 0.160681035 | -0.096887054 | 0.036343608 |
| NECAP1  | lightyellow | 0.082075042  | 0.076412195 | 0.073947386  | 0.110506767 |
| NEDD1   | lightyellow | -0.018515853 | 0.689824797 | -0.056648918 | 0.221747685 |
| NET1    | lightyellow | 0.22472393   | 9.29E-07    | 0.192858152  | 2.72E-05    |
| NFIL3   | lightyellow | -0.181679574 | 7.86E-05    | -0.200875908 | 1.22E-05    |
| NGLY1   | lightyellow | 0.198950448  | 1.48E-05    | 0.187968456  | 4.36E-05    |
| NGRN    | lightyellow | -0.020494164 | 0.658675825 | -0.052603087 | 0.256584268 |
| NINJ1   | lightyellow | 0.068262296  | 0.140771039 | 0.091733312  | 0.047564364 |
| NIP7    | lightyellow | 0.032570663  | 0.482580641 | 0.030475039  | 0.511207399 |
| NKIRAS1 | lightyellow | -0.090105922 | 0.051661113 | -0.126614031 | 0.006146647 |
| NKRF    | lightyellow | -0.052537865 | 0.257175271 | -0.0855781   | 0.06463227  |
| NLK     | lightyellow | 0.017726653  | 0.702402314 | -0.023438456 | 0.613403409 |
| NLN     | lightyellow | 0.211799998  | 3.89E-06    | 0.185344189  | 5.59E-05    |
| NMD3    | lightyellow | 0.007223133  | 0.876287675 | -0.027992373 | 0.546231055 |
| NMNAT1  | lightyellow | 0.205127778  | 7.87E-06    | 0.193028813  | 2.67E-05    |
| NNT     | lightyellow | 0.051704812  | 0.264806729 | 0.047987105  | 0.300749617 |
| NOC3L   | lightyellow | -0.03558509  | 0.442973071 | -0.074068371 | 0.109923347 |
| NOL11   | lightyellow | -0.098708209 | 0.032957864 | -0.132245416 | 0.004199526 |
| NPEPPS  | lightyellow | 0.027374278  | 0.555131406 | -0.003450543 | 0.940718167 |
| NPIPB3  | lightyellow | 0.062772021  | 0.175667725 | 0.071762138  | 0.121469728 |
| NPIPB5  | lightyellow | 0.076903842  | 0.096932322 | 0.103075344  | 0.025917657 |
| NR1H2   | lightyellow | 0.071398898  | 0.123371525 | 0.084562107  | 0.067883926 |
| NRAS    | lightyellow | -0.122785079 | 0.00789904  | -0.122718465 | 0.007933123 |
| NRBF2   | lightyellow | -0.096098006 | 0.037899817 | -0.115440047 | 0.012548023 |
| NSRP1   | lightyellow | -0.007072834 | 0.878841856 | -0.048633699 | 0.294276059 |
| NT5DC1  | lightyellow | 0.178335988  | 0.000106779 | 0.144527079  | 0.001740094 |
| NUDT21  | lightyellow | 0.08961449   | 0.052954617 | 0.068841419  | 0.137424279 |
| NUDT4   | lightyellow | 0.070518783  | 0.128075575 | 0.042286991  | 0.361880078 |
| NUFIP1  | lightyellow | -0.0391746   | 0.398319835 | -0.067070574 | 0.147854099 |
| NUP50   | lightyellow | 0.0862993    | 0.062402727 | 0.050837724  | 0.272913689 |
| NUP54   | lightyellow | -0.042394224 | 0.360662881 | -0.071594155 | 0.122346367 |
| NUPL1   | lightyellow | 0.103328109  | 0.025553233 | 0.065040701  | 0.160539085 |
| NUS1    | lightyellow | -0.048870838 | 0.291925387 | -0.073038758 | 0.114966643 |
| NXT2    | lightyellow | 0.055147292  | 0.234260846 | 0.026380383  | 0.569589573 |
| OGFOD1  | lightyellow | 0.301763325  | 2.75E-11    | 0.288343694  | 2.16E-10    |
| OLA1    | lightyellow | -0.013860837 | 0.765133218 | -0.049298179 | 0.287721145 |
| ORC5    | lightyellow | 0.086082626  | 0.063065795 | 0.074640604  | 0.107196705 |
| OSBP    | lightyellow | 0.149500044  | 0.001194069 | 0.129921876  | 0.004922856 |
| OSBPL3  | lightyellow | -0.096078341 | 0.037939313 | -0.087691355 | 0.058278548 |



|         |             |              |             |              |             |
|---------|-------------|--------------|-------------|--------------|-------------|
| OXCT1   | lightyellow | 0.097953052  | 0.03432765  | 0.085017597  | 0.066409928 |
| OXSR1   | lightyellow | 0.044661355  | 0.335530413 | 0.004295252  | 0.926242919 |
| P2RX4   | lightyellow | 0.227400548  | 6.83E-07    | 0.228352966  | 6.11E-07    |
| P4HA1   | lightyellow | 0.128758823  | 0.005325547 | 0.108553018  | 0.018950586 |
| PACRGL  | lightyellow | -0.01636098  | 0.724358465 | -0.02645455  | 0.568504513 |
| PAFAH1H | lightyellow | 0.10474843   | 0.023586597 | 0.08385379   | 0.070229285 |
| PAIP1   | lightyellow | -0.07316449  | 0.114341218 | -0.096359874 | 0.037377197 |
| PAIP2   | lightyellow | -0.008727496 | 0.850797542 | -0.027531579 | 0.552859634 |
| PANK1   | lightyellow | 0.208954406  | 5.27E-06    | 0.171323171  | 0.000199269 |
| PANK3   | lightyellow | -0.002442006 | 0.95802604  | -0.032520434 | 0.483256474 |
| PANX1   | lightyellow | -0.114519185 | 0.013275202 | -0.134112388 | 0.003689538 |
| PAPD5   | lightyellow | 0.156321342  | 0.000699073 | 0.144738391  | 0.001712872 |
| PAPOLA  | lightyellow | -0.021979984 | 0.635659834 | -0.060065063 | 0.195075946 |
| PARP16  | lightyellow | 0.116629581  | 0.011660845 | 0.098796097  | 0.032801515 |
| PBRM1   | lightyellow | 0.082982308  | 0.073205413 | 0.0584144    | 0.207655301 |
| PCGF6   | lightyellow | 0.098225089  | 0.033828713 | 0.065198542  | 0.15952423  |
| PCID2   | lightyellow | -0.135701071 | 0.003300509 | -0.15891301  | 0.000567135 |
| PCMT1   | lightyellow | -0.072165668 | 0.119383866 | -0.055872109 | 0.228159988 |
| PDCD10  | lightyellow | -0.182727118 | 7.14E-05    | -0.186875323 | 4.84E-05    |
| PDCD7   | lightyellow | -0.036191797 | 0.435231392 | -0.04545916  | 0.32696034  |
| PDE12   | lightyellow | 0.162109726  | 0.000436251 | 0.1672881    | 0.000282263 |
| PDHX    | lightyellow | 0.263597916  | 7.31E-09    | 0.258729552  | 1.40E-08    |
| PDIK1L  | lightyellow | 0.097029742  | 0.036068067 | 0.077230876  | 0.095516178 |
| PDK1    | lightyellow | 0.11034829   | 0.017053824 | 0.099393755  | 0.031755009 |
| PDS5A   | lightyellow | 0.20824405   | 5.68E-06    | 0.180761597  | 8.56E-05    |
| PDSS2   | lightyellow | 0.174284864  | 0.000153559 | 0.16465341   | 0.00035282  |
| PDXDC1  | lightyellow | 0.159561821  | 0.000537935 | 0.173311901  | 0.000167361 |
| PDZD8   | lightyellow | 0.302610804  | 2.40E-11    | 0.279662742  | 7.72E-10    |
| PEX13   | lightyellow | 0.115297847  | 0.012657967 | 0.114011315  | 0.013691935 |
| PEX3    | lightyellow | -0.125434671 | 0.00664503  | -0.135151004 | 0.003430778 |
| PFN2    | lightyellow | -0.136584013 | 0.003100773 | -0.126827721 | 0.006060023 |
| PGM2    | lightyellow | 0.158730184  | 0.000575625 | 0.113127456  | 0.0144447   |
| PGM3    | lightyellow | 0.199346343  | 1.42E-05    | 0.189459141  | 3.78E-05    |
| PGRMC1  | lightyellow | -0.082146238 | 0.07615649  | -0.092058401 | 0.046779501 |
| PGRMC2  | lightyellow | 0.114496727  | 0.013293391 | 0.11734627   | 0.011153518 |
| PHAX    | lightyellow | 0.050772327  | 0.27353191  | 0.033491976  | 0.470275645 |
| PHF10   | lightyellow | -0.077295907 | 0.095236556 | -0.112499848 | 0.015001079 |
| PHF13   | lightyellow | -0.031053809 | 0.503213889 | -0.073000649 | 0.115156735 |
| PHF14   | lightyellow | 0.013429369  | 0.772239776 | 0.000542291  | 0.99067486  |
| PHF20   | lightyellow | -0.124493899 | 0.007068234 | -0.151339239 | 0.001035796 |
| PHOSPHO | lightyellow | -0.104965637 | 0.023297689 | -0.10236876  | 0.026960228 |
| PHTF2   | lightyellow | -0.067319986 | 0.146349678 | -0.078178875 | 0.091504242 |
| PI4K2B  | lightyellow | 0.228352697  | 6.11E-07    | 0.211983046  | 3.81E-06    |
| PIGA    | lightyellow | 0.043862404  | 0.344255937 | 0.041441936  | 0.371561835 |
| PIGF    | lightyellow | 0.085417922  | 0.065136241 | 0.071325255  | 0.123759906 |

|         |             |              |             |              |             |
|---------|-------------|--------------|-------------|--------------|-------------|
| PIGK    | lightyellow | -0.114129733 | 0.01359375  | -0.151506691 | 0.001022392 |
| PIGN    | lightyellow | 0.227874615  | 6.46E-07    | 0.189722166  | 3.68E-05    |
| PIGW    | lightyellow | 0.024994077  | 0.590050244 | 0.016617997  | 0.720208419 |
| PIK3CB  | lightyellow | -0.023926097 | 0.606039156 | -0.024373167 | 0.599322473 |
| PITPNB  | lightyellow | 0.010338067  | 0.823679688 | -0.006679114 | 0.885538646 |
| PLA2G12 | lightyellow | 0.066718155  | 0.149999877 | 0.074843261  | 0.106243967 |
| PLAA    | lightyellow | 0.034911761  | 0.451655993 | 0.024406598  | 0.598821554 |
| PLEKHA1 | lightyellow | 0.069535948  | 0.133491638 | 0.077930661  | 0.092541405 |
| PLOD2   | lightyellow | 0.078541556  | 0.090005544 | 0.079314716  | 0.086876375 |
| PLRG1   | lightyellow | 0.083829533  | 0.070310765 | 0.050890994  | 0.272410799 |
| PLS1    | lightyellow | 0.242702141  | 1.09E-07    | 0.242424515  | 1.13E-07    |
| PLS3    | lightyellow | 0.076075392  | 0.100594682 | 0.074257759  | 0.109014945 |
| PMM2    | lightyellow | 0.095635458  | 0.038838082 | 0.085728993  | 0.064160453 |
| PMPCB   | lightyellow | 0.131425322  | 0.004443052 | 0.117717346  | 0.010898601 |
| PNN     | lightyellow | -0.020423615 | 0.659776941 | -0.060354863 | 0.192926175 |
| PNPLA2  | lightyellow | -0.048199346 | 0.298614358 | -0.020813263 | 0.653704622 |
| PNPLA6  | lightyellow | 0.098410824  | 0.033491622 | 0.122833164  | 0.007874518 |
| PNPT1   | lightyellow | -0.118988546 | 0.010064012 | -0.135996994 | 0.003232301 |
| PNRC2   | lightyellow | 0.009990939  | 0.829507875 | -0.011510393 | 0.804069955 |
| POLE3   | lightyellow | 0.175948629  | 0.000132401 | 0.156981877  | 0.000662983 |
| POLR2C  | lightyellow | 0.066185869  | 0.153285592 | 0.072376124  | 0.118307168 |
| POLR3F  | lightyellow | -0.233360157 | 3.40E-07    | -0.237061141 | 2.18E-07    |
| POLR3G  | lightyellow | 0.06021775   | 0.193941125 | 0.049914615  | 0.281728617 |
| PON2    | lightyellow | 0.130962711  | 0.004585984 | 0.105048915  | 0.023187736 |
| POT1    | lightyellow | -0.175228656 | 0.000141197 | -0.208851308 | 5.33E-06    |
| PPA1    | lightyellow | 0.125608531  | 0.006569353 | 0.114191631  | 0.013542676 |
| PPAPDC2 | lightyellow | 0.069671327  | 0.132735294 | 0.059342429  | 0.200512682 |
| PPAT    | lightyellow | -0.011064293 | 0.811518204 | -0.03967438  | 0.392324372 |
| PPID    | lightyellow | 0.155390507  | 0.000753028 | 0.132396772  | 0.004155923 |
| PPIG    | lightyellow | -0.071739674 | 0.121586673 | -0.105540984 | 0.022547173 |
| PPIL4   | lightyellow | -0.097222779 | 0.035698122 | -0.115598753 | 0.012426313 |
| PPM1B   | lightyellow | -0.025910409 | 0.576488075 | -0.038372465 | 0.408056626 |
| PPP1CB  | lightyellow | -0.071887983 | 0.120816203 | -0.085118924 | 0.066085625 |
| PPP1R2  | lightyellow | -0.053798938 | 0.245914635 | -0.064335088 | 0.165135427 |
| PPP2R1B | lightyellow | 0.318527469  | 1.80E-12    | 0.303633489  | 2.04E-11    |
| PPP2R5C | lightyellow | -0.016251107 | 0.726135061 | -0.030691062 | 0.508216146 |
| PPP2R5E | lightyellow | 0.039905936  | 0.389565166 | 0.024955671  | 0.59062186  |
| PPP3R1  | lightyellow | -0.062842233 | 0.175184155 | -0.085670047 | 0.064344427 |
| PPTC7   | lightyellow | -0.100010714 | 0.030704771 | -0.105050133 | 0.023186132 |
| PRCP    | lightyellow | -0.096149639 | 0.037796285 | -0.133113531 | 0.003954948 |
| PRDX3   | lightyellow | 0.238389943  | 1.86E-07    | 0.223708469  | 1.04E-06    |
| PRKAR2A | lightyellow | 0.102161961  | 0.027272107 | 0.09409145   | 0.042113687 |
| PRMT3   | lightyellow | 0.022713434  | 0.624424621 | -0.011717478 | 0.800618367 |
| PRMT6   | lightyellow | -0.182069325 | 7.59E-05    | -0.196072752 | 1.98E-05    |
| PRPF18  | lightyellow | -0.059246596 | 0.201241878 | -0.088322802 | 0.056483622 |

|         |             |              |             |              |             |
|---------|-------------|--------------|-------------|--------------|-------------|
| PRPF38A | lightyellow | -0.108997255 | 0.018464873 | -0.137211482 | 0.002965575 |
| PRPF40A | lightyellow | -0.050893849 | 0.272383872 | -0.07907381  | 0.08784185  |
| PRPS2   | lightyellow | 0.104744409  | 0.023591974 | 0.094622882  | 0.040960894 |
| PRPSAP2 | lightyellow | 0.131100436  | 0.004543004 | 0.117110791  | 0.01131801  |
| PSEN1   | lightyellow | 0.043523494  | 0.348000466 | 0.036321853  | 0.433582053 |
| PSMA6   | lightyellow | -0.050499102 | 0.276125152 | -0.064776974 | 0.162245582 |
| PSMD10  | lightyellow | -0.02292569  | 0.621189242 | -0.017673773 | 0.703248036 |
| PSMD12  | lightyellow | 0.004827999  | 0.91712575  | -0.0048806   | 0.916226142 |
| PSME4   | lightyellow | -0.080893531 | 0.080758503 | -0.068056786 | 0.14197358  |
| PSMG4   | lightyellow | -0.018254416 | 0.69398209  | 0.021210207  | 0.647542023 |
| PSPC1   | lightyellow | 0.148116452  | 0.001327497 | 0.11601429   | 0.012112564 |
| PSPH    | lightyellow | 0.169295052  | 0.000237612 | 0.16427649   | 0.000364164 |
| PTBP3   | lightyellow | 0.197267479  | 1.76E-05    | 0.181370222  | 8.09E-05    |
| PTCD2   | lightyellow | 0.049847305  | 0.282378817 | 0.017035043  | 0.713491863 |
| PTER    | lightyellow | 0.110872498  | 0.016532271 | 0.096464269  | 0.037170563 |
| PTGES3  | lightyellow | 0.008733607  | 0.850694287 | -0.009437422 | 0.838820532 |
| PTP4A1  | lightyellow | 0.052581736  | 0.256777638 | 0.047803868  | 0.30260121  |
| PTP4A2  | lightyellow | -0.163611831 | 0.000385002 | -0.166397776 | 0.000304481 |
| PTPLB   | lightyellow | 0.05338174   | 0.249601179 | 0.018615872  | 0.688236782 |
| PTPN11  | lightyellow | -0.006489143 | 0.888772801 | -0.036904498 | 0.426237415 |
| PWP1    | lightyellow | -0.02530702  | 0.585402075 | -0.048331375 | 0.297291181 |
| PXYLP1  | lightyellow | -0.069655225 | 0.132825078 | -0.105575364 | 0.022502997 |
| PYCARD  | lightyellow | 0.010261048  | 0.824971994 | 0.075414344  | 0.103595149 |
| QRSL1   | lightyellow | 0.145488343  | 0.001619384 | 0.14258685   | 0.002009214 |
| R3HCC1I | lightyellow | 0.036112493  | 0.436238883 | 0.017223124  | 0.710470006 |
| RAB10   | lightyellow | 0.015839484  | 0.732803816 | 0.001427518  | 0.975455943 |
| RAB12   | lightyellow | -0.322121545 | 9.79E-13    | -0.344012007 | 2.03E-14    |
| RAB18   | lightyellow | 0.026350156  | 0.57003207  | 0.000246754  | 0.995756775 |
| RAB1A   | lightyellow | 0.038890456  | 0.401752872 | 0.038934873  | 0.401215066 |
| RAB21   | lightyellow | -0.091362688 | 0.048472595 | -0.104944494 | 0.023325676 |
| RAB27B  | lightyellow | 0.193109082  | 2.65E-05    | 0.165333674  | 0.000333175 |
| RAB28   | lightyellow | -0.033441245 | 0.470948679 | -0.053347788 | 0.249902884 |
| RAB32   | lightyellow | -0.238675513 | 1.79E-07    | -0.219456891 | 1.68E-06    |
| RAB3IP  | lightyellow | -0.006702828 | 0.885135049 | -0.031005704 | 0.503875767 |
| RAB5B   | lightyellow | -0.141570663 | 0.002164881 | -0.176820496 | 0.000122439 |
| RAB6A   | lightyellow | -0.0232186   | 0.616736457 | -0.057068099 | 0.218341433 |
| RAB7A   | lightyellow | -0.134895809 | 0.003492784 | -0.13855     | 0.00269492  |
| RAB9A   | lightyellow | 0.000646307  | 0.988886321 | -0.000616867 | 0.989392531 |
| RABGGT  | lightyellow | -0.091624067 | 0.04783058  | -0.130290736 | 0.004801002 |
| RABL3   | lightyellow | 0.040766536  | 0.379413878 | 0.015945702  | 0.731081013 |
| RAD1    | lightyellow | -0.056786195 | 0.220628026 | -0.073115838 | 0.114582909 |
| RAD51C  | lightyellow | -0.014155166 | 0.760296679 | -0.020624266 | 0.656647158 |
| RALA    | lightyellow | -0.103698566 | 0.025027114 | -0.109949651 | 0.017460022 |
| RALB    | lightyellow | -0.092187875 | 0.046469948 | -0.119910354 | 0.009494803 |
| RANBP9  | lightyellow | -0.052585713 | 0.256741608 | -0.060821438 | 0.189501616 |

|          |             |              |             |              |             |
|----------|-------------|--------------|-------------|--------------|-------------|
| RAP1A    | lightyellow | -0.133606337 | 0.003821916 | -0.143095969 | 0.001935136 |
| RAP1GDI  | lightyellow | 0.251880512  | 3.43E-08    | 0.232644233  | 3.70E-07    |
| RAP2A    | lightyellow | -0.08287763  | 0.073569708 | -0.09907852  | 0.032303377 |
| RARS2    | lightyellow | -0.004004437 | 0.931223918 | -0.006259484 | 0.892685083 |
| RBBP8    | lightyellow | 0.031385691  | 0.49866007  | -0.004828368 | 0.917119433 |
| RBBP9    | lightyellow | 0.135775269  | 0.003283286 | 0.113965897  | 0.013729758 |
| RBM22    | lightyellow | -0.072169594 | 0.119363713 | -0.088992711 | 0.054629754 |
| RBM27    | lightyellow | -0.149624182 | 0.001182722 | -0.164483379 | 0.000357896 |
| RBM4     | lightyellow | -0.035190841 | 0.448045517 | -0.069825759 | 0.131876539 |
| RBM45    | lightyellow | 0.010862227  | 0.81489762  | -0.004612464 | 0.920813064 |
| RBM7     | lightyellow | 0.107686207  | 0.01993047  | 0.061747228  | 0.182839101 |
| RBMX     | lightyellow | -0.05134391  | 0.268160706 | -0.094245495 | 0.041776748 |
| RCL1     | lightyellow | -0.123227994 | 0.007675724 | -0.14279581  | 0.001978502 |
| RCN2     | lightyellow | 0.039523487  | 0.394128735 | -0.003876627 | 0.933413881 |
| RDX      | lightyellow | 0.077261132  | 0.095386001 | 0.059202435  | 0.20157855  |
| REEP3    | lightyellow | 0.12148088   | 0.008590675 | 0.103528507  | 0.025267458 |
| REXO2    | lightyellow | 0.186333     | 5.09E-05    | 0.143506335  | 0.001877256 |
| RFK      | lightyellow | 0.173208915  | 0.000168888 | 0.149372733  | 0.001205809 |
| RFX5     | lightyellow | 0.021142556  | 0.648590638 | 0.014026755  | 0.76240564  |
| RFXAP    | lightyellow | 0.032077675  | 0.489235908 | 0.010007535  | 0.829229021 |
| RGMB     | lightyellow | 0.095283046  | 0.039566076 | 0.070990584  | 0.125536893 |
| RHEB     | lightyellow | -0.053334025 | 0.250025251 | -0.095079771 | 0.039991215 |
| RHOA     | lightyellow | 0.137332149  | 0.002940199 | 0.141245432  | 0.002216983 |
| RHOT1    | lightyellow | 0.084647893  | 0.067604284 | 0.058069156  | 0.210358895 |
| RIOK1    | lightyellow | -0.173718503 | 0.000161457 | -0.192905882 | 2.70E-05    |
| RIOK3    | lightyellow | -0.078874953 | 0.08864529  | -0.100317776 | 0.030193241 |
| RMI1     | lightyellow | 0.216685726  | 2.29E-06    | 0.197020201  | 1.80E-05    |
| RNF138   | lightyellow | -0.052575864 | 0.256830832 | -0.062526034 | 0.177369734 |
| RNF145   | lightyellow | 0.206789376  | 6.62E-06    | 0.191535688  | 3.09E-05    |
| RNF149   | lightyellow | 0.011222486  | 0.808874963 | -0.013170202 | 0.776517641 |
| RNF185   | lightyellow | -0.009569701 | 0.836592909 | -0.03269261  | 0.480941976 |
| RNF219   | lightyellow | -0.059155224 | 0.201938928 | -0.082442873 | 0.075098577 |
| RNFT1    | lightyellow | 0.170912793  | 0.000206526 | 0.157383217  | 0.000641907 |
| RNGTT    | lightyellow | -0.041313501 | 0.373047198 | -0.067052307 | 0.147964744 |
| ROGDI    | lightyellow | 0.122762008  | 0.007910829 | 0.166377617  | 0.000305002 |
| RP11-347 | lightyellow | 0.053440167  | 0.249082594 | 0.07797394   | 0.09235989  |
| RP11-571 | lightyellow | 0.079705695  | 0.085327645 | 0.05771463   | 0.213161497 |
| RPAP3    | lightyellow | -0.105905125 | 0.022083068 | -0.125799594 | 0.006487081 |
| RPE      | lightyellow | -0.118212447 | 0.010566524 | -0.135896586 | 0.0032553   |
| RPL7L1   | lightyellow | -0.030100739 | 0.516411907 | -0.052237878 | 0.259905682 |
| RPRD1A   | lightyellow | 0.039094737  | 0.399282952 | -0.010251349 | 0.825134769 |
| RPS6KB1  | lightyellow | -0.049740787 | 0.283409835 | -0.08032955  | 0.082902605 |
| RRAGC    | lightyellow | -0.169535344 | 0.000232733 | -0.16867417  | 0.000250666 |
| RRAS     | lightyellow | -0.28652744  | 2.83E-10    | -0.257221813 | 1.71E-08    |
| RRAS2    | lightyellow | -0.107861451 | 0.019728883 | -0.124546482 | 0.007043958 |

|         |             |              |             |              |             |
|---------|-------------|--------------|-------------|--------------|-------------|
| RRM2B   | lightyellow | 0.089059908  | 0.054446619 | 0.065445269  | 0.157947579 |
| RRN3    | lightyellow | 0.019241828  | 0.678329721 | 0.007164459  | 0.877284636 |
| RRP1B   | lightyellow | -0.070487472 | 0.128245451 | -0.109702179 | 0.017716418 |
| RSU1    | lightyellow | 0.09863215   | 0.033093683 | 0.081935289  | 0.07691616  |
| RTCA    | lightyellow | 0.055981151  | 0.227252026 | 0.059922114  | 0.196142777 |
| RTF1    | lightyellow | 0.204078598  | 8.78E-06    | 0.177171455  | 0.000118631 |
| RTN3    | lightyellow | 0.001246123  | 0.978573968 | -0.01327453  | 0.774794755 |
| RWDD2A  | lightyellow | -0.016529167 | 0.721641829 | -0.036841676 | 0.427025829 |
| RWDD3   | lightyellow | -0.109288058 | 0.018152834 | -0.136246911 | 0.003175697 |
| SAR1A   | lightyellow | 0.039762599  | 0.39127177  | 0.024564998  | 0.596450787 |
| SAV1    | lightyellow | -0.049852002 | 0.282333408 | -0.065758239 | 0.155964575 |
| SBDS    | lightyellow | -0.176341612 | 0.00012782  | -0.189057878 | 3.93E-05    |
| SC5D    | lightyellow | -0.019037471 | 0.681558119 | -0.066318306 | 0.152463027 |
| SCARB2  | lightyellow | 0.035671125  | 0.441870503 | 0.009264358  | 0.841736941 |
| SCFD1   | lightyellow | 0.043494193  | 0.348325419 | 0.037819943  | 0.414844923 |
| SCO1    | lightyellow | 0.200825666  | 1.23E-05    | 0.197593468  | 1.70E-05    |
| SCYL2   | lightyellow | 0.102917896  | 0.026146915 | 0.090556969  | 0.050497209 |
| SDCBP   | lightyellow | -0.031697602 | 0.494400269 | -0.051753542 | 0.26435608  |
| SEC22B  | lightyellow | 0.006668606  | 0.885717491 | -0.017897552 | 0.699671657 |
| SEC22C  | lightyellow | 0.113202013  | 0.014379825 | 0.096066733  | 0.037962643 |
| SEC23IP | lightyellow | 0.107353377  | 0.020318268 | 0.078056802  | 0.092013154 |
| SEC62   | lightyellow | -0.212754174 | 3.51E-06    | -0.214843193 | 2.80E-06    |
| SEC63   | lightyellow | -0.055558485 | 0.230785801 | -0.0821344   | 0.076198958 |
| SEH1L   | lightyellow | -0.023289236 | 0.615664744 | -0.062082537 | 0.180469225 |
| SELO    | lightyellow | 0.216271127  | 2.39E-06    | 0.218745754  | 1.82E-06    |
| SELT    | lightyellow | -0.010976144 | 0.812992005 | -0.019951708 | 0.66716118  |
| SEPT7   | lightyellow | -0.097539997 | 0.035097202 | -0.119995608 | 0.009443634 |
| SERBP1  | lightyellow | 0.018311927  | 0.693066772 | -0.011982652 | 0.796204239 |
| SERF1B  | lightyellow | -0.104099354 | 0.024468473 | -0.122589274 | 0.007999599 |
| SERP1   | lightyellow | -0.022652439 | 0.625355709 | -0.009627501 | 0.835619952 |
| SET     | lightyellow | 0.071633483  | 0.122140688 | 0.042127696  | 0.363692958 |
| SETD3   | lightyellow | -0.07781108  | 0.093044422 | -0.075271141 | 0.104254395 |
| SETD9   | lightyellow | 0.183847022  | 6.43E-05    | 0.189035911  | 3.93E-05    |
| SH3GLB2 | lightyellow | 0.175719859  | 0.000135138 | 0.175456242  | 0.000138359 |
| SHQ1    | lightyellow | 0.148181425  | 0.001320936 | 0.129763425  | 0.004976052 |
| SIX4    | lightyellow | 0.101320578  | 0.028573224 | 0.095579864  | 0.038952166 |
| SKAP2   | lightyellow | -0.020873988 | 0.652760319 | -0.023231025 | 0.616547871 |
| SKIV2L2 | lightyellow | 0.03863575   | 0.404845242 | 0.002930248  | 0.949644168 |
| SLC17A5 | lightyellow | 0.138001663  | 0.002802953 | 0.126875752  | 0.006040704 |
| SLC25A1 | lightyellow | 0.050238841  | 0.278610841 | 0.038384735  | 0.407906627 |
| SLC25A1 | lightyellow | 0.163681814  | 0.000382756 | 0.13370728   | 0.003795171 |
| SLC25A2 | lightyellow | -0.019567847 | 0.673191538 | -0.042764636 | 0.356478092 |
| SLC25A4 | lightyellow | 0.087616212  | 0.058495259 | 0.061520703  | 0.184453088 |
| SLC30A9 | lightyellow | 0.102990809  | 0.026040531 | 0.086599495  | 0.061493572 |
| SLC33A1 | lightyellow | -0.014244539 | 0.758829898 | -0.034816816 | 0.452888035 |

|                     |              |             |              |             |
|---------------------|--------------|-------------|--------------|-------------|
| SLC35A5 lightyellow | 0.022245934  | 0.631576086 | 0.004295022  | 0.926246847 |
| SLC35B3 lightyellow | -0.025732421 | 0.579110893 | -0.031341906 | 0.499259603 |
| SLC35G1 lightyellow | 0.2506708    | 4.01E-08    | 0.190089333  | 3.56E-05    |
| SLC39A9 lightyellow | 0.270537469  | 2.82E-09    | 0.25842853   | 1.46E-08    |
| SLC4A1A lightyellow | -0.158089734 | 0.000606306 | -0.17711361  | 0.000119251 |
| SLC9A3R lightyellow | 0.161439499  | 0.000461108 | 0.210841209  | 4.31E-06    |
| SLMO2 lightyellow   | -0.054016236 | 0.244009646 | -0.070535971 | 0.127982395 |
| SMAP1 lightyellow   | -0.141553772 | 0.002167559 | -0.148327976 | 0.001306248 |
| SMARCA lightyellow  | -0.082076833 | 0.076405755 | -0.113688361 | 0.013962886 |
| SMARCA lightyellow  | 0.030273549  | 0.514005639 | 0.008871534  | 0.848364633 |
| SMARCE lightyellow  | 0.13507782   | 0.003448457 | 0.104231262  | 0.024286984 |
| SMEK1 lightyellow   | -0.016607952 | 0.720370456 | -0.043552039 | 0.347684093 |
| SMEK2 lightyellow   | -0.053513085 | 0.24843643  | -0.07266343  | 0.116849575 |
| SMIM1 lightyellow   | -0.024222362 | 0.601584381 | -0.042135658 | 0.363602216 |
| SMNDC1 lightyellow  | -0.048282849 | 0.297777045 | -0.077006579 | 0.09648565  |
| SMU1 lightyellow    | -0.015300881 | 0.741560148 | -0.02116105  | 0.648303894 |
| SNAPC3 lightyellow  | 0.152816885  | 0.000922912 | 0.142562397  | 0.002012836 |
| SNRNP48 lightyellow | 0.002817994  | 0.951570834 | -0.009850557 | 0.831867528 |
| SNX14 lightyellow   | 0.162133404  | 0.000435396 | 0.153253432  | 0.000891804 |
| SNX2 lightyellow    | -0.133191426 | 0.003933645 | -0.150438268 | 0.00111074  |
| SNX24 lightyellow   | -0.103985007 | 0.024626748 | -0.106449788 | 0.021404348 |
| SNX25 lightyellow   | 0.100145132  | 0.030479942 | 0.052007852  | 0.262012822 |
| SNX3 lightyellow    | -0.008478595 | 0.855004979 | -0.0054914   | 0.905787949 |
| SNX4 lightyellow    | -0.053174667 | 0.251445197 | -0.066489124 | 0.151407023 |
| SNX5 lightyellow    | -0.098588559 | 0.033171738 | -0.120435947 | 0.009183226 |
| SNX6 lightyellow    | -0.04127887  | 0.373448338 | -0.06435041  | 0.165034584 |
| SNX7 lightyellow    | 0.074611158  | 0.107335696 | 0.066387536  | 0.152034373 |
| SOCS4 lightyellow   | 0.022404696  | 0.62914357  | 0.005261044  | 0.909722774 |
| SORT1 lightyellow   | 0.137831811  | 0.002837208 | 0.138530808  | 0.002698636 |
| SOX4 lightyellow    | 0.171725182  | 0.000192392 | 0.162084607  | 0.00043716  |
| SPATA5I lightyellow | 0.258660622  | 1.42E-08    | 0.24062931   | 1.41E-07    |
| SPATS2 lightyellow  | 0.319374263  | 1.56E-12    | 0.295501171  | 7.28E-11    |
| SPG21 lightyellow   | 0.024854131  | 0.592134345 | 0.015126749  | 0.744398326 |
| SPIN4 lightyellow   | 0.079989742  | 0.084216506 | 0.075663173  | 0.102457511 |
| SPOP lightyellow    | -0.039403288 | 0.395569645 | -0.058375656 | 0.207957443 |
| SPPL3 lightyellow   | -0.113816834 | 0.01385454  | -0.12463009  | 0.007005512 |
| SPTLC2 lightyellow  | 0.004535008  | 0.922138581 | -0.014358935 | 0.756953711 |
| SPTSSA lightyellow  | 0.062690578  | 0.176229889 | 0.058492759  | 0.207045191 |
| SPTY2D1 lightyellow | 0.0294455    | 0.525588242 | 0.008186712  | 0.859944213 |
| SRBD1 lightyellow   | 0.070834835  | 0.126370591 | 0.054641817  | 0.238583098 |
| SRFBP1 lightyellow  | 0.061342603  | 0.185729411 | 0.043060439  | 0.353158202 |
| SRI lightyellow     | -0.013534158 | 0.770512054 | -0.011479705 | 0.804581769 |
| SRP54 lightyellow   | 0.098174187  | 0.033921598 | 0.080271767  | 0.083124853 |
| SRP72 lightyellow   | 0.09418473   | 0.041909386 | 0.072334417  | 0.118519935 |
| SRPK1 lightyellow   | 0.017444703  | 0.706915762 | -0.018573778 | 0.688904949 |

|         |             |              |             |              |             |
|---------|-------------|--------------|-------------|--------------|-------------|
| SRPK2   | lightyellow | 0.162398611  | 0.000425927 | 0.135316235  | 0.003391166 |
| SRRM1   | lightyellow | 0.041030158  | 0.376337038 | 0.011923999  | 0.797180035 |
| SRSF4   | lightyellow | 0.020354662  | 0.660853851 | 0.003753555  | 0.935523149 |
| SSR1    | lightyellow | 0.094976619  | 0.040208427 | 0.088457877  | 0.056105678 |
| SSR3    | lightyellow | 0.00847851   | 0.855006409 | -0.007027167 | 0.879618173 |
| ST7L    | lightyellow | -0.116818009 | 0.011525522 | -0.122928643 | 0.007826028 |
| STAM    | lightyellow | -0.025306501 | 0.585409774 | -0.049119589 | 0.289473165 |
| STARD3M | lightyellow | -0.121953877 | 0.008333836 | -0.133693018 | 0.00379894  |
| STARD4  | lightyellow | -0.004640533 | 0.92033277  | -0.002236718 | 0.961551745 |
| STAU1   | lightyellow | -0.10797934  | 0.019594275 | -0.1140935   | 0.013623726 |
| STK17A  | lightyellow | 0.010238621  | 0.825348387 | 0.033304833  | 0.472761053 |
| STK38L  | lightyellow | -0.083840521 | 0.070273849 | -0.100927429 | 0.029199235 |
| STRADB  | lightyellow | -0.007488169 | 0.871786806 | -0.023844878 | 0.607262967 |
| STRAP   | lightyellow | -0.004920176 | 0.915549342 | -0.021374993 | 0.644990727 |
| STRBP   | lightyellow | 0.221313316  | 1.37E-06    | 0.210368764  | 4.53E-06    |
| STT3B   | lightyellow | 0.080714278  | 0.081435053 | 0.047239302  | 0.308353533 |
| STX3    | lightyellow | 0.056945561  | 0.21933328  | 0.051790981  | 0.264010209 |
| STXBP3  | lightyellow | -0.136025563 | 0.003225785 | -0.165111007 | 0.00033949  |
| STYX    | lightyellow | 0.040682553  | 0.380397301 | 0.031643426  | 0.495138766 |
| SUCLA2  | lightyellow | 0.122389116  | 0.008103574 | 0.100832599  | 0.029351982 |
| SUDS3   | lightyellow | 0.080229927  | 0.083286079 | 0.054424198  | 0.240461106 |
| SUGP2   | lightyellow | 0.010004458  | 0.829280723 | -0.01523086  | 0.742701004 |
| SUGT1   | lightyellow | 0.057388131  | 0.215766214 | 0.044597913  | 0.336218045 |
| SUPT4H1 | lightyellow | -0.079701148 | 0.085345529 | -0.078071077 | 0.091953528 |
| SUZ12   | lightyellow | 0.080295685  | 0.0830328   | 0.040956348  | 0.37719695  |
| SYNCRIF | lightyellow | 0.026697652  | 0.564954847 | -0.001443574 | 0.975179969 |
| SYPL1   | lightyellow | 0.023505804  | 0.612383991 | 0.008892228  | 0.848015227 |
| TAF13   | lightyellow | 0.119647945  | 0.009653851 | 0.127719879  | 0.005710087 |
| TAF1A   | lightyellow | -0.117476487 | 0.011063468 | -0.135895693 | 0.003255505 |
| TAF1D   | lightyellow | -0.094000538 | 0.042313612 | -0.129756175 | 0.004978498 |
| TAF3    | lightyellow | -0.081709385 | 0.077736502 | -0.082803619 | 0.073828167 |
| TAF7    | lightyellow | 0.066105995  | 0.153783313 | 0.033859036  | 0.465421761 |
| TANGO2  | lightyellow | 0.023405379  | 0.613904353 | 0.050267612  | 0.278335316 |
| TAX1BP1 | lightyellow | -0.082968062 | 0.073254904 | -0.073148148 | 0.11442236  |
| TBC1D17 | lightyellow | -0.079632246 | 0.085616882 | -0.075890507 | 0.101426827 |
| TBK1    | lightyellow | 0.00860825   | 0.852812763 | -0.019786706 | 0.669750726 |
| TBP     | lightyellow | -0.180052248 | 9.13E-05    | -0.19426317  | 2.37E-05    |
| TBPL1   | lightyellow | -0.145689111 | 0.001595164 | -0.158109602 | 0.000605331 |
| TCEAL8  | lightyellow | -0.114357328 | 0.013406784 | -0.11987293  | 0.009517342 |
| TCEB3   | lightyellow | 0.006336566  | 0.891371688 | -0.011695646 | 0.800982074 |
| TCIRG1  | lightyellow | 0.111217888  | 0.01619631  | 0.128929328  | 0.005264715 |
| TCP1    | lightyellow | 0.011226952  | 0.80880038  | 0.02207563   | 0.634189873 |
| TCTN3   | lightyellow | 0.284217927  | 3.98E-10    | 0.254089164  | 2.58E-08    |
| TDG     | lightyellow | 0.171412399  | 0.000197723 | 0.163132901  | 0.000400699 |
| TEFM    | lightyellow | 0.017077615  | 0.712807484 | -0.001482617 | 0.974508919 |

|         |             |              |             |              |             |
|---------|-------------|--------------|-------------|--------------|-------------|
| TERF1   | lightyellow | -0.133878484 | 0.0037502   | -0.183744942 | 6.49E-05    |
| TERF2   | lightyellow | 0.144727849  | 0.001714221 | 0.133349059  | 0.003890853 |
| TES     | lightyellow | -0.010645009 | 0.818534266 | 0.007971529  | 0.863589058 |
| TEX10   | lightyellow | -0.051964879 | 0.262407781 | -0.086560888 | 0.061609879 |
| TFAM    | lightyellow | -0.071030864 | 0.125321976 | -0.106882762 | 0.020877797 |
| TFCP2   | lightyellow | -0.064526279 | 0.163880373 | -0.062637614 | 0.176596192 |
| TGDS    | lightyellow | -0.046464771 | 0.316361732 | -0.072790909 | 0.116207354 |
| THAP1   | lightyellow | -0.073002619 | 0.115146901 | -0.113744213 | 0.013915693 |
| THAP10  | lightyellow | -0.056403246 | 0.223761561 | -0.069696119 | 0.132597139 |
| THAP5   | lightyellow | -0.017271348 | 0.709695931 | -0.019169539 | 0.679471071 |
| THNSL1  | lightyellow | -0.13150175  | 0.00441983  | -0.156634528 | 0.000681741 |
| THUMPC  | lightyellow | 0.170371098  | 0.000216484 | 0.168428995  | 0.000256002 |
| TIAL1   | lightyellow | 0.025995209  | 0.575240441 | -0.002682769 | 0.953892122 |
| TIFA    | lightyellow | 0.251762573  | 3.49E-08    | 0.220275987  | 1.54E-06    |
| TIGD2   | lightyellow | 0.203518625  | 9.30E-06    | 0.197919981  | 1.65E-05    |
| TIMM10  | lightyellow | 0.04154754   | 0.370343245 | 0.035699698  | 0.441504669 |
| TIMM21  | lightyellow | 0.020921717  | 0.652018504 | 0.00845592   | 0.85538848  |
| TLK1    | lightyellow | -0.03660306  | 0.430028172 | -0.069539704 | 0.133470609 |
| TLK2    | lightyellow | -0.122298    | 0.008151304 | -0.140587065 | 0.002325976 |
| TM2D1   | lightyellow | -0.159495567 | 0.000540851 | -0.190034974 | 3.57E-05    |
| TM2D3   | lightyellow | 0.138441263  | 0.002716037 | 0.122388004  | 0.008104155 |
| TM7SF3  | lightyellow | 0.206030937  | 7.17E-06    | 0.178003701  | 0.000110042 |
| TM9SF2  | lightyellow | 0.010975269  | 0.813006634 | -0.0060078   | 0.896975564 |
| TM9SF3  | lightyellow | 0.149342948  | 0.001208571 | 0.11724697   | 0.011222624 |
| TMED2   | lightyellow | 0.172964382  | 0.000172567 | 0.160364724  | 0.000503733 |
| TMED5   | lightyellow | 0.079572577  | 0.08585243  | 0.063114226  | 0.173320204 |
| TMED7-1 | lightyellow | 0.086757324  | 0.061019983 | 0.047429747  | 0.3064051   |
| TMEM12  | lightyellow | 0.069031342  | 0.136340137 | 0.02574452   | 0.578932419 |
| TMEM12  | lightyellow | 0.019023423  | 0.681780263 | 0.007504308  | 0.871512853 |
| TMEM12  | lightyellow | 0.014650635  | 0.75217606  | -0.010535643 | 0.820366741 |
| TMEM13  | lightyellow | 0.092340582  | 0.046107064 | 0.076639181  | 0.098090581 |
| TMEM14  | lightyellow | -0.036183424 | 0.435337699 | -0.056734814 | 0.22104663  |
| TMEM16  | lightyellow | 0.079133579  | 0.087601516 | 0.058664761  | 0.20571051  |
| TMEM17  | lightyellow | 0.207134552  | 6.38E-06    | 0.238785271  | 1.77E-07    |
| TMEM18  | lightyellow | 0.006085314  | 0.89565385  | -0.016619544 | 0.720183454 |
| TMEM18  | lightyellow | 0.022046953  | 0.634630443 | 0.006457024  | 0.889319785 |
| TMEM19  | lightyellow | -0.096680653 | 0.03674535  | -0.093241074 | 0.044015219 |
| TMEM21  | lightyellow | 0.190339952  | 3.47E-05    | 0.149395617  | 0.001203691 |
| TMEM24  | lightyellow | -0.073029934 | 0.115010636 | -0.060798485 | 0.189669037 |
| TMEM25  | lightyellow | 0.060902382  | 0.188912075 | 0.075443532  | 0.10346119  |
| TMEM26  | lightyellow | -0.056886736 | 0.219810557 | -0.067158581 | 0.147321912 |
| TMEM33  | lightyellow | 0.153094724  | 0.000903    | 0.148855771  | 0.001254584 |
| TMEM38  | lightyellow | -0.101242113 | 0.028697236 | -0.109080845 | 0.018374703 |
| TMEM5   | lightyellow | 0.007886807  | 0.865024904 | -0.031621209 | 0.495441778 |
| TMEM50  | lightyellow | -0.038947115 | 0.401066913 | -0.050836081 | 0.272929205 |



|                    |              |             |              |             |
|--------------------|--------------|-------------|--------------|-------------|
| TMEM57 lightyellow | 0.086406455  | 0.062076941 | 0.07401076   | 0.110200858 |
| TMEM69 lightyellow | -0.065600807 | 0.15695971  | -0.083109942 | 0.072763218 |
| TMLHE lightyellow  | 0.25322303   | 2.89E-08    | 0.238690368  | 1.79E-07    |
| TMTC3 lightyellow  | 0.123930452  | 0.0073331   | 0.096922811  | 0.036274392 |
| TMTC4 lightyellow  | 0.049008366  | 0.290567897 | -0.00668486  | 0.885440838 |
| TMX1 lightyellow   | 0.090301224  | 0.051154429 | 0.062081121  | 0.180479188 |
| TNPO1 lightyellow  | 0.09990515   | 0.030882334 | 0.073834247  | 0.111054556 |
| TOMM70lightyellow  | -0.185235208 | 5.65E-05    | -0.204499992 | 8.40E-06    |
| TOP1 lightyellow   | 0.099168142  | 0.032146658 | 0.073411331  | 0.113121143 |
| TOP2B lightyellow  | 0.00116374   | 0.979990157 | -0.021320699 | 0.645830884 |
| TPM4 lightyellow   | -0.182590039 | 7.23E-05    | -0.188667189 | 4.08E-05    |
| TRAM1 lightyellow  | -0.123803531 | 0.007393975 | -0.143425407 | 0.001888544 |
| TRAPPC1lightyellow | 0.120550708  | 0.009116417 | 0.111905973  | 0.015544793 |
| TRAPPC1lightyellow | 0.168164785  | 0.000261872 | 0.130388803  | 0.004769066 |
| TRAPPC2lightyellow | 0.107801518  | 0.019797625 | 0.116277224  | 0.011917672 |
| TRAPPC6lightyellow | 0.018627835  | 0.688046935 | -0.004587106 | 0.921247003 |
| TRIM24 lightyellow | 0.129467942  | 0.005076639 | 0.091133664  | 0.049041055 |
| TRIP4 lightyellow  | 0.171803755  | 0.000191074 | 0.155213118  | 0.000763738 |
| TRMT10/lightyellow | 0.266478242  | 4.94E-09    | 0.225161621  | 8.83E-07    |
| TRMT1L lightyellow | -6.32E-05    | 0.998914014 | -0.013830544 | 0.765631531 |
| TRMT2B lightyellow | 0.135533768  | 0.003339647 | 0.140046152  | 0.00241916  |
| TRMT6 lightyellow  | -0.103023018 | 0.025993656 | -0.124670213 | 0.006987129 |
| TRUB1 lightyellow  | 0.033036583  | 0.476336155 | 0.002966374  | 0.949024181 |
| TSG101 lightyellow | 0.007826199  | 0.866052335 | -0.001853468 | 0.968135796 |
| TSN lightyellow    | -0.107723445 | 0.019887485 | -0.13856555  | 0.002691913 |
| TSPAN31lightyellow | -0.216045463 | 2.45E-06    | -0.215891814 | 2.49E-06    |
| TSPAN6 lightyellow | -0.070007085 | 0.130873719 | -0.074949041 | 0.105749336 |
| TTC19 lightyellow  | 0.359057601  | 1.17E-15    | 0.342418507  | 2.72E-14    |
| TTC27 lightyellow  | -0.131581828 | 0.004395616 | -0.145201086 | 0.001654626 |
| TTC32 lightyellow  | -0.169841259 | 0.000226657 | -0.174177171 | 0.000155032 |
| TTF1 lightyellow   | -0.064428353 | 0.164522301 | -0.089548887 | 0.053129315 |
| TUBD1 lightyellow  | -0.040837232 | 0.378587245 | -0.060760287 | 0.189947892 |
| TUBGCP·lightyellow | 0.240202412  | 1.49E-07    | 0.208025597  | 5.81E-06    |
| TVP23C·lightyellow | -0.002294943 | 0.960551684 | -0.015926126 | 0.731398419 |
| TWISTNlightyellow  | -0.037200836 | 0.422529792 | -0.038994374 | 0.400495285 |
| TXLNG lightyellow  | 0.00716142   | 0.877336279 | -0.03162695  | 0.495363475 |
| TXNDC1lightyellow  | -0.027849402 | 0.548283503 | -0.056735258 | 0.221043005 |
| TXNRD1 lightyellow | 0.048465407  | 0.295951923 | 0.056780185  | 0.220676963 |
| TYW1 lightyellow   | -0.057498457 | 0.214883521 | -0.082604804 | 0.074526134 |
| TYW3 lightyellow   | 0.029053563  | 0.531116605 | 0.001486708  | 0.9744386   |
| UBA5 lightyellow   | 0.047622164  | 0.304444766 | 0.034849264  | 0.452466768 |
| UBAP1 lightyellow  | 0.042942871  | 0.354475358 | 0.041191029  | 0.374467009 |
| UBE2A lightyellow  | 0.092957668  | 0.044664784 | 0.093727552  | 0.04291875  |
| UBE2D1 lightyellow | 0.005167293  | 0.911324827 | -0.011488365 | 0.804437331 |
| UBE2D3 lightyellow | 0.032013162  | 0.490110455 | 0.011205744  | 0.809154604 |

|         |             |              |             |              |             |
|---------|-------------|--------------|-------------|--------------|-------------|
| UBE2E1  | lightyellow | -0.063506002 | 0.170661413 | -0.090835885 | 0.049788497 |
| UBE2E3  | lightyellow | 0.073603041  | 0.112180635 | 0.075488589  | 0.10325466  |
| UBE2G1  | lightyellow | 0.127638972  | 0.005741055 | 0.104386192  | 0.024075305 |
| UBE2H   | lightyellow | 0.02742712   | 0.554367751 | 0.024499965  | 0.597423625 |
| UBE2K   | lightyellow | 0.22267111   | 1.17E-06    | 0.219711411  | 1.64E-06    |
| UBE2N   | lightyellow | 0.140744271  | 0.002299515 | 0.117077863  | 0.011341182 |
| UBE2Q2  | lightyellow | 0.060479274  | 0.192008629 | 0.034263586  | 0.460104429 |
| UBE2R2  | lightyellow | -0.003798238 | 0.934757301 | 0.015645307  | 0.735956719 |
| UBP1    | lightyellow | -0.056372746 | 0.224012488 | -0.081220785 | 0.079535093 |
| UBR7    | lightyellow | 0.149844122  | 0.001162863 | 0.148879545  | 0.001252301 |
| UBTD2   | lightyellow | -0.050302781 | 0.277998765 | -0.066332106 | 0.152377506 |
| UBXN2A  | lightyellow | -0.033429048 | 0.471110575 | -0.045576486 | 0.325712069 |
| UFSP2   | lightyellow | 0.047349864  | 0.307221385 | 0.022917308  | 0.621316879 |
| UNC50   | lightyellow | -0.110498753 | 0.016902669 | -0.129195274 | 0.00517108  |
| UPF2    | lightyellow | -0.069207429 | 0.135340864 | -0.107130309 | 0.020581833 |
| UPRT    | lightyellow | 0.073213887  | 0.11409624  | 0.072365975  | 0.118358912 |
| USP1    | lightyellow | -0.074117072 | 0.109689185 | -0.108620769 | 0.018875797 |
| USP14   | lightyellow | -0.027981096 | 0.546392814 | -0.044711926 | 0.334982937 |
| USP16   | lightyellow | -0.051417091 | 0.267478267 | -0.062139608 | 0.180068138 |
| USP28   | lightyellow | -0.041110543 | 0.375401892 | -0.075874729 | 0.101498095 |
| USP38   | lightyellow | -0.015943814 | 0.731111617 | -0.023810804 | 0.607776735 |
| USP48   | lightyellow | 0.015471265  | 0.738786466 | -0.015820447 | 0.733112723 |
| USP7    | lightyellow | 0.203235711  | 9.58E-06    | 0.198411691  | 1.57E-05    |
| UTP15   | lightyellow | 0.150897609  | 0.001071929 | 0.122426111  | 0.008084266 |
| UTP18   | lightyellow | -0.000669457 | 0.988488265 | -0.032843863 | 0.478913723 |
| UTP3    | lightyellow | -0.041467133 | 0.37127085  | -0.054873532 | 0.236594821 |
| UTP6    | lightyellow | 0.033221313  | 0.473872587 | 0.008871458  | 0.848365919 |
| UXS1    | lightyellow | -0.024613106 | 0.595731585 | -0.049983627 | 0.281063023 |
| VAMP7   | lightyellow | 0.01533758   | 0.740962452 | 0.008563943  | 0.853561788 |
| VAPB    | lightyellow | -0.086260686 | 0.062520472 | -0.104479872 | 0.023948086 |
| VASH2   | lightyellow | -0.014511813 | 0.7544486   | -0.034385467 | 0.45850911  |
| VDAC2   | lightyellow | -0.005259525 | 0.909748729 | -0.018473712 | 0.690494272 |
| VEZT    | lightyellow | 0.077981925  | 0.092326428 | 0.06356043   | 0.17029446  |
| VIPAS39 | lightyellow | -0.014725942 | 0.750944153 | -0.028951423 | 0.532562137 |
| VKORC1  | lightyellow | -0.074519537 | 0.107769079 | -0.089104849 | 0.054324427 |
| VMA21   | lightyellow | -0.063953164 | 0.167664096 | -0.074315277 | 0.108740234 |
| VPS26A  | lightyellow | 0.029382933  | 0.526468791 | 0.001709383  | 0.970611705 |
| VPS35   | lightyellow | 0.153312196  | 0.000887691 | 0.145437813  | 0.001625533 |
| VPS4B   | lightyellow | 0.040938948  | 0.377399846 | 0.033837345  | 0.465707817 |
| VPS9D1  | lightyellow | 0.127519111  | 0.005787211 | 0.161143325  | 0.000472506 |
| VRK2    | lightyellow | -0.029432378 | 0.525772859 | -0.060735934 | 0.190125836 |
| VT A1   | lightyellow | -0.067806678 | 0.143447681 | -0.072532006 | 0.117514575 |
| VTI1A   | lightyellow | 0.068617137  | 0.138713079 | 0.056155268  | 0.225807521 |
| VTI1B   | lightyellow | -0.01590409  | 0.731755774 | -0.014595571 | 0.753077217 |
| VWA1    | lightyellow | -0.042375751 | 0.360872381 | -0.029334742 | 0.527147535 |

|         |             |              |             |              |             |
|---------|-------------|--------------|-------------|--------------|-------------|
| VWA9    | lightyellow | 0.184591351  | 6.00E-05    | 0.175514385  | 0.000137642 |
| WAC     | lightyellow | -0.015813826 | 0.733220173 | -0.056894301 | 0.219749138 |
| WAPAL   | lightyellow | 0.076229513  | 0.099905155 | 0.043404148  | 0.34932522  |
| WARS2   | lightyellow | 0.104514849  | 0.023900736 | 0.05730676   | 0.216418912 |
| WBP4    | lightyellow | 0.04256142   | 0.358770169 | 0.012347466  | 0.79014214  |
| WBP5    | lightyellow | -0.275802792 | 1.34E-09    | -0.286145881 | 2.99E-10    |
| WDR12   | lightyellow | -0.013023731 | 0.778938319 | -0.04337246  | 0.349677491 |
| WDR13   | lightyellow | -0.077902015 | 0.092661704 | -0.03891393  | 0.401468591 |
| WDR24   | lightyellow | 0.126181296  | 0.006325479 | 0.161562608  | 0.000456446 |
| WDR3    | lightyellow | -0.096670014 | 0.036766158 | -0.127139673 | 0.005935533 |
| WDR41   | lightyellow | 0.131681295  | 0.004365706 | 0.140448678  | 0.002349499 |
| WDR43   | lightyellow | -0.205612609 | 7.49E-06    | -0.245037597 | 8.18E-08    |
| WDSUB1  | lightyellow | -0.062146403 | 0.180020424 | -0.080260471 | 0.083168355 |
| WDYHV1  | lightyellow | -0.057081692 | 0.21823161  | -0.096607483 | 0.036888671 |
| WEE1    | lightyellow | 0.197792399  | 1.67E-05    | 0.153966498  | 0.000843069 |
| WSB2    | lightyellow | 0.356953102  | 1.77E-15    | 0.356233653  | 2.03E-15    |
| WTAP    | lightyellow | -0.13356432  | 0.003833098 | -0.154135643 | 0.000831875 |
| XAB2    | lightyellow | 0.094645216  | 0.040913036 | 0.110167086  | 0.017237427 |
| XPNPEP1 | lightyellow | 0.270378735  | 2.88E-09    | 0.261202852  | 1.01E-08    |
| XPOT    | lightyellow | 0.012336967  | 0.790316422 | -0.024454726 | 0.598100778 |
| XRCC4   | lightyellow | 0.028230394  | 0.542822547 | 0.007561486  | 0.870542446 |
| XRCC5   | lightyellow | 0.028422655  | 0.540077047 | 1.67E-05     | 0.999712676 |
| YEATS4  | lightyellow | 0.114769148  | 0.01307423  | 0.082827953  | 0.073743108 |
| YES1    | lightyellow | -0.008379796 | 0.856676232 | -0.033162171 | 0.474660546 |
| YIPF4   | lightyellow | -0.271756674 | 2.38E-09    | -0.281687622 | 5.76E-10    |
| YIPF5   | lightyellow | -0.05738314  | 0.215806204 | -0.066177992 | 0.153334621 |
| YIPF6   | lightyellow | -0.020327825 | 0.661273183 | -0.035395431 | 0.445409153 |
| YME1L1  | lightyellow | 0.03837172   | 0.408065733 | 0.001545785  | 0.973423246 |
| YPEL3   | lightyellow | -0.260022115 | 1.18E-08    | -0.233909056 | 3.18E-07    |
| YTHDF2  | lightyellow | 0.089969792  | 0.052016757 | 0.086404803  | 0.062081951 |
| YWHAB   | lightyellow | -0.130902577 | 0.004604866 | -0.147884119 | 0.001351203 |
| ZADH2   | lightyellow | 0.224794387  | 9.21E-07    | 0.221108399  | 1.40E-06    |
| ZBTB2   | lightyellow | -0.154378895 | 0.000816019 | -0.17149523  | 0.000196298 |
| ZC3H15  | lightyellow | -0.076495545 | 0.098723788 | -0.096492415 | 0.037115018 |
| ZDHHC2  | lightyellow | 0.184830215  | 5.86E-05    | 0.163081165  | 0.00040243  |
| ZDHHC6  | lightyellow | 0.20328552   | 9.53E-06    | 0.169703489  | 0.000229375 |
| ZFP91   | lightyellow | 0.065420677  | 0.158104199 | 0.034328253  | 0.459257603 |
| ZFPM1   | lightyellow | 0.083743809  | 0.070599327 | 0.09245328   | 0.045840781 |
| ZMPSTE2 | lightyellow | -0.117069705 | 0.011346929 | -0.13856101  | 0.00269279  |
| ZMYM6   | lightyellow | -0.21910433  | 1.75E-06    | -0.237984435 | 1.95E-07    |
| ZMYND1  | lightyellow | -0.029483663 | 0.525051511 | -0.07464022  | 0.107198519 |
| ZNF101  | lightyellow | 0.103844103  | 0.024822996 | 0.122027966  | 0.008294233 |
| ZNF14   | lightyellow | -0.094449238 | 0.0413346   | -0.103691274 | 0.02503738  |
| ZNF174  | lightyellow | 0.093864352  | 0.042614595 | 0.072357451  | 0.118402393 |
| ZNF184  | lightyellow | -0.015811935 | 0.733250857 | -0.034636954 | 0.455227158 |

|         |             |              |             |              |             |
|---------|-------------|--------------|-------------|--------------|-------------|
| ZNF277  | lightyellow | -0.025414498 | 0.58380962  | -0.036709616 | 0.428685944 |
| ZNF280B | lightyellow | 0.079480948  | 0.086215163 | 0.033258695  | 0.473374906 |
| ZNF322  | lightyellow | -0.134167929 | 0.003675265 | -0.166737869 | 0.000295808 |
| ZNF330  | lightyellow | -0.031179046 | 0.501492924 | -0.042761991 | 0.35650786  |
| ZNF341  | lightyellow | 0.071636969  | 0.122122473 | 0.07983579   | 0.084817281 |
| ZNF35   | lightyellow | 0.077451873  | 0.094568588 | 0.074326826  | 0.108685142 |
| ZNF480  | lightyellow | 0.137380379  | 0.002930112 | 0.144087979  | 0.001797931 |
| ZNF57   | lightyellow | 0.298558008  | 4.54E-11    | 0.287633931  | 2.40E-10    |
| ZNF664  | lightyellow | 0.088428499  | 0.0561877   | 0.063030699  | 0.173891027 |
| ZNF670  | lightyellow | -0.086152823 | 0.062850347 | -0.095369149 | 0.03938715  |
| ZNF830  | lightyellow | -0.011201163 | 0.809231132 | -0.038035591 | 0.41218759  |
| ZNF837  | lightyellow | 0.122529265  | 0.008030646 | 0.115626282  | 0.012405308 |
| ZNHIT3  | lightyellow | 0.085529345  | 0.064785328 | 0.068112159  | 0.141648791 |
| ZNHIT6  | lightyellow | -0.157407585 | 0.000640647 | -0.199886448 | 1.35E-05    |
| ZNRF2   | lightyellow | 0.027385011  | 0.554976258 | -0.000862893 | 0.98516236  |
| ZRANB3  | lightyellow | -0.082072015 | 0.076423082 | -0.125387324 | 0.006665773 |
| ZUFSP   | lightyellow | 0.044375386  | 0.338637092 | 0.031354147  | 0.499091951 |
| ZW10    | lightyellow | 0.074824795  | 0.106330505 | 0.03609126   | 0.43650886  |
| ABCC10  | magenta     | 0.07215869   | 0.119419697 | 0.068458763  | 0.139628724 |
| ACACA   | magenta     | 0.234168136  | 3.08E-07    | 0.221786593  | 1.30E-06    |
| ACLY    | magenta     | 0.407424613  | 4.22E-20    | 0.404647617  | 7.96E-20    |
| ACO2    | magenta     | 0.152699508  | 0.000931445 | 0.1496798    | 0.001177671 |
| ACTR1B  | magenta     | 0.05300596   | 0.252954534 | 0.053518822  | 0.248385643 |
| ACVR1B  | magenta     | -0.161986401 | 0.000440729 | -0.188787338 | 4.03E-05    |
| ADCY7   | magenta     | 0.064977881  | 0.16094434  | 0.065793649  | 0.155741402 |
| ADD1    | magenta     | 0.011148351  | 0.810113416 | 0.006202489  | 0.893656421 |
| AGAP1   | magenta     | -0.092600478 | 0.045494927 | -0.111072737 | 0.016336763 |
| AKAP1   | magenta     | 0.230256916  | 4.90E-07    | 0.21179754   | 3.89E-06    |
| AKT1    | magenta     | 0.183796997  | 6.46E-05    | 0.192352592  | 2.85E-05    |
| AMBRA1  | magenta     | -0.008940986 | 0.847192055 | -0.027777145 | 0.549322253 |
| AMFR    | magenta     | 0.102386912  | 0.026933    | 0.098659118  | 0.033045472 |
| ANKFY1  | magenta     | 0.132606063  | 0.004096305 | 0.114655465  | 0.013165297 |
| ANKRD1  | magenta     | 0.138180016  | 0.002767389 | 0.147342694  | 0.001407964 |
| ANKRD5  | magenta     | 0.051954274  | 0.262505308 | 0.033188079  | 0.474315282 |
| AP2A1   | magenta     | 0.043578629  | 0.34738955  | 0.053843967  | 0.245519029 |
| AP2B1   | magenta     | 0.290487103  | 1.56E-10    | 0.290998453  | 1.45E-10    |
| APP     | magenta     | 0.143559268  | 0.001869907 | 0.124674313  | 0.006985253 |
| ARHGAP  | magenta     | -0.033453358 | 0.470787937 | -0.044752044 | 0.334549021 |
| ARHGEF  | magenta     | 0.160636932  | 0.000492604 | 0.129121096  | 0.005197045 |
| ARID1A  | magenta     | -0.038132241 | 0.410999886 | -0.039462594 | 0.394858304 |
| ARL6IP4 | magenta     | -0.021845069 | 0.637735731 | -0.0156555   | 0.735791093 |
| ATF6B   | magenta     | -0.091834605 | 0.047318636 | -0.120207358 | 0.009317601 |
| ATG2A   | magenta     | -0.067433306 | 0.14567002  | -0.060302738 | 0.193311565 |
| ATN1    | magenta     | 0.002916331  | 0.94988301  | -0.005945641 | 0.898035661 |
| ATP11A  | magenta     | 0.107954516  | 0.019622553 | 0.10000243   | 0.030718675 |

|          |         |              |             |              |             |
|----------|---------|--------------|-------------|--------------|-------------|
| ATP2A2   | magenta | 0.121027598  | 0.008843401 | 0.118967614  | 0.010077282 |
| ATP9A    | magenta | -0.00130601  | 0.977544513 | -0.010720271 | 0.817273785 |
| ATXN10   | magenta | 0.185861501  | 5.32E-05    | 0.144410976  | 0.001755218 |
| ATXN1L   | magenta | -0.048982877 | 0.290819177 | -0.042371186 | 0.36092417  |
| ATXN2    | magenta | 0.007134909  | 0.877786803 | 0.008824472  | 0.84915939  |
| ATXN2L   | magenta | 0.06250679   | 0.177503403 | 0.061253632  | 0.186369439 |
| ATXN7L   | magenta | 0.044243609  | 0.340074859 | 0.02871969   | 0.535849047 |
| BANP     | magenta | 0.066511521  | 0.151268981 | 0.080130034  | 0.083672032 |
| BAP1     | magenta | 0.028162923  | 0.543787671 | 0.042881891  | 0.355159763 |
| BAZ2A    | magenta | -0.085499591 | 0.064878881 | -0.109418422 | 0.018014451 |
| BBS2     | magenta | 0.175434433  | 0.000138628 | 0.135004819  | 0.003466174 |
| BCKDHA   | magenta | -0.010313799 | 0.824086823 | -0.034631039 | 0.455304192 |
| BCL7C    | magenta | -0.022424706 | 0.628837261 | -0.010632207 | 0.818748722 |
| BCL9L    | magenta | -0.027773617 | 0.549372988 | -0.040883832 | 0.378042967 |
| BECN1    | magenta | 0.146825427  | 0.001464232 | 0.140194285  | 0.002393308 |
| BRD2     | magenta | 0.034133688  | 0.461808083 | 0.009778219  | 0.833084035 |
| BRD3     | magenta | 0.058478808  | 0.20715372  | 0.039848606  | 0.390247209 |
| BRF2     | magenta | 0.030240488  | 0.514465541 | 0.013495544  | 0.77114858  |
| BRPF1    | magenta | -0.030587529 | 0.509648614 | -0.05797766  | 0.211079631 |
| BRPF3    | magenta | -0.125657967 | 0.006547977 | -0.160722459 | 0.000489155 |
| BTN2A1   | magenta | -0.122420532 | 0.008087175 | -0.128716023 | 0.005340916 |
| C15orf39 | magenta | -0.179822268 | 9.33E-05    | -0.15418735  | 0.000828481 |
| C16orf58 | magenta | -0.005193874 | 0.910870567 | -0.024424531 | 0.598552947 |
| C16orf70 | magenta | 0.09598499   | 0.038127275 | 0.103728667  | 0.024984779 |
| C9orf64  | magenta | 0.154792962  | 0.000789669 | 0.157056143  | 0.000659035 |
| CAD      | magenta | -0.130392739 | 0.004767788 | -0.133674109 | 0.003803941 |
| CAMK1    | magenta | -0.087262671 | 0.059523827 | -0.124030345 | 0.007285505 |
| CAMTA2   | magenta | 0.165606575  | 0.000325585 | 0.159608268  | 0.000535899 |
| CARM1    | magenta | 0.071225661  | 0.124286654 | 0.06768276   | 0.144182359 |
| CCDC71   | magenta | 0.052977535  | 0.253209458 | 0.048828056  | 0.292348541 |
| CCDC85C  | magenta | -0.143237672 | 0.001914968 | -0.157791293 | 0.000621114 |
| CDC42B   | magenta | -0.055790157 | 0.228844073 | -0.070444778 | 0.12847737  |
| CENPBD   | magenta | -0.064227768 | 0.16584307  | -0.077713409 | 0.093456893 |
| CEP170B  | magenta | 0.062503669  | 0.177525088 | 0.074548312  | 0.107632821 |
| CES2     | magenta | 0.202720835  | 1.01E-05    | 0.22080476   | 1.45E-06    |
| CHD8     | magenta | -0.019946197 | 0.667247612 | -0.038353356 | 0.408290285 |
| CHKB     | magenta | 0.011929169  | 0.79709402  | 0.00602955   | 0.89660467  |
| CHTF8    | magenta | 0.150765121  | 0.001082993 | 0.140178635  | 0.002396027 |
| CIC      | magenta | -0.166634249 | 0.000298425 | -0.181609554 | 7.91E-05    |
| CIZ1     | magenta | -0.000556375 | 0.990432687 | -0.013875515 | 0.764891813 |
| CKLF-CM  | magenta | 0.034731914  | 0.453991346 | 0.013969581  | 0.763345225 |
| CLCN7    | magenta | 0.056003999  | 0.227062097 | 0.071070029  | 0.125113281 |
| CLDND2   | magenta | 0.021897472  | 0.636929085 | 0.024703397  | 0.594382856 |
| CMIP     | magenta | 0.113190099  | 0.014390174 | 0.107407118  | 0.02025521  |
| CMTM1    | magenta | 0.018126159  | 0.696024959 | 0.000963635  | 0.9834303   |

|          |         |              |             |              |             |
|----------|---------|--------------|-------------|--------------|-------------|
| CNNM3    | magenta | 0.053575644  | 0.247883004 | 0.038387245  | 0.40787594  |
| CNOT3    | magenta | 0.033751382  | 0.466842453 | 0.032632868  | 0.481744387 |
| CREBBP   | magenta | -0.053214172 | 0.251092669 | -0.05579732  | 0.228784222 |
| CRKL     | magenta | -0.096678547 | 0.036749469 | -0.129342175 | 0.005120005 |
| CSNK1D   | magenta | -0.073875498 | 0.110854583 | -0.08723419  | 0.059607338 |
| CSNK1E   | magenta | 0.186774073  | 4.88E-05    | 0.169267883  | 0.00023817  |
| CTBP1    | magenta | 0.102322927  | 0.027029084 | 0.109697344  | 0.01772146  |
| CTD-219  | magenta | -0.027480065 | 0.553603115 | -0.027774388 | 0.5493619   |
| CTDSP2   | magenta | -0.315463969 | 3.00E-12    | -0.33128126  | 2.01E-13    |
| CTNNA1   | magenta | 0.237489074  | 2.07E-07    | 0.246118423  | 7.14E-08    |
| CUL7     | magenta | -0.17019292  | 0.000219856 | -0.174354762 | 0.000152609 |
| CYB561A  | magenta | 0.075180617  | 0.104672837 | 0.082400166  | 0.075250143 |
| CYB5D1   | magenta | 0.101875594  | 0.027709107 | 0.086119222  | 0.062953399 |
| CYFIP1   | magenta | 0.286888015  | 2.68E-10    | 0.290944591  | 1.46E-10    |
| CYP51A1  | magenta | 0.132345944  | 0.00417052  | 0.09748044   | 0.035209362 |
| DAG1     | magenta | 0.092774129  | 0.045089743 | 0.074342885  | 0.108608572 |
| DALRD3   | magenta | 0.080364069  | 0.082770064 | 0.079678621  | 0.085434168 |
| DCTN5    | magenta | 0.113018894  | 0.014539623 | 0.130835417  | 0.004626036 |
| DDB1     | magenta | -0.05772941  | 0.213044118 | -0.068719503 | 0.138123706 |
| DDX24    | magenta | -0.059377438 | 0.200246776 | -0.059518759 | 0.199176002 |
| DGCR2    | magenta | 0.172440826  | 0.000180697 | 0.150110582  | 0.001139214 |
| DHX30    | magenta | 0.093778733  | 0.042804744 | 0.089216863  | 0.054020857 |
| DHX38    | magenta | 0.1212616    | 0.008712119 | 0.134423437  | 0.003610247 |
| DHX8     | magenta | 0.233650516  | 3.28E-07    | 0.236352952  | 2.37E-07    |
| DIP2A    | magenta | 0.104378456  | 0.024085836 | 0.095182121  | 0.039776675 |
| DLG5     | magenta | 0.128104938  | 0.005564747 | 0.092092995  | 0.046696623 |
| DLST     | magenta | 0.074330261  | 0.108668762 | 0.032512344  | 0.483365377 |
| DNAAF5   | magenta | 0.13660517   | 0.003096124 | 0.139964411  | 0.002433535 |
| DNAJA3   | magenta | 0.091396207  | 0.048389863 | 0.096109842  | 0.037876063 |
| DNASE1   | magenta | 0.052448487  | 0.257986686 | 0.027658235  | 0.551033767 |
| DNM2     | magenta | -0.020083335 | 0.665098247 | -0.012165724 | 0.793160585 |
| DPF2     | magenta | -0.136752963 | 0.003063829 | -0.156991469 | 0.000662472 |
| DPH1     | magenta | 0.102370138  | 0.026958159 | 0.080712036  | 0.081443543 |
| DRG2     | magenta | 0.193213231  | 2.62E-05    | 0.191373686  | 3.14E-05    |
| DYNC1H   | magenta | 0.07375175   | 0.111455329 | 0.079440345  | 0.086376292 |
| EARS2    | magenta | 0.144410717  | 0.001755252 | 0.157186299  | 0.000652169 |
| EDC4     | magenta | 0.162808915  | 0.000411653 | 0.162233967  | 0.000431783 |
| EEF1A1   | magenta | 0.06788396   | 0.142990951 | 0.035211228  | 0.447782423 |
| EEF1G    | magenta | -0.044298469 | 0.339475827 | -0.062826433 | 0.175292883 |
| EFTUD2   | magenta | 0.101540837  | 0.028227568 | 0.114436244  | 0.013342486 |
| EGLN2    | magenta | -0.160240374 | 0.000508894 | -0.140819252 | 0.002286991 |
| EIF3C    | magenta | -0.026381584 | 0.569571991 | -0.040214934 | 0.385901547 |
| EIF3L    | magenta | 0.077084882  | 0.096146316 | 0.043500455  | 0.348255958 |
| EIF4B    | magenta | 0.021264595  | 0.646699506 | -0.036015585 | 0.437471829 |
| EIF4ENIF | magenta | -0.121964158 | 0.008328331 | -0.15157492  | 0.001016977 |

|          |         |              |             |              |             |
|----------|---------|--------------|-------------|--------------|-------------|
| EIF4H    | magenta | -0.016325027 | 0.724939649 | -0.03967891  | 0.392270274 |
| ELL      | magenta | -0.106925265 | 0.020826719 | -0.11180686  | 0.015637198 |
| ELMSAN   | magenta | -0.112750775 | 0.014776412 | -0.124207478 | 0.007201786 |
| EP300    | magenta | 0.095152943  | 0.039837738 | 0.063235318  | 0.172495136 |
| EP400    | magenta | 0.020326867  | 0.661288156 | -0.003391244 | 0.941735123 |
| ERF      | magenta | -0.159630439 | 0.00053493  | -0.182526429 | 7.27E-05    |
| EXOC7    | magenta | -0.073363682 | 0.113355859 | -0.086890774 | 0.0606219   |
| FAM168E  | magenta | -0.152471541 | 0.000948227 | -0.171008068 | 0.000204819 |
| FAM219E  | magenta | 0.155075383  | 0.00077215  | 0.127957448  | 0.005620019 |
| FBXL12   | magenta | -0.118985249 | 0.010066101 | -0.13363299  | 0.003814837 |
| FBXL14   | magenta | 0.011350719  | 0.806733926 | -0.005266931 | 0.909622197 |
| FBXL18   | magenta | -0.015608693 | 0.736551736 | 0.012292531  | 0.791054197 |
| FBXO18   | magenta | -0.078322979 | 0.090906388 | -0.108873196 | 0.01859941  |
| FBXW8    | magenta | -0.124296864 | 0.007159867 | -0.146756432 | 0.001471891 |
| FITM2    | magenta | -0.038266003 | 0.409359462 | -0.051833121 | 0.263621286 |
| FLII     | magenta | 0.169502815  | 0.000233388 | 0.185464127  | 5.53E-05    |
| FO538757 | magenta | -0.13242833  | 0.004146884 | -0.147274208 | 0.001415298 |
| FOXK1    | magenta | -0.185998352 | 5.25E-05    | -0.188089453 | 4.31E-05    |
| FOXP4    | magenta | -0.21785771  | 2.01E-06    | -0.208436661 | 5.57E-06    |
| FRMD8    | magenta | 0.085047745  | 0.066313301 | 0.096533622  | 0.037033825 |
| FTO      | magenta | 0.143389592  | 0.001893559 | 0.144945044  | 0.001686629 |
| GATSL2   | magenta | -0.062666592 | 0.176395705 | -0.070196479 | 0.12983259  |
| GBA2     | magenta | 0.091381799  | 0.048425411 | 0.081796978  | 0.077417581 |
| GBF1     | magenta | 0.269309348  | 3.34E-09    | 0.270278499  | 2.92E-09    |
| GCC1     | magenta | 0.065935483  | 0.154849922 | 0.064725198  | 0.162582205 |
| GCN1L1   | magenta | -0.044432962 | 0.338010129 | -0.045600773 | 0.325454066 |
| GLG1     | magenta | 0.101112478  | 0.028903131 | 0.114017788  | 0.013686552 |
| GLTSCR1  | magenta | 0.086794923  | 0.060907606 | 0.088798789  | 0.055161125 |
| GLYR1    | magenta | 0.068531501  | 0.13920761  | 0.054341578  | 0.241176807 |
| GMPR2    | magenta | -0.021835614 | 0.637881321 | -0.027697445 | 0.550469111 |
| GNA11    | magenta | 0.206247505  | 7.01E-06    | 0.218027974  | 1.97E-06    |
| GNA12    | magenta | -0.026659934 | 0.565504893 | -0.043684133 | 0.346222408 |
| GNL3L    | magenta | 0.021934442  | 0.636360248 | 0.023936859  | 0.605877085 |
| GORASP1  | magenta | 0.073715178  | 0.111633361 | 0.074341024  | 0.108617442 |
| GSE1     | magenta | 0.127764484  | 0.005693077 | 0.105494417  | 0.022607129 |
| GTF3C1   | magenta | 0.033006505  | 0.476737934 | 0.045794486  | 0.323400917 |
| HARBI1   | magenta | 0.15842673   | 0.000589978 | 0.180610111  | 8.68E-05    |
| HAUS7    | magenta | -0.047711686 | 0.303535558 | -0.037986987 | 0.412785627 |
| HCFC1    | magenta | 0.043210064  | 0.351486366 | 0.041299559  | 0.373208658 |
| HECTD4   | magenta | 0.051189599  | 0.269603607 | 0.029598108  | 0.523443631 |
| HERC2    | magenta | 0.034477107  | 0.457311658 | 0.013742854  | 0.767074554 |
| HGS      | magenta | -0.012053505 | 0.795025914 | -0.037213828 | 0.422367675 |
| HIC2     | magenta | -0.219178845 | 1.73E-06    | -0.242025304 | 1.19E-07    |
| HNRNPU   | magenta | 0.027818896  | 0.548721938 | -0.007188098 | 0.876882954 |
| HUWE1    | magenta | -0.089019139 | 0.054557668 | -0.086686219 | 0.061232972 |

|         |         |              |             |              |             |
|---------|---------|--------------|-------------|--------------|-------------|
| IGF2R   | magenta | 0.019746588  | 0.670380932 | 0.01318214   | 0.776320444 |
| IKBKG   | magenta | -0.103817704 | 0.024859915 | -0.13044221  | 0.004751755 |
| ILK     | magenta | -0.03540809  | 0.445246316 | -0.07133873  | 0.123688766 |
| INO80   | magenta | 0.081903254  | 0.077032063 | 0.06147391   | 0.184787796 |
| IP6K1   | magenta | -0.050120429 | 0.279746775 | -0.052407818 | 0.25835648  |
| IPPK    | magenta | 0.060704063  | 0.19035889  | 0.045652729  | 0.324902557 |
| IRF2    | magenta | 0.046609209  | 0.314858096 | 0.062744883  | 0.175854897 |
| IRF2BPL | magenta | -0.310680429 | 6.58E-12    | -0.314251927 | 3.66E-12    |
| KAT5    | magenta | -0.030384202 | 0.512467932 | -0.037048511 | 0.424433238 |
| KBTBD4  | magenta | 0.06116322   | 0.18702149  | 0.040068892  | 0.387630464 |
| KCTD5   | magenta | 0.093534595  | 0.04335087  | 0.100886745  | 0.029264684 |
| KDM5C   | magenta | 0.166109865  | 0.000312008 | 0.151408291  | 0.001030249 |
| KHNYN   | magenta | -0.107720443 | 0.019890947 | -0.133846194 | 0.003758644 |
| KIAA019 | magenta | 0.133809851  | 0.00376817  | 0.118868739  | 0.010140174 |
| KLF13   | magenta | -0.121924197 | 0.008349749 | -0.132198415 | 0.00421315  |
| KLHDC2  | magenta | -0.023280467 | 0.615797737 | -0.046043216 | 0.320777031 |
| KLHL26  | magenta | -0.053576387 | 0.247876434 | -0.048200209 | 0.298605697 |
| KLHL36  | magenta | 0.070872235  | 0.126170003 | 0.096269515  | 0.037556835 |
| KMT2B   | magenta | -0.093874823 | 0.04259139  | -0.112871321 | 0.014669536 |
| KMT2D   | magenta | -0.036021852 | 0.437392042 | -0.054130302 | 0.243013801 |
| LARS2   | magenta | 0.187439921  | 4.58E-05    | 0.169223887  | 0.000239076 |
| LDB1    | magenta | -0.032385609 | 0.485073081 | -0.064077496 | 0.166837748 |
| LDOC1L  | magenta | 0.03220188   | 0.487554534 | 0.006568317  | 0.887424674 |
| LIG3    | magenta | 0.150988908  | 0.001064365 | 0.115649247  | 0.012387808 |
| LLGL1   | magenta | -0.040443465 | 0.383205531 | -0.046147168 | 0.319684538 |
| LPCAT3  | magenta | 0.055316542  | 0.232826041 | 0.024388133  | 0.599098198 |
| LRCH4   | magenta | -0.081478673 | 0.078581622 | -0.079424926 | 0.086437543 |
| LRFN3   | magenta | 0.107477623  | 0.020172741 | 0.092480707  | 0.045776171 |
| LRP3    | magenta | -0.040637179 | 0.380929276 | -0.028859331 | 0.53386715  |
| LRP5    | magenta | 0.155764113  | 0.000730925 | 0.136442535  | 0.00313202  |
| LRRC59  | magenta | 0.307322397  | 1.13E-11    | 0.319682772  | 1.48E-12    |
| M6PR    | magenta | -0.025957615 | 0.575793397 | -0.047094033 | 0.309845258 |
| MAEA    | magenta | 0.077997886  | 0.092259578 | 0.082955784  | 0.073297579 |
| MAFG    | magenta | -0.118034287 | 0.010684973 | -0.139324679 | 0.002548752 |
| MAN2A2  | magenta | 0.046430571  | 0.316718443 | 0.001915494  | 0.967070057 |
| MAPK7   | magenta | 0.142296727  | 0.002052579 | 0.12326171   | 0.007658958 |
| MAZ     | magenta | 0.090091368  | 0.05169904  | 0.08104405   | 0.080193924 |
| MBD1    | magenta | -0.035263542 | 0.447107676 | -0.041778584 | 0.367685836 |
| MBTPS1  | magenta | 0.17564274   | 0.000136073 | 0.164870728  | 0.00034643  |
| MCM3AF  | magenta | 0.04728003   | 0.307936164 | 0.014945841  | 0.747350601 |
| MED12   | magenta | -0.094806834 | 0.040568121 | -0.103785683 | 0.024904759 |
| MGAT2   | magenta | 0.062210401  | 0.179571529 | 0.030556334  | 0.510080642 |
| MGAT5   | magenta | -0.042690086 | 0.357317864 | -0.053433702 | 0.249139933 |
| MINK1   | magenta | 0.132701269  | 0.004069442 | 0.115251952  | 0.012693633 |
| MLX     | magenta | 0.372958842  | 7.37E-17    | 0.374522526  | 5.35E-17    |



|         |         |              |             |              |             |
|---------|---------|--------------|-------------|--------------|-------------|
| MLYCD   | magenta | 0.044422229  | 0.338126951 | 0.08601249   | 0.063281667 |
| MMGT1   | magenta | -0.064496325 | 0.164076531 | -0.081634437 | 0.078010231 |
| MNT     | magenta | 0.012654938  | 0.78504267  | 0.012189357  | 0.792767896 |
| MPPE1   | magenta | 0.123444543  | 0.007568608 | 0.120643861  | 0.009062506 |
| MUL1    | magenta | -0.021239488 | 0.647088379 | -0.029693452 | 0.522106024 |
| MYD88   | magenta | 0.186817495  | 4.86E-05    | 0.196417888  | 1.91E-05    |
| MYO18A  | magenta | -0.09370544  | 0.042968083 | -0.122292939 | 0.008153962 |
| MYO1D   | magenta | 0.185843827  | 5.33E-05    | 0.180699487  | 8.61E-05    |
| N4BP1   | magenta | 0.066470914  | 0.151519336 | 0.082365361  | 0.075373852 |
| NAPA    | magenta | 0.144613395  | 0.001728927 | 0.159146352  | 0.000556468 |
| NCK2    | magenta | -0.031484    | 0.497315366 | -0.038073099 | 0.411726425 |
| NDST1   | magenta | -0.071903164 | 0.120737552 | -0.08357403  | 0.071173695 |
| NELFA   | magenta | 0.0475382    | 0.305299167 | 0.038708911  | 0.403955546 |
| NEURL4  | magenta | 0.098487379  | 0.03335352  | 0.083607065  | 0.071061636 |
| NFE2L1  | magenta | -0.031037003 | 0.503445069 | -0.049899465 | 0.281874876 |
| NFYC    | magenta | -0.082980848 | 0.073210482 | -0.093848608 | 0.042649508 |
| NISCH   | magenta | 0.127922453  | 0.005633206 | 0.117499856  | 0.011047376 |
| NMT1    | magenta | 0.087319072  | 0.059358742 | 0.07655982   | 0.098440036 |
| NOA1    | magenta | 0.181361467  | 8.10E-05    | 0.168438622  | 0.000255791 |
| NOMO2   | magenta | -0.045539091 | 0.326109592 | -0.080931848 | 0.080614477 |
| NOMO3   | magenta | -0.090544958 | 0.050527916 | -0.109814563 | 0.017599576 |
| NOP9    | magenta | -0.075154769 | 0.104792563 | -0.073578455 | 0.112300909 |
| NOTCH1  | magenta | 0.041326804  | 0.372893179 | 0.032562459  | 0.482691    |
| NSF     | magenta | 0.362351942  | 6.17E-16    | 0.364429395  | 4.09E-16    |
| NUMA1   | magenta | 0.034174086  | 0.461277867 | 0.010211672  | 0.825800722 |
| OGDH    | magenta | 0.117804052  | 0.010839785 | 0.122345533  | 0.008126373 |
| OGG1    | magenta | -0.076167299 | 0.10018304  | -0.110132306 | 0.017272865 |
| OPN3    | magenta | -0.084600126 | 0.067759878 | -0.112979892 | 0.014573859 |
| PAFAH1I | magenta | 0.04805344   | 0.300081163 | 0.035004362  | 0.450456202 |
| PCBP1   | magenta | 0.055197231  | 0.233836845 | 0.038564581  | 0.405711821 |
| PCIF1   | magenta | -0.190076422 | 3.56E-05    | -0.194951089 | 2.21E-05    |
| PELO    | magenta | -0.055507417 | 0.23121539  | -0.048011223 | 0.300506461 |
| PI4KA   | magenta | 0.058250336  | 0.208936929 | 0.044175619  | 0.340818189 |
| PINK1   | magenta | -0.015638539 | 0.7360667   | -0.016682539 | 0.719167544 |
| PJA1    | magenta | -0.161701171 | 0.00045125  | -0.162357631 | 0.000427377 |
| PLD2    | magenta | 0.163638465  | 0.000384146 | 0.167785953  | 0.000270508 |
| PLEKHM  | magenta | -0.12637827  | 0.006243507 | -0.132746259 | 0.004056803 |
| PLXNA3  | magenta | -0.098446163 | 0.033427812 | -0.095105953 | 0.039936242 |
| PNPO    | magenta | 0.195955837  | 2.00E-05    | 0.180600635  | 8.68E-05    |
| POLDIP3 | magenta | 0.133808358  | 0.003768562 | 0.112825946  | 0.014709686 |
| POLG    | magenta | 0.128263441  | 0.005505894 | 0.098012756  | 0.034217614 |
| POLR1A  | magenta | -0.029348158 | 0.526958524 | -0.036836677 | 0.427088607 |
| POLR2A  | magenta | 0.093157717  | 0.044205443 | 0.098281406  | 0.033726198 |
| POLR3E  | magenta | 0.016018054  | 0.729908268 | 0.024310944  | 0.600255284 |
| POM121  | magenta | 0.003400419  | 0.941577773 | -0.040308531 | 0.384795974 |

|         |         |              |             |              |             |
|---------|---------|--------------|-------------|--------------|-------------|
| POM121C | magenta | 0.080844229  | 0.080944126 | 0.053887454  | 0.24513739  |
| PPIL2   | magenta | 0.188114858  | 4.30E-05    | 0.172757866  | 0.000175732 |
| PPP6R1  | magenta | 0.080710576  | 0.081449073 | 0.086121097  | 0.062947645 |
| PRDM4   | magenta | -0.011563888 | 0.803177964 | -0.04069305  | 0.380274306 |
| PRMT5   | magenta | -0.012417717 | 0.788976209 | -0.034665258 | 0.454858612 |
| PRPF8   | magenta | 0.154523797  | 0.000806706 | 0.150507882  | 0.001104776 |
| PRPS1   | magenta | -0.082867475 | 0.073605129 | -0.097804558 | 0.034602633 |
| PRR12   | magenta | 0.069630939  | 0.132960586 | 0.063351828  | 0.171704059 |
| PRRC2B  | magenta | 0.022585276  | 0.62638162  | -0.001321343 | 0.97728096  |
| PSKH1   | magenta | 0.019380398  | 0.676143966 | 0.035577226  | 0.443073928 |
| PSME3   | magenta | 0.277413166  | 1.07E-09    | 0.263017038  | 7.90E-09    |
| PTGFRN  | magenta | 0.204815553  | 8.13E-06    | 0.18446651   | 6.07E-05    |
| PTPN23  | magenta | 0.101172863  | 0.028807066 | 0.10539854   | 0.022731007 |
| PTPN9   | magenta | 0.175224998  | 0.000141243 | 0.151755063  | 0.001002806 |
| QRICH1  | magenta | 0.055685941  | 0.229716111 | 0.026223434  | 0.571888977 |
| RAB19   | magenta | 0.261173271  | 1.01E-08    | 0.260395553  | 1.12E-08    |
| RAB35   | magenta | 0.108867817  | 0.018605262 | 0.114645863  | 0.013173015 |
| RAB43   | magenta | -0.100446989 | 0.02998018  | -0.102447901 | 0.026841688 |
| RAB5C   | magenta | 0.07299276   | 0.115196114 | 0.084947208  | 0.06663598  |
| RAI1    | magenta | 0.109232913  | 0.01821165  | 0.103175391  | 0.025772883 |
| RANBP1  | magenta | 0.171087987  | 0.000203398 | 0.175248408  | 0.000140948 |
| RAPGEF1 | magenta | 0.030866817  | 0.505789263 | 0.026184802  | 0.572455629 |
| RAVER1  | magenta | 0.054495296  | 0.239846406 | 0.042535765  | 0.359060189 |
| RBM14   | magenta | 0.095840285  | 0.038420198 | 0.091235208  | 0.048788327 |
| RBM23   | magenta | -0.036796679 | 0.427591068 | -0.03477982  | 0.453368608 |
| RECQL   | magenta | -0.060419272 | 0.19245075  | -0.092914697 | 0.044763975 |
| RETSAT  | magenta | 0.360539225  | 8.80E-16    | 0.351533693  | 4.97E-15    |
| RFFL    | magenta | 0.22825594   | 6.18E-07    | 0.216439631  | 2.35E-06    |
| RFX1    | magenta | -0.041488044 | 0.371029476 | -0.040918079 | 0.377643279 |
| RGP1    | magenta | -0.095973008 | 0.038151457 | -0.094491219 | 0.041243987 |
| RNF123  | magenta | 0.132795769  | 0.004042935 | 0.117636286  | 0.010953841 |
| RNF19B  | magenta | -0.03231929  | 0.485967995 | -0.02029584  | 0.661773098 |
| RNF216  | magenta | -0.139546241 | 0.002508297 | -0.124326134 | 0.007146187 |
| RNF31   | magenta | -0.095237327 | 0.039661361 | -0.10790963  | 0.019673774 |
| RNF40   | magenta | -0.00658724  | 0.887102521 | -0.018307985 | 0.69312949  |
| RNF44   | magenta | -0.157871814 | 0.000617086 | -0.166154207 | 0.000310838 |
| RPAP1   | magenta | 0.24185188   | 1.22E-07    | 0.227536529  | 6.72E-07    |
| RPTOR   | magenta | -0.078651405 | 0.089555525 | -0.083432111 | 0.071656734 |
| SAP130  | magenta | -0.002033056 | 0.965050261 | -0.014226952 | 0.759118463 |
| SBF1    | magenta | 0.064355424  | 0.16500159  | 0.057359084  | 0.21599904  |
| SCAP    | magenta | 0.070077545  | 0.130485639 | 0.079663237  | 0.085494743 |
| SCRN1   | magenta | -0.331128938 | 2.06E-13    | -0.330801954 | 2.18E-13    |
| SEC14L1 | magenta | 0.180933053  | 8.42E-05    | 0.17136083   | 0.000198615 |
| SEC24C  | magenta | 0.079024464  | 0.088040676 | 0.059905887  | 0.196264149 |
| SEMA4C  | magenta | -0.138357885 | 0.002732331 | -0.169323426 | 0.000237031 |

|          |         |              |             |              |             |
|----------|---------|--------------|-------------|--------------|-------------|
| SEPT8    | magenta | 0.08039909   | 0.082635773 | 0.070129406  | 0.130200566 |
| SEPT9    | magenta | 0.13765746   | 0.002872767 | 0.157127179  | 0.00065528  |
| SETD1A   | magenta | -0.097791357 | 0.034627171 | -0.09366468  | 0.043059148 |
| SETD1B   | magenta | 0.050974971  | 0.271619324 | 0.047162554  | 0.309141043 |
| SF1      | magenta | 0.014951305  | 0.747261381 | -0.019068113 | 0.681073659 |
| SF3A1    | magenta | -0.042389381 | 0.3607178   | -0.071018308 | 0.125388937 |
| SIX5     | magenta | 0.002445736  | 0.957961987 | -0.010508961 | 0.820813953 |
| SLC25A2  | magenta | -0.034089376 | 0.462390046 | -0.066050138 | 0.154132104 |
| SLC35B1  | magenta | 0.223808612  | 1.03E-06    | 0.235139177  | 2.75E-07    |
| SLC6A6   | magenta | 0.255779493  | 2.07E-08    | 0.268575898  | 3.70E-09    |
| SMARCC   | magenta | -0.032410892 | 0.484732146 | -0.063168524 | 0.172949878 |
| SMG6     | magenta | 0.038713125  | 0.403904334 | 0.021768517  | 0.638914874 |
| SMYD4    | magenta | 0.090793924  | 0.049894586 | 0.071837642  | 0.121077301 |
| SNRNP200 | magenta | -0.111893824 | 0.015556094 | -0.11960188  | 0.009682014 |
| SNX12    | magenta | -0.129001243 | 0.005239246 | -0.170199051 | 0.000219739 |
| SOCS7    | magenta | -0.125048299 | 0.00681601  | -0.154628731 | 0.000800024 |
| SOGA1    | magenta | -0.241497067 | 1.27E-07    | -0.262152478 | 8.88E-09    |
| SP2      | magenta | 0.062304716  | 0.178911494 | 0.049170331  | 0.288974646 |
| SPEN     | magenta | -0.020273899 | 0.662116114 | -0.043388075 | 0.349503869 |
| SPNS1    | magenta | -0.109593266 | 0.017830297 | -0.119313572 | 0.009859944 |
| SPTAN1   | magenta | 0.002073337  | 0.964358257 | 0.006134969  | 0.894807321 |
| SRRD     | magenta | 0.070903048  | 0.126004928 | 0.036340887  | 0.433340972 |
| SRRM2    | magenta | 0.056406765  | 0.223732626 | 0.033761978  | 0.466702519 |
| STRIP1   | magenta | -0.133617511 | 0.003818947 | -0.151848174 | 0.000995553 |
| STRN4    | magenta | 0.174660984  | 0.000148515 | 0.173091166  | 0.00017065  |
| SUN2     | magenta | 0.076658536  | 0.098005504 | 0.05755878   | 0.214401983 |
| SUPT16H  | magenta | -0.073445743 | 0.112951866 | -0.109230006 | 0.018214755 |
| SUSD6    | magenta | 0.14587303   | 0.001573268 | 0.160098742  | 0.000514833 |
| SZRD1    | magenta | 0.010472231  | 0.82142968  | 0.012399337  | 0.789281211 |
| TAF6     | magenta | 0.046670343  | 0.314223087 | 0.029060262  | 0.531021873 |
| TAOK2    | magenta | 0.174639416  | 0.0001488   | 0.179985053  | 9.19E-05    |
| TBC1D9E  | magenta | 0.155993718  | 0.000717641 | 0.144155532  | 0.00178892  |
| TFIP11   | magenta | -0.009079199 | 0.844859572 | -0.023090969 | 0.618674972 |
| THTPA    | magenta | -0.02112076  | 0.648928619 | -0.041874548 | 0.366585567 |
| TIAF1    | magenta | -0.22679252  | 7.32E-07    | -0.233910498 | 3.18E-07    |
| TINF2    | magenta | -0.021747801 | 0.639234133 | -0.030719683 | 0.507820531 |
| TM9SF1   | magenta | 0.076643194  | 0.098072939 | 0.056759116  | 0.220848565 |
| TMEM10   | magenta | 0.061674665  | 0.183354977 | 0.045626924  | 0.325176398 |
| TMEM12   | magenta | -0.064400873 | 0.164702779 | -0.042544283 | 0.358963881 |
| TMEM55   | magenta | 0.006428685  | 0.88980245  | -0.016975701 | 0.714446239 |
| TNFSF13  | magenta | 0.238700431  | 1.79E-07    | 0.213496755  | 3.24E-06    |
| TNRC18   | magenta | 0.034029493  | 0.463177168 | 0.046248987  | 0.318616824 |
| TNS3     | magenta | 0.071716515  | 0.121707332 | 0.076412229  | 0.099092567 |
| TOM1L1   | magenta | 0.30071402   | 3.24E-11    | 0.281473542  | 5.94E-10    |
| TOX4     | magenta | -0.034172432 | 0.461299566 | -0.038750842 | 0.403446166 |

|         |         |              |             |              |             |
|---------|---------|--------------|-------------|--------------|-------------|
| TP53I11 | magenta | -0.041148799 | 0.374957353 | -0.021243716 | 0.647022895 |
| TRAF3   | magenta | -0.139689759 | 0.002482405 | -0.141411777 | 0.002190193 |
| TRAF7   | magenta | 0.142054575  | 0.002089427 | 0.158509844  | 0.000586014 |
| TRAM2   | magenta | -0.307882107 | 1.04E-11    | -0.306260524 | 1.34E-11    |
| TRAP1   | magenta | 0.18875416   | 4.04E-05    | 0.182512476  | 7.28E-05    |
| TSSK6   | magenta | 0.102651604  | 0.026538636 | 0.114961417  | 0.012921474 |
| TXNDC5  | magenta | 0.111625882  | 0.015807172 | 0.083119332  | 0.072730772 |
| TYK2    | magenta | 0.138381871  | 0.002727635 | 0.140118271  | 0.002406542 |
| UBE3B   | magenta | 0.078406974  | 0.090559361 | 0.05589078   | 0.228004337 |
| UBN1    | magenta | 0.048437556  | 0.296229881 | 0.058305085  | 0.208508614 |
| ULK1    | magenta | -0.074796003 | 0.106465539 | -0.09136381  | 0.048469825 |
| UNC119E | magenta | -0.103275094 | 0.0256293   | -0.123932607 | 0.007332071 |
| UQCRC2  | magenta | 0.116672299  | 0.011630043 | 0.115267089  | 0.01268186  |
| URB1    | magenta | 0.042893695  | 0.355027219 | 0.010192195  | 0.826127674 |
| USP19   | magenta | -0.014305712 | 0.757826438 | -0.028184097 | 0.54348469  |
| USP22   | magenta | 0.040656883  | 0.380698211 | 0.017342207  | 0.70855906  |
| VKORC1  | magenta | 0.15620318   | 0.000705718 | 0.146642216  | 0.001484652 |
| VPRBP   | magenta | 0.06442333   | 0.164555276 | 0.039678738  | 0.392272333 |
| VPS37C  | magenta | 0.166758954  | 0.000295278 | 0.149289731  | 0.001213521 |
| VPS51   | magenta | -0.039874189 | 0.389942768 | -0.04238055  | 0.360817952 |
| VPS52   | magenta | -0.043194536 | 0.351659633 | -0.067462799 | 0.145493524 |
| WASF2   | magenta | -0.125501394 | 0.006615895 | -0.121704746 | 0.008468248 |
| WASH1   | magenta | -0.116277833 | 0.011917224 | -0.126496216 | 0.00619488  |
| WDR1    | magenta | 0.207319478  | 6.26E-06    | 0.224981806  | 9.02E-07    |
| WDR6    | magenta | 0.144078419  | 0.00179921  | 0.112755137  | 0.014772532 |
| WDR81   | magenta | 0.021357338  | 0.645263872 | 0.018237513  | 0.69425118  |
| WDTC1   | magenta | -0.076670995 | 0.097950773 | -0.07091818  | 0.125923928 |
| WWP2    | magenta | 0.223708225  | 1.04E-06    | 0.245655856  | 7.57E-08    |
| XPC     | magenta | 0.044712265  | 0.334979266 | 0.019288193  | 0.677598088 |
| XPO6    | magenta | 0.094840129  | 0.040497372 | 0.117033     | 0.01137282  |
| ZBTB39  | magenta | -0.175140795 | 0.000142307 | -0.209798406 | 4.82E-06    |
| ZC3H4   | magenta | 0.112001768  | 0.015455937 | 0.094784373  | 0.040615909 |
| ZC3H7B  | magenta | 0.051346324  | 0.268138172 | 0.043887801  | 0.343976377 |
| ZCCHC14 | magenta | 0.01340954   | 0.772566844 | -0.002248484 | 0.961349648 |
| ZDHHC8  | magenta | -0.045811469 | 0.323221323 | -0.057705151 | 0.213236791 |
| ZFAND3  | magenta | -0.068149391 | 0.141430733 | -0.05855987  | 0.206523692 |
| ZFP64   | magenta | -0.074510488 | 0.107811957 | -0.09417016  | 0.041941242 |
| ZNF319  | magenta | 0.098955306  | 0.032519902 | 0.113078635  | 0.01448732  |
| ZNF384  | magenta | -0.057465777 | 0.21514471  | -0.089128383 | 0.054260531 |
| ZNF496  | magenta | 0.013172421  | 0.776480987 | -0.017353927 | 0.708371093 |
| ZNF500  | magenta | 0.049001295  | 0.290637591 | 0.062610331  | 0.1767851   |
| ZNF592  | magenta | 0.070042387  | 0.130679173 | 0.058353362  | 0.20813145  |
| ZNF646  | magenta | -0.050779243 | 0.273466492 | -0.055250311 | 0.233386772 |
| ZNF668  | magenta | 0.152886882  | 0.000917857 | 0.147639183  | 0.001376615 |
| ZNF710  | magenta | 0.233045772  | 3.53E-07    | 0.217959526  | 1.99E-06    |

|         |           |              |             |              |             |
|---------|-----------|--------------|-------------|--------------|-------------|
| ZNF74   | magenta   | 0.095892808  | 0.038313656 | 0.076608276  | 0.098226549 |
| ZNF740  | magenta   | -0.16188631  | 0.000444395 | -0.188177004 | 4.27E-05    |
| ZNF777  | magenta   | 0.028253293  | 0.54249518  | 0.011142295  | 0.810214601 |
| ZSWIM8  | magenta   | 0.178772449  | 0.000102631 | 0.151899615  | 0.000991566 |
| ZZEF1   | magenta   | 0.13733513   | 0.002939575 | 0.142005392  | 0.002096984 |
| ADAM12  | mediumpur | -0.034742674 | 0.453851428 | -0.001572143 | 0.972970235 |
| ADAMTS  | mediumpur | -0.197896809 | 1.65E-05    | -0.173914546 | 0.000158681 |
| ADAMTS  | mediumpur | -0.083125268 | 0.072710266 | -0.037775909 | 0.415388781 |
| AEBP1   | mediumpur | -0.269181854 | 3.40E-09    | -0.225287083 | 8.71E-07    |
| ANGPTL  | mediumpur | -0.223351059 | 1.09E-06    | -0.204783381 | 8.16E-06    |
| ANTXR1  | mediumpur | -0.127932723 | 0.005629333 | -0.118390114 | 0.010449564 |
| BGN     | mediumpur | -0.039120495 | 0.398972171 | 0.002326271  | 0.960013631 |
| C3orf80 | mediumpur | -0.078977224 | 0.08823135  | -0.053531563 | 0.248272872 |
| CD248   | mediumpur | -0.171703218 | 0.000192762 | -0.141388211 | 0.00219397  |
| CDH11   | mediumpur | -0.078600206 | 0.089765045 | -0.054234558 | 0.242106096 |
| CHST11  | mediumpur | -0.16497067  | 0.000343527 | -0.162146999 | 0.000434906 |
| COL10A1 | mediumpur | 0.016177058  | 0.727333234 | 0.049354171  | 0.287173325 |
| COL15A1 | mediumpur | 0.001301483  | 0.977622329 | 0.018848262  | 0.684552391 |
| COL1A1  | mediumpur | -0.017419504 | 0.707319637 | 0.026449434  | 0.568579316 |
| COL1A2  | mediumpur | 0.03556745   | 0.443199329 | 0.061287775  | 0.186123631 |
| COL3A1  | mediumpur | -0.08870638  | 0.055415846 | -0.051070497 | 0.270720907 |
| COL4A1  | mediumpur | -0.041941114 | 0.365823564 | -0.039841637 | 0.39033016  |
| COL4A2  | mediumpur | -0.145143328 | 0.001661796 | -0.138664817 | 0.002672785 |
| COL5A1  | mediumpur | -0.146722958 | 0.001475621 | -0.116373632 | 0.01184691  |
| COL5A2  | mediumpur | 0.022988427  | 0.620234356 | 0.047911135  | 0.301516371 |
| COL6A1  | mediumpur | -0.211417437 | 4.05E-06    | -0.178656934 | 0.000103714 |
| COL6A2  | mediumpur | -0.203139213 | 9.67E-06    | -0.164457733 | 0.000358668 |
| COL6A3  | mediumpur | -0.184908896 | 5.82E-05    | -0.153928205 | 0.000845622 |
| COL8A1  | mediumpur | 0.023637597  | 0.610391267 | 0.054755355  | 0.237607399 |
| DIO2    | mediumpur | 0.097373633  | 0.03541127  | 0.103306225  | 0.02558461  |
| DKK3    | mediumpur | -0.16282717  | 0.000411029 | -0.168619552 | 0.000251845 |
| ECM1    | mediumpur | -0.081377019 | 0.078956347 | -0.057586996 | 0.214177019 |
| ETV1    | mediumpur | 0.026169512  | 0.572679976 | 0.015960767  | 0.73083678  |
| F2R     | mediumpur | -0.011560571 | 0.803233262 | -0.002053369 | 0.964701292 |
| FAP     | mediumpur | -0.171089918 | 0.000203363 | -0.146164512 | 0.001539131 |
| FBN1    | mediumpur | -0.132122975 | 0.004235101 | -0.113023907 | 0.014535228 |
| FN1     | mediumpur | -0.091841797 | 0.04730123  | -0.067343192 | 0.146210299 |
| FNDC1   | mediumpur | -0.002638456 | 0.95465289  | 0.035372626  | 0.445702586 |
| GJA1    | mediumpur | 0.003762982  | 0.935361564 | 0.006491045  | 0.888740418 |
| INHBA   | mediumpur | 0.025381104  | 0.584304194 | 0.041933811  | 0.365907115 |
| ISLR    | mediumpur | -0.156092161 | 0.000712015 | -0.113510233 | 0.014114341 |
| LAMB1   | mediumpur | 0.133245173  | 0.003919007 | 0.119064551  | 0.010015959 |
| LOXL2   | mediumpur | 0.14674734   | 0.001472903 | 0.163552931  | 0.000386901 |
| LUM     | mediumpur | -0.095093652 | 0.039962061 | -0.057545949 | 0.214504347 |
| MMP11   | mediumpur | 0.0019096    | 0.967171332 | 0.045835112  | 0.322971396 |

|         |            |              |             |              |             |
|---------|------------|--------------|-------------|--------------|-------------|
| MMP14   | mediumpur  | 0.025178786  | 0.587304699 | 0.024462133  | 0.597989882 |
| MMP2    | mediumpur  | 0.031589082  | 0.495880143 | 0.03306006   | 0.476022675 |
| MOXD1   | mediumpur  | 0.109372154  | 0.018063458 | 0.090319452  | 0.051107351 |
| MXRA8   | mediumpur  | -0.29070765  | 1.51E-10    | -0.248156624 | 5.52E-08    |
| NID1    | mediumpur  | -0.030867361 | 0.50578176  | -0.020984075 | 0.651049835 |
| NID2    | mediumpur  | -0.107728632 | 0.019881504 | -0.096524439 | 0.037051906 |
| NTM     | mediumpur  | -0.007662449 | 0.868829395 | 0.01957537   | 0.673073153 |
| OLFML2l | mediumpur  | 0.02744503   | 0.554109037 | 0.064290982  | 0.165425979 |
| P4HA3   | mediumpur  | 0.004892229  | 0.91602726  | 0.014654834  | 0.752107352 |
| PAMR1   | mediumpur  | -0.171074868 | 0.00020363  | -0.13541517  | 0.003367646 |
| PCOLCE  | mediumpur  | -0.202350703 | 1.05E-05    | -0.173639868 | 0.000162584 |
| PDGFB   | mediumpur  | -0.113036486 | 0.014524204 | -0.132269184 | 0.004192651 |
| PDGFRB  | mediumpur  | -0.101038807 | 0.029020704 | -0.065858605 | 0.155332649 |
| PMEPA1  | mediumpur  | 0.036633029  | 0.429650423 | 0.028203476  | 0.543207486 |
| PRDM1   | mediumpur  | -0.007502451 | 0.871544372 | 0.003154055  | 0.945803781 |
| PXDN    | mediumpur  | -0.339744845 | 4.42E-14    | -0.341285578 | 3.34E-14    |
| SPARC   | mediumpur  | -0.098868523 | 0.032673149 | -0.066982921 | 0.148385593 |
| SPOCK1  | mediumpur  | 0.007498592  | 0.87160988  | -0.01106647  | 0.811481816 |
| SPON2   | mediumpur  | -0.027248025 | 0.556958056 | 0.006933417  | 0.88121225  |
| SRPX2   | mediumpur  | -0.100774471 | 0.02944595  | -0.058534437 | 0.206721207 |
| SULF1   | mediumpur  | 0.078671936  | 0.089471617 | 0.101580389  | 0.028165879 |
| SYDE1   | mediumpur  | -0.207463665 | 6.17E-06    | -0.196410426 | 1.91E-05    |
| TGFBI   | mediumpur  | 0.085697084  | 0.064259988 | 0.092937109  | 0.04471222  |
| THBS1   | mediumpur  | -0.08503964  | 0.066339267 | -0.065022557 | 0.160656055 |
| THBS2   | mediumpur  | -0.113382565 | 0.014223779 | -0.073922    | 0.110629493 |
| THY1    | mediumpur  | -0.178824774 | 0.000102144 | -0.155690384 | 0.000735239 |
| TNC     | mediumpur  | 0.175843429  | 0.000133653 | 0.176266877  | 0.00012868  |
| VCAN    | mediumpur  | 0.005966387  | 0.897681827 | -0.020624572 | 0.656642386 |
| WISP1   | mediumpur  | -0.121336757 | 0.008670323 | -0.110900464 | 0.016504843 |
| WNT2    | mediumpur  | -0.064786634 | 0.162182835 | -0.029950269 | 0.518511817 |
| WNT5A   | mediumpur  | -0.035175026 | 0.448249689 | -0.036875016 | 0.426607307 |
| ZNF469  | mediumpur  | -0.079490277 | 0.086178177 | -0.049496269 | 0.285786192 |
| ABI3    | midnightbl | -0.06112643  | 0.187287305 | -0.006120779 | 0.89504923  |
| ACP5    | midnightbl | -0.142030061 | 0.002093191 | -0.079422578 | 0.086446876 |
| ADAM8   | midnightbl | -0.04837571  | 0.296847738 | -0.003720216 | 0.936094598 |
| ADAP2   | midnightbl | -0.027167139 | 0.558129854 | -0.00175316  | 0.969859413 |
| ADORA3  | midnightbl | -0.134180591 | 0.003672018 | -0.112436308 | 0.015058444 |
| AIF1    | midnightbl | -0.102871124 | 0.026215354 | -0.062447183 | 0.177917895 |
| ALOX15l | midnightbl | -0.20982888  | 4.80E-06    | -0.204537116 | 8.37E-06    |
| ALOX5   | midnightbl | -0.205649712 | 7.46E-06    | -0.189750831 | 3.67E-05    |
| ALOX5A  | midnightbl | 0.000582611  | 0.989981561 | 0.044976776  | 0.332125061 |
| AMICA1  | midnightbl | -0.002286837 | 0.960690909 | 0.049211148  | 0.288574049 |
| APOBR   | midnightbl | 0.075592893  | 0.102777821 | 0.12770678   | 0.00571509  |
| APOC1   | midnightbl | -0.072018451 | 0.120141571 | -0.030231945 | 0.514584426 |
| APOC2   | midnightbl | -0.074564087 | 0.10755818  | -0.058840501 | 0.204353281 |

|                     |              |             |              |             |
|---------------------|--------------|-------------|--------------|-------------|
| APOC4-Amidnightbl   | -0.066838168 | 0.149266509 | -0.059527112 | 0.199112848 |
| APOE midnightbl     | -0.236353291 | 2.37E-07    | -0.186626655 | 4.95E-05    |
| ARHGAPmidnightbl    | -0.178629064 | 0.000103976 | -0.156997661 | 0.000662142 |
| ARRB2 midnightbl    | -0.028859399 | 0.53386618  | -0.013562001 | 0.770053186 |
| ARRDC2 midnightbl   | -0.141125656 | 0.002236458 | -0.120989534 | 0.008864922 |
| AURKC midnightbl    | -0.11963147  | 0.009663915 | -0.110109688 | 0.017295944 |
| BCL2A1 midnightbl   | 0.054451285  | 0.240226788 | 0.100539142  | 0.029829015 |
| C15orf48 midnightbl | -0.005366935 | 0.907913726 | 0.02948675   | 0.525008105 |
| C19orf35 midnightbl | -0.055194061 | 0.233863742 | -0.024263477 | 0.60096731  |
| C19orf38 midnightbl | -0.172302622 | 0.000182902 | -0.127116969 | 0.005944515 |
| C1orf162 midnightbl | -0.157101915 | 0.000656613 | -0.111721715 | 0.015716966 |
| C1orf54 midnightbl  | -0.125616695 | 0.006565818 | -0.11261892  | 0.014894097 |
| C1QA midnightbl     | -0.116749094 | 0.011574852 | -0.070610817 | 0.127577255 |
| C1QB midnightbl     | -0.062883263 | 0.174902023 | -0.015408338 | 0.739810469 |
| C1QC midnightbl     | -0.066006814 | 0.154403041 | -0.020154003 | 0.663991752 |
| C2 midnightbl       | -0.206212756 | 7.03E-06    | -0.184741117 | 5.91E-05    |
| C3 midnightbl       | -0.005081036 | 0.912799139 | 0.005230391  | 0.910246553 |
| C5AR1 midnightbl    | -0.021872423 | 0.637314615 | 0.006446859  | 0.889492913 |
| CACNA2 midnightbl   | -0.165479425 | 0.000329101 | -0.14621378  | 0.001533428 |
| CAPG midnightbl     | -0.152258214 | 0.000964184 | -0.125514421 | 0.00661022  |
| CARD11 midnightbl   | -0.327170806 | 4.11E-13    | -0.306387566 | 1.32E-11    |
| CARD16 midnightbl   | -0.075044044 | 0.105306656 | -0.027992804 | 0.54622487  |
| CARD9 midnightbl    | -0.161177653 | 0.000471172 | -0.132688283 | 0.004073096 |
| CASP1 midnightbl    | -0.017737961 | 0.70222151  | 0.015097015  | 0.744883306 |
| CCDC88Imidnightbl   | 0.078573995  | 0.089872461 | 0.104840251  | 0.02346409  |
| CCL1 midnightbl     | -0.001339122 | 0.976975353 | 0.037514106  | 0.41863088  |
| CCL18 midnightbl    | -0.004359415 | 0.92514433  | 0.026082557  | 0.57395665  |
| CCL2 midnightbl     | -0.112751809 | 0.014775492 | -0.109709397 | 0.017708893 |
| CCL25 midnightbl    | -0.163223926 | 0.00039767  | -0.125186309 | 0.00675449  |
| CCL3 midnightbl     | -0.023454788 | 0.613156124 | 0.018016922  | 0.697766616 |
| CCL3L3 midnightbl   | -0.027100921 | 0.559090051 | 0.013024296  | 0.778928972 |
| CCL4 midnightbl     | -0.018590907 | 0.68863303  | 0.038077401  | 0.411673543 |
| CCL4L1 midnightbl   | -0.017516119 | 0.705771557 | 0.026304681  | 0.57069811  |
| CCL7 midnightbl     | -0.045691762 | 0.324488633 | -0.032074399 | 0.489280297 |
| CCL8 midnightbl     | -0.09202082  | 0.046869673 | -0.078088305 | 0.091881604 |
| CD14 midnightbl     | -0.085210885 | 0.065792426 | -0.036584169 | 0.430266391 |
| CD1B midnightbl     | 0.012493685  | 0.787715949 | 0.031370571  | 0.498867063 |
| CD1C midnightbl     | -0.021019893 | 0.650493705 | 0.01388496   | 0.764736474 |
| CD1E midnightbl     | -0.052295394 | 0.25938064  | -0.027359276 | 0.555348298 |
| CD300A midnightbl   | -0.053782391 | 0.246060123 | -0.00735685  | 0.874016369 |
| CD300C midnightbl   | -0.067624083 | 0.144531239 | -0.036811186 | 0.427408784 |
| CD300E midnightbl   | -0.139179008 | 0.002575673 | -0.15783783  | 0.000618783 |
| CD300LBmidnightbl   | -0.121357027 | 0.008659081 | -0.10293524  | 0.026121575 |
| CD300LFmidnightbl   | -0.011471804 | 0.804713564 | 0.028156117  | 0.543885071 |
| CD33 midnightbl     | -0.11238399  | 0.015105822 | -0.087724381 | 0.058183513 |

|         |            |              |             |              |             |
|---------|------------|--------------|-------------|--------------|-------------|
| CD40    | midnightbl | -0.314133299 | 3.73E-12    | -0.305854435 | 1.43E-11    |
| CD68    | midnightbl | -0.001289873 | 0.977821912 | 0.001613395  | 0.972261282 |
| CD72    | midnightbl | -0.100617344 | 0.029701247 | -0.074078464 | 0.109874787 |
| CD74    | midnightbl | 0.037318802  | 0.42105912  | 0.071511028  | 0.122781995 |
| CEACAM  | midnightbl | 0.059289705  | 0.200913622 | 0.093608825  | 0.043184203 |
| CEACAM  | midnightbl | -0.040883089 | 0.378051639 | 0.003689607  | 0.936619293 |
| CFD     | midnightbl | -0.015271362 | 0.742041035 | 0.020874164  | 0.652757585 |
| CHIT1   | midnightbl | -0.027885385 | 0.547766591 | -0.012869713 | 0.781486043 |
| CIITA   | midnightbl | -0.07281744  | 0.116074043 | -0.041836235 | 0.367024596 |
| CLEC10A | midnightbl | -0.032510944 | 0.483384229 | -0.004783139 | 0.917893067 |
| CLEC4E  | midnightbl | -0.093441238 | 0.04356125  | -0.072812602 | 0.116098345 |
| CLLU10  | midnightbl | 0.108471633  | 0.019040766 | 0.129154806  | 0.005185231 |
| COTL1   | midnightbl | 0.028749979  | 0.535418845 | 0.04623847   | 0.318727    |
| CSF1    | midnightbl | -0.12233218  | 0.008133369 | -0.097688819 | 0.034818259 |
| CSF1R   | midnightbl | -0.088318332 | 0.056496165 | -0.052718555 | 0.255540287 |
| CSF3R   | midnightbl | -0.057575496 | 0.214268689 | -0.026216101 | 0.571996513 |
| CSTA    | midnightbl | -0.04112148  | 0.37527478  | -0.027150706 | 0.558368061 |
| CTC-479 | midnightbl | -0.012412166 | 0.789068326 | 0.031609561  | 0.495600685 |
| CTSB    | midnightbl | 0.174368657  | 0.000152421 | 0.193393357  | 2.58E-05    |
| CTSD    | midnightbl | -0.037529836 | 0.418435676 | -0.000862713 | 0.98516544  |
| CTSZ    | midnightbl | 0.084174516  | 0.069159223 | 0.115426243  | 0.012558658 |
| CXCL16  | midnightbl | -0.092556683 | 0.045597597 | -0.062742922 | 0.175868424 |
| CYTH4   | midnightbl | -0.066557166 | 0.15098794  | -0.014754017 | 0.750485052 |
| DOK2    | midnightbl | -0.024983349 | 0.590209884 | 0.032449906  | 0.484206301 |
| DOK3    | midnightbl | 0.089881581  | 0.052248297 | 0.11957462   | 0.009698715 |
| DPEP2   | midnightbl | -0.089272154 | 0.053871533 | -0.04264389  | 0.357838875 |
| EBI3    | midnightbl | -0.080775177 | 0.081204691 | -0.055315964 | 0.232830934 |
| EFHD2   | midnightbl | 0.009145418  | 0.843742532 | 0.056034647  | 0.226807516 |
| EMR1    | midnightbl | -0.163086972 | 0.000402235 | -0.168198129 | 0.000261124 |
| FAM26F  | midnightbl | -0.073800499 | 0.111218368 | -0.018118419 | 0.696148315 |
| FBP1    | midnightbl | 0.235270403  | 2.70E-07    | 0.27129419   | 2.54E-09    |
| FCER1A  | midnightbl | -0.119322977 | 0.009854094 | -0.108484601 | 0.019026372 |
| FCER1G  | midnightbl | -0.037119788 | 0.423541942 | 0.007504399  | 0.871511312 |
| FCGR1A  | midnightbl | -0.041813211 | 0.367288589 | -0.012901779 | 0.780955422 |
| FCGR1B  | midnightbl | -0.06317027  | 0.17293798  | -0.037357798 | 0.42057363  |
| FCGR2B  | midnightbl | -0.0874835   | 0.058879625 | -0.044643413 | 0.335724789 |
| FCN1    | midnightbl | -0.07037245  | 0.128870999 | -0.044681787 | 0.335309143 |
| FERMT3  | midnightbl | -0.031901953 | 0.491619979 | 0.025955581  | 0.575823322 |
| FFAR2   | midnightbl | 0.095119998  | 0.039906778 | 0.108092764  | 0.01946552  |
| FGD3    | midnightbl | 0.072072331  | 0.119863824 | 0.102862435  | 0.026228085 |
| FLT3LG  | midnightbl | -0.223906538 | 1.02E-06    | -0.204409773 | 8.48E-06    |
| FOLR2   | midnightbl | -0.190599236 | 3.38E-05    | -0.17801506  | 0.000109929 |
| FPR1    | midnightbl | 0.007751502  | 0.867318928 | 0.026709967  | 0.564775309 |
| FTL     | midnightbl | -0.074281189 | 0.108902977 | -0.045019737 | 0.331662967 |
| FUT7    | midnightbl | -0.010998831 | 0.81261262  | 0.037372347  | 0.420392575 |



|         |            |              |             |              |             |
|---------|------------|--------------|-------------|--------------|-------------|
| FXVD5   | midnightbl | -0.292326756 | 1.18E-10    | -0.234354067 | 3.02E-07    |
| GAL3ST4 | midnightbl | -0.137822409 | 0.002839116 | -0.121790912 | 0.008421543 |
| GALM    | midnightbl | -0.095756263 | 0.038591155 | -0.063573584 | 0.170205863 |
| GM2A    | midnightbl | 0.125745287  | 0.006510371 | 0.150415076  | 0.001112734 |
| GNA15   | midnightbl | 0.149508116  | 0.001193328 | 0.181147034  | 8.26E-05    |
| GPR84   | midnightbl | 0.039086935  | 0.39937712  | 0.067428096  | 0.145701215 |
| HAMP    | midnightbl | -0.041735834 | 0.368176644 | -0.022604393 | 0.626089531 |
| HAVCR2  | midnightbl | -0.049199667 | 0.288686688 | -0.001516982 | 0.973918267 |
| HCK     | midnightbl | -0.114774132 | 0.01307025  | -0.083616618 | 0.07102926  |
| HK3     | midnightbl | -0.017108667 | 0.712308427 | 0.012801529  | 0.782614669 |
| HLA-DM  | midnightbl | 0.068199756  | 0.141136162 | 0.107801494  | 0.019797653 |
| HLA-DM  | midnightbl | 0.191922536  | 2.98E-05    | 0.197495634  | 1.72E-05    |
| HLA-DO  | midnightbl | -0.20316568  | 9.65E-06    | -0.175278902 | 0.000140565 |
| HLA-DP  | midnightbl | -0.029537983 | 0.524288035 | -0.000810348 | 0.986065788 |
| HLA-DP  | midnightbl | -0.050843359 | 0.272860459 | -0.0084019   | 0.856302267 |
| HLA-DQ  | midnightbl | -0.031566854 | 0.49618354  | 0.012597565  | 0.785993526 |
| HLA-DQ  | midnightbl | -0.092721797 | 0.04521153  | -0.044427734 | 0.338067032 |
| HLA-DQ  | midnightbl | 0.023927801  | 0.606013494 | 0.049328438  | 0.287425006 |
| HLA-DQ  | midnightbl | 0.019398937  | 0.675851746 | 0.060108821  | 0.194750225 |
| HLA-DR  | midnightbl | -0.002144899 | 0.963128934 | 0.026230819  | 0.571780681 |
| HLA-DR  | midnightbl | -0.020206379 | 0.663172125 | 0.014300041  | 0.757919443 |
| HLA-DR  | midnightbl | -0.015028676 | 0.74599833  | 0.014297264  | 0.757964986 |
| HMHA1   | midnightbl | 0.142606249  | 0.002006345 | 0.192511101  | 2.81E-05    |
| HMOX1   | midnightbl | -0.011096486 | 0.81098012  | 0.019292681  | 0.677527279 |
| HS3ST2  | midnightbl | -0.083590654 | 0.071117287 | -0.052479126 | 0.257708334 |
| IFI30   | midnightbl | -0.0733161   | 0.113590632 | -0.052536306 | 0.257189408 |
| IGFLR1  | midnightbl | 0.012392926  | 0.789387602 | 0.065791487  | 0.155755022 |
| IGSF6   | midnightbl | 0.014020606  | 0.762506686 | 0.05979295   | 0.197110399 |
| IL18    | midnightbl | 0.118631235  | 0.010292669 | 0.120676262  | 0.00904382  |
| IL27    | midnightbl | 0.107407491  | 0.020254774 | 0.114436652  | 0.013342155 |
| IL32    | midnightbl | -0.048410663 | 0.296498446 | 0.007702571  | 0.868148817 |
| IL4I1   | midnightbl | -0.126996445 | 0.005992403 | -0.092340166 | 0.046108049 |
| INSL3   | midnightbl | -0.173496518 | 0.000164656 | -0.160049261 | 0.000516923 |
| IRF1    | midnightbl | -0.082840923 | 0.073697804 | -0.046004496 | 0.321184578 |
| IRF5    | midnightbl | -0.179920142 | 9.24E-05    | -0.154423615 | 0.000813134 |
| ITGAM   | midnightbl | -0.084790447 | 0.067141682 | -0.047059033 | 0.310205376 |
| ITGAX   | midnightbl | -0.065728136 | 0.156154486 | -0.023688768 | 0.609618327 |
| ITGB2   | midnightbl | -0.034987971 | 0.450668436 | 0.012620803  | 0.785608351 |
| JAK3    | midnightbl | -0.236431003 | 2.35E-07    | -0.19109751  | 3.23E-05    |
| KCNAB2  | midnightbl | -0.133969836 | 0.003726401 | -0.108662067 | 0.018830336 |
| KCNK13  | midnightbl | 0.005927146  | 0.898351129 | -0.013641089 | 0.76875019  |
| KLHDC7  | midnightbl | -0.050410573 | 0.276968971 | -0.011247685 | 0.808454121 |
| LAIR1   | midnightbl | -0.081284614 | 0.079298236 | -0.042223232 | 0.362605021 |
| LAPTM5  | midnightbl | -0.042248239 | 0.362320581 | 0.02295321   | 0.620770304 |
| LAT2    | midnightbl | -0.028241611 | 0.542662166 | 0.014700796  | 0.751355428 |

|        |            |              |             |              |             |
|--------|------------|--------------|-------------|--------------|-------------|
| LGALS2 | midnightbl | -0.078375885 | 0.090687682 | -0.0446044   | 0.336147686 |
| LILRA1 | midnightbl | -0.064601108 | 0.163391124 | -0.060977113 | 0.188368986 |
| LILRA2 | midnightbl | -0.041944384 | 0.365786157 | -0.028754385 | 0.535356284 |
| LILRA4 | midnightbl | -0.057025685 | 0.218684379 | -0.036916105 | 0.426091834 |
| LILRA5 | midnightbl | -0.032323205 | 0.485915139 | -0.003705936 | 0.93633938  |
| LILRA6 | midnightbl | -0.051285448 | 0.268706739 | -0.025337448 | 0.584951033 |
| LILRB1 | midnightbl | -0.064065992 | 0.166914077 | -0.035835277 | 0.439771174 |
| LILRB2 | midnightbl | -0.048067095 | 0.299943683 | -0.022507515 | 0.62757032  |
| LILRB3 | midnightbl | -0.031368006 | 0.498902182 | -0.000878238 | 0.984898522 |
| LILRB4 | midnightbl | -0.022737978 | 0.624050139 | 0.016911917  | 0.71547254  |
| LIMD2  | midnightbl | -0.084536798 | 0.067966608 | -0.053024331 | 0.25278988  |
| LPAR5  | midnightbl | -0.126814376 | 0.0060654   | -0.082074387 | 0.076414552 |
| LRRC25 | midnightbl | -0.089797991 | 0.052468502 | -0.046322467 | 0.317847734 |
| LSP1   | midnightbl | -0.054858324 | 0.236724953 | 0.005343207  | 0.908319057 |
| LST1   | midnightbl | -0.049191162 | 0.288770151 | 7.11E-05     | 0.998776536 |
| LTB    | midnightbl | -0.133323766 | 0.003897691 | -0.074747389 | 0.106693846 |
| LY86   | midnightbl | -0.150151084 | 0.001135659 | -0.114692648 | 0.01313545  |
| MARCO  | midnightbl | -0.110628737 | 0.016773034 | -0.096997023 | 0.036131091 |
| MCEMP1 | midnightbl | 0.026587657  | 0.566559627 | 0.057557183  | 0.214414727 |
| MILR1  | midnightbl | -0.017701984 | 0.7027968   | 0.018851389  | 0.684502868 |
| MMP25  | midnightbl | -0.019354704 | 0.676549059 | 0.011530682  | 0.803731618 |
| MMP9   | midnightbl | 0.087793233  | 0.057985798 | 0.141360794  | 0.002198372 |
| MYO1F  | midnightbl | 0.009733178  | 0.833841706 | 0.064152973  | 0.166337593 |
| NAGK   | midnightbl | -0.061880478 | 0.181894592 | -0.058968603 | 0.203368048 |
| NCF1   | midnightbl | -0.019203997 | 0.678926938 | 0.01951241   | 0.674064182 |
| NCF4   | midnightbl | -0.01167938  | 0.801253077 | 0.047758464  | 0.303061185 |
| NEURL3 | midnightbl | -0.049446191 | 0.286274523 | -0.031558276 | 0.496300668 |
| NFAM1  | midnightbl | 0.075099968  | 0.105046754 | 0.102240956  | 0.027152609 |
| NFKBIE | midnightbl | -0.096917814 | 0.036284057 | -0.075280764 | 0.104209989 |
| NR1H3  | midnightbl | -0.032618441 | 0.481938266 | -0.005652546 | 0.903036688 |
| OSCAR  | midnightbl | -0.069487925 | 0.133760737 | -0.027931402 | 0.547105872 |
| OSM    | midnightbl | 0.018280172  | 0.693572102 | 0.038964314  | 0.400858817 |
| P2RY6  | midnightbl | -0.113120019 | 0.014451184 | -0.069819048 | 0.131913768 |
| PARVG  | midnightbl | 0.281871527  | 5.61E-10    | 0.298757211  | 4.40E-11    |
| PIK3R6 | midnightbl | -0.136809875 | 0.003051475 | -0.098048957 | 0.034151041 |
| PILRA  | midnightbl | -0.21548316  | 2.61E-06    | -0.18388221  | 6.41E-05    |
| PKD2L1 | midnightbl | -0.070676191 | 0.1272242   | -0.047670671 | 0.303951891 |
| PLCB2  | midnightbl | -0.102835853 | 0.026267067 | -0.065202512 | 0.159498769 |
| PLD4   | midnightbl | -0.152329263 | 0.000958842 | -0.133666855 | 0.003805861 |
| PLEKHO | midnightbl | -0.063778697 | 0.168828822 | -0.026165847 | 0.572733757 |
| PLEKHO | midnightbl | -0.189540629 | 3.75E-05    | -0.161650795 | 0.000453133 |
| POU2F2 | midnightbl | -0.13284565  | 0.004029007 | -0.095766737 | 0.038569809 |
| PRAM1  | midnightbl | -0.048621178 | 0.294400519 | -0.031673439 | 0.494729574 |
| PSMB10 | midnightbl | 0.107388708  | 0.020276792 | 0.169923973  | 0.00022504  |
| PSME1  | midnightbl | -0.069876942 | 0.131592874 | -0.042530807 | 0.359116249 |

|         |            |              |             |              |             |
|---------|------------|--------------|-------------|--------------|-------------|
| PSME2   | midnightbl | 0.05056896   | 0.275460529 | 0.090445545  | 0.050782676 |
| PTAFR   | midnightbl | -0.028199704 | 0.543261441 | 0.017221162  | 0.710501502 |
| PTCRA   | midnightbl | -0.046977446 | 0.311045884 | -0.033342491 | 0.472260347 |
| PTK2B   | midnightbl | 0.114108982  | 0.013610911 | 0.160361573  | 0.000503863 |
| RAB42   | midnightbl | -0.230911759 | 4.53E-07    | -0.222989392 | 1.13E-06    |
| RARRES  | midnightbl | -0.084220836 | 0.069005792 | -0.019005912 | 0.682057198 |
| RASGRP4 | midnightbl | -0.148017628 | 0.001337533 | -0.135591944 | 0.003325991 |
| RASSF4  | midnightbl | 0.027475445  | 0.553669813 | 0.020428326  | 0.659703387 |
| RELB    | midnightbl | -0.194977668 | 2.21E-05    | -0.183089602 | 6.90E-05    |
| RENB    | midnightbl | -0.166355745 | 0.000305569 | -0.148205885 | 0.001318474 |
| RETN    | midnightbl | -0.116679396 | 0.011624933 | -0.106946075 | 0.020801751 |
| RGS19   | midnightbl | -0.164747165 | 0.00035005  | -0.131734395 | 0.004349814 |
| RIN3    | midnightbl | -0.138659444 | 0.002673817 | -0.097603872 | 0.034977247 |
| RNASE2  | midnightbl | -0.016479814 | 0.722438649 | 0.01390172   | 0.764460858 |
| RNASE6  | midnightbl | 0.050177313  | 0.279200693 | 0.085693742  | 0.06427042  |
| RNF166  | midnightbl | 0.071823869  | 0.121148809 | 0.096555374  | 0.036991027 |
| S100B   | midnightbl | -0.064974211 | 0.16096804  | -0.044479763 | 0.337501051 |
| SAMHD1  | midnightbl | 0.048621668  | 0.29439565  | 0.08327826   | 0.072183408 |
| SDS     | midnightbl | -0.080643954 | 0.081701724 | -0.050098536 | 0.279957133 |
| SIGLEC1 | midnightbl | -0.176992493 | 0.000120559 | -0.156868357 | 0.00066906  |
| SIGLEC1 | midnightbl | -0.060815831 | 0.189542506 | -0.036915018 | 0.426105465 |
| SIGLEC1 | midnightbl | 0.022149712  | 0.633052322 | 0.042764722  | 0.356477125 |
| SIGLEC1 | midnightbl | -0.068933985 | 0.13689506  | -0.05116448  | 0.269838985 |
| SIGLEC5 | midnightbl | -0.051264938 | 0.268898479 | -0.024455566 | 0.598088195 |
| SIGLEC7 | midnightbl | -0.065918138 | 0.154958737 | -0.051108522 | 0.270363854 |
| SIGLEC8 | midnightbl | -0.078885473 | 0.088602641 | -0.051407179 | 0.267570632 |
| SIGLEC9 | midnightbl | -0.066169753 | 0.153385915 | -0.037697761 | 0.416354995 |
| SIRPA   | midnightbl | -0.149755164 | 0.001170858 | -0.174048569 | 0.000156809 |
| SLAMF8  | midnightbl | 0.014043797  | 0.76212566  | 0.066133987  | 0.153608746 |
| SLC11A1 | midnightbl | -0.073308316 | 0.113629072 | -0.045587521 | 0.325594831 |
| SLC15A3 | midnightbl | -0.208117079 | 5.76E-06    | -0.154497897 | 0.000808364 |
| SLC2A5  | midnightbl | -0.133821795 | 0.003765037 | -0.088401283 | 0.056263773 |
| SLC37A2 | midnightbl | -0.01714904  | 0.71165976  | 0.025239356  | 0.586405655 |
| SLC7A7  | midnightbl | -0.162023193 | 0.000439389 | -0.122844013 | 0.007868995 |
| SMCO4   | midnightbl | -0.132427031 | 0.004147255 | -0.108249907 | 0.019288354 |
| SOWAH1  | midnightbl | 0.060756811  | 0.189973287 | 0.079185262  | 0.087394121 |
| SPATC1  | midnightbl | 0.021573082  | 0.641929332 | 0.038555033  | 0.405828169 |
| SPHK1   | midnightbl | -0.122702367 | 0.00794138  | -0.097400402 | 0.035360574 |
| SPI1    | midnightbl | -0.015966869 | 0.730737862 | 0.035820832  | 0.439955681 |
| SPIB    | midnightbl | -0.083363336 | 0.071891781 | -0.059475132 | 0.199506116 |
| SQRDL   | midnightbl | 0.324879895  | 6.11E-13    | 0.364108164  | 4.36E-16    |
| STAB1   | midnightbl | -0.117632236 | 0.010956608 | -0.076493704 | 0.098731925 |
| STAC3   | midnightbl | 0.12944523   | 0.005084446 | 0.139067763  | 0.002596406 |
| STAT5A  | midnightbl | -0.172321525 | 0.000182599 | -0.148652394 | 0.001274265 |
| TBXAS1  | midnightbl | -0.06261836  | 0.176729493 | -0.038788994 | 0.402983019 |

|         |            |              |             |              |             |
|---------|------------|--------------|-------------|--------------|-------------|
| TFEB    | midnightbl | -0.141836153 | 0.002123181 | -0.096133763 | 0.037828094 |
| TIFAB   | midnightbl | -0.01458373  | 0.753271034 | 0.007161479  | 0.877335272 |
| TIMD4   | midnightbl | -0.139368129 | 0.002540772 | -0.119163317 | 0.009953821 |
| TMEM15  | midnightbl | -0.019612985 | 0.672481337 | 0.009165741  | 0.843399779 |
| TMEM17  | midnightbl | -0.382028051 | 1.12E-17    | -0.332781538 | 1.54E-13    |
| TMEM86  | midnightbl | -0.238242186 | 1.89E-07    | -0.210741632 | 4.36E-06    |
| TNFAIP8 | midnightbl | -0.062685711 | 0.176263521 | -0.010628413 | 0.818812279 |
| TNFRSF1 | midnightbl | 0.04610493   | 0.320128144 | 0.080396065  | 0.082647367 |
| TNFRSF1 | midnightbl | -0.15854038  | 0.000584564 | -0.113985972 | 0.013713028 |
| TNFRSF4 | midnightbl | -0.015074807 | 0.745245601 | 0.025749261  | 0.578862505 |
| TNFSF14 | midnightbl | 0.16172042   | 0.000450533 | 0.185975235  | 5.27E-05    |
| TREM2   | midnightbl | -0.045504972 | 0.326472565 | -0.010977938 | 0.812962004 |
| TREML1  | midnightbl | -0.101275727 | 0.028644052 | -0.087923308 | 0.057613795 |
| TRPV2   | midnightbl | -0.039693988 | 0.392090262 | 0.015798393  | 0.733470643 |
| TYMP    | midnightbl | 0.036969108  | 0.425427444 | 0.091961869  | 0.047011415 |
| TYROBP  | midnightbl | -0.064218331 | 0.165905406 | -0.006488337 | 0.888786533 |
| UBD     | midnightbl | -0.053391065 | 0.249518359 | -0.024962371 | 0.590522118 |
| UNC13D  | midnightbl | -0.220712198 | 1.46E-06    | -0.203437395 | 9.38E-06    |
| VAMP5   | midnightbl | -0.121233999 | 0.008727513 | -0.066700338 | 0.150108985 |
| VAV1    | midnightbl | -0.118189591 | 0.010581655 | -0.062629529 | 0.176652158 |
| VENTX   | midnightbl | -0.147480255 | 0.001393339 | -0.139243235 | 0.002563772 |
| VMO1    | midnightbl | 0.037124647  | 0.423481226 | 0.066535944  | 0.151118554 |
| ZFP57   | midnightbl | -0.070749197 | 0.126830828 | -0.054691146 | 0.23815884  |
| ZMYND1  | midnightbl | -0.198287692 | 1.59E-05    | -0.17692285  | 0.000121317 |
| ACTR10  | orange     | -0.105480714 | 0.022624798 | -0.129136307 | 0.005191711 |
| AIMP1   | orange     | -0.005887693 | 0.899024103 | -0.014133557 | 0.760651452 |
| AK3     | orange     | -0.051872498 | 0.263258214 | -0.08575775  | 0.064070855 |
| ALG5    | orange     | 0.200316175  | 1.29E-05    | 0.181733096  | 7.82E-05    |
| ANAPC1  | orange     | -0.029717102 | 0.521774514 | -0.03831048  | 0.408814873 |
| ANAPC1  | orange     | 0.014830439  | 0.74923581  | 0.010062414  | 0.828307058 |
| ANAPC1  | orange     | 0.128806231  | 0.00530857  | 0.130981648  | 0.004580053 |
| AP3S1   | orange     | 0.017147624  | 0.711682516 | 0.006957791  | 0.880797758 |
| ARL14EP | orange     | -0.063733088 | 0.169134301 | -0.080767568 | 0.081233443 |
| ASF1A   | orange     | 0.001365493  | 0.976522059 | -0.006786154 | 0.88371717  |
| ATG12   | orange     | 0.091481851  | 0.04817901  | 0.08266281   | 0.074321943 |
| ATG4C   | orange     | -0.102649855 | 0.026541225 | -0.127803679 | 0.005678169 |
| ATP6V1C | orange     | 0.118383121  | 0.010454146 | 0.098835549  | 0.032731539 |
| BCDIN3L | orange     | 0.090687069  | 0.05016559  | 0.062850484  | 0.175127388 |
| BDH2    | orange     | 0.033409411  | 0.471371278 | 0.01670724   | 0.718769326 |
| BET1    | orange     | 0.060186136  | 0.194175693 | 0.047050595  | 0.310292225 |
| BTF3    | orange     | 0.05954687   | 0.198963508 | 0.02539761   | 0.584059711 |
| C2orf76 | orange     | -0.008117675 | 0.861113269 | -0.0261195   | 0.573414087 |
| CAAP1   | orange     | 0.023217965  | 0.616746089 | 0.006277063  | 0.892385526 |
| CALM2   | orange     | -0.1070637   | 0.020661109 | -0.105924383 | 0.022058755 |
| CAMLG   | orange     | -0.126987422 | 0.005996002 | -0.161049157 | 0.000476185 |

|         |        |              |             |              |             |
|---------|--------|--------------|-------------|--------------|-------------|
| CBR4    | orange | 0.161407278  | 0.000462335 | 0.152384619  | 0.000954699 |
| CCDC112 | orange | -0.038535531 | 0.406065864 | -0.055024315 | 0.235307282 |
| CCDC90  | orange | 0.01809887   | 0.696459891 | -0.000193051 | 0.996680259 |
| CCNH    | orange | 0.188547189  | 4.12E-05    | 0.173658184  | 0.000162321 |
| CDC37L1 | orange | -0.026001598 | 0.575146497 | -0.035057903 | 0.449763301 |
| CDC42   | orange | 0.005150439  | 0.911612878 | -0.012791905 | 0.78277401  |
| CETN3   | orange | 0.087516718  | 0.05878322  | 0.059044008  | 0.202789726 |
| CGRRF1  | orange | -0.144534578 | 0.001739121 | -0.158816637 | 0.000571596 |
| CIR1    | orange | -0.203725127 | 9.11E-06    | -0.218798202 | 1.81E-06    |
| COMMD   | orange | 0.083539698  | 0.071290302 | 0.056342669  | 0.22426013  |
| COPS2   | orange | 0.079917195  | 0.08449918  | 0.053506142  | 0.248497907 |
| COQ7    | orange | -0.104878136 | 0.023413704 | -0.101440751 | 0.028384186 |
| CRYZL1  | orange | -0.001505989 | 0.974107215 | -0.014267728 | 0.758449464 |
| DARS    | orange | -0.013204435 | 0.775952202 | -0.050988597 | 0.271491053 |
| DERL2   | orange | 0.124356321  | 0.007132105 | 0.115001439  | 0.012889876 |
| DNAJC25 | orange | 0.096660185  | 0.036785393 | 0.066331015  | 0.152384265 |
| DPH5    | orange | -0.035455617 | 0.444635269 | -0.055566074 | 0.230722016 |
| DUSP11  | orange | -0.194543554 | 2.30E-05    | -0.211309622 | 4.10E-06    |
| DUT     | orange | 0.087213506  | 0.059668045 | 0.071666703  | 0.121967162 |
| EAPP    | orange | -0.107018176 | 0.020715443 | -0.108531621 | 0.018974259 |
| EIF1AX  | orange | 0.082831651  | 0.07373019  | 0.053602806  | 0.247642979 |
| EIF1B   | orange | -0.278475296 | 9.16E-10    | -0.301168325 | 3.02E-11    |
| EIF2A   | orange | -0.074327337 | 0.108682707 | -0.10466213  | 0.023702242 |
| EIF3E   | orange | -0.036351073 | 0.433211976 | -0.097909067 | 0.034408906 |
| ELMOD2  | orange | 0.127796374  | 0.005680945 | 0.114892243  | 0.01297625  |
| ELP4    | orange | 0.136846355  | 0.00304358  | 0.119599254  | 0.009683621 |
| ERP44   | orange | 0.119852604  | 0.009529604 | 0.111421099  | 0.016001454 |
| ESD     | orange | -0.046308564 | 0.317993159 | -0.059839334 | 0.19676252  |
| FOPNL   | orange | -0.009885961 | 0.831272287 | -0.028025332 | 0.545758449 |
| FRA10A  | orange | 0.109896469  | 0.017514846 | 0.073750433  | 0.111461739 |
| FXN     | orange | 0.224594068  | 9.42E-07    | 0.218274489  | 1.92E-06    |
| GKAP1   | orange | -0.083831748 | 0.070303322 | -0.112491875 | 0.015008267 |
| GPBP1   | orange | -0.073867948 | 0.110891162 | -0.100825434 | 0.029363551 |
| GTF2B   | orange | 0.016826243  | 0.716851875 | 0.006458917  | 0.889287553 |
| IER3IP1 | orange | 0.086980306  | 0.060356029 | 0.076745545  | 0.097623773 |
| ISCA1   | orange | -0.067216987 | 0.146969535 | -0.074748063 | 0.106690679 |
| LARP7   | orange | 0.033329551  | 0.472432365 | 0.004077921  | 0.929965051 |
| LIAS    | orange | -0.041911833 | 0.366158631 | -0.054017395 | 0.243999505 |
| LYRM5   | orange | 0.069822477  | 0.131894744 | 0.060255651  | 0.19366018  |
| MBD2    | orange | 0.08622052   | 0.062643142 | 0.074499937  | 0.107861971 |
| MEAF6   | orange | -0.050558788 | 0.275557236 | -0.072511641 | 0.117617887 |
| MED31   | orange | 0.19350791   | 2.55E-05    | 0.194568058  | 2.30E-05    |
| MED7    | orange | -0.027480341 | 0.553599125 | -0.030591712 | 0.509590706 |
| MFF     | orange | -0.154504477 | 0.000807942 | -0.175165077 | 0.000141999 |
| MICU2   | orange | 0.055195222  | 0.233853895 | 0.022168565  | 0.632762965 |

|         |        |              |             |              |             |
|---------|--------|--------------|-------------|--------------|-------------|
| MOB4    | orange | -0.081824047 | 0.077319239 | -0.082281262 | 0.075673448 |
| MORF4L  | orange | -0.046553185 | 0.315440765 | -0.074727854 | 0.106785701 |
| MORF4L  | orange | -0.082316594 | 0.075547464 | -0.103785133 | 0.024905529 |
| MRPL50  | orange | 0.176710076  | 0.00012366  | 0.162004625  | 0.000440065 |
| MRPS36  | orange | 0.241307861  | 1.30E-07    | 0.246716284  | 6.63E-08    |
| MSANTE  | orange | 0.225705447  | 8.30E-07    | 0.222342629  | 1.22E-06    |
| NAP1L1  | orange | -0.107346724 | 0.020326086 | -0.140704628 | 0.002306161 |
| NDFIP1  | orange | 0.137105134  | 0.002988105 | 0.11654771   | 0.011720079 |
| NDNL2   | orange | -0.063163051 | 0.172987175 | -0.091217075 | 0.048833379 |
| NDUFA5  | orange | -0.025881525 | 0.576913334 | -0.036326121 | 0.433527986 |
| NDUFAB1 | orange | 0.332577538  | 1.60E-13    | 0.324953096  | 6.03E-13    |
| NDUFS4  | orange | 0.065078277  | 0.160297044 | 0.062971384  | 0.174297239 |
| NFYB    | orange | -0.09060942  | 0.050363295 | -0.107729105 | 0.019880959 |
| NKAP    | orange | -0.1495033   | 0.00119377  | -0.159611026 | 0.000535778 |
| NOL8    | orange | -0.009633238 | 0.835523393 | -0.050993494 | 0.271444964 |
| NPM1    | orange | -0.03282123  | 0.479216925 | -0.075965415 | 0.101089017 |
| NSA2    | orange | 0.127881017  | 0.005648855 | 0.111951438  | 0.015502566 |
| NT5C3A  | orange | 0.014906499  | 0.747993116 | 0.005060015  | 0.913158473 |
| NUDCD2  | orange | -0.00627017  | 0.892502989 | -0.012118874 | 0.793939189 |
| OCIAD1  | orange | 0.031650186  | 0.49504659  | 0.015901064  | 0.731804851 |
| OSTC    | orange | 0.170817469  | 0.000208246 | 0.166985497  | 0.000289638 |
| PCNP    | orange | -0.185098206 | 5.72E-05    | -0.206204311 | 7.04E-06    |
| PFDN1   | orange | 0.082775603  | 0.0739262   | 0.069880091  | 0.131575439 |
| PIGP    | orange | -0.012847097 | 0.781860349 | -0.025316578 | 0.58526038  |
| POLR3G  | orange | 0.131455078  | 0.004433998 | 0.118316859  | 0.010497649 |
| PPHLN1  | orange | -0.08151411  | 0.078451332 | -0.095341812 | 0.039443883 |
| PPP1CC  | orange | -0.021993666 | 0.635449462 | -0.049018863 | 0.290464466 |
| PPP2CA  | orange | 0.045354657  | 0.328074777 | 0.029898325  | 0.519237756 |
| PPP2R3C | orange | 0.00263086   | 0.954783297 | -0.009017543 | 0.845899908 |
| PPP4R2  | orange | 0.065946247  | 0.154782425 | 0.03407476   | 0.462582096 |
| PRIMPO1 | orange | 0.004368214  | 0.924993683 | -0.029328105 | 0.527241037 |
| PSIP1   | orange | -0.144901871 | 0.001692081 | -0.171634974 | 0.000193915 |
| PUS3    | orange | 0.166152495  | 0.000310883 | 0.14953119   | 0.001191213 |
| RAB5A   | orange | 0.040456626  | 0.383050614 | 0.024096893  | 0.603469185 |
| RAD17   | orange | 0.053158557  | 0.251589047 | 0.024952225  | 0.590673154 |
| RFESD   | orange | -0.061356183 | 0.185631865 | -0.056844569 | 0.22015314  |
| RIOK2   | orange | 0.009513988  | 0.837530985 | -0.010395448 | 0.822717203 |
| RNF14   | orange | 0.175668471  | 0.000135761 | 0.166562099  | 0.000300261 |
| RPS27L  | orange | 0.358986247  | 1.19E-15    | 0.365179815  | 3.53E-16    |
| RSL1D1  | orange | 0.008320589  | 0.857678072 | -0.022512626 | 0.62749216  |
| RSL24D1 | orange | 0.016294734  | 0.725429455 | -0.014735649 | 0.750785415 |
| RWDD4   | orange | 0.045442367  | 0.327139255 | 0.033675039  | 0.4678514   |
| SCOC    | orange | 0.042659859  | 0.357658718 | 0.03340342   | 0.471450845 |
| SDHD    | orange | -0.122972844 | 0.007803671 | -0.137768219 | 0.002850131 |
| SEC11A  | orange | 0.283408338  | 4.48E-10    | 0.260620692  | 1.09E-08    |

|                   |              |             |              |             |
|-------------------|--------------|-------------|--------------|-------------|
| 15-Sep orange     | -0.026633512 | 0.565890364 | -0.052037392 | 0.261741565 |
| SFR1 orange       | 0.017974093  | 0.698449912 | 0.005256083  | 0.909807548 |
| SIAH1 orange      | -0.099429037 | 0.031694132 | -0.103759426 | 0.024941583 |
| SKP1 orange       | -0.043858766 | 0.344296002 | -0.055795459 | 0.228799771 |
| SLU7 orange       | -0.077610759 | 0.093891972 | -0.103203991 | 0.025731624 |
| SMIM20 orange     | 0.145767133  | 0.001585841 | 0.135760789  | 0.00328664  |
| SNAPC1 orange     | -0.005678726 | 0.902589829 | -0.019041231 | 0.681498665 |
| SNW1 orange       | -0.019518205 | 0.673972945 | -0.05281881  | 0.25463623  |
| SPCS2 orange      | 0.074357499  | 0.108538926 | 0.046807804  | 0.312798339 |
| SREK1IP orange    | 0.072808828  | 0.116117302 | 0.069737161  | 0.132368679 |
| SRP14 orange      | 0.185524233  | 5.49E-05    | 0.175601151  | 0.00013658  |
| ST13 orange       | 0.013816865  | 0.765856582 | -0.02074504  | 0.654766187 |
| SYF2 orange       | -0.058445229 | 0.207415107 | -0.07779212  | 0.093124377 |
| TAF12 orange      | 0.099901151  | 0.030889078 | 0.089505047  | 0.053246327 |
| TAF9 orange       | 0.262123191  | 8.91E-09    | 0.260423799  | 1.12E-08    |
| TCAIM orange      | 0.218603977  | 1.85E-06    | 0.203176477  | 9.64E-06    |
| TMA16 orange      | -0.003103831 | 0.946665477 | -0.019757739 | 0.670205728 |
| TMBIM4 orange     | 0.04854664   | 0.295142209 | 0.036968274  | 0.42543789  |
| TMEM23 orange     | -0.134955364 | 0.003478223 | -0.146773704 | 0.00146997  |
| TRMT5 orange      | -0.086350735 | 0.062246172 | -0.11654352  | 0.011723117 |
| TRNT1 orange      | -0.0335542   | 0.46945086  | -0.058557628 | 0.206541096 |
| TXNL1 orange      | 0.161508513  | 0.000458489 | 0.151679059  | 0.001008762 |
| UBA3 orange       | 0.169914954  | 0.000225216 | 0.134937857  | 0.003482498 |
| UBE2B orange      | -0.140610646 | 0.002321989 | -0.157298433 | 0.000646307 |
| UBLCP1 orange     | 0.007673108  | 0.868648583 | -0.01769131  | 0.702967517 |
| UFM1 orange       | 0.114367139  | 0.013398776 | 0.098204177  | 0.033866846 |
| UGP2 orange       | -0.044154528 | 0.341048986 | -0.055558577 | 0.230785026 |
| UIMC1 orange      | -0.047826561 | 0.302371494 | -0.082247004 | 0.075795768 |
| VAPA orange       | -0.071029714 | 0.125328107 | -0.089578794 | 0.053049614 |
| WDR89 orange      | 0.030594166  | 0.509556727 | 0.011059493  | 0.811598438 |
| XPA orange        | 0.022910144  | 0.621425965 | 0.014011075  | 0.76266329  |
| ZCCHC1 orange     | 0.134175367  | 0.003673357 | 0.105411345  | 0.022714429 |
| ZCCHC7 orange     | -0.046621913 | 0.314726072 | -0.071047951 | 0.125230892 |
| ZCCHC9 orange     | -0.09762032  | 0.034946414 | -0.118120552 | 0.010627474 |
| ZCRB1 orange      | 0.031058384  | 0.503150966 | 0.017254277  | 0.709969915 |
| ZFAND6 orange     | 0.019832201  | 0.669036335 | 0.005980995  | 0.897432692 |
| ZNF22 orange      | -0.145184041 | 0.001656739 | -0.176113812 | 0.000130457 |
| BPIFC orangered4  | -0.035526317 | 0.443727163 | -0.040540471 | 0.382064621 |
| CLCA2 orangered4  | 0.132169831  | 0.004221455 | 0.119647293  | 0.009654249 |
| FAM26D orangered4 | -0.061064214 | 0.187737451 | -0.066721481 | 0.149979515 |
| GPRC5D orangered4 | 0.084290267  | 0.068776328 | 0.082380012  | 0.075321759 |
| IL1F10 orangered4 | -0.079795128 | 0.084976535 | -0.063966229 | 0.167577123 |
| IL36G orangered4  | -0.025113824 | 0.588269627 | -0.036605601 | 0.429996145 |
| KRT33A orangered4 | 0.040119268  | 0.387033566 | 0.015849471  | 0.732641761 |
| KRT33B orangered4 | 0.016271053  | 0.725812439 | 0.030476865  | 0.511182069 |

|                   |            |              |             |              |             |
|-------------------|------------|--------------|-------------|--------------|-------------|
| KRT34             | orangered4 | -0.043606693 | 0.347078842 | -0.02816328  | 0.543782562 |
| KRT36             | orangered4 | 0.046394225  | 0.317097834 | 0.044801624  | 0.334013284 |
| KRT37             | orangered4 | -0.072362479 | 0.118376742 | -0.028402307 | 0.540367296 |
| KRT38             | orangered4 | 0.059464194  | 0.199588941 | 0.051308307  | 0.268493141 |
| KRT39             | orangered4 | -0.045103052 | 0.330768012 | -0.01216471  | 0.793177432 |
| KRT82             | orangered4 | 0.003317643  | 0.942997497 | 0.041099628  | 0.375528789 |
| KRT83             | orangered4 | 0.043403572  | 0.349331616 | 0.022874131  | 0.621974488 |
| KRT84             | orangered4 | 0.007177559  | 0.877062039 | 0.01949605   | 0.674321788 |
| KRT85             | orangered4 | 0.014231154  | 0.759049518 | 0.01408822   | 0.761395949 |
| KRTAP1-orangered4 |            | -0.076084779 | 0.100552578 | -0.065718165 | 0.156217427 |
| KRTAP1-orangered4 |            | 0.048133124  | 0.299279504 | 0.053669115  | 0.247057709 |
| KRTAP1-orangered4 |            | -0.036103194 | 0.436357109 | -0.013885445 | 0.7647285   |
| KRTAP1(orangered4 |            | -0.097938109 | 0.034355237 | -0.09363038  | 0.043135907 |
| KRTAP1(orangered4 |            | -0.069674029 | 0.132720227 | -0.067033751 | 0.148077201 |
| KRTAP1(orangered4 |            | -0.053650387 | 0.247222915 | -0.05608229  | 0.226412163 |
| KRTAP1(orangered4 |            | -0.091018206 | 0.049329738 | -0.087842769 | 0.057843897 |
| KRTAP1(orangered4 |            | -0.089956371 | 0.052051929 | -0.097414079 | 0.035334695 |
| KRTAP1lorangered4 |            | 0.019753672  | 0.670269627 | 0.018549631  | 0.689288348 |
| KRTAP1lorangered4 |            | -0.0093599   | 0.840126635 | -0.011873261 | 0.798024401 |
| KRTAP1lorangered4 |            | 0.006318632  | 0.891677237 | 0.006395936  | 0.890360279 |
| KRTAP1lorangered4 |            | -0.03777715  | 0.415373447 | -0.029411282 | 0.526069725 |
| KRTAP1lorangered4 |            | -0.013289654 | 0.774545095 | -0.035829202 | 0.439848765 |
| KRTAP1lorangered4 |            | -0.006116727 | 0.895118297 | -0.010498417 | 0.820990699 |
| KRTAP1lorangered4 |            | -0.028908056 | 0.533176475 | -0.022750584 | 0.623857832 |
| KRTAP1lorangered4 |            | -0.021609254 | 0.641370949 | -0.008548824 | 0.853817395 |
| KRTAP1lorangered4 |            | -0.028718376 | 0.535867709 | -0.027856915 | 0.548175563 |
| KRTAP2-orangered4 |            | -0.050937512 | 0.271972183 | -0.049042105 | 0.290235525 |
| KRTAP2-orangered4 |            | -0.084983067 | 0.06652074  | -0.06459448  | 0.163434409 |
| KRTAP2-orangered4 |            | -0.029217679 | 0.528798131 | -0.020493227 | 0.658690444 |
| KRTAP2(orangered4 |            | -0.001457505 | 0.974940521 | -0.00142943  | 0.975423084 |
| KRTAP2(orangered4 |            | -0.054900085 | 0.236367725 | -0.058010367 | 0.210821782 |
| KRTAP2lorangered4 |            | -0.002934795 | 0.949566128 | -0.001426042 | 0.975481317 |
| KRTAP3-orangered4 |            | -0.002075781 | 0.964316274 | 0.012120577  | 0.793910888 |
| KRTAP3-orangered4 |            | 0.103627716  | 0.025127006 | 0.111026274  | 0.016381946 |
| KRTAP4-orangered4 |            | -0.084263621 | 0.068864316 | -0.096884733 | 0.036348106 |
| KRTAP4-orangered4 |            | -0.056087136 | 0.226371975 | -0.047906747 | 0.301560701 |
| KRTAP4-orangered4 |            | -0.056176677 | 0.225630369 | -0.044437642 | 0.337959205 |
| KRTAP4-orangered4 |            | -0.035804299 | 0.44016691  | -0.036734248 | 0.428376008 |
| KRTAP4-orangered4 |            | -0.038344247 | 0.408401708 | -0.037827528 | 0.414751289 |
| KRTAP4-orangered4 |            | -0.033341499 | 0.472273527 | -0.030003337 | 0.517770717 |
| KRTAP4-orangered4 |            | -0.050955979 | 0.271798187 | -0.046371805 | 0.317332005 |
| KRTAP4-orangered4 |            | -0.033964047 | 0.464038249 | -0.026430834 | 0.56885136  |
| KRTAP4-orangered4 |            | 0.025386132  | 0.584229714 | 0.037627838  | 0.41722063  |
| KRTAP4-orangered4 |            | -0.026111049 | 0.57353819  | -0.005305518 | 0.908962926 |
| KRTAP4-orangered4 |            | 0.065324369  | 0.158718685 | 0.086417589  | 0.06204317  |



|                      |              |             |              |             |
|----------------------|--------------|-------------|--------------|-------------|
| KRTAP5-orangered4    | 0.09059269   | 0.050405977 | 0.086725113  | 0.061116393 |
| KRTAP5-orangered4    | -0.039047476 | 0.399853568 | -0.034751236 | 0.453740119 |
| KRTAP5-orangered4    | -0.062456686 | 0.177851766 | -0.067402218 | 0.145856239 |
| KRTAP6-orangered4    | 0.009947678  | 0.830234876 | 0.012722966  | 0.783915657 |
| KRTAP7-orangered4    | -0.011569547 | 0.803083619 | -0.007599926 | 0.869890151 |
| KRTAP8-orangered4    | -0.003053737 | 0.947525021 | -0.004169241 | 0.928400853 |
| KRTAP9-orangered4    | -0.071487708 | 0.122904418 | -0.068762486 | 0.137876804 |
| KRTAP9-orangered4    | -0.030403913 | 0.512194267 | -0.029566898 | 0.523881861 |
| KRTAP9-orangered4    | -0.030059486 | 0.516987181 | -0.010886184 | 0.81449677  |
| KRTAP9-orangered4    | 0.014490477  | 0.754798074 | 0.029263725  | 0.52814857  |
| KRTAP9-orangered4    | -0.024041866 | 0.604296654 | -0.025794443 | 0.578196305 |
| KRTAP9-orangered4    | -0.033273392 | 0.47317931  | -0.017210655 | 0.7106702   |
| KRTAP9-orangered4    | -0.030378849 | 0.512542277 | -0.025421224 | 0.583710024 |
| LOR orangered4       | -0.040388368 | 0.383854464 | -0.03259583  | 0.48224222  |
| NEU2 orangered4      | -0.017509199 | 0.7058824   | -0.003633062 | 0.937588627 |
| R3HDM1 orangered4    | -0.061431059 | 0.185094695 | -0.065865206 | 0.155291156 |
| SLC39A1 orangered4   | -0.080211504 | 0.083357151 | -0.070266254 | 0.129450641 |
| SPRR4 orangered4     | 0.023997412  | 0.604965488 | 0.039401679  | 0.395588949 |
| WFDC11 orangered4    | -0.041646137 | 0.369207757 | -0.02456452  | 0.596457929 |
| ABCB8 paleturquoi    | 0.173498149  | 0.000164632 | 0.197633189  | 1.69E-05    |
| ABHD17 paleturquoi   | 0.269037298  | 3.47E-09    | 0.289373112  | 1.85E-10    |
| ACADS paleturquoi    | 0.289538631  | 1.80E-10    | 0.319081099  | 1.64E-12    |
| ACD paleturquoi      | 0.144326604  | 0.001766285 | 0.165455901  | 0.000329755 |
| ACSF3 paleturquoi    | 0.236511488  | 2.33E-07    | 0.24237881   | 1.14E-07    |
| ADAT3 paleturquoi    | 0.243925487  | 9.40E-08    | 0.263295428  | 7.61E-09    |
| ADRBK1 paleturquoi   | 0.121305631  | 0.008687611 | 0.136951416  | 0.003020946 |
| AKR1A1 paleturquoi   | 0.304436316  | 1.80E-11    | 0.332613794  | 1.59E-13    |
| ALKBH7 paleturquoi   | 0.219695537  | 1.64E-06    | 0.230979332  | 4.50E-07    |
| ANAPC2 paleturquoi   | 0.203932675  | 8.91E-06    | 0.214817088  | 2.81E-06    |
| AP3D1 paleturquoi    | 0.377713586  | 2.77E-17    | 0.387722369  | 3.35E-18    |
| APBA3 paleturquoi    | 0.234506921  | 2.96E-07    | 0.254783904  | 2.36E-08    |
| APRT paleturquoi     | 0.228804733  | 5.80E-07    | 0.26302494   | 7.89E-09    |
| ATP5D paleturquoi    | 0.257281892  | 1.70E-08    | 0.279312895  | 8.12E-10    |
| ATPAF2 paleturquoi   | 0.415069483  | 7.13E-21    | 0.433459179  | 8.18E-23    |
| BSG paleturquoi      | 0.308460523  | 9.43E-12    | 0.306391128  | 1.32E-11    |
| BTBD2 paleturquoi    | 0.274340375  | 1.65E-09    | 0.285311982  | 3.38E-10    |
| C17orf59 paleturquoi | 0.247428173  | 6.06E-08    | 0.280893173  | 6.46E-10    |
| C19orf24 paleturquoi | 0.321157387  | 1.15E-12    | 0.358918838  | 1.21E-15    |
| C19orf25 paleturquoi | 0.28869182   | 2.05E-10    | 0.32518251   | 5.80E-13    |
| C19orf70 paleturquoi | 0.208554174  | 5.50E-06    | 0.234137665  | 3.10E-07    |
| C9orf114 paleturquoi | 0.24242439   | 1.13E-07    | 0.237854953  | 1.98E-07    |
| C9orf69 paleturquoi  | 0.171863863  | 0.000190072 | 0.195877427  | 2.02E-05    |
| CACTIN paleturquoi   | 0.262850413  | 8.08E-09    | 0.26851496   | 3.73E-09    |
| CCDC94 paleturquoi   | 0.222773499  | 1.16E-06    | 0.239288208  | 1.66E-07    |
| CD320 paleturquoi    | 0.151643634  | 0.00101155  | 0.146265713  | 0.001527439 |

|        |             |             |             |             |             |
|--------|-------------|-------------|-------------|-------------|-------------|
| CDC34  | paleturquoi | 0.128652718 | 0.005363721 | 0.148370006 | 0.001302063 |
| CHMP1A | paleturquoi | 0.307982532 | 1.02E-11    | 0.341798616 | 3.04E-14    |
| CLPP   | paleturquoi | 0.324108139 | 6.97E-13    | 0.350450709 | 6.10E-15    |
| COG4   | paleturquoi | 0.243448677 | 9.97E-08    | 0.276271009 | 1.26E-09    |
| COX4I1 | paleturquoi | 0.228712163 | 5.86E-07    | 0.271045233 | 2.63E-09    |
| CRELD2 | paleturquoi | 0.392994852 | 1.07E-18    | 0.40860806  | 3.21E-20    |
| CSK    | paleturquoi | 0.262883843 | 8.05E-09    | 0.292907868 | 1.08E-10    |
| CSNK1G | paleturquoi | 0.295769048 | 6.99E-11    | 0.297626819 | 5.24E-11    |
| CTDNBP | paleturquoi | 0.227712892 | 6.59E-07    | 0.236008065 | 2.48E-07    |
| CTU2   | paleturquoi | 0.281209362 | 6.17E-10    | 0.321232928 | 1.14E-12    |
| DAK    | paleturquoi | 0.369236144 | 1.57E-16    | 0.369084936 | 1.62E-16    |
| DAPK3  | paleturquoi | 0.177459201 | 0.000115593 | 0.200438618 | 1.28E-05    |
| DDX28  | paleturquoi | 0.061665717 | 0.183418664 | 0.08581649  | 0.063888162 |
| DOHH   | paleturquoi | 0.316989846 | 2.32E-12    | 0.342700485 | 2.58E-14    |
| DOK1   | paleturquoi | 0.264590433 | 6.39E-09    | 0.280386648 | 6.96E-10    |
| DOT1L  | paleturquoi | 0.366280521 | 2.83E-16    | 0.367768477 | 2.11E-16    |
| DUS2   | paleturquoi | 0.263001477 | 7.92E-09    | 0.285460432 | 3.31E-10    |
| DUS3L  | paleturquoi | 0.290349805 | 1.60E-10    | 0.289997197 | 1.68E-10    |
| ELP5   | paleturquoi | 0.104590242 | 0.023798948 | 0.105690667 | 0.022355386 |
| FAM96B | paleturquoi | 0.203643429 | 9.18E-06    | 0.259095474 | 1.34E-08    |
| FASTK  | paleturquoi | 0.167463203 | 0.000278075 | 0.191037655 | 3.24E-05    |
| FDXR   | paleturquoi | 0.31014463  | 7.18E-12    | 0.325085792 | 5.89E-13    |
| FUK    | paleturquoi | 0.344257174 | 1.94E-14    | 0.376918323 | 3.27E-17    |
| FZR1   | paleturquoi | 0.31665279  | 2.46E-12    | 0.338954003 | 5.10E-14    |
| GCHFR  | paleturquoi | 0.372082249 | 8.81E-17    | 0.375795385 | 4.12E-17    |
| GMPPA  | paleturquoi | 0.218381697 | 1.90E-06    | 0.238820625 | 1.76E-07    |
| GMPPB  | paleturquoi | 0.335433817 | 9.61E-14    | 0.368769799 | 1.72E-16    |
| GPX4   | paleturquoi | 0.320810121 | 1.22E-12    | 0.35274185  | 3.96E-15    |
| GTF2F1 | paleturquoi | 0.249586265 | 4.61E-08    | 0.26055071  | 1.10E-08    |
| HMG20B | paleturquoi | 0.443420267 | 6.48E-24    | 0.456208325 | 2.20E-25    |
| HMGCL  | paleturquoi | 0.299265265 | 4.06E-11    | 0.328319393 | 3.37E-13    |
| KLF16  | paleturquoi | 0.204370227 | 8.52E-06    | 0.217614037 | 2.06E-06    |
| KLHDC4 | paleturquoi | 0.162897801 | 0.000408621 | 0.186585434 | 4.97E-05    |
| LONP1  | paleturquoi | 0.308105017 | 9.99E-12    | 0.331780948 | 1.84E-13    |
| LSM7   | paleturquoi | 0.362606925 | 5.87E-16    | 0.385942482 | 4.91E-18    |
| MAP2K2 | paleturquoi | 0.291016687 | 1.44E-10    | 0.295572422 | 7.20E-11    |
| MBD3   | paleturquoi | 0.257040305 | 1.75E-08    | 0.270124929 | 2.98E-09    |
| MCAT   | paleturquoi | 0.205830745 | 7.32E-06    | 0.231809168 | 4.08E-07    |
| MED16  | paleturquoi | 0.251876171 | 3.43E-08    | 0.269162247 | 3.41E-09    |
| MFSD12 | paleturquoi | 0.274827748 | 1.54E-09    | 0.297806866 | 5.10E-11    |
| MIER2  | paleturquoi | 0.290183513 | 1.64E-10    | 0.292322836 | 1.18E-10    |
| MOB3A  | paleturquoi | 0.329630489 | 2.68E-13    | 0.352298992 | 4.30E-15    |
| MPND   | paleturquoi | 0.362997904 | 5.43E-16    | 0.384629617 | 6.49E-18    |
| MRPL54 | paleturquoi | 0.273155862 | 1.95E-09    | 0.298763478 | 4.39E-11    |
| MVD    | paleturquoi | 0.343097538 | 2.40E-14    | 0.364021002 | 4.44E-16    |

|         |             |             |             |             |             |
|---------|-------------|-------------|-------------|-------------|-------------|
| MYDGF   | paleturquoi | 0.367723548 | 2.12E-16    | 0.379901733 | 1.76E-17    |
| NCLN    | paleturquoi | 0.388767419 | 2.68E-18    | 0.411631099 | 1.60E-20    |
| NDUFA1  | paleturquoi | 0.274610186 | 1.59E-09    | 0.299032731 | 4.21E-11    |
| NDUFS7  | paleturquoi | 0.276121128 | 1.28E-09    | 0.314246752 | 3.66E-12    |
| NELFB   | paleturquoi | 0.117698839 | 0.010911191 | 0.135453522 | 0.003358569 |
| NHP2L1  | paleturquoi | 0.207777936 | 5.97E-06    | 0.21673384  | 2.27E-06    |
| NUDT18  | paleturquoi | 0.426095665 | 5.06E-22    | 0.457759245 | 1.45E-25    |
| NUTF2   | paleturquoi | 0.276404536 | 1.23E-09    | 0.318323757 | 1.86E-12    |
| OAZ1    | paleturquoi | 0.264302801 | 6.64E-09    | 0.309621307 | 7.82E-12    |
| PARD6A  | paleturquoi | 0.338372067 | 5.67E-14    | 0.360070245 | 9.65E-16    |
| PDDC1   | paleturquoi | 0.221818105 | 1.29E-06    | 0.235898417 | 2.51E-07    |
| PEX11G  | paleturquoi | 0.338714175 | 5.33E-14    | 0.358182651 | 1.39E-15    |
| PIAS4   | paleturquoi | 0.35423778  | 2.97E-15    | 0.360404898 | 9.04E-16    |
| PLEKHJ1 | paleturquoi | 0.305926743 | 1.42E-11    | 0.324675764 | 6.33E-13    |
| POLR2E  | paleturquoi | 0.29300019  | 1.07E-10    | 0.315934571 | 2.77E-12    |
| POLR3H  | paleturquoi | 0.194104409 | 2.40E-05    | 0.209557822 | 4.94E-06    |
| POLRMT  | paleturquoi | 0.196947542 | 1.81E-05    | 0.231320084 | 4.32E-07    |
| PPP2R4  | paleturquoi | 0.38025335  | 1.63E-17    | 0.391291165 | 1.55E-18    |
| PQLC1   | paleturquoi | 0.148131546 | 0.00132597  | 0.163580835 | 0.000386    |
| PRMT7   | paleturquoi | 0.2806434   | 6.70E-10    | 0.320363183 | 1.32E-12    |
| R3HCC1  | paleturquoi | 0.186442639 | 5.04E-05    | 0.196086148 | 1.98E-05    |
| R3HDM4  | paleturquoi | 0.369362136 | 1.53E-16    | 0.397715062 | 3.78E-19    |
| RAB11B  | paleturquoi | 0.164986065 | 0.000343082 | 0.185180279 | 5.68E-05    |
| RANBP3  | paleturquoi | 0.318625946 | 1.77E-12    | 0.320423667 | 1.31E-12    |
| RNF126  | paleturquoi | 0.292692105 | 1.12E-10    | 0.312525527 | 4.87E-12    |
| RPS15   | paleturquoi | 0.292885634 | 1.09E-10    | 0.312261678 | 5.08E-12    |
| RRP7A   | paleturquoi | 0.156211016 | 0.000705276 | 0.174969568 | 0.000144494 |
| SDF2L1  | paleturquoi | 0.2593878   | 1.29E-08    | 0.291645311 | 1.31E-10    |
| SF3A2   | paleturquoi | 0.206409423 | 6.89E-06    | 0.207095457 | 6.41E-06    |
| SGSM3   | paleturquoi | 0.3570253   | 1.74E-15    | 0.384088485 | 7.28E-18    |
| SGTA    | paleturquoi | 0.374155136 | 5.77E-17    | 0.38502295  | 5.97E-18    |
| SH3GL1  | paleturquoi | 0.382624428 | 9.92E-18    | 0.417072325 | 4.44E-21    |
| SIL1    | paleturquoi | 0.219424985 | 1.69E-06    | 0.235883374 | 2.51E-07    |
| SIRT6   | paleturquoi | 0.390611801 | 1.80E-18    | 0.417568971 | 3.95E-21    |
| SLC2A8  | paleturquoi | 0.153049253 | 0.000906231 | 0.150096145 | 0.001140484 |
| SLC39A3 | paleturquoi | 0.326258929 | 4.82E-13    | 0.349920089 | 6.74E-15    |
| SPATA2I | paleturquoi | 0.319722573 | 1.47E-12    | 0.344179021 | 1.97E-14    |
| SSR4    | paleturquoi | 0.243877218 | 9.45E-08    | 0.27391457  | 1.76E-09    |
| STK11   | paleturquoi | 0.270100805 | 2.99E-09    | 0.273049578 | 1.98E-09    |
| TBCD    | paleturquoi | 0.191419045 | 3.13E-05    | 0.20556268  | 7.53E-06    |
| TCF25   | paleturquoi | 0.246145291 | 7.12E-08    | 0.26240993  | 8.58E-09    |
| TEX264  | paleturquoi | 0.318411867 | 1.83E-12    | 0.351272102 | 5.23E-15    |
| THOP1   | paleturquoi | 0.414877726 | 7.46E-21    | 0.412367349 | 1.34E-20    |
| TIMM13  | paleturquoi | 0.294751644 | 8.17E-11    | 0.318504465 | 1.80E-12    |
| TMED3   | paleturquoi | 0.391473412 | 1.49E-18    | 0.387693995 | 3.37E-18    |

|                     |              |             |              |             |
|---------------------|--------------|-------------|--------------|-------------|
| TMEM20 paleturquoi  | 0.186512756  | 5.00E-05    | 0.228671665  | 5.89E-07    |
| TMEM25 paleturquoi  | 0.197711894  | 1.68E-05    | 0.211820495  | 3.88E-06    |
| TMUB1 paleturquoi   | 0.273608208  | 1.83E-09    | 0.28075517   | 6.59E-10    |
| TP53I13 paleturquoi | 0.224330609  | 9.71E-07    | 0.226133844  | 7.90E-07    |
| TPGS1 paleturquoi   | 0.116168697  | 0.011997776 | 0.12408929   | 0.007257549 |
| TRAPPC2 paleturquoi | 0.218034032  | 1.97E-06    | 0.263301864  | 7.60E-09    |
| TRAPPC4 paleturquoi | 0.236643017  | 2.29E-07    | 0.25304491   | 2.95E-08    |
| TUBG1 paleturquoi   | 0.418244621  | 3.36E-21    | 0.440884295  | 1.25E-23    |
| TUBGCP paleturquoi  | 0.118192084  | 0.010580003 | 0.13158642   | 0.004394231 |
| TXN2 paleturquoi    | 0.282443055  | 5.16E-10    | 0.287485852  | 2.45E-10    |
| UBXN6 paleturquoi   | 0.259077193  | 1.34E-08    | 0.285743522  | 3.17E-10    |
| UQCR11 paleturquoi  | 0.325538496  | 5.45E-13    | 0.358661534  | 1.27E-15    |
| VAC14 paleturquoi   | 0.147670701  | 0.001373321 | 0.1951836    | 2.16E-05    |
| VPS4A paleturquoi   | 0.158556864  | 0.000583783 | 0.195382313  | 2.12E-05    |
| WDR18 paleturquoi   | 0.28621725   | 2.96E-10    | 0.30644193   | 1.31E-11    |
| ZNF358 paleturquoi  | 0.105977755  | 0.021991496 | 0.114359857  | 0.013404719 |
| ZNF414 paleturquoi  | 0.173976441  | 0.000157814 | 0.185890613  | 5.31E-05    |
| ZNF524 paleturquoi  | 0.224015534  | 1.01E-06    | 0.24362309   | 9.76E-08    |
| ZSWIM7 paleturquoi  | 0.380784507  | 1.46E-17    | 0.399561534  | 2.50E-19    |
| AADACL pink         | -0.037192577 | 0.422632869 | -0.051952323 | 0.262523253 |
| ABCG5 pink          | -0.243071689 | 1.04E-07    | -0.235400697 | 2.66E-07    |
| AC00236 pink        | 0.000651739  | 0.988792918 | 0.012783393  | 0.782914932 |
| AC00495 pink        | -0.049280688 | 0.287892421 | -0.063382981 | 0.171492992 |
| AC00577 pink        | -0.048984991 | 0.290798324 | -0.029843115 | 0.52000992  |
| AC00862 pink        | -0.047034015 | 0.310462953 | -0.031742979 | 0.493782172 |
| AC01920 pink        | -0.045462175 | 0.326928224 | -0.035878771 | 0.439215897 |
| AC08776 pink        | -0.021964784 | 0.635893556 | -0.020431247 | 0.659657783 |
| AC09332 pink        | -0.001222867 | 0.978973737 | 0.011318747  | 0.80726762  |
| ACCSL pink          | -0.001717477 | 0.970472599 | 0.006042812  | 0.896378536 |
| ACER1 pink          | -0.023263796 | 0.616050621 | -0.030262069 | 0.51416531  |
| ACSBG2 pink         | -0.046594215 | 0.315013966 | -0.047042922 | 0.310371231 |
| ACTL6B pink         | -0.005836906 | 0.899890528 | 0.001180128  | 0.979708442 |
| ACTL7A pink         | -0.011614941 | 0.802326931 | -0.00480614  | 0.91749963  |
| ACTL7B pink         | -0.0187071   | 0.686789525 | -0.009928977 | 0.830549206 |
| ACTL9 pink          | -0.044460914 | 0.337706025 | -0.039428938 | 0.3952619   |
| ACTN3 pink          | -0.110860162 | 0.016544381 | -0.108474684 | 0.019037379 |
| ADAM30 pink         | -0.052013444 | 0.261961456 | -0.044824917 | 0.333761774 |
| AGRP pink           | 0.103600195  | 0.0251659   | 0.108114227  | 0.019441239 |
| AIPL1 pink          | -0.040176348 | 0.386357894 | -0.038593835 | 0.40535548  |
| AKR1D1 pink         | -0.038055946 | 0.411937274 | -0.02862361  | 0.537214829 |
| AL02257 pink        | -0.064876138 | 0.161602327 | -0.053324958 | 0.250105889 |
| AL35482 pink        | -0.025264605 | 0.58603108  | -0.027552686 | 0.552555162 |
| AL35628 pink        | -0.020105885 | 0.664745099 | -0.013499577 | 0.771082091 |
| AL35714 pink        | -0.010044979 | 0.828599941 | 0.017128535  | 0.711989196 |
| ANGPTL pink         | -0.102896322 | 0.026178465 | -0.065612465 | 0.156885855 |

|               |              |             |              |             |
|---------------|--------------|-------------|--------------|-------------|
| AP002884 pink | -0.124437707 | 0.007094259 | -0.143326326 | 0.001902448 |
| APOC4 pink    | 0.061158033  | 0.187058955 | 0.051565514  | 0.26609784  |
| APOF pink     | 0.169777731  | 0.000227907 | 0.174201575  | 0.000154697 |
| APOL5 pink    | -0.061266883 | 0.186274009 | -0.06211313  | 0.180254141 |
| ARGFX pink    | -0.031946338 | 0.49101721  | -0.017534767 | 0.705472892 |
| ARL5C pink    | -0.053616293 | 0.247523863 | -0.051172783 | 0.269761166 |
| ARR3 pink     | -0.051098836 | 0.270454772 | -0.053390922 | 0.24951963  |
| ASB11 pink    | -0.080409986 | 0.082594026 | -0.069835307 | 0.131823588 |
| ASGR2 pink    | -0.061008499 | 0.188141239 | -0.050228523 | 0.278709702 |
| ASIC4 pink    | -0.201326136 | 1.17E-05    | -0.192088556 | 2.93E-05    |
| AWAT1 pink    | -0.00564015  | 0.903248287 | 0.024668954  | 0.594897191 |
| BANF2 pink    | -0.12642497  | 0.006224213 | -0.126464677 | 0.00620785  |
| BEST2 pink    | -0.099817466 | 0.031030488 | -0.090210217 | 0.051390015 |
| BHMG1 pink    | -0.056509309 | 0.222890526 | -0.055889219 | 0.228017344 |
| BIRC8 pink    | 0.004520476  | 0.922387302 | 0.007975485  | 0.86352202  |
| BPIFA3 pink   | -0.041308951 | 0.373099883 | -0.036516983 | 0.431114217 |
| BTN1A1 pink   | -0.117537936 | 0.011021198 | -0.095342264 | 0.039442945 |
| BTNL2 pink    | -0.265981072 | 5.28E-09    | -0.264103435 | 6.82E-09    |
| C10orf12 pink | 0.007356953  | 0.87401462  | 0.000846482  | 0.985444509 |
| C10orf62 pink | -0.097702995 | 0.034791789 | -0.091222801 | 0.048819149 |
| C11orf40 pink | -0.024870271 | 0.591893807 | -0.012504223 | 0.787541174 |
| C14orf17 pink | -0.009549239 | 0.836937414 | -0.005057184 | 0.913206869 |
| C15orf43 pink | -0.015300692 | 0.741563228 | -0.01500162  | 0.746439933 |
| C15orf53 pink | 0.011920227  | 0.797242805 | 0.027351662  | 0.555458402 |
| C16orf78 pink | -0.009616955 | 0.835797455 | -0.009119649 | 0.844177186 |
| C16orf96 pink | -0.187076212 | 4.74E-05    | -0.182470017 | 7.31E-05    |
| C17orf10 pink | 0.00195254   | 0.966433563 | 0.014512332  | 0.754440108 |
| C17orf64 pink | -0.133699836 | 0.003797138 | -0.125652648 | 0.006550274 |
| C17orf98 pink | -0.001690776 | 0.970931457 | 0.041076393  | 0.375798999 |
| C17orf99 pink | -0.113390511 | 0.014216946 | -0.098901685 | 0.032614517 |
| C19orf80 pink | -0.166642792 | 0.000298209 | -0.158885758 | 0.000568393 |
| C1orf177 pink | -0.111913674 | 0.015537633 | -0.110472292 | 0.016929167 |
| C20orf17 pink | -0.065330697 | 0.158678255 | -0.063735117 | 0.169120702 |
| C20orf62 pink | -0.020679907 | 0.65578031  | -0.019502983 | 0.674212622 |
| C2orf57 pink  | -0.077447727 | 0.094586295 | -0.076801743 | 0.09737785  |
| C2orf61 pink  | -0.09386883  | 0.042604669 | -0.082807803 | 0.073813537 |
| C2orf78 pink  | 0.000260813  | 0.995515032 | 0.028090239  | 0.544828321 |
| C2orf83 pink  | -0.065382741 | 0.158346032 | -0.05113898  | 0.270078084 |
| C3orf20 pink  | -0.03313856  | 0.474975322 | -0.032129942 | 0.488527976 |
| C3orf22 pink  | -0.179442964 | 9.66E-05    | -0.167277065 | 0.000282528 |
| C3orf84 pink  | -0.069235765 | 0.135180587 | -0.068047764 | 0.142026553 |
| C4orf50 pink  | -0.038950267 | 0.401028762 | -0.032705381 | 0.480770544 |
| C5orf60 pink  | 0.006465413  | 0.889176922 | 0.017282145  | 0.709522655 |
| C8orf74 pink  | 0.038378331  | 0.407984907 | 0.029240578  | 0.528475054 |
| CA5A pink     | 0.034290553  | 0.459751189 | 0.013487331  | 0.771283978 |

|         |      |              |             |              |             |
|---------|------|--------------|-------------|--------------|-------------|
| CA7     | pink | -0.097378095 | 0.035402816 | -0.090074299 | 0.051743549 |
| CABP5   | pink | -0.033077137 | 0.47579473  | -0.026456936 | 0.568469614 |
| CABS1   | pink | -0.056802101 | 0.220498558 | -0.045245753 | 0.329238767 |
| CACNG2  | pink | -0.008202784 | 0.85967211  | -0.000809416 | 0.986081806 |
| CALR3   | pink | -0.045606118 | 0.325397304 | -0.037429042 | 0.419687485 |
| CATSPEI | pink | -0.119086816 | 0.010001921 | -0.096879922 | 0.036357429 |
| CATSPEI | pink | -0.032209219 | 0.487455275 | -0.021369334 | 0.645078271 |
| CCDC105 | pink | -0.090696467 | 0.050141706 | -0.083957998 | 0.069880133 |
| CCDC182 | pink | -0.060065364 | 0.195073703 | -0.040387885 | 0.383860154 |
| CCDC27  | pink | -0.206112017 | 7.11E-06    | -0.216019699 | 2.46E-06    |
| CCDC63  | pink | -0.025859673 | 0.577235156 | -0.010422306 | 0.822266777 |
| CCDC83  | pink | -0.036236559 | 0.434663328 | -0.010741939 | 0.816910973 |
| CCKAR   | pink | -0.079581833 | 0.085815856 | -0.085354056 | 0.06533808  |
| CCT8L2  | pink | -0.031239252 | 0.500666696 | -0.02849487  | 0.539047607 |
| CD300LE | pink | 0.036791556  | 0.427655447 | 0.035154114  | 0.448519724 |
| CDCP2   | pink | 0.004186177  | 0.928110798 | 0.014056924  | 0.761909998 |
| CEACAM  | pink | 0.015365129  | 0.740513869 | 0.050603517  | 0.275132161 |
| CEACAM  | pink | -0.011951676 | 0.796719536 | -0.005230992 | 0.910236274 |
| CEBPE   | pink | -0.071782251 | 0.121365095 | -0.053522662 | 0.248351654 |
| CELA1   | pink | -0.077126741 | 0.095965308 | -0.076073199 | 0.100604518 |
| CELA2A  | pink | -0.091409163 | 0.048357917 | -0.093865356 | 0.04261237  |
| CES5A   | pink | 0.083215054  | 0.07240069  | 0.061895775  | 0.181786388 |
| CIB3    | pink | -0.074310048 | 0.108765186 | -0.043167647 | 0.351959804 |
| CIB4    | pink | -0.184186733 | 6.23E-05    | -0.189715761 | 3.69E-05    |
| CIDEC   | pink | -0.0803584   | 0.08279182  | -0.075915196 | 0.101315392 |
| CLCN1   | pink | -0.212556306 | 3.58E-06    | -0.203285756 | 9.53E-06    |
| CLEC17A | pink | -0.064866571 | 0.161664302 | -0.039402872 | 0.395574633 |
| CLRN2   | pink | -0.055447244 | 0.231722291 | -0.054790353 | 0.237307209 |
| CLVS1   | pink | -0.185509978 | 5.50E-05    | -0.185127926 | 5.70E-05    |
| CNBD2   | pink | -0.107624954 | 0.020001351 | -0.101475273 | 0.028330081 |
| CNTN2   | pink | -0.07700427  | 0.096495671 | -0.075338237 | 0.103945101 |
| CNTNAP  | pink | -0.174142225 | 0.000155513 | -0.177673243 | 0.00011338  |
| CPLX4   | pink | -0.035378704 | 0.44562436  | -0.028656725 | 0.536743904 |
| CRLF2   | pink | -0.073160492 | 0.114361068 | -0.070487281 | 0.128246487 |
| CRX     | pink | -0.030644675 | 0.508857696 | -0.025136979 | 0.587925604 |
| CRYGA   | pink | 0.000513546  | 0.991169122 | 0.003881842  | 0.933324518 |
| CST11   | pink | -0.094929924 | 0.040307082 | -0.077183636 | 0.095719711 |
| CST9L   | pink | -0.031411321 | 0.498309317 | -0.02512148  | 0.588155873 |
| CSTL1   | pink | -0.098659612 | 0.033044588 | -0.060549808 | 0.191489849 |
| CT47B1  | pink | -0.091162115 | 0.048970134 | -0.085871105 | 0.063718685 |
| CTD-308 | pink | -0.056897128 | 0.219726185 | -0.001252755 | 0.978459955 |
| CTD-313 | pink | -0.077018203 | 0.096435218 | -0.071546144 | 0.122597824 |
| CTRC    | pink | -0.059865109 | 0.1965694   | -0.059171853 | 0.201811938 |
| CU10478 | pink | -0.046047059 | 0.3207366   | -0.035617886 | 0.442552597 |
| CYP11B1 | pink | 0.018159253  | 0.695497628 | 0.020738452  | 0.654868736 |

|              |              |             |              |             |
|--------------|--------------|-------------|--------------|-------------|
| CYP11B2pink  | -0.035958315 | 0.438201415 | -0.02845669  | 0.539591759 |
| CYP2A13pink  | -0.102335547 | 0.02701011  | -0.096776342 | 0.036558633 |
| CYP2F1 pink  | -0.087229518 | 0.059621044 | -0.064926266 | 0.161277895 |
| CYP46A1pink  | -0.288521412 | 2.10E-10    | -0.296892311 | 5.87E-11    |
| CYP4F2 pink  | -0.118718211 | 0.010236589 | -0.114583955 | 0.013222867 |
| DAND5 pink   | -0.078915858 | 0.088479543 | -0.072839174 | 0.115964926 |
| DAO pink     | -0.0448983   | 0.332970217 | -0.04175924  | 0.367907877 |
| DCST1 pink   | 0.189065321  | 3.92E-05    | 0.182354663  | 7.39E-05    |
| DCST2 pink   | 0.265032893  | 6.01E-09    | 0.261454497  | 9.75E-09    |
| DDX4 pink    | -0.1110048   | 0.016402866 | -0.105865075 | 0.022133703 |
| DEFB116pink  | 0.046082803  | 0.320360703 | 0.043392193  | 0.349458092 |
| DEFB118pink  | -0.061379367 | 0.185465414 | -0.056748408 | 0.220935823 |
| DEFB119pink  | -0.022997328 | 0.620098926 | -0.022361545 | 0.629804315 |
| DEFB121pink  | -0.057483737 | 0.21500114  | -0.050022811 | 0.28068558  |
| DEFB123 pink | -0.044846663 | 0.333527084 | -0.03477486  | 0.453433064 |
| DGAT2Lpink   | 0.015700908  | 0.735053459 | 0.017649484  | 0.703636601 |
| DMRTC2pink   | -0.022063012 | 0.634383719 | -0.002138454 | 0.96323965  |
| DNAH17 pink  | -0.249974521 | 4.38E-08    | -0.256484881 | 1.89E-08    |
| DNAJC5pink   | -0.127132515 | 0.005938364 | -0.126643749 | 0.006134534 |
| DNMT3Lpink   | -0.077341318 | 0.095041682 | -0.069139505 | 0.135725654 |
| DSCAM pink   | -0.104519918 | 0.023893881 | -0.074864546 | 0.106144292 |
| DUSP21 pink  | -0.030420405 | 0.511965359 | -0.014859956 | 0.748753468 |
| DUX4 pink    | 0.094746891  | 0.040695759 | 0.075292564  | 0.104155561 |
| EFCAB8 pink  | -0.097169683 | 0.035799555 | -0.092819031 | 0.044985464 |
| EFCAB9 pink  | -0.045897973 | 0.322307527 | -0.055117864 | 0.234510953 |
| ERICH6 pink  | -0.104377558 | 0.024087059 | -0.078806345 | 0.08892385  |
| ETV3L pink   | -0.03138496  | 0.49867008  | -0.042466655 | 0.359842174 |
| FAM129Cpink  | -0.12043945  | 0.00918118  | -0.112232997 | 0.01524329  |
| FAM151A/pink | -0.046879967 | 0.31205208  | -0.050508311 | 0.276037479 |
| FAM187Epink  | -0.125229048 | 0.006735539 | -0.123916003 | 0.007340007 |
| FAM205A/pink | -0.040086947 | 0.387416466 | -0.032939994 | 0.477627047 |
| FAM221Epink  | 0.101425809  | 0.028407632 | 0.124380103  | 0.007121027 |
| FAM47A pink  | -0.05513908  | 0.234330622 | -0.052762119 | 0.255147168 |
| FAM47B pink  | 0.051057396  | 0.270844001 | 0.05238945   | 0.258523623 |
| FAM71C pink  | -0.074305934 | 0.108784821 | -0.058268214 | 0.208796997 |
| FBXW12 pink  | -0.077001194 | 0.096509024 | -0.07142399  | 0.123239414 |
| FCAMR pink   | 0.019419568  | 0.675526606 | 0.017860011  | 0.700271158 |
| FFAR3 pink   | 0.012103748  | 0.794190608 | 0.0103938    | 0.822744835 |
| FGF6 pink    | 0.010093616  | 0.827782964 | 0.02736659   | 0.555242548 |
| FNDC7 pink   | -0.107696423 | 0.019918669 | -0.113011084 | 0.014546473 |
| FP325317pink | -0.02029729  | 0.661750434 | -0.014574788 | 0.75341743  |
| FSCB pink    | 0.013618967  | 0.769114586 | 0.013104133  | 0.777609276 |
| FSD2 pink    | -0.073804017 | 0.111201285 | -0.076577314 | 0.098362919 |
| G6PC pink    | -0.023597357 | 0.61099939  | -0.026407965 | 0.569185929 |
| GABRB1 pink  | -0.142259549 | 0.002058197 | -0.147064409 | 0.001437984 |

|         |      |              |             |              |             |
|---------|------|--------------|-------------|--------------|-------------|
| GAGE10  | pink | -0.138469811 | 0.002710479 | -0.117698863 | 0.010911175 |
| GATA1   | pink | -0.121438472 | 0.008614043 | -0.120908673 | 0.008910795 |
| GDF2    | pink | -0.004548472 | 0.921908164 | 0.013458183  | 0.771764591 |
| GGTLC1  | pink | 0.060605618  | 0.191080102 | 0.06036417   | 0.192857431 |
| GGTLC2  | pink | 0.043987935  | 0.342875508 | 0.02621173   | 0.572060619 |
| GIP     | pink | -0.049923687 | 0.281641055 | -0.048166323 | 0.298945924 |
| GJA10   | pink | -0.039970091 | 0.388802785 | -0.029250801 | 0.528330845 |
| GJA8    | pink | -0.165987556 | 0.000315258 | -0.161570925 | 0.000456132 |
| GJD2    | pink | -0.006605205 | 0.886796674 | -0.027644052 | 0.551238076 |
| GLT6D1  | pink | 0.003350208  | 0.942438932 | -0.003938061 | 0.932361176 |
| GNAT1   | pink | -0.117951639 | 0.010740319 | -0.122940696 | 0.007819926 |
| GOLGA6  | pink | -0.029792031 | 0.520724889 | -0.031140037 | 0.502028636 |
| GOLGA6  | pink | -0.065042516 | 0.16052739  | -0.073243621 | 0.113948975 |
| GOLGA6  | pink | -0.030963143 | 0.504461733 | -0.017124295 | 0.712057308 |
| GOLGA8  | pink | -0.051713868 | 0.264722937 | -0.075672703 | 0.102414137 |
| GOT1L1  | pink | -0.042744689 | 0.356702667 | -0.034787843 | 0.453264371 |
| GPR101  | pink | -0.032452912 | 0.484165801 | -0.020758183 | 0.654561627 |
| GPR119  | pink | -0.023828035 | 0.607516897 | -0.032241262 | 0.487022057 |
| GPR144  | pink | -0.089226338 | 0.053995242 | -0.070837294 | 0.126357397 |
| GPR148  | pink | -0.056644824 | 0.221781139 | -0.053320125 | 0.250148884 |
| GPR152  | pink | -0.04754067  | 0.305274007 | -0.033888384 | 0.465034875 |
| GPR32   | pink | -0.000573288 | 0.990141856 | 0.013078542  | 0.778032226 |
| GPR33   | pink | -0.067976375 | 0.142446239 | -0.038415306 | 0.407533043 |
| GPR42   | pink | -0.028630126 | 0.537122159 | -0.006690161 | 0.885350626 |
| GPX5    | pink | -0.014170626 | 0.760042885 | -0.016053243 | 0.729338131 |
| GRK7    | pink | -0.086014978 | 0.063274    | -0.082408889 | 0.075219164 |
| GRXCR1  | pink | -0.006088782 | 0.895594726 | 0.000445626  | 0.99233704  |
| GSG1    | pink | -0.037039665 | 0.424543933 | -0.029850603 | 0.51990515  |
| H1FNT   | pink | -0.111511038 | 0.01591587  | -0.104968027 | 0.023294527 |
| HEATR4  | pink | -0.228543511 | 5.98E-07    | -0.22802889  | 6.35E-07    |
| HIGD2B  | pink | 0.042662176  | 0.357632586 | 0.04181433   | 0.367275755 |
| HIPK4   | pink | -0.139465731 | 0.002522929 | -0.140038569 | 0.002420491 |
| HSD3B1  | pink | -0.0374386   | 0.419568684 | -0.042536517 | 0.359051685 |
| HTR1A   | pink | -0.052224134 | 0.260031256 | -0.053187378 | 0.251331724 |
| HTR3D   | pink | 0.042657588  | 0.357684339 | 0.024258153  | 0.601047198 |
| HZGJ    | pink | -0.085997036 | 0.063329313 | -0.078253733 | 0.091193281 |
| IDI2    | pink | -0.041871568 | 0.366619702 | -0.042015946 | 0.364968113 |
| IFNL1   | pink | -0.171428561 | 0.000197444 | -0.163287868 | 0.000395556 |
| IFNL2   | pink | -0.096406995 | 0.037283808 | -0.082744661 | 0.07403459  |
| IFNL3   | pink | -0.135413195 | 0.003368114 | -0.1307132   | 0.004664786 |
| IL1RAPL | pink | -0.031697529 | 0.494401269 | -0.036039338 | 0.437169441 |
| IL22    | pink | -0.035259157 | 0.447164207 | -0.017155427 | 0.71155716  |
| IL31    | pink | -0.0357901   | 0.44034837  | -0.031942387 | 0.491070848 |
| INHBC   | pink | -0.156401903 | 0.000694576 | -0.166654289 | 0.000297918 |
| IQCF1   | pink | 0.045840219  | 0.322917436 | 0.04110366   | 0.375481918 |



|         |      |              |             |              |             |
|---------|------|--------------|-------------|--------------|-------------|
| IQCF2   | pink | -0.026441643 | 0.568693264 | -0.017460969 | 0.706655088 |
| IQCF6   | pink | 0.143494375  | 0.001878921 | 0.131506043  | 0.004418528 |
| IRGC    | pink | -0.043722166 | 0.345802276 | -0.0323458   | 0.48561017  |
| ITIH6   | pink | -0.143879861 | 0.001825955 | -0.137344176 | 0.002937681 |
| IZUMO1  | pink | -0.05024225  | 0.27857819  | -0.035472598 | 0.444417053 |
| KCNG4   | pink | -0.013067581 | 0.778213397 | -0.002336901 | 0.959831064 |
| KCNH4   | pink | -0.044266343 | 0.339826541 | -0.02746953  | 0.553755218 |
| KCNH5   | pink | 0.019004333  | 0.682082175 | 0.009598205  | 0.836113061 |
| KCNJ6   | pink | -0.069049753 | 0.136235393 | -0.06778137  | 0.143597492 |
| KCNK10  | pink | -0.040173342 | 0.386393465 | -0.031639834 | 0.495187745 |
| KCTD19  | pink | -0.115371235 | 0.01260112  | -0.115170181 | 0.012757397 |
| KHDC3L  | pink | -0.169919451 | 0.000225128 | -0.155651184 | 0.000737542 |
| KIF2B   | pink | 0.006969204  | 0.880603693 | 0.007283417  | 0.875263579 |
| KIR3DL3 | pink | -0.038186863 | 0.410329541 | -0.021382236 | 0.644878693 |
| KIR3DX1 | pink | -0.043011935 | 0.35370124  | -0.028112807 | 0.544505098 |
| KLHL10  | pink | -0.175976146 | 0.000132075 | -0.185489783 | 5.51E-05    |
| KRT32   | pink | 0.041889522  | 0.36641407  | 0.02110401   | 0.649188412 |
| KRT35   | pink | 0.032809646  | 0.47937215  | 0.005103489  | 0.912415336 |
| KRTAP1  | pink | -0.016247785 | 0.726188804 | -0.021283999 | 0.646399032 |
| KRTAP1  | pink | -0.044160756 | 0.340980824 | -0.049609071 | 0.284688256 |
| KRTAP1  | pink | -0.067682524 | 0.144183759 | -0.066448463 | 0.15165789  |
| KRTAP1  | pink | -0.055912408 | 0.227824127 | -0.054613589 | 0.238826119 |
| KRTAP1  | pink | -0.047586032 | 0.304812246 | -0.05042395  | 0.276841356 |
| KRTAP1  | pink | -0.048339666 | 0.297208212 | -0.047603927 | 0.30463021  |
| KRTAP1  | pink | -0.058048058 | 0.210524928 | -0.044519825 | 0.337065661 |
| KRTAP1  | pink | -0.025170834 | 0.587422778 | -0.023449489 | 0.613236353 |
| KRTAP1  | pink | -0.086222475 | 0.062637167 | -0.07643116  | 0.099008676 |
| KRTAP1  | pink | -0.060271071 | 0.193545964 | -0.064621168 | 0.163260148 |
| KRTAP2  | pink | -0.009405081 | 0.839365365 | -0.005170001 | 0.911278542 |
| KRTAP2  | pink | -0.00788618  | 0.865035534 | -0.00959154  | 0.836225262 |
| KRTAP2  | pink | -0.003988402 | 0.931498656 | 0.004605636  | 0.920929913 |
| KRTAP5  | pink | -0.118687614 | 0.010256286 | -0.120658341 | 0.009054151 |
| KRTAP5  | pink | -0.05849759  | 0.20700762  | -0.046236592 | 0.318746682 |
| KRTAP5  | pink | -0.015121449 | 0.74448476  | -0.01458059  | 0.753322435 |
| KRTAP6  | pink | -0.020952872 | 0.651534478 | -0.014406851 | 0.756168258 |
| KRTAP6  | pink | -0.008785191 | 0.849822858 | -0.005278205 | 0.909429567 |
| KRTAP9  | pink | -0.016409941 | 0.723567266 | -0.0159772   | 0.730570388 |
| LACTBL  | pink | 0.003975807  | 0.931714438 | 0.008109114  | 0.861258256 |
| LALBA   | pink | -0.041203923 | 0.374317376 | -0.031312251 | 0.499665873 |
| LCE3A   | pink | -0.049080877 | 0.289853884 | -0.055808783 | 0.228688471 |
| LCE3C   | pink | 0.040118514  | 0.387042496 | 0.034962047  | 0.451004226 |
| LCT     | pink | -0.02094065  | 0.651724343 | -0.025314547 | 0.585290489 |
| LELP1   | pink | -0.017903387 | 0.699578485 | -0.00403514  | 0.93069792  |
| LEP     | pink | -0.068708415 | 0.138187448 | -0.070446024 | 0.128470592 |
| LGALS13 | pink | 0.031966342  | 0.49074568  | 0.039370498  | 0.395963269 |

|             |              |             |              |             |
|-------------|--------------|-------------|--------------|-------------|
| LHFPL5 pink | 0.031363592  | 0.498962622 | 0.03150809   | 0.496986137 |
| LMOD2 pink  | 0.008648527  | 0.852131979 | 0.015994957  | 0.730282579 |
| LMOD3 pink  | 0.109224424  | 0.018220719 | 0.120832682  | 0.008954097 |
| LOXHD1 pink | -0.174794484 | 0.000146763 | -0.176065175 | 0.000131027 |
| LRRC10 pink | 0.040428154  | 0.383385801 | 0.052220474  | 0.260064696 |
| LRRC30 pink | -0.032363111 | 0.485376567 | -0.026819163 | 0.563184592 |
| LRRC3C pink | -0.076469317 | 0.098839764 | -0.071338547 | 0.123689736 |
| LY6G6E pink | -0.045407514 | 0.327510793 | -0.06584866  | 0.155395179 |
| LY6G6F pink | -0.012228674 | 0.792114735 | -0.01864633  | 0.687753466 |
| LYPD4 pink  | -0.007246081 | 0.875897816 | 0.01449847   | 0.75466715  |
| LYZL4 pink  | 0.07148292   | 0.122929568 | 0.117526922  | 0.011028764 |
| LYZL6 pink  | -0.076433356 | 0.098998949 | -0.057818038 | 0.212341274 |
| MAGEB1 pink | -0.0694755   | 0.133830429 | -0.045640142 | 0.325036117 |
| MAGEB3 pink | -0.046751051 | 0.31338605  | -0.044587721 | 0.336328601 |
| MCHR2 pink  | -0.086537416 | 0.06168068  | -0.088076931 | 0.057176996 |
| MDS2 pink   | -0.099615856 | 0.031373447 | -0.075388862 | 0.103712217 |
| MEP1A pink  | 0.046674557  | 0.314179346 | 0.013473823  | 0.771506694 |
| METTL1 pink | -0.019720371 | 0.670792892 | -0.03646283  | 0.431798285 |
| MMD2 pink   | -0.051881099 | 0.263178954 | -0.05339484  | 0.249484844 |
| MOG pink    | -0.040822409 | 0.378760473 | -0.035641155 | 0.442254392 |
| MOGAT3 pink | -0.056772468 | 0.220739803 | -0.052397219 | 0.25845292  |
| MPL pink    | -0.187631531 | 4.50E-05    | -0.20171282  | 1.12E-05    |
| MPP4 pink   | -0.076617619 | 0.09818543  | -0.025589217 | 0.581225176 |
| MRGPRE pink | -0.074232117 | 0.109137592 | -0.052182836 | 0.260408821 |
| MRGPRX pink | -0.045197415 | 0.329756268 | -0.027824173 | 0.548646084 |
| MRGPRX pink | -0.062652804 | 0.176491077 | -0.067413718 | 0.14578733  |
| MRGPRX pink | -0.01373019  | 0.767283009 | -0.000573402 | 0.9901399   |
| MROH7 pink  | -0.22145942  | 1.34E-06    | -0.240296008 | 1.47E-07    |
| MS4A10 pink | -0.0629036   | 0.174762308 | -0.045337674 | 0.328256118 |
| MS4A18 pink | -0.095762372 | 0.038578704 | -0.080897851 | 0.080742253 |
| MUC17 pink  | -0.039062334 | 0.399674126 | -0.029621979 | 0.523108577 |
| MYL7 pink   | -0.160330443 | 0.000505151 | -0.141521417 | 0.002172697 |
| MYO16 pink  | -0.155690092 | 0.000735256 | -0.14795733  | 0.001343691 |
| MYPN pink   | 0.006458231  | 0.889299234 | 0.024246295  | 0.601225146 |
| NANOG pink  | -0.05531576  | 0.232832661 | -0.050183305 | 0.279143207 |
| NANOG pink  | -0.04850955  | 0.295511735 | -0.023214076 | 0.616805116 |
| NANOS2 pink | -0.071536376 | 0.122649032 | -0.065247558 | 0.159210064 |
| NKX2-6 pink | -0.027236893 | 0.557119244 | -0.014695331 | 0.751444822 |
| NLRP10 pink | -0.010935499 | 0.813671787 | -0.002953526 | 0.949244673 |
| NLRP12 pink | -0.029008871 | 0.531748855 | -0.016627362 | 0.720057354 |
| NLRP13 pink | -0.028728853 | 0.53571889  | 0.003424083  | 0.94117193  |
| NLRP5 pink  | 0.01567518   | 0.735471368 | 0.015865975  | 0.732374011 |
| NLRP8 pink  | -0.021983602 | 0.635604201 | -0.024022242 | 0.604591864 |
| NLRP9 pink  | -0.000342699 | 0.994106918 | -0.017001961 | 0.714023859 |
| NMRK2 pink  | -0.140734345 | 0.002301177 | -0.13581598  | 0.00327387  |

|        |      |              |             |              |             |
|--------|------|--------------|-------------|--------------|-------------|
| NOBOX  | pink | -0.073513159 | 0.112620817 | -0.086614752 | 0.06144766  |
| NPHS1  | pink | -0.136538395 | 0.003110817 | -0.130389274 | 0.004768913 |
| NPY4R  | pink | -0.07770188  | 0.093505681 | -0.081223574 | 0.079524735 |
| NR1I2  | pink | -0.313617194 | 4.07E-12    | -0.315657183 | 2.90E-12    |
| NR1I3  | pink | -0.114994342 | 0.012895474 | -0.123911591 | 0.007342118 |
| NT5DC4 | pink | -0.017666134 | 0.703370226 | -0.038341361 | 0.408437003 |
| NUTM1  | pink | -0.107153702 | 0.020554055 | -0.108488527 | 0.019022016 |
| OCM    | pink | -0.039288718 | 0.396946025 | -0.035577465 | 0.443070866 |
| OCM2   | pink | -0.050941255 | 0.271936911 | -0.04828668  | 0.297738663 |
| ODF1   | pink | -0.035882843 | 0.439163937 | -0.047649769 | 0.304164209 |
| ODF4   | pink | -0.004200906 | 0.927858546 | 0.009800376  | 0.832711388 |
| OLAH   | pink | -0.168133094 | 0.000262585 | -0.16874916  | 0.000249054 |
| OPN1LW | pink | -0.134023494 | 0.003712487 | -0.12849332  | 0.005421533 |
| OPN1MW | pink | -0.00638818  | 0.890492402 | -0.014321349 | 0.757569997 |
| OPRD1  | pink | -0.102425157 | 0.026875709 | -0.096507173 | 0.037085923 |
| OR10A2 | pink | -0.049787061 | 0.282961621 | -0.045422289 | 0.327353254 |
| OR10A4 | pink | -0.076107834 | 0.100449225 | -0.069698826 | 0.132582061 |
| OR10G2 | pink | -0.065395023 | 0.158267706 | -0.050197009 | 0.279011779 |
| OR10G3 | pink | -0.024005158 | 0.604848928 | -0.007325192 | 0.874554014 |
| OR10H2 | pink | -0.064261527 | 0.165620229 | -0.052322888 | 0.259129917 |
| OR10H3 | pink | -0.020606962 | 0.656916827 | -0.019991856 | 0.666531694 |
| OR10H5 | pink | -0.103649088 | 0.025096837 | -0.090656934 | 0.050242241 |
| OR10J3 | pink | -0.01722635  | 0.710418209 | -0.013622622 | 0.769054389 |
| OR10J5 | pink | 0.012894221  | 0.781080478 | 0.007628233  | 0.86940988  |
| OR10K1 | pink | -0.021803435 | 0.638376913 | -0.020627337 | 0.656599303 |
| OR10K2 | pink | -0.005585961 | 0.904173368 | 0.003695627  | 0.936516095 |
| OR10P1 | pink | -0.04497595  | 0.332133943 | -0.039291065 | 0.396917804 |
| OR10S1 | pink | -0.017198075 | 0.71087221  | -0.016038788 | 0.729572313 |
| OR10V1 | pink | -0.056048902 | 0.226689177 | -0.04755822  | 0.305095302 |
| OR10W1 | pink | -0.083946997 | 0.069916926 | -0.071790866 | 0.121320296 |
| OR11A1 | pink | -0.044655434 | 0.335594547 | -0.035998773 | 0.437685928 |
| OR11G2 | pink | -0.023922401 | 0.60609482  | -0.027695668 | 0.550494697 |
| OR11L1 | pink | -0.027088314 | 0.559272952 | -0.021126887 | 0.648833608 |
| OR12D3 | pink | 0.007597661  | 0.869928591 | 0.002761485  | 0.952540826 |
| OR13C8 | pink | -0.002528813 | 0.956535426 | 0.009224984  | 0.84240076  |
| OR13F1 | pink | -0.048453691 | 0.296068828 | -0.054272943 | 0.2417725   |
| OR13J1 | pink | 0.018805722  | 0.685226278 | 0.004817648  | 0.917302793 |
| OR14I1 | pink | -0.035537156 | 0.443588037 | -0.028213008 | 0.543071159 |
| OR14J1 | pink | -0.024258654 | 0.601039685 | -0.020296852 | 0.661757285 |
| OR1A1  | pink | -0.040386147 | 0.383880634 | -0.024565653 | 0.596440981 |
| OR1A2  | pink | -0.015354268 | 0.740690697 | -0.020147239 | 0.66409763  |
| OR1E2  | pink | -0.016243447 | 0.726258975 | -0.016488859 | 0.722292595 |
| OR1G1  | pink | -0.001475047 | 0.974639015 | -0.006163996 | 0.894312514 |
| OR1I1  | pink | -0.035130215 | 0.448828446 | -0.022589037 | 0.626324159 |
| OR1K1  | pink | -0.013331552 | 0.773853559 | -0.000640447 | 0.988987079 |

|        |      |              |             |              |             |
|--------|------|--------------|-------------|--------------|-------------|
| OR1M1  | pink | -0.03581901  | 0.43997896  | -0.032711037 | 0.480694633 |
| OR2AT4 | pink | -0.069978308 | 0.131032478 | -0.053416867 | 0.249289312 |
| OR2B11 | pink | -0.040859872 | 0.378322757 | -0.039381834 | 0.395827166 |
| OR2F2  | pink | -0.044726651 | 0.334823626 | -0.043859944 | 0.344283029 |
| OR2G2  | pink | 0.002603803  | 0.955247848 | 0.005665871  | 0.902809256 |
| OR2G3  | pink | 0.048143002  | 0.29918022  | 0.044609524  | 0.336092122 |
| OR2G6  | pink | -0.08600921  | 0.063291777 | -0.082088345 | 0.076364364 |
| OR2H2  | pink | -0.173638494 | 0.000162603 | -0.176686232 | 0.000123926 |
| OR2L2  | pink | -0.15830075  | 0.000596033 | -0.160724376 | 0.000489078 |
| OR2M4  | pink | -0.041606053 | 0.369669129 | -0.035615259 | 0.442586257 |
| OR2M7  | pink | -0.014266817 | 0.758464415 | -0.013955143 | 0.763582542 |
| OR2T2  | pink | -0.038611301 | 0.405142819 | -0.038042868 | 0.412098092 |
| OR2T27 | pink | -0.050595453 | 0.27520876  | -0.045687913 | 0.324529436 |
| OR2T3  | pink | -0.010120776 | 0.827326842 | -0.008253181 | 0.858818947 |
| OR2T34 | pink | 0.02131147   | 0.645973739 | 0.018828326  | 0.684868166 |
| OR2T35 | pink | -0.039130509 | 0.398851387 | -0.039935161 | 0.389217761 |
| OR2T6  | pink | -0.022884847 | 0.62181125  | -0.01996501  | 0.666952592 |
| OR2T7  | pink | 0.013626799  | 0.768985574 | 0.01548535   | 0.738557332 |
| OR2Y1  | pink | -0.054587851 | 0.23904785  | -0.045542921 | 0.326068869 |
| OR2Z1  | pink | -0.020885931 | 0.652574676 | -0.020023908 | 0.666029311 |
| OR3A1  | pink | -0.033665956 | 0.467971518 | -0.03285205  | 0.47880407  |
| OR4B1  | pink | 0.023685678  | 0.609664994 | 0.012145438  | 0.793497702 |
| OR4C11 | pink | -0.043082781 | 0.352908241 | -0.023630205 | 0.610502957 |
| OR4C12 | pink | -0.028803389 | 0.534660682 | -0.013946567 | 0.76372352  |
| OR4C15 | pink | -0.053164358 | 0.251537245 | -0.04697453  | 0.311075955 |
| OR4C5  | pink | -0.008991599 | 0.846337763 | 0.004138725  | 0.928923534 |
| OR4D1  | pink | -0.033327534 | 0.472459179 | -0.01664873  | 0.719712718 |
| OR4D10 | pink | -0.030265844 | 0.514112813 | -0.028197449 | 0.543293691 |
| OR4D11 | pink | -0.043923551 | 0.343583088 | -0.049108248 | 0.28958466  |
| OR4D5  | pink | 0.008697048  | 0.85131201  | 0.023126568  | 0.618134015 |
| OR4D9  | pink | -0.025381403 | 0.584299765 | -0.026658232 | 0.565529718 |
| OR4K13 | pink | -0.057845153 | 0.212126577 | -0.054296403 | 0.241568769 |
| OR4K14 | pink | 0.022302889  | 0.630702971 | 0.015140917  | 0.74416727  |
| OR4K2  | pink | -0.010549912 | 0.820127593 | -0.003762312 | 0.935373049 |
| OR4M1  | pink | -0.000264768 | 0.99544701  | -0.003845166 | 0.933953028 |
| OR4N2  | pink | -0.040504563 | 0.382486698 | -0.037484627 | 0.418996872 |
| OR4Q3  | pink | 0.023249887  | 0.61626165  | 0.028388163  | 0.540569091 |
| OR51A7 | pink | 0.043490924  | 0.348361679 | 0.066001128  | 0.154438631 |
| OR51D1 | pink | -0.071661427 | 0.121994708 | -0.062978711 | 0.17424702  |
| OR51F2 | pink | -0.033655446 | 0.468110539 | -0.034230681 | 0.460535653 |
| OR51L1 | pink | 0.047345842  | 0.307262527 | 0.04760049   | 0.304665165 |
| OR51S1 | pink | -0.03272223  | 0.480544422 | -0.039332171 | 0.396423668 |
| OR51V1 | pink | 0.001238069  | 0.978712407 | -0.00260999  | 0.955141617 |
| OR52B2 | pink | -0.019846276 | 0.668815379 | -0.007850422 | 0.865641684 |
| OR52I2 | pink | -0.004400476 | 0.924441357 | -0.003651293 | 0.937276096 |

|         |      |              |             |              |             |
|---------|------|--------------|-------------|--------------|-------------|
| OR52K1  | pink | -0.084360225 | 0.068545754 | -0.070462353 | 0.128381859 |
| OR52M1  | pink | 0.028165263  | 0.543754176 | 0.026465728  | 0.568341063 |
| OR52W1  | pink | -0.061587134 | 0.183978685 | -0.062036183 | 0.180795481 |
| OR56B4  | pink | -0.090702566 | 0.05012621  | -0.082528779 | 0.074794444 |
| OR5A1   | pink | -0.030052894 | 0.517079143 | -0.028603538 | 0.537500373 |
| OR5AP2  | pink | -0.044378    | 0.338608611 | -0.041910312 | 0.366176047 |
| OR5B12  | pink | -0.026836526 | 0.562931864 | -0.025384215 | 0.584258106 |
| OR5C1   | pink | 0.005285527  | 0.909304463 | 0.01455126   | 0.753802628 |
| OR5J2   | pink | -0.027140453 | 0.558516712 | -0.021879931 | 0.637199045 |
| OR5M9   | pink | -0.016586574 | 0.720715371 | -0.01473717  | 0.750760541 |
| OR6B2   | pink | -0.055032183 | 0.235240232 | -0.050834998 | 0.272939439 |
| OR6C6   | pink | -0.061532089 | 0.184371712 | -0.081187084 | 0.079660383 |
| OR6C75  | pink | -0.000898286 | 0.984553843 | -0.002859003 | 0.95086695  |
| OR6K2   | pink | -0.072477218 | 0.117792675 | -0.074589213 | 0.107439376 |
| OR6K6   | pink | 0.053483314  | 0.248700104 | 0.032322552  | 0.485923968 |
| OR6M1   | pink | -0.013781635 | 0.766436281 | -0.019578435 | 0.673024921 |
| OR6N2   | pink | -0.00411763  | 0.929284861 | -0.002259971 | 0.961152351 |
| OR6S1   | pink | -0.013324573 | 0.77396874  | -0.011529885 | 0.80374492  |
| OR6T1   | pink | 0.019581229  | 0.672980949 | 0.01761568   | 0.704177528 |
| OR6X1   | pink | -0.105996059 | 0.021968471 | -0.0969499   | 0.036222029 |
| OR6Y1   | pink | -0.037479092 | 0.419065608 | -0.037097057 | 0.423826077 |
| OR7A10  | pink | -0.070403176 | 0.128703663 | -0.061188756 | 0.186837156 |
| OR7C2   | pink | -0.076877404 | 0.097047531 | -0.065948296 | 0.154769581 |
| OR7D4   | pink | -0.075145452 | 0.104835745 | -0.068572823 | 0.138968817 |
| OR7G1   | pink | -0.051260963 | 0.268935655 | -0.049987382 | 0.281026837 |
| OR7G2   | pink | -0.066258538 | 0.15283383  | -0.057038076 | 0.218584147 |
| OR7G3   | pink | -0.073493739 | 0.112716101 | -0.068633761 | 0.138617236 |
| OR8K1   | pink | 0.015718402  | 0.734769323 | 0.024533368  | 0.596923853 |
| OR8K5   | pink | -0.041825163 | 0.367151537 | -0.034697013 | 0.454445332 |
| OR8S1   | pink | -0.067399132 | 0.14587473  | -0.072263265 | 0.118883608 |
| OR9A4   | pink | -0.085944799 | 0.063490591 | -0.080638843 | 0.081721134 |
| OR9Q1   | pink | -0.050874939 | 0.272562299 | -0.039097951 | 0.399244174 |
| OTUD6A  | pink | -0.02675992  | 0.56404735  | -0.005592889 | 0.904055088 |
| P2RX3   | pink | -0.067667929 | 0.144270482 | -0.077958275 | 0.092425555 |
| P2RX6   | pink | -0.126346449 | 0.006256685 | -0.116887299 | 0.01147611  |
| PADI4   | pink | -0.043192837 | 0.351678589 | -0.023555477 | 0.611632594 |
| PADI6   | pink | -0.011769427 | 0.799753109 | -0.002244071 | 0.961425447 |
| PANX3   | pink | -0.072075583 | 0.119847075 | -0.064095065 | 0.166721225 |
| PDZD3   | pink | -0.167433696 | 0.000278777 | -0.156633717 | 0.000681785 |
| PEX5L   | pink | -0.041668114 | 0.368954954 | -0.044384458 | 0.338538264 |
| PGAM4   | pink | 0.158808035  | 0.000571996 | 0.134184042  | 0.003671134 |
| PGLYRP1 | pink | -0.046068405 | 0.320512079 | -0.032023696 | 0.48996759  |
| PGLYRP2 | pink | -0.104694973 | 0.023658174 | -0.08727055  | 0.059500744 |
| PIWIL3  | pink | -0.05552714  | 0.231049407 | -0.04910837  | 0.289583461 |
| PKLR    | pink | -0.025117438 | 0.588215924 | -0.019211864 | 0.678802728 |

|               |              |             |              |             |
|---------------|--------------|-------------|--------------|-------------|
| PLA2G2F pink  | 0.00493981   | 0.915213613 | -0.004695174 | 0.919397889 |
| PNLIPRP pink  | -0.051543479 | 0.266302471 | -0.047584031 | 0.304832598 |
| PP2672 pink   | -0.080999986 | 0.080358869 | -0.065814972 | 0.155607132 |
| PPEF2 pink    | 0.021652092  | 0.640709942 | 0.02773283   | 0.549959789 |
| PPIAL4G pink  | -0.01391828  | 0.764188577 | -0.020207351 | 0.663156923 |
| PPP3R2 pink   | -0.059793475 | 0.197106454 | -0.044730133 | 0.334785964 |
| PRAMEF pink   | -0.016322682 | 0.72497756  | -0.014358775 | 0.756956321 |
| PRAMEF pink   | 0.004162225  | 0.928521031 | 0.006180827  | 0.894025639 |
| PRAMEF pink   | -0.063515923 | 0.170594478 | -0.059873894 | 0.196503611 |
| PRAMEF pink   | -0.054850294 | 0.236793687 | -0.052269617 | 0.259615857 |
| PRDM14 pink   | -0.014407048 | 0.756165034 | -0.015516866 | 0.738044694 |
| PRKACG pink   | -0.023426318 | 0.613587214 | -0.013961219 | 0.763482659 |
| PRKAG3 pink   | -0.043956939 | 0.343216036 | -0.041171902 | 0.374689059 |
| PRM1 pink     | -0.017882943 | 0.699904921 | -0.000116042 | 0.998004512 |
| PRNT pink     | -0.023744614 | 0.608775274 | -0.02061372  | 0.656811502 |
| PRODH2 pink   | -0.057886913 | 0.211796226 | -0.049373892 | 0.28698054  |
| PROP1 pink    | -0.043640193 | 0.346708186 | -0.02295571  | 0.620732253 |
| PRR21 pink    | -0.034750713 | 0.453746924 | -0.017215318 | 0.710595337 |
| PRR23A pink   | 0.013316376  | 0.774104024 | 0.021514875  | 0.642828275 |
| PRR23B pink   | -0.067228898 | 0.146897751 | -0.054052498 | 0.243692752 |
| PRR23C pink   | -0.065436296 | 0.15800471  | -0.051405887 | 0.267582675 |
| PRR30 pink    | -0.016915562 | 0.715413883 | -0.000214142 | 0.996317588 |
| PRSS38 pink   | -0.071720186 | 0.1216882   | -0.071744515 | 0.121561465 |
| PRSS54 pink   | -0.044065637 | 0.342022809 | -0.041290393 | 0.373314835 |
| PRSS55 pink   | 0.032003602  | 0.490240123 | 0.030120861  | 0.516131413 |
| PSG8 pink     | -0.036273523 | 0.434194537 | -0.035211706 | 0.447776255 |
| PSMB11 pink   | -0.029701562 | 0.521992338 | -0.030057275 | 0.517018024 |
| PTCHD3 pink   | -0.095737441 | 0.03862954  | -0.081820217 | 0.077333149 |
| PTX4 pink     | 0.063016911  | 0.173985389 | 0.054543325  | 0.239431783 |
| QRFPR pink    | -0.071165401 | 0.124606219 | -0.070369016 | 0.128889712 |
| RBPJL pink    | -0.196630163 | 1.87E-05    | -0.187258164 | 4.66E-05    |
| RD3L pink     | -0.106581227 | 0.021243296 | -0.108824227 | 0.01865275  |
| RESP18 pink   | -0.030461174 | 0.511399702 | -0.020335101 | 0.66115949  |
| RETNLB pink   | -0.082961678 | 0.073277091 | -0.080435335 | 0.082496974 |
| RFPL4A pink   | -0.068678347 | 0.138360426 | -0.0836629   | 0.070872571 |
| RFPL4AL pink  | -0.074547127 | 0.107638431 | -0.084959788 | 0.066595533 |
| RHAG pink     | -0.051476776 | 0.266922567 | -0.055581462 | 0.230592705 |
| RNF222 pink   | -0.015146995 | 0.744068155 | 0.007123555  | 0.877979761 |
| RP1-270 pink  | -0.110408874 | 0.01699282  | -0.104775024 | 0.023551058 |
| RP11-407 pink | -0.061073162 | 0.187672661 | -0.043395911 | 0.349416764 |
| RP11-446 pink | -0.058075948 | 0.210305463 | -0.063934346 | 0.167789436 |
| RP11-477 pink | -0.012257231 | 0.79164041  | -0.009132692 | 0.843957178 |
| RP11-761 pink | 0.049636848  | 0.284418333 | 0.067675869  | 0.144223295 |
| RP13-279 pink | -0.028424161 | 0.540055566 | -0.025450972 | 0.583269651 |
| RP1L1 pink    | 0.01502236   | 0.746101411 | 0.001108112  | 0.980946462 |

|               |              |             |              |             |
|---------------|--------------|-------------|--------------|-------------|
| RP4-533E pink | 0.001083315  | 0.981372759 | 0.019360684  | 0.676454763 |
| RPH3A pink    | -0.097700161 | 0.034797079 | -0.094424376 | 0.041388341 |
| RPL3L pink    | -0.049393451 | 0.286789425 | -0.048050007 | 0.300115733 |
| RSPH6A pink   | -0.001479197 | 0.974567686 | 0.022194824  | 0.632360026 |
| RTP2 pink     | -0.103265552 | 0.025643012 | -0.095170189 | 0.039801635 |
| S100A7L pink  | 0.012760466  | 0.783294583 | 0.017757631  | 0.701907051 |
| SAG pink      | -0.101269635 | 0.028653685 | -0.092934201 | 0.044718932 |
| SATL1 pink    | -0.073128805 | 0.114518455 | -0.079648006 | 0.085554753 |
| SBK3 pink     | -0.083687551 | 0.07078923  | -0.083468787 | 0.071531645 |
| SCN10A pink   | -0.021465871 | 0.643585491 | -0.016298349 | 0.725371003 |
| SEPT12 pink   | 0.092301226  | 0.04620036  | 0.098516604  | 0.033300926 |
| SERPINE pink  | -0.106450523 | 0.021403444 | -0.102228014 | 0.027172156 |
| SHISA7 pink   | -0.094832363 | 0.040513864 | -0.090431864 | 0.050817819 |
| SLC13A4 pink  | -0.116834265 | 0.011513912 | -0.11384997  | 0.013826715 |
| SLC17A2 pink  | -0.060090961 | 0.194883118 | -0.054211339 | 0.242308051 |
| SLC22A1 pink  | -0.067199693 | 0.147073806 | -0.061597612 | 0.183903941 |
| SLC22A1 pink  | -0.099419745 | 0.031710155 | -0.10248262  | 0.026789825 |
| SLC22A1 pink  | -0.114646752 | 0.0131723   | -0.113152462 | 0.014422912 |
| SLC22A1 pink  | -0.018586738 | 0.688699201 | -0.021200515 | 0.647692214 |
| SLC22A6 pink  | -0.012552185 | 0.786745839 | -0.003186143 | 0.945253264 |
| SLC22A9 pink  | -0.072325551 | 0.118565207 | -0.074446452 | 0.108115776 |
| SLC24A4 pink  | -0.048600985 | 0.294601327 | -0.056456185 | 0.223326502 |
| SLC26A8 pink  | -0.016170678 | 0.7274365   | -0.017601119 | 0.704410578 |
| SLC28A1 pink  | -0.037676162 | 0.41662227  | -0.022682535 | 0.624896226 |
| SLC2A7 pink   | -0.053687705 | 0.246893799 | -0.050842075 | 0.272872586 |
| SLC35G3 pink  | -0.023414724 | 0.613762815 | 0.009539635  | 0.837099117 |
| SLC36A2 pink  | -0.109269402 | 0.018172714 | -0.110982619 | 0.016424499 |
| SLC36A3 pink  | -0.075216478 | 0.104506914 | -0.068366086 | 0.140166683 |
| SLC4A1 pink   | -0.028039626 | 0.545553538 | -0.019477225 | 0.674618269 |
| SLC4A9 pink   | -0.063397784 | 0.171392774 | -0.05921098  | 0.201513375 |
| SLC5A11 pink  | -0.088617674 | 0.055661277 | -0.083018709 | 0.073079076 |
| SLFN14 pink   | -0.087181918 | 0.059760854 | -0.070690066 | 0.127149367 |
| SMCO1 pink    | -0.083000938 | 0.073140731 | -0.074524268 | 0.107746668 |
| SMCP pink     | -0.054681511 | 0.238241664 | -0.06779723  | 0.143503593 |
| SMIM21 pink   | -0.027451593 | 0.554014244 | -0.019900988 | 0.667956764 |
| SOAT2 pink    | -0.199322687 | 1.43E-05    | -0.185655066 | 5.43E-05    |
| SPACA3 pink   | -0.090651434 | 0.050256241 | -0.079076465 | 0.087831162 |
| SPATA21 pink  | 0.03953205   | 0.394026204 | 0.05852769   | 0.206773632 |
| SPATA3 pink   | -0.012582774 | 0.786238705 | -0.010815549 | 0.815678755 |
| SPIC pink     | -0.044283936 | 0.339634455 | -0.034560791 | 0.456219698 |
| SPPL2C pink   | -0.018209545 | 0.69469654  | -0.031070309 | 0.502986972 |
| SPTA1 pink    | -0.068234955 | 0.140930571 | -0.069037243 | 0.136306557 |
| SSMEM1 pink   | -0.071170013 | 0.124581738 | -0.076538999 | 0.098531882 |
| SSX1 pink     | -0.117742001 | 0.010881848 | -0.11046733  | 0.01693414  |
| SUN5 pink     | -0.042908908 | 0.35485644  | -0.040433007 | 0.383328657 |

|         |      |              |             |              |             |
|---------|------|--------------|-------------|--------------|-------------|
| SYCN    | pink | -0.094993773 | 0.040172235 | -0.085245768 | 0.065681489 |
| SYNPO2I | pink | -0.106142985 | 0.021784402 | -0.086282139 | 0.062455033 |
| TAAR5   | pink | -0.020955105 | 0.651499791 | -0.009161148 | 0.843477234 |
| TAF1L   | pink | -0.019514101 | 0.67403756  | -0.013322627 | 0.774000853 |
| TARM1   | pink | -0.026199392 | 0.572241589 | -0.012944391 | 0.780250436 |
| TAS1R2  | pink | -0.059562142 | 0.198848136 | -0.058229143 | 0.209102903 |
| TAS2R38 | pink | -0.219726601 | 1.63E-06    | -0.217875825 | 2.00E-06    |
| TBC1D21 | pink | -0.06476533  | 0.162321243 | -0.051217424 | 0.269343032 |
| TCP10   | pink | -0.031295266 | 0.499898644 | -0.02322835  | 0.616588473 |
| TEX13A  | pink | -0.012687323 | 0.784506096 | -0.013722828 | 0.7674042   |
| TEX37   | pink | -0.005508336 | 0.905498749 | 0.002544088  | 0.956273141 |
| TFDP3   | pink | -0.012840649 | 0.781967074 | -0.012321612 | 0.790571338 |
| TGM4    | pink | 0.032818614  | 0.479251973 | 0.026285789  | 0.570974912 |
| THEGL   | pink | -0.140242654 | 0.002384922 | -0.133379261 | 0.003882702 |
| TISP43  | pink | -0.027295229 | 0.556274757 | -0.011486096 | 0.804475179 |
| TKTL2   | pink | -0.144233621 | 0.001778555 | -0.137605008 | 0.002883543 |
| TMC2    | pink | -0.173782038 | 0.000160553 | -0.170562969 | 0.000212906 |
| TMCO2   | pink | -0.034378308 | 0.458602724 | -0.032963951 | 0.477306696 |
| TMEM20  | pink | -0.019642    | 0.672024958 | -0.000725518 | 0.987524343 |
| TMEM22  | pink | -0.046866462 | 0.312191648 | -0.040640664 | 0.380888398 |
| TMEM23  | pink | -0.065017361 | 0.160689567 | -0.069466374 | 0.133881634 |
| TMEM95  | pink | 0.00426594   | 0.926744835 | 0.013744853  | 0.76704165  |
| TMPRSS6 | pink | -0.125548237 | 0.00659551  | -0.134438238 | 0.003606513 |
| TPRX1   | pink | -0.072834618 | 0.115987793 | -0.070313727 | 0.129191273 |
| TRIM40  | pink | 0.011122782  | 0.810540658 | 0.011717596  | 0.800616408 |
| TRIM42  | pink | -0.052595431 | 0.256653601 | -0.032515484 | 0.483323115 |
| TRIM60  | pink | -0.023341122 | 0.614878023 | -0.020744729 | 0.65477103  |
| TRIM67  | pink | -0.042752242 | 0.356617619 | -0.036533639 | 0.430903943 |
| TRIML1  | pink | 0.004786758  | 0.917831165 | 0.011042727  | 0.811878709 |
| TRIML2  | pink | -0.057828436 | 0.212258922 | -0.053436943 | 0.249111183 |
| TRPV5   | pink | -0.100204794 | 0.030380602 | -0.095725064 | 0.038654799 |
| TSGA10  | pink | -0.001752877 | 0.969864278 | 0.034663192  | 0.454885504 |
| TSGA13  | pink | -0.007535455 | 0.870984216 | 0.004919559  | 0.915559904 |
| TSPAN16 | pink | -0.035882638 | 0.439166553 | -0.031374321 | 0.498815727 |
| TUBAL3  | pink | 0.160116193  | 0.000514098 | 0.141965037  | 0.002103204 |
| TULP2   | pink | -0.174498937 | 0.000150669 | -0.173033015 | 0.000171527 |
| TUSC5   | pink | -0.087679303 | 0.058313261 | -0.079676249 | 0.085443506 |
| TXNDC2  | pink | -0.079792968 | 0.084984999 | -0.083373717 | 0.071856259 |
| UBL4B   | pink | -0.132354132 | 0.004168165 | -0.140436682 | 0.002351548 |
| UGT1A3  | pink | -0.031481642 | 0.497347592 | -0.038162273 | 0.410631239 |
| UGT1A4  | pink | -0.057013885 | 0.218779855 | -0.06392336  | 0.167862638 |
| UGT1A5  | pink | -0.083766958 | 0.070521309 | -0.087210462 | 0.059676983 |
| UPB1    | pink | -0.08029799  | 0.083023934 | -0.060353881 | 0.192933436 |
| VHLL    | pink | -0.062496226 | 0.17757681  | -0.051683947 | 0.264999845 |
| VRTN    | pink | -0.071000097 | 0.12548611  | -0.072933859 | 0.115490485 |



|               |              |             |              |             |
|---------------|--------------|-------------|--------------|-------------|
| WFDC10.pink   | 0.013238312  | 0.775392736 | 0.00055521   | 0.990452716 |
| WFDC12 pink   | -0.062489109 | 0.177626275 | -0.068768761 | 0.137840784 |
| WFDC5 pink    | -0.054111844 | 0.243174752 | -0.061361773 | 0.18559172  |
| WFDC9 pink    | -0.09273979  | 0.045169626 | -0.092185849 | 0.04647478  |
| WNT8A pink    | -0.068222065 | 0.141005833 | -0.065303181 | 0.158854116 |
| XKR3 pink     | -0.053488283 | 0.248656079 | -0.044589361 | 0.336310802 |
| XXbac-Bpink   | -0.034247148 | 0.460319825 | -0.033984998 | 0.463762495 |
| XXbac-Bpink   | -0.035845275 | 0.439643503 | -0.039035465 | 0.399998666 |
| ZAN pink      | -0.044388292 | 0.338496492 | -0.035197298 | 0.447962188 |
| ZCCHC1pink    | -0.032267479 | 0.486667769 | -0.020926466 | 0.651944712 |
| ZG16 pink     | -0.074017411 | 0.110168794 | -0.054471481 | 0.240052181 |
| ZIM2 pink     | -0.167558212 | 0.000275827 | -0.168083151 | 0.000263711 |
| ZNF645 pink   | -0.039467971 | 0.394793853 | -0.019733732 | 0.670582931 |
| ZNF728 pink   | -0.199865904 | 1.35E-05    | -0.199606087 | 1.39E-05    |
| ZNF729 pink   | -0.165177263 | 0.000337599 | -0.155342812 | 0.000755894 |
| ZNRF4 pink    | 0.020256541  | 0.662387523 | 0.035386822  | 0.445519914 |
| ZP1 pink      | -0.165970459 | 0.000315715 | -0.167525822 | 0.000276592 |
| ZBP2 pink     | -0.064678229 | 0.162888031 | -0.060615364 | 0.19100861  |
| ZSCAN5pink    | -0.019959477 | 0.667039346 | -0.003993285 | 0.931414986 |
| ANKRD4plum1   | -0.194262136 | 2.37E-05    | -0.232267999 | 3.87E-07    |
| ARFGEF1plum1  | 0.004744842  | 0.918548181 | -0.032482071 | 0.483772998 |
| ARMC1 plum1   | -0.128386833 | 0.005460466 | -0.170874786 | 0.00020721  |
| ATP6V1Cplum1  | -0.156703059 | 0.000678001 | -0.187312182 | 4.64E-05    |
| ATP6V1Fplum1  | 0.030640605  | 0.508914005 | 0.012582821  | 0.786237935 |
| AZIN1 plum1   | 0.098698733  | 0.032974759 | 0.070599483  | 0.127638544 |
| C8orf76 plum1 | -0.062417308 | 0.178125913 | -0.07520225  | 0.104572719 |
| CHD7 plum1    | -0.123832897 | 0.00737985  | -0.147068491 | 0.001437539 |
| COPS5 plum1   | 0.017182687  | 0.711119329 | -0.012775118 | 0.783051952 |
| CPNE3 plum1   | -0.022428435 | 0.628780175 | -0.059861811 | 0.196594104 |
| DCAF13 plum1  | -0.100488735 | 0.02991162  | -0.140138986 | 0.002402929 |
| DERL1 plum1   | -0.240452922 | 1.44E-07    | -0.246075195 | 7.18E-08    |
| DPY19L4plum1  | -0.149014584 | 0.00123941  | -0.191995226 | 2.96E-05    |
| E2F5 plum1    | -0.084119674 | 0.069341245 | -0.133745404 | 0.003785115 |
| EBAG9 plum1   | -0.067154021 | 0.147349449 | -0.090104536 | 0.051664724 |
| EIF3H plum1   | -0.048130652 | 0.299304346 | -0.089225804 | 0.053996686 |
| EMC2 plum1    | 0.002800136  | 0.951877361 | -0.032448386 | 0.484226787 |
| ENY2 plum1    | -0.055375732 | 0.232325738 | -0.078477322 | 0.09026953  |
| EXT1 plum1    | -0.243223071 | 1.03E-07    | -0.244761059 | 8.47E-08    |
| FAM84B plum1  | -0.092733217 | 0.045184929 | -0.131422796 | 0.004443822 |
| FAM91A plum1  | -0.123716648 | 0.007435906 | -0.147776142 | 0.001362352 |
| FNTA plum1    | -0.12870807  | 0.005343776 | -0.168185625 | 0.000261405 |
| IMPA1 plum1   | -0.028919116 | 0.533019771 | -0.069513949 | 0.133614857 |
| IMPAD1 plum1  | -0.062124379 | 0.180175102 | -0.088285948 | 0.056587106 |
| KIAA142plum1  | -0.197729272 | 1.68E-05    | -0.228068808 | 6.32E-07    |
| LACTB2 plum1  | -0.082422086 | 0.075172319 | -0.111268302 | 0.016147775 |

|         |       |              |             |              |             |
|---------|-------|--------------|-------------|--------------|-------------|
| LYPLA1  | plum1 | 0.078519228  | 0.090097238 | 0.048677826  | 0.293837691 |
| MED30   | plum1 | -0.224335755 | 9.71E-07    | -0.26355326  | 7.35E-09    |
| MRPL13  | plum1 | 0.030335677  | 0.513141982 | 0.01437428   | 0.75670214  |
| MRPS28  | plum1 | -0.03604329  | 0.437119142 | -0.064298042 | 0.165379441 |
| MTDH    | plum1 | 0.055644785  | 0.230061127 | 0.029305708  | 0.527556662 |
| MTERF3  | plum1 | -0.070450899 | 0.128444101 | -0.108455773 | 0.019058384 |
| MTFR1   | plum1 | 0.101417711  | 0.028420346 | 0.072777957  | 0.116272479 |
| NBN     | plum1 | -0.01541023  | 0.739779673 | -0.04340995  | 0.349260735 |
| NCOA2   | plum1 | -0.077721452 | 0.093422872 | -0.115798672 | 0.012274481 |
| NDUFAB1 | plum1 | -0.12246562  | 0.008063691 | -0.144466154 | 0.001748016 |
| NSMCE2  | plum1 | -0.199157364 | 1.45E-05    | -0.234577339 | 2.94E-07    |
| NUDCD1  | plum1 | -0.12616589  | 0.006331931 | -0.139618484 | 0.002495233 |
| OSGIN2  | plum1 | -0.080114485 | 0.083732235 | -0.112571192 | 0.014936899 |
| OTUD6B  | plum1 | -0.122809231 | 0.007886714 | -0.159174806 | 0.00055518  |
| PABPC1  | plum1 | 0.054443957  | 0.240290157 | 0.024794142  | 0.593028727 |
| PEX2    | plum1 | 0.085436276  | 0.06507833  | 0.042645701  | 0.357818439 |
| PLEKHF2 | plum1 | -0.015844939 | 0.732715294 | -0.036797181 | 0.427584756 |
| POLR2K  | plum1 | -0.109631525 | 0.017790221 | -0.123561014 | 0.007511549 |
| PTK2    | plum1 | -0.03192419  | 0.491317942 | -0.065164838 | 0.15974053  |
| RAB2A   | plum1 | -0.087647033 | 0.058406291 | -0.0962173   | 0.037660975 |
| RAD21   | plum1 | -0.100499619 | 0.029893767 | -0.140100025 | 0.002409729 |
| RB1CC1  | plum1 | -0.252994866 | 2.97E-08    | -0.29027909  | 1.61E-10    |
| RMDN1   | plum1 | 0.034399696  | 0.45832306  | 0.006103773  | 0.895339145 |
| RNF139  | plum1 | -0.164695304 | 0.00035158  | -0.192737059 | 2.75E-05    |
| SLC25A3 | plum1 | -0.127215588 | 0.005905588 | -0.165399385 | 0.000331333 |
| SQLE    | plum1 | -0.001806885 | 0.968936224 | -0.050716981 | 0.27405587  |
| STAU2   | plum1 | -0.029390669 | 0.526359871 | -0.077536126 | 0.094209313 |
| STK3    | plum1 | -0.150504583 | 0.001105058 | -0.192302791 | 2.87E-05    |
| TAF2    | plum1 | -0.065651007 | 0.15664187  | -0.112933909 | 0.014614314 |
| TATDN1  | plum1 | -0.212861623 | 3.47E-06    | -0.26236204  | 8.63E-09    |
| TCEA1   | plum1 | -0.045524944 | 0.326260065 | -0.087619539 | 0.058485649 |
| TCEB1   | plum1 | -0.076866697 | 0.09709422  | -0.081433389 | 0.078748373 |
| TMEM65  | plum1 | -0.15295873  | 0.000912696 | -0.173185386 | 0.000169239 |
| TMEM68  | plum1 | 0.042960178  | 0.354281265 | 0.002295805  | 0.960536884 |
| TMEM70  | plum1 | -0.022741643 | 0.623994219 | -0.046523273 | 0.315752149 |
| TPD52   | plum1 | 0.09394996   | 0.042425185 | 0.085738348  | 0.064131294 |
| TRMT12  | plum1 | -0.155620701 | 0.000739338 | -0.161689535 | 0.000451685 |
| UBE2V2  | plum1 | -0.017407933 | 0.707505129 | -0.050485742 | 0.27625238  |
| UBE2W   | plum1 | -0.137029644 | 0.003004193 | -0.178656886 | 0.000103714 |
| UBR5    | plum1 | -0.114495798 | 0.013294144 | -0.148009124 | 0.0013384   |
| UTP23   | plum1 | -0.190272253 | 3.49E-05    | -0.226627491 | 7.46E-07    |
| YWHAZ   | plum1 | -0.074671088 | 0.107052964 | -0.093857151 | 0.042630559 |
| ZBTB10  | plum1 | -0.152207317 | 0.000968027 | -0.194938789 | 2.21E-05    |
| ZFAND1  | plum1 | -0.096123136 | 0.037849398 | -0.153154341 | 0.000898779 |
| ZNF16   | plum1 | -0.14478507  | 0.001706912 | -0.184352981 | 6.13E-05    |

|         |        |              |             |              |             |
|---------|--------|--------------|-------------|--------------|-------------|
| ZNF250  | plum1  | -0.19301541  | 2.68E-05    | -0.232797017 | 3.63E-07    |
| ZNF572  | plum1  | -0.362799913 | 5.65E-16    | -0.378718944 | 2.25E-17    |
| ZNF623  | plum1  | -0.183817791 | 6.45E-05    | -0.212406908 | 3.64E-06    |
| ZNF7    | plum1  | -0.145087029 | 0.001668813 | -0.181293207 | 8.15E-05    |
| ZNF706  | plum1  | -0.060388128 | 0.192680528 | -0.071967679 | 0.120403756 |
| APOL1   | plum2  | -0.138956888 | 0.002617222 | -0.090649348 | 0.050261551 |
| APOL2   | plum2  | -0.077806794 | 0.093062491 | -0.046409687 | 0.316936399 |
| APOL6   | plum2  | -0.110596806 | 0.016804799 | -0.078990162 | 0.088179095 |
| B2M     | plum2  | -0.026687535 | 0.565102365 | -0.013622174 | 0.769061766 |
| BATF2   | plum2  | -0.051652609 | 0.265290078 | -0.009213638 | 0.842592075 |
| BTN2A2  | plum2  | 0.023013519  | 0.619852621 | 0.035391466  | 0.44546016  |
| BTN3A1  | plum2  | -0.048927371 | 0.291366862 | -0.045794044 | 0.323405597 |
| BTN3A2  | plum2  | -0.095285945 | 0.039560041 | -0.086818906 | 0.060836014 |
| BTN3A3  | plum2  | -0.140043339 | 0.002419654 | -0.121397964 | 0.008636418 |
| CFB     | plum2  | -0.256765654 | 1.82E-08    | -0.245000884 | 8.22E-08    |
| DHX58   | plum2  | 0.012783085  | 0.782920046 | 0.045421252  | 0.327364317 |
| ETV7    | plum2  | -0.07807341  | 0.091943783 | -0.019872236 | 0.668407925 |
| GBP3    | plum2  | 0.092121866  | 0.046627551 | 0.104113984  | 0.024448287 |
| HLA-A   | plum2  | -0.067141464 | 0.147425308 | -0.035101267 | 0.449202556 |
| HLA-B   | plum2  | -0.081332123 | 0.079122308 | -0.049260688 | 0.288088348 |
| HLA-C   | plum2  | -0.028647581 | 0.53687392  | 0.002213084  | 0.961957687 |
| HLA-E   | plum2  | -0.141176072 | 0.002228242 | -0.096122527 | 0.037850619 |
| HLA-F   | plum2  | -0.243517391 | 9.89E-08    | -0.203909659 | 8.93E-06    |
| HLA-G   | plum2  | -0.037631124 | 0.417179926 | -0.000233677 | 0.995981651 |
| IDO1    | plum2  | 0.031400599  | 0.498456033 | 0.047757682  | 0.303069109 |
| IFI35   | plum2  | -0.147984965 | 0.001340865 | -0.104541752 | 0.023864372 |
| IFITM1  | plum2  | -0.132623551 | 0.004091359 | -0.115545431 | 0.012467088 |
| IFITM2  | plum2  | -0.110495825 | 0.0169056   | -0.074500877 | 0.107857515 |
| IFITM3  | plum2  | -0.276440605 | 1.23E-09    | -0.234453884 | 2.98E-07    |
| LGALS3E | plum2  | -0.159418909 | 0.000544244 | -0.151086042 | 0.001056372 |
| LGALS9  | plum2  | 0.006853741  | 0.882567372 | 0.056050137  | 0.226678919 |
| MVP     | plum2  | -0.114651425 | 0.013168544 | -0.063895823 | 0.168046236 |
| NLRC5   | plum2  | -0.074418107 | 0.108250471 | -0.034173591 | 0.461284368 |
| PML     | plum2  | -0.128370797 | 0.00546635  | -0.097235764 | 0.035673355 |
| PSMB8   | plum2  | -0.06582646  | 0.155534829 | -0.034897232 | 0.451844399 |
| PSMB9   | plum2  | -0.07306147  | 0.114853468 | -0.021694263 | 0.640059496 |
| SECTM1  | plum2  | -0.017682835 | 0.703103068 | 0.027974603  | 0.546485949 |
| TAP1    | plum2  | -0.052703462 | 0.255676579 | -0.0347294   | 0.454024034 |
| TAP2    | plum2  | -0.20487791  | 8.08E-06    | -0.179916952 | 9.25E-05    |
| TAPBP   | plum2  | -0.021284811 | 0.646386459 | 0.028384828  | 0.540616668 |
| TAPBPL  | plum2  | -0.200609793 | 1.25E-05    | -0.156839006 | 0.00067064  |
| TRIM22  | plum2  | -0.099401607 | 0.031741452 | -0.082053429 | 0.076489959 |
| UBA7    | plum2  | -0.182481292 | 7.30E-05    | -0.133605159 | 0.003822229 |
| WARS    | plum2  | -0.052824775 | 0.254582514 | -0.005450168 | 0.906492083 |
| ABHD12  | purple | 0.123878269  | 0.007358074 | 0.149056047  | 0.001235476 |

|                 |              |             |              |             |
|-----------------|--------------|-------------|--------------|-------------|
| ACADVL purple   | 0.244902249  | 8.32E-08    | 0.245440088  | 7.78E-08    |
| ADAP1 purple    | 0.189055129  | 3.93E-05    | 0.217677238  | 2.05E-06    |
| ADPRHL purple   | -0.101875994 | 0.027708492 | -0.080022083 | 0.084090735 |
| AMOTL2 purple   | -0.270131854 | 2.98E-09    | -0.301213954 | 2.99E-11    |
| ANKRD3 purple   | 0.10017615   | 0.03042826  | 0.114892448  | 0.012976088 |
| AP4M1 purple    | 0.18170418   | 7.85E-05    | 0.173799462  | 0.000160305 |
| APOA1B purple   | 0.041069304  | 0.375881463 | 0.037940667  | 0.413356048 |
| ARL16 purple    | -0.103450657 | 0.025378146 | -0.088614021 | 0.055671403 |
| ARPC5L purple   | 0.160792221  | 0.000486358 | 0.192464725  | 2.82E-05    |
| ATAD3B purple   | -0.064627234 | 0.163220563 | -0.075694803 | 0.10231361  |
| ATOX1 purple    | 0.041939655  | 0.365840262 | 0.081030362  | 0.080245134 |
| ATP5E purple    | -0.037636749 | 0.417110262 | -0.012485048 | 0.787859202 |
| ATP5G1 purple   | 0.153077872  | 0.000904196 | 0.161697171  | 0.0004514   |
| ATP5H purple    | 0.080860656  | 0.080882239 | 0.088908015  | 0.054861307 |
| ATP5I purple    | -0.003061244 | 0.947396203 | 0.018212586  | 0.694648114 |
| ATP5J2 purple   | 0.130680818  | 0.004675103 | 0.155202245  | 0.000764399 |
| ATP5L purple    | 0.050934537  | 0.272000222 | 0.061063762  | 0.187740729 |
| ATP5O purple    | -0.034906752 | 0.45172095  | -0.031018966 | 0.503693248 |
| ATPIF1 purple   | 0.303485203  | 2.09E-11    | 0.333509156  | 1.35E-13    |
| AURKA purple    | 0.064811119  | 0.162023875 | 0.089105051  | 0.054323877 |
| BABAM1 purple   | -0.112021086 | 0.015438073 | -0.095753005 | 0.038597797 |
| BAD purple      | 0.088720453  | 0.05537699  | 0.103406771  | 0.025440728 |
| BAX purple      | 0.250347233  | 4.18E-08    | 0.256916865  | 1.78E-08    |
| BCAT2 purple    | 0.045514586  | 0.326370257 | 0.081178042  | 0.079694027 |
| BCS1L purple    | -0.037450177 | 0.419424817 | -0.035771077 | 0.44059154  |
| BNIP1 purple    | 0.188894819  | 3.99E-05    | 0.202219578  | 1.06E-05    |
| BRAT1 purple    | 0.160169317  | 0.000511866 | 0.180095995  | 9.10E-05    |
| BRF1 purple     | 0.137318574  | 0.002943044 | 0.136428543  | 0.003135126 |
| BRICD5 purple   | 0.138498388  | 0.002704925 | 0.146237874  | 0.001530647 |
| BRMS1 purple    | 0.01420973   | 0.759401076 | 0.04812464   | 0.299364782 |
| BTBD6 purple    | 0.191457502  | 3.11E-05    | 0.208843364  | 5.33E-06    |
| C11orf31 purple | 0.035575362  | 0.443097839 | 0.049488829  | 0.285858705 |
| C12orf45 purple | 0.25301063   | 2.97E-08    | 0.257287752  | 1.70E-08    |
| C14orf2 purple  | 0.101443158  | 0.028380411 | 0.135372891  | 0.003377679 |
| C16orf13 purple | 0.149891082  | 0.001158663 | 0.183106914  | 6.89E-05    |
| C16orf95 purple | 0.200836341  | 1.22E-05    | 0.197236556  | 1.76E-05    |
| C17orf89 purple | 0.08989757   | 0.052206264 | 0.107306549  | 0.020373352 |
| C19orf73 purple | 0.274450446  | 1.63E-09    | 0.289161038  | 1.91E-10    |
| C1orf122 purple | -0.02858247  | 0.537800176 | 0.004617554  | 0.920725968 |
| C1orf35 purple  | 0.057313528  | 0.216364572 | 0.061555268  | 0.18420614  |
| C1orf50 purple  | 0.117769574  | 0.010863139 | 0.138514222  | 0.002701852 |
| C6orf136 purple | -0.06137482  | 0.18549805  | -0.045410096 | 0.327483261 |
| C7orf26 purple  | 0.025729124  | 0.57915953  | 0.044495071  | 0.337334637 |
| C7orf50 purple  | 0.06867575   | 0.138375378 | 0.098162225  | 0.033943458 |
| C9orf142 purple | 0.209511758  | 4.97E-06    | 0.221363857  | 1.36E-06    |

|                |              |             |              |             |
|----------------|--------------|-------------|--------------|-------------|
| CARHSP purple  | 0.08812212   | 0.057049034 | 0.115647823  | 0.012388893 |
| CARS2 purple   | 0.291689932  | 1.30E-10    | 0.293284018  | 1.02E-10    |
| CC2D1A purple  | 0.056168608  | 0.225697124 | 0.044736095  | 0.334721484 |
| CCDC137purple  | 0.042934277  | 0.354571768 | 0.033911625  | 0.464728615 |
| CCDC167purple  | 0.089432009  | 0.053441744 | 0.111021535  | 0.016386561 |
| CCHCR1 purple  | -0.038915816 | 0.401445757 | -0.018656204 | 0.687596812 |
| CDK5 purple    | 0.248207957  | 5.49E-08    | 0.25440992   | 2.47E-08    |
| CDKN2A purple  | 0.054350697  | 0.241097739 | 0.043156895  | 0.352079877 |
| CDKN2D purple  | -0.025414719 | 0.583806351 | -0.007720634 | 0.867842446 |
| CENPT purple   | 0.085403745  | 0.065181001 | 0.09204958   | 0.046800653 |
| CHCHD1 purple  | 0.261930971  | 9.15E-09    | 0.275392018  | 1.42E-09    |
| CHCHD6 purple  | -0.052267503 | 0.259635151 | -0.063026217 | 0.173921696 |
| CHMP2A purple  | 0.198680646  | 1.52E-05    | 0.239204215  | 1.68E-07    |
| CINP purple    | 0.141655945  | 0.002151405 | 0.16963325   | 0.000230772 |
| CISD3 purple   | 0.04923258   | 0.288363856 | 0.065572925  | 0.157136453 |
| CITED4 purple  | 0.386386525  | 4.46E-18    | 0.383937183  | 7.51E-18    |
| CLN3 purple    | 0.198849619  | 1.50E-05    | 0.203960687  | 8.89E-06    |
| CLN6 purple    | 0.298866782  | 4.32E-11    | 0.302717069  | 2.36E-11    |
| CLTA purple    | 0.115492639  | 0.012507574 | 0.13883837   | 0.00263964  |
| COA3 purple    | 0.217533442  | 2.08E-06    | 0.244613499  | 8.63E-08    |
| COA4 purple    | 0.104891285  | 0.023396238 | 0.112675398  | 0.014843589 |
| COASY purple   | 0.323332802  | 7.96E-13    | 0.354358716  | 2.91E-15    |
| COMMD purple   | 0.019668496  | 0.671608318 | 0.048224912  | 0.298357833 |
| COMMD' purple  | 0.222821043  | 1.15E-06    | 0.23178755   | 4.09E-07    |
| COMMD' purple  | -0.059718665 | 0.197668469 | -0.067315716 | 0.14637534  |
| COMMD' purple  | 0.210677625  | 4.39E-06    | 0.223207034  | 1.10E-06    |
| COPRS purple   | 0.160919338  | 0.0004813   | 0.189321561  | 3.83E-05    |
| COX14 purple   | 0.030150392  | 0.51571992  | 0.062302905  | 0.17892415  |
| COX5B purple   | 0.026308695  | 0.5706393   | 0.062306293  | 0.178900472 |
| COX6A1 purple  | 0.178599098  | 0.00010426  | 0.206541199  | 6.79E-06    |
| COX6B1 purple  | 0.003691679  | 0.936583766 | 0.033536183  | 0.469689592 |
| COX7A2 purple  | 0.156196765  | 0.000706081 | 0.193842334  | 2.47E-05    |
| COX7B purple   | 0.014900261  | 0.748095008 | 0.054719368  | 0.237916353 |
| COX7C purple   | 0.138365738  | 0.002730793 | 0.146460851  | 0.001505123 |
| CRACR2]purple  | 0.335777782  | 9.04E-14    | 0.337712143  | 6.39E-14    |
| CRIP1 purple   | 0.161281383  | 0.000467161 | 0.192575348  | 2.79E-05    |
| CSNK2B purple  | -0.106470112 | 0.021379376 | -0.095021532 | 0.040113729 |
| CTB-55O purple | 0.208506011  | 5.52E-06    | 0.214737569  | 2.83E-06    |
| DDX51 purple   | -0.036440792 | 0.432076847 | -0.055860498 | 0.22825682  |
| DDX56 purple   | 0.063337882  | 0.171798607 | 0.054680886  | 0.238247039 |
| DNTTIP1 purple | -0.131670343 | 0.00436899  | -0.112401403 | 0.015090038 |
| DPH7 purple    | 0.031580123  | 0.49600241  | 0.034244196  | 0.460358506 |
| DPM2 purple    | 0.216076146  | 2.44E-06    | 0.237495828  | 2.07E-07    |
| DXO purple     | -0.100968493 | 0.029133304 | -0.093287223 | 0.043910202 |
| ECHS1 purple   | 0.24527431   | 7.94E-08    | 0.273268077  | 1.92E-09    |

|         |        |              |             |              |             |
|---------|--------|--------------|-------------|--------------|-------------|
| ECI1    | purple | 0.261035138  | 1.03E-08    | 0.288163601  | 2.21E-10    |
| EDF1    | purple | 0.135452304  | 0.003358857 | 0.152501828  | 0.000945982 |
| EIF3I   | purple | 0.136547005  | 0.003108919 | 0.154775104  | 0.000790789 |
| EIF4E2  | purple | 0.209297148  | 5.08E-06    | 0.204199303  | 8.67E-06    |
| EIF5A   | purple | 0.237738036  | 2.01E-07    | 0.245261917  | 7.95E-08    |
| ELP6    | purple | 0.2051562    | 7.85E-06    | 0.208610553  | 5.46E-06    |
| ENDOG   | purple | 0.272176228  | 2.24E-09    | 0.295049255  | 7.80E-11    |
| ENO3    | purple | 0.09268985   | 0.045286013 | 0.087215338  | 0.059662665 |
| ENTHD2  | purple | -0.035864891 | 0.439393056 | -0.041070119 | 0.375871984 |
| EPC2    | purple | -0.234287006 | 3.04E-07    | -0.257942294 | 1.56E-08    |
| EXOSC5  | purple | -0.076163323 | 0.100200822 | -0.084181397 | 0.069136413 |
| EXOSC7  | purple | 0.060141563  | 0.19450677  | 0.078170739  | 0.09153809  |
| FAAH    | purple | 0.294964874  | 7.91E-11    | 0.311501907  | 5.75E-12    |
| FAM162A | purple | 0.163758265  | 0.000380318 | 0.169758899  | 0.000228278 |
| FAM173A | purple | 0.171188195  | 0.000201629 | 0.203912582  | 8.93E-06    |
| FAM195A | purple | 0.204464194  | 8.44E-06    | 0.245776659  | 7.46E-08    |
| FAM50A  | purple | 0.136985516  | 0.003013633 | 0.140907588  | 0.002272316 |
| FAM73B  | purple | 0.021496043  | 0.643119226 | 0.018475197  | 0.690470691 |
| FDX1L   | purple | -0.050211443 | 0.278873391 | -0.042418702 | 0.360385394 |
| FKBPL   | purple | -0.103867914 | 0.024789739 | -0.092590946 | 0.045517258 |
| FUOM    | purple | -0.182109271 | 7.56E-05    | -0.160059535 | 0.000516488 |
| GADD45A | purple | 0.012134693  | 0.793676262 | 0.02591886   | 0.576363683 |
| GCAT    | purple | 0.166082338  | 0.000312737 | 0.192657076  | 2.77E-05    |
| GEMIN7  | purple | -0.036150031 | 0.435761828 | -0.030022029 | 0.517509808 |
| GGA1    | purple | 0.199717228  | 1.37E-05    | 0.198926731  | 1.49E-05    |
| GPATCH  | purple | -0.101874125 | 0.027711364 | -0.092283083 | 0.046243421 |
| GSTZ1   | purple | 0.255310763  | 2.20E-08    | 0.268984904  | 3.50E-09    |
| GTF3A   | purple | 0.05451469   | 0.239678917 | 0.070259857  | 0.129485621 |
| HDGFRP  | purple | 0.131187351  | 0.004516067 | 0.130439557  | 0.004752613 |
| HDHD3   | purple | 0.367513681  | 2.22E-16    | 0.376751814  | 3.38E-17    |
| HEBP2   | purple | 0.240060105  | 1.51E-07    | 0.265376532  | 5.74E-09    |
| HES4    | purple | 0.194688583  | 2.27E-05    | 0.230501499  | 4.76E-07    |
| HGSNAT  | purple | -0.084860423 | 0.066915557 | -0.135421584 | 0.003366126 |
| HIGD2A  | purple | 0.065486299  | 0.157686527 | 0.07909475   | 0.087757589 |
| HINT2   | purple | 0.135324446  | 0.003389208 | 0.152973087  | 0.000911668 |
| HSD17B1 | purple | 0.055718208  | 0.229445861 | 0.084527453  | 0.067997157 |
| ICT1    | purple | 0.166184779  | 0.000310033 | 0.16642043   | 0.000303896 |
| IGF1R   | purple | -0.17963717  | 9.49E-05    | -0.215164365 | 2.70E-06    |
| IMP3    | purple | 0.209153031  | 5.16E-06    | 0.22527823   | 8.72E-07    |
| IPO4    | purple | -0.094982743 | 0.040195505 | -0.090582279 | 0.050432552 |
| JMJD4   | purple | 0.052035299  | 0.261760781 | 0.053059223  | 0.252477336 |
| JSRP1   | purple | 0.335551158  | 9.41E-14    | 0.358449394  | 1.32E-15    |
| KAT2A   | purple | 0.068227445  | 0.140974414 | 0.041261633  | 0.373648099 |
| KIRREL  | purple | -0.388677245 | 2.73E-18    | -0.388808857 | 2.65E-18    |
| LAGE3   | purple | 0.046484332  | 0.316157814 | 0.056574711  | 0.222354625 |

|        |        |              |             |              |             |
|--------|--------|--------------|-------------|--------------|-------------|
| LAMTOR | purple | 0.280885279  | 6.47E-10    | 0.285184052  | 3.45E-10    |
| LAS1L  | purple | -0.049820579 | 0.282637263 | -0.048491133 | 0.295695329 |
| 9-Mar  | purple | 0.180876589  | 8.47E-05    | 0.209186377  | 5.14E-06    |
| MBD5   | purple | -0.155374458 | 0.000753991 | -0.181898763 | 7.71E-05    |
| MCRS1  | purple | 0.058261554  | 0.208849119 | 0.057283595  | 0.216604982 |
| MEA1   | purple | -0.022281391 | 0.631032475 | 0.000184579  | 0.996825955 |
| MED11  | purple | 0.334166517  | 1.20E-13    | 0.354783951  | 2.68E-15    |
| MED19  | purple | 0.081299318  | 0.079243753 | 0.075290969  | 0.104162919 |
| MED27  | purple | 0.081971729  | 0.076784493 | 0.109639857  | 0.017781503 |
| MEF2A  | purple | -0.091686496 | 0.047678295 | -0.117503812 | 0.011044654 |
| MEF2BN | purple | -0.054495648 | 0.239843359 | -0.035355639 | 0.445921224 |
| MESP1  | purple | 0.220112276  | 1.56E-06    | 0.252439728  | 3.19E-08    |
| METTL1 | purple | -0.088834389 | 0.055063257 | -0.094422091 | 0.041393284 |
| MMAB   | purple | 0.038438486  | 0.407249924 | 0.044489772  | 0.337392235 |
| MPDU1  | purple | 0.359695099  | 1.04E-15    | 0.385111031  | 5.86E-18    |
| MPV17L | purple | 0.060895351  | 0.188963233 | 0.086970389  | 0.060385428 |
| MRPL12 | purple | -0.014387117 | 0.756491718 | -0.011555983 | 0.803309764 |
| MRPL14 | purple | 0.059290615  | 0.200906698 | 0.083549224  | 0.071257931 |
| MRPL16 | purple | 0.193106184  | 2.65E-05    | 0.193090407  | 2.66E-05    |
| MRPL20 | purple | 0.055710596  | 0.229509596 | 0.083131069  | 0.072690233 |
| MRPL21 | purple | -0.063536205 | 0.170457714 | -0.046437302 | 0.316648212 |
| MRPL22 | purple | 0.148073537  | 0.001331847 | 0.166908755  | 0.000291537 |
| MRPL23 | purple | 0.257826237  | 1.58E-08    | 0.276328612  | 1.25E-09    |
| MRPL24 | purple | 0.200953219  | 1.21E-05    | 0.180704461  | 8.60E-05    |
| MRPL27 | purple | 0.119589163  | 0.009689802 | 0.146363449  | 0.001516224 |
| MRPL34 | purple | 0.010233992  | 0.825426082 | 0.017098068  | 0.712478762 |
| MRPL36 | purple | -0.04988255  | 0.282038235 | -0.027687114 | 0.550617863 |
| MRPL41 | purple | 0.250168448  | 4.28E-08    | 0.284777421  | 3.66E-10    |
| MRPL52 | purple | 0.079856083  | 0.084737893 | 0.093029645  | 0.044499055 |
| MRPL53 | purple | 0.060446202  | 0.192252224 | 0.050974098  | 0.271627544 |
| MRPL57 | purple | 0.298429047  | 4.63E-11    | 0.31988631   | 1.43E-12    |
| MRPS15 | purple | 0.13301926   | 0.003980869 | 0.145917728  | 0.001567988 |
| MRPS25 | purple | 0.021832262  | 0.637932936 | 0.019215084  | 0.678751893 |
| MRPS5  | purple | -0.152488645 | 0.000946958 | -0.151451824 | 0.001026767 |
| MSN    | purple | -0.215003688 | 2.75E-06    | -0.197797039 | 1.67E-05    |
| MTG2   | purple | -0.110039437 | 0.017367803 | -0.121434031 | 0.008616493 |
| MTMR14 | purple | 0.016304819  | 0.725266384 | 0.023513784  | 0.61226325  |
| MUTYH  | purple | 0.004211996  | 0.927668623 | 0.002134787  | 0.963302643 |
| MVK    | purple | 0.167422315  | 0.000279048 | 0.171740294  | 0.000192138 |
| MYEOV2 | purple | 0.111501139  | 0.015925271 | 0.135439515  | 0.003361881 |
| MYL6B  | purple | 0.004220993  | 0.927514534 | -0.00628952  | 0.892173267 |
| NAA10  | purple | 0.05489046   | 0.236450022 | 0.075884762  | 0.10145277  |
| NAA38  | purple | 0.194461075  | 2.32E-05    | 0.221786129  | 1.30E-06    |
| NABP2  | purple | 0.052565477  | 0.256924955 | 0.067331513  | 0.146280433 |
| NANS   | purple | 0.385601117  | 5.28E-18    | 0.418245017  | 3.36E-21    |

|        |        |              |             |              |             |
|--------|--------|--------------|-------------|--------------|-------------|
| NAT9   | purple | 0.011804451  | 0.799169896 | -0.009023987 | 0.845791174 |
| NDUFA1 | purple | 0.011286857  | 0.807800028 | 0.030668441  | 0.508528954 |
| NDUFA1 | purple | 0.156567022  | 0.000685443 | 0.180784771  | 8.54E-05    |
| NDUFA1 | purple | 0.087075263  | 0.060075098 | 0.116373549  | 0.011846971 |
| NDUFA2 | purple | 0.18150488   | 7.99E-05    | 0.205104314  | 7.89E-06    |
| NDUFA3 | purple | 0.13366532   | 0.003806268 | 0.168212339  | 0.000260806 |
| NDUFA6 | purple | 0.335608043  | 9.31E-14    | 0.359807757  | 1.02E-15    |
| NDUFA8 | purple | 0.186763276  | 4.89E-05    | 0.206142475  | 7.08E-06    |
| NDUFA9 | purple | 0.004719207  | 0.918986717 | 0.033728808  | 0.467140665 |
| NDUFB1 | purple | 0.019443955  | 0.675142355 | 0.055205825  | 0.23376393  |
| NDUFB2 | purple | 0.073714725  | 0.111635569 | 0.094364212  | 0.041518633 |
| NDUFB4 | purple | 0.186789058  | 4.88E-05    | 0.203789524  | 9.05E-06    |
| NDUFB7 | purple | -0.049513544 | 0.285617865 | -0.030095756 | 0.516481371 |
| NDUFB9 | purple | -0.131146518 | 0.004528704 | -0.137533171 | 0.002898362 |
| NDUFC1 | purple | 0.272887762  | 2.03E-09    | 0.292068942  | 1.23E-10    |
| NDUFS5 | purple | 0.194087862  | 2.41E-05    | 0.218506047  | 1.87E-06    |
| NDUFS6 | purple | -0.032521044 | 0.483248266 | 0.002510577  | 0.956848543 |
| NDUFS8 | purple | 0.130865826  | 0.004616439 | 0.15920294   | 0.000553909 |
| NDUFV3 | purple | 0.157567513  | 0.000632438 | 0.183452562  | 6.67E-05    |
| NELFE  | purple | -0.125801809 | 0.006486132 | -0.118903735 | 0.010117874 |
| NME1   | purple | 0.166312236  | 0.000306699 | 0.169334767  | 0.000236799 |
| NOL12  | purple | 0.06864944   | 0.138526884 | 0.062140942  | 0.180058769 |
| NOP10  | purple | 0.323324511  | 7.97E-13    | 0.342575857  | 2.64E-14    |
| NOP16  | purple | 0.037651103  | 0.416932499 | 0.038489358  | 0.406628972 |
| NPRL2  | purple | 0.164253367  | 0.000364871 | 0.170530877  | 0.000213501 |
| NSUN5  | purple | -0.013068687 | 0.778195117 | 0.008754376  | 0.850343403 |
| NTN4   | purple | -0.208078476 | 5.78E-06    | -0.212619812 | 3.56E-06    |
| NUDC   | purple | 0.100866777  | 0.029296852 | 0.121732965  | 0.008452928 |
| NUDT1  | purple | 0.02712511   | 0.558739194 | 0.062407585  | 0.178193652 |
| OSMR   | purple | -0.096989849 | 0.036144923 | -0.082549169 | 0.074722407 |
| PAM16  | purple | -0.006495449 | 0.888665408 | -0.025042312 | 0.589332703 |
| PANO1  | purple | 0.196183944  | 1.96E-05    | 0.229794487  | 5.17E-07    |
| PARK7  | purple | 0.164530965  | 0.000356469 | 0.160652516  | 0.000491974 |
| PDAP1  | purple | 0.027256082  | 0.556841388 | 0.031107331  | 0.502478027 |
| PDZD11 | purple | 0.090836035  | 0.049788119 | 0.087012425  | 0.060260884 |
| PELP1  | purple | 0.075639772  | 0.102564077 | 0.075166701  | 0.104737281 |
| PFDN6  | purple | -0.064368218 | 0.164917434 | -0.057385801 | 0.215784884 |
| PHPT1  | purple | 0.270493582  | 2.84E-09    | 0.289763671  | 1.74E-10    |
| PICK1  | purple | 0.118603069  | 0.010310888 | 0.131929712  | 0.004291808 |
| PIDD1  | purple | 0.295568642  | 7.21E-11    | 0.295902163  | 6.84E-11    |
| PIGU   | purple | -0.068933702 | 0.136896676 | -0.073685935 | 0.111775878 |
| PIN4   | purple | -0.029044708 | 0.531241852 | -0.014287821 | 0.758119868 |
| PMF1   | purple | 0.112426006  | 0.015067763 | 0.10341037   | 0.025435591 |
| PMPCA  | purple | 0.188074719  | 4.31E-05    | 0.204090998  | 8.77E-06    |
| PMVK   | purple | 0.256571274  | 1.86E-08    | 0.248644825  | 5.19E-08    |



|          |        |              |             |              |             |
|----------|--------|--------------|-------------|--------------|-------------|
| POLE4    | purple | -0.017032435 | 0.713533801 | -0.006829421 | 0.882981088 |
| POLR1C   | purple | -0.126105758 | 0.00635717  | -0.113783235 | 0.013882803 |
| POLR2J   | purple | 0.058684242  | 0.205559745 | 0.077442949  | 0.094606708 |
| POP5     | purple | 0.133903494  | 0.003743671 | 0.158348716  | 0.000593721 |
| POP7     | purple | 0.095391755  | 0.03934029  | 0.098997239  | 0.032446074 |
| PPAN     | purple | -0.074932788 | 0.105825219 | -0.081230979 | 0.079497226 |
| PPCDC    | purple | 0.247852005  | 5.74E-08    | 0.246737764  | 6.61E-08    |
| PPFIA3   | purple | 0.307499714  | 1.10E-11    | 0.296164712  | 6.57E-11    |
| PPIE     | purple | -0.109508893 | 0.017918956 | -0.09687788  | 0.036361386 |
| PPP1R14l | purple | 0.057170764  | 0.217512931 | 0.064606581  | 0.163355382 |
| PPP1R35  | purple | 0.082630714  | 0.074434872 | 0.092073855  | 0.04674246  |
| PPP1R7   | purple | 0.309706396  | 7.71E-12    | 0.343734645  | 2.13E-14    |
| PRADC1   | purple | 0.155646887  | 0.000737795 | 0.20401207   | 8.84E-06    |
| PRKRIP1  | purple | -0.009914332 | 0.830795367 | -0.03283549  | 0.479025878 |
| PSMB1    | purple | 0.009280702  | 0.841461438 | 0.050617717  | 0.274997309 |
| PSMB3    | purple | 0.105451958  | 0.022661916 | 0.135850034  | 0.003266013 |
| PSMB6    | purple | 0.176958481  | 0.000120928 | 0.213701673  | 3.17E-06    |
| PSMB7    | purple | 0.120180595  | 0.009333447 | 0.144386985  | 0.001758359 |
| PSMC4    | purple | -0.04984315  | 0.282418982 | -0.024869647 | 0.591903107 |
| PSMC5    | purple | 0.067547356  | 0.144988415 | 0.088672387  | 0.05550979  |
| PSMD13   | purple | 0.111907877  | 0.015543023 | 0.125671763  | 0.006542022 |
| PSMG3    | purple | 0.203907353  | 8.94E-06    | 0.235679191  | 2.57E-07    |
| PTPMT1   | purple | 0.214236749  | 2.99E-06    | 0.212545779  | 3.59E-06    |
| PTRH2    | purple | 0.040784891  | 0.379199155 | 0.035845252  | 0.439643799 |
| QPCTL    | purple | 0.124196633  | 0.007206886 | 0.131611499  | 0.004386674 |
| RAB26    | purple | 0.176793685  | 0.000122734 | 0.202237306  | 1.06E-05    |
| RABEP2   | purple | 0.185994     | 5.26E-05    | 0.200477532  | 1.27E-05    |
| RABL6    | purple | 0.275788654  | 1.35E-09    | 0.284631619  | 3.74E-10    |
| RAD9A    | purple | -0.110221308 | 0.017182307 | -0.101997693 | 0.027522052 |
| RASSF7   | purple | 0.186877287  | 4.83E-05    | 0.211433971  | 4.04E-06    |
| RBMS2    | purple | -0.16754272  | 0.000276193 | -0.18673474  | 4.90E-05    |
| RBX1     | purple | 0.185031787  | 5.75E-05    | 0.196680876  | 1.86E-05    |
| REXO4    | purple | 0.027776449  | 0.549332266 | 0.026926634  | 0.561621108 |
| RHBDL1   | purple | 0.194178587  | 2.39E-05    | 0.208582477  | 5.48E-06    |
| RHOT2    | purple | 0.162408351  | 0.000425583 | 0.177909466  | 0.000110984 |
| RNF181   | purple | 0.009080242  | 0.844841975 | 0.056381004  | 0.22394453  |
| RNMTL1   | purple | 0.226658582  | 7.44E-07    | 0.239766049  | 1.57E-07    |
| ROMO1    | purple | 0.041524847  | 0.370604896 | 0.078751217  | 0.089148189 |
| RP1-37E1 | purple | 0.004984309  | 0.914452751 | 0.006296795  | 0.892049311 |
| RP9      | purple | -0.061403247 | 0.185294089 | -0.068588564 | 0.138877932 |
| RPL26L1  | purple | 0.13076281   | 0.004649022 | 0.149714209  | 0.001174556 |
| RPP21    | purple | -0.011897181 | 0.797626297 | -0.00996054  | 0.830018714 |
| RPP25    | purple | 0.001796168  | 0.969120391 | 0.011434781  | 0.805331179 |
| RPS19BP  | purple | 0.145826985  | 0.001578723 | 0.158170156  | 0.000602371 |
| RPUSD2   | purple | 0.18769748   | 4.47E-05    | 0.198862907  | 1.50E-05    |

|         |        |              |             |              |             |
|---------|--------|--------------|-------------|--------------|-------------|
| RPUSD3  | purple | 0.106193488  | 0.021721442 | 0.099957744  | 0.030793759 |
| RRP1    | purple | -0.090941417 | 0.049522524 | -0.094522472 | 0.04117664  |
| SAP18   | purple | 0.211512109  | 4.01E-06    | 0.215848749  | 2.51E-06    |
| SDHAF1  | purple | -0.041074945 | 0.37581584  | -0.033250197 | 0.473488015 |
| SDHAF2  | purple | 0.035156475  | 0.448489237 | 0.072789265  | 0.11621562  |
| SEC61B  | purple | 0.335279239  | 9.88E-14    | 0.350056185  | 6.57E-15    |
| SERF2   | purple | 0.241101804  | 1.33E-07    | 0.271719759  | 2.39E-09    |
| SHFM1   | purple | 0.09982182   | 0.031023118 | 0.122397133  | 0.008099386 |
| SLIRP   | purple | 0.065032227  | 0.160593705 | 0.083053372  | 0.072958938 |
| SMAD3   | purple | -0.277547795 | 1.05E-09    | -0.298602023 | 4.51E-11    |
| SMG9    | purple | 0.239013588  | 1.72E-07    | 0.236676724  | 2.28E-07    |
| SMIM4   | purple | 0.127523155  | 0.005785649 | 0.161402757  | 0.000462508 |
| SMUG1   | purple | -0.034493281 | 0.457100504 | -0.042214006 | 0.362709995 |
| SNF8    | purple | 0.048680155  | 0.293814562 | 0.073401101  | 0.113171502 |
| SNRPD2  | purple | -0.040195225 | 0.386134605 | -0.029907947 | 0.519103257 |
| SNRPF   | purple | 0.101401334  | 0.028446073 | 0.116487779  | 0.011763608 |
| SOD1    | purple | -0.00167695  | 0.971169049 | 0.025264301  | 0.586035591 |
| SRA1    | purple | 0.270531056  | 2.82E-09    | 0.294541831  | 8.44E-11    |
| SS18L2  | purple | 0.12376331   | 0.00741336  | 0.124211231  | 0.007200021 |
| SSNA1   | purple | 0.231205398  | 4.38E-07    | 0.255081355  | 2.27E-08    |
| SSR2    | purple | 0.274599208  | 1.59E-09    | 0.248927202  | 5.01E-08    |
| SSSCA1  | purple | -0.029579083 | 0.523710738 | 0.002641557  | 0.95459965  |
| SSU72   | purple | 0.062463743  | 0.177802672 | 0.08390378   | 0.070061615 |
| STX10   | purple | 0.047014254  | 0.310666497 | 0.069068288  | 0.136130004 |
| STYXL1  | purple | 0.017679968  | 0.703148938 | 0.049909969  | 0.281773459 |
| SURF1   | purple | 0.210315759  | 4.56E-06    | 0.234811144  | 2.86E-07    |
| SURF2   | purple | 0.104143049  | 0.024408225 | 0.116558793  | 0.011712045 |
| SURF6   | purple | 0.109097744  | 0.018356521 | 0.083084763  | 0.072850281 |
| TACO1   | purple | -0.016116986 | 0.728305731 | 0.002664095  | 0.954212714 |
| TAF10   | purple | 0.176732106  | 0.000123416 | 0.222807107  | 1.15E-06    |
| TCEB2   | purple | 0.073873078  | 0.110866306 | 0.116367741  | 0.011851223 |
| TFPT    | purple | 0.115160476  | 0.012764984 | 0.143920162  | 0.001820497 |
| TIMM17F | purple | -0.036596806 | 0.430107032 | 0.006849234  | 0.882644043 |
| TIMM22  | purple | 0.113029332  | 0.014530473 | 0.124628707  | 0.007006146 |
| TIMM44  | purple | 0.112153863  | 0.015315774 | 0.110359555  | 0.017042466 |
| TIMM50  | purple | -0.094397235 | 0.041447075 | -0.083521347 | 0.071352695 |
| TIMM8B  | purple | 0.174974124  | 0.000144435 | 0.204867708  | 8.09E-06    |
| TMEM13  | purple | 0.230501766  | 4.76E-07    | 0.241658415  | 1.24E-07    |
| TMEM22  | purple | -0.087907912 | 0.057657723 | -0.085220062 | 0.065763225 |
| TMEM25  | purple | 0.227616515  | 6.66E-07    | 0.243321325  | 1.01E-07    |
| TMEM52  | purple | 0.105557948  | 0.022525366 | 0.079543065  | 0.085969124 |
| TRAPPC2 | purple | 0.004141582  | 0.9288746   | 0.023400935  | 0.613971668 |
| TRMT2A  | purple | 0.111596445  | 0.015834972 | 0.110240396  | 0.01716294  |
| TRNAU1  | purple | 0.128344902  | 0.005475865 | 0.159188593  | 0.000554557 |
| TSEN54  | purple | 0.003412074  | 0.941377883 | 9.59E-05     | 0.99835075  |

|         |        |              |             |              |             |
|---------|--------|--------------|-------------|--------------|-------------|
| TSR3    | purple | -0.01120842  | 0.809109906 | 0.021138048  | 0.648660538 |
| TUBB4B  | purple | 0.241320907  | 1.30E-07    | 0.267591819  | 4.24E-09    |
| TUSC2   | purple | 0.011738105  | 0.800274783 | 0.03895008   | 0.401031024 |
| TUT1    | purple | -0.016643399 | 0.719798689 | -0.020793299 | 0.654015202 |
| TXN     | purple | 0.289147082  | 1.91E-10    | 0.300658332  | 3.27E-11    |
| TXNDC1  | purple | 0.328777558  | 3.11E-13    | 0.36218845   | 6.37E-16    |
| UBE2F   | purple | 0.020034719  | 0.665859892 | 0.040420748  | 0.383473012 |
| UBE2J2  | purple | -0.10551073  | 0.02258611  | -0.096527557 | 0.037045767 |
| UBL5    | purple | 0.03386219   | 0.465380174 | 0.0537229    | 0.246583688 |
| UBL7    | purple | 0.144430563  | 0.001752659 | 0.15557215   | 0.000742206 |
| UCHL3   | purple | 0.166213192  | 0.000309287 | 0.183074691  | 6.91E-05    |
| UCK1    | purple | 0.217065054  | 2.19E-06    | 0.233458816  | 3.36E-07    |
| UQCC2   | purple | -0.010117983 | 0.827373744 | 0.007906169  | 0.864696723 |
| UQCC3   | purple | 0.073427994  | 0.113039149 | 0.077651341  | 0.093719772 |
| UQCRQ   | purple | 0.297764113  | 5.13E-11    | 0.32915527   | 2.91E-13    |
| URM1    | purple | 0.186884687  | 4.83E-05    | 0.209096956  | 5.19E-06    |
| UROS    | purple | 0.08791479   | 0.057638096 | 0.105510833  | 0.022585977 |
| VAR52   | purple | 0.164678395  | 0.00035208  | 0.172002352  | 0.000187781 |
| VPS25   | purple | 0.236096208  | 2.45E-07    | 0.260300856  | 1.14E-08    |
| WBSCR2  | purple | 0.013407921  | 0.772593537 | 0.022018399  | 0.635069266 |
| WDR34   | purple | 0.35522646   | 2.46E-15    | 0.381220164  | 1.33E-17    |
| WDR46   | purple | -0.119180198 | 0.009943235 | -0.106316091 | 0.021569252 |
| WDR74   | purple | -0.176747338 | 0.000123247 | -0.181184131 | 8.23E-05    |
| WIBG    | purple | 0.127598557  | 0.005756581 | 0.122536922  | 0.008026679 |
| WRAP53  | purple | 0.186469554  | 5.03E-05    | 0.200810064  | 1.23E-05    |
| ZBTB38  | purple | -0.147359831 | 0.001406134 | -0.168100599 | 0.000263317 |
| ZBTB80  | purple | 0.091015876  | 0.04933558  | 0.116736087  | 0.011584184 |
| ZFYVE15 | purple | 0.338859734  | 5.19E-14    | 0.335628651  | 9.28E-14    |
| ZMYND1  | purple | 0.12743294   | 0.0058206   | 0.137729372  | 0.002858051 |
| ZNF296  | purple | 0.006304825  | 0.891912486 | 0.031327504  | 0.499456883 |
| ZNF316  | purple | -0.023427443 | 0.613570184 | -0.017965829 | 0.698581773 |
| ZNF593  | purple | 0.092597293  | 0.045502387 | 0.095618638  | 0.038872569 |
| ZNHIT1  | purple | 0.088210454  | 0.056799581 | 0.113066268  | 0.014498133 |
| A4GNT   | red    | -0.089120547 | 0.054281799 | -0.077147066 | 0.095877514 |
| AADACL  | red    | -0.07144156  | 0.123146969 | -0.05853356  | 0.206728026 |
| ABCA12  | red    | 0.109661796  | 0.017758568 | 0.103275461  | 0.025628773 |
| ABCA13  | red    | -0.104928632 | 0.023346693 | -0.112702806 | 0.014819131 |
| ABRA    | red    | -0.131338057 | 0.004469702 | -0.132342204 | 0.004171596 |
| AC00504 | red    | -0.092314662 | 0.04616849  | -0.090032654 | 0.051852275 |
| AC00547 | red    | -0.057342033 | 0.216135806 | -0.044104927 | 0.341592158 |
| AC00548 | red    | -0.066342606 | 0.152312462 | -0.066705457 | 0.150077634 |
| AC00611 | red    | -0.120270791 | 0.009280138 | -0.112749802 | 0.014777277 |
| AC00704 | red    | -0.081305501 | 0.079220852 | -0.062836145 | 0.175226045 |
| AC00755 | red    | -0.063944345 | 0.16772283  | -0.046543497 | 0.315541594 |
| AC00790 | red    | -0.083241792 | 0.072308707 | -0.075870896 | 0.101515412 |

|             |              |             |              |             |
|-------------|--------------|-------------|--------------|-------------|
| AC00807:red | -0.068629179 | 0.138643643 | -0.056764942 | 0.220801102 |
| AC00864:red | -0.013094179 | 0.777773777 | -0.018700648 | 0.686891842 |
| AC00949:red | -0.025120781 | 0.588166263 | -0.025744184 | 0.578937382 |
| AC01028:red | -0.06480055  | 0.162092479 | -0.04899282  | 0.290721134 |
| AC01064:red | -0.167041056 | 0.000288271 | -0.171299888 | 0.000199674 |
| AC01138:red | -0.02917915  | 0.529341969 | -0.012310035 | 0.790763549 |
| AC01236:red | -0.100289325 | 0.030240329 | -0.079962033 | 0.084324381 |
| AC01328:red | -0.074118514 | 0.109682259 | -0.061581051 | 0.184022085 |
| AC01654:red | -0.081015381 | 0.080301211 | -0.064035006 | 0.167119806 |
| AC01657:red | -0.054617191 | 0.238795098 | -0.037429634 | 0.419680124 |
| AC01673:red | -0.01200543  | 0.795825378 | -0.000982926 | 0.983098654 |
| AC01702:red | -0.103184978 | 0.025759046 | -0.108637725 | 0.018857121 |
| AC01886:red | 0.022966074  | 0.620574504 | 0.03444485   | 0.457732962 |
| AC01890:red | -0.048364109 | 0.29696373  | -0.032611126 | 0.482036594 |
| AC02281:red | -0.080092173 | 0.083818691 | -0.067576841 | 0.144812599 |
| AC02644:red | -0.080771579 | 0.081218287 | -0.057833281 | 0.212220558 |
| AC06395:red | -0.003374191 | 0.942027592 | -0.011078332 | 0.811283533 |
| AC06906:red | -0.090206685 | 0.051399178 | -0.082875983 | 0.073575453 |
| AC06906:red | -0.080731123 | 0.081371282 | -0.070979564 | 0.125595737 |
| AC06936:red | -0.187405575 | 4.60E-05    | -0.179703866 | 9.43E-05    |
| AC06949:red | -0.114704407 | 0.013126023 | -0.098643669 | 0.033073082 |
| AC07313:red | -0.020063772 | 0.665404691 | -0.014844182 | 0.749011228 |
| AC08739:red | -0.027163314 | 0.558185301 | -0.020698499 | 0.65549077  |
| AC09215:red | -0.133708586 | 0.003794827 | -0.118807651 | 0.010179204 |
| AC09283:red | -0.261842692 | 9.26E-09    | -0.276361461 | 1.24E-09    |
| AC09288:red | -0.076691907 | 0.097858957 | -0.066560389 | 0.150968106 |
| AC10082:red | -0.027270255 | 0.556636215 | -0.029102837 | 0.530419975 |
| AC10465:red | -0.076956008 | 0.096705312 | -0.052519376 | 0.257342975 |
| AC10500:red | -0.069036898 | 0.136308519 | -0.093210036 | 0.044085969 |
| AC10708:red | -0.063827461 | 0.168502671 | -0.048988421 | 0.290764504 |
| AC11060:red | -0.04384381  | 0.344460713 | -0.030239473 | 0.514479668 |
| AC12431:red | -0.103974625 | 0.024641162 | -0.095271392 | 0.039590346 |
| AC23165:red | -0.0779538   | 0.092444322 | -0.051063124 | 0.27079018  |
| AC24298:red | -0.108771508 | 0.018710322 | -0.104977084 | 0.023282549 |
| ACAD11:red  | -0.087548441 | 0.058691278 | -0.10424746  | 0.024264777 |
| ACKR2:red   | -0.046244218 | 0.318666784 | -0.020500199 | 0.658581672 |
| ACMSD:red   | -0.106735086 | 0.021056111 | -0.103885811 | 0.024764767 |
| ACPT:red    | -0.067431072 | 0.145683398 | -0.070082301 | 0.130459477 |
| ACRV1:red   | -0.120034113 | 0.009420603 | -0.123638228 | 0.007473935 |
| ACSM6:red   | -0.101420941 | 0.028415274 | -0.096196254 | 0.037703019 |
| ACTR3C:red  | -0.011900505 | 0.797570991 | -0.021176595 | 0.648062931 |
| ADAM20:red  | -0.095217195 | 0.03970338  | -0.094758545 | 0.040670919 |
| ADAM32:red  | -0.138025477 | 0.00279818  | -0.141658479 | 0.002151006 |
| ADCY10:red  | 0.036907579  | 0.426198767 | 0.03648022   | 0.431578537 |
| ADH1A:red   | -0.067583925 | 0.144770384 | -0.059034432 | 0.202863101 |

|             |              |             |              |             |
|-------------|--------------|-------------|--------------|-------------|
| ADH4 red    | 0.175532967  | 0.000137414 | 0.180899245  | 8.45E-05    |
| ADORA2red   | -0.012885466 | 0.781225342 | 0.005923531  | 0.898412779 |
| AGAP5 red   | 0.068730886  | 0.138058286 | 0.069311068  | 0.134755363 |
| AGBL3 red   | -0.136216806 | 0.003182467 | -0.137873342 | 0.002828797 |
| AGBL4 red   | -0.291292077 | 1.38E-10    | -0.284735363 | 3.68E-10    |
| AL02380(red | -0.207403458 | 6.21E-06    | -0.19865805  | 1.53E-05    |
| AL04979red  | -0.058468266 | 0.207235758 | -0.044958732 | 0.332319265 |
| AL04987red  | -0.060672413 | 0.190590538 | -0.063353638 | 0.17169179  |
| AL10965red  | 0.0465842    | 0.315118113 | 0.024890045  | 0.591599188 |
| AL13716red  | -0.07597696  | 0.101037034 | -0.05695507  | 0.219256194 |
| AL13870(red | 0.031347412  | 0.499184194 | 0.016273353  | 0.725775243 |
| AL13875red  | 0.005291371  | 0.90920463  | -0.002237374 | 0.961540471 |
| AL13933red  | -0.062459103 | 0.177834953 | -0.061359034 | 0.185611386 |
| AL35613red  | -0.005475668 | 0.906056596 | -0.011071184 | 0.811403008 |
| AL35658red  | -0.026071896 | 0.574113262 | -0.015803893 | 0.733381378 |
| AL36520red  | -0.100972531 | 0.029126826 | -0.093298661 | 0.043884206 |
| AL44518red  | -0.034191015 | 0.461055789 | -0.024978738 | 0.590278507 |
| AL59622(red | -0.011786192 | 0.799473931 | 0.002080163  | 0.964241001 |
| AMZ1 red    | -0.175093765 | 0.000142904 | -0.174040291 | 0.000156924 |
| ANGPTLred   | -0.09387483  | 0.042591375 | -0.081787187 | 0.077453175 |
| ANGPTLred   | -0.093572698 | 0.043265251 | -0.087556978 | 0.058666556 |
| ANKAR red   | -0.164302704 | 0.000363365 | -0.16090185  | 0.000481993 |
| ANKHD1red   | 0.004386795  | 0.924675578 | 0.015377382  | 0.740314369 |
| ANKHD1red   | 0.251140464  | 3.78E-08    | 0.24912482   | 4.88E-08    |
| ANKRD2red   | -0.062585853 | 0.176954719 | -0.06168193  | 0.183303277 |
| ANKRD3red   | -0.249573055 | 4.61E-08    | -0.243514625 | 9.89E-08    |
| ANKRD3red   | -0.109234642 | 0.018209803 | -0.107667469 | 0.01995213  |
| ANKRD3red   | -0.078040365 | 0.092081853 | -0.082333056 | 0.075488823 |
| ANKRD3red   | -0.082729914 | 0.074086296 | -0.074359905 | 0.108527462 |
| ANKRD5red   | -0.076652193 | 0.098033378 | -0.077114    | 0.096020374 |
| ANKRD6red   | -0.088865139 | 0.054978836 | -0.076310018 | 0.099546478 |
| ANKRD6red   | -0.127467594 | 0.005807152 | -0.124711518 | 0.006968249 |
| ANXA10 red  | -0.042845889 | 0.355564219 | -0.030450692 | 0.511545095 |
| AP00086(red | -0.13599817  | 0.003232033 | -0.141821966 | 0.002125391 |
| APLF red    | -0.214853141 | 2.79E-06    | -0.239721756 | 1.58E-07    |
| APOBECred   | -0.07742279  | 0.094692862 | -0.079350389 | 0.086734139 |
| ARG1 red    | -0.06252085  | 0.177405732 | -0.060500033 | 0.191855842 |
| ARHGAPred   | -0.128598962 | 0.005383156 | -0.123362637 | 0.007608965 |
| ARHGAPred   | 0.066529869  | 0.151155963 | 0.032075456  | 0.489265976 |
| ARHGDLred   | 0.129611261  | 0.005027624 | 0.130230823  | 0.004820607 |
| ARL13A red  | -0.065379039 | 0.158369643 | -0.059477939 | 0.199484862 |
| ARL17A red  | -0.037699371 | 0.416335074 | -0.038322235 | 0.408671005 |
| ARL17B red  | -0.055943391 | 0.22756615  | -0.08002363  | 0.084084724 |
| ASB14 red   | -0.02892988  | 0.532867271 | -0.024510192 | 0.597270577 |
| ASPDH red   | -0.13615602  | 0.003196178 | -0.124329364 | 0.007144679 |

|           |     |              |             |              |             |
|-----------|-----|--------------|-------------|--------------|-------------|
| ASZ1      | red | -0.084841314 | 0.066977244 | -0.08515087  | 0.065983651 |
| ATP2A1    | red | -0.017759748 | 0.701873214 | -0.016029238 | 0.729727058 |
| ATP5L2    | red | -0.030116536 | 0.516191702 | -0.007570204 | 0.870394501 |
| ATRIP     | red | -0.021558732 | 0.642150904 | -0.045724123 | 0.324145715 |
| B3GALT2   | red | -0.045960427 | 0.321648836 | -0.031104014 | 0.50252362  |
| B3GAT2    | red | -0.161632758 | 0.000453809 | -0.138861102 | 0.002635327 |
| BBS1      | red | -0.138241905 | 0.002755145 | -0.157546302 | 0.000633521 |
| BCL7B     | red | 0.00913989   | 0.843835766 | 0.024109705  | 0.60327661  |
| BLID      | red | -0.089253043 | 0.053923108 | -0.082538348 | 0.074760629 |
| BOD1L2    | red | -0.038251631 | 0.409535533 | -0.034657916 | 0.454954197 |
| BOLL      | red | -0.078369214 | 0.090715236 | -0.05987884  | 0.196466575 |
| BTBD18    | red | -0.095132425 | 0.039880723 | -0.07873667  | 0.089207464 |
| BTBD8     | red | -0.098657637 | 0.033048117 | -0.108251478 | 0.01928659  |
| C10orf11  | red | -0.083046809 | 0.072981672 | -0.074077081 | 0.109881441 |
| C10orf13  | red | -0.050773909 | 0.273516944 | -0.051724669 | 0.264623028 |
| C11orf42  | red | -0.015314002 | 0.74134644  | -0.018840659 | 0.68467281  |
| C11orf65  | red | -0.03762982  | 0.417196087 | -0.032155462 | 0.488182534 |
| C11orf68  | red | -0.080036505 | 0.084034701 | -0.074141383 | 0.109572443 |
| C12orf40  | red | -0.062802966 | 0.175454473 | -0.055376922 | 0.232315687 |
| C12orf71  | red | -0.067032138 | 0.14808698  | -0.05704035  | 0.218565762 |
| C12orf79  | red | -0.000340916 | 0.994137582 | 0.00854438   | 0.853892543 |
| C14orf18  | red | -0.064282472 | 0.165482079 | -0.055906769 | 0.227871104 |
| C14orf39  | red | -0.14359916  | 0.001864385 | -0.147207826 | 0.00142244  |
| C17orf78  | red | -0.07359641  | 0.112213064 | -0.062710269 | 0.176093847 |
| C18orf63  | red | -0.112623644 | 0.014889867 | -0.102169336 | 0.027260932 |
| C19orf67  | red | -0.023517857 | 0.612201629 | -0.02148278  | 0.643324163 |
| C1orf100  | red | 0.045954821  | 0.321707929 | 0.055544668  | 0.230901977 |
| C1orf105  | red | -0.035462356 | 0.444548658 | -0.034492796 | 0.457106826 |
| C1orf111  | red | -0.048436254 | 0.296242882 | -0.053155215 | 0.251618902 |
| C1orf146  | red | -0.102656616 | 0.026531216 | -0.10530537  | 0.022851951 |
| C1orf195  | red | -0.107581471 | 0.020051803 | -0.097784197 | 0.034640485 |
| C1QTNF3   | red | -0.085076338 | 0.066221766 | -0.078913613 | 0.088488631 |
| C20orf14  | red | -0.045516233 | 0.326352737 | -0.032939071 | 0.477639396 |
| C3orf30   | red | -0.149771857 | 0.001169354 | -0.132037025 | 0.004260236 |
| C3orf49   | red | -0.088082561 | 0.05716104  | -0.080866195 | 0.080861382 |
| C4orf45   | red | -0.126206663 | 0.006314868 | -0.113700933 | 0.013952251 |
| C4orf51   | red | -0.141696169 | 0.002145076 | -0.131466731 | 0.004430457 |
| C6orf10   | red | -0.07173441  | 0.121614091 | -0.07339622  | 0.113195536 |
| C6orf163  | red | 0.021724555  | 0.63959245  | 0.023118396  | 0.618258183 |
| C7orf25   | red | -0.148776376 | 0.001262233 | -0.145501578 | 0.001617777 |
| C8orf44-S | red | -0.107847533 | 0.019744829 | -0.087686909 | 0.058291352 |
| C9orf131  | red | -0.080128349 | 0.083678555 | -0.060120845 | 0.194660794 |
| C9orf153  | red | -0.095782609 | 0.038537481 | -0.082845887 | 0.073680471 |
| C9orf47   | red | -0.123839699 | 0.007376582 | -0.128986705 | 0.005244385 |
| C9orf84   | red | -0.048165054 | 0.298958668 | -0.037081838 | 0.424016359 |

|         |     |              |             |              |             |
|---------|-----|--------------|-------------|--------------|-------------|
| CA1     | red | -0.103593127 | 0.025175898 | -0.094684006 | 0.040830029 |
| CACNB4  | red | -0.075371045 | 0.103794133 | -0.087345048 | 0.059282839 |
| CALCR   | red | -0.041992497 | 0.365236049 | -0.032007776 | 0.490183501 |
| CAPZB   | red | 0.109970533  | 0.017438535 | 0.130637995  | 0.004688777 |
| CARD18  | red | -0.14160659  | 0.002159195 | -0.135585954 | 0.003327394 |
| CAV3    | red | -0.121372601 | 0.008650453 | -0.11221549  | 0.0152593   |
| CBWD3   | red | -0.089074829 | 0.054406025 | -0.090190706 | 0.051440641 |
| CC2D2B  | red | -0.110240607 | 0.017162725 | -0.105283512 | 0.022880405 |
| CCDC144 | red | -0.069641252 | 0.13290303  | -0.063771717 | 0.168875547 |
| CCDC158 | red | -0.286907715 | 2.67E-10    | -0.287446262 | 2.46E-10    |
| CCDC175 | red | -0.062367304 | 0.178474488 | -0.060980019 | 0.188347897 |
| CCDC175 | red | -0.037970727 | 0.412985817 | -0.030340265 | 0.513078223 |
| CCDC38  | red | -0.181088412 | 8.30E-05    | -0.181416888 | 8.06E-05    |
| CCDC54  | red | -0.1456575   | 0.001598955 | -0.133603301 | 0.003822723 |
| CCDC62  | red | -0.01966982  | 0.671587511 | 0.010380339  | 0.822970616 |
| CCDC7   | red | 0.141873754  | 0.002117335 | 0.138067953  | 0.002789686 |
| CCDC70  | red | -0.083764003 | 0.070531263 | -0.089989102 | 0.051966185 |
| CCDC73  | red | -0.149110917 | 0.001230289 | -0.138833789 | 0.00264051  |
| CCDC9   | red | 0.047933699  | 0.3012885   | 0.040439495  | 0.383252267 |
| CCR6    | red | -0.050226478 | 0.278729298 | -0.032778434 | 0.479790533 |
| CCSER1  | red | -0.056257455 | 0.224962814 | -0.063898975 | 0.168025213 |
| CD160   | red | -0.096952059 | 0.036217857 | -0.084633664 | 0.067650601 |
| CD200R1 | red | -0.062253767 | 0.179267823 | -0.042139869 | 0.363554219 |
| CDC37   | red | -0.003978883 | 0.931661746 | 0.007490615  | 0.871745278 |
| CDH9    | red | -0.055697666 | 0.229617876 | -0.043333499 | 0.350110927 |
| CDKL3   | red | -0.127417292 | 0.005826681 | -0.119169501 | 0.009949941 |
| CDKL4   | red | -0.031908059 | 0.491537034 | -0.042249139 | 0.362310348 |
| CDR1    | red | -0.055340248 | 0.232625576 | -0.038474525 | 0.406809971 |
| CDRT15L | red | -0.069810264 | 0.131962505 | -0.06678731  | 0.149576958 |
| CDRT4   | red | -0.01861157  | 0.688305045 | -0.018856441 | 0.68442285  |
| CEACAM  | red | 0.014472742  | 0.755088592 | 0.011654475  | 0.801668068 |
| CECR2   | red | -0.244837431 | 8.39E-08    | -0.256331477 | 1.92E-08    |
| CELA2B  | red | -0.185282317 | 5.62E-05    | -0.19371468  | 2.50E-05    |
| CELF6   | red | -0.05249929  | 0.257525254 | -0.048132371 | 0.299287067 |
| CFHR4   | red | -0.104738602 | 0.023599743 | -0.088204327 | 0.056816854 |
| CHRM5   | red | -0.076965088 | 0.096665842 | -0.075849355 | 0.10161279  |
| CHRNA   | red | -0.077426963 | 0.09467502  | -0.065604867 | 0.156933983 |
| CLCA1   | red | -0.063312386 | 0.17197156  | -0.048221596 | 0.298391091 |
| CLDN18  | red | -0.024342965 | 0.599775157 | -0.018866274 | 0.684267134 |
| CLDN20  | red | -0.08169124  | 0.0778027   | -0.070677104 | 0.127219275 |
| CNPPD1  | red | 0.132359892  | 0.00416651  | 0.135401224  | 0.003370952 |
| COL24A1 | red | -0.152368835 | 0.000955879 | -0.135480312 | 0.003352241 |
| COL6A6  | red | -0.282240752 | 5.31E-10    | -0.281919331 | 5.57E-10    |
| COPS7A  | red | 0.108637223  | 0.018857674 | 0.124421097  | 0.007101968 |
| CPNE6   | red | -0.139815129 | 0.002459987 | -0.128517366 | 0.005412776 |

|              |              |             |              |             |
|--------------|--------------|-------------|--------------|-------------|
| CREB3 red    | 0.174019198  | 0.000157217 | 0.206317438  | 6.96E-06    |
| CRYBA1 red   | -0.087205822 | 0.05969061  | -0.095012978 | 0.04013175  |
| CSMD2 red    | 0.018416481  | 0.691403886 | 0.012143156  | 0.793535625 |
| CSMD3 red    | -0.094422759 | 0.041391837 | -0.095711158 | 0.038682332 |
| CSNK1A red   | 0.012470423  | 0.78810179  | 0.004188329  | 0.928073945 |
| CTC-454I red | -0.100304535 | 0.030215148 | -0.095685471 | 0.038735692 |
| CTC-487I red | -0.053079807 | 0.252293085 | -0.066308702 | 0.152522561 |
| CTD-211I red | -0.043892753 | 0.34392188  | -0.030061539 | 0.516958548 |
| CTD-231I red | -0.140775518 | 0.002294288 | -0.150146915 | 0.001136024 |
| CTD-237I red | -0.084057739 | 0.069547279 | -0.079693597 | 0.085375233 |
| CTD-252I red | -0.016644574 | 0.719779736 | -0.02785436  | 0.548212262 |
| CTD-322I red | -0.07102577  | 0.125349137 | -0.059706506 | 0.197759927 |
| CTDSP1 red   | -0.027391659 | 0.554880154 | -0.036230481 | 0.43474044  |
| CTRL red     | -0.10178426  | 0.027849743 | -0.08235098  | 0.075425016 |
| CYP19A1 red  | -0.108597249 | 0.018901731 | -0.108163167 | 0.019385972 |
| CYP2A7 red   | -0.110358622 | 0.017043407 | -0.081701109 | 0.077766692 |
| CYP2C19 red  | -0.032623255 | 0.481873575 | -0.037136973 | 0.423327213 |
| CYP4A22 red  | -0.089043065 | 0.054492474 | -0.079209343 | 0.087297622 |
| CYP7B1 red   | -0.285087027 | 3.50E-10    | -0.292474155 | 1.16E-10    |
| CYP8B1 red   | -0.13341541  | 0.003872967 | -0.108631928 | 0.018863504 |
| DCAF4L1 red  | -0.007323197 | 0.874587898 | 0.000738789  | 0.98729615  |
| DCDC2C red   | -0.157906363 | 0.000615365 | -0.140490066 | 0.002342441 |
| DCLRE1C red  | -0.064402864 | 0.164689694 | -0.066507222 | 0.151295469 |
| DDI1 red     | -0.088059696 | 0.057225864 | -0.082047932 | 0.076509746 |
| DEFB108 red  | -0.070828843 | 0.126402749 | -0.07475089  | 0.106677393 |
| DEFB113 red  | 0.017906904  | 0.699522335 | 0.034521399  | 0.456733526 |
| DEFB134 red  | 0.017860873  | 0.700257389 | 0.014093742  | 0.761305257 |
| DEFB135 red  | -0.074483728 | 0.107938837 | -0.070000058 | 0.130912471 |
| DGKH red     | -0.030258108 | 0.514220419 | -0.041064416 | 0.375938328 |
| DIRC1 red    | -0.069390215 | 0.134309545 | -0.06051629  | 0.191736249 |
| DKFZp31 red  | -0.044628424 | 0.335887233 | -0.051766938 | 0.264232291 |
| DLEU1 red    | 0.096750557  | 0.036608866 | 0.079726147  | 0.085247251 |
| DLEU7 red    | -0.117700295 | 0.0109102   | -0.103163726 | 0.025789727 |
| DMP1 red     | -0.056983443 | 0.219026312 | -0.049992765 | 0.280974967 |
| DNAH14 red   | -0.000443313 | 0.992376806 | -0.013199274 | 0.776037432 |
| DNAJB7 red   | -0.123304922 | 0.007637518 | -0.111592658 | 0.015838551 |
| DNHD1 red    | -0.186409867 | 5.05E-05    | -0.167033739 | 0.000288451 |
| DNM3 red     | -0.178777654 | 0.000102582 | -0.173188191 | 0.000169197 |
| DRD3 red     | -0.061049844 | 0.187841539 | -0.054722842 | 0.237886517 |
| DSPP red     | -0.056651559 | 0.221726108 | -0.03402524  | 0.463233096 |
| EBLN2 red    | -0.034309054 | 0.459508919 | -0.05328232  | 0.250485348 |
| EDDM3B red   | -0.139095807 | 0.002591165 | -0.121550035 | 0.008552688 |
| EFCAB13 red  | -0.084566931 | 0.067868177 | -0.094263307 | 0.041737935 |
| EFCAB5 red   | -0.020304885 | 0.661631712 | -0.007804863 | 0.866414087 |
| EMD red      | -0.029092945 | 0.530559782 | -0.026781138 | 0.563738287 |



|          |     |              |             |              |             |
|----------|-----|--------------|-------------|--------------|-------------|
| EML6     | red | 0.000609928  | 0.989511844 | -0.010146259 | 0.826898923 |
| ENAM     | red | -0.142561723 | 0.002012936 | -0.147035643 | 0.00144112  |
| EPB42    | red | -0.060182599 | 0.19420195  | -0.04831686  | 0.297436453 |
| EPGN     | red | -0.024598801 | 0.595945398 | -0.040366776 | 0.384108953 |
| EPPIN-W  | red | 0.050571031  | 0.275440839 | 0.060060192  | 0.19511223  |
| EQTN     | red | -0.188312639 | 4.22E-05    | -0.187806386 | 4.43E-05    |
| ERC2     | red | -0.126853024 | 0.006049838 | -0.147782198 | 0.001361724 |
| ERICH6B  | red | -0.008963592 | 0.846810473 | -0.012408603 | 0.789127447 |
| ERVFRD   | red | -0.163986883 | 0.000373111 | -0.153778747 | 0.000855656 |
| ERVV-1   | red | 0.02628083   | 0.571047568 | 0.030094592  | 0.516497603 |
| ERVW-1   | red | -0.004687194 | 0.919534411 | 0.006201985  | 0.893665007 |
| ESR2     | red | -0.08991369  | 0.052163916 | -0.063680453 | 0.169487345 |
| ESYT3    | red | -0.266099371 | 5.20E-09    | -0.287784121 | 2.34E-10    |
| EYS      | red | -0.109658938 | 0.017761554 | -0.096676041 | 0.036754369 |
| FABP12   | red | 0.019418883  | 0.675537397 | 0.0047367    | 0.918687459 |
| FAM106A  | red | -0.09141549  | 0.048342321 | -0.077529537 | 0.09423737  |
| FAM127E  | red | -0.020320044 | 0.661394785 | -0.013237184 | 0.775411371 |
| FAM184E  | red | -0.178370806 | 0.000106442 | -0.175755281 | 0.000134711 |
| FAM186E  | red | -0.103884652 | 0.024766383 | -0.094505716 | 0.041212737 |
| FAM196A  | red | 0.010170695  | 0.826488637 | 0.014784656  | 0.749984134 |
| FAM217A  | red | 0.015778023  | 0.733801286 | 0.035370404  | 0.445731181 |
| FAM24A   | red | -0.012001747 | 0.795886632 | 0.001270739  | 0.978150819 |
| FAM46D   | red | -0.10653949  | 0.021294321 | -0.097943842 | 0.03434465  |
| FANCD2   | red | 0.027698519  | 0.550453656 | 0.024757533  | 0.593574854 |
| FAT3     | red | -0.203067313 | 9.75E-06    | -0.211461684 | 4.03E-06    |
| FBXO40   | red | -0.136384129 | 0.003145003 | -0.126317231 | 0.006268806 |
| FKSG61   | red | -0.062932113 | 0.17456657  | -0.09501797  | 0.040121233 |
| FKSG68   | red | -0.076005406 | 0.10090904  | -0.061590247 | 0.183956476 |
| FKSG70   | red | -0.106139949 | 0.021788191 | -0.110517412 | 0.016884008 |
| FLG2     | red | -0.064283421 | 0.165475824 | -0.060081597 | 0.194952822 |
| FNDC9    | red | -0.099124918 | 0.032222161 | -0.073407431 | 0.113140338 |
| FOXD4L   | red | 0.013370996  | 0.773202691 | 0.016435904  | 0.723147824 |
| FOXR1    | red | -0.077650169 | 0.093724744 | -0.081745578 | 0.077604598 |
| FP325331 | red | -0.039393985 | 0.395681303 | -0.036780253 | 0.427797509 |
| FPGT-TN  | red | -0.081265399 | 0.079369479 | -0.093106602 | 0.044322432 |
| FSBP     | red | -0.057797216 | 0.212506245 | -0.062372443 | 0.178438638 |
| FSIP2    | red | -0.080893951 | 0.080756922 | -0.080825938 | 0.08101308  |
| FUT9     | red | -0.125250834 | 0.006725897 | -0.11865569  | 0.010276873 |
| GABRB2   | red | -0.152847696 | 0.000920684 | -0.166444185 | 0.000303283 |
| GABRR2   | red | -0.171556834 | 0.000195244 | -0.185591834 | 5.46E-05    |
| GALNTL   | red | -0.084611621 | 0.067722408 | -0.078826339 | 0.088842599 |
| GAPDHS   | red | -0.103194452 | 0.025745379 | -0.104067544 | 0.024512415 |
| GBP7     | red | -0.082391104 | 0.075282336 | -0.054346516 | 0.241133985 |
| GCM2     | red | -0.110749568 | 0.016653308 | -0.103138259 | 0.025826534 |
| GCNT7    | red | -0.100446448 | 0.02998107  | -0.089191759 | 0.054088767 |

|          |     |              |             |              |             |
|----------|-----|--------------|-------------|--------------|-------------|
| GCSAM    | red | -0.058287531 | 0.20864587  | -0.033605068 | 0.468777192 |
| GDI1     | red | 0.000904598  | 0.984445318 | -0.001694468 | 0.970868011 |
| GDPD4    | red | -0.112844943 | 0.014692864 | -0.115787317 | 0.012283061 |
| GHRL     | red | -0.099880295 | 0.030924269 | -0.098459461 | 0.033403827 |
| GHSR     | red | -0.06079175  | 0.18971818  | -0.068914987 | 0.137003549 |
| GIF      | red | -0.077500509 | 0.09436106  | -0.071237256 | 0.124225243 |
| GJA9     | red | -0.018254568 | 0.693979668 | -0.004695213 | 0.919397222 |
| GJE1     | red | -0.097530519 | 0.035115031 | -0.091103466 | 0.049116423 |
| GLIPR1L  | red | -0.134474655 | 0.00359734  | -0.129866396 | 0.004941424 |
| GNB2     | red | 0.164274005  | 0.00036424  | 0.206886827  | 6.55E-06    |
| GNRHR    | red | -0.071550779 | 0.122573526 | -0.067306678 | 0.146429657 |
| GOLGA8   | red | -0.080721343 | 0.081408303 | -0.077179145 | 0.095739083 |
| GPC5     | red | -0.14906536  | 0.001234595 | -0.1486253   | 0.001276908 |
| GPR113   | red | -0.195530661 | 2.09E-05    | -0.189981185 | 3.59E-05    |
| GPR18    | red | -0.036418902 | 0.432353636 | -0.006646884 | 0.886087207 |
| GPR21    | red | -0.073265571 | 0.113840359 | -0.060509156 | 0.191788721 |
| GPR22    | red | -0.140629793 | 0.002318756 | -0.132408707 | 0.004152502 |
| GPR52    | red | -0.069863239 | 0.131668772 | -0.067585916 | 0.144758518 |
| GPR61    | red | -0.220445889 | 1.51E-06    | -0.203099717 | 9.71E-06    |
| GPR82    | red | -0.121092155 | 0.008807008 | -0.096844819 | 0.03642551  |
| GREB1L   | red | 0.029199412  | 0.529055948 | 0.018540181  | 0.689438405 |
| GRIA4    | red | -0.078269036 | 0.091129815 | -0.066592088 | 0.150773191 |
| GRIK1    | red | -0.161645323 | 0.000453338 | -0.156762528 | 0.000674772 |
| GRIN2B   | red | -0.163683101 | 0.000382715 | -0.183157746 | 6.86E-05    |
| GRM5     | red | -0.031260039 | 0.500381594 | -0.021726201 | 0.639567066 |
| GS1-114L | red | -0.028759655 | 0.535281455 | -0.030272137 | 0.514025286 |
| GSK3A    | red | 0.019714049  | 0.670892246 | 0.013876063  | 0.764882799 |
| GUCY2C   | red | -0.133599842 | 0.003823642 | -0.114491928 | 0.013297281 |
| GYPA     | red | -0.112038906 | 0.015421609 | -0.108350094 | 0.019176136 |
| GYPB     | red | -0.101296937 | 0.02861054  | -0.098494327 | 0.033341009 |
| GYPE     | red | -0.205611976 | 7.49E-06    | -0.205920083 | 7.25E-06    |
| H1FX     | red | -0.017626392 | 0.7040061   | -0.027976797 | 0.546454482 |
| HCRTR1   | red | -0.099304592 | 0.0319093   | -0.099297088 | 0.031922313 |
| HEPHL1   | red | -0.193543217 | 2.54E-05    | -0.16818871  | 0.000261335 |
| HIGD1C   | red | -0.071303664 | 0.12387395  | -0.059866699 | 0.196557491 |
| HIST1H1L | red | -0.087447444 | 0.058984411 | -0.080621836 | 0.081785744 |
| HIST1H2L | red | -0.070685016 | 0.127176602 | -0.060052861 | 0.195166841 |
| HIST3H3  | red | 0.014216425  | 0.759291213 | 0.030442399  | 0.51166016  |
| HIST4H4  | red | -0.170142588 | 0.000220818 | -0.142905398 | 0.001962567 |
| HMGB4    | red | -0.071462412 | 0.123037328 | -0.053808098 | 0.245834121 |
| HRH4     | red | -0.140613188 | 0.00232156  | -0.13301597  | 0.003981776 |
| HRNR     | red | -0.173291622 | 0.000167661 | -0.172801973 | 0.000175051 |
| HTR1E    | red | -0.242487583 | 1.12E-07    | -0.252840095 | 3.03E-08    |
| HTR1F    | red | -0.103873382 | 0.024782106 | -0.093125326 | 0.044279547 |
| IAPP     | red | -0.094127255 | 0.042035169 | -0.078518767 | 0.090099133 |

|          |     |              |             |              |             |
|----------|-----|--------------|-------------|--------------|-------------|
| IFIT1B   | red | -0.126397992 | 0.006235352 | -0.114465304 | 0.013318878 |
| IFNA8    | red | -0.082985586 | 0.073194029 | -0.068129559 | 0.141546855 |
| IFNK     | red | -0.082424934 | 0.075162211 | -0.068576006 | 0.138950435 |
| IFNW1    | red | -0.062248052 | 0.179307823 | -0.061450373 | 0.184956324 |
| IL1RAPL  | red | -0.072238987 | 0.1190079   | -0.075613213 | 0.102685127 |
| IL1RL1   | red | -0.040145814 | 0.386719246 | -0.037856067 | 0.414399086 |
| IL5      | red | -0.100263132 | 0.030283735 | -0.09947891  | 0.031608248 |
| IMPG1    | red | -0.057323471 | 0.21628475  | -0.054352952 | 0.241078192 |
| INSL6    | red | -0.051488988 | 0.266808968 | -0.052833845 | 0.254500843 |
| IRF2BP1  | red | -0.074358362 | 0.108534815 | -0.089284985 | 0.053836928 |
| IRGM     | red | -0.135194201 | 0.003420382 | -0.131905966 | 0.004298822 |
| ISPD     | red | -0.243367695 | 1.01E-07    | -0.237710065 | 2.02E-07    |
| JMJD7    | red | 0.116786324  | 0.011548179 | 0.108911499  | 0.018557781 |
| KCNA7    | red | -0.158239773 | 0.000598985 | -0.153842083 | 0.000851391 |
| KCNG3    | red | -0.117005489 | 0.01139226  | -0.139493737 | 0.00251783  |
| KCNH8    | red | -0.254747653 | 2.37E-08    | -0.272361159 | 2.18E-09    |
| KCNJ13   | red | -0.126004766 | 0.006399762 | -0.129341161 | 0.005120356 |
| KCNMB3   | red | -0.273346052 | 1.90E-09    | -0.273034174 | 1.99E-09    |
| KCNS2    | red | -0.176507752 | 0.000125928 | -0.171364274 | 0.000198555 |
| KCNV2    | red | -0.13507091  | 0.003450131 | -0.129553697 | 0.00504726  |
| KCTD4    | red | -0.078916292 | 0.088477783 | -0.067120964 | 0.147549205 |
| KDELR1   | red | 0.139522078  | 0.00251268  | 0.13669859   | 0.003075675 |
| KIAA040  | red | -0.125298812 | 0.006704708 | -0.11279308  | 0.014738827 |
| KIAA173  | red | -0.153393655 | 0.000882019 | -0.143228862 | 0.001916216 |
| KIAA191  | red | -0.075358325 | 0.103852645 | -0.060646227 | 0.190782354 |
| KLC1     | red | -0.116983848 | 0.011407572 | -0.105137443 | 0.023071343 |
| KRTAP2   | red | -0.066504956 | 0.151309435 | -0.057447606 | 0.215290046 |
| LA16c-43 | red | -0.013824952 | 0.765723532 | 0.007021884  | 0.879707992 |
| LCTL     | red | -0.186477069 | 5.02E-05    | -0.18489532  | 5.83E-05    |
| LDHAL6   | red | -0.129078216 | 0.005212108 | -0.119647312 | 0.009654237 |
| LDHAL6l  | red | -0.088152928 | 0.056961929 | -0.083113565 | 0.072750698 |
| LENEP    | red | -0.013676325 | 0.768169877 | -0.016169455 | 0.727456292 |
| LGSN     | red | -0.125882931 | 0.006451486 | -0.089107183 | 0.054318087 |
| LHCGR    | red | -0.155549053 | 0.000743574 | -0.147123442 | 0.001431567 |
| LHX4     | red | -0.031529694 | 0.496691    | -0.037633069 | 0.417155835 |
| LIPI     | red | -0.199452332 | 1.41E-05    | -0.193268763 | 2.61E-05    |
| LIPN     | red | -0.050954084 | 0.271816035 | -0.050155392 | 0.279411046 |
| LRIT3    | red | 0.010082643  | 0.827967266 | 0.003640735  | 0.937457091 |
| LRP1B    | red | -0.111441771 | 0.015981747 | -0.106277598 | 0.021616934 |
| LRRC19   | red | -0.129746284 | 0.004981838 | -0.122380227 | 0.008108219 |
| LRRC37A  | red | -0.058513841 | 0.206881264 | -0.082209423 | 0.075930139 |
| LRRC37A  | red | -0.067674431 | 0.144231844 | -0.085220204 | 0.065762772 |
| LRRC69   | red | -0.043744965 | 0.345550584 | -0.037805943 | 0.415017791 |
| LRRC7    | red | -0.095859527 | 0.038381137 | -0.099718046 | 0.031199209 |
| LRRC75A  | red | -0.332510767 | 1.62E-13    | -0.333305202 | 1.40E-13    |

|        |     |              |             |              |             |
|--------|-----|--------------|-------------|--------------|-------------|
| LRRC9  | red | -0.2003494   | 1.29E-05    | -0.184845013 | 5.86E-05    |
| LRRD1  | red | -0.100399679 | 0.030058041 | -0.091622547 | 0.047834292 |
| LRRN3  | red | -0.038561707 | 0.405746837 | -0.011211482 | 0.809058774 |
| LRRTM2 | red | -0.129540312 | 0.005051835 | -0.123622908 | 0.007481385 |
| LRRTM4 | red | -0.106692508 | 0.021107768 | -0.105267545 | 0.022901211 |
| LSMEM1 | red | -0.056279395 | 0.224781747 | -0.068689592 | 0.138295717 |
| LYG2   | red | -0.119271798 | 0.009885965 | -0.107674593 | 0.019943893 |
| LZTS2  | red | -0.003865637 | 0.93360222  | -0.0062536   | 0.892785364 |
| MAB21L | red | -0.170370475 | 0.000216495 | -0.164640377 | 0.000353207 |
| MAB21L | red | -0.085433614 | 0.065086727 | -0.073158484 | 0.114371033 |
| MAB21L | red | -0.005436971 | 0.906717469 | -0.008064496 | 0.862013987 |
| MALRD1 | red | -0.209954847 | 4.74E-06    | -0.209236929 | 5.11E-06    |
| MASP2  | red | -0.135783142 | 0.003281463 | -0.145173958 | 0.00165799  |
| MATR3  | red | -0.104202321 | 0.024326704 | -0.114490894 | 0.013298119 |
| MCF2L2 | red | -0.208982495 | 5.25E-06    | -0.194090949 | 2.41E-05    |
| MCMDCL | red | -0.216012736 | 2.46E-06    | -0.224034757 | 1.00E-06    |
| MCTP1  | red | -0.029371717 | 0.526626716 | -0.038360736 | 0.408200032 |
| MDGA2  | red | -0.116680318 | 0.01162427  | -0.111365098 | 0.016054946 |
| MEMO1  | red | -0.137565151 | 0.002891756 | -0.15240027  | 0.000953531 |
| MEP1B  | red | -0.017356908 | 0.708323285 | -0.020223794 | 0.662899698 |
| METTL2 | red | -0.166214295 | 0.000309258 | -0.160943967 | 0.000480326 |
| MGAM   | red | -0.12246638  | 0.008063296 | -0.1166711   | 0.011630907 |
| MIA2   | red | 0.024443292  | 0.598271976 | 0.011002904  | 0.812544517 |
| MLANA  | red | -0.062106774 | 0.18029881  | -0.0618028   | 0.182444751 |
| MLF2   | red | 0.056035529  | 0.226800191 | 0.064986273  | 0.160890163 |
| MLN    | red | -0.134726547 | 0.003534469 | -0.134207466 | 0.003665135 |
| MMP21  | red | -0.102860929 | 0.026230293 | -0.081928102 | 0.07694215  |
| MOSPD3 | red | 0.072021785  | 0.120124371 | 0.092906845  | 0.044782119 |
| MPG    | red | 0.318739407  | 1.73E-12    | 0.343764187  | 2.12E-14    |
| MRAP   | red | -0.106636832 | 0.02117548  | -0.095495587 | 0.039125652 |
| MRGPRX | red | -0.115637581 | 0.012396695 | -0.107681059 | 0.019936419 |
| MRPL10 | red | 0.027870609  | 0.54797883  | 0.015530034  | 0.737830549 |
| MS4A12 | red | -0.078319925 | 0.090919027 | -0.060897179 | 0.188949933 |
| MS4A13 | red | -0.115598776 | 0.012426295 | -0.106409201 | 0.021454292 |
| MS4A4E | red | -0.132990967 | 0.003988678 | -0.130600293 | 0.004700845 |
| MS4A5  | red | -0.017656461 | 0.703524972 | -0.011821613 | 0.798884149 |
| MSANTE | red | -0.137466831 | 0.002912108 | -0.128842353 | 0.005295667 |
| MTMR7  | red | -0.151303823 | 0.001038652 | -0.140935694 | 0.002267666 |
| MTNR1A | red | -0.105364073 | 0.022775684 | -0.10318303  | 0.025761858 |
| MTRNR2 | red | 0.007578981  | 0.870245557 | 0.026999513  | 0.560562057 |
| MTRNR2 | red | -0.080400219 | 0.082631446 | -0.07194136  | 0.120539841 |
| MUSK   | red | -0.05581092  | 0.228670622 | -0.047283678 | 0.307898796 |
| MYH1   | red | -0.081422076 | 0.078790076 | -0.067485013 | 0.1453607   |
| MYH13  | red | -0.073026592 | 0.1150273   | -0.068374366 | 0.140118555 |
| MYH2   | red | -0.118026096 | 0.010690447 | -0.114507517 | 0.013284649 |

|         |     |              |             |              |             |
|---------|-----|--------------|-------------|--------------|-------------|
| MYH4    | red | -0.089594734 | 0.053007175 | -0.077005409 | 0.09649073  |
| MYO1H   | red | 0.027151435  | 0.558357496 | 0.012813068  | 0.782423636 |
| NAA11   | red | -0.171368128 | 0.000198488 | -0.162775201 | 0.000412809 |
| NABP1   | red | -0.134955007 | 0.00347831  | -0.158853444 | 0.000569888 |
| NAIP    | red | -0.087058449 | 0.060124763 | -0.07533415  | 0.103963922 |
| NBEAL1  | red | -0.060735723 | 0.190127372 | -0.057794352 | 0.212528944 |
| NCR3LG  | red | -0.113764806 | 0.013898328 | -0.125107806 | 0.006789423 |
| NEB     | red | -0.083444836 | 0.071613314 | -0.068406667 | 0.139930927 |
| NME1-N  | red | 0.071973817  | 0.120372038 | 0.043015635  | 0.35365979  |
| NOTCH2  | red | -0.087548781 | 0.058690295 | -0.084083454 | 0.069461674 |
| NPAP1   | red | -0.235195188 | 2.73E-07    | -0.237967971 | 1.95E-07    |
| NPBWR2  | red | -0.134308015 | 0.003639488 | -0.129713573 | 0.004992895 |
| NPFFR2  | red | -0.170063134 | 0.000222344 | -0.157956828 | 0.00061286  |
| NPHP3-A | red | -0.074381567 | 0.108424308 | -0.086366038 | 0.062199656 |
| NPIP4   | red | -0.067642033 | 0.144424443 | -0.052320355 | 0.259153005 |
| NPIPB8  | red | -0.047696946 | 0.303685134 | -0.032723094 | 0.480532821 |
| NT5C1B  | red | -0.071192095 | 0.124464577 | -0.072947577 | 0.115421871 |
| NUCB1   | red | 0.03944487   | 0.395070809 | 0.043736106  | 0.345648373 |
| NUDT13  | red | 0.160208254  | 0.000510236 | 0.148056693  | 0.001333557 |
| NUP210L | red | -0.059220203 | 0.201443046 | -0.049260397 | 0.288091204 |
| NUTM2A  | red | -0.05011383  | 0.279810169 | -0.039286395 | 0.396973961 |
| NUTM2G  | red | 0.000508905  | 0.991248931 | -0.005311691 | 0.908857463 |
| NXF2    | red | -0.157871639 | 0.000617095 | -0.126263458 | 0.00629117  |
| NXNL1   | red | -0.174955196 | 0.000144679 | -0.141486867 | 0.002178197 |
| NXPE1   | red | -0.052535037 | 0.257200915 | -0.041605668 | 0.369673554 |
| NXPE4   | red | 0.11248067   | 0.015018373 | 0.104544046  | 0.023861273 |
| OCLM    | red | 0.008581088  | 0.853271932 | 0.00676919   | 0.88400581  |
| ODF3    | red | -0.108320543 | 0.019209176 | -0.098432402 | 0.033452646 |
| OFCC1   | red | -0.095699498 | 0.038707018 | -0.077785401 | 0.093152724 |
| OIT3    | red | -0.059197465 | 0.201616465 | -0.053730573 | 0.246516118 |
| OR10A5  | red | -0.044968679 | 0.332212191 | -0.046501576 | 0.315978133 |
| OR10AD1 | red | -0.090539142 | 0.05054279  | -0.09478975  | 0.040604465 |
| OR13C4  | red | -0.06716055  | 0.147310025 | -0.049213435 | 0.288551618 |
| OR13C9  | red | -0.068300255 | 0.140549779 | -0.049082969 | 0.289833299 |
| OR13D1  | red | -0.031518904 | 0.496838392 | -0.024554821 | 0.596602972 |
| OR13H1  | red | -0.077492749 | 0.094394147 | -0.061721477 | 0.183022055 |
| OR1L4   | red | -0.051270967 | 0.268842103 | -0.037108574 | 0.423682099 |
| OR1L6   | red | -0.074526083 | 0.10773807  | -0.064885037 | 0.161544698 |
| OR2A2   | red | -0.060276405 | 0.193506471 | -0.040952518 | 0.377241607 |
| OR2A42  | red | -0.169974489 | 0.000224058 | -0.174439111 | 0.000151471 |
| OR2A5   | red | -0.021621589 | 0.641180584 | -0.033926345 | 0.464534702 |
| OR2AE1  | red | -0.116023845 | 0.012105433 | -0.106857912 | 0.020907711 |
| OR2AG2  | red | -0.058627189 | 0.206001523 | -0.069935718 | 0.131267709 |
| OR2B2   | red | -0.096655698 | 0.036794175 | -0.083928791 | 0.069977851 |
| OR2D2   | red | -0.07635436  | 0.099349353 | -0.079636    | 0.085602077 |

|        |     |              |             |              |             |
|--------|-----|--------------|-------------|--------------|-------------|
| OR2D3  | red | -0.093120914 | 0.044289648 | -0.093239159 | 0.044019581 |
| OR2J2  | red | -0.15374094  | 0.000858212 | -0.150225858 | 0.001129122 |
| OR2M3  | red | -0.041156746 | 0.374865054 | -0.045723302 | 0.324154413 |
| OR2M5  | red | 0.004735709  | 0.918704411 | -0.002135595 | 0.96328875  |
| OR2T12 | red | -0.050647946 | 0.274710374 | -0.04554509  | 0.326045804 |
| OR4S2  | red | -0.067571308 | 0.144845582 | -0.067045133 | 0.148008214 |
| OR51B4 | red | -0.150800063 | 0.001080065 | -0.159636082 | 0.000534683 |
| OR51B6 | red | -0.068625564 | 0.138664486 | -0.055828653 | 0.228522555 |
| OR51I1 | red | -0.098734607 | 0.032910837 | -0.096650764 | 0.036803836 |
| OR51I2 | red | -0.032514873 | 0.483331336 | -0.033960158 | 0.464089443 |
| OR51J1 | red | -0.075858642 | 0.1015708   | -0.069464344 | 0.133893029 |
| OR51M1 | red | -0.079886369 | 0.084619525 | -0.072693808 | 0.116696284 |
| OR51Q1 | red | -0.115100502 | 0.012811956 | -0.113540052 | 0.014088887 |
| OR52B6 | red | -0.065756197 | 0.155977448 | -0.055318451 | 0.232809894 |
| OR52D1 | red | -0.101441523 | 0.028382975 | -0.099012911 | 0.032418518 |
| OR52E4 | red | -0.044884173 | 0.333122504 | -0.04288646  | 0.35510845  |
| OR52E5 | red | -0.055259912 | 0.233305424 | -0.039086698 | 0.399379976 |
| OR52E6 | red | -0.089878042 | 0.052257605 | -0.074911745 | 0.105923525 |
| OR52E8 | red | -0.016829971 | 0.71679184  | -0.02510247  | 0.588438353 |
| OR52H1 | red | -0.09005546  | 0.051792709 | -0.078344509 | 0.090817333 |
| OR52I1 | red | 0.020995042  | 0.650879542 | 0.019001141  | 0.682132665 |
| OR52N1 | red | -0.067053967 | 0.147954681 | -0.064864203 | 0.161679651 |
| OR52N2 | red | -0.065685384 | 0.156424501 | -0.071093784 | 0.124986832 |
| OR52N5 | red | -0.072958605 | 0.115366741 | -0.065139776 | 0.159901504 |
| OR56A1 | red | -0.132780927 | 0.004047088 | -0.132189286 | 0.004215801 |
| OR56B1 | red | -0.054565911 | 0.239236979 | -0.04259444  | 0.358397103 |
| OR5B21 | red | -0.062821045 | 0.175329977 | -0.059985061 | 0.195672481 |
| OR5D16 | red | 0.029089479  | 0.530608786 | 0.049768934  | 0.283137144 |
| OR5P3  | red | -0.062578505 | 0.177005658 | -0.043856876 | 0.344316817 |
| OR6A2  | red | -0.068440944 | 0.139732034 | -0.060755841 | 0.189980368 |
| OR6C70 | red | 0.003897616  | 0.933054218 | 0.016253134  | 0.72610227  |
| OR6C76 | red | -0.063547589 | 0.170380979 | -0.039472429 | 0.394740415 |
| OVCH1  | red | -0.080369403 | 0.082749598 | -0.071028451 | 0.12533484  |
| P2RY4  | red | -0.076072253 | 0.100608762 | -0.043711259 | 0.345922721 |
| PAK6   | red | 0.022405291  | 0.629134449 | -0.00936096  | 0.840108785 |
| PALM2  | red | -0.100448776 | 0.029977243 | -0.093416891 | 0.043616256 |
| PAPOLB | red | -0.07416826  | 0.10944349  | -0.066155434 | 0.153475095 |
| PATE1  | red | -0.073511772 | 0.11262762  | -0.062618203 | 0.17673058  |
| PATE2  | red | -0.118467194 | 0.01039918  | -0.109292619 | 0.018147976 |
| PATE3  | red | -0.090939702 | 0.049526836 | -0.081113632 | 0.079934011 |
| PATE4  | red | -0.085821391 | 0.063872938 | -0.078691614 | 0.089391254 |
| PBOV1  | red | -0.053187209 | 0.251333234 | -0.037300609 | 0.421285737 |
| PCDH9  | red | -0.077614504 | 0.093876071 | -0.066219502 | 0.153076377 |
| PCDHA1 | red | -0.148280685 | 0.001310971 | -0.144106741 | 0.001795424 |
| PCDHA5 | red | -0.07982012  | 0.084878625 | -0.063849748 | 0.168353767 |

|            |              |             |              |             |
|------------|--------------|-------------|--------------|-------------|
| PCDHA8 red | -0.069080145 | 0.136062616 | -0.060374821 | 0.192778772 |
| PCDHA9 red | -0.076651605 | 0.098035963 | -0.056891055 | 0.219775488 |
| PCDHGAred  | -0.120229488 | 0.009304515 | -0.106298302 | 0.021591276 |
| PCDHGAred  | -0.06862486  | 0.138668542 | -0.059989108 | 0.19564227  |
| PCDHGCred  | -0.071092743 | 0.124992371 | -0.080016684 | 0.084111723 |
| PDC red    | -0.074653404 | 0.10713633  | -0.057275397 | 0.21667086  |
| PDE6C red  | -0.032568093 | 0.482615211 | -0.054246091 | 0.242005836 |
| PDZD9 red  | -0.141682231 | 0.002147267 | -0.125009889 | 0.006833222 |
| PEF1 red   | -0.105571088 | 0.022508487 | -0.083236906 | 0.07232551  |
| PFKFB1 red | 0.192913608  | 2.70E-05    | 0.192399305  | 2.84E-05    |
| PGBD3 red  | -0.048156168 | 0.299047935 | -0.043759854 | 0.345386277 |
| PHKG1 red  | 0.009905798  | 0.830938815 | 0.012056726  | 0.794972362 |
| PKD2L2 red | -0.117292303 | 0.011191029 | -0.100423621 | 0.030018616 |
| PKHD1 red  | -0.111221658 | 0.016192676 | -0.120880034 | 0.008927092 |
| PLET1 red  | -0.107921667 | 0.019660027 | -0.09465581  | 0.040890352 |
| PLSCR2 red | -0.218582608 | 1.85E-06    | -0.189267257 | 3.85E-05    |
| POTEE red  | -0.087699444 | 0.058255259 | -0.088849936 | 0.055020561 |
| POTEF red  | -0.064375572 | 0.164869077 | -0.059608465 | 0.198498482 |
| POTEI red  | -0.042853781 | 0.35547553  | -0.034316187 | 0.45941554  |
| POU1F1 red | -0.053032056 | 0.252720661 | -0.049561217 | 0.28515368  |
| POU5F2 red | -0.065453012 | 0.157898289 | -0.047823173 | 0.302405785 |
| POU6F2 red | -0.174738347 | 0.000147497 | -0.181673233 | 7.87E-05    |
| PP2D1 red  | -0.103648844 | 0.025097182 | -0.091631408 | 0.047812652 |
| PRB1 red   | -0.017412526 | 0.707431498 | -0.000494943 | 0.991489012 |
| PRB2 red   | -0.005428844 | 0.906856281 | -0.005813818 | 0.900284444 |
| PRB3 red   | -0.106716144 | 0.021079079 | -0.093717626 | 0.04294089  |
| PRB4 red   | -0.052466813 | 0.257820166 | -0.022509388 | 0.627541682 |
| PRDM7 red  | -0.078490494 | 0.090215348 | -0.079131097 | 0.087611483 |
| PREB red   | -0.023557704 | 0.611598924 | -0.022653317 | 0.625342296 |
| PRH1 red   | -0.159236337 | 0.000552404 | -0.160967837 | 0.000479383 |
| PRH2 red   | -0.042129398 | 0.363673561 | -0.03141117  | 0.498311374 |
| PROX2 red  | -0.069357105 | 0.13449591  | -0.059341466 | 0.20052     |
| PRR26 red  | -0.050144494 | 0.279515668 | -0.060566272 | 0.19136891  |
| PRR34 red  | -0.102964969 | 0.026078191 | -0.096862322 | 0.03639155  |
| PRR4 red   | -0.082055424 | 0.076482777 | -0.064823105 | 0.161946104 |
| PRR5-ARed  | -0.071260035 | 0.124104654 | -0.10191215  | 0.027652988 |
| PRSS37 red | -0.067154462 | 0.147346787 | -0.062689323 | 0.176238561 |
| PRSS42 red | -0.192456725 | 2.83E-05    | -0.202128019 | 1.07E-05    |
| PRSS46 red | -0.196803747 | 1.84E-05    | -0.209718573 | 4.86E-06    |
| PRSS48 red | -0.081769901 | 0.077516054 | -0.072946293 | 0.115428296 |
| PSG1 red   | -0.050411995 | 0.276955403 | -0.047220017 | 0.308551294 |
| PSG11 red  | -0.051621108 | 0.265582041 | -0.039044219 | 0.399892906 |
| PSG2 red   | -0.053744767 | 0.246391155 | -0.02849037  | 0.539111732 |
| PSG3 red   | -0.076475898 | 0.098810654 | -0.077674527 | 0.093621502 |
| PSG6 red   | -0.079539694 | 0.085982461 | -0.075662367 | 0.102461182 |

|          |     |              |             |              |             |
|----------|-----|--------------|-------------|--------------|-------------|
| PSG7     | red | -0.066644453 | 0.150451608 | -0.057057148 | 0.218429942 |
| PTMS     | red | -0.02507893  | 0.588788246 | -0.029065947 | 0.530941476 |
| PTTG2    | red | 0.00924397   | 0.842080654 | 0.02961855   | 0.523156699 |
| PVRIG    | red | -0.123790429 | 0.007400284 | -0.120692205 | 0.009034639 |
| PXT1     | red | -0.10552972  | 0.022561663 | -0.100941385 | 0.029176814 |
| RAB1B    | red | 0.259014139  | 1.35E-08    | 0.272253553  | 2.22E-09    |
| RAB39A   | red | -0.174617352 | 0.000149092 | -0.161897701 | 0.000443976 |
| RAB40A   | red | -0.324579591 | 6.43E-13    | -0.330888301 | 2.15E-13    |
| RAB40AI  | red | -0.137694248 | 0.00286523  | -0.131462262 | 0.004431814 |
| RAD21L1  | red | -0.152741923 | 0.000928353 | -0.138706149 | 0.002664857 |
| RANBP3   | red | -0.171098307 | 0.000203215 | -0.175838903 | 0.000133707 |
| RAPH1    | red | 0.142176472  | 0.002070803 | 0.134737769  | 0.003531692 |
| RBM14-R  | red | -0.090069687 | 0.05175558  | -0.11538919  | 0.012587246 |
| RBM44    | red | -0.086477794 | 0.061860826 | -0.099699365 | 0.031230998 |
| RBMXL3   | red | -0.08046926  | 0.082367226 | -0.080866583 | 0.080859919 |
| REC114   | red | -0.077481735 | 0.094441124 | -0.077808385 | 0.093055784 |
| RFPL1    | red | -0.143021476 | 0.001945817 | -0.144423668 | 0.001753559 |
| RFX6     | red | 0.074910947  | 0.105927257 | 0.040724678  | 0.379903833 |
| RGL4     | red | -0.033017131 | 0.476595973 | -0.009040389 | 0.84551439  |
| RGPD1    | red | -0.053024792 | 0.252785745 | -0.065304221 | 0.158847464 |
| RGPD5    | red | -0.035959445 | 0.438187002 | -0.042878104 | 0.355202295 |
| RGPD6    | red | -0.073450721 | 0.112927395 | -0.070789399 | 0.126614612 |
| RGPD8    | red | -0.282208261 | 5.34E-10    | -0.314396476 | 3.57E-12    |
| RGS17    | red | 0.00698112   | 0.880401069 | 0.000177135  | 0.996953961 |
| RHD      | red | -0.177260072 | 0.000117687 | -0.167288006 | 0.000282265 |
| RNASE3   | red | -0.117063755 | 0.011351123 | -0.090496568 | 0.050651789 |
| RNF113B  | red | -0.073857395 | 0.110942309 | -0.066972123 | 0.148451167 |
| RNF133   | red | -0.032931607 | 0.477739229 | -0.033596596 | 0.468889349 |
| RNF148   | red | -0.057610792 | 0.213987421 | -0.039793107 | 0.390908153 |
| RNF167   | red | 0.119239325  | 0.009906234 | 0.116719024  | 0.011596436 |
| RNF212B  | red | -0.094102403 | 0.042089655 | -0.088537432 | 0.055884065 |
| RNH1     | red | 0.14406106   | 0.001801534 | 0.15615844   | 0.00070825  |
| RP11-11N | red | -0.115145863 | 0.012776415 | -0.121411695 | 0.008628827 |
| RP11-12J | red | -0.13119823  | 0.004512706 | -0.13647189  | 0.003125513 |
| RP11-219 | red | -0.065979015 | 0.154577087 | -0.064384741 | 0.164808792 |
| RP11-231 | red | 0.010159804  | 0.826671494 | 0.016541032  | 0.721450308 |
| RP11-248 | red | -0.107918102 | 0.019664098 | -0.101742358 | 0.027914469 |
| RP11-248 | red | -0.116371414 | 0.011848534 | -0.116977839 | 0.011411827 |
| RP11-286 | red | -0.092961176 | 0.044656697 | -0.085752413 | 0.064087477 |
| RP11-287 | red | -0.152473329 | 0.000948094 | -0.165847709 | 0.000319013 |
| RP11-290 | red | -0.096026261 | 0.038044079 | -0.101812091 | 0.027806824 |
| RP11-295 | red | -0.09579336  | 0.038515595 | -0.111331273 | 0.016087332 |
| RP11-314 | red | -0.051046393 | 0.270947413 | -0.035644706 | 0.442208897 |
| RP11-321 | red | -0.01459901  | 0.753020914 | -0.016952916 | 0.714812805 |
| RP11-33C | red | 0.004591269  | 0.921175763 | 0.010206894  | 0.825880933 |



|             |              |             |              |             |
|-------------|--------------|-------------|--------------|-------------|
| RP11-371red | -0.054590888 | 0.239021681 | -0.048193586 | 0.298672171 |
| RP11-400red | -0.029845534 | 0.519976073 | -0.034617594 | 0.455479342 |
| RP11-434red | -0.115186393 | 0.012744733 | -0.126649087 | 0.006132361 |
| RP11-437red | -0.06770317  | 0.144061158 | -0.060913109 | 0.188834049 |
| RP11-463red | -0.026233414 | 0.571742624 | -0.022459268 | 0.628308338 |
| RP11-468red | 0.120880164  | 0.008927018 | 0.120745458  | 0.009004031 |
| RP11-49Kred | -0.060535933 | 0.19159182  | -0.065341588 | 0.158608687 |
| RP11-507red | -0.094503692 | 0.041217098 | -0.090303705 | 0.051148019 |
| RP11-508red | -0.04415211  | 0.34107545  | -0.053656177 | 0.247171825 |
| RP11-574red | -0.104613001 | 0.023768295 | -0.11601192  | 0.012114334 |
| RP11-58Cred | -0.047399972 | 0.306709188 | -0.04759263  | 0.304745116 |
| RP11-599red | -0.002548207 | 0.956202419 | 0.001904262  | 0.967263044 |
| RP11-613red | -0.07740336  | 0.094775958 | -0.077367278 | 0.094930422 |
| RP11-65Ered | -0.033036538 | 0.476336751 | -0.030366776 | 0.51270994  |
| RP11-690red | -0.12164424  | 0.008501183 | -0.113025813 | 0.014533557 |
| RP11-691red | -0.078152542 | 0.091613829 | -0.076122392 | 0.100384007 |
| RP11-697red | -0.035631993 | 0.442371799 | -0.043482396 | 0.348456298 |
| RP11-849red | -0.107478585 | 0.020171618 | -0.122551635 | 0.00801906  |
| RP11-894red | -0.147119682 | 0.001431975 | -0.134554546 | 0.003577291 |
| RP3-461Fred | -0.102525724 | 0.02672556  | -0.086377203 | 0.062165737 |
| RP3-468Kred | -0.085092835 | 0.066168999 | -0.071692571 | 0.121832174 |
| RP5-1021red | -0.046158577 | 0.319564786 | -0.049626161 | 0.284522158 |
| RP5-1042red | -0.002691443 | 0.953743204 | 7.27E-05     | 0.998750412 |
| RP5-1052red | -0.069192711 | 0.135424166 | -0.05365919  | 0.247145246 |
| RP5-864Kred | -0.061506355 | 0.184555671 | -0.039021255 | 0.400170355 |
| RPA4 red    | -0.146962521 | 0.001449121 | -0.159961063 | 0.000520667 |
| RPE65 red   | -0.139463925 | 0.002523258 | -0.131752308 | 0.004344465 |
| RPEL1 red   | -0.054764982 | 0.237524795 | -0.038203    | 0.410131631 |
| RRH red     | -0.018279395 | 0.693584474 | -0.031877505 | 0.491952163 |
| S100G red   | 0.122524446  | 0.008033144 | 0.106081234  | 0.021861599 |
| S100Z red   | -0.208193332 | 5.71E-06    | -0.199516695 | 1.40E-05    |
| SARNP red   | -0.084323727 | 0.068665968 | -0.095494514 | 0.039127864 |
| SCAF1 red   | 0.00425643   | 0.926907681 | 0.019054233  | 0.68129309  |
| SCGB2B2red  | -0.211723443 | 3.92E-06    | -0.207841333 | 5.93E-06    |
| SCHIP1 red  | -0.225472647 | 8.52E-07    | -0.239941743 | 1.54E-07    |
| SCLY red    | 0.035728235  | 0.441139475 | 0.032215733  | 0.487367192 |
| SCN11A red  | -0.303627129 | 2.05E-11    | -0.311335087 | 5.91E-12    |
| SCN2A red   | -0.134957961 | 0.00347759  | -0.107640633 | 0.019983186 |
| SCN3A red   | -0.006833863 | 0.882905518 | -0.002514403 | 0.956782854 |
| SDF4 red    | 0.17625664   | 0.000128798 | 0.177474806  | 0.00011543  |
| SEBOX red   | -0.057532484 | 0.214611798 | -0.046780635 | 0.313079599 |
| SEC16B red  | 0.11193843   | 0.015514637 | 0.100777703  | 0.029440718 |
| SH2D4B red  | -0.083459789 | 0.071562319 | -0.060228658 | 0.193860238 |
| SIX6 red    | -0.108658538 | 0.018834217 | -0.101695831 | 0.02798649  |
| SLC10A1 red | -0.149092903 | 0.00123199  | -0.128976549 | 0.005247979 |

|             |              |             |              |             |
|-------------|--------------|-------------|--------------|-------------|
| SLC10A3 red | -0.080457164 | 0.082413467 | -0.10146523  | 0.028345812 |
| SLC10A5 red | 0.005272956  | 0.909519244 | -0.029550215 | 0.524116185 |
| SLC15A5 red | -0.098395822 | 0.033518742 | -0.087183558 | 0.059756032 |
| SLC17A1 red | -0.098308831 | 0.033676374 | -0.095163627 | 0.039815369 |
| SLC1A2 red  | 0.072788669  | 0.116218615 | 0.053318535  | 0.250163026 |
| SLC22A1 red | -0.252017553 | 3.37E-08    | -0.267158169 | 4.50E-09    |
| SLC24A5 red | -0.113794514 | 0.01387331  | -0.11518875  | 0.012742892 |
| SLC25A2 red | 0.039630713  | 0.392846026 | 0.045881893  | 0.32247727  |
| SLC25A5 red | -0.106868988 | 0.020894372 | -0.120448059 | 0.009176154 |
| SLC26A5 red | 0.076846297  | 0.097183229 | 0.094865478  | 0.040443576 |
| SLC34A1 red | -0.089958702 | 0.052045819 | -0.095777316 | 0.038548259 |
| SLC35A4 red | 0.296727778  | 6.03E-11    | 0.317088963  | 2.29E-12    |
| SLC35F4 red | -0.161968577 | 0.00044138  | -0.160444955 | 0.000500429 |
| SLC38A4 red | -0.111592279 | 0.015838909 | -0.135114345 | 0.003439623 |
| SLC38A6 red | -0.085245342 | 0.065682842 | -0.074140116 | 0.109578524 |
| SLC4A5 red  | -0.116912641 | 0.011458086 | -0.113990842 | 0.013708973 |
| SLC5A12 red | -0.07082348  | 0.12643154  | -0.074560387 | 0.107575683 |
| SLC5A4 red  | -0.103831879 | 0.024840086 | -0.104511458 | 0.023905323 |
| SLC5A9 red  | 0.001304292  | 0.977574048 | -0.004984608 | 0.914447639 |
| SLC6A7 red  | -0.093457811 | 0.043523841 | -0.072435225 | 0.118006173 |
| SLC9C1 red  | -0.088077889 | 0.057174281 | -0.077493785 | 0.094389727 |
| SLCO1A2 red | -0.130309054 | 0.004795022 | -0.138795153 | 0.002647859 |
| SLCO1B1 red | -0.000621132 | 0.989319201 | 0.000686585  | 0.988193761 |
| SLCO6A1 red | -0.146760768 | 0.001471409 | -0.136248945 | 0.00317524  |
| SLFNL1 red  | -0.158326349 | 0.000594798 | -0.164546067 | 0.000356017 |
| SLX1B red   | -0.064290201 | 0.165431125 | -0.073863447 | 0.110912972 |
| SMCO3 red   | -0.211645088 | 3.95E-06    | -0.192791019 | 2.73E-05    |
| SMIM18 red  | -0.041195283 | 0.374417638 | -0.03001584  | 0.517596189 |
| SNAPC2 red  | 0.182393941  | 7.36E-05    | 0.197735992  | 1.68E-05    |
| SNURF red   | -0.144736325 | 0.001713137 | -0.139123502 | 0.002585999 |
| SNX17 red   | -0.020504277 | 0.658518045 | -0.005369008 | 0.907878317 |
| SOGA3 red   | -0.140963872 | 0.002263011 | -0.146803752 | 0.001466634 |
| SPACA1 red  | -0.067397322 | 0.14588558  | -0.052009556 | 0.261997172 |
| SPATA12 red | 0.026303935  | 0.57070903  | 0.039611471  | 0.393076018 |
| SPATA32 red | 0.007929353  | 0.864303783 | 0.008935993  | 0.847276337 |
| SPDYA red   | -0.064278728 | 0.16550677  | -0.058592803 | 0.206268121 |
| SPDYE1 red  | -0.085852458 | 0.063776507 | -0.070061665 | 0.130573028 |
| SPDYE2 red  | -0.059657824 | 0.198126399 | -0.060855017 | 0.18925689  |
| SPDYE2F red | -0.023645467 | 0.610272358 | -0.018174123 | 0.695260721 |
| SPDYE5 red  | -0.088770738 | 0.055238343 | -0.077392894 | 0.094820742 |
| SPDYE6 red  | -0.051441713 | 0.26724893  | -0.046546196 | 0.315513498 |
| SPECC1L red | -0.036717806 | 0.42858288  | -0.07358721  | 0.112258065 |
| SPIN2A red  | -0.186269493 | 5.12E-05    | -0.166999553 | 0.000289292 |
| SPINK14 red | 0.119278068  | 0.009882055 | 0.12819686   | 0.005530547 |
| SPINT3 red  | -0.062232298 | 0.179418129 | -0.045621108 | 0.325238142 |

|         |     |              |             |              |             |
|---------|-----|--------------|-------------|--------------|-------------|
| SPINT4  | red | -0.094138246 | 0.042011091 | -0.081329373 | 0.079132481 |
| STH     | red | -0.033419558 | 0.471236559 | -0.030456548 | 0.511463868 |
| STK31   | red | -0.195146463 | 2.17E-05    | -0.180345685 | 8.89E-05    |
| STPG2   | red | -0.14006168  | 0.002416439 | -0.137030581 | 0.003003992 |
| STUB1   | red | 0.069209772  | 0.135327606 | 0.091469192  | 0.048210127 |
| SULT1C3 | red | -0.066300355 | 0.152574323 | -0.045548352 | 0.326011114 |
| SUMO4   | red | -0.097851258 | 0.034515952 | -0.082530122 | 0.074789699 |
| SYCP2   | red | -0.218956222 | 1.78E-06    | -0.238560143 | 1.82E-07    |
| SYCP2L  | red | -0.2825427   | 5.08E-10    | -0.275827607 | 1.34E-09    |
| SYCP3   | red | -0.074846736 | 0.106227689 | -0.070169455 | 0.129980749 |
| SYN3    | red | -0.176867867 | 0.000121918 | -0.173998093 | 0.000157512 |
| SYNPR   | red | -0.09325816  | 0.043976314 | -0.074752249 | 0.106671005 |
| SYT16   | red | -0.147655613 | 0.001374897 | -0.154173383 | 0.000829397 |
| TAAR8   | red | -0.107489822 | 0.020158502 | -0.097545437 | 0.035086972 |
| TAAR9   | red | -0.133623655 | 0.003817315 | -0.122373794 | 0.008111583 |
| TAB1    | red | 0.180346027  | 8.89E-05    | 0.158276224  | 0.000597219 |
| TAC4    | red | -0.05098025  | 0.271569623 | -0.032109777 | 0.488801036 |
| TACR3   | red | -0.114597265 | 0.013212135 | -0.159282484 | 0.000550331 |
| TAS2R10 | red | -0.082989831 | 0.073179287 | -0.087727203 | 0.058175399 |
| TAS2R13 | red | -0.074040757 | 0.110056296 | -0.05996594  | 0.195815251 |
| TAS2R14 | red | -0.184779206 | 5.89E-05    | -0.17317865  | 0.000169339 |
| TAS2R19 | red | -0.180119561 | 9.08E-05    | -0.173731194 | 0.000161276 |
| TAS2R20 | red | -0.141174439 | 0.002228507 | -0.141384316 | 0.002194595 |
| TAS2R3  | red | -0.090571512 | 0.050460049 | -0.07822068  | 0.091330477 |
| TAS2R30 | red | -0.092923247 | 0.044744224 | -0.081559178 | 0.078285884 |
| TAS2R31 | red | -0.136721916 | 0.003070588 | -0.135021122 | 0.00346221  |
| TAS2R4  | red | -0.152962399 | 0.000912433 | -0.150817618 | 0.001078596 |
| TAS2R40 | red | -0.042635313 | 0.357935659 | -0.025052493 | 0.589181294 |
| TAS2R41 | red | -0.079349286 | 0.086738531 | -0.076335732 | 0.099432127 |
| TAS2R42 | red | -0.045240704 | 0.329292795 | -0.021887447 | 0.637083358 |
| TAS2R43 | red | -0.100470662 | 0.029941285 | -0.093332182 | 0.043808096 |
| TAS2R46 | red | -0.104195542 | 0.024336016 | -0.090585814 | 0.050423526 |
| TAS2R50 | red | -0.096689467 | 0.036728116 | -0.081532909 | 0.078382282 |
| TAS2R60 | red | -0.076554265 | 0.098464535 | -0.072955535 | 0.11538301  |
| TAS2R8  | red | -0.028461889 | 0.539517643 | -0.01619051  | 0.727115521 |
| TAS2R9  | red | -0.037440954 | 0.419539425 | -0.029354843 | 0.52686437  |
| TCEB3B  | red | -0.131124233 | 0.004535614 | -0.121651478 | 0.008497238 |
| TCEB3C  | red | -0.040961078 | 0.377141812 | -0.044872381 | 0.33324966  |
| TCEB3CI | red | -0.048568637 | 0.294923197 | -0.033909274 | 0.464759588 |
| TDRD6   | red | -0.144080626 | 0.001798915 | -0.146631947 | 0.001485804 |
| TEDDM1  | red | -0.05953008  | 0.199090404 | -0.058628105 | 0.205994428 |
| TEX12   | red | -0.106425509 | 0.021434212 | -0.105743583 | 0.022287924 |
| TEX38   | red | -0.130659123 | 0.004682026 | -0.113131057 | 0.01444156  |
| TICAM2  | red | -0.10434486  | 0.02413162  | -0.120548781 | 0.009117535 |
| TM4SF19 | red | -0.06961277  | 0.133062036 | -0.071421804 | 0.123250917 |

|              |              |             |              |             |
|--------------|--------------|-------------|--------------|-------------|
| TMEFF2 red   | -0.196830837 | 1.83E-05    | -0.182666773 | 7.18E-05    |
| TMEM11 red   | -0.060984584 | 0.188314759 | -0.059281229 | 0.200978134 |
| TMEM14 red   | -0.088708756 | 0.055409284 | -0.073940092 | 0.11054202  |
| TMEM17 red   | 0.090609825  | 0.050362262 | 0.095468751  | 0.039181031 |
| TMEM21 red   | 0.295302637  | 7.51E-11    | 0.315084512  | 3.19E-12    |
| TMEM24 red   | -0.122139693 | 0.008234827 | -0.10071292  | 0.029545732 |
| TMEM25 red   | -0.193965764 | 2.44E-05    | -0.19522746  | 2.15E-05    |
| TMEM30 red   | -0.050433818 | 0.276747243 | -0.05717033  | 0.217516427 |
| TMEM52 red   | -0.144964553 | 0.001684171 | -0.136127421 | 0.003202647 |
| TMPRSS1 red  | -0.064945737 | 0.161152007 | -0.082522004 | 0.074818395 |
| TMPRSS1 red  | 0.007655558  | 0.868946292 | 0.018739706  | 0.686272553 |
| TMPRSS1 red  | -0.075028534 | 0.105378827 | -0.077986481 | 0.092307345 |
| TMPRSS1 red  | -0.116670694 | 0.0116312   | -0.109600174 | 0.017823055 |
| TMPRSS1 red  | -0.071950917 | 0.120490409 | -0.066166384 | 0.153406896 |
| TNP2 red     | -0.065309143 | 0.158815999 | -0.053663895 | 0.247103746 |
| TOLLIP red   | 0.149433043  | 0.001200234 | 0.178560337  | 0.000104627 |
| TOMM20 red   | -0.079979022 | 0.084258228 | -0.064095338 | 0.166719414 |
| TOP3B red    | -0.083808455 | 0.070381629 | -0.106566967 | 0.021260718 |
| TP53TG5 red  | -0.166595958 | 0.000299398 | -0.162496368 | 0.000422485 |
| TREML4 red   | -0.046660301 | 0.314327342 | -0.035867309 | 0.439362191 |
| TRHR red     | -0.077031269 | 0.096378552 | -0.067048016 | 0.147990744 |
| TRIM34 red   | -0.081123633 | 0.079896711 | -0.099595972 | 0.031407447 |
| TRIM61 red   | -0.224483911 | 9.54E-07    | -0.220291185 | 1.53E-06    |
| TRIM71 red   | -0.172552583 | 0.000178932 | -0.171715277 | 0.000192559 |
| TRIM77 red   | -0.061226617 | 0.186564099 | -0.049248937 | 0.288203505 |
| TRPA1 red    | -0.02032531  | 0.661312493 | -0.026875184 | 0.562369338 |
| TRPC5 red    | -0.095406902 | 0.039308916 | -0.088250767 | 0.05668604  |
| TRPV1 red    | -0.074102458 | 0.109759412 | -0.072068581 | 0.119883138 |
| TSEN34 red   | 0.078414684  | 0.090527557 | 0.067925612  | 0.14274525  |
| TSNAX-I red  | -0.031275519 | 0.500169335 | 0.00080119   | 0.986223233 |
| TSPO2 red    | -0.177795425 | 0.000112135 | -0.156915915 | 0.000666508 |
| TSPYL6 red   | -0.089029217 | 0.0545302   | -0.080511723 | 0.08220506  |
| TSSK1B red   | 0.037581921  | 0.417789658 | 0.030488086  | 0.51102647  |
| TSSK3 red    | -0.111484943 | 0.01594066  | -0.108219884 | 0.019322094 |
| TSSK4 red    | -0.034476583 | 0.457318503 | -0.039797032 | 0.390861387 |
| TTN red      | -0.116121037 | 0.012033104 | -0.109980862 | 0.017427916 |
| TUBA8 red    | -0.184267886 | 6.18E-05    | -0.194778524 | 2.25E-05    |
| TUBB1 red    | -0.061836216 | 0.182207931 | -0.044613841 | 0.336045318 |
| TVP23C red   | -0.003360436 | 0.94226352  | -0.006956879 | 0.880813271 |
| TXNDC8 red   | -0.049896513 | 0.281903381 | -0.031014478 | 0.503755008 |
| TYR red      | 0.01268073   | 0.784615328 | 0.002918574  | 0.949844529 |
| U2AF1 red    | -0.158147163 | 0.000603494 | -0.170045825 | 0.000222678 |
| U51561.1 red | -0.083042126 | 0.072997898 | -0.076290111 | 0.099635073 |
| UBAP1L red   | -0.087579239 | 0.058602132 | -0.084200518 | 0.069073059 |
| UBQLN3 red   | -0.079109966 | 0.0876964   | -0.071219202 | 0.124320879 |

|             |              |             |              |             |
|-------------|--------------|-------------|--------------|-------------|
| UNC13C red  | -0.127175173 | 0.005921512 | -0.122983236 | 0.007798423 |
| UNC45A red  | 0.055822679  | 0.228572422 | 0.061373363  | 0.185508509 |
| UPP2 red    | -0.063896562 | 0.168041307 | -0.01693594  | 0.715085949 |
| USP17L1 red | -0.082504978 | 0.074878607 | -0.077316873 | 0.095146545 |
| USP17L2 red | -0.063991138 | 0.16741139  | -0.055075331 | 0.234872781 |
| USP17L7 red | -0.021326937 | 0.645734323 | -0.03301595  | 0.476611756 |
| USP50 red   | 0.000358765  | 0.993830656 | 0.003674147  | 0.936884303 |
| UTS2B red   | -0.184306532 | 6.16E-05    | -0.174063988 | 0.000156595 |
| UTY red     | -0.051220617 | 0.269313142 | -0.053834494 | 0.245602215 |
| VN1R1 red   | -0.265086289 | 5.97E-09    | -0.26667522  | 4.80E-09    |
| VWC2L red   | -0.122471436 | 0.008060666 | -0.122339722 | 0.008129417 |
| WBP2 red    | -0.048503722 | 0.295569827 | -0.035743986 | 0.440937979 |
| WBP2NL red  | -0.099503928 | 0.031565241 | -0.121310643 | 0.008684825 |
| WDPCP red   | -0.078981426 | 0.088214376 | -0.082514917 | 0.074843453 |
| WDR64 red   | -0.027470968 | 0.553734448 | -0.027683448 | 0.55067064  |
| WDR87 red   | -0.130269497 | 0.004807944 | -0.130993621 | 0.004576306 |
| WEE2 red    | -0.084616271 | 0.067707253 | -0.077610757 | 0.09389198  |
| WFDC13 red  | -0.079224524 | 0.087236831 | -0.071915755 | 0.12067235  |
| WNK3 red    | -0.349521665 | 7.27E-15    | -0.352643402 | 4.03E-15    |
| XKR6 red    | -0.296746837 | 6.01E-11    | -0.306875784 | 1.22E-11    |
| XRCC1 red   | -0.011162484 | 0.809877292 | -0.02273364  | 0.624116315 |
| XRRA1 red   | 0.053410363  | 0.249347031 | 0.060823633  | 0.18948561  |
| YIPF3 red   | 0.098051969  | 0.034145508 | 0.122745588  | 0.00791923  |
| ZACN red    | -0.092234316 | 0.046359335 | -0.083565888 | 0.071201336 |
| ZBTB20 red  | -0.043985446 | 0.34290285  | -0.04694423  | 0.311388503 |
| ZC2HC1Ered  | -0.009476533 | 0.838161754 | -0.003738524 | 0.935780776 |
| ZCCHC1(red  | -0.128654337 | 0.005363137 | -0.1097677   | 0.017648215 |
| ZNF154 red  | -0.185734529 | 5.39E-05    | -0.171846177 | 0.000190366 |
| ZNF177 red  | -0.034298469 | 0.459647519 | -0.048063107 | 0.299983826 |
| ZNF233 red  | -0.113546006 | 0.01408381  | -0.114137912 | 0.013586992 |
| ZNF257 red  | -0.359788425 | 1.02E-15    | -0.349352268 | 7.50E-15    |
| ZNF410 red  | -0.090889318 | 0.049653682 | -0.110756422 | 0.01664654  |
| ZNF483 red  | -0.202963507 | 9.85E-06    | -0.211513431 | 4.01E-06    |
| ZNF506 red  | -0.270643081 | 2.78E-09    | -0.279640728 | 7.75E-10    |
| ZNF559-2red | -0.175146121 | 0.000142239 | -0.178343253 | 0.000106708 |
| ZNF564 red  | -0.074975717 | 0.10562489  | -0.080938626 | 0.08058902  |
| ZNF573 red  | -0.077460291 | 0.094532645 | -0.08332432  | 0.072025401 |
| ZNF578 red  | -0.310029956 | 7.31E-12    | -0.291753829 | 1.29E-10    |
| ZNF587Bred  | 0.162847867  | 0.000410322 | 0.173219092  | 0.000168737 |
| ZNF716 red  | -0.167270364 | 0.00028269  | -0.16527456  | 0.000334841 |
| ZNF732 red  | -0.23024503  | 4.90E-07    | -0.237694883 | 2.02E-07    |
| ZNF81 red   | -0.074928864 | 0.105843546 | -0.07348766  | 0.112745939 |
| ZNF852 red  | 0.005932118  | 0.898266324 | -0.001986908 | 0.965843089 |
| ZNF878 red  | -0.05232517  | 0.259109116 | -0.048407276 | 0.296532281 |
| ZNF891 red  | -0.116271278 | 0.011922049 | -0.130958413 | 0.004587332 |

|          |           |              |             |              |             |
|----------|-----------|--------------|-------------|--------------|-------------|
| ZNF98    | red       | -0.338898385 | 5.15E-14    | -0.33106518  | 2.08E-13    |
| ZNF99    | red       | -0.231343619 | 4.31E-07    | -0.232157501 | 3.92E-07    |
| ZBPB     | red       | -0.205913152 | 7.26E-06    | -0.195690358 | 2.06E-05    |
| ZRSR1    | red       | -0.003094947 | 0.946817921 | -0.006610738 | 0.886702494 |
| ZSCAN2   | red       | -0.231948018 | 4.01E-07    | -0.259887247 | 1.20E-08    |
| ZSCAN5   | red       | -0.056687812 | 0.221430048 | -0.040987871 | 0.376829554 |
| ABHD14   | royalblue | 0.194326138  | 2.35E-05    | 0.195715309  | 2.05E-05    |
| ACY3     | royalblue | 0.211541659  | 4.00E-06    | 0.244197072  | 9.09E-08    |
| AES      | royalblue | 0.244104677  | 9.19E-08    | 0.264899251  | 6.12E-09    |
| ALG10    | royalblue | -0.083658597 | 0.070887126 | -0.097940397 | 0.034351011 |
| ANKLE2   | royalblue | -0.170168054 | 0.000220331 | -0.189610214 | 3.72E-05    |
| ANKRD2   | royalblue | -0.257452844 | 1.66E-08    | -0.28042945  | 6.91E-10    |
| AP3M2    | royalblue | -0.143280983 | 0.001908842 | -0.180623917 | 8.67E-05    |
| ARHGAP   | royalblue | -0.346750824 | 1.22E-14    | -0.365853024 | 3.09E-16    |
| ARL6IP6  | royalblue | -0.163484967 | 0.000389103 | -0.199129062 | 1.46E-05    |
| ARMC8    | royalblue | -0.259314363 | 1.30E-08    | -0.276398477 | 1.23E-09    |
| ARSA     | royalblue | 0.326075498  | 4.97E-13    | 0.326566763  | 4.57E-13    |
| ASTE1    | royalblue | -0.296814745 | 5.95E-11    | -0.294469664 | 8.53E-11    |
| ATL2     | royalblue | -0.214261179 | 2.98E-06    | -0.23210011  | 3.94E-07    |
| ATP13A3  | royalblue | -0.133496977 | 0.003851082 | -0.146402104 | 0.00151181  |
| ATP6V0A  | royalblue | -0.154074819 | 0.000835884 | -0.159447274 | 0.000542987 |
| BOK      | royalblue | 0.129695184  | 0.004999121 | 0.156297862  | 0.000700389 |
| BRAP     | royalblue | -0.077521767 | 0.094270465 | -0.091088847 | 0.049152943 |
| C17orf10 | royalblue | -0.122110071 | 0.00825054  | -0.132606927 | 0.00409606  |
| C2orf44  | royalblue | -0.13266175  | 0.004080573 | -0.145121423 | 0.001664523 |
| C3orf17  | royalblue | -0.19542455  | 2.11E-05    | -0.224107566 | 9.96E-07    |
| C5orf30  | royalblue | -0.132537561 | 0.004115732 | -0.137997837 | 0.002803721 |
| C6orf62  | royalblue | -0.20377559  | 9.06E-06    | -0.212344716 | 3.67E-06    |
| CBFA2T2  | royalblue | -0.151632419 | 0.001012434 | -0.173122336 | 0.000170182 |
| CCDC6    | royalblue | -0.071921752 | 0.120641304 | -0.061343036 | 0.185726298 |
| CD47     | royalblue | -0.338699909 | 5.34E-14    | -0.331884763 | 1.80E-13    |
| CDKAL1   | royalblue | -0.227470548 | 6.77E-07    | -0.23889232  | 1.75E-07    |
| CEBPG    | royalblue | -0.211855388 | 3.87E-06    | -0.242717837 | 1.09E-07    |
| CHN1     | royalblue | -0.2767568   | 1.17E-09    | -0.270756452 | 2.73E-09    |
| CMTR1    | royalblue | -0.277284509 | 1.09E-09    | -0.285531218 | 3.28E-10    |
| COMMD    | royalblue | -0.140818127 | 0.002287178 | -0.167771638 | 0.00027084  |
| DCUN1D   | royalblue | -0.229648589 | 5.26E-07    | -0.245386369 | 7.83E-08    |
| DDX55    | royalblue | -0.047471376 | 0.305980286 | -0.070312174 | 0.129199755 |
| DEGS1    | royalblue | -0.253451127 | 2.80E-08    | -0.264550937 | 6.42E-09    |
| DEPDC4   | royalblue | -0.009844124 | 0.831975701 | -0.026888133 | 0.562180975 |
| DHX36    | royalblue | -0.216886502 | 2.24E-06    | -0.245657951 | 7.57E-08    |
| DHX57    | royalblue | -0.150211569 | 0.001130368 | -0.178236512 | 0.000107746 |
| DIRC2    | royalblue | -0.06058273  | 0.191248062 | -0.071925738 | 0.120620672 |
| DLG1     | royalblue | -0.092548558 | 0.045616667 | -0.115782943 | 0.012286367 |
| DNAJC6   | royalblue | -0.276823747 | 1.16E-09    | -0.287586333 | 2.41E-10    |

|         |           |              |             |              |             |
|---------|-----------|--------------|-------------|--------------|-------------|
| DVL3    | royalblue | -0.157692564 | 0.000626087 | -0.154564965 | 0.000804079 |
| DYRK2   | royalblue | -0.245115202 | 8.10E-08    | -0.256111485 | 1.98E-08    |
| E2F6    | royalblue | -0.189219849 | 3.87E-05    | -0.219485962 | 1.68E-06    |
| EED     | royalblue | 0.014640307  | 0.75234506  | 0.008421918  | 0.855963622 |
| EHHADH  | royalblue | -0.285737927 | 3.18E-10    | -0.298720054 | 4.42E-11    |
| ELOVL7  | royalblue | -0.236937065 | 2.21E-07    | -0.250931712 | 3.88E-08    |
| ERBB4   | royalblue | -0.167653886 | 0.000273581 | -0.145858624 | 0.001574973 |
| ESCO1   | royalblue | -0.036112881 | 0.436233957 | -0.06992039  | 0.131352447 |
| EXO5    | royalblue | -0.27374129  | 1.80E-09    | -0.296854661 | 5.91E-11    |
| FAM131A | royalblue | -0.294529945 | 8.45E-11    | -0.297356142 | 5.47E-11    |
| FAM216A | royalblue | -0.286605368 | 2.79E-10    | -0.312632091 | 4.78E-12    |
| FAM60A  | royalblue | -0.151553501 | 0.001018674 | -0.187299558 | 4.64E-05    |
| FANCM   | royalblue | -0.079218914 | 0.087259291 | -0.090851852 | 0.049748179 |
| FAR2    | royalblue | -0.141181895 | 0.002227294 | -0.159688372 | 0.000532405 |
| FASTKD1 | royalblue | -0.130076155 | 0.004871554 | -0.148766966 | 0.001263143 |
| FBXL8   | royalblue | 0.379482792  | 1.92E-17    | 0.409897194  | 2.39E-20    |
| FBXW4   | royalblue | 0.265887733  | 5.35E-09    | 0.279006907  | 8.49E-10    |
| FIGN    | royalblue | -0.176820745 | 0.000122436 | -0.186668193 | 4.93E-05    |
| FMR1    | royalblue | -0.192069009 | 2.93E-05    | -0.219995289 | 1.58E-06    |
| FUT8    | royalblue | -0.266661192 | 4.81E-09    | -0.269243689 | 3.37E-09    |
| FXR1    | royalblue | -0.283442247 | 4.46E-10    | -0.292537809 | 1.15E-10    |
| FYTDD1  | royalblue | -0.267831915 | 4.10E-09    | -0.283265905 | 4.57E-10    |
| G2E3    | royalblue | -0.132754469 | 0.0040545   | -0.150015757 | 0.001147579 |
| GFM1    | royalblue | -0.147923515 | 0.001347156 | -0.162506551 | 0.000422128 |
| GHDC    | royalblue | 0.207092082  | 6.41E-06    | 0.206123958  | 7.10E-06    |
| GPATCH  | royalblue | -0.290687773 | 1.52E-10    | -0.319829679 | 1.44E-12    |
| GPBP1L1 | royalblue | -0.14139348  | 0.002193125 | -0.164010943 | 0.00037236  |
| GPR108  | royalblue | 0.244966372  | 8.25E-08    | 0.259485484  | 1.27E-08    |
| GPR137C | royalblue | -0.104295731 | 0.024198706 | -0.118036474 | 0.010683512 |
| GSK3B   | royalblue | 0.023594394  | 0.611044191 | 0.003383086  | 0.941875046 |
| GXYLT1  | royalblue | -0.054394218 | 0.24072063  | -0.087197709 | 0.059714443 |
| HLTF    | royalblue | -0.088867259 | 0.05497302  | -0.111958592 | 0.01549593  |
| HPS3    | royalblue | -0.139763865 | 0.002469132 | -0.15398862  | 0.000841597 |
| HYLS1   | royalblue | -0.101934361 | 0.02761894  | -0.11479397  | 0.01305442  |
| ICE1    | royalblue | -0.250446408 | 4.13E-08    | -0.276049059 | 1.30E-09    |
| ITPK1   | royalblue | 0.114233182  | 0.013508486 | 0.152630792  | 0.000936475 |
| IZUMO4  | royalblue | 0.202756894  | 1.01E-05    | 0.21337645   | 3.28E-06    |
| JADE3   | royalblue | -0.164410049 | 0.000360106 | -0.182965746 | 6.98E-05    |
| KIAA022 | royalblue | -0.243086023 | 1.04E-07    | -0.237664534 | 2.03E-07    |
| KLHL24  | royalblue | -0.301509956 | 2.86E-11    | -0.301652239 | 2.80E-11    |
| KPNA1   | royalblue | -0.153630102 | 0.000865745 | -0.175127736 | 0.000142472 |
| KPNA4   | royalblue | -0.185169038 | 5.68E-05    | -0.208753815 | 5.38E-06    |
| LCLAT1  | royalblue | -0.093335019 | 0.043801659 | -0.106346963 | 0.021531077 |
| LENG9   | royalblue | 0.264414189  | 6.54E-09    | 0.274198692  | 1.69E-09    |
| LGALS1  | royalblue | 0.159048358  | 0.000560925 | 0.184062584  | 6.30E-05    |

|         |           |              |             |              |             |
|---------|-----------|--------------|-------------|--------------|-------------|
| LIN28B  | royalblue | -0.133056893 | 0.003970503 | -0.148179265 | 0.001321154 |
| LMF2    | royalblue | 0.257659614  | 1.62E-08    | 0.26873263   | 3.62E-09    |
| LPHN2   | royalblue | -0.306028108 | 1.40E-11    | -0.312222458 | 5.11E-12    |
| LRRC58  | royalblue | -0.032705502 | 0.480768923 | -0.057149312 | 0.217685863 |
| LSM14A  | royalblue | -0.175411381 | 0.000138914 | -0.210894128 | 4.29E-06    |
| LYPD6   | royalblue | -0.076477097 | 0.098805351 | -0.070383121 | 0.128812866 |
| MAP3K1  | royalblue | -0.356113714 | 2.08E-15    | -0.350593986 | 5.94E-15    |
| MAPKAP  | royalblue | -0.086920446 | 0.060533678 | -0.108945505 | 0.018520891 |
| 2-Mar   | royalblue | 0.199064526  | 1.47E-05    | 0.245835789  | 7.40E-08    |
| MB21D1  | royalblue | -0.205882115 | 7.28E-06    | -0.175074812 | 0.000143146 |
| MB21D2  | royalblue | -0.409474707 | 2.63E-20    | -0.434966131 | 5.61E-23    |
| MBOAT2  | royalblue | -0.293413019 | 1.00E-10    | -0.308364832 | 9.58E-12    |
| MBTD1   | royalblue | -0.109679239 | 0.017740351 | -0.1456709   | 0.001597347 |
| MCCC1   | royalblue | -0.175345369 | 0.000139734 | -0.193630969 | 2.52E-05    |
| MED20   | royalblue | -0.082288656 | 0.075647069 | -0.095328858 | 0.039470791 |
| METTL4  | royalblue | -0.165748724 | 0.000321695 | -0.198991646 | 1.48E-05    |
| MFN1    | royalblue | -0.185066257 | 5.74E-05    | -0.193587782 | 2.53E-05    |
| MGAT4A  | royalblue | -0.249110111 | 4.89E-08    | -0.24636592  | 6.93E-08    |
| MIS18BP | royalblue | -0.196036445 | 1.99E-05    | -0.228794481 | 5.81E-07    |
| MLK4    | royalblue | -0.068150917 | 0.141421799 | -0.091226744 | 0.048809352 |
| MPP6    | royalblue | -0.179413433 | 9.68E-05    | -0.196692525 | 1.86E-05    |
| MRE11A  | royalblue | -0.223655673 | 1.05E-06    | -0.262731428 | 8.21E-09    |
| MTA3    | royalblue | 0.087786789  | 0.058004281 | 0.048349176  | 0.297113081 |
| MTPAP   | royalblue | -0.088899224 | 0.054885387 | -0.125999574 | 0.006401959 |
| MURC    | royalblue | -0.144101331 | 0.001796147 | -0.178237318 | 0.000107738 |
| MYNN    | royalblue | -0.276460387 | 1.22E-09    | -0.299294226 | 4.05E-11    |
| NAA25   | royalblue | -0.11754352  | 0.011017364 | -0.150285919 | 0.001123896 |
| NDUFAB1 | royalblue | -0.214622785 | 2.87E-06    | -0.229298973 | 5.48E-07    |
| NINL    | royalblue | -0.180636962 | 8.66E-05    | -0.202850492 | 9.97E-06    |
| NREP    | royalblue | -0.188476832 | 4.15E-05    | -0.204583264 | 8.33E-06    |
| NUP35   | royalblue | -0.122416742 | 0.008089152 | -0.139233218 | 0.002565625 |
| OPA1    | royalblue | -0.164701081 | 0.000351409 | -0.164535744 | 0.000356326 |
| ORC2    | royalblue | -0.018676123 | 0.68728083  | -0.03434489  | 0.459039876 |
| ORC4    | royalblue | -0.164997295 | 0.000342758 | -0.185297748 | 5.61E-05    |
| OSBPL1  | royalblue | -0.218987216 | 1.77E-06    | -0.238978466 | 1.73E-07    |
| OSER1   | royalblue | -0.319001876 | 1.66E-12    | -0.339526161 | 4.60E-14    |
| PAK2    | royalblue | -0.116086147 | 0.012059025 | -0.135174066 | 0.003425224 |
| PANK2   | royalblue | -0.207676776 | 6.03E-06    | -0.205071446 | 7.92E-06    |
| PAPD7   | royalblue | -0.269411132 | 3.30E-09    | -0.293320955 | 1.02E-10    |
| PARD6B  | royalblue | -0.225896582 | 8.12E-07    | -0.223151741 | 1.11E-06    |
| PBX2    | royalblue | -0.342591906 | 2.63E-14    | -0.373751054 | 6.27E-17    |
| PCYT1A  | royalblue | -0.22022601  | 1.54E-06    | -0.219458609 | 1.68E-06    |
| PEMT    | royalblue | 0.201527672  | 1.14E-05    | 0.201072684  | 1.20E-05    |
| PGBD1   | royalblue | -0.169112428 | 0.000241384 | -0.196382872 | 1.92E-05    |
| PHF6    | royalblue | 0.021889948  | 0.637044873 | -0.011198082 | 0.809282599 |



|         |           |              |             |              |             |
|---------|-----------|--------------|-------------|--------------|-------------|
| PIK3CA  | royalblue | -0.329732055 | 2.63E-13    | -0.343509265 | 2.22E-14    |
| PLAG1   | royalblue | -0.416615191 | 4.95E-21    | -0.406708122 | 4.97E-20    |
| PMM1    | royalblue | 0.331789456  | 1.83E-13    | 0.327474352  | 3.90E-13    |
| PPT1    | royalblue | -0.273409829 | 1.88E-09    | -0.302797105 | 2.33E-11    |
| PRELID2 | royalblue | -0.024469504 | 0.597879532 | -0.011510805 | 0.80406308  |
| PRKCI   | royalblue | -0.315384241 | 3.04E-12    | -0.3326379   | 1.58E-13    |
| PRKRA   | royalblue | 0.000754449  | 0.987026893 | -0.027962694 | 0.546656814 |
| PRTFDC1 | royalblue | -0.29541485  | 7.38E-11    | -0.320351076 | 1.32E-12    |
| PTCD3   | royalblue | 0.016345897  | 0.724602263 | -0.018212467 | 0.694649996 |
| PTPN2   | royalblue | -0.237969907 | 1.95E-07    | -0.264844066 | 6.17E-09    |
| PURB    | royalblue | -0.156656341 | 0.000680548 | -0.164976966 | 0.000343345 |
| PVRL3   | royalblue | -0.177177886 | 0.000118562 | -0.172353886 | 0.000182081 |
| QTRTD1  | royalblue | -0.077647149 | 0.093737549 | -0.120915279 | 0.008907039 |
| RAB22A  | royalblue | -0.135073716 | 0.003449451 | -0.152581669 | 0.000940085 |
| RAB39B  | royalblue | -0.312964935 | 4.53E-12    | -0.320332955 | 1.33E-12    |
| RALGAP  | royalblue | -0.208534363 | 5.51E-06    | -0.232653969 | 3.69E-07    |
| REEP6   | royalblue | 0.213054005  | 3.40E-06    | 0.221302256  | 1.37E-06    |
| REST    | royalblue | -0.090298343 | 0.051161872 | -0.110951234 | 0.016455152 |
| RIN1    | royalblue | 0.082756146  | 0.073994342 | 0.108903332  | 0.018566651 |
| RNF114  | royalblue | -0.194807215 | 2.24E-05    | -0.197687787 | 1.68E-05    |
| RNF168  | royalblue | -0.093438485 | 0.043567467 | -0.08556781  | 0.064664548 |
| RSRC1   | royalblue | -0.202865111 | 9.95E-06    | -0.190743242 | 3.34E-05    |
| SCML2   | royalblue | -0.293978637 | 9.19E-11    | -0.30004683  | 3.60E-11    |
| SEC22A  | royalblue | -0.166934968 | 0.000290887 | -0.171852514 | 0.00019026  |
| SENP2   | royalblue | -0.355549172 | 2.31E-15    | -0.372913035 | 7.44E-17    |
| SENP5   | royalblue | -0.304670853 | 1.73E-11    | -0.298765456 | 4.39E-11    |
| SIKE1   | royalblue | -0.136026678 | 0.003225531 | -0.153677893 | 0.000862489 |
| SIRT5   | royalblue | -0.373441662 | 6.68E-17    | -0.391670488 | 1.43E-18    |
| SLC16A1 | royalblue | -0.219664516 | 1.64E-06    | -0.246489745 | 6.82E-08    |
| SLC25A4 | royalblue | -0.173935257 | 0.00015839  | -0.185724849 | 5.39E-05    |
| SLC25A5 | royalblue | -0.081049011 | 0.080175369 | -0.073966542 | 0.110414233 |
| SLC30A6 | royalblue | -0.204267159 | 8.61E-06    | -0.222491529 | 1.20E-06    |
| SLC38A1 | royalblue | -0.218608164 | 1.85E-06    | -0.226333139 | 7.72E-07    |
| SLC9A7  | royalblue | -0.182909322 | 7.02E-05    | -0.168660403 | 0.000250962 |
| SMC6    | royalblue | -0.066026119 | 0.15428227  | -0.114183485 | 0.013549388 |
| SMIM13  | royalblue | -0.25885066  | 1.38E-08    | -0.292231843 | 1.20E-10    |
| SNIP1   | royalblue | -0.172579029 | 0.000178517 | -0.182483712 | 7.30E-05    |
| SPAST   | royalblue | -0.050930089 | 0.272042142 | -0.071778643 | 0.12138386  |
| SRSF12  | royalblue | -0.281898535 | 5.58E-10    | -0.290015682 | 1.68E-10    |
| SSX2IP  | royalblue | -0.049976775 | 0.281129064 | -0.086803462 | 0.060882108 |
| STK38   | royalblue | -0.183185731 | 6.84E-05    | -0.185790009 | 5.36E-05    |
| SYCE1L  | royalblue | 0.238273369  | 1.88E-07    | 0.228069875  | 6.32E-07    |
| TAF1B   | royalblue | -0.223758897 | 1.04E-06    | -0.251495332 | 3.61E-08    |
| TAF4B   | royalblue | -0.285936876 | 3.08E-10    | -0.332971616 | 1.49E-13    |
| TBC1D22 | royalblue | -0.097488262 | 0.035194615 | -0.109381117 | 0.018053955 |

|         |            |              |             |              |             |
|---------|------------|--------------|-------------|--------------|-------------|
| TBCCD1  | royalblue  | -0.08214886  | 0.076147086 | -0.084531658 | 0.067983411 |
| TBL1XR1 | royalblue  | -0.286829774 | 2.70E-10    | -0.293295454 | 1.02E-10    |
| TCFL5   | royalblue  | -0.275023706 | 1.50E-09    | -0.288097427 | 2.24E-10    |
| TFDP2   | royalblue  | -0.17644454  | 0.000126645 | -0.187169913 | 4.70E-05    |
| TLE2    | royalblue  | 0.189397393  | 3.80E-05    | 0.176975912  | 0.000120739 |
| TMEM13  | royalblue  | -0.36792295  | 2.04E-16    | -0.402705045 | 1.24E-19    |
| TMEM19  | royalblue  | -0.124306328 | 0.007155441 | -0.137764924 | 0.002850802 |
| TMEM23  | royalblue  | -0.224353684 | 9.69E-07    | -0.255511063 | 2.14E-08    |
| TMSB15  | royalblue  | -0.118603912 | 0.010310342 | -0.142331645 | 0.002047315 |
| TOM1    | royalblue  | 0.295191304  | 7.64E-11    | 0.303613876  | 2.05E-11    |
| TRADD   | royalblue  | 0.30876316   | 8.98E-12    | 0.352764457  | 3.94E-15    |
| TRAM1L  | royalblue  | -0.297985304 | 4.96E-11    | -0.325093998 | 5.89E-13    |
| TTC9C   | royalblue  | -0.159101975 | 0.000558482 | -0.167400536 | 0.000279567 |
| TTPAL   | royalblue  | -0.12401936  | 0.007290725 | -0.15145202  | 0.001026751 |
| UBA2    | royalblue  | -0.186287066 | 5.11E-05    | -0.228330814 | 6.13E-07    |
| UBE2G2  | royalblue  | -0.214843291 | 2.80E-06    | -0.239224314 | 1.68E-07    |
| UBE2V1  | royalblue  | -0.179195234 | 9.88E-05    | -0.203722315 | 9.11E-06    |
| UBXN7   | royalblue  | -0.238102139 | 1.92E-07    | -0.252743363 | 3.07E-08    |
| URI1    | royalblue  | -0.313039146 | 4.47E-12    | -0.317947549 | 1.98E-12    |
| WASF1   | royalblue  | -0.254241492 | 2.53E-08    | -0.251974963 | 3.39E-08    |
| WDR33   | royalblue  | -0.107452471 | 0.020202128 | -0.125347809 | 0.00668313  |
| WDR88   | royalblue  | -0.218488038 | 1.87E-06    | -0.231078345 | 4.45E-07    |
| XPO1    | royalblue  | -0.143459284 | 0.001883811 | -0.172524744 | 0.00017937  |
| YEATS2  | royalblue  | -0.167674494 | 0.000273099 | -0.186381131 | 5.07E-05    |
| YY1     | royalblue  | -0.22049219  | 1.50E-06    | -0.235274726 | 2.70E-07    |
| ZBED9   | royalblue  | -0.36304733  | 5.38E-16    | -0.387252293 | 3.71E-18    |
| ZBTB33  | royalblue  | -0.100442926 | 0.02998686  | -0.118608476 | 0.010307388 |
| ZC3H8   | royalblue  | -0.21839179  | 1.89E-06    | -0.246813254 | 6.55E-08    |
| ZCCHC3  | royalblue  | -0.200900941 | 1.22E-05    | -0.215273534 | 2.67E-06    |
| ZDHHC1  | royalblue  | -0.09732036  | 0.035512345 | -0.101487855 | 0.028310383 |
| ZDHHC2  | royalblue  | -0.030299507 | 0.513644702 | -0.045063223 | 0.331195651 |
| ZFP69   | royalblue  | -0.256659964 | 1.84E-08    | -0.272777184 | 2.06E-09    |
| ZKSCAN  | royalblue  | -0.198092846 | 1.62E-05    | -0.221628038 | 1.32E-06    |
| ZKSCAN  | royalblue  | -0.045175509 | 0.329990962 | -0.06689847  | 0.148899053 |
| ZNF146  | royalblue  | -0.159245773 | 0.00055198  | -0.193663929 | 2.51E-05    |
| ZNF239  | royalblue  | -0.201406589 | 1.16E-05    | -0.246175096 | 7.09E-08    |
| ZNF343  | royalblue  | -0.289309782 | 1.87E-10    | -0.317267256 | 2.22E-12    |
| ZNF485  | royalblue  | -0.035270236 | 0.447021382 | -0.076527509 | 0.098582595 |
| ZNF512  | royalblue  | -0.464413164 | 2.33E-26    | -0.453381065 | 4.71E-25    |
| ZNF639  | royalblue  | -0.253920971 | 2.64E-08    | -0.264898593 | 6.12E-09    |
| ZNF714  | royalblue  | 0.033474682  | 0.470505016 | 0.021913273  | 0.636685929 |
| AACS    | saddlebrow | 0.259911342  | 1.20E-08    | 0.269697933  | 3.17E-09    |
| AC11449 | saddlebrow | 0.274260245  | 1.67E-09    | 0.290830837  | 1.48E-10    |
| ACAA2   | saddlebrow | -0.175827032 | 0.00013385  | -0.185178633 | 5.68E-05    |
| ACSL5   | saddlebrow | 0.160997189  | 0.000478226 | 0.153830756  | 0.000852152 |

|          |            |              |             |              |             |
|----------|------------|--------------|-------------|--------------|-------------|
| ADAM28   | saddlebrow | 0.304967498  | 1.65E-11    | 0.274123174  | 1.70E-09    |
| ANO1     | saddlebrow | 0.215327531  | 2.65E-06    | 0.209824901  | 4.80E-06    |
| AQP5     | saddlebrow | 0.235857446  | 2.52E-07    | 0.25405617   | 2.59E-08    |
| ARF1     | saddlebrow | 0.325971025  | 5.06E-13    | 0.344018017  | 2.02E-14    |
| ARFIP2   | saddlebrow | 0.396471659  | 4.98E-19    | 0.403090425  | 1.13E-19    |
| ARSD     | saddlebrow | 0.401973289  | 1.46E-19    | 0.398324355  | 3.30E-19    |
| ATP2C2   | saddlebrow | 0.432139296  | 1.14E-22    | 0.42750532   | 3.58E-22    |
| B4GALN1  | saddlebrow | 0.356187279  | 2.05E-15    | 0.363633983  | 4.79E-16    |
| B4GALT1  | saddlebrow | 0.328113736  | 3.49E-13    | 0.330816741  | 2.18E-13    |
| BACE2    | saddlebrow | 0.124062452  | 0.007270266 | 0.128733186  | 0.005334748 |
| BCAS4    | saddlebrow | -0.277615707 | 1.04E-09    | -0.259293298 | 1.30E-08    |
| C1orf64  | saddlebrow | 0.234410237  | 3.00E-07    | 0.262866142  | 8.07E-09    |
| C4BPA    | saddlebrow | 0.259022696  | 1.35E-08    | 0.259462022  | 1.27E-08    |
| C5AR2    | saddlebrow | 0.221414152  | 1.35E-06    | 0.231468135  | 4.25E-07    |
| C9orf152 | saddlebrow | 0.440444665  | 1.39E-23    | 0.448236743  | 1.84E-24    |
| CA8      | saddlebrow | 0.294436036  | 8.57E-11    | 0.261532678  | 9.65E-09    |
| CAPN6    | saddlebrow | 0.251907888  | 3.42E-08    | 0.271531984  | 2.45E-09    |
| CCDC129  | saddlebrow | 0.122249234  | 0.008176952 | 0.103060502  | 0.025939194 |
| CEACAM5  | saddlebrow | 0.370823306  | 1.14E-16    | 0.3681441    | 1.95E-16    |
| CES3     | saddlebrow | 0.391543034  | 1.47E-18    | 0.378662751  | 2.27E-17    |
| CHDH     | saddlebrow | 0.340300437  | 4.00E-14    | 0.322928622  | 8.53E-13    |
| CISH     | saddlebrow | 0.308361531  | 9.58E-12    | 0.308648996  | 9.15E-12    |
| CLDN6    | saddlebrow | -0.340823476 | 3.63E-14    | -0.351269981 | 5.23E-15    |
| CPVL     | saddlebrow | -0.463998889 | 2.61E-26    | -0.462398068 | 4.07E-26    |
| CREB3L1  | saddlebrow | 0.314355311  | 3.60E-12    | 0.322822715  | 8.69E-13    |
| CREB3L4  | saddlebrow | 0.403202657  | 1.10E-19    | 0.40655075   | 5.15E-20    |
| CRYL1    | saddlebrow | 0.33892321   | 5.13E-14    | 0.345780642  | 1.46E-14    |
| CTNNB1   | saddlebrow | 0.379700538  | 1.83E-17    | 0.374303799  | 5.60E-17    |
| CYB561   | saddlebrow | 0.317875732  | 2.00E-12    | 0.33090437   | 2.14E-13    |
| CYB5R1   | saddlebrow | 0.221398699  | 1.35E-06    | 0.215966774  | 2.47E-06    |
| CYP2J2   | saddlebrow | 0.150574485  | 0.001099098 | 0.144664661  | 0.001722326 |
| CYP4X1   | saddlebrow | 0.274689701  | 1.57E-09    | 0.255437786  | 2.16E-08    |
| DACT2    | saddlebrow | 0.162898876  | 0.000408584 | 0.140676721  | 0.002310851 |
| DEPTOR   | saddlebrow | 0.247282923  | 6.17E-08    | 0.247703923  | 5.85E-08    |
| DNAJC22  | saddlebrow | 0.294723496  | 8.20E-11    | 0.305359346  | 1.55E-11    |
| DOCK5    | saddlebrow | 0.243430942  | 9.99E-08    | 0.234875517  | 2.84E-07    |
| ENTPD3   | saddlebrow | 0.327626112  | 3.80E-13    | 0.312995549  | 4.50E-12    |
| EPHB2    | saddlebrow | -0.366775623 | 2.57E-16    | -0.369263657 | 1.56E-16    |
| EPHX1    | saddlebrow | 0.391496071  | 1.48E-18    | 0.39510617   | 6.73E-19    |
| ERGIC1   | saddlebrow | 0.350142688  | 6.47E-15    | 0.363355198  | 5.06E-16    |
| ERMN     | saddlebrow | 0.306454992  | 1.30E-11    | 0.285121814  | 3.48E-10    |
| ESR1     | saddlebrow | 0.238444675  | 1.84E-07    | 0.243046805  | 1.05E-07    |
| FAM174E  | saddlebrow | 0.252234478  | 3.28E-08    | 0.256573915  | 1.86E-08    |
| FAM189A  | saddlebrow | 0.15632632   | 0.000698795 | 0.142987163  | 0.001950755 |
| FAM46C   | saddlebrow | 0.337126917  | 7.09E-14    | 0.347576361  | 1.05E-14    |

|          |            |              |             |              |             |
|----------|------------|--------------|-------------|--------------|-------------|
| FBLN1    | saddlebrow | 0.098892732  | 0.032630337 | 0.099580448  | 0.031434013 |
| FCHO1    | saddlebrow | -0.267195891 | 4.47E-09    | -0.249740558 | 4.52E-08    |
| FOLH1    | saddlebrow | 0.227075894  | 7.09E-07    | 0.23206576   | 3.96E-07    |
| FOXA2    | saddlebrow | 0.40749345   | 4.15E-20    | 0.39971027   | 2.42E-19    |
| GALNT1   | saddlebrow | 0.449178856  | 1.44E-24    | 0.454884763  | 3.15E-25    |
| GALNT1   | saddlebrow | 0.273492743  | 1.86E-09    | 0.286849896  | 2.69E-10    |
| GCNT1    | saddlebrow | 0.281134468  | 6.24E-10    | 0.26107249   | 1.03E-08    |
| GCNT2    | saddlebrow | 0.311986947  | 5.31E-12    | 0.320668822  | 1.25E-12    |
| GCNT3    | saddlebrow | 0.255995632  | 2.01E-08    | 0.288198964  | 2.20E-10    |
| GDF5     | saddlebrow | 0.13983266   | 0.002456867 | 0.145156449  | 0.001660165 |
| GLIS2    | saddlebrow | -0.41762054  | 3.90E-21    | -0.401078442 | 1.78E-19    |
| GLYATL   | saddlebrow | 0.391073559  | 1.63E-18    | 0.39063328   | 1.79E-18    |
| GNB5     | saddlebrow | 0.154816919  | 0.000788168 | 0.14699332   | 0.001445746 |
| GREB1    | saddlebrow | 0.135533262  | 0.003339766 | 0.102080736  | 0.027395452 |
| GRIN1    | saddlebrow | 0.398355186  | 3.28E-19    | 0.400235336  | 2.15E-19    |
| HADH     | saddlebrow | 0.315606416  | 2.93E-12    | 0.321489603  | 1.09E-12    |
| HGD      | saddlebrow | 0.371607925  | 9.70E-17    | 0.382012694  | 1.13E-17    |
| HID1     | saddlebrow | 0.241691258  | 1.24E-07    | 0.237842486  | 1.98E-07    |
| HIF3A    | saddlebrow | -0.48603522  | 4.65E-29    | -0.495652482 | 2.53E-30    |
| HMGA2    | saddlebrow | -0.191565009 | 3.08E-05    | -0.200107537 | 1.32E-05    |
| HOXA4    | saddlebrow | -0.265992796 | 5.28E-09    | -0.276439683 | 1.23E-09    |
| HPX      | saddlebrow | 0.191408889  | 3.13E-05    | 0.197622142  | 1.69E-05    |
| IGF2BP2  | saddlebrow | -0.358592134 | 1.29E-15    | -0.363572796 | 4.85E-16    |
| IHH      | saddlebrow | 0.274532222  | 1.61E-09    | 0.254758171  | 2.36E-08    |
| IL20RA   | saddlebrow | 0.332893805  | 1.51E-13    | 0.336169441  | 8.42E-14    |
| IQCJ-SCF | saddlebrow | -0.316276767 | 2.62E-12    | -0.329255621 | 2.86E-13    |
| ITM2C    | saddlebrow | -0.305056783 | 1.63E-11    | -0.322933137 | 8.52E-13    |
| KDM4B    | saddlebrow | 0.494969765  | 3.12E-30    | 0.486475221  | 4.08E-29    |
| KIAA132  | saddlebrow | 0.408633857  | 3.19E-20    | 0.418540071  | 3.13E-21    |
| L1CAM    | saddlebrow | -0.388612247 | 2.77E-18    | -0.39961452  | 2.47E-19    |
| LRP5L    | saddlebrow | 0.214537887  | 2.89E-06    | 0.202453865  | 1.04E-05    |
| LRRC26   | saddlebrow | 0.406275492  | 5.49E-20    | 0.412867823  | 1.20E-20    |
| LRRC3    | saddlebrow | -0.277764186 | 1.02E-09    | -0.300922408 | 3.14E-11    |
| MAL      | saddlebrow | -0.178594054 | 0.000104307 | -0.167813952 | 0.000269861 |
| MANSC1   | saddlebrow | 0.372993482  | 7.32E-17    | 0.364404213  | 4.11E-16    |
| MAP2K6   | saddlebrow | 0.303471412  | 2.10E-11    | 0.305749589  | 1.46E-11    |
| MCF2L    | saddlebrow | 0.300224065  | 3.50E-11    | 0.283714375  | 4.28E-10    |
| MLPH     | saddlebrow | 0.344496912  | 1.85E-14    | 0.361280214  | 7.61E-16    |
| MMP26    | saddlebrow | 0.12381571   | 0.007388114 | 0.08085778   | 0.080893071 |
| MUC5AC   | saddlebrow | 0.139492393  | 0.002518075 | 0.185680969  | 5.41E-05    |
| MUC5B    | saddlebrow | 0.329329543  | 2.82E-13    | 0.343887238  | 2.07E-14    |
| NAAA     | saddlebrow | 0.187808844  | 4.42E-05    | 0.193659964  | 2.51E-05    |
| NCMAP    | saddlebrow | 0.265571818  | 5.59E-09    | 0.261357016  | 9.88E-09    |
| PGR      | saddlebrow | 0.196433855  | 1.91E-05    | 0.167818894  | 0.000269747 |
| PIGR     | saddlebrow | 0.333450929  | 1.37E-13    | 0.354221654  | 2.98E-15    |

|          |            |              |             |              |             |
|----------|------------|--------------|-------------|--------------|-------------|
| PIK3R3   | saddlebrow | 0.432015549  | 1.17E-22    | 0.448035926  | 1.94E-24    |
| PLLP     | saddlebrow | 0.209251026  | 5.11E-06    | 0.223922293  | 1.02E-06    |
| POC1B-Gs | saddlebrow | 0.273975838  | 1.74E-09    | 0.265709006  | 5.48E-09    |
| PORCN    | saddlebrow | 0.145366354  | 0.001634265 | 0.133071506  | 0.003966484 |
| PPAP2C   | saddlebrow | 0.42591544   | 5.29E-22    | 0.441592199  | 1.04E-23    |
| RBBP7    | saddlebrow | 0.301034038  | 3.08E-11    | 0.294492634  | 8.50E-11    |
| RNF183   | saddlebrow | 0.294942461  | 7.93E-11    | 0.30719618   | 1.16E-11    |
| RSPO4    | saddlebrow | -0.42985789  | 2.01E-22    | -0.442901768 | 7.41E-24    |
| SCGB2A2  | saddlebrow | 0.342956846  | 2.46E-14    | 0.352102952  | 4.47E-15    |
| SELENBI  | saddlebrow | 0.19560985   | 2.07E-05    | 0.196434827  | 1.91E-05    |
| SERINC2  | saddlebrow | 0.339160166  | 4.92E-14    | 0.363139773  | 5.28E-16    |
| SH2D4A   | saddlebrow | 0.349685112  | 7.05E-15    | 0.339461801  | 4.65E-14    |
| SLC25A3  | saddlebrow | 0.288000363  | 2.27E-10    | 0.276856834  | 1.16E-09    |
| SLC43A1  | saddlebrow | 0.263228859  | 7.68E-09    | 0.246701304  | 6.64E-08    |
| SLC44A3  | saddlebrow | 0.22018598   | 1.55E-06    | 0.204150357  | 8.72E-06    |
| SLC47A1  | saddlebrow | 0.303896673  | 1.96E-11    | 0.272920605  | 2.02E-09    |
| SLC5A1   | saddlebrow | 0.345884402  | 1.43E-14    | 0.335574561  | 9.37E-14    |
| SLC6A12  | saddlebrow | -0.36362976  | 4.80E-16    | -0.359542842 | 1.07E-15    |
| SLCO3A1  | saddlebrow | -0.387467875 | 3.54E-18    | -0.38191891  | 1.15E-17    |
| SPDEF    | saddlebrow | 0.449874432  | 1.20E-24    | 0.468793336  | 6.85E-27    |
| SPINK4   | saddlebrow | 0.23838565   | 1.86E-07    | 0.249825587  | 4.47E-08    |
| SRD5A3   | saddlebrow | 0.375853422  | 4.07E-17    | 0.387617232  | 3.43E-18    |
| ST6GALN  | saddlebrow | 0.20652677   | 6.80E-06    | 0.244156109  | 9.13E-08    |
| STEAP1   | saddlebrow | 0.30808642   | 1.00E-11    | 0.292908493  | 1.08E-10    |
| STX19    | saddlebrow | 0.247925251  | 5.69E-08    | 0.25099783   | 3.85E-08    |
| STXBP6   | saddlebrow | 0.281736161  | 5.72E-10    | 0.287557766  | 2.42E-10    |
| TBC1D30  | saddlebrow | 0.329523209  | 2.73E-13    | 0.317389869  | 2.17E-12    |
| TFF3     | saddlebrow | 0.431515006  | 1.33E-22    | 0.456099907  | 2.27E-25    |
| TMC5     | saddlebrow | 0.297351969  | 5.47E-11    | 0.311110094  | 6.13E-12    |
| TMEM21   | saddlebrow | 0.384172964  | 7.15E-18    | 0.370117463  | 1.31E-16    |
| TMEM21   | saddlebrow | 0.297151214  | 5.64E-11    | 0.30551839   | 1.51E-11    |
| TMEM62   | saddlebrow | 0.429436272  | 2.23E-22    | 0.441726883  | 1.00E-23    |
| TMEM63   | saddlebrow | 0.305520093  | 1.51E-11    | 0.309462927  | 8.02E-12    |
| TMPRSS1  | saddlebrow | 0.2706234    | 2.78E-09    | 0.252262511  | 3.27E-08    |
| TNNT1    | saddlebrow | -0.261629933 | 9.52E-09    | -0.25568264  | 2.10E-08    |
| TRIM3    | saddlebrow | 0.304483562  | 1.79E-11    | 0.313682869  | 4.02E-12    |
| TRPM4    | saddlebrow | 0.406550625  | 5.15E-20    | 0.41788074   | 3.67E-21    |
| TSKU     | saddlebrow | 0.287967941  | 2.28E-10    | 0.30003793   | 3.60E-11    |
| TSPAN8   | saddlebrow | 0.233709872  | 3.26E-07    | 0.235092261  | 2.76E-07    |
| TUBA3D   | saddlebrow | 0.01245174   | 0.788411717 | -0.008044814 | 0.862347395 |
| TUBB4A   | saddlebrow | -0.278966769 | 8.54E-10    | -0.29294519  | 1.08E-10    |
| VIM      | saddlebrow | 0.136185763  | 0.003189463 | 0.148578713  | 0.001281465 |
| VMAC     | saddlebrow | 0.421975914  | 1.38E-21    | 0.435211539  | 5.27E-23    |
| ZG16B    | saddlebrow | 0.282773627  | 4.91E-10    | 0.28844541   | 2.12E-10    |
| ZNF516   | saddlebrow | 0.04347965   | 0.348486766 | 0.021343446  | 0.645478837 |

|          |        |              |             |              |             |
|----------|--------|--------------|-------------|--------------|-------------|
| AAAS     | salmon | 0.053195088  | 0.251262923 | 0.027670833  | 0.550852313 |
| AAK1     | salmon | -0.241019516 | 1.35E-07    | -0.238038219 | 1.94E-07    |
| ABCA1    | salmon | -0.146429662 | 0.00150867  | -0.132618052 | 0.004092913 |
| AC00300  | salmon | -0.069136802 | 0.135740984 | -0.057043751 | 0.218538253 |
| AC07365  | salmon | 0.11079309   | 0.016610368 | 0.095463266  | 0.039192357 |
| AC09015  | salmon | -0.189926669 | 3.61E-05    | -0.202190906 | 1.07E-05    |
| AC09118  | salmon | -0.075731214 | 0.102148159 | -0.072163345 | 0.119395792 |
| AGO1     | salmon | -0.210325707 | 4.55E-06    | -0.208625699 | 5.46E-06    |
| AGO2     | salmon | -0.166415311 | 0.000304028 | -0.191622836 | 3.06E-05    |
| AGO3     | salmon | -0.183288135 | 6.77E-05    | -0.200665436 | 1.25E-05    |
| AK1      | salmon | 0.04055388   | 0.381907068 | 0.070250426  | 0.129537209 |
| AKAP13   | salmon | -0.004414976 | 0.92419314  | -0.014799129 | 0.749747538 |
| ALKBH4   | salmon | -0.026183572 | 0.572473673 | -0.008530885 | 0.854120728 |
| ANKRD6   | salmon | -0.243239556 | 1.02E-07    | -0.252770692 | 3.06E-08    |
| ARF5     | salmon | 0.17700539   | 0.000120419 | 0.192659101  | 2.77E-05    |
| ARFGEF2  | salmon | -0.076083011 | 0.100560505 | -0.097837971 | 0.034540595 |
| ARHGAP   | salmon | 0.148047623  | 0.00133448  | 0.123754319  | 0.007417699 |
| ARPC4    | salmon | 0.132856172  | 0.004026075 | 0.161018337  | 0.000477395 |
| ASXL1    | salmon | -0.356824527 | 1.81E-15    | -0.390580527 | 1.81E-18    |
| ASXL2    | salmon | -0.096324828 | 0.037446783 | -0.118059106 | 0.010668402 |
| ATP5G2   | salmon | 0.195408081  | 2.11E-05    | 0.191947876  | 2.97E-05    |
| ATP6V1F  | salmon | 0.059368106  | 0.200317633 | 0.083071258  | 0.07289701  |
| ATP9B    | salmon | 0.107754213  | 0.019852029 | 0.101073228  | 0.028965721 |
| ATRAID   | salmon | -0.033036144 | 0.476342012 | -0.022265799 | 0.631271502 |
| B3GALN   | salmon | 0.134944792  | 0.003480804 | 0.102260306  | 0.027123405 |
| B3GALT   | salmon | -0.110424572 | 0.016977044 | -0.115508884 | 0.012495104 |
| BANF1    | salmon | -0.044424685 | 0.338100215 | -0.054734441 | 0.237786915 |
| BIRC6    | salmon | -0.07197815  | 0.120349647 | -0.084541826 | 0.067950175 |
| BMP2K    | salmon | 0.050024575  | 0.280668597 | 0.052406374  | 0.258369615 |
| BOD1L1   | salmon | -0.092403131 | 0.045959112 | -0.110528015 | 0.01687341  |
| C10orf12 | salmon | 0.029876356  | 0.519544942 | 0.023967061  | 0.605422323 |
| C12orf10 | salmon | -0.024828905 | 0.592510365 | -0.024741007 | 0.593821456 |
| C14orf1  | salmon | 0.16080583   | 0.000485814 | 0.135380886  | 0.003375779 |
| C19orf53 | salmon | -0.01594378  | 0.731112172 | -0.003005221 | 0.948357548 |
| C1QL3    | salmon | -0.016573321 | 0.720929206 | -0.040226136 | 0.385769125 |
| C2orf16  | salmon | -0.304676826 | 1.73E-11    | -0.301699925 | 2.77E-11    |
| C5orf42  | salmon | -0.193327475 | 2.59E-05    | -0.209603562 | 4.92E-06    |
| C7orf55  | salmon | 0.055329899  | 0.232713079 | 0.066438427  | 0.151719854 |
| CBL      | salmon | -0.121055963 | 0.008827394 | -0.135390259 | 0.003373554 |
| CCDC107  | salmon | 0.138725751  | 0.002661105 | 0.139178655  | 0.002575739 |
| CCRN4L   | salmon | 0.237442978  | 2.08E-07    | 0.225763908  | 8.24E-07    |
| CD63     | salmon | 0.087237939  | 0.059596338 | 0.099506833  | 0.031560252 |
| CDK5RA   | salmon | 0.080676276  | 0.08157907  | 0.070008158  | 0.130867804 |
| CDK6     | salmon | -0.267630847 | 4.21E-09    | -0.262065567 | 8.98E-09    |
| CDKL2    | salmon | -0.258752476 | 1.40E-08    | -0.250612264 | 4.04E-08    |

|          |        |              |             |              |             |
|----------|--------|--------------|-------------|--------------|-------------|
| CDKL5    | salmon | -0.217069892 | 2.19E-06    | -0.24349926  | 9.91E-08    |
| CDPF1    | salmon | 0.217113885  | 2.18E-06    | 0.209105038  | 5.18E-06    |
| CH17-14C | salmon | -0.040477149 | 0.382809129 | -0.068846779 | 0.137393593 |
| CLASP1   | salmon | -0.087297638 | 0.059421436 | -0.104560041 | 0.023839678 |
| CNPY3    | salmon | -0.041267833 | 0.373576244 | -0.037721577 | 0.416060398 |
| COBLL1   | salmon | 0.007636256  | 0.869273752 | 0.010871038  | 0.814750184 |
| COPS6    | salmon | 0.018773969  | 0.685729452 | 0.04067205   | 0.380520406 |
| CRYBG3   | salmon | -0.169829004 | 0.000226898 | -0.153438502 | 0.000878911 |
| CTD-258  | salmon | -0.015565455 | 0.737254588 | -0.054593537 | 0.238998854 |
| CYB5RL   | salmon | 0.014592734  | 0.753123642 | -0.014101341 | 0.761180464 |
| DGCR14   | salmon | 0.066649762  | 0.150419033 | 0.055065263  | 0.234958478 |
| DGCR6L   | salmon | 0.080173167  | 0.083505201 | 0.090830298  | 0.049802612 |
| DHRS4L2  | salmon | 0.076390369  | 0.099189507 | 0.095208685  | 0.039721153 |
| DNAJC17  | salmon | 0.231500025  | 4.23E-07    | 0.23710218   | 2.17E-07    |
| DOCK4    | salmon | -0.235012961 | 2.79E-07    | -0.225815108 | 8.20E-07    |
| DRAP1    | salmon | -0.068152451 | 0.141412821 | -0.062106045 | 0.180303932 |
| DSE      | salmon | -0.212625459 | 3.56E-06    | -0.211711082 | 3.93E-06    |
| DYNLRB   | salmon | -0.009033275 | 0.845634442 | 0.02297154   | 0.620491321 |
| ECH1     | salmon | 0.062574731  | 0.177031828 | 0.078420819  | 0.090502259 |
| EPB41L4  | salmon | -0.05486866  | 0.236636501 | -0.065496221 | 0.157623451 |
| EPG5     | salmon | -0.050859519 | 0.272707859 | -0.065420864 | 0.158103007 |
| EPHA6    | salmon | -0.223825218 | 1.03E-06    | -0.220440513 | 1.51E-06    |
| ERCC1    | salmon | 0.045787912  | 0.323470457 | 0.041021927  | 0.37643287  |
| ERP29    | salmon | 0.171087556  | 0.000203405 | 0.152052642  | 0.000979794 |
| FAM160A  | salmon | 0.045863954  | 0.322666697 | 0.068276522  | 0.140688085 |
| FAM169A  | salmon | 0.017570329  | 0.704903465 | -0.004445552 | 0.923669727 |
| FAM83B   | salmon | -0.017405233 | 0.707548414 | -0.019981111 | 0.666700139 |
| FAM89B   | salmon | 0.000101314  | 0.998257788 | 0.016754983  | 0.717999847 |
| FAU      | salmon | -0.011716788 | 0.800629861 | -0.005158877 | 0.91146867  |
| FRK      | salmon | -0.0066164   | 0.886606108 | 0.008518088  | 0.854337113 |
| GAFA3    | salmon | 0.115818721  | 0.012259345 | 0.091826118  | 0.047339185 |
| GAN      | salmon | 0.026682583  | 0.565174572 | 0.040623917  | 0.381084853 |
| GIT2     | salmon | -0.106240449 | 0.021663038 | -0.116078738 | 0.012064536 |
| GLIS3    | salmon | 0.124147179  | 0.007230188 | 0.133086241  | 0.003962435 |
| GNPTG    | salmon | 0.094353759  | 0.041541307 | 0.097704505  | 0.034788969 |
| GOLGA3   | salmon | 0.144305696  | 0.001769037 | 0.161892413  | 0.000444171 |
| GPATCH   | salmon | -0.141605183 | 0.002159417 | -0.164247939 | 0.000365037 |
| GPLD1    | salmon | -0.243441377 | 9.98E-08    | -0.270382167 | 2.88E-09    |
| GPR75    | salmon | -0.186381199 | 5.07E-05    | -0.171307287 | 0.000199545 |
| GSTK1    | salmon | 0.279722324  | 7.66E-10    | 0.293213455  | 1.03E-10    |
| HECW2    | salmon | -0.142238724 | 0.00206135  | -0.135627007 | 0.003317784 |
| HELB     | salmon | -0.102442655 | 0.026849532 | -0.09747381  | 0.035221867 |
| HERC1    | salmon | -0.065502107 | 0.157586041 | -0.070444666 | 0.128477975 |
| HHLA3    | salmon | 0.118632568  | 0.010291807 | 0.121374129  | 0.008649607 |
| HIPK2    | salmon | -0.103876073 | 0.024778352 | -0.11562649  | 0.012405149 |

|         |        |              |             |              |             |
|---------|--------|--------------|-------------|--------------|-------------|
| HIVEP1  | salmon | -0.083398943 | 0.071770009 | -0.087129229 | 0.059915924 |
| HIVEP2  | salmon | -0.212668393 | 3.54E-06    | -0.209152556 | 5.16E-06    |
| HMCN1   | salmon | -0.017203457 | 0.710785783 | -0.027661549 | 0.550986033 |
| IFI27L1 | salmon | 0.130605408  | 0.004699206 | 0.125106413  | 0.006790044 |
| IFI27L2 | salmon | -0.274398611 | 1.64E-09    | -0.268928574 | 3.52E-09    |
| IFNAR2  | salmon | -0.255254061 | 2.22E-08    | -0.240917048 | 1.36E-07    |
| IGF2BP3 | salmon | -0.153536007 | 0.000872188 | -0.171519726 | 0.000195878 |
| INPP4A  | salmon | -0.2469617   | 6.42E-08    | -0.265138973 | 5.93E-09    |
| ITGA4   | salmon | 0.094671591  | 0.040856581 | 0.108061012  | 0.019501489 |
| JAGN1   | salmon | 0.007193466  | 0.876791743 | 0.02311676   | 0.618283036 |
| JRK     | salmon | -0.143578926 | 0.001867184 | -0.171185225 | 0.000201681 |
| KALRN   | salmon | -0.286007689 | 3.05E-10    | -0.300215696 | 3.50E-11    |
| KAT6A   | salmon | -0.122106023 | 0.008252689 | -0.152226034 | 0.000966612 |
| KDM5A   | salmon | -0.115023594 | 0.012872413 | -0.132535005 | 0.004116459 |
| KIAA035 | salmon | -0.14194332  | 0.002106558 | -0.165798771 | 0.000320336 |
| KIAA201 | salmon | 0.052421119  | 0.258235497 | 0.033674417  | 0.467859627 |
| KIF3B   | salmon | 0.066168399  | 0.153394344 | 0.058383425  | 0.207896835 |
| KLHL11  | salmon | 0.072514545  | 0.117603148 | 0.058056437  | 0.210458975 |
| KMT2A   | salmon | -0.076791868 | 0.097421025 | -0.106224027 | 0.021683447 |
| KRBA2   | salmon | 0.018527905  | 0.689633368 | 0.030943218  | 0.504736183 |
| LAMTOR  | salmon | 0.025850079  | 0.577376467 | 0.054606291  | 0.238888971 |
| LARP4B  | salmon | 0.115449771  | 0.012540536 | 0.100702373  | 0.02956286  |
| LENG1   | salmon | -0.044163614 | 0.340949547 | -0.032349265 | 0.485563398 |
| LONRF3  | salmon | 0.078279891  | 0.091084819 | 0.061745575  | 0.182850846 |
| LTB4R2  | salmon | 0.003961701  | 0.931956131 | -0.002805683 | 0.95178214  |
| LY6G5B  | salmon | -0.166232825 | 0.000308772 | -0.176634827 | 0.000124499 |
| MACC1   | salmon | -0.193772778 | 2.48E-05    | -0.173210851 | 0.000168859 |
| MACF1   | salmon | -0.107527583 | 0.020114481 | -0.125378553 | 0.006669623 |
| MAP3K9  | salmon | 0.138993745  | 0.002610286 | 0.133200787  | 0.003931092 |
| MICAL3  | salmon | -0.113197269 | 0.014383944 | -0.152971417 | 0.000911787 |
| MICAL3  | salmon | 0.154259857  | 0.000823743 | 0.145473766  | 0.001621156 |
| MID2    | salmon | -0.132175211 | 0.004219891 | -0.146101587 | 0.001546442 |
| MIEN1   | salmon | 0.029250517  | 0.528334853 | 0.034141857  | 0.461700833 |
| MKL2    | salmon | -0.066848981 | 0.149200571 | -0.074060847 | 0.109959559 |
| MRPL40  | salmon | 0.201008028  | 1.20E-05    | 0.207720843  | 6.00E-06    |
| MVB12A  | salmon | -0.08514515  | 0.0660019   | -0.058858929 | 0.204211337 |
| MYCBP2  | salmon | -0.124476306 | 0.007076373 | -0.142106617 | 0.002081457 |
| MYL6    | salmon | -0.047226177 | 0.308488122 | -0.022730241 | 0.624168173 |
| MYO5A   | salmon | -0.243746602 | 9.61E-08    | -0.219700113 | 1.64E-06    |
| MZT2A   | salmon | -0.020004666 | 0.666330897 | -0.038508814 | 0.406391639 |
| MZT2B   | salmon | 0.083029177  | 0.073042779 | 0.075459345  | 0.103388668 |
| NBPF26  | salmon | -0.132129897 | 0.004233082 | -0.144513473 | 0.00174186  |
| NEDD8   | salmon | -0.018943141 | 0.683050289 | -0.002779452 | 0.952232405 |
| NFAT5   | salmon | 0.005304216  | 0.908985174 | 0.002908624  | 0.950015283 |
| NFKBIL1 | salmon | -0.11144525  | 0.015978433 | -0.125981656 | 0.006409545 |



|         |        |              |             |              |             |
|---------|--------|--------------|-------------|--------------|-------------|
| NHSL2   | salmon | -0.058404064 | 0.207735873 | -0.066425498 | 0.151799713 |
| NOD1    | salmon | -0.057369608 | 0.215914667 | -0.090606581 | 0.050370534 |
| NOS1AP  | salmon | 0.051506794  | 0.266643388 | 0.024970418  | 0.590402337 |
| NOXA1   | salmon | 0.159773808  | 0.000528701 | 0.154620901  | 0.000800521 |
| NPC2    | salmon | 0.012658897  | 0.784977078 | 0.032899255  | 0.478172087 |
| NT5C    | salmon | 0.046449387  | 0.316522156 | 0.038667664  | 0.404456995 |
| OTULIN  | salmon | -0.086086271 | 0.063054596 | -0.069076405 | 0.136083869 |
| PCDHAC  | salmon | -0.049450889 | 0.286228688 | -0.025783392 | 0.578359225 |
| PCDHGA  | salmon | -0.193824056 | 2.47E-05    | -0.194695591 | 2.27E-05    |
| PCDHGB  | salmon | -0.111917661 | 0.015533928 | -0.103729006 | 0.024984303 |
| PCDHGC  | salmon | 0.094254841  | 0.041756378 | 0.092294575  | 0.046216141 |
| PCLO    | salmon | -0.003266364 | 0.943877096 | -0.001363857 | 0.97655017  |
| PCNX    | salmon | -0.102421393 | 0.026881343 | -0.128431722 | 0.005444023 |
| PCSK7   | salmon | 0.02112339   | 0.648887834 | 0.023206633  | 0.616918104 |
| PDIA3   | salmon | 0.176696609  | 0.00012381  | 0.174593214  | 0.000149412 |
| PDZD2   | salmon | -0.170075845 | 0.000222099 | -0.20548216  | 7.59E-06    |
| PEAK1   | salmon | -0.051480488 | 0.266888039 | -0.061806375 | 0.182419407 |
| PEBP1   | salmon | 0.182075682  | 7.58E-05    | 0.189216961  | 3.87E-05    |
| PER2    | salmon | 0.067411647  | 0.145799735 | 0.062898748  | 0.17479564  |
| PFDN2   | salmon | 0.161934195  | 0.000442638 | 0.158327414  | 0.000594747 |
| PGLS    | salmon | 0.045200098  | 0.329727528 | 0.061870426  | 0.181965715 |
| PHC3    | salmon | -0.212521058 | 3.60E-06    | -0.21209199  | 3.77E-06    |
| PHLPP2  | salmon | -0.097181348 | 0.035777249 | -0.096355978 | 0.037384927 |
| PLEKHM  | salmon | -0.154557489 | 0.000804555 | -0.156879967 | 0.000668436 |
| PMF1-BG | salmon | -0.079948004 | 0.08437904  | -0.09449018  | 0.041246229 |
| POMK    | salmon | 0.091957309  | 0.047022394 | 0.077335223  | 0.095067821 |
| PPARA   | salmon | -0.016541496 | 0.72144283  | -0.031943974 | 0.491049299 |
| PPIB    | salmon | 0.264230667  | 6.71E-09    | 0.260370812  | 1.13E-08    |
| PRDX5   | salmon | 0.010708221  | 0.817475574 | 0.029596176  | 0.523470754 |
| PRKCE   | salmon | -0.279589722 | 7.81E-10    | -0.280873677 | 6.48E-10    |
| PRR13   | salmon | 0.053610278  | 0.24757698  | 0.064696139  | 0.162771369 |
| PRRC2C  | salmon | 0.053999328  | 0.244157496 | 0.022312919  | 0.630549269 |
| PSMB4   | salmon | 0.070687637  | 0.127162465 | 0.088613703  | 0.055672285 |
| PSMD4   | salmon | 0.041477348  | 0.371152929 | 0.054525752  | 0.23958343  |
| PTPN14  | salmon | -0.158495297 | 0.000586706 | -0.168223996 | 0.000260546 |
| PTRHD1  | salmon | 0.016789323  | 0.717446567 | 0.012386286  | 0.789497795 |
| RAB13   | salmon | 0.0870102    | 0.060267469 | 0.079301305  | 0.086929895 |
| RAB24   | salmon | -0.031579914 | 0.496005274 | -0.041353568 | 0.372583426 |
| RAD54L2 | salmon | 0.004158224  | 0.928589557 | -0.012429259 | 0.7887847   |
| RALGAP  | salmon | 0.19749888   | 1.72E-05    | 0.188370021  | 4.19E-05    |
| RBM33   | salmon | -0.131873559 | 0.004308412 | -0.154467195 | 0.000810332 |
| REL     | salmon | 0.005705569  | 0.902131683 | -0.001759237 | 0.969755    |
| RELL1   | salmon | 0.090170972  | 0.051491887 | 0.09824484   | 0.033792731 |
| RHOC    | salmon | 0.270302633  | 2.91E-09    | 0.28401333   | 4.10E-10    |
| RING1   | salmon | -0.147854851 | 0.001354216 | -0.152138945 | 0.000973213 |

|          |        |              |             |              |             |
|----------|--------|--------------|-------------|--------------|-------------|
| RNF152   | salmon | -0.128073968 | 0.005576313 | -0.127897928 | 0.005642464 |
| RNF169   | salmon | -0.02197134  | 0.635792738 | -0.048066125 | 0.299953451 |
| RNF25    | salmon | -0.064558468 | 0.163669776 | -0.045931605 | 0.321952707 |
| RP11-101 | salmon | 0.099411624  | 0.031724165 | 0.091879957  | 0.047208962 |
| RP11-449 | salmon | -0.069498011 | 0.133704184 | -0.077633455 | 0.093795635 |
| RP11-849 | salmon | -0.014017524 | 0.762557321 | -0.028250508 | 0.542534986 |
| RPP25L   | salmon | 0.099770635  | 0.031109866 | 0.121051726  | 0.008829784 |
| RPS16    | salmon | -0.069659987 | 0.132798521 | -0.068222235 | 0.141004841 |
| RTEL1    | salmon | -0.077795124 | 0.093111707 | -0.107966375 | 0.01960904  |
| SAMD12   | salmon | -0.199524639 | 1.40E-05    | -0.221415728 | 1.35E-06    |
| SAT2     | salmon | 0.261843951  | 9.25E-09    | 0.253553601  | 2.77E-08    |
| SCNM1    | salmon | -0.065197441 | 0.159531292 | -0.054728202 | 0.237840481 |
| SCRN2    | salmon | 0.138406993  | 0.002722724 | 0.134987305  | 0.003470437 |
| SEPW1    | salmon | 0.132605544  | 0.004096452 | 0.184855945  | 5.85E-05    |
| SH3BGR1  | salmon | 0.1712068    | 0.000201302 | 0.218711496  | 1.83E-06    |
| SHPRH    | salmon | -0.102734615 | 0.026415986 | -0.121058154 | 0.008826159 |
| SHROOM   | salmon | -0.194675726 | 2.27E-05    | -0.221882819 | 1.28E-06    |
| SIK2     | salmon | 0.023246969  | 0.616305928 | -0.001832386 | 0.96849805  |
| SIK3     | salmon | -0.074465777 | 0.108024018 | -0.093162504 | 0.044194501 |
| SLC35E2  | salmon | 0.045345525  | 0.328172278 | 0.04847716   | 0.295834684 |
| SLIT2    | salmon | -0.164804602 | 0.000348363 | -0.148550139 | 0.001284267 |
| SOX6     | salmon | 0.035485601  | 0.44425001  | 0.050943919  | 0.271911803 |
| SPAG7    | salmon | 0.0414244    | 0.371764419 | 0.043630937  | 0.346810574 |
| SPIRE1   | salmon | -0.259693761 | 1.23E-08    | -0.259454965 | 1.27E-08    |
| SRGAP1   | salmon | -0.128503908 | 0.005417675 | -0.126572494 | 0.006163613 |
| SRGAP2I  | salmon | -0.108888874 | 0.018582361 | -0.156406925 | 0.000694297 |
| SSBP4    | salmon | -0.10014757  | 0.030475876 | -0.078134518 | 0.091688902 |
| STX8     | salmon | 0.202137685  | 1.07E-05    | 0.20634609   | 6.93E-06    |
| SWSAP1   | salmon | -0.14496279  | 0.001684393 | -0.1134552   | 0.014161425 |
| SYDE2    | salmon | -0.268767315 | 3.60E-09    | -0.284324561 | 3.91E-10    |
| SYNE2    | salmon | -0.024699153 | 0.594446218 | -0.040997411 | 0.376718401 |
| SYNGAP   | salmon | -0.27306398  | 1.98E-09    | -0.294472532 | 8.53E-11    |
| SYNJ2    | salmon | 0.003496603  | 0.939928317 | 0.006926931  | 0.881322542 |
| SZT2     | salmon | -0.220273369 | 1.54E-06    | -0.231005561 | 4.49E-07    |
| TADA3    | salmon | 0.162643253  | 0.000417362 | 0.164521713  | 0.000356746 |
| TANC1    | salmon | 0.005678965  | 0.902585749 | -0.01070627  | 0.817508245 |
| TANC2    | salmon | -0.368607961 | 1.78E-16    | -0.392924148 | 1.09E-18    |
| TBC1D9   | salmon | -0.029758159 | 0.521199241 | -0.023124495 | 0.618165504 |
| TCP11L1  | salmon | -0.015739773 | 0.73442229  | -0.037332813 | 0.420884645 |
| TCP11L2  | salmon | -0.079590497 | 0.085781633 | -0.07713202  | 0.095942498 |
| TEP1     | salmon | 0.242687132  | 1.10E-07    | 0.245244549  | 7.97E-08    |
| TET1     | salmon | -0.053895246 | 0.245069049 | -0.075002731 | 0.10549898  |
| THAP3    | salmon | 0.025843624  | 0.577471558 | 0.024302431  | 0.600382953 |
| THAP7    | salmon | 0.094366145  | 0.041514443 | 0.081145481  | 0.079815273 |
| TMEM14   | salmon | 0.200049912  | 1.33E-05    | 0.210124315  | 4.65E-06    |

|                |              |             |              |             |
|----------------|--------------|-------------|--------------|-------------|
| TMEM25 salmon  | 0.180305625  | 8.92E-05    | 0.166399241  | 0.000304443 |
| TMPPE salmon   | 0.004343805  | 0.925411592 | 0.02642312   | 0.5689642   |
| TNRC6B salmon  | -0.04032743  | 0.38457298  | -0.045538298 | 0.326118031 |
| TRAPPC1salmon  | 0.184711118  | 5.93E-05    | 0.20955255   | 4.94E-06    |
| TRAPPC6salmon  | 0.097821213  | 0.034571699 | 0.10526375   | 0.022906157 |
| TRIO salmon    | -0.215570678 | 2.58E-06    | -0.214728487 | 2.83E-06    |
| TRMT112salmon  | -0.050306944 | 0.277958948 | -0.046572371 | 0.315241146 |
| TTC28 salmon   | 0.025015211  | 0.589735806 | 0.022718628  | 0.624345367 |
| TULP4 salmon   | 0.091167353  | 0.048957086 | 0.077638349  | 0.093774871 |
| UBXN1 salmon   | -0.080483029 | 0.082314616 | -0.086026529 | 0.063238407 |
| USE1 salmon    | -0.192104569 | 2.92E-05    | -0.192881712 | 2.71E-05    |
| USP24 salmon   | -0.096179066 | 0.037737386 | -0.123342365 | 0.007618983 |
| USP31 salmon   | -0.221934081 | 1.27E-06    | -0.232306392 | 3.85E-07    |
| USP34 salmon   | -0.045042267 | 0.331420798 | -0.077354444 | 0.094985415 |
| USP37 salmon   | 0.036491514  | 0.431435866 | 0.015343794  | 0.74086126  |
| VPS13B salmon  | -0.099000226 | 0.032440821 | -0.128362183 | 0.005469514 |
| WDR7 salmon    | 0.097853502  | 0.034511792 | 0.095679731  | 0.038747433 |
| ZBED6 salmon   | 0.067277229  | 0.146606754 | 0.04245869   | 0.359932371 |
| ZC3HAV1salmon  | -0.021737827 | 0.639387855 | -0.021936432 | 0.63632964  |
| ZCCHC11salmon  | -0.12627126  | 0.006287921 | -0.154987801 | 0.000777544 |
| ZFHX3 salmon   | 0.184858249  | 5.85E-05    | 0.186536415  | 4.99E-05    |
| ZFYVE26salmon  | -0.005365825 | 0.907932688 | -0.01430405  | 0.757853682 |
| ZHX3 salmon    | -0.13780104  | 0.002843455 | -0.155400665 | 0.000752419 |
| ZMAT5 salmon   | 0.090468015  | 0.050725    | 0.06927274   | 0.134971667 |
| ZNF221 salmon  | 0.066713725  | 0.150027002 | 0.056521017  | 0.22279452  |
| ZNF236 salmon  | 0.041748513  | 0.368031034 | 0.020344374  | 0.661014592 |
| ZNF264 salmon  | 0.04691248   | 0.311716235 | 0.052941866  | 0.253529605 |
| ZNF275 salmon  | -0.142321038 | 0.002048912 | -0.148520839 | 0.001287146 |
| ZNF407 salmon  | -0.091051037 | 0.049247507 | -0.106979175 | 0.02076209  |
| ZNF417 salmon  | -0.059940017 | 0.196008935 | -0.069866197 | 0.131652386 |
| ZNF460 salmon  | -0.086730426 | 0.06110048  | -0.081906621 | 0.077019872 |
| ZNF462 salmon  | -0.111411741 | 0.016010381 | -0.147381581 | 0.001403815 |
| ZNF490 salmon  | -0.007007921 | 0.879945393 | -0.000604629 | 0.989602957 |
| ZNF543 salmon  | -0.017483129 | 0.70630003  | -0.030286243 | 0.513829124 |
| ZNF551 salmon  | -0.081808252 | 0.077376611 | -0.096274228 | 0.037547447 |
| ZNF557 salmon  | 0.116457413  | 0.011785717 | 0.118534568  | 0.010355316 |
| ZNF587 salmon  | 0.014484857  | 0.754890132 | 0.020345067  | 0.661003773 |
| ZNF611 salmon  | -0.030531772 | 0.510420927 | -0.046047335 | 0.32073369  |
| ZNF625 salmon  | 0.003605032  | 0.93806918  | 0.00028736   | 0.995058527 |
| ZNF699 salmon  | -0.005851046 | 0.89964929  | -0.032121096 | 0.488647754 |
| ZNF70 salmon   | -0.092418555 | 0.045922691 | -0.089793059 | 0.052481519 |
| ZNF724P salmon | 0.012296074  | 0.790995368 | 0.011198104  | 0.809282227 |
| ZNF727 salmon  | -0.36920879  | 1.58E-16    | -0.372829779 | 7.57E-17    |
| ZNF749 salmon  | 0.070839182  | 0.126347266 | 0.059996739  | 0.195585323 |
| ZNF765 salmon  | 0.003848246  | 0.933900256 | 0.000583915  | 0.989959129 |

|          |         |              |             |              |             |
|----------|---------|--------------|-------------|--------------|-------------|
| ZNF778   | salmon  | 0.009021917  | 0.845826099 | 0.031100164  | 0.502576534 |
| ZNF8     | salmon  | -0.072992427 | 0.115197777 | -0.075578947 | 0.102841476 |
| ZNF805   | salmon  | -0.050542846 | 0.275708848 | -0.056736885 | 0.221029741 |
| ZNF808   | salmon  | -0.012663276 | 0.784904507 | 0.00166419   | 0.971388341 |
| ZNF813   | salmon  | 0.051980186  | 0.262267049 | 0.039080071  | 0.39945998  |
| ZNF827   | salmon  | 0.008428287  | 0.855855892 | -0.02524971  | 0.586252042 |
| ZNF845   | salmon  | 0.013589967  | 0.769592365 | 0.006988213  | 0.88028046  |
| ZNRD1    | salmon  | -0.065437918 | 0.157994381 | -0.048107517 | 0.299536965 |
| ZNRF3    | salmon  | 0.056416461  | 0.223652903 | 0.024743347  | 0.59378653  |
| ZSCAN2C  | salmon  | -0.150496826 | 0.001105721 | -0.180160447 | 9.04E-05    |
| ACSL6    | sienna3 | -0.130780073 | 0.004643547 | -0.11225489  | 0.015223291 |
| ADTRP    | sienna3 | -0.190031709 | 3.58E-05    | -0.177995778 | 0.000110121 |
| AGTR1    | sienna3 | -0.190385869 | 3.46E-05    | -0.193510265 | 2.55E-05    |
| AICDA    | sienna3 | -0.097557837 | 0.035063664 | -0.096424645 | 0.037248879 |
| ALOX12I  | sienna3 | -0.176253225 | 0.000128837 | -0.174869361 | 0.000145788 |
| ANKRD1   | sienna3 | -0.12856927  | 0.005393917 | -0.112882636 | 0.014659539 |
| APOBEC   | sienna3 | -0.041161613 | 0.374808532 | -0.055913808 | 0.227812463 |
| ARPP21   | sienna3 | -0.104980767 | 0.023277679 | -0.10000717  | 0.030710718 |
| ASMT     | sienna3 | -0.05184886  | 0.263476122 | -0.040419651 | 0.383485928 |
| ATP8A2   | sienna3 | -0.318521892 | 1.80E-12    | -0.321145698 | 1.16E-12    |
| AVIL     | sienna3 | -0.176746962 | 0.000123251 | -0.188206987 | 4.26E-05    |
| B4GALN   | sienna3 | 0.059671549  | 0.19802303  | 0.055381467  | 0.232277299 |
| BSND     | sienna3 | -0.174964888 | 0.000144554 | -0.172021216 | 0.000187471 |
| C11orf53 | sienna3 | -0.034196847 | 0.460979293 | -0.037019321 | 0.424798574 |
| C1orf141 | sienna3 | -0.098662074 | 0.033040191 | -0.098002565 | 0.034236376 |
| C1orf167 | sienna3 | -0.087922873 | 0.057615036 | -0.093352333 | 0.043762396 |
| C5orf58  | sienna3 | -0.127333148 | 0.005859482 | -0.116302625 | 0.011898992 |
| CALHM1   | sienna3 | -0.053564897 | 0.247978012 | -0.070414163 | 0.128643872 |
| CCDC177  | sienna3 | -0.122044353 | 0.008285495 | -0.107175874 | 0.020527756 |
| CERS3    | sienna3 | -0.033524772 | 0.469840829 | -0.050142673 | 0.279533143 |
| CHRNA3   | sienna3 | -0.059646052 | 0.198215095 | -0.067100467 | 0.147673167 |
| CNDP1    | sienna3 | -0.100263433 | 0.030283235 | -0.108698067 | 0.018790784 |
| CNGA3    | sienna3 | -0.083423872 | 0.071684858 | -0.08241312  | 0.075204143 |
| CNIH3    | sienna3 | 0.012398306  | 0.789298327 | 0.002835387  | 0.951272287 |
| CPB1     | sienna3 | -0.073751213 | 0.111457943 | -0.071940708 | 0.120543213 |
| CRHR2    | sienna3 | -0.175195976 | 0.000141609 | -0.176236763 | 0.000129028 |
| CSMD1    | sienna3 | -0.135660601 | 0.003309938 | -0.136649104 | 0.003086492 |
| CTD-254  | sienna3 | 0.023188702  | 0.617190317 | 0.026681176  | 0.565195092 |
| DGKI     | sienna3 | -0.091136775 | 0.049033295 | -0.078780165 | 0.089030332 |
| DLG2     | sienna3 | 0.015901963  | 0.731790268 | -0.004543716 | 0.921989558 |
| DNTT     | sienna3 | 0.018737866  | 0.686301713 | -0.001184713 | 0.97962962  |
| FAM150A  | sienna3 | -0.07523131  | 0.104438346 | -0.068672852 | 0.138392059 |
| FKSG62   | sienna3 | -0.139042684 | 0.002601101 | -0.149215826 | 0.001220425 |
| FOXE3    | sienna3 | -0.096617207 | 0.036869596 | -0.088014087 | 0.057355348 |
| GFI1B    | sienna3 | -0.028126684 | 0.544306396 | -0.023022143 | 0.619721436 |

|        |         |              |             |              |             |
|--------|---------|--------------|-------------|--------------|-------------|
| GJC3   | sienna3 | -0.265659679 | 5.52E-09    | -0.260710627 | 1.08E-08    |
| GNG13  | sienna3 | -0.06748505  | 0.145360476 | -0.083008275 | 0.07311527  |
| GPR12  | sienna3 | -0.165288124 | 0.000334458 | -0.155385823 | 0.000753309 |
| GPR26  | sienna3 | -0.145631139 | 0.001602123 | -0.144742922 | 0.001712293 |
| HEPACA | sienna3 | 0.016057244  | 0.729273311 | -0.003030434 | 0.947924883 |
| HHIPL2 | sienna3 | -0.016166316 | 0.727507101 | -0.009186348 | 0.843052244 |
| HOXC5  | sienna3 | -0.136309179 | 0.003161735 | -0.149396229 | 0.001203635 |
| HPCA   | sienna3 | -0.250571028 | 4.06E-08    | -0.252148123 | 3.32E-08    |
| HTR3C  | sienna3 | -0.04537216  | 0.327887949 | -0.061266347 | 0.186277873 |
| HTR3E  | sienna3 | -0.060094816 | 0.19485443  | -0.062159252 | 0.179930235 |
| IGSF21 | sienna3 | -0.161953923 | 0.000441916 | -0.151835605 | 0.000996529 |
| IL23R  | sienna3 | -0.072474088 | 0.117808578 | -0.056580308 | 0.222308807 |
| IL25   | sienna3 | -0.09260975  | 0.045473217 | -0.094957156 | 0.040249524 |
| IL37   | sienna3 | -0.00620344  | 0.893640211 | -0.000660058 | 0.988649873 |
| IRX1   | sienna3 | -0.141375738 | 0.002195972 | -0.139720722 | 0.002476851 |
| KCNB2  | sienna3 | -0.127358413 | 0.005849616 | -0.135084559 | 0.003446826 |
| KCNH1  | sienna3 | -0.114224249 | 0.01351583  | -0.118323803 | 0.010493083 |
| KCNQ5  | sienna3 | -0.257287979 | 1.70E-08    | -0.24551624  | 7.71E-08    |
| KRT2   | sienna3 | 0.034048179  | 0.462931468 | 0.042497673  | 0.359491071 |
| LANCL3 | sienna3 | -0.033999943 | 0.463565854 | -0.03963192  | 0.392831592 |
| LIPJ   | sienna3 | -0.135563887 | 0.00333257  | -0.121242544 | 0.008722744 |
| LRMP   | sienna3 | -0.10829381  | 0.019239109 | -0.090060609 | 0.051779269 |
| MAGEA2 | sienna3 | 0.003229363  | 0.944511823 | -0.015109289 | 0.7446831   |
| MAGEA2 | sienna3 | -0.048695724 | 0.293660011 | -0.053868105 | 0.245307146 |
| MEIOB  | sienna3 | -0.170316888 | 0.000217505 | -0.168604406 | 0.000252173 |
| MORC1  | sienna3 | -0.061224694 | 0.186577955 | -0.05114377  | 0.270033157 |
| NTSR2  | sienna3 | -0.158784012 | 0.000573113 | -0.160075749 | 0.000515803 |
| NXF5   | sienna3 | -0.055992213 | 0.227160054 | -0.058710409 | 0.205357352 |
| OLIG2  | sienna3 | -0.046695501 | 0.313962014 | -0.051765193 | 0.264248412 |
| PIK3CG | sienna3 | -0.099413424 | 0.031721058 | -0.076166534 | 0.100186462 |
| PIRT   | sienna3 | -0.04641407  | 0.31689065  | -0.058860397 | 0.204200032 |
| PNMA5  | sienna3 | -0.142519548 | 0.002019198 | -0.148898062 | 0.001250526 |
| PNPLA1 | sienna3 | -0.092293538 | 0.046218601 | -0.081226389 | 0.079514274 |
| POU2F3 | sienna3 | -0.230091667 | 4.99E-07    | -0.242693826 | 1.10E-07    |
| POU3F1 | sienna3 | 0.035390605  | 0.445471236 | 0.012347865  | 0.790135517 |
| POU4F1 | sienna3 | 0.103800224  | 0.024884386 | 0.094236001  | 0.041797449 |
| PPEF1  | sienna3 | -0.004402016 | 0.92441499  | -0.023697275 | 0.609489872 |
| PSG5   | sienna3 | -0.103671074 | 0.025065835 | -0.108887161 | 0.018584223 |
| PSG9   | sienna3 | -0.044469845 | 0.337608891 | -0.044068304 | 0.341993568 |
| RBFOX1 | sienna3 | -0.152185538 | 0.000969676 | -0.16278875  | 0.000412344 |
| RGS13  | sienna3 | -0.081671593 | 0.077874432 | -0.07266533  | 0.11683998  |
| RGS21  | sienna3 | -0.040986763 | 0.376842463 | -0.03693012  | 0.425916097 |
| RLN3   | sienna3 | -0.121800638 | 0.008416286 | -0.120572166 | 0.009103973 |
| SH2D6  | sienna3 | -0.021279836 | 0.646463486 | -0.022767137 | 0.623605359 |
| SH2D7  | sienna3 | -0.07532206  | 0.104019606 | -0.088325243 | 0.056476773 |

|         |         |              |             |              |             |
|---------|---------|--------------|-------------|--------------|-------------|
| SHCBP1I | sienna3 | -0.026381385 | 0.569574901 | -0.016407559 | 0.723605755 |
| SLC22A7 | sienna3 | -0.092249911 | 0.046322242 | -0.090959622 | 0.049476763 |
| SLC4A10 | sienna3 | -0.063280917 | 0.172185208 | -0.02750033  | 0.553310585 |
| SLC6A17 | sienna3 | -0.07883325  | 0.088814528 | -0.073872554 | 0.110868846 |
| SPANXC  | sienna3 | -0.02056435  | 0.65758111  | 0.007267937  | 0.875526525 |
| SPANXD  | sienna3 | -0.033429125 | 0.471109549 | -0.005112787 | 0.912256404 |
| SPTB    | sienna3 | -0.166400188 | 0.000304418 | -0.175278728 | 0.000140568 |
| SSX4B   | sienna3 | -0.096430364 | 0.037237566 | -0.103108948 | 0.025868953 |
| ST18    | sienna3 | -0.071066963 | 0.125129608 | -0.064833161 | 0.161880874 |
| TDRD1   | sienna3 | 2.22E-05     | 0.999618096 | 0.002065681  | 0.964489775 |
| TEX11   | sienna3 | -0.107367794 | 0.020301335 | -0.100571862 | 0.029775499 |
| TFAP2B  | sienna3 | 0.139323788  | 0.002548916 | 0.123022524  | 0.00777861  |
| TMEM17  | sienna3 | -0.041950195 | 0.365719688 | -0.044390813 | 0.338469034 |
| TMEM24  | sienna3 | -0.035578679 | 0.443055294 | -0.019277352 | 0.67776912  |
| TRPM5   | sienna3 | -0.17881876  | 0.0001022   | -0.178898022 | 0.000101466 |
| USP41   | sienna3 | 0.013351732  | 0.773520553 | -0.015446882 | 0.739183194 |
| VCX2    | sienna3 | -0.076317694 | 0.099512332 | -0.074930166 | 0.105837463 |
| ZFP42   | sienna3 | -0.188825575 | 4.01E-05    | -0.191619136 | 3.07E-05    |
| ZMAT4   | sienna3 | -0.176482078 | 0.000126219 | -0.188522056 | 4.13E-05    |
| ZNF560  | sienna3 | -0.097963327 | 0.034308691 | -0.103383606 | 0.025473815 |
| ZP4     | sienna3 | -0.01569481  | 0.735152495 | -0.022396468 | 0.629269538 |
| AAMDC   | skyblue | -0.085557141 | 0.06469803  | -0.078126165 | 0.091723709 |
| AC01568 | skyblue | 0.027078765  | 0.559411493 | 0.055809441  | 0.228682974 |
| ADPRM   | skyblue | 0.144583558  | 0.00173278  | 0.126534026  | 0.006179364 |
| ALKBH2  | skyblue | -0.022108342 | 0.633687466 | -0.053440563 | 0.249079079 |
| C11orf1 | skyblue | 0.154390972  | 0.000815239 | 0.141416353  | 0.00218946  |
| C18orf8 | skyblue | -0.022834052 | 0.622585175 | -0.019797035 | 0.669588501 |
| C6orf48 | skyblue | -0.191250981 | 3.18E-05    | -0.221782943 | 1.30E-06    |
| CCNB1IP | skyblue | -0.037845196 | 0.414533216 | -0.064897427 | 0.161464482 |
| CLEC16A | skyblue | -0.038998396 | 0.400446662 | -0.024023777 | 0.604568765 |
| COMMD1  | skyblue | -0.056012968 | 0.226987573 | -0.058692931 | 0.205492523 |
| CUEDC2  | skyblue | 0.168919575  | 0.000245428 | 0.159770061  | 0.000528863 |
| DEXI    | skyblue | -0.136380784 | 0.003145748 | -0.146276214 | 0.00152623  |
| DNAJC5  | skyblue | -0.030906873 | 0.505237004 | -0.003100205 | 0.946727705 |
| DYRK4   | skyblue | 0.037669643  | 0.416702966 | 0.035283341  | 0.446852466 |
| EEF1B2  | skyblue | 0.097534557  | 0.035107434 | 0.067248452  | 0.146779965 |
| EEF1D   | skyblue | -0.160519493 | 0.000497377 | -0.203376833 | 9.44E-06    |
| EIF1    | skyblue | 0.093983994  | 0.04235008  | 0.091305635  | 0.048613688 |
| EIF3D   | skyblue | 0.040076184  | 0.387544028 | 0.020597675  | 0.657061578 |
| EIF3F   | skyblue | 0.104474676  | 0.023955127 | 0.109892002  | 0.017519458 |
| GLTSCR2 | skyblue | 0.080675568  | 0.081581757 | 0.054965694  | 0.235807259 |
| GNB2L1  | skyblue | 0.103047833  | 0.025957591 | 0.095849463  | 0.038401563 |
| HNRNPA  | skyblue | 0.10740764   | 0.020254598 | 0.060387798  | 0.192682967 |
| HSCB    | skyblue | 0.087872481  | 0.05775892  | 0.080187042  | 0.083451597 |
| IGBP1   | skyblue | -0.021173777 | 0.648106617 | -0.032488831 | 0.483681957 |

|         |         |              |             |              |             |
|---------|---------|--------------|-------------|--------------|-------------|
| IMPDH2  | skyblue | 0.039318905  | 0.396583098 | 0.004483813  | 0.923014809 |
| LYRM4   | skyblue | -0.184883714 | 5.84E-05    | -0.194435955 | 2.33E-05    |
| MALL    | skyblue | 0.175542156  | 0.000137301 | 0.212246638  | 3.71E-06    |
| METTL12 | skyblue | -0.01975164  | 0.670301552 | -0.034270535 | 0.460013387 |
| MTIF3   | skyblue | 0.178300738  | 0.000107121 | 0.178033205  | 0.000109748 |
| NACA    | skyblue | 0.051783267  | 0.264081447 | 0.013858543  | 0.76517096  |
| NDUFAF  | skyblue | 0.090699129  | 0.050134942 | 0.074721008  | 0.106817905 |
| NPAS2   | skyblue | 0.006168926  | 0.894228492 | -0.008289671 | 0.858201322 |
| NPC1    | skyblue | -0.017612458 | 0.704229095 | -0.048377212 | 0.296832722 |
| NUDT2   | skyblue | 0.174987234  | 0.000144267 | 0.172365153  | 0.000181901 |
| PFDN5   | skyblue | -0.059236234 | 0.201320845 | -0.057891802 | 0.211757569 |
| PHB2    | skyblue | -0.019422972 | 0.675472967 | -0.033905537 | 0.464808827 |
| PLBD2   | skyblue | 0.106410526  | 0.021452661 | 0.098607341  | 0.033138087 |
| PLXNA1  | skyblue | -0.072305854 | 0.118665823 | -0.075070515 | 0.10518357  |
| POLL    | skyblue | 0.095560927  | 0.038991092 | 0.072423591  | 0.118065378 |
| POLR1D  | skyblue | 0.228878231  | 5.75E-07    | 0.206513942  | 6.81E-06    |
| POLR1E  | skyblue | -0.084746199 | 0.067284992 | -0.102229954 | 0.027169224 |
| PPARD   | skyblue | 0.134060812  | 0.003702837 | 0.131656527  | 0.004373136 |
| PQBP1   | skyblue | -0.184466853 | 6.07E-05    | -0.173960124 | 0.000158042 |
| PRAF2   | skyblue | -0.255136804 | 2.25E-08    | -0.236960735 | 2.21E-07    |
| PRR3    | skyblue | -0.212419891 | 3.64E-06    | -0.231644369 | 4.16E-07    |
| RCN1    | skyblue | 0.032754866  | 0.480106577 | -0.013961433 | 0.763479153 |
| RNF113A | skyblue | -0.024715337 | 0.594204604 | -0.006768765 | 0.884013035 |
| RPL10   | skyblue | 0.034548868  | 0.456375196 | 0.017630484  | 0.703940616 |
| RPL10A  | skyblue | 0.038363523  | 0.408165961 | 0.010681395  | 0.817924825 |
| RPL11   | skyblue | 0.0158729    | 0.732261679 | -0.009255882 | 0.841879828 |
| RPL12   | skyblue | 0.121346803  | 0.00866475  | 0.10563679   | 0.022424254 |
| RPL13   | skyblue | 0.173987504  | 0.000157659 | 0.186600346  | 4.96E-05    |
| RPL13A  | skyblue | 0.014815522  | 0.749479592 | -0.004674572 | 0.91975036  |
| RPL14   | skyblue | 0.046127895  | 0.31988691  | 0.016360437  | 0.724367247 |
| RPL15   | skyblue | 0.094431637  | 0.04137264  | 0.061346872  | 0.185698738 |
| RPL17   | skyblue | -0.078099606 | 0.091834448 | -0.112314677 | 0.015168791 |
| RPL18   | skyblue | 0.0916295    | 0.04781731  | 0.090433282  | 0.050814178 |
| RPL18A  | skyblue | -0.101922373 | 0.027637313 | -0.097118735 | 0.035897114 |
| RPL19   | skyblue | 0.06909771   | 0.135962842 | 0.055083632  | 0.234802135 |
| RPL21   | skyblue | -0.080761331 | 0.081257021 | -0.098206847 | 0.033861975 |
| RPL22   | skyblue | -0.114502709 | 0.013288544 | -0.158187634 | 0.00060152  |
| RPL22L1 | skyblue | 0.266330344  | 5.04E-09    | 0.251984302  | 3.39E-08    |
| RPL23   | skyblue | 0.048527163  | 0.295336216 | 0.027764767  | 0.549500295 |
| RPL23A  | skyblue | 0.045821465  | 0.323115646 | 0.020566642  | 0.657545375 |
| RPL24   | skyblue | -0.030501499 | 0.510840513 | -0.050567239 | 0.275476894 |
| RPL26   | skyblue | 0.078929947  | 0.088422511 | 0.044628546  | 0.335885912 |
| RPL27   | skyblue | 0.145046068  | 0.001673935 | 0.143134529  | 0.001929629 |
| RPL27A  | skyblue | 0.036957708  | 0.425570291 | 0.029655701  | 0.522635429 |
| RPL28   | skyblue | 0.08510878   | 0.066118032 | 0.096161419  | 0.037772697 |

|                 |         |              |             |              |             |
|-----------------|---------|--------------|-------------|--------------|-------------|
| RPL29           | skyblue | 0.19469341   | 2.27E-05    | 0.187566852  | 4.53E-05    |
| RPL3            | skyblue | 0.158645611  | 0.000579592 | 0.130609425  | 0.00469792  |
| RPL30           | skyblue | -0.105596951 | 0.022475297 | -0.136495062 | 0.003120385 |
| RPL31           | skyblue | -0.032402809 | 0.484841124 | -0.054583174 | 0.239088158 |
| RPL32           | skyblue | 0.023570265  | 0.611408975 | 0.012717769  | 0.784001741 |
| RPL34           | skyblue | 0.082112718  | 0.07627679  | 0.077657763  | 0.093692547 |
| RPL35           | skyblue | 0.054109796  | 0.243192619 | 0.049454434  | 0.286194103 |
| RPL35A          | skyblue | -0.181228529 | 8.20E-05    | -0.193654555 | 2.51E-05    |
| RPL36           | skyblue | 0.183819696  | 6.45E-05    | 0.197008219  | 1.80E-05    |
| RPL36A          | skyblue | -0.089903062 | 0.052191833 | -0.100376332 | 0.030096528 |
| RPL36A-lskyblue |         | -0.140022291 | 0.002423348 | -0.119758083 | 0.009586809 |
| RPL36ALskyblue  |         | 0.093037545  | 0.044480896 | 0.104813983  | 0.02349908  |
| RPL37           | skyblue | -0.073221588 | 0.114058084 | -0.102042072 | 0.027454333 |
| RPL37A          | skyblue | -0.030779143 | 0.506999129 | -0.035581077 | 0.443024541 |
| RPL38           | skyblue | -0.049523611 | 0.285519796 | -0.058021041 | 0.210737685 |
| RPL39           | skyblue | -0.108521585 | 0.018985372 | -0.136581342 | 0.00310136  |
| RPL4            | skyblue | 0.088613984  | 0.055671505 | 0.05630449   | 0.224574763 |
| RPL41           | skyblue | -0.059795118 | 0.197094131 | -0.089598624 | 0.052996823 |
| RPL5            | skyblue | -0.080778807 | 0.081190976 | -0.124770115 | 0.006941544 |
| RPL6            | skyblue | 0.011347163  | 0.806793278 | -0.026635056 | 0.565867832 |
| RPL7            | skyblue | -0.099823901 | 0.031019595 | -0.152917484 | 0.000915656 |
| RPL7A           | skyblue | 0.211771212  | 3.90E-06    | 0.194513     | 2.31E-05    |
| RPL9            | skyblue | -0.01640788  | 0.723600564 | -0.036239163 | 0.434630296 |
| RPLP0           | skyblue | 0.176170384  | 0.000129797 | 0.15833839   | 0.000594218 |
| RPLP1           | skyblue | 0.124079052  | 0.007262398 | 0.120979216  | 0.008870764 |
| RPLP2           | skyblue | 0.055879271  | 0.228100271 | 0.068627353  | 0.138654175 |
| RPS10           | skyblue | -0.109478906 | 0.017950558 | -0.120227597 | 0.009305633 |
| RPS11           | skyblue | 0.057484329  | 0.214996411 | 0.059933797  | 0.196055428 |
| RPS12           | skyblue | -0.080443671 | 0.082465076 | -0.089690333 | 0.052753246 |
| RPS13           | skyblue | 0.061231301  | 0.186530332 | 0.052360038  | 0.258791408 |
| RPS14           | skyblue | 0.086180646  | 0.062765118 | 0.087130574  | 0.059911961 |
| RPS15A          | skyblue | -0.070198143 | 0.129823467 | -0.084694015 | 0.06745433  |
| RPS17           | skyblue | 0.021611474  | 0.641336684 | -0.007922791 | 0.864415007 |
| RPS18           | skyblue | -0.030924598 | 0.50499273  | -0.041318501 | 0.37298931  |
| RPS19           | skyblue | -0.007529724 | 0.871081475 | -0.010380599 | 0.822966246 |
| RPS2            | skyblue | 0.22440973   | 9.62E-07    | 0.23139958   | 4.28E-07    |
| RPS20           | skyblue | -0.119576021 | 0.009697855 | -0.143853825 | 0.001829489 |
| RPS23           | skyblue | -0.034853529 | 0.452411412 | -0.075402879 | 0.103647807 |
| RPS24           | skyblue | -0.022169398 | 0.632750178 | -0.056729788 | 0.221087605 |
| RPS25           | skyblue | -0.032307734 | 0.486124031 | -0.062760739 | 0.175745518 |
| RPS26           | skyblue | 0.028800103  | 0.534707311 | 0.031603274  | 0.495686476 |
| RPS27           | skyblue | -0.032602959 | 0.482146379 | -0.056600179 | 0.222146188 |
| RPS27A          | skyblue | -0.173415239 | 0.000165842 | -0.17111268  | 0.00020296  |
| RPS28           | skyblue | 0.18785345   | 4.41E-05    | 0.208550217  | 5.50E-06    |
| RPS29           | skyblue | -0.016879575 | 0.715993139 | -0.016113973 | 0.728354521 |



|         |          |              |             |              |             |
|---------|----------|--------------|-------------|--------------|-------------|
| RPS3    | skyblue  | 0.016114428  | 0.728347156 | -0.019133591 | 0.680038901 |
| RPS3A   | skyblue  | -0.028519982 | 0.538689859 | -0.054927889 | 0.236130095 |
| RPS4X   | skyblue  | 0.14644697   | 0.001506701 | 0.121890533  | 0.008367831 |
| RPS5    | skyblue  | 0.070905239  | 0.1259932   | 0.056727365  | 0.221107365 |
| RPS6    | skyblue  | 0.067370795  | 0.146044645 | 0.048874244  | 0.291891717 |
| RPS7    | skyblue  | -0.009083468 | 0.844787546 | -0.045687068 | 0.324538392 |
| RPS8    | skyblue  | -0.016092752 | 0.728698171 | -0.035633086 | 0.442357783 |
| RPS9    | skyblue  | 0.093418625  | 0.043612336 | 0.08132723   | 0.079140411 |
| RPSA    | skyblue  | 0.107059461  | 0.020666164 | 0.112887382  | 0.014655348 |
| RSAD1   | skyblue  | 0.212642554  | 3.55E-06    | 0.172217648  | 0.000184271 |
| SLC12A7 | skyblue  | 0.001104283  | 0.981012298 | 0.008013903  | 0.862871075 |
| SLC9A1  | skyblue  | 0.258682254  | 1.41E-08    | 0.284384443  | 3.88E-10    |
| THG1L   | skyblue  | 0.037529098  | 0.418444822 | 0.020451104  | 0.659347809 |
| THYN1   | skyblue  | 0.117598912  | 0.010979394 | 0.101087916  | 0.028942284 |
| TMEM18  | skyblue  | 0.08633735   | 0.062286881 | 0.070635793  | 0.127442284 |
| TMEM18  | skyblue  | 0.137487889  | 0.002907739 | 0.135901156  | 0.00325425  |
| TOMM7   | skyblue  | -0.008786357 | 0.849803169 | 0.00244585   | 0.957960036 |
| TPT1    | skyblue  | 0.14373496   | 0.001845702 | 0.127670313  | 0.005729041 |
| UBA52   | skyblue  | -0.023845331 | 0.607256137 | -0.001469974 | 0.97472622  |
| UXT     | skyblue  | 0.022673888  | 0.625028224 | 0.043287198  | 0.350626462 |
| WDR45   | skyblue  | -0.252499587 | 3.17E-08    | -0.229810794 | 5.16E-07    |
| YBEY    | skyblue  | 0.201739411  | 1.12E-05    | 0.185923398  | 5.29E-05    |
| ZNF32   | skyblue  | 0.032782582  | 0.479734913 | 0.018716191  | 0.686645372 |
| ZNF581  | skyblue  | 0.011674531  | 0.801333874 | 0.003172288  | 0.945490955 |
| ZNF691  | skyblue  | -0.157634272 | 0.00062904  | -0.176802684 | 0.000122635 |
| ABCF3   | skyblue3 | -0.20952209  | 4.96E-06    | -0.195618592 | 2.07E-05    |
| ADCK5   | skyblue3 | 0.136930958  | 0.003025342 | 0.123832763  | 0.007379914 |
| ALG3    | skyblue3 | -0.120444421 | 0.009178278 | -0.091044712 | 0.049263339 |
| AP2M1   | skyblue3 | -0.211148035 | 4.17E-06    | -0.166890377 | 0.000291994 |
| ARHGAP  | skyblue3 | 0.013967483  | 0.763379703 | 0.006131396  | 0.894868229 |
| ATAD3A  | skyblue3 | 0.155754735  | 0.000731473 | 0.172886796  | 0.00017375  |
| BOP1    | skyblue3 | 0.042912751  | 0.354813301 | 0.045159485  | 0.330162707 |
| C8orf82 | skyblue3 | 0.015282041  | 0.741867063 | 0.022146171  | 0.633106669 |
| CA5B    | skyblue3 | 0.116946067  | 0.011434349 | 0.109567257  | 0.017857586 |
| CLUH    | skyblue3 | 0.131887071  | 0.004304412 | 0.132285409  | 0.004187965 |
| COMMD1  | skyblue3 | 0.104479904  | 0.023948043 | 0.117563444  | 0.011003694 |
| CPSF1   | skyblue3 | 0.059847049  | 0.196704701 | 0.047325574  | 0.307469877 |
| CYC1    | skyblue3 | 0.079557369  | 0.08591255  | 0.097366782  | 0.035424255 |
| CYHR1   | skyblue3 | -0.049984875 | 0.281050998 | -0.04684973  | 0.312364627 |
| DGAT1   | skyblue3 | 0.08238811   | 0.075292974 | 0.101382425  | 0.028475802 |
| DNPEP   | skyblue3 | -0.033811472 | 0.466049165 | 0.003879712  | 0.933361017 |
| ECE2    | skyblue3 | -0.057592395 | 0.214133986 | -0.036588584 | 0.430210714 |
| EIF2B5  | skyblue3 | -0.0687332   | 0.138044989 | -0.047739245 | 0.303256017 |
| EIF3B   | skyblue3 | -0.0457509   | 0.323862149 | -0.029936691 | 0.518701525 |
| ELOVL1  | skyblue3 | 0.131027325  | 0.004565774 | 0.149232409  | 0.001218873 |

|                  |              |             |              |             |
|------------------|--------------|-------------|--------------|-------------|
| EXOSC4 skyblue3  | 0.125678653  | 0.00653905  | 0.142508912  | 0.00202078  |
| FAM229A skyblue3 | 0.037113122  | 0.423625262 | 0.031938481  | 0.491123875 |
| FBRSL1 skyblue3  | -0.052595145 | 0.256656186 | -0.064025134 | 0.167185392 |
| FBXL6 skyblue3   | 0.168875078  | 0.00024637  | 0.166612201  | 0.000298985 |
| GLI4 skyblue3    | -0.01906544  | 0.681115928 | -0.039436387 | 0.395172549 |
| GPAA1 skyblue3   | 0.048752979  | 0.293092101 | 0.046080462  | 0.320385312 |
| GPR137 skyblue3  | 0.063399179  | 0.171383329 | 0.080099003  | 0.083792219 |
| GPT skyblue3     | -0.003091417 | 0.946878482 | 0.013267237  | 0.77491517  |
| GRINA skyblue3   | 0.11863251   | 0.010291845 | 0.127892315  | 0.005644584 |
| GRWD1 skyblue3   | 0.035964946  | 0.438116903 | 0.027623235  | 0.551538033 |
| HGH1 skyblue3    | 0.162644585  | 0.000417316 | 0.166438597  | 0.000303427 |
| HSF1 skyblue3    | -0.058485475 | 0.20710185  | -0.047116419 | 0.309615069 |
| IDH3B skyblue3   | -0.212296713 | 3.69E-06    | -0.199207396 | 1.44E-05    |
| IMP4 skyblue3    | 0.057541561  | 0.214539356 | 0.073699246  | 0.111710985 |
| INTS1 skyblue3   | 0.035321678  | 0.446358522 | 0.058327546  | 0.208333071 |
| IPO13 skyblue3   | 0.020531419  | 0.658094661 | 0.029591739  | 0.523533042 |
| KIFC2 skyblue3   | 0.12016444   | 0.009343024 | 0.102283782  | 0.027088013 |
| LRFN4 skyblue3   | -0.04376586  | 0.34532001  | -0.031303395 | 0.499787238 |
| LRRC14 skyblue3  | 0.003190786  | 0.94517362  | -0.015405666 | 0.739853951 |
| MAF1 skyblue3    | -0.136987966 | 0.003013108 | -0.124722839 | 0.006963083 |
| MAP3K1 skyblue3  | -0.003233244 | 0.94444523  | 0.030086098  | 0.516616039 |
| MEN1 skyblue3    | 0.056301878  | 0.224596306 | 0.028687984  | 0.53629956  |
| MFSD3 skyblue3   | 0.158405789  | 0.00059098  | 0.163782874  | 0.000379536 |
| MROH1 skyblue3   | 0.094485112  | 0.04125716  | 0.099472213  | 0.03161977  |
| MYBBP1 skyblue3  | 0.064578414  | 0.163539385 | 0.048997036  | 0.290679573 |
| NAPRT skyblue3   | 0.048666949  | 0.293945703 | 0.076865733  | 0.097098425 |
| NAT8L skyblue3   | -0.203961889 | 8.89E-06    | -0.209117277 | 5.18E-06    |
| NDUFV1 skyblue3  | -0.043764255 | 0.345337719 | -0.025590016 | 0.581213365 |
| OPLAH skyblue3   | 0.204781078  | 8.16E-06    | 0.168939149  | 0.000245015 |
| OTUB1 skyblue3   | 0.017079145  | 0.712782895 | 0.039398897  | 0.395622337 |
| POLD2 skyblue3   | 0.015024181  | 0.7460717   | 0.036082954  | 0.43661449  |
| POLR2H skyblue3  | -0.031892036 | 0.491754708 | -0.008743666 | 0.850524353 |
| PPP1R16 skyblue3 | 0.025644342  | 0.580410874 | 0.044246571  | 0.340042497 |
| PRPF19 skyblue3  | -0.007834236 | 0.865916091 | -0.033745865 | 0.466915329 |
| PUF60 skyblue3   | -0.105103117 | 0.023116414 | -0.102379641 | 0.026943903 |
| PYCRL skyblue3   | 0.12833155   | 0.005480777 | 0.142178499  | 0.002070494 |
| RANGAP skyblue3  | 0.074412557  | 0.108276859 | 0.088588372  | 0.055742548 |
| RBM38 skyblue3   | -0.271218176 | 2.56E-09    | -0.264697983 | 6.29E-09    |
| RHPN1 skyblue3   | 0.170985577  | 0.000205221 | 0.170636206  | 0.000211555 |
| RNF220 skyblue3  | -0.044353338 | 0.338877386 | -0.047173534 | 0.309028298 |
| SCRIB skyblue3   | -0.002860578 | 0.950839906 | -0.013271335 | 0.774847513 |
| SCYL1 skyblue3   | 0.002775664  | 0.952297422 | 0.01804159   | 0.697373166 |
| SHARPIN skyblue3 | 0.043135979  | 0.35231353  | 0.060392615  | 0.192647415 |
| SKIV2L skyblue3  | -0.14767029  | 0.001373364 | -0.131451845 | 0.004434981 |
| SLC19A1 skyblue3 | 0.172681801  | 0.000176911 | 0.174260261  | 0.000153894 |

|                    |              |             |              |             |
|--------------------|--------------|-------------|--------------|-------------|
| SLC39A4 skyblue3   | 0.072358195  | 0.118398597 | 0.085300487  | 0.065507778 |
| SLC45A4 skyblue3   | -0.210083314 | 4.67E-06    | -0.208697685 | 5.41E-06    |
| SLC52A2 skyblue3   | 0.14353032   | 0.001873923 | 0.154598807  | 0.000801925 |
| SMYD5 skyblue3     | -0.111518126 | 0.015909143 | -0.117498112 | 0.011048576 |
| TBRG4 skyblue3     | -0.102269377 | 0.027109726 | -0.078626191 | 0.089658659 |
| THEM6 skyblue3     | 0.177426306  | 0.000115936 | 0.173455584  | 0.000165252 |
| TIGD5 skyblue3     | -0.106498818 | 0.021344149 | -0.104898985 | 0.023386015 |
| TMEM24 skyblue3    | -0.010328178 | 0.823845585 | -0.026274857 | 0.571135108 |
| TRAPPC9 skyblue3   | 0.045865938  | 0.322645735 | 0.035270278  | 0.447020844 |
| TSNARE skyblue3    | -0.22789143  | 6.45E-07    | -0.253630266 | 2.74E-08    |
| TSTA3 skyblue3     | 0.173362096  | 0.000166621 | 0.196579999  | 1.88E-05    |
| TTLL12 skyblue3    | 0.188502934  | 4.14E-05    | 0.187109105  | 4.73E-05    |
| VAR5 skyblue3      | 0.111290282  | 0.016126655 | 0.128900627  | 0.005274911 |
| VPS28 skyblue3     | 0.093660277  | 0.043068995 | 0.099261961  | 0.031983296 |
| WDR4 skyblue3      | 0.042985586  | 0.353996446 | 0.046431956  | 0.316703992 |
| ZC3H3 skyblue3     | -0.018448804 | 0.690890096 | -0.02087177  | 0.652794813 |
| ZFP41 skyblue3     | -0.152350788 | 0.000957229 | -0.155207687 | 0.000764068 |
| ZNF517 skyblue3    | -0.112183335 | 0.015288743 | -0.148727489 | 0.001266965 |
| ZNF696 skyblue3    | -0.132856381 | 0.004026016 | -0.167547895 | 0.000276071 |
| ZNF707 skyblue3    | -0.205373123 | 7.68E-06    | -0.2190804   | 1.75E-06    |
| AKT1S1 steelblue   | 0.136622973  | 0.003092218 | 0.152768832  | 0.000926396 |
| ALDH16 steelblue   | 0.09015741   | 0.051527131 | 0.088006289  | 0.057377511 |
| ANAPC1 steelblue   | 0.18166986   | 7.87E-05    | 0.214510724  | 2.90E-06    |
| ANAPC1 steelblue   | 0.131060331  | 0.004555482 | 0.137034586  | 0.003003137 |
| AP2S1 steelblue    | 0.225424642  | 8.57E-07    | 0.27440933   | 1.64E-09    |
| ARMC6 steelblue    | 0.026985248  | 0.560769273 | 0.03468125   | 0.454650455 |
| ASCC2 steelblue    | 0.13688646   | 0.003034922 | 0.159096938  | 0.000558711 |
| ASPSCR1 steelblue  | 0.021990243  | 0.635502094 | 0.017476681  | 0.706403335 |
| AUP1 steelblue     | 0.090664966  | 0.0502218   | 0.11348861   | 0.014132825 |
| B3GAT3 steelblue   | 0.138969586  | 0.00261483  | 0.141704106  | 0.002143829 |
| B4GALT2 steelblue  | 0.085550877  | 0.064717694 | 0.087640245  | 0.058425876 |
| BCKDK steelblue    | 0.12136901   | 0.008652442 | 0.145139823  | 0.001662232 |
| C14orf80 steelblue | 0.123714152  | 0.007437114 | 0.141954124  | 0.002104889 |
| C17orf62 steelblue | 0.176880578  | 0.000121779 | 0.198827356  | 1.50E-05    |
| C17orf70 steelblue | 0.10411313   | 0.024449465 | 0.093803039  | 0.04275069  |
| C19orf48 steelblue | 0.091342965  | 0.048521331 | 0.088580741  | 0.055763729 |
| C19orf60 steelblue | 0.051560746  | 0.266142104 | 0.057025376  | 0.218686875 |
| C6orf226 steelblue | 0.197939087  | 1.64E-05    | 0.241988238  | 1.19E-07    |
| CCDC106 steelblue  | 0.139633353  | 0.002492552 | 0.135063448  | 0.003451938 |
| CENPM steelblue    | 0.323122267  | 8.25E-13    | 0.33424492   | 1.19E-13    |
| CEP131 steelblue   | 0.044836515  | 0.333636583 | 0.032386544  | 0.485060473 |
| CFL1 steelblue     | 0.150686073  | 0.001089644 | 0.171252555  | 0.0002005   |
| CHCHD1 steelblue   | 0.013756454  | 0.766850697 | 0.041350485  | 0.372619101 |
| CHTF18 steelblue   | -0.042245034 | 0.362357031 | -0.026077459 | 0.574031541 |
| COMTD1 steelblue   | 0.067814051  | 0.143404058 | 0.101463149  | 0.028349072 |

|          |           |              |             |              |             |
|----------|-----------|--------------|-------------|--------------|-------------|
| COX8A    | steelblue | 0.157162585  | 0.000653415 | 0.184447507  | 6.08E-05    |
| CTU1     | steelblue | -0.090842605 | 0.049771526 | -0.075581856 | 0.102828194 |
| DCXR     | steelblue | 0.134171757  | 0.003674283 | 0.143980828  | 0.00181231  |
| DDX39A   | steelblue | 0.011284354  | 0.807841811 | 0.018881524  | 0.684025643 |
| DHX34    | steelblue | -0.021392238 | 0.644723968 | -0.027616319 | 0.5516377   |
| DNPH1    | steelblue | 0.061869784  | 0.181970258 | 0.066152554  | 0.153493039 |
| DUS1L    | steelblue | 0.142986429  | 0.00195086  | 0.158534017  | 0.000584866 |
| EIF4EBP1 | steelblue | 0.164690213  | 0.00035173  | 0.179413063  | 9.68E-05    |
| EMC9     | steelblue | 0.187649003  | 4.49E-05    | 0.215704946  | 2.55E-06    |
| ERI3     | steelblue | -0.127558336 | 0.00577207  | -0.114690891 | 0.013136859 |
| FAM195E  | steelblue | -0.005659563 | 0.902916923 | -0.02196918  | 0.635825955 |
| FIBP     | steelblue | 0.132430384  | 0.004146296 | 0.150676745  | 0.001090431 |
| FLYWCH   | steelblue | 0.079955477  | 0.084349921 | 0.097192125  | 0.035756652 |
| FOXRED   | steelblue | 0.099680051  | 0.031263895 | 0.104561321  | 0.023837951 |
| GALK1    | steelblue | 0.062987557  | 0.174186409 | 0.080575105  | 0.081963485 |
| GFER     | steelblue | 0.245159011  | 8.06E-08    | 0.275351194  | 1.43E-09    |
| GPS1     | steelblue | -0.01400162  | 0.762818665 | -0.001045872 | 0.982016474 |
| HAGH     | steelblue | 0.210605212  | 4.42E-06    | 0.241376658  | 1.29E-07    |
| HMBS     | steelblue | 0.249180377  | 4.85E-08    | 0.250671526  | 4.01E-08    |
| HMOX2    | steelblue | 0.326928619  | 4.29E-13    | 0.374683437  | 5.18E-17    |
| HRAS     | steelblue | 0.190632061  | 3.37E-05    | 0.225831011  | 8.18E-07    |
| HSPBP1   | steelblue | 0.044857022  | 0.333415322 | 0.065304686  | 0.158844493 |
| IRF3     | steelblue | -0.06781137  | 0.143419922 | -0.061839108 | 0.182187444 |
| ISOC2    | steelblue | 0.018365473  | 0.692214956 | 0.05006073   | 0.280320661 |
| ITPA     | steelblue | -0.016371469 | 0.724188939 | 2.15E-06     | 0.99996297  |
| KPTN     | steelblue | 0.064547467  | 0.163741727 | 0.054775502  | 0.237434554 |
| LAMTOR   | steelblue | 0.240146338  | 1.50E-07    | 0.271823768  | 2.35E-09    |
| LRRC45   | steelblue | 0.220324965  | 1.53E-06    | 0.219275591  | 1.72E-06    |
| LSM10    | steelblue | 0.121836253  | 0.008397059 | 0.159212728  | 0.000553468 |
| MLST8    | steelblue | 0.165069254  | 0.000340687 | 0.189688822  | 3.70E-05    |
| MRPL17   | steelblue | 0.204387823  | 8.50E-06    | 0.222807247  | 1.15E-06    |
| MRPL28   | steelblue | 0.072623103  | 0.117053315 | 0.109539511  | 0.017886738 |
| MRPS11   | steelblue | 0.213596133  | 3.20E-06    | 0.219600324  | 1.66E-06    |
| MRPS12   | steelblue | -0.002170515 | 0.962688914 | 0.014041953  | 0.762155953 |
| MRPS26   | steelblue | 0.103045118  | 0.025961534 | 0.114280287  | 0.013469817 |
| MRPS34   | steelblue | 0.2287668    | 5.83E-07    | 0.268366154  | 3.81E-09    |
| MXD3     | steelblue | 0.133079152  | 0.003964383 | 0.140651012  | 0.002315179 |
| NARF     | steelblue | 0.207550223  | 6.11E-06    | 0.217378622  | 2.12E-06    |
| NARFL    | steelblue | 0.135786663  | 0.003280648 | 0.157582329  | 0.000631682 |
| NAT14    | steelblue | -0.076527222 | 0.098583866 | -0.065137564 | 0.159915719 |
| NCAPH2   | steelblue | 0.133425875  | 0.003870153 | 0.138331818  | 0.002737444 |
| NDUFB1   | steelblue | 0.154730583  | 0.000793587 | 0.197564229  | 1.70E-05    |
| NDUFS3   | steelblue | 0.080099758  | 0.08378929  | 0.101891095  | 0.027685298 |
| NMRAL1   | steelblue | 0.270096038  | 3.00E-09    | 0.304801163  | 1.70E-11    |
| NOC4L    | steelblue | 0.098193281  | 0.033886731 | 0.124961876  | 0.00685479  |

|         |           |              |             |              |             |
|---------|-----------|--------------|-------------|--------------|-------------|
| NOSIP   | steelblue | -0.040409354 | 0.383607207 | -0.025290729 | 0.585643623 |
| NTHL1   | steelblue | 0.098424379  | 0.033467135 | 0.126537725  | 0.006177848 |
| NUBP2   | steelblue | 0.233642549  | 3.28E-07    | 0.264562123  | 6.41E-09    |
| NUDT16I | steelblue | 0.064445038  | 0.164412793 | 0.106061545  | 0.021886264 |
| OXLD1   | steelblue | 0.050809295  | 0.273182324 | 0.060553781  | 0.191460658 |
| PAFAH1I | steelblue | 0.230317763  | 4.86E-07    | 0.244163174  | 9.12E-08    |
| PARD3B  | steelblue | -0.225474288 | 8.52E-07    | -0.256771391 | 1.82E-08    |
| PCGF1   | steelblue | 0.225621639  | 8.38E-07    | 0.240989187  | 1.35E-07    |
| PCYT2   | steelblue | 0.036790666  | 0.427666623 | 0.050886107  | 0.272456915 |
| PGP     | steelblue | 0.187041671  | 4.76E-05    | 0.227174429  | 7.01E-07    |
| PIH1D1  | steelblue | 0.144873085  | 0.001695725 | 0.14416825   | 0.001787228 |
| PNKP    | steelblue | 0.16361839   | 0.000384791 | 0.168477325  | 0.000254942 |
| POLR2G  | steelblue | 0.16878638   | 0.000248258 | 0.167285701  | 0.00028232  |
| POLR2I  | steelblue | 0.059016898  | 0.202997514 | 0.091751105  | 0.047521123 |
| POLR2L  | steelblue | 0.116551794  | 0.011717118 | 0.164052201  | 0.000371075 |
| POLR3K  | steelblue | 0.221194833  | 1.38E-06    | 0.239300839  | 1.66E-07    |
| PPP1CA  | steelblue | 0.161406228  | 0.000462375 | 0.180013382  | 9.16E-05    |
| PPP4C   | steelblue | 0.15978439   | 0.000528244 | 0.203956566  | 8.89E-06    |
| PQLC2   | steelblue | 0.141280404  | 0.002211326 | 0.157952091  | 0.000613094 |
| PRPF31  | steelblue | 0.020741843  | 0.654815959 | 0.041258617  | 0.373683061 |
| PSMC3   | steelblue | 0.054693083  | 0.238142193 | 0.078018139  | 0.092174809 |
| PSMD8   | steelblue | 0.017618814  | 0.70412738  | 0.038962238  | 0.400883929 |
| PTGES2  | steelblue | 0.110879204  | 0.01652569  | 0.136909346  | 0.003029991 |
| PTOV1   | steelblue | 0.088094336  | 0.057127682 | 0.105815333  | 0.022196734 |
| RAB40C  | steelblue | 0.259953875  | 1.19E-08    | 0.274943208  | 1.52E-09    |
| RFNG    | steelblue | -0.021402313 | 0.644568158 | -0.038036321 | 0.412178607 |
| RHBDD3  | steelblue | 0.321766094  | 1.04E-12    | 0.342243807  | 2.80E-14    |
| RPS6KB2 | steelblue | 0.122107912  | 0.008251686 | 0.13606543   | 0.003216711 |
| RPUSD1  | steelblue | 0.07598977   | 0.100979377 | 0.098440189  | 0.033438592 |
| RUVBL2  | steelblue | 0.127168636  | 0.005924092 | 0.153731248  | 0.000858868 |
| SAC3D1  | steelblue | 0.094429143  | 0.041378031 | 0.104431664  | 0.024013481 |
| SAMD1   | steelblue | 0.13272415   | 0.004063009 | 0.120774208  | 0.008987545 |
| SCAND1  | steelblue | 0.080547492  | 0.082068659 | 0.109065355  | 0.018391384 |
| SEC13   | steelblue | 0.176320299  | 0.000128065 | 0.207533662  | 6.12E-06    |
| SF3B5   | steelblue | 0.138459405  | 0.002712503 | 0.179717261  | 9.42E-05    |
| SIRT7   | steelblue | 0.063097187  | 0.173436532 | 0.072217327  | 0.119118872 |
| SIVA1   | steelblue | 0.030155262  | 0.515652084 | 0.063008878  | 0.174040386 |
| SLC25A1 | steelblue | 0.222198383  | 1.24E-06    | 0.229522873  | 5.34E-07    |
| SLC25A3 | steelblue | 0.216324924  | 2.38E-06    | 0.234348887  | 3.02E-07    |
| SLC27A4 | steelblue | 0.301702739  | 2.77E-11    | 0.320296565  | 1.33E-12    |
| SLC37A4 | steelblue | 0.202801336  | 1.00E-05    | 0.172658214  | 0.000177279 |
| SNRNP25 | steelblue | 0.288678607  | 2.05E-10    | 0.318240201  | 1.89E-12    |
| SNRNP7C | steelblue | 0.057788326  | 0.212576713 | 0.043704844  | 0.345993578 |
| SNRPA   | steelblue | 0.117951179  | 0.010740628 | 0.114068464  | 0.013644473 |
| SRM     | steelblue | 0.068288038  | 0.140620959 | 0.085252047  | 0.065661534 |

|          |           |              |             |              |             |
|----------|-----------|--------------|-------------|--------------|-------------|
| STRA13   | steelblue | 0.22022109   | 1.54E-06    | 0.232666979  | 3.69E-07    |
| SUV420H  | steelblue | -0.039938863 | 0.389173771 | -0.065886188 | 0.155159322 |
| TBL3     | steelblue | 0.049778363  | 0.283045833 | 0.079049751  | 0.087938745 |
| TELO2    | steelblue | 0.221369324  | 1.36E-06    | 0.221524081  | 1.33E-06    |
| THOC6    | steelblue | 0.088954257  | 0.054734783 | 0.089753854  | 0.052585085 |
| TIMM10   | steelblue | 0.109359148  | 0.018077256 | 0.122631656  | 0.007977737 |
| TMEM11   | steelblue | 0.241481135  | 1.27E-07    | 0.260217141  | 1.15E-08    |
| TMEM14   | steelblue | -0.030842526 | 0.506124315 | -0.018410909 | 0.691492462 |
| TMEM16   | steelblue | 0.097864641  | 0.034491146 | 0.128513422  | 0.005414211 |
| TRMU     | steelblue | 0.149726357  | 0.001173458 | 0.1550781    | 0.000771983 |
| TUFM     | steelblue | 0.108483395  | 0.01902771  | 0.135649496  | 0.00331253  |
| UBE2M    | steelblue | 0.074918542  | 0.105891764 | 0.099418831  | 0.031711732 |
| UQCR10   | steelblue | 0.195484524  | 2.10E-05    | 0.234096828  | 3.11E-07    |
| WBSCR1   | steelblue | 0.214539456  | 2.89E-06    | 0.227164617  | 7.02E-07    |
| YDJC     | steelblue | 0.037704593  | 0.416270474 | 0.041149103  | 0.374953823 |
| YIF1A    | steelblue | 0.101179449  | 0.028796605 | 0.132617416  | 0.004093093 |
| YIF1B    | steelblue | 0.176846662  | 0.000122151 | 0.17929096   | 9.79E-05    |
| ZNF428   | steelblue | 0.113570918  | 0.014062581 | 0.113218372  | 0.014365625 |
| ZNF444   | steelblue | 0.013356654  | 0.773439329 | 0.016866871  | 0.716197665 |
| ZNF598   | steelblue | 0.033154325  | 0.474765128 | 0.038894454  | 0.401704443 |
| ZNF784   | steelblue | -0.058973504 | 0.203330427 | -0.064686901 | 0.162831534 |
| ZNF787   | steelblue | -0.064874523 | 0.161612792 | -0.057432497 | 0.21541094  |
| ZNHIT2   | steelblue | 0.093206492  | 0.044094054 | 0.11178795   | 0.015654883 |
| AARSD1   | tan       | 0.027090726  | 0.559237949 | 0.002664021  | 0.954213985 |
| ACOT13   | tan       | 0.14818882   | 0.001320191 | 0.154713933  | 0.000794636 |
| AL158801 | tan       | 0.008483119  | 0.854928467 | -0.023784289 | 0.608176653 |
| ALG12    | tan       | 0.215981136  | 2.47E-06    | 0.219222027  | 1.73E-06    |
| ANP32A   | tan       | 0.125625287  | 0.006562101 | 0.110661355  | 0.016740641 |
| APITD1   | tan       | 0.031390606  | 0.498592795 | 0.027167405  | 0.558125994 |
| APITD1-C | tan       | -0.019968365 | 0.666899986 | -0.025852645 | 0.577338669 |
| ARPC3    | tan       | 0.135127528  | 0.00343644  | 0.145004328  | 0.001679169 |
| ATP5J    | tan       | -0.021110604 | 0.649086139 | -0.018483905 | 0.690332319 |
| BCAR1    | tan       | 0.182786985  | 7.10E-05    | 0.216042182  | 2.45E-06    |
| BCCIP    | tan       | 0.074111173  | 0.109717528 | 0.052228008  | 0.259995856 |
| BLOC1S2  | tan       | 0.139465775  | 0.002522921 | 0.129948836  | 0.004913856 |
| BRE      | tan       | -0.172845372 | 0.000174384 | -0.17635493  | 0.000127667 |
| BRIX1    | tan       | -0.147854253 | 0.001354278 | -0.167774891 | 0.000270764 |
| BRK1     | tan       | 0.048689019  | 0.293726563 | 0.059416174  | 0.199952864 |
| BTF3L4   | tan       | -0.108161636 | 0.019387699 | -0.128091281 | 0.005569845 |
| BUD31    | tan       | -0.038654784 | 0.404613659 | -0.040960578 | 0.377147641 |
| C11orf73 | tan       | -0.082243204 | 0.075809346 | -0.086357171 | 0.062226606 |
| C11orf98 | tan       | 0.009267799  | 0.841678931 | -0.016496258 | 0.722173123 |
| C14orf16 | tan       | 0.165918019  | 0.00031712  | 0.155919123  | 0.000721932 |
| C18orf21 | tan       | -0.059033883 | 0.202867308 | -0.064798527 | 0.162105609 |
| C4orf27  | tan       | 0.085904403  | 0.063615538 | 0.063610296  | 0.169958778 |

|              |              |             |              |             |
|--------------|--------------|-------------|--------------|-------------|
| C6orf203 tan | -0.016826308 | 0.716850836 | -0.028676323 | 0.536465301 |
| C7orf73 tan  | 0.02304441   | 0.619382794 | 0.021624049  | 0.641142633 |
| C8orf59 tan  | -0.0867232   | 0.061122121 | -0.116642531 | 0.0116515   |
| CAMTA1 tan   | -0.235270178 | 2.70E-07    | -0.237075731 | 2.18E-07    |
| CBWD1 tan    | -0.080870469 | 0.080845291 | -0.074513976 | 0.107795431 |
| CBX3 tan     | -0.063938268 | 0.167763305 | -0.086637671 | 0.061378743 |
| CCDC23 tan   | -0.251643215 | 3.54E-08    | -0.27021285  | 2.95E-09    |
| CCDC43 tan   | 0.196667189  | 1.86E-05    | 0.185080159  | 5.73E-05    |
| CCDC58 tan   | -0.060993688 | 0.188248688 | -0.084137214 | 0.069282987 |
| CCDC59 tan   | -0.121315524 | 0.008682113 | -0.143278944 | 0.00190913  |
| CCT8 tan     | 0.043417919  | 0.349172195 | 0.020939591  | 0.651740794 |
| CDC26 tan    | 0.037205245  | 0.422474773 | 0.018544015  | 0.68937752  |
| CENPQ tan    | -0.141057574 | 0.002247597 | -0.162797398 | 0.000412048 |
| CFDP1 tan    | 0.073401125  | 0.113171384 | 0.064296421  | 0.16539013  |
| CHCHD4 tan   | 0.052614321  | 0.256482572 | 0.054834819  | 0.23692619  |
| CHCHD7 tan   | -0.278149959 | 9.60E-10    | -0.261786233 | 9.33E-09    |
| CISD1 tan    | 0.027152359  | 0.558344104 | 0.031226867  | 0.500836603 |
| CISD2 tan    | 0.093414272  | 0.043622178 | 0.082293281  | 0.075630574 |
| CKLF tan     | 0.098819734  | 0.032759575 | 0.105344683  | 0.022800851 |
| CMC1 tan     | 0.110841951  | 0.016562275 | 0.105787371  | 0.022232233 |
| CMSS1 tan    | -0.199978134 | 1.34E-05    | -0.217929744 | 1.99E-06    |
| COA5 tan     | -0.221366357 | 1.36E-06    | -0.227210807 | 6.98E-07    |
| COA6 tan     | 0.160251392  | 0.000508435 | 0.159380395  | 0.000545956 |
| COMMD1 tan   | 0.028553188  | 0.538216991 | 0.013692221  | 0.767908132 |
| COX16 tan    | 0.138810317  | 0.002644972 | 0.137899019  | 0.002823609 |
| COX17 tan    | -0.022471035 | 0.628128315 | -0.008548106 | 0.853829541 |
| COX6C tan    | -0.069912232 | 0.131397565 | -0.060951434 | 0.188555479 |
| COX7A2 tan   | -0.090968646 | 0.04945409  | -0.093289002 | 0.043906158 |
| CRIPAK tan   | 0.170049993  | 0.000222597 | 0.194951141  | 2.21E-05    |
| CRIP1 tan    | -0.172815707 | 0.00017484  | -0.172693261 | 0.000176733 |
| CRLS1 tan    | -0.078568913 | 0.089893303 | -0.062017101 | 0.180929918 |
| CSTF3 tan    | 0.084057393  | 0.069548431 | 0.052282307  | 0.259500041 |
| CTNBL1 tan   | -0.285660887 | 3.21E-10    | -0.275741212 | 1.35E-09    |
| CUTC tan     | 0.042827342  | 0.355772684 | 0.024147267  | 0.602712142 |
| CWC15 tan    | -0.046324222 | 0.317829379 | -0.054808449 | 0.237152095 |
| CYCS tan     | -0.062789079 | 0.175550149 | -0.064154173 | 0.16632965  |
| DAD1 tan     | 0.13614964   | 0.00319762  | 0.136162607  | 0.00319469  |
| DDT tan      | -0.003614445 | 0.937907811 | -0.018605893 | 0.688395155 |
| DECR1 tan    | 0.208913481  | 5.29E-06    | 0.202847268  | 9.97E-06    |
| DENR tan     | -0.01657526  | 0.720897924 | -0.041491633 | 0.370988063 |
| DGUOK tan    | -0.008931388 | 0.847354081 | 0.018492934  | 0.690188875 |
| DNAJC2 tan   | -0.08631     | 0.062370133 | -0.108345108 | 0.019181707 |
| DNAJC7 tan   | 0.178539604  | 0.000104824 | 0.168457305  | 0.000255381 |
| DNAJC8 tan   | 0.013871839  | 0.764952275 | 0.001173582  | 0.979820976 |
| DNTTIP2 tan  | -0.089879911 | 0.05225269  | -0.116957666 | 0.011426122 |

|         |     |              |             |              |             |
|---------|-----|--------------|-------------|--------------|-------------|
| DPY30   | tan | -0.023124127 | 0.618171098 | -0.023901139 | 0.606415104 |
| EBNA1B  | tan | -0.073871225 | 0.110875283 | -0.075525727 | 0.103084679 |
| EBPL    | tan | 0.163346788  | 0.000393616 | 0.16591403   | 0.000317227 |
| EEF1E1  | tan | -0.099010334 | 0.032423049 | -0.099909678 | 0.0308747   |
| EEF2    | tan | 0.324547077  | 6.47E-13    | 0.313899133  | 3.88E-12    |
| EID2    | tan | -0.063871397 | 0.168209214 | -0.074736179 | 0.106746547 |
| EIF3M   | tan | -0.125678242 | 0.006539228 | -0.149214074 | 0.001220589 |
| EIF5B   | tan | -0.0865003   | 0.061792772 | -0.09843951  | 0.033439816 |
| EMC3    | tan | 0.081684914  | 0.077825793 | 0.113012624  | 0.014545122 |
| EXOSC8  | tan | 0.103475951  | 0.025342138 | 0.07612733   | 0.100361894 |
| EXOSC9  | tan | 0.030282124  | 0.513886391 | 0.007007795  | 0.879947536 |
| FAM103A | tan | 0.087406547  | 0.059103454 | 0.071314944  | 0.123814357 |
| FKBP1A  | tan | -0.221738275 | 1.30E-06    | -0.218342351 | 1.90E-06    |
| FKBP3   | tan | 0.059907894  | 0.196249138 | 0.039045207  | 0.399880972 |
| FRG1    | tan | -0.002273531 | 0.960919437 | -0.008543447 | 0.853908321 |
| FTSJ2   | tan | -0.034141118 | 0.461710533 | -0.034637932 | 0.455214414 |
| FUCA2   | tan | 0.012205545  | 0.792498961 | 0.017136818  | 0.71185611  |
| FUNDC1  | tan | -0.094187503 | 0.041903325 | -0.098851378 | 0.032703497 |
| FUNDC2  | tan | -0.221069544 | 1.40E-06    | -0.235160423 | 2.74E-07    |
| GABARA  | tan | 0.028891056  | 0.533417406 | 0.004317898  | 0.925855164 |
| GAR1    | tan | 0.061597977  | 0.183901335 | 0.070179048  | 0.12992814  |
| GCSH    | tan | -0.032888259 | 0.478319261 | -0.0493946   | 0.2867782   |
| GEMIN6  | tan | -0.145543469 | 0.0016127   | -0.133362878 | 0.003887122 |
| GGCT    | tan | 0.230463294  | 4.78E-07    | 0.222741242  | 1.16E-06    |
| GLO1    | tan | -0.102901536 | 0.026170836 | -0.130433838 | 0.004754465 |
| GLRX3   | tan | 0.038202398  | 0.410139014 | 0.026676973  | 0.565256374 |
| GLRX5   | tan | -0.091327743 | 0.048558974 | -0.080378496 | 0.08271472  |
| GNG5    | tan | 0.012283727  | 0.791200393 | 0.010687679  | 0.817819575 |
| GNL2    | tan | -0.060933007 | 0.188689377 | -0.079681413 | 0.085423179 |
| GNL3    | tan | 0.038097155  | 0.41143081  | 0.010394265  | 0.822737044 |
| GPANK1  | tan | -0.16790912  | 0.000267672 | -0.178098256 | 0.000109104 |
| GRPEL1  | tan | 0.152781869  | 0.00092545  | 0.161332613  | 0.000465192 |
| GTF2A2  | tan | 0.173130183  | 0.000170065 | 0.178777987  | 0.000102579 |
| GTF2F2  | tan | 0.095256064  | 0.039622287 | 0.076815671  | 0.097316977 |
| GTF2H4  | tan | -0.154612674 | 0.000801043 | -0.186746381 | 4.90E-05    |
| GTF2H5  | tan | 0.13791827   | 0.002819724 | 0.150469282  | 0.001108079 |
| GTF3C6  | tan | 0.230818425  | 4.58E-07    | 0.238116614  | 1.92E-07    |
| H3F3A   | tan | -0.028844585 | 0.534076267 | -0.055926285 | 0.227708558 |
| H3F3B   | tan | -0.082105821 | 0.076301566 | -0.099663069 | 0.031292843 |
| HARS2   | tan | 0.057962792  | 0.211196919 | 0.036251134  | 0.434478445 |
| HAUS1   | tan | 0.097318917  | 0.035515087 | 0.077277444  | 0.095315876 |
| HDDC2   | tan | 0.02816586   | 0.543745633 | 0.039145691  | 0.398668301 |
| HESX1   | tan | -0.048057856 | 0.300036695 | -0.069359804 | 0.134480709 |
| HMGB1   | tan | -0.036235402 | 0.434678002 | -0.064226217 | 0.165853313 |
| HMGN1   | tan | 0.017607252  | 0.704312417 | -0.003861382 | 0.933675132 |



|              |              |             |              |             |
|--------------|--------------|-------------|--------------|-------------|
| HMGN3 tan    | -0.027996899 | 0.54616614  | -0.037837623 | 0.414626683 |
| HNRNPA tan   | 0.067508885  | 0.145218063 | 0.044845253  | 0.333542288 |
| HNRNPC tan   | 0.0141975    | 0.75960179  | -0.025023105 | 0.589618377 |
| HNRNPD tan   | 0.038326747  | 0.408615805 | 0.013785764  | 0.766368329 |
| HNRNPL tan   | 0.006069835  | 0.895917764 | -0.035370394 | 0.445731309 |
| HNRNPU tan   | -0.139128622 | 0.002585045 | -0.164148602 | 0.00036809  |
| HRSP12 tan   | 0.079794449  | 0.084979194 | 0.055574113  | 0.230654453 |
| HSP90B1 tan  | -0.016951078 | 0.714842374 | -0.023951606 | 0.605655014 |
| HSPA4 tan    | 0.124857685  | 0.006901806 | 0.118572846  | 0.010330469 |
| HSPB11 tan   | -0.09856635  | 0.033211567 | -0.103609092 | 0.025153321 |
| HSPE1 tan    | 0.010642184  | 0.818581587 | 0.015238531  | 0.742575993 |
| HSPE1-M tan  | -0.05652722  | 0.222743677 | -0.088851873 | 0.055015244 |
| IMMP1L tan   | 0.079173388  | 0.087441733 | 0.0652322    | 0.159308449 |
| INO80C tan   | -0.104676976 | 0.023682313 | -0.106836476 | 0.020933544 |
| ISCA2 tan    | 0.029114683  | 0.530252559 | 0.03375881   | 0.46674435  |
| ITGB1BP tan  | -0.221064176 | 1.41E-06    | -0.224260909 | 9.79E-07    |
| ITGB3BP tan  | 0.067207768  | 0.14702511  | 0.059216605  | 0.201470477 |
| LINC0049 tan | -0.058014501 | 0.210789205 | -0.046128202 | 0.319883686 |
| LLPH tan     | -0.052017415 | 0.261924993 | -0.053221703 | 0.251025501 |
| LSM12 tan    | 0.172078157  | 0.000186538 | 0.143495498  | 0.001878764 |
| LSM3 tan     | 0.04623918   | 0.318719563 | 0.051188762  | 0.269611445 |
| LSM5 tan     | -0.059309368 | 0.200764026 | -0.049110263 | 0.289564849 |
| LSM6 tan     | -0.11643957  | 0.011798726 | -0.140432605 | 0.002352245 |
| LTV1 tan     | -0.089792933 | 0.052481849 | -0.116027543 | 0.012102674 |
| LYAR tan     | -0.086976061 | 0.060368612 | -0.106507438 | 0.021333579 |
| MAGOHI tan   | -0.014980581 | 0.746783376 | -0.015668843 | 0.735574327 |
| MCTS1 tan    | 0.056662563  | 0.221636214 | 0.069432707  | 0.13407067  |
| MED15 tan    | 0.087577967  | 0.058605811 | 0.104364565  | 0.024104757 |
| MED4 tan     | 0.001897748  | 0.96737497  | -0.020192064 | 0.663396098 |
| MED6 tan     | -0.155652052 | 0.000737491 | -0.156674746 | 0.000679544 |
| METTL2 tan   | 0.02317707   | 0.617366931 | 0.0260016    | 0.575146465 |
| METTL5 tan   | 0.095003816  | 0.040151062 | 0.086902462  | 0.060587135 |
| MGRN1 tan    | 0.158223763  | 0.000599762 | 0.191017228  | 3.25E-05    |
| MKKS tan     | -0.062216177 | 0.179531054 | -0.070644511 | 0.127395195 |
| MKL1 tan     | 0.1002494    | 0.030306512 | 0.126421745  | 0.006225543 |
| MNAT1 tan    | 0.093721607  | 0.042932009 | 0.089916631  | 0.052156193 |
| MPHOSP tan   | -0.067039431 | 0.14804277  | -0.085881608 | 0.063686137 |
| MPLKIP tan   | -0.037992593 | 0.412716624 | -0.039068237 | 0.399602844 |
| MRPL1 tan    | 0.058382845  | 0.207901358 | 0.034734955  | 0.453951804 |
| MRPL18 tan   | 0.122802206  | 0.007890298 | 0.135231992  | 0.00341131  |
| MRPL32 tan   | -0.070090217 | 0.130415939 | -0.070545493 | 0.127930797 |
| MRPL33 tan   | -0.156607475 | 0.000683222 | -0.170549075 | 0.000213163 |
| MRPL35 tan   | 0.046270072  | 0.318396012 | 0.050485743  | 0.276252373 |
| MRPL39 tan   | 0.124251489  | 0.007181119 | 0.113006326  | 0.014550647 |
| MRPL46 tan   | -0.052600849 | 0.256604537 | -0.054497075 | 0.23983104  |

|             |              |             |              |             |
|-------------|--------------|-------------|--------------|-------------|
| MRPL51 tan  | -0.02728198  | 0.556466496 | -0.027057977 | 0.559713182 |
| MRPS10 tan  | 0.03143636   | 0.497966761 | 0.012270401  | 0.791421684 |
| MRPS17 tan  | -0.048120386 | 0.299407553 | -0.055398887 | 0.232130226 |
| MRPS18Ctan  | -0.06755337  | 0.144952545 | -0.068150677 | 0.141423202 |
| MRPS22 tan  | -0.174554844 | 0.000149922 | -0.18334387  | 6.74E-05    |
| MRPS31 tan  | -0.100854408 | 0.029316793 | -0.124389666 | 0.007116577 |
| MRPS33 tan  | -0.054727806 | 0.237843887 | -0.043561979 | 0.34757397  |
| MRPS6 tan   | -0.160982082 | 0.000478821 | -0.161498841 | 0.000458855 |
| MRPS9 tan   | -0.030255661 | 0.514254451 | -0.04380702  | 0.344866108 |
| MZT1 tan    | 0.091315191  | 0.048590033 | 0.074686498  | 0.106980359 |
| NAA20 tan   | -0.03909249  | 0.399310071 | -0.041530134 | 0.370543932 |
| NCOR2 tan   | -0.004352968 | 0.925254705 | 0.003750108  | 0.935582217 |
| NDUFA4 tan  | 0.022005699  | 0.635264484 | 0.050638053  | 0.274804253 |
| NDUFABtan   | 0.060855262  | 0.189255106 | 0.091464151  | 0.048222524 |
| NDUFABtan   | -0.12183059  | 0.008400113 | -0.115883715 | 0.012210392 |
| NDUFB3 tan  | 0.051516683  | 0.266551455 | 0.062890958  | 0.174849151 |
| NDUFB6 tan  | 0.081459193  | 0.078653319 | 0.085077596  | 0.066217741 |
| NDUFC2 tan  | 0.0080973    | 0.861458355 | 0.007928242  | 0.864322614 |
| NFU1 tan    | 0.101539216  | 0.028230098 | 0.129420822  | 0.005092847 |
| NGDN tan    | -0.278958037 | 8.55E-10    | -0.294078139 | 9.06E-11    |
| NIFK tan    | -0.101038981 | 0.029020426 | -0.129393206 | 0.005102369 |
| NIT2 tan    | -0.11883647  | 0.010160774 | -0.112762111 | 0.014766332 |
| NOL10 tan   | -0.072134406 | 0.119544454 | -0.081975905 | 0.076769417 |
| NOL7 tan    | -0.134040792 | 0.003708011 | -0.138860302 | 0.002635479 |
| NOP58 tan   | -0.062480362 | 0.177687087 | -0.096051044 | 0.037994194 |
| NOX1 tan    | 0.079249866  | 0.087135429 | 0.084944805  | 0.066643708 |
| NSMCE4tan   | 0.072326514  | 0.118560286 | 0.040103964  | 0.387214842 |
| OARD1 tan   | -0.113716095 | 0.013939434 | -0.125485153 | 0.006622976 |
| PBDC1 tan   | 0.084457058  | 0.068227651 | 0.084183971  | 0.069127881 |
| PCBP2 tan   | -0.186236997 | 5.14E-05    | -0.221101135 | 1.40E-06    |
| PDCD2 tan   | 0.009185502  | 0.843066521 | 0.007132712  | 0.877824142 |
| PDCL3 tan   | 0.052568365  | 0.25689878  | 0.025367629  | 0.584503809 |
| PDHB tan    | 0.142809065  | 0.001976568 | 0.155879158  | 0.000724241 |
| PET117 tan  | -0.063682557 | 0.169473224 | -0.063629879 | 0.16982709  |
| PFDN4 tan   | -0.283957014 | 4.13E-10    | -0.300420956 | 3.39E-11    |
| PINX1 tan   | 0.225334637  | 8.66E-07    | 0.202829858  | 9.99E-06    |
| PIP5K1C tan | 0.196595239  | 1.88E-05    | 0.209887766  | 4.77E-06    |
| PITHD1 tan  | -0.05197865  | 0.262281168 | -0.070056584 | 0.130600993 |
| PLEC tan    | -0.099649841 | 0.031315408 | -0.079663984 | 0.085491802 |
| PLGRKT tan  | 0.097407781  | 0.035346611 | 0.102465161  | 0.026815895 |
| PLXNB2 tan  | 0.239272448  | 1.67E-07    | 0.256244933  | 1.95E-08    |
| POLB tan    | -0.093335759 | 0.043799982 | -0.113691527 | 0.013960207 |
| POMP tan    | 0.099143558  | 0.032189582 | 0.114764094  | 0.013078266 |
| PPA2 tan    | 0.311009446  | 6.24E-12    | 0.300164334  | 3.53E-11    |
| PPCS tan    | 0.115542568  | 0.012469281 | 0.119964631  | 0.009462198 |

|         |     |              |             |              |             |
|---------|-----|--------------|-------------|--------------|-------------|
| PPT2    | tan | -0.32748483  | 3.89E-13    | -0.342947154 | 2.46E-14    |
| PRDX1   | tan | 0.195002571  | 2.20E-05    | 0.206320592  | 6.95E-06    |
| PRDX6   | tan | -0.092418768 | 0.045922187 | -0.092570552 | 0.045565063 |
| PSMA1   | tan | 0.008686858  | 0.851484208 | 0.010688393  | 0.817807612 |
| PSMA2   | tan | -0.089348722 | 0.053665314 | -0.075619916 | 0.102654564 |
| PSMA3   | tan | 0.109695996  | 0.017722865 | 0.130279578  | 0.004804648 |
| PSMA4   | tan | 0.099442132  | 0.031671562 | 0.109706045  | 0.017712387 |
| PSMC6   | tan | -0.017872556 | 0.700070804 | -0.027040088 | 0.559972865 |
| PSMD6   | tan | 0.130186811  | 0.004835055 | 0.13702211   | 0.003005802 |
| PSMG1   | tan | 0.160320849  | 0.000505549 | 0.150393192  | 0.001114618 |
| PSMG2   | tan | -0.000850926 | 0.985368113 | -0.013589774 | 0.769595544 |
| PTS     | tan | 0.191310969  | 3.16E-05    | 0.174697074  | 0.000148039 |
| PYURF   | tan | -0.086774525 | 0.060968552 | -0.081978526 | 0.076759954 |
| RARS    | tan | -0.010681088 | 0.817929953 | -0.0108779   | 0.814635363 |
| RBM17   | tan | -0.191586652 | 3.08E-05    | -0.218254929 | 1.92E-06    |
| RBM8A   | tan | 0.03251599   | 0.483316302 | 0.01624979   | 0.726156366 |
| RBMX2   | tan | -0.044932177 | 0.332605196 | -0.054916595 | 0.236226603 |
| RDH14   | tan | -0.135142711 | 0.003432777 | -0.141745794 | 0.002137291 |
| RMND1   | tan | 0.05093265   | 0.272018006 | 0.004112276  | 0.929376561 |
| RNASEH  | tan | -0.088871503 | 0.054961377 | -0.110145606 | 0.017259306 |
| RNF5    | tan | -0.152868673 | 0.00091917  | -0.138138832 | 0.002775565 |
| RNF7    | tan | -0.071927751 | 0.120610256 | -0.049431407 | 0.286418794 |
| RPA2    | tan | -0.018086108 | 0.69666334  | -0.041555812 | 0.370247904 |
| RPF1    | tan | -0.099049997 | 0.032353391 | -0.118053097 | 0.010672412 |
| RPF2    | tan | -0.062047083 | 0.180718725 | -0.084112235 | 0.069365967 |
| RPP30   | tan | -0.055672613 | 0.229827801 | -0.069686645 | 0.132649921 |
| RPSAP58 | tan | -0.087045215 | 0.06016388  | -0.108532274 | 0.018973537 |
| RTFDC1  | tan | -0.344752679 | 1.77E-14    | -0.354982047 | 2.58E-15    |
| RWDD1   | tan | -0.008338582 | 0.857373582 | 0.006227105  | 0.893236888 |
| SAAL1   | tan | 0.170059173  | 0.00022242  | 0.155233203  | 0.000762518 |
| SEC61G  | tan | 0.131703531  | 0.004359045 | 0.152166556  | 0.000971115 |
| SF3B6   | tan | -0.101338642 | 0.02854474  | -0.10739223  | 0.020272662 |
| SFPQ    | tan | -0.009205353 | 0.842731764 | -0.026930224 | 0.561568921 |
| SFT2D1  | tan | 0.053721333  | 0.246597496 | 0.065016944  | 0.160692256 |
| SKA2    | tan | 0.013909749  | 0.764328846 | 0.005693933  | 0.902330277 |
| SMIM7   | tan | -0.0647948   | 0.162129806 | -0.064896818 | 0.161468423 |
| SMN1    | tan | 0.023136113  | 0.617989007 | -0.004491317 | 0.922886378 |
| SMS     | tan | 0.131008897  | 0.00457153  | 0.139179191  | 0.002575639 |
| SNRNP27 | tan | -0.088031278 | 0.057306516 | -0.11960249  | 0.00968164  |
| SNRPB2  | tan | -0.20580145  | 7.34E-06    | -0.210024854 | 4.70E-06    |
| SNRPE   | tan | 0.030158556  | 0.515606197 | 0.014154629  | 0.760305485 |
| SNRPG   | tan | 0.065976739  | 0.154591341 | 0.065784608  | 0.155798363 |
| SNUPN   | tan | 0.137201677  | 0.002967646 | 0.128352887  | 0.00547293  |
| SPCS1   | tan | 0.198168179  | 1.60E-05    | 0.197630329  | 1.69E-05    |
| SRP19   | tan | 0.110136103  | 0.017268993 | 0.104904854  | 0.023378227 |

|         |     |              |             |              |             |
|---------|-----|--------------|-------------|--------------|-------------|
| SRSF1   | tan | 0.051197982  | 0.269525089 | 0.020155438  | 0.66396929  |
| SRSF2   | tan | -0.023089326 | 0.618699941 | -0.051368894 | 0.267927591 |
| SRSF3   | tan | -0.049031739 | 0.290337613 | -0.077689113 | 0.093559726 |
| SRSF7   | tan | 0.006376874  | 0.890684994 | -0.014483894 | 0.754905903 |
| SSB     | tan | -0.115190621 | 0.012741432 | -0.141392166 | 0.002193336 |
| SSBP1   | tan | 0.099306814  | 0.031905446 | 0.098175966  | 0.033918348 |
| SUB1    | tan | -0.038752823 | 0.40342211  | -0.052677912 | 0.255907411 |
| SUCLG1  | tan | -0.028022593 | 0.545797722 | -0.017168393 | 0.711348901 |
| SUMO1   | tan | -0.135717193 | 0.00329676  | -0.149627367 | 0.001182432 |
| SUMO2   | tan | -0.114342191 | 0.013419148 | -0.144847107 | 0.00169902  |
| SUPV3L1 | tan | -0.045356931 | 0.328050509 | -0.061412185 | 0.185229991 |
| TARDBP  | tan | -0.081920205 | 0.076970717 | -0.107932668 | 0.01964747  |
| TBCA    | tan | 0.042825082  | 0.355798097 | 0.024345558  | 0.599736281 |
| TDP2    | tan | -0.002598076 | 0.955346169 | -0.009649698 | 0.835246356 |
| TECPR2  | tan | -0.027571897 | 0.55227809  | -0.026410243 | 0.569152603 |
| TEX30   | tan | -0.042821067 | 0.355843235 | -0.069891507 | 0.131512239 |
| THOC7   | tan | 0.148011043  | 0.001338204 | 0.132701522  | 0.00406937  |
| TIMM9   | tan | -0.026305374 | 0.570687944 | -0.04592239  | 0.322049902 |
| TIMMDC  | tan | -0.145409161 | 0.001629029 | -0.138206034 | 0.002762236 |
| TMA7    | tan | 0.065106751  | 0.16011382  | 0.05075294   | 0.273715371 |
| TMEM12  | tan | 0.142905399  | 0.001962567 | 0.145461641  | 0.001622631 |
| TMEM14  | tan | -0.1263721   | 0.00624606  | -0.126153215 | 0.006337244 |
| TMEM14  | tan | -0.13183909  | 0.004318634 | -0.138959327 | 0.002616762 |
| TMEM19  | tan | -0.096437051 | 0.037224343 | -0.093124472 | 0.044281502 |
| TMEM24  | tan | -0.043364408 | 0.349767033 | -0.055321861 | 0.232781053 |
| TMEM60  | tan | 0.005599938  | 0.903934753 | 0.020712008  | 0.655280415 |
| TOMM22  | tan | 0.055905517  | 0.227881538 | 0.04892499   | 0.291390367 |
| TP53RK  | tan | -0.13143519  | 0.004440048 | -0.129504161 | 0.005064212 |
| TPRKB   | tan | -0.140509905 | 0.002339065 | -0.145906608 | 0.0015693   |
| TRIAP1  | tan | 0.114676545  | 0.013148368 | 0.128109403  | 0.005563081 |
| TRIT1   | tan | -0.238088238 | 1.93E-07    | -0.275712914 | 1.36E-09    |
| TRMT10C | tan | -0.149131119 | 0.001228384 | -0.166903608 | 0.000291665 |
| TSC2    | tan | 0.11066931   | 0.016732748 | 0.11793017   | 0.010754738 |
| TSFM    | tan | 0.004021836  | 0.930925839 | 0.002555672  | 0.956074244 |
| TTC1    | tan | -0.036640539 | 0.429555792 | -0.032847936 | 0.478859167 |
| TTC4    | tan | -0.196063701 | 1.98E-05    | -0.23448664  | 2.97E-07    |
| TXNDC1  | tan | 0.05386142   | 0.245365815 | 0.034865653  | 0.452254064 |
| TXNDC9  | tan | -0.129161601 | 0.005182853 | -0.141924646 | 0.002109446 |
| UPF3B   | tan | -0.088155738 | 0.056953991 | -0.115647466 | 0.012389165 |
| UQCRB   | tan | -0.042733916 | 0.35682399  | -0.069671775 | 0.132732793 |
| UTP11L  | tan | -0.050456671 | 0.276529368 | -0.076725859 | 0.097710038 |
| UTP14A  | tan | -0.109143467 | 0.018307404 | -0.147963311 | 0.001343079 |
| VBP1    | tan | 0.014133019  | 0.760660289 | -0.002038677 | 0.964953699 |
| VPS29   | tan | 0.00869398   | 0.851363847 | 0.011097962  | 0.810955443 |
| VPS33A  | tan | -0.059114768 | 0.202248113 | -0.058028355 | 0.210680069 |

|                  |              |             |              |             |
|------------------|--------------|-------------|--------------|-------------|
| YAE1D1 tan       | -0.060698765 | 0.190397654 | -0.063618035 | 0.169906728 |
| ZNF213 tan       | 0.221018593  | 1.41E-06    | 0.248756097  | 5.12E-08    |
| AASS turquoise   | -0.077409138 | 0.094751239 | -0.092011422 | 0.046892246 |
| ABCA10 turquoise | -0.007469105 | 0.872110415 | -0.015590673 | 0.736844631 |
| ABCA6 turquoise  | -0.157187098 | 0.000652127 | -0.153592918 | 0.000868286 |
| ABCA8 turquoise  | -0.231832392 | 4.07E-07    | -0.232545599 | 3.74E-07    |
| ABCA9 turquoise  | -0.13678844  | 0.003056123 | -0.139153643 | 0.002580387 |
| ABCC1 turquoise  | 0.170539224  | 0.000213346 | 0.14551828   | 0.001615751 |
| ABCC9 turquoise  | -0.193237619 | 2.62E-05    | -0.183396656 | 6.71E-05    |
| ABCD2 turquoise  | -0.229627562 | 5.27E-07    | -0.211037358 | 4.22E-06    |
| ABHD11 turquoise | 0.091348996  | 0.048506424 | 0.11209656   | 0.015368451 |
| ABHD17(turquoise | 0.339253917  | 4.83E-14    | 0.364128978  | 4.35E-16    |
| ABI3BP turquoise | -0.198045481 | 1.62E-05    | -0.193882396 | 2.46E-05    |
| ABLIM3 turquoise | -0.250780185 | 3.95E-08    | -0.249550804 | 4.63E-08    |
| ABRACL turquoise | 0.219438594  | 1.69E-06    | 0.233041158  | 3.53E-07    |
| ACACB turquoise  | -0.349721407 | 7.00E-15    | -0.366742152 | 2.58E-16    |
| ACKR4 turquoise  | -0.163136979 | 0.000400563 | -0.137746594 | 0.002854538 |
| ACOX2 turquoise  | -0.093944719 | 0.042436759 | -0.094201334 | 0.041873108 |
| ACSS3 turquoise  | -0.245613902 | 7.61E-08    | -0.252378407 | 3.22E-08    |
| ACTA2 turquoise  | -0.055308511 | 0.232893987 | -0.022672652 | 0.625047092 |
| ACTC1 turquoise  | -0.107263481 | 0.020424129 | -0.106614992 | 0.021202095 |
| ACTG2 turquoise  | -0.080590186 | 0.081906091 | -0.048186402 | 0.298744291 |
| ACTN1 turquoise  | -0.066882358 | 0.148997165 | -0.065755428 | 0.1559823   |
| ACTR3B turquoise | 0.073784167  | 0.111297714 | 0.030717198  | 0.50785487  |
| ACY1 turquoise   | 0.113443661  | 0.014171315 | 0.108697274  | 0.018791654 |
| ADAM11 turquoise | -0.204339257 | 8.55E-06    | -0.220987514 | 1.42E-06    |
| ADAM22 turquoise | -0.053811259 | 0.245806344 | -0.062673543 | 0.176347641 |
| ADAM33 turquoise | -0.397770101 | 3.73E-19    | -0.400983282 | 1.82E-19    |
| ADAMTSturquoise  | -0.229148717 | 5.57E-07    | -0.233469524 | 3.35E-07    |
| ADAMTSturquoise  | -0.156077202 | 0.000712867 | -0.135630315 | 0.003317011 |
| ADAMTSturquoise  | -0.188835033 | 4.01E-05    | -0.202300756 | 1.05E-05    |
| ADAMTSturquoise  | -0.082696766 | 0.074202626 | -0.075776776 | 0.101941427 |
| ADAMTSturquoise  | -0.094970684 | 0.040220955 | -0.092709362 | 0.045240508 |
| ADAMTSturquoise  | -0.339926733 | 4.28E-14    | -0.333155258 | 1.44E-13    |
| ADAMTSturquoise  | -0.160830933 | 0.000484812 | -0.151816766 | 0.000997994 |
| ADARB1 turquoise | -0.303641534 | 2.04E-11    | -0.324459497 | 6.56E-13    |
| ADCY2 turquoise  | -0.228612595 | 5.93E-07    | -0.218709215 | 1.83E-06    |
| ADCY3 turquoise  | -0.284948896 | 3.57E-10    | -0.303669701 | 2.03E-11    |
| ADCY5 turquoise  | -0.270760448 | 2.73E-09    | -0.274458837 | 1.63E-09    |
| ADCY9 turquoise  | -0.436639288 | 3.67E-23    | -0.403530638 | 1.03E-19    |
| ADCYAPturquoise  | -0.165750932 | 0.000321635 | -0.168720785 | 0.000249663 |
| ADH1B turquoise  | -0.205264048 | 7.76E-06    | -0.208855811 | 5.32E-06    |
| ADHFE1 turquoise | -0.370839754 | 1.13E-16    | -0.376594063 | 3.49E-17    |
| ADM2 turquoise   | 0.1502529    | 0.001126766 | 0.152445303  | 0.000950176 |
| ADRA1D turquoise | -0.299442175 | 3.95E-11    | -0.306799181 | 1.23E-11    |

|                   |              |             |              |             |
|-------------------|--------------|-------------|--------------|-------------|
| ADRA2A turquoise  | 0.057266501  | 0.216742361 | 0.078329836  | 0.090878018 |
| ADRA2C turquoise  | -0.25754989  | 1.64E-08    | -0.258132627 | 1.52E-08    |
| AFAP1L1 turquoise | -0.22859436  | 5.95E-07    | -0.228571011 | 5.96E-07    |
| AFAP1L2 turquoise | -0.280423645 | 6.92E-10    | -0.275787724 | 1.35E-09    |
| AFF3 turquoise    | -0.035486931 | 0.444232923 | -0.049276462 | 0.287933814 |
| AGMAT turquoise   | 0.191180363  | 3.20E-05    | 0.203666857  | 9.16E-06    |
| AGRN turquoise    | -0.031812593 | 0.492834733 | -0.021656517 | 0.64064167  |
| AHCY turquoise    | 0.060281483  | 0.193468869 | 0.048202285  | 0.29858486  |
| AHNAK turquoise   | -0.159618511 | 0.000535451 | -0.173046456 | 0.000171324 |
| AIFM1 turquoise   | 0.054054337  | 0.243676692 | 0.075709118  | 0.102248541 |
| AKAP2 turquoise   | -0.177010406 | 0.000120364 | -0.184094575 | 6.28E-05    |
| AKNAD1 turquoise  | -0.205836222 | 7.31E-06    | -0.196674412 | 1.86E-05    |
| AKT3 turquoise    | -0.259479626 | 1.27E-08    | -0.245703275 | 7.53E-08    |
| ALDH18/turquoise  | 0.405812539  | 6.10E-20    | 0.39927928   | 2.67E-19    |
| ALDH1A turquoise  | -0.089295827 | 0.053807705 | -0.106111447 | 0.021823799 |
| ALDH1A turquoise  | -0.354406577 | 2.88E-15    | -0.347440357 | 1.07E-14    |
| ALDH1A turquoise  | 0.010454613  | 0.821725058 | 0.00933896   | 0.840479511 |
| ALDH1B turquoise  | -0.109495697 | 0.017932858 | -0.115839919 | 0.01224336  |
| ALDOA turquoise   | 0.163706443  | 0.000381969 | 0.207936645  | 5.87E-06    |
| AMIGO1 turquoise  | -0.175796865 | 0.000134211 | -0.183565684 | 6.60E-05    |
| AMPH turquoise    | -0.109924319 | 0.017486117 | -0.126936116 | 0.006016502 |
| ANG turquoise     | 0.178454568  | 0.000105636 | 0.174332464  | 0.000152912 |
| ANGPT1 turquoise  | -0.163473061 | 0.00038949  | -0.152856582 | 0.000920042 |
| ANGPTL turquoise  | -0.11470732  | 0.013123689 | -0.115295729 | 0.012659611 |
| ANK2 turquoise    | -0.155966847 | 0.000719184 | -0.191167294 | 3.20E-05    |
| ANKDD1 turquoise  | -0.327388324 | 3.96E-13    | -0.330872456 | 2.16E-13    |
| ANKRD2 turquoise  | -0.252633994 | 3.11E-08    | -0.269319415 | 3.34E-09    |
| ANKRD3 turquoise  | -0.41143633  | 1.67E-20    | -0.421514063 | 1.54E-21    |
| ANKRD3 turquoise  | 0.049025487  | 0.290399206 | 0.021145779  | 0.648540653 |
| ANKZF1 turquoise  | 0.14913804   | 0.001227732 | 0.144721185  | 0.001715074 |
| ANO4 turquoise    | -0.206393376 | 6.90E-06    | -0.1960454   | 1.98E-05    |
| ANO5 turquoise    | -0.440805777 | 1.27E-23    | -0.452131314 | 6.57E-25    |
| ANO9 turquoise    | 0.058132628  | 0.209859948 | 0.054086272  | 0.243397863 |
| ANTXR2 turquoise  | -0.058482176 | 0.207127516 | -0.055725032 | 0.229388736 |
| ANXA6 turquoise   | -0.182624387 | 7.21E-05    | -0.13810525  | 0.002782247 |
| AOC3 turquoise    | -0.15950061  | 0.000540629 | -0.152387936 | 0.000954451 |
| AOX1 turquoise    | -0.251790735 | 3.47E-08    | -0.267747183 | 4.15E-09    |
| AP1S1 turquoise   | 0.270179132  | 2.96E-09    | 0.289336415  | 1.86E-10    |
| AP4S1 turquoise   | -0.220871736 | 1.44E-06    | -0.20785563  | 5.92E-06    |
| APBA1 turquoise   | -0.180648151 | 8.65E-05    | -0.176130493 | 0.000130262 |
| APBB1 turquoise   | -0.394790601 | 7.21E-19    | -0.400578556 | 1.99E-19    |
| APEH turquoise    | 0.148394577  | 0.001299622 | 0.173724229  | 0.000161376 |
| APEX2 turquoise   | 0.217662485  | 2.05E-06    | 0.239445922  | 1.63E-07    |
| APOD turquoise    | -0.168822556 | 0.000247486 | -0.160692647 | 0.000490355 |
| APOLD1 turquoise  | -0.207924668 | 5.87E-06    | -0.225935233 | 8.08E-07    |

|         |           |              |             |              |             |
|---------|-----------|--------------|-------------|--------------|-------------|
| AQP8    | turquoise | -0.204826854 | 8.12E-06    | -0.203676814 | 9.15E-06    |
| AR      | turquoise | -0.048694038 | 0.293676744 | -0.061969533 | 0.181265356 |
| ARHGAP  | turquoise | -0.093097347 | 0.044343641 | -0.07540186  | 0.103652492 |
| ARHGAP  | turquoise | -0.290187517 | 1.63E-10    | -0.288722683 | 2.04E-10    |
| ARHGAP  | turquoise | -0.444616853 | 4.75E-24    | -0.447323728 | 2.34E-24    |
| ARHGAP  | turquoise | -0.14133108  | 0.002203152 | -0.142953431 | 0.00195562  |
| ARHGAP  | turquoise | -0.270916584 | 2.67E-09    | -0.269949491 | 3.06E-09    |
| ARHGEF  | turquoise | 0.021098199  | 0.649278551 | 0.009737345  | 0.833771603 |
| ARHGEF  | turquoise | -0.325437027 | 5.55E-13    | -0.316281247 | 2.62E-12    |
| ARHGEF  | turquoise | 0.138679815  | 0.002669906 | 0.123313994  | 0.007633023 |
| ARHGEF  | turquoise | -0.265550299 | 5.60E-09    | -0.27528632  | 1.45E-09    |
| ARHGEF  | turquoise | -0.068664471 | 0.138440314 | -0.094403562 | 0.041433377 |
| ARHGEF  | turquoise | -0.110345611 | 0.017056526 | -0.137344428 | 0.002937628 |
| ARHGEF  | turquoise | 0.075432976  | 0.103509622 | 0.073863635  | 0.110912062 |
| ARL10   | turquoise | -0.407020284 | 4.63E-20    | -0.417677066 | 3.85E-21    |
| ARMC9   | turquoise | -0.051542371 | 0.266312759 | -0.057994358 | 0.210947964 |
| ARMCX1  | turquoise | -0.493717896 | 4.57E-30    | -0.487470936 | 3.03E-29    |
| ARMCX4  | turquoise | -0.383337234 | 8.53E-18    | -0.393282265 | 1.00E-18    |
| ARRB1   | turquoise | -0.328520769 | 3.25E-13    | -0.285113379 | 3.48E-10    |
| ARSI    | turquoise | -0.287211797 | 2.55E-10    | -0.266730223 | 4.77E-09    |
| ART4    | turquoise | -0.155533543 | 0.000744494 | -0.138182194 | 0.002766957 |
| ARTN    | turquoise | 0.243822404  | 9.52E-08    | 0.232071227  | 3.96E-07    |
| ARVCF   | turquoise | 0.190212526  | 3.51E-05    | 0.168756135  | 0.000248905 |
| ASB1    | turquoise | -0.203436651 | 9.38E-06    | -0.216363002 | 2.37E-06    |
| ASB2    | turquoise | -0.160741887 | 0.000488374 | -0.125584113 | 0.006579935 |
| ASB5    | turquoise | -0.142692673 | 0.001993606 | -0.141683175 | 0.002147118 |
| ASPA    | turquoise | -0.231987206 | 4.00E-07    | -0.237104555 | 2.17E-07    |
| ASPN    | turquoise | -0.077700867 | 0.093509967 | -0.0472126   | 0.308627379 |
| ATIC    | turquoise | 0.127298993  | 0.005872844 | 0.113763031  | 0.013899824 |
| ATL1    | turquoise | -0.041138756 | 0.375074021 | -0.048818424 | 0.292443861 |
| ATOH8   | turquoise | -0.25221506  | 3.29E-08    | -0.262927316 | 8.00E-09    |
| ATP13A1 | turquoise | 0.127336483  | 0.005858179 | 0.146427413  | 0.001508926 |
| ATP13A2 | turquoise | 0.278814676  | 8.73E-10    | 0.279339934  | 8.09E-10    |
| ATP1B2  | turquoise | -0.347154859 | 1.13E-14    | -0.334164961 | 1.20E-13    |
| ATP6AP1 | turquoise | 0.11726582   | 0.011209476 | 0.130956099  | 0.004588057 |
| ATP6V0E | turquoise | 0.094080644  | 0.04213741  | 0.121753724  | 0.008441672 |
| ATP6V1C | turquoise | -0.279644137 | 7.74E-10    | -0.294092294 | 9.04E-11    |
| ATP8B2  | turquoise | -0.326663169 | 4.49E-13    | -0.322209259 | 9.64E-13    |
| ATP8B4  | turquoise | -0.179541762 | 9.57E-05    | -0.174359166 | 0.00015255  |
| ATRNL1  | turquoise | -0.245633399 | 7.59E-08    | -0.257930796 | 1.56E-08    |
| AVPR1A  | turquoise | -0.227888337 | 6.45E-07    | -0.21513546  | 2.71E-06    |
| AVPR2   | turquoise | -0.318182701 | 1.90E-12    | -0.321160274 | 1.15E-12    |
| AXIN1   | turquoise | 0.201618347  | 1.13E-05    | 0.204882034  | 8.08E-06    |
| AXL     | turquoise | -0.300966671 | 3.11E-11    | -0.280077464 | 7.27E-10    |
| B3GALT1 | turquoise | 0.004056466  | 0.93033258  | -0.013954925 | 0.763586122 |

|          |           |              |             |              |             |
|----------|-----------|--------------|-------------|--------------|-------------|
| B3GNT4   | turquoise | 0.187539641  | 4.54E-05    | 0.200190075  | 1.31E-05    |
| B4GAT1   | turquoise | -0.141634154 | 0.002154841 | -0.168146876 | 0.000262275 |
| BACH2    | turquoise | -0.349392068 | 7.45E-15    | -0.348110132 | 9.47E-15    |
| BAG2     | turquoise | -0.001363352 | 0.976558866 | -0.003158811 | 0.945722175 |
| BAI3     | turquoise | -0.263705557 | 7.20E-09    | -0.287299665 | 2.52E-10    |
| BAIAP2L  | turquoise | 0.254149964  | 2.56E-08    | 0.268806841  | 3.58E-09    |
| BCAN     | turquoise | -0.150469767 | 0.001108038 | -0.163930365 | 0.000374881 |
| BCHE     | turquoise | -0.251274622 | 3.71E-08    | -0.26018959  | 1.15E-08    |
| BCL2     | turquoise | -0.035399166 | 0.445361107 | -0.101578463 | 0.028168881 |
| BDH1     | turquoise | 0.08261261   | 0.074498629 | 0.137791108  | 0.002845474 |
| BEGAIN   | turquoise | -0.153898136 | 0.000847632 | -0.133350831 | 0.003890374 |
| BEND6    | turquoise | -0.350803657 | 5.71E-15    | -0.344829748 | 1.74E-14    |
| BEST1    | turquoise | -0.234152418 | 3.09E-07    | -0.233651979 | 3.28E-07    |
| BHLHE41  | turquoise | -0.258620065 | 1.42E-08    | -0.240631944 | 1.41E-07    |
| BHMT2    | turquoise | -0.396388755 | 5.07E-19    | -0.38824291  | 3.00E-18    |
| BIK      | turquoise | 0.059446514  | 0.199722876 | 0.081009486  | 0.080323284 |
| BMP6     | turquoise | -0.162900575 | 0.000408526 | -0.178952511 | 0.000100964 |
| BNC2     | turquoise | -0.261654413 | 9.49E-09    | -0.260105703 | 1.17E-08    |
| BOC      | turquoise | -0.224148903 | 9.92E-07    | -0.213976465 | 3.07E-06    |
| BPI      | turquoise | -0.19444462  | 2.32E-05    | -0.182263955 | 7.45E-05    |
| BST1     | turquoise | -0.296456826 | 6.28E-11    | -0.281794698 | 5.67E-10    |
| BTBD19   | turquoise | -0.34541144  | 1.56E-14    | -0.331189613 | 2.04E-13    |
| BTG1     | turquoise | 0.062759703  | 0.175752666 | 0.045334046  | 0.32829487  |
| BVES     | turquoise | -0.186811212 | 4.87E-05    | -0.199919143 | 1.34E-05    |
| C11orf95 | turquoise | -0.323230688 | 8.10E-13    | -0.341714609 | 3.09E-14    |
| C11orf96 | turquoise | -0.112312607 | 0.015170674 | -0.094925556 | 0.04031632  |
| C14orf28 | turquoise | -0.042605784 | 0.358269002 | -0.046441408 | 0.316605378 |
| C15orf52 | turquoise | -0.269922551 | 3.07E-09    | -0.269901732 | 3.08E-09    |
| C16orf45 | turquoise | -0.310335101 | 6.96E-12    | -0.29039682  | 1.58E-10    |
| C16orf86 | turquoise | -0.084572863 | 0.067848813 | -0.067703187 | 0.144061057 |
| C17orf51 | turquoise | -0.354263402 | 2.96E-15    | -0.368371693 | 1.87E-16    |
| C17orf61 | turquoise | 0.026773094  | 0.563855442 | 0.016570633  | 0.720972584 |
| C19orf54 | turquoise | 0.186980274  | 4.79E-05    | 0.201027012  | 1.20E-05    |
| C1orf159 | turquoise | 0.139565596  | 0.002504791 | 0.134007751  | 0.003716564 |
| C1orf21  | turquoise | -0.066932302 | 0.148693193 | -0.08212168  | 0.076244612 |
| C1orf53  | turquoise | 0.076917759  | 0.096871719 | 0.096720213  | 0.036668058 |
| C1QTNF1  | turquoise | -0.243802946 | 9.54E-08    | -0.203360341 | 9.46E-06    |
| C1QTNF2  | turquoise | -0.200444243 | 1.27E-05    | -0.194475735 | 2.32E-05    |
| C1QTNF4  | turquoise | -0.225416414 | 8.58E-07    | -0.22177863  | 1.30E-06    |
| C1QTNF7  | turquoise | -0.244581416 | 8.66E-08    | -0.236742925 | 2.27E-07    |
| C1R      | turquoise | -0.305428519 | 1.54E-11    | -0.26925276  | 3.37E-09    |
| C1S      | turquoise | -0.310505636 | 6.77E-12    | -0.266649281 | 4.82E-09    |
| C2CD4C   | turquoise | -0.163476988 | 0.000389362 | -0.166208542 | 0.000309409 |
| C2orf15  | turquoise | -0.034641829 | 0.45516367  | -0.030597914 | 0.509504829 |
| C2orf40  | turquoise | -0.331478661 | 1.94E-13    | -0.334435702 | 1.15E-13    |



|         |           |              |             |              |             |
|---------|-----------|--------------|-------------|--------------|-------------|
| C2orf74 | turquoise | -0.400565383 | 2.00E-19    | -0.377802305 | 2.72E-17    |
| C3orf18 | turquoise | -0.155013157 | 0.000775979 | -0.180191843 | 9.02E-05    |
| C3orf70 | turquoise | -0.225288959 | 8.70E-07    | -0.2188753   | 1.79E-06    |
| C4orf32 | turquoise | -0.009992899 | 0.829474942 | -0.013253421 | 0.775143264 |
| C7      | turquoise | -0.208659023 | 5.44E-06    | -0.208726503 | 5.40E-06    |
| C7orf31 | turquoise | -0.430414438 | 1.75E-22    | -0.432727362 | 9.83E-23    |
| C8orf46 | turquoise | -0.301610249 | 2.81E-11    | -0.305663287 | 1.48E-11    |
| C8orf88 | turquoise | -0.383599131 | 8.07E-18    | -0.38803271  | 3.14E-18    |
| C9orf3  | turquoise | -0.274276049 | 1.67E-09    | -0.263279508 | 7.63E-09    |
| CA11    | turquoise | -0.174325778 | 0.000153002 | -0.195014147 | 2.20E-05    |
| CA3     | turquoise | -0.269451137 | 3.28E-09    | -0.294043569 | 9.10E-11    |
| CAB39L  | turquoise | -0.092068568 | 0.046755131 | -0.100985443 | 0.029106125 |
| CABP1   | turquoise | -0.210928948 | 4.27E-06    | -0.217391781 | 2.11E-06    |
| CACNA1  | turquoise | -0.151892117 | 0.000992146 | -0.146005739 | 0.00155764  |
| CACNA1  | turquoise | -0.196005645 | 1.99E-05    | -0.204485147 | 8.42E-06    |
| CACNA1  | turquoise | -0.173529573 | 0.000164176 | -0.161361026 | 0.000464103 |
| CACNA2  | turquoise | -0.283624375 | 4.34E-10    | -0.280382366 | 6.96E-10    |
| CACNB2  | turquoise | -0.254839882 | 2.34E-08    | -0.2604593   | 1.11E-08    |
| CADM3   | turquoise | -0.192856569 | 2.72E-05    | -0.203710326 | 9.12E-06    |
| CALCOC  | turquoise | -0.18104031  | 8.34E-05    | -0.200131851 | 1.32E-05    |
| CALD1   | turquoise | -0.132522837 | 0.004119919 | -0.122098499 | 0.008256685 |
| CALHM2  | turquoise | -0.266210536 | 5.12E-09    | -0.262180778 | 8.85E-09    |
| CALR    | turquoise | 0.018608429  | 0.688354911 | 0.02860485   | 0.537481709 |
| CAMK2A  | turquoise | -0.229643792 | 5.26E-07    | -0.237474833 | 2.07E-07    |
| CAMK2C  | turquoise | -0.095150596 | 0.039842653 | -0.12468191  | 0.006981778 |
| CAMKM   | turquoise | 0.131961652  | 0.004282389 | 0.124599976  | 0.007019338 |
| CAND2   | turquoise | -0.275545639 | 1.39E-09    | -0.292489299 | 1.15E-10    |
| CAPN15  | turquoise | 0.149549926  | 0.001189497 | 0.158249127  | 0.000598531 |
| CASKIN2 | turquoise | -0.136096495 | 0.003209656 | -0.151711447 | 0.00100622  |
| CASP6   | turquoise | 0.299812319  | 3.73E-11    | 0.324947117  | 6.04E-13    |
| CASQ2   | turquoise | -0.160406126 | 0.000502025 | -0.164743586 | 0.000350155 |
| CAV1    | turquoise | -0.189962623 | 3.60E-05    | -0.190175552 | 3.53E-05    |
| CAV2    | turquoise | -0.238421538 | 1.85E-07    | -0.229047045 | 5.64E-07    |
| CBLN1   | turquoise | -0.135747561 | 0.003289708 | -0.137778099 | 0.00284812  |
| CBLN4   | turquoise | -0.230049657 | 5.02E-07    | -0.224268009 | 9.78E-07    |
| CBX6    | turquoise | -0.303181685 | 2.20E-11    | -0.314261132 | 3.66E-12    |
| CBX7    | turquoise | -0.225332659 | 8.66E-07    | -0.226477249 | 7.59E-07    |
| CBX8    | turquoise | 0.182358556  | 7.39E-05    | 0.166857599  | 0.00029281  |
| CCBE1   | turquoise | -0.240973268 | 1.35E-07    | -0.261361352 | 9.87E-09    |
| CCDC134 | turquoise | 0.164017444  | 0.000372157 | 0.171586674  | 0.000194736 |
| CCDC136 | turquoise | -0.276982964 | 1.14E-09    | -0.283330784 | 4.53E-10    |
| CCDC141 | turquoise | -0.11849957  | 0.010378081 | -0.103755046 | 0.024947729 |
| CCDC145 | turquoise | -0.010056672 | 0.828403505 | -0.017570488 | 0.704900925 |
| CCDC152 | turquoise | -0.262628626 | 8.33E-09    | -0.271741127 | 2.38E-09    |
| CCDC181 | turquoise | -0.38705645  | 3.87E-18    | -0.387972756 | 3.18E-18    |

|                  |              |             |              |             |
|------------------|--------------|-------------|--------------|-------------|
| CCDC184turquoise | -0.259296798 | 1.30E-08    | -0.238511277 | 1.83E-07    |
| CCDC3 turquoise  | -0.291660721 | 1.31E-10    | -0.270093617 | 3.00E-09    |
| CCDC36 turquoise | -0.27079252  | 2.72E-09    | -0.265794271 | 5.42E-09    |
| CCDC64 turquoise | 0.105952318  | 0.022023529 | 0.109241447  | 0.018202537 |
| CCDC80 turquoise | -0.230704946 | 4.65E-07    | -0.205788555 | 7.35E-06    |
| CCDC85/turquoise | -0.016953874 | 0.71479738  | -0.057345667 | 0.216106652 |
| CCIN turquoise   | -0.296234864 | 6.50E-11    | -0.293799336 | 9.45E-11    |
| CCL14 turquoise  | -0.210364607 | 4.53E-06    | -0.217187833 | 2.16E-06    |
| CCL16 turquoise  | -0.165868434 | 0.000318454 | -0.164070621 | 0.000370503 |
| CCL21 turquoise  | -0.145560788 | 0.001610606 | -0.110287879 | 0.017114844 |
| CCL23 turquoise  | -0.200908143 | 1.22E-05    | -0.1874426   | 4.58E-05    |
| CCND2 turquoise  | -0.181960514 | 7.66E-05    | -0.144068168 | 0.001800582 |
| CD200 turquoise  | -0.106655582 | 0.021152656 | -0.08048114  | 0.08232183  |
| CD300LGturquoise | -0.183793443 | 6.46E-05    | -0.193320455 | 2.60E-05    |
| CD302 turquoise  | -0.233913402 | 3.18E-07    | -0.227546048 | 6.71E-07    |
| CD99L2 turquoise | -0.252074237 | 3.35E-08    | -0.26108942  | 1.02E-08    |
| CDC42EFturquoise | -0.184658208 | 5.96E-05    | -0.209235101 | 5.11E-06    |
| CDC42EFturquoise | -0.210181109 | 4.62E-06    | -0.170393718 | 0.000216059 |
| CDH13 turquoise  | -0.072215808 | 0.119126654 | -0.07235749  | 0.118402192 |
| CDH23 turquoise  | -0.245327206 | 7.89E-08    | -0.235998663 | 2.48E-07    |
| CDIP1 turquoise  | -0.26203592  | 9.02E-09    | -0.247048805 | 6.35E-08    |
| CDO1 turquoise   | -0.292001795 | 1.24E-10    | -0.295992378 | 6.75E-11    |
| CDON turquoise   | -0.282944481 | 4.79E-10    | -0.319139932 | 1.62E-12    |
| CELF2 turquoise  | -0.03149868  | 0.497114723 | -0.024246513 | 0.601221884 |
| CEP112 turquoise | -0.22190812  | 1.28E-06    | -0.225653958 | 8.35E-07    |
| CES1 turquoise   | -0.102607146 | 0.026604523 | -0.123951945 | 0.007322836 |
| CFL2 turquoise   | -0.2237717   | 1.03E-06    | -0.235452614 | 2.65E-07    |
| CGNL1 turquoise  | 0.113983999  | 0.013714672 | 0.092383315  | 0.046005941 |
| CHKA turquoise   | 0.087825311  | 0.057893874 | 0.07357422   | 0.112321636 |
| CHPF2 turquoise  | 0.131606414  | 0.004388205 | 0.146799451  | 0.001467111 |
| CHPT1 turquoise  | -0.203416998 | 9.40E-06    | -0.211241881 | 4.13E-06    |
| CHRD turquoise   | -0.234358537 | 3.02E-07    | -0.219405799 | 1.69E-06    |
| CHRD1 turquoise  | -0.261703664 | 9.43E-09    | -0.269215761 | 3.39E-09    |
| CHRD2 turquoise  | -0.140232189 | 0.002386734 | -0.130422669 | 0.004758082 |
| CHSY3 turquoise  | -0.190361687 | 3.46E-05    | -0.177918731 | 0.000110891 |
| CIDEB turquoise  | -0.17886995  | 0.000101725 | -0.197352356 | 1.74E-05    |
| CILP turquoise   | -0.234453234 | 2.98E-07    | -0.224543752 | 9.48E-07    |
| CLDN11 turquoise | -0.236728457 | 2.27E-07    | -0.239578924 | 1.61E-07    |
| CLEC4G turquoise | -0.118431467 | 0.010422506 | -0.105800959 | 0.022214976 |
| CLEC4M turquoise | -0.215158205 | 2.70E-06    | -0.223600877 | 1.06E-06    |
| CLIP2 turquoise  | -0.191997178 | 2.96E-05    | -0.193396751 | 2.58E-05    |
| CLIP3 turquoise  | -0.363081217 | 5.34E-16    | -0.344632225 | 1.81E-14    |
| CLMP turquoise   | -0.246616791 | 6.71E-08    | -0.231305125 | 4.33E-07    |
| CLSTN2 turquoise | -0.290988756 | 1.45E-10    | -0.276879683 | 1.15E-09    |
| CLVS2 turquoise  | -0.042606448 | 0.358261498 | -0.05077725  | 0.273485338 |

|         |           |              |             |              |             |
|---------|-----------|--------------|-------------|--------------|-------------|
| CMA1    | turquoise | -0.170030054 | 0.000222982 | -0.169865405 | 0.000226184 |
| CMTM3   | turquoise | -0.125231896 | 0.006734278 | -0.103992611 | 0.024616195 |
| CMTM5   | turquoise | -0.222570806 | 1.19E-06    | -0.242491195 | 1.12E-07    |
| CMYA5   | turquoise | -0.200882814 | 1.22E-05    | -0.21342149  | 3.26E-06    |
| CNN1    | turquoise | -0.156220642 | 0.000704733 | -0.126156338 | 0.006335934 |
| CNNM1   | turquoise | -0.301826727 | 2.72E-11    | -0.295166278 | 7.66E-11    |
| CNPY4   | turquoise | -0.026024961 | 0.574803018 | -0.050510377 | 0.276017814 |
| CNRIP1  | turquoise | -0.250701644 | 3.99E-08    | -0.232319288 | 3.84E-07    |
| CNTN1   | turquoise | 0.023888566  | 0.606604547 | 0.010764824  | 0.816527845 |
| CNTN4   | turquoise | -0.199564366 | 1.39E-05    | -0.18672671  | 4.90E-05    |
| CNTNAP  | turquoise | -0.077644232 | 0.093749919 | -0.073981795 | 0.110340592 |
| COL12A1 | turquoise | 0.044880456  | 0.333162575 | 0.053324608  | 0.250109007 |
| COL14A1 | turquoise | -0.117842905 | 0.010813522 | -0.11397796  | 0.013719703 |
| COL16A1 | turquoise | -0.323572306 | 7.64E-13    | -0.310425813 | 6.86E-12    |
| COL4A6  | turquoise | -0.205612688 | 7.49E-06    | -0.222062658 | 1.26E-06    |
| COLEC12 | turquoise | -0.250987879 | 3.85E-08    | -0.261512768 | 9.68E-09    |
| COPG1   | turquoise | 0.165215505  | 0.000336513 | 0.187302141  | 4.64E-05    |
| COPZ1   | turquoise | 0.239148884  | 1.69E-07    | 0.244535956  | 8.71E-08    |
| COPZ2   | turquoise | -0.326744198 | 4.43E-13    | -0.286971145 | 2.65E-10    |
| COQ9    | turquoise | 0.315059587  | 3.20E-12    | 0.347938389  | 9.78E-15    |
| CORO2B  | turquoise | -0.319615453 | 1.50E-12    | -0.30688362  | 1.22E-11    |
| COX4I2  | turquoise | -0.289181375 | 1.90E-10    | -0.275088548 | 1.49E-09    |
| COX5A   | turquoise | 0.224236786  | 9.82E-07    | 0.237289402  | 2.12E-07    |
| COX7A1  | turquoise | -0.200129202 | 1.32E-05    | -0.170773803 | 0.000209039 |
| CPA3    | turquoise | -0.151120143 | 0.001053579 | -0.109506411 | 0.01792157  |
| CPE     | turquoise | -0.285309382 | 3.38E-10    | -0.276987623 | 1.13E-09    |
| CPEB1   | turquoise | -0.346869185 | 1.19E-14    | -0.353227192 | 3.61E-15    |
| CPED1   | turquoise | -0.1963842   | 1.92E-05    | -0.192322084 | 2.86E-05    |
| CPQ     | turquoise | -0.161580157 | 0.000455785 | -0.181693885 | 7.85E-05    |
| CPXM1   | turquoise | -0.335794887 | 9.01E-14    | -0.294823117 | 8.08E-11    |
| CPZ     | turquoise | -0.193173597 | 2.63E-05    | -0.179668576 | 9.46E-05    |
| CREBRF  | turquoise | -0.277829043 | 1.01E-09    | -0.286372309 | 2.89E-10    |
| CRHBP   | turquoise | -0.269222829 | 3.38E-09    | -0.279386653 | 8.04E-10    |
| CRIM1   | turquoise | -0.300590245 | 3.30E-11    | -0.300816324 | 3.19E-11    |
| CRISPLD | turquoise | -0.131093566 | 0.004545139 | -0.112901516 | 0.014642871 |
| CRMP1   | turquoise | -0.281588189 | 5.84E-10    | -0.283937897 | 4.14E-10    |
| CRTAP   | turquoise | -0.076931539 | 0.09681174  | -0.095726141 | 0.0386526   |
| CSDC2   | turquoise | -0.255418772 | 2.17E-08    | -0.244225993 | 9.05E-08    |
| CSGALN  | turquoise | -0.02398081  | 0.605215357 | -0.045182423 | 0.329916872 |
| CSRNP1  | turquoise | -0.040072494 | 0.387587765 | -0.036100159 | 0.436395697 |
| CSRP1   | turquoise | -0.05147964  | 0.266895929 | -0.049045276 | 0.290204302 |
| CSTB    | turquoise | 0.2082281    | 5.69E-06    | 0.239555623  | 1.61E-07    |
| CTB-133 | turquoise | -0.124184631 | 0.007212536 | -0.128220394 | 0.005521822 |
| CTD-220 | turquoise | -0.140945148 | 0.002266103 | -0.128958031 | 0.005254536 |
| CTF1    | turquoise | 0.034168059  | 0.461356949 | 0.05693208   | 0.219442592 |

|         |           |              |             |              |             |
|---------|-----------|--------------|-------------|--------------|-------------|
| CTGF    | turquoise | -0.048868332 | 0.291950165 | -0.036095088 | 0.436460171 |
| CTIF    | turquoise | -0.024515868 | 0.597185657 | -0.033404569 | 0.471435577 |
| CTNNA3  | turquoise | -0.235775184 | 2.55E-07    | -0.247861499 | 5.73E-08    |
| CTSF    | turquoise | -0.335230027 | 9.96E-14    | -0.36279558  | 5.65E-16    |
| CTSG    | turquoise | -0.220333362 | 1.53E-06    | -0.206380642 | 6.91E-06    |
| CTSK    | turquoise | -0.133316996 | 0.003899523 | -0.097774698 | 0.034658154 |
| CTSO    | turquoise | -0.128236683 | 0.00551579  | -0.116241837 | 0.011943739 |
| CUX1    | turquoise | -0.181298851 | 8.14E-05    | -0.212620315 | 3.56E-06    |
| CXCL12  | turquoise | -0.283414771 | 4.47E-10    | -0.268290287 | 3.85E-09    |
| CXorf57 | turquoise | -0.194122083 | 2.40E-05    | -0.19692358  | 1.82E-05    |
| CYBRD1  | turquoise | -0.31912363  | 1.63E-12    | -0.322732284 | 8.82E-13    |
| CYP1B1  | turquoise | -0.272875981 | 2.03E-09    | -0.248326674 | 5.41E-08    |
| CYP2U1  | turquoise | -0.151368717 | 0.001033425 | -0.139441738 | 0.002527304 |
| CYR61   | turquoise | -0.089546966 | 0.053134438 | -0.096994013 | 0.036136894 |
| CYS1    | turquoise | -0.226367157 | 7.69E-07    | -0.239334321 | 1.65E-07    |
| CYTL1   | turquoise | -0.305437027 | 1.53E-11    | -0.3154569   | 3.00E-12    |
| DAAM2   | turquoise | -0.08211296  | 0.076275922 | -0.125430467 | 0.006646869 |
| DAB2    | turquoise | -0.189374693 | 3.81E-05    | -0.17740273  | 0.000116183 |
| DACT1   | turquoise | -0.111463262 | 0.015961283 | -0.101297005 | 0.028610431 |
| DACT3   | turquoise | -0.24233084  | 1.15E-07    | -0.231460909 | 4.25E-07    |
| DAGLB   | turquoise | 0.045229779  | 0.329409722 | 0.082960966  | 0.073279566 |
| DBI     | turquoise | 0.224617277  | 9.40E-07    | 0.229208539  | 5.54E-07    |
| DBNDD1  | turquoise | 0.319450928  | 1.54E-12    | 0.343305018  | 2.31E-14    |
| DBNDD2  | turquoise | -0.194114718 | 2.40E-05    | -0.20752016  | 6.13E-06    |
| DCAF12I | turquoise | -0.292651494 | 1.13E-10    | -0.293186844 | 1.04E-10    |
| DCHS1   | turquoise | -0.186318758 | 5.10E-05    | -0.19023613  | 3.51E-05    |
| DCLK1   | turquoise | -0.139786047 | 0.002465171 | -0.155510287 | 0.000745875 |
| DCLK2   | turquoise | -0.23482969  | 2.85E-07    | -0.23985149  | 1.55E-07    |
| DCN     | turquoise | -0.214806519 | 2.81E-06    | -0.193030854 | 2.67E-05    |
| DCP1B   | turquoise | -0.139233889 | 0.0025655   | -0.15848154  | 0.000587361 |
| DDR2    | turquoise | -0.262010928 | 9.05E-09    | -0.245912007 | 7.33E-08    |
| DDX54   | turquoise | 0.115974833  | 0.012142052 | 0.125121019  | 0.006783532 |
| DEFB124 | turquoise | -0.286563638 | 2.81E-10    | -0.281952681 | 5.54E-10    |
| DENND2  | turquoise | -0.261662015 | 9.48E-09    | -0.252836485 | 3.03E-08    |
| DENND2  | turquoise | 0.009668879  | 0.834923572 | 0.046912643  | 0.31171455  |
| DES     | turquoise | -0.190646844 | 3.37E-05    | -0.163222079 | 0.000397731 |
| DET1    | turquoise | -0.093912335 | 0.042508344 | -0.108438156 | 0.019077969 |
| DFNA5   | turquoise | -0.342510033 | 2.67E-14    | -0.345292838 | 1.60E-14    |
| DGKB    | turquoise | -0.18474095  | 5.91E-05    | -0.18984871  | 3.64E-05    |
| DIO3    | turquoise | -0.164784774 | 0.000348944 | -0.168642858 | 0.000251341 |
| DIP2C   | turquoise | -0.206501892 | 6.82E-06    | -0.244923152 | 8.30E-08    |
| DIRAS1  | turquoise | -0.179401821 | 9.69E-05    | -0.190289712 | 3.49E-05    |
| DIXDC1  | turquoise | -0.180909351 | 8.44E-05    | -0.184771039 | 5.90E-05    |
| DLC1    | turquoise | -0.016633243 | 0.719962489 | -0.030438281 | 0.511717295 |
| DLG4    | turquoise | -0.103541396 | 0.025249172 | -0.131403903 | 0.00444958  |

|        |           |              |             |              |             |
|--------|-----------|--------------|-------------|--------------|-------------|
| DLL1   | turquoise | -0.056657615 | 0.221676633 | -0.080377175 | 0.082719787 |
| DMD    | turquoise | -0.183698935 | 6.52E-05    | -0.188018754 | 4.34E-05    |
| DMPK   | turquoise | -0.114820247 | 0.013033478 | -0.130914866 | 0.004601001 |
| DNAJB5 | turquoise | -0.248766233 | 5.11E-08    | -0.252589489 | 3.13E-08    |
| DNAJC1 | turquoise | -0.308673472 | 9.11E-12    | -0.340746905 | 3.69E-14    |
| DNASE1 | turquoise | -0.082208593 | 0.075933105 | -0.08187667  | 0.077128349 |
| DOK6   | turquoise | -0.139556491 | 0.00250644  | -0.130343171 | 0.004783902 |
| DPP3   | turquoise | 0.196905136  | 1.82E-05    | 0.199935264  | 1.34E-05    |
| DPP6   | turquoise | -0.193343594 | 2.59E-05    | -0.196632032 | 1.87E-05    |
| DPT    | turquoise | -0.210380594 | 4.53E-06    | -0.205585073 | 7.51E-06    |
| DPYD   | turquoise | -0.158542034 | 0.000584486 | -0.142488683 | 0.002023792 |
| DPYSL2 | turquoise | -0.124127887 | 0.007239296 | -0.131049353 | 0.004558903 |
| DPYSL3 | turquoise | -0.10012027  | 0.030521419 | -0.105927999 | 0.022054192 |
| DPYSL4 | turquoise | -0.157624154 | 0.000629554 | -0.158089927 | 0.000606296 |
| DRP2   | turquoise | -0.25293219  | 3.00E-08    | -0.249730084 | 4.52E-08    |
| DSCAML | turquoise | -0.339539635 | 4.59E-14    | -0.319720154 | 1.47E-12    |
| DSEL   | turquoise | -0.291759589 | 1.29E-10    | -0.309774575 | 7.62E-12    |
| DSP    | turquoise | 0.132601858  | 0.004097495 | 0.1186223    | 0.010298445 |
| DSTN   | turquoise | -0.079064925 | 0.087877622 | -0.081257217 | 0.079399833 |
| DTNA   | turquoise | -0.378813696 | 2.20E-17    | -0.391512043 | 1.48E-18    |
| DTNB   | turquoise | 0.274793406  | 1.55E-09    | 0.293655347  | 9.66E-11    |
| DUSP1  | turquoise | -0.116861569 | 0.011494436 | -0.120273699 | 0.009278424 |
| DUSP3  | turquoise | -0.067620198 | 0.14455436  | -0.045475026 | 0.326791356 |
| DZIP1  | turquoise | -0.353621576 | 3.35E-15    | -0.382052968 | 1.12E-17    |
| EBF1   | turquoise | -0.170416681 | 0.000215629 | -0.168808401 | 0.000247788 |
| EBF2   | turquoise | -0.013043683 | 0.778608458 | -0.025533422 | 0.582049912 |
| EBF3   | turquoise | -0.190067577 | 3.56E-05    | -0.206037013 | 7.16E-06    |
| EBF4   | turquoise | -0.42406539  | 8.30E-22    | -0.417563885 | 3.95E-21    |
| ECM2   | turquoise | -0.206806864 | 6.61E-06    | -0.189855787 | 3.64E-05    |
| EDA2R  | turquoise | 0.014912615  | 0.747893229 | 0.00285929   | 0.950862016 |
| EDEM2  | turquoise | 0.084622052  | 0.067688419 | 0.074202896  | 0.109277485 |
| EDIL3  | turquoise | -0.122369752 | 0.008113697 | -0.108113587 | 0.019441962 |
| EDNRA  | turquoise | -0.217894536 | 2.00E-06    | -0.201378794 | 1.16E-05    |
| EDNRB  | turquoise | -0.144062308 | 0.001801366 | -0.156496454 | 0.000689332 |
| EFCC1  | turquoise | -0.161820933 | 0.000446805 | -0.157691008 | 0.000626165 |
| EFEMP1 | turquoise | -0.329846823 | 2.58E-13    | -0.32099011  | 1.19E-12    |
| EFEMP2 | turquoise | -0.314448458 | 3.54E-12    | -0.282489293 | 5.12E-10    |
| EFHD1  | turquoise | -0.207851179 | 5.92E-06    | -0.206218219 | 7.03E-06    |
| EFNA3  | turquoise | 0.106118428  | 0.021815073 | 0.095531068  | 0.039052533 |
| EFNA4  | turquoise | 0.228314193  | 6.14E-07    | 0.209990704  | 4.72E-06    |
| EFS    | turquoise | -0.318220996 | 1.89E-12    | -0.33056508  | 2.28E-13    |
| EGR1   | turquoise | -0.028637796 | 0.537013068 | -0.055363446 | 0.232429523 |
| EGR2   | turquoise | -0.156916067 | 0.0006665   | -0.161449433 | 0.00046073  |
| EHBP1  | turquoise | -0.128222924 | 0.005520885 | -0.118421493 | 0.010429027 |
| EHD2   | turquoise | -0.193716452 | 2.50E-05    | -0.164468136 | 0.000358354 |

|         |           |              |             |              |             |
|---------|-----------|--------------|-------------|--------------|-------------|
| EID3    | turquoise | -0.358729056 | 1.25E-15    | -0.355303931 | 2.43E-15    |
| ELK3    | turquoise | -0.174586531 | 0.000149501 | -0.171336824 | 0.000199031 |
| ELN     | turquoise | -0.108957952 | 0.018507404 | -0.08713709  | 0.059892766 |
| EMILIN1 | turquoise | -0.165068241 | 0.000340716 | -0.137495588 | 0.002906143 |
| EMILIN3 | turquoise | -0.168394399 | 0.000256764 | -0.15431266  | 0.000820308 |
| EML1    | turquoise | -0.373547801 | 6.53E-17    | -0.374609691 | 5.26E-17    |
| EMP3    | turquoise | -0.18303206  | 6.94E-05    | -0.137282067 | 0.002950707 |
| ENO1    | turquoise | 0.13461988   | 0.00356097  | 0.140743688  | 0.002299612 |
| ENOX1   | turquoise | -0.220273863 | 1.54E-06    | -0.223523863 | 1.06E-06    |
| ENPEP   | turquoise | -0.224402549 | 9.63E-07    | -0.227759359 | 6.55E-07    |
| ENPP1   | turquoise | -0.077707326 | 0.09348263  | -0.105162389 | 0.023038637 |
| ENTPD6  | turquoise | 0.225511308  | 8.49E-07    | 0.218145188  | 1.95E-06    |
| EPB41L3 | turquoise | -0.285669327 | 3.21E-10    | -0.273889308 | 1.76E-09    |
| EPDR1   | turquoise | -0.104342142 | 0.024135327 | -0.121963508 | 0.008328679 |
| EPHA3   | turquoise | 0.029209732  | 0.528910285 | 0.014622924  | 0.752629512 |
| EPHA5   | turquoise | -0.157488611 | 0.000636476 | -0.157952582 | 0.00061307  |
| EPHB6   | turquoise | -0.3014741   | 2.87E-11    | -0.312667773 | 4.75E-12    |
| EPM2A   | turquoise | -0.334008601 | 1.24E-13    | -0.352041072 | 4.52E-15    |
| EPO     | turquoise | -0.007239322 | 0.876012636 | -0.035099334 | 0.449227554 |
| ESPN    | turquoise | 0.086906734  | 0.060574434 | 0.111100914  | 0.016309414 |
| ESRRA   | turquoise | 0.136218289  | 0.003182134 | 0.13791074   | 0.002821243 |
| EVC2    | turquoise | -0.361315615 | 7.56E-16    | -0.37011229  | 1.31E-16    |
| EXTL1   | turquoise | -0.260652655 | 1.09E-08    | -0.26949292  | 3.26E-09    |
| EZH1    | turquoise | -0.126493041 | 0.006196185 | -0.151408912 | 0.0010302   |
| EZR     | turquoise | 0.129976133  | 0.004904759 | 0.159935252  | 0.000521768 |
| F10     | turquoise | -0.317710118 | 2.06E-12    | -0.318267842 | 1.88E-12    |
| F12     | turquoise | 0.173093181  | 0.00017062  | 0.173456943  | 0.000165232 |
| F13A1   | turquoise | -0.163412501 | 0.000391464 | -0.163212455 | 0.000398051 |
| F8      | turquoise | -0.208591378 | 5.47E-06    | -0.230489456 | 4.77E-07    |
| FAAH2   | turquoise | -0.028903505 | 0.533240972 | -0.035000417 | 0.450507268 |
| FAM101  | turquoise | -0.005797402 | 0.900564555 | -0.01555168  | 0.737478558 |
| FAM110  | turquoise | 0.300787618  | 3.20E-11    | 0.311683296  | 5.59E-12    |
| FAM110  | turquoise | -0.504280767 | 1.71E-31    | -0.509431725 | 3.31E-32    |
| FAM114  | turquoise | 0.008088577  | 0.8616061   | 0.031006431  | 0.503865756 |
| FAM117  | turquoise | -0.231985657 | 4.00E-07    | -0.257416909 | 1.67E-08    |
| FAM129  | turquoise | 0.050756837  | 0.273678484 | 0.062834784  | 0.175235409 |
| FAM131  | turquoise | -0.244594762 | 8.65E-08    | -0.234982444 | 2.80E-07    |
| FAM13C  | turquoise | -0.049609008 | 0.284688868 | -0.038928109 | 0.401296929 |
| FAM162  | turquoise | -0.32538116  | 5.60E-13    | -0.304609567 | 1.75E-11    |
| FAM180  | turquoise | -0.141701783 | 0.002144194 | -0.124173836 | 0.00721762  |
| FAM180  | turquoise | -0.190274277 | 3.49E-05    | -0.197329256 | 1.75E-05    |
| FAM198  | turquoise | -0.153009973 | 0.000909031 | -0.150930376 | 0.001069208 |
| FAM198  | turquoise | 0.021521785  | 0.642721533 | 0.014443455  | 0.75556842  |
| FAM19A  | turquoise | -0.277414774 | 1.07E-09    | -0.278716614 | 8.85E-10    |
| FAM212  | turquoise | 0.003566813  | 0.938724451 | -0.002256165 | 0.961217713 |

|                   |              |             |              |             |
|-------------------|--------------|-------------|--------------|-------------|
| FAM219A turquoise | -0.249908397 | 4.42E-08    | -0.244474443 | 8.78E-08    |
| FAM228E turquoise | -0.162903633 | 0.000408422 | -0.168119959 | 0.00026288  |
| FAM26E turquoise  | -0.145972471 | 0.001561544 | -0.120110235 | 0.009375221 |
| FAM43A turquoise  | -0.215386762 | 2.64E-06    | -0.205792717 | 7.35E-06    |
| FAM49A turquoise  | -0.258621902 | 1.42E-08    | -0.241222378 | 1.31E-07    |
| FAM65A turquoise  | -0.040206133 | 0.386005606 | -0.021850438 | 0.637653064 |
| FAM65B turquoise  | -0.220829527 | 1.44E-06    | -0.204917723 | 8.05E-06    |
| FAM65C turquoise  | -0.298223092 | 4.78E-11    | -0.293568211 | 9.79E-11    |
| FAM69A turquoise  | -0.33491932  | 1.05E-13    | -0.326535092 | 4.59E-13    |
| FAM71E1 turquoise | -0.116519573 | 0.011740497 | -0.10263703  | 0.026560219 |
| FAM78B turquoise  | 0.06596096   | 0.154690201 | 0.044421891  | 0.338130631 |
| FAM83G turquoise  | 0.191076395  | 3.23E-05    | 0.18221551   | 7.48E-05    |
| FAM89A turquoise  | -0.353430672 | 3.47E-15    | -0.346209724 | 1.35E-14    |
| FAT4 turquoise    | -0.100801805 | 0.029401731 | -0.100967912 | 0.029134236 |
| FAXDC2 turquoise  | -0.33837737  | 5.66E-14    | -0.337367033 | 6.79E-14    |
| FBLN5 turquoise   | -0.289632269 | 1.78E-10    | -0.261441509 | 9.77E-09    |
| FBXL22 turquoise  | -0.165483929 | 0.000328976 | -0.162705302 | 0.000415215 |
| FBXL7 turquoise   | -0.189579476 | 3.73E-05    | -0.18682589  | 4.86E-05    |
| FBXO17 turquoise  | -0.449613069 | 1.28E-24    | -0.453000986 | 5.21E-25    |
| FBXO32 turquoise  | -0.181119865 | 8.28E-05    | -0.178035133 | 0.000109729 |
| FERMT2 turquoise  | -0.159818001 | 0.000526795 | -0.170426134 | 0.000215452 |
| FES turquoise     | -0.293828279 | 9.41E-11    | -0.266917586 | 4.65E-09    |
| FEZ1 turquoise    | -0.224764453 | 9.24E-07    | -0.194779917 | 2.25E-05    |
| FGF1 turquoise    | -0.169051314 | 0.000242659 | -0.149108713 | 0.001230497 |
| FGF10 turquoise   | -0.212857702 | 3.47E-06    | -0.224379854 | 9.66E-07    |
| FGF13 turquoise   | -0.092057703 | 0.046781172 | -0.142525215 | 0.002018356 |
| FGF2 turquoise    | -0.22985678  | 5.13E-07    | -0.217491592 | 2.09E-06    |
| FGF7 turquoise    | -0.182003705 | 7.63E-05    | -0.183796978 | 6.46E-05    |
| FHL1 turquoise    | -0.300584327 | 3.31E-11    | -0.289905538 | 1.71E-10    |
| FHL3 turquoise    | -0.241406785 | 1.28E-07    | -0.233334124 | 3.41E-07    |
| FHL5 turquoise    | -0.124034168 | 0.007283689 | -0.13204123  | 0.004259003 |
| FIBIN turquoise   | -0.034066537 | 0.462690164 | -0.024765227 | 0.593460053 |
| FIGF turquoise    | -0.076421413 | 0.099051861 | -0.092240574 | 0.046344448 |
| FILIP1 turquoise  | -0.190047443 | 3.57E-05    | -0.183788527 | 6.47E-05    |
| FILIP1L turquoise | -0.184179504 | 6.23E-05    | -0.169661898 | 0.000230201 |
| FKBP7 turquoise   | -0.203843561 | 9.00E-06    | -0.210274135 | 4.58E-06    |
| FLAD1 turquoise   | 0.221746613  | 1.30E-06    | 0.232915965  | 3.58E-07    |
| FLNA turquoise    | -0.192491238 | 2.82E-05    | -0.17570354  | 0.000135336 |
| FLNC turquoise    | -0.265661176 | 5.52E-09    | -0.258472809 | 1.45E-08    |
| FLRT2 turquoise   | -0.187610938 | 4.51E-05    | -0.189588069 | 3.73E-05    |
| FMNL3 turquoise   | -0.295252969 | 7.56E-11    | -0.295996492 | 6.75E-11    |
| FMO1 turquoise    | -0.06114541  | 0.187150139 | -0.058217132 | 0.209197004 |
| FMOD turquoise    | -0.049954706 | 0.281341824 | -0.034534112 | 0.456567667 |
| FNBP1 turquoise   | -0.358596347 | 1.28E-15    | -0.339600193 | 4.54E-14    |
| FNDC5 turquoise   | -0.300918662 | 3.14E-11    | -0.30185806  | 2.71E-11    |

|         |           |              |             |              |             |
|---------|-----------|--------------|-------------|--------------|-------------|
| FOS     | turquoise | -0.002787741 | 0.952090117 | -0.029111995 | 0.530290543 |
| FOSB    | turquoise | -0.084209616 | 0.069042931 | -0.11701554  | 0.011385154 |
| FOSL2   | turquoise | -0.244891234 | 8.33E-08    | -0.252802801 | 3.05E-08    |
| FOXI2   | turquoise | -0.091777013 | 0.047458218 | -0.088465699 | 0.056083857 |
| FOXJ2   | turquoise | -0.071029711 | 0.125328122 | -0.080557019 | 0.082032362 |
| FOXL2   | turquoise | -0.218802681 | 1.81E-06    | -0.206171144 | 7.06E-06    |
| FOXL2N1 | turquoise | -0.205824959 | 7.32E-06    | -0.200036625 | 1.33E-05    |
| FOXN3   | turquoise | -0.104242662 | 0.024271354 | -0.110541142 | 0.016860298 |
| FOXO1   | turquoise | -0.069201309 | 0.135375497 | -0.078702501 | 0.089346816 |
| FOXO4   | turquoise | -0.266850718 | 4.69E-09    | -0.302957297 | 2.27E-11    |
| FOXP1   | turquoise | 0.007990251  | 0.86327182  | 0.037600728  | 0.417556538 |
| FOXP2   | turquoise | -0.141293202 | 0.002209259 | -0.145255246 | 0.001647928 |
| FRAT2   | turquoise | 0.098836556  | 0.032729754 | 0.103466478  | 0.025355618 |
| FREM1   | turquoise | -0.220224587 | 1.54E-06    | -0.228168334 | 6.25E-07    |
| FRMD3   | turquoise | -0.222563356 | 1.19E-06    | -0.214921088 | 2.77E-06    |
| FRMD6   | turquoise | -0.073804887 | 0.111197057 | -0.089467299 | 0.053347248 |
| FRMD7   | turquoise | -0.149856685 | 0.001161738 | -0.154143293 | 0.000831372 |
| FRY     | turquoise | -0.213513724 | 3.23E-06    | -0.205608957 | 7.49E-06    |
| FSTL1   | turquoise | -0.131212671 | 0.004508247 | -0.133129997 | 0.003950436 |
| FSTL3   | turquoise | -0.214373051 | 2.94E-06    | -0.187002995 | 4.78E-05    |
| FXYD1   | turquoise | -0.332121539 | 1.73E-13    | -0.338050303 | 6.01E-14    |
| FXYD6   | turquoise | -0.412541943 | 1.29E-20    | -0.41637513  | 5.24E-21    |
| FYCO1   | turquoise | -0.03289092  | 0.478283648 | -0.046711815 | 0.313792793 |
| FYN     | turquoise | -0.244309952 | 8.96E-08    | -0.262476619 | 8.50E-09    |
| FZD4    | turquoise | -0.204536523 | 8.37E-06    | -0.199231513 | 1.44E-05    |
| FZD7    | turquoise | -0.23493326  | 2.82E-07    | -0.254086138 | 2.58E-08    |
| GAB2    | turquoise | -0.214860641 | 2.79E-06    | -0.24100634  | 1.35E-07    |
| GABARA  | turquoise | -0.192194589 | 2.90E-05    | -0.182859357 | 7.05E-05    |
| GABBR1  | turquoise | -0.316501246 | 2.52E-12    | -0.32617193  | 4.89E-13    |
| GABRB3  | turquoise | -0.162185869 | 0.000433508 | -0.18337282  | 6.72E-05    |
| GALE    | turquoise | 0.198215586  | 1.60E-05    | 0.223746853  | 1.04E-06    |
| GALNT1  | turquoise | -0.125841005 | 0.006469371 | -0.118496766 | 0.010379907 |
| GALNT1  | turquoise | -0.204338672 | 8.55E-06    | -0.210047354 | 4.69E-06    |
| GALNT6  | turquoise | 0.115855669  | 0.012231495 | 0.135259166  | 0.0034048   |
| GAPDH   | turquoise | 0.280127553  | 7.22E-10    | 0.290242886  | 1.62E-10    |
| GARNL3  | turquoise | -0.258660508 | 1.42E-08    | -0.289208689 | 1.89E-10    |
| GAS1    | turquoise | -0.266416016 | 4.98E-09    | -0.248740324 | 5.13E-08    |
| GAS6    | turquoise | -0.342591918 | 2.63E-14    | -0.338063776 | 5.99E-14    |
| GAS7    | turquoise | -0.238905927 | 1.74E-07    | -0.240343383 | 1.46E-07    |
| GATA6   | turquoise | -0.203218283 | 9.60E-06    | -0.200664186 | 1.25E-05    |
| GCOM1   | turquoise | -0.087144419 | 0.059871183 | -0.109067923 | 0.018388618 |
| GCSAML  | turquoise | -0.209433175 | 5.01E-06    | -0.194121195 | 2.40E-05    |
| GDAP1L1 | turquoise | -0.213425381 | 3.26E-06    | -0.215808329 | 2.52E-06    |
| GDF10   | turquoise | -0.161850241 | 0.000445723 | -0.16054628  | 0.000496285 |
| GDF15   | turquoise | 0.335900161  | 8.84E-14    | 0.355511028  | 2.33E-15    |



|         |           |              |             |              |             |
|---------|-----------|--------------|-------------|--------------|-------------|
| GDF7    | turquoise | -0.17298079  | 0.000172318 | -0.168152951 | 0.000262138 |
| GEM     | turquoise | -0.079204033 | 0.087318891 | -0.070472938 | 0.128324365 |
| GFPT2   | turquoise | -0.191892625 | 2.99E-05    | -0.1941538   | 2.39E-05    |
| GFRA1   | turquoise | -0.288709925 | 2.04E-10    | -0.292928812 | 1.08E-10    |
| GGT5    | turquoise | -0.099576998 | 0.031439919 | -0.042401603 | 0.360579217 |
| GHR     | turquoise | -0.269739838 | 3.15E-09    | -0.270073523 | 3.01E-09    |
| GIPC1   | turquoise | 0.038150435  | 0.410776523 | 0.063004806  | 0.174068266 |
| GJC1    | turquoise | -0.177823867 | 0.000111847 | -0.177428972 | 0.000115908 |
| GJC2    | turquoise | -0.207555132 | 6.11E-06    | -0.194443889 | 2.32E-05    |
| GLI1    | turquoise | -0.041978028 | 0.365401422 | -0.0345413   | 0.456473897 |
| GLI2    | turquoise | -0.294615474 | 8.34E-11    | -0.275748157 | 1.35E-09    |
| GLI3    | turquoise | -0.359496264 | 1.08E-15    | -0.36559218  | 3.25E-16    |
| GLIPR1  | turquoise | -0.235301271 | 2.69E-07    | -0.209152267 | 5.16E-06    |
| GLIPR1L | turquoise | -0.138197675 | 0.00276389  | -0.144634219 | 0.001726243 |
| GLIPR2  | turquoise | -0.278813742 | 8.73E-10    | -0.245654377 | 7.57E-08    |
| GLIS1   | turquoise | -0.295355674 | 7.44E-11    | -0.280379967 | 6.96E-10    |
| GLP2R   | turquoise | -0.099597984 | 0.031404004 | -0.113756748 | 0.01390512  |
| GLRA4   | turquoise | -0.150845607 | 0.001076259 | -0.157177668 | 0.000652622 |
| GLT1D1  | turquoise | -0.256588817 | 1.86E-08    | -0.25767091  | 1.61E-08    |
| GLT8D2  | turquoise | -0.229674024 | 5.24E-07    | -0.225544361 | 8.45E-07    |
| GMDS    | turquoise | 0.248351892  | 5.39E-08    | 0.290753676  | 1.50E-10    |
| GMIP    | turquoise | 0.283057465  | 4.71E-10    | 0.310383352  | 6.91E-12    |
| GNA14   | turquoise | 0.016798797  | 0.71729394  | 0.036111482  | 0.436251734 |
| GNAL    | turquoise | -0.270958264 | 2.66E-09    | -0.278600099 | 9.00E-10    |
| GNAO1   | turquoise | -0.181889071 | 7.71E-05    | -0.175034357 | 0.000143663 |
| GNAZ    | turquoise | -0.28391331  | 4.16E-10    | -0.307196204 | 1.16E-11    |
| GNG11   | turquoise | -0.063527739 | 0.170514793 | -0.058368706 | 0.208011682 |
| GNG2    | turquoise | -0.131386702 | 0.004454829 | -0.104234065 | 0.02428314  |
| GNG7    | turquoise | -0.205737666 | 7.39E-06    | -0.214500979 | 2.90E-06    |
| GOLT1A  | turquoise | 0.23470158   | 2.89E-07    | 0.238547315  | 1.82E-07    |
| GOT1    | turquoise | 0.288288823  | 2.17E-10    | 0.286881853  | 2.68E-10    |
| GPI     | turquoise | 0.133957407  | 0.003729631 | 0.151406102  | 0.001030425 |
| GPIHBP1 | turquoise | -0.243056727 | 1.05E-07    | -0.253876569 | 2.65E-08    |
| GPM6A   | turquoise | -0.270737211 | 2.74E-09    | -0.279583502 | 7.81E-10    |
| GPR1    | turquoise | -0.179075774 | 9.98E-05    | -0.186154605 | 5.18E-05    |
| GPR124  | turquoise | -0.165976525 | 0.000315553 | -0.146097112 | 0.001546963 |
| GPR133  | turquoise | -0.29401345  | 9.15E-11    | -0.295234204 | 7.59E-11    |
| GPR137B | turquoise | -0.21914687  | 1.74E-06    | -0.189681448 | 3.70E-05    |
| GPR146  | turquoise | -0.092621008 | 0.045446866 | -0.087829624 | 0.057881525 |
| GPR153  | turquoise | -0.290132271 | 1.65E-10    | -0.298885182 | 4.31E-11    |
| GPR161  | turquoise | -0.207581342 | 6.09E-06    | -0.226704397 | 7.40E-07    |
| GPR17   | turquoise | -0.264026141 | 6.89E-09    | -0.257632972 | 1.62E-08    |
| GPR173  | turquoise | -0.458573286 | 1.16E-25    | -0.471071609 | 3.60E-27    |
| GPR176  | turquoise | -0.204283487 | 8.60E-06    | -0.185860459 | 5.32E-05    |
| GPR182  | turquoise | -0.189204282 | 3.87E-05    | -0.198296621 | 1.58E-05    |

|          |           |              |             |              |             |
|----------|-----------|--------------|-------------|--------------|-------------|
| GPR20    | turquoise | -0.302152139 | 2.58E-11    | -0.295949332 | 6.79E-11    |
| GPR78    | turquoise | -0.245013871 | 8.21E-08    | -0.246064152 | 7.19E-08    |
| GPRASP1  | turquoise | -0.259952348 | 1.19E-08    | -0.263079973 | 7.84E-09    |
| GPRASP2  | turquoise | -0.245993908 | 7.26E-08    | -0.263290353 | 7.62E-09    |
| GPT2     | turquoise | 0.332668076  | 1.57E-13    | 0.355790898  | 2.21E-15    |
| GRASP    | turquoise | -0.40014015  | 2.20E-19    | -0.409882898 | 2.39E-20    |
| GREM1    | turquoise | -0.1326455   | 0.004085158 | -0.125203487 | 0.006746867 |
| GRIA3    | turquoise | -0.251911058 | 3.42E-08    | -0.234364709 | 3.01E-07    |
| GRID1    | turquoise | -0.232584422 | 3.72E-07    | -0.213938034 | 3.09E-06    |
| GRK5     | turquoise | -0.15620208  | 0.00070578  | -0.13987864  | 0.002448701 |
| GRM7     | turquoise | -0.191668581 | 3.05E-05    | -0.191514531 | 3.10E-05    |
| GS1-259F | turquoise | -0.078655371 | 0.089539311 | -0.087265503 | 0.059515531 |
| GSN      | turquoise | -0.038043866 | 0.412085814 | -0.013327677 | 0.773917518 |
| GSPT2    | turquoise | -0.452804815 | 5.49E-25    | -0.44551901  | 3.76E-24    |
| GSS      | turquoise | 0.290143216  | 1.65E-10    | 0.295502503  | 7.28E-11    |
| GSTM2    | turquoise | -0.434802105 | 5.84E-23    | -0.433368275 | 8.37E-23    |
| GSTM5    | turquoise | -0.263938742 | 6.98E-09    | -0.261041647 | 1.03E-08    |
| GTF2IRD  | turquoise | -0.140354843 | 0.002365572 | -0.161711157 | 0.000450863 |
| GUCY1A   | turquoise | -0.256738831 | 1.82E-08    | -0.251017728 | 3.84E-08    |
| GUCY1B   | turquoise | -0.074755483 | 0.10665581  | -0.076578014 | 0.098359836 |
| GYS1     | turquoise | 0.254370199  | 2.49E-08    | 0.257028367  | 1.76E-08    |
| H6PD     | turquoise | -0.053152459 | 0.251643522 | -0.061351346 | 0.185666602 |
| HAAO     | turquoise | -0.307235946 | 1.15E-11    | -0.295976011 | 6.77E-11    |
| HABP4    | turquoise | -0.060920208 | 0.188782432 | -0.093005068 | 0.044555587 |
| HAND2    | turquoise | -0.278300746 | 9.40E-10    | -0.25939946  | 1.28E-08    |
| HAPLN2   | turquoise | -0.1964349   | 1.91E-05    | -0.205681976 | 7.43E-06    |
| HAS1     | turquoise | -0.167341556 | 0.000280978 | -0.165649432 | 0.000324408 |
| HBEGF    | turquoise | -0.05091477  | 0.272186555 | -0.057040059 | 0.218568112 |
| HDAC5    | turquoise | -0.242462145 | 1.13E-07    | -0.239444928 | 1.63E-07    |
| HEPH     | turquoise | -0.151047156 | 0.001059565 | -0.146551209 | 0.001494892 |
| HES6     | turquoise | 0.343737808  | 2.13E-14    | 0.337208961  | 6.99E-14    |
| HGF      | turquoise | -0.149017969 | 0.001239088 | -0.168522164 | 0.000253962 |
| HHIPL1   | turquoise | -0.326669854 | 4.49E-13    | -0.318046794 | 1.95E-12    |
| HIC1     | turquoise | -0.164348538 | 0.00036197  | -0.137414791 | 0.002922933 |
| HILPDA   | turquoise | 0.285099738  | 3.49E-10    | 0.288951515  | 1.97E-10    |
| HIP1R    | turquoise | 0.233236633  | 3.45E-07    | 0.23594356   | 2.49E-07    |
| HK2      | turquoise | 0.248662797  | 5.18E-08    | 0.255925502  | 2.03E-08    |
| HLF      | turquoise | -0.213626808 | 3.19E-06    | -0.231370751 | 4.30E-07    |
| HMCN2    | turquoise | -0.226726085 | 7.38E-07    | -0.226610671 | 7.48E-07    |
| HN1L     | turquoise | 0.30819774   | 9.84E-12    | 0.320523365  | 1.28E-12    |
| HNMT     | turquoise | -0.081220886 | 0.079534718 | -0.077917386 | 0.092597136 |
| HOOK2    | turquoise | 0.033633744  | 0.468397647 | 0.008228179  | 0.85924218  |
| HOPX     | turquoise | -0.137485098 | 0.002908317 | -0.100786277 | 0.029426844 |
| HOXA10   | turquoise | 0.164672054  | 0.000352267 | 0.14639661   | 0.001512436 |
| HOXA11   | turquoise | 0.116552778  | 0.011716405 | 0.121350083  | 0.008662931 |

|         |           |              |             |              |             |
|---------|-----------|--------------|-------------|--------------|-------------|
| HOXA13  | turquoise | -0.110302335 | 0.017100224 | -0.111959051 | 0.015495505 |
| HPGDS   | turquoise | -0.208470752 | 5.55E-06    | -0.193886386 | 2.46E-05    |
| HPSE2   | turquoise | -0.232701153 | 3.67E-07    | -0.224552528 | 9.47E-07    |
| HRC     | turquoise | -0.136586993 | 0.003100118 | -0.137918876 | 0.002819602 |
| HRCT1   | turquoise | -0.131776491 | 0.004337253 | -0.109123053 | 0.018329319 |
| HS6ST1  | turquoise | -0.061061575 | 0.187756566 | -0.068073764 | 0.141873939 |
| HS6ST3  | turquoise | -0.027362039 | 0.555308355 | -0.041499559 | 0.370896598 |
| HSD17B1 | turquoise | -0.197293667 | 1.75E-05    | -0.225457071 | 8.54E-07    |
| HSD17B1 | turquoise | -0.193407213 | 2.57E-05    | -0.199493384 | 1.40E-05    |
| HSD17B6 | turquoise | -0.223044527 | 1.12E-06    | -0.221427095 | 1.35E-06    |
| HSPA12E | turquoise | -0.276872614 | 1.15E-09    | -0.257304507 | 1.69E-08    |
| HSPB2   | turquoise | -0.349096557 | 7.87E-15    | -0.330627134 | 2.25E-13    |
| HSPB2-C | turquoise | -0.176191593 | 0.000129551 | -0.168079762 | 0.000263788 |
| HSPB3   | turquoise | -0.18752616  | 4.55E-05    | -0.191041934 | 3.24E-05    |
| HSPB6   | turquoise | -0.339125277 | 4.95E-14    | -0.32902787  | 2.98E-13    |
| HSPB7   | turquoise | -0.213681591 | 3.17E-06    | -0.200084698 | 1.32E-05    |
| HSPB8   | turquoise | -0.159065537 | 0.000560141 | -0.144557793 | 0.001736113 |
| HTR1B   | turquoise | -0.126697734 | 0.006112584 | -0.090116909 | 0.051632498 |
| HTR2A   | turquoise | -0.128017385 | 0.005597498 | -0.127917195 | 0.005635189 |
| HTR2B   | turquoise | -0.1738868   | 0.000159071 | -0.160322726 | 0.000505471 |
| HTRA1   | turquoise | 0.028263851  | 0.54234428  | 0.025432197  | 0.583547569 |
| HTRA3   | turquoise | -0.115081561 | 0.012826821 | -0.057817165 | 0.212348187 |
| IDH2    | turquoise | 0.306435181  | 1.31E-11    | 0.336073069  | 8.57E-14    |
| IGDCC4  | turquoise | -0.27460454  | 1.59E-09    | -0.270750236 | 2.74E-09    |
| IGF2    | turquoise | -0.327315149 | 4.01E-13    | -0.311417355 | 5.83E-12    |
| IGFBP5  | turquoise | -0.099209618 | 0.032074351 | -0.084184703 | 0.069125455 |
| IGFBP6  | turquoise | -0.367833827 | 2.08E-16    | -0.354930186 | 2.61E-15    |
| IGFN1   | turquoise | -0.1401458   | 0.002401742 | -0.135250476 | 0.003406881 |
| IGIP    | turquoise | -0.064601585 | 0.163388006 | -0.060059779 | 0.195115302 |
| IGSF8   | turquoise | 0.160537062  | 0.00049666  | 0.145146941  | 0.001661347 |
| IGSF9   | turquoise | 0.047599989  | 0.304670255 | 0.015359884  | 0.740599255 |
| IGSF9B  | turquoise | -0.26740052  | 4.35E-09    | -0.283526543 | 4.40E-10    |
| IKBKE   | turquoise | 0.141873354  | 0.002117397 | 0.153713573  | 0.000860066 |
| IL11RA  | turquoise | -0.282176445 | 5.36E-10    | -0.287387681 | 2.49E-10    |
| IL17D   | turquoise | -0.260364694 | 1.13E-08    | -0.271337192 | 2.52E-09    |
| INMT    | turquoise | -0.109283733 | 0.018157441 | -0.092657315 | 0.045361973 |
| INMT-FA | turquoise | -0.097017854 | 0.036090955 | -0.095597979 | 0.03891496  |
| INPP5A  | turquoise | -0.188850874 | 4.01E-05    | -0.21284377  | 3.47E-06    |
| IQSEC1  | turquoise | -0.07658078  | 0.098347645 | -0.088659636 | 0.055545064 |
| IQSEC3  | turquoise | -0.429676378 | 2.10E-22    | -0.430539586 | 1.69E-22    |
| IRS1    | turquoise | -0.177799706 | 0.000112091 | -0.193728431 | 2.49E-05    |
| IRS2    | turquoise | -0.369838948 | 1.39E-16    | -0.393655171 | 9.25E-19    |
| IRS4    | turquoise | -0.140961577 | 0.00226339  | -0.144933054 | 0.001688142 |
| ISCU    | turquoise | -0.197091018 | 1.79E-05    | -0.173779831 | 0.000160584 |
| ITGA11  | turquoise | -0.02295212  | 0.620786887 | 0.007349984  | 0.874132974 |

|         |           |              |             |              |             |
|---------|-----------|--------------|-------------|--------------|-------------|
| ITGA7   | turquoise | -0.340022191 | 4.20E-14    | -0.34479667  | 1.75E-14    |
| ITGA8   | turquoise | -0.166248675 | 0.000308358 | -0.172448419 | 0.000180577 |
| ITGA9   | turquoise | -0.057786341 | 0.212592449 | -0.06303781  | 0.173842379 |
| ITGB1BP | turquoise | -0.156040765 | 0.000714947 | -0.155703207 | 0.000734487 |
| ITGBL1  | turquoise | 0.041853532  | 0.366826352 | 0.059488145  | 0.19940761  |
| ITM2A   | turquoise | -0.2396046   | 1.60E-07    | -0.221967615 | 1.27E-06    |
| ITPKB   | turquoise | 0.134967708  | 0.003475212 | 0.10369422   | 0.025033232 |
| ITPR1   | turquoise | -0.060340502 | 0.193032299 | -0.077824525 | 0.092987757 |
| ITPRIP  | turquoise | -0.01972447  | 0.670728477 | -0.034102407 | 0.462218859 |
| JADE2   | turquoise | -0.164651103 | 0.000352888 | -0.169071476 | 0.000242238 |
| JAM2    | turquoise | -0.138040963 | 0.002795081 | -0.141637003 | 0.002154392 |
| JAM3    | turquoise | -0.232240737 | 3.88E-07    | -0.218793474 | 1.81E-06    |
| JAZF1   | turquoise | -0.144836155 | 0.001700411 | -0.135987054 | 0.003234571 |
| JPH2    | turquoise | -0.25781167  | 1.58E-08    | -0.253445733 | 2.80E-08    |
| JPH4    | turquoise | -0.250876298 | 3.91E-08    | -0.252002237 | 3.38E-08    |
| KANK2   | turquoise | -0.155770424 | 0.000730557 | -0.15627832  | 0.000701486 |
| KATNAL1 | turquoise | -0.187837912 | 4.41E-05    | -0.200211762 | 1.31E-05    |
| KBTD1   | turquoise | -0.187586317 | 4.52E-05    | -0.187701746 | 4.47E-05    |
| KCNA1   | turquoise | -0.200577788 | 1.26E-05    | -0.197207304 | 1.77E-05    |
| KCNA4   | turquoise | -0.137141474 | 0.002980389 | -0.14912174  | 0.001229268 |
| KCNA5   | turquoise | -0.218164556 | 1.94E-06    | -0.214721749 | 2.83E-06    |
| KCNAB1  | turquoise | -0.186020049 | 5.24E-05    | -0.17655895  | 0.000125351 |
| KCNAB3  | turquoise | -0.164537925 | 0.00035626  | -0.167023133 | 0.000288711 |
| KCNB1   | turquoise | -0.179805633 | 9.34E-05    | -0.202065009 | 1.08E-05    |
| KCND2   | turquoise | -0.252283001 | 3.26E-08    | -0.253393003 | 2.82E-08    |
| KCND3   | turquoise | -0.043031075 | 0.353486885 | -0.042581734 | 0.358540627 |
| KCNE4   | turquoise | -0.086535875 | 0.06168533  | -0.074925875 | 0.105857506 |
| KCNH2   | turquoise | -0.406114811 | 5.69E-20    | -0.408732199 | 3.12E-20    |
| KCNJ8   | turquoise | -0.187897141 | 4.39E-05    | -0.173663548 | 0.000162244 |
| KCNK3   | turquoise | -0.218608819 | 1.85E-06    | -0.204883692 | 8.08E-06    |
| KCNMA1  | turquoise | -0.079923973 | 0.084472739 | -0.077933744 | 0.092528465 |
| KCNMB1  | turquoise | -0.146759905 | 0.001471505 | -0.123474809 | 0.007553744 |
| KCNN2   | turquoise | 0.120090881  | 0.009386741 | 0.08890513   | 0.054869209 |
| KCTD10  | turquoise | -0.137506561 | 0.002903869 | -0.149087609 | 0.00123249  |
| KCTD12  | turquoise | -0.354097778 | 3.05E-15    | -0.355441276 | 2.36E-15    |
| KCTD15  | turquoise | -0.200115249 | 1.32E-05    | -0.233005785 | 3.54E-07    |
| KCTD17  | turquoise | -0.27311981  | 1.96E-09    | -0.275145383 | 1.47E-09    |
| KCTD7   | turquoise | -0.195106597 | 2.18E-05    | -0.206453773 | 6.86E-06    |
| KCTD8   | turquoise | -0.222685818 | 1.17E-06    | -0.224316345 | 9.73E-07    |
| KIAA121 | turquoise | -0.254283142 | 2.51E-08    | -0.243688878 | 9.68E-08    |
| KIAA146 | turquoise | -0.180902129 | 8.45E-05    | -0.172826865 | 0.000174668 |
| KIAA161 | turquoise | 0.010850643  | 0.815091458 | 0.001980417  | 0.965954613 |
| KIAA164 | turquoise | -0.156442883 | 0.000692299 | -0.160905814 | 0.000481836 |
| KIAA175 | turquoise | -0.14939175  | 0.001204049 | -0.118547177 | 0.010347126 |
| KIF26A  | turquoise | -0.190566511 | 3.40E-05    | -0.197766217 | 1.67E-05    |

|        |           |              |             |              |             |
|--------|-----------|--------------|-------------|--------------|-------------|
| KIT    | turquoise | -0.107684471 | 0.019932475 | -0.128600761 | 0.005382504 |
| KLF17  | turquoise | -0.157806643 | 0.000620345 | -0.154543097 | 0.000805474 |
| KLF2   | turquoise | -0.093507998 | 0.043410719 | -0.059659877 | 0.198110939 |
| KLF4   | turquoise | 0.050580467  | 0.275351154 | 0.038236138  | 0.409725384 |
| KLF7   | turquoise | -0.200999249 | 1.20E-05    | -0.211067314 | 4.21E-06    |
| KLF9   | turquoise | -0.162326262 | 0.000428491 | -0.162379121 | 0.000426616 |
| KLHDC1 | turquoise | -0.193833754 | 2.47E-05    | -0.20922991  | 5.12E-06    |
| KLHL13 | turquoise | -0.109472762 | 0.01795704  | -0.104674728 | 0.023685329 |
| KLHL21 | turquoise | -0.088680249 | 0.05548805  | -0.088016473 | 0.057348568 |
| KLHL33 | turquoise | -0.177852147 | 0.000111561 | -0.181359917 | 8.10E-05    |
| KLHL38 | turquoise | -0.19319239  | 2.63E-05    | -0.190435393 | 3.44E-05    |
| KLHL4  | turquoise | -0.211416985 | 4.05E-06    | -0.220915346 | 1.43E-06    |
| KRT222 | turquoise | -0.085295087 | 0.065524901 | -0.069675726 | 0.132710773 |
| KRT7   | turquoise | -0.158178703 | 0.000601955 | -0.142613816 | 0.002005226 |
| KSR1   | turquoise | -0.269862579 | 3.10E-09    | -0.282084889 | 5.43E-10    |
| KY     | turquoise | -0.179423101 | 9.67E-05    | -0.181015086 | 8.36E-05    |
| LAMA2  | turquoise | -0.301194438 | 3.00E-11    | -0.292962961 | 1.07E-10    |
| LAMA4  | turquoise | -0.09029646  | 0.051166737 | -0.095313804 | 0.039502081 |
| LAMTOR | turquoise | 0.053417268  | 0.249285748 | 0.06551584   | 0.157498778 |
| LATS2  | turquoise | -0.227816166 | 6.51E-07    | -0.230265823 | 4.89E-07    |
| LAYN   | turquoise | -0.384066789 | 7.31E-18    | -0.363793664 | 4.64E-16    |
| LBH    | turquoise | -0.209677791 | 4.88E-06    | -0.181918743 | 7.69E-05    |
| LCN10  | turquoise | -0.204237123 | 8.64E-06    | -0.219543879 | 1.67E-06    |
| LCN6   | turquoise | -0.175952173 | 0.000132359 | -0.188532686 | 4.13E-05    |
| LDB2   | turquoise | -0.160951107 | 0.000480044 | -0.157467896 | 0.00063754  |
| LDB3   | turquoise | -0.050220804 | 0.278783671 | -0.058532922 | 0.206732978 |
| LDLRAD | turquoise | -0.183131222 | 6.87E-05    | -0.182971739 | 6.98E-05    |
| LDLRAD | turquoise | -0.041025642 | 0.376389619 | -0.047051472 | 0.310283204 |
| LEFTY2 | turquoise | -0.065077819 | 0.160299994 | -0.064140393 | 0.166420882 |
| LEPR   | turquoise | -0.274271766 | 1.67E-09    | -0.27774571  | 1.02E-09    |
| LGI2   | turquoise | -0.3103685   | 6.92E-12    | -0.333070428 | 1.46E-13    |
| LGI3   | turquoise | -0.182957284 | 6.99E-05    | -0.184848726 | 5.85E-05    |
| LGI4   | turquoise | -0.210210629 | 4.61E-06    | -0.203049367 | 9.76E-06    |
| LHFP   | turquoise | -0.162260823 | 0.000430822 | -0.147925361 | 0.001346966 |
| LIFR   | turquoise | -0.2725701   | 2.12E-09    | -0.294375797 | 8.65E-11    |
| LIMS2  | turquoise | -0.231584645 | 4.19E-07    | -0.211830679 | 3.88E-06    |
| LIN7A  | turquoise | -0.012233328 | 0.792037428 | -0.024199149 | 0.601932886 |
| LINGO2 | turquoise | -0.240573273 | 1.42E-07    | -0.254195274 | 2.54E-08    |
| LIX1L  | turquoise | 0.00032493   | 0.994412476 | -0.007095474 | 0.878457046 |
| LMCD1  | turquoise | -0.298577661 | 4.52E-11    | -0.273244931 | 1.93E-09    |
| LMOD1  | turquoise | -0.177158278 | 0.000118772 | -0.15555439  | 0.000743258 |
| LNP1   | turquoise | -0.401881848 | 1.49E-19    | -0.404201911 | 8.80E-20    |
| LONRF2 | turquoise | -0.220671967 | 1.47E-06    | -0.220656651 | 1.47E-06    |
| LOXL4  | turquoise | -0.247065339 | 6.34E-08    | -0.2332859   | 3.43E-07    |
| LPAR1  | turquoise | 0.142078526  | 0.002085755 | 0.142898076  | 0.001963628 |

|         |           |              |             |              |             |
|---------|-----------|--------------|-------------|--------------|-------------|
| LPAR2   | turquoise | 0.141193548  | 0.0022254   | 0.169828392  | 0.00022691  |
| LPAR4   | turquoise | -0.194708068 | 2.27E-05    | -0.195442814 | 2.11E-05    |
| LPAR6   | turquoise | -0.02240018  | 0.629212699 | -0.040390286 | 0.383831866 |
| LPP     | turquoise | -0.10702944  | 0.020701988 | -0.100190486 | 0.0304044   |
| LRCH2   | turquoise | -0.4168534   | 4.68E-21    | -0.418299286 | 3.32E-21    |
| LRFN5   | turquoise | -0.260591933 | 1.09E-08    | -0.273363272 | 1.90E-09    |
| LRP1    | turquoise | -0.197327125 | 1.75E-05    | -0.192310692 | 2.87E-05    |
| LRRC2   | turquoise | 0.015811106  | 0.733264308 | -0.017745771 | 0.702096654 |
| LRRC32  | turquoise | -0.194555353 | 2.30E-05    | -0.165109534 | 0.000339532 |
| LRRC4B  | turquoise | -0.240145616 | 1.50E-07    | -0.227505201 | 6.75E-07    |
| LRRC70  | turquoise | -0.171252056 | 0.000200509 | -0.180539946 | 8.73E-05    |
| LRRC8C  | turquoise | -0.150240494 | 0.001127846 | -0.139820396 | 0.00245905  |
| LRRK2   | turquoise | -0.259095635 | 1.34E-08    | -0.258916829 | 1.37E-08    |
| LRRN4C1 | turquoise | -0.232332841 | 3.84E-07    | -0.224324286 | 9.72E-07    |
| LSAMP   | turquoise | -0.254201328 | 2.54E-08    | -0.265946632 | 5.31E-09    |
| LSMEM2  | turquoise | -0.121785756 | 0.008424331 | -0.121154803 | 0.008771818 |
| LTBP2   | turquoise | -0.18216977  | 7.52E-05    | -0.168775813 | 0.000248484 |
| LTBP4   | turquoise | -0.220081776 | 1.57E-06    | -0.211679964 | 3.94E-06    |
| LTC4S   | turquoise | -0.1385795   | 0.002689217 | -0.140890418 | 0.002275162 |
| LURAP1  | turquoise | -0.20987874  | 4.78E-06    | -0.203481099 | 9.34E-06    |
| LYPLA2  | turquoise | 0.05209924   | 0.261174268 | 0.090650127  | 0.050259568 |
| LYPLAL1 | turquoise | -0.219361788 | 1.70E-06    | -0.195942541 | 2.00E-05    |
| LYSMD4  | turquoise | -0.133740355 | 0.003786445 | -0.165854992 | 0.000318816 |
| LYVE1   | turquoise | -0.207576599 | 6.09E-06    | -0.20207057  | 1.08E-05    |
| MAF     | turquoise | -0.147499499 | 0.001391304 | -0.147796607 | 0.001360232 |
| MAGEE1  | turquoise | -0.315393261 | 3.03E-12    | -0.328208117 | 3.43E-13    |
| MAGEE2  | turquoise | -0.236799408 | 2.25E-07    | -0.234130743 | 3.10E-07    |
| MAGEH1  | turquoise | -0.531453229 | 2.12E-35    | -0.508242035 | 4.85E-32    |
| MAGEL2  | turquoise | -0.292617292 | 1.13E-10    | -0.300507368 | 3.35E-11    |
| MAGI2   | turquoise | -0.400119074 | 2.21E-19    | -0.388528026 | 2.82E-18    |
| MAMDC1  | turquoise | -0.267622874 | 4.22E-09    | -0.273174546 | 1.95E-09    |
| MAMLD1  | turquoise | -0.259193287 | 1.32E-08    | -0.266364892 | 5.01E-09    |
| MAN1A1  | turquoise | -0.152840646 | 0.000921193 | -0.155017841 | 0.00077569  |
| MAN1C1  | turquoise | -0.028698733 | 0.536146801 | -0.056356293 | 0.224147934 |
| MANF    | turquoise | 0.142573711  | 0.00201116  | 0.141003271  | 0.002256518 |
| MAOB    | turquoise | -0.112525342 | 0.014978118 | -0.103418097 | 0.025424564 |
| MAP10   | turquoise | -0.355337497 | 2.41E-15    | -0.346991743 | 1.17E-14    |
| MAP1B   | turquoise | 0.022734311  | 0.624106078 | 0.021985561  | 0.635574076 |
| MAP2K3  | turquoise | 0.300795235  | 3.20E-11    | 0.334996217  | 1.04E-13    |
| MAP3K1  | turquoise | -0.302986692 | 2.26E-11    | -0.322885078 | 8.59E-13    |
| MAP3K3  | turquoise | -0.247199106 | 6.24E-08    | -0.263367174 | 7.54E-09    |
| MAP3K7  | turquoise | -0.158669019 | 0.000578492 | -0.132991364 | 0.003988568 |
| MAP7D3  | turquoise | -0.37700895  | 3.21E-17    | -0.395225704 | 6.55E-19    |
| MAPK10  | turquoise | -0.286365058 | 2.89E-10    | -0.290113692 | 1.65E-10    |
| MAPK3   | turquoise | -0.222451137 | 1.20E-06    | -0.182898397 | 7.02E-05    |

|                  |              |             |              |             |
|------------------|--------------|-------------|--------------|-------------|
| MAPKAPturquoise  | 0.06645879   | 0.151594141 | 0.081101913  | 0.079977737 |
| MAPKBPturquoise  | 0.084844414  | 0.066967233 | 0.061956659  | 0.181356217 |
| MAPRE2 turquoise | 0.058929349  | 0.203669581 | 0.042682315  | 0.357405483 |
| MARCKSturquoise  | 0.253490386  | 2.79E-08    | 0.248043732  | 5.60E-08    |
| MARVELturquoise  | -0.190781274 | 3.33E-05    | -0.18574024  | 5.38E-05    |
| MAS1 turquoise   | -0.174545685 | 0.000150044 | -0.178454263 | 0.000105639 |
| MAS1L turquoise  | -0.154376923 | 0.000816146 | -0.146810405 | 0.001465897 |
| MASP1 turquoise  | -0.174208127 | 0.000154607 | -0.170573007 | 0.000212721 |
| MAST4 turquoise  | 0.121215304  | 0.008737954 | 0.116278724  | 0.011916568 |
| MATN2 turquoise  | -0.202201779 | 1.07E-05    | -0.193474302 | 2.56E-05    |
| MBOAT7turquoise  | 0.188601159  | 4.10E-05    | 0.183948235  | 6.37E-05    |
| MCHR1 turquoise  | -0.10183929  | 0.027764934 | -0.09014848  | 0.051550346 |
| MDFIC turquoise  | -0.158379053 | 0.000592263 | -0.14014921  | 0.002401148 |
| MDGA1 turquoise  | -0.331447703 | 1.95E-13    | -0.309051177 | 8.57E-12    |
| MECP2 turquoise  | -0.293185151 | 1.04E-10    | -0.299605628 | 3.85E-11    |
| MEDAG turquoise  | -0.182281233 | 7.44E-05    | -0.163719767 | 0.000381544 |
| MEF2C turquoise  | -0.223460017 | 1.07E-06    | -0.210148469 | 4.64E-06    |
| MEF2D turquoise  | -0.041918549 | 0.366081769 | -0.05144208  | 0.267245512 |
| MEIS2 turquoise  | -0.068653748 | 0.138502068 | -0.06314429  | 0.173115086 |
| MEIS3 turquoise  | -0.185113141 | 5.71E-05    | -0.168104446 | 0.00026323  |
| MEOX1 turquoise  | -0.255208056 | 2.23E-08    | -0.254906551 | 2.32E-08    |
| MEOX2 turquoise  | -0.188156279 | 4.28E-05    | -0.175748451 | 0.000134793 |
| METTL7,turquoise | 0.010254636  | 0.825079599 | 0.000319429  | 0.994507063 |
| MEX3B turquoise  | 0.043360435  | 0.349811228 | 0.029290004  | 0.527778033 |
| MFAP4 turquoise  | -0.30780274  | 1.05E-11    | -0.281465765 | 5.95E-10    |
| MFAP5 turquoise  | -0.213095909 | 3.38E-06    | -0.213230456 | 3.33E-06    |
| MGARP turquoise  | -0.143827881 | 0.001833016 | -0.14731698  | 0.001410714 |
| MGAT4Bturquoise  | 0.044300363  | 0.339455165 | 0.051334455  | 0.268248962 |
| MGP turquoise    | -0.083173093 | 0.072545235 | -0.04456227  | 0.33660476  |
| MICAL2 turquoise | -0.013970934 | 0.763322974 | 0.009910817  | 0.830854458 |
| MICU3 turquoise  | -0.189433346 | 3.79E-05    | -0.207484824 | 6.15E-06    |
| MITF turquoise   | -0.083677235 | 0.070824095 | -0.098346698 | 0.03360768  |
| MME turquoise    | -0.181354463 | 8.10E-05    | -0.172689125 | 0.000176797 |
| MMP15 turquoise  | 0.193027765  | 2.67E-05    | 0.226642021  | 7.45E-07    |
| MMP16 turquoise  | -0.140786174 | 0.002292508 | -0.136505668 | 0.003118041 |
| MMP19 turquoise  | -0.248616166 | 5.21E-08    | -0.231847126 | 4.06E-07    |
| MMP24 turquoise  | -0.23139509  | 4.28E-07    | -0.236980135 | 2.20E-07    |
| MMP28 turquoise  | -0.192452883 | 2.83E-05    | -0.169392443 | 0.000235623 |
| MN1 turquoise    | -0.182288914 | 7.43E-05    | -0.188328715 | 4.21E-05    |
| MOB3C turquoise  | -0.38900698  | 2.54E-18    | -0.370760212 | 1.15E-16    |
| MOGS turquoise   | 0.14695854   | 0.001449558 | 0.153799105  | 0.000854283 |
| MOV10 turquoise  | -0.024294558 | 0.600501034 | -0.000705749 | 0.987864251 |
| MPRIP turquoise  | -0.08992548  | 0.052132961 | -0.100214616 | 0.030364274 |
| MRAS turquoise   | -0.32453087  | 6.48E-13    | -0.329178289 | 2.90E-13    |
| MRC2 turquoise   | -0.197393372 | 1.73E-05    | -0.177191117 | 0.000118421 |

|         |           |              |             |              |             |
|---------|-----------|--------------|-------------|--------------|-------------|
| MREG    | turquoise | 0.157202783  | 0.000651304 | 0.14667982   | 0.001480439 |
| MRGPRED | turquoise | -0.154608868 | 0.000801285 | -0.153099047 | 0.000902693 |
| MRGPREF | turquoise | -0.268665013 | 3.65E-09    | -0.248800158 | 5.09E-08    |
| MRV11   | turquoise | -0.171731104 | 0.000192292 | -0.152344353 | 0.000957711 |
| MS4A2   | turquoise | -0.181417342 | 8.06E-05    | -0.165165872 | 0.000337924 |
| MSC     | turquoise | -0.018614003 | 0.688266434 | 0.024093043  | 0.603527068 |
| MSRB3   | turquoise | -0.141899232 | 0.002113382 | -0.141424094 | 0.002188221 |
| MSTO1   | turquoise | 0.145574393  | 0.001608962 | 0.129238005  | 0.005156176 |
| MT1F    | turquoise | 0.099652934  | 0.031310132 | 0.110379741  | 0.017022131 |
| MTFP1   | turquoise | 0.180691762  | 8.61E-05    | 0.190869941  | 3.30E-05    |
| MTL5    | turquoise | -0.114579031 | 0.01322684  | -0.157936714 | 0.000613857 |
| MTMR11  | turquoise | -0.101097284 | 0.028927346 | -0.121538991 | 0.008558745 |
| MTUS2   | turquoise | -0.170349655 | 0.000216887 | -0.179713276 | 9.42E-05    |
| MTX1    | turquoise | 0.199691399  | 1.38E-05    | 0.187970871  | 4.36E-05    |
| MUM1    | turquoise | 0.107329755  | 0.020346039 | 0.095955226  | 0.03818737  |
| MUM1L1  | turquoise | -0.263465575 | 7.44E-09    | -0.257625701 | 1.62E-08    |
| MUSTN1  | turquoise | -0.067814852 | 0.143399324 | -0.077311435 | 0.095169884 |
| MVB12B  | turquoise | -0.143330029 | 0.001901926 | -0.163534721 | 0.00038749  |
| MXRA7   | turquoise | -0.143222698 | 0.00191709  | -0.155594267 | 0.000740898 |
| MYADM   | turquoise | -0.106466135 | 0.02138426  | -0.086270216 | 0.062491394 |
| MYH11   | turquoise | -0.113248719 | 0.014339315 | -0.09241556  | 0.045929761 |
| MYL3    | turquoise | -0.15925001  | 0.000551789 | -0.164719015 | 0.000350879 |
| MYL9    | turquoise | -0.219871219 | 1.61E-06    | -0.195181169 | 2.16E-05    |
| MYLK    | turquoise | -0.199601568 | 1.39E-05    | -0.188763275 | 4.04E-05    |
| MYO10   | turquoise | 0.126185242  | 0.006323827 | 0.115421936  | 0.012561979 |
| MYOCD   | turquoise | -0.186120245 | 5.19E-05    | -0.187987021 | 4.35E-05    |
| MYOM1   | turquoise | -0.296875873 | 5.89E-11    | -0.298637092 | 4.48E-11    |
| MYOM2   | turquoise | -0.006443164 | 0.889555843 | 0.003762264  | 0.935373865 |
| MYOZ2   | turquoise | -0.142269621 | 0.002056674 | -0.145624053 | 0.001602975 |
| MYOZ3   | turquoise | -0.294695285 | 8.24E-11    | -0.293607765 | 9.73E-11    |
| MYZAP   | turquoise | -0.127059875 | 0.005967157 | -0.135926996 | 0.003248319 |
| N4BP2L1 | turquoise | -0.344749674 | 1.77E-14    | -0.348842965 | 8.26E-15    |
| NAALAD  | turquoise | -0.311959624 | 5.34E-12    | -0.3182068   | 1.90E-12    |
| NAALAD  | turquoise | -0.318948897 | 1.67E-12    | -0.306643888 | 1.26E-11    |
| NACAD   | turquoise | -0.29945238  | 3.95E-11    | -0.301880801 | 2.70E-11    |
| NACC1   | turquoise | 0.030509986  | 0.510722871 | 0.038091838  | 0.41149614  |
| NACC2   | turquoise | -0.031126796 | 0.502210556 | -0.006634969 | 0.886290014 |
| NAP1L2  | turquoise | -0.264495527 | 6.47E-09    | -0.270775067 | 2.73E-09    |
| NAP1L3  | turquoise | -0.304376853 | 1.82E-11    | -0.309122318 | 8.47E-12    |
| NAP1L5  | turquoise | -0.076492631 | 0.098736666 | -0.09358177  | 0.043244886 |
| NAT2    | turquoise | -0.149804498 | 0.001166418 | -0.151017306 | 0.001062022 |
| NAV3    | turquoise | -0.200927929 | 1.21E-05    | -0.222271253 | 1.23E-06    |
| NBEA    | turquoise | -0.187141592 | 4.71E-05    | -0.194536263 | 2.30E-05    |
| NBEAL2  | turquoise | 0.25229667   | 3.25E-08    | 0.255602067  | 2.12E-08    |
| NBL1    | turquoise | -0.251306886 | 3.70E-08    | -0.216201285 | 2.41E-06    |



|         |           |              |             |              |             |
|---------|-----------|--------------|-------------|--------------|-------------|
| NCAM1   | turquoise | -0.185939659 | 5.28E-05    | -0.208221245 | 5.69E-06    |
| NCS1    | turquoise | -0.239935961 | 1.54E-07    | -0.230010292 | 5.04E-07    |
| NDN     | turquoise | -0.238360494 | 1.86E-07    | -0.20807753  | 5.78E-06    |
| NDNF    | turquoise | -0.216333815 | 2.38E-06    | -0.213949395 | 3.08E-06    |
| NDP     | turquoise | -0.035781494 | 0.440458377 | -0.023325073 | 0.615121323 |
| NDRG4   | turquoise | -0.298688456 | 4.45E-11    | -0.293929094 | 9.26E-11    |
| NECAB1  | turquoise | -0.356767238 | 1.83E-15    | -0.362813227 | 5.63E-16    |
| NECAB3  | turquoise | -0.103615213 | 0.02514467  | -0.103001716 | 0.02602465  |
| NEDD4   | turquoise | -0.059485737 | 0.199425833 | -0.072110944 | 0.119665084 |
| NEFM    | turquoise | -0.177274672 | 0.000117533 | -0.192045029 | 2.94E-05    |
| NEGR1   | turquoise | -0.144883942 | 0.00169435  | -0.149157845 | 0.001225868 |
| NEK6    | turquoise | 0.359363923  | 1.11E-15    | 0.373142114  | 7.10E-17    |
| NES     | turquoise | -0.217946668 | 1.99E-06    | -0.218887103 | 1.79E-06    |
| NEU1    | turquoise | 0.131183726  | 0.004517188 | 0.13534579   | 0.003384124 |
| NEURL1  | turquoise | -0.266366799 | 5.01E-09    | -0.276688738 | 1.18E-09    |
| NEURL1  | turquoise | -0.100705897 | 0.029557135 | -0.101100078 | 0.028922892 |
| NEXN    | turquoise | -0.223601697 | 1.06E-06    | -0.218493204 | 1.87E-06    |
| NFASC   | turquoise | -0.136905631 | 0.003030791 | -0.133411998 | 0.003873885 |
| NFATC2  | turquoise | -0.223056889 | 1.12E-06    | -0.203136173 | 9.68E-06    |
| NFATC4  | turquoise | -0.191410118 | 3.13E-05    | -0.213100126 | 3.38E-06    |
| NGF     | turquoise | -0.20296785  | 9.85E-06    | -0.199312836 | 1.43E-05    |
| NGFR    | turquoise | -0.1669189   | 0.000291286 | -0.162050609 | 0.000438392 |
| NIPAL2  | turquoise | -0.162341037 | 0.000427966 | -0.158082604 | 0.000606656 |
| NKAPL   | turquoise | -0.220547105 | 1.49E-06    | -0.227567525 | 6.70E-07    |
| NLGN1   | turquoise | -0.344078287 | 2.00E-14    | -0.339377693 | 4.73E-14    |
| NLGN2   | turquoise | -0.151133758 | 0.001052466 | -0.189637223 | 3.71E-05    |
| NLGN3   | turquoise | -0.195095448 | 2.18E-05    | -0.191400337 | 3.13E-05    |
| NLRP1   | turquoise | -0.371249208 | 1.04E-16    | -0.35050736  | 6.04E-15    |
| NMT2    | turquoise | -0.391879874 | 1.36E-18    | -0.406098716 | 5.71E-20    |
| NMUR1   | turquoise | -0.221563675 | 1.33E-06    | -0.20496105  | 8.01E-06    |
| NNAT    | turquoise | -0.266796145 | 4.73E-09    | -0.245869774 | 7.37E-08    |
| NOSTRIN | turquoise | -0.101410549 | 0.028431594 | -0.08005934  | 0.083946038 |
| NOVA1   | turquoise | -0.384101653 | 7.26E-18    | -0.386579345 | 4.28E-18    |
| NPAS4   | turquoise | -0.161785845 | 0.000448103 | -0.163295683 | 0.000395298 |
| NPR1    | turquoise | -0.424750318 | 7.02E-22    | -0.417779194 | 3.76E-21    |
| NPR2    | turquoise | -0.288350462 | 2.15E-10    | -0.297478507 | 5.37E-11    |
| NPR3    | turquoise | -0.06677027  | 0.149681083 | -0.060702675 | 0.190369046 |
| NPY1R   | turquoise | -0.206280709 | 6.98E-06    | -0.201710471 | 1.12E-05    |
| NPY5R   | turquoise | -0.15096538  | 0.001066309 | -0.148685068 | 0.001271084 |
| NR2F1   | turquoise | -0.180005891 | 9.17E-05    | -0.170643586 | 0.00021142  |
| NR2F2   | turquoise | -0.123375018 | 0.007602852 | -0.106733307 | 0.021058267 |
| NR2F6   | turquoise | -0.115394521 | 0.01258313  | -0.094592476 | 0.041026126 |
| NR3C1   | turquoise | -0.436480718 | 3.83E-23    | -0.416295532 | 5.34E-21    |
| NR3C2   | turquoise | -0.147941107 | 0.001345352 | -0.141004839 | 0.00225626  |
| NR4A1   | turquoise | 0.019573372  | 0.673104597 | -0.019684603 | 0.671355085 |

|         |           |              |             |              |             |
|---------|-----------|--------------|-------------|--------------|-------------|
| NR4A2   | turquoise | 0.141559402  | 0.002166666 | 0.135317875  | 0.003390775 |
| NR4A3   | turquoise | -0.063427916 | 0.171188896 | -0.09062335  | 0.050327779 |
| NRIP2   | turquoise | -0.142248719 | 0.002059836 | -0.132109166 | 0.00423913  |
| NRP2    | turquoise | -0.010111652 | 0.827480054 | -0.020368841 | 0.660632354 |
| NRXN2   | turquoise | -0.332035137 | 1.76E-13    | -0.314336733 | 3.61E-12    |
| NT5DC3  | turquoise | -0.056129378 | 0.2260219   | -0.084904344 | 0.066773945 |
| NT5E    | turquoise | 0.25886608   | 1.38E-08    | 0.25316095   | 2.91E-08    |
| NTAN1   | turquoise | -0.003616087 | 0.937879657 | 0.001041746  | 0.982087407 |
| NTRK3   | turquoise | -0.26221048  | 8.81E-09    | -0.255242338 | 2.22E-08    |
| NUAK1   | turquoise | -0.288351474 | 2.15E-10    | -0.281087681 | 6.28E-10    |
| NUAK2   | turquoise | -0.113443068 | 0.014171823 | -0.122321932 | 0.008138743 |
| NUDT10  | turquoise | -0.352352588 | 4.26E-15    | -0.343345887 | 2.29E-14    |
| NUDT11  | turquoise | -0.340048619 | 4.18E-14    | -0.349943412 | 6.72E-15    |
| NUDT7   | turquoise | 0.031688575  | 0.494523276 | 0.023163249  | 0.617576827 |
| NUMBL   | turquoise | -0.180587243 | 8.70E-05    | -0.195157035 | 2.17E-05    |
| NXPE3   | turquoise | -0.336646098 | 7.73E-14    | -0.339541524 | 4.59E-14    |
| NXPH3   | turquoise | -0.208171895 | 5.72E-06    | -0.205344357 | 7.70E-06    |
| NYAP1   | turquoise | -0.399459331 | 2.56E-19    | -0.413042692 | 1.15E-20    |
| OAF     | turquoise | -0.286879736 | 2.68E-10    | -0.312298189 | 5.05E-12    |
| OCIAD2  | turquoise | 0.274601053  | 1.59E-09    | 0.304002746  | 1.93E-11    |
| OGN     | turquoise | -0.229205039 | 5.54E-07    | -0.230702536 | 4.65E-07    |
| OLFM1   | turquoise | -0.202573793 | 1.03E-05    | -0.204594783 | 8.32E-06    |
| OLFML1  | turquoise | -0.255953351 | 2.02E-08    | -0.230948095 | 4.52E-07    |
| OLFML2  | turquoise | -0.129228355 | 0.005159539 | -0.124957058 | 0.006856958 |
| OLFML3  | turquoise | -0.113318359 | 0.014279099 | -0.105727377 | 0.022308566 |
| OMD     | turquoise | -0.209179796 | 5.14E-06    | -0.209192545 | 5.14E-06    |
| OPCML   | turquoise | -0.097628    | 0.034932027 | -0.106031315 | 0.02192418  |
| OPN1SW  | turquoise | -0.150782    | 0.001081577 | -0.159502371 | 0.000540551 |
| OR5K2   | turquoise | -0.152538791 | 0.000943248 | -0.172495705 | 0.000179828 |
| ORMDL2  | turquoise | 0.17135813   | 0.000198662 | 0.193007318  | 2.68E-05    |
| OSBPL1A | turquoise | -0.224161248 | 9.90E-07    | -0.254476069 | 2.45E-08    |
| OSBPL5  | turquoise | -0.040871819 | 0.378183237 | -0.039650348 | 0.392611407 |
| OSR1    | turquoise | 0.034817351  | 0.452881085 | 0.007729013  | 0.867700339 |
| OSR2    | turquoise | -0.294165229 | 8.94E-11    | -0.283112529 | 4.68E-10    |
| OTC     | turquoise | -0.201364696 | 1.16E-05    | -0.204741214 | 8.20E-06    |
| OTOP2   | turquoise | -0.09223256  | 0.046363513 | -0.090365336 | 0.050989005 |
| OTUD7A  | turquoise | -0.22786116  | 6.47E-07    | -0.259170754 | 1.32E-08    |
| OVOL1   | turquoise | -0.000931086 | 0.983989912 | -0.01464024  | 0.752346156 |
| OXER1   | turquoise | -0.320238324 | 1.35E-12    | -0.316512671 | 2.52E-12    |
| OXSM    | turquoise | 0.296029944  | 6.71E-11    | 0.302155524  | 2.58E-11    |
| P2RY1   | turquoise | -0.109584453 | 0.017839539 | -0.121545144 | 0.00855537  |
| P2RY14  | turquoise | -0.100826712 | 0.029361488 | -0.085230451 | 0.065730181 |
| P3H2    | turquoise | -0.296896128 | 5.87E-11    | -0.308464179 | 9.43E-12    |
| P3H3    | turquoise | -0.179811874 | 9.34E-05    | -0.173219534 | 0.00016873  |
| PABPC5  | turquoise | -0.252190498 | 3.30E-08    | -0.254908231 | 2.32E-08    |

|                   |              |             |              |             |
|-------------------|--------------|-------------|--------------|-------------|
| PACSIN1 turquoise | 0.181233171  | 8.19E-05    | 0.160960263  | 0.000479682 |
| PAGE4 turquoise   | -0.235585204 | 2.60E-07    | -0.235279011 | 2.70E-07    |
| PAK3 turquoise    | -0.257509795 | 1.65E-08    | -0.259667341 | 1.24E-08    |
| PALLD turquoise   | 0.111091381  | 0.016318662 | 0.108756735  | 0.018726484 |
| PALM turquoise    | -0.342188656 | 2.83E-14    | -0.318552194 | 1.79E-12    |
| PALM2-Aturquoise  | -0.157272078 | 0.00064768  | -0.164519943 | 0.000356799 |
| PAPLN turquoise   | -0.424357793 | 7.73E-22    | -0.427816536 | 3.32E-22    |
| PAPPA turquoise   | -0.177431593 | 0.000115881 | -0.173703995 | 0.000161664 |
| PAQR4 turquoise   | 0.402554693  | 1.28E-19    | 0.410409052  | 2.12E-20    |
| PARK2 turquoise   | -0.083555553 | 0.071236432 | -0.125227495 | 0.006736227 |
| PARM1 turquoise   | -0.043706692 | 0.345973166 | -0.066021264 | 0.154312638 |
| PARVA turquoise   | -0.028716848 | 0.535889426 | -0.024762589 | 0.593499409 |
| PAX8 turquoise    | -0.029964383 | 0.518314671 | -0.031652369 | 0.495016824 |
| PBX3 turquoise    | -0.266365335 | 5.01E-09    | -0.261696566 | 9.44E-09    |
| PCBD1 turquoise   | 0.192698041  | 2.76E-05    | 0.191540467  | 3.09E-05    |
| PCBP3 turquoise   | -0.311234968 | 6.01E-12    | -0.307463568 | 1.11E-11    |
| PCDH18 turquoise  | -0.101589152 | 0.028152228 | -0.086750038 | 0.061041779 |
| PCDH20 turquoise  | -0.049656596 | 0.284226539 | -0.074958503 | 0.105705185 |
| PCDHB1(turquoise  | -0.129387999 | 0.005104165 | -0.139052335 | 0.002599294 |
| PCDHB11turquoise  | -0.00245453  | 0.957810972 | -0.021255147 | 0.646845839 |
| PCDHB12turquoise  | -0.162361774 | 0.00042723  | -0.173792017 | 0.000160411 |
| PCDHB14turquoise  | -0.003553391 | 0.938954586 | -0.013376991 | 0.773103796 |
| PCDHB14'turquoise | -0.30930796  | 8.22E-12    | -0.307178055 | 1.16E-11    |
| PCDHB4 turquoise  | -0.235132997 | 2.75E-07    | -0.235982823 | 2.48E-07    |
| PCDHB5 turquoise  | -0.289343322 | 1.86E-10    | -0.289976872 | 1.69E-10    |
| PCDHB7 turquoise  | -0.192674685 | 2.77E-05    | -0.188838263 | 4.01E-05    |
| PCDHB9 turquoise  | -0.009291696 | 0.841276109 | -0.004280971 | 0.926487448 |
| PCDHGA turquoise  | -0.172604988 | 0.00017811  | -0.163194991 | 0.000398631 |
| PCDHGA turquoise  | -0.241908813 | 1.21E-07    | -0.246293082 | 6.99E-08    |
| PCDHGA turquoise  | -0.2424853   | 1.12E-07    | -0.242792199 | 1.08E-07    |
| PCDHGA turquoise  | -0.210529746 | 4.46E-06    | -0.203049473 | 9.76E-06    |
| PCDHGA turquoise  | -0.236403248 | 2.36E-07    | -0.233732805 | 3.25E-07    |
| PCDHGA turquoise  | -0.193641167 | 2.52E-05    | -0.200988837 | 1.21E-05    |
| PCDHGA turquoise  | -0.121631789 | 0.008507975 | -0.161367407 | 0.000463859 |
| PCDHGB turquoise  | -0.132537603 | 0.004115721 | -0.117270818 | 0.011205992 |
| PCDHGB turquoise  | -0.080333923 | 0.082885805 | -0.077073761 | 0.096194452 |
| PDCD6 turquoise   | -0.029877771 | 0.519525153 | -0.004940671 | 0.915198899 |
| PDE10A turquoise  | -0.068593752 | 0.138847986 | -0.075127942 | 0.104916937 |
| PDE1A turquoise   | -0.198094395 | 1.62E-05    | -0.208061366 | 5.79E-06    |
| PDE1B turquoise   | -0.226260437 | 7.79E-07    | -0.215750035 | 2.53E-06    |
| PDE1C turquoise   | -0.194114462 | 2.40E-05    | -0.19919068  | 1.45E-05    |
| PDE2A turquoise   | -0.228226758 | 6.20E-07    | -0.236071554 | 2.46E-07    |
| PDE5A turquoise   | -0.152858923 | 0.000919873 | -0.135217507 | 0.003414784 |
| PDE7B turquoise   | -0.259317262 | 1.30E-08    | -0.260156451 | 1.16E-08    |
| PDE8B turquoise   | -0.162186929 | 0.000433469 | -0.164163794 | 0.000367622 |

|         |           |              |             |              |             |
|---------|-----------|--------------|-------------|--------------|-------------|
| PDGFD   | turquoise | -0.085392498 | 0.065216528 | -0.091076479 | 0.049183858 |
| PDGFRA  | turquoise | -0.107913206 | 0.01966969  | -0.103154875 | 0.025802514 |
| PDGFRL  | turquoise | -0.103633658 | 0.025118615 | -0.107520067 | 0.020123236 |
| PDIA4   | turquoise | 0.159481556  | 0.00054147  | 0.159937827  | 0.000521658 |
| PDK4    | turquoise | -0.111159568 | 0.016252614 | -0.098322723 | 0.033651158 |
| PDLIM2  | turquoise | -0.047124132 | 0.309535787 | -0.037268199 | 0.421689624 |
| PDLIM3  | turquoise | -0.175384758 | 0.000139244 | -0.15616546  | 0.000707852 |
| PDLIM7  | turquoise | -0.249607812 | 4.59E-08    | -0.231086131 | 4.44E-07    |
| PDPN    | turquoise | -0.289833017 | 1.72E-10    | -0.281584698 | 5.84E-10    |
| PDZD4   | turquoise | -0.244722686 | 8.51E-08    | -0.244138684 | 9.15E-08    |
| PDZRN3  | turquoise | -0.033576245 | 0.469158834 | -0.039981534 | 0.3886669   |
| PDZRN4  | turquoise | -0.206328004 | 6.95E-06    | -0.193982486 | 2.43E-05    |
| PEAR1   | turquoise | -0.147309766 | 0.001411486 | -0.144836074 | 0.001700421 |
| PEG10   | turquoise | -0.068753926 | 0.137925947 | -0.069290158 | 0.134873334 |
| PEG3    | turquoise | -0.299258746 | 4.07E-11    | -0.305055073 | 1.63E-11    |
| PELI3   | turquoise | -0.084301666 | 0.068738714 | -0.102042255 | 0.027454054 |
| PENK    | turquoise | -0.189769017 | 3.67E-05    | -0.195572637 | 2.08E-05    |
| PER1    | turquoise | -0.162988516 | 0.000405547 | -0.177153011 | 0.000118828 |
| PER3    | turquoise | -0.335953625 | 8.76E-14    | -0.347968814 | 9.73E-15    |
| PFKFB4  | turquoise | 0.254763028  | 2.36E-08    | 0.23920775   | 1.68E-07    |
| PGAP2   | turquoise | 0.338797959  | 5.25E-14    | 0.329452415  | 2.76E-13    |
| PGD     | turquoise | 0.242318238  | 1.15E-07    | 0.237071075  | 2.18E-07    |
| PGM5    | turquoise | -0.144898565 | 0.001692499 | -0.146570253 | 0.001492744 |
| PHF1    | turquoise | -0.209500664 | 4.97E-06    | -0.216746681 | 2.27E-06    |
| PHF21B  | turquoise | -0.171771388 | 0.000191616 | -0.197363409 | 1.74E-05    |
| PHLDA2  | turquoise | 0.278153143  | 9.60E-10    | 0.30934264   | 8.18E-12    |
| PHLDB2  | turquoise | -0.06214765  | 0.180011675 | -0.093695831 | 0.042989536 |
| PHYHIP  | turquoise | -0.271549112 | 2.45E-09    | -0.263717301 | 7.19E-09    |
| PI15    | turquoise | -0.164048498 | 0.000371191 | -0.172174792 | 0.000184964 |
| PI16    | turquoise | -0.178085043 | 0.000109235 | -0.180746744 | 8.57E-05    |
| PIANP   | turquoise | -0.195897491 | 2.01E-05    | -0.201262431 | 1.17E-05    |
| PID1    | turquoise | -0.245119222 | 8.10E-08    | -0.250853901 | 3.92E-08    |
| PIEZO2  | turquoise | -0.175866794 | 0.000133374 | -0.16040897  | 0.000501908 |
| PIK3IP1 | turquoise | -0.17639014  | 0.000127265 | -0.174363425 | 0.000152492 |
| PINLYP  | turquoise | -0.24811617  | 5.55E-08    | -0.234553654 | 2.95E-07    |
| PITX1   | turquoise | 0.138222022  | 0.002759073 | 0.163912406  | 0.000375445 |
| PIWIL2  | turquoise | -0.1423888   | 0.002038725 | -0.152240447 | 0.000965524 |
| pk      | turquoise | -0.024141428 | 0.602799877 | -0.055759997 | 0.229096201 |
| PKD1    | turquoise | -0.152956303 | 0.00091287  | -0.149657455 | 0.001179698 |
| PKD2    | turquoise | -0.144544655 | 0.001737815 | -0.174716283 | 0.000147787 |
| PKIG    | turquoise | -0.116857605 | 0.011497262 | -0.099691966 | 0.031243597 |
| PKM     | turquoise | 0.20597423   | 7.21E-06    | 0.235098849  | 2.76E-07    |
| PKNOX2  | turquoise | -0.235848894 | 2.52E-07    | -0.229948133 | 5.08E-07    |
| PLA2R1  | turquoise | -0.033799678 | 0.466204807 | -0.056985367 | 0.219010729 |
| PLAC9   | turquoise | -0.226850814 | 7.27E-07    | -0.216128517 | 2.43E-06    |

|          |           |              |             |              |             |
|----------|-----------|--------------|-------------|--------------|-------------|
| PLAT     | turquoise | -0.19134141  | 3.15E-05    | -0.164508605 | 0.000357139 |
| PLCL1    | turquoise | -0.26412867  | 6.80E-09    | -0.261424499 | 9.79E-09    |
| PLEKHG   | turquoise | -0.077442207 | 0.094609877 | -0.084970457 | 0.066561246 |
| PLEKHH   | turquoise | -0.181235735 | 8.19E-05    | -0.193350463 | 2.59E-05    |
| PLIN4    | turquoise | -0.106731305 | 0.021060693 | -0.126550682 | 0.00617254  |
| PLK5     | turquoise | -0.17290591  | 0.000173458 | -0.183944498 | 6.37E-05    |
| PLN      | turquoise | -0.152594941 | 0.000939109 | -0.134071329 | 0.003700122 |
| PLOD1    | turquoise | 0.225515954  | 8.48E-07    | 0.208342353  | 5.62E-06    |
| PLP1     | turquoise | -0.142397466 | 0.002037425 | -0.151456691 | 0.001026378 |
| PLSCR4   | turquoise | -0.311149095 | 6.09E-12    | -0.297450588 | 5.39E-11    |
| PLXDC1   | turquoise | -0.075267552 | 0.104270958 | -0.058825926 | 0.204465597 |
| PLXDC2   | turquoise | -0.207921029 | 5.88E-06    | -0.188162849 | 4.28E-05    |
| PMP22    | turquoise | -0.111647388 | 0.015786889 | -0.095007153 | 0.040144027 |
| PNKD     | turquoise | -0.054035659 | 0.24383987  | -0.05278421  | 0.254947989 |
| PNMAL2   | turquoise | -0.444485892 | 4.91E-24    | -0.447525969 | 2.22E-24    |
| PODN     | turquoise | -0.267994314 | 4.01E-09    | -0.252587736 | 3.13E-08    |
| PODXL2   | turquoise | 0.13704637   | 0.003000621 | 0.112378482  | 0.015110817 |
| POLDIP2  | turquoise | 0.106941452  | 0.020807296 | 0.117656103  | 0.010940314 |
| POMGNT   | turquoise | -0.215174429 | 2.70E-06    | -0.210531529 | 4.45E-06    |
| POPDC2   | turquoise | -0.162909647 | 0.000408218 | -0.16096144  | 0.000479636 |
| POR      | turquoise | 0.120624326  | 0.009073788 | 0.136942758  | 0.003022806 |
| POSTN    | turquoise | -0.105987179 | 0.021979639 | -0.069904293 | 0.131441482 |
| POU6F1   | turquoise | -0.20254443  | 1.03E-05    | -0.217591934 | 2.07E-06    |
| PPAPDC2  | turquoise | -0.250579558 | 4.06E-08    | -0.245046145 | 8.17E-08    |
| PPFIA4   | turquoise | 0.14413002   | 0.001792318 | 0.121632259  | 0.008507718 |
| PPM1F    | turquoise | -0.170819734 | 0.000208205 | -0.178908322 | 0.000101371 |
| PPM1K    | turquoise | -0.234779779 | 2.87E-07    | -0.205645033 | 7.46E-06    |
| PPP1R12l | turquoise | -0.161402538 | 0.000462516 | -0.157643322 | 0.00062858  |
| PPP1R12  | turquoise | -0.250123695 | 4.30E-08    | -0.264727536 | 6.27E-09    |
| PPP1R14  | turquoise | -0.161436416 | 0.000461225 | -0.167648792 | 0.0002737   |
| PPP1R18  | turquoise | -0.137330383 | 0.002940569 | -0.112348779 | 0.015137781 |
| PPP1R3C  | turquoise | -0.226451487 | 7.62E-07    | -0.225268223 | 8.73E-07    |
| PRAME    | turquoise | 0.13544805   | 0.003359862 | 0.113623165  | 0.014018153 |
| PRDM11   | turquoise | -0.360821591 | 8.33E-16    | -0.363681539 | 4.75E-16    |
| PRDM5    | turquoise | -0.323059045 | 8.34E-13    | -0.336611376 | 7.78E-14    |
| PRDM8    | turquoise | -0.154001662 | 0.00084073  | -0.152739491 | 0.00092853  |
| PRELP    | turquoise | -0.170687337 | 0.000210617 | -0.151193297 | 0.001047611 |
| PRICKLE  | turquoise | -0.116871627 | 0.01148727  | -0.157784759 | 0.000621442 |
| PRICKLE  | turquoise | -0.190094219 | 3.55E-05    | -0.224943348 | 9.06E-07    |
| PRIMA1   | turquoise | -0.36156818  | 7.20E-16    | -0.364846924 | 3.77E-16    |
| PRKAR2l  | turquoise | -0.299974495 | 3.64E-11    | -0.298883123 | 4.31E-11    |
| PRKCA    | turquoise | -0.016719636 | 0.718569508 | -0.048585449 | 0.29475589  |
| PRKCD    | turquoise | 0.057623313  | 0.213887709 | 0.074596375  | 0.107405529 |
| PRKCDB   | turquoise | -0.280856378 | 6.50E-10    | -0.244569541 | 8.67E-08    |
| PRKCZ    | turquoise | 0.187393849  | 4.60E-05    | 0.188342711  | 4.20E-05    |

|         |           |              |             |              |             |
|---------|-----------|--------------|-------------|--------------|-------------|
| PRKD1   | turquoise | -0.301343831 | 2.93E-11    | -0.315004869 | 3.23E-12    |
| PRKG1   | turquoise | -0.18624341  | 5.13E-05    | -0.189805056 | 3.65E-05    |
| PRLHR   | turquoise | -0.128497652 | 0.005419954 | -0.132751038 | 0.004055462 |
| PRLR    | turquoise | -0.010921135 | 0.813912052 | -0.0138705   | 0.764974284 |
| PRND    | turquoise | -0.097023836 | 0.036079436 | -0.091852824 | 0.047274553 |
| PRNP    | turquoise | -0.436006384 | 4.31E-23    | -0.444305867 | 5.15E-24    |
| PROB1   | turquoise | -0.208110053 | 5.76E-06    | -0.192684071 | 2.76E-05    |
| PROCR   | turquoise | -0.222940467 | 1.14E-06    | -0.199947453 | 1.34E-05    |
| PROS1   | turquoise | -0.295804796 | 6.95E-11    | -0.294057671 | 9.08E-11    |
| PROSER2 | turquoise | 0.191895404  | 2.98E-05    | 0.195641829  | 2.07E-05    |
| PRPH2   | turquoise | -0.161826341 | 0.000446605 | -0.175997734 | 0.00013182  |
| PRR16   | turquoise | 0.02566672   | 0.580080465 | 0.031655593  | 0.494972865 |
| PRR36   | turquoise | 0.265469078  | 5.67E-09    | 0.257910359  | 1.56E-08    |
| PRR7    | turquoise | 0.100570688  | 0.029777418 | 0.101041196  | 0.029016886 |
| PRRG3   | turquoise | -0.343987695 | 2.04E-14    | -0.346950805 | 1.18E-14    |
| PRRT1   | turquoise | -0.072417952 | 0.118094082 | -0.072871159 | 0.115804483 |
| PRRT2   | turquoise | -0.146871769 | 0.001459108 | -0.143647487 | 0.001857717 |
| PRRX1   | turquoise | 0.126680801  | 0.006119462 | 0.137295709  | 0.002947842 |
| PRSS23  | turquoise | -0.05461196  | 0.238840145 | -0.061364927 | 0.185569075 |
| PRSS35  | turquoise | -0.184459041 | 6.07E-05    | -0.172427795 | 0.000180904 |
| PRUNE2  | turquoise | -0.232765713 | 3.64E-07    | -0.22759963  | 6.67E-07    |
| PRX     | turquoise | -0.222447452 | 1.20E-06    | -0.241080912 | 1.34E-07    |
| PSD     | turquoise | -0.294246478 | 8.83E-11    | -0.28894534  | 1.97E-10    |
| PTCH1   | turquoise | 0.049165233  | 0.289024702 | 0.028617023  | 0.537308537 |
| PTCH2   | turquoise | 0.020531034  | 0.658100668 | 0.024544181  | 0.596762114 |
| PTCHD1  | turquoise | -0.112966337 | 0.014585774 | -0.119716893 | 0.009611833 |
| PTGDR   | turquoise | -0.197909393 | 1.65E-05    | -0.162137612 | 0.000435244 |
| PTGDR2  | turquoise | -0.1218044   | 0.008414253 | -0.129995197 | 0.004898415 |
| PTGDS   | turquoise | -0.190969311 | 3.27E-05    | -0.1666824   | 0.000297206 |
| PTGER2  | turquoise | -0.074210613 | 0.109240528 | -0.061105811 | 0.187436401 |
| PTGER3  | turquoise | -0.173756048 | 0.000160922 | -0.17800645  | 0.000110015 |
| PTGES3L | turquoise | -0.11373882  | 0.013920243 | -0.101395712 | 0.028454909 |
| PTGFR   | turquoise | -0.184536888 | 6.03E-05    | -0.1859397   | 5.28E-05    |
| PTGIS   | turquoise | -0.257545874 | 1.64E-08    | -0.245541734 | 7.68E-08    |
| PTH1R   | turquoise | -0.259267505 | 1.31E-08    | -0.258850729 | 1.38E-08    |
| PTN     | turquoise | -0.146476391 | 0.001503359 | -0.152656202 | 0.000934612 |
| PTPN21  | turquoise | -0.171062513 | 0.00020385  | -0.192329237 | 2.86E-05    |
| PTPN6   | turquoise | 0.139422553  | 0.002530808 | 0.174901405  | 0.000145373 |
| PTPRD   | turquoise | -0.022846315 | 0.622398292 | -0.012579438 | 0.786294017 |
| PTPRN2  | turquoise | -0.196630247 | 1.87E-05    | -0.188678028 | 4.07E-05    |
| PTPRO   | turquoise | -0.20813595  | 5.74E-06    | -0.197160598 | 1.78E-05    |
| PTPRR   | turquoise | 0.005195506  | 0.910842671 | 0.012222434  | 0.792218379 |
| PTRF    | turquoise | -0.191089757 | 3.23E-05    | -0.165399405 | 0.000331332 |
| PURG    | turquoise | -0.275746771 | 1.35E-09    | -0.285601355 | 3.24E-10    |
| PYCR1   | turquoise | 0.296484622  | 6.26E-11    | 0.282974416  | 4.77E-10    |

|         |           |              |             |              |             |
|---------|-----------|--------------|-------------|--------------|-------------|
| PYGM    | turquoise | -0.261621759 | 9.54E-09    | -0.256405782 | 1.91E-08    |
| RAB11F1 | turquoise | -0.040534514 | 0.382134621 | -0.032554036 | 0.482804311 |
| RAB11F1 | turquoise | -0.267969093 | 4.02E-09    | -0.269905125 | 3.08E-09    |
| RAB17   | turquoise | 0.111192945  | 0.01622037  | 0.128889437  | 0.005278891 |
| RAB20   | turquoise | 0.209105675  | 5.18E-06    | 0.239220285  | 1.68E-07    |
| RAB23   | turquoise | -0.110938283 | 0.016467815 | -0.127017701 | 0.005983932 |
| RAB31   | turquoise | -0.295845696 | 6.90E-11    | -0.258140869 | 1.52E-08    |
| RAB3C   | turquoise | -0.051829976 | 0.263650294 | -0.058821844 | 0.204497054 |
| RAB3IL1 | turquoise | -0.351723362 | 4.80E-15    | -0.343504432 | 2.23E-14    |
| RAB41   | turquoise | -0.170164503 | 0.000220399 | -0.168854043 | 0.000246817 |
| RAB6C   | turquoise | -0.198048777 | 1.62E-05    | -0.204244038 | 8.63E-06    |
| RAB9B   | turquoise | -0.258605805 | 1.43E-08    | -0.264987322 | 6.05E-09    |
| RADIL   | turquoise | -0.241753739 | 1.23E-07    | -0.257960423 | 1.55E-08    |
| RAMP1   | turquoise | -0.179717385 | 9.42E-05    | -0.158577575 | 0.000582802 |
| RAPGEF4 | turquoise | -0.14498108  | 0.001682091 | -0.165187299 | 0.000337314 |
| RARRES1 | turquoise | -0.313419079 | 4.20E-12    | -0.275166066 | 1.47E-09    |
| RASA3   | turquoise | -0.247861359 | 5.73E-08    | -0.249848863 | 4.45E-08    |
| RASA4   | turquoise | -0.261847168 | 9.25E-09    | -0.259657893 | 1.24E-08    |
| RASA4B  | turquoise | -0.153495408 | 0.000874981 | -0.167340195 | 0.000281011 |
| RASD2   | turquoise | -0.081948451 | 0.076868582 | -0.070063265 | 0.130564221 |
| RASGRF1 | turquoise | -0.054763989 | 0.237533313 | -0.067107191 | 0.147632496 |
| RASL11A | turquoise | -0.083893694 | 0.07009542  | -0.07648141  | 0.098786279 |
| RASL12  | turquoise | -0.246776769 | 6.58E-08    | -0.22925021  | 5.51E-07    |
| RASSF2  | turquoise | -0.170787327 | 0.000208793 | -0.184879696 | 5.84E-05    |
| RASSF8  | turquoise | -0.274706852 | 1.57E-09    | -0.277709582 | 1.02E-09    |
| RBFOX2  | turquoise | -0.089363656 | 0.053625168 | -0.102508089 | 0.026751837 |
| RBFOX3  | turquoise | -0.246982618 | 6.41E-08    | -0.243056228 | 1.05E-07    |
| RBM20   | turquoise | -0.118933515 | 0.010098932 | -0.113602612 | 0.014035616 |
| RBM24   | turquoise | -0.046480227 | 0.316200608 | -0.055720954 | 0.229422873 |
| RBM47   | turquoise | 0.255225017  | 2.22E-08    | 0.281881544  | 5.60E-10    |
| RBMS3   | turquoise | -0.212813238 | 3.49E-06    | -0.207819997 | 5.94E-06    |
| RBP7    | turquoise | -0.21200961  | 3.80E-06    | -0.238478503 | 1.84E-07    |
| RBPMS2  | turquoise | -0.014635545 | 0.752422984 | -0.013375238 | 0.773132716 |
| RCAN2   | turquoise | -0.214372252 | 2.94E-06    | -0.222645863 | 1.18E-06    |
| RCBTB2  | turquoise | -0.28909902  | 1.93E-10    | -0.293019773 | 1.06E-10    |
| RECK    | turquoise | -0.294713659 | 8.22E-11    | -0.293269277 | 1.02E-10    |
| REEP1   | turquoise | -0.128110706 | 0.005562596 | -0.135600055 | 0.00332409  |
| REM1    | turquoise | -0.286812921 | 2.71E-10    | -0.271228005 | 2.56E-09    |
| RER1    | turquoise | 0.097830162  | 0.034555087 | 0.104609652  | 0.023772804 |
| RERG    | turquoise | -0.284118704 | 4.03E-10    | -0.279929333 | 7.43E-10    |
| RERGL   | turquoise | -0.206602605 | 6.75E-06    | -0.220181194 | 1.55E-06    |
| RFTN2   | turquoise | -0.257111574 | 1.74E-08    | -0.240815186 | 1.38E-07    |
| RGAG4   | turquoise | -0.26467439  | 6.31E-09    | -0.266371194 | 5.01E-09    |
| RGL1    | turquoise | 0.063094665  | 0.173453756 | 0.035096492  | 0.449264285 |
| RGMA    | turquoise | -0.252377624 | 3.22E-08    | -0.250842508 | 3.92E-08    |

|          |           |              |             |              |             |
|----------|-----------|--------------|-------------|--------------|-------------|
| RGN      | turquoise | -0.383702851 | 7.90E-18    | -0.389065129 | 2.51E-18    |
| RGS2     | turquoise | -0.149499075 | 0.001194158 | -0.148177685 | 0.001321313 |
| RGS4     | turquoise | -0.210243558 | 4.59E-06    | -0.177855909 | 0.000111523 |
| RGS9     | turquoise | -0.339089219 | 4.98E-14    | -0.364923755 | 3.71E-16    |
| RHOB     | turquoise | 0.026304113  | 0.570706427 | 0.003042928  | 0.947710497 |
| RHOBTB   | turquoise | 0.039115944  | 0.399027068 | 0.01727863   | 0.70957907  |
| RHOV     | turquoise | 0.211072892  | 4.20E-06    | 0.214608045  | 2.87E-06    |
| RHPN2    | turquoise | -0.010603441 | 0.819230642 | -0.019273452 | 0.677830658 |
| RIC3     | turquoise | -0.376004803 | 3.95E-17    | -0.38232649  | 1.06E-17    |
| RILPL1   | turquoise | -0.176682259 | 0.00012397  | -0.182331339 | 7.40E-05    |
| RIMS3    | turquoise | -0.275937688 | 1.32E-09    | -0.301598657 | 2.82E-11    |
| RITA1    | turquoise | 0.111116232  | 0.016294564 | 0.124611382  | 0.007014098 |
| RNASE4   | turquoise | 0.001616492  | 0.97220805  | -0.011713686 | 0.800681528 |
| RNF112   | turquoise | -0.293004349 | 1.07E-10    | -0.292250156 | 1.20E-10    |
| RNF144A  | turquoise | -0.268127177 | 3.94E-09    | -0.288191188 | 2.21E-10    |
| RORB     | turquoise | -0.202766589 | 1.01E-05    | -0.194190101 | 2.38E-05    |
| RP11-136 | turquoise | -0.182333721 | 7.40E-05    | -0.202620758 | 1.02E-05    |
| RP11-20J | turquoise | -0.240072792 | 1.51E-07    | -0.244139215 | 9.15E-08    |
| RP11-216 | turquoise | -0.075470479 | 0.103337634 | -0.089790614 | 0.052487972 |
| RP11-244 | turquoise | -0.150120574 | 0.001138336 | -0.158815974 | 0.000571627 |
| RP11-903 | turquoise | -0.062426007 | 0.178065322 | -0.090188462 | 0.051446467 |
| RP6-24A2 | turquoise | -0.144958274 | 0.001684962 | -0.151865231 | 0.000994229 |
| RPN1     | turquoise | -0.028207797 | 0.543145683 | 0.000924966  | 0.984095136 |
| RPRM     | turquoise | -0.232427686 | 3.79E-07    | -0.227795081 | 6.52E-07    |
| RPS6KA1  | turquoise | 0.377502423  | 2.89E-17    | 0.395184316  | 6.61E-19    |
| RPS6KA2  | turquoise | -0.127105135 | 0.005949202 | -0.123332682 | 0.007623772 |
| RPS6KA6  | turquoise | -0.454773805 | 3.24E-25    | -0.458775499 | 1.10E-25    |
| RSPO1    | turquoise | -0.257975954 | 1.55E-08    | -0.258438405 | 1.46E-08    |
| RSPO3    | turquoise | -0.340717269 | 3.71E-14    | -0.345273534 | 1.61E-14    |
| RTKN     | turquoise | 0.125295969  | 0.006705962 | 0.128805636  | 0.005308783 |
| RTN4IP1  | turquoise | 0.236478491  | 2.34E-07    | 0.256741596  | 1.82E-08    |
| RUNDC3   | turquoise | -0.112470707 | 0.015027364 | -0.107625208 | 0.020001057 |
| RUNX1T   | turquoise | -0.218660475 | 1.84E-06    | -0.213924755 | 3.09E-06    |
| RUSC2    | turquoise | -0.234621076 | 2.92E-07    | -0.231506122 | 4.23E-07    |
| RYR2     | turquoise | -0.124459348 | 0.007084226 | -0.097442727 | 0.035280542 |
| RYR3     | turquoise | -0.177403026 | 0.00011618  | -0.192417014 | 2.84E-05    |
| S100A11  | turquoise | 0.282345446  | 5.23E-10    | 0.307088289  | 1.18E-11    |
| S1PR3    | turquoise | -0.140006497 | 0.002426124 | -0.141848979 | 0.002121186 |
| SAMD10   | turquoise | 0.110750431  | 0.016652456 | 0.122353575  | 0.008122162 |
| SAMD4A   | turquoise | -0.355137554 | 2.50E-15    | -0.352540652 | 4.11E-15    |
| SAMD5    | turquoise | -0.279342103 | 8.09E-10    | -0.263080865 | 7.83E-09    |
| SAP30L   | turquoise | -0.199871856 | 1.35E-05    | -0.215325177 | 2.65E-06    |
| SATB1    | turquoise | -0.104875719 | 0.023416916 | -0.095879081 | 0.038341477 |
| SBK1     | turquoise | 0.18638311   | 5.07E-05    | 0.196836736  | 1.83E-05    |
| SCARA3   | turquoise | -0.078904519 | 0.088525463 | -0.089436776 | 0.053428971 |



|                   |              |             |              |             |
|-------------------|--------------|-------------|--------------|-------------|
| SCARA5 turquoise  | -0.144208875 | 0.001781834 | -0.153733106 | 0.000858742 |
| SCARF2 turquoise  | -0.234683008 | 2.90E-07    | -0.213978507 | 3.07E-06    |
| SCN1B turquoise   | -0.208733969 | 5.39E-06    | -0.20400438  | 8.85E-06    |
| SCN2B turquoise   | -0.305739021 | 1.46E-11    | -0.315968468 | 2.75E-12    |
| SCN3B turquoise   | -0.274512942 | 1.61E-09    | -0.277609636 | 1.04E-09    |
| SCN4B turquoise   | -0.097061308 | 0.03600735  | -0.117877702 | 0.010790047 |
| SCN7A turquoise   | -0.145677089 | 0.001596604 | -0.144246172 | 0.001776894 |
| SCRG1 turquoise   | -0.136162871 | 0.00319463  | -0.124967162 | 0.006852413 |
| SDC1 turquoise    | 0.321941139  | 1.01E-12    | 0.321915581  | 1.01E-12    |
| SDPR turquoise    | -0.286311392 | 2.92E-10    | -0.275493265 | 1.40E-09    |
| SEC61A1 turquoise | 0.253086167  | 2.94E-08    | 0.261034346  | 1.03E-08    |
| SEL1L2 turquoise  | -0.173057699 | 0.000171154 | -0.179959121 | 9.21E-05    |
| SELE turquoise    | -0.08680591  | 0.060874802 | -0.090570013 | 0.050463879 |
| SELM turquoise    | -0.071795751 | 0.121294901 | -0.061015122 | 0.188093208 |
| SEMA4A turquoise  | 0.101898993  | 0.027673175 | 0.122514873  | 0.008038108 |
| SEMA5A turquoise  | -0.075301793 | 0.104113006 | -0.063877446 | 0.168168843 |
| SEPHS2 turquoise  | 0.133710896  | 0.003794217 | 0.153948985  | 0.000844235 |
| SEPT4 turquoise   | 0.026623395  | 0.566037981 | 0.043518089  | 0.348060396 |
| SERP2 turquoise   | -0.381788913 | 1.18E-17    | -0.388964714 | 2.57E-18    |
| SERPINF turquoise | -0.144036583 | 0.001804815 | -0.122109769 | 0.0082507   |
| SERPING turquoise | -0.328407672 | 3.32E-13    | -0.308787716 | 8.95E-12    |
| SERTAD turquoise  | 0.040052622  | 0.387823369 | 0.002513959  | 0.956790471 |
| SERTM1 turquoise  | -0.035635222 | 0.442330418 | -0.061645084 | 0.183565579 |
| SETBP1 turquoise  | -0.245280219 | 7.94E-08    | -0.257849476 | 1.58E-08    |
| SETD7 turquoise   | -0.076748458 | 0.097611013 | -0.092987766 | 0.04459542  |
| SFN turquoise     | 0.388241285  | 3.00E-18    | 0.398431461  | 3.22E-19    |
| SFRP1 turquoise   | -0.288038312 | 2.26E-10    | -0.29699671  | 5.78E-11    |
| SFRP4 turquoise   | -0.139877013 | 0.00244899  | -0.110430744 | 0.016970845 |
| SGCA turquoise    | -0.116173545 | 0.011994188 | -0.097174571 | 0.035790207 |
| SGCE turquoise    | -0.265774696 | 5.43E-09    | -0.272417642 | 2.17E-09    |
| SGIP1 turquoise   | -0.179874013 | 9.28E-05    | -0.176586043 | 0.000125046 |
| SH3BGR1 turquoise | 0.007791675  | 0.866637699 | -0.015189505 | 0.743375071 |
| SH3BP5 turquoise  | -0.198177097 | 1.60E-05    | -0.227561019 | 6.70E-07    |
| SH3PXD2 turquoise | -0.179651702 | 9.47E-05    | -0.177595199 | 0.000114182 |
| SHC2 turquoise    | -0.14326157  | 0.001911585 | -0.138896595 | 0.002628605 |
| SHF turquoise     | -0.186822441 | 4.86E-05    | -0.201077045 | 1.20E-05    |
| SHMT1 turquoise   | 0.245930565  | 7.31E-08    | 0.235104455  | 2.76E-07    |
| SIDT2 turquoise   | -0.163487934 | 0.000389006 | -0.163862764 | 0.000377008 |
| SIGLEC6 turquoise | -0.191778743 | 3.02E-05    | -0.175022056 | 0.00014382  |
| SLC10A6 turquoise | -0.014671204 | 0.75183951  | -0.023703638 | 0.609393804 |
| SLC12A4 turquoise | -0.041060209 | 0.375987278 | -0.023598897 | 0.610976115 |
| SLC12A8 turquoise | 0.099695875  | 0.031236941 | 0.097858318  | 0.034502864 |
| SLC16A2 turquoise | -0.203789113 | 9.05E-06    | -0.199883552 | 1.35E-05    |
| SLC16A3 turquoise | 0.060023565  | 0.19538521  | 0.099945501  | 0.030814359 |
| SLC16A7 turquoise | -0.270154511 | 2.97E-09    | -0.260058893 | 1.18E-08    |

|                   |              |             |              |             |
|-------------------|--------------|-------------|--------------|-------------|
| SLC1A7 turquoise  | -0.198091629 | 1.62E-05    | -0.206266195 | 6.99E-06    |
| SLC22A1 turquoise | -0.342028004 | 2.92E-14    | -0.36350802  | 4.91E-16    |
| SLC22A3 turquoise | -0.258769133 | 1.40E-08    | -0.266954658 | 4.62E-09    |
| SLC23A2 turquoise | -0.304672141 | 1.73E-11    | -0.318594638 | 1.78E-12    |
| SLC24A3 turquoise | -0.234607825 | 2.93E-07    | -0.239629854 | 1.60E-07    |
| SLC25A2 turquoise | 0.212971116  | 3.43E-06    | 0.22876583   | 5.83E-07    |
| SLC25A4 turquoise | -0.202092693 | 1.08E-05    | -0.215218182 | 2.69E-06    |
| SLC26A1 turquoise | -0.074834561 | 0.106284734 | -0.100600484 | 0.029728755 |
| SLC26A6 turquoise | 0.237185094  | 2.15E-07    | 0.221197545  | 1.38E-06    |
| SLC2A4 turquoise  | -0.339650153 | 4.50E-14    | -0.347943357 | 9.77E-15    |
| SLC2A6 turquoise  | 0.080246841  | 0.083220872 | 0.083480786  | 0.071490762 |
| SLC35F1 turquoise | -0.195953472 | 2.00E-05    | -0.214188097 | 3.00E-06    |
| SLC35G2 turquoise | -0.208331309 | 5.63E-06    | -0.207078818 | 6.42E-06    |
| SLC38A7 turquoise | 0.306472342  | 1.30E-11    | 0.325236865  | 5.74E-13    |
| SLC39A1 turquoise | 0.255598274  | 2.12E-08    | 0.259524456  | 1.26E-08    |
| SLC45A1 turquoise | -0.241609068 | 1.25E-07    | -0.24598863  | 7.26E-08    |
| SLC50A1 turquoise | 0.166582046  | 0.000299753 | 0.177585888  | 0.000114278 |
| SLC51B turquoise  | -0.094242929 | 0.041782341 | -0.079493201 | 0.086166586 |
| SLC6A1 turquoise  | 0.019182698  | 0.679263248 | 0.028987165  | 0.532056073 |
| SLC7A3 turquoise  | -0.16568698  | 0.000323379 | -0.14863062  | 0.001276388 |
| SLC7A5 turquoise  | 0.359066884  | 1.17E-15    | 0.345318494  | 1.59E-14    |
| SLC8A1 turquoise  | -0.39600899  | 5.51E-19    | -0.414176077 | 8.80E-21    |
| SLC8A2 turquoise  | -0.16792288  | 0.000267357 | -0.169117563 | 0.000241277 |
| SLC9B2 turquoise  | -0.044768095 | 0.334375523 | -0.074384878 | 0.108408547 |
| SLIT3 turquoise   | -0.198613381 | 1.53E-05    | -0.22207493  | 1.25E-06    |
| SLITRK3 turquoise | -0.188691677 | 4.07E-05    | -0.196874535 | 1.83E-05    |
| SMAD9 turquoise   | 0.091296726  | 0.048635752 | 0.062710273  | 0.176093821 |
| SMARCA turquoise  | 0.12852484   | 0.005410057 | 0.126190966  | 0.006321432 |
| SMIM10 turquoise  | -0.406579216 | 5.12E-20    | -0.418369123 | 3.26E-21    |
| SMOC2 turquoise   | -0.108933809 | 0.018533572 | -0.121573215 | 0.008539989 |
| SMPDL3 turquoise  | -0.115614564 | 0.012414245 | -0.10309519  | 0.025888884 |
| SMTN turquoise    | -0.132922683 | 0.004007583 | -0.132369142 | 0.004163852 |
| SNAI2 turquoise   | -0.046376406 | 0.31728394  | -0.061507703 | 0.184546032 |
| SNAP25 turquoise  | -0.37304561  | 7.24E-17    | -0.379896073 | 1.76E-17    |
| SNCA turquoise    | -0.352495316 | 4.15E-15    | -0.357680476 | 1.53E-15    |
| SNCAIP turquoise  | -0.130600369 | 0.004700821 | -0.139753369 | 0.002471008 |
| SNED1 turquoise   | -0.238734301 | 1.78E-07    | -0.246752866 | 6.60E-08    |
| SNPH turquoise    | -0.128598641 | 0.005383272 | -0.146537638 | 0.001496425 |
| SNTG2 turquoise   | -0.21307863  | 3.39E-06    | -0.190432693 | 3.44E-05    |
| SNX21 turquoise   | -0.105877928 | 0.022117442 | -0.122359307 | 0.008119161 |
| SNX33 turquoise   | 0.032663434  | 0.481333757 | 0.045868797  | 0.322615544 |
| SOBP turquoise    | -0.153733035 | 0.000858747 | -0.165130262 | 0.00033894  |
| SOCS2 turquoise   | -0.170726192 | 0.000209906 | -0.172559732 | 0.00017882  |
| SORBS1 turquoise  | -0.184368328 | 6.12E-05    | -0.202594757 | 1.02E-05    |
| SORBS3 turquoise  | -0.081092758 | 0.080011912 | -0.070093871 | 0.130395844 |

|         |           |              |             |              |             |
|---------|-----------|--------------|-------------|--------------|-------------|
| SORCS1  | turquoise | -0.16693965  | 0.000290771 | -0.168520485 | 0.000253998 |
| SOX15   | turquoise | -0.227206242 | 6.98E-07    | -0.225232029 | 8.76E-07    |
| SOX7    | turquoise | -0.074160626 | 0.109480103 | -0.091711306 | 0.04761789  |
| SPAG4   | turquoise | 0.212809457  | 3.49E-06    | 0.235546284  | 2.62E-07    |
| SPARCL1 | turquoise | -0.187444014 | 4.58E-05    | -0.183379975 | 6.72E-05    |
| SPEG    | turquoise | -0.397900566 | 3.63E-19    | -0.42572816  | 5.53E-22    |
| SPP1    | turquoise | 0.072834499  | 0.115988389 | 0.064084177  | 0.166793429 |
| SPSB1   | turquoise | -0.218171138 | 1.94E-06    | -0.192984188 | 2.68E-05    |
| SPTBN2  | turquoise | 0.043698392  | 0.346064854 | 0.043136652  | 0.352306003 |
| SPTBN4  | turquoise | -0.258086353 | 1.53E-08    | -0.264632787 | 6.35E-09    |
| SREBF1  | turquoise | 0.44301622   | 7.19E-24    | 0.450896686  | 9.13E-25    |
| SRF     | turquoise | -0.188703849 | 4.06E-05    | -0.187241529 | 4.67E-05    |
| SRL     | turquoise | -0.232911468 | 3.58E-07    | -0.211273713 | 4.11E-06    |
| SRPRB   | turquoise | 0.240168498  | 1.49E-07    | 0.258722231  | 1.40E-08    |
| SRPX    | turquoise | -0.339672765 | 4.48E-14    | -0.327692975 | 3.76E-13    |
| SSBP2   | turquoise | -0.150815276 | 0.001078792 | -0.127414003 | 0.00582796  |
| SSC5D   | turquoise | -0.187697281 | 4.47E-05    | -0.15239594  | 0.000953854 |
| SSPN    | turquoise | -0.359432572 | 1.09E-15    | -0.342762225 | 2.55E-14    |
| SSTR1   | turquoise | -0.327406362 | 3.95E-13    | -0.335255876 | 9.92E-14    |
| SSTR3   | turquoise | -0.202087305 | 1.08E-05    | -0.195511732 | 2.09E-05    |
| ST3GAL2 | turquoise | -0.161958484 | 0.000441749 | -0.16323456  | 0.000397318 |
| ST3GAL3 | turquoise | -0.23807144  | 1.93E-07    | -0.251254991 | 3.72E-08    |
| ST3GAL5 | turquoise | -0.158070676 | 0.000607241 | -0.15333086  | 0.000886389 |
| ST5     | turquoise | -0.13519326  | 0.003420608 | -0.153440776 | 0.000878754 |
| ST6GAL2 | turquoise | -0.135010166 | 0.003464874 | -0.1488444   | 0.001255677 |
| ST6GALM | turquoise | -0.263808514 | 7.10E-09    | -0.28215776  | 5.38E-10    |
| ST6GALM | turquoise | -0.256863911 | 1.79E-08    | -0.236794036 | 2.25E-07    |
| ST8SIA1 | turquoise | -0.278138963 | 9.62E-10    | -0.258814418 | 1.39E-08    |
| STAB2   | turquoise | -0.152696525 | 0.000931663 | -0.164417454 | 0.000359883 |
| STARD13 | turquoise | -0.045977518 | 0.321468739 | -0.056803239 | 0.220489291 |
| STARD5  | turquoise | -0.014979669 | 0.746798273 | -0.026172634 | 0.572634164 |
| STARD9  | turquoise | -0.21314066  | 3.37E-06    | -0.227513676 | 6.74E-07    |
| STAT5B  | turquoise | -0.09023726  | 0.051319916 | -0.102805442 | 0.026311725 |
| STC2    | turquoise | 0.123438821  | 0.007571421 | 0.107991593  | 0.01958033  |
| STEAP4  | turquoise | -0.051325978 | 0.268328106 | -0.055675727 | 0.229801699 |
| STMN3   | turquoise | -0.212095554 | 3.77E-06    | -0.220141819 | 1.56E-06    |
| STON1   | turquoise | -0.375230337 | 4.63E-17    | -0.380471074 | 1.56E-17    |
| STON1-G | turquoise | -0.178775033 | 0.000102607 | -0.174503421 | 0.000150609 |
| STX1B   | turquoise | -0.293133607 | 1.05E-10    | -0.29296203  | 1.07E-10    |
| STX2    | turquoise | -0.103891502 | 0.02475683  | -0.120140568 | 0.009357192 |
| STXBP1  | turquoise | -0.252355329 | 3.23E-08    | -0.293215716 | 1.03E-10    |
| SULF2   | turquoise | -0.097158794 | 0.035820387 | -0.092901586 | 0.044794275 |
| SUSD5   | turquoise | -0.249207723 | 4.83E-08    | -0.2517496   | 3.49E-08    |
| SVEP1   | turquoise | -0.134964672 | 0.003475953 | -0.116963332 | 0.011422106 |
| SVIL    | turquoise | -0.179136634 | 9.93E-05    | -0.19564275  | 2.06E-05    |

|         |           |              |             |              |             |
|---------|-----------|--------------|-------------|--------------|-------------|
| SYK     | turquoise | 0.222516968  | 1.19E-06    | 0.230665866  | 4.67E-07    |
| SYNC    | turquoise | -0.179167102 | 9.90E-05    | -0.174245962 | 0.000154089 |
| SYNE1   | turquoise | -0.269298091 | 3.35E-09    | -0.256824126 | 1.80E-08    |
| SYNE3   | turquoise | -0.202842336 | 9.97E-06    | -0.19388681  | 2.46E-05    |
| SYNM    | turquoise | -0.196661241 | 1.87E-05    | -0.208848176 | 5.33E-06    |
| SYNPO   | turquoise | -0.241282618 | 1.30E-07    | -0.189807493 | 3.65E-05    |
| SYNPO2  | turquoise | -0.177967932 | 0.000110399 | -0.162596237 | 0.000418995 |
| SYPL2   | turquoise | -0.099715396 | 0.031203716 | -0.098865333 | 0.032678795 |
| SYT1    | turquoise | -0.124213768 | 0.007198829 | -0.148463839 | 0.001292765 |
| SYT15   | turquoise | -0.245446931 | 7.77E-08    | -0.24847078  | 5.31E-08    |
| SYT9    | turquoise | -0.256002771 | 2.01E-08    | -0.26239073  | 8.60E-09    |
| SYTL4   | turquoise | -0.102683205 | 0.026491887 | -0.119340685 | 0.009843089 |
| SYTL5   | turquoise | -0.123549817 | 0.007517018 | -0.13181817  | 0.004324848 |
| TACC1   | turquoise | -0.143799155 | 0.001836929 | -0.159949499 | 0.00052116  |
| TACR2   | turquoise | -0.145921741 | 0.001567515 | -0.150207004 | 0.001130767 |
| TAGLN   | turquoise | -0.14092844  | 0.002268865 | -0.106801945 | 0.020975218 |
| TAL1    | turquoise | -0.21495426  | 2.76E-06    | -0.217146191 | 2.17E-06    |
| TALDO1  | turquoise | 0.277854613  | 1.00E-09    | 0.299352556  | 4.01E-11    |
| TARBP2  | turquoise | -0.117530702 | 0.011026167 | -0.116659775 | 0.011639067 |
| TBC1D1  | turquoise | -0.0931958   | 0.04411845  | -0.101031271 | 0.029032754 |
| TBC1D2E | turquoise | -0.169697898 | 0.000229486 | -0.173446928 | 0.000165378 |
| TBC1D7  | turquoise | 0.124492399  | 0.007068928 | 0.143221498  | 0.00191726  |
| TBL1X   | turquoise | -0.142644469 | 0.002000702 | -0.162008675 | 0.000439917 |
| TBX2    | turquoise | -0.159719038 | 0.000531073 | -0.129866507 | 0.004941386 |
| TBX3    | turquoise | -0.177633714 | 0.000113786 | -0.182338833 | 7.40E-05    |
| TCAF2   | turquoise | 0.02282505   | 0.622722376 | 0.020001737  | 0.66637681  |
| TCEAL1  | turquoise | -0.104279042 | 0.024221531 | -0.128590329 | 0.005386283 |
| TCEAL2  | turquoise | -0.219308199 | 1.71E-06    | -0.237538929 | 2.06E-07    |
| TCEAL3  | turquoise | -0.135733113 | 0.003293061 | -0.131129698 | 0.004533919 |
| TCEAL4  | turquoise | -0.154840093 | 0.00078672  | -0.16902354  | 0.00024324  |
| TCEAL5  | turquoise | -0.429214628 | 2.35E-22    | -0.43928163  | 1.88E-23    |
| TCEAL6  | turquoise | -0.186316436 | 5.10E-05    | -0.195254603 | 2.15E-05    |
| TCEAL7  | turquoise | -0.257604236 | 1.63E-08    | -0.247468552 | 6.03E-08    |
| TCF21   | turquoise | -0.159139433 | 0.000556782 | -0.160514275 | 0.00049759  |
| TCF23   | turquoise | -0.227222808 | 6.97E-07    | -0.228107338 | 6.29E-07    |
| TCF4    | turquoise | -0.191959944 | 2.97E-05    | -0.179203774 | 9.87E-05    |
| TCF7L2  | turquoise | -0.197870467 | 1.65E-05    | -0.193816407 | 2.47E-05    |
| TDRD10  | turquoise | -0.202046567 | 1.08E-05    | -0.217322758 | 2.13E-06    |
| TEAD3   | turquoise | -0.210524393 | 4.46E-06    | -0.220744206 | 1.46E-06    |
| TEF     | turquoise | -0.16625242  | 0.00030826  | -0.177003936 | 0.000120435 |
| TEX15   | turquoise | -0.223083855 | 1.12E-06    | -0.227760842 | 6.55E-07    |
| TFAP2A  | turquoise | 0.248818881  | 5.08E-08    | 0.229167017  | 5.56E-07    |
| TFPI    | turquoise | -0.071566072 | 0.122493403 | -0.06847474  | 0.139536142 |
| TGFB1I1 | turquoise | -0.155016467 | 0.000775775 | -0.125627106 | 0.006561314 |
| TGFB3   | turquoise | -0.03992019  | 0.389395707 | -0.047111251 | 0.309668199 |

|         |           |              |             |              |             |
|---------|-----------|--------------|-------------|--------------|-------------|
| TGFBR3  | turquoise | -0.27998077  | 7.38E-10    | -0.288344691 | 2.16E-10    |
| TGM2    | turquoise | -0.204213419 | 8.66E-06    | -0.176100789 | 0.000130609 |
| THBS4   | turquoise | -0.103258126 | 0.025653686 | -0.088121407 | 0.057051051 |
| THPO    | turquoise | -0.220004634 | 1.58E-06    | -0.213004305 | 3.42E-06    |
| THRA    | turquoise | -0.179149136 | 9.92E-05    | -0.195311844 | 2.13E-05    |
| THRB    | turquoise | -0.388006706 | 3.15E-18    | -0.393438202 | 9.71E-19    |
| TIAM1   | turquoise | -0.307855942 | 1.04E-11    | -0.311913456 | 5.38E-12    |
| TIMP2   | turquoise | -0.334886311 | 1.06E-13    | -0.311397887 | 5.85E-12    |
| TIMP3   | turquoise | -0.229426164 | 5.40E-07    | -0.227981168 | 6.38E-07    |
| TK2     | turquoise | 0.134177989  | 0.003672685 | 0.138636833  | 0.002678165 |
| TKT     | turquoise | 0.206757275  | 6.64E-06    | 0.224672147  | 9.34E-07    |
| TLCD1   | turquoise | 0.15313463   | 0.000900172 | 0.175597535  | 0.000136624 |
| TLE4    | turquoise | -0.319174355 | 1.61E-12    | -0.290303233 | 1.61E-10    |
| TLL1    | turquoise | -0.193929224 | 2.45E-05    | -0.189573152 | 3.74E-05    |
| TLN1    | turquoise | -0.100858829 | 0.029309664 | -0.090588297 | 0.050417188 |
| TM7SF2  | turquoise | 0.166386286  | 0.000304778 | 0.173827679  | 0.000159906 |
| TMC6    | turquoise | -0.07685941  | 0.097126006 | -0.044972144 | 0.332174897 |
| TMEM11  | turquoise | -0.196909046 | 1.82E-05    | -0.153697479 | 0.000861158 |
| TMEM13  | turquoise | 0.323469545  | 7.78E-13    | 0.318595198  | 1.78E-12    |
| TMEM13  | turquoise | -0.309567761 | 7.88E-12    | -0.323653339 | 7.54E-13    |
| TMEM15  | turquoise | -0.004957683 | 0.914907998 | -0.005858246 | 0.899526463 |
| TMEM17  | turquoise | 0.110032643  | 0.017374765 | 0.093059595  | 0.044430246 |
| TMEM19  | turquoise | -0.165559239 | 0.00032689  | -0.169906542 | 0.00022538  |
| TMEM20  | turquoise | -0.226850779 | 7.27E-07    | -0.2117005   | 3.93E-06    |
| TMEM20  | turquoise | -0.192376827 | 2.85E-05    | -0.187009066 | 4.77E-05    |
| TMEM21  | turquoise | -0.125843189 | 0.006468438 | -0.125622122 | 0.00656347  |
| TMEM22  | turquoise | 0.103799359  | 0.024885597 | 0.102527232  | 0.026723313 |
| TMEM23  | turquoise | 0.237806248  | 1.99E-07    | 0.264425178  | 6.53E-09    |
| TMEM24  | turquoise | -0.237398283 | 2.09E-07    | -0.225951943 | 8.07E-07    |
| TMEM24  | turquoise | -0.409609004 | 2.55E-20    | -0.430144371 | 1.87E-22    |
| TMEM25  | turquoise | -0.195692533 | 2.05E-05    | -0.182912896 | 7.01E-05    |
| TMEM35  | turquoise | -0.055810636 | 0.228672993 | -0.070088744 | 0.130424038 |
| TMEM43  | turquoise | -0.173616401 | 0.000162921 | -0.199048816 | 1.47E-05    |
| TMEM47  | turquoise | -0.111718047 | 0.01572041  | -0.086204202 | 0.062693037 |
| TMEM55  | turquoise | -0.242257366 | 1.16E-07    | -0.237406322 | 2.09E-07    |
| TMEM63  | turquoise | 0.282242332  | 5.31E-10    | 0.293021131  | 1.06E-10    |
| TMEM88  | turquoise | -0.065789393 | 0.155768215 | -0.058515969 | 0.206864727 |
| TMEM8A  | turquoise | 0.23654206   | 2.32E-07    | 0.269696438  | 3.17E-09    |
| TMEM8B  | turquoise | -0.096246604 | 0.037602499 | -0.105319471 | 0.02283361  |
| TMOD1   | turquoise | -0.160239293 | 0.000508939 | -0.1368827   | 0.003035733 |
| TMOD2   | turquoise | -0.230866121 | 4.56E-07    | -0.234474691 | 2.97E-07    |
| TMPRSS4 | turquoise | 0.095493955  | 0.039129016 | 0.117715006  | 0.010900192 |
| TNFAIP8 | turquoise | -0.160293954 | 0.000506665 | -0.162176146 | 0.000433857 |
| TNRC6C  | turquoise | -0.212438577 | 3.63E-06    | -0.21366101  | 3.18E-06    |
| TNS1    | turquoise | -0.278698858 | 8.87E-10    | -0.268474966 | 3.75E-09    |

|         |           |              |             |              |             |
|---------|-----------|--------------|-------------|--------------|-------------|
| TNS2    | turquoise | -0.131169512 | 0.004521584 | -0.117480964 | 0.011060384 |
| TNXB    | turquoise | -0.227311271 | 6.90E-07    | -0.218847592 | 1.80E-06    |
| TPI1    | turquoise | 0.233238823  | 3.45E-07    | 0.260279717  | 1.14E-08    |
| TPM1    | turquoise | -0.181225232 | 8.20E-05    | -0.174393972 | 0.000152079 |
| TPM2    | turquoise | -0.1490144   | 0.001239428 | -0.141655031 | 0.002151549 |
| TPPP2   | turquoise | -0.167877792 | 0.000268391 | -0.17315903  | 0.000169633 |
| TPRN    | turquoise | 0.10984731   | 0.017565658 | 0.120303935  | 0.009260617 |
| TPSAB1  | turquoise | -0.119288814 | 0.009875358 | -0.06949276  | 0.133733623 |
| TPSB2   | turquoise | -0.135480823 | 0.00335212  | -0.105675731 | 0.022374459 |
| TPSD1   | turquoise | -0.090090462 | 0.0517014   | -0.072596717 | 0.117186772 |
| TPSG1   | turquoise | -0.187844385 | 4.41E-05    | -0.2009288   | 1.21E-05    |
| TRAF4   | turquoise | 0.165688851  | 0.000323328 | 0.168481139  | 0.000254858 |
| TRANK1  | turquoise | -0.213750247 | 3.15E-06    | -0.194747906 | 2.26E-05    |
| TRDN    | turquoise | -0.162496243 | 0.000422489 | -0.165381791 | 0.000331825 |
| TRERF1  | turquoise | -0.287252243 | 2.54E-10    | -0.284885997 | 3.60E-10    |
| TRH     | turquoise | -0.217116853 | 2.18E-06    | -0.239915147 | 1.54E-07    |
| TRIM4   | turquoise | -0.220465688 | 1.50E-06    | -0.219408324 | 1.69E-06    |
| TRIM56  | turquoise | -0.213497075 | 3.24E-06    | -0.20139572  | 1.16E-05    |
| TRIM63  | turquoise | -0.146333179 | 0.001519689 | -0.151737331 | 0.001004192 |
| TRIM9   | turquoise | -0.081901122 | 0.07703978  | -0.090066978 | 0.05176265  |
| TRIOBP  | turquoise | -0.058370843 | 0.207995004 | -0.058768546 | 0.204908197 |
| TRO     | turquoise | -0.569831687 | 1.47E-41    | -0.580678301 | 1.89E-43    |
| TRPC1   | turquoise | -0.368370807 | 1.87E-16    | -0.377548224 | 2.87E-17    |
| TRPC4   | turquoise | -0.170377072 | 0.000216372 | -0.160533293 | 0.000496814 |
| TRPM2   | turquoise | 0.251429637  | 3.64E-08    | 0.258138077  | 1.52E-08    |
| TRPM3   | turquoise | -0.145248137 | 0.001648806 | -0.157206667 | 0.000651101 |
| TRUB2   | turquoise | 0.243296244  | 1.02E-07    | 0.24863189   | 5.20E-08    |
| TSACC   | turquoise | 0.036458467  | 0.431853419 | 0.036018536  | 0.437434259 |
| TSC22D3 | turquoise | -0.355107814 | 2.52E-15    | -0.329787094 | 2.61E-13    |
| TSHB    | turquoise | -0.186405013 | 5.06E-05    | -0.183308849 | 6.76E-05    |
| TSHZ2   | turquoise | -0.197716444 | 1.68E-05    | -0.180917015 | 8.44E-05    |
| TSHZ3   | turquoise | -0.259726637 | 1.23E-08    | -0.25068232  | 4.00E-08    |
| TSLP    | turquoise | -0.132906774 | 0.004011999 | -0.143565496 | 0.001869044 |
| TSPAN17 | turquoise | 0.040220942  | 0.385830522 | 0.065656082  | 0.156609769 |
| TSPAN18 | turquoise | -0.307430204 | 1.11E-11    | -0.302211112 | 2.56E-11    |
| TSPAN2  | turquoise | -0.332679534 | 1.57E-13    | -0.323540052 | 7.68E-13    |
| TSPAN33 | turquoise | -0.034882105 | 0.452040613 | -0.045545614 | 0.326040227 |
| TSPAN4  | turquoise | -0.287628872 | 2.40E-10    | -0.247096172 | 6.32E-08    |
| TSPAN5  | turquoise | 0.060396765  | 0.192616789 | 0.030372102  | 0.512635975 |
| TSPAN7  | turquoise | -0.23719697  | 2.14E-07    | -0.246620217 | 6.71E-08    |
| TSPAN9  | turquoise | -0.034337031 | 0.459142721 | -0.01581505  | 0.733200301 |
| TSPYL2  | turquoise | -0.190535883 | 3.41E-05    | -0.208642923 | 5.45E-06    |
| TSPYL5  | turquoise | -0.440522614 | 1.37E-23    | -0.445195104 | 4.09E-24    |
| TSSC1   | turquoise | 0.199938887  | 1.34E-05    | 0.191312024  | 3.16E-05    |
| TTYH2   | turquoise | -0.263062712 | 7.85E-09    | -0.279660459 | 7.73E-10    |

|         |           |              |             |              |             |
|---------|-----------|--------------|-------------|--------------|-------------|
| TUB     | turquoise | -0.390937153 | 1.67E-18    | -0.393704125 | 9.16E-19    |
| TUBB6   | turquoise | -0.326254173 | 4.82E-13    | -0.305933518 | 1.42E-11    |
| TUBG2   | turquoise | -0.03723851  | 0.42205979  | -0.045976162 | 0.321483022 |
| TUSC1   | turquoise | -0.240295469 | 1.47E-07    | -0.233571926 | 3.31E-07    |
| TVP23A  | turquoise | -0.153096169 | 0.000902897 | -0.157454857 | 0.00063821  |
| TWIST1  | turquoise | -0.085861676 | 0.063747917 | -0.075138001 | 0.104870286 |
| TWIST2  | turquoise | -0.318325028 | 1.86E-12    | -0.313516331 | 4.13E-12    |
| TXLNB   | turquoise | -0.280138778 | 7.21E-10    | -0.282490376 | 5.12E-10    |
| TXNDC1  | turquoise | 0.00730498   | 0.874897306 | -0.011499383 | 0.804253579 |
| TXNIP   | turquoise | 0.015004771  | 0.746388502 | 0.005380185  | 0.907687384 |
| TXNL4A  | turquoise | 0.142698289  | 0.001992781 | 0.168624692  | 0.000251734 |
| TYSND1  | turquoise | 0.158255768  | 0.000598209 | 0.147046834  | 0.001439899 |
| UBE2QL1 | turquoise | -0.046167438 | 0.319471793 | -0.073813126 | 0.111157056 |
| UCP2    | turquoise | 0.177900065  | 0.000111079 | 0.207952643  | 5.86E-06    |
| UNC93B1 | turquoise | 0.002945648  | 0.949379874 | 0.031123793  | 0.502251803 |
| USF1    | turquoise | 0.167518468  | 0.000276766 | 0.18949843   | 3.76E-05    |
| USP27X  | turquoise | -0.333758089 | 1.29E-13    | -0.353304369 | 3.55E-15    |
| USP51   | turquoise | -0.399744616 | 2.40E-19    | -0.418213379 | 3.39E-21    |
| UST     | turquoise | -0.340526795 | 3.84E-14    | -0.352301251 | 4.30E-15    |
| VAMP2   | turquoise | 0.059393924  | 0.200121649 | 0.060574902  | 0.191305537 |
| VASH1   | turquoise | -0.242318653 | 1.15E-07    | -0.240852533 | 1.37E-07    |
| VAT1L   | turquoise | -0.147685009 | 0.001371828 | -0.128652365 | 0.005363849 |
| VAV3    | turquoise | 0.201197654  | 1.18E-05    | 0.200220643  | 1.30E-05    |
| VGLL3   | turquoise | -0.206346937 | 6.93E-06    | -0.200079165 | 1.32E-05    |
| VIP     | turquoise | -0.212766916 | 3.50E-06    | -0.211204075 | 4.15E-06    |
| VIPR2   | turquoise | -0.172393059 | 0.000181456 | -0.15641464  | 0.000693868 |
| VPS37B  | turquoise | 0.306711947  | 1.25E-11    | 0.328573846  | 3.22E-13    |
| VSTM4   | turquoise | -0.192779329 | 2.74E-05    | -0.178895103 | 0.000101493 |
| VWC2    | turquoise | -0.217337139 | 2.13E-06    | -0.219456929 | 1.68E-06    |
| WBSCR1  | turquoise | -0.287782669 | 2.34E-10    | -0.29769534  | 5.19E-11    |
| WDR17   | turquoise | -0.297305517 | 5.51E-11    | -0.317178363 | 2.25E-12    |
| WDR55   | turquoise | 0.34034537   | 3.96E-14    | 0.328338374  | 3.36E-13    |
| WIPF3   | turquoise | -0.330354865 | 2.36E-13    | -0.328534917 | 3.24E-13    |
| WISP2   | turquoise | -0.175259967 | 0.000140803 | -0.199915234 | 1.35E-05    |
| WNT2B   | turquoise | -0.210472981 | 4.48E-06    | -0.214937293 | 2.77E-06    |
| WNT4    | turquoise | -0.278480225 | 9.16E-10    | -0.270630692 | 2.78E-09    |
| WNT9B   | turquoise | -0.188791041 | 4.03E-05    | -0.193306708 | 2.60E-05    |
| WSCD2   | turquoise | -0.185451866 | 5.53E-05    | -0.1815622   | 7.95E-05    |
| WT1     | turquoise | -0.411805748 | 1.53E-20    | -0.407290523 | 4.35E-20    |
| WWC3    | turquoise | -0.211987178 | 3.81E-06    | -0.225214186 | 8.78E-07    |
| WWTR1   | turquoise | -0.242293996 | 1.15E-07    | -0.247553078 | 5.96E-08    |
| XKR5    | turquoise | -0.040593489 | 0.381441941 | -0.065100665 | 0.160152969 |
| XPNPEP2 | turquoise | -0.129265198 | 0.005146712 | -0.1277902   | 0.005683292 |
| XYLT1   | turquoise | -0.230111312 | 4.98E-07    | -0.220415184 | 1.51E-06    |
| YIPF1   | turquoise | 0.208537535  | 5.51E-06    | 0.234123635  | 3.10E-07    |

|         |           |              |             |              |             |
|---------|-----------|--------------|-------------|--------------|-------------|
| YPEL4   | turquoise | -0.328863124 | 3.06E-13    | -0.333306324 | 1.40E-13    |
| YWHAE   | turquoise | 0.29736981   | 5.46E-11    | 0.282908256  | 4.82E-10    |
| ZBTB16  | turquoise | -0.203934596 | 8.91E-06    | -0.210410489 | 4.51E-06    |
| ZBTB4   | turquoise | 0.002149777  | 0.963045131 | -0.017796631 | 0.701283731 |
| ZBTB46  | turquoise | -0.446199199 | 3.14E-24    | -0.43790445  | 2.67E-23    |
| ZBTB47  | turquoise | -0.171075073 | 0.000203627 | -0.180169194 | 9.04E-05    |
| ZC3H12B | turquoise | -0.334672993 | 1.10E-13    | -0.34192993  | 2.97E-14    |
| ZCCHC12 | turquoise | -0.072874255 | 0.115788967 | -0.113893063 | 0.013790603 |
| ZCCHC18 | turquoise | -0.192500302 | 2.81E-05    | -0.203709571 | 9.12E-06    |
| ZCCHC24 | turquoise | -0.26110249  | 1.02E-08    | -0.247058982 | 6.35E-08    |
| ZCCHC5  | turquoise | -0.122642082 | 0.007972366 | -0.122813665 | 0.007884453 |
| ZDBF2   | turquoise | -0.375621438 | 4.27E-17    | -0.384681253 | 6.42E-18    |
| ZDHHC11 | turquoise | -0.264509208 | 6.46E-09    | -0.270296966 | 2.91E-09    |
| ZDHHC11 | turquoise | -0.345872453 | 1.44E-14    | -0.339510496 | 4.61E-14    |
| ZDHHC11 | turquoise | 0.248752842  | 5.12E-08    | 0.250675538  | 4.01E-08    |
| ZEB1    | turquoise | -0.172586172 | 0.000178405 | -0.167837886 | 0.000269309 |
| ZEB2    | turquoise | -0.241575003 | 1.26E-07    | -0.219222523 | 1.73E-06    |
| ZFPM2   | turquoise | -0.327993892 | 3.57E-13    | -0.324605373 | 6.40E-13    |
| ZFYVE21 | turquoise | 0.003656676  | 0.937183803 | 0.011578719  | 0.802930704 |
| ZNF165  | turquoise | -0.102111703 | 0.027348371 | -0.111570169 | 0.015859822 |
| ZNF208  | turquoise | -0.305449058 | 1.53E-11    | -0.309938663 | 7.42E-12    |
| ZNF229  | turquoise | -0.459421998 | 9.20E-26    | -0.472850466 | 2.17E-27    |
| ZNF25   | turquoise | -0.095370465 | 0.039384421 | -0.126278333 | 0.006284977 |
| ZNF34   | turquoise | -0.262397128 | 8.59E-09    | -0.280145315 | 7.20E-10    |
| ZNF385D | turquoise | -0.189335632 | 3.82E-05    | -0.188162224 | 4.28E-05    |
| ZNF438  | turquoise | -0.140495049 | 0.002341593 | -0.143456124 | 0.001884252 |
| ZNF454  | turquoise | -0.262280363 | 8.73E-09    | -0.286912624 | 2.67E-10    |
| ZNF501  | turquoise | -0.37446755  | 5.41E-17    | -0.371364741 | 1.02E-16    |
| ZNF502  | turquoise | -0.390004295 | 2.05E-18    | -0.397670416 | 3.82E-19    |
| ZNF521  | turquoise | -0.132485311 | 0.004130607 | -0.13610571  | 0.003207566 |
| ZNF540  | turquoise | -0.125284782 | 0.006710898 | -0.129723265 | 0.004989617 |
| ZNF559  | turquoise | -0.234919385 | 2.82E-07    | -0.258338408 | 1.48E-08    |
| ZNF575  | turquoise | -0.05846855  | 0.207233546 | -0.06086261  | 0.189201578 |
| ZNF582  | turquoise | -0.32175044  | 1.04E-12    | -0.312005485 | 5.30E-12    |
| ZNF662  | turquoise | -0.496643722 | 1.86E-30    | -0.497686726 | 1.35E-30    |
| ZNF672  | turquoise | 0.301543813  | 2.84E-11    | 0.313898789  | 3.88E-12    |
| ZNF676  | turquoise | -0.281610117 | 5.82E-10    | -0.285978004 | 3.07E-10    |
| ZNF677  | turquoise | -0.377459934 | 2.92E-17    | -0.397385853 | 4.07E-19    |
| ZNF781  | turquoise | -0.163391198 | 0.00039216  | -0.206238439 | 7.01E-06    |
| ZNF835  | turquoise | -0.398231999 | 3.37E-19    | -0.394615762 | 7.50E-19    |
| ZNF843  | turquoise | -0.304446095 | 1.80E-11    | -0.29917533  | 4.12E-11    |
| ZYX     | turquoise | -0.100291797 | 0.030236234 | -0.079468794 | 0.086263367 |
| A3GALT  | violet    | -0.116008688 | 0.012116747 | -0.110084534 | 0.017321644 |
| ADAD1   | violet    | -0.037980655 | 0.412863584 | -0.032329057 | 0.485836154 |
| ADAM7   | violet    | -0.100738035 | 0.029504983 | -0.075063373 | 0.105216769 |



|          |        |              |             |              |             |
|----------|--------|--------------|-------------|--------------|-------------|
| AGBL1    | violet | -0.062848846 | 0.17513866  | -0.039400655 | 0.395601245 |
| ANKRD3   | violet | -0.081145809 | 0.07981405  | -0.08824271  | 0.056708716 |
| ASB17    | violet | -0.042486145 | 0.359621528 | -0.022060155 | 0.634427611 |
| ASB18    | violet | -0.043659153 | 0.346498519 | -0.044648552 | 0.335669111 |
| ATP11A   | violet | -0.066642321 | 0.150464688 | -0.041955196 | 0.365662491 |
| ATXN3L   | violet | -0.073280719 | 0.113765448 | -0.05722328  | 0.217089997 |
| BAGE5    | violet | -0.131382919 | 0.004455984 | -0.124457624 | 0.007085025 |
| BRS3     | violet | -0.083831119 | 0.070305437 | -0.097916055 | 0.034395987 |
| C1orf185 | violet | -0.064014385 | 0.16725682  | -0.038208262 | 0.410067102 |
| C7orf33  | violet | -0.110650103 | 0.016751809 | -0.10160694  | 0.028124534 |
| CABP2    | violet | -0.136539966 | 0.00311047  | -0.099133782 | 0.032206664 |
| CCDC168  | violet | -0.026186922 | 0.572424527 | -0.014580002 | 0.753332071 |
| CCDC79   | violet | -0.045282819 | 0.328842295 | -0.033007164 | 0.476729129 |
| CNBD1    | violet | -0.075779357 | 0.101929726 | -0.059051869 | 0.202729501 |
| CRB1     | violet | -0.103491832 | 0.025319551 | -0.110806915 | 0.016596748 |
| CRYAA    | violet | -0.0271038   | 0.559048291 | -0.034198209 | 0.460961426 |
| CYLC2    | violet | -0.043387367 | 0.349511739 | -0.025869577 | 0.577089283 |
| CYP7A1   | violet | -0.06167491  | 0.183353234 | -0.065925031 | 0.154915486 |
| DAOA     | violet | -0.037083778 | 0.423992102 | -0.021730333 | 0.639503379 |
| DDX3Y    | violet | -0.070875354 | 0.126153286 | -0.058443043 | 0.207432136 |
| DDX53    | violet | 0.009957945  | 0.830062336 | 0.032781197  | 0.479753483 |
| DEFB110  | violet | -0.063782523 | 0.168803214 | -0.051687575 | 0.264966256 |
| DEFB128  | violet | -0.044732384 | 0.334761616 | -0.01677645  | 0.717653954 |
| DNAH8    | violet | -0.100896501 | 0.029248977 | -0.096490002 | 0.037119777 |
| DNAJB8   | violet | -0.113151841 | 0.014423453 | -0.087083925 | 0.060049527 |
| EFCAB3   | violet | -0.011086149 | 0.811152888 | -0.007672216 | 0.868663709 |
| G6PC2    | violet | -0.076574557 | 0.098375069 | -0.063538752 | 0.170440541 |
| GABRR3   | violet | -0.075469882 | 0.103340367 | -0.064610949 | 0.163326861 |
| GAGE2E   | violet | -0.080259824 | 0.083170848 | -0.061126415 | 0.187287415 |
| GFRAL    | violet | -0.053637047 | 0.247340633 | -0.04342232  | 0.349123298 |
| GPR112   | violet | -0.123123375 | 0.007727957 | -0.123188402 | 0.007695454 |
| GPR141   | violet | 0.027992425  | 0.546230316 | 0.040061832  | 0.387714168 |
| GPR149   | violet | -0.064540196 | 0.163789298 | -0.060156057 | 0.194399064 |
| HEMGN    | violet | -0.060806946 | 0.189607306 | -0.044977275 | 0.332119691 |
| HIST1H4A | violet | 0.010011262  | 0.829166403 | 0.014315927  | 0.757658903 |
| HNRNPC   | violet | 0.013891373  | 0.76463101  | 0.017715331  | 0.702583358 |
| HORMAI   | violet | -0.040159732 | 0.386554503 | -0.035553591 | 0.443377135 |
| HSF5     | violet | -0.054579495 | 0.239119864 | -0.025743986 | 0.578940299 |
| HTR4     | violet | -0.095615646 | 0.038878706 | -0.092657442 | 0.045361675 |
| IFNA2    | violet | -0.128416513 | 0.005449589 | -0.116086012 | 0.012059125 |
| IFNA21   | violet | -0.030683743 | 0.508317339 | -0.015301012 | 0.741558027 |
| IL17F    | violet | 0.027851765  | 0.548249561 | 0.055066928  | 0.234944311 |
| IL26     | violet | -0.01124525  | 0.808494784 | 0.017537262  | 0.705432938 |
| IL3      | violet | -0.051206428 | 0.269445988 | -0.045544714 | 0.326049802 |
| IQCF3    | violet | -0.02915451  | 0.529689919 | -0.024684936 | 0.5946585   |

|                |              |             |              |             |
|----------------|--------------|-------------|--------------|-------------|
| KRTAP21violet  | -0.061754574 | 0.18278694  | -0.043150101 | 0.352155754 |
| KRTAP24violet  | -0.056016288 | 0.226959998 | -0.035358922 | 0.445878968 |
| MBL2 violet    | -0.041561779 | 0.370179138 | -0.028349324 | 0.541123408 |
| MGAT4Dviolet   | -0.086925156 | 0.060519685 | -0.073609585 | 0.112148638 |
| MLIP violet    | -0.135478673 | 0.003352628 | -0.123109815 | 0.007734751 |
| MROH2Bviolet   | -0.081783774 | 0.077465587 | -0.067370157 | 0.146048473 |
| NLRP14 violet  | -0.201148645 | 1.19E-05    | -0.215361723 | 2.64E-06    |
| NME8 violet    | -0.049148228 | 0.289191724 | -0.035356311 | 0.445912573 |
| NOTO violet    | -0.024134001 | 0.602911465 | -0.016464176 | 0.722691182 |
| NPHS2 violet   | -0.127674806 | 0.00572732  | -0.116755628 | 0.011570167 |
| OOSP2 violet   | -0.013919484 | 0.764168781 | -0.01108056  | 0.811246299 |
| OPRM1 violet   | -0.024734508 | 0.593918449 | -0.015400292 | 0.739941427 |
| OR11H4 violet  | -0.185004327 | 5.77E-05    | -0.179190768 | 9.88E-05    |
| OR11H6 violet  | -0.085011784 | 0.06642857  | -0.074682507 | 0.106999161 |
| OR13G1 violet  | -0.10972898  | 0.017688493 | -0.096390499 | 0.037316479 |
| OR1L8 violet   | -0.053615851 | 0.247527762 | -0.044394194 | 0.338432213 |
| OR1N2 violet   | -0.054619033 | 0.238779234 | -0.040856999 | 0.378356311 |
| OR2A12 violet  | -0.072067627 | 0.119888052 | -0.052708201 | 0.255633778 |
| OR2B3 violet   | -0.075681874 | 0.102372411 | -0.050570888 | 0.275442202 |
| OR4K15 violet  | -0.030752087 | 0.507372798 | -0.026936018 | 0.561484686 |
| OR4K17 violet  | -0.094260156 | 0.041744798 | -0.083211039 | 0.072414509 |
| OR56A5 violet  | -0.114011322 | 0.013691929 | -0.106536167 | 0.021298389 |
| OR5K3 violet   | -0.068897661 | 0.137102546 | -0.054776204 | 0.237428537 |
| OR5L2 violet   | -0.050964347 | 0.271719373 | -0.04215989  | 0.363326116 |
| OR5M8 violet   | -0.058689869 | 0.205516205 | -0.045104918 | 0.330747983 |
| OR5T1 violet   | -0.063068438 | 0.173632946 | -0.050024387 | 0.280670415 |
| OR6B1 violet   | -0.060378114 | 0.192754455 | -0.045953071 | 0.321726375 |
| OR7A17 violet  | -0.065511491 | 0.157526409 | -0.059761844 | 0.197343945 |
| OR8B12 violet  | -0.03707679  | 0.424079497 | -0.015261821 | 0.742196481 |
| OR8B3 violet   | -0.045034042 | 0.331509197 | -0.025391062 | 0.584156692 |
| OR8D1 violet   | -0.035518405 | 0.443828742 | -0.011794464 | 0.799336186 |
| OR8D4 violet   | 0.028440854  | 0.539817529 | 0.046932712  | 0.311507369 |
| OR8J3 violet   | -0.049148315 | 0.289190865 | -0.019777175 | 0.669900419 |
| OR9A2 violet   | -0.065827452 | 0.155528586 | -0.056892098 | 0.21976702  |
| OTOGL violet   | -0.186729928 | 4.90E-05    | -0.188126759 | 4.29E-05    |
| PLA2G2Eviolet  | -0.02996404  | 0.518319461 | -0.013621039 | 0.769080453 |
| PLCZ1 violet   | 0.01508275   | 0.745116016 | 0.029110102  | 0.530317302 |
| PNLIPRP.violet | -0.057443686 | 0.215321401 | -0.039219146 | 0.397783227 |
| POTEC violet   | -0.06920952  | 0.135329027 | -0.064292368 | 0.165416845 |
| POTEG violet   | -0.017604031 | 0.704363976 | -0.007504285 | 0.871513254 |
| POTEH violet   | 0.020451062  | 0.659348462 | 0.071372107  | 0.123512704 |
| POTEJ violet   | -0.056142783 | 0.225910884 | -0.050926887 | 0.272072319 |
| POTEM violet   | 0.002582101  | 0.955620447 | 0.042582089  | 0.358536622 |
| PRDM9 violet   | -0.119006667 | 0.010052537 | -0.114842683 | 0.01301562  |
| RBMXL2 violet  | -0.145509216 | 0.00161685  | -0.138093263 | 0.002784636 |

|          |        |              |             |              |             |
|----------|--------|--------------|-------------|--------------|-------------|
| RDH8     | violet | -0.107371817 | 0.020296611 | -0.099519442 | 0.031538599 |
| RGSL1    | violet | -0.054822713 | 0.237029877 | -0.046318682 | 0.317887319 |
| RIT2     | violet | -0.050494175 | 0.276172069 | -0.030206777 | 0.51493471  |
| RNASE11  | violet | -0.051487785 | 0.266820154 | -0.051475091 | 0.26693825  |
| RP11-310 | violet | -0.038340318 | 0.408449769 | -0.029739861 | 0.521455586 |
| RP11-506 | violet | -0.014528639 | 0.754173038 | -0.006639314 | 0.886216057 |
| RXFP2    | violet | -0.088269559 | 0.056633176 | -0.080534038 | 0.082119944 |
| SAMD7    | violet | -0.16313975  | 0.00040047  | -0.146848463 | 0.001461683 |
| SERPINB  | violet | -0.073788721 | 0.111275581 | -0.067539393 | 0.145035926 |
| SLC13A1  | violet | -0.07585767  | 0.101575192 | -0.069354752 | 0.134509158 |
| SLC22A2  | violet | -0.033874299 | 0.465220526 | -0.027785875 | 0.549196698 |
| SLC22A2  | violet | -0.062299102 | 0.178950736 | -0.044253834 | 0.339963156 |
| SLC25A3  | violet | -0.029791423 | 0.520733394 | -0.01283608  | 0.782042692 |
| SPACA7   | violet | -0.019543143 | 0.673580361 | -0.012586343 | 0.786179543 |
| SPAM1    | violet | 0.02462775   | 0.595512742 | 0.032461854  | 0.484045319 |
| SPATA16  | violet | -0.115493546 | 0.012506878 | -0.101958043 | 0.027582676 |
| SPATA31  | violet | -0.072213382 | 0.119139092 | -0.055113378 | 0.2345491   |
| SPATA9   | violet | -0.09558475  | 0.038942129 | -0.099841353 | 0.030990068 |
| SPO11    | violet | -0.076386395 | 0.099207137 | -0.057718893 | 0.213127634 |
| SPZ1     | violet | -0.053876218 | 0.245235958 | -0.061186729 | 0.186851785 |
| SULT6B1  | violet | -0.089663818 | 0.052823574 | -0.081528301 | 0.078399205 |
| TAS2R39  | violet | -0.062203622 | 0.179619041 | -0.046123437 | 0.319933723 |
| TAS2R7   | violet | -0.050599514 | 0.275170183 | -0.036522237 | 0.43104788  |
| TBC1D29  | violet | -0.051847562 | 0.263488096 | -0.038639076 | 0.404804766 |
| TBPL2    | violet | -0.096634988 | 0.03683474  | -0.077546844 | 0.094163687 |
| TDRD15   | violet | 0.023965351  | 0.605448071 | 0.030876233  | 0.505659411 |
| TEX14    | violet | -0.106479544 | 0.021367796 | -0.09261469  | 0.045461652 |
| TGIF2LX  | violet | -0.093590739 | 0.043224761 | -0.078077981 | 0.091924699 |
| TNR      | violet | -0.032037767 | 0.489776801 | -0.023761831 | 0.60851546  |
| TOPAZ1   | violet | -0.037612348 | 0.417412545 | -0.026466946 | 0.568323244 |
| TPH2     | violet | -0.057352966 | 0.216048103 | -0.052119835 | 0.26098554  |
| TRIM64C  | violet | -0.065715018 | 0.156237297 | -0.050094226 | 0.279998563 |
| UGT1A7   | violet | -0.125384373 | 0.006667068 | -0.11676598  | 0.011562748 |
| UMOD     | violet | 0.013062301  | 0.778300676 | 0.020135637  | 0.664279248 |
| USP26    | violet | 0.033715874  | 0.467311579 | 0.044052432  | 0.342167625 |
| USP9Y    | violet | -0.01464348  | 0.752293134 | 0.005069585  | 0.91299487  |
| WFDC8    | violet | 0.015775567  | 0.733841147 | 0.008887804  | 0.848089915 |
| ZNF157   | violet | -0.326567594 | 4.57E-13    | -0.31988778  | 1.43E-12    |
| ZSWIM2   | violet | -0.116173852 | 0.011993961 | -0.103464289 | 0.025358734 |
| AC01065' | white  | -0.045732409 | 0.32405795  | -0.053708907 | 0.24670695  |
| AC10407' | white  | -0.144924337 | 0.001689242 | -0.134415646 | 0.003612214 |
| AC11271' | white  | -0.07876147  | 0.089106432 | -0.070313901 | 0.129190326 |
| AC11875' | white  | -7.71E-05    | 0.998673805 | 0.001601258  | 0.972469859 |
| ACOT12   | white  | -0.013301428 | 0.774350749 | -0.024604601 | 0.595858705 |
| ACOT6    | white  | -0.097955256 | 0.034323582 | -0.058716358 | 0.205311354 |

|                |              |             |              |             |
|----------------|--------------|-------------|--------------|-------------|
| ACSM2A white   | -0.067388642 | 0.145937611 | -0.060773428 | 0.189851922 |
| ACSM2B white   | -0.080710254 | 0.081450294 | -0.073784516 | 0.111296015 |
| ACTRT1 white   | -0.07051033  | 0.128121419 | -0.069664604 | 0.132772773 |
| AGXT2 white    | -0.077188767 | 0.095697588 | -0.098670284 | 0.033025527 |
| AHSP white     | -0.000102285 | 0.998241091 | -0.009483418 | 0.838045799 |
| AL13333'white  | -0.094875474 | 0.04042238  | -0.096273198 | 0.0375495   |
| AL35482{white  | -0.091635982 | 0.047801483 | -0.076824985 | 0.097276285 |
| ART1 white     | -0.063262517 | 0.17231022  | -0.056978286 | 0.219068079 |
| ASB15 white    | -0.045875748 | 0.322542142 | -0.032651702 | 0.481491353 |
| BEND2 white    | -0.021235572 | 0.647149051 | -0.013026901 | 0.778885902 |
| C12orf50 white | -0.024370761 | 0.599358523 | -0.022482687 | 0.627950059 |
| C16orf92 white | -0.033906153 | 0.464800713 | -0.027163787 | 0.558178444 |
| C17orf47 white | -0.090481686 | 0.050689938 | -0.098028685 | 0.034188308 |
| C4orf26 white  | -0.144537036 | 0.001738802 | -0.144729705 | 0.001713984 |
| C5orf47 white  | -0.118218119 | 0.010562773 | -0.103271097 | 0.025635042 |
| C9orf57 white  | -0.053181085 | 0.251387896 | -0.042348523 | 0.361181323 |
| CETN1 white    | -0.020383847 | 0.66039795  | -0.010974459 | 0.813020178 |
| CGB7 white     | -0.097617289 | 0.034952094 | -0.115854297 | 0.012232528 |
| CLLU1 white    | -0.030809314 | 0.50658261  | -0.030039827 | 0.517261444 |
| COL20A1white   | -0.185923697 | 5.29E-05    | -0.195606486 | 2.07E-05    |
| COL6A5 white   | -0.143908864 | 0.001822026 | -0.14814401  | 0.00132471  |
| CTAGE1 white   | 0.030439349  | 0.511702474 | 0.032173274  | 0.487941495 |
| CTD-307'white  | 0.056651338  | 0.221727919 | 0.036051611  | 0.437013242 |
| CXorf66 white  | -0.043779968 | 0.345164387 | -0.038045501 | 0.412065708 |
| CYP3A43white   | -0.020883159 | 0.652617759 | -0.036850841 | 0.42691075  |
| DAZL white     | -0.023327754 | 0.615080677 | -0.007308915 | 0.874830481 |
| DEFB125 white  | -0.004939357 | 0.915221358 | -0.004448532 | 0.923618709 |
| DUXA white     | -0.054191433 | 0.242481274 | -0.040414616 | 0.383545228 |
| EIF4E1B white  | -0.080445717 | 0.082457249 | -0.074624376 | 0.10727329  |
| FAM186'white   | -0.036093332 | 0.436482502 | -0.031741732 | 0.493799153 |
| FAM25E white   | -0.023005339 | 0.619977048 | -0.022256723 | 0.631410646 |
| FAM47C white   | -0.00047281  | 0.991869594 | 0.006462101  | 0.889233324 |
| FAM71D white   | 0.046076937  | 0.320422374 | 0.053819423  | 0.245734612 |
| FAM9A white    | -0.085492375 | 0.064901586 | -0.081688676 | 0.07781206  |
| FBXO47 white   | -0.155499514 | 0.000746516 | -0.141895462 | 0.002113967 |
| FLJ20019 white | -0.082740586 | 0.074048875 | -0.081717151 | 0.077708186 |
| GABRA1 white   | -0.109550856 | 0.017874813 | -0.104232567 | 0.024285195 |
| GABRA6 white   | -0.067745907 | 0.143807619 | -0.060555659 | 0.191446866 |
| GK2 white      | -0.043797352 | 0.344972692 | -0.032143388 | 0.488345959 |
| GKN1 white     | -0.057104486 | 0.218047533 | -0.05221766  | 0.260090414 |
| GLYAT white    | -0.084431072 | 0.068312898 | -0.077275277 | 0.09532519  |
| GOLGA6 white   | -0.065397022 | 0.158254957 | -0.067867808 | 0.143086315 |
| GOLGA8'white   | -0.081729885 | 0.077661769 | -0.07908679  | 0.087789612 |
| GRIFIN white   | -0.133718282 | 0.003792267 | -0.108971732 | 0.018492482 |
| GSC2 white     | -0.090091492 | 0.051698716 | -0.081956532 | 0.076839384 |

|               |              |             |              |             |
|---------------|--------------|-------------|--------------|-------------|
| GUCA1A white  | -0.057819856 | 0.212326873 | -0.044374897 | 0.33864242  |
| HBG2 white    | -0.052341252 | 0.258962545 | -0.09796123  | 0.034312559 |
| HCRT white    | -0.065901197 | 0.155065071 | -0.041114712 | 0.37535344  |
| HEPACA white  | -0.049450929 | 0.286228295 | -0.041162653 | 0.374796452 |
| HES3 white    | 0.006268771  | 0.892526832 | 0.008139984  | 0.860735456 |
| HNRNPC white  | 0.043685098  | 0.346211744 | 0.01052543   | 0.820537917 |
| HSPC047 white | -0.190367302 | 3.46E-05    | -0.195750521 | 2.04E-05    |
| IFNA13 white  | -0.10011724  | 0.030526477 | -0.098501886 | 0.033327404 |
| IFNA6 white   | -0.135845603 | 0.003267034 | -0.14096904  | 0.002262159 |
| IL13 white    | 0.090905774  | 0.049612224 | 0.067269656  | 0.146652321 |
| IZUMO1 white  | -0.156066328 | 0.000713487 | -0.167481204 | 0.000277648 |
| IZUMO3 white  | -0.02399071  | 0.605066353 | -0.014357321 | 0.756980165 |
| KCNK4 white   | -0.094460446 | 0.041310391 | -0.087692005 | 0.058276677 |
| KIAA102 white | 0.041975346  | 0.365432085 | 0.018951002  | 0.682925892 |
| KRTAP5- white | -0.092631967 | 0.045421227 | -0.087973687 | 0.057470248 |
| LCE2C white   | -0.007258359 | 0.875689231 | -0.008263886 | 0.858637744 |
| LYZL1 white   | -0.038788729 | 0.402986238 | -0.038418947 | 0.407488562 |
| MAGEB5 white  | 0.008217782  | 0.859418186 | 0.020160065  | 0.663896873 |
| MIP white     | -0.044067345 | 0.342004089 | -0.02810638  | 0.544597138 |
| MS4A3 white   | -0.017880466 | 0.699944483 | 0.007615884  | 0.869619388 |
| MTRNR2 white  | -0.02233112  | 0.630270382 | -0.013595198 | 0.769506173 |
| MUC22 white   | -0.09354244  | 0.043333228 | -0.088697866 | 0.055439362 |
| NANOGP white  | 0.019402136  | 0.67580133  | -0.010071349 | 0.828156972 |
| NEUROD white  | -0.129705142 | 0.004995749 | -0.129837525 | 0.004951111 |
| NRN1L white   | -0.050035203 | 0.280566286 | -0.040801253 | 0.379007802 |
| OPALIN white  | -0.004989071 | 0.914371333 | -0.004803838 | 0.917539003 |
| OR10G7 white  | -0.049843497 | 0.282415634 | -0.056626412 | 0.221931641 |
| OR11H1 white  | -0.083614263 | 0.071037242 | -0.083042384 | 0.072997005 |
| OR11H12 white | 0.010291777  | 0.824456338 | 0.026799946  | 0.563464387 |
| OR1D2 white   | -0.05363881  | 0.247325072 | -0.05585532  | 0.228300012 |
| OR1D5 white   | -0.004984845 | 0.914443579 | -0.000730345 | 0.987441345 |
| OR2H1 white   | -0.049176087 | 0.288918125 | -0.041852446 | 0.366838801 |
| OR2K2 white   | 0.044723021  | 0.334862892 | 0.021833817  | 0.637908996 |
| OR2T4 white   | -0.111201979 | 0.016211652 | -0.104843173 | 0.023460201 |
| OR4D2 white   | -0.013118472 | 0.777372321 | -0.01303659  | 0.778725722 |
| OR4F4 white   | -0.003875847 | 0.933427257 | -0.018172706 | 0.695283301 |
| OR4K5 white   | -0.070236222 | 0.12961493  | -0.043684216 | 0.346221486 |
| OR51H1 white  | -0.060346859 | 0.19298532  | -0.052353498 | 0.258850979 |
| OR52A1 white  | -0.030436643 | 0.511740018 | -0.032142969 | 0.48835163  |
| OR5AS1 white  | -0.036203209 | 0.435086523 | -0.031374633 | 0.498811449 |
| OR5D18 white  | -0.085385881 | 0.065237438 | -0.088286344 | 0.056585993 |
| OR5H2 white   | -0.067950644 | 0.142597745 | -0.065576104 | 0.157116291 |
| OR5T3 white   | 0.004316374  | 0.925881249 | 0.015823863  | 0.73305728  |
| OR5V1 white   | -0.049640086 | 0.284386879 | -0.050261529 | 0.278393552 |
| OR6C2 white   | -0.070402429 | 0.128707731 | -0.061591015 | 0.183950996 |

|          |       |              |             |              |             |
|----------|-------|--------------|-------------|--------------|-------------|
| OR6C68   | white | -0.055627952 | 0.230202357 | -0.060363254 | 0.192864192 |
| OR6J1    | white | -0.049903886 | 0.281832189 | -0.044878255 | 0.333186315 |
| OR6N1    | white | -0.032004166 | 0.490232465 | -0.028248766 | 0.542559892 |
| OR6V1    | white | -0.086269214 | 0.06249445  | -0.083769227 | 0.070513666 |
| OR8H1    | white | -0.053475848 | 0.248766259 | -0.043594854 | 0.347209893 |
| OR8H2    | white | -0.011028561 | 0.812115535 | -0.009495803 | 0.837837213 |
| OTOP3    | white | 0.01911571   | 0.680321417 | 0.023585931  | 0.611172116 |
| PDE6H    | white | -0.076863479 | 0.097108257 | -0.06880718  | 0.137620433 |
| PGA3     | white | -0.091450032 | 0.048257258 | -0.093178274 | 0.044158468 |
| PKD1L3   | white | -0.033292833 | 0.472920667 | -0.027727502 | 0.550036462 |
| PNLIP    | white | 0.051870964  | 0.263272352 | 0.060239048  | 0.193783218 |
| PPP1R27  | white | -0.101713545 | 0.027959051 | -0.097272535 | 0.035603293 |
| PPP5D1   | white | -0.16293199  | 0.000407459 | -0.151632058 | 0.001012462 |
| PRG3     | white | -0.049558212 | 0.285182922 | -0.046886118 | 0.311988525 |
| PRR25    | white | -0.071586911 | 0.122384279 | -0.048359815 | 0.297006665 |
| PRSS58   | white | -0.073084113 | 0.114740726 | -0.074273239 | 0.108940958 |
| RP1-66C1 | white | -0.107512244 | 0.020132352 | -0.098680273 | 0.033007693 |
| RP11-322 | white | -0.036951118 | 0.425652874 | -0.035737072 | 0.441026425 |
| RP11-385 | white | 0.078721401  | 0.089269712 | 0.09746215   | 0.035243868 |
| RP11-545 | white | 0.039305507  | 0.396744148 | 0.032684031  | 0.481057163 |
| RP11-546 | white | -0.017422507 | 0.707271512 | -0.019958439 | 0.667055633 |
| RP5-907C | white | 0.034192849  | 0.461031731 | 0.004069478  | 0.930109687 |
| SHOX     | white | -0.032607867 | 0.482080401 | -0.035427123 | 0.445001549 |
| SKOR2    | white | -0.112629124 | 0.01488496  | -0.107468065 | 0.020183904 |
| SLC22A2  | white | -0.072581993 | 0.117261297 | -0.074769111 | 0.106591784 |
| SLC5A10  | white | -0.064901382 | 0.161438887 | -0.058106094 | 0.210068425 |
| SLCO1B7  | white | 0.013216727  | 0.775749188 | 0.005135075  | 0.911875468 |
| SMIM9    | white | -0.032950516 | 0.477486339 | -0.020967523 | 0.651306894 |
| SPATA19  | white | -0.136258472 | 0.003173101 | -0.108606002 | 0.018892077 |
| SPATA31  | white | -0.057526424 | 0.214660172 | -0.051635208 | 0.265451328 |
| SPHKAP   | white | -0.117342635 | 0.011156042 | -0.117705829 | 0.010906434 |
| SSX7     | white | -0.0107855   | 0.816181715 | -0.000964039 | 0.983423368 |
| SUN3     | white | -0.150063009 | 0.001143404 | -0.15366489  | 0.000863374 |
| SYCP1    | white | -0.129992572 | 0.004899288 | -0.128602575 | 0.005381847 |
| TAT      | white | -0.088237716 | 0.056722778 | -0.088609058 | 0.055685162 |
| TBL1Y    | white | 0.026596267  | 0.566433931 | 0.018150914  | 0.695630484 |
| TEX101   | white | 0.031862435  | 0.492156988 | 0.010214607  | 0.825751464 |
| TEX28    | white | -0.011132619 | 0.810376287 | 0.005741204  | 0.901523529 |
| TEX40    | white | -0.07453824  | 0.107680501 | -0.075480917 | 0.103289807 |
| TFAP2D   | white | -0.026943807 | 0.561371474 | -0.012595259 | 0.786031744 |
| TLR9     | white | -0.183017027 | 6.95E-05    | -0.18155823  | 7.95E-05    |
| TPD52L3  | white | -0.083810422 | 0.070375013 | -0.064008124 | 0.167298439 |
| TTLL8    | white | -0.094204899 | 0.041865322 | -0.08393896  | 0.069943814 |
| USP29    | white | -0.039798145 | 0.390848132 | -0.040009562 | 0.388334182 |
| ZAR1L    | white | -0.135271216 | 0.003401917 | -0.122567434 | 0.008010886 |

|          |             |              |             |              |             |
|----------|-------------|--------------|-------------|--------------|-------------|
| ZIM3     | white       | -0.047218841 | 0.308563355 | -0.043069074 | 0.353061585 |
| ZNF534   | white       | -0.061753548 | 0.182794227 | -0.066050257 | 0.154131357 |
| ZNF735   | white       | -0.025665427 | 0.580099549 | -0.022808317 | 0.622977446 |
| ADSS     | yellowgreen | 0.092710006  | 0.045239008 | 0.06302179   | 0.173951998 |
| AHCTF1   | yellowgreen | 0.001389888  | 0.976102742 | -0.037287483 | 0.421449277 |
| ANP32E   | yellowgreen | 0.179134414  | 9.93E-05    | 0.150076097  | 0.00114225  |
| ARPC5    | yellowgreen | 0.069033886  | 0.13632566  | 0.070833939  | 0.126375401 |
| ARV1     | yellowgreen | 0.1517458    | 0.00100353  | 0.148490211  | 0.001290162 |
| B4GALT2  | yellowgreen | 0.191146247  | 3.21E-05    | 0.165160697  | 0.000338071 |
| BPNT1    | yellowgreen | 0.246557167  | 6.76E-08    | 0.251902433  | 3.42E-08    |
| C1orf131 | yellowgreen | 0.153288141  | 0.000889373 | 0.141490281  | 0.002177653 |
| C1orf43  | yellowgreen | 0.264136781  | 6.79E-09    | 0.24662682   | 6.70E-08    |
| C1orf74  | yellowgreen | 0.151521325  | 0.001021229 | 0.116571653  | 0.011702729 |
| CACYBP   | yellowgreen | 0.212683038  | 3.54E-06    | 0.182751527  | 7.12E-05    |
| CCSAP    | yellowgreen | 0.101931143  | 0.027623871 | 0.092701181  | 0.045259582 |
| CHD1L    | yellowgreen | 0.168727335  | 0.000249522 | 0.12371671   | 0.007435876 |
| CHTOP    | yellowgreen | 0.015922264  | 0.731461043 | -0.013007813 | 0.779201518 |
| CNIH4    | yellowgreen | 0.164461924  | 0.000358541 | 0.175560209  | 0.00013708  |
| COG2     | yellowgreen | 0.165156647  | 0.000338187 | 0.142968359  | 0.001953465 |
| COX20    | yellowgreen | 0.039742693  | 0.391509127 | 0.017630623  | 0.703938403 |
| CREG1    | yellowgreen | -0.070210804 | 0.129754102 | -0.109276618 | 0.018165022 |
| DAP3     | yellowgreen | 0.117809644  | 0.010836002 | 0.102836864  | 0.026265584 |
| DEDD     | yellowgreen | 0.19752045   | 1.71E-05    | 0.165974494  | 0.000315607 |
| DUSP12   | yellowgreen | 0.004898868  | 0.915913723 | -0.022885696 | 0.621798319 |
| ENSA     | yellowgreen | 0.092832134  | 0.044955076 | 0.083177217  | 0.072531017 |
| EPRS     | yellowgreen | 0.166905662  | 0.000291614 | 0.137927114  | 0.002817941 |
| FAM189E  | yellowgreen | -0.043173169 | 0.351898139 | -0.074290913 | 0.108856533 |
| FH       | yellowgreen | 0.310592992  | 6.67E-12    | 0.319770241  | 1.46E-12    |
| FLVCR1   | yellowgreen | 0.219727059  | 1.63E-06    | 0.18417569   | 6.24E-05    |
| GALNT2   | yellowgreen | 0.082668854  | 0.074300693 | 0.076991268  | 0.096552114 |
| GBA      | yellowgreen | 0.091852067  | 0.047276383 | 0.081548653  | 0.078324497 |
| GGPS1    | yellowgreen | 0.212717387  | 3.52E-06    | 0.198172326  | 1.60E-05    |
| GLMP     | yellowgreen | -0.105970407 | 0.022000746 | -0.135602399 | 0.003323541 |
| GLRX2    | yellowgreen | 0.25134472   | 3.68E-08    | 0.251827191  | 3.46E-08    |
| GNPAT    | yellowgreen | 0.273652387  | 1.82E-09    | 0.270087397  | 3.00E-09    |
| HAX1     | yellowgreen | 0.142903447  | 0.00196285  | 0.132327371  | 0.004175865 |
| HSD17B7  | yellowgreen | 0.244484747  | 8.77E-08    | 0.219902095  | 1.60E-06    |
| IARS2    | yellowgreen | 0.222281575  | 1.23E-06    | 0.196455334  | 1.90E-05    |
| INTS7    | yellowgreen | 0.259777295  | 1.22E-08    | 0.248282064  | 5.44E-08    |
| ISG20L2  | yellowgreen | 0.072970451  | 0.115307538 | 0.040466204  | 0.382937906 |
| JTB      | yellowgreen | 0.174170166  | 0.000155128 | 0.180830817  | 8.50E-05    |
| LHX4-AS  | yellowgreen | 0.112313583  | 0.015169786 | 0.102118068  | 0.027338701 |
| LIN9     | yellowgreen | -0.042702267 | 0.357180572 | -0.066677984 | 0.150245965 |
| MARC1    | yellowgreen | 0.140600791  | 0.002323654 | 0.127771419  | 0.005690437 |
| METTL1   | yellowgreen | 0.149825557  | 0.001164527 | 0.142260899  | 0.002057993 |

|         |             |              |             |              |             |
|---------|-------------|--------------|-------------|--------------|-------------|
| METTL1  | yellowgreen | -0.011912024 | 0.797379296 | -0.046413623 | 0.31689531  |
| MPC2    | yellowgreen | 0.239285663  | 1.66E-07    | 0.231922205  | 4.03E-07    |
| MRPL9   | yellowgreen | 0.006032477  | 0.896554763 | -0.027001749 | 0.560529584 |
| MRPS14  | yellowgreen | 0.130839858  | 0.004624633 | 0.12224234   | 0.008180583 |
| NDUFS2  | yellowgreen | 0.24602987   | 7.22E-08    | 0.235871615  | 2.52E-07    |
| NSL1    | yellowgreen | 0.092393806  | 0.045981143 | 0.057385461  | 0.215787608 |
| NTPCR   | yellowgreen | 0.261843143  | 9.26E-09    | 0.251963533  | 3.40E-08    |
| NUP133  | yellowgreen | 0.087207272  | 0.059686351 | 0.056119719  | 0.226101913 |
| NVL     | yellowgreen | 0.127234613  | 0.005898104 | 0.09760065   | 0.034983289 |
| PAK1IP1 | yellowgreen | 0.129888487  | 0.004934023 | 0.102497193  | 0.026768083 |
| PARP1   | yellowgreen | 0.154130462  | 0.000832216 | 0.132228866  | 0.004204319 |
| PEX11B  | yellowgreen | 0.185100346  | 5.72E-05    | 0.178948371  | 0.000101002 |
| PEX19   | yellowgreen | -0.011924661 | 0.797169025 | -0.035298392 | 0.446658501 |
| PIGC    | yellowgreen | 0.065278043  | 0.159014908 | 0.033351149  | 0.472145267 |
| PIGM    | yellowgreen | 0.13782569   | 0.00283845  | 0.108929417  | 0.018538335 |
| POLR3C  | yellowgreen | -0.0933013   | 0.043878211 | -0.133091501 | 0.003960991 |
| PRCC    | yellowgreen | -0.000402305 | 0.993081966 | -0.017170603 | 0.711313399 |
| PRPF3   | yellowgreen | -0.043822898 | 0.344691113 | -0.066427906 | 0.151784834 |
| PYGO2   | yellowgreen | 0.116416809  | 0.011815339 | 0.094853465  | 0.040469062 |
| RAB4A   | yellowgreen | 0.179034185  | 0.000100216 | 0.182282846  | 7.44E-05    |
| RABIF   | yellowgreen | 0.33885938   | 5.19E-14    | 0.343115192  | 2.39E-14    |
| RBM34   | yellowgreen | 0.153058881  | 0.000905546 | 0.146984262  | 0.001446738 |
| RFWD2   | yellowgreen | 0.014748723  | 0.750571626 | -0.006107222 | 0.895280339 |
| RNPEP   | yellowgreen | 0.359021692  | 1.18E-15    | 0.350683175  | 5.84E-15    |
| RRP15   | yellowgreen | 0.028674791  | 0.536487067 | 0.001093181  | 0.981203156 |
| SCAMP3  | yellowgreen | 0.153568365  | 0.000869967 | 0.144096797  | 0.001796753 |
| SCCPDH  | yellowgreen | 0.108774601  | 0.018706941 | 0.085891909  | 0.063654225 |
| SDHC    | yellowgreen | 0.099108476  | 0.032250921 | 0.071040309  | 0.125271621 |
| SH3BP5L | yellowgreen | 0.176553552  | 0.000125412 | 0.17635991   | 0.00012761  |
| SLC25A4 | yellowgreen | 0.102696706  | 0.026471937 | 0.08642414   | 0.062023306 |
| SMYD2   | yellowgreen | 0.31101048   | 6.23E-12    | 0.309609041  | 7.83E-12    |
| SNAP47  | yellowgreen | 0.023219263  | 0.616726381 | 0.006194752  | 0.893788294 |
| SNAPIN  | yellowgreen | 0.113793387  | 0.013874258 | 0.094040252  | 0.042226179 |
| SRP9    | yellowgreen | 0.264056284  | 6.87E-09    | 0.254723504  | 2.37E-08    |
| STX6    | yellowgreen | 0.367919018  | 2.04E-16    | 0.355886285  | 2.17E-15    |
| TARS2   | yellowgreen | 0.026360639  | 0.569878584 | 0.013717218  | 0.767496567 |
| TATDN3  | yellowgreen | 0.272247602  | 2.22E-09    | 0.24261361   | 1.11E-07    |
| TBCE    | yellowgreen | 0.168725772  | 0.000249556 | 0.137927929  | 0.002817777 |
| TFB2M   | yellowgreen | 0.083549195  | 0.071258031 | 0.055461018  | 0.231606184 |
| TIMM17A | yellowgreen | 0.162583249  | 0.000419448 | 0.153639429  | 0.000865109 |
| TIPRL   | yellowgreen | 0.111332005  | 0.01608663  | 0.094332548  | 0.041587346 |
| TMEM18  | yellowgreen | 0.242175644  | 1.17E-07    | 0.224689768  | 9.32E-07    |
| TOMM20  | yellowgreen | 0.136516354  | 0.00311568  | 0.098531001  | 0.033275043 |
| TOR3A   | yellowgreen | 0.36419493   | 4.29E-16    | 0.348654394  | 8.55E-15    |
| TPM3    | yellowgreen | 0.164431841  | 0.000359448 | 0.139090552  | 0.002592147 |



|        |             |             |             |              |             |
|--------|-------------|-------------|-------------|--------------|-------------|
| TSEN15 | yellowgreer | 0.154051249 | 0.000837443 | 0.119480062  | 0.009756843 |
| TSNAX  | yellowgreer | 0.030402549 | 0.512213201 | 0.019285209  | 0.677645163 |
| TTC13  | yellowgreer | 0.044115635 | 0.341474853 | 0.018310287  | 0.693092866 |
| UBE2Q1 | yellowgreer | 0.07918156  | 0.08740896  | 0.050512857  | 0.275994201 |
| UBQLN4 | yellowgreer | 0.006154414 | 0.894475855 | -0.041920703 | 0.366057115 |
| UCHL5  | yellowgreer | 0.161848973 | 0.00044577  | 0.133520428  | 0.003844811 |
| USP21  | yellowgreer | 0.03650867  | 0.431219178 | 0.006724177  | 0.884771738 |
| VPS45  | yellowgreer | 0.138675818 | 0.002670673 | 0.123697469  | 0.007445191 |
| VPS72  | yellowgreer | 0.008773841 | 0.850014594 | -0.0081688   | 0.860247506 |

| GS.cg07773116 | p.GS.cg07773116 | GS.cg14720763 | p.GS.cg14720763 | GS.cg20186445 |
|---------------|-----------------|---------------|-----------------|---------------|
| -0.142396252  | 0.002037607     | -0.102310337  | 0.027048024     | -0.11707949   |
| -0.177886497  | 0.000111215     | -0.159695777  | 0.000532083     | -0.165125343  |
| -0.154170768  | 0.000829568     | -0.1386361    | 0.002678306     | -0.13624427   |
| -0.11270933   | 0.014813315     | -0.090285513  | 0.051195034     | -0.09443133   |
| -0.279499896  | 7.91E-10        | -0.254780881  | 2.36E-08        | -0.272211901  |
| -0.168457867  | 0.000255368     | -0.147512803  | 0.001389899     | -0.141167627  |
| -0.121134957  | 0.008782952     | -0.123806768  | 0.007392416     | -0.135632345  |
| -0.166039139  | 0.000313883     | -0.149096604  | 0.00123164      | -0.143565238  |
| -0.125214543  | 0.006741965     | -0.113450734  | 0.014165252     | -0.109812214  |
| -0.284190813  | 3.99E-10        | -0.251957571  | 3.40E-08        | -0.27062187   |
| -0.111210163  | 0.016203758     | -0.097647557  | 0.034895409     | -0.100481142  |
| -0.173377336  | 0.000166397     | -0.172485189  | 0.000179994     | -0.178933502  |
| -0.237323952  | 2.11E-07        | -0.237025878  | 2.19E-07        | -0.23350034   |
| -0.140329252  | 0.002369973     | -0.112664092  | 0.014853687     | -0.06113615   |
| -0.141786773  | 0.002130881     | -0.137262947  | 0.002954728     | -0.139227756  |
| -0.156554938  | 0.000686107     | -0.134719866  | 0.003536124     | -0.136065153  |
| -0.112131794  | 0.015336043     | -0.115702837  | 0.012347059     | -0.12272438   |
| -0.099225156  | 0.032047297     | -0.082603259  | 0.07453158      | -0.083019002  |
| -0.087250901  | 0.059558328     | -0.109019397  | 0.018440951     | -0.111965388  |
| -0.076182966  | 0.100113004     | -0.050778644  | 0.273472154     | -0.063114589  |
| -0.223095766  | 1.12E-06        | -0.214121248  | 3.03E-06        | -0.208289158  |
| -0.13949092   | 0.002518343     | -0.156681373  | 0.000679183     | -0.11768828   |
| -0.070940314  | 0.125805513     | -0.038689539  | 0.404191008     | -0.03362143   |
| -0.063608775  | 0.169969014     | -0.07230792   | 0.118655268     | -0.057413478  |
| -0.034827444  | 0.452750018     | -0.011406291  | 0.80580653      | 0.002400389   |
| -0.20649249   | 6.83E-06        | -0.186370649  | 5.07E-05        | -0.190243653  |
| -0.095874423  | 0.038350921     | -0.074791417  | 0.106487061     | -0.093211265  |
| -0.232910075  | 3.58E-07        | -0.219323702  | 1.71E-06        | -0.214821192  |
| -0.116286759  | 0.011910657     | -0.122522     | 0.008034412     | -0.137312551  |
| -0.081341523  | 0.079087538     | -0.079264968  | 0.087075048     | -0.082888137  |
| -0.142537039  | 0.002016599     | -0.125811622  | 0.006481932     | -0.115126635  |
| -0.263093964  | 7.82E-09        | -0.211093135  | 4.19E-06        | -0.203066273  |
| -0.19525714   | 2.15E-05        | -0.172247441  | 0.00018379      | -0.201976798  |
| -0.137637774  | 0.002876807     | -0.113411936  | 0.014198536     | -0.104420879  |
| -0.039523154  | 0.39413272      | -0.022980416  | 0.620356246     | -0.016585991  |
| -0.050885997  | 0.272457949     | -0.043450528  | 0.348810021     | -0.039859006  |
| -0.13155409   | 0.004403989     | -0.118025499  | 0.010690846     | -0.129297747  |
| -0.043603358  | 0.347115763     | -0.032285619  | 0.486422697     | -0.036026459  |
| -0.066179637  | 0.153324379     | -0.046535467  | 0.315625182     | -0.033920021  |
| -0.159834791  | 0.000526072     | -0.123398154  | 0.007591441     | -0.127024935  |
| -0.081561009  | 0.078279167     | -0.078547256  | 0.08998215      | -0.111931839  |
| -0.213834836  | 3.12E-06        | -0.19526564   | 2.14E-05        | -0.194681915  |
| -0.202391105  | 1.04E-05        | -0.213411861  | 3.27E-06        | -0.218748125  |
| -0.120108349  | 0.009376343     | -0.086992839  | 0.060318888     | -0.118895866  |

|              |             |              |             |              |
|--------------|-------------|--------------|-------------|--------------|
| 0.137477602  | 0.002909873 | 0.184170201  | 6.24E-05    | 0.190460198  |
| 0.024760613  | 0.593528902 | 0.093475245  | 0.043484515 | 0.123251312  |
| -0.036961871 | 0.425518122 | -0.005222424 | 0.910382694 | -0.022989642 |
| -0.029923288 | 0.518888831 | 0.011032618  | 0.812047707 | 0.025948154  |
| -0.037249114 | 0.421927556 | -0.009901875 | 0.831004765 | 0.010369741  |
| 0.145682653  | 0.001595937 | 0.214914558  | 2.78E-06    | 0.218034309  |
| -0.029545087 | 0.524188228 | -0.023829886 | 0.607488987 | -0.04584114  |
| 0.069813737  | 0.131943236 | 0.106103261  | 0.021834036 | 0.14202734   |
| 0.106541927  | 0.021291339 | 0.154887674  | 0.000783753 | 0.108781036  |
| 0.194345709  | 2.35E-05    | 0.241469594  | 1.27E-07    | 0.258111248  |
| 0.043145207  | 0.352210432 | 0.108958736  | 0.018506555 | 0.133895869  |
| 0.037376961  | 0.420335167 | 0.10558382   | 0.022492142 | 0.098752894  |
| -0.160745243 | 0.00048824  | -0.140606903 | 0.002322621 | -0.137140509 |
| 0.21811058   | 1.95E-06    | 0.266616172  | 4.84E-09    | 0.274019435  |
| -0.024620746 | 0.59561741  | 0.003576084  | 0.938565492 | -0.030330678 |
| 0.286259621  | 2.94E-10    | 0.326759236  | 4.42E-13    | 0.366601435  |
| 0.092286778  | 0.046234648 | 0.152174621  | 0.000970504 | 0.126764582  |
| -0.227848798 | 6.48E-07    | -0.188775155 | 4.03E-05    | -0.18553156  |
| -0.082786891 | 0.073886688 | -0.041478297 | 0.37114198  | -0.036999546 |
| -0.089490491 | 0.053285224 | -0.100813425 | 0.02938295  | -0.105170595 |
| -0.119105024 | 0.009990454 | -0.089826415 | 0.052393537 | -0.114217543 |
| 0.194478604  | 2.32E-05    | 0.216028584  | 2.46E-06    | 0.213550733  |
| 0.0405351    | 0.38212773  | 0.068567757  | 0.138998074 | 0.040353916  |
| 0.021465236  | 0.64359531  | -0.015622504 | 0.736327272 | -0.008837681 |
| -0.233972749 | 3.16E-07    | -0.207162053 | 6.37E-06    | -0.228160607 |
| -0.215635485 | 2.57E-06    | -0.168336382 | 0.000258046 | -0.169214423 |
| 0.182299041  | 7.43E-05    | 0.184712695  | 5.93E-05    | 0.199506727  |
| -0.042300686 | 0.36172448  | -0.02632677  | 0.570374539 | -0.004477617 |
| -0.211583617 | 3.98E-06    | -0.144067053 | 0.001800731 | -0.124915212 |
| -0.082863077 | 0.073620472 | -0.010658382 | 0.818310255 | -0.000752137 |
| -0.229317683 | 5.47E-07    | -0.198850964 | 1.50E-05    | -0.179268989 |
| 0.046799875  | 0.312880401 | 0.087283051  | 0.059464133 | 0.109642103  |
| -0.173258546 | 0.000168151 | -0.130843118 | 0.004623604 | -0.124188492 |
| -0.033797862 | 0.466228769 | -0.027532923 | 0.552840251 | -0.017196401 |
| -0.093609048 | 0.043183702 | -0.032005374 | 0.490216087 | -0.05851467  |
| 0.044407357  | 0.33828886  | 0.097604922  | 0.034975278 | 0.0830836    |
| 0.075501322  | 0.103196355 | 0.103125514  | 0.025844971 | 0.110710201  |
| 0.012514541  | 0.787370048 | -0.002158915 | 0.96288816  | 0.040590137  |
| -0.09289453  | 0.04481059  | -0.065254332 | 0.159166683 | -0.044408847 |
| 0.038816923  | 0.402644173 | 0.065195329  | 0.159544844 | 0.087616272  |
| -0.038700593 | 0.404056644 | 0.01732737   | 0.70879705  | 0.008113771  |
| -0.052949139 | 0.253464298 | -0.007528888 | 0.871095672 | -0.004268688 |
| -0.003089125 | 0.946917809 | 0.045685042  | 0.324559875 | 0.033268577  |
| -0.171299434 | 0.000199682 | -0.098333157 | 0.03363223  | -0.098507241 |
| -0.05438578  | 0.240793713 | -0.026139823 | 0.57311572  | 0.001008637  |

|              |             |              |             |              |
|--------------|-------------|--------------|-------------|--------------|
| -0.029586582 | 0.523605445 | 0.008118494  | 0.861099397 | 0.008490656  |
| 0.065508742  | 0.157543873 | 0.098628998  | 0.03309932  | 0.11789366   |
| -0.277910952 | 9.94E-10    | -0.237309019 | 2.12E-07    | -0.220145397 |
| -0.062071627 | 0.180545975 | -0.04990286  | 0.281842093 | -0.064930682 |
| 0.11502075   | 0.012874654 | 0.161621031  | 0.000454248 | 0.14910896   |
| -0.07984071  | 0.084798026 | -0.004700721 | 0.919302978 | -0.019953859 |
| 0.048776784  | 0.292856199 | 0.059639064  | 0.198267757 | 0.050064891  |
| -0.174047147 | 0.000156829 | -0.115825001 | 0.012254608 | -0.156792995 |
| -0.158014535 | 0.000610006 | -0.099809231 | 0.031044435 | -0.08393193  |
| -0.177247121 | 0.000117825 | -0.18494091  | 5.80E-05    | -0.164620393 |
| 0.003233234  | 0.944445415 | 0.020915335  | 0.652117683 | 0.034388694  |
| -0.05186458  | 0.263331194 | -0.046260778 | 0.318493328 | -0.064326157 |
| -0.191568567 | 3.08E-05    | -0.144495304 | 0.001744221 | -0.098439744 |
| -0.096299352 | 0.037497437 | -0.055682606 | 0.229744051 | -0.024556207 |
| -0.075579118 | 0.102840696 | -0.080066635 | 0.083917728 | -0.097132861 |
| 0.034818752  | 0.452862883 | 0.063202853  | 0.172716049 | 0.093067516  |
| 0.042032851  | 0.364775035 | 0.070188652  | 0.129875487 | 0.066689413  |
| -0.155529729 | 0.00074472  | -0.11901529  | 0.01004708  | -0.130982578 |
| -0.018389546 | 0.691832136 | 0.043264071  | 0.350884143 | 0.074830123  |
| -0.25474168  | 2.37E-08    | -0.262920627 | 8.01E-09    | -0.226729082 |
| 0.019717044  | 0.670845173 | 0.035071515  | 0.449587251 | 0.008026745  |
| -0.03652943  | 0.430957067 | -0.004822515 | 0.917219552 | 0.023447221  |
| 0.128542722  | 0.005403556 | 0.068049709  | 0.142015133 | 0.073174665  |
| -0.164772295 | 0.000349311 | -0.0880278   | 0.057316392 | -0.077589781 |
| 0.077108789  | 0.096042904 | 0.133354182  | 0.00388947  | 0.157009163  |
| -0.093858123 | 0.042628405 | -0.093057097 | 0.044435984 | -0.087546369 |
| 0.078330649  | 0.090874656 | 0.126443731  | 0.006216476 | 0.142240868  |
| 0.018932192  | 0.683223568 | 0.076441215  | 0.098964143 | 0.090209592  |
| 0.040550986  | 0.381941073 | 0.067148072  | 0.147385383 | 0.056093088  |
| 0.061566154  | 0.184128415 | 0.003238995  | 0.944346575 | 0.03756672   |
| 0.130089836  | 0.004867028 | 0.144866324  | 0.001696582 | 0.144447757  |
| -0.20010894  | 1.32E-05    | -0.188542413 | 4.13E-05    | -0.196999907 |
| 0.093897627  | 0.042540889 | 0.037691157  | 0.416436704 | 0.018137369  |
| 0.007613944  | 0.869652308 | -0.015511354 | 0.738134351 | -0.014736353 |
| 0.002110468  | 0.963720386 | 0.03454374   | 0.456442071 | 0.044339148  |
| 0.058850792  | 0.204274003 | 0.055974745  | 0.227305292 | 0.082652545  |
| -0.085198964 | 0.065830374 | -0.029566465 | 0.523887947 | -0.021243595 |
| -0.187904343 | 4.38E-05    | -0.233605473 | 3.30E-07    | -0.28181892  |
| -0.036994893 | 0.425104436 | -0.072865388 | 0.115833422 | -0.100435332 |
| 0.200748862  | 1.24E-05    | 0.153659451  | 0.000863744 | 0.195030848  |
| -0.249032316 | 4.94E-08    | -0.190092472 | 3.55E-05    | -0.185238112 |
| 0.045596414  | 0.325500357 | 0.050853426  | 0.272765385 | 0.059414003  |
| -0.082924339 | 0.07340697  | -0.045362937 | 0.327986389 | -0.041869551 |
| 0.183294563  | 6.77E-05    | 0.190951684  | 3.27E-05    | 0.217312692  |
| -0.097680083 | 0.034834582 | -0.075029739 | 0.10537322  | -0.074968703 |

|              |             |              |             |              |
|--------------|-------------|--------------|-------------|--------------|
| -0.078399975 | 0.090588234 | -0.080820232 | 0.081034603 | -0.101187241 |
| 0.012380014  | 0.789601896 | 0.081732824  | 0.07765106  | 0.088834406  |
| 0.029311159  | 0.527479841 | 0.028838777  | 0.534158639 | 0.018721684  |
| -0.001485021 | 0.974467592 | -0.000644008 | 0.988925851 | 0.019640017  |
| 0.2544216    | 2.47E-08    | 0.238378851  | 1.86E-07    | 0.27353578   |
| -0.136372336 | 0.00314763  | -0.158308489 | 0.00059566  | -0.154889069 |
| 0.047112386  | 0.309656532 | 0.020631809  | 0.656529608 | 0.017966216  |
| -0.188787373 | 4.03E-05    | -0.140312403 | 0.002372875 | -0.169219867 |
| -0.095913271 | 0.038272217 | -0.113878846 | 0.013802508 | -0.111085739 |
| -0.010890764 | 0.814420139 | 0.03927922   | 0.397060261 | 0.035229694  |
| -0.073423407 | 0.113061718 | -0.024451011 | 0.598156405 | -0.037221159 |
| -0.003504007 | 0.939801362 | -0.029944293 | 0.518595317 | -0.022107721 |
| 0.202524717  | 1.03E-05    | 0.209509815  | 4.97E-06    | 0.211544668  |
| -0.034001883 | 0.463540318 | 0.024628825  | 0.595496691 | 0.029829447  |
| 0.06588307   | 0.155178909 | 0.077352554  | 0.094993512 | 0.127904102  |
| -0.13912084  | 0.002586495 | -0.103297616 | 0.025596961 | -0.062448974 |
| -0.015388627 | 0.740131316 | 0.022985774  | 0.620274722 | -0.008285526 |
| 0.160136242  | 0.000513254 | 0.176910275  | 0.000121454 | 0.223889826  |
| -0.096388001 | 0.037321429 | -0.070056296 | 0.130602583 | -0.078052679 |
| -0.067650521 | 0.144373963 | -0.069953357 | 0.131170247 | -0.061779307 |
| -0.012179555 | 0.792930756 | 0.018941859  | 0.683070568 | 0.019365789  |
| 0.123118321  | 0.007730489 | 0.130611919  | 0.004697121 | 0.116085951  |
| -0.107374655 | 0.020293281 | -0.090023066 | 0.051877333 | -0.12327667  |
| -0.092914317 | 0.044764854 | -0.114329133 | 0.013429822 | -0.107733089 |
| 0.103149289  | 0.025810587 | 0.114537782  | 0.013260157 | 0.140024511  |
| -0.112111192 | 0.015354984 | -0.063692508 | 0.169406442 | -0.068498081 |
| -0.044796727 | 0.334066174 | -0.052772469 | 0.255053838 | -0.087115928 |
| 0.114126308  | 0.013596581 | 0.158900123  | 0.00056773  | 0.148168945  |
| 0.097199626  | 0.035742324 | 0.070055333  | 0.130607882 | 0.079221032  |
| 0.063083047  | 0.173533114 | 0.088191827  | 0.056852106 | 0.0783206    |
| 0.209859537  | 4.79E-06    | 0.170729277  | 0.00020985  | 0.162046525  |
| -0.124031673 | 0.007284874 | -0.114146912 | 0.013579559 | -0.114913374 |
| 0.098626028  | 0.033104636 | 0.148989447  | 0.0012418   | 0.135540785  |
| -0.001888189 | 0.967539215 | 0.058113278  | 0.210011967 | 0.056229343  |
| -0.053451578 | 0.248981393 | -0.004771933 | 0.918084752 | 0.031747328  |
| -0.063341691 | 0.171772779 | -0.015066508 | 0.745380999 | -0.003532232 |
| -0.033662681 | 0.468014841 | -0.0312188   | 0.50094728  | -0.038904727 |
| -0.202012109 | 1.09E-05    | -0.147190973 | 0.001424259 | -0.149366181 |
| 0.090366346  | 0.050986402 | 0.134820992  | 0.003511154 | 0.141181724  |
| 0.157816609  | 0.000619845 | 0.196328141  | 1.93E-05    | 0.192783674  |
| -0.107785202 | 0.019816375 | -0.077109729 | 0.096038836 | -0.065153455 |
| 0.070889509  | 0.126077443 | 0.021234738  | 0.647161971 | 0.043871415  |
| 0.047902484  | 0.301603769 | 0.118786697  | 0.010192623 | 0.118164732  |
| -0.0312255   | 0.500855357 | 0.042131605  | 0.363648407 | 0.049247203  |
| -0.043079218 | 0.352948096 | 0.007012966  | 0.87985961  | 0.031199504  |

|              |             |              |             |              |
|--------------|-------------|--------------|-------------|--------------|
| -0.251987602 | 3.39E-08    | -0.222631422 | 1.18E-06    | -0.217877414 |
| -0.162922843 | 0.00040777  | -0.190109417 | 3.55E-05    | -0.200472809 |
| 0.139224404  | 0.002567256 | 0.144735118  | 0.001713291 | 0.114131126  |
| -0.101022101 | 0.029047423 | -0.046474126 | 0.316264201 | -0.042715521 |
| -0.123566073 | 0.00750908  | -0.109816793 | 0.017597265 | -0.098418631 |
| -0.143229783 | 0.001916086 | -0.071143989 | 0.124719919 | -0.074481764 |
| 0.013249235  | 0.775212389 | 0.093909494  | 0.042514628 | 0.101239973  |
| -0.038848077 | 0.402266415 | 0.021999044  | 0.635366784 | 0.016103616  |
| -0.047469332 | 0.306001128 | -0.047465216 | 0.306043114 | -0.033623559 |
| -0.230364966 | 4.84E-07    | -0.204817298 | 8.13E-06    | -0.229007941 |
| 0.133830913  | 0.003762647 | 0.111768484  | 0.015673107 | 0.078250539  |
| -0.219635918 | 1.65E-06    | -0.174812517 | 0.000146527 | -0.207602486 |
| 0.077715401  | 0.093448466 | 0.107155814  | 0.020551549 | 0.129877582  |
| -0.203788577 | 9.05E-06    | -0.20224953  | 1.06E-05    | -0.197624339 |
| -0.038077151 | 0.411676622 | 0.023320571  | 0.615189579 | 0.034711201  |
| -0.063683441 | 0.169467292 | 0.007427706  | 0.872813242 | 0.020350625  |
| -0.044200195 | 0.340549385 | 0.014021009  | 0.762500064 | 0.00845248   |
| 0.22975312   | 5.19E-07    | 0.232151611  | 3.92E-07    | 0.223021221  |
| 0.161884478  | 0.000444462 | 0.165083397  | 0.000340281 | 0.191862946  |
| -0.001594624 | 0.972583871 | 0.043449222  | 0.348824518 | 0.054670454  |
| -0.075671792 | 0.102418284 | -0.054928662 | 0.236123486 | -0.050175867 |
| -0.059118078 | 0.202222802 | -0.021435271 | 0.644058513 | -0.007651622 |
| -0.012844423 | 0.781904598 | 0.02921301   | 0.528864025 | 0.051459038  |
| -0.074659622 | 0.107107014 | -0.026714504 | 0.564709174 | -0.02637956  |
| -0.009820963 | 0.832365173 | 0.039476489  | 0.394691759 | 0.053881812  |
| 0.098229185  | 0.033821248 | 0.170932361  | 0.000206174 | 0.162162735  |
| 0.057218197  | 0.217130906 | 0.068552036  | 0.139088901 | 0.043409314  |
| -0.036031461 | 0.4372697   | 0.015137575  | 0.744221772 | 0.010709251  |
| 0.160292215  | 0.000506737 | 0.18708525   | 4.74E-05    | 0.178133698  |
| 0.170263867  | 0.000218508 | 0.215015355  | 2.75E-06    | 0.23170578   |
| 0.057747261  | 0.212902425 | 0.059384518  | 0.200193031 | 0.067706662  |
| 0.035149112  | 0.448584331 | 0.102523652  | 0.026728645 | 0.082476175  |
| -0.107259136 | 0.020429257 | -0.113087957 | 0.014479173 | -0.119084045 |
| -0.186800425 | 4.87E-05    | -0.176735362 | 0.00012338  | -0.18936393  |
| -0.074275599 | 0.108929683 | -0.096556932 | 0.036987964 | -0.112419944 |
| -0.160327682 | 0.000505265 | -0.157300699 | 0.000646189 | -0.132337858 |
| 0.043335368  | 0.350090126 | 0.045955612  | 0.321699588 | 0.051603074  |
| -0.153967271 | 0.000843017 | -0.108418195 | 0.019100183 | -0.135787023 |
| 0.178131041  | 0.00010878  | 0.238697662  | 1.79E-07    | 0.281288468  |
| -0.158576681 | 0.000582845 | -0.158400751 | 0.000591222 | -0.128657596 |
| -0.108064133 | 0.019497951 | -0.066849583 | 0.149196897 | -0.050816449 |
| -0.060186188 | 0.194175306 | -0.034060077 | 0.462775071 | -0.065371231 |
| -0.095006491 | 0.040145421 | -0.040301623 | 0.384877515 | -0.027874972 |
| -0.147568266 | 0.001384055 | -0.120554287 | 0.009114341 | -0.129573297 |
| -0.030374824 | 0.51259817  | 0.016418912  | 0.723422338 | 0.020890971  |

|              |             |              |             |              |
|--------------|-------------|--------------|-------------|--------------|
| -0.085246371 | 0.065679572 | -0.056490678 | 0.223043355 | -0.067423141 |
| 0.029805774  | 0.520532484 | 0.010021652  | 0.828991834 | 0.042593159  |
| -0.085702946 | 0.064241693 | -0.067122526 | 0.147539765 | -0.095290769 |
| 0.048277682  | 0.297828814 | 0.024644807  | 0.59525789  | 0.051930887  |
| -0.089703117 | 0.052719366 | -0.025861102 | 0.577214103 | -0.023038606 |
| -0.275212249 | 1.46E-09    | -0.216577876 | 2.31E-06    | -0.216497322 |
| 0.105563346  | 0.022518431 | 0.134048778  | 0.003705946 | 0.131022666  |
| -0.02746735  | 0.553786701 | -0.010368484 | 0.823169448 | -0.020353542 |
| -0.232842179 | 3.61E-07    | -0.168580823 | 0.000252685 | -0.152736872 |
| 0.161586964  | 0.000455528 | 0.158114704  | 0.000605082 | 0.179301114  |
| -0.012208482 | 0.79245016  | 0.009404402  | 0.83937681  | 0.018049996  |
| -0.019942095 | 0.66731194  | 0.02026179   | 0.662305454 | 0.05314275   |
| 0.073196318  | 0.114183325 | 0.122121157  | 0.008244656 | 0.143899079  |
| -0.074109661 | 0.109724796 | -0.082453232 | 0.075061849 | -0.065966276 |
| 0.140861681  | 0.002279932 | 0.141075882  | 0.002244597 | 0.167335941  |
| -0.097578165 | 0.035025481 | -0.030150609 | 0.515716894 | -0.007600683 |
| 0.012161139  | 0.793236775 | 0.071483465  | 0.122926703 | 0.075148263  |
| 0.103593977  | 0.025174695 | 0.128426731  | 0.005445849 | 0.128281161  |
| 0.126533926  | 0.006179405 | 0.186191328  | 5.16E-05    | 0.179371786  |
| 0.071391836  | 0.123408728 | 0.072625435  | 0.117041526 | 0.110240173  |
| -0.051151233 | 0.269963177 | -0.009117533 | 0.844212883 | 0.025335247  |
| -0.168726543 | 0.000249539 | -0.122877093 | 0.007852175 | -0.118027014 |
| -0.205135093 | 7.87E-06    | -0.172726547 | 0.000176217 | -0.185033784 |
| -0.044619155 | 0.335987703 | -0.001012766 | 0.982585636 | -0.032038785 |
| -0.121814546 | 0.008408773 | -0.078286909 | 0.091055738 | -0.099240017 |
| 0.165389476  | 0.00033161  | 0.210458648  | 4.49E-06    | 0.208077075  |
| 0.044926229  | 0.332669269 | 0.01731511   | 0.708993728 | 0.022732536  |
| -0.11383619  | 0.013838281 | -0.098415408 | 0.03348334  | -0.08707668  |
| 0.035863645  | 0.439408958 | 0.070640938  | 0.127414495 | 0.070392631  |
| 0.064673112  | 0.162921379 | 0.094741595  | 0.040707053 | 0.095344187  |
| 0.114603364  | 0.01320722  | 0.169275126  | 0.000238021 | 0.181169978  |
| -0.077675465 | 0.093617528 | -0.007685536 | 0.86843777  | -0.017984758 |
| 0.096225799  | 0.037644007 | 0.114180039  | 0.013552229 | 0.167310428  |
| -0.246899178 | 6.48E-08    | -0.222641905 | 1.18E-06    | -0.236319816 |
| 0.132873433  | 0.004021268 | 0.174506377  | 0.000150569 | 0.185043001  |
| 0.157710579  | 0.000625177 | 0.186382436  | 5.07E-05    | 0.193038663  |
| 0.03376381   | 0.466678328 | 0.03467558   | 0.454724249 | 0.01952252   |
| 0.158298113  | 0.000596161 | 0.216697998  | 2.28E-06    | 0.187957168  |
| 0.196363957  | 1.92E-05    | 0.239105829  | 1.70E-07    | 0.269388353  |
| -0.037232962 | 0.422128983 | 0.003680157  | 0.936781287 | 0.014764108  |
| -0.177328183 | 0.000116967 | -0.174771522 | 0.000147063 | -0.190385314 |
| 0.001390346  | 0.976094859 | 0.062229354  | 0.179438746 | 0.088421404  |
| -0.12744383  | 0.005816371 | -0.081955    | 0.076844915 | -0.077362944 |
| 0.011408388  | 0.805771525 | 0.038480383  | 0.40673848  | 0.079484588  |
| -0.100082152 | 0.030585107 | -0.027229622 | 0.557224554 | -0.037778223 |

|              |             |              |             |              |
|--------------|-------------|--------------|-------------|--------------|
| -0.085920571 | 0.063565505 | -0.052030933 | 0.261800861 | -0.105090457 |
| 0.090992442  | 0.049394351 | 0.126857324  | 0.006048109 | 0.161050976  |
| 0.168437029  | 0.000255826 | 0.188405694  | 4.18E-05    | 0.20527853   |
| 0.096862994  | 0.036390246 | 0.151650828  | 0.001010983 | 0.096506901  |
| -0.024482851 | 0.597679748 | 0.029300255  | 0.527633529 | 0.040652551  |
| 0.068379318  | 0.14008978  | 0.104308626  | 0.024181082 | 0.122801093  |
| -0.080319634 | 0.082940711 | -0.011456499 | 0.804968864 | -0.011349299 |
| 0.165721253  | 0.000322444 | 0.263198655  | 7.71E-09    | 0.278996563  |
| 0.036874248  | 0.426616942 | 0.057456647  | 0.215217722 | 0.03998922   |
| 0.105954633  | 0.022020613 | 0.093333782  | 0.043804466 | 0.095637073  |
| -0.051591211 | 0.265859334 | -0.007716604 | 0.86791079  | -0.006125403 |
| -0.016481273 | 0.722415082 | 0.016057413  | 0.729270586 | 0.011159634  |
| 0.091163554  | 0.04896655  | 0.019086637  | 0.680780874 | -0.013588603 |
| -0.166807976 | 0.000294049 | -0.113367727 | 0.014236547 | -0.11634566  |
| 0.005456716  | 0.906380264 | -0.047970726 | 0.300914811 | -0.022632662 |
| 0.253353782  | 2.84E-08    | 0.230929401  | 4.53E-07    | 0.214850442  |
| -0.160074331 | 0.000515863 | -0.124478171 | 0.00707551  | -0.101988309 |
| -0.053831265 | 0.245630578 | 0.003657482  | 0.937169996 | -0.001158329 |
| -0.058570934 | 0.206437807 | 1.09E-05     | 0.999811964 | -0.034038749 |
| -0.053102238 | 0.252092417 | -0.003178148 | 0.945390423 | 0.010971818  |
| -0.058688549 | 0.205526419 | -0.013878553 | 0.764841846 | -0.017645175 |
| 0.021508856  | 0.64292126  | 0.046804091  | 0.312836764 | 0.061552785  |
| 0.122235458  | 0.00818421  | 0.156310353  | 0.000699689 | 0.162898686  |
| -0.071653541 | 0.122035892 | -0.0576559   | 0.213628351 | -0.026753341 |
| -0.051904516 | 0.262963252 | 0.009855098  | 0.83179118  | 0.00713776   |
| 0.031122446  | 0.50227032  | 0.033814322  | 0.466011555 | 0.037983614  |
| -0.058292981 | 0.208603249 | -0.093424433 | 0.043599211 | -0.119010203 |
| -0.099107911 | 0.032251911 | -0.06486562  | 0.161670464 | -0.070043842 |
| 0.09963117   | 0.031347283 | 0.13241249   | 0.004151419 | 0.140387543  |
| 0.206417745  | 6.88E-06    | 0.233792282  | 3.23E-07    | 0.228396553  |
| -0.028243083 | 0.542641134 | -0.014468776 | 0.755153552 | -0.013731388 |
| 0.022706574  | 0.624529314 | -0.004899988 | 0.915894583 | 0.001288554  |
| -0.043593498 | 0.347224907 | -0.078702768 | 0.089345724 | -0.074708389 |
| -0.134421585 | 0.003610714 | -0.103440189 | 0.025393061 | -0.112441665 |
| 0.06767415   | 0.144233511 | 0.114307219  | 0.013447752 | 0.106091176  |
| 0.096811569  | 0.036490099 | 0.145522382  | 0.001615254 | 0.160256118  |
| 0.040575521  | 0.381652898 | 0.091898007  | 0.047165372 | 0.08297029   |
| -0.205636473 | 7.47E-06    | -0.216250685 | 2.40E-06    | -0.235640487 |
| 0.079209614  | 0.087296538 | 0.13007343   | 0.004872456 | 0.126729896  |
| 0.146982187  | 0.001446965 | 0.194367464  | 2.34E-05    | 0.2080382    |
| -0.010910421 | 0.814091294 | 0.059937929  | 0.196024542 | 0.069315244  |
| 0.13720719   | 0.002966482 | 0.130622562  | 0.004693714 | 0.108145693  |
| -0.108871201 | 0.018601581 | -0.058806889 | 0.204612359 | -0.064020747 |
| 0.030273693  | 0.514003637 | 0.037508613  | 0.418699067 | 0.084195937  |
| -0.260236168 | 1.15E-08    | -0.240590051 | 1.42E-07    | -0.272638898 |



|              |             |              |             |              |
|--------------|-------------|--------------|-------------|--------------|
| -0.104060303 | 0.024522427 | -0.065365393 | 0.158456711 | -0.028556322 |
| -0.004684177 | 0.919586022 | 0.056419891  | 0.223624707 | 0.063617549  |
| -0.11002385  | 0.017383781 | -0.13666173  | 0.003083729 | -0.13817939  |
| -0.0877094   | 0.058226608 | -0.032802554 | 0.479467199 | -0.033111527 |
| -0.046773405 | 0.313154476 | 0.047715214  | 0.303499762 | 0.043172862  |
| -0.172975595 | 0.000172397 | -0.137208579 | 0.002966188 | -0.1026629   |
| -0.10262936  | 0.026571585 | -0.051697327 | 0.264875989 | -0.071203173 |
| -0.084961896 | 0.066588758 | -0.027366011 | 0.555250915 | -0.019254361 |
| -0.016486419 | 0.72233199  | 0.049716881  | 0.283641571 | 0.031379682  |
| -0.071521534 | 0.122726869 | -0.045897014 | 0.322317652 | -0.042580432 |
| 0.076417885  | 0.099067499 | 0.050482619  | 0.276282129 | 0.060891633  |
| -0.050573897 | 0.275413604 | -0.009634942 | 0.835494713 | -0.008259967 |
| -0.054843079 | 0.236855464 | -0.00019301  | 0.996680973 | 0.000991444  |
| 0.15498017   | 0.000778016 | 0.188419269  | 4.17E-05    | 0.253998032  |
| -0.002538495 | 0.956369168 | 0.009617957  | 0.835780588 | -0.001602432 |
| -0.016264765 | 0.725914145 | -0.01526141  | 0.74220319  | -0.039128482 |
| 0.050500824  | 0.276108759 | 0.088665635  | 0.055528468 | 0.091195958  |
| -0.130957024 | 0.004587767 | -0.106432345 | 0.0214258   | -0.052036946 |
| -0.041463879 | 0.371308425 | -0.000617165 | 0.989387412 | 0.037691247  |
| 0.067973451  | 0.142463454 | 0.063963531  | 0.16759508  | 0.077025927  |
| -0.015195868 | 0.743271332 | -0.003234329 | 0.944426624 | 0.045756418  |
| 0.06008343   | 0.194939181 | 0.088411471  | 0.056235288 | 0.080763719  |
| 0.038465102  | 0.40692497  | 0.070396346  | 0.128740845 | 0.089298085  |
| -0.194152721 | 2.39E-05    | -0.146208727 | 0.001534012 | -0.132866446 |
| -0.221814782 | 1.29E-06    | -0.159869292 | 0.00052459  | -0.178743516 |
| 0.338945423  | 5.11E-14    | 0.377573438  | 2.85E-17    | 0.372412735  |
| -0.212490242 | 3.61E-06    | -0.177999184 | 0.000110087 | -0.170115223 |
| -0.329764123 | 2.62E-13    | -0.304976283 | 1.65E-11    | -0.282883709 |
| -0.083790787 | 0.070441072 | -0.033959197 | 0.464102094 | -0.039840818 |
| -0.213226485 | 3.33E-06    | -0.169815838 | 0.000227157 | -0.199867372 |
| 0.16646385   | 0.000302777 | 0.244666568  | 8.57E-08    | 0.265659545  |
| -0.065668722 | 0.156529831 | -0.000164695 | 0.997167876 | -0.016223777 |
| -0.080100289 | 0.083787233 | -0.028460212 | 0.539541545 | -0.022613206 |
| 0.102766396  | 0.026369159 | 0.103741241  | 0.024967113 | 0.089074833  |
| -0.185172571 | 5.68E-05    | -0.14752533  | 0.001388577 | -0.127553258 |
| -0.117569688 | 0.010999412 | -0.064471848 | 0.164236948 | -0.057120784 |
| 0.033785125  | 0.4663969   | 0.100312265  | 0.030202357 | 0.095129677  |
| -0.064316712 | 0.165256433 | -0.056175377 | 0.225641122 | -0.073537638 |
| 0.163823598  | 0.000378245 | 0.194474448  | 2.32E-05    | 0.209125546  |
| -0.133313632 | 0.003900433 | -0.108373131 | 0.019150413 | -0.1143694   |
| 0.215728728  | 2.54E-06    | 0.286748367  | 2.73E-10    | 0.266305485  |
| 0.185260219  | 5.63E-05    | 0.161223891  | 0.00046938  | 0.18147593   |
| -0.042574883 | 0.358618027 | -0.012525609 | 0.787186507 | -0.034145395 |
| 0.017337086  | 0.708641206 | 0.018870578  | 0.684198968 | -0.010941826 |
| 0.124399951  | 0.007111793 | 0.178837466  | 0.000102026 | 0.177897754  |

|              |             |              |             |              |
|--------------|-------------|--------------|-------------|--------------|
| -0.242459274 | 1.13E-07    | -0.211223623 | 4.14E-06    | -0.237655043 |
| 0.238801427  | 1.77E-07    | 0.285615423  | 3.23E-10    | 0.303590883  |
| -0.013122208 | 0.777310579 | 0.022306019  | 0.630654998 | -0.015452484 |
| 0.175556707  | 0.000137123 | 0.192536214  | 2.80E-05    | 0.195108797  |
| 0.047698587  | 0.303668484 | 0.078893764  | 0.088569036 | 0.080242848  |
| 0.107358859  | 0.020311827 | 0.128430807  | 0.005444358 | 0.167888364  |
| 0.248282037  | 5.44E-08    | 0.278232649  | 9.49E-10    | 0.274196165  |
| -0.016204467 | 0.726889659 | 0.00738035   | 0.873617316 | 0.04058132   |
| -0.014063879 | 0.761795761 | 0.018781132  | 0.685615928 | 0.053509683  |
| -0.134137516 | 0.003683074 | -0.066132065 | 0.153620724 | -0.056851267 |
| -0.102045904 | 0.027448492 | -0.058688813 | 0.205524379 | -0.064693606 |
| -0.007418943 | 0.872962015 | 0.010231301  | 0.825471239 | 0.002508144  |
| 0.13878314   | 0.002650147 | 0.120141779  | 0.009356472 | 0.091923392  |
| -0.154516638 | 0.000807164 | -0.121186199 | 0.00875423  | -0.087510337 |
| 0.036062165  | 0.436878947 | 0.086452004  | 0.061938881 | 0.107344234  |
| -0.004720576 | 0.918963307 | -0.031759991 | 0.493550552 | 0.029364704  |
| -0.007761352 | 0.867151887 | -0.009585769 | 0.836322402 | 0.023032302  |
| -0.0303042   | 0.513579456 | 0.016306101  | 0.725245658 | 0.007039379  |
| -0.031864264 | 0.49213213  | -0.003857103 | 0.933748463 | -0.018032958 |
| -0.000512134 | 0.991193401 | 0.04879568   | 0.292669033 | 0.082962271  |
| 0.071732726  | 0.121622865 | 0.122499291  | 0.008046194 | 0.125656341  |
| -0.224453734 | 9.58E-07    | -0.176078128 | 0.000130875 | -0.184157018 |
| 0.092095064  | 0.04669167  | 0.070568776  | 0.127804701 | 0.075173515  |
| -0.102692668 | 0.026477902 | -0.085508896 | 0.064849614 | -0.090687406 |
| 0.040782056  | 0.379232313 | -0.003051135 | 0.947569678 | -0.021411118 |
| 0.044123237  | 0.341391583 | 0.080659912  | 0.081641148 | 0.065366947  |
| 0.008533739  | 0.85407246  | 0.007865238  | 0.86539052  | -0.005209217 |
| -0.059275722 | 0.201020058 | -0.000506589 | 0.991288751 | 0.005881559  |
| 0.091201042  | 0.048873239 | 0.123970919  | 0.007313786 | 0.113540488  |
| -0.233645083 | 3.28E-07    | -0.195568152 | 2.08E-05    | -0.196858959 |
| -0.044831253 | 0.333693385 | 0.001500887  | 0.974194898 | -0.005862252 |
| -0.050885385 | 0.272463721 | 0.018562394  | 0.689085683 | 0.023131357  |
| -0.02706969  | 0.559543196 | -0.009497568 | 0.837807502 | -0.044364323 |
| -0.136060232 | 0.003217892 | -0.162264022 | 0.000430708 | -0.207636414 |
| 0.113240204  | 0.014346692 | 0.130409844  | 0.004762239 | 0.156959843  |
| 0.09299503   | 0.044578692 | 0.098788765  | 0.032814534 | 0.064852695  |
| -0.00752748  | 0.871119571 | -0.039680525 | 0.392250996 | -0.04269107  |
| 0.027096171  | 0.559158959 | -0.005502036 | 0.905606319 | -0.017277557 |
| 0.023681998  | 0.609720564 | 0.066661449  | 0.150347347 | 0.066141765  |
| -0.065638267 | 0.156722486 | -0.04544689  | 0.327091066 | -0.051031357 |
| -0.077441585 | 0.094612534 | -0.117152964 | 0.011288394 | -0.084441989 |
| 0.145674315  | 0.001596937 | 0.133082133  | 0.003963564 | 0.173287836  |
| -0.177357704 | 0.000116656 | -0.124917304 | 0.006874868 | -0.133216048 |
| -0.089675314 | 0.052793073 | -0.058035949 | 0.210620264 | -0.078980319 |
| 0.007928944  | 0.864310714 | 0.025016863  | 0.589711234 | -0.005356761 |

|              |             |              |             |              |
|--------------|-------------|--------------|-------------|--------------|
| 0.001784815  | 0.969315461 | 0.013968876  | 0.763356806 | 0.009022965  |
| -0.173307658 | 0.000167424 | -0.106197253 | 0.021716754 | -0.128388879 |
| 0.101406867  | 0.028437378 | 0.153654372  | 0.00086409  | 0.174958304  |
| -0.188338039 | 4.21E-05    | -0.170154439 | 0.000220591 | -0.20218572  |
| -0.167859414 | 0.000268813 | -0.114207414 | 0.01352968  | -0.085022503 |
| 0.00864013   | 0.852273898 | 0.046670298  | 0.314223555 | 0.047817667  |
| 0.08080042   | 0.08110936  | 0.073993076  | 0.110286153 | 0.068973597  |
| 0.183916907  | 6.39E-05    | 0.20937569   | 5.04E-06    | 0.206417027  |
| 0.097892513  | 0.034439531 | 0.132507591  | 0.004124258 | 0.139213989  |
| -0.032072791 | 0.489302084 | -0.009863623 | 0.831647839 | 0.014236499  |
| 0.09124638   | 0.048760591 | 0.127022838  | 0.005981886 | 0.173987972  |
| 0.097439204  | 0.035287198 | 0.14120504   | 0.002223533 | 0.143251825  |
| -0.013014854 | 0.779085103 | 0.040909607  | 0.377742127 | 0.039397607  |
| -0.161548329 | 0.000456984 | -0.12387941  | 0.007357527 | -0.111879043 |
| -0.005691795 | 0.90236677  | 0.034748548  | 0.453775061 | 0.037816463  |
| -0.03156368  | 0.496226878 | -0.019411421 | 0.675654991 | -0.009115073 |
| 0.116143139  | 0.012016709 | 0.188688305  | 4.07E-05    | 0.211271143  |
| 0.085035051  | 0.066353973 | 0.162859764  | 0.000409916 | 0.167835491  |
| 0.13554333   | 0.003337399 | 0.104878327  | 0.02341345  | 0.118928409  |
| 0.168468116  | 0.000255144 | 0.1247608    | 0.006945783 | 0.147305951  |
| 0.146587348  | 0.001490818 | 0.115044719  | 0.012855782 | 0.137191138  |
| -0.009504783 | 0.837685992 | -0.013430488 | 0.772221325 | -0.022053011 |
| -0.194510505 | 2.31E-05    | -0.135291765 | 0.003397006 | -0.098179826 |
| 0.196135456  | 1.97E-05    | 0.183288998  | 6.77E-05    | 0.179604277  |
| -0.270333374 | 2.90E-09    | -0.279773353 | 7.60E-10    | -0.293386332 |
| 0.09562767   | 0.038854048 | 0.126809933  | 0.006067191 | 0.147257431  |
| 0.03687727   | 0.426579019 | 0.101576173  | 0.028172449 | 0.06853281   |
| -0.006050532 | 0.896246899 | 0.038309341  | 0.408828815 | 0.059435524  |
| 0.056032353  | 0.226826567 | 0.08798849   | 0.057428126 | 0.076735716  |
| 0.005499343  | 0.905652306 | 0.043823724  | 0.344682008 | 0.033339418  |
| 0.022175394  | 0.632658164 | 0.032625933  | 0.481837584 | 0.012990763  |
| 0.229934717  | 5.09E-07    | 0.200051157  | 1.33E-05    | 0.192698946  |
| 0.05328412   | 0.250469322 | 0.053854936  | 0.245422724 | 0.024136335  |
| -0.036833429 | 0.427129393 | -0.01336428  | 0.773313511 | -0.004107705 |
| -0.169961013 | 0.00022432  | -0.140255355 | 0.002382724 | -0.156978318 |
| -0.12009068  | 0.00938686  | -0.107209862 | 0.020487499 | -0.068883397 |
| -0.013138319 | 0.777044377 | -0.048184778 | 0.298760599 | -0.027142229 |
| -0.009899412 | 0.831046174 | 0.02543209   | 0.583549155 | 0.01125669   |
| -0.071536263 | 0.122649623 | -0.039299555 | 0.396815711 | -0.029531386 |
| 0.046927061  | 0.311565703 | 0.09744893   | 0.035268826 | 0.09171199   |
| 0.103011231  | 0.026010801 | 0.164430273  | 0.000359495 | 0.156368289  |
| -0.178240868 | 0.000107703 | -0.129784248 | 0.004969032 | -0.153104767 |
| -0.058196495 | 0.209358764 | -0.026113631 | 0.573500267 | -0.027324052 |
| 0.348984761  | 8.04E-15    | 0.372028491  | 8.91E-17    | 0.401653875  |
| -0.085656286 | 0.064387439 | -0.048162218 | 0.298987153 | -0.050091695 |

|              |             |              |             |              |
|--------------|-------------|--------------|-------------|--------------|
| 0.036374705  | 0.432912824 | 0.091212923  | 0.048843697 | 0.086827539  |
| 0.060559513  | 0.191418549 | 0.05463603   | 0.23863291  | 0.015444875  |
| 0.018374508  | 0.692071264 | -0.013682124 | 0.768074395 | -0.0297827   |
| 0.197618288  | 1.70E-05    | 0.218423883  | 1.89E-06    | 0.187226801  |
| -0.114151327 | 0.013575913 | -0.170046154 | 0.000222671 | -0.206440881 |
| -0.058363142 | 0.208055103 | -0.104717094 | 0.023628531 | -0.086587377 |
| -0.072701597 | 0.116657003 | -0.052299109 | 0.259346753 | -0.075001042 |
| 0.267575518  | 4.25E-09    | 0.24823402   | 5.47E-08    | 0.26422311   |
| -0.094241324 | 0.041785842 | -0.110382119 | 0.017019736 | -0.089496421 |
| -0.118185991 | 0.01058404  | -0.100077992 | 0.030592064 | -0.123330222 |
| 0.070548018  | 0.127917119 | 0.124655973  | 0.006993648 | 0.106352478  |
| 0.067943663  | 0.142638867 | 0.066492011  | 0.151389225 | 0.055383801  |
| 0.136659694  | 0.003084174 | 0.17850815   | 0.000105124 | 0.183999649  |
| 0.042253537  | 0.362260336 | 0.074049801  | 0.110012738 | 0.0435057    |
| -0.119549585 | 0.009714074 | -0.084633728 | 0.067650394 | -0.070231407 |
| -0.111543388 | 0.015885186 | -0.059811657 | 0.196970044 | -0.058869205 |
| 0.068307202  | 0.140509313 | 0.117826241  | 0.010824779 | 0.151246996  |
| 0.098859661  | 0.032688832 | 0.11195011   | 0.015503798 | 0.098985698  |
| -0.175738561 | 0.000134913 | -0.142395025 | 0.002037791 | -0.166859751 |
| 0.136094138  | 0.003210191 | 0.172855821  | 0.000174224 | 0.195740505  |
| -0.028045749 | 0.545465778 | -0.077621188 | 0.093847692 | -0.066938735 |
| 0.111435994  | 0.015987253 | 0.095286515  | 0.039558854 | 0.095754542  |
| 0.043381069  | 0.349581758 | 0.077802151  | 0.093082071 | 0.080502352  |
| -0.096725991 | 0.036656781 | -0.09689487  | 0.036328469 | -0.097871129 |
| 0.106389768  | 0.021478242 | 0.153090628  | 0.00090329  | 0.169348599  |
| -0.324833294 | 6.16E-13    | -0.302833812 | 2.32E-11    | -0.324030427 |
| -0.26265803  | 8.29E-09    | -0.229290952 | 5.48E-07    | -0.244672219 |
| -0.033093364 | 0.475578173 | 0.007511122  | 0.871397203 | 0.01234879   |
| -0.161998794 | 0.000440277 | -0.115651314 | 0.012386235 | -0.093090836 |
| -0.027739805 | 0.54985942  | -0.002807902 | 0.951744047 | -0.000784254 |
| 0.024280135  | 0.600717391 | 0.07070095   | 0.127090686 | 0.09672497   |
| 0.115206636  | 0.012728935 | 0.154912651  | 0.0007822   | 0.147444521  |
| 0.09357012   | 0.043271037 | 0.083052748  | 0.072961099 | 0.089154937  |
| 0.054861859  | 0.2366947   | 0.007841193  | 0.865798133 | 0.023933943  |
| -0.230957838 | 4.51E-07    | -0.17984456  | 9.31E-05    | -0.19631908  |
| 0.085279608  | 0.065574014 | 0.116983724  | 0.01140766  | 0.128532254  |
| -0.039197722 | 0.398041242 | 0.003129795  | 0.946220009 | -0.033553038 |
| 0.159427197  | 0.000543876 | 0.21524915   | 2.68E-06    | 0.23998295   |
| 0.086780844  | 0.060949665 | 0.153913962  | 0.000846573 | 0.151614517  |
| 0.139099474  | 0.002590481 | 0.149514656  | 0.001192728 | 0.142425939  |
| -0.073966034 | 0.110416684 | -0.072098722 | 0.119727965 | -0.09460981  |
| 0.041306399  | 0.373129444 | -0.003005325 | 0.948355768 | 0.019588871  |
| -0.203586068 | 9.24E-06    | -0.137907783 | 0.00282184  | -0.164295433 |
| 0.052034775  | 0.261765587 | 0.033303996  | 0.472772184 | 0.028367109  |
| 0.041396679  | 0.372084818 | 0.082468767  | 0.075006796 | 0.090872774  |

|              |             |              |             |              |
|--------------|-------------|--------------|-------------|--------------|
| 0.170876212  | 0.000207184 | 0.22785363   | 6.48E-07    | 0.225956348  |
| 0.036781331  | 0.427783953 | 0.04973684   | 0.283448082 | 0.085117606  |
| 0.058568383  | 0.206457607 | 0.072301359  | 0.118688795 | 0.075834904  |
| -0.185028346 | 5.76E-05    | -0.194684761 | 2.27E-05    | -0.189779892 |
| -0.001269384 | 0.978174105 | 0.035372265  | 0.445707227 | 0.074781486  |
| 0.064584182  | 0.163501693 | 0.080988256  | 0.080402828 | 0.054603006  |
| 0.097694416  | 0.034807807 | 0.118423801  | 0.010427517 | 0.084906022  |
| -0.043111179 | 0.352583869 | 0.01998726   | 0.666603738 | 0.041831679  |
| -0.291597994 | 1.32E-10    | -0.268789464 | 3.59E-09    | -0.275559    |
| -0.200795455 | 1.23E-05    | -0.190146534 | 3.54E-05    | -0.216243778 |
| 0.054329405  | 0.24128238  | 0.051478327  | 0.266908143 | 0.034950995  |
| 0.012310571  | 0.790754657 | 0.05417841   | 0.242594655 | 0.041746977  |
| -0.172027374 | 0.00018737  | -0.124603038 | 0.007017931 | -0.137032447 |
| -0.03622375  | 0.434825839 | -0.021244385 | 0.647012527 | -0.003762502 |
| 0.029487741  | 0.524994179 | 0.056229397  | 0.225194531 | 0.067879127  |
| 0.02265102   | 0.62537737  | 0.085364761  | 0.065304213 | 0.091076272  |
| 0.145127774  | 0.001663732 | 0.188987122  | 3.95E-05    | 0.209235078  |
| 0.072101833  | 0.119711954 | 0.107631869  | 0.019993338 | 0.14113366   |
| -0.04299416  | 0.353900366 | -0.038409415 | 0.407605024 | -0.041569101 |
| -0.136755906 | 0.003063189 | -0.098591633 | 0.033166228 | -0.115595893 |
| 0.039249512  | 0.397417685 | 0.098498177  | 0.03333408  | 0.123290608  |
| 0.254645897  | 2.40E-08    | 0.21849742   | 1.87E-06    | 0.228805978  |
| 0.042534509  | 0.359074381 | 0.037556188  | 0.418108747 | 0.033498031  |
| -0.129269998 | 0.005145043 | -0.119718818 | 0.009610662 | -0.114523155 |
| -0.104050847 | 0.024535507 | -0.061720517 | 0.183028873 | -0.0771438   |
| 0.096111687  | 0.037872361 | 0.112913806  | 0.014632031 | 0.101146474  |
| -0.056000229 | 0.22709343  | -0.032824301 | 0.479175783 | -0.043805485 |
| -0.195309771 | 2.13E-05    | -0.150421788 | 0.001112156 | -0.159841925 |
| 0.073276588  | 0.113785871 | 0.087514609  | 0.058789339 | 0.078155068  |
| -0.062052418 | 0.180681163 | -0.02514356  | 0.587827848 | -0.060325568 |
| -0.066832392 | 0.14930174  | -0.005871611 | 0.899298446 | 0.014368891  |
| 0.230133605  | 4.97E-07    | 0.243473593  | 9.94E-08    | 0.230520131  |
| 0.130710064  | 0.004665785 | 0.066001473  | 0.154436468 | 0.074804994  |
| -0.057237829 | 0.216972932 | 0.010072739  | 0.828133618 | 0.013750676  |
| 0.203155932  | 9.66E-06    | 0.236813459  | 2.25E-07    | 0.265315922  |
| -0.095444464 | 0.039231207 | -0.050470754 | 0.276395168 | -0.051799912 |
| -0.053910173 | 0.244938177 | 0.001979821  | 0.965964852 | 0.010981813  |
| -0.028631357 | 0.537104638 | 0.028891618  | 0.533409427 | 0.027086654  |
| -0.206459136 | 6.85E-06    | -0.130325376 | 0.004789699 | -0.121042915 |
| -0.061057259 | 0.187787822 | -0.009004602 | 0.846118298 | 0.00258166   |
| -0.165417462 | 0.000330827 | -0.139978703 | 0.002431016 | -0.143024623 |
| -0.039770733 | 0.391174799 | 0.001163855  | 0.979988191 | -2.02E-05    |
| -0.011229401 | 0.808759483 | 0.033176926  | 0.474463891 | 0.019556162  |
| -0.243271557 | 1.02E-07    | -0.205285358 | 7.75E-06    | -0.187727399 |
| -0.143238757 | 0.001914814 | -0.127346629 | 0.005854216 | -0.110344834 |

|              |             |              |             |              |
|--------------|-------------|--------------|-------------|--------------|
| 0.079927317  | 0.084459696 | 0.045887778  | 0.322415135 | 0.010729037  |
| -0.251183356 | 3.75E-08    | -0.216934146 | 2.22E-06    | -0.256115459 |
| -0.031945708 | 0.491025764 | -0.000546463 | 0.990603117 | -0.041097823 |
| -0.100761149 | 0.029467521 | -0.120722595 | 0.009017161 | -0.118409025 |
| -0.072354254 | 0.118418699 | -0.085541195 | 0.064748099 | -0.084745511 |
| 0.015048098  | 0.74568138  | 0.072973402  | 0.115292796 | 0.071652243  |
| -0.041678733 | 0.36883284  | -0.001826223 | 0.968603948 | 0.047212551  |
| -0.150551643 | 0.001101042 | -0.106219664 | 0.021688871 | -0.138927123 |
| -0.207309281 | 6.27E-06    | -0.156062126 | 0.000713727 | -0.156660838 |
| -0.002034147 | 0.965031525 | 0.064947589  | 0.161140033 | 0.102621548  |
| 0.15041277   | 0.001112932 | 0.122991742  | 0.007794129 | 0.132343325  |
| 0.140206347  | 0.002391214 | 0.167633493  | 0.000274058 | 0.155664326  |
| -0.047656159 | 0.304099294 | -0.019691578 | 0.67124545  | -0.011090829 |
| -0.026892082 | 0.562123541 | 0.014015754  | 0.76258641  | -0.006364023 |
| 0.234383377  | 3.01E-07    | 0.259835522  | 1.21E-08    | 0.29513831   |
| -0.153841926 | 0.000851401 | -0.163102579 | 0.000401712 | -0.198315471 |
| -0.08187342  | 0.077140126 | -0.103105661 | 0.025873712 | -0.138424795 |
| 0.211860366  | 3.86E-06    | 0.269693352  | 3.17E-09    | 0.293005831  |
| -0.31340744  | 4.21E-12    | -0.289042197 | 1.94E-10    | -0.267904905 |
| -0.112877409 | 0.014664156 | -0.154165416 | 0.000829919 | -0.160410672 |
| -0.079441419 | 0.086372025 | -0.059978968 | 0.195717966 | -0.107426208 |
| -0.126800587 | 0.006070961 | -0.147520719 | 0.001389063 | -0.154632227 |
| -0.019604306 | 0.67261786  | 0.000795709  | 0.986317473 | 0.005790907  |
| -0.108000908 | 0.019569734 | -0.090962016 | 0.049470747 | -0.08050656  |
| 0.193215198  | 2.62E-05    | 0.225788176  | 8.22E-07    | 0.2218734    |
| -0.038497767 | 0.406526388 | -0.033650808 | 0.468171883 | -0.043898347 |
| 0.372222065  | 8.56E-17    | 0.414762267  | 7.66E-21    | 0.419883752  |
| 0.257123833  | 1.73E-08    | 0.291452128  | 1.35E-10    | 0.271140343  |
| 0.028298309  | 0.541851919 | 0.092813378  | 0.044998584 | 0.108419732  |
| 0.119987583  | 0.00944844  | 0.207445419  | 6.18E-06    | 0.182637691  |
| 0.057613402  | 0.213966628 | 0.064246737  | 0.165717827 | 0.070192063  |
| 0.17272483   | 0.000176243 | 0.184952302  | 5.80E-05    | 0.194837479  |
| -0.068909473 | 0.137035043 | 0.017489686  | 0.706194983 | 0.028208385  |
| -0.048235657 | 0.298250063 | 0.007358588  | 0.873986863 | 0.032163017  |
| -0.110989053 | 0.016418222 | -0.056324367 | 0.224410919 | -0.057536116 |
| 0.069828719  | 0.131860119 | 0.075737317  | 0.102120447 | 0.090886605  |
| 0.127713247  | 0.005712619 | 0.153967369  | 0.000843011 | 0.128282023  |
| 0.077579254  | 0.094025828 | 0.056156795  | 0.225794887 | 0.053903254  |
| 0.069976769  | 0.13104097  | 0.083129913  | 0.072694227 | 0.119512719  |
| 0.2204986    | 1.50E-06    | 0.207598707  | 6.08E-06    | 0.247676493  |
| 0.024512915  | 0.597229834 | 0.061493389  | 0.184648407 | 0.1068792    |
| 0.105387585  | 0.0227452   | 0.155323349  | 0.000757066 | 0.142881911  |
| 0.058875764  | 0.204081727 | 0.062574435  | 0.177033879 | 0.046497238  |
| -0.044328781 | 0.339145137 | -0.016259864 | 0.725993409 | -0.01292851  |
| -0.224233688 | 9.82E-07    | -0.219029821 | 1.76E-06    | -0.21866905  |

|              |             |              |             |              |
|--------------|-------------|--------------|-------------|--------------|
| 0.168192244  | 0.000261256 | 0.166880795  | 0.000292232 | 0.150252448  |
| -0.2030362   | 9.78E-06    | -0.171499936 | 0.000196217 | -0.146964812 |
| 0.270246214  | 2.93E-09    | 0.320413389  | 1.31E-12    | 0.352892847  |
| 0.014041451  | 0.762164196 | 0.070013494  | 0.130838383 | 0.099992349  |
| -0.006981239 | 0.880399044 | 0.076592643  | 0.098295386 | 0.100035577  |
| 0.101769882  | 0.027871938 | 0.166222003  | 0.000309056 | 0.189619676  |
| 0.134734395  | 0.003532526 | 0.126344701  | 0.006257409 | 0.13034437   |
| 0.036203607  | 0.435081477 | 0.074137477  | 0.109591191 | 0.063232434  |
| -0.055409544 | 0.232040279 | -0.047131287 | 0.309462261 | -0.029517578 |
| -0.085415949 | 0.065142467 | -0.117683537 | 0.010921611 | -0.151084722 |
| -0.01949831  | 0.674286203 | -0.022326431 | 0.630342222 | -0.035011268 |
| -0.026245183 | 0.57157007  | 0.005614769  | 0.903681559 | 0.039217977  |
| 0.029558634  | 0.523997925 | 0.049032713  | 0.290328025 | 0.066581425  |
| 0.080222278  | 0.083315581 | 0.105520581  | 0.022573425 | 0.068676684  |
| -0.102920757 | 0.026142733 | -0.070533996 | 0.127993099 | -0.064153725 |
| 0.092488345  | 0.045758192 | 0.14018985   | 0.002394078 | 0.173793222  |
| 0.002495136  | 0.957113686 | 0.032791458  | 0.47961593  | -0.006491942 |
| 0.107553252  | 0.020084604 | 0.146629259  | 0.001486106 | 0.170184814  |
| 0.027614962  | 0.551657255 | 0.060856739  | 0.189244341 | 0.052818893  |
| -0.124340246 | 0.007139601 | -0.044750969 | 0.334560648 | -0.051982793 |
| -0.217753258 | 2.03E-06    | -0.202776902 | 1.00E-05    | -0.188666288 |
| 0.03874239   | 0.403548805 | 0.090208355  | 0.051394845 | 0.134836767  |
| 0.025896886  | 0.576687154 | 0.074094589  | 0.109797239 | 0.086366944  |
| 0.283377539  | 4.50E-10    | 0.281296946  | 6.09E-10    | 0.295176879  |
| 0.205974926  | 7.21E-06    | 0.180493688  | 8.77E-05    | 0.148704546  |
| -0.080130986 | 0.083668344 | -0.078249587 | 0.091210481 | -0.133536648 |
| -0.158425453 | 0.000590039 | -0.151530539 | 0.001020497 | -0.140701952 |
| 0.10164755   | 0.028061397 | 0.071017429  | 0.125393625 | 0.082505268  |
| -0.025884615 | 0.576867828 | 0.043157959  | 0.352067987 | 0.036978346  |
| 0.022999836  | 0.620060777 | 0.052600368  | 0.256608888 | 0.024190798  |
| 0.007253853  | 0.87576579  | 0.056012162  | 0.226994271 | 0.065128427  |
| 0.154054406  | 0.000837234 | 0.13913294   | 0.002584241 | 0.1722317    |
| 0.03646811   | 0.431731552 | 0.094633646  | 0.040937822 | 0.079535431  |
| -0.03736707  | 0.420458237 | -0.009403618 | 0.839390026 | -0.01914321  |
| 0.012039353  | 0.795261228 | 0.064068567  | 0.166896994 | 0.089167104  |
| -0.075805788 | 0.101809959 | -0.007045151 | 0.879312453 | -0.017249971 |
| 0.064549666  | 0.163727346 | 0.072917166  | 0.115574018 | 0.080152522  |
| 0.020804451  | 0.653841708 | 0.044801997  | 0.334009246 | 0.045561656  |
| 0.214075876  | 3.04E-06    | 0.276024138  | 1.30E-09    | 0.3014319    |
| 0.19789946   | 1.65E-05    | 0.21840757   | 1.89E-06    | 0.24406331   |
| -0.054912526 | 0.23626137  | -0.009437708 | 0.83881572  | -0.023676409 |
| -0.134624014 | 0.00355994  | -0.091594865 | 0.047901952 | -0.057489272 |
| 0.013676436  | 0.768168054 | 0.015530872  | 0.737816911 | 0.01162939   |
| -0.011397401 | 0.805954872 | 0.028786528  | 0.534899974 | 0.069327925  |
| 0.135862478  | 0.003263146 | 0.18635112   | 5.08E-05    | 0.227849294  |

|              |             |              |             |              |
|--------------|-------------|--------------|-------------|--------------|
| 0.077460652  | 0.094531103 | 0.063589627  | 0.170097855 | 0.008077648  |
| 0.033705092  | 0.467454079 | 0.080724351  | 0.081396913 | 0.079144979  |
| 0.007725395  | 0.867761696 | 0.028969885  | 0.532300705 | 0.036629593  |
| 0.242128013  | 1.17E-07    | 0.267705804  | 4.17E-09    | 0.304585117  |
| 0.159357491  | 0.000546977 | 0.159087534  | 0.000559139 | 0.193777474  |
| -0.165035785 | 0.000341649 | -0.149038432 | 0.001237146 | -0.120683286 |
| 0.007547015  | 0.870788026 | -0.014702047 | 0.751334978 | -0.003675868 |
| -0.121498861 | 0.008580783 | -0.048671255 | 0.293902934 | -0.064840342 |
| 0.093058657  | 0.0444324   | 0.12843873   | 0.00544146  | 0.110239426  |
| 0.261177343  | 1.01E-08    | 0.286714463  | 2.75E-10    | 0.269061761  |
| -0.071366452 | 0.123542521 | -0.06151981  | 0.184459476 | -0.041787586 |
| -0.008669    | 0.851785994 | -0.018875404 | 0.684122551 | -0.016687131 |
| -0.130029933 | 0.004886874 | -0.069841382 | 0.131789901 | -0.083444515 |
| 0.205925674  | 7.25E-06    | 0.247698905  | 5.85E-08    | 0.268109402  |
| 0.032188112  | 0.487740759 | 0.093915214  | 0.042501974 | 0.136340141  |
| 0.129335381  | 0.005122357 | 0.185030615  | 5.76E-05    | 0.176164255  |
| -0.002520985 | 0.956669826 | 0.007497906  | 0.871621522 | 0.002194035  |
| -0.034914021 | 0.451626688 | 0.029291863  | 0.527751828 | 0.038059022  |
| 0.010884141  | 0.814530957 | 0.065101115  | 0.160150076 | 0.078722484  |
| -0.408658754 | 3.18E-20    | -0.360595996 | 8.70E-16    | -0.359008344 |
| 0.113273482  | 0.014317877 | 0.133332561  | 0.003895312 | 0.129808893  |
| -0.137957334 | 0.002811857 | -0.089886546 | 0.052235243 | -0.090247004 |
| -0.228253378 | 6.19E-07    | -0.179613438 | 9.51E-05    | -0.207190585 |
| 0.176062439  | 0.000131059 | 0.232189426  | 3.90E-07    | 0.24155034   |
| -0.084977638 | 0.066538176 | -0.063722844 | 0.16920297  | -0.058351486 |
| 0.066946943  | 0.148604175 | 0.035242504  | 0.447378956 | 0.034437975  |
| -0.054968187 | 0.23578598  | -0.013956739 | 0.763556298 | -0.010097927 |
| -0.015054417 | 0.74557828  | 0.045016538  | 0.331697357 | 0.057791859  |
| -0.206387713 | 6.90E-06    | -0.254186605 | 2.55E-08    | -0.237009015 |
| 0.030943388  | 0.50473384  | 0.082802241  | 0.073832988 | 0.091604845  |
| 0.046715351  | 0.313756125 | 0.05756723   | 0.214334595 | 0.039455672  |
| 0.018737366  | 0.686309642 | 0.04565855   | 0.324840806 | 0.076341001  |
| -0.175205116 | 0.000141493 | -0.156725999 | 0.000676754 | -0.153066692 |
| 0.047291761  | 0.307816018 | 0.059958248  | 0.195872709 | 0.052721961  |
| -0.116748559 | 0.011575236 | -0.108978511 | 0.018485146 | -0.130999687 |
| -0.09949658  | 0.031577868 | -0.050820323 | 0.273078088 | -0.053654182 |
| -0.050037109 | 0.280547947 | -0.005675592 | 0.902643319 | -0.028672751 |
| -0.042327815 | 0.361416391 | 0.017728737  | 0.702368997 | -0.006948603 |
| -0.034733918 | 0.453965287 | 0.005692279  | 0.902358509 | 0.000115061  |
| 0.02218825   | 0.632460887 | -0.011048365 | 0.811784454 | 0.017953078  |
| 0.274589039  | 1.60E-09    | 0.339070324  | 5.00E-14    | 0.350528052  |
| -0.158736721 | 0.00057532  | -0.090047715 | 0.051812932 | -0.074003834 |
| 0.188155164  | 4.28E-05    | 0.20091224   | 1.22E-05    | 0.200391135  |
| -0.172356841 | 0.000182034 | -0.175980009 | 0.00013203  | -0.180801412 |
| 0.021189511  | 0.647862738 | 0.067677896  | 0.144211257 | 0.0444440025 |



|              |             |              |             |              |
|--------------|-------------|--------------|-------------|--------------|
| -0.108713245 | 0.018774131 | -0.10514201  | 0.023065353 | -0.114399191 |
| -0.228496222 | 6.01E-07    | -0.216705117 | 2.28E-06    | -0.188920163 |
| 0.112725963  | 0.014798495 | 0.168813978  | 0.000247669 | 0.167744037  |
| -0.204953155 | 8.02E-06    | -0.190155228 | 3.53E-05    | -0.193448763 |
| -0.163251988 | 0.000396741 | -0.146477895 | 0.001503189 | -0.185577439 |
| 0.158490118  | 0.000586953 | 0.14020178   | 0.002392007 | 0.148225588  |
| 0.114754641  | 0.01308582  | 0.14198575   | 0.00210001  | 0.1650896    |
| -0.107343497 | 0.020329879 | -0.068218132 | 0.1410288   | -0.110110821 |
| -0.021296115 | 0.646211441 | -0.053398126 | 0.249455664 | -0.057731063 |
| -0.002849599 | 0.951028359 | 0.018310141  | 0.693095191 | 0.014914465  |
| 0.169483559  | 0.000233777 | 0.131103033  | 0.004542197 | 0.151435896  |
| 0.015795332  | 0.733520324 | 0.020959502  | 0.651431483 | 0.022313194  |
| 0.258099288  | 1.52E-08    | 0.256529287  | 1.87E-08    | 0.28281633   |
| -0.146323467 | 0.001520803 | -0.163123241 | 0.000401021 | -0.17689878  |
| 0.154344748  | 0.000818228 | 0.205889105  | 7.27E-06    | 0.206143158  |
| 0.022769197  | 0.623573942 | 0.091340421  | 0.04852762  | 0.091703909  |
| 0.054602015  | 0.238925808 | 0.073704264  | 0.111686536 | 0.09729122   |
| 0.012311357  | 0.790741603 | 0.083119712  | 0.072729458 | 0.070855813  |
| -0.023882015 | 0.606703248 | 0.007481852  | 0.871894025 | 0.009970943  |
| -0.075422865 | 0.103556027 | -0.049157626 | 0.289099405 | -0.059257629 |
| 0.00079397   | 0.98634738  | -0.011226248 | 0.808812132 | -0.036167114 |
| 0.120493316  | 0.009149774 | 0.160285533  | 0.000507014 | 0.152015035  |
| 0.184439668  | 6.08E-05    | 0.24959148   | 4.60E-08    | 0.270414506  |
| -0.055144783 | 0.234282162 | -0.000161353 | 0.99722535  | 0.003389334  |
| -0.023319659 | 0.615203394 | -0.008306148 | 0.857922459 | -0.037349008 |
| -0.136665884 | 0.00308282  | -0.069843577 | 0.131777734 | -0.05237023  |
| 0.074901458  | 0.105971612 | 0.153275092  | 0.000890286 | 0.157382327  |
| -0.031633142 | 0.495279018 | 0.003413023  | 0.941361617 | 0.003034903  |
| -0.03178716  | 0.493180758 | 0.016650914  | 0.719677502 | 0.027667873  |
| -0.040280337 | 0.385128804 | 0.001950984  | 0.966460294 | -0.006509205 |
| -0.241088593 | 1.33E-07    | -0.214190048 | 3.00E-06    | -0.218490023 |
| 0.209054     | 5.21E-06    | 0.287167165  | 2.57E-10    | 0.283598088  |
| 0.054804293  | 0.237187709 | 0.07585894   | 0.101569451 | 0.106772683  |
| 0.014618184  | 0.752707095 | 0.044751199  | 0.334558162 | 0.037919968  |
| -0.124275804 | 0.007169724 | -0.136644165 | 0.003087573 | -0.16446258  |
| 0.094222578  | 0.04182673  | 0.094829515  | 0.040519914 | 0.107634084  |
| -0.181093251 | 8.30E-05    | -0.14313359  | 0.001929763 | -0.122500517 |
| -0.102836267 | 0.02626646  | -0.062628029 | 0.17666254  | -0.080287798 |
| -0.094705631 | 0.040783814 | -0.049052869 | 0.290129541 | -0.061474068 |
| 0.275027358  | 1.50E-09    | 0.26335082   | 7.55E-09    | 0.256964854  |
| 0.084725352  | 0.0673526   | 0.14483647   | 0.001700371 | 0.162027165  |
| 0.003455213  | 0.940638089 | 0.035639261  | 0.442278663 | 0.021568299  |
| 0.158280894  | 0.000596993 | 0.182461958  | 7.31E-05    | 0.194087137  |
| 0.268495644  | 3.74E-09    | 0.304549509  | 1.77E-11    | 0.329021851  |
| 0.100307355  | 0.030210481 | 0.096188658  | 0.037718202 | 0.150311146  |

|              |             |              |             |              |
|--------------|-------------|--------------|-------------|--------------|
| -0.1286076   | 0.005380029 | -0.11610711  | 0.012043445 | -0.13284121  |
| 0.129635     | 0.005019547 | 0.122699526  | 0.007942837 | 0.120394683  |
| 0.096442231  | 0.037214104 | 0.132813202  | 0.004038062 | 0.116542969  |
| 0.143327099  | 0.001902339 | 0.084500065  | 0.068086759 | 0.106880745  |
| 0.118492698  | 0.010382556 | 0.156232831  | 0.000704045 | 0.149954332  |
| -0.120935926 | 0.008895311 | -0.09759953  | 0.03498539  | -0.093904889 |
| -0.151866784 | 0.000994109 | -0.137250651 | 0.002957316 | -0.146694616 |
| 0.219249113  | 1.72E-06    | 0.263459194  | 7.44E-09    | 0.289136365  |
| 0.047472219  | 0.305971685 | 0.114206311  | 0.013530588 | 0.163573886  |
| -0.024882513 | 0.5917114   | -0.021012412 | 0.650609841 | -0.040005554 |
| -0.081597419 | 0.07814572  | -0.007695817 | 0.868263379 | -0.008812505 |
| 0.027902314  | 0.547523483 | 0.047733032  | 0.303319027 | 0.045977369  |
| -0.157989915 | 0.000611222 | -0.118203742 | 0.010572284 | -0.104623197 |
| 0.002715228  | 0.953334892 | 0.082999782  | 0.073144744 | 0.078898279  |
| -0.048464603 | 0.295959945 | 0.003925064  | 0.932583877 | 0.012811935  |
| 0.094785142  | 0.040614273 | 0.157552345  | 0.000633212 | 0.15554522   |
| -0.0160411   | 0.729534853 | 0.004611332  | 0.920832437 | 0.027029943  |
| -0.15389831  | 0.00084762  | -0.110984901 | 0.016422273 | -0.110008651 |
| 0.113227705  | 0.014357529 | 0.150690141  | 0.001089301 | 0.144468636  |
| 0.167199213  | 0.000284411 | 0.244292037  | 8.98E-08    | 0.265402344  |
| -0.019508201 | 0.674130462 | -0.023700781 | 0.609436929 | -0.02901177  |
| 0.168765676  | 0.0002487   | 0.1896517    | 3.71E-05    | 0.200458797  |
| -0.144311465 | 0.001768278 | -0.080939251 | 0.080586674 | -0.040996869 |
| -0.086223595 | 0.062633746 | -0.054373325 | 0.240901619 | -0.034919431 |
| -0.116792182 | 0.011543988 | -0.048719401 | 0.293425075 | -0.021168627 |
| 0.089378278  | 0.053585887 | 0.117223333  | 0.011239129 | 0.133923873  |
| 0.211712283  | 3.93E-06    | 0.254916396  | 2.32E-08    | 0.293183442  |
| 0.009130334  | 0.84399695  | 0.075653134  | 0.102503215 | 0.078149692  |
| -0.010145982 | 0.826903572 | -0.01941028  | 0.675672974 | -0.024908927 |
| -0.131940182 | 0.004288718 | -0.094190523 | 0.041896726 | -0.109268454 |
| -0.004927506 | 0.915424005 | -0.032475484 | 0.483861719 | -0.01986623  |
| 0.011811146  | 0.799058427 | 0.087748146  | 0.058115209 | 0.10140992   |
| -0.067062072 | 0.147905589 | -0.040088046 | 0.387403451 | -0.056329388 |
| -0.078585892 | 0.089823695 | -0.041538315 | 0.370449598 | -0.031031203 |
| 0.13978347   | 0.002465631 | 0.145631361  | 0.001602096 | 0.159758884  |
| 0.138287563  | 0.002746143 | 0.177831914  | 0.000111765 | 0.18034389   |
| -0.174279084 | 0.000153637 | -0.183272878 | 6.78E-05    | -0.210298606 |
| 0.016772972  | 0.717709996 | 0.068861425  | 0.13730977  | 0.055922121  |
| -0.150584481 | 0.001098248 | -0.079885671 | 0.084622248 | -0.088992849 |
| -0.053680746 | 0.246955152 | 0.003782387  | 0.935028971 | 0.021472264  |
| -0.21357057  | 3.21E-06    | -0.14317708  | 0.001923568 | -0.12281662  |
| 0.020071393  | 0.665285309 | 0.02133211   | 0.645654274 | 0.036185485  |
| -0.173906393 | 0.000158796 | -0.215378524 | 2.64E-06    | -0.218627568 |
| -0.23666999  | 2.29E-07    | -0.18293755  | 7.00E-05    | -0.209051567 |
| -0.178275032 | 0.00010737  | -0.171785349 | 0.000191382 | -0.162164035 |

|              |             |              |             |              |
|--------------|-------------|--------------|-------------|--------------|
| -0.174189818 | 0.000154858 | -0.171293394 | 0.000199787 | -0.166412508 |
| 0.043620022  | 0.346931334 | 0.038117795  | 0.411177269 | 0.056561778  |
| 0.077788826  | 0.093138275 | 0.136553533  | 0.00310748  | 0.135945843  |
| 0.109313595  | 0.018125653 | 0.148575375  | 0.001281792 | 0.136855766  |
| -0.008261095 | 0.858684979 | 0.022614423  | 0.625936308 | 0.037357871  |
| -0.179087096 | 9.97E-05    | -0.124788404 | 0.006933228 | -0.139447645 |
| 0.144130673  | 0.001792231 | 0.177379783  | 0.000116424 | 0.196972698  |
| -0.11169846  | 0.015738813 | -0.109043733 | 0.01841469  | -0.083151197 |
| 0.167125571  | 0.000286202 | 0.200711531  | 1.24E-05    | 0.197451167  |
| 0.237436045  | 2.08E-07    | 0.202174128  | 1.07E-05    | 0.206663152  |
| -0.158830268 | 0.000570963 | -0.153993505 | 0.000841272 | -0.160559868 |
| -0.263117575 | 7.80E-09    | -0.188758079 | 4.04E-05    | -0.17826982  |
| -0.195242129 | 2.15E-05    | -0.185695509 | 5.41E-05    | -0.178610556 |
| 0.049923491  | 0.28164295  | 0.088657956  | 0.055549714 | 0.113524334  |
| -0.188391293 | 4.19E-05    | -0.159397323 | 0.000545203 | -0.128856393 |
| -0.083758204 | 0.070550803 | -0.014562913 | 0.753611841 | -0.029365884 |
| 0.00307731   | 0.947120541 | 0.029706969  | 0.521916532 | 0.009936631  |
| 0.073064188  | 0.114839932 | 0.071277785  | 0.124010757 | 0.079686085  |
| -0.136273201 | 0.003169795 | -0.088100247 | 0.057110942 | -0.085998416 |
| 0.094763638  | 0.040660067 | 0.095741265  | 0.038621739 | 0.098404859  |
| 0.144472494  | 0.00174719  | 0.144092465  | 0.001797332 | 0.158082315  |
| -0.091566598 | 0.047971125 | -0.035722813 | 0.441208846 | -0.031213585 |
| 0.036544557  | 0.430766141 | 0.023069395  | 0.619002917 | 0.03803818   |
| 0.069027893  | 0.136359766 | 0.066419381  | 0.151837502 | 0.068995077  |
| 0.021844986  | 0.637737009 | 0.080567174  | 0.081993683 | 0.104013995  |
| -0.106068348 | 0.02187774  | -0.050940044 | 0.271948324 | -0.049241303 |
| -0.042551628 | 0.358880844 | 0.026353337  | 0.569985491 | 0.043095148  |
| 0.021634876  | 0.640975565 | 0.055141931  | 0.234306392 | 0.034436395  |
| -0.185726462 | 5.39E-05    | -0.121956103 | 0.008332644 | -0.121713921 |
| 0.208596543  | 5.47E-06    | 0.188505076  | 4.14E-05    | 0.228996738  |
| 0.078805795  | 0.088926089 | 0.103032703  | 0.025979574 | 0.112123285  |
| -0.174872364 | 0.000145749 | -0.161405814 | 0.000462391 | -0.197572913 |
| -0.254974739 | 2.30E-08    | -0.213926163 | 3.09E-06    | -0.241862622 |
| -0.082814811 | 0.073789037 | -0.055237879 | 0.233492127 | -0.10009719  |
| -0.110434799 | 0.016966774 | -0.043807069 | 0.344865568 | -0.040662126 |
| 0.040616836  | 0.381167935 | 0.091719143  | 0.047598823 | 0.096073907  |
| -0.228628489 | 5.92E-07    | -0.197210735 | 1.77E-05    | -0.193401611 |
| -0.100838868 | 0.029341864 | -0.054857795 | 0.236729485 | -0.066388226 |
| -0.24409661  | 9.20E-08    | -0.208095846 | 5.77E-06    | -0.222819349 |
| 0.042777386  | 0.356334588 | 0.069780702  | 0.132126644 | 0.043801194  |
| -0.208575863 | 5.48E-06    | -0.156260931 | 0.000702463 | -0.174612621 |
| -0.038276511 | 0.40923076  | 0.014463274  | 0.755243703 | 0.051972615  |
| -0.027288094 | 0.556378003 | -0.078435214 | 0.090442926 | -0.107126465 |
| 0.152021559  | 0.000982175 | 0.115440504  | 0.012547671 | 0.124202197  |
| -0.01161017  | 0.802406441 | 0.000155833  | 0.997320274 | 0.001464376  |

|              |             |              |             |              |
|--------------|-------------|--------------|-------------|--------------|
| 0.020197793  | 0.663306453 | 0.029911978  | 0.519046898 | 0.051898703  |
| -0.007339548 | 0.874310206 | -0.015552149 | 0.737470926 | -0.045664092 |
| -0.223518897 | 1.07E-06    | -0.150204386 | 0.001130995 | -0.150047819 |
| -0.31652253  | 2.51E-12    | -0.285325398 | 3.38E-10    | -0.266107164 |
| -0.197971571 | 1.64E-05    | -0.161482946 | 0.000459457 | -0.19045079  |
| 0.112484781  | 0.015014664 | 0.110951893  | 0.016454507 | 0.124411665  |
| 0.049111385  | 0.289553813 | 0.081989578  | 0.076720067 | 0.098990261  |
| -0.15351758  | 0.000873455 | -0.09856847  | 0.033207762 | -0.096046933 |
| -0.005309727 | 0.908891011 | -0.065144661 | 0.159870119 | -0.071076232 |
| -0.012648065 | 0.785156562 | 0.085291963  | 0.065534814 | 0.0691584    |
| -0.019844547 | 0.668842523 | 0.043751495  | 0.345478519 | 0.057023001  |
| 0.011155501  | 0.80999396  | -0.058932966 | 0.203641783 | -0.056676966 |
| 0.066926793  | 0.1487267   | 0.07842211   | 0.090496935 | 0.071042366  |
| -0.198923264 | 1.49E-05    | -0.139920403 | 0.002441306 | -0.119473361 |
| 0.180718665  | 8.59E-05    | 0.128289859  | 0.005496139 | 0.126370361  |
| -0.027275641 | 0.556558242 | 0.013100401  | 0.777670951 | 0.035496391  |
| 0.100552857  | 0.029806574 | 0.055551365  | 0.230845666 | 0.034755253  |
| -0.053778831 | 0.246091436 | -0.012982148 | 0.779625948 | -0.028995808 |
| -0.083603388 | 0.071074104 | -0.106057694 | 0.021891091 | -0.131274303 |
| -0.046238109 | 0.318730787 | 0.014940129  | 0.74744387  | 0.007323965  |
| -0.141376449 | 0.002195858 | -0.057860294 | 0.212006757 | -0.055120824 |
| -0.070210673 | 0.129754823 | -0.024035098 | 0.604398462 | -0.051814216 |
| -0.053249418 | 0.250778436 | -0.020037813 | 0.665811421 | -0.041377395 |
| -0.146406181 | 0.001511345 | -0.151354064 | 0.001034603 | -0.184746426 |
| -0.156583946 | 0.000684513 | -0.114656964 | 0.013164092 | -0.09637634  |
| -0.085917283 | 0.063575678 | -0.000205886 | 0.996459549 | -0.005979117 |
| 0.019534173  | 0.673721551 | 0.078235794  | 0.091267721 | 0.115781925  |
| -0.109778628 | 0.017636864 | -0.032830675 | 0.479090376 | -0.044941914 |
| -0.114263375 | 0.013483689 | -0.059484678 | 0.19943385  | -0.054404334 |
| -0.055745311 | 0.229219038 | -0.036334928 | 0.433416435 | -0.039154183 |
| 0.061075167  | 0.187658146 | 0.022825497  | 0.622715575 | 0.02022996   |
| -0.172711186 | 0.000176455 | -0.174602133 | 0.000149294 | -0.161924849 |
| 0.119523765  | 0.009729939 | 0.16622615   | 0.000308947 | 0.160308156  |
| -0.071871162 | 0.120903396 | -0.03997556  | 0.388737834 | -0.039869761 |
| -0.011296896 | 0.807632418 | 0.037945305  | 0.413298919 | 0.016997474  |
| -0.116052102 | 0.012084365 | -0.074535801 | 0.107692049 | -0.064414722 |
| -0.204618083 | 8.30E-06    | -0.204481808 | 8.42E-06    | -0.239452981 |
| -0.069579046 | 0.133250494 | 0.002663982  | 0.954214656 | 0.010865986  |
| -0.154096258 | 0.000834469 | -0.099501351 | 0.03156967  | -0.120688213 |
| -0.151107929 | 0.001054579 | -0.072447654 | 0.117942951 | -0.118521861 |
| -0.023663022 | 0.610007171 | 0.0535764    | 0.247876319 | 0.061178338  |
| -0.233101164 | 3.50E-07    | -0.216954495 | 2.22E-06    | -0.229468631 |
| 0.080663196  | 0.081628689 | 0.144544784  | 0.001737798 | 0.143272838  |
| 0.103844083  | 0.024823024 | 0.088753001  | 0.055287215 | 0.086764535  |
| -0.1345473   | 0.003579105 | -0.056677602 | 0.221513398 | -0.070224391 |

|              |             |              |             |              |
|--------------|-------------|--------------|-------------|--------------|
| -0.062682617 | 0.176284908 | -0.000650525 | 0.9888138   | 0.005471791  |
| -0.146822112 | 0.001464599 | -0.110290235 | 0.017112461 | -0.146360396 |
| -0.055012403 | 0.23540882  | -0.012945718 | 0.78022849  | -0.0234261   |
| -0.149821015 | 0.001164935 | -0.070617867 | 0.127539147 | -0.075970268 |
| -0.049471292 | 0.28602968  | 0.025492369  | 0.582657087 | 0.026330926  |
| -0.023715739 | 0.609211112 | 0.054265354  | 0.241838426 | 0.020659974  |
| 0.099734189  | 0.03117176  | 0.166106124  | 0.000312107 | 0.194219461  |
| -0.045373926 | 0.327869107 | -0.017285559 | 0.709467874 | -0.034341993 |
| -0.081347262 | 0.079066315 | -0.103247295 | 0.025669263 | -0.128169297 |
| -0.170159193 | 0.0002205   | -0.195698216 | 2.05E-05    | -0.230521061 |
| -0.025925949 | 0.57625935  | 0.043622139  | 0.346907909 | 0.048743903  |
| -0.141561036 | 0.002166407 | -0.063159724 | 0.173009856 | -0.060899542 |
| -0.337374261 | 6.79E-14    | -0.273232167 | 1.93E-09    | -0.276639039 |
| -0.123795468 | 0.007397857 | -0.058523065 | 0.20680957  | -0.044792592 |
| -0.144995788 | 0.001680242 | -0.080426252 | 0.082531738 | -0.08218967  |
| -0.015359746 | 0.740601507 | 0.04159593   | 0.369785697 | 0.063239022  |
| -0.119169445 | 0.009949977 | -0.047166668 | 0.309098803 | -0.028910746 |
| 0.007283805  | 0.875256982 | 0.059115684  | 0.202241113 | 0.082248724  |
| -0.03858721  | 0.405436165 | 0.005173975  | 0.911210633 | 0.03235223   |
| -0.132406403 | 0.004153163 | -0.083214048 | 0.072404155 | -0.070662967 |
| -0.247415313 | 6.07E-08    | -0.200863963 | 1.22E-05    | -0.181037363 |
| -0.029612151 | 0.52324651  | 0.010252195  | 0.825120563 | 0.025641915  |
| -0.181892907 | 7.71E-05    | -0.134176448 | 0.00367308  | -0.138469836 |
| -0.150127259 | 0.001137749 | -0.202059163 | 1.08E-05    | -0.205925027 |
| -0.085293156 | 0.065531027 | -0.031926642 | 0.491284645 | -0.018194998 |
| -0.056541147 | 0.222629529 | -0.057950179 | 0.211296448 | -0.074127297 |
| 0.016685584  | 0.719118438 | 0.093485293  | 0.043461866 | 0.098628721  |
| -0.01849658  | 0.69013095  | 0.036190592  | 0.435246692 | 0.017874496  |
| 0.138124539  | 0.002778407 | 0.082559263  | 0.074686766 | 0.030616893  |
| 0.080592896  | 0.081895779 | 0.1208431    | 0.008948149 | 0.140675212  |
| 0.047527412  | 0.305409052 | 0.106113395  | 0.021821364 | 0.129605165  |
| 0.303689937  | 2.03E-11    | 0.246998262  | 6.40E-08    | 0.267857557  |
| -0.010216092 | 0.825726539 | 0.053678103  | 0.246978451 | 0.057805348  |
| -0.172435716 | 0.000180778 | -0.151491429 | 0.001023607 | -0.129586572 |
| -0.132177551 | 0.00421921  | -0.10004233  | 0.030651762 | -0.107280105 |
| -0.035174824 | 0.448252294 | 0.008843489  | 0.848838223 | 0.01699391   |
| -0.01742145  | 0.707288455 | 0.058171754  | 0.20955281  | 0.044820567  |
| -0.097823547 | 0.034567366 | -0.034293007 | 0.45971905  | -0.046036819 |
| 0.129710346  | 0.004993987 | 0.177912748  | 0.000110951 | 0.191887862  |
| -0.128924731 | 0.005266347 | -0.103631482 | 0.025121687 | -0.107071352 |
| -0.182679056 | 7.17E-05    | -0.122378409 | 0.008109169 | -0.102433961 |
| 0.024126782  | 0.603019953 | 0.00300408   | 0.94837713  | 0.002097778  |
| 0.003027234  | 0.947979799 | 0.060093488  | 0.194864312 | 0.052951734  |
| -0.219049177 | 1.76E-06    | -0.151899123 | 0.000991604 | -0.127840359 |
| -0.229862046 | 5.13E-07    | -0.192069757 | 2.93E-05    | -0.217146857 |

|              |             |              |             |              |
|--------------|-------------|--------------|-------------|--------------|
| -0.188659235 | 4.08E-05    | -0.125655265 | 0.006549143 | -0.148255812 |
| -0.105716076 | 0.022322971 | -0.063514742 | 0.170602448 | -0.060527423 |
| -0.060153743 | 0.194416258 | -0.037938142 | 0.413387165 | -0.031858979 |
| -0.079712449 | 0.085301089 | -0.009605922 | 0.835983166 | -0.005491087 |
| 0.033821689  | 0.465914357 | 0.048852573  | 0.292105991 | 0.054161509  |
| -0.10088142  | 0.029273258 | -0.053119315 | 0.251939708 | -0.065413197 |
| -0.089848283 | 0.052335922 | -0.019646754 | 0.671950209 | 0.010850324  |
| -0.092130792 | 0.046606212 | -0.0297387   | 0.52147185  | -0.025582496 |
| 0.0412337    | 0.373971952 | 0.099313395  | 0.031894038 | 0.090946296  |
| -0.06786104  | 0.143126288 | -0.043336202 | 0.350080838 | -0.06425235  |
| -0.368206523 | 1.93E-16    | -0.313563265 | 4.10E-12    | -0.309710839 |
| 0.104544943  | 0.023860061 | 0.063876648  | 0.168174171 | 0.077839467  |
| -0.212980795 | 3.42E-06    | -0.147541843 | 0.001386836 | -0.179382262 |
| -0.125017131 | 0.006829974 | -0.055076209 | 0.234865303 | -0.039439099 |
| -0.022039533 | 0.634744463 | 0.0199777    | 0.666753619 | 0.029372207  |
| -0.333073037 | 1.46E-13    | -0.31167836  | 5.59E-12    | -0.291922281 |
| -0.133330795 | 0.003895789 | -0.065020332 | 0.160670402 | -0.07271115  |
| -0.037817668 | 0.414873011 | 0.023898171  | 0.60645983  | 0.008922328  |
| 0.02796819   | 0.546577952 | 0.077217827  | 0.095572367 | 0.076170472  |
| 0.033787286  | 0.466368366 | -0.049627761 | 0.284506611 | -0.038764858 |
| -0.082439818 | 0.075109411 | -0.033145639 | 0.474880924 | -0.031576972 |
| -0.511079079 | 1.95E-32    | -0.512328061 | 1.30E-32    | -0.530482921 |
| -0.282002242 | 5.50E-10    | -0.254761914 | 2.36E-08    | -0.25588923  |
| -0.193737592 | 2.49E-05    | -0.154155317 | 0.000830582 | -0.154158035 |
| -0.214277419 | 2.97E-06    | -0.138585025 | 0.00268815  | -0.130246209 |
| -0.026115226 | 0.573476851 | 0.055131082  | 0.234398593 | 0.055175552  |
| 0.183119528  | 6.88E-05    | 0.133615162  | 0.003819571 | 0.078954281  |
| -0.06481435  | 0.162002906 | 0.030797815  | 0.506741334 | 0.066839175  |
| -0.178048462 | 0.000109597 | -0.111478182 | 0.015947089 | -0.098345335 |
| -0.150849122 | 0.001075966 | -0.094816894 | 0.040546734 | -0.081613111 |
| 0.128005992  | 0.005601773 | 0.057222089  | 0.217099579 | 0.067508828  |
| -0.116748838 | 0.011575036 | -0.075806754 | 0.101805586 | -0.078521469 |
| 0.073859543  | 0.110931894 | 0.00851559   | 0.854379352 | -0.056505933 |
| -0.029585552 | 0.523619904 | 0.011554931  | 0.803327292 | 0.022339931  |
| -0.061784517 | 0.182574425 | 0.005257167  | 0.909789022 | 0.034060719  |
| -0.067180996 | 0.147186601 | -0.004000071 | 0.931298731 | -0.003823215 |
| -0.101674088 | 0.028020203 | -0.040657159 | 0.380694977 | -0.008773029 |
| -0.125134537 | 0.00677751  | -0.102641225 | 0.026554006 | -0.132549155 |
| 0.081041771  | 0.080202449 | 0.120637214  | 0.009066343 | 0.137855426  |
| 0.177231209  | 0.000117994 | 0.15898124   | 0.000563997 | 0.18519923   |
| -0.097969656 | 0.034297019 | -0.035788028 | 0.440374861 | -0.022569508 |
| -0.026636296 | 0.56584974  | 0.02940783   | 0.526118313 | 0.014339885  |
| 0.135473803  | 0.003353777 | 0.120232072  | 0.009302989 | 0.111719409  |
| -0.261530449 | 9.65E-09    | -0.218703393 | 1.83E-06    | -0.188738183 |
| -0.124340889 | 0.007139301 | -0.112331474 | 0.015153509 | -0.065825349 |

|              |             |              |             |              |
|--------------|-------------|--------------|-------------|--------------|
| -0.068929177 | 0.136922506 | -0.036577402 | 0.43035174  | -0.054601504 |
| -0.241341589 | 1.29E-07    | -0.166309181 | 0.000306779 | -0.165490017 |
| 0.034230049  | 0.460543936 | 0.123208012  | 0.007685676 | 0.160417621  |
| -0.132319491 | 0.004178135 | -0.092980473 | 0.04461222  | -0.108192948 |
| -0.218097679 | 1.96E-06    | -0.153690166 | 0.000861655 | -0.168908426 |
| -0.230268659 | 4.89E-07    | -0.170580238 | 0.000212587 | -0.162570721 |
| -0.265826221 | 5.40E-09    | -0.241758261 | 1.23E-07    | -0.235264629 |
| -0.115602462 | 0.012423481 | -0.066416084 | 0.151857878 | -0.113016308 |
| 0.106886686  | 0.020873076 | 0.162278357  | 0.000430197 | 0.143694963  |
| 0.116255573  | 0.011933615 | 0.060733997  | 0.190139992 | 0.10542958   |
| -0.075026951 | 0.105386194 | -0.016680578 | 0.719199164 | -0.015139939 |
| 0.131781002  | 0.004335908 | 0.104003981  | 0.024600423 | 0.119357078  |
| -0.097879011 | 0.034464527 | -0.052116969 | 0.261011798 | -0.076278601 |
| -0.152171961 | 0.000970705 | -0.096577081 | 0.03694836  | -0.088357452 |
| -0.028313995 | 0.541627872 | 0.012477423  | 0.787985674 | 0.00642853   |
| -0.033466012 | 0.470620031 | -0.002703302 | 0.953539619 | 0.000186399  |
| 0.06630864   | 0.152522944 | 0.016002374  | 0.730162378 | 0.021561713  |
| -0.0507166   | 0.274059479 | 0.003024745  | 0.948022517 | 0.016536541  |
| 0.193980205  | 2.43E-05    | 0.176121069  | 0.000130372 | 0.170583751  |
| -0.092287283 | 0.04623345  | -0.048897132 | 0.291665523 | -0.088531873 |
| 0.101796073  | 0.02783152  | 0.172860206  | 0.000174157 | 0.169592919  |
| -0.152223037 | 0.000966839 | -0.113725441 | 0.013931539 | -0.141035869 |
| 0.188883805  | 3.99E-05    | 0.208754159  | 5.38E-06    | 0.180152459  |
| -0.111193635 | 0.016219704 | -0.045823764 | 0.323091342 | -0.040463096 |
| 0.197808882  | 1.66E-05    | 0.148845702  | 0.001255551 | 0.181932454  |
| -0.173507141 | 0.000164501 | -0.122045453 | 0.008284909 | -0.111883203 |
| -0.000324691 | 0.99441658  | 0.061340716  | 0.18574297  | 0.040596169  |
| -0.108650578 | 0.018842973 | -0.057118238 | 0.217936533 | -0.067268357 |
| 0.028300922  | 0.541814597 | 0.077743556  | 0.093329427 | 0.106909743  |
| -0.079949683 | 0.084372497 | -0.058068541 | 0.210363726 | -0.049984074 |
| -0.078957346 | 0.088311684 | -0.018037815 | 0.697433377 | -0.020701391 |
| 0.065548287  | 0.157292754 | 0.020118091  | 0.664553964 | 0.025116229  |
| -0.06611347  | 0.153736681 | -0.006086883 | 0.895627102 | -0.042280574 |
| -0.11991302  | 0.009493199 | -0.082113564 | 0.076273753 | -0.068530117 |
| -0.044988411 | 0.331999868 | 0.004661944  | 0.91996643  | 0.012069837  |
| 0.016260282  | 0.725986658 | 0.066623816  | 0.150578282 | 0.07770497   |
| -0.328245208 | 3.41E-13    | -0.270379272 | 2.88E-09    | -0.285621931 |
| -0.109714203 | 0.017703885 | -0.056496791 | 0.222993205 | -0.092219606 |
| -0.137954429 | 0.002812441 | -0.126446999 | 0.00621513  | -0.144223276 |
| -0.159959687 | 0.000520726 | -0.104888981 | 0.023399299 | -0.102922751 |
| -0.115146751 | 0.01277572  | -0.158074437 | 0.000607057 | -0.12677065  |
| -0.21638424  | 2.36E-06    | -0.186016852 | 5.24E-05    | -0.200982352 |
| -0.164872127 | 0.000346389 | -0.140077628 | 0.002413646 | -0.137363775 |
| 0.044522557  | 0.337035983 | 0.011748526  | 0.800101209 | 0.002501162  |
| -0.12674047  | 0.006095259 | -0.07549733  | 0.103214635 | -0.042943973 |

|              |             |              |             |              |
|--------------|-------------|--------------|-------------|--------------|
| -0.179105949 | 9.96E-05    | -0.127716684 | 0.005711307 | -0.129445367 |
| 0.009141687  | 0.843805463 | 0.056397368  | 0.223809908 | 0.054565201  |
| 0.149342944  | 0.001208572 | 0.226972957  | 7.17E-07    | 0.242471919  |
| -0.128828836 | 0.005300492 | -0.106296572 | 0.021593419 | -0.081135766 |
| 0.162137614  | 0.000435244 | 0.126736217  | 0.006096981 | 0.14228385   |
| 0.041643849  | 0.369234079 | 0.073437907  | 0.112990393 | 0.091954959  |
| -0.151351384 | 0.001034819 | -0.111423434 | 0.015999227 | -0.084606678 |
| -0.19053388  | 3.41E-05    | -0.136421797 | 0.003136624 | -0.122215354 |
| -0.068817181 | 0.137563117 | -0.064960285 | 0.161057991 | -0.076052164 |
| -0.234763536 | 2.87E-07    | -0.184816793 | 5.87E-05    | -0.191343753 |
| -0.16734731  | 0.00028084  | -0.124088224 | 0.007258054 | -0.115919183 |
| 0.20747551   | 6.16E-06    | 0.166162854  | 0.00031061  | 0.158433954  |
| -0.217132274 | 2.18E-06    | -0.169459434 | 0.000234264 | -0.183633956 |
| 0.038763357  | 0.4032942   | -0.004727904 | 0.918837933 | 0.010561748  |
| -0.163681132 | 0.000382778 | -0.08253536  | 0.074771188 | -0.093196672 |
| -0.047269318 | 0.308045904 | -0.003497381 | 0.93991498  | 0.018988822  |
| -0.095201973 | 0.039735175 | -0.052804545 | 0.254764731 | -0.046540393 |
| -0.168875423 | 0.000246363 | -0.112728064 | 0.014796624 | -0.106622806 |
| 0.022876222  | 0.621942624 | 0.062761281  | 0.175741782 | 0.087542944  |
| -0.142831283 | 0.001973331 | -0.087206469 | 0.059688709 | -0.098011769 |
| -0.074517298 | 0.107779688 | -0.021699566 | 0.639977717 | -0.021809081 |
| -0.191976591 | 2.96E-05    | -0.130734625 | 0.004657972 | -0.145534015 |
| -0.243739827 | 9.62E-08    | -0.183393648 | 6.71E-05    | -0.178375665 |
| -0.246083238 | 7.18E-08    | -0.195439735 | 2.11E-05    | -0.179973045 |
| -0.057901281 | 0.211682649 | -0.008616419 | 0.852674684 | -0.011797273 |
| -0.084700117 | 0.067434511 | -0.016622614 | 0.720133946 | -0.044817345 |
| 0.039687341  | 0.39216962  | 0.097063514  | 0.036003109 | 0.101167214  |
| -0.072013116 | 0.1201691   | -0.034740906 | 0.453874423 | -0.070849135 |
| -0.138815536 | 0.00264398  | -0.073304099 | 0.113649904 | -0.050888964 |
| -0.046211558 | 0.319009046 | 0.018970495  | 0.682617457 | 0.015957896  |
| -0.05704072  | 0.218562768 | 0.011055207  | 0.811670091 | 0.026125479  |
| -0.153850381 | 0.000850833 | -0.104156222 | 0.024390087 | -0.090664612 |
| -0.014764336 | 0.750316342 | 0.044969596  | 0.33220232  | 0.049067918  |
| -0.148405815 | 0.001298507 | -0.093842036 | 0.042664086 | -0.10464087  |
| 0.110104719  | 0.017301019 | 0.104636705  | 0.023736406 | 0.134226002  |
| -0.22794787  | 6.41E-07    | -0.168979159 | 0.000244172 | -0.191418409 |
| -0.065896016 | 0.155097599 | -0.114847525 | 0.013011769 | -0.139218046 |
| -0.070490947 | 0.128226589 | -0.029821757 | 0.520308786 | -0.04181058  |
| 0.157955181  | 0.000612941 | 0.140924769  | 0.002269472 | 0.20481691   |
| -0.147694132 | 0.001370876 | -0.105048645 | 0.023188092 | -0.058638098 |
| -0.012254366 | 0.791687991 | 0.054684681  | 0.238214411 | 0.030222768  |
| 0.425365308  | 6.05E-22    | 0.392799327  | 1.12E-18    | 0.382240743  |
| -0.050306618 | 0.277962068 | 0.025934124  | 0.576139042 | 0.053754422  |
| -0.170563814 | 0.000212891 | -0.099607675 | 0.031387432 | -0.084587921 |
| -0.336458023 | 8.00E-14    | -0.312120479 | 5.20E-12    | -0.331684541 |



|              |             |              |             |              |
|--------------|-------------|--------------|-------------|--------------|
| 0.071495819  | 0.122861827 | 0.106194884  | 0.021719703 | 0.088727596  |
| -0.225670674 | 8.33E-07    | -0.161951083 | 0.000442019 | -0.148935249 |
| -0.197591812 | 1.70E-05    | -0.149593082 | 0.001185556 | -0.14500939  |
| 0.05980279   | 0.197036564 | 0.09276058   | 0.045121247 | 0.090901492  |
| -0.355358868 | 2.40E-15    | -0.362230665 | 6.32E-16    | -0.358876314 |
| -0.072192177 | 0.119247824 | -0.016904268 | 0.715595648 | -0.004466825 |
| 0.192689215  | 2.76E-05    | 0.146020711  | 0.001555886 | 0.165144794  |
| -0.002770178 | 0.952391601 | 0.052820898  | 0.254617428 | 0.041859406  |
| 0.193052385  | 2.67E-05    | 0.189981114  | 3.59E-05    | 0.171605099  |
| 0.005452723  | 0.906448458 | 0.03072823   | 0.507702417 | 0.054769002  |
| -0.127213434 | 0.005906435 | -0.080395156 | 0.082650848 | -0.075385042 |
| -0.139686753 | 0.002482945 | -0.101914437 | 0.027649481 | -0.110794423 |
| -0.043884558 | 0.344012061 | 0.015516722  | 0.738047031 | 0.039264816  |
| -0.082179464 | 0.076037393 | -0.049875068 | 0.28211051  | -0.029370286 |
| 0.005925516  | 0.898378923 | 0.061131296  | 0.187252129 | 0.056961194  |
| -0.063368471 | 0.171591276 | -0.022897134 | 0.621624099 | -0.025957621 |
| 0.126037198  | 0.006386057 | 0.190280894  | 3.49E-05    | 0.183721535  |
| -0.021659585 | 0.640594357 | 0.024766309  | 0.593443909 | 0.081104955  |
| 0.318635469  | 1.76E-12    | 0.293602694  | 9.74E-11    | 0.309893659  |
| 0.279486888  | 7.92E-10    | 0.22550561   | 8.49E-07    | 0.239682925  |
| 0.276048906  | 1.30E-09    | 0.258734186  | 1.40E-08    | 0.255251756  |
| -0.064558757 | 0.163667889 | -0.026166789 | 0.572719941 | -0.02904244  |
| 0.122982554  | 0.007798767 | 0.150274589  | 0.00112488  | 0.130502109  |
| 0.083650169  | 0.070915644 | 0.121329276  | 0.008674475 | 0.110349869  |
| -0.339948953 | 4.26E-14    | -0.306328095 | 1.33E-11    | -0.33274509  |
| 0.078917417  | 0.088473228 | 0.066055517  | 0.154098484 | 0.079340087  |
| 0.130562065  | 0.004713111 | 0.060768917  | 0.189884863 | 0.079021094  |
| -0.153893873 | 0.000847917 | -0.127959188 | 0.005619364 | -0.095146294 |
| -0.286599805 | 2.80E-10    | -0.225255634 | 8.74E-07    | -0.219784282 |
| -0.233463016 | 3.35E-07    | -0.169280539 | 0.00023791  | -0.184500178 |
| 0.062445288  | 0.177931086 | 0.09384369   | 0.042660417 | 0.106281394  |
| -0.082463008 | 0.075027204 | -0.035309069 | 0.446520944 | -0.057217903 |
| -0.155670048 | 0.000736433 | -0.101796047 | 0.02783156  | -0.111778561 |
| 0.116020502  | 0.012107928 | 0.103363013  | 0.025503259 | 0.111995232  |
| -0.006936433 | 0.88116095  | 0.062742066  | 0.175874333 | 0.098457158  |
| 0.018222962  | 0.694482877 | 0.083677603  | 0.070822852 | 0.058670851  |
| -0.094985376 | 0.040189948 | -0.024612648 | 0.595738431 | -0.022661083 |
| -0.134740176 | 0.003531096 | -0.060685249 | 0.190496571 | -0.076040147 |
| -0.098015629 | 0.034212327 | -0.049413391 | 0.286594674 | -0.024310954 |
| -0.073556956 | 0.112406162 | -0.049556174 | 0.285202762 | -0.001357748 |
| -0.163658037 | 0.000383518 | -0.134563009 | 0.003575173 | -0.120040706 |
| -0.111611877 | 0.015820393 | -0.074654347 | 0.107131886 | -0.105320405 |
| -0.150455536 | 0.001109258 | -0.11498835  | 0.012900202 | -0.121059599 |
| -0.064401657 | 0.164697629 | 0.003591472  | 0.938301675 | 0.021259424  |
| -0.217185991 | 2.16E-06    | -0.157420238 | 0.000639994 | -0.156867833 |

|              |             |              |             |              |
|--------------|-------------|--------------|-------------|--------------|
| -0.167452154 | 0.000278338 | -0.140056491 | 0.002417348 | -0.147615978 |
| 0.013532156  | 0.770545061 | -0.025694089 | 0.579676482 | -0.015170116 |
| -0.222016302 | 1.26E-06    | -0.168828923 | 0.000247351 | -0.169322936 |
| 0.114383895  | 0.013385108 | 0.12039101   | 0.009209505 | 0.129049012  |
| 0.346365112  | 1.31E-14    | 0.335935511  | 8.78E-14    | 0.310678719  |
| 0.205600731  | 7.50E-06    | 0.175572963  | 0.000136924 | 0.157374176  |
| 0.078826589  | 0.088841583 | 0.114491475  | 0.013297648 | 0.119873774  |
| -0.016799606 | 0.717280919 | 0.01557725   | 0.73706283  | 0.032410119  |
| -0.025306966 | 0.585402873 | 0.028428539  | 0.53999313  | 0.054375778  |
| -0.070143302 | 0.130124262 | -0.062373772 | 0.178429371 | -0.03102903  |
| -0.071729082 | 0.121641843 | -0.032786339 | 0.479684553 | -0.011772755 |
| -0.139431327 | 0.002529205 | -0.090108818 | 0.051653571 | -0.072775464 |
| -0.161746331 | 0.000449569 | -0.107281432 | 0.020402952 | -0.113052364 |
| -0.06670362  | 0.150088881 | 0.00254314   | 0.956289409 | 0.03113282   |
| -0.09158256  | 0.047932053 | -0.049607253 | 0.28470593  | -0.012189032 |
| -0.057089218 | 0.218170823 | -0.004083587 | 0.929867986 | 0.01401357   |
| 0.058705642  | 0.205394208 | 0.086023642  | 0.063247301 | 0.107301017  |
| -0.076942318 | 0.096764847 | -0.015218826 | 0.742897126 | 0.012905003  |
| -0.019523134 | 0.67389534  | 0.046719261  | 0.313715575 | 0.055687765  |
| -0.155904109 | 0.000722799 | -0.177039804 | 0.000120046 | -0.159229822 |
| -0.044544149 | 0.336801487 | 0.003237591  | 0.944370673 | 0.032107908  |
| 0.037536577  | 0.418352024 | 0.080222158  | 0.083316046 | 0.07893966   |
| 0.126547753  | 0.006173739 | 0.094209344  | 0.041855616 | 0.078188861  |
| 0.137052581  | 0.002999296 | 0.078331983  | 0.090869138 | 0.079758267  |
| 0.11805636   | 0.010670234 | 0.062512833  | 0.177461422 | 0.06911531   |
| -0.024393139 | 0.599023198 | 0.053437817  | 0.249103433 | 0.057706129  |
| -0.067869816 | 0.143074457 | 0.010509231  | 0.820809439 | 0.031714091  |
| 0.093775168  | 0.042812675 | 0.121832284  | 0.008399199 | 0.145492972  |
| 0.399508235  | 2.53E-19    | 0.379452824  | 1.93E-17    | 0.382201063  |
| -0.181139122 | 8.27E-05    | -0.156080854 | 0.000712659 | -0.123348579 |
| -0.052417286 | 0.25827036  | 0.006544919  | 0.887823048 | 0.010950609  |
| -0.059256841 | 0.201163833 | -0.012116756 | 0.793974389 | -0.029734901 |
| -0.329781488 | 2.61E-13    | -0.2901269   | 1.65E-10    | -0.279002983 |
| -0.091301424 | 0.048624116 | -0.026893395 | 0.562104448 | -0.032710507 |
| 0.011067398  | 0.811466299 | 0.074999198  | 0.105515439 | 0.050308883  |
| 0.087611885  | 0.058507759 | 0.03221568   | 0.487367908 | 0.026158981  |
| -0.043404378 | 0.349322665 | 0.029798763  | 0.520630642 | 0.047380849  |
| 0.044405259  | 0.338311705 | 0.015889942  | 0.731985235 | 0.02627819   |
| 0.037447854  | 0.419453681 | 0.029541308  | 0.524241322 | 0.033329945  |
| 0.106621789  | 0.021193808 | 0.091322714  | 0.048571416 | 0.081263971  |
| -0.126244285 | 0.006299161 | -0.053783293 | 0.24605219  | -0.021998656 |
| -0.099810608 | 0.031042102 | -0.075293903 | 0.104149388 | -0.105806152 |
| -0.084301622 | 0.068738861 | -0.025505538 | 0.582462289 | -0.019206847 |
| 0.100198933  | 0.030390347 | 0.141125192  | 0.002236534 | 0.143127671  |
| -0.05284227  | 0.254424999 | -0.009128771 | 0.844023312 | -0.001560968 |

|              |             |              |             |              |
|--------------|-------------|--------------|-------------|--------------|
| -0.065129718 | 0.159966145 | 0.015376915  | 0.74032198  | 0.001903394  |
| 0.089662677  | 0.052826601 | 0.043570528  | 0.347479263 | 0.05094392   |
| -0.202672208 | 1.02E-05    | -0.157053315 | 0.000659185 | -0.185338064 |
| -0.182028051 | 7.61E-05    | -0.185925807 | 5.29E-05    | -0.21138511  |
| -0.214495228 | 2.91E-06    | -0.154166816 | 0.000829827 | -0.158054884 |
| 0.000596649  | 0.989740179 | 0.040176063  | 0.386361263 | 0.044732067  |
| -0.08242735  | 0.07515364  | -0.007703301 | 0.868136426 | -0.02156695  |
| -0.22675715  | 7.35E-07    | -0.177417457 | 0.000116029 | -0.183651628 |
| 0.212448596  | 3.63E-06    | 0.188289412  | 4.23E-05    | 0.222426271  |
| 0.132914744  | 0.004009786 | 0.10669631   | 0.02110315  | 0.143759709  |
| -0.151390117 | 0.001031707 | -0.112609603 | 0.014902444 | -0.112265054 |
| -0.099689554 | 0.031247706 | -0.029846044 | 0.519968929 | -0.041078132 |
| -0.031390123 | 0.498599416 | -0.02306027  | 0.619141635 | -0.009468351 |
| 0.277772668  | 1.01E-09    | 0.263591392  | 7.31E-09    | 0.286330082  |
| 0.232841425  | 3.61E-07    | 0.194018579  | 2.42E-05    | 0.203306979  |
| -0.027547772 | 0.552626035 | 0.037458251  | 0.419324493 | 0.03297864   |
| -0.157987964 | 0.000611318 | -0.13017744  | 0.004838137 | -0.100922628 |
| -0.225023444 | 8.97E-07    | -0.18863735  | 4.09E-05    | -0.177668177 |
| 0.005694522  | 0.902320225 | 0.092306738  | 0.046187283 | 0.092843395  |
| 0.083693126  | 0.070770391 | 0.12292049   | 0.007830158 | 0.118109159  |
| 0.211325787  | 4.09E-06    | 0.201919824  | 1.10E-05    | 0.204826267  |
| 0.05688517   | 0.219823274 | 0.004943203  | 0.915155593 | 0.016665481  |
| -0.136705497 | 0.003074168 | -0.077767118 | 0.093229896 | -0.089171163 |
| -0.008934326 | 0.847304485 | -0.042408928 | 0.360496184 | -0.063549907 |
| 0.097676578  | 0.034841132 | 0.176532803  | 0.000125646 | 0.176594715  |
| -0.053288443 | 0.250430833 | -0.001569482 | 0.973015966 | -0.011570259 |
| -0.043274    | 0.350773494 | -0.066422431 | 0.151818661 | -0.082984858 |
| -0.063244602 | 0.172431998 | -0.007798638 | 0.866519636 | 0.001015455  |
| -0.100075794 | 0.03059574  | -0.052694969 | 0.255753291 | -0.065516538 |
| -0.133816184 | 0.003766508 | -0.111228119 | 0.01618645  | -0.124945876 |
| -0.253201704 | 2.89E-08    | -0.199539125 | 1.40E-05    | -0.220719836 |
| -0.090290241 | 0.051182811 | -0.026822935 | 0.563129681 | -0.011886843 |
| 0.081392324  | 0.078899836 | 0.11922475   | 0.009915343 | 0.150459324  |
| 0.154160339  | 0.000830253 | 0.125724103  | 0.006519476 | 0.138879645  |
| -0.023938234 | 0.605856377 | -0.041043655 | 0.37617993  | -0.044116358 |
| -0.070633878 | 0.127452629 | -0.13271057  | 0.004066826 | -0.168756185 |
| -0.039193031 | 0.398097754 | 0.00715973   | 0.877364996 | 0.008154014  |
| -0.269377353 | 3.31E-09    | -0.235851673 | 2.52E-07    | -0.239724785 |
| -0.244605655 | 8.63E-08    | -0.196607352 | 1.88E-05    | -0.180965075 |
| -0.11853685  | 0.010353834 | -0.070258931 | 0.129490688 | -0.042438108 |
| -0.011066495 | 0.8114814   | -0.045588726 | 0.325582025 | -0.078128611 |
| -0.109844402 | 0.017568667 | -0.036850322 | 0.426917278 | -0.040174944 |
| -0.09188158  | 0.04720504  | -0.035672761 | 0.441849542 | -0.066050606 |
| -0.028225616 | 0.542890859 | -0.069185443 | 0.135465323 | -0.070240733 |
| -0.125285772 | 0.006710461 | -0.073801124 | 0.11121533  | -0.032912057 |

|              |             |              |             |              |
|--------------|-------------|--------------|-------------|--------------|
| 0.137186049  | 0.002970949 | 0.12609523   | 0.006361598 | 0.149426053  |
| -0.097923824 | 0.034381627 | -0.067652254 | 0.144363662 | -0.070689694 |
| 0.142181575  | 0.002070026 | 0.195529764  | 2.09E-05    | 0.209247435  |
| 0.00629651   | 0.892054157 | 0.07714153   | 0.095901422 | 0.11810176   |
| -0.069682904 | 0.132670765 | -0.045238485 | 0.329316541 | -0.038685588 |
| -0.132246743 | 0.004199142 | -0.05977741  | 0.197227051 | -0.070080494 |
| -0.144923748 | 0.001689317 | -0.06146097  | 0.184880431 | -0.049824411 |
| -0.544011415 | 2.50E-37    | -0.535378343 | 5.40E-36    | -0.525516453 |
| 0.025442074  | 0.583401353 | -0.018632149 | 0.687978477 | -0.024109729 |
| -0.178890387 | 0.000101536 | -0.122609786 | 0.007989012 | -0.137742146 |
| 0.128296758  | 0.005493594 | 0.194938292  | 2.21E-05    | 0.164591299  |
| 0.101949322  | 0.027596025 | 0.076158024  | 0.100224521 | 0.077749096  |
| -0.146286093 | 0.001525094 | -0.091510934 | 0.048107585 | -0.091480633 |
| -0.042339275 | 0.361286287 | 0.03146264   | 0.497607367 | 0.019664378  |
| -0.086122013 | 0.062944835 | -0.008217413 | 0.859424433 | 0.001665798  |
| 0.03679423   | 0.427621843 | 0.002686587  | 0.953826564 | 0.015945111  |
| -0.13877014  | 0.002652626 | -0.103365613 | 0.025499541 | -0.09757855  |
| 0.082415183  | 0.075196819 | 0.147916989  | 0.001347825 | 0.150097718  |
| 0.059515384  | 0.199201527 | 0.083668723  | 0.070852876 | 0.11418767   |
| 0.022748562  | 0.623888676 | 0.047642037  | 0.304242777 | 0.060976285  |
| -0.001162379 | 0.980013552 | 0.040556411  | 0.381877335 | 0.053235382  |
| 0.193541818  | 2.54E-05    | 0.159405995  | 0.000544818 | 0.134026814  |
| -0.108402148 | 0.019118056 | -0.017892366 | 0.699754456 | -0.025545735 |
| -0.094995547 | 0.040168494 | -0.044443093 | 0.337899887 | -0.03269295  |
| 0.222815415  | 1.15E-06    | 0.254082908  | 2.58E-08    | 0.275030913  |
| -0.141451504 | 0.002183839 | -0.076055509 | 0.100683911 | -0.052588629 |
| 0.028218204  | 0.542996853 | 0.08226914   | 0.075716713 | 0.088203444  |
| -0.016703562 | 0.718828613 | 0.051310177  | 0.268475673 | 0.043853563  |
| -0.148354489 | 0.001303606 | -0.124795677 | 0.006929923 | -0.122233621 |
| -0.031688259 | 0.494527594 | 0.022528986  | 0.627242003 | 0.024973492  |
| -0.124296882 | 0.007159858 | -0.129495614 | 0.005067142 | -0.147134436 |
| -0.083067222 | 0.072910981 | -0.091237296 | 0.048783144 | -0.086634775 |
| -0.07092602  | 0.125881972 | -0.000310272 | 0.994664531 | -0.026654135 |
| -0.190362708 | 3.46E-05    | -0.147887262 | 0.001350879 | -0.155822969 |
| 0.156710229  | 0.000677611 | 0.19253709   | 2.80E-05    | 0.157818673  |
| -0.144173068 | 0.001786588 | -0.074114821 | 0.109700001 | -0.068601204 |
| -0.065448667 | 0.157925947 | 0.00734091   | 0.874287081 | 0.034510395  |
| -0.185519755 | 5.50E-05    | -0.174690738 | 0.000148123 | -0.169578063 |
| -0.078062575 | 0.091989035 | -0.013215868 | 0.775763372 | 0.003899566  |
| -0.120247291 | 0.009294001 | -0.063198577 | 0.172745164 | -0.052876743 |
| -0.181032051 | 8.35E-05    | -0.123752822 | 0.007418422 | -0.14167866  |
| -0.0953213   | 0.039486498 | -0.018560659 | 0.689113226 | -0.010021059 |
| -0.309794737 | 7.60E-12    | -0.292747579 | 1.11E-10    | -0.330433158 |
| -0.116028639 | 0.012101856 | -0.042800509 | 0.356074428 | -0.034265262 |
| -0.118102366 | 0.010639573 | -0.074300613 | 0.108810222 | -0.050717069 |

|              |             |              |             |              |
|--------------|-------------|--------------|-------------|--------------|
| 0.043898916  | 0.343854064 | 0.002351389  | 0.959582238 | -0.029968969 |
| -0.143913297 | 0.001821426 | -0.064794836 | 0.162129577 | -0.067532561 |
| -0.12461021  | 0.007014636 | -0.070461529 | 0.128386338 | -0.061705516 |
| 0.119118212  | 0.009982156 | 0.162422719  | 0.000425076 | 0.204397099  |
| -0.188065563 | 4.32E-05    | -0.162036364 | 0.00043891  | -0.169417448 |
| -0.047614778 | 0.304519856 | 0.014816551  | 0.749462772 | 0.007623961  |
| -0.02695364  | 0.561228564 | -0.100039837 | 0.030655939 | -0.075448054 |
| 0.01216964   | 0.793095519 | -0.064340737 | 0.165098243 | -0.064040385 |
| -0.188995247 | 3.95E-05    | -0.137829958 | 0.002837584 | -0.145286314 |
| -0.211989748 | 3.81E-06    | -0.166534045 | 0.000300978 | -0.173091195 |
| -0.059396473 | 0.200102309 | -0.012942344 | 0.780284306 | -0.012878127 |
| -0.112453889 | 0.015042553 | -0.042761587 | 0.356512412 | -0.054811446 |
| 0.053164211  | 0.251538556 | 0.098063309  | 0.034124679 | 0.115398394  |
| -0.102112903 | 0.027346547 | -0.13826547  | 0.002750495 | -0.147604198 |
| 0.204029054  | 8.83E-06    | 0.175315855  | 0.000140103 | 0.177355078  |
| -0.054732107 | 0.237806952 | 0.011277912  | 0.80794938  | 0.016190443  |
| -0.247533039 | 5.98E-08    | -0.170828343 | 0.000208049 | -0.193995168 |
| -0.046335864 | 0.317707643 | 0.000426448  | 0.992666809 | -0.002065601 |
| 0.075190158  | 0.10462867  | 0.139107055  | 0.002589066 | 0.150918984  |
| -0.034808335 | 0.452998179 | 0.023793671  | 0.608035133 | 0.007662965  |
| -0.160079312 | 0.000515653 | -0.099224737 | 0.032048027 | -0.105271127 |
| -0.045358192 | 0.328037045 | 0.018935911  | 0.683164698 | 0.025170698  |
| -0.038216766 | 0.409962843 | 0.015097923  | 0.744868495 | 0.039414676  |
| -0.084067141 | 0.069515971 | -0.16650072  | 0.000301831 | -0.165078712 |
| -0.162392919 | 0.000426128 | -0.147745508 | 0.00136553  | -0.135627582 |
| -0.088263887 | 0.056649128 | -0.030368449 | 0.512686701 | -0.050945606 |
| -0.066312574 | 0.152498557 | 0.011435663  | 0.805316468 | 0.011297857  |
| 0.292951212  | 1.08E-10    | 0.265618095  | 5.55E-09    | 0.275410336  |
| 0.032748107  | 0.480197239 | 0.081407764  | 0.078842862 | 0.056461825  |
| -0.122912974 | 0.007833967 | -0.095673075 | 0.038761049 | -0.105367062 |
| -0.14744735  | 0.001396824 | -0.101888309 | 0.027689576 | -0.113093269 |
| 0.047214561  | 0.308607256 | 0.094263376  | 0.041737785 | 0.112765345  |
| -0.145234772 | 0.001650457 | -0.078547759 | 0.089980086 | -0.071558747 |
| -0.231805119 | 4.08E-07    | -0.201038307 | 1.20E-05    | -0.229725633 |
| -0.019951438 | 0.667165412 | 0.007800147  | 0.866494051 | 0.008546342  |
| 0.067352867  | 0.146152223 | 0.102766376  | 0.026369188 | 0.102533044  |
| 0.027795013  | 0.549065301 | -0.022967189 | 0.620557544 | -0.06180637  |
| -0.008175393 | 0.860135878 | -0.043723302 | 0.345789732 | -0.020085931 |
| 0.047948326  | 0.301140846 | 0.141610746  | 0.002158538 | 0.157367196  |
| 0.05134376   | 0.268162108 | 0.007185953  | 0.876919392 | 0.014836168  |
| 0.023116326  | 0.618289623 | 0.087539572  | 0.058716972 | 0.100022135  |
| -0.182838648 | 7.06E-05    | -0.222204046 | 1.24E-06    | -0.221948279 |
| 0.155625657  | 0.000739045 | 0.121893045  | 0.00836648  | 0.107989887  |
| -0.158148866 | 0.000603411 | -0.137949665 | 0.0028134   | -0.110203087 |
| -0.006577312 | 0.887271541 | 0.077082407  | 0.096157027 | 0.101816694  |

|              |             |              |             |              |
|--------------|-------------|--------------|-------------|--------------|
| -0.034379919 | 0.45858166  | 0.032660173  | 0.481377562 | 0.048301943  |
| -0.066497326 | 0.151356461 | -0.01406673  | 0.761748933 | -0.018393465 |
| 0.070121347  | 0.130244835 | 0.142357059  | 0.002043491 | 0.146819355  |
| -0.12062769  | 0.009071844 | -0.077237957 | 0.0954857   | -0.086230238 |
| -0.083316773 | 0.072051269 | -0.041788107 | 0.367576566 | -0.045140183 |
| 0.133928373  | 0.003737186 | 0.114567668  | 0.01323601  | 0.119218188  |
| -0.04711561  | 0.309623395 | 0.015089849  | 0.745000191 | 0.049379018  |
| -0.122254651 | 0.008174099 | -0.06710223  | 0.1476625   | -0.050916741 |
| 0.054821275  | 0.237042198 | 0.11409854   | 0.013619553 | 0.132966724  |
| 0.061956143  | 0.181359861 | 0.103837942  | 0.024831608 | 0.139781556  |
| -0.009019372 | 0.845869043 | 0.03571551   | 0.441302299 | 0.060234143  |
| 0.212000185  | 3.81E-06    | 0.22531777   | 8.68E-07    | 0.270857831  |
| -0.143994553 | 0.001810462 | -0.054477086 | 0.240003743 | -0.056836246 |
| 0.062871637  | 0.174981934 | 0.087370902  | 0.05920737  | 0.0936231    |
| 0.049530138  | 0.285456235 | 0.07852018   | 0.090093326 | 0.084208749  |
| 0.163739614  | 0.000380911 | 0.234625018  | 2.92E-07    | 0.23004671   |
| 0.071904724  | 0.120729475 | 0.125476462  | 0.006626768 | 0.131987618  |
| 0.028342007  | 0.541227856 | 0.066018503  | 0.154329906 | 0.043065527  |
| 0.037678443  | 0.416594043 | 0.073152497  | 0.114400759 | 0.068437973  |
| -0.127543969 | 0.005777612 | -0.062620877 | 0.176712061 | -0.082104388 |
| -0.091241723 | 0.048772152 | -0.042010321 | 0.365032374 | -0.057111159 |
| -0.284166726 | 4.01E-10    | -0.270945776 | 2.66E-09    | -0.2609747   |
| -0.097972034 | 0.034292633 | -0.051853595 | 0.263432467 | -0.042031688 |
| 0.079697737  | 0.085358946 | 0.129103663  | 0.005203164 | 0.112423644  |
| -0.064845523 | 0.16180072  | -0.042382961 | 0.360790604 | -0.016362968 |
| -0.191018399 | 3.25E-05    | -0.162960399 | 0.000406497 | -0.210368489 |
| -0.228480429 | 6.02E-07    | -0.162375597 | 0.000426741 | -0.167648034 |
| -0.160440831 | 0.000500598 | -0.101923283 | 0.027635918 | -0.12920769  |
| 0.023119948  | 0.618234599 | 0.07884068   | 0.088784358 | 0.068569754  |
| -0.029864935 | 0.519704674 | -0.072389529 | 0.118238846 | -0.049981893 |
| -0.038543513 | 0.405968562 | 0.035522465  | 0.443776622 | 0.008012549  |
| -0.111759252 | 0.015681756 | -0.049823907 | 0.282605077 | -0.025669475 |
| 0.160092121  | 0.000515112 | 0.194152277  | 2.39E-05    | 0.185829393  |
| 0.234939453  | 2.81E-07    | 0.291031202  | 1.44E-10    | 0.299155582  |
| -0.154732796 | 0.000793448 | -0.104899291 | 0.02338561  | -0.151532597 |
| -0.109500834 | 0.017927444 | -0.079995805 | 0.084192915 | -0.091584168 |
| -0.088615261 | 0.055667966 | -0.009357717 | 0.840163427 | -0.003915157 |
| -0.005533855 | 0.905063009 | 0.061501015  | 0.184593862 | 0.060741915  |
| 0.034555845  | 0.456284206 | 0.093916289  | 0.042499597 | 0.076832597  |
| 0.092164022  | 0.046526849 | 0.145097062  | 0.00166756  | 0.140404806  |
| -0.107430739 | 0.020227548 | -0.040286029 | 0.385061599 | -0.031605638 |
| 0.120716974  | 0.009020391 | 0.158119364  | 0.000604853 | 0.146831397  |
| -0.032667563 | 0.481278306 | -0.015292827 | 0.741691345 | 0.002851358  |
| -0.239774522 | 1.57E-07    | -0.173403311 | 0.000166016 | -0.150963133 |
| -0.009545016 | 0.837008517 | -0.002247017 | 0.961374838 | -0.038457245 |

|              |             |              |             |              |
|--------------|-------------|--------------|-------------|--------------|
| 0.134631518  | 0.00355807  | 0.095413762  | 0.039294714 | 0.052120551  |
| -0.192833319 | 2.72E-05    | -0.138115569 | 0.002780192 | -0.182550844 |
| -0.007907596 | 0.864672543 | 0.050355823  | 0.277491705 | 0.055168764  |
| 0.081013188  | 0.08030942  | 0.0814249    | 0.078779663 | 0.062849293  |
| 0.076953194  | 0.096717546 | 0.056874258  | 0.219911895 | 0.009923672  |
| 0.027904363  | 0.547494054 | -0.027982015 | 0.546379625 | -0.041718667 |
| -0.120372677 | 0.009220245 | -0.099524226 | 0.031530386 | -0.085759429 |
| 0.17967987   | 9.45E-05    | 0.175148166  | 0.000142213 | 0.182717336  |
| 0.111675341  | 0.01576056  | 0.070720403  | 0.126985863 | 0.069710908  |
| 0.230674531  | 4.66E-07    | 0.163108053  | 0.000401529 | 0.155526345  |
| 0.032345945  | 0.485608208 | 0.073872624  | 0.110868506 | 0.058524594  |
| -0.104641719 | 0.023729665 | -0.092785885 | 0.04506242  | -0.113672929 |
| -0.13403873  | 0.003708544 | -0.101527309 | 0.028248693 | -0.061270277 |
| -0.167582878 | 0.000275247 | -0.137717046 | 0.002860569 | -0.135291505 |
| -0.155230565 | 0.000762678 | -0.091873245 | 0.047225181 | -0.097627857 |
| -0.116319717 | 0.011886437 | -0.051552433 | 0.266219306 | -0.069364876 |
| 0.005566858  | 0.904499504 | 0.054847086  | 0.236821152 | 0.05553001   |
| -0.432472391 | 1.05E-22    | -0.396188067 | 5.30E-19    | -0.426593258 |
| 0.024775041  | 0.593313644 | 0.058757571  | 0.204992934 | 0.054784866  |
| 0.07904416   | 0.087961271 | 0.115857453  | 0.012230151 | 0.136652977  |
| -0.142113316 | 0.002080433 | -0.1109308   | 0.016475136 | -0.107212853 |
| -0.165972793 | 0.000315652 | -0.123498909 | 0.007541927 | -0.109408214 |
| -0.232814827 | 3.62E-07    | -0.148140398 | 0.001325075 | -0.157673205 |
| -0.122455642 | 0.008068883 | -0.03603817  | 0.437184312 | -0.026376289 |
| 0.079400811  | 0.086533412 | 0.106586179  | 0.021237249 | 0.092952835  |
| -0.038730046 | 0.403698753 | 0.029863955  | 0.519718376 | 0.031724943  |
| -0.199228623 | 1.44E-05    | -0.146300687 | 0.001523417 | -0.131713973 |
| -0.348746663 | 8.41E-15    | -0.317134277 | 2.27E-12    | -0.310581887 |
| 0.050475975  | 0.276345418 | 0.122281912  | 0.008159757 | 0.120553574  |
| -0.114245661 | 0.013498232 | -0.066641568 | 0.15046931  | -0.085258006 |
| -0.017069794 | 0.712933187 | -0.060447339 | 0.192243847 | -0.077351979 |
| -0.104143478 | 0.024407634 | -0.042791293 | 0.356178105 | -0.006052867 |
| -0.158298112 | 0.000596161 | -0.090680182 | 0.050183098 | -0.097741021 |
| -0.032034753 | 0.489817666 | 0.018977759  | 0.682502529 | -0.001740881 |
| -0.059135922 | 0.202086404 | -0.016644376 | 0.719782938 | -0.048452682 |
| 0.012323094  | 0.790546738 | -0.016186997 | 0.72717237  | -0.029395196 |
| 0.139918596  | 0.002441625 | 0.066799849  | 0.149500371 | 0.085643822  |
| 0.01377611   | 0.766527191 | 0.031693565  | 0.494455283 | 0.085940917  |
| 0.055997109  | 0.227119364 | 0.114206282  | 0.013530612 | 0.105347572  |
| 0.037545627  | 0.418239757 | 0.101753244  | 0.027897641 | 0.109796935  |
| 0.077240323  | 0.095475517 | 0.139571657  | 0.002503694 | 0.150068214  |
| -0.19598084  | 2.00E-05    | -0.151620689 | 0.001013359 | -0.160356359 |
| -0.080816805 | 0.081047531 | -0.037128317 | 0.423435365 | -0.04835404  |
| -0.147830024 | 0.001356778 | -0.111483425 | 0.015942103 | -0.106445011 |
| 0.000905602  | 0.984428058 | 0.050234074  | 0.278656516 | 0.041705923  |

|              |             |              |             |              |
|--------------|-------------|--------------|-------------|--------------|
| -0.219135288 | 1.74E-06    | -0.215979991 | 2.47E-06    | -0.22562616  |
| -0.111596758 | 0.015834676 | -0.03592823  | 0.438584944 | -0.041623392 |
| -0.06112539  | 0.187294824 | -0.006898956 | 0.881798319 | -0.006979947 |
| -0.12272868  | 0.007927888 | -0.107063024 | 0.020661915 | -0.117254155 |
| -0.03185879  | 0.492206533 | 0.032901521  | 0.478141761 | 0.033990977  |
| 0.258035991  | 1.54E-08    | 0.214603634  | 2.87E-06    | 0.204116977  |
| 0.075555831  | 0.102947055 | 0.119121604  | 0.009980022 | 0.136420895  |
| -0.140925336 | 0.002269378 | -0.088894107 | 0.054899406 | -0.108292294 |
| -0.083270666 | 0.072209483 | -0.022619403 | 0.625860246 | -0.036392882 |
| -0.07426984  | 0.108957202 | -0.016755297 | 0.717994791 | -0.05895992  |
| -0.051469811 | 0.26698738  | -0.01267449  | 0.784718702 | -0.005588475 |
| -0.09517217  | 0.039797492 | -0.02332527  | 0.615118331 | -0.012241267 |
| 0.020626975  | 0.656604947 | 0.067593116  | 0.144715626 | 0.099534236  |
| -0.085309333 | 0.06547973  | -0.060772056 | 0.189861944 | -0.061522123 |
| 0.11187485   | 0.015573758 | 0.155876222  | 0.000724411 | 0.17569703   |
| -0.148139906 | 0.001325125 | -0.095520172 | 0.039074976 | -0.106662173 |
| 0.173864942  | 0.000159379 | 0.124107901  | 0.007248743 | 0.160598188  |
| -0.147032358 | 0.001441479 | -0.089975078 | 0.052002908 | -0.110004395 |
| -0.161489718 | 0.000459201 | -0.127961272 | 0.00561858  | -0.124258456 |
| 0.002114263  | 0.963655204 | 0.052847708  | 0.254376055 | 0.031446724  |
| -0.19153806  | 3.09E-05    | -0.142995483 | 0.001949556 | -0.143850874 |
| 0.004674252  | 0.919755845 | 0.024674018  | 0.59482155  | 0.001902827  |
| -0.040274651 | 0.385195952 | 0.006117833  | 0.895099441 | -0.033515135 |
| -0.103562187 | 0.025219701 | -0.043090474 | 0.352822198 | -0.044974253 |
| 0.113484265  | 0.014136542 | 0.146416189  | 0.001510204 | 0.148125173  |
| 0.156572437  | 0.000685145 | 0.136977434  | 0.003015365 | 0.126534803  |
| -0.284284784 | 3.94E-10    | -0.231444495 | 4.26E-07    | -0.201193979 |
| 0.093202143  | 0.044103977 | 0.07241      | 0.11813457  | 0.068324019  |
| -0.067034149 | 0.148074791 | -0.030905264 | 0.505259183 | -0.017814092 |
| -0.191280821 | 3.17E-05    | -0.146184153 | 0.001536855 | -0.180144226 |
| -0.380561902 | 1.53E-17    | -0.344998674 | 1.69E-14    | -0.341297827 |
| -0.016099997 | 0.728580842 | 0.029450998  | 0.525510901 | 0.023231785  |
| -0.214319269 | 2.96E-06    | -0.161970129 | 0.000441323 | -0.15572626  |
| -0.045683583 | 0.324575338 | 0.014602633  | 0.75296161  | 0.017507524  |
| -0.004985777 | 0.91442765  | 0.041288124  | 0.373341123 | 0.062429585  |
| 0.047444814  | 0.306251297 | 0.113982215  | 0.013716158 | 0.136625193  |
| -0.235178098 | 2.73E-07    | -0.187835502 | 4.41E-05    | -0.204380846 |
| -0.3970387   | 4.39E-19    | -0.363943716 | 4.51E-16    | -0.362908078 |
| -0.092163539 | 0.046528    | -0.061633772 | 0.18364617  | -0.070308653 |
| 0.090068765  | 0.051757986 | 0.135816031  | 0.003273858 | 0.151104214  |
| -0.135985442 | 0.00323494  | -0.123607148 | 0.007489056 | -0.080921483 |
| 0.109446594  | 0.017984667 | 0.148705154  | 0.001269132 | 0.127983932  |
| 0.288579023  | 2.08E-10    | 0.319173424  | 1.61E-12    | 0.335612729  |
| -0.019780238 | 0.669852311 | 0.040106446  | 0.387185438 | 0.05381886   |
| 0.120816161  | 0.008963536 | 0.180806025  | 8.52E-05    | 0.180903945  |



|              |             |              |             |              |
|--------------|-------------|--------------|-------------|--------------|
| -0.171842883 | 0.000190421 | -0.11909267  | 0.009998233 | -0.102221138 |
| 0.122740776  | 0.007921693 | 0.191975161  | 2.96E-05    | 0.202263909  |
| -0.034419637 | 0.458062406 | 0.030774904  | 0.507057673 | 0.050705913  |
| 0.019050008  | 0.681359881 | 0.029488277  | 0.524986641 | 0.03911409   |
| 0.005702375  | 0.902186194 | 0.024315404  | 0.600188395 | 0.018720621  |
| -0.07133205  | 0.123724028 | -0.015050674 | 0.745639355 | -0.03493583  |
| -0.11757859  | 0.010993311 | -0.039650096 | 0.392614422 | -0.034366719 |
| -0.272262244 | 2.21E-09    | -0.223090766 | 1.12E-06    | -0.200345181 |
| -0.25643981  | 1.90E-08    | -0.198584846 | 1.54E-05    | -0.189654726 |
| 0.094536726  | 0.041145956 | 0.14058223   | 0.002326794 | 0.137552422  |
| -0.198312459 | 1.58E-05    | -0.160200763 | 0.000510549 | -0.16329117  |
| 0.179565202  | 9.55E-05    | 0.125579642  | 0.006581874 | 0.148157882  |
| -0.099900255 | 0.030890589 | -0.051195611 | 0.26954729  | -0.022143645 |
| -0.033836283 | 0.465721831 | 0.038673558  | 0.404385317 | 0.005810812  |
| 0.024646352  | 0.595234807 | 0.051076392  | 0.270665535 | 0.012839858  |
| 0.023698011  | 0.609478756 | 0.060355519  | 0.192921334 | 0.056610594  |
| -0.04885979  | 0.292034622 | -0.008220526 | 0.859371741 | -0.040583924 |
| -0.331809918 | 1.83E-13    | -0.288919019 | 1.98E-10    | -0.279066863 |
| -0.034850173 | 0.452454962 | 0.029633752  | 0.522943364 | 0.04868224   |
| -0.121677204 | 0.008483226 | -0.074995083 | 0.105534615 | -0.091845486 |
| -0.222830512 | 1.15E-06    | -0.191207963 | 3.19E-05    | -0.224066362 |
| -0.013720877 | 0.767436326 | 0.008273545  | 0.858474258 | 0.028893713  |
| -0.095824133 | 0.038453011 | -0.129570881 | 0.005041391 | -0.132765859 |
| -0.097747539 | 0.03470872  | -0.089043948 | 0.05449007  | -0.087197572 |
| -0.045111207 | 0.330680492 | 0.018437579  | 0.691068517 | 0.017567506  |
| -0.111658012 | 0.015776878 | -0.081269193 | 0.079355409 | -0.059721235 |
| -0.352541972 | 4.11E-15    | -0.325854073 | 5.16E-13    | -0.321353317 |
| -0.076453163 | 0.098911245 | -0.017390933 | 0.707777679 | -0.021674727 |
| 0.060539446  | 0.191565999 | 0.096863186  | 0.036389874 | 0.099657852  |
| -0.186848321 | 4.85E-05    | -0.130332803 | 0.004787279 | -0.13722779  |
| -0.328422053 | 3.31E-13    | -0.279799984 | 7.57E-10    | -0.29011605  |
| -0.145728455 | 0.001590456 | -0.108503003 | 0.019005962 | -0.125107686 |
| -0.147023533 | 0.001442442 | -0.109301312 | 0.018138722 | -0.081633609 |
| -0.170212527 | 0.000219483 | -0.103336099 | 0.025541787 | -0.118208801 |
| -0.050536291 | 0.275771199 | -0.003191548 | 0.945160539 | -0.026096946 |
| -0.203387099 | 9.43E-06    | -0.189548035 | 3.75E-05    | -0.193660715 |
| -0.011925718 | 0.797151434 | 0.00326728   | 0.943861376 | -0.002815649 |
| -0.014513492 | 0.754421108 | 0.049513894  | 0.285614451 | 0.048328408  |
| -0.015780978 | 0.733753325 | -0.054353228 | 0.241075797 | -0.010057392 |
| -0.096366985 | 0.037363092 | -0.037664182 | 0.416770569 | -0.06176347  |
| -0.165607219 | 0.000325567 | -0.125612543 | 0.006567616 | -0.114168857 |
| -0.067630878 | 0.144490809 | 0.006505671  | 0.888491352 | 0.023686051  |
| -0.17701263  | 0.00012034  | -0.121997804 | 0.008310335 | -0.108842219 |
| -0.082204208 | 0.075948797 | -0.040411068 | 0.383587024 | -0.023270424 |
| -0.01931616  | 0.677156899 | 0.055319394  | 0.232801919 | 0.069777323  |

|              |             |              |             |              |
|--------------|-------------|--------------|-------------|--------------|
| 0.093833576  | 0.042682862 | 0.142043753  | 0.002091087 | 0.155298122  |
| -0.072952    | 0.11539976  | -0.071447759 | 0.123114366 | -0.070248603 |
| -0.063458874 | 0.170979623 | 0.007891017  | 0.864953536 | 0.015879142  |
| -0.005429448 | 0.906845969 | 0.030462646  | 0.511379277 | 0.03314936   |
| 0.16714634   | 0.000285696 | 0.136659868  | 0.003084136 | 0.136526952  |
| -0.00630308  | 0.891942212 | 0.060505271  | 0.191817298 | 0.0442813    |
| -0.128112001 | 0.005562112 | -0.073176265 | 0.114282784 | -0.086728572 |
| 0.159049956  | 0.000560852 | 0.207546645  | 6.11E-06    | 0.205344051  |
| -0.026729208 | 0.564494867 | -0.018568984 | 0.688981049 | 0.009920457  |
| -0.126082405 | 0.006366996 | -0.059738391 | 0.197520162 | -0.064731544 |
| -0.292661989 | 1.12E-10    | -0.250549434 | 4.07E-08    | -0.22354281  |
| -0.268883536 | 3.55E-09    | -0.20603688  | 7.16E-06    | -0.206513002 |
| -0.237593952 | 2.04E-07    | -0.156177151 | 0.00070719  | -0.126564492 |
| -0.177043289 | 0.000120009 | -0.114520112 | 0.013274452 | -0.097626205 |
| -0.127955766 | 0.005620652 | -0.112304974 | 0.015177624 | -0.111030683 |
| 0.108366303  | 0.019158034 | 0.112203968  | 0.015269845 | 0.110538159  |
| 0.007298233  | 0.875011908 | 0.062760636  | 0.175746226 | 0.069192357  |
| -0.102082648 | 0.027392542 | -0.074612513 | 0.107329297 | -0.064135943 |
| -0.202889393 | 9.93E-06    | -0.135080583 | 0.003447788 | -0.144374357 |
| 0.061537102  | 0.184335894 | 0.094020743  | 0.042269111 | 0.09298959   |
| 0.045554942  | 0.32594106  | 0.102478345  | 0.026796207 | 0.088837606  |
| 0.076980584  | 0.096598513 | 0.133287841  | 0.003907421 | 0.11860319   |
| 0.202690127  | 1.01E-05    | 0.169425929  | 0.000234943 | 0.201254425  |
| 0.040765849  | 0.379421911 | 0.01228507   | 0.791178078 | 0.032501644  |
| -0.009808309 | 0.832577965 | 0.042767012  | 0.356451341 | 0.043630596  |
| -0.165742381 | 0.000321868 | -0.116171759 | 0.01199551  | -0.091054309 |
| 0.033006918  | 0.476732422 | 0.110274744  | 0.017128136 | 0.125112196  |
| 0.187012483  | 4.77E-05    | 0.202821918  | 1.00E-05    | 0.206812736  |
| 0.154038158  | 0.00083831  | 0.203704201  | 9.13E-06    | 0.208073079  |
| -0.066136558 | 0.153592718 | 0.003086389  | 0.946964749 | -0.020898134 |
| 0.020697384  | 0.655508133 | -0.00500096  | 0.914168065 | -0.018929165 |
| 0.13181115   | 0.004326935 | 0.218179042  | 1.94E-06    | 0.252263573  |
| -0.080985008 | 0.080415    | -0.037088936 | 0.423927611 | -0.048635491 |
| -0.109929202 | 0.017481085 | -0.043933163 | 0.343477387 | -0.062793534 |
| -0.027283122 | 0.556449974 | 0.023734079  | 0.608934265 | 0.019801772  |
| -0.092290879 | 0.046224912 | -0.050468501 | 0.276416635 | -0.070728767 |
| -0.13439971  | 0.003616241 | -0.088880503 | 0.054936697 | -0.115712061 |
| -0.193424284 | 2.57E-05    | -0.145576139 | 0.001608751 | -0.126409648 |
| -0.14785272  | 0.001354436 | -0.080985032 | 0.08041491  | -0.066465107 |
| -0.077852703 | 0.092869085 | -0.018377286 | 0.69202709  | 0.000853422  |
| -0.222245236 | 1.23E-06    | -0.197411322 | 1.73E-05    | -0.199986646 |
| 0.037775952  | 0.41538825  | 0.090302772  | 0.051150428 | 0.120856088  |
| -0.052922448 | 0.253704004 | -0.009550347 | 0.836918762 | -0.02029707  |
| -0.126703069 | 0.006110419 | -0.070364816 | 0.1289126   | -0.091075707 |
| -0.324004134 | 7.10E-13    | -0.28870153  | 2.04E-10    | -0.29785632  |

|              |             |              |             |              |
|--------------|-------------|--------------|-------------|--------------|
| -0.068812774 | 0.137588369 | -0.03093575  | 0.504839066 | -0.078531292 |
| -0.113704578 | 0.013949169 | -0.091966802 | 0.04699954  | -0.096284889 |
| 0.019786121  | 0.669759903 | 0.048506244  | 0.29554468  | 0.103783771  |
| 0.017226814  | 0.710410773 | 0.070927721  | 0.125872874 | 0.054273892  |
| -0.005234877 | 0.910169888 | -0.001291091 | 0.977800962 | 0.013175507  |
| -0.231447206 | 4.26E-07    | -0.171384749 | 0.000198201 | -0.1601155   |
| -0.097276307 | 0.035596112 | -0.079912684 | 0.084516782 | -0.046725577 |
| -0.13421087  | 0.003664264 | -0.065193296 | 0.159557882 | -0.055716802 |
| -0.19503535  | 2.19E-05    | -0.160091777 | 0.000515127 | -0.156376651 |
| -0.014820837 | 0.749392726 | 0.061492404  | 0.184655453 | 0.065032832  |
| -0.174711632 | 0.000147848 | -0.132779585 | 0.004047464 | -0.116254874 |
| 0.011763969  | 0.799844014 | 0.079794018  | 0.084980884 | 0.083197898  |
| 0.096891203  | 0.036335572 | 0.150031648  | 0.001146173 | 0.138264939  |
| -0.001607009 | 0.972371029 | 0.051997966  | 0.262103644 | 0.041096172  |
| -0.016153175 | 0.727719821 | 0.039875955  | 0.389921747 | 0.003069237  |
| -0.124231777 | 0.007190369 | -0.076342082 | 0.099403903 | -0.057876516 |
| 0.171759769  | 0.000191811 | 0.129997168  | 0.004897759 | 0.149791713  |
| 0.130805546  | 0.00463548  | 0.09873786   | 0.032905045 | 0.069124188  |
| -0.130851946 | 0.004620817 | -0.073219468 | 0.114068588 | -0.090426739 |
| -0.128728463 | 0.005336445 | -0.04989047  | 0.281961734 | -0.044090297 |
| -0.02943395  | 0.525750734 | 0.014850435  | 0.74890905  | 0.051456255  |
| -0.166530952 | 0.000301057 | -0.097897655 | 0.034430017 | -0.082688199 |
| 0.000852942  | 0.985333437 | 0.017303834  | 0.70917464  | 0.036102336  |
| -0.096990023 | 0.036144588 | -0.029725045 | 0.521663196 | -0.033739508 |
| -0.047506286 | 0.305624327 | 0.000195512  | 0.99663794  | -0.000538408 |
| 0.210302625  | 4.56E-06    | 0.178333854  | 0.000106799 | 0.188619412  |
| -0.132792991 | 0.004043712 | -0.081431231 | 0.078756326 | -0.099158031 |
| -0.158786716 | 0.000572987 | -0.087896634 | 0.05768992  | -0.101181833 |
| -0.131224117 | 0.004504716 | -0.101491124 | 0.028305267 | -0.106624299 |
| 0.093341129  | 0.0437878   | 0.142377696  | 0.002040391 | 0.13401792   |
| -0.123655905 | 0.007465348 | -0.061896617 | 0.181780439 | -0.048872632 |
| 0.023487604  | 0.612659405 | 0.027092975  | 0.559205323 | 0.021280618  |
| -0.276398035 | 1.23E-09    | -0.247433639 | 6.05E-08    | -0.253948219 |
| 0.251761566  | 3.49E-08    | 0.242830594  | 1.08E-07    | 0.246085339  |
| -0.114728644 | 0.013106612 | -0.053810089 | 0.24581663  | -0.054097828 |
| -0.173813346 | 0.000160109 | -0.100383465 | 0.030084764 | -0.112112074 |
| -0.171642245 | 0.000193792 | -0.164691495 | 0.000351692 | -0.150254668 |
| 0.102666682  | 0.026516322 | 0.138837173  | 0.002639868 | 0.121710358  |
| -0.156114466 | 0.000710746 | -0.102970866 | 0.026069592 | -0.094866192 |
| -0.019768483 | 0.670036962 | 0.056206813  | 0.225381159 | 0.059898168  |
| -0.063267582 | 0.172275799 | -0.044279374 | 0.339684259 | -0.068758115 |
| 0.22548022   | 8.52E-07    | 0.232751874  | 3.65E-07    | 0.248004485  |
| -0.086798999 | 0.060895433 | -0.147038008 | 0.001440862 | -0.187462858 |
| 0.260911624  | 1.05E-08    | 0.240655459  | 1.41E-07    | 0.270192494  |
| 0.198053298  | 1.62E-05    | 0.160197144  | 0.0005107   | 0.171495671  |

|              |             |              |             |              |
|--------------|-------------|--------------|-------------|--------------|
| 0.144490312  | 0.001744871 | 0.117704278  | 0.01090749  | 0.10904425   |
| -0.078782581 | 0.089020501 | -0.045500147 | 0.32652392  | -0.044659065 |
| -0.268260851 | 3.86E-09    | -0.221309053 | 1.37E-06    | -0.191785532 |
| 0.076503095  | 0.098690423 | 0.131445678  | 0.004436856 | 0.131327698  |
| -0.228900236 | 5.74E-07    | -0.183344932 | 6.74E-05    | -0.183927186 |
| 0.089203363  | 0.054057368 | 0.032691045  | 0.480962989 | 0.031168881  |
| 0.09994616   | 0.03081325  | 0.069780299  | 0.132128883 | 0.098399715  |
| 0.145820868  | 0.001579449 | 0.092351155  | 0.046082026 | 0.119259688  |
| -0.041993686 | 0.365222455 | -0.028259785 | 0.542402387 | -0.069048866 |
| -0.173303476 | 0.000167486 | -0.133791999 | 0.003772857 | -0.176429579 |
| -0.165852228 | 0.000318891 | -0.105461534 | 0.02264955  | -0.096344382 |
| -0.183216263 | 6.82E-05    | -0.109355231 | 0.018081413 | -0.103304663 |
| 0.066651246  | 0.150409932 | 0.159950414  | 0.000521121 | 0.15903882   |
| -0.097893408 | 0.034437875 | -0.031297286 | 0.499870965 | -0.049524258 |
| -0.252666766 | 3.10E-08    | -0.197965894 | 1.64E-05    | -0.24631013  |
| -0.122739034 | 0.007922585 | -0.095831851 | 0.03843733  | -0.061888082 |
| 0.220796949  | 1.45E-06    | 0.284661679  | 3.72E-10    | 0.273047493  |
| -0.197228096 | 1.76E-05    | -0.153810004 | 0.000853549 | -0.136204256 |
| 0.022356455  | 0.629882278 | 0.037936739  | 0.41340444  | 0.048295791  |
| -0.147759042 | 0.001364125 | -0.126863227 | 0.006045736 | -0.100441439 |
| -0.024836582 | 0.59239592  | 0.001952556  | 0.966433291 | 0.032519331  |
| -0.133508557 | 0.003847984 | -0.103763278 | 0.024936177 | -0.097665002 |
| 0.073505341  | 0.11265917  | 0.114831962  | 0.013024151 | 0.108168798  |
| -0.132185278 | 0.004216965 | -0.086669607 | 0.06128282  | -0.106969277 |
| -0.048571163 | 0.294898058 | 0.030101973  | 0.516394703 | 0.005288838  |
| -0.055862746 | 0.228238067 | 0.010215705  | 0.82573302  | 0.038229872  |
| -0.063576215 | 0.170188148 | -0.028896448 | 0.533340983 | -0.037779698 |
| 0.267595112  | 4.23E-09    | 0.242757456  | 1.09E-07    | 0.23386323   |
| -0.024798009 | 0.592971061 | 0.01507186   | 0.745293667 | 0.016266924  |
| -0.267160732 | 4.50E-09    | -0.243813747 | 9.53E-08    | -0.241602285 |
| 0.162916877  | 0.000407972 | 0.174886392  | 0.000145568 | 0.187627708  |
| 0.05249474   | 0.25756656  | 0.037934899  | 0.413427111 | 0.027682353  |
| 0.082533579  | 0.074777482 | 0.119134999  | 0.009971602 | 0.104275725  |
| -0.079244008 | 0.087158863 | -0.044770235 | 0.3343524   | -0.051762158 |
| -0.092458832 | 0.045827696 | -0.043886819 | 0.343987176 | -0.052359588 |
| -0.086605024 | 0.061476931 | -0.010020868 | 0.829005012 | -0.051610142 |
| -0.110400726 | 0.017001013 | -0.039470959 | 0.394758037 | -0.05102747  |
| -0.136891882 | 0.003033753 | -0.058014741 | 0.210787316 | -0.078006952 |
| -0.142517921 | 0.00201944  | -0.089333188 | 0.053707096 | -0.132328942 |
| 0.208653515  | 5.44E-06    | 0.254591194  | 2.42E-08    | 0.256079063  |
| -0.105088403 | 0.023135756 | -0.03583932  | 0.439719546 | -0.070817261 |
| -0.036084137 | 0.436599448 | 0.042595541  | 0.358384669 | 0.00361813   |
| 0.052599832  | 0.256613748 | 0.123828436  | 0.007381994 | 0.111785206  |
| -0.024747232 | 0.593728556 | 0.009362987  | 0.840074623 | 0.010843625  |
| -0.014305934 | 0.757822787 | 0.004742157  | 0.91859411  | 0.01930281   |

|              |             |              |             |              |
|--------------|-------------|--------------|-------------|--------------|
| -0.032318306 | 0.485981291 | 0.001395347  | 0.976008899 | -0.027867663 |
| -0.137674478 | 0.002869278 | -0.109734038 | 0.017683227 | -0.14428199  |
| 0.158914801  | 0.000567053 | 0.096711868  | 0.036684351 | 0.130883731  |
| -0.032481821 | 0.483776366 | 0.03595055   | 0.43830038  | 0.040533087  |
| -0.036830386 | 0.427167614 | 0.009630972  | 0.835561519 | -0.025281223 |
| -0.139715147 | 0.002477851 | -0.085458145 | 0.065009384 | -0.072085028 |
| -0.072367062 | 0.118353372 | -0.023639704 | 0.610359426 | -0.030218021 |
| -0.127475294 | 0.005804167 | -0.079519043 | 0.086064207 | -0.057211636 |
| -0.076152046 | 0.100251266 | -0.014809235 | 0.749582355 | 0.000647452  |
| -0.045521554 | 0.326296123 | -0.025503981 | 0.582485325 | -0.049683241 |
| 0.168835076  | 0.00024722  | 0.215719445  | 2.54E-06    | 0.247224328  |
| 0.021292046  | 0.646274443 | 0.011081376  | 0.811232651 | 0.006518123  |
| 0.138976715  | 0.002613488 | 0.103216929  | 0.02571298  | 0.094289547  |
| -0.002510941 | 0.956842291 | 0.05691919   | 0.219547148 | 0.07714436   |
| -0.019245032 | 0.678279164 | 0.05375889   | 0.246266863 | 0.051116374  |
| -0.089709371 | 0.052702799 | 0.00324101   | 0.944312018 | -0.013925352 |
| 0.042293512  | 0.361805992 | 0.071542886  | 0.122614901 | 0.087874162  |
| 0.016920513  | 0.715334202 | 0.041597232  | 0.369770706 | 0.085186842  |
| 0.068735644  | 0.138030945 | 0.101433837  | 0.028395034 | 0.118173262  |
| -0.254662307 | 2.39E-08    | -0.19284027  | 2.72E-05    | -0.195387319 |
| 0.279528486  | 7.87E-10    | 0.233410935  | 3.38E-07    | 0.254710459  |
| -0.097677469 | 0.034839467 | -0.041781009 | 0.367658004 | -0.03567036  |
| 0.132201626  | 0.004212218 | 0.112092575  | 0.015372119 | 0.130415056  |
| 0.237228191  | 2.14E-07    | 0.18197413   | 7.65E-05    | 0.204843247  |
| -0.251512093 | 3.60E-08    | -0.209834602 | 4.80E-06    | -0.203229088 |
| -0.127680843 | 0.005725009 | -0.065189193 | 0.159584206 | -0.058641009 |
| -0.127377235 | 0.005842276 | -0.05527144  | 0.23320778  | -0.060293698 |
| 0.039738006  | 0.391565032 | 0.115288506  | 0.012665219 | 0.123850001  |
| 0.081362878  | 0.07900859  | 0.03695651   | 0.425585301 | 0.047900789  |
| -0.145488159 | 0.001619406 | -0.099986272 | 0.030745806 | -0.085104171 |
| 0.100298968  | 0.030224363 | 0.056057508  | 0.226617749 | 0.083790394  |
| -0.047521924 | 0.305464966 | 0.022489681  | 0.627843082 | 0.006832107  |
| -0.127490675 | 0.00579821  | -0.105047027 | 0.023190224 | -0.078976509 |
| 0.051917149  | 0.26284693  | 0.013321526  | 0.774019026 | 0.003494296  |
| 0.276371593  | 1.24E-09    | 0.240431819  | 1.45E-07    | 0.231085109  |
| 0.292871661  | 1.09E-10    | 0.238042195  | 1.94E-07    | 0.233148079  |
| -0.037459672 | 0.419306842 | 0.006047054  | 0.896306202 | -0.017593156 |
| -0.071475935 | 0.12296626  | -0.053321361 | 0.250137893 | -0.060052088 |
| -0.082489095 | 0.074934813 | -0.054964854 | 0.235814429 | -0.03150196  |
| 0.0490713    | 0.28994812  | 0.052499267  | 0.25752546  | 0.059822854  |
| -0.083442064 | 0.071622771 | -0.043815113 | 0.344776899 | -0.073530124 |
| -0.058948303 | 0.203523948 | -0.006067699 | 0.895954177 | 0.017652034  |
| -0.001945973 | 0.966546396 | 0.029913323  | 0.519028099 | 0.002326361  |
| -0.124745188 | 0.006952893 | -0.064727457 | 0.162567508 | -0.052648627 |
| -0.24799151  | 5.64E-08    | -0.19140402  | 3.13E-05    | -0.200142178 |

|              |             |              |             |              |
|--------------|-------------|--------------|-------------|--------------|
| 0.103818861  | 0.024858296 | 0.041467136  | 0.371270824 | 0.051205021  |
| 0.018711398  | 0.68672138  | 0.054269925  | 0.241798721 | 0.037034287  |
| -0.354077429 | 3.07E-15    | -0.328522162 | 3.25E-13    | -0.354578341 |
| -0.12985518  | 0.004945185 | -0.074427462 | 0.108205999 | -0.048116385 |
| -0.133421939 | 0.003871212 | -0.07997948  | 0.084256443 | -0.106280219 |
| -0.103641838 | 0.025107068 | -0.036030799 | 0.437278139 | -0.023322975 |
| 0.283951286  | 4.13E-10    | 0.287857225  | 2.32E-10    | 0.280272866  |
| -0.286543036 | 2.82E-10    | -0.24262482  | 1.10E-07    | -0.229362075 |
| -0.271966408 | 2.31E-09    | -0.257163691 | 1.72E-08    | -0.247325048 |
| 0.010542399  | 0.820253508 | 0.089594421  | 0.05300801  | 0.078496447  |
| -0.234628539 | 2.92E-07    | -0.184990296 | 5.78E-05    | -0.181656546 |
| -0.025644194 | 0.580413061 | 0.043403375  | 0.349333802 | 0.038021225  |
| -0.155474768 | 0.00074799  | -0.111470385 | 0.015954505 | -0.077125691 |
| 0.034829824  | 0.452719121 | 0.019379475  | 0.676158524 | -0.020269999 |
| -0.257348897 | 1.68E-08    | -0.237335109 | 2.11E-07    | -0.243717047 |
| -0.061331166 | 0.185811597 | -0.009613863 | 0.835849502 | -0.007996444 |
| -0.129911546 | 0.004926309 | -0.083811623 | 0.070370974 | -0.089407907 |
| -0.197222744 | 1.76E-05    | -0.128163052 | 0.005543103 | -0.138356832 |
| -0.011308001 | 0.807447017 | -0.008906003 | 0.847782648 | -0.007350375 |
| 0.068203722  | 0.141112984 | 0.051176443  | 0.269726874 | 0.082411334  |
| -0.045568858 | 0.32579314  | -0.019073285 | 0.680991916 | -0.010572201 |
| -0.085745919 | 0.064107705 | -0.004568131 | 0.921571726 | -0.000730128 |
| -0.091859332 | 0.047258813 | -0.067065198 | 0.147886655 | -0.049209877 |
| -0.033838708 | 0.465689846 | -0.013792381 | 0.766259438 | -0.00400035  |
| 0.035864526  | 0.43939772  | 0.104622713  | 0.023755225 | 0.098230364  |
| -0.0972432   | 0.035659177 | -0.059856914 | 0.196630783 | -0.030228894 |
| 0.030270474  | 0.514048406 | 0.092428876  | 0.045898332 | 0.086264881  |
| 0.0186539    | 0.687633361 | 0.064791763  | 0.162149527 | 0.046458146  |
| -0.152803068 | 0.000923913 | -0.092166768 | 0.046520295 | -0.086099658 |
| 0.12975986   | 0.004977255 | 0.160909375  | 0.000481695 | 0.149384934  |
| 0.033608321  | 0.468734123 | 0.085298349  | 0.065514555 | 0.097522627  |
| 0.00131909   | 0.977319675 | 0.021638039  | 0.640926749 | 0.004001577  |
| -0.126325803 | 0.006265248 | -0.071802249 | 0.121261127 | -0.064443136 |
| -0.231357949 | 4.30E-07    | -0.153652929 | 0.000864188 | -0.159062612 |
| 0.014059064  | 0.761874852 | 0.004289903  | 0.926334512 | -0.032512862 |
| -0.089574803 | 0.053060243 | -0.03477602  | 0.453417993 | -0.042346696 |
| -0.393081595 | 1.05E-18    | -0.37418629  | 5.73E-17    | -0.399628675 |
| 0.113402071  | 0.014207011 | 0.157774025  | 0.000621981 | 0.140445437  |
| -0.063460011 | 0.170971944 | -0.017238223 | 0.710227609 | -0.022293751 |
| 0.041619629  | 0.369512822 | 0.017253977  | 0.709974723 | 0.013191042  |
| 0.168919001  | 0.00024544  | 0.111024661  | 0.016383517 | 0.124199161  |
| 0.270465262  | 2.85E-09    | 0.229744109  | 5.20E-07    | 0.206316517  |
| 0.311924669  | 5.37E-12    | 0.272867973  | 2.03E-09    | 0.265577343  |
| -0.120566054 | 0.009107516 | -0.098691758 | 0.032987201 | -0.079548709 |
| -0.050469829 | 0.276403975 | -0.017926888 | 0.699203305 | 0.0037426    |

|              |             |              |             |              |
|--------------|-------------|--------------|-------------|--------------|
| 0.014940047  | 0.74744521  | 0.028598042  | 0.53757858  | 0.058264113  |
| -0.191587157 | 3.08E-05    | -0.129991323 | 0.004899703 | -0.137581944 |
| -0.154362471 | 0.00081708  | -0.11086486  | 0.016539768 | -0.091777368 |
| -0.181755086 | 7.81E-05    | -0.152930848 | 0.000914696 | -0.139470703 |
| -0.229758904 | 5.19E-07    | -0.164745136 | 0.00035011  | -0.174005234 |
| -0.151307053 | 0.001038391 | -0.112524638 | 0.014978751 | -0.114435082 |
| 0.30485334   | 1.68E-11    | 0.376891284  | 3.29E-17    | 0.391990334  |
| -0.11856606  | 0.01033487  | -0.058307758 | 0.208487713 | -0.091130316 |
| -0.100157703 | 0.030458986 | -0.040626498 | 0.381054575 | -0.036442244 |
| 0.213017135  | 3.41E-06    | 0.189985546  | 3.59E-05    | 0.21170215   |
| -0.052362934 | 0.258765034 | 0.009917205  | 0.830747077 | 0.034057575  |
| -0.253497211 | 2.79E-08    | -0.157935923 | 0.000613896 | -0.169103874 |
| -0.067274679 | 0.146622092 | -0.000402911 | 0.99307154  | -0.004690547 |
| 0.106012629  | 0.021947645 | 0.082091332  | 0.076353628 | 0.071249891  |
| -0.029416363 | 0.525998212 | 0.043885694  | 0.343999558 | 0.037107416  |
| -0.150267304 | 0.001125513 | -0.082473066 | 0.074991571 | -0.101301582 |
| 0.025290089  | 0.585653118 | 0.054894449  | 0.236415909 | 0.053475893  |
| -0.361122199 | 7.85E-16    | -0.327441827 | 3.92E-13    | -0.327439931 |
| 0.005897854  | 0.898850766 | 0.073184859  | 0.114240152 | 0.10317968   |
| 0.13530818   | 0.003393087 | 0.173247841  | 0.000168309 | 0.214194506  |
| 0.161799846  | 0.000447585 | 0.212526813  | 3.60E-06    | 0.202559476  |
| -0.089978835 | 0.051993069 | -0.043908762 | 0.343745749 | -0.071047555 |
| -0.189491438 | 3.77E-05    | -0.178834812 | 0.000102051 | -0.18023742  |
| 0.074345008  | 0.108598453 | 0.136175575  | 0.003191762 | 0.153166307  |
| -0.170166987 | 0.000220351 | -0.134130281 | 0.003684935 | -0.144711532 |
| 0.089704497  | 0.05271571  | 0.165674491  | 0.000323721 | 0.181608819  |
| -0.239525766 | 1.62E-07    | -0.283028281 | 4.73E-10    | -0.313133263 |
| -0.040032211 | 0.388065459 | 0.006218142  | 0.893389643 | 0.029859726  |
| 0.077233703  | 0.09550401  | 0.043754964  | 0.345440239 | 0.025404254  |
| -0.246818529 | 6.54E-08    | -0.217262966 | 2.15E-06    | -0.250688477 |
| -0.276578246 | 1.20E-09    | -0.234070104 | 3.12E-07    | -0.258423645 |
| -0.306819285 | 1.23E-11    | -0.251990142 | 3.38E-08    | -0.224869684 |
| 0.04873226   | 0.29329753  | 0.1232608    | 0.00765941  | 0.109037912  |
| -0.150824495 | 0.001078021 | -0.071670432 | 0.121947698 | -0.074998796 |
| -0.10265367  | 0.026535578 | -0.061833419 | 0.182227742 | -0.07144012  |
| 0.140101955  | 0.002409392 | 0.068508666  | 0.139339706 | 0.060727003  |
| -0.30406161  | 1.91E-11    | -0.265694123 | 5.49E-09    | -0.249687671 |
| -0.044588826 | 0.336316607 | 0.023654281  | 0.610139205 | 0.024513723  |
| -0.096220762 | 0.037654061 | -0.039088314 | 0.399360474 | -0.040659894 |
| -0.115807269 | 0.012267989 | -0.054237712 | 0.242078678 | -0.048209745 |
| 0.057944414  | 0.211341957 | 0.106425705  | 0.021433972 | 0.112489523  |
| -0.165340737 | 0.000332977 | -0.110366984 | 0.01703498  | -0.109234151 |
| -0.231311402 | 4.33E-07    | -0.19708227  | 1.79E-05    | -0.210572608 |
| 0.148175071  | 0.001321576 | 0.17227341   | 0.000183372 | 0.195497488  |
| 0.070567616  | 0.127810978 | 0.094748198  | 0.040692973 | 0.06615329   |

|              |             |              |             |              |
|--------------|-------------|--------------|-------------|--------------|
| 0.002054584  | 0.964680417 | 0.034726615  | 0.454060251 | 0.051312274  |
| 0.197389383  | 1.73E-05    | 0.169420571  | 0.000235052 | 0.175403108  |
| -0.336200084 | 8.38E-14    | -0.298765229 | 4.39E-11    | -0.292938822 |
| 0.002850675  | 0.951009882 | -0.031736333 | 0.493872681 | -0.002321099 |
| -0.059045256 | 0.202780164 | -0.013093024 | 0.777792878 | -0.004818526 |
| -0.11300308  | 0.014553496 | -0.044483912 | 0.337455941 | -0.022456643 |
| -0.170436935 | 0.00021525  | -0.104069743 | 0.024509376 | -0.115266236 |
| -0.015607308 | 0.736574242 | 0.042770731  | 0.356409483 | 0.05074086   |
| -0.045146032 | 0.330306942 | -0.053384421 | 0.249577366 | -0.081694852 |
| -0.197190789 | 1.77E-05    | -0.129406714 | 0.005097709 | -0.112601869 |
| -0.098595962 | 0.033158471 | -0.047445595 | 0.306243324 | -0.061675805 |
| -0.010546771 | 0.82018024  | 0.033425825  | 0.471153364 | 0.046273677  |
| -0.130914028 | 0.004601264 | -0.04958546  | 0.284917827 | -0.083919678 |
| -0.183212937 | 6.82E-05    | -0.164251059 | 0.000364942 | -0.158012749 |
| -0.060256588 | 0.19365324  | 0.00281629   | 0.95160008  | -0.009551336 |
| -0.164563119 | 0.000355507 | -0.084930913 | 0.066688402 | -0.081333258 |
| -0.122044101 | 0.00828563  | -0.042143807 | 0.363509347 | -0.044638983 |
| -0.065359981 | 0.158491252 | -0.119053799 | 0.010022745 | -0.09951496  |
| 0.075400447  | 0.103658982 | 0.022533288  | 0.627176238 | 0.004767678  |
| -0.236041639 | 2.47E-07    | -0.15714533  | 0.000654323 | -0.155119454 |
| -0.220606329 | 1.48E-06    | -0.157337242 | 0.000644289 | -0.168604385 |
| 0.048695375  | 0.293663468 | 0.014494221  | 0.754736743 | 0.022726055  |
| -0.05576435  | 0.229059798 | 0.013038101  | 0.77870074  | 0.019898004  |
| -0.138711893 | 0.002663757 | -0.068737366 | 0.138021051 | -0.081052212 |
| -0.163432445 | 0.000390813 | -0.176941864 | 0.000121109 | -0.228373958 |
| -0.311794683 | 5.48E-12    | -0.277800041 | 1.01E-09    | -0.292673472 |
| -0.191178411 | 3.20E-05    | -0.119696631 | 0.009624164 | -0.119210486 |
| -0.140346336 | 0.002367035 | -0.094098366 | 0.042098511 | -0.072294353 |
| -0.100260963 | 0.030287331 | -0.021057036 | 0.649917207 | -0.028296891 |
| 0.190394941  | 3.45E-05    | 0.134056652  | 0.003703912 | 0.098911494  |
| -0.002865388 | 0.950757349 | -0.030455886 | 0.511473048 | 0.011802484  |
| -0.093167064 | 0.044184079 | -0.015419689 | 0.739625712 | 0.001283477  |
| -0.042538749 | 0.359026444 | -0.006842857 | 0.882752519 | -0.009450807 |
| 0.033994843  | 0.463632946 | 0.074279612  | 0.108910512 | 0.084349659  |
| -0.308892719 | 8.80E-12    | -0.266789382 | 4.73E-09    | -0.27291764  |
| -0.03004148  | 0.517238382 | 0.046243574  | 0.318673532 | 0.058098569  |
| -0.099281024 | 0.031950189 | -0.040930195 | 0.377501934 | -0.00468324  |
| -0.104449742 | 0.023988939 | -0.062122115 | 0.180191007 | -0.053937354 |
| -0.080633542 | 0.081741267 | -0.043134317 | 0.352332094 | -0.049575509 |
| 0.145595928  | 0.001606363 | 0.09623534   | 0.037624967 | 0.077778463  |
| -0.03400302  | 0.463525364 | 0.031525127  | 0.496753379 | 0.012715455  |
| 0.174233052  | 0.000154266 | 0.123257854  | 0.007660874 | 0.105502632  |
| -0.05635638  | 0.224147218 | -0.086325791 | 0.062322054 | -0.1030641   |
| -0.038828097 | 0.402508655 | 0.009437871  | 0.838812977 | -0.014110292 |
| 0.136712087  | 0.003072731 | 0.110568172  | 0.016833329 | 0.098276617  |



|              |             |              |             |              |
|--------------|-------------|--------------|-------------|--------------|
| -0.158165238 | 0.000602611 | -0.112717879 | 0.014805696 | -0.119141711 |
| -0.302597374 | 2.41E-11    | -0.227512788 | 6.74E-07    | -0.189921584 |
| 0.159064004  | 0.000560211 | 0.151813315  | 0.000998262 | 0.190381476  |
| -0.2850127   | 3.54E-10    | -0.223485045 | 1.07E-06    | -0.242623305 |
| -0.04763131  | 0.304351798 | 0.003538585  | 0.939208446 | 0.003585973  |
| -0.012586471 | 0.786177427 | -0.044367415 | 0.338723953 | -0.050415104 |
| -0.154260975 | 0.00082367  | -0.153598339 | 0.000867915 | -0.109958841 |
| -0.09068756  | 0.050164342 | -0.011570163 | 0.803073341 | -0.014546894 |
| -0.140011424 | 0.002425258 | -0.111325175 | 0.016093177 | -0.100672428 |
| -0.060721422 | 0.190231927 | 0.007672681  | 0.868655828 | 0.041759703  |
| -0.08599799  | 0.063326373 | -0.006333783 | 0.891419102 | -0.016155143 |
| -0.201486884 | 1.15E-05    | -0.130663643 | 0.004680583 | -0.1534946   |
| -0.148476089 | 0.001291555 | -0.086619956 | 0.061432007 | -0.120831415 |
| -0.103406913 | 0.025440525 | -0.134568599 | 0.003573774 | -0.125118105 |
| 0.007748763  | 0.867365382 | 0.083189939  | 0.072487176 | 0.104881293  |
| -0.083457699 | 0.071569444 | -0.020381376 | 0.660436547 | 0.01000078   |
| 0.20600875   | 7.18E-06    | 0.158819706  | 0.000571453 | 0.173333042  |
| -0.066601949 | 0.150712591 | -0.033660201 | 0.468047635 | -0.012582755 |
| -0.003423956 | 0.941174109 | 0.0642077    | 0.165975645 | 0.074564067  |
| -0.26466291  | 6.32E-09    | -0.232533578 | 3.75E-07    | -0.270433784 |
| -0.164283112 | 0.000363962 | -0.104710725 | 0.023637062 | -0.110747121 |
| -0.251751515 | 3.49E-08    | -0.209262712 | 5.10E-06    | -0.205525929 |
| -0.023698514 | 0.609471169 | 0.035849164  | 0.439593847 | 0.042730105  |
| -0.099222289 | 0.032052288 | -0.08215014  | 0.076142493 | -0.117766683 |
| 0.030002867  | 0.517777275 | -0.027194681 | 0.557730717 | -0.031791284 |
| -0.017325071 | 0.708833943 | 0.058516786  | 0.206858373 | 0.077804952  |
| -0.019101071 | 0.680552742 | 0.036948361  | 0.42568743  | 0.039271877  |
| -0.081709318 | 0.077736748 | -0.056979966 | 0.219054474 | -0.076478086 |
| -0.171976379 | 0.000188208 | -0.129588424 | 0.005035406 | -0.152013473 |
| -0.013070654 | 0.778162613 | 0.061170737  | 0.186967218 | 0.084193469  |
| -0.194023197 | 2.42E-05    | -0.1716252   | 0.000194081 | -0.209018542 |
| -0.096540156 | 0.037020965 | -0.052953734 | 0.253423055 | -0.068793059 |
| -0.153425901 | 0.000879783 | -0.14965893  | 0.001179564 | -0.131422878 |
| -0.022319368 | 0.630450438 | -0.032332165 | 0.485794196 | -0.022048517 |
| -0.21488517  | 2.78E-06    | -0.209784088 | 4.82E-06    | -0.236318819 |
| 0.096780097  | 0.036551322 | 0.120276148  | 0.00927698  | 0.135928868  |
| -0.086955798 | 0.060428709 | -0.039698991 | 0.392030542 | -0.020965232 |
| -0.028635485 | 0.537045936 | -0.079518371 | 0.086066868 | -0.107725506 |
| 0.003340323  | 0.942608475 | -0.018665817 | 0.6874443   | -0.016489397 |
| -0.187161652 | 4.71E-05    | -0.139762782 | 0.002469325 | -0.151828938 |
| -0.116695206 | 0.011613557 | -0.03644844  | 0.431980163 | -0.027720436 |
| -0.078638359 | 0.089608875 | -0.034309135 | 0.459507863 | -0.035651653 |
| -0.131036271 | 0.004562983 | -0.166243998 | 0.00030848  | -0.185833057 |
| -0.163772902 | 0.000379852 | -0.105013803 | 0.02323404  | -0.136123796 |
| -0.206999259 | 6.48E-06    | -0.158606315 | 0.000581444 | -0.185917899 |

|              |             |              |             |              |
|--------------|-------------|--------------|-------------|--------------|
| -0.405422666 | 6.67E-20    | -0.376172408 | 3.81E-17    | -0.396653423 |
| -0.142214396 | 0.00206504  | -0.102416801 | 0.026888217 | -0.110598095 |
| 0.02892275   | 0.53296828  | 0.067215976  | 0.146975629 | 0.113098686  |
| 0.071103452  | 0.124935399 | 0.126644941  | 0.006134049 | 0.147066937  |
| 0.002364689  | 0.959353817 | 0.064423376  | 0.164554973 | 0.051640927  |
| -0.090675059 | 0.050196127 | -0.02348539  | 0.612692905 | -0.036914526 |
| -0.099342763 | 0.031843169 | -0.002030433 | 0.965095326 | 0.014029722  |
| 0.016412393  | 0.723527645 | 0.098878734  | 0.032655086 | 0.115380834  |
| -0.020455224 | 0.659283498 | -0.08064295  | 0.081705538 | -0.079720498 |
| 0.147514059  | 0.001389766 | 0.07784703   | 0.092892969 | 0.097278545  |
| -0.065596344 | 0.156987987 | -0.02614331  | 0.57306454  | 0.003033825  |
| -0.229486168 | 5.36E-07    | -0.202491761 | 1.03E-05    | -0.175775734 |
| 0.152179867  | 0.000970106 | 0.127215645  | 0.005905565 | 0.123225287  |
| -0.365885107 | 3.07E-16    | -0.340221307 | 4.06E-14    | -0.340288044 |
| -0.034546706 | 0.456403393 | -0.014692298 | 0.751494433 | -0.0280005   |
| -0.144915642 | 0.00169034  | -0.088617837 | 0.055660824 | -0.081822404 |
| -0.10324955  | 0.025666019 | -0.064295413 | 0.16539677  | -0.088732234 |
| -0.328043131 | 3.53E-13    | -0.27120235  | 2.57E-09    | -0.295457153 |
| -0.24297353  | 1.06E-07    | -0.196067016 | 1.98E-05    | -0.205277691 |
| 0.045013604  | 0.331728904 | 0.05196187   | 0.262435451 | 0.051510365  |
| -0.18406062  | 6.30E-05    | -0.137038109 | 0.003002385 | -0.120772832 |
| -0.101063488 | 0.02898127  | -0.049503426 | 0.28571644  | -0.062899869 |
| -0.323926657 | 7.19E-13    | -0.257821811 | 1.58E-08    | -0.2750756   |
| -0.076118218 | 0.100402704 | -0.06006218  | 0.195097418 | -0.045448188 |
| 0.019231955  | 0.678485565 | 0.080675164  | 0.081583288 | 0.055721108  |
| -0.248638316 | 5.20E-08    | -0.220118579 | 1.56E-06    | -0.197504882 |
| -0.034563427 | 0.456185336 | 0.028377985  | 0.540714323 | 0.017014175  |
| -0.14608472  | 0.001548407 | -0.080057371 | 0.083953681 | -0.093297012 |
| -0.010890623 | 0.814422497 | -0.007232743 | 0.876124419 | -0.025241538 |
| -0.090877175 | 0.049684292 | -0.035432054 | 0.444938152 | -0.059081789 |
| 0.102287506  | 0.027082401 | 0.151732992  | 0.001004532 | 0.164449609  |
| -0.279124067 | 8.35E-10    | -0.208301718 | 5.65E-06    | -0.206669285 |
| -0.403482462 | 1.04E-19    | -0.358837321 | 1.23E-15    | -0.333087101 |
| -0.101194454 | 0.028772784 | -0.046746555 | 0.313432642 | -0.040129647 |
| -0.109561038 | 0.017864116 | -0.045108435 | 0.330710247 | -0.035021276 |
| 0.154719113  | 0.00079431  | 0.11280326   | 0.014729795 | 0.096289547  |
| -0.199808968 | 1.36E-05    | -0.17208812  | 0.000186375 | -0.182025089 |
| 0.190319566  | 3.48E-05    | 0.15200602   | 0.000983367 | 0.188035817  |
| -0.334075491 | 1.22E-13    | -0.308394216 | 9.53E-12    | -0.311276512 |
| 0.296651646  | 6.10E-11    | 0.247794187  | 5.78E-08    | 0.252582163  |
| -0.157868252 | 0.000617264 | -0.090906397 | 0.049610655 | -0.083367107 |
| -0.147051937 | 0.001439343 | -0.081268252 | 0.079358898 | -0.090019602 |
| -0.05988897  | 0.196390747 | -0.015973277 | 0.730633986 | -0.019325389 |
| -0.113416933 | 0.014194246 | -0.084222783 | 0.068999347 | -0.045628892 |
| -0.14695626  | 0.001449808 | -0.098004376 | 0.034233041 | -0.096705365 |

|              |             |              |             |              |
|--------------|-------------|--------------|-------------|--------------|
| -0.017813253 | 0.701018126 | 0.021224539  | 0.647319973 | 0.017927907  |
| -0.059687305 | 0.197904412 | -0.009809095 | 0.832564757 | -0.005356565 |
| 0.009385495  | 0.839695368 | -0.032380628 | 0.485140268 | -0.004961536 |
| -0.137273467 | 0.002952515 | -0.091229441 | 0.048802652 | -0.084095469 |
| -0.276184281 | 1.27E-09    | -0.236836588 | 2.24E-07    | -0.26394038  |
| -0.071409177 | 0.123317392 | -0.119536302 | 0.009722233 | -0.140005726 |
| -0.131595053 | 0.004391628 | -0.102449317 | 0.02683957  | -0.121794623 |
| 0.137528795  | 0.002899267 | 0.090627552  | 0.050317069 | 0.045690158  |
| 0.08897091   | 0.054689279 | 0.150354834  | 0.001117927 | 0.151493116  |
| -0.292285108 | 1.19E-10    | -0.262708294 | 8.24E-09    | -0.26178664  |
| 0.076593826  | 0.098290177 | 0.059240919  | 0.201285136 | 0.062417074  |
| -0.161387171 | 0.000463103 | -0.106653185 | 0.021155573 | -0.095694017 |
| -0.046058743 | 0.320613694 | -0.008557004 | 0.853679093 | -0.012896579 |
| -0.221284779 | 1.37E-06    | -0.159930997 | 0.000521949 | -0.145488536 |
| 0.200850142  | 1.22E-05    | 0.27342868   | 1.88E-09    | 0.292169488  |
| -0.029944468 | 0.518592866 | -0.026192006 | 0.572349944 | -0.052910211 |
| 0.034014702  | 0.463371697 | 0.088190272  | 0.056856495 | 0.098584587  |
| -0.058935024 | 0.203625969 | 0.009499981  | 0.837766866 | 0.022293299  |
| -0.335958019 | 8.75E-14    | -0.292644214 | 1.13E-10    | -0.28485044  |
| -0.056445512 | 0.223414168 | 0.027434055  | 0.554267563 | 0.060041096  |
| -0.254870471 | 2.33E-08    | -0.191509908 | 3.10E-05    | -0.17494735  |
| -0.186561448 | 4.98E-05    | -0.125895243 | 0.006446242 | -0.134035788 |
| -0.035142696 | 0.448667204 | 0.050982281  | 0.271550508 | 0.040624228  |
| -0.1468299   | 0.001463737 | -0.090804575 | 0.049867639 | -0.085819935 |
| -0.161772539 | 0.000448596 | -0.079488479 | 0.086185305 | -0.08018163  |
| -0.105592764 | 0.022480667 | -0.133708531 | 0.003794841 | -0.130214425 |
| -0.214556633 | 2.89E-06    | -0.166974613 | 0.000289907 | -0.177277352 |
| 0.002498445  | 0.957056866 | 0.079689333  | 0.08539201  | 0.082828206  |
| -0.114954444 | 0.012926987 | -0.049740966 | 0.283408098 | -0.065706506 |
| -0.170961094 | 0.000205659 | -0.11254125  | 0.014963805 | -0.121320329 |
| -0.190240074 | 3.50E-05    | -0.138347985 | 0.002734272 | -0.128411277 |
| 0.019981965  | 0.666686754 | 0.062543477  | 0.177248641 | 0.079495014  |
| -0.059885844 | 0.19641414  | -0.025623101 | 0.580724583 | -0.011698862 |
| 0.265159329  | 5.91E-09    | 0.226452365  | 7.62E-07    | 0.202607812  |
| 0.06577697   | 0.155846494 | 0.094869405  | 0.040435249 | 0.090511917  |
| -0.128277095 | 0.00550085  | -0.094719666 | 0.040753844 | -0.07407193  |
| 0.209098734  | 5.19E-06    | 0.182844823  | 7.06E-05    | 0.166617065  |
| -0.066377857 | 0.152094247 | 0.006263418  | 0.892618056 | -0.0056181   |
| 0.119195306  | 0.009933768 | 0.168763335  | 0.000248751 | 0.158915035  |
| -0.094166636 | 0.04194895  | -0.029575231 | 0.523764833 | -0.011360747 |
| -0.024384351 | 0.599154868 | 0.052460086  | 0.257881281 | 0.039561106  |
| 0.007259019  | 0.875678026 | 0.080393507  | 0.08265717  | 0.101639743  |
| -0.118364911 | 0.010466086 | -0.037804153 | 0.415039899 | -0.045796929 |
| -0.039452487 | 0.394979485 | -0.009005249 | 0.846107387 | 0.041449751  |
| -0.006047693 | 0.896295304 | 0.015591795  | 0.736826386 | 0.004728224  |

|              |             |              |             |              |
|--------------|-------------|--------------|-------------|--------------|
| -0.271452609 | 2.48E-09    | -0.221925662 | 1.28E-06    | -0.259270262 |
| -0.130185153 | 0.004835601 | -0.06299144  | 0.174159811 | -0.066791646 |
| -0.116112516 | 0.01203943  | -0.0583935   | 0.207818252 | -0.046243913 |
| -0.054450949 | 0.240229686 | 0.007435161  | 0.872686673 | 0.006143662  |
| 0.144331169  | 0.001765685 | 0.18063308   | 8.66E-05    | 0.182772062  |
| -0.208645942 | 5.44E-06    | -0.147389413 | 0.001402981 | -0.171648343 |
| -0.119686207 | 0.009630513 | -0.079494604 | 0.086161026 | -0.085377124 |
| 0.024000074  | 0.604925426 | 0.012465879  | 0.788177166 | -0.019883325 |
| -0.110150555 | 0.017254263 | -0.098791929 | 0.032808915 | -0.083279828 |
| 0.125984896  | 0.006408172 | 0.174144879  | 0.000155476 | 0.175823252  |
| 0.058229275  | 0.209101863 | 0.126432515  | 0.0062211   | 0.182675021  |
| 0.079988773  | 0.084220275 | 0.143738696  | 0.00184519  | 0.156409952  |
| -0.126628856 | 0.006140602 | -0.044831768 | 0.333687821 | -0.029547559 |
| -0.051371968 | 0.267898917 | 0.041571783  | 0.370063854 | 0.0713983    |
| -0.034673912 | 0.454745962 | 0.038138501  | 0.410923023 | 0.03629717   |
| -0.135756681 | 0.003287593 | -0.073639996 | 0.112000049 | -0.076792349 |
| -0.073812831 | 0.111158487 | -0.02344171  | 0.613354132 | -0.039856594 |
| -0.087662299 | 0.058362266 | -0.076607779 | 0.098228739 | -0.075738904 |
| -0.008598034 | 0.85298545  | 0.046046063  | 0.320747079 | 0.02479483   |
| 0.033508177  | 0.470060816 | 0.076686314  | 0.097883506 | 0.030570711  |
| -0.006908095 | 0.881642882 | 0.027476941  | 0.553648218 | 0.017612725  |
| -0.167883884 | 0.000268251 | -0.136803613 | 0.003052832 | -0.13110208  |
| -0.047423665 | 0.306467201 | -0.092956972 | 0.04466639  | -0.092611472 |
| -0.107653712 | 0.019968045 | -0.046446052 | 0.316556942 | -0.069037247 |
| -0.155942476 | 0.000720587 | -0.089339984 | 0.053688813 | -0.107119336 |
| 0.218993782  | 1.77E-06    | 0.200453413  | 1.27E-05    | 0.214436021  |
| 0.068712963  | 0.138161298 | 0.065574582  | 0.157125943 | 0.052233643  |
| -0.067417904 | 0.145762253 | -0.082308196 | 0.075577393 | -0.11183917  |
| 0.042637714  | 0.357908562 | 0.083729213  | 0.070648558 | 0.106506568  |
| 0.167266108  | 0.000282793 | 0.139827136  | 0.00245785  | 0.146799981  |
| -0.348609535 | 8.63E-15    | -0.346220745 | 1.35E-14    | -0.352594821 |
| 0.091225716  | 0.048811906 | 0.072467757  | 0.117840746 | 0.058562539  |
| -0.136871065 | 0.003038243 | -0.058064078 | 0.210398843 | -0.048846943 |
| -0.217190859 | 2.16E-06    | -0.195387714 | 2.12E-05    | -0.185447773 |
| 0.050614829  | 0.275024726 | 0.094276204  | 0.041709852 | 0.101295058  |
| 0.079237324  | 0.087185605 | 0.163021589  | 0.000404431 | 0.143155912  |
| 0.043680115  | 0.346266806 | 0.07588024   | 0.101473199 | 0.045494377  |
| -0.177740189 | 0.000112696 | -0.147957393 | 0.001343684 | -0.170653767 |
| -0.001299377 | 0.977658528 | 0.053605008  | 0.247623525 | 0.039756664  |
| 0.276208778  | 1.27E-09    | 0.257541526  | 1.64E-08    | 0.280089647  |
| 0.198290891  | 1.58E-05    | 0.162743779  | 0.000413889 | 0.183306316  |
| -0.210152003 | 4.64E-06    | -0.187983973 | 4.35E-05    | -0.23235465  |
| 0.040654454  | 0.380726684 | 0.063514366  | 0.170604982 | 0.064900105  |
| -0.022493199 | 0.627789273 | 0.055588615  | 0.230532615 | 0.072195614  |
| -0.162928101 | 0.000407591 | -0.126959434 | 0.006007177 | -0.124040112 |

|              |             |              |             |              |
|--------------|-------------|--------------|-------------|--------------|
| 0.173735064  | 0.000161221 | 0.109497749  | 0.017930694 | 0.144874885  |
| 0.065254849  | 0.159163371 | 0.056307225  | 0.224552214 | 0.073623218  |
| -0.21774799  | 2.03E-06    | -0.166189734 | 0.000309903 | -0.193135941 |
| 0.076499116  | 0.098708007 | 0.027878299  | 0.547868363 | -0.006088298 |
| -0.203937065 | 8.91E-06    | -0.143853094 | 0.001829588 | -0.142571377 |
| 0.019170786  | 0.679451377 | 0.082202591  | 0.075954584 | 0.078733557  |
| -0.221209513 | 1.38E-06    | -0.175162407 | 0.000142033 | -0.148496384 |
| -0.007519396 | 0.871256773 | 0.043005513  | 0.353773174 | 0.022078362  |
| -0.199633207 | 1.38E-05    | -0.157847224 | 0.000618314 | -0.184335083 |
| -0.246612943 | 6.71E-08    | -0.193119111 | 2.65E-05    | -0.238694479 |
| 0.10234377   | 0.026997752 | 0.148754545  | 0.001264344 | 0.151248725  |
| -0.313408503 | 4.21E-12    | -0.275705781 | 1.36E-09    | -0.261098088 |
| -0.258702036 | 1.41E-08    | -0.233109353 | 3.50E-07    | -0.256225377 |
| -0.169756823 | 0.000228319 | -0.123958978 | 0.00731948  | -0.11908068  |
| 0.037321925  | 0.421020232 | 0.081646365  | 0.077966614 | 0.10516303   |
| -0.172936244 | 0.000172995 | -0.132404602 | 0.004153679 | -0.145635712 |
| -0.037289467 | 0.421424564 | -0.013213617 | 0.775800553 | -0.010621597 |
| -0.111552183 | 0.015876852 | -0.037975094 | 0.412932046 | -0.036265028 |
| -0.092138426 | 0.04658797  | -0.058379462 | 0.207927756 | -0.048927815 |
| 0.043147575  | 0.352183976 | 0.097784044  | 0.03464077  | 0.099046398  |
| -0.102279646 | 0.027094245 | -0.038354099 | 0.408281207 | -0.056195576 |
| -0.008292007 | 0.858161775 | 0.038850694  | 0.402234691 | 0.060519794  |
| -0.090269593 | 0.05123621  | -0.028657928 | 0.536726795 | -0.023143821 |
| -0.156539215 | 0.000686973 | -0.070475565 | 0.128310097 | -0.077379271 |
| -0.05258541  | 0.256744358 | 0.024753245  | 0.593638833 | 0.022889446  |
| -0.056718922 | 0.221176215 | -0.009129341 | 0.844013704 | -0.043932117 |
| -0.041821613 | 0.367192234 | 0.0325722    | 0.482559973 | 0.053082842  |
| -0.063657478 | 0.169641621 | 0.005562298  | 0.904577358 | -0.000793049 |
| -0.223517127 | 1.07E-06    | -0.174454462 | 0.000151265 | -0.168293353 |
| -0.191053247 | 3.24E-05    | -0.132337392 | 0.00417298  | -0.140837751 |
| -0.123655633 | 0.00746548  | -0.108180908 | 0.019365971 | -0.115318307 |
| -0.094687196 | 0.040823208 | -0.024915635 | 0.591217999 | -0.011017359 |
| -0.153175924 | 0.000897256 | -0.103897131 | 0.024748983 | -0.100187832 |
| -0.172232368 | 0.000184033 | -0.137811443 | 0.002841341 | -0.160358289 |
| -0.107162697 | 0.020543382 | -0.042063516 | 0.364424962 | -0.051351112 |
| -0.203039434 | 9.77E-06    | -0.156390892 | 0.000695189 | -0.1347395   |
| 0.057862691  | 0.21198779  | 0.044312351  | 0.339324361 | 0.022411543  |
| -0.097648766 | 0.034893147 | -0.072562506 | 0.117359985 | -0.058380015 |
| -0.260922118 | 1.05E-08    | -0.211409738 | 4.05E-06    | -0.205170675 |
| 0.046862836  | 0.312229125 | 0.114976977  | 0.012909181 | 0.108921077  |
| -0.23612306  | 2.44E-07    | -0.209154432 | 5.16E-06    | -0.214690177 |
| -0.171020544 | 0.000204597 | -0.115756439 | 0.012306418 | -0.11117853  |
| -0.240270302 | 1.48E-07    | -0.212926374 | 3.44E-06    | -0.228733736 |
| -0.142976779 | 0.001952251 | -0.121277589 | 0.008703212 | -0.092210345 |
| -0.004363783 | 0.925069548 | 0.056502702  | 0.222944716 | 0.043133005  |

|              |             |              |             |              |
|--------------|-------------|--------------|-------------|--------------|
| -0.19057954  | 3.39E-05    | -0.141741469 | 0.002137968 | -0.171226056 |
| -0.189095683 | 3.91E-05    | -0.12353633  | 0.00752361  | -0.122009336 |
| -0.045582896 | 0.325643968 | 0.028478735  | 0.539277532 | 0.010856226  |
| -0.032578881 | 0.482470124 | -0.009214107 | 0.842584161 | -0.001772977 |
| -0.058642107 | 0.205885944 | -0.00799782  | 0.863143581 | -0.013337986 |
| -0.242618539 | 1.11E-07    | -0.161188048 | 0.000470768 | -0.183435941 |
| -0.124307583 | 0.007154854 | -0.08915388  | 0.054191374 | -0.096506754 |
| -0.089594972 | 0.053006543 | -0.017802434 | 0.701190993 | -0.002612144 |
| -0.155386221 | 0.000753285 | -0.148842887 | 0.001255822 | -0.135224822 |
| -0.222013719 | 1.26E-06    | -0.175153241 | 0.000142149 | -0.199145497 |
| -0.074256633 | 0.109020329 | 0.006308511  | 0.891849687 | 0.02953913   |
| -0.183535119 | 6.62E-05    | -0.161552598 | 0.000456823 | -0.179524783 |
| -0.250918835 | 3.88E-08    | -0.211012486 | 4.23E-06    | -0.220106966 |
| -0.018769464 | 0.685800837 | 0.023585774  | 0.611174498 | 0.064082436  |
| -0.088506088 | 0.055971293 | -0.044952543 | 0.332385892 | -0.02972729  |
| -0.106601554 | 0.021218484 | -0.091074637 | 0.049188465 | -0.061855051 |
| 0.109554329  | 0.017871164 | 0.153467082  | 0.000876935 | 0.161546625  |
| 0.039243124  | 0.397494559 | 0.05561495   | 0.230311476 | 0.053095931  |
| -0.085069417 | 0.066243911 | -0.044255831 | 0.339941344 | -0.028414653 |
| 0.375962473  | 3.98E-17    | 0.37310977   | 7.15E-17    | 0.366465849  |
| 0.224677277  | 9.34E-07    | 0.217253093  | 2.15E-06    | 0.237914049  |
| 0.191096677  | 3.23E-05    | 0.224335129  | 9.71E-07    | 0.227201197  |
| -0.21939414  | 1.69E-06    | -0.183506935 | 6.64E-05    | -0.214353551 |
| -0.207755888 | 5.98E-06    | -0.168019822 | 0.000265146 | -0.174134931 |
| -0.239908394 | 1.54E-07    | -0.193412162 | 2.57E-05    | -0.191370621 |
| -0.017916421 | 0.699370395 | 0.032995513  | 0.476884814 | 0.027219947  |
| -0.075041489 | 0.105318541 | -0.02705155  | 0.559806473 | -0.022462647 |
| 0.01946636   | 0.674789395 | 0.079505253  | 0.086118826 | 0.099688474  |
| -0.067693295 | 0.14411979  | -0.105939409 | 0.022039802 | -0.115327038 |
| 0.054921365  | 0.236185835 | 0.060443897  | 0.192269214 | 0.061872214  |
| -0.170641652 | 0.000211455 | -0.116873953 | 0.011485612 | -0.141335582 |
| -0.065550404 | 0.15727932  | 0.017021377  | 0.713711613 | -0.010261333 |
| 0.092960121  | 0.04465913  | 0.168503798  | 0.000254363 | 0.139640578  |
| -0.021454124 | 0.643767067 | -0.042608157 | 0.358242203 | -0.048708586 |
| -0.2558499   | 2.05E-08    | -0.186254629 | 5.13E-05    | -0.171682679 |
| -0.054729742 | 0.237827259 | -0.024927724 | 0.591037954 | -0.013865705 |
| -0.087448661 | 0.058980872 | -0.041076301 | 0.375800068 | -0.032369329 |
| 0.196318883  | 1.93E-05    | 0.258551026  | 1.44E-08    | 0.255367849  |
| -0.048304591 | 0.297559292 | -0.061984514 | 0.181159665 | -0.054460427 |
| 0.057108317  | 0.218016606 | 0.054858503  | 0.236723423 | 0.041130183  |
| -0.032909311 | 0.478037519 | 0.015678977  | 0.735409697 | -0.007003943 |
| -0.042168026 | 0.363233439 | 0.019185518  | 0.679218722 | 0.02481978   |
| -0.091784539 | 0.04743996  | -0.064990758 | 0.160861209 | -0.067680628 |
| -0.267791482 | 4.12E-09    | -0.210330295 | 4.55E-06    | -0.220422058 |
| -0.152120894 | 0.000974586 | -0.117619794 | 0.010965111 | -0.130657124 |

|              |             |              |             |              |
|--------------|-------------|--------------|-------------|--------------|
| -0.150354091 | 0.001117991 | -0.145723788 | 0.001591014 | -0.164984717 |
| -0.102554657 | 0.026682496 | -0.02005421  | 0.665554502 | -0.027387384 |
| -0.061894141 | 0.181797947 | 0.006750339  | 0.884326553 | 0.014923475  |
| -0.05514013  | 0.234321698 | -0.044491099 | 0.337377814 | -0.08644342  |
| 0.103680297  | 0.025052839 | 0.177251776  | 0.000117776 | 0.171733846  |
| -0.09357681  | 0.043256019 | -0.065424417 | 0.158080367 | -0.058882133 |
| -0.210668533 | 4.39E-06    | -0.185303479 | 5.61E-05    | -0.185789075 |
| -0.196342326 | 1.93E-05    | -0.143507293 | 0.001877123 | -0.176396646 |
| 0.007670195  | 0.868697994 | 0.086795067  | 0.060907175 | 0.110522204  |
| -0.223788872 | 1.03E-06    | -0.189022986 | 3.94E-05    | -0.216782285 |
| -0.13897441  | 0.002613922 | -0.075770322 | 0.101970688 | -0.062661471 |
| -0.182685983 | 7.16E-05    | -0.135947386 | 0.003243645 | -0.128248991 |
| -0.100264907 | 0.030280791 | -0.049613966 | 0.284640674 | -0.019865196 |
| -0.123065734 | 0.007756871 | -0.05829363  | 0.208598178 | -0.084695917 |
| -0.069669748 | 0.132744091 | -0.113709274 | 0.013945199 | -0.110606401 |
| -0.217568045 | 2.07E-06    | -0.156094037 | 0.000711908 | -0.143113703 |
| -0.11991801  | 0.009490198 | -0.031284023 | 0.500052751 | 0.003721926  |
| -0.021423956 | 0.64423347  | 0.033006331  | 0.476740268 | 0.034090297  |
| -0.00682281  | 0.883093543 | -0.007300783 | 0.874968601 | 0.010960292  |
| 0.000219966  | 0.996217423 | 0.057422342  | 0.215492219 | 0.063563909  |
| 0.05092037   | 0.272133761 | 0.125757502  | 0.006505126 | 0.160800456  |
| 0.051052613  | 0.270888956 | 0.116449605  | 0.011791408 | 0.13968888   |
| -0.00925955  | 0.841818002 | 0.018204633  | 0.694774761 | -0.054402803 |
| -0.245356516 | 7.86E-08    | -0.181927127 | 7.69E-05    | -0.175800381 |
| 0.173429991  | 0.000165626 | 0.112190034  | 0.015282606 | 0.118146349  |
| 0.090762967  | 0.049972972 | 0.167833327  | 0.000269414 | 0.199524201  |
| -0.156672229 | 0.000679681 | -0.085223241 | 0.065753112 | -0.074902258 |
| -0.186529092 | 5.00E-05    | -0.169837745 | 0.000226726 | -0.190146311 |
| 0.045635075  | 0.325089891 | 0.018773631  | 0.685734795 | 0.029214308  |
| 0.031121072  | 0.502289192 | 0.08491849   | 0.066728389 | 0.083147581  |
| -0.165559289 | 0.000326888 | -0.223216773 | 1.10E-06    | -0.227853544 |
| -0.16966934  | 0.000230053 | -0.110386795 | 0.017015029 | -0.113680062 |
| -0.006142739 | 0.894674864 | 0.058948852  | 0.203519728 | 0.05166412   |
| -0.377291613 | 3.02E-17    | -0.352839394 | 3.88E-15    | -0.384970151 |
| -0.179617179 | 9.50E-05    | -0.134573188 | 0.003572627 | -0.147606314 |
| -0.069116046 | 0.135858745 | -0.028952171 | 0.532551542 | -0.004831025 |
| -0.333943941 | 1.25E-13    | -0.311741863 | 5.53E-12    | -0.326500833 |
| -0.068404474 | 0.139943658 | -0.003010074 | 0.948274266 | 0.016368797  |
| 0.131023433  | 0.004566989 | 0.103068053  | 0.025928235 | 0.096639375  |
| -0.143607974 | 0.001863168 | -0.075063192 | 0.105217607 | -0.094327617 |
| 0.06030862   | 0.193268045 | 0.012987237  | 0.779541779 | 0.004720047  |
| -0.099333614 | 0.031859008 | -0.035595389 | 0.442841003 | -0.023686644 |
| 0.155232891  | 0.000762537 | 0.106233158  | 0.021672096 | 0.115629451  |
| -0.016004125 | 0.730134    | 0.01579968   | 0.73344976  | -0.010824814 |
| -0.027778904 | 0.549296957 | 0.023958814  | 0.605546485 | 0.043919806  |

|              |             |              |             |              |
|--------------|-------------|--------------|-------------|--------------|
| -0.370251775 | 1.28E-16    | -0.31736547  | 2.18E-12    | -0.302707451 |
| 0.105808406  | 0.022205524 | 0.146671567  | 0.001481363 | 0.168519303  |
| 0.181958079  | 7.66E-05    | 0.142037509  | 0.002092046 | 0.152923969  |
| 0.02864525   | 0.536907071 | 0.083504218  | 0.071410973 | 0.07722428   |
| 0.125740236  | 0.006512541 | 0.081627216  | 0.078036647 | 0.086186935  |
| 0.19876268   | 1.51E-05    | 0.183996802  | 6.34E-05    | 0.185554527  |
| -0.236098561 | 2.45E-07    | -0.196735337 | 1.85E-05    | -0.206989823 |
| 0.009887151  | 0.831252295 | 0.064691793  | 0.162799668 | 0.063860971  |
| -0.198294977 | 1.58E-05    | -0.120006409 | 0.009437168 | -0.121522054 |
| -0.299608568 | 3.85E-11    | -0.234800724 | 2.86E-07    | -0.227535589 |
| 0.143029162  | 0.001944712 | 0.118450451  | 0.010410106 | 0.135752531  |
| 0.113269322  | 0.014321477 | 0.075887097  | 0.101442226 | 0.040107459  |
| 0.094426612  | 0.041383504 | 0.147085771  | 0.001435659 | 0.181126305  |
| -0.189782828 | 3.66E-05    | -0.133613459 | 0.003820023 | -0.132571619 |
| -0.204567575 | 8.35E-06    | -0.172176998 | 0.000184929 | -0.184059412 |
| 0.286266476  | 2.94E-10    | 0.281190958  | 6.19E-10    | 0.295393552  |
| 0.046256536  | 0.318537752 | 0.117842697  | 0.010813662 | 0.109654228  |
| -0.299033644 | 4.21E-11    | -0.289093095 | 1.93E-10    | -0.27532137  |
| 0.108693413  | 0.018795894 | 0.142032197  | 0.002092862 | 0.169581456  |
| -0.006764025 | 0.884093691 | 0.053365134  | 0.24974871  | 0.066209974  |
| 0.170096173  | 0.000221708 | 0.156386004  | 0.000695462 | 0.148918925  |
| -0.052326016 | 0.259101401 | 0.015114806  | 0.744593107 | 0.042811578  |
| -0.167451448 | 0.000278354 | -0.121673917 | 0.008485015 | -0.105460577 |
| -0.12407541  | 0.007264123 | -0.150649536 | 0.001092731 | -0.129218632 |
| -0.110264792 | 0.017138214 | -0.059228196 | 0.201382108 | -0.061243293 |
| 0.253381217  | 2.83E-08    | 0.258099816  | 1.52E-08    | 0.260881738  |
| -0.054806887 | 0.237165484 | 0.007196931  | 0.87673286  | 0.052090173  |
| -0.070836333 | 0.126362554 | -0.001441177 | 0.975221165 | -0.016584493 |
| -0.126681234 | 0.006119286 | -0.163331077 | 0.000394132 | -0.167913222 |
| -0.443108884 | 7.02E-24    | -0.401820242 | 1.51E-19    | -0.441977503 |
| 0.329731952  | 2.63E-13    | 0.315408391  | 3.02E-12    | 0.318317556  |
| 0.155860743  | 0.000725307 | 0.115038963  | 0.012860312 | 0.090792875  |
| -0.087774332 | 0.058040019 | -0.039925813 | 0.389328867 | -0.013108681 |
| -0.180910503 | 8.44E-05    | -0.145457471 | 0.001623138 | -0.142233008 |
| 0.012629881  | 0.78545791  | 0.09419711   | 0.041882333 | 0.084462259  |
| -0.065280862 | 0.158996868 | 0.003895462  | 0.933091134 | 0.008552861  |
| -0.049057789 | 0.290081102 | -0.001627297 | 0.972022365 | 0.015975646  |
| 0.034700251  | 0.454403198 | 0.113257321  | 0.014331864 | 0.160301704  |
| -0.125108708 | 0.006789021 | -0.061860271 | 0.182037593 | -0.076610858 |
| -0.006790988 | 0.883634926 | -0.013756487 | 0.76685015  | -0.004398568 |
| -0.092877423 | 0.044850165 | -0.039890628 | 0.389747213 | -0.019323449 |
| -0.20267934  | 1.01E-05    | -0.177341134 | 0.00011683  | -0.183674714 |
| -0.005837704 | 0.899876921 | 0.049655446  | 0.284237702 | 0.047514314  |
| -0.071977617 | 0.120352402 | -0.016274448 | 0.725757533 | -0.051712481 |
| 0.027474387  | 0.553685087 | 0.084793741  | 0.067131023 | 0.096521703  |



|              |             |              |             |              |
|--------------|-------------|--------------|-------------|--------------|
| -0.08170443  | 0.077754576 | -0.000317676 | 0.994537207 | -0.004370268 |
| -0.060657298 | 0.190701244 | 0.003972589  | 0.931769582 | -0.000832608 |
| -0.174186683 | 0.000154901 | -0.185698819 | 5.40E-05    | -0.191503381 |
| -0.157876632 | 0.000616846 | -0.127139761 | 0.005935498 | -0.145398466 |
| -0.13255711  | 0.00411018  | -0.14743024  | 0.00139864  | -0.179614025 |
| 0.04223041   | 0.362523365 | 0.113559207  | 0.014072557 | 0.12177734   |
| 0.160194462  | 0.000510812 | 0.208304981  | 5.64E-06    | 0.25248256   |
| 0.259394643  | 1.28E-08    | 0.210341956  | 4.55E-06    | 0.23942556   |
| -0.09655504  | 0.036991684 | -0.038123618 | 0.411105759 | -0.017841446 |
| -0.318499279 | 1.81E-12    | -0.271395136 | 2.50E-09    | -0.287201569 |
| 0.341960886  | 2.95E-14    | 0.310193891  | 7.12E-12    | 0.297241763  |
| -0.286127248 | 3.00E-10    | -0.235255423 | 2.71E-07    | -0.230226721 |
| 0.010091843  | 0.827812752 | -0.002530863 | 0.956500224 | -0.01402578  |
| 0.141803889  | 0.002128209 | 0.142849387  | 0.001970697 | 0.125592735  |
| -0.130822001 | 0.004630275 | -0.058711488 | 0.205349006 | -0.05374185  |
| -0.237015824 | 2.19E-07    | -0.197223346 | 1.76E-05    | -0.197921649 |
| -0.124543006 | 0.00704556  | -0.088108888 | 0.057086478 | -0.101972127 |
| -0.059894532 | 0.196349115 | 0.028352159  | 0.541082935 | 0.05132309   |
| -0.158239944 | 0.000598977 | -0.073961636 | 0.110437925 | -0.088627023 |
| -0.075580414 | 0.102834778 | -0.027802223 | 0.548961627 | -0.037934881 |
| 0.016761868  | 0.717888905 | 0.030039605  | 0.517264536 | 0.016223105  |
| -0.093997682 | 0.042319907 | -0.031048443 | 0.503287704 | -0.057360174 |
| 0.156225875  | 0.000704438 | 0.14397635   | 0.001812913 | 0.147991272  |
| -0.304972478 | 1.65E-11    | -0.247737076 | 5.83E-08    | -0.24076404  |
| 0.221366675  | 1.36E-06    | 0.207510638  | 6.14E-06    | 0.201381139  |
| -0.096467853 | 0.037163486 | -0.057963246 | 0.211193333 | -0.050561468 |
| 0.002393805  | 0.9588538   | 0.058733543  | 0.205178536 | 0.070591777  |
| 0.03198698   | 0.490465618 | 0.003093696  | 0.946839378 | 0.010426061  |
| -0.016069799 | 0.729069937 | -0.066680243 | 0.150232116 | -0.065478571 |
| 0.025288237  | 0.585680576 | 0.029428991  | 0.525820512 | 0.038650589  |
| -0.026012238 | 0.574990059 | 0.039209773  | 0.397896101 | 0.049380144  |
| -0.063629028 | 0.169832813 | -0.002144395 | 0.963137591 | 0.026572794  |
| -0.116780446 | 0.011552387 | -0.042388648 | 0.360726116 | -0.03594149  |
| 0.092192698  | 0.04645845  | 0.179767362  | 9.37E-05    | 0.174982002  |
| -0.190887927 | 3.29E-05    | -0.148413518 | 0.001297743 | -0.167376843 |
| -0.031679767 | 0.494643324 | 0.0278429    | 0.548376935 | 0.036942159  |
| -0.00818006  | 0.860056846 | -0.044147414 | 0.341126857 | -0.010438672 |
| 0.121430543  | 0.008618418 | 0.181337372  | 8.12E-05    | 0.185295426  |
| -0.000753638 | 0.987040848 | -0.081010732 | 0.080318621 | -0.104726875 |
| -0.187911442 | 4.38E-05    | -0.103134252 | 0.025832329 | -0.098997225 |
| 0.101294871  | 0.028613802 | 0.154782896  | 0.0007903   | 0.151347497  |
| -0.165641743 | 0.000324618 | -0.102631159 | 0.026568918 | -0.092103648 |
| -0.063611857 | 0.169948278 | -0.020012712 | 0.666204785 | 0.01860795   |
| 0.23037535   | 4.83E-07    | 0.197234101  | 1.76E-05    | 0.202865302  |
| -0.065241979 | 0.159245799 | -0.08689584  | 0.060606828 | -0.085044079 |

|              |             |              |             |              |
|--------------|-------------|--------------|-------------|--------------|
| -0.11481345  | 0.013038892 | -0.183157318 | 6.86E-05    | -0.206214732 |
| -0.165350652 | 0.000332698 | -0.102432776 | 0.026864307 | -0.115358677 |
| -0.095958766 | 0.038180219 | -0.103347421 | 0.025525574 | -0.077869769 |
| -0.038967292 | 0.400822799 | 0.013062613  | 0.778295521 | -0.012475134 |
| -0.163607842 | 0.00038513  | -0.09730529  | 0.035540983 | -0.111674913 |
| 0.092861845  | 0.044886228 | 0.152709356  | 0.000930726 | 0.137504795  |
| -0.179105997 | 9.96E-05    | -0.127502222 | 0.005793742 | -0.118134186 |
| -0.209794508 | 4.82E-06    | -0.155438986 | 0.000750125 | -0.175781818 |
| -0.059778053 | 0.197222218 | -0.030587072 | 0.509654944 | -0.004386251 |
| -0.039717776 | 0.391806362 | 0.034247773  | 0.460311626 | 0.046624471  |
| -0.227798234 | 6.52E-07    | -0.178161801 | 0.000108478 | -0.170450819 |
| 0.002450003  | 0.957888719 | 0.046957574  | 0.311250831 | 0.072232671  |
| 0.041520023  | 0.370660538 | 0.09667248   | 0.036761335 | 0.107087386  |
| 0.055640079  | 0.230100608 | 0.08470666   | 0.067413264 | 0.071759756  |
| -0.078706178 | 0.089331809 | -0.043686262 | 0.346198874 | -0.025860153 |
| -0.366895301 | 2.51E-16    | -0.352562289 | 4.09E-15    | -0.372836646 |
| 0.120877204  | 0.008928704 | 0.145701512  | 0.001593678 | 0.157033938  |
| -0.188671561 | 4.07E-05    | -0.124430642 | 0.007097537 | -0.182123594 |
| 0.042541053  | 0.359000394 | 0.008368749  | 0.856863138 | 0.042788065  |
| -0.156246444 | 0.000703279 | -0.112261636 | 0.015217133 | -0.107318711 |
| -0.018826439 | 0.684898066 | -0.067262469 | 0.146695576 | -0.077280805 |
| -0.133578833 | 0.003829232 | -0.09500059  | 0.040157862 | -0.101233376 |
| -0.00882203  | 0.849200642 | 0.033039494  | 0.476297281 | 0.017246384  |
| 0.046499472  | 0.316000057 | 0.098185285  | 0.033901329 | 0.104140844  |
| -0.042727647 | 0.356894601 | 0.00461684   | 0.920738187 | -0.001988921 |
| 0.01369599   | 0.767846065 | 0.006251723  | 0.892817344 | -0.01471127  |
| -0.000697803 | 0.98800087  | 0.082619498  | 0.074474364 | 0.082501941  |
| -0.118513194 | 0.010369214 | -0.056636197 | 0.221851647 | -0.042686822 |
| -0.05008156  | 0.280120329 | 0.009314335  | 0.840894528 | 0.025802327  |
| -0.23245639  | 3.78E-07    | -0.193964513 | 2.44E-05    | -0.181408898 |
| 0.090619682  | 0.050337129 | 0.156611673  | 0.000682992 | 0.188522347  |
| -0.075492047 | 0.103238826 | -0.032151287 | 0.488239038 | -0.065279667 |
| -0.154787262 | 0.000790026 | -0.08248137  | 0.074962163 | -0.099458961 |
| 0.00362671   | 0.937697529 | 0.031460398  | 0.49763802  | 0.02407744   |
| -0.115960106 | 0.012153075 | -0.079865597 | 0.084700694 | -0.066332289 |
| 0.064058762  | 0.166962064 | 0.121160373  | 0.008768696 | 0.129141588  |
| -0.029605299 | 0.523342682 | 0.048761366  | 0.293008972 | 0.065718064  |
| -0.023889368 | 0.606592458 | 0.036220004  | 0.434873369 | 0.04271453   |
| -0.082628017 | 0.074444367 | -0.025089395 | 0.588632685 | -0.051289426 |
| -0.199673893 | 1.38E-05    | -0.16212382  | 0.000435742 | -0.175363228 |
| -0.04110452  | 0.375471915 | 0.018437611  | 0.691068006 | 0.010871517  |
| -0.058361146 | 0.208070683 | -0.020799971 | 0.653911398 | -0.046085782 |
| -0.084811722 | 0.067072868 | -0.049633519 | 0.284450669 | -0.0475475   |
| -0.189755217 | 3.67E-05    | -0.115947003 | 0.012162889 | -0.083722417 |
| -0.044738478 | 0.334695712 | 0.007462439  | 0.872223581 | 0.000895668  |

|              |             |              |             |              |
|--------------|-------------|--------------|-------------|--------------|
| 0.006018869  | 0.896786815 | -0.018891961 | 0.683860393 | -0.022451757 |
| 0.138460931  | 0.002712206 | 0.170840021  | 0.000207838 | 0.158768202  |
| -0.040411893 | 0.383577299 | 0.016365843  | 0.724279876 | 0.022252643  |
| -0.317088022 | 2.29E-12    | -0.281830121 | 5.64E-10    | -0.284134752 |
| -0.042388425 | 0.36072864  | 0.009607206  | 0.835961555 | 0.027618691  |
| 0.066771405  | 0.149674144 | 0.115364015  | 0.012606703 | 0.11648411   |
| -0.080435927 | 0.082494706 | -0.011140125 | 0.810250867 | -0.018511196 |
| -0.180663209 | 8.64E-05    | -0.133935794 | 0.003735254 | -0.138631264 |
| -0.172171327 | 0.000185021 | -0.097616949 | 0.034952731 | -0.09057843  |
| -0.270305303 | 2.91E-09    | -0.229434745 | 5.39E-07    | -0.241245233 |
| -0.236720604 | 2.27E-07    | -0.219337999 | 1.70E-06    | -0.207612297 |
| -0.172641156 | 0.000177545 | -0.101129167 | 0.028876553 | -0.102425265 |
| 0.160146028  | 0.000512843 | 0.201050217  | 1.20E-05    | 0.233286178  |
| -0.193378586 | 2.58E-05    | -0.133348412 | 0.003891028 | -0.123784226 |
| 0.008873551  | 0.848330578 | 0.009831287  | 0.832191566 | 0.033351008  |
| -0.096500382 | 0.037099308 | -0.032581785 | 0.482431067 | -0.024905673 |
| -0.174310758 | 0.000153206 | -0.111340552 | 0.016078442 | -0.113938052 |
| -0.188140703 | 4.29E-05    | -0.123182339 | 0.00769848  | -0.116622526 |
| 0.106735347  | 0.021055795 | 0.113993555  | 0.013706713 | 0.123620788  |
| -0.031973152 | 0.490653248 | 0.010377359  | 0.823020583 | -0.004472889 |
| -0.179950104 | 9.22E-05    | -0.12488425  | 0.006889791 | -0.124144349 |
| -0.194652827 | 2.28E-05    | -0.147872279 | 0.001352421 | -0.127426892 |
| -0.063578378 | 0.170173584 | -0.034215251 | 0.460737938 | -0.020936211 |
| -0.178067095 | 0.000109412 | -0.127427455 | 0.005822731 | -0.137765488 |
| 0.180020202  | 9.16E-05    | 0.192817105  | 2.73E-05    | 0.207694299  |
| -0.084439297 | 0.068285906 | -0.017060872 | 0.713076618 | -0.006336919 |
| -0.191721527 | 3.04E-05    | -0.134997389 | 0.003467982 | -0.121573436 |
| -0.271420826 | 2.49E-09    | -0.219377945 | 1.70E-06    | -0.250452078 |
| -0.149245128 | 0.001217684 | -0.071100911 | 0.124948915 | -0.039599754 |
| -0.169733023 | 0.00022879  | -0.116216345 | 0.011962549 | -0.113746935 |
| -0.050039808 | 0.280521971 | 0.027545993  | 0.552651702 | -0.003737297 |
| 0.021183522  | 0.647955573 | 0.066955859  | 0.148549985 | 0.043196433  |
| 0.032787023  | 0.479675382 | 0.082480536  | 0.074965113 | 0.064317851  |
| 0.081769759  | 0.077516569 | 0.141828163  | 0.002124426 | 0.163867444  |
| -0.019767959 | 0.67004519  | 0.05212002   | 0.260983846 | 0.042905425  |
| 0.330637287  | 2.25E-13    | 0.270834986  | 2.70E-09    | 0.293947358  |
| 0.065348721  | 0.158563141 | 0.088078505  | 0.057172535 | 0.108517199  |
| -0.104169459 | 0.024371871 | -0.059423125 | 0.199900152 | -0.068152306 |
| 0.248446733  | 5.32E-08    | 0.210927905  | 4.27E-06    | 0.230581014  |
| 0.088372604  | 0.05634403  | 0.045797032  | 0.323373995 | 0.029844937  |
| -0.080087469 | 0.083836926 | -0.029069452 | 0.530891917 | -0.038516375 |
| -0.032403343 | 0.484833925 | 0.014192945  | 0.759676554 | 0.026659839  |
| -0.06393195  | 0.167805397 | -0.00661866  | 0.88656764  | 0.030119621  |
| -0.075711152 | 0.102239296 | -0.020069611 | 0.665313226 | 0.00305423   |
| -0.4199277   | 2.25E-21    | -0.402230091 | 1.38E-19    | -0.416563856 |

|              |             |              |             |              |
|--------------|-------------|--------------|-------------|--------------|
| -0.076193849 | 0.100064376 | -0.04193074  | 0.365942258 | -0.051144295 |
| -0.042625375 | 0.358047822 | 0.041568905  | 0.370097021 | 0.057184205  |
| -0.017123986 | 0.712062285 | 0.035010847  | 0.450372238 | 0.086312381  |
| -0.145093501 | 0.001668005 | -0.099605084 | 0.031391862 | -0.105178294 |
| -0.027255849 | 0.55684477  | 0.042398212  | 0.36061766  | 0.049056173  |
| -0.162812854 | 0.000411519 | -0.12970208  | 0.004996786 | -0.134560484 |
| -0.012668772 | 0.784813451 | 0.026313955  | 0.570562243 | 0.028701109  |
| -0.108595585 | 0.018903567 | -0.066892244 | 0.148936958 | -0.049237872 |
| -0.455857717 | 2.42E-25    | -0.407319634 | 4.32E-20    | -0.360357756 |
| -0.315584605 | 2.94E-12    | -0.252320241 | 3.24E-08    | -0.241473045 |
| -0.014574796 | 0.753417295 | 0.058811603  | 0.20457601  | 0.065822281  |
| -0.199823853 | 1.36E-05    | -0.143944357 | 0.001817228 | -0.144543146 |
| -0.088857993 | 0.054998444 | -0.018257693 | 0.693929915 | 0.022154828  |
| -0.19203474  | 2.94E-05    | -0.12210453  | 0.008253482 | -0.097322069 |
| 0.022707873  | 0.624509492 | 0.081429981  | 0.078760936 | 0.09744543   |
| -0.070614188 | 0.127559033 | -0.033868952 | 0.465291021 | -0.038405681 |
| -0.010263277 | 0.824934583 | 0.001478608  | 0.974577818 | 0.019397715  |
| -0.223888828 | 1.02E-06    | -0.166640215 | 0.000298274 | -0.163160986 |
| 0.042450017  | 0.36003059  | 0.080831963  | 0.080990362 | 0.098638919  |
| -0.13457472  | 0.003572244 | -0.060469709 | 0.192079055 | -0.086533533 |
| -0.204006828 | 8.85E-06    | -0.15278063  | 0.00092554  | -0.155045102 |
| -0.190863734 | 3.30E-05    | -0.129330447 | 0.005124066 | -0.144994869 |
| -0.058535513 | 0.20671285  | -0.019043968 | 0.68145539  | 0.003592094  |
| -0.082766316 | 0.073958719 | -0.038433176 | 0.407314768 | -0.068841665 |
| -0.245760441 | 7.47E-08    | -0.203096636 | 9.72E-06    | -0.193927088 |
| -0.181422116 | 8.05E-05    | -0.142807669 | 0.001976772 | -0.137628072 |
| -0.070109971 | 0.130307339 | -0.011593987 | 0.802676194 | 0.011876046  |
| -0.133343222 | 0.00389243  | -0.073697472 | 0.111719632 | -0.02925922  |
| -0.177398495 | 0.000116227 | -0.13288363  | 0.004018431 | -0.095308073 |
| 0.106713386  | 0.021082424 | 0.123969241  | 0.007314586 | 0.14015072   |
| 0.136445966  | 0.003131259 | 0.095634333  | 0.038840388 | 0.128074679  |
| -0.313627925 | 4.06E-12    | -0.269370444 | 3.31E-09    | -0.287597852 |
| -0.112313127 | 0.015170201 | -0.090534034 | 0.050555858 | -0.086194219 |
| -0.05704862  | 0.218498888 | -0.015612635 | 0.736487665 | -0.008011816 |
| -0.137729055 | 0.002858116 | -0.066400887 | 0.151951814 | -0.037344109 |
| -0.39314371  | 1.04E-18    | -0.325041899 | 5.94E-13    | -0.314990598 |
| -0.124655943 | 0.006993662 | -0.084162396 | 0.069199417 | -0.10397949  |
| -0.205871187 | 7.29E-06    | -0.182963185 | 6.98E-05    | -0.213369415 |
| -0.05644869  | 0.22338806  | -0.016849098 | 0.716483828 | -0.008531437 |
| -0.069651364 | 0.132846616 | 0.008104713  | 0.861332799 | 0.019881272  |
| -0.110305818 | 0.017096703 | -0.043593667 | 0.347223035 | -0.011091981 |
| -0.191223825 | 3.19E-05    | -0.137609509 | 0.002882617 | -0.115062947 |
| -0.054685376 | 0.238208441 | 0.016878475  | 0.716010845 | 0.041224219  |
| -0.092064284 | 0.046765396 | -0.028300816 | 0.541816109 | -0.015796385 |
| -0.07233613  | 0.118511193 | -0.021257729 | 0.646805839 | 0.018961782  |

|              |             |              |             |              |
|--------------|-------------|--------------|-------------|--------------|
| -0.262580839 | 8.38E-09    | -0.223427231 | 1.08E-06    | -0.204481378 |
| -0.144597616 | 0.001730963 | -0.111523458 | 0.015904084 | -0.113500171 |
| -0.124573322 | 0.007031595 | -0.050415934 | 0.276917827 | -0.042973173 |
| -0.051155148 | 0.269926472 | -0.001197152 | 0.979415777 | 0.005911158  |
| -0.416038604 | 5.67E-21    | -0.358610986 | 1.28E-15    | -0.377055093 |
| -0.205105443 | 7.89E-06    | -0.136720631 | 0.003070868 | -0.129211891 |
| -0.152318299 | 0.000959665 | -0.0861919   | 0.062730674 | -0.047877507 |
| 0.019572679  | 0.673115494 | -0.023253606 | 0.616205229 | -0.01021377  |
| -0.102191752 | 0.027226989 | -0.03596067  | 0.438171396 | -0.0404422   |
| -0.037232275 | 0.422137555 | 0.01581205   | 0.733248986 | 0.03249889   |
| -0.097052755 | 0.036023793 | -0.022286153 | 0.630959472 | 0.001303465  |
| -0.264134876 | 6.79E-09    | -0.200958929 | 1.21E-05    | -0.212373377 |
| -0.134777382 | 0.003521902 | -0.075995685 | 0.100952765 | -0.064343807 |
| -0.105255739 | 0.022916604 | -0.041988738 | 0.365279004 | -0.012834422 |
| -0.205041009 | 7.95E-06    | -0.140231519 | 0.00238685  | -0.130684948 |
| -0.07678054  | 0.097470575 | -0.007506806 | 0.871470462 | -0.000145046 |
| 0.085963088  | 0.063434088 | 0.150376265  | 0.001116077 | 0.174694452  |
| -0.024399664 | 0.598925443 | 0.0566847    | 0.221455448 | 0.069894559  |
| -0.014670743 | 0.751847052 | 0.05287937   | 0.254091199 | 0.064109637  |
| -0.149796875 | 0.001167103 | -0.110714    | 0.016688473 | -0.093370509 |
| -0.301406353 | 2.91E-11    | -0.228010131 | 6.36E-07    | -0.243344113 |
| 0.038704081  | 0.404014244 | 0.056630294  | 0.2218999   | 0.056357288  |
| -0.060665687 | 0.190639795 | 0.026084216  | 0.573932274 | 0.059654066  |
| -0.097225822 | 0.035692317 | -0.06180076  | 0.182459216 | -0.055059316 |
| 0.024290423  | 0.600563059 | 0.084522196  | 0.068014349 | 0.119494578  |
| 0.102902632  | 0.026169233 | 0.152935391  | 0.00091437  | 0.174452641  |
| -0.127408313 | 0.005830174 | -0.181167049 | 8.24E-05    | -0.158727033 |
| 0.085964273  | 0.063430429 | 0.063291458  | 0.172113622 | 0.087969454  |
| -0.144771005 | 0.001708706 | -0.101461162 | 0.028352185 | -0.08108112  |
| -0.175770465 | 0.000134528 | -0.151697912 | 0.001007282 | -0.137026223 |
| 0.13654301   | 0.003109799 | 0.149824785  | 0.001164596 | 0.163106307  |
| -0.003347662 | 0.942482608 | 0.080901127  | 0.080729934 | 0.110242926  |
| -0.114457955 | 0.013324845 | -0.052145752 | 0.260748192 | -0.021408562 |
| -0.200217363 | 1.30E-05    | -0.145958331 | 0.001563206 | -0.141255037 |
| 0.007120716  | 0.878028012 | -0.030258587 | 0.514213752 | -0.037265268 |
| -0.066017475 | 0.154336338 | -0.034279394 | 0.459897341 | -0.023846219 |
| -0.097360069 | 0.035436982 | -0.027658926 | 0.551023804 | -0.013269054 |
| -0.271911679 | 2.33E-09    | -0.207587736 | 6.09E-06    | -0.217649191 |
| 0.132967424  | 0.003995187 | 0.183903267  | 6.40E-05    | 0.182517577  |
| 0.09035925   | 0.051004689 | 0.073768565  | 0.111373549 | 0.077130801  |
| -0.005078658 | 0.91283978  | 0.058435335  | 0.207492173 | 0.065771012  |
| -0.152127925 | 0.000974051 | -0.102663415 | 0.026521154 | -0.115471871 |
| -0.121733246 | 0.008452775 | -0.078355349 | 0.090772526 | -0.057614724 |
| -0.472484361 | 2.41E-27    | -0.437041258 | 3.32E-23    | -0.389786658 |
| -0.184583008 | 6.00E-05    | -0.138920309 | 0.002624122 | -0.148508602 |

|              |             |              |             |              |
|--------------|-------------|--------------|-------------|--------------|
| -0.125597099 | 0.006574305 | -0.084038277 | 0.069612126 | -0.044955596 |
| -0.01432936  | 0.757438621 | 0.036930244  | 0.425914542 | 0.026273954  |
| -0.02111352  | 0.649040904 | 0.04404125   | 0.342290292 | 0.072721987  |
| -0.293734161 | 9.54E-11    | -0.242110761 | 1.18E-07    | -0.240806365 |
| -0.026665333 | 0.565426136 | 0.031764182  | 0.493493502 | 0.040034728  |
| -0.447603762 | 2.18E-24    | -0.430790729 | 1.59E-22    | -0.430690566 |
| -0.29825242  | 4.76E-11    | -0.247448161 | 6.04E-08    | -0.284850186 |
| -0.112863656 | 0.014676312 | -0.066730296 | 0.149925564 | -0.046585009 |
| -0.205229279 | 7.79E-06    | -0.178547218 | 0.000104752 | -0.181421569 |
| -0.057747606 | 0.212899684 | -0.011348722 | 0.80676727  | -0.001814239 |
| -0.003294357 | 0.943396918 | 0.008565878  | 0.853529068 | 0.014024409  |
| 0.037126765  | 0.423454765 | 0.064875744  | 0.161604881 | 0.066991389  |
| -0.333852624 | 1.27E-13    | -0.317817001 | 2.02E-12    | -0.33850412  |
| -0.11174716  | 0.015693091 | -0.099843032 | 0.030987228 | -0.09197715  |
| -0.158451084 | 0.000588814 | -0.113103361 | 0.01446572  | -0.098385704 |
| -0.029033453 | 0.531401056 | 0.031625765  | 0.495379633 | 0.028086527  |
| 0.182493871  | 7.29E-05    | 0.231025173  | 4.47E-07    | 0.256309586  |
| -0.014476044 | 0.755034496 | 0.035484544  | 0.444263589 | 0.025094747  |
| 0.023686743  | 0.609648909 | 0.057087316  | 0.218186182 | 0.070686216  |
| -0.110046744 | 0.017360316 | -0.054166268 | 0.242700398 | -0.055195478 |
| -0.195542677 | 2.09E-05    | -0.144107282 | 0.001795352 | -0.142227837 |
| 0.000125538  | 0.997841226 | -0.038714752 | 0.403884572 | -0.032820771 |
| -0.092610516 | 0.045471423 | -0.031415196 | 0.498256296 | -0.034663874 |
| 0.020077666  | 0.665187054 | -0.016903956 | 0.715600671 | -0.046460762 |
| -0.447053441 | 2.51E-24    | -0.395886371 | 5.67E-19    | -0.412055523 |
| -0.049110359 | 0.289563908 | -0.02630483  | 0.570695924 | -0.024599707 |
| -0.356678568 | 1.86E-15    | -0.299404286 | 3.98E-11    | -0.30197782  |
| 0.066012794  | 0.154365626 | 0.122442728  | 0.008075607 | 0.150284856  |
| -0.006719874 | 0.884844964 | 0.059915799  | 0.196190007 | 0.03071721   |
| 0.000209148  | 0.996403462 | 0.022722897  | 0.624280225 | 0.04563386   |
| -0.249165754 | 4.86E-08    | -0.219737131 | 1.63E-06    | -0.225909486 |
| -0.153792828 | 0.000854706 | -0.107336638 | 0.020337943 | -0.114680391 |
| -0.263267257 | 7.64E-09    | -0.194509601 | 2.31E-05    | -0.211359002 |
| -0.217962857 | 1.99E-06    | -0.142772913 | 0.001981846 | -0.144154348 |
| 0.025441733  | 0.583406404 | 0.073260826  | 0.113863833 | 0.05606495   |
| -0.059870337 | 0.196530244 | -0.040071244 | 0.387602588 | -0.062822582 |
| -0.076412943 | 0.099089401 | -0.050285211 | 0.278166863 | -0.083220314 |
| -0.071572794 | 0.122458194 | -0.070254934 | 0.12951255  | -0.101415122 |
| -0.156840969 | 0.000670534 | -0.182977884 | 6.97E-05    | -0.219421552 |
| 0.133585644  | 0.003827419 | 0.168232144  | 0.000260364 | 0.192988331  |
| -0.013311112 | 0.774190899 | -0.07440631  | 0.108306571 | -0.120773879 |
| 0.119012496  | 0.010048848 | 0.116834871  | 0.01151348  | 0.103308588  |
| 0.034853013  | 0.4524181   | 0.026073416  | 0.574090934 | 0.052658184  |
| -0.026037975 | 0.574611721 | -0.028933052 | 0.53282233  | -0.059605792 |
| -0.098257723 | 0.033769277 | -0.09523143  | 0.039673665 | -0.103234286 |

|              |             |              |             |              |
|--------------|-------------|--------------|-------------|--------------|
| -0.075265058 | 0.104282473 | -0.02893007  | 0.532864584 | -0.052581335 |
| 0.195341972  | 2.13E-05    | 0.210318108  | 4.56E-06    | 0.165993141  |
| 0.088946098  | 0.054757089 | 0.088274199  | 0.05662013  | 0.081401984  |
| -0.096830671 | 0.036452981 | -0.064564218 | 0.163632177 | -0.035285147 |
| -0.030665301 | 0.508572383 | -0.042859708 | 0.355408936 | -0.047425521 |
| 0.087720642  | 0.058194268 | 0.079260006  | 0.087094882 | 0.121452829  |
| 0.014698051  | 0.751400331 | 0.014293858  | 0.758020855 | 0.036317644  |
| -0.112129974 | 0.015337715 | -0.097883293 | 0.034456597 | -0.098947026 |
| 0.104463524  | 0.023970245 | 0.045820084  | 0.323130239 | 0.044146519  |
| 0.053338631  | 0.249984294 | 0.019379593  | 0.676156663 | -0.005420132 |
| 0.058714028  | 0.205329372 | 0.06844658   | 0.13969935  | 0.06469908   |
| -0.022790865 | 0.623243528 | -0.024908612 | 0.591322598 | -0.1028533   |
| -0.113225067 | 0.014359816 | -0.135833425 | 0.003269843 | -0.144805992 |
| -0.090612262 | 0.050356045 | -0.080976478 | 0.080446982 | -0.042861255 |
| 0.053698838  | 0.246795675 | 0.072373034  | 0.118322919 | 0.102256103  |
| -0.034362097 | 0.458814756 | -0.031333045 | 0.499380982 | -0.009294934 |
| 0.032351523  | 0.485532933 | 0.038287365  | 0.409097845 | 0.02555419   |
| 0.070837508  | 0.126356246 | 0.106041691  | 0.021911159 | 0.063812303  |
| 0.144357343  | 0.001762246 | 0.156154291  | 0.000708485 | 0.139446601  |
| 0.113514426  | 0.01411076  | 0.116502276  | 0.011753065 | 0.104411977  |
| 0.102308858  | 0.02705025  | 0.102693325  | 0.026476931 | 0.080957524  |
| 0.005623504  | 0.903532452 | 0.004368381  | 0.924990818 | -0.011083492 |
| -0.197124024 | 1.78E-05    | -0.160275734 | 0.000507422 | -0.156065025 |
| -0.096882369 | 0.036352687 | -0.072126084 | 0.119587231 | -0.073219638 |
| 0.317628427  | 2.09E-12    | 0.352672232  | 4.01E-15    | 0.307558129  |
| 0.059771691  | 0.197269993 | 0.073809077  | 0.111176711 | 0.058578261  |
| 0.119584289  | 0.009692788 | 0.121655905  | 0.008494825 | 0.119065521  |
| 0.116038278  | 0.012094668 | 0.111354528  | 0.016065061 | 0.122409023  |
| 0.090552182  | 0.050509444 | 0.106598995  | 0.021221605 | 0.111305955  |
| 0.084553679  | 0.067911451 | 0.077947102  | 0.092472415 | 0.076547374  |
| 0.014511036  | 0.754461324 | 0.056347897  | 0.224217077 | 0.025387366  |
| 0.081393411  | 0.078895826 | 0.087640702  | 0.058424558 | 0.090809004  |
| 0.059502599  | 0.199298236 | 0.052509953  | 0.257428483 | 0.014689829  |
| 0.191021287  | 3.25E-05    | 0.20576184   | 7.37E-06    | 0.170709414  |
| -0.109255659 | 0.018187369 | -0.143820863 | 0.001833971 | -0.187090779 |
| 0.067782553  | 0.14359049  | 0.093721863  | 0.042931437 | 0.064069385  |
| 0.125505797  | 0.006613977 | 0.155442249  | 0.00074993  | 0.156559736  |
| 0.090137486  | 0.051578943 | 0.095357886  | 0.039410516 | 0.04427039   |
| 0.17650955   | 0.000125908 | 0.177899564  | 0.000111084 | 0.128125955  |
| 0.0697986    | 0.132027253 | 0.097292609  | 0.035565094 | 0.086805219  |
| 0.134881193  | 0.003496366 | 0.10627249   | 0.021623269 | 0.108780105  |
| -0.098566482 | 0.03321133  | -0.09745202  | 0.035262992 | -0.123727233 |
| 0.049521341  | 0.285541906 | 0.063133312  | 0.173189967 | 0.05348908   |
| -0.074674124 | 0.107038655 | -0.017021274 | 0.713713277 | -0.003879372 |
| 0.084664574  | 0.067550018 | 0.135720216  | 0.003296057 | 0.140681432  |

|              |             |              |             |              |
|--------------|-------------|--------------|-------------|--------------|
| 0.024390894  | 0.599056836 | 0.054101505  | 0.243264937 | 0.024117044  |
| 0.22076886   | 1.45E-06    | 0.246395767  | 6.90E-08    | 0.253833567  |
| 0.08855093   | 0.055846537 | 0.074124914  | 0.109651517 | 0.088893285  |
| 0.105092587  | 0.023130255 | 0.109319769  | 0.018119086 | 0.099008006  |
| -0.185004917 | 5.77E-05    | -0.145371608 | 0.001633622 | -0.169905517 |
| 0.176047724  | 0.000131232 | 0.205350271  | 7.69E-06    | 0.221948934  |
| 0.278884589  | 8.64E-10    | 0.295457733  | 7.33E-11    | 0.31015856   |
| 0.057053187  | 0.218461968 | 0.094069276  | 0.042162377 | 0.099254006  |
| -0.083315613 | 0.072055246 | -0.067226388 | 0.146912875 | -0.067394306 |
| -0.248691619 | 5.16E-08    | -0.237000689 | 2.20E-07    | -0.223073148 |
| 0.217912566  | 2.00E-06    | 0.222717992  | 1.17E-06    | 0.22363536   |
| -0.115113165 | 0.012802025 | -0.152875093 | 0.000918707 | -0.152427622 |
| 0.086212785  | 0.06266679  | 0.076904721  | 0.096928491 | 0.06791047   |
| 0.063574577  | 0.170199176 | 0.048899729  | 0.291639865 | -0.002038771 |
| 0.023093009  | 0.618643974 | 0.028020339  | 0.545830032 | 0.022230833  |
| -0.149573966 | 0.0011873   | -0.140273489 | 0.002379589 | -0.185448663 |
| 0.063418034  | 0.171255738 | 0.056162841  | 0.225744845 | 0.052607686  |
| -0.017502842 | 0.705984232 | -0.031164977 | 0.501686103 | -0.030995278 |
| 0.159881362  | 0.000524073 | 0.164794872  | 0.000348648 | 0.182548836  |
| 0.104741283  | 0.023596156 | 0.11086425   | 0.016540367 | 0.110483578  |
| 0.322803364  | 8.71E-13    | 0.245674838  | 7.55E-08    | 0.270802647  |
| -0.031266368 | 0.500294815 | -0.032626148 | 0.481834694 | -0.054965916 |
| 0.234599863  | 2.93E-07    | 0.265850045  | 5.38E-09    | 0.216615391  |
| -0.052672571 | 0.255955687 | -0.023535747 | 0.611930999 | -0.07091619  |
| 0.115582774  | 0.01243852  | 0.147476366  | 0.00139375  | 0.112178137  |
| 0.235903877  | 2.51E-07    | 0.255320673  | 2.20E-08    | 0.226714795  |
| -0.139660482 | 0.002487667 | -0.126728223 | 0.006100219 | -0.108585125 |
| -0.238271911 | 1.88E-07    | -0.1973673   | 1.74E-05    | -0.226049512 |
| 0.214046125  | 3.05E-06    | 0.259190342  | 1.32E-08    | 0.24386842   |
| 0.068667046  | 0.138425485 | 0.074582225  | 0.107472409 | 0.104735578  |
| -0.047477976 | 0.305912966 | -0.011194336 | 0.809345175 | -0.017560497 |
| -0.001515848 | 0.973937761 | 0.019991361  | 0.666539453 | 0.00908569   |
| 0.12142464   | 0.008621677 | 0.140574295  | 0.002328137 | 0.14494128   |
| 0.012241507  | 0.791901562 | 0.029331936  | 0.52718707  | 0.023394534  |
| 0.111506138  | 0.015920523 | 0.151155791  | 0.001050667 | 0.158708793  |
| 0.051264397  | 0.268903539 | 0.045378749  | 0.327817643 | 0.061292008  |
| 0.215531771  | 2.59E-06    | 0.240903492  | 1.37E-07    | 0.245950497  |
| -0.006611174 | 0.886695072 | 0.007842044  | 0.865783719 | 0.020365403  |
| -0.142840491 | 0.001971991 | -0.129203932 | 0.005168057 | -0.116324454 |
| 0.015042895  | 0.745766296 | -0.013122931 | 0.777298643 | -0.025977213 |
| -0.102418166 | 0.026886173 | -0.165314259 | 0.000333721 | -0.159444484 |
| -0.024422076 | 0.59858971  | -0.037953443 | 0.413198667 | -0.030780578 |
| -0.017863372 | 0.70021748  | 0.012730427  | 0.783792081 | -0.028567618 |
| 0.053202188  | 0.251199575 | 0.066329612  | 0.152392957 | 0.095579329  |
| 0.079805574  | 0.084935597 | 0.094083645  | 0.04213082  | 0.086675431  |



|              |             |              |             |              |
|--------------|-------------|--------------|-------------|--------------|
| -0.011900838 | 0.797565449 | 0.010988033  | 0.812793188 | -0.004195647 |
| 0.079289656  | 0.08697641  | 0.111325493  | 0.016092871 | 0.071442949  |
| 0.141370932  | 0.002196744 | 0.136773046  | 0.003059465 | 0.145263973  |
| 0.1917163    | 3.04E-05    | 0.189337823  | 3.82E-05    | 0.146048531  |
| -0.004619229 | 0.920697316 | 0.021257307  | 0.646812375 | 0.006030681  |
| 0.087132647  | 0.059905855 | 0.081044805  | 0.080191101 | 0.104989884  |
| 0.195075759  | 2.18E-05    | 0.185825524  | 5.34E-05    | 0.15412361   |
| 0.105806842  | 0.022207508 | 0.088463623  | 0.056089647 | 0.085795574  |
| 0.016631321  | 0.719993491 | -0.019073356 | 0.680990787 | -0.003536071 |
| 0.08277402   | 0.073931741 | 0.07115133   | 0.124680929 | 0.044105931  |
| -0.076716786 | 0.097749816 | -0.039014506 | 0.40025193  | -0.053553123 |
| 0.165044144  | 0.000341408 | 0.219356907  | 1.70E-06    | 0.228703909  |
| 0.011984741  | 0.7961695   | 0.030532347  | 0.51041296  | 0.014005539  |
| -0.014235492 | 0.758978329 | -0.004032326 | 0.930746131 | -0.037886508 |
| -0.102137485 | 0.027309226 | -0.069723788 | 0.13244309  | -0.060565822 |
| -0.118810406 | 0.010177441 | -0.101626944 | 0.028093418 | -0.131852654 |
| -0.003097865 | 0.946767847 | 0.001938378  | 0.966676887 | 0.01947637   |
| -0.306732533 | 1.25E-11    | -0.34484281  | 1.74E-14    | -0.387336773 |
| 0.041656659  | 0.369086712 | 0.060070812  | 0.195033129 | 0.04972433   |
| 0.00908604   | 0.844744152 | 0.034764699  | 0.453565121 | 0.037642815  |
| 0.161889115  | 0.000444292 | 0.186951777  | 4.80E-05    | 0.196374205  |
| -0.089524495 | 0.05319439  | -0.069830263 | 0.131851556 | -0.081289036 |
| 1.11E-05     | 0.999809848 | -0.002685505 | 0.953845148 | -0.011429744 |
| 0.031382888  | 0.498698443 | 0.03627841   | 0.434132589 | 0.038603063  |
| -0.102746522 | 0.026398434 | -0.115237126 | 0.012705173 | -0.140573161 |
| -0.085332041 | 0.065407775 | -0.097633084 | 0.034922504 | -0.117351524 |
| 0.126994502  | 0.005993177 | 0.120601145  | 0.009087192 | 0.115623265  |
| 0.165861104  | 0.000318651 | 0.179220715  | 9.85E-05    | 0.186968781  |
| 0.094913395  | 0.040342053 | 0.076336655  | 0.099428026 | 0.06981742   |
| 0.119830837  | 0.009542751 | 0.125428063  | 0.006647921 | 0.145284696  |
| -0.043307601 | 0.350399228 | -0.035443266 | 0.444794008 | -0.039615161 |
| -0.040332094 | 0.38451795  | -0.028842727 | 0.534102619 | -0.005797268 |
| -0.040424993 | 0.383423017 | -0.051316741 | 0.268414372 | -0.063243585 |
| -0.037455456 | 0.419359223 | -0.071030449 | 0.125324187 | -0.071153495 |
| -0.102842454 | 0.026257383 | -0.086638432 | 0.061376456 | -0.079949938 |
| 0.134111615  | 0.003689737 | 0.184261369  | 6.19E-05    | 0.151808681  |
| -0.096669638 | 0.036766894 | -0.101945095 | 0.027602499 | -0.093635462 |
| -0.176816999 | 0.000122477 | -0.153888937 | 0.000848248 | -0.188952122 |
| 0.135869084  | 0.003261625 | 0.145722838  | 0.001591127 | 0.103116279  |
| 0.031389949  | 0.498601786 | 0.040165118  | 0.386490773 | 0.04310732   |
| -0.047286732 | 0.307867523 | -0.015994386 | 0.73029183  | -0.022577997 |
| -0.023620085 | 0.610655892 | -0.009404432 | 0.839376303 | -0.020297752 |
| 0.104519402  | 0.023894579 | 0.103536209  | 0.02525653  | 0.114545736  |
| 0.258452045  | 1.45E-08    | 0.258833824  | 1.38E-08    | 0.278935159  |
| 0.133695595  | 0.003798259 | 0.158356651  | 0.000593339 | 0.164434985  |

|              |             |              |             |              |
|--------------|-------------|--------------|-------------|--------------|
| 0.121190219  | 0.008751981 | 0.117897882  | 0.010776455 | 0.11561621   |
| 0.141875803  | 0.002117017 | 0.130317945  | 0.004792122 | 0.132032162  |
| 0.085886362  | 0.063671408 | 0.059516028  | 0.199196657 | 0.041069808  |
| 0.122566277  | 0.008011484 | 0.126410001  | 0.006230391 | 0.158442511  |
| 0.170458432  | 0.000214848 | 0.199949992  | 1.34E-05    | 0.256985439  |
| 0.076888767  | 0.096998001 | 0.090352387  | 0.051022381 | 0.113600611  |
| 0.256912498  | 1.78E-08    | 0.260212786  | 1.15E-08    | 0.299773947  |
| -0.12845491  | 0.005435547 | -0.117232369 | 0.011232817 | -0.169533606 |
| -0.026862184 | 0.56255847  | -0.017069629 | 0.712935849 | -0.029558502 |
| 0.109023995  | 0.018435987 | 0.094543266  | 0.041131884 | 0.076458782  |
| 0.120424587  | 0.009189863 | 0.152382954  | 0.000954823 | 0.128163707  |
| 0.112506168  | 0.014995384 | 0.098371553  | 0.033562657 | 0.093952743  |
| 0.026996319  | 0.560608453 | 0.061695237  | 0.183208616 | 0.025598697  |
| -0.03719958  | 0.422545462 | -0.020105605 | 0.664749475 | -0.029733253 |
| 0.107163939  | 0.020541909 | 0.104766002  | 0.023563109 | 0.109184137  |
| 0.138928748  | 0.002622529 | 0.134344967  | 0.003630103 | 0.133120613  |
| 0.097204438  | 0.035733133 | 0.097768247  | 0.03467016  | 0.105759518  |
| -0.018693636 | 0.687003061 | -0.040050731 | 0.387845792 | -0.05199671  |
| -0.107403276 | 0.020259713 | -0.101860085 | 0.027732945 | -0.117849509 |
| 0.090633988  | 0.050300671 | 0.099996619  | 0.030728429 | 0.106511177  |
| -0.067753614 | 0.143761932 | -0.121128161 | 0.008786768 | -0.132789503 |
| 0.059041531  | 0.202808703 | 0.04237288   | 0.360904949 | 0.051187492  |
| -0.067114672 | 0.147587251 | -0.049998413 | 0.280920554 | -0.044304244 |
| 0.10137505   | 0.028487403 | 0.088042745  | 0.057273961 | 0.083531565  |
| 0.093870937  | 0.0426      | 0.092756081  | 0.045131713 | 0.09094944   |
| 0.081296076  | 0.079255761 | 0.081919596  | 0.076972918 | 0.090624241  |
| -0.07636458  | 0.099303968 | -0.055138446 | 0.234336013 | -0.087261194 |
| -0.033363828 | 0.471976773 | -0.047433757 | 0.306364162 | -0.029728953 |
| 0.283277457  | 4.56E-10    | 0.243780492  | 9.57E-08    | 0.25972031   |
| 0.083698706  | 0.070751541 | 0.080877873  | 0.080817418 | 0.052459474  |
| -0.014752034 | 0.750517485 | -0.03093686  | 0.504823776 | -0.054849872 |
| 0.041354906  | 0.372567941 | 0.029649072  | 0.522728424 | 0.007830505  |
| 0.080542497  | 0.082087698 | 0.077367871  | 0.094927883 | 0.082297471  |
| 0.063616749  | 0.169915375 | 0.084753421  | 0.067261586 | 0.109654767  |
| 0.049999936  | 0.280905881 | 0.050438069  | 0.276706704 | 0.02626622   |
| 0.175635235  | 0.000136164 | 0.207048516  | 6.44E-06    | 0.195020202  |
| 0.105795004  | 0.022222537 | 0.11567005   | 0.012371976 | 0.115927904  |
| 0.043281317  | 0.350691974 | 0.042053351  | 0.364540988 | 0.026559405  |
| 0.006940511  | 0.881091608 | -0.009411871 | 0.839250969 | -0.0100997   |
| -0.046496577 | 0.316030217 | -0.031547004 | 0.496454574 | -0.050914657 |
| 0.084796452  | 0.067122252 | 0.094770202  | 0.040646084 | 0.084236619  |
| 0.033786267  | 0.466381817 | 0.046261172  | 0.318489198 | 0.017482454  |
| 0.003218012  | 0.944706535 | 0.018831408  | 0.684819351 | 0.007174576  |
| 0.094884932  | 0.040402331 | 0.105964261  | 0.022008484 | 0.089529948  |
| -0.009539306 | 0.837104653 | -0.019969088 | 0.666888644 | -0.034772751 |

|              |             |              |             |              |
|--------------|-------------|--------------|-------------|--------------|
| 0.253197032  | 2.90E-08    | 0.272785991  | 2.06E-09    | 0.290510285  |
| 0.018526272  | 0.689659299 | 0.001701515  | 0.970746901 | -0.009438545 |
| 0.083204234  | 0.07243794  | 0.082062359  | 0.076457821 | 0.072136293  |
| 0.013513126  | 0.770858729 | 0.03407084   | 0.462633604 | 0.041813502  |
| 0.123578945  | 0.0075028   | 0.138041126  | 0.002795049 | 0.129701851  |
| -0.190919792 | 3.28E-05    | -0.201633683 | 1.13E-05    | -0.188220773 |
| 0.250287015  | 4.21E-08    | 0.238199447  | 1.90E-07    | 0.245484575  |
| 0.102232598  | 0.02716523  | 0.115786753  | 0.012283487 | 0.113984483  |
| -0.065309371 | 0.158814542 | -0.077621693 | 0.093845549 | -0.089641319 |
| 0.075619921  | 0.102654544 | 0.074831954  | 0.106296948 | 0.080124318  |
| 0.10209132   | 0.027379352 | 0.104822315  | 0.023487976 | 0.104776119  |
| 0.000208268  | 0.996418582 | -0.00611903  | 0.895079036 | 0.025689215  |
| -0.067459741 | 0.145511818 | -0.081579923 | 0.078209822 | -0.066261538 |
| 0.159883235  | 0.000523992 | 0.167180142  | 0.000284874 | 0.177585942  |
| 0.037146314  | 0.423210528 | 0.043809475  | 0.344839047 | 0.058564302  |
| -0.242335319 | 1.14E-07    | -0.285482975 | 3.30E-10    | -0.268727346 |
| -0.270047613 | 3.02E-09    | -0.270101118 | 2.99E-09    | -0.295596463 |
| 0.189881808  | 3.63E-05    | 0.170345745  | 0.000216961 | 0.165804294  |
| 0.348332195  | 9.09E-15    | 0.344009306  | 2.03E-14    | 0.325421819  |
| 0.074603037  | 0.107374057 | 0.068730003  | 0.138063361 | 0.065142909  |
| 0.054525903  | 0.23958212  | 0.055061462  | 0.234990845 | 0.058493714  |
| 0.294805422  | 8.10E-11    | 0.302262628  | 2.54E-11    | 0.307050875  |
| -0.065816753 | 0.155595921 | -0.028829002 | 0.534297285 | -0.049637907 |
| 0.102689361  | 0.026482789 | 0.100567972  | 0.029781858 | 0.098743688  |
| -0.028134385 | 0.544196142 | 0.025152379  | 0.58769685  | 0.028910032  |
| 0.082626145  | 0.074450956 | 0.088305914  | 0.056531024 | 0.090213632  |
| 0.022424508  | 0.628840283 | -0.012521955 | 0.787247093 | 0.021653845  |
| 0.08781299   | 0.057929167 | 0.084739137  | 0.067307887 | 0.076031933  |
| 0.055032814  | 0.23523486  | 0.037309158  | 0.421179241 | 0.027044888  |
| 0.197294193  | 1.75E-05    | 0.220153257  | 1.56E-06    | 0.250998001  |
| -0.020604163 | 0.65696046  | 0.018804596  | 0.685244111 | 0.019146598  |
| -0.0071226   | 0.877995994 | -0.006518756 | 0.888268529 | -0.010573416 |
| 0.055682272  | 0.22974685  | 0.061696756  | 0.183197807 | 0.057711282  |
| 0.143889346  | 0.001824669 | 0.163544203  | 0.000387183 | 0.157821617  |
| 0.103318755  | 0.025566641 | 0.112667036  | 0.014851057 | 0.10157597   |
| 0.359228149  | 1.14E-15    | 0.384608613  | 6.52E-18    | 0.401957159  |
| 0.044921532  | 0.332719866 | 0.056714952  | 0.221208598 | 0.051369136  |
| 0.061667923  | 0.183402962 | 0.084371613  | 0.068508281 | 0.085687113  |
| 0.098057984  | 0.034134458 | 0.115202955  | 0.012731807 | 0.123431457  |
| 0.041362919  | 0.372475236 | 0.08069778   | 0.081497553 | 0.067994383  |
| -0.044918125 | 0.332756574 | -0.051081115 | 0.270621177 | -0.054087347 |
| -0.016041069 | 0.729535358 | -0.010202378 | 0.825956735 | -0.034558044 |
| -0.01254991  | 0.786783548 | 0.00294708   | 0.949355295 | 0.026894827  |
| 0.25507754   | 2.27E-08    | 0.252483504  | 3.18E-08    | 0.290524134  |
| 0.034043108  | 0.462998132 | 0.037752604  | 0.415676781 | 0.028054596  |

|              |             |              |             |              |
|--------------|-------------|--------------|-------------|--------------|
| 0.085182558  | 0.065882628 | 0.109385227  | 0.0180496   | 0.104743006  |
| 0.083416443  | 0.071710225 | 0.083318416  | 0.072045639 | 0.070163031  |
| 0.056228845  | 0.225199086 | 0.086866692  | 0.060693577 | 0.080831847  |
| -0.094604582 | 0.041000142 | -0.090942899 | 0.049518797 | -0.109586945 |
| 0.021517875  | 0.642781927 | -0.003673409 | 0.936896958 | 0.000427437  |
| 0.066892862  | 0.148933196 | 0.104661617  | 0.023702931 | 0.070940415  |
| -0.088686857 | 0.055469783 | -0.067169607 | 0.147255339 | -0.065767337 |
| 0.021428423  | 0.644164398 | 0.017988381  | 0.698221935 | 0.009929682  |
| 0.092434594  | 0.045884842 | 0.094362005  | 0.04152342  | 0.074239195  |
| -0.113515519 | 0.014109826 | -0.091440604 | 0.048280463 | -0.117208172 |
| 0.128349151  | 0.005474303 | 0.140732298  | 0.00230152  | 0.136423019  |
| 0.122211337  | 0.008196933 | 0.123517004  | 0.007533065 | 0.112414498  |
| 0.125844038  | 0.006468076 | 0.134435429  | 0.003607221 | 0.134781586  |
| 0.075408293  | 0.103622941 | 0.086786856  | 0.060931704 | 0.067994193  |
| 0.029147305  | 0.529791677 | 0.030514299  | 0.510663083 | 0.024413072  |
| -0.250103943 | 4.31E-08    | -0.270031815 | 3.02E-09    | -0.308179384 |
| 0.003234881  | 0.944417149 | -0.017006015 | 0.713958654 | -0.021198615 |
| -0.082176248 | 0.076048914 | -0.083786017 | 0.070457127 | -0.068062238 |
| 0.123091325  | 0.007744023 | 0.098318099  | 0.033659549 | 0.082250976  |
| -0.198203077 | 1.60E-05    | -0.20357726  | 9.25E-06    | -0.222519523 |
| -0.004592258 | 0.921158843 | -0.014789551 | 0.749904114 | -0.00679154  |
| 0.2527925    | 3.05E-08    | 0.238942402  | 1.74E-07    | 0.251436099  |
| -0.20812367  | 5.75E-06    | -0.22108092  | 1.40E-06    | -0.237090618 |
| 0.15684222   | 0.000670467 | 0.150149701  | 0.00113578  | 0.13860505   |
| -0.020997641 | 0.650839186 | -0.028367531 | 0.540863519 | -0.06787604  |
| -0.041437459 | 0.371613544 | -0.058034451 | 0.210632059 | -0.086331235 |
| 0.224105799  | 9.96E-07    | 0.243267709  | 1.02E-07    | 0.219802062  |
| 0.149590299  | 0.001185809 | 0.156571409  | 0.000685202 | 0.171151133  |
| 0.281337509  | 6.06E-10    | 0.241957393  | 1.20E-07    | 0.246726982  |
| 0.100438794  | 0.029993655 | 0.129652775  | 0.005013507 | 0.142582943  |
| 0.092885244  | 0.044832067 | 0.083741976  | 0.070605509 | 0.072853726  |
| 0.197693711  | 1.68E-05    | 0.172846152  | 0.000174372 | 0.184024954  |
| -0.169517078 | 0.000233101 | -0.195226701 | 2.15E-05    | -0.212013824 |
| 0.032069916  | 0.489341049 | 0.024260728  | 0.60100857  | -0.013914735 |
| 0.094286874  | 0.041686628 | 0.094086023  | 0.0421256   | 0.079004272  |
| 0.126960502  | 0.006006751 | 0.130070963  | 0.004873273 | 0.133234529  |
| 0.131410354  | 0.004447613 | 0.152936759  | 0.000914271 | 0.14962549   |
| -0.061661545 | 0.183448363 | -0.028205421 | 0.543179667 | -0.077761524 |
| 0.410343851  | 2.15E-20    | 0.415342655  | 6.69E-21    | 0.439485479  |
| -0.073024217 | 0.115039143 | -0.062674481 | 0.176341156 | -0.0466746   |
| 0.135957465  | 0.003241338 | 0.156907773  | 0.000666944 | 0.130223276  |
| 0.166326635  | 0.000306325 | 0.169637447  | 0.000230689 | 0.183536875  |
| -0.084879639 | 0.066853568 | -0.023836494 | 0.607389364 | -0.021709386 |
| 0.176972142  | 0.00012078  | 0.15799818   | 0.000610813 | 0.162606471  |
| -0.04643188  | 0.316704786 | -0.065714432 | 0.156240998 | -0.020916092 |

|              |             |              |             |              |
|--------------|-------------|--------------|-------------|--------------|
| -0.239859725 | 1.55E-07    | -0.214832861 | 2.80E-06    | -0.180694454 |
| -0.135308354 | 0.003393046 | -0.130111882 | 0.004859743 | -0.153325508 |
| 0.019807317  | 0.669427046 | 0.008770131  | 0.850077266 | 0.029158709  |
| 0.046238465  | 0.318727058 | 0.080496019  | 0.082265004 | 0.085326496  |
| -0.149185759 | 0.001223245 | -0.153406899 | 0.0008811   | -0.116985772 |
| 0.242818234  | 1.08E-07    | 0.273529904  | 1.85E-09    | 0.239676721  |
| -0.145112443 | 0.001665642 | -0.16195439  | 0.000441898 | -0.135133911 |
| -0.02939994  | 0.526229366 | -0.028963079 | 0.532397075 | -0.045205251 |
| 0.040640752  | 0.38088737  | 0.051162345  | 0.269859002 | 0.028403756  |
| 0.055723059  | 0.229405248 | 0.053764979  | 0.246213285 | 0.069041665  |
| 0.066599747  | 0.150726119 | 0.080593884  | 0.081892021 | 0.080355689  |
| 0.151528768  | 0.001020637 | 0.147511884  | 0.001389996 | 0.139068398  |
| 0.02360295   | 0.610914857 | 0.008529111  | 0.854150717 | -0.002680837 |
| -0.032338563 | 0.485707835 | -0.042836527 | 0.355669433 | -0.056485218 |
| 0.043455686  | 0.348752755 | 0.036553684  | 0.430650957 | 0.046579077  |
| -0.076503795 | 0.09868733  | -0.057959759 | 0.211220848 | -0.078575788 |
| 0.069053437  | 0.136214439 | 0.071559729  | 0.122526628 | 0.056643279  |
| -0.018598286 | 0.688515892 | 0.001081683  | 0.981400826 | -0.02139212  |
| 0.048934797  | 0.291293547 | 0.053938105  | 0.244693404 | 0.037809646  |
| -0.001970384 | 0.966126996 | 0.013682828  | 0.768062791 | -0.006543156 |
| -0.032889442 | 0.478303432 | -0.019289651 | 0.677575081 | -0.010046392 |
| 0.09984994   | 0.030975548 | 0.078372201  | 0.090702895 | 0.081019783  |
| 0.111752847  | 0.015687759 | 0.103020149  | 0.025997827 | 0.098067794  |
| -0.229542233 | 5.32E-07    | -0.194945015 | 2.21E-05    | -0.190683598 |
| 0.063397942  | 0.171391705 | 0.053471956  | 0.248800747 | 0.025510728  |
| 0.11332373   | 0.014274464 | 0.084590909  | 0.067789931 | 0.103393557  |
| 0.114325263  | 0.013432987 | 0.097533246  | 0.035109899 | 0.121899506  |
| 0.004815406  | 0.917341144 | 0.024574381  | 0.596310482 | 0.02885696   |
| -0.063242859 | 0.17244385  | -0.074428498 | 0.108201076 | -0.072298141 |
| 0.13588792   | 0.003257291 | 0.128780872  | 0.005317645 | 0.140807017  |
| 0.122613482  | 0.007987105 | 0.124034545  | 0.00728351  | 0.090266197  |
| 0.050533133  | 0.275801248 | 0.018468635  | 0.690574945 | 0.010588284  |
| 0.316616685  | 2.47E-12    | 0.31763235   | 2.09E-12    | 0.333815146  |
| -0.092330863 | 0.046130088 | -0.086439143 | 0.061977836 | -0.101427876 |
| -0.059264644 | 0.201104409 | -0.045990516 | 0.32133181  | -0.071393344 |
| 0.051789375  | 0.264025042 | 0.045453618  | 0.327019381 | 0.04738813   |
| 0.026478096  | 0.568160238 | 0.057575821  | 0.214266095 | 0.073494219  |
| -0.086325453 | 0.062323084 | -0.097931664 | 0.034367141 | -0.065867461 |
| 0.081979698  | 0.076755723 | 0.12141685   | 0.008625979 | 0.079916844  |
| -0.043011704 | 0.353703824 | -0.003405397 | 0.941492397 | -0.007135024 |
| 0.096988951  | 0.036146656 | 0.092376966  | 0.046020953 | 0.091988869  |
| 0.102384702  | 0.026936314 | 0.072975167  | 0.115283977 | 0.091113389  |
| 0.081120249  | 0.079909332 | 0.093265899  | 0.043958701 | 0.060003288  |
| -0.019318361 | 0.677122192 | 0.012780832  | 0.782957335 | -0.027683149 |
| -0.124166427 | 0.007221111 | -0.102214573 | 0.027192469 | -0.091324822 |

|              |             |              |             |              |
|--------------|-------------|--------------|-------------|--------------|
| -0.099109033 | 0.032249947 | -0.096143326 | 0.03780893  | -0.09956906  |
| -0.024289704 | 0.600573846 | -0.046357598 | 0.317480458 | -0.033778147 |
| -0.025524556 | 0.58218102  | -0.025376421 | 0.584373555 | -0.007800775 |
| 0.157502467  | 0.000635765 | 0.175108557  | 0.000142716 | 0.142078498  |
| 0.259449102  | 1.27E-08    | 0.259035922  | 1.35E-08    | 0.259527162  |
| 0.040128783  | 0.386920877 | 0.05435021   | 0.241101959 | 0.044878308  |
| 0.052730476  | 0.255432673 | 0.077781195  | 0.093170473 | 0.095997676  |
| 0.000840396  | 0.985549152 | -0.010306944 | 0.824201849 | -0.015667495 |
| -0.186059857 | 5.22E-05    | -0.177150651 | 0.000118854 | -0.183173453 |
| -0.051387052 | 0.267758249 | -0.001124496 | 0.980664801 | -0.004360073 |
| 0.22317426   | 1.11E-06    | 0.212217012  | 3.72E-06    | 0.21265279   |
| 0.000615461  | 0.989416703 | 0.025314653  | 0.585288921 | 0.000316731  |
| 0.075185181  | 0.104651707 | 0.085929237  | 0.0635387   | 0.109259586  |
| 0.208454167  | 5.55E-06    | 0.214992     | 2.75E-06    | 0.257759206  |
| 0.049493933  | 0.285808954 | 0.063889723  | 0.168086925 | 0.079809584  |
| -0.011340719 | 0.806900851 | -0.023461828 | 0.613049551 | -0.072465994 |
| -0.128008983 | 0.00560065  | -0.131297685 | 0.004482081 | -0.155954806 |
| -0.05397225  | 0.244394421 | -0.034602716 | 0.455673189 | -0.058748519 |
| -0.02913564  | 0.529956465 | -0.057915095 | 0.21157349  | -0.027786467 |
| -0.104308395 | 0.024181398 | -0.084612051 | 0.067721006 | -0.107831247 |
| -0.044676057 | 0.335371193 | -0.016713814 | 0.718663352 | -0.014091478 |
| -0.020287091 | 0.661909863 | -0.064682215 | 0.162862061 | -0.083250106 |
| 0.005115266  | 0.912214038 | -0.017359981 | 0.708274001 | -0.026913255 |
| -0.032480353 | 0.483796135 | 0.00275636   | 0.952628803 | 0.022649791  |
| 0.030854559  | 0.505958328 | 0.021541249  | 0.642420897 | 0.053977804  |
| -0.047660366 | 0.304056556 | 0.004627585  | 0.920554318 | 0.011611097  |
| 0.284135081  | 4.02E-10    | 0.293150595  | 1.04E-10    | 0.271362311  |
| 0.142819829  | 0.001974999 | 0.158234789  | 0.000599227 | 0.11675076   |
| -0.048129711 | 0.299313806 | -0.052691755 | 0.255782328 | -0.060145324 |
| 0.167689363  | 0.000272752 | 0.161059822  | 0.000475767 | 0.15829875   |
| 0.12019622   | 0.009324193 | 0.135709977  | 0.003298438 | 0.115301395  |
| 0.242141365  | 1.17E-07    | 0.263958632  | 6.96E-09    | 0.248848956  |
| 0.093263291  | 0.043964636 | 0.136556997  | 0.003106717 | 0.140067357  |
| 0.075966871  | 0.101082463 | 0.107487746  | 0.020160925 | 0.087194648  |
| 0.00804589   | 0.862329176 | 0.025403628  | 0.583970575 | 0.01418629   |
| 0.010084488  | 0.827936285 | 0.01494726   | 0.747327433 | -0.009079965 |
| 0.028503419  | 0.538925802 | 0.053309535  | 0.2502431   | 0.059326568  |
| -0.201252056 | 1.17E-05    | -0.171362477 | 0.000198586 | -0.19604077  |
| 0.004066637  | 0.930158353 | -0.018298243 | 0.693284511 | -0.04226361  |
| 0.282550188  | 5.08E-10    | 0.23724915   | 2.13E-07    | 0.218859422  |
| 0.125197371  | 0.00674958  | 0.137964669  | 0.002810382 | 0.12877574   |
| -0.105582075 | 0.022494382 | -0.110516741 | 0.016884678 | -0.138677793 |
| 0.26600435   | 5.27E-09    | 0.284917194  | 3.59E-10    | 0.34513561   |
| -0.003083329 | 0.947017268 | 0.028136975  | 0.544159065 | 0.012696637  |
| -0.132945972 | 0.004001126 | -0.10906515  | 0.018391605 | -0.147039758 |

|              |             |              |             |              |
|--------------|-------------|--------------|-------------|--------------|
| -0.024295099 | 0.600492927 | -0.020319479 | 0.661403625 | -0.036089169 |
| -0.022613065 | 0.62595705  | -0.023043446 | 0.619397452 | -0.077723433 |
| 0.212599228  | 3.57E-06    | 0.211654711  | 3.95E-06    | 0.208235659  |
| 0.125662027  | 0.006546224 | 0.14569254   | 0.001594753 | 0.171406072  |
| 0.121960262  | 0.008330417 | 0.097503968  | 0.035165017 | 0.08779349   |
| 0.357657038  | 1.54E-15    | 0.341926926  | 2.97E-14    | 0.383777671  |
| -0.022531972 | 0.627196361 | -0.045448852 | 0.32707016  | -0.109302706 |
| 0.086874974  | 0.060668919 | 0.073023548  | 0.115042483 | 0.098049797  |
| 0.037086366  | 0.423959743 | 0.036689332  | 0.428941262 | 0.048083812  |
| 0.075112452  | 0.104988805 | 0.10341555   | 0.025428199 | 0.09507757   |
| 0.129945862  | 0.004914848 | 0.130742781  | 0.00465538  | 0.135065358  |
| 0.117653678  | 0.010941968 | 0.105124727  | 0.023088031 | 0.10187897   |
| 0.047063776  | 0.310156559 | 0.031896388  | 0.491695589 | 0.027294952  |
| 0.11584107   | 0.012242492 | 0.141642365  | 0.002153546 | 0.126067205  |
| 0.066428124  | 0.15178349  | 0.072845122  | 0.115935077 | 0.06135007   |
| -0.080855967 | 0.0808999   | -0.076197126 | 0.100049737 | -0.094889104 |
| 0.091905987  | 0.047146112 | 0.092867937  | 0.044872122 | 0.084550826  |
| 0.054512604  | 0.239696932 | 0.063728994  | 0.169161743 | 0.036655015  |
| 0.013670483  | 0.768266093 | 0.036689537  | 0.428938687 | 0.019338943  |
| -0.038955251 | 0.400968468 | -0.013942553 | 0.763789499 | -0.033026248 |
| 0.057711163  | 0.213189034 | 0.073713994  | 0.111639129 | 0.069503295  |
| 0.086569414  | 0.061584179 | 0.08362898   | 0.07098738  | 0.067943632  |
| -0.013075356 | 0.778084885 | -0.007574223 | 0.870326305 | 0.002057143  |
| 0.09210044   | 0.046678803 | 0.0996411    | 0.031330327 | 0.112263235  |
| 0.122088123  | 0.008262199 | 0.154516797  | 0.000807154 | 0.118850174  |
| 0.058797809  | 0.204682389 | 0.086454012  | 0.0619328   | 0.111794073  |
| 0.016861267  | 0.716287882 | 0.060597146  | 0.191142257 | 0.067456266  |
| 0.138280335  | 0.002747566 | 0.149321792  | 0.001210537 | 0.156551762  |
| -0.122447865 | 0.008072931 | -0.088521704 | 0.055927821 | -0.085270663 |
| -0.016095147 | 0.728659393 | -0.04262469  | 0.358055555 | -0.04236283  |
| 0.264021927  | 6.90E-09    | 0.249014857  | 4.95E-08    | 0.274614613  |
| -0.103011076 | 0.026011026 | -0.093355008 | 0.043756333 | -0.095370334 |
| 0.051558494  | 0.266163022 | 0.046935798  | 0.311475524 | 0.033902169  |
| 0.112560368  | 0.01494662  | 0.120808944  | 0.008967662 | 0.11318697   |
| -0.004661018 | 0.919982268 | 0.024564246  | 0.596462026 | 0.045224167  |
| 0.043626074  | 0.346864374 | 0.057554129  | 0.214439085 | 0.033091705  |
| 0.058673836  | 0.205640265 | 0.072417884  | 0.118094426 | 0.086338922  |
| 0.068519312  | 0.139278109 | 0.075567443  | 0.102894007 | 0.097641678  |
| 0.032787398  | 0.47967035  | 0.056776078  | 0.220710404 | 0.080128065  |
| 0.031566643  | 0.496186429 | 0.027834167  | 0.54850244  | 0.034624828  |
| 0.230953296  | 4.51E-07    | 0.239936621  | 1.54E-07    | 0.247967515  |
| -0.036817383 | 0.427330928 | 0.014010595  | 0.762671182 | 0.021581592  |
| -0.083192065 | 0.072479854 | -0.067924725 | 0.142750477 | -0.063827933 |
| -0.048222196 | 0.298385078 | -0.051684777 | 0.26499216  | -0.053040596 |
| 0.071027528  | 0.125339765 | 0.061234419  | 0.186507863 | 0.038852964  |

|              |             |              |             |              |
|--------------|-------------|--------------|-------------|--------------|
| -0.002034098 | 0.965032368 | -0.015129161 | 0.744358978 | -0.043825145 |
| -0.193274979 | 2.61E-05    | -0.141071526 | 0.00224531  | -0.145320454 |
| -0.066713314 | 0.150029517 | -0.013910745 | 0.764312466 | -0.031116732 |
| 0.184883182  | 5.84E-05    | 0.140540028  | 0.002333947 | 0.108371148  |
| 0.064498387  | 0.164063017 | 0.068516903  | 0.139292047 | 0.067680317  |
| 0.37443529   | 5.45E-17    | 0.360884658  | 8.23E-16    | 0.359656809  |
| 0.027897889  | 0.547587014 | 0.050010541  | 0.280803737 | 0.028898538  |
| 0.127278537  | 0.005880859 | 0.132587427  | 0.004101582 | 0.12368935   |
| -0.101803204 | 0.027820524 | -0.071840789 | 0.121060963 | -0.088141086 |
| -0.05051402  | 0.275983129 | -0.035809997 | 0.440094113 | -0.07015873  |
| 0.019073259  | 0.680992323 | 0.071529992  | 0.122682506 | 0.072190996  |
| 0.136269297  | 0.003170671 | 0.122638241  | 0.007974344 | 0.149745185  |
| -0.056130126 | 0.2260157   | -0.026975917 | 0.560904842 | -0.041539862 |
| 0.033156145  | 0.474740875 | 0.052209774  | 0.2601625   | 0.049362465  |
| -0.019198812 | 0.679008801 | -0.01847772  | 0.690430592 | -0.040573271 |
| 0.200176087  | 1.31E-05    | 0.184740493  | 5.91E-05    | 0.207954322  |
| -0.009282354 | 0.841433578 | -0.004944499 | 0.915133434 | -0.012189082 |
| 0.072760573  | 0.116359933 | 0.07427401   | 0.108937276 | 0.074324922  |
| 0.199256533  | 1.44E-05    | 0.23058833   | 4.71E-07    | 0.217566045  |
| 0.078186391  | 0.09147298  | 0.065648933  | 0.156654995 | 0.059357591  |
| 0.001031005  | 0.982272057 | 0.033993946  | 0.463644748 | -0.007620662 |
| -0.01205901  | 0.794934371 | -0.00106269  | 0.981727336 | -0.007397348 |
| 0.013083324  | 0.777953192 | 0.012997239  | 0.77937637  | 0.012744563  |
| -0.036051533 | 0.437014239 | -0.003079004 | 0.94709147  | -0.009413846 |
| -0.136885836 | 0.003035056 | -0.114578032 | 0.013227645 | -0.104324465 |
| 0.19698172   | 1.81E-05    | 0.201250029  | 1.17E-05    | 0.211113162  |
| -0.183528391 | 6.62E-05    | -0.21641377  | 2.36E-06    | -0.261688708 |
| 0.265990222  | 5.28E-09    | 0.26736392   | 4.37E-09    | 0.248622487  |
| -0.123021116 | 0.007779319 | -0.129783623 | 0.004969242 | -0.156284256 |
| 0.274962995  | 1.51E-09    | 0.294785587  | 8.13E-11    | 0.342360806  |
| 0.167203649  | 0.000284303 | 0.167934156  | 0.000267099 | 0.186028728  |
| 0.091447776  | 0.04826281  | 0.089366018  | 0.053618822 | 0.090762667  |
| 0.069551152  | 0.133406533 | 0.082909897  | 0.073457255 | 0.079287183  |
| 0.101746008  | 0.027908826 | 0.10025602   | 0.03029553  | 0.102444309  |
| 0.072156055  | 0.119433227 | 0.079108035  | 0.087704164 | 0.067745423  |
| -0.125999187 | 0.006402123 | -0.101882165 | 0.027699013 | -0.129851641 |
| 0.132005324  | 0.004269541 | 0.131272275  | 0.004489887 | 0.160026008  |
| 0.127821835  | 0.005671275 | 0.159667708  | 0.000533304 | 0.155075011  |
| -0.140031109 | 0.0024218   | -0.165647218 | 0.000324468 | -0.169192142 |
| 0.063357573  | 0.171665118 | 0.10415521   | 0.02439148  | 0.092781205  |
| -0.319965147 | 1.41E-12    | -0.32143915  | 1.10E-12    | -0.336105333 |
| 0.084330122  | 0.068644894 | 0.080659835  | 0.081641441 | 0.126744313  |
| -0.010514013 | 0.820729268 | 0.005081156  | 0.912797085 | 0.0391587    |
| 0.214931726  | 2.77E-06    | 0.223304017  | 1.09E-06    | 0.242333267  |
| -0.068124313 | 0.141577581 | -0.077109755 | 0.096038726 | -0.110742078 |



|              |             |              |             |              |
|--------------|-------------|--------------|-------------|--------------|
| -0.109120208 | 0.018332375 | -0.146258981 | 0.001528214 | -0.158028435 |
| -0.082430326 | 0.075143081 | -0.058695962 | 0.205469077 | -0.083850279 |
| -0.07892782  | 0.088431118 | -0.100793249 | 0.029415565 | -0.119317023 |
| 0.08403147   | 0.069634817 | 0.074736263  | 0.106746152 | 0.032821946  |
| -0.005342871 | 0.908324797 | -0.025382605 | 0.584281956 | -0.015753385 |
| 0.069160789  | 0.135604989 | 0.068326551  | 0.140396654 | 0.068873238  |
| 0.245598228  | 7.63E-08    | 0.249993864  | 4.37E-08    | 0.265918097  |
| 0.040655806  | 0.380710833 | 0.052975954  | 0.253223648 | 0.078310169  |
| 0.175967809  | 0.000132174 | 0.206933781  | 6.52E-06    | 0.228735051  |
| -0.008484897 | 0.854898404 | -0.017491924 | 0.706159125 | -0.012274351 |
| 0.078672741  | 0.089468329 | 0.087002558  | 0.060290098 | 0.076898882  |
| 0.061400928  | 0.185310718 | 0.116193132  | 0.011979699 | 0.12990617   |
| -0.12130014  | 0.008690664 | -0.053732359 | 0.246500397 | -0.07023207  |
| -0.005486144 | 0.905877705 | -0.022061697 | 0.634403914 | -0.029869398 |
| 0.102792709  | 0.026330443 | 0.106008203  | 0.021953206 | 0.102719514  |
| 0.089375047  | 0.053594564 | 0.085181669  | 0.06588546  | 0.077557095  |
| 0.208004153  | 5.83E-06    | 0.216006268  | 2.46E-06    | 0.215925903  |
| 0.030819973  | 0.506435506 | 0.029768471  | 0.521054809 | 0.016105103  |
| -0.34522374  | 1.62E-14    | -0.32288461  | 8.59E-13    | -0.324810167 |
| -0.022994345 | 0.620144308 | -0.032929988 | 0.477760884 | -0.044263601 |
| -0.025536825 | 0.581999594 | -0.011499783 | 0.804246912 | 0.019321488  |
| -0.027111933 | 0.558930317 | -0.034760768 | 0.45361621  | -0.060302334 |
| 0.094528428  | 0.041163815 | 0.085093943  | 0.066165457 | 0.080254677  |
| -0.042717813 | 0.357005387 | -0.02778491  | 0.549210571 | -0.05876534  |
| 0.079834279  | 0.084823194 | 0.112122964  | 0.015344159 | 0.106649131  |
| 0.105092867  | 0.023129887 | 0.108306877  | 0.019224473 | 0.114469291  |
| -0.052607513 | 0.256544198 | -0.010262068 | 0.824954874 | -0.02272303  |
| 0.02952486   | 0.524472429 | 0.00647765   | 0.888968525 | 0.037686228  |
| -0.015242416 | 0.742512687 | 0.019645212  | 0.671974455 | 0.021505479  |
| -0.04461467  | 0.336036335 | -0.032114168 | 0.488741576 | -0.04281708  |
| 0.020910404  | 0.652194306 | 0.026637506  | 0.565832075 | -0.030620362 |
| 0.091687036  | 0.047676981 | 0.107033586  | 0.020697037 | 0.084099661  |
| 0.215436028  | 2.62E-06    | 0.20689028   | 6.55E-06    | 0.170202469  |
| 0.080662618  | 0.081630882 | 0.071255727  | 0.124127454 | 0.06083716   |
| -0.019940049 | 0.667344032 | -0.026207893 | 0.572116895 | -0.016194809 |
| 0.090209356  | 0.051392248 | 0.102306047  | 0.027054482 | 0.104974948  |
| 0.001523415  | 0.973807705 | 0.012786802  | 0.782858495 | 0.018552689  |
| 0.109528005  | 0.017898839 | 0.102032886  | 0.027468339 | 0.109897496  |
| 0.045982518  | 0.321416057 | 0.052419514  | 0.258250097 | 0.074465963  |
| 0.133424519  | 0.003870518 | 0.133193756  | 0.003933009 | 0.140283653  |
| -0.053942114 | 0.244658283 | -0.027736427 | 0.549908019 | -0.038112111 |
| -0.242233114 | 1.16E-07    | -0.20698375  | 6.49E-06    | -0.19646516  |
| -0.015910445 | 0.731652715 | -0.018046773 | 0.697290516 | -0.009942377 |
| 0.307074016  | 1.18E-11    | 0.315717273  | 2.87E-12    | 0.342775086  |
| 0.130601485  | 0.004700463 | 0.13263549   | 0.004087985 | 0.15398455   |

|              |             |              |             |              |
|--------------|-------------|--------------|-------------|--------------|
| 0.020595226  | 0.657099755 | 0.026320225  | 0.570470401 | 0.013403935  |
| 0.11716777   | 0.011278012 | 0.118676644  | 0.010263357 | 0.112354435  |
| 0.056737779  | 0.221022457 | 0.098922237  | 0.032578225 | 0.087001662  |
| -0.001424927 | 0.975500471 | 0.017776798  | 0.701600691 | 0.014140113  |
| 0.007652461  | 0.868998842 | -0.014483243 | 0.754916563 | -0.039917089 |
| 0.05488448   | 0.236501166 | 0.054535067  | 0.239503034 | 0.031678763  |
| -0.040249734 | 0.385490263 | -0.025929455 | 0.576207751 | -0.056018843 |
| 0.101931937  | 0.027622654 | 0.108236948  | 0.019302911 | 0.110450094  |
| 0.057364294  | 0.215957272 | 0.058414083  | 0.207657775 | 0.03838009   |
| 0.037807016  | 0.415004536 | 0.052734039  | 0.255400513 | 0.091067509  |
| -0.193118431 | 2.65E-05    | -0.183481777 | 6.65E-05    | -0.15965926  |
| -0.046167486 | 0.319471289 | -0.079950184 | 0.084370546 | -0.06266045  |
| 0.026653248  | 0.565602416 | 0.05128345   | 0.268725408 | 0.055112265  |
| -0.050483115 | 0.276277402 | -0.051575113 | 0.266008725 | -0.058234668 |
| -0.043622659 | 0.34690216  | -0.008906486 | 0.847774485 | -0.01318597  |
| 0.096827307  | 0.036459516 | 0.061661339  | 0.183449831 | 0.061512285  |
| 0.056978103  | 0.219069561 | 0.052707588  | 0.255639316 | 0.105362309  |
| 0.191129751  | 3.22E-05    | 0.189666837  | 3.70E-05    | 0.187209042  |
| 0.062564202  | 0.177104846 | 0.045306575  | 0.328588362 | 0.081104202  |
| -0.028366287 | 0.540881269 | -0.022382437 | 0.629484373 | -0.018305774 |
| 0.102827274  | 0.026279659 | 0.11158352   | 0.015847191 | 0.098208283  |
| 0.1328905    | 0.004016521 | 0.141087134  | 0.002242754 | 0.11494209   |
| 0.113655589  | 0.013990643 | 0.072700203  | 0.116664034 | 0.095626878  |
| 0.02355692   | 0.61161078  | 0.037309952  | 0.421169358 | 0.052213432  |
| 0.150769933  | 0.001082589 | 0.164895102  | 0.00034572  | 0.153991004  |
| 0.078320825  | 0.090915303 | 0.112220515  | 0.015254704 | 0.114614289  |
| -0.114763231 | 0.013078956 | -0.100154513 | 0.030464302 | -0.128333546 |
| -0.095168101 | 0.039806006 | -0.081021897 | 0.080276814 | -0.086877738 |
| 0.219903446  | 1.60E-06    | 0.25902074   | 1.35E-08    | 0.246533723  |
| -0.252095582 | 3.34E-08    | -0.286439943 | 2.86E-10    | -0.274990508 |
| 0.024323269  | 0.600070458 | 0.04182572   | 0.367145146 | 0.03237472   |
| -0.246179869 | 7.09E-08    | -0.203942458 | 8.90E-06    | -0.208355752 |
| 0.144367067  | 0.00176097  | 0.146628024  | 0.001486244 | 0.150907488  |
| 0.086669368  | 0.061283536 | 0.028033347  | 0.545643542 | 0.023944157  |
| 0.133905533  | 0.003743139 | 0.130954902  | 0.004588432 | 0.13266324   |
| 0.261106543  | 1.02E-08    | 0.264944741  | 6.09E-09    | 0.271990891  |
| -0.205982461 | 7.20E-06    | -0.192819933 | 2.73E-05    | -0.217874108 |
| 0.216801153  | 2.26E-06    | 0.241859228  | 1.21E-07    | 0.265404756  |
| 0.215365914  | 2.64E-06    | 0.235085752  | 2.76E-07    | 0.264524101  |
| 0.07526666   | 0.104275078 | 0.055603101  | 0.230410953 | 0.015097988  |
| -0.078084116 | 0.091899087 | -0.095849066 | 0.038402369 | -0.106559794 |
| 0.044350417  | 0.338909221 | 0.070107114  | 0.130323043 | 0.028697175  |
| -0.003484547 | 0.940135051 | 0.002334578  | 0.959870962 | 0.009562864  |
| 0.105199193  | 0.022990458 | 0.103296903  | 0.025597984 | 0.073342278  |
| -0.061019033 | 0.188064846 | -0.090261615 | 0.051256851 | -0.081646201 |

|              |             |              |             |              |
|--------------|-------------|--------------|-------------|--------------|
| 0.099994812  | 0.030731462 | 0.128702511  | 0.005345776 | 0.134364482  |
| 0.017811359  | 0.701048384 | 0.083851234  | 0.070237869 | 0.099553451  |
| 0.179526762  | 9.58E-05    | 0.206952461  | 6.51E-06    | 0.203957299  |
| 0.144517239  | 0.001741371 | 0.189193514  | 3.88E-05    | 0.16796427   |
| 0.057828204  | 0.212260762 | 0.025741037  | 0.578983796 | 0.047536886  |
| 0.089657375  | 0.052840673 | 0.113007385  | 0.014549719 | 0.102966632  |
| -0.246490321 | 6.82E-08    | -0.226494274 | 7.58E-07    | -0.253640623 |
| 0.030446247  | 0.511606761 | -0.003941735 | 0.932298228 | 0.003504328  |
| -0.067776712 | 0.143625081 | -0.036947767 | 0.425694872 | -0.039869125 |
| -0.075086898 | 0.10510745  | -0.047495922 | 0.305729975 | -0.059520438 |
| -0.05307678  | 0.252320183 | -0.039313636 | 0.39664643  | -0.048581644 |
| -0.027602025 | 0.551843724 | -0.015683554 | 0.735335334 | -0.006006638 |
| -0.127495521 | 0.005796335 | -0.099691678 | 0.031244088 | -0.107777075 |
| 0.278008622  | 9.80E-10    | 0.283313155  | 4.54E-10    | 0.298257602  |
| 0.239344145  | 1.65E-07    | 0.282330242  | 5.24E-10    | 0.278955507  |
| 0.088176384  | 0.056895686 | 0.073926295  | 0.110608725 | 0.063054554  |
| -0.039601547 | 0.393194676 | -0.053609043 | 0.247587884 | -0.086971837 |
| -0.003979684 | 0.931648015 | -0.023766205 | 0.608449461 | 0.010577634  |
| -0.050214558 | 0.278843539 | -0.118097295 | 0.010642948 | -0.15937604  |
| -0.186220264 | 5.15E-05    | -0.159679953 | 0.000532771 | -0.182158754 |
| -0.151689996 | 0.001007903 | -0.149680041 | 0.001177649 | -0.154954155 |
| -0.047123807 | 0.30953913  | -0.024547399 | 0.596713981 | 0.009504384  |
| -0.019013138 | 0.681942904 | -0.003275066 | 0.943727823 | -0.014548861 |
| -0.049790342 | 0.282929862 | -0.031431099 | 0.49803873  | -0.065532379 |
| -0.023422995 | 0.613637533 | -0.019729948 | 0.670642383 | -0.053891724 |
| -0.022233614 | 0.631765016 | -0.016659298 | 0.71954229  | -0.010086922 |
| -0.006123246 | 0.895007176 | -0.060490888 | 0.191923133 | -0.056651029 |
| 0.037978926  | 0.412884868 | 0.026361577  | 0.569864853 | 0.013272683  |
| -0.105346432 | 0.02279858  | -0.093136637 | 0.044253658 | -0.0972623   |
| 0.095811466  | 0.038478762 | 0.122641214  | 0.007972814 | 0.125549576  |
| -0.080232056 | 0.083277868 | -0.080682623 | 0.081555002 | -0.080927659 |
| -0.001365005 | 0.976530448 | -0.004199783 | 0.927877768 | -0.007251038 |
| -0.170789869 | 0.000208747 | -0.122023362 | 0.008296688 | -0.12638216  |
| -0.021257803 | 0.646804705 | 0.011428119  | 0.805442315 | -0.018973665 |
| 0.040539783  | 0.382072702 | 0.021238956  | 0.64709663  | 0.029782923  |
| -0.011202849 | 0.809202968 | 0.022858368  | 0.622214638 | -0.011339245 |
| -0.164058714 | 0.000370873 | -0.184395141 | 6.11E-05    | -0.172727312 |
| -0.058088779 | 0.210204551 | -0.068899298 | 0.13709319  | -0.089005724 |
| 0.183870992  | 6.42E-05    | 0.168501921  | 0.000254404 | 0.238036138  |
| -0.110395341 | 0.017006431 | -0.123741485 | 0.007423898 | -0.08508876  |
| 0.033839491  | 0.465679517 | 0.089081938  | 0.054386692 | 0.113007089  |
| -0.072695935 | 0.116685557 | -0.091716855 | 0.047604387 | -0.107639595 |
| -0.044698292 | 0.335130481 | -0.066850679 | 0.149190213 | -0.108946234 |
| 0.038582232  | 0.405496793 | 0.048732582  | 0.293294332 | 0.068294389  |
| 0.175086938  | 0.000142991 | 0.180716378  | 8.59E-05    | 0.223892618  |

|              |             |              |             |              |
|--------------|-------------|--------------|-------------|--------------|
| 0.229840458  | 5.14E-07    | 0.2659579    | 5.30E-09    | 0.222257857  |
| 0.161511668  | 0.000458369 | 0.174694134  | 0.000148078 | 0.193116013  |
| -0.016585954 | 0.720725365 | -0.02351915  | 0.612182076 | -0.039379238 |
| -0.120772942 | 0.00898827  | -0.143705966 | 0.001849676 | -0.1571938   |
| -0.113177747 | 0.014400911 | -0.111021128 | 0.016386958 | -0.108759507 |
| -0.110640306 | 0.016761538 | -0.144994934 | 0.001680349 | -0.147928219 |
| -0.022551252 | 0.626901613 | -0.032520179 | 0.483259907 | -0.024212249 |
| -0.028129728 | 0.544262816 | -0.027484813 | 0.553534569 | -0.029469315 |
| -0.074303177 | 0.108797982 | -0.084222883 | 0.068999018 | -0.133694658 |
| -0.116888893 | 0.011474976 | -0.151027677 | 0.001061168 | -0.160314299 |
| 0.308233078  | 9.79E-12    | 0.315322349  | 3.07E-12    | 0.331265343  |
| -0.018066203 | 0.696980682 | -0.037780402 | 0.415333263 | -0.02078576  |
| -0.107266804 | 0.020420208 | -0.102490564 | 0.026777973 | -0.128916996 |
| -0.064178801 | 0.166166703 | -0.066446454 | 0.151670287 | -0.076515805 |
| -0.123004559 | 0.007787664 | -0.10089917  | 0.029244682 | -0.098724693 |
| 0.302791363  | 2.34E-11    | 0.324182579  | 6.88E-13    | 0.323436242  |
| -0.012902336 | 0.780946207 | -0.014354248 | 0.75703055  | -0.006625522 |
| 0.077910435  | 0.09262633  | 0.077047646  | 0.096307563 | 0.089963896  |
| -0.023206663 | 0.616917636 | -0.029431224 | 0.525789084 | -0.04244358  |
| 0.08347266   | 0.071518448 | 0.044578362  | 0.336430136 | 0.033084949  |
| 0.032286086  | 0.486416392 | 0.059578001  | 0.198728378 | 0.047452716  |
| 0.060252992  | 0.193679885 | 0.060744779  | 0.190061195 | 0.078621484  |
| -0.041839768 | 0.366984103 | 0.008053201  | 0.862205323 | 0.021890901  |
| -0.20244002  | 1.04E-05    | -0.178997424 | 0.000100552 | -0.207775434 |
| -0.079940006 | 0.084410218 | -0.042763218 | 0.356494053 | -0.054726091 |
| -0.004436918 | 0.923817528 | 0.052787075  | 0.25492216  | 0.067455599  |
| 0.129365579  | 0.00511191  | 0.142823868  | 0.001974411 | 0.117954258  |
| 0.005163809  | 0.91138437  | 0.010058504  | 0.828372745 | -0.009802105 |
| -0.091189681 | 0.048901502 | -0.131581529 | 0.004395706 | -0.154193536 |
| 0.142128761  | 0.002078074 | 0.155695197  | 0.000734957 | 0.142172445  |
| 0.150168654  | 0.00113412  | 0.146506607  | 0.001499934 | 0.150189713  |
| 0.054419376  | 0.240502829 | 0.04599208   | 0.321315339 | 0.064654863  |
| 0.026736838  | 0.564383673 | 0.045178523  | 0.329958664 | 0.018279842  |
| 0.059261639  | 0.201127291 | 0.057322411  | 0.216293255 | 0.053547741  |
| -0.011657674 | 0.801614762 | 0.014519873  | 0.754316604 | -0.039626626 |
| 0.068206344  | 0.141097667 | 0.064621946  | 0.163255073 | 0.07042844   |
| 0.035636848  | 0.442309588 | 0.00644921   | 0.889452871 | -0.018926487 |
| -0.020383392 | 0.660405058 | 0.045359722  | 0.328020705 | 0.052944056  |
| -0.044151556 | 0.341081522 | -0.016876597 | 0.716041084 | -0.006465248 |
| -0.029354035 | 0.526875749 | -0.028192846 | 0.543359542 | -0.027278917 |
| 0.114427063  | 0.013349953 | 0.095787869  | 0.038526772 | 0.08698573   |
| 0.132446082  | 0.004141807 | 0.126939614  | 0.006015103 | 0.11854889   |
| 0.035215028  | 0.447733393 | 0.048600007  | 0.294611055 | 0.035869951  |
| 0.078415316  | 0.09052495  | 0.080605989  | 0.081845984 | 0.110891574  |
| -0.001118801 | 0.980762713 | 0.030527717  | 0.510477129 | 0.024650306  |

|              |             |              |             |              |
|--------------|-------------|--------------|-------------|--------------|
| 0.107973577  | 0.019600837 | 0.129693766  | 0.004999602 | 0.15184734   |
| 0.121906689  | 0.008359148 | 0.131797126  | 0.004331107 | 0.116740853  |
| 0.124118615  | 0.007243677 | 0.07870271   | 0.089345962 | 0.031440205  |
| 0.027996156  | 0.5461768   | 0.026242656  | 0.571607125 | 0.014146498  |
| -0.041148784 | 0.374957533 | -0.035060972 | 0.449723604 | -0.052007573 |
| -0.108561409 | 0.018941309 | -0.092672985 | 0.045325375 | -0.094073161 |
| 0.239660357  | 1.59E-07    | 0.236990169  | 2.20E-07    | 0.249845968  |
| -0.14098956  | 0.002258776 | -0.131431124 | 0.004441285 | -0.125322599 |
| 0.091607695  | 0.047870582 | 0.095346151  | 0.039434875 | 0.07595106   |
| 0.149816041  | 0.001165381 | 0.136900143  | 0.003031973 | 0.132552393  |
| -0.026460934 | 0.568411151 | -0.045848879 | 0.322825931 | -0.025550041 |
| -0.192736043 | 2.75E-05    | -0.16657832  | 0.000299847 | -0.208185882 |
| -0.117529593 | 0.011026929 | -0.100995878 | 0.029089406 | -0.122348403 |
| 0.155984083  | 0.000718194 | 0.160462853  | 0.000499695 | 0.163634625  |
| -0.095554703 | 0.039003892 | -0.121356971 | 0.008659112 | -0.163090621 |
| -0.03448167  | 0.457252081 | 0.008204688  | 0.859639876 | 0.044759094  |
| -0.032380816 | 0.485137723 | -0.047768758 | 0.302956858 | -0.060731714 |
| 0.044660895  | 0.335535395 | 0.071558366  | 0.122533774 | 0.057185405  |
| -0.024069238 | 0.603884978 | 0.019196381  | 0.67904719  | 0.007956399  |
| -0.022041662 | 0.634711756 | -0.018886359 | 0.683949102 | -0.050742102 |
| 0.091767113  | 0.047482248 | 0.083234296  | 0.072334485 | 0.097796573  |
| -0.081600453 | 0.078134606 | -0.045306356 | 0.328590703 | -0.067779253 |
| -0.036225496 | 0.434803681 | -8.92E-05    | 0.998465892 | 0.011195384  |
| -0.073661671 | 0.111894236 | -0.042054003 | 0.364533543 | -0.024748065 |
| 0.146962129  | 0.001449164 | 0.138675495  | 0.002670735 | 0.136955793  |
| -0.025412743 | 0.583835602 | -0.057539049 | 0.214559407 | -0.035221958 |
| -0.076776868 | 0.097486641 | -0.092290907 | 0.046224847 | -0.100101798 |
| -0.152349412 | 0.000957332 | -0.145300321 | 0.001642373 | -0.171000576 |
| 0.045104271  | 0.330754932 | 0.014154963  | 0.760300005 | 0.016785236  |
| 0.127038656  | 0.005975592 | 0.115420479  | 0.012563102 | 0.119711073  |
| 0.067102023  | 0.147663753 | 0.116486354  | 0.011764645 | 0.135891827  |
| -0.015359475 | 0.740605916 | -0.01010624  | 0.82757095  | -0.012362372 |
| 0.180493398  | 8.77E-05    | 0.203080509  | 9.73E-06    | 0.190156899  |
| -0.017069165 | 0.712943301 | 0.013748267  | 0.766985448 | -0.007145106 |
| 0.207873886  | 5.91E-06    | 0.18854657   | 4.12E-05    | 0.210194337  |
| -0.023510538 | 0.61231236  | -0.000315173 | 0.994580259 | 0.029255899  |
| -0.151606589 | 0.001014472 | -0.1452878   | 0.001643914 | -0.180113447 |
| -0.057661119 | 0.213586832 | -0.023138097 | 0.617958867 | -0.010995786 |
| 0.040818498  | 0.378806191 | 0.042705783  | 0.357140945 | 0.020358589  |
| 0.162804079  | 0.000411819 | 0.138702028  | 0.002665647 | 0.090234106  |
| 0.119872387  | 0.00951767  | 0.150225811  | 0.001129126 | 0.187872137  |
| 0.075784067  | 0.101908374 | 0.051613989  | 0.265648044 | 0.054778459  |
| -0.091763512 | 0.047490991 | -0.102168585 | 0.027262071 | -0.151893806 |
| 0.083160277  | 0.07258943  | 0.089190771  | 0.054091442 | 0.039346209  |
| 0.126876497  | 0.006040404 | 0.113535163  | 0.014093058 | 0.134738495  |

|              |             |              |             |              |
|--------------|-------------|--------------|-------------|--------------|
| 0.055431755  | 0.231852898 | 0.087395869  | 0.059134569 | 0.065591041  |
| -0.16973316  | 0.000228787 | -0.105332642 | 0.022816491 | -0.118317873 |
| 0.08221907   | 0.075895627 | 0.094703799  | 0.040787727 | 0.08276393   |
| 0.107325549  | 0.020350986 | 0.125388773  | 0.006665138 | 0.080666684  |
| -0.191197698 | 3.19E-05    | -0.158687128 | 0.000577642 | -0.191642215 |
| -0.088502434 | 0.05598147  | -0.116062355 | 0.012076729 | -0.087414633 |
| -0.028741327 | 0.535541713 | -0.062956194 | 0.174401376 | -0.08064438  |
| 0.042635078  | 0.357938307 | 0.072451881  | 0.117921455 | 0.101430744  |
| 0.033215813  | 0.473945832 | 0.039479855  | 0.394651418 | 0.029811967  |
| 0.071690457  | 0.121843201 | 0.079091291  | 0.087771506 | 0.083340532  |
| -0.02558257  | 0.581323402 | -0.052609363 | 0.256527455 | -0.079076918 |
| -0.174632107 | 0.000148897 | -0.196156542 | 1.96E-05    | -0.179314038 |
| 0.093756773  | 0.042853628 | 0.063370694  | 0.171576218 | 0.086342267  |
| 0.096229521  | 0.037636579 | 0.108798735  | 0.01868057  | 0.100840917  |
| 0.025290604  | 0.585645475 | 0.057911685  | 0.211600431 | 0.08761265   |
| 0.201785208  | 1.11E-05    | 0.212806011  | 3.49E-06    | 0.178912375  |
| 0.079744043  | 0.085176949 | 0.08511578   | 0.066095667 | 0.101254711  |
| 0.064269677  | 0.165566461 | 0.037142696  | 0.423255718 | 0.046572361  |
| 0.057272349  | 0.216695354 | 0.037483708  | 0.419008289 | 0.092736223  |
| 0.084162518  | 0.06919901  | 0.08324369   | 0.072302181 | 0.083370385  |
| 0.071775126  | 0.121402154 | 0.065526121  | 0.157433478 | 0.066596302  |
| 0.032822786  | 0.479196072 | 0.05585582   | 0.228295844 | 0.052273639  |
| -0.242207669 | 1.16E-07    | -0.218651089 | 1.84E-06    | -0.244598318 |
| 0.143955735  | 0.001815692 | 0.149565731  | 0.001188052 | 0.150734185  |
| -0.006087934 | 0.895609185 | 0.011517699  | 0.803948118 | 0.020695967  |
| 0.10249927   | 0.026764986 | 0.110106144  | 0.017299564 | 0.095432875  |
| 0.143794668  | 0.001837541 | 0.147410312  | 0.001400757 | 0.15216869   |
| 0.09157009   | 0.047962574 | 0.114500462  | 0.013290365 | 0.112054974  |
| -0.051505973 | 0.26665102  | -0.003650955 | 0.937281879 | 0.010140543  |
| 0.203727359  | 9.10E-06    | 0.200078887  | 1.32E-05    | 0.205722757  |
| 0.059431529  | 0.199836442 | 0.068715393  | 0.138147332 | 0.069886391  |
| -0.022559739 | 0.626771898 | -0.01337362  | 0.773159411 | -0.044829722 |
| 0.117453489  | 0.011079326 | 0.113881208  | 0.01380053  | 0.114324628  |
| 0.093473687  | 0.043488029 | 0.064289468  | 0.165435956 | 0.05106623   |
| 0.069482535  | 0.133790964 | 0.073107344  | 0.114625144 | 0.074588208  |
| -0.091722377 | 0.047590956 | -0.083781822 | 0.070471249 | -0.080808068 |
| -0.025300419 | 0.585499953 | -0.005300541 | 0.909047947 | -0.026265344 |
| 0.168777884  | 0.000248439 | 0.190768328  | 3.33E-05    | 0.196987508  |
| 0.197868975  | 1.65E-05    | 0.173057282  | 0.000171161 | 0.168559626  |
| 0.092785062  | 0.045064335 | 0.109192996  | 0.018254328 | 0.108827284  |
| 0.244766626  | 8.46E-08    | 0.258252472  | 1.49E-08    | 0.263909848  |
| 0.067561045  | 0.144906772 | 0.070839876  | 0.126343541 | 0.00451969   |
| -0.082447158 | 0.075083381 | -0.021970079 | 0.635812135 | -0.01894427  |
| -0.228318954 | 6.14E-07    | -0.203193242 | 9.62E-06    | -0.232907752 |
| 0.149838637  | 0.001163354 | 0.219205259  | 1.73E-06    | 0.246717217  |

|              |             |              |             |              |
|--------------|-------------|--------------|-------------|--------------|
| -0.011789848 | 0.799413056 | 0.011419292  | 0.805589598 | -0.009869793 |
| -0.060023752 | 0.195383816 | -0.022909855 | 0.621430376 | -0.018830911 |
| 0.089758405  | 0.052573054 | 0.102121659  | 0.027333248 | 0.089372563  |
| -0.132868145 | 0.00402274  | -0.136311344 | 0.00316125  | -0.129548762 |
| 0.089265083  | 0.053890609 | 0.087978694  | 0.057455998 | 0.082680649  |
| -0.01943535  | 0.675277921 | -0.03645477  | 0.431900152 | -0.015901565 |
| -0.037121084 | 0.423525747 | -0.07227372  | 0.118830115 | -0.047932291 |
| 0.044912962  | 0.332812205 | 0.044054182  | 0.342148431 | 0.039365666  |
| -0.095788971 | 0.038524529 | -0.09721056  | 0.035721444 | -0.10261758  |
| -0.036027075 | 0.437325543 | -0.064955361 | 0.161089807 | -0.057692269 |
| -0.166941073 | 0.000290736 | -0.191491798 | 3.10E-05    | -0.161937125 |
| -0.035745428 | 0.440919543 | -0.028415433 | 0.540180061 | -0.003464508 |
| 0.201738483  | 1.12E-05    | 0.19273839   | 2.75E-05    | 0.171953959  |
| -0.072132644 | 0.11955351  | -0.073364216 | 0.113353227 | -0.083524781 |
| 0.042026894  | 0.364843067 | 0.073858004  | 0.110939355 | 0.047516373  |
| 0.203938759  | 8.91E-06    | 0.161059476  | 0.000475781 | 0.16697778   |
| -0.037824144 | 0.414793066 | -0.03422946  | 0.460551657 | -0.030103751 |
| 0.008350605  | 0.857170148 | 0.031741559  | 0.493801515 | 0.008673987  |
| 0.314640183  | 3.43E-12    | 0.349536511  | 7.25E-15    | 0.369738876  |
| 0.002111664  | 0.96369985  | -0.045216862 | 0.329548008 | -0.027547032 |
| -0.046102026 | 0.320158665 | -0.04748657  | 0.305825322 | -0.042613419 |
| -0.262006958 | 9.05E-09    | -0.231735323 | 4.12E-07    | -0.242293579 |
| 0.005559734  | 0.904621138 | 0.043146328  | 0.352197909 | 0.050052729  |
| 0.207435505  | 6.19E-06    | 0.192843606  | 2.72E-05    | 0.215215322  |
| 0.044790291  | 0.334135687 | 0.041189019  | 0.37449034  | 0.024082703  |
| 0.245046249  | 8.17E-08    | 0.237253764  | 2.13E-07    | 0.2547493    |
| 0.156093627  | 0.000711931 | 0.135064221  | 0.003451751 | 0.108443508  |
| 0.194435196  | 2.33E-05    | 0.224567607  | 9.45E-07    | 0.224763445  |
| -0.026044912 | 0.574509772 | 0.009041576  | 0.845494369 | 0.004641745  |
| -0.064861857 | 0.161694851 | -0.047928573 | 0.301340258 | -0.032281574 |
| 0.020048107  | 0.665650114 | 0.037601254  | 0.41755002  | 0.070518853  |
| -0.033776305 | 0.466513336 | -0.02825315  | 0.542497222 | -0.044844242 |
| -0.161507626 | 0.000458522 | -0.168934571 | 0.000245111 | -0.168877338 |
| 0.014967079  | 0.747003815 | 0.033805752  | 0.466124645 | 0.019910985  |
| -0.078124286 | 0.091731539 | -0.090624592 | 0.050324613 | -0.104496115 |
| 0.1039454    | 0.024681776 | 0.087074016  | 0.060078781 | 0.086154306  |
| 0.123246393  | 0.007666571 | 0.106281192  | 0.021612478 | 0.108350679  |
| 0.062977728  | 0.174253761 | 0.085651409  | 0.06440269  | 0.129900187  |
| 0.035019734  | 0.450257202 | 0.036278794  | 0.434127716 | 0.029459903  |
| 0.097870108  | 0.034481017 | 0.100601733  | 0.029726716 | 0.144165159  |
| 0.236158596  | 2.43E-07    | 0.251805435  | 3.47E-08    | 0.25827855   |
| 0.046485821  | 0.3161423   | 0.067860841  | 0.143127465 | 0.06033138   |
| -0.016699664 | 0.718891452 | 0.012392799  | 0.789389708 | -0.004374054 |
| -0.088369186 | 0.0563536   | -0.110129368 | 0.017275861 | -0.138365216 |
| 0.135995522  | 0.003232637 | 0.117617506  | 0.010966675 | 0.143712852  |

|              |             |              |             |              |
|--------------|-------------|--------------|-------------|--------------|
| 0.253151617  | 2.91E-08    | 0.295612035  | 7.16E-11    | 0.329605794  |
| 0.156672249  | 0.00067968  | 0.179518325  | 9.59E-05    | 0.182706805  |
| -0.042218591 | 0.362657827 | -0.003987713 | 0.931510461 | 0.010663799  |
| 0.210080008  | 4.67E-06    | 0.234201666  | 3.07E-07    | 0.187781725  |
| -0.150410668 | 0.001113113 | -0.152588135 | 0.000939609 | -0.175343962 |
| 0.249101557  | 4.90E-08    | 0.236067802  | 2.46E-07    | 0.227356293  |
| 0.208456313  | 5.55E-06    | 0.240238527  | 1.48E-07    | 0.214107621  |
| 0.068272057  | 0.140714117 | 0.077486378  | 0.094421317 | 0.091285438  |
| 0.027665152  | 0.55093413  | 0.036206104  | 0.435049784 | 0.039006362  |
| -0.181592158 | 7.93E-05    | -0.222881873 | 1.14E-06    | -0.236180704 |
| 0.047105109  | 0.309731355 | 0.060895832  | 0.188959737 | 0.079621464  |
| -0.019998702 | 0.666424375 | -0.065908729 | 0.155017787 | -0.073052113 |
| -0.135128247 | 0.003436267 | -0.140184206 | 0.002395059 | -0.106772223 |
| -0.031237362 | 0.500692621 | -0.036782609 | 0.427767895 | -0.055258648 |
| 0.205719199  | 7.40E-06    | 0.24985426   | 4.45E-08    | 0.267605081  |
| 0.091458453  | 0.048236539 | 0.112153752  | 0.015315876 | 0.096230915  |
| -0.011581132 | 0.802890485 | 0.032195921  | 0.487635132 | 0.007977387  |
| 0.063022804  | 0.173945056 | 0.084350919  | 0.068576389 | 0.067103619  |
| -0.150989553 | 0.001064312 | -0.197658322 | 1.69E-05    | -0.221836659 |
| 0.082607284  | 0.074517395 | 0.084526825  | 0.067999211 | 0.086719965  |
| 0.003715101  | 0.936182276 | 0.04037075   | 0.384062116 | 0.080350051  |
| -0.082136448 | 0.076191609 | -0.051529837 | 0.266429209 | -0.086176486 |
| 0.128557157  | 0.005398313 | 0.13605327   | 0.003219476 | 0.14824416   |
| -0.040831594 | 0.378653125 | 0.012501664  | 0.7875836   | -0.024625275 |
| 0.014283185  | 0.758195912 | 0.026391234  | 0.569430753 | 0.019615507  |
| 0.004061329  | 0.930249276 | 0.018960256  | 0.682779459 | 0.016725224  |
| -0.061729275 | 0.182966638 | -0.064320485 | 0.165231585 | -0.057511647 |
| 0.057176149  | 0.217469529 | 0.048015828  | 0.30046005  | 0.083533115  |
| -0.022370018 | 0.62967455  | 0.013808347  | 0.765996728 | -0.00604818  |
| 0.071560174  | 0.122524297 | 0.081078732  | 0.08006429  | 0.062517808  |
| 0.410930462  | 1.88E-20    | 0.404218813  | 8.77E-20    | 0.362402143  |
| -0.079405418 | 0.086515089 | -0.089725737 | 0.052659464 | -0.086847397 |
| -0.101590969 | 0.028149399 | -0.071794341 | 0.121302231 | -0.096261138 |
| -0.12499285  | 0.006840869 | -0.15527266  | 0.000760127 | -0.18365078  |
| -0.02902152  | 0.531569875 | -0.055902476 | 0.227906869 | -0.047559411 |
| 0.244536903  | 8.71E-08    | 0.218802054  | 1.81E-06    | 0.208489228  |
| -0.052146031 | 0.260745638 | -0.045143863 | 0.330330201 | -0.070273205 |
| 0.078527023  | 0.090065216 | 0.051883333  | 0.263158375 | 0.088365436  |
| 0.170972945  | 0.000205447 | 0.196727956  | 1.85E-05    | 0.200805432  |
| 0.128474244  | 0.005428489 | 0.133319012  | 0.003898977 | 0.129302526  |
| 0.205475191  | 7.59E-06    | 0.214994918  | 2.75E-06    | 0.187296887  |
| 0.050227454  | 0.278719938 | 0.04511563   | 0.330633043 | 0.052991896  |
| 0.061885833  | 0.181856707 | 0.066102798  | 0.153803256 | 0.048660943  |
| 0.234835371  | 2.85E-07    | 0.26413092   | 6.80E-09    | 0.279317884  |
| 0.045236441  | 0.329338417 | 0.080609444  | 0.081832847 | 0.090759664  |



|              |             |              |             |              |
|--------------|-------------|--------------|-------------|--------------|
| 0.127628559  | 0.005745052 | 0.105228737  | 0.022951846 | 0.067622216  |
| -0.063719679 | 0.16922419  | -0.062213027 | 0.17955313  | -0.071512638 |
| 0.087692398  | 0.058275546 | 0.087356266  | 0.059250085 | 0.116099059  |
| 0.14715984   | 0.001427624 | 0.159645365  | 0.000534278 | 0.156301399  |
| -0.023967743 | 0.605412055 | -0.02897236  | 0.532265663 | -0.034139492 |
| 0.079592827  | 0.085772432 | 0.100056096  | 0.030628707 | 0.10898706   |
| 0.114187043  | 0.013546456 | 0.117645714  | 0.010947404 | 0.122988445  |
| 0.062463676  | 0.177803134 | 0.107588507  | 0.020043632 | 0.136397056  |
| 0.049358671  | 0.287129323 | 0.045357882  | 0.328040353 | 0.035255735  |
| -0.25429929  | 2.51E-08    | -0.249588809 | 4.60E-08    | -0.242988516 |
| -0.144773318 | 0.001708411 | -0.175788024 | 0.000134317 | -0.18701259  |
| 0.206148078  | 7.08E-06    | 0.207304806  | 6.27E-06    | 0.201928575  |
| -0.063624951 | 0.169860223 | -0.042224071 | 0.362595478 | -0.043404665 |
| 0.020338317  | 0.661109231 | -0.003173264 | 0.94547422  | 0.060773049  |
| 0.06578336   | 0.155806227 | 0.114758053  | 0.013083093 | 0.129568741  |
| 0.008485369  | 0.854890423 | 0.058166799  | 0.20959169  | 0.091751396  |
| 0.126173032  | 0.006328939 | 0.163655547  | 0.000383598 | 0.196363333  |
| 0.155190109  | 0.000765137 | 0.222925442  | 1.14E-06    | 0.193746162  |
| -0.237297202 | 2.12E-07    | -0.249223778 | 4.82E-08    | -0.273328144 |
| 0.178367455  | 0.000106474 | 0.149974212  | 0.001151261 | 0.167861206  |
| 0.029376961  | 0.526552873 | 0.035188157  | 0.448080163 | 0.069754913  |
| 0.039457785  | 0.394915964 | 0.048089545  | 0.299717751 | 0.063996798  |
| 0.256748936  | 1.82E-08    | 0.251358269  | 3.67E-08    | 0.24972817   |
| 0.12532507   | 0.006693136 | 0.150807892  | 0.001079409 | 0.149411322  |
| -0.016044241 | 0.729483964 | -0.03733743  | 0.42082717  | -0.046868166 |
| 0.115320009  | 0.012640776 | 0.125110966  | 0.006788014 | 0.101998555  |
| -0.081929154 | 0.076938347 | -0.090297121 | 0.051165031 | -0.078992489 |
| -0.118742917 | 0.010220709 | -0.109206526 | 0.018239852 | -0.140125571 |
| 0.237867958  | 1.98E-07    | 0.257143049  | 1.73E-08    | 0.298677363  |
| -0.017996769 | 0.698088105 | 0.010806306  | 0.815833458 | 0.026736959  |
| 0.100079869  | 0.030588924 | 0.11574812   | 0.012312718 | 0.118606075  |
| 0.078804723  | 0.088930446 | 0.077844641  | 0.092903025 | 0.066848408  |
| 0.062872605  | 0.174975281 | 0.082119475  | 0.07625253  | 0.070815432  |
| 0.074930555  | 0.105835648 | 0.069349466  | 0.134538934 | 0.055808557  |
| 0.124954761  | 0.006857992 | 0.167086408  | 0.000287159 | 0.172661233  |
| 0.128684087  | 0.00535241  | 0.174713866  | 0.000147819 | 0.209319325  |
| 0.111666352  | 0.015769023 | 0.089049336  | 0.054475398 | 0.066444478  |
| 0.009552947  | 0.83687499  | 0.007014283  | 0.879837226 | 0.024930027  |
| 0.096640222  | 0.036824485 | 0.142788739  | 0.001979534 | 0.144890656  |
| 0.243339905  | 1.01E-07    | 0.248378118  | 5.37E-08    | 0.242336624  |
| 0.055713356  | 0.229486485 | 0.077500239  | 0.094362209 | 0.015555125  |
| 0.146504237  | 0.001500203 | 0.119950389  | 0.009470743 | 0.137698355  |
| 0.176270992  | 0.000128632 | 0.19119695   | 3.19E-05    | 0.191236404  |
| 0.094226906  | 0.041817286 | 0.073824311  | 0.111102765 | 0.104054186  |
| 0.166981689  | 0.000289732 | 0.195815904  | 2.03E-05    | 0.17926021   |

|              |             |              |             |              |
|--------------|-------------|--------------|-------------|--------------|
| 0.134955104  | 0.003478287 | 0.157778125  | 0.000621775 | 0.207433291  |
| 0.332851459  | 1.52E-13    | 0.34521441   | 1.62E-14    | 0.318187835  |
| 0.055036845  | 0.235200514 | 0.045875536  | 0.322544387 | 0.02045389   |
| -0.201595002 | 1.13E-05    | -0.180453418 | 8.80E-05    | -0.198448066 |
| -0.055403704 | 0.232089565 | -0.053793993 | 0.245958109 | -0.020697126 |
| -0.01498838  | 0.746656067 | 0.013368365  | 0.773246109 | -0.022184605 |
| 0.002686127  | 0.953834472 | 0.029256421  | 0.528251573 | 0.010138756  |
| -0.097056868 | 0.036015885 | -0.065301777 | 0.158863095 | -0.086226718 |
| 0.301319435  | 2.95E-11    | 0.331141907  | 2.06E-13    | 0.353380332  |
| 0.056182039  | 0.225586005 | 0.056461242  | 0.223284973 | 0.040149954  |
| -0.063701663 | 0.169345017 | -0.063386192 | 0.171471248 | -0.062599642 |
| 0.082156927  | 0.076118157 | 0.083457508  | 0.071570095 | 0.077746054  |
| -0.035221141 | 0.447654516 | -0.004394605 | 0.924541863 | -0.0172932   |
| -0.058316322 | 0.208420777 | -0.092503267 | 0.045723085 | -0.083356378 |
| 0.09789611   | 0.034432875 | 0.093296258  | 0.043889668 | 0.101718515  |
| 0.072784902  | 0.116237553 | 0.083686068  | 0.070794239 | 0.077090848  |
| 0.02603791   | 0.574612674 | 0.01743991   | 0.70699257  | 0.013961668  |
| 0.006519291  | 0.888259424 | 0.032554208  | 0.48280199  | 0.034229315  |
| -0.103146281 | 0.025814935 | -0.088553622 | 0.055839055 | -0.087204042 |
| 0.05966873   | 0.198044261 | 0.049659919  | 0.284194266 | -0.000982871 |
| -0.041516461 | 0.370701615 | -0.071711616 | 0.121732867 | -0.097657808 |
| 0.021998765  | 0.635371082 | 0.02210303   | 0.633769034 | 0.001859158  |
| 0.033201685  | 0.474134012 | 0.03031552   | 0.513422111 | 0.04147521   |
| -0.136519002 | 0.003115096 | -0.14241933  | 0.00203415  | -0.153382562 |
| -0.140685725 | 0.002309337 | -0.179703513 | 9.43E-05    | -0.190209161 |
| 0.029801613  | 0.520590745 | -0.000843886 | 0.985489142 | -0.019768403 |
| -0.039226566 | 0.39769389  | -0.010855444 | 0.815011119 | -0.021343377 |
| -0.054422378 | 0.240476855 | -0.014839149 | 0.749093468 | -0.056670899 |
| -0.089566993 | 0.053081051 | -0.052599084 | 0.256620515 | -0.080818623 |
| -0.235946581 | 2.49E-07    | -0.243220758 | 1.03E-07    | -0.268057934 |
| 0.084489757  | 0.068120506 | 0.091128161  | 0.04905478  | 0.140975347  |
| 0.076991405  | 0.096551519 | 0.073411186  | 0.113121857 | 0.095111209  |
| 0.113186176  | 0.014393583 | 0.141673779  | 0.002148597 | 0.172837866  |
| 0.07152507   | 0.122708324 | 0.065981171  | 0.154563582 | 0.063528418  |
| -0.057995501 | 0.210938953 | -0.066991649 | 0.148332607 | -0.067791163 |
| -0.108426642 | 0.019090779 | -0.097529052 | 0.03511779  | -0.123920153 |
| 0.107266693  | 0.020420339 | 0.131109011  | 0.00454034  | 0.131888992  |
| 0.108078664  | 0.019481486 | 0.115268267  | 0.012680944 | 0.071102662  |
| 0.098642851  | 0.033074545 | 0.093212681  | 0.044079935 | 0.10028748   |
| -0.22232188  | 1.22E-06    | -0.191516693 | 3.10E-05    | -0.205732806 |
| 0.094636218  | 0.040932313 | 0.096572667  | 0.036957032 | 0.047694143  |
| 0.156988439  | 0.000662634 | 0.161855186  | 0.000445541 | 0.164390237  |
| 0.008879682  | 0.848227057 | 0.026949261  | 0.561292198 | 0.011555426  |
| 0.064555882  | 0.163686691 | 0.054591895  | 0.239013004 | 0.089369425  |
| 0.026656631  | 0.565553072 | 0.044130869  | 0.341308009 | 0.033851836  |

|              |             |              |             |              |
|--------------|-------------|--------------|-------------|--------------|
| 0.07681777   | 0.097307802 | 0.113545392  | 0.014084333 | 0.107918368  |
| 0.047496869  | 0.305720324 | 0.057145457  | 0.217716942 | 0.089133614  |
| -0.187354696 | 4.62E-05    | -0.178501109 | 0.000105191 | -0.186374096 |
| -0.072887671 | 0.115721727 | -0.065249148 | 0.159199879 | -0.043746333 |
| -0.090239047 | 0.051315287 | -0.071018518 | 0.125387818 | -0.056660279 |
| -0.06576695  | 0.155909649 | -0.085784482 | 0.06398766  | -0.122364004 |
| 0.17123823   | 0.000200751 | 0.165600045  | 0.000325765 | 0.172764704  |
| 0.117451584  | 0.01108064  | 0.118798403  | 0.010185124 | 0.119058686  |
| 0.085436118  | 0.065078828 | 0.086284491  | 0.062447861 | 0.08728873   |
| 0.140317916  | 0.002371925 | 0.171290452  | 0.000199838 | 0.145546269  |
| -0.018170723 | 0.695314885 | -0.002316609 | 0.960179562 | 0.053240491  |
| 0.094658705  | 0.040884154 | 0.137162975  | 0.002975832 | 0.11550009   |
| -0.13279624  | 0.004042803 | -0.162115165 | 0.000436055 | -0.197701532 |
| 0.107390253  | 0.02027498  | 0.114128123  | 0.013595081 | 0.155606566  |
| 0.045776546  | 0.323590712 | 0.056244558  | 0.225069298 | 0.068782204  |
| 0.126755778  | 0.006089063 | 0.123099152  | 0.007740096 | 0.120165602  |
| -0.038996017 | 0.400475417 | -0.024820718 | 0.592632427 | -0.060599074 |
| 0.098457382  | 0.033407575 | 0.097853481  | 0.034511832 | 0.093405199  |
| -0.076851696 | 0.097159665 | -0.082129247 | 0.076217449 | -0.088845341 |
| -0.132022852 | 0.004264394 | -0.134311    | 0.003638729 | -0.147929451 |
| -0.000529532 | 0.990894245 | 0.018727819  | 0.686461004 | 0.013234182  |
| 0.143141079  | 0.001928695 | 0.197035343  | 1.80E-05    | 0.168442962  |
| 0.047581688  | 0.304856445 | 0.030536418  | 0.510356554 | 0.014437398  |
| 0.004144866  | 0.928818345 | -0.005202016 | 0.910731429 | -0.015781256 |
| 0.125095565  | 0.006794885 | 0.152272739  | 0.000963089 | 0.136643429  |
| -0.010521106 | 0.82061039  | -0.005354605 | 0.908124339 | -0.042392664 |
| -0.107643912 | 0.01997939  | -0.099783315 | 0.031088356 | -0.119252465 |
| 5.28E-05     | 0.999091759 | 0.002915803  | 0.949892088 | -0.010512741 |
| -0.087058517 | 0.060124563 | -0.061610098 | 0.183814904 | -0.066359349 |
| 0.086808723  | 0.060866404 | 0.124865185  | 0.006898412 | 0.121130071  |
| -0.013868977 | 0.764999332 | -0.027143165 | 0.558477396 | -0.065471413 |
| 0.153459573  | 0.000877454 | 0.144121305  | 0.001793481 | 0.137371     |
| 0.011958432  | 0.796607143 | -6.82E-05    | 0.998827874 | -0.006856148 |
| 0.0043398    | 0.925480147 | -0.003004459 | 0.948370623 | -0.01024952  |
| 0.020787345  | 0.654107827 | 0.023197066  | 0.617063337 | 0.03411376   |
| 0.082074601  | 0.07641378  | 0.102479475  | 0.026794521 | 0.097616099  |
| 0.095644875  | 0.038818785 | 0.103421542  | 0.025419649 | 0.098191926  |
| -0.065325335 | 0.158712515 | -0.084015519 | 0.069688017 | -0.090679366 |
| -0.012161732 | 0.79322692  | -0.036195526 | 0.435184049 | -0.004967858 |
| 0.111001596  | 0.016405989 | 0.110487621  | 0.016913812 | 0.098516816  |
| 0.237812759  | 1.99E-07    | 0.281677242  | 5.77E-10    | 0.273135186  |
| 0.013958958  | 0.763519824 | 0.021627909  | 0.641083056 | 0.037677901  |
| 0.361160641  | 7.79E-16    | 0.352211593  | 4.37E-15    | 0.390883365  |
| 0.365931267  | 3.04E-16    | 0.372260023  | 8.50E-17    | 0.404700149  |
| 0.134408188  | 0.003614098 | 0.127092299  | 0.005954289 | 0.104678902  |

|              |             |              |             |              |
|--------------|-------------|--------------|-------------|--------------|
| 0.120123885  | 0.009367104 | 0.125416844  | 0.006652833 | 0.169427735  |
| 0.049002594  | 0.290624787 | 0.04415822   | 0.341008581 | 0.06702259   |
| 0.250485673  | 4.11E-08    | 0.277978153  | 9.84E-10    | 0.290060514  |
| 0.191119634  | 3.22E-05    | 0.208895062  | 5.30E-06    | 0.218808603  |
| -0.037974211 | 0.412942918 | -0.047482075 | 0.305871161 | -0.061024708 |
| 0.200459454  | 1.27E-05    | 0.165492135  | 0.000328748 | 0.18735686   |
| 0.050445684  | 0.276634106 | 0.041911359  | 0.366164064 | 0.070541283  |
| -0.285594963 | 3.24E-10    | -0.268260343 | 3.86E-09    | -0.30451085  |
| 0.081663496  | 0.077904008 | 0.073069552  | 0.114813217 | 0.083104342  |
| 0.048642632  | 0.294187283 | 0.044125308  | 0.341368906 | 0.045197956  |
| 0.074943901  | 0.105773333 | 0.056246284  | 0.225055045 | 0.053309552  |
| 0.020630947  | 0.656543039 | 0.025074014  | 0.588861322 | 0.047202572  |
| -0.035949019 | 0.438319896 | -0.042686574 | 0.357357459 | -0.023990483 |
| 0.091807771  | 0.047383631 | 0.061142652  | 0.187170067 | 0.076969837  |
| 0.18306728   | 6.91E-05    | 0.199570928  | 1.39E-05    | 0.195966946  |
| 0.099669966  | 0.031281084 | 0.104653786  | 0.023713449 | 0.086521488  |
| -0.002799308 | 0.951891567 | -0.015223353 | 0.742823348 | 0.006731125  |
| -0.175234176 | 0.000141127 | -0.173574389 | 0.000163527 | -0.14458212  |
| -0.085928556 | 0.063540806 | -0.086719354 | 0.061133642 | -0.120964246 |
| 0.114057541  | 0.013653533 | 0.147872823  | 0.001352365 | 0.145176365  |
| -0.000562206 | 0.990332424 | 0.024485214  | 0.597644378 | 0.026193857  |
| -0.08592527  | 0.063550969 | -0.114824099 | 0.013030411 | -0.118318072 |
| 0.109829038  | 0.017584576 | 0.085772258  | 0.064025694 | 0.105264897  |
| -0.0605658   | 0.19137237  | -0.063583766 | 0.170137309 | -0.073371953 |
| -0.097456366 | 0.035254785 | -0.106178153 | 0.021740542 | -0.082835248 |
| 0.264040591  | 6.88E-09    | 0.25448293   | 2.45E-08    | 0.285745024  |
| -0.14329546  | 0.001906798 | -0.114876156 | 0.012989018 | -0.102852274 |
| 0.152854164  | 0.000920217 | 0.179157793  | 9.91E-05    | 0.199890587  |
| 0.098462786  | 0.033397831 | 0.088981116  | 0.054661406 | 0.097937194  |
| 0.20818758   | 5.71E-06    | 0.187945709  | 4.37E-05    | 0.241124386  |
| -0.144399482 | 0.001756722 | -0.121476332 | 0.008593178 | -0.112257605 |
| 0.193297208  | 2.60E-05    | 0.201583784  | 1.13E-05    | 0.208870942  |
| 0.169094334  | 0.000241761 | 0.197085151  | 1.79E-05    | 0.250600461  |
| -0.073078036 | 0.114770976 | -0.044890022 | 0.333059449 | -0.012715989 |
| 0.187720627  | 4.46E-05    | 0.219108977  | 1.75E-06    | 0.209173382  |
| 0.03152338   | 0.496777253 | 0.029489805  | 0.524965158 | 0.043177451  |
| 0.153188154  | 0.000896393 | 0.161553424  | 0.000456792 | 0.163841999  |
| 0.087767075  | 0.058060849 | 0.104882152  | 0.023408369 | 0.042659221  |
| 0.193813903  | 2.47E-05    | 0.188817739  | 4.02E-05    | 0.189659324  |
| 0.109411103  | 0.018022195 | 0.09943232   | 0.031688473 | 0.060548932  |
| 0.030744001  | 0.507484507 | 0.032225544  | 0.487234537 | 0.049013989  |
| 0.275408295  | 1.42E-09    | 0.288069389  | 2.25E-10    | 0.264437445  |
| -0.15736567  | 0.000642815 | -0.133710227 | 0.003794393 | -0.126955826 |
| 0.126085183  | 0.006365827 | 0.135285029  | 0.003398615 | 0.12268346   |
| 0.054032265  | 0.243869533 | 0.02110855   | 0.649118    | 0.044386577  |

|              |             |              |             |              |
|--------------|-------------|--------------|-------------|--------------|
| -0.004566372 | 0.921601824 | 0.009959068  | 0.830043456 | 0.012070754  |
| -0.162791574 | 0.000412247 | -0.160217551 | 0.000509847 | -0.19241891  |
| 0.01501572   | 0.746209789 | -0.011593037 | 0.802692036 | -0.003356761 |
| 0.111380941  | 0.016039797 | 0.137289081  | 0.002949234 | 0.133185897  |
| 0.030248952  | 0.514347789 | 0.05149115   | 0.266788859 | -0.001528163 |
| -0.074783594 | 0.106523778 | -0.099137328 | 0.032200468 | -0.145149577 |
| 0.059359179  | 0.200385427 | 0.056316354  | 0.224476964 | 0.108177363  |
| 0.087401189  | 0.059119066 | 0.088267025  | 0.056640301 | 0.03581593   |
| -0.133937892 | 0.003734708 | -0.174648066 | 0.000148686 | -0.177972879 |
| -0.019906887 | 0.667864215 | 0.008272948  | 0.858484366 | -0.015745778 |
| 0.017425576  | 0.707222313 | 0.005919044  | 0.89848932  | 0.00334131   |
| -0.02981743  | 0.520369338 | -0.045289157 | 0.328774538 | -0.036556645 |
| 0.043373647  | 0.349664286 | 0.057728258  | 0.213053266 | 0.044117288  |
| 0.050781911  | 0.273441256 | 0.025618736  | 0.580789052 | 0.05055384   |
| 0.250003689  | 4.37E-08    | 0.188870037  | 4.00E-05    | 0.184583543  |
| -0.105336878 | 0.022810988 | -0.082092663 | 0.076348844 | -0.119454877 |
| 0.094588572  | 0.041034507 | 0.04830896   | 0.297515546 | 0.0250654    |
| -0.018410756 | 0.691494896 | -0.016022821 | 0.729831036 | -0.014360612 |
| -0.004380376 | 0.924785464 | -0.010091687 | 0.827815368 | -0.013872199 |
| 0.13858643   | 0.002687879 | 0.152491688  | 0.000946733 | 0.148082039  |
| -0.049796223 | 0.282872933 | -0.106387567 | 0.021480956 | -0.136777171 |
| -0.072296764 | 0.118712278 | -0.078595674 | 0.089783612 | -0.089927845 |
| 0.039624513  | 0.392920123 | 0.038266062  | 0.409358734 | 0.047111481  |
| 0.205489852  | 7.58E-06    | 0.161926096  | 0.000442934 | 0.154609718  |
| 0.277631061  | 1.03E-09    | 0.28798007   | 2.28E-10    | 0.301218012  |
| 0.049815814  | 0.282683363 | 0.044828881  | 0.333718987 | 0.048896584  |
| 0.052316857  | 0.259184901 | 0.052538548  | 0.257169073 | 0.037546039  |
| 0.013021697  | 0.778971954 | -0.022195153 | 0.632354982 | 0.016331558  |
| 0.284456221  | 3.84E-10    | 0.328262086  | 3.40E-13    | 0.330933938  |
| -0.121196031 | 0.008748729 | -0.145656717 | 0.001599049 | -0.162266835 |
| 0.144189636  | 0.001784387 | 0.162390875  | 0.0004262   | 0.193131749  |
| -0.111524469 | 0.015903125 | -0.138191249 | 0.002765163 | -0.138594183 |
| -0.210475095 | 4.48E-06    | -0.222279319 | 1.23E-06    | -0.234049687 |
| 0.249576708  | 4.61E-08    | 0.257488572  | 1.65E-08    | 0.257336256  |
| 0.00907287   | 0.844966343 | 0.020753728  | 0.65463097  | 0.021218739  |
| -0.335119603 | 1.02E-13    | -0.347301614 | 1.10E-14    | -0.348227531 |
| -0.135932704 | 0.00324701  | -0.118867757 | 0.0101408   | -0.126418972 |
| -0.278749095 | 8.81E-10    | -0.257520192 | 1.65E-08    | -0.256645991 |
| 0.050473222  | 0.276371649 | 0.053977041  | 0.244352485 | 0.048845773  |
| 0.106857555  | 0.02090814  | 0.12190947   | 0.008357655 | 0.108322662  |
| 0.260325767  | 1.13E-08    | 0.282093282  | 5.43E-10    | 0.294142642  |
| -0.071645406 | 0.122078386 | -0.083351593 | 0.071931974 | -0.085811533 |
| 0.268218131  | 3.89E-09    | 0.244227181  | 9.05E-08    | 0.255670485  |
| -0.058571967 | 0.20642979  | -0.056884929 | 0.219825229 | -0.08923551  |
| 0.082976934  | 0.07322408  | 0.144734579  | 0.00171336  | 0.143103015  |

|              |             |              |             |              |
|--------------|-------------|--------------|-------------|--------------|
| 6.28E-05     | 0.998920074 | 0.032766188  | 0.479954736 | -0.019602188 |
| -0.21164372  | 3.95E-06    | -0.146100933 | 0.001546518 | -0.129448524 |
| 0.078459875  | 0.090341341 | 0.072764436  | 0.116340494 | 0.064236996  |
| 0.135715305  | 0.003297199 | 0.139492488  | 0.002518057 | 0.130002078  |
| 0.074987278  | 0.105570988 | 0.072735233  | 0.116487499 | 0.058040859  |
| -0.081768558 | 0.077520939 | -0.044180383 | 0.340766072 | -0.057915001 |
| 0.009112535  | 0.844297194 | -0.031848346 | 0.492348519 | -0.035408632 |
| 0.005754144  | 0.901302695 | -0.00387492  | 0.933443144 | -0.048608891 |
| 0.301300627  | 2.95E-11    | 0.299284212  | 4.05E-11    | 0.33318963   |
| 0.151040074  | 0.001060148 | 0.206448042  | 6.86E-06    | 0.246886017  |
| -0.004501101 | 0.922718904 | -0.040982708 | 0.376889716 | -0.07075197  |
| 0.054558342  | 0.239302246 | 0.071712278  | 0.121729413 | 0.051573716  |
| -0.057042734 | 0.218546481 | -0.025281192 | 0.585785065 | -0.017144562 |
| -0.175127751 | 0.000142472 | -0.161345139 | 0.000464711 | -0.179138666 |
| -0.189430777 | 3.79E-05    | -0.156849053 | 0.000670099 | -0.167480228 |
| 0.134870004  | 0.00349911  | 0.127412853  | 0.005828408 | 0.128553063  |
| -0.133298052 | 0.003904653 | -0.143667707 | 0.001854933 | -0.17592177  |
| -0.115641588 | 0.012393642 | -0.084610165 | 0.067727152 | -0.089076584 |
| -0.012215022 | 0.792341515 | 0.014447076  | 0.755509093 | 0.037582195  |
| 0.093705264  | 0.042968477 | 0.093444218  | 0.043554521 | 0.083976934  |
| 0.053361667  | 0.249779519 | 0.0493291    | 0.28741853  | 0.053264581  |
| 0.051658615  | 0.265234432 | 0.054492969  | 0.239866503 | 0.053817486  |
| 0.2269331    | 7.21E-07    | 0.245459655  | 7.76E-08    | 0.238677749  |
| 0.205678722  | 7.44E-06    | 0.257333608  | 1.69E-08    | 0.275419784  |
| -0.333302921 | 1.40E-13    | -0.316531838 | 2.51E-12    | -0.288787372 |
| 0.050556383  | 0.275580105 | 0.020640095  | 0.65640051  | -0.013876755 |
| 0.153363554  | 0.000884111 | 0.132579707  | 0.00410377  | 0.138880475  |
| -0.167553108 | 0.000275948 | -0.198978823 | 1.48E-05    | -0.217602131 |
| -0.027915654 | 0.54733194  | -0.070386671 | 0.128793532 | -0.083559721 |
| -0.207281439 | 6.29E-06    | -0.201950272 | 1.09E-05    | -0.246750782 |
| -0.080927041 | 0.080632533 | -0.103521215 | 0.025277809 | -0.051909219 |
| 0.158054956  | 0.000608014 | 0.166692857  | 0.000296942 | 0.166342233  |
| 0.229328018  | 5.46E-07    | 0.228875836  | 5.75E-07    | 0.219796943  |
| -0.093286891 | 0.043910958 | -0.076024971 | 0.10082108  | -0.108890874 |
| -0.102479053 | 0.026795151 | -0.078510647 | 0.090132495 | -0.086209815 |
| -0.01113002  | 0.810419714 | -0.004647354 | 0.920216067 | -0.000183057 |
| 0.200331917  | 1.29E-05    | 0.228046186  | 6.34E-07    | 0.222102468  |
| 0.09288629   | 0.044829648 | 0.095289722  | 0.039552177 | 0.124648546  |
| -0.152297905 | 0.000961196 | -0.189729933 | 3.68E-05    | -0.202034088 |
| 0.086156119  | 0.062840243 | 0.082734868  | 0.074068921 | 0.073565764  |
| -0.149283397 | 0.001214111 | -0.158667153 | 0.000578579 | -0.199159634 |
| 0.116983555  | 0.01140778  | 0.091513738  | 0.048100703 | 0.08737547   |
| 0.101303359  | 0.028600398 | 0.097997878  | 0.034245007 | 0.095722898  |
| 0.04025685   | 0.385406192 | 0.068132813  | 0.141527796 | 0.073971791  |
| 0.049965324  | 0.281239449 | 0.075373528  | 0.10378271  | 0.06430159   |

|              |             |              |             |              |
|--------------|-------------|--------------|-------------|--------------|
| -0.305253959 | 1.58E-11    | -0.293346537 | 1.01E-10    | -0.284077189 |
| 0.013676846  | 0.768161305 | 0.003920991  | 0.932653668 | 0.015532975  |
| 0.064028947  | 0.167160061 | 0.060937184  | 0.188659024 | 0.062189589  |
| 0.027264183  | 0.556724115 | 0.034976921  | 0.450811549 | 0.036170393  |
| 0.140999607  | 0.002257122 | 0.126862978  | 0.006045836 | 0.135643502  |
| -0.040736493 | 0.379765497 | -0.067016073 | 0.148184399 | -0.070358757 |
| 0.017872525  | 0.7000713   | 0.064531762  | 0.163844489 | 0.052731284  |
| 0.29124685   | 1.39E-10    | 0.280182356  | 7.16E-10    | 0.269089793  |
| 0.264615646  | 6.36E-09    | 0.266404131  | 4.99E-09    | 0.241040961  |
| -0.217398576 | 2.11E-06    | -0.230103668 | 4.99E-07    | -0.223696021 |
| 0.021454244  | 0.643765209 | 0.047687813  | 0.303777836 | 0.055793919  |
| 0.112128555  | 0.015339019 | 0.111358098  | 0.016061643 | 0.116261617  |
| -0.058543376 | 0.20665177  | -0.066821594 | 0.149367626 | -0.078984472 |
| 0.063481886  | 0.170824192 | 0.052581451  | 0.256780221 | 0.036013242  |
| 0.184397833  | 6.11E-05    | 0.215864375  | 2.50E-06    | 0.192485454  |
| 0.028480135  | 0.539257586 | 0.081714558  | 0.077717638 | 0.118239587  |
| 0.235257179  | 2.71E-07    | 0.246753529  | 6.60E-08    | 0.26785945   |
| 0.067744052  | 0.143818618 | 0.041001294  | 0.37667317  | 0.027710038  |
| 0.039801244  | 0.390811206 | 0.052552901  | 0.257038941 | 0.034951142  |
| 0.024770138  | 0.593386795 | 0.008059964  | 0.862090754 | 0.026350916  |
| 0.063223036  | 0.172578685 | 0.038311471  | 0.408802741 | 0.043037655  |
| 0.220247857  | 1.54E-06    | 0.247778684  | 5.79E-08    | 0.23151575   |
| -0.105963823 | 0.022009037 | -0.07799283  | 0.092280751 | -0.097535448 |
| -0.01941011  | 0.675675656 | -0.073055342 | 0.114883993 | -0.1141431   |
| -0.082271938 | 0.075706725 | -0.076242825 | 0.099845773 | -0.01584279  |
| -0.014377865 | 0.756643369 | -0.050878439 | 0.272529268 | -0.045080378 |
| -0.123916692 | 0.007339678 | -0.135726004 | 0.003294713 | -0.114729493 |
| -0.025227895 | 0.586575729 | -0.039692844 | 0.392103926 | -0.05659129  |
| 0.119194666  | 0.009934169 | 0.138119433  | 0.002779423 | 0.13710474   |
| 0.014543113  | 0.753936026 | 0.036392362  | 0.432689376 | 0.01803106   |
| -0.07893406  | 0.088405866 | -0.09748159  | 0.035207194 | -0.081991125 |
| 0.260790431  | 1.07E-08    | 0.291152533  | 1.41E-10    | 0.322035125  |
| -0.142264667 | 0.002057423 | -0.140980452 | 0.002260277 | -0.110163313 |
| -0.121264681 | 0.008710402 | -0.143043256 | 0.001942689 | -0.117681847 |
| 0.046194516  | 0.319187744 | 0.016130925  | 0.728080039 | 0.011700422  |
| 0.16308921   | 0.00040216  | 0.165202429  | 0.000336884 | 0.129188382  |
| -0.129089947 | 0.005207983 | -0.082906745 | 0.073468235 | -0.068810845 |
| 0.276573801  | 1.20E-09    | 0.294302978  | 8.75E-11    | 0.304594276  |
| -0.009955888 | 0.830096897 | -0.048980253 | 0.290845046 | -0.087248754 |
| -0.058440076 | 0.207455244 | -0.089758306 | 0.052573313 | -0.106672251 |
| 0.067717012  | 0.143979003 | 0.074162108  | 0.109472996 | 0.044849405  |
| -0.057707773 | 0.21321596  | -0.060230454 | 0.193846922 | -0.076450685 |
| 0.041874821  | 0.36658244  | 0.047086611  | 0.309921604 | 0.038362155  |
| 0.153742331  | 0.000858118 | 0.155373648  | 0.00075404  | 0.139861042  |
| 0.358996449  | 1.19E-15    | 0.362013191  | 6.59E-16    | 0.334721306  |

|              |             |              |             |              |
|--------------|-------------|--------------|-------------|--------------|
| -0.192854154 | 2.72E-05    | -0.1686355   | 0.0002515   | -0.155448    |
| -0.048665078 | 0.293964285 | -0.069662657 | 0.13278363  | -0.114905508 |
| 0.105922034  | 0.02206172  | 0.091964565  | 0.047004926 | 0.093068726  |
| -0.038592118 | 0.405376389 | -0.009004836 | 0.846114351 | -0.02890196  |
| 0.033067442  | 0.475924126 | 0.061724019  | 0.183003986 | 0.054985477  |
| 0.201821382  | 1.11E-05    | 0.211480507  | 4.02E-06    | 0.19925027   |
| -0.021625671 | 0.641117605 | -0.069621175 | 0.133015102 | -0.098607154 |
| 0.027109072  | 0.558971812 | 0.03098896   | 0.504106244 | -0.001562765 |
| 0.073463835  | 0.112862951 | 0.080200397  | 0.083400022 | 0.047657573  |
| 0.113975109  | 0.013722078 | 0.117492513  | 0.011052431 | 0.06997926   |
| 0.030612478  | 0.509303226 | 0.024467886  | 0.597903749 | 0.044945457  |
| 0.011437475  | 0.805286231 | 0.032924732  | 0.477831193 | 0.014762644  |
| 0.003336605  | 0.942672255 | 0.015746233  | 0.734317393 | 0.016041286  |
| -0.058495526 | 0.207023673 | -0.063073509 | 0.173598286 | -0.066789601 |
| -0.039546136 | 0.393857578 | -0.025781748 | 0.578383449 | -0.025803802 |
| 0.091769049  | 0.047477549 | 0.097639809  | 0.034909913 | 0.100681929  |
| 0.176192793  | 0.000129537 | 0.178299699  | 0.000107131 | 0.13528868   |
| -0.085136899 | 0.066028231 | -0.088835378 | 0.055060539 | -0.104227737 |
| 0.002555142  | 0.956083335 | 0.010177788  | 0.826369553 | 0.017246678  |
| 0.160991532  | 0.000478449 | 0.200353306  | 1.29E-05    | 0.223520158  |
| 0.048298644  | 0.297618838 | 0.037448918  | 0.419440459 | 0.021622874  |
| 0.087330824  | 0.059324394 | 0.118176821  | 0.010590116 | 0.104621744  |
| -0.000723107 | 0.987565791 | 0.00929307   | 0.841252954 | 0.007882796  |
| 0.085050413  | 0.066304754 | 0.095218647  | 0.039700347 | 0.085526569  |
| 0.076161346  | 0.100209664 | 0.0981815    | 0.033908239 | 0.076493165  |
| 0.063338297  | 0.171795789 | 0.071131796  | 0.124784703 | 0.053929382  |
| -0.269746984 | 3.15E-09    | -0.270683495 | 2.76E-09    | -0.291817499 |
| -0.143872057 | 0.001827013 | -0.150428727 | 0.00111156  | -0.150164036 |
| -0.16393569  | 0.000374714 | -0.159831642 | 0.000526208 | -0.182458269 |
| -0.077379609 | 0.09487761  | -0.056014238 | 0.226977022 | -0.050381044 |
| 0.067188883  | 0.147139014 | 0.052772949  | 0.255049507 | 0.067045973  |
| -0.000626173 | 0.989232516 | 0.051505144  | 0.266658731 | 0.103624839  |
| 0.204187974  | 8.68E-06    | 0.228401387  | 6.08E-07    | 0.252239917  |
| 0.093702033  | 0.04297569  | 0.084983968  | 0.066517847 | 0.08275542   |
| -0.008843322 | 0.848841044 | 0.012102693  | 0.79420815  | 0.032977342  |
| -0.042064315 | 0.364415851 | -0.069478555 | 0.133813292 | -0.116285015 |
| 0.010889087  | 0.814448206 | 0.052967075  | 0.253303311 | 0.064683092  |
| -0.017561423 | 0.705046056 | -0.013955822 | 0.763571381 | -0.031115865 |
| 0.164616839  | 0.000353906 | 0.132001452  | 0.004270678 | 0.087233895  |
| -0.147972899 | 0.001342098 | -0.113313095 | 0.014283643 | -0.137207278 |
| 0.141613654  | 0.002158078 | 0.172448822  | 0.00018057  | 0.16593011   |
| 0.09680876   | 0.03649556  | 0.078483327  | 0.090244828 | 0.0633182    |
| 0.028880873  | 0.533561736 | 0.00671055   | 0.885003643 | 0.00562787   |
| 0.216016193  | 2.46E-06    | 0.236611607  | 2.30E-07    | 0.223637446  |
| -0.170274343 | 0.000218309 | -0.151914103 | 0.000990446 | -0.15151227  |



|              |             |              |             |              |
|--------------|-------------|--------------|-------------|--------------|
| 0.263848519  | 7.06E-09    | 0.263807838  | 7.10E-09    | 0.213486322  |
| -0.136873928 | 0.003037625 | -0.097770186 | 0.034666552 | -0.106042031 |
| 0.007983716  | 0.863382553 | -0.01968675  | 0.671321344 | -0.051482772 |
| -0.133114455 | 0.003954694 | -0.143994025 | 0.001810533 | -0.119269999 |
| 0.145184893  | 0.001656633 | 0.153060221  | 0.000905451 | 0.175089035  |
| -0.014907296 | 0.747980098 | -0.063503402 | 0.170678959 | -0.064454587 |
| 0.058679445  | 0.205596861 | 0.072355787  | 0.118410878 | 0.032582791  |
| -0.00806446  | 0.862014598 | -0.017519832 | 0.705712077 | 0.01677879   |
| -0.093435506 | 0.043574194 | -0.098567933 | 0.033208726 | -0.140346609 |
| 0.008613946  | 0.852716483 | 0.040626256  | 0.381057412 | 0.07708654   |
| -0.072585444 | 0.117243823 | -0.06325129  | 0.172386532 | -0.105203644 |
| -0.05184092  | 0.263549346 | -0.072737393 | 0.116476623 | -0.054735973 |
| 0.041076295  | 0.375800141 | 0.050493969  | 0.276174033 | 0.012207687  |
| 0.094754705  | 0.040679102 | 0.088148069  | 0.056975661 | 0.032506492  |
| -0.108485182 | 0.019025727 | -0.098084105 | 0.034086511 | -0.119511848 |
| 0.069582352  | 0.133232013 | 0.083961345  | 0.069868943 | 0.089332887  |
| 0.067992553  | 0.142351052 | 0.06921124   | 0.135319299 | 0.05501426   |
| -0.113990884 | 0.013708938 | -0.09764607  | 0.034898192 | -0.113197043 |
| 0.17779867   | 0.000112102 | 0.15364838   | 0.000864498 | 0.173481404  |
| -0.14148228  | 0.002178928 | -0.137160791 | 0.002976295 | -0.176019426 |
| 0.123332938  | 0.007623645 | 0.085506099  | 0.06485841  | 0.057415428  |
| 0.06273444   | 0.175926963 | 0.025229967  | 0.586544974 | -0.017655537 |
| -0.144641868 | 0.001725258 | -0.108038653 | 0.019526852 | -0.09689678  |
| 0.255320812  | 2.20E-08    | 0.282077984  | 5.44E-10    | 0.302074833  |
| 0.09177344   | 0.047466891 | 0.090622108  | 0.050330945 | 0.088929163  |
| 0.04986291   | 0.282227985 | 0.059494498  | 0.19935953  | 0.031020506  |
| 0.08086996   | 0.080847207 | 0.058993924  | 0.203173713 | 0.064906362  |
| -0.150065016 | 0.001143227 | -0.128010608 | 0.005600041 | -0.114122824 |
| -0.02884582  | 0.534058754 | -0.015676627 | 0.735447859 | -0.000586188 |
| 0.038920927  | 0.401383881 | 0.050570432  | 0.275446537 | 0.044815828  |
| 0.093564798  | 0.043282989 | 0.108738098  | 0.01874689  | 0.105187734  |
| 0.053949845  | 0.24459058  | 0.058428871  | 0.207542533 | 0.040824167  |
| 0.044894342  | 0.33301288  | 0.061170709  | 0.186967418 | 0.060645209  |
| 0.225661763  | 8.34E-07    | 0.227388067  | 6.84E-07    | 0.215394117  |
| -0.110675038 | 0.016727068 | -0.102235339 | 0.027161091 | -0.129033763 |
| 0.074724237  | 0.106802712 | 0.073013954  | 0.115090337 | 0.064416877  |
| 0.051317228  | 0.268409817 | 0.018617236  | 0.688215131 | -0.008964618 |
| 0.119453485  | 0.009773237 | 0.129132291  | 0.005193119 | 0.11541776   |
| -0.081453015 | 0.07867607  | -0.098375182 | 0.033556086 | -0.135199669 |
| 0.087265776  | 0.059514731 | 0.122903118  | 0.007838965 | 0.100089701  |
| 0.197435891  | 1.73E-05    | 0.222492724  | 1.20E-06    | 0.276404542  |
| 0.197496174  | 1.72E-05    | 0.212917475  | 3.45E-06    | 0.220561639  |
| 0.01953959   | 0.673636283 | 0.033913708  | 0.464701178 | 0.0163508    |
| 0.243737101  | 9.62E-08    | 0.242947036  | 1.06E-07    | 0.234884473  |
| 0.031204823  | 0.501139087 | 0.031872638  | 0.492018303 | 0.014672683  |

|              |             |              |             |              |
|--------------|-------------|--------------|-------------|--------------|
| -0.24469144  | 8.54E-08    | -0.234187317 | 3.08E-07    | -0.269551726 |
| 0.238110405  | 1.92E-07    | 0.247136099  | 6.29E-08    | 0.260982762  |
| -0.051817786 | 0.26376277  | -0.087919833 | 0.057623709 | -0.11262255  |
| -0.178270678 | 0.000107413 | -0.220156411 | 1.56E-06    | -0.255174424 |
| 0.137353293  | 0.002935773 | 0.141860352  | 0.002119417 | 0.14960201   |
| 0.080059646  | 0.083944852 | 0.080865892  | 0.080862524 | 0.082517567  |
| 0.069777398  | 0.132144998 | 0.080225171  | 0.083304421 | 0.064530415  |
| -0.070782799 | 0.126650088 | -0.071750348 | 0.121531095 | -0.087931856 |
| 0.157293959  | 0.00064654  | 0.162641018  | 0.000417439 | 0.150981697  |
| 0.081901929  | 0.077036858 | 0.084283823  | 0.068797599 | 0.084343102  |
| -0.330522065 | 2.29E-13    | -0.298756112 | 4.40E-11    | -0.303238443 |
| 0.00153662   | 0.973580761 | 0.040857728  | 0.378347798 | 0.048881625  |
| -0.014072291 | 0.761657574 | 0.009898881  | 0.831055098 | 0.012306179  |
| -0.013069514 | 0.778181446 | -0.008828625 | 0.849089258 | -0.015726784 |
| -0.019991246 | 0.666541262 | 0.039448239  | 0.395030415 | 0.036970507  |
| -0.029621152 | 0.523120181 | 0.00520489   | 0.910682319 | 0.01928887   |
| 0.023186858  | 0.617218318 | 0.066547617  | 0.151046697 | 0.042438828  |
| 0.096533868  | 0.037033342 | 0.118048704  | 0.010675344 | 0.125024361  |
| -0.056751845 | 0.220907811 | -0.057427231 | 0.215453087 | -0.077296599 |
| 0.107853472  | 0.019738023 | 0.117513541  | 0.011037962 | 0.105361219  |
| 0.057906918  | 0.211638098 | 0.082746176  | 0.074029281 | 0.076222144  |
| 0.128628804  | 0.005372359 | 0.12713691   | 0.005936625 | 0.152336275  |
| -0.009735631 | 0.83380043  | 0.005936069  | 0.898198927 | 0.01328453   |
| -0.236690093 | 2.28E-07    | -0.221657493 | 1.31E-06    | -0.23085086  |
| 0.070528927  | 0.128020576 | 0.076013725  | 0.100871631 | 0.061514969  |
| 0.063322149  | 0.171905314 | 0.147332405  | 0.001409064 | 0.152621343  |
| 0.13227949   | 0.004189674 | 0.149741886  | 0.001172056 | 0.173342326  |
| -0.037006578 | 0.424958116 | -0.042567445 | 0.358702081 | -0.043548631 |
| -0.071019633 | 0.125381869 | -0.081695483 | 0.077787216 | -0.111376628 |
| 0.099699686  | 0.031230452 | 0.139877879  | 0.002448836 | 0.148354534  |
| 0.15615979   | 0.000708173 | 0.190305974  | 3.48E-05    | 0.198409169  |
| 0.02951492   | 0.524612114 | 0.075325726  | 0.104002717 | 0.077157085  |
| 0.269482143  | 3.26E-09    | 0.285982733  | 3.06E-10    | 0.319559117  |
| -0.010602883 | 0.819239989 | 0.032790177  | 0.479633102 | 0.035717286  |
| 0.106852706  | 0.020913982 | 0.131585125  | 0.004394621 | 0.129710297  |
| 0.170081447  | 0.000221991 | 0.210311547  | 4.56E-06    | 0.24662261   |
| 0.212881169  | 3.46E-06    | 0.241026731  | 1.35E-07    | 0.250821767  |
| 0.175498858  | 0.000137833 | 0.210844532  | 4.31E-06    | 0.221028691  |
| 0.273108071  | 1.97E-09    | 0.306355312  | 1.32E-11    | 0.29790231   |
| 0.237020712  | 2.19E-07    | 0.262760899  | 8.18E-09    | 0.262149175  |
| 0.061610647  | 0.183810991 | 0.111720204  | 0.015718385 | 0.119164159  |
| 0.142281825  | 0.002054829 | 0.157519155  | 0.00063491  | 0.176061875  |
| 0.006664335  | 0.885790173 | 0.054376658  | 0.240872737 | 0.093367098  |
| 0.186398457  | 5.06E-05    | 0.240516687  | 1.43E-07    | 0.286066968  |
| 0.060728427  | 0.190180713 | 0.087205566  | 0.059691363 | 0.087615129  |

|              |             |              |             |              |
|--------------|-------------|--------------|-------------|--------------|
| 0.157196353  | 0.000651641 | 0.207294417  | 6.28E-06    | 0.224005875  |
| 0.164108861  | 0.000369318 | 0.196110959  | 1.97E-05    | 0.19208996   |
| 0.357972729  | 1.45E-15    | 0.362800098  | 5.65E-16    | 0.39377156   |
| 0.16540782   | 0.000331097 | 0.216374356  | 2.37E-06    | 0.253931011  |
| 0.268700842  | 3.64E-09    | 0.252340051  | 3.24E-08    | 0.275293438  |
| -0.008909008 | 0.847731913 | 0.037790697  | 0.415206085 | 0.065859563  |
| 0.276885762  | 1.15E-09    | 0.306992085  | 1.20E-11    | 0.322242456  |
| 0.289661983  | 1.77E-10    | 0.318942101  | 1.68E-12    | 0.339631767  |
| 0.131951857  | 0.004285276 | 0.17439564   | 0.000152057 | 0.152486997  |
| 0.186004748  | 5.25E-05    | 0.184167611  | 6.24E-05    | 0.217032598  |
| -0.047688356 | 0.303772328 | -0.013398681 | 0.772745965 | 0.014968989  |
| 0.130544422  | 0.004718781 | 0.160242909  | 0.000508789 | 0.149825541  |
| 0.057032619  | 0.218628288 | 0.097261639  | 0.035624041 | 0.101691944  |
| 0.170670707  | 0.000210922 | 0.241047497  | 1.34E-07    | 0.263323864  |
| -0.087658916 | 0.058372021 | -0.039416795 | 0.395407569 | -0.027838254 |
| 0.220662027  | 1.47E-06    | 0.211034058  | 4.22E-06    | 0.216056611  |
| 0.106982772  | 0.020757785 | 0.154088377  | 0.000834989 | 0.173806382  |
| 0.000290243  | 0.995008946 | 0.022714303  | 0.624411366 | 0.058868602  |
| 0.087670048  | 0.058339929 | 0.114332244  | 0.013427278 | 0.115845321  |
| 0.063319503  | 0.171923264 | 0.099189383  | 0.032109609 | 0.09113064   |
| 0.145356755  | 0.001635441 | 0.193465778  | 2.56E-05    | 0.200220805  |
| 0.051163429  | 0.269848838 | 0.096975319  | 0.036172951 | 0.09469805   |
| 0.0730361    | 0.114979889 | 0.105002048  | 0.023249559 | 0.084213755  |
| 0.107464489  | 0.020188082 | 0.119463018  | 0.009767354 | 0.136954081  |
| 0.086628345  | 0.061406777 | 0.109318506  | 0.01812043  | 0.125428667  |
| 0.357135739  | 1.70E-15    | 0.370649658  | 1.18E-16    | 0.414941556  |
| 0.096498069  | 0.037103868 | 0.121618962  | 0.008514977 | 0.153221806  |
| 0.253372949  | 2.83E-08    | 0.290813243  | 1.49E-10    | 0.298695194  |
| 0.015114523  | 0.744597722 | 0.051559618  | 0.266152581 | 0.0380341    |
| 0.145299934  | 0.00164242  | 0.191296618  | 3.16E-05    | 0.196288443  |
| -0.010276968 | 0.824704827 | 0.046076409  | 0.320427925 | 0.053201387  |
| 0.161890456  | 0.000444243 | 0.188345048  | 4.20E-05    | 0.214938109  |
| 0.122331611  | 0.008133668 | 0.137916004  | 0.002820181 | 0.148040158  |
| -0.022844746 | 0.622422212 | 0.00081208   | 0.986036004 | -0.007563387 |
| -0.063048573 | 0.173768759 | -0.035883084 | 0.439160857 | -0.058435695 |
| -0.014301565 | 0.757894451 | 0.003774257  | 0.935168309 | 0.007136808  |
| -0.05386361  | 0.24534659  | -0.04164716  | 0.369195985 | -0.055266776 |
| -0.116129068 | 0.012027145 | -0.089408765 | 0.05350406  | -0.09592804  |
| 0.020421653  | 0.659807572 | 0.042842421  | 0.355603187 | 0.024056167  |
| -0.125840669 | 0.006469515 | -0.084423084 | 0.06833912  | -0.106132944 |
| -0.076601725 | 0.09825539  | -0.054774039 | 0.237447109 | -0.06213454  |
| -0.020464992 | 0.659131055 | 0.00065169   | 0.988793762 | -0.025153087 |
| -0.033370283 | 0.471891007 | -0.004911926 | 0.915690432 | -0.02641118  |
| 0.002956026  | 0.94920178  | 0.01448163   | 0.754942995 | 0.003048633  |
| -0.026947981 | 0.561310808 | 0.003137004  | 0.946096317 | -0.023764638 |

|              |             |              |             |              |
|--------------|-------------|--------------|-------------|--------------|
| -0.045988338 | 0.321354745 | -0.008740301 | 0.850581192 | -0.030360118 |
| -0.016850425 | 0.716462453 | 0.015416908  | 0.739670982 | 0.005154174  |
| -0.052898709 | 0.253917325 | -0.016191453 | 0.72710025  | -0.039426378 |
| -0.101656099 | 0.02804812  | -0.053797416 | 0.245928018 | -0.063945641 |
| 0.013945152  | 0.763746774 | 0.056915951  | 0.219573426 | 0.043525957  |
| -0.05492654  | 0.236141619 | -0.013738148 | 0.767152016 | -0.031327515 |
| -0.068397173 | 0.139986055 | -0.054070422 | 0.243536219 | -0.049372234 |
| -0.044978843 | 0.332102816 | -0.033053828 | 0.476105877 | -0.035893238 |
| -0.053763503 | 0.246226274 | -0.044718229 | 0.334914736 | -0.060916955 |
| -0.048102509 | 0.299587338 | -0.02876932  | 0.53514423  | -0.025467714 |
| -0.148317528 | 0.00130729  | -0.125574981 | 0.006583896 | -0.149150966 |
| 0.006221044  | 0.893340173 | 0.035181635  | 0.448164364 | 0.011059254  |
| -0.131335093 | 0.00447061  | -0.125441097 | 0.006642219 | -0.132008603 |
| -0.095300708 | 0.039529318 | -0.052731889 | 0.255419915 | -0.06955352  |
| -0.022643061 | 0.625498907 | -0.001276068 | 0.978059201 | -0.013186124 |
| -0.152882045 | 0.000918206 | -0.116255845 | 0.011933415 | -0.13865836  |
| -0.011834558 | 0.798668641 | -0.010713552 | 0.817386291 | -0.048839511 |
| -0.024665675 | 0.594946162 | -0.019234604 | 0.678443746 | -0.03564103  |
| 0.014831742  | 0.749214508 | 0.006674918  | 0.885610055 | 0.024151411  |
| -0.119620681 | 0.009670511 | -0.102621626 | 0.026583048 | -0.103374264 |
| -0.039421506 | 0.395351053 | -0.028958481 | 0.532462186 | -0.041527054 |
| -0.051135666 | 0.270109167 | -0.021564159 | 0.642067103 | -0.046244747 |
| -0.221670199 | 1.31E-06    | -0.192816952 | 2.73E-05    | -0.237329977 |
| -0.032978918 | 0.477106607 | -0.00933297  | 0.840580459 | -0.029375378 |
| 0.012158556  | 0.793279694 | 0.061384946  | 0.185425382 | 0.046071267  |
| -0.004343751 | 0.925412509 | 0.026684491  | 0.565146748 | 0.023439859  |
| -0.049198422 | 0.288698905 | -0.003594663 | 0.938246963 | -0.019290641 |
| -0.17426051  | 0.000153891 | -0.172267137 | 0.000183472 | -0.193546521 |
| -0.047504042 | 0.305647196 | -0.015052569 | 0.745608439 | -0.03601226  |
| -0.039922182 | 0.389372022 | -0.008169465 | 0.860236248 | -0.030953374 |
| -0.002999384 | 0.948457711 | 0.006747416  | 0.884376292 | -0.003041497 |
| -0.033219836 | 0.473892257 | -0.002276092 | 0.960875465 | -0.029055131 |
| -0.010857487 | 0.814976923 | 0.01333504   | 0.773796006 | 0.002071726  |
| -0.028100687 | 0.544678665 | -0.010017157 | 0.829067359 | -0.022046497 |
| -0.017470337 | 0.706504983 | -0.025306792 | 0.58540545  | -0.018074332 |
| -0.148407104 | 0.001298379 | -0.128175972 | 0.005538302 | -0.147872635 |
| -0.13344984  | 0.003863716 | -0.106217986 | 0.021690958 | -0.10257624  |
| -0.0780504   | 0.092039905 | -0.060644435 | 0.190795483 | -0.063211429 |
| -0.038381952 | 0.407940642 | -0.008358666 | 0.857033741 | -0.012213644 |
| -0.056124392 | 0.226063199 | -0.014039643 | 0.762193899 | -0.054421447 |
| -0.037217487 | 0.42232203  | -0.01547188  | 0.738776463 | -0.04756955  |
| -0.096155882 | 0.037783783 | -0.051389628 | 0.267734234 | -0.070132404 |
| 0.072309178  | 0.118648841 | 0.082482797  | 0.074957108 | 0.085800943  |
| -0.046888612 | 0.311962757 | -0.029088073 | 0.530628655 | -0.031358516 |
| -0.046480805 | 0.316194575 | -0.022708681 | 0.624497162 | -0.049289483 |

|              |             |              |             |              |
|--------------|-------------|--------------|-------------|--------------|
| -0.061139984 | 0.187189341 | -0.018317466 | 0.69297864  | -0.049073634 |
| -0.080455155 | 0.082421152 | -0.051543819 | 0.266299307 | -0.069594809 |
| -0.071315507 | 0.123811385 | -0.064372515 | 0.164889172 | -0.078454081 |
| 0.001569685  | 0.973012485 | -0.007532441 | 0.871035363 | -0.036935885 |
| 0.032460157  | 0.484068181 | 0.019759092  | 0.67018448  | 0.022887263  |
| -0.070830295 | 0.126394961 | -0.057437076 | 0.215374294 | -0.063628068 |
| -0.051849642 | 0.263468907 | -0.017756208 | 0.701929812 | -0.0429684   |
| -0.129364787 | 0.005112183 | -0.117568471 | 0.011000247 | -0.130919743 |
| -0.086139364 | 0.062891606 | -0.08363376  | 0.070971193 | -0.098795944 |
| -0.160865991 | 0.000483417 | -0.151594675 | 0.001015414 | -0.155830569 |
| -0.14329663  | 0.001906633 | -0.094615869 | 0.040975932 | -0.115248853 |
| -0.141031637 | 0.002251854 | -0.119112382 | 0.009985824 | -0.112672518 |
| -0.0125902   | 0.786115613 | 0.026379638  | 0.569600473 | 0.01033994   |
| -0.055152889 | 0.234213301 | -0.035500264 | 0.444061678 | -0.016523363 |
| -0.042161801 | 0.363304349 | -0.013815076 | 0.765886013 | -0.036964777 |
| -0.014776829 | 0.75011208  | -0.028478047 | 0.539287336 | 0.012066982  |
| 0.04947417   | 0.286001614 | 0.024229296  | 0.601480292 | 0.05942289   |
| 0.004384691  | 0.924711595 | 0.036905826  | 0.426220757 | 0.000415319  |
| -0.022974126 | 0.620451975 | 0.007747132  | 0.867393052 | -0.018363628 |
| -0.031423947 | 0.498136568 | 0.001864794  | 0.967941199 | -0.021503088 |
| -0.074257425 | 0.109016545 | -0.061962513 | 0.181314901 | -0.035235305 |
| -0.048930235 | 0.291338578 | -0.022065409 | 0.634346892 | -0.028479305 |
| -0.093083074 | 0.044376367 | -0.038226934 | 0.409838195 | -0.058842105 |
| -0.067475946 | 0.145414906 | -0.059009086 | 0.203057418 | -0.056804012 |
| 0.022330701  | 0.630276794 | 0.073068804  | 0.114816944 | 0.048423146  |
| -0.045951395 | 0.321744047 | -0.051438186 | 0.267281774 | -0.088055094 |
| -0.027005767 | 0.560471229 | -0.002208991 | 0.962028006 | 0.005260769  |
| -0.019260984 | 0.678027405 | -0.011272452 | 0.808040552 | -0.040336854 |
| -0.225036203 | 8.96E-07    | -0.213070832 | 3.39E-06    | -0.244012943 |
| -0.043585837 | 0.347309728 | -0.030516978 | 0.510625949 | -0.052824143 |
| -0.05788802  | 0.211787472 | -0.036000596 | 0.437662712 | -0.055467129 |
| -0.100781524 | 0.029434534 | -0.093719472 | 0.042936772 | -0.092518357 |
| -0.041638515 | 0.369295466 | -0.023497702 | 0.612506598 | -0.023595874 |
| -0.09444123  | 0.041351904 | -0.068205652 | 0.141101706 | -0.081113481 |
| -0.05156417  | 0.266110317 | -0.015011351 | 0.746281093 | -0.033476956 |
| -0.0681066   | 0.141681372 | -0.026942727 | 0.561387172 | -0.04170999  |
| -0.01191679  | 0.797299998 | -0.000493745 | 0.991509605 | -0.01137583  |
| -0.080284537 | 0.083075693 | -0.088400396 | 0.056266254 | -0.090320803 |
| -0.046596827 | 0.314986814 | -0.023152149 | 0.617745408 | -0.023033925 |
| 0.047115597  | 0.309623526 | 0.077042092  | 0.096331632 | 0.063728357  |
| 0.000589559  | 0.989862087 | 0.019718255  | 0.670826143 | 0.032713124  |
| -0.067997601 | 0.142321359 | -0.047734556 | 0.303303571 | -0.058963701 |
| -0.002445389 | 0.957967946 | 0.013846975  | 0.765361228 | 0.025770084  |
| 0.005712933  | 0.902006004 | 0.033285451  | 0.473018868 | -0.018764124 |
| 0.019112842  | 0.680366746 | 0.014379853  | 0.756610778 | -0.025516264 |

|              |             |              |             |              |
|--------------|-------------|--------------|-------------|--------------|
| 0.013819267  | 0.765817061 | 0.027638829  | 0.551313326 | -0.003953372 |
| -0.031832281 | 0.492566954 | -0.012008796 | 0.795769393 | -0.01164703  |
| -0.120342524 | 0.009237935 | -0.087186076 | 0.059748631 | -0.097670323 |
| -0.049093261 | 0.289732051 | -0.016426438 | 0.723300742 | -0.052085109 |
| -0.017631412 | 0.703925764 | 0.000215497  | 0.996294274 | 0.004108415  |
| -0.078577227 | 0.089859214 | -0.05221417  | 0.260122319 | -0.081352375 |
| -0.085508796 | 0.064849928 | -0.057541412 | 0.21454055  | -0.058405762 |
| 0.046835348  | 0.312513359 | 0.050668294  | 0.274517347 | 0.038162349  |
| 0.037605134  | 0.417501939 | 0.042318059  | 0.361527165 | 0.069184747  |
| -0.025926099 | 0.576257142 | 0.013270852  | 0.774855481 | -0.009947747 |
| 0.011716813  | 0.800629439 | 0.031208829  | 0.501084116 | 0.014245794  |
| -0.023064276 | 0.619080731 | 0.01021492   | 0.825746197 | 0.022469089  |
| -0.047602017 | 0.304649628 | -0.025404085 | 0.583963818 | -0.032828172 |
| -0.035982601 | 0.437891936 | -0.020759535 | 0.654540585 | -0.035442401 |
| -0.015618258 | 0.736396276 | 0.018357947  | 0.692334659 | -0.009550168 |
| -0.028576112 | 0.53789066  | -0.029482136 | 0.525072983 | -0.01513094  |
| -0.03687872  | 0.426560826 | -0.008000843 | 0.863092349 | -0.02553365  |
| -0.017043758 | 0.713351742 | 0.005222927  | 0.91037409  | -0.018284139 |
| -1.10E-05    | 0.999809998 | 0.025865892  | 0.577143554 | 0.001691773  |
| -0.046061928 | 0.320580197 | -0.027222746 | 0.557324135 | -0.036642666 |
| 0.040358687  | 0.384204328 | 0.056462141  | 0.22327759  | 0.045105606  |
| -0.038153939 | 0.410733514 | -0.006370877 | 0.890787161 | -0.035834233 |
| -0.086786348 | 0.06093322  | -0.045991594 | 0.321320454 | -0.062902338 |
| -0.024818787 | 0.592661213 | 0.029686546  | 0.522202849 | 0.002045532  |
| -0.018044803 | 0.69732193  | 0.019219069  | 0.678688983 | -0.001193484 |
| -0.067389183 | 0.14593437  | -0.037866282 | 0.414273063 | -0.058808504 |
| -0.12890427  | 0.005273616 | -0.104874073 | 0.023419104 | -0.123875298 |
| -0.07787831  | 0.092761351 | -0.039017486 | 0.400215912 | -0.062831538 |
| -0.048619784 | 0.29441438  | -0.012111504 | 0.794061697 | -0.008537599 |
| -0.101359952 | 0.028511168 | -0.064197624 | 0.166042245 | -0.040026423 |
| -0.089019156 | 0.05455762  | -0.069390488 | 0.134308011 | -0.06186821  |
| -0.084663459 | 0.067553646 | -0.061879436 | 0.181901959 | -0.069278789 |
| -0.096776963 | 0.036557423 | -0.052180912 | 0.260426418 | -0.070372445 |
| -0.054146955 | 0.242868652 | -0.039382241 | 0.395822278 | -0.02260627  |
| -0.082793981 | 0.073861879 | -0.065083067 | 0.16026621  | -0.092463476 |
| 0.006485237  | 0.888839323 | 0.006552641  | 0.887691575 | 0.038315846  |
| -0.051571892 | 0.266038626 | -0.009509973 | 0.837598597 | -0.034535733 |
| -0.057661357 | 0.21358494  | -0.019934615 | 0.667429256 | -0.032894976 |
| -0.04090076  | 0.377845372 | -0.023992808 | 0.605034782 | -0.013664109 |
| -0.099158805 | 0.032162955 | -0.084187768 | 0.069115297 | -0.112201268 |
| -0.081350235 | 0.079055323 | -0.040196527 | 0.386119199 | -0.070786652 |
| -0.094509644 | 0.041204272 | -0.066385521 | 0.152046838 | -0.095306101 |
| -0.066136209 | 0.153594891 | -0.054949977 | 0.235941434 | -0.067223095 |
| -0.065965525 | 0.154661593 | -0.020182466 | 0.663546284 | -0.047924403 |
| -0.034354728 | 0.458911157 | -0.001006681 | 0.982690236 | -0.013592189 |

|              |             |              |             |              |
|--------------|-------------|--------------|-------------|--------------|
| -0.024015557 | 0.604692452 | 0.000599342  | 0.98969387  | -0.032020532 |
| -0.056891894 | 0.219768681 | -0.053965218 | 0.244455975 | -0.060846121 |
| -0.071659809 | 0.12200316  | -0.056860611 | 0.220022761 | -0.064993871 |
| -0.060138262 | 0.194531302 | -0.038155927 | 0.410709113 | -0.044722743 |
| -0.064631847 | 0.163190457 | -0.02885143  | 0.533979186 | -0.049108431 |
| -0.028382043 | 0.540656409 | 0.000587027  | 0.989905621 | -0.017507894 |
| -0.022711286 | 0.624457404 | 0.007577086  | 0.870277714 | -0.008733755 |
| -0.028373137 | 0.540783503 | -0.014617942 | 0.752711052 | -0.025975822 |
| -2.68E-05    | 0.999538866 | 0.02175976   | 0.639049825 | 0.002026589  |
| -0.034887207 | 0.45197443  | -0.003225356 | 0.944580547 | -0.038781068 |
| -0.050899618 | 0.27232945  | -0.02093177  | 0.651862302 | -0.027472221 |
| -0.051579376 | 0.265969158 | -0.019031342 | 0.681655029 | -0.041910745 |
| -0.03831482  | 0.408761747 | -0.019835782 | 0.668980113 | -0.02643683  |
| -0.009862806 | 0.831661578 | 0.015312049  | 0.741378251 | 0.010539352  |
| -0.053198745 | 0.251230287 | -0.05369456  | 0.246833378 | -0.04576895  |
| -0.072811001 | 0.116106385 | -0.040229442 | 0.385730061 | -0.057320566 |
| -0.044779015 | 0.33425752  | -0.01772634  | 0.702407319 | -0.038166465 |
| -0.050965052 | 0.271712728 | -0.022513401 | 0.627480321 | -0.054967013 |
| -0.025294466 | 0.585588208 | 1.15E-05     | 0.999801763 | -0.007531467 |
| -0.033726775 | 0.467167534 | 0.003473296  | 0.940327992 | -0.013819278 |
| -0.0456059   | 0.325399617 | -0.025999173 | 0.575182154 | -0.047319402 |
| -0.061837892 | 0.182196061 | -0.036597238 | 0.430101586 | -0.060955033 |
| 0.025947218  | 0.575946359 | 0.028225552  | 0.542891778 | 0.052526227  |
| -0.021650333 | 0.64073707  | 0.020541134  | 0.65794314  | -0.005418462 |
| -0.071732706 | 0.121622966 | -0.053771295 | 0.246157719 | -0.08237195  |
| 0.022317919  | 0.630472646 | 0.049187438  | 0.288806699 | 0.043779614  |
| -0.051362113 | 0.267990845 | -0.017056057 | 0.713154015 | -0.048749747 |
| -0.08751218  | 0.058796383 | -0.072203748 | 0.119188481 | -0.089971085 |
| -0.139694755 | 0.002481508 | -0.095063453 | 0.040025511 | -0.118878261 |
| -0.109914214 | 0.017496536 | -0.078137294 | 0.091677333 | -0.095900025 |
| -0.054730061 | 0.237824518 | -0.018327405 | 0.692820501 | -0.039067444 |
| 0.021121831  | 0.648912011 | 0.041712865  | 0.368440517 | 0.042418344  |
| -0.054077687 | 0.243472796 | -0.028531958 | 0.538519297 | -0.043414252 |
| -0.027617354 | 0.551622776 | -0.007170205 | 0.877186994 | -0.028867603 |
| -0.061063793 | 0.187740499 | -0.028605463 | 0.537472985 | -0.04328189  |
| -0.063497127 | 0.170721306 | -0.031596123 | 0.49578405  | -0.052092244 |
| -0.044885561 | 0.333107536 | -0.020730019 | 0.655000012 | -0.043849453 |
| -0.052265831 | 0.25965042  | -0.008261386 | 0.858680065 | -0.033265699 |
| -0.033835775 | 0.465728536 | -0.003582885 | 0.938448898 | -0.025939003 |
| -0.038601806 | 0.405258414 | 0.003816203  | 0.934449393 | -0.025841964 |
| -0.042381378 | 0.360808557 | -0.042444055 | 0.360098127 | -0.057835984 |
| -0.04043621  | 0.383290939 | -0.010244651 | 0.825247181 | -0.014237007 |
| 0.032904561  | 0.47810109  | 0.0699534    | 0.131170009 | 0.03722922   |
| 0.010031509  | 0.828826233 | 0.02109209   | 0.649373314 | -0.002654113 |
| -0.055337458 | 0.232649165 | -0.032092456 | 0.48903565  | -0.063637367 |

|              |             |              |             |              |
|--------------|-------------|--------------|-------------|--------------|
| -0.040770552 | 0.379366885 | -0.008315766 | 0.85775968  | -0.024580948 |
| -0.052190112 | 0.260342274 | -0.027114085 | 0.558899103 | -0.047692442 |
| 0.002470892  | 0.957530007 | 0.015341805  | 0.740893645 | -0.001539445 |
| -0.042285314 | 0.361899135 | -0.009624846 | 0.835664636 | -0.02294118  |
| -0.033093774 | 0.475572705 | -0.006646625 | 0.886091617 | -0.011631816 |
| 0.017613396  | 0.704214082 | 0.044225188  | 0.340276153 | 0.025296715  |
| -0.070058657 | 0.130589581 | -0.043361582 | 0.349798473 | -0.053088398 |
| 0.001401542  | 0.975902424 | 0.025221741  | 0.586667057 | 0.014662496  |
| 0.0309731    | 0.504324623 | 0.074328906  | 0.10867522  | 0.051996918  |
| 0.0566183    | 0.221997966 | 0.10540701   | 0.022720041 | 0.084363473  |
| -0.003454419 | 0.940651691 | 0.018078858  | 0.696778919 | 0.00399754   |
| -0.018957982 | 0.68281544  | -0.045664101 | 0.32478193  | -0.058824001 |
| -0.02889672  | 0.533337122 | -0.001549392 | 0.973361239 | -0.022657384 |
| -0.034962425 | 0.450999338 | -0.002437249 | 0.958107728 | -0.024577589 |
| -0.023804637 | 0.607869726 | 0.005327326  | 0.90859036  | -0.021891753 |
| -0.041885681 | 0.36645806  | -0.058597523 | 0.206231516 | -0.083126729 |
| -0.042936553 | 0.354546231 | -0.018008839 | 0.697895558 | -0.027338122 |
| -0.050440004 | 0.276688255 | -0.04885706  | 0.292061619 | -0.048911495 |
| -0.060737011 | 0.19011796  | -0.035374214 | 0.445682145 | -0.046323894 |
| -0.025424052 | 0.583668151 | 0.007974666  | 0.863535906 | -0.012687868 |
| -0.066016153 | 0.154344609 | -0.044918597 | 0.332751486 | -0.053577723 |
| -0.020590113 | 0.657179459 | -0.025684758 | 0.579814193 | -0.018985164 |
| -0.049613707 | 0.284643191 | -0.041872118 | 0.366613407 | -0.040303229 |
| -0.017324854 | 0.708837413 | 0.013131623  | 0.777155008 | -0.016000814 |
| -0.102125241 | 0.027327809 | -0.059945311 | 0.195969373 | -0.068739877 |
| 0.011340369  | 0.806906694 | 0.052100286  | 0.261164679 | 0.013207504  |
| -0.053741154 | 0.246422964 | -0.035689484 | 0.441635425 | -0.036396007 |
| -0.142405958 | 0.002036152 | -0.130672557 | 0.004677738 | -0.138822283 |
| -0.035350879 | 0.445982496 | -0.004627082 | 0.920562924 | -0.030963382 |
| 0.022954579  | 0.620749465 | 0.060483059  | 0.191980762 | 0.040502145  |
| -0.010209374 | 0.8258393   | 0.001488048  | 0.974415563 | -0.00963484  |
| -0.052253886 | 0.259759473 | -0.02542855  | 0.583601566 | -0.031089248 |
| -0.020921769 | 0.652017694 | 0.017882537  | 0.699911405 | -0.023146616 |
| -0.025247921 | 0.586278576 | 0.003994967  | 0.931386166 | 0.015390401  |
| -0.056527031 | 0.222745224 | -0.055354844 | 0.232502209 | -0.065963361 |
| 0.009329111  | 0.840645495 | 0.020061022  | 0.665447777 | 0.016804666  |
| -0.094136371 | 0.042015196 | -0.074830291 | 0.106304745 | -0.087107453 |
| -0.047872293 | 0.301908894 | -0.01442997  | 0.75578938  | -0.027813396 |
| -0.110868384 | 0.016536309 | -0.114200427 | 0.013535432 | -0.148904304 |
| -0.042744772 | 0.356701727 | -0.016279221 | 0.72568034  | -0.037430108 |
| -0.024818173 | 0.592670375 | -0.009231827 | 0.842285384 | -0.005718026 |
| 0.034775945  | 0.453418965 | 0.071635406  | 0.122130636 | 0.065486416  |
| -0.050557011 | 0.275574136 | -0.023007905 | 0.619938014 | -0.040742074 |
| -0.033230385 | 0.473751783 | -0.0382884   | 0.409085176 | -0.046529612 |
| -0.055473623 | 0.231499971 | -0.053565231 | 0.247975058 | -0.060335259 |



|              |             |              |             |              |
|--------------|-------------|--------------|-------------|--------------|
| -0.069071889 | 0.136109536 | -0.05067352  | 0.27446779  | -0.060880521 |
| 0.017128983  | 0.711981985 | 0.04852391   | 0.295368622 | 0.023237104  |
| 7.16E-05     | 0.998768289 | 0.008921242  | 0.847525376 | -0.013434394 |
| 0.012011789  | 0.795719622 | 0.013906465  | 0.76438284  | 0.030463307  |
| -0.018074896 | 0.696842084 | -0.015002689 | 0.746422487 | 0.013627759  |
| -0.010443571 | 0.821910213 | 0.015289358  | 0.741747855 | -0.037663329 |
| 0.005172785  | 0.911230967 | 0.020942582  | 0.651694327 | 0.017099761  |
| 0.000797927  | 0.986279349 | 0.023312826  | 0.615306997 | -0.015723595 |
| -0.008901365 | 0.847860947 | 0.002060144  | 0.9645849   | -0.012085191 |
| 0.008516518  | 0.854363654 | 0.007274947  | 0.875407456 | 0.023915693  |
| -0.032698129 | 0.480867889 | 0.005124336  | 0.912059019 | -0.022941025 |
| -0.037295368 | 0.421351031 | -0.070106598 | 0.130325878 | -0.06614413  |
| 0.03586338   | 0.439412341 | 0.047942057  | 0.301204121 | 0.045810828  |
| -0.076805857 | 0.097359863 | -0.065048257 | 0.160490395 | -0.069909438 |
| -0.102926941 | 0.026133698 | -0.101635509 | 0.028080104 | -0.118850584 |
| -0.053198745 | 0.251230287 | -0.05369456  | 0.246833378 | -0.04576895  |
| -0.057758574 | 0.212812657 | -0.026160024 | 0.572819215 | -0.04660601  |
| -0.013815868 | 0.765872981 | -0.043275929 | 0.350751999 | -0.067593948 |
| 0.011378452  | 0.80627108  | 0.023905737  | 0.606345838 | 0.020888924  |
| -0.103695281 | 0.025031738 | -0.063377839 | 0.171527821 | -0.08420219  |
| -0.066840916 | 0.149249747 | -0.051542582 | 0.266310802 | -0.075542166 |
| -0.035708168 | 0.441396257 | -0.023259428 | 0.616116892 | -0.031356721 |
| -0.092727215 | 0.045198907 | -0.054751763 | 0.23763822  | -0.074442078 |
| -0.082542519 | 0.074745894 | -0.065045755 | 0.160506516 | -0.066698003 |
| 0.032108045  | 0.488824491 | 0.079207754  | 0.087303985 | 0.038603614  |
| 0.011327309  | 0.807124698 | 0.050127999  | 0.279674057 | 0.038582438  |
| -0.046849838 | 0.312363513 | -0.016578108 | 0.720851968 | -0.039287175 |
| -0.155003166 | 0.000776595 | -0.128464941 | 0.005431884 | -0.132702987 |
| -0.22154456  | 1.33E-06    | -0.180583662 | 8.70E-05    | -0.200141298 |
| -0.279942276 | 7.42E-10    | -0.234550526 | 2.95E-07    | -0.243668211 |
| -0.184689614 | 5.94E-05    | -0.158616818 | 0.000580949 | -0.149401185 |
| -0.128162925 | 0.005543151 | -0.106825422 | 0.020946877 | -0.097755253 |
| -0.1269193   | 0.006023236 | -0.106031196 | 0.021924329 | -0.105174302 |
| 0.059050444  | 0.202740418 | 0.069267626  | 0.135000547 | 0.086256152  |
| -0.126748724 | 0.006091917 | -0.085110598 | 0.066112225 | -0.110151327 |
| -0.293362974 | 1.01E-10    | -0.302931424 | 2.28E-11    | -0.333446724 |
| -0.018890166 | 0.683888813 | -0.028838686 | 0.534159922 | -0.029826743 |
| 0.033072412  | 0.475857795 | 0.062652698  | 0.176491807 | 0.072658935  |
| -0.141287823 | 0.002210128 | -0.124903559 | 0.00688107  | -0.13493273  |
| -0.187059295 | 4.75E-05    | -0.136801143 | 0.003053368 | -0.143815656 |
| -0.147996145 | 0.001339724 | -0.109026504 | 0.018433278 | -0.123069269 |
| -0.14757308  | 0.001383548 | -0.108846658 | 0.0186283   | -0.127048892 |
| -0.235656408 | 2.58E-07    | -0.233844326 | 3.21E-07    | -0.212991141 |
| 0.112013843  | 0.015444769 | 0.173561999  | 0.000163706 | 0.197125764  |
| -0.207106028 | 6.40E-06    | -0.166819459 | 0.000293762 | -0.164462783 |

|              |             |              |             |              |
|--------------|-------------|--------------|-------------|--------------|
| -0.166099593 | 0.00031228  | -0.13619246  | 0.003187953 | -0.141171027 |
| -0.068334587 | 0.140349886 | -0.039765112 | 0.391241805 | -0.031721075 |
| -0.195885338 | 2.02E-05    | -0.204896398 | 8.07E-06    | -0.181427464 |
| 0.011507015  | 0.80412629  | 0.022831717  | 0.622620761 | 0.031556556  |
| -0.180325429 | 8.91E-05    | -0.18003212  | 9.15E-05    | -0.225893072 |
| -0.110698477 | 0.016703841 | -0.059169862 | 0.201827144 | -0.063359938 |
| -0.078005947 | 0.092225832 | -0.083744039 | 0.070598554 | -0.094010813 |
| -0.127251178 | 0.005891595 | -0.145696073 | 0.00159433  | -0.16062576  |
| -0.162665988 | 0.000416574 | -0.157505226 | 0.000635623 | -0.170908017 |
| -0.314053009 | 3.78E-12    | -0.315111995 | 3.18E-12    | -0.328984321 |
| -0.174612043 | 0.000149163 | -0.141432961 | 0.002186803 | -0.16065194  |
| -0.101973131 | 0.027559593 | -0.056621798 | 0.221969366 | -0.050090976 |
| -0.099929933 | 0.030840569 | -0.102531784 | 0.026716535 | -0.159973111 |
| -0.0283685   | 0.540849688 | 0.002168697  | 0.962720128 | 0.017267446  |
| -0.089129178 | 0.054258372 | -0.097254515 | 0.035637612 | -0.129367517 |
| -0.187936431 | 4.37E-05    | -0.199083776 | 1.46E-05    | -0.174736071 |
| -0.13464639  | 0.003554367 | -0.115468576 | 0.012526067 | -0.120122567 |
| -0.229287524 | 5.48E-07    | -0.192825594 | 2.73E-05    | -0.176001355 |
| -0.216630644 | 2.30E-06    | -0.189561526 | 3.74E-05    | -0.199045437 |
| -0.182894983 | 7.03E-05    | -0.154221891 | 0.000826221 | -0.166465813 |
| -0.172860634 | 0.00017415  | -0.152648212 | 0.000935197 | -0.172711581 |
| -0.224076728 | 1.00E-06    | -0.1774891   | 0.000115281 | -0.196248516 |
| -0.084054514 | 0.069558021 | -0.054266493 | 0.241828529 | -0.064546245 |
| -0.013058609 | 0.778361707 | 0.00099434   | 0.982902414 | 0.024737849  |
| -0.232428255 | 3.79E-07    | -0.199590736 | 1.39E-05    | -0.197496702 |
| 0.074361865  | 0.108518127 | 0.085867137  | 0.063730985 | 0.110847423  |
| -0.344940609 | 1.71E-14    | -0.318743379 | 1.73E-12    | -0.328833368 |
| -0.046919062 | 0.311648276 | -0.010605349 | 0.819198666 | -0.026113284 |
| -0.05055443  | 0.275598679 | -0.024077554 | 0.603759933 | -0.0112388   |
| -0.115075854 | 0.012831304 | -0.086683831 | 0.061240135 | -0.096695546 |
| -0.13991305  | 0.002442606 | -0.121829355 | 0.008400779 | -0.111013994 |
| -0.186861982 | 4.84E-05    | -0.154980092 | 0.00077802  | -0.156548575 |
| -0.153456558 | 0.000877662 | -0.183350852 | 6.73E-05    | -0.18467359  |
| -0.074644677 | 0.107177491 | -0.074200853 | 0.109287271 | -0.075716147 |
| -0.096675629 | 0.036755176 | -0.100667218 | 0.029620008 | -0.084184093 |
| -0.160564969 | 0.000495524 | -0.115808186 | 0.012267297 | -0.112361579 |
| -0.23156622  | 4.20E-07    | -0.192577734 | 2.79E-05    | -0.198609362 |
| -0.1865407   | 4.99E-05    | -0.152498858 | 0.000946202 | -0.140870644 |
| -0.296644181 | 6.10E-11    | -0.265665844 | 5.52E-09    | -0.274823787 |
| -0.042298485 | 0.361749489 | 0.01048859   | 0.821155444 | 0.034598936  |
| 0.076376071  | 0.099252954 | 0.102317143  | 0.027037785 | 0.105861795  |
| -0.028196089 | 0.543313147 | 0.007890814  | 0.864956986 | 0.000815362  |
| -0.08658317  | 0.061542731 | -0.070014971 | 0.130830244 | -0.074178429 |
| -0.051337288 | 0.268222513 | -0.024945116 | 0.590778987 | -0.049774902 |
| 0.074485774  | 0.107929133 | 0.085674188  | 0.064331488 | 0.090963962  |

|              |             |              |             |              |
|--------------|-------------|--------------|-------------|--------------|
| -0.064719907 | 0.162616635 | -0.049236257 | 0.288327806 | -0.050506727 |
| -0.188258059 | 4.24E-05    | -0.156394759 | 0.000694974 | -0.161954803 |
| -0.16622391  | 0.000309006 | -0.165160395 | 0.00033808  | -0.120357372 |
| -0.06383798  | 0.168432378 | -0.065965135 | 0.15466404  | -0.045517576 |
| -0.15074482  | 0.001084697 | -0.146945312 | 0.00145101  | -0.146482515 |
| -0.233956657 | 3.16E-07    | -0.212863757 | 3.47E-06    | -0.217985261 |
| -0.174838868 | 0.000146184 | -0.14938077  | 0.001205065 | -0.17566031  |
| -0.022866635 | 0.622088681 | 0.014910515  | 0.747927529 | 0.0280284    |
| -0.202122232 | 1.07E-05    | -0.17122978  | 0.000200899 | -0.176156568 |
| -0.017936399 | 0.699051477 | 0.019256141  | 0.678103836 | 0.028210149  |
| 0.044527544  | 0.336981816 | 0.029526005  | 0.524456343 | 0.045664778  |
| -0.155406644 | 0.000752061 | -0.128904108 | 0.005273673 | -0.156354979 |
| -0.028406479 | 0.540307777 | -0.006282729 | 0.892288992 | -0.03742066  |
| -0.102122638 | 0.027331761 | -0.081394002 | 0.078893643 | -0.102293096 |
| -0.160354107 | 0.000504172 | -0.126169828 | 0.006330281 | -0.143319055 |
| -0.143678231 | 0.001853486 | -0.108257145 | 0.019280228 | -0.132348914 |
| -0.107632097 | 0.019993074 | -0.085719019 | 0.064191551 | -0.109965072 |
| -0.178162998 | 0.000108466 | -0.151062076 | 0.001058339 | -0.166089524 |
| -0.123942623 | 0.007327286 | -0.119689515 | 0.009628498 | -0.101881503 |
| -0.127084534 | 0.005957368 | -0.131949031 | 0.004286109 | -0.113012263 |
| -0.099843405 | 0.030986597 | -0.093966574 | 0.042388507 | -0.052461524 |
| 0.075188759  | 0.104635145 | 0.087213293  | 0.05966867  | 0.089574926  |
| -0.144699204 | 0.001717891 | -0.102194525 | 0.027222792 | -0.109455313 |
| 0.06298285   | 0.174218662 | 0.073181491  | 0.11425686  | 0.08960977   |
| -0.259262367 | 1.31E-08    | -0.231782994 | 4.09E-07    | -0.22670928  |
| -0.082355877 | 0.07540759  | -0.041100419 | 0.375519595 | -0.057975354 |
| 0.076521841  | 0.098607623 | 0.131797058  | 0.004331127 | 0.133976016  |
| -0.201970273 | 1.09E-05    | -0.18933346  | 3.82E-05    | -0.201531571 |
| -0.214362969 | 2.95E-06    | -0.184565645 | 6.01E-05    | -0.198732797 |
| -0.116140814 | 0.012018434 | -0.077845868 | 0.092897861 | -0.064335056 |
| -0.327387985 | 3.96E-13    | -0.304143802 | 1.88E-11    | -0.339299536 |
| -0.117767621 | 0.010864463 | -0.087564172 | 0.058645731 | -0.089026065 |
| -0.127790051 | 0.005683349 | -0.13240148  | 0.004154573 | -0.136235501 |
| -0.183593832 | 6.58E-05    | -0.150736536 | 0.001085394 | -0.132414813 |
| -0.144616996 | 0.001728463 | -0.130206033 | 0.004828741 | -0.104766981 |
| -0.214899078 | 2.78E-06    | -0.183744531 | 6.49E-05    | -0.163177931 |
| -0.21081631  | 4.32E-06    | -0.19627514  | 1.94E-05    | -0.172456658 |
| -0.171895613 | 0.000189544 | -0.174725341 | 0.000147668 | -0.152625641 |
| -0.174927413 | 0.000145037 | -0.172298004 | 0.000182976 | -0.13882112  |
| -0.039364614 | 0.396033929 | -0.090375875 | 0.050961855 | -0.124004402 |
| -0.267470433 | 4.31E-09    | -0.242702043 | 1.09E-07    | -0.261268002 |
| -0.12692525  | 0.006020853 | -0.109631255 | 0.017790503 | -0.140375782 |
| -0.221198731 | 1.38E-06    | -0.1837825   | 6.47E-05    | -0.236831492 |
| -0.19499664  | 2.20E-05    | -0.160690138 | 0.000490456 | -0.18711366  |
| -0.125646191 | 0.006553063 | -0.090841898 | 0.049773312 | -0.099235082 |

|              |             |              |             |              |
|--------------|-------------|--------------|-------------|--------------|
| -0.036645795 | 0.42948957  | 0.000797057  | 0.986294305 | 0.009083156  |
| -0.114470553 | 0.013314618 | -0.14334702  | 0.001899536 | -0.171106068 |
| -0.026951239 | 0.561263451 | -0.029097098 | 0.530501089 | -0.037890533 |
| -0.234429961 | 2.99E-07    | -0.212461243 | 3.62E-06    | -0.192585076 |
| -0.203185834 | 9.63E-06    | -0.154799116 | 0.000789283 | -0.19408689  |
| -0.063618024 | 0.169906803 | -0.023542337 | 0.611831316 | 0.030569715  |
| -0.093433107 | 0.043579613 | -0.07847062  | 0.090297111 | -0.072729002 |
| -0.159765035 | 0.00052908  | -0.135699984 | 0.003300762 | -0.151826818 |
| -0.150828747 | 0.001077666 | -0.113171112 | 0.014406681 | -0.106667286 |
| -0.255518261 | 2.14E-08    | -0.226457592 | 7.61E-07    | -0.22645523  |
| -0.247662824 | 5.88E-08    | -0.234880219 | 2.83E-07    | -0.255087555 |
| -0.194659685 | 2.28E-05    | -0.178974946 | 0.000100758 | -0.196633082 |
| 0.115799743  | 0.012273672 | 0.119081189  | 0.010005468 | 0.12679103   |
| -0.1989312   | 1.49E-05    | -0.173022302 | 0.000171689 | -0.171404998 |
| 0.050449667  | 0.276596129 | 0.05148644   | 0.266832672 | 0.021893535  |
| -0.214076469 | 3.04E-06    | -0.18288941  | 7.03E-05    | -0.190873673 |
| -0.163540523 | 0.000387302 | -0.151619838 | 0.001013426 | -0.160654996 |
| -0.233632676 | 3.29E-07    | -0.192643802 | 2.77E-05    | -0.202689692 |
| 0.006990683  | 0.880238477 | 0.016010811  | 0.730025652 | -0.007513741 |
| -0.110437425 | 0.016964138 | -0.083386639 | 0.07181207  | -0.069876609 |
| -0.304946642 | 1.66E-11    | -0.28926651  | 1.88E-10    | -0.278562913 |
| -0.103163215 | 0.025790465 | -0.06480837  | 0.162041719 | -0.077083877 |
| 0.194218044  | 2.38E-05    | 0.201944012  | 1.09E-05    | 0.235138018  |
| 0.062745677  | 0.175849417 | 0.08809592   | 0.057123195 | 0.10510169   |
| -0.161956028 | 0.000441839 | -0.152183243 | 0.00096985  | -0.164189378 |
| -0.104254881 | 0.02425461  | -0.083789157 | 0.070446558 | -0.076600757 |
| -0.142897387 | 0.001963728 | -0.103249092 | 0.025666678 | -0.089530029 |
| -0.060446425 | 0.192250586 | -0.045517054 | 0.326343996 | -0.043135794 |
| -0.246313852 | 6.97E-08    | -0.220044846 | 1.58E-06    | -0.250604215 |
| 0.121768141  | 0.008433863 | 0.109657798  | 0.017762746 | 0.122108258  |
| -0.15077086  | 0.001082511 | -0.174263358 | 0.000153852 | -0.175569024 |
| -0.056017626 | 0.226948877 | -0.026288141 | 0.57094044  | -0.041258945 |
| 0.080866222  | 0.08086128  | 0.118610191  | 0.010306278 | 0.098298892  |
| -0.136721416 | 0.003070697 | -0.131548944 | 0.004405545 | -0.136342894 |
| 0.124880968  | 0.006891274 | 0.166943561  | 0.000290675 | 0.145410779  |
| -0.129135027 | 0.00519216  | -0.111719122 | 0.015719401 | -0.118674924 |
| -0.138761407 | 0.002654292 | -0.098123281 | 0.034014709 | -0.078169143 |
| -0.159577279 | 0.000537257 | -0.157582011 | 0.000631698 | -0.156775719 |
| 0.057518432  | 0.214723979 | 0.052682495  | 0.255865996 | 0.064227178  |
| -0.177228275 | 0.000118025 | -0.165026329 | 0.000341921 | -0.191336403 |
| -0.133132741 | 0.003949684 | -0.112796233 | 0.014736029 | -0.154209325 |
| -0.169807797 | 0.000227315 | -0.140153775 | 0.002400353 | -0.17118322  |
| -0.256216426 | 1.95E-08    | -0.234426383 | 2.99E-07    | -0.252180031 |
| -0.083743075 | 0.070601803 | -0.067854322 | 0.143165978 | -0.065025994 |
| -0.075439409 | 0.103480104 | -0.026811123 | 0.563301639 | -0.015281079 |

|              |             |              |             |              |
|--------------|-------------|--------------|-------------|--------------|
| -0.277831949 | 1.01E-09    | -0.220389847 | 1.52E-06    | -0.229036075 |
| -0.137806456 | 0.002842354 | -0.11405943  | 0.013651966 | -0.101870985 |
| -0.079392097 | 0.086568073 | -0.054814015 | 0.237104403 | -0.039057536 |
| -0.114651884 | 0.013168175 | -0.086237486 | 0.062591302 | -0.12282255  |
| -0.135859271 | 0.003263885 | -0.100735639 | 0.029508869 | -0.104801536 |
| 0.000126086  | 0.997831799 | 0.015866194  | 0.732370459 | 0.049507104  |
| -0.070392654 | 0.128760947 | -0.084392781 | 0.06843867  | -0.068638404 |
| -0.000994497 | 0.982899718 | 0.01460707   | 0.752888997 | 0.03663424   |
| -0.149656275 | 0.001179805 | -0.085297522 | 0.065517179 | -0.123333762 |
| -0.153366147 | 0.000883931 | -0.120947072 | 0.008888984 | -0.157807712 |
| -0.101875255 | 0.027709627 | -0.084513159 | 0.068043909 | -0.095493681 |
| -0.228183426 | 6.24E-07    | -0.19784014  | 1.66E-05    | -0.2232391   |
| -0.212713787 | 3.52E-06    | -0.177828219 | 0.000111803 | -0.172080785 |
| 0.053980379  | 0.244323274 | 0.028764141  | 0.535217766 | 0.047423574  |
| -0.202480922 | 1.04E-05    | -0.170980893 | 0.000205304 | -0.201895519 |
| -0.222613663 | 1.18E-06    | -0.242287834 | 1.15E-07    | -0.258196426 |
| -0.192818847 | 2.73E-05    | -0.168836561 | 0.000247188 | -0.189481769 |
| -0.123845724 | 0.007373688 | -0.089439373 | 0.053422013 | -0.123594354 |
| -0.058326893 | 0.208338175 | -0.020123104 | 0.664475478 | -0.016308837 |
| -0.143542776 | 0.001872194 | -0.10332088  | 0.025563595 | -0.144379585 |
| -0.10509736  | 0.02312398  | -0.104055596 | 0.024528938 | -0.089881045 |
| -0.101494701 | 0.028299671 | -0.068489873 | 0.139448494 | -0.064529669 |
| -0.142976078 | 0.001952352 | -0.119496373 | 0.009746794 | -0.130427528 |
| -0.182082477 | 7.58E-05    | -0.124778791 | 0.006937598 | -0.130892375 |
| -0.108448851 | 0.019066077 | -0.099169563 | 0.032144177 | -0.08250134  |
| -0.091893353 | 0.047176607 | -0.025209635 | 0.586846726 | -0.028671319 |
| -0.246159026 | 7.11E-08    | -0.223081224 | 1.12E-06    | -0.226747846 |
| 0.08866091   | 0.055541538 | 0.160622593  | 0.000493185 | 0.162421304  |
| -0.146766278 | 0.001470796 | -0.099232288 | 0.032034887 | -0.12393446  |
| -0.130308483 | 0.004795208 | -0.086431031 | 0.062002417 | -0.077746644 |
| -0.160497392 | 0.00049828  | -0.1589955   | 0.000563343 | -0.159382481 |
| -0.033911005 | 0.46473679  | -0.006581311 | 0.887203459 | 0.007486973  |
| -0.189628998 | 3.72E-05    | -0.173899173 | 0.000158897 | -0.164889894 |
| -0.124854849 | 0.006903089 | -0.095811949 | 0.03847778  | -0.071534566 |
| -0.016525547 | 0.72170026  | 0.008690586  | 0.851421214 | 0.015991974  |
| -0.030200177 | 0.515026581 | -0.005149692 | 0.911625634 | 0.003531037  |
| -0.140713271 | 0.002304711 | -0.104211023 | 0.024314754 | -0.104163798 |
| -0.055063522 | 0.234973306 | -0.014940281 | 0.747441392 | -0.034467912 |
| 0.068841384  | 0.137424481 | 0.142262608  | 0.002057734 | 0.153263538  |
| 0.130399755  | 0.004765511 | 0.168592036  | 0.000252442 | 0.188148166  |
| -0.165847097 | 0.000319029 | -0.117300665 | 0.011185209 | -0.131270095 |
| -0.017379518 | 0.70796071  | 0.003144534  | 0.945967133 | -0.003450131 |
| 0.088985654  | 0.054649016 | 0.069085465  | 0.136032389 | 0.097422761  |
| 0.045055645  | 0.331277059 | 0.095225056  | 0.039686967 | 0.09651582   |
| 0.025402582  | 0.583986074 | 0.022931435  | 0.621101773 | 0.022796234  |

|              |             |              |             |              |
|--------------|-------------|--------------|-------------|--------------|
| -0.193402347 | 2.58E-05    | -0.171102614 | 0.000203139 | -0.188192743 |
| -0.125053533 | 0.006813668 | -0.085417866 | 0.065136417 | -0.082813098 |
| -0.029236931 | 0.5285265   | 0.00525632   | 0.909803506 | 0.028675722  |
| -0.054853781 | 0.236763843 | -0.01943744  | 0.675244995 | -0.033225518 |
| 0.042440838  | 0.36013457  | 0.090926606  | 0.049559782 | 0.104889925  |
| 0.126111718  | 0.006354664 | 0.118136476  | 0.01061689  | 0.0714927    |
| -0.100316729 | 0.030194973 | -0.064468893 | 0.164256321 | -0.069592272 |
| -0.084671645 | 0.067527026 | -0.022037666 | 0.634773161 | -0.050168888 |
| -0.022483532 | 0.627937133 | 0.029812506  | 0.520438254 | 0.053305898  |
| 0.003944767  | 0.932246284 | 0.071215559  | 0.124340185 | 0.059674031  |
| -0.214775874 | 2.82E-06    | -0.216699948 | 2.28E-06    | -0.208505378 |
| -0.107635172 | 0.019989512 | -0.109329167 | 0.018109096 | -0.146347208 |
| 0.073319121  | 0.113575713 | 0.143266262  | 0.001910922 | 0.133960438  |
| -0.081255681 | 0.079405529 | -0.014514522 | 0.754404238 | -0.042540415 |
| 0.148453763  | 0.00129376  | 0.149920032  | 0.00115608  | 0.148632928  |
| 0.050857891  | 0.272723234 | 0.116251178  | 0.011936854 | 0.114178427  |
| -0.0579848   | 0.21102332  | -0.026160629 | 0.572810334 | -0.027406948 |
| -0.028617628 | 0.537299923 | 0.012658853  | 0.784977803 | -0.011557068 |
| -0.011911074 | 0.797395111 | 0.030017166  | 0.517577685 | 0.040849691  |
| 0.008288666  | 0.858218327 | 0.060671721  | 0.190595607 | 0.037931385  |
| 0.028933315  | 0.532818608 | 0.082920966  | 0.073418712 | 0.078205016  |
| -0.057720325 | 0.213116263 | 0.000186962  | 0.996784961 | 0.036701651  |
| 0.003752009  | 0.935549641 | 0.053627032  | 0.247429043 | 0.025431492  |
| -0.047394946 | 0.306760543 | -0.00480184  | 0.917573188 | -0.038722521 |
| -0.032085192 | 0.489134064 | 0.001300924  | 0.977631937 | -0.024377243 |
| -0.089998935 | 0.051940447 | -0.057800556 | 0.212479775 | -0.063652731 |
| 0.015782004  | 0.73373666  | 0.061979792  | 0.181192968 | 0.035208954  |
| 0.017412859  | 0.707426163 | 0.06821786   | 0.14103039  | 0.071440181  |
| -0.076714013 | 0.097761976 | -0.078233589 | 0.091276876 | -0.066749839 |
| -0.046039208 | 0.320819195 | -0.047494008 | 0.30574949  | -0.083416957 |
| 0.145306357  | 0.00164163  | 0.208557663  | 5.49E-06    | 0.188031826  |
| -0.074597431 | 0.107400542 | -0.049235328 | 0.288336919 | -0.034135031 |
| -0.046724511 | 0.313661145 | 0.031805841  | 0.49292659  | 0.024242884  |
| -0.10964786  | 0.017773134 | -0.07453152  | 0.107712319 | -0.11329359  |
| -0.028460252 | 0.53954097  | 0.004621409  | 0.920659998 | -0.001383006 |
| -0.08746307  | 0.058938979 | -0.056912854 | 0.219598558 | -0.064967667 |
| -0.064649649 | 0.163074336 | 0.002697249  | 0.953643537 | -0.016038009 |
| 0.027666296  | 0.550917653 | 0.083038757  | 0.073009571 | 0.074286714  |
| -0.096709256 | 0.036689453 | -0.062317981 | 0.17881881  | -0.084187673 |
| 0.294837256  | 8.06E-11    | 0.308843653  | 8.87E-12    | 0.305176868  |
| 0.116564929  | 0.011707599 | 0.165383976  | 0.000331764 | 0.169964161  |
| -0.111676562 | 0.015759412 | -0.063516137 | 0.170593038 | -0.062883781 |
| -0.025823763 | 0.577764188 | 0.020625385  | 0.656629713 | 0.000892664  |
| -0.043106821 | 0.352639419 | -0.008605399 | 0.852860948 | -0.055986445 |
| 0.06372174   | 0.169210368 | 0.122554594  | 0.008017529 | 0.130613798  |

|              |             |              |             |              |
|--------------|-------------|--------------|-------------|--------------|
| 0.124352356  | 0.007133953 | 0.176332647  | 0.000127923 | 0.161219729  |
| -0.049223463 | 0.288453258 | 0.011900132  | 0.797577197 | 0.025082872  |
| -0.179951674 | 9.22E-05    | -0.121945232 | 0.008338469 | -0.165442798 |
| -0.004130554 | 0.929063482 | 0.060341755  | 0.193023038 | 0.06614093   |
| -0.060017241 | 0.19543237  | -0.021374138 | 0.64500395  | -0.023535809 |
| 0.274961617  | 1.51E-09    | 0.300698351  | 3.25E-11    | 0.278529809  |
| 0.080776907  | 0.081198155 | 0.116246606  | 0.011940223 | 0.113199473  |
| -0.066148566 | 0.153517886 | -0.071438027 | 0.123165552 | -0.087454498 |
| 0.106530428  | 0.021305414 | 0.139533165  | 0.002510668 | 0.131973089  |
| 0.09907541   | 0.032308826 | 0.111484194  | 0.015941373 | 0.086334644  |
| 0.032145943  | 0.488311367 | 0.095130721  | 0.039884296 | 0.108722195  |
| 0.09271795   | 0.045220493 | 0.149955775  | 0.001152899 | 0.144952529  |
| -0.02288887  | 0.621749973 | 0.035619394  | 0.442533268 | 0.032737195  |
| -0.054275677 | 0.241748751 | -0.028072586 | 0.545081211 | -0.031773901 |
| 0.040709814  | 0.380077909 | 0.080753514  | 0.081286575 | 0.080008214  |
| -0.200485382 | 1.27E-05    | -0.196082403 | 1.98E-05    | -0.1799923   |
| 0.186537118  | 4.99E-05    | 0.229575515  | 5.30E-07    | 0.222777214  |
| -0.142171573 | 0.002071548 | -0.107749655 | 0.019857278 | -0.105234551 |
| 0.110030693  | 0.017376764 | 0.155292906  | 0.000758903 | 0.165864462  |
| 0.162289657  | 0.000429794 | 0.197703885  | 1.68E-05    | 0.202269113  |
| -0.047934018 | 0.301285278 | -0.015158506 | 0.743880462 | -0.029676771 |
| 0.105575552  | 0.022502756 | 0.093650427  | 0.04309103  | 0.073517281  |
| 8.12E-05     | 0.998603167 | 0.005801136  | 0.900500838 | -0.002845239 |
| -0.017476854 | 0.706400559 | 0.00581017   | 0.900346694 | 0.014830482  |
| -0.116476363 | 0.011771916 | -0.097229946 | 0.03568445  | -0.097807832 |
| 0.057360123  | 0.215990709 | 0.061886469  | 0.181852206 | 0.03237067   |
| -0.082085859 | 0.0763733   | -0.040428521 | 0.383381468 | -0.077617371 |
| 0.025248896  | 0.586264119 | 0.067190707  | 0.147128009 | 0.062516982  |
| -0.06648469  | 0.151434368 | -0.014424535 | 0.755878444 | -0.027535662 |
| -0.060959428 | 0.18849741  | -0.004347018 | 0.925356568 | 0.001078029  |
| 0.103640958  | 0.025108309 | 0.141797546  | 0.002129199 | 0.156933769  |
| 0.111758128  | 0.015682809 | 0.1390538    | 0.002599019 | 0.161489656  |
| 0.147864352  | 0.001353237 | 0.177067091  | 0.000119752 | 0.179652964  |
| 0.119521855  | 0.009731114 | 0.13275615   | 0.004054029 | 0.109796831  |
| 0.081212734  | 0.07956501  | 0.140847501  | 0.002282289 | 0.122872812  |
| -0.084428726 | 0.068320597 | -0.03233478  | 0.485758891 | -0.019109223 |
| 0.081848763  | 0.077229534 | 0.133026085  | 0.003978987 | 0.125632636  |
| 0.078550212  | 0.089970017 | 0.091535065  | 0.048048388 | 0.083937009  |
| -0.037513062 | 0.418643841 | -0.032389039 | 0.48502682  | -0.037625169 |
| 0.016479487  | 0.722443918 | 0.038935192  | 0.401211205 | 0.031818276  |
| -0.087644151 | 0.058414607 | -0.048079361 | 0.299820227 | -0.047542132 |
| -0.013596173 | 0.769490113 | 0.044430158  | 0.338040654 | 0.042156943  |
| 0.143291932  | 0.001907296 | 0.16183794   | 0.000446177 | 0.168179449  |
| 0.0539708    | 0.244407112 | 0.132136599  | 0.004231129 | 0.140225274  |
| -0.092991088 | 0.044587771 | -0.056959264 | 0.219222199 | -0.055159363 |

|              |             |              |             |              |
|--------------|-------------|--------------|-------------|--------------|
| -0.159185549 | 0.000554695 | -0.114231132 | 0.01351017  | -0.131297762 |
| -0.024045613 | 0.604240282 | 0.027169378  | 0.558097407 | 0.01693754   |
| -0.042299009 | 0.36174353  | -0.027290252 | 0.556346782 | -0.045138135 |
| -0.023327983 | 0.615077209 | 0.03092432   | 0.504996562 | 0.039164274  |
| 0.131113812  | 0.004538849 | 0.180118349  | 9.08E-05    | 0.195152184  |
| -0.119509992 | 0.009738411 | -0.099530148 | 0.031520223 | -0.100309618 |
| -0.085807984 | 0.063914592 | -0.049161319 | 0.289063143 | -0.067484898 |
| 0.091606601  | 0.047873258 | 0.131090217  | 0.00454618  | 0.140546494  |
| 0.088916391  | 0.05483837  | 0.15041788   | 0.001112492 | 0.149149386  |
| 0.165942569  | 0.000316461 | 0.193956887  | 2.44E-05    | 0.190588757  |
| -0.102480146 | 0.026793519 | -0.062871632 | 0.174981969 | -0.071967916 |
| -0.020252021 | 0.662458212 | 0.019179111  | 0.679319893 | 0.013541355  |
| -0.073660755 | 0.111898704 | -0.010784988 | 0.816190297 | -0.025595454 |
| 0.042877031  | 0.355214343 | 0.106164207  | 0.021757925 | 0.1031676    |
| -0.03300684  | 0.476733464 | 0.012286274  | 0.791158097 | 0.010869891  |
| -0.013104969 | 0.777595456 | 0.045548604  | 0.32600844  | 0.039764135  |
| 0.101350925  | 0.028525385 | 0.132082251  | 0.004246993 | 0.119090177  |
| -0.043190028 | 0.351709946 | -0.044852147 | 0.333467915 | -0.050322258 |
| 0.076204936  | 0.100014857 | 0.134444181  | 0.003605014 | 0.13479117   |
| -0.021417883 | 0.644327363 | 0.011039768  | 0.811928176 | -0.006014332 |
| -0.121915937 | 0.008354182 | -0.049775218 | 0.283076292 | -0.065249591 |
| -0.03724884  | 0.421930977 | -0.010524558 | 0.820552534 | -0.030342198 |
| 0.293545094  | 9.82E-11    | 0.311118891  | 6.12E-12    | 0.30980051   |
| 0.087017538  | 0.060245749 | 0.113978289  | 0.013719429 | 0.113359737  |
| -0.044701732 | 0.335093251 | -0.004082777 | 0.929881867 | -0.019571774 |
| -0.062063666 | 0.180601994 | -0.004208854 | 0.927722423 | -0.01667978  |
| -0.060694896 | 0.190425968 | -0.007331789 | 0.874441982 | -0.026388976 |
| -0.043102505 | 0.352687669 | 0.021437521  | 0.64402373  | 0.020541838  |
| -0.031560786 | 0.49626639  | 0.020409522  | 0.65999699  | 0.008827045  |
| 0.124891712  | 0.00688642  | 0.173116811  | 0.000170265 | 0.133511601  |
| -0.201788066 | 1.11E-05    | -0.163647853 | 0.000383844 | -0.161064606 |
| -0.043315236 | 0.35031421  | 0.021474964  | 0.64344495  | 0.020638227  |
| 0.030931873  | 0.504892479 | 0.013672635  | 0.76823065  | -0.022501912 |
| -8.00E-05    | 0.998624028 | 0.021713626  | 0.63976093  | 0.029771533  |
| 0.07891077   | 0.088500146 | 0.075714634  | 0.102223473 | 0.059229426  |
| 0.099273819  | 0.031962698 | 0.119856819  | 0.00952706  | 0.136480148  |
| 0.117307853  | 0.011180209 | 0.136534657  | 0.003111641 | 0.118835991  |
| 0.04882572   | 0.292371654 | 0.127098107  | 0.005951987 | 0.112122012  |
| 0.021906548  | 0.63678942  | 0.075399533  | 0.103663181 | 0.078832761  |
| -0.137875445 | 0.002828372 | -0.102107973 | 0.027354037 | -0.101690378 |
| 0.087677479  | 0.058318516 | 0.143975057  | 0.001813087 | 0.155507411  |
| 0.11163504   | 0.015798532 | 0.135560983  | 0.003333252 | 0.12032557   |
| -0.044311093 | 0.339338081 | -0.010416248 | 0.822368377 | -0.013897931 |
| 0.09337924   | 0.043701438 | 0.135003591  | 0.003466473 | 0.131647198  |
| -0.140429045 | 0.002352854 | -0.091260713 | 0.048725022 | -0.094550963 |



|              |             |              |             |              |
|--------------|-------------|--------------|-------------|--------------|
| -0.198943509 | 1.48E-05    | -0.15650518  | 0.00068885  | -0.156101995 |
| -0.099464725 | 0.031632655 | -0.068796656 | 0.137680768 | -0.0642574   |
| -0.126908894 | 0.006027405 | -0.114113832 | 0.013606898 | -0.146794014 |
| -0.135865119 | 0.003262538 | -0.134935381 | 0.003483103 | -0.137932832 |
| -0.175369791 | 0.00013943  | -0.118711564 | 0.010240865 | -0.130263967 |
| 0.076073847  | 0.100601613 | 0.09563205   | 0.038845067 | 0.094456359  |
| -0.032415567 | 0.484669112 | -0.028136783 | 0.544161814 | -0.025150722 |
| -0.059724132 | 0.197627361 | -0.027596533 | 0.551922885 | -0.020854813 |
| -0.061855241 | 0.182073201 | 0.003406031  | 0.941481531 | 0.015375285  |
| 0.152372741  | 0.000955587 | 0.163604305  | 0.000385244 | 0.161517057  |
| 0.062531562  | 0.177331352 | 0.107920148  | 0.019661761 | 0.092382369  |
| 0.144921966  | 0.001689542 | 0.182166622  | 7.52E-05    | 0.171457263  |
| 0.139808713  | 0.00246113  | 0.163622732  | 0.000384651 | 0.182823554  |
| -0.035399446 | 0.445357496 | -0.032535197 | 0.483057784 | -0.030627874 |
| -0.000127371 | 0.997809694 | 0.015877317  | 0.732190024 | 0.012893654  |
| 0.148869899  | 0.001253227 | 0.159916045  | 0.000522588 | 0.200673244  |
| 0.065417007  | 0.158127581 | 0.047731769  | 0.30333183  | 0.05377272   |
| 0.19363157   | 2.52E-05    | 0.212034121  | 3.79E-06    | 0.235898929  |
| -0.014718805 | 0.751060885 | 0.019820009  | 0.669227744 | 0.037657859  |
| 0.102949503  | 0.026100753 | 0.093414675  | 0.043621266 | 0.081363456  |
| 0.040060613  | 0.387728619 | 0.055892862  | 0.227986989 | 0.073642071  |
| 0.044239586  | 0.340118816 | 0.068605399  | 0.138780785 | 0.055130863  |
| 0.108397409  | 0.019123337 | 0.146800124  | 0.001467037 | 0.140672037  |
| 0.115976079  | 0.012141121 | 0.152527879  | 0.000944054 | 0.184149642  |
| 0.090041217  | 0.051829904 | 0.105443659  | 0.022672638 | 0.110650808  |
| 0.005454552  | 0.906417213 | 0.00272671   | 0.95313777  | 0.032784417  |
| 0.061330217  | 0.185818412 | 0.111549508  | 0.015879386 | 0.146883497  |
| 0.079638859  | 0.085590805 | 0.093189246  | 0.044133412 | 0.094046983  |
| 0.152726658  | 0.000929465 | 0.17343571   | 0.000165542 | 0.199724283  |
| 0.225830403  | 8.18E-07    | 0.256904206  | 1.78E-08    | 0.255928224  |
| 0.224901246  | 9.10E-07    | 0.229115033  | 5.60E-07    | 0.252463596  |
| 0.035220862  | 0.447658122 | 0.053618619  | 0.24750332  | 0.104818227  |
| 0.048877251  | 0.29186199  | 0.043779788  | 0.345166374 | 0.087973197  |
| 0.04311014   | 0.352602306 | 0.050503408  | 0.276084158 | 0.06590144   |
| 0.03269218   | 0.480947757 | 0.038652317  | 0.404643671 | 0.009091958  |
| 0.008131433  | 0.860880274 | 0.019502363  | 0.674222386 | 0.024585141  |
| 0.138581314  | 0.002688867 | 0.164980521  | 0.000343243 | 0.189163994  |
| 0.054679501  | 0.238258943 | 0.079776918  | 0.085047931 | 0.067787026  |
| 0.045902561  | 0.322259115 | 0.067296011  | 0.146493785 | 0.065197059  |
| 0.040177655  | 0.386342431 | 0.053433708  | 0.249139887 | 0.078361746  |
| 0.046076409  | 0.320427918 | 0.038238832  | 0.409692367 | 0.061426089  |
| 0.198248709  | 1.59E-05    | 0.200997887  | 1.20E-05    | 0.233722568  |
| -0.041071575 | 0.375855043 | -0.045183126 | 0.329909343 | -0.007603307 |
| 0.056101912  | 0.226249479 | 0.044624326  | 0.335931652 | 0.043109171  |
| 0.102244064  | 0.027147916 | 0.099474367  | 0.031616064 | 0.097721989  |

|              |             |              |             |              |
|--------------|-------------|--------------|-------------|--------------|
| 0.031953995  | 0.490913261 | 0.017355309  | 0.708348919 | 0.043229372  |
| 0.045256211  | 0.329126876 | 0.029215871  | 0.528823651 | 0.074288313  |
| 0.164486473  | 0.000357803 | 0.164753994  | 0.000349849 | 0.19934674   |
| 0.108156803  | 0.019393151 | 0.108705292  | 0.018782855 | 0.141953619  |
| 0.100945261  | 0.029170588 | 0.10712716   | 0.020585576 | 0.117005499  |
| 0.091213461  | 0.048842362 | 0.041927638  | 0.365977752 | 0.02463801   |
| 0.044348953  | 0.338925182 | 0.056142799  | 0.225910755 | 0.061913511  |
| 0.117518384  | 0.011034632 | 0.124823489  | 0.006917299 | 0.138160214  |
| 0.139035489  | 0.00260245  | 0.117361549  | 0.011142919 | 0.142081567  |
| 0.088326109  | 0.056474345 | 0.10942651   | 0.018005895 | 0.105125714  |
| 0.069447763  | 0.133986106 | 0.074393231  | 0.108368793 | 0.08880502   |
| 0.016245624  | 0.726223758 | 0.029267749  | 0.528091816 | 0.03427872   |
| 0.0642601    | 0.165629642 | 0.07137932   | 0.123474685 | 0.076515916  |
| 0.065401643  | 0.158225497 | 0.082430875  | 0.075141131 | 0.095472952  |
| 0.132075349  | 0.004249012 | 0.144866069  | 0.001696615 | 0.153083906  |
| 0.038754468  | 0.403402136 | 0.038859679  | 0.402125788 | 0.037711915  |
| 0.069141363  | 0.135715116 | 0.07322803   | 0.114026176 | 0.080506932  |
| -0.049511261 | 0.285640106 | -0.039767767 | 0.391210154 | -0.023598327 |
| 0.173140744  | 0.000169906 | 0.194884619  | 2.23E-05    | 0.217822591  |
| -0.048255432 | 0.298051788 | -0.065619491 | 0.156841357 | -0.093460723 |
| 0.092509205  | 0.045709121 | 0.121327036  | 0.008675719 | 0.127324416  |
| 0.031915056  | 0.491441995 | 0.057032845  | 0.21862646  | 0.033484567  |
| 0.08839448   | 0.056282804 | 0.081736613  | 0.077637252 | 0.07828908   |
| 0.083759584  | 0.070546154 | 0.074112945  | 0.109709013 | 0.104889535  |
| 0.089931043  | 0.052118361 | 0.065419237  | 0.15811337  | 0.077309113  |
| -0.001688989 | 0.970962166 | 0.016402498  | 0.723687533 | 0.028292196  |
| 0.091959236  | 0.047017754 | 0.107117558  | 0.020596988 | 0.119497391  |
| 0.210460083  | 4.49E-06    | 0.212992663  | 3.42E-06    | 0.252243663  |
| -0.02635431  | 0.569971251 | -0.007913229 | 0.864577061 | 0.02349281   |
| 0.134002311  | 0.003717974 | 0.182985112  | 6.97E-05    | 0.184747377  |
| 0.125892395  | 0.006447454 | 0.170491839  | 0.000214226 | 0.187388636  |
| -0.01658146  | 0.720797875 | 0.020626494  | 0.656612435 | 0.02564721   |
| 0.098377752  | 0.033551435 | 0.076321166  | 0.099496889 | 0.08513568   |
| 0.119065354  | 0.010015453 | 0.10722479   | 0.020469839 | 0.148709772  |
| 0.097073122  | 0.035984648 | 0.108208716  | 0.019334657 | 0.1217782    |
| 0.015585154  | 0.736934347 | 0.016704394  | 0.718815205 | 0.025970542  |
| 0.093530817  | 0.043359367 | 0.112292476  | 0.015189008 | 0.118978567  |
| 0.088774105  | 0.055229069 | 0.085838275  | 0.063820516 | 0.096026119  |
| 0.24936395   | 4.74E-08    | 0.265304079  | 5.80E-09    | 0.264183584  |
| 0.056067483  | 0.22653498  | 0.068690079  | 0.138292915 | 0.101190799  |
| 0.004802965  | 0.917553938 | 0.031848427  | 0.492347418 | 0.045234238  |
| 0.101855231  | 0.027740408 | 0.104120826  | 0.024438851 | 0.133164743  |
| 0.046003005  | 0.321200275 | 0.071027956  | 0.125337481 | 0.103742527  |
| 0.062934678  | 0.174548968 | 0.082645604  | 0.074382465 | 0.089884617  |
| 0.085550645  | 0.064718424 | 0.101609464  | 0.028120606 | 0.119820031  |

|              |             |              |             |              |
|--------------|-------------|--------------|-------------|--------------|
| 0.287308039  | 2.52E-10    | 0.310269113  | 7.03E-12    | 0.300912747  |
| 0.042356862  | 0.361086682 | 0.056166051  | 0.225718284 | 0.062067817  |
| 0.173898774  | 0.000158903 | 0.186657539  | 4.94E-05    | 0.196620504  |
| 0.13168494   | 0.004364613 | 0.166450254  | 0.000303127 | 0.203312101  |
| 0.096609861  | 0.036884004 | 0.16192428   | 0.000443001 | 0.178224479  |
| 0.08405514   | 0.069555936 | 0.127977449  | 0.005612495 | 0.151735226  |
| 0.085272439  | 0.065596771 | 0.126138195  | 0.006343544 | 0.124802008  |
| 0.150207082  | 0.00113076  | 0.179010364  | 0.000100434 | 0.204597448  |
| 0.146601986  | 0.001489171 | 0.174099632  | 0.000156101 | 0.215321728  |
| 0.104472043  | 0.023958696 | 0.135349974  | 0.003383128 | 0.157868942  |
| 0.061374629  | 0.185499423 | 0.07243878   | 0.117988089 | 0.109537419  |
| 0.160635624  | 0.000492657 | 0.197225386  | 1.76E-05    | 0.229910813  |
| 0.100904372  | 0.029236312 | 0.133929796  | 0.003736815 | 0.162179251  |
| 0.054201041  | 0.242397657 | 0.086623673  | 0.061420829 | 0.113895749  |
| 0.052435021  | 0.258109088 | 0.06417794   | 0.1661724   | 0.082448084  |
| 0.147604108  | 0.00138029  | 0.176813972  | 0.000122511 | 0.204416631  |
| 0.194744572  | 2.26E-05    | 0.219708704  | 1.64E-06    | 0.241414116  |
| 0.050971207  | 0.271654764 | 0.029991889  | 0.517930549 | 0.051524887  |
| 0.066657108  | 0.150373968 | 0.080758554  | 0.081267518 | 0.103470146  |
| 0.068372055  | 0.14013199  | 0.090694343  | 0.050147102 | 0.087445106  |
| 0.126456833  | 0.006211079 | 0.128367464  | 0.005467574 | 0.143791109  |
| 0.242951045  | 1.06E-07    | 0.22896359   | 5.70E-07    | 0.274941184  |
| -0.051381677 | 0.267808372 | -0.068683868 | 0.138328653 | -0.074174856 |
| 0.122799359  | 0.00789175  | 0.132543978  | 0.004113909 | 0.152560015  |
| 0.161233636  | 0.000469003 | 0.187636828  | 4.50E-05    | 0.203571269  |
| 0.221439972  | 1.35E-06    | 0.208564302  | 5.49E-06    | 0.273310644  |
| 0.13799964   | 0.002803359 | 0.203516432  | 9.31E-06    | 0.165074542  |
| -0.008643858 | 0.852210894 | 0.048003408  | 0.300585239 | 0.054690541  |
| 0.064108926  | 0.16662934  | 0.11817998   | 0.010588022 | 0.094908079  |
| 0.270411721  | 2.87E-09    | 0.27560266   | 1.38E-09    | 0.28865818   |
| 0.289946797  | 1.69E-10    | 0.35111407   | 5.39E-15    | 0.33428417   |
| -0.003311096 | 0.943109784 | 0.071773112  | 0.121412629 | 0.061766592  |
| 0.105201118  | 0.02298794  | 0.152682742  | 0.00093267  | 0.151487707  |
| -0.043779658 | 0.345167811 | -0.018493224 | 0.690184262 | -0.028946083 |
| -0.002868854 | 0.95069787  | 0.046942099  | 0.311410496 | 0.054643082  |
| -0.007445234 | 0.872515645 | 0.049502486  | 0.285725602 | 0.033010971  |
| 0.039447526  | 0.39503897  | 0.062915819  | 0.174678408 | 0.045850446  |
| -0.021537753 | 0.642474889 | 0.040469737  | 0.382896331 | 0.00947357   |
| 0.114426237  | 0.013350625 | 0.15898398   | 0.000563871 | 0.148841684  |
| 0.076858088  | 0.097131777 | 0.113686092  | 0.013964807 | 0.103037611  |
| 0.080466635  | 0.082377261 | 0.137939634  | 0.002815419 | 0.132835862  |
| -0.122085631 | 0.008263524 | -0.058826314 | 0.204462604 | -0.050937664 |
| 0.135406425  | 0.003369719 | 0.177111991  | 0.000119268 | 0.161799982  |
| 0.03083084   | 0.50628555  | 0.08376341   | 0.070533261 | 0.074870153  |
| 0.056928646  | 0.219470444 | 0.080042227  | 0.084012479 | 0.081339512  |

|              |             |              |             |              |
|--------------|-------------|--------------|-------------|--------------|
| 0.087125584  | 0.059926665 | 0.144836956  | 0.001700309 | 0.132215907  |
| -0.031119099 | 0.502316305 | 0.035227979  | 0.447566309 | 0.048708136  |
| 0.023197773  | 0.617052605 | 0.089131028  | 0.054253353 | 0.083038337  |
| -0.0249974   | 0.590000794 | 0.025624088  | 0.58071001  | 0.019886645  |
| 0.111797463  | 0.015645984 | 0.163217302  | 0.00039789  | 0.156836472  |
| 0.072806469  | 0.116129153 | 0.115755666  | 0.012307003 | 0.105605942  |
| -0.115524756 | 0.01248293  | -0.069304636 | 0.134791644 | -0.085033748 |
| 0.087387738  | 0.05915827  | 0.133352601  | 0.003889896 | 0.106915266  |
| 0.207722161  | 6.00E-06    | 0.269128023  | 3.43E-09    | 0.253736903  |
| 0.081188483  | 0.079655182 | 0.140697754  | 0.002307316 | 0.131354053  |
| -0.06477201  | 0.162277832 | -0.00995899  | 0.830044774 | -0.047657564 |
| 0.071912447  | 0.12068948  | 0.096986269  | 0.036151828 | 0.111650388  |
| 0.073561623  | 0.112383305 | 0.099803429  | 0.031054263 | 0.1101479    |
| 0.075732909  | 0.102140464 | 0.148820347  | 0.001257991 | 0.135393196  |
| 0.034253114  | 0.460241644 | 0.071111331  | 0.124893495 | 0.076040077  |
| 0.082844466  | 0.07368543  | 0.135153012  | 0.003430294 | 0.153969521  |
| 0.034596413  | 0.455755333 | 0.064459493  | 0.164317967 | 0.043256564  |
| 0.140197601  | 0.002392732 | 0.15628768   | 0.00070096  | 0.14493536   |
| -0.032350126 | 0.48555178  | 0.022763768  | 0.623656744 | -0.005825584 |
| -0.081559312 | 0.078285389 | -0.032405393 | 0.484806287 | -0.037645043 |
| 0.059292912  | 0.200889219 | 0.126771684  | 0.006082632 | 0.111249997  |
| 0.282172848  | 5.36E-10    | 0.33909049   | 4.98E-14    | 0.297434594  |
| 0.062277615  | 0.179100971 | 0.109431238  | 0.018000896 | 0.133473866  |
| 0.062410973  | 0.178170046 | 0.096804979  | 0.036502911 | 0.068881917  |
| -0.141921965 | 0.002109861 | -0.080696097 | 0.081503929 | -0.086653709 |
| 0.080583661  | 0.081930918 | 0.151187886  | 0.001048051 | 0.147406962  |
| 0.056464087  | 0.223261609 | 0.114713976  | 0.013118357 | 0.109070232  |
| -0.091157658 | 0.048981238 | -0.034584602 | 0.455909269 | -0.049217761 |
| 0.044404959  | 0.338314975 | 0.092352199  | 0.046079555 | 0.056168468  |
| 0.136303931  | 0.003162909 | 0.183763486  | 6.48E-05    | 0.19791421   |
| 0.049185366  | 0.288827043 | 0.105141008  | 0.023066668 | 0.090913212  |
| 0.063919428  | 0.167888848 | 0.120213145  | 0.009314177 | 0.156291234  |
| 0.086808761  | 0.06086629  | 0.164946965  | 0.000344214 | 0.167463295  |
| 0.183561858  | 6.60E-05    | 0.252750738  | 3.07E-08    | 0.248960299  |
| 0.15409929   | 0.000834269 | 0.195920091  | 2.01E-05    | 0.171716135  |
| 0.186878063  | 4.83E-05    | 0.221096469  | 1.40E-06    | 0.195553522  |
| 0.04240251   | 0.360568937 | 0.103421368  | 0.025419898 | 0.10627962   |
| -0.016783789 | 0.717535712 | 0.028167205  | 0.543726398 | 0.029144863  |
| 0.105045042  | 0.02319284  | 0.165681951  | 0.000323517 | 0.186085485  |
| 0.239750783  | 1.57E-07    | 0.290521572  | 1.55E-10    | 0.284557231  |
| 0.054676415  | 0.238285482 | 0.113214954  | 0.01436859  | 0.079763469  |
| 0.04605369   | 0.320666838 | 0.078196039  | 0.091432869 | 0.094883703  |
| 0.108353211  | 0.019172654 | 0.153840774  | 0.000851479 | 0.135717708  |
| 0.175321034  | 0.000140038 | 0.196966413  | 1.81E-05    | 0.221159218  |
| -0.051300398 | 0.26856703  | -0.016500796 | 0.722099854 | -0.023615169 |

|              |             |              |             |              |
|--------------|-------------|--------------|-------------|--------------|
| 0.033140267  | 0.474952562 | 0.075647471  | 0.102529005 | 0.100696321  |
| -0.031532046 | 0.496658872 | 0.011529735  | 0.803747419 | 0.018630338  |
| 0.066065889  | 0.154033689 | 0.089891894  | 0.052221183 | 0.073126071  |
| 0.275151509  | 1.47E-09    | 0.30851993   | 9.34E-12    | 0.291989205  |
| 0.10313907   | 0.025825361 | 0.160918296  | 0.000481341 | 0.145746934  |
| -0.05073018  | 0.273930856 | 0.007979268  | 0.863457928 | 0.006308166  |
| -0.018697756 | 0.68693772  | 0.027341455  | 0.555606003 | 0.0272571    |
| -0.147676161 | 0.001372751 | -0.09456235  | 0.041090843 | -0.084935661 |
| -0.016162218 | 0.727573435 | 0.023286273  | 0.615709678 | 0.001733527  |
| 0.137226721  | 0.00296236  | 0.180183182  | 9.02E-05    | 0.121797197  |
| -0.111540363 | 0.015888052 | -0.087364726 | 0.059225391 | -0.11714516  |
| 0.03967008   | 0.392375712 | 0.09276734   | 0.045105526 | 0.100266067  |
| 0.193807836  | 2.48E-05    | 0.231703995  | 4.13E-07    | 0.228627589  |
| 0.050245649  | 0.278545632 | 0.117849225  | 0.010809255 | 0.110109783  |
| 0.01242488   | 0.788857354 | 0.065945652  | 0.154786156 | 0.045722839  |
| -0.066165896 | 0.153409935 | 0.011729106  | 0.800424678 | -0.005118209 |
| -0.038857719 | 0.402149533 | 0.019569447  | 0.673166362 | 0.010059965  |
| 0.026982534  | 0.560808715 | 0.067455419  | 0.145537674 | 0.073464287  |
| -0.09789668  | 0.03443182  | -0.041461568 | 0.371335112 | -0.049222127 |
| -0.064170379 | 0.166222417 | 0.003934809  | 0.932416897 | -0.008705071 |
| -0.066114685 | 0.153729099 | -0.000385596 | 0.993369286 | -0.008771964 |
| 0.117024065  | 0.01137913  | 0.195943747  | 2.00E-05    | 0.176298916  |
| 0.085110504  | 0.066112525 | 0.132265056  | 0.004193844 | 0.107318907  |
| 0.016254352  | 0.726082574 | 0.072633209  | 0.117002229 | 0.067219203  |
| -0.054365979 | 0.240965274 | 0.008125575  | 0.860979481 | -0.025332809 |
| 0.254860463  | 2.33E-08    | 0.314469567  | 3.53E-12    | 0.341751321  |
| 0.194002231  | 2.43E-05    | 0.236914064  | 2.22E-07    | 0.241807872  |
| 0.059052552  | 0.202724277 | 0.093766445  | 0.042832091 | 0.082040592  |
| 0.106505342  | 0.021336149 | 0.162086171  | 0.000437103 | 0.149669117  |
| -0.038060258 | 0.411884266 | -0.001888064 | 0.967541358 | -0.001211328 |
| 0.019647828  | 0.671933306 | 0.066822048  | 0.149364855 | 0.078391264  |
| -0.04617886  | 0.319351952 | 0.03191695   | 0.491416265 | 0.034511491  |
| 0.003907016  | 0.932893135 | 0.072448274  | 0.117939796 | 0.048930702  |
| 0.154645567  | 0.000798957 | 0.199575716  | 1.39E-05    | 0.159753504  |
| 0.030488052  | 0.511026948 | 0.113007997  | 0.014549181 | 0.089194246  |
| 0.041376046  | 0.3723234   | 0.0898787    | 0.052255874 | 0.07077259   |
| -0.091995219 | 0.046931185 | -0.04245084  | 0.360021269 | -0.056593805 |
| 0.120935289  | 0.008895672 | 0.160469632  | 0.000499417 | 0.159706741  |
| 0.022246656  | 0.631565017 | 0.082164783  | 0.076089998 | 0.07609162   |
| 0.098720055  | 0.032936753 | 0.122635785  | 0.007975609 | 0.110408306  |
| 0.243044878  | 1.05E-07    | 0.294930264  | 7.95E-11    | 0.275820856  |
| 0.04933936   | 0.287318162 | 0.07630972   | 0.099547803 | 0.069424764  |
| 0.13924176   | 0.002564044 | 0.186932019  | 4.81E-05    | 0.157251966  |
| -0.007654911 | 0.868957274 | 0.064788557  | 0.162170349 | 0.057742822  |
| 0.02187837   | 0.637223074 | 0.073142833  | 0.114448757 | 0.060374423  |

|              |             |              |             |              |
|--------------|-------------|--------------|-------------|--------------|
| 0.067966795  | 0.142502631 | 0.084129186  | 0.069309648 | 0.089141358  |
| 0.09775821   | 0.034688845 | 0.15000223   | 0.001148777 | 0.133738102  |
| 0.076404152  | 0.099128378 | 0.131327451  | 0.004472951 | 0.108692694  |
| -0.060572601 | 0.191322431 | 0.022493242  | 0.627788615 | 0.022823869  |
| 0.085587959  | 0.064601355 | 0.158229614  | 0.000599478 | 0.139100321  |
| 0.025957003  | 0.575802398 | 0.103551468  | 0.025234892 | 0.092033624  |
| 0.02818714   | 0.543441167 | 0.080712607  | 0.081441382 | 0.070775128  |
| -0.043075812 | 0.352986205 | 0.002965594  | 0.949037582 | 0.002094321  |
| 0.029078406  | 0.530765317 | 0.084671322  | 0.067528075 | 0.094872719  |
| -0.054373895 | 0.240896676 | 0.032637148  | 0.481686883 | 0.026705349  |
| 0.218806017  | 1.81E-06    | 0.182146437  | 7.53E-05    | 0.216867489  |
| 0.225401977  | 8.59E-07    | 0.194947133  | 2.21E-05    | 0.19175531   |
| 0.34047233   | 3.87E-14    | 0.322708705  | 8.86E-13    | 0.293121898  |
| 0.295214549  | 7.61E-11    | 0.288808293  | 2.01E-10    | 0.267031259  |
| 0.122333653  | 0.008132598 | 0.11595663   | 0.012155678 | 0.130471861  |
| 0.420974005  | 1.75E-21    | 0.41127644   | 1.73E-20    | 0.416932997  |
| -0.061427912 | 0.185117247 | -0.063378405 | 0.171523986 | -0.111985556 |
| 0.155113861  | 0.000769791 | 0.14755774   | 0.001385162 | 0.121478524  |
| -0.074200173 | 0.109290532 | -0.088439125 | 0.056158022 | -0.12936687  |
| 0.29075898   | 1.50E-10    | 0.265212626  | 5.87E-09    | 0.253533276  |
| 0.159452732  | 0.000542745 | 0.14202475   | 0.002094007 | 0.113137754  |
| 0.09640393   | 0.037289875 | 0.063829799  | 0.168487046 | 0.070505715  |
| 0.240137883  | 1.50E-07    | 0.221046516  | 1.41E-06    | 0.238103154  |
| 0.154763344  | 0.000791527 | 0.166952413  | 0.000290456 | 0.151830137  |
| 0.188998035  | 3.95E-05    | 0.139251448  | 0.002562253 | 0.095039552  |
| 0.051246362  | 0.269072222 | 0.011183979  | 0.809518187 | 0.003889231  |
| 0.222716354  | 1.17E-06    | 0.18619389   | 5.16E-05    | 0.201431009  |
| 0.27510516   | 1.48E-09    | 0.276823288  | 1.16E-09    | 0.281016938  |
| 0.261704031  | 9.43E-09    | 0.248899462  | 5.03E-08    | 0.24713745   |
| 0.072175496  | 0.119333416 | 0.084592984  | 0.067783165 | 0.098550254  |
| 0.012503525  | 0.787552736 | -0.013153451 | 0.776794373 | -0.006994751 |
| -0.014806897 | 0.749620563 | -0.034075137 | 0.462577138 | -0.056957677 |
| 0.104678909  | 0.023679719 | 0.100173812  | 0.030432152 | 0.102761208  |
| 0.068311033  | 0.140486998 | 0.033387133  | 0.47166716  | 0.025478932  |
| 0.13075408   | 0.004651792 | 0.105232789  | 0.022946554 | 0.076183104  |
| 0.22401334   | 1.01E-06    | 0.194693188  | 2.27E-05    | 0.168295408  |
| 0.18005748   | 9.13E-05    | 0.208890233  | 5.30E-06    | 0.193442853  |
| 0.108038472  | 0.019527058 | 0.106715911  | 0.021079361 | 0.092392082  |
| 0.246029407  | 7.22E-08    | 0.240749976  | 1.39E-07    | 0.195650944  |
| 0.282883812  | 4.83E-10    | 0.258656272  | 1.42E-08    | 0.267946418  |
| 0.044992325  | 0.331957765 | 0.015629956  | 0.736206164 | 0.011931653  |
| 0.055764176  | 0.229061253 | 0.049193054  | 0.288751589 | 0.025884387  |
| 0.143769168  | 0.001841022 | 0.129835839  | 0.004951677 | 0.102981259  |
| 0.16281138   | 0.000411569 | 0.137735129  | 0.002856877 | 0.09264303   |
| 0.154854794  | 0.000785802 | 0.128228743  | 0.005518729 | 0.133135727  |

|              |             |              |             |              |
|--------------|-------------|--------------|-------------|--------------|
| 0.135717759  | 0.003296628 | 0.125274865  | 0.006715277 | 0.143990308  |
| 0.266962415  | 4.62E-09    | 0.257302981  | 1.69E-08    | 0.271467875  |
| -0.038748555 | 0.40347393  | -0.017867627 | 0.700149525 | -0.056607728 |
| 0.126881346  | 0.006038457 | 0.113168456  | 0.014408992 | 0.096594963  |
| 0.134867706  | 0.003499674 | 0.083704656  | 0.070731447 | 0.06796494   |
| 0.041731444  | 0.368227063 | 0.020552604  | 0.657764261 | 0.05600399   |
| 0.219709002  | 1.64E-06    | 0.187055948  | 4.75E-05    | 0.203283944  |
| 0.172213172  | 0.000184343 | 0.166283248  | 0.000307455 | 0.142223877  |
| 0.211678104  | 3.94E-06    | 0.210416558  | 4.51E-06    | 0.213720989  |
| 0.183546503  | 6.61E-05    | 0.184615989  | 5.98E-05    | 0.170641047  |
| 0.251809646  | 3.46E-08    | 0.263555666  | 7.35E-09    | 0.261933275  |
| 0.149256071  | 0.001216661 | 0.139129231  | 0.002584932 | 0.109685546  |
| 0.174574994  | 0.000149654 | 0.13774424   | 0.002855018 | 0.142812756  |
| 0.299874803  | 3.69E-11    | 0.291435938  | 1.35E-10    | 0.283279591  |
| 0.249127421  | 4.88E-08    | 0.219571567  | 1.66E-06    | 0.208870667  |
| 0.07170723   | 0.121755731 | 0.072769053  | 0.116317266 | 0.057383361  |
| 0.119404454  | 0.009803545 | 0.12290698   | 0.007837006 | 0.091707136  |
| 0.115429212  | 0.01255637  | 0.084754972  | 0.067256559 | 0.093816779  |
| 0.231512497  | 4.23E-07    | 0.249184026  | 4.85E-08    | 0.262308273  |
| 0.219590744  | 1.66E-06    | 0.216070701  | 2.45E-06    | 0.271278104  |
| 0.167052129  | 0.000287999 | 0.200530371  | 1.26E-05    | 0.222042833  |
| 0.208063888  | 5.79E-06    | 0.202062515  | 1.08E-05    | 0.19545021   |
| 0.182187722  | 7.50E-05    | 0.193957469  | 2.44E-05    | 0.220883834  |
| -0.118803042 | 0.010182154 | -0.14738359  | 0.001403601 | -0.168869813 |
| 0.063158987  | 0.173014876 | 0.054311764  | 0.241435442 | 0.043378027  |
| 0.204694738  | 8.24E-06    | 0.174448734  | 0.000151342 | 0.177719745  |
| 0.099583209  | 0.031429286 | 0.063726306  | 0.169179762 | 0.032526103  |
| 0.111692493  | 0.015744424 | 0.126346738  | 0.006256565 | 0.139959834  |
| 0.276675641  | 1.19E-09    | 0.200773005  | 1.23E-05    | 0.207345324  |
| 0.063442633  | 0.17108939  | 0.045800104  | 0.3233415   | 0.043572234  |
| 0.231765425  | 4.10E-07    | 0.168422407  | 0.000256147 | 0.170625875  |
| 0.098896201  | 0.032624207 | 0.048545732  | 0.29515125  | 0.024058186  |
| 0.142264103  | 0.002057508 | 0.107120777  | 0.020593162 | 0.087009235  |
| 0.315688767  | 2.89E-12    | 0.307068526  | 1.18E-11    | 0.282357813  |
| 0.021163326  | 0.648268615 | 0.011440629  | 0.80523361  | -0.016302279 |
| 0.158276985  | 0.000597182 | 0.176988828  | 0.000120598 | 0.204944739  |
| 0.11779079   | 0.010848763 | 0.119484199  | 0.009754294 | 0.102769061  |
| 0.236428132  | 2.35E-07    | 0.208912129  | 5.29E-06    | 0.19743105   |
| 0.186412359  | 5.05E-05    | 0.173478683  | 0.000164915 | 0.130570757  |
| 0.116216473  | 0.011962454 | 0.04903196   | 0.29033544  | 0.057918533  |
| -0.041894406 | 0.366358141 | -0.039841329 | 0.390333833 | -0.051154671 |
| -0.057377869 | 0.215848447 | -0.072344255 | 0.11846972  | -0.095378331 |
| 0.119317019  | 0.009857799 | 0.13030173   | 0.004797412 | 0.108508471  |
| 0.24252259   | 1.12E-07    | 0.223365623  | 1.08E-06    | 0.211095433  |
| 0.304318423  | 1.83E-11    | 0.291592343  | 1.32E-10    | 0.305438617  |

|              |             |              |             |              |
|--------------|-------------|--------------|-------------|--------------|
| 0.270745153  | 2.74E-09    | 0.25775342   | 1.60E-08    | 0.264798761  |
| 0.089340591  | 0.053687182 | 0.068147474  | 0.141441953 | 0.043852864  |
| 0.143980822  | 0.001812311 | 0.15188933   | 0.000992362 | 0.176846351  |
| 0.085931874  | 0.063530547 | 0.067865083  | 0.143102408 | 0.029802925  |
| -0.111353164 | 0.016066366 | -0.119631879 | 0.009663665 | -0.149831049 |
| 0.037105839  | 0.423716292 | 0.021336406  | 0.645587787 | 0.00541167   |
| 0.133392889  | 0.00387903  | 0.134917378  | 0.003487504 | 0.13465211   |
| 0.217838055  | 2.01E-06    | 0.203465749  | 9.35E-06    | 0.208405873  |
| 0.130464499  | 0.004744547 | 0.142474024  | 0.002025977 | 0.076154252  |
| 0.304552788  | 1.77E-11    | 0.290342833  | 1.60E-10    | 0.29458123   |
| 0.230472974  | 4.77E-07    | 0.204133809  | 8.73E-06    | 0.202265683  |
| -0.00633739  | 0.891357639 | -0.007019098 | 0.879755367 | -0.002836997 |
| 0.285664578  | 3.21E-10    | 0.26745082   | 4.32E-09    | 0.272918749  |
| 0.156292221  | 0.000700706 | 0.154809287  | 0.000788646 | 0.154540471  |
| 0.211256726  | 4.12E-06    | 0.217434719  | 2.10E-06    | 0.255337069  |
| 0.234980106  | 2.80E-07    | 0.224094178  | 9.98E-07    | 0.212563109  |
| 0.231304353  | 4.33E-07    | 0.222430295  | 1.20E-06    | 0.244422409  |
| 0.034205718  | 0.46086295  | 0.01547067   | 0.738796153 | 0.026562572  |
| 0.167175067  | 0.000284997 | 0.153107774  | 0.000902074 | 0.165096607  |
| 0.141280911  | 0.002211244 | 0.128928545  | 0.005264993 | 0.094867596  |
| 0.331610496  | 1.89E-13    | 0.348933029  | 8.12E-15    | 0.356364938  |
| 0.116662658  | 0.011636989 | 0.105604714  | 0.022465343 | 0.110891516  |
| 0.220322844  | 1.53E-06    | 0.208061875  | 5.79E-06    | 0.229982418  |
| 0.214838493  | 2.80E-06    | 0.210901971  | 4.28E-06    | 0.216868662  |
| 0.19886709   | 1.50E-05    | 0.190840772  | 3.31E-05    | 0.186597449  |
| 0.253991753  | 2.61E-08    | 0.26264992   | 8.30E-09    | 0.24124399   |
| 0.16440357   | 0.000360302 | 0.1197344    | 0.00960119  | 0.145266496  |
| 0.079314245  | 0.086878256 | 0.078272723  | 0.09111453  | 0.066162076  |
| 0.136784615  | 0.003056953 | 0.120208573  | 0.009316881 | 0.100050661  |
| 0.319469877  | 1.53E-12    | 0.321032413  | 1.18E-12    | 0.330072138  |
| 0.230040554  | 5.02E-07    | 0.236677391  | 2.28E-07    | 0.245497045  |
| 0.123260238  | 0.007659689 | 0.130131233  | 0.004853357 | 0.112183959  |
| 0.161539014  | 0.000457336 | 0.155224851  | 0.000763025 | 0.140949708  |
| -0.013580336 | 0.76975105  | -0.018010014 | 0.697876807 | -0.015884333 |
| 0.369751833  | 1.41E-16    | 0.350609702  | 5.92E-15    | 0.344960738  |
| 0.079309168  | 0.086898515 | 0.098664364  | 0.033036099 | 0.084472783  |
| 0.149619431  | 0.001183155 | 0.130985986  | 0.004578695 | 0.083196295  |
| 0.145028289  | 0.001676163 | 0.136427659  | 0.003135322 | 0.138903404  |
| 0.16282443   | 0.000411122 | 0.1495013    | 0.001193953 | 0.144117786  |
| 0.252443335  | 3.19E-08    | 0.223373458  | 1.08E-06    | 0.244492225  |
| 0.098433258  | 0.033451102 | 0.070612188  | 0.127569844 | 0.055036765  |
| 0.208098231  | 5.77E-06    | 0.185756547  | 5.38E-05    | 0.182254792  |
| 0.349861864  | 6.82E-15    | 0.31953465   | 1.52E-12    | 0.307724873  |
| 0.167503467  | 0.00027712  | 0.147340567  | 0.001408191 | 0.146203638  |
| 0.171196747  | 0.000201478 | 0.144852061  | 0.001698391 | 0.128858148  |



|              |             |              |             |              |
|--------------|-------------|--------------|-------------|--------------|
| 0.403364188  | 1.06E-19    | 0.399426936  | 2.58E-19    | 0.406683825  |
| 0.139967144  | 0.002433053 | 0.117747413  | 0.010878173 | 0.128452599  |
| 0.292777862  | 1.10E-10    | 0.256545311  | 1.87E-08    | 0.232575254  |
| 0.412691558  | 1.25E-20    | 0.413311377  | 1.08E-20    | 0.405848939  |
| 0.155991803  | 0.000717751 | 0.15008965   | 0.001141056 | 0.154856675  |
| 0.206083471  | 7.13E-06    | 0.220856723  | 1.44E-06    | 0.225829831  |
| 0.110385217  | 0.017016618 | 0.097374156  | 0.035410279 | 0.076696537  |
| 0.061274302  | 0.186220602 | 0.045798209  | 0.323361548 | 0.051838857  |
| 0.265693381  | 5.50E-09    | 0.263091783  | 7.82E-09    | 0.249703062  |
| -0.014505939 | 0.754544806 | -0.007516998 | 0.871297475 | -0.017483614 |
| 0.314608166  | 3.45E-12    | 0.311385084  | 5.86E-12    | 0.317814695  |
| 0.185190808  | 5.67E-05    | 0.180493674  | 8.77E-05    | 0.122510599  |
| 0.245915589  | 7.33E-08    | 0.227893686  | 6.45E-07    | 0.212301204  |
| 0.222157061  | 1.24E-06    | 0.267396916  | 4.35E-09    | 0.284069824  |
| 0.180158746  | 9.04E-05    | 0.108476652  | 0.019035194 | 0.090261793  |
| -0.03395768  | 0.464122069 | -0.02969899  | 0.522028387 | -0.024461293 |
| 0.049658607  | 0.284207005 | 0.034977739  | 0.450800962 | 0.013955009  |
| 0.131628348  | 0.004381604 | 0.110792961  | 0.016610495 | 0.087104055  |
| 0.030179493  | 0.515314594 | 0.000900348  | 0.984518379 | -0.003585338 |
| 0.048895118  | 0.291685423 | 0.045134519  | 0.330430409 | 0.025225911  |
| 0.278045276  | 9.75E-10    | 0.273258408  | 1.93E-09    | 0.262906882  |
| -0.255410432 | 2.17E-08    | -0.206712073 | 6.67E-06    | -0.182786262 |
| -0.116645399 | 0.011649431 | -0.076328386 | 0.099464785 | -0.080752504 |
| -0.13605042  | 0.003220124 | -0.111599206 | 0.015832362 | -0.108065251 |
| -0.032895878 | 0.478217288 | 0.031374375  | 0.498814986 | 0.031292222  |
| -0.262502172 | 8.47E-09    | -0.232388641 | 3.81E-07    | -0.235072509 |
| -0.144630186 | 0.001726762 | -0.091212441 | 0.048844896 | -0.108861321 |
| -0.089082816 | 0.054384307 | -0.050099747 | 0.279945498 | -0.042253114 |
| -0.084877413 | 0.066860748 | -0.037427057 | 0.419712165 | -0.056596349 |
| -0.164881551 | 0.000346114 | -0.142370968 | 0.002041401 | -0.141559296 |
| -0.051125307 | 0.27020634  | -0.010932597 | 0.813720328 | 0.002455733  |
| -0.004184834 | 0.928133791 | 0.041990454  | 0.365259397 | 0.023187783  |
| -0.072191175 | 0.119252966 | -0.030803657 | 0.506660694 | -0.049962391 |
| -0.04495997  | 0.332305932 | -0.01439327  | 0.756390856 | -0.025732309 |
| -0.066947509 | 0.14860073  | -0.013758437 | 0.766818058 | -0.02462225  |
| -0.141426831 | 0.002187783 | -0.084548403 | 0.067928687 | -0.107796875 |
| -0.176079017 | 0.000130864 | -0.170745056 | 0.000209562 | -0.179494158 |
| -0.029078953 | 0.530757586 | 0.014704212  | 0.751299557 | -0.00401232  |
| -0.023091005 | 0.618674435 | 0.006606977  | 0.886766511 | 0.008276749  |
| -0.178923804 | 0.000101228 | -0.151348311 | 0.001035066 | -0.153713927 |
| -0.021088729 | 0.649425454 | 0.039082574  | 0.399429759 | 0.02571425   |
| -0.037237753 | 0.422069233 | 0.02091633   | 0.652102216 | 0.032983805  |
| -0.100855189 | 0.029315534 | -0.0774686   | 0.094497175 | -0.079404135 |
| 0.078500488  | 0.090174253 | 0.112667219  | 0.014850893 | 0.141013039  |
| -0.101883584 | 0.027696833 | -0.069308961 | 0.13476725  | -0.079818408 |

|              |             |              |             |              |
|--------------|-------------|--------------|-------------|--------------|
| -0.076113819 | 0.100422409 | -0.075372713 | 0.103786458 | -0.061452136 |
| -0.076153748 | 0.10024365  | -0.022116229 | 0.633566353 | -0.030528187 |
| -0.010048742 | 0.828536724 | 0.041364752  | 0.372454033 | 0.074890327  |
| -0.251513783 | 3.60E-08    | -0.211544245 | 4.00E-06    | -0.202896707 |
| 0.015493292  | 0.738428139 | 0.062184721  | 0.179751553 | 0.078053829  |
| 0.082886189  | 0.073539866 | 0.096549623  | 0.03700234  | 0.107468513  |
| -0.160688133 | 0.000490536 | -0.128834267 | 0.005298553 | -0.122094097 |
| -0.041103724 | 0.375481165 | -0.028598585 | 0.537570844 | -0.010211719 |
| -0.156524886 | 0.000687763 | -0.096317378 | 0.037461589 | -0.129665027 |
| -0.094585932 | 0.041040175 | -0.04289094  | 0.355058144 | -0.019101907 |
| -0.205413053 | 7.64E-06    | -0.17151328  | 0.000195988 | -0.165043839 |
| -0.058797437 | 0.204685258 | -0.046083821 | 0.320349998 | -0.011757258 |
| -0.024979391 | 0.590268796 | 0.008731271  | 0.850733767 | 0.032961025  |
| -0.140982264 | 0.002259978 | -0.071947511 | 0.120508027 | -0.067792423 |
| -0.091411919 | 0.048351123 | -0.023747683 | 0.608728952 | -0.004255794 |
| -0.038589829 | 0.405404261 | 0.012252815  | 0.791713743 | 0.038396652  |
| -0.109226432 | 0.018218573 | -0.060520569 | 0.191704776 | -0.057804956 |
| -0.05756724  | 0.214334512 | -0.020127457 | 0.664407315 | -0.029295789 |
| 0.005336778  | 0.908428886 | 0.039424278  | 0.395317793 | 0.050197767  |
| -0.103833213 | 0.024838221 | -0.094021149 | 0.042268216 | -0.109418272 |
| -0.028940306 | 0.532719589 | 0.01754976   | 0.705232792 | 0.014672275  |
| 0.02268434   | 0.624868665 | 0.022851962  | 0.622312241 | 0.031309839  |
| -0.015284762 | 0.741822739 | 0.029652658  | 0.522678125 | 0.065487918  |
| 0.043495973  | 0.348305667 | 0.081199271  | 0.079615058 | 0.100767142  |
| -0.229671942 | 5.24E-07    | -0.20665209  | 6.72E-06    | -0.210855046 |
| 0.122551442  | 0.00801916  | 0.162120566  | 0.00043586  | 0.131397915  |
| 0.308015311  | 1.01E-11    | 0.34034423   | 3.97E-14    | 0.32807833   |
| 0.133238964  | 0.003920696 | 0.180844352  | 8.49E-05    | 0.18726378   |
| 0.157467932  | 0.000637538 | 0.210432524  | 4.50E-06    | 0.212138629  |
| 0.046860202  | 0.312256353 | 0.098552854  | 0.033235789 | 0.096214888  |
| 0.101286603  | 0.028626864 | 0.16955368   | 0.000232365 | 0.156411281  |
| 0.225795834  | 8.21E-07    | 0.284373895  | 3.89E-10    | 0.285794576  |
| 0.299523421  | 3.90E-11    | 0.370334855  | 1.26E-16    | 0.381552056  |
| 0.131682031  | 0.004365485 | 0.215308263  | 2.66E-06    | 0.207511351  |
| 0.040196073  | 0.386124568 | 0.121275762  | 0.00870423  | 0.13601346   |
| 0.170970122  | 0.000205497 | 0.203271371  | 9.54E-06    | 0.200604306  |
| 0.298080161  | 4.89E-11    | 0.340329779  | 3.98E-14    | 0.344127569  |
| 0.130728986  | 0.004659765 | 0.192570113  | 2.79E-05    | 0.19407912   |
| 0.193773515  | 2.48E-05    | 0.217320472  | 2.13E-06    | 0.204657365  |
| 0.219230445  | 1.73E-06    | 0.228015607  | 6.36E-07    | 0.235025272  |
| 0.009831628  | 0.83218582  | 0.031309158  | 0.499708263 | 0.029298648  |
| 0.113864799  | 0.01381428  | 0.138127143  | 0.002777889 | 0.168444411  |
| 0.103247449  | 0.025669042 | 0.159143499  | 0.000556597 | 0.181403491  |
| 0.145627044  | 0.001602615 | 0.206217016  | 7.03E-06    | 0.187787934  |
| -0.194721542 | 2.26E-05    | -0.218184032 | 1.94E-06    | -0.24828834  |

|              |             |              |             |              |
|--------------|-------------|--------------|-------------|--------------|
| 0.182347724  | 7.39E-05    | 0.233637473  | 3.29E-07    | 0.199500569  |
| 0.042340136  | 0.361276507 | 0.072549722  | 0.117424759 | 0.039423054  |
| 0.01774574   | 0.70209715  | 0.081204445  | 0.079595821 | 0.07516622   |
| 0.165560459  | 0.000326856 | 0.180055413  | 9.13E-05    | 0.169534805  |
| 0.193639523  | 2.52E-05    | 0.255193351  | 2.23E-08    | 0.234931127  |
| 0.011986862  | 0.796134221 | 0.062787333  | 0.17556218  | 0.042029581  |
| 0.098088967  | 0.034077593 | 0.132798395  | 0.004042201 | 0.138605673  |
| 0.190693315  | 3.35E-05    | 0.226111168  | 7.92E-07    | 0.224316531  |
| 0.228585045  | 5.95E-07    | 0.210091018  | 4.67E-06    | 0.254518969  |
| 0.187751859  | 4.45E-05    | 0.237129424  | 2.16E-07    | 0.239505274  |
| 0.397899135  | 3.63E-19    | 0.412663106  | 1.25E-20    | 0.465555197  |
| 0.195241413  | 2.15E-05    | 0.261102055  | 1.02E-08    | 0.271425285  |
| 0.140783481  | 0.002292958 | 0.191984607  | 2.96E-05    | 0.160193417  |
| -0.015458695 | 0.73899098  | 0.02944879   | 0.525541962 | 0.037763914  |
| 0.057420687  | 0.215505466 | 0.16669795   | 0.000296814 | 0.170898016  |
| 0.017945596  | 0.698904681 | 0.099073881  | 0.032311506 | 0.105080371  |
| 0.291262727  | 1.39E-10    | 0.328049335  | 3.53E-13    | 0.362867693  |
| 0.192292419  | 2.87E-05    | 0.242658017  | 1.10E-07    | 0.225457178  |
| -0.200634033 | 1.25E-05    | -0.218966922 | 1.78E-06    | -0.23360234  |
| 0.05367067   | 0.247043995 | 0.104001363  | 0.024604055 | 0.098303809  |
| 0.077344699  | 0.095027188 | 0.099126081  | 0.032220127 | 0.125973536  |
| 0.155132371  | 0.000768659 | 0.178060652  | 0.000109476 | 0.16284144   |
| 0.333356477  | 1.39E-13    | 0.359320022  | 1.12E-15    | 0.351558193  |
| 0.202616214  | 1.02E-05    | 0.243745178  | 9.61E-08    | 0.258123925  |
| 0.046408621  | 0.316947523 | 0.09013422   | 0.051587441 | 0.088286724  |
| 0.14618218   | 0.001537084 | 0.223367876  | 1.08E-06    | 0.211568776  |
| 0.072934431  | 0.11548762  | 0.086100573  | 0.063010655 | 0.078305833  |
| -0.020184731 | 0.663510844 | 0.034694223  | 0.454481627 | 0.017237504  |
| -0.091153638 | 0.048991255 | -0.123058329 | 0.007760593 | -0.121675319 |
| 0.161164824  | 0.00047167  | 0.189483164  | 3.77E-05    | 0.162376742  |
| 0.187063186  | 4.75E-05    | 0.215942462  | 2.48E-06    | 0.241463412  |
| 0.211906301  | 3.84E-06    | 0.229368267  | 5.43E-07    | 0.213487614  |
| 0.106967107  | 0.020776543 | 0.163624597  | 0.000384591 | 0.173432977  |
| 0.093957926  | 0.042407596 | 0.144248215  | 0.001776624 | 0.154153504  |
| 0.262469531  | 8.51E-09    | 0.282426059  | 5.17E-10    | 0.288316974  |
| 0.280919891  | 6.44E-10    | 0.318368847  | 1.84E-12    | 0.312654032  |
| 0.121603313  | 0.008523525 | 0.16389861   | 0.000375878 | 0.153344779  |
| 0.02871249   | 0.535951332 | 0.103684834  | 0.025046449 | 0.096397696  |
| 0.361267174  | 7.63E-16    | 0.41438326   | 8.38E-21    | 0.392123615  |
| 0.076117014  | 0.100408094 | 0.141063934  | 0.002246554 | 0.154393218  |
| 0.099158106  | 0.032164175 | 0.155562912  | 0.000742753 | 0.138292517  |
| 0.036172802  | 0.435472584 | 0.06358505   | 0.170128663 | 0.060988092  |
| 0.053741712  | 0.246418044 | 0.075246453  | 0.104368384 | 0.053784827  |
| 0.269249815  | 3.37E-09    | 0.340074718  | 4.16E-14    | 0.322475551  |
| 0.176574093  | 0.000125181 | 0.209879717  | 4.78E-06    | 0.161547218  |

|              |             |              |             |              |
|--------------|-------------|--------------|-------------|--------------|
| 0.046292348  | 0.31816283  | 0.096656928  | 0.036791769 | 0.095252942  |
| 0.164675905  | 0.000352153 | 0.192919854  | 2.70E-05    | 0.19920942   |
| 0.195265538  | 2.14E-05    | 0.282016157  | 5.49E-10    | 0.229997597  |
| 0.181313525  | 8.13E-05    | 0.21387664   | 3.11E-06    | 0.202131131  |
| 0.120031259  | 0.009422308 | 0.172143282  | 0.000185476 | 0.180636302  |
| 0.235373797  | 2.67E-07    | 0.28315501   | 4.65E-10    | 0.240831086  |
| 0.236246956  | 2.41E-07    | 0.289770047  | 1.74E-10    | 0.297243     |
| 0.287776458  | 2.35E-10    | 0.324694182  | 6.31E-13    | 0.36184837   |
| 0.390304081  | 1.92E-18    | 0.399831275  | 2.36E-19    | 0.382997138  |
| -0.218576202 | 1.86E-06    | -0.251136547 | 3.78E-08    | -0.271689784 |
| 0.114795639  | 0.013053089 | 0.139031122  | 0.002603269 | 0.144531376  |
| 0.092958921  | 0.044661897 | 0.153978745  | 0.000842253 | 0.160697759  |
| -0.135571353 | 0.003330818 | -0.188319862 | 4.21E-05    | -0.179251487 |
| -0.23540452  | 2.66E-07    | -0.177998262 | 0.000110096 | -0.17047433  |
| 0.028382387  | 0.540651502 | 0.072867197  | 0.115824349 | 0.042988832  |
| 0.139564539  | 0.002504982 | 0.177216732  | 0.000118148 | 0.158379969  |
| 0.33158442   | 1.90E-13    | 0.351309751  | 5.19E-15    | 0.332800391  |
| 0.175244828  | 0.000140993 | 0.216274894  | 2.39E-06    | 0.230344736  |
| 0.084605721  | 0.067741637 | 0.12865524   | 0.005362811 | 0.140473689  |
| 0.033367297  | 0.47193068  | 0.092691145  | 0.045282992 | 0.093807206  |
| 0.069433661  | 0.134065306 | 0.124418318  | 0.007103259 | 0.126893917  |
| 0.034982452  | 0.450739915 | 0.08508222   | 0.066202948 | 0.092320613  |
| -0.02338302  | 0.614243085 | 0.03377903   | 0.466477364 | 0.028582043  |
| -0.116673105 | 0.011629463 | -0.075038589 | 0.105332031 | -0.085692746 |
| 0.220668152  | 1.47E-06    | 0.246963477  | 6.42E-08    | 0.259171314  |
| 0.195846276  | 2.02E-05    | 0.288102966  | 2.23E-10    | 0.303949924  |
| 0.154056462  | 0.000837098 | 0.181693565  | 7.85E-05    | 0.209516143  |
| 0.217132765  | 2.18E-06    | 0.270166675  | 2.97E-09    | 0.296842909  |
| 0.320607858  | 1.27E-12    | 0.318684308  | 1.75E-12    | 0.339560914  |
| 0.146961908  | 0.001449188 | 0.17251611   | 0.000179506 | 0.161849134  |
| 0.152938387  | 0.000914155 | 0.198790168  | 1.51E-05    | 0.194029118  |
| 0.221018426  | 1.41E-06    | 0.278999266  | 8.50E-10    | 0.303651101  |
| 0.300158177  | 3.53E-11    | 0.306727446  | 1.25E-11    | 0.297562692  |
| 0.259018719  | 1.35E-08    | 0.242343798  | 1.14E-07    | 0.22552715   |
| 0.099043483  | 0.032364822 | 0.14876992   | 0.001262857 | 0.135919359  |
| 0.133785691  | 0.003774514 | 0.158514241  | 0.000585805 | 0.188101567  |
| 0.22516343   | 8.83E-07    | 0.245074597  | 8.14E-08    | 0.286614113  |
| 0.23104854   | 4.46E-07    | 0.257068358  | 1.75E-08    | 0.260728565  |
| -0.268776547 | 3.60E-09    | -0.262788827 | 8.15E-09    | -0.270425986 |
| 0.281411907  | 5.99E-10    | 0.323796069  | 7.35E-13    | 0.347311133  |
| -0.269589437 | 3.22E-09    | -0.2685918   | 3.69E-09    | -0.306350267 |
| 0.23131166   | 4.33E-07    | 0.274827327  | 1.54E-09    | 0.286594807  |
| -0.018749401 | 0.686118848 | 0.006277443  | 0.892379067 | 0.021517468  |
| 0.078196889  | 0.091429334 | 0.116672093  | 0.011630192 | 0.129448025  |
| 0.148029843  | 0.001336289 | 0.18320398   | 6.83E-05    | 0.166225309  |

|              |             |              |             |              |
|--------------|-------------|--------------|-------------|--------------|
| -0.085478617 | 0.064944895 | -0.086464831 | 0.061900048 | -0.075761112 |
| 0.262992661  | 7.93E-09    | 0.297631387  | 5.24E-11    | 0.319993558  |
| -0.234470031 | 2.98E-07    | -0.23897476  | 1.73E-07    | -0.241289429 |
| 0.271714735  | 2.39E-09    | 0.309375255  | 8.13E-12    | 0.321812905  |
| 0.094021944  | 0.042266466 | 0.149563304  | 0.001188274 | 0.136590802  |
| -0.06775243  | 0.143768949 | 0.016309444  | 0.725191602 | 0.01263028   |
| 0.150565872  | 0.00109983  | 0.221939485  | 1.27E-06    | 0.215887952  |
| 0.103313147  | 0.025574681 | 0.142485477  | 0.00202427  | 0.17213081   |
| -0.253310217 | 2.85E-08    | -0.280453255 | 6.89E-10    | -0.303370578 |
| -0.012589625 | 0.786125143 | 0.023499805  | 0.612474762 | 0.01564171   |
| 0.26221726   | 8.80E-09    | 0.300621944  | 3.29E-11    | 0.321740029  |
| 0.339062348  | 5.00E-14    | 0.354695474  | 2.73E-15    | 0.360611316  |
| 0.171146297  | 0.000202367 | 0.247166066  | 6.26E-08    | 0.246978242  |
| 0.085076424  | 0.066221491 | 0.079609382  | 0.085707075 | 0.099003912  |
| 0.133927062  | 0.003737527 | 0.195805865  | 2.03E-05    | 0.191313201  |
| 0.220927014  | 1.43E-06    | 0.195103495  | 2.18E-05    | 0.153163613  |
| 0.176832985  | 0.000122301 | 0.232239789  | 3.88E-07    | 0.214025997  |
| 0.224948267  | 9.05E-07    | 0.246930266  | 6.45E-08    | 0.254584568  |
| 0.216542383  | 2.32E-06    | 0.243185923  | 1.03E-07    | 0.21956533   |
| 0.390627829  | 1.79E-18    | 0.417735471  | 3.79E-21    | 0.421645588  |
| 0.072917241  | 0.115573643 | 0.148773633  | 0.001262498 | 0.168007697  |
| 0.192854869  | 2.72E-05    | 0.181103981  | 8.29E-05    | 0.175871081  |
| 0.223658496  | 1.05E-06    | 0.228111766  | 6.29E-07    | 0.25348621   |
| 0.277307508  | 1.08E-09    | 0.298937114  | 4.28E-11    | 0.298716392  |
| 0.090263418  | 0.051252185 | 0.136910178  | 0.003029812 | 0.138686715  |
| 0.277815395  | 1.01E-09    | 0.298641789  | 4.48E-11    | 0.271107834  |
| 0.173251272  | 0.000168259 | 0.218241603  | 1.93E-06    | 0.204353073  |
| 0.300229961  | 3.49E-11    | 0.342832668  | 2.52E-14    | 0.362053721  |
| 0.196175284  | 1.96E-05    | 0.265019786  | 6.02E-09    | 0.28442435   |
| 0.001575632  | 0.972910273 | 0.084169651  | 0.069175356 | 0.083878115  |
| 0.215172704  | 2.70E-06    | 0.244794505  | 8.43E-08    | 0.266782711  |
| 0.243499442  | 9.91E-08    | 0.277429125  | 1.06E-09    | 0.297529111  |
| 0.013660165  | 0.768436009 | 0.065655847  | 0.156611253 | 0.026046876  |
| 0.177646183  | 0.000113657 | 0.230943277  | 4.52E-07    | 0.280359819  |
| 0.111712914  | 0.015725231 | 0.179154253  | 9.91E-05    | 0.15472529   |
| 0.138811215  | 0.002644802 | 0.168010515  | 0.000265357 | 0.154578433  |
| 0.051145308  | 0.270018739 | 0.102009895  | 0.027503417 | 0.088627096  |
| 0.192339305  | 2.86E-05    | 0.230695576  | 4.65E-07    | 0.239593755  |
| 0.088727166  | 0.055358466 | 0.109936747  | 0.01747331  | 0.117902467  |
| 0.251095004  | 3.80E-08    | 0.285311492  | 3.38E-10    | 0.283668896  |
| 0.116616654  | 0.01167018  | 0.143748339  | 0.00184387  | 0.136289444  |
| 0.042264276  | 0.362138245 | 0.125134977  | 0.006777314 | 0.121696861  |
| 0.260743119  | 1.07E-08    | 0.333745014  | 1.30E-13    | 0.28044112   |
| 0.011578201  | 0.802939337 | 0.083226438  | 0.072361516 | 0.079629109  |
| 0.169756547  | 0.000228325 | 0.240928076  | 1.36E-07    | 0.226182181  |

|              |             |              |             |              |
|--------------|-------------|--------------|-------------|--------------|
| 0.143976029  | 0.001812956 | 0.164841333  | 0.000347288 | 0.167870047  |
| 0.021414779  | 0.644375373 | 0.084921361  | 0.066719146 | 0.065340224  |
| 0.165728945  | 0.000322234 | 0.196166648  | 1.96E-05    | 0.174356952  |
| 0.189607836  | 3.72E-05    | 0.231146507  | 4.41E-07    | 0.189838135  |
| 0.061275753  | 0.186210152 | 0.125245386  | 0.006728308 | 0.13127393   |
| 0.192033123  | 2.94E-05    | 0.236885375  | 2.23E-07    | 0.221442603  |
| 0.209444774  | 5.00E-06    | 0.225123128  | 8.87E-07    | 0.230706156  |
| 0.340363053  | 3.95E-14    | 0.312284132  | 5.06E-12    | 0.330007764  |
| 0.170316782  | 0.000217507 | 0.194096206  | 2.41E-05    | 0.210449776  |
| 0.054464463  | 0.240112844 | 0.101605881  | 0.028126183 | 0.094358118  |
| 0.093249146  | 0.043996836 | 0.12135528   | 0.00866005  | 0.087264432  |
| -0.326670018 | 4.49E-13    | -0.342569747 | 2.64E-14    | -0.335631465 |
| 0.049972892  | 0.281166489 | 0.078909644  | 0.088504705 | 0.091827569  |
| 0.145181013  | 0.001657115 | 0.170247557  | 0.000218817 | 0.121649096  |
| 0.177322153  | 0.000117031 | 0.18588468   | 5.31E-05    | 0.171878451  |
| 0.128304139  | 0.005490873 | 0.18415659   | 6.25E-05    | 0.20900777   |
| -0.004624592 | 0.920605534 | 0.042433548  | 0.360217166 | 0.0363342    |
| 0.064434509  | 0.164481892 | 0.111786811  | 0.015655949 | 0.155393479  |
| 0.316668154  | 2.45E-12    | 0.375247532  | 4.61E-17    | 0.361577167  |
| 0.173454211  | 0.000165272 | 0.208622022  | 5.46E-06    | 0.227110392  |
| -0.031188348 | 0.501365227 | 0.012460706  | 0.788262987 | 0.021676774  |
| 0.158735103  | 0.000575395 | 0.215023388  | 2.74E-06    | 0.213736459  |
| 0.185895769  | 5.31E-05    | 0.23523182   | 2.72E-07    | 0.249539081  |
| -0.163903427 | 0.000375727 | -0.164919027 | 0.000345024 | -0.167635603 |
| 0.230902252  | 4.54E-07    | 0.258260807  | 1.49E-08    | 0.278867204  |
| 0.095149373  | 0.039845214 | 0.096055958  | 0.03798431  | 0.098142364  |
| -0.015266892 | 0.742113864 | 0.026954111  | 0.561221718 | -0.000766766 |
| 0.187390554  | 4.60E-05    | 0.22557967   | 8.42E-07    | 0.239356809  |
| 0.116946102  | 0.011434324 | 0.177235056  | 0.000117953 | 0.14261982   |
| 0.249554064  | 4.62E-08    | 0.269540789  | 3.24E-09    | 0.279898007  |
| 0.177591015  | 0.000114225 | 0.241828037  | 1.22E-07    | 0.251486884  |
| 0.092977425  | 0.044619242 | 0.172123904  | 0.000185791 | 0.169300582  |
| 0.107739002  | 0.019869551 | 0.148902254  | 0.001250125 | 0.096992732  |
| 0.273018307  | 1.99E-09    | 0.331139455  | 2.06E-13    | 0.339965635  |
| 0.264458082  | 6.50E-09    | 0.294099602  | 9.03E-11    | 0.289959545  |
| 0.187157862  | 4.71E-05    | 0.231698874  | 4.13E-07    | 0.217614669  |
| 0.16590234   | 0.000317541 | 0.212394207  | 3.65E-06    | 0.201505193  |
| 0.046557696  | 0.315393824 | 0.09623495   | 0.037625746 | 0.098694181  |
| 0.001918922  | 0.967011158 | 0.049531838  | 0.285439677 | 0.051507042  |
| -0.107224498 | 0.020470184 | -0.136226015 | 0.003180395 | -0.161872845 |
| -0.00058736  | 0.989899896 | 0.050859944  | 0.272703847 | 0.049841515  |
| 0.004721931  | 0.918940114 | 0.046053624  | 0.320667535 | 0.066070067  |
| 0.267988978  | 4.01E-09    | 0.309394909  | 8.11E-12    | 0.276697813  |
| -0.003276688 | 0.943699988 | 0.051735904  | 0.264519128 | 0.065654376  |
| -0.088382583 | 0.056316094 | -0.108383459 | 0.019138891 | -0.108491922 |

|              |             |              |             |              |
|--------------|-------------|--------------|-------------|--------------|
| -0.192458764 | 2.83E-05    | -0.118269998 | 0.010528512 | -0.108436327 |
| -0.22352917  | 1.06E-06    | -0.203110611 | 9.70E-06    | -0.212305465 |
| -0.111045819 | 0.016362926 | -0.091109282 | 0.0491019   | -0.098384591 |
| -0.178772479 | 0.00010263  | -0.117866152 | 0.010797834 | -0.122079382 |
| -0.085253649 | 0.065656446 | -0.026648166 | 0.565676552 | -0.018170615 |
| -0.38315068  | 8.87E-18    | -0.36113009  | 7.84E-16    | -0.370510601 |
| -0.330170105 | 2.44E-13    | -0.280009189 | 7.35E-10    | -0.309453415 |
| -0.148690926 | 0.001270514 | -0.11355115  | 0.014079424 | -0.089295355 |
| 0.061180478  | 0.186896895 | 0.075159459  | 0.104770833 | 0.05876244   |
| -0.453270278 | 4.85E-25    | -0.443731954 | 5.97E-24    | -0.466534022 |
| -0.487333767 | 3.15E-29    | -0.481706986 | 1.67E-28    | -0.520116342 |
| -0.46047231  | 6.91E-26    | -0.446939508 | 2.59E-24    | -0.482886838 |
| -0.269648569 | 3.19E-09    | -0.235994204 | 2.48E-07    | -0.230950113 |
| -0.228188273 | 6.23E-07    | -0.220346699 | 1.52E-06    | -0.206335943 |
| -0.235118424 | 2.75E-07    | -0.186261187 | 5.13E-05    | -0.192026349 |
| -0.251606381 | 3.56E-08    | -0.258833669 | 1.38E-08    | -0.304467495 |
| -0.227502982 | 6.75E-07    | -0.191230982 | 3.18E-05    | -0.180437718 |
| -0.205112842 | 7.89E-06    | -0.178111746 | 0.000108971 | -0.173474881 |
| -0.343098829 | 2.40E-14    | -0.291316804 | 1.38E-10    | -0.291819522 |
| -0.19408733  | 2.41E-05    | -0.149153284 | 0.001226297 | -0.14592596  |
| -0.23881224  | 1.76E-07    | -0.209177701 | 5.15E-06    | -0.207525156 |
| -0.189400885 | 3.80E-05    | -0.157466701 | 0.000637601 | -0.156476873 |
| -0.173514446 | 0.000164395 | -0.146768354 | 0.001470565 | -0.139833967 |
| -0.268232428 | 3.88E-09    | -0.230512276 | 4.75E-07    | -0.22523747  |
| -0.147883212 | 0.001351296 | -0.112934063 | 0.014614178 | -0.106630379 |
| -0.361310077 | 7.57E-16    | -0.353453113 | 3.45E-15    | -0.355981886 |
| -0.113743253 | 0.013916503 | -0.08323247  | 0.072340765 | -0.086424061 |
| -0.121880878 | 0.008373023 | -0.068246893 | 0.140860894 | -0.038072851 |
| -0.159950263 | 0.000521128 | -0.113064918 | 0.014499314 | -0.110500735 |
| -0.225375869 | 8.62E-07    | -0.17948808  | 9.62E-05    | -0.183972094 |
| -0.209950395 | 4.74E-06    | -0.175703513 | 0.000135336 | -0.17814577  |
| -0.176797012 | 0.000122698 | -0.168813396 | 0.000247681 | -0.179908651 |
| -0.431100352 | 1.47E-22    | -0.402001232 | 1.45E-19    | -0.432774261 |
| -0.175303555 | 0.000140257 | -0.102998925 | 0.026028713 | -0.111244898 |
| -0.168174559 | 0.000261653 | -0.126040263 | 0.006384763 | -0.125067844 |
| -0.085035965 | 0.066351043 | -0.0422485   | 0.362317608 | -0.027646875 |
| -0.237392295 | 2.09E-07    | -0.190280366 | 3.49E-05    | -0.184563966 |
| -0.385995966 | 4.85E-18    | -0.390934571 | 1.68E-18    | -0.408301326 |
| -0.217688442 | 2.05E-06    | -0.21253537  | 3.59E-06    | -0.198376101 |
| -0.293399416 | 1.00E-10    | -0.261389064 | 9.84E-09    | -0.255798189 |
| -0.093749492 | 0.042869847 | -0.025408278 | 0.583901725 | -0.02254136  |
| 0.06973918   | 0.132357452 | 0.07477497   | 0.10656427  | 0.122821382  |
| 0.006632624  | 0.886329939 | 0.055750048  | 0.229179407 | 0.092600556  |
| 0.135217567  | 0.00341477  | 0.135041657  | 0.003457223 | 0.197868892  |
| 0.037284429  | 0.421487338 | 0.075804685  | 0.101814955 | 0.128418104  |

|              |             |              |             |              |
|--------------|-------------|--------------|-------------|--------------|
| -0.025720872 | 0.579281272 | -0.003943529 | 0.932267485 | 0.036682206  |
| 0.051094415  | 0.270496277 | 0.025976186  | 0.575520212 | 0.065635457  |
| 0.102749922  | 0.026393424 | 0.135745599  | 0.003290163 | 0.151693531  |
| -0.003845695 | 0.93394397  | -0.041175305 | 0.374649543 | 0.017692862  |
| -0.102923073 | 0.026139349 | -0.052442748 | 0.258038846 | -0.006395275 |
| 0.067826177  | 0.143332337 | 0.072543794  | 0.117454808 | 0.113529839  |
| -0.044341087 | 0.339010948 | 0.024303278  | 0.600370252 | 0.053482629  |
| 0.087390471  | 0.059150302 | 0.132454435  | 0.004139419 | 0.159513169  |
| 0.067663609  | 0.144296156 | 0.042026568  | 0.364846793 | 0.088502313  |
| -0.011131938 | 0.810387664 | 0.017307148  | 0.709121468 | 0.060830839  |
| -0.041577534 | 0.369997598 | -0.035851206 | 0.439567775 | 0.010767873  |
| 0.004847452  | 0.916793049 | -0.002730139 | 0.953078915 | 0.031256437  |
| 0.107100062  | 0.0206178   | 0.127074515  | 0.005961344 | 0.163695318  |
| 0.096302476  | 0.037491223 | 0.132908518  | 0.004011515 | 0.170368219  |
| -1.88E-05    | 0.999675873 | 0.009709403  | 0.834241698 | 0.070432627  |
| 0.064792029  | 0.162147804 | 0.069091645  | 0.135997287 | 0.08321844   |
| 0.083561286  | 0.07121696  | 0.074837343  | 0.106271695 | 0.144398862  |
| -0.01229207  | 0.791061841 | 0.013252463  | 0.775159078 | 0.0114625    |
| 0.118424194  | 0.010427261 | 0.131133202  | 0.004532832 | 0.148582791  |
| 0.104246283  | 0.024266391 | 0.124202329  | 0.007204207 | 0.155845944  |
| 0.027455275  | 0.55396106  | 0.027320826  | 0.555904404 | 0.061734796  |
| -0.055072645 | 0.234895637 | -0.044675867 | 0.335373251 | 0.013310964  |
| -0.012610893 | 0.785772607 | -0.032317224 | 0.485995888 | -0.004180141 |
| 0.060172938  | 0.194273678 | 0.103985384  | 0.024626225 | 0.116662507  |
| 0.032270415  | 0.486628103 | 0.079238373  | 0.087181406 | 0.07518903   |
| 0.090801739  | 0.049874812 | 0.111106122  | 0.016304364 | 0.156007937  |
| 0.051609608  | 0.265688678 | 0.058070798  | 0.210345977 | 0.098042242  |
| 0.010792346  | 0.816067122 | 0.007853849  | 0.865583593 | 0.058615417  |
| -0.064922708 | 0.161300904 | -0.058335035 | 0.208274569 | -0.023501896 |
| -0.028928197 | 0.532891118 | -0.011068627 | 0.811445749 | -0.005187971 |
| 0.218279366  | 1.92E-06    | 0.23797346   | 1.95E-07    | 0.277186834  |
| 0.066108586  | 0.153767146 | 0.090189636  | 0.05144342  | 0.108309273  |
| -0.01065937  | 0.81829371  | 0.025261759  | 0.586073295 | 0.047067265  |
| 0.016119709  | 0.728261632 | 0.016186099  | 0.727186904 | 0.071402928  |
| 0.019589068  | 0.672857612 | 0.001947004  | 0.966528672 | 0.067283296  |
| -0.105192446 | 0.022999283 | -0.096239602 | 0.037616465 | -0.064251226 |
| -0.036326663 | 0.433521116 | -0.042453401 | 0.359992269 | 0.016409611  |
| 0.12308713   | 0.007746127 | 0.166844958  | 0.000293125 | 0.182496963  |
| 0.100905549  | 0.029234418 | 0.12763408   | 0.005742932 | 0.163328267  |
| -0.090860918 | 0.049725299 | -0.104423254 | 0.024024905 | -0.063573825 |
| 0.054176494  | 0.24261134  | 0.040323001  | 0.38462523  | 0.06107741   |
| -0.022580433 | 0.62645563  | -0.019444089 | 0.675140234 | 0.014113065  |
| 0.167753474  | 0.000271261 | 0.223052999  | 1.12E-06    | 0.248384318  |
| 0.056113578  | 0.226152797 | 0.087717996  | 0.058201876 | 0.096534047  |
| -0.033497781 | 0.47019867  | -0.026823523 | 0.563121129 | 0.031389657  |



|              |             |              |             |              |
|--------------|-------------|--------------|-------------|--------------|
| 0.125020173  | 0.00682861  | 0.169531483  | 0.000232811 | 0.222791608  |
| -0.052643956 | 0.256214424 | -0.030062082 | 0.516950971 | 0.02812458   |
| -0.008575383 | 0.853368377 | -0.062274786 | 0.179120755 | -0.008575015 |
| 0.028848663  | 0.534018427 | 0.047411533  | 0.306591098 | 0.07346102   |
| 0.024573427  | 0.59632474  | 0.034785906  | 0.453289534 | 0.055601261  |
| -0.065385115 | 0.158330886 | -0.102480465 | 0.026793042 | -0.07235736  |
| 0.131835297  | 0.00431976  | 0.184680259  | 5.95E-05    | 0.226601413  |
| 0.104519901  | 0.023893904 | 0.101856884  | 0.027737866 | 0.150575426  |
| 0.103973124  | 0.024643246 | 0.111788032  | 0.015654807 | 0.17661217   |
| 0.016341074  | 0.724680228 | 0.018993644  | 0.682251239 | 0.056271909  |
| 0.10292878   | 0.02613101  | 0.101907779  | 0.027659694 | 0.153018747  |
| -0.007285274 | 0.875232031 | -0.01901106  | 0.681975769 | 0.032238628  |
| 0.233688462  | 3.27E-07    | 0.210799885  | 4.33E-06    | 0.254936442  |
| -0.080963748 | 0.080494727 | -0.09609448  | 0.037906897 | -0.063908979 |
| -0.159314059 | 0.000548917 | -0.167622268 | 0.000274321 | -0.13208498  |
| 0.161962298  | 0.000441609 | 0.180835944  | 8.50E-05    | 0.22933754   |
| 0.262851405  | 8.08E-09    | 0.274001002  | 1.73E-09    | 0.32977746   |
| -0.08708551  | 0.060044847 | -0.086175446 | 0.06278104  | -0.044144275 |
| -0.090926505 | 0.049560034 | -0.066812882 | 0.1494208   | -0.059222911 |
| 0.012022149  | 0.795547331 | -0.021418941 | 0.644311005 | 0.01205456   |
| 0.046543482  | 0.315541748 | 0.02293051   | 0.621115857 | 0.040228429  |
| 0.089763656  | 0.052559173 | 0.147323504  | 0.001410016 | 0.182682579  |
| -0.074581731 | 0.107474744 | -0.09194022  | 0.04706356  | -0.084089091 |
| 0.020789166  | 0.654079502 | -0.006334665 | 0.891404065 | 0.048007585  |
| 0.196807789  | 1.84E-05    | 0.211345193  | 4.08E-06    | 0.198434432  |
| -0.02381377  | 0.607732002 | 0.011428619  | 0.805433975 | 0.060620695  |
| -0.10054796  | 0.029814584 | -0.115958198 | 0.012154504 | -0.085370993 |
| 0.035439879  | 0.44483756  | 0.035891234  | 0.439056851 | 0.076350318  |
| 0.014317403  | 0.757634699 | 0.015262175  | 0.742190721 | 0.029530184  |
| 0.050155535  | 0.279409677 | 0.045129091  | 0.33048863  | 0.077044712  |
| 0.059837376  | 0.196777194 | 0.11879464   | 0.010187534 | 0.158760338  |
| -0.086464459 | 0.061901175 | -0.094319652 | 0.041615359 | -0.056500174 |
| -0.146238461 | 0.001530579 | -0.136329084 | 0.003157283 | -0.113917198 |
| -0.005091059 | 0.912627812 | -0.021921779 | 0.636555062 | 0.003912563  |
| -0.017003913 | 0.71399247  | -0.025887325 | 0.57682792  | 0.011160173  |
| -0.127909064 | 0.005638258 | -0.119980655 | 0.009452591 | -0.113014491 |
| -0.114147016 | 0.013579472 | -0.070988905 | 0.125545856 | -0.002072161 |
| -0.095098056 | 0.039952816 | -0.103903202 | 0.024740521 | -0.090218519 |
| -0.023935634 | 0.605895531 | -0.025074271 | 0.588857497 | 0.018574944  |
| -0.094627415 | 0.040951178 | -0.086257528 | 0.06253011  | -0.03658541  |
| 0.013231377  | 0.775507261 | -0.011429395 | 0.805421039 | 0.052877824  |
| 0.186585108  | 4.97E-05    | 0.241788441  | 1.22E-07    | 0.253622464  |
| 0.028536899  | 0.538448926 | 0.070070641  | 0.130523623 | 0.105204841  |
| 0.043177629  | 0.351848353 | 0.056829841  | 0.220272888 | 0.064257515  |
| 0.06495554   | 0.16108865  | 0.088394882  | 0.056281679 | 0.129532145  |

|              |             |              |             |              |
|--------------|-------------|--------------|-------------|--------------|
| 0.085018087  | 0.066408355 | 0.036073461  | 0.436735237 | 0.057734058  |
| -0.025519495 | 0.582255857 | 0.004747981  | 0.918494473 | 0.056503113  |
| 0.13235356   | 0.00416833  | 0.175251251  | 0.000140912 | 0.217186102  |
| 0.196093132  | 1.97E-05    | 0.250860603  | 3.91E-08    | 0.269665513  |
| 0.015291619  | 0.741711026 | 0.024483081  | 0.597676302 | 0.041366672  |
| 0.032721675  | 0.480551864 | 0.051306387  | 0.268511085 | 0.084905734  |
| -0.009831391 | 0.832189804 | -0.020526083 | 0.658177881 | 0.016950633  |
| 0.121256235  | 0.008715109 | 0.15997669   | 0.000520002 | 0.197427579  |
| 0.166408506  | 0.000304204 | 0.158635524  | 0.000580067 | 0.159120563  |
| 0.014966709  | 0.74700986  | 0.024819245  | 0.592654394 | 0.066810247  |
| -0.029026852 | 0.531494443 | -0.051307029 | 0.268505088 | -0.019483141 |
| -0.003628772 | 0.937662177 | 0.030549279  | 0.510178376 | 0.072052654  |
| -0.09194836  | 0.047043947 | -0.106619184 | 0.021196984 | -0.093449877 |
| -0.056256126 | 0.22497379  | -0.070684128 | 0.12718139  | 0.015243961  |
| -0.021368293 | 0.64509438  | -0.008534985 | 0.854051397 | 0.017576595  |
| -0.032121316 | 0.488644774 | -0.032689403 | 0.480985032 | 0.010208761  |
| 0.012607772  | 0.78582434  | -0.008074236 | 0.861849014 | 0.045563829  |
| -0.095993088 | 0.038110939 | -0.104434774 | 0.024009257 | -0.089126922 |
| -0.048997544 | 0.290674563 | -0.048195169 | 0.298656281 | -0.015154742 |
| 0.217616133  | 2.06E-06    | 0.230968143  | 4.51E-07    | 0.281001634  |
| 0.058446348  | 0.207406396 | 0.063923546  | 0.167861399 | 0.104824476  |
| 0.006637998  | 0.886238452 | 0.014252675  | 0.75869641  | 0.052297678  |
| 0.017177758  | 0.711198475 | 0.049266024  | 0.288036066 | 0.05834743   |
| 0.086225651  | 0.062627462 | 0.091362585  | 0.048472851 | 0.109543768  |
| -0.017227161 | 0.710405194 | -0.001361275 | 0.976594557 | 0.018870542  |
| 0.036144806  | 0.435828218 | 0.077467621  | 0.094501351 | 0.117813134  |
| -0.213598702 | 3.20E-06    | -0.175702116 | 0.000135353 | -0.107428947 |
| 0.048496897  | 0.295637858 | 0.099025241  | 0.032396853 | 0.112144086  |
| -0.042605647 | 0.358270539 | -0.068641216 | 0.13857427  | -0.043235804 |
| -0.060376117 | 0.192769204 | -0.043051093 | 0.353262798 | -0.013272419 |
| -0.069086282 | 0.136027747 | -0.049362034 | 0.287096449 | -0.02086051  |
| 0.020664068  | 0.656027023 | -0.001856408 | 0.968085285 | 0.046014391  |
| 0.033889151  | 0.465024764 | 0.085584181  | 0.0646132   | 0.076791332  |
| 0.107843254  | 0.019749733 | 0.101242985  | 0.028695855 | 0.117537647  |
| -0.048032555 | 0.300291511 | -0.040924911 | 0.37756358  | 0.005874106  |
| 0.093585184  | 0.043237224 | 0.158061416  | 0.000607697 | 0.185020374  |
| -0.065604181 | 0.15693833  | -0.100102248 | 0.030551516 | -0.053359183 |
| -0.010477816 | 0.821336053 | 0.013868313  | 0.765010256 | 0.040972139  |
| 0.08667351   | 0.061271104 | 0.098933504  | 0.032558343 | 0.113758708  |
| 0.034878025  | 0.452093547 | 0.047898711  | 0.301641889 | 0.055657256  |
| 0.159883421  | 0.000523984 | 0.153781734  | 0.000855455 | 0.195905684  |
| 0.128165446  | 0.005542214 | 0.155826328  | 0.000727304 | 0.190984386  |
| -0.011263911 | 0.808183159 | -0.034570116 | 0.456098121 | -0.005197775 |
| 0.013899331  | 0.764500142 | 0.027124181  | 0.558752674 | 0.059129951  |
| -0.10483308  | 0.023473637 | -0.091767883 | 0.047480379 | -0.071224467 |

|              |             |              |             |              |
|--------------|-------------|--------------|-------------|--------------|
| 0.136681002  | 0.003079515 | 0.153699398  | 0.000861028 | 0.166199299  |
| -0.081343775 | 0.079079208 | -0.092982219 | 0.044608198 | -0.050324865 |
| 0.119381663  | 0.009817661 | 0.177111176  | 0.000119277 | 0.196375286  |
| -0.154374649 | 0.000816293 | -0.147253303 | 0.001417544 | -0.137925675 |
| 0.020057069  | 0.665509707 | 0.040684707  | 0.380372063 | 0.074533603  |
| -0.085535639 | 0.064765552 | -0.058393095 | 0.207821413 | -0.000810086 |
| 0.020470287  | 0.659048417 | 0.051910535  | 0.262907829 | 0.070261953  |
| 0.130870341  | 0.004615016 | 0.172270548  | 0.000183418 | 0.190075741  |
| 0.223104836  | 1.12E-06    | 0.287987622  | 2.27E-10    | 0.313578962  |
| 0.105022064  | 0.023223139 | 0.143483642  | 0.001880415 | 0.197978111  |
| 0.302647761  | 2.39E-11    | 0.343459691  | 2.24E-14    | 0.383882065  |
| 0.103031864  | 0.025980794 | 0.09700914   | 0.036107741 | 0.115379762  |
| 0.091290823  | 0.048650374 | 0.10726974   | 0.020416743 | 0.147018612  |
| 0.046734473  | 0.313557867 | 0.096447097  | 0.037204485 | 0.134985387  |
| -0.104922536 | 0.023354773 | -0.095344421 | 0.039438466 | -0.057032341 |
| -0.202917461 | 9.90E-06    | -0.197046842 | 1.80E-05    | -0.189760686 |
| 0.017402721  | 0.707588688 | -0.011525794 | 0.803813132 | 0.038531778  |
| -0.069304638 | 0.134791631 | -0.06153628  | 0.184341768 | -0.048279486 |
| -0.004067656 | 0.930140885 | -0.013643555 | 0.768709569 | -0.004905504 |
| -0.119636429 | 0.009660884 | -0.087746124 | 0.058121018 | -0.075210646 |
| 0.015190758  | 0.743354638 | 0.038872201  | 0.401974034 | 0.058146195  |
| -0.128773879 | 0.00532015  | -0.102947652 | 0.026103454 | -0.125916517 |
| -0.083151911 | 0.072618293 | -0.050111158 | 0.279835845 | -0.039903118 |
| 0.026743542  | 0.564285982 | 0.058745932  | 0.20508282  | 0.052920692  |
| 0.020217842  | 0.662992794 | 0.050221346  | 0.278778472 | 0.058945986  |
| 0.119338805  | 0.009844256 | 0.118435419  | 0.010419924 | 0.129328125  |
| 0.05484396   | 0.23684792  | 0.07519602   | 0.104601543 | 0.091642042  |
| -0.055732239 | 0.229328416 | -0.034794655 | 0.453175873 | -0.013233944 |
| -0.062492675 | 0.17760149  | -0.03193439  | 0.49117943  | -0.038599761 |
| 0.010880586  | 0.814590426 | 0.023427147  | 0.613574668 | 0.022058652  |
| 0.013092972  | 0.777793734 | 0.009040316  | 0.845515631 | 0.034059441  |
| 0.060220945  | 0.193917429 | 0.0796326    | 0.085615484 | 0.080654862  |
| 0.025154965  | 0.587658448 | 0.048416882  | 0.296436327 | 0.056182201  |
| 0.044150146  | 0.341096955 | 0.049796286  | 0.282872326 | 0.053910193  |
| 0.064113323  | 0.166600198 | 0.085317563  | 0.065453643 | 0.115487841  |
| -0.049390552 | 0.286817746 | -0.022366493 | 0.629728532 | -0.007094146 |
| 0.03735607   | 0.420595137 | 0.052627554  | 0.256362812 | 0.055993427  |
| 0.004026172  | 0.930851556 | 0.002762623  | 0.952521292 | -0.001357791 |
| -0.108505537 | 0.019003153 | -0.09010387  | 0.051666459 | -0.07955088  |
| -0.041150733 | 0.374934887 | -0.037309643 | 0.421173207 | -0.039273149 |
| -0.065866424 | 0.155283501 | -0.062200921 | 0.179637976 | -0.080312567 |
| -0.044554066 | 0.336693818 | -0.015141706 | 0.744154402 | -0.0199006   |
| -0.042838708 | 0.355644919 | -0.044009523 | 0.342638467 | -0.005595133 |
| -0.09100823  | 0.049354749 | -0.061612494 | 0.183797818 | -0.06889748  |
| -0.107166554 | 0.020538807 | -0.086263462 | 0.062512001 | -0.096792682 |

|              |             |              |             |              |
|--------------|-------------|--------------|-------------|--------------|
| 0.005076534  | 0.912876092 | 0.032441814  | 0.484315336 | 0.05442334   |
| -0.086049917 | 0.063166396 | -0.074141496 | 0.1095719   | -0.056095085 |
| -0.078595883 | 0.089782756 | -0.059571628 | 0.198776499 | -0.064002591 |
| 0.073264907  | 0.113843644 | 0.097578329  | 0.035025174 | 0.111278234  |
| -0.117973716 | 0.01072551  | -0.110620691 | 0.016781033 | -0.098619061 |
| -0.090010456 | 0.051910309 | -0.093442988 | 0.043557298 | -0.094808253 |
| 0.059348607  | 0.20046574  | 0.075173969  | 0.104703622 | 0.084392507  |
| -0.112106971 | 0.015358868 | -0.087518948 | 0.058776754 | -0.082601151 |
| -0.022842938 | 0.622449755 | -0.001270368 | 0.978157191 | 0.016822017  |
| -0.021186405 | 0.647910879 | -0.007784966 | 0.866751464 | 0.021276671  |
| -0.050289503 | 0.278125799 | -0.0297395   | 0.521460635 | -0.004123749 |
| -0.123459732 | 0.007561145 | -0.099352097 | 0.031827016 | -0.085570106 |
| -0.016543261 | 0.721414332 | 0.0112       | 0.809250555 | 0.0129515    |
| -0.018673381 | 0.687324313 | 0.018497705  | 0.690113075 | 0.043446748  |
| -0.075060781 | 0.105228819 | -0.058154982 | 0.209684433 | -0.041542849 |
| -0.085349057 | 0.065353903 | -0.062346464 | 0.178619913 | -0.067296146 |
| -0.066975525 | 0.148430508 | -0.073662614 | 0.111889635 | -0.072005261 |
| -0.07689856  | 0.096955329 | -0.026493943 | 0.567928586 | -0.053518623 |
| -0.09510432  | 0.039939668 | -0.072390147 | 0.118235697 | -0.067993615 |
| -0.084694678 | 0.067452176 | -0.047595171 | 0.304719267 | -0.037520565 |
| 0.050004729  | 0.280859721 | 0.056904836  | 0.219663621 | 0.071248464  |
| 0.13502995   | 0.003460065 | 0.150449557  | 0.001109771 | 0.182622647  |
| -0.005435167 | 0.90674828  | 0.058902514  | 0.203875905 | 0.054482928  |
| -0.0746673   | 0.107070818 | -0.046521389 | 0.315771764 | -0.047611273 |
| -0.092038277 | 0.046827768 | -0.089097512 | 0.05434436  | -0.101807648 |
| -0.126188513 | 0.006322459 | -0.132725045 | 0.004062758 | -0.138643268 |
| 0.236248294  | 2.40E-07    | 0.257808646  | 1.58E-08    | 0.270464678  |
| -0.150247821 | 0.001127208 | -0.141013793 | 0.002254787 | -0.1689296   |
| 0.147820076  | 0.001357805 | 0.128912721  | 0.005270613 | 0.113486381  |
| -0.204279461 | 8.60E-06    | -0.221431775 | 1.35E-06    | -0.224271287 |
| 0.152102941  | 0.000975953 | 0.150098753  | 0.001140255 | 0.144990116  |
| -0.033564103 | 0.469319667 | -0.055705888 | 0.229549021 | -0.070128788 |
| 0.133594907  | 0.003824955 | 0.118382896  | 0.010454294 | 0.131846433  |
| -0.238849456 | 1.76E-07    | -0.244733006 | 8.50E-08    | -0.248553223 |
| 0.046341853  | 0.317645022 | 0.006992931  | 0.880200248 | -0.011433709 |
| -0.136096178 | 0.003209728 | -0.127743031 | 0.005701252 | -0.148583804 |
| -0.228245215 | 6.19E-07    | -0.261720183 | 9.41E-09    | -0.275615032 |
| -0.314761387 | 3.37E-12    | -0.329902785 | 2.56E-13    | -0.331129096 |
| -0.08664294  | 0.061362909 | -0.111296916 | 0.016120286 | -0.174434093 |
| -0.102210528 | 0.027198584 | -0.125049828 | 0.006815326 | -0.165799503 |
| -0.076435731 | 0.098988429 | -0.047233564 | 0.308412364 | -0.028044219 |
| 0.058840731  | 0.204351503 | 0.046904246  | 0.311801267 | 0.015859875  |
| 0.133218704  | 0.003926209 | 0.15976301   | 0.000529168 | 0.147526977  |
| -0.291422926 | 1.36E-10    | -0.311407006 | 5.84E-12    | -0.327072297 |
| 0.072834615  | 0.115987806 | 0.088139745  | 0.056999188 | 0.082028804  |

|              |             |              |             |              |
|--------------|-------------|--------------|-------------|--------------|
| 0.103905387  | 0.024737476 | 0.070869957  | 0.126182216 | 0.10833817   |
| 0.077931775  | 0.092536729 | 0.075358895  | 0.10385002  | 0.067345146  |
| 0.028721307  | 0.535826079 | 0.024399859  | 0.598922526 | 0.022816992  |
| 0.001602649  | 0.972445951 | 0.00906485   | 0.845101661 | -0.021025687 |
| -0.172110164 | 0.000186015 | -0.212182798 | 3.73E-06    | -0.198559258 |
| -0.009122818 | 0.84412373  | -0.000995742 | 0.982878318 | -0.035533155 |
| 0.0675681    | 0.144864708 | 0.078668874  | 0.089484126 | 0.084405148  |
| -0.037452194 | 0.419399751 | -0.022147426 | 0.633087399 | -0.02543781  |
| -0.043649347 | 0.346606946 | -0.051044241 | 0.270967644 | -0.059084495 |
| -0.080909452 | 0.080698634 | -0.083762808 | 0.070535291 | -0.07142659  |
| 0.122521543  | 0.008034649 | 0.091416891  | 0.048338869 | 0.090706275  |
| 0.103882678  | 0.024769136 | 0.114254013  | 0.013491373 | 0.168189523  |
| -0.168028205 | 0.000264956 | -0.204490995 | 8.41E-06    | -0.188377683 |
| 0.013664603  | 0.768362921 | 0.019932173  | 0.66746755  | 0.01637222   |
| -0.110162337 | 0.017242262 | -0.151385122 | 0.001032108 | -0.14604257  |
| 0.193990987  | 2.43E-05    | 0.161074121  | 0.000475207 | 0.157253251  |
| 0.108548724  | 0.018955335 | 0.087880177  | 0.057736927 | 0.080651011  |
| 0.031440451  | 0.49791081  | 0.008814055  | 0.849335323 | -0.015059769 |
| 0.015761511  | 0.734069345 | 0.037306893  | 0.421207451 | 0.025104648  |
| -0.071500264 | 0.12283849  | -0.077457538 | 0.094544398 | -0.080557328 |
| -0.050357439 | 0.277476264 | -0.019302526 | 0.677371962 | -0.021351992 |
| 0.023929167  | 0.605992925 | 0.039641881  | 0.392712565 | 0.067319133  |
| -0.049697018 | 0.283834218 | -0.138538743 | 0.002697099 | -0.144958753 |
| 0.101122161  | 0.028887708 | 0.052998353  | 0.253022739 | 0.047348342  |
| 0.077753191  | 0.093288715 | 0.062154582  | 0.179963014 | 0.095973121  |
| 0.12037716   | 0.009217618 | 0.090021782  | 0.051880693 | 0.086460632  |
| 0.024109087  | 0.603285896 | 0.012069309  | 0.794763142 | 0.031580502  |
| 0.004843259  | 0.916864753 | -0.019377755 | 0.676185638 | -0.020555806 |
| -0.003908707 | 0.932864161 | -0.032989237 | 0.476968691 | -0.047839325 |
| 0.156235575  | 0.000703891 | 0.13074156   | 0.004655768 | 0.136361737  |
| -0.091146132 | 0.049009964 | -0.118187971 | 0.010582728 | -0.172604401 |
| 0.043813846  | 0.344790867 | 0.071166014  | 0.124602964 | 0.065824843  |
| 0.062816526  | 0.175361092 | 0.025467258  | 0.583028631 | 0.017555519  |
| -0.202030073 | 1.08E-05    | -0.197763961 | 1.67E-05    | -0.209183767 |
| -0.041163436 | 0.374787353 | -0.044360976 | 0.338794128 | -0.040552837 |
| 0.076337395  | 0.099424735 | 0.054937327  | 0.236049466 | 0.051931743  |
| 0.010259361  | 0.825000309 | 0.013557299  | 0.770130673 | 0.021058344  |
| 0.277560231  | 1.05E-09    | 0.286213116  | 2.96E-10    | 0.273154756  |
| 0.132145543  | 0.004228523 | 0.077685697  | 0.093574189 | 0.070492036  |
| -0.029791936 | 0.520726217 | 0.019980067  | 0.666716513 | 0.001149034  |
| 0.204944981  | 8.03E-06    | 0.233008589  | 3.54E-07    | 0.221727611  |
| -0.039143237 | 0.398697892 | -0.000207869 | 0.996425446 | -0.002906306 |
| 0.342325665  | 2.76E-14    | 0.331344879  | 1.98E-13    | 0.315438532  |
| 0.048633729  | 0.294275762 | 0.080905506  | 0.080713469 | 0.098810491  |
| 0.000325059  | 0.994410252 | -0.00084699  | 0.985435774 | -0.012174986 |

|              |             |              |             |              |
|--------------|-------------|--------------|-------------|--------------|
| 0.058861728  | 0.20418978  | 0.067533138  | 0.145073257 | 0.075033691  |
| 0.257464017  | 1.66E-08    | 0.28210362   | 5.42E-10    | 0.251460556  |
| -0.082459274 | 0.075040435 | -0.085650025 | 0.064407018 | -0.100257181 |
| -0.032415513 | 0.484669842 | -0.023896878 | 0.606479306 | -0.050715003 |
| 0.111957563  | 0.015496885 | 0.096833549  | 0.03644739  | 0.121923323  |
| -0.0289524   | 0.532548298 | -0.051941935 | 0.262618815 | -0.018964075 |
| 0.000501867  | 0.991369956 | -0.042141858 | 0.363531562 | -0.040427409 |
| 0.145382877  | 0.001632242 | 0.115384725  | 0.012590695 | 0.121269867  |
| -0.027156239 | 0.558287851 | -0.032481659 | 0.483778553 | -0.059754893 |
| -0.001547408 | 0.973395346 | -0.001812308 | 0.968843047 | -0.010154171 |
| -0.17943051  | 9.67E-05    | -0.209785543 | 4.82E-06    | -0.183903108 |
| -0.164887626 | 0.000345937 | -0.110743463 | 0.016659339 | -0.108600903 |
| -0.085075768 | 0.06622359  | -0.093242177 | 0.044012707 | -0.099343173 |
| -0.021579514 | 0.641830026 | -0.060434591 | 0.192337804 | -0.065566351 |
| -0.155525132 | 0.000744993 | -0.162105381 | 0.000436408 | -0.177717204 |
| -0.034275486 | 0.459948523 | 0.002556996  | 0.956051508 | -0.013782396 |
| 0.147752749  | 0.001364778 | 0.16678409   | 0.000294647 | 0.168493077  |
| -0.065781138 | 0.155820223 | -0.090258525 | 0.05126485  | -0.151543254 |
| -0.234152391 | 3.09E-07    | -0.272917172 | 2.02E-09    | -0.254845096 |
| -0.006526585 | 0.888135227 | 0.046791785  | 0.312964149 | 0.068723719  |
| -0.177466508 | 0.000115516 | -0.17791426  | 0.000110936 | -0.193410469 |
| 0.067732794  | 0.143885378 | 0.095529845  | 0.039055051 | 0.087358179  |
| -0.144151247 | 0.00178949  | -0.163667943 | 0.0003832   | -0.165947211 |
| 0.066617458  | 0.150617323 | 0.069337678  | 0.134605349 | 0.100930708  |
| 0.165322349  | 0.000333494 | 0.188469334  | 4.15E-05    | 0.181766843  |
| 0.063852388  | 0.168336134 | 0.058458215  | 0.207313995 | 0.076585766  |
| 0.154062432  | 0.000836703 | 0.1937319    | 2.49E-05    | 0.194898487  |
| -0.164814311 | 0.000348078 | -0.184992044 | 5.78E-05    | -0.201872446 |
| 0.00808055   | 0.861742054 | -0.013258629 | 0.775057287 | 0.008716082  |
| -0.053406791 | 0.249378738 | -0.041969358 | 0.365500545 | -0.041729761 |
| -0.000473762 | 0.991853222 | -0.026422346 | 0.568975534 | -0.012858429 |
| -0.10837073  | 0.019153093 | -0.129086001 | 0.00520937  | -0.12794838  |
| -0.212886217 | 3.46E-06    | -0.193086883 | 2.66E-05    | -0.195906038 |
| -0.07803371  | 0.092109676 | -0.034952729 | 0.451124961 | -0.050321018 |
| 0.078119183  | 0.091752808 | 0.068245082  | 0.140871462 | 0.070716555  |
| -0.214465533 | 2.91E-06    | -0.204975517 | 8.00E-06    | -0.201702103 |
| 0.127604634  | 0.005754244 | 0.131403046  | 0.004449841 | 0.129140381  |
| 0.161005228  | 0.00047791  | 0.135816974  | 0.00327364  | 0.13046997   |
| 0.130078507  | 0.004870776 | 0.112299509  | 0.015182601 | 0.113165512  |
| -0.154229089 | 0.000825751 | -0.17838339  | 0.000106321 | -0.184236432 |
| 0.096216867  | 0.037661839 | 0.102266097  | 0.027114672 | 0.088815824  |
| 0.124471488  | 0.007078603 | 0.093246679  | 0.044002455 | 0.081580322  |
| 0.086369479  | 0.062189202 | 0.07468015   | 0.107010264 | 0.067400941  |
| 0.070847498  | 0.12630265  | 0.075010365  | 0.105463418 | 0.067126204  |
| -0.015340986 | 0.740906985 | -0.057855521 | 0.212044519 | -0.063943045 |

|              |             |              |             |              |
|--------------|-------------|--------------|-------------|--------------|
| -0.001964175 | 0.966233664 | -0.003199166 | 0.945029843 | -0.019380936 |
| -0.147159404 | 0.001427671 | -0.134750404 | 0.003528567 | -0.123266036 |
| 0.055410029  | 0.232036185 | 0.075135405  | 0.104882327 | 0.06122339   |
| 0.100803441  | 0.029399086 | 0.06484674   | 0.161792826 | 0.06103173   |
| 0.040467095  | 0.382927415 | 0.026980938  | 0.560831899 | 0.049115605  |
| 0.020129985  | 0.664367732 | -0.012732842 | 0.783752084 | -0.000605164 |
| 0.139180533  | 0.00257539  | 0.127904539  | 0.005639966 | 0.135636004  |
| 0.220931156  | 1.43E-06    | 0.219901039  | 1.60E-06    | 0.222301385  |
| -0.035677137 | 0.44179351  | -0.013692919 | 0.767896628 | -0.029253041 |
| 0.160919883  | 0.000481278 | 0.160621815  | 0.000493216 | 0.160434785  |
| 0.093296671  | 0.043888728 | 0.05716564   | 0.217554225 | 0.068508891  |
| 0.026452802  | 0.568530069 | 0.014952901  | 0.747235309 | 0.024043966  |
| 0.046364109  | 0.317412419 | 0.016032745  | 0.72967023  | 0.01178847   |
| 0.264780432  | 6.22E-09    | 0.303435554  | 2.11E-11    | 0.290771121  |
| 0.076776314  | 0.097489067 | 0.055376998  | 0.232315046 | 0.049157038  |
| 0.110971201  | 0.016435645 | 0.132136282  | 0.004231221 | 0.139823409  |
| 0.133269605  | 0.003912369 | 0.122577442  | 0.008005712 | 0.129047893  |
| 0.05835684   | 0.208104298 | 0.017414344  | 0.707402351 | 0.020503618  |
| -0.005960784 | 0.897777385 | -0.015827776 | 0.732993791 | -0.011307544 |
| -0.13920904  | 0.002570102 | -0.138710465 | 0.002664031 | -0.165662461 |
| -0.296210336 | 6.53E-11    | -0.326765164 | 4.41E-13    | -0.375400915 |
| 0.110503098  | 0.016898322 | 0.086106587  | 0.062992187 | 0.086557615  |
| -0.099395388 | 0.031752189 | -0.112953624 | 0.014596957 | -0.13666406  |
| 0.316793511  | 2.40E-12    | 0.271864524  | 2.34E-09    | 0.27168475   |
| -0.035483614 | 0.444275532 | -0.013802985 | 0.76608496  | 0.018038478  |
| -0.029776482 | 0.520942611 | -0.059339402 | 0.200535689 | -0.060338527 |
| -0.009072777 | 0.844967916 | 0.009905622  | 0.830941776 | 0.022456562  |
| 0.067920404  | 0.142775953 | 0.074494162  | 0.107889351 | 0.068674421  |
| 0.145866274  | 0.001574067 | 0.117471925  | 0.011066612 | 0.130502867  |
| -0.008582097 | 0.853254877 | 0.001789859  | 0.969228792 | -0.00568755  |
| 0.12633879   | 0.00625986  | 0.139004108  | 0.002608338 | 0.142603507  |
| -0.002089069 | 0.964088001 | 0.022763012  | 0.623668265 | 0.00588904   |
| 0.164446196  | 0.000359015 | 0.167134987  | 0.000285972 | 0.17391221   |
| -0.013118517 | 0.777371577 | -0.016690947 | 0.719031981 | -0.031924552 |
| -0.05952162  | 0.199154372 | -0.033257487 | 0.473390981 | -0.043622727 |
| 0.166715233  | 0.000296378 | 0.172571202  | 0.000178639 | 0.183243838  |
| -0.018620015 | 0.688171023 | -0.057917313 | 0.211555973 | -0.056840189 |
| 0.123108822  | 0.007735249 | 0.108504436  | 0.019004373 | 0.126068368  |
| -0.090071359 | 0.051751219 | -0.125290933 | 0.006708183 | -0.147929273 |
| 0.114529759  | 0.013266646 | 0.116964009  | 0.011421626 | 0.094933446  |
| -0.145709096 | 0.001592771 | -0.142125574 | 0.002078561 | -0.137798039 |
| -0.047767065 | 0.302974012 | -0.059202272 | 0.201579799 | -0.02263188  |
| -0.050610726 | 0.275063696 | -0.029879317 | 0.519503538 | 0.004405876  |
| 0.072866929  | 0.115825695 | 0.065350217  | 0.158553587 | 0.065840306  |
| 0.311350886  | 5.90E-12    | 0.316196403  | 2.65E-12    | 0.312411418  |

|              |             |              |             |              |
|--------------|-------------|--------------|-------------|--------------|
| 0.21724778   | 2.15E-06    | 0.207341807  | 6.25E-06    | 0.194133875  |
| 0.061352673  | 0.185657073 | 0.061551222  | 0.184235035 | 0.072482134  |
| -0.010394045 | 0.822740737 | 0.002451702  | 0.957859532 | -0.005538624 |
| -0.190307705 | 3.48E-05    | -0.191269802 | 3.17E-05    | -0.187260563 |
| 0.095513191  | 0.039089359 | 0.100316536  | 0.030195293 | 0.103504102  |
| -0.210742872 | 4.36E-06    | -0.201829638 | 1.11E-05    | -0.232356288 |
| -0.205725656 | 7.40E-06    | -0.229733642 | 5.21E-07    | -0.235471804 |
| 0.049832127  | 0.282525569 | 0.099916848  | 0.030862615 | 0.132325542  |
| 0.056394404  | 0.223834285 | 0.017446505  | 0.706886883 | 0.043750323  |
| -0.000756985 | 0.986983295 | 0.037206301  | 0.422461594 | 0.05474081   |
| 0.019074946  | 0.680965648 | 0.026741623  | 0.564313937 | 0.022315281  |
| 0.032359882  | 0.485420134 | 0.041261043  | 0.373654935 | 0.049676038  |
| -0.034650591 | 0.455049567 | -0.050456671 | 0.276529372 | -0.082092351 |
| 0.172982769  | 0.000172288 | 0.141623409  | 0.002156537 | 0.145139948  |
| -0.127244372 | 0.005894269 | -0.165874275 | 0.000318296 | -0.164706688 |
| 0.099655022  | 0.03130657  | 0.061441192  | 0.185022091 | 0.009836566  |
| 0.1983889    | 1.57E-05    | 0.190057895  | 3.57E-05    | 0.195698562  |
| 0.001117733  | 0.980781064 | -0.007030179 | 0.879566981 | -0.054606847 |
| 0.082106826  | 0.076297955 | 0.090694792  | 0.050145961 | 0.100330671  |
| -0.019985841 | 0.666625994 | -0.00838655  | 0.856561956 | -0.052369158 |
| 0.217689675  | 2.05E-06    | 0.213156653  | 3.36E-06    | 0.199711218  |
| 0.036984476  | 0.42523491  | 0.075431064  | 0.103518396 | 0.091420126  |
| 0.012865554  | 0.781554866 | -0.024652154 | 0.595148137 | -0.036005447 |
| 0.187327061  | 4.63E-05    | 0.214336878  | 2.96E-06    | 0.246897086  |
| 0.104512232  | 0.023904276 | 0.083568646  | 0.071191972 | 0.095180534  |
| 0.167649211  | 0.00027369  | 0.19387714   | 2.46E-05    | 0.198075108  |
| 0.045231954  | 0.32938644  | 0.014733061  | 0.75082773  | 0.009378014  |
| 0.031403719  | 0.498413333 | 0.004927469  | 0.915424637 | 0.026565404  |
| 0.089623797  | 0.052929872 | 0.046120819  | 0.319961226 | 0.008128941  |
| -0.087648657 | 0.058401606 | -0.050532791 | 0.275804505 | -0.057697602 |
| -0.099770078 | 0.031110811 | -0.104350576 | 0.024123825 | -0.103653013 |
| -0.067468847 | 0.145457351 | -0.041751863 | 0.367992571 | -0.058716478 |
| 0.055017775  | 0.235363024 | 0.044423715  | 0.338110778 | 0.048863827  |
| 0.107580208  | 0.020053269 | 0.13247233   | 0.00413431  | 0.101383512  |
| -0.133212901 | 0.00392779  | -0.123623741 | 0.00748098  | -0.139637967 |
| -0.092993305 | 0.044582666 | -0.104630418 | 0.02374486  | -0.100192127 |
| -0.056129976 | 0.226016941 | -0.033442089 | 0.470937477 | -0.034166315 |
| -0.137260987 | 0.00295514  | -0.108695995 | 0.018793059 | -0.136854076 |
| 0.067588222  | 0.144744778 | 0.118232716  | 0.010553123 | 0.186749984  |
| -0.097542249 | 0.035092966 | -0.083659481 | 0.070884136 | -0.088477351 |
| 0.117531812  | 0.011025404 | 0.133241849  | 0.003919911 | 0.135258619  |
| -0.005579711 | 0.904280061 | -0.019359574 | 0.676472261 | -0.037339585 |
| 0.248630703  | 5.20E-08    | 0.250344568  | 4.18E-08    | 0.255905418  |
| -0.011653039 | 0.801691988 | 0.00107723   | 0.981477378 | -0.019291324 |
| -0.059089179 | 0.202443853 | -0.034661307 | 0.454910044 | -0.045826061 |



|              |             |              |             |              |
|--------------|-------------|--------------|-------------|--------------|
| -0.095971522 | 0.038154458 | -0.102728646 | 0.026424789 | -0.065358815 |
| -0.104809608 | 0.023504912 | -0.142579903 | 0.002010242 | -0.142957822 |
| 0.053088683  | 0.252213671 | 0.077506377  | 0.094336044 | 0.068317262  |
| -0.046683731 | 0.314084139 | -0.049528802 | 0.285469247 | -0.045206381 |
| -0.060826484 | 0.189464827 | -0.032149481 | 0.488263486 | -0.019941889 |
| 0.143959086  | 0.00181524  | 0.101653122  | 0.028052742 | 0.122216314  |
| -0.265134719 | 5.93E-09    | -0.261949758 | 9.12E-09    | -0.318605496 |
| -0.00414502  | 0.928815707 | 0.010184658  | 0.826254209 | 0.005506611  |
| 0.012261971  | 0.791561683 | 0.013541623  | 0.770389026 | 0.00413372   |
| -0.045424312 | 0.327331697 | -0.036677455 | 0.429090798 | -0.035472723 |
| -0.15446522  | 0.000810459 | -0.154916589 | 0.000781955 | -0.198925722 |
| 0.11312895   | 0.014443397 | 0.069593138  | 0.133171723 | 0.043236188  |
| 0.191253727  | 3.18E-05    | 0.144136659  | 0.001791433 | 0.193488095  |
| 0.186087119  | 5.21E-05    | 0.182435951  | 7.33E-05    | 0.180667891  |
| -0.080295937 | 0.083031829 | -0.017092857 | 0.7125625   | -0.01077136  |
| 0.097544367  | 0.035088983 | 0.07678326   | 0.097458677 | 0.05671393   |
| 0.062944041  | 0.174484731 | 0.099986589  | 0.030745273 | 0.096618674  |
| 0.021266662  | 0.646667503 | 0.014189299  | 0.759736394 | 0.019942677  |
| 0.046738257  | 0.313518644 | 0.069225812  | 0.135236866 | 0.070524616  |
| -0.156072156 | 0.000713155 | -0.184149919 | 6.25E-05    | -0.181385736 |
| -0.215547266 | 2.59E-06    | -0.230490017 | 4.77E-07    | -0.256313646 |
| 0.039390416  | 0.395724135 | 0.079554891  | 0.085922348 | 0.069691882  |
| 0.150117585  | 0.001138599 | 0.10903506   | 0.018424045 | 0.119268094  |
| 0.13460463   | 0.003564773 | 0.131266499  | 0.004491663 | 0.114771329  |
| -0.19837813  | 1.57E-05    | -0.184114645 | 6.27E-05    | -0.165189033 |
| 0.014667309  | 0.751903246 | 0.036626508  | 0.429732605 | 0.044234866  |
| 0.100713153  | 0.029545353 | 0.11943845   | 0.009782522 | 0.118367117  |
| -0.077046565 | 0.096312247 | -0.083216656 | 0.072395178 | -0.07974782  |
| -0.06980978  | 0.131965195 | -0.086176515 | 0.062777768 | -0.105797167 |
| -0.015728387 | 0.734607174 | 0.009277487  | 0.841515619 | 0.014643736  |
| -0.266958354 | 4.62E-09    | -0.226649678 | 7.45E-07    | -0.219724243 |
| -0.008868647 | 0.848413382 | -0.018645804 | 0.687761805 | -0.009687864 |
| -0.066236604 | 0.152970081 | -0.054544684 | 0.239420053 | -0.073689975 |
| -0.001883725 | 0.967615923 | -0.017705086 | 0.702747196 | -0.020575734 |
| 0.214896998  | 2.78E-06    | 0.22941393   | 5.40E-07    | 0.221974474  |
| 0.210662619  | 4.39E-06    | 0.197244137  | 1.76E-05    | 0.193300355  |
| -0.220111771 | 1.56E-06    | -0.253456449 | 2.80E-08    | -0.283201695 |
| 0.006974155  | 0.880519496 | -0.039426672 | 0.395289078 | -0.052507511 |
| 0.1223399    | 0.008129324 | 0.10769253   | 0.019923165 | 0.111776941  |
| -0.119251055 | 0.009898908 | -0.112758438 | 0.014769598 | -0.101839219 |
| 0.238588945  | 1.81E-07    | 0.244105609  | 9.19E-08    | 0.266945609  |
| 0.10649308   | 0.021351186 | 0.102554425  | 0.02668284  | 0.083366848  |
| 0.106644291  | 0.021166398 | 0.073161349  | 0.11435681  | 0.078860198  |
| 0.00475612   | 0.918355239 | 0.026590311  | 0.566520873 | 0.006263757  |
| -0.027167161 | 0.558129539 | -0.068629309 | 0.138642897 | -0.053241702 |

|              |             |              |             |              |
|--------------|-------------|--------------|-------------|--------------|
| 0.127700486  | 0.005717496 | 0.103405071  | 0.025443155 | 0.141308229  |
| -0.033043639 | 0.476241925 | -0.059027708 | 0.202914636 | -0.088097464 |
| 0.17380998   | 0.000160156 | 0.210419348  | 4.51E-06    | 0.225661892  |
| 0.136847472  | 0.003043339 | 0.129667342  | 0.005008561 | 0.139348273  |
| -0.046457826 | 0.316434146 | -0.015911333 | 0.731638318 | -0.007597789 |
| 0.019683292  | 0.671375704 | 0.017652296  | 0.703591618 | 0.016395262  |
| 0.30211853   | 2.60E-11    | 0.289221701  | 1.89E-10    | 0.287487352  |
| -0.04454032  | 0.336843059 | -0.030387986 | 0.5124154   | -0.061639191 |
| 0.021830027  | 0.637967351 | 0.022844766  | 0.622421897 | 0.014205424  |
| 0.072098044  | 0.119731454 | 0.055871937  | 0.228161419 | 0.05013037   |
| 0.007716986  | 0.867904323 | 0.005907454  | 0.898687009 | -8.36E-05    |
| 0.130510977  | 0.004729548 | 0.119689595  | 0.009628449 | 0.13491632   |
| 0.212958013  | 3.43E-06    | 0.232728732  | 3.66E-07    | 0.232248489  |
| 0.079919921  | 0.084488546 | 0.085552498  | 0.064712605 | 0.081668421  |
| -0.017541751 | 0.705361046 | -0.0320496   | 0.48961639  | -0.049080605 |
| -0.222423052 | 1.21E-06    | -0.215683226 | 2.55E-06    | -0.254824291 |
| 0.065644462  | 0.156683285 | 0.11653678   | 0.011728007 | 0.086544288  |
| 0.137306798  | 0.002945514 | 0.140714018  | 0.002304585 | 0.128630145  |
| -0.090571539 | 0.050459979 | -0.061616951 | 0.183766047 | -0.096278959 |
| -0.001763155 | 0.969687669 | 0.017699279  | 0.702840066 | 0.00021311   |
| -0.073411819 | 0.113118738 | -0.064052945 | 0.167000681 | -0.08089179  |
| 0.058421176  | 0.20760249  | 0.039185494  | 0.398188555 | 0.04443834   |
| 0.055181096  | 0.233973778 | 0.071198099  | 0.124432741 | 0.051706621  |
| 0.041261481  | 0.373649858 | 0.070455     | 0.128421813 | 0.124112588  |
| 0.284396291  | 3.87E-10    | 0.320816568  | 1.22E-12    | 0.380130976  |
| 0.00172472   | 0.970348133 | 0.025024997  | 0.589590231 | -0.002187279 |
| 0.20244336   | 1.04E-05    | 0.197450422  | 1.72E-05    | 0.183746226  |
| -0.013407937 | 0.772593276 | -0.034339049 | 0.459116314 | -0.052160994 |
| 0.104930224  | 0.023344583 | 0.079189793  | 0.087375957 | 0.086419245  |
| -0.129648952 | 0.005014805 | -0.145261064 | 0.00164721  | -0.161951625 |
| -0.018194027 | 0.694943683 | 0.009370188  | 0.839953282 | 0.014178253  |
| 0.065808184  | 0.155649866 | 0.05617548   | 0.225640264 | 0.064437434  |
| -0.031226263 | 0.500844888 | -0.027966678 | 0.546599646 | -0.063756947 |
| -0.101513949 | 0.02826957  | -0.1003624   | 0.030119514 | -0.110567446 |
| 0.002389082  | 0.958934907 | -0.012914162 | 0.780750529 | -0.039429612 |
| -0.046321084 | 0.317862197 | -0.059449939 | 0.199696926 | -0.077224784 |
| 0.043560568  | 0.347589597 | 0.029684863  | 0.522226453 | 0.014275191  |
| 0.196799014  | 1.84E-05    | 0.177555262  | 0.000114595 | 0.191579367  |
| -0.05224833  | 0.259810211 | -0.050808675 | 0.273188182 | -0.052971568 |
| 0.183154641  | 6.86E-05    | 0.219741316  | 1.63E-06    | 0.211076075  |
| 0.051959298  | 0.262459099 | 0.071587944  | 0.122378873 | 0.079091201  |
| -0.094266592 | 0.04173078  | -0.111152245 | 0.016259696 | -0.124683286 |
| 0.097977233  | 0.034283047 | 0.092156503  | 0.046544796 | 0.08903759   |
| 0.162540915  | 0.000420925 | 0.170224989  | 0.000219246 | 0.188611704  |
| 0.055713663  | 0.229483916 | 0.024436047  | 0.598380473 | 0.004789791  |

|              |             |              |             |              |
|--------------|-------------|--------------|-------------|--------------|
| 0.080625471  | 0.08177193  | 0.050176887  | 0.279204775 | 0.080110138  |
| 0.158574919  | 0.000582928 | 0.144444186  | 0.00175088  | 0.169269785  |
| -0.042820084 | 0.355854289 | -0.040945289 | 0.377325904 | -0.046750819 |
| -0.047057976 | 0.310216248 | -0.030391859 | 0.512361625 | 0.009818207  |
| -0.078940238 | 0.088380872 | -0.064279727 | 0.165500183 | -0.060396931 |
| 0.044284772  | 0.339625332 | 0.084329826  | 0.068645868 | 0.080745852  |
| -0.146653592 | 0.001483376 | -0.132650536 | 0.004083736 | -0.138892751 |
| -0.00145899  | 0.974915005 | -0.007687326 | 0.868407395 | -0.011634983 |
| -0.074701112 | 0.106911542 | -0.065822266 | 0.155561224 | -0.064870012 |
| -0.078561037 | 0.089925604 | -0.038871064 | 0.401987807 | -0.063695239 |
| 0.196625477  | 1.87E-05    | 0.179723399  | 9.41E-05    | 0.173211139  |
| -0.12053052  | 0.009128138 | -0.070714333 | 0.127018563 | -0.080169622 |
| -0.051779601 | 0.264115305 | -0.095390158 | 0.039343599 | -0.103505039 |
| -0.029881527 | 0.519472628 | -0.02795546  | 0.546760603 | -0.002617363 |
| 0.118976026  | 0.010071947 | 0.109575171  | 0.017849279 | 0.10537842   |
| 0.116092704  | 0.01205415  | 0.155224643  | 0.000763038 | 0.16690023   |
| 0.099264969  | 0.03197807  | 0.10216338   | 0.027269957 | 0.090141417  |
| -0.07371467  | 0.111635837 | -0.074374223 | 0.108459269 | -0.097167907 |
| 0.075802992  | 0.101822621 | 0.069962476  | 0.131119883 | 0.084359546  |
| 0.096075772  | 0.037944476 | 0.073960601  | 0.110442923 | 0.084444032  |
| 0.046880912  | 0.312042317 | 0.036829271  | 0.427181609 | 0.042584091  |
| 0.003843496  | 0.933981659 | 0.012845621  | 0.781884774 | -0.013907328 |
| 0.043514096  | 0.348104672 | 0.024769965  | 0.593389365 | 0.036678514  |
| -0.022993938 | 0.620150506 | 0.002749009  | 0.952754976 | 0.001321171  |
| -0.021787241 | 0.638626383 | -0.034245966 | 0.460335304 | -0.04203828  |
| -0.072583281 | 0.117254774 | -0.075499567 | 0.103204394 | -0.091751951 |
| -0.087734765 | 0.05815366  | -0.059311166 | 0.200750351 | -0.067189129 |
| -0.066898429 | 0.1488993   | -0.054032951 | 0.243863531 | -0.045356341 |
| 0.045792497  | 0.323421964 | 0.042421112  | 0.360358086 | 0.070813629  |
| -0.164157355 | 0.00036782  | -0.185243755 | 5.64E-05    | -0.200059375 |
| 0.043070326  | 0.353047571 | 0.042961062  | 0.354271353 | 0.037647385  |
| 0.272739185  | 2.07E-09    | 0.249431325  | 4.70E-08    | 0.273856991  |
| 0.271967415  | 2.31E-09    | 0.300674989  | 3.26E-11    | 0.2911568    |
| -0.033908159 | 0.464774279 | -0.033117888 | 0.475250997 | -0.015969196 |
| 0.096822234  | 0.036469371 | 0.095855959  | 0.038388378 | 0.117177197  |
| -0.178592069 | 0.000104326 | -0.212677728 | 3.54E-06    | -0.227890732 |
| -0.093441195 | 0.043561346 | -0.110527749 | 0.016873676 | -0.133601872 |
| 0.035466389  | 0.44449684  | 0.018350084  | 0.69245972  | -0.006786969 |
| -0.056010385 | 0.227009036 | -0.050882963 | 0.272486575 | -0.076949253 |
| 0.125725823  | 0.006518737 | 0.144268976  | 0.001773881 | 0.124888869  |
| -0.124210628 | 0.007200305 | -0.114640761 | 0.013177117 | -0.113385384 |
| -0.020826957 | 0.653491629 | -0.009795039 | 0.832801141 | 0.016693084  |
| -0.288601264 | 2.07E-10    | -0.303607509 | 2.05E-11    | -0.332168012 |
| 0.080325863  | 0.082916771 | 0.079057475  | 0.087907627 | 0.087296347  |
| 0.014072173  | 0.761659519 | 0.040830796  | 0.378662458 | 0.016604161  |

|              |             |              |             |              |
|--------------|-------------|--------------|-------------|--------------|
| 0.042219902  | 0.362642911 | -0.003228891 | 0.944519904 | 0.007882349  |
| 0.132556933  | 0.00411023  | 0.150145963  | 0.001136108 | 0.158241015  |
| -0.059641392 | 0.198250211 | -0.086430962 | 0.062002628 | -0.063855824 |
| -0.022145883 | 0.633111089 | -0.0366823   | 0.429029804 | -0.041674673 |
| -0.011280189 | 0.807911358 | -0.016964835 | 0.71462105  | -0.016764414 |
| -0.083893167 | 0.070097187 | -0.109121907 | 0.01833055  | -0.142252931 |
| -0.06346351  | 0.170948306 | -0.039501187 | 0.39439582  | -0.047793368 |
| 0.147487561  | 0.001392566 | 0.153465715  | 0.00087703  | 0.15207223   |
| 0.006731356  | 0.88464957  | 0.043181256  | 0.351807859 | 0.013405244  |
| 0.215532351  | 2.59E-06    | 0.184325733  | 6.15E-05    | 0.213926078  |
| 0.202313481  | 1.05E-05    | 0.18206002   | 7.59E-05    | 0.183075818  |
| 0.265090239  | 5.97E-09    | 0.269721957  | 3.16E-09    | 0.253540513  |
| 0.058921924  | 0.20372666  | 0.073133867  | 0.1144933   | 0.10425441   |
| -0.125273526 | 0.006715868 | -0.126284261 | 0.006282509 | -0.148044907 |
| -0.014204031 | 0.759494596 | -0.0470764   | 0.310026653 | -0.052688414 |
| 0.045533296  | 0.326171228 | 0.043866848  | 0.34420701  | 0.032717051  |
| 0.077060548  | 0.09625167  | 0.097068711  | 0.035993123 | 0.130267777  |
| -0.006714629 | 0.884934218 | -0.024284237 | 0.60065586  | -0.065145644 |
| 0.104235399  | 0.024281311 | 0.138953897  | 0.002617786 | 0.151622904  |
| -0.40464889  | 7.95E-20    | -0.419844114 | 2.29E-21    | -0.45837966  |
| -0.060309552 | 0.193261151 | -0.041667296 | 0.368964363 | -0.014981562 |
| 0.046383446  | 0.317210403 | 0.013473248  | 0.771516174 | 0.018285433  |
| 0.088045558  | 0.057265976 | 0.051961951  | 0.262434705 | 0.022958779  |
| -0.053334181 | 0.250023867 | -0.088985765 | 0.054648711 | -0.108704393 |
| -0.019452786 | 0.675003229 | -0.012878027 | 0.781348452 | -0.030227845 |
| 0.121661536  | 0.008491757 | 0.105114515  | 0.023101439 | 0.115498757  |
| 0.048985456  | 0.290793742 | 0.042883085  | 0.355146347 | 0.045607298  |
| 0.190908584  | 3.28E-05    | 0.170281831  | 0.000218167 | 0.180039469  |
| 0.179455419  | 9.64E-05    | 0.144959166  | 0.00168485  | 0.136066036  |
| -0.331825611 | 1.82E-13    | -0.364718696 | 3.87E-16    | -0.408140775 |
| 0.149413995  | 0.001201993 | 0.119102916  | 0.009991781 | 0.094653989  |
| -0.252197751 | 3.30E-08    | -0.240743649 | 1.39E-07    | -0.244151083 |
| 0.012054098  | 0.795016053 | 0.04250751   | 0.35937976  | 0.038339849  |
| 0.118097972  | 0.010642498 | 0.094514533  | 0.04119374  | 0.074214267  |
| 0.031832787  | 0.492560078 | -0.003674059 | 0.936885809 | -0.025819308 |
| 0.117979709  | 0.010721493 | 0.122528947  | 0.008030811 | 0.126941757  |
| 0.119310224  | 0.009862027 | 0.129588658  | 0.005035326 | 0.101675032  |
| -0.078350904 | 0.090790895 | -0.07072094  | 0.12698297  | -0.056424254 |
| 0.086274583  | 0.062478076 | 0.113869684  | 0.013810184 | 0.095925229  |
| -0.065712443 | 0.15625356  | -0.05879567  | 0.204698885 | -0.051517624 |
| -0.023020187 | 0.619751186 | -0.050066135 | 0.280268668 | -0.083323737 |
| 0.121679919  | 0.008481749 | 0.117851904  | 0.010807447 | 0.082188069  |
| -0.165913882 | 0.000317231 | -0.162198498 | 0.000433054 | -0.110281567 |
| 0.066910894  | 0.14882343  | 0.061590797  | 0.183952553 | 0.057529402  |
| 0.00444722   | 0.923641165 | 0.019543668  | 0.673572083 | 0.02983813   |

|              |             |              |             |              |
|--------------|-------------|--------------|-------------|--------------|
| 0.101953931  | 0.027588969 | 0.096379382  | 0.037338511 | 0.093581971  |
| 0.047543099  | 0.305249272 | 0.004580806  | 0.921354813 | -0.042130924 |
| -0.118151903 | 0.010606645 | -0.103702316 | 0.025021837 | -0.147817528 |
| 0.123735515  | 0.007426782 | 0.139106299  | 0.002589207 | 0.161953453  |
| -0.200494393 | 1.27E-05    | -0.184836615 | 5.86E-05    | -0.160909772 |
| 0.016951488  | 0.714835769 | 0.038854989  | 0.402182624 | 0.063865203  |
| 0.314322029  | 3.62E-12    | 0.304901049  | 1.67E-11    | 0.307270476  |
| -0.096922728 | 0.036274552 | -0.078204222 | 0.091398855 | -0.087842813 |
| -0.217768733 | 2.03E-06    | -0.210586427 | 4.43E-06    | -0.214587984 |
| 0.105822636  | 0.02218747  | 0.119705676  | 0.009618658 | 0.126616135  |
| 0.071349752  | 0.123630607 | 0.085923615  | 0.063556089 | 0.086135259  |
| 0.022124142  | 0.633444862 | 0.043160924  | 0.352034873 | 0.052061936  |
| -0.008835719 | 0.848969438 | -0.000468561 | 0.991942665 | -0.00856854  |
| 0.087664598  | 0.058355639 | 0.071299423  | 0.123896363 | 0.0712995    |
| -0.239124096 | 1.70E-07    | -0.273569359 | 1.84E-09    | -0.240176446 |
| 0.089505597  | 0.053244856 | 0.076425359  | 0.099034378 | 0.077460674  |
| -0.004199798 | 0.92787752  | 0.035583492  | 0.442993567 | 0.04837692   |
| 0.016887964  | 0.715858092 | -0.008173433 | 0.860169051 | -0.018711247 |
| 0.022267298  | 0.631248509 | 0.012352947  | 0.790051148 | 0.015826513  |
| 0.005614201  | 0.903691249 | -0.015760581 | 0.734084444 | -0.027758644 |
| 0.078228932  | 0.091296209 | 0.061837166  | 0.182201204 | 0.048465849  |
| 0.06454854   | 0.163734707 | 0.077677372  | 0.093609451 | 0.077569041  |
| 0.057026784  | 0.218675485 | 0.038089486  | 0.411525032 | 0.025113803  |
| -0.051114409 | 0.270308597 | -0.063271281 | 0.172250667 | -0.093321854 |
| -0.108230411 | 0.019310258 | -0.079330772 | 0.086812332 | -0.092532034 |
| -0.198258844 | 1.59E-05    | -0.246922179 | 6.46E-08    | -0.256959037 |
| -0.025876907 | 0.576981332 | -0.027902262 | 0.547524221 | -0.015682167 |
| 0.051064433  | 0.270777883 | 0.042201252  | 0.362855138 | 0.066441974  |
| 0.011882712  | 0.797867112 | 0.016349896  | 0.724537622 | 0.014636522  |
| 0.101981177  | 0.02754729  | 0.116595556  | 0.01168543  | 0.110708064  |
| -0.100693172 | 0.029577807 | -0.124321085 | 0.007148546 | -0.145128687 |
| 0.158691048  | 0.000577458 | 0.130891189  | 0.004608449 | 0.128525097  |
| 0.058601928  | 0.206197349 | 0.076982383  | 0.096590701 | 0.070030445  |
| -0.055378943 | 0.232298616 | -0.037738336 | 0.41585316  | -0.034857133 |
| 0.3235517    | 7.67E-13    | 0.310370297  | 6.92E-12    | 0.319005752  |
| -0.22418842  | 9.87E-07    | -0.231080098 | 4.45E-07    | -0.258094073 |
| 0.177257053  | 0.000117719 | 0.155894836  | 0.000723335 | 0.169117547  |
| 0.148135224  | 0.001325598 | 0.120522526  | 0.009132783 | 0.106835695  |
| -0.02671032  | 0.564770171 | -0.060911641 | 0.188844729 | -0.066166183 |
| 0.03322398   | 0.473837066 | 0.048906738  | 0.291570627 | 0.080822605  |
| 0.164469199  | 0.000358323 | 0.159313229  | 0.000548954 | 0.163207147  |
| 0.203128421  | 9.69E-06    | 0.22136697   | 1.36E-06    | 0.219747018  |
| 0.041554931  | 0.370258059 | 0.070837413  | 0.12635676  | 0.022449624  |
| -0.104066402 | 0.024513994 | -0.12877459  | 0.005319896 | -0.166533733 |
| 0.058307724  | 0.208487982 | 0.075504177  | 0.103183288 | 0.051183087  |

|              |             |              |             |              |
|--------------|-------------|--------------|-------------|--------------|
| 0.000554396  | 0.990466717 | 0.025234224  | 0.58648181  | 0.017130935  |
| -0.188659651 | 4.08E-05    | -0.169234805 | 0.00023885  | -0.186873947 |
| 0.269914463  | 3.07E-09    | 0.27434361   | 1.65E-09    | 0.292727208  |
| 0.067591996  | 0.144722298 | 0.04889129   | 0.291723246 | 0.068729744  |
| -0.107447239 | 0.020208245 | -0.122342954 | 0.008127724 | -0.119783559 |
| -0.226513451 | 7.56E-07    | -0.228234339 | 6.20E-07    | -0.23222683  |
| 0.080449072  | 0.082444414 | 0.046550905  | 0.315464492 | 0.028471182  |
| 0.146527312  | 0.001497592 | 0.082525749  | 0.074805154 | 0.083851104  |
| -0.078174111 | 0.091524058 | -0.081440593 | 0.078721828 | -0.094942029 |
| 0.085400341  | 0.065191751 | 0.089985834  | 0.05197474  | 0.089901485  |
| -0.093330465 | 0.043811993 | -0.080179777 | 0.083479662 | -0.099480204 |
| -0.023122357 | 0.618197988 | -0.014041195 | 0.76216841  | -0.004717026 |
| 0.066170979  | 0.153378282 | 0.072613933  | 0.11709968  | 0.05783169   |
| 0.002102529  | 0.963856776 | -0.022685994 | 0.624843415 | 0.002284333  |
| -0.236242998 | 2.41E-07    | -0.255689602 | 2.09E-08    | -0.246807715 |
| -0.112498227 | 0.015002541 | -0.123269616 | 0.007655031 | -0.134662121 |
| 0.017028351  | 0.713599477 | 0.007673227  | 0.868646557 | 0.024007867  |
| -0.164078934 | 0.000370245 | -0.186137956 | 5.19E-05    | -0.164417838 |
| -0.184187143 | 6.23E-05    | -0.227918644 | 6.43E-07    | -0.2042717   |
| 0.091261376  | 0.048723378 | 0.069696372  | 0.13259573  | 0.059162417  |
| -0.192930006 | 2.70E-05    | -0.203651107 | 9.18E-06    | -0.175355478 |
| -0.041571188 | 0.370070714 | -0.030143927 | 0.51580999  | -0.020241054 |
| 0.021427927  | 0.644172061 | 0.031649392  | 0.495057405 | 0.029174006  |
| 0.039928025  | 0.389302577 | 0.027119696  | 0.558817722 | 0.008312924  |
| -0.054562173 | 0.23926921  | -0.0432162   | 0.351417909 | -0.06388923  |
| 0.09569797   | 0.03871014  | 0.082274605  | 0.075697205 | 0.073839973  |
| 0.111566292  | 0.015863492 | 0.118873783  | 0.010136957 | 0.102648852  |
| 0.052850544  | 0.254350531 | 0.059505313  | 0.199277706 | 0.041534504  |
| 0.040793978  | 0.379092872 | 0.014433974  | 0.755723768 | -0.010182389 |
| -0.175299758 | 0.000140304 | -0.157530959 | 0.000634305 | -0.158534925 |
| -0.170986902 | 0.000205197 | -0.17294924  | 0.000172797 | -0.203493306 |
| -0.102407505 | 0.026902138 | -0.091595427 | 0.047900578 | -0.087597222 |
| -0.122271587 | 0.008165186 | -0.151041698 | 0.001060014 | -0.169153929 |
| -0.052167561 | 0.260548572 | -0.045876305 | 0.322536269 | -0.071972314 |
| 0.130156545  | 0.004845014 | 0.122857319  | 0.007862225 | 0.120245652  |
| -0.150316811 | 0.001121217 | -0.142666215 | 0.001997498 | -0.138185187 |
| -0.043705589 | 0.345985353 | -0.052250504 | 0.259790359 | -0.078028871 |
| 0.141024989  | 0.002252947 | 0.125243609  | 0.006729094 | 0.138703269  |
| -0.008970432 | 0.846695016 | 0.002768801  | 0.952415241 | 0.05911112   |
| 0.285271215  | 3.40E-10    | 0.319416229  | 1.55E-12    | 0.328171314  |
| 0.057062909  | 0.218383382 | 0.046900347  | 0.311841537 | 0.06960502   |
| -0.120669597 | 0.009047661 | -0.126156333 | 0.006335936 | -0.123209667 |
| 0.089962002  | 0.052037168 | 0.090864878  | 0.049715309 | 0.064069152  |
| -0.023715305 | 0.609217656 | -0.023609123 | 0.610821551 | -0.029894959 |
| 0.155580171  | 0.000741731 | 0.149582232  | 0.001186545 | 0.157836731  |

|              |             |              |             |              |
|--------------|-------------|--------------|-------------|--------------|
| 0.070535608  | 0.127984363 | 0.073828109  | 0.111084334 | 0.080129364  |
| -0.085877516 | 0.063698816 | -0.059641543 | 0.198249072 | -0.059634377 |
| 0.194611126  | 2.29E-05    | 0.181075291  | 8.31E-05    | 0.196111669  |
| -0.072260549 | 0.118897508 | -0.017786184 | 0.701450672 | -0.026229155 |
| -0.188386696 | 4.19E-05    | -0.216365933 | 2.37E-06    | -0.244909916 |
| -0.09167699  | 0.047701458 | -0.114470419 | 0.013314726 | -0.14442621  |
| -0.057765669 | 0.212756373 | -0.096061399 | 0.037973367 | -0.093415586 |
| -0.101108858 | 0.028908899 | -0.092304394 | 0.046192842 | -0.09525326  |
| 0.118647754  | 0.010281997 | 0.07987764   | 0.084653626 | 0.073837696  |
| -0.114145454 | 0.013580762 | -0.143018308 | 0.001946272 | -0.151955213 |
| 0.061904376  | 0.181725573 | 0.048330509  | 0.297299844 | 0.072468733  |
| 0.064865608  | 0.161670544 | 0.059367505  | 0.200322192 | 0.059537805  |
| 0.056520187  | 0.222801326 | 0.033115388  | 0.475284356 | 0.027746235  |
| 0.000787521  | 0.986458261 | -0.027925804 | 0.547186237 | -0.037790896 |
| -0.073481871 | 0.112774362 | -0.05293645  | 0.253578242 | -0.056854607 |
| -0.082604784 | 0.074526205 | -0.11320181  | 0.014380001 | -0.048342114 |
| 0.218395705  | 1.89E-06    | 0.223183794  | 1.11E-06    | 0.259964085  |
| -0.238081235 | 1.93E-07    | -0.215574416 | 2.58E-06    | -0.208935777 |
| 0.286826419  | 2.70E-10    | 0.262403206  | 8.58E-09    | 0.252037602  |
| 0.0189708    | 0.682612623 | -0.006076907 | 0.895797195 | -0.027569003 |
| 0.145278756  | 0.001645028 | 0.153601247  | 0.000867716 | 0.138317304  |
| -0.105406586 | 0.02272059  | -0.099749503 | 0.03114574  | -0.096099817 |
| 0.042200934  | 0.362858765 | 0.016774954  | 0.717678057 | 0.016128145  |
| -0.0611436   | 0.187163212 | -0.075086007 | 0.105111589 | -0.077930077 |
| -0.070353442 | 0.128974602 | -0.049288692 | 0.287814041 | -0.051831201 |
| 0.124443731  | 0.007091465 | 0.088191899  | 0.056851906 | 0.086864022  |
| -0.225903634 | 8.11E-07    | -0.25724888  | 1.71E-08    | -0.231800056 |
| 0.220550559  | 1.49E-06    | 0.219198048  | 1.73E-06    | 0.21727081   |
| -0.08271634  | 0.074133913 | -0.087254978 | 0.059546376 | -0.086279322 |
| 0.016689426  | 0.719056498 | 0.022977881  | 0.620394823 | 0.021022049  |
| 0.024990304  | 0.590106391 | 0.058568934  | 0.20645333  | 0.038078492  |
| 0.143847928  | 0.00183029  | 0.167744936  | 0.000271459 | 0.18596152   |
| -0.089669514 | 0.052808458 | -0.084072544 | 0.069497982 | -0.074575348 |
| -0.005115499 | 0.912210057 | -0.002807652 | 0.951748341 | 0.006715766  |
| -0.021372004 | 0.64503697  | -0.026693788 | 0.565011188 | -0.026506445 |
| 0.160598951  | 0.000494143 | 0.184277325  | 6.18E-05    | 0.192327874  |
| 0.10590411   | 0.022084349 | 0.107888174  | 0.019698301 | 0.107794027  |
| 0.040373191  | 0.384033342 | 0.050089891  | 0.280040238 | 0.031997838  |
| 0.066015075  | 0.154351351 | 0.057382891  | 0.215808197 | 0.055581556  |
| -0.239751863 | 1.57E-07    | -0.236061889 | 2.46E-07    | -0.239618006 |
| -0.03835433  | 0.408278373 | -0.012414739 | 0.78902563  | -0.015319848 |
| -0.110988803 | 0.016418466 | -0.114632453 | 0.013183799 | -0.12546361  |
| 0.086550272  | 0.061641893 | 0.071776546  | 0.121394768 | 0.069978993  |
| -0.076724944 | 0.09771405  | -0.047444346 | 0.306256074 | -0.038034506 |
| -0.048564043 | 0.294968932 | -0.04705011  | 0.310297222 | -0.050871778 |

|              |             |              |             |              |
|--------------|-------------|--------------|-------------|--------------|
| -0.132472491 | 0.004134264 | -0.146943238 | 0.001451238 | -0.182711672 |
| 0.015739127  | 0.734432777 | 0.013756822  | 0.766844645 | 0.00241823   |
| 0.198719979  | 1.52E-05    | 0.195042896  | 2.19E-05    | 0.181227376  |
| -0.076328955 | 0.099462252 | -0.087574738 | 0.058615153 | -0.089340762 |
| -0.006977252 | 0.880466849 | 0.004919031  | 0.91556893  | 0.02988784   |
| 0.220544344  | 1.49E-06    | 0.230576599  | 4.72E-07    | 0.254551421  |
| 0.220501751  | 1.50E-06    | 0.230873696  | 4.56E-07    | 0.213418336  |
| -0.125760134 | 0.006503996 | -0.139981647 | 0.002430497 | -0.155986247 |
| 0.004145461  | 0.928808155 | 0.011026642  | 0.812147623 | 0.018477532  |
| 0.150680242  | 0.001090136 | 0.144611454  | 0.001729177 | 0.199169086  |
| -0.087178233 | 0.059771688 | -0.103971106 | 0.02464605  | -0.115901016 |
| -0.01196895  | 0.796432171 | -0.049003715 | 0.290613735 | -0.043236525 |
| 0.064342674  | 0.165085495 | 0.034898199  | 0.451831868 | 0.028973769  |
| -0.120529283 | 0.009128857 | -0.127102338 | 0.00595031  | -0.163728978 |
| 0.259622149  | 1.25E-08    | 0.272912135  | 2.02E-09    | 0.295774056  |
| -0.110031304 | 0.017376138 | -0.118042217 | 0.010679675 | -0.124500872 |
| 0.001826525  | 0.968598747 | -0.008755446 | 0.850325329 | 0.016707936  |
| 0.053641315  | 0.247302967 | 0.021680411  | 0.640273114 | 0.005817672  |
| -0.213298465 | 3.31E-06    | -0.232471312 | 3.77E-07    | -0.218605346 |
| -0.059733231 | 0.197558955 | -0.059840348 | 0.19675492  | -0.054664447 |
| -0.082886545 | 0.073538625 | -0.065287079 | 0.158957098 | -0.093382466 |
| -0.030687524 | 0.508265067 | 0.014371     | 0.756755905 | -0.011723354 |
| -0.061938149 | 0.181486919 | -0.091150982 | 0.048997876 | -0.046337836 |
| -0.005079204 | 0.912830443 | 0.052404643  | 0.258385363 | 0.049787258  |
| 0.013207718  | 0.775897981 | -0.00845986  | 0.855321851 | -0.020686679 |
| -0.118264887 | 0.010531882 | -0.122806045 | 0.007888339 | -0.119871414 |
| 0.171678912  | 0.000193172 | 0.164946989  | 0.000344213 | 0.16769687   |
| 0.019739236  | 0.670496441 | 0.013869647  | 0.764988323 | 0.008709477  |
| -0.152071441 | 0.000978357 | -0.1423726   | 0.002041156 | -0.146388749 |
| -0.128172335 | 0.005539653 | -0.100004175 | 0.030715744 | -0.112007763 |
| 0.189263622  | 3.85E-05    | 0.191902539  | 2.98E-05    | 0.183798358  |
| 0.095942988  | 0.038212103 | 0.119683966  | 0.009631879 | 0.100115542  |
| 0.068932761  | 0.136902046 | 0.065846276  | 0.155410173 | 0.040185943  |
| -0.070562749 | 0.127837332 | -0.050758319 | 0.273664466 | -0.077457927 |
| 0.137286003  | 0.00294988  | 0.175370632  | 0.00013942  | 0.216235905  |
| 0.152960628  | 0.00091256  | 0.161863497  | 0.000445234 | 0.178697056  |
| 0.15993611   | 0.000521731 | 0.156499634  | 0.000689157 | 0.168269352  |
| -0.089070355 | 0.054418194 | -0.150122836 | 0.001138138 | -0.144462853 |
| -0.083611208 | 0.071047595 | -0.11538719  | 0.012588791 | -0.140828406 |
| -0.112892157 | 0.014651132 | -0.113482106 | 0.014138388 | -0.116033593 |
| 0.145250852  | 0.00164847  | 0.138445786  | 0.002715156 | 0.142993359  |
| 0.137322387  | 0.002942245 | 0.135542666  | 0.003337555 | 0.116287972  |
| 0.109227442  | 0.018217494 | 0.093479527  | 0.043474862 | 0.110217174  |
| 0.193355268  | 2.59E-05    | 0.188287639  | 4.23E-05    | 0.185592904  |
| -0.103900817 | 0.024743845 | -0.085700377 | 0.06424971  | -0.125734499 |



|              |             |              |             |              |
|--------------|-------------|--------------|-------------|--------------|
| 0.008013614  | 0.862875974 | -0.041347089 | 0.372658394 | -0.050964837 |
| 0.167165935  | 0.000285219 | 0.165142602  | 0.000338587 | 0.180435635  |
| -0.283435071 | 4.46E-10    | -0.302552072 | 2.43E-11    | -0.32570428  |
| -0.046604319 | 0.314908925 | -0.014904041 | 0.748033271 | -0.032175459 |
| -0.000126597 | 0.997823014 | 0.008033185  | 0.862544412 | 0.005332248  |
| 0.142827439  | 0.001973891 | 0.134921842  | 0.003486413 | 0.163989525  |
| 0.233639111  | 3.29E-07    | 0.216173093  | 2.42E-06    | 0.229197336  |
| -0.088179218 | 0.056887686 | -0.05304729  | 0.252584196 | -0.039749405 |
| 0.199269695  | 1.44E-05    | 0.186494808  | 5.01E-05    | 0.159960868  |
| 0.254196384  | 2.54E-08    | 0.22301581   | 1.13E-06    | 0.215555026  |
| 0.164600006  | 0.000354407 | 0.167196667  | 0.000284473 | 0.150175596  |
| -0.043051157 | 0.353262079 | -0.031890814 | 0.491771312 | -0.047045791 |
| 0.024075616  | 0.603789077 | -0.001140893 | 0.980382922 | -0.001283542 |
| 0.02463822   | 0.59535631  | -0.019751914 | 0.670297242 | -0.052248634 |
| -0.129039225 | 0.005225839 | -0.178015374 | 0.000109926 | -0.193078212 |
| 0.046675934  | 0.314165059 | 0.065531064  | 0.157402087 | 0.097669594  |
| -0.053178255 | 0.251413164 | -0.129730007 | 0.004987337 | -0.14784575  |
| 0.287378701  | 2.49E-10    | 0.262909535  | 8.02E-09    | 0.28191272   |
| -0.205931287 | 7.24E-06    | -0.203181975 | 9.63E-06    | -0.197567833 |
| -0.124067705 | 0.007267775 | -0.173074941 | 0.000170894 | -0.192176642 |
| 0.058462725  | 0.207278887 | 0.065465691  | 0.157817604 | 0.056468076  |
| 0.248894774  | 5.03E-08    | 0.211972103  | 3.82E-06    | 0.19570334   |
| 0.130153917  | 0.004845879 | 0.145732305  | 0.001589996 | 0.144174485  |
| 0.009789561  | 0.832893273 | -0.024392925 | 0.5990264   | 7.07E-05     |
| 0.003359905  | 0.942272627 | -0.016448801 | 0.722939512 | -0.023669185 |
| -0.156577186 | 0.000684884 | -0.154005458 | 0.000840478 | -0.141110302 |
| 0.210109877  | 4.66E-06    | 0.16969969   | 0.00022945  | 0.160929724  |
| 0.198345806  | 1.58E-05    | 0.207383701  | 6.22E-06    | 0.21818841   |
| 0.248611641  | 5.21E-08    | 0.27051467   | 2.83E-09    | 0.291904517  |
| -0.047434206 | 0.306359575 | -0.014766628 | 0.750278863 | -0.001048144 |
| 0.031043715  | 0.503352738 | -0.000582714 | 0.989979777 | 0.012024901  |
| 0.135383061  | 0.003375263 | 0.111500011  | 0.015926342 | 0.101686225  |
| 0.144991778  | 0.001680746 | 0.154254478  | 0.000824094 | 0.155227133  |
| 0.242736377  | 1.09E-07    | 0.233588987  | 3.31E-07    | 0.240172514  |
| 0.015035157  | 0.745892566 | 0.043769195  | 0.345283215 | 0.034080649  |
| 0.164843156  | 0.000347235 | 0.135611905  | 0.003321316 | 0.13529264   |
| 0.004134162  | 0.929001691 | 0.009812535  | 0.832506906 | 0.013206166  |
| 0.137413482  | 0.002923206 | 0.108696333  | 0.018792688 | 0.096132075  |
| 0.069040731  | 0.136286714 | 0.046501857  | 0.315975208 | 0.031016539  |
| 0.000459158  | 0.992104343 | 0.061029477  | 0.187989132 | 0.048912495  |
| 0.150115131  | 0.001138815 | 0.130667257  | 0.004679429 | 0.13167061   |
| 0.08775851   | 0.058085439 | 0.115610424  | 0.012417404 | 0.096855293  |
| -0.083367125 | 0.071878815 | -0.073065211 | 0.114834834 | -0.076387163 |
| -0.017095119 | 0.712526157 | 0.013768387  | 0.766654293 | 0.012212972  |
| -0.045947185 | 0.321788425 | -0.021160427 | 0.64831356  | -0.013369174 |

|              |             |              |             |              |
|--------------|-------------|--------------|-------------|--------------|
| -0.01739716  | 0.707677833 | 0.002245485  | 0.961401165 | -0.000468669 |
| -0.162991677 | 0.00040544  | -0.196181113 | 1.96E-05    | -0.228588252 |
| 0.164253332  | 0.000364872 | 0.157034172  | 0.000660201 | 0.141296605  |
| 0.122594969  | 0.007996658 | 0.077745338  | 0.093321893 | 0.042581887  |
| 0.047402146  | 0.306686984 | 0.029325391  | 0.527279285 | 0.028621728  |
| 0.161367182  | 0.000463867 | 0.107415727  | 0.020245125 | 0.120570799  |
| 0.12197787   | 0.008320993 | 0.114179269  | 0.013552863 | 0.115724973  |
| 0.205223528  | 7.80E-06    | 0.193636837  | 2.52E-05    | 0.224039567  |
| 0.152284768  | 0.000962184 | 0.090606366  | 0.050371083 | 0.041136321  |
| 0.072816962  | 0.116076443 | 0.024540557  | 0.596816311 | 0.010782218  |
| 0.043222561  | 0.351346953 | 0.052703284  | 0.255678186 | 0.032942509  |
| -0.151286177 | 0.001040078 | -0.13051787  | 0.004727327 | -0.149380216 |
| 0.153938855  | 0.000844911 | 0.156545083  | 0.00068665  | 0.147156591  |
| -0.020656259 | 0.656148668 | 0.02577842   | 0.578432524 | 0.00109176   |
| -0.012049051 | 0.795099977 | -0.007356937 | 0.874014893 | -0.019820318 |
| 0.084956512  | 0.066606063 | 0.051403483  | 0.267605078 | 0.033969832  |
| -0.026542526 | 0.567218698 | -0.034298108 | 0.459652244 | -0.021763268 |
| 0.099346892  | 0.031836022 | 0.070462707  | 0.128379935 | 0.023148261  |
| 0.028487889  | 0.539147088 | -0.009140435 | 0.843826582 | -0.040973744 |
| 0.064062547  | 0.166936945 | 0.026391127  | 0.56943233  | -0.000299826 |
| 0.085290142  | 0.065540589 | 0.052208206  | 0.26017683  | 0.010312655  |
| 0.123127595  | 0.007725845 | 0.142943333  | 0.001957078 | 0.133453243  |
| 0.066059592  | 0.154073027 | 0.054078694  | 0.243464008 | 0.056526675  |
| 0.102037426  | 0.027461415 | 0.092895024  | 0.044809448 | 0.082103375  |
| -0.058688321 | 0.205528185 | -0.078359701 | 0.090754539 | -0.100156205 |
| 0.012057294  | 0.794962914 | -0.003372333 | 0.942059467 | -0.011821233 |
| 0.277341928  | 1.08E-09    | 0.294737923  | 8.19E-11    | 0.304110863  |
| -0.039641056 | 0.392722423 | -0.050180645 | 0.27916873  | -0.021716323 |
| 0.116311014  | 0.011892828 | 0.087416668  | 0.059073977 | 0.074049545  |
| 0.14767547   | 0.001372823 | 0.095243151  | 0.039649211 | 0.091772655  |
| 0.021754529  | 0.639130438 | 0.02054691   | 0.657853061 | 0.022167472  |
| 0.168604202  | 0.000252178 | 0.190344114  | 3.47E-05    | 0.18442233   |
| 0.235699713  | 2.57E-07    | 0.228208327  | 6.22E-07    | 0.263995814  |
| 0.125936411  | 0.006428735 | 0.116190474  | 0.011981664 | 0.099709478  |
| 0.044797881  | 0.334053707 | 0.068793711  | 0.137697654 | 0.098605096  |
| 0.126532788  | 0.006179871 | 0.142320786  | 0.00204895  | 0.153848941  |
| 0.012972968  | 0.779777762 | -0.003356865 | 0.94232476  | -0.033826998 |
| 0.048693127  | 0.293685785 | 0.029558545  | 0.523999183 | 0.026856089  |
| 0.061303848  | 0.186007999 | 0.060055221  | 0.195149263 | 0.052177613  |
| -0.090283195 | 0.051201027 | -0.044413367 | 0.338223421 | -0.058350246 |
| -0.021457003 | 0.643722562 | -0.046099818 | 0.32018186  | -0.076696157 |
| 0.161756191  | 0.000449203 | 0.143631167  | 0.001859966 | 0.149618117  |
| -0.045668202 | 0.32473843  | -0.039008104 | 0.400329297 | -0.047426267 |
| -0.119502044 | 0.009743302 | -0.096990775 | 0.036143137 | -0.11369137  |
| 0.00703879   | 0.879420582 | 0.004023948  | 0.930889659 | -0.015709663 |

|              |             |              |             |              |
|--------------|-------------|--------------|-------------|--------------|
| -0.227618102 | 6.66E-07    | -0.244359297 | 8.90E-08    | -0.271665604 |
| 0.004241494  | 0.92716346  | 0.001607429  | 0.97236381  | -0.011525482 |
| 0.128737549  | 0.005333181 | 0.127924561  | 0.00563241  | 0.154635969  |
| 0.124924074  | 0.006871815 | 0.171478881  | 0.000196578 | 0.161934211  |
| -0.033469067 | 0.470579501 | 0.00284394   | 0.951125481 | -0.008100901 |
| -0.044075321 | 0.341916635 | -0.007967238 | 0.863661773 | -0.036118408 |
| -0.141010082 | 0.002255398 | -0.125063176 | 0.006809355 | -0.162189271 |
| -0.015214675 | 0.742964795 | 0.00824668   | 0.858928998 | -0.013182125 |
| 0.107811403  | 0.019786273 | 0.103068097  | 0.025928172 | 0.085494156  |
| 0.147932115  | 0.001346274 | 0.132222339  | 0.00420621  | 0.137924707  |
| 0.119769045  | 0.009580159 | 0.117274166  | 0.011203659 | 0.142223194  |
| -0.008895979 | 0.847951896 | -0.028150534 | 0.543964982 | -0.041835581 |
| -0.03724945  | 0.421923367 | -0.053401903 | 0.249422132 | -0.03028935  |
| -0.008206212 | 0.85961407  | -0.019090047 | 0.680726965 | -0.035101064 |
| 0.123501826  | 0.007540497 | 0.084437434  | 0.068292019 | 0.097030475  |
| 0.193317053  | 2.60E-05    | 0.142827431  | 0.001973892 | 0.14984268   |
| 0.06188734   | 0.181846046 | 0.010435932  | 0.82203829  | 0.021092569  |
| 0.168794071  | 0.000248094 | 0.146744296  | 0.001473242 | 0.15034208   |
| 0.048349472  | 0.297110119 | 0.081630914  | 0.078023118 | 0.093935754  |
| -0.150605122 | 0.001096495 | -0.165436971 | 0.000330283 | -0.187796962 |
| 0.018057596  | 0.697117934 | 0.009792844  | 0.832838068 | -0.004472285 |
| -0.026823714 | 0.563118346 | -0.008524613 | 0.854226776 | -0.017582831 |
| 0.212131992  | 3.75E-06    | 0.233449512  | 3.36E-07    | 0.250500903  |
| 0.037704272  | 0.41627444  | 0.041268745  | 0.373565675 | 0.058088671  |
| -0.013200919 | 0.776010258 | -0.035602837 | 0.4427455   | -0.038839189 |
| -0.067530469 | 0.145089184 | -0.093693594 | 0.042994533 | -0.091485478 |
| 0.085728811  | 0.064161019 | 0.047942545  | 0.3011992   | 0.051222849  |
| 0.197998723  | 1.63E-05    | 0.198987825  | 1.48E-05    | 0.178896827  |
| -0.028777374 | 0.535029908 | -0.00464701  | 0.920221948 | 0.000679745  |
| 0.133062696  | 0.003968906 | 0.101125387  | 0.028882572 | 0.120862792  |
| -0.001404301 | 0.975855009 | -0.027959002 | 0.546709786 | -0.047921063 |
| 0.058619766  | 0.206059053 | 0.068985102  | 0.13660348  | 0.069464909  |
| 0.089813138  | 0.052428541 | 0.080803443  | 0.081097948 | 0.056809888  |
| 0.082130706  | 0.076212215 | 0.124982342  | 0.006845589 | 0.157724899  |
| 0.058820184  | 0.204509851 | 0.080300441  | 0.083014505 | 0.078533221  |
| -0.186325225 | 5.09E-05    | -0.197760141 | 1.67E-05    | -0.241824722 |
| 0.026493348  | 0.567937287 | 0.031615261  | 0.49552293  | 0.031864467  |
| -0.084798765 | 0.067114769 | -0.096732058 | 0.036644943 | -0.109294976 |
| 0.208304358  | 5.64E-06    | 0.194622365  | 2.28E-05    | 0.207823289  |
| 0.174688537  | 0.000148152 | 0.207861948  | 5.91E-06    | 0.211624651  |
| 0.236398499  | 2.36E-07    | 0.231797362  | 4.09E-07    | 0.232876413  |
| 0.035156495  | 0.44848898  | 0.020452143  | 0.659331588 | 0.015799411  |
| -0.12521212  | 0.00674304  | -0.14547296  | 0.001621254 | -0.139956008 |
| 0.004232271  | 0.927321402 | 0.026990372  | 0.560694847 | 0.037422833  |
| -0.026747359 | 0.564230359 | -0.041013566 | 0.376530241 | -0.067051202 |

|              |             |              |             |              |
|--------------|-------------|--------------|-------------|--------------|
| 0.357056526  | 1.73E-15    | 0.323466224  | 7.78E-13    | 0.328371173  |
| -0.098072567 | 0.034107684 | -0.065707032 | 0.156287728 | -0.068279656 |
| 0.354702915  | 2.72E-15    | 0.332657251  | 1.57E-13    | 0.388829366  |
| 0.180126771  | 9.07E-05    | 0.186915972  | 4.82E-05    | 0.192735791  |
| -0.126024828 | 0.006391281 | -0.101454767 | 0.028362208 | -0.102541084 |
| -0.034963674 | 0.450983157 | -0.023713808 | 0.60924026  | -0.010991764 |
| -0.119069923 | 0.010012571 | -0.077930913 | 0.092540346 | -0.064719122 |
| 0.01026009   | 0.824988065 | 0.022737267  | 0.624060979 | 0.031479868  |
| -0.058895527 | 0.20392965  | -0.083834028 | 0.07029566  | -0.069622913 |
| -0.101390184 | 0.028463599 | -0.118135659 | 0.010617433 | -0.102644998 |
| 0.095622975  | 0.038863674 | 0.096444191  | 0.037210229 | 0.067481238  |
| -0.172021157 | 0.000187472 | -0.163701233 | 0.000382136 | -0.185029113 |
| 0.194174542  | 2.39E-05    | 0.192972428  | 2.69E-05    | 0.194262501  |
| 0.039817528  | 0.390617235 | 0.02713199   | 0.558639429 | 0.007147539  |
| -0.079717086 | 0.085282859 | -0.097777827 | 0.034652334 | -0.099032537 |
| 0.009129184  | 0.84401636  | 0.011286091  | 0.807812817 | 0.010527884  |
| -0.010836521 | 0.815327773 | 0.005017895  | 0.913878536 | -0.008222328 |
| 0.220006487  | 1.58E-06    | 0.225276614  | 8.72E-07    | 0.221598229  |
| 0.142193498  | 0.002068214 | 0.096375541  | 0.037346124 | 0.098519073  |
| 0.195865292  | 2.02E-05    | 0.160525401  | 0.000497136 | 0.172175392  |
| 0.126331877  | 0.006262727 | 0.105486238  | 0.022617673 | 0.105478562  |
| 0.133131626  | 0.00394999  | 0.134152483  | 0.003679229 | 0.140095792  |
| 0.042668026  | 0.357566601 | 0.069747644  | 0.132310377 | 0.075876963  |
| 0.100475534  | 0.029933286 | 0.099089393  | 0.032284328 | 0.090693158  |
| -0.222653501 | 1.17E-06    | -0.209268457 | 5.10E-06    | -0.189891798 |
| -0.188061194 | 4.32E-05    | -0.201236011 | 1.18E-05    | -0.22800807  |
| 0.169698796  | 0.000229468 | 0.194279058  | 2.36E-05    | 0.211795339  |
| -0.087713126 | 0.058215888 | -0.070683963 | 0.127182282 | -0.125503613 |
| 0.12358521   | 0.007499745 | 0.112562397  | 0.014944798 | 0.105115642  |
| 0.078007559  | 0.092219085 | 0.050544924  | 0.275689079 | 0.032099166  |
| 0.007216713  | 0.876396749 | -0.060452605 | 0.192205049 | -0.059906379 |
| 0.008246722  | 0.858928279 | -0.006621738 | 0.88651524  | -0.038620046 |
| -0.099073919 | 0.032311441 | -0.132172235 | 0.004220756 | -0.130815394 |
| 0.033593522  | 0.46893005  | 0.003965281  | 0.931894788 | 0.019319569  |
| -0.271848587 | 2.35E-09    | -0.303016517 | 2.25E-11    | -0.318216658 |
| 0.235698659  | 2.57E-07    | 0.238818716  | 1.76E-07    | 0.259679102  |
| -0.032665538 | 0.481305501 | -0.024033006 | 0.604429921 | -0.003515923 |
| -0.224453947 | 9.58E-07    | -0.249593502 | 4.60E-08    | -0.257437478 |
| 0.146228347  | 0.001531746 | 0.205323513  | 7.72E-06    | 0.198127898  |
| -0.052964866 | 0.253323138 | -0.039727427 | 0.391691222 | -0.037495981 |
| -0.039941692 | 0.389140149 | -0.054057361 | 0.243650276 | -0.097126243 |
| -0.108819526 | 0.018657877 | -0.07991396  | 0.084511804 | -0.104820434 |
| 0.144881162  | 0.001694702 | 0.114345266  | 0.013416635 | 0.106385575  |
| 0.058904293  | 0.203862223 | 0.026350167  | 0.570031907 | 0.015463093  |
| -0.032654449 | 0.481454442 | -0.076537406 | 0.098538913 | -0.096486576 |

|              |             |              |             |              |
|--------------|-------------|--------------|-------------|--------------|
| 0.039557392  | 0.393722867 | 0.02629261   | 0.570874959 | 0.018583922  |
| 0.090265845  | 0.051245906 | 0.084113585  | 0.069361477 | 0.082843356  |
| 0.046809783  | 0.312777855 | 0.028883852  | 0.533519506 | 0.019973824  |
| -0.193577586 | 2.53E-05    | -0.221408658 | 1.35E-06    | -0.221040114 |
| 0.088205328  | 0.056814033 | 0.065086179  | 0.160246185 | 0.063949126  |
| 0.082947596  | 0.073326053 | 0.0442956    | 0.339507139 | 0.046725536  |
| 0.032316532  | 0.486005236 | 0.009893684  | 0.831142462 | 0.010048252  |
| -0.072091572 | 0.119764761 | -0.055958349 | 0.227441679 | -0.072915577 |
| 0.102396054  | 0.026919296 | 0.09290367   | 0.044789458 | 0.077531509  |
| -0.049403573 | 0.286690552 | -0.07891948  | 0.088464877 | -0.105687692 |
| 0.070560532  | 0.127849339 | 0.043295255  | 0.35053671  | 0.0174752    |
| 0.096684597  | 0.036737638 | 0.106217792  | 0.021691198 | 0.085820007  |
| 0.061758049  | 0.18276227  | 0.025620903  | 0.580757054 | 0.022222982  |
| -0.029356167 | 0.526845717 | -0.010503098 | 0.820912236 | 0.007526894  |
| -0.138906776 | 0.00262668  | -0.162907137 | 0.000408303 | -0.215146476 |
| 0.013768983  | 0.766644497 | -0.011777638 | 0.799616368 | -0.050470282 |
| -0.021970127 | 0.635811394 | 0.017211445  | 0.710657519 | 0.009978224  |
| -0.076375534 | 0.099255337 | -0.087255118 | 0.059545964 | -0.093022019 |
| -0.026970339 | 0.560985896 | -0.052530382 | 0.25724314  | -0.069699752 |
| -0.304819175 | 1.69E-11    | -0.356605786 | 1.89E-15    | -0.394616223 |
| 0.068892268  | 0.137133369 | 0.036210223  | 0.434997501 | 0.037050227  |
| -0.163704473 | 0.000382032 | -0.147447781 | 0.001396779 | -0.129710345 |
| -0.053917515 | 0.244873823 | -0.030767275 | 0.50716302  | -0.008717029 |
| -0.033268101 | 0.473249728 | -0.02698334  | 0.560797003 | -0.047870893 |
| -0.000145872 | 0.997491553 | 0.024088268  | 0.60359886  | 0.044212023  |
| -0.107088082 | 0.02063206  | -0.10522982  | 0.022950431 | -0.124407479 |
| 0.135813162  | 0.003274521 | 0.124542814  | 0.007045648 | 0.086223071  |
| 0.268072272  | 3.97E-09    | 0.283611469  | 4.35E-10    | 0.309928482  |
| -0.018093352 | 0.696547861 | -0.055848659 | 0.228355585 | -0.058844364 |
| 0.123480866  | 0.007550772 | 0.174684971  | 0.000148199 | 0.18920614   |
| -0.040290697 | 0.385006483 | -0.031430523 | 0.49804661  | -0.03820608  |
| -0.141753073 | 0.002136151 | -0.115859836 | 0.012228357 | -0.079264395 |
| -0.083765821 | 0.070525138 | -0.107908264 | 0.019675336 | -0.138672813 |
| 0.051488933  | 0.266809485 | 0.048503861  | 0.295568435 | 0.080428116  |
| -0.166840165 | 0.000293244 | -0.208015269 | 5.82E-06    | -0.224671711 |
| -0.080031533 | 0.084054017 | -0.0608124   | 0.189567524 | -0.089324197 |
| 0.11712796   | 0.011305944 | 0.099783699  | 0.031087705 | 0.10562178   |
| -0.016877071 | 0.716033448 | -0.03787662  | 0.414145536 | -0.049215599 |
| -0.16591601  | 0.000317174 | -0.104694243 | 0.023659152 | -0.099745007 |
| 0.024075036  | 0.603797807 | 0.021076314  | 0.649618064 | 0.03582111   |
| 0.164716439  | 0.000350955 | 0.155103883  | 0.000770402 | 0.1507168    |
| 0.094978236  | 0.040205014 | 0.082633681  | 0.074424426 | 0.070738006  |
| 0.220618996  | 1.48E-06    | 0.185135024  | 5.70E-05    | 0.204346063  |
| -0.105172724 | 0.0230251   | -0.122693562 | 0.007945898 | -0.145538801 |
| 0.221042351  | 1.41E-06    | 0.233568276  | 3.31E-07    | 0.237964642  |

|              |             |              |             |              |
|--------------|-------------|--------------|-------------|--------------|
| 0.19092609   | 3.28E-05    | 0.154866668  | 0.000785062 | 0.142996061  |
| 0.085264185  | 0.065622981 | 0.094373246  | 0.041499047 | 0.087385861  |
| 0.207485669  | 6.15E-06    | 0.187565756  | 4.53E-05    | 0.161208193  |
| -0.092100652 | 0.046678294 | -0.099546187 | 0.031492712 | -0.128017668 |
| 0.269487902  | 3.26E-09    | 0.286105718  | 3.01E-10    | 0.271341941  |
| 0.043886466  | 0.343991065 | -0.004308905 | 0.926009145 | 0.031212583  |
| -0.135879582 | 0.003259209 | -0.116061995 | 0.012076997 | -0.120360642 |
| -0.001117258 | 0.980789242 | -0.031854942 | 0.492258845 | -0.022202074 |
| 0.108558324  | 0.01894472  | 0.135696686  | 0.00330153  | 0.159467164  |
| -0.041657635 | 0.369075479 | -0.112973812 | 0.014579203 | -0.13713235  |
| -0.264959584 | 6.07E-09    | -0.305249394 | 1.58E-11    | -0.338074522 |
| 0.110292735  | 0.017109932 | 0.098076765  | 0.034099979 | 0.120585472  |
| 0.005023848  | 0.913776753 | 0.055146326  | 0.234269052 | 0.027879165  |
| -0.188432677 | 4.17E-05    | -0.118439577 | 0.010417207 | -0.098955172 |
| 0.10001787   | 0.030692766 | 0.116497942  | 0.011756216 | 0.113823291  |
| -0.059111461 | 0.202273407 | -0.045651971 | 0.324910601 | -0.019536782 |
| -0.01419166  | 0.759697631 | 0.017198435  | 0.710866427 | 0.026539535  |
| -0.032267992 | 0.48666083  | -0.049518495 | 0.285569633 | -0.051470227 |
| 0.069493713  | 0.133728281 | 0.014784874  | 0.749980573 | 0.002754154  |
| 0.021124836  | 0.648865407 | 0.007991065  | 0.86325803  | -0.029182036 |
| 0.061771526  | 0.1826666   | 0.040661304  | 0.380646371 | 0.049545761  |
| 0.123477022  | 0.007552658 | 0.12169022   | 0.008476145 | 0.128962825  |
| 0.277419538  | 1.07E-09    | 0.318905364  | 1.69E-12    | 0.326975844  |
| -0.173400488 | 0.000166058 | -0.140715112 | 0.002304402 | -0.158112722 |
| -0.142322744 | 0.002048655 | -0.154760248 | 0.000791721 | -0.162219333 |
| 0.057844715  | 0.212130044 | 0.077362919  | 0.094949098 | 0.128501061  |
| 0.074414092  | 0.10826956  | 0.105050337  | 0.023185863 | 0.083469623  |
| 0.057709996  | 0.213198301 | 0.058185891  | 0.209441922 | 0.035403877  |
| 0.017810567  | 0.701061034 | -0.007949795 | 0.863957354 | -0.01564319  |
| -0.138810757 | 0.002644889 | -0.106846034 | 0.020922021 | -0.12798356  |
| -0.055920437 | 0.227757259 | -0.066539844 | 0.151094544 | -0.078942387 |
| 0.002487413  | 0.957246307 | 0.040586922  | 0.381519034 | 0.031913649  |
| -0.041759211 | 0.367908208 | -0.061559402 | 0.184176618 | -0.08046098  |
| 0.047151293  | 0.309256705 | 0.008950966  | 0.847023597 | 0.016023697  |
| 0.042080591  | 0.364230129 | 0.054501491  | 0.239792894 | 0.040069516  |
| 0.014771757  | 0.75019501  | 0.025257082  | 0.586142669 | 0.009174237  |
| 0.023922995  | 0.606085872 | 0.039811509  | 0.390688925 | 0.042968488  |
| -0.174915248 | 0.000145194 | -0.151797537 | 0.000999491 | -0.157150084 |
| -0.090451555 | 0.050767244 | -0.094991531 | 0.040176964 | -0.106243851 |
| -0.047988746 | 0.300733064 | -0.03047791  | 0.511167588 | -0.034415634 |
| 0.033316815  | 0.472601705 | 0.006374184  | 0.890730812 | -0.002810108 |
| 0.099473372  | 0.031617776 | 0.093281157  | 0.043923995 | 0.120886134  |
| 0.136070339  | 0.003215595 | 0.125436654  | 0.006644162 | 0.098269528  |
| -0.054996307 | 0.235546067 | -0.069926476 | 0.131318795 | -0.064123812 |
| -0.00362378  | 0.937747759 | -0.027145272 | 0.558446843 | 0.011905841  |

|              |             |              |             |              |
|--------------|-------------|--------------|-------------|--------------|
| 0.132195763  | 0.00421392  | 0.131857186  | 0.004313265 | 0.113642618  |
| 0.042573203  | 0.358637009 | 0.050762163  | 0.273628086 | 0.050564028  |
| 0.12336779   | 0.00760642  | 0.113768382  | 0.013895314 | 0.11140087   |
| 0.050854649  | 0.272753839 | 0.009993101  | 0.829471548 | 0.013886019  |
| 0.013091551  | 0.777817217 | 0.022766081  | 0.623621464 | 0.023815003  |
| 0.045427427  | 0.327298483 | 0.004314221  | 0.925918106 | -0.005708909 |
| 0.25960519   | 1.25E-08    | 0.238794631  | 1.77E-07    | 0.24515454   |
| 0.106445559  | 0.021409547 | 0.073227891  | 0.114026865 | 0.055422291  |
| -0.368977977 | 1.65E-16    | -0.401294797 | 1.70E-19    | -0.419736861 |
| 0.119968982  | 0.009459588 | 0.133333742  | 0.003894992 | 0.122436385  |
| 0.132752327  | 0.004055101 | 0.136568821  | 0.003104114 | 0.159400324  |
| 0.303840179  | 1.98E-11    | 0.319377446  | 1.56E-12    | 0.312742832  |
| 0.163233079  | 0.000397367 | 0.152193773  | 0.000969052 | 0.123854723  |
| -0.112367288 | 0.015120974 | -0.096066419 | 0.037963274 | -0.132998743 |
| 0.056697105  | 0.221354203 | -0.002634041 | 0.954728678 | 0.022448872  |
| 0.050472941  | 0.276374325 | 0.01626562   | 0.725900317 | 0.018961504  |
| -0.037565475 | 0.41799358  | -0.042939566 | 0.354512436 | -0.022459391 |
| 0.281547036  | 5.88E-10    | 0.249905942  | 4.42E-08    | 0.232881555  |
| 0.10487548   | 0.023417234 | 0.098531492  | 0.033274161 | 0.114942804  |
| -0.110768641 | 0.016634478 | -0.097168362 | 0.035802082 | -0.110246562 |
| -0.194845827 | 2.23E-05    | -0.147103197 | 0.001433765 | -0.182557113 |
| 0.061762342  | 0.18273179  | 0.091914567  | 0.047125408 | 0.125794384  |
| 0.02021185   | 0.663086544 | 0.039916557  | 0.389438886 | 0.038986721  |
| -0.299417073 | 3.97E-11    | -0.313841073 | 3.92E-12    | -0.315168553 |
| 0.113809493  | 0.013860711 | 0.096065989  | 0.037964139 | 0.075556182  |
| -0.305997336 | 1.40E-11    | -0.273612773 | 1.83E-09    | -0.281948406 |
| 0.225109439  | 8.89E-07    | 0.2570811    | 1.74E-08    | 0.247734394  |
| 0.030413677  | 0.512058741 | 0.059029733  | 0.202899115 | 0.104186277  |
| 0.129009234  | 0.005236422 | 0.146687022  | 0.001479634 | 0.156335516  |
| 0.257510185  | 1.65E-08    | 0.251537261  | 3.59E-08    | 0.253422033  |
| -0.038657515 | 0.404580432 | -0.051762608 | 0.264272301 | -0.077210809 |
| -0.121441488 | 0.008612379 | -0.128858395 | 0.005289946 | -0.147463918 |
| 0.029570101  | 0.523836882 | 0.016820452  | 0.716945139 | 0.013916454  |
| 0.032566189  | 0.482640818 | 0.04309471   | 0.352774834 | 0.0176911    |
| -0.136733921 | 0.003067973 | -0.135693718 | 0.003302221 | -0.118606068 |
| 0.141731722  | 0.002139496 | 0.17018194   | 0.000220066 | 0.158088684  |
| 0.14576328   | 0.0015863   | 0.114981083  | 0.012905939 | 0.098857396  |
| 0.184017038  | 6.33E-05    | 0.186082392  | 5.21E-05    | 0.200217365  |
| -0.055303981 | 0.232932313 | -0.069885291 | 0.131546647 | -0.101760942 |
| -0.187398105 | 4.60E-05    | -0.217762637 | 2.03E-06    | -0.2353392   |
| -0.0064138   | 0.890055988 | -0.012202601 | 0.792547855 | -0.025546438 |
| 0.013960191  | 0.763499561 | 0.006180494  | 0.894031308 | -0.005678393 |
| -0.116051239 | 0.012085008 | -0.107339764 | 0.020334267 | -0.145030792 |
| -0.218070733 | 1.96E-06    | -0.177629616 | 0.000113828 | -0.188789027 |
| 0.304335747  | 1.83E-11    | 0.286398364  | 2.88E-10    | 0.290349193  |

|              |             |              |             |              |
|--------------|-------------|--------------|-------------|--------------|
| -0.042383693 | 0.360782309 | -0.043891992 | 0.343930248 | -0.074735932 |
| 0.010820288  | 0.815599439 | -0.025546217 | 0.581860737 | -0.005160483 |
| 0.05635894   | 0.224126142 | 0.05948502   | 0.19943126  | 0.071654344  |
| -0.08518395  | 0.065878192 | -0.030046433 | 0.517169274 | 0.003324485  |
| -0.094068094 | 0.042164974 | -0.046474987 | 0.316255221 | -0.038368293 |
| 0.147818135  | 0.001358006 | 0.157262479  | 0.000648181 | 0.151257642  |
| -0.065269437 | 0.159069983 | -0.069301636 | 0.134808569 | -0.032816612 |
| -0.27894788  | 8.56E-10    | -0.281944102 | 5.55E-10    | -0.297708659 |
| -0.068334365 | 0.140351178 | -0.070854373 | 0.126265773 | -0.082261868 |
| -0.152956318 | 0.000912869 | -0.099435403 | 0.031683158 | -0.090111261 |
| -0.210555985 | 4.44E-06    | -0.199873844 | 1.35E-05    | -0.185394055 |
| -0.044160055 | 0.340988493 | -0.017755626 | 0.701939104 | -0.03380753  |
| -0.216663532 | 2.29E-06    | -0.196772319 | 1.85E-05    | -0.189610739 |
| 0.014557262  | 0.753704358 | 0.025408962  | 0.5838916   | 0.031694069  |
| -0.12126146  | 0.008712197 | -0.118510722 | 0.010370822 | -0.124108789 |
| 0.052446068  | 0.25800867  | 0.053880896  | 0.245194918 | 0.073841772  |
| 0.106554622  | 0.02127581  | 0.124954812  | 0.006857969 | 0.137871756  |
| 0.208428726  | 5.57E-06    | 0.204488589  | 8.41E-06    | 0.21244428   |
| -0.138628593 | 0.002679751 | -0.179974757 | 9.20E-05    | -0.183409793 |
| -0.259123153 | 1.33E-08    | -0.231953685 | 4.01E-07    | -0.237669825 |
| -0.019820316 | 0.669222923 | 0.026972312  | 0.560957227 | 0.038312738  |
| 0.243268842  | 1.02E-07    | 0.238997478  | 1.72E-07    | 0.248114676  |
| -0.088627142 | 0.055635036 | -0.055366869 | 0.232400604 | -0.041685815 |
| 0.038597926  | 0.405305667 | 0.057899567  | 0.211696196 | 0.043783306  |
| -0.11873221  | 0.010227589 | -0.087756939 | 0.058089951 | -0.104113214 |
| 0.023741076  | 0.608828659 | 0.043116424  | 0.352532068 | 0.05053673   |
| -0.049157826 | 0.289097441 | 0.022381914  | 0.629492376 | 0.019132103  |
| -0.17864119  | 0.000103862 | -0.161211637 | 0.000469854 | -0.141203575 |
| 0.044262804  | 0.339865184 | 0.068335216  | 0.140346227 | 0.063110518  |
| -0.144388762 | 0.001758126 | -0.073266873 | 0.113833917 | -0.078361409 |
| -0.106644817 | 0.021165758 | -0.056371161 | 0.224025534 | -0.019872782 |
| -0.103519789 | 0.025279833 | -0.072885525 | 0.115732484 | -0.042467197 |
| -0.22878553  | 5.81E-07    | -0.165214605 | 0.000336538 | -0.178424027 |
| 0.025241781  | 0.586369672 | -0.000421632 | 0.992749623 | -0.029770357 |
| -0.299946536 | 3.65E-11    | -0.244985974 | 8.23E-08    | -0.227372386 |
| -0.010095477 | 0.827751709 | 0.03024588   | 0.514390528 | 0.022517925  |
| 0.090895525  | 0.04963804  | 0.051980844  | 0.262260999 | 0.060234112  |
| 0.278763674  | 8.79E-10    | 0.280264606  | 7.08E-10    | 0.266634563  |
| -0.283910242 | 4.16E-10    | -0.214486687 | 2.91E-06    | -0.20388756  |
| -0.188680965 | 4.07E-05    | -0.129037744 | 0.005226361 | -0.127034476 |
| -0.030240989 | 0.51445858  | 0.023262291  | 0.616073466 | -0.003195041 |
| -0.263291632 | 7.61E-09    | -0.203059787 | 9.75E-06    | -0.209230524 |
| -0.290529142 | 1.55E-10    | -0.246848174 | 6.52E-08    | -0.230667491 |
| -0.154595361 | 0.000802144 | -0.093779718 | 0.042802552 | -0.10671276  |
| -0.091724332 | 0.047586199 | -0.065064476 | 0.160385911 | -0.100017961 |



|              |             |              |             |              |
|--------------|-------------|--------------|-------------|--------------|
| -0.042879914 | 0.355181968 | -0.028722588 | 0.535807873 | -0.05543555  |
| 0.069473903  | 0.133839389 | 0.101130218  | 0.028874881 | 0.111319169  |
| -0.052128453 | 0.260906598 | -0.016631256 | 0.719994548 | -0.032747341 |
| -0.284217525 | 3.98E-10    | -0.25908708  | 1.34E-08    | -0.263714649 |
| -0.015402019 | 0.739913321 | -0.001106078 | 0.980981425 | -0.040799044 |
| -0.180275132 | 8.95E-05    | -0.161304685 | 0.000466264 | -0.148562528 |
| -0.159300965 | 0.000549503 | -0.102124948 | 0.027328253 | -0.115323349 |
| -0.066608823 | 0.150670361 | -0.042255726 | 0.362235444 | -0.04293992  |
| -0.062006827 | 0.181002328 | -0.029783455 | 0.520844963 | -0.042948037 |
| 0.038178597  | 0.410430946 | 0.086929312  | 0.06050734  | 0.102598981  |
| -0.062065235 | 0.180590954 | -0.021917145 | 0.636626367 | -0.022268036 |
| -0.107820364 | 0.019775987 | -0.050811284 | 0.273163516 | -0.055611208 |
| -0.061510442 | 0.184526448 | -0.046065949 | 0.320537903 | -0.031418829 |
| -0.269043914 | 3.47E-09    | -0.236150646 | 2.43E-07    | -0.25170799  |
| -0.059654963 | 0.198147957 | -0.026077751 | 0.574027252 | -0.020475174 |
| -0.171280043 | 0.00020002  | -0.108508008 | 0.019000414 | -0.101520001 |
| -0.097586973 | 0.035008948 | -0.041750428 | 0.368009042 | -0.028380426 |
| 0.025943923  | 0.575994852 | 0.010520691  | 0.820617347 | 0.050679863  |
| -0.043590611 | 0.347256868 | 0.028290287  | 0.541966528 | 0.025012633  |
| -0.012624899 | 0.78554047  | 0.053917435  | 0.244874524 | 0.07193239   |
| -0.167003936 | 0.000289184 | -0.109751617 | 0.017664936 | -0.1002727   |
| -0.10483722  | 0.023468125 | -0.059815391 | 0.196942034 | -0.082612548 |
| -0.221297761 | 1.37E-06    | -0.171855971 | 0.000190203 | -0.16588357  |
| -0.040220795 | 0.38583226  | -0.010210961 | 0.825812661 | -0.000511373 |
| -0.191711493 | 3.04E-05    | -0.141487335 | 0.002178122 | -0.139766774 |
| -0.218299444 | 1.91E-06    | -0.179386804 | 9.70E-05    | -0.190495985 |
| -0.049019926 | 0.290453994 | -0.042050389 | 0.364574796 | -0.054971181 |
| -0.046204332 | 0.319084807 | -0.009316761 | 0.84085364  | 0.023142099  |
| 0.089966271  | 0.052025983 | 0.082503675  | 0.074883216 | 0.067161227  |
| -0.11603674  | 0.012095815 | -0.024416794 | 0.598668832 | -0.018419414 |
| -0.168637892 | 0.000251449 | -0.110536943 | 0.016864491 | -0.109189663 |
| -0.209822005 | 4.80E-06    | -0.142224113 | 0.002063565 | -0.174212554 |
| -0.103499435 | 0.025308745 | -0.065934971 | 0.154853132 | -0.082969362 |
| -0.168856478 | 0.000246765 | -0.12717254  | 0.005922551 | -0.12522104  |
| -0.191850421 | 3.00E-05    | -0.158315874 | 0.000595303 | -0.118870448 |
| -0.123643634 | 0.007471308 | -0.079778748 | 0.085040755 | -0.079621038 |
| -0.015740598 | 0.734408893 | 0.038077544  | 0.411671781 | 0.052089268  |
| -0.189029742 | 3.94E-05    | -0.128255184 | 0.005508946 | -0.130552998 |
| -0.200500744 | 1.27E-05    | -0.164010678 | 0.000372368 | -0.176250029 |
| 0.065317992  | 0.158759436 | 0.030859431  | 0.505891118 | 0.006089962  |
| 0.069464786  | 0.133890544 | 0.107194538  | 0.02050564  | 0.107599575  |
| 0.081723802  | 0.07768394  | 0.09080031   | 0.049878426 | 0.097387873  |
| -0.179803999 | 9.34E-05    | -0.152616927 | 0.000937492 | -0.161504163 |
| 0.345162575  | 1.64E-14    | 0.340107089  | 4.14E-14    | 0.317957857  |
| -0.092008352 | 0.046899621 | -0.019796789 | 0.669592367 | -0.030017941 |

|              |             |              |             |              |
|--------------|-------------|--------------|-------------|--------------|
| -0.08118854  | 0.079654968 | 0.007664757  | 0.868790252 | 0.018930562  |
| 0.114432524  | 0.013345511 | 0.12950199   | 0.005064956 | 0.118218876  |
| -0.063206309 | 0.172692526 | -0.015370037 | 0.740433948 | -0.042206261 |
| -0.046972549 | 0.311096378 | -0.00334738  | 0.942487443 | -0.018794795 |
| -0.149164126 | 0.001225277 | -0.086375105 | 0.062172108 | -0.078632069 |
| -0.092934575 | 0.044718069 | -0.05463426  | 0.238648139 | -0.035938163 |
| -0.110263976 | 0.01713904  | -0.071815337 | 0.121193126 | -0.101634018 |
| -0.191897536 | 2.98E-05    | -0.165042189 | 0.000341464 | -0.201516065 |
| -0.053250611 | 0.250767803 | 0.004489891  | 0.922910774 | 0.031281896  |
| -0.129831938 | 0.004952987 | -0.079938706 | 0.084415283 | -0.07177359  |
| -0.159469817 | 0.000541989 | -0.119042032 | 0.010030175 | -0.127237174 |
| -0.075766131 | 0.101989699 | -0.033163637 | 0.474640996 | -0.049875309 |
| -0.089466692 | 0.053348873 | -0.057039794 | 0.218570255 | -0.062394048 |
| 0.015305257  | 0.741488873 | 0.051683771  | 0.265001474 | 0.024682217  |
| -0.044766078 | 0.334397325 | -0.01391017  | 0.764321916 | -0.003344404 |
| -0.129721605 | 0.004990178 | -0.102708075 | 0.026455146 | -0.072646717 |
| -0.104068041 | 0.024511728 | -0.064543532 | 0.163767471 | -0.051247946 |
| -0.23940306  | 1.64E-07    | -0.176266781 | 0.000128681 | -0.177099452 |
| -0.189946628 | 3.60E-05    | -0.159047972 | 0.000560943 | -0.172803051 |
| -0.121900318 | 0.008362572 | -0.107295533 | 0.020386329 | -0.088875698 |
| -0.103519875 | 0.025279711 | -0.063871673 | 0.168207374 | -0.070866837 |
| -0.249303698 | 4.77E-08    | -0.191507712 | 3.10E-05    | -0.198951631 |
| -0.08729873  | 0.059418239 | -0.018780604 | 0.685624293 | -0.03369365  |
| -0.301436787 | 2.89E-11    | -0.274562271 | 1.60E-09    | -0.284769319 |
| -0.18074811  | 8.57E-05    | -0.131826675 | 0.00432232  | -0.137091439 |
| -0.095202461 | 0.039734155 | -0.056344922 | 0.224241579 | -0.074509008 |
| -0.01151465  | 0.803998964 | 0.045856004  | 0.32275066  | 0.066630306  |
| -0.137076861 | 0.002994121 | -0.100787982 | 0.029424086 | -0.108678821 |
| -0.216000038 | 2.46E-06    | -0.158061759 | 0.00060768  | -0.17111489  |
| -0.153081221 | 0.000903958 | -0.089625591 | 0.052925101 | -0.097906865 |
| -0.158172321 | 0.000602266 | -0.119338124 | 0.00984468  | -0.105207938 |
| -0.121838558 | 0.008395816 | -0.06461139  | 0.163323977 | -0.085857688 |
| -0.324784885 | 6.21E-13    | -0.295699411 | 7.06E-11    | -0.322719529 |
| 0.012309606  | 0.790770667 | 0.089661842  | 0.052828817 | 0.092354395  |
| -0.228159331 | 6.25E-07    | -0.191076065 | 3.23E-05    | -0.230458128 |
| -0.16778385  | 0.000270557 | -0.151853915 | 0.000995107 | -0.172981861 |
| -0.163159034 | 0.000399827 | -0.1160092   | 0.012116365 | -0.137209629 |
| -0.150141787 | 0.001136474 | -0.113286818 | 0.014306344 | -0.117935622 |
| -0.138264802 | 0.002750627 | -0.098489055 | 0.033350501 | -0.075038056 |
| -0.150052084 | 0.001144368 | -0.112218497 | 0.015256549 | -0.104926085 |
| -0.111632923 | 0.015800529 | -0.048773394 | 0.292889791 | -0.066578755 |
| -0.108213448 | 0.019329333 | -0.084788685 | 0.067147385 | -0.103330882 |
| -0.218202767 | 1.93E-06    | -0.160770167 | 0.000487241 | -0.146592936 |
| -0.051757413 | 0.264320303 | -0.04513967  | 0.330375158 | -0.051614241 |
| -0.12116725  | 0.008764842 | -0.061430411 | 0.185099337 | -0.0546417   |

|              |             |              |             |              |
|--------------|-------------|--------------|-------------|--------------|
| -0.200123187 | 1.32E-05    | -0.208942859 | 5.27E-06    | -0.23134635  |
| 0.091734441  | 0.047561619 | 0.107410417  | 0.020251345 | 0.097518477  |
| -0.223446222 | 1.07E-06    | -0.175529831 | 0.000137453 | -0.168274364 |
| -0.011440598 | 0.805234126 | 0.055798652  | 0.228773094 | 0.070446129  |
| -0.110406056 | 0.016995653 | -0.039731019 | 0.391648371 | -0.042117896 |
| -0.137151572 | 0.002978248 | -0.05605769  | 0.226616239 | -0.049690208 |
| -0.081633975 | 0.078011923 | -0.012002092 | 0.795880905 | -0.008468305 |
| -0.283187046 | 4.62E-10    | -0.239064172 | 1.71E-07    | -0.244634925 |
| -0.227190438 | 7.00E-07    | -0.143624825 | 0.001860841 | -0.141608934 |
| -0.012436081 | 0.788671521 | 0.02987477   | 0.51956712  | 0.015680055  |
| -0.187210186 | 4.68E-05    | -0.118788829 | 0.010191257 | -0.108903647 |
| -0.100570053 | 0.029778456 | -0.038974825 | 0.400731676 | -0.029681465 |
| -0.211980971 | 3.81E-06    | -0.178167983 | 0.000108417 | -0.176702116 |
| -0.098775942 | 0.032837314 | -0.06183719  | 0.182201034 | -0.022547585 |
| -0.135130746 | 0.003435664 | -0.074798784 | 0.106452491 | -0.061635684 |
| -0.037349621 | 0.420675407 | 0.022793978  | 0.623196062 | -0.014066797 |
| -0.089170994 | 0.054144995 | -0.108434268 | 0.019082295 | -0.072753819 |
| -0.262601394 | 8.36E-09    | -0.247393608 | 6.08E-08    | -0.243818549 |
| 0.211008289  | 4.23E-06    | 0.167445495  | 0.000278496 | 0.149476192  |
| -0.202602108 | 1.02E-05    | -0.18254958  | 7.26E-05    | -0.198622574 |
| -0.080658872 | 0.081645096 | -0.063676773 | 0.169512053 | -0.072633405 |
| -0.142002404 | 0.002097444 | -0.121478773 | 0.008591834 | -0.112551587 |
| -0.143293652 | 0.001907053 | -0.075985099 | 0.101000401 | -0.055542136 |
| -0.095993597 | 0.038109911 | -0.037283445 | 0.421499605 | -0.022283623 |
| -0.174521339 | 0.000150369 | -0.107051713 | 0.020675404 | -0.107174186 |
| -0.168819282 | 0.000247556 | -0.099410643 | 0.031725857 | -0.098327635 |
| -0.319031189 | 1.65E-12    | -0.262411242 | 8.58E-09    | -0.258612955 |
| -0.133398209 | 0.003877597 | -0.119789544 | 0.009567735 | -0.160921435 |
| -0.113420347 | 0.014191315 | -0.084190284 | 0.069106961 | -0.061857316 |
| -0.027895442 | 0.547622156 | 0.009458648  | 0.838462994 | 0.021137234  |
| -0.094751954 | 0.040684966 | -0.053428594 | 0.249185253 | -0.052956024 |
| -0.192858705 | 2.72E-05    | -0.147973384 | 0.001342049 | -0.15369091  |
| -0.082340002 | 0.075464089 | -0.049394567 | 0.286778525 | -0.055073254 |
| -0.153202828 | 0.00089536  | -0.101259852 | 0.028669158 | -0.118047492 |
| -0.027144108 | 0.558463716 | 0.039871401  | 0.389975931 | 0.074541354  |
| -0.082055751 | 0.076481599 | -0.028305624 | 0.541747423 | -0.020195986 |
| -0.114439961 | 0.013339465 | -0.088147479 | 0.056977328 | -0.0761812   |
| -0.123545695 | 0.007519032 | -0.074998574 | 0.105518345 | -0.069717983 |
| -0.370463954 | 1.22E-16    | -0.337911212 | 6.16E-14    | -0.363664415 |
| -0.106492232 | 0.021352226 | -0.063176503 | 0.172895505 | -0.073299124 |
| -0.210463525 | 4.49E-06    | -0.193837157 | 2.47E-05    | -0.175489603 |
| 0.108520223  | 0.01898688  | 0.125752339  | 0.006507342 | 0.135265439  |
| -0.268065923 | 3.97E-09    | -0.215754256 | 2.53E-06    | -0.217517598 |
| -0.138279838 | 0.002747664 | -0.10153683  | 0.028233824 | -0.096407318 |
| -0.06163523  | 0.183635781 | -0.019956322 | 0.667088832 | -0.000289505 |

|              |             |              |             |              |
|--------------|-------------|--------------|-------------|--------------|
| -0.240944534 | 1.36E-07    | -0.184052398 | 6.31E-05    | -0.204286214 |
| -0.02255364  | 0.62686511  | 0.061270848  | 0.186245463 | 0.070438964  |
| -0.160229353 | 0.000509354 | -0.123735007 | 0.007427028 | -0.108739065 |
| -0.192544895 | 2.80E-05    | -0.151194137 | 0.001047542 | -0.17402701  |
| -0.304131254 | 1.89E-11    | -0.261721437 | 9.41E-09    | -0.290357496 |
| -0.152865623 | 0.00091939  | -0.15557572  | 0.000741995 | -0.152989916 |
| -0.086639855 | 0.061372179 | -0.034680788 | 0.454656467 | -0.034320261 |
| -0.02177227  | 0.638857052 | 0.010848107  | 0.815133891 | -0.00625926  |
| -0.070881351 | 0.126121148 | -0.031860455 | 0.492183898 | -0.039325904 |
| -0.201858279 | 1.10E-05    | -0.138830156 | 0.002641201 | -0.148118356 |
| -0.187386783 | 4.61E-05    | -0.128960458 | 0.005253676 | -0.110809882 |
| 0.02542238   | 0.583692906 | 0.084396163  | 0.068427554 | 0.104207761  |
| -0.081310494 | 0.079202362 | -0.049652889 | 0.28426253  | -0.082381044 |
| -0.282896353 | 4.83E-10    | -0.254866415 | 2.33E-08    | -0.250773738 |
| -0.105638286 | 0.02242234  | -0.044263686 | 0.339855551 | -0.045955717 |
| -0.056234493 | 0.225152428 | -0.02543482  | 0.583508736 | -0.030736213 |
| -0.022193778 | 0.632376081 | 0.020311645  | 0.661526059 | 0.037699897  |
| -0.091624737 | 0.047828943 | -0.037304838 | 0.421233052 | -0.05071554  |
| -0.1878764   | 4.40E-05    | -0.157081262 | 0.000657705 | -0.186730281 |
| -0.02922286  | 0.528725034 | 0.030486103  | 0.511053972 | 0.030064337  |
| 0.01509406   | 0.744931507 | 0.010722901  | 0.817229739 | 0.00695663   |
| -0.054366201 | 0.240963348 | 0.012734886  | 0.78371823  | 0.006514029  |
| -0.165629124 | 0.000324965 | -0.113259712 | 0.014329794 | -0.103751437 |
| -0.208415519 | 5.58E-06    | -0.166507442 | 0.000301658 | -0.171654147 |
| -0.169537296 | 0.000232694 | -0.11909095  | 0.009999317 | -0.125506702 |
| -0.250592169 | 4.05E-08    | -0.226947839 | 7.19E-07    | -0.225391816 |
| -0.035988737 | 0.437813771 | 0.039334104  | 0.396400442 | 0.052673489  |
| -0.222981735 | 1.13E-06    | -0.222093905 | 1.25E-06    | -0.205247048 |
| 0.030404512  | 0.512185953 | 0.059515519  | 0.199200505 | 0.026898407  |
| -0.19876072  | 1.51E-05    | -0.166489307 | 0.000302123 | -0.159124792 |
| -0.082852159 | 0.073658574 | -0.047136813 | 0.309405469 | -0.025533745 |
| -0.098721732 | 0.032933766 | -0.063610568 | 0.169956951 | -0.058700671 |
| -0.196129881 | 1.97E-05    | -0.183210475 | 6.82E-05    | -0.197747182 |
| -0.080307584 | 0.082987036 | -0.028201279 | 0.543238908 | 6.42E-06     |
| -0.142608265 | 0.002006047 | -0.107458177 | 0.020195458 | -0.101863486 |
| -0.009656049 | 0.83513948  | 0.030571435  | 0.509871478 | 0.040803814  |
| -0.093757386 | 0.042852263 | -0.064134371 | 0.166460761 | -0.068719185 |
| -0.161773163 | 0.000448573 | -0.109394385 | 0.018039897 | -0.08729221  |
| -0.148715807 | 0.001268098 | -0.114201491 | 0.013534556 | -0.122779874 |
| -0.143023628 | 0.001945508 | -0.166485124 | 0.000302231 | -0.141213683 |
| -0.008781458 | 0.849885912 | 0.057649473  | 0.213679481 | 0.086697311  |
| 0.006953851  | 0.88086476  | 0.072785195  | 0.116236078 | 0.099103016  |
| -0.089682401 | 0.052774277 | -0.053067463 | 0.252403571 | -0.013204598 |
| -0.138136138 | 0.0027761   | -0.086657829 | 0.061318182 | -0.092104478 |
| 0.008518941  | 0.854322678 | 0.056586387  | 0.222259047 | 0.06904798   |

|              |             |              |             |              |
|--------------|-------------|--------------|-------------|--------------|
| -0.15628118  | 0.000701325 | -0.092055805 | 0.046785725 | -0.096686571 |
| -0.151967676 | 0.000986315 | -0.110751396 | 0.016651502 | -0.122868605 |
| -0.374987296 | 4.86E-17    | -0.332588983 | 1.59E-13    | -0.349852334 |
| -0.099964932 | 0.03078167  | -0.055701708 | 0.229584029 | -0.069081137 |
| -0.135515944 | 0.003343842 | -0.082226743 | 0.075868186 | -0.095710507 |
| 0.052726098  | 0.255472184 | 0.070218764  | 0.129710507 | 0.085062984  |
| -0.1150886   | 0.012821296 | -0.078080586 | 0.091913824 | -0.092679989 |
| -0.187145508 | 4.71E-05    | -0.144880108 | 0.001694836 | -0.153587683 |
| -0.065914374 | 0.154982355 | -0.021496369 | 0.643114184 | -0.014950143 |
| -0.113320283 | 0.014277439 | -0.049494526 | 0.285803178 | -0.060851991 |
| -0.120729545 | 0.009013167 | -0.074209159 | 0.109247488 | -0.106060049 |
| -0.121815822 | 0.008408083 | -0.027964116 | 0.546636405 | -0.019765272 |
| -0.139920558 | 0.002441278 | -0.100833835 | 0.029349987 | -0.083141537 |
| 0.239236631  | 1.67E-07    | 0.249284784  | 4.79E-08    | 0.269612498  |
| -0.169150198 | 0.0002406   | -0.152276236 | 0.000962826 | -0.155148084 |
| -0.042303793 | 0.361689196 | -0.025656915 | 0.580225224 | -0.021628393 |
| -0.137410361 | 0.002923857 | -0.092616683 | 0.045456988 | -0.088472594 |
| -0.1194365   | 0.009783727 | -0.071219933 | 0.124317007 | -0.075841953 |
| -0.221773643 | 1.30E-06    | -0.159535775 | 0.00053908  | -0.144689149 |
| -0.154052443 | 0.000837364 | -0.125540803 | 0.006598741 | -0.117497296 |
| -0.048333202 | 0.2972729   | -0.004635389 | 0.920420784 | 0.016567639  |
| -0.090035375 | 0.051845166 | -0.061821008 | 0.182315681 | -0.077925607 |
| -0.243069833 | 1.05E-07    | -0.180696354 | 8.61E-05    | -0.186378196 |
| -0.204011252 | 8.84E-06    | -0.148573566 | 0.001281969 | -0.151024858 |
| -0.070649983 | 0.127365649 | -0.036118603 | 0.436161214 | 0.000268335  |
| -0.16368894  | 0.000382528 | -0.123922923 | 0.007336699 | -0.116365183 |
| -0.064185927 | 0.166119575 | 0.00489309   | 0.916012534 | 0.009774657  |
| -0.191753937 | 3.03E-05    | -0.145751187 | 0.001587742 | -0.14662036  |
| -0.127926263 | 0.005631769 | -0.09741215  | 0.035338344 | -0.062117965 |
| -0.086194675 | 0.062722182 | -0.044167879 | 0.340902882 | -0.046597338 |
| -0.002875846 | 0.95057785  | 0.030667276  | 0.508545064 | 0.029408658  |
| -0.050129927 | 0.279655547 | -0.007624061 | 0.869480659 | 0.004816871  |
| -0.100904238 | 0.029236527 | -0.062198855 | 0.179652452 | -0.046294787 |
| 0.106173234  | 0.021746672 | 0.152129843  | 0.000973905 | 0.185676191  |
| -0.091485251 | 0.048170655 | -0.056884057 | 0.219832315 | -0.027489497 |
| -0.170839816 | 0.000207842 | -0.132198595 | 0.004213098 | -0.089357097 |
| 0.005299776  | 0.909061017 | 0.030870128  | 0.505743601 | 0.026995579  |
| -0.291065417 | 1.43E-10    | -0.251659166 | 3.53E-08    | -0.231439252 |
| -0.035555468 | 0.443353055 | 0.02526061   | 0.58609033  | 0.033705239  |
| -0.139251946 | 0.002562161 | -0.099472455 | 0.031619353 | -0.103440846 |
| -0.011474914 | 0.804661686 | 0.024536973  | 0.59686992  | 0.03608549   |
| -0.026116731 | 0.573454753 | 0.019573383  | 0.673104412 | 0.030493828  |
| -0.172440294 | 0.000180705 | -0.149876034 | 0.001160007 | -0.175972271 |
| -0.161667341 | 0.000452514 | -0.096838514 | 0.03643775  | -0.107606604 |
| -0.234291718 | 3.04E-07    | -0.190529751 | 3.41E-05    | -0.185876762 |

|              |             |              |             |              |
|--------------|-------------|--------------|-------------|--------------|
| -0.145616631 | 0.001603869 | -0.12266851  | 0.007958769 | -0.113257102 |
| -0.172178431 | 0.000184905 | -0.135248985 | 0.003407238 | -0.137244456 |
| -0.028072721 | 0.545079273 | 0.013301785  | 0.774344848 | 0.027226321  |
| -0.124063155 | 0.007269932 | -0.070267983 | 0.129441191 | -0.062169196 |
| -0.162578477 | 0.000419614 | -0.109291404 | 0.018149271 | -0.119271203 |
| -0.131334678 | 0.004470737 | -0.074781481 | 0.106533701 | -0.066709011 |
| 0.089354165  | 0.053650678 | 0.117493214  | 0.011051948 | 0.152379774  |
| 0.009538368  | 0.83712046  | 0.048761503  | 0.293007614 | 0.058178457  |
| -0.26992384  | 3.07E-09    | -0.2116128   | 3.97E-06    | -0.204458641 |
| -0.194795083 | 2.25E-05    | -0.139075741 | 0.002594914 | -0.142179779 |
| 0.029316756  | 0.527400971 | 0.09446104   | 0.04130911  | 0.114060243  |
| -0.166623799 | 0.000298691 | -0.121053504 | 0.008828781 | -0.101528952 |
| -0.103671677 | 0.025064985 | -0.047868162 | 0.301950666 | -0.054519134 |
| -0.274190961 | 1.69E-09    | -0.236256978 | 2.40E-07    | -0.206932687 |
| -0.163612077 | 0.000384994 | -0.108514926 | 0.018992748 | -0.100273114 |
| 0.001678099  | 0.971149303 | 0.039392298  | 0.395701552 | 0.063925599  |
| -0.009715489 | 0.834139294 | 0.001719625  | 0.970435686 | 0.010809023  |
| -0.135251587 | 0.003406615 | -0.099971803 | 0.030770119 | -0.072621226 |
| -0.189682175 | 3.70E-05    | -0.124467657 | 0.007080377 | -0.127738629 |
| -0.090542964 | 0.050533017 | -0.044818377 | 0.333832378 | -0.043356322 |
| -0.063665801 | 0.169585723 | -0.011903683 | 0.797518095 | -0.022090181 |
| -0.032606663 | 0.48209658  | 0.003855475  | 0.933776363 | -0.008716839 |
| -0.010352116 | 0.823444005 | 0.042173153  | 0.363175052 | 0.042732814  |
| -0.045838386 | 0.322936799 | -0.003432681 | 0.94102449  | 0.024669674  |
| -0.306197824 | 1.36E-11    | -0.261294977 | 9.96E-09    | -0.291350953 |
| -0.021499263 | 0.643069472 | 0.026380859  | 0.569582595 | 0.016842825  |
| -0.104213366 | 0.024311538 | -0.035607118 | 0.442690616 | -0.042579296 |
| -0.158218859 | 0.0006      | -0.134700647 | 0.003540887 | -0.122115174 |
| -0.001902845 | 0.967287401 | 0.049594409  | 0.284830802 | 0.060169234  |
| -0.234834764 | 2.85E-07    | -0.183755968 | 6.49E-05    | -0.202235587 |
| -0.154360158 | 0.00081723  | -0.13216489  | 0.004222892 | -0.111162309 |
| -0.262190918 | 8.83E-09    | -0.247011709 | 6.38E-08    | -0.254163405 |
| -0.141422812 | 0.002188426 | -0.103083393 | 0.025905984 | -0.108398877 |
| -0.040304555 | 0.384842905 | 0.008259923  | 0.85870483  | 0.010816885  |
| 0.004293278  | 0.926276715 | 0.024069717  | 0.603877781 | -0.009131604 |
| 0.023400372  | 0.613980194 | 0.079257655  | 0.087104282 | 0.090225261  |
| -0.106017616 | 0.02194138  | -0.061842995 | 0.182159915 | -0.074084177 |
| -0.050007747 | 0.280830652 | -0.042139088 | 0.363563118 | -0.021205572 |
| -0.093375887 | 0.043709029 | -0.054125674 | 0.243054152 | -0.019695954 |
| -0.129029699 | 0.005229199 | -0.09493945  | 0.040286939 | -0.082625793 |
| -0.049449088 | 0.28624626  | -0.017225825 | 0.710426646 | -0.025611833 |
| -1.85E-05    | 0.999682577 | 0.028164612  | 0.543763495 | 0.066058934  |
| -0.218405282 | 1.89E-06    | -0.162013902 | 0.000439727 | -0.178586902 |
| -0.214888002 | 2.78E-06    | -0.143071972 | 0.001938571 | -0.113020877 |
| -0.117672512 | 0.010929123 | -0.059702837 | 0.197787527 | -0.037377944 |

|              |             |              |             |              |
|--------------|-------------|--------------|-------------|--------------|
| -0.147773082 | 0.001362669 | -0.167871571 | 0.000268533 | -0.163561883 |
| 0.140684422  | 0.002309556 | 0.128676173  | 0.005355262 | 0.143406051  |
| -0.045811005 | 0.323226227 | -0.026507532 | 0.567729981 | -0.035742488 |
| 0.020440649  | 0.659511019 | 0.062086903  | 0.180438519 | 0.063134188  |
| 0.141946821  | 0.002106017 | 0.19359971   | 2.53E-05    | 0.238214956  |
| -0.195383965 | 2.12E-05    | -0.218041091 | 1.97E-06    | -0.223333693 |
| -0.284056807 | 4.07E-10    | -0.301233956 | 2.99E-11    | -0.319646162 |
| 0.001630998  | 0.971958751 | -0.022909091 | 0.621442003 | -0.025285298 |
| -0.201849523 | 1.10E-05    | -0.200073794 | 1.32E-05    | -0.182786101 |
| 0.1028865    | 0.026192839 | 0.046601984  | 0.314933203 | 0.040772321  |
| -0.202895752 | 9.92E-06    | -0.250386953 | 4.16E-08    | -0.265000357 |
| -0.120801905 | 0.008971688 | -0.11736318  | 0.011141788 | -0.100491067 |
| -0.140696098 | 0.002307594 | -0.138547755 | 0.002695355 | -0.158406289 |
| 0.025922534  | 0.576309606 | 0.011882681  | 0.797867629 | -0.000331638 |
| 0.120163242  | 0.009343734 | 0.090097677  | 0.051682596 | 0.097374411  |
| -0.079625786 | 0.085642358 | -0.049935929 | 0.281522941 | -0.062072775 |
| 0.029274683  | 0.527994046 | 0.016241511  | 0.726290291 | 0.015210143  |
| 0.268540448  | 3.72E-09    | 0.302951578  | 2.28E-11    | 0.259893921  |
| -0.105642873 | 0.022416469 | -0.096698607 | 0.036710255 | -0.102680126 |
| -0.204157213 | 8.71E-06    | -0.163946332 | 0.00037438  | -0.153430791 |
| 0.153206848  | 0.000895077 | 0.128595069  | 0.005384565 | 0.167320193  |
| -0.288817281 | 2.01E-10    | -0.265588588 | 5.57E-09    | -0.256747305 |
| -0.231343452 | 4.31E-07    | -0.232543941 | 3.74E-07    | -0.233013816 |
| 0.09474548   | 0.040698768 | 0.109817372  | 0.017596665 | 0.146704516  |
| -0.031592352 | 0.495835508 | -0.019344186 | 0.676714904 | -0.060239443 |
| 0.167338923  | 0.000281041 | 0.194188056  | 2.38E-05    | 0.163365808  |
| 0.009235032  | 0.842231345 | 0.028377023  | 0.540728052 | 0.032917291  |
| -0.038647188 | 0.404706071 | -0.051020955 | 0.271186598 | -0.045278129 |
| -0.070566929 | 0.127814699 | -0.07765404  | 0.093708329 | -0.071194376 |
| -0.228946834 | 5.71E-07    | -0.221059996 | 1.41E-06    | -0.228256814 |
| 0.211570015  | 3.99E-06    | 0.234687097  | 2.90E-07    | 0.232576685  |
| 0.008629922  | 0.852446449 | 0.032500112  | 0.483530063 | 0.013994685  |
| -0.001762085 | 0.969706054 | -0.025873379 | 0.577033284 | -0.017603536 |
| 0.020833027  | 0.653397228 | 0.033980905  | 0.46381636  | 0.046901703  |
| -0.153722612 | 0.000859453 | -0.142025188 | 0.002093939 | -0.154796581 |
| -0.053411981 | 0.249332673 | -0.03970497  | 0.391959189 | -0.052740788 |
| -0.18869138  | 4.07E-05    | -0.169469691 | 0.000234057 | -0.200990258 |
| -0.120003793 | 0.009438734 | -0.097123749 | 0.035887502 | -0.124236939 |
| -0.107585056 | 0.020047639 | -0.152205035 | 0.0009682   | -0.126760719 |
| -0.070374929 | 0.12885749  | -0.080422468 | 0.082546226 | -0.083731723 |
| -0.014920591 | 0.747762951 | -0.048123973 | 0.29937149  | -0.039610683 |
| -0.093060346 | 0.044428524 | -0.092628354 | 0.045429677 | -0.123652212 |
| -0.025820423 | 0.577813399 | -0.016650637 | 0.719681962 | -0.007152936 |
| 0.018386112  | 0.691886736 | 0.021659766  | 0.64059155  | 0.02547413   |
| -0.110618453 | 0.016783259 | -0.124147299 | 0.007230131 | -0.108783708 |

|              |             |              |             |              |
|--------------|-------------|--------------|-------------|--------------|
| 0.118003287  | 0.010705703 | 0.146272886  | 0.001526613 | 0.092998407  |
| -0.107952503 | 0.019624847 | -0.107586433 | 0.02004604  | -0.085092949 |
| 0.101309201  | 0.028591176 | 0.112417657  | 0.015075318 | 0.112411785  |
| -0.092235624 | 0.046356224 | -0.106516211 | 0.021322828 | -0.105885101 |
| 0.016763054  | 0.717869785 | 0.00254388   | 0.956276707 | 0.028856581  |
| -0.118580201 | 0.010325701 | -0.10189553  | 0.02767849  | -0.124085033 |
| -0.019719181 | 0.670811588 | -0.0484583   | 0.296022841 | -0.057409792 |
| 0.07578541   | 0.101902285 | 0.059556236  | 0.198892749 | 0.071256282  |
| 0.03375057   | 0.466853188 | 0.015754491  | 0.734183311 | 0.035182262  |
| 0.005776148  | 0.900927214 | 0.005139637  | 0.911797493 | -0.008756373 |
| -0.023343936 | 0.614835365 | -0.013976997 | 0.763223328 | -0.033089865 |
| -0.073298973 | 0.113675229 | -0.059442887 | 0.199750358 | -0.084059029 |
| 0.07738971   | 0.09483437  | 0.082796357  | 0.073853568 | 0.059522987  |
| -0.09211153  | 0.046652269 | -0.08562816  | 0.064475425 | -0.079746342 |
| -0.041834544 | 0.367043986 | -0.059990131 | 0.195634634 | -0.051031155 |
| 0.007006337  | 0.879972311 | -0.007324043 | 0.874573541 | -0.032197312 |
| -0.052236951 | 0.259914152 | -0.050217329 | 0.278816976 | -0.059186582 |
| -0.000781576 | 0.98656048  | -0.025122767 | 0.588136749 | -0.014515179 |
| -0.158867129 | 0.000569255 | -0.156597824 | 0.000683751 | -0.15052291  |
| -0.195541822 | 2.09E-05    | -0.195727679 | 2.05E-05    | -0.22931273  |
| 0.022387138  | 0.629412379 | 0.029293847  | 0.527723862 | 0.04007145   |
| 0.016424987  | 0.723324188 | 0.002082784  | 0.964195977 | -0.016329278 |
| 0.005946538  | 0.898020371 | 0.017006092  | 0.71395742  | 0.007091527  |
| -0.062619186 | 0.176723771 | -0.044217869 | 0.340356152 | -0.057395229 |
| -0.008486506 | 0.854871195 | -0.016131661 | 0.728068116 | -0.027796382 |
| 0.191461039  | 3.11E-05    | 0.208640328  | 5.45E-06    | 0.193867257  |
| -0.029801321 | 0.520594828 | -0.02948075  | 0.525092478 | -0.016038124 |
| -0.029875756 | 0.519553339 | 0.002144884  | 0.963129196 | -0.035956583 |
| -0.085682102 | 0.064306769 | -0.090215858 | 0.051375386 | -0.083776443 |
| 0.062013125  | 0.180957936 | 0.037323388  | 0.421002012 | 0.048368925  |
| -0.03588862  | 0.439090208 | -0.043552533 | 0.347678622 | -0.038001698 |
| 0.100022587  | 0.030684856 | 0.140062109  | 0.002416363 | 0.115145021  |
| 0.098530444  | 0.033276044 | 0.104366844  | 0.024101652 | 0.112529249  |
| -0.041253024 | 0.373747887 | -0.055941278 | 0.227583736 | -0.051254423 |
| -0.136794643 | 0.003054777 | -0.147618562 | 0.001378775 | -0.145977918 |
| -0.083836168 | 0.07028847  | -0.077032434 | 0.096373499 | -0.080438859 |
| 0.010716031  | 0.817344792 | -0.00791154  | 0.864605682 | 0.001194504  |
| 0.036371813  | 0.432949422 | 0.049144611  | 0.289227258 | 0.057405317  |
| 0.091239162  | 0.048778509 | 0.0894539    | 0.053383112 | 0.09060771   |
| 0.034632518  | 0.455284931 | 0.053921738  | 0.244836805 | 0.033763292  |
| -0.058837167 | 0.204378966 | -0.048894828 | 0.291688286 | -0.04688217  |
| -0.048838624 | 0.292243967 | -0.040407215 | 0.383632406 | -0.045254898 |
| -0.193298259 | 2.60E-05    | -0.169222555 | 0.000239103 | -0.17073195  |
| -0.156123158 | 0.000710252 | -0.168449167 | 0.000255559 | -0.166726993 |
| -0.062136717 | 0.180088442 | -0.068792195 | 0.137706347 | -0.099756267 |



|              |             |              |             |              |
|--------------|-------------|--------------|-------------|--------------|
| -0.306480023 | 1.30E-11    | -0.316456175 | 2.54E-12    | -0.303903379 |
| -0.048551951 | 0.295089322 | -0.010811884 | 0.815740107 | -0.020918277 |
| -0.103737699 | 0.024972088 | -0.128522288 | 0.005410985 | -0.097749654 |
| 0.077076824  | 0.096181193 | 0.061555077  | 0.184207503 | 0.029966488  |
| -0.015010702 | 0.746291685 | 0.002188946  | 0.962372317 | -0.016907431 |
| -0.006495259 | 0.888668649 | -0.005666409 | 0.902800061 | -0.014568057 |
| -0.030598853 | 0.509491842 | -0.034744343 | 0.453829741 | -0.03186544  |
| -0.05001571  | 0.280753959 | -0.045609583 | 0.3253605   | -0.100805887 |
| -0.070377485 | 0.128843568 | -0.076976835 | 0.096614798 | -0.043035686 |
| -0.043453775 | 0.348773968 | -0.063501923 | 0.170688937 | -0.052977399 |
| 0.195619829  | 2.07E-05    | 0.210059171  | 4.68E-06    | 0.216303814  |
| 0.161819291  | 0.000446865 | 0.165904164  | 0.000317492 | 0.182107739  |
| 0.107300072  | 0.020380981 | 0.091110564  | 0.049098699 | 0.091419787  |
| -0.033414152 | 0.471308333 | -0.002541865 | 0.956311309 | 4.22E-05     |
| -0.003741046 | 0.935737559 | 0.00978722   | 0.832932649 | 0.034256113  |
| 0.094807669  | 0.040566347 | 0.0901856    | 0.051453896 | 0.051858509  |
| -0.154639728 | 0.000799327 | -0.20426017  | 8.62E-06    | -0.263348009 |
| -0.259685456 | 1.24E-08    | -0.289760953 | 1.74E-10    | -0.294662034 |
| 0.075967226  | 0.101080863 | 0.115456485  | 0.012535368 | 0.092726198  |
| 0.04593113   | 0.321957716 | 0.048819539  | 0.292432825 | 0.032542551  |
| 0.09288008   | 0.044844016 | 0.135186111  | 0.003422327 | 0.104556736  |
| 0.100152039  | 0.030468426 | 0.135544542  | 0.003337114 | 0.123255488  |
| 0.070988368  | 0.125548721 | 0.050198969  | 0.278992986 | 0.061679756  |
| 0.272226281  | 2.23E-09    | 0.310591377  | 6.68E-12    | 0.332939347  |
| 0.170248199  | 0.000218805 | 0.209823056  | 4.80E-06    | 0.216208731  |
| -0.061447154 | 0.18497938  | -0.073128185 | 0.114521535 | -0.078177044 |
| -0.274346761 | 1.65E-09    | -0.30042489  | 3.39E-11    | -0.32808346  |
| -0.033546671 | 0.46955061  | -0.018664178 | 0.687470305 | -0.007298965 |
| -0.22194424  | 1.27E-06    | -0.203599677 | 9.23E-06    | -0.205385112 |
| -0.161944018 | 0.000442278 | -0.163223107 | 0.000397697 | -0.197577276 |
| -0.033324032 | 0.472505735 | -0.003629958 | 0.93764184  | -0.027720427 |
| -0.056697921 | 0.221347545 | -0.070182328 | 0.129910156 | -0.065954402 |
| 0.023551956  | 0.611685843 | -0.025695653 | 0.579653403 | -0.003237724 |
| 0.056829765  | 0.220273504 | 0.064276895  | 0.16551886  | 0.034109449  |
| 0.027126266  | 0.558722444 | 0.03594739   | 0.438340666 | -0.011052875 |
| 0.196533     | 1.89E-05    | 0.201906038  | 1.10E-05    | 0.207795655  |
| -0.236659656 | 2.29E-07    | -0.258095503 | 1.53E-08    | -0.282980567 |
| -0.18154651  | 7.96E-05    | -0.139062083 | 0.002597469 | -0.198821095 |
| -0.03204095  | 0.489733657 | -0.050902697 | 0.272300406 | -0.053979302 |
| 0.257311813  | 1.69E-08    | 0.266007844  | 5.26E-09    | 0.308391678  |
| 0.009416272  | 0.839176835 | 0.008652882  | 0.852058383 | -0.023598897 |
| -0.103702436 | 0.025021668 | -0.141195698 | 0.00222505  | -0.167225692 |
| -0.310059261 | 7.28E-12    | -0.308819476 | 8.90E-12    | -0.317591765 |
| 0.037390199  | 0.420170478 | 0.043120982  | 0.352481114 | 0.021340187  |
| -0.028149779 | 0.543975786 | -0.007575972 | 0.870296629 | -0.002427419 |

|              |             |              |             |              |
|--------------|-------------|--------------|-------------|--------------|
| -0.065259687 | 0.159132396 | -0.044263064 | 0.339862352 | -0.043982538 |
| -0.115884181 | 0.012210042 | -0.100623222 | 0.029691663 | -0.116527211 |
| 0.32213831   | 9.76E-13    | 0.299112114  | 4.16E-11    | 0.277212269  |
| -0.245497629 | 7.72E-08    | -0.217753047 | 2.03E-06    | -0.226077437 |
| -0.081246622 | 0.07943915  | -0.055991708 | 0.227164252 | -0.032310185 |
| -0.196945732 | 1.81E-05    | -0.181628145 | 7.90E-05    | -0.167103561 |
| -0.222457375 | 1.20E-06    | -0.214710905 | 2.84E-06    | -0.202560407 |
| -0.353808542 | 3.23E-15    | -0.335460274 | 9.56E-14    | -0.336416934 |
| -0.090928245 | 0.049555656 | -0.105763408 | 0.022262696 | -0.080337375 |
| -0.166881582 | 0.000292213 | -0.148864996 | 0.001253698 | -0.143318408 |
| -0.154107601 | 0.000833721 | -0.121528842 | 0.008564313 | -0.069100139 |
| -0.199012231 | 1.47E-05    | -0.151452705 | 0.001026696 | -0.126989904 |
| -0.235965917 | 2.49E-07    | -0.241664212 | 1.24E-07    | -0.254370481 |
| 0.10209213   | 0.027378121 | 0.064920838  | 0.161312998 | 0.053632242  |
| -0.109634277 | 0.017787341 | -0.098787846 | 0.032816167 | -0.147232406 |
| 0.002246434  | 0.961384863 | -0.02355211  | 0.611683519 | -0.039665928 |
| 0.006383508  | 0.890571981 | -0.010742531 | 0.816901073 | -0.007383669 |
| -0.165969017 | 0.000315753 | -0.17614114  | 0.000130138 | -0.199268997 |
| 0.185233667  | 5.65E-05    | 0.153900965  | 0.000847443 | 0.137754009  |
| -0.117686101 | 0.010919864 | -0.126332771 | 0.006262356 | -0.121677005 |
| -0.101173301 | 0.02880637  | -0.071965758 | 0.120413684 | -0.085449098 |
| 0.006407172  | 0.890168893 | 0.023015426  | 0.619823615 | -0.008393792 |
| 0.353820476  | 3.22E-15    | 0.325865048  | 5.15E-13    | 0.373572898  |
| -0.116672995 | 0.011629542 | -0.11413016  | 0.013593397 | -0.098267741 |
| -0.072379555 | 0.118289676 | -0.099824333 | 0.031018863 | -0.15558368  |
| 0.163305939  | 0.00039496  | 0.171544209  | 0.00019546  | 0.17619012   |
| -0.299300119 | 4.04E-11    | -0.289530856 | 1.80E-10    | -0.320341321 |
| -0.226961785 | 7.18E-07    | -0.25359142  | 2.75E-08    | -0.278845759 |
| 0.003414149  | 0.941342297 | 0.003040142  | 0.947758309 | 0.002588639  |
| -0.166439376 | 0.000303407 | -0.168955578 | 0.000244668 | -0.156069251 |
| 0.331938708  | 1.79E-13    | 0.355126659  | 2.51E-15    | 0.389208484  |
| -0.183729802 | 6.50E-05    | -0.16587062  | 0.000318395 | -0.128434089 |
| -0.010344504 | 0.823571703 | -0.001949681 | 0.966482688 | -0.017276592 |
| 0.058755355  | 0.205010043 | 0.060324508  | 0.19315054  | 0.133515528  |
| -0.06511069  | 0.160088484 | -0.049440387 | 0.286331162 | -0.06474553  |
| 0.123861855  | 0.007365945 | 0.140014017  | 0.002424802 | 0.10854816   |
| 0.139056872  | 0.002598444 | 0.194895814  | 2.22E-05    | 0.236447118  |
| -0.158566537 | 0.000583325 | -0.137313786 | 0.002944048 | -0.144251285 |
| 0.188599688  | 4.10E-05    | 0.19063967   | 3.37E-05    | 0.148746859  |
| -0.076165975 | 0.100188964 | -0.06248259  | 0.1776716   | -0.117556325 |
| -0.025768195 | 0.578583279 | -0.06108699  | 0.187572571 | -0.07542041  |
| -0.099626143 | 0.031355869 | -0.069006643 | 0.136480753 | -0.032089791 |
| -0.198354732 | 1.57E-05    | -0.202791123 | 1.00E-05    | -0.23034799  |
| -0.160832699 | 0.000484742 | -0.162742048 | 0.000413949 | -0.171032056 |
| -0.103272515 | 0.025633006 | -0.093036516 | 0.044483262 | -0.105607899 |

|              |             |              |             |              |
|--------------|-------------|--------------|-------------|--------------|
| -0.252971897 | 2.98E-08    | -0.267543036 | 4.27E-09    | -0.287454743 |
| 0.20688147   | 6.56E-06    | 0.214455282  | 2.92E-06    | 0.184138002  |
| -0.086670536 | 0.061280031 | -0.130894443 | 0.004607425 | -0.138546049 |
| 0.071455518  | 0.123073566 | 0.101818529  | 0.027796904 | 0.10296273   |
| 0.016390464  | 0.723881984 | 0.009715419  | 0.83414048  | -0.006974721 |
| -0.274182651 | 1.69E-09    | -0.244516624 | 8.73E-08    | -0.249473822 |
| -0.088423748 | 0.056200974 | -0.073552502 | 0.112427976 | -0.065660821 |
| -0.239064617 | 1.71E-07    | -0.242391713 | 1.14E-07    | -0.25552042  |
| -0.092359796 | 0.046061572 | -0.084371908 | 0.068507311 | -0.070193273 |
| 0.061522236  | 0.184442131 | 0.049183564  | 0.288844728 | 0.05738241   |
| -0.148308225 | 0.001308218 | -0.13903556  | 0.002602437 | -0.128820492 |
| -0.124020342 | 0.007290258 | -0.093717624 | 0.042940894 | -0.118130571 |
| -0.16254665  | 0.000420725 | -0.137365029 | 0.002933319 | -0.168682644 |
| -0.251623502 | 3.55E-08    | -0.265813164 | 5.41E-09    | -0.288065021 |
| 0.259944752  | 1.19E-08    | 0.288015867  | 2.26E-10    | 0.266510122  |
| -0.393236799 | 1.01E-18    | -0.389490335 | 2.29E-18    | -0.375868824 |
| 0.126082519  | 0.006366948 | 0.126405766  | 0.00623214  | 0.091945341  |
| 0.062652915  | 0.176490306 | 0.047777517  | 0.302868109 | 0.059760309  |
| 0.122466936  | 0.008063007 | 0.122427559  | 0.008083511 | 0.110198033  |
| 0.129018755  | 0.005233061 | 0.13769251   | 0.002865586 | 0.115561777  |
| -0.156189427 | 0.000706496 | -0.135917335 | 0.003250535 | -0.138836069 |
| 0.156848721  | 0.000670117 | 0.139457471  | 0.002524435 | 0.137217332  |
| 0.060348867  | 0.192970484 | 0.030339854  | 0.513083941 | 0.002962229  |
| -0.185153392 | 5.69E-05    | -0.193443185 | 2.57E-05    | -0.218604004 |
| -0.046104585 | 0.320131777 | -0.066327188 | 0.152407981 | -0.078072332 |
| -0.016169533 | 0.727455028 | -0.036141667 | 0.435868092 | -0.025590828 |
| -0.102281917 | 0.027090822 | -0.127141766 | 0.005934705 | -0.150751051 |
| 0.006758472  | 0.884188163 | 0.001300593  | 0.977637634 | 0.028619466  |
| 0.060192259  | 0.194130247 | 0.063166609  | 0.172962931 | 0.07015688   |
| 0.072369045  | 0.118343261 | 0.064650806  | 0.16306679  | 0.096964196  |
| -0.18631807  | 5.10E-05    | -0.175668082 | 0.000135765 | -0.191789399 |
| 0.032287268  | 0.486400435 | 0.023441262  | 0.613360914 | 0.013664319  |
| -0.036691348 | 0.428915889 | -0.047955871 | 0.301064702 | -0.007527772 |
| -0.054552074 | 0.239356308 | -0.059592164 | 0.198621474 | -0.052152109 |
| 0.268509756  | 3.73E-09    | 0.288621353  | 2.07E-10    | 0.308405724  |
| -0.001472083 | 0.974689971 | -0.029332369 | 0.527180963 | 0.012644103  |
| 0.059413246  | 0.199975069 | 0.113527721  | 0.014099408 | 0.116951507  |
| 0.067428167  | 0.145700788 | 0.049137836  | 0.289293826 | 0.053545912  |
| -0.104785678 | 0.023536834 | -0.075825471 | 0.101720842 | -0.088200501 |
| 0.184114434  | 6.27E-05    | 0.179011906  | 0.00010042  | 0.149143029  |
| 0.123165496  | 0.007706889 | 0.087871342  | 0.057762177 | 0.101091431  |
| 0.101252729  | 0.02868043  | 0.116962051  | 0.011423014 | 0.118235683  |
| -0.084903742 | 0.066775883 | -0.064128472 | 0.166499832 | -0.071773708 |
| -0.254077805 | 2.58E-08    | -0.25128169  | 3.71E-08    | -0.276578202 |
| -0.221579848 | 1.33E-06    | -0.246365069 | 6.93E-08    | -0.260424426 |

|              |             |              |             |              |
|--------------|-------------|--------------|-------------|--------------|
| -0.446569754 | 2.85E-24    | -0.465137961 | 1.91E-26    | -0.493673746 |
| -0.088373295 | 0.056342095 | -0.090831638 | 0.049799226 | -0.100335371 |
| -0.032762055 | 0.480010159 | -0.066850082 | 0.149193858 | -0.0375912   |
| -0.161658803 | 0.000452833 | -0.128779147 | 0.005318263 | -0.141620995 |
| -0.155740036 | 0.000732331 | -0.177427686 | 0.000115922 | -0.200683707 |
| 0.116511787  | 0.011746153 | 0.092410212  | 0.045942389 | 0.031282372  |
| -0.11449583  | 0.013294118 | -0.12071905  | 0.009019198 | -0.115895783 |
| -0.090744803 | 0.050019013 | -0.07643533  | 0.098990208 | -0.051475309 |
| -0.052580547 | 0.256788411 | -0.058423853 | 0.207581634 | 0.017675838  |
| 0.157566829  | 0.000632473 | 0.143380503  | 0.001894834 | 0.128936447  |
| -0.05394851  | 0.244602269 | -0.032157098 | 0.488160393 | -0.059816994 |
| -0.356468542 | 1.94E-15    | -0.313836058 | 3.92E-12    | -0.33526492  |
| -0.239101696 | 1.70E-07    | -0.231992009 | 3.99E-07    | -0.243287269 |
| -0.183154979 | 6.86E-05    | -0.199921837 | 1.34E-05    | -0.185930225 |
| -0.073228217 | 0.114025246 | -0.063259021 | 0.172333978 | -0.083225549 |
| 0.123915959  | 0.007340029 | 0.17204016   | 0.00018716  | 0.186536218  |
| 0.229828204  | 5.15E-07    | 0.248357787  | 5.38E-08    | 0.198826013  |
| -0.135836685 | 0.003269091 | -0.121565486 | 0.008544222 | -0.150577072 |
| -0.067547629 | 0.144986786 | -0.093908207 | 0.042517475 | -0.089594697 |
| 0.016079067  | 0.728919821 | -0.004291553 | 0.926306255 | -0.00029333  |
| -0.158626958 | 0.000580471 | -0.143714113 | 0.001848559 | -0.157002717 |
| -0.067665666 | 0.144283928 | -0.077247428 | 0.095444944 | -0.083400047 |
| 0.378161794  | 2.52E-17    | 0.383119476  | 8.93E-18    | 0.413712808  |
| -0.041808542 | 0.367342141 | -0.034582641 | 0.455934837 | -0.013721797 |
| -0.130662461 | 0.00468096  | -0.11779493  | 0.01084596  | -0.151666337 |
| -0.308189183 | 9.86E-12    | -0.333426059 | 1.37E-13    | -0.346859555 |
| -0.05668033  | 0.221491129 | -0.073561065 | 0.112386037 | -0.064637871 |
| -0.052967735 | 0.253297391 | -0.066492073 | 0.151388841 | -0.049139503 |
| -0.062469038 | 0.17776584  | -0.074447964 | 0.108108591 | -0.060654894 |
| -0.014335491 | 0.757338096 | -0.036595448 | 0.430124151 | -0.049672258 |
| -0.207051769 | 6.44E-06    | -0.190652466 | 3.37E-05    | -0.202919809 |
| 0.002350459  | 0.959598207 | -0.016657622 | 0.719569317 | -0.022326294 |
| -0.068991756 | 0.136565564 | -0.037811549 | 0.414948561 | -0.020299116 |
| -0.135008503 | 0.003465278 | -0.144169015 | 0.001787127 | -0.092659707 |
| 0.259172061  | 1.32E-08    | 0.26043726   | 1.12E-08    | 0.289028882  |
| -0.100701542 | 0.02956421  | -0.083073553 | 0.072889065 | -0.082623056 |
| 0.148675895  | 0.001271976 | 0.122595877  | 0.00799619  | 0.120980811  |
| -0.113167002 | 0.014410257 | -0.135182549 | 0.003423183 | -0.139463344 |
| -0.008589937 | 0.853122325 | 0.017785956  | 0.701454319 | 0.044325801  |
| -0.032083626 | 0.489155274 | -0.042987205 | 0.353978309 | -0.032058868 |
| -0.045853497 | 0.322777151 | -0.048899621 | 0.291640933 | 0.005096079  |
| -0.077309842 | 0.095176723 | -0.054461853 | 0.240135405 | -0.08041865  |
| -0.175376118 | 0.000139352 | -0.175048842 | 0.000143477 | -0.175942705 |
| 0.019126637  | 0.680148777 | 0.027602117  | 0.551842392 | 0.013531118  |
| -0.116676208 | 0.011627229 | -0.062808714 | 0.175414882 | -0.085774063 |

|              |             |              |             |              |
|--------------|-------------|--------------|-------------|--------------|
| -0.050665999 | 0.274539113 | -0.038468367 | 0.406885121 | -0.077782032 |
| -0.283882899 | 4.18E-10    | -0.29127987  | 1.39E-10    | -0.291187937 |
| -0.094915392 | 0.040337826 | -0.107451031 | 0.020203812 | -0.09968384  |
| -0.149192825 | 0.001222582 | -0.153669669 | 0.000863049 | -0.175758989 |
| -0.432242611 | 1.11E-22    | -0.42429887  | 7.84E-22    | -0.440755773 |
| 0.001024474  | 0.982384339 | 0.031754876  | 0.493620192 | -0.00413159  |
| 0.244309332  | 8.96E-08    | 0.258361365  | 1.47E-08    | 0.295219055  |
| -0.376299673 | 3.71E-17    | -0.35225781  | 4.34E-15    | -0.36192603  |
| -0.061253997 | 0.186366809 | -0.036575361 | 0.430377486 | -0.054844242 |
| -0.001936129 | 0.966715517 | 0.002205032  | 0.962096009 | -0.003502471 |
| 0.192370048  | 2.85E-05    | 0.19218631   | 2.90E-05    | 0.232998059  |
| 0.030049227  | 0.517130296 | 0.041399782  | 0.372048949 | 0.044463516  |
| 0.143622518  | 0.00186116  | 0.114229727  | 0.013511326 | 0.05990117   |
| -0.154675995 | 0.000797031 | -0.188191483 | 4.27E-05    | -0.192218765 |
| 0.301917602  | 2.68E-11    | 0.308523823  | 9.34E-12    | 0.316975739  |
| -0.034902258 | 0.451779218 | -0.046642194 | 0.314515371 | -0.082080442 |
| 0.370491039  | 1.22E-16    | 0.375528733  | 4.35E-17    | 0.360025555  |
| 0.122906529  | 0.007837235 | 0.159267029  | 0.000551025 | 0.118065778  |
| 0.067891112  | 0.142948734 | 0.068003543  | 0.142286409 | 0.051060862  |
| 0.056630974  | 0.221894344 | 0.072619173  | 0.117073183 | 0.004558647  |
| -0.094613231 | 0.040981589 | -0.087075622 | 0.060074039 | -0.139417953 |
| -0.136992181 | 0.003012205 | -0.151813192 | 0.000998272 | -0.172695937 |
| 0.092421261  | 0.045916304 | 0.143912315  | 0.001821559 | 0.15082116   |
| -0.146277157 | 0.001526122 | -0.16249496  | 0.000422534 | -0.211133245 |
| -0.186524663 | 5.00E-05    | -0.138399474 | 0.002724193 | -0.151963869 |
| 0.008482392  | 0.854940758 | 0.041665846  | 0.368981043 | 0.037872424  |
| -0.046177492 | 0.319366301 | -0.035399483 | 0.44535702  | -0.034457977 |
| 0.018449822  | 0.69087392  | -0.009424641 | 0.839035843 | 0.020884218  |
| 0.080226654  | 0.083298703 | 0.020226635  | 0.662855251 | 0.043743624  |
| -0.084063999 | 0.069526432 | -0.085745924 | 0.064107689 | -0.099941182 |
| 0.153276767  | 0.000890169 | 0.148878816  | 0.001252371 | 0.169178732  |
| 0.322735437  | 8.82E-13    | 0.310047744  | 7.29E-12    | 0.30296837   |
| 0.165173472  | 0.000337707 | 0.176180846  | 0.000129676 | 0.128768434  |
| -0.090133299 | 0.051589836 | -0.103022358 | 0.025994615 | -0.138165162 |
| 0.231415985  | 4.27E-07    | 0.288506418  | 2.10E-10    | 0.267344696  |
| -0.334906051 | 1.06E-13    | -0.367943228 | 2.03E-16    | -0.368325247 |
| 0.216822836  | 2.25E-06    | 0.222435228  | 1.20E-06    | 0.218642132  |
| 0.137551456  | 0.002894584 | 0.163269995  | 0.000396146 | 0.160281551  |
| -0.058574737 | 0.206408289 | -0.064910127 | 0.161382294 | -0.110688051 |
| 0.106991868  | 0.020746899 | 0.083610519  | 0.07104993  | 0.130729188  |
| -0.031316758 | 0.499604117 | -0.018608042 | 0.688361051 | 0.014383192  |
| 0.006248177  | 0.892877773 | 0.040535475  | 0.382123321 | 0.015450603  |
| -0.21199689  | 3.81E-06    | -0.221503157 | 1.34E-06    | -0.211499168 |
| -0.013235513 | 0.775438954 | -0.046660518 | 0.314325082 | -0.069911223 |
| -0.080617587 | 0.081801889 | -0.048900264 | 0.29163458  | -0.024747578 |

|              |             |              |             |              |
|--------------|-------------|--------------|-------------|--------------|
| -0.287207023 | 2.55E-10    | -0.304293707 | 1.84E-11    | -0.310018206 |
| 0.019966531  | 0.666928745 | 0.032946762  | 0.477536532 | 0.032694988  |
| -0.124915885 | 0.006875508 | -0.1251763   | 0.006758935 | -0.135624861 |
| 0.020133846  | 0.664307296 | 0.050564697  | 0.275501054 | 0.075373964  |
| -0.107690177 | 0.019925883 | -0.141113443 | 0.002238453 | -0.140744951 |
| 0.216645287  | 2.30E-06    | 0.219541771  | 1.67E-06    | 0.244414793  |
| -0.143141368 | 0.001928654 | -0.129142652 | 0.005189488 | -0.156282894 |
| 0.062668415  | 0.176383098 | 0.032472106  | 0.483907218 | 0.014628715  |
| 0.089296521  | 0.053805834 | 0.062873878  | 0.174966525 | 0.041385416  |
| 0.165125929  | 0.000339063 | 0.141528223  | 0.002171616 | 0.1805479    |
| -0.004929324 | 0.915392926 | -0.050966775 | 0.271696506 | -0.015807184 |
| 0.098971112  | 0.032492057 | 0.04749391   | 0.305750485 | 0.072752964  |
| -0.044450285 | 0.337821644 | -0.035251762 | 0.447259561 | -0.063230976 |
| -0.153961676 | 0.00084339  | -0.139925964 | 0.002440323 | -0.171343969 |
| -0.185150005 | 5.69E-05    | -0.182660823 | 7.18E-05    | -0.195189681 |
| -0.182283953 | 7.44E-05    | -0.192760648 | 2.74E-05    | -0.176364941 |
| 0.050369126  | 0.277364628 | 0.080267119  | 0.083142749 | 0.091902413  |
| 0.053571931  | 0.247915823 | 0.013502529  | 0.771033425 | 0.018014731  |
| -0.021631685 | 0.641024791 | -0.022552495 | 0.62688261  | -0.032773846 |
| 0.067070656  | 0.147853601 | 0.098860121  | 0.032688018 | 0.108817245  |
| 0.165722351  | 0.000322414 | 0.186041459  | 5.23E-05    | 0.180550584  |
| -0.164288472 | 0.000363799 | -0.16961957  | 0.000231045 | -0.200573235 |
| -0.117857656 | 0.010803565 | -0.156413798 | 0.000693915 | -0.159842974 |
| -0.102988266 | 0.026044235 | -0.122161793 | 0.008223121 | -0.142681244 |
| 0.019860057  | 0.668599058 | -0.016069153 | 0.729080401 | 0.01063628   |
| 0.026938746  | 0.56144504  | 0.012647019  | 0.785173902 | -0.047961877 |
| 0.013023496  | 0.778942208 | 0.040011051  | 0.388316517 | -0.039290893 |
| 7.14E-05     | 0.998773034 | 0.014951121  | 0.747264382 | -0.001019888 |
| -0.17296881  | 0.0001725   | -0.1802247   | 8.99E-05    | -0.17891199  |
| -0.017483297 | 0.706297342 | 0.004818873  | 0.917281849 | 0.041438617  |
| -0.106899138 | 0.020858105 | -0.111167931 | 0.01624453  | -0.113865996 |
| 0.011712365  | 0.800703545 | 0.027480289  | 0.55359988  | 0.061964284  |
| -0.014826133 | 0.749306181 | -0.019478288 | 0.674601515 | -0.037332683 |
| -0.210132014 | 4.65E-06    | -0.200226123 | 1.30E-05    | -0.203386613 |
| -0.070425297 | 0.128583298 | -0.066120051 | 0.153695637 | -0.065811912 |
| 0.13862527   | 0.00268039  | 0.155093826  | 0.000771019 | 0.161668952  |
| 0.277208766  | 1.10E-09    | 0.280811685  | 6.54E-10    | 0.27549993   |
| 0.122784259  | 0.007899459 | 0.0969688    | 0.036185533 | 0.110312462  |
| 0.083075646  | 0.072881824 | 0.106169302  | 0.021751574 | 0.075821106  |
| -0.14116504  | 0.002230037 | -0.15208717  | 0.000977156 | -0.130683124 |
| 0.078479751  | 0.090259539 | 0.085089772  | 0.066178793 | 0.046330113  |
| -0.376412079 | 3.63E-17    | -0.334482171 | 1.14E-13    | -0.292256798 |
| -0.036975472 | 0.425347703 | -0.034075452 | 0.462573    | -0.005633496 |
| 0.15508451   | 0.00077159  | 0.101007362  | 0.029071014 | 0.053174617  |
| 0.051429392  | 0.267363678 | 0.069680973  | 0.132681526 | 0.034642976  |

|              |             |              |             |              |
|--------------|-------------|--------------|-------------|--------------|
| 0.147023835  | 0.00144241  | 0.127973766  | 0.00561388  | 0.154150986  |
| -0.332045249 | 1.75E-13    | -0.292532496 | 1.15E-10    | -0.268263855 |
| 0.239575913  | 1.61E-07    | 0.2495772    | 4.61E-08    | 0.267200532  |
| 0.034765692  | 0.453552216 | 0.076258844  | 0.099774356 | 0.117061059  |
| -0.335228497 | 9.97E-14    | -0.330800256 | 2.18E-13    | -0.339173426 |
| 0.039326078  | 0.396496882 | 0.046612674  | 0.314822078 | 0.032235733  |
| 0.084903218  | 0.066777572 | 0.094472442  | 0.041284494 | 0.152921091  |
| -0.336707887 | 7.65E-14    | -0.305859077 | 1.43E-11    | -0.323609551 |
| -0.163092509 | 0.00040205  | -0.161616874 | 0.000454404 | -0.168552273 |
| 0.047613861  | 0.304529188 | 0.091050373  | 0.049249169 | 0.07301587   |
| -0.005434655 | 0.906757035 | 0.02912902   | 0.53004998  | 0.033082013  |
| 0.022784825  | 0.623335615 | 0.015638913  | 0.736060624 | 0.009321882  |
| -0.028632686 | 0.537085743 | -0.055386793 | 0.232232325 | -0.04872142  |
| -0.016072893 | 0.729019828 | -0.027506535 | 0.553221027 | -0.089211786 |
| 0.05226277   | 0.259678364 | 0.065270475  | 0.159063339 | 0.05432123   |
| 0.167201575  | 0.000284354 | 0.164328931  | 0.000362566 | 0.191856208  |
| -0.048502384 | 0.295583159 | -0.043881419 | 0.344046608 | -0.045565458 |
| -0.003166496 | 0.945590332 | -0.005403116 | 0.907295708 | 0.021416822  |
| -0.183484718 | 6.65E-05    | -0.17299642  | 0.000172081 | -0.200968594 |
| 0.113594509  | 0.014042506 | 0.12898676   | 0.005244366 | 0.182461065  |
| -0.015681148 | 0.73537442  | -0.001585201 | 0.972745817 | 0.00751736   |
| 0.028464881  | 0.539474995 | 0.001314481  | 0.97739891  | -0.013957305 |
| 0.157930267  | 0.000614177 | 0.170960741  | 0.000205665 | 0.094864562  |
| 0.040567371  | 0.381748607 | 0.018269569  | 0.693740877 | 0.014655237  |
| -0.230645269 | 4.68E-07    | -0.202773372 | 1.00E-05    | -0.197850005 |
| -0.093740143 | 0.042890679 | -0.107888214 | 0.019698254 | -0.143248034 |
| 0.015318758  | 0.741268971 | 0.040994137  | 0.376756549 | 0.022924935  |
| -0.211896418 | 3.85E-06    | -0.154831999 | 0.000787225 | -0.17753067  |
| -0.225134539 | 8.86E-07    | -0.274304966 | 1.66E-09    | -0.339312212 |
| -0.216206829 | 2.41E-06    | -0.219144535 | 1.74E-06    | -0.2191307   |
| -0.260415284 | 1.12E-08    | -0.216851149 | 2.24E-06    | -0.209461417 |
| -0.242235093 | 1.16E-07    | -0.223146507 | 1.11E-06    | -0.226374739 |
| -0.044720852 | 0.334886357 | -0.096007151 | 0.038082582 | -0.107390642 |
| 0.029702609  | 0.521977659 | 0.022213559  | 0.632072619 | 0.036919049  |
| -0.164333554 | 0.000362425 | -0.134140546 | 0.003682296 | -0.163230349 |
| 0.063871431  | 0.168208988 | 0.066123337  | 0.153675142 | 0.079869367  |
| 0.166864743  | 0.000292632 | 0.172485799  | 0.000179985 | 0.200080333  |
| -0.079514408 | 0.08608256  | -0.107662747 | 0.019957591 | -0.109977151 |
| 0.139008618  | 0.002607491 | 0.186950425  | 4.80E-05    | 0.180444143  |
| -0.072782147 | 0.116251404 | -0.070989886 | 0.125540618 | -0.066320342 |
| 0.062249879  | 0.179295033 | 0.088235149  | 0.056730006 | 0.071370681  |
| -0.166143065 | 0.000311131 | -0.163855463 | 0.000377238 | -0.163492955 |
| -0.183905084 | 6.40E-05    | -0.163106271 | 0.000401589 | -0.228143302 |
| 0.042202698  | 0.362838681 | 0.060012531  | 0.1954675   | 0.003485187  |
| -0.011928468 | 0.797105681 | -0.019690352 | 0.67126471  | -0.006430061 |

|              |             |              |             |              |
|--------------|-------------|--------------|-------------|--------------|
| -0.005825741 | 0.90008102  | 0.028713529  | 0.53593657  | -0.01740853  |
| 0.02716904   | 0.558102297 | 0.008230644  | 0.859200455 | -0.024792511 |
| 0.136395309  | 0.003142514 | 0.096556249  | 0.036989307 | 0.095295338  |
| -0.092475055 | 0.045789479 | -0.042691335 | 0.357303784 | -0.061578953 |
| -0.045692907 | 0.324476491 | -0.073274278 | 0.113797293 | -0.117452081 |
| 0.014363025  | 0.756886654 | 0.048739623  | 0.293224518 | 0.032757632  |
| -0.163823875 | 0.000378236 | -0.169702945 | 0.000229386 | -0.171902059 |
| -0.055094374 | 0.234710731 | -0.0644184   | 0.164587651 | -0.021852375 |
| 0.145896896  | 0.001570447 | 0.102672989  | 0.026506993 | 0.139868404  |
| 0.021129616  | 0.648791281 | -0.000976779 | 0.983204322 | -0.024394664 |
| 0.067281366  | 0.146581861 | 0.066431555  | 0.151762296 | 0.049928735  |
| 0.164198331  | 0.000366559 | 0.181285977  | 8.15E-05    | 0.194482688  |
| 0.215790181  | 2.52E-06    | 0.214929739  | 2.77E-06    | 0.17632284   |
| 0.181437259  | 8.04E-05    | 0.148944726  | 0.001246064 | 0.13320933   |
| 0.267051392  | 4.56E-09    | 0.24105642   | 1.34E-07    | 0.244025013  |
| -0.146637995 | 0.001485125 | -0.17910295  | 9.96E-05    | -0.201893562 |
| 0.219597973  | 1.66E-06    | 0.210043942  | 4.69E-06    | 0.237794521  |
| 0.025840692  | 0.577514758 | 0.031001571  | 0.503932654 | 0.033670022  |
| -0.08200867  | 0.076651204 | -0.114687488 | 0.013139588 | -0.08661193  |
| -0.108173662 | 0.019374138 | -0.081704318 | 0.077754984 | -0.091561678 |
| 0.064477652  | 0.164198896 | 0.074474037  | 0.107984817 | 0.095246687  |
| 0.047914825  | 0.301479095 | 0.055681385  | 0.229754287 | 0.063534423  |
| 0.108931894  | 0.018535648 | 0.122266625  | 0.008167796 | 0.090796826  |
| -0.247127752 | 6.29E-08    | -0.228374612 | 6.10E-07    | -0.249858309 |
| -0.093115402 | 0.044302272 | -0.082172161 | 0.076063558 | -0.022928517 |
| 0.109649839  | 0.017771065 | 0.099154758  | 0.032170021 | 0.12469076   |
| -0.064036544 | 0.167109593 | -0.075269209 | 0.104263313 | -0.053322274 |
| 0.14060298   | 0.002323284 | 0.147525036  | 0.001388608 | 0.13094092   |
| -0.04082272  | 0.378756844 | -0.028017666 | 0.545868349 | -0.035443156 |
| -0.043052841 | 0.353243226 | -0.034088585 | 0.462400441 | -0.074844497 |
| -0.250266328 | 4.22E-08    | -0.256270773 | 1.94E-08    | -0.285454922 |
| -0.1092847   | 0.01815641  | -0.08213965  | 0.076180122 | -0.067829819 |
| -0.041267561 | 0.373579393 | -0.051745527 | 0.264430165 | -0.099439212 |
| -0.083753093 | 0.070568031 | -0.05145411  | 0.267133513 | -0.089435507 |
| 0.024953289  | 0.59065731  | 0.00396365   | 0.931922735 | -0.059242159 |
| 0.01892516   | 0.683334858 | 0.02775484   | 0.549643096 | 0.032174837  |
| -0.186173772 | 5.17E-05    | -0.176149461 | 0.000130041 | -0.17454227  |
| -0.199740604 | 1.37E-05    | -0.176539282 | 0.000125572 | -0.200711701 |
| 0.01997333   | 0.666822135 | 0.012509634  | 0.787451427 | 0.015327203  |
| -0.163452665 | 0.000390154 | -0.169733698 | 0.000228777 | -0.14141676  |
| 0.168831471  | 0.000247297 | 0.19892996   | 1.49E-05    | 0.187312991  |
| -0.164658492 | 0.000352669 | -0.183664164 | 6.54E-05    | -0.196605413 |
| -0.021003362 | 0.650750344 | 0.005711852  | 0.902024445 | -0.029991696 |
| 0.151806101  | 0.000998824 | 0.141985199  | 0.002100094 | 0.133082319  |
| 0.158152964  | 0.00060321  | 0.147902331  | 0.00134933  | 0.165515856  |



|              |             |              |             |              |
|--------------|-------------|--------------|-------------|--------------|
| 0.141146485  | 0.00223306  | 0.14208814   | 0.002084283 | 0.126188642  |
| -0.084033442 | 0.069628245 | -0.092854705 | 0.044902763 | -0.078249415 |
| -0.143100554 | 0.001934481 | -0.197452731 | 1.72E-05    | -0.162428612 |
| -0.158922767 | 0.000566685 | -0.194794634 | 2.25E-05    | -0.216248577 |
| 0.180457912  | 8.80E-05    | 0.202537906  | 1.03E-05    | 0.1403522    |
| 0.023744936  | 0.60877041  | -0.009561096 | 0.836737777 | 0.032820649  |
| -0.087971383 | 0.057476806 | -0.133449053 | 0.003863927 | -0.126542976 |
| -0.132191839 | 0.004215059 | -0.193148301 | 2.64E-05    | -0.233649809 |
| 0.000591078  | 0.989835961 | 0.046855667  | 0.312303244 | 0.100099188  |
| -0.043389364 | 0.349489536 | -0.065307794 | 0.158824623 | -0.087848162 |
| 0.381575585  | 1.24E-17    | 0.377624802  | 2.82E-17    | 0.372198434  |
| -0.299131293 | 4.15E-11    | -0.333341169 | 1.39E-13    | -0.36485048  |
| -0.043977141 | 0.342994077 | -0.023909722 | 0.606285806 | -0.007060642 |
| -0.104658325 | 0.023707352 | -0.045456845 | 0.326985004 | -0.02302023  |
| -0.21883893  | 1.80E-06    | -0.24412359  | 9.17E-08    | -0.207462937 |
| -0.008647027 | 0.852157345 | -0.051696363 | 0.264884913 | -0.07814253  |
| -0.03028131  | 0.513897718 | -0.019862456 | 0.668561412 | -0.024029859 |
| 0.197705588  | 1.68E-05    | 0.2416396    | 1.25E-07    | 0.211595273  |
| 0.034571128  | 0.456084917 | 0.064957817  | 0.161073939 | 0.005823427  |
| -0.182766183 | 7.11E-05    | -0.16294611  | 0.000406981 | -0.158403689 |
| 0.093266954  | 0.043956302 | 0.082210711  | 0.075925528 | 0.118351696  |
| 0.000433088  | 0.992552623 | -0.017409411 | 0.707481432 | -0.021089235 |
| -0.067039848 | 0.148040241 | -0.078400153 | 0.090587501 | -0.081256206 |
| -0.27235654  | 2.19E-09    | -0.249011822 | 4.96E-08    | -0.234593156 |
| 0.197184608  | 1.77E-05    | 0.223721021  | 1.04E-06    | 0.226059124  |
| -0.31476018  | 3.37E-12    | -0.296891587 | 5.88E-11    | -0.242308788 |
| -0.497348565 | 1.50E-30    | -0.510623762 | 2.25E-32    | -0.5237471   |
| -0.524051988 | 2.67E-34    | -0.501636261 | 3.94E-31    | -0.499586529 |
| 0.210666201  | 4.39E-06    | 0.25761502   | 1.63E-08    | 0.291647309  |
| -0.020613619 | 0.656813072 | -0.005084784 | 0.912735061 | 0.01058703   |
| 0.239161996  | 1.69E-07    | 0.263283332  | 7.62E-09    | 0.267634804  |
| -0.077372686 | 0.094907259 | -0.128790144 | 0.005314325 | -0.156958885 |
| 0.03360119   | 0.468828522 | 0.058740306  | 0.205126281 | 0.061356552  |
| -0.021079843 | 0.649563315 | -0.072898725 | 0.115666351 | -0.084487249 |
| -0.188601759 | 4.10E-05    | -0.163099786 | 0.000401806 | -0.192333615 |
| -0.208458442 | 5.55E-06    | -0.186012665 | 5.25E-05    | -0.203244479 |
| 0.093636655  | 0.043121855 | 0.074172197  | 0.109424611 | 0.037722952  |
| -0.268586427 | 3.69E-09    | -0.259367958 | 1.29E-08    | -0.312789313 |
| -0.12748066  | 0.005802088 | -0.159047262 | 0.000560975 | -0.187841093 |
| -0.030866516 | 0.505793402 | -0.031968719 | 0.490713412 | 0.017597049  |
| 0.067343051  | 0.146211145 | 0.049065384  | 0.290006346 | 0.022282239  |
| -0.097336966 | 0.035480812 | -0.096224627 | 0.037646346 | -0.066524198 |
| 0.187672784  | 4.48E-05    | 0.193275661  | 2.61E-05    | 0.20040739   |
| -0.018236121 | 0.694273353 | -0.038235768 | 0.409729915 | -0.041243301 |
| 0.057315836  | 0.216346041 | 0.045151071  | 0.330252911 | 0.039347878  |

|              |             |              |             |              |
|--------------|-------------|--------------|-------------|--------------|
| -0.199186852 | 1.45E-05    | -0.204136282 | 8.73E-06    | -0.189647061 |
| -0.006778242 | 0.883851779 | -0.016502543 | 0.722071641 | -0.042188666 |
| -0.203366044 | 9.45E-06    | -0.165994758 | 0.000315066 | -0.1443588   |
| -0.119615753 | 0.009673524 | -0.09986204  | 0.030955099 | -0.067725932 |
| -0.234414329 | 3.00E-07    | -0.215722659 | 2.54E-06    | -0.194524934 |
| 0.111421147  | 0.016001408 | 0.091684155  | 0.047683998 | 0.151204703  |
| -0.332323155 | 1.67E-13    | -0.358061131 | 1.43E-15    | -0.328845153 |
| -0.081489255 | 0.078542699 | -0.095737631 | 0.038629151 | -0.10184352  |
| 0.0863563    | 0.062229253 | 0.084475009  | 0.068168813 | 0.090523405  |
| -0.187839161 | 4.41E-05    | -0.166730491 | 0.000295993 | -0.172684269 |
| -0.005362781 | 0.907984687 | 0.00843039   | 0.855820325 | 0.003983792  |
| 0.006082009  | 0.895710202 | 0.028652555  | 0.536803187 | 0.037640397  |
| 0.079698629  | 0.085355436 | 0.072533882  | 0.117505064 | 0.041857022  |
| -0.119369335 | 0.009825305 | -0.118646816 | 0.010282603 | -0.126216452 |
| 0.05200649   | 0.26202534  | 0.052926618  | 0.253666544 | 0.035654112  |
| 0.230261844  | 4.89E-07    | 0.267577291  | 4.25E-09    | 0.275432681  |
| -0.042319275 | 0.361513357 | -0.039099399 | 0.399226697 | -0.056116736 |
| -0.022568717 | 0.626634674 | -0.017151771 | 0.711615898 | -0.004618068 |
| 0.12962748   | 0.005022104 | 0.148333872  | 0.00130566  | 0.141894261  |
| -0.181326405 | 8.12E-05    | -0.179768675 | 9.37E-05    | -0.191991605 |
| -0.039690551 | 0.392131296 | -0.093787751 | 0.042784682 | -0.084410714 |
| -0.335793656 | 9.01E-14    | -0.295131099 | 7.71E-11    | -0.302357442 |
| -0.048768563 | 0.292937659 | -0.029155009 | 0.529682869 | -0.005300601 |
| -0.000759267 | 0.986944062 | -0.00945356  | 0.838548705 | 0.024003388  |
| -0.218317509 | 1.91E-06    | -0.175326613 | 0.000139968 | -0.159419872 |
| -0.060394095 | 0.192636493 | -0.067984137 | 0.142400563 | -0.064589904 |
| 0.066622355  | 0.150587252 | 0.078871472  | 0.088659405 | 0.073891704  |
| -0.20497458  | 8.00E-06    | -0.216995588 | 2.21E-06    | -0.20169445  |
| -0.068372829 | 0.140127491 | -0.065901879 | 0.15506079  | -0.066321977 |
| 0.122849717  | 0.007866092 | 0.055195727  | 0.233849611 | 0.096659144  |
| 0.10289256   | 0.026183969 | 0.102196209  | 0.027220243 | 0.07918241   |
| -0.147905132 | 0.001349043 | -0.212076582 | 3.77E-06    | -0.231727093 |
| 0.008615778  | 0.852685517 | -0.027106007 | 0.559016262 | -0.097492421 |
| -0.159807524 | 0.000527246 | -0.174551173 | 0.000149971 | -0.166966154 |
| -0.231928157 | 4.02E-07    | -0.217006081 | 2.21E-06    | -0.188292448 |
| 0.083536958  | 0.071299615 | 0.085668143  | 0.064350379 | 0.091751135  |
| 0.007191481  | 0.876825466 | 0.00737345   | 0.873734475 | 0.005889507  |
| -0.063057393 | 0.173708449 | -0.04760525  | 0.304616753 | -0.072920837 |
| 0.004859865  | 0.91658075  | -0.015286646 | 0.741792036 | 0.009880575  |
| -0.20407056  | 8.79E-06    | -0.189353124 | 3.82E-05    | -0.131121103 |
| 0.008526396  | 0.854196624 | -0.018550164 | 0.689279883 | -0.032232773 |
| 0.156789222  | 0.000673327 | 0.153426874  | 0.000879716 | 0.116725742  |
| -0.20382604  | 9.01E-06    | -0.252011017 | 3.38E-08    | -0.264926705 |
| 0.078063326  | 0.091985898 | 0.085276649  | 0.065583408 | 0.147875347  |
| 0.069534682  | 0.133498729 | 0.038379504  | 0.407970572 | 0.068884825  |

|              |             |              |             |              |
|--------------|-------------|--------------|-------------|--------------|
| -0.244263753 | 9.01E-08    | -0.23169826  | 4.13E-07    | -0.224476662 |
| 0.010397107  | 0.822689381 | 0.03280275   | 0.47946457  | 0.049911857  |
| 0.116246383  | 0.011940388 | 0.109375772  | 0.018059622 | 0.127462678  |
| 0.040493916  | 0.382611906 | 0.030643043  | 0.50888027  | 0.019195841  |
| -0.099070303 | 0.032317779 | -0.049841703 | 0.282432981 | -0.03770245  |
| -0.029227323 | 0.528662057 | -0.035735906 | 0.441041338 | -0.036449727 |
| 0.068551994  | 0.139089141 | 0.061725022  | 0.182996862 | 0.068240422  |
| 0.144188775  | 0.001784501 | 0.17409857   | 0.000156116 | 0.137360416  |
| -0.030225551 | 0.514673393 | -0.026768653 | 0.563920142 | -0.034175091 |
| -0.217650497 | 2.06E-06    | -0.21026533  | 4.58E-06    | -0.219828312 |
| -0.112620776 | 0.014892435 | -0.098689845 | 0.032990614 | -0.081711816 |
| -0.09699961  | 0.036126105 | -0.072059324 | 0.119930829 | -0.081075896 |
| -0.136925642 | 0.003026485 | -0.165219339 | 0.000336404 | -0.172563489 |
| 0.03521948   | 0.447675948 | 0.080995988  | 0.08037385  | 0.067836106  |
| 0.041458182  | 0.37137421  | 0.073920762  | 0.110635485 | 0.0593684    |
| -0.162331432 | 0.000428307 | -0.129963447 | 0.004908985 | -0.102442096 |
| 0.114214486  | 0.01352386  | 0.077638241  | 0.09377533  | 0.080746319  |
| -0.013491565 | 0.771214183 | 0.045793315  | 0.323413312 | 0.070446181  |
| -0.081312957 | 0.079193244 | -0.129771077 | 0.004973471 | -0.138106144 |
| -0.17165709  | 0.000193541 | -0.15199728  | 0.000984038 | -0.132607817 |
| -0.185710535 | 5.40E-05    | -0.133507677 | 0.00384822  | -0.164949959 |
| 0.049703269  | 0.283773585 | 0.086636131  | 0.061383372 | 0.06733253   |
| -0.098563412 | 0.033216838 | -0.092398643 | 0.045969714 | -0.099366527 |
| 0.025151911  | 0.587703801 | 0.026123335  | 0.573357784 | 0.023878782  |
| -0.063522132 | 0.170552601 | -0.089420752 | 0.053471915 | -0.06334115  |
| -0.265649662 | 5.53E-09    | -0.264382376 | 6.57E-09    | -0.295163159 |
| -0.140481023 | 0.002343982 | -0.159107975 | 0.00055821  | -0.213835674 |
| 0.134875388  | 0.00349779  | 0.137906398  | 0.002822119 | 0.204684476  |
| -0.043322362 | 0.350234889 | -0.060394806 | 0.192631241 | -0.056855666 |
| -0.144485219 | 0.001745533 | -0.16757283  | 0.000275483 | -0.193719011 |
| -0.07582811  | 0.101708897 | -0.135538339 | 0.003338572 | -0.136316521 |
| 0.017502481  | 0.705990013 | -0.0032148   | 0.944761641 | -0.021374105 |
| -0.208906498 | 5.30E-06    | -0.221171072 | 1.39E-06    | -0.220931117 |
| 0.221082722  | 1.40E-06    | 0.239420109  | 1.64E-07    | 0.194405819  |
| 0.077578168  | 0.094030443 | 0.045099186  | 0.330809509 | 0.071200091  |
| -0.216010417 | 2.46E-06    | -0.226788362 | 7.33E-07    | -0.213628039 |
| -0.132193483 | 0.004214582 | -0.103673689 | 0.02506215  | -0.114261441 |
| 0.084643747  | 0.067617776 | 0.088044518  | 0.057268927 | 0.068933869  |
| 0.037587272  | 0.417723325 | 0.000802165  | 0.986206483 | 0.002847723  |
| 0.032757482  | 0.480071488 | 0.02927637   | 0.527970258 | 0.046632173  |
| -0.086630473 | 0.06140038  | -0.089994071 | 0.051953177 | -0.123776667 |
| -0.080088385 | 0.083833375 | -0.072067108 | 0.119890725 | -0.078945769 |
| -0.15846934  | 0.000587943 | -0.138210029 | 0.002761445 | -0.159802781 |
| -0.194306899 | 2.36E-05    | -0.199932243 | 1.34E-05    | -0.208558449 |
| -0.064245078 | 0.16572878  | -0.089233537 | 0.05397579  | -0.093079934 |

|              |             |              |             |              |
|--------------|-------------|--------------|-------------|--------------|
| -0.230849428 | 4.57E-07    | -0.187014551 | 4.77E-05    | -0.181144666 |
| 0.06151194   | 0.184515735 | 0.074745802  | 0.106701307 | 0.110673542  |
| -0.161652522 | 0.000453068 | -0.152067264 | 0.000978676 | -0.14806818  |
| -0.055873884 | 0.228145184 | -0.070858226 | 0.126245108 | -0.030829294 |
| -0.047548626 | 0.305192988 | -0.012059856 | 0.794920319 | -0.010689177 |
| -0.132567395 | 0.004107261 | -0.1514645   | 0.001025755 | -0.165337549 |
| 0.078252945  | 0.091196549 | 0.080534073  | 0.082119811 | 0.11871344   |
| -0.098331768 | 0.03363475  | -0.094823316 | 0.040533086 | -0.100479101 |
| 0.014040562  | 0.762178797 | -0.00964518  | 0.83532239  | -0.014742198 |
| -0.003841021 | 0.93402407  | -0.038334325 | 0.408523082 | -0.055227878 |
| -0.042317834 | 0.361529714 | -0.020323259 | 0.661344542 | 0.005999917  |
| 0.097860479  | 0.034498859 | 0.140280412  | 0.002378393 | 0.145981202  |
| 0.097904717  | 0.034416952 | 0.151050772  | 0.001059268 | 0.192974147  |
| -0.074878507 | 0.106078953 | -0.052563432 | 0.256943488 | -0.081160063 |
| 0.124032023  | 0.007284707 | 0.134011316  | 0.003715641 | 0.132642909  |
| -0.115133379 | 0.012786187 | -0.116828916 | 0.011517731 | -0.119278738 |
| 0.043526701  | 0.347964912 | 0.057047928  | 0.218504481 | 0.016336597  |
| -0.432526995 | 1.03E-22    | -0.456366971 | 2.11E-25    | -0.460182776 |
| -0.054942429 | 0.236005897 | -0.076233925 | 0.09988547  | -0.094292986 |
| 0.058223413  | 0.209147787 | 0.064847214  | 0.161789756 | 0.073567182  |
| -0.029265103 | 0.528129129 | -0.041160246 | 0.374824405 | -0.059764472 |
| -0.049308827 | 0.287616911 | -0.029679291 | 0.522304591 | -0.036605515 |
| 0.021712043  | 0.639785349 | -0.035631108 | 0.44238313  | -0.027554789 |
| 0.090165612  | 0.051505813 | 0.135546671  | 0.003336614 | 0.103090222  |
| -0.286299811 | 2.92E-10    | -0.311808229 | 5.47E-12    | -0.326859035 |
| 0.101709095  | 0.027965943 | 0.112385967  | 0.015104029 | 0.115004182  |
| -0.118259479 | 0.01053545  | -0.121054148 | 0.008828418 | -0.115595383 |
| -0.305372064 | 1.55E-11    | -0.327344471 | 3.99E-13    | -0.336369933 |
| -0.146797006 | 0.001467383 | -0.132697956 | 0.004070374 | -0.183338381 |
| -0.097241874 | 0.035661705 | -0.073223535 | 0.114048437 | -0.126731832 |
| 0.183856595  | 6.42E-05    | 0.194488247  | 2.31E-05    | 0.179857979  |
| 0.09793576   | 0.034359575 | 0.145879075  | 0.001572553 | 0.096633148  |
| -0.169970266 | 0.00022414  | -0.109641648 | 0.01777963  | -0.108957083 |
| 0.006157081  | 0.894430388 | 0.036720672  | 0.428546822 | 0.026718478  |
| -0.133660501 | 0.003807544 | -0.151086403 | 0.001056342 | -0.131453904 |
| 0.107562866  | 0.020073423 | 0.092792847  | 0.045046249 | 0.09832345   |
| 0.12563363   | 0.006558492 | 0.152986555  | 0.000910704 | 0.131519754  |
| -0.266745044 | 4.76E-09    | -0.238615301 | 1.81E-07    | -0.257820592 |
| -0.051793549 | 0.263986496 | -0.081771073 | 0.077511788 | -0.130471878 |
| -0.175746733 | 0.000134814 | -0.165494911 | 0.000328671 | -0.154476489 |
| -0.113936414 | 0.013754359 | -0.082150854 | 0.076139932 | -0.066694142 |
| 0.219932919  | 1.60E-06    | 0.186374428  | 5.07E-05    | 0.186948897  |
| 0.025173941  | 0.587376641 | 0.021642986  | 0.640850428 | 0.011749117  |
| 0.074982734  | 0.105592171 | 0.105783178  | 0.022237561 | 0.104910223  |
| 0.049063274  | 0.290027105 | 0.08310736   | 0.072772142 | 0.117931539  |

|              |             |              |             |              |
|--------------|-------------|--------------|-------------|--------------|
| -0.015045185 | 0.745728925 | -0.022769681 | 0.623566562 | -0.02406126  |
| -0.275108768 | 1.48E-09    | -0.228623484 | 5.93E-07    | -0.219525235 |
| -0.043120099 | 0.352490989 | -0.077105169 | 0.096058557 | -0.1331544   |
| -0.077926069 | 0.092560679 | -0.029666477 | 0.522484294 | -0.039509258 |
| 0.323261308  | 8.06E-13    | 0.289836688  | 1.72E-10    | 0.276763004  |
| -0.063997003 | 0.167372379 | -0.102939631 | 0.026115163 | -0.054408386 |
| -0.15838296  | 0.000592075 | -0.132110554 | 0.004238725 | -0.156383981 |
| 0.04525351   | 0.329155768 | 0.052864467  | 0.254225252 | 0.060715116  |
| 0.179591666  | 9.53E-05    | 0.221286039  | 1.37E-06    | 0.237130435  |
| -0.175457038 | 0.000138349 | -0.178875445 | 0.000101674 | -0.195869168 |
| 0.151183472  | 0.00104841  | 0.135850528  | 0.003265899 | 0.151406639  |
| 0.207617578  | 6.07E-06    | 0.205723756  | 7.40E-06    | 0.184584302  |
| -0.056054862 | 0.22663971  | -0.05592578  | 0.22771276  | -0.044895507 |
| 0.150926717  | 0.001069512 | 0.156542321  | 0.000686802 | 0.161653826  |
| -0.148140639 | 0.001325051 | -0.133522775 | 0.003844184 | -0.162579456 |
| 0.154784555  | 0.000790196 | 0.101612454  | 0.028115954 | 0.09987729   |
| 0.165868253  | 0.000318458 | 0.191947486  | 2.97E-05    | 0.205491171  |
| -0.046286393 | 0.31822516  | -0.036028894 | 0.437302384 | -0.033543639 |
| 0.001988178  | 0.965821275 | 0.027194906  | 0.557727461 | 0.01848674   |
| 0.003964843  | 0.931902289 | -0.04513529  | 0.330422142 | -0.029363775 |
| -0.33610274  | 8.53E-14    | -0.33256402  | 1.60E-13    | -0.35209296  |
| -0.21950674  | 1.67E-06    | -0.25924515  | 1.31E-08    | -0.264776672 |
| 0.035581411  | 0.443020257 | 0.081634133  | 0.078011344 | 0.03739225   |
| -0.166486107 | 0.000302206 | -0.209614307 | 4.91E-06    | -0.255709532 |
| -0.081504271 | 0.07848749  | -0.052286814 | 0.259458916 | -0.06077074  |
| -0.309653597 | 7.78E-12    | -0.3418826   | 3.00E-14    | -0.324825989 |
| -0.075422372 | 0.103558294 | -0.075395972 | 0.103679543 | -0.055422091 |
| 0.023139734  | 0.617933995 | 0.050590053  | 0.275260066 | 0.086404807  |
| -0.130351708 | 0.004781124 | -0.143452537 | 0.001884753 | -0.165027979 |
| -0.059911324 | 0.196223483 | -0.055289408 | 0.233055656 | -0.063448062 |
| -0.205857014 | 7.30E-06    | -0.222990814 | 1.13E-06    | -0.226510415 |
| 0.0366458    | 0.429489506 | 0.071697625  | 0.121805812 | 0.062615081  |
| -0.078226935 | 0.091304502 | -0.072733387 | 0.116496798 | -0.073079725 |
| -0.18626891  | 5.12E-05    | -0.199198982 | 1.45E-05    | -0.221010342 |
| 0.109783632  | 0.017631667 | 0.126171306  | 0.006329662 | 0.206301887  |
| -0.116281343 | 0.011914641 | -0.095818211 | 0.038465048 | -0.09286996  |
| -0.097356302 | 0.035444125 | -0.103937043 | 0.0246934   | -0.059036211 |
| -0.082191387 | 0.075994693 | -0.077963537 | 0.092403492 | -0.088339971 |
| -0.057690067 | 0.213356664 | -0.073734506 | 0.111539244 | -0.046857099 |
| -0.08150004  | 0.07850304  | -0.058211893 | 0.209238059 | -0.044273095 |
| -0.148640022 | 0.001275471 | -0.129001756 | 0.005239064 | -0.127930959 |
| -0.204605489 | 8.31E-06    | -0.19997186  | 1.34E-05    | -0.199058278 |
| -0.100329761 | 0.030173425 | -0.14677949  | 0.001469328 | -0.151180083 |
| 0.146623373  | 0.001486767 | 0.139558016  | 0.002506163 | 0.15939319   |
| -0.046700304 | 0.313912183 | -0.055583979 | 0.230571559 | -0.071661037 |

|              |             |              |             |              |
|--------------|-------------|--------------|-------------|--------------|
| -0.133334157 | 0.00389488  | -0.139828642 | 0.002457582 | -0.17105168  |
| -0.159006331 | 0.000562846 | -0.156943266 | 0.000665044 | -0.105548362 |
| -0.197455448 | 1.72E-05    | -0.218161021 | 1.94E-06    | -0.187059097 |
| 0.005877778  | 0.899193245 | -0.029053562 | 0.531116626 | -0.018930842 |
| -0.060808282 | 0.189597564 | -0.077123143 | 0.095980853 | -0.056855561 |
| -0.053782045 | 0.24606317  | -0.018992794 | 0.682264693 | -0.080420704 |
| -0.088318544 | 0.056495571 | -0.10602727  | 0.021929258 | -0.112125635 |
| 0.161517294  | 0.000458157 | 0.143963481  | 0.001814647 | 0.137487087  |
| 0.276714085  | 1.18E-09    | 0.317324281  | 2.20E-12    | 0.29567137   |
| 0.053916818  | 0.24487993  | 0.045698055  | 0.32442193  | 0.059208062  |
| -0.056292134 | 0.224676658 | -0.073695255 | 0.111730441 | -0.074077283 |
| 0.169363144  | 0.00023622  | 0.168713303  | 0.000249823 | 0.16627202   |
| -0.0027051   | 0.953508746 | 0.019911405  | 0.667793339 | 0.013835405  |
| -0.242691696 | 1.10E-07    | -0.251033283 | 3.83E-08    | -0.284203143 |
| 0.252294017  | 3.25E-08    | 0.249424516  | 4.70E-08    | 0.249184079  |
| 0.082545856  | 0.074734108 | 0.120441869  | 0.009179768 | 0.13929176   |
| -0.036755451 | 0.428109327 | 0.004563127  | 0.92165735  | -0.00434667  |
| 0.233285764  | 3.43E-07    | 0.240414046  | 1.45E-07    | 0.219693592  |
| 0.030142299  | 0.515832674 | 0.001833345  | 0.968481567 | -0.001694116 |
| -0.070268983 | 0.129435724 | -0.009130754 | 0.843989873 | -0.046310048 |
| -0.218585397 | 1.85E-06    | -0.242340557 | 1.14E-07    | -0.255847853 |
| -0.042122138 | 0.363756314 | -0.08886762  | 0.05497203  | -0.08862284  |
| -0.225142837 | 8.85E-07    | -0.254623853 | 2.41E-08    | -0.241031248 |
| 0.01632484   | 0.724942666 | 0.010987153  | 0.812807911 | 0.044749796  |
| 0.090339774  | 0.051054908 | 0.106699026  | 0.021099853 | 0.109781723  |
| -0.116251803 | 0.011936393 | -0.087821823 | 0.057903863 | -0.104270341 |
| -0.058975163 | 0.203317694 | -0.020732755 | 0.654957424 | -0.032100102 |
| -0.172704131 | 0.000176564 | -0.144126136 | 0.001792836 | -0.141799098 |
| 0.175221887  | 0.000141282 | 0.193133611  | 2.64E-05    | 0.177494695  |
| 0.036891418  | 0.426401497 | 0.008964495  | 0.84679523  | -0.016442475 |
| 0.088687675  | 0.055467522 | 0.125854134  | 0.006463765 | 0.084868539  |
| -0.079349015 | 0.086739611 | -0.081214617 | 0.079558014 | -0.092092602 |
| -0.141702034 | 0.002144154 | -0.136408978 | 0.003139473 | -0.117481105 |
| -0.262022651 | 9.04E-09    | -0.251182977 | 3.75E-08    | -0.27004044  |
| -0.120269369 | 0.009280976 | -0.14839004  | 0.001300072 | -0.189973633 |
| 0.086089365  | 0.063045088 | 0.0536166    | 0.247521144 | 0.001451583  |
| 0.241542663  | 1.26E-07    | 0.194999555  | 2.20E-05    | 0.204627416  |
| -0.191003283 | 3.25E-05    | -0.201305197 | 1.17E-05    | -0.227996528 |
| 0.051892953  | 0.263069744 | 0.051626299  | 0.265533908 | 0.053134662  |
| 0.11784201   | 0.010814126 | 0.137520316  | 0.002901021 | 0.13589614   |
| -0.205600425 | 7.50E-06    | -0.184759371 | 5.90E-05    | -0.186560729 |
| 0.020647446  | 0.656285978 | 0.02193377   | 0.636370595 | 0.001837046  |
| -0.134470862 | 0.003598294 | -0.143160456 | 0.001925934 | -0.170730978 |
| -0.004276515 | 0.926563755 | -0.022185684 | 0.632500269 | -0.013343715 |
| -0.218528483 | 1.87E-06    | -0.202810258 | 1.00E-05    | -0.22092196  |

|              |             |              |             |              |
|--------------|-------------|--------------|-------------|--------------|
| -0.088124999 | 0.057040887 | -0.094785035 | 0.0406145   | -0.087194002 |
| -0.124281757 | 0.007166936 | -0.12799208  | 0.005606997 | -0.112901666 |
| -0.127227283 | 0.005900986 | -0.115918736 | 0.012184085 | -0.093939653 |
| -0.019423202 | 0.675469346 | -0.011925878 | 0.79714878  | -0.009839442 |
| -0.167441037 | 0.000278602 | -0.170484644 | 0.00021436  | -0.171127599 |
| -0.108028365 | 0.019538533 | -0.074341262 | 0.108616307 | -0.09883488  |
| -0.05303626  | 0.252682996 | 0.013322054  | 0.774010313 | 0.036062505  |
| -0.144756427 | 0.001710567 | -0.096544449 | 0.037012518 | -0.072124351 |
| 0.14117488   | 0.002228435 | 0.11061539   | 0.016786305 | 0.121695875  |
| -0.195392961 | 2.12E-05    | -0.17936686  | 9.72E-05    | -0.201603386 |
| -0.133674463 | 0.003803847 | -0.141252154 | 0.002215895 | -0.168159225 |
| 0.031243843  | 0.500603729 | 0.054757522  | 0.237588804 | 0.07965646   |
| -0.382390801 | 1.04E-17    | -0.390660682 | 1.78E-18    | -0.404364176 |
| 0.062834173  | 0.175239613 | 0.061448171  | 0.184972093 | 0.092025619  |
| -0.12217435  | 0.008216477 | -0.129863939 | 0.004942247 | -0.143178818 |
| -0.099685665 | 0.03125433  | -0.082532544 | 0.07478114  | -0.058399803 |
| -0.016588997 | 0.720676275 | 0.011058401  | 0.811616696 | 0.028154187  |
| 0.243657279  | 9.72E-08    | 0.247077543  | 6.33E-08    | 0.28120957   |
| -0.010228615 | 0.825516328 | -0.006763793 | 0.884097627 | 0.010145239  |
| 0.05017213   | 0.279250415 | 0.032733577  | 0.480392158 | 0.028818837  |
| -0.02166487  | 0.640512817 | -0.024638601 | 0.595350608 | -0.079128046 |
| -0.011402677 | 0.805866828 | 0.012882537  | 0.781273818 | 0.027130645  |
| 0.204330907  | 8.55E-06    | 0.203851853  | 8.99E-06    | 0.264968318  |
| -0.171557975 | 0.000195225 | -0.204920423 | 8.05E-06    | -0.247761704 |
| -0.20682725  | 6.59E-06    | -0.204609088 | 8.31E-06    | -0.228088853 |
| -0.051734123 | 0.264535603 | -0.053214829 | 0.251086807 | -0.063901991 |
| -0.026064809 | 0.574217397 | 0.001103576  | 0.981024439 | -0.020338904 |
| 0.07671724   | 0.097747827 | 0.128581451  | 0.0053895   | 0.092431573  |
| -0.028495371 | 0.53904047  | -0.0068225   | 0.883098827 | -0.00809828  |
| 0.051236562  | 0.269163914 | 0.070531257  | 0.128007944 | 0.054643556  |
| 0.043415889  | 0.34919475  | 0.060187119  | 0.194168398 | 0.062322484  |
| -0.3747309   | 5.13E-17    | -0.386676556 | 4.19E-18    | -0.404493516 |
| 0.204401937  | 8.49E-06    | 0.208705655  | 5.41E-06    | 0.243265921  |
| -0.049324087 | 0.287467578 | -0.04971167  | 0.283692106 | -0.031984517 |
| 0.238054904  | 1.93E-07    | 0.276125706  | 1.28E-09    | 0.26161321   |
| -0.03508504  | 0.449412344 | -0.02185135  | 0.637639028 | -0.04534063  |
| 0.165870075  | 0.000318409 | 0.172395535  | 0.000181417 | 0.173968377  |
| 0.009278386  | 0.84150047  | -0.009276719 | 0.841528571 | 0.012794319  |
| -0.236516373 | 2.33E-07    | -0.197008373 | 1.80E-05    | -0.20872753  |
| 0.144553273  | 0.001736698 | 0.133275977  | 0.00391064  | 0.162771891  |
| 0.022312732  | 0.630552136 | 0.015576772  | 0.737070597 | 0.010840651  |
| 0.028317744  | 0.541574329 | 0.042649527  | 0.357775274 | 0.080076482  |
| 0.093551377  | 0.043313141 | 0.08417158   | 0.069168959 | 0.029286606  |
| -0.218728876 | 1.82E-06    | -0.223274911 | 1.10E-06    | -0.258044927 |
| -0.02027803  | 0.662051527 | 0.007411766  | 0.873083866 | 0.027556976  |

|              |             |              |             |              |
|--------------|-------------|--------------|-------------|--------------|
| -0.079837829 | 0.084809299 | -0.064975003 | 0.160962928 | -0.075984237 |
| 0.041952522  | 0.365693071 | 0.02329594   | 0.615563066 | -0.006376622 |
| -0.042267814 | 0.362098031 | -0.032785086 | 0.479701352 | -0.099364156 |
| -0.002318678 | 0.960144029 | 0.022679643  | 0.624940362 | -0.026334389 |
| -0.135690886 | 0.00330288  | -0.135621348 | 0.003319107 | -0.132180766 |
| -0.23847148  | 1.84E-07    | -0.224541034 | 9.48E-07    | -0.231668992 |
| -0.11030199  | 0.017100573 | -0.062546238 | 0.177229484 | -0.062865771 |
| -0.176619704 | 0.000124669 | -0.16093561  | 0.000480656 | -0.160371407 |
| -0.068575823 | 0.138951491 | -0.098803566 | 0.032788257 | -0.109738645 |
| 0.149073868  | 0.001233789 | 0.12940295   | 0.005099007 | 0.134034667  |
| -0.085426394 | 0.065109503 | -0.086755996 | 0.061023955 | -0.070802829 |
| -0.075690153 | 0.102334758 | -0.058332764 | 0.208292307 | -0.073047613 |
| -0.300238642 | 3.49E-11    | -0.286260648 | 2.94E-10    | -0.31336019  |
| 0.117404081  | 0.01111346  | 0.150004857  | 0.001148544 | 0.133290669  |
| 0.087206006  | 0.059690068 | 0.071155412  | 0.124659248 | 0.050705091  |
| -0.203224159 | 9.59E-06    | -0.236416475 | 2.36E-07    | -0.237162757 |
| 0.006792071  | 0.883616508 | 0.02707181   | 0.559512417 | 0.030538626  |
| 0.061917034  | 0.181636104 | 0.073671656  | 0.111845518 | 0.065803165  |
| 0.048830233  | 0.292326993 | 0.05267486   | 0.255935002 | 0.030494975  |
| -0.148886583 | 0.001251626 | -0.143177098 | 0.001923566 | -0.15887303  |
| -0.104937858 | 0.023334467 | -0.140654436 | 0.002314602 | -0.112667528 |
| -0.270484679 | 2.84E-09    | -0.292660445 | 1.12E-10    | -0.242854033 |
| -0.199925495 | 1.34E-05    | -0.202532378 | 1.03E-05    | -0.199681968 |
| -0.109608498 | 0.017814332 | -0.081474489 | 0.078597018 | -0.121278173 |
| 0.038185885  | 0.410341538 | 0.057142853  | 0.217737949 | 0.067962322  |
| -0.268913185 | 3.53E-09    | -0.223376251 | 1.08E-06    | -0.221496766 |
| 0.064052416  | 0.167004191 | 0.080459894  | 0.082403031 | 0.054355446  |
| -0.08615425  | 0.062845972 | -0.073040937 | 0.114955779 | -0.06659681  |
| -0.201440446 | 1.15E-05    | -0.24078028  | 1.39E-07    | -0.247380518 |
| 0.059596113  | 0.198591673 | 0.092173933  | 0.046503199 | 0.068418055  |
| 0.184079216  | 6.29E-05    | 0.204589639  | 8.33E-06    | 0.186465352  |
| 0.138821817  | 0.002642785 | 0.136442997  | 0.003131917 | 0.105738843  |
| 0.058525451  | 0.206791027 | 0.081309008  | 0.079207864 | 0.042938204  |
| -0.134162837 | 0.003676571 | -0.168059213 | 0.000264253 | -0.217277465 |
| -0.12201231  | 0.008302587 | -0.155186852 | 0.000765335 | -0.198590247 |
| -0.058107021 | 0.210061137 | -0.071778589 | 0.121384141 | -0.080078804 |
| 0.033643855  | 0.468263871 | 0.046372315  | 0.317326674 | 0.082746819  |
| 0.195825845  | 2.03E-05    | 0.206331637  | 6.94E-06    | 0.209867982  |
| 0.183379898  | 6.72E-05    | 0.183822254  | 6.45E-05    | 0.195227333  |
| -0.384411641 | 6.79E-18    | -0.387324586 | 3.65E-18    | -0.357983503 |
| -0.163331465 | 0.00039412  | -0.169749387 | 0.000228466 | -0.178056968 |
| -0.142923405 | 0.00195996  | -0.133239604 | 0.003920521 | -0.143983473 |
| -0.22418449  | 9.87E-07    | -0.22563615  | 8.37E-07    | -0.232275435 |
| 0.227683745  | 6.61E-07    | 0.221546135  | 1.33E-06    | 0.250557277  |
| -0.117514702 | 0.011037164 | -0.143005666 | 0.00194809  | -0.136654032 |



|              |             |              |             |              |
|--------------|-------------|--------------|-------------|--------------|
| 0.040068116  | 0.387639669 | 0.039550832  | 0.393801374 | 0.023887782  |
| -0.276228048 | 1.26E-09    | -0.265843443 | 5.38E-09    | -0.245886165 |
| -0.084123304 | 0.069329183 | -0.09656469  | 0.03697271  | -0.074498271 |
| -0.078939794 | 0.088382666 | -0.070685853 | 0.127172084 | -0.056613157 |
| -0.044951341 | 0.332398827 | -0.05154781  | 0.266262235 | -0.049621981 |
| -0.062228354 | 0.17944575  | -0.029199666 | 0.529052356 | -0.001334183 |
| -0.031127379 | 0.502202542 | -0.023619776 | 0.610660559 | -0.011860017 |
| 0.108741227  | 0.018743462 | 0.105359529  | 0.022781579 | 0.107458803  |
| -0.084061551 | 0.069534583 | -0.043131115 | 0.352367874 | -0.085190691 |
| 0.03436388   | 0.458791431 | 0.041324867  | 0.372915605 | 0.046718126  |
| -0.110244897 | 0.017158375 | -0.073835944 | 0.111046325 | -0.071216792 |
| 0.045478513  | 0.326754228 | 0.045847348  | 0.322842111 | 0.056863522  |
| 0.004399757  | 0.924453672 | -0.020598038 | 0.657055924 | 0.001634765  |
| -0.108021686 | 0.019546119 | -0.117209687 | 0.011248667 | -0.115290627 |
| -0.119638994 | 0.009659317 | -0.148225982 | 0.001316454 | -0.143431434 |
| 0.035347499  | 0.446026021 | 0.027394191  | 0.554843568 | 0.02203024   |
| 0.035294054  | 0.4467144   | 0.025134791  | 0.587958108 | 0.002175665  |
| -0.126741621 | 0.006094793 | -0.147346801 | 0.001407525 | -0.123762846 |
| -0.008004179 | 0.863035832 | 0.029600246  | 0.523413621 | 0.006478896  |
| -0.078409539 | 0.09054878  | -0.059777802 | 0.197224104 | -0.047022129 |
| -0.048650212 | 0.294111961 | -0.063583119 | 0.170141665 | -0.054709734 |
| -0.101271349 | 0.028650975 | -0.077837818 | 0.09293176  | -0.094475857 |
| -0.053169258 | 0.251493489 | -0.030416743 | 0.512016175 | -0.043199903 |
| 0.074234258  | 0.109127345 | 0.061165056  | 0.187008236 | 0.085250737  |
| -0.019717121 | 0.670843963 | -0.025903854 | 0.576584579 | -0.022836396 |
| -0.033923767 | 0.464568667 | -0.014709317 | 0.751216056 | -0.015743571 |
| -0.039043356 | 0.399903332 | -0.01615033  | 0.727765877 | -0.023631665 |
| 0.033055442  | 0.476084331 | -1.23E-05    | 0.999788199 | 0.008888923  |
| -0.129629092 | 0.005021556 | -0.138884167 | 0.002630957 | -0.155143217 |
| 0.06746549   | 0.145477431 | 0.044267741  | 0.339811277 | 0.023494748  |
| -0.2646464   | 6.34E-09    | -0.2976895   | 5.19E-11    | -0.326201637 |
| 0.04425152   | 0.339988432 | 0.094205542  | 0.041863916 | 0.130740255  |
| -0.17415173  | 0.000155382 | -0.192517195 | 2.81E-05    | -0.175607894 |
| 0.075325642  | 0.104003105 | 0.076848904  | 0.09717185  | 0.092202508  |
| -0.141923766 | 0.002109582 | -0.16839525  | 0.000256745 | -0.14101796  |
| 0.011912299  | 0.797374732 | -0.025455529 | 0.583202213 | -0.030327146 |
| 0.030200487  | 0.515022266 | 0.046973044  | 0.311091273 | 0.038241356  |
| 0.172509019  | 0.000179618 | 0.175381116  | 0.00013929  | 0.175733397  |
| -0.373682204 | 6.36E-17    | -0.359726334 | 1.03E-15    | -0.339739758 |
| 0.025567482  | 0.581546395 | 0.015210944  | 0.743025601 | 0.009657259  |
| -0.281772863 | 5.69E-10    | -0.295228368 | 7.59E-11    | -0.299424871 |
| -0.122568615 | 0.008010275 | -0.113845537 | 0.013830435 | -0.114652236 |
| -0.107666206 | 0.019953591 | -0.09891163  | 0.032596952 | -0.090424045 |
| -0.019564346 | 0.673246636 | -0.028153767 | 0.543918704 | -0.058305694 |
| -0.035597743 | 0.442810822 | -0.026703655 | 0.564867324 | -0.009080214 |

|              |             |              |             |              |
|--------------|-------------|--------------|-------------|--------------|
| 0.059401677  | 0.20006282  | 0.065290587  | 0.158934657 | 0.044787956  |
| 0.063938907  | 0.167759054 | 0.042112406  | 0.363867265 | 0.074057886  |
| 0.114024588  | 0.013680899 | 0.114808479  | 0.013042853 | 0.130422274  |
| 0.015429815  | 0.739460913 | -0.020818792 | 0.653618634 | 0.043256819  |
| -0.125993505 | 0.006404527 | -0.165864287 | 0.000318565 | -0.186346368 |
| -0.159007898 | 0.000562775 | -0.146000654 | 0.001558236 | -0.141391684 |
| -0.189509636 | 3.76E-05    | -0.167672082 | 0.000273156 | -0.161590376 |
| 0.204101551  | 8.76E-06    | 0.218716159  | 1.83E-06    | 0.165423264  |
| -0.160926032 | 0.000481035 | -0.146310132 | 0.001522332 | -0.136462151 |
| -0.039336678 | 0.396369512 | -0.058341836 | 0.208221451 | -0.018898062 |
| -0.124727471 | 0.00696097  | -0.165612851 | 0.000325412 | -0.167292605 |
| -0.084164905 | 0.069191095 | -0.09851707  | 0.033300088 | -0.103597159 |
| -0.209540179 | 4.95E-06    | -0.186721572 | 4.91E-05    | -0.16879497  |
| 0.089012759  | 0.054575064 | 0.091395115  | 0.048392555 | 0.054865138  |
| -0.159816959 | 0.00052684  | -0.141278674 | 0.002211605 | -0.11171796  |
| -0.207843258 | 5.93E-06    | -0.2279802   | 6.38E-07    | -0.268171431 |
| -0.005071037 | 0.912970063 | 0.027955972  | 0.546753255 | 0.054430927  |
| -0.280058259 | 7.29E-10    | -0.274953961 | 1.52E-09    | -0.254908792 |
| 0.216099811  | 2.44E-06    | 0.233163655  | 3.48E-07    | 0.237632938  |
| 0.162627354  | 0.000417914 | 0.21213876   | 3.75E-06    | 0.214778245  |
| -0.006995444 | 0.880157523 | 0.011869795  | 0.79808209  | 0.023336952  |
| -0.10401776  | 0.024581322 | -0.139450913 | 0.00252563  | -0.174415366 |
| -0.109946838 | 0.017462918 | -0.090465412 | 0.050731679 | -0.091406021 |
| -0.00280074  | 0.951866986 | -0.013504088 | 0.771007726 | -0.002589183 |
| -0.093925851 | 0.042478454 | -0.086801535 | 0.060887864 | -0.067256043 |
| -0.132360328 | 0.004166384 | -0.10878316  | 0.018697585 | -0.114995094 |
| 0.073564187  | 0.112370751 | 0.035620328  | 0.442521294 | 0.05980081   |
| 0.120093564  | 0.009385143 | 0.145832748  | 0.00157804  | 0.154577575  |
| -0.117055904 | 0.011356658 | -0.14972953  | 0.001173171 | -0.146837842 |
| -0.008785518 | 0.849817336 | -0.017424552 | 0.707238734 | -0.019166933 |
| 0.160425701  | 0.00050122  | 0.133295484  | 0.003905349 | 0.110987222  |
| 0.152859172  | 0.000919855 | 0.100629788  | 0.02968096  | 0.07735317   |
| -0.200588482 | 1.26E-05    | -0.187154502 | 4.71E-05    | -0.189302843 |
| -0.047521391 | 0.305470393 | -0.072237338 | 0.119016342 | -0.056860403 |
| 0.127816409  | 0.005673335 | 0.162250788  | 0.000431181 | 0.197811851  |
| -0.131174877 | 0.004519924 | -0.105030112 | 0.023212523 | -0.120688608 |
| -0.281442698 | 5.97E-10    | -0.30621303  | 1.35E-11    | -0.349542265 |
| -0.186165113 | 5.17E-05    | -0.218574884 | 1.86E-06    | -0.222748886 |
| -0.334312642 | 1.17E-13    | -0.329168905 | 2.91E-13    | -0.349091204 |
| -0.249937678 | 4.40E-08    | -0.243234915 | 1.02E-07    | -0.262948867 |
| -0.174853406 | 0.000145995 | -0.164861639 | 0.000346695 | -0.155059992 |
| 0.099746197  | 0.031151356 | 0.069921033  | 0.131348892 | 0.038283504  |
| -0.210993277 | 4.24E-06    | -0.24314272  | 1.04E-07    | -0.256503429 |
| 0.014110132  | 0.761036089 | 0.044749335  | 0.334578314 | 0.057606143  |
| -0.20630424  | 6.96E-06    | -0.223312743 | 1.09E-06    | -0.225251357 |

|              |             |              |             |              |
|--------------|-------------|--------------|-------------|--------------|
| -0.045462206 | 0.326927889 | -0.014110054 | 0.761037381 | -0.050836934 |
| 0.130860545  | 0.004618104 | 0.13176576   | 0.004340452 | 0.092068607  |
| -0.1642862   | 0.000363868 | -0.162420679 | 0.000425147 | -0.15666433  |
| 0.061728758  | 0.182970308 | 0.104417151  | 0.024033198 | 0.063478595  |
| -0.216685753 | 2.29E-06    | -0.295270008 | 7.54E-11    | -0.299035948 |
| -0.119070539 | 0.010012182 | -0.098358141 | 0.033586945 | -0.09227723  |
| -0.172772378 | 0.000175508 | -0.178465401 | 0.000105533 | -0.175050643 |
| -0.160060495 | 0.000516448 | -0.132209817 | 0.004209841 | -0.115611304 |
| 0.024242871  | 0.60127654  | 0.012042638  | 0.795206598 | 0.012670833  |
| -0.111532853 | 0.015895173 | -0.145104106 | 0.001666682 | -0.102310256 |
| -0.048065955 | 0.299955156 | -0.066912674 | 0.148812594 | -0.064548256 |
| 0.018247089  | 0.694098724 | 0.007570038  | 0.870397316 | 0.038335462  |
| 0.138607823  | 0.002683752 | 0.121183925  | 0.008755503 | 0.126384015  |
| -0.017393328 | 0.707739269 | -0.022747049 | 0.623911753 | -0.001672521 |
| -0.007488255 | 0.871785339 | 0.021714018  | 0.639754893 | 0.020868559  |
| 0.119845861  | 0.009533675 | 0.111311062  | 0.01610671  | 0.146221792  |
| 0.029134601  | 0.529971137 | 0.037236275  | 0.422087659 | 0.024137557  |
| 0.03770056   | 0.416320364 | 0.045073691  | 0.331083227 | 0.041122218  |
| 0.096599684  | 0.036903974 | 0.11984055   | 0.009536882 | 0.111727512  |
| 0.135461362  | 0.003356716 | 0.143280644  | 0.00190889  | 0.143907582  |
| 0.049127933  | 0.289391143 | 0.016248292  | 0.726180596 | 0.035068015  |
| 0.135703927  | 0.003299845 | 0.137321067  | 0.002942521 | 0.091997297  |
| 0.024914963  | 0.591228012 | 0.030941296  | 0.504762656 | 0.026194886  |
| -0.180134643 | 9.06E-05    | -0.16110097  | 0.000474158 | -0.163791342 |
| -0.159732048 | 0.000530508 | -0.13940959  | 0.002533178 | -0.132803931 |
| -0.018899381 | 0.683742935 | -0.00970657  | 0.834289359 | 0.034869926  |
| 0.048805999  | 0.292566855 | 0.028595602  | 0.537613292 | 0.003608825  |
| 0.146560342  | 0.001493861 | 0.177238496  | 0.000117917 | 0.162278956  |
| 0.018512968  | 0.689870614 | 0.027339555  | 0.555633496 | 0.044968641  |
| 0.042463349  | 0.359879613 | 0.060217476  | 0.193943156 | 0.053198979  |
| -0.02752309  | 0.552982123 | -0.004096462 | 0.92964744  | 0.066527789  |
| 0.151196911  | 0.001047316 | 0.167621537  | 0.000274339 | 0.166043947  |
| 0.095134805  | 0.039875734 | 0.138503493  | 0.002703934 | 0.137446883  |
| -0.008113435 | 0.861185074 | -0.065153827 | 0.15981124  | -0.080660212 |
| -0.04995022  | 0.281385084 | -0.07324657  | 0.113934374 | -0.115079123 |
| -0.296151495 | 6.59E-11    | -0.290147014 | 1.64E-10    | -0.303798003 |
| 0.157860786  | 0.000617636 | 0.180701097  | 8.61E-05    | 0.230664703  |
| 0.127337499  | 0.005857782 | 0.173824143  | 0.000159956 | 0.214271005  |
| 0.034019009  | 0.463315038 | 0.031644515  | 0.495123916 | 0.03428458   |
| -0.201310801 | 1.17E-05    | -0.20800566  | 5.82E-06    | -0.248010932 |
| -0.017902159 | 0.699598088 | -0.042463007 | 0.359883476 | -0.074453469 |
| -0.376027275 | 3.93E-17    | -0.394777854 | 7.23E-19    | -0.395703178 |
| -0.030295222 | 0.51370428  | -0.042029568 | 0.364812526 | -0.047373722 |
| -0.090410408 | 0.050872978 | -0.105539888 | 0.022548582 | -0.071200737 |
| -0.102181195 | 0.027242971 | -0.09919454  | 0.03210062  | -0.081481693 |

|              |             |              |             |              |
|--------------|-------------|--------------|-------------|--------------|
| 0.012877111  | 0.781363616 | 0.058276159  | 0.208734827 | 0.070417702  |
| 0.043134582  | 0.352329133 | 0.031394397  | 0.498540914 | 0.038541685  |
| 0.089015177  | 0.054568469 | 0.149970562  | 0.001151585 | 0.129835259  |
| -0.124057995 | 0.007272379 | -0.102360814 | 0.026972155 | -0.076133297 |
| -0.275104498 | 1.48E-09    | -0.309187417 | 8.39E-12    | -0.279467811 |
| -0.05931395  | 0.200729178 | -0.024060989 | 0.604009025 | -0.051453682 |
| 0.265846143  | 5.38E-09    | 0.27268948   | 2.09E-09    | 0.2878645    |
| -0.173800719 | 0.000160287 | -0.164898109 | 0.000345632 | -0.145415107 |
| -0.072329904 | 0.118542977 | -0.047105206 | 0.309730357 | -0.066842431 |
| -0.321060794 | 1.17E-12    | -0.335559712 | 9.39E-14    | -0.366393582 |
| -0.206123232 | 7.10E-06    | -0.257265022 | 1.70E-08    | -0.269922194 |
| -0.253981604 | 2.62E-08    | -0.238849097 | 1.76E-07    | -0.250038865 |
| -0.21321357  | 3.34E-06    | -0.229126423 | 5.59E-07    | -0.176583255 |
| -0.122213457 | 0.008195814 | -0.093150882 | 0.044221072 | -0.088171203 |
| 0.070771341  | 0.126711695 | 0.069354123  | 0.134512705 | 0.073753843  |
| -0.219531224 | 1.67E-06    | -0.209906646 | 4.76E-06    | -0.226561923 |
| -0.27167961  | 2.40E-09    | -0.261335706 | 9.91E-09    | -0.280538363 |
| -0.255520125 | 2.14E-08    | -0.216874163 | 2.24E-06    | -0.200187212 |
| -0.378702054 | 2.26E-17    | -0.374430778 | 5.45E-17    | -0.393808494 |
| -0.323847646 | 7.29E-13    | -0.302329049 | 2.51E-11    | -0.317086583 |
| -0.191187652 | 3.20E-05    | -0.202125023 | 1.07E-05    | -0.18900927  |
| -0.211942371 | 3.83E-06    | -0.215953143 | 2.48E-06    | -0.241196027 |
| -0.177982121 | 0.000110257 | -0.16207282  | 0.000437587 | -0.159723269 |
| -0.081755999 | 0.077566652 | -0.071464445 | 0.123026643 | -0.043171677 |
| 0.158059434  | 0.000607794 | 0.147846299  | 0.001355098 | 0.191827328  |
| -0.036001947 | 0.437645502 | -0.012377006 | 0.789651822 | 0.016522873  |
| -0.163766905 | 0.000380043 | -0.144505122 | 0.001742945 | -0.158918114 |
| 0.202427095  | 1.04E-05    | 0.184848268  | 5.85E-05    | 0.172544786  |
| 0.184885845  | 5.83E-05    | 0.188748179  | 4.04E-05    | 0.185132588  |
| -0.165745457 | 0.000321784 | -0.18547842  | 5.52E-05    | -0.20536838  |
| 0.021467963  | 0.643553151 | 0.02285442   | 0.622274789 | 0.021675125  |
| -0.032855046 | 0.478763948 | -0.016805259 | 0.717189845 | -2.35E-05    |
| -0.254563911 | 2.42E-08    | -0.251817556 | 3.46E-08    | -0.275022261 |
| -0.121550938 | 0.008552193 | -0.125423418 | 0.006649955 | -0.11999185  |
| -0.095164677 | 0.039813171 | -0.10241963  | 0.026883981 | -0.121979955 |
| -0.104440111 | 0.024002012 | -0.121163862 | 0.00876674  | -0.15584732  |
| -0.091821958 | 0.047349259 | -0.078239119 | 0.091253922 | -0.108632482 |
| -0.055273383 | 0.233191331 | -0.075264624 | 0.104284474 | -0.058389044 |
| -0.110183674 | 0.017220548 | -0.101923009 | 0.027636338 | -0.080113448 |
| 0.065295203  | 0.158905135 | 0.070451058  | 0.128443236 | 0.076410561  |
| -0.028154816 | 0.54390369  | -0.034056348 | 0.462824081 | -0.02210176  |
| 0.007096231  | 0.878444176 | 0.038623704  | 0.40499184  | 0.054531042  |
| -0.269020879 | 3.48E-09    | -0.284747787 | 3.68E-10    | -0.280850626 |
| -0.084718505 | 0.067374817 | -0.052360204 | 0.258789893 | -0.007732861 |
| 0.007208223  | 0.876541012 | 0.012826613  | 0.782199398 | 0.020799285  |

|              |             |              |             |              |
|--------------|-------------|--------------|-------------|--------------|
| 0.031452155  | 0.497750746 | 0.029484468  | 0.525040191 | 0.041622772  |
| 0.068909696  | 0.137033775 | 0.027805354  | 0.548916606 | 0.052878134  |
| 0.104041686  | 0.024548185 | 0.145281347  | 0.001644709 | 0.125710599  |
| -0.004432699 | 0.923889738 | 0.035285642  | 0.446822807 | 0.012960213  |
| 0.252007808  | 3.38E-08    | 0.239815654  | 1.56E-07    | 0.198608042  |
| -0.084357417 | 0.068554999 | -0.076597857 | 0.098272423 | -0.100854191 |
| 0.048076772  | 0.29984628  | 0.058001486  | 0.210891775 | 0.011748602  |
| -0.113572077 | 0.014061595 | -0.085845998 | 0.063796551 | -0.090627155 |
| -0.022270478 | 0.631199755 | -0.032647973 | 0.481541447 | -0.034344401 |
| -0.003718775 | 0.936119303 | -0.000674548 | 0.988400726 | -0.003550751 |
| 0.153261146  | 0.000891263 | 0.158803169  | 0.000572222 | 0.154248802  |
| -0.233354032 | 3.40E-07    | -0.213250337 | 3.33E-06    | -0.193482584 |
| -0.393845846 | 8.88E-19    | -0.398152264 | 3.43E-19    | -0.385032912 |
| -0.210728847 | 4.36E-06    | -0.201880145 | 1.10E-05    | -0.229383144 |
| -0.101887233 | 0.027691228 | -0.124292184 | 0.007162056 | -0.110948224 |
| -0.30694172  | 1.20E-11    | -0.328807742 | 3.09E-13    | -0.300876574 |
| -0.084837785 | 0.066988641 | -0.049955867 | 0.281330631 | -0.055009386 |
| 0.277387694  | 1.07E-09    | 0.32662974   | 4.52E-13    | 0.337474769  |
| -0.309888195 | 7.48E-12    | -0.312394081 | 4.97E-12    | -0.327477778 |
| 0.0784       | 0.090588132 | 0.067393928  | 0.145905927 | 0.045399743  |
| -0.047053558 | 0.310261728 | -0.049309495 | 0.287610372 | -0.034232162 |
| -0.091029767 | 0.049300769 | -0.099943103 | 0.030818394 | -0.077563343 |
| -0.186779    | 4.88E-05    | -0.217079598 | 2.19E-06    | -0.23553059  |
| -0.233418925 | 3.37E-07    | -0.253168265 | 2.91E-08    | -0.26409979  |
| -0.063466982 | 0.170924851 | -0.044553564 | 0.336699268 | -0.036595197 |
| -0.08698215  | 0.060350562 | -0.063446507 | 0.171063205 | -0.052797431 |
| 0.001856094  | 0.968090672 | -0.01846087  | 0.690698352 | -0.044411165 |
| -0.323462462 | 7.79E-13    | -0.373733457 | 6.29E-17    | -0.377346495 |
| -0.112563133 | 0.014944136 | -0.125494709 | 0.006618809 | -0.138140313 |
| -0.042352806 | 0.361132718 | -0.043736976 | 0.345638762 | -0.053371234 |
| -0.194648867 | 2.28E-05    | -0.201467964 | 1.15E-05    | -0.218430394 |
| 0.118703332  | 0.010246164 | 0.067040577  | 0.148035822 | 0.110219638  |
| 0.100750631  | 0.029484564 | 0.083775485  | 0.070492587 | 0.079916634  |
| -0.030459766 | 0.51141923  | -0.076267193 | 0.09973715  | -0.074649225 |
| -0.021735229 | 0.639427898 | -0.061111439 | 0.187395696 | -0.072392239 |
| -0.30194863  | 2.67E-11    | -0.30425493  | 1.85E-11    | -0.295205917 |
| 0.022495695  | 0.627751104 | 0.022984843  | 0.62028889  | 0.040805428  |
| 0.03023395   | 0.514556515 | 0.008982863  | 0.846485197 | -0.003259482 |
| -0.088983385 | 0.05465521  | -0.125267798 | 0.006718398 | -0.107168386 |
| 0.061906269  | 0.181712191 | 0.080143728  | 0.083619035 | 0.068001335  |
| 0.184304078  | 6.16E-05    | 0.203268656  | 9.55E-06    | 0.224530634  |
| -0.055923542 | 0.227731399 | -0.072784078 | 0.116241699 | -0.031250026 |
| -0.068063241 | 0.141935688 | -0.085947263 | 0.063482976 | -0.062931908 |
| -0.087605436 | 0.058526392 | -0.080660888 | 0.081637446 | -0.077188952 |
| 0.076171074  | 0.100166162 | 0.078311517  | 0.090953827 | 0.087199091  |

|              |             |              |             |              |
|--------------|-------------|--------------|-------------|--------------|
| -0.034549265 | 0.456370007 | -0.053798177 | 0.24592133  | -0.063798794 |
| 0.031414266  | 0.498269021 | 0.036073076  | 0.436740136 | 0.065762029  |
| -0.187696285 | 4.47E-05    | -0.161413937 | 0.000462081 | -0.141636833 |
| -0.050630471 | 0.274876224 | -0.007003298 | 0.880023987 | -0.070886479 |
| -0.03829162  | 0.409045742 | -0.085709601 | 0.064220928 | -0.095687878 |
| -0.02005099  | 0.665604955 | -0.04425139  | 0.339989858 | -0.050722865 |
| -0.060094835 | 0.19485429  | -0.077021686 | 0.096420108 | -0.083012243 |
| -0.08803886  | 0.057284988 | -0.108207129 | 0.019336443 | -0.13820693  |
| -0.052386534 | 0.258550161 | -0.071565797 | 0.12249484  | -0.064875281 |
| -0.06546978  | 0.157791588 | -0.082949104 | 0.073320807 | -0.1024582   |
| -0.102312991 | 0.027044031 | -0.101184524 | 0.028788547 | -0.106895952 |
| 0.005694116  | 0.902327152 | 0.01669127   | 0.719026776 | 0.045795044  |
| -0.063495268 | 0.17073385  | -0.052506498 | 0.257459835 | -0.04584693  |
| -0.110316127 | 0.017086287 | -0.111380839 | 0.016039894 | -0.113589674 |
| 0.042380403  | 0.360819619 | 0.039981431  | 0.388668121 | 0.043188803  |
| -0.13455496  | 0.003577187 | -0.136189842 | 0.003188543 | -0.121302601 |
| -0.075978351 | 0.101030774 | -0.079214941 | 0.087275202 | -0.08274418  |
| -0.105564593 | 0.022516829 | -0.111441848 | 0.015981674 | -0.07742914  |
| 0.102717622  | 0.026441054 | 0.122661354  | 0.007962449 | 0.103645945  |
| 0.12307976   | 0.007749827 | 0.121693826  | 0.008474184 | 0.128016247  |
| -0.053595204 | 0.247710143 | -0.046433117 | 0.316691884 | -0.0678543   |
| 0.095333927  | 0.039460261 | 0.107221967  | 0.020473177 | 0.089029855  |
| 0.163874092  | 0.00037665  | 0.178927131  | 0.000101197 | 0.180685457  |
| -0.054733911 | 0.237791463 | -0.080184132 | 0.083462837 | -0.091176707 |
| 0.04275612   | 0.356573955 | 0.04501733   | 0.331688843 | 0.043099809  |
| -0.062899455 | 0.174790783 | -0.086468506 | 0.061888926 | -0.129253358 |
| 0.01772077   | 0.702496388 | 0.038066618  | 0.411806084 | 0.032602675  |
| 0.03406225   | 0.4627465   | 0.027588762  | 0.55203492  | 0.073100909  |
| -0.155983915 | 0.000718204 | -0.160365832 | 0.000503687 | -0.134473587 |
| -0.032858198 | 0.478721725 | -0.06671396  | 0.150025562 | -0.035932134 |
| 0.033530652  | 0.469762891 | 0.020179191  | 0.663597535 | 0.008033694  |
| -0.035353903 | 0.445943569 | -0.019488982 | 0.674433092 | -0.01310697  |
| 0.042664263  | 0.357609047 | 0.056178866  | 0.225612259 | 0.069391466  |
| -0.012585845 | 0.786187802 | 0.004473877  | 0.923184878 | -0.015679248 |
| 0.177203217  | 0.000118292 | 0.25384871   | 2.66E-08    | 0.269911811  |
| -0.311584138 | 5.68E-12    | -0.298195763 | 4.80E-11    | -0.293094146 |
| 0.03193957   | 0.49110909  | 0.034038257  | 0.46306192  | 0.009754046  |
| -0.054736476 | 0.237769446 | -0.014453527 | 0.75540339  | -0.019252257 |
| -0.111749317 | 0.015691068 | -0.115817007 | 0.012260639 | -0.110501237 |
| 0.020372196  | 0.660579945 | 0.043896713  | 0.343878303 | 0.046956464  |
| -0.024647641 | 0.595215555 | -0.001784051 | 0.969328595 | -0.009082699 |
| -0.016717297 | 0.718607216 | 0.010045797  | 0.828586193 | 0.00625929   |
| 0.102612091  | 0.026597188 | 0.075206776  | 0.104551782 | 0.113024554  |
| 0.039429912  | 0.395250217 | 0.031546241  | 0.496465006 | 0.031555334  |
| -0.02125891  | 0.646787551 | -0.01890734  | 0.683616933 | -0.029407585 |

|              |             |              |             |              |
|--------------|-------------|--------------|-------------|--------------|
| -0.080874198 | 0.080831252 | -0.064208405 | 0.165970987 | -0.036123673 |
| -0.04577507  | 0.32360633  | -0.07672752  | 0.097702758 | -0.051080926 |
| -0.043843148 | 0.344468012 | -0.051391902 | 0.267713036 | -0.038961677 |
| 0.022669564  | 0.625094236 | 0.031591823  | 0.495842732 | 0.035603063  |
| -0.045492958 | 0.326600439 | -0.076087775 | 0.100539143 | -0.075119474 |
| -0.006676468 | 0.885583674 | -0.007181774 | 0.876990407 | -0.011568138 |
| -0.091298521 | 0.048631306 | -0.078785898 | 0.089007005 | -0.080528743 |
| 0.11182074   | 0.015624229 | 0.107244934  | 0.020446029 | 0.12067808   |
| 0.004557028  | 0.921761739 | 0.00611806   | 0.89509557  | 0.014045049  |
| -0.035264963 | 0.447089364 | -0.030053914 | 0.517064904 | -0.054165286 |
| -0.040821338 | 0.378772995 | -0.000656884 | 0.988704451 | -0.027122318 |
| 0.076871363  | 0.097073871 | 0.080221105  | 0.083320106 | 0.078445014  |
| -0.052818019 | 0.254643355 | -0.043711754 | 0.345917261 | -0.076174848 |
| -0.001507577 | 0.974079912 | 0.012755474  | 0.783377261 | 0.003050115  |
| 0.011261003  | 0.808231717 | 0.041788054  | 0.367577165 | 0.01376047   |
| 0.00418005   | 0.928215739 | 0.026768197  | 0.563926776 | 0.007571198  |
| 0.064087891  | 0.166768802 | 0.073091138  | 0.114705766 | 0.029563736  |
| 0.100729937  | 0.029518116 | 0.104574493  | 0.02382018  | 0.105334077  |
| 0.226761195  | 7.35E-07    | 0.278197315  | 9.54E-10    | 0.250796126  |
| 0.152577267  | 0.00094041  | 0.195508517  | 2.09E-05    | 0.221362822  |
| -0.19476085  | 2.25E-05    | -0.173415062 | 0.000165844 | -0.164081505 |
| 0.060641075  | 0.190820113 | 0.055027513  | 0.23528003  | 0.052844881  |
| -0.018334725 | 0.692704052 | 0.026463249  | 0.568377304 | 0.053741613  |
| 0.015582927  | 0.736970553 | 0.031857665  | 0.49222183  | 0.018286866  |
| -0.014129577 | 0.760716805 | -0.034757605 | 0.453657325 | -0.012668728 |
| -0.033714081 | 0.467335275 | -0.072661449 | 0.116859579 | -0.091754639 |
| 0.086301415  | 0.062396282 | 0.080887795  | 0.080780082 | 0.03163829   |
| 0.16873767   | 0.0002493   | 0.168797202  | 0.000248027 | 0.190752627  |
| 0.354617553  | 2.77E-15    | 0.340044694  | 4.19E-14    | 0.350342403  |
| 0.16169439   | 0.000451503 | 0.134764527  | 0.003525077 | 0.137995579  |
| -0.278408086 | 9.25E-10    | -0.237430575 | 2.09E-07    | -0.235313099 |
| 0.060188546  | 0.194157805 | 0.085427498  | 0.065106019 | 0.069577738  |
| -0.006297427 | 0.892038539 | 0.020968481  | 0.651292022 | -0.011423848 |
| -0.107377956 | 0.020289407 | -0.085640981 | 0.064435307 | -0.084732345 |
| -0.310143564 | 7.18E-12    | -0.296806079 | 5.95E-11    | -0.335893195 |
| -0.097616789 | 0.034953032 | -0.063038325 | 0.173838855 | -0.084009796 |
| 0.095656063  | 0.03879587  | 0.111902141  | 0.015548358 | 0.121752472  |
| -0.086292411 | 0.062423719 | -0.057218928 | 0.217125023 | -0.078722862 |
| 0.157276955  | 0.000647426 | 0.184992702  | 5.78E-05    | 0.175363243  |
| 0.066156123  | 0.153470807 | 0.096828189  | 0.036457802 | 0.082422684  |
| 0.035827358  | 0.439872327 | 0.016514036  | 0.721886086 | 0.0481893    |
| -0.069865568 | 0.13165587  | -0.057208505 | 0.217208924 | -0.101979668 |
| -0.072548459 | 0.117431164 | -0.094544087 | 0.041130116 | -0.096992472 |
| -0.05554047  | 0.23093728  | -0.05390624  | 0.244972653 | -0.054984717 |
| -0.190259614 | 3.50E-05    | -0.197001211 | 1.80E-05    | -0.202396422 |

|              |             |              |             |              |
|--------------|-------------|--------------|-------------|--------------|
| -0.187472266 | 4.57E-05    | -0.21200675  | 3.80E-06    | -0.260176598 |
| -0.171414771 | 0.000197682 | -0.144729351 | 0.001714029 | -0.160572202 |
| 0.193082334  | 2.66E-05    | 0.22154674   | 1.33E-06    | 0.204134604  |
| 0.193744007  | 2.49E-05    | 0.220749133  | 1.46E-06    | 0.225599561  |
| 0.076513912  | 0.098642639 | 0.077635542  | 0.093786779 | 0.087416572  |
| 0.028409004  | 0.540271757 | 0.040596919  | 0.381401676 | 0.051328957  |
| -0.22418501  | 9.87E-07    | -0.270379294 | 2.88E-09    | -0.265277611 |
| -0.070011046 | 0.130851881 | -0.047675563 | 0.303902213 | -0.046941347 |
| 0.01804111   | 0.697380832 | 0.02301158   | 0.619882108 | 0.018699581  |
| -0.193570533 | 2.53E-05    | -0.213701399 | 3.17E-06    | -0.21843649  |
| -0.010302575 | 0.824275144 | -0.007457512 | 0.872307218 | -0.055295218 |
| 0.080117311  | 0.083721291 | 0.125971913  | 0.006413673 | 0.136416371  |
| -0.057690406 | 0.213353967 | -0.043320168 | 0.350259305 | 0.022845222  |
| -0.112216449 | 0.015258423 | -0.098454632 | 0.033412534 | -0.086294092 |
| -0.319536357 | 1.52E-12    | -0.306649422 | 1.26E-11    | -0.316421917 |
| 0.124591783  | 0.007023103 | 0.127355678  | 0.005850684 | 0.141801813  |
| -0.12455175  | 0.00704153  | -0.141371396 | 0.002196669 | -0.148249847 |
| -0.074067588 | 0.109927119 | -0.112714608 | 0.01480861  | -0.091158313 |
| 0.089874215  | 0.052267672 | 0.104808568  | 0.023506298 | 0.083981879  |
| 0.038144404  | 0.410850561 | 0.045734423  | 0.324036622 | -0.01111202  |
| -0.006859936 | 0.882461993 | -0.010378272 | 0.823005277 | -0.035707366 |
| 0.099849815  | 0.030975759 | 0.098831279  | 0.032739106 | 0.133248836  |
| 0.041083747  | 0.375713465 | 0.046776569  | 0.313121702 | 0.041793153  |
| -0.181455146 | 8.03E-05    | -0.159973851 | 0.000520123 | -0.177330199 |
| -0.215776809 | 2.53E-06    | -0.27429909  | 1.66E-09    | -0.323861221 |
| -0.119499361 | 0.009744954 | -0.113333553 | 0.014265991 | -0.135876609 |
| 0.044210833  | 0.34043307  | 0.049002533  | 0.29062539  | 0.006308249  |
| 0.031716357  | 0.494144746 | 0.001066387  | 0.981663775 | 0.00581785   |
| -0.035118829 | 0.448975574 | -0.00775512  | 0.867257572 | 0.003338008  |
| 0.10692927   | 0.020821913 | 0.111125902  | 0.016285195 | 0.051378458  |
| -0.086902079 | 0.060588276 | -0.060495912 | 0.191886167 | -0.08868187  |
| 0.055453222  | 0.231671897 | 0.067349932  | 0.146169839 | 0.021951142  |
| -0.102991765 | 0.026039138 | -0.096569425 | 0.036963403 | -0.080331062 |
| 0.00965722   | 0.835119769 | 0.051783566  | 0.264078689 | 0.027509114  |
| -0.065462364 | 0.157838774 | -0.048999591 | 0.290654391 | -0.075193678 |
| 0.217060885  | 2.19E-06    | 0.213539838  | 3.22E-06    | 0.233005303  |
| 0.161816212  | 0.000446979 | 0.159991239  | 0.000519383 | 0.197716308  |
| -0.16850046  | 0.000254436 | -0.16034519  | 0.000504541 | -0.121660022 |
| -0.191414289 | 3.13E-05    | -0.190493208 | 3.42E-05    | -0.196002758 |
| -0.043360373 | 0.349811917 | 0.006477098  | 0.888977921 | 0.00666474   |
| -0.138525129 | 0.002699737 | -0.133852126 | 0.003757092 | -0.152849273 |
| 0.197732161  | 1.68E-05    | 0.236624541  | 2.30E-07    | 0.196065084  |
| 0.090724176  | 0.050071341 | 0.120988417  | 0.008865554 | 0.105009452  |
| 0.24833106   | 5.40E-08    | 0.247848581  | 5.74E-08    | 0.265104876  |
| 0.004633358  | 0.920455545 | -0.021288262 | 0.646333018 | -0.000650815 |



|              |             |              |             |              |
|--------------|-------------|--------------|-------------|--------------|
| -0.008060745 | 0.862077531 | -0.032501377 | 0.483513022 | -0.010846666 |
| -0.039153228 | 0.398577439 | -0.042314864 | 0.361563453 | -0.049405808 |
| -0.142975453 | 0.001952442 | -0.202481478 | 1.04E-05    | -0.198218743 |
| -0.054772934 | 0.237456579 | -0.101572329 | 0.028178442 | -0.090223717 |
| -0.05632089  | 0.224439576 | -0.074401861 | 0.108327734 | -0.058529174 |
| -0.426778344 | 4.28E-22    | -0.419140044 | 2.72E-21    | -0.446441151 |
| -0.23793097  | 1.96E-07    | -0.242242446 | 1.16E-07    | -0.247572627 |
| -0.045906644 | 0.322216032 | -0.084835614 | 0.066995653 | -0.118395464 |
| -0.125296666 | 0.006705655 | -0.108682408 | 0.018807979 | -0.108638655 |
| 0.005758943  | 0.90122081  | -0.009720726 | 0.834051181 | 0.014824824  |
| 0.167027785  | 0.000288597 | 0.2132402    | 3.33E-06    | 0.214886089  |
| -0.132112497 | 0.004238158 | -0.128797653 | 0.005311638 | -0.139425    |
| 0.06880964   | 0.137606329 | 0.092010797  | 0.046893747 | 0.076241026  |
| -0.06814586  | 0.141451404 | -0.051191607 | 0.269584799 | -0.018160303 |
| 0.248237585  | 5.47E-08    | 0.259393223  | 1.28E-08    | 0.240571553  |
| -0.102211535 | 0.027197062 | -0.109734436 | 0.017682813 | -0.083611281 |
| 0.172861112  | 0.000174143 | 0.205380182  | 7.67E-06    | 0.220473326  |
| -0.271630535 | 2.42E-09    | -0.254605879 | 2.41E-08    | -0.26391401  |
| 0.028440105  | 0.539828202 | 0.05108251   | 0.27060807  | 0.034265531  |
| -0.084133739 | 0.069294527 | -0.133058564 | 0.003970043 | -0.122965195 |
| 0.34099321   | 3.52E-14    | 0.367980548  | 2.02E-16    | 0.370432292  |
| 0.013094398  | 0.777770161 | -0.003937677 | 0.932367755 | -0.061408529 |
| -0.026806114 | 0.563374579 | -0.085922096 | 0.063560789 | -0.097826905 |
| 0.266426204  | 4.97E-09    | 0.268869624  | 3.55E-09    | 0.296966607  |
| 0.18062011   | 8.67E-05    | 0.205303821  | 7.73E-06    | 0.253953569  |
| 0.069399852  | 0.134255341 | 0.078168245  | 0.091548465 | 0.08229914   |
| -0.091562194 | 0.047981909 | -0.078245703 | 0.091226597 | -0.09295835  |
| 0.131053808  | 0.004557514 | 0.168148337  | 0.000262242 | 0.194731349  |
| -0.308878809 | 8.82E-12    | -0.299591319 | 3.86E-11    | -0.32305757  |
| -0.126021842 | 0.006392543 | -0.095313277 | 0.039503176 | -0.073889311 |
| -0.09001617  | 0.051895365 | -0.026448102 | 0.568598808 | -0.029650519 |
| 0.054072961  | 0.24351405  | 0.002006442  | 0.965507487 | -0.017126746 |
| 0.069543612  | 0.133448732 | 0.066308945  | 0.152521055 | 0.100077333  |
| 0.024967387  | 0.590447451 | -0.007570232 | 0.870394022 | -0.018681987 |
| 0.037513924  | 0.418633144 | -0.018521377 | 0.689737047 | -0.022985669 |
| 0.258826651  | 1.38E-08    | 0.232056217  | 3.96E-07    | 0.220075428  |
| 0.008951559  | 0.847013578 | 0.012249815  | 0.791763586 | 0.012304894  |
| 0.019048274  | 0.681387302 | -0.004743126 | 0.918577534 | 0.016880538  |
| 0.114129968  | 0.013593556 | 0.082287919  | 0.075649697 | 0.125471276  |
| -0.031278777 | 0.500124673 | -0.022423503 | 0.628855668 | -0.016019757 |
| 0.035138941  | 0.44871571  | 0.038296332  | 0.408988062 | 0.016134916  |
| -0.028743464 | 0.535511363 | -0.008682216 | 0.851562649 | 0.006860738  |
| -0.031024784 | 0.503613189 | -0.037826364 | 0.414765661 | -0.03149585  |
| 0.027175468  | 0.558009136 | -0.004489247 | 0.9229218   | 0.025289385  |
| -0.103210071 | 0.025722862 | -0.122235187 | 0.008184353 | -0.109016322 |

|              |             |              |             |              |
|--------------|-------------|--------------|-------------|--------------|
| 0.011762039  | 0.79987615  | 0.039815062  | 0.390646613 | 0.016813222  |
| 0.017501702  | 0.706002479 | -0.00766268  | 0.868825485 | 0.025344407  |
| 0.228329217  | 6.13E-07    | 0.272738686  | 2.07E-09    | 0.288948619  |
| 0.135850153  | 0.003265985 | 0.143434778  | 0.001887234 | 0.151695293  |
| 0.217215571  | 2.16E-06    | 0.222874362  | 1.15E-06    | 0.200512616  |
| -0.001241395 | 0.978655232 | 0.015813078  | 0.733232304 | 0.000815287  |
| -0.058081625 | 0.210260806 | -0.037289682 | 0.42142188  | -0.034480832 |
| 0.157498405  | 0.000635973 | 0.167473204  | 0.000277838 | 0.190075844  |
| 0.058962984  | 0.203411197 | 0.036778823  | 0.427815485 | -0.006734582 |
| -0.022366822 | 0.629723492 | 0.014703911  | 0.751304489 | 0.020630124  |
| 0.179499604  | 9.61E-05    | 0.209550882  | 4.95E-06    | 0.232750756  |
| -0.201399416 | 1.16E-05    | -0.220818374 | 1.44E-06    | -0.233664251 |
| -0.064550412 | 0.163722464 | -0.061666951 | 0.183409876 | -0.052716472 |
| 0.221908461  | 1.28E-06    | 0.214308452  | 2.96E-06    | 0.220494868  |
| 0.136909569  | 0.003029943 | 0.165449322  | 0.000329939 | 0.135602675  |
| 0.062232851  | 0.179414256 | 0.039452194  | 0.394982993 | 0.004857971  |
| 0.253829701  | 2.67E-08    | 0.265868974  | 5.37E-09    | 0.272850556  |
| 0.102726957  | 0.026427281 | 0.087846298  | 0.057833799 | 0.09946332   |
| 0.101237394  | 0.028704707 | 0.053541447  | 0.248185422 | 0.083116369  |
| 0.190507413  | 3.41E-05    | 0.22707043   | 7.09E-07    | 0.253421614  |
| 0.010490393  | 0.821125208 | 0.01910301   | 0.680522105 | -0.010676218 |
| 0.346661071  | 1.24E-14    | 0.32624923   | 4.82E-13    | 0.326575615  |
| 0.0532991    | 0.250335969 | 0.027843193  | 0.548372727 | 0.043121109  |
| -0.008954949 | 0.846956357 | 0.045121655  | 0.330568394 | 0.068028874  |
| -0.305127316 | 1.61E-11    | -0.277588253 | 1.04E-09    | -0.282639138 |
| -0.027317248 | 0.555956158 | -0.03463461  | 0.455257679 | -0.032539402 |
| -0.023572764 | 0.611371187 | 0.003421038  | 0.941224154 | 0.008848662  |
| -0.20440535  | 8.49E-06    | -0.200421715 | 1.28E-05    | -0.178371861 |
| -0.0595982   | 0.198575926 | -0.060902241 | 0.188913106 | -0.016212415 |
| 0.242219809  | 1.16E-07    | 0.204686811  | 8.24E-06    | 0.188819643  |
| -0.054505932 | 0.239754539 | -0.041813438 | 0.367285984 | -0.025230558 |
| -0.019412059 | 0.675644943 | -0.066991724 | 0.14833215  | -0.100682308 |
| -0.364816303 | 3.79E-16    | -0.37646046  | 3.59E-17    | -0.360252296 |
| -0.073537822 | 0.112499898 | -0.092712412 | 0.0452334   | -0.050402654 |
| -0.213508671 | 3.23E-06    | -0.224138685 | 9.93E-07    | -0.223127148 |
| -0.174443102 | 0.000151418 | -0.184855898 | 5.85E-05    | -0.203520425 |
| -0.104117498 | 0.02444344  | -0.134668969 | 0.003548752 | -0.140409829 |
| 0.085801537  | 0.06393463  | 0.053747079  | 0.246370806 | 0.110574637  |
| 0.071755281  | 0.121505415 | 0.042540525  | 0.359006361 | 0.106511168  |
| -0.13719304  | 0.002969471 | -0.159303161 | 0.000549405 | -0.136974704 |
| 0.260998406  | 1.04E-08    | 0.307088755  | 1.18E-11    | 0.351648123  |
| 0.186088654  | 5.21E-05    | 0.23992315   | 1.54E-07    | 0.282435274  |
| -0.043315591 | 0.350310265 | -0.076107993 | 0.100448514 | -0.087334282 |
| 0.016154319  | 0.727701303 | 0.01553596   | 0.737734171 | 0.041332995  |
| -0.390255195 | 1.94E-18    | -0.360406991 | 9.03E-16    | -0.356249443 |

|              |             |              |             |              |
|--------------|-------------|--------------|-------------|--------------|
| -0.168519066 | 0.000254029 | -0.172584843 | 0.000178425 | -0.191872413 |
| -0.132898918 | 0.004014181 | -0.149193231 | 0.001222543 | -0.17611494  |
| 0.047311143  | 0.30761758  | 0.018583225  | 0.688754964 | -0.015040764 |
| -0.042524561 | 0.35918689  | -0.066037017 | 0.154214118 | -0.072519314 |
| 0.066564345  | 0.150943772 | 0.112281743  | 0.015198791 | 0.076465582  |
| 0.239780646  | 1.57E-07    | 0.258504779  | 1.44E-08    | 0.259724017  |
| -0.127077472 | 0.005960171 | -0.129302095 | 0.005133895 | -0.113011736 |
| -0.162713527 | 0.000414931 | -0.161954868 | 0.000441881 | -0.147894397 |
| -0.120799461 | 0.008973086 | -0.134003022 | 0.00371779  | -0.123967815 |
| 0.161302679  | 0.000466341 | 0.163047588  | 0.000403557 | 0.187485783  |
| -0.245473811 | 7.75E-08    | -0.250364822 | 4.17E-08    | -0.260272116 |
| 0.071776947  | 0.121392679 | 0.086254219  | 0.06254021  | 0.085663244  |
| -0.012407295 | 0.78914916  | -0.036045571 | 0.437090104 | -0.012594634 |
| 0.070928709  | 0.125867585 | 0.057161809  | 0.217585102 | 0.047995275  |
| 0.098628958  | 0.033099392 | 0.117768342  | 0.010863975 | 0.113162066  |
| 0.084835344  | 0.066996527 | 0.090001654  | 0.051933333 | 0.129823848  |
| -0.191753163 | 3.03E-05    | -0.145431787 | 0.001626268 | -0.167448073 |
| 0.137106641  | 0.002987785 | 0.18047587   | 8.78E-05    | 0.237126416  |
| -0.029907407 | 0.519110802 | -0.014318559 | 0.75761574  | -0.024092911 |
| 0.030678053  | 0.508396029 | -0.015105601 | 0.744743254 | 0.012344898  |
| 0.017383997  | 0.707888886 | -0.006171804 | 0.894179425 | 0.016857411  |
| -0.216157665 | 2.42E-06    | -0.209436149 | 5.01E-06    | -0.19611057  |
| -0.076384992 | 0.099213361 | -0.09992632  | 0.030846654 | -0.099390304 |
| -0.331816363 | 1.83E-13    | -0.345467438 | 1.55E-14    | -0.350380309 |
| 0.216941855  | 2.22E-06    | 0.268170818  | 3.91E-09    | 0.25871958   |
| -0.173342663 | 0.000166907 | -0.171551932 | 0.000195328 | -0.184608445 |
| -0.360826254 | 8.32E-16    | -0.356625964 | 1.88E-15    | -0.370130893 |
| -0.104544586 | 0.023860544 | -0.087371239 | 0.059206387 | -0.092585407 |
| -0.077476941 | 0.094461576 | -0.050528725 | 0.275843186 | -0.043403588 |
| -0.404244416 | 8.72E-20    | -0.41312823  | 1.12E-20    | -0.449646894 |
| -0.089456831 | 0.053375263 | -0.107223617 | 0.020471226 | -0.145806365 |
| -0.030132434 | 0.515970137 | -0.006406542 | 0.890179619 | -0.046254857 |
| -0.063873555 | 0.16819481  | -0.092930125 | 0.044728342 | -0.111677147 |
| -0.056503462 | 0.222938478 | -0.053637712 | 0.24733476  | -0.064087795 |
| -0.014648203 | 0.752215849 | -0.041353257 | 0.372587023 | -0.077398816 |
| 0.029394111  | 0.526311415 | 0.031441192  | 0.497900671 | 0.031318192  |
| -0.012469181 | 0.788122391 | 0.011193311  | 0.809362287 | -0.019972232 |
| -0.136559923 | 0.003106073 | -0.115868388 | 0.012221921 | -0.120543354 |
| -0.046762929 | 0.313262991 | -0.043080146 | 0.352937721 | -0.029715135 |
| -0.077717242 | 0.093440678 | -0.090134211 | 0.051587463 | -0.1111015   |
| -0.103219492 | 0.025709288 | -0.160183284 | 0.00051128  | -0.181205891 |
| -0.025664048 | 0.58011991  | -0.012532228 | 0.787076738 | -0.01777978  |
| -0.13036237  | 0.004777655 | -0.127913785 | 0.005636476 | -0.158590969 |
| -0.177275459 | 0.000117524 | -0.201660608 | 1.13E-05    | -0.213636486 |
| -0.176647957 | 0.000124353 | -0.176012876 | 0.000131642 | -0.161347482 |

|              |             |              |             |              |
|--------------|-------------|--------------|-------------|--------------|
| -0.120228077 | 0.00930535  | -0.117038371 | 0.011369028 | -0.127954228 |
| 0.04988536   | 0.282011092 | 0.053353026  | 0.249856316 | 0.049654089  |
| -0.161890199 | 0.000444252 | -0.163408142 | 0.000391606 | -0.149787541 |
| -0.163652919 | 0.000383682 | -0.164887435 | 0.000345943 | -0.16719738  |
| -0.170314297 | 0.000217554 | -0.189154259 | 3.89E-05    | -0.196871332 |
| -0.120179739 | 0.009333954 | -0.1115706   | 0.015859414 | -0.132470707 |
| -0.282929157 | 4.80E-10    | -0.283837328 | 4.20E-10    | -0.294863342 |
| -0.196656142 | 1.87E-05    | -0.178147125 | 0.000108622 | -0.156526193 |
| -0.127317626 | 0.005865551 | -0.121265707 | 0.00870983  | -0.133281785 |
| -0.024810143 | 0.592790105 | -0.029484365 | 0.525041644 | 0.001694337  |
| 0.191115814  | 3.22E-05    | 0.205791084  | 7.35E-06    | 0.184644395  |
| -0.018732234 | 0.686391009 | -0.033511592 | 0.470015542 | -0.03709146  |
| -0.325177515 | 5.80E-13    | -0.345124397 | 1.65E-14    | -0.367748355 |
| -0.178304834 | 0.000107081 | -0.16667877  | 0.000297298 | -0.184412225 |
| -0.120462022 | 0.009168008 | -0.10363983  | 0.025109901 | -0.107203429 |
| 0.014608303  | 0.752868818 | -0.010946546 | 0.813487018 | -0.037721166 |
| 0.020153125  | 0.664005493 | 0.008177926  | 0.860092976 | -0.001039338 |
| 0.309175984  | 8.40E-12    | 0.308572943  | 9.26E-12    | 0.35284703   |
| 0.237315934  | 2.11E-07    | 0.260556241  | 1.10E-08    | 0.324214441  |
| 0.162579763  | 0.000419569 | 0.186955129  | 4.80E-05    | 0.195029636  |
| 0.008687471  | 0.851473849 | 0.025244275  | 0.58633268  | 0.022293378  |
| -0.058028891 | 0.210675853 | -0.03652427  | 0.431022211 | -0.044409799 |
| -0.13873222  | 0.002659868 | -0.175318107 | 0.000140075 | -0.138683925 |
| 0.122855661  | 0.007863069 | 0.126798844  | 0.006071664 | 0.115393879  |
| 0.096528734  | 0.03704345  | 0.101204933  | 0.028756158 | 0.123732124  |
| -0.099156855 | 0.03216636  | -0.100818677 | 0.029374464 | -0.122622269 |
| -0.13543846  | 0.003362131 | -0.142128723 | 0.00207808  | -0.097081316 |
| -0.074981953 | 0.105595811 | -0.077532768 | 0.094223613 | -0.115854534 |
| 0.016450001  | 0.722920131 | 0.016440113  | 0.723079841 | 0.044399671  |
| -0.126229007 | 0.006305536 | -0.12831996  | 0.005485044 | -0.132540954 |
| 0.01942208   | 0.675487017 | 0.021148435  | 0.648499479 | 0.052511639  |
| -0.135698134 | 0.003301193 | -0.172104262 | 0.000186111 | -0.213169272 |
| -0.086382279 | 0.062150321 | -0.07626722  | 0.099737028 | -0.073638792 |
| -0.048741188 | 0.293208998 | -0.111440132 | 0.015983309 | -0.090460851 |
| 0.077699867  | 0.093514198 | 0.09000248   | 0.051931172 | 0.068378425  |
| -0.292356582 | 1.18E-10    | -0.321690958 | 1.05E-12    | -0.310487752 |
| -0.345817895 | 1.45E-14    | -0.353760664 | 3.26E-15    | -0.327823239 |
| -0.298739627 | 4.41E-11    | -0.270401445 | 2.87E-09    | -0.266991495 |
| 0.038739458  | 0.403584414 | 0.024869999  | 0.591897866 | 0.055019864  |
| 0.056431656  | 0.223528008 | 0.055779329  | 0.228934569 | 0.01875808   |
| -0.2735053   | 1.86E-09    | -0.271887462 | 2.33E-09    | -0.262907165 |
| -0.281688663 | 5.76E-10    | -0.243935668 | 9.39E-08    | -0.241420534 |
| 0.057739815  | 0.212961523 | 0.067037348  | 0.148055394 | 0.089858233  |
| -0.060406537 | 0.192544684 | -0.062928362 | 0.17459231  | -0.044465573 |
| -0.266254779 | 5.09E-09    | -0.246929849 | 6.45E-08    | -0.245548307 |

|              |             |              |             |              |
|--------------|-------------|--------------|-------------|--------------|
| 0.102273628  | 0.027103317 | 0.108697677  | 0.018791213 | 0.127937833  |
| 0.03475236   | 0.453725513 | 0.037087705  | 0.423943002 | 0.054074092  |
| 0.19201531   | 2.95E-05    | 0.245681119  | 7.55E-08    | 0.245864499  |
| -0.006984831 | 0.880337965 | -0.020605602 | 0.656938023 | -0.008083978 |
| -0.291676228 | 1.31E-10    | -0.267005179 | 4.59E-09    | -0.248630606 |
| 0.268515525  | 3.73E-09    | 0.231299955  | 4.33E-07    | 0.251953455  |
| 0.348425557  | 8.93E-15    | 0.360756515  | 8.44E-16    | 0.370584361  |
| -0.111595829 | 0.015835553 | -0.115277048 | 0.012674119 | -0.131854525 |
| 0.065392047  | 0.158286681 | 0.08835548   | 0.056391994 | 0.104855626  |
| -0.092956498 | 0.044667483 | -0.126799218 | 0.006071513 | -0.1223094   |
| -0.051983071 | 0.262240527 | -0.061869653 | 0.181971182 | -0.043679913 |
| -0.195974867 | 2.00E-05    | -0.218314644 | 1.91E-06    | -0.248188839 |
| 0.286893611  | 2.68E-10    | 0.313973181  | 3.83E-12    | 0.317251429  |
| -0.10480181  | 0.02351531  | -0.142545006 | 0.002015416 | -0.171813433 |
| -0.04384257  | 0.344474379 | -0.01738749  | 0.707832885 | -0.021938736 |
| -0.311750431 | 5.52E-12    | -0.301384466 | 2.92E-11    | -0.33504699  |
| -0.226924125 | 7.21E-07    | -0.205258402 | 7.77E-06    | -0.230032795 |
| -0.329152374 | 2.91E-13    | -0.32744174  | 3.92E-13    | -0.332644886 |
| -0.120352993 | 0.009231789 | -0.119353389 | 0.009835199 | -0.114969275 |
| -0.001230423 | 0.978843846 | -0.02251964  | 0.627384919 | 0.038477391  |
| 0.181561323  | 7.95E-05    | 0.185481859  | 5.52E-05    | 0.224174296  |
| 0.165841191  | 0.000319189 | 0.156624309  | 0.0006823   | 0.16453685   |
| -0.187122649 | 4.72E-05    | -0.186092329 | 5.21E-05    | -0.151745504 |
| -0.203305793 | 9.51E-06    | -0.178300625 | 0.000107122 | -0.190308508 |
| 0.238855045  | 1.75E-07    | 0.207989073  | 5.83E-06    | 0.163229143  |
| -0.029188518 | 0.52920972  | 0.012037563  | 0.795290988 | -0.001953821 |
| 0.167681524  | 0.000272935 | 0.153062097  | 0.000905317 | 0.175633191  |
| 0.008987822  | 0.846401495 | -0.030846991 | 0.506062721 | -0.056970869 |
| -0.122022646 | 0.008297071 | -0.061142963 | 0.187167818 | -0.027669051 |
| -0.063599525 | 0.170031245 | -0.07657038  | 0.09839348  | -0.084481842 |
| 0.219942838  | 1.59E-06    | 0.249454916  | 4.68E-08    | 0.223662757  |
| 0.143166786  | 0.001925033 | 0.167449592  | 0.000278398 | 0.183851803  |
| -0.14577136  | 0.001585337 | -0.136965357 | 0.003017954 | -0.142187747 |
| 0.010199132  | 0.826011234 | 0.006144747  | 0.894640634 | 0.005750598  |
| -0.299854248 | 3.71E-11    | -0.303218419 | 2.18E-11    | -0.305713535 |
| 0.145704886  | 0.001593275 | 0.105155221  | 0.023048031 | 0.140688773  |
| 0.142094618  | 0.002083292 | 0.147960387  | 0.001343378 | 0.196611653  |
| 0.038209664  | 0.410049916 | 0.015266248  | 0.742124352 | -0.044250092 |
| -0.060383742 | 0.192712908 | -0.040619337 | 0.381138584 | -0.068042252 |
| 0.200138943  | 1.31E-05    | 0.202833892  | 9.98E-06    | 0.211186787  |
| -0.173730325 | 0.000161289 | -0.192463475 | 2.82E-05    | -0.258433999 |
| -0.104709555 | 0.02363863  | -0.111161989 | 0.016250274 | -0.163732842 |
| -0.086862089 | 0.060707285 | -0.073100804 | 0.114657674 | -0.057511631 |
| 0.01439233   | 0.756406271 | -0.032396436 | 0.484927064 | -0.04246607  |
| -0.258193232 | 1.51E-08    | -0.257654199 | 1.62E-08    | -0.28228618  |

|              |             |              |             |              |
|--------------|-------------|--------------|-------------|--------------|
| 0.150342767  | 0.00111897  | 0.177949667  | 0.000110581 | 0.196206396  |
| 0.035379001  | 0.445620539 | 0.053263147  | 0.250656111 | 0.034698922  |
| -0.197103784 | 1.79E-05    | -0.182158462 | 7.52E-05    | -0.178531657 |
| -0.254415816 | 2.47E-08    | -0.265867046 | 5.37E-09    | -0.256473232 |
| -0.097150404 | 0.035836445 | -0.089292495 | 0.053816684 | -0.083857784 |
| -0.152905703 | 0.000916503 | -0.193055771 | 2.66E-05    | -0.191641806 |
| 0.180637099  | 8.66E-05    | 0.191264016  | 3.17E-05    | 0.170104599  |
| -0.075265321 | 0.104281256 | -0.045506978 | 0.326451213 | -0.065990217 |
| -0.076491569 | 0.098741363 | -0.077131383 | 0.095945248 | -0.085205389 |
| -0.146468698 | 0.001504232 | -0.141225356 | 0.002220236 | -0.163219622 |
| -0.119165357 | 0.009952541 | -0.115428828 | 0.012556666 | -0.135072929 |
| 0.010292165  | 0.824449819 | 0.044603346  | 0.336159119 | 0.056290032  |
| -0.126819673 | 0.006063265 | -0.104889876 | 0.023398109 | -0.12810855  |
| 0.150943443  | 0.001068125 | 0.172464515  | 0.000180321 | 0.167314869  |
| -0.136347505 | 0.003153169 | -0.135869035 | 0.003261636 | -0.196099223 |
| -0.035818804 | 0.43998159  | -0.029382921 | 0.526468963 | -0.061634437 |
| -0.28440485  | 3.87E-10    | -0.257899956 | 1.57E-08    | -0.280746785 |
| -0.050158235 | 0.279383759 | -0.045272489 | 0.32895276  | -0.052500739 |
| -0.108924586 | 0.018543577 | -0.102645557 | 0.02654759  | -0.134867896 |
| -0.245079548 | 8.14E-08    | -0.241784504 | 1.23E-07    | -0.255819836 |
| 0.070639525  | 0.127422125 | 0.018794676  | 0.685401291 | 0.058276154  |
| 0.090184356  | 0.051457127 | 0.152541852  | 0.000943022 | 0.155489926  |
| -0.067196235 | 0.147094661 | -0.038924538 | 0.401340167 | -0.011931833 |
| 0.15089426   | 0.001072207 | 0.147712037  | 0.001369011 | 0.149404032  |
| -0.118055841 | 0.010670581 | -0.085167877 | 0.065929416 | -0.042695528 |
| -0.118463585 | 0.010401534 | -0.14996288  | 0.001152268 | -0.191040405 |
| -0.136682606 | 0.003079165 | -0.151526412 | 0.001020824 | -0.197043987 |
| -0.162148192 | 0.000434863 | -0.171011913 | 0.00020475  | -0.207373585 |
| -0.002871933 | 0.950645025 | 0.010187227  | 0.826211087 | 0.018284689  |
| 0.201351519  | 1.16E-05    | 0.230047642  | 5.02E-07    | 0.282685659  |
| 0.131706766  | 0.004358076 | 0.102105547  | 0.027357724 | 0.116761103  |
| -0.313561596 | 4.10E-12    | -0.341015172 | 3.51E-14    | -0.360779069 |
| 0.017344702  | 0.708519049 | 0.060839328  | 0.1893712   | 0.06636941   |
| -0.036354351 | 0.433170482 | -0.058301863 | 0.208533798 | -0.01805977  |
| 0.043444718  | 0.348874528 | 0.056643857  | 0.221789044 | 0.08036079   |
| 0.131430223  | 0.00444156  | 0.152312131  | 0.000960128 | 0.106190319  |
| 0.0263855    | 0.569514681 | 0.000900913  | 0.984508674 | 0.00813468   |
| 0.033321207  | 0.472543298 | 0.038397302  | 0.40775303  | 0.028425676  |
| -0.066511312 | 0.151270266 | -0.072305481 | 0.118667729 | -0.050756026 |
| 0.383386064  | 8.44E-18    | 0.362754987  | 5.70E-16    | 0.340547556  |
| -0.01389914  | 0.76450329  | -0.00544368  | 0.9066029   | -0.028707367 |
| 0.049582294  | 0.284948623 | 0.067911862  | 0.142826325 | 0.052414968  |
| -0.321352035 | 1.12E-12    | -0.328355372 | 3.35E-13    | -0.360842433 |
| -0.051183512 | 0.269660637 | -0.037336561 | 0.420837983 | -0.036431407 |
| -0.206089551 | 7.12E-06    | -0.245648886 | 7.58E-08    | -0.280116427 |

|              |             |              |             |              |
|--------------|-------------|--------------|-------------|--------------|
| -0.051757975 | 0.264315112 | -0.090195324 | 0.051428655 | -0.038700784 |
| -0.040149422 | 0.386676531 | -0.055847035 | 0.228369137 | -0.065856184 |
| 0.188766682  | 4.04E-05    | 0.154182991  | 0.000828767 | 0.162369702  |
| -0.117453094 | 0.011079598 | -0.111033916 | 0.016374507 | -0.101895808 |
| -0.183667789 | 6.54E-05    | -0.17668499  | 0.00012394  | -0.164563014 |
| 0.202513237  | 1.03E-05    | 0.21945731   | 1.68E-06    | 0.199693018  |
| -0.267651967 | 4.20E-09    | -0.278714888 | 8.85E-10    | -0.300066083 |
| 0.104962118  | 0.023302346 | 0.072776424  | 0.11628019  | 0.060244451  |
| -0.035570302 | 0.443162741 | 0.007189887  | 0.876852559 | -0.007242524 |
| -0.101747529 | 0.027906474 | -0.067452762 | 0.145553574 | -0.073531358 |
| -0.196336793 | 1.93E-05    | -0.204746955 | 8.19E-06    | -0.19561327  |
| -0.095861141 | 0.038377863 | -0.131099605 | 0.004543262 | -0.10369301  |
| -0.231597904 | 4.18E-07    | -0.267837018 | 4.10E-09    | -0.30331466  |
| -0.159811746 | 0.000527064 | -0.178619059 | 0.000104071 | -0.190106058 |
| -0.244356405 | 8.91E-08    | -0.241613529 | 1.25E-07    | -0.261204065 |
| -0.012316789 | 0.790651418 | -0.05782096  | 0.21231813  | -0.068741451 |
| -0.093887142 | 0.042564101 | -0.112529652 | 0.014974239 | -0.104753951 |
| 0.247496526  | 6.01E-08    | 0.28338525   | 4.49E-10    | 0.299684443  |
| -0.129453878 | 0.005081472 | -0.131080687 | 0.004549145 | -0.165814858 |
| -0.12431884  | 0.007149594 | -0.11656287  | 0.011709091 | -0.097426911 |
| -0.153720404 | 0.000859603 | -0.156935088 | 0.000665482 | -0.150495853 |
| -0.036218787 | 0.434888821 | 0.035202117  | 0.447899986 | 0.040220127  |
| -0.087485403 | 0.058874098 | -0.062397032 | 0.178267194 | -0.038769346 |
| -0.079982917 | 0.084243067 | -0.057305485 | 0.216429147 | -0.08096858  |
| 0.254073799  | 2.58E-08    | 0.260840326  | 1.06E-08    | 0.290656441  |
| 0.141817596  | 0.002126072 | 0.129849604  | 0.004947056 | 0.168008018  |
| -0.073624102 | 0.112077687 | -0.111004701 | 0.016402962 | -0.102339553 |
| 0.050192587  | 0.279054184 | 0.064006576  | 0.167308729 | 0.095025567  |
| -0.241051676 | 1.34E-07    | -0.223279361 | 1.09E-06    | -0.170314136 |
| -0.021930972 | 0.636413637 | -0.001844203 | 0.968294996 | 0.009797579  |
| 0.013783039  | 0.766413173 | 0.015733847  | 0.734518515 | -0.02170856  |
| 0.036762571  | 0.428019807 | 0.043338307  | 0.350057416 | 0.020601157  |
| 0.121630654  | 0.008508594 | 0.128460339  | 0.005433564 | 0.112024082  |
| 0.216761351  | 2.27E-06    | 0.21917683   | 1.74E-06    | 0.24772091   |
| -0.124818958 | 0.006919354 | -0.095613116 | 0.038883897 | -0.107569252 |
| -0.240824088 | 1.38E-07    | -0.231046963 | 4.46E-07    | -0.252300126 |
| -0.10501207  | 0.023236328 | -0.12697289  | 0.006001802 | -0.137987853 |
| -0.131455535 | 0.004433859 | -0.124222119 | 0.007194905 | -0.134457254 |
| -0.10202837  | 0.027475226 | -0.091883993 | 0.047199212 | -0.111434363 |
| -0.301327015 | 2.94E-11    | -0.27930743  | 8.13E-10    | -0.283640514 |
| -0.24668756  | 6.65E-08    | -0.255113985 | 2.26E-08    | -0.283148474 |
| 0.178077904  | 0.000109305 | 0.182172449  | 7.51E-05    | 0.231517707  |
| -0.112473057 | 0.015025243 | -0.10108061  | 0.02895394  | -0.095194592 |
| 0.023481528  | 0.612751359 | -0.032859947 | 0.478698315 | -0.065590324 |
| 0.037628163  | 0.417216602 | 0.017152741  | 0.711600316 | 0.060419014  |

|              |             |              |             |              |
|--------------|-------------|--------------|-------------|--------------|
| -0.17012443  | 0.000221166 | -0.162712842 | 0.000414955 | -0.148121939 |
| -0.543936261 | 2.57E-37    | -0.503301857 | 2.33E-31    | -0.539321549 |
| -0.105081256 | 0.023145157 | -0.125414816 | 0.006653721 | -0.104752015 |
| -0.023223563 | 0.61666112  | -0.016219991 | 0.726638463 | -7.84E-05    |
| 0.015276142  | 0.741963167 | 0.013040642  | 0.778658733 | -0.010135855 |
| 0.071865509  | 0.120932709 | 0.097921443  | 0.034386028 | 0.072599153  |
| -0.412617527 | 1.27E-20    | -0.411788397 | 1.54E-20    | -0.457430516 |
| 0.04210767   | 0.363921267 | -0.005506247 | 0.905534416 | 0.033932089  |
| -0.101015005 | 0.029058778 | -0.114311764 | 0.013444031 | -0.140049951 |
| 0.202478672  | 1.04E-05    | 0.249583562  | 4.61E-08    | 0.237515313  |
| -0.197825183 | 1.66E-05    | -0.182427882 | 7.34E-05    | -0.161963288 |
| -0.186963467 | 4.80E-05    | -0.156536482 | 0.000687124 | -0.169450564 |
| -0.01051533  | 0.820707203 | -0.031398776 | 0.498480985 | -0.047293705 |
| -0.050170726 | 0.279263891 | -0.05528054  | 0.233130727 | -0.073505031 |
| -0.347139168 | 1.14E-14    | -0.358461834 | 1.32E-15    | -0.396382771 |
| -0.0819904   | 0.076717103 | -0.089685054 | 0.052767242 | -0.099371518 |
| -0.058074102 | 0.210319979 | -0.047042574 | 0.310374815 | -0.038874142 |
| 0.328365865  | 3.34E-13    | 0.355423179  | 2.37E-15    | 0.3817553    |
| 0.020129434  | 0.664376363 | -0.005425013 | 0.906921717 | 0.002836678  |
| -0.195541448 | 2.09E-05    | -0.215133588 | 2.71E-06    | -0.160919945 |
| -0.030231533 | 0.514590157 | -0.043180646 | 0.351814665 | -0.017976153 |
| -0.124108888 | 0.007248276 | -0.144994517 | 0.001680402 | -0.118818865 |
| 0.041073467  | 0.375833039 | 0.041830766  | 0.3670873   | 0.052958592  |
| -0.022103633 | 0.633759775 | -0.042440966 | 0.360133125 | -0.025083423 |
| -0.00213418  | 0.963313053 | -0.048395352 | 0.296651419 | -0.050628903 |
| -0.056408739 | 0.223716394 | -0.073714844 | 0.11163499  | -0.05684437  |
| 0.136274971  | 0.003169398 | 0.131622226  | 0.004383446 | 0.155286808  |
| -0.315942949 | 2.77E-12    | -0.330087546 | 2.47E-13    | -0.365954066 |
| -0.100344062 | 0.030149794 | -0.093778353 | 0.042805589 | -0.084343075 |
| 0.169171873  | 0.00024015  | 0.154478137  | 0.00080963  | 0.112342594  |
| 0.011304902  | 0.807498745 | 0.022439063  | 0.628617529 | 0.012878516  |
| 0.031222692  | 0.500893888 | 0.03878041   | 0.403087198 | 0.045236177  |
| -0.006454546 | 0.889361992 | -0.084697487 | 0.067443051 | -0.05853029  |
| -0.070517122 | 0.12808458  | -0.068206604 | 0.141096145 | -0.042001649 |
| -0.031642393 | 0.495152858 | 0.007396531  | 0.87334255  | 0.051265891  |
| -0.112623775 | 0.014889749 | -0.160502544 | 0.00049807  | -0.141442378 |
| -0.305067463 | 1.63E-11    | -0.30728859  | 1.14E-11    | -0.296724663 |
| 0.04822836   | 0.298323249 | 0.088388661  | 0.056299085 | 0.089106778  |
| -0.290032357 | 1.67E-10    | -0.29242658  | 1.16E-10    | -0.294189412 |
| -0.023902835 | 0.606389555 | -0.0357729   | 0.440568233 | -0.005080492 |
| -0.101339434 | 0.028543491 | -0.108201439 | 0.019342848 | -0.093824055 |
| -0.110100255 | 0.017305578 | -0.131676702 | 0.004367083 | -0.182862153 |
| -0.032503175 | 0.483488812 | -0.028332791 | 0.541359442 | 0.011045849  |
| -0.168469886 | 0.000255105 | -0.243182215 | 1.03E-07    | -0.272540174 |
| 0.060155813  | 0.194400879 | 0.048652442  | 0.294089809 | 0.028174179  |



|              |             |              |             |              |
|--------------|-------------|--------------|-------------|--------------|
| -0.258295044 | 1.49E-08    | -0.299229401 | 4.09E-11    | -0.328398055 |
| -0.013534224 | 0.770510964 | -0.041643887 | 0.369233645 | -0.013414636 |
| 0.04933469   | 0.287363848 | 0.08354685   | 0.071265998 | 0.05395008   |
| -0.089757401 | 0.052575708 | -0.085422321 | 0.065122356 | -0.069023824 |
| -0.174735125 | 0.00014754  | -0.125133303 | 0.006778059 | -0.160963731 |
| -0.035371316 | 0.445719442 | -0.075426818 | 0.103537882 | -0.101223597 |
| 0.117756085  | 0.010872288 | 0.09751902   | 0.035136672 | 0.107195058  |
| 0.145671121  | 0.00159732  | 0.16809828   | 0.000263369 | 0.166317282  |
| -0.216230418 | 2.40E-06    | -0.226418063 | 7.65E-07    | -0.240980793 |
| -0.110062653 | 0.017344026 | -0.086240585 | 0.062581839 | -0.08024749  |
| 0.160496631  | 0.000498311 | 0.175361052  | 0.000139539 | 0.199478622  |
| 0.134123911  | 0.003686573 | 0.102352029  | 0.026985346 | 0.134214122  |
| -0.257093484 | 1.74E-08    | -0.264092392 | 6.83E-09    | -0.261131786 |
| -0.05903199  | 0.20288182  | -0.052409412 | 0.258341979 | -0.047140403 |
| 0.061563837  | 0.184144956 | 0.101704927  | 0.027972398 | 0.09855748   |
| 0.100497947  | 0.029896508 | 0.11507219   | 0.012834182 | 0.09989722   |
| -0.001737929 | 0.970121153 | -0.025228652 | 0.586564488 | 0.005133186  |
| 0.175755289  | 0.000134711 | 0.153068319  | 0.000904875 | 0.141528079  |
| 0.003582266  | 0.938459505 | -0.003490385 | 0.940034945 | -0.000166798 |
| -0.295512095 | 7.27E-11    | -0.296789928 | 5.97E-11    | -0.305239147 |
| -0.162696878 | 0.000415506 | -0.171901443 | 0.000189447 | -0.132799298 |
| -0.134566255 | 0.003574361 | -0.102468607 | 0.026810748 | -0.109085767 |
| -0.37110529  | 1.07E-16    | -0.355555066 | 2.31E-15    | -0.382781869 |
| -0.115379622 | 0.012594638 | -0.118438368 | 0.010417997 | -0.134922656 |
| -0.115647068 | 0.012389468 | -0.110883693 | 0.016521286 | -0.090871722 |
| -0.010634939 | 0.818702945 | -0.01055768  | 0.819997414 | 0.020399429  |
| -0.034442444 | 0.457764393 | -0.047262172 | 0.308119119 | -0.057991132 |
| 0.103610165  | 0.025151805 | 0.103450732  | 0.025378039 | 0.10877137   |
| -0.000894139 | 0.984625139 | -0.011292949 | 0.807698318 | 0.039534467  |
| 0.030129237  | 0.516014694 | 0.044874236  | 0.333229655 | 0.040354508  |
| -0.152074978 | 0.000978087 | -0.120806787 | 0.008968896 | -0.079429816 |
| 0.044189689  | 0.340664274 | 0.084099358  | 0.069408772 | 0.08875681   |
| -0.101379917 | 0.028479747 | -0.092748032 | 0.045150442 | -0.041318861 |
| 0.035556187  | 0.443343826 | 0.036972111  | 0.425389817 | 0.107138989  |
| -0.155138832 | 0.000768264 | -0.086572799 | 0.061573979 | -0.090415889 |
| -0.089782621 | 0.052509074 | -0.124292161 | 0.007162067 | -0.144097742 |
| -0.057156407 | 0.217628653 | -0.046078905 | 0.320401681 | -0.082051261 |
| 0.032509618  | 0.483402083 | -0.007661276 | 0.868849289 | 0.01531252   |
| 0.181234977  | 8.19E-05    | 0.21747119   | 2.10E-06    | 0.215464639  |
| 0.063751553  | 0.169010578 | 0.06099748   | 0.188221179 | 0.034377436  |
| 0.041429439  | 0.371706205 | 0.054023231  | 0.24394849  | 0.055266019  |
| 0.238717077  | 1.78E-07    | 0.242662312  | 1.10E-07    | 0.232945719  |
| 0.128993322  | 0.005242046 | 0.111558234  | 0.015871121 | 0.113993359  |
| 0.23728651   | 2.12E-07    | 0.261609902  | 9.55E-09    | 0.262195673  |
| 0.010867943  | 0.814801975 | -0.006730664 | 0.884661352 | 0.02787006   |

|              |             |              |             |              |
|--------------|-------------|--------------|-------------|--------------|
| -0.332649804 | 1.58E-13    | -0.340139162 | 4.12E-14    | -0.346729045 |
| -0.178916668 | 0.000101294 | -0.149767013 | 0.00116979  | -0.101377867 |
| 0.094633571  | 0.040937983 | 0.158375877  | 0.000592415 | 0.149855951  |
| -0.269016716 | 3.48E-09    | -0.266563576 | 4.88E-09    | -0.268400891 |
| -0.1799723   | 9.20E-05    | -0.16141564  | 0.000462016 | -0.18844097  |
| -0.08804926  | 0.05725547  | -0.074342818 | 0.108608892 | -0.058565179 |
| -0.107804766 | 0.019793894 | -0.090413515 | 0.050864987 | -0.104157179 |
| -0.116092463 | 0.012054329 | -0.093182228 | 0.044149437 | -0.13135276  |
| -0.100465192 | 0.029950268 | -0.110459431 | 0.016942059 | -0.122980786 |
| -0.087967294 | 0.057488449 | -0.099728301 | 0.03118177  | -0.105676137 |
| -0.115643133 | 0.012392465 | -0.092510767 | 0.045705449 | -0.091671761 |
| -0.003990915 | 0.931455599 | -0.056088892 | 0.226357414 | -0.025773941 |
| -0.014384318 | 0.756537598 | -0.049680822 | 0.283991362 | -0.060353361 |
| -0.011833377 | 0.798688314 | 0.005819439  | 0.900188543 | -0.005168118 |
| -0.092693995 | 0.045276342 | -0.076651386 | 0.098036929 | -0.108392803 |
| -0.172501758 | 0.000179733 | -0.151869041 | 0.000993934 | -0.146343611 |
| -0.211087835 | 4.20E-06    | -0.177434898 | 0.000115846 | -0.197093844 |
| -0.188119407 | 4.30E-05    | -0.158259937 | 0.000598007 | -0.18039233  |
| 0.128529434  | 0.005408386 | 0.122942798  | 0.007818862 | 0.114863984  |
| -0.055616797 | 0.230295971 | -0.061909073 | 0.181692371 | -0.039290252 |
| 0.059457541  | 0.199639333 | 0.030073206  | 0.516795821 | 0.027110121  |
| -0.162842495 | 0.000410505 | -0.168611522 | 0.000252019 | -0.143850755 |
| 0.281284992  | 6.10E-10    | 0.263059416  | 7.86E-09    | 0.278440128  |
| -0.267641645 | 4.21E-09    | -0.278060196 | 9.73E-10    | -0.260937093 |
| 0.021927887  | 0.63646109  | 0.016145566  | 0.727842996 | -0.008183724 |
| 0.094688318  | 0.040820809 | 0.091282973  | 0.048669825 | 0.114459518  |
| -0.077328169 | 0.095098077 | -0.069092986 | 0.135989671 | -0.067270668 |
| -0.084516287 | 0.068033677 | -0.064072354 | 0.166871867 | -0.065865436 |
| -0.084631344 | 0.067658155 | -0.109265922 | 0.018176424 | -0.1310583   |
| -0.254928433 | 2.31E-08    | -0.256920362 | 1.78E-08    | -0.267454582 |
| -0.06007333  | 0.19501438  | -0.019296297 | 0.677470232 | -0.040805364 |
| 0.006128385  | 0.894919563 | -0.015963281 | 0.730796014 | 0.025220352  |
| 0.183426066  | 6.69E-05    | 0.153206979  | 0.000895068 | 0.18457029   |
| 0.001755111  | 0.9698259   | -0.033442465 | 0.470932482 | -0.036543563 |
| 0.059268562  | 0.201074569 | 0.048085297  | 0.299760489 | 0.009814949  |
| -0.156070382 | 0.000713256 | -0.176692717 | 0.000123853 | -0.177750092 |
| 0.187140962  | 4.72E-05    | 0.171943113  | 0.000188757 | 0.172561479  |
| 0.116116433  | 0.012036522 | 0.143993574  | 0.001810594 | 0.133981378  |
| 0.042692383  | 0.357291973 | 0.049232431  | 0.288365319 | 0.075951471  |
| 0.091896662  | 0.047168617 | 0.071659058  | 0.122007081 | 0.096463861  |
| -0.077639247 | 0.093771063 | -0.087975408 | 0.05746535  | -0.146037551 |
| 0.134121967  | 0.003687073 | 0.111921627  | 0.015530242 | 0.139084817  |
| 0.033509182  | 0.470047502 | 0.065785045  | 0.155795611 | 0.026033835  |
| -0.051028809 | 0.271112734 | -0.03783588  | 0.414648199 | -0.048149425 |
| 0.138604144  | 0.002684461 | 0.10379767   | 0.024887963 | 0.062170427  |

|              |             |              |             |              |
|--------------|-------------|--------------|-------------|--------------|
| -0.219093495 | 1.75E-06    | -0.24245253  | 1.13E-07    | -0.245098784 |
| -0.144573074 | 0.001734135 | -0.174674242 | 0.00014834  | -0.184224522 |
| -0.308112219 | 9.98E-12    | -0.362130801 | 6.44E-16    | -0.360135549 |
| 0.065881146  | 0.155190993 | 0.070404621  | 0.128695798 | 0.07730635   |
| -0.0899771   | 0.051997611 | -0.091528318 | 0.048064932 | -0.091346517 |
| -0.215440364 | 2.62E-06    | -0.181675155 | 7.87E-05    | -0.197563443 |
| 0.079877462  | 0.084654321 | 0.102599753  | 0.026615495 | 0.115711939  |
| 0.020406581  | 0.66004291  | 0.048456648  | 0.296039323 | 0.055810954  |
| -0.146494703 | 0.001501283 | -0.146107426 | 0.001545762 | -0.174864337 |
| -0.092269118 | 0.04627659  | -0.103630268 | 0.025123402 | -0.107498487 |
| -0.077226269 | 0.095536014 | -0.051604393 | 0.265737049 | -0.062418514 |
| 0.010021497  | 0.828994445 | 0.015345858  | 0.740827649 | 0.000163316  |
| -0.219703611 | 1.64E-06    | -0.169971336 | 0.000224119 | -0.162023208 |
| -0.141028331 | 0.002252397 | -0.134718092 | 0.003536563 | -0.129161434 |
| -0.104998199 | 0.023254644 | -0.088963787 | 0.054708737 | -0.08330408  |
| -0.184192124 | 6.23E-05    | -0.194189108 | 2.38E-05    | -0.161937215 |
| 0.130572889  | 0.004709635 | 0.074005122  | 0.11022805  | 0.055530917  |
| 0.003401058  | 0.941566806 | -0.023313015 | 0.615304141 | 0.007822676  |
| -0.276672281 | 1.19E-09    | -0.291993643 | 1.24E-10    | -0.283965174 |
| -0.050258791 | 0.278419765 | -0.047970467 | 0.300917431 | -0.051924709 |
| -0.160004249 | 0.000518831 | -0.176397972 | 0.000127175 | -0.166775135 |
| -0.111372546 | 0.016047823 | -0.146116139 | 0.001544749 | -0.156566182 |
| -0.039931379 | 0.389262712 | -0.067722147 | 0.14394853  | -0.096230575 |
| -0.004339055 | 0.925492907 | 0.040590123  | 0.381481454 | 0.019327515  |
| 0.083450927  | 0.071592536 | 0.062613636  | 0.176762209 | 0.09431891   |
| -0.101383718 | 0.028473768 | -0.133413402 | 0.003873508 | -0.136610779 |
| 0.333553886  | 1.34E-13    | 0.339339302  | 4.76E-14    | 0.306615912  |
| -0.058785434 | 0.204777857 | -0.01346459  | 0.77165895  | -0.067325059 |
| -0.038023738 | 0.412333377 | -0.065293811 | 0.158914033 | -0.092562134 |
| 0.295719674  | 7.04E-11    | 0.324832683  | 6.16E-13    | 0.272673971  |
| -0.091798426 | 0.047406281 | -0.091919288 | 0.047114022 | -0.107628994 |
| -0.017942844 | 0.698948614 | -0.023239196 | 0.616423882 | -0.010496334 |
| -0.337925335 | 6.14E-14    | -0.339866576 | 4.33E-14    | -0.352406584 |
| -0.01951024  | 0.674098343 | -0.014683221 | 0.751642918 | 0.00961335   |
| 0.181283177  | 8.16E-05    | 0.174908908  | 0.000145276 | 0.213484678  |
| 0.027971604  | 0.546528972 | -0.042183755 | 0.363054325 | -0.041590645 |
| 0.171119412  | 0.000202841 | 0.15916259   | 0.000555733 | 0.156306102  |
| 0.160558944  | 0.000495769 | 0.109161951  | 0.01828758  | 0.105608834  |
| 0.019184985  | 0.679227128 | 0.023681179  | 0.609732938 | 0.038994472  |
| -0.05018126  | 0.279162831 | -0.037331611 | 0.420899614 | -0.04348892  |
| -0.207804955 | 5.95E-06    | -0.195869164 | 2.02E-05    | -0.167477563 |
| -0.250183034 | 4.27E-08    | -0.250175382 | 4.27E-08    | -0.224048716 |
| -0.10221391  | 0.027193471 | -0.12457698  | 0.007029912 | -0.104454999 |
| 0.158801511  | 0.000572299 | 0.141384628  | 0.002194545 | 0.133125593  |
| -0.395650411 | 5.97E-19    | -0.376903883 | 3.28E-17    | -0.38815734  |

|              |             |              |             |              |
|--------------|-------------|--------------|-------------|--------------|
| -0.105298734 | 0.022860586 | -0.125597064 | 0.00657432  | -0.100484857 |
| -0.175058107 | 0.000143359 | -0.184997106 | 5.77E-05    | -0.197001367 |
| -0.14484289  | 0.001699556 | -0.12280447  | 0.007889143 | -0.117678485 |
| -0.329472218 | 2.76E-13    | -0.322747555 | 8.80E-13    | -0.32025151  |
| -0.132616395 | 0.004093382 | -0.102657455 | 0.026529974 | -0.147407866 |
| 0.037885852  | 0.414031686 | 0.018601299  | 0.688468075 | -0.004925697 |
| 0.08507285   | 0.066232925 | 0.128076931  | 0.005575205 | 0.152021834  |
| -0.107955979 | 0.019620885 | -0.09158796  | 0.047918841 | -0.086597935 |
| -0.128651306 | 0.005364231 | -0.110439944 | 0.016961609 | -0.110810774 |
| -0.100358598 | 0.030125789 | -0.088105337 | 0.057096531 | -0.089524132 |
| -0.051331195 | 0.268279401 | -0.078885111 | 0.088604107 | -0.094641545 |
| -0.11118491  | 0.016228128 | -0.110275685 | 0.017127184 | -0.126071448 |
| 0.232516177  | 3.75E-07    | 0.227799416  | 6.52E-07    | 0.235941271  |
| -0.174528315 | 0.000150276 | -0.209156995 | 5.16E-06    | -0.219527856 |
| -0.079446506 | 0.086351828 | -0.055707039 | 0.229539379 | -0.081662349 |
| -0.003594969 | 0.938241708 | -0.000401419 | 0.993097192 | -0.017399577 |
| -0.397484686 | 3.98E-19    | -0.411072135 | 1.82E-20    | -0.418868153 |
| -0.278827804 | 8.71E-10    | -0.241884522 | 1.21E-07    | -0.260815446 |
| -0.070693961 | 0.127128367 | -0.09636075  | 0.037375458 | -0.132983123 |
| 0.118527399  | 0.010359976 | 0.163749447  | 0.000380598 | 0.185608499  |
| 0.120139778  | 0.00935766  | 0.162672776  | 0.000416339 | 0.129406971  |
| -0.238065679 | 1.93E-07    | -0.24724496  | 6.20E-08    | -0.216867124 |
| -0.117093401 | 0.011330242 | -0.140954732 | 0.00226452  | -0.169502764 |
| -0.088816615 | 0.0551121   | -0.055296527 | 0.232995397 | -0.042920772 |
| -0.163742411 | 0.000380822 | -0.185192904 | 5.67E-05    | -0.20786082  |
| 0.034380083  | 0.45857952  | 0.029801345  | 0.520594492 | 0.066100865  |
| -0.101723748 | 0.027943258 | -0.133181991 | 0.00393622  | -0.157190864 |
| 0.171828562  | 0.00019066  | 0.138983144  | 0.002612279 | 0.151751958  |
| -0.100663927 | 0.029625363 | -0.090268948 | 0.051237878 | -0.080663632 |
| -0.209101736 | 5.19E-06    | -0.212258958 | 3.70E-06    | -0.191421889 |
| -0.076346413 | 0.09938466  | -0.029738563 | 0.521473763 | -0.040665544 |
| 0.252908786  | 3.01E-08    | 0.231736271  | 4.12E-07    | 0.218761284  |
| 0.014015565  | 0.76258951  | 0.04389517   | 0.343895281 | 0.026506975  |
| -0.157439257 | 0.000639013 | -0.120295314 | 0.009265691 | -0.08027453  |
| 0.003386908  | 0.9418095   | -0.014978929 | 0.746810346 | -0.036234556 |
| -0.140124139 | 0.002405519 | -0.180293325 | 8.93E-05    | -0.228622965 |
| -0.054041932 | 0.243785056 | 0.020489196  | 0.658753349 | 0.011661935  |
| -0.190473093 | 3.43E-05    | -0.174334265 | 0.000152887 | -0.136176594 |
| -0.216001779 | 2.46E-06    | -0.216135434 | 2.43E-06    | -0.23025326  |
| -0.087930935 | 0.057592044 | -0.096302709 | 0.03749076  | -0.089478426 |
| -0.163413272 | 0.000391439 | -0.145308041 | 0.001641423 | -0.147394062 |
| 0.054743939  | 0.237705375 | 0.072164093  | 0.119391951 | 0.061664122  |
| -0.212956172 | 3.43E-06    | -0.231134404 | 4.42E-07    | -0.240424361 |
| -0.373708047 | 6.32E-17    | -0.375452524 | 4.42E-17    | -0.382160687 |
| -0.082732249 | 0.074078107 | -0.089721231 | 0.052671392 | -0.091087174 |

|              |             |              |             |              |
|--------------|-------------|--------------|-------------|--------------|
| -0.218347638 | 1.90E-06    | -0.153936853 | 0.000845045 | -0.169492582 |
| 0.170685994  | 0.000210642 | 0.211515925  | 4.01E-06    | 0.17682255   |
| -0.208429878 | 5.57E-06    | -0.179168143 | 9.90E-05    | -0.131819069 |
| 0.049465367  | 0.286087465 | 0.088142988  | 0.056990022 | 0.072785588  |
| 0.010562474  | 0.819917089 | 0.016647073  | 0.719739445 | 0.040473332  |
| -0.150020257 | 0.001147181 | -0.118736839 | 0.010224614 | -0.12443204  |
| -0.048067977 | 0.2999348   | -0.037825445 | 0.414777    | 0.009418481  |
| -0.167080976 | 0.000287292 | -0.208100075 | 5.77E-06    | -0.229774694 |
| -0.068755625 | 0.137916192 | -0.042514661 | 0.359298865 | -0.057658944 |
| -0.308253504 | 9.75E-12    | -0.335547892 | 9.41E-14    | -0.343416538 |
| 0.275304325  | 1.44E-09    | 0.243540286  | 9.86E-08    | 0.271692224  |
| -0.042597532 | 0.358362188 | -0.047730578 | 0.303343913 | -0.073822826 |
| -0.396148227 | 5.35E-19    | -0.40027317  | 2.14E-19    | -0.428752208 |
| -0.247186674 | 6.25E-08    | -0.257939726 | 1.56E-08    | -0.232878851 |
| 0.038599121  | 0.405291108 | 0.00684028   | 0.882796353 | 0.046138011  |
| -0.114420481 | 0.013355307 | -0.123662026 | 0.007462377 | -0.083578586 |
| 0.072544908  | 0.117449163 | 0.055738693  | 0.229274407 | 0.106471975  |
| 0.135801367  | 0.003277247 | 0.132952498  | 0.003999318 | 0.14488905   |
| -0.186108817 | 5.20E-05    | -0.163037638 | 0.000403891 | -0.192445382 |
| 0.214202295  | 3.00E-06    | 0.268196619  | 3.90E-09    | 0.301723     |
| -0.154678162 | 0.000796894 | -0.15202278  | 0.000982081 | -0.131352282 |
| 0.277933864  | 9.91E-10    | 0.288600306  | 2.07E-10    | 0.263121095  |
| -0.058978892 | 0.203289066 | -0.043242128 | 0.351128742 | -0.060931837 |
| -0.249290704 | 4.78E-08    | -0.220381889 | 1.52E-06    | -0.201486596 |
| 0.095654854  | 0.038798346 | 0.105946826  | 0.022030451 | 0.086534434  |
| -0.0757606   | 0.102014786 | -0.137003839 | 0.00300971  | -0.176669757 |
| -0.070600705 | 0.127631935 | -0.079237478 | 0.087184986 | -0.072934199 |
| -0.057254552 | 0.216838432 | -0.08503946  | 0.066339842 | -0.079060114 |
| -0.054376949 | 0.240870217 | -0.037648836 | 0.416960574 | -0.044484529 |
| -0.169705475 | 0.000229336 | -0.182512894 | 7.28E-05    | -0.20164432  |
| -0.043957198 | 0.343213196 | -0.034010696 | 0.463424394 | -0.015496655 |
| -0.111300349 | 0.01611699  | -0.062954864 | 0.1744105   | -0.056411183 |
| -0.013551771 | 0.770221766 | -0.053444757 | 0.24904188  | -0.066138413 |
| -0.075414704 | 0.103593498 | -0.101418539 | 0.028419046 | -0.106296886 |
| 0.193518433  | 2.55E-05    | 0.184699549  | 5.94E-05    | 0.182307466  |
| -0.109703277 | 0.017715273 | -0.1387491   | 0.002656642 | -0.146900847 |
| 0.092065869  | 0.046761598 | 0.08166963   | 0.0778816   | 0.062652862  |
| 0.09390551   | 0.042523442 | 0.087625485  | 0.05846848  | 0.075769219  |
| -0.076601401 | 0.098256819 | -0.079521526 | 0.086054373 | -0.043520227 |
| 0.186911588  | 4.82E-05    | 0.230252463  | 4.90E-07    | 0.23413332   |
| -0.188860247 | 4.00E-05    | -0.178831109 | 0.000102085 | -0.166056287 |
| -0.14642254  | 0.001509481 | -0.157324404 | 0.000644956 | -0.181461725 |
| -0.117213056 | 0.011246312 | -0.139157957 | 0.002579585 | -0.141042748 |
| 0.04522774   | 0.329431548 | 0.018923316  | 0.683364046 | -0.005570707 |
| -0.017830493 | 0.700742669 | 0.002162469  | 0.962827123 | -0.008496408 |

|              |             |              |             |              |
|--------------|-------------|--------------|-------------|--------------|
| 0.30307899   | 2.23E-11    | 0.303101768  | 2.22E-11    | 0.319912682  |
| 0.076228172  | 0.099911136 | 0.084667779  | 0.067539596 | 0.05783431   |
| 0.262093745  | 8.95E-09    | 0.281011586  | 6.35E-10    | 0.263046189  |
| -0.084336044 | 0.06862538  | -0.06499222  | 0.160851771 | -0.083170116 |
| 0.065278793  | 0.159010107 | 0.040279295  | 0.385141104 | 0.083510215  |
| 0.026978013  | 0.560874398 | 0.013140867  | 0.777002286 | 0.048494036  |
| -0.206571002 | 6.77E-06    | -0.172373987 | 0.00018176  | -0.148273487 |
| -0.069806478 | 0.131983521 | -0.043809929 | 0.344834046 | -0.073066926 |
| -0.096339005 | 0.03741862  | -0.100369161 | 0.030108358 | -0.073166209 |
| -0.144281434 | 0.001772236 | -0.171808603 | 0.000190993 | -0.164666119 |
| -0.136542236 | 0.00310997  | -0.156054583 | 0.000714158 | -0.167452268 |
| 0.080417683  | 0.082564548 | 0.09135316   | 0.048496135 | 0.118354913  |
| -0.036463862 | 0.431785238 | -0.018204793 | 0.694772216 | -0.013834016 |
| -0.056583417 | 0.22228336  | -0.06471993  | 0.16261649  | -0.046327467 |
| -0.043681164 | 0.346255218 | -0.047519165 | 0.305493084 | -0.012804373 |
| -0.026594927 | 0.566453491 | -0.042348864 | 0.361177452 | -0.030704222 |
| -0.077408384 | 0.094754463 | -0.084422222 | 0.06834195  | -0.084410761 |
| 0.006953651  | 0.880868153 | 0.044001881  | 0.342722373 | 0.039213276  |
| -0.106508049 | 0.02133283  | -0.118868991 | 0.010140013 | -0.117765844 |
| 0.382418074  | 1.04E-17    | 0.37021728   | 1.29E-16    | 0.376310969  |
| -0.121617894 | 0.00851556  | -0.128638393 | 0.005368894 | -0.138483589 |
| 0.032385259  | 0.485077799 | 0.005650641  | 0.903069219 | 0.017002538  |
| 0.109366544  | 0.018069409 | 0.137228349  | 0.002962016 | 0.092741029  |
| -0.044008144 | 0.342653607 | -0.020354984 | 0.660848833 | -0.018443494 |
| -0.182251506 | 7.46E-05    | -0.187192283 | 4.69E-05    | -0.224689446 |
| -0.098622045 | 0.033111762 | -0.131814006 | 0.004326086 | -0.132992432 |
| 0.251317506  | 3.69E-08    | 0.242515893  | 1.12E-07    | 0.267638209  |
| -0.011983901 | 0.796183473 | -0.03344318  | 0.470923004 | -0.048582899 |
| -0.17114333  | 0.000202419 | -0.154462698 | 0.000810621 | -0.160762642 |
| -0.013432289 | 0.772191618 | -0.040660127 | 0.380660175 | -0.028436767 |
| 0.100650081  | 0.029647901 | 0.097982694  | 0.034272982 | 0.097967685  |
| -0.033839892 | 0.465674231 | -0.030864253 | 0.505824613 | -0.076634809 |
| -0.046757994 | 0.313314112 | -0.030793929 | 0.506794981 | -0.045061099 |
| -0.049967502 | 0.28121845  | -0.046332305 | 0.317744856 | -0.066190614 |
| 0.112784334  | 0.01474659  | 0.108327581  | 0.019201303 | 0.083438406  |
| -0.096863476 | 0.036389311 | -0.08182486  | 0.077316287 | -0.085524926 |
| -0.215295182 | 2.66E-06    | -0.227996572 | 6.37E-07    | -0.24855757  |
| -0.194011679 | 2.43E-05    | -0.20700829  | 6.47E-06    | -0.203717963 |
| 0.063041593  | 0.173816502 | 0.080110697  | 0.083746907 | 0.071274446  |
| -0.043346166 | 0.349969969 | -0.049264147 | 0.288054459 | -0.045566926 |
| -0.301476008 | 2.87E-11    | -0.304631189 | 1.74E-11    | -0.346708918 |
| 0.251200969  | 3.75E-08    | 0.245917903  | 7.33E-08    | 0.26489671   |
| -0.313763586 | 3.97E-12    | -0.316718187 | 2.43E-12    | -0.33449037  |
| -0.000189423 | 0.996742654 | 0.014987938  | 0.746663278 | -0.033839158 |
| -0.34533364  | 1.59E-14    | -0.325928924 | 5.10E-13    | -0.307363316 |

|              |             |              |             |              |
|--------------|-------------|--------------|-------------|--------------|
| -0.127123771 | 0.005941823 | -0.133887701 | 0.003747792 | -0.170108161 |
| 0.236653385  | 2.29E-07    | 0.229540441  | 5.32E-07    | 0.187088128  |
| 0.128830059  | 0.005300055 | 0.156266918  | 0.000702127 | 0.151654146  |
| -0.02496007  | 0.590556366 | -0.036375405 | 0.432903966 | -0.04926077  |
| -0.018902897 | 0.683687271 | -0.037243167 | 0.422001709 | -0.051833376 |
| -0.008488017 | 0.85484564  | -0.046812425 | 0.312750513 | 0.000948982  |
| 0.090496906  | 0.050650922 | 0.068205484  | 0.141102687 | 0.046383809  |
| -0.011039147 | 0.811938566 | -0.022789675 | 0.623261661 | 0.000162034  |
| -0.241638715 | 1.25E-07    | -0.213831363 | 3.12E-06    | -0.230558908 |
| -0.05066425  | 0.274555709 | -0.050930197 | 0.272041118 | -0.052398988 |
| -0.199693467 | 1.38E-05    | -0.182378666 | 7.37E-05    | -0.162034522 |
| 0.009887812  | 0.831241173 | 0.0398021    | 0.39080101  | 0.029838497  |
| -0.057728783 | 0.213049103 | -0.029125217 | 0.530103722 | -0.030158267 |
| 0.153561825  | 0.000870416 | 0.160573206  | 0.000495189 | 0.169386291  |
| 0.102424675  | 0.02687643  | 0.103335172  | 0.025543114 | 0.12419356   |
| -0.36794659  | 2.03E-16    | -0.358390572 | 1.34E-15    | -0.362523634 |
| -0.094411804 | 0.041415538 | -0.112531386 | 0.014972679 | -0.161080641 |
| -0.354934972 | 2.60E-15    | -0.392489984 | 1.19E-18    | -0.430639051 |
| -0.014876061 | 0.748490349 | -0.006586217 | 0.887119925 | 0.003654574  |
| -0.184494643 | 6.05E-05    | -0.184442032 | 6.08E-05    | -0.192874908 |
| -0.173701274 | 0.000161703 | -0.163949528 | 0.00037428  | -0.195163742 |
| -0.163127198 | 0.000400889 | -0.138034201 | 0.002796434 | -0.07748585  |
| -0.006308167 | 0.891855544 | -0.034876577 | 0.452112326 | -0.030008241 |
| -0.131275608 | 0.004488862 | -0.176920183 | 0.000121346 | -0.210780011 |
| 0.181500169  | 8.00E-05    | 0.219381005  | 1.70E-06    | 0.203692057  |
| -0.092099267 | 0.04668161  | -0.063312299 | 0.171972148 | -0.063549576 |
| 0.122531655  | 0.008029408 | 0.11994601   | 0.009473372 | 0.117017602  |
| -0.17636755  | 0.000127523 | -0.201727001 | 1.12E-05    | -0.222232213 |
| 0.133545839  | 0.003838026 | 0.124033844  | 0.007283843 | 0.143130477  |
| -0.125641265 | 0.006555192 | -0.08586839  | 0.0637271   | -0.079996721 |
| -0.243790493 | 9.56E-08    | -0.208103137 | 5.76E-06    | -0.208570553 |
| -0.21516891  | 2.70E-06    | -0.211157963 | 4.17E-06    | -0.220750833 |
| 0.010529818  | 0.820464359 | -0.011657195 | 0.80162274  | -0.00095647  |
| -0.045671329 | 0.324705268 | -0.057173043 | 0.217494561 | -0.046374028 |
| -0.465967167 | 1.51E-26    | -0.44571941  | 3.56E-24    | -0.474426853 |
| -0.169728707 | 0.000228875 | -0.164989155 | 0.000342993 | -0.185216311 |
| -0.079439882 | 0.086378129 | -0.07940105  | 0.086532463 | -0.073483269 |
| 0.217781725  | 2.03E-06    | 0.224205234  | 9.85E-07    | 0.235152054  |
| -0.064084664 | 0.166790204 | -0.006823322 | 0.883084835 | -0.050982151 |
| -0.116756094 | 0.011569833 | -0.109344089 | 0.018093243 | -0.115801249 |
| -0.223225035 | 1.10E-06    | -0.248094688 | 5.57E-08    | -0.251874909 |
| -0.090783321 | 0.04992142  | -0.054351132 | 0.241093969 | -0.018379854 |
| -0.037837675 | 0.414626042 | -0.033964139 | 0.464037042 | -0.039742256 |
| 0.119666514  | 0.009642518 | 0.108667082  | 0.018824822 | 0.138507583  |
| -0.107430537 | 0.020227785 | -0.133337113 | 0.003894081 | -0.13506858  |

|              |             |              |             |              |
|--------------|-------------|--------------|-------------|--------------|
| -0.084705171 | 0.067418099 | -0.087151273 | 0.059851007 | -0.071648394 |
| 0.033639267  | 0.468324581 | 0.030964789  | 0.504439065 | 0.040608782  |
| 0.09662814   | 0.036848161 | 0.149562576  | 0.001188341 | 0.16620591   |
| 0.21099221   | 4.24E-06    | 0.243660135  | 9.71E-08    | 0.226379769  |
| 0.029024062  | 0.531533909 | 0.022265307  | 0.631279043 | 0.032410084  |
| -0.124118015 | 0.007243961 | -0.145779658 | 0.001584349 | -0.175492731 |
| 0.020060169  | 0.665461148 | -0.025124422 | 0.588112165 | -0.02839689  |
| -0.134405518 | 0.003614773 | -0.135521175 | 0.00334261  | -0.133324429 |
| 0.438525727  | 2.28E-23    | 0.453618499  | 4.42E-25    | 0.448497189  |
| 0.004015095  | 0.931041332 | 0.009934674  | 0.830453447 | -0.007389119 |
| -0.027443136 | 0.55413639  | -0.048590097 | 0.294709639 | -0.03438303  |
| -0.117043946 | 0.011365094 | -0.132929736 | 0.004005626 | -0.146809092 |
| -0.253506755 | 2.78E-08    | -0.306578579 | 1.28E-11    | -0.315323538 |
| 0.034554243  | 0.456305091 | 0.072233621  | 0.119035384 | 0.102044468  |
| -0.033382581 | 0.471727622 | -0.020290193 | 0.661861369 | -0.029112507 |
| -0.003005174 | 0.948358355 | -0.041381808 | 0.372256759 | -0.013211686 |
| 0.035744211  | 0.440935106 | 0.035851334  | 0.439566128 | 0.053061235  |
| -0.171243812 | 0.000200653 | -0.164228328 | 0.000365638 | -0.141430352 |
| 0.046574762  | 0.315216266 | 0.034104546  | 0.462190761 | 0.0240994    |
| -0.028343829 | 0.541201856 | -0.046307181 | 0.318007625 | -0.086681288 |
| -0.080929526 | 0.080623199 | -0.092701795 | 0.045258151 | -0.129017555 |
| -0.141081097 | 0.002243743 | -0.14988719  | 0.00115901  | -0.16321348  |
| -0.044801554 | 0.334014033 | -0.080605326 | 0.081848505 | -0.098859766 |
| -0.013868821 | 0.76500191  | -0.023904681 | 0.606361747 | -0.034629955 |
| -0.024022448 | 0.60458876  | -0.029552934 | 0.524078001 | -0.000141496 |
| 0.103257152  | 0.025655087 | 0.084149759  | 0.069241343 | 0.055222433  |
| -0.226064633 | 7.96E-07    | -0.256151526 | 1.97E-08    | -0.278413304 |
| 0.066591108  | 0.150779213 | 0.036806854  | 0.427463208 | 0.015354137  |
| 0.014925903  | 0.747676201 | 0.015433715  | 0.739397455 | 0.030303158  |
| -0.068502736 | 0.139374028 | -0.05113545  | 0.270111191 | -0.030016733 |
| 0.066713367  | 0.150029195 | 0.118864733  | 0.010142729 | 0.135126678  |
| -0.011047234 | 0.811803361 | -0.029339912 | 0.527074687 | 0.009334037  |
| -0.065409715 | 0.158174049 | -0.061285871 | 0.186137335 | -0.057275496 |
| 0.040119832  | 0.387026876 | 0.039670672  | 0.392368644 | 0.024655349  |
| -0.074886642 | 0.106040897 | -0.123472379 | 0.007554936 | -0.111685181 |
| -0.068703076 | 0.138218151 | -0.033708764 | 0.467405543 | -0.007224745 |
| -0.240588422 | 1.42E-07    | -0.223789541 | 1.03E-06    | -0.224058812 |
| -0.00730415  | 0.874911401 | -0.003696948 | 0.93649345  | -0.017103606 |
| -0.235863059 | 2.52E-07    | -0.234392836 | 3.00E-07    | -0.236086963 |
| -0.013988451 | 0.763035085 | -0.010428164 | 0.822168554 | 0.004539599  |
| 0.135601542  | 0.003323742 | 0.137882807  | 0.002826884 | 0.134416175  |
| -0.033875512 | 0.465204539 | -0.033039151 | 0.476301861 | -0.074603496 |
| 0.01883001   | 0.684841498 | -0.012649628 | 0.785130671 | 0.017778502  |
| 0.041804343  | 0.367390304 | 0.061284447  | 0.186147584 | 0.065898304  |
| -0.044723135 | 0.334861667 | -0.005451279 | 0.906473118 | -0.008794995 |



|              |             |              |             |              |
|--------------|-------------|--------------|-------------|--------------|
| 0.012219738  | 0.79226317  | 0.034405882  | 0.458242193 | 0.050528621  |
| -0.119076921 | 0.010008158 | -0.137884574 | 0.002826527 | -0.133855755 |
| 0.17949415   | 9.61E-05    | 0.187316091  | 4.64E-05    | 0.191674331  |
| -0.072937889 | 0.115470322 | -0.033507277 | 0.47007275  | -0.023638986 |
| 0.294424684  | 8.59E-11    | 0.312496558  | 4.89E-12    | 0.341560487  |
| 0.073649378  | 0.111954235 | 0.071271965  | 0.124041538 | 0.021336606  |
| 0.051161166  | 0.269870049 | 0.031650595  | 0.495041007 | 0.056473069  |
| 0.032799119  | 0.479513241 | 0.029115111  | 0.530246513 | 0.036310309  |
| 0.016706784  | 0.718776677 | 0.029447732  | 0.525556842 | 0.027782284  |
| -0.079924965 | 0.084468868 | -0.095206587 | 0.039725535 | -0.113585201 |
| -0.161808402 | 0.000447268 | -0.150813625 | 0.00107893  | -0.165730002 |
| -0.026789088 | 0.563622492 | -0.069122974 | 0.13581943  | -0.088079698 |
| 0.03121318   | 0.501024405 | -0.003832118 | 0.934176648 | 0.021374988  |
| -0.090743297 | 0.050022833 | -0.095056264 | 0.040040628 | -0.103358634 |
| -0.268164273 | 3.92E-09    | -0.263170164 | 7.74E-09    | -0.284178183 |
| 0.018761598  | 0.685925518 | -0.01060228  | 0.819250093 | -0.002997058 |
| 0.074468598  | 0.108010628 | 0.084382858  | 0.068471296 | 0.070190292  |
| 0.015147273  | 0.74406363  | 0.005486423  | 0.905872944 | -0.010520565 |
| -0.000475057 | 0.991830958 | 0.034094691  | 0.462320215 | 0.036545457  |
| 0.027234968  | 0.557147132 | 0.010040731  | 0.8286713   | 0.042015061  |
| 0.136007638  | 0.003229872 | 0.144042137  | 0.00180407  | 0.150708314  |
| -0.02262963  | 0.625704037 | -0.005576661 | 0.904332134 | 0.002965076  |
| -0.146145655 | 0.001541319 | -0.141631465 | 0.002155265 | -0.173941804 |
| -0.152181705 | 0.000969967 | -0.136751124 | 0.003064229 | -0.125099374 |
| -0.311634268 | 5.63E-12    | -0.327931781 | 3.60E-13    | -0.342742709 |
| -0.030045123 | 0.517187551 | -0.021051186 | 0.650007986 | -0.001666939 |
| 0.109916525  | 0.017494153 | 0.112758889  | 0.014769196 | 0.112862886  |
| 0.074447834  | 0.108109209 | 0.054145855  | 0.242878234 | 0.080591945  |
| 0.110212306  | 0.017191447 | 0.083826652  | 0.070320447 | 0.05609535   |
| 0.234671635  | 2.90E-07    | 0.256757719  | 1.82E-08    | 0.289558926  |
| -0.187096552 | 4.74E-05    | -0.229873067 | 5.12E-07    | -0.247522504 |
| 0.159161588  | 0.000555778 | 0.140327181  | 0.00237033  | 0.140790514  |
| -0.06156322  | 0.184149361 | -0.056634727 | 0.22186366  | -0.097504588 |
| -0.057239553 | 0.216959064 | -0.101560962 | 0.028196164 | -0.118353896 |
| 0.070476003  | 0.128307721 | 0.093974741  | 0.042370488 | 0.111073437  |
| 0.08631203   | 0.062363951 | 0.062369036  | 0.178462403 | 0.064281545  |
| 0.264478265  | 6.48E-09    | 0.216222284  | 2.41E-06    | 0.219667205  |
| -0.047930467 | 0.301321131 | -0.046106811 | 0.320108382 | -0.069430768 |
| 0.103525236  | 0.0252721   | 0.108656383  | 0.018836587 | 0.139212058  |
| 0.164878298  | 0.000346209 | 0.206834717  | 6.59E-06    | 0.197209583  |
| 0.143778621  | 0.001839731 | 0.180280567  | 8.94E-05    | 0.185661876  |
| 0.148158259  | 0.001323272 | 0.117376408  | 0.011132619 | 0.182941312  |
| 0.076886602  | 0.097007435 | 0.053280485  | 0.250501687 | 0.044374863  |
| 0.094024122  | 0.042261673 | 0.109110395  | 0.01834292  | 0.133648965  |
| -0.011334604 | 0.807002916 | -0.015867211 | 0.732353969 | -0.036658072 |

|              |             |              |             |              |
|--------------|-------------|--------------|-------------|--------------|
| -0.036842298 | 0.427018013 | -0.028252732 | 0.542503194 | 0.014949875  |
| 0.077259811  | 0.095391681 | 0.06515563   | 0.159799657 | 0.102286568  |
| 0.003744441  | 0.935679353 | 0.004566957  | 0.921591803 | 0.002190215  |
| -0.040686565 | 0.38035029  | -0.060385857 | 0.192697294 | -0.054745359 |
| 0.002499849  | 0.95703276  | -0.032085047 | 0.489136022 | -0.016769047 |
| -0.042266045 | 0.362118133 | -0.041310905 | 0.373077256 | -0.078487485 |
| -0.098009056 | 0.034224425 | -0.057034746 | 0.218611083 | -0.05369544  |
| 0.021611308  | 0.641339261 | 0.014016649  | 0.762571694 | 0.034112731  |
| 0.17290612   | 0.000173454 | 0.162618786  | 0.000418211 | 0.18928854   |
| 0.1015634    | 0.028192362 | 0.122323619  | 0.008137858 | 0.082262094  |
| 0.213404805  | 3.27E-06    | 0.251998593  | 3.38E-08    | 0.264421222  |
| -0.209762518 | 4.84E-06    | -0.187635173 | 4.50E-05    | -0.202479177 |
| 0.058680852  | 0.205585969 | 0.065515431  | 0.15750138  | 0.028777649  |
| 0.164711966  | 0.000351087 | 0.2104052    | 4.51E-06    | 0.214976752  |
| -0.05259864  | 0.256624538 | -0.053293936 | 0.250381935 | -0.034767864 |
| -0.004703795 | 0.919250383 | -0.042802528 | 0.356051722 | 0.015297371  |
| -0.02164506  | 0.64081843  | -0.029424306 | 0.525886428 | -0.025372891 |
| -0.038672419 | 0.404399164 | -0.07909052  | 0.087774606 | -0.065347988 |
| 0.16874439   | 0.000249156 | 0.154081797  | 0.000835424 | 0.11626376   |
| 0.162341981  | 0.000427933 | 0.141484895  | 0.002178511 | 0.093389061  |
| 0.030704745  | 0.508026987 | 0.063044535  | 0.173796379 | 0.050749217  |
| 0.066659664  | 0.150358294 | 0.067750343  | 0.143781319 | 0.010585475  |
| -0.008823429 | 0.849177003 | -0.004732631 | 0.918757067 | -0.017338112 |
| -0.01628096  | 0.725652205 | 0.002582009  | 0.955622034 | -0.01514736  |
| -0.102695591 | 0.026473583 | -0.098557861 | 0.0332268   | -0.115872775 |
| -0.038056341 | 0.411932417 | -0.043632608 | 0.346792085 | -0.025786679 |
| 0.077064977  | 0.096232487 | 0.058179693  | 0.209490534 | 0.079794543  |
| -0.103236229 | 0.025685188 | -0.093657506 | 0.043075193 | -0.111529949 |
| -0.029645054 | 0.522784798 | -0.045581499 | 0.32565881  | -0.042752369 |
| 0.133098013  | 0.003959204 | 0.151166463  | 0.001049796 | 0.152909788  |
| -0.183557152 | 6.61E-05    | -0.182390228 | 7.36E-05    | -0.165271373 |
| -0.143389478 | 0.001893575 | -0.14419252  | 0.001784004 | -0.143287893 |
| -0.13656087  | 0.003105865 | -0.119957821 | 0.009466283 | -0.108828958 |
| -0.068734943 | 0.138034972 | -0.04111719  | 0.375324637 | -0.031452153 |
| -0.031980446 | 0.490554277 | -0.014882907 | 0.748378501 | -0.002470985 |
| 0.059973009  | 0.195762463 | 0.083330766  | 0.072003311 | 0.114046782  |
| 0.344472663  | 1.86E-14    | 0.330300741  | 2.38E-13    | 0.32068647   |
| -0.063877389 | 0.168169222 | -0.081503131 | 0.078491679 | -0.093169433 |
| -0.070298106 | 0.129276573 | -0.076254514 | 0.099793654 | -0.059584936 |
| -0.078649966 | 0.089561409 | -0.081712226 | 0.077726143 | -0.089434578 |
| 0.198935889  | 1.49E-05    | 0.203952068  | 8.90E-06    | 0.173219424  |
| 0.259882903  | 1.20E-08    | 0.258415643  | 1.46E-08    | 0.227630363  |
| 0.079980688  | 0.084251742 | 0.057434037  | 0.215398612 | 0.047851674  |
| 0.084491072  | 0.068116199 | 0.083761275  | 0.070540455 | 0.074414641  |
| -0.027608142 | 0.551755547 | -0.061581313 | 0.18402022  | -0.126848081 |

|              |             |              |             |              |
|--------------|-------------|--------------|-------------|--------------|
| 0.141558423  | 0.002166821 | 0.142889339  | 0.001964895 | 0.103192198  |
| 0.0987402    | 0.032900881 | 0.096383079  | 0.037331182 | 0.060272596  |
| 0.174035645  | 0.000156989 | 0.172708327  | 0.000176499 | 0.147921753  |
| 0.057793615  | 0.212534785 | 0.053414864  | 0.249307086 | 0.051238455  |
| 0.041240136  | 0.37389732  | 0.007053671  | 0.879167606 | 0.021960446  |
| 0.180965045  | 8.40E-05    | 0.195740149  | 2.04E-05    | 0.198984554  |
| -0.178696277 | 0.000103344 | -0.18329655  | 6.77E-05    | -0.212272363 |
| -0.066512815 | 0.151261006 | -0.059821216 | 0.19689835  | -0.030463173 |
| -0.077569557 | 0.094067055 | -0.086697488 | 0.061199175 | -0.122751779 |
| 0.036167499  | 0.435539935 | 0.043057586  | 0.353190127 | 0.032086677  |
| 0.233605644  | 3.30E-07    | 0.246156245  | 7.11E-08    | 0.241345568  |
| 0.158956978  | 0.000565111 | 0.167531814  | 0.00027645  | 0.190044679  |
| -0.192661662 | 2.77E-05    | -0.189991984 | 3.59E-05    | -0.277581682 |
| -0.113937651 | 0.013753326 | -0.122404724 | 0.008095423 | -0.115483586 |
| -0.24947166  | 4.67E-08    | -0.262183037 | 8.84E-09    | -0.289631806 |
| -0.03041184  | 0.512084237 | -0.014425157 | 0.755868266 | -0.041610064 |
| -0.229388475 | 5.42E-07    | -0.174077602 | 0.000156406 | -0.189847883 |
| 0.014988851  | 0.74664837  | -0.019311932 | 0.677223596 | 0.01927421   |
| -0.116321871 | 0.011884855 | -0.18690506  | 4.82E-05    | -0.163492533 |
| 0.163713573  | 0.000381742 | 0.141948986  | 0.002105683 | 0.132273115  |
| 0.202252781  | 1.06E-05    | 0.217801539  | 2.02E-06    | 0.224670159  |
| 0.103625349  | 0.025130349 | 0.087459036  | 0.058950707 | 0.131088242  |
| 0.089729302  | 0.052650029 | 0.087390894  | 0.059149069 | 0.151098988  |
| -0.097739899 | 0.034722956 | -0.113821198 | 0.013850873 | -0.08741679  |
| -0.041402419 | 0.372018459 | -0.051587145 | 0.265897066 | -0.04756543  |
| 0.113954366  | 0.013739375 | 0.090152757  | 0.051539226 | 0.084348554  |
| 0.167078195  | 0.00028736  | 0.196646592  | 1.87E-05    | 0.207519571  |
| 0.056879833  | 0.219866619 | 0.060703084  | 0.190366053 | 0.066213472  |
| -0.290945558 | 1.46E-10    | -0.311782343 | 5.50E-12    | -0.320252055 |
| 0.220666683  | 1.47E-06    | 0.213441562  | 3.26E-06    | 0.222186171  |
| -0.06000376  | 0.195532932 | -0.07120015  | 0.124421865 | -0.052616506 |
| 0.160212082  | 0.000510076 | 0.189118869  | 3.90E-05    | 0.233380172  |
| 0.1957683    | 2.04E-05    | 0.206273545  | 6.99E-06    | 0.219699205  |
| -0.000857602 | 0.985253317 | -0.008788304 | 0.849770282 | -0.005863448 |
| -0.11897882  | 0.010070176 | -0.092419235 | 0.045921087 | -0.106762062 |
| 0.010737791  | 0.816980423 | -0.015412118 | 0.739748932 | -0.023935885 |
| -0.071387985 | 0.123429016 | -0.087357564 | 0.059246295 | -0.091636565 |
| -0.244410753 | 8.85E-08    | -0.256861331 | 1.79E-08    | -0.274197681 |
| 0.053744617  | 0.246392476 | 0.01647877   | 0.722455505 | -0.017864523 |
| -0.125819754 | 0.006478454 | -0.089702378 | 0.052721326 | -0.078916732 |
| 0.069060676  | 0.136173275 | 0.050834649  | 0.272942735 | 0.055777799  |
| -0.089148691 | 0.05420544  | -0.1181645   | 0.010598287 | -0.139855544 |
| 0.120890072  | 0.008921377 | 0.092586875  | 0.045526797 | 0.057325725  |
| -0.04361226  | 0.347017231 | -0.054246179 | 0.242005064 | -0.036968021 |
| -0.007669885 | 0.868703253 | -0.020123375 | 0.664471221 | 0.018042758  |

|              |             |              |             |              |
|--------------|-------------|--------------|-------------|--------------|
| 0.122282749  | 0.008159317 | 0.130930924  | 0.004595956 | 0.141456122  |
| -0.184065148 | 6.30E-05    | -0.188795921 | 4.03E-05    | -0.190669368 |
| -0.098227938 | 0.033823521 | -0.133146441 | 0.003945935 | -0.178436066 |
| -0.120744562 | 0.009004545 | -0.106556176 | 0.02127391  | -0.124020834 |
| -0.008069693 | 0.861925955 | -0.037876134 | 0.41415153  | 0.007680168  |
| -0.149291098 | 0.001213394 | -0.153688187 | 0.000861789 | -0.147875275 |
| 0.031365034  | 0.498942871 | 0.1014149    | 0.02842476  | 0.079148828  |
| -0.030642717 | 0.508884785 | -0.049735408 | 0.283461967 | -0.042371511 |
| 0.103456788  | 0.025369415 | 0.093534708  | 0.043350615 | 0.099479794  |
| 0.122949328  | 0.007815558 | 0.098187041  | 0.033898122 | 0.105653873  |
| -0.030185048 | 0.515237237 | 0.002727038  | 0.953132152 | -0.038155789 |
| 0.111910428  | 0.015540651 | 0.112366733  | 0.015121478 | 0.13683821   |
| 0.077987415  | 0.092303431 | 0.099457601  | 0.031644918 | 0.109707448  |
| -0.050779838 | 0.273460856 | -0.024746231 | 0.593743503 | -0.039305462 |
| 0.105828529  | 0.022179997 | 0.118377583  | 0.010457776 | 0.122557774  |
| -0.001150855 | 0.980211663 | 0.03773939   | 0.415840127 | -0.001273605 |
| 0.037843441  | 0.414554882 | 0.008169974  | 0.86022762  | 0.041769143  |
| -0.050809759 | 0.273177932 | -0.042234506 | 0.362476764 | -0.059337543 |
| -0.106167879 | 0.021753348 | -0.141669478 | 0.002149274 | -0.179635665 |
| 0.073932259  | 0.110579887 | 0.080331607  | 0.082894702 | 0.134109516  |
| 0.088490241  | 0.056015436 | 0.137654001  | 0.002873476 | 0.165920498  |
| 0.060373268  | 0.192790237 | 0.096407336  | 0.037283132 | 0.145065107  |
| -0.168213795 | 0.000260774 | -0.124725444 | 0.006961894 | -0.123382032 |
| -0.06732925  | 0.146294026 | -0.062241775 | 0.179351769 | -0.096872931 |
| -0.056692647 | 0.221390583 | -0.067531508 | 0.145082987 | -0.075039445 |
| 0.19703349   | 1.80E-05    | 0.193800447  | 2.48E-05    | 0.219369587  |
| 0.223936243  | 1.02E-06    | 0.238979135  | 1.73E-07    | 0.245528067  |
| 0.103859931  | 0.024800885 | 0.072243057  | 0.118987055 | 0.109543866  |
| -0.014354834 | 0.757020943 | -0.026287983 | 0.570942753 | -9.14E-05    |
| 0.0977182    | 0.034763414 | 0.062157144  | 0.179945029 | 0.018739462  |
| -0.003764753 | 0.935331203 | 0.018174966  | 0.695247298 | 0.021367057  |
| -0.07472618  | 0.106793574 | -0.055047635 | 0.235108595 | -0.045219971 |
| -0.15930401  | 0.000549367 | -0.14407432  | 0.001799758 | -0.144840736 |
| 0.076665466  | 0.097975058 | 0.120506585  | 0.009142052 | 0.112385769  |
| -0.054245278 | 0.242012903 | -0.046500433 | 0.315990039 | -0.012350921 |
| -0.328555082 | 3.23E-13    | -0.33064678  | 2.24E-13    | -0.277355886 |
| -0.085551337 | 0.06471625  | -0.091455053 | 0.048244902 | -0.08373367  |
| -0.16573375  | 0.000322103 | -0.183193089 | 6.83E-05    | -0.213524236 |
| -0.12671944  | 0.006103779 | -0.178770364 | 0.00010265  | -0.192283235 |
| -0.144001735 | 0.001809496 | -0.158115966 | 0.00060502  | -0.164578237 |
| -0.247802038 | 5.78E-08    | -0.248957386 | 4.99E-08    | -0.208613177 |
| -0.005849839 | 0.89966989  | 0.014475217  | 0.755048049 | 0.017253913  |
| 0.034860519  | 0.452320686 | 0.018559409  | 0.689133087 | 0.036352698  |
| 0.023547899  | 0.611747198 | 0.040682004  | 0.380403739 | 0.038939384  |
| 0.036078703  | 0.436668558 | 0.034241243  | 0.460397204 | 0.033571346  |

|              |             |              |             |              |
|--------------|-------------|--------------|-------------|--------------|
| 0.012592563  | 0.786076436 | 0.022188004  | 0.632464662 | 0.034111005  |
| -0.250972349 | 3.86E-08    | -0.24835119  | 5.39E-08    | -0.24254419  |
| -0.157316373 | 0.000645373 | -0.154011342 | 0.000840088 | -0.163624056 |
| -0.20314641  | 9.67E-06    | -0.169784371 | 0.000227776 | -0.19187184  |
| -0.098465846 | 0.033392315 | -0.055916933 | 0.227786438 | -0.080198363 |
| -0.162486224 | 0.000422841 | -0.120240516 | 0.009298001 | -0.157299214 |
| -0.188126803 | 4.29E-05    | -0.169478168 | 0.000233886 | -0.181619558 |
| -0.218901836 | 1.79E-06    | -0.199742208 | 1.37E-05    | -0.212261909 |
| -0.044603202 | 0.336160685 | -0.042028133 | 0.364828923 | -0.102596748 |
| -0.05184482  | 0.263513379 | -0.060324508 | 0.193150537 | -0.06128007  |
| -0.148436752 | 0.001295442 | -0.141219327 | 0.002221214 | -0.192124378 |
| -0.164283882 | 0.000363939 | -0.167429607 | 0.000278874 | -0.145383547 |
| 0.095915567  | 0.038267569 | 0.0884744    | 0.056059591 | 0.078962041  |
| 0.013464445  | 0.771661333 | 0.007774144  | 0.866934966 | -0.007727231 |
| 0.12188192   | 0.008372462 | 0.144993305  | 0.001680554 | 0.145191013  |
| 0.063343203  | 0.171762526 | 0.104739658  | 0.023598329 | 0.118862432  |
| 0.227713408  | 6.58E-07    | 0.248034538  | 5.61E-08    | 0.229836207  |
| 0.12880228   | 0.005309983 | 0.162361477  | 0.000427241 | 0.147564841  |
| 0.199795101  | 1.36E-05    | 0.197047468  | 1.80E-05    | 0.153730312  |
| -0.09224276  | 0.046339248 | -0.082661732 | 0.074325735 | -0.086137489 |
| 0.243025918  | 1.05E-07    | 0.274528013  | 1.61E-09    | 0.285173577  |
| 0.132474392  | 0.004133721 | 0.153460477  | 0.000877392 | 0.165427508  |
| -0.18996486  | 3.60E-05    | -0.174696067 | 0.000148053 | -0.251199568 |
| 0.020062346  | 0.665427038 | 0.051635769  | 0.265446123 | 0.032005296  |
| -0.061772702 | 0.182658257 | -0.061574008 | 0.184072352 | -0.080332944 |
| -0.066299203 | 0.152581469 | -0.118199618 | 0.010575015 | -0.172491132 |
| -0.037364092 | 0.420495294 | -0.035887848 | 0.439100069 | -0.037715437 |
| -0.094002546 | 0.042309187 | -0.119400001 | 0.009806302 | -0.141486898 |
| 0.030655758  | 0.508704369 | 0.057116177  | 0.217953166 | 0.070989202  |
| -0.060829312 | 0.189444211 | -0.042531085 | 0.359113106 | -0.04068276  |
| -0.106905553 | 0.020850395 | -0.094559091 | 0.041097849 | -0.117791251 |
| -0.093943441 | 0.042439582 | -0.042938592 | 0.354523364 | -0.077869992 |
| -0.009858158 | 0.831739725 | 0.0235455    | 0.61178348  | 0.028240917  |
| -0.184752519 | 5.91E-05    | -0.185148343 | 5.69E-05    | -0.207327142 |
| -0.264606381 | 6.37E-09    | -0.245817573 | 7.42E-08    | -0.231294053 |
| 0.000701426  | 0.987938578 | -0.025805805 | 0.578028833 | -0.071623056 |
| -0.054609021 | 0.238865458 | -0.011938244 | 0.796943012 | 0.006536991  |
| -0.25002691  | 4.35E-08    | -0.248317634 | 5.41E-08    | -0.239893124 |
| -0.178108036 | 0.000109007 | -0.158349243 | 0.000593696 | -0.161283311 |
| -0.039340941 | 0.396318287 | -0.05961265  | 0.198466912 | -0.042346671 |
| -0.062168137 | 0.179867884 | -0.073515888 | 0.112607435 | -0.083354211 |
| 0.092932603  | 0.04472262  | 0.111706305  | 0.015731441 | 0.114362524  |
| 0.165368427  | 0.000332199 | 0.171091513  | 0.000203335 | 0.165021613  |
| -0.145815304 | 0.00158011  | -0.129691706 | 0.0050003   | -0.146257389 |
| -0.008996872 | 0.846248758 | 0.003268132  | 0.943846764 | 0.010375342  |

|              |             |              |             |              |
|--------------|-------------|--------------|-------------|--------------|
| 0.137454387  | 0.002914694 | 0.164254568  | 0.000364835 | 0.182020149  |
| -0.082438464 | 0.07511421  | -0.081005039 | 0.080339943 | -0.065256327 |
| -0.062884889 | 0.174890854 | -0.100250518 | 0.030304657 | -0.09073494  |
| -0.101469977 | 0.028338376 | -0.126186281 | 0.006323393 | -0.131076142 |
| 0.004194711  | 0.927964644 | 0.030199621  | 0.515034331 | 0.039502421  |
| 0.084110749  | 0.069370904 | 0.11466957   | 0.013153968 | 0.116329763  |
| 0.061977159  | 0.181211545 | 0.008796158  | 0.84963761  | 0.050957757  |
| 0.050292589  | 0.278096273 | 0.043213833  | 0.351444308 | 0.017893934  |
| -0.176700287 | 0.000123769 | -0.141431221 | 0.002187081 | -0.164313866 |
| 0.156373134  | 0.000696179 | 0.156450091  | 0.000691899 | 0.16261621   |
| 0.009663279  | 0.835017814 | 0.060241777  | 0.193762989 | 0.100440521  |
| -0.144711414 | 0.001716326 | -0.16656764  | 0.00030012  | -0.194444416 |
| -0.483814817 | 8.98E-29    | -0.478420148 | 4.37E-28    | -0.471555398 |
| -0.008477723 | 0.855019731 | -0.020147663 | 0.664090995 | 0.022752351  |
| 0.074815947  | 0.106371989 | 0.070131381  | 0.130189718 | 0.070659614  |
| -0.195954738 | 2.00E-05    | -0.196065821 | 1.98E-05    | -0.185053098 |
| 0.018625837  | 0.688078644 | 0.035778405  | 0.440497866 | 0.065449578  |
| -0.108766283 | 0.018716038 | -0.136522347 | 0.003114357 | -0.126547794 |
| -0.049868202 | 0.282176844 | -0.077013225 | 0.096456811 | -0.106956104 |
| 0.2235494    | 1.06E-06    | 0.204580145  | 8.34E-06    | 0.183976536  |
| -0.013621499 | 0.769072883 | -0.074795563 | 0.106467604 | -0.098838588 |
| 0.027739974  | 0.549856988 | 0.044738385  | 0.334696716 | 0.034898263  |
| 0.135760086  | 0.003286803 | 0.100170487  | 0.03043769  | 0.119425987  |
| -0.006074998 | 0.895829741 | -0.008831139 | 0.849046801 | 0.024977898  |
| -0.17347639  | 0.000164949 | -0.150321078 | 0.001120847 | -0.123804372 |
| -0.29222045  | 1.20E-10    | -0.297730396 | 5.16E-11    | -0.295798651 |
| -0.044486643 | 0.337426247 | -0.058634477 | 0.205945053 | -0.060736743 |
| -0.239020437 | 1.72E-07    | -0.233175996 | 3.47E-07    | -0.214947341 |
| 0.007329316  | 0.874483975 | 0.033485145  | 0.470366232 | 0.071816623  |
| -0.022162618 | 0.632854227 | 0.007535478  | 0.870983819 | -0.030013011 |
| -0.10827828  | 0.019256516 | -0.08862251  | 0.055647873 | -0.114451039 |
| -0.089741435 | 0.052617927 | -0.079078442 | 0.087823207 | -0.101621054 |
| 0.12860639   | 0.005380467 | 0.092999347  | 0.044568755 | 0.076517583  |
| -0.090128295 | 0.051602859 | -0.068689201 | 0.138297965 | -0.0646257   |
| 0.068286668  | 0.140628944 | 0.067852507  | 0.143176701 | 0.081965707  |
| -0.081816901 | 0.07734519  | -0.077764923 | 0.093239165 | -0.095364105 |
| -0.063057783 | 0.17370578  | -0.09063996  | 0.050285458 | -0.085253822 |
| 0.083101737  | 0.072791579 | 0.05259698   | 0.256639571 | 0.100693269  |
| 0.018815457  | 0.685072031 | -0.005282718 | 0.909352464 | -0.012606504 |
| -0.061009256 | 0.188135751 | -0.096734725 | 0.036639739 | -0.106156058 |
| -0.175687627 | 0.000135528 | -0.163191525 | 0.000398746 | -0.166566904 |
| 0.225232325  | 8.76E-07    | 0.237943407  | 1.96E-07    | 0.224554091  |
| 0.161318199  | 0.000465745 | 0.175531107  | 0.000137437 | 0.125128904  |
| -0.133103561 | 0.003957682 | -0.119371985 | 0.009823662 | -0.096072445 |
| -0.150222528 | 0.001129412 | -0.104362114 | 0.024108097 | -0.123218243 |

|              |             |              |             |              |
|--------------|-------------|--------------|-------------|--------------|
| -0.06131318  | 0.18594089  | -0.082563982 | 0.074670107 | -0.092060649 |
| -0.224893995 | 9.11E-07    | -0.221693856 | 1.31E-06    | -0.219036242 |
| -0.035812775 | 0.44005862  | -0.030847484 | 0.506055913 | -0.037972766 |
| -0.171702863 | 0.000192768 | -0.13915973  | 0.002579255 | -0.145588938 |
| 0.143259619  | 0.001911861 | 0.150943359  | 0.001068132 | 0.115124812  |
| -0.14451356  | 0.001741849 | -0.139776135 | 0.00246694  | -0.123036535 |
| -0.217468739 | 2.10E-06    | -0.244785707 | 8.44E-08    | -0.271921274 |
| -0.124063092 | 0.007269962 | -0.113524527 | 0.014102135 | -0.099366558 |
| -0.049659167 | 0.284201566 | -0.046292836 | 0.318157719 | -0.062311704 |
| -0.080504324 | 0.082233299 | -0.054177251 | 0.242604747 | -0.076475897 |
| -0.052245216 | 0.259838654 | -0.041855502 | 0.366803782 | -0.015340217 |
| 0.069708576  | 0.132527765 | 0.058011693  | 0.210811332 | 0.076516691  |
| 0.221844709  | 1.29E-06    | 0.211192211  | 4.15E-06    | 0.225251826  |
| -0.200432835 | 1.28E-05    | -0.215025956 | 2.74E-06    | -0.222156178 |
| 0.249649238  | 4.57E-08    | 0.204130849  | 8.73E-06    | 0.221406361  |
| -0.140757849 | 0.002297242 | -0.163231568 | 0.000397417 | -0.195483655 |
| -0.077459633 | 0.094535454 | -0.090970946 | 0.049448315 | -0.123937116 |
| -0.10250859  | 0.02675109  | -0.105532107 | 0.022558592 | -0.125514422 |
| -0.010891199 | 0.814412861 | -0.004279418 | 0.926514034 | 0.020632015  |
| -0.13972511  | 0.002476065 | -0.110160326 | 0.01724431  | -0.118944493 |
| -0.296154055 | 6.58E-11    | -0.307340149 | 1.13E-11    | -0.329839191 |
| -0.297713059 | 5.17E-11    | -0.300704315 | 3.24E-11    | -0.298501379 |
| -0.072999467 | 0.115162631 | -0.071237481 | 0.124224049 | -0.110188895 |
| -0.076313121 | 0.099532672 | -0.119767377 | 0.009581171 | -0.122295552 |
| -0.187035833 | 4.76E-05    | -0.208437752 | 5.56E-06    | -0.199244633 |
| -0.279704086 | 7.68E-10    | -0.300336011 | 3.44E-11    | -0.304397215 |
| -0.125882197 | 0.006451798 | -0.118544528 | 0.010348846 | -0.103820914 |
| -0.297760132 | 5.14E-11    | -0.294243563 | 8.83E-11    | -0.296349255 |
| -0.192286079 | 2.87E-05    | -0.15274648  | 0.000928022 | -0.174115704 |
| -0.331495518 | 1.93E-13    | -0.350751651 | 5.77E-15    | -0.379799042 |
| -0.027462496 | 0.553856781 | -0.02112086  | 0.648927076 | -0.028230228 |
| 0.123525974  | 0.007528675 | 0.099742241  | 0.031158076 | 0.070990545  |
| -0.311343608 | 5.90E-12    | -0.349537451 | 7.25E-15    | -0.356026271 |
| -0.062889986 | 0.174855829 | -0.083355901 | 0.071917228 | -0.087173058 |
| 0.100564757  | 0.029787114 | 0.116377876  | 0.011843803 | 0.121215784  |
| -0.182881492 | 7.04E-05    | -0.194042724 | 2.42E-05    | -0.21863311  |
| 0.077139245  | 0.095911288 | 0.09301391   | 0.044535243 | 0.071335278  |
| -0.031640427 | 0.495179665 | -0.058023229 | 0.210720452 | -0.013416919 |
| -0.065613836 | 0.156877171 | -0.054652019 | 0.23849531  | -0.055169123 |
| -0.284342073 | 3.90E-10    | -0.291671701 | 1.31E-10    | -0.293913834 |
| -0.050709239 | 0.274129216 | -0.071369097 | 0.123528575 | -0.084953689 |
| 0.262056826  | 8.99E-09    | 0.289703801  | 1.76E-10    | 0.27401252   |
| -0.044370286 | 0.338692672 | -0.059670757 | 0.198028992 | -0.050478727 |
| -0.152872024 | 0.000918928 | -0.156201794 | 0.000705797 | -0.158231185 |
| 0.065999103  | 0.154451304 | 0.086403771  | 0.062085084 | 0.035992954  |

|              |             |              |             |              |
|--------------|-------------|--------------|-------------|--------------|
| -0.106560554 | 0.021268556 | -0.074108725 | 0.109729292 | -0.080755728 |
| -0.043891646 | 0.343934063 | -0.034522699 | 0.456716573 | -0.055334042 |
| -0.269200981 | 3.39E-09    | -0.239640988 | 1.59E-07    | -0.235937708 |
| 0.06576126   | 0.155945522 | 0.037373842  | 0.420373968 | -0.018627174 |
| -0.09841665  | 0.033481095 | -0.14147354  | 0.002180322 | -0.126829792 |
| -0.327161712 | 4.12E-13    | -0.328224575 | 3.42E-13    | -0.343945431 |
| -0.225307046 | 8.69E-07    | -0.207055836 | 6.44E-06    | -0.168750694 |
| -0.042306347 | 0.361660181 | -0.047244335 | 0.308301937 | 0.005755161  |
| 0.252574468  | 3.14E-08    | 0.24906089   | 4.92E-08    | 0.23558422   |
| -0.03515555  | 0.448501174 | -0.029996293 | 0.517869058 | -0.023966114 |
| -0.079991243 | 0.084210667 | -0.095712211 | 0.038681043 | -0.117015062 |
| -0.215829977 | 2.51E-06    | -0.198425395 | 1.56E-05    | -0.214424573 |
| -0.120026724 | 0.009425019 | -0.132019209 | 0.004265463 | -0.166521086 |
| -0.244056832 | 9.25E-08    | -0.23665412  | 2.29E-07    | -0.26142441  |
| -0.120106805 | 0.009377262 | -0.109986883 | 0.017421728 | -0.106797944 |
| -0.305623056 | 1.49E-11    | -0.325852581 | 5.17E-13    | -0.355608593 |
| -0.054803844 | 0.237191557 | -0.06249467  | 0.177587625 | -0.065922116 |
| -0.141646066 | 0.002152962 | -0.129174985 | 0.00517817  | -0.11745857  |
| -0.191240971 | 3.18E-05    | -0.185454088 | 5.53E-05    | -0.231699251 |
| 0.07770263   | 0.093502504 | 0.096204614  | 0.037686312 | 0.11712162   |
| 0.172707676  | 0.000176509 | 0.129801287  | 0.004963294 | 0.158335239  |
| 0.194095943  | 2.41E-05    | 0.257902113  | 1.56E-08    | 0.241247449  |
| -0.126640746 | 0.006135757 | -0.139317023 | 0.00255016  | -0.124286207 |
| -0.25652955  | 1.87E-08    | -0.204883932 | 8.08E-06    | -0.237993065 |
| -0.070009005 | 0.130863136 | -0.011859853 | 0.798247584 | -0.0114741   |
| 0.161818874  | 0.000446881 | 0.180406973  | 8.84E-05    | 0.187448564  |
| -0.066125374 | 0.15366244  | -0.058231595 | 0.209083697 | -0.049335056 |
| -0.159813593 | 0.000526985 | -0.140829925 | 0.002285213 | -0.153868706 |
| 0.032773384  | 0.479858244 | 0.013673235  | 0.768220759 | -0.029183638 |
| -0.170224341 | 0.000219258 | -0.178372678 | 0.000106424 | -0.185969903 |
| -0.088964663 | 0.054706345 | -0.077512524 | 0.094309845 | -0.043070799 |
| -0.419980089 | 2.22E-21    | -0.407142294 | 4.50E-20    | -0.439760324 |
| -0.146517597 | 0.00149869  | -0.133970779 | 0.003726156 | -0.128743571 |
| -0.030139825 | 0.515867152 | -0.015788436 | 0.733632261 | -0.034314495 |
| 0.026407998  | 0.569185443 | 0.054295654  | 0.241575271 | 0.060851509  |
| 0.133992126  | 0.003720615 | 0.155921297  | 0.000721807 | 0.164976835  |
| 0.191064486  | 3.24E-05    | 0.214128441  | 3.02E-06    | 0.235937333  |
| 0.107719658  | 0.019891853 | 0.113530199  | 0.014097294 | 0.109737161  |
| -0.024136472 | 0.602874336 | -0.012997363 | 0.779374328 | -0.019475815 |
| 0.018152246  | 0.69560927  | -0.023870493 | 0.606876887 | -0.042335714 |
| -0.168809082 | 0.000247773 | -0.200503647 | 1.27E-05    | -0.172448331 |
| 0.084113837  | 0.06936064  | 0.106096878  | 0.02184202  | 0.08562317   |
| 0.03739736   | 0.420081415 | 0.07265869   | 0.116873509 | 0.033534464  |
| 0.104535098  | 0.023873361 | 0.120571553  | 0.009104329 | 0.126696493  |
| -0.201121503 | 1.19E-05    | -0.16094376  | 0.000480334 | -0.178386852 |



|              |             |              |             |              |
|--------------|-------------|--------------|-------------|--------------|
| -0.379566267 | 1.88E-17    | -0.357393352 | 1.62E-15    | -0.343997827 |
| -0.09643918  | 0.037220135 | -0.131469833 | 0.004429514 | -0.123423483 |
| -0.396433862 | 5.02E-19    | -0.369882421 | 1.38E-16    | -0.347244222 |
| -0.114211952 | 0.013525945 | -0.12460266  | 0.007018104 | -0.126505206 |
| -0.102485391 | 0.02678569  | -0.083995092 | 0.069756192 | -0.104137303 |
| -0.091022799 | 0.049318227 | -0.077641384 | 0.093761998 | -0.10044637  |
| -0.087554536 | 0.058673629 | -0.077676766 | 0.093612019 | -0.088697134 |
| 0.007092385  | 0.87850955  | 0.011488798  | 0.804430117 | -0.02364876  |
| -0.130532457 | 0.004722631 | -0.173284264 | 0.00016777  | -0.182814908 |
| 0.059526327  | 0.199118777 | 0.058803307  | 0.204639983 | 0.057857329  |
| 0.181103593  | 8.29E-05    | 0.13058952   | 0.004704299 | 0.17032778   |
| 0.285776015  | 3.16E-10    | 0.275192306  | 1.46E-09    | 0.273206141  |
| 0.143935908  | 0.001818369 | 0.130196988  | 0.004831711 | 0.162162894  |
| -0.235249264 | 2.71E-07    | -0.231481285 | 4.24E-07    | -0.252013361 |
| -0.111535368 | 0.015892788 | -0.103308318 | 0.025581606 | -0.137556412 |
| -0.097213253 | 0.035716302 | -0.095325009 | 0.039478789 | -0.067185478 |
| -0.258187314 | 1.51E-08    | -0.229125977 | 5.59E-07    | -0.238857131 |
| 0.2454042    | 7.81E-08    | 0.230610491  | 4.70E-07    | 0.183817805  |
| 0.011089206  | 0.811101789 | 0.016984244  | 0.714308819 | -0.007452192 |
| -0.286250238 | 2.94E-10    | -0.289714286 | 1.76E-10    | -0.295699503 |
| -0.184864762 | 5.85E-05    | -0.165799459 | 0.000320318 | -0.169141657 |
| 0.166294558  | 0.00030716  | 0.16077201   | 0.000487167 | 0.172481121  |
| 0.117835281  | 0.010818671 | 0.167773442  | 0.000270798 | 0.189757881  |
| 0.232536766  | 3.74E-07    | 0.218517853  | 1.87E-06    | 0.273218366  |
| -0.256609922 | 1.86E-08    | -0.257423853 | 1.67E-08    | -0.218463988 |
| -0.170078253 | 0.000222053 | -0.191647231 | 3.06E-05    | -0.223979555 |
| -0.074328016 | 0.108679468 | -0.070758133 | 0.126782741 | -0.077298584 |
| -0.076482578 | 0.098781111 | -0.07713915  | 0.095911701 | -0.115743274 |
| -0.143291617 | 0.001907341 | -0.137510152 | 0.002903125 | -0.133128217 |
| -0.147872579 | 0.00135239  | -0.15616065  | 0.000708124 | -0.188459072 |
| 0.017499111  | 0.706043998 | -0.000185426 | 0.996811385 | -0.058492619 |
| 0.22510343   | 8.89E-07    | 0.227378411  | 6.84E-07    | 0.23349188   |
| -0.035285837 | 0.446820293 | -0.032590626 | 0.482312181 | -0.070228173 |
| 0.120718992  | 0.009019231 | 0.120255851  | 0.009288949 | 0.125057653  |
| -0.012549537 | 0.786789733 | -0.01720406  | 0.710776093 | 0.022014709  |
| 0.020681995  | 0.655747789 | 0.039091714  | 0.399319439 | 0.046508161  |
| -0.027821706 | 0.548681535 | -0.038901959 | 0.401613554 | -0.028262353 |
| -0.221079622 | 1.40E-06    | -0.248241015 | 5.47E-08    | -0.268958064 |
| -0.311712845 | 5.56E-12    | -0.334589272 | 1.12E-13    | -0.379473648 |
| -0.30197845  | 2.66E-11    | -0.320954133 | 1.19E-12    | -0.356444899 |
| -0.289165641 | 1.91E-10    | -0.326651629 | 4.50E-13    | -0.364432537 |
| -0.006960465 | 0.880752282 | -0.028652943 | 0.536797672 | -0.010194785 |
| 0.123179947  | 0.007699673 | 0.109388399  | 0.018046238 | 0.123197054  |
| -0.220493715 | 1.50E-06    | -0.210765867 | 4.34E-06    | -0.216484331 |
| 0.100982311  | 0.029111147 | 0.126533361  | 0.006179637 | 0.111065178  |

|              |             |              |             |              |
|--------------|-------------|--------------|-------------|--------------|
| -0.136907666 | 0.003030353 | -0.154631609 | 0.000799842 | -0.152813734 |
| -0.066824712 | 0.149348599 | -0.145460245 | 0.001622801 | -0.131103237 |
| 0.056722213  | 0.221149372 | 0.042050174  | 0.364577249 | 0.058789918  |
| 0.091320603  | 0.04857664  | 0.073457517  | 0.112893995 | 0.077698431  |
| 0.026475346  | 0.568200438 | 0.008892456  | 0.848011371 | 0.04504283   |
| 0.212343842  | 3.67E-06    | 0.239566208  | 1.61E-07    | 0.251747264  |
| 0.050339509  | 0.277647588 | 0.075260927  | 0.104301541 | 0.0789046    |
| 0.042312445  | 0.361590917 | -0.016484652 | 0.722360524 | -0.041163157 |
| -0.033956741 | 0.464134433 | -0.030326158 | 0.513274262 | -0.012753252 |
| 0.003086135  | 0.946969118 | -0.007346733 | 0.87418819  | 0.006175245  |
| 0.138860734  | 0.002635397 | 0.119311977  | 0.009860936 | 0.164695831  |
| 0.017830954  | 0.700735318 | -0.058841791 | 0.204343336 | -0.088481249 |
| 0.061652617  | 0.183511935 | -0.01481244  | 0.749529977 | -0.05038743  |
| 0.089967705  | 0.052022224 | 0.068378184  | 0.140096369 | 0.066778267  |
| -0.09714684  | 0.035843268 | -0.087024471 | 0.06022523  | -0.088908363 |
| 0.076624606  | 0.098154689 | 0.087303703  | 0.059403691 | 0.107654188  |
| 0.026418138  | 0.569037092 | -0.010006323 | 0.829249393 | -0.07067591  |
| 0.064897338  | 0.161465057 | 0.005525336  | 0.905208457 | -0.060009389 |
| -0.037452043 | 0.419401629 | -0.050110453 | 0.279842615 | -0.061509808 |
| -0.189850613 | 3.64E-05    | -0.190597801 | 3.39E-05    | -0.198251069 |
| 0.007051482  | 0.879204828 | -0.003464866 | 0.940472548 | -0.00785418  |
| 0.047220974  | 0.308541475 | 0.026330621  | 0.570318134 | 0.058338048  |
| -0.025709006 | 0.579456352 | 0.010763148  | 0.816555898 | -0.001855467 |
| -0.02053121  | 0.658097908 | -0.042853316 | 0.355480759 | -0.047734101 |
| 0.17028547   | 0.000218098 | 0.157087349  | 0.000657383 | 0.170146711  |
| -0.001130547 | 0.980560773 | -0.025572063 | 0.581478682 | -0.014706031 |
| -0.161267251 | 0.000467705 | -0.1778884   | 0.000111196 | -0.209030834 |
| 0.039951901  | 0.389018856 | 0.019041875  | 0.681488485 | 0.031829375  |
| -0.152103839 | 0.000975885 | -0.180108753 | 9.09E-05    | -0.176553669 |
| -0.11927573  | 0.009883512 | -0.14093383  | 0.002267974 | -0.131789398 |
| -0.004799349 | 0.917615796 | -0.015741226 | 0.734398703 | 0.00302653   |
| -0.048506423 | 0.295542903 | -0.059502356 | 0.199300076 | -0.064187423 |
| 0.254051408  | 2.59E-08    | 0.303141994  | 2.21E-11    | 0.295351168  |
| -0.077659068 | 0.093687015 | -0.076286956 | 0.099649122 | -0.082955345 |
| -0.081409504 | 0.078836442 | -0.060674461 | 0.190575542 | -0.052329001 |
| -0.032651249 | 0.481497426 | -0.043971082 | 0.34306064  | -0.051298929 |
| -0.147966018 | 0.001342802 | -0.15028293  | 0.001124155 | -0.151410262 |
| -0.174836543 | 0.000146215 | -0.133780333 | 0.003775923 | -0.115747016 |
| -0.323309412 | 7.99E-13    | -0.279555945 | 7.84E-10    | -0.28865213  |
| -0.028526309 | 0.538599754 | -0.024270735 | 0.600858422 | 0.001008276  |
| -0.229924574 | 5.09E-07    | -0.199764652 | 1.37E-05    | -0.205712376 |
| -0.160365239 | 0.000503712 | -0.143214787 | 0.001918212 | -0.126971026 |
| -0.093848008 | 0.042650837 | -0.087200454 | 0.059706379 | -0.132621408 |
| 0.050235235  | 0.278645388 | 0.017698989  | 0.702844697 | -0.006069293 |
| 0.15823375   | 0.000599277 | 0.161218678  | 0.000469582 | 0.172108547  |

|              |             |              |             |              |
|--------------|-------------|--------------|-------------|--------------|
| 0.056326705  | 0.224391653 | 0.075054352  | 0.105258711 | 0.088111223  |
| 0.00473872   | 0.918652899 | 0.015671742  | 0.735527227 | 0.046597963  |
| 0.081851929  | 0.077218051 | 0.094352854  | 0.041543269 | 0.091974006  |
| 0.042062299  | 0.364438855 | 0.045824846  | 0.323079899 | 0.019922532  |
| -0.023385389 | 0.614207192 | -0.014968939 | 0.746973445 | 0.003855674  |
| 0.004213998  | 0.927634335 | 0.012887328  | 0.781194538 | 0.035101423  |
| -0.001948386 | 0.966504929 | 0.024777213  | 0.593281248 | -0.000134671 |
| -0.241519113 | 1.27E-07    | -0.209473186 | 4.99E-06    | -0.219731473 |
| -0.056284157 | 0.224742456 | -0.062865919 | 0.175021242 | -0.058875853 |
| -0.162688915 | 0.000415781 | -0.165710757 | 0.00032273  | -0.179974878 |
| -0.135948772 | 0.003243328 | -0.15429365  | 0.000821543 | -0.143320999 |
| 0.077954953  | 0.092439488 | 0.079387951  | 0.086584571 | 0.160372254  |
| 0.016464963  | 0.722678474 | 0.047113087  | 0.309649331 | 0.046990266  |
| 0.024823627  | 0.592589062 | 0.022162881  | 0.632850185 | 0.027323354  |
| -0.189610234 | 3.72E-05    | -0.192173512 | 2.90E-05    | -0.199215395 |
| -0.131981888 | 0.004276431 | -0.136260008 | 0.003172756 | -0.130378275 |
| 0.2897689    | 1.74E-10    | 0.320729852  | 1.24E-12    | 0.305627101  |
| 0.169752193  | 0.000228411 | 0.150249597  | 0.001127053 | 0.101454608  |
| -0.312662978 | 4.76E-12    | -0.320447999 | 1.30E-12    | -0.306552642 |
| 0.147064828  | 0.001437938 | 0.141632739  | 0.002155064 | 0.144842459  |
| -0.210777698 | 4.34E-06    | -0.188118307 | 4.30E-05    | -0.18143034  |
| 0.181459624  | 8.02E-05    | 0.208478442  | 5.54E-06    | 0.220378968  |
| -0.007286792 | 0.875206241 | -0.034657209 | 0.454963399 | -0.011074489 |
| 0.044512298  | 0.337147433 | 0.075159518  | 0.104770558 | 0.083919375  |
| -0.090329142 | 0.051082337 | -0.104217528 | 0.024305825 | -0.075743315 |
| 0.241599586  | 1.25E-07    | 0.247988801  | 5.64E-08    | 0.265672687  |
| 0.129520652  | 0.005058562 | 0.114248411  | 0.013495973 | 0.083944417  |
| -0.118983288 | 0.010067344 | -0.128716632 | 0.005340697 | -0.107592272 |
| 0.084727865  | 0.067344448 | 0.059881372  | 0.196447619 | 0.056648296  |
| -0.041583711 | 0.369926441 | -0.029635763 | 0.522915152 | -0.072109499 |
| -0.057825664 | 0.21228087  | -0.061860597 | 0.182035283 | -0.038851262 |
| -0.042744087 | 0.356709441 | -0.044464474 | 0.337667301 | -0.03548381  |
| 0.124514541  | 0.007058695 | 0.101419987  | 0.028416772 | 0.034292374  |
| 0.073516266  | 0.112605581 | 0.031448733  | 0.497797539 | -0.049825312 |
| -0.04965429  | 0.284248926 | -0.060746021 | 0.190052116 | -0.07513358  |
| -0.032486483 | 0.483713586 | -0.011321907 | 0.807214872 | -0.008719051 |
| -0.14841142  | 0.001297951 | -0.167983028 | 0.000265983 | -0.188533564 |
| 0.000985438  | 0.983055459 | -0.007688282 | 0.868391183 | 0.020791295  |
| -0.171169723 | 0.000201954 | -0.135200618 | 0.00341884  | -0.150966426 |
| -0.071945175 | 0.120520108 | -0.068658032 | 0.138477395 | -0.047492414 |
| -0.192984251 | 2.68E-05    | -0.230482296 | 4.77E-07    | -0.217762252 |
| 0.083181487  | 0.072516301 | 0.085338161  | 0.065388395 | 0.071226427  |
| -0.04106587  | 0.375921415 | -0.075185038 | 0.104652372 | -0.06743646  |
| 0.04390757   | 0.343758852 | 0.015731085  | 0.734563367 | -0.031173856 |
| -0.109328967 | 0.018109309 | -0.095617639 | 0.038874618 | -0.094909755 |

|              |             |              |             |              |
|--------------|-------------|--------------|-------------|--------------|
| 0.081313486  | 0.079191284 | 0.065436554  | 0.158003066 | 0.043838628  |
| 0.025417263  | 0.583768671 | 0.047563015  | 0.305046489 | 0.055218624  |
| -0.084935597 | 0.066673329 | -0.129910731 | 0.004926581 | -0.130140206 |
| 0.009354662  | 0.840214901 | -0.006787758 | 0.883689873 | -0.018509123 |
| -0.083285771 | 0.072157622 | -0.060206786 | 0.194022449 | -0.045865877 |
| 0.012791488  | 0.782780908 | 0.038733131  | 0.403661267 | -0.003313178 |
| -0.023043086 | 0.619402924 | -0.022582895 | 0.626418004 | -0.018935232 |
| -0.022336919 | 0.630181536 | -0.016911931 | 0.715472314 | 0.001706672  |
| -0.21529072  | 2.66E-06    | -0.220447614 | 1.51E-06    | -0.227969997 |
| -0.038176347 | 0.410458548 | -0.008850828 | 0.848714286 | -0.01553217  |
| -0.165598033 | 0.00032582  | -0.177154989 | 0.000118807 | -0.164085279 |
| 0.006978904  | 0.880438756 | -0.021943678 | 0.636218178 | -0.029981957 |
| 0.163592358  | 0.000385628 | 0.187623757  | 4.50E-05    | 0.166092618  |
| -0.15096335  | 0.001066477 | -0.165528331 | 0.000327744 | -0.187187336 |
| -0.111398316 | 0.016023197 | -0.083295159 | 0.072125402 | -0.107720754 |
| 0.017699466  | 0.702837076 | 0.001307112  | 0.977525573 | -0.005136524 |
| 0.001450134  | 0.975067221 | -0.024648949 | 0.595196013 | -0.066680945 |
| 0.335788351  | 9.02E-14    | 0.318343398  | 1.85E-12    | 0.337601905  |
| -0.327906537 | 3.62E-13    | -0.32224043  | 9.59E-13    | -0.316418953 |
| 0.033796994  | 0.466240235 | 0.056649143  | 0.221745847 | 0.053097427  |
| 0.126845221  | 0.006052977 | 0.150415516  | 0.001112696 | 0.13419031   |
| -0.215355231 | 2.65E-06    | -0.191234275 | 3.18E-05    | -0.181511834 |
| -0.058844949 | 0.204319013 | -0.04025225  | 0.385460542 | -0.004447047 |
| 0.036498761  | 0.431344327 | 0.040664329  | 0.380610918 | 0.016095797  |
| 0.258069431  | 1.53E-08    | 0.264452039  | 6.51E-09    | 0.271202939  |
| -0.131012716 | 0.004570337 | -0.162264942 | 0.000430675 | -0.166027974 |
| -0.121633616 | 0.008506978 | -0.081241381 | 0.079458603 | -0.023011097 |
| -0.298028608 | 4.93E-11    | -0.264847886 | 6.17E-09    | -0.286276455 |
| -0.057034022 | 0.218616941 | -0.07213019  | 0.119566126 | -0.031412418 |
| -0.169933936 | 0.000224846 | -0.149809411 | 0.001165977 | -0.156658416 |
| 0.149893729  | 0.001158426 | 0.114549455  | 0.013250721 | 0.126535489  |
| -0.080101477 | 0.083782628 | -0.0899846   | 0.051977972 | -0.09415221  |
| 0.0507482    | 0.273760241 | 0.039119922  | 0.398979084 | 0.064845664  |
| 0.022412647  | 0.629021837 | 0.049275259  | 0.287945599 | 0.057102998  |
| -0.194378933 | 2.34E-05    | -0.201992002 | 1.09E-05    | -0.156859168 |
| -0.290725562 | 1.51E-10    | -0.273930545 | 1.75E-09    | -0.290448757 |
| -0.089207258 | 0.054046832 | -0.104668255 | 0.023694018 | -0.111292622 |
| -0.263753598 | 7.15E-09    | -0.250487594 | 4.10E-08    | -0.239903284 |
| -0.159645777 | 0.00053426  | -0.131115804 | 0.00453823  | -0.102334656 |
| -0.03880992  | 0.402729119 | -0.012118161 | 0.793951049 | -0.041266428 |
| -0.184949888 | 5.80E-05    | -0.175425171 | 0.000138743 | -0.178564054 |
| -0.036524299 | 0.431021846 | -0.006826027 | 0.883038815 | -0.023179024 |
| 0.153291476  | 0.00088914  | 0.161534303  | 0.000457514 | 0.186378132  |
| -0.107729291 | 0.019880744 | -0.061750291 | 0.182817355 | -0.034884847 |
| -0.116526388 | 0.011735549 | -0.087630296 | 0.058454589 | -0.084258829 |

|              |             |              |             |              |
|--------------|-------------|--------------|-------------|--------------|
| 0.109548681  | 0.017877099 | 0.128714491  | 0.005341467 | 0.095014379  |
| -0.189572025 | 3.74E-05    | -0.18041508  | 8.83E-05    | -0.166659011 |
| -0.265833755 | 5.39E-09    | -0.302958504 | 2.27E-11    | -0.324569724 |
| 0.000426697  | 0.992662532 | -0.025265215 | 0.586022027 | -0.023634033 |
| 0.059946617  | 0.195959609 | 0.104098742  | 0.024469318 | 0.082174075  |
| -0.116373241 | 0.011847196 | -0.141359707 | 0.002198547 | -0.150790877 |
| 0.014403659  | 0.756220577 | 0.014461403  | 0.755274359 | 0.031436946  |
| -0.048840811 | 0.292222334 | -0.068262044 | 0.140772509 | -0.051069262 |
| 0.014467089  | 0.755181195 | -0.004101657 | 0.929558455 | 0.008877522  |
| -0.034358582 | 0.458860747 | -0.011726157 | 0.800473801 | 0.019183977  |
| 0.160407919  | 0.000501952 | 0.153486948  | 0.000875565 | 0.114740869  |
| -0.184583753 | 6.00E-05    | -0.155729174 | 0.000732967 | -0.155873093 |
| -0.16228454  | 0.000429976 | -0.161469805 | 0.000459956 | -0.195768571 |
| 0.052468036  | 0.25780906  | 0.100603952  | 0.029723094 | 0.129996777  |
| -0.088417275 | 0.056219064 | -0.044762853 | 0.334432179 | -0.050743781 |
| -0.226797285 | 7.32E-07    | -0.205035447 | 7.95E-06    | -0.176029343 |
| -0.044163247 | 0.340953568 | -0.04422545  | 0.34027329  | -0.076629864 |
| 0.020666556  | 0.655988272 | 0.032422069  | 0.484581461 | 0.039784101  |
| -0.06450432  | 0.164024158 | -0.058798085 | 0.204680263 | -0.043039343 |
| 0.145724216  | 0.001590963 | 0.141468594  | 0.002181111 | 0.134449767  |
| 0.140648604  | 0.002315585 | 0.178299137  | 0.000107136 | 0.203794865  |
| -0.0650092   | 0.160742208 | -0.074854614 | 0.106190797 | -0.097215496 |
| -0.174624838 | 0.000148993 | -0.178314326 | 0.000106989 | -0.200116297 |
| -0.420864089 | 1.80E-21    | -0.376382932 | 3.65E-17    | -0.363826832 |
| -0.312501388 | 4.88E-12    | -0.321298507 | 1.13E-12    | -0.338661947 |
| -0.183159695 | 6.86E-05    | -0.194791685 | 2.25E-05    | -0.232010862 |
| -0.170375687 | 0.000216398 | -0.148009585 | 0.001338353 | -0.138589005 |
| 0.004751352  | 0.918436812 | -0.026727001 | 0.564527022 | 0.013743391  |
| 0.100839924  | 0.029340159 | 0.094100314  | 0.042094239 | 0.142628054  |
| 0.053766953  | 0.246195913 | 0.058467705  | 0.207240124 | 0.057153499  |
| -0.263569557 | 7.33E-09    | -0.259354084 | 1.29E-08    | -0.250161622 |
| 0.112916379  | 0.014629762 | 0.095713755  | 0.03867789  | 0.105961111  |
| 0.080750416  | 0.081298292 | 0.075523818  | 0.103093411 | 0.068943646  |
| 0.022714609  | 0.6244067   | 0.029863572  | 0.519723737 | 0.021057258  |
| 0.162152802  | 0.000434697 | 0.166830166  | 0.000293494 | 0.151634037  |
| 0.006925402  | 0.881348548 | -0.004185951 | 0.928114661 | 0.046814508  |
| -0.051127434 | 0.270186385 | -0.016359574 | 0.72438119  | -0.04803374  |
| -0.161405748 | 0.000462394 | -0.217873009 | 2.01E-06    | -0.216957451 |
| -0.199774905 | 1.36E-05    | -0.181751727 | 7.81E-05    | -0.19529526  |
| -0.029052121 | 0.531137002 | -0.029736945 | 0.521496444 | -0.050833569 |
| 0.115653137  | 0.012384847 | 0.097081857  | 0.035967872 | 0.086351156  |
| -0.197748994 | 1.67E-05    | -0.197158341 | 1.78E-05    | -0.197295396 |
| -0.151263479 | 0.001041914 | -0.165411686 | 0.000330989 | -0.200059046 |
| 0.110238812  | 0.017164546 | 0.093593383  | 0.043218828 | 0.044173325  |
| -0.231816523 | 4.08E-07    | -0.264637321 | 6.35E-09    | -0.287783548 |

|              |             |              |             |              |
|--------------|-------------|--------------|-------------|--------------|
| -0.154147233 | 0.000831113 | -0.179799258 | 9.35E-05    | -0.207644272 |
| 0.029374865  | 0.526582393 | 0.042036307  | 0.364735576 | 0.064920424  |
| -0.005347325 | 0.908248709 | -0.0564232   | 0.223597508 | -0.04216352  |
| 0.019549752  | 0.673476318 | 0.036836153  | 0.427095181 | 0.058309428  |
| -0.03088184  | 0.505582091 | -0.040706195 | 0.380120301 | -0.015099384 |
| 0.039806968  | 0.390743014 | 0.025484329  | 0.582776041 | 0.015596118  |
| -0.289392356 | 1.84E-10    | -0.281238467 | 6.15E-10    | -0.327552059 |
| -0.067405097 | 0.145838982 | -0.04939047  | 0.286818543 | -0.008136368 |
| 0.192567888  | 2.80E-05    | 0.205796899  | 7.34E-06    | 0.188786664  |
| 0.048786106  | 0.292763853 | 0.058555664  | 0.206556346 | 0.06643794   |
| -0.119243461 | 0.00990365  | -0.157315437 | 0.000645422 | -0.145133948 |
| 0.0404217    | 0.383461793 | 0.079921248  | 0.084483368 | 0.082934606  |
| -0.342645322 | 2.61E-14    | -0.361403192 | 7.43E-16    | -0.370859935 |
| -0.101763484 | 0.027881819 | -0.117698577 | 0.010911369 | -0.132246506 |
| -0.249938326 | 4.40E-08    | -0.250925784 | 3.88E-08    | -0.239244662 |
| -0.17946465  | 9.64E-05    | -0.200880126 | 1.22E-05    | -0.215839576 |
| -0.061197887 | 0.186771277 | -0.095581073 | 0.038949682 | -0.071852409 |
| -0.023695177 | 0.60952155  | -0.059634416 | 0.198302791 | -0.035559967 |
| -0.247660464 | 5.88E-08    | -0.260717258 | 1.08E-08    | -0.261928906 |
| -0.043874033 | 0.344127913 | -0.084362251 | 0.068539086 | -0.055906174 |
| -0.060808938 | 0.189592775 | -0.048310737 | 0.297497753 | -0.041759637 |
| -0.166197606 | 0.000309696 | -0.162890472 | 0.00040887  | -0.150701113 |
| -0.135928725 | 0.003247922 | -0.130708634 | 0.00466624  | -0.095641316 |
| -0.111202205 | 0.016211434 | -0.121610393 | 0.008519657 | -0.121743526 |
| 0.025276556  | 0.585853812 | 0.048071697  | 0.29989736  | 0.028368712  |
| -0.022654654 | 0.625321879 | -0.002746867 | 0.952791745 | 0.000463447  |
| -0.12733822  | 0.005857501 | -0.104011507 | 0.024589989 | -0.124210914 |
| -0.042702136 | 0.357182046 | -0.054892409 | 0.236433361 | -0.053453154 |
| 0.010310803  | 0.824137104 | 0.014449217  | 0.755474007 | 0.051921695  |
| -0.05655857  | 0.2224868   | -0.07083587  | 0.126365036 | -0.079770223 |
| -0.041613104 | 0.369587944 | -0.074869657 | 0.106120369 | -0.095004979 |
| -0.13422464  | 0.003660743 | -0.141411214 | 0.002190283 | -0.147922381 |
| -0.045769583 | 0.323664391 | -0.02937489  | 0.526582038 | -0.024061372 |
| -0.136061435 | 0.003217619 | -0.11119621  | 0.016217219 | -0.13294339  |
| -0.314154451 | 3.72E-12    | -0.301406687 | 2.91E-11    | -0.306544297 |
| -0.189290011 | 3.84E-05    | -0.159275366 | 0.000550651 | -0.172959917 |
| -0.14533162  | 0.001638525 | -0.11976802  | 0.009580781 | -0.131222725 |
| 0.267251222  | 4.44E-09    | 0.265724395  | 5.47E-09    | 0.229297903  |
| 0.285133258  | 3.47E-10    | 0.254546118  | 2.43E-08    | 0.27727957   |
| -0.237609586 | 2.04E-07    | -0.260489027 | 1.11E-08    | -0.287142372 |
| 0.083646899  | 0.07092671  | 0.089864353  | 0.052293619 | 0.084262762  |
| 0.176923559  | 0.000121309 | 0.206999414  | 6.48E-06    | 0.227090471  |
| -0.015777607 | 0.733808044 | -0.000758242 | 0.986961681 | -0.013653174 |
| -0.154235351 | 0.000825342 | -0.156470756 | 0.000690754 | -0.160229029 |
| 0.079007692  | 0.088108334 | 0.068590917  | 0.138864352 | 0.084758511  |

|              |             |              |             |              |
|--------------|-------------|--------------|-------------|--------------|
| -0.025176955 | 0.587331875 | 0.009388814  | 0.839639439 | -0.007882725 |
| -0.050723873 | 0.273990587 | -0.026893308 | 0.56210572  | -0.0632814   |
| -0.174762553 | 0.00014718  | -0.153801333 | 0.000854133 | -0.1729405   |
| -0.018152984 | 0.695597506 | 0.009476497  | 0.83816237  | 0.023598689  |
| -0.1246179   | 0.007011106 | -0.112482602 | 0.01501663  | -0.089673747 |
| 0.029430841  | 0.525794475 | 0.047769485  | 0.302949493 | -0.017274022 |
| -0.257639041 | 1.62E-08    | -0.252890176 | 3.01E-08    | -0.274476917 |
| 0.118596189  | 0.010315342 | 0.110030995  | 0.017376455 | 0.08130508   |
| -0.19184522  | 3.00E-05    | -0.162618855 | 0.000418209 | -0.168054134 |
| -0.203645229 | 9.18E-06    | -0.215817197 | 2.51E-06    | -0.205382485 |
| 0.038593213  | 0.405363053 | 0.017599155  | 0.704442022 | 0.000588614  |
| 0.036088081  | 0.436549285 | 0.020782658  | 0.654180767 | 0.043414777  |
| 0.094516302  | 0.041189929 | 0.111236957  | 0.016177937 | 0.092724118  |
| -0.048573949 | 0.294870323 | -0.044962171 | 0.332282246 | -0.074505864 |
| 0.246059195  | 7.20E-08    | 0.249909784  | 4.42E-08    | 0.220112105  |
| -0.261069423 | 1.03E-08    | -0.232758053 | 3.65E-07    | -0.228577928 |
| 0.170315532  | 0.00021753  | 0.153050497  | 0.000906142 | 0.164199473  |
| -0.006026863 | 0.896650496 | -2.22E-05    | 0.999618246 | -0.036242533 |
| 0.073231009  | 0.11401142  | 0.045893797  | 0.322351611 | -0.020078684 |
| 0.077524707  | 0.094257942 | 0.100078942  | 0.030590475 | 0.067722562  |
| -0.144928342 | 0.001688737 | -0.124743665 | 0.006953587 | -0.092414192 |
| -0.131944825 | 0.004287349 | -0.145028766 | 0.001676103 | -0.176448725 |
| -0.154026715 | 0.000839068 | -0.14461347  | 0.001728917 | -0.130659745 |
| 0.190951557  | 3.27E-05    | 0.174610481  | 0.000149183 | 0.203365606  |
| -0.124069058 | 0.007267134 | -0.158144836 | 0.000603608 | -0.165675065 |
| -0.024286822 | 0.60061707  | -0.053933371 | 0.244734878 | 0.004716912  |
| -0.11663793  | 0.01165482  | -0.104791991 | 0.023528409 | -0.142332999 |
| -0.399928532 | 2.31E-19    | -0.394436192 | 7.80E-19    | -0.393295577 |
| 0.04851569   | 0.295450535 | 0.066464266  | 0.151560351 | 0.032874521  |
| -0.110091014 | 0.017315021 | -0.12557772  | 0.006582708 | -0.088974299 |
| -0.062573122 | 0.177042981 | -0.05224611  | 0.259830491 | -0.068976521 |
| -0.203611955 | 9.21E-06    | -0.188216933 | 4.26E-05    | -0.22900731  |
| -0.173993955 | 0.000157569 | -0.143914137 | 0.001821312 | -0.162480085 |
| 0.03144841   | 0.497801952 | 0.013355821  | 0.773453074 | 0.02994063   |
| -0.124035746 | 0.007282939 | -0.13550996  | 0.003345251 | -0.196419121 |
| -0.047020077 | 0.310606508 | -0.07863263  | 0.089632314 | -0.056722444 |
| 0.233158483  | 3.48E-07    | 0.232395135  | 3.81E-07    | 0.241895865  |
| -0.10510817  | 0.023109775 | -0.1100079   | 0.017400146 | -0.128292193 |
| 0.137534939  | 0.002897996 | 0.157889415  | 0.000616209 | 0.159405493  |
| -0.031089703 | 0.502720335 | -0.045263422 | 0.329049732 | -0.051483902 |
| -0.102416524 | 0.026888631 | -0.103469888 | 0.025350765 | -0.14177659  |
| -0.143628559 | 0.001860326 | -0.118536856 | 0.01035383  | -0.116504344 |
| -0.002938505 | 0.949502463 | 0.02886065   | 0.533848442 | -0.017167921 |
| -0.169183614 | 0.000239907 | -0.176829464 | 0.00012234  | -0.221945571 |
| -0.10907514  | 0.018380846 | -0.102540343 | 0.026703794 | -0.095164301 |

|              |             |              |             |              |
|--------------|-------------|--------------|-------------|--------------|
| -0.202787309 | 1.00E-05    | -0.170020882 | 0.000223159 | -0.17070788  |
| -0.114132832 | 0.013591189 | -0.156610927 | 0.000683033 | -0.217278758 |
| 0.08320581   | 0.072432514 | 0.10149022   | 0.028306683 | 0.107603421  |
| 0.156383869  | 0.000695581 | 0.144929921  | 0.001688537 | 0.128028323  |
| -0.068227291 | 0.140975314 | -0.060668636 | 0.1906182   | -0.05626226  |
| 0.11752724   | 0.011028545 | 0.055712457  | 0.229494008 | 0.016405646  |
| -0.315513452 | 2.97E-12    | -0.35629967  | 2.00E-15    | -0.369954293 |
| -0.009038802 | 0.845541171 | 0.033748796  | 0.466876614 | 0.075174316  |
| -0.150744014 | 0.001084765 | -0.127550584 | 0.005775059 | -0.125189988 |
| -0.078720609 | 0.089272943 | -0.092815865 | 0.044992811 | -0.131174648 |
| -0.247042914 | 6.36E-08    | -0.220293798 | 1.53E-06    | -0.173291957 |
| -0.166934869 | 0.00029089  | -0.135925432 | 0.003248677 | -0.102925379 |
| -0.129476859 | 0.005073577 | -0.163584618 | 0.000385878 | -0.206404075 |
| -0.045481786 | 0.326719374 | -0.034045948 | 0.462960799 | -0.034206217 |
| -0.091501887 | 0.048129793 | -0.071884871 | 0.12083233  | -0.027249345 |
| 0.141889329  | 0.002114918 | 0.179359315  | 9.73E-05    | 0.144915061  |
| -0.236972017 | 2.20E-07    | -0.229606675 | 5.28E-07    | -0.221746941 |
| -0.081040141 | 0.080208544 | -0.070363448 | 0.128920057 | -0.085225256 |
| -0.054809833 | 0.237140236 | -0.063769427 | 0.168890879 | -0.06238459  |
| -0.234992907 | 2.80E-07    | -0.246948505 | 6.44E-08    | -0.269579106 |
| -0.040642886 | 0.380862339 | -0.062361464 | 0.17851523  | -0.016607302 |
| 0.142136857  | 0.002076839 | 0.157480751  | 0.000636879 | 0.085895327  |
| 0.213751885  | 3.15E-06    | 0.212749701  | 3.51E-06    | 0.1892385    |
| 0.102058479  | 0.027429333 | 0.103616684  | 0.025142591 | 0.089804558  |
| 0.058677964  | 0.205608322 | 0.070801084  | 0.126551822 | 0.045340771  |
| 0.042511979  | 0.359329208 | 0.042339695  | 0.361281523 | 0.024279564  |
| 0.070475611  | 0.128309846 | 0.090460608  | 0.050744006 | 0.103945527  |
| 0.171609486  | 0.000194348 | 0.158127248  | 0.000604468 | 0.180589141  |
| 0.023196004  | 0.617079454 | 0.025588766  | 0.581231847 | 0.02112252   |
| 0.082447813  | 0.075081057 | 0.108480344  | 0.019031096 | 0.110511975  |
| 0.003675944  | 0.936853504 | 0.023345275  | 0.614815079 | -0.008545198 |
| 0.037305907  | 0.421219738 | 0.019457437  | 0.674929954 | -0.002221152 |
| -0.209289233 | 5.08E-06    | -0.219526499 | 1.67E-06    | -0.197136984 |
| -0.045480247 | 0.326735764 | -0.036814158 | 0.427371452 | -0.069584678 |
| 0.443342225  | 6.61E-24    | 0.429429467  | 2.23E-22    | 0.468215724  |
| 0.287091417  | 2.60E-10    | 0.29347477   | 9.93E-11    | 0.256772704  |
| -0.241438265 | 1.28E-07    | -0.271862099 | 2.34E-09    | -0.258211044 |
| -0.093159827 | 0.044200619 | -0.128421737 | 0.005447677 | -0.1437819   |
| 0.203286527  | 9.53E-06    | 0.219381207  | 1.70E-06    | 0.238679448  |
| -0.415948019 | 5.80E-21    | -0.422256007 | 1.29E-21    | -0.45571057  |
| -0.421078217 | 1.71E-21    | -0.418848894 | 2.91E-21    | -0.419992154 |
| 0.01468645   | 0.751590107 | 0.054414346  | 0.240546364 | 0.053426482  |
| 0.048334319  | 0.297261721 | 0.08531275   | 0.065468897 | 0.10480612   |
| -0.075178897 | 0.104680803 | -0.056267794 | 0.224877479 | -0.055758353 |
| 0.015981453  | 0.730501446 | 0.033004973  | 0.476758412 | 0.04820135   |



|              |             |              |             |              |
|--------------|-------------|--------------|-------------|--------------|
| -0.033300931 | 0.472812945 | -0.00969118  | 0.834548302 | 0.001235349  |
| -0.148772515 | 0.001262606 | -0.178116404 | 0.000108925 | -0.197038042 |
| 0.064126882  | 0.16651036  | 0.042441939  | 0.360122096 | 0.012271999  |
| -0.008048278 | 0.862288722 | 0.030075429  | 0.51676482  | 0.056541531  |
| -0.034325325 | 0.459295922 | -0.036886407 | 0.426464365 | -0.027012231 |
| 0.047656934  | 0.304091422 | 0.018033715  | 0.697498771 | 0.030707296  |
| -0.147827499 | 0.001357038 | -0.143644628 | 0.001858111 | -0.132247752 |
| -0.090536023 | 0.05055077  | -0.103653525 | 0.025090578 | -0.091815332 |
| -0.127467112 | 0.005807338 | -0.111783734 | 0.015658829 | -0.128660024 |
| -0.040568141 | 0.381739569 | -0.032325142 | 0.48588899  | -0.009124664 |
| -0.159251819 | 0.000551708 | -0.108174279 | 0.019373443 | -0.111483359 |
| -0.097614177 | 0.034957927 | -0.080215022 | 0.083343574 | -0.080637249 |
| 0.488188009  | 2.44E-29    | 0.487337495  | 3.15E-29    | 0.47377895   |
| 0.176783647  | 0.000122845 | 0.170219173  | 0.000219356 | 0.183224321  |
| -0.081998219 | 0.076688893 | -0.061751552 | 0.182808396 | -0.057335689 |
| 0.004571034  | 0.921522045 | 0.031423676  | 0.498140277 | 0.052211277  |
| 0.016420434  | 0.723397734 | -0.00183812  | 0.968399526 | -0.022065907 |
| 0.365001414  | 3.66E-16    | 0.396795518  | 4.63E-19    | 0.420023857  |
| -0.032043767 | 0.489695458 | 0.013584211  | 0.76968721  | 0.046186469  |
| -0.051186823 | 0.269629616 | -0.047434338 | 0.306358234 | -0.065341756 |
| -0.09383088  | 0.042688847 | -0.083997834 | 0.069747037 | -0.055051479 |
| 0.08121302   | 0.079563947 | 0.073292243  | 0.113708485 | -0.00487535  |
| 0.261009102  | 1.04E-08    | 0.261133923  | 1.02E-08    | 0.292787416  |
| -0.119340097 | 0.009843453 | -0.121979246 | 0.008320257 | -0.117669225 |
| -0.211414668 | 4.05E-06    | -0.18842299  | 4.17E-05    | -0.174507578 |
| -0.301666844 | 2.79E-11    | -0.316178229 | 2.66E-12    | -0.341696088 |
| -0.192107523 | 2.92E-05    | -0.165265267 | 0.000335103 | -0.171960862 |
| 0.038339703  | 0.408457293 | 0.002293678  | 0.960573407 | 0.016397942  |
| -0.338475955 | 5.56E-14    | -0.372327728 | 8.38E-17    | -0.40148106  |
| -0.276156671 | 1.28E-09    | -0.267873431 | 4.08E-09    | -0.271256717 |
| -0.108676651 | 0.018814304 | -0.091357483 | 0.048485453 | -0.091777848 |
| -0.039727788 | 0.391686919 | -0.026195071 | 0.572304975 | -0.028021345 |
| 0.036221918  | 0.434849085 | 0.029789581  | 0.520759186 | 0.023621295  |
| 0.078553084  | 0.089958231 | 0.074966692  | 0.105666978 | 0.062539854  |
| -0.029406111 | 0.526142503 | -0.009158604 | 0.843520141 | -0.031619441 |
| -0.04378889  | 0.345065998 | -0.008055189 | 0.862171642 | -0.034966049 |
| -0.045776953 | 0.323586402 | -0.098742646 | 0.032896526 | -0.129235673 |
| -0.159260868 | 0.000551301 | -0.147371518 | 0.001404888 | -0.178208198 |
| -0.258215886 | 1.50E-08    | -0.216770231 | 2.26E-06    | -0.196912331 |
| -0.062091405 | 0.180406857 | -0.05101329  | 0.271258693 | -0.075245804 |
| -0.288956717 | 1.97E-10    | -0.2956767   | 7.09E-11    | -0.294971299 |
| -0.079404688 | 0.086517993 | -0.047597578 | 0.304694779 | -0.055300455 |
| 0.100926547  | 0.029200653 | 0.126382483  | 0.006241764 | 0.147487028  |
| 0.091083288  | 0.049166837 | 0.098744871  | 0.032892568 | 0.108096394  |
| -0.143978439 | 0.001812632 | -0.168017939 | 0.000265189 | -0.184702356 |

|              |             |              |             |              |
|--------------|-------------|--------------|-------------|--------------|
| -0.141508601 | 0.002174736 | -0.191394187 | 3.13E-05    | -0.190982491 |
| 0.168838079  | 0.000247156 | 0.183890302  | 6.40E-05    | 0.205165487  |
| -0.068645611 | 0.138548945 | -0.059655613 | 0.19814306  | -0.051423527 |
| 0.346968235  | 1.17E-14    | 0.360694817  | 8.54E-16    | 0.344153896  |
| -0.018293472 | 0.693360443 | 0.001480221  | 0.974550102 | 0.017574286  |
| 0.013302678  | 0.774330105 | -0.012675585 | 0.78470056  | -0.002784641 |
| 0.114883585  | 0.012983121 | 0.112519258  | 0.014983594 | 0.110670368  |
| -0.091896482 | 0.047169054 | -0.107422365 | 0.020237351 | -0.104516766 |
| 0.103220215  | 0.025708246 | 0.071585038  | 0.122394086 | 0.071532177  |
| -0.073602764 | 0.11218199  | -0.090217227 | 0.051371838 | -0.078336743 |
| 0.019874399  | 0.668373971 | 0.013074361  | 0.778101328 | 0.026325854  |
| -0.075842106 | 0.101645577 | -0.07587591  | 0.101492757 | -0.06225342  |
| 0.099935209  | 0.030831685 | 0.076043544  | 0.100737637 | 0.129443012  |
| -0.017829282 | 0.700762028 | -0.017784128 | 0.701483542 | -0.00612789  |
| -0.125782621 | 0.006494352 | -0.133156437 | 0.003943201 | -0.078897107 |
| 0.001089714  | 0.981262749 | 0.008259901  | 0.858705194 | 0.034980593  |
| -0.140796116 | 0.002290849 | -0.13694867  | 0.003021536 | -0.142945321 |
| -0.037397551 | 0.420079042 | -0.045575357 | 0.32572407  | -0.054017845 |
| -0.045819985 | 0.323131293 | -0.028387291 | 0.540581524 | -0.03443638  |
| 0.012567088  | 0.786498742 | 0.020663715  | 0.656032521 | 0.033509418  |
| -0.048371092 | 0.296893904 | -0.060304913 | 0.193295467 | -0.038604805 |
| 0.030342947  | 0.513040967 | 0.024300827  | 0.600407008 | 0.051371424  |
| 0.039174891  | 0.398316325 | 0.046421288  | 0.316815311 | 0.054746156  |
| 0.039906194  | 0.389562101 | 0.036191285  | 0.435237896 | 0.050949752  |
| -0.083910589 | 0.070038802 | -0.080809206 | 0.0810762   | -0.062905459 |
| -0.077557932 | 0.094116505 | -0.076686283 | 0.097883641 | -0.071514909 |
| 0.128082179  | 0.005573244 | 0.093556211  | 0.04330228  | 0.146597686  |
| 0.021738522  | 0.639377138 | -0.026705059 | 0.564846858 | -0.083938604 |
| -0.12017931  | 0.009334208 | -0.090462582 | 0.05073894  | -0.106535623 |
| 0.018404765  | 0.691590144 | 0.033875972  | 0.46519848  | -0.019568312 |
| 0.015623329  | 0.736313856 | -0.007935534 | 0.864199027 | -0.014322933 |
| -0.033641447 | 0.468295728 | -0.075976599 | 0.101038661 | -0.141538117 |
| 0.210562516  | 4.44E-06    | 0.228521446  | 6.00E-07    | 0.212351524  |
| 0.047167994  | 0.309085186 | 0.073574864  | 0.11231848  | 0.11971757   |
| 0.036796518  | 0.427593086 | 0.027307219  | 0.556101265 | 0.044589528  |
| 0.108945648  | 0.018520735 | 0.11138865   | 0.01603243  | 0.12783203   |
| -0.113198251 | 0.014383091 | -0.125460347 | 0.006633804 | -0.108050925 |
| 0.066651079  | 0.150410957 | 0.076849166  | 0.097170705 | 0.104382903  |
| -0.050971018 | 0.271656544 | -0.033520089 | 0.469902905 | -0.057333664 |
| 0.006907395  | 0.881654786 | 0.011991336  | 0.796059808 | 0.002133311  |
| 0.022417434  | 0.628948568 | 0.058423854  | 0.207581622 | 0.01513128   |
| -0.077160657 | 0.095818842 | -0.09019273  | 0.051435387 | -0.118696582 |
| -0.121471559 | 0.008595806 | -0.142907202 | 0.001962306 | -0.166499591 |
| 0.137613806  | 0.002881733 | 0.133758676  | 0.00378162  | 0.165393575  |
| 0.21565293   | 2.56E-06    | 0.205649183  | 7.46E-06    | 0.210727152  |

|              |             |              |             |              |
|--------------|-------------|--------------|-------------|--------------|
| -0.00047717  | 0.991794623 | -0.031422588 | 0.498155156 | 0.013725991  |
| -0.074362842 | 0.108513473 | -0.052640766 | 0.256243277 | -0.051979475 |
| -0.231655849 | 4.15E-07    | -0.195546607 | 2.08E-05    | -0.204130169 |
| -0.166351651 | 0.000305675 | -0.107678655 | 0.019939196 | -0.135976293 |
| -0.076792066 | 0.09742016  | -0.039196532 | 0.398055578 | -0.082687269 |
| -0.105379423 | 0.022755777 | -0.083045041 | 0.072987799 | -0.092893548 |
| -0.079979718 | 0.084255517 | -0.05951517  | 0.199203142 | -0.056676824 |
| 0.006186808  | 0.893923695 | -0.00592976  | 0.898306533 | 0.022993679  |
| 0.065635782  | 0.156738218 | 0.070331796  | 0.129092663 | 0.073067781  |
| -0.022103744 | 0.633758069 | -0.035617086 | 0.442562841 | -0.034479474 |
| 0.035833491  | 0.439793991 | 0.090407344  | 0.050880858 | 0.055284871  |
| -0.029707507 | 0.521908991 | -0.012935972 | 0.780389715 | -0.002352038 |
| -0.134327581 | 0.003634516 | -0.172284555 | 0.000183192 | -0.181141273 |
| -0.206551327 | 6.79E-06    | -0.1765259   | 0.000125723 | -0.225118807 |
| -0.191428132 | 3.12E-05    | -0.179160325 | 9.91E-05    | -0.186943534 |
| -0.012624095 | 0.785553795 | -0.02647888  | 0.56814878  | 0.002790822  |
| 0.045147454  | 0.330291693 | 0.074173585  | 0.109417956 | 0.038753932  |
| 0.19345525   | 2.56E-05    | 0.246168625  | 7.10E-08    | 0.234675394  |
| -0.142403568 | 0.002036511 | -0.180228464 | 8.99E-05    | -0.229670424 |
| 0.063068497  | 0.173632546 | 0.069244062  | 0.135133682 | 0.101297791  |
| -0.162306499 | 0.000429194 | -0.158006453 | 0.000610405 | -0.19563549  |
| -0.211038155 | 4.22E-06    | -0.180697522 | 8.61E-05    | -0.177201303 |
| -0.247492495 | 6.01E-08    | -0.233733601 | 3.25E-07    | -0.225479673 |
| -0.092922038 | 0.044747018 | -0.076838945 | 0.097215322 | -0.07447423  |
| -0.151624504 | 0.001013058 | -0.153708905 | 0.000860383 | -0.199568339 |
| -0.185684076 | 5.41E-05    | -0.193493113 | 2.55E-05    | -0.17224757  |
| -0.349893757 | 6.78E-15    | -0.318172678 | 1.91E-12    | -0.319725951 |
| 0.079114495  | 0.087678196 | 0.065899162  | 0.155077847 | 0.071267555  |
| -0.114134733 | 0.013589618 | -0.100149662 | 0.030472388 | -0.160972147 |
| -0.044786948 | 0.334171803 | -0.010838314 | 0.815297768 | -0.002811094 |
| -0.305781724 | 1.45E-11    | -0.338961454 | 5.10E-14    | -0.324378934 |
| -0.041481403 | 0.37110613  | -0.066197674 | 0.153212135 | -0.048731452 |
| -0.281546779 | 5.88E-10    | -0.295406591 | 7.39E-11    | -0.291319023 |
| 0.097217617  | 0.035707973 | 0.069867273  | 0.131646422 | 0.109056097  |
| 0.241992396  | 1.19E-07    | 0.271046464  | 2.63E-09    | 0.284692516  |
| -0.015643167 | 0.735991488 | 0.02769635   | 0.550484874 | 0.046828052  |
| 0.107860504  | 0.019729969 | 0.117857088  | 0.010803948 | 0.116316132  |
| 0.036331119  | 0.433464678 | 0.077602671  | 0.09392632  | 0.059382463  |
| -0.08918271  | 0.054113265 | -0.077003234 | 0.096500168 | -0.086900723 |
| 0.029035464  | 0.5313726   | 0.006539881  | 0.88790883  | 0.046142524  |
| -0.298045663 | 4.91E-11    | -0.286244955 | 2.95E-10    | -0.30052082  |
| -0.073442762 | 0.112966523 | -0.056703758 | 0.221299914 | -0.105000325 |
| 0.231120472  | 4.43E-07    | 0.246701493  | 6.64E-08    | 0.239539941  |
| -0.042482167 | 0.359666565 | -0.047320245 | 0.307524417 | -0.002783723 |
| -0.217850496 | 2.01E-06    | -0.219894965 | 1.60E-06    | -0.227948384 |

|              |             |              |             |              |
|--------------|-------------|--------------|-------------|--------------|
| -0.214610775 | 2.87E-06    | -0.237398644 | 2.09E-07    | -0.248827191 |
| 0.050158115  | 0.27938491  | 0.093502549  | 0.043422988 | 0.125058061  |
| -0.102490613 | 0.026777898 | -0.053132029 | 0.251826063 | -0.047149602 |
| -0.086943132 | 0.060466302 | -0.074941939 | 0.105782488 | -0.05751895  |
| 0.046611168  | 0.314837734 | 0.028367564  | 0.540863048 | 0.041459083  |
| -0.006785725 | 0.883724471 | 0.025096259  | 0.588530669 | -0.031774165 |
| 0.17464422   | 0.000148737 | 0.183393307  | 6.71E-05    | 0.194764257  |
| -0.038337386 | 0.408485631 | -0.006705878 | 0.885083153 | -0.028691536 |
| -0.094215838 | 0.041841438 | -0.073886089 | 0.110803288 | -0.084912003 |
| 0.039266137  | 0.397217643 | 0.012537549  | 0.786988522 | 0.07635215   |
| 0.067388407  | 0.145939026 | 0.051873     | 0.26325359  | 0.04687478   |
| 0.028887763  | 0.533464069 | -0.001839962 | 0.968367872 | 0.032409777  |
| -0.151590994 | 0.001015705 | -0.15509037  | 0.000771231 | -0.131709461 |
| -0.075806782 | 0.101805456 | -0.088357626 | 0.056385982 | -0.117205884 |
| 0.123263103  | 0.007658266 | 0.111567783  | 0.01586208  | 0.12335559   |
| 0.140158224  | 0.002399578 | 0.177490566  | 0.000115266 | 0.179149178  |
| -0.354390144 | 2.89E-15    | -0.343804621 | 2.11E-14    | -0.329574143 |
| -0.104677584 | 0.023681496 | -0.14223759  | 0.002061522 | -0.154668709 |
| 0.128291103  | 0.00549568  | 0.103198164  | 0.025740026 | 0.078701354  |
| -0.200954145 | 1.21E-05    | -0.212142163 | 3.75E-06    | -0.230042599 |
| -0.072717256 | 0.116578068 | -0.081623683 | 0.078049572 | -0.081395702 |
| -0.063917813 | 0.16789961  | -0.052079458 | 0.261355622 | -0.026220605 |
| -0.06837     | 0.140143932 | -0.110172272 | 0.017232149 | -0.129689257 |
| 0.01343986   | 0.77206675  | -0.054457851 | 0.240170005 | -0.00686397  |
| 0.026610062  | 0.566232575 | -0.032109332 | 0.488807064 | -0.037828227 |
| 0.096393932  | 0.037309678 | 0.078805063  | 0.088929064 | 0.048844822  |
| 0.156059881  | 0.000713855 | 0.143909172  | 0.001821984 | 0.142864544  |
| 0.042813976  | 0.355922971 | 0.061235805  | 0.186497874 | 0.069614701  |
| 0.091764254  | 0.047489189 | 0.101159133  | 0.028828884 | 0.139506875  |
| -0.043919432 | 0.343628381 | -0.063494388 | 0.170739792 | -0.139097143 |
| -0.117019136 | 0.011382613 | -0.145998582 | 0.001558479 | -0.107371659 |
| -0.029708863 | 0.521889985 | -0.012620368 | 0.785615574 | 0.007383522  |
| 0.07237061   | 0.118335282 | 0.073024445  | 0.115038005 | 0.073560161  |
| -0.074652631 | 0.107139978 | -0.059997015 | 0.195583261 | -0.060865944 |
| -0.128116077 | 0.005560593 | -0.114135188 | 0.013589243 | -0.151625766 |
| -0.213605315 | 3.20E-06    | -0.214376372 | 2.94E-06    | -0.221896695 |
| 0.083893967  | 0.070094504 | 0.135484631  | 0.003351222 | 0.104037968  |
| 0.034947589  | 0.451191572 | 0.021083989  | 0.649498998 | -0.005365267 |
| 0.164222783  | 0.000365808 | 0.101561526  | 0.028195285 | 0.086805695  |
| -0.311456443 | 5.80E-12    | -0.30934362  | 8.18E-12    | -0.305097401 |
| 0.005492213  | 0.905774074 | -0.059524678 | 0.199131244 | -0.027734726 |
| -0.056941927 | 0.219362744 | -0.078503191 | 0.090163142 | -0.022700526 |
| -0.369236883 | 1.57E-16    | -0.399953692 | 2.29E-19    | -0.42238911  |
| 0.008347877  | 0.857216302 | 0.006871849  | 0.882259363 | 0.03612962   |
| -0.062291071 | 0.179006877 | -0.03763699  | 0.417107275 | -0.033154217 |

|              |             |              |             |              |
|--------------|-------------|--------------|-------------|--------------|
| 0.405271716  | 6.90E-20    | 0.422145574  | 1.32E-21    | 0.419746333  |
| -0.124349213 | 0.007135418 | -0.143458037 | 0.001883985 | -0.143302432 |
| 0.133612248  | 0.003820345 | 0.128821908  | 0.005302967 | 0.133662447  |
| -0.07392817  | 0.110599658 | -0.106889185 | 0.020870071 | -0.071235813 |
| -0.130099088 | 0.00486397  | -0.121904404 | 0.008360376 | -0.116715822 |
| -0.027552116 | 0.552563377 | -0.050448023 | 0.276611806 | -0.056579611 |
| -0.249557404 | 4.62E-08    | -0.275871198 | 1.33E-09    | -0.315056432 |
| -0.021991184 | 0.635487619 | -0.049247006 | 0.288222434 | -0.021914929 |
| -0.045190346 | 0.329831994 | -0.037129938 | 0.423415118 | -0.045596777 |
| 0.085587069  | 0.064604145 | 0.099256805  | 0.031992255 | 0.122863298  |
| 0.037541891  | 0.418286103 | 0.0166072    | 0.720382588 | -0.002116805 |
| 0.262449039  | 8.53E-09    | 0.301651546  | 2.80E-11    | 0.245021231  |
| 0.031721941  | 0.494068692 | 0.054450205  | 0.240236125 | 0.028994402  |
| -0.113776597 | 0.013888393 | -0.101100757 | 0.02892181  | -0.108894075 |
| -0.052567603 | 0.256905692 | -0.08848474  | 0.056030767 | -0.0898783   |
| -0.080565981 | 0.081998227 | -0.079385412 | 0.086594676 | -0.112521339 |
| 0.145902913  | 0.001569736 | 0.1618636    | 0.000445231 | 0.146910059  |
| -0.049630149 | 0.284483417 | -0.047997745 | 0.300642332 | -0.045547857 |
| -0.052480368 | 0.25769705  | -0.0976083   | 0.034968944 | -0.08831393  |
| -0.189450843 | 3.78E-05    | -0.16936655  | 0.000236151 | -0.162535009 |
| 0.091985856  | 0.046953697 | 0.096836759  | 0.036441159 | 0.124260774  |
| 0.170032047  | 0.000222944 | 0.170940221  | 0.000206033 | 0.159166877  |
| -0.102501675 | 0.0267614   | -0.057759287 | 0.212806997 | -0.067760744 |
| -0.006999213 | 0.880093433 | -0.013003125 | 0.779279042 | -0.017194966 |
| -0.014752342 | 0.75051245  | -0.036644343 | 0.429507862 | -0.036270285 |
| 0.005902242  | 0.898775921 | 0.002484562  | 0.957295258 | -0.004301257 |
| -0.075827623 | 0.101711101 | -0.078610717 | 0.089722001 | -0.061803335 |
| -0.129233441 | 0.005157766 | -0.161954032 | 0.000441912 | -0.190264087 |
| 0.229946404  | 5.08E-07    | 0.259343593  | 1.29E-08    | 0.270795978  |
| 0.084894331  | 0.066806208 | 0.066595973  | 0.15074931  | 0.055554281  |
| 0.105073712  | 0.023155083 | 0.10348134   | 0.025334472 | 0.082047556  |
| -0.079920588 | 0.084485944 | -0.039113933 | 0.399051326 | -0.053768573 |
| -0.016402133 | 0.723693419 | 0.008087443  | 0.861625297 | 0.000403914  |
| -0.31347303  | 4.16E-12    | -0.303795158 | 1.99E-11    | -0.30127609  |
| 0.262074375  | 8.97E-09    | 0.29334755   | 1.01E-10    | 0.314876585  |
| 0.023651129  | 0.610186825 | 0.037481272  | 0.419038534 | 0.06102945   |
| -0.019708523 | 0.670979093 | -0.02151004  | 0.642902974 | -0.015161333 |
| 0.130126402  | 0.00485495  | 0.173475526  | 0.000164961 | 0.221131103  |
| 0.279784821  | 7.59E-10    | 0.285218082  | 3.43E-10    | 0.300277243  |
| -0.091707062 | 0.047628219 | -0.075600965 | 0.102740992 | -0.058383988 |
| -0.364479498 | 4.05E-16    | -0.402257336 | 1.37E-19    | -0.413447796 |
| -0.178210125 | 0.000108004 | -0.215477127 | 2.61E-06    | -0.217870605 |
| 0.025149265  | 0.587743104 | 0.007558859  | 0.870587032 | -0.01774704  |
| -0.123267353 | 0.007656155 | -0.092327801 | 0.046137343 | -0.096055207 |
| -0.193223036 | 2.62E-05    | -0.147503983 | 0.00139083  | -0.148298206 |

|              |             |              |             |              |
|--------------|-------------|--------------|-------------|--------------|
| 0.074718848  | 0.106828068 | 0.040772196  | 0.379347657 | 0.049937336  |
| 0.078302393  | 0.090991602 | 0.033819913  | 0.465937783 | 0.023789139  |
| -0.022477423 | 0.628030591 | 0.002195555  | 0.962258786 | -0.027565109 |
| -0.00541388  | 0.907111855 | -0.017893234 | 0.699740589 | 0.0002117    |
| -0.013776461 | 0.766521428 | -0.015070647 | 0.745313471 | -0.050754016 |
| -0.298118903 | 4.86E-11    | -0.27426482  | 1.67E-09    | -0.253067727 |
| -0.118205636 | 0.010571031 | -0.145280461 | 0.001644818 | -0.132779446 |
| 0.018301251  | 0.693236644 | 0.008267134  | 0.858582771 | 0.025028964  |
| -0.028066402 | 0.545169814 | -0.019106701 | 0.680463783 | -0.012708214 |
| -0.048236471 | 0.298241898 | -0.037913955 | 0.413685209 | -0.034696563 |
| -0.060292306 | 0.193388756 | -0.079939823 | 0.084410929 | -0.083002943 |
| -0.015868704 | 0.732329746 | -0.012135537 | 0.793662248 | -0.020696498 |
| 0.039719405  | 0.391786935 | 0.038504155  | 0.406448468 | 0.02306363   |
| -0.039757431 | 0.391333387 | -0.032854087 | 0.47877679  | -0.040244447 |
| 0.026267417  | 0.57124415  | -0.004995182 | 0.914266852 | 0.021269465  |
| 0.006489677  | 0.888763697 | 0.01460318   | 0.752952666 | -0.000881987 |
| -0.143736975 | 0.001845426 | -0.114652461 | 0.013167711 | -0.132501887 |
| 0.105549378  | 0.02253638  | 0.107271561  | 0.020414594 | 0.118512489  |
| -0.025514886 | 0.582324023 | -0.015752356 | 0.734217986 | -0.030387152 |
| -0.097309029 | 0.035533875 | -0.097275484 | 0.035597679 | -0.094515401 |
| -0.010152337 | 0.826796864 | -0.006393728 | 0.890397888 | 0.023177775  |
| 0.045321476  | 0.328429139 | 0.031240407  | 0.500650847 | 0.039841502  |
| 0.066825449  | 0.149344104 | 0.093746472  | 0.042876574 | 0.066227391  |
| 0.043724243  | 0.345779338 | 0.043959322  | 0.343189848 | 0.028134148  |
| -0.006763701 | 0.884099203 | -0.021067609 | 0.649753133 | 0.030119703  |
| -0.205552566 | 7.53E-06    | -0.2525183   | 3.16E-08    | -0.234415916 |
| -0.382333293 | 1.05E-17    | -0.38431836  | 6.93E-18    | -0.410505321 |
| -0.096533079 | 0.037034894 | -0.097452396 | 0.035262281 | -0.105024133 |
| -0.198639269 | 1.53E-05    | -0.188480702 | 4.15E-05    | -0.212838082 |
| -0.279976127 | 7.38E-10    | -0.271940504 | 2.32E-09    | -0.280398989 |
| 0.125845468  | 0.006467465 | 0.080851669  | 0.080916094 | 0.05464179   |
| -0.096014719 | 0.03806733  | -0.115898515 | 0.012199269 | -0.156568561 |
| 0.002731602  | 0.953053806 | -0.012605349 | 0.785864495 | -0.067077454 |
| -0.165376381 | 0.000331976 | -0.158318814 | 0.000595162 | -0.184894887 |
| 0.011047195  | 0.811804011 | 0.013166331  | 0.776581587 | 0.025704592  |
| -0.005315209 | 0.908797363 | -0.00375065  | 0.935572933 | 0.0150356    |
| -0.084213426 | 0.069030316 | -0.073158448 | 0.114371212 | -0.069559633 |
| -0.048580319 | 0.294806929 | -0.088185252 | 0.056870657 | -0.089459978 |
| -0.060827935 | 0.189454247 | -0.075488601 | 0.103254609 | -0.066456163 |
| -0.212062272 | 3.78E-06    | -0.220401128 | 1.51E-06    | -0.174576151 |
| -0.037475237 | 0.419113486 | -0.029980554 | 0.518088819 | -0.00445683  |
| -0.161660057 | 0.000452786 | -0.154212766 | 0.000826817 | -0.149434267 |
| -0.11586648  | 0.012223356 | -0.122223127 | 0.008190712 | -0.145367947 |
| -0.228133003 | 6.27E-07    | -0.232444229 | 3.79E-07    | -0.279352687 |
| 0.038841953  | 0.402340653 | 0.033207815  | 0.47405235  | 0.017089739  |

|              |             |              |             |              |
|--------------|-------------|--------------|-------------|--------------|
| -0.365695394 | 3.18E-16    | -0.344866784 | 1.73E-14    | -0.39858737  |
| -0.087175716 | 0.059779088 | -0.091248767 | 0.048754664 | -0.10935519  |
| 0.192257016  | 2.88E-05    | 0.229702067  | 5.23E-07    | 0.212513334  |
| -0.16098031  | 0.000478891 | -0.161494053 | 0.000459036 | -0.152559289 |
| -0.087111104 | 0.059969533 | -0.119099696 | 0.009993808 | -0.104103039 |
| -0.181570857 | 7.94E-05    | -0.162386192 | 0.000426366 | -0.167089387 |
| -0.08215095  | 0.076139588 | -0.067799655 | 0.143489244 | -0.093731536 |
| -0.091355637 | 0.048490014 | -0.132783448 | 0.004046382 | -0.103808956 |
| 0.075259159  | 0.104309703 | 0.054010321  | 0.244061364 | 0.042802672  |
| 0.029998275  | 0.517841387 | 0.056249257  | 0.225030502 | 0.096198944  |
| -0.058918611 | 0.203752122 | -0.076044489 | 0.100733394 | -0.071964336 |
| -0.315893558 | 2.79E-12    | -0.329305392 | 2.84E-13    | -0.333675821 |
| -0.266570412 | 4.87E-09    | -0.277814221 | 1.01E-09    | -0.287605952 |
| -0.200657581 | 1.25E-05    | -0.228100783 | 6.30E-07    | -0.224460252 |
| -0.174483723 | 0.000150872 | -0.1740971   | 0.000156136 | -0.152844302 |
| -0.166306421 | 0.000306851 | -0.145243366 | 0.001649395 | -0.140606783 |
| -0.18779454  | 4.43E-05    | -0.174095463 | 0.000156159 | -0.219316137 |
| 0.057171977  | 0.217503152 | 0.071136307  | 0.124760731 | 0.059926854  |
| 0.032713896  | 0.480656253 | 0.047803868  | 0.302601215 | 0.030255012  |
| -0.112265685 | 0.015213437 | -0.157384033 | 0.000641864 | -0.161743159 |
| 0.221486497  | 1.34E-06    | 0.234718407  | 2.89E-07    | 0.197872234  |
| -0.063929759 | 0.167819995 | -0.016405834 | 0.723633628 | -0.032546469 |
| -0.172522062 | 0.000179412 | -0.144533897 | 0.001739209 | -0.19554936  |
| -0.109303461 | 0.018136435 | -0.056113166 | 0.226156206 | -0.0732395   |
| 0.029871491  | 0.519612976 | 0.076067388  | 0.100630595 | 0.063209572  |
| -0.354907183 | 2.62E-15    | -0.362154054 | 6.41E-16    | -0.380647686 |
| -0.069588048 | 0.133200172 | -0.057606549 | 0.21402122  | -0.065476651 |
| -0.075272417 | 0.104248505 | -0.055828111 | 0.228527079 | -0.048901727 |
| 0.078497203  | 0.090187759 | 0.062336257  | 0.178691169 | 0.071726882  |
| 0.046221534  | 0.318904476 | 0.064988005  | 0.160878983 | 0.049602262  |
| -0.044130614 | 0.341310801 | -0.020037798 | 0.665811653 | -0.033198622 |
| 0.081994613  | 0.076701903 | 0.14469266   | 0.00171873  | 0.164828201  |
| -0.096335532 | 0.037425518 | -0.059490421 | 0.199390381 | -0.06863245  |
| -0.124858468 | 0.006901451 | -0.107109393 | 0.020606698 | -0.065836158 |
| 0.170923068  | 0.000206341 | 0.252564387  | 3.14E-08    | 0.249581991  |
| -0.024725959 | 0.594046046 | -0.000701831 | 0.987931614 | 0.009520762  |
| 0.017958789  | 0.698694121 | 0.027323435  | 0.555866655 | 0.024056279  |
| -0.346177323 | 1.36E-14    | -0.319999604 | 1.40E-12    | -0.321592495 |
| -0.034613887 | 0.455527629 | -0.049708514 | 0.283722712 | -0.073297601 |
| -0.00180534  | 0.96896278  | 0.018689121  | 0.687074655 | 0.035496024  |
| 0.34594274   | 1.42E-14    | 0.351727699  | 4.79E-15    | 0.359350623  |
| 0.146239554  | 0.001530453 | 0.169837974  | 0.000226722 | 0.198629557  |
| 0.059233639  | 0.201340616 | 0.073400651  | 0.11317372  | 0.054894291  |
| 0.186212594  | 5.15E-05    | 0.230581698  | 4.71E-07    | 0.239589792  |
| -0.282814264 | 4.88E-10    | -0.274276995 | 1.67E-09    | -0.279505435 |

|              |             |              |             |              |
|--------------|-------------|--------------|-------------|--------------|
| -0.198986989 | 1.48E-05    | -0.222877582 | 1.15E-06    | -0.182000631 |
| -0.024563676 | 0.596470554 | -0.050598381 | 0.275180947 | -0.020798354 |
| -0.219985908 | 1.59E-06    | -0.226055794 | 7.97E-07    | -0.231332624 |
| -0.089348541 | 0.053665799 | -0.070228585 | 0.129656733 | -0.063381389 |
| 0.13384922   | 0.003757852 | 0.164381123  | 0.000360982 | 0.173343068  |
| -0.135339184 | 0.003385697 | -0.151331324 | 0.001036434 | -0.136990687 |
| -0.289283719 | 1.87E-10    | -0.264350543 | 6.60E-09    | -0.266860806 |
| 0.004096664  | 0.929643982 | 0.000285625  | 0.995088353 | 0.027013453  |
| 0.084012226  | 0.069699004 | 0.050278499  | 0.278231102 | 0.025674172  |
| -0.009102336 | 0.844469246 | 0.001525561  | 0.97377083  | -0.014479564 |
| -0.115048045 | 0.012853165 | -0.100969326 | 0.029131967 | -0.122123362 |
| 0.182426629  | 7.34E-05    | 0.195130153  | 2.17E-05    | 0.157886831  |
| -0.041209748 | 0.374249789 | -0.047666775 | 0.303991464 | -0.083429192 |
| 0.276629744  | 1.19E-09    | 0.258741563  | 1.40E-08    | 0.287953816  |
| -0.092650138 | 0.045378743 | -0.069048704 | 0.136241356 | -0.045429939 |
| -0.01140062  | 0.805901151 | -0.020848041 | 0.653163753 | -0.072550407 |
| 0.028432317  | 0.539939268 | 0.056043191  | 0.226736582 | 0.031744861  |
| -0.145567349 | 0.001609813 | -0.13321534  | 0.003927126 | -0.137291301 |
| 0.013012042  | 0.779131603 | -0.006300845 | 0.891980303 | 0.070894219  |
| -0.184934598 | 5.81E-05    | -0.18516829  | 5.68E-05    | -0.215853959 |
| 0.019696587  | 0.671166713 | 0.013145621  | 0.776923728 | 0.033819339  |
| -0.065953514 | 0.154736871 | -0.046797763 | 0.31290226  | -0.035448406 |
| 0.001949896  | 0.966478984 | 0.029406229  | 0.526140844 | 0.026709172  |
| -0.08122083  | 0.079534929 | -0.042497315 | 0.359495119 | -0.059499761 |
| 0.036948535  | 0.425685255 | 0.057211685  | 0.217183322 | 0.040724702  |
| 0.027500173  | 0.553312841 | 0.035954867  | 0.438245357 | 0.042075885  |
| -0.062085698 | 0.180446995 | -0.052995977 | 0.253044045 | -0.048354057 |
| -0.188580373 | 4.11E-05    | -0.160773211 | 0.000487119 | -0.163184103 |
| -0.056978216 | 0.219068651 | -0.025598344 | 0.581090318 | -0.017335491 |
| 0.020305097  | 0.661628409 | 0.023101532  | 0.618514444 | 0.030110855  |
| -0.143517248 | 0.001875739 | -0.114769865 | 0.013073658 | -0.096614145 |
| -0.078273475 | 0.091111413 | -0.037007655 | 0.424944631 | -0.014244913 |
| 0.150210874  | 0.001130429 | 0.128902216  | 0.005274346 | 0.148164365  |
| -0.076365504 | 0.099299861 | -0.057969421 | 0.211144618 | -0.040534095 |
| -0.069535564 | 0.133493789 | -0.040451545 | 0.383110422 | -0.0295426   |
| -0.011624331 | 0.802170417 | 0.00991795   | 0.830734557 | 0.01371705   |
| -0.176499464 | 0.000126022 | -0.166463258 | 0.000302793 | -0.197193335 |
| -0.136067374 | 0.003216269 | -0.112937925 | 0.014610777 | -0.119298778 |
| -0.098423144 | 0.033469365 | -0.086204953 | 0.062690739 | -0.078451955 |
| -0.108298369 | 0.019234002 | -0.116656686 | 0.011641293 | -0.100343178 |
| -0.10306966  | 0.025925903 | -0.097853869 | 0.034511111 | -0.095220532 |
| -0.180852046 | 8.49E-05    | -0.184126549 | 6.26E-05    | -0.185373974 |
| -0.234241253 | 3.06E-07    | -0.233537297 | 3.33E-07    | -0.243112089 |
| -0.076250885 | 0.099809836 | -0.04769092  | 0.303746299 | -0.042285123 |
| 0.008120848  | 0.86105954  | -0.008983189 | 0.846479689 | 0.021715134  |



|              |             |              |             |              |
|--------------|-------------|--------------|-------------|--------------|
| 0.048453322  | 0.29607251  | 0.045768037  | 0.323680756 | 0.071110187  |
| -0.019741653 | 0.670458464 | -0.010992384 | 0.812720429 | -0.02445897  |
| 0.076149688  | 0.100261816 | -0.00253927  | 0.956355873 | 0.00068776   |
| -0.047732992 | 0.303319428 | -0.046430853 | 0.3167155   | -0.048208575 |
| -0.084461267 | 0.068213853 | -0.071798514 | 0.121280538 | -0.068093319 |
| -0.07854734  | 0.089981806 | -0.084791502 | 0.067138269 | -0.082258138 |
| -0.021637239 | 0.640939095 | 0.024842008  | 0.592315027 | 0.013779712  |
| -0.042246526 | 0.362340055 | -0.053915049 | 0.244895433 | -0.031597751 |
| -0.224218915 | 9.84E-07    | -0.216609727 | 2.31E-06    | -0.215707955 |
| -0.097144984 | 0.035846823 | -0.085947505 | 0.063482227 | -0.084949548 |
| 0.102054452  | 0.027435467 | 0.144977703  | 0.001682516 | 0.158537455  |
| -0.090291088 | 0.051180622 | -0.093387876 | 0.043681886 | -0.060907478 |
| -0.189859412 | 3.64E-05    | -0.185980423 | 5.26E-05    | -0.178352628 |
| -0.087468967 | 0.058921841 | -0.065863466 | 0.155302091 | -0.077518799 |
| 0.078381517  | 0.090664423 | 0.087923559  | 0.057613078 | 0.101208434  |
| 0.063556752  | 0.170319234 | 0.045301567  | 0.328641882 | 0.105932555  |
| 0.014564213  | 0.75359056  | 0.020775036  | 0.654299354 | -0.018075698 |
| -0.086883312 | 0.060644102 | -0.068682322 | 0.138337553 | -0.049061725 |
| 0.035051716  | 0.449843343 | 0.027735036  | 0.54992804  | 0.025179307  |
| -0.122938089 | 0.007821245 | -0.133609005 | 0.003821206 | -0.126634448 |
| -0.097545777 | 0.035086332 | -0.096610743 | 0.036882275 | -0.087568647 |
| 0.185075573  | 5.73E-05    | 0.191302322  | 3.16E-05    | 0.168836916  |
| 0.241496337  | 1.27E-07    | 0.257591783  | 1.63E-08    | 0.240409445  |
| -0.028470582 | 0.539393735 | -0.013968074 | 0.763369983 | -0.011556822 |
| -0.079170959 | 0.087451477 | -0.034683445 | 0.454621887 | -0.00929727  |
| -0.220775841 | 1.45E-06    | -0.213250835 | 3.33E-06    | -0.226685684 |
| -0.069933964 | 0.131277405 | -0.0459295   | 0.321974915 | -0.062945244 |
| 0.102988721  | 0.026043573 | 0.107327296  | 0.020348931 | 0.129693945  |
| 0.316983459  | 2.33E-12    | 0.304457211  | 1.79E-11    | 0.282408498  |
| 0.381826003  | 1.17E-17    | 0.397584486  | 3.89E-19    | 0.413933226  |
| -0.17891578  | 0.000101302 | -0.149830717 | 0.001164064 | -0.167382107 |
| 0.048442639  | 0.296179139 | 0.047809012  | 0.302549127 | 0.04189529   |
| -0.14600153  | 0.001558134 | -0.118389725 | 0.010449819 | -0.143125726 |
| -0.073095576 | 0.114683684 | -0.083477421 | 0.071502226 | -0.078756868 |
| -0.013838219 | 0.765505279 | -0.03210074  | 0.488923436 | 7.25E-05     |
| -0.025324447 | 0.585143726 | -0.033170316 | 0.47455198  | -0.032047846 |
| 0.094467545  | 0.041295065 | 0.072286709  | 0.118763688 | 0.044718491  |
| -0.047993355 | 0.300686591 | -0.047615599 | 0.304511508 | -0.045576111 |
| -0.185276229 | 5.62E-05    | -0.196450201 | 1.91E-05    | -0.207139187 |
| 0.007448309  | 0.872463447 | -0.030669152 | 0.508519116 | -0.027432472 |
| -0.107615392 | 0.020012436 | -0.076245364 | 0.099834452 | -0.09654385  |
| -0.078130113 | 0.091707257 | -0.112850602 | 0.014687857 | -0.100671597 |
| 0.074325134  | 0.10869321  | 0.036081154  | 0.436637381 | 0.037570484  |
| -0.299221217 | 4.09E-11    | -0.305063099 | 1.63E-11    | -0.327328845 |
| -0.160067925 | 0.000516133 | -0.153089936 | 0.000903339 | -0.145332847 |

|              |             |              |             |              |
|--------------|-------------|--------------|-------------|--------------|
| -0.168982103 | 0.00024411  | -0.190054884 | 3.57E-05    | -0.201228904 |
| -0.112107511 | 0.015358371 | -0.067140286 | 0.147432423 | -0.048557997 |
| 0.03231395   | 0.486040101 | -0.000845362 | 0.985463776 | -0.008821977 |
| -0.082245201 | 0.075802208 | -0.052642838 | 0.256224535 | -0.023633384 |
| 0.094854938  | 0.040465936 | 0.114635808  | 0.0131811   | 0.146759957  |
| 0.198311092  | 1.58E-05    | 0.193246301  | 2.62E-05    | 0.195248481  |
| 0.09288774   | 0.044826295 | 0.116244716  | 0.011941617 | 0.126599166  |
| -0.180100292 | 9.09E-05    | -0.177530892 | 0.000114847 | -0.173657477 |
| -0.174901154 | 0.000145376 | -0.142071731 | 0.002086796 | -0.153290393 |
| -0.122043603 | 0.008285895 | -0.128048962 | 0.005585666 | -0.131332267 |
| 0.096207879  | 0.03767979  | 0.078307687  | 0.09096968  | 0.116213943  |
| -0.15271487  | 0.000930324 | -0.160482311 | 0.000498897 | -0.158982838 |
| -0.027767631 | 0.549459091 | -0.054930002 | 0.23611204  | -0.078017597 |
| 0.002817027  | 0.951587418 | -0.003192493 | 0.945144336 | -0.032178788 |
| 0.222001616  | 1.26E-06    | 0.247098674  | 6.31E-08    | 0.220084083  |
| 0.16109103   | 0.000474546 | 0.135346923  | 0.003383854 | 0.146946056  |
| 0.076705033  | 0.097801363 | 0.066338697  | 0.152336676 | 0.093165451  |
| 0.188153953  | 4.28E-05    | 0.159720072  | 0.000531028 | 0.121305932  |
| -0.029227539 | 0.528659003 | -0.028363167 | 0.540925802 | -0.040351519 |
| -0.181357272 | 8.10E-05    | -0.158891719 | 0.000568118 | -0.170849618 |
| -0.042014664 | 0.364982758 | -0.046188073 | 0.319255312 | -0.054328028 |
| -0.006011309 | 0.896915725 | -0.011421976 | 0.805544815 | -0.004163387 |
| -0.138070334 | 0.002789211 | -0.162314609 | 0.000428905 | -0.18318825  |
| -0.144662854 | 0.001722558 | -0.182689695 | 7.16E-05    | -0.20105051  |
| -0.09603888  | 0.038018671 | -0.072261199 | 0.118894185 | -0.073109459 |
| -0.132099258 | 0.004242023 | -0.139679055 | 0.002484328 | -0.155892956 |
| -0.006788816 | 0.883671883 | 0.015446859  | 0.73918357  | -0.005642496 |
| 0.161961298  | 0.000441646 | 0.204504761  | 8.40E-06    | 0.221010804  |
| 0.065764134  | 0.155927406 | 0.032445006  | 0.484272326 | 0.015878853  |
| -0.224610914 | 9.41E-07    | -0.23261683  | 3.71E-07    | -0.170825251 |
| -0.077508293 | 0.094327877 | -0.089586231 | 0.053029811 | -0.104048685 |
| -0.120106903 | 0.009377203 | -0.126524222 | 0.006183384 | -0.108825426 |
| -0.027662809 | 0.550967881 | -0.018841351 | 0.684661849 | -0.047092052 |
| -0.002336036 | 0.959845913 | -0.049500967 | 0.2857404   | -0.077097559 |
| 0.075048344  | 0.105286653 | 0.059234681  | 0.201332675 | 0.050173975  |
| -0.059170764 | 0.201820252 | -0.059454932 | 0.199659094 | -0.027011506 |
| -0.142192009 | 0.00206844  | -0.132883094 | 0.00401858  | -0.113341387 |
| 0.010196023  | 0.826063424 | 0.040488951  | 0.382670303 | 0.00898142   |
| -0.125731607 | 0.00651625  | -0.139735433 | 0.002474217 | -0.14740313  |
| 0.237946815  | 1.96E-07    | 0.235998953  | 2.48E-07    | 0.264167863  |
| -0.103513314 | 0.025289027 | -0.086533191 | 0.061693431 | -0.07991546  |
| -0.229216214 | 5.53E-07    | -0.208355813 | 5.61E-06    | -0.207418008 |
| 0.042797684  | 0.356106207 | 0.045935071  | 0.321916158 | 0.031857766  |
| 0.007845829  | 0.865719555 | 0.026672249  | 0.565325281 | -0.020469613 |
| -0.143450647 | 0.001885017 | -0.156257571 | 0.000702652 | -0.172465364 |

|              |             |              |             |              |
|--------------|-------------|--------------|-------------|--------------|
| 0.015163704  | 0.743795704 | 0.010961973  | 0.813228994 | -0.026481486 |
| -0.101062716 | 0.028982504 | -0.101141476 | 0.028856964 | -0.105346864 |
| 0.006030894  | 0.896581762 | 0.045585232  | 0.325619146 | 0.076678271  |
| -0.143459364 | 0.0018838   | -0.119963838 | 0.009462673 | -0.129848382 |
| -0.121179006 | 0.008758257 | -0.115185802 | 0.012745194 | -0.112334467 |
| 0.053619921  | 0.247491821 | 0.028291447  | 0.54194996  | 0.080461231  |
| 0.080746874  | 0.081311689 | 0.092752051  | 0.045141088 | 0.072457502  |
| 0.265919369  | 5.33E-09    | 0.292252109  | 1.20E-10    | 0.258565372  |
| 0.003649065  | 0.937314278 | -0.046029225 | 0.320924252 | 0.01950829   |
| 0.256043997  | 2.00E-08    | 0.248326688  | 5.41E-08    | 0.260408811  |
| -0.100232764 | 0.030334127 | -0.129817413 | 0.004957869 | -0.135622908 |
| 0.131480211  | 0.004426363 | 0.135804556  | 0.00327651  | 0.123184729  |
| 0.103604817  | 0.025159364 | 0.157352668  | 0.000643489 | 0.193499283  |
| 0.047330509  | 0.307419382 | -0.000684919 | 0.988222414 | -0.038914264 |
| -0.330093131 | 2.47E-13    | -0.299106307 | 4.17E-11    | -0.302484874 |
| -0.067377369 | 0.146005213 | -0.032098575 | 0.488952761 | -0.009766204 |
| -0.130064561 | 0.004875393 | -0.101185908 | 0.028786349 | -0.091780529 |
| -0.064335814 | 0.165130646 | -0.04198856  | 0.365281041 | -0.043633338 |
| 0.059737638  | 0.197525828 | 0.082758997  | 0.073984355 | 0.129794165  |
| -0.029520978 | 0.524526977 | -0.090597131 | 0.050394644 | -0.040821188 |
| 0.008269239  | 0.858547133 | 0.021459671  | 0.643681324 | 0.029175844  |
| -0.198662598 | 1.53E-05    | -0.165303505 | 0.000334024 | -0.187177879 |
| -0.144736887 | 0.001713065 | -0.131322162 | 0.004474572 | -0.140851205 |
| -0.08125171  | 0.079420265 | -0.045346577 | 0.328161049 | -0.065508244 |
| -0.051723447 | 0.264634328 | -0.041948218 | 0.3657423   | -0.031611109 |
| -0.122103484 | 0.008254037 | -0.072540255 | 0.117472749 | -0.071130715 |
| 0.065167298  | 0.15972473  | 0.110374692  | 0.017027215 | 0.109745617  |
| -0.020481638 | 0.658871278 | 0.011472015  | 0.804710045 | -0.026568385 |
| -0.062251106 | 0.179286446 | -0.058090457 | 0.210191351 | -0.075264349 |
| 0.007591262  | 0.870037173 | 0.023419229  | 0.61369458  | 0.043513898  |
| -0.100008203 | 0.030708985 | -0.107466805 | 0.020185376 | -0.059832688 |
| -0.050107511 | 0.279870891 | -0.050907527 | 0.272254858 | -0.014000395 |
| -0.162048645 | 0.000438464 | -0.11443783  | 0.013341197 | -0.116688529 |
| -0.319029609 | 1.65E-12    | -0.306621897 | 1.27E-11    | -0.322162434 |
| 0.023519354  | 0.612178986 | 0.044398694  | 0.338383195 | 0.062440683  |
| -0.163886399 | 0.000376263 | -0.174999558 | 0.000144108 | -0.146140052 |
| 0.045802071  | 0.323320699 | 0.070987635  | 0.125552637 | 0.079783784  |
| -0.038658468 | 0.404568844 | -0.04252105  | 0.359226592 | 0.000725622  |
| -0.168603265 | 0.000252198 | -0.127812202 | 0.005674932 | -0.140382921 |
| -0.111120367 | 0.016290557 | -0.067122312 | 0.147541055 | -0.077561432 |
| 0.054305219  | 0.241492246 | 0.034224618  | 0.460615134 | 0.067589617  |
| -0.14276344  | 0.001983231 | -0.18047962  | 8.78E-05    | -0.187639992 |
| -0.297818232 | 5.09E-11    | -0.276304533 | 1.25E-09    | -0.292490068 |
| -0.038809193 | 0.402737943 | -0.047339464 | 0.307327762 | -0.052182806 |
| 0.10714245   | 0.020567413 | 0.08626262   | 0.062514571 | 0.133426761  |

|              |             |              |             |              |
|--------------|-------------|--------------|-------------|--------------|
| -0.085760855 | 0.064061187 | -0.071783158 | 0.121360379 | -0.079471949 |
| -0.355550056 | 2.31E-15    | -0.393218191 | 1.02E-18    | -0.384876093 |
| -0.162347321 | 0.000427743 | -0.129718871 | 0.004991103 | -0.163422654 |
| 0.007587976  | 0.870092928 | -0.000178991 | 0.996922045 | 0.011027706  |
| 0.335265031  | 9.90E-14    | 0.363960596  | 4.49E-16    | 0.369693753  |
| 0.1006287    | 0.029682734 | 0.153703998  | 0.000860716 | 0.129827705  |
| -0.195329861 | 2.13E-05    | -0.233734939 | 3.25E-07    | -0.234678846 |
| -0.157340151 | 0.000644138 | -0.132239261 | 0.004201308 | -0.138221009 |
| -0.153398719 | 0.000881668 | -0.132949121 | 0.004000253 | -0.125554004 |
| -0.125214785 | 0.006741858 | -0.147483219 | 0.001393025 | -0.196022787 |
| -0.095655127 | 0.038797788 | -0.102965193 | 0.026077864 | -0.126372603 |
| -0.011103869 | 0.810856736 | -0.002731328 | 0.953058508 | 0.013210195  |
| -0.484604236 | 7.11E-29    | -0.502266144 | 3.23E-31    | -0.52746328  |
| 0.128209991  | 0.005525677 | 0.079250555  | 0.087132674 | 0.079962647  |
| -0.289791869 | 1.73E-10    | -0.276900481 | 1.15E-09    | -0.290119361 |
| -0.160472019 | 0.000499319 | -0.150483277 | 0.001106881 | -0.143562572 |
| -0.040196774 | 0.386116283 | -0.035454958 | 0.444643739 | -0.064079643 |
| 0.001422062  | 0.97554973  | 0.026849855  | 0.562737879 | 0.034014943  |
| 0.110101065  | 0.017304751 | 0.184321857  | 6.15E-05    | 0.18430527   |
| -0.07496172  | 0.105690171 | -0.05656583  | 0.222427337 | -0.053532398 |
| 0.172399762  | 0.00018135  | 0.145920101  | 0.001567708 | 0.111856607  |
| -0.157063873 | 0.000658626 | -0.15366927  | 0.000863076 | -0.151392252 |
| 0.005350914  | 0.908187398 | -0.02673878  | 0.564355374 | -0.030216073 |
| 0.015489395  | 0.738491517 | 0.044581141  | 0.336399986 | 0.010944707  |
| 0.038608211  | 0.405180431 | 0.049600893  | 0.284767759 | 0.042453408  |
| 0.007830226  | 0.865984075 | 0.006726413  | 0.88473369  | -0.00137079  |
| 0.04182708   | 0.36712956  | 0.034192829  | 0.461031985 | -0.021076435 |
| -0.153827571 | 0.000852366 | -0.146118178 | 0.001544511 | -0.205720438 |
| 0.010408484  | 0.822498581 | 0.037110003  | 0.423664243 | -0.016229892 |
| 0.045383177  | 0.327770397 | 0.046140419  | 0.319755398 | 0.041940578  |
| 0.229198314  | 5.54E-07    | 0.222844524  | 1.15E-06    | 0.176777479  |
| -0.169352631 | 0.000236435 | -0.157009615 | 0.000661506 | -0.156778858 |
| -0.087172261 | 0.059789249 | -0.109499554 | 0.017928793 | -0.128655173 |
| -0.244085106 | 9.21E-08    | -0.278751367 | 8.81E-10    | -0.288492594 |
| -0.061985967 | 0.181149411 | -0.059062944 | 0.202644686 | -0.089788844 |
| -0.149738878 | 0.001172327 | -0.141804901 | 0.002128052 | -0.180824169 |
| -0.194607261 | 2.29E-05    | -0.220639352 | 1.47E-06    | -0.208961571 |
| 0.049476807  | 0.285975902 | 0.015716411  | 0.734801669 | 0.070495311  |
| 0.016316633  | 0.725075368 | 0.021437526  | 0.644023657 | 0.01699915   |
| -0.109949379 | 0.017460301 | -0.141481432 | 0.002179063 | -0.089209205 |
| -0.204410143 | 8.48E-06    | -0.144923757 | 0.001689316 | -0.146591301 |
| -0.219238087 | 1.72E-06    | -0.24501424  | 8.20E-08    | -0.288825282 |
| -0.088427444 | 0.056190648 | -0.080372884 | 0.082736246 | -0.084027803 |
| -0.001739528 | 0.970093671 | 0.024508163  | 0.597300937 | 0.027086723  |
| 0.076758852  | 0.097565499 | 0.132042306  | 0.004258688 | 0.113429321  |

|              |             |              |             |              |
|--------------|-------------|--------------|-------------|--------------|
| -0.02389143  | 0.606561383 | -0.0068337   | 0.882908298 | -0.016434928 |
| -0.099079935 | 0.032300897 | -0.101689415 | 0.027996436 | -0.097833462 |
| 0.19006012   | 3.57E-05    | 0.20772772   | 6.00E-06    | 0.251916164  |
| 0.174892432  | 0.000145489 | 0.168502134  | 0.000254399 | 0.185070342  |
| 0.177010153  | 0.000120367 | 0.199490217  | 1.40E-05    | 0.240437743  |
| -0.21224871  | 3.71E-06    | -0.244446091 | 8.81E-08    | -0.272161912 |
| -0.203480327 | 9.34E-06    | -0.186639022 | 4.95E-05    | -0.182127925 |
| 0.002685935  | 0.953837761 | -0.071047646 | 0.125232519 | -0.056531247 |
| -0.019399942 | 0.675835913 | 0.004728005  | 0.918836209 | -0.00740931  |
| 0.136977504  | 0.00301535  | 0.183439149  | 6.68E-05    | 0.199662487  |
| 0.071752996  | 0.121517311 | 0.104525533  | 0.023886289 | 0.11418378   |
| -0.075483716 | 0.103276983 | -0.106687222 | 0.021114188 | -0.139080825 |
| 0.077676574  | 0.09361283  | 0.098612908  | 0.033128118 | 0.084713231  |
| 0.150776698  | 0.001082022 | 0.197545504  | 1.71E-05    | 0.219213412  |
| 0.018906565  | 0.683629196 | 0.013013634  | 0.779105279 | 0.016482107  |
| -0.003751977 | 0.935550184 | 0.026407239  | 0.569196551 | 0.013361322  |
| -0.051127625 | 0.270184593 | -0.091802466 | 0.047396487 | -0.113953528 |
| -0.223046101 | 1.12E-06    | -0.224948477 | 9.05E-07    | -0.219354222 |
| 0.138959261  | 0.002616775 | 0.127636582  | 0.005741972 | 0.121406545  |
| 0.175000357  | 0.000144098 | 0.191263588  | 3.17E-05    | 0.173020505  |
| -0.128894018 | 0.005277261 | -0.089142231 | 0.054222959 | -0.057306016 |
| -0.219693869 | 1.64E-06    | -0.228060854 | 6.33E-07    | -0.252816722 |
| -0.212900718 | 3.45E-06    | -0.248684669 | 5.17E-08    | -0.302136312 |
| 0.234528895  | 2.95E-07    | 0.210513441  | 4.46E-06    | 0.23764409   |
| -0.227990169 | 6.38E-07    | -0.206204217 | 7.04E-06    | -0.208308252 |
| 0.172906502  | 0.000173448 | 0.210660994  | 4.39E-06    | 0.268451729  |
| -0.096758936 | 0.036592537 | -0.129592718 | 0.005033942 | -0.128970014 |
| 0.169807412  | 0.000227322 | 0.178017053  | 0.000109909 | 0.205564581  |
| -0.058513873 | 0.206881014 | -0.065927186 | 0.154901968 | -0.070598848 |
| -0.058631839 | 0.20596549  | -0.062581343 | 0.176985983 | -0.053928691 |
| 0.02628235   | 0.571025307 | 0.022322212  | 0.630406866 | 0.003788034  |
| -0.244459201 | 8.79E-08    | -0.224017776 | 1.01E-06    | -0.275102552 |
| 0.117872423  | 0.010793606 | 0.142381148  | 0.002039873 | 0.139182589  |
| 0.219774071  | 1.62E-06    | 0.27159929   | 2.43E-09    | 0.223862449  |
| -0.037274267 | 0.421613991 | 0.008829115  | 0.84908098  | 0.016693062  |
| -0.40610931  | 5.70E-20    | -0.380517146 | 1.54E-17    | -0.399844224 |
| -0.142238771 | 0.002061343 | -0.13288846  | 0.004017088 | -0.174431553 |
| -0.200012754 | 1.33E-05    | -0.170212064 | 0.000219492 | -0.19228975  |
| -0.049382846 | 0.28689304  | -0.055934919 | 0.227636669 | -0.046571395 |
| 0.074665606  | 0.107078803 | 0.051972732  | 0.262335571 | 0.035793651  |
| -0.090326926 | 0.051088058 | -0.093598422 | 0.043207528 | -0.169039826 |
| -0.122688269 | 0.007948616 | -0.088840593 | 0.055046216 | -0.096524861 |
| 0.179888087  | 9.27E-05    | 0.212009874  | 3.80E-06    | 0.219522436  |
| 0.221746568  | 1.30E-06    | 0.278385901  | 9.28E-10    | 0.292051156  |
| 0.004597844  | 0.921063246 | 0.005246784  | 0.909966431 | 0.054618566  |

|              |             |              |             |              |
|--------------|-------------|--------------|-------------|--------------|
| 0.038567883  | 0.405671593 | 0.064829896  | 0.161902051 | 0.078919395  |
| -0.188045557 | 4.33E-05    | -0.196191796 | 1.96E-05    | -0.203429371 |
| -0.004578883 | 0.921387724 | -0.020774535 | 0.654307153 | -0.003889546 |
| 0.041469392  | 0.371244769 | 0.047258488  | 0.308156874 | 0.058065464  |
| 0.234195705  | 3.07E-07    | 0.233795344  | 3.22E-07    | 0.224252164  |
| -0.038013258 | 0.412462313 | -0.015664977 | 0.735637131 | -0.013902019 |
| -0.222831148 | 1.15E-06    | -0.198840975 | 1.50E-05    | -0.234534326 |
| -0.186744405 | 4.90E-05    | -0.213501903 | 3.24E-06    | -0.215503705 |
| -0.099869634 | 0.03094227  | -0.101454201 | 0.028363096 | -0.111934302 |
| -0.110623966 | 0.016777777 | -0.121685155 | 0.0084789   | -0.1362061   |
| -0.085538695 | 0.064755952 | -0.109485291 | 0.017943826 | -0.120335417 |
| 0.03412304   | 0.461947885 | 0.041200186  | 0.374360745 | 0.020473028  |
| -0.212594813 | 3.57E-06    | -0.208571903 | 5.49E-06    | -0.188018928 |
| 0.067255652  | 0.14673661  | 0.108927162  | 0.018540782 | 0.132589594  |
| 0.09815687   | 0.033953248 | 0.115629531  | 0.01240283  | 0.109676513  |
| 0.050706493  | 0.274155238 | 0.077187545  | 0.095702859 | 0.048180585  |
| -0.24449225  | 8.76E-08    | -0.238594462 | 1.81E-07    | -0.268637856 |
| 0.146917962  | 0.001454017 | 0.161677174  | 0.000452146 | 0.096129287  |
| 0.094110334  | 0.042072261 | 0.087049895  | 0.060150043 | 0.105327746  |
| -0.235305843 | 2.69E-07    | -0.211184713 | 4.15E-06    | -0.153724669 |
| -0.154186527 | 0.000828535 | -0.12147707  | 0.008592772 | -0.131875527 |
| -0.109327164 | 0.018111225 | -0.059999169 | 0.195567188 | -0.071989724 |
| -0.16956176  | 0.000232203 | -0.170477162 | 0.000214499 | -0.154561099 |
| 0.02510004   | 0.588474475 | 0.024692334  | 0.594548038 | 0.069985356  |
| 0.239797424  | 1.56E-07    | 0.265509606  | 5.63E-09    | 0.2807714    |
| 0.317206212  | 2.24E-12    | 0.335046873  | 1.03E-13    | 0.340938092  |
| -0.01982739  | 0.669111864 | -0.057668184 | 0.213530639 | -0.064022843 |
| -0.075279031 | 0.104217987 | -0.052216905 | 0.260097313 | -0.084076437 |
| -0.025318728 | 0.585228512 | -0.030253474 | 0.51428487  | -0.05083973  |
| -0.017027619 | 0.713611244 | 0.011606325  | 0.802470535 | 0.013562663  |
| 0.37671441   | 3.41E-17    | 0.426063161  | 5.10E-22    | 0.400411537  |
| 0.074464203  | 0.108031488 | 0.061017046  | 0.188079256 | 0.042201011  |
| -0.069018353 | 0.136414074 | -0.067154546 | 0.147346282 | -0.075613725 |
| 0.058553794  | 0.206570861 | -0.000721765 | 0.987588862 | -0.016496445 |
| -0.295669277 | 7.09E-11    | -0.300372937 | 3.42E-11    | -0.307927189 |
| 0.125264985  | 0.006719641 | 0.152049218  | 0.000980056 | 0.132238345  |
| -0.221225184 | 1.38E-06    | -0.205575967 | 7.52E-06    | -0.21849854  |
| 0.074324125  | 0.108698028 | 0.067764571  | 0.143697002 | 0.057432975  |
| 0.031673841  | 0.494724096 | 0.033327522  | 0.472459344 | 0.037181152  |
| -0.098857789 | 0.032692147 | -0.080776117 | 0.08120114  | -0.074973058 |
| -0.02107963  | 0.64956662  | -0.00449946  | 0.922746993 | 0.014533914  |
| -0.159725716 | 0.000530783 | -0.161211637 | 0.000469854 | -0.143643525 |
| -0.198099683 | 1.62E-05    | -0.204146782 | 8.72E-06    | -0.234332247 |
| -0.476514385 | 7.58E-28    | -0.492350008 | 6.94E-30    | -0.524797738 |
| -0.317193485 | 2.25E-12    | -0.358185853 | 1.39E-15    | -0.379243131 |

|              |             |              |             |              |
|--------------|-------------|--------------|-------------|--------------|
| -0.380519785 | 1.54E-17    | -0.379908947 | 1.75E-17    | -0.37645354  |
| -0.197508297 | 1.71E-05    | -0.197142045 | 1.78E-05    | -0.193272847 |
| -0.340908261 | 3.58E-14    | -0.327753611 | 3.72E-13    | -0.344293344 |
| 0.110882729  | 0.016522232 | 0.10093929   | 0.029180179 | 0.119469326  |
| 0.047979604  | 0.300825259 | 0.014762562  | 0.750345341 | 0.043701645  |
| -0.242431193 | 1.13E-07    | -0.251172842 | 3.76E-08    | -0.238640827 |
| -0.003035595 | 0.947836338 | -0.041921939 | 0.366042966 | -0.055948253 |
| 0.046939287  | 0.311439518 | 0.054341295  | 0.241179259 | -0.007432858 |
| -0.099135825 | 0.032203095 | -0.094846813 | 0.040483182 | -0.108008292 |
| 0.05848521   | 0.207103908 | 0.067853887  | 0.143168547 | 0.105557359  |
| -0.199393278 | 1.42E-05    | -0.179222778 | 9.85E-05    | -0.184781444 |
| -0.002276931 | 0.960861046 | -0.009996332 | 0.829417258 | -0.018000991 |
| -0.133277852 | 0.003910131 | -0.128433012 | 0.005443551 | -0.106974808 |
| 0.001655287  | 0.97154134  | -0.001040947 | 0.982101134 | 0.030476776  |
| -0.147916971 | 0.001347827 | -0.128055027 | 0.005583396 | -0.129841995 |
| 0.044091548  | 0.341738767 | 0.029253964  | 0.528286237 | 0.044615759  |
| 0.044288864  | 0.339580661 | 0.015412759  | 0.739738502 | 0.059417335  |
| 0.023876105  | 0.606792312 | 0.025626705  | 0.580671352 | 0.057358879  |
| 0.079664174  | 0.085491053 | 0.101930473  | 0.027624898 | 0.119382501  |
| 0.078976096  | 0.088235907 | 0.086053934  | 0.063154035 | 0.065622219  |
| -0.006149853 | 0.894553601 | -0.002294338 | 0.960562069 | -0.003742749 |
| -0.110090737 | 0.017315304 | -0.076128231 | 0.100357859 | -0.09601228  |
| 0.01029538   | 0.824395876 | 0.021164814  | 0.648245557 | 0.028699533  |
| -0.002863589 | 0.950788231 | -0.029634285 | 0.522935887 | -0.004688466 |
| -0.018346982 | 0.692509068 | -0.050075738 | 0.280176316 | -0.029639179 |
| -0.082841365 | 0.07369626  | -0.069364214 | 0.134455879 | -0.082765419 |
| -0.088485432 | 0.056028838 | -0.076919912 | 0.096862344 | -0.077899677 |
| -0.091393091 | 0.04839755  | -0.083625462 | 0.070999297 | -0.075277055 |
| -0.061960825 | 0.181326812 | -0.028763855 | 0.535221817 | -0.025846419 |
| -0.001366228 | 0.976509415 | 0.042165187  | 0.363265779 | 0.080509045  |
| 0.164281143  | 0.000364022 | 0.181995506  | 7.64E-05    | 0.13820819   |
| -0.159322222 | 0.000548552 | -0.178154886 | 0.000108546 | -0.189196099 |
| 0.053239565  | 0.250866252 | 0.078111179  | 0.091786183 | 0.089846597  |
| -0.324874362 | 6.11E-13    | -0.328344813 | 3.35E-13    | -0.332994092 |
| -0.124235372 | 0.007188681 | -0.141734398 | 0.002139076 | -0.192703935 |
| 0.061506566  | 0.184554166 | 0.062365338  | 0.178488204 | 0.051082229  |
| -0.151311762 | 0.001038011 | -0.127900834 | 0.005641366 | -0.12445243  |
| 0.072195811  | 0.119229188 | 0.059809102  | 0.196989208 | 0.029121803  |
| 0.044055831  | 0.342130351 | 0.038462786  | 0.406953239 | 0.021427735  |
| 0.121543889  | 0.008556058 | 0.111054292  | 0.016354687 | 0.126692315  |
| -0.027048033 | 0.559857527 | -0.018790048 | 0.685474632 | -0.061625974 |
| -0.021617677 | 0.641240958 | -0.020411165 | 0.659971331 | -0.024879675 |
| 0.068581037  | 0.138921385 | 0.0675906    | 0.144730611 | 0.064032869  |
| 0.092205315  | 0.046428384 | 0.087048935  | 0.060152881 | 0.115708012  |
| 0.135603932  | 0.003323182 | 0.120390233  | 0.00920996  | 0.105598236  |

|              |             |              |             |              |
|--------------|-------------|--------------|-------------|--------------|
| -0.025571705 | 0.581483966 | -0.04131615  | 0.373016529 | -0.077654806 |
| 0.308640795  | 9.16E-12    | 0.302953615  | 2.28E-11    | 0.351134285  |
| 0.130365259  | 0.004776716 | 0.156824852  | 0.000671403 | 0.207720398  |
| -0.095188931 | 0.039762436 | -0.101411531 | 0.028430052 | -0.115263719 |
| 0.010534421  | 0.820387227 | -0.021577527 | 0.641860708 | -0.026940712 |
| -0.057821243 | 0.212315882 | -0.042750207 | 0.356640534 | -0.037487085 |
| -0.029593683 | 0.523505749 | -0.055983183 | 0.227235123 | -0.039508975 |
| -0.022699978 | 0.624629982 | -0.051850904 | 0.263457272 | -0.074051278 |
| 0.199356948  | 1.42E-05    | 0.194613603  | 2.29E-05    | 0.190529182  |
| -0.040239966 | 0.385605679 | -0.039670793 | 0.392367199 | -0.085412009 |
| 0.055623787  | 0.230237305 | 0.054914685  | 0.236242921 | 0.059103062  |
| 0.153180568  | 0.000896928 | 0.115889868  | 0.012205766 | 0.127806581  |
| -0.105468017 | 0.02264118  | -0.11220818  | 0.015265989 | -0.120866221 |
| -0.221371505 | 1.36E-06    | -0.212416814 | 3.64E-06    | -0.225534655 |
| -0.133473502 | 0.003857369 | -0.10569764  | 0.022346486 | -0.109661392 |
| 0.058678778  | 0.205602021 | 0.091882481  | 0.047202864 | 0.117323673  |
| -0.30788071  | 1.04E-11    | -0.299720751 | 3.78E-11    | -0.307403952 |
| -0.032831185 | 0.479083547 | -0.023118909 | 0.618250382 | -0.006127466 |
| 0.016947398  | 0.714901586 | -0.004824217 | 0.917190441 | -0.004579663 |
| 0.146189087  | 0.001536284 | 0.151564148  | 0.00101783  | 0.19362999   |
| -0.195714537 | 2.05E-05    | -0.202563436 | 1.03E-05    | -0.21891053  |
| 0.183282415  | 6.78E-05    | 0.204248772  | 8.63E-06    | 0.216489379  |
| -0.17509498  | 0.000142889 | -0.139291599 | 0.002554843 | -0.157412084 |
| -0.141911932 | 0.002111415 | -0.134865256 | 0.003500275 | -0.148223119 |
| -0.216774003 | 2.26E-06    | -0.183447302 | 6.67E-05    | -0.214859792 |
| -0.074117733 | 0.109686009 | -0.053797811 | 0.245924546 | -0.03828871  |
| 0.245892309  | 7.35E-08    | 0.235976724  | 2.48E-07    | 0.23413147   |
| -0.062059437 | 0.180631757 | -0.047115    | 0.309629665 | -0.05571331  |
| -0.162834082 | 0.000410793 | -0.181769443 | 7.80E-05    | -0.211880918 |
| -0.043279544 | 0.350711725 | -0.003724392 | 0.936023021 | -0.000332322 |
| 0.022364971  | 0.629751844 | -0.014025742 | 0.762422293 | -0.033105146 |
| 0.046216724  | 0.318954898 | 0.034668461  | 0.454816916 | 0.028735701  |
| -0.206597474 | 6.75E-06    | -0.212326857 | 3.67E-06    | -0.218683642 |
| -0.045362976 | 0.32798598  | -0.050830374 | 0.272983125 | -0.052467909 |
| -0.213545716 | 3.22E-06    | -0.215473351 | 2.61E-06    | -0.23350184  |
| -0.185098155 | 5.72E-05    | -0.173906957 | 0.000158788 | -0.186672543 |
| -0.065814985 | 0.155607054 | -0.031757352 | 0.493586476 | -0.06259119  |
| -0.071949852 | 0.120495918 | -0.084767001 | 0.067217588 | -0.081677449 |
| -0.204750826 | 8.19E-06    | -0.183410419 | 6.70E-05    | -0.198570677 |
| 0.165266694  | 0.000335063 | 0.174966136  | 0.000144538 | 0.173051734  |
| -0.073038005 | 0.114970397 | -0.088742305 | 0.055316703 | -0.074210351 |
| -0.178231997 | 0.00010779  | -0.206942767 | 6.51E-06    | -0.226453129 |
| -0.192036894 | 2.94E-05    | -0.184441804 | 6.08E-05    | -0.216380783 |
| -0.192777985 | 2.74E-05    | -0.15585166  | 0.000725834 | -0.155254826 |
| -0.034446177 | 0.457715618 | -0.026284334 | 0.57099623  | -0.02470311  |



|              |             |              |             |              |
|--------------|-------------|--------------|-------------|--------------|
| 0.036622031  | 0.429789026 | 0.036778728  | 0.427816682 | 0.077466284  |
| -0.135999946 | 0.003231627 | -0.131940203 | 0.004288712 | -0.113357986 |
| 0.222699545  | 1.17E-06    | 0.198853159  | 1.50E-05    | 0.206814697  |
| -0.095670128 | 0.038767079 | -0.079375307 | 0.086634894 | -0.112074833 |
| -0.085848581 | 0.063788534 | -0.068316473 | 0.140455323 | -0.110298602 |
| -0.110381205 | 0.017020657 | -0.143593318 | 0.001865193 | -0.147763516 |
| 0.194867605  | 2.23E-05    | 0.190809937  | 3.32E-05    | 0.156677906  |
| -0.164868112 | 0.000346506 | -0.128646089 | 0.005366115 | -0.126060738 |
| -0.022822797 | 0.622756716 | -0.040101777 | 0.387240748 | -0.038047041 |
| -0.158510501 | 0.000585983 | -0.19429716  | 2.36E-05    | -0.206789781 |
| 0.003900905  | 0.932997865 | 0.001877126  | 0.967729302 | 0.017445421  |
| -0.023737978 | 0.608875422 | 0.036700135  | 0.428805276 | 0.043809979  |
| -0.048179807 | 0.298810505 | -0.07594628  | 0.101175225 | -0.072258241 |
| 0.042932912  | 0.35458708  | 0.053643609  | 0.247282725 | 0.024808236  |
| 0.014076018  | 0.761596369 | 0.002571002  | 0.955811023 | 0.011429273  |
| -0.03731442  | 0.421113698 | -0.047811873 | 0.302520168 | -0.021687815 |
| 0.027572396  | 0.552270896 | 0.034432778  | 0.457890678 | 0.05714926   |
| -0.08781544  | 0.057922149 | -0.076451695 | 0.098917746 | -0.073908007 |
| -0.07761668  | 0.093866832 | -0.062158793 | 0.179933454 | -0.063494023 |
| 0.037980428  | 0.412866374 | 0.043103116  | 0.352680836 | 0.049075275  |
| -0.001577025 | 0.972886337 | -0.058831879 | 0.204419718 | -0.015890784 |
| 0.159104501  | 0.000558367 | 0.161208694  | 0.000469968 | 0.153980646  |
| -0.046241104 | 0.318699401 | -0.03530727  | 0.446544123 | -0.0126203   |
| -0.173751656 | 0.000160985 | -0.20413191  | 8.73E-06    | -0.228202705 |
| -0.186248028 | 5.13E-05    | -0.231987353 | 4.00E-07    | -0.24307827  |
| 0.130194825  | 0.004832422 | 0.141461089  | 0.002182308 | 0.089791894  |
| -0.288572091 | 2.08E-10    | -0.288427226 | 2.13E-10    | -0.303723148 |
| -0.054845187 | 0.236837411 | -0.070126514 | 0.130216451 | -0.129652976 |
| 0.032086387  | 0.489117867 | 0.008015868  | 0.86283779  | -0.003783336 |
| 0.036582719  | 0.430284676 | 0.004642343  | 0.920301803 | -0.004173572 |
| -0.189631671 | 3.72E-05    | -0.151124497 | 0.001053223 | -0.149943008 |
| -0.333446435 | 1.37E-13    | -0.314762385 | 3.36E-12    | -0.320062759 |
| 0.029060467  | 0.531018969 | 0.052489217  | 0.257616697 | 0.056932168  |
| 0.078923225  | 0.088449716 | 0.090260335  | 0.051260166 | 0.103473278  |
| -0.168584587 | 0.000252603 | -0.161511871 | 0.000458362 | -0.20608605  |
| -0.021417346 | 0.644335676 | -0.048284084 | 0.297764673 | -0.051570294 |
| 0.072961032  | 0.115354609 | 0.039179817  | 0.398256963 | 0.069831484  |
| 0.040647868  | 0.380803914 | 0.048663334  | 0.293981603 | 0.037339214  |
| -0.110771434 | 0.016631722 | -0.114895725 | 0.012973488 | -0.119727292 |
| 0.150342479  | 0.001118995 | 0.157884146  | 0.000616471 | 0.143857411  |
| -0.130700182 | 0.004668931 | -0.144402009 | 0.001756392 | -0.16115142  |
| 0.054238555  | 0.242071343 | 0.035320048  | 0.446379522 | 0.036288262  |
| -0.053191215 | 0.25129748  | -0.060661415 | 0.190671085 | -0.065083062 |
| -0.099473536 | 0.031617493 | -0.107284468 | 0.020399372 | -0.12771389  |
| -0.034657584 | 0.454958521 | -0.033497797 | 0.470198447 | -0.052508227 |

|              |             |              |             |              |
|--------------|-------------|--------------|-------------|--------------|
| 0.147189153  | 0.001424455 | 0.159503374  | 0.000540507 | 0.174592083  |
| -0.292260502 | 1.19E-10    | -0.250726186 | 3.98E-08    | -0.265981313 |
| 0.051469749  | 0.266987952 | 0.100013687  | 0.030699783 | 0.138175615  |
| 0.078254796  | 0.091188871 | 0.081989955  | 0.076718707 | 0.117292877  |
| 0.092057079  | 0.04678267  | 0.116091804  | 0.012054819 | 0.14147037   |
| 0.085361715  | 0.065313848 | 0.097763744  | 0.034678541 | 0.087900406  |
| -0.229139671 | 5.58E-07    | -0.221885312 | 1.28E-06    | -0.194809387 |
| -0.216601473 | 2.31E-06    | -0.247062584 | 6.34E-08    | -0.267243126 |
| -0.083941485 | 0.069935366 | -0.071153859 | 0.124667496 | -0.072739538 |
| 0.076521632  | 0.098608544 | 0.096903133  | 0.036312469 | 0.092184348  |
| -0.345553998 | 1.52E-14    | -0.342822746 | 2.52E-14    | -0.354069853 |
| 0.166286677  | 0.000307365 | 0.20697523   | 6.49E-06    | 0.232275524  |
| -0.03439927  | 0.45832864  | -0.064071775 | 0.166875706 | -0.006244363 |
| 0.044667645  | 0.335462281 | 0.038959812  | 0.40091328  | 0.060647462  |
| -0.043391782 | 0.349462666 | -0.03798539  | 0.412805285 | -0.043908444 |
| 0.021210868  | 0.647531782 | 0.031749046  | 0.493699563 | 0.094423265  |
| 0.215979639  | 2.47E-06    | 0.209919287  | 4.76E-06    | 0.151514066  |
| -0.058904533 | 0.203860382 | -0.037242633 | 0.42200837  | -0.01233746  |
| -0.341406135 | 3.27E-14    | -0.371340238 | 1.02E-16    | -0.369746943 |
| -0.238019145 | 1.94E-07    | -0.235660168 | 2.58E-07    | -0.259600543 |
| 0.237063699  | 2.18E-07    | 0.22801893   | 6.36E-07    | 0.202171891  |
| -0.325311135 | 5.67E-13    | -0.288067942 | 2.25E-10    | -0.303884596 |
| -0.194339599 | 2.35E-05    | -0.164727192 | 0.000350638 | -0.171632406 |
| 0.159089596  | 0.000559045 | 0.152144203  | 0.000972813 | 0.130051768  |
| -0.325905447 | 5.12E-13    | -0.278779209 | 8.77E-10    | -0.26873403  |
| -0.015382854 | 0.740225284 | -0.010018753 | 0.829040548 | 0.003502018  |
| -0.01240172  | 0.789241669 | 0.005397071  | 0.907398953 | 0.002642797  |
| -0.181624368 | 7.90E-05    | -0.210155324 | 4.64E-06    | -0.210567797 |
| 0.026773143  | 0.563854739 | 0.049513688  | 0.285616462 | 0.027591304  |
| -0.152844769 | 0.000920895 | -0.160422549 | 0.00050135  | -0.157087795 |
| -0.07088205  | 0.126117403 | -0.048575656 | 0.294853341 | -0.064268243 |
| -0.385039844 | 5.95E-18    | -0.407890506 | 3.79E-20    | -0.403864884 |
| -0.211176379 | 4.16E-06    | -0.227164737 | 7.02E-07    | -0.249243797 |
| -0.040497705 | 0.382567346 | -0.038606063 | 0.405206581 | -0.076906026 |
| -0.382042551 | 1.12E-17    | -0.424297265 | 7.84E-22    | -0.451406708 |
| -0.123129266 | 0.007725008 | -0.108008934 | 0.01956061  | -0.120812808 |
| -0.039208706 | 0.397908942 | -0.02392507  | 0.606054623 | -0.025989078 |
| -0.111437776 | 0.015985554 | -0.132152843 | 0.004226398 | -0.173847919 |
| 0.173074169  | 0.000170906 | 0.164084835  | 0.000370062 | 0.138855775  |
| -0.148753468 | 0.001264448 | -0.166224992 | 0.000308978 | -0.196693857 |
| 0.270787534  | 2.72E-09    | 0.263016691  | 7.90E-09    | 0.21220805   |
| 0.154527067  | 0.000806497 | 0.156682647  | 0.000679113 | 0.182365278  |
| -0.004642519 | 0.920298794 | 0.021569482  | 0.641984913 | 0.00434088   |
| 0.055505392  | 0.231232438 | 0.071440349  | 0.123153335 | 0.073653169  |
| -0.143939545 | 0.001817878 | -0.102673371 | 0.026506428 | -0.114379498 |

|              |             |              |             |              |
|--------------|-------------|--------------|-------------|--------------|
| -0.163159662 | 0.000399806 | -0.175276189 | 0.000140599 | -0.228313817 |
| -0.154004131 | 0.000840566 | -0.166871038 | 0.000292475 | -0.140920243 |
| 0.124685527  | 0.006980124 | 0.130564602  | 0.004712296 | 0.123073382  |
| -0.011818136 | 0.798942048 | -0.005932096 | 0.898266686 | -0.002145591 |
| 0.258581268  | 1.43E-08    | 0.253098206  | 2.93E-08    | 0.278299969  |
| -0.01964507  | 0.67197668  | -0.039749723 | 0.391425295 | -0.037719528 |
| -0.027169676 | 0.558093086 | 0.003869792  | 0.933531024 | -0.011831819 |
| 0.062049115  | 0.180704415 | 0.00493849   | 0.915236186 | 0.031266577  |
| 0.094402788  | 0.041435053 | 0.111828974  | 0.01561654  | 0.100861586  |
| -0.048897489 | 0.291661994 | -0.023745346 | 0.60876422  | -0.021065518 |
| 0.079158824  | 0.087500162 | 0.073275527  | 0.113791118 | 0.079187491  |
| -0.235814702 | 2.53E-07    | -0.245074049 | 8.14E-08    | -0.272392467 |
| 0.002288126  | 0.960668765 | -0.005327308 | 0.908590659 | -0.041066175 |
| -0.057542758 | 0.214529809 | -0.05181635  | 0.263776026 | -0.067215578 |
| 0.080860269  | 0.080883697 | 0.098377796  | 0.033551354 | 0.089858981  |
| 0.071171429  | 0.124574224 | 0.069828033  | 0.131863926 | 0.08374252   |
| 0.256935697  | 1.78E-08    | 0.300805078  | 3.19E-11    | 0.298266432  |
| -0.043230631 | 0.351256947 | -0.007520379 | 0.871240078 | -0.026828328 |
| 0.087652539  | 0.058390408 | 0.068363357  | 0.140182546 | 0.052128551  |
| -0.097560429 | 0.035058794 | -0.079724464 | 0.085253861 | -0.083161677 |
| -0.241008194 | 1.35E-07    | -0.211207821 | 4.14E-06    | -0.213938479 |
| 0.123240702  | 0.007669401 | 0.156194666  | 0.000706199 | 0.179293601  |
| -0.176756753 | 0.000123143 | -0.17714602  | 0.000118903 | -0.173046588 |
| 0.061103883  | 0.187450345 | 0.074334367  | 0.108649181 | 0.06323551   |
| -0.161847576 | 0.000445821 | -0.16345776  | 0.000389988 | -0.186041878 |
| 0.209919743  | 4.75E-06    | 0.21451872   | 2.90E-06    | 0.240739092  |
| -0.160087859 | 0.000515292 | -0.138725216 | 0.002661207 | -0.136504109 |
| -0.197077739 | 1.79E-05    | -0.203751554 | 9.08E-06    | -0.235389719 |
| -0.22612628  | 7.91E-07    | -0.210608011 | 4.42E-06    | -0.244991157 |
| -0.113775317 | 0.013889472 | -0.149972261 | 0.001151435 | -0.187050662 |
| 0.002763433  | 0.952507376 | 0.004949746  | 0.915043714 | 0.014611775  |
| -0.135728191 | 0.003294204 | -0.153263442 | 0.000891102 | -0.162490292 |
| 0.01682074   | 0.716940508 | -0.020448038 | 0.659395663 | -0.010250895 |
| -0.277869747 | 1.00E-09    | -0.269577373 | 3.22E-09    | -0.274143486 |
| 0.089353178  | 0.053653333 | 0.102096558  | 0.027371388 | 0.078720698  |
| -0.2414879   | 1.27E-07    | -0.26551141  | 5.63E-09    | -0.261164495 |
| -0.127939665 | 0.005626716 | -0.141083508 | 0.002243348 | -0.145032097 |
| -0.10661631  | 0.021200487 | -0.084472227 | 0.068177929 | -0.105893496 |
| -0.028896368 | 0.533342107 | -0.008698252 | 0.851291659 | -0.011819036 |
| 0.132627436  | 0.00409026  | 0.144674221  | 0.001721097 | 0.117664669  |
| -0.379953638 | 1.74E-17    | -0.354843859 | 2.65E-15    | -0.407758496 |
| -0.063458626 | 0.170981304 | -0.037441041 | 0.419538345 | -0.042461544 |
| 0.162727459  | 0.000414451 | 0.192702709  | 2.76E-05    | 0.216843957  |
| 0.009653268  | 0.835186275 | 0.084919656  | 0.066724632 | 0.097133888  |
| -0.174507658 | 0.000150552 | -0.180964599 | 8.40E-05    | -0.14217228  |

|              |             |              |             |              |
|--------------|-------------|--------------|-------------|--------------|
| -0.124888628 | 0.006887813 | -0.107320906 | 0.020356451 | -0.117817063 |
| -0.081381868 | 0.07893844  | -0.098835527 | 0.032731577 | -0.09751856  |
| 0.16839279   | 0.000256799 | 0.180588966  | 8.69E-05    | 0.156680051  |
| -0.224069836 | 1.00E-06    | -0.185027957 | 5.76E-05    | -0.172154442 |
| -0.098950267 | 0.032528784 | -0.088024625 | 0.05732541  | -0.077314593 |
| 0.099975849  | 0.030763319 | 0.16487159   | 0.000346405 | 0.188916457  |
| 0.143933191  | 0.001818736 | 0.165731402  | 0.000322167 | 0.226463802  |
| -0.024924873 | 0.591080417 | -0.015506938 | 0.738206164 | -0.052287186 |
| -0.269493108 | 3.26E-09    | -0.286554562 | 2.81E-10    | -0.284248946 |
| 0.016138552  | 0.727956554 | 0.023071342  | 0.618973316 | -0.013693196 |
| -0.039967698 | 0.388831202 | -0.051526484 | 0.266460368 | -0.016973069 |
| -0.213901999 | 3.10E-06    | -0.218162867 | 1.94E-06    | -0.221231782 |
| -0.225917082 | 8.10E-07    | -0.249352698 | 4.75E-08    | -0.222451975 |
| -0.128909661 | 0.0052717   | -0.115896343 | 0.0122009   | -0.130575878 |
| -0.0074495   | 0.872443223 | 0.008338708  | 0.85737146  | -0.015366021 |
| 0.042744179  | 0.356708407 | 0.04043011   | 0.383362757 | 0.020623716  |
| -0.128764513 | 0.005323507 | -0.121890082 | 0.008368073 | -0.125449679 |
| 0.01196806   | 0.796446985 | 0.031981421  | 0.490541049 | -0.017225327 |
| 0.090727267  | 0.050063497 | 0.104709634  | 0.023638525 | 0.103934327  |
| 0.031945068  | 0.491034452 | 0.00818929   | 0.859900578 | 0.01991349   |
| -0.221770182 | 1.30E-06    | -0.215942737 | 2.48E-06    | -0.242656896 |
| 0.021589097  | 0.641682085 | 0.01148012   | 0.804574863 | 0.002351251  |
| -0.273914139 | 1.76E-09    | -0.285445399 | 3.32E-10    | -0.267997634 |
| 0.270038401  | 3.02E-09    | 0.228943183  | 5.71E-07    | 0.235604883  |
| 0.02572815   | 0.579173897 | 0.022035942  | 0.634799653 | -0.000704894 |
| 0.169659661  | 0.000230246 | 0.182580118  | 7.24E-05    | 0.195151845  |
| 0.037819406  | 0.41485155  | 0.01492373   | 0.747711686 | -0.008967152 |
| -0.080994704 | 0.08037866  | -0.059437632 | 0.199790179 | -0.044450606 |
| -0.109747235 | 0.017669493 | -0.101111287 | 0.028905029 | -0.09621438  |
| -0.066996975 | 0.148300276 | -0.063738852 | 0.169095671 | -0.068087543 |
| -0.087164004 | 0.05981354  | -0.068016105 | 0.142212554 | -0.064841256 |
| 0.103135612  | 0.025830362 | 0.116417178  | 0.01181507  | 0.12959311   |
| -0.013090113 | 0.777840982 | -0.006277534 | 0.892377513 | 0.013031939  |
| -0.028144946 | 0.544044966 | -0.050118622 | 0.27976413  | -0.018131808 |
| -0.015076261 | 0.745221866 | 0.017519174  | 0.705722622 | 0.030945529  |
| -0.075779829 | 0.101927583 | -0.046538708 | 0.315591445 | -0.042098443 |
| 0.270608505  | 2.79E-09    | 0.297043691  | 5.74E-11    | 0.294966127  |
| 0.127471599  | 0.005805599 | 0.126220335  | 0.006309157 | 0.145019102  |
| -0.045290311 | 0.328762206 | -0.075273021 | 0.10424572  | -0.05739027  |
| 0.02021973   | 0.662963271 | -0.014196967 | 0.759610539 | -0.057442401 |
| -0.079274168 | 0.087038278 | -0.04617346  | 0.319408612 | -0.048611595 |
| -0.01290576  | 0.780889555 | -0.030841559 | 0.506137661 | 0.006640574  |
| 0.249526179  | 4.64E-08    | 0.2646888    | 6.30E-09    | 0.255006424  |
| 0.039934969  | 0.389220039 | 0.048582282  | 0.2947874   | 0.047888588  |
| -0.105230604 | 0.022949407 | -0.098640243 | 0.033079207 | -0.105302067 |

|              |             |              |             |              |
|--------------|-------------|--------------|-------------|--------------|
| -0.133555462 | 0.003835459 | -0.158953313 | 0.000565279 | -0.157609928 |
| 0.195136241  | 2.17E-05    | 0.200327339  | 1.29E-05    | 0.213268949  |
| -0.092875029 | 0.044855706 | -0.120674451 | 0.009044864 | -0.145281319 |
| 0.114428617  | 0.013348688 | 0.164979641  | 0.000343268 | 0.1107583    |
| -0.078422441 | 0.090495572 | -0.099213098 | 0.032068289 | -0.07707787  |
| -0.061785461 | 0.182567728 | -0.085335319 | 0.065397394 | -0.110053161 |
| -0.098477926 | 0.033370546 | -0.115358244 | 0.012611167 | -0.168736111 |
| -0.151686567 | 0.001008172 | -0.161218041 | 0.000469606 | -0.148019512 |
| 0.182438377  | 7.33E-05    | 0.136802236  | 0.003053131 | 0.124566851  |
| -0.104353094 | 0.024120391 | -0.131443797 | 0.004437429 | -0.172905185 |
| -0.188266012 | 4.24E-05    | -0.158059388 | 0.000607796 | -0.166349735 |
| -0.120594075 | 0.009091283 | -0.105526326 | 0.02256603  | -0.103503143 |
| -0.084903172 | 0.066777722 | -0.069760484 | 0.132238987 | -0.068263839 |
| 0.085748725  | 0.064098964 | 0.110050426  | 0.017356545 | 0.130631837  |
| 0.064313318  | 0.165278792 | 0.063063892  | 0.173664017 | 0.043436301  |
| 0.032265327  | 0.486696835 | 0.025984808  | 0.575393404 | 0.012196664  |
| 0.00731478   | 0.87473086  | 0.041652688  | 0.369132387 | 0.068329533  |
| 0.030628206  | 0.50908556  | 0.033256821  | 0.47339985  | 0.030126118  |
| 0.309297053  | 8.24E-12    | 0.314375551  | 3.59E-12    | 0.333148669  |
| -0.1784179   | 0.000105988 | -0.186623335 | 4.95E-05    | -0.177518514 |
| 0.018741785  | 0.686239588 | 0.028786337  | 0.534902675 | 0.079864985  |
| -0.213818109 | 3.13E-06    | -0.221619625 | 1.32E-06    | -0.210364126 |
| -0.162678959 | 0.000416125 | -0.168932559 | 0.000245154 | -0.196729846 |
| 0.137716256  | 0.00286073  | 0.146696643  | 0.001478559 | 0.156106586  |
| 0.038623396  | 0.404995587 | 0.026020357  | 0.574870697 | -0.000218977 |
| -0.019181384 | 0.679284    | -0.00618765  | 0.893909327 | -0.0171147   |
| -0.15457773  | 0.000803265 | -0.121764591 | 0.008435786 | -0.147895037 |
| 0.167068555  | 0.000287596 | 0.194955982  | 2.21E-05    | 0.205530111  |
| -0.031541668 | 0.496527452 | 0.007354207  | 0.874061251 | 0.009843257  |
| -0.175372285 | 0.000139399 | -0.19350676  | 2.55E-05    | -0.223326678 |
| -0.164781057 | 0.000349053 | -0.192394045 | 2.84E-05    | -0.194550019 |
| 0.075026545  | 0.105388084 | 0.044070471  | 0.341969807 | 0.044521334  |
| -0.087794133 | 0.057983218 | -0.107969729 | 0.01960522  | -0.133612149 |
| -0.047050042 | 0.310297923 | -0.045851202 | 0.322801396 | -0.012513103 |
| -0.138571022 | 0.002690855 | -0.154796346 | 0.000789457 | -0.169060678 |
| 0.218719583  | 1.83E-06    | 0.22287087   | 1.15E-06    | 0.222922871  |
| 0.132882463  | 0.004018756 | 0.170335225  | 0.000217159 | 0.205505855  |
| 0.074551567  | 0.107617414 | 0.079351103  | 0.086731292 | 0.057047595  |
| -0.174938943 | 0.000144888 | -0.170825606 | 0.000208099 | -0.166493629 |
| 0.130083269  | 0.004869201 | 0.110581464  | 0.01682008  | 0.096664163  |
| -0.068113571 | 0.141640522 | -0.057822306 | 0.21230747  | -0.047899406 |
| 0.10038737   | 0.030078326 | 0.082922501  | 0.073413368 | 0.045805939  |
| -0.084812751 | 0.067069541 | -0.072642469 | 0.116955438 | -0.078198493 |
| -0.060478019 | 0.192017871 | -0.010989388 | 0.812770537 | -0.028152066 |
| -0.088856485 | 0.055002585 | -0.085134709 | 0.066035222 | -0.054926799 |

|              |             |              |             |              |
|--------------|-------------|--------------|-------------|--------------|
| -0.178153142 | 0.000108563 | -0.189776824 | 3.66E-05    | -0.185625452 |
| -0.292254806 | 1.20E-10    | -0.320188798 | 1.36E-12    | -0.342184314 |
| -0.066892648 | 0.1489345   | -0.070400604 | 0.128717668 | -0.062430107 |
| 0.110275877  | 0.017126989 | 0.103884258  | 0.024766932 | 0.147727975  |
| -0.319557313 | 1.51E-12    | -0.312650276 | 4.77E-12    | -0.297840807 |
| -0.075891591 | 0.101421934 | -0.063513489 | 0.1706109   | -0.044475326 |
| -0.137098371 | 0.002989543 | -0.135600089 | 0.003324082 | -0.149915725 |
| -0.420150964 | 2.13E-21    | -0.404149505 | 8.91E-20    | -0.411195141 |
| -0.158567311 | 0.000583288 | -0.118699476 | 0.010248646 | -0.077858438 |
| 0.331341353  | 1.99E-13    | 0.294744828  | 8.18E-11    | 0.313753631  |
| 0.033561281  | 0.469357045 | 0.010816585  | 0.815661415 | -0.00207765  |
| 0.028215336  | 0.543037865 | 0.042245101  | 0.36235627  | 0.039400662  |
| 0.037415365  | 0.41985752  | 0.052476946  | 0.257728132 | 0.049066576  |
| 0.149464835  | 0.001197305 | 0.157388634  | 0.000641626 | 0.151153894  |
| -0.42573122  | 5.53E-22    | -0.432520124 | 1.03E-22    | -0.459397112 |
| -0.383838448 | 7.67E-18    | -0.372316644 | 8.40E-17    | -0.397731271 |
| -0.179690391 | 9.44E-05    | -0.160212628 | 0.000510053 | -0.187207348 |
| 0.006020352  | 0.896761511 | 0.027125798  | 0.558729231 | 0.025593081  |
| -0.099250933 | 0.032002461 | -0.011139068 | 0.810268529 | -0.008305212 |
| 0.105156858  | 0.023045886 | 0.156819593  | 0.000671687 | 0.110061441  |
| 0.012662408  | 0.7849189   | 0.016370161  | 0.724210082 | 0.009664312  |
| -0.180691884 | 8.61E-05    | -0.159637377 | 0.000534627 | -0.157944619 |
| -0.047627859 | 0.304386869 | -0.029330528 | 0.527206901 | -0.034598125 |
| 0.042213894  | 0.362711262 | 0.05592313   | 0.22773483  | 0.023271637  |
| 0.073563362  | 0.112374792 | 0.102964882  | 0.026078317 | 0.108344529  |
| -0.007914426 | 0.864556767 | -0.026966248 | 0.56104534  | -0.003899146 |
| -0.008609528 | 0.852791167 | -0.017305337 | 0.709150524 | 0.014553299  |
| -0.041037368 | 0.376253103 | -0.058647175 | 0.205846688 | -0.067982933 |
| -0.048137589 | 0.299234616 | -0.076148138 | 0.100268753 | -0.06032914  |
| 0.134287992  | 0.003644582 | 0.103813546  | 0.024865733 | 0.095942808  |
| 0.032261041  | 0.486754754 | 0.065486678  | 0.157684121 | 0.043684283  |
| 0.028608254  | 0.537433285 | 0.06148994   | 0.184673086 | 0.049677065  |
| -0.022978999 | 0.620377818 | -0.020495262 | 0.6586587   | -0.025237132 |
| -0.066945778 | 0.148611256 | -0.036956984 | 0.425579358 | -0.081812258 |
| 0.184035492  | 6.32E-05    | 0.129765136  | 0.004975475 | 0.151177145  |
| 0.04091378   | 0.377693436 | 0.049039302  | 0.290263124 | 0.058587187  |
| 0.03147008   | 0.497505655 | 0.060994583  | 0.188242194 | 0.044032665  |
| -0.021052806 | 0.649982851 | -0.024765436 | 0.593456932 | -0.015604086 |
| 0.054961484  | 0.235843193 | 0.072380877  | 0.118282936 | 0.080584119  |
| -0.040268331 | 0.385270586 | -0.045925622 | 0.322015814 | -0.046553308 |
| 0.014755082  | 0.750467638 | 0.03386266   | 0.465373978 | 0.037369971  |
| 0.010367037  | 0.823193719 | 0.034439715  | 0.457800042 | 0.044977542  |
| -0.143089473 | 0.001936066 | -0.130330763 | 0.004787944 | -0.106605165 |
| -0.187218013 | 4.68E-05    | -0.190378671 | 3.46E-05    | -0.202624135 |
| 0.036285689  | 0.434040313 | 0.059735264  | 0.197543671 | 0.091820205  |

|              |             |              |             |              |
|--------------|-------------|--------------|-------------|--------------|
| 0.139227522  | 0.002566679 | 0.132434376  | 0.004145154 | 0.131616536  |
| 0.032686157  | 0.481028613 | 0.02189262   | 0.637003754 | 0.013393118  |
| -0.075781955 | 0.101917946 | -0.051084386 | 0.270590458 | -0.058128516 |
| -0.103097139 | 0.025886059 | -0.101453383 | 0.028364379 | -0.084555781 |
| 0.073408834  | 0.11313343  | 0.110527358  | 0.016874066 | 0.119577201  |
| 0.031682573  | 0.494605079 | -0.002593849 | 0.955418738 | -0.023642554 |
| 0.077949782  | 0.092461175 | 0.033454297  | 0.470775471 | 0.046426137  |
| 0.006320191  | 0.89165068  | 0.020362432  | 0.660732468 | 0.024898427  |
| -0.111090708 | 0.016319316 | -0.099950174 | 0.030806495 | -0.117717061 |
| -0.024344325 | 0.599754767 | -0.030992239 | 0.504061103 | -0.030262753 |
| -0.057281161 | 0.21662454  | -0.053352885 | 0.249857575 | -0.065911038 |
| 0.100302893  | 0.030217866 | 0.129769953  | 0.00497385  | 0.113468157  |
| 0.031053251  | 0.503221571 | 0.013364456  | 0.773310612 | 0.07058905   |
| -0.037587628 | 0.417718905 | -0.03484526  | 0.452518734 | -0.03828814  |
| -0.07803775  | 0.092092783 | -0.110915511 | 0.016490102 | -0.099526805 |
| -0.01200136  | 0.795893074 | -0.029466305 | 0.525295608 | -0.019879984 |
| -0.03143943  | 0.497924778 | -0.044022176 | 0.342499581 | -0.063721123 |
| 0.086145683  | 0.062872232 | 0.109698991  | 0.017719742 | 0.098457924  |
| -0.016438512 | 0.723105702 | -0.017089164 | 0.712621851 | -0.028190873 |
| 0.015416421  | 0.739678908 | 0.010226608  | 0.825550018 | -0.034404196 |
| 0.021921443  | 0.636560238 | 0.037425649  | 0.419729664 | 0.039786184  |
| -0.092822928 | 0.044976425 | -0.12302866  | 0.007775519 | -0.12026258  |
| -0.065520852 | 0.157466942 | -0.048054845 | 0.300067016 | -0.044317022 |
| 0.009412211  | 0.839245252 | 0.005336453  | 0.908434433 | -0.004824872 |
| -0.032165429 | 0.48804765  | -0.038083232 | 0.41160189  | -0.040095793 |
| 0.031971915  | 0.490670033 | 0.069669946  | 0.132742989 | 0.07794128   |
| -0.072849327 | 0.115913977 | -0.075238766 | 0.104403895 | -0.075429102 |
| 0.02870465   | 0.536062724 | -0.002243178 | 0.961440783 | 0.000312344  |
| 0.094324072  | 0.041605754 | 0.104186256  | 0.024348775 | 0.092216298  |
| -0.048885076 | 0.291784657 | -0.071322177 | 0.123776158 | -0.083501854 |
| -0.125761799 | 0.006503282 | -0.147443995 | 0.00139718  | -0.186401631 |
| 0.009256233  | 0.841873916 | 0.030530066  | 0.510444576 | 0.006484373  |
| 0.047448352  | 0.306215194 | 0.07267989   | 0.116766498 | 0.076440022  |
| 0.029996284  | 0.517869183 | 0.027615645  | 0.551647409 | 0.029714662  |
| -0.004004898 | 0.931216029 | -0.011130955 | 0.810404096 | 0.004284481  |
| 0.022190554  | 0.632425541 | 0.038850302  | 0.402239442 | 0.041630361  |
| -0.073515269 | 0.112610468 | -0.063354589 | 0.171685344 | -0.070498269 |
| 0.035972578  | 0.438019649 | 0.067052719  | 0.147962247 | 0.026870249  |
| 0.022463887  | 0.62823768  | 0.070199589  | 0.129815545 | 0.018222665  |
| 0.087014004  | 0.060256208 | 0.104596536  | 0.023790468 | 0.090341902  |
| -0.021525571 | 0.642663043 | -0.016478488 | 0.722460052 | -0.0091532   |
| 0.000154579  | 0.997341828 | -0.010643646 | 0.818557102 | -0.018442722 |
| -0.017516779 | 0.705760985 | -0.004190141 | 0.928042916 | -0.014199352 |
| -0.000324085 | 0.994427013 | 0.017002349  | 0.714017625 | 0.000818622  |
| 0.066833508  | 0.149294932 | 0.041454312  | 0.371418892 | 0.064677011  |

|              |             |              |             |              |
|--------------|-------------|--------------|-------------|--------------|
| 0.015596062  | 0.736757032 | 0.027284603  | 0.556428536 | 0.009372879  |
| -0.033938451 | 0.464375265 | -0.018769151 | 0.685805802 | -0.044213207 |
| 0.089990985  | 0.051961256 | 0.066830078  | 0.149315859 | 0.073267002  |
| 0.10279684   | 0.026324369 | 0.111661451  | 0.015773638 | 0.130875308  |
| 0.074893003  | 0.106011145 | 0.067271466  | 0.146641425 | 0.062445935  |
| -0.053985347 | 0.244279804 | -0.068452373 | 0.139665761 | -0.103952617 |
| -0.090496908 | 0.050650917 | -0.083307131 | 0.072084333 | -0.080534102 |
| 0.022185651  | 0.632500766 | -0.011415757 | 0.805648584 | 0.01091029   |
| 0.026735836  | 0.564398278 | 0.036360548  | 0.433092025 | 0.025677261  |
| 0.053859208  | 0.245385227 | 0.057269324  | 0.216719667 | 0.058221047  |
| 0.153909055  | 0.000846902 | 0.177841438  | 0.000111669 | 0.159823879  |
| 0.06972883   | 0.132415032 | 0.087766196  | 0.058063372 | 0.093072473  |
| -0.039385086 | 0.395788118 | -0.049311302 | 0.287592692 | -0.0070658   |
| -0.082630297 | 0.074436338 | -0.106722594 | 0.021071255 | -0.101866024 |
| 0.112620853  | 0.014892366 | 0.131291655  | 0.004483932 | 0.140010544  |
| -0.017563941 | 0.705005745 | -0.007672079 | 0.868666034 | -0.019137323 |
| -0.015996391 | 0.730259332 | 0.012601093  | 0.785935044 | -0.005811314 |
| 0.049640156  | 0.284386194 | 0.081620638  | 0.078060716 | 0.050972532  |
| 0.054457587  | 0.240172288 | 0.09236991   | 0.046037642 | 0.084419965  |
| 0.063186201  | 0.172829443 | 0.063493715  | 0.170744336 | 0.059861971  |
| -0.008181909 | 0.860025536 | -0.002623575 | 0.954908366 | 0.00167836   |
| -0.017185965 | 0.711066673 | -0.004474456 | 0.923174966 | -0.013846265 |
| -0.002539311 | 0.956355169 | 0.00346814   | 0.940416398 | -0.002149608 |
| -0.119912048 | 0.009493783 | -0.097472644 | 0.035224067 | -0.153335626 |
| -0.100759037 | 0.029470944 | -0.088901332 | 0.05487961  | -0.04516287  |
| -0.019155338 | 0.679695365 | 0.008299318  | 0.858038043 | -0.013102605 |
| 0.059377361  | 0.200247362 | 0.075104249  | 0.10502688  | 0.072766227  |
| 0.002793445  | 0.951992214 | 0.056595215  | 0.222186802 | 0.012817177  |
| 0.052127726  | 0.260913262 | 0.073704171  | 0.111686989 | 0.058291992  |
| 0.112947759  | 0.014602119 | 0.12957569   | 0.00503975  | 0.111015191  |
| 0.145032168  | 0.001675676 | 0.176844798  | 0.000122172 | 0.16595346   |
| -0.111383199 | 0.016037639 | -0.125597896 | 0.00657396  | -0.11166867  |
| 0.000331098  | 0.994306412 | 0.010782723  | 0.816228208 | 0.008383412  |
| 0.063981457  | 0.167475785 | 0.072630278  | 0.117017045 | 0.035249327  |
| 0.092152605  | 0.046554102 | 0.096500338  | 0.037099396 | 0.101516203  |
| -0.168596986 | 0.000252334 | -0.152188464 | 0.000969454 | -0.173695061 |
| 0.072990822  | 0.115205791 | 0.061795277  | 0.182498105 | 0.068429849  |
| 0.031973782  | 0.490644708 | 0.009454146  | 0.838538831 | -0.003112989 |
| 0.043929896  | 0.343513312 | 0.05722218   | 0.217098848 | 0.007903025  |
| -0.041172271 | 0.374684774 | -0.024436132 | 0.598379195 | -0.040524676 |
| 0.039975554  | 0.388737904 | 0.052952542  | 0.253433751 | 0.050230867  |
| 0.089913106  | 0.052165451 | 0.119928923  | 0.009483637 | 0.124492295  |
| 0.015369188  | 0.740447786 | 0.011634058  | 0.802008315 | 0.026643324  |
| 0.055352061  | 0.23252573  | 0.032726333  | 0.480489355 | 0.031197295  |
| -0.046113659 | 0.320036441 | -0.001653882 | 0.971565477 | -0.029709357 |



|              |             |              |             |              |
|--------------|-------------|--------------|-------------|--------------|
| -0.00048527  | 0.991655349 | 0.014965047  | 0.747036994 | 0.008576229  |
| -0.123327216 | 0.007626477 | -0.127816509 | 0.005673296 | -0.152670647 |
| -0.025271419 | 0.585929999 | -0.034526314 | 0.456669397 | -0.045412013 |
| -0.059259406 | 0.201144297 | -0.057085848 | 0.218198042 | -0.057946172 |
| -0.045493787 | 0.326591613 | -0.060031965 | 0.195322582 | -0.084240072 |
| 0.0516006    | 0.265772233 | 0.081222751  | 0.079527791 | 0.073336798  |
| -0.111520957 | 0.015906457 | -0.070727253 | 0.126948967 | -0.122985216 |
| 0.096749779  | 0.036610385 | 0.098250403  | 0.033782601 | 0.106412294  |
| 0.022895253  | 0.621652748 | -0.01222806  | 0.792124937 | 0.008215161  |
| 0.029601744  | 0.523392587 | 0.050372394  | 0.277333421 | 0.045113998  |
| -0.062770756 | 0.175676446 | -0.059306296 | 0.200787395 | -0.045829974 |
| -0.100461983 | 0.029955539 | -0.061247021 | 0.186417057 | -0.070043582 |
| 0.119647657  | 0.009654026 | 0.151683277  | 0.001008431 | 0.139130971  |
| 0.091244861  | 0.04876436  | 0.065075698  | 0.160313652 | 0.091260549  |
| -0.046398495 | 0.317053247 | -0.00020684  | 0.996443146 | -0.011470247 |
| -0.005227675 | 0.910292964 | -0.001804043 | 0.968985057 | -0.017058157 |
| -0.048610315 | 0.294508535 | -0.054158145 | 0.242771153 | -0.09929079  |
| 0.006911235  | 0.881589476 | -0.007630845 | 0.869365567 | -0.010766373 |
| -0.008619374 | 0.852624729 | 0.010932231  | 0.813726458 | -0.015350275 |
| 0.067306219  | 0.146432417 | 0.039373156  | 0.395931359 | 0.037114904  |
| -0.239614075 | 1.60E-07    | -0.248362803 | 5.38E-08    | -0.247546317 |
| -0.034854373 | 0.452400455 | -0.073864865 | 0.1109061   | -0.092319039 |
| 0.14380286   | 0.001836424 | 0.153756397  | 0.000857166 | 0.171085581  |
| 0.127045141  | 0.005973013 | 0.133623506  | 0.003817355 | 0.123588787  |
| 0.061507572  | 0.184546969 | 0.109584558  | 0.017839429 | 0.105224866  |
| 0.000647531  | 0.988865266 | 0.009562177  | 0.836719574 | 0.006990475  |
| 0.077531051  | 0.094230921 | 0.055984182  | 0.227226821 | 0.038360437  |
| 0.020618215  | 0.656741455 | -0.009407104 | 0.839331291 | 0.044955392  |
| -0.116390015 | 0.011834922 | -0.101396163 | 0.028454199 | -0.117083058 |
| -0.063697543 | 0.16937266  | -0.061751845 | 0.18280632  | -0.09753905  |
| -0.000511989 | 0.991195904 | 0.007814135  | 0.866256889 | 0.011912448  |
| -0.184070926 | 6.30E-05    | -0.182858711 | 7.05E-05    | -0.199999527 |
| -0.058375966 | 0.207955032 | -0.077232932 | 0.09550733  | -0.108896914 |
| 0.113481028  | 0.014139311 | 0.09764795   | 0.034894674 | 0.0916321    |
| 0.044167538  | 0.340906604 | 0.113162605  | 0.014414083 | 0.098666717  |
| -0.026184183 | 0.572464714 | -0.039067072 | 0.39961691  | -0.053527565 |
| -0.11578211  | 0.012286997 | -0.095778287 | 0.038546282 | -0.101352296 |
| -0.17777698  | 0.000112322 | -0.213641824 | 3.19E-06    | -0.209576579 |
| 0.237022311  | 2.19E-07    | 0.22901268   | 5.66E-07    | 0.247665203  |
| -0.132236104 | 0.004202222 | -0.158264216 | 0.0005978   | -0.152383399 |
| 0.215642151  | 2.56E-06    | 0.221607384  | 1.32E-06    | 0.203423887  |
| -0.030624794 | 0.509132786 | -0.031350376 | 0.499143598 | -0.002960512 |
| -0.088764943 | 0.055254306 | -0.027458716 | 0.553911373 | -0.021505984 |
| -0.041915229 | 0.366119759 | -0.06303862  | 0.173836836 | -0.055373027 |
| 0.102494965  | 0.026771407 | 0.125632365  | 0.00655904  | 0.129361658  |

|              |             |              |             |              |
|--------------|-------------|--------------|-------------|--------------|
| -0.117765532 | 0.01086588  | -0.096549918 | 0.037001759 | -0.107767696 |
| -0.243520148 | 9.88E-08    | -0.211051746 | 4.21E-06    | -0.241099648 |
| -0.010082651 | 0.827967133 | -0.004344898 | 0.925392873 | 0.003061668  |
| -0.363152098 | 5.27E-16    | -0.36011353  | 9.56E-16    | -0.389653302 |
| 0.117309517  | 0.011179052 | 0.110508593  | 0.016892825 | 0.124852954  |
| -0.007178452 | 0.87704685  | -0.021444518 | 0.643915559 | -0.069861342 |
| -0.006020197 | 0.896764158 | -0.012832364 | 0.782104199 | -0.032975861 |
| 0.031070724  | 0.502981268 | -0.004156207 | 0.9286241   | 0.001563122  |
| -0.225012893 | 8.98E-07    | -0.260798465 | 1.06E-08    | -0.279887762 |
| 0.06274993   | 0.175820072 | 0.034350549  | 0.458965841 | 0.005892237  |
| -0.097864284 | 0.034491808 | -0.117656561 | 0.010940001 | -0.105256138 |
| -0.079425079 | 0.086436935 | -0.102899606 | 0.02617366  | -0.093600118 |
| 0.119505917  | 0.009740918 | 0.120237751  | 0.009299634 | 0.081729822  |
| 0.160039865  | 0.00051732  | 0.162117663  | 0.000435964 | 0.126218858  |
| 0.127472294  | 0.00580533  | 0.124718849  | 0.006964903 | 0.090570368  |
| 0.109408128  | 0.018025344 | 0.093381789  | 0.043695665 | 0.069222903  |
| 0.05478759   | 0.237330892 | 0.093777775  | 0.042806873 | 0.068049183  |
| 0.071370722  | 0.123520006 | 0.11613459   | 0.012023049 | 0.091352931  |
| -0.049971423 | 0.281180645 | -0.052093864 | 0.261223544 | -0.033163401 |
| -0.053231735 | 0.250936049 | -0.050622917 | 0.274947931 | -0.05423606  |
| -0.231922603 | 4.03E-07    | -0.212924359 | 3.44E-06    | -0.204889174 |
| -0.275010133 | 1.50E-09    | -0.246912805 | 6.46E-08    | -0.264165387 |
| -0.101544007 | 0.028222619 | -0.068274824 | 0.14069798  | -0.063337889 |
| -0.131014471 | 0.004569788 | -0.124185917 | 0.00721193  | -0.101750979 |
| -0.195105929 | 2.18E-05    | -0.201799768 | 1.11E-05    | -0.200842444 |
| 0.287284346  | 2.52E-10    | 0.311870358  | 5.42E-12    | 0.332440399  |
| -0.178542662 | 0.000104795 | -0.16022221  | 0.000509652 | -0.198875121 |
| 0.028224009  | 0.542913842 | 0.020721346  | 0.655135027 | 0.008894891  |
| -0.073335039 | 0.11349714  | -0.061278444 | 0.186190787 | -0.094889507 |
| 0.261052457  | 1.03E-08    | 0.253839757  | 2.66E-08    | 0.285934192  |
| -0.146801729 | 0.001466859 | -0.125192168 | 0.006751889 | -0.144311825 |
| -0.201596337 | 1.13E-05    | -0.188927743 | 3.98E-05    | -0.171261926 |
| 0.183031835  | 6.94E-05    | 0.191404365  | 3.13E-05    | 0.188931173  |
| -0.094295104 | 0.041668724 | -0.053717799 | 0.246628619 | -0.009635643 |
| 0.265795856  | 5.42E-09    | 0.264936251  | 6.09E-09    | 0.271199744  |
| -0.232888    | 3.59E-07    | -0.246080103 | 7.18E-08    | -0.23526088  |
| 0.139890765  | 0.002446552 | 0.125738882  | 0.006513123 | 0.107869381  |
| 0.093810915  | 0.042733186 | 0.108426047  | 0.019091442 | 0.149549089  |
| -0.124434465 | 0.007095763 | -0.093366138 | 0.043731112 | -0.10099481  |
| -0.023005285 | 0.61997787  | -0.043445    | 0.3488714   | 0.009178718  |
| -0.100813121 | 0.02938344  | -0.107148343 | 0.020560415 | -0.087335936 |
| -0.314622921 | 3.44E-12    | -0.289920399 | 1.70E-10    | -0.306763754 |
| -0.003151464 | 0.945848226 | -0.034451193 | 0.457650102 | -0.007968161 |
| -0.003752373 | 0.935543404 | -0.037922445 | 0.413580574 | -0.028816198 |
| 0.170389387  | 0.00021614  | 0.145731825  | 0.001590054 | 0.133739385  |

|              |             |              |             |              |
|--------------|-------------|--------------|-------------|--------------|
| -0.02921365  | 0.528854987 | -0.055367763 | 0.232393051 | -0.053101667 |
| 0.010276439  | 0.824713718 | 0.012865038  | 0.781563399 | 0.038769671  |
| -0.12925264  | 0.005151081 | -0.133994166 | 0.003720086 | -0.167119054 |
| 0.039380967  | 0.395837572 | 0.084538834  | 0.067959954 | 0.123834264  |
| -0.186194649 | 5.16E-05    | -0.170782746 | 0.000208876 | -0.202102454 |
| -0.344465988 | 1.86E-14    | -0.334410134 | 1.15E-13    | -0.313690827 |
| -0.329897227 | 2.56E-13    | -0.331876319 | 1.81E-13    | -0.35074674  |
| -0.111726922 | 0.015712078 | -0.084670539 | 0.067530622 | -0.1106562   |
| -0.131157993 | 0.00452515  | -0.174121943 | 0.000155793 | -0.19607911  |
| -0.07694142  | 0.096768752 | -0.037476365 | 0.419099481 | -0.059140109 |
| -0.073124587 | 0.114539418 | -0.116767893 | 0.011561377 | -0.095296088 |
| 0.02121979   | 0.647393541 | -0.02451397  | 0.597214057 | -0.022403548 |
| 0.031154604  | 0.501828551 | 0.045748362  | 0.323889021 | -0.017172548 |
| -0.07042825  | 0.128567234 | -0.031347067 | 0.499188912 | -0.020190022 |
| -0.069770385 | 0.132183962 | -0.075939895 | 0.101204006 | -0.051292582 |
| -0.159186191 | 0.000554666 | -0.198109656 | 1.61E-05    | -0.185196018 |
| 0.083195736  | 0.072467207 | 0.04781612   | 0.30247717  | -0.001055936 |
| 0.240025044  | 1.52E-07    | 0.242884873  | 1.07E-07    | 0.219519506  |
| -0.023057538 | 0.619183175 | -0.038003042 | 0.412588029 | -0.051157505 |
| -0.219491772 | 1.68E-06    | -0.213585506 | 3.21E-06    | -0.172783932 |
| -0.264671812 | 6.32E-09    | -0.279517823 | 7.89E-10    | -0.264004795 |
| -0.230131562 | 4.97E-07    | -0.245594803 | 7.63E-08    | -0.225935482 |
| -0.316509039 | 2.52E-12    | -0.302810267 | 2.33E-11    | -0.306408454 |
| 0.215638624  | 2.56E-06    | 0.211078596  | 4.20E-06    | 0.216998093  |
| 0.00428924   | 0.926345859 | 0.025562397  | 0.581621545 | 0.064248104  |
| -0.173165714 | 0.000169533 | -0.172321923 | 0.000182593 | -0.210320707 |
| -0.21819626  | 1.93E-06    | -0.209116478 | 5.18E-06    | -0.211443998 |
| 0.077781296  | 0.093170046 | 0.105841764  | 0.022163222 | 0.114416711  |
| -0.209256992 | 5.10E-06    | -0.205114549 | 7.89E-06    | -0.225694836 |
| 0.083851352  | 0.070237472 | 0.086824958  | 0.060817961 | 0.097202687  |
| -0.14022764  | 0.002387522 | -0.15475534  | 0.00079203  | -0.152241443 |
| -0.006568156 | 0.887427422 | -0.03090699  | 0.505235384 | -0.015942218 |
| 0.009845814  | 0.831947292 | 0.008631627  | 0.852417622 | 0.02985039   |
| 0.003991395  | 0.931447375 | 0.022542715  | 0.627032114 | 0.001291625  |
| -0.044537059 | 0.336878474 | 0.00146617   | 0.974791591 | 0.006031327  |
| -0.13636319  | 0.003149669 | -0.118330676 | 0.010488564 | -0.093895623 |
| -0.307446634 | 1.11E-11    | -0.290072502 | 1.66E-10    | -0.280809804 |
| -0.33970455  | 4.45E-14    | -0.3123115   | 5.04E-12    | -0.316882089 |
| 0.031576124  | 0.496057005 | 0.036956829  | 0.425581305 | 0.069428717  |
| -0.003145013 | 0.945958913 | 0.020987543  | 0.65099598  | -0.033264648 |
| 0.072717259  | 0.116578056 | 0.055079048  | 0.234841146 | 0.03013199   |
| 0.125795123  | 0.006488995 | 0.176409483  | 0.000127044 | 0.163136031  |
| 0.31086618   | 6.38E-12    | 0.342894112  | 2.49E-14    | 0.346901121  |
| -0.072029967 | 0.120082166 | -0.061734373 | 0.182930413 | -0.054170601 |
| -0.182664443 | 7.18E-05    | -0.18723062  | 4.68E-05    | -0.181494688 |

|              |             |              |             |              |
|--------------|-------------|--------------|-------------|--------------|
| -0.05427589  | 0.241746902 | -0.087250601 | 0.059559207 | -0.075023835 |
| 0.003803162  | 0.934672897 | -0.01028039  | 0.824647408 | -0.018083444 |
| 0.003230189  | 0.944497646 | 0.033887993  | 0.465040025 | 0.013553124  |
| 0.109461831  | 0.017968576 | 0.122215753  | 0.008194602 | 0.101930217  |
| 0.148210159  | 0.001318044 | 0.153338451  | 0.00088586  | 0.139073757  |
| -0.060255158 | 0.193663837 | -0.069298383 | 0.134826919 | -0.078703378 |
| 0.201075262  | 1.20E-05    | 0.21765577   | 2.05E-06    | 0.212853656  |
| 0.100311165  | 0.030204177 | 0.129331547  | 0.005123685 | 0.142589111  |
| -0.038916552 | 0.401436845 | -0.05207883  | 0.26136138  | -0.058257648 |
| 0.246295831  | 6.99E-08    | 0.262248477  | 8.77E-09    | 0.230492992  |
| 0.015275527  | 0.741973181 | 0.043483342  | 0.348445802 | 0.034792237  |
| 0.100310667  | 0.030205001 | 0.123402673  | 0.007589214 | 0.13230464   |
| 0.007980722  | 0.863433288 | 0.007405611  | 0.87318837  | 0.022579674  |
| -0.041377339 | 0.372308453 | 0.003513806  | 0.939633332 | -0.006582417 |
| 0.020994746  | 0.650884131 | 0.050988793  | 0.271489202 | 0.040436922  |
| -0.017319742 | 0.708919427 | 0.004200979  | 0.927857301 | -0.006699582 |
| -0.235488852 | 2.63E-07    | -0.212291615 | 3.69E-06    | -0.197912044 |
| -0.10419924  | 0.024330935 | -0.124136595 | 0.007235183 | -0.126684163 |
| 0.225983885  | 8.04E-07    | 0.237359875  | 2.10E-07    | 0.264686272  |
| 0.059761569  | 0.197346008 | 0.052921327  | 0.253714077 | 0.063407026  |
| -0.009821705 | 0.832352687 | -0.051057997 | 0.270838358 | 0.001756397  |
| -0.115389592 | 0.012586936 | -0.12092036  | 0.008904152 | -0.113828186 |
| 0.076610344  | 0.098217449 | 0.078829543  | 0.088829586 | 0.06585719   |
| 0.018533991  | 0.689536705 | 0.03454008   | 0.456489817 | 0.025646329  |
| -0.279954505 | 7.40E-10    | -0.291681968 | 1.30E-10    | -0.262758992 |
| -0.104518629 | 0.023895624 | -0.086031484 | 0.063223147 | -0.092033783 |
| 0.097411777  | 0.035339051 | 0.110243657  | 0.017159632 | 0.083643223  |
| 0.007397201  | 0.873331182 | 0.000294012  | 0.994944135 | -0.01422058  |
| -0.043881481 | 0.344045928 | -0.027845733 | 0.548336227 | -0.045274215 |
| 0.029124727  | 0.530110637 | 0.064201824  | 0.16601448  | 0.055032054  |
| 0.029502726  | 0.524783514 | 0.03938963   | 0.395733579 | 0.001518401  |
| -0.054743014 | 0.237713318 | -0.043013473 | 0.35368401  | -0.041485659 |
| -0.081192891 | 0.079638785 | -0.111626633 | 0.015806463 | -0.123109586 |
| 0.064691759  | 0.16279989  | 0.094516994  | 0.041188438 | 0.134856694  |
| -0.031287478 | 0.500005399 | 0.009972359  | 0.829820099 | 0.05325791   |
| -0.301945491 | 2.67E-11    | -0.29381029  | 9.43E-11    | -0.28182357  |
| -0.103242728 | 0.025675834 | -0.077770162 | 0.093217045 | -0.06636367  |
| 0.070104519  | 0.130337305 | 0.087937069  | 0.057574555 | 0.041962264  |
| 0.175316879  | 0.00014009  | 0.19691998   | 1.82E-05    | 0.18076134   |
| 0.132886284  | 0.004017693 | 0.151804493  | 0.000998949 | 0.144277941  |
| -0.323305    | 8.00E-13    | -0.302581675 | 2.41E-11    | -0.352781065 |
| 0.158082634  | 0.000606654 | 0.18758459   | 4.52E-05    | 0.223175733  |
| -0.068152221 | 0.141414166 | -0.060175077 | 0.194257798 | -0.042131714 |
| -0.107399255 | 0.020264425 | -0.137565365 | 0.002891712 | -0.148427611 |
| -0.035655402 | 0.44207188  | -0.042987692 | 0.353972854 | -0.012794473 |

|              |             |              |             |              |
|--------------|-------------|--------------|-------------|--------------|
| -0.096539723 | 0.037021818 | -0.097779863 | 0.034648547 | -0.099590336 |
| -0.138538783 | 0.002697092 | -0.158710335 | 0.000576554 | -0.166853866 |
| -0.007287897 | 0.875187476 | -0.016894723 | 0.71574929  | -0.043424355 |
| -0.033740068 | 0.466991902 | -0.062418332 | 0.178118777 | -0.06101004  |
| -0.133690938 | 0.003799489 | -0.176272446 | 0.000128615 | -0.175469193 |
| -0.096586434 | 0.036929987 | -0.091290865 | 0.048650269 | -0.084681808 |
| -0.039696991 | 0.39205442  | -0.035742291 | 0.440959666 | 0.008554985  |
| -0.065157021 | 0.159790726 | -0.038714447 | 0.403888277 | -0.036437978 |
| -0.034494758 | 0.457081221 | -0.042260707 | 0.362178815 | -0.024007846 |
| 0.197277627  | 1.75E-05    | 0.173607861  | 0.000163044 | 0.1887961    |
| -0.012944628 | 0.780246529 | -0.030276144 | 0.513969553 | -0.022432841 |
| -0.010521232 | 0.820608283 | -0.02912311  | 0.530133492 | 0.026426923  |
| -0.183283614 | 6.78E-05    | -0.159430688 | 0.000543722 | -0.152382597 |
| -0.059976913 | 0.195733311 | -0.07787413  | 0.092778929 | -0.080706096 |
| -0.036132172 | 0.435988755 | -0.018151072 | 0.695627965 | -0.050253567 |
| 0.227527767  | 6.73E-07    | 0.237650027  | 2.03E-07    | 0.263883454  |
| -0.05073524  | 0.273882934 | -0.063945934 | 0.167712246 | -0.045834378 |
| -0.026968172 | 0.561017372 | -0.052085913 | 0.261296437 | -0.015688362 |
| 0.01879095   | 0.685460336 | 0.002378014  | 0.959124972 | 0.008192248  |
| 0.073304316  | 0.113648832 | 0.079623908  | 0.085649762 | 0.094349936  |
| -0.056527319 | 0.222742864 | -0.029553112 | 0.52407549  | -0.039773681 |
| -0.033912047 | 0.464723062 | -0.034579328 | 0.45597802  | -0.055684583 |
| 0.092888165  | 0.044825311 | 0.072157728  | 0.119424636 | 0.076621887  |
| -0.027713299 | 0.550240888 | -0.017956741 | 0.698726818 | -0.043287044 |
| 0.102027719  | 0.027476219 | 0.129131044  | 0.005193556 | 0.146910123  |
| -0.143251366 | 0.001913029 | -0.138123103 | 0.002778693 | -0.167708682 |
| 0.066890563  | 0.148947196 | 0.015661171  | 0.73569896  | 0.017575732  |
| 0.084057067  | 0.069549517 | 0.029517733  | 0.524572586 | 0.029711925  |
| -0.122511211 | 0.008040008 | -0.157313743 | 0.00064551  | -0.153027956 |
| -0.123681292 | 0.00745303  | -0.130966905 | 0.00458467  | -0.156848049 |
| -0.145316889 | 0.001640335 | -0.157914725 | 0.000614949 | -0.136603403 |
| -0.027203216 | 0.557607049 | -0.000115403 | 0.998015512 | 0.019653632  |
| 0.055493724  | 0.231330674 | 0.045487704  | 0.326656366 | 0.041388724  |
| -0.025004687 | 0.58989237  | -0.033220052 | 0.473889372 | -0.052814023 |
| -0.156339117 | 0.000698079 | -0.149167839 | 0.001224928 | -0.144547835 |
| -0.013915804 | 0.764229288 | 0.002350502  | 0.959597469 | -0.001028097 |
| -0.090275614 | 0.051220633 | -0.071343671 | 0.123662692 | -0.065907014 |
| -0.174482019 | 0.000150895 | -0.19112442  | 3.22E-05    | -0.189902567 |
| 0.129535523  | 0.005053473 | 0.097629057  | 0.034930046 | 0.048603276  |
| 0.094284993  | 0.041690721 | 0.10072756   | 0.029521973 | 0.063481366  |
| -0.033493964 | 0.470249286 | -0.050709128 | 0.274130269 | -0.080135671 |
| -0.312188993 | 5.14E-12    | -0.304053271 | 1.91E-11    | -0.322622909 |
| -0.035492133 | 0.444166102 | -0.059807664 | 0.196999991 | -0.005771537 |
| -0.15187718  | 0.000993303 | -0.141186796 | 0.002226498 | -0.13714298  |
| -0.088926084 | 0.054811839 | -0.070442548 | 0.12848949  | -0.076473141 |

|              |             |              |             |              |
|--------------|-------------|--------------|-------------|--------------|
| 0.111600461  | 0.015831176 | 0.13236652   | 0.004164605 | 0.15910808   |
| 0.079976991  | 0.084266135 | 0.053124895  | 0.251889825 | 0.053942395  |
| -0.226462335 | 7.61E-07    | -0.230802267 | 4.59E-07    | -0.259416399 |
| -0.224258864 | 9.79E-07    | -0.19747871  | 1.72E-05    | -0.188290456 |
| 0.066316806  | 0.152472323 | 0.082756937  | 0.073991572 | 0.084688704  |
| -0.152845117 | 0.00092087  | -0.128397188 | 0.005456669 | -0.150782062 |
| -0.089742928 | 0.052613976 | -0.121048797 | 0.008831436 | -0.112325039 |
| -0.066170667 | 0.153380223 | -0.059677029 | 0.197981768 | -0.092821209 |
| -0.095349927 | 0.039427035 | -0.10992424  | 0.017486199 | -0.111774669 |
| -0.217834623 | 2.01E-06    | -0.19720908  | 1.77E-05    | -0.215373657 |
| -0.006322782 | 0.891606526 | -0.057776614 | 0.212669571 | -0.020677213 |
| -0.056963389 | 0.219188774 | -0.022609388 | 0.626013229 | 0.024295962  |
| -0.057390227 | 0.21574942  | -0.073472454 | 0.11282061  | -0.078436022 |
| -0.207287751 | 6.28E-06    | -0.19339283  | 2.58E-05    | -0.202006973 |
| 0.186326134  | 5.09E-05    | 0.242308057  | 1.15E-07    | 0.213771688  |
| -0.119227061 | 0.009913898 | -0.12915982  | 0.005183476 | -0.114197467 |
| 0.152804233  | 0.000923828 | 0.157611121  | 0.000630216 | 0.170153786  |
| 0.068043603  | 0.142050987 | -0.000733916 | 0.987379943 | -0.030316695 |
| -0.097966646 | 0.03430257  | -0.104367655 | 0.024100548 | -0.101788846 |
| -0.087680241 | 0.05831056  | -0.076526023 | 0.098589158 | -0.053129711 |
| 0.009205402  | 0.842730953 | 0.005924366  | 0.898398545 | -0.003498163 |
| 0.015646071  | 0.735944307 | 0.03613348   | 0.435972134 | 0.041133441  |
| -0.197339863 | 1.74E-05    | -0.201395044 | 1.16E-05    | -0.205122486 |
| 0.277543681  | 1.05E-09    | 0.27940905   | 8.01E-10    | 0.265083226  |
| -0.054568956 | 0.23921072  | -0.080474584 | 0.082346882 | -0.118431231 |
| -0.078453535 | 0.090367449 | -0.066160562 | 0.153443152 | -0.061423464 |
| 0.038402636  | 0.40768785  | 0.015255991  | 0.742291488 | 0.007707165  |
| -0.113651269 | 0.013994305 | -0.142452417 | 0.002029202 | -0.128652995 |
| -0.14724499  | 0.001418438 | -0.122862733 | 0.007859472 | -0.140223806 |
| 0.111722289  | 0.015716427 | 0.173604365  | 0.000163094 | 0.16144321   |
| -0.03401555  | 0.463360534 | -0.016072799 | 0.729021339 | -0.018014113 |
| -0.043785176 | 0.34510695  | -0.029030322 | 0.531445348 | -0.056004766 |
| -0.054087836 | 0.243384216 | -0.018822265 | 0.684964175 | -0.031765695 |
| -0.065976755 | 0.154591238 | -0.056056853 | 0.226623183 | -0.081158253 |
| -0.13479599  | 0.003517313 | -0.120306976 | 0.009258827 | -0.096841725 |
| 0.129746986  | 0.004981601 | 0.133374637  | 0.003883949 | 0.152838502  |
| 0.028015685  | 0.545896755 | 0.032890865  | 0.47828438  | 0.053460781  |
| -0.065474412 | 0.157762126 | -0.069704678 | 0.132549472 | -0.114112788 |
| 0.261044763  | 1.03E-08    | 0.290704155  | 1.51E-10    | 0.262643127  |
| -0.004281615 | 0.926476421 | 0.021102433  | 0.649212873 | 0.007961503  |
| 0.143256491  | 0.001912304 | 0.145380742  | 0.001632503 | 0.158226745  |
| 0.06313293   | 0.173192569 | 0.070801064  | 0.12655193  | 0.043211108  |
| -0.136467196 | 0.003126553 | -0.111771684 | 0.01567011  | -0.126464432 |
| -0.036488317 | 0.431476242 | -0.01823123  | 0.694351218 | -0.013776479 |
| -0.002527134 | 0.956564246 | 0.016831784  | 0.716762635 | 0.060580495  |

|              |             |              |             |              |
|--------------|-------------|--------------|-------------|--------------|
| -0.133910256 | 0.003741907 | -0.122623409 | 0.007981986 | -0.109643679 |
| 0.079131824  | 0.087608564 | 0.079660619  | 0.085505058 | 0.061293536  |
| -0.049064304 | 0.290016969 | -0.064879557 | 0.161580187 | -0.097807457 |
| 0.065586191  | 0.157052342 | 0.098794325  | 0.032804662 | 0.057215107  |
| -0.236627326 | 2.30E-07    | -0.235304336 | 2.69E-07    | -0.248923054 |
| -0.053781451 | 0.246068394 | -0.051448336 | 0.267187261 | -0.017288911 |
| -0.249676704 | 4.55E-08    | -0.207556173 | 6.11E-06    | -0.189033557 |
| -0.195429593 | 2.11E-05    | -0.174134041 | 0.000155626 | -0.131211834 |
| -0.0504611   | 0.276487157 | -0.041940625 | 0.365829166 | -0.036102853 |
| 0.022847099  | 0.622386356 | 0.069533742  | 0.133503992 | 0.028712133  |
| -0.059772972 | 0.19726037  | -0.094429106 | 0.041378111 | -0.102428719 |
| -0.134303298 | 0.003640687 | -0.161694928 | 0.000451483 | -0.12486287  |
| -0.116713081 | 0.011600705 | -0.099513177 | 0.031549356 | -0.11441678  |
| -0.031770416 | 0.493408648 | -0.051043267 | 0.270976796 | -0.065236328 |
| 0.223247149  | 1.10E-06    | 0.221923828  | 1.28E-06    | 0.218190493  |
| 0.173300963  | 0.000167523 | 0.189215808  | 3.87E-05    | 0.202446951  |
| 0.168268987  | 0.000259542 | 0.15871401   | 0.000576382 | 0.188126275  |
| -0.199864136 | 1.35E-05    | -0.181352285 | 8.10E-05    | -0.197273812 |
| -0.046579552 | 0.315166452 | -0.027758744 | 0.549586933 | -0.032477293 |
| 0.120886305  | 0.008923521 | 0.082432096  | 0.0751368   | 0.07471196   |
| 0.083124343  | 0.072713462 | 0.056746697  | 0.220949765 | 0.074323075  |
| -0.152160327 | 0.000971588 | -0.125038851 | 0.006820241 | -0.118125803 |
| 0.261198601  | 1.01E-08    | 0.265767356  | 5.44E-09    | 0.276808437  |
| 0.013324637  | 0.773967677 | 0.045808873  | 0.323248768 | 0.048031431  |
| -0.095683803 | 0.038739103 | -0.057472306 | 0.21509251  | -0.05601121  |
| -0.01026573  | 0.824893421 | -0.018893615 | 0.683834207 | -0.030775941 |
| -0.20778587  | 5.96E-06    | -0.235085503 | 2.76E-07    | -0.235232428 |
| -0.111725573 | 0.015713344 | -0.113394705 | 0.014213341 | -0.078999834 |
| -0.13998549  | 0.00242982  | -0.156960152 | 0.000664142 | -0.188469152 |
| -0.010396219 | 0.822704272 | 0.009741839  | 0.833695995 | 0.053592325  |
| -0.008752959 | 0.850367343 | 0.00769159   | 0.868335073 | -0.027313388 |
| -0.100782245 | 0.029433368 | -0.087341085 | 0.059294414 | -0.074896464 |
| 0.184673215  | 5.95E-05    | 0.188582571  | 4.11E-05    | 0.192779832  |
| -0.36262147  | 5.85E-16    | -0.329263989 | 2.86E-13    | -0.387401304 |
| -0.166558771 | 0.000300346 | -0.153550406 | 0.000871199 | -0.211368774 |
| -0.015276738 | 0.74195346  | -0.001045738 | 0.982018769 | 0.011277271  |
| 0.034173807  | 0.461281526 | 0.035787959  | 0.440375738 | 0.024096261  |
| 0.085275493  | 0.065587076 | 0.085293461  | 0.06553006  | 0.048139152  |
| -0.315709796 | 2.88E-12    | -0.330534884 | 2.29E-13    | -0.287059986 |
| -0.052816694 | 0.254655292 | -0.089615573 | 0.052951736 | -0.142263168 |
| -0.045349444 | 0.328130443 | -0.035918062 | 0.438714616 | -0.03720273  |
| 0.003212819  | 0.944795629 | 0.019731563  | 0.670617008 | 0.019510027  |
| -0.071970634 | 0.120388486 | -0.109170987 | 0.018277897 | -0.122887337 |
| -0.3730354   | 7.26E-17    | -0.390879053 | 1.70E-18    | -0.430318498 |
| -0.268686585 | 3.64E-09    | -0.270148572 | 2.97E-09    | -0.276636444 |

|              |             |              |             |              |
|--------------|-------------|--------------|-------------|--------------|
| -0.359169725 | 1.15E-15    | -0.344429037 | 1.88E-14    | -0.350616577 |
| -0.033145585 | 0.474881649 | -0.011885506 | 0.797820607 | -0.009316889 |
| 0.135124919  | 0.00343707  | 0.187193575  | 4.69E-05    | 0.173477872  |
| -0.163986207 | 0.000373132 | -0.166169312 | 0.00031044  | -0.198203157 |
| -0.03074101  | 0.507525827 | -0.02514323  | 0.587832752 | -0.051519651 |
| -0.028328196 | 0.541425055 | -0.068174967 | 0.141281085 | -0.030798033 |
| -0.104775745 | 0.023550096 | -0.177864135 | 0.00011144  | -0.1993952   |
| -0.311954622 | 5.34E-12    | -0.313573608 | 4.09E-12    | -0.332599603 |
| 0.211141389  | 4.17E-06    | 0.245020954  | 8.20E-08    | 0.25644709   |
| -0.086824066 | 0.060820621 | -0.069039601 | 0.136293141 | -0.070381593 |
| -0.120181294 | 0.009333032 | -0.101567996 | 0.028185196 | -0.143775036 |
| -0.07980743  | 0.084928327 | -0.102880351 | 0.026201841 | -0.055528341 |
| -0.031357698 | 0.499043326 | -0.009544764 | 0.837012751 | 0.000966709  |
| -0.268667813 | 3.65E-09    | -0.276165485 | 1.28E-09    | -0.290190734 |
| -0.226227456 | 7.82E-07    | -0.255806863 | 2.06E-08    | -0.28195306  |
| 0.036577561  | 0.430349727 | 0.022224054  | 0.631911639 | -0.028793566 |
| 0.15717939   | 0.000652532 | 0.187765302  | 4.44E-05    | 0.167003704  |
| -0.000458447 | 0.992116573 | -0.045491439 | 0.326616606 | -0.079879558 |
| 0.100208189  | 0.030374956 | 0.126137409  | 0.006343874 | 0.111079988  |
| -0.018338615 | 0.692642165 | -0.000536966 | 0.990766424 | 0.025261821  |
| -0.020979117 | 0.651126832 | -0.01382159  | 0.765778834 | -0.011200759 |
| 0.061104652  | 0.187444781 | 0.088229402  | 0.05674619  | 0.096520104  |
| 0.034568811  | 0.45611513  | 0.017802359  | 0.701192189 | 0.013113215  |
| -0.17701447  | 0.00012032  | -0.168475024 | 0.000254992 | -0.184236459 |
| -0.146763172 | 0.001471142 | -0.146985813 | 0.001446568 | -0.162749366 |
| -0.268362632 | 3.81E-09    | -0.316025071 | 2.73E-12    | -0.325864211 |
| -0.101147888 | 0.028846765 | -0.128474992 | 0.005428216 | -0.14159681  |
| -0.243643535 | 9.73E-08    | -0.230082317 | 5.00E-07    | -0.226709403 |
| -0.276661369 | 1.19E-09    | -0.239812296 | 1.56E-07    | -0.214286691 |
| 0.128212434  | 0.005524772 | 0.155977803  | 0.000718555 | 0.223545905  |
| -0.085138738 | 0.066022363 | -0.112128732 | 0.015338857 | -0.080917333 |
| -0.047464679 | 0.3060486   | -0.051770453 | 0.264199818 | -0.081294357 |
| -0.146575729 | 0.001492127 | -0.145939492 | 0.001565423 | -0.147717848 |
| -0.251271941 | 3.71E-08    | -0.240543027 | 1.43E-07    | -0.225397358 |
| 0.030168491  | 0.515467816 | 0.021856515  | 0.637559501 | -0.014271525 |
| -0.294131773 | 8.98E-11    | -0.29988645  | 3.69E-11    | -0.312351631 |
| -0.148254964 | 0.001313547 | -0.145106846 | 0.00166634  | -0.162300696 |
| -0.091069727 | 0.049200744 | -0.093993184 | 0.04232982  | -0.076395499 |
| -0.001119979 | 0.980742457 | 0.010113885  | 0.827442567 | 0.051744309  |
| -0.166597375 | 0.000299362 | -0.166756332 | 0.000295344 | -0.15224533  |
| 0.035784253  | 0.440423101 | 0.03697359   | 0.425371279 | 0.044416307  |
| -0.049567056 | 0.28509687  | -0.076027849 | 0.100808147 | -0.08445101  |
| -0.159616185 | 0.000535553 | -0.137020362 | 0.003006176 | -0.116373319 |
| -0.005640112 | 0.903248933 | 0.014718652  | 0.751063379 | -0.018556735 |
| -0.21522068  | 2.68E-06    | -0.194780345 | 2.25E-05    | -0.169049703 |



|              |             |              |             |              |
|--------------|-------------|--------------|-------------|--------------|
| 0.100595569  | 0.029736777 | 0.1267097    | 0.006107729 | 0.129983187  |
| 0.049917508  | 0.281700695 | 0.05335527   | 0.249836371 | 0.088967749  |
| -0.066086104 | 0.153907449 | -0.052004049 | 0.262047762 | -0.015198584 |
| -0.125800607 | 0.006486647 | -0.112845798 | 0.014692108 | -0.105835777 |
| -0.055760251 | 0.229094077 | 7.18E-05     | 0.99876518  | -0.022209362 |
| 0.09475337   | 0.040681948 | 0.103255685  | 0.025657196 | 0.087952542  |
| -0.222482042 | 1.20E-06    | -0.230253149 | 4.90E-07    | -0.246711717 |
| 0.05404807   | 0.243731431 | 0.094206529  | 0.041861763 | 0.101398715  |
| -0.155722889 | 0.000733334 | -0.116395377 | 0.011831001 | -0.109278205 |
| -0.067526153 | 0.145114946 | -0.083008431 | 0.07311473  | -0.105789577 |
| -0.090329015 | 0.051082666 | -0.12050366  | 0.009143754 | -0.097730992 |
| -0.264849025 | 6.17E-09    | -0.293806609 | 9.44E-11    | -0.3138269   |
| 0.156295938  | 0.000700497 | 0.18606477   | 5.22E-05    | 0.176447832  |
| -0.005245543 | 0.90998765  | -0.0082225   | 0.859338323 | -0.023388628 |
| -0.17637872  | 0.000127395 | -0.213935274 | 3.09E-06    | -0.214967894 |
| 0.016495609  | 0.722183591 | 0.033982367  | 0.463797117 | 0.064726997  |
| -0.08980662  | 0.052445732 | -0.086618912 | 0.061435146 | -0.089191297 |
| 0.113281305  | 0.014311111 | 0.130482162  | 0.004738842 | 0.13357645   |
| -0.422483617 | 1.22E-21    | -0.409376588 | 2.69E-20    | -0.41564523  |
| -0.257594207 | 1.63E-08    | -0.247148128 | 6.28E-08    | -0.263662098 |
| -0.083878078 | 0.070147781 | -0.08278228  | 0.073902824 | -0.104215484 |
| -0.106200192 | 0.021713096 | -0.074149323 | 0.109534335 | -0.085726843 |
| -0.288840517 | 2.00E-10    | -0.313794621 | 3.95E-12    | -0.316963366 |
| -0.203688707 | 9.14E-06    | -0.216788194 | 2.26E-06    | -0.20458685  |
| 0.244560887  | 8.68E-08    | 0.239768012  | 1.57E-07    | 0.267118731  |
| -0.104235708 | 0.024280887 | -0.096037754 | 0.038020938 | -0.099039178 |
| -0.232220195 | 3.89E-07    | -0.207563909 | 6.10E-06    | -0.214938258 |
| -0.100615812 | 0.029703746 | -0.099573658 | 0.031445639 | -0.107732748 |
| -0.305043822 | 1.63E-11    | -0.311629338 | 5.63E-12    | -0.321302837 |
| 0.070874417  | 0.126158309 | 0.066067225  | 0.154025344 | 0.096882501  |
| 0.069261114  | 0.13503733  | 0.032461594  | 0.484048824 | 0.027930101  |
| 0.107204777  | 0.020493518 | 0.078857633  | 0.088715544 | 0.0872629    |
| -0.077322581 | 0.095122051 | -0.101350267 | 0.028526421 | -0.117604498 |
| 0.162347827  | 0.000427725 | 0.166085759  | 0.000312646 | 0.159920048  |
| 0.022526938  | 0.62727332  | 0.010018107  | 0.829051393 | -0.002537727 |
| -0.006294209 | 0.892093366 | 0.016215193  | 0.726716102 | 0.063367531  |
| 0.013536651  | 0.770470978 | 0.026553844  | 0.567053381 | 0.032173327  |
| 0.046581721  | 0.315143891 | 0.051903715  | 0.262970621 | 0.091983377  |
| 0.031139861  | 0.502031058 | 0.03857909   | 0.405535069 | 0.082079015  |
| -0.064462298 | 0.164299567 | -0.051701427 | 0.264838051 | -0.046356029 |
| -0.088269772 | 0.056632578 | -0.065774361 | 0.155862937 | -0.073922534 |
| -0.013943625 | 0.763771874 | -0.031567846 | 0.496170002 | 0.002215692  |
| 0.035417677  | 0.445123013 | 0.087528554  | 0.058748905 | 0.064317888  |
| 0.045839858  | 0.322921248 | 0.084836392  | 0.066993141 | 0.082740814  |
| -0.005819704 | 0.900184017 | 0.005323767  | 0.908651157 | 0.003850923  |

|              |             |              |             |              |
|--------------|-------------|--------------|-------------|--------------|
| -0.032614555 | 0.4819905   | 0.002265944  | 0.961049756 | -0.007396154 |
| 0.111632247  | 0.015801166 | 0.138217448  | 0.002759977 | 0.118846193  |
| -0.07603717  | 0.100766267 | -0.064826184 | 0.161926131 | -0.038674931 |
| -0.354544248 | 2.81E-15    | -0.337678149 | 6.42E-14    | -0.352226951 |
| -0.090972867 | 0.049443489 | -0.069708453 | 0.132528451 | -0.079780411 |
| -0.035780069 | 0.440476593 | -0.040848865 | 0.378451333 | -0.045616667 |
| -0.103194294 | 0.025745607 | -0.071470178 | 0.122996513 | -0.084696095 |
| -0.035586597 | 0.44295374  | 0.004139551  | 0.928909384 | -0.024905066 |
| 0.057756241  | 0.212831164 | 0.0803739    | 0.08273235  | 0.089943489  |
| -0.060830174 | 0.189437924 | -0.047227819 | 0.30847128  | -0.049210483 |
| -0.081437363 | 0.078733729 | -0.106696976 | 0.021102342 | -0.090423964 |
| -0.047096417 | 0.309820739 | -0.07791173  | 0.092620893 | -0.155144748 |
| 0.15035106   | 0.001118253 | 0.149550388  | 0.001189455 | 0.140918067  |
| -0.087889854 | 0.057709283 | -0.09578688  | 0.038528784 | -0.156532532 |
| -0.000127801 | 0.9978023   | 0.008492059  | 0.854777282 | 0.003039835  |
| 0.000389204  | 0.993307237 | 0.038245584  | 0.409609628 | 0.051304878  |
| 0.00627472   | 0.892425464 | 0.014356403  | 0.756995217 | 0.018512712  |
| -0.141123684 | 0.00223678  | -0.196277558 | 1.94E-05    | -0.189478921 |
| -0.134279906 | 0.003646641 | -0.122669912 | 0.007958048 | -0.13910128  |
| 0.042170045  | 0.363210453 | 0.048908361  | 0.291554588 | 0.056205508  |
| -0.049178247 | 0.28889692  | -0.055393293 | 0.232177445 | -0.048816485 |
| 0.031323957  | 0.499505483 | 0.024215255  | 0.601691065 | -0.013128723 |
| -0.036044746 | 0.437100607 | -0.040762897 | 0.37945646  | -0.052314065 |
| 0.050670726  | 0.274494285 | 0.05470637   | 0.238028011 | 0.053386041  |
| 0.062169002  | 0.179861815 | 0.067626946  | 0.144514204 | 0.060810632  |
| -0.0717688   | 0.121435063 | -0.09079365  | 0.049895279 | -0.073684882 |
| -0.236664167 | 2.29E-07    | -0.213873069 | 3.11E-06    | -0.216015017 |
| -0.407437493 | 4.21E-20    | -0.391606382 | 1.45E-18    | -0.390284218 |
| -0.080643733 | 0.081702564 | -0.102040178 | 0.027457219 | -0.095431291 |
| 0.087108418  | 0.059977267 | 0.051236932  | 0.269160455 | 0.026593212  |
| -0.047745312 | 0.303194502 | -0.031292517 | 0.499936331 | 0.001294642  |
| 0.097227366  | 0.035689372 | 0.119558257  | 0.009708752 | 0.181182624  |
| -0.137085882 | 0.002992201 | -0.161526332 | 0.000457815 | -0.164692637 |
| -0.215884082 | 2.50E-06    | -0.214250239 | 2.98E-06    | -0.221364038 |
| 0.085343983  | 0.065369964 | 0.074494999  | 0.107885381 | 0.086008061  |
| -0.038669262 | 0.404437566 | 0.032642431  | 0.481615895 | 0.02849501   |
| 0.052187696  | 0.260364371 | 0.048557529  | 0.295033779 | -0.01649763  |
| -0.041252943 | 0.373748832 | -0.004028202 | 0.930816789 | -0.029424431 |
| 0.282421482  | 5.17E-10    | 0.29878296   | 4.38E-11    | 0.258177351  |
| 0.181295795  | 8.15E-05    | 0.175873862  | 0.00013329  | 0.168440563  |
| 0.208391351  | 5.59E-06    | 0.243208977  | 1.03E-07    | 0.277008227  |
| -0.091139516 | 0.049026461 | -0.107757015 | 0.019848803 | -0.07089288  |
| -0.166451052 | 0.000303107 | -0.155428038 | 0.00075078  | -0.163544862 |
| 0.127618122  | 0.00574906  | 0.161635817  | 0.000453694 | 0.126012978  |
| -0.060794539 | 0.189697829 | -0.069335796 | 0.134615954 | -0.071326617 |

|              |             |              |             |              |
|--------------|-------------|--------------|-------------|--------------|
| -0.297030799 | 5.75E-11    | -0.313759261 | 3.97E-12    | -0.305039507 |
| -0.258624011 | 1.42E-08    | -0.300907315 | 3.14E-11    | -0.317060809 |
| 0.189546207  | 3.75E-05    | 0.194571786  | 2.30E-05    | 0.164203828  |
| -0.072421567 | 0.11807568  | -0.084167913 | 0.069181119 | -0.09282352  |
| -0.293065119 | 1.06E-10    | -0.30111216  | 3.04E-11    | -0.326797979 |
| -0.063825758 | 0.168514054 | -0.078586792 | 0.089820007 | -0.072450267 |
| 0.123810385  | 0.007390676 | 0.145770055  | 0.001585493 | 0.080381681  |
| -0.063709809 | 0.169290375 | -0.070278054 | 0.129386134 | -0.07239143  |
| -0.085076847 | 0.066220135 | -0.06890323  | 0.137070716 | -0.082473359 |
| -0.063900096 | 0.168017736 | -0.073442461 | 0.112968003 | -0.084305276 |
| -0.055251032 | 0.233380663 | -0.049042309 | 0.290233518 | -0.0480714   |
| -0.035237417 | 0.447444563 | -0.013404163 | 0.772655536 | -0.026005185 |
| -0.170761945 | 0.000209255 | -0.164462418 | 0.000358527 | -0.165394988 |
| -0.02917879  | 0.529347063 | -0.01804376  | 0.697338569 | -0.04647376  |
| -0.111060765 | 0.016348394 | -0.082043876 | 0.07652435  | -0.114226498 |
| 0.01297775   | 0.779698684 | 0.00514329   | 0.911735061 | -0.06090873  |
| -0.219237524 | 1.72E-06    | -0.242044998 | 1.19E-07    | -0.229910891 |
| -0.016620038 | 0.720175499 | 4.35E-05     | 0.999251166 | 0.014046907  |
| -0.23977606  | 1.57E-07    | -0.216141234 | 2.43E-06    | -0.193594165 |
| -0.22114686  | 1.39E-06    | -0.206188569 | 7.05E-06    | -0.205090416 |
| -0.010974356 | 0.813021898 | 0.012181339  | 0.792901116 | 0.019438264  |
| -0.262940796 | 7.98E-09    | -0.255245955 | 2.22E-08    | -0.284878926 |
| 0.000555578  | 0.990446393 | -0.007508636 | 0.871439404 | -0.035482765 |
| -0.037765513 | 0.415517236 | -0.04857505  | 0.294859372 | -0.071745026 |
| -0.056063053 | 0.226571736 | -0.051022376 | 0.271173226 | -0.059015531 |
| -0.022785003 | 0.623332909 | 0.02603767   | 0.57461621  | 0.029698693  |
| 0.088561386  | 0.055817482 | 0.094348214  | 0.041553339 | 0.055219271  |
| -0.073087107 | 0.114725825 | -0.06800523  | 0.142276492 | -0.061429334 |
| 0.193680209  | 2.51E-05    | 0.221716916  | 1.31E-06    | 0.251968107  |
| -0.172135215 | 0.000185607 | -0.149022136 | 0.001238693 | -0.177291599 |
| 0.261428958  | 9.79E-09    | 0.243568393  | 9.83E-08    | 0.21183474   |
| 0.046799144  | 0.312887966 | 0.045961937  | 0.321632928 | 0.03572214   |
| 0.190427607  | 3.44E-05    | 0.182679132  | 7.17E-05    | 0.193550876  |
| 0.071000319  | 0.125484922 | 0.069277438  | 0.13494514  | 0.089408239  |
| 0.011913642  | 0.79735237  | 0.010136458  | 0.827063501 | 0.019550956  |
| 0.027740815  | 0.549844889 | 0.051866933  | 0.2633095   | 0.066683733  |
| -0.082593135 | 0.074567266 | -0.133197092 | 0.0039321   | -0.179250158 |
| 0.105475186  | 0.02263193  | 0.094222569  | 0.041826748 | 0.105936459  |
| -0.010688786 | 0.817801026 | -0.003267223 | 0.943862351 | -0.003022009 |
| -0.011550603 | 0.803399451 | -0.03221927  | 0.487319368 | -0.005678488 |
| -0.014772322 | 0.750185771 | -0.052235596 | 0.259926527 | -0.030989666 |
| 0.19430213   | 2.36E-05    | 0.163491549  | 0.000388889 | 0.166120195  |
| -0.119533948 | 0.00972368  | -0.111175353 | 0.016237358 | -0.096491246 |
| -0.01161677  | 0.80229644  | -0.016543531 | 0.721409979 | 0.016122607  |
| -0.008062842 | 0.862042011 | 0.016751046  | 0.718063281 | 0.026953073  |

|              |             |              |             |              |
|--------------|-------------|--------------|-------------|--------------|
| 0.070812158  | 0.126492337 | 0.065254855  | 0.159163337 | 0.058486029  |
| -0.09591479  | 0.038269141 | -0.078986646 | 0.088193296 | -0.072914167 |
| -0.151298624 | 0.001039072 | -0.189630688 | 3.72E-05    | -0.198449199 |
| 0.18361824   | 6.57E-05    | 0.203137138  | 9.68E-06    | 0.143633372  |
| -0.020012814 | 0.666203178 | -0.062057442 | 0.180645801 | -0.099903877 |
| -0.052830184 | 0.2545338   | -0.068841171 | 0.1374257   | -0.074161699 |
| -0.026085827 | 0.573908619 | -0.037265506 | 0.421723186 | -0.055886385 |
| -0.175285489 | 0.000140483 | -0.182019714 | 7.62E-05    | -0.229888948 |
| -0.075282752 | 0.10420082  | -0.075907195 | 0.101351493 | -0.062847455 |
| 0.297291097  | 5.52E-11    | 0.282500533  | 5.11E-10    | 0.305613467  |
| -0.183916253 | 6.39E-05    | -0.201925606 | 1.10E-05    | -0.174058344 |
| -0.027899803 | 0.547559526 | -0.000219798 | 0.996220327 | 0.061743648  |
| -0.232624643 | 3.71E-07    | -0.218407485 | 1.89E-06    | -0.214981939 |
| -0.107889175 | 0.019697156 | -0.120539221 | 0.009123085 | -0.134293424 |
| 0.067289346  | 0.146533862 | 0.040542833  | 0.382036865 | 0.048222253  |
| -0.355874712 | 2.17E-15    | -0.368605204 | 1.78E-16    | -0.422174587 |
| -0.147862443 | 0.001353434 | -0.166049043 | 0.00031362  | -0.186228707 |
| -0.327411984 | 3.94E-13    | -0.31777344  | 2.04E-12    | -0.285398807 |
| -0.201818401 | 1.11E-05    | -0.188096353 | 4.30E-05    | -0.214124966 |
| -0.259053488 | 1.34E-08    | -0.221450811 | 1.35E-06    | -0.226002284 |
| 0.035989305  | 0.437806527 | 0.008243729  | 0.858978938 | 0.02506696   |
| -0.043136515 | 0.352307538 | -0.029252088 | 0.528312699 | -0.021786707 |
| 0.14778767   | 0.001361157 | 0.147663709  | 0.001374051 | 0.146357666  |
| -0.281981854 | 5.52E-10    | -0.275665355 | 1.37E-09    | -0.28226337  |
| -0.090800036 | 0.049879119 | -0.042373395 | 0.360899114 | -0.048567366 |
| -0.28491157  | 3.59E-10    | -0.320930516 | 1.20E-12    | -0.345234899 |
| -0.062335434 | 0.178696916 | -0.076871598 | 0.097072846 | -0.093846422 |
| -0.202466257 | 1.04E-05    | -0.191430297 | 3.12E-05    | -0.169112543 |
| 0.008395575  | 0.856409282 | -0.004258695 | 0.926868907 | -0.002604704 |
| -0.000775248 | 0.986669276 | 0.027348148  | 0.55550921  | 0.036291792  |
| -0.058035623 | 0.210622831 | -0.09084324  | 0.049769924 | -0.071466837 |
| -0.12655571  | 0.006170481 | -0.118783206 | 0.01019486  | -0.152919678 |
| -0.075812958 | 0.101777487 | -0.107524244 | 0.020118369 | -0.145629121 |
| -0.247621536 | 5.91E-08    | -0.234800489 | 2.86E-07    | -0.207961024 |
| -0.063435471 | 0.171137809 | -0.071064786 | 0.125141204 | -0.044032149 |
| 0.036770559  | 0.427919372 | 0.062230863  | 0.179428178 | 0.034348237  |
| -0.131139029 | 0.004531025 | -0.164047592 | 0.000371219 | -0.187588228 |
| -0.001058141 | 0.981805543 | -0.017085405 | 0.71268228  | 0.001252706  |
| 0.023766481  | 0.608445304 | -0.028063131 | 0.545216677 | -0.006813461 |
| 0.140251999  | 0.002383304 | 0.110115068  | 0.017290452 | 0.102547188  |
| 0.046615209  | 0.314795733 | 0.029420841  | 0.5259352   | 0.011912351  |
| -0.031065722 | 0.503050048 | -0.053587493 | 0.247778278 | -0.091872346 |
| -0.023844692 | 0.607265779 | 0.005548172  | 0.904818542 | 0.049509354  |
| 0.112504267  | 0.014997097 | 0.093781296  | 0.042799039 | 0.155964195  |
| 0.032935531  | 0.477686749 | 0.073163505  | 0.114346109 | 0.079612688  |

|              |             |              |             |              |
|--------------|-------------|--------------|-------------|--------------|
| 0.227646598  | 6.64E-07    | 0.259055903  | 1.34E-08    | 0.260660149  |
| 0.065415211  | 0.158139021 | 0.080583901  | 0.081930008 | 0.08876621   |
| 0.020489464  | 0.658749155 | 0.039556306  | 0.393735867 | 0.05622401   |
| -0.17730723  | 0.000117188 | -0.156614609 | 0.000682831 | -0.151576557 |
| -0.028692361 | 0.536237356 | -0.053831736 | 0.245626444 | -0.034774288 |
| -0.068011205 | 0.142241361 | -0.043533131 | 0.347893638 | -0.053084089 |
| 0.006874222  | 0.882219006 | 0.068651713  | 0.138513789 | 0.090911737  |
| 0.064889344  | 0.161516808 | 0.04598572   | 0.321382322 | 0.02335885   |
| -0.003723345 | 0.93604096  | -0.048879819 | 0.291836612 | -0.052882632 |
| 0.035196066  | 0.447978088 | 0.052037568  | 0.261739949 | 0.063303863  |
| -0.194723796 | 2.26E-05    | -0.157639892 | 0.000628755 | -0.154912849 |
| 0.043975341  | 0.343013845 | 0.022270314  | 0.631202284 | 0.042046197  |
| -0.057597931 | 0.214089876 | -0.046807139 | 0.312805221 | -0.061907299 |
| 0.061344284  | 0.185717333 | 0.082057785  | 0.076474279 | 0.109625943  |
| 0.261365783  | 9.87E-09    | 0.261918265  | 9.16E-09    | 0.237807064  |
| -0.070439277 | 0.128507272 | -0.024037436 | 0.60436329  | -0.012129828 |
| 0.114208092  | 0.013529122 | 0.124727938  | 0.006960757 | 0.121581209  |
| 0.144531298  | 0.001739546 | 0.095977145  | 0.038143106 | 0.080403412  |
| -0.126574709 | 0.006162708 | -0.134284726 | 0.003645414 | -0.143089302 |
| -0.071837816 | 0.121076396 | -0.070614244 | 0.12755873  | -0.070306266 |
| -0.036729772 | 0.428432321 | -0.033740873 | 0.46698127  | -0.021641452 |
| -0.037717658 | 0.416108858 | -0.074169818 | 0.10943602  | -0.068277788 |
| -0.070464105 | 0.128372343 | -0.077685757 | 0.093573937 | -0.081328551 |
| -0.060971657 | 0.188408604 | -0.063544187 | 0.170403907 | -0.061098769 |
| -0.10976384  | 0.017652228 | -0.108610654 | 0.018886947 | -0.120836691 |
| -0.094937702 | 0.040290634 | -0.094094984 | 0.042105932 | -0.077739804 |
| -0.067869605 | 0.1430757   | -0.060252507 | 0.193683476 | -0.024675618 |
| -0.011227247 | 0.808795455 | -0.034954112 | 0.451107048 | -0.033994934 |
| -0.036721879 | 0.428531634 | -0.031450563 | 0.49777251  | -0.037560681 |
| -0.06343548  | 0.171137749 | -0.0688652   | 0.137288171 | -0.063102377 |
| -0.071244552 | 0.12418661  | -0.049615109 | 0.284629565 | -0.061927674 |
| -0.08027607  | 0.083108285 | -0.063894822 | 0.168052915 | -0.091111037 |
| -0.035893081 | 0.439033291 | -0.05921734  | 0.201464878 | -0.069746597 |
| -0.348434639 | 8.91E-15    | -0.299414629 | 3.97E-11    | -0.304230977 |
| -0.02067425  | 0.655868422 | -0.040729017 | 0.37985303  | -0.047883145 |
| -0.133910253 | 0.003741908 | -0.13415545  | 0.003678468 | -0.112549699 |
| 0.128640134  | 0.005368265 | 0.103523082  | 0.025275159 | 0.10490199   |
| -0.050521466 | 0.275912264 | -0.022381623 | 0.629496829 | 0.013179838  |
| 0.165433234  | 0.000330387 | 0.201704236  | 1.12E-05    | 0.230269887  |
| -0.140293657 | 0.002376107 | -0.136977572 | 0.003015335 | -0.146291246 |
| -0.04184464  | 0.366928254 | -0.028864308 | 0.533796579 | -0.018245479 |
| -0.047562076 | 0.305056041 | -0.036423564 | 0.432294682 | -0.04495887  |
| -0.156569239 | 0.000685321 | -0.126921463 | 0.006022369 | -0.132102568 |
| -0.079491377 | 0.086173815 | -0.069555683 | 0.133381175 | -0.047038073 |
| 0.026266356  | 0.571259699 | 0.034164808  | 0.461399608 | 0.038169481  |

|              |             |              |             |              |
|--------------|-------------|--------------|-------------|--------------|
| -0.166723507 | 0.000296169 | -0.164434018 | 0.000359382 | -0.18217367  |
| 0.029643246  | 0.522810156 | 0.047555102  | 0.305127046 | -0.013183747 |
| -0.040243731 | 0.385561195 | -0.025683925 | 0.579826492 | -0.030768831 |
| -0.150701472 | 0.001088345 | -0.14775957  | 0.00136407  | -0.144209667 |
| 0.024269683  | 0.600874192 | 0.031071259  | 0.502973907 | 0.019047686  |
| -0.159700859 | 0.000531862 | -0.145249331 | 0.001648658 | -0.090429787 |
| 0.007286525  | 0.875210773 | 0.019715118  | 0.670875439 | 0.013424914  |
| 0.252968745  | 2.98E-08    | 0.275184334  | 1.47E-09    | 0.256544458  |
| -0.098770303 | 0.032847337 | -0.052912463 | 0.253793713 | -0.040346905 |
| -0.170973729 | 0.000205433 | -0.204007558 | 8.84E-06    | -0.18949438  |
| -0.060394065 | 0.192636711 | -0.047436578 | 0.306335368 | -0.063322186 |
| -0.111123477 | 0.016287544 | -0.070097325 | 0.130376852 | -0.075066036 |
| 0.185037228  | 5.75E-05    | 0.183005742  | 6.95E-05    | 0.182714108  |
| -0.137490612 | 0.002907174 | -0.102242029 | 0.027150988 | -0.099548583 |
| -0.210779485 | 4.34E-06    | -0.200027038 | 1.33E-05    | -0.199247108 |
| -0.240198412 | 1.49E-07    | -0.222403487 | 1.21E-06    | -0.256423089 |
| -0.031822282 | 0.492702949 | -0.006864377 | 0.882386468 | -0.052321348 |
| 0.112742991  | 0.014783337 | 0.113544991  | 0.014084675 | 0.129382783  |
| 0.229182598  | 5.55E-07    | 0.222200662  | 1.24E-06    | 0.215421459  |
| -0.28610494  | 3.01E-10    | -0.284987627 | 3.55E-10    | -0.286952367 |
| 0.020015302  | 0.666164196 | 0.035787203  | 0.440385397 | 0.031221769  |
| 0.139272282  | 0.002558406 | 0.157552951  | 0.000633181 | 0.123666274  |
| -0.01168466  | 0.801165109 | 0.01065305   | 0.818399563 | -0.02598327  |
| -0.168584476 | 0.000252606 | -0.166410835 | 0.000304143 | -0.18755039  |
| -0.172609043 | 0.000178046 | -0.164433247 | 0.000359406 | -0.16505405  |
| -0.072186443 | 0.119277243 | -0.076471585 | 0.09882973  | -0.068326321 |
| -0.157422536 | 0.000639875 | -0.119802132 | 0.009560113 | -0.131795301 |
| -0.310361034 | 6.93E-12    | -0.315385332 | 3.03E-12    | -0.288296711 |
| -0.345069902 | 1.67E-14    | -0.33392127  | 1.26E-13    | -0.354642604 |
| 0.22424045   | 9.81E-07    | 0.256694417  | 1.83E-08    | 0.21980102   |
| 0.154448151  | 0.000811555 | 0.141271103  | 0.002212829 | 0.145391578  |
| -0.177246535 | 0.000117831 | -0.179481982 | 9.62E-05    | -0.193654556 |
| -0.087319155 | 0.059358501 | -0.083512356 | 0.071383283 | -0.073216808 |
| 0.001211167  | 0.979174865 | -0.022214561 | 0.632057237 | -0.028449589 |
| 0.017551886  | 0.705198751 | -0.001525321 | 0.973774958 | 0.011672838  |
| -0.010526085 | 0.820526935 | -0.009219986 | 0.842485034 | -0.025416827 |
| -0.06103729  | 0.187932502 | -0.05242027  | 0.258243221 | -0.050481957 |
| 0.119006809  | 0.010052447 | 0.14505193   | 0.001673201 | 0.131822034  |
| -0.035894567 | 0.439014328 | -0.027401276 | 0.554741176 | -0.027952256 |
| 0.021741784  | 0.639326861 | -0.017203955 | 0.710777787 | -0.017790137 |
| -0.112500518 | 0.015000476 | -0.153100777 | 0.00090257  | -0.158602566 |
| 0.256891278  | 1.79E-08    | 0.261952335  | 9.12E-09    | 0.265732164  |
| 0.09955715   | 0.031473919 | 0.077708557  | 0.093477424 | 0.090253202  |
| 0.048438824  | 0.296217223 | 0.068240666  | 0.140897234 | 0.098432716  |
| 0.075285687  | 0.104187281 | 0.102900313  | 0.026172625 | 0.131708513  |

|              |             |              |             |              |
|--------------|-------------|--------------|-------------|--------------|
| 0.047206026  | 0.308694817 | 0.054536014  | 0.239494865 | 0.035834731  |
| 0.19178253   | 3.02E-05    | 0.184046558  | 6.31E-05    | 0.200464262  |
| 0.03888691   | 0.401795825 | 0.032997782  | 0.476854496 | 0.03140837   |
| 0.074386466  | 0.108400989 | 0.111796565  | 0.015646825 | 0.136472856  |
| -0.347711483 | 1.02E-14    | -0.369437818 | 1.51E-16    | -0.369849926 |
| -0.188524271 | 4.13E-05    | -0.200162004 | 1.31E-05    | -0.203020428 |
| -0.042324284 | 0.36145648  | -0.024905506 | 0.591368868 | -0.024437337 |
| -0.210143596 | 4.64E-06    | -0.221826376 | 1.29E-06    | -0.248657719 |
| 0.027277063  | 0.55653767  | 0.061200895  | 0.186749576 | 0.081301076  |
| 0.000658119  | 0.988683223 | 0.022946953  | 0.62086554  | 0.027874636  |
| -0.162815376 | 0.000411432 | -0.170888965 | 0.000206954 | -0.199497015 |
| -0.292686037 | 1.12E-10    | -0.285845153 | 3.13E-10    | -0.285135129 |
| -0.26819832  | 3.90E-09    | -0.285840485 | 3.13E-10    | -0.298134377 |
| -0.043551841 | 0.34768629  | -0.036379571 | 0.432851235 | -0.035389038 |
| -0.118959174 | 0.010082637 | -0.07263277  | 0.117004447 | -0.105051383 |
| -0.037568743 | 0.417953054 | -0.03032422  | 0.513301189 | -0.07327317  |
| -0.250853213 | 3.92E-08    | -0.265411393 | 5.71E-09    | -0.239267862 |
| 0.004460222  | 0.923418617 | 0.015237041  | 0.742600276 | -0.001800159 |
| -0.240889411 | 1.37E-07    | -0.231256146 | 4.36E-07    | -0.216709982 |
| 0.273767316  | 1.79E-09    | 0.284247078  | 3.96E-10    | 0.260011121  |
| 0.122718463  | 0.007933124 | 0.128705493  | 0.005344704 | 0.159605725  |
| -0.162245499 | 0.00043137  | -0.143916822 | 0.001820949 | -0.161587582 |
| 0.016805581  | 0.717184659 | -0.012998359 | 0.779357862 | -0.055310887 |
| 0.175856491  | 0.000133497 | 0.152960276  | 0.000912585 | 0.135899057  |
| -0.286509833 | 2.83E-10    | -0.261897523 | 9.19E-09    | -0.274418947 |
| -0.196852908 | 1.83E-05    | -0.203893277 | 8.95E-06    | -0.197277394 |
| -0.052853652 | 0.254322558 | -0.048070013 | 0.299914315 | -0.074826534 |
| 0.064209112  | 0.165966314 | 0.092341199  | 0.046105601 | 0.074432968  |
| -0.194461    | 2.32E-05    | -0.182824915 | 7.07E-05    | -0.234634654 |
| 0.103328583  | 0.025552554 | 0.161256402  | 0.000468124 | 0.173252663  |
| 0.241863296  | 1.21E-07    | 0.220274147  | 1.54E-06    | 0.246092322  |
| 0.41144253   | 1.67E-20    | 0.427305763  | 3.76E-22    | 0.441587632  |
| -0.103430181 | 0.025407329 | -0.096185495 | 0.037724528 | -0.061858408 |
| -0.034119125 | 0.4619993   | -0.014134977 | 0.760628139 | 0.005147298  |
| 0.112644397  | 0.014871294 | 0.159969241  | 0.000520319 | 0.145460659  |
| -0.01389676  | 0.76454243  | -0.028839133 | 0.534153584 | -0.017479389 |
| -0.063407933 | 0.171324081 | -0.101134224 | 0.028868504 | -0.119072671 |
| -0.072454954 | 0.117905833 | -0.08406343  | 0.069528327 | -0.057563136 |
| 0.089846111  | 0.052341643 | 0.077212437  | 0.095595582 | 0.05675829   |
| 0.074711408  | 0.106863077 | 0.059517085  | 0.199188666 | 0.039962511  |
| 0.000641724  | 0.988965119 | -0.017676951 | 0.703197192 | -0.030274002 |
| 0.014962162  | 0.747084107 | -0.03140893  | 0.498342031 | -0.101356328 |
| 0.055432986  | 0.231842515 | 0.044382827  | 0.338556024 | -0.029842932 |
| -0.193236962 | 2.62E-05    | -0.180879529 | 8.47E-05    | -0.175853847 |
| -0.145035848 | 0.001675215 | -0.160675288 | 0.000491054 | -0.152332883 |

|              |             |              |             |              |
|--------------|-------------|--------------|-------------|--------------|
| -0.156948667 | 0.000664756 | -0.145369132 | 0.001633925 | -0.113360148 |
| -0.330287564 | 2.39E-13    | -0.351887716 | 4.65E-15    | -0.354513478 |
| -0.211609952 | 3.97E-06    | -0.218366433 | 1.90E-06    | -0.207099805 |
| 0.11197603   | 0.015479767 | 0.116256436  | 0.011932979 | 0.096592094  |
| -0.093718702 | 0.042938489 | -0.121176375 | 0.00875973  | -0.109613345 |
| -0.228972024 | 5.69E-07    | -0.177149341 | 0.000118868 | -0.180398033 |
| 0.157195921  | 0.000651664 | 0.131534611  | 0.004409879 | 0.105921982  |
| -0.37302593  | 7.27E-17    | -0.396677322 | 4.76E-19    | -0.375617688 |
| 0.053553558  | 0.248078286 | 0.066283841  | 0.152676765 | 0.108213261  |
| 0.114816945  | 0.013036108 | 0.128165738  | 0.005542105 | 0.113350796  |
| -0.199875301 | 1.35E-05    | -0.215662007 | 2.56E-06    | -0.23222328  |
| 0.120394897  | 0.00920723  | 0.097940056  | 0.034351642 | 0.083498522  |
| -0.266351672 | 5.02E-09    | -0.263799871 | 7.11E-09    | -0.287793044 |
| -0.188073131 | 4.31E-05    | -0.163172717 | 0.000399371 | -0.181259434 |
| -0.097623206 | 0.034941007 | -0.100989039 | 0.029100363 | -0.125970115 |
| 0.091104771  | 0.049113164 | 0.104549107  | 0.023854438 | 0.099320914  |
| 0.046465912  | 0.316349827 | 0.050789437  | 0.273370075 | 0.061985055  |
| 0.082100552  | 0.076320495 | 0.027927724  | 0.547158676 | 0.033443167  |
| -0.217042129 | 2.20E-06    | -0.208585248 | 5.48E-06    | -0.19018295  |
| 0.139971477  | 0.002432289 | 0.185272434  | 5.63E-05    | 0.194161543  |
| -0.048158584 | 0.299023659 | -0.070753088 | 0.126809887 | -0.090769614 |
| -0.099128538 | 0.032215832 | -0.113421129 | 0.014190644 | -0.107179552 |
| -0.129609745 | 0.005028141 | -0.093423654 | 0.043600972 | -0.081891237 |
| 0.15202831   | 0.000981658 | 0.191246783  | 3.18E-05    | 0.161561344  |
| -0.171258866 | 0.00020039  | -0.176518782 | 0.000125804 | -0.189764555 |
| -0.325496803 | 5.49E-13    | -0.335036163 | 1.03E-13    | -0.368156138 |
| -0.102378516 | 0.02694559  | -0.120949802 | 0.008887436 | -0.097080793 |
| -0.076125925 | 0.100368185 | -0.069985879 | 0.130990692 | -0.070042268 |
| 0.087944732  | 0.057552714 | 0.070777586  | 0.126678116 | 0.055431109  |
| -0.108846391 | 0.018628591 | -0.128520222 | 0.005411737 | -0.099368155 |
| -0.06355358  | 0.170340612 | -0.065204586 | 0.159485466 | -0.068106001 |
| -0.084003741 | 0.069727319 | -0.083391896 | 0.071794098 | -0.087676763 |
| 0.261956842  | 9.12E-09    | 0.264441703  | 6.52E-09    | 0.227557809  |
| -0.226723702 | 7.38E-07    | -0.234877417 | 2.83E-07    | -0.226940681 |
| -0.008486782 | 0.85486652  | -0.003462388 | 0.940515049 | 0.001936238  |
| -0.252364011 | 3.23E-08    | -0.291092025 | 1.43E-10    | -0.298976087 |
| -0.112628439 | 0.014885574 | -0.160010669 | 0.000518558 | -0.192157421 |
| 0.238726407  | 1.78E-07    | 0.241953543  | 1.20E-07    | 0.253183209  |
| -0.007890399 | 0.864964022 | 0.006045997  | 0.896324228 | 0.027645973  |
| 0.039260296  | 0.397287919 | 0.073410908  | 0.113123225 | 0.030636774  |
| -0.126927593 | 0.006019914 | -0.097682785 | 0.034829533 | -0.046195574 |
| -0.012863417 | 0.781590231 | 0.010533394  | 0.820404437 | -0.042813715 |
| 0.049486092  | 0.285885387 | 0.095596432  | 0.038918137 | 0.083604964  |
| -0.070349607 | 0.128995511 | -0.056289306 | 0.224699983 | -0.010858186 |
| 0.069595884  | 0.133156375 | 0.035212664  | 0.447763887 | 0.031496614  |



|              |             |              |             |              |
|--------------|-------------|--------------|-------------|--------------|
| -0.054273532 | 0.241767381 | -0.037103907 | 0.423740433 | -0.037938024 |
| 0.066379202  | 0.152085926 | 0.070419161  | 0.128616676 | 0.061116687  |
| 0.167907023  | 0.00026772  | 0.179091703  | 9.97E-05    | 0.138860228  |
| -0.148255246 | 0.001313518 | -0.123106925 | 0.007736199 | -0.138014488 |
| -0.167912664 | 0.00026759  | -0.140396149 | 0.002358485 | -0.146931433 |
| 0.062473204  | 0.177736865 | -0.008725799 | 0.85082621  | -0.026372349 |
| -0.227844974 | 6.49E-07    | -0.216940662 | 2.22E-06    | -0.204202033 |
| -9.48E-05    | 0.998369632 | -0.018658574 | 0.68755921  | -0.00751293  |
| -0.247668232 | 5.88E-08    | -0.274125909 | 1.70E-09    | -0.291843694 |
| 0.13246768   | 0.004135637 | 0.124853553  | 0.006903676 | 0.119363707  |
| -0.063308901 | 0.17199521  | -0.05876203  | 0.204958501 | -0.01995991  |
| -0.114696876 | 0.01313206  | -0.149330143 | 0.001209761 | -0.136082176 |
| 0.111660373  | 0.015774654 | 0.121655285  | 0.008495163 | 0.140872226  |
| 0.026252718  | 0.571459613 | 0.071187306  | 0.124489982 | 0.067795511  |
| 0.037347482  | 0.42070203  | 0.051749505  | 0.264393395 | 0.046297446  |
| -0.056366553 | 0.224063465 | -0.040619146 | 0.381140822 | -0.069430288 |
| -0.191333048 | 3.15E-05    | -0.20725793  | 6.30E-06    | -0.205108879 |
| -0.091311367 | 0.048599496 | -0.080156606 | 0.083569223 | -0.072761657 |
| 0.076201144  | 0.100031793 | 0.08277879   | 0.073915041 | 0.01716435   |
| -0.129071146 | 0.005214595 | -0.063079631 | 0.173556456 | -0.023579032 |
| 0.041860316  | 0.36674862  | 0.027769692  | 0.549429445 | 0.005607498  |
| -0.284081594 | 4.06E-10    | -0.263048652 | 7.87E-09    | -0.290545318 |
| -0.05750612  | 0.214822307 | -0.053089959 | 0.252202256 | -0.065385416 |
| -0.064155112 | 0.166323441 | -0.055802366 | 0.228742067 | -0.060235516 |
| -0.00483087  | 0.91707665  | 0.028957431  | 0.532477049 | 0.035437948  |
| -0.076304063 | 0.099572972 | -0.076067076 | 0.100631994 | -0.075744864 |
| -0.185971747 | 5.27E-05    | -0.207335269 | 6.25E-06    | -0.26567004  |
| 0.178838842  | 0.000102013 | 0.174717036  | 0.000147777 | 0.19979326   |
| 0.107267042  | 0.020419926 | 0.103244159  | 0.025673776 | 0.099432663  |
| 0.070800553  | 0.126554674 | 0.113066432  | 0.01449799  | 0.143222142  |
| -0.09445195  | 0.041328741 | -0.084058211 | 0.069545708 | -0.108659044 |
| -0.106800001 | 0.020977566 | -0.085118284 | 0.06608767  | -0.109742517 |
| -0.06011875  | 0.194676376 | -0.059580139 | 0.198712234 | -0.104552328 |
| -0.049768924 | 0.283137243 | -0.024573739 | 0.596320078 | -0.033704413 |
| -0.152274669 | 0.000962944 | -0.121725122 | 0.008457183 | -0.139402634 |
| 0.13157489   | 0.004397709 | 0.143207177  | 0.001919292 | 0.195422337  |
| -0.057453995 | 0.215238935 | -0.002736273 | 0.952973619 | 0.054499554  |
| -0.107003897 | 0.020732511 | -0.083369653 | 0.071870163 | -0.116039976 |
| -0.087000775 | 0.06029538  | -0.056419904 | 0.2236246   | -0.03518941  |
| 0.046870103  | 0.31215402  | 0.001301854  | 0.977615949 | -0.000917706 |
| -0.19938624  | 1.42E-05    | -0.199684922 | 1.38E-05    | -0.174669092 |
| 0.164537185  | 0.000356282 | 0.144824017  | 0.001701954 | 0.170510394  |
| -0.01528979  | 0.741740821 | -0.019674421 | 0.671515162 | -0.021155086 |
| 0.106942133  | 0.020806478 | 0.090910885  | 0.049599352 | 0.114972742  |
| -0.010161395 | 0.82664477  | -0.032328193 | 0.485847807 | -0.03407518  |

|              |             |              |             |              |
|--------------|-------------|--------------|-------------|--------------|
| 0.073978777  | 0.110355158 | 0.061892628  | 0.181808647 | 0.091472386  |
| -0.014352981 | 0.757051326 | 0.012595813  | 0.786022559 | -0.02779576  |
| 0.179680207  | 9.45E-05    | 0.205066122  | 7.92E-06    | 0.163053334  |
| 0.028194089  | 0.543341752 | 0.076555534  | 0.098458938 | 0.065067735  |
| -0.098048326 | 0.034152202 | -0.077369893 | 0.094919222 | -0.066055323 |
| 0.216870055  | 2.24E-06    | 0.205111946  | 7.89E-06    | 0.146911337  |
| -0.144584696 | 0.001732633 | -0.14981444  | 0.001165525 | -0.195182972 |
| 0.170234265  | 0.000219069 | 0.156898696  | 0.000667431 | 0.13722558   |
| -0.303979636 | 1.93E-11    | -0.335748158 | 9.08E-14    | -0.333170899 |
| 0.095878846  | 0.038341955 | 0.090019207  | 0.051887422 | 0.093561219  |
| -0.165355523 | 0.000332561 | -0.176018152 | 0.00013158  | -0.17772584  |
| -0.085856984 | 0.063762468 | -0.093128949 | 0.044271254 | -0.081946177 |
| 0.045929988  | 0.321969766 | 0.033567626  | 0.469272999 | 0.055535605  |
| 0.018533147  | 0.689550113 | 0.033117394  | 0.475257594 | 0.026444254  |
| -0.01875714  | 0.685996183 | -0.004185547 | 0.928121591 | -0.021443038 |
| 0.103741847  | 0.024966262 | 0.116213951  | 0.011964316 | 0.110941133  |
| -0.260220398 | 1.15E-08    | -0.239479182 | 1.63E-07    | -0.257710587 |
| -0.101995676 | 0.027525133 | -0.078962541 | 0.088290686 | -0.116377767 |
| -0.054673973 | 0.238306478 | -0.045313504 | 0.328514315 | -0.077501392 |
| -0.118222323 | 0.010559993 | -0.141097247 | 0.0022411   | -0.145070725 |
| -0.252802316 | 3.05E-08    | -0.287849872 | 2.32E-10    | -0.283258307 |
| 0.260158872  | 1.16E-08    | 0.293464033  | 9.95E-11    | 0.263380849  |
| 0.204496291  | 8.41E-06    | 0.235893288  | 2.51E-07    | 0.257229139  |
| 0.183036152  | 6.94E-05    | 0.192423268  | 2.83E-05    | 0.227797551  |
| -0.092345252 | 0.046096002 | -0.122371169 | 0.008112955 | -0.094424697 |
| 0.045007185  | 0.331797937 | 0.046900381  | 0.31184119  | 0.047644559  |
| -0.306468963 | 1.30E-11    | -0.311570959 | 5.69E-12    | -0.316855871 |
| 0.085967154  | 0.06342153  | 0.09897644   | 0.032482676 | 0.153537569  |
| 0.082037532  | 0.076547197 | 0.1561328    | 0.000709704 | 0.145372652  |
| -0.217316192 | 2.13E-06    | -0.203743775 | 9.09E-06    | -0.208998932 |
| -0.043531775 | 0.347908666 | -0.060109575 | 0.194744616 | -0.056335745 |
| -0.207637537 | 6.05E-06    | -0.221068632 | 1.40E-06    | -0.274074799 |
| -0.072307565 | 0.118657081 | -0.047222887 | 0.308521855 | -0.067186588 |
| -0.077471137 | 0.094486347 | -0.068453009 | 0.139662077 | -0.073754172 |
| 0.050947113  | 0.271881714 | 0.066115742  | 0.153722511 | 0.032340001  |
| -0.115579266 | 0.012441201 | -0.108124336 | 0.019429811 | -0.129157776 |
| -0.005744206 | 0.901472287 | -0.003912163 | 0.93280494  | -0.016970807 |
| -0.015316237 | 0.741310028 | -0.022724617 | 0.624253993 | -0.015338562 |
| -0.113279477 | 0.014312691 | -0.106286293 | 0.021606156 | -0.12120221  |
| 0.015951398  | 0.730988666 | 0.000484105  | 0.991675381 | 0.039578114  |
| 0.087827033  | 0.057888943 | 0.098946708  | 0.032535057 | 0.114026365  |
| 0.041975474  | 0.365430623 | 0.029128509  | 0.530057206 | 0.02951371   |
| -0.170806683 | 0.000208442 | -0.173655665 | 0.000162357 | -0.169952809 |
| 0.068093542  | 0.14175793  | 0.093233864  | 0.044031645 | 0.091693321  |
| 0.012738981  | 0.7836504   | -0.041477801 | 0.371147707 | -0.042000601 |

|              |             |              |             |              |
|--------------|-------------|--------------|-------------|--------------|
| -0.271854205 | 2.34E-09    | -0.239474245 | 1.63E-07    | -0.245232416 |
| -0.153685366 | 0.000861981 | -0.14562123  | 0.001603315 | -0.150030177 |
| -0.286185523 | 2.97E-10    | -0.261026912 | 1.03E-08    | -0.227766197 |
| -0.202317927 | 1.05E-05    | -0.20942378  | 5.01E-06    | -0.206988213 |
| 0.140376762  | 0.002361809 | 0.150082521  | 0.001141684 | 0.13877832   |
| 0.234292224  | 3.04E-07    | 0.257833173  | 1.58E-08    | 0.242230447  |
| 0.161542712  | 0.000457196 | 0.188394143  | 4.18E-05    | 0.16482782   |
| -0.208377196 | 5.60E-06    | -0.203300545 | 9.51E-06    | -0.186774163 |
| -0.002771742 | 0.952364757 | 0.029727412  | 0.521630023 | -0.002947264 |
| 0.187458147  | 4.58E-05    | 0.179350539  | 9.74E-05    | 0.168894383  |
| -0.044787643 | 0.334164295 | -0.015897006 | 0.731870671 | -0.039117325 |
| 0.260004301  | 1.18E-08    | 0.254033737  | 2.60E-08    | 0.228428098  |
| -0.305319542 | 1.56E-11    | -0.278163874 | 9.58E-10    | -0.302586725 |
| 0.069332561  | 0.134634186 | 0.08230786   | 0.075578589 | 0.082618325  |
| -0.189307646 | 3.83E-05    | -0.187865549 | 4.40E-05    | -0.213331966 |
| -0.066933448 | 0.148686223 | -0.103880265 | 0.024772502 | -0.156530016 |
| -0.11152872  | 0.015899092 | -0.101759377 | 0.027888165 | -0.09109188  |
| -0.142944756 | 0.001956873 | -0.170434772 | 0.00021529  | -0.216405092 |
| -0.026303371 | 0.570717288 | -0.034676884 | 0.454707274 | -0.07293704  |
| -0.214572278 | 2.88E-06    | -0.210561074 | 4.44E-06    | -0.221095037 |
| -0.075747752 | 0.102073079 | -0.073088333 | 0.114719722 | -0.080897658 |
| -0.040661569 | 0.38064327  | -0.054987521 | 0.235621007 | -0.050222939 |
| 0.026059899  | 0.574289529 | -0.00353086  | 0.939340914 | 0.035677067  |
| 0.127804726  | 0.005677771 | 0.129133594  | 0.005192662 | 0.10222134   |
| 0.024129214  | 0.602983413 | 0.011698091  | 0.800941342 | -0.029300335 |
| -0.071315809 | 0.12380979  | -0.089896139 | 0.052210026 | -0.066346025 |
| 0.108271973  | 0.01926359  | 0.119915495  | 0.00949171  | 0.137427895  |
| -0.161299948 | 0.000466446 | -0.141380581 | 0.002195194 | -0.169059595 |
| -0.133117049 | 0.003953983 | -0.104146696 | 0.024403202 | -0.07287542  |
| -0.188009071 | 4.34E-05    | -0.205878602 | 7.28E-06    | -0.245727686 |
| -0.163802516 | 0.000378913 | -0.148589833 | 0.001280376 | -0.131900835 |
| 0.046993619  | 0.310879152 | 0.099253251  | 0.031998432 | 0.071676902  |
| -0.125475987 | 0.006626975 | -0.117791378 | 0.010848365 | -0.120787368 |
| -0.119963174 | 0.009463071 | -0.101069943 | 0.028970964 | -0.099919648 |
| 0.055914644  | 0.227805506 | 0.093690745  | 0.043000896 | 0.119699932  |
| 0.117004516  | 0.011392948 | 0.115137722  | 0.012782787 | 0.082518316  |
| -0.172790146 | 0.000175234 | -0.211045992 | 4.22E-06    | -0.17692179  |
| 0.167748211  | 0.000271383 | 0.141944826  | 0.002106325 | 0.139133429  |
| -0.018473959 | 0.690490355 | 0.018106094  | 0.696344751 | -0.000172647 |
| -0.035553309 | 0.443380755 | -0.080496069 | 0.082264815 | -0.14121783  |
| -0.200257341 | 1.30E-05    | -0.191981114 | 2.96E-05    | -0.191185478 |
| -0.093575472 | 0.043259022 | -0.103170559 | 0.025779859 | -0.095387242 |
| -0.102148593 | 0.027292375 | -0.089917909 | 0.052152838 | -0.08416945  |
| -0.15523497  | 0.000762411 | -0.117440311 | 0.01108842  | -0.171474751 |
| 0.164805575  | 0.000348334 | 0.148423413  | 0.001296763 | 0.159006773  |

|              |             |              |             |              |
|--------------|-------------|--------------|-------------|--------------|
| -0.201415318 | 1.15E-05    | -0.215549081 | 2.59E-06    | -0.186698967 |
| 0.030179188  | 0.515318837 | 0.048049878  | 0.300117027 | 0.060426     |
| -0.051008217 | 0.271306418 | -0.046816694 | 0.312706334 | -0.047698684 |
| -0.204368626 | 8.52E-06    | -0.243181774 | 1.03E-07    | -0.247593962 |
| -0.116497857 | 0.011756278 | -0.147342503 | 0.001407985 | -0.204849213 |
| -0.112353914 | 0.015133116 | -0.129062525 | 0.00521763  | -0.214629843 |
| 0.021944791  | 0.636201066 | 0.096259368  | 0.037577053 | 0.10881146   |
| -0.137189819 | 0.002970152 | -0.117898561 | 0.010775998 | -0.0702927   |
| 0.413830301  | 9.54E-21    | 0.454733841  | 3.28E-25    | 0.448640669  |
| 0.114471566  | 0.013313795 | 0.11588047   | 0.012212832 | 0.066683522  |
| 0.165535059  | 0.000327558 | 0.118230974  | 0.010554274 | 0.088634911  |
| 0.072131476  | 0.119559513 | 0.075674024  | 0.102408125 | 0.102278947  |
| 0.027658179  | 0.551034569 | 0.080561517  | 0.082015228 | 0.06220893   |
| -0.163001079 | 0.000405123 | -0.144369782 | 0.001760614 | -0.169222093 |
| 0.044861217  | 0.333370061 | 0.01032953   | 0.823822901 | 0.016655334  |
| -0.158643774 | 0.000579679 | -0.182338469 | 7.40E-05    | -0.204268401 |
| -0.075930853 | 0.10124477  | -0.049326827 | 0.287440765 | -0.028745204 |
| 0.001598358  | 0.972519707 | -0.00573104  | 0.901696973 | -0.009238788 |
| 0.007078402  | 0.878747214 | 0.02616002   | 0.572819276 | 0.039554676  |
| -0.135440022 | 0.003361761 | -0.173179821 | 0.000169322 | -0.193423659 |
| -0.220371244 | 1.52E-06    | -0.261106172 | 1.02E-08    | -0.243378912 |
| -0.043513812 | 0.348107817 | -0.041258134 | 0.373688662 | -0.027200181 |
| 0.12119832   | 0.008747449 | 0.150497897  | 0.00110563  | 0.169887996  |
| -0.283278942 | 4.56E-10    | -0.272561796 | 2.12E-09    | -0.272902963 |
| -0.141159293 | 0.002230973 | -0.086100171 | 0.063011889 | -0.040160485 |
| 0.261747315  | 9.38E-09    | 0.269943905  | 3.06E-09    | 0.249632488  |
| 0.142000275  | 0.002097772 | 0.170928708  | 0.00020624  | 0.183685052  |
| -0.21285369  | 3.47E-06    | -0.182354286 | 7.39E-05    | -0.178118694 |
| -0.096791146 | 0.036529819 | -0.094396817 | 0.041447981 | -0.102852623 |
| -0.09788605  | 0.034451493 | -0.08618905  | 0.062739393 | -0.069292126 |
| 0.012098991  | 0.794269686 | 0.0499407    | 0.281476906 | 0.059790811  |
| 0.300580063  | 3.31E-11    | 0.28467455   | 3.72E-10    | 0.284923071  |
| 0.047280277  | 0.307933629 | 0.02048801   | 0.658771843 | -0.007137824 |
| 0.011015784  | 0.812329169 | 0.041613795  | 0.369579992 | 0.041497462  |
| 0.090749564  | 0.050006942 | 0.069452302  | 0.13396062  | 0.067263088  |
| 0.121948459  | 0.008336739 | 0.167504284  | 0.000277101 | 0.16081411   |
| 0.178022209  | 0.000109858 | 0.182721125  | 7.14E-05    | 0.203254038  |
| 0.12832458   | 0.005483342 | 0.102040685  | 0.027456447 | 0.102409983  |
| 0.171382031  | 0.000198248 | 0.185343571  | 5.59E-05    | 0.200960537  |
| 0.000894042  | 0.984626802 | 0.01188132   | 0.797890265 | 0.006963397  |
| -0.386867938 | 4.02E-18    | -0.367819989 | 2.08E-16    | -0.403467359 |
| 0.064223316  | 0.165872473 | 0.04540447   | 0.327543258 | 0.050141272  |
| 0.172829111  | 0.000174634 | 0.176294923  | 0.000128356 | 0.19714802   |
| -0.050384335 | 0.277219403 | -0.036691126 | 0.42891868  | -0.044742428 |
| -0.197152793 | 1.78E-05    | -0.182363597 | 7.38E-05    | -0.17635077  |

|              |             |              |             |              |
|--------------|-------------|--------------|-------------|--------------|
| 0.066058179  | 0.154081853 | 0.10009838   | 0.03055798  | 0.090261605  |
| -0.153126768 | 0.000900729 | -0.154284197 | 0.000822158 | -0.156991876 |
| -0.05561086  | 0.230345809 | -0.043387026 | 0.349515537 | -0.028228922 |
| -0.078359253 | 0.090756391 | -0.059110192 | 0.202283107 | -0.058538962 |
| -0.180681624 | 8.62E-05    | -0.157330331 | 0.000644648 | -0.152994931 |
| -0.1381576   | 0.002771836 | -0.129719136 | 0.004991013 | -0.124733125 |
| -0.059168383 | 0.201838438 | -0.060463261 | 0.192126551 | -0.058714808 |
| -0.054115062 | 0.243146685 | -0.040774616 | 0.379319343 | -0.064963543 |
| 0.036930733  | 0.425908413 | 0.032865127  | 0.478628944 | -0.012937326 |
| -0.040963632 | 0.377112044 | -0.023048506 | 0.619320507 | -0.050180884 |
| -0.069632887 | 0.132949712 | -0.073755024 | 0.111439403 | -0.100090104 |
| -0.051201088 | 0.269496001 | -0.045421838 | 0.327358064 | -0.055875506 |
| -0.088636003 | 0.055610489 | -0.086561645 | 0.061607599 | -0.105178146 |
| -0.113680384 | 0.013969638 | -0.10915572  | 0.018294261 | -0.133061352 |
| -0.065797965 | 0.155714221 | -0.034819456 | 0.452853745 | -0.063684421 |
| -0.161517011 | 0.000458167 | -0.119127157 | 0.009976531 | -0.117120726 |
| 0.020062864  | 0.66541892  | 0.008889162  | 0.848066989 | 0.038182669  |
| -0.163564601 | 0.000386524 | -0.150414108 | 0.001112817 | -0.13222894  |
| -0.127732473 | 0.005705279 | -0.099549346 | 0.031487295 | -0.108900209 |
| 0.128286909  | 0.005497228 | 0.148242675  | 0.001314779 | 0.11533019   |
| 0.258282199  | 1.49E-08    | 0.248034879  | 5.61E-08    | 0.251234495  |
| -0.002743356 | 0.95285202  | -0.046595155 | 0.315004193 | -0.019952496 |
| -0.043028424 | 0.353516574 | -0.019443421 | 0.675150761 | 0.007868993  |
| -0.022297154 | 0.630790858 | -0.075350789 | 0.10388732  | -0.129161188 |
| 0.047072846  | 0.31006322  | 0.086809186  | 0.060865022 | 0.055270311  |
| -0.085760099 | 0.064063541 | -0.077953059 | 0.092447431 | -0.102828416 |
| -0.223573793 | 1.06E-06    | -0.219032759 | 1.76E-06    | -0.231966264 |
| 0.183706337  | 6.52E-05    | 0.19327217   | 2.61E-05    | 0.177148297  |
| 0.029699237  | 0.522024931 | -0.040497179 | 0.382573531 | -0.030672857 |
| -0.178014446 | 0.000109935 | -0.129220656 | 0.005162223 | -0.135863456 |
| -0.12079326  | 0.008976635 | -0.117932538 | 0.010753147 | -0.128807053 |
| -0.195333998 | 2.13E-05    | -0.203932824 | 8.91E-06    | -0.182901312 |
| -0.007175429 | 0.877098228 | 0.01170984   | 0.800745607 | 0.046243982  |
| -0.23890355  | 1.74E-07    | -0.25447766  | 2.45E-08    | -0.286829358 |
| -0.075303125 | 0.104106866 | -0.072532961 | 0.117509734 | -0.104251653 |
| 0.072416844  | 0.118099723 | 0.071599579  | 0.122317986 | 0.045283359  |
| -0.222276198 | 1.23E-06    | -0.233511782 | 3.34E-07    | -0.254315224 |
| 0.297481232  | 5.36E-11    | 0.257977175  | 1.55E-08    | 0.254408763  |
| 0.250739578  | 3.97E-08    | 0.183791365  | 6.46E-05    | 0.199833117  |
| -0.124920975 | 0.006873212 | -0.108131721 | 0.019421467 | -0.105014357 |
| -0.022013969 | 0.635137352 | 0.024100188  | 0.603419652 | -0.003856588 |
| 0.026501681  | 0.567815489 | 0.010316135  | 0.824047637 | 0.007139709  |
| 0.326510867  | 4.61E-13    | 0.325327575  | 5.65E-13    | 0.331710906  |
| 0.048171937  | 0.298889541 | 0.076160091  | 0.100215278 | 0.051035511  |
| -0.367392706 | 2.27E-16    | -0.358568321 | 1.29E-15    | -0.352645382 |

|              |             |              |             |              |
|--------------|-------------|--------------|-------------|--------------|
| 0.016458393  | 0.722784583 | 0.032561979  | 0.482697457 | 0.023465287  |
| -0.026106256 | 0.573608571 | -0.035901934 | 0.438920343 | -0.012839688 |
| -0.022511991 | 0.627501872 | -0.030826159 | 0.506350141 | -0.030820069 |
| -0.077700623 | 0.093511001 | -0.079694554 | 0.085371468 | -0.073338035 |
| 0.039808894  | 0.390720072 | 0.051483645  | 0.266858664 | 0.079534021  |
| -0.130676177 | 0.004676583 | -0.106956676 | 0.020789042 | -0.09148951  |
| -0.36939797  | 1.52E-16    | -0.331437856 | 1.95E-13    | -0.290139849 |
| -0.191686191 | 3.05E-05    | -0.163991815 | 0.000372957 | -0.153426585 |
| -0.079639329 | 0.085588953 | -0.093749315 | 0.042870241 | -0.111629696 |
| -0.028490964 | 0.539103274 | -0.022226711 | 0.631870884 | -0.024501645 |
| -0.064454475 | 0.16435088  | -0.069805005 | 0.131991696 | -0.058138884 |
| -0.048558249 | 0.295026608 | -0.057575622 | 0.214267678 | -0.097745887 |
| -0.062130862 | 0.18012956  | -0.046677157 | 0.314152367 | -0.013842202 |
| -0.33471892  | 1.09E-13    | -0.361096311 | 7.89E-16    | -0.395530527 |
| 0.035282339  | 0.446865378 | 0.009646134  | 0.83530635  | -0.018151343 |
| -0.010819497 | 0.815612686 | 0.021247855  | 0.646958782 | 0.015410067  |
| 0.179919008  | 9.24E-05    | 0.186940695  | 4.81E-05    | 0.14605207   |
| 0.111252795  | 0.016162691 | 0.108011768  | 0.019557389 | 0.119690819  |
| 0.029511848  | 0.524655301 | -0.035635599 | 0.442325591 | -0.046913628 |
| 0.057002593  | 0.218871251 | 0.008976766  | 0.846588098 | -0.000283759 |
| 0.243292365  | 1.02E-07    | 0.233752978  | 3.24E-07    | 0.213234309  |
| 0.013930248  | 0.763991801 | 0.024205234  | 0.601841518 | 0.027017754  |
| -0.250590652 | 4.05E-08    | -0.245848193 | 7.39E-08    | -0.258277385 |
| -0.108867837 | 0.018605241 | -0.089623501 | 0.052930658 | -0.08284296  |
| 0.089972622  | 0.052009343 | 0.1056508    | 0.022406328 | 0.080478314  |
| -0.13587628  | 0.003259969 | -0.093765459 | 0.042834287 | -0.132122632 |
| 0.223670206  | 1.05E-06    | 0.221182502  | 1.39E-06    | 0.24309835   |
| 0.280212459  | 7.13E-10    | 0.279951578  | 7.41E-10    | 0.295536466  |
| 0.12602902   | 0.00638951  | 0.1729573    | 0.000172674 | 0.20111011   |
| 0.046058985  | 0.320611144 | 0.064293077  | 0.165412166 | 0.046458433  |
| -0.010977843 | 0.812963596 | 0.011559556  | 0.803250184 | -0.000342715 |
| 0.018485077  | 0.6903137   | 0.035130104  | 0.448829883 | 0.041939406  |
| 0.330396466  | 2.34E-13    | 0.345170718  | 1.64E-14    | 0.380798864  |
| 0.023793269  | 0.608041194 | 0.020524876  | 0.658196705 | 0.027523055  |
| 0.01247324   | 0.788055059 | 0.032117845  | 0.488691784 | 0.01964845   |
| 0.100060283  | 0.030621696 | 0.153773378  | 0.000856019 | 0.186029957  |
| 0.232801834  | 3.63E-07    | 0.263163134  | 7.75E-09    | 0.310070295  |
| -0.041322645 | 0.372941326 | -0.015774348 | 0.73386094  | -0.014454003 |
| 0.107591409  | 0.020040262 | 0.108152383  | 0.019398138 | 0.109838094  |
| -0.083223981 | 0.072369969 | -0.096449446 | 0.037199845 | -0.098624168 |
| -0.062020549 | 0.180905618 | -0.04241982  | 0.360372723 | -0.03501893  |
| -0.180467891 | 8.79E-05    | -0.181043231 | 8.34E-05    | -0.177901393 |
| -0.186699915 | 4.92E-05    | -0.204610665 | 8.31E-06    | -0.231171659 |
| -0.231336388 | 4.31E-07    | -0.239737265 | 1.58E-07    | -0.22393845  |
| -0.116626817 | 0.01166284  | -0.090042943 | 0.051825396 | -0.129434989 |

|              |             |              |             |              |
|--------------|-------------|--------------|-------------|--------------|
| -0.078163035 | 0.091570149 | -0.067703544 | 0.144058934 | -0.057717232 |
| -0.002860487 | 0.950841467 | 0.050190723  | 0.279072058 | 0.037126726  |
| -0.299604151 | 3.85E-11    | -0.295264004 | 7.55E-11    | -0.259056717 |
| 0.065299261  | 0.158879183 | 0.102982414  | 0.02605276  | 0.101314851  |
| -0.013276557 | 0.774761306 | -0.016942732 | 0.714976663 | -0.033955033 |
| 0.140721453  | 0.002303338 | 0.165363691  | 0.000332332 | 0.171877643  |
| -0.065182018 | 0.159630249 | -0.060651944 | 0.190740464 | -0.060722383 |
| -0.219667137 | 1.64E-06    | -0.198341998 | 1.58E-05    | -0.149445754 |
| -0.02342444  | 0.613615655 | -0.004134587 | 0.928994411 | -0.014166564 |
| 0.052570199  | 0.256882164 | 0.046140658  | 0.319752889 | 0.040225179  |
| 0.125876296  | 0.006454313 | 0.068477955  | 0.139517515 | 0.082988078  |
| 0.122360039  | 0.008118778 | 0.167919503  | 0.000267434 | 0.186055093  |
| -0.204869173 | 8.09E-06    | -0.19199136  | 2.96E-05    | -0.203618862 |
| -0.227593477 | 6.68E-07    | -0.215377121 | 2.64E-06    | -0.240286269 |
| 0.172135953  | 0.000185595 | 0.190608259  | 3.38E-05    | 0.199209672  |
| 0.068828004  | 0.137501108 | 0.06071979   | 0.190243863 | 0.004360622  |
| -0.053481402 | 0.248717044 | -0.036335771 | 0.433405752 | -0.039572434 |
| -0.252669939 | 3.10E-08    | -0.29508668  | 7.76E-11    | -0.309864682 |
| -0.030210563 | 0.514882005 | -0.037760059 | 0.415584636 | -0.03240645  |
| -0.20436872  | 8.52E-06    | -0.19805295  | 1.62E-05    | -0.207258786 |
| -0.136322297 | 0.0031588   | -0.161316035 | 0.000465828 | -0.17504585  |
| 0.064226411  | 0.165852036 | 0.054672875  | 0.238315924 | 0.044950351  |
| -0.192331597 | 2.86E-05    | -0.221698831 | 1.31E-06    | -0.166422304 |
| -0.350124803 | 6.49E-15    | -0.336050606 | 8.61E-14    | -0.33415925  |
| 0.032200448  | 0.487573891 | -0.004798391 | 0.917632177 | -0.03102491  |
| -0.121908068 | 0.008358408 | -0.104281866 | 0.024217668 | -0.114923813 |
| -0.117313856 | 0.011176034 | -0.11181675  | 0.015627957 | -0.127523352 |
| -0.375607974 | 4.28E-17    | -0.395421184 | 6.28E-19    | -0.392145186 |
| -0.050178878 | 0.279185682 | -0.044363076 | 0.338771238 | -0.042431628 |
| -0.089658479 | 0.052837744 | -0.090556749 | 0.050497771 | -0.093876122 |
| -0.08499528  | 0.06648153  | -0.094115543 | 0.04206084  | -0.098624078 |
| -0.334565253 | 1.12E-13    | -0.299196178 | 4.11E-11    | -0.297947978 |
| -0.150171731 | 0.00113385  | -0.128307778 | 0.005489532 | -0.140252304 |
| -0.120515276 | 0.009136998 | -0.102647469 | 0.026544757 | -0.107677009 |
| -0.265971983 | 5.29E-09    | -0.228026346 | 6.35E-07    | -0.213837701 |
| 0.137174877  | 0.002973313 | 0.158544227  | 0.000584382 | 0.137397243  |
| 0.048801134  | 0.292615025 | 0.06083311   | 0.18941652  | 0.078823556  |
| -0.13856992  | 0.002691068 | -0.157196782 | 0.000651619 | -0.181646447 |
| -0.047276878 | 0.30796845  | -0.043558811 | 0.34760906  | -0.02920144  |
| -0.157138406 | 0.000654688 | -0.195492724 | 2.10E-05    | -0.183362757 |
| 0.011730777  | 0.800396831 | 0.004007817  | 0.931166012 | 0.025910514  |
| -0.20999957  | 4.71E-06    | -0.168465278 | 0.000255206 | -0.179292161 |
| 0.203476096  | 9.34E-06    | 0.191412201  | 3.13E-05    | 0.23540914   |
| -0.01695825  | 0.714726982 | -0.009007011 | 0.846077658 | 0.006727097  |
| 0.165733475  | 0.000322111 | 0.19806845   | 1.62E-05    | 0.196912172  |

|              |             |              |             |              |
|--------------|-------------|--------------|-------------|--------------|
| -0.136269209 | 0.003170691 | -0.122051038 | 0.008281934 | -0.139623371 |
| 0.088094682  | 0.057126703 | 0.084852125  | 0.066942337 | 0.105204768  |
| 0.047643565  | 0.304227252 | 0.045920712  | 0.322067601 | 0.076829914  |
| -0.195365947 | 2.12E-05    | -0.181738555 | 7.82E-05    | -0.191259232 |
| -0.047716017 | 0.303491613 | -0.017579974 | 0.704749057 | -0.02755195  |
| -0.035578452 | 0.443058201 | -0.043039946 | 0.353387569 | -0.045268909 |
| -0.138717071 | 0.002662766 | -0.112540282 | 0.014964675 | -0.072109731 |
| 0.134453272  | 0.003602723 | 0.168241112  | 0.000260164 | 0.136891246  |
| -0.140675395 | 0.002311074 | -0.127438304 | 0.005818516 | -0.133297643 |
| 0.308199274  | 9.84E-12    | 0.347026629  | 1.16E-14    | 0.333496476  |
| -0.063518225 | 0.170578951 | -0.013528099 | 0.770611927 | -0.045151222 |
| -0.15287406  | 0.000918781 | -0.148407343 | 0.001298356 | -0.159145049 |
| -0.274047359 | 1.72E-09    | -0.257977174 | 1.55E-08    | -0.264183402 |
| -0.021609711 | 0.641363907 | -0.01860942  | 0.688339178 | 0.011268092  |
| -0.004797312 | 0.91765063  | -0.025641982 | 0.580445726 | -0.033821738 |
| -0.177814857 | 0.000111938 | -0.182244297 | 7.46E-05    | -0.160702446 |
| -0.111516196 | 0.015910975 | -0.102621824 | 0.026582755 | -0.12843532  |
| 0.228163325  | 6.25E-07    | 0.253154996  | 2.91E-08    | 0.247489479  |
| -0.2571293   | 1.73E-08    | -0.202283306 | 1.06E-05    | -0.19955852  |
| -0.237462509 | 2.08E-07    | -0.259570877 | 1.25E-08    | -0.275342051 |
| 0.128880315  | 0.005282137 | 0.1383904    | 0.002725966 | 0.198997419  |
| 0.012983504  | 0.779603521 | -0.002758067 | 0.952599489 | 0.020296375  |
| -0.150291727 | 0.001123392 | -0.168235872 | 0.000260281 | -0.18237887  |
| -0.016964871 | 0.714620456 | 0.011319033  | 0.807262851 | -0.003335346 |
| -0.015320442 | 0.741241557 | 0.004716839  | 0.919027239 | -0.016820128 |
| -0.398207701 | 3.39E-19    | -0.397661948 | 3.82E-19    | -0.420470828 |
| -0.077133742 | 0.095935057 | -0.115486062 | 0.012512627 | -0.135901438 |
| -0.055756402 | 0.229126262 | -0.068695362 | 0.138262519 | -0.066250879 |
| -0.223609302 | 1.05E-06    | -0.219966589 | 1.59E-06    | -0.277200866 |
| 0.018609362  | 0.688340102 | 0.060041423  | 0.195252075 | 0.072195874  |
| 0.100828885  | 0.029357978 | 0.074729839  | 0.106776366 | 0.05605428   |
| -0.002715477 | 0.953330606 | -0.018401925 | 0.691635298 | -0.038706386 |
| -0.02619722  | 0.572273459 | 0.024439925  | 0.598322403 | 0.022783239  |
| 0.037662746  | 0.416788339 | 0.023957855  | 0.605560922 | 0.001374395  |
| -0.373104353 | 7.15E-17    | -0.384845821 | 6.20E-18    | -0.412692798 |
| -0.187003347 | 4.78E-05    | -0.142220498 | 0.002064114 | -0.107443516 |
| 0.053487608  | 0.248662061 | 0.04531328   | 0.328516711 | 0.084083759  |
| 0.061437381  | 0.185049392 | 0.075952949  | 0.101145176 | 0.102443915  |
| -0.083789351 | 0.070445905 | -0.080297409 | 0.083026167 | -0.085334185 |
| -0.205982026 | 7.20E-06    | -0.190710036 | 3.35E-05    | -0.193471822 |
| -0.481342368 | 1.86E-28    | -0.455338692 | 2.78E-25    | -0.483606876 |
| -0.215040685 | 2.74E-06    | -0.197637948 | 1.69E-05    | -0.206879172 |
| -0.028462237 | 0.539512676 | -0.036077177 | 0.43668797  | -0.040067219 |
| -0.08699315  | 0.060317965 | -0.029461968 | 0.525356594 | -0.032320731 |
| -0.126563255 | 0.006167393 | -0.129740245 | 0.004983878 | -0.107881764 |



|              |             |              |             |              |
|--------------|-------------|--------------|-------------|--------------|
| 0.057358584  | 0.216003054 | 0.10530903   | 0.02284719  | 0.126790133  |
| -0.060722478 | 0.190224208 | -0.065354064 | 0.158529024 | -0.062508377 |
| 0.044146912  | 0.341132356 | 0.056768423  | 0.220772754 | 0.049836201  |
| 0.150774763  | 0.001082184 | 0.17540944   | 0.000138938 | 0.168982392  |
| 0.070680274  | 0.127202176 | 0.081384885  | 0.078927299 | 0.136525721  |
| 0.27226173   | 2.21E-09    | 0.252881432  | 3.02E-08    | 0.279149233  |
| -0.421202217 | 1.66E-21    | -0.416958107 | 4.56E-21    | -0.433848609 |
| -0.519583743 | 1.19E-33    | -0.502103911 | 3.40E-31    | -0.504198435 |
| 0.002656602  | 0.954341344 | 0.044011559  | 0.342616119 | 0.027998649  |
| -0.066754012 | 0.149780478 | -0.044998464 | 0.331891731 | -0.024967615 |
| 0.029987183  | 0.517996261 | 0.060174687  | 0.194260693 | 0.06353991   |
| -0.017616747 | 0.704160461 | -0.028468468 | 0.539423861 | -0.025760017 |
| -0.123781163 | 0.00740475  | -0.14024795  | 0.002384005 | -0.128586826 |
| -0.22709734  | 7.07E-07    | -0.208928501 | 5.28E-06    | -0.180808212 |
| -0.130378783 | 0.00477232  | -0.112271641 | 0.015208004 | -0.094832418 |
| 0.004313604  | 0.925928684 | -0.022013238 | 0.635148591 | -0.012930387 |
| 0.196644289  | 1.87E-05    | 0.263870098  | 7.04E-09    | 0.282099919  |
| -0.186873089 | 4.84E-05    | -0.2123077   | 3.68E-06    | -0.201867578 |
| -0.139736434 | 0.002474037 | -0.191007557 | 3.25E-05    | -0.225801673 |
| -0.255083784 | 2.27E-08    | -0.243976373 | 9.34E-08    | -0.289090484 |
| -0.148627991 | 0.001276645 | -0.160523858 | 0.000497199 | -0.141185693 |
| -0.055566178 | 0.230721137 | -0.117625768 | 0.010961027 | -0.121900678 |
| -0.147990482 | 0.001340302 | -0.139459438 | 0.002524076 | -0.145063296 |
| -0.09892212  | 0.032578431 | -0.155460899 | 0.000748817 | -0.143048917 |
| -0.216295897 | 2.39E-06    | -0.195801774 | 2.03E-05    | -0.172948746 |
| 0.037227702  | 0.422194591 | 0.023671094  | 0.609885248 | 0.057988367  |
| -0.02677197  | 0.563871822 | -0.042387658 | 0.360737343 | -0.061350262 |
| -0.187142779 | 4.71E-05    | -0.187657776 | 4.49E-05    | -0.191658803 |
| -0.082457671 | 0.075046113 | -0.063000316 | 0.174099014 | -0.069746659 |
| -0.321933959 | 1.01E-12    | -0.318514645 | 1.80E-12    | -0.311102336 |
| 0.139786141  | 0.002465154 | 0.183818236  | 6.45E-05    | 0.160732615  |
| -0.053940026 | 0.244676574 | -0.0129069   | 0.780870683 | 0.032874189  |
| 0.042788881  | 0.356205238 | 0.048833171  | 0.292297926 | 0.053782951  |
| -0.103844267 | 0.024822768 | -0.071622769 | 0.122196694 | -0.083868309 |
| -0.01188868  | 0.797767788 | -0.034428885 | 0.457941548 | -0.042263567 |
| -0.00597246  | 0.897578258 | -0.030721667 | 0.507793106 | -0.060473178 |
| 0.15889057   | 0.000568171 | 0.184207517  | 6.22E-05    | 0.202072696  |
| -0.028900438 | 0.533284426 | 0.008147918  | 0.860601114 | 0.054375086  |
| -0.118654955 | 0.010277348 | -0.099363614 | 0.031807094 | -0.099487601 |
| -0.204184328 | 8.68E-06    | -0.193345776 | 2.59E-05    | -0.215732095 |
| -0.149131769 | 0.001228322 | -0.093554011 | 0.043307223 | -0.115976531 |
| -0.209137499 | 5.17E-06    | -0.183684686 | 6.53E-05    | -0.186124688 |
| -0.029548705 | 0.524137403 | -0.038776862 | 0.403130259 | -0.025050375 |
| -0.07736877  | 0.094924031 | -0.053588467 | 0.247769668 | -0.031479515 |
| -0.080583709 | 0.081930736 | -0.080088385 | 0.083833374 | -0.05607707  |

|              |             |              |             |              |
|--------------|-------------|--------------|-------------|--------------|
| -0.004526531 | 0.922283659 | -0.019667459 | 0.671624631 | -0.008975353 |
| -0.061681455 | 0.183306657 | -0.054670601 | 0.238335471 | -0.032164991 |
| -0.017696396 | 0.702886179 | -0.043474583 | 0.348543002 | -0.023562999 |
| 0.214237745  | 2.99E-06    | 0.252498884  | 3.17E-08    | 0.258358164  |
| -0.137474575 | 0.002910501 | -0.140416606 | 0.002354982 | -0.144446344 |
| -0.215459167 | 2.62E-06    | -0.203632474 | 9.19E-06    | -0.207700213 |
| -0.14082099  | 0.002286701 | -0.102102172 | 0.027362853 | -0.090841797 |
| -0.023019511 | 0.619761475 | 0.032089052  | 0.48908176  | 0.045743688  |
| -0.088909257 | 0.054857903 | -0.076086665 | 0.100544121 | -0.064595202 |
| -0.31060647  | 6.66E-12    | -0.271546159 | 2.45E-09    | -0.275008534 |
| -0.200825672 | 1.23E-05    | -0.179718601 | 9.42E-05    | -0.179042375 |
| 0.30326035   | 2.17E-11    | 0.292375651  | 1.17E-10    | 0.294923029  |
| -0.106449083 | 0.021405214 | -0.084195176 | 0.069090755 | -0.10611039  |
| -0.071513371 | 0.122769699 | -0.101797999 | 0.027828549 | -0.135086524 |
| -0.1720648   | 0.000186756 | -0.172816159 | 0.000174833 | -0.174436665 |
| -0.045688335 | 0.324524965 | -0.038086854 | 0.411557381 | -0.030720307 |
| -0.018304529 | 0.69318449  | 0.015105485  | 0.744745141 | 0.060004763  |
| -0.071593303 | 0.122350828 | -0.030783948 | 0.506932787 | -0.035691894 |
| 0.027648574  | 0.551172933 | 0.057050565  | 0.218483161 | 0.030160904  |
| -0.23219638  | 3.90E-07    | -0.204450286 | 8.45E-06    | -0.258108465 |
| -0.175809646 | 0.000134058 | -0.183540045 | 6.62E-05    | -0.160403298 |
| 0.075084799  | 0.105117199 | 0.129697789  | 0.004998239 | 0.154054808  |
| 0.030844578  | 0.506096001 | 0.033273284  | 0.473180747 | 0.015261614  |
| 0.035997086  | 0.437707422 | 0.05058998   | 0.275260761 | 0.028905011  |
| 0.070240853  | 0.129589585 | 0.092536596  | 0.045644754 | 0.100393333  |
| -0.051272247 | 0.268830138 | -0.03429161  | 0.459737341 | -0.043107187 |
| 0.353743178  | 3.27E-15    | 0.346063943  | 1.39E-14    | 0.380297471  |
| -0.218934733 | 1.78E-06    | -0.204571922 | 8.34E-06    | -0.216359742 |
| -0.09662959  | 0.036845319 | -0.083366692 | 0.071880296 | -0.147317827 |
| -0.190168576 | 3.53E-05    | -0.190034299 | 3.57E-05    | -0.240673462 |
| 0.074848135  | 0.106221137 | 0.061548726  | 0.184252856 | 0.043572551  |
| 0.012571996  | 0.786417382 | 0.041992618  | 0.365234655 | 0.008903425  |
| 0.056533574  | 0.222691595 | 0.065897941  | 0.155085515 | 0.022719521  |
| -0.061293169 | 0.186084819 | -0.0784861   | 0.090233421 | -0.102730306 |
| 0.09530424   | 0.03952197  | 0.117029821  | 0.011375065 | 0.058816429  |
| 0.156321364  | 0.000699072 | 0.149196298  | 0.001222256 | 0.142946141  |
| 0.190876008  | 3.30E-05    | 0.192908523  | 2.70E-05    | 0.153519423  |
| 0.128155665  | 0.005545851 | 0.111863455  | 0.015584376 | 0.111908513  |
| 0.010742074  | 0.816908721 | 0.015504434  | 0.738246903 | -0.024766114 |
| -0.053005274 | 0.25296069  | -0.059884736 | 0.196422439 | -0.064742826 |
| 0.010114927  | 0.827425068 | 0.011482918  | 0.804528185 | -0.033445904 |
| -0.06949519  | 0.133720002 | -0.068045318 | 0.14204092  | -0.068614157 |
| -0.092092391 | 0.046698068 | -0.108883959 | 0.018587704 | -0.130005599 |
| 0.027964864  | 0.54662568  | 0.028993618  | 0.531964732 | 0.011182055  |
| 0.127796098  | 0.00568105  | 0.127850949  | 0.005660236 | 0.121238786  |

|              |             |              |             |              |
|--------------|-------------|--------------|-------------|--------------|
| -0.030576274 | 0.509804461 | -0.009521874 | 0.837398187 | -0.029928232 |
| 0.018390346  | 0.691819414 | 0.016708918  | 0.718742279 | -0.017663472 |
| -0.020997305 | 0.650844395 | -0.001183642 | 0.97964803  | -0.027544419 |
| 0.016569773  | 0.72098646  | 0.030530399  | 0.510439959 | -0.006368345 |
| 0.06050784   | 0.191798403 | 0.07374031   | 0.111510996 | 0.063166778  |
| 0.159551779  | 0.000538376 | 0.165297207  | 0.000334202 | 0.13751266   |
| -0.035650264 | 0.442137699 | -0.03362481  | 0.468515881 | -0.038003911 |
| 0.079424129  | 0.086440713 | 0.085003094  | 0.066456451 | 0.058249049  |
| 0.01689424   | 0.715757064 | 0.041492894  | 0.370973504 | -0.00726295  |
| 0.05529593   | 0.233000447 | 0.067188349  | 0.147142232 | 0.024405114  |
| 0.129534274  | 0.0050539   | 0.123439926  | 0.007570878 | 0.103361201  |
| 0.000986414  | 0.983038685 | 0.008932443  | 0.847336277 | -0.000164802 |
| 0.018811747  | 0.685130808 | 0.018529533  | 0.689607516 | -0.007486453 |
| 0.013721627  | 0.767423985 | 0.005508169  | 0.905501607 | -0.036835301 |
| 0.121160892  | 0.008768405 | 0.125529574  | 0.006603625 | 0.103196016  |
| 0.092821729  | 0.044979207 | 0.097261991  | 0.035623372 | 0.073654566  |
| 0.073065162  | 0.11483508  | 0.086789424  | 0.060924032 | 0.049796057  |
| -0.020569223 | 0.657505132 | 0.00593932   | 0.898143468 | -0.015413146 |
| -0.009193483 | 0.842931932 | 0.008369271  | 0.856854303 | -0.030344437 |
| 0.075164874  | 0.104745746 | 0.091817696  | 0.047359583 | 0.095387016  |
| 0.06207547   | 0.180518938 | 0.065249852  | 0.159195373 | 0.039148213  |
| 0.029990003  | 0.51795688  | 0.024498721  | 0.597442233 | -0.006307688 |
| 0.060851229  | 0.189284483 | 0.047784787  | 0.302794454 | 0.022497033  |
| 0.058512212  | 0.20689393  | 0.022701451  | 0.624607496 | -0.040241566 |
| 0.072850664  | 0.115907269 | 0.055775794  | 0.228964117 | 0.048068967  |
| -0.066553494 | 0.151010532 | -0.104013014 | 0.024587901 | -0.145713655 |
| 0.067966873  | 0.142502176 | 0.071503608  | 0.122820937 | 0.043161618  |
| -0.002751364 | 0.952714554 | -0.024780541 | 0.593231596 | 0.008552424  |
| 0.068947623  | 0.136817217 | 0.077173391  | 0.095763899 | 0.047689149  |
| -0.124666169 | 0.006988979 | -0.104679114 | 0.023679444 | -0.11848034  |
| 0.009820276  | 0.832376715 | 0.020021961  | 0.666059823 | 0.011785982  |
| 0.07387393   | 0.110862182 | 0.071168301  | 0.124590821 | 0.027123305  |
| -0.12953235  | 0.005054558 | -0.134179022 | 0.00367242  | -0.141266148 |
| 0.005265922  | 0.909639437 | 0.007630999  | 0.869362953 | -0.022816441 |
| 0.015299576  | 0.741581415 | 0.039839044  | 0.390361029 | 0.020318667  |
| 0.124248301  | 0.007182614 | 0.109278524  | 0.018162991 | 0.126703876  |
| -0.0065295   | 0.888085584 | 0.005792443  | 0.900649169 | -0.036904729 |
| 0.121024062  | 0.008845399 | 0.121947057  | 0.008337491 | 0.110097053  |
| 0.163345223  | 0.000393668 | 0.162015874  | 0.000439655 | 0.150862268  |
| 0.098944269  | 0.032539357 | 0.100841476  | 0.029337655 | 0.076067162  |
| 0.036582426  | 0.430288366 | 0.042510822  | 0.359342296 | -0.004940182 |
| 0.054627889  | 0.238702987 | 0.065904038  | 0.155047233 | 0.041008102  |
| 0.013222194  | 0.775658903 | 0.002034994  | 0.965016975 | -0.020839094 |
| -0.004108641 | 0.929438833 | 0.022680177  | 0.624932216 | 0.000220196  |
| 0.217585193  | 2.07E-06    | 0.192356836  | 2.85E-05    | 0.169349855  |

|              |             |              |             |              |
|--------------|-------------|--------------|-------------|--------------|
| 0.106043336  | 0.021909096 | 0.12353393   | 0.007524784 | 0.092046596  |
| 0.107438535  | 0.020218425 | 0.088334983  | 0.056449453 | 0.087602727  |
| 0.298373925  | 4.67E-11    | 0.30098857   | 3.10E-11    | 0.292739317  |
| 0.230744366  | 4.62E-07    | 0.245659489  | 7.57E-08    | 0.228161952  |
| -0.013949894 | 0.763668828 | 0.018664865  | 0.687459409 | -0.011878184 |
| 0.084530999  | 0.067985564 | 0.096796062  | 0.036520255 | 0.061357975  |
| -0.115073289 | 0.012833319 | -0.12044599  | 0.009177362 | -0.131816497 |
| -0.055410392 | 0.232033121 | -0.0416951   | 0.368644682 | -0.05384759  |
| 0.111468088  | 0.01595669  | 0.122735067  | 0.007924616 | 0.100038217  |
| 0.256474802  | 1.89E-08    | 0.227984775  | 6.38E-07    | 0.190218463  |
| -0.007752886 | 0.867295459 | 0.009062805  | 0.845136163 | 0.004408172  |
| 0.007125145  | 0.877952742 | 0.019741266  | 0.670464551 | 0.017252524  |
| 0.064157448  | 0.16630798  | 0.071389483  | 0.123421126 | 0.063248143  |
| -0.012573281 | 0.786396077 | -0.008046879 | 0.862312425 | -0.009773582 |
| 0.029990526  | 0.517949581 | 0.024573085  | 0.596329862 | 0.024544361  |
| 0.041476168  | 0.37116655  | 0.042576688  | 0.358597641 | 0.043894352  |
| 0.023311071  | 0.61533361  | 0.029748297  | 0.521337392 | 0.033383761  |
| -0.038750755 | 0.403447224 | -0.037980868 | 0.412860956 | -0.063063804 |
| 0.137994702  | 0.00280435  | 0.112469023  | 0.015028885 | 0.098681469  |
| 0.110196468  | 0.017207539 | 0.099505987  | 0.031561705 | 0.076813506  |
| 0.071959144  | 0.120447875 | 0.080973808  | 0.080456995 | 0.05122568   |
| -0.048017917 | 0.300439004 | -0.056633401 | 0.221874504 | -0.090790626 |
| -0.097251484 | 0.035643388 | -0.096399228 | 0.037299187 | -0.129992656 |
| -0.03821687  | 0.409961565 | -0.034584379 | 0.455912175 | -0.039420538 |
| 0.154646564  | 0.000798894 | 0.171348112  | 0.000198835 | 0.149390025  |
| 0.034697201  | 0.454442883 | 0.015814774  | 0.733204792 | 0.000175077  |
| 0.013030047  | 0.778833901 | 0.043834414  | 0.344564217 | 0.006301655  |
| 0.135319334  | 0.003390427 | 0.133024303  | 0.003979478 | 0.07745937   |
| 0.23630714   | 2.39E-07    | 0.251514082  | 3.60E-08    | 0.244141746  |
| -0.024031977 | 0.604445413 | -0.033798975 | 0.466214084 | -0.071034219 |
| 0.000785432  | 0.986494185 | 0.021769776  | 0.63889547  | -0.030259057 |
| 0.032746071  | 0.480224552 | 0.058382146  | 0.207906813 | 0.034385406  |
| 0.076199062  | 0.100041093 | 0.073441266  | 0.112973878 | 0.082547868  |
| 0.033603028  | 0.468804196 | 0.037235321  | 0.42209956  | 0.00655369   |
| -0.036001585 | 0.437650119 | -0.005235237 | 0.910163748 | -0.02853242  |
| -0.030005159 | 0.517745285 | -0.000376895 | 0.993518908 | -0.041474846 |
| -0.005340228 | 0.908369944 | -0.021808733 | 0.638295312 | -0.058316609 |
| -0.062068446 | 0.180568357 | -0.06088665  | 0.18902655  | -0.063003377 |
| 0.104895316  | 0.023390887 | 0.090280646  | 0.051207618 | 0.041634312  |
| 0.099522295  | 0.0315337   | 0.109336485  | 0.018101319 | 0.08247058   |
| 0.127303097  | 0.005871237 | 0.122701567  | 0.00794179  | 0.103619165  |
| 0.069176099  | 0.135518242 | 0.063317781  | 0.17193495  | 0.037249858  |
| 0.017828206  | 0.700779206 | 0.008880935  | 0.848205893 | 0.035791169  |
| 0.127291929  | 0.005875611 | 0.118949646  | 0.010088685 | 0.105342499  |
| 0.02616736   | 0.572711565 | 0.038930089  | 0.401272962 | 0.041834732  |

|              |             |              |             |              |
|--------------|-------------|--------------|-------------|--------------|
| 0.085052423  | 0.066298318 | 0.076619277  | 0.098178131 | 0.041836391  |
| -0.050828198 | 0.273003678 | -0.037554851 | 0.41812533  | -0.065697193 |
| 0.018790543  | 0.685466788 | 0.021124212  | 0.648875085 | -0.007198618 |
| 0.032701833  | 0.480818176 | 0.033652532  | 0.468149077 | 0.019418733  |
| 0.065663316  | 0.156564012 | 0.06470717   | 0.162699542 | 0.049434175  |
| 0.065405354  | 0.158201841 | 0.097114037  | 0.035906121 | 0.06062188   |
| 0.048448252  | 0.296123112 | 0.044012935  | 0.342601015 | 0.010905594  |
| 0.128468038  | 0.005430754 | 0.146295388  | 0.001524026 | 0.077453199  |
| 0.021206998  | 0.647591749 | 0.024432343  | 0.598435943 | 0.020636655  |
| 0.120570943  | 0.009104682 | 0.10062895   | 0.029682326 | 0.088651072  |
| 0.195430456  | 2.11E-05    | 0.214672403  | 2.85E-06    | 0.218603446  |
| 0.068335954  | 0.140341933 | 0.079181726  | 0.087408296 | 0.048294085  |
| 0.02183086   | 0.637954521 | 0.028611984  | 0.537380216 | 0.011770561  |
| 0.175976669  | 0.000132069 | 0.15353316   | 0.000872383 | 0.110511254  |
| 0.098196236  | 0.033881337 | 0.106993621  | 0.020744801 | 0.055871228  |
| 0.05109585   | 0.27048281  | 0.042517569  | 0.359265971 | 0.005114193  |
| -0.024688008 | 0.59461263  | 0.008505955  | 0.854542276 | -0.019335893 |
| -0.064540904 | 0.163784664 | -0.047761676 | 0.303028625 | -0.09188241  |
| 0.022723297  | 0.62427412  | 0.039476919  | 0.394686608 | 0.013312684  |
| 0.002379321  | 0.959102537 | 0.007637609  | 0.8692508   | -0.020397564 |
| -0.043323632 | 0.350220745 | -0.023553251 | 0.611666262 | -0.039342012 |
| -0.000970654 | 0.983309634 | 0.001907679  | 0.967204333 | -0.025065532 |
| 0.073245691  | 0.113938729 | 0.066383466  | 0.152059548 | 0.054205906  |
| -0.080309435 | 0.082979917 | -0.095748916 | 0.038606134 | -0.111477851 |
| 0.069667876  | 0.132754532 | 0.064134617  | 0.166459127 | 0.061155181  |
| 0.068923693  | 0.136953822 | 0.099359243  | 0.031814653 | 0.069640843  |
| 0.026331748  | 0.570301631 | 0.036477324  | 0.431615132 | 0.007229761  |
| 0.072849607  | 0.115912571 | 0.079462988  | 0.086286407 | 0.050937986  |
| 0.054383582  | 0.240812753 | 0.056041195  | 0.22675315  | 0.03799477   |
| -0.173156839 | 0.000169665 | -0.202956573 | 9.86E-06    | -0.252690092 |
| -0.070877419 | 0.126142221 | -0.085916432 | 0.063578309 | -0.137822956 |
| -0.003109765 | 0.946563677 | 0.009116301  | 0.84423366  | -0.010225201 |
| -0.12947664  | 0.005073652 | -0.09332217  | 0.043830817 | -0.100125199 |
| 0.185212273  | 5.66E-05    | 0.199659857  | 1.38E-05    | 0.168172444  |
| -0.00123245  | 0.978808993 | 0.011539544  | 0.80358385  | 0.006817912  |
| 0.043334657  | 0.35009804  | 0.05699735   | 0.218913698 | 0.011622013  |
| -0.084655858 | 0.067578369 | -0.100713116 | 0.029545414 | -0.129556856 |
| 0.111080695  | 0.016329034 | 0.095103     | 0.039942439 | 0.073918971  |
| -0.023053203 | 0.619249095 | -0.025017121 | 0.589707391 | -0.051062459 |
| 0.047704535  | 0.303608121 | 0.048138606  | 0.299224399 | 0.02101459   |
| 0.002918869  | 0.949839463 | 0.009679118  | 0.834751273 | -0.021324592 |
| 0.031425478  | 0.498115617 | 0.055455352  | 0.231653946 | 0.02510288   |
| 0.101960311  | 0.027579205 | 0.094658459  | 0.04088468  | 0.066411801  |
| 0.080355737  | 0.082802042 | 0.058363997  | 0.20804843  | 0.065219908  |
| -0.090834992 | 0.049790754 | -0.082283766 | 0.075664513 | -0.088117402 |

|              |             |              |             |              |
|--------------|-------------|--------------|-------------|--------------|
| -0.062338266 | 0.178677142 | -0.088822701 | 0.055095372 | -0.095808289 |
| 0.080301607  | 0.083010021 | 0.083672948  | 0.070838591 | 0.048662292  |
| 0.041228055  | 0.374037423 | 0.030008763  | 0.517694974 | 0.009601904  |
| -0.059857697 | 0.196624921 | -0.03573873  | 0.441005215 | -0.064632876 |
| 0.219695073  | 1.64E-06    | 0.209416909  | 5.02E-06    | 0.208837014  |
| 0.138112194  | 0.002780864 | 0.120167479  | 0.009341222 | 0.102937608  |
| 0.092064671  | 0.046764469 | 0.055521122  | 0.231100043 | 0.036888911  |
| 0.041197376  | 0.374393352 | 0.032938993  | 0.477640434 | 0.035781338  |
| 0.05083165   | 0.272971067 | 0.040697206  | 0.380225613 | 0.03598806   |
| 0.025723931  | 0.579236137 | 0.042255144  | 0.362242067 | 0.013726013  |
| 0.043062613  | 0.353133869 | 0.029207938  | 0.528935606 | -0.003512329 |
| 0.094539297  | 0.041140422 | 0.086292605  | 0.062423128 | 0.030274964  |
| 0.050343863  | 0.277605985 | 0.061493077  | 0.184650638 | 0.033529447  |
| -0.170838415 | 0.000207867 | -0.17544879  | 0.000138451 | -0.167212263 |
| 0.048537497  | 0.29523327  | 0.046866917  | 0.312186948 | -0.012335674 |
| -0.040609123 | 0.38125844  | -0.040547959 | 0.381976632 | -0.085177947 |
| 0.066152986  | 0.153490347 | 0.070370468  | 0.128881797 | 0.025497207  |
| 0.065673506  | 0.156499582 | 0.100205288  | 0.03037978  | 0.059986789  |
| -0.060027222 | 0.195357937 | -0.068051202 | 0.142006362 | -0.092520676 |
| 0.029369766  | 0.526654198 | 0.048761633  | 0.293006329 | 0.030817866  |
| 0.03973239   | 0.391632016 | 0.030085061  | 0.516630494 | 0.018377665  |
| 0.093427815  | 0.04359157  | 0.093885005  | 0.042568834 | 0.071098367  |
| 0.04192064   | 0.366057839 | 0.063980735  | 0.167480587 | 0.0275642    |
| -0.005666989 | 0.902790162 | -0.016692116 | 0.719013126 | -0.083703322 |
| 0.013458943  | 0.771752067 | 0.027756214  | 0.549623329 | 0.006141275  |
| 0.095717793  | 0.038669643 | 0.080657793  | 0.081649189 | 0.033175704  |
| 0.022910914  | 0.621414245 | 0.022899655  | 0.621585699 | 0.00849556   |
| 0.030284939  | 0.51384725  | 0.049573005  | 0.285038986 | 0.024869596  |
| -0.050403574 | 0.277035756 | -0.022314267 | 0.630528613 | -0.025072597 |
| -0.159448154 | 0.000542948 | -0.184204715 | 6.22E-05    | -0.224361125 |
| 0.136999344  | 0.003010672 | 0.125950127  | 0.006422912 | 0.101439002  |
| 0.118189552  | 0.01058168  | 0.123333353  | 0.00762344  | 0.099506453  |
| 0.043161482  | 0.352028647 | 0.049504003  | 0.28571082  | 0.022541272  |
| 0.054106476  | 0.243221574 | 0.058647906  | 0.205841025 | 0.0465573    |
| 0.031666564  | 0.494823292 | 0.032896303  | 0.478211607 | 0.008022292  |
| 0.050961387  | 0.271747244 | 0.049586683  | 0.28490594  | 0.026632792  |
| -0.022340346 | 0.630129037 | -0.040242645 | 0.385574028 | -0.056393959 |
| 0.04285047   | 0.355512732 | 0.055726785  | 0.229374062 | 0.019785808  |
| -0.06687699  | 0.149029866 | -0.106934731 | 0.020815358 | -0.108494061 |
| -0.004631832 | 0.920481663 | -0.009638678 | 0.835431833 | -0.043372809 |
| 0.043847803  | 0.344416729 | 0.045815432  | 0.323179428 | 0.010612896  |
| -0.214984178 | 2.75E-06    | -0.208451034 | 5.56E-06    | -0.23528375  |
| 0.011373928  | 0.806346573 | 0.029521533  | 0.524519179 | -0.033210765 |
| -0.08307143  | 0.072896415 | -0.069399324 | 0.134258311 | -0.11081856  |
| 0.058635387  | 0.205938005 | 0.053855511  | 0.245417677 | 0.017062927  |

|              |             |              |             |              |
|--------------|-------------|--------------|-------------|--------------|
| -0.06281351  | 0.175381858 | -0.052201999 | 0.26023358  | -0.049368002 |
| -0.066771208 | 0.149675348 | -0.047301172 | 0.307719655 | -0.069727475 |
| 0.04968926   | 0.283909485 | 0.06091264   | 0.188837461 | 0.059885249  |
| 0.120869582  | 0.008933047 | 0.126093767  | 0.006362214 | 0.094676238  |
| -0.009270812 | 0.841628147 | -0.00886478  | 0.848478685 | -0.044983829 |
| -0.023180314 | 0.617317677 | -0.017972026 | 0.698482899 | -0.034092861 |
| 0.000545639  | 0.990617285 | -0.003147502 | 0.9459162   | -0.05243674  |
| 0.033523477  | 0.469857994 | 0.021852622  | 0.637619431 | 0.026825329  |
| 0.068251082  | 0.140836454 | 0.055978735  | 0.227272115 | 0.047354909  |
| -0.113977816 | 0.013719823 | -0.093637085 | 0.043120893 | -0.126865127 |
| 0.032885987  | 0.47834968  | 0.033993382  | 0.463652176 | 0.006002073  |
| -0.008267701 | 0.858573165 | 0.016465298  | 0.72267306  | 0.00752629   |
| 0.047393134  | 0.306779053 | 0.073024667  | 0.115036898 | 0.032638485  |
| 0.025845322  | 0.577446543 | 0.034793045  | 0.453196791 | 0.011440585  |
| -0.185275104 | 5.62E-05    | -0.211840705 | 3.87E-06    | -0.256187787 |
| 0.115446246  | 0.012543249 | 0.102282629  | 0.02708975  | 0.069456542  |
| 0.061721249  | 0.183023673 | 0.073731018  | 0.111556223 | 0.029794109  |
| 0.044385989  | 0.338521577 | 0.027291301  | 0.556331601 | 0.012146801  |
| 0.071264387  | 0.124081629 | 0.06101343   | 0.18810548  | 0.025020144  |
| -0.115402575 | 0.012576913 | -0.090674142 | 0.050198459 | -0.125164251 |
| 0.049170701  | 0.288971014 | 0.076755117  | 0.09758185  | 0.068528253  |
| -0.073597583 | 0.112207327 | -0.089779876 | 0.052516324 | -0.121823386 |
| -0.071796446 | 0.121291291 | -0.104364581 | 0.024104735 | -0.138163861 |
| -0.03706277  | 0.424254851 | -0.059146145 | 0.202008282 | -0.063492431 |
| 0.005091841  | 0.912614443 | 0.001564865  | 0.973095321 | -0.016905731 |
| 0.093944646  | 0.042436922 | 0.086280051  | 0.0624614   | 0.04974752   |
| 0.030731616  | 0.507655627 | 0.038154087  | 0.410731702 | 0.030639915  |
| -0.197978201 | 1.64E-05    | -0.193947925 | 2.44E-05    | -0.201078602 |
| -0.020109731 | 0.664684871 | 0.007309182  | 0.874825942 | 0.003453655  |
| -0.19373488  | 2.49E-05    | -0.151995807 | 0.000984151 | -0.150723486 |
| -0.057644288 | 0.213720744 | -0.063012992 | 0.174012215 | -0.065137186 |
| -0.137312248 | 0.002944371 | -0.101879949 | 0.027702417 | -0.097458659 |
| -0.125883798 | 0.006451116 | -0.133702775 | 0.003796361 | -0.112490694 |
| -0.08903415  | 0.05451676  | -0.102594202 | 0.026623734 | -0.097049169 |
| -0.145715075 | 0.001592056 | -0.121527962 | 0.008564796 | -0.117038743 |
| -0.041078883 | 0.375770031 | 0.008409953  | 0.856166029 | 0.007125246  |
| -0.056254884 | 0.224984039 | -0.009888457 | 0.831230333 | -0.031179495 |
| -0.100842808 | 0.029335505 | -0.091686991 | 0.04767709  | -0.073247651 |
| -0.00316534  | 0.945610165 | 0.018593553  | 0.688591017 | 0.018310206  |
| 0.06309031   | 0.173483502 | 0.05232844   | 0.259079306 | 0.089140105  |
| 0.02963392   | 0.522941016 | 0.04661338   | 0.314814748 | 0.044566863  |
| -0.101562397 | 0.028193927 | -0.111163551 | 0.016248764 | -0.094913628 |
| -0.13775317  | 0.002853197 | -0.122993546 | 0.007793219 | -0.113226112 |
| -0.093757411 | 0.042852207 | -0.059903167 | 0.196284501 | -0.057698438 |
| -0.069088328 | 0.136016127 | -0.078540173 | 0.090011223 | -0.06421795  |

|              |             |              |             |              |
|--------------|-------------|--------------|-------------|--------------|
| -0.083340347 | 0.071970488 | -0.077337669 | 0.095057328 | -0.050982455 |
| 0.000637179  | 0.989043274 | 0.026250953  | 0.57148549  | 0.037007524  |
| -0.046242077 | 0.318689213 | -0.018650754 | 0.687683267 | 0.005707824  |
| -0.041735158 | 0.368184406 | -0.022381467 | 0.629499226 | -0.028364634 |
| -0.00259311  | 0.955431424 | 0.013034212  | 0.778765027 | 0.027691063  |
| 0.006182982  | 0.893988892 | 0.045450327  | 0.327054439 | 0.057674051  |
| -0.204719402 | 8.22E-06    | -0.212274307 | 3.70E-06    | -0.221598537 |
| -0.008366735 | 0.856897214 | -0.001649978 | 0.971632577 | 0.006740929  |
| -0.073640478 | 0.111997693 | -0.021391041 | 0.64474249  | -0.019315621 |
| -0.07713784  | 0.095917358 | -0.104651526 | 0.023716485 | -0.097020038 |
| -0.059105408 | 0.2023197   | -0.056805209 | 0.220473263 | -0.037061056 |
| -0.057441146 | 0.215341727 | -0.051134776 | 0.270117514 | -0.053514653 |
| -0.053970611 | 0.244408769 | -0.05886805  | 0.204141106 | -0.054194403 |
| -0.094270206 | 0.04172291  | -0.084168424 | 0.069179424 | -0.077283822 |
| -0.068540728 | 0.139154261 | -0.074824765 | 0.106330645 | -0.070664728 |
| -0.081500532 | 0.078501234 | -0.100788589 | 0.029423104 | -0.116957947 |
| -0.033626865 | 0.468488681 | -0.026239041 | 0.571660116 | -0.026212855 |
| 0.005241281  | 0.91006047  | 0.032798227  | 0.479525197 | 0.032617553  |
| -0.052716924 | 0.255555006 | -0.048840613 | 0.292224298 | -0.034569079 |
| -0.050667782 | 0.274522204 | -0.055886268 | 0.228041948 | -0.053031716 |
| -0.048123736 | 0.299373872 | -0.048327832 | 0.297326635 | -0.038408755 |
| -0.071761639 | 0.121472323 | -0.056419088 | 0.223631308 | -0.049835437 |
| -0.010840834 | 0.815255593 | -0.002026066 | 0.965170361 | 0.007436153  |
| -0.023591011 | 0.611095319 | -0.060450188 | 0.192222858 | -0.057942767 |
| -0.103147395 | 0.025813324 | -0.1254635   | 0.006632428 | -0.126660904 |
| -0.081584941 | 0.078191432 | -0.086594231 | 0.061509421 | -0.094922697 |
| -0.114914362 | 0.012958713 | -0.106020776 | 0.021937411 | -0.092316285 |
| 0.010476705  | 0.821354684 | -0.009949439 | 0.830205282 | 0.024983461  |
| -0.004394654 | 0.924541037 | -0.013343223 | 0.77366097  | 0.018369037  |
| -0.02877166  | 0.535111022 | -0.058040631 | 0.210583403 | -0.006142251 |
| -0.011005451 | 0.812501925 | -0.028533311 | 0.53850003  | 0.01919287   |
| -0.004657086 | 0.920049538 | -0.016273029 | 0.725780482 | 0.017025147  |
| -0.006472809 | 0.88905097  | 0.013642451  | 0.768727757 | 0.020838882  |
| -0.058806958 | 0.204611828 | -0.085686356 | 0.064293483 | -0.079154882 |
| -0.117968687 | 0.010728882 | -0.085020745 | 0.066399831 | -0.08377952  |
| -0.081654364 | 0.077937378 | -0.104498742 | 0.02392253  | -0.104614533 |
| -0.030021382 | 0.517518842 | -0.023354329 | 0.614677846 | -0.049560749 |
| -0.048110855 | 0.299503394 | -0.00769903  | 0.868208882 | 0.002581507  |
| -0.169602743 | 0.000231382 | -0.184699138 | 5.94E-05    | -0.228777076 |
| -0.056515664 | 0.222838414 | -0.054685238 | 0.238209622 | -0.014630699 |
| -0.051576245 | 0.265998218 | -0.042145361 | 0.363491635 | -0.054957808 |
| -0.030536945 | 0.510349253 | -0.015438066 | 0.73932665  | -0.033976859 |
| -0.018298029 | 0.693287927 | -0.037077847 | 0.424066272 | -0.06880987  |
| -0.120060369 | 0.009404928 | -0.083168996 | 0.072559361 | -0.111834098 |
| -0.075505799 | 0.103175863 | -0.080599466 | 0.08187079  | -0.118254749 |



|              |             |              |             |              |
|--------------|-------------|--------------|-------------|--------------|
| -0.02688661  | 0.562203128 | -0.022091221 | 0.633950398 | -0.067185451 |
| -0.113708743 | 0.013945647 | -0.105967975 | 0.022003807 | -0.1579899   |
| -0.029714253 | 0.521814442 | -0.004355614 | 0.925209409 | -0.031114876 |
| -0.192754206 | 2.74E-05    | -0.183002793 | 6.96E-05    | -0.188018051 |
| 0.037492837  | 0.41889493  | 0.047750288  | 0.30314406  | 0.015991098  |
| -0.117299529 | 0.011185999 | -0.112290075 | 0.015191196 | -0.152086331 |
| 0.077491214  | 0.094400691 | 0.080092947  | 0.083815687 | 0.02278102   |
| -0.024707614 | 0.594319895 | 0.000869786  | 0.985043844 | -0.044823128 |
| -0.068549756 | 0.139102077 | -0.061517668 | 0.184474785 | -0.088343277 |
| -0.034262108 | 0.460123782 | -0.018862065 | 0.684333788 | -0.050946942 |
| -0.071884353 | 0.120835014 | -0.059312422 | 0.200740801 | -0.090539356 |
| -0.1570582   | 0.000658926 | -0.127816353 | 0.005673356 | -0.209773035 |
| -0.013300844 | 0.77436039  | -0.028529954 | 0.538547842 | -0.039483885 |
| -0.254732032 | 2.37E-08    | -0.256323233 | 1.93E-08    | -0.327140833 |
| 0.013395567  | 0.772797339 | 0.027182882  | 0.557901692 | -0.020787137 |
| 0.043931139  | 0.343499641 | 0.039685227  | 0.39219485  | 0.02778454   |
| -0.156059092 | 0.0007139   | -0.164421052 | 0.000359774 | -0.173083927 |
| 0.094004492  | 0.0423049   | 0.089694463  | 0.052742301 | 0.083615273  |
| -0.108263113 | 0.01927353  | -0.095814069 | 0.038473469 | -0.129891646 |
| 0.089100359  | 0.054336625 | 0.108582184  | 0.018918358 | 0.095045474  |
| 0.052977319  | 0.253211402 | 0.049399458  | 0.286730749 | 0.040616082  |
| -0.011843407 | 0.798521329 | -0.005718585 | 0.901909533 | -0.048818737 |
| -0.133649803 | 0.003810379 | -0.137844883 | 0.002834558 | -0.161412058 |
| -0.141788383 | 0.00213063  | -0.149503236 | 0.001193776 | -0.163502789 |
| 0.038525959  | 0.406182562 | 0.044035101  | 0.342357754 | 0.036157305  |
| -0.002792712 | 0.9520048   | 0.022084833  | 0.634048503 | -0.00087376  |
| -0.10500366  | 0.023247431 | -0.073685376 | 0.111778602 | -0.105958675 |
| -0.015306873 | 0.741462555 | -0.010898758 | 0.814286401 | -0.01639902  |
| -0.050165194 | 0.279316969 | -0.003375583 | 0.942003727 | -0.024700805 |
| -0.007819951 | 0.866158274 | -0.010714792 | 0.81736553  | -0.074018586 |
| -0.006929649 | 0.881276314 | -0.013163117 | 0.776634688 | -0.038592865 |
| 0.031543755  | 0.496498943 | 0.046694019  | 0.313977391 | 0.012518138  |
| -0.046934    | 0.311494082 | -0.031215273 | 0.500995679 | -0.032850003 |
| -0.038601354 | 0.405263918 | -0.031625826 | 0.495378803 | -0.052512009 |
| -0.016437824 | 0.723116809 | -0.009491946 | 0.837902172 | -0.034499824 |
| -0.018173304 | 0.695273769 | -0.023371955 | 0.614410729 | -0.041871825 |
| -0.01558623  | 0.736916853 | 0.030389845  | 0.512389586 | 0.001584428  |
| -0.028971203 | 0.532282041 | -0.04280084  | 0.356070712 | -0.054768142 |
| -0.112222284 | 0.015253086 | -0.097540517 | 0.035096223 | -0.101946615 |
| -0.049285019 | 0.287850008 | -0.030928868 | 0.504933894 | -0.096057828 |
| -0.069303338 | 0.134798965 | -0.049997443 | 0.280929904 | -0.048528389 |
| 0.020827548  | 0.653482434 | 0.037093938  | 0.423865062 | 0.000714656  |
| -0.007215679 | 0.876414321 | -0.005182142 | 0.911071062 | -0.000200486 |
| 0.056477077  | 0.223154975 | 0.071118261  | 0.124856649 | 0.008667787  |
| -0.04026878  | 0.385265279 | -0.013890769 | 0.764640953 | -0.042815385 |

|              |             |              |             |              |
|--------------|-------------|--------------|-------------|--------------|
| -0.148384195 | 0.001300653 | -0.126312515 | 0.006270765 | -0.144883512 |
| -0.049806291 | 0.282775505 | -0.031232063 | 0.500765315 | -0.026683423 |
| -0.000634205 | 0.989094402 | -0.012830545 | 0.782134319 | -0.055592378 |
| -0.039698349 | 0.392038208 | -0.012402511 | 0.789228544 | -0.025884504 |
| 0.092208299  | 0.046421277 | 0.077338272  | 0.095054745 | 0.066684527  |
| -0.221410356 | 1.35E-06    | -0.232842196 | 3.61E-07    | -0.292572602 |
| 0.131388094  | 0.004454404 | 0.14035421   | 0.002365681 | 0.094565148  |
| 0.003852866  | 0.933821077 | 0.005343136  | 0.908320266 | -0.039788385 |
| -0.027782427 | 0.549246282 | -0.033816745 | 0.465979589 | -0.073918847 |
| -0.110843027 | 0.016561218 | -0.088195908 | 0.056840597 | -0.136019946 |
| -0.029995855 | 0.517875174 | -0.009545771 | 0.836995803 | -0.04045433  |
| 0.038587631  | 0.405431039 | 0.08315518   | 0.072607011 | 0.067669812  |
| -0.062659335 | 0.176445894 | -0.026933514 | 0.561521093 | -0.03647074  |
| 0.028749732  | 0.535422349 | 0.048220958  | 0.298397494 | 0.010324292  |
| -0.219686677 | 1.64E-06    | -0.217172161 | 2.17E-06    | -0.26372623  |
| -0.018322494 | 0.692898638 | -0.029071046 | 0.530869386 | -0.001786357 |
| -0.095923507 | 0.038251501 | -0.058659508 | 0.205751183 | -0.092246606 |
| 0.004843142  | 0.916866759 | 0.021916085  | 0.63664267  | -0.019586396 |
| -0.048087201 | 0.299741336 | -0.020981099 | 0.651096044 | -0.053075306 |
| 0.076994806  | 0.096536753 | 0.094009034  | 0.042294896 | 0.061943883  |
| -0.119177964 | 0.009944635 | -0.119369314 | 0.009825318 | -0.115114091 |
| -0.047342779 | 0.307293854 | -0.036655152 | 0.42937169  | -0.040501946 |
| 0.014423929  | 0.755888378 | 0.040931025  | 0.377492259 | 0.023291969  |
| -0.064551718 | 0.163713921 | -0.03961356  | 0.393051046 | -0.072604506 |
| -0.034014263 | 0.463377466 | -0.016541916 | 0.721436048 | -0.048123152 |
| -0.184916222 | 5.82E-05    | -0.156665184 | 0.000680066 | -0.183949416 |
| -0.032175505 | 0.487911314 | -0.016661566 | 0.719505715 | -0.028714933 |
| -0.001297152 | 0.97769679  | 0.003683978  | 0.936715783 | -0.019089588 |
| -0.012176569 | 0.792980374 | -0.009036873 | 0.845573724 | -0.034757131 |
| -0.100346039 | 0.030146527 | -0.116951953 | 0.011430174 | -0.163884217 |
| -0.09876222  | 0.032861706 | -0.056139717 | 0.225936267 | -0.075004025 |
| -0.076341617 | 0.099405971 | -0.058547097 | 0.206622873 | -0.082146642 |
| -0.156821121 | 0.000671604 | -0.141578094 | 0.002163704 | -0.163336675 |
| -0.085520254 | 0.064813899 | -0.05077099  | 0.273544561 | -0.066323471 |
| -0.018049369 | 0.697249123 | 0.006918905  | 0.881459044 | 0.00053713   |
| -0.062848376 | 0.175141891 | -0.046321257 | 0.317860383 | -0.078070179 |
| -0.016154365 | 0.727700548 | -0.003922067 | 0.932635236 | -0.048800625 |
| -0.138430245 | 0.002718185 | -0.110614977 | 0.016786716 | -0.155381839 |
| -0.132075704 | 0.004248908 | -0.109639403 | 0.017781978 | -0.126965592 |
| -0.130233414 | 0.004819758 | -0.126565713 | 0.006166387 | -0.171471668 |
| -0.086079542 | 0.063075276 | -0.070596995 | 0.127651997 | -0.098170129 |
| -0.058845526 | 0.204314568 | -0.044814359 | 0.333875754 | -0.085695321 |
| -0.202368628 | 1.05E-05    | -0.178012586 | 0.000109953 | -0.212862199 |
| -0.2389653   | 1.73E-07    | -0.229253907 | 5.51E-07    | -0.250637402 |
| -0.128689759 | 0.005350367 | -0.088437531 | 0.056162474 | -0.124219983 |

|              |             |              |             |              |
|--------------|-------------|--------------|-------------|--------------|
| -0.161957702 | 0.000441777 | -0.127053742 | 0.005969594 | -0.152950581 |
| -0.062165174 | 0.179888679 | -0.039705716 | 0.391950277 | -0.08389324  |
| -0.03800394  | 0.412576975 | -0.029158144 | 0.529638601 | -0.009921326 |
| -0.14829413  | 0.001309627 | -0.14751098  | 0.001390091 | -0.155726217 |
| -0.184615824 | 5.98E-05    | -0.196822716 | 1.84E-05    | -0.196723041 |
| -0.007408137 | 0.873145479 | -0.02748424  | 0.553542839 | -0.017393699 |
| -0.029319139 | 0.527367385 | -0.021484309 | 0.643300538 | -0.012352723 |
| -0.050522702 | 0.275900501 | -0.042476566 | 0.359729964 | -0.077404063 |
| -0.01061422  | 0.819050039 | 0.012689561  | 0.784469015 | -0.007956171 |
| 0.009328365  | 0.840658065 | 0.014346278  | 0.757161212 | -0.016482353 |
| -0.043032663 | 0.353469109 | -0.015901114 | 0.731804043 | -0.039589978 |
| -0.18136499  | 8.10E-05    | -0.147743072 | 0.001365783 | -0.211500023 |
| -0.124650885 | 0.006995979 | -0.141175902 | 0.002228269 | -0.199113128 |
| 0.039595956  | 0.393261535 | 0.070171662  | 0.129968647 | 0.05609169   |
| 0.130321499  | 0.004790963 | 0.145013873  | 0.001677971 | 0.140268994  |
| -0.072393378 | 0.118219235 | -0.048678829 | 0.293827725 | -0.050479858 |
| 0.055676207  | 0.229797678 | 0.047874837  | 0.301883183 | 0.049108487  |
| 0.066665716  | 0.150321176 | 0.0604975    | 0.191874481 | 0.047845757  |
| -0.011623479 | 0.802184615 | 0.011798168  | 0.799274516 | 0.010044421  |
| -0.028091738 | 0.544806843 | -0.028976954 | 0.532200627 | -0.041158082 |
| -0.068228905 | 0.140965891 | -0.048059995 | 0.300015162 | -0.108696835 |
| -0.027828631 | 0.548582    | -0.023039026 | 0.619464668 | -0.027711092 |
| 0.193719946  | 2.50E-05    | 0.21994235   | 1.59E-06    | 0.152059686  |
| -0.043418237 | 0.349168662 | -0.0023032   | 0.96040986  | -0.022000949 |
| -0.032161836 | 0.488096267 | -0.013611595 | 0.76923604  | -0.010844564 |
| -0.030902215 | 0.505301204 | -0.039814766 | 0.390650133 | -0.019607283 |
| 0.083834849  | 0.070292901 | 0.099478694  | 0.031608621 | 0.097305095  |
| -0.003859878 | 0.933700913 | -0.007070982 | 0.878873353 | -0.03841153  |
| -0.003169439 | 0.945539838 | 0.011444125  | 0.805175282 | 4.79E-05     |
| -0.042254293 | 0.362251737 | -0.006721197 | 0.884822457 | -0.047045934 |
| -0.114546124 | 0.013253413 | -0.074574365 | 0.107509571 | -0.101718815 |
| 0.002479346  | 0.957384835 | 0.012637279  | 0.785335299 | -0.013536564 |
| 0.099437086  | 0.031680258 | 0.113841248  | 0.013834034 | 0.101173376  |
| 0.179291091  | 9.79E-05    | 0.167115084  | 0.000286458 | 0.13369149   |
| 0.009585933  | 0.836319646 | 0.03390126   | 0.464865187 | 0.028047821  |
| 0.023879982  | 0.606733884 | 0.036963587  | 0.425496618 | -0.001696314 |
| 0.010152968  | 0.826786271 | -0.007258195 | 0.875692028 | 9.27E-05     |
| -0.103359564 | 0.025508195 | -0.092126123 | 0.046617374 | -0.138550692 |
| -0.185834867 | 5.34E-05    | -0.163915843 | 0.000375337 | -0.189612556 |
| 0.158333564  | 0.00059445  | 0.161938725  | 0.000442472 | 0.121813926  |
| -0.133859734 | 0.003755101 | -0.108404826 | 0.019115073 | -0.161334021 |
| 0.085591222  | 0.064591126 | 0.118437422  | 0.010418615 | 0.084945548  |
| -0.097760926 | 0.034683788 | -0.097756897 | 0.034691291 | -0.134486458 |
| -0.161755642 | 0.000449223 | -0.120632565 | 0.009069028 | -0.152785481 |
| -0.180177354 | 9.03E-05    | -0.174982525 | 0.000144327 | -0.224996848 |

|              |             |              |             |              |
|--------------|-------------|--------------|-------------|--------------|
| 0.000348543  | 0.994006436 | 0.009257636  | 0.841850261 | -0.014086035 |
| 0.049411689  | 0.286611293 | 0.075635073  | 0.102585484 | 0.087849341  |
| -0.041947404 | 0.365751616 | -0.014307564 | 0.757796056 | -0.057447903 |
| -0.093683528 | 0.043017019 | -0.06576884  | 0.155897736 | -0.09637255  |
| -0.127468847 | 0.005806666 | -0.116392717 | 0.011832946 | -0.144113793 |
| -0.124882372 | 0.00689064  | -0.098293686 | 0.033703881 | -0.103444401 |
| -0.086632252 | 0.061395033 | -0.077283783 | 0.095288635 | -0.090089013 |
| -0.093259857 | 0.043972452 | -0.093476333 | 0.043482063 | -0.109147039 |
| -0.063581956 | 0.17014949  | -0.047250574 | 0.308237984 | -0.076967293 |
| -0.104348875 | 0.024126144 | -0.082271009 | 0.075710039 | -0.120154765 |
| -0.093640228 | 0.043113855 | -0.084541949 | 0.067949772 | -0.118885895 |
| 0.154149101  | 0.000830991 | 0.171554493  | 0.000195284 | 0.142473867  |
| 0.019773596  | 0.669956638 | 0.027397955  | 0.554789161 | -0.00051583  |
| -0.022150667 | 0.633037663 | 0.016238251  | 0.726343043 | -0.019689529 |
| -0.159877763 | 0.000524227 | -0.148474298 | 0.001291732 | -0.190723042 |
| -0.145887767 | 0.001571525 | -0.105327817 | 0.022822762 | -0.14205864  |
| 0.176676316  | 0.000124036 | 0.178681878  | 0.000103479 | 0.167678994  |
| -0.027547918 | 0.552623926 | -0.015710211 | 0.734902359 | -0.046742699 |
| -0.244345433 | 8.92E-08    | -0.237975537 | 1.95E-07    | -0.257319279 |
| -0.041396597 | 0.372085763 | -0.063449213 | 0.171044912 | -0.123459128 |
| -0.070863277 | 0.126218028 | -0.05374251  | 0.246411026 | -0.08922421  |
| -0.135650556 | 0.003312283 | -0.120949653 | 0.00888752  | -0.145061941 |
| -0.02811476  | 0.544477124 | -0.006034192 | 0.896525515 | -0.021764739 |
| -0.031894163 | 0.491725808 | 0.027629732  | 0.551444401 | 0.009324271  |
| -0.112446637 | 0.015049105 | -0.139684233 | 0.002483398 | -0.171263278 |
| -0.084085066 | 0.06945631  | -0.08178819  | 0.077449529 | -0.126596014 |
| -0.078434198 | 0.090447111 | -0.029695187 | 0.52208171  | -0.030953654 |
| -0.080305304 | 0.082995804 | -0.064327433 | 0.165185827 | -0.112429495 |
| -0.279293432 | 8.15E-10    | -0.264593289 | 6.38E-09    | -0.299481821 |
| -0.026775517 | 0.563820145 | -0.048661575 | 0.293999079 | -0.086264866 |
| -0.144495952 | 0.001744137 | -0.13949537  | 0.002517533 | -0.106534114 |
| -0.033319625 | 0.472564339 | -0.003816944 | 0.934436693 | -0.039005527 |
| -0.218718826 | 1.83E-06    | -0.172982227 | 0.000172296 | -0.175777175 |
| -0.199412244 | 1.42E-05    | -0.231481656 | 4.24E-07    | -0.237421124 |
| -0.133243836 | 0.00391937  | -0.126041794 | 0.006384117 | -0.150029475 |
| -0.081768071 | 0.077522711 | -0.059978253 | 0.195723303 | -0.126603865 |
| -0.170793442 | 0.000208682 | -0.13369633  | 0.003798064 | -0.161138534 |
| 0.123640774  | 0.007472698 | 0.148889418  | 0.001251355 | 0.115033196  |
| -0.006374476 | 0.890725839 | 0.031109937  | 0.50244222  | 0.001724973  |
| -0.007364118 | 0.873892947 | 0.049781231  | 0.283018062 | 0.02343826   |
| -0.128520815 | 0.005411521 | -0.095827968 | 0.038445219 | -0.119659613 |
| -0.097876776 | 0.034468666 | -0.075684816 | 0.10235903  | -0.115104885 |
| 0.081319392  | 0.07916942  | 0.088740369  | 0.055322044 | 0.04033833   |
| -0.040238553 | 0.385622378 | -0.020228319 | 0.66282891  | -0.032651679 |
| -0.037616595 | 0.417359925 | -0.033905476 | 0.464809635 | -0.058866548 |

|              |             |              |             |              |
|--------------|-------------|--------------|-------------|--------------|
| -0.107024431 | 0.02070797  | -0.07397234  | 0.110386234 | -0.098127697 |
| -0.176115936 | 0.000130432 | -0.123089937 | 0.007744719 | -0.161980746 |
| -0.03097934  | 0.504238695 | -0.008060473 | 0.862082138 | -0.041814704 |
| -0.012174964 | 0.793007048 | 0.001245833  | 0.978578937 | -0.012356556 |
| -0.15440754  | 0.00081417  | -0.155051747 | 0.000773602 | -0.163130299 |
| 0.003871507  | 0.93350162  | -0.00138763  | 0.976141543 | -0.026537076 |
| -0.0365908   | 0.430182768 | -0.03584359  | 0.439665018 | -0.0502269   |
| -0.035568297 | 0.443188459 | -0.025219214 | 0.586704552 | -0.049651846 |
| -0.012351142 | 0.790081113 | -0.005194512 | 0.910859667 | -0.039662153 |
| -0.078617623 | 0.089693727 | -0.040779804 | 0.37925865  | -0.057436507 |
| 0.049310132  | 0.287604137 | 0.054369721  | 0.24093285  | 0.05010639   |
| -0.130577573 | 0.004708132 | -0.114498937 | 0.0132916   | -0.099145362 |
| -0.108389218 | 0.019132469 | -0.088794402 | 0.055173197 | -0.118549516 |
| -0.116153156 | 0.012009286 | -0.084704228 | 0.06742116  | -0.113324547 |
| 0.234152425  | 3.09E-07    | 0.211700513  | 3.93E-06    | 0.240681343  |
| -0.123191936 | 0.007693691 | -0.112731631 | 0.014793447 | -0.145540272 |
| 0.057488933  | 0.214959614 | 0.084715739  | 0.067383793 | 0.042147332  |
| -0.106186361 | 0.021730317 | -0.088352215 | 0.056401144 | -0.120693371 |
| -0.155146309 | 0.000767807 | -0.139691706 | 0.002482056 | -0.178597911 |
| 0.009675211  | 0.834817023 | 0.050431505  | 0.2767693   | 0.039656097  |
| -0.037838896 | 0.414610968 | -0.034904123 | 0.451755036 | -0.042327329 |
| 0.037948557  | 0.413258861 | 0.04553338   | 0.326170328 | 0.008950279  |
| -0.048796646 | 0.29265947  | -0.032181367 | 0.487831998 | -0.044375511 |
| -0.060651439 | 0.190744163 | -0.065498581 | 0.157608448 | -0.085099556 |
| -0.001889388 | 0.967518614 | 0.00199374   | 0.965725722 | -0.043518864 |
| -0.065430886 | 0.158039165 | -0.043023017 | 0.35357712  | -0.076477953 |
| -0.082609448 | 0.07450977  | -0.031309191 | 0.499707803 | -0.074131021 |
| -0.046169269 | 0.319452579 | -0.018010261 | 0.697872868 | -0.03203279  |
| 0.0832088    | 0.072422218 | 0.11133281   | 0.016085859 | 0.109243146  |
| -0.013619977 | 0.769097954 | 0.021033863  | 0.650276856 | -0.009198053 |
| -0.086342217 | 0.062272076 | -0.053520831 | 0.248367863 | -0.093517333 |
| -0.03504998  | 0.449865801 | -0.018322902 | 0.692892151 | -0.031651247 |
| -0.170537276 | 0.000213382 | -0.136320601 | 0.00315918  | -0.166715368 |
| -0.101099413 | 0.028923952 | -0.066134055 | 0.153608323 | -0.112663383 |
| -0.160054731 | 0.000516691 | -0.14951974  | 0.001192262 | -0.186228437 |
| -0.056820813 | 0.220346314 | -0.024914433 | 0.591235903 | -0.060161801 |
| -0.011201412 | 0.809226961 | -0.010761519 | 0.816583164 | -0.056015598 |
| -0.04182712  | 0.3671291   | -0.029899198 | 0.519225551 | -0.068994123 |
| -0.01667476  | 0.719292971 | 0.013694831  | 0.767865153 | 0.042752783  |
| 0.079737641  | 0.085202094 | 0.091762348  | 0.047493815 | 0.105583789  |
| -0.127203352 | 0.005910405 | -0.105177748 | 0.02301852  | -0.118030251 |
| 0.026894976  | 0.562081454 | 0.033016464  | 0.476604882 | -0.016663382 |
| -0.076644129 | 0.098068826 | -0.07788173  | 0.092746966 | -0.100899007 |
| 0.057649411  | 0.213679975 | 0.078468066  | 0.090307622 | 0.050328146  |
| -0.151697887 | 0.001007284 | -0.128616695 | 0.005376738 | -0.156982815 |

|              |             |              |             |              |
|--------------|-------------|--------------|-------------|--------------|
| -0.054007101 | 0.244089516 | -0.058653818 | 0.205795242 | -0.072977225 |
| -0.013129587 | 0.777188658 | -0.007828222 | 0.86601805  | -0.022821747 |
| -0.060546611 | 0.191513343 | -0.061581923 | 0.184015868 | -0.084469168 |
| -0.100830696 | 0.029355055 | -0.114022609 | 0.013682544 | -0.128100369 |
| -0.001610946 | 0.972303358 | -0.004253598 | 0.926956187 | -0.008077872 |
| -0.056315132 | 0.224487031 | -0.063463999 | 0.170945003 | -0.083082449 |
| -0.050005379 | 0.280853456 | -0.056330307 | 0.224361972 | -0.064981797 |
| -0.025619769 | 0.5807738   | -0.036997166 | 0.425075976 | -0.057511996 |
| -0.002509204 | 0.956872122 | 0.004072584  | 0.930056469 | -0.007615514 |
| -0.039689066 | 0.392149019 | -0.045540819 | 0.326091214 | -0.063944089 |
| -0.00259417  | 0.955413236 | -0.016373533 | 0.724155582 | -0.036798686 |
| 0.000325922  | 0.994395416 | -0.007913958 | 0.864564705 | -0.002716743 |
| 0.065014073  | 0.160710773 | 0.065443894  | 0.15795633  | 0.03837886   |
| 0.085463365  | 0.064992936 | 0.068784788  | 0.137748829 | 0.020015309  |
| -0.010011578 | 0.829161083 | -0.024177412 | 0.602259314 | -0.034445237 |
| 0.032088206  | 0.489093228 | -0.00403888  | 0.930633847 | -0.050628268 |
| -0.005232999 | 0.910201991 | 0.003949595  | 0.932163562 | -0.028066894 |
| 0.038255549  | 0.409487525 | 0.030876173  | 0.505660237 | 0.048723709  |
| -0.055813738 | 0.228647087 | -0.058914979 | 0.203780046 | -0.06790301  |
| 0.03199791   | 0.490317336 | 0.035691424  | 0.441610592 | -0.006647702 |
| 0.036922408  | 0.426012793 | 0.028748314  | 0.535442488 | 0.005640099  |
| -0.00133255  | 0.977088317 | -0.030352497 | 0.512908286 | -0.065804913 |
| -0.132107672 | 0.004239566 | -0.116405327 | 0.011823727 | -0.128471859 |
| 0.032118809  | 0.488678728 | 0.044809401  | 0.333929288 | 0.023296864  |
| 0.038585981  | 0.405451131 | 0.060012537  | 0.195467452 | 0.053511764  |
| -0.034489224 | 0.457153465 | -0.034401655 | 0.458297457 | -0.054918854 |
| -0.100235286 | 0.030329938 | -0.117011887 | 0.011387736 | -0.162796012 |
| 0.015534592  | 0.737756424 | 0.022189284  | 0.632445025 | 0.028149702  |
| -0.022929337 | 0.621133726 | -0.009552583 | 0.836881111 | -0.032921703 |
| -0.060796466 | 0.189683767 | -0.0857351   | 0.064141417 | -0.10544438  |
| -0.089450765 | 0.053391503 | -0.065898151 | 0.155084191 | -0.102623345 |
| -0.043199206 | 0.351607513 | -0.088585057 | 0.055751747 | -0.13210703  |
| -0.027199926 | 0.557654726 | -0.027102505 | 0.559067071 | -0.054657562 |
| 0.00693966   | 0.881106074 | -0.01081973  | 0.815608778 | -0.033883022 |
| -0.097385882 | 0.035388066 | -0.086278818 | 0.062465161 | -0.076306065 |
| -0.123281675 | 0.007649045 | -0.128179152 | 0.005537121 | -0.13062522  |
| -0.158024684 | 0.000609505 | -0.112673798 | 0.014845017 | -0.145382843 |
| -0.021121496 | 0.6489172   | -0.023296682 | 0.615551808 | -0.037642671 |
| 0.009366196  | 0.840020541 | -0.026076362 | 0.574047662 | -0.079285236 |
| 0.048267252  | 0.297933324 | 0.046467236  | 0.316336025 | 0.044945766  |
| -0.016615283 | 0.720252188 | -0.001163905 | 0.979987325 | -0.035529352 |
| -0.009534747 | 0.837181419 | -0.030667074 | 0.508547853 | -0.037799468 |
| -0.084384071 | 0.068467306 | -0.098622222 | 0.033111446 | -0.07043797  |
| -0.024854772 | 0.592124788 | -0.023574137 | 0.611350426 | -0.035575502 |
| -0.084351624 | 0.06857407  | -0.080761252 | 0.081257319 | -0.095434522 |

|              |             |              |             |              |
|--------------|-------------|--------------|-------------|--------------|
| 0.001079422  | 0.981439695 | -0.001066166 | 0.981667583 | -0.023898968 |
| -0.078906046 | 0.088519277 | -0.066731236 | 0.149919812 | -0.10838458  |
| -0.073899441 | 0.110738643 | -0.076122487 | 0.100383581 | -0.084250634 |
| 0.034944637  | 0.451229825 | 0.047180805  | 0.30895365  | 0.022505358  |
| -0.049476364 | 0.28598022  | -0.035718735 | 0.441261028 | -0.025322797 |
| 0.05528524   | 0.233090938 | 0.00078817   | 0.9864471   | -0.070926617 |
| -0.076779213 | 0.09747638  | -0.0760792   | 0.100577598 | -0.093574205 |
| -0.052735301 | 0.255389121 | -0.05360688  | 0.247606992 | -0.057813464 |
| -0.079135477 | 0.08759389  | -0.055445715 | 0.231735179 | -0.081858407 |
| -0.003746834 | 0.935638343 | -0.00312779  | 0.946254406 | -0.018150289 |
| -0.011838137 | 0.798609071 | -0.004520886 | 0.922380278 | -0.032932706 |
| 0.109973641  | 0.01743534  | 0.100375253  | 0.030098307 | 0.048314379  |
| 0.032351996  | 0.485526546 | -0.024068721 | 0.603892756 | -0.081117732 |
| -0.047054239 | 0.310254714 | -0.049271199 | 0.287985366 | -0.069404834 |
| 0.074286003  | 0.108879981 | 0.013882738  | 0.764773011 | -0.061687591 |
| 0.013689218  | 0.767957573 | 0.041947315  | 0.365752637 | 0.013310771  |
| -0.104812221 | 0.023501429 | -0.147675388 | 0.001372831 | -0.173685546 |
| -0.059888564 | 0.196393782 | -0.124953853 | 0.0068584   | -0.148587965 |
| -0.074627688 | 0.107257653 | -0.119977531 | 0.009454463 | -0.138102768 |
| -0.119178046 | 0.009944583 | -0.128935168 | 0.005262643 | -0.174913126 |
| -0.049927433 | 0.281604912 | -0.072922609 | 0.115546775 | -0.097323694 |
| -0.183753653 | 6.49E-05    | -0.157334882 | 0.000644412 | -0.177982383 |
| 0.112959551  | 0.014591742 | 0.09976853   | 0.031113437 | 0.076227033  |
| -0.148842822 | 0.001255828 | -0.160176219 | 0.000511576 | -0.182204337 |
| 0.116092679  | 0.012054168 | 0.088647567  | 0.055578468 | 0.079347517  |
| -0.164790482 | 0.000348777 | -0.16883713  | 0.000247176 | -0.169703082 |
| 0.067853195  | 0.143172634 | 0.097903622  | 0.034418977 | 0.089619654  |
| -0.088322952 | 0.056483201 | -0.075076977 | 0.105153538 | -0.05962948  |
| -0.135543692 | 0.003337314 | -0.126880479 | 0.006038805 | -0.127568747 |
| 0.066811578  | 0.149428757 | 0.019109948  | 0.680412472 | 0.021653299  |
| 0.095159384  | 0.039824251 | 0.091428816  | 0.048309489 | 0.067891778  |
| 0.291232839  | 1.40E-10    | 0.274754415  | 1.56E-09    | 0.258355829  |
| 0.212566332  | 3.58E-06    | 0.237923185  | 1.96E-07    | 0.214471937  |
| -0.042066043 | 0.364396126 | -0.031882298 | 0.491887025 | -0.014059927 |
| 0.037105724  | 0.423717721 | 0.0341757    | 0.461256695 | 0.017870196  |
| 0.034175992  | 0.461252865 | 0.040776518  | 0.37929709  | 0.072383459  |
| -0.050503287 | 0.276085306 | -0.037742714 | 0.415799037 | -0.045643561 |
| -0.031446363 | 0.497829956 | -0.026640609 | 0.565786811 | -0.055678317 |
| 0.114992378  | 0.012897023 | 0.130668317  | 0.004679091 | 0.121500735  |
| 0.105455445  | 0.022657413 | 0.06963348   | 0.132946408 | 0.026859704  |
| 0.09084313   | 0.0497702   | 0.098487302  | 0.033353657 | 0.067880919  |
| 0.112217944  | 0.015257055 | 0.049442327  | 0.286312226 | 0.010318835  |
| 0.067784903  | 0.14357657  | 0.058071101  | 0.210343592 | 0.025426027  |
| -0.01068296  | 0.817898598 | -0.003627459 | 0.937684685 | -0.015896821 |
| 0.099803664  | 0.031053865 | 0.068484149  | 0.139481638 | 0.032343566  |

|              |             |              |             |              |
|--------------|-------------|--------------|-------------|--------------|
| 0.219788761  | 1.62E-06    | 0.21601624   | 2.46E-06    | 0.220337709  |
| -0.087088926 | 0.060034766 | -0.094598995 | 0.041012132 | -0.143546963 |
| -0.124159784 | 0.007224242 | -0.142119158 | 0.00207954  | -0.201751555 |
| -0.063246629 | 0.172418218 | -0.071599898 | 0.122316316 | -0.109174024 |
| 0.003845025  | 0.933955445 | 0.00277615   | 0.952289083 | 0.022059516  |
| 0.133906218  | 0.00374296  | 0.123886107  | 0.007354318 | 0.075395185  |
| 0.1006173    | 0.02970132  | 0.100824471  | 0.029365107 | 0.069783809  |
| 0.042704751  | 0.357152576 | 0.052919905  | 0.253726847 | 0.036265006  |
| -0.047254956 | 0.308193069 | -0.061424204 | 0.185143827 | -0.06677706  |
| 0.044024609  | 0.342472885 | 0.049130029  | 0.289370546 | 0.044091099  |
| 0.041237592  | 0.373926819 | 0.049803433  | 0.282803158 | 0.013835467  |
| 0.099860865  | 0.030957085 | 0.074673666  | 0.107040813 | 0.065103572  |
| -0.020644385 | 0.656333662 | -0.005773798 | 0.900967323 | -0.028720045 |
| 0.200002993  | 1.33E-05    | 0.240492752  | 1.44E-07    | 0.224913224  |
| 0.163846858  | 0.00037751  | 0.148110861  | 0.001328063 | 0.117889285  |
| -0.047611488 | 0.304553311 | -0.048226943 | 0.29833746  | -0.088118744 |
| 0.243994564  | 9.32E-08    | 0.251271358  | 3.71E-08    | 0.256635205  |
| -0.112282789 | 0.015197837 | -0.086625332 | 0.061415839 | -0.108683921 |
| 0.194770312  | 2.25E-05    | 0.201713309  | 1.12E-05    | 0.174667156  |
| 0.248316823  | 5.41E-08    | 0.246448819  | 6.85E-08    | 0.239453412  |
| -0.173265627 | 0.000168046 | -0.176232932 | 0.000129072 | -0.197137492 |
| -0.035090254 | 0.449344939 | -0.018847582 | 0.684563154 | -0.002596821 |
| 0.129244566  | 0.005153891 | 0.106161207  | 0.021761667 | 0.108926354  |
| 0.006075038  | 0.895829051 | 0.010009265  | 0.829199962 | 0.006631269  |
| 0.081153174  | 0.079786613 | 0.06392379   | 0.167859777 | 0.064386425  |
| -0.020259303 | 0.662344337 | -0.022277065 | 0.631098776 | -0.015346129 |
| 0.062867186  | 0.175012534 | 0.03778777   | 0.415242239 | 0.011556078  |
| 0.104651564  | 0.023716435 | 0.093153405  | 0.044215303 | 0.073553799  |
| 0.066964138  | 0.148499675 | 0.071445419  | 0.123126668 | 0.079706095  |
| 0.061329623  | 0.185822683 | 0.098520394  | 0.033294111 | 0.067073003  |
| 0.242927706  | 1.06E-07    | 0.262656644  | 8.30E-09    | 0.242780344  |
| -0.053142785 | 0.251729946 | -0.055341635 | 0.23261385  | -0.062159807 |
| -0.038871237 | 0.401985713 | -0.049679128 | 0.2840078   | -0.069705335 |
| 0.232835599  | 3.61E-07    | 0.221601784  | 1.32E-06    | 0.251680958  |
| 0.37808407   | 2.57E-17    | 0.395592347  | 6.05E-19    | 0.409028484  |
| 0.280459282  | 6.88E-10    | 0.290502686  | 1.56E-10    | 0.277685127  |
| -0.00116146  | 0.98002936  | 0.016363295  | 0.724321052 | -0.003957272 |
| 0.015513584  | 0.738098072 | 0.021158927  | 0.648336819 | 0.025336182  |
| -0.036251048 | 0.434479538 | -0.054327613 | 0.241297924 | -0.069552956 |
| -0.059196694 | 0.201622353 | -0.048104765 | 0.299564643 | -0.081151176 |
| -0.038721379 | 0.403804041 | -0.02927367  | 0.52800833  | -0.066612924 |
| 0.113126416  | 0.014445606 | 0.115919934  | 0.012183187 | 0.104671923  |
| 0.260310176  | 1.14E-08    | 0.240100926  | 1.51E-07    | 0.23832808   |
| -0.000517551 | 0.991100265 | -0.001603274 | 0.972435218 | -0.033212689 |
| 0.297022644  | 5.76E-11    | 0.297562237  | 5.30E-11    | 0.283678535  |



|              |             |              |             |              |
|--------------|-------------|--------------|-------------|--------------|
| 0.093662208  | 0.043064678 | 0.080839403  | 0.080962317 | 0.052904324  |
| -0.009651297 | 0.835219447 | 0.013996652  | 0.762900304 | -0.021645203 |
| 0.104018714  | 0.024580001 | 0.131430335  | 0.004441526 | 0.107012231  |
| -0.007267474 | 0.875534394 | 0.008721377  | 0.850900924 | -0.019959013 |
| 0.153190973  | 0.000896195 | 0.166538058  | 0.000300875 | 0.111650982  |
| -0.102287791 | 0.027081972 | -0.050484104 | 0.276267986 | -0.077458582 |
| 0.123622997  | 0.007481342 | 0.15586652   | 0.000724973 | 0.175772395  |
| 0.022805984  | 0.623013012 | 0.034189932  | 0.461069987 | 0.04571842   |
| -0.099956582 | 0.030795714 | -0.096061484 | 0.037973197 | -0.141097311 |
| -0.146001772 | 0.001558105 | -0.079778891 | 0.085040194 | -0.101203194 |
| 0.144548495  | 0.001737317 | 0.165564117  | 0.000326755 | 0.138219273  |
| -0.033776131 | 0.466515641 | -0.011901097 | 0.797561129 | -0.074205188 |
| -0.149527864 | 0.001191517 | -0.157181231 | 0.000652435 | -0.165000179 |
| 0.232293738  | 3.85E-07    | 0.227477755  | 6.77E-07    | 0.215043952  |
| 0.092438018  | 0.045876765 | 0.023311203  | 0.61533162  | -0.013439562 |
| 0.008527206  | 0.854182937 | 0.013666103  | 0.768338217 | -0.00635489  |
| 0.285834758  | 3.13E-10    | 0.272281922  | 2.21E-09    | 0.262728531  |
| 0.009552211  | 0.836887381 | 0.024140463  | 0.602814373 | 0.010526062  |
| 0.017805015  | 0.701149748 | 0.039633501  | 0.392812697 | -0.009806454 |
| 0.06540602   | 0.158197597 | 0.105183763  | 0.023010647 | 0.074076532  |
| -0.134899598 | 0.003491856 | -0.139109262 | 0.002588654 | -0.172044585 |
| 0.059844747  | 0.196721947 | 0.067984308  | 0.142399559 | 0.062829651  |
| 0.061769651  | 0.182679909 | 0.085484348  | 0.064926852 | 0.057403371  |
| -0.06636817  | 0.152154188 | -0.081488913 | 0.078543955 | -0.10579392  |
| -0.006059463 | 0.896094614 | -0.004916636 | 0.915609883 | -0.031749683 |
| -0.128477747 | 0.005427211 | -0.118080092 | 0.010654408 | -0.145061435 |
| -0.082865863 | 0.073610752 | -0.094418362 | 0.041401349 | -0.090232552 |
| -0.08661451  | 0.061448388 | -0.084049324 | 0.069575311 | -0.090349927 |
| -0.091120228 | 0.049074576 | -0.071548258 | 0.12258674  | -0.093088342 |
| -0.048906584 | 0.291572145 | -0.045535546 | 0.3261473   | -0.065096557 |
| 0.0808791    | 0.080812801 | 0.071515847  | 0.122756708 | 0.02693636   |
| -0.194708389 | 2.27E-05    | -0.183778012 | 6.47E-05    | -0.192477621 |
| 0.05511961   | 0.234496108 | 0.043712226  | 0.345912042 | 0.024936579  |
| 0.195225134  | 2.15E-05    | 0.154290795  | 0.000821729 | 0.11932537   |
| 0.046839812  | 0.312467185 | 0.066296585  | 0.152597702 | 0.040302527  |
| 0.080065102  | 0.083923679 | 0.089422628  | 0.053466886 | 0.093778407  |
| -0.203585115 | 9.24E-06    | -0.216859787 | 2.24E-06    | -0.237199858 |
| 0.03148319   | 0.497326432 | 0.000105738  | 0.998181704 | -0.027382914 |
| 0.105985211  | 0.021982115 | 0.104686471  | 0.023669574 | 0.084127859  |
| 0.025892202  | 0.576756115 | 0.044440463  | 0.337928502 | 0.040170984  |
| 0.086117965  | 0.062957256 | 0.091252643  | 0.048745044 | 0.06290934   |
| -0.049168889 | 0.288988803 | -0.048356035 | 0.297044473 | -0.08838792  |
| -0.005755154 | 0.901285467 | -0.035609176 | 0.442664241 | -0.07581776  |
| 0.106482479  | 0.021364193 | 0.109375719  | 0.018059678 | 0.071778708  |
| 0.014074011  | 0.761629326 | -0.028339565 | 0.541262726 | 0.021491284  |

|              |             |              |             |              |
|--------------|-------------|--------------|-------------|--------------|
| -0.014318438 | 0.75761773  | -0.040570363 | 0.381713469 | 0.014878792  |
| -0.036171261 | 0.435492158 | -0.050298014 | 0.278044362 | -0.005010566 |
| -0.017280271 | 0.709552729 | -0.060771131 | 0.189868697 | -0.019783891 |
| -0.006152601 | 0.894506756 | -0.032731126 | 0.480425055 | 0.009154972  |
| -0.033844515 | 0.465613256 | -0.056230202 | 0.225187875 | -0.014794494 |
| -0.0033748   | 0.942017147 | -0.040792989 | 0.379104442 | 0.012772042  |
| -0.064965408 | 0.161024901 | -0.102754585 | 0.026386554 | -0.061343818 |
| -0.085534949 | 0.06476772  | -0.117902389 | 0.010773421 | -0.070109987 |
| 0.006719315  | 0.884854484 | -0.024841142 | 0.592327938 | 0.025463329  |
| 0.029269502  | 0.528067095 | 0.011032429  | 0.812050873 | 0.055224658  |
| -0.104293834 | 0.0242013   | -0.120560749 | 0.009110592 | -0.072532899 |
| -0.144373838 | 0.001760082 | -0.171625403 | 0.000194078 | -0.117366565 |
| -0.15076389  | 0.001083096 | -0.178781675 | 0.000102545 | -0.225850084 |
| 0.068417751  | 0.139866588 | 0.086437126  | 0.061983947 | 0.031983359  |
| 0.11163411   | 0.015799409 | 0.120949149  | 0.008887806 | 0.093446331  |
| -0.085782581 | 0.063993575 | -0.090503714 | 0.050633479 | -0.102221593 |
| -0.021660814 | 0.640575397 | -0.049669123 | 0.28410491  | -0.074419462 |
| 0.157903496  | 0.000615508 | 0.173993171  | 0.00015758  | 0.16151865   |
| -0.004338069 | 0.925509799 | -0.022790586 | 0.623247779 | -0.056250121 |
| 0.067264594  | 0.146682781 | 0.097581192  | 0.035019799 | 0.086482763  |
| 0.138638752  | 0.002677795 | 0.160197922  | 0.000510668 | 0.164047951  |
| 0.177978907  | 0.000110289 | 0.162761541  | 0.000413278 | 0.147173211  |
| 0.110092984  | 0.017313007 | 0.094536333  | 0.041146801 | 0.077764967  |
| 0.099711044  | 0.031211121 | 0.089544452  | 0.053141142 | 0.038696069  |
| 0.010492497  | 0.821089934 | 0.033725337  | 0.467186526 | 0.013773594  |
| -0.134510753 | 0.003588268 | -0.160364595 | 0.000503738 | -0.16759608  |
| 0.001483381  | 0.974495779 | 0.008920379  | 0.847539944 | 0.007071361  |
| 0.146920974  | 0.001453685 | 0.134999785  | 0.003467399 | 0.103212045  |
| -0.008949688 | 0.847045159 | 0.006908926  | 0.881628753 | -0.02197913  |
| 0.132652286  | 0.004083243 | 0.137196876  | 0.002968661 | 0.126361979  |
| -0.040760284 | 0.379487031 | -0.012894457 | 0.781076568 | -0.024737567 |
| 0.017907498  | 0.69951285  | 0.019268398  | 0.677910406 | 0.003237003  |
| 0.206514444  | 6.81E-06    | 0.241310242  | 1.30E-07    | 0.217874302  |
| 0.153579155  | 0.000869228 | 0.162633288  | 0.000417708 | 0.129312045  |
| 0.130444089  | 0.004751147 | 0.178123196  | 0.000108858 | 0.162935028  |
| 0.072388041  | 0.11824643  | 0.059034876  | 0.202859701 | 0.027053819  |
| 0.174910302  | 0.000145258 | 0.187793055  | 4.43E-05    | 0.226539391  |
| 0.151377273  | 0.001032738 | 0.173924632  | 0.000158539 | 0.14726984   |
| -0.033811582 | 0.466047715 | -0.034861731 | 0.452304959 | -0.056253888 |
| -0.049418401 | 0.286545758 | -0.041701566 | 0.36857036  | -0.07866167  |
| -0.027759857 | 0.549570916 | 0.000108565  | 0.998133091 | 0.008133545  |
| -0.025734243 | 0.579084009 | -0.019424619 | 0.675447015 | -0.047685598 |
| 0.051329683  | 0.268293515 | 0.06589802   | 0.155085019 | 0.041108538  |
| 0.021319376  | 0.645851352 | 0.01319826   | 0.77605418  | -0.022838042 |
| 0.208337563  | 5.62E-06    | 0.177344102  | 0.000116799 | 0.180300509  |

|              |             |              |             |              |
|--------------|-------------|--------------|-------------|--------------|
| 0.110342724  | 0.017059437 | 0.11634777   | 0.011865856 | 0.121820504  |
| 0.195150973  | 2.17E-05    | 0.167671822  | 0.000273162 | 0.17456203   |
| -0.002866301 | 0.950741678 | -0.014609506 | 0.752849116 | -0.015390467 |
| 0.027615418  | 0.551650677 | 0.013608565  | 0.769285954 | -0.009546467 |
| 0.22140987   | 1.35E-06    | 0.23250611   | 3.76E-07    | 0.232340417  |
| 0.09796844   | 0.034299261 | 0.096282605  | 0.037530767 | 0.041377237  |
| 0.195606055  | 2.07E-05    | 0.198279365  | 1.59E-05    | 0.176454502  |
| 0.093151193  | 0.04422036  | 0.084110484  | 0.069371787 | 0.049400299  |
| 0.068160598  | 0.141365142 | 0.103593447  | 0.025175444 | 0.130587822  |
| -0.088857721 | 0.054999191 | -0.075375796 | 0.103772285 | -0.088204922 |
| -0.100127199 | 0.030509855 | -0.086518922 | 0.061736512 | -0.090462714 |
| -0.080592003 | 0.081899179 | -0.075073417 | 0.105170083 | -0.121787507 |
| 0.049958117  | 0.281308936 | 0.049544379  | 0.285317574 | 0.045482552  |
| 0.077925729  | 0.092562108 | 0.114465731  | 0.013318531 | 0.122040861  |
| 0.173107426  | 0.000170406 | 0.163261473  | 0.000396427 | 0.161592396  |
| 0.037302526  | 0.421261856 | 0.088030468  | 0.057308815 | 0.067512588  |
| 0.130241692  | 0.004817045 | 0.138679377  | 0.00266999  | 0.097999498  |
| 0.197952755  | 1.64E-05    | 0.207143265  | 6.38E-06    | 0.193120469  |
| 0.011638565  | 0.801933191 | -0.0049505   | 0.915030817 | -0.01208489  |
| 0.143647244  | 0.00185775  | 0.124284971  | 0.007165432 | 0.094749806  |
| 0.106899667  | 0.020857469 | 0.072664867  | 0.11684232  | 0.028723725  |
| -0.029505912 | 0.524738725 | -0.033185656 | 0.474347557 | -0.033289541 |
| -0.202778048 | 1.00E-05    | -0.16915795  | 0.000240439 | -0.190390153 |
| -0.015575392 | 0.737093035 | 0.008067034  | 0.861971007 | -0.029851331 |
| 0.083860237  | 0.070207646 | 0.06473736   | 0.162503092 | 0.045171343  |
| 0.323729199  | 7.44E-13    | 0.300849722  | 3.17E-11    | 0.272507649  |
| 0.142029091  | 0.00209334  | 0.107079444  | 0.020642348 | 0.071522643  |
| -0.058045986 | 0.21054124  | -0.03603297  | 0.437250496 | -0.08314668  |
| 0.058506879  | 0.206935387 | 0.053111434  | 0.252010173 | 0.048881309  |
| 0.103488204  | 0.025324709 | 0.122208778  | 0.008198284 | 0.101074143  |
| -0.057450045 | 0.215270532 | -0.071413846 | 0.123292809 | -0.100887283 |
| -0.09027759  | 0.051215523 | -0.051366668 | 0.267948351 | -0.081110956 |
| 0.041039349  | 0.376230048 | 0.060892697  | 0.188982544 | 0.060775362  |
| 0.045753266  | 0.323837106 | 0.048355872  | 0.297046097 | 0.030737734  |
| -0.097587573 | 0.035007822 | -0.110089123 | 0.017316953 | -0.120494088 |
| 0.027507688  | 0.553204381 | 0.05251141   | 0.257415256 | 0.028644013  |
| -0.20394882  | 8.90E-06    | -0.212904039 | 3.45E-06    | -0.25660214  |
| -0.065402811 | 0.158218051 | -0.049353875 | 0.287176215 | -0.073824693 |
| 0.055089188  | 0.234754855 | 0.130448482  | 0.004749725 | 0.104172768  |
| 0.138996854  | 0.002609701 | 0.136763064  | 0.003061633 | 0.111394775  |
| 0.028865998  | 0.533772625 | 0.043625271  | 0.346873264 | 0.032725779  |
| -0.18318006  | 6.84E-05    | -0.178444034 | 0.000105737 | -0.211998599 |
| -0.09775703  | 0.034691043 | -0.064341558 | 0.165092841 | -0.103789364 |
| 0.134205782  | 0.003665566 | 0.103412802  | 0.025432119 | 0.091773862  |
| 0.222957083  | 1.14E-06    | 0.248503347  | 5.29E-08    | 0.244958978  |

|              |             |              |             |              |
|--------------|-------------|--------------|-------------|--------------|
| 0.127644144  | 0.005739071 | 0.111076546  | 0.016333063 | 0.095947441  |
| 0.113372256  | 0.014232649 | 0.135096229  | 0.003444002 | 0.115754717  |
| -0.073434761 | 0.113005867 | -0.065809206 | 0.155643435 | -0.097386233 |
| -0.03287151  | 0.478543485 | -0.033472961 | 0.47052785  | -0.058286832 |
| -0.042582075 | 0.358536778 | -0.046453433 | 0.316479961 | -0.066772782 |
| 0.04125929   | 0.373675261 | 0.056018138  | 0.226944627 | 0.034505579  |
| -0.048488845 | 0.295718143 | -0.061093988 | 0.18752193  | -0.083486241 |
| 0.090829856  | 0.04980373  | 0.118102696  | 0.010639353 | 0.077522431  |
| -0.021898869 | 0.636907578 | -0.007829932 | 0.865989052 | -0.054002225 |
| 0.075335908  | 0.103955828 | 0.10968358   | 0.01773582  | 0.110086737  |
| -0.091857246 | 0.047263859 | -0.123416286 | 0.007582509 | -0.180145203 |
| 0.045871933  | 0.32258243  | 0.032489802  | 0.483668883 | 0.020741607  |
| 0.212941371  | 3.44E-06    | 0.223149406  | 1.11E-06    | 0.216671868  |
| 0.019228079  | 0.678546745 | 0.018545706  | 0.689350668 | -0.001578703 |
| 0.192314665  | 2.87E-05    | 0.20197528   | 1.09E-05    | 0.209445914  |
| 0.115534637  | 0.012475357 | 0.163910182  | 0.000375515 | 0.151809035  |
| -0.02556163  | 0.581632888 | 0.023512988  | 0.612275299 | 0.020417114  |
| 0.032464445  | 0.484010412 | 0.035449995  | 0.444707522 | 0.021959494  |
| -0.109631146 | 0.017790618 | -0.101965692 | 0.027570972 | -0.128493007 |
| -0.097349848 | 0.035456368 | -0.101025721 | 0.029041633 | -0.128130699 |
| -0.111053782 | 0.016355183 | -0.106596192 | 0.021225026 | -0.149647125 |
| -0.18146472  | 8.02E-05    | -0.214376089 | 2.94E-06    | -0.245482941 |
| -0.211113386 | 4.19E-06    | -0.226361129 | 7.70E-07    | -0.284083104 |
| -0.146137169 | 0.001542304 | -0.176836328 | 0.000122265 | -0.240957585 |
| -0.147791001 | 0.001360812 | -0.138412792 | 0.002721591 | -0.191567625 |
| -0.146179968 | 0.00153734  | -0.116441694 | 0.011797177 | -0.156994444 |
| -0.079297086 | 0.08694674  | -0.054349882 | 0.241104806 | -0.083023802 |
| -0.173962223 | 0.000158013 | -0.16071487  | 0.00048946  | -0.206303294 |
| -0.216614727 | 2.30E-06    | -0.208812949 | 5.35E-06    | -0.238642503 |
| -0.180086284 | 9.10E-05    | -0.186042765 | 5.23E-05    | -0.212600853 |
| -0.07705902  | 0.096258286 | -0.087143454 | 0.059874027 | -0.096496394 |
| -0.102745658 | 0.026399707 | -0.131892403 | 0.004302834 | -0.191828028 |
| -0.365280564 | 3.46E-16    | -0.387843967 | 3.26E-18    | -0.443297257 |
| -0.152542569 | 0.000942969 | -0.152785961 | 0.000925153 | -0.197648646 |
| 0.003498792  | 0.939890788 | -0.016945989 | 0.714924256 | -0.066732133 |
| -0.268193976 | 3.90E-09    | -0.252939054 | 2.99E-08    | -0.295389674 |
| -0.098245288 | 0.033791913 | -0.126587899 | 0.006157316 | -0.178537588 |
| -0.222276588 | 1.23E-06    | -0.215795263 | 2.52E-06    | -0.26604893  |
| -0.244111507 | 9.18E-08    | -0.256454254 | 1.89E-08    | -0.309254851 |
| -0.118648213 | 0.010281701 | -0.152304676 | 0.000960687 | -0.184107594 |
| -0.126322596 | 0.006266579 | -0.125133757 | 0.006777857 | -0.181765462 |
| -0.220962644 | 1.42E-06    | -0.234923299 | 2.82E-07    | -0.276706473 |
| -0.235624794 | 2.59E-07    | -0.236626201 | 2.30E-07    | -0.288804586 |
| -0.207017688 | 6.46E-06    | -0.220733031 | 1.46E-06    | -0.274786645 |
| -0.213096426 | 3.38E-06    | -0.194019231 | 2.42E-05    | -0.207020175 |

|              |             |              |             |              |
|--------------|-------------|--------------|-------------|--------------|
| -0.168158625 | 0.00026201  | -0.170926394 | 0.000206281 | -0.198232347 |
| 0.00200273   | 0.965571266 | -0.016980487 | 0.714369258 | -0.051449849 |
| -0.179505526 | 9.60E-05    | -0.188119525 | 4.30E-05    | -0.229955776 |
| 9.91E-05     | 0.998295919 | -0.050291594 | 0.278105792 | -0.073826812 |
| -0.139671348 | 0.002485713 | -0.176081834 | 0.000130831 | -0.235316258 |
| -0.011793287 | 0.79935578  | -0.011116516 | 0.810645368 | -0.058572512 |
| -0.176173888 | 0.000129757 | -0.215296522 | 2.66E-06    | -0.26529936  |
| -0.155963758 | 0.000719362 | -0.183087603 | 6.90E-05    | -0.23650472  |
| -0.442771992 | 7.66E-24    | -0.452250307 | 6.37E-25    | -0.489445517 |
| -0.088842557 | 0.055040821 | -0.092500819 | 0.045728843 | -0.154996545 |
| -0.094957665 | 0.040248447 | -0.146236222 | 0.001530837 | -0.213278573 |
| -0.040994998 | 0.376746519 | -0.072568928 | 0.117327456 | -0.123298714 |
| -0.022219251 | 0.631985306 | -0.048260784 | 0.297998141 | -0.104862835 |
| -0.059417406 | 0.199943517 | -0.092247923 | 0.04632697  | -0.141528102 |
| -0.261272955 | 9.99E-09    | -0.27020846  | 2.95E-09    | -0.335094653 |
| -0.1213405   | 0.008668246 | -0.161842463 | 0.00044601  | -0.234233847 |
| -0.172581668 | 0.000178475 | -0.163799314 | 0.000379014 | -0.221411425 |
| -0.111994238 | 0.015462905 | -0.103617727 | 0.025141117 | -0.149326478 |
| -0.221166104 | 1.39E-06    | -0.200431408 | 1.28E-05    | -0.272115801 |
| -0.156142993 | 0.000709125 | -0.158493029 | 0.000586814 | -0.210719292 |
| -0.188653786 | 4.08E-05    | -0.212613432 | 3.56E-06    | -0.26826411  |
| -0.252162301 | 3.31E-08    | -0.298315877 | 4.71E-11    | -0.378570255 |
| -0.129588405 | 0.005035412 | -0.137504216 | 0.002904355 | -0.164804669 |
| -0.188343026 | 4.20E-05    | -0.179973044 | 9.20E-05    | -0.239591787 |
| -0.13821757  | 0.002759953 | -0.134389021 | 0.003618944 | -0.194038355 |
| -0.179862002 | 9.29E-05    | -0.225383253 | 8.61E-07    | -0.253009111 |
| -0.218517035 | 1.87E-06    | -0.207203048 | 6.34E-06    | -0.257031855 |
| -0.206484903 | 6.83E-06    | -0.21909022  | 1.75E-06    | -0.266144118 |
| -0.1860928   | 5.21E-05    | -0.211427082 | 4.05E-06    | -0.277699997 |
| -0.141413641 | 0.002189894 | -0.151867864 | 0.000994025 | -0.199153569 |
| -0.196727347 | 1.85E-05    | -0.203583805 | 9.24E-06    | -0.227324528 |
| -0.246465418 | 6.84E-08    | -0.248306002 | 5.42E-08    | -0.259330796 |
| -0.330643578 | 2.24E-13    | -0.312190871 | 5.14E-12    | -0.357377094 |
| 0.078292591  | 0.091032198 | 0.084431792  | 0.068310535 | -0.001725228 |
| 0.042409287  | 0.360492112 | 0.050057086  | 0.280355709 | 0.009111231  |
| -0.132115982 | 0.004237141 | -0.112399325 | 0.015091921 | -0.133326588 |
| -0.133181085 | 0.003936467 | -0.157769668 | 0.0006222   | -0.144135875 |
| -0.216724228 | 2.28E-06    | -0.245309545 | 7.91E-08    | -0.313124359 |
| 0.04308727   | 0.352858038 | 0.035266765  | 0.447066129 | -0.025327516 |
| -0.20927624  | 5.09E-06    | -0.206687224 | 6.69E-06    | -0.250967743 |
| -0.146278646 | 0.00152595  | -0.15762816  | 0.00062935  | -0.197174301 |
| -0.078145453 | 0.09164335  | -0.032828535 | 0.479119051 | -0.026962427 |
| 0.319429067  | 1.54E-12    | 0.299701316  | 3.80E-11    | 0.312236864  |
| 0.215329554  | 2.65E-06    | 0.273193892  | 1.94E-09    | 0.253076494  |
| -0.050242346 | 0.27857727  | 0.004769035  | 0.918134316 | -0.012392522 |

|              |             |              |             |              |
|--------------|-------------|--------------|-------------|--------------|
| -0.172329671 | 0.000182469 | -0.073735968 | 0.11153213  | -0.081509598 |
| 0.199894118  | 1.35E-05    | 0.177649705  | 0.000113621 | 0.203246596  |
| 0.354598347  | 2.78E-15    | 0.380479403  | 1.56E-17    | 0.383503189  |
| -0.012130098 | 0.793752638 | 0.049739629  | 0.283421059 | 0.062717775  |
| -0.068832218 | 0.137476969 | -0.018083851 | 0.696699312 | -0.056361707 |
| 0.131230381  | 0.004502785 | 0.135509239  | 0.003345421 | 0.116890115  |
| 0.215162268  | 2.70E-06    | 0.27794096   | 9.90E-10    | 0.262173151  |
| 0.131338628  | 0.004469528 | 0.134215358  | 0.003663116 | 0.129570192  |
| 0.173620938  | 0.000162856 | 0.204108072  | 8.75E-06    | 0.218211898  |
| -0.024837038 | 0.592389115 | 0.013507947  | 0.770944114 | 0.008063716  |
| -0.05295277  | 0.253431704 | -0.038204588 | 0.41011216  | -0.051106389 |
| 0.096005921  | 0.038085062 | 0.109072839  | 0.018383324 | 0.093571017  |
| 0.021527617  | 0.642631444 | 0.073830556  | 0.111072461 | 0.085508272  |
| 0.179987907  | 9.19E-05    | 0.238989085  | 1.73E-07    | 0.240036649  |
| -0.121855145 | 0.008386875 | -0.121038239 | 0.008837394 | -0.107901563 |
| 0.227578957  | 6.69E-07    | 0.255192429  | 2.23E-08    | 0.253901722  |
| -0.106851892 | 0.020914962 | -0.091281798 | 0.04867274  | -0.08552127  |
| 0.118978521  | 0.010070366 | 0.155584474  | 0.000741477 | 0.164125255  |
| -0.18592848  | 5.29E-05    | -0.120751576 | 0.009000521 | -0.127895702 |
| -0.135927573 | 0.003248186 | -0.117164866 | 0.011280048 | -0.150186337 |
| 0.003663667  | 0.937063957 | 0.014164404  | 0.760145019 | 0.016860357  |
| 0.047899986  | 0.301629006 | 0.098680454  | 0.033007371 | 0.109367251  |
| -0.01316559  | 0.776593828 | 0.024711973  | 0.59425482  | 0.058941104  |
| 0.085372479  | 0.065279805 | 0.122192832  | 0.008206705 | 0.1102755    |
| -0.03179103  | 0.493128101 | 0.017077688  | 0.712806305 | -0.021690752 |
| 0.058532841  | 0.206733613 | 0.069166594  | 0.135572093 | 0.028735214  |
| -0.152985214 | 0.0009108   | -0.125965739 | 0.00641629  | -0.139715049 |
| -0.204548703 | 8.36E-06    | -0.203469507 | 9.35E-06    | -0.191613013 |
| -0.032472056 | 0.48390789  | -0.009717196 | 0.834110582 | -0.002524856 |
| -0.114842126 | 0.013016063 | -0.122966984 | 0.007806631 | -0.131870075 |
| 0.037264492  | 0.421735826 | 0.055131382  | 0.234396046 | 0.045710433  |
| -0.176681286 | 0.000123981 | -0.140165336 | 0.00239834  | -0.156492854 |
| 0.063138353  | 0.173155577 | 0.098193041  | 0.033887169 | 0.105068727  |
| 0.121370831  | 0.008651433 | 0.125773939  | 0.006498074 | 0.11635226   |
| -0.077345568 | 0.095023462 | -0.057862375 | 0.211990293 | -0.043278339 |
| 0.021748161  | 0.63922858  | 0.036374995  | 0.432909148 | 0.039399694  |
| 0.160160596  | 0.000512232 | 0.109224489  | 0.018220649 | 0.129989121  |
| 0.087732327  | 0.058160669 | 0.113632972  | 0.014009828 | 0.110784619  |
| 0.036319215  | 0.433615465 | 0.09503943   | 0.040076045 | 0.06855195   |
| 0.022346794  | 0.630030255 | 0.086922205  | 0.060528451 | 0.084830283  |
| -0.015431713 | 0.739430039 | 0.0204788    | 0.658915561 | 0.070355395  |
| 0.237053999  | 2.18E-07    | 0.22249887   | 1.20E-06    | 0.242803649  |
| 0.148767462  | 0.001263095 | 0.202094243  | 1.08E-05    | 0.207270386  |
| 0.052032306  | 0.261788254 | 0.100083851  | 0.030582266 | 0.106883878  |
| 0.001188486  | 0.979564765 | 0.0394596    | 0.394894194 | 0.048494073  |

|              |             |              |             |              |
|--------------|-------------|--------------|-------------|--------------|
| 0.007995062  | 0.863190301 | 0.057272714  | 0.216692421 | 0.062840303  |
| 0.08388688   | 0.070118262 | 0.1300912    | 0.004866577 | 0.108214574  |
| 0.061241301  | 0.186458271 | 0.129418407  | 0.005093679 | 0.134988122  |
| 0.103887814  | 0.024761973 | 0.164721755  | 0.000350799 | 0.153337685  |
| 0.113680124  | 0.013969858 | 0.135759614  | 0.003286913 | 0.103472679  |
| 0.118114424  | 0.01063155  | 0.180259415  | 8.96E-05    | 0.178924363  |
| -0.144137573 | 0.001791312 | -0.092953764 | 0.04467379  | -0.111725332 |
| -0.094431688 | 0.041372529 | -0.031326162 | 0.499475267 | -0.009378417 |
| 0.117697508  | 0.010912097 | 0.096782121  | 0.036547383 | 0.094720389  |
| -0.045546867 | 0.326026905 | 0.01093976   | 0.813600515 | 0.017701672  |
| -0.104476194 | 0.02395307  | -0.058618536 | 0.206068589 | -0.052651434 |
| 0.019826249  | 0.669129775 | 0.053146379  | 0.251697838 | 0.050329547  |
| 0.110241135  | 0.01716219  | 0.161932329  | 0.000442706 | 0.149866488  |
| -0.041559732 | 0.370202719 | -0.012581885 | 0.786253441 | -0.003812269 |
| -0.13846934  | 0.00271057  | -0.09261998  | 0.045449272 | -0.114436988 |
| 0.070931755  | 0.125851289 | 0.125947955  | 0.006423834 | 0.094267525  |
| -0.002655409 | 0.954361832 | -0.015246807 | 0.742441128 | -0.003648318 |
| -0.070629873 | 0.127474266 | -0.013185252 | 0.776269031 | 0.029340044  |
| -0.118821522 | 0.01017033  | -0.087622189 | 0.058477997 | -0.119764372 |
| 0.082244272  | 0.075805531 | 0.109249794  | 0.018193628 | 0.093307565  |
| -0.059143434 | 0.202029002 | -0.001137321 | 0.980444333 | -0.032281637 |
| 0.077800722  | 0.093088094 | 0.142060197  | 0.002088564 | 0.170379844  |
| 0.114942863  | 0.012936146 | 0.15073357   | 0.001085643 | 0.16015745   |
| -0.155842209 | 0.000726382 | -0.143516268 | 0.001875875 | -0.14703235  |
| 0.08226469   | 0.075732599 | 0.109455817  | 0.017974925 | 0.092187941  |
| 0.108674695  | 0.018816454 | 0.140707826  | 0.002305625 | 0.137797026  |
| 0.022052833  | 0.634540104 | 0.053778941  | 0.24609047  | 0.032448034  |
| 0.076105799  | 0.100458344 | 0.116357047  | 0.011859056 | 0.120325136  |
| -0.02363243  | 0.610469337 | 0.045328475  | 0.32835438  | 0.035829831  |
| -0.021503769 | 0.642999852 | 0.01515997   | 0.743856593 | -0.019331938 |
| -0.048857188 | 0.292060354 | -0.031854138 | 0.49226977  | -0.064425921 |
| 0.221633336  | 1.32E-06    | 0.254474645  | 2.45E-08    | 0.262481655  |
| -0.058616445 | 0.206084797 | 0.011660772  | 0.801563138 | 0.018201623  |
| -0.076481683 | 0.09878507  | -0.041863268 | 0.366714791 | -0.050887933 |
| 0.010325269  | 0.823894394 | 0.046184562  | 0.319292135 | 0.037747344  |
| 0.050486789  | 0.276242406 | 0.093715841  | 0.042944872 | 0.090399662  |
| 0.082959453  | 0.073284825 | 0.124597271  | 0.007020581 | 0.125076373  |
| 0.071206496  | 0.124388222 | 0.143720702  | 0.001847655 | 0.090292555  |
| 0.14122875   | 0.002219686 | 0.127948797  | 0.005623276 | 0.120172121  |
| -0.044487033 | 0.337422016 | 0.028997881  | 0.531904393 | 0.027047605  |
| 0.04812752   | 0.299335836 | 0.066786473  | 0.149582072 | 0.073734771  |
| -0.095517211 | 0.039081075 | -0.036677921 | 0.429084936 | -0.015881025 |
| -0.27845242  | 9.20E-10    | -0.221935988 | 1.27E-06    | -0.234089704 |
| -0.19179975  | 3.01E-05    | -0.119377962 | 0.009819956 | -0.100659185 |
| -0.004804478 | 0.917528058 | 0.041548465  | 0.370332585 | 0.025959662  |

|              |             |              |             |              |
|--------------|-------------|--------------|-------------|--------------|
| -0.21499105  | 2.75E-06    | -0.198519691 | 1.55E-05    | -0.201281756 |
| 0.086205075  | 0.062690366 | 0.069804641  | 0.131993719 | 0.071045111  |
| 0.158214237  | 0.000600225 | 0.189118016  | 3.90E-05    | 0.173309556  |
| 0.048681429  | 0.293801913 | 0.090978611  | 0.049429068 | 0.118355555  |
| -0.254605352 | 2.41E-08    | -0.214501173 | 2.90E-06    | -0.249572125 |
| -0.040486855 | 0.382694949 | 0.014502372  | 0.754603238 | 0.016004922  |
| 0.018713702  | 0.686684841 | 0.054765165  | 0.23752323  | 0.051952479  |
| 0.038111328  | 0.411256708 | 0.093822986  | 0.042706373 | 0.095161864  |
| 0.006399565  | 0.890298469 | 0.027685608  | 0.550639541 | 0.023354054  |
| -0.006852971 | 0.882580476 | 0.031100745  | 0.502568549 | 0.032330347  |
| -0.096676898 | 0.036752693 | -0.059512345 | 0.199224513 | -0.062349637 |
| 0.203297712  | 9.52E-06    | 0.267328915  | 4.39E-09    | 0.284917332  |
| -0.102101659 | 0.027363633 | -0.042109167 | 0.363904191 | -0.035734978 |
| -0.141955308 | 0.002104706 | -0.09548506  | 0.039147367 | -0.067922266 |
| -0.065836035 | 0.155474586 | -0.005014456 | 0.913937332 | -0.014948903 |
| -0.071118382 | 0.124856002 | -0.022626605 | 0.62575023  | -0.020071532 |
| 0.13980802   | 0.002461254 | 0.162664562  | 0.000416623 | 0.161128064  |
| -0.101688701 | 0.027997542 | -0.07885154  | 0.088740271 | -0.076300656 |
| -0.007350326 | 0.874127173 | 0.04642933   | 0.316731391 | 0.055725042  |
| 0.079202688  | 0.087324283 | 0.11516294   | 0.012763057 | 0.12246308   |
| -0.04192912  | 0.365960788 | -0.022086686 | 0.634020042 | -0.032118795 |
| 0.022921237  | 0.621257055 | 0.079178033  | 0.087423106 | 0.079818188  |
| -0.089720978 | 0.052672063 | -0.058732754 | 0.205184637 | -0.099561253 |
| -0.04148335  | 0.371083651 | -0.017315904 | 0.708980993 | -0.022262546 |
| 0.090155999  | 0.051530798 | 0.099600541  | 0.031399631 | 0.102266778  |
| 0.105198887  | 0.022990858 | 0.142783923  | 0.001980237 | 0.103193191  |
| -0.000449754 | 0.992266046 | -0.002627868 | 0.954834673 | -0.044720326 |
| -0.224157738 | 9.91E-07    | -0.161659497 | 0.000452807 | -0.173067073 |
| -0.043695095 | 0.346101282 | -0.02640415  | 0.569241757 | -0.037220232 |
| -0.18119558  | 8.22E-05    | -0.140662884 | 0.002313179 | -0.164615258 |
| -0.041450196 | 0.371466431 | 0.011949021  | 0.796763712 | 0.022223005  |
| 0.052304622  | 0.259296465 | 0.101671044  | 0.028024925 | 0.096678036  |
| 0.060057782  | 0.195130181 | 0.087114487  | 0.059959372 | 0.074035621  |
| -0.07243057  | 0.11802986  | -0.020424035 | 0.659770379 | -0.029291048 |
| -0.16894862  | 0.000244815 | -0.120463223 | 0.009167308 | -0.11567006  |
| 0.09221548   | 0.046404174 | 0.140529687  | 0.002335703 | 0.139715214  |
| -0.077925434 | 0.092563346 | -0.067275196 | 0.146618986 | -0.088336972 |
| 0.11807762   | 0.010656056 | 0.157028358  | 0.00066051  | 0.136742192  |
| -0.04656136  | 0.315355692 | 0.014240748  | 0.7588921   | 0.020385823  |
| -0.135608049 | 0.003322219 | -0.103311428 | 0.025577146 | -0.12816064  |
| -0.080159371 | 0.083558534 | -0.043008738 | 0.35373705  | -0.050019828 |
| -0.126858743 | 0.006047539 | -0.096015203 | 0.038066354 | -0.102811636 |
| -0.007067653 | 0.878929931 | 0.017645323  | 0.703703187 | 0.024935998  |
| -0.066356987 | 0.152223409 | -0.035936608 | 0.438478126 | -0.044537803 |
| 0.094908942  | 0.040351479 | 0.139405919  | 0.00253385  | 0.121944049  |



|              |             |              |             |              |
|--------------|-------------|--------------|-------------|--------------|
| -0.070025931 | 0.130769832 | -0.01693005  | 0.715180726 | -0.048258475 |
| 0.032166217  | 0.488036991 | 0.076958209  | 0.096695746 | 0.086751905  |
| 0.24684915   | 6.52E-08    | 0.269219725  | 3.38E-09    | 0.271486942  |
| 0.010335732  | 0.82371886  | 0.013372699  | 0.773174602 | -0.033414958 |
| 0.033876699  | 0.465188889 | 0.064506998  | 0.164006616 | 0.026348532  |
| 0.266527261  | 4.90E-09    | 0.297734872  | 5.16E-11    | 0.316250525  |
| -0.129236956 | 0.005156542 | -0.093809884 | 0.042735479 | -0.125909422 |
| -0.03837168  | 0.408066223 | -0.004502234 | 0.922699513 | -0.038356054 |
| -0.099465732 | 0.031630922 | -0.05887272  | 0.204105156 | -0.054848186 |
| 0.110082959  | 0.017323254 | 0.145507981  | 0.001617    | 0.16452638   |
| -0.160172051 | 0.000511751 | -0.130531196 | 0.004723037 | -0.156386631 |
| -0.033340795 | 0.472282888 | 0.046995492  | 0.310859845 | 0.050512305  |
| -0.02192578  | 0.636493501 | -0.020875575 | 0.652735649 | -0.008120848 |
| 0.002294627  | 0.960557106 | 0.046720932  | 0.313698249 | 0.031240885  |
| 0.047758797  | 0.303057803 | 0.095264977  | 0.03960371  | 0.074053767  |
| 0.053832547  | 0.245619321 | 0.083761613  | 0.070539316 | 0.103252332  |
| 0.085039976  | 0.066338191 | 0.126800391  | 0.00607104  | 0.171374316  |
| -0.169514228 | 0.000233158 | -0.14682026  | 0.001464804 | -0.141315116 |
| -0.094314942 | 0.041625593 | -0.073130221 | 0.114511417 | -0.092039564 |
| -0.054174849 | 0.242625658 | -0.047785021 | 0.302792091 | -0.076058314 |
| -0.068373668 | 0.140122612 | -0.031901177 | 0.491630523 | -0.071365394 |
| -0.085517603 | 0.064822233 | -0.045938677 | 0.321878129 | -0.041622982 |
| -0.019326416 | 0.676995138 | 0.011954899  | 0.796665923 | -0.011277911 |
| -0.028432952 | 0.539930202 | 0.014263906  | 0.75851217  | -0.004844851 |
| -0.024434783 | 0.598399409 | 0.041945434  | 0.365774147 | 0.063372669  |
| -0.058664525 | 0.205712341 | 0.006114674  | 0.895153295 | -0.003713337 |
| -0.077686754 | 0.093569715 | -0.07355648  | 0.112408493 | -0.111348841 |
| -0.100845447 | 0.029331247 | -0.06155763  | 0.184189272 | -0.082874977 |
| -0.152299994 | 0.000961039 | -0.135520599 | 0.003342746 | -0.148996501 |
| 0.131191999  | 0.004514631 | 0.138001094  | 0.002803067 | 0.139073012  |
| -0.067037823 | 0.148052515 | -0.011481841 | 0.804546148 | -0.001268029 |
| -0.032872706 | 0.478527467 | -0.02717558  | 0.558007508 | -0.012116836 |
| -0.206631761 | 6.73E-06    | -0.197428111 | 1.73E-05    | -0.211739982 |
| -0.16577542  | 0.00032097  | -0.101126223 | 0.028881241 | -0.086377352 |
| -0.013193707 | 0.776129377 | 0.010722597  | 0.817234831 | 0.010232136  |
| -0.163698558 | 0.000382221 | -0.132815695 | 0.004037366 | -0.149573082 |
| -0.24029019  | 1.47E-07    | -0.224988844 | 9.01E-07    | -0.222723487 |
| -0.183768634 | 6.48E-05    | -0.153467257 | 0.000876923 | -0.188276966 |
| -0.063171442 | 0.172929994 | -0.030543814 | 0.510254077 | -0.041348154 |
| 0.102592896  | 0.026625673 | 0.1434457    | 0.001885707 | 0.128454398  |
| -0.112956784 | 0.014594177 | -0.067498591 | 0.145279553 | -0.048473723 |
| -0.167843084 | 0.000269189 | -0.126643781 | 0.006134521 | -0.119700176 |
| -0.106765251 | 0.021019581 | -0.065031088 | 0.160601048 | -0.064074077 |
| -0.103765893 | 0.024932508 | -0.071548876 | 0.122583501 | -0.078493175 |
| 0.092483856  | 0.045768758 | 0.136235221  | 0.003178325 | 0.149222297  |

|              |             |              |             |              |
|--------------|-------------|--------------|-------------|--------------|
| -0.028259943 | 0.542400137 | 0.014202769  | 0.759515318 | 0.03436178   |
| 0.10324469   | 0.025673012 | 0.091220259  | 0.048825465 | 0.087834985  |
| 0.013722183  | 0.767414829 | 0.008976771  | 0.846588016 | 0.017709837  |
| -0.063361601 | 0.171637823 | -0.002227752 | 0.961705756 | -0.013774124 |
| -0.03972248  | 0.391750245 | 0.023168226  | 0.617501242 | 0.00824527   |
| 0.033146556  | 0.474868698 | 0.071760933  | 0.121475998 | 0.06877762   |
| -0.041574161 | 0.370036459 | -0.026710835 | 0.564762659 | -0.061556425 |
| -0.186309227 | 5.10E-05    | -0.17217259  | 0.000185    | -0.15513243  |
| 0.087564078  | 0.058646004 | 0.135374107  | 0.00337739  | 0.136429934  |
| 0.100951498  | 0.029160575 | 0.162735491  | 0.000414174 | 0.149993094  |
| -0.085889694 | 0.063661087 | -0.122522776 | 0.00803401  | -0.103140632 |
| -0.036244061 | 0.434568154 | -0.012628809 | 0.785475672 | -0.041581675 |
| -0.110542608 | 0.016858834 | -0.042927511 | 0.354647675 | -0.020039251 |
| -0.104264382 | 0.024241597 | -0.084272621 | 0.068834588 | -0.078682074 |
| 0.027149655  | 0.5583833   | 0.061059035  | 0.187774963 | 0.063685505  |
| -0.038678286 | 0.404327827 | -0.022084431 | 0.634054688 | -0.033690252 |
| -0.316352933 | 2.58E-12    | -0.290944837 | 1.46E-10    | -0.299451194 |
| 0.142222888  | 0.002063751 | 0.196016112  | 1.99E-05    | 0.215577953  |
| 0.029406202  | 0.526141216 | 0.061559339  | 0.184177067 | 0.053627056  |
| 0.19853616   | 1.55E-05    | 0.2304318    | 4.80E-07    | 0.245726167  |
| 0.054636401  | 0.238629713 | 0.10037714   | 0.030095195 | 0.124700799  |
| 0.023302126  | 0.615469255 | 0.069775701  | 0.132154427 | 0.060939487  |
| -0.077534807 | 0.09421493  | -0.044787341 | 0.334167557 | -0.052131332 |
| -0.150033596 | 0.001146001 | -0.128949902 | 0.005257417 | -0.16344148  |
| 0.117630619  | 0.010957712 | 0.142302302  | 0.002051737 | 0.140619504  |
| -0.080581984 | 0.081937301 | -0.014892282 | 0.748225351 | -0.033376063 |
| 0.095137695  | 0.039869679 | 0.130089169  | 0.004867249 | 0.115112087  |
| 0.070362794  | 0.128923621 | 0.127909583  | 0.005638062 | 0.119279355  |
| 0.038556636  | 0.405808628 | 0.075848657  | 0.101615947 | 0.073886091  |
| 0.034263738  | 0.460102432 | 0.042311702  | 0.361599354 | 0.07526264   |
| 0.03829699   | 0.408979999 | 0.091338955  | 0.048531245 | 0.092357762  |
| -0.11774355  | 0.010880796 | -0.098845133 | 0.032714558 | -0.092144921 |
| 0.046643741  | 0.314499301 | 0.057184422  | 0.217402881 | 0.045214134  |
| 0.255500101  | 2.15E-08    | 0.287958069  | 2.28E-10    | 0.29335285   |
| 0.016717875  | 0.718597893 | 0.084652846  | 0.067588167 | 0.067792547  |
| 0.259602147  | 1.25E-08    | 0.294852846  | 8.04E-11    | 0.292737438  |
| 0.026765805  | 0.563961629 | 0.091706484  | 0.047629625 | 0.074776304  |
| 0.081725743  | 0.077676865 | 0.12470637   | 0.0069706   | 0.142718063  |
| 0.002058732  | 0.964609158 | 0.009127724  | 0.844040977 | -0.040224482 |
| -0.205700719 | 7.42E-06    | -0.170203845 | 0.000219648 | -0.163040565 |
| -0.122852372 | 0.007864741 | -0.084982438 | 0.06652276  | -0.10552409  |
| -0.079423204 | 0.086444387 | -0.042015532 | 0.36497285  | -0.05330412  |
| -0.202301302 | 1.05E-05    | -0.160463086 | 0.000499685 | -0.164423572 |
| 0.04853388   | 0.295269302 | 0.061871605  | 0.181957368 | 0.089101168  |
| 0.034797697  | 0.453136354 | 0.004787946  | 0.91781084  | 0.029368937  |

|              |             |              |             |              |
|--------------|-------------|--------------|-------------|--------------|
| -0.000412332 | 0.992909541 | 0.042629531  | 0.358000914 | 0.043242903  |
| 0.035118491  | 0.448979952 | 0.067158465  | 0.147322614 | 0.058921072  |
| 0.028296073  | 0.541883869 | 0.089800714  | 0.052461316 | 0.097090077  |
| -0.04649647  | 0.316031336 | -0.059708921 | 0.197741757 | -0.006891737 |
| 0.049010808  | 0.290543834 | 0.114526991  | 0.013268885 | 0.13807545   |
| -0.000780517 | 0.986578683 | 0.027010349  | 0.560404676 | 0.006682834  |
| 0.012759284  | 0.783314161 | 0.063144845  | 0.173111299 | 0.036336077  |
| -0.085464304 | 0.064989977 | -0.020333631 | 0.661182459 | -0.018938688 |
| -0.173723699 | 0.000161383 | -0.121437296 | 0.008614692 | -0.130653804 |
| -0.036361486 | 0.433080146 | -0.017894531 | 0.699719885 | -0.0290067   |
| 0.185178657  | 5.68E-05    | 0.215436314  | 2.62E-06    | 0.238421358  |
| -0.212283174 | 3.69E-06    | -0.194930651 | 2.22E-05    | -0.226669255 |
| 0.202284188  | 1.06E-05    | 0.257136161  | 1.73E-08    | 0.230563701  |
| 0.16631874   | 0.00030653  | 0.156219981  | 0.00070477  | 0.176006645  |
| 0.007578219  | 0.870258492 | 0.044887561  | 0.33308598  | 0.067652183  |
| 0.127669273  | 0.005729439 | 0.143513758  | 0.001876224 | 0.133869672  |
| 0.021199897  | 0.647701792 | 0.072176114  | 0.119330243 | 0.058569911  |
| 0.104405035  | 0.024049669 | 0.147083864  | 0.001435866 | 0.160077523  |
| -0.02875493  | 0.535348547 | -0.023688594 | 0.609620952 | -0.016785597 |
| -0.09651717  | 0.037066223 | -0.052533037 | 0.257219052 | -0.047596348 |
| -0.150995561 | 0.001063816 | -0.109114493 | 0.018338516 | -0.136165902 |
| 0.041139382  | 0.375066757 | 0.066274038  | 0.152737597 | 0.039869844  |
| 0.028611304  | 0.537389891 | 0.066278358  | 0.15271079  | 0.079112742  |
| 0.001668976  | 0.971306091 | 0.059791502  | 0.197121262 | 0.058930607  |
| -0.040556645 | 0.381874594 | 0.001060636  | 0.981762659 | 0.002502377  |
| -0.098411495 | 0.03349041  | -0.028666594 | 0.536603597 | -0.03739032  |
| -0.093710592 | 0.042956584 | -0.049640163 | 0.284386127 | -0.029490783 |
| -0.178197618 | 0.000108126 | -0.13663051  | 0.003090565 | -0.172271779 |
| 0.108409249  | 0.019110145 | 0.110997549  | 0.016409935 | 0.091131386  |
| 0.229804186  | 5.16E-07    | 0.270278662  | 2.92E-09    | 0.252202351  |
| 0.139218245  | 0.002568396 | 0.159685647  | 0.000532523 | 0.179529426  |
| 0.089938807  | 0.052097991 | 0.145391875  | 0.001631142 | 0.15189236   |
| 0.185535796  | 5.49E-05    | 0.238151049  | 1.91E-07    | 0.258341608  |
| -0.052618653 | 0.256443361 | 0.02652194   | 0.567519442 | 0.035139562  |
| 0.122797566  | 0.007892665 | 0.140065593  | 0.002415753 | 0.128391353  |
| 0.094189103  | 0.041899828 | 0.105135529  | 0.023073855 | 0.073911948  |
| 0.001350149  | 0.976785802 | 0.02713242   | 0.558633191 | 0.023816588  |
| -0.071961652 | 0.120434908 | -0.063239282 | 0.172468174 | -0.10946034  |
| 0.095276756  | 0.039579173 | 0.131401843  | 0.004450208 | 0.136909964  |
| -0.145346199 | 0.001636736 | -0.1009519   | 0.02915993  | -0.119338023 |
| -0.068282954 | 0.140650588 | -0.025460121 | 0.583134242 | 0.002041579  |
| -0.082878275 | 0.073567457 | -0.067533148 | 0.145073195 | -0.046599669 |
| -0.203359315 | 9.46E-06    | -0.145275806 | 0.001645392 | -0.166043078 |
| -0.154446456 | 0.000811664 | -0.141537365 | 0.002170163 | -0.170991019 |
| 0.149605698  | 0.001184405 | 0.208658244  | 5.44E-06    | 0.174172639  |

|              |             |              |             |              |
|--------------|-------------|--------------|-------------|--------------|
| -0.184232975 | 6.20E-05    | -0.118644506 | 0.010284094 | -0.141992228 |
| -0.09088765  | 0.049657886 | -0.109640558 | 0.017780771 | -0.109984976 |
| 0.190704768  | 3.35E-05    | 0.244517571  | 8.73E-08    | 0.234159148  |
| 0.1472028    | 0.001422982 | 0.192974816  | 2.69E-05    | 0.186140591  |
| 0.037666551  | 0.416741234 | 0.06466047   | 0.163003778 | 0.082716004  |
| -0.06509214  | 0.160207821 | -0.055597447 | 0.230458435 | -0.07050736  |
| 0.171950797  | 0.00018863  | 0.143622894  | 0.001861108 | 0.144067576  |
| 0.128226643  | 0.005519507 | 0.171996619  | 0.000187875 | 0.186631985  |
| 0.140589838  | 0.002325507 | 0.109566875  | 0.017857987 | 0.110420841  |
| 0.109387995  | 0.018046666 | 0.157299091  | 0.000646272 | 0.157884032  |
| -0.002169433 | 0.962707492 | 0.053951127  | 0.24457935  | 0.067807038  |
| -0.0903527   | 0.051021574 | -0.043267397 | 0.350847076 | -0.051976413 |
| 0.222788746  | 1.16E-06    | 0.265616086  | 5.55E-09    | 0.269928043  |
| 0.23348227   | 3.35E-07    | 0.244762177  | 8.47E-08    | 0.2837218    |
| -0.012394141 | 0.789367443 | 0.036804203  | 0.427496517 | 0.028072723  |
| 0.032148443  | 0.488277528 | 0.072975933  | 0.115280152 | 0.078521477  |
| 0.013511762  | 0.770881223 | -0.013899398 | 0.764499042 | 0.003586148  |
| 0.047445117  | 0.306248205 | 0.080242698  | 0.08323684  | 0.092154783  |
| 0.114179469  | 0.013552698 | 0.178725491  | 0.00010307  | 0.185466374  |
| -0.051594296 | 0.265830709 | -0.018287228 | 0.693459815 | -0.004924206 |
| 0.012204968  | 0.792508536 | 0.081404243  | 0.078855851 | 0.09811903   |
| -0.149880637 | 0.001159596 | -0.097313347 | 0.03552567  | -0.106571064 |
| 0.052374779  | 0.258657167 | 0.103301842  | 0.025590897 | 0.117036425  |
| 0.290992273  | 1.45E-10    | 0.317846619  | 2.01E-12    | 0.323563777  |
| 0.193814718  | 2.47E-05    | 0.17788793   | 0.000111201 | 0.179912541  |
| -0.005945202 | 0.898043144 | 0.036241483  | 0.434600858 | 0.029472835  |
| 0.013116732  | 0.777401072 | 0.0345056    | 0.456939698 | 0.04338026   |
| 0.19832359   | 1.58E-05    | 0.233297724  | 3.42E-07    | 0.250408833  |
| 0.074696727  | 0.106932187 | 0.128227434  | 0.005519214 | 0.149495015  |
| 0.15210261   | 0.000975979 | 0.21441017   | 2.93E-06    | 0.208723154  |
| -0.011360215 | 0.806575434 | 0.014932755  | 0.747564302 | 0.004415166  |
| -0.227800182 | 6.52E-07    | -0.225920695 | 8.10E-07    | -0.202675758 |
| -0.03314628  | 0.474872386 | 0.037409272  | 0.419933273 | 0.038432071  |
| 0.149165452  | 0.001225152 | 0.157700952  | 0.000625663 | 0.185103321  |
| 0.007927895  | 0.864328504 | 0.063225328  | 0.172563094 | 0.073235772  |
| 0.163589656  | 0.000385715 | 0.214669284  | 2.85E-06    | 0.220838526  |
| -0.227862273 | 6.47E-07    | -0.183356653 | 6.73E-05    | -0.172749894 |
| -0.018782392 | 0.685595963 | 0.01963331   | 0.672161634 | 0.026644634  |
| -0.059887047 | 0.196405137 | -0.035382051 | 0.445581302 | -0.017794201 |
| 0.052227536  | 0.260000161 | 0.105570882  | 0.022508752 | 0.122043374  |
| 0.124404137  | 0.007109847 | 0.15073605   | 0.001085434 | 0.156218369  |
| -0.183392241 | 6.71E-05    | -0.230219263 | 4.92E-07    | -0.199803077 |
| -0.076347109 | 0.099381569 | -0.000554611 | 0.990463017 | 0.011761804  |
| 0.010052804  | 0.828468482 | 0.050844841  | 0.272846465 | 0.055809784  |
| -0.096736006 | 0.036637241 | -0.038100495 | 0.411389776 | -0.036216251 |

|              |             |              |             |              |
|--------------|-------------|--------------|-------------|--------------|
| 0.144997616  | 0.001680012 | 0.161511027  | 0.000458394 | 0.159140398  |
| 0.110109023  | 0.017296624 | 0.122049406  | 0.008282803 | 0.126783047  |
| -0.019704283 | 0.671045733 | 0.039801565  | 0.390807388 | 0.035907517  |
| -0.07759806  | 0.093945905 | -0.072846751 | 0.115926902 | -0.067277799 |
| 0.052785238  | 0.254938721 | 0.077972882  | 0.092364322 | 0.109877041  |
| 0.051956241  | 0.26248722  | 0.123983246  | 0.007307911 | 0.10816019   |
| -0.180728742 | 8.58E-05    | -0.145079877 | 0.001669706 | -0.149700738 |
| -0.12780373  | 0.00567815  | -0.090585369 | 0.050424663 | -0.110336043 |
| -0.197948975 | 1.64E-05    | -0.151478903 | 0.001024606 | -0.176724099 |
| -0.063902998 | 0.167998386 | -0.032769825 | 0.479905969 | -0.041681863 |
| 0.034821079  | 0.452832669 | 0.107062854  | 0.020662118 | 0.111736441  |
| 0.091059594  | 0.049226091 | 0.119278294  | 0.009881914 | 0.104640646  |
| 0.034813311  | 0.452933551 | 0.079039222  | 0.087981175 | 0.084885492  |
| -0.134542996 | 0.003580183 | -0.112047242 | 0.015413914 | -0.131726159 |
| 0.087712718  | 0.058217059 | 0.113027739  | 0.014531869 | 0.080585033  |
| 0.15658317   | 0.000684555 | 0.183727022  | 6.50E-05    | 0.181680809  |
| 0.01088464   | 0.814522596 | 0.075458564  | 0.103392249 | 0.081101794  |
| -0.09151177  | 0.048105533 | -0.021041878 | 0.650152442 | -0.048174836 |
| -0.012295839 | 0.790999262 | 0.020773724  | 0.654319772 | -0.002504859 |
| 0.287163082  | 2.57E-10    | 0.28639822   | 2.88E-10    | 0.290262606  |
| -0.179817145 | 9.33E-05    | -0.151846439 | 0.000995687 | -0.120694758 |
| 0.010724844  | 0.81719722  | 0.062152232  | 0.17997951  | 0.041295754  |
| 0.063196711  | 0.172757869 | 0.066799588  | 0.149501963 | 0.060718353  |
| 0.159866026  | 0.00052473  | 0.215682966  | 2.55E-06    | 0.214617484  |
| -0.147620607 | 0.00137856  | -0.09605555  | 0.037985129 | -0.109935047 |
| 0.009538003  | 0.837126595 | 0.028862285  | 0.533825264 | 0.061376049  |
| -0.029625619 | 0.523057487 | -0.045736173 | 0.324018084 | -0.019072342 |
| 0.102802691  | 0.026315768 | 0.159915078  | 0.00052263  | 0.179152994  |
| 0.041370745  | 0.372384712 | 0.098649302  | 0.033063013 | 0.149880998  |
| 0.06069297   | 0.190440056 | 0.097349141  | 0.035457709 | 0.14751605   |
| 0.013297954  | 0.774408085 | 0.051384806  | 0.267779194 | 0.044710696  |
| 0.057711963  | 0.213182679 | 0.116261539  | 0.01192922  | 0.10918319   |
| -0.195377243 | 2.12E-05    | -0.122874097 | 0.007853697 | -0.136487603 |
| -0.222348147 | 1.22E-06    | -0.173284765 | 0.000167762 | -0.142192698 |
| 0.146508262  | 0.001499747 | 0.209990147  | 4.72E-06    | 0.240066706  |
| -0.057846399 | 0.212116709 | -0.024714005 | 0.594224486 | -0.05657732  |
| 0.054009946  | 0.244064637 | 0.101137191  | 0.028863782 | 0.110281516  |
| 0.227614924  | 6.66E-07    | 0.286502955  | 2.84E-10    | 0.317160148  |
| 0.05606704   | 0.226538658 | 0.067731119  | 0.143895307 | 0.039048513  |
| 0.174314208  | 0.000153159 | 0.179811053  | 9.34E-05    | 0.174398504  |
| 0.079515811  | 0.086077005 | 0.095013818  | 0.040129981 | 0.040757769  |
| 0.140388896  | 0.002359728 | 0.166027943  | 0.000314181 | 0.198755621  |
| 0.053102573  | 0.252089416 | 0.085080309  | 0.066209061 | 0.098476788  |
| -0.014849166 | 0.748929777 | 0.024231933  | 0.601440706 | 0.023562177  |
| 0.18951928   | 3.76E-05    | 0.214986822  | 2.75E-06    | 0.2141076    |

|              |             |              |             |              |
|--------------|-------------|--------------|-------------|--------------|
| 0.011093048  | 0.811037574 | 0.045619864  | 0.325251349 | 0.049363994  |
| 0.154096228  | 0.000834471 | 0.153882019  | 0.000848711 | 0.125865946  |
| -0.192666074 | 2.77E-05    | -0.145571176 | 0.001609351 | -0.160183209 |
| -0.004204179 | 0.927802485 | 0.037925212  | 0.413546477 | 0.029090201  |
| -0.015789994 | 0.733606976 | 0.024427028  | 0.59851555  | 0.013933892  |
| -0.048027777 | 0.300339647 | 0.021286985  | 0.646352802 | 0.016660764  |
| -0.069644422 | 0.132885344 | -0.03008789  | 0.516591052 | -0.072840807 |
| 0.303304389  | 2.15E-11    | 0.349766836  | 6.94E-15    | 0.317260333  |
| -0.016252638 | 0.726110304 | 0.032857086  | 0.478736624 | 0.035431202  |
| -0.027482699 | 0.55356508  | 0.009117337  | 0.844216186 | 0.007487829  |
| -0.238635398 | 1.80E-07    | -0.219861006 | 1.61E-06    | -0.2052175   |
| -0.014498132 | 0.754672684 | 0.038738326  | 0.403598163 | 0.02641924   |
| -0.121479101 | 0.008591654 | -0.080146155 | 0.083609646 | -0.091512626 |
| -0.193960196 | 2.44E-05    | -0.098993104 | 0.032453347 | -0.100122955 |
| -0.026008198 | 0.575049452 | 0.032656063  | 0.481432768 | 0.053040573  |
| 0.058577497  | 0.206386871 | 0.079470626  | 0.086256103 | 0.049920925  |
| -0.078170771 | 0.091537958 | -0.068611353 | 0.138746437 | -0.091537826 |
| 0.0549914    | 0.235587918 | 0.12793933   | 0.005626843 | 0.09749933   |
| -0.055931349 | 0.227666389 | -0.029526386 | 0.524450984 | -0.009015253 |
| 0.069498915  | 0.133699117 | 0.085619891  | 0.064501311 | 0.116578186  |
| 0.198103859  | 1.61E-05    | 0.242515619  | 1.12E-07    | 0.228334225  |
| 0.146279449  | 0.001525858 | 0.170830502  | 0.00020801  | 0.18409989   |
| 0.058334185  | 0.208281211 | 0.109522055  | 0.017905101 | 0.152033722  |
| -0.107507462 | 0.020137927 | -0.033696918 | 0.467562133 | -0.019628771 |
| -0.065428811 | 0.158052382 | -0.027622971 | 0.551541834 | -0.027902155 |
| -0.040454787 | 0.383072257 | 0.013390562  | 0.772879903 | -0.011095701 |
| 0.029479699  | 0.525107248 | 0.06253203   | 0.177328107 | 0.031972748  |
| -0.065081211 | 0.16027816  | -0.042591655 | 0.358428563 | -0.071928131 |
| -0.169200646 | 0.000239555 | -0.127719587 | 0.005710198 | -0.145031814 |
| 0.118518637  | 0.010365673 | 0.147242728  | 0.001418681 | 0.187831668  |
| 0.017986938  | 0.69824495  | 0.021188517  | 0.647878153 | 0.010181153  |
| 0.07306087   | 0.114856454 | 0.131916837  | 0.00429561  | 0.114999805  |
| 0.173663625  | 0.000162243 | 0.170726607  | 0.000209899 | 0.152105635  |
| -0.004817858 | 0.91729921  | 0.015375719  | 0.740341455 | -0.011446405 |
| 0.116521614  | 0.011739015 | 0.16987584   | 0.00022598  | 0.168131322  |
| 0.120563175  | 0.009109186 | 0.171467212  | 0.000196779 | 0.153878467  |
| -0.120607009 | 0.009083799 | -0.094022192 | 0.042265922 | -0.087571649 |
| -0.055160846 | 0.234145717 | -0.00954251  | 0.837050715 | -0.019754843 |
| -0.080713788 | 0.08143691  | -0.061026458 | 0.188011019 | -0.056962205 |
| -0.25488283  | 2.33E-08    | -0.227970456 | 6.39E-07    | -0.203467939 |
| 0.287148892  | 2.58E-10    | 0.314583881  | 3.47E-12    | 0.32335472   |
| -0.116867327 | 0.011490333 | -0.053923087 | 0.244824991 | -0.049445092 |
| 0.242530828  | 1.12E-07    | 0.271593553  | 2.43E-09    | 0.274053668  |
| 0.057174073  | 0.21748626  | 0.056306273  | 0.224560065 | 0.047803663  |
| -0.093230092 | 0.044040241 | -0.041622206 | 0.369483165 | -0.041849155 |

|              |             |              |             |              |
|--------------|-------------|--------------|-------------|--------------|
| -0.042387726 | 0.36073657  | -0.038143945 | 0.410856192 | -0.078038491 |
| 0.068614123  | 0.13873046  | 0.079483616  | 0.086204585 | 0.075475425  |
| 0.014498952  | 0.75465924  | 0.033887125  | 0.465051469 | 0.020291344  |
| 0.121319173  | 0.008680086 | 0.165718694  | 0.000322513 | 0.160454184  |
| 0.007587439  | 0.870102032 | 0.020159938  | 0.663898847 | 0.005833001  |
| 0.156681371  | 0.000679183 | 0.214324085  | 2.96E-06    | 0.240482791  |
| 0.039321457  | 0.396552422 | 0.084713384  | 0.067391436 | 0.08034446   |
| -0.064687441 | 0.162828016 | -0.025350974 | 0.584750589 | -0.05501372  |
| -0.055930472 | 0.227673692 | 0.015998266  | 0.730228955 | 0.03363903   |
| -0.115203185 | 0.012731627 | -0.059458963 | 0.199628559 | -0.070028632 |
| -0.188743572 | 4.05E-05    | -0.148953431 | 0.001245233 | -0.159968904 |
| -0.115644567 | 0.012391373 | -0.047756795 | 0.303078098 | -0.030023736 |
| -0.053790284 | 0.245990722 | 0.008822684  | 0.849189587 | -0.009933571 |
| 0.030006676  | 0.517724103 | 0.080124094  | 0.083695026 | 0.054172158  |
| -0.047177851 | 0.308983978 | -0.026679088 | 0.565225532 | 0.026747395  |
| 0.057052431  | 0.218468079 | 0.068586758  | 0.138888357 | 0.059057455  |
| -0.053993389 | 0.244209445 | 0.01678723   | 0.717480275 | 0.029701714  |
| 0.078349482  | 0.090796777 | 0.098841734  | 0.032720579 | 0.120786228  |
| -0.138497291 | 0.002705138 | -0.103274817 | 0.025629697 | -0.087476191 |
| 0.136043409  | 0.00322172  | 0.130932765  | 0.004595378 | 0.108182872  |
| -0.167524787 | 0.000276616 | -0.079458729 | 0.086303308 | -0.084708924 |
| 0.178689962  | 0.000103403 | 0.18780855   | 4.42E-05    | 0.198325961  |
| -0.035447145 | 0.444744154 | -0.017775822 | 0.701616293 | -0.015141369 |
| -0.11899743  | 0.010058385 | -0.090609494 | 0.050363106 | -0.112480314 |
| 0.007119381  | 0.8780507   | 0.049773578  | 0.28309217  | 0.036220396  |
| 0.252808179  | 3.05E-08    | 0.309295037  | 8.24E-12    | 0.341238335  |
| 0.15578207   | 0.000729878 | 0.097657321  | 0.034877139 | 0.103759627  |
| 0.130971285  | 0.004583298 | 0.165777274  | 0.000320919 | 0.171636403  |
| 0.076577509  | 0.098362061 | 0.069761698  | 0.132232244 | 0.074419128  |
| -0.126528322 | 0.006181703 | -0.104349232 | 0.024125657 | -0.111188918 |
| -0.050423857 | 0.276842243 | -0.01163958  | 0.801916281 | -0.05266268  |
| -0.236596259 | 2.31E-07    | -0.215177567 | 2.70E-06    | -0.247472303 |
| -0.099722301 | 0.031191972 | -0.065527127 | 0.157427091 | -0.061583474 |
| -0.16116335  | 0.000471727 | -0.130982597 | 0.004579756 | -0.149125289 |
| -0.073384481 | 0.113253356 | -0.077922163 | 0.092577077 | -0.075393222 |
| -0.159757328 | 0.000529414 | -0.139992985 | 0.002428501 | -0.14872203  |
| -0.148372468 | 0.001301818 | -0.116862532 | 0.01149375  | -0.092813206 |
| 0.043511521  | 0.348133227 | 0.051132033  | 0.270143242 | 0.04864323   |
| 0.286339324  | 2.91E-10    | 0.294964488  | 7.91E-11    | 0.311173898  |
| -0.101902142 | 0.027668342 | -0.057563286 | 0.214366051 | -0.061070356 |
| 0.081670717  | 0.07787763  | 0.120655949  | 0.009055531 | 0.119211018  |
| -0.039056219 | 0.399747968 | 0.032165673  | 0.488044345 | 0.044246355  |
| 0.112406849  | 0.015085105 | 0.145406479  | 0.001629357 | 0.147527113  |
| 0.052121812  | 0.260967428 | 0.106030857  | 0.021924754 | 0.101920675  |
| -0.018238128 | 0.694241394 | 0.048899145  | 0.29164563  | 0.051020166  |

|              |             |              |             |              |
|--------------|-------------|--------------|-------------|--------------|
| 0.096032965  | 0.038030579 | 0.14583603   | 0.00157765  | 0.161523328  |
| -0.02763236  | 0.551406535 | 0.000112842  | 0.998059549 | 0.01408142   |
| 0.026040684  | 0.574571902 | 0.082416774  | 0.075191173 | 0.087094052  |
| 0.016880677  | 0.715975393 | 0.078637352  | 0.089612996 | 0.073330303  |
| -0.094666914 | 0.040866586 | -0.053120522 | 0.251928916 | -0.058406212 |
| 0.122036131  | 0.008289878 | 0.173175131  | 0.000169392 | 0.166546433  |
| -0.16668412  | 0.000297163 | -0.120737865 | 0.00900839  | -0.138093737 |
| -0.146821263 | 0.001464693 | -0.111301502 | 0.016115883 | -0.147764856 |
| -0.026917858 | 0.561748707 | -0.04777425  | 0.30290121  | -0.023542608 |
| -0.190508078 | 3.41E-05    | -0.122382595 | 0.008106981 | -0.104156243 |
| -0.146037712 | 0.001553897 | -0.10723563  | 0.020457024 | -0.11982073  |
| -0.093607439 | 0.043187308 | -0.064880427 | 0.16157455  | -0.062667361 |
| 0.018228355  | 0.694397007 | 0.035115488  | 0.449018755 | 0.030360967  |
| -0.059337038 | 0.200553652 | 0.023758968  | 0.608558672 | 0.024962645  |
| 0.001120345  | 0.980736163 | 0.020653369  | 0.656193694 | 0.058919609  |
| 0.112431343  | 0.015062934 | 0.155616892  | 0.000739562 | 0.156817698  |
| -0.159272096 | 0.000550797 | -0.076189571 | 0.100083488 | -0.074668361 |
| 0.230203081  | 4.93E-07    | 0.262257547  | 8.75E-09    | 0.225433411  |
| 0.182238626  | 7.47E-05    | 0.224539594  | 9.48E-07    | 0.210333107  |
| 0.068428388  | 0.139804866 | 0.119837499  | 0.009538726 | 0.159267607  |
| -0.145435883 | 0.001625768 | -0.135270198 | 0.003402161 | -0.134061987 |
| -0.06677096  | 0.149676865 | 0.007395631  | 0.873357826 | 0.009093304  |
| 0.069975057  | 0.131050421 | 0.130294062  | 0.004799916 | 0.119007393  |
| 0.029468154  | 0.525269592 | 0.092381831  | 0.04600945  | 0.090448931  |
| 0.111566193  | 0.015863586 | 0.157554618  | 0.000633096 | 0.149478077  |
| -0.026399283 | 0.569312964 | 0.005841833  | 0.899806477 | 0.00994494   |
| -0.148222382 | 0.001316816 | -0.124588598 | 0.007024568 | -0.121073297 |
| -0.134299178 | 0.003641735 | -0.084812421 | 0.067070605 | -0.099490997 |
| -0.10348101  | 0.025334941 | -0.05315792  | 0.251594739 | -0.052729228 |
| 0.113710918  | 0.013943809 | 0.142424131  | 0.002033431 | 0.141699705  |
| 0.062298834  | 0.178952609 | 0.108276015  | 0.019259056 | 0.114229709  |
| 0.048085515  | 0.299758301 | 0.087620895  | 0.058481732 | 0.119512331  |
| -0.088967103 | 0.054699677 | -0.028177646 | 0.543576987 | -0.054469637 |
| -0.038188422 | 0.410310415 | -0.032790209 | 0.479632673 | -0.011999563 |
| 0.239720373  | 1.58E-07    | 0.285996901  | 3.06E-10    | 0.291040741  |
| 0.048167116  | 0.298937959 | 0.057800403  | 0.212480992 | 0.108900433  |
| 0.041015843  | 0.376503721 | 0.083912812  | 0.070031358 | 0.08145155   |
| 0.102289943  | 0.02707873  | 0.084365015  | 0.068529992 | 0.073003131  |
| 0.074830876  | 0.106302    | 0.053731516  | 0.246507814 | 0.062530721  |
| -0.143597145 | 0.001864664 | -0.092433401 | 0.045887656 | -0.087819847 |
| 0.001316654  | 0.977361546 | 0.047962114  | 0.301001697 | 0.041710221  |
| -0.013724726 | 0.767372963 | 0.008982114  | 0.846497834 | 0.036458782  |
| 0.184815034  | 5.87E-05    | 0.194053151  | 2.42E-05    | 0.223228865  |
| -0.248318285 | 5.41E-08    | -0.235202097 | 2.73E-07    | -0.234906902 |
| -0.057084359 | 0.218210071 | -0.04674677  | 0.313430412 | -0.0534475   |



|              |             |              |             |              |
|--------------|-------------|--------------|-------------|--------------|
| -0.064854519 | 0.161742407 | -0.004988387 | 0.914383028 | 0.00449923   |
| 0.138302486  | 0.002743207 | 0.185483176  | 5.52E-05    | 0.210673655  |
| 0.156151453  | 0.000708646 | 0.158959406  | 0.000564999 | 0.16084736   |
| 0.109572214  | 0.017852383 | 0.14020003   | 0.002392311 | 0.128247003  |
| -0.065474913 | 0.157758935 | -0.003472271 | 0.94034556  | 0.005023952  |
| 0.067809973  | 0.143428188 | 0.080270976  | 0.083127896 | 0.081558827  |
| -0.135213681 | 0.003415703 | -0.132026067 | 0.00426345  | -0.134833904 |
| -0.027781805 | 0.54925523  | 0.014576382  | 0.75339133  | -0.007702412 |
| -0.020024021 | 0.666027547 | -0.002549355 | 0.956182698 | -0.004544095 |
| -0.066348485 | 0.152276053 | -0.006410856 | 0.890106137 | -0.027788325 |
| 0.033354375  | 0.472102387 | 0.053922071  | 0.244833891 | 0.04615697   |
| 0.117651589  | 0.010943394 | 0.125478581  | 0.006625843 | 0.132819893  |
| -0.005624131 | 0.903521736 | 0.04846034   | 0.296002486 | 0.056336372  |
| 0.11326523   | 0.014325018 | 0.134661624  | 0.003550577 | 0.126705701  |
| -0.161044844 | 0.000476354 | -0.147074088 | 0.00143693  | -0.171031775 |
| 0.112104434  | 0.015361203 | 0.168251733  | 0.000259927 | 0.194643366  |
| -0.163563425 | 0.000386562 | -0.103632613 | 0.02512009  | -0.111852276 |
| -0.097936119 | 0.034358912 | -0.061745529 | 0.182851169 | -0.077639644 |
| -0.030107219 | 0.516321575 | -0.000367168 | 0.993686166 | -0.034209194 |
| -0.167074635 | 0.000287447 | -0.165949173 | 0.000316284 | -0.204076089 |
| -0.095928482 | 0.038241438 | -0.106171742 | 0.021748532 | -0.102195247 |
| -0.106394902 | 0.021471912 | -0.065372363 | 0.158412237 | -0.060200453 |
| -0.009986811 | 0.829577251 | -0.019026752 | 0.681727618 | 0.003553879  |
| -0.177991349 | 0.000110165 | -0.123266719 | 0.00765647  | -0.145597751 |
| -0.097232744 | 0.035679113 | -0.049093707 | 0.289727663 | -0.057511488 |
| 0.07493512   | 0.10581433  | 0.068871678  | 0.137251107 | 0.082565676  |
| 0.027526839  | 0.552928025 | 0.061601946  | 0.183873029 | 0.037774705  |
| 0.175991626  | 0.000131892 | 0.183303284  | 6.76E-05    | 0.191726718  |
| -0.065648477 | 0.156657876 | 0.000926408  | 0.98407034  | 0.009000197  |
| -0.073769241 | 0.111370261 | -0.051175247 | 0.269738082 | -0.033217867 |
| 0.260861274  | 1.06E-08    | 0.297176739  | 5.62E-11    | 0.310488973  |
| 0.038796855  | 0.402887629 | 0.055844328  | 0.228391723 | 0.066038452  |
| -0.119948842 | 0.009471672 | -0.092961179 | 0.044656688 | -0.091645132 |
| -0.086996981 | 0.060306616 | -0.006610404 | 0.886708171 | -0.022120546 |
| -0.041159218 | 0.37483634  | -0.028177407 | 0.543580409 | -0.026143135 |
| 0.073559793  | 0.112392268 | 0.10068607   | 0.02958935  | 0.091403103  |
| -0.191745773 | 3.03E-05    | -0.140680283 | 0.002310252 | -0.134324072 |
| -0.101507606 | 0.028279487 | -0.078941259 | 0.08837674  | -0.098933331 |
| -0.040848983 | 0.378449948 | -0.015371018 | 0.740417976 | 0.022264547  |
| 0.069713268  | 0.132501641 | 0.118219435  | 0.010561902 | 0.114598979  |
| 0.038738991  | 0.403590085 | 0.090843065  | 0.049770365 | 0.10063808   |
| -0.066855303 | 0.149162022 | -0.011337897 | 0.80694795  | -0.035627311 |
| -0.033242899 | 0.473585168 | 0.009288111  | 0.841336547 | 0.022875968  |
| -0.063252384 | 0.172379093 | -0.062878968 | 0.17493154  | -0.063159919 |
| 0.163023914  | 0.000404353 | 0.15045166   | 0.00110959  | 0.12377657   |

|              |             |              |             |              |
|--------------|-------------|--------------|-------------|--------------|
| 0.020500218  | 0.658581374 | 0.058028509  | 0.210678862 | 0.044758935  |
| -0.120770831 | 0.00898948  | -0.077262017 | 0.095382193 | -0.125817851 |
| 0.008501708  | 0.854614095 | 0.078929535  | 0.088424177 | 0.110732725  |
| 0.042018055  | 0.364944022 | 0.100236151  | 0.030328502 | 0.12971905   |
| -0.163848751 | 0.00037745  | -0.128903089 | 0.005274036 | -0.108716718 |
| -0.112936751 | 0.014611811 | -0.052414164 | 0.258298752 | -0.050533499 |
| -0.16241043  | 0.000425509 | -0.136708369 | 0.003073541 | -0.137474847 |
| -0.043517517 | 0.348066741 | -0.003807464 | 0.934599169 | -0.027317252 |
| -0.149261357 | 0.001216167 | -0.090254683 | 0.051274794 | -0.10848283  |
| -0.064866752 | 0.161663134 | -0.03251568  | 0.483320466 | -0.055626782 |
| 0.163517063  | 0.000388061 | 0.189688245  | 3.70E-05    | 0.196158989  |
| 0.050674648  | 0.274457095 | 0.075784057  | 0.10190842  | 0.055002506  |
| 0.023783006  | 0.608195998 | 0.091720628  | 0.047595211 | 0.08447382   |
| 0.068679751  | 0.138352346 | 0.097407032  | 0.035348027 | 0.115030755  |
| 0.080879513  | 0.080811246 | 0.100652427  | 0.029644082 | 0.11400095   |
| 0.092837429  | 0.044942799 | 0.094457926  | 0.041315834 | 0.101505586  |
| 0.050085137  | 0.280085943 | 0.070099814  | 0.13036317  | 0.075916712  |
| -0.055205151 | 0.233769654 | -0.035862499 | 0.439423589 | -0.064605382 |
| 0.280051455  | 7.30E-10    | 0.298543547  | 4.55E-11    | 0.301140819  |
| -0.042970686 | 0.354163458 | -0.014553301 | 0.753769209 | -0.027230083 |
| 0.094143694  | 0.041999159 | 0.074750001  | 0.106681573 | 0.056377759  |
| -0.05627085  | 0.224852253 | -0.046972325 | 0.311098688 | -0.057610069 |
| 0.022848098  | 0.622371121 | 0.064142016  | 0.166410132 | 0.056348091  |
| -0.23148915  | 4.24E-07    | -0.199682046 | 1.38E-05    | -0.229364573 |
| -0.01567765  | 0.735431254 | 0.026855613  | 0.562654088 | 0.038193435  |
| 0.02652823   | 0.567427544 | 0.00358188   | 0.938466115 | 0.033485219  |
| 0.177332859  | 0.000116918 | 0.203972495  | 8.88E-06    | 0.236832554  |
| -0.130475899 | 0.004740864 | -0.086140803 | 0.062887196 | -0.112004081 |
| 0.016948418  | 0.714885176 | 0.033655105  | 0.468115049 | 0.048946227  |
| 0.048286585  | 0.297739615 | 0.067938428  | 0.142669713 | 0.078737564  |
| -0.02661582  | 0.566148532 | 0.020237986  | 0.662677707 | 0.050199365  |
| -0.013451799 | 0.771869874 | 0.013550024  | 0.770250572 | 0.005751313  |
| -0.101837013 | 0.027768439 | -0.064868756 | 0.161650147 | -0.074155968 |
| -0.166377008 | 0.000305018 | -0.125406655 | 0.006657297 | -0.143637532 |
| 0.027134448  | 0.558603782 | 0.009232373  | 0.842276176 | -0.011107718 |
| 0.01450235   | 0.754603587 | 0.074983778  | 0.105587306 | 0.064179123  |
| -0.044004056 | 0.342698489 | 0.002509592  | 0.956865464 | 0.000847341  |
| 0.069197963  | 0.135394436 | 0.087080495  | 0.060059652 | 0.102669306  |
| -0.011978516 | 0.796273053 | 0.026974995  | 0.560918241 | 0.017271908  |
| -0.184528492 | 6.03E-05    | -0.13806696  | 0.002789885 | -0.131394468 |
| -0.098189912 | 0.033892881 | -0.071046946 | 0.125236248 | -0.08355434  |
| -0.201821253 | 1.11E-05    | -0.148004726 | 0.001338848 | -0.169345425 |
| 0.284224488  | 3.97E-10    | 0.266647182  | 4.82E-09    | 0.311837875  |
| 0.121566154  | 0.008543856 | 0.137828495  | 0.002837881 | 0.156181569  |
| -0.062163011 | 0.179903853 | -0.020205868 | 0.663180125 | -0.033764293 |

|              |             |              |             |              |
|--------------|-------------|--------------|-------------|--------------|
| -0.049987559 | 0.281025136 | -0.018829951 | 0.684842428 | -0.049765574 |
| 0.108312663  | 0.019217995 | 0.122778657  | 0.00790232  | 0.122424949  |
| -0.10555371  | 0.022530813 | -0.055881829 | 0.228078947 | -0.045708314 |
| -0.04619099  | 0.319224719 | -0.008063189 | 0.862036138 | -0.048029769 |
| -0.145659986 | 0.001598656 | -0.09812122  | 0.034018482 | -0.112568655 |
| 0.031936192  | 0.491154958 | 0.096306577  | 0.037483066 | 0.085766661  |
| -0.117266817 | 0.011208781 | -0.08451932  | 0.068023757 | -0.077309719 |
| 0.080207569  | 0.083372339 | 0.114588199  | 0.013219444 | 0.097126437  |
| -0.063285081 | 0.172156922 | -0.034171798 | 0.46130789  | -0.019583301 |
| 0.1536082    | 0.000867241 | 0.20341013   | 9.41E-06    | 0.235146796  |
| -0.203180542 | 9.63E-06    | -0.171568783 | 0.00019504  | -0.19035199  |
| 0.158399781  | 0.000591268 | 0.210831347  | 4.31E-06    | 0.209214525  |
| -0.0675688   | 0.144860531 | -0.022736942 | 0.62406594  | -0.028884293 |
| 0.109539863  | 0.017886368 | 0.068126908  | 0.141562383 | 0.079090067  |
| 0.042163642  | 0.363283373 | 0.050785665  | 0.273405744 | 0.033523146  |
| -0.15590527  | 0.000722732 | -0.116957796 | 0.01142603  | -0.094724187 |
| -0.091815203 | 0.047365623 | -0.093942294 | 0.042442117 | -0.057632691 |
| -0.012140683 | 0.793576724 | -0.004947843 | 0.91507625  | 0.008971685  |
| 0.181875061  | 7.72E-05    | 0.203831227  | 9.01E-06    | 0.216009495  |
| -0.022493738 | 0.627781026 | 0.018351577  | 0.692435977 | 0.004381731  |
| 0.181720121  | 7.83E-05    | 0.217702734  | 2.04E-06    | 0.211789959  |
| 0.05236516   | 0.25874476  | 0.085346138  | 0.06536314  | 0.064179796  |
| -0.105810515 | 0.022202847 | -0.046542571 | 0.315551229 | -0.048847694 |
| -0.149462685 | 0.001197503 | -0.090353241 | 0.051020178 | -0.108776814 |
| -0.029281873 | 0.527892665 | 0.030228347  | 0.514634492 | 0.021020438  |
| 0.082372151  | 0.075349704 | 0.052622321  | 0.256410167 | 0.072242871  |
| 0.083391999  | 0.071793745 | 0.065313477  | 0.158788293 | 0.091476847  |
| 0.079078623  | 0.087822478 | 0.056611554  | 0.222053142 | 0.066432844  |
| -0.14751456  | 0.001389713 | -0.106533405 | 0.02130177  | -0.124767401 |
| -0.099883073 | 0.030919578 | -0.070325812 | 0.129125312 | -0.094678555 |
| -0.047412743 | 0.306578738 | -0.011212901 | 0.809035061 | -0.016021754 |
| 0.14794351   | 0.001345106 | 0.195362895  | 2.12E-05    | 0.175439726  |
| 0.026648235  | 0.565675556 | 0.079215391  | 0.087273397 | 0.085768524  |
| 0.034560288  | 0.456226263 | 0.055944914  | 0.227553473 | 0.064275041  |
| -0.130930606 | 0.004596056 | -0.064880153 | 0.161576327 | -0.039568353 |
| 0.036583378  | 0.430276364 | 0.086594645  | 0.061508174 | 0.089831785  |
| -0.1109568   | 0.016449712 | -0.041697621 | 0.368615705 | -0.054199326 |
| 0.020333446  | 0.661185346 | 0.091632407  | 0.047810213 | 0.10215005   |
| -0.079066625 | 0.087870778 | -0.015676668 | 0.735447204 | -0.045029662 |
| 0.045430058  | 0.327270445 | 0.052522728  | 0.257312566 | 0.045253776  |
| 0.231717577  | 4.12E-07    | 0.270792677  | 2.72E-09    | 0.319274267  |
| -0.022220968 | 0.631958973 | -0.032152717 | 0.488219685 | -0.0254748   |
| 0.078551813  | 0.089963448 | 0.095280507  | 0.039571363 | 0.093712517  |
| 0.119428974  | 0.009788378 | 0.170293265  | 0.000217951 | 0.162005107  |
| -0.120932243 | 0.008897402 | -0.106095845 | 0.021843312 | -0.090613284 |

|              |             |              |             |              |
|--------------|-------------|--------------|-------------|--------------|
| 0.073931251  | 0.110584759 | 0.113670667  | 0.013977866 | 0.112350642  |
| -0.019144031 | 0.679873972 | 0.036667289  | 0.429218821 | 0.049430624  |
| 0.228815817  | 5.79E-07    | 0.215079859  | 2.73E-06    | 0.225353912  |
| 0.062562262  | 0.177118303 | 0.087670451  | 0.058338768 | 0.117774902  |
| -0.082226984 | 0.075867323 | -0.024727698 | 0.594020083 | -0.024271493 |
| 0.035735243  | 0.441049819 | 0.064870699  | 0.161637561 | 0.098700742  |
| -0.107721344 | 0.019889908 | -0.062245078 | 0.179328643 | -0.078217111 |
| -0.044292065 | 0.339545727 | -0.003648275 | 0.937327822 | -0.018497128 |
| 0.140082939  | 0.002412717 | 0.168255185  | 0.00025985  | 0.205784628  |
| -0.051539305 | 0.266341242 | -0.007362837 | 0.873914703 | -0.001905675 |
| -0.142373109 | 0.00204108  | -0.130086443 | 0.00486815  | -0.114609262 |
| 0.136442024  | 0.003132133 | 0.167352751  | 0.00028071  | 0.168917279  |
| -0.094455045 | 0.041322056 | -0.03719612  | 0.422588652 | -0.03131642  |
| 0.076390958  | 0.099186895 | 0.118384761  | 0.010453072 | 0.116467648  |
| 0.005411146  | 0.907158547 | 0.067192183  | 0.147119104 | 0.086478424  |
| 0.045584531  | 0.325626595 | 0.080089488  | 0.083829097 | 0.099745962  |
| -0.168749382 | 0.000249049 | -0.113693836 | 0.013958254 | -0.154753655 |
| -0.029259497 | 0.528208202 | -0.016773389 | 0.717703269 | -0.06176806  |
| -0.176139335 | 0.000130159 | -0.1557848   | 0.000729719 | -0.18287665  |
| -0.07674637  | 0.097620161 | -0.032087466 | 0.489103253 | -0.045358194 |
| 0.142301001  | 0.002051934 | 0.191970412  | 2.96E-05    | 0.184583491  |
| 0.23714426   | 2.16E-07    | 0.270773916  | 2.73E-09    | 0.279917582  |
| 0.048623109  | 0.294381331 | 0.095979138  | 0.038139085 | 0.098489473  |
| 0.114392311  | 0.013378247 | 0.112458159  | 0.015038695 | 0.123471745  |
| 0.151126412  | 0.001053066 | 0.196319663  | 1.93E-05    | 0.21352493   |
| 0.155978025  | 0.000718542 | 0.197471765  | 1.72E-05    | 0.180308409  |
| 0.170273224  | 0.00021833  | 0.177691902  | 0.000113189 | 0.177374096  |
| 0.21777441   | 2.03E-06    | 0.29314371   | 1.04E-10    | 0.310995077  |
| 0.109000937  | 0.018460894 | 0.115271238  | 0.012678635 | 0.120427944  |
| -0.119587981 | 0.009690526 | -0.085954644 | 0.063460169 | -0.124078479 |
| -0.144529501 | 0.00173978  | -0.141042246 | 0.002250112 | -0.136166171 |
| 0.122512836  | 0.008039165 | 0.16614422   | 0.000311101 | 0.171330683  |
| 0.139557211  | 0.002506309 | 0.218560699  | 1.86E-06    | 0.211088375  |
| -0.100332463 | 0.03016896  | -0.084644005 | 0.067616938 | -0.096435065 |
| 0.049864908  | 0.282208677 | 0.102765607  | 0.02637032  | 0.103106234  |
| -0.004375726 | 0.924865079 | 0.042290667  | 0.361838306 | 0.042768301  |
| -0.145693922 | 0.001594587 | -0.092691637 | 0.045281844 | -0.087364883 |
| -0.087344704 | 0.059283844 | -0.060916244 | 0.188811253 | -0.035837558 |
| -0.042118612 | 0.363796514 | -0.001428483 | 0.975439351 | 0.011715149  |
| -0.153298164 | 0.000888672 | -0.119424258 | 0.009791293 | -0.123298419 |
| -0.12108081  | 0.008813394 | -0.08092979  | 0.080622205 | -0.117038362 |
| -0.104812848 | 0.023500592 | -0.052850479 | 0.254351118 | -0.057527079 |
| 0.191287629  | 3.17E-05    | 0.233049094  | 3.52E-07    | 0.228071122  |
| 0.074546724  | 0.107640339 | 0.062017265  | 0.180928761 | 0.056874239  |
| 0.069478952  | 0.133811065 | 0.100111931  | 0.030535342 | 0.078594071  |

|              |             |              |             |              |
|--------------|-------------|--------------|-------------|--------------|
| -0.180923591 | 8.43E-05    | -0.1220279   | 0.008294268 | -0.119952938 |
| 0.130053545  | 0.004879042 | 0.201448664  | 1.15E-05    | 0.225184874  |
| -0.019323826 | 0.677035984 | 0.017816628  | 0.700964192 | 0.017060006  |
| 0.006361641  | 0.890944494 | 0.033343436  | 0.472247784 | -0.00411921  |
| -0.023026879 | 0.619649405 | 0.03443904   | 0.457808858 | 0.015187272  |
| 0.021900214  | 0.636886878 | 0.040987029  | 0.376839364 | 0.071317104  |
| 0.032277266  | 0.486535534 | 0.036295723  | 0.433913132 | 0.055154889  |
| -0.010935196 | 0.813676864 | 0.051610655  | 0.265678971 | 0.085026815  |
| 0.040884672  | 0.378033162 | 0.081249069  | 0.079430067 | 0.072137203  |
| 0.027508478  | 0.553192983 | 0.081128034  | 0.079880301 | 0.084259347  |
| 0.263976846  | 6.94E-09    | 0.286660016  | 2.77E-10    | 0.26060311   |
| 0.019774518  | 0.66994216  | 0.077804314  | 0.093072948 | 0.075915692  |
| 0.085055638  | 0.066288022 | 0.13996128   | 0.002434087 | 0.112907606  |
| 0.137574806  | 0.002889765 | 0.145829596  | 0.001578414 | 0.134957661  |
| -0.085060464 | 0.066272569 | -0.049064976 | 0.290010354 | -0.0294335   |
| -0.005287002 | 0.909279275 | -0.030696597 | 0.50813963  | -0.04357158  |
| 0.12840772   | 0.005452809 | 0.115860201  | 0.012228082 | 0.114623741  |
| -0.098075965 | 0.034101446 | -0.099439214 | 0.031676589 | -0.118393729 |
| -0.054033757 | 0.243856488 | 0.007311268  | 0.874790503 | 0.00684667   |
| 0.13754831   | 0.002895233 | 0.16792307   | 0.000267352 | 0.170755091  |
| 0.048856887  | 0.292063328 | 0.070334057  | 0.129080322 | 0.073570146  |
| -0.23304787  | 3.52E-07    | -0.226358572 | 7.70E-07    | -0.2314348   |
| 0.132103791  | 0.004240699 | 0.121890747  | 0.008367716 | 0.07344527   |
| 0.1303899    | 0.00476871  | 0.147427961  | 0.001398882 | 0.117740261  |
| -0.190064989 | 3.56E-05    | -0.145233921 | 0.001650562 | -0.18326743  |
| 0.107647226  | 0.019975553 | 0.132166409  | 0.00422245  | 0.126844636  |
| 0.028214131  | 0.543055097 | 0.048660083  | 0.294013895 | 0.074591943  |
| -0.01829738  | 0.693298242 | 0.011031669  | 0.812063585 | -0.007962061 |
| 0.129338772  | 0.005121183 | 0.169015897  | 0.0002434   | 0.161562089  |
| -0.108482883 | 0.019028279 | -0.084382797 | 0.068471495 | -0.078872117 |
| -0.137496289 | 0.002905997 | -0.096052348 | 0.03799157  | -0.098318112 |
| -0.077222374 | 0.095552786 | -0.029571266 | 0.523820515 | -0.022406649 |
| -0.109568627 | 0.017856148 | -0.074113391 | 0.109706869 | -0.081729848 |
| -0.105511267 | 0.022585418 | -0.060519232 | 0.191714608 | -0.051680733 |
| 0.269836484  | 3.11E-09    | 0.302721708  | 2.36E-11    | 0.335697435  |
| -0.056174145 | 0.225651311 | -0.026443174 | 0.568670868 | -0.008282801 |
| -0.006147442 | 0.8945947   | 0.045678914  | 0.324624845 | 0.034491831  |
| -0.08301037  | 0.073108003 | -0.060376565 | 0.192765892 | -0.071993578 |
| -0.076660536 | 0.097996719 | -0.056370794 | 0.224028555 | -0.087946885 |
| -0.180788862 | 8.54E-05    | -0.133338323 | 0.003893754 | -0.100627563 |
| 0.229082191  | 5.62E-07    | 0.26351593   | 7.39E-09    | 0.237732411  |
| 0.073932891  | 0.110576833 | 0.11471946   | 0.013113965 | 0.121550405  |
| -0.020864041 | 0.652914976 | 0.026223927  | 0.571881738 | 0.025008674  |
| -0.209630099 | 4.90E-06    | -0.189673401 | 3.70E-05    | -0.190110114 |
| -0.101998488 | 0.027520837 | -0.05509502  | 0.234705241 | -0.069129344 |

|              |             |              |             |              |
|--------------|-------------|--------------|-------------|--------------|
| -0.144000761 | 0.001809627 | -0.104576711 | 0.023817189 | -0.117811313 |
| -0.088379394 | 0.05632502  | -0.047321986 | 0.307506596 | -0.058711011 |
| 0.098500961  | 0.033329067 | 0.112288263  | 0.015192848 | 0.105740414  |
| 0.072343137  | 0.118475428 | 0.128763181  | 0.005323985 | 0.131641323  |
| -0.055098063 | 0.234679353 | 0.003277383  | 0.943688077 | 0.027282862  |
| -0.03356077  | 0.469363813 | 0.00028455   | 0.995106846 | -0.04414525  |
| -0.012229447 | 0.792101899 | 0.002733375  | 0.953023368 | -0.021797728 |
| -0.023326714 | 0.615096443 | 0.002634993  | 0.954712349 | 0.006047341  |
| -0.074638856 | 0.107204952 | -0.064329276 | 0.16517369  | -0.061367989 |
| 0.036364599  | 0.433040733 | 0.022012813  | 0.635155133 | -0.009068457 |
| 0.081556416  | 0.078296015 | 0.138703073  | 0.002665447 | 0.148023302  |
| 0.171336902  | 0.00019903  | 0.170224068  | 0.000219263 | 0.16760129   |
| 0.146397943  | 0.001512284 | 0.200880523  | 1.22E-05    | 0.200815991  |
| 0.003124734  | 0.946306838 | 0.038690735  | 0.40417647  | 0.049917179  |
| 0.096989371  | 0.036145845 | 0.155215979  | 0.000763564 | 0.120661734  |
| 0.021014299  | 0.650580545 | 0.026045761  | 0.574497287 | -0.006391987 |
| 0.011316898  | 0.807298484 | 0.060453866  | 0.192195759 | 0.059535195  |
| -0.148035058 | 0.001335758 | -0.140568312 | 0.002329151 | -0.166954986 |
| 0.031543203  | 0.496506491 | 0.065054553  | 0.160449828 | 0.052073017  |
| -0.036651434 | 0.429418527 | 0.004645672  | 0.920244839 | -0.002049237 |
| -0.038333308 | 0.408535527 | -0.031795676 | 0.493064879 | -0.034124897 |
| -0.156062646 | 0.000713697 | -0.10797649  | 0.019597519 | -0.067620993 |
| 0.086693807  | 0.061210212 | 0.049709323  | 0.283714862 | 0.012965875  |
| 0.13366667   | 0.00380591  | 0.164150305  | 0.000368038 | 0.155355983  |
| -0.0156372   | 0.736088444 | 0.051849288  | 0.26347218  | 0.031861027  |
| 0.021633347  | 0.640999153 | 0.025824573  | 0.57775225  | 0.013714079  |
| -0.323502323 | 7.73E-13    | -0.302353773 | 2.50E-11    | -0.326316121 |
| -0.050456747 | 0.276528648 | 0.021933063  | 0.636381464 | 0.028782715  |
| 0.032907098  | 0.478067133 | 0.070801942  | 0.126547214 | 0.048353335  |
| -0.100402775 | 0.03005294  | -0.077751101 | 0.093297545 | -0.085361006 |
| 0.162126241  | 0.000435655 | 0.208838822  | 5.33E-06    | 0.184963675  |
| -0.077856047 | 0.09285501  | -0.03170646  | 0.494279574 | -0.042908243 |
| -0.205761102 | 7.37E-06    | -0.184533503 | 6.03E-05    | -0.238206664 |
| -0.025982619 | 0.575425598 | -0.011382261 | 0.806207517 | -0.010564405 |
| -0.168323706 | 0.000258327 | -0.171660387 | 0.000193485 | -0.155886245 |
| -0.057703505 | 0.213249873 | -0.04135545  | 0.372561649 | -0.009932478 |
| -0.100905209 | 0.029234964 | -0.107571913 | 0.020062907 | -0.118062405 |
| 0.025465161  | 0.583059667 | 0.019873825  | 0.668382981 | 0.021345742  |
| -0.096914306 | 0.036290845 | -0.08269834  | 0.074197096 | -0.093117577 |
| 0.006673138  | 0.885640357 | 0.055374967  | 0.232332198 | 0.033536298  |
| -0.079255123 | 0.087114406 | -0.029483431 | 0.52505478  | -0.050692441 |
| -0.053815022 | 0.245773279 | -0.02181258  | 0.638236055 | -0.023032988 |
| -0.128828846 | 0.005300488 | -0.11410658  | 0.013612899 | -0.105749484 |
| -0.105299549 | 0.022859526 | -0.074366972 | 0.108493801 | -0.09999926  |
| -0.0755486   | 0.102980098 | -0.044113524 | 0.341497983 | -0.046862733 |

|              |             |              |             |              |
|--------------|-------------|--------------|-------------|--------------|
| -0.153163406 | 0.000898139 | -0.109689724 | 0.017729408 | -0.134267995 |
| 0.211067091  | 4.21E-06    | 0.252454176  | 3.19E-08    | 0.265021488  |
| -0.154387125 | 0.000815487 | -0.091078356 | 0.049179166 | -0.078901121 |
| -0.057501276 | 0.214860996 | -0.016419649 | 0.723410421 | -0.007224432 |
| -0.005089923 | 0.912647221 | 0.021214162  | 0.64748075  | 0.024145495  |
| 0.051500209  | 0.266704614 | 0.119766698  | 0.009581582 | 0.14233831   |
| -0.076831491 | 0.097247868 | -0.069446105 | 0.133995416 | -0.08399166  |
| -0.190509406 | 3.41E-05    | -0.152577598 | 0.000940385 | -0.15642325  |
| -0.111162015 | 0.016250249 | -0.049960548 | 0.281285496 | -0.052745471 |
| -0.007977285 | 0.863491528 | 0.024604654  | 0.59585792  | 0.009932008  |
| 0.01411828   | 0.760902298 | 0.087532482  | 0.058737518 | 0.101855452  |
| -0.099784617 | 0.031086149 | -0.070060635 | 0.130578697 | -0.071033693 |
| -0.117600902 | 0.010978033 | -0.104207404 | 0.024319723 | -0.126898319 |
| -0.041475425 | 0.371175125 | -0.000843432 | 0.985496959 | 0.024296147  |
| 0.037160094  | 0.423038413 | 0.081460527  | 0.078648407 | 0.084777057  |
| 0.081315908  | 0.079182319 | 0.113694633  | 0.013957579 | 0.12999342   |
| 0.109043445  | 0.018415    | 0.166848652  | 0.000293033 | 0.200774189  |
| 0.131500735  | 0.004420137 | 0.161578409  | 0.00045585  | 0.165226914  |
| 0.000334803  | 0.994242709 | 0.035989572  | 0.437803128 | 0.017298478  |
| -0.015642841 | 0.735996782 | 0.041755451  | 0.367951373 | 0.030228415  |
| -0.008076151 | 0.861816577 | 0.046843707  | 0.312426902 | 0.081612994  |
| -0.061892801 | 0.181807424 | -0.053785463 | 0.246033115 | -0.063654395 |
| 0.108408117  | 0.019111406 | 0.159451092  | 0.000542817 | 0.145459864  |
| 0.015612249  | 0.736493943 | 0.057186578  | 0.21738551  | 0.077408096  |
| -0.18221577  | 7.48E-05    | -0.155307104 | 0.000758046 | -0.175250161 |
| -0.119270376 | 0.009886851 | -0.086946087 | 0.060457528 | -0.085285287 |
| 0.159735472  | 0.00053036  | 0.187504556  | 4.55E-05    | 0.211378611  |
| -0.0901543   | 0.051535215 | -0.043983958 | 0.342919196 | -0.06052812  |
| 0.16228377   | 0.000430004 | 0.208570772  | 5.49E-06    | 0.215971614  |
| -0.014801101 | 0.749715307 | 0.001089327  | 0.981269414 | 0.000796986  |
| -0.08897944  | 0.054665981 | -0.015951601 | 0.730985369 | -0.023601766 |
| -0.124063388 | 0.007269822 | -0.061855955 | 0.182068143 | -0.073849537 |
| 0.095838725  | 0.038423366 | 0.167586627  | 0.000275158 | 0.170038645  |
| -0.075907419 | 0.101350483 | -0.034642337 | 0.455157048 | -0.039714589 |
| 0.170160014  | 0.000220485 | 0.125973817  | 0.006412866 | 0.133531337  |
| 0.041847454  | 0.366896004 | 0.054473813  | 0.240032025 | 0.05409119   |
| 0.076791084  | 0.097424454 | 0.120944105  | 0.008890668 | 0.064504024  |
| -0.110687297 | 0.016714916 | -0.090678207 | 0.05018812  | -0.117130192 |
| -0.125310783 | 0.00669943  | -0.09944426  | 0.031667895 | -0.12347252  |
| -0.071796369 | 0.121291689 | -0.022221261 | 0.63195447  | -0.048892843 |
| -0.058161484 | 0.209633397 | -0.003650069 | 0.93729708  | 0.025523663  |
| -0.126304073 | 0.006274272 | -0.044603167 | 0.336161064 | -0.054524264 |
| -0.183266652 | 6.79E-05    | -0.152793802 | 0.000924584 | -0.176058021 |
| -0.237616554 | 2.04E-07    | -0.280835518 | 6.52E-10    | -0.281822485 |
| -0.158735887 | 0.000575359 | -0.119893698 | 0.009504828 | -0.109420861 |

|              |             |              |             |              |
|--------------|-------------|--------------|-------------|--------------|
| 0.01132071   | 0.807234854 | 0.070190079  | 0.129867667 | 0.084272989  |
| -0.022839762 | 0.622498161 | 0.013507394  | 0.770953233 | 0.025514421  |
| -0.097894187 | 0.034436434 | -0.070939191 | 0.125811515 | -0.079478902 |
| 0.057500141  | 0.214870069 | 0.100159669  | 0.03045571  | 0.113100207  |
| 0.055322169  | 0.232778446 | 0.056340613  | 0.224277066 | 0.073569846  |
| 0.125290992  | 0.006708157 | 0.173284426  | 0.000167767 | 0.214385578  |
| 0.01213629   | 0.79364972  | 0.012447925  | 0.788475016 | -0.011711492 |
| -0.10431642  | 0.024170436 | -0.057482317 | 0.215012486 | -0.020634094 |
| -0.162464693 | 0.000423597 | -0.110181439 | 0.017222822 | -0.128935996 |
| -0.024543744 | 0.596768642 | 0.030512766  | 0.510684339 | 0.032043932  |
| -0.127199447 | 0.005911943 | -0.06498439  | 0.160902318 | -0.056308938 |
| -0.159699488 | 0.000531921 | -0.136634269 | 0.003089741 | -0.17239293  |
| -0.053768089 | 0.246185926 | -0.038190055 | 0.410290393 | -0.015231394 |
| -0.027939574 | 0.546988589 | 0.027615543  | 0.551648888 | 0.029469643  |
| 0.007678703  | 0.868553666 | 0.050763649  | 0.273614022 | 0.050787919  |
| 0.171182073  | 0.000201736 | 0.231720877  | 4.12E-07    | 0.214703158  |
| 0.068122875  | 0.141586006 | 0.107629061  | 0.019996591 | 0.111907065  |
| -0.095970454 | 0.038156614 | -0.025456357 | 0.583189955 | -0.039615116 |
| -0.024723355 | 0.594084918 | 0.028680665  | 0.536403585 | 0.005093724  |
| 0.028450445  | 0.539680782 | 0.099979232  | 0.030757634 | 0.116927444  |
| 0.044787923  | 0.334161277 | 0.112398344  | 0.01509281  | 0.103854126  |
| -0.250872408 | 3.91E-08    | -0.202856036 | 9.96E-06    | -0.212710044 |
| -0.098917907 | 0.032585868 | -0.056468208 | 0.223227775 | -0.057837192 |
| -0.048545791 | 0.295150661 | -0.015652576 | 0.735838608 | -0.029082906 |
| 0.195220363  | 2.15E-05    | 0.184151319  | 6.25E-05    | 0.218539048  |
| 0.007674016  | 0.868633179 | 0.035167921  | 0.448341426 | 0.008007009  |
| -0.15060775  | 0.001096272 | -0.097812504 | 0.034587871 | -0.100845676 |
| -0.014417195 | 0.755998736 | 0.027222736  | 0.557324288 | 0.011475947  |
| -0.145249126 | 0.001648683 | -0.084249482 | 0.068911044 | -0.11434494  |
| 0.00205956   | 0.964594934 | -0.000636029 | 0.989063051 | -0.009805008 |
| 0.027462623  | 0.553854948 | 0.059873356  | 0.196507636 | 0.054810597  |
| -0.061635898 | 0.183631022 | -0.048092198 | 0.299691059 | -0.074663249 |
| 0.165506874  | 0.000328339 | 0.185023736  | 5.76E-05    | 0.181467408  |
| 0.15839654   | 0.000591424 | 0.131579044  | 0.004396456 | 0.178756729  |
| 0.061294143  | 0.186077816 | 0.129458259  | 0.005079966 | 0.145344221  |
| 0.075692958  | 0.102322002 | 0.060457366  | 0.192169967 | 0.094795301  |
| 0.001718215  | 0.970459918 | 0.018673387  | 0.687324221 | -0.006322859 |
| -0.003041604 | 0.947733219 | 0.049757465  | 0.283248238 | 0.041118208  |
| 0.110019142  | 0.01738861  | 0.151912464  | 0.000990573 | 0.145050755  |
| 0.05282923   | 0.254542396 | 0.069811507  | 0.131955608 | 0.046969326  |
| 0.103473077  | 0.025346226 | 0.164847009  | 0.000347122 | 0.159539153  |
| -0.076162645 | 0.100203855 | -0.012858086 | 0.781678469 | -0.027264674 |
| 0.065255861  | 0.159156896 | 0.102790435  | 0.026333787 | 0.082404656  |
| 0.038169862  | 0.410538119 | 0.084834513  | 0.066999211 | 0.112854999  |
| -0.051960237 | 0.262450463 | 0.003657543  | 0.937168951 | -0.007476361 |



|              |             |              |             |              |
|--------------|-------------|--------------|-------------|--------------|
| -0.071459527 | 0.123052489 | 0.000374821  | 0.993554559 | 0.0157386    |
| -0.07271661  | 0.116581322 | -0.009482977 | 0.83805323  | -0.038127584 |
| 0.131566021  | 0.004400386 | 0.204360089  | 8.53E-06    | 0.233910144  |
| 0.179696868  | 9.43E-05    | 0.248406677  | 5.35E-08    | 0.268331507  |
| -0.156417466 | 0.000693711 | -0.13737763  | 0.002930686 | -0.15828692  |
| 0.200764036  | 1.23E-05    | 0.185675172  | 5.42E-05    | 0.174287868  |
| -0.044084983 | 0.341810723 | -0.043617378 | 0.346960596 | -0.051766882 |
| -0.13967048  | 0.002485869 | -0.126912747 | 0.006025861 | -0.122423879 |
| -0.188157917 | 4.28E-05    | -0.125984687 | 0.006408261 | -0.103897003 |
| -0.053771006 | 0.246160263 | 0.030454157  | 0.511497031 | 0.027147195  |
| 0.030893598  | 0.505419988 | 0.10000996   | 0.030706036 | 0.114773162  |
| -0.080287483 | 0.083064355 | -0.01545102  | 0.739115864 | -0.026740798 |
| -0.083076657 | 0.072878326 | -0.049612625 | 0.284653709 | -0.066519149 |
| -0.023860322 | 0.607030181 | -0.059801017 | 0.197049861 | -0.048613755 |
| -0.098582219 | 0.033183103 | -0.058949767 | 0.203512701 | -0.062358202 |
| -0.033415492 | 0.471290542 | 0.002857437  | 0.950893817 | -0.017377432 |
| 0.119397149  | 0.009808068 | 0.148267754  | 0.001312265 | 0.163266472  |
| -0.058091056 | 0.210186645 | -0.016714088 | 0.718658932 | -0.008509628 |
| 0.106866744  | 0.020897075 | 0.159832605  | 0.000526166 | 0.150132938  |
| -0.143656546 | 0.001856469 | -0.108497619 | 0.019011932 | -0.139307507 |
| -0.074160639 | 0.109480041 | -0.099518781 | 0.031539732 | -0.105045026 |
| 0.068054221  | 0.141988638 | 0.096297443  | 0.037501235 | 0.116971086  |
| 0.029810202  | 0.520470513 | 0.037992282  | 0.412720455 | 0.001316763  |
| -0.080343357 | 0.082849569 | -0.030329267 | 0.513231045 | -0.056298061 |
| -0.112225936 | 0.015249746 | -0.083158922 | 0.072594104 | -0.09774934  |
| -0.082356439 | 0.07540559  | -0.034596816 | 0.455750073 | -0.048280256 |
| 0.025260975  | 0.586084923 | 0.113436676  | 0.014177305 | 0.065810515  |
| -0.050275115 | 0.278263491 | 0.014559701  | 0.75366442  | 0.01999191   |
| 0.146729484  | 0.001474893 | 0.149336966  | 0.001209127 | 0.139963021  |
| 0.066763438  | 0.149722842 | 0.101094096  | 0.028932429 | 0.167187261  |
| 0.211787855  | 3.89E-06    | 0.253516814  | 2.78E-08    | 0.253559768  |
| 0.247351121  | 6.12E-08    | 0.274929764  | 1.52E-09    | 0.307157783  |
| 0.016648157  | 0.719721963 | 0.025088855  | 0.588640708 | 0.024185461  |
| 0.060321404  | 0.193173491 | 0.111268304  | 0.016147774 | 0.082181569  |
| -0.092165046 | 0.046524404 | -0.033678186 | 0.467809784 | -0.050879449 |
| -0.134969241 | 0.003474839 | -0.134981909 | 0.003471751 | -0.13401879  |
| -0.060358643 | 0.192898255 | -0.016964997 | 0.714618435 | -0.009673272 |
| 0.075482892  | 0.103280756 | 0.068802091  | 0.137649605 | 0.070753423  |
| -0.00331028  | 0.943123785 | 0.059059432  | 0.202671577 | 0.032722744  |
| -0.006499556 | 0.888595479 | 0.06714313   | 0.147415242 | 0.071737927  |
| 0.02854118   | 0.538387976 | 0.077837765  | 0.09293198  | 0.069356316  |
| -0.017644257 | 0.703720231 | 0.012626443  | 0.785514887 | -0.027371588 |
| 0.079018712  | 0.088063875 | 0.120328436  | 0.009246209 | 0.105751614  |
| 0.031923592  | 0.491326059 | 0.094888848  | 0.040394034 | 0.101240173  |
| -0.009513579 | 0.837537875 | 0.011234247  | 0.80867854  | 0.013744944  |

|              |             |              |             |              |
|--------------|-------------|--------------|-------------|--------------|
| 0.131785949  | 0.004334435 | 0.167792379  | 0.00027036  | 0.169947161  |
| -0.00240291  | 0.958697436 | 0.041363123  | 0.372472881 | 0.048898321  |
| -0.00498103  | 0.914508811 | 0.01917521   | 0.679381499 | 0.016458341  |
| 0.043211298  | 0.351472598 | 0.10570444   | 0.022337809 | 0.094359287  |
| -0.020738816 | 0.654863075 | 0.018659097  | 0.687550919 | 0.012408836  |
| -0.159179472 | 0.000554969 | -0.110293737 | 0.017108919 | -0.118952566 |
| -0.070509869 | 0.128123922 | -0.023906596 | 0.606332902 | -0.01570736  |
| -0.176420045 | 0.000126924 | -0.114670263 | 0.013153411 | -0.127733376 |
| -0.036499884 | 0.431330147 | -0.014979678 | 0.746798121 | 0.016734382  |
| -0.093695913 | 0.042989355 | -0.084721561 | 0.0673649   | -0.108044222 |
| -0.011913904 | 0.79734802  | 0.040963903  | 0.377108884 | 0.033677897  |
| -0.115238607 | 0.01270402  | -0.099222777 | 0.032051438 | -0.078966771 |
| -0.022308295 | 0.630620117 | 0.000106029  | 0.998176701 | -0.015738106 |
| -0.016258531 | 0.726014971 | -0.01085706  | 0.814984077 | -0.010220455 |
| 0.174894912  | 0.000145457 | 0.187372988  | 4.61E-05    | 0.224931329  |
| 0.001088888  | 0.981276954 | 0.071065901  | 0.125135268 | 0.086897805  |
| 0.034297428  | 0.459661157 | 0.058484243  | 0.207111438 | 0.06584044   |
| -0.167464452 | 0.000278045 | -0.126327862 | 0.006264393 | -0.151448713 |
| 0.004719675  | 0.91897872  | 0.053244136  | 0.250825508 | 0.042042277  |
| 0.038521252  | 0.406239957 | 0.129508728  | 0.005062646 | 0.125075906  |
| 0.039128159  | 0.398879723 | 0.063273976  | 0.172232355 | 0.080017163  |
| -0.018018109 | 0.697747681 | 0.010503421  | 0.820906823 | 0.001054292  |
| -0.016426321 | 0.72330263  | 0.045490207  | 0.326629721 | 0.044617029  |
| -0.112329752 | 0.015155076 | -0.078492861 | 0.090205615 | -0.089380213 |
| 0.029143538  | 0.529844885 | 0.072551222  | 0.117417159 | 0.07506021   |
| -0.022352441 | 0.629943754 | 0.03079441   | 0.506788343 | 0.018211665  |
| 0.020017056  | 0.666136701 | 0.050678225  | 0.274423174 | 0.020835973  |
| 0.099547707  | 0.031490105 | 0.118078885  | 0.010655212 | 0.122418185  |
| -0.169311897 | 0.000237267 | -0.11645721  | 0.011785865 | -0.128169085 |
| -0.13170102  | 0.004359796 | -0.100051987 | 0.030635586 | -0.098152362 |
| -0.101811812 | 0.027807254 | -0.054957385 | 0.235878189 | -0.066235568 |
| 0.032250226  | 0.486900912 | 0.053018147  | 0.252845292 | 0.050841259  |
| 0.093971555  | 0.042377517 | 0.079309208  | 0.086898354 | 0.050380273  |
| -0.062234851 | 0.17940025  | -0.056731978 | 0.22106975  | -0.071100827 |
| -0.063269424 | 0.172263286 | -0.082909325 | 0.073459247 | -0.081743409 |
| -0.00409045  | 0.929750419 | 0.02213272   | 0.63331316  | 0.009151339  |
| -0.144342343 | 0.001764216 | -0.125393477 | 0.006663074 | -0.179276992 |
| -0.153526153 | 0.000872865 | -0.128108366 | 0.005563468 | -0.144015544 |
| -0.189980487 | 3.59E-05    | -0.145009377 | 0.001678535 | -0.128346272 |
| -0.040753518 | 0.379566218 | 0.015963141  | 0.730798282 | 0.008741213  |
| 0.156964371  | 0.000663917 | 0.134945753  | 0.003480569 | 0.120399021  |
| 0.056769534  | 0.220763701 | 0.048260297  | 0.298003031 | 0.024853181  |
| 0.154512724  | 0.000807415 | 0.221774173  | 1.30E-06    | 0.273890241  |
| 0.14671673   | 0.001476316 | 0.162960218  | 0.000406503 | 0.188737316  |
| -0.024442784 | 0.59827959  | 0.02134306   | 0.645484814 | 0.00853593   |

|              |             |              |             |              |
|--------------|-------------|--------------|-------------|--------------|
| -0.187358655 | 4.62E-05    | -0.140807034 | 0.002289027 | -0.136966331 |
| 0.113208798  | 0.014373933 | 0.133571391  | 0.003831214 | 0.140602327  |
| -0.010391329 | 0.822786279 | 0.006400705  | 0.890279044 | -0.002174368 |
| -0.12361232  | 0.007486537 | -0.079956135 | 0.084347356 | -0.066228324 |
| -0.093341443 | 0.043787088 | -0.058000536 | 0.210899263 | -0.080010016 |
| -0.069515391 | 0.13360678  | -0.060097351 | 0.194835567 | -0.059523039 |
| -0.099464322 | 0.03163335  | -0.037185592 | 0.422720063 | -0.062520975 |
| -0.107964515 | 0.019611158 | -0.072066756 | 0.119892539 | -0.090703849 |
| -0.072768158 | 0.116321767 | -0.045219163 | 0.329523369 | -0.055832016 |
| -0.038595298 | 0.405337661 | -0.003473523 | 0.940324088 | -0.015653814 |
| -0.171862707 | 0.000190091 | -0.146897263 | 0.001456296 | -0.138640358 |
| 0.108808126  | 0.018670316 | 0.166042226  | 0.000313801 | 0.177390828  |
| -0.048505182 | 0.295555274 | 0.003151864  | 0.945841365 | 0.014988136  |
| 0.183506973  | 6.64E-05    | 0.23554706   | 2.62E-07    | 0.247777059  |
| 0.20708538   | 6.42E-06    | 0.223557263  | 1.06E-06    | 0.219845199  |
| -0.039002689 | 0.400394764 | 0.012227134  | 0.792140308 | 0.039574596  |
| 0.00753728   | 0.870953243 | 0.017118959  | 0.712143058 | 0.012493927  |
| -0.085093468 | 0.066166974 | -0.047177618 | 0.308986371 | -0.03881979  |
| -0.183759063 | 6.48E-05    | -0.129254069 | 0.005150583 | -0.143530414 |
| -0.205629536 | 7.47E-06    | -0.153327871 | 0.000886597 | -0.168330978 |
| 0.084588658  | 0.067797275 | 0.129829108  | 0.004953938 | 0.143075287  |
| 0.173148733  | 0.000169787 | 0.188529999  | 4.13E-05    | 0.204479137  |
| -0.04561642  | 0.32528791  | 0.017889725  | 0.699796628 | 0.004877794  |
| 0.055100486  | 0.234658737 | 0.120695669  | 0.009032645 | 0.150745074  |
| 0.146234091  | 0.001531083 | 0.172243259  | 0.000183857 | 0.168314116  |
| 0.052093823  | 0.261223914 | 0.117896409  | 0.010777446 | 0.080482099  |
| 0.056467145  | 0.223236508 | 0.090472682  | 0.050713028 | 0.089599475  |
| 0.010737899  | 0.816978619 | 0.065836781  | 0.155469896 | 0.06598126   |
| -0.002264195 | 0.961079804 | 0.021191375  | 0.647833852 | 0.019315453  |
| -0.04184546  | 0.36691886  | -0.003815601 | 0.934459715 | -0.008567994 |
| 0.047620112  | 0.304465632 | 0.097648866  | 0.034892959 | 0.09792851   |
| -0.033842311 | 0.465642322 | -0.006029145 | 0.896611586 | -0.049136464 |
| 0.04158949   | 0.369859869 | 0.06625746   | 0.152840519 | 0.078309603  |
| 0.216867753  | 2.24E-06    | 0.208690987  | 5.42E-06    | 0.224085748  |
| -0.034017957 | 0.46332888  | 0.029996297  | 0.517868997 | 0.000972411  |
| -0.046765565 | 0.31323568  | 0.014410214  | 0.75611314  | 0.024005101  |
| -0.103244883 | 0.025672733 | -0.094002002 | 0.042310386 | -0.099374378 |
| 0.115236984  | 0.012705284 | 0.168899362  | 0.000245856 | 0.17302864   |
| -0.056896777 | 0.219729037 | -0.018125433 | 0.696036525 | -0.086369962 |
| 0.051058116  | 0.270837235 | 0.079099696  | 0.087737695 | 0.055762955  |
| -0.097298975 | 0.035552988 | -0.034520661 | 0.456743159 | -0.066230561 |
| 0.134910112  | 0.003489282 | 0.158307624  | 0.000595701 | 0.159658653  |
| -0.057406197 | 0.215621489 | -0.040519753 | 0.382308112 | -0.100772547 |
| -0.026961515 | 0.561114117 | 0.004529487  | 0.922233074 | -0.017393726 |
| -0.085974973 | 0.063397389 | -0.026525501 | 0.567467417 | -0.047831833 |

|              |             |              |             |              |
|--------------|-------------|--------------|-------------|--------------|
| 0.018524787  | 0.689682884 | 0.053039306  | 0.252655707 | 0.094037711  |
| -0.075173412 | 0.104706198 | -0.07181142  | 0.121213472 | -0.075692304 |
| 0.21124563   | 4.13E-06    | 0.240717633  | 1.40E-07    | 0.259012536  |
| 0.040211921  | 0.385937177 | 0.109963733  | 0.01744553  | 0.127206788  |
| -0.071177541 | 0.124541788 | -0.011021229 | 0.81223813  | 0.025453362  |
| 0.045853545  | 0.322776643 | 0.102146146  | 0.027296085 | 0.08389669   |
| 0.062492291  | 0.17760416  | 0.10421683   | 0.024306783 | 0.099052874  |
| -0.192820486 | 2.73E-05    | -0.17850689  | 0.000105136 | -0.176460301 |
| 0.064752319  | 0.162405815 | 0.090525212  | 0.050578434 | 0.100449509  |
| -0.092546949 | 0.045620444 | -0.023416236 | 0.613739904 | -0.002300602 |
| -0.212550612 | 3.59E-06    | -0.192804817 | 2.73E-05    | -0.182528576 |
| -0.165148377 | 0.000338423 | -0.116251535 | 0.01193659  | -0.127488842 |
| 0.102408374  | 0.026900836 | 0.087638516  | 0.058430864 | 0.128773552  |
| 0.120140976  | 0.009356949 | 0.157477693  | 0.000637036 | 0.160745647  |
| 0.077683844  | 0.093582037 | 0.084989321  | 0.066500659 | 0.119783298  |
| -0.045150726 | 0.330256611 | -0.008387002 | 0.856554323 | 0.017464148  |
| 0.077769667  | 0.093219133 | 0.102430689  | 0.02686743  | 0.141055256  |
| 0.135225997  | 0.003412747 | 0.191496315  | 3.10E-05    | 0.173916675  |
| 0.210867358  | 4.30E-06    | 0.239669138  | 1.59E-07    | 0.255803785  |
| -0.054971849 | 0.235754727 | 0.003449322  | 0.940739109 | -0.008404354 |
| 0.141788122  | 0.002130671 | 0.148989597  | 0.001241786 | 0.154976074  |
| -0.110104872 | 0.017300863 | -0.097378323 | 0.035402384 | -0.098306792 |
| -0.041520891 | 0.37065052  | 0.015702619  | 0.735025664 | 0.026095392  |
| -0.000290606 | 0.995002699 | 0.03005019   | 0.517116855 | 0.008134073  |
| -0.151719809 | 0.001005565 | -0.109565789 | 0.017859128 | -0.124870026 |
| -0.224477188 | 9.55E-07    | -0.205755982 | 7.38E-06    | -0.219223502 |
| -0.129202536 | 0.005168545 | -0.119175067 | 0.009946451 | -0.090835273 |
| 0.274638189  | 1.58E-09    | 0.334070508  | 1.23E-13    | 0.360624359  |
| -0.126094828 | 0.006361767 | -0.10397943  | 0.024634491 | -0.131267294 |
| -0.165905384 | 0.000317459 | -0.160134242 | 0.000513338 | -0.170879647 |
| -0.120582859 | 0.009097778 | -0.093073637 | 0.044398017 | -0.082536486 |
| -0.105751624 | 0.022277689 | -0.048160514 | 0.299004273 | -0.050009283 |
| 0.20114534   | 1.19E-05    | 0.251450101  | 3.63E-08    | 0.254051887  |
| -0.018065996 | 0.696983983 | 0.032376014  | 0.485202499 | -0.015513166 |
| -0.073017211 | 0.11507409  | -0.005963569 | 0.897729889 | -0.026167969 |
| 0.007653158  | 0.868987016 | 0.007465033  | 0.87217953  | 0.009459595  |
| -0.090828636 | 0.049806812 | -0.047172908 | 0.309034727 | -0.030623212 |
| 0.116765158  | 0.011563337 | 0.113617648  | 0.014022838 | 0.061274053  |
| -0.070664601 | 0.127286738 | -0.02520743  | 0.586879461 | -0.056711563 |
| -0.022761604 | 0.623689738 | 0.041463506  | 0.371312736 | 0.026371975  |
| -0.022187421 | 0.632473616 | 0.045122724  | 0.330556925 | 0.054881454  |
| 0.051631119  | 0.265489226 | 0.048577921  | 0.294830798 | 0.05533895   |
| 0.076320255  | 0.09950094  | 0.074950981  | 0.105740284 | 0.097084754  |
| -0.036022164 | 0.437388062 | 0.008618499  | 0.852639512 | -0.002395613 |
| -0.010704863 | 0.817531791 | 0.041244049  | 0.373851949 | 0.03062718   |

|              |             |              |             |              |
|--------------|-------------|--------------|-------------|--------------|
| -0.114340864 | 0.013420232 | -0.08594087  | 0.063502735 | -0.076866288 |
| 0.016110193  | 0.728415734 | 0.055182111  | 0.233965166 | 0.058725984  |
| 0.06656055   | 0.150967116 | 0.130338937  | 0.004785281 | 0.137710001  |
| -0.00718213  | 0.876984365 | 0.004217622  | 0.927572267 | 0.025367103  |
| 0.201286191  | 1.17E-05    | 0.234050056  | 3.13E-07    | 0.237355352  |
| 0.11667601   | 0.011627372 | 0.110066585  | 0.017340003 | 0.135281961  |
| 0.002527392  | 0.956559813 | 0.06345765   | 0.170987896 | 0.066880967  |
| 0.020541161  | 0.657942709 | 0.007728995  | 0.867700638 | -0.003075004 |
| -0.118893413 | 0.010124446 | -0.054936158 | 0.236059453 | -0.046294713 |
| 0.117714545  | 0.010900505 | 0.170475168  | 0.000214536 | 0.154891344  |
| -0.130527048 | 0.004724372 | -0.077313005 | 0.095163145 | -0.05941526  |
| -0.054998421 | 0.235528041 | -0.044641908 | 0.335741094 | -0.03690636  |
| -0.012893522 | 0.781092039 | 0.049051937  | 0.29013871  | 0.056418771  |
| -0.157027759 | 0.000660542 | -0.111692905 | 0.015744037 | -0.123721144 |
| -0.122226994 | 0.008188672 | -0.059698549 | 0.197819794 | -0.063378282 |
| 0.023492659  | 0.612582901 | 0.073558919  | 0.112396548 | 0.080985206  |
| -0.095563507 | 0.038985786 | -0.067786089 | 0.143569547 | -0.084001811 |
| -0.041270842 | 0.373541368 | -0.019876396 | 0.668342638 | -0.015682435 |
| -0.061264407 | 0.186291843 | -0.02698585  | 0.560760535 | -0.044596436 |
| -0.084151479 | 0.069235636 | -0.052185577 | 0.260383747 | -0.036792201 |
| -0.07080003  | 0.126557486 | -0.004842214 | 0.916882622 | -0.01412574  |
| -0.047662992 | 0.30402988  | -0.00027918  | 0.99519919  | 0.013668941  |
| 0.161586147  | 0.000455559 | 0.195213854  | 2.15E-05    | 0.227025855  |
| 0.110664644  | 0.016737377 | 0.145157956  | 0.001659977 | 0.1543556    |
| -0.020787341 | 0.654107898 | 0.011799132  | 0.799258466 | -0.012925413 |
| -0.067963853 | 0.142519956 | -0.039914814 | 0.389459617 | -0.035490198 |
| 0.002214494  | 0.961933474 | 0.037891942  | 0.413956596 | 0.031996574  |
| -0.046662605 | 0.314303418 | -0.023879694 | 0.606738227 | -0.037430003 |
| -0.013893627 | 0.764593945 | 0.03932169   | 0.396549627 | 0.020178079  |
| -0.1068618   | 0.020903028 | -0.103781292 | 0.024910914 | -0.087549729 |
| -0.1145378   | 0.013260142 | -0.068048821 | 0.142020343 | -0.030469118 |
| -0.040265505 | 0.385303966 | -0.020309307 | 0.661562602 | -0.015874744 |
| 0.018483504  | 0.690338692 | 0.071953266  | 0.120478267 | 0.080119356  |
| -0.087156635 | 0.059835223 | -0.0392299   | 0.397653752 | -0.017858035 |
| -0.056162604 | 0.225746809 | -0.042711993 | 0.35707096  | -0.071567085 |
| -0.073360333 | 0.11337237  | -0.063875384 | 0.168182608 | -0.072537522 |
| -0.015449172 | 0.739145929 | 0.02622158   | 0.571916156 | 0.025216391  |
| 0.116296214  | 0.011903704 | 0.160191631  | 0.000510931 | 0.16323821   |
| -0.015653864 | 0.735817676 | 0.043099473  | 0.352721565 | 0.035639181  |
| 0.142900415  | 0.001963289 | 0.115542124  | 0.012469621 | 0.126731808  |
| -0.044656268 | 0.335585516 | -0.007792265 | 0.866627694 | -0.032649515 |
| -0.085062946 | 0.066264625 | -0.05352939  | 0.248292104 | -0.067083333 |
| 0.001203788  | 0.97930171  | 0.041126206  | 0.375219855 | 0.069367122  |
| -0.035624702 | 0.442465232 | 0.000912841  | 0.984303601 | -0.016988601 |
| 0.007526235  | 0.871140687 | -0.031408413 | 0.498349098 | -0.045294248 |

|              |             |              |             |              |
|--------------|-------------|--------------|-------------|--------------|
| 0.144722561  | 0.001714898 | 0.185685549  | 5.41E-05    | 0.180143503  |
| -0.090933288 | 0.049542969 | -0.030225299 | 0.514676904 | -0.013676115 |
| -0.014888752 | 0.74828301  | 0.055896342  | 0.227957985 | 0.071974782  |
| 0.026571455  | 0.566796186 | 0.072822728  | 0.116047488 | 0.092404817  |
| -0.030620946 | 0.509186037 | 0.020930434  | 0.651883059 | 0.039224708  |
| -0.33127004  | 2.01E-13    | -0.307573109 | 1.09E-11    | -0.294931135 |
| -0.018181182 | 0.695148274 | -0.013941953 | 0.763799364 | -0.017412197 |
| -0.039977078 | 0.388719811 | -0.06722029  | 0.146949628 | -0.064673617 |
| 0.177584309  | 0.000114294 | 0.144575022  | 0.001733883 | 0.143041634  |
| -0.10311422  | 0.025861318 | -0.079992026 | 0.084207618 | -0.094099216 |
| 0.104412522  | 0.024039489 | 0.124647996  | 0.006997303 | 0.128769653  |
| -0.22116011  | 1.39E-06    | -0.208011575 | 5.82E-06    | -0.210150049 |
| -0.055986627 | 0.227206492 | -0.035277102 | 0.446932875 | -0.058376779 |
| -0.050103791 | 0.279906633 | -0.083532312 | 0.071315408 | -0.069627165 |
| 0.125396844  | 0.006661598 | 0.193893778  | 2.45E-05    | 0.194262489  |
| 0.344852124  | 1.74E-14    | 0.34602561   | 1.40E-14    | 0.371523525  |
| -0.143233463 | 0.001915564 | -0.102453077 | 0.02683395  | -0.138535996 |
| 0.099666109  | 0.03128766  | 0.104749105  | 0.023585694 | 0.100685129  |
| 0.244625763  | 8.61E-08    | 0.261608167  | 9.55E-09    | 0.285364134  |
| 0.011212653  | 0.809039204 | 0.007530788  | 0.871063416 | 0.014926755  |
| 0.022304382  | 0.630680086 | 0.040021058  | 0.388197776 | 0.019818893  |
| -0.025625745 | 0.580685527 | -0.003653682 | 0.937235132 | 0.018117232  |
| 0.074344755  | 0.108599656 | 0.111513625  | 0.015913415 | 0.099145842  |
| -0.062479388 | 0.177693858 | -0.014570854 | 0.753481828 | -0.009495422 |
| -0.289059776 | 1.94E-10    | -0.268321388 | 3.83E-09    | -0.28332106  |
| -0.080472499 | 0.082354848 | -0.039727125 | 0.391694831 | -0.058171466 |
| -0.053505069 | 0.248507408 | -0.033432285 | 0.4710676   | -0.024895717 |
| -0.022968575 | 0.620536438 | 0.032995982  | 0.476878543 | 0.036833092  |
| -0.255871062 | 2.04E-08    | -0.28402457  | 4.09E-10    | -0.255381188 |
| 0.057596216  | 0.214103537 | 0.088605347  | 0.055695454 | 0.092635693  |
| -0.125615693 | 0.006566253 | -0.111011142 | 0.016396685 | -0.133518598 |
| 0.132889407  | 0.004016825 | 0.206155373  | 7.07E-06    | 0.215404845  |
| -0.16408428  | 0.00037008  | -0.130525194 | 0.004724969 | -0.158904006 |
| -0.085703554 | 0.064239795 | -0.061001293 | 0.188193515 | -0.080188616 |
| 0.102071165  | 0.027410017 | 0.168833674  | 0.00024725  | 0.183483265  |
| 0.127782088  | 0.005686377 | 0.17685618   | 0.000122047 | 0.199371596  |
| 0.02206189   | 0.634400957 | 0.073375337  | 0.11329841  | 0.065684707  |
| 0.074772944  | 0.106573787 | 0.045222397  | 0.32948875  | 0.07750748   |
| -0.164021118 | 0.000372043 | -0.128075378 | 0.005575785 | -0.123701467 |
| -0.226647033 | 7.45E-07    | -0.176533248 | 0.000125641 | -0.241651818 |
| -0.10828876  | 0.019244767 | -0.041499633 | 0.370895751 | -0.030377191 |
| 0.093434462  | 0.043576553 | 0.130999362  | 0.004574511 | 0.12412877   |
| -0.165662205 | 0.000324057 | -0.11670637  | 0.011605529 | -0.103511658 |
| 0.088071462  | 0.057192498 | 0.099870665  | 0.030940528 | 0.089310426  |
| -0.106096771 | 0.021842154 | -0.036486905 | 0.43149408  | -0.036022465 |

|              |             |              |             |              |
|--------------|-------------|--------------|-------------|--------------|
| -0.036052961 | 0.436996062 | -0.019090826 | 0.680714664 | -0.014967999 |
| -0.021705121 | 0.639892073 | 0.044345701  | 0.338960636 | 0.074159697  |
| -0.210795085 | 4.33E-06    | -0.151737672 | 0.001004166 | -0.151959784 |
| -0.056960937 | 0.219208645 | 0.002755721  | 0.952639757 | -0.034617731 |
| 0.084439577  | 0.068284988 | 0.075721087  | 0.102194156 | 0.075647554  |
| 0.004155577  | 0.928634883 | 0.038417011  | 0.407512223 | 0.077337574  |
| 0.1151517    | 0.012771848 | 0.133361198  | 0.003887575 | 0.144400481  |
| 0.244822264  | 8.40E-08    | 0.286712038  | 2.75E-10    | 0.321286918  |
| 0.052943598  | 0.253514051 | 0.068783002  | 0.137759074 | 0.077990228  |
| -0.13783215  | 0.002837139 | -0.083098733 | 0.072801966 | -0.088782632 |
| -0.063961513 | 0.16760851  | -0.021992026 | 0.635474678 | -0.033978823 |
| 0.082118963  | 0.076254366 | 0.086048961  | 0.063169337 | 0.104169029  |
| 0.064856794  | 0.161727662 | 0.072795635  | 0.1161836   | 0.066263294  |
| -0.218450872 | 1.88E-06    | -0.154373368 | 0.000816376 | -0.170090689 |
| 0.005419087  | 0.907022917 | 0.032640402  | 0.481643162 | 0.023742247  |
| -0.182962539 | 6.98E-05    | -0.132351844 | 0.004168823 | -0.099688087 |
| 0.028032632  | 0.545653795 | 0.061162244  | 0.187028543 | 0.053414235  |
| 0.024654643  | 0.59511095  | 0.075177421  | 0.104687634 | 0.076043111  |
| 0.043769442  | 0.345280493 | 0.063272356  | 0.172243363 | 0.076672436  |
| 0.206791728  | 6.62E-06    | 0.230791533  | 4.60E-07    | 0.250001904  |
| 0.374052227  | 5.89E-17    | 0.426029883  | 5.14E-22    | 0.423607517  |
| 0.182031663  | 7.61E-05    | 0.188332251  | 4.21E-05    | 0.165658189  |
| 0.067509025  | 0.145217227 | 0.06130763   | 0.185980802 | 0.044711659  |
| -0.132526513 | 0.004118874 | -0.170087571 | 0.000221873 | -0.184090034 |
| 0.058351998  | 0.208142102 | 0.062663037  | 0.176420291 | 0.087072749  |
| -0.045806563 | 0.323273201 | 0.00874901   | 0.850434065 | 0.010451602  |
| -0.098943167 | 0.032541301 | -0.102733175 | 0.026418109 | -0.093534024 |
| 0.196217319  | 1.95E-05    | 0.229810779  | 5.16E-07    | 0.23438117   |
| 0.182857233  | 7.05E-05    | 0.187308865  | 4.64E-05    | 0.189356167  |
| -0.016067404 | 0.729108737 | 0.00248909   | 0.957217518 | -0.01107432  |
| 0.056904019  | 0.219670253 | 0.084277818  | 0.068817424 | 0.114831479  |
| 0.07666439   | 0.097979786 | 0.139363371  | 0.002541644 | 0.139306633  |
| 0.087549388  | 0.058688537 | 0.117029803  | 0.011375077 | 0.142399293  |
| 0.046191902  | 0.319215156 | 0.053064056  | 0.25243407  | 0.057391331  |
| 0.078372137  | 0.090703162 | 0.076638661  | 0.09809287  | 0.054813814  |
| 0.259703275  | 1.23E-08    | 0.308857438  | 8.85E-12    | 0.290177709  |
| 0.126502146  | 0.006192444 | 0.152925911  | 0.00091505  | 0.149488524  |
| -0.027229031 | 0.557233108 | -0.014982968 | 0.746744416 | -0.030921055 |
| 0.139081217  | 0.002593891 | 0.189995862  | 3.59E-05    | 0.163353576  |
| -0.050783247 | 0.273428618 | -0.028082031 | 0.544945891 | -0.033037801 |
| -0.005705489 | 0.902133053 | -0.036573863 | 0.430396382 | -0.030726262 |
| -0.114320595 | 0.013436805 | -0.102482088 | 0.02679062  | -0.106574976 |
| -0.035744233 | 0.440934823 | -0.048052223 | 0.300093417 | -0.063206861 |
| -0.014540943 | 0.753971557 | -0.025322291 | 0.585175692 | -0.004171047 |
| 0.112928169  | 0.014619371 | 0.150035977  | 0.001145791 | 0.12591753   |

|              |             |              |             |              |
|--------------|-------------|--------------|-------------|--------------|
| 0.125750222  | 0.006508252 | 0.140249096  | 0.002383807 | 0.132528623  |
| -0.04386183  | 0.344262267 | 0.0051166    | 0.91219124  | -0.007741088 |
| 0.113492106  | 0.014129835 | 0.169762371  | 0.00022821  | 0.175231963  |
| -0.093308446 | 0.043861979 | -0.037755771 | 0.415637638 | -0.036322627 |
| 0.025356964  | 0.58466183  | 0.022085511  | 0.634038092 | 0.014011917  |
| 0.057148616  | 0.217691471 | 0.055460331  | 0.231611976 | 0.066572228  |
| -0.023202553 | 0.616980036 | 0.004018955  | 0.930975202 | 0.028951783  |
| 0.063283172  | 0.172169887 | 0.10048617   | 0.029915829 | 0.069711706  |
| 0.01561742   | 0.736409901 | 0.018511092  | 0.689900423 | 0.023953008  |
| -0.074309199 | 0.108769237 | -0.069328636 | 0.134656309 | -0.079098336 |
| 0.079534675  | 0.086002325 | 0.140615248  | 0.002321212 | 0.160327992  |
| -0.01147165  | 0.804716129 | 0.027367999  | 0.555222174 | -0.024480853 |
| -0.039980136 | 0.388683501 | -0.059295168 | 0.200872056 | -0.042194029 |
| -0.025412296 | 0.583842227 | -0.016281851 | 0.725637807 | -0.023419493 |
| 0.124610072  | 0.0070147   | 0.19775797   | 1.67E-05    | 0.156335858  |
| 0.011424535  | 0.80550212  | 0.056616944  | 0.222009059 | 0.029440682  |
| 0.00131284   | 0.97742711  | 0.050990417  | 0.271473922 | 0.056682614  |
| 0.036070103  | 0.436777962 | 0.050956755  | 0.27179088  | 0.033241481  |
| -0.084094947 | 0.069423442 | -0.031686646 | 0.494549565 | -0.027071878 |
| -0.14453747  | 0.001738746 | -0.115529829 | 0.012479041 | -0.137634827 |
| -0.145120214 | 0.001664674 | -0.100136524 | 0.030494296 | -0.135211029 |
| -0.099303657 | 0.03191092  | -0.139184674 | 0.002574621 | -0.166771332 |
| -0.02981799  | 0.520361501 | 0.008050149  | 0.862257031 | -0.009498858 |
| 0.072879818  | 0.11576108  | 0.122147053  | 0.008230927 | 0.11128567   |
| 0.113193928  | 0.014386847 | 0.18356457   | 6.60E-05    | 0.16033187   |
| -0.088897497 | 0.054890117 | -0.104635654 | 0.023737819 | -0.129720686 |
| -0.126478884 | 0.006202005 | -0.061869025 | 0.181975628 | -0.096453331 |
| 0.125816658  | 0.006479778 | 0.163739592  | 0.000380912 | 0.182772343  |
| 0.068969956  | 0.136689827 | 0.071900178  | 0.120753018 | 0.071904314  |
| 0.006930987  | 0.88125356  | 0.021758874  | 0.639063472 | 0.044985962  |
| -0.118320462 | 0.010495279 | -0.116745143 | 0.011577686 | -0.147705118 |
| -0.088380606 | 0.056321628 | -0.041902693 | 0.366263269 | -0.049169461 |
| -0.078640094 | 0.089601777 | -0.051167555 | 0.269810166 | -0.070682195 |
| 0.073870039  | 0.110881031 | 0.075454022  | 0.103413074 | 0.067106816  |
| 0.199220434  | 1.44E-05    | 0.210351596  | 4.54E-06    | 0.211624847  |
| -0.061600903 | 0.183880467 | -0.02124266  | 0.647039254 | -0.01028628  |
| -0.008497587 | 0.854683789 | 0.005765383  | 0.901110903 | 0.007025579  |
| 0.113985185  | 0.013713683 | 0.156442861  | 0.0006923   | 0.144286749  |
| -0.183152484 | 6.86E-05    | -0.174315294 | 0.000153145 | -0.175692664 |
| -0.014942022 | 0.747412965 | -0.007663863 | 0.868805417 | -0.007081097 |
| 0.046234519  | 0.318768396 | 0.051684876  | 0.264991242 | 0.027478722  |
| 0.109164636  | 0.018284703 | 0.089175359  | 0.054133171 | 0.070550416  |
| 0.027224876  | 0.557293292 | 0.016804405  | 0.717203603 | 0.020694199  |
| 0.109858105  | 0.017554488 | 0.128474017  | 0.005428572 | 0.134177968  |
| 0.013503206  | 0.771022274 | 0.024402605  | 0.598881386 | 0.017495655  |



|              |             |              |             |              |
|--------------|-------------|--------------|-------------|--------------|
| 0.046632608  | 0.314614946 | 0.068966838  | 0.136707606 | 0.048488049  |
| 0.034424164  | 0.458003244 | 0.031418378  | 0.498212758 | 0.034206322  |
| -0.084483365 | 0.068141438 | -0.04765243  | 0.304137173 | -0.044508226 |
| -0.176276946 | 0.000128563 | -0.116019528 | 0.012108655 | -0.107729477 |
| -0.097471743 | 0.035225766 | -0.068073541 | 0.141875245 | -0.083848616 |
| 0.051693737  | 0.264909223 | 0.125322987  | 0.006694054 | 0.180677295  |
| 0.09651851   | 0.037063585 | 0.090770537  | 0.049953794 | 0.091751812  |
| -0.08198424  | 0.07673933  | -0.041027385 | 0.376369322 | -0.030887875 |
| -0.334300102 | 1.18E-13    | -0.315992553 | 2.74E-12    | -0.32287354  |
| 0.212184193  | 3.73E-06    | 0.247722972  | 5.84E-08    | 0.250114649  |
| -0.181572875 | 7.94E-05    | -0.180231877 | 8.98E-05    | -0.18592793  |
| 0.05748749   | 0.214971145 | 0.079992677  | 0.084205085 | 0.078758671  |
| 0.062134327  | 0.180105221 | 0.111699909  | 0.015737451 | 0.09715103   |
| 0.252241744  | 3.28E-08    | 0.296876324  | 5.89E-11    | 0.313996787  |
| 0.105847429  | 0.022156045 | 0.127473226  | 0.005804969 | 0.139843475  |
| 0.055606468  | 0.230382687 | 0.078125716  | 0.091725578 | 0.089682572  |
| 0.089646151  | 0.052870476 | 0.107596958  | 0.020033821 | 0.070581391  |
| 0.083319174  | 0.07204304  | 0.108966965  | 0.018497643 | 0.125929049  |
| -0.057555572 | 0.214427574 | -0.061649673 | 0.183532897 | -0.05612691  |
| -0.086557447 | 0.061620255 | -0.060018124 | 0.195425785 | -0.05527484  |
| 0.109201734  | 0.018244978 | 0.140560002  | 0.002330559 | 0.160443105  |
| 0.054170484  | 0.242663675 | 0.082030708  | 0.076571777 | 0.096985695  |
| 0.110226245  | 0.017177296 | 0.157098918  | 0.000656771 | 0.137832355  |
| 0.174627479  | 0.000148958 | 0.256439996  | 1.90E-08    | 0.241884023  |
| 0.08837399   | 0.05634015  | 0.121165905  | 0.008765595 | 0.116042573  |
| 0.083293923  | 0.072129644 | 0.113587256  | 0.014048675 | 0.131167191  |
| 0.050715141  | 0.274073304 | 0.071299487  | 0.123896024 | 0.064576384  |
| 0.159357038  | 0.000546997 | 0.166584432  | 0.000299692 | 0.142910401  |
| 0.16010552   | 0.000514547 | 0.142754829  | 0.001984491 | 0.112553428  |
| 0.08061466   | 0.081813016 | 0.065829237  | 0.155517358 | 0.054938447  |
| 0.038869456  | 0.402007297 | 0.013099469  | 0.777686356 | -0.007423365 |
| -0.157446727 | 0.000638629 | -0.130409697 | 0.004762287 | -0.142408116 |
| 0.064405577  | 0.164671871 | 0.105358829  | 0.022782489 | 0.105161277  |
| 0.159626528  | 0.000535101 | 0.198724472  | 1.52E-05    | 0.209578249  |
| 0.051652309  | 0.265292857 | 0.08327599   | 0.072191202 | 0.093123731  |
| 0.155733094  | 0.000732737 | 0.149371608  | 0.001205914 | 0.161594792  |
| 0.145896343  | 0.001570512 | 0.179059178  | 1.00E-04    | 0.173582589  |
| 0.037648219  | 0.416968212 | 0.079112194  | 0.087687444 | 0.064362885  |
| -0.04925662  | 0.288128214 | -0.053384658 | 0.249575266 | -0.055210255 |
| 0.102843129  | 0.026256392 | 0.123112121  | 0.007733595 | 0.106128377  |
| -0.109453258 | 0.017977627 | -0.137376679 | 0.002930884 | -0.164978555 |
| -0.058716331 | 0.205311562 | -0.03601587  | 0.437468208 | -0.022724005 |
| 0.008437079  | 0.855707167 | 0.085086141  | 0.066190407 | 0.077441344  |
| -0.035798248 | 0.440244237 | 0.002509612  | 0.956865117 | 0.005271782  |
| -0.206558119 | 6.78E-06    | -0.130539737 | 0.004720288 | -0.128738725 |

|              |             |              |             |              |
|--------------|-------------|--------------|-------------|--------------|
| -0.013975253 | 0.76325199  | 0.020360809  | 0.660757828 | -0.016249699 |
| -0.083178909 | 0.072525186 | -0.081291477 | 0.079272802 | -0.093186812 |
| -0.150401064 | 0.00111394  | -0.115781301 | 0.012287608 | -0.109607957 |
| 0.015668788  | 0.735575217 | 0.082477127  | 0.074977185 | 0.104534256  |
| -0.005209031 | 0.910611546 | 0.019835234  | 0.668988709 | 0.021373954  |
| -0.168983268 | 0.000244086 | -0.179272409 | 9.81E-05    | -0.176414094 |
| -0.120388792 | 0.009210804 | -0.07440116  | 0.108331067 | -0.07999522  |
| -0.211988147 | 3.81E-06    | -0.156455031 | 0.000691625 | -0.160786713 |
| 0.10891672   | 0.018552114 | 0.143629491  | 0.001860197 | 0.161365141  |
| -0.135548746 | 0.003336126 | -0.115658459 | 0.012380795 | -0.124882986 |
| 0.012729602  | 0.783805732 | 0.009012474  | 0.845985458 | 0.007726853  |
| -0.012525938 | 0.787181046 | 0.003828973  | 0.934230551 | 0.006722789  |
| -0.133434332 | 0.00386788  | -0.069808184 | 0.131974053 | -0.071599517 |
| -0.154668157 | 0.000797527 | -0.115493347 | 0.01250703  | -0.136776404 |
| -0.042600696 | 0.358326457 | -0.003766985 | 0.935292948 | -0.045611688 |
| 0.186802576  | 4.87E-05    | 0.204758479  | 8.18E-06    | 0.186707503  |
| -0.127379931 | 0.005841225 | -0.129347714 | 0.005118088 | -0.151517762 |
| -0.193461094 | 2.56E-05    | -0.178313081 | 0.000107001 | -0.182371859 |
| -0.208000237 | 5.83E-06    | -0.229485699 | 5.36E-07    | -0.234216779 |
| 0.120140391  | 0.009357296 | 0.134367025  | 0.003624511 | 0.088990827  |
| 0.075314596  | 0.104053996 | 0.144276863  | 0.001772839 | 0.159758058  |
| -0.08894582  | 0.05475785  | -0.064420399 | 0.164574525 | -0.049370284 |
| 0.112555321  | 0.014951155 | 0.098704116  | 0.032965161 | 0.097782785  |
| 0.23266946   | 3.69E-07    | 0.284652874  | 3.73E-10    | 0.288817589  |
| 0.064495752  | 0.164080284 | 0.086480508  | 0.061852616 | 0.073068828  |
| -0.006372336 | 0.890762294 | -0.001620258 | 0.97214332  | -0.040716462 |
| 0.027166379  | 0.558140875 | 0.099682861  | 0.031259107 | 0.108310645  |
| 0.096169041  | 0.037757441 | 0.0663837    | 0.152058099 | 0.085217298  |
| 0.059758077  | 0.197372241 | 0.101873383  | 0.027712504 | 0.074340695  |
| -0.052931081 | 0.253626455 | -0.023429224 | 0.613543215 | -0.025264035 |
| 0.208911911  | 5.29E-06    | 0.238392502  | 1.86E-07    | 0.220587545  |
| -0.082083529 | 0.076381677 | -0.025641261 | 0.580456377 | -0.020744648 |
| 0.016497269  | 0.72215679  | 0.040522081  | 0.382280746 | 0.046951473  |
| 0.087593304  | 0.058561458 | 0.111689526  | 0.015747214 | 0.089237382  |
| 0.128021229  | 0.005596057 | 0.119853007  | 0.009529361 | 0.133959055  |
| -0.001231308 | 0.978828628 | 0.014417969  | 0.75598605  | 0.039590152  |
| 0.188947583  | 3.97E-05    | 0.170364811  | 0.000216602 | 0.171771128  |
| -0.017303442 | 0.709180927 | -0.039122744 | 0.398945037 | -0.054012198 |
| 0.049500859  | 0.285741453 | 0.057512596  | 0.21477058  | 0.050194257  |
| 0.022219601  | 0.631979936 | 0.046875162  | 0.312101737 | 0.06056546   |
| -0.014879576 | 0.748432924 | 0.0262647    | 0.571283974 | 0.037954706  |
| -0.020563525 | 0.657593978 | -0.012511788 | 0.787415706 | -0.020124251 |
| -0.249404984 | 4.71E-08    | -0.234764921 | 2.87E-07    | -0.232011159 |
| -0.008197846 | 0.859755714 | 0.016943508  | 0.714964175 | 0.02121341   |
| -0.086118608 | 0.062955285 | -0.060291061 | 0.193397972 | -0.074622751 |

|              |             |              |             |              |
|--------------|-------------|--------------|-------------|--------------|
| 0.009729926  | 0.833896408 | 0.04391531   | 0.343673722 | 0.041630915  |
| -0.081619771 | 0.078063887 | -0.063015076 | 0.173997955 | -0.105174039 |
| -0.063691104 | 0.169415864 | -0.002738653 | 0.952932749 | -0.039539116 |
| 0.064192947  | 0.16607316  | 0.116795489  | 0.011541621 | 0.090519579  |
| -0.092725236 | 0.045203518 | -0.061297701 | 0.186052219 | -0.052145036 |
| 0.068662925  | 0.138449217 | 0.095455146  | 0.03920913  | 0.074522427  |
| 0.063124611  | 0.173249327 | 0.087691526  | 0.058278055 | 0.063958631  |
| -0.308385512 | 9.55E-12    | -0.328297631 | 3.38E-13    | -0.316633223 |
| -0.014082433 | 0.761490992 | 0.013021495  | 0.7789753   | -0.031815024 |
| 0.043666374  | 0.346418688 | 0.082135504  | 0.076194996 | 0.052675399  |
| 0.133305645  | 0.003902596 | 0.103485089  | 0.02532914  | 0.105855667  |
| 0.132339152  | 0.004172474 | 0.148426144  | 0.001296493 | 0.179852496  |
| -0.122872664 | 0.007854425 | -0.098984375 | 0.032468707 | -0.107374924 |
| 0.062853061  | 0.175109667 | 0.085938016  | 0.063511557 | 0.116129389  |
| -0.13506763  | 0.003450925 | -0.119390233 | 0.009812351 | -0.121339477 |
| -0.087346999 | 0.059277142 | -0.009162004 | 0.843462799 | -0.037069159 |
| -0.021732038 | 0.639477097 | -0.043319857 | 0.350262769 | -0.062072593 |
| 0.044922099  | 0.332713758 | 0.074469351  | 0.108007054 | 0.088876671  |
| -0.09822205  | 0.033834253 | -0.098622977 | 0.033110095 | -0.094455453 |
| -0.059455751 | 0.199652892 | -0.046301144 | 0.318070792 | -0.030776088 |
| 0.154835586  | 0.000787001 | 0.190890935  | 3.29E-05    | 0.200697205  |
| -0.082396509 | 0.075263136 | -0.062373906 | 0.178428436 | -0.04229161  |
| -0.024067405 | 0.603912541 | 0.027163285  | 0.558185718 | 0.025086737  |
| 0.11800136   | 0.010706992 | 0.137643111  | 0.002875711 | 0.140006192  |
| -0.062453734 | 0.177872311 | -0.032303257 | 0.48618448  | -0.035482748 |
| 0.04132336   | 0.372933049 | 0.071162345  | 0.124622438 | 0.062385425  |
| -0.031051471 | 0.503246057 | -0.050005778 | 0.280849613 | -0.079412805 |
| 0.040295195  | 0.38495339  | 0.082966021  | 0.073261998 | 0.101564259  |
| -0.042097687 | 0.364035115 | -0.059040924 | 0.202813358 | -0.051822071 |
| 0.138153312  | 0.002772688 | 0.141226379  | 0.002220071 | 0.153090464  |
| 0.312898851  | 4.58E-12    | 0.342939453  | 2.47E-14    | 0.326179465  |
| -0.032684798 | 0.481046871 | 0.002234302  | 0.96159324  | -0.025444449 |
| 0.054819288  | 0.237059221 | 0.081271145  | 0.07934817  | 0.070177012  |
| -0.113782804 | 0.013883167 | -0.096876182 | 0.036364676 | -0.103635657 |
| 0.035328655  | 0.446268659 | 0.049601894  | 0.284758029 | 0.050247867  |
| 0.080983526  | 0.080420558 | 0.101394226  | 0.028457245 | 0.136152947  |
| 0.098637193  | 0.033084663 | 0.109567823  | 0.017856992 | 0.091639563  |
| -0.049363797 | 0.287079213 | -0.019349081 | 0.676637713 | -0.031460056 |
| 0.086427066  | 0.062014437 | 0.152803984  | 0.000923846 | 0.176485033  |
| 0.023463164  | 0.613029323 | 0.080858983  | 0.080888542 | 0.039979863  |
| -0.099538855 | 0.031505285 | -0.096223879 | 0.03764784  | -0.0931264   |
| 0.040278816  | 0.385146759 | 0.082064058  | 0.076451706 | 0.057657175  |
| -0.075617022 | 0.102667761 | -0.059151268 | 0.201969151 | -0.0369322   |
| 0.107048836  | 0.020678837 | 0.15667041   | 0.00067978  | 0.141382532  |
| 0.375469124  | 4.41E-17    | 0.397564148  | 3.91E-19    | 0.393127554  |

|              |             |              |             |              |
|--------------|-------------|--------------|-------------|--------------|
| 0.050298443  | 0.278040263 | 0.100306326  | 0.030212184 | 0.065932383  |
| -0.093238967 | 0.044020019 | -0.05268163  | 0.255873816 | -0.066899006 |
| -0.0013741   | 0.976374107 | 0.015002979  | 0.74641775  | 0.029035717  |
| 0.122483421  | 0.008054437 | 0.175513596  | 0.000137652 | 0.134477509  |
| -0.028281671 | 0.542089623 | -0.003532913 | 0.939305704 | -0.032545635 |
| 0.205126716  | 7.88E-06    | 0.232913867  | 3.58E-07    | 0.212473956  |
| -0.092540328 | 0.045635989 | -0.082315934 | 0.075549816 | -0.094090648 |
| 0.174502768  | 0.000150617 | 0.199488224  | 1.40E-05    | 0.18878789   |
| 0.025837358  | 0.577563869 | 0.075713864  | 0.102226972 | 0.08149587   |
| 0.18356792   | 6.60E-05    | 0.193178257  | 2.63E-05    | 0.154834833  |
| -0.059611698 | 0.198474096 | -0.040322066 | 0.384636264 | -0.036374154 |
| -0.111202216 | 0.016211423 | -0.093305479 | 0.043868716 | -0.074280597 |
| 0.028333282  | 0.541352441 | 0.016593412  | 0.720605043 | 0.038072188  |
| 0.068385114  | 0.140056103 | 0.097698573  | 0.034800044 | 0.102351489  |
| -0.080690836 | 0.081523867 | -0.0386686   | 0.404445618 | -0.03857678  |
| -0.077742003 | 0.093335991 | -0.073744236 | 0.111491891 | -0.095155743 |
| 0.043164966  | 0.351989737 | 0.078760019  | 0.089112342 | 0.127708605  |
| 0.079017674  | 0.088068061 | 0.111258434  | 0.016157266 | 0.088965554  |
| 0.159244134  | 0.000552054 | 0.185182745  | 5.67E-05    | 0.190313329  |
| -0.071005876 | 0.125455266 | -0.033418965 | 0.47124443  | -0.036478283 |
| -0.111130224 | 0.016281009 | -0.078368956 | 0.090716301 | -0.077507927 |
| -0.054709815 | 0.237998411 | -0.033685343 | 0.46771515  | -0.070825106 |
| 0.046089522  | 0.320290067 | 0.039334642  | 0.396393977 | 0.043198885  |
| 0.342067921  | 2.90E-14    | 0.402591884  | 1.27E-19    | 0.382236658  |
| -0.030061952 | 0.516952781 | 0.019243914  | 0.678296798 | 0.024419224  |
| 0.181566601  | 7.95E-05    | 0.166110941  | 0.00031198  | 0.139482939  |
| -0.113260962 | 0.014328712 | -0.074341083 | 0.108617159 | -0.077402518 |
| -0.13270966  | 0.004067082 | -0.085529168 | 0.064785883 | -0.095212934 |
| -0.038583349 | 0.405483187 | 0.049827907  | 0.282566386 | 0.05748025   |
| 0.068432968  | 0.139778295 | 0.077838324  | 0.092929627 | 0.054859153  |
| -0.201070633 | 1.20E-05    | -0.186764319 | 4.89E-05    | -0.20846718  |
| -0.03902873  | 0.40008004  | -0.021357505 | 0.645261292 | -0.036019531 |
| 0.030570912  | 0.509878727 | 0.081264738  | 0.07937193  | 0.069950139  |
| -0.006006163 | 0.89700349  | 0.020175152  | 0.663660744 | -0.003929029 |
| -0.167992068 | 0.000265777 | -0.143111001 | 0.001932988 | -0.173231073 |
| 0.145882054  | 0.0015722   | 0.182605986  | 7.22E-05    | 0.159792075  |
| -0.125352257 | 0.006681174 | -0.11246791  | 0.015029889 | -0.116903138 |
| -0.084185881 | 0.069121552 | -0.128645446 | 0.005366347 | -0.092653839 |
| 0.186640389  | 4.94E-05    | 0.220384097  | 1.52E-06    | 0.198087113  |
| 0.086867453  | 0.060691311 | 0.141651736  | 0.002152068 | 0.131277494  |
| 0.111064809  | 0.016344464 | 0.154753238  | 0.000792162 | 0.144453806  |
| -0.045630802 | 0.325135239 | -0.030772011 | 0.507097614 | -0.018166195 |
| 0.066607826  | 0.150676486 | 0.103031923  | 0.025980709 | 0.102993459  |
| 0.020940279  | 0.651730096 | 0.048522069  | 0.295386966 | 0.029772799  |
| -0.030216642 | 0.514797395 | 0.005723025  | 0.901833772 | 0.000247756  |

|              |             |              |             |              |
|--------------|-------------|--------------|-------------|--------------|
| 0.052602071  | 0.256593472 | 0.07443733   | 0.108159106 | 0.076235878  |
| 0.160211815  | 0.000510087 | 0.189604139  | 3.73E-05    | 0.188789157  |
| 0.120735985  | 0.009009469 | 0.107067601  | 0.02065646  | 0.084115928  |
| -0.085340985 | 0.065379455 | -0.048787055 | 0.292754459 | -0.01489994  |
| -0.025011988 | 0.589783752 | 0.013742534  | 0.767079811 | -0.014317809 |
| 0.108531496  | 0.018974397 | 0.158296269  | 0.00059625  | 0.168553782  |
| -0.05955065  | 0.198934949 | -0.051269185 | 0.268858772 | -0.090864048 |
| 0.060690794  | 0.19045598  | 0.055981341  | 0.227250441 | 0.066047665  |
| -0.028081919 | 0.5449475   | 0.021431019  | 0.64412426  | 0.0196746    |
| -0.003584105 | 0.93842798  | 0.016395974  | 0.723792943 | 0.02059023   |
| 0.256154439  | 1.97E-08    | 0.283811463  | 4.22E-10    | 0.289667337  |
| 0.166424121  | 0.000303801 | 0.192727512  | 2.75E-05    | 0.206714925  |
| 0.075576462  | 0.102852823 | 0.102798978  | 0.026321225 | 0.117334299  |
| 0.148219199  | 0.001317136 | 0.181412568  | 8.06E-05    | 0.183664558  |
| -0.014775201 | 0.750138694 | 0.054705573  | 0.238034856 | 0.057295152  |
| 0.268306201  | 3.84E-09    | 0.293902654  | 9.30E-11    | 0.273844077  |
| 0.162456534  | 0.000423884 | 0.162677437  | 0.000416178 | 0.119644897  |
| -0.096542854 | 0.037015655 | -0.077268371 | 0.095354874 | -0.097246143 |
| 0.10796043   | 0.019615813 | 0.140012861  | 0.002425005 | 0.084839576  |
| 0.100759147  | 0.029470765 | 0.112565909  | 0.014941643 | 0.112859192  |
| 0.131597914  | 0.004390766 | 0.165987949  | 0.000315247 | 0.178183208  |
| 0.011255177  | 0.808329009 | 0.037368438  | 0.420441215 | 0.036630036  |
| 0.050317334  | 0.27785958  | 0.074140329  | 0.109577503 | 0.053581173  |
| 0.078992165  | 0.088171009 | 0.118115869  | 0.010630588 | 0.095180082  |
| -0.061256767 | 0.186346855 | -0.016700436 | 0.718879    | -0.039421379 |
| -0.107371844 | 0.02029658  | -0.047107855 | 0.30970312  | -0.057465526 |
| 0.341269782  | 3.35E-14    | 0.373900299  | 6.08E-17    | 0.381587217  |
| 0.223624883  | 1.05E-06    | 0.259121005  | 1.33E-08    | 0.230907172  |
| -0.04560015  | 0.325460682 | -0.050208222 | 0.278904267 | -0.050914963 |
| -0.09077682  | 0.049937882 | -0.070675687 | 0.12722692  | -0.085445615 |
| 0.101670992  | 0.028025005 | 0.131082076  | 0.004548712 | 0.131079961  |
| 0.025406877  | 0.583922474 | 0.023112877  | 0.618342037 | -0.018444012 |
| -0.156211889 | 0.000705227 | -0.117376514 | 0.011132545 | -0.13620433  |
| -0.084965192 | 0.066578164 | -0.071940607 | 0.120543735 | -0.09433029  |
| -0.028108346 | 0.544568984 | 0.004546687  | 0.921938709 | -0.004941615 |
| -0.148617997 | 0.001277621 | -0.171583833 | 0.000194784 | -0.172860648 |
| 0.197981775  | 1.63E-05    | 0.213491645  | 3.24E-06    | 0.241742532  |
| -0.092175576 | 0.04649928  | -0.064571369 | 0.16358543  | -0.075595108 |
| -0.023349543 | 0.61475039  | -0.003769666 | 0.935247007 | 0.011821745  |
| 0.065013643  | 0.160713542 | 0.070326887  | 0.129119445 | 0.078213559  |
| 0.048545516  | 0.295153404 | 0.066538824  | 0.151100821 | 0.077109783  |
| -0.328499905 | 3.26E-13    | -0.325728774 | 5.28E-13    | -0.313112568 |
| 0.107353528  | 0.02031809  | 0.138644076  | 0.002676771 | 0.197403326  |
| 0.043173367  | 0.35189593  | 0.098913878  | 0.032592982 | 0.086120883  |
| -0.19103658  | 3.24E-05    | -0.167097493 | 0.000286888 | -0.15557803  |

|              |             |              |             |              |
|--------------|-------------|--------------|-------------|--------------|
| 0.052976392  | 0.253219718 | 0.082161182  | 0.076102904 | 0.082369467  |
| 0.133491526  | 0.003852541 | 0.121918884  | 0.008352601 | 0.135793961  |
| -0.110073225 | 0.017333209 | -0.119483174 | 0.009754925 | -0.102990847 |
| 0.067243116  | 0.146812101 | 0.047474645  | 0.305946933 | 0.053401386  |
| -0.027989411 | 0.546273542 | -0.001454814 | 0.974986775 | 0.005124044  |
| -0.09642105  | 0.03725599  | -0.036276971 | 0.434150825 | -0.045148735 |
| -0.026693196 | 0.565019811 | -0.007929137 | 0.864307456 | -0.020093678 |
| -0.065165622 | 0.159735493 | -0.026138557 | 0.5731343   | -0.034081646 |
| 0.214096754  | 3.03E-06    | 0.225147138  | 8.85E-07    | 0.22643893   |
| 0.193063869  | 2.66E-05    | 0.264857656  | 6.16E-09    | 0.280303082  |
| -0.043823257 | 0.344687149 | -0.024693107 | 0.594536493 | -0.033252263 |
| -0.019619677 | 0.672376073 | 0.045198194  | 0.329747922 | 0.049962355  |
| 0.022186831  | 0.632482666 | 0.078268568  | 0.091131758 | 0.097465247  |
| -0.107313946 | 0.020364642 | -0.084663127 | 0.067554723 | -0.111002856 |
| -0.12187538  | 0.008375981 | -0.115998559 | 0.012124313 | -0.140397636 |
| -0.190312833 | 3.48E-05    | -0.152629985 | 0.000936534 | -0.134842344 |
| -0.265246834 | 5.84E-09    | -0.262158383 | 8.87E-09    | -0.245010909 |
| 0.054736402  | 0.237770082 | 0.088930513  | 0.054799718 | 0.071808551  |
| -0.046869757 | 0.312157597 | -0.005651301 | 0.903057952 | -0.011106686 |
| -0.119427947 | 0.009789012 | -0.119904058 | 0.009498591 | -0.111041047 |
| -0.009276715 | 0.841528645 | 0.02487713   | 0.591791601 | 0.004771346  |
| -0.007929012 | 0.864309573 | 0.079500101  | 0.086139238 | 0.075149436  |
| 0.02832034   | 0.541537254 | 0.051287409  | 0.268688413 | 0.065288823  |
| -0.176335415 | 0.000127891 | -0.134638496 | 0.003556332 | -0.140905998 |
| 0.177441382  | 0.000115779 | 0.152699569  | 0.000931441 | 0.177173728  |
| 0.02738913   | 0.554916718 | 0.094166582  | 0.041949068 | 0.076725846  |
| -0.114154376 | 0.013573396 | -0.089515265 | 0.053219035 | -0.084872873 |
| 0.143789614  | 0.001838231 | 0.168132958  | 0.000262588 | 0.156520498  |
| 0.027325491  | 0.555836913 | 0.019528277  | 0.673814366 | 0.006130979  |
| 0.055691377  | 0.229670565 | 0.07818362   | 0.091484506 | 0.047167457  |
| 0.124103872  | 0.007250648 | 0.157606252  | 0.000630464 | 0.183604165  |
| 0.151134955  | 0.001052368 | 0.152457443  | 0.000949274 | 0.157732393  |
| -0.035038282 | 0.450017162 | 0.028717314  | 0.535882797 | -0.002488598 |
| -0.027729919 | 0.550001679 | -0.004090752 | 0.929745262 | -0.026137578 |
| -0.210615554 | 4.41E-06    | -0.217431552 | 2.11E-06    | -0.225397063 |
| -0.033866519 | 0.465323102 | -0.010243163 | 0.825272157 | -0.022381481 |
| 0.065029849  | 0.160609036 | 0.077800997  | 0.093086937 | 0.073051705  |
| 0.064984951  | 0.160898696 | 0.082655753  | 0.074346761 | 0.05690199   |
| -0.04452437  | 0.337016283 | -0.04978112  | 0.283019141 | -0.056238366 |
| 0.021253248  | 0.646875253 | -0.003975083 | 0.931726841 | 0.008769767  |
| 0.225968159  | 8.05E-07    | 0.265034499  | 6.01E-09    | 0.242814877  |
| -0.011708875 | 0.800761678 | 0.020755884  | 0.654597403 | 0.030503215  |
| 0.032457819  | 0.484099677 | 0.088314926  | 0.056505725 | 0.077397961  |
| 0.269917412  | 3.07E-09    | 0.318419078  | 1.83E-12    | 0.296389588  |
| -0.055645176 | 0.230057851 | -0.026840294 | 0.562877015 | -0.031413211 |

|              |             |              |             |              |
|--------------|-------------|--------------|-------------|--------------|
| -0.0029126   | 0.949947045 | -0.025320657 | 0.585199915 | -0.043043685 |
| -0.146488648 | 0.001501969 | -0.123553198 | 0.007515367 | -0.138711327 |
| 0.178870219  | 0.000101723 | 0.146334318  | 0.001519559 | 0.15544705   |
| -0.325230187 | 5.75E-13    | -0.299892513 | 3.68E-11    | -0.306663466 |
| 0.219141194  | 1.74E-06    | 0.221217731  | 1.38E-06    | 0.199849982  |
| 0.116166762  | 0.011999209 | 0.10111886   | 0.028892965 | 0.104339978  |
| 0.089011555  | 0.054578346 | 0.132701969  | 0.004069245 | 0.124280015  |
| 0.139499605  | 0.002516763 | 0.149253095  | 0.001216939 | 0.141366518  |
| 0.059928004  | 0.196098739 | 0.078448313  | 0.090388954 | 0.078421817  |
| 0.058931258  | 0.203654912 | 0.067468204  | 0.145461195 | 0.069083207  |
| -0.068525741 | 0.13924092  | -0.100682113 | 0.029595783 | -0.081235679 |
| -0.138714006 | 0.002663353 | -0.108577171 | 0.018923895 | -0.121989181 |
| 0.103765191  | 0.024933493 | 0.136201277  | 0.003185965 | 0.128996088  |
| -0.019964538 | 0.666959989 | 0.029425803  | 0.525865365 | 0.044811026  |
| -0.045269799 | 0.328981533 | -0.00447737  | 0.923125084 | -0.020923473 |
| -0.033531919 | 0.469746108 | 0.023035359  | 0.619520437 | 0.032664272  |
| 0.143285943  | 0.001908141 | 0.120908538  | 0.008910872 | 0.146027013  |
| 0.037449889  | 0.419428393 | 0.0823434    | 0.075451994 | 0.076740219  |
| 0.151020637  | 0.001061748 | 0.140247017  | 0.002384166 | 0.154281114  |
| -0.02957165  | 0.523815122 | -0.028032239 | 0.545659428 | -0.037423258 |
| -0.053941932 | 0.244659876 | -0.025549713 | 0.581809045 | -0.049799739 |
| -0.136877566 | 0.00303684  | -0.103971384 | 0.024645664 | -0.109254725 |
| -0.093347301 | 0.043773804 | -0.108772102 | 0.018709673 | -0.133552346 |
| 0.218383485  | 1.90E-06    | 0.233065009  | 3.52E-07    | 0.222949483  |
| 0.061585606  | 0.183989589 | 0.118363162  | 0.010467233 | 0.137603099  |
| -0.015642403 | 0.736003909 | 0.03455606   | 0.456281395 | 0.034225132  |
| -0.086003376 | 0.063309764 | -0.087689077 | 0.05828511  | -0.071275716 |
| 0.228350428  | 6.12E-07    | 0.255089091  | 2.26E-08    | 0.24008351   |
| -0.023309268 | 0.615360959 | 0.05807614   | 0.210303948 | 0.048552498  |
| 0.118875107  | 0.010136113 | 0.108487242  | 0.019023441 | 0.109800935  |
| -0.229938476 | 5.08E-07    | -0.198248434 | 1.59E-05    | -0.182906904 |
| 0.071637725  | 0.122118517 | 0.083472421  | 0.071519263 | 0.105279675  |
| 0.027811159  | 0.54883315  | 0.071417598  | 0.123273058 | 0.05520025   |
| -0.042060441 | 0.364460056 | -0.005083976 | 0.912748885 | 0.016100784  |
| -0.109962352 | 0.017446951 | -0.084324343 | 0.068663939 | -0.052266493 |
| -0.072160023 | 0.119412851 | -0.059200929 | 0.201590041 | -0.068858256 |
| -0.070307055 | 0.129227704 | -0.067037213 | 0.148056218 | -0.078577198 |
| 0.08218276   | 0.076025588 | 0.097678474  | 0.03483759  | 0.102933429  |
| -0.088581807 | 0.05576077  | -0.055439791 | 0.231785134 | -0.063153153 |
| -0.056465361 | 0.223251153 | -0.018196301 | 0.694907469 | -0.007158081 |
| 0.004949217  | 0.915052768 | 0.045400556  | 0.327585004 | 0.044676805  |
| 0.058539118  | 0.206684848 | 0.088394374  | 0.056283099 | 0.080994329  |
| -0.087069514 | 0.060092077 | -0.064217735 | 0.165909343 | -0.05255629  |
| 0.124661634  | 0.006991056 | 0.150803306  | 0.001079793 | 0.155526728  |
| 0.245888748  | 7.35E-08    | 0.253958307  | 2.62E-08    | 0.251683942  |

|              |             |              |             |              |
|--------------|-------------|--------------|-------------|--------------|
| 0.014429828  | 0.755791718 | 0.039642992  | 0.392699291 | 0.09090228   |
| -0.166767117 | 0.000295073 | -0.155501304 | 0.00074641  | -0.187993475 |
| 0.01992106   | 0.66764187  | 0.008396718  | 0.856389945 | 0.022905227  |
| 0.124957537  | 0.006856742 | 0.160328611  | 0.000505227 | 0.175612431  |
| 0.088386004  | 0.05630652  | 0.152640593  | 0.000935756 | 0.162263203  |
| -0.052922466 | 0.253703838 | -0.013221596 | 0.77566878  | -0.0075574   |
| -0.202405734 | 1.04E-05    | -0.174727901 | 0.000147634 | -0.178712835 |
| -0.094549294 | 0.041118915 | -0.061922237 | 0.181599334 | -0.052663073 |
| -0.304270468 | 1.85E-11    | -0.268049463 | 3.98E-09    | -0.251194664 |
| -0.279013682 | 8.48E-10    | -0.234418324 | 2.99E-07    | -0.209470126 |
| -0.210670685 | 4.39E-06    | -0.146802757 | 0.001466745 | -0.116108094 |
| -0.053022302 | 0.252808055 | -0.04379869  | 0.344957934 | -0.015114704 |
| -0.088999514 | 0.054611191 | -0.057803448 | 0.212456858 | -0.064677917 |
| -0.219100567 | 1.75E-06    | -0.170146997 | 0.000220734 | -0.16608127  |
| -0.139200654 | 0.002571656 | -0.072963911 | 0.115340222 | -0.062710084 |
| -0.206755481 | 6.64E-06    | -0.172479473 | 0.000180085 | -0.161598517 |
| 0.025056095  | 0.589127736 | 0.067650453  | 0.144374367 | 0.042342912  |
| -0.038919473 | 0.401401482 | 0.005311545  | 0.908859955 | 0.023685881  |
| -0.044705521 | 0.335052241 | -0.009006471 | 0.84608677  | 0.014567318  |
| -0.020364741 | 0.660696397 | 0.026121106  | 0.573390512 | 0.054933113  |
| -0.145502783 | 0.001617631 | -0.081726893 | 0.077672672 | -0.056689048 |
| -0.103465556 | 0.02535693  | -0.071725454 | 0.121660748 | -0.031837283 |
| -0.20701142  | 6.47E-06    | -0.188242441 | 4.25E-05    | -0.143050918 |
| -0.182341316 | 7.40E-05    | -0.142960316 | 0.001954626 | -0.126367876 |
| -0.052735003 | 0.25539181  | 0.011020975  | 0.812242376 | 0.049213113  |
| -0.229679803 | 5.24E-07    | -0.214344104 | 2.95E-06    | -0.205237827 |
| -0.232641581 | 3.70E-07    | -0.20920024  | 5.13E-06    | -0.192160802 |
| -0.224250361 | 9.80E-07    | -0.17380453  | 0.000160233 | -0.15785661  |
| 0.036754232  | 0.42812466  | 0.04865713   | 0.294043228 | 0.047923269  |
| 0.027490242  | 0.5534562   | 0.072237215  | 0.119016974 | 0.109766018  |
| -0.224203205 | 9.85E-07    | -0.216389138 | 2.36E-06    | -0.157370907 |
| -0.147039432 | 0.001440707 | -0.084776633 | 0.067186396 | -0.069543012 |
| -0.065158666 | 0.159780163 | -0.011906773 | 0.797466687 | 0.020071563  |
| -0.09028056  | 0.051207842 | -0.044911278 | 0.332830346 | -0.004634945 |
| -0.205587088 | 7.51E-06    | -0.149101086 | 0.001231217 | -0.152984571 |
| -0.193596431 | 2.53E-05    | -0.135208989 | 0.003416829 | -0.110807353 |
| -0.079067698 | 0.087866458 | -0.05955772  | 0.198881538 | -0.073262179 |
| 0.005715084  | 0.901969285 | 0.033639926  | 0.468315858 | 0.009795877  |
| -0.05252471  | 0.257294585 | -0.03548524  | 0.444254651 | 0.013940589  |
| 0.002507844  | 0.956895477 | 0.02975349   | 0.521264648 | 0.048581073  |
| -0.19497304  | 2.21E-05    | -0.159514313 | 0.000540025 | -0.139293517 |
| 0.073752935  | 0.111449565 | 0.114970086  | 0.012914624 | 0.139418758  |
| 0.09824847   | 0.033786121 | 0.126490054  | 0.006197412 | 0.166151901  |
| -0.166936957 | 0.000290838 | -0.100249415 | 0.030306487 | -0.075345149 |
| -0.043293949 | 0.350551253 | -0.010429797 | 0.822141176 | 0.01240036   |



|              |             |              |             |              |
|--------------|-------------|--------------|-------------|--------------|
| -0.049442002 | 0.286315402 | 0.008362233  | 0.856973381 | 0.028787509  |
| -0.083689983 | 0.070781009 | -0.011541464 | 0.803551843 | 0.039179326  |
| -0.002337823 | 0.959815225 | 0.062297434  | 0.178962396 | 0.109910959  |
| -0.290159826 | 1.64E-10    | -0.271754779 | 2.38E-09    | -0.277882562 |
| -0.079968946 | 0.084297456 | -0.021201148 | 0.647682409 | -0.016996073 |
| -0.126029172 | 0.006389446 | -0.089301673 | 0.053791951 | -0.082549893 |
| -0.002393827 | 0.958853414 | 0.018860857  | 0.684352907 | 0.017747373  |
| 0.023751403  | 0.608672821 | 0.04908735   | 0.289790192 | 0.056062211  |
| -0.004061355 | 0.930248835 | -0.010633866 | 0.818720915 | 0.019761241  |
| -0.199256113 | 1.44E-05    | -0.149536993 | 0.001190681 | -0.16419742  |
| -0.226791092 | 7.33E-07    | -0.215028487 | 2.74E-06    | -0.205288645 |
| -0.152229974 | 0.000966315 | -0.156463166 | 0.000691174 | -0.116918125 |
| -0.134141358 | 0.003682087 | -0.091324856 | 0.048566115 | -0.078930388 |
| -0.009113579 | 0.844279587 | 0.025366201  | 0.584524965 | 0.049069443  |
| -0.053036197 | 0.252683559 | -0.009691111 | 0.834549467 | 0.012245313  |
| -0.344154945 | 1.97E-14    | -0.34943186  | 7.39E-15    | -0.34297602  |
| -0.140180661 | 0.002395675 | -0.103376773 | 0.025483583 | -0.075804949 |
| -0.0376615   | 0.416803768 | -0.037262657 | 0.421758705 | 0.010242406  |
| -0.054899356 | 0.236373954 | -0.021147053 | 0.648520911 | -0.009384726 |
| -0.139565893 | 0.002504737 | -0.108872846 | 0.018599791 | -0.075521309 |
| 0.046383202  | 0.317212954 | 0.081503873  | 0.078488953 | 0.100756895  |
| -0.242781662 | 1.08E-07    | -0.208894893 | 5.30E-06    | -0.207577323 |
| 0.04061725   | 0.381163067 | 0.077608669  | 0.093900845 | 0.092448087  |
| -0.104844747 | 0.023458105 | -0.060489668 | 0.191932117 | -0.063301178 |
| -0.125377591 | 0.006670045 | -0.087655127 | 0.058382946 | -0.0792953   |
| -0.207791526 | 5.96E-06    | -0.196956005 | 1.81E-05    | -0.17628942  |
| 0.126897491  | 0.006031978 | 0.174068167  | 0.000156537 | 0.182749974  |
| -0.082982553 | 0.07320456  | -0.034428238 | 0.457950003 | 0.016100157  |
| -0.151022968 | 0.001061556 | -0.102115563 | 0.027342507 | -0.099878329 |
| -0.107169326 | 0.02053552  | -0.052883037 | 0.254058223 | -0.050407874 |
| -0.108506156 | 0.019002467 | -0.053887901 | 0.245133472 | -0.034031231 |
| -0.095344275 | 0.03943877  | -0.067101053 | 0.147669623 | -0.066028063 |
| -0.013231559 | 0.775504258 | -0.006025347 | 0.896676347 | -0.037736056 |
| -0.077851482 | 0.092874228 | -0.084490185 | 0.068119106 | -0.117676968 |
| 0.040415618  | 0.38353343  | 0.005591687  | 0.904075615 | -0.047423201 |
| 0.015126429  | 0.744403538 | 0.026382341  | 0.569560915 | -0.016541957 |
| -0.052603187 | 0.256583371 | -0.078121472 | 0.091743267 | -0.122363953 |
| -0.072344594 | 0.118467991 | -0.058591851 | 0.206275504 | -0.091432192 |
| -0.213438717 | 3.26E-06    | -0.211075459 | 4.20E-06    | -0.208317308 |
| -0.140054739 | 0.002417655 | -0.145230929 | 0.001650932 | -0.202103495 |
| 0.053029714  | 0.252741638 | 0.060278292  | 0.193492497 | 0.020084157  |
| 0.017302426  | 0.709197229 | 0.047934517  | 0.301280241 | 0.01828304   |
| 0.128859344  | 0.005289607 | 0.131533169  | 0.004410315 | 0.089034496  |
| -0.005801741 | 0.900490517 | -0.026915401 | 0.561784435 | -0.06340217  |
| -0.03825852  | 0.409451128 | -0.052382314 | 0.258588569 | -0.066104506 |

|              |             |              |             |              |
|--------------|-------------|--------------|-------------|--------------|
| -0.029643807 | 0.522802293 | -0.033097192 | 0.475527099 | -0.066347777 |
| -0.171895583 | 0.000189545 | -0.194055604 | 2.42E-05    | -0.230538089 |
| -0.153269061 | 0.000890709 | -0.181356014 | 8.10E-05    | -0.182823615 |
| 0.024156071  | 0.602579879 | 0.027183109  | 0.557898394 | -0.016540445 |
| -0.064895729 | 0.161475475 | -0.067710429 | 0.14401807  | -0.132997807 |
| -0.093329416 | 0.043814372 | -0.110238717 | 0.017164642 | -0.117603103 |
| 0.058024979  | 0.210706661 | 0.090145934  | 0.051556969 | 0.077807034  |
| 0.050572714  | 0.27542485  | 0.044500884  | 0.337271468 | 0.004265194  |
| -0.023740322 | 0.608840042 | -0.039549371 | 0.393818866 | -0.035930347 |
| -0.094233071 | 0.041803838 | -0.122765281 | 0.007909156 | -0.170447061 |
| -0.106601763 | 0.021218229 | -0.107984112 | 0.019588843 | -0.136971982 |
| -0.125007765 | 0.006834175 | -0.132460645 | 0.004137646 | -0.118590241 |
| -0.054074729 | 0.243498616 | -0.07076309  | 0.126756074 | -0.100824883 |
| -0.000240791 | 0.995859324 | -0.014267216 | 0.758457856 | -0.03883921  |
| 0.000499118  | 0.991417229 | -0.017536487 | 0.705445342 | -0.044591011 |
| -0.139178371 | 0.002575791 | -0.180737647 | 8.58E-05    | -0.201254272 |
| 0.011401953  | 0.80587891  | 0.020852369  | 0.653096449 | -0.011458653 |
| 0.044348764  | 0.338927243 | 0.018619971  | 0.688171724 | -0.007867136 |
| -0.176737461 | 0.000123356 | -0.150040246 | 0.001145413 | -0.166232667 |
| -0.070082809 | 0.130456683 | -0.108637856 | 0.018856977 | -0.147487425 |
| -0.29068189  | 1.52E-10    | -0.28575354  | 3.17E-10    | -0.333290315 |
| -0.029702687 | 0.521976569 | -0.05351143  | 0.248451085 | -0.059964274 |
| -0.077208616 | 0.095612043 | -0.104075618 | 0.024501255 | -0.152686822 |
| 0.028007716  | 0.546011031 | 0.03021167   | 0.514866592 | -0.009693982 |
| 0.111532101  | 0.015895886 | 0.104282931  | 0.024216211 | 0.088521315  |
| 0.023453621  | 0.613173794 | 0.009225386  | 0.84239399  | 0.019525711  |
| 0.014265074  | 0.758492993 | 0.006290835  | 0.892150856 | 0.01803472   |
| -0.101346543 | 0.028532288 | -0.085238193 | 0.065705566 | -0.108458163 |
| -0.096112571 | 0.037870589 | -0.139222585 | 0.002567593 | -0.159668477 |
| 0.02548809   | 0.582720392 | 0.03130138   | 0.499814856 | -0.013416923 |
| 0.008453378  | 0.855431482 | 0.028075125  | 0.545044827 | -0.014312408 |
| 0.033766112  | 0.466647929 | 0.04294771   | 0.354421085 | 0.00356025   |
| 0.023700796  | 0.609436715 | 0.04752113   | 0.305473061 | -0.001070109 |
| -0.0224301   | 0.628754695 | -0.000162621 | 0.997203546 | -0.035596144 |
| -0.042754537 | 0.356591776 | -0.02792942  | 0.547134321 | -0.078001777 |
| -0.033415461 | 0.471290954 | -0.046981745 | 0.311001559 | -0.074394368 |
| 0.024705303  | 0.594354389 | 0.027240783  | 0.557062916 | 0.016229792  |
| -0.028531981 | 0.538518972 | 0.007441106  | 0.872585737 | -0.011514241 |
| -0.054696856 | 0.238109765 | -0.025198651 | 0.587009769 | -0.050429047 |
| -0.01191871  | 0.797268049 | -0.006210396 | 0.89352166  | -0.038234724 |
| -0.010789883 | 0.816108349 | -0.017308976 | 0.709092143 | -0.061393085 |
| -0.113560632 | 0.014071344 | -0.121820535 | 0.008405539 | -0.138987227 |
| -0.104696679 | 0.023655886 | -0.08528863  | 0.065545384 | -0.107269431 |
| 0.032632802  | 0.481745275 | 0.034394835  | 0.458386616 | 0.012042361  |
| -0.075303436 | 0.104105432 | -0.071570756 | 0.122468866 | -0.100305619 |

|              |             |              |             |              |
|--------------|-------------|--------------|-------------|--------------|
| -0.316189886 | 2.66E-12    | -0.278977721 | 8.53E-10    | -0.321682482 |
| 0.026334208  | 0.570265603 | 0.027743278  | 0.549809449 | 0.000623635  |
| -0.061787212 | 0.182555309 | -0.083627016 | 0.070994034 | -0.090188531 |
| 0.087633162  | 0.058446318 | 0.066224059  | 0.153048045 | 0.04401189   |
| 0.06090046   | 0.188926061 | 0.090358263  | 0.051007232 | 0.064575032  |
| -0.044221647 | 0.340314856 | -0.030288529 | 0.513797329 | -0.02954631  |
| 0.040602707  | 0.381333738 | 0.034691128  | 0.454521899 | -0.000206915 |
| -0.019766094 | 0.670074476 | -0.000705564 | 0.987867426 | -0.002142976 |
| -0.013890811 | 0.764640261 | -0.013658673 | 0.768460586 | -0.06389418  |
| -0.047299383 | 0.307737967 | -0.008840881 | 0.848882277 | -0.02048745  |
| -0.06737804  | 0.146001188 | -0.061254461 | 0.186363468 | -0.083460169 |
| 0.138301515  | 0.002743398 | 0.11782103   | 0.010828302 | 0.115957619  |
| 0.051783658  | 0.264077842 | 0.037144158  | 0.423237455 | 0.042411136  |
| -0.059923006 | 0.196136111 | -0.070123887 | 0.130230881 | -0.118543121 |
| -0.055275008 | 0.233177565 | -0.046035473 | 0.320858498 | -0.071602903 |
| -0.008866116 | 0.848456122 | -0.018445382 | 0.690944449 | -0.053430492 |
| -0.024936504 | 0.590907224 | -0.027106126 | 0.559014542 | -0.02179986  |
| 0.043028101  | 0.353520187 | 0.035489818  | 0.444195845 | -0.003574569 |
| 0.175559432  | 0.00013709  | 0.173847631  | 0.000159624 | 0.177859382  |
| 0.046524734  | 0.315736927 | -0.002645594 | 0.954530344 | -0.035100124 |
| 0.100398283  | 0.030060341 | 0.096809759  | 0.036493618 | 0.10902671   |
| -0.023915863 | 0.606193309 | -0.040568701 | 0.381732983 | -0.088117119 |
| -0.014351864 | 0.75706963  | -0.003300174 | 0.943297135 | -0.046678062 |
| 0.017844198  | 0.700523747 | 0.031894452  | 0.491721887 | -0.003748281 |
| 0.118394217  | 0.010446877 | 0.098484573  | 0.033358573 | 0.110163007  |
| -0.031731994 | 0.493931767 | -0.031245503 | 0.500580947 | -0.067528146 |
| -0.051140299 | 0.270065708 | -0.052957311 | 0.253390947 | -0.073435946 |
| 0.088226631  | 0.056753996 | 0.038381884  | 0.407941477 | 0.025374447  |
| -0.133423565 | 0.003870774 | -0.144030502 | 0.001805631 | -0.168872552 |
| 0.00452017   | 0.922392535 | -0.023051593 | 0.619273578 | -0.049812049 |
| 0.26525971   | 5.83E-09    | 0.246461298  | 6.84E-08    | 0.254059691  |
| -0.162323687 | 0.000428582 | -0.112485523 | 0.015013996 | -0.125742269 |
| 0.018539234  | 0.689453452 | 0.004192156  | 0.928008395 | -0.016703694 |
| 0.00070271   | 0.9879165   | -0.007462396 | 0.872224308 | -0.028700498 |
| -0.036896153 | 0.426342096 | -0.031643347 | 0.495139838 | -0.053321341 |
| -0.031379841 | 0.498740158 | -0.034505911 | 0.45693564  | -0.066715666 |
| -0.020764177 | 0.654468337 | -0.01292456  | 0.780578508 | -0.05715139  |
| 0.034015898  | 0.463355965 | 0.028781741  | 0.53496791  | -0.007902906 |
| 0.087032245  | 0.060202234 | 0.109073355  | 0.018382767 | 0.095394205  |
| 0.108222298  | 0.019319379 | 0.122326024  | 0.008136597 | 0.093153768  |
| -0.183245087 | 6.80E-05    | -0.164465204 | 0.000358443 | -0.223916416 |
| -0.164876028 | 0.000346275 | -0.169129572 | 0.000241028 | -0.182176588 |
| 0.018555041  | 0.689202431 | 0.036004755  | 0.437609739 | 0.021896049  |
| 0.006799058  | 0.883497628 | -0.017857471 | 0.700311735 | -0.066641261 |
| 0.022975556  | 0.620430203 | 0.020061699  | 0.665437167 | -0.004220956 |

|              |             |              |             |              |
|--------------|-------------|--------------|-------------|--------------|
| -0.17656745  | 0.000125255 | -0.239064441 | 1.71E-07    | -0.277055593 |
| -0.110726037 | 0.016676565 | -0.082986035 | 0.073192468 | -0.128030979 |
| -0.026838856 | 0.562897945 | -0.038857865 | 0.402147764 | -0.089209628 |
| 0.165992195  | 0.000315134 | 0.149767457  | 0.00116975  | 0.148192567  |
| 0.176160186  | 0.000129916 | 0.183902165  | 6.40E-05    | 0.170980987  |
| 0.06864574   | 0.138548201 | 0.069290546  | 0.134871147 | 0.047409366  |
| -0.041142679 | 0.375028451 | -0.03505542  | 0.44979543  | -0.035814907 |
| 0.012010477  | 0.795741438 | 0.004897744  | 0.915932946 | -0.024688489 |
| -0.061326554 | 0.185844743 | -0.067588301 | 0.144744311 | -0.09765918  |
| 0.033299517  | 0.472831759 | 0.023534996  | 0.611942355 | -0.002528123 |
| 0.118514813  | 0.010368161 | 0.119508939  | 0.009739059 | 0.080954142  |
| 0.183649425  | 6.55E-05    | 0.216308557  | 2.38E-06    | 0.193504427  |
| -0.181550501 | 7.96E-05    | -0.15653083  | 0.000687435 | -0.194296316 |
| 0.019869918  | 0.668444296 | 0.012485266  | 0.787855585 | -0.013707124 |
| 0.004394037  | 0.92455159  | 0.003972732  | 0.931767131 | -0.031820241 |
| 0.023749976  | 0.608694352 | 0.028958577  | 0.532460817 | -0.013335148 |
| -0.047756946 | 0.303076568 | -0.029845195 | 0.519980815 | -0.086363097 |
| 0.065738313  | 0.156090263 | 0.056817778  | 0.220370999 | 0.03324207   |
| 0.06551776   | 0.157486581 | 0.062297348  | 0.178962996 | 0.029111277  |
| 0.03587522   | 0.439261219 | 0.04369889   | 0.346059359 | 0.008440031  |
| 0.027752852  | 0.549671691 | 0.021032879  | 0.650292119 | -0.010958359 |
| 0.032480597  | 0.483792844 | 0.034750233  | 0.453753163 | -0.014739871 |
| 0.220353271  | 1.52E-06    | 0.198846574  | 1.50E-05    | 0.156102372  |
| 0.02792872   | 0.547144379 | 0.026175033  | 0.572598965 | 0.000422081  |
| -0.060137686 | 0.194535582 | -0.0420381   | 0.364715099 | -0.057782391 |
| -0.002002138 | 0.965581437 | -0.008897441 | 0.847927203 | -0.045847989 |
| 0.051226767  | 0.269255579 | 0.047560744  | 0.305069604 | 0.020068166  |
| 0.039938979  | 0.38917239  | 0.047868295  | 0.301949325 | 0.038026246  |
| 0.150339316  | 0.001119269 | 0.150483768  | 0.001106838 | 0.12226592   |
| 0.124095221  | 0.007254742 | 0.136664315  | 0.003083163 | 0.109629693  |
| 0.015251525  | 0.742364251 | -0.018983066 | 0.682418581 | -0.032096334 |
| -0.09480936  | 0.040562751 | -0.097352297 | 0.035451721 | -0.127993677 |
| -0.142445115 | 0.002030293 | -0.149993734 | 0.00114953  | -0.180718701 |
| -0.003812062 | 0.934520376 | -0.0227802   | 0.62340614  | -0.07856253  |
| -0.10647983  | 0.021367444 | -0.127242746 | 0.005894908 | -0.184403227 |
| -0.026219531 | 0.571946213 | -0.031163895 | 0.501700961 | -0.065654793 |
| -0.017243587 | 0.710141508 | -0.013882849 | 0.764771185 | -0.046858265 |
| 0.020012113  | 0.666214176 | 0.020245418  | 0.662561475 | -0.010394708 |
| -0.211927563 | 3.84E-06    | -0.212710717 | 3.53E-06    | -0.228193634 |
| -0.036717629 | 0.428585108 | -0.049750168 | 0.28331893  | -0.117553328 |
| -0.01826271  | 0.693850049 | -0.019336826 | 0.676830972 | -0.008267593 |
| 0.011103067  | 0.810870126 | -0.033152994 | 0.474782877 | -0.039421269 |
| -0.036355782 | 0.433152357 | -0.036356795 | 0.433139539 | -0.057321725 |
| 0.035806262  | 0.44014183  | 0.022356482  | 0.62988187  | -0.015161834 |
| 0.031601005  | 0.495717426 | 0.025073297  | 0.588871984 | -0.014641483 |

|              |             |              |             |              |
|--------------|-------------|--------------|-------------|--------------|
| -0.02161414  | 0.641295541 | -0.023207725 | 0.616901523 | -0.078676073 |
| -0.059000399 | 0.203124044 | -0.042644017 | 0.357837446 | -0.054001319 |
| -0.003251146 | 0.94413814  | -0.002484726 | 0.957292448 | -0.038208531 |
| -0.025651027 | 0.580312163 | -0.025302984 | 0.58546191  | -0.042567116 |
| -0.032812031 | 0.479340192 | -0.017766092 | 0.701771809 | -0.02196903  |
| -0.000193894 | 0.996665762 | -0.011175594 | 0.809658262 | -0.037018634 |
| -0.031346989 | 0.499189989 | -0.034451766 | 0.45764261  | -0.04024287  |
| -0.032399807 | 0.484881607 | -0.020343547 | 0.661027517 | -0.029354708 |
| -0.011911345 | 0.797390597 | -0.006066231 | 0.895979214 | -0.010850133 |
| 0.02687564   | 0.562362711 | 0.018193321  | 0.694954927 | -0.004006795 |
| -0.10973818  | 0.017678915 | -0.108960801 | 0.018504318 | -0.086656988 |
| -0.025550886 | 0.581791716 | -0.046324371 | 0.317827821 | -0.104346049 |
| -0.051484953 | 0.266846496 | -0.058406997 | 0.207713007 | -0.076036477 |
| 0.008519269  | 0.854317144 | 0.007796987  | 0.866547635 | -0.031948269 |
| -0.003145177 | 0.945956096 | -0.005010256 | 0.914009123 | -0.035114878 |
| -0.084046182 | 0.06958578  | -0.099432764 | 0.031687707 | -0.135347952 |
| -0.107033807 | 0.020696773 | -0.102329784 | 0.027018773 | -0.136139968 |
| -0.07991109  | 0.084523003 | -0.093105843 | 0.044324171 | -0.104623154 |
| 0.048498253  | 0.295624341 | 0.065694549  | 0.156366586 | 0.037371507  |
| -9.85E-05    | 0.998305331 | -0.010344163 | 0.823577428 | 0.004019662  |
| 0.035882265  | 0.439171307 | -0.000277714 | 0.995224403 | -0.011021025 |
| 0.14996017   | 0.001152508 | 0.12758762   | 0.005760789 | 0.100496482  |
| 0.050661263  | 0.274584034 | 0.059180437  | 0.201746413 | 0.03115668   |
| -0.047221945 | 0.308531519 | -0.043537193 | 0.347848619 | -0.063387651 |
| 0.036462432  | 0.431803306 | 0.033210629  | 0.474014874 | -0.001602937 |
| 0.044867847  | 0.333298554 | 0.040772362  | 0.379345711 | 0.007555663  |
| 0.039292028  | 0.396906223 | 0.017231393  | 0.710337262 | -0.055344698 |
| 0.093382693  | 0.04369362  | 0.100812657  | 0.029384191 | 0.084587277  |
| -0.049120547 | 0.289463742 | -0.067630628 | 0.144492295 | -0.108952865 |
| 0.012910269  | 0.780814951 | 0.012609426  | 0.78579693  | -0.021176307 |
| -0.01078843  | 0.816132681 | -0.03004065  | 0.517249965 | -0.060809585 |
| 0.044833458  | 0.333669582 | 0.058123276  | 0.209933413 | 0.025310799  |
| -0.063216332 | 0.172624301 | -0.081820342 | 0.077332693 | -0.106954468 |
| 0.254449613  | 2.46E-08    | 0.29604459   | 6.70E-11    | 0.285191236  |
| -0.10420051  | 0.024329191 | -0.100070881 | 0.030603959 | -0.115725146 |
| -0.125461379 | 0.006633354 | -0.178693816 | 0.000103367 | -0.217871085 |
| -0.019907389 | 0.667856335 | -0.04910853  | 0.289581888 | -0.070820668 |
| -0.046177966 | 0.319361335 | -0.04320016  | 0.35159687  | -0.088495141 |
| -0.130612567 | 0.004696913 | -0.125036645 | 0.006821229 | -0.151830247 |
| -0.093440344 | 0.043563269 | -0.082829947 | 0.073736142 | -0.055996696 |
| -0.161650503 | 0.000453144 | -0.141788212 | 0.002130657 | -0.187571479 |
| -0.100802271 | 0.029400977 | -0.103053041 | 0.025950027 | -0.099769465 |
| -0.047051779 | 0.310280039 | -0.03387025  | 0.465273913 | -0.03878509  |
| 0.189796003  | 3.66E-05    | 0.168532723  | 0.000253732 | 0.118235878  |
| 0.024582396  | 0.596190639 | -0.032024192 | 0.489960863 | -0.07214037  |

|              |             |              |             |              |
|--------------|-------------|--------------|-------------|--------------|
| 0.134390985  | 0.003618447 | 0.079135279  | 0.087594685 | 0.054335148  |
| 0.036494708  | 0.431395522 | 0.004204512  | 0.927796783 | -0.011017902 |
| -0.023525679 | 0.612083303 | -0.029118011 | 0.53020553  | -0.038001947 |
| 0.198684786  | 1.52E-05    | 0.190346     | 3.47E-05    | 0.136004521  |
| -0.201264581 | 1.17E-05    | -0.198527806 | 1.55E-05    | -0.219820736 |
| 0.009176552  | 0.843217446 | -0.014077159 | 0.76157762  | -0.0742451   |
| -0.131562205 | 0.004401538 | -0.113817004 | 0.013854397 | -0.145968035 |
| 0.046205518  | 0.31907237  | 0.034782419  | 0.453334842 | 0.022955907  |
| -0.156800767 | 0.000672703 | -0.167204234 | 0.000284289 | -0.201470935 |
| -0.128335659 | 0.005479265 | -0.125823188 | 0.006476985 | -0.164325244 |
| -0.068867263 | 0.137276364 | -0.073473603 | 0.112814967 | -0.110355896 |
| -0.083482058 | 0.071486429 | -0.103005765 | 0.026018756 | -0.173010397 |
| -0.081361101 | 0.079015157 | -0.116379807 | 0.01184239  | -0.11899328  |
| 0.01888209   | 0.684016681 | 0.014169149  | 0.760067125 | -0.007042594 |
| 0.085975407  | 0.063396052 | 0.083553629  | 0.071242967 | 0.076150967  |
| 0.083147082  | 0.072634956 | 0.100207623  | 0.030375897 | 0.076921996  |
| -0.070404287 | 0.128697616 | -0.064290805 | 0.165427143 | -0.068607496 |
| 0.087120879  | 0.059940529 | 0.092905223  | 0.044785868 | 0.059390794  |
| -0.002296898 | 0.9605181   | -0.029944134 | 0.518597534 | -0.063868474 |
| -0.0954765   | 0.039165032 | -0.129991229 | 0.004899735 | -0.166257357 |
| -0.047624536 | 0.304420653 | -0.046871014 | 0.312144606 | -0.04463809  |
| 0.045907292  | 0.322209187 | 0.048423084  | 0.296374383 | 0.031965817  |
| -0.039078444 | 0.399479611 | -0.044808526 | 0.333938739 | -0.058338378 |
| -0.033888476 | 0.465033666 | -0.023016411 | 0.619808627 | -0.039035646 |
| -0.033777832 | 0.466493182 | -0.031943516 | 0.491055524 | -0.055924725 |
| -0.018817855 | 0.68503404  | -0.032936523 | 0.477673475 | -0.057037455 |
| -0.023207927 | 0.616898456 | -0.022480007 | 0.627991064 | -0.051009155 |
| -0.149579907 | 0.001186758 | -0.145410111 | 0.001628913 | -0.158421671 |
| 0.061457782  | 0.184903259 | 0.055569842  | 0.230690348 | 0.039795772  |
| -0.027942082 | 0.546952586 | -0.05376029  | 0.246254539 | -0.057363511 |
| -0.116335708 | 0.011874701 | -0.143626225 | 0.001860648 | -0.196482873 |
| -0.099788869 | 0.031078939 | -0.094927442 | 0.040312331 | -0.120984992 |
| 0.059416858  | 0.199947676 | 0.054938192  | 0.236042081 | 0.008557635  |
| -0.100433959 | 0.030001607 | -0.106287678 | 0.02160444  | -0.151876408 |
| -0.075255043 | 0.104328708 | -0.077786096 | 0.09314979  | -0.122665516 |
| 0.146169135  | 0.001538595 | 0.086271766  | 0.062486667 | 0.074873122  |
| 0.037358324  | 0.420567079 | 0.041468761  | 0.371252056 | 0.026041526  |
| -0.093592837 | 0.043220055 | -0.077190183 | 0.095691484 | -0.110607971 |
| 0.037705143  | 0.416263663 | 0.02680838   | 0.563341575 | 0.000948121  |
| -0.021862808 | 0.637462625 | -0.054056217 | 0.24366027  | -0.08402465  |
| 0.38642282   | 4.43E-18    | 0.386514413  | 4.34E-18    | 0.340907906  |
| -0.085379165 | 0.065258666 | -0.080915367 | 0.0806764   | -0.100160136 |
| 0.164503611  | 0.000357289 | 0.12185166   | 0.008388753 | 0.125427604  |
| -0.119171482 | 0.009948699 | -0.099482583 | 0.031601932 | -0.166289795 |
| -0.029512599 | 0.524644737 | -0.028923295 | 0.532960562 | -0.057223866 |

|              |             |              |             |              |
|--------------|-------------|--------------|-------------|--------------|
| -0.056465093 | 0.223253353 | -0.078727086 | 0.089246532 | -0.123962273 |
| 0.013866793  | 0.765035266 | 0.011603513  | 0.802517399 | -0.001528114 |
| -0.052462271 | 0.257861432 | -0.094624123 | 0.040958233 | -0.138190708 |
| 0.033386342  | 0.471677662 | 0.020762996  | 0.654486722 | -0.001013815 |
| -0.321777284 | 1.04E-12    | -0.331466614 | 1.94E-13    | -0.371704394 |
| -0.202241718 | 1.06E-05    | -0.201629489 | 1.13E-05    | -0.220664403 |
| 0.00214437   | 0.963138023 | -0.003644872 | 0.937386162 | -0.050152158 |
| 0.127223018  | 0.005902664 | 0.114152801  | 0.013574696 | 0.060049174  |
| -0.111067898 | 0.016341463 | -0.109781142 | 0.017634252 | -0.135862139 |
| -0.01128764  | 0.807786955 | -0.000443944 | 0.992365959 | -0.006185067 |
| 0.197462623  | 1.72E-05    | 0.191244127  | 3.18E-05    | 0.163075594  |
| 0.030052109  | 0.517090089 | 0.004065194  | 0.930183064 | -0.030694465 |
| -0.070162882 | 0.130016806 | -0.066444348 | 0.151683293 | -0.091745529 |
| 0.00571426   | 0.901983357 | 0.013619252  | 0.7691099   | -0.019432354 |
| 0.126127371  | 0.006348088 | 0.098306466  | 0.033680668 | 0.047061214  |
| 0.015363676  | 0.740537516 | -0.01254755  | 0.78682269  | -0.04381762  |
| 0.026020632  | 0.57486665  | 0.015628895  | 0.736223408 | -0.051908735 |
| -0.166260002 | 0.000308061 | -0.179887596 | 9.27E-05    | -0.218478167 |
| -0.072085687 | 0.119795054 | -0.077898235 | 0.092677587 | -0.100748183 |
| -0.046562868 | 0.315340004 | -0.045834098 | 0.322982121 | -0.094687628 |
| -0.149194674 | 0.001222408 | -0.129176194 | 0.005177748 | -0.153022249 |
| 0.07279353   | 0.116194177 | 0.053069795  | 0.2523827   | 0.036066395  |
| -0.040614511 | 0.381195211 | -0.048569636 | 0.294913251 | -0.062366539 |
| -0.139102631 | 0.002589892 | -0.150153864 | 0.001135415 | -0.199771741 |
| -0.1519463   | 0.000987961 | -0.113576747 | 0.014057619 | -0.12229383  |
| -0.021579697 | 0.641827197 | 0.019672715  | 0.671541993 | -0.000956327 |
| -0.118907738 | 0.010115326 | -0.07279811  | 0.116171158 | -0.06520871  |
| 0.117789075  | 0.010849925 | 0.169369029  | 0.0002361   | 0.190257282  |
| -0.066070633 | 0.154004055 | -0.007304847 | 0.874899563 | -0.0249871   |
| -0.028082455 | 0.54493982  | 0.005021973  | 0.913808809 | 4.22E-07     |
| 0.09822439   | 0.033829986 | 0.13084329   | 0.004623549 | 0.127882196  |
| -0.001400748 | 0.975916071 | 0.034490229  | 0.457140345 | 0.016615411  |
| -0.131736636 | 0.004349144 | -0.073544791 | 0.11246575  | -0.07581119  |
| -0.03988154  | 0.389855315 | -0.014839671 | 0.749084932 | -0.002130856 |
| 0.050730675  | 0.273926163 | 0.099721689  | 0.031193012 | 0.09218814   |
| -0.132572748 | 0.004105743 | -0.082935967 | 0.073366506 | -0.103554472 |
| 0.053132738  | 0.251819729 | 0.070231997  | 0.129638054 | 0.104925249  |
| 0.023615451  | 0.610725918 | 0.021246905  | 0.646973489 | 0.062188515  |
| -0.081370518 | 0.078980362 | -0.001529664 | 0.973700298 | 0.014505636  |
| 0.037029411  | 0.424672273 | 0.07681271   | 0.097329915 | 0.045513659  |
| 0.050857242  | 0.272729361 | 0.051242182  | 0.269111332 | 0.045791016  |
| -0.031248724 | 0.500536777 | -0.017896134 | 0.699694289 | -0.017226473 |
| -0.030700707 | 0.508082803 | 0.021857726  | 0.637540854 | 0.015125332  |
| -0.083528122 | 0.071329657 | -0.086945615 | 0.060458929 | -0.116504345 |
| -0.175143665 | 0.00014227  | -0.153564008 | 0.000870266 | -0.134692187 |

|              |             |              |             |              |
|--------------|-------------|--------------|-------------|--------------|
| 0.070907064  | 0.125983428 | 0.133577353  | 0.003829626 | 0.173358679  |
| -0.050522652 | 0.275900976 | -0.03158015  | 0.496002049 | -0.039056344 |
| -0.091060967 | 0.049222655 | -0.013082476 | 0.777967196 | 0.009602792  |
| 0.146683149  | 0.001480067 | 0.169345246  | 0.000236585 | 0.186648434  |
| -0.046321206 | 0.317860917 | -0.022181369 | 0.632566473 | -0.027102426 |
| -0.036971553 | 0.4253968   | 0.001885323  | 0.967588453 | 0.00016735   |
| 0.053485722  | 0.248678774 | 0.059508705  | 0.199252043 | 0.073757802  |
| -0.230297194 | 4.87E-07    | -0.161338802 | 0.000464954 | -0.165044923 |
| -0.212566356 | 3.58E-06    | -0.204472017 | 8.43E-06    | -0.216026221 |
| 0.025635351  | 0.580543655 | 0.067314149  | 0.146384757 | 0.073869016  |
| 0.001709185  | 0.970615097 | 0.055634439  | 0.230147925 | 0.078993888  |
| -0.115628186 | 0.012403856 | -0.111232414 | 0.016182313 | -0.110763045 |
| -0.053903629 | 0.244995546 | -0.002567759 | 0.955866708 | -0.007731156 |
| -0.082047472 | 0.076511403 | -0.033340739 | 0.47228363  | -0.026212726 |
| 0.048783993  | 0.292784785 | 0.081198302  | 0.07961866  | 0.114653739  |
| 0.039166326  | 0.39841955  | 0.085649158  | 0.06440973  | 0.089892282  |
| -0.089449702 | 0.053394351 | -0.076422285 | 0.099048    | -0.042774497 |
| -0.218305168 | 1.91E-06    | -0.199205852 | 1.45E-05    | -0.211675011 |
| 0.049971008  | 0.281184649 | 0.079610192  | 0.085703882 | 0.076172164  |
| -0.14297649  | 0.001952293 | -0.116380551 | 0.011841846 | -0.122564889 |
| 0.0506433    | 0.274754464 | 0.071449861  | 0.12310331  | 0.082347602  |
| -0.316777057 | 2.41E-12    | -0.28665828  | 2.77E-10    | -0.294143145 |
| -0.105746212 | 0.022284577 | -0.067607202 | 0.144631728 | -0.073053642 |
| -0.118598974 | 0.010313539 | -0.083745494 | 0.070593646 | -0.052110008 |
| 0.022890391  | 0.621726796 | 0.08848437   | 0.056031797 | 0.117284304  |
| 0.101030587  | 0.029033849 | 0.136560423  | 0.003105963 | 0.145660005  |
| 0.075669036  | 0.102430826 | 0.087660814  | 0.058366549 | 0.113000983  |
| -0.10341496  | 0.02542904  | -0.049989063 | 0.281010639 | -0.055315    |
| -0.032318545 | 0.485978054 | -0.000166887 | 0.997130173 | -0.019907098 |
| 0.009360342  | 0.84011919  | 0.070217556  | 0.129717121 | 0.093260006  |
| 0.175355811  | 0.000139604 | 0.189685352  | 3.70E-05    | 0.218173354  |
| -0.127273447 | 0.005882856 | -0.123409387 | 0.007585907 | -0.104206357 |
| -0.128677176 | 0.0053549   | -0.075614808 | 0.102677853 | -0.089242937 |
| -0.012023069 | 0.795532017 | 0.02226399   | 0.631299235 | 0.021920123  |
| 0.048743119  | 0.293189855 | 0.080112247  | 0.083740903 | 0.073329262  |
| -0.088261487 | 0.056655877 | -0.051273843 | 0.268815216 | -0.075655584 |
| -0.018691915 | 0.687030343 | 0.023540414  | 0.611860416 | 0.025145474  |
| -0.050200577 | 0.278977565 | -0.058467487 | 0.207241821 | -0.05292114  |
| 0.019358457  | 0.676489886 | 0.041209054  | 0.374257845 | 0.064894173  |
| 0.064290989  | 0.165425935 | 0.085768844  | 0.064036318 | 0.089125519  |
| -0.0792804   | 0.087013378 | -0.055637514 | 0.230122125 | -0.06373227  |
| 0.149768026  | 0.001169699 | 0.18660358   | 4.96E-05    | 0.1951055    |
| -0.058767782 | 0.204914096 | -0.050841581 | 0.272877257 | -0.041287564 |
| -0.201824683 | 1.11E-05    | -0.180968016 | 8.40E-05    | -0.173948486 |
| -0.020807586 | 0.653792943 | 0.039489233  | 0.394539042 | 0.037698386  |



|              |             |              |             |              |
|--------------|-------------|--------------|-------------|--------------|
| -0.083801157 | 0.070406178 | -0.060971014 | 0.188413272 | -0.080662354 |
| -0.093618363 | 0.043162826 | -0.04246027  | 0.359914476 | -0.05229078  |
| -0.130315357 | 0.004792966 | -0.088981505 | 0.054660343 | -0.092259676 |
| 0.126631311  | 0.006139601 | 0.165244609  | 0.000335688 | 0.169382951  |
| 0.271877882  | 2.34E-09    | 0.253415186  | 2.82E-08    | 0.24929664   |
| 0.153398369  | 0.000881692 | 0.198450556  | 1.56E-05    | 0.22893477   |
| -0.136799943 | 0.003053628 | -0.128319748 | 0.005485122 | -0.118540781 |
| 0.08634353   | 0.062268082 | 0.117274271  | 0.011203586 | 0.126505519  |
| -0.143292898 | 0.00190716  | -0.106151602 | 0.021773648 | -0.084120666 |
| -0.031783749 | 0.493227174 | -0.016621906 | 0.720145365 | -0.035972478 |
| 0.30935912   | 8.16E-12    | 0.318123187  | 1.92E-12    | 0.340738244  |
| 0.072671025  | 0.116811236 | 0.085974138  | 0.063399967 | 0.059313931  |
| -0.144084971 | 0.001798333 | -0.103576175 | 0.025199889 | -0.100386034 |
| -0.145803187 | 0.00158155  | -0.15081534  | 0.001078787 | -0.15316729  |
| -0.060838648 | 0.189376157 | -0.007785991 | 0.86673408  | -0.013697455 |
| -0.044826947 | 0.333739862 | -0.03680092  | 0.427537765 | -0.047788039 |
| 0.107985642  | 0.019587101 | 0.130573171  | 0.004709545 | 0.133094672  |
| 0.044180548  | 0.340764269 | 0.047811155  | 0.30252743  | 0.005572338  |
| -0.016056116 | 0.729291589 | 0.001389533  | 0.976108834 | -0.013202695 |
| -0.018806565 | 0.68521291  | 0.009070411  | 0.845007835 | 0.016082855  |
| 0.107346373  | 0.020326498 | 0.15844797   | 0.000588962 | 0.169284464  |
| -0.233339488 | 3.40E-07    | -0.182381577 | 7.37E-05    | -0.198317472 |
| 0.06480365   | 0.162072353 | 0.061043288  | 0.187889036 | 0.07065513   |
| -0.036695694 | 0.428861177 | -0.025791499 | 0.578239705 | -0.016318272 |
| 0.090107682  | 0.051656528 | 0.127180506  | 0.005919409 | 0.11922146   |
| -0.127573866 | 0.005766085 | -0.085016722 | 0.066412735 | -0.096889361 |
| -0.037932435 | 0.413457481 | -0.03580475  | 0.440161153 | -0.033146925 |
| 0.026815148  | 0.563243047 | 0.036418222  | 0.432362245 | 0.04228561   |
| -0.058284769 | 0.208667476 | -0.002738561 | 0.952934338 | 0.002278134  |
| -0.017035186 | 0.713489576 | 0.040775857  | 0.379304831 | 0.056329352  |
| -0.062316527 | 0.178828964 | -0.000437964 | 0.992468781 | -0.00218451  |
| -0.177617537 | 0.000113952 | -0.151428923 | 0.001028597 | -0.154587588 |
| 0.119521083  | 0.009731588 | 0.138495409  | 0.002705503 | 0.170142252  |
| -0.024267405 | 0.600908374 | 0.019086035  | 0.680790389 | 0.042803104  |
| -0.008319977 | 0.857688416 | 0.032509771  | 0.483400012 | 0.04570042   |
| -0.048301123 | 0.297594013 | -0.027002192 | 0.560523147 | -0.067236025 |
| -0.026034797 | 0.574658436 | -0.002895018 | 0.950248814 | 0.00632591   |
| 0.141703078  | 0.00214399  | 0.184348027  | 6.14E-05    | 0.179897965  |
| 0.342968195  | 2.46E-14    | 0.354699249  | 2.72E-15    | 0.374004889  |
| -0.007126014 | 0.877937983 | -0.004031934 | 0.930752848 | -0.000227624 |
| -0.056656015 | 0.221689702 | -0.017032485 | 0.713533003 | 0.001682638  |
| 0.009834022  | 0.832145572 | 0.059041827  | 0.202806434 | 0.048103099  |
| -0.003397326 | 0.941630822 | 0.05391699   | 0.244878419 | 0.036563996  |
| -0.105652168 | 0.022404579 | -0.087941452 | 0.057562062 | -0.130006125 |
| 0.233694094  | 3.26E-07    | 0.247211064  | 6.23E-08    | 0.278793807  |

|              |             |              |             |              |
|--------------|-------------|--------------|-------------|--------------|
| -0.080197304 | 0.083411965 | -0.015357676 | 0.740635217 | -0.042640916 |
| -0.002943314 | 0.949419931 | 0.005926969  | 0.898354143 | 0.007507324  |
| -0.151657279 | 0.001010475 | -0.098007494 | 0.034227301 | -0.111548839 |
| -0.03656946  | 0.430451915 | -0.023827492 | 0.607525082 | -0.052678551 |
| -0.116389971 | 0.011834954 | -0.086236407 | 0.062594598 | -0.088488069 |
| 0.127363914  | 0.00584747  | 0.152689591  | 0.000932169 | 0.141612937  |
| -0.048872635 | 0.291907622 | -0.01332957  | 0.773886271 | -0.028611148 |
| -0.080264777 | 0.083151771 | -0.032021936 | 0.48999146  | -0.039252085 |
| 0.004168726  | 0.928409675 | 0.05551565   | 0.231146093 | 0.063098844  |
| 0.040400089  | 0.383716357 | 0.068501364  | 0.139381967 | 0.076768195  |
| 0.13924819   | 0.002562856 | 0.158960959  | 0.000564928 | 0.183105165  |
| -0.043030675 | 0.353491365 | 0.010783414  | 0.816216646 | 0.004673549  |
| -0.097838888 | 0.034538895 | -0.075635163 | 0.102585073 | -0.076851026 |
| 0.091193862  | 0.048891099 | 0.090806962  | 0.049861602 | 0.104885262  |
| 0.272663584  | 2.09E-09    | 0.274942726  | 1.52E-09    | 0.2689685    |
| 0.172286325  | 0.000183164 | 0.231093743  | 4.44E-07    | 0.214917406  |
| -0.057420406 | 0.215507715 | 0.002954308  | 0.94923126  | -0.003958882 |
| 0.011343832  | 0.806848885 | 0.048177069  | 0.298837999 | 0.030104231  |
| -0.179260168 | 9.82E-05    | -0.14040437  | 0.002357076 | -0.140640503 |
| -0.162293051 | 0.000429673 | -0.112655484 | 0.01486138  | -0.105409973 |
| -0.089823541 | 0.052401111 | -0.043504878 | 0.348206896 | -0.046491133 |
| 0.108927166  | 0.018540778 | 0.120371939  | 0.009220678 | 0.153874104  |
| 0.098252406  | 0.033778955 | 0.136739258  | 0.003066811 | 0.168478638  |
| -0.150197123 | 0.00113163  | -0.142351089 | 0.002044389 | -0.147694413 |
| -0.069582342 | 0.133232066 | -0.012151039 | 0.79340462  | 0.002822427  |
| 0.056776349  | 0.220708196 | 0.128952607  | 0.005256458 | 0.107192467  |
| -0.056698442 | 0.22134329  | -0.038586229 | 0.405448115 | -0.047453784 |
| -0.100208539 | 0.030374375 | -0.046982862 | 0.310990044 | -0.052556112 |
| -0.096860049 | 0.036395959 | -0.062700215 | 0.176163294 | -0.074029962 |
| -0.037038747 | 0.424555422 | 0.007430789  | 0.872760888 | 0.014782921  |
| -0.016571174 | 0.720963854 | 0.038027036  | 0.412292811 | 0.012732465  |
| 0.095275231  | 0.03958235  | 0.137714955  | 0.002860996 | 0.12747667   |
| -0.096568921 | 0.036964395 | -0.057676468 | 0.213464766 | -0.055812062 |
| -0.118398842 | 0.010443848 | -0.088465669 | 0.05608394  | -0.108561905 |
| 0.030479696  | 0.511142809 | 0.02845022   | 0.539683994 | 0.025719014  |
| 0.00414317   | 0.928847399 | 0.047185629  | 0.308904138 | 0.026124779  |
| -0.218565374 | 1.86E-06    | -0.172644831 | 0.000177487 | -0.172176009 |
| -0.035314432 | 0.446451854 | -0.034909061 | 0.451691    | -0.039311516 |
| 0.072327251  | 0.118556523 | 0.107957273  | 0.019619411 | 0.142202891  |
| -0.055847049 | 0.228369017 | -0.072153839 | 0.119444612 | -0.075185093 |
| 0.075287462  | 0.104179093 | 0.081787199  | 0.077453132 | 0.087175639  |
| -0.086413116 | 0.062056734 | -0.069444093 | 0.134006714 | -0.072247821 |
| -0.040420912 | 0.383471079 | -0.029792771 | 0.520714524 | -0.016858514 |
| 0.02237136   | 0.629653993 | 0.036974521  | 0.425359619 | 0.03548898   |
| 0.006339936  | 0.891314267 | 0.026356061  | 0.56994561  | 0.014563561  |

|              |             |              |             |              |
|--------------|-------------|--------------|-------------|--------------|
| -0.055678827 | 0.229775722 | -0.038306689 | 0.408861267 | -0.048163738 |
| 0.020270395  | 0.662170894 | 0.048631234  | 0.294300555 | 0.052301067  |
| -0.030744541 | 0.50747705  | -0.05606086  | 0.226589935 | -0.07071282  |
| 0.05241886   | 0.258256041 | 0.064955368  | 0.161089762 | 0.052419192  |
| -0.018437508 | 0.691069646 | -0.040492563 | 0.382627813 | -0.0351274   |
| 0.021323939  | 0.645780732 | 0.03578201   | 0.44045178  | 0.003029941  |
| 0.070552583  | 0.127892388 | 0.061644768  | 0.183567835 | 0.038858068  |
| 0.019039243  | 0.681530096 | 0.027276148  | 0.556550908 | 0.002578804  |
| -0.00698503  | 0.880334595 | 0.026654163  | 0.565589077 | 0.005007181  |
| -0.083186434 | 0.072499254 | -0.071625911 | 0.122180269 | -0.080424633 |
| 0.056110447  | 0.226178743 | 0.071353642  | 0.123610085 | 0.057972434  |
| -0.051601248 | 0.26576622  | -0.040118924 | 0.38703763  | -0.042465362 |
| -0.103398246 | 0.025452901 | -0.115466656 | 0.012527544 | -0.100021576 |
| -0.078597304 | 0.089776933 | -0.073364797 | 0.113350361 | -0.076445369 |
| -0.073646028 | 0.111970594 | -0.084428121 | 0.068322583 | -0.063112988 |
| -0.105365474 | 0.022773867 | -0.103744873 | 0.024962011 | -0.094874037 |
| -0.106430597 | 0.02142795  | -0.092603008 | 0.045489002 | -0.096030108 |
| -0.014403759 | 0.756218941 | 0.033175475  | 0.474483231 | 0.01498671   |
| -0.035064243 | 0.449681303 | -0.010064173 | 0.828277506 | -0.018121006 |
| -0.020866883 | 0.652870791 | 0.015848294  | 0.732660868 | -0.000635733 |
| -0.043347636 | 0.34995361  | -0.034183682 | 0.461151974 | -0.042282046 |
| -0.039285144 | 0.396989006 | -0.052675707 | 0.255927348 | -0.02250813  |
| -0.039776298 | 0.391108464 | -0.005531783 | 0.905098381 | -0.008903253 |
| -0.048407723 | 0.296527809 | -0.018004574 | 0.697963595 | -0.033813353 |
| -0.010921983 | 0.813897869 | -0.017331118 | 0.708736935 | 0.014128683  |
| -0.047010878 | 0.310701286 | -0.017099039 | 0.71246315  | -0.031095434 |
| -0.059060114 | 0.202666353 | -0.055007211 | 0.235453082 | -0.051688885 |
| -0.079773888 | 0.085059814 | -0.076616833 | 0.098188888 | -0.077771352 |
| -0.036550576 | 0.430690178 | -0.019643154 | 0.672006815 | -0.034364594 |
| -0.02623972  | 0.571650168 | 0.008695492  | 0.851338301 | -0.007046957 |
| -0.083051396 | 0.072965784 | -0.064788859 | 0.162168389 | -0.056439305 |
| 0.01335523   | 0.77346284  | -0.00109752  | 0.981128555 | -0.010484377 |
| -0.010617967 | 0.818987275 | 0.014094361  | 0.761295086 | 0.000699904  |
| 0.089567669  | 0.053079249 | 0.115902699  | 0.012196125 | 0.110339924  |
| -0.071317498 | 0.123800867 | -0.070490243 | 0.128230407 | -0.090812539 |
| -0.043319526 | 0.350266451 | -0.054622187 | 0.238752077 | -0.058731996 |
| -0.05712053  | 0.217918038 | -0.052598338 | 0.25662727  | -0.055851654 |
| -0.050884724 | 0.272469964 | -0.039673628 | 0.392333343 | -0.041163467 |
| -0.053580132 | 0.247843331 | -0.041960471 | 0.365602172 | -0.041703394 |
| -0.043297    | 0.350517277 | -0.03179952  | 0.493012589 | -0.039723781 |
| -0.061946025 | 0.181431295 | -0.051392241 | 0.267709871 | -0.05472767  |
| -0.043158272 | 0.35206449  | -0.034843951 | 0.452535728 | -0.037062089 |
| 0.013114242  | 0.777442214 | 0.026726075  | 0.56454053  | 0.032167266  |
| -0.02124086  | 0.647067128 | -0.021967403 | 0.635853288 | -0.015363195 |
| 0.058843605  | 0.204329361 | 0.07257423   | 0.117300602 | 0.07854339   |

|              |             |              |             |              |
|--------------|-------------|--------------|-------------|--------------|
| 0.108381661  | 0.019140897 | 0.11382972   | 0.013843714 | 0.08460276   |
| -0.053207309 | 0.25115388  | -0.04333996  | 0.350039019 | -0.048622747 |
| -0.089609015 | 0.052969179 | -0.053618902 | 0.247500817 | -0.073772708 |
| -0.009890552 | 0.831195108 | 0.024488761  | 0.597591289 | 0.006710451  |
| -0.035397264 | 0.445385568 | 0.002034901  | 0.965018563 | -0.013803342 |
| -0.03144219  | 0.497887025 | 0.00827745   | 0.858408158 | -0.008930947 |
| -0.086770226 | 0.060981401 | -0.077241831 | 0.095469028 | -0.078163177 |
| -0.045335921 | 0.328274844 | -0.0290925   | 0.530566074 | -0.035876358 |
| -0.032159266 | 0.488131042 | -0.02710381  | 0.559048138 | -0.036402867 |
| 0.020621041  | 0.656697409 | 0.003424877  | 0.941158327 | 0.013518725  |
| -0.038316196 | 0.408744916 | -0.025597754 | 0.581099029 | -0.02495634  |
| -0.036173175 | 0.435467846 | -0.030028288 | 0.51742246  | -0.029022389 |
| -0.036142256 | 0.435860608 | -0.022655567 | 0.625307945 | -0.034103362 |
| -0.059834012 | 0.196802412 | -0.048288312 | 0.297722318 | -0.048976739 |
| -0.022432824 | 0.628713008 | -0.012380002 | 0.789602096 | -0.012061306 |
| -0.0697752   | 0.132157209 | -0.070192271 | 0.129855649 | -0.061835007 |
| -0.083789771 | 0.070444492 | -0.072863037 | 0.115845211 | -0.078173011 |
| 0.009981032  | 0.829674358 | 0.026082961  | 0.573950723 | 0.035808109  |
| -0.042533839 | 0.359081958 | -0.028963272 | 0.532394338 | -0.045578504 |
| 0.264803665  | 6.20E-09    | 0.21152228   | 4.01E-06    | 0.184483397  |
| 0.255558867  | 2.13E-08    | 0.264241448  | 6.70E-09    | 0.289169579  |
| 0.348529535  | 8.76E-15    | 0.333845226  | 1.28E-13    | 0.298682911  |
| 0.149047127  | 0.001236322 | 0.146431099  | 0.001508506 | 0.152031872  |
| 0.20870011   | 5.41E-06    | 0.217214343  | 2.16E-06    | 0.224906496  |
| 0.254212642  | 2.54E-08    | 0.255525718  | 2.14E-08    | 0.247385606  |
| 0.151485672  | 0.001024066 | 0.131126962  | 0.004534767 | 0.140628169  |
| 0.32194301   | 1.01E-12    | 0.322670304  | 8.91E-13    | 0.314519272  |
| 0.242337802  | 1.14E-07    | 0.206244857  | 7.01E-06    | 0.213657711  |
| 0.194691431  | 2.27E-05    | 0.210547563  | 4.45E-06    | 0.205839372  |
| 0.377363543  | 2.98E-17    | 0.392129989  | 1.29E-18    | 0.408962234  |
| 0.227440067  | 6.80E-07    | 0.24434319   | 8.92E-08    | 0.254450509  |
| 0.285787271  | 3.15E-10    | 0.232683186  | 3.68E-07    | 0.230269735  |
| 0.280982154  | 6.38E-10    | 0.22808532   | 6.31E-07    | 0.26390389   |
| 0.39444986   | 7.77E-19    | 0.401220821  | 1.73E-19    | 0.424974599  |
| 0.273656383  | 1.82E-09    | 0.257767156  | 1.59E-08    | 0.305129569  |
| 0.250741164  | 3.97E-08    | 0.244850016  | 8.38E-08    | 0.275883112  |
| 0.234858986  | 2.84E-07    | 0.248729305  | 5.14E-08    | 0.257026202  |
| 0.366176611  | 2.89E-16    | 0.318014108  | 1.96E-12    | 0.334067464  |
| 0.284573684  | 3.77E-10    | 0.281554318  | 5.87E-10    | 0.289630442  |
| 0.255163327  | 2.24E-08    | 0.210643677  | 4.40E-06    | 0.217441706  |
| 0.217460102  | 2.10E-06    | 0.228011825  | 6.36E-07    | 0.235494565  |
| 0.225718502  | 8.29E-07    | 0.190566907  | 3.40E-05    | 0.165740532  |
| 0.233216241  | 3.45E-07    | 0.266968882  | 4.62E-09    | 0.276930943  |
| 0.228516722  | 6.00E-07    | 0.221608824  | 1.32E-06    | 0.221959614  |
| 0.162123777  | 0.000435744 | 0.135076174  | 0.003448855 | 0.154172058  |

|             |             |             |             |             |
|-------------|-------------|-------------|-------------|-------------|
| 0.121699166 | 0.008471281 | 0.106642074 | 0.021169097 | 0.145295947 |
| 0.326768019 | 4.41E-13    | 0.310195622 | 7.12E-12    | 0.31377943  |
| 0.373073506 | 7.20E-17    | 0.34168496  | 3.11E-14    | 0.344752863 |
| 0.218320571 | 1.91E-06    | 0.235672632 | 2.58E-07    | 0.254259502 |
| 0.28475005  | 3.68E-10    | 0.225665006 | 8.34E-07    | 0.232259245 |
| 0.375751652 | 4.16E-17    | 0.375469909 | 4.41E-17    | 0.39362758  |
| 0.301591925 | 2.82E-11    | 0.274656039 | 1.58E-09    | 0.281793249 |
| 0.25208541  | 3.34E-08    | 0.265013936 | 6.03E-09    | 0.302999474 |
| 0.202022275 | 1.09E-05    | 0.21576143  | 2.53E-06    | 0.225410103 |
| 0.278887943 | 8.64E-10    | 0.291996672 | 1.24E-10    | 0.295711521 |
| 0.339560506 | 4.57E-14    | 0.327602939 | 3.82E-13    | 0.36357667  |
| 0.152166144 | 0.000971147 | 0.176135107 | 0.000130208 | 0.197953282 |
| 0.085201498 | 0.065822304 | 0.064377862 | 0.164854018 | 0.061232333 |
| 0.3148398   | 3.32E-12    | 0.305498129 | 1.52E-11    | 0.329079327 |
| 0.294093158 | 9.04E-11    | 0.286126932 | 3.00E-10    | 0.269738545 |
| 0.343634802 | 2.17E-14    | 0.355689282 | 2.25E-15    | 0.387347239 |
| 0.278547595 | 9.07E-10    | 0.270593163 | 2.80E-09    | 0.282979229 |
| 0.308404104 | 9.52E-12    | 0.326395935 | 4.70E-13    | 0.29414031  |
| 0.11153801  | 0.015890284 | 0.096834113 | 0.036446295 | 0.097961661 |
| 0.259164926 | 1.32E-08    | 0.198234481 | 1.59E-05    | 0.223268174 |
| 0.232668896 | 3.69E-07    | 0.170511584 | 0.000213859 | 0.171774587 |
| 0.307315999 | 1.13E-11    | 0.301002288 | 3.10E-11    | 0.310297117 |
| 0.348177736 | 9.35E-15    | 0.349426908 | 7.40E-15    | 0.358322432 |
| 0.311120851 | 6.12E-12    | 0.315565    | 2.95E-12    | 0.331658571 |
| 0.374351702 | 5.54E-17    | 0.379800036 | 1.79E-17    | 0.367818872 |
| 0.252114317 | 3.33E-08    | 0.240321046 | 1.47E-07    | 0.226032921 |
| 0.346205136 | 1.35E-14    | 0.355761204 | 2.22E-15    | 0.352022846 |
| 0.359963654 | 9.85E-16    | 0.314312124 | 3.63E-12    | 0.335680324 |
| 0.226232323 | 7.81E-07    | 0.236711126 | 2.27E-07    | 0.254799536 |
| 0.42966997  | 2.10E-22    | 0.425299158 | 6.15E-22    | 0.455314181 |
| 0.279233518 | 8.22E-10    | 0.290067073 | 1.66E-10    | 0.3032123   |
| 0.23235937  | 3.82E-07    | 0.198194906 | 1.60E-05    | 0.214309027 |
| 0.173042234 | 0.000171388 | 0.149512311 | 0.001192943 | 0.164089611 |
| 0.356117586 | 2.07E-15    | 0.330480165 | 2.31E-13    | 0.333290187 |
| 0.367411702 | 2.26E-16    | 0.342261771 | 2.79E-14    | 0.376658752 |
| 0.304715731 | 1.72E-11    | 0.273315275 | 1.91E-09    | 0.297891492 |
| 0.239233779 | 1.68E-07    | 0.233238854 | 3.45E-07    | 0.255239291 |
| 0.23469596  | 2.90E-07    | 0.217602885 | 2.07E-06    | 0.211918878 |
| 0.22518555  | 8.81E-07    | 0.242931718 | 1.06E-07    | 0.260284223 |
| 0.311437587 | 5.81E-12    | 0.279132932 | 8.34E-10    | 0.295947611 |
| 0.237386304 | 2.10E-07    | 0.26248389  | 8.49E-09    | 0.296690358 |
| 0.303058548 | 2.24E-11    | 0.306077732 | 1.38E-11    | 0.348023603 |
| 0.376250822 | 3.75E-17    | 0.349310722 | 7.56E-15    | 0.38168293  |
| 0.284859711 | 3.62E-10    | 0.272632697 | 2.10E-09    | 0.280138299 |
| 0.353405862 | 3.49E-15    | 0.333020379 | 1.48E-13    | 0.361082107 |

|             |             |             |             |             |
|-------------|-------------|-------------|-------------|-------------|
| 0.360682788 | 8.56E-16    | 0.363454261 | 4.97E-16    | 0.38074151  |
| 0.387872768 | 3.24E-18    | 0.384449994 | 6.74E-18    | 0.398767067 |
| 0.298566994 | 4.53E-11    | 0.270595353 | 2.80E-09    | 0.273097205 |
| 0.343119269 | 2.39E-14    | 0.302684519 | 2.37E-11    | 0.294681916 |
| 0.128596954 | 0.005383883 | 0.131458456 | 0.004432971 | 0.112416972 |
| 0.196146394 | 1.96E-05    | 0.194853437 | 2.23E-05    | 0.222559236 |
| 0.423664471 | 9.14E-22    | 0.406420322 | 5.31E-20    | 0.437328457 |
| 0.303080812 | 2.23E-11    | 0.261518679 | 9.67E-09    | 0.288172842 |
| 0.317384499 | 2.18E-12    | 0.290636186 | 1.53E-10    | 0.285502562 |
| 0.38204851  | 1.12E-17    | 0.350170559 | 6.43E-15    | 0.354381404 |
| 0.203868781 | 8.97E-06    | 0.206376994 | 6.91E-06    | 0.223136339 |
| 0.286875988 | 2.68E-10    | 0.294783914 | 8.13E-11    | 0.338911003 |
| 0.312835277 | 4.62E-12    | 0.323927621 | 7.19E-13    | 0.362939305 |
| 0.310599564 | 6.67E-12    | 0.287267747 | 2.53E-10    | 0.312600964 |
| 0.3034685   | 2.10E-11    | 0.287968174 | 2.28E-10    | 0.303810409 |
| 0.183378186 | 6.72E-05    | 0.204693217 | 8.24E-06    | 0.208940714 |
| 0.206391946 | 6.90E-06    | 0.204072735 | 8.79E-06    | 0.219658844 |
| 0.361634468 | 7.10E-16    | 0.364114307 | 4.36E-16    | 0.373797868 |
| 0.162221342 | 0.000432235 | 0.144918444 | 0.001689986 | 0.141776629 |
| 0.285819416 | 3.14E-10    | 0.272259697 | 2.22E-09    | 0.290540192 |
| 0.172631341 | 0.000177698 | 0.174670518 | 0.000148389 | 0.190281461 |
| 0.357622217 | 1.55E-15    | 0.357299574 | 1.65E-15    | 0.387627505 |
| 0.165337959 | 0.000333055 | 0.152241056 | 0.000965478 | 0.174014834 |
| 0.292156833 | 1.21E-10    | 0.326352611 | 4.74E-13    | 0.337505821 |
| 0.290908444 | 1.47E-10    | 0.287491374 | 2.45E-10    | 0.316835042 |
| 0.289873306 | 1.71E-10    | 0.25288808  | 3.01E-08    | 0.299362583 |
| 0.170785805 | 0.000208821 | 0.16328515  | 0.000395645 | 0.163331233 |
| 0.29547838  | 7.31E-11    | 0.252795265 | 3.05E-08    | 0.272843466 |
| 0.177621375 | 0.000113912 | 0.164697368 | 0.000351519 | 0.2029952   |
| 0.353335443 | 3.53E-15    | 0.366194144 | 2.88E-16    | 0.374270127 |
| 0.356500373 | 1.93E-15    | 0.344714032 | 1.78E-14    | 0.382883858 |
| 0.385363486 | 5.55E-18    | 0.371397427 | 1.01E-16    | 0.402256754 |
| 0.220312254 | 1.53E-06    | 0.196669122 | 1.86E-05    | 0.223607127 |
| 0.397625305 | 3.86E-19    | 0.381026726 | 1.39E-17    | 0.400480525 |
| 0.137865172 | 0.00283045  | 0.125835707 | 0.006471634 | 0.148031956 |
| 0.326018786 | 5.02E-13    | 0.319314275 | 1.57E-12    | 0.339194861 |
| 0.329395191 | 2.79E-13    | 0.288830225 | 2.00E-10    | 0.326394045 |
| 0.252359212 | 3.23E-08    | 0.222430401 | 1.20E-06    | 0.253328565 |
| 0.243021294 | 1.05E-07    | 0.253876622 | 2.65E-08    | 0.274856966 |
| 0.190062501 | 3.56E-05    | 0.199821298 | 1.36E-05    | 0.201962547 |
| 0.248274772 | 5.44E-08    | 0.257255519 | 1.70E-08    | 0.252815115 |
| 0.336447591 | 8.01E-14    | 0.307816197 | 1.05E-11    | 0.319903048 |
| 0.406541489 | 5.16E-20    | 0.40069336  | 1.94E-19    | 0.427511106 |
| 0.307464744 | 1.11E-11    | 0.280557313 | 6.79E-10    | 0.306906664 |
| 0.364280605 | 4.22E-16    | 0.36332003  | 5.10E-16    | 0.396914559 |

|              |             |              |             |              |
|--------------|-------------|--------------|-------------|--------------|
| 0.218853996  | 1.80E-06    | 0.169964646  | 0.000224249 | 0.19432708   |
| 0.190933806  | 3.28E-05    | 0.189809653  | 3.65E-05    | 0.210274212  |
| 0.3053472    | 1.56E-11    | 0.252497784  | 3.17E-08    | 0.272762838  |
| 0.209678076  | 4.88E-06    | 0.204552001  | 8.36E-06    | 0.214282755  |
| 0.085191925  | 0.065852788 | 0.099642464  | 0.031327998 | 0.11695489   |
| 0.262814418  | 8.12E-09    | 0.218640573  | 1.84E-06    | 0.225971188  |
| 0.228427185  | 6.06E-07    | 0.230900861  | 4.54E-07    | 0.246448619  |
| 0.434948946  | 5.63E-23    | 0.428465799  | 2.83E-22    | 0.438981722  |
| 0.115034078  | 0.012864157 | 0.1152225    | 0.012716566 | 0.121322551  |
| 0.284547307  | 3.79E-10    | 0.277111794  | 1.11E-09    | 0.280796204  |
| 0.265235352  | 5.85E-09    | 0.260338718  | 1.13E-08    | 0.259906113  |
| 0.350656171  | 5.87E-15    | 0.322558833  | 9.09E-13    | 0.334094729  |
| 0.191077297  | 3.23E-05    | 0.158476009  | 0.000587625 | 0.166354975  |
| 0.207925345  | 5.87E-06    | 0.169707333  | 0.000229299 | 0.171395655  |
| 0.271738969  | 2.38E-09    | 0.266722414  | 4.77E-09    | 0.289835119  |
| 0.066738063  | 0.149878038 | 0.046727117  | 0.31363412  | 0.09583471   |
| 0.173054054  | 0.000171209 | 0.159236354  | 0.000552404 | 0.180495646  |
| 0.254058466  | 2.59E-08    | 0.214339008  | 2.96E-06    | 0.226807877  |
| 0.312434073  | 4.94E-12    | 0.345208276  | 1.62E-14    | 0.382254264  |
| -0.069679647 | 0.132688916 | -0.071690238 | 0.121844344 | -0.035349543 |
| -0.223906053 | 1.02E-06    | -0.223845281 | 1.03E-06    | -0.261677777 |
| -0.020677044 | 0.655824906 | -0.003636708 | 0.93752612  | -0.002003395 |
| -0.033781479 | 0.466445035 | -0.064818893 | 0.161973428 | -0.058115976 |
| -0.036492296 | 0.431425987 | -0.029159526 | 0.529619076 | -0.051473371 |
| -0.017597218 | 0.704473017 | -0.043260001 | 0.350929504 | -0.047209448 |
| -0.039243833 | 0.397486034 | -0.031970014 | 0.490695834 | -0.048675255 |
| -0.023431022 | 0.613515986 | -0.027085773 | 0.559309813 | -0.021516834 |
| -0.006110795 | 0.89521944  | 0.007652225  | 0.869002846 | -0.003541873 |
| -0.021085899 | 0.649469364 | 0.00733646   | 0.874362655 | -0.007988587 |
| -0.048850412 | 0.292127367 | -0.030276499 | 0.513964619 | -0.032170309 |
| -0.059315486 | 0.200717497 | -0.038992014 | 0.400523812 | -0.043219095 |
| 0.023200277  | 0.617014579 | -0.007881941 | 0.865107392 | -0.012157871 |
| -0.014874035 | 0.748523438 | -0.024912717 | 0.591261462 | -0.006581151 |
| -0.040665183 | 0.380600897 | -0.017063414 | 0.713035754 | -0.02127165  |
| -0.057574765 | 0.214274516 | -0.02809241  | 0.544797214 | -0.042851865 |
| -0.141354889 | 0.002199321 | -0.130324807 | 0.004789885 | -0.115637365 |
| -0.069718511 | 0.132472456 | -0.055575563 | 0.230642266 | -0.054960052 |
| 0.072036815  | 0.120046851 | 0.08253663   | 0.074766702 | 0.109543637  |
| 0.011986426  | 0.796141477 | -0.049247898 | 0.288213689 | -0.045065704 |
| -0.037900015 | 0.413857054 | -0.032582141 | 0.482426284 | -0.040550302 |
| -0.065620395 | 0.156835632 | -0.056100518 | 0.226261036 | -0.066601587 |
| -0.011001033 | 0.812575813 | -0.043951039 | 0.343280883 | -0.027254407 |
| -0.030647022 | 0.508825229 | -0.035106779 | 0.449131319 | -0.02542019  |
| -0.013916767 | 0.764213443 | -0.00893414  | 0.847307619 | -0.008168965 |
| -0.023054366 | 0.619231407 | -0.043234832 | 0.351210092 | -0.099505362 |

|              |             |              |             |              |
|--------------|-------------|--------------|-------------|--------------|
| -0.139902035 | 0.002444556 | -0.121694918 | 0.00847359  | -0.143309355 |
| 0.033395352  | 0.471557993 | 0.047876148  | 0.30186993  | 0.050029246  |
| 0.168501809  | 0.000254406 | 0.173200237  | 0.000169017 | 0.169749793  |
| -0.068309291 | 0.140497145 | -0.061097299 | 0.187497976 | -0.069641332 |
| -0.038076978 | 0.411678748 | -0.017994361 | 0.698126527 | -0.033045573 |
| -0.064184079 | 0.166131799 | -0.057964278 | 0.211185192 | -0.062740011 |
| -0.0562841   | 0.224742934 | -0.037185517 | 0.422720996 | -0.046692351 |
| -0.090275869 | 0.051219973 | -0.073708037 | 0.111668147 | -0.088717431 |
| -0.049056756 | 0.290091272 | -0.055206226 | 0.233760535 | -0.057987876 |
| -0.165512157 | 0.000328192 | -0.192096303 | 2.93E-05    | -0.217103011 |
| 0.002524199  | 0.956614641 | 0.000469932  | 0.99191909  | 0.007134814  |
| -0.128241672 | 0.005513944 | -0.130082195 | 0.004869556 | -0.135492744 |
| -0.102536978 | 0.026708803 | -0.093856566 | 0.042631858 | -0.110418685 |
| -0.062904603 | 0.174755421 | -0.07424742  | 0.109064386 | -0.062695421 |
| -0.008080967 | 0.861734998 | -0.012745703 | 0.783539073 | -0.000938937 |
| -0.047713197 | 0.303520228 | -0.046245401 | 0.31865439  | -0.050562365 |
| -0.108860837 | 0.018612859 | -0.100072602 | 0.03060108  | -0.11954933  |
| -0.304440099 | 1.80E-11    | -0.272973827 | 2.00E-09    | -0.2798892   |
| -0.009293718 | 0.841242035 | -0.016337557 | 0.724737079 | -0.001039812 |
| -0.089615077 | 0.052953055 | -0.104784459 | 0.023538461 | -0.105514068 |
| -0.020845902 | 0.653197015 | -0.001205635 | 0.979269966 | -0.025068392 |
| -0.022978338 | 0.620387874 | -0.007028416 | 0.879596938 | -0.012966331 |
| -0.019417476 | 0.675559575 | -0.020639312 | 0.656412702 | -0.019270296 |
| 0.008052568  | 0.862216057 | 0.036458721  | 0.431850204 | 0.016231761  |
| -0.026854931 | 0.562664015 | -0.037011446 | 0.424897165 | -0.015212378 |
| -0.176698497 | 0.000123789 | -0.186639433 | 4.94E-05    | -0.200082117 |
| -0.018315801 | 0.693005119 | -0.006365457 | 0.890879487 | -0.005069275 |
| -0.159989029 | 0.000519477 | -0.152330386 | 0.000958758 | -0.146097305 |
| 0.015166999  | 0.743741985 | -0.001320274 | 0.977299336 | -0.000771194 |
| -0.054592013 | 0.239011988 | -0.073430738 | 0.113025653 | -0.117773181 |
| -0.177875201 | 0.000111329 | -0.165160404 | 0.00033808  | -0.165763484 |
| -0.107110385 | 0.020605519 | -0.074308627 | 0.108771967 | -0.11927055  |
| -0.070924099 | 0.125892252 | -0.07923738  | 0.087185378 | -0.07659521  |
| -0.040108563 | 0.387160357 | 0.001802077  | 0.969018853 | -0.020121373 |
| -0.0679594   | 0.142546177 | -0.088097085 | 0.057119896 | -0.088665905 |
| -0.088548378 | 0.055853631 | -0.081372336 | 0.078973647 | -0.09312948  |
| 0.002972068  | 0.948926475 | -0.004801606 | 0.917577175 | 0.001647944  |
| -0.059020164 | 0.202972472 | -0.058984775 | 0.203243914 | -0.067161645 |
| -0.061069252 | 0.187700976 | -0.03090274  | 0.505293967 | -0.029475796 |
| -0.168404815 | 0.000256534 | -0.196617475 | 1.87E-05    | -0.18885249  |
| -0.08546079  | 0.065001049 | -0.073489932 | 0.112734788 | -0.074259535 |
| 0.015340709  | 0.740911491 | -0.009762061 | 0.833355829 | -0.034773741 |
| -0.001344759 | 0.976878448 | 0.017298868  | 0.70925432  | 0.00305584   |
| 0.028366036  | 0.540884847 | 0.035230496  | 0.44753383  | 0.032323161  |
| 0.028656046  | 0.536753562 | 0.029922859  | 0.518894828 | 0.027382145  |



|              |             |              |             |              |
|--------------|-------------|--------------|-------------|--------------|
| -0.037624019 | 0.417267941 | -0.061655002 | 0.183494951 | -0.104960787 |
| -0.042260035 | 0.362186457 | -0.043296181 | 0.350526395 | -0.043263575 |
| -0.085967698 | 0.063419851 | -0.080317399 | 0.082949301 | -0.067486148 |
| -0.016929243 | 0.715193708 | -0.008380801 | 0.856659223 | -0.008765912 |
| -0.056903941 | 0.219670891 | -0.06153419  | 0.184356699 | -0.057688488 |
| -0.062113835 | 0.180249185 | -0.098984624 | 0.032468269 | -0.124058283 |
| -0.041094605 | 0.37558719  | -0.041230926 | 0.374004126 | -0.040209954 |
| -0.096784303 | 0.036543135 | -0.098829188 | 0.032742813 | -0.096674091 |
| -0.05752822  | 0.214645838 | -0.072977108 | 0.115274282 | -0.06637191  |
| -0.224887218 | 9.11E-07    | -0.218166073 | 1.94E-06    | -0.227878153 |
| -0.014293722 | 0.758023085 | -0.027691562 | 0.55055381  | -0.037311762 |
| -0.048875486 | 0.291879441 | -0.026589556 | 0.566531897 | -0.037574553 |
| -0.095150624 | 0.039842594 | -0.082094362 | 0.076342737 | -0.087279354 |
| -0.049321585 | 0.287492055 | -0.038009809 | 0.412504758 | -0.039001107 |
| 0.025125302  | 0.588099085 | 0.022025542  | 0.634959484 | 0.028161777  |
| -0.009009041 | 0.846043398 | 0.006898567  | 0.881804935 | -0.000104004 |
| 0.051096874  | 0.270473197 | 0.013027217  | 0.778880686 | 0.021333891  |
| -0.003706737 | 0.936325647 | -0.008325685 | 0.85759182  | -0.018358489 |
| -0.068432141 | 0.13978309  | -0.027404328 | 0.554697059 | -0.05996396  |
| 0.024688386  | 0.59460698  | -0.031460138 | 0.497641582 | -0.088578208 |
| -0.104602296 | 0.02378271  | -0.085177779 | 0.065897856 | -0.103626739 |
| 0.094233757  | 0.041802342 | 0.090073616  | 0.051745331 | 0.073045334  |
| -0.04088023  | 0.378085019 | -0.068879778 | 0.137204781 | -0.080075035 |
| -0.16362023  | 0.000384731 | -0.168656382 | 0.000251049 | -0.199359058 |
| -0.084018554 | 0.069677893 | -0.056386413 | 0.223900027 | -0.085784024 |
| -0.214386881 | 2.94E-06    | -0.187832473 | 4.41E-05    | -0.221865239 |
| 0.008439132  | 0.855672445 | -0.025886644 | 0.576837955 | -0.058127702 |
| -0.072493565 | 0.117709646 | -0.053562217 | 0.248001711 | -0.061546858 |
| -0.177817085 | 0.000111915 | -0.186303241 | 5.10E-05    | -0.186311484 |
| -0.107599435 | 0.020030946 | -0.11521217  | 0.012724619 | -0.114712674 |
| -0.072313188 | 0.118628353 | -0.081728734 | 0.077665963 | -0.093222937 |
| -0.21279955  | 3.49E-06    | -0.185115501 | 5.71E-05    | -0.190594534 |
| -0.021983118 | 0.635611639 | -0.024028504 | 0.60449766  | -0.04470675  |
| -0.059977095 | 0.195731955 | -0.061015003 | 0.18809407  | -0.065487428 |
| -0.040989283 | 0.3768131   | -0.040051335 | 0.387838631 | -0.036380538 |
| -0.004268186 | 0.926706379 | -0.009925548 | 0.830606842 | -0.008357273 |
| -0.080287555 | 0.083064079 | -0.070257643 | 0.129497731 | -0.102941894 |
| -0.035270763 | 0.447014591 | -0.046583281 | 0.315127668 | -0.039936579 |
| -0.030762338 | 0.507231209 | -0.091696376 | 0.047654234 | -0.105783315 |
| -0.083194944 | 0.072469936 | -0.087425751 | 0.059047531 | -0.094855307 |
| -0.013252923 | 0.775151484 | -0.015831955 | 0.732925982 | -0.035205194 |
| -0.082797572 | 0.07384932  | -0.082911821 | 0.073450554 | -0.08072244  |
| -0.066723196 | 0.149969022 | -0.073848709 | 0.110984415 | -0.062690427 |
| -0.051953954 | 0.26250825  | -0.028322526 | 0.541506028 | -0.056586123 |
| -0.014431577 | 0.755763051 | -0.001689101 | 0.97096023  | 0.010573695  |

|              |             |              |             |              |
|--------------|-------------|--------------|-------------|--------------|
| -0.058434001 | 0.207502565 | -0.038645264 | 0.404729472 | -0.035976353 |
| -0.070715792 | 0.127010705 | -0.112070912 | 0.015392079 | -0.112266817 |
| -0.014413571 | 0.756058128 | -0.066320995 | 0.152446356 | -0.081951799 |
| -0.302458005 | 2.46E-11    | -0.303542546 | 2.07E-11    | -0.297760574 |
| -0.136547142 | 0.003108889 | -0.121874099 | 0.00837667  | -0.121469582 |
| -0.042571328 | 0.358658205 | -0.070321231 | 0.129150315 | -0.084454404 |
| 0.001902312  | 0.967296559 | -0.027550578 | 0.552585567 | -0.054227081 |
| 0.181144134  | 8.26E-05    | 0.176661494  | 0.000124201 | 0.178496331  |
| 0.2392495    | 1.67E-07    | 0.239470432  | 1.63E-07    | 0.24920636   |
| -0.116830246 | 0.011516782 | -0.121424879 | 0.008621545 | -0.117796616 |
| 0.017615688  | 0.704177395 | 0.033983344  | 0.463784263 | 0.03849299   |
| -0.059663748 | 0.198081778 | -0.066960897 | 0.148519371 | -0.067331038 |
| -0.03770915  | 0.416214102 | -0.02633606  | 0.570238479 | -0.027464234 |
| -0.067759665 | 0.143726073 | -0.055250856 | 0.233382156 | -0.059934719 |
| -0.046834234 | 0.312524874 | -0.044070875 | 0.341965379 | -0.047817766 |
| 0.005008767  | 0.914034586 | 0.030341093  | 0.513066717 | 0.010855805  |
| -0.013557944 | 0.770120041 | -0.030164271 | 0.515526586 | -0.018123777 |
| -0.255169442 | 2.24E-08    | -0.257633148 | 1.62E-08    | -0.264600867 |
| -0.151357284 | 0.001034344 | -0.133959945 | 0.003728971 | -0.136355611 |
| -0.052607423 | 0.25654502  | -0.041867373 | 0.366667768 | -0.077032171 |
| -0.089144662 | 0.054216367 | -0.088837672 | 0.055054238 | -0.094272606 |
| -0.027810627 | 0.548840804 | -0.036620532 | 0.429807919 | -0.03771706  |
| 0.027664566  | 0.550942569 | 0.018893764  | 0.683831847 | 0.084508938  |
| -0.119313481 | 0.009860001 | -0.106443734 | 0.021411791 | -0.084977375 |
| -0.093845576 | 0.042656232 | -0.061883425 | 0.18187374  | -0.053155196 |
| -0.099772436 | 0.031106809 | -0.113811994 | 0.013858608 | -0.11353096  |
| -0.033383402 | 0.471716712 | -0.028733578 | 0.535651772 | -0.048656099 |
| -0.118431036 | 0.010422788 | -0.120153404 | 0.009349571 | -0.123195527 |
| -0.010577328 | 0.819668176 | -0.016102825 | 0.728535043 | -0.057777777 |
| -0.145297002 | 0.001642781 | -0.141482643 | 0.00217887  | -0.126426823 |
| -0.05166217  | 0.265201502 | -0.022918578 | 0.621297539 | -0.048905749 |
| 0.129600602  | 0.005031255 | 0.099371935  | 0.031792708 | 0.100511329  |
| -0.060831365 | 0.189429242 | -0.050717805 | 0.274048065 | -0.058570596 |
| 0.040884057  | 0.378040346 | 0.060013422  | 0.195460852 | 0.040585223  |
| -0.059022957 | 0.20295106  | -0.05421002  | 0.242319521 | -0.077467144 |
| -0.10374494  | 0.024961918 | -0.086244735 | 0.062569165 | -0.08230208  |
| 0.064269085  | 0.165570367 | 0.062752062  | 0.175805364 | 0.012335083  |
| -0.013071887 | 0.778142222 | -0.008096496 | 0.861471961 | 0.011809708  |
| 0.013793655  | 0.766238481 | 0.029385584  | 0.526431465 | 0.00798623   |
| -0.119184762 | 0.009940374 | -0.120646264 | 0.009061119 | -0.114138755 |
| -0.027947117 | 0.54688033  | -0.033363109 | 0.471986324 | -0.025244404 |
| 0.001068384  | 0.981629451 | 0.010360276  | 0.823307131 | 0.013200484  |
| -0.09971868  | 0.031198129 | -0.070315076 | 0.129183912 | -0.07618565  |
| -0.016295225 | 0.72542152  | -0.036863857 | 0.426747359 | -0.030061787 |
| -0.166206291 | 0.000309468 | -0.159493959 | 0.000540922 | -0.153856659 |

|              |             |              |             |              |
|--------------|-------------|--------------|-------------|--------------|
| -0.144669087 | 0.001721757 | -0.120702496 | 0.009028717 | -0.121976656 |
| -0.110882626 | 0.016522333 | -0.124307042 | 0.007155108 | -0.117409252 |
| -0.015320885 | 0.741234333 | 0.018143805  | 0.695743763 | -0.010874272 |
| 0.068626755  | 0.138657617 | 0.072044034  | 0.120009631 | 0.050570194  |
| 0.018791947  | 0.68544454  | 0.034801786  | 0.453083243 | 0.034631312  |
| -0.026622793 | 0.566046776 | -0.033059728 | 0.476027111 | -0.044874102 |
| -0.033601519 | 0.468824167 | -0.048035004 | 0.300266837 | -0.043068476 |
| -0.168579897 | 0.000252705 | -0.173769131 | 0.000160736 | -0.173692718 |
| -0.02020702  | 0.663162092 | -0.038012411 | 0.412472736 | -0.024060725 |
| -0.014263071 | 0.758525857 | -0.021296371 | 0.646207471 | -0.005817872 |
| -0.130829199 | 0.004628    | -0.133248406 | 0.003918128 | -0.130008335 |
| -0.035927443 | 0.438594979 | -0.021615099 | 0.641280741 | -0.029381516 |
| -0.051559164 | 0.266156797 | -0.069905779 | 0.131433262 | -0.069969962 |
| -0.029148794 | 0.529770649 | -0.035227397 | 0.447573806 | -0.033898708 |
| -0.069688153 | 0.132641517 | -0.090860793 | 0.049725615 | -0.063731555 |
| -0.057392229 | 0.215733375 | -0.051588135 | 0.265887879 | -0.052568458 |
| -0.036045566 | 0.437090178 | -0.031048851 | 0.503282091 | -0.034274123 |
| -0.03573045  | 0.441111141 | -0.039669082 | 0.392387634 | -0.033224311 |
| -0.074478168 | 0.107965216 | -0.074503967 | 0.107842868 | -0.086465551 |
| -0.072996884 | 0.115175526 | -0.071493002 | 0.122876618 | -0.063888546 |
| -0.043801574 | 0.34492614  | -0.048973602 | 0.290910642 | -0.052428365 |
| -0.003747533 | 0.935626359 | -0.018877364 | 0.684091513 | -0.005225856 |
| -0.075264354 | 0.10428572  | -0.059751249 | 0.197423538 | -0.062086094 |
| -0.032335381 | 0.485750789 | -0.030567044 | 0.509932289 | -0.035063577 |
| -0.038624679 | 0.404979971 | -0.008959287 | 0.846883133 | -0.027706378 |
| -0.110552231 | 0.016849229 | -0.100319778 | 0.030189931 | -0.090385035 |
| -0.003953393 | 0.932098478 | 0.018426657  | 0.691242111 | -0.011539818 |
| -0.048934698 | 0.291294525 | -0.036271334 | 0.4342223   | -0.045206005 |
| -0.130037185 | 0.004884467 | -0.116061983 | 0.012077006 | -0.119019465 |
| -0.21913452  | 1.74E-06    | -0.226120685 | 7.91E-07    | -0.240015909 |
| 0.04777566   | 0.302886921 | 0.042718631  | 0.356996168 | 0.034372608  |
| -0.15843199  | 0.000589726 | -0.162999716 | 0.000405169 | -0.150937138 |
| -0.048470528 | 0.295900833 | -0.0349813   | 0.450754832 | -0.045373253 |
| -0.051993278 | 0.262146722 | -0.046351022 | 0.317549185 | -0.060719431 |
| 0.000646301  | 0.988886422 | 0.018808417  | 0.685183581 | 0.039616899  |
| -0.097762247 | 0.034681329 | -0.07749697  | 0.094376148 | -0.091916514 |
| -0.059831927 | 0.196818041 | -0.056424088 | 0.223590204 | -0.051392348 |
| -0.13678324  | 0.003057251 | -0.144593288 | 0.001731522 | -0.177180314 |
| -0.08543408  | 0.065085256 | -0.081222117 | 0.079530146 | -0.111569012 |
| -0.11080988  | 0.016593828 | -0.108686552 | 0.018803427 | -0.144349912 |
| -0.082543746 | 0.07474156  | -0.063714335 | 0.169260024 | -0.040262079 |
| -0.045111447 | 0.330677925 | -0.025005387 | 0.58988196  | -0.035623333 |
| -0.047400387 | 0.306704952 | -0.048038716 | 0.300229448 | -0.037360442 |
| -0.176771385 | 0.000122981 | -0.170633215 | 0.00021161  | -0.175063264 |
| 0.024125425  | 0.60304034  | 0.045628232  | 0.325162515 | 0.042854275  |

|              |             |              |             |              |
|--------------|-------------|--------------|-------------|--------------|
| -0.039139273 | 0.398745689 | -0.038623945 | 0.404988902 | -0.029126442 |
| 0.116186926  | 0.011984288 | 0.108845325  | 0.018629753 | 0.135203454  |
| -0.020205156 | 0.663191269 | -0.043591733 | 0.34724445  | -0.053554438 |
| -0.103891313 | 0.024757094 | -0.12676835  | 0.006083979 | -0.150186615 |
| -0.039668103 | 0.392399325 | -0.024473375 | 0.597821582 | -0.047363163 |
| -0.016541016 | 0.721450574 | -0.008363653 | 0.856949368 | -0.0185539   |
| -0.02351747  | 0.612207483 | -0.029397417 | 0.52626488  | -0.048934397 |
| -0.00465535  | 0.920079246 | 0.006924501  | 0.881363865 | 0.008397375  |
| -0.089679294 | 0.052782516 | -0.074345606 | 0.1085956   | -0.081468886 |
| -0.049425822 | 0.286473313 | -0.048866621 | 0.291967078 | -0.047896152 |
| -0.131575646 | 0.004397481 | -0.125143521 | 0.00677351  | -0.125250268 |
| -0.198177803 | 1.60E-05    | -0.191201203 | 3.19E-05    | -0.178193306 |
| -0.005838534 | 0.899862749 | -0.008362831 | 0.856963272 | -0.003131939 |
| -0.033047687 | 0.476187875 | -0.030351158 | 0.512926886 | -0.039158424 |
| -0.031057437 | 0.503163992 | -0.038090099 | 0.411517503 | -0.037286206 |
| -0.203980164 | 8.87E-06    | -0.192059072 | 2.94E-05    | -0.18558395  |
| 0.025105513  | 0.588393126 | 0.029285263  | 0.527844875 | 0.052132519  |
| 0.017557611  | 0.705107096 | 0.009442693  | 0.838731757 | 0.037310537  |
| -0.023146213 | 0.617835572 | -0.032338414 | 0.48570985  | -0.028614992 |
| -0.064520618 | 0.16391743  | -0.068046715 | 0.142032716 | -0.055868056 |
| -0.063003865 | 0.174074706 | -0.081503261 | 0.078491201 | -0.073364601 |
| -0.069482369 | 0.133791897 | -0.07529096  | 0.104162959 | -0.069545164 |
| -0.055361315 | 0.232447525 | -0.049505057 | 0.285700553 | -0.058632601 |
| -0.054979279 | 0.235691323 | -0.059047902 | 0.202759893 | -0.054246642 |
| -0.046983727 | 0.310981124 | -0.064954986 | 0.161092232 | -0.06074207  |
| -0.025182247 | 0.587253308 | -0.030406977 | 0.512151735 | -0.032879474 |
| -0.078912987 | 0.088491167 | -0.085191322 | 0.06585471  | -0.085158208 |
| -0.062437396 | 0.177986022 | -0.055602988 | 0.230411904 | -0.066332638 |
| -0.002267018 | 0.961031318 | -0.014321063 | 0.757574673 | -0.015845349 |
| -0.031633068 | 0.495280028 | -0.008178406 | 0.860084862 | -0.015957782 |
| -0.01528003  | 0.741899824 | -0.000116159 | 0.998002511 | -0.005343873 |
| -0.124229047 | 0.007191651 | -0.115120987 | 0.012795894 | -0.130259588 |
| -0.051960676 | 0.262446425 | -0.055338377 | 0.232641396 | -0.067028344 |
| -0.037076351 | 0.424084982 | -0.020054137 | 0.665555649 | -0.024642386 |
| -0.023934101 | 0.605918609 | -0.027369274 | 0.555203739 | -0.031811212 |
| -0.010279769 | 0.824657828 | -0.01935163  | 0.676597521 | -0.017052891 |
| -0.015657501 | 0.73575859  | -0.025117971 | 0.588208011 | -0.022256244 |
| -0.023144602 | 0.617860042 | -0.016170882 | 0.727433185 | -0.003127543 |
| -0.039642074 | 0.392710266 | -0.006791039 | 0.883634061 | -0.026257866 |
| -0.062085443 | 0.180448786 | -0.045606424 | 0.325394047 | -0.058030731 |
| 0.032440368  | 0.484334825 | 0.058405978  | 0.207720954 | 0.041378667  |
| -0.015178468 | 0.743554996 | -0.011129759 | 0.81042408  | -0.031806281 |
| 0.000681743  | 0.988277009 | -0.011890454 | 0.79773825  | -0.024201291 |
| -0.083302105 | 0.072101572 | -0.061164871 | 0.187009568 | -0.071812915 |
| 0.032228774  | 0.487190876 | 0.036254473  | 0.434436102 | 0.022809777  |

|              |             |              |             |              |
|--------------|-------------|--------------|-------------|--------------|
| 0.031616951  | 0.495499875 | 0.019017806  | 0.681869085 | 0.015641111  |
| -0.008285259 | 0.858275985 | 0.026077364  | 0.574032934 | 0.001902071  |
| 0.083873731  | 0.070162365 | 0.109190912  | 0.018256559 | 0.116802784  |
| -0.160838489 | 0.000484511 | -0.162748972 | 0.00041371  | -0.182485478 |
| 0.018620932  | 0.688156482 | 0.078183579  | 0.091484675 | 0.047259236  |
| -0.046342889 | 0.317634198 | -0.033116965 | 0.47526331  | -0.038554437 |
| -0.09124871  | 0.048754805 | -0.076353819 | 0.099351757 | -0.086502404 |
| -0.054720147 | 0.237909658 | -0.078709633 | 0.089317715 | -0.039571573 |
| -0.033590924 | 0.468964454 | -0.036529917 | 0.43095092  | -0.00320592  |
| -0.009683782 | 0.834672787 | -0.016015813 | 0.729944588 | -0.011492837 |
| 0.095083178  | 0.039984058 | 0.108185984  | 0.019360252 | 0.082286313  |
| -0.076873841 | 0.097063067 | -0.055268781 | 0.233230302 | -0.079835302 |
| -0.063536111 | 0.170458348 | -0.044396829 | 0.338403509 | -0.053872536 |
| -0.051750246 | 0.264386545 | -0.043099331 | 0.352723156 | -0.052569954 |
| -0.108078556 | 0.019481608 | -0.104247448 | 0.024264794 | -0.094158329 |
| -0.065395889 | 0.158262181 | -0.097532682 | 0.035110961 | -0.084080904 |
| 0.052287135  | 0.259455988 | 0.033851836  | 0.4655167   | 0.052043274  |
| -0.044248618 | 0.34002013  | -0.029763126 | 0.521129667 | -0.017519857 |
| -0.075891266 | 0.1014234   | -0.048340475 | 0.297200118 | -0.063957436 |
| -0.066783843 | 0.149598136 | -0.046900833 | 0.311836521 | -0.048929894 |
| 0.037111226  | 0.423648959 | -0.018075386 | 0.696834268 | -0.062865825 |
| -0.213705904 | 3.17E-06    | -0.200412772 | 1.28E-05    | -0.200727819 |
| -0.060975447 | 0.188381085 | -0.072338432 | 0.11849944  | -0.085590252 |
| -0.060604248 | 0.19109015  | -0.065676479 | 0.156480785 | -0.077285824 |
| -0.043289389 | 0.350602049 | -0.047998584 | 0.30063387  | -0.032042719 |
| -0.06745079  | 0.14556537  | -0.062088565 | 0.180426828 | -0.064347274 |
| -0.01483404  | 0.749176956 | 0.005641389  | 0.903227149 | -0.018930317 |
| -0.225008751 | 8.99E-07    | -0.219154986 | 1.74E-06    | -0.230943283 |
| -0.066664501 | 0.150328628 | -0.061421468 | 0.185163439 | -0.068541154 |
| -0.078396132 | 0.090604093 | -0.086668202 | 0.061287036 | -0.09395873  |
| -0.032097075 | 0.48897308  | -0.037343438 | 0.420752373 | -0.046273425 |
| -0.199164372 | 1.45E-05    | -0.165632299 | 0.000324878 | -0.169701299 |
| -0.186589277 | 4.97E-05    | -0.151845662 | 0.000995748 | -0.160991664 |
| -0.008381946 | 0.856639862 | 0.009025747  | 0.845761467 | 0.003997339  |
| -0.070230812 | 0.129644544 | -0.064855924 | 0.161733299 | -0.0556666   |
| -0.039575164 | 0.393510224 | -0.033270277 | 0.473220765 | -0.041079181 |
| -0.077993302 | 0.092278774 | -0.080774662 | 0.081206636 | -0.082216194 |
| 0.009673454  | 0.834846588 | -0.009927346 | 0.830576616 | -0.031424113 |
| -0.043997192 | 0.342773851 | -0.024510878 | 0.597260312 | -0.014463232 |
| -0.047367352 | 0.307042568 | -0.035268272 | 0.447046698 | -0.035550286 |
| -0.025569923 | 0.581510313 | -0.020488499 | 0.658764216 | -0.031155667 |
| 0.005847078  | 0.899716985 | 0.014249065  | 0.758755633 | 0.021257942  |
| -0.031098016 | 0.502606053 | -0.038276525 | 0.409230588 | -0.027133514 |
| -0.021468592 | 0.643543434 | -0.007305016 | 0.874896691 | -0.010667864 |
| -0.154339479 | 0.000818569 | -0.145176768 | 0.001657641 | -0.147647725 |

|              |             |              |             |              |
|--------------|-------------|--------------|-------------|--------------|
| -0.089849091 | 0.052333796 | -0.091044437 | 0.049264028 | -0.069350928 |
| -0.135032084 | 0.003459547 | -0.14907709  | 0.001233484 | -0.151362435 |
| -0.080257359 | 0.083180344 | -0.071001171 | 0.125480373 | -0.078303945 |
| -0.294541087 | 8.44E-11    | -0.300895996 | 3.15E-11    | -0.339257882 |
| -0.11121392  | 0.016200135 | -0.103646082 | 0.025101079 | -0.128448841 |
| -0.005508503 | 0.905495902 | -0.017522387 | 0.705671155 | -0.018712088 |
| -0.127987549 | 0.005608699 | -0.126895026 | 0.006032967 | -0.113793874 |
| -0.042606684 | 0.358258832 | -0.054883912 | 0.236506025 | -0.028112223 |
| -0.043166872 | 0.351968452 | -0.066127338 | 0.153650195 | -0.05977238  |
| -0.036696472 | 0.428851386 | -0.029221202 | 0.528748422 | -0.032063328 |
| 0.014149257  | 0.760393683 | -0.002926482 | 0.949708796 | -0.002339839 |
| -0.151813304 | 0.000998263 | -0.129930147 | 0.004920094 | -0.165239904 |
| -0.155185516 | 0.000765417 | -0.137650952 | 0.002874102 | -0.144120049 |
| 0.016533213  | 0.721576525 | 0.014057816  | 0.761895358 | -0.0205009   |
| -0.061457418 | 0.184905868 | -0.108803418 | 0.018675456 | -0.099230843 |
| -0.06751272  | 0.145195157 | -0.05253458  | 0.257205062 | -0.060363252 |
| -0.087936159 | 0.057577151 | -0.067215172 | 0.146980472 | -0.078696722 |
| -0.052789114 | 0.254903787 | -0.064292593 | 0.165415357 | -0.059893859 |
| -0.016025263 | 0.729791461 | -0.028893577 | 0.533381669 | -0.026136259 |
| -0.06185724  | 0.182059049 | -0.061280086 | 0.186178968 | -0.063946336 |
| -0.027240558 | 0.557066172 | -0.040694483 | 0.380257507 | -0.022135659 |
| -0.100570461 | 0.029777779 | -0.089103433 | 0.054328274 | -0.107428731 |
| -0.02275873  | 0.623733585 | -0.011170205 | 0.809748295 | -0.025321937 |
| -0.007686682 | 0.868418326 | 0.008321175  | 0.857668152 | 0.008005523  |
| -0.034231846 | 0.460520381 | -0.013964881 | 0.763422475 | -0.027817161 |
| -0.005736302 | 0.901607184 | 0.00499199   | 0.914321419 | -0.007960183 |
| -0.054875438 | 0.236578511 | -0.05784079  | 0.212161109 | -0.056185492 |
| -0.037354188 | 0.42061856  | 0.00224259   | 0.961450892 | -0.016630247 |
| -0.052814121 | 0.254678463 | -0.063101272 | 0.17340864  | -0.057948824 |
| -0.0866923   | 0.061214731 | -0.079377648 | 0.086625577 | -0.08557204  |
| -0.050049571 | 0.280428015 | -0.046807729 | 0.312799115 | -0.048988164 |
| -0.036390719 | 0.43271016  | -0.03133062  | 0.499414199 | -0.031767921 |
| -0.029043963 | 0.531252392 | -0.023317013 | 0.615243527 | -0.035658548 |
| -0.01130505  | 0.807496282 | 0.000627183  | 0.989215145 | -0.002794351 |
| -0.017476926 | 0.706399407 | 0.004704859  | 0.919232185 | -0.003477241 |
| -0.065748317 | 0.156027149 | -0.061457362 | 0.184906269 | -0.049094072 |
| 0.033383297  | 0.471718105 | -0.011269877 | 0.80808354  | 0.006400345  |
| -0.02475397  | 0.593628022 | -0.03983626  | 0.390394176 | -0.045845675 |
| -0.052645808 | 0.256197668 | -0.063276325 | 0.172216395 | -0.02880381  |
| -0.025298133 | 0.585533848 | -0.025275309 | 0.585872307 | -0.036669832 |
| -0.036361102 | 0.43308501  | -0.04095828  | 0.377174432 | -0.02320396  |
| -0.022683692 | 0.624878566 | -0.022633049 | 0.625651819 | -0.022072199 |
| -0.0260071   | 0.575065601 | -0.025353639 | 0.584711092 | -0.011238538 |
| -0.025495809 | 0.582606207 | -0.020327628 | 0.661276275 | -0.035125093 |
| -0.020831912 | 0.653414566 | -0.024686862 | 0.594629738 | -0.019286345 |

|              |             |              |             |              |
|--------------|-------------|--------------|-------------|--------------|
| -0.026135841 | 0.573174171 | -0.040616248 | 0.381174827 | -0.040510145 |
| -0.074411544 | 0.108281675 | -0.06819982  | 0.141135784 | -0.069196458 |
| -0.033432377 | 0.471066386 | -0.036821835 | 0.427275006 | -0.050993778 |
| -0.045111513 | 0.330677212 | -0.069270596 | 0.134983771 | -0.051677177 |
| -0.003422911 | 0.941192032 | 0.00744271   | 0.872558503 | -0.005400497 |
| 0.035220382  | 0.447664307 | 0.031974705  | 0.490632175 | 0.038814946  |
| -0.100221425 | 0.030352959 | -0.097810212 | 0.03459213  | -0.090739068 |
| -0.190185968 | 3.52E-05    | -0.188214738 | 4.26E-05    | -0.190619648 |
| -0.174683979 | 0.000148212 | -0.178382898 | 0.000106325 | -0.172427341 |
| -0.044222561 | 0.340304869 | -0.005696239 | 0.902290923 | -0.044743994 |
| -0.01853868  | 0.689462245 | 0.006571591  | 0.88736893  | -0.018633181 |
| -0.048652769 | 0.29408656  | -0.045471529 | 0.326828597 | -0.049738678 |
| -0.050053069 | 0.280394364 | -0.050468283 | 0.276418708 | -0.053417964 |
| -0.012906452 | 0.780878099 | -0.029224395 | 0.528703367 | -0.017020857 |
| 0.021418756  | 0.644313876 | 0.003342603  | 0.942569373 | 0.011794362  |
| -0.039686849 | 0.392175486 | -0.064946782 | 0.161145252 | -0.050822014 |
| -0.021576545 | 0.641875869 | -0.034365232 | 0.458773757 | -0.030319866 |
| 0.011155876  | 0.809987689 | 0.024691196  | 0.59456503  | 0.011273571  |
| -0.049726931 | 0.283544131 | -0.046336707 | 0.317698825 | -0.062461339 |
| -0.020252421 | 0.662451963 | -0.024939762 | 0.590858701 | -0.03205098  |
| -0.057672812 | 0.213493835 | -0.048415814 | 0.296446991 | -0.041573298 |
| 0.007110104  | 0.878208374 | 0.032420051  | 0.484608672 | 0.011520582  |
| -0.039386572 | 0.395770283 | -0.028853985 | 0.533942964 | -0.040054352 |
| -0.046258993 | 0.318512019 | -0.04281027  | 0.355964654 | -0.03012169  |
| -0.065878204 | 0.155209476 | -0.060277275 | 0.193500026 | -0.055335156 |
| -0.022425249 | 0.628828953 | -0.013977937 | 0.763207881 | -0.011057055 |
| -0.015517198 | 0.7380393   | -0.029750015 | 0.521313325 | -0.039493263 |
| -0.039602337 | 0.393185234 | -0.034495961 | 0.45706551  | -0.036357817 |
| -0.053420479 | 0.249257252 | -0.048960477 | 0.29104011  | -0.054358297 |
| 0.004638468  | 0.920368109 | 0.011366525  | 0.806470124 | 0.006600671  |
| -0.030051985 | 0.517091818 | -0.034622136 | 0.455420165 | -0.036551619 |
| -0.075393741 | 0.103689794 | -0.048767252 | 0.292950645 | -0.060720369 |
| 0.007627328  | 0.869425222 | 0.004304218  | 0.926089398 | 0.011107521  |
| -0.024442136 | 0.598289293 | -0.024289506 | 0.60057681  | -0.01821525  |
| -0.027745178 | 0.549782104 | 4.39E-05     | 0.999244631 | -0.008378461 |
| -0.047632927 | 0.304335355 | -0.02505628  | 0.589124994 | -0.047959325 |
| 0.014945929  | 0.747349158 | 0.025034371  | 0.589450809 | 0.01910655   |
| 0.042310875  | 0.361608745 | 0.073103339  | 0.114645067 | 0.046866422  |
| -0.071513168 | 0.122770763 | -0.076409647 | 0.099104013 | -0.069008272 |
| -0.053006254 | 0.252951905 | -0.050594813 | 0.275214841 | -0.040744326 |
| 0.037212922  | 0.422378986 | 0.067711809  | 0.144009878 | 0.039843484  |
| -0.04687006  | 0.312154456 | -0.048295578 | 0.297649547 | -0.043369349 |
| -0.01454571  | 0.753893507 | -0.002848437 | 0.951048294 | -0.006732374 |
| -0.025549426 | 0.581813301 | -0.024406071 | 0.598829452 | -0.024894107 |
| -0.02747393  | 0.553691686 | -0.002897941 | 0.950198637 | -0.011045707 |

|              |             |              |             |              |
|--------------|-------------|--------------|-------------|--------------|
| -0.079616938 | 0.085677261 | -0.065907876 | 0.155023142 | -0.080655147 |
| 0.012636514  | 0.785347979 | 0.022187877  | 0.632466614 | 0.015403008  |
| -0.092473932 | 0.045792125 | -0.044148899 | 0.34111106  | -0.064158249 |
| -0.117687576 | 0.010918859 | -0.090456329 | 0.050754988 | -0.103306503 |
| -0.02687807  | 0.562327366 | -0.042352974 | 0.361130805 | -0.037381488 |
| -0.04124521  | 0.373838491 | -0.049945743 | 0.281428264 | -0.052762534 |
| -0.042273155 | 0.362037312 | -0.016464837 | 0.722680506 | -0.031867292 |
| -0.01048364  | 0.821238419 | -0.010574818 | 0.819710235 | -0.000910444 |
| -0.054097393 | 0.243300814 | -0.036653474 | 0.429392839 | -0.032434528 |
| -0.009804331 | 0.83264488  | 0.016559912  | 0.721145597 | -0.02043309  |
| -0.068029495 | 0.142133863 | -0.05670464  | 0.221292719 | -0.063981344 |
| -0.07602732  | 0.100810522 | -0.078908756 | 0.088508301 | -0.075455424 |
| -0.03034354  | 0.513032723 | -0.01350309  | 0.771024185 | -0.006831466 |
| -0.089639084 | 0.052889247 | -0.073691499 | 0.111748751 | -0.078636932 |
| 0.03394655   | 0.464268609 | 0.061272622  | 0.186232692 | 0.053036817  |
| -0.039030077 | 0.400063763 | -0.036104672 | 0.43633832  | -0.022070703 |
| 0.002196953  | 0.962234778 | 0.014634758  | 0.752435862 | -0.009085324 |
| -0.002853029 | 0.950969483 | -0.023997779 | 0.604959971 | -0.019489031 |
| 0.022641197  | 0.62552737  | 0.022862362  | 0.622153793 | 0.007208708  |
| -0.125762539 | 0.006502964 | -0.140485224 | 0.002343266 | -0.107369648 |
| -0.045951361 | 0.321744405 | -0.037374475 | 0.420366092 | -0.043618305 |
| -0.0741043   | 0.109750558 | -0.087519523 | 0.058775088 | -0.069667077 |
| -0.081292035 | 0.079270733 | -0.068889381 | 0.137149874 | -0.084842399 |
| -0.085367772 | 0.06529469  | -0.077026148 | 0.096400756 | -0.07817422  |
| -0.039969491 | 0.388809911 | -0.056531833 | 0.222705862 | -0.056087068 |
| -0.050233852 | 0.278658643 | -0.065550129 | 0.157281065 | -0.067729506 |
| -0.069081325 | 0.13605591  | -0.071989475 | 0.120291145 | -0.075520696 |
| 0.005021395  | 0.913818699 | 0.018283202  | 0.69352389  | 0.00970537   |
| -0.045121958 | 0.330565149 | -0.034387773 | 0.458478951 | -0.048349109 |
| -0.090306298 | 0.05114132  | -0.082117741 | 0.076258755 | -0.081060124 |
| -0.088652654 | 0.055564385 | -0.08042532  | 0.082535305 | -0.093623927 |
| -0.033865411 | 0.465337702 | -0.063956716 | 0.167640449 | -0.053866143 |
| -0.027053447 | 0.559778936 | -0.039154752 | 0.39855906  | -0.029748321 |
| -0.08365988  | 0.070882787 | -0.087173463 | 0.059785715 | -0.078352236 |
| -0.117749551 | 0.010876722 | -0.117350399 | 0.011150653 | -0.129003139 |
| -0.049531227 | 0.285445627 | -0.043347396 | 0.34995628  | -0.043002505 |
| 0.012574004  | 0.786384099 | -0.002439448 | 0.958069964 | -0.012320645 |
| -0.070972749 | 0.125632141 | -0.074404531 | 0.108315031 | -0.073333858 |
| -0.118372088 | 0.010461379 | -0.135617387 | 0.003320034 | -0.182096864 |
| -0.034350921 | 0.458960971 | -0.038066414 | 0.411808584 | -0.042020532 |
| 0.118389713  | 0.010449827 | 0.16511696   | 0.00033932  | 0.159218965  |
| -0.065109284 | 0.160097531 | -0.052852626 | 0.254331792 | -0.050647039 |
| -0.099326645 | 0.031871079 | -0.101394842 | 0.028456276 | -0.116374406 |
| -0.067931552 | 0.142710234 | -0.066813185 | 0.149418946 | -0.064149469 |
| -0.031606428 | 0.49564343  | -0.028011872 | 0.545951432 | -0.036904411 |



|              |             |              |             |              |
|--------------|-------------|--------------|-------------|--------------|
| 0.002927898  | 0.949684501 | -0.001814074 | 0.968812701 | -0.000110733 |
| -0.071030127 | 0.125325903 | -0.056757706 | 0.220860054 | -0.061549711 |
| -0.085911486 | 0.063593615 | -0.078176771 | 0.091512992 | -0.090129189 |
| 0.004197138  | 0.92792307  | 0.019574916  | 0.673080294 | 0.018713954  |
| -0.02671863  | 0.564649042 | -0.001024851 | 0.98237786  | -0.011039061 |
| -0.053637143 | 0.247339783 | -0.032208078 | 0.487470711 | -0.051411031 |
| -0.025530717 | 0.582089918 | -0.014633279 | 0.752460052 | -0.019159816 |
| -0.015508331 | 0.738183518 | -0.010963893 | 0.813196887 | -0.003298403 |
| -0.100117278 | 0.030526415 | -0.080690654 | 0.081524557 | -0.068888822 |
| -0.088083329 | 0.057158863 | -0.077202879 | 0.095636762 | -0.06287049  |
| -0.035119758 | 0.448963572 | -0.042497139 | 0.359497107 | -0.023288222 |
| -0.019087051 | 0.680774319 | -0.016840687 | 0.716619266 | -0.024083474 |
| -0.051333973 | 0.268253464 | -0.056899528 | 0.219706707 | -0.051523778 |
| -0.01529008  | 0.741736095 | -0.017237524 | 0.710238838 | -0.017479296 |
| -0.035358681 | 0.445882067 | -0.032433724 | 0.484424374 | -0.031149247 |
| 0.005484228  | 0.905910427 | -0.031633478 | 0.495274433 | -0.066116945 |
| -0.038379002 | 0.407976704 | -0.056323037 | 0.224421879 | -0.044769585 |
| -0.01546438  | 0.738898473 | -0.037566368 | 0.417982504 | -0.035493703 |
| -0.004041133 | 0.930595247 | 0.013161822  | 0.77665608  | 0.010109242  |
| -0.075662111 | 0.102462345 | -0.081331202 | 0.079125715 | -0.074298076 |
| -0.068719819 | 0.138121885 | -0.054275382 | 0.241751313 | -0.073658473 |
| -0.026720085 | 0.564627835 | -0.024236313 | 0.601374962 | -0.02247653  |
| -0.056781269 | 0.220668135 | -0.072973697 | 0.11529132  | -0.080215731 |
| -0.052515893 | 0.257374581 | -0.044306096 | 0.339392606 | -0.05191486  |
| 0.002906728  | 0.950047829 | 0.029107732  | 0.530350787 | 0.014987717  |
| -0.048649291 | 0.294121114 | -0.049561193 | 0.285153913 | -0.043703906 |
| -0.033180433 | 0.474417155 | -0.038999191 | 0.400437048 | -0.04003126  |
| -0.09624132  | 0.037613037 | -0.085719998 | 0.064188498 | -0.102372826 |
| 0.026021746  | 0.574850267 | 0.067216471  | 0.146972647 | 0.06329819   |
| -0.097526656 | 0.035122299 | -0.076928975 | 0.096822898 | -0.082854231 |
| -0.217786777 | 2.02E-06    | -0.208251249 | 5.68E-06    | -0.213883201 |
| -0.118551163 | 0.010344538 | -0.123567418 | 0.007508424 | -0.107902994 |
| -0.028967021 | 0.53234125  | -0.031177635 | 0.501512294 | -0.040557069 |
| -0.065308966 | 0.158817133 | -0.075660953 | 0.102467618 | -0.077038216 |
| -0.085943309 | 0.063495196 | -0.079153873 | 0.087520033 | -0.060036936 |
| -0.083867543 | 0.070183124 | -0.085982266 | 0.063374882 | -0.0713686   |
| -0.082478855 | 0.074971068 | -0.069128927 | 0.135785652 | -0.064362883 |
| -0.016229001 | 0.726492688 | 0.001672761  | 0.971241046 | -0.004919208 |
| -0.103976967 | 0.02463791  | -0.100524037 | 0.029853747 | -0.107720142 |
| -0.069083506 | 0.13604352  | -0.074845183 | 0.106234968 | -0.071424841 |
| -0.080125401 | 0.083689967 | -0.065651654 | 0.15663778  | -0.066227166 |
| -0.01909884  | 0.680588003 | -0.022763619 | 0.623659014 | -0.021105942 |
| 0.025056943  | 0.589115129 | 0.03381141   | 0.466049973 | 0.056314957  |
| -0.016751696 | 0.718052805 | -0.031632644 | 0.495285804 | -0.034855148 |
| 0.01615083   | 0.727757772 | 0.013331393  | 0.773856191 | 0.011451727  |

|              |             |              |             |              |
|--------------|-------------|--------------|-------------|--------------|
| 0.010584012  | 0.819556177 | 4.83E-06     | 0.999917027 | 0.002205172  |
| -0.107101115 | 0.020616546 | -0.11072224  | 0.016680321 | -0.105084427 |
| -0.04950984  | 0.285653951 | -0.075562211 | 0.102917907 | -0.062701711 |
| -0.008937136 | 0.847257046 | -0.005420119 | 0.907005298 | -0.002479364 |
| -0.093681477 | 0.043021601 | -0.102872169 | 0.026213824 | -0.109076487 |
| -0.001993391 | 0.965731722 | 0.018987322  | 0.682351247 | 0.00601328   |
| -0.093708704 | 0.042960798 | -0.102152157 | 0.027286971 | -0.103351387 |
| -0.075890415 | 0.101427241 | -0.092126872 | 0.046615583 | -0.090515067 |
| -0.10534487  | 0.022800608 | -0.092777138 | 0.045082748 | -0.100991653 |
| -0.038025811 | 0.41230788  | -0.02447706  | 0.597766425 | -0.026111308 |
| 0.099486451  | 0.03159528  | 0.09187539   | 0.047219997 | 0.087840783  |
| -0.124040167 | 0.00728084  | -0.094289921 | 0.04168     | -0.114381542 |
| -0.12244713  | 0.008073314 | -0.113094503 | 0.014473454 | -0.099969441 |
| -0.145672307 | 0.001597178 | -0.129410947 | 0.00509625  | -0.114980608 |
| -0.074323309 | 0.108701916 | -0.063403116 | 0.17135668  | -0.066980647 |
| -0.078023476 | 0.092152479 | -0.05193754  | 0.262659251 | -0.068810314 |
| -0.112823865 | 0.014711529 | -0.119226069 | 0.009914519 | -0.108833227 |
| -0.136985991 | 0.003013531 | -0.125279552 | 0.006713207 | -0.123511964 |
| -0.036192557 | 0.435221744 | -0.014003514 | 0.762787531 | -0.01607057  |
| -0.018351043 | 0.692444468 | -0.021956833 | 0.636015836 | -0.020597835 |
| -0.06684901  | 0.149200393 | -0.061063091 | 0.187745589 | -0.080352547 |
| -0.071469822 | 0.12299838  | -0.077460135 | 0.094533307 | -0.059090243 |
| -0.048719082 | 0.293428234 | -0.018078797 | 0.696779895 | -0.022601803 |
| 0.023684708  | 0.609679643 | 0.008327558  | 0.857560133 | -0.025548079 |
| -0.068288557 | 0.140617935 | -0.046227701 | 0.318839847 | -0.061863193 |
| -0.025956028 | 0.57581674  | -0.030271061 | 0.514040248 | -0.021990057 |
| -0.119984672 | 0.009450183 | -0.102824318 | 0.026283998 | -0.099379699 |
| -0.070797204 | 0.12657267  | -0.069690692 | 0.132627375 | -0.08141293  |
| -0.031487834 | 0.497262964 | -0.048599293 | 0.294618162 | -0.038834137 |
| -0.083430268 | 0.071663025 | -0.070165521 | 0.13000233  | -0.076172845 |
| -0.068783323 | 0.137757232 | -0.086531679 | 0.061697995 | -0.094853056 |
| -0.069985911 | 0.130990519 | -0.051974625 | 0.26231817  | -0.092668187 |
| -0.097313593 | 0.035525202 | -0.081353923 | 0.079041689 | -0.08560559  |
| -0.091290407 | 0.048651404 | -0.083432972 | 0.071653796 | -0.065501319 |
| -0.03558756  | 0.442941391 | -0.007518166 | 0.871277645 | -0.030868346 |
| -0.11126923  | 0.016146884 | -0.139366372 | 0.002541094 | -0.20332583  |
| -0.072624563 | 0.117045934 | -0.085619575 | 0.064502302 | -0.085943499 |
| 0.031010252  | 0.503813173 | 0.026693979  | 0.565008404 | 0.049243047  |
| -0.028218866 | 0.542987382 | -0.030161224 | 0.515569027 | -0.02510546  |
| -0.026938641 | 0.561446568 | -0.030034537 | 0.517335259 | -0.040397376 |
| -0.045876932 | 0.322529645 | -0.026680133 | 0.565210298 | -0.023317122 |
| -0.06775817  | 0.143734929 | -0.045480965 | 0.326728113 | -0.072061315 |
| -0.097768285 | 0.034670089 | -0.084218967 | 0.069011976 | -0.086382381 |
| -0.094930577 | 0.040305701 | -0.11291197  | 0.01463365  | -0.125055264 |
| -0.052278098 | 0.259538454 | -0.048878342 | 0.291851207 | -0.04546041  |

|              |             |              |             |              |
|--------------|-------------|--------------|-------------|--------------|
| -0.108087026 | 0.019472016 | -0.105158722 | 0.023043443 | -0.107703405 |
| -0.128542343 | 0.005403693 | -0.09404067  | 0.042225259 | -0.112967347 |
| -0.00984885  | 0.83189623  | -0.019644539 | 0.671985029 | -0.027739977 |
| -0.030047997 | 0.517147454 | -0.028422758 | 0.540075579 | -0.0280902   |
| -0.033253836 | 0.473439574 | -0.025211774 | 0.586814983 | -0.02220436  |
| -0.068764368 | 0.137866    | -0.066136695 | 0.153591863 | -0.062999027 |
| -0.209156487 | 5.16E-06    | -0.220246824 | 1.54E-06    | -0.226798448 |
| -0.055196943 | 0.233839293 | -0.057762226 | 0.212783685 | -0.069770744 |
| -0.047645787 | 0.304204672 | -0.060718531 | 0.190253065 | -0.041728518 |
| -0.014305108 | 0.757836344 | -0.020124617 | 0.664451783 | -0.02250313  |
| -0.026032813 | 0.574687595 | -0.024425491 | 0.59853857  | -0.013277107 |
| 0.006507163  | 0.888465935 | -0.012040754 | 0.795237926 | -0.018014045 |
| -0.006161359 | 0.894357466 | -0.013274856 | 0.774789375 | 0.026083944  |
| -0.152052819 | 0.000979781 | -0.147461266 | 0.001395349 | -0.15165691  |
| -0.019545735 | 0.673539554 | -0.022530781 | 0.62721457  | -0.025595366 |
| -0.141744849 | 0.002137439 | -0.140561146 | 0.002330365 | -0.14704065  |
| -0.190462061 | 3.43E-05    | -0.155704786 | 0.000734395 | -0.184526579 |
| -0.038498579 | 0.406516482 | -0.054910239 | 0.236280918 | -0.036678005 |
| -0.020195222 | 0.663346688 | -0.018144474 | 0.695733095 | -0.024355988 |
| -0.03294681  | 0.477535892 | -0.042408973 | 0.360495665 | -0.053572145 |
| -0.08895113  | 0.05474333  | -0.074142875 | 0.10956528  | -0.063647368 |
| -0.019020832 | 0.681821237 | -0.001072359 | 0.981561118 | -0.002540949 |
| -0.123881259 | 0.007356641 | -0.14176348  | 0.002134522 | -0.122237327 |
| -0.10390038  | 0.024744454 | -0.079912525 | 0.084517402 | -0.081504549 |
| -0.004040422 | 0.930607427 | 0.00443307   | 0.923883386 | 0.005113118  |
| -0.058725718 | 0.205239008 | -0.050650852 | 0.274682803 | -0.051421006 |
| -0.036645585 | 0.429492213 | -0.009865792 | 0.831611383 | -0.024455903 |
| -0.046436746 | 0.316654016 | -0.043767908 | 0.345297417 | -0.057439269 |
| -0.003604823 | 0.938072769 | -6.58E-05    | 0.998867742 | -0.005127654 |
| -0.062699972 | 0.176164976 | -0.052765661 | 0.255115224 | -0.059784188 |
| -0.111434512 | 0.015988665 | -0.1072018   | 0.020497041 | -0.109274649 |
| -0.003233917 | 0.944433687 | -0.00820636  | 0.859611563 | -0.001207386 |
| -0.041624972 | 0.369451319 | -0.014941214 | 0.747426162 | -0.007767172 |
| -0.045924927 | 0.322023143 | -0.038058848 | 0.411901606 | -0.043918106 |
| 0.173455248  | 0.000165257 | 0.173089855  | 0.00017067  | 0.151995934  |
| -0.182532323 | 7.27E-05    | -0.165617711 | 0.000325279 | -0.175849698 |
| -0.100700959 | 0.029565157 | -0.07399266  | 0.110288159 | -0.086868601 |
| -0.100778742 | 0.029439036 | -0.073344766 | 0.113449147 | -0.083443398 |
| -0.13413809  | 0.003682927 | -0.133159981 | 0.003942232 | -0.148159885 |
| 0.03222553   | 0.487234729 | -0.003216064 | 0.944739959 | -0.040102583 |
| -0.002564161 | 0.955928475 | -0.035743662 | 0.440942126 | -0.069780216 |
| -0.001160727 | 0.980041951 | -0.047502815 | 0.305659704 | -0.092605531 |
| -0.067341044 | 0.146223198 | -0.065362074 | 0.158477898 | -0.062266363 |
| -0.042636425 | 0.357923109 | -0.078433944 | 0.090448156 | -0.067906603 |
| -0.038536511 | 0.406053916 | -0.084152286 | 0.069232958 | -0.08213757  |

|              |             |              |             |              |
|--------------|-------------|--------------|-------------|--------------|
| -0.007119727 | 0.878044819 | 0.002568204  | 0.955859057 | 0.009705383  |
| -0.066725395 | 0.149955559 | -0.060175812 | 0.194252337 | -0.075681515 |
| -0.033227557 | 0.473789433 | -0.050289561 | 0.278125236 | -0.062483747 |
| -0.116598512 | 0.011683293 | -0.09975308  | 0.031139666 | -0.097886154 |
| -0.078652713 | 0.089550179 | -0.079517744 | 0.08606935  | -0.077294699 |
| -0.05819732  | 0.209352294 | -0.04527981  | 0.328874468 | -0.060093782 |
| -0.033523013 | 0.469864148 | -0.036823067 | 0.427259536 | -0.034806947 |
| -0.02732068  | 0.555906511 | -0.039974623 | 0.388748969 | -0.034684398 |
| -0.045230579 | 0.329401158 | -0.050228319 | 0.27871165  | -0.050451294 |
| -0.035953644 | 0.438260947 | -0.021061005 | 0.649855617 | -0.039127991 |
| -0.050375532 | 0.277303458 | -0.0442971   | 0.339490776 | -0.066721926 |
| -0.169734156 | 0.000228767 | -0.165907605 | 0.000317399 | -0.177344478 |
| -0.043524812 | 0.347985854 | -0.033026476 | 0.476471138 | -0.042431085 |
| -0.228579814 | 5.96E-07    | -0.197007175 | 1.80E-05    | -0.209118908 |
| -0.164890563 | 0.000345852 | -0.150738212 | 0.001085253 | -0.163787487 |
| 0.024980294  | 0.590255346 | 0.027325691  | 0.555834027 | 0.016757737  |
| -0.154476938 | 0.000809707 | -0.180469695 | 8.79E-05    | -0.163631033 |
| -0.075147564 | 0.104825954 | -0.062571058 | 0.177057299 | -0.074207337 |
| -0.024835989 | 0.592404763 | -0.002006091 | 0.96551353  | -0.024462834 |
| -0.243560859 | 9.83E-08    | -0.219030069 | 1.76E-06    | -0.204096348 |
| -0.045133001 | 0.33044669  | 0.000241767  | 0.995842531 | 0.00696439   |
| -0.17392694  | 0.000158507 | -0.141220579 | 0.002221011 | -0.130912489 |
| -0.182572572 | 7.24E-05    | -0.156627893 | 0.000682104 | -0.151778602 |
| 0.014023692  | 0.762455976 | 0.005408716  | 0.907200064 | 0.035302228  |
| 0.050554512  | 0.275597901 | 0.076435224  | 0.098990676 | 0.100998867  |
| -0.06083257  | 0.189420458 | -0.058205807 | 0.209285766 | -0.07263371  |
| -0.168086301 | 0.00026364  | -0.14121065  | 0.002222622 | -0.122026354 |
| -0.008826959 | 0.849117382 | 0.005583454  | 0.904216168 | 0.015818818  |
| -0.069388707 | 0.134318029 | -0.022933697 | 0.621067342 | -0.009363478 |
| -0.127377884 | 0.005842023 | -0.113218087 | 0.014365871 | -0.104844962 |
| -0.213905646 | 3.10E-06    | -0.218163665 | 1.94E-06    | -0.240853507 |
| -0.209913475 | 4.76E-06    | -0.162759422 | 0.000413351 | -0.162829462 |
| -0.161201863 | 0.000470233 | -0.131333567 | 0.004471078 | -0.094131403 |
| -0.105671495 | 0.022379872 | -0.087358096 | 0.059244742 | -0.070244511 |
| -0.074901437 | 0.105971712 | -0.09638122  | 0.037334866 | -0.049307908 |
| -0.0410473   | 0.376137507 | -0.015081316 | 0.745139402 | 0.001599371  |
| -0.089984091 | 0.051979304 | -0.088408515 | 0.056243552 | -0.070863609 |
| -0.268221965 | 3.88E-09    | -0.260192246 | 1.15E-08    | -0.247423907 |
| -0.145418568 | 0.00162788  | -0.10582248  | 0.022187668 | -0.106709008 |
| -0.133552356 | 0.003836287 | -0.117142394 | 0.01129581  | -0.124213294 |
| -0.155055077 | 0.000773398 | -0.141483357 | 0.002178756 | -0.148661596 |
| -0.079571213 | 0.085857821 | -0.025599928 | 0.581066915 | -0.041223236 |
| -0.125008717 | 0.006833747 | -0.070496834 | 0.128194638 | -0.059133415 |
| -0.263868342 | 7.04E-09    | -0.209294188 | 5.08E-06    | -0.200314374 |
| -0.052628289 | 0.25635616  | -0.057486161 | 0.21498177  | -0.086669413 |

|              |             |              |             |              |
|--------------|-------------|--------------|-------------|--------------|
| 0.046798631  | 0.312893273 | 0.08335334   | 0.071925996 | 0.074500257  |
| -0.217200978 | 2.16E-06    | -0.22234896  | 1.22E-06    | -0.243130335 |
| 0.054965589  | 0.235808152 | 0.031719148  | 0.494106732 | 0.02567893   |
| -0.029140277 | 0.529890956 | -0.027461438 | 0.553872065 | -0.046155694 |
| 0.015735937  | 0.734484581 | 0.066287365  | 0.152654897 | 0.066841072  |
| -0.10693278  | 0.020817699 | -0.087800952 | 0.057963668 | -0.080822669 |
| 0.081457068  | 0.078661143 | 0.118892407  | 0.010125088 | 0.117258498  |
| -0.059502456 | 0.199299313 | 0.000985651  | 0.983051798 | -0.013252401 |
| -0.137995676 | 0.002804154 | -0.076106238 | 0.100456378 | -0.073762081 |
| -0.127408754 | 0.005830002 | -0.130631619 | 0.004690816 | -0.126240329 |
| -0.232499723 | 3.76E-07    | -0.234144796 | 3.09E-07    | -0.202533368 |
| -0.130571282 | 0.004710151 | -0.115548245 | 0.012464933 | -0.133363817 |
| -0.114420387 | 0.013355384 | -0.078477693 | 0.090268004 | -0.07726532  |
| -0.161369104 | 0.000463794 | -0.113110843 | 0.01445919  | -0.121217651 |
| 0.048919927  | 0.291440357 | 0.028825343  | 0.534349194 | 0.059061421  |
| 0.011856224  | 0.798307988 | 0.061981421  | 0.181181481 | 0.074142765  |
| -0.040346067 | 0.384353147 | -0.022209692 | 0.63213193  | -0.017210458 |
| -0.116397022 | 0.011829798 | -0.117979685 | 0.010721509 | -0.104326541 |
| -0.080067146 | 0.083915749 | -0.049429659 | 0.286435863 | -0.032647529 |
| -0.101563582 | 0.028192079 | -0.076431171 | 0.099008629 | -0.076638161 |
| -0.122699312 | 0.007942947 | -0.109105069 | 0.018348645 | -0.109090341 |
| -0.292794341 | 1.10E-10    | -0.271109904 | 2.60E-09    | -0.255805286 |
| -0.032761879 | 0.480012518 | -0.008125996 | 0.860972341 | 0.034028818  |
| -0.216380297 | 2.36E-06    | -0.169728387 | 0.000228882 | -0.179813551 |
| -0.178168874 | 0.000108408 | -0.127240939 | 0.005895618 | -0.128190193 |
| -0.056391943 | 0.223854533 | -0.039127578 | 0.398886738 | -0.00680726  |
| -0.099245256 | 0.03201233  | -0.06379908  | 0.168692436 | -0.037326664 |
| -0.197568151 | 1.70E-05    | -0.154440913 | 0.000812021 | -0.1524211   |
| -0.118317895 | 0.010496968 | -0.08299984  | 0.073144544 | -0.065891023 |
| -0.239518969 | 1.62E-07    | -0.225190861 | 8.80E-07    | -0.229148307 |
| -0.077455239 | 0.094554212 | -0.031778767 | 0.493294978 | -0.053408666 |
| -0.047354841 | 0.307170486 | -0.090497798 | 0.050648637 | -0.077384728 |
| -0.162159939 | 0.00043444  | -0.163036551 | 0.000403928 | -0.15108787  |
| -0.018794963 | 0.685396745 | 0.017879845  | 0.699954399 | 0.034569847  |
| -0.007197557 | 0.876722233 | -0.016336774 | 0.724749745 | -0.019319832 |
| 0.107340796  | 0.020333054 | 0.105643431  | 0.022415755 | 0.097151238  |
| -0.1496046   | 0.001184506 | -0.171649922 | 0.000193662 | -0.157479622 |
| -0.047288792 | 0.307846426 | -0.030548327 | 0.510191563 | -0.021930519 |
| -0.200647066 | 1.25E-05    | -0.153227868 | 0.000893599 | -0.145600462 |
| -0.170591735 | 0.000212375 | -0.125447692 | 0.006639335 | -0.108892104 |
| -0.221324444 | 1.36E-06    | -0.194417069 | 2.33E-05    | -0.196220032 |
| -0.090065154 | 0.051767408 | -0.079503415 | 0.086126109 | -0.080670999 |
| -0.243462302 | 9.96E-08    | -0.186513628 | 5.00E-05    | -0.170523645 |
| -0.15399326  | 0.000841288 | -0.113976109 | 0.013721245 | -0.104526549 |
| -0.241321803 | 1.30E-07    | -0.209616365 | 4.91E-06    | -0.178212749 |

|              |             |              |             |              |
|--------------|-------------|--------------|-------------|--------------|
| -0.256832878 | 1.80E-08    | -0.234962521 | 2.81E-07    | -0.214605718 |
| -0.399317574 | 2.64E-19    | -0.405051239 | 7.26E-20    | -0.368950653 |
| -0.248246417 | 5.46E-08    | -0.212888992 | 3.46E-06    | -0.19027086  |
| -0.220558158 | 1.49E-06    | -0.189626114 | 3.72E-05    | -0.162582977 |
| -0.041672287 | 0.368906965 | -0.046465456 | 0.316354587 | -0.054674941 |
| -0.083421156 | 0.07169413  | -0.095857924 | 0.038384389 | -0.13408646  |
| -0.037336822 | 0.42083474  | -0.045254684 | 0.329143212 | -0.072638957 |
| -0.069346195 | 0.134557361 | -0.054650892 | 0.238505009 | -0.102819123 |
| -0.002457014 | 0.957768317 | 0.004155293  | 0.928639746 | -0.025252755 |
| 0.028064214  | 0.545201166 | 0.02380105   | 0.607923833 | -0.044453927 |
| 0.01322863   | 0.775552615 | 0.035959954  | 0.438180524 | 0.032398982  |
| -0.052590176 | 0.256701189 | -0.020593216 | 0.657131086 | -0.053104675 |
| -0.060866871 | 0.189170551 | -0.05494399  | 0.235992564 | -0.096055066 |
| -0.127488569 | 0.005799025 | -0.116258702 | 0.01193131  | -0.142930172 |
| -0.207450089 | 6.18E-06    | -0.236468714 | 2.34E-07    | -0.267477298 |
| 0.047537813  | 0.30530311  | 0.058672584  | 0.205649958 | 0.016842205  |
| 0.032834509  | 0.479039014 | -0.0033089   | 0.943147457 | -0.067449742 |
| 0.110122223  | 0.017283151 | 0.125740769  | 0.006512312 | 0.095873797  |
| -0.027834913 | 0.548491722 | -0.054453776 | 0.240205241 | -0.078243316 |
| -0.029643978 | 0.522799888 | -0.051628669 | 0.265511938 | -0.084988026 |
| 0.032213748  | 0.487394033 | 0.004706433  | 0.919205265 | -0.032353424 |
| -0.074380013 | 0.108431702 | -0.090123303 | 0.051615853 | -0.133875305 |
| -0.175877708 | 0.000133244 | -0.192763645 | 2.74E-05    | -0.241796175 |
| 0.010452715  | 0.821756887 | -0.007965294 | 0.863694717 | -0.035821895 |
| 0.050294128  | 0.278081541 | 0.031732542  | 0.493924299 | 0.030025885  |
| -0.061020672 | 0.188052968 | -0.083616205 | 0.071030661 | -0.156440178 |
| -0.119947586 | 0.009472426 | -0.145558429 | 0.001610891 | -0.145396803 |
| -0.095769546 | 0.038564086 | -0.105230085 | 0.022950085 | -0.10690517  |
| -0.218968915 | 1.78E-06    | -0.254257224 | 2.52E-08    | -0.27910251  |
| -0.127098008 | 0.005952026 | -0.164953847 | 0.000344014 | -0.172539034 |
| 0.083290051  | 0.072142932 | 0.056123422  | 0.226071237 | 0.008803907  |
| -0.03114988  | 0.501893433 | -0.05526417  | 0.233269362 | -0.099571929 |
| -0.00424101  | 0.927171739 | -0.010453722 | 0.821740009 | -0.057429623 |
| -0.028957046 | 0.532482497 | -0.0790518   | 0.087930489 | -0.126318042 |
| 0.014029279  | 0.762364183 | -0.014999038 | 0.746482075 | -0.072810405 |
| 0.031415651  | 0.498250071 | -0.011946737 | 0.796801711 | -0.066665201 |
| 0.0971311    | 0.035873415 | 0.058919481  | 0.203745434 | -0.010307863 |
| 0.009190903  | 0.842975437 | -0.015620553 | 0.736358976 | -0.05341747  |
| -0.132313986 | 0.004179721 | -0.157223606 | 0.000650213 | -0.209911252 |
| 0.066371233  | 0.152135236 | 0.020333973  | 0.661177113 | -0.025931754 |
| -0.104023162 | 0.024573837 | -0.132978714 | 0.003992064 | -0.195517986 |
| -0.102686063 | 0.026487663 | -0.071732201 | 0.121625596 | -0.09317511  |
| -0.098388266 | 0.033532409 | -0.116822197 | 0.01152253  | -0.180339455 |
| 0.021719837  | 0.639665176 | 0.003027235  | 0.947979777 | -0.04359045  |
| 0.153451469  | 0.000878014 | 0.112183416  | 0.01528867  | 0.125045935  |

|              |             |              |             |              |
|--------------|-------------|--------------|-------------|--------------|
| 0.221487179  | 1.34E-06    | 0.22190747   | 1.28E-06    | 0.252125253  |
| 0.240843839  | 1.38E-07    | 0.205100247  | 7.90E-06    | 0.19198473   |
| -0.058093568 | 0.210166889 | -0.091629912 | 0.047816305 | -0.115100157 |
| -0.315201374 | 3.13E-12    | -0.277061726 | 1.12E-09    | -0.28604333  |
| 0.158274161  | 0.000597319 | 0.110682598  | 0.016719573 | 0.108826632  |
| 0.199172243  | 1.45E-05    | 0.172278562  | 0.000183289 | 0.173034148  |
| 0.099037459  | 0.032375397 | 0.035166751  | 0.448356529 | 0.020116621  |
| -0.106944972 | 0.020803073 | -0.122653552 | 0.007966462 | -0.123379158 |
| 0.199811977  | 1.36E-05    | 0.132983254  | 0.003990809 | 0.165927217  |
| -0.020093459 | 0.664939698 | -0.045559331 | 0.325894397 | -0.062889064 |
| 0.128226582  | 0.00551953  | 0.067556658  | 0.144932931 | 0.044304059  |
| 0.014769953  | 0.750224497 | -0.035345043 | 0.446057635 | -0.034722698 |
| 0.214930404  | 2.77E-06    | 0.164118281  | 0.000369027 | 0.152767043  |
| 0.109388854  | 0.018045756 | 0.080450707  | 0.082438162 | 0.074587918  |
| 0.060629471  | 0.190905169 | -0.003595538 | 0.938231962 | -0.007605077 |
| 0.22171801   | 1.31E-06    | 0.140013919  | 0.002424819 | 0.134999013  |
| 0.096336934  | 0.037422734 | 0.043342251  | 0.350013533 | 0.050575874  |
| 0.000261256  | 0.995507412 | -0.032642137 | 0.481619842 | -0.048984399 |
| 0.32489679   | 6.09E-13    | 0.292008273  | 1.24E-10    | 0.320298978  |
| 0.128075998  | 0.005575554 | 0.068416303  | 0.139874992 | 0.06717384   |
| -0.068945782 | 0.136827726 | -0.097778748 | 0.03465062  | -0.116327707 |
| 0.099070489  | 0.032317452 | 0.072189034  | 0.11926395  | 0.0818951    |
| 0.261453787  | 9.75E-09    | 0.231552717  | 4.21E-07    | 0.258538027  |
| 0.12736592   | 0.005846688 | 0.096106954  | 0.037881858 | 0.054924802  |
| 0.025157616  | 0.587619069 | -0.018044365 | 0.697328911 | -0.037466588 |
| 0.222089502  | 1.25E-06    | 0.19895665   | 1.48E-05    | 0.188561838  |
| 0.160741493  | 0.00048839  | 0.156921864  | 0.00066619  | 0.16306936   |
| 0.132630821  | 0.004089304 | 0.130270417  | 0.004807643 | 0.132986217  |
| 0.142961738  | 0.001954421 | 0.109795564  | 0.017619281 | 0.130132191  |
| 0.075307959  | 0.104084582 | 0.01412374   | 0.760812637 | 0.018342737  |
| 0.16407078   | 0.000370498 | 0.180552917  | 8.72E-05    | 0.202581937  |
| 0.049221001  | 0.288477402 | 0.028809731  | 0.534570685 | 0.024477737  |
| 0.246931328  | 6.45E-08    | 0.226616168  | 7.47E-07    | 0.260958086  |
| 0.147791732  | 0.001360737 | 0.08969964   | 0.05272858  | 0.105116555  |
| 0.204416238  | 8.48E-06    | 0.13936007   | 0.00254225  | 0.159373511  |
| 0.192258047  | 2.88E-05    | 0.189623412  | 3.72E-05    | 0.196059183  |
| 0.117434827  | 0.011092207 | 0.078662865  | 0.089508679 | 0.091108192  |
| 0.268423584  | 3.78E-09    | 0.248998577  | 4.96E-08    | 0.278376188  |
| 0.01007301   | 0.828129073 | -0.032318252 | 0.485982016 | -0.03240453  |
| 0.074481479  | 0.107949506 | 0.05587673   | 0.228121457 | 0.035706644  |
| 0.107758053  | 0.019847608 | 0.086495062  | 0.061808607 | 0.118388013  |
| 0.021739045  | 0.639369089 | -0.05830019  | 0.20854688  | -0.07137081  |
| 0.011930032  | 0.79707965  | 0.031909129  | 0.491522493 | 0.017019988  |
| 0.085263662  | 0.06562464  | 0.063927167  | 0.167837269 | 0.068596527  |
| 0.226411241  | 7.65E-07    | 0.186831775  | 4.86E-05    | 0.201175456  |

|              |             |              |             |              |
|--------------|-------------|--------------|-------------|--------------|
| 0.128924159  | 0.00526655  | 0.109375582  | 0.018059823 | 0.090070372  |
| 0.255802263  | 2.06E-08    | 0.252726841  | 3.08E-08    | 0.291357734  |
| 0.080339045  | 0.082866131 | 0.048384366  | 0.296761211 | 0.057957229  |
| 0.074249897  | 0.109052537 | 0.042488589  | 0.359593871 | 0.038537233  |
| 0.116974993  | 0.011413843 | 0.081191323  | 0.079644618 | 0.086014213  |
| 0.006556747  | 0.887621657 | -0.01490742  | 0.747978071 | -0.05779268  |
| 0.309513763  | 7.95E-12    | 0.236357235  | 2.37E-07    | 0.250212949  |
| 0.034971122  | 0.450886671 | 0.010769489  | 0.816449742 | 0.040933287  |
| 0.035336098  | 0.446172809 | -0.00488252  | 0.916193304 | -0.023763575 |
| 0.066216633  | 0.153094218 | 0.073446033  | 0.112950441 | 0.084746146  |
| 0.264059142  | 6.86E-09    | 0.246128266  | 7.14E-08    | 0.254151034  |
| -0.021252706 | 0.64688364  | -0.053721312 | 0.246597679 | -0.063633363 |
| 0.227514311  | 6.74E-07    | 0.195366517  | 2.12E-05    | 0.209208284  |
| 0.185958516  | 5.27E-05    | 0.137975237  | 0.002808258 | 0.155693027  |
| 0.142046402  | 0.002090681 | 0.106766063  | 0.021018598 | 0.048388777  |
| 0.344032201  | 2.02E-14    | 0.345261612  | 1.61E-14    | 0.376955584  |
| 0.229032726  | 5.65E-07    | 0.22017313   | 1.55E-06    | 0.192805117  |
| 0.354113583  | 3.05E-15    | 0.298814876  | 4.36E-11    | 0.298055908  |
| 0.178817028  | 0.000102216 | 0.120285535  | 0.009271449 | 0.117882589  |
| 0.219387753  | 1.70E-06    | 0.240028204  | 1.52E-07    | 0.217275863  |
| 0.146786983  | 0.001468495 | 0.110699769  | 0.016702561 | 0.120642653  |
| 0.343993118  | 2.03E-14    | 0.341596923  | 3.16E-14    | 0.336612563  |
| 0.04348899   | 0.348383135 | -0.002576445 | 0.95571757  | 0.013589445  |
| 0.245521307  | 7.70E-08    | 0.215292305  | 2.66E-06    | 0.229346423  |
| -0.053865514 | 0.245329881 | -0.088664472 | 0.055531684 | -0.074263002 |
| 0.172229868  | 0.000184073 | 0.17385744   | 0.000159485 | 0.215864032  |
| 0.193763195  | 2.49E-05    | 0.163833704  | 0.000377925 | 0.156558379  |
| 0.113949532  | 0.013743408 | 0.059051878  | 0.202729436 | 0.028284217  |
| 0.098052612  | 0.034144326 | 0.012011599  | 0.795722779 | 0.027605869  |
| 0.266000243  | 5.27E-09    | 0.200674457  | 1.25E-05    | 0.178483025  |
| 0.084596301  | 0.067772349 | 0.010432936  | 0.822088533 | -2.22E-05    |
| 0.233054345  | 3.52E-07    | 0.166837854  | 0.000293302 | 0.163736939  |
| 0.145484226  | 0.001619884 | 0.056035362  | 0.226801581 | 0.027511037  |
| 0.178668197  | 0.000103607 | 0.128150051  | 0.005547939 | 0.133433631  |
| 0.337834814  | 6.25E-14    | 0.327797281  | 3.69E-13    | 0.342462315  |
| 0.208367828  | 5.61E-06    | 0.198154182  | 1.61E-05    | 0.15694899   |
| -0.059596373 | 0.198589707 | -0.11315248  | 0.014422896 | -0.117556839 |
| 0.247729704  | 5.83E-08    | 0.199455316  | 1.41E-05    | 0.208181192  |
| -0.017855185 | 0.700348236 | -0.049607666 | 0.284701909 | -0.041443683 |
| 0.054435279  | 0.240365227 | 0.065591846  | 0.157016498 | 0.060872451  |
| -0.073525444 | 0.112560575 | -0.094915338 | 0.040337941 | -0.136386865 |
| 0.020117716  | 0.664559828 | 0.019854641  | 0.668684068 | 0.021379876  |
| 0.229569426  | 5.31E-07    | 0.200219257  | 1.30E-05    | 0.216634124  |
| -0.074191032 | 0.109334325 | -0.093885153 | 0.042568507 | -0.114054965 |
| 0.284122282  | 4.03E-10    | 0.251462052  | 3.62E-08    | 0.251761364  |



|              |             |              |             |              |
|--------------|-------------|--------------|-------------|--------------|
| 0.309697567  | 7.72E-12    | 0.264493865  | 6.47E-09    | 0.261365193  |
| 0.156284621  | 0.000701132 | 0.113697585  | 0.013955083 | 0.132152594  |
| 0.157582537  | 0.000631672 | 0.128659895  | 0.005361132 | 0.142708334  |
| 0.201496801  | 1.15E-05    | 0.175071808  | 0.000143184 | 0.199423083  |
| 0.268894095  | 3.54E-09    | 0.229748935  | 5.20E-07    | 0.240727376  |
| 0.145613674  | 0.001604225 | 0.178568856  | 0.000104546 | 0.201813354  |
| 0.297840935  | 5.07E-11    | 0.266589071  | 4.86E-09    | 0.272557596  |
| 0.085685713  | 0.06429549  | 0.081228581  | 0.079506134 | 0.082379183  |
| -0.040100629 | 0.387254354 | -0.038654494 | 0.404617183 | -0.040603092 |
| -0.286715944 | 2.75E-10    | -0.232874058 | 3.60E-07    | -0.2466282   |
| -0.0180099   | 0.697878624 | -0.069198051 | 0.135393939 | -0.088690665 |
| 0.075602634  | 0.102733379 | 0.068081183  | 0.14183041  | 0.063888796  |
| 0.293263343  | 1.03E-10    | 0.282631207  | 5.02E-10    | 0.297277239  |
| 0.198491542  | 1.55E-05    | 0.166770829  | 0.00029498  | 0.165718196  |
| 0.238762165  | 1.77E-07    | 0.176612735  | 0.000124747 | 0.175236057  |
| 0.293733537  | 9.55E-11    | 0.219593104  | 1.66E-06    | 0.209136291  |
| 0.16632357   | 0.000306404 | 0.125940665  | 0.006426929 | 0.148810934  |
| 0.038992193  | 0.400521657 | 0.025575918  | 0.581421708 | 0.017437203  |
| -0.025584968 | 0.581287958 | -0.060019622 | 0.195414614 | -0.059259131 |
| -0.075559705 | 0.102929355 | -0.094030352 | 0.04224796  | -0.120293494 |
| -0.155268009 | 0.000760409 | -0.173887105 | 0.000159067 | -0.196247029 |
| 0.043271494  | 0.350801421 | 0.001004412  | 0.982729251 | 0.008540768  |
| 0.157100296  | 0.000656699 | 0.176339919  | 0.000127839 | 0.17343064   |
| 0.018568481  | 0.688989038 | -0.031055962 | 0.503184284 | -0.044734366 |
| 0.141021051  | 0.002253594 | 0.1764982    | 0.000126037 | 0.200633651  |
| -0.092356247 | 0.046069972 | -0.093857221 | 0.042630405 | -0.109152516 |
| 0.238873974  | 1.75E-07    | 0.227200031  | 6.99E-07    | 0.264382962  |
| 0.067099363  | 0.147679846 | 0.047990947  | 0.300710874 | 0.054874912  |
| 0.099204167  | 0.032083845 | 0.100485547  | 0.029916851 | 0.123056328  |
| 0.370681315  | 1.17E-16    | 0.358976269  | 1.19E-15    | 0.359163366  |
| 0.25283321   | 3.04E-08    | 0.225933055  | 8.09E-07    | 0.24563344   |
| 0.217103076  | 2.18E-06    | 0.169161107  | 0.000240373 | 0.194160363  |
| -0.169497276 | 0.0002335   | -0.138477474 | 0.002708988 | -0.096658491 |
| 0.128603134  | 0.005381645 | 0.058647182  | 0.205846634 | 0.05482584   |
| 0.181238617  | 8.19E-05    | 0.134545919  | 0.003579451 | 0.132730118  |
| 0.125911136  | 0.006439478 | 0.080744352  | 0.081321227 | 0.069996349  |
| 0.179988073  | 9.19E-05    | 0.172211068  | 0.000184377 | 0.16116842   |
| -0.211465236 | 4.03E-06    | -0.1992398   | 1.44E-05    | -0.182018618 |
| 0.25114829   | 3.77E-08    | 0.226102695  | 7.93E-07    | 0.216622057  |
| -0.047025105 | 0.310554721 | -0.084939469 | 0.066660871 | -0.102894747 |
| 0.083884091  | 0.070127614 | 0.045847243  | 0.322843221 | 0.032182063  |
| 0.343240145  | 2.34E-14    | 0.332582356  | 1.59E-13    | 0.355678304  |
| 0.045602783  | 0.325432718 | 0.057415896  | 0.215543825 | 0.062293151  |
| -0.409997677 | 2.33E-20    | -0.379787276 | 1.80E-17    | -0.398937165 |
| 0.115198744  | 0.012735092 | 0.061909884  | 0.181686636 | 0.045257313  |

|              |             |              |             |              |
|--------------|-------------|--------------|-------------|--------------|
| 0.287196149  | 2.56E-10    | 0.249734342  | 4.52E-08    | 0.268964593  |
| -0.024216814 | 0.601667662 | -0.04944646  | 0.286271895 | -0.061568307 |
| 0.186015869  | 5.25E-05    | 0.147378785  | 0.001404113 | 0.188919051  |
| -0.2214351   | 1.35E-06    | -0.166449991 | 0.000303134 | -0.162626795 |
| 0.07417444   | 0.109413858 | 0.045552217  | 0.325970021 | 0.044430134  |
| 0.022741969  | 0.623989249 | -0.020847621 | 0.653170279 | -0.026340113 |
| 0.338009503  | 6.05E-14    | 0.327686514  | 3.76E-13    | 0.341970922  |
| 0.07160338   | 0.122298098 | 0.07730578   | 0.09519416  | 0.084922196  |
| 0.086212949  | 0.062666287 | 0.084308072  | 0.068717583 | 0.074937175  |
| -0.136331091 | 0.003156835 | -0.089506642 | 0.053242066 | -0.086264955 |
| -0.014107406 | 0.761080861 | -0.047484648 | 0.305844923 | -0.059044971 |
| 0.276484308  | 1.22E-09    | 0.238395571  | 1.85E-07    | 0.234566777  |
| -0.047139593 | 0.30937691  | -0.078976623 | 0.088233778 | -0.093159197 |
| 0.093023694  | 0.044512739 | 0.048937787  | 0.291264032 | 0.038552253  |
| 0.36545418   | 3.34E-16    | 0.356084143  | 2.09E-15    | 0.366255959  |
| 0.114420906  | 0.013354962 | 0.065675229  | 0.156488687 | 0.076346114  |
| 0.045003321  | 0.33183949  | -0.014280393 | 0.758241713 | -0.025593529 |
| 0.126310636  | 0.006271545 | 0.075345568  | 0.103911354 | 0.050773642  |
| 0.201712128  | 1.12E-05    | 0.201006995  | 1.20E-05    | 0.184548814  |
| 0.12082707   | 0.008957302 | 0.091538124  | 0.048040889 | 0.068384268  |
| 0.010318789  | 0.82400311  | -0.052192122 | 0.260323893 | -0.062125552 |
| 0.177067007  | 0.000119753 | 0.139792453  | 0.002464029 | 0.15207624   |
| 0.287744045  | 2.36E-10    | 0.24895324   | 4.99E-08    | 0.256299526  |
| 0.209859743  | 4.79E-06    | 0.182191605  | 7.50E-05    | 0.19030433   |
| 0.155701627  | 0.00073458  | 0.127146814  | 0.00593271  | 0.118525549  |
| 0.064369225  | 0.164910808 | 0.02032255   | 0.661355628 | 0.010333115  |
| 0.045953358  | 0.32172335  | -0.01080623  | 0.815834739 | -0.041448184 |
| 0.290849226  | 1.48E-10    | 0.227391808  | 6.83E-07    | 0.260587597  |
| 0.10033856   | 0.030158883 | 0.065577344  | 0.157108431 | 0.075741881  |
| 0.071937405  | 0.120560302 | 0.031429666  | 0.498058325 | 0.053468047  |
| 0.270676683  | 2.76E-09    | 0.256042839  | 2.00E-08    | 0.299416651  |
| 0.157463763  | 0.000637752 | 0.120943007  | 0.008891291 | 0.135062411  |
| 0.013329735  | 0.773883548 | 0.008128762  | 0.860925511 | 0.015548188  |
| -0.099404518 | 0.031736426 | -0.130362154 | 0.004777725 | -0.165102136 |
| -0.182651368 | 7.19E-05    | -0.178793825 | 0.000102431 | -0.206828783 |
| -0.065472302 | 0.157775543 | -0.087003872 | 0.060286208 | -0.118031304 |
| 0.007814026  | 0.866258725 | 0.014252349  | 0.758701765 | 0.015353634  |
| -0.008798796 | 0.849593061 | -0.007769762 | 0.867009282 | -0.004038656 |
| 0.215016312  | 2.74E-06    | 0.165382798  | 0.000331797 | 0.176578637  |
| 0.135896518  | 0.003255315 | 0.091740873  | 0.047545986 | 0.105061981  |
| 0.008850526  | 0.848719389 | -0.022366107 | 0.629734448 | -0.019085084 |
| 0.113784502  | 0.013881737 | 0.047940907  | 0.301215725 | 0.061236846  |
| 0.223781357  | 1.03E-06    | 0.189812018  | 3.65E-05    | 0.196866477  |
| 0.139788879  | 0.002464666 | 0.096815372  | 0.036482706 | 0.055032773  |
| 0.412352994  | 1.35E-20    | 0.417160483  | 4.35E-21    | 0.398139767  |

|              |             |              |             |              |
|--------------|-------------|--------------|-------------|--------------|
| -0.009829813 | 0.832216349 | -0.007778198 | 0.86686623  | -0.001761073 |
| 0.102866217  | 0.026222543 | 0.026744773  | 0.564268045 | 0.011090262  |
| 0.233958341  | 3.16E-07    | 0.168513341  | 0.000254154 | 0.166440511  |
| 0.141280648  | 0.002211287 | 0.07930699   | 0.086907206 | 0.085031142  |
| 0.234805106  | 2.86E-07    | 0.168546915  | 0.000253422 | 0.178245352  |
| 0.195464189  | 2.10E-05    | 0.119690035  | 0.009628181 | 0.13913571   |
| 0.358303224  | 1.36E-15    | 0.341350739  | 3.30E-14    | 0.353807388  |
| 0.212463769  | 3.62E-06    | 0.159762602  | 0.000529186 | 0.174870711  |
| 0.06957607   | 0.133267138 | 0.021678296  | 0.640305735 | -0.000691147 |
| 0.083812698  | 0.070367357 | 0.028154504  | 0.54390815  | 0.03019141   |
| 0.160969268  | 0.000479327 | 0.113372181  | 0.014232713 | 0.067515971  |
| 0.204204667  | 8.67E-06    | 0.17447286   | 0.000151018 | 0.195748147  |
| 0.031752618  | 0.493650936 | -0.045069673 | 0.331126378 | -0.054851415 |
| -0.080621232 | 0.081788037 | -0.141259752 | 0.002214665 | -0.144809186 |
| 0.272201545  | 2.23E-09    | 0.268456981  | 3.76E-09    | 0.266323331  |
| 0.209769701  | 4.83E-06    | 0.169317584  | 0.000237151 | 0.201916452  |
| 0.077322717  | 0.095121466 | -0.001625166 | 0.972058987 | -0.032763074 |
| 0.183323574  | 6.75E-05    | 0.111848721  | 0.015598112 | 0.135687481  |
| 0.209909607  | 4.76E-06    | 0.148636842  | 0.001275781 | 0.159343991  |
| -0.087647675 | 0.058404439 | -0.127776025 | 0.005688684 | -0.139393459 |
| 0.194153731  | 2.39E-05    | 0.158811326  | 0.000571843 | 0.164693248  |
| 0.053490329  | 0.248637955 | 0.092963806  | 0.044650633 | 0.07800469   |
| 0.341425989  | 3.26E-14    | 0.312488893  | 4.89E-12    | 0.342135589  |
| 0.085079864  | 0.066210485 | 0.038860634  | 0.402114203 | 0.039947481  |
| 0.174684287  | 0.000148208 | 0.162455694  | 0.000423914 | 0.165875479  |
| 0.066954462  | 0.148558472 | 0.028729599  | 0.535708285 | -0.025484136 |
| -0.237099808 | 2.17E-07    | -0.213838818 | 3.12E-06    | -0.212816156 |
| 0.15070977   | 0.001087646 | 0.115348681  | 0.012618566 | 0.094993879  |
| 0.083911222  | 0.070036682 | 0.047854787  | 0.302085919 | 0.034990329  |
| -0.115160813 | 0.01276472  | -0.071833873 | 0.121096865 | -0.094290451 |
| 0.027023826  | 0.560208974 | 0.013971705  | 0.763310304 | -0.018037467 |
| 0.172059833  | 0.000186837 | 0.150419963  | 0.001112313 | 0.209370296  |
| 0.190548149  | 3.40E-05    | 0.164119022  | 0.000369004 | 0.168218454  |
| 0.09457012   | 0.041074142 | 0.050331462  | 0.277724508 | 0.022392481  |
| 0.128309102  | 0.005489044 | 0.059913533  | 0.196206956 | 0.08844859   |
| 0.063536042  | 0.170458811 | 0.040716514  | 0.379999441 | 0.071687923  |
| -0.023797621 | 0.607975549 | -0.074017688 | 0.110167458 | -0.068036508 |
| 0.298469775  | 4.60E-11    | 0.240776964  | 1.39E-07    | 0.263319914  |
| 0.094552662  | 0.041111673 | 0.120797149  | 0.008974409 | 0.122503115  |
| 0.271522056  | 2.46E-09    | 0.267353947  | 4.38E-09    | 0.300891557  |
| -0.038498782 | 0.406514004 | -0.074276912 | 0.108923407 | -0.076919778 |
| -0.009791024 | 0.83286867  | -0.052386981 | 0.258546088 | -0.036794496 |
| 0.086635949  | 0.06138392  | 0.095613184  | 0.038883757 | 0.083201519  |
| 0.201701058  | 1.12E-05    | 0.184809554  | 5.88E-05    | 0.183903087  |
| 0.24931953   | 4.77E-08    | 0.243049085  | 1.05E-07    | 0.239971645  |

|              |             |              |             |              |
|--------------|-------------|--------------|-------------|--------------|
| 0.038980939  | 0.400657736 | 0.006861508  | 0.882435268 | -0.028155696 |
| -0.072873423 | 0.115793138 | -0.106554427 | 0.021276049 | -0.132372926 |
| 0.102525885  | 0.02672532  | 0.046610621  | 0.314843425 | 0.054858105  |
| 0.198474755  | 1.56E-05    | 0.142577978  | 0.002010528 | 0.139899087  |
| 0.179602128  | 9.52E-05    | 0.095658327  | 0.038791236 | 0.087893876  |
| -0.049292832 | 0.287773493 | -0.071074975 | 0.125086944 | -0.085675408 |
| 0.257619705  | 1.62E-08    | 0.244701949  | 8.53E-08    | 0.252512569  |
| 0.316413861  | 2.56E-12    | 0.323884989  | 7.24E-13    | 0.312902839  |
| -0.103359509 | 0.025508273 | -0.09953407  | 0.031513493 | -0.126110207 |
| 0.094949833  | 0.040264995 | 0.044920311  | 0.332733021 | 0.053200265  |
| 0.165941119  | 0.0003165   | 0.091121603  | 0.049071146 | 0.078033214  |
| 0.336016262  | 8.66E-14    | 0.304820298  | 1.69E-11    | 0.319357561  |
| 0.221672321  | 1.31E-06    | 0.180118246  | 9.08E-05    | 0.164977678  |
| -0.032648875 | 0.481529325 | -0.04344256  | 0.348898489 | -0.029416688 |
| 0.09138835   | 0.048409246 | 0.04252047   | 0.359233155 | 0.020855414  |
| 0.160155996  | 0.000512425 | 0.111005596  | 0.01640209  | 0.101580585  |
| 0.210543288  | 4.45E-06    | 0.188484494  | 4.15E-05    | 0.189793259  |
| 0.139337243  | 0.002546442 | 0.101276347  | 0.028643073 | 0.118321728  |
| -0.009503408 | 0.837709145 | -0.027958426 | 0.54671805  | -0.049724964 |
| 0.066687617  | 0.150186923 | 0.071106496  | 0.124919207 | 0.067351115  |
| 0.096967914  | 0.036187243 | 0.088066926  | 0.057205359 | 0.111162435  |
| 0.241932696  | 1.20E-07    | 0.200040365  | 1.33E-05    | 0.205914526  |
| 0.22867991   | 5.89E-07    | 0.213370245  | 3.28E-06    | 0.213902842  |
| 0.009245412  | 0.842056354 | 0.026204306  | 0.572169518 | 0.033007934  |
| 0.134135669  | 0.003683549 | 0.101182397  | 0.028791923 | 0.117158398  |
| 0.220685579  | 1.47E-06    | 0.193971653  | 2.44E-05    | 0.185172592  |
| 0.18669237   | 4.92E-05    | 0.164518234  | 0.00035685  | 0.187912993  |
| 0.287971327  | 2.28E-10    | 0.252638666  | 3.11E-08    | 0.271837464  |
| -0.045903632 | 0.32224781  | -0.086356841 | 0.062227608 | -0.112388828 |
| 0.215858093  | 2.50E-06    | 0.189604634  | 3.73E-05    | 0.179047282  |
| -0.229467477 | 5.37E-07    | -0.188938335 | 3.97E-05    | -0.166669471 |
| 0.17275583   | 0.000175763 | 0.172479842  | 0.000180079 | 0.183847523  |
| 0.026511334  | 0.567674419 | 0.0301514    | 0.515705881 | 0.013191075  |
| 0.247643872  | 5.89E-08    | 0.214383291  | 2.94E-06    | 0.205384556  |
| 0.197793296  | 1.67E-05    | 0.158849535  | 0.00057007  | 0.16379983   |
| 0.082005799  | 0.076661557 | 0.012261287  | 0.791573037 | 0.01771346   |
| 0.210085595  | 4.67E-06    | 0.223149276  | 1.11E-06    | 0.229106423  |
| 0.112986399  | 0.014568142 | 0.047572325  | 0.304951725 | 0.044796755  |
| 0.018291928  | 0.693385004 | 0.026128874  | 0.573276451 | 0.005183914  |
| -0.08735507  | 0.059253576 | -0.092803253 | 0.045022084 | -0.057671353 |
| 0.17881238   | 0.000102259 | 0.133767745  | 0.003779233 | 0.136325346  |
| 0.031450319  | 0.497775855 | -0.002186407 | 0.962415924 | -0.024634668 |
| 0.052667048  | 0.256005614 | 0.041013199  | 0.376534515 | 0.003266258  |
| 0.131616697  | 0.004385109 | 0.132690517  | 0.004072467 | 0.148516238  |
| 0.163913717  | 0.000375403 | 0.159273074  | 0.000550753 | 0.191656921  |

|              |             |              |             |              |
|--------------|-------------|--------------|-------------|--------------|
| 0.101608179  | 0.028122606 | 0.101792388  | 0.027837203 | 0.118546459  |
| -0.055115216 | 0.234533469 | -0.083863268 | 0.070197471 | -0.101743843 |
| 0.158215853  | 0.000600147 | 0.191383006  | 3.14E-05    | 0.205770638  |
| 0.003370204  | 0.942095975 | -0.023383275 | 0.614239208 | -0.050883318 |
| 0.090435777  | 0.050807767 | 0.032105388  | 0.488860483 | 0.033817453  |
| 0.329452925  | 2.76E-13    | 0.327094079  | 4.17E-13    | 0.337686944  |
| 0.268508823  | 3.73E-09    | 0.222353457  | 1.22E-06    | 0.246565391  |
| 0.153322375  | 0.000886981 | 0.105000762  | 0.023251258 | 0.099723463  |
| 0.086003878  | 0.063308217 | 0.037042684  | 0.424506157 | 0.062721661  |
| -0.302204915 | 2.56E-11    | -0.270166935 | 2.97E-09    | -0.281071777 |
| 0.248592668  | 5.23E-08    | 0.235756207  | 2.55E-07    | 0.23349623   |
| 0.169891648  | 0.000225671 | 0.143754994  | 0.00184296  | 0.12992756   |
| -0.001693761 | 0.97088015  | -0.043232609 | 0.351234883 | -0.051196278 |
| 0.077355834  | 0.094979456 | 0.070633296  | 0.127455771 | 0.051633059  |
| 0.004415699  | 0.924180749 | -0.040472035 | 0.382869291 | -0.047785415 |
| 0.149131693  | 0.001228329 | 0.087885789  | 0.057720893 | 0.097163358  |
| 0.091139304  | 0.049026988 | 0.045241166  | 0.329287853 | 0.001145831  |
| 0.289052559  | 1.94E-10    | 0.254312677  | 2.51E-08    | 0.272667415  |
| 0.113261241  | 0.014328471 | 0.104483319  | 0.023943416 | 0.119332501  |
| 0.266973968  | 4.61E-09    | 0.221512584  | 1.34E-06    | 0.228630223  |
| 0.195976147  | 2.00E-05    | 0.225167986  | 8.83E-07    | 0.25684109   |
| 0.021736326  | 0.639410996 | -0.025400143 | 0.584022192 | -0.02110985  |
| 0.116120448  | 0.012033542 | 0.076618077  | 0.098183412 | 0.082846337  |
| 0.078103036  | 0.091820141 | 0.039625678  | 0.392906193 | 0.053613124  |
| 0.067079895  | 0.147797661 | 0.009761506  | 0.833365161 | 0.017199259  |
| 0.203487181  | 9.33E-06    | 0.202861093  | 9.96E-06    | 0.209649627  |
| 0.130154075  | 0.004845828 | 0.085501854  | 0.064871763 | 0.09589549   |
| 0.092972397  | 0.044630829 | 0.101124896  | 0.028883353 | 0.08847503   |
| 0.013570488  | 0.769913322 | 0.004024856  | 0.930874101 | -0.020090957 |
| 0.215583351  | 2.58E-06    | 0.149804581  | 0.00116641  | 0.196507128  |
| 0.15273909   | 0.000928559 | 0.075708396  | 0.102251822 | 0.081574553  |
| 0.162591291  | 0.000419168 | 0.125664912  | 0.006544979 | 0.107642683  |
| 0.043200914  | 0.351588455 | -0.012756837 | 0.783354676 | -0.020003063 |
| 0.068735636  | 0.138030994 | 0.091399368  | 0.048382068 | 0.110403767  |
| 0.130951655  | 0.004589451 | 0.111156532  | 0.01625555  | 0.12452927   |
| -0.055738739 | 0.229274024 | -0.094688298 | 0.040820853 | -0.102250677 |
| 0.202151685  | 1.07E-05    | 0.16048073   | 0.000498962 | 0.197661944  |
| 0.229636922  | 5.27E-07    | 0.176601586  | 0.000124872 | 0.22819662   |
| -0.066937717 | 0.148660266 | -0.112727396 | 0.014797219 | -0.102298205 |
| 0.25000623   | 4.37E-08    | 0.198395271  | 1.57E-05    | 0.225730144  |
| 0.164988875  | 0.000343001 | 0.094817851  | 0.040544701 | 0.10869279   |
| -0.0029651   | 0.949046053 | -0.016383442 | 0.723995457 | -0.001996884 |
| 0.11973619   | 0.009600103 | 0.093612548  | 0.043175858 | 0.104553311  |
| 0.173168339  | 0.000169493 | 0.166586109  | 0.000299649 | 0.146672242  |
| 0.046147817  | 0.319677731 | 0.021543539  | 0.642385517 | -0.011480812 |

|              |             |              |             |              |
|--------------|-------------|--------------|-------------|--------------|
| 0.058890274  | 0.203970062 | 0.015772056  | 0.733898159 | -0.005544599 |
| 0.281317858  | 6.08E-10    | 0.246919275  | 6.46E-08    | 0.243727309  |
| 0.028299325  | 0.541837412 | -0.008265141 | 0.858616494 | 0.013279474  |
| -0.008660067 | 0.851936948 | -0.048662609 | 0.293988805 | -0.031879058 |
| 0.312562496  | 4.84E-12    | 0.307032347  | 1.19E-11    | 0.285457     |
| 0.356938016  | 1.77E-15    | 0.326256718  | 4.82E-13    | 0.340168333  |
| 0.034274527  | 0.459961089 | -0.002150426 | 0.963033987 | 0.019463214  |
| -0.076040153 | 0.100752869 | -0.095754761 | 0.038594217 | -0.105018444 |
| 0.086239927  | 0.062583847 | 0.028834281  | 0.534222405 | 0.035813134  |
| 0.154001791  | 0.000840722 | 0.123793015  | 0.007399039 | 0.148470248  |
| 0.14923125   | 0.001218981 | 0.156983053  | 0.000662921 | 0.167990401  |
| 0.196453276  | 1.90E-05    | 0.194451546  | 2.32E-05    | 0.212938701  |
| 0.02675674   | 0.564093684 | -0.012563662 | 0.786555542 | -0.015985941 |
| 0.120877483  | 0.008928545 | 0.056316438  | 0.224476267 | 0.067095697  |
| 0.345683715  | 1.49E-14    | 0.277337684  | 1.08E-09    | 0.305479247  |
| 0.200702365  | 1.24E-05    | 0.180322338  | 8.91E-05    | 0.179900743  |
| 0.063716691  | 0.169244221 | 0.06171635   | 0.183058497 | 0.092745695  |
| 0.147830438  | 0.001356735 | 0.149279595  | 0.001214466 | 0.147700086  |
| 0.263308697  | 7.60E-09    | 0.263474658  | 7.43E-09    | 0.247232717  |
| 0.036025776  | 0.437342079 | -0.005504519 | 0.905563926 | 0.000984012  |
| 0.378470749  | 2.37E-17    | 0.346565162  | 1.26E-14    | 0.35637307   |
| -0.084237462 | 0.068950788 | -0.088340462 | 0.056434088 | -0.12523817  |
| -0.139652759 | 0.002489057 | -0.159203344 | 0.000553891 | -0.175864142 |
| 0.14177913   | 0.002132075 | 0.111634544  | 0.015799    | 0.115720368  |
| 0.182023089  | 7.62E-05    | 0.183481085  | 6.65E-05    | 0.182659458  |
| -0.196411577 | 1.91E-05    | -0.132008607 | 0.004268576 | -0.135875288 |
| 0.11840202   | 0.010441768 | 0.09987023   | 0.030941264 | 0.101689306  |
| 0.330882634  | 2.15E-13    | 0.324782333  | 6.21E-13    | 0.342703333  |
| 0.152488989  | 0.000946933 | 0.11430082   | 0.013452992 | 0.132565453  |
| 0.101321664  | 0.028571511 | 0.040484411  | 0.382723696 | 0.01674351   |
| -0.047850299 | 0.302131318 | -0.040436916 | 0.383282625 | -0.02635092  |
| 0.100423962  | 0.030018055 | 0.080537744  | 0.082105815 | 0.089542238  |
| 0.144865158  | 0.00169673  | 0.085945256  | 0.063489177 | 0.083298888  |
| -0.10489481  | 0.023391558 | -0.060749287 | 0.190028251 | -0.095335032 |
| -0.055495795 | 0.231313233 | -0.012528949 | 0.787131113 | -0.061508752 |
| 0.108641167  | 0.018853331 | 0.144266697  | 0.001774182 | 0.105547804  |
| -0.114812872 | 0.013039353 | -0.070067094 | 0.130543142 | -0.096898004 |
| -0.146142383 | 0.001541698 | -0.113641962 | 0.014002199 | -0.134024475 |
| -0.117664887 | 0.010934322 | -0.065568016 | 0.157167586 | -0.086665677 |
| -0.062377357 | 0.178404368 | -0.020864874 | 0.652902011 | -0.045258746 |
| -0.059013736 | 0.203021759 | -0.053116744 | 0.251962693 | -0.069638886 |
| -0.118726778 | 0.01023108  | -0.096069691 | 0.037956696 | -0.11957891  |
| -0.05919049  | 0.201669691 | -0.083513287 | 0.071380114 | -0.08144525  |
| -0.072856874 | 0.115876119 | -0.020504957 | 0.658507431 | -0.052333945 |
| -0.093713653 | 0.042949754 | -0.043100809 | 0.352706635 | -0.071635927 |

|              |             |              |             |              |
|--------------|-------------|--------------|-------------|--------------|
| -0.069279674 | 0.134932512 | -0.054751099 | 0.237643921 | -0.072655557 |
| -0.048937963 | 0.291262295 | -0.021814648 | 0.638204201 | -0.008077315 |
| -0.032154404 | 0.488196849 | 0.013919174  | 0.764173865 | -0.020231486 |
| -0.087195041 | 0.059722282 | -0.05162931  | 0.265505992 | -0.054989639 |
| -0.186752883 | 4.89E-05    | -0.151839969 | 0.00099619  | -0.169996297 |
| -0.044027895 | 0.342436829 | -0.009632924 | 0.83552867  | -0.020787043 |
| -0.098678709 | 0.033010486 | -0.052938213 | 0.253562407 | -0.097200549 |
| -0.09427218  | 0.041718612 | -0.045349036 | 0.328134792 | -0.068960673 |
| -0.094522426 | 0.041176739 | -0.054700171 | 0.238081278 | -0.07265027  |
| -0.057321234 | 0.216302703 | -0.019916657 | 0.667710934 | -0.057299396 |
| 0.015992659  | 0.730319825 | 0.027070545  | 0.559530784 | -0.013086002 |
| -0.124496014 | 0.007067256 | -0.107248121 | 0.020442265 | -0.098499086 |
| -0.007093243 | 0.878494963 | 0.036906792  | 0.426208636 | 0.029819559  |
| -0.052079246 | 0.261357564 | -0.033058346 | 0.476045558 | -0.046517224 |
| -0.0836927   | 0.070771832 | -0.04847031  | 0.29590301  | -0.071660639 |
| -0.08464922  | 0.067599967 | -0.041183933 | 0.37454938  | -0.070890319 |
| -0.031865778 | 0.492111551 | -0.01735049  | 0.708426221 | -0.013643608 |
| -0.107782853 | 0.019819076 | -0.06755183  | 0.144961731 | -0.0895308   |
| -0.093459415 | 0.043520221 | -0.050331568 | 0.277723497 | -0.072387083 |
| -0.178405974 | 0.000106103 | -0.157655322 | 0.000627972 | -0.195822996 |
| -0.114155172 | 0.013572739 | -0.094537602 | 0.04114407  | -0.10155553  |
| -0.064752305 | 0.162405903 | -0.026827829 | 0.563058445 | -0.017917875 |
| -0.029739589 | 0.521459399 | -0.029242261 | 0.528451313 | -0.024649131 |
| -0.151953021 | 0.000987443 | -0.12223802  | 0.00818286  | -0.131504363 |
| -0.320607968 | 1.27E-12    | -0.275034357 | 1.50E-09    | -0.263624599 |
| -0.097343068 | 0.035469231 | -0.050190895 | 0.279070413 | -0.070323725 |
| -0.04118827  | 0.374499042 | -0.006559693 | 0.887571505 | -0.027354004 |
| -0.035738169 | 0.441012392 | -0.019860558 | 0.668591205 | -0.064846866 |
| -0.118669706 | 0.01026783  | -0.083262272 | 0.072238319 | -0.069132362 |
| -0.079541549 | 0.085975124 | -0.048419    | 0.296415173 | -0.059110957 |
| -0.060815733 | 0.189543221 | -0.029068826 | 0.530900776 | -0.047350248 |
| -0.118977404 | 0.010071074 | -0.087232642 | 0.059611877 | -0.099975588 |
| -0.091127079 | 0.04905748  | -0.046735374 | 0.313548529 | -0.066696478 |
| -0.135919106 | 0.003250129 | -0.10457533  | 0.023819051 | -0.110536688 |
| -0.114086515 | 0.013629512 | -0.04773557  | 0.303293286 | -0.080873461 |
| -0.028389808 | 0.540545618 | -0.013782069 | 0.766429134 | -0.032613993 |
| -0.104597756 | 0.023788824 | -0.071200193 | 0.124421634 | -0.114097323 |
| -0.074716928 | 0.1068371   | -0.053348808 | 0.249893814 | -0.087037794 |
| -0.13887826  | 0.002632075 | -0.127947855 | 0.005623631 | -0.13449094  |
| -0.126422184 | 0.006225362 | -0.094669957 | 0.040860076 | -0.104642444 |
| 0.002720619  | 0.953242332 | 0.006976501  | 0.880479608 | -0.008447277 |
| -0.124488676 | 0.007070649 | -0.08342645  | 0.071676056 | -0.093601519 |
| -0.197248949 | 1.76E-05    | -0.156482375 | 0.000690111 | -0.140776117 |
| 0.021382437  | 0.644875584 | 0.059782773  | 0.197186783 | 0.036437252  |
| -0.080910967 | 0.080692939 | -0.028970152 | 0.532296924 | -0.064350656 |

|              |             |              |             |              |
|--------------|-------------|--------------|-------------|--------------|
| 0.142116515  | 0.002079944 | 0.198525526  | 1.55E-05    | 0.183978167  |
| 0.020311169  | 0.661533495 | 0.03186559   | 0.492114098 | 0.00012621   |
| 0.048824449  | 0.292384234 | 0.071682031  | 0.12188716  | 0.060168374  |
| -0.128517881 | 0.005412588 | -0.087138234 | 0.059889397 | -0.149408584 |
| -0.290294712 | 1.61E-10    | -0.277082291 | 1.12E-09    | -0.313444028 |
| -0.21851717  | 1.87E-06    | -0.178140372 | 0.000108689 | -0.199828652 |
| -0.058286471 | 0.208654162 | -0.035216869 | 0.447709636 | -0.051682882 |
| -0.062449142 | 0.177904264 | -0.036730533 | 0.428422749 | -0.063830705 |
| -0.004890804 | 0.916051632 | 0.038638988  | 0.404805837 | 0.030342077  |
| -0.093502419 | 0.043423282 | -0.039804775 | 0.390769138 | -0.064409657 |
| -0.017592134 | 0.704554404 | 0.045438658  | 0.327178786 | 0.028214025  |
| -0.023724    | 0.609086407 | 0.017457498  | 0.706710704 | 0.010799439  |
| -0.091630497 | 0.047814877 | -0.058488502 | 0.207078306 | -0.055356597 |
| -0.031112068 | 0.502412925 | -0.017740536 | 0.702180342 | -0.012855674 |
| -0.04460544  | 0.336136418 | -0.017847428 | 0.700472151 | -0.02756902  |
| -0.119698212 | 0.009623202 | -0.082340937 | 0.075460762 | -0.097659943 |
| -0.059744914 | 0.197471144 | -0.016284132 | 0.725600903 | -0.022829551 |
| -0.029922798 | 0.51889568  | 0.02007753   | 0.665189186 | -0.010230167 |
| -0.180447867 | 8.81E-05    | -0.169387081 | 0.000235732 | -0.17588352  |
| -0.106850511 | 0.020916626 | -0.061141673 | 0.187177139 | -0.083753569 |
| -0.108773689 | 0.018707938 | -0.08985631  | 0.052314787 | -0.093414582 |
| -0.205137314 | 7.87E-06    | -0.138600809 | 0.002685104 | -0.163350919 |
| 0.016194981  | 0.727043163 | 0.030913571  | 0.505144686 | 0.022294838  |
| 0.192957269  | 2.69E-05    | 0.236832579  | 2.24E-07    | 0.242400466  |
| -0.064918167 | 0.161330276 | -0.021472898 | 0.643476891 | -0.060329813 |
| -0.283517514 | 4.41E-10    | -0.252398175 | 3.21E-08    | -0.257661565 |
| -0.125662589 | 0.006545981 | -0.080792454 | 0.081139432 | -0.100215328 |
| -0.102281786 | 0.02709102  | -0.052220059 | 0.260068494 | -0.072156262 |
| -0.101916332 | 0.027646575 | -0.054757236 | 0.237591256 | -0.071508755 |
| -0.047602672 | 0.304642974 | -0.040489715 | 0.382661313 | -0.073848119 |
| -0.080608984 | 0.081834594 | -0.048415019 | 0.296454929 | -0.074304649 |
| -0.140771895 | 0.002294894 | -0.107430098 | 0.020228299 | -0.117241112 |
| 0.014039466  | 0.762196804 | 0.004218189  | 0.92756256  | -0.038120998 |
| -0.181525349 | 7.98E-05    | -0.13374255  | 0.003785867 | -0.138492266 |
| -0.29079571  | 1.49E-10    | -0.252181637 | 3.30E-08    | -0.229996149 |
| -0.118048702 | 0.010675346 | -0.06817493  | 0.141281305 | -0.075201752 |
| -0.076023135 | 0.100829334 | -0.034055728 | 0.462832228 | -0.06519067  |
| -0.152038806 | 0.000980853 | -0.142394617 | 0.002037852 | -0.130601546 |
| 0.017623791  | 0.704047731 | 0.054668123  | 0.238356786 | 0.06236375   |
| 0.160193074  | 0.000510871 | 0.130870745  | 0.004614889 | 0.131004633  |
| -0.089877816 | 0.052258199 | -0.024643221 | 0.595281584 | -0.055736486 |
| -0.068676276 | 0.138372347 | -0.012500006 | 0.787611108 | -0.030111483 |
| -0.096812097 | 0.036489072 | -0.065753316 | 0.155995617 | -0.050908517 |
| -0.062488615 | 0.177629713 | -0.010780056 | 0.816272846 | -0.020410823 |
| -0.126483946 | 0.006199923 | -0.112550488 | 0.014955499 | -0.124162587 |



|              |             |              |             |              |
|--------------|-------------|--------------|-------------|--------------|
| -0.107379537 | 0.020287551 | -0.07431168  | 0.108757398 | -0.086714103 |
| -0.039062619 | 0.399670679 | -0.036547999 | 0.430722706 | -0.0273067   |
| -0.020643318 | 0.656350294 | 0.001167568  | 0.979924357 | -0.023156148 |
| -0.055926556 | 0.227706301 | -0.018568153 | 0.688994255 | -0.016589808 |
| -0.044730191 | 0.334785334 | -0.041072534 | 0.375843886 | -0.026429537 |
| -0.175751159 | 0.000134761 | -0.147548768 | 0.001386106 | -0.162108472 |
| -0.181889449 | 7.71E-05    | -0.130737161 | 0.004657166 | -0.136591423 |
| 0.070607465  | 0.127595378 | 0.04111013   | 0.375406697 | 0.00675721   |
| -0.107830682 | 0.019764149 | -0.075892398 | 0.101418289 | -0.090383263 |
| -0.058832873 | 0.204412052 | -0.021076107 | 0.649621275 | -0.025700216 |
| -0.089601723 | 0.052988576 | -0.058361228 | 0.208070041 | -0.07005805  |
| -0.106133313 | 0.021796478 | -0.068705169 | 0.138206117 | -0.086377791 |
| -0.140458691 | 0.00234779  | -0.081337239 | 0.079103383 | -0.088212457 |
| -0.104140686 | 0.024411481 | -0.067596531 | 0.144695281 | -0.079652247 |
| -0.065065855 | 0.160377031 | -0.031027275 | 0.503578912 | -0.035770898 |
| -0.041252039 | 0.373759314 | 0.006245591  | 0.892921837 | -0.016269625 |
| -0.057786002 | 0.212595131 | -0.039450465 | 0.395003722 | -0.032423077 |
| -0.083151975 | 0.072618071 | -0.084859228 | 0.066919411 | -0.087123792 |
| -0.061857354 | 0.182058236 | -0.024447546 | 0.598208276 | -0.048219915 |
| -0.0722551   | 0.118925399 | -0.046079543 | 0.320394974 | -0.058339535 |
| 0.009391471  | 0.839594671 | 0.02433514   | 0.599892466 | 0.016084512  |
| -0.07419591  | 0.109310955 | -0.045726607 | 0.324119407 | -0.063153635 |
| -0.155792661 | 0.000729261 | -0.178480773 | 0.000105386 | -0.152196635 |
| -0.077365479 | 0.094938132 | -0.051203825 | 0.269470367 | -0.069499634 |
| -0.138624293 | 0.002680578 | -0.108951863 | 0.018514    | -0.117061289 |
| -0.053365452 | 0.249745884 | -0.035838459 | 0.439730539 | -0.035566227 |
| 0.032370339  | 0.485279059 | 0.062728917  | 0.175965085 | 0.038643293  |
| -0.068964418 | 0.136721406 | -0.030279273 | 0.513926044 | -0.037819531 |
| -0.068522106 | 0.13926195  | -0.025647248 | 0.58036797  | -0.044856989 |
| -0.122881235 | 0.007850071 | -0.066633838 | 0.150516751 | -0.096885172 |
| -0.114672357 | 0.01315173  | -0.085776516 | 0.064012444 | -0.100213149 |
| -0.075040254 | 0.105324286 | -0.041767886 | 0.367808617 | -0.078137892 |
| -0.079144311 | 0.087558415 | -0.056325941 | 0.224397946 | -0.037983468 |
| -0.166882116 | 0.000292199 | -0.140739697 | 0.002300281 | -0.155076277 |
| -0.12407896  | 0.007262441 | -0.064971827 | 0.160983436 | -0.08762862  |
| -0.130038158 | 0.004884144 | -0.096368548 | 0.03735999  | -0.118683779 |
| -0.154498077 | 0.000808352 | -0.131560107 | 0.004402172 | -0.15014669  |
| -0.101141821 | 0.028856416 | -0.070391223 | 0.128768743 | -0.07514015  |
| -0.015726043 | 0.73464524  | 0.029847939  | 0.519942427 | 0.023843777  |
| -0.190098593 | 3.55E-05    | -0.138258971 | 0.002751777 | -0.142445559 |
| -0.112075241 | 0.015388089 | -0.059509392 | 0.199246845 | -0.091736853 |
| -0.089844562 | 0.052345724 | -0.043891802 | 0.343932347 | -0.073779397 |
| -0.113799883 | 0.013868793 | -0.08782165  | 0.05790436  | -0.096355574 |
| -0.191440655 | 3.12E-05    | -0.116821279 | 0.011523186 | -0.129946981 |
| -0.075628659 | 0.102614712 | -0.02811725  | 0.544441478 | -0.042404381 |

|              |             |              |             |              |
|--------------|-------------|--------------|-------------|--------------|
| -0.111713502 | 0.015724678 | -0.079548289 | 0.08594846  | -0.099753417 |
| -0.107031757 | 0.020699221 | -0.088526535 | 0.055914379 | -0.075000152 |
| -0.000695644 | 0.988037993 | -0.021098676 | 0.649271144 | -0.048075736 |
| 0.130760124  | 0.004649874 | 0.121471575  | 0.008595797 | 0.124465919  |
| -0.142173412 | 0.002071268 | -0.131892862 | 0.004302698 | -0.13358454  |
| -0.143074552 | 0.001938202 | -0.100686353 | 0.029588891 | -0.120298418 |
| -0.108779712 | 0.018701354 | -0.066604365 | 0.150697745 | -0.091993086 |
| -0.135660659 | 0.003309925 | -0.084802988 | 0.06710111  | -0.106808087 |
| -0.073458152 | 0.112890873 | -0.024044174 | 0.604261925 | -0.055451721 |
| -0.318604996 | 1.77E-12    | -0.292380949 | 1.17E-10    | -0.299536693 |
| -0.085443629 | 0.065055141 | -0.040377979 | 0.383976897 | -0.064654618 |
| -0.051431509 | 0.267343961 | -0.000201561 | 0.996533921 | -0.029134628 |
| -0.204839994 | 8.11E-06    | -0.170869983 | 0.000207297 | -0.184469593 |
| -0.163898642 | 0.000375877 | -0.113804985 | 0.013864502 | -0.144944344 |
| -0.041857848 | 0.366776898 | 0.000853288  | 0.985327492 | -0.01599153  |
| 0.084221798  | 0.069002608 | 0.150617783  | 0.00109542  | 0.148735378  |
| -0.07798007  | 0.0923342   | -0.062428482 | 0.178048086 | -0.083258483 |
| -0.100502036 | 0.029889804 | -0.094290901 | 0.041677868 | -0.134890632 |
| 0.104134033  | 0.024420646 | 0.079514801  | 0.086081004 | 0.0434788    |
| -0.024441083 | 0.598305056 | -0.013739508 | 0.767129631 | -0.045749229 |
| -0.092088415 | 0.046707588 | -0.051298692 | 0.268582972 | -0.055534718 |
| -0.110011761 | 0.017396183 | -0.056596287 | 0.222178034 | -0.09509687  |
| -0.064271618 | 0.165553657 | -0.033612955 | 0.468672783 | -0.048636386 |
| 0.017126385  | 0.71202374  | -0.004188605 | 0.928069214 | -0.004498539 |
| -0.054306147 | 0.241484191 | -0.01857731  | 0.688848867 | -0.0598917   |
| -0.137081071 | 0.002993225 | -0.119555598 | 0.009710383 | -0.134806401 |
| -0.056156103 | 0.22580061  | -0.03316297  | 0.474649896 | -0.047570328 |
| -0.087223605 | 0.059638396 | -0.067365984 | 0.146073504 | -0.05677362  |
| -0.081848739 | 0.07722962  | -0.079269256 | 0.08705791  | -0.072356073 |
| -0.05441574  | 0.240534305 | -0.003381697 | 0.941898867 | -0.023398046 |
| 0.002237749  | 0.961534044 | 0.024005916  | 0.60483751  | 0.010436839  |
| -0.239790579 | 1.57E-07    | -0.240321306 | 1.47E-07    | -0.255058668 |
| -0.190579754 | 3.39E-05    | -0.172367247 | 0.000181868 | -0.191434683 |
| -0.0386118   | 0.405136741 | -0.059346869 | 0.200478943 | -0.056368037 |
| -0.103458959 | 0.025366322 | -0.08137776  | 0.078953613 | -0.089484444 |
| -0.103770186 | 0.024926486 | -0.069086367 | 0.136027265 | -0.06972233  |
| -0.002978724 | 0.948812256 | -0.051678098 | 0.265053992 | -0.07158647  |
| -0.053700883 | 0.246777651 | -0.013314847 | 0.774129257 | -0.046403231 |
| -0.034469358 | 0.457412851 | -0.013055245 | 0.778417317 | -0.02708194  |
| -0.103881651 | 0.024770569 | -0.050030333 | 0.28061317  | -0.071033068 |
| 0.196639073  | 1.87E-05    | 0.137899612  | 0.002823489 | 0.131537361  |
| -0.161898523 | 0.000443946 | -0.129717024 | 0.004991728 | -0.141642035 |
| -0.292505387 | 1.15E-10    | -0.243430711 | 9.99E-08    | -0.279693378 |
| 0.137427833  | 0.002920217 | 0.131262029  | 0.004493039 | 0.110673397  |
| -0.120648029 | 0.0090601   | -0.106967478 | 0.020776098 | -0.130610079 |

|              |             |              |             |              |
|--------------|-------------|--------------|-------------|--------------|
| 0.196525316  | 1.89E-05    | 0.187570565  | 4.53E-05    | 0.175441704  |
| -0.095241951 | 0.039651715 | -0.067883649 | 0.142992787 | -0.088322366 |
| 0.027063237  | 0.559636844 | 0.017761023  | 0.701852832 | 0.011703383  |
| -0.12353829  | 0.007522652 | -0.093865729 | 0.042611543 | -0.097953393 |
| -0.040573367 | 0.381678186 | -0.015068137 | 0.745354413 | 0.011664065  |
| -0.120301791 | 0.009261878 | -0.102606003 | 0.02660622  | -0.1032326   |
| -0.103130347 | 0.025837977 | -0.051602075 | 0.265758551 | -0.057550279 |
| -0.053029428 | 0.252744204 | -0.015776442 | 0.733826947 | -0.036550951 |
| -0.15693105  | 0.000665698 | -0.118185421 | 0.010584417 | -0.142378107 |
| -0.09870663  | 0.032960679 | -0.055022073 | 0.235326391 | -0.07940324  |
| -0.047499248 | 0.305696072 | -0.01303163  | 0.778807726 | -0.003398808 |
| -0.083220498 | 0.072381953 | -0.045326288 | 0.328377739 | -0.066983791 |
| -0.024346758 | 0.599718299 | -0.050430889 | 0.276775172 | -0.053393678 |
| -0.0739717   | 0.110389326 | -0.065514294 | 0.157508599 | -0.098906426 |
| -0.117696463 | 0.010912808 | -0.099862612 | 0.030954132 | -0.104197829 |
| -0.095315943 | 0.039497633 | -0.086891758 | 0.060618972 | -0.10283555  |
| -0.031121859 | 0.502278389 | 0.0212399    | 0.647082007 | -0.018847318 |
| -0.10187572  | 0.027708913 | -0.066718285 | 0.149999082 | -0.087383673 |
| -0.331100974 | 2.07E-13    | -0.289492725 | 1.81E-10    | -0.283768215 |
| -0.096330608 | 0.037435299 | -0.087675038 | 0.05832555  | -0.118451513 |
| -0.025697711 | 0.579623024 | 0.017589125  | 0.70460257  | -0.005625947 |
| -0.180071087 | 9.12E-05    | -0.147465849 | 0.001394864 | -0.158477126 |
| -0.089524495 | 0.053194391 | -0.05750726  | 0.214813196 | -0.052998418 |
| -0.098358063 | 0.033587087 | -0.053575724 | 0.247882293 | -0.083363488 |
| -0.091048203 | 0.0492546   | -0.036377065 | 0.432882946 | -0.055547996 |
| 0.015280299  | 0.741895438 | 0.010570441  | 0.819783581 | 0.020577495  |
| 0.014134838  | 0.760630421 | 0.043142585  | 0.352239722 | 0.021287862  |
| -0.108840853 | 0.018634625 | -0.090078121 | 0.05173358  | -0.076851188 |
| -0.097361416 | 0.035434428 | -0.014325414 | 0.757503338 | -0.033428337 |
| -0.095876993 | 0.038345712 | -0.058706538 | 0.20538728  | -0.061995845 |
| -0.069787695 | 0.132087803 | -0.061748556 | 0.182829673 | -0.036635686 |
| 0.040237859  | 0.385630576 | 0.111821678  | 0.015623353 | 0.088655081  |
| -0.118657977 | 0.010275398 | -0.085080438 | 0.066208647 | -0.109518749 |
| -0.073172125 | 0.11430333  | -0.050645165 | 0.274736764 | -0.050481705 |
| -0.022918904 | 0.621292578 | 0.003184195  | 0.94528669  | -0.007675518 |
| -0.163307887 | 0.000394896 | -0.107836671 | 0.019757281 | -0.122293353 |
| -0.155305349 | 0.000758152 | -0.16149569  | 0.000458974 | -0.179220827 |
| -0.221064578 | 1.41E-06    | -0.163677676 | 0.000382889 | -0.179857645 |
| -0.08383755  | 0.070283827 | -0.065621542 | 0.156828368 | -0.063317483 |
| -0.057762689 | 0.212780009 | -0.035493491 | 0.444148667 | -0.049192837 |
| -0.082136898 | 0.076189996 | -0.033284984 | 0.473025078 | -0.027563436 |
| -0.125114204 | 0.00678657  | -0.127508777 | 0.005791206 | -0.142836946 |
| -0.141487991 | 0.002178018 | -0.108583158 | 0.018917284 | -0.09124656  |
| -0.040318607 | 0.384677073 | -0.006963132 | 0.880706941 | -0.023967023 |
| 0.025366273  | 0.584523898 | -0.041621589 | 0.369490264 | -0.032372791 |

|              |             |              |             |              |
|--------------|-------------|--------------|-------------|--------------|
| -0.046080829 | 0.320381454 | 0.002896153  | 0.950229323 | 0.001610485  |
| -0.156544915 | 0.000686659 | -0.117509847 | 0.011040502 | -0.139993096 |
| -0.081386142 | 0.07892266  | -0.042005946 | 0.365082362 | -0.060093186 |
| -0.060902641 | 0.188910196 | -0.035067483 | 0.449639389 | -0.031629716 |
| 0.050117906  | 0.279771011 | 0.062672257  | 0.176356531 | 0.043199611  |
| -0.190896732 | 3.29E-05    | -0.193258239 | 2.61E-05    | -0.19638898  |
| -0.178525037 | 0.000104963 | -0.14973726  | 0.001172473 | -0.128278726 |
| -0.043477275 | 0.348513129 | 0.011658556  | 0.80160006  | -0.017633495 |
| -0.175361418 | 0.000139535 | -0.141038479 | 0.002250731 | -0.163748439 |
| 0.006381413  | 0.890607671 | 0.031661786  | 0.494888426 | 0.034169968  |
| -0.02225908  | 0.631374512 | -0.005217058 | 0.910474379 | 0.001431712  |
| -0.121376561 | 0.00864826  | -0.071915445 | 0.120673955 | -0.084399033 |
| -0.292395161 | 1.17E-10    | -0.268847536 | 3.56E-09    | -0.261081336 |
| -0.12368442  | 0.007451514 | -0.069879128 | 0.131580768 | -0.102459438 |
| -0.024272816 | 0.600827188 | 0.011008214  | 0.812455735 | 0.013449224  |
| -0.087201376 | 0.059703668 | -0.058853593 | 0.204252431 | -0.071037696 |
| -0.005993201 | 0.897224524 | -0.064150936 | 0.166351079 | -0.023867696 |
| -0.203548077 | 9.28E-06    | -0.165994933 | 0.000315061 | -0.197691411 |
| -0.140240357 | 0.002385319 | -0.107650566 | 0.019971687 | -0.112843728 |
| -0.004175028 | 0.928301739 | 0.019150007  | 0.679779568 | 0.013798464  |
| 0.010885612  | 0.814506342 | 0.046374224  | 0.317306734 | 0.025645397  |
| -0.02887622  | 0.533627705 | 0.018655904  | 0.687601567 | 0.000277474  |
| -0.153287615 | 0.00088941  | -0.122552682 | 0.008018518 | -0.110164651 |
| 0.00762819   | 0.869410604 | 0.030522527  | 0.510549053 | 0.035488111  |
| -0.196675389 | 1.86E-05    | -0.199128138 | 1.46E-05    | -0.215848135 |
| -0.155147451 | 0.000767738 | -0.11805865  | 0.010668706 | -0.137434247 |
| -0.050409705 | 0.276977252 | -0.057122584 | 0.21790146  | -0.073031038 |
| -0.075653864 | 0.102499892 | -0.037133728 | 0.42336776  | -0.062828055 |
| -0.10365618  | 0.025086834 | -0.096607068 | 0.036889485 | -0.115909556 |
| -0.091970951 | 0.046989554 | -0.065747165 | 0.156034414 | -0.066713539 |
| -0.085474348 | 0.064958338 | -0.050823157 | 0.273051316 | -0.085153858 |
| -0.015058896 | 0.745505191 | -0.009590609 | 0.836240927 | 0.014589497  |
| -0.092944971 | 0.044694075 | -0.059835952 | 0.196787866 | -0.075668383 |
| -0.062448674 | 0.177907523 | -0.026733746 | 0.564428727 | -0.030919917 |
| -0.083393896 | 0.07178726  | -0.064398234 | 0.164720116 | -0.089100564 |
| -0.079754418 | 0.085136214 | -0.047983573 | 0.300785236 | -0.059162938 |
| -0.116299914 | 0.011900984 | -0.071317962 | 0.123798419 | -0.076421212 |
| -0.129761829 | 0.004976591 | -0.115215713 | 0.012721857 | -0.122246738 |
| -0.140846594 | 0.00228244  | -0.131124379 | 0.004535569 | -0.164167394 |
| -0.198176156 | 1.60E-05    | -0.167002039 | 0.000289231 | -0.179638793 |
| -0.098104801 | 0.034048564 | -0.091758383 | 0.047503445 | -0.086678455 |
| -0.100338721 | 0.030158618 | -0.098266453 | 0.033753393 | -0.110829602 |
| -0.063137086 | 0.173164222 | -0.031708458 | 0.494252365 | -0.055422879 |
| -0.13773052  | 0.002857817 | -0.09456149  | 0.041092691 | -0.108772612 |
| -0.120828756 | 0.008956339 | -0.079858179 | 0.084729696 | -0.09439896  |

|              |             |              |             |              |
|--------------|-------------|--------------|-------------|--------------|
| -0.047217961 | 0.308572383 | -0.030416169 | 0.512024146 | -0.039380582 |
| 0.008712584  | 0.851049504 | -0.033951471 | 0.464203814 | 0.012893912  |
| -0.102895005 | 0.026180391 | -0.094441761 | 0.041350756 | -0.10335711  |
| -0.143601626 | 0.001864045 | -0.125814635 | 0.006480643 | -0.115714569 |
| -0.091337662 | 0.048534443 | -0.092968932 | 0.044638816 | -0.071503026 |
| -0.084920703 | 0.066721262 | -0.0643449   | 0.165070839 | -0.07881985  |
| -0.036122773 | 0.436108203 | 0.000162772  | 0.99720095  | -0.016485323 |
| -0.116297176 | 0.011902997 | -0.067555415 | 0.144940344 | -0.089126729 |
| -0.155184957 | 0.000765451 | -0.075959735 | 0.101114604 | -0.124227372 |
| 0.257057628  | 1.75E-08    | 0.1891072    | 3.91E-05    | 0.166367635  |
| -0.097945586 | 0.03434143  | -0.044202014 | 0.340529487 | -0.060899398 |
| -0.09008151  | 0.051724742 | -0.054466371 | 0.240096349 | -0.084119821 |
| -0.167073524 | 0.000287474 | -0.147729898 | 0.001367152 | -0.161699698 |
| -0.229291155 | 5.48E-07    | -0.205822711 | 7.32E-06    | -0.207276184 |
| -0.020962295 | 0.651388102 | 0.012316707  | 0.79065278  | -0.021143824 |
| -0.097225262 | 0.035693385 | -0.042804041 | 0.356034704 | -0.065928201 |
| -0.164173718 | 0.000367316 | -0.103656919 | 0.025085791 | -0.1317619   |
| -0.085666279 | 0.064356202 | -0.049089505 | 0.289768996 | -0.066173505 |
| -0.259868949 | 1.21E-08    | -0.242469962 | 1.13E-07    | -0.234066388 |
| -0.111620857 | 0.015811914 | -0.082807341 | 0.073815153 | -0.112183703 |
| -0.013414398 | 0.772486704 | 0.014961571  | 0.747093758 | 0.034828566  |
| -0.094800377 | 0.040581854 | -0.07552021  | 0.103109917 | -0.067690758 |
| -0.116729015 | 0.01158926  | -0.131568416 | 0.004399663 | -0.161157518 |
| -0.211656113 | 3.95E-06    | -0.193404712 | 2.58E-05    | -0.185366156 |
| -0.031867063 | 0.492094084 | -0.0025202   | 0.956683318 | -0.02654056  |
| -0.069335459 | 0.134617851 | -0.007813573 | 0.866266406 | -0.02728415  |
| 0.028162003  | 0.543800837 | 0.001058834  | 0.981793638 | 0.013417442  |
| -0.130083499 | 0.004869124 | -0.086777257 | 0.060960385 | -0.128793134 |
| -0.142883887 | 0.001965686 | -0.111182594 | 0.016230364 | -0.113691583 |
| -0.120128467 | 0.00936438  | -0.087845361 | 0.057836478 | -0.101470276 |
| -0.242317927 | 1.15E-07    | -0.185575375 | 5.47E-05    | -0.198911113 |
| -0.024059491 | 0.604031567 | -0.062797587 | 0.175491525 | -0.02830474  |
| -0.119396253 | 0.009808623 | -0.089764018 | 0.052558217 | -0.107049072 |
| -0.17732835  | 0.000116965 | -0.171668038 | 0.000193356 | -0.186971974 |
| -0.084040471 | 0.069604813 | -0.032797165 | 0.479539427 | -0.059337222 |
| -0.107398103 | 0.020265777 | -0.075547816 | 0.102983682 | -0.08510429  |
| -0.096227921 | 0.037639772 | -0.057558562 | 0.214403728 | -0.056979131 |
| 0.032009802  | 0.490156018 | 0.055237297  | 0.233497066 | 0.014111759  |
| -0.186305985 | 5.10E-05    | -0.152556366 | 0.00094195  | -0.164271981 |
| -0.078491867 | 0.090209702 | -0.04920086  | 0.288674982 | -0.063979248 |
| -0.151186055 | 0.0010482   | -0.126231339 | 0.006304562 | -0.142665496 |
| -0.19814395  | 1.61E-05    | -0.186637485 | 4.95E-05    | -0.180626086 |
| -0.287797659 | 2.34E-10    | -0.248040886 | 5.61E-08    | -0.253960048 |
| -0.134425087 | 0.003609831 | -0.115434049 | 0.012552643 | -0.103020913 |
| -0.069330664 | 0.134644877 | -0.072225895 | 0.119074966 | -0.092000709 |

|              |             |              |             |              |
|--------------|-------------|--------------|-------------|--------------|
| -0.128683034 | 0.00535279  | -0.10747074  | 0.020180779 | -0.124677729 |
| -0.094331691 | 0.041589206 | -0.06680968  | 0.149440344 | -0.080634989 |
| -0.092218079 | 0.046397984 | -0.048412512 | 0.296479972 | -0.075143239 |
| -0.078107954 | 0.09179963  | -0.050267537 | 0.278336033 | -0.065598136 |
| -0.099769824 | 0.031111242 | -0.077905924 | 0.09264528  | -0.086152199 |
| -0.056816832 | 0.220378697 | -0.036168066 | 0.435532738 | -0.041296844 |
| -0.108606961 | 0.018891019 | -0.065512134 | 0.157522326 | -0.094205626 |
| -0.074969646 | 0.1056532   | -0.032939786 | 0.477629834 | -0.052123463 |
| -0.082223182 | 0.075880921 | -0.045610306 | 0.325352832 | -0.035278562 |
| -0.086007591 | 0.06329677  | -0.1010582   | 0.028989716 | -0.098951692 |
| -0.136315037 | 0.003160424 | -0.111684794 | 0.015751665 | -0.13669072  |
| -0.326985448 | 4.25E-13    | -0.253259515 | 2.87E-08    | -0.244953262 |
| 0.108054855  | 0.019508471 | 0.147451982  | 0.001396333 | 0.12189999   |
| -0.148246629 | 0.001314382 | -0.161917214 | 0.00044326  | -0.169882634 |
| -0.143385298 | 0.001894161 | -0.1102361   | 0.017167296 | -0.108979853 |
| -0.280234644 | 7.11E-10    | -0.250895205 | 3.90E-08    | -0.23435256  |
| -0.163160474 | 0.000399779 | -0.131090876 | 0.004545975 | -0.135482423 |
| -0.274140617 | 1.70E-09    | -0.25047833  | 4.11E-08    | -0.272736423 |
| -0.20808769  | 5.77E-06    | -0.153213039 | 0.000894641 | -0.172798737 |
| -0.136262662 | 0.00317216  | -0.121368527 | 0.008652709 | -0.140564934 |
| -0.097410477 | 0.035341509 | -0.051806468 | 0.263867228 | -0.072767827 |
| 0.141600267  | 0.002160194 | 0.102406333  | 0.026903893 | 0.130471053  |
| -0.136174387 | 0.00319203  | -0.094872085 | 0.040429566 | -0.121118135 |
| -0.163427115 | 0.000390987 | -0.137391097 | 0.002927874 | -0.14517505  |
| -0.111627928 | 0.015805241 | -0.086242721 | 0.062575315 | -0.066969496 |
| -0.172007934 | 0.000187689 | -0.133085516 | 0.003962635 | -0.117928029 |
| -0.086377704 | 0.062164214 | -0.066721864 | 0.149977174 | -0.064096919 |
| -0.015493417 | 0.7384261   | 0.00973637   | 0.833787993 | 0.007704045  |
| -0.176375799 | 0.000127429 | -0.157582012 | 0.000631698 | -0.186493723 |
| -0.164276077 | 0.000364177 | -0.11201176  | 0.015446695 | -0.128116654 |
| -0.105688611 | 0.022358011 | -0.078102213 | 0.091823576 | -0.084666698 |
| -0.051308535 | 0.268491015 | -0.010033749 | 0.828788601 | -0.026556004 |
| -0.121588003 | 0.008531897 | -0.120616694 | 0.009078199 | -0.112213255 |
| -0.180247419 | 8.97E-05    | -0.15714767  | 0.0006542   | -0.159552869 |
| -0.065626628 | 0.156796167 | -0.013666    | 0.768339914 | -0.033729903 |
| -0.22592128  | 8.10E-07    | -0.170726459 | 0.000209902 | -0.197082078 |
| -0.068979607 | 0.136634804 | -0.035797112 | 0.440258762 | -0.05039498  |
| -0.047457335 | 0.306123521 | 0.002436765  | 0.958116042 | 0.005936387  |
| -0.136997816 | 0.003010999 | -0.100332556 | 0.030168804 | -0.111154811 |
| -0.086745715 | 0.061054715 | -0.060150975 | 0.194436822 | -0.118174987 |
| -0.095464212 | 0.039190404 | -0.043011385 | 0.353707392 | -0.052622723 |
| -0.083584294 | 0.071138862 | -0.033069347 | 0.475898695 | -0.075797032 |
| -0.069957008 | 0.131150081 | -0.027772991 | 0.549382    | -0.034927877 |
| -0.13521249  | 0.003415989 | -0.083821576 | 0.070337508 | -0.093681288 |
| -0.335416711 | 9.64E-14    | -0.316962202 | 2.33E-12    | -0.331767857 |

|              |             |              |             |              |
|--------------|-------------|--------------|-------------|--------------|
| -0.217221934 | 2.15E-06    | -0.199203818 | 1.45E-05    | -0.207761771 |
| -0.107179947 | 0.020522928 | -0.089928335 | 0.052125469 | -0.09852896  |
| -0.04291795  | 0.354754963 | -0.042534513 | 0.359074336 | -0.029338437 |
| -0.146149686 | 0.001540851 | -0.105372625 | 0.022764592 | -0.126674116 |
| -0.117529667 | 0.011026878 | -0.10204713  | 0.027446623 | -0.115065771 |
| -0.072621402 | 0.117061914 | -0.055209147 | 0.233735753 | -0.051818584 |
| -0.083310997 | 0.072071074 | -0.096377163 | 0.03734291  | -0.090373219 |
| -0.034569915 | 0.456100741 | -0.036190055 | 0.43525351  | -0.01910619  |
| -0.212801326 | 3.49E-06    | -0.183039195 | 6.93E-05    | -0.172340935 |
| -0.104445817 | 0.023994266 | -0.0588821   | 0.204032965 | -0.075264921 |
| -0.018297551 | 0.693295522 | -0.001087869 | 0.981294468 | 0.00190662   |
| -0.261491622 | 9.70E-09    | -0.209513667 | 4.96E-06    | -0.215481763 |
| -0.172838394 | 0.000174491 | -0.122438603 | 0.008077756 | -0.13377307  |
| -0.142311664 | 0.002050325 | -0.081392718 | 0.078898382 | -0.100414728 |
| -0.193212697 | 2.62E-05    | -0.173987302 | 0.000157662 | -0.197291328 |
| -0.19649376  | 1.90E-05    | -0.192827227 | 2.73E-05    | -0.214290845 |
| -0.090100382 | 0.051675548 | -0.055234437 | 0.233521305 | -0.024567046 |
| -0.151010765 | 0.001062562 | -0.121989561 | 0.008314741 | -0.108009834 |
| -0.160434987 | 0.000500838 | -0.130430865 | 0.004755427 | -0.135960738 |
| -0.021294648 | 0.646234153 | -0.022557214 | 0.626810488 | 0.0037873    |
| -0.179714006 | 9.42E-05    | -0.156907416 | 0.000666964 | -0.164959753 |
| -0.140041592 | 0.00241996  | -0.114658088 | 0.01316319  | -0.126046768 |
| 0.021274317  | 0.64654895  | 0.061653336  | 0.183506813 | 0.0240852    |
| -0.088303825 | 0.056536889 | -0.064171943 | 0.166212067 | -0.057285445 |
| 0.09283099   | 0.044957726 | 0.039047469  | 0.399853648 | 0.057628816  |
| -0.160944787 | 0.000480293 | -0.167436352 | 0.000278713 | -0.147449242 |
| -0.136592255 | 0.003098961 | -0.098473945 | 0.033377719 | -0.093851447 |
| 0.114926357  | 0.012949211 | 0.071838811  | 0.12107123  | 0.061310059  |
| 0.329522531  | 2.73E-13    | 0.32525912   | 5.72E-13    | 0.328447716  |
| -0.120040612 | 0.009416721 | -0.081806605 | 0.077382594 | -0.101636609 |
| -0.137362438 | 0.00293386  | -0.095923657 | 0.038251198 | -0.118884324 |
| 0.010291521  | 0.824460636 | 0.031459003  | 0.497657104 | 0.026627773  |
| -0.066338534 | 0.152337686 | -0.013905354 | 0.764401109 | -0.05808948  |
| -0.136088835 | 0.003211394 | -0.092245478 | 0.046332782 | -0.110432945 |
| -0.130319444 | 0.004791633 | -0.091214748 | 0.048839161 | -0.125199133 |
| -0.03587713  | 0.439236843 | 0.016728326  | 0.718429435 | -0.017339525 |
| -0.095445305 | 0.039229468 | -0.132964209 | 0.003996076 | -0.148296997 |
| -0.140589606 | 0.002325546 | -0.104763733 | 0.023566141 | -0.150827108 |
| -0.102451272 | 0.026836648 | -0.092387619 | 0.045995767 | -0.115277804 |
| -0.002444002 | 0.95799176  | -0.018316476 | 0.692994392 | 0.013341486  |
| -0.087899861 | 0.057680707 | -0.063428184 | 0.171187089 | -0.074990983 |
| -0.076665981 | 0.097972796 | -0.030899831 | 0.505334061 | -0.055317309 |
| -0.11914638  | 0.009964452 | -0.077989517 | 0.092294628 | -0.08510439  |
| -0.090727339 | 0.050063314 | -0.06610167  | 0.153810295 | -0.077648288 |
| -0.138627259 | 0.002680007 | -0.104690533 | 0.023664127 | -0.122632566 |

|              |             |              |             |              |
|--------------|-------------|--------------|-------------|--------------|
| -0.119128193 | 0.00997588  | -0.085516345 | 0.064826188 | -0.093196661 |
| -0.007383456 | 0.87356456  | -0.010861694 | 0.814906526 | 0.021769437  |
| -0.123022501 | 0.007778622 | -0.145619686 | 0.001603501 | -0.168505974 |
| -0.158318191 | 0.000595192 | -0.110681885 | 0.01672028  | -0.134345015 |
| -0.085605053 | 0.064547783 | -0.070432208 | 0.12854571  | -0.055313806 |
| -0.088000521 | 0.057393911 | -0.043124874 | 0.352437616 | -0.047390108 |
| -0.149071508 | 0.001234013 | -0.10118284  | 0.02879122  | -0.105995884 |
| -0.06243107  | 0.178030066 | -0.05619576  | 0.225472534 | -0.063271825 |
| 0.083429088  | 0.071667052 | 0.069876446  | 0.131595623 | 0.051521242  |
| -0.10949564  | 0.017932917 | -0.051127597 | 0.270184859 | -0.077098674 |
| -0.249770047 | 4.50E-08    | -0.20690852  | 6.54E-06    | -0.231022365 |
| -0.137915959 | 0.00282019  | -0.124858069 | 0.006901632 | -0.138199011 |
| -0.155922816 | 0.000721719 | -0.135394851 | 0.003372464 | -0.152453882 |
| -0.097886753 | 0.034450192 | -0.047815885 | 0.302479548 | -0.069710037 |
| -0.061895157 | 0.181790758 | -0.044412141 | 0.338236774 | -0.064480647 |
| -0.048904647 | 0.291591274 | -0.02851245  | 0.538797152 | -0.038455943 |
| -0.077935335 | 0.092521785 | -0.067847629 | 0.143205524 | -0.065862842 |
| 0.056465001  | 0.223254109 | 0.020373357  | 0.660561804 | 0.027839486  |
| 0.071551088  | 0.12257191  | 0.11640492   | 0.011824025 | 0.159387038  |
| -0.085296729 | 0.065519695 | -0.057786111 | 0.212594274 | -0.064373261 |
| -0.074369745 | 0.108480593 | -0.042740336 | 0.356751682 | -0.057724583 |
| -0.039645512 | 0.392669177 | 0.027341503  | 0.555605314 | -0.005584112 |
| -0.128703699 | 0.005345349 | -0.144109923 | 0.001795    | -0.158377111 |
| -0.138124641 | 0.002778387 | -0.150788209 | 0.001081057 | -0.178734076 |
| -0.074593344 | 0.107419851 | -0.0244257   | 0.598535439 | -0.047344334 |
| 0.049766666  | 0.283159113 | 0.118538882  | 0.010352514 | 0.120104548  |
| -0.025027407 | 0.589554376 | 0.021797822  | 0.638463373 | 0.00992653   |
| -0.121142533 | 0.0087787   | -0.081560922 | 0.078279487 | -0.10002795  |
| -0.101338284 | 0.028545303 | -0.100792464 | 0.029416836 | -0.098116528 |
| -0.039115824 | 0.399028519 | -0.035142349 | 0.448671692 | -0.060949667 |
| -0.065817897 | 0.15558872  | -0.045120958 | 0.330575876 | -0.048902886 |
| -0.104291312 | 0.024204748 | -0.083906586 | 0.070052213 | -0.104580212 |
| -0.072988262 | 0.115218576 | -0.02416688  | 0.602417504 | -0.048465546 |
| -0.076892603 | 0.096981282 | -0.035166594 | 0.448358563 | -0.060635458 |
| -0.048551476 | 0.29509405  | -0.00257619  | 0.955721947 | -0.035656849 |
| -0.091726701 | 0.047580439 | -0.060854201 | 0.189262831 | -0.071805944 |
| -0.067342961 | 0.146211687 | -0.035458447 | 0.44459889  | -0.043684065 |
| -0.085678593 | 0.064317729 | -0.03807752  | 0.411672079 | -0.071514663 |
| -0.068194423 | 0.141167332 | -0.026785543 | 0.56367413  | -0.048865135 |
| -0.186064437 | 5.22E-05    | -0.184164091 | 6.24E-05    | -0.178858763 |
| -0.041640816 | 0.36926898  | -0.011629525 | 0.802083851 | -0.019461039 |
| -0.119760904 | 0.009585097 | -0.089449278 | 0.053395487 | -0.112774328 |
| -0.101781392 | 0.02785417  | -0.045346743 | 0.328159277 | -0.061065949 |
| -0.119003338 | 0.010054644 | -0.094748487 | 0.040692358 | -0.093758599 |
| -0.101083102 | 0.028949965 | -0.072193749 | 0.119239763 | -0.077251606 |



|              |             |              |             |              |
|--------------|-------------|--------------|-------------|--------------|
| -0.109580904 | 0.017843263 | -0.077690237 | 0.093554966 | -0.091930975 |
| -0.15255407  | 0.00094212  | -0.119020337 | 0.010043888 | -0.152207248 |
| -0.049935845 | 0.281523747 | -0.009921762 | 0.830670474 | -0.039549345 |
| 0.000759835  | 0.986934294 | 0.047402818  | 0.306680115 | 0.009162007  |
| -0.066125435 | 0.153662061 | -0.016472667 | 0.722554052 | -0.049939035 |
| -0.075048176 | 0.105287434 | -0.078123898 | 0.091733155 | -0.073667325 |
| -0.134484235 | 0.00359493  | -0.122096498 | 0.008257748 | -0.141854499 |
| -0.075945874 | 0.101177056 | -0.044137562 | 0.341234719 | -0.062968924 |
| -0.116217672 | 0.011961569 | -0.081722199 | 0.077689782 | -0.084480936 |
| -0.048270814 | 0.297897627 | -0.025643598 | 0.580421864 | -0.036763318 |
| -0.08174023  | 0.077624075 | -0.068396542 | 0.139989721 | -0.074382295 |
| -0.092115151 | 0.046643609 | -0.073676731 | 0.11182076  | -0.079190858 |
| -0.125076902 | 0.006803219 | -0.093919508 | 0.04249248  | -0.10334851  |
| -0.072766529 | 0.116329961 | -0.056961673 | 0.219202681 | -0.06818154  |
| -0.117951942 | 0.010740116 | -0.088267264 | 0.056639629 | -0.097280291 |
| -0.066383859 | 0.152057114 | -0.042526996 | 0.359159347 | -0.04249178  |
| -0.063013921 | 0.174005855 | -0.033342744 | 0.472256982 | -0.050424367 |
| -0.096734481 | 0.036640216 | -0.070858774 | 0.126242174 | -0.085708741 |
| -0.028035623 | 0.545610918 | -0.023343471 | 0.614842416 | -0.013851758 |
| -0.096692612 | 0.036721971 | -0.059107249 | 0.202305616 | -0.080983294 |
| -0.00529622  | 0.909121776 | 0.047381763  | 0.306895253 | 0.031874654  |
| -0.078879097 | 0.088628485 | -0.052684268 | 0.255849978 | -0.062863699 |
| -0.091217429 | 0.048832499 | -0.048389551 | 0.296709387 | -0.0652713   |
| -0.082294253 | 0.075627107 | -0.059080692 | 0.202508806 | -0.066191004 |
| -0.155679626 | 0.00073587  | -0.136604429 | 0.003096287 | -0.137843463 |
| -0.056588798 | 0.22223932  | -0.023356861 | 0.614639467 | -0.050064247 |
| -0.094191257 | 0.041895122 | -0.059365683 | 0.200336035 | -0.062802837 |
| 0.027698008  | 0.550461004 | 0.038200926  | 0.410157062 | 0.030028697  |
| -0.065307159 | 0.158828681 | -0.073322293 | 0.113560049 | -0.062481016 |
| -0.085598811 | 0.064567343 | -0.056670854 | 0.221568504 | -0.066926063 |
| 0.023323345  | 0.615147511 | 0.027352795  | 0.555442017 | 0.013329942  |
| -0.048901504 | 0.291622325 | -0.031773643 | 0.49336472  | -0.056976822 |
| -0.115109307 | 0.01280505  | -0.076296334 | 0.099607371 | -0.086403597 |
| -0.046737446 | 0.313527046 | -0.025493746 | 0.582636725 | -0.067411047 |
| 0.014260051  | 0.758575399 | 0.029059475  | 0.531033002 | 0.019233627  |
| -0.131006362 | 0.004572322 | -0.098604219 | 0.033143678 | -0.085850589 |
| -0.085912689 | 0.063589892 | -0.055295201 | 0.233006622 | -0.068726349 |
| -0.086492937 | 0.06181503  | -0.069087776 | 0.136019264 | -0.072175281 |
| -0.127145408 | 0.005933266 | -0.112501234 | 0.01499983  | -0.121297702 |
| -0.115869306 | 0.01222123  | -0.09368169  | 0.043021126 | -0.092886195 |
| -0.101354087 | 0.028520405 | -0.083690061 | 0.070780746 | -0.087227024 |
| -0.059141275 | 0.202045494 | -0.016669084 | 0.719384493 | -0.043305952 |
| -0.10540143  | 0.022727265 | -0.084709813 | 0.067403028 | -0.078987898 |
| -0.153036835 | 0.000907115 | -0.136200833 | 0.003186065 | -0.158750484 |
| -0.092915402 | 0.044762347 | -0.071817285 | 0.121183004 | -0.073702795 |

|              |             |              |             |              |
|--------------|-------------|--------------|-------------|--------------|
| -0.091117437 | 0.049081543 | -0.066472034 | 0.151512424 | -0.074731773 |
| -0.083824688 | 0.070327047 | -0.050439622 | 0.276691896 | -0.067849739 |
| -0.118411735 | 0.010435409 | -0.087485622 | 0.058873463 | -0.107522346 |
| -0.088188238 | 0.056862233 | -0.054059192 | 0.243634287 | -0.057562941 |
| -0.110262052 | 0.01714099  | -0.080691107 | 0.081522841 | -0.06936698  |
| -0.094406727 | 0.041426527 | -0.048766664 | 0.292956474 | -0.064513956 |
| -0.092778012 | 0.045080717 | -0.036474113 | 0.431655702 | -0.042602289 |
| -0.149437992 | 0.001199778 | -0.088366609 | 0.056360819 | -0.136296626 |
| -0.047338808 | 0.307334474 | -0.077547821 | 0.094159528 | -0.104433761 |
| 0.142901069  | 0.001963194 | 0.163886169  | 0.00037627  | 0.205798631  |
| -0.062676466 | 0.176327428 | -0.033731347 | 0.467107123 | -0.047890041 |
| -0.019909193 | 0.667828037 | 0.010096285  | 0.827738141 | 0.012347521  |
| -0.127768371 | 0.005691597 | -0.073253244 | 0.113901344 | -0.110937829 |
| -0.121957611 | 0.008331836 | -0.093866862 | 0.042609032 | -0.120433515 |
| -0.12403572  | 0.007282952 | -0.08861829  | 0.055659569 | -0.102676622 |
| -0.187301984 | 4.64E-05    | -0.150430548 | 0.001111403 | -0.21600331  |
| -0.112770782 | 0.014758627 | -0.098038904 | 0.034169518 | -0.089377795 |
| -0.081784354 | 0.07746348  | -0.043238722 | 0.351166725 | -0.053460418 |
| -0.062727331 | 0.175976031 | -0.053800476 | 0.245901115 | -0.039081393 |
| -0.077283092 | 0.095291605 | -0.02903891  | 0.531323865 | -0.051144154 |
| -0.075083126 | 0.105124972 | -0.029940825 | 0.518643768 | -0.056949799 |
| -0.18449277  | 6.05E-05    | -0.175880381 | 0.000133212 | -0.171960589 |
| -0.120367466 | 0.0092233   | -0.072025697 | 0.120104187 | -0.097155241 |
| -0.031662303 | 0.494881381 | 0.002216804  | 0.961893801 | -0.006843338 |
| -0.010336804 | 0.82370088  | -0.028009964 | 0.545978794 | 0.016805962  |
| -0.118365672 | 0.010465586 | -0.113045486 | 0.014516321 | -0.117290649 |
| -0.032427914 | 0.484502677 | -0.029498989 | 0.524836051 | -0.011248108 |
| -0.106153231 | 0.021771615 | -0.073525496 | 0.112560321 | -0.080145624 |
| 0.033383257  | 0.471718646 | -0.013256967 | 0.775084717 | -0.006134737 |
| -0.179941551 | 9.23E-05    | -0.152102008 | 0.000976025 | -0.152272419 |
| -0.041665482 | 0.368985227 | -0.014310671 | 0.757745099 | -0.038391142 |
| -0.086033862 | 0.063215823 | -0.04058024  | 0.381597479 | -0.072539114 |
| -0.07391114  | 0.110682029 | -0.018085442 | 0.696673961 | -0.042278582 |
| -0.134576055 | 0.00357191  | -0.096876982 | 0.036363126 | -0.097233891 |
| -0.084281706 | 0.068804588 | -0.057189853 | 0.217359129 | -0.075057205 |
| -0.115496082 | 0.012504931 | -0.094218452 | 0.041835734 | -0.080857445 |
| -0.08337168  | 0.071863228 | -0.047885342 | 0.301776992 | -0.067946152 |
| -0.243686627 | 9.68E-08    | -0.210253695 | 4.59E-06    | -0.201760076 |
| -0.241958067 | 1.20E-07    | -0.206945344 | 6.51E-06    | -0.211720566 |
| -0.099285423 | 0.031942554 | -0.064266344 | 0.165588449 | -0.07978795  |
| -0.073116886 | 0.114577698 | -0.049055609 | 0.29010256  | -0.053950328 |
| -0.069622031 | 0.133010319 | -0.053020037 | 0.252828355 | -0.049961731 |
| -0.026702619 | 0.564882433 | -0.036118087 | 0.436167774 | -0.050997667 |
| -0.081103294 | 0.079972583 | -0.066924853 | 0.148738498 | -0.079250687 |
| -0.083989858 | 0.06977367  | -0.084543139 | 0.067945885 | -0.083636537 |

|              |             |              |             |              |
|--------------|-------------|--------------|-------------|--------------|
| -0.080891379 | 0.080766598 | -0.065048708 | 0.160487488 | -0.065497313 |
| -0.032860304 | 0.478693529 | -0.05938028  | 0.200225203 | -0.041904974 |
| 0.00233904   | 0.959794318 | 0.027267478  | 0.556676405 | 0.022166166  |
| -0.121929918 | 0.00834668  | -0.080783878 | 0.081171822 | -0.112635625 |
| -0.117382983 | 0.011128064 | -0.110096007 | 0.017309918 | -0.10884508  |
| 0.303535484  | 2.08E-11    | 0.288434244  | 2.13E-10    | 0.264918969  |
| -0.16361373  | 0.00038494  | -0.14783926  | 0.001355824 | -0.173762463 |
| -0.365261415 | 3.47E-16    | -0.321042592 | 1.18E-12    | -0.333771785 |
| -0.148152488 | 0.001323854 | -0.103705196 | 0.025017785 | -0.129331941 |
| -0.166453404 | 0.000303046 | -0.131677765 | 0.004366764 | -0.155018807 |
| -0.199521957 | 1.40E-05    | -0.161671765 | 0.000452348 | -0.175010127 |
| 0.117671873  | 0.010929559 | 0.185061402  | 5.74E-05    | 0.154485957  |
| -0.113647688 | 0.013997342 | -0.060072246 | 0.195022452 | -0.098672978 |
| -0.107488005 | 0.020160622 | -0.083822094 | 0.070335767 | -0.080087316 |
| -0.099311962 | 0.031896522 | -0.09040723  | 0.05088115  | -0.086007986 |
| -0.099813836 | 0.031036635 | -0.057652785 | 0.213653133 | -0.07590833  |
| -0.140077437 | 0.002413679 | -0.121560262 | 0.008547083 | -0.145190865 |
| 0.013057634  | 0.778377827 | 0.034570224  | 0.456096703 | 0.053615234  |
| -0.03756418  | 0.418009636 | 0.014311069  | 0.75773857  | -0.023908891 |
| -0.056006658 | 0.227040006 | -0.06235539  | 0.178557616 | -0.039358059 |
| -0.049389493 | 0.286828097 | -0.014231033 | 0.759051506 | -0.037034199 |
| -0.084561388 | 0.067886275 | -0.046263448 | 0.318465367 | -0.078188349 |
| -0.315222337 | 3.12E-12    | -0.265581901 | 5.58E-09    | -0.287240599 |
| -0.006652023 | 0.885999727 | 0.02186342   | 0.637453201 | 0.004838385  |
| -0.171276017 | 0.00020009  | -0.150221796 | 0.001129476 | -0.175312752 |
| -0.117708596 | 0.010904551 | -0.093147777 | 0.044228174 | -0.110057283 |
| -0.095097094 | 0.039954836 | -0.051773282 | 0.264173677 | -0.066084691 |
| -0.027228212 | 0.557244976 | 0.001167307  | 0.97992884  | -0.022574533 |
| -0.03564626  | 0.442188992 | -0.017664253 | 0.703400324 | -0.026116166 |
| 0.101818533  | 0.027796899 | 0.096274127  | 0.037547649 | 0.118486163  |
| -0.112131656 | 0.01533617  | -0.097757928 | 0.03468937  | -0.095234981 |
| 0.154827524  | 0.000787505 | 0.17026576   | 0.000218472 | 0.145577475  |
| -0.141370591 | 0.002196798 | -0.073605315 | 0.112169518 | -0.115991248 |
| -0.13965523  | 0.002488612 | -0.112817621 | 0.014717062 | -0.124821767 |
| -0.072250202 | 0.118950473 | -0.027720215 | 0.550141333 | -0.052710505 |
| 0.007410986  | 0.873097114 | 0.003831619  | 0.934185201 | 0.021441536  |
| -0.134242733 | 0.003656121 | -0.081386688 | 0.078920643 | -0.098289185 |
| -0.126634291 | 0.006138387 | -0.110378494 | 0.017023386 | -0.116632876 |
| -0.11275904  | 0.014769063 | -0.080419489 | 0.082557633 | -0.09229816  |
| -0.175074969 | 0.000143144 | -0.141126722 | 0.002236284 | -0.163640661 |
| -0.124159474 | 0.007224389 | -0.075839769 | 0.101656148 | -0.097281214 |
| -0.156234324 | 0.000703961 | -0.091042409 | 0.049269106 | -0.0962345   |
| -0.058540898 | 0.206671022 | -0.035736866 | 0.441029055 | -0.041402224 |
| -0.03444532  | 0.457726824 | 0.015128872  | 0.744363695 | -0.01314445  |
| -0.002068722 | 0.964437534 | 0.02502477   | 0.589593613 | 0.019417897  |

|              |             |              |             |              |
|--------------|-------------|--------------|-------------|--------------|
| -0.085099615 | 0.066147325 | -0.021531615 | 0.642569694 | -0.053560598 |
| -0.033062613 | 0.475988595 | 0.007135807  | 0.877771541 | -0.029429316 |
| -0.147278029 | 0.001414888 | -0.116493154 | 0.011759698 | -0.114241454 |
| -0.083393177 | 0.071789717 | -0.043393616 | 0.349442274 | -0.061183062 |
| -0.031459231 | 0.497653978 | -0.027286481 | 0.556401348 | -0.018050639 |
| 0.1074782    | 0.020172068 | 0.127770555  | 0.005690766 | 0.126790815  |
| -0.063267441 | 0.172276754 | -0.032030405 | 0.489876616 | -0.057884519 |
| -0.113264455 | 0.014325689 | -0.095100121 | 0.039948482 | -0.096020851 |
| -0.075554917 | 0.102951232 | -0.049074859 | 0.289913093 | -0.055742254 |
| -0.119057672 | 0.0100203   | -0.088089957 | 0.057140086 | -0.108171919 |
| -0.063472367 | 0.170888472 | -0.058370536 | 0.207997399 | -0.050376729 |
| -0.007447537 | 0.87247656  | -0.000764522 | 0.986853698 | -0.008982541 |
| -0.08481183  | 0.067072519 | -0.057068144 | 0.218341072 | -0.07897488  |
| -0.058849424 | 0.204284538 | -0.010098722 | 0.827697218 | -0.023551102 |
| -0.145519459 | 0.001615608 | -0.105949761 | 0.022026752 | -0.115705466 |
| -0.103415288 | 0.025428572 | -0.052645911 | 0.256196738 | -0.076544777 |
| -0.045872143 | 0.32258021  | 0.001353511  | 0.976728016 | -0.04429767  |
| -0.143887277 | 0.001824949 | -0.117578449 | 0.010993408 | -0.109111394 |
| -0.142248612 | 0.002059853 | -0.112922989 | 0.014623935 | -0.149862163 |
| -0.103813639 | 0.024865604 | -0.076054301 | 0.100689335 | -0.093651873 |
| -0.115617237 | 0.012412206 | -0.072218127 | 0.119114772 | -0.088889179 |
| -0.058939784 | 0.203589391 | -0.023154241 | 0.617713637 | -0.045572785 |
| -0.03379985  | 0.466202538 | 0.002211154  | 0.961990844 | -0.000288904 |
| -0.077760492 | 0.093257877 | -0.029026289 | 0.531502401 | -0.058946128 |
| -0.063779359 | 0.168824394 | -0.016913848 | 0.715441464 | -0.055303567 |
| -0.14275112  | 0.001985034 | -0.130908148 | 0.004603113 | -0.146353817 |
| -0.146473637 | 0.001503672 | -0.140124486 | 0.002405458 | -0.143617888 |
| -0.055865799 | 0.228212606 | -0.04703244  | 0.310479169 | -0.052170952 |
| -0.046505329 | 0.315939041 | 0.016725602  | 0.718473341 | -0.017441082 |
| 0.096289552  | 0.037516938 | 0.102284705  | 0.027086622 | 0.139886072  |
| -0.215503683 | 2.60E-06    | -0.16139649  | 0.000462747 | -0.199528837 |
| -0.104281029 | 0.024218813 | -0.07158986  | 0.122368844 | -0.098860659 |
| 0.035855201  | 0.439516767 | 0.00037176   | 0.993607206 | 0.001632371  |
| -0.204180886 | 8.69E-06    | -0.209059068 | 5.21E-06    | -0.231952453 |
| -0.236321011 | 2.38E-07    | -0.219772523 | 1.62E-06    | -0.23087055  |
| 0.025286453  | 0.585707034 | 0.051284576  | 0.268714889 | 0.038155812  |
| -0.36169186  | 7.02E-16    | -0.337505937 | 6.63E-14    | -0.320378506 |
| -0.101671282 | 0.028024555 | -0.082151461 | 0.076137758 | -0.113753165 |
| -0.007566997 | 0.870448926 | 0.025469468  | 0.582995921 | -0.000494617 |
| 0.172477543  | 0.000180115 | 0.172198232  | 0.000184585 | 0.180918774  |
| -0.061660838 | 0.183453397 | -0.044784936 | 0.334193542 | -0.05411436  |
| 0.094905124  | 0.040359562 | 0.146961188  | 0.001449267 | 0.10734989   |
| -0.09231569  | 0.046166053 | -0.081010586 | 0.080319166 | -0.079586135 |
| -0.135981724 | 0.003235789 | -0.110913393 | 0.016492176 | -0.110748378 |
| -0.156362989 | 0.000696745 | -0.113945462 | 0.013746805 | -0.139195689 |

|              |             |              |             |              |
|--------------|-------------|--------------|-------------|--------------|
| -0.05400799  | 0.244081744 | -0.088397266 | 0.05627501  | -0.087130956 |
| -0.038429538 | 0.407359206 | 0.00069674   | 0.988019155 | -0.003743533 |
| -0.115602856 | 0.01242318  | -0.07409692  | 0.109786035 | -0.094445173 |
| -0.105088092 | 0.023136165 | -0.100440206 | 0.029991333 | -0.10122723  |
| 0.021134958  | 0.648708442 | 0.073058999  | 0.114865778 | 0.065581609  |
| -0.230139318 | 4.96E-07    | -0.226791823 | 7.32E-07    | -0.258124479 |
| -0.139304923 | 0.002552388 | -0.113037238 | 0.014523545 | -0.119727166 |
| 0.016812025  | 0.717080868 | 0.04106177   | 0.375969117 | 0.043271616  |
| -0.138426518 | 0.002718912 | -0.118076775 | 0.010656618 | -0.110304751 |
| 0.077312733  | 0.095164314 | 0.0992028    | 0.032086226 | 0.081421963  |
| -0.039435029 | 0.395188841 | -0.057069737 | 0.218328197 | -0.101177629 |
| 0.323042951  | 8.37E-13    | 0.296515299  | 6.23E-11    | 0.303857764  |
| -0.190633924 | 3.37E-05    | -0.164446324 | 0.000359011 | -0.167212351 |
| -0.178025371 | 0.000109826 | -0.135019738 | 0.003462547 | -0.114694351 |
| -0.084695165 | 0.067450593 | -0.07140269  | 0.123351553 | -0.085092534 |
| -0.120618362 | 0.009077235 | -0.113022604 | 0.01453637  | -0.134785241 |
| -0.11605292  | 0.012083756 | -0.088068748 | 0.057200193 | -0.062153987 |
| -0.122664278 | 0.007960945 | -0.082479473 | 0.074968878 | -0.099069967 |
| 0.008002546  | 0.863063502 | 0.012398473  | 0.789295546 | -0.0138579   |
| -0.080360622 | 0.082783293 | -0.085999636 | 0.063321295 | -0.089548648 |
| -0.104660636 | 0.023704248 | -0.062221503 | 0.179493746 | -0.08430452  |
| -0.128147383 | 0.005548932 | -0.150998162 | 0.001063601 | -0.139826125 |
| -0.016205366 | 0.726875101 | -0.000840679 | 0.985544279 | 0.001808079  |
| -0.161989887 | 0.000440602 | -0.152943054 | 0.00091382  | -0.150527362 |
| -0.167463061 | 0.000278078 | -0.127367821 | 0.005845946 | -0.15357966  |
| -0.085301787 | 0.065503653 | -0.07163357  | 0.122140234 | -0.062664904 |
| -0.205030521 | 7.95E-06    | -0.16992734  | 0.000224975 | -0.199090855 |
| -0.058786757 | 0.204767649 | -0.006790925 | 0.883636001 | -0.034584671 |
| 0.187066413  | 4.75E-05    | 0.198651238  | 1.53E-05    | 0.180148477  |
| -0.132657159 | 0.004081868 | -0.111012054 | 0.016395796 | -0.140517203 |
| -0.002632492 | 0.954755284 | -0.003726163 | 0.935992659 | -0.02716781  |
| -0.196045418 | 1.98E-05    | -0.142867633 | 0.001968045 | -0.140954867 |
| -0.079830577 | 0.084837685 | -0.046126547 | 0.319901063 | -0.064522121 |
| 0.0121595    | 0.793264017 | 0.034872542  | 0.452164686 | 0.037717071  |
| 0.009840999  | 0.832028253 | 0.021124328  | 0.648873294 | 0.007443981  |
| -0.089435579 | 0.05343218  | -0.049854015 | 0.282313951 | -0.059962495 |
| -0.105355102 | 0.022787325 | -0.051332798 | 0.268264436 | -0.075700289 |
| -0.07629316  | 0.099621501 | -0.038356853 | 0.408247515 | -0.058425711 |
| -0.042535376 | 0.359064579 | -0.013448581 | 0.771922937 | -0.023561597 |
| -0.107511421 | 0.020133311 | -0.066457264 | 0.151603559 | -0.078614511 |
| -0.05429556  | 0.24157609  | -0.046890058 | 0.311947817 | -0.048125881 |
| -0.062284929 | 0.179049817 | -0.048934818 | 0.291293335 | -0.044935452 |
| -0.19314745  | 2.64E-05    | -0.152518795 | 0.000944726 | -0.179181319 |
| 0.083992636  | 0.069764394 | 0.123165168  | 0.007707053 | 0.1173279    |
| -0.071430721 | 0.123203989 | -0.050242084 | 0.278579773 | -0.05919849  |

|              |             |              |             |              |
|--------------|-------------|--------------|-------------|--------------|
| -0.112214594 | 0.01526012  | -0.075444054 | 0.103458795 | -0.091667141 |
| -0.067106704 | 0.147635438 | -0.039173037 | 0.398338672 | -0.036745961 |
| -0.174911689 | 0.00014524  | -0.168378398 | 0.000257117 | -0.184103929 |
| -0.159672038 | 0.000533116 | -0.134758677 | 0.003526522 | -0.147931508 |
| 0.117120945  | 0.011310873 | 0.097850735  | 0.034516922 | 0.079611568  |
| -0.072106487 | 0.119688013 | -0.025809684 | 0.577971666 | -0.05219501  |
| -0.107916742 | 0.019665651 | -0.07783872  | 0.092927962 | -0.084754876 |
| -0.219167239 | 1.74E-06    | -0.193657277 | 2.51E-05    | -0.231127425 |
| -0.27676984  | 1.17E-09    | -0.275834319 | 1.34E-09    | -0.293948753 |
| -0.073679511 | 0.111807201 | -0.050551589 | 0.275625691 | -0.064551871 |
| -0.170516663 | 0.000213764 | -0.183548632 | 6.61E-05    | -0.172057477 |
| -0.093142901 | 0.044239326 | -0.095088876 | 0.039972092 | -0.100718332 |
| -0.20856625  | 5.49E-06    | -0.185807932 | 5.35E-05    | -0.165488385 |
| -0.060570723 | 0.191336221 | -0.06671969  | 0.149990481 | -0.109119273 |
| -0.069000037 | 0.136518379 | -0.086020364 | 0.063257403 | -0.134482502 |
| 0.128669916  | 0.005357518 | 0.176354965  | 0.000127667 | 0.181185601  |
| -0.063416068 | 0.171269038 | -0.041726002 | 0.368289576 | -0.049777396 |
| -0.136008828 | 0.0032296   | -0.147850526 | 0.001354662 | -0.117342412 |
| -0.109221156 | 0.018224211 | -0.051107568 | 0.270372808 | -0.073396552 |
| -0.090295193 | 0.051170012 | -0.042184055 | 0.363050911 | -0.065787853 |
| -0.205290489 | 7.74E-06    | -0.157297498 | 0.000646355 | -0.173671196 |
| -0.189573386 | 3.74E-05    | -0.165032022 | 0.000341757 | -0.174671494 |
| -0.168656868 | 0.000251039 | -0.111273925 | 0.016142371 | -0.135170557 |
| -0.103543467 | 0.025246236 | -0.058449978 | 0.207378126 | -0.083782391 |
| -0.108398603 | 0.019122007 | -0.064883563 | 0.161554241 | -0.085365716 |
| -0.158385691 | 0.000591944 | -0.124375297 | 0.007123264 | -0.134515727 |
| -0.163537007 | 0.000387416 | -0.132875124 | 0.004020798 | -0.158365079 |
| -0.053611637 | 0.247564982 | -0.003011331 | 0.94825269  | -0.033596678 |
| -0.106751587 | 0.021036121 | -0.076249685 | 0.099815186 | -0.081968836 |
| -0.037724083 | 0.416029397 | -0.012003685 | 0.795854404 | -0.032649007 |
| -0.120954222 | 0.008884929 | -0.093427909 | 0.043591358 | -0.103428924 |
| -0.117939055 | 0.010748768 | -0.071154544 | 0.12466386  | -0.094702894 |
| -0.109626886 | 0.017795076 | -0.063002039 | 0.174087214 | -0.086537086 |
| -0.077128791 | 0.095956447 | -0.055579057 | 0.23061291  | -0.06800175  |
| -0.050774722 | 0.273509251 | -0.018121939 | 0.696092212 | -0.02442885  |
| -0.045128364 | 0.330496427 | -0.015315791 | 0.741317307 | -0.036849059 |
| -0.137815533 | 0.002840511 | -0.106504503 | 0.021337177 | -0.127627889 |
| -0.057863184 | 0.211983892 | -0.023719933 | 0.609147796 | -0.039268042 |
| -0.060064172 | 0.195082583 | -0.044603945 | 0.336152629 | -0.046638578 |
| -0.157471294 | 0.000637365 | -0.140095806 | 0.002410466 | -0.151629478 |
| -0.071682794 | 0.121883183 | -0.045684863 | 0.324561763 | -0.066153926 |
| -0.10814736  | 0.019403807 | -0.088862897 | 0.054984988 | -0.107052413 |
| -0.177301331 | 0.00011725  | -0.157217116 | 0.000650553 | -0.143546899 |
| -0.1101858   | 0.017218386 | -0.067874706 | 0.143045583 | -0.09835431  |
| -0.054454689 | 0.240197351 | -0.048615367 | 0.294458304 | -0.067719769 |

|              |             |              |             |              |
|--------------|-------------|--------------|-------------|--------------|
| -0.222905963 | 1.14E-06    | -0.213938051 | 3.09E-06    | -0.209268191 |
| -0.092826336 | 0.044968521 | -0.102610593 | 0.026599411 | -0.087578212 |
| -0.11020602  | 0.017197833 | -0.064153175 | 0.166336257 | -0.079958236 |
| 0.097353505  | 0.035449431 | 0.071697388  | 0.121807053 | 0.080311037  |
| 0.277843114  | 1.00E-09    | 0.285912886  | 3.10E-10    | 0.31119477   |
| -0.117158522 | 0.011284496 | -0.089295295 | 0.053809139 | -0.110529477 |
| -0.220369311 | 1.52E-06    | -0.209560715 | 4.94E-06    | -0.207847665 |
| -0.074449002 | 0.108103661 | -0.050464507 | 0.276454688 | -0.058110577 |
| -0.146850633 | 0.001461443 | -0.137876506 | 0.002828158 | -0.146539167 |
| -0.096853865 | 0.036407956 | -0.066892059 | 0.148938086 | -0.060220144 |
| -0.019991075 | 0.666543935 | 0.030716931  | 0.507858556 | 0.031160766  |
| -0.09921979  | 0.032056637 | -0.067734894 | 0.143872918 | -0.080699148 |
| -0.112171775 | 0.015299341 | -0.094059121 | 0.042184691 | -0.119144285 |
| -0.086959176 | 0.060418688 | -0.084430906 | 0.068313444 | -0.048629963 |
| -0.082065426 | 0.076446786 | -0.06589317  | 0.155115472 | -0.066483312 |
| 0.177864916  | 0.000111432 | 0.177117692  | 0.000119207 | 0.15833351   |
| -0.125732863 | 0.00651571  | -0.071644614 | 0.122082523 | -0.066082929 |
| -0.118387227 | 0.010451456 | -0.072723908 | 0.116544549 | -0.083795852 |
| -0.1839949   | 6.34E-05    | -0.1396117   | 0.002496457 | -0.171420588 |
| -0.063953905 | 0.167659165 | -0.027356879 | 0.555382965 | -0.047565219 |
| -0.081646324 | 0.077966767 | -0.04180056  | 0.367433687 | -0.071805606 |
| -0.112944558 | 0.014604936 | -0.081111575 | 0.079941685 | -0.078655927 |
| -0.224713429 | 9.30E-07    | -0.189679761 | 3.70E-05    | -0.226744612 |
| -0.17527858  | 0.000140569 | -0.181462543 | 8.02E-05    | -0.181248636 |
| -0.065362915 | 0.158472531 | -0.048582508 | 0.294785147 | -0.056862812 |
| -0.043533864 | 0.347885519 | -0.021998229 | 0.635379318 | -0.007685074 |
| -0.1016421   | 0.028069863 | -0.06559517  | 0.15699543  | -0.091685462 |
| -0.078547202 | 0.089982372 | -0.059675379 | 0.197994192 | -0.074797118 |
| 0.099044006  | 0.032363903 | 0.064181806  | 0.166146826 | 0.066199049  |
| -0.023259828 | 0.616110833 | -0.023971292 | 0.60535863  | -0.029810626 |
| -0.154462195 | 0.000810653 | -0.129413683 | 0.005095307 | -0.172612747 |
| -0.101930335 | 0.027625109 | -0.067392844 | 0.145912421 | -0.087601594 |
| 0.018104543  | 0.696369464 | 0.022898656  | 0.621600922 | 0.036919038  |
| -0.14298395  | 0.001951218 | -0.089369178 | 0.053610332 | -0.107126757 |
| -0.072595932 | 0.117190743 | -0.021512341 | 0.642867414 | -0.027264733 |
| -0.136502193 | 0.003118809 | -0.084879219 | 0.066854924 | -0.112406802 |
| -0.16221042  | 0.000432626 | -0.154712265 | 0.000794741 | -0.197523745 |
| -0.02904959  | 0.5311728   | -0.025638858 | 0.580491856 | -0.060223896 |
| -0.057491571 | 0.214938538 | 0.005315999  | 0.908783864 | 0.001457368  |
| -0.055786902 | 0.228871277 | -0.011594685 | 0.802664552 | -0.041442508 |
| -0.01146751  | 0.804785185 | 0.004220164  | 0.927528729 | 0.010527428  |
| -0.169415325 | 0.000235158 | -0.132740751 | 0.004058348 | -0.167302103 |
| -0.107814185 | 0.019783079 | -0.06219207  | 0.179700023 | -0.079640762 |
| -0.139973833 | 0.002431874 | -0.071300175 | 0.123892387 | -0.08558677  |
| -0.097138695 | 0.035858867 | -0.071718692 | 0.121695985 | -0.079425182 |

|              |             |              |             |              |
|--------------|-------------|--------------|-------------|--------------|
| -0.157700057 | 0.000625708 | -0.127842216 | 0.005663545 | -0.118242496 |
| 0.053971465  | 0.244401291 | 0.0649497    | 0.161126391 | 0.071432173  |
| -0.057421664 | 0.215497648 | -0.007164554 | 0.877283016 | -0.04643963  |
| -0.084004519 | 0.069724724 | -0.073180206 | 0.114263233 | -0.0855399   |
| -0.067887164 | 0.142972038 | -0.05128382  | 0.268721954 | -0.059974126 |
| -0.047908028 | 0.301547756 | -0.024220639 | 0.601610239 | -0.03056028  |
| -0.01462195  | 0.752645462 | 0.010056097  | 0.828413168 | 0.002877382  |
| -0.224324212 | 9.72E-07    | -0.178599515 | 0.000104256 | -0.190965698 |
| -0.079616744 | 0.085678026 | -0.055819472 | 0.228599201 | -0.060885915 |
| -0.245858983 | 7.38E-08    | -0.242098479 | 1.18E-07    | -0.265890242 |
| -0.130691162 | 0.004671805 | -0.115680457 | 0.012364062 | -0.12624217  |
| -0.009004475 | 0.846120446 | -0.028644468 | 0.536918181 | -0.039758546 |
| -0.160155818 | 0.000512432 | -0.117614706 | 0.010968589 | -0.10302993  |
| -0.121330086 | 0.008674026 | -0.071739319 | 0.121588525 | -0.078515742 |
| -0.051836052 | 0.263594249 | -0.009494307 | 0.837862409 | -0.031287775 |
| -0.132692716 | 0.004071848 | -0.122146616 | 0.008231158 | -0.141417885 |
| -0.096453058 | 0.037192707 | -0.056403525 | 0.223759266 | -0.079346658 |
| -0.076962529 | 0.096676966 | -0.07384017  | 0.111025827 | -0.076606336 |
| -0.372193878 | 8.61E-17    | -0.352422455 | 4.20E-15    | -0.361098931 |
| -0.279504991 | 7.90E-10    | -0.291511878 | 1.34E-10    | -0.317916582 |
| 0.015908851  | 0.731678566 | -0.008034772 | 0.862517516 | -0.026259812 |
| 0.023036088  | 0.61950935  | 0.060869042  | 0.189154743 | 0.067298306  |
| 0.116091417  | 0.012055106 | 0.103041588  | 0.025966663 | 0.097435132  |
| -0.085416417 | 0.065140991 | -0.089867313 | 0.05228583  | -0.100578938 |
| -0.061472555 | 0.184797497 | -0.022523202 | 0.627330442 | -0.035764767 |
| -0.025983478 | 0.575412969 | 0.007209621  | 0.876517251 | -0.007547044 |
| -0.131785695 | 0.00433451  | -0.110347528 | 0.017054592 | -0.126568875 |
| -0.193587901 | 2.53E-05    | -0.15484571  | 0.000786369 | -0.175553519 |
| -0.069929818 | 0.131300319 | -0.023659196 | 0.610064967 | -0.043391744 |
| -0.10098469  | 0.029107333 | -0.109266662 | 0.018175634 | -0.116182881 |
| -0.338872631 | 5.18E-14    | -0.314699638 | 3.40E-12    | -0.356925358 |
| -0.148366712 | 0.00130239  | -0.07414606  | 0.109549993 | -0.098804217 |
| -0.249884829 | 4.43E-08    | -0.191150615 | 3.21E-05    | -0.196382282 |
| -0.279503661 | 7.90E-10    | -0.268866431 | 3.55E-09    | -0.267728202 |
| -0.199442692 | 1.41E-05    | -0.149492393 | 0.001194771 | -0.17749036  |
| -0.10957619  | 0.01784821  | -0.064077395 | 0.166838416 | -0.081544203 |
| -0.139406978 | 0.002533656 | -0.08582787  | 0.063852818 | -0.075184741 |
| -0.323808108 | 7.34E-13    | -0.295560802 | 7.21E-11    | -0.316587102 |
| 0.155296072  | 0.000758712 | 0.185324148  | 5.60E-05    | 0.156496346  |
| -0.202945561 | 9.87E-06    | -0.182376247 | 7.37E-05    | -0.180013377 |
| -0.264689455 | 6.30E-09    | -0.233970153 | 3.16E-07    | -0.238119794 |
| -0.117171134 | 0.011275655 | -0.05444657  | 0.240267564 | -0.057006914 |
| -0.059782317 | 0.197190208 | 0.017213114  | 0.710630718 | 0.01179955   |
| -0.063800546 | 0.168682628 | -0.0245392   | 0.596836615 | -0.052261579 |
| -0.170027033 | 0.00022304  | -0.12470695  | 0.006970335 | -0.125600646 |



|              |             |              |             |              |
|--------------|-------------|--------------|-------------|--------------|
| -0.33903299  | 5.03E-14    | -0.336006047 | 8.67E-14    | -0.35242516  |
| -0.231916399 | 4.03E-07    | -0.227471976 | 6.77E-07    | -0.240450614 |
| -0.22350966  | 1.07E-06    | -0.197223363 | 1.76E-05    | -0.211225044 |
| -0.028648769 | 0.536857027 | 0.018545354  | 0.689356265 | 0.011488136  |
| -0.290925504 | 1.46E-10    | -0.240748695 | 1.39E-07    | -0.243757519 |
| -0.057181473 | 0.217426634 | -0.024632605 | 0.595440199 | -0.046000399 |
| 0.19878041   | 1.51E-05    | 0.19864      | 1.53E-05    | 0.192830111  |
| 0.27629754   | 1.25E-09    | 0.266143972  | 5.17E-09    | 0.215552943  |
| 0.251686549  | 3.52E-08    | 0.231858803  | 4.06E-07    | 0.252272244  |
| -0.106438274 | 0.021418506 | -0.08445863  | 0.068222497 | -0.086241903 |
| -0.165387969 | 0.000331652 | -0.182071439 | 7.58E-05    | -0.182623994 |
| -0.246010553 | 7.24E-08    | -0.252029651 | 3.37E-08    | -0.258189521 |
| -0.184492591 | 6.05E-05    | -0.183154565 | 6.86E-05    | -0.158515354 |
| -0.376680211 | 3.43E-17    | -0.355407454 | 2.38E-15    | -0.358789664 |
| -0.201370148 | 1.16E-05    | -0.169829716 | 0.000226884 | -0.185337242 |
| -0.273831891 | 1.78E-09    | -0.234223131 | 3.06E-07    | -0.260716851 |
| 0.307742165  | 1.06E-11    | 0.286927578  | 2.66E-10    | 0.328281576  |
| -0.284120243 | 4.03E-10    | -0.250408489 | 4.15E-08    | -0.284290386 |
| -0.20080833  | 1.23E-05    | -0.194704921 | 2.27E-05    | -0.214447848 |
| -0.153767619 | 0.000856408 | -0.119503508 | 0.009742401 | -0.127069519 |
| -0.170766542 | 0.000209171 | -0.158720825 | 0.000576063 | -0.152081934 |
| 0.11322238   | 0.014362147 | 0.128412023  | 0.005451233 | 0.121462065  |
| -0.09559261  | 0.038925986 | -0.112286002 | 0.015194909 | -0.091981603 |
| -0.127510545 | 0.005790522 | -0.107054748 | 0.020671784 | -0.130029752 |
| -0.142932626 | 0.001958626 | -0.133392227 | 0.003879208 | -0.144088386 |
| -0.262598935 | 8.36E-09    | -0.21214624  | 3.75E-06    | -0.21302769  |
| -0.107688694 | 0.019927596 | -0.12703283  | 0.005977909 | -0.143721463 |
| -0.243392378 | 1.00E-07    | -0.19150659  | 3.10E-05    | -0.223992126 |
| -0.163433563 | 0.000390776 | -0.160389225 | 0.000502722 | -0.14538201  |
| -0.094623449 | 0.040959678 | -0.074064099 | 0.109943909 | -0.080694352 |
| -0.314173126 | 3.71E-12    | -0.310498305 | 6.78E-12    | -0.354333093 |
| -0.280072409 | 7.28E-10    | -0.237211439 | 2.14E-07    | -0.238064644 |
| -0.182671322 | 7.17E-05    | -0.198988507 | 1.48E-05    | -0.225916137 |
| -0.323243939 | 8.08E-13    | -0.28608852  | 3.02E-10    | -0.28043989  |
| -0.274261145 | 1.67E-09    | -0.248163958 | 5.52E-08    | -0.296607422 |
| -0.182374919 | 7.37E-05    | -0.128234747 | 0.005516506 | -0.143114054 |
| -0.249033864 | 4.94E-08    | -0.211452537 | 4.04E-06    | -0.232353306 |
| -0.035686965 | 0.441667672 | -0.038851208 | 0.402228459 | -0.049007302 |
| -0.224214351 | 9.84E-07    | -0.210547715 | 4.45E-06    | -0.26393737  |
| -0.036103026 | 0.436359237 | 0.008157962  | 0.860431033 | -0.013092445 |
| -0.277857322 | 1.00E-09    | -0.211476011 | 4.03E-06    | -0.216890257 |
| -0.215470861 | 2.61E-06    | -0.179948865 | 9.22E-05    | -0.156610914 |
| -0.090707102 | 0.050114689 | -0.079226414 | 0.087229267 | -0.0597557   |
| -0.134346516 | 0.00362971  | -0.092174474 | 0.04650191  | -0.092649878 |
| -0.232086109 | 3.95E-07    | -0.254583315 | 2.42E-08    | -0.272886823 |

|              |             |              |             |              |
|--------------|-------------|--------------|-------------|--------------|
| -0.150115899 | 0.001138747 | -0.167221447 | 0.000283872 | -0.148394571 |
| -0.240228873 | 1.48E-07    | -0.229292463 | 5.48E-07    | -0.25527272  |
| -0.201195832 | 1.18E-05    | -0.17810641  | 0.000109023 | -0.204514868 |
| 0.023648999  | 0.610219004 | 0.04131955   | 0.372977162 | 0.009688788  |
| -0.266748199 | 4.76E-09    | -0.256016982 | 2.01E-08    | -0.305688682 |
| -0.189697564 | 3.69E-05    | -0.195700366 | 2.05E-05    | -0.23250387  |
| -0.161083063 | 0.000474857 | -0.172690994 | 0.000176768 | -0.178126714 |
| -0.110601455 | 0.016800171 | -0.045914345 | 0.32213477  | -0.047409379 |
| -0.314803041 | 3.34E-12    | -0.291479168 | 1.34E-10    | -0.282744868 |
| -0.275499883 | 1.40E-09    | -0.288387738 | 2.14E-10    | -0.29481169  |
| -0.303235763 | 2.18E-11    | -0.298514859 | 4.57E-11    | -0.301600058 |
| -0.209807383 | 4.81E-06    | -0.176095464 | 0.000130672 | -0.167476842 |
| -0.131749503 | 0.004345302 | -0.074402911 | 0.10832274  | -0.075001726 |
| -0.1392652   | 0.002559713 | -0.124122774 | 0.007241712 | -0.15368356  |
| -0.140447981 | 0.002349618 | -0.118771331 | 0.010202473 | -0.141301987 |
| 0.355396548  | 2.38E-15    | 0.378226603  | 2.49E-17    | 0.388182529  |
| 0.210286323  | 4.57E-06    | 0.210991017  | 4.24E-06    | 0.262837719  |
| -0.192482036 | 2.82E-05    | -0.175229478 | 0.000141186 | -0.187466087 |
| -0.22299266  | 1.13E-06    | -0.206844021 | 6.58E-06    | -0.20521328  |
| -0.263919681 | 6.99E-09    | -0.25923746  | 1.31E-08    | -0.272313691 |
| -0.286748033 | 2.73E-10    | -0.27342657  | 1.88E-09    | -0.295245734 |
| -0.321796696 | 1.03E-12    | -0.286154833 | 2.99E-10    | -0.266132909 |
| -0.168316837 | 0.000258479 | -0.135101501 | 0.003442727 | -0.13092708  |
| -0.135017519 | 0.003463086 | -0.108316456 | 0.01921375  | -0.142937775 |
| 0.173275293  | 0.000167902 | 0.195421085  | 2.11E-05    | 0.205929443  |
| -0.312082612 | 5.23E-12    | -0.296359849 | 6.38E-11    | -0.3014943   |
| -0.187348695 | 4.62E-05    | -0.135743476 | 0.003290656 | -0.149748649 |
| 0.226981688  | 7.17E-07    | 0.256371716  | 1.91E-08    | 0.250862516  |
| -0.172611679 | 0.000178005 | -0.158543125 | 0.000584434 | -0.110784243 |
| -0.027771061 | 0.549409761 | 0.003148748  | 0.94589482  | 0.027402003  |
| -0.118217603 | 0.010563114 | -0.059251014 | 0.201208223 | -0.076546475 |
| -0.105245873 | 0.022929475 | -0.067985563 | 0.142392174 | -0.089154127 |
| -0.121215146 | 0.008738042 | -0.082570911 | 0.074645653 | -0.133194251 |
| -0.120424156 | 0.009190115 | -0.1215679   | 0.0085429   | -0.11687769  |
| -0.285443223 | 3.32E-10    | -0.229355511 | 5.44E-07    | -0.251293144 |
| 0.156442748  | 0.000692307 | 0.141854425  | 0.002120339 | 0.125265707  |
| 0.179806451  | 9.34E-05    | 0.188794797  | 4.03E-05    | 0.22023155   |
| -0.21249524  | 3.61E-06    | -0.164618627 | 0.000353853 | -0.158754913 |
| -0.21974077  | 1.63E-06    | -0.230237134 | 4.91E-07    | -0.226573321 |
| -0.336418326 | 8.06E-14    | -0.313994195 | 3.82E-12    | -0.306320331 |
| -0.172832114 | 0.000174588 | -0.12679587  | 0.006072864 | -0.150296399 |
| -0.204852881 | 8.10E-06    | -0.176000945 | 0.000131782 | -0.188633187 |
| -0.121473716 | 0.008594618 | -0.105368733 | 0.022769639 | -0.101684012 |
| 0.269949703  | 3.06E-09    | 0.261202466  | 1.01E-08    | 0.268935561  |
| 0.122872589  | 0.007854463 | 0.14453647   | 0.001738876 | 0.180563697  |

|              |             |              |             |              |
|--------------|-------------|--------------|-------------|--------------|
| -0.165994914 | 0.000315062 | -0.133391156 | 0.003879497 | -0.143513104 |
| 0.273759979  | 1.79E-09    | 0.255186125  | 2.24E-08    | 0.264537764  |
| -0.34525196  | 1.61E-14    | -0.314709187 | 3.39E-12    | -0.309052248 |
| -0.067790214 | 0.14354513  | -0.021504912 | 0.642982191 | -0.027168232 |
| -0.198121558 | 1.61E-05    | -0.177555401 | 0.000114593 | -0.189623108 |
| -0.066817997 | 0.149389576 | -0.08160357  | 0.078123192 | -0.08617852  |
| -0.290729535 | 1.51E-10    | -0.311930873 | 5.36E-12    | -0.364278889 |
| -0.095687835 | 0.038730859 | -0.070346131 | 0.129014469 | -0.090873679 |
| 0.248023389  | 5.62E-08    | 0.220573828  | 1.48E-06    | 0.224788339  |
| -0.165765543 | 0.000321238 | -0.131993443 | 0.004273033 | -0.189166876 |
| -0.448157213 | 1.88E-24    | -0.440247657 | 1.47E-23    | -0.418846041 |
| -0.303008854 | 2.26E-11    | -0.298403868 | 4.65E-11    | -0.298091734 |
| -0.192630345 | 2.78E-05    | -0.129094133 | 0.005206512 | -0.127086507 |
| -0.161294326 | 0.000466663 | -0.150267054 | 0.001125535 | -0.170144513 |
| -0.131065957 | 0.004553729 | -0.090655348 | 0.050246278 | -0.093950139 |
| -0.206809849 | 6.61E-06    | -0.16016648  | 0.000511985 | -0.171942015 |
| -0.191763942 | 3.02E-05    | -0.154174869 | 0.000829299 | -0.182998082 |
| -0.234425456 | 2.99E-07    | -0.214272515 | 2.98E-06    | -0.254027139 |
| -0.24491371  | 8.31E-08    | -0.198648846 | 1.53E-05    | -0.200499884 |
| -0.073455938 | 0.112901753 | -0.058372173 | 0.207984627 | -0.076430489 |
| -0.192463061 | 2.82E-05    | -0.15776729  | 0.00062232  | -0.191327137 |
| -0.280716146 | 6.63E-10    | -0.23588555  | 2.51E-07    | -0.237291671 |
| 0.03903257   | 0.400033641 | 0.057466869  | 0.215135984 | 0.070731581  |
| -0.152727301 | 0.000929418 | -0.11219658  | 0.015276609 | -0.100559987 |
| -0.226103427 | 7.93E-07    | -0.186089045 | 5.21E-05    | -0.162688594 |
| -0.310287023 | 7.01E-12    | -0.263965708 | 6.95E-09    | -0.285300809 |
| -0.129551566 | 0.005047988 | -0.102168767 | 0.027261794 | -0.121027441 |
| -0.217852369 | 2.01E-06    | -0.225445848 | 8.55E-07    | -0.223822369 |
| -0.260102198 | 1.17E-08    | -0.205780803 | 7.36E-06    | -0.194908082 |
| -0.269776893 | 3.13E-09    | -0.239654635 | 1.59E-07    | -0.200600605 |
| -0.119115376 | 0.00998394  | -0.109485782 | 0.017943308 | -0.123617268 |
| -0.18311179  | 6.89E-05    | -0.148962675 | 0.001244351 | -0.157214069 |
| -0.04174356  | 0.368087914 | -0.008871326 | 0.848368159 | -0.022814903 |
| -0.197049006 | 1.79E-05    | -0.170016166 | 0.00022325  | -0.185575697 |
| -0.240708427 | 1.40E-07    | -0.187321011 | 4.64E-05    | -0.22143394  |
| -0.31119997  | 6.04E-12    | -0.305255481 | 1.58E-11    | -0.32851075  |
| -0.145183513 | 0.001656804 | -0.115256255 | 0.012690285 | -0.117845799 |
| -0.230601393 | 4.70E-07    | -0.192421101 | 2.84E-05    | -0.212197337 |
| -0.27482739  | 1.54E-09    | -0.259443183 | 1.28E-08    | -0.265513314 |
| -0.200111218 | 1.32E-05    | -0.216975116 | 2.21E-06    | -0.241513847 |
| -0.367580125 | 2.19E-16    | -0.35821552  | 1.38E-15    | -0.367980527 |
| -0.219598976 | 1.66E-06    | -0.179040782 | 0.000100156 | -0.208311287 |
| 0.186198812  | 5.16E-05    | 0.179731239  | 9.40E-05    | 0.194259257  |
| -0.238083693 | 1.93E-07    | -0.191702934 | 3.04E-05    | -0.189516576 |
| -0.044374465 | 0.338647137 | -0.000437517 | 0.99247648  | 0.012528469  |

|              |             |              |             |              |
|--------------|-------------|--------------|-------------|--------------|
| -0.363436228 | 4.98E-16    | -0.311328448 | 5.92E-12    | -0.331528908 |
| -0.412916791 | 1.18E-20    | -0.396014796 | 5.51E-19    | -0.419282512 |
| 0.323621051  | 7.58E-13    | 0.351731691  | 4.79E-15    | 0.335866982  |
| -0.319197666 | 1.61E-12    | -0.275744394 | 1.35E-09    | -0.29959141  |
| -0.014512294 | 0.754440724 | -0.033291825 | 0.472934076 | -0.024421241 |
| -0.323306141 | 8.00E-13    | -0.32053834  | 1.28E-12    | -0.32798938  |
| -0.050561349 | 0.275532885 | -0.024078314 | 0.603748506 | -0.020237731 |
| -0.376619216 | 3.48E-17    | -0.317310202 | 2.20E-12    | -0.29806451  |
| -0.014101513 | 0.761177636 | -0.009353642 | 0.840232089 | 0.021913172  |
| -0.248936017 | 5.00E-08    | -0.228776071 | 5.82E-07    | -0.249257914 |
| -0.226787319 | 7.33E-07    | -0.169839856 | 0.000226685 | -0.153650866 |
| -0.197190822 | 1.77E-05    | -0.16572438  | 0.000322358 | -0.188189314 |
| -0.130015383 | 0.004891705 | -0.076397697 | 0.099157    | -0.088691474 |
| -0.160952296 | 0.000479997 | -0.13058754  | 0.004704934 | -0.13563468  |
| -0.34673572  | 1.22E-14    | -0.335105045 | 1.02E-13    | -0.332599555 |
| -0.243745164 | 9.61E-08    | -0.213209644 | 3.34E-06    | -0.2085092   |
| 0.24646882   | 6.84E-08    | 0.220616877  | 1.48E-06    | 0.204494012  |
| -0.171580368 | 0.000194843 | -0.120153097 | 0.009349753 | -0.103226737 |
| 0.114157663  | 0.013570684 | 0.10665992   | 0.021147379 | 0.089748414  |
| -0.163950361 | 0.000374254 | -0.15843749  | 0.000589463 | -0.200763285 |
| -0.098782228 | 0.032826146 | -0.078290901 | 0.091039201 | -0.08150196  |
| -0.158302706 | 0.000595939 | -0.171073124 | 0.000203661 | -0.202754035 |
| -0.275999862 | 1.31E-09    | -0.269579499 | 3.22E-09    | -0.300264421 |
| -0.198187324 | 1.60E-05    | -0.140658847 | 0.002313859 | -0.16991036  |
| -0.355900316 | 2.16E-15    | -0.340656621 | 3.75E-14    | -0.356916369 |
| -0.330277061 | 2.39E-13    | -0.311215636 | 6.03E-12    | -0.303858322 |
| -0.201400442 | 1.16E-05    | -0.146788195 | 0.001468361 | -0.144072995 |
| -0.390457701 | 1.86E-18    | -0.382707948 | 9.74E-18    | -0.40313577  |
| -0.258283562 | 1.49E-08    | -0.245479532 | 7.74E-08    | -0.232482924 |
| -0.116235795 | 0.011948195 | -0.129500659 | 0.005065412 | -0.180492204 |
| -0.164424825 | 0.00035966  | -0.119822856 | 0.009547575 | -0.090137344 |
| -0.232420362 | 3.80E-07    | -0.203028561 | 9.79E-06    | -0.217541525 |
| -0.212844794 | 3.47E-06    | -0.223104447 | 1.12E-06    | -0.224434627 |
| -0.162235027 | 0.000431745 | -0.172791539 | 0.000175212 | -0.167597844 |
| -0.111623363 | 0.015809549 | -0.084010696 | 0.069704109 | -0.065150196 |
| -0.30836807  | 9.57E-12    | -0.28900014  | 1.95E-10    | -0.277540622 |
| -0.222840394 | 1.15E-06    | -0.175530223 | 0.000137448 | -0.178314877 |
| -0.10930326  | 0.018136649 | -0.074594211 | 0.107415758 | -0.066835274 |
| -0.329275147 | 2.85E-13    | -0.31284547  | 4.62E-12    | -0.296274746 |
| -0.10141832  | 0.02841939  | -0.081016038 | 0.08029875  | -0.06852169  |
| -0.171312332 | 0.000199457 | -0.175507928 | 0.000137722 | -0.187301126 |
| 0.157907712  | 0.000615298 | 0.177394606  | 0.000116268 | 0.236583684  |
| -0.243880354 | 9.45E-08    | -0.232753267 | 3.65E-07    | -0.232227317 |
| -0.284962869 | 3.56E-10    | -0.287132659 | 2.58E-10    | -0.295427607 |
| -0.10913746  | 0.01831385  | -0.098494776 | 0.033340201 | -0.112588519 |

|              |             |              |             |              |
|--------------|-------------|--------------|-------------|--------------|
| -0.096946728 | 0.036228156 | -0.058530118 | 0.206754768 | -0.074745657 |
| -0.311356194 | 5.89E-12    | -0.268822335 | 3.58E-09    | -0.295442855 |
| -0.234283437 | 3.04E-07    | -0.241780196 | 1.23E-07    | -0.281749949 |
| -0.221019004 | 1.41E-06    | -0.178887345 | 0.000101564 | -0.183384889 |
| 0.1289291    | 0.005264796 | 0.164506595  | 0.000357199 | 0.189309713  |
| -0.409648312 | 2.53E-20    | -0.384560721 | 6.58E-18    | -0.397122501 |
| -0.173662343 | 0.000162261 | -0.12917943  | 0.005176616 | -0.138951647 |
| -0.2695249   | 3.24E-09    | -0.223459571 | 1.07E-06    | -0.24371893  |
| -0.215012873 | 2.75E-06    | -0.163113949 | 0.000401332 | -0.138097793 |
| 0.270647681  | 2.78E-09    | 0.295323357  | 7.48E-11    | 0.304983706  |
| 0.340226029  | 4.05E-14    | 0.342806073  | 2.53E-14    | 0.32388984   |
| -0.32813303  | 3.48E-13    | -0.328351035 | 3.35E-13    | -0.322592607 |
| -0.150806961 | 0.001079487 | -0.161763508 | 0.000448931 | -0.160412913 |
| -0.200398877 | 1.28E-05    | -0.14255524  | 0.002013898 | -0.134725589 |
| -0.20243086  | 1.04E-05    | -0.191756759 | 3.03E-05    | -0.194151544 |
| -0.21282045  | 3.48E-06    | -0.188873825 | 4.00E-05    | -0.22497293  |
| -0.19050473  | 3.42E-05    | -0.155877174 | 0.000724356 | -0.18002753  |
| -0.295125243 | 7.71E-11    | -0.244489901 | 8.76E-08    | -0.240167091 |
| -0.312893578 | 4.58E-12    | -0.30538135  | 1.55E-11    | -0.334414111 |
| -0.28416362  | 4.01E-10    | -0.257098777 | 1.74E-08    | -0.257507599 |
| -0.152658578 | 0.000934438 | -0.093325973 | 0.043822185 | -0.120992705 |
| -0.262189015 | 8.84E-09    | -0.256586387 | 1.86E-08    | -0.238517252 |
| -0.181619097 | 7.91E-05    | -0.151164357 | 0.001049968 | -0.160445023 |
| -0.183747609 | 6.49E-05    | -0.169500446 | 0.000233436 | -0.173403063 |
| -0.232031095 | 3.97E-07    | -0.202929204 | 9.89E-06    | -0.232780849 |
| -0.400457859 | 2.05E-19    | -0.384255763 | 7.02E-18    | -0.392526779 |
| -0.135972868 | 0.003237814 | -0.110546141 | 0.016855307 | -0.105923371 |
| -0.241704739 | 1.24E-07    | -0.206722397 | 6.67E-06    | -0.238235482 |
| -0.244554866 | 8.69E-08    | -0.226343459 | 7.71E-07    | -0.226370986 |
| -0.092679495 | 0.045310176 | -0.086852215 | 0.0607367   | -0.095055944 |
| -0.022649791 | 0.625396133 | -0.012928991 | 0.780505206 | -0.034423273 |
| -0.3086636   | 9.13E-12    | -0.282483633 | 5.13E-10    | -0.261837245 |
| -0.270249079 | 2.93E-09    | -0.224301922 | 9.74E-07    | -0.213025363 |
| -0.059979831 | 0.195711526 | -0.037660788 | 0.416812585 | -0.050365077 |
| -0.206225129 | 7.02E-06    | -0.166327164 | 0.000306311 | -0.17220806  |
| -0.259482002 | 1.27E-08    | -0.232244176 | 3.88E-07    | -0.233516152 |
| -0.352929635 | 3.82E-15    | -0.300018713 | 3.61E-11    | -0.305604296 |
| -0.106554904 | 0.021275464 | -0.067315936 | 0.146374014 | -0.05924971  |
| -0.449778757 | 1.23E-24    | -0.454304839 | 3.68E-25    | -0.466934326 |
| -0.28211235  | 5.41E-10    | -0.243436892 | 9.99E-08    | -0.260547945 |
| 0.005872877  | 0.899276851 | 0.042114551  | 0.363842813 | 0.039566884  |
| 0.297371531  | 5.45E-11    | 0.310857733  | 6.39E-12    | 0.278456876  |
| 0.27516002   | 1.47E-09    | 0.280835266  | 6.52E-10    | 0.288357771  |
| -0.229271529 | 5.49E-07    | -0.190581246 | 3.39E-05    | -0.185792179 |
| 0.135291804  | 0.003396996 | 0.173512514  | 0.000164423 | 0.17193312   |

|              |             |              |             |              |
|--------------|-------------|--------------|-------------|--------------|
| 0.251636878  | 3.54E-08    | 0.29342592   | 1.00E-10    | 0.306377834  |
| 0.19449388   | 2.31E-05    | 0.22910169   | 5.60E-07    | 0.214258559  |
| 0.215265934  | 2.67E-06    | 0.202795187  | 1.00E-05    | 0.240334964  |
| 0.341304346  | 3.33E-14    | 0.333397783  | 1.38E-13    | 0.328474194  |
| 0.340606094  | 3.78E-14    | 0.379009093  | 2.12E-17    | 0.398809326  |
| 0.3459695    | 1.41E-14    | 0.362293207  | 6.24E-16    | 0.390980748  |
| 0.417149147  | 4.36E-21    | 0.434730802  | 5.95E-23    | 0.447111122  |
| 0.347685889  | 1.03E-14    | 0.358885984  | 1.21E-15    | 0.363837808  |
| 0.34084363   | 3.62E-14    | 0.346790141  | 1.21E-14    | 0.338409594  |
| 0.100680431  | 0.029598518 | 0.123201084  | 0.007689129 | 0.129042316  |
| -0.218007493 | 1.98E-06    | -0.257673454 | 1.61E-08    | -0.284238092 |
| 0.215397078  | 2.63E-06    | 0.228755298  | 5.83E-07    | 0.245643554  |
| 0.239778191  | 1.57E-07    | 0.301969933  | 2.66E-11    | 0.260134309  |
| 0.222273851  | 1.23E-06    | 0.219333403  | 1.71E-06    | 0.232654873  |
| 0.407391504  | 4.25E-20    | 0.455767815  | 2.48E-25    | 0.451821875  |
| 0.207037714  | 6.45E-06    | 0.266940734  | 4.63E-09    | 0.288351909  |
| 0.195572438  | 2.08E-05    | 0.246431587  | 6.87E-08    | 0.249008062  |
| 0.067311542  | 0.146400424 | 0.119264828  | 0.009890312 | 0.139263536  |
| 0.377096011  | 3.15E-17    | 0.383510269  | 8.22E-18    | 0.388094097  |
| 0.337169878  | 7.04E-14    | 0.383728476  | 7.85E-18    | 0.394529169  |
| 0.352319855  | 4.29E-15    | 0.366089184  | 2.94E-16    | 0.340484078  |
| 0.323676065  | 7.51E-13    | 0.331648757  | 1.88E-13    | 0.315172656  |
| -0.348989346 | 8.03E-15    | -0.364340483 | 4.17E-16    | -0.363589444 |
| -0.410933183 | 1.88E-20    | -0.43491404  | 5.68E-23    | -0.475740546 |
| 0.262800149  | 8.14E-09    | 0.307289353  | 1.14E-11    | 0.328465606  |
| 0.366156526  | 2.91E-16    | 0.395615572  | 6.01E-19    | 0.387866053  |
| 0.318757537  | 1.73E-12    | 0.345589465  | 1.51E-14    | 0.353629277  |
| 0.392446024  | 1.21E-18    | 0.365314466  | 3.44E-16    | 0.391104106  |
| 0.327306321  | 4.02E-13    | 0.317494769  | 2.14E-12    | 0.315930345  |
| 0.183228803  | 6.81E-05    | 0.20311526   | 9.70E-06    | 0.219726753  |
| 0.16073593   | 0.000488614 | 0.165965007  | 0.000315861 | 0.152668773  |
| 0.227184967  | 7.00E-07    | 0.251866047  | 3.44E-08    | 0.272128118  |
| 0.092688148  | 0.045289983 | 0.122094068  | 0.00825904  | 0.141441283  |
| 0.263822034  | 7.09E-09    | 0.269066924  | 3.46E-09    | 0.24503819   |
| 0.268166634  | 3.91E-09    | 0.304937781  | 1.66E-11    | 0.287427458  |
| 0.210985298  | 4.24E-06    | 0.26476723   | 6.23E-09    | 0.251215135  |
| 0.247477151  | 6.02E-08    | 0.283627314  | 4.34E-10    | 0.333124619  |
| -0.323576741 | 7.64E-13    | -0.373359506 | 6.79E-17    | -0.383027672 |
| 0.372474453  | 8.13E-17    | 0.410535761  | 2.06E-20    | 0.395748594  |
| 0.353360498  | 3.52E-15    | 0.370572835  | 1.20E-16    | 0.357674631  |
| 0.26387645   | 7.04E-09    | 0.288345295  | 2.16E-10    | 0.309601247  |
| 0.185367816  | 5.58E-05    | 0.241270762  | 1.31E-07    | 0.245306714  |
| 0.204365636  | 8.52E-06    | 0.22140381   | 1.35E-06    | 0.262561413  |
| 0.10164592   | 0.028063929 | 0.105010596  | 0.023238273 | 0.149681501  |
| 0.308318545  | 9.65E-12    | 0.329974294  | 2.52E-13    | 0.365855136  |

|              |             |              |             |              |
|--------------|-------------|--------------|-------------|--------------|
| 0.047098138  | 0.309803044 | 0.077623955  | 0.093835951 | 0.107342769  |
| -0.178769917 | 0.000102654 | -0.208343187 | 5.62E-06    | -0.277527411 |
| 0.169662118  | 0.000230197 | 0.208296317  | 5.65E-06    | 0.229165802  |
| 0.395492678  | 6.18E-19    | 0.403095629  | 1.13E-19    | 0.420055597  |
| 0.401167271  | 1.75E-19    | 0.435463735  | 4.95E-23    | 0.472219395  |
| 0.256740922  | 1.82E-08    | 0.289504147  | 1.81E-10    | 0.253508636  |
| 0.220220344  | 1.54E-06    | 0.246325097  | 6.96E-08    | 0.281506899  |
| 0.284963811  | 3.56E-10    | 0.307014832  | 1.19E-11    | 0.314858304  |
| 0.281665939  | 5.78E-10    | 0.315176895  | 3.14E-12    | 0.275065373  |
| 0.107548352  | 0.020090303 | 0.129500161  | 0.005065583 | 0.141053016  |
| -0.380729918 | 1.48E-17    | -0.403725783 | 9.81E-20    | -0.427055809 |
| 0.380944786  | 1.41E-17    | 0.376819741  | 3.33E-17    | 0.404785859  |
| 0.099421652  | 0.031706866 | 0.129503306  | 0.005064505 | 0.157436485  |
| 0.058211961  | 0.209237526 | 0.101075058  | 0.0289628   | 0.123531234  |
| 0.397164613  | 4.27E-19    | 0.383867368  | 7.63E-18    | 0.40202591   |
| 0.308063165  | 1.01E-11    | 0.325405986  | 5.58E-13    | 0.327802288  |
| 0.337337057  | 6.83E-14    | 0.384428693  | 6.77E-18    | 0.378410512  |
| 0.232380536  | 3.81E-07    | 0.223325137  | 1.09E-06    | 0.254454535  |
| -0.491438578 | 9.16E-30    | -0.498549226 | 1.03E-30    | -0.512366581 |
| -0.234083468 | 3.12E-07    | -0.229526035 | 5.33E-07    | -0.211562822 |
| -0.26079694  | 1.06E-08    | -0.272188395 | 2.24E-09    | -0.281022641 |
| 0.200002003  | 1.33E-05    | 0.198293017  | 1.58E-05    | 0.18537722   |
| -0.362323678 | 6.20E-16    | -0.367118467 | 2.40E-16    | -0.371185564 |
| 0.205440367  | 7.62E-06    | 0.240674005  | 1.40E-07    | 0.274380851  |
| 0.274252227  | 1.67E-09    | 0.315442321  | 3.01E-12    | 0.3432943    |
| -0.309367984 | 8.14E-12    | -0.310092034 | 7.24E-12    | -0.319319203 |
| -0.343643389 | 2.17E-14    | -0.342148829 | 2.85E-14    | -0.335316974 |
| 0.414444496  | 8.26E-21    | 0.469503988  | 5.61E-27    | 0.507797463  |
| 0.377946417  | 2.64E-17    | 0.412671659  | 1.25E-20    | 0.420422155  |
| -0.37249695  | 8.10E-17    | -0.397691186 | 3.80E-19    | -0.410623736 |
| 0.171864806  | 0.000190056 | 0.204919932  | 8.05E-06    | 0.208735355  |
| 0.400946877  | 1.84E-19    | 0.396679103  | 4.76E-19    | 0.415717256  |
| -0.243876876 | 9.46E-08    | -0.280351979 | 6.99E-10    | -0.305506139 |
| -0.150084128 | 0.001141542 | -0.16529619  | 0.00033423  | -0.188481129 |
| 0.313383107  | 4.23E-12    | 0.356383572  | 1.97E-15    | 0.377754566  |
| 0.21567195   | 2.56E-06    | 0.267725447  | 4.16E-09    | 0.305481295  |
| 0.232723314  | 3.66E-07    | 0.26627167   | 5.08E-09    | 0.302355543  |
| 0.370173527  | 1.30E-16    | 0.371055129  | 1.09E-16    | 0.361080048  |
| 0.062659759  | 0.176442965 | 0.075333283  | 0.103967914 | 0.104826597  |
| 0.143415011  | 0.001889998 | 0.150336868  | 0.00111948  | 0.141542557  |
| 0.330420755  | 2.33E-13    | 0.36516985   | 3.54E-16    | 0.3288649    |
| 0.171420536  | 0.000197582 | 0.195250441  | 2.15E-05    | 0.200794725  |
| 0.260732415  | 1.07E-08    | 0.274137119  | 1.70E-09    | 0.264365115  |
| 0.117868938  | 0.010795956 | 0.177958066  | 0.000110497 | 0.195134166  |
| 0.346084522  | 1.38E-14    | 0.380308721  | 1.61E-17    | 0.345558559  |

|              |             |              |             |              |
|--------------|-------------|--------------|-------------|--------------|
| 0.394817353  | 7.17E-19    | 0.421710717  | 1.47E-21    | 0.448671567  |
| 0.185107694  | 5.71E-05    | 0.183948803  | 6.37E-05    | 0.212416141  |
| 0.225200141  | 8.79E-07    | 0.266463385  | 4.95E-09    | 0.284565468  |
| 0.13793823   | 0.002815702 | 0.139761615  | 0.002469534 | 0.150920778  |
| 0.42198857   | 1.37E-21    | 0.431706563  | 1.27E-22    | 0.437000272  |
| 0.322446458  | 9.26E-13    | 0.300378879  | 3.41E-11    | 0.312851449  |
| 0.280674797  | 6.67E-10    | 0.28572574   | 3.18E-10    | 0.301205685  |
| -0.415446991 | 6.52E-21    | -0.434094752 | 6.98E-23    | -0.457649761 |
| 0.297505481  | 5.34E-11    | 0.308751461  | 9.00E-12    | 0.349536495  |
| 0.17966014   | 9.47E-05    | 0.207593138  | 6.08E-06    | 0.194937802  |
| 0.347086921  | 1.15E-14    | 0.328673486  | 3.17E-13    | 0.345172494  |
| 0.330488774  | 2.31E-13    | 0.36973728   | 1.42E-16    | 0.35032696   |
| 0.23157734   | 4.19E-07    | 0.255644481  | 2.11E-08    | 0.292036992  |
| 0.20438164   | 8.51E-06    | 0.24623929   | 7.04E-08    | 0.254222868  |
| 0.176592436  | 0.000124974 | 0.204223827  | 8.65E-06    | 0.221973491  |
| 0.249798133  | 4.48E-08    | 0.273844484  | 1.77E-09    | 0.301634384  |
| 0.307810427  | 1.05E-11    | 0.327846925  | 3.66E-13    | 0.358877462  |
| -0.356240952 | 2.03E-15    | -0.352889642 | 3.85E-15    | -0.382138018 |
| -0.332805609 | 1.53E-13    | -0.344845025 | 1.74E-14    | -0.392596142 |
| 0.437540608  | 2.92E-23    | 0.457161779  | 1.70E-25    | 0.46435422   |
| 0.259506401  | 1.26E-08    | 0.235085121  | 2.76E-07    | 0.248346634  |
| 0.347722009  | 1.02E-14    | 0.369404657  | 1.52E-16    | 0.394630914  |
| 0.210509075  | 4.47E-06    | 0.234437336  | 2.99E-07    | 0.223432745  |
| 0.314319463  | 3.62E-12    | 0.325710168  | 5.29E-13    | 0.322570985  |
| 0.210526686  | 4.46E-06    | 0.221087757  | 1.40E-06    | 0.255405209  |
| 0.185653392  | 5.43E-05    | 0.247193552  | 6.24E-08    | 0.279847665  |
| 0.295219334  | 7.60E-11    | 0.356190829  | 2.05E-15    | 0.343946805  |
| 0.417379782  | 4.13E-21    | 0.435549536  | 4.84E-23    | 0.444637997  |
| 0.309716682  | 7.70E-12    | 0.349044092  | 7.95E-15    | 0.314657987  |
| 0.372443128  | 8.19E-17    | 0.377172059  | 3.10E-17    | 0.385012645  |
| 0.275653852  | 1.37E-09    | 0.310512802  | 6.76E-12    | 0.304219166  |
| 0.418321623  | 3.30E-21    | 0.453487573  | 4.58E-25    | 0.440066325  |
| 0.286736511  | 2.74E-10    | 0.309915477  | 7.45E-12    | 0.312293901  |
| 0.250179189  | 4.27E-08    | 0.257955707  | 1.55E-08    | 0.294195792  |
| -0.218186801 | 1.94E-06    | -0.235393769 | 2.66E-07    | -0.27536864  |
| 0.2817217    | 5.73E-10    | 0.319009063  | 1.66E-12    | 0.311959263  |
| 0.391446517  | 1.50E-18    | 0.401072911  | 1.78E-19    | 0.416900031  |
| 0.25853428   | 1.44E-08    | 0.30679556   | 1.23E-11    | 0.305190075  |
| 0.205783896  | 7.35E-06    | 0.230741547  | 4.63E-07    | 0.230468496  |
| -0.033330729 | 0.472416707 | -0.022170067 | 0.632739907 | 0.001711341  |
| -0.311130233 | 6.11E-12    | -0.315485269 | 2.99E-12    | -0.304649111 |
| 0.072745176  | 0.116437433 | 0.095321478  | 0.039486128 | 0.143578206  |
| 0.399628548  | 2.47E-19    | 0.42833349   | 2.92E-22    | 0.426413599  |
| 0.284015611  | 4.10E-10    | 0.296729644  | 6.02E-11    | 0.293441476  |
| -0.034234983 | 0.460479263 | 0.004611427  | 0.920830812 | 0.037872418  |



|              |             |              |             |              |
|--------------|-------------|--------------|-------------|--------------|
| 0.044747376  | 0.334599492 | 0.017194444  | 0.710930514 | 0.038742162  |
| -0.263788447 | 7.12E-09    | -0.228841567 | 5.78E-07    | -0.216247562 |
| -0.200616784 | 1.25E-05    | -0.169660709 | 0.000230225 | -0.145182806 |
| -0.107237077 | 0.020455313 | -0.079487305 | 0.086189959 | -0.073302099 |
| 0.039908029  | 0.389540284 | 0.104020168  | 0.024577986 | 0.121312178  |
| -0.205974411 | 7.21E-06    | -0.181368899 | 8.09E-05    | -0.196490136 |
| -0.052847748 | 0.254375697 | -0.033529191 | 0.469782259 | -0.072967504 |
| -0.238805219 | 1.76E-07    | -0.206422356 | 6.88E-06    | -0.199631541 |
| -0.209135897 | 5.17E-06    | -0.18565704  | 5.43E-05    | -0.159390754 |
| -0.245984491 | 7.27E-08    | -0.18324225  | 6.80E-05    | -0.189117814 |
| 0.074756349  | 0.106651738 | 0.054146691  | 0.242870949 | 0.032591831  |
| -0.062182286 | 0.179768636 | 0.008007924  | 0.862972379 | 0.014658749  |
| -0.012994027 | 0.779429498 | -0.034835314 | 0.452647844 | -0.03563078  |
| -0.2713438   | 2.52E-09    | -0.254743468 | 2.37E-08    | -0.257594712 |
| 0.207837185  | 5.93E-06    | 0.165724834  | 0.000322346 | 0.17167204   |
| -0.091535264 | 0.048047899 | -0.053515579 | 0.248414355 | -0.066458495 |
| 0.080636875  | 0.081728608 | 0.130445902  | 0.00475056  | 0.159258333  |
| 0.133253316  | 0.003916793 | 0.122862861  | 0.007859407 | 0.132192135  |
| -0.39441241  | 7.84E-19    | -0.361780275 | 6.90E-16    | -0.367240445 |
| -0.117694568 | 0.010914099 | -0.086857607 | 0.060720636 | -0.087915621 |
| 0.213946122  | 3.08E-06    | 0.164800721  | 0.000348476 | 0.18183839   |
| 0.132673762  | 0.004077187 | 0.057013169  | 0.218785647 | 0.068647649  |
| 0.04804992   | 0.300116607 | 0.105480816  | 0.022624667 | 0.119136712  |
| -0.034029253 | 0.463180318 | -0.085664007 | 0.064363303 | -0.047656322 |
| 0.069047531  | 0.136248031 | 0.122725342  | 0.007929598 | 0.138090576  |
| -0.131241758 | 0.004499279 | -0.146797162 | 0.001467365 | -0.126565345 |
| -0.00500966  | 0.914019328 | -0.054226508 | 0.242176101 | -0.058969036 |
| -0.10240947  | 0.026899195 | -0.048864139 | 0.291991619 | -0.059510376 |
| 0.031026342  | 0.503591749 | 0.075935666  | 0.10122307  | 0.067546283  |
| -0.153433484 | 0.000879258 | -0.100471062 | 0.029940629 | -0.086040242 |
| 0.004696145  | 0.919381272 | 0.047728908  | 0.303360851 | 0.043109162  |
| 0.002080775  | 0.964230482 | -0.044146112 | 0.341141112 | -0.035818878 |
| 0.096525582  | 0.037049657 | 0.090825499  | 0.049814738 | 0.141426197  |
| 0.019093043  | 0.680679629 | -0.054998696 | 0.235525691 | -0.020713785 |
| -0.0336132   | 0.468669542 | 0.012976699  | 0.779716057 | 0.002751123  |
| -0.308757177 | 8.99E-12    | -0.303249456 | 2.17E-11    | -0.306033673 |
| -0.23218977  | 3.90E-07    | -0.177400548 | 0.000116206 | -0.194063659 |
| 0.0854698    | 0.064972665 | 0.052028867  | 0.261819826 | 0.053038185  |
| -0.160780172 | 0.00048684  | -0.11981729  | 0.009550941 | -0.116194956 |
| 0.186787027  | 4.88E-05    | 0.151253449  | 0.001042726 | 0.132210739  |
| 0.200815026  | 1.23E-05    | 0.229518807  | 5.34E-07    | 0.263390695  |
| 0.112030125  | 0.01542972  | 0.069195212  | 0.135410011 | 0.080158217  |
| 0.076957523  | 0.096698728 | 0.090255523  | 0.051272619 | 0.069788867  |
| -0.300162357 | 3.53E-11    | -0.262705177 | 8.24E-09    | -0.263302052 |
| -0.261999457 | 9.06E-09    | -0.242718151 | 1.09E-07    | -0.257439214 |

|              |             |              |             |              |
|--------------|-------------|--------------|-------------|--------------|
| -0.253200606 | 2.89E-08    | -0.212803311 | 3.49E-06    | -0.219495151 |
| 0.17871724   | 0.000103147 | 0.183528658  | 6.62E-05    | 0.207532504  |
| -0.094879519 | 0.040413806 | -0.057381692 | 0.215817806 | -0.036855502 |
| -0.155541139 | 0.000744043 | -0.114364195 | 0.013401178 | -0.092570777 |
| -0.029831391 | 0.520173962 | -0.071691682 | 0.121836811 | -0.072245277 |
| 0.027916261  | 0.547323231 | 0.027917252  | 0.547309005 | 0.026362736  |
| 0.123043775  | 0.007767912 | 0.052386257  | 0.258552679 | 0.025886578  |
| -0.1836229   | 6.57E-05    | -0.128710925 | 0.005342749 | -0.156090434 |
| -0.05241999  | 0.258245761 | -0.013546827 | 0.770303258 | -0.026081661 |
| -0.013507926 | 0.770944449 | 0.029199427  | 0.529055735 | 0.015738048  |
| 0.011341468  | 0.806888351 | 0.036559908  | 0.430572427 | 0.066326436  |
| 0.075294254  | 0.10414777  | 0.060907226  | 0.188876842 | 0.068005441  |
| 0.11512502   | 0.012792735 | 0.084153297  | 0.069229603 | 0.069943204  |
| 0.19874455   | 1.51E-05    | 0.206821608  | 6.60E-06    | 0.228798853  |
| -0.22346854  | 1.07E-06    | -0.192156799 | 2.91E-05    | -0.22819017  |
| -0.021547434 | 0.642325367 | -0.082005533 | 0.076662517 | -0.065976105 |
| -0.227877944 | 6.46E-07    | -0.194572456 | 2.30E-05    | -0.203641361 |
| 0.046401275  | 0.317024217 | -0.01869557  | 0.686972386 | -0.00469483  |
| 0.109487421  | 0.01794158  | 0.071276602  | 0.124017014 | 0.058537408  |
| -0.077703523 | 0.093498727 | -0.054372325 | 0.240910287 | -0.051964296 |
| -0.115864802 | 0.012224619 | -0.066783873 | 0.149597954 | -0.054820992 |
| -0.223911158 | 1.02E-06    | -0.212016511 | 3.80E-06    | -0.217957148 |
| 0.046348853  | 0.317571851 | 0.025894461  | 0.576722856 | 0.02422236   |
| 0.180435645  | 8.82E-05    | 0.153806235  | 0.000853802 | 0.159884986  |
| 0.051657984  | 0.265240281 | 0.073417196  | 0.113092274 | 0.065113687  |
| -0.05802371  | 0.210716662 | -0.003811892 | 0.934523288 | 0.024945177  |
| -0.050111817 | 0.279829514 | 0.008099419  | 0.861422464 | -0.006500438 |
| 0.019561848  | 0.673285951 | -0.029591259 | 0.523539784 | 0.002054286  |
| 0.027940417  | 0.546976485 | -0.024408564 | 0.598792114 | -0.022978417 |
| 0.001935274  | 0.966730221 | 0.041560135  | 0.370198084 | 0.00323461   |
| 0.073843514  | 0.111009607 | 0.12409107   | 0.007256707 | 0.134421518  |
| -0.016102052 | 0.728547565 | 0.043074708  | 0.35299855  | 0.046767256  |
| -0.112381299 | 0.015108262 | -0.069137095 | 0.135739318 | -0.094455715 |
| 0.106445508  | 0.02140961  | 0.127474052  | 0.005804648 | 0.121772917  |
| 0.091555512  | 0.047998276 | 0.075922038  | 0.101284525 | 0.095781349  |
| 0.142591588  | 0.002008513 | 0.176605996  | 0.000124822 | 0.168233778  |
| -0.228223863 | 6.21E-07    | -0.146520463 | 0.001498366 | -0.143376987 |
| -0.268695283 | 3.64E-09    | -0.27028987  | 2.92E-09    | -0.256751634 |
| -0.170533966 | 0.000213443 | -0.151179813 | 0.001048708 | -0.173239664 |
| 0.299187327  | 4.11E-11    | 0.272135323  | 2.25E-09    | 0.282830443  |
| -0.157940711 | 0.000613659 | -0.113229243 | 0.014356194 | -0.136386024 |
| -0.104539853 | 0.023866937 | -0.081042509 | 0.080199687 | -0.099396408 |
| -0.099803875 | 0.031053507 | -0.052170352 | 0.260523031 | -0.053620462 |
| 0.11360596   | 0.01403277  | 0.097917339  | 0.034393614 | 0.114995455  |
| -0.135017135 | 0.003463179 | -0.122245949 | 0.008178682 | -0.108727966 |

|              |             |              |             |              |
|--------------|-------------|--------------|-------------|--------------|
| -0.113604435 | 0.014034066 | -0.081954528 | 0.076846621 | -0.078300131 |
| -0.245793521 | 7.44E-08    | -0.208987119 | 5.25E-06    | -0.207959625 |
| -0.08169231  | 0.077798798 | -0.032435486 | 0.48440062  | -0.009354973 |
| 0.134940071  | 0.003481957 | 0.119878404  | 0.009514043 | 0.133358948  |
| -0.235480497 | 2.64E-07    | -0.236830681 | 2.24E-07    | -0.283682206 |
| -0.224964391 | 9.03E-07    | -0.195728831 | 2.05E-05    | -0.246935462 |
| -0.164682662 | 0.000351953 | -0.156555546 | 0.000686074 | -0.163583044 |
| -0.256364406 | 1.92E-08    | -0.225948022 | 8.07E-07    | -0.250176187 |
| 0.069035161  | 0.136318403 | 0.127321775  | 0.005863929 | 0.112241867  |
| 0.007204378  | 0.87660633  | -0.001101586 | 0.981058652 | -0.005681501 |
| -0.21611047  | 2.44E-06    | -0.158710104 | 0.000576565 | -0.156231902 |
| -0.324759963 | 6.23E-13    | -0.294125944 | 8.99E-11    | -0.301810771 |
| -0.183424591 | 6.69E-05    | -0.140901992 | 0.002273243 | -0.1155109   |
| -0.160627802 | 0.000492974 | -0.138793096 | 0.00264825  | -0.113819123 |
| -0.186676351 | 4.93E-05    | -0.141706872 | 0.002143394 | -0.141238168 |
| -0.008948721 | 0.847061491 | 0.053135249  | 0.251797284 | 0.056278084  |
| 0.034737368  | 0.453920423 | 0.060198038  | 0.194087357 | 0.080266506  |
| 0.018741333  | 0.686246749 | 0.072641577  | 0.116959944 | 0.090756661  |
| -0.145814435 | 0.001580213 | -0.088935794 | 0.05478527  | -0.067652691 |
| -0.03789899  | 0.413869686 | 0.019282805  | 0.677683092 | 0.025370204  |
| 0.100834335  | 0.029349181 | 0.039690005  | 0.392137813 | 0.019153472  |
| 0.08912343   | 0.054273973 | 0.11787608   | 0.010791141 | 0.125493372  |
| -0.01264314  | 0.785238174 | -0.038671877 | 0.404405755 | -0.047106588 |
| 0.055102057  | 0.23464538  | 0.093229451  | 0.044041703 | 0.079236627  |
| 0.002444854  | 0.957977137 | 0.027171292  | 0.558069665 | 0.003075551  |
| -0.169540252 | 0.000232635 | -0.143351307 | 0.001898933 | -0.173786601 |
| -0.164782731 | 0.000349004 | -0.168091476 | 0.000263523 | -0.190781748 |
| -0.183794565 | 6.46E-05    | -0.117047276 | 0.011362744 | -0.099508728 |
| 0.114551319  | 0.013249215 | 0.129749213  | 0.004980849 | 0.15291476   |
| -0.153237144 | 0.000892947 | -0.108875511 | 0.018596892 | -0.114683379 |
| 0.164372492  | 0.000361243 | 0.154725594  | 0.000793901 | 0.172828798  |
| -0.188193781 | 4.27E-05    | -0.14374622  | 0.00184416  | -0.144007583 |
| 0.057594097  | 0.214120429 | 0.021009     | 0.650662807 | 0.019848962  |
| -0.125684915 | 0.00653635  | -0.065054479 | 0.160450308 | -0.062558199 |
| 0.190878126  | 3.29E-05    | 0.179927122  | 9.24E-05    | 0.204788151  |
| -0.050947525 | 0.271877833 | -0.07948494  | 0.086199333 | -0.101195017 |
| -0.20741816  | 6.20E-06    | -0.124003948 | 0.007298055 | -0.12186536  |
| 0.019138043  | 0.679968577 | -0.018642779 | 0.687809802 | -0.051374535 |
| -0.255895817 | 2.04E-08    | -0.231833703 | 4.07E-07    | -0.205456279 |
| -0.025678832 | 0.579901673 | -0.06114539  | 0.18715028  | -0.048880932 |
| 0.086119108  | 0.062953748 | 0.057130896  | 0.217834395 | 0.062010065  |
| -0.165227005 | 0.000336187 | -0.132814282 | 0.004037761 | -0.13555969  |
| 0.033816069  | 0.465988497 | -0.004906743 | 0.91577906  | -0.019894544 |
| -0.039773933 | 0.391136652 | 0.009525083  | 0.837344151 | 0.017664232  |
| -0.104043294 | 0.024545959 | -0.13627024  | 0.003170459 | -0.13675504  |

|              |             |              |             |              |
|--------------|-------------|--------------|-------------|--------------|
| -0.084326523 | 0.068656755 | -0.064238386 | 0.165772959 | -0.046721273 |
| -0.114429643 | 0.013347854 | -0.053123127 | 0.25190563  | -0.054171215 |
| 0.029246558  | 0.528390693 | 0.049152829  | 0.289146528 | 0.048049308  |
| 0.127136081  | 0.005936953 | 0.126134832  | 0.006344956 | 0.130609718  |
| 0.015388394  | 0.740135107 | -0.024361836 | 0.599492293 | -0.002223039 |
| 0.022195924  | 0.632343158 | 0.012610619  | 0.785777148 | 0.027744298  |
| -0.071819993 | 0.121168941 | -0.039653432 | 0.392574561 | -0.064383268 |
| -0.041729228 | 0.368252522 | -0.027655319 | 0.551075766 | -0.049503745 |
| -0.218346528 | 1.90E-06    | -0.196135737 | 1.97E-05    | -0.189062404 |
| -0.126797072 | 0.006072379 | -0.103723923 | 0.024991447 | -0.096055412 |
| 0.041690761  | 0.368694559 | 0.078096883  | 0.091845808 | 0.094198835  |
| -0.023576209 | 0.61131911  | -0.014085449 | 0.761441463 | 0.006655696  |
| -0.197612244 | 1.70E-05    | -0.118111845 | 0.010633265 | -0.102485195 |
| -0.003694928 | 0.936528071 | 0.045978269  | 0.321460818 | 0.048608407  |
| 0.153832474  | 0.000852036 | 0.143522688  | 0.001874983 | 0.167462287  |
| -0.238605989 | 1.81E-07    | -0.184253084 | 6.19E-05    | -0.170853898 |
| -0.087349565 | 0.059269647 | -0.054260413 | 0.241881359 | -0.043801832 |
| 0.176215659  | 0.000129272 | 0.153125     | 0.000900854 | 0.178142916  |
| 0.042676477  | 0.357471305 | 0.081274951  | 0.079334057 | 0.078623665  |
| 0.173453167  | 0.000165287 | 0.137813684  | 0.002840887 | 0.155109209  |
| 0.075147883  | 0.104824477 | 0.009670406  | 0.834897872 | 0.031257971  |
| -0.229277139 | 5.49E-07    | -0.181332474 | 8.12E-05    | -0.203949971 |
| -0.11137844  | 0.016042188 | -0.069827034 | 0.131869469 | -0.082696559 |
| -0.180377705 | 8.86E-05    | -0.136401085 | 0.003141228 | -0.143526936 |
| -0.073636716 | 0.112016068 | -0.075761407 | 0.102011125 | -0.109428919 |
| 0.042068958  | 0.364362859 | 0.080717946  | 0.081421165 | 0.10596888   |
| -0.034353757 | 0.458923869 | 0.002245988  | 0.961392523 | -0.015528414 |
| 0.231903385  | 4.04E-07    | 0.238606162  | 1.81E-07    | 0.256554577  |
| 0.070766626  | 0.126737056 | 0.007261383  | 0.875637869 | -0.003693726 |
| -0.274867433 | 1.53E-09    | -0.270749275 | 2.74E-09    | -0.284805745 |
| 0.160298798  | 0.000506463 | 0.11015104   | 0.017253769 | 0.056167394  |
| 0.004056499  | 0.930332022 | 0.05284318   | 0.254416812 | 0.060664453  |
| 0.09411975   | 0.042051618 | 0.066128092  | 0.153645495 | 0.058494143  |
| 0.051424559  | 0.267408694 | 0.039543412  | 0.393890187 | 0.029012519  |
| -0.228235403 | 6.20E-07    | -0.166979643 | 0.000289783 | -0.16386505  |
| 0.045102511  | 0.330773821 | -0.007195861 | 0.876751048 | 0.004135831  |
| 0.07944386   | 0.086362332 | 0.070249342  | 0.129543139 | 0.077331934  |
| -0.013414058 | 0.772492312 | -0.021674204 | 0.640368847 | -0.038651863 |
| -0.062227037 | 0.179454976 | -0.017931131 | 0.699135563 | 0.018681072  |
| 0.188315803  | 4.22E-05    | 0.222061144  | 1.26E-06    | 0.21156344   |
| -0.151444127 | 0.001027382 | -0.117529636 | 0.011026899 | -0.121461828 |
| -0.029336278 | 0.527125893 | 0.019755497  | 0.670240956 | 0.027116901  |
| 0.091786639  | 0.047434865 | 0.106861215  | 0.020903732 | 0.119346317  |
| 0.281166475  | 6.21E-10    | 0.244911649  | 8.31E-08    | 0.264942108  |
| -0.169834587 | 0.000226788 | -0.172571527 | 0.000178634 | -0.164664833 |

|              |             |              |             |              |
|--------------|-------------|--------------|-------------|--------------|
| -0.195826337 | 2.03E-05    | -0.152487256 | 0.000947061 | -0.139369568 |
| -0.08904255  | 0.054493877 | -0.016878224 | 0.716014892 | -0.014518296 |
| -0.045109265 | 0.330701336 | -0.070791229 | 0.126604774 | -0.071237639 |
| 0.056387344  | 0.223892364 | 0.074001541  | 0.110245317 | 0.105689666  |
| -0.079737331 | 0.08520331  | -0.051244411 | 0.269090479 | -0.060704464 |
| -0.055050663 | 0.235082804 | -0.014815698 | 0.749476715 | -0.0105796   |
| 0.131598793  | 0.004390501 | 0.093878186  | 0.042583939 | 0.085899563  |
| -0.024203538 | 0.601866985 | -0.075054481 | 0.105258109 | -0.077390371 |
| -0.095406985 | 0.039308744 | -0.055472603 | 0.231508567 | -0.079099345 |
| -0.199486681 | 1.40E-05    | -0.174975465 | 0.000144418 | -0.204140814 |
| 0.20538106   | 7.67E-06    | 0.209778015  | 4.83E-06    | 0.258653809  |
| -0.063175264 | 0.172903947 | -0.080007941 | 0.084145714 | -0.084448453 |
| 0.0827259    | 0.074100373 | 0.095338385  | 0.039451    | 0.123167655  |
| 0.170524182  | 0.000213625 | 0.149245309  | 0.001217667 | 0.139682204  |
| 0.223624704  | 1.05E-06    | 0.175476607  | 0.000138107 | 0.193455054  |
| -0.155393014 | 0.000752878 | -0.091727375 | 0.047578801 | -0.091409281 |
| -0.251382809 | 3.66E-08    | -0.216118043 | 2.43E-06    | -0.197186206 |
| -0.043774183 | 0.345228196 | 0.014538861  | 0.754005646 | 0.033895935  |
| -0.128040582 | 0.005588804 | -0.102054041 | 0.027436094 | -0.071933302 |
| -0.006289504 | 0.892173547 | 0.020244009  | 0.662583512 | 0.06325288   |
| -0.197846576 | 1.66E-05    | -0.201166522 | 1.18E-05    | -0.175332292 |
| -0.006176649 | 0.894096845 | 0.027891849  | 0.547673756 | 0.029500509  |
| 0.056994626  | 0.21893575  | 0.033310542  | 0.472685116 | 0.035605679  |
| -0.21261615  | 3.56E-06    | -0.233118923 | 3.49E-07    | -0.245891377 |
| -0.098906387 | 0.03260621  | -0.09612119  | 0.037853299 | -0.118251577 |
| -0.171847831 | 0.000190338 | -0.113409843 | 0.014200334 | -0.119989797 |
| -0.069062814 | 0.136161123 | -0.106405349 | 0.021459038 | -0.10681187  |
| 0.16537901   | 0.000331903 | 0.181488199  | 8.00E-05    | 0.202323712  |
| -0.089627727 | 0.052919426 | -0.124708934 | 0.006969429 | -0.16203337  |
| -0.302334929 | 2.51E-11    | -0.256753156 | 1.82E-08    | -0.265535413 |
| -0.081665734 | 0.077895831 | -0.012935919 | 0.780390595 | -0.02292233  |
| -0.308345213 | 9.61E-12    | -0.276236565 | 1.26E-09    | -0.290618297 |
| 0.045077457  | 0.331042783 | 0.035926254  | 0.438610149 | 0.028007998  |
| -0.253911079 | 2.64E-08    | -0.223308052 | 1.09E-06    | -0.219142934 |
| 0.081350964  | 0.079052627 | 0.109625395  | 0.017796637 | 0.145462157  |
| -0.03717188  | 0.422891247 | -1.50E-05    | 0.999742833 | 0.016201591  |
| -0.408550258 | 3.26E-20    | -0.398666561 | 3.06E-19    | -0.386237733 |
| -0.069758515 | 0.132249933 | -0.015423585 | 0.73956231  | -0.020505835 |
| -0.056648627 | 0.221750066 | -0.020496572 | 0.65863825  | -0.001004681 |
| -0.098546291 | 0.033247574 | -0.069527324 | 0.133539932 | -0.071013301 |
| 0.222331501  | 1.22E-06    | 0.25857712   | 1.43E-08    | 0.250894018  |
| -0.138876474 | 0.002632414 | -0.092451803 | 0.045844263 | -0.049637193 |
| 0.025453804  | 0.583227746 | 0.012590929  | 0.786103518 | 0.017995429  |
| 0.049661418  | 0.284179713 | 0.040156407  | 0.386593855 | 0.079392067  |
| 0.248797564  | 5.09E-08    | 0.187865355  | 4.40E-05    | 0.192986081  |

|              |             |              |             |              |
|--------------|-------------|--------------|-------------|--------------|
| 0.14856625   | 0.001282686 | 0.121457933  | 0.008603312 | 0.177206464  |
| -0.02172852  | 0.639531322 | 0.040743729  | 0.379680785 | 0.019765595  |
| -0.099805751 | 0.031050329 | -0.042426575 | 0.360296168 | -0.031651445 |
| 0.187178638  | 4.70E-05    | 0.169780053  | 0.000227861 | 0.190968523  |
| 0.106514095  | 0.021325421 | 0.066250051  | 0.152886536 | 0.085752564  |
| -0.24896373  | 4.99E-08    | -0.195109391 | 2.18E-05    | -0.204394194 |
| -0.009725179 | 0.833976272 | -0.049199355 | 0.28868975  | -0.061739663 |
| -0.064176767 | 0.166180155 | 0.003265245  | 0.943896288 | 0.020319744  |
| 0.063635522  | 0.169789156 | 0.099036815  | 0.032376526 | 0.109759903  |
| -0.078654588 | 0.08954251  | -0.11087785  | 0.016527019 | -0.088306318 |
| -0.154963157 | 0.000779068 | -0.199282938 | 1.43E-05    | -0.20484332  |
| -0.118013951 | 0.010698568 | -0.079037728 | 0.087987198 | -0.097971868 |
| -0.2352185   | 2.72E-07    | -0.206847566 | 6.58E-06    | -0.214423048 |
| -0.104781756 | 0.02354207  | -0.047098962 | 0.309794564 | -0.038436943 |
| -0.005003344 | 0.914127308 | 0.047374916  | 0.306965238 | 0.04746846   |
| -0.167787729 | 0.000270467 | -0.093927311 | 0.042475228 | -0.090754939 |
| 0.056734719  | 0.221047405 | 0.110255674  | 0.017147451 | 0.104237385  |
| -0.007077835 | 0.87875685  | 0.062836168  | 0.175225888 | 0.067387236  |
| -0.040868114 | 0.378226501 | -0.018890459 | 0.683884179 | -0.018605259 |
| -0.194290532 | 2.36E-05    | -0.139382594 | 0.00253812  | -0.12346506  |
| 0.131266912  | 0.004491536 | 0.179939053  | 9.23E-05    | 0.200437649  |
| -0.059334012 | 0.200576649 | -0.015251135 | 0.742370609 | -0.009634651 |
| -0.176249052 | 0.000128885 | -0.146226742 | 0.001531931 | -0.131406136 |
| 0.074188145  | 0.10934816  | 0.082182084  | 0.076028007 | 0.083333279  |
| 0.023692175  | 0.609566876 | 0.064895455  | 0.161477249 | 0.075742679  |
| -0.027892509 | 0.54766428  | 0.018226573  | 0.694425372 | 0.037140438  |
| 0.00244312   | 0.958006903 | 0.037321492  | 0.421025621 | 0.051844652  |
| -0.189503414 | 3.76E-05    | -0.176253077 | 0.000128839 | -0.141531144 |
| -0.151349679 | 0.001034956 | -0.081026148 | 0.080260902 | -0.092109714 |
| -0.113824288 | 0.013848277 | -0.062558123 | 0.177147018 | -0.052195417 |
| -0.106771117 | 0.021012483 | -0.066274405 | 0.152735321 | -0.080542394 |
| -0.160583842 | 0.000494757 | -0.12102702  | 0.008843728 | -0.12585339  |
| -0.048487274 | 0.295733814 | -0.000720462 | 0.987611265 | 0.00529729   |
| -0.066972084 | 0.14845141  | -0.025979883 | 0.57546584  | -0.015365798 |
| -0.107174364 | 0.020529546 | -0.069939105 | 0.13124899  | -0.086424602 |
| 0.060119246  | 0.194672684 | 0.119614126  | 0.00967452  | 0.12940244   |
| -0.014309318 | 0.757767292 | 0.022814868  | 0.622877586 | 0.018956786  |
| -0.083843084 | 0.070265239 | -0.035852766 | 0.439547849 | -0.025291187 |
| -0.059752784 | 0.197412007 | -0.024901309 | 0.591431381 | -0.008016743 |
| -0.08254203  | 0.074747623 | -0.006588743 | 0.88707692  | -0.000272163 |
| -0.142531365 | 0.002017442 | -0.109317791 | 0.018121191 | -0.088978303 |
| -0.026122616 | 0.573368343 | 0.017383546  | 0.70789612  | 0.023384677  |
| -0.39378807  | 8.99E-19    | -0.367716504 | 2.13E-16    | -0.385163946 |
| 0.01805849   | 0.697103674 | 0.063020412  | 0.173961425 | 0.075833892  |
| -0.007678724 | 0.868553322 | 0.023046141  | 0.619356479 | 0.017048629  |

|              |             |              |             |              |
|--------------|-------------|--------------|-------------|--------------|
| -0.021447009 | 0.643877056 | 0.016304294  | 0.725274879 | 0.030736488  |
| -0.132946368 | 0.004001016 | -0.106531992 | 0.0213035   | -0.072541755 |
| -0.089514973 | 0.053219815 | -0.040524343 | 0.382254161 | -0.042419755 |
| -0.049306005 | 0.287644536 | 0.006698711  | 0.885205125 | -0.010191954 |
| 0.014252676  | 0.758696403 | 0.049651854  | 0.284272586 | 0.045369326  |
| -0.088331487 | 0.056459258 | -0.024047269 | 0.604215384 | -0.001953843 |
| -0.016191799 | 0.727094658 | 0.034038755  | 0.46305537  | 0.022151528  |
| -0.023624647 | 0.610586942 | -0.052247829 | 0.259814788 | -0.077925664 |
| 0.016689849  | 0.719049675 | 0.062231941  | 0.179420634 | 0.082835799  |
| -0.205553131 | 7.53E-06    | -0.157806058 | 0.000620374 | -0.148165982 |
| -0.04774304  | 0.303217544 | -0.07427228  | 0.108945543 | -0.123966666 |
| -0.091136965 | 0.04903282  | -0.138573692 | 0.002690339 | -0.200591526 |
| -0.127206471 | 0.005909176 | -0.134558366 | 0.003576335 | -0.194843411 |
| -0.007585023 | 0.870143033 | -0.060587592 | 0.191212374 | -0.091556082 |
| -0.149589981 | 0.001185838 | -0.17657832  | 0.000125133 | -0.19126472  |
| -0.056176704 | 0.225630143 | -0.071995792 | 0.120258528 | -0.121050733 |
| 0.02171129   | 0.639796953 | -0.008105152 | 0.861325356 | -0.037468875 |
| -0.034749794 | 0.453758862 | -0.062371384 | 0.178446025 | -0.10834571  |
| 0.008880892  | 0.848206621 | -0.023665963 | 0.609962742 | -0.052132342 |
| -0.29296171  | 1.07E-10    | -0.278820855 | 8.72E-10    | -0.327858225 |
| -0.125762786 | 0.006502858 | -0.157448269 | 0.000638549 | -0.17229034  |
| 0.122273374  | 0.008164246 | 0.096283741  | 0.037528505 | 0.081653986  |
| -0.104401169 | 0.024054927 | -0.157455052 | 0.0006382   | -0.188698293 |
| 0.021733561  | 0.639453615 | 0.000851354  | 0.98536074  | -0.029718091 |
| -0.006859595 | 0.882467804 | -0.044407585 | 0.338286382 | -0.10261818  |
| -0.009394105 | 0.83955029  | -0.059954717 | 0.195899087 | -0.097652958 |
| -0.050789954 | 0.273365184 | -0.06573364  | 0.156119749 | -0.11753371  |
| 0.022366612  | 0.62972672  | -0.028541889 | 0.538377871 | -0.046212733 |
| -0.072318431 | 0.11860157  | -0.094923561 | 0.040320542 | -0.12830765  |
| -0.047404682 | 0.306661076 | -0.037179487 | 0.422796267 | -0.03398979  |
| -0.056000593 | 0.227090405 | -0.059676635 | 0.197984738 | -0.050786243 |
| -0.031311507 | 0.499676071 | -0.0624415   | 0.177957454 | -0.10274746  |
| -0.041309222 | 0.373096749 | -0.049871512 | 0.282144865 | -0.077685961 |
| 0.015220942  | 0.742862648 | -0.013485999 | 0.771305946 | 0.000509938  |
| 0.01593581   | 0.731241396 | -0.023582192 | 0.611228642 | -0.076342079 |
| -0.091255135 | 0.048738862 | -0.129336901 | 0.005121831 | -0.183296394 |
| -0.094437362 | 0.041360262 | -0.09816116  | 0.033945405 | -0.13987398  |
| 0.088408481  | 0.056243645 | 0.057209579  | 0.21720028  | 0.026667958  |
| -0.040268585 | 0.385267584 | -0.038711845 | 0.403919896 | -0.085657159 |
| 0.022032149  | 0.634857936 | 0.042551738  | 0.358879596 | 0.007024365  |
| 0.079376215  | 0.086631279 | 0.068436224  | 0.139759406 | 0.011063341  |
| -0.028236749 | 0.542731674 | -0.033138756 | 0.474972701 | -0.088277107 |
| -0.05926217  | 0.201123244 | -0.075302222 | 0.10411103  | -0.13291572  |
| -0.041276543 | 0.3734753   | -0.076586482 | 0.098322526 | -0.105870774 |
| 0.06517248   | 0.159691467 | 0.034276778  | 0.4599316   | -0.031788093 |

|              |             |              |             |              |
|--------------|-------------|--------------|-------------|--------------|
| -0.239618136 | 1.60E-07    | -0.225116757 | 8.88E-07    | -0.262540176 |
| 0.007741712  | 0.867484956 | -0.037757083 | 0.415621423 | -0.066073724 |
| -0.077881523 | 0.092747838 | -0.115014103 | 0.012879892 | -0.168336051 |
| -0.075209722 | 0.104538154 | -0.108264587 | 0.019271876 | -0.154678121 |
| 0.084324189  | 0.068664446 | 0.040471577  | 0.382874677 | 0.019071568  |
| 0.025847791  | 0.577410177 | 0.032816488  | 0.479280465 | -0.020837024 |
| -0.056697386 | 0.221351907 | -0.092355814 | 0.046070997 | -0.146801544 |
| -0.198056897 | 1.62E-05    | -0.217767201 | 2.03E-06    | -0.264201235 |
| 0.025721985  | 0.579264842 | -0.020880402 | 0.652660625 | -0.045352042 |
| 0.015029574  | 0.745983684 | -0.038050437 | 0.412005011 | -0.057831994 |
| -0.059076059 | 0.202544268 | -0.105232417 | 0.02294704  | -0.162402531 |
| 0.015450758  | 0.739120121 | -0.00816867  | 0.860249704 | -0.067737563 |
| -0.002342042 | 0.95974277  | -0.039583736 | 0.393407685 | -0.098136239 |
| 0.05777912   | 0.2126497   | 0.025167687  | 0.587469499 | -0.000285627 |
| -0.054830903 | 0.236959726 | -0.098700203 | 0.032972138 | -0.141837681 |
| -0.025788206 | 0.578288254 | -0.091065748 | 0.049210695 | -0.125044065 |
| -0.073300803 | 0.113666186 | -0.088078008 | 0.057173943 | -0.123764772 |
| -0.171736188 | 0.000192207 | -0.22501938  | 8.98E-07    | -0.257427977 |
| 0.103808776  | 0.024872411 | 0.058271742  | 0.208769386 | 0.028469806  |
| -0.001362257 | 0.976577685 | -0.017719249 | 0.70252071  | -0.0340586   |
| -0.034548674 | 0.456377715 | -0.073481523 | 0.11277607  | -0.143460556 |
| -0.02515982  | 0.587586336 | -0.045438734 | 0.32717797  | -0.088840197 |
| 0.03101266   | 0.503780024 | -0.023850948 | 0.607171467 | 0.028941258  |
| 0.020171014  | 0.663725497 | -0.044069187 | 0.341983892 | -0.031129693 |
| -0.100980557 | 0.029113958 | -0.137385647 | 0.002929012 | -0.177065777 |
| 0.033986681  | 0.463740343 | -0.013191861 | 0.776159875 | -0.047998252 |
| -0.090310603 | 0.0511302   | -0.143271178 | 0.001910227 | -0.171853468 |
| -0.043256526 | 0.350968232 | -0.030539146 | 0.510318759 | -0.061032894 |
| 0.009302811  | 0.841088769 | -0.033127891 | 0.475117596 | -0.052953064 |
| -0.025463097 | 0.583090201 | -0.029840409 | 0.520047773 | -0.075672438 |
| 0.019375248  | 0.676225155 | -0.016209565 | 0.726807168 | -0.038071905 |
| -0.078918828 | 0.088467519 | -0.132584153 | 0.00410251  | -0.147410948 |
| -0.034575628 | 0.456026253 | -0.058255633 | 0.208895466 | -0.086848623 |
| -0.149660736 | 0.0011794   | -0.212313765 | 3.68E-06    | -0.231380225 |
| 0.037701197  | 0.41631248  | -0.015687331 | 0.735273988 | 0.05108166   |
| 0.135627571  | 0.003317652 | 0.123660368  | 0.007463181 | 0.115866746  |
| 0.034969764  | 0.45090426  | -0.005032654 | 0.913626209 | 0.010970383  |
| -0.06002543  | 0.195371301 | -0.076654369 | 0.098023816 | -0.105644928 |
| 0.055067149  | 0.234942426 | 0.00912533   | 0.844081367 | -0.045926466 |
| -0.09611623  | 0.037863248 | -0.12672078  | 0.006103236 | -0.140814522 |
| 0.007214124  | 0.876440744 | -0.020293662 | 0.661807153 | -0.07831819  |
| 0.053169147  | 0.251494478 | 0.020977959  | 0.651144811 | -0.039227852 |
| -0.07678099  | 0.097468605 | -0.101616676 | 0.028109387 | -0.132732848 |
| 0.054277235  | 0.24173522  | 0.015516052  | 0.738057936 | -0.025847933 |
| 0.000561997  | 0.990336004 | -0.032959741 | 0.477362983 | -0.084078847 |



|              |             |              |             |              |
|--------------|-------------|--------------|-------------|--------------|
| -0.001268771 | 0.978184648 | 0.01044553   | 0.821877366 | -0.031465203 |
| -0.037930421 | 0.413482291 | -0.071236397 | 0.124229792 | -0.103570669 |
| 0.029700755  | 0.522003649 | -0.008257313 | 0.858748996 | -0.032404723 |
| 0.007052912  | 0.879180515 | -0.036253388 | 0.434449859 | -0.080610325 |
| 0.004203806  | 0.927808877 | -0.008541324 | 0.853944213 | 0.018300607  |
| -0.006978832 | 0.880439982 | -0.025897096 | 0.576684068 | 0.010322288  |
| -0.11984745  | 0.009532715 | -0.158534521 | 0.000584842 | -0.17170419  |
| -0.030007911 | 0.51770686  | -0.070627294 | 0.127488198 | -0.099591258 |
| 0.000987485  | 0.983020274 | -0.02876359  | 0.535225592 | -0.07174912  |
| 0.05684517   | 0.220148256 | 0.0330157    | 0.476615089 | 0.031456568  |
| -0.052145292 | 0.260752405 | -0.069439618 | 0.134031848 | -0.106452793 |
| 0.182080691  | 7.58E-05    | 0.140861653  | 0.002279936 | 0.130980639  |
| -0.000484815 | 0.991663172 | -0.055217114 | 0.233668182 | -0.048102903 |
| 0.065973548  | 0.15461133  | 0.0384898    | 0.406623574 | -0.032747477 |
| -0.163471344 | 0.000389546 | -0.170776266 | 0.000208994 | -0.182395181 |
| 0.044613378  | 0.336050334 | 0.031018011  | 0.503706386 | 0.021859267  |
| -0.035216248 | 0.44771764  | -0.069808823 | 0.131970507 | -0.073749692 |
| -0.177983093 | 0.000110247 | -0.169392548 | 0.000235621 | -0.19018381  |
| -0.171231685 | 0.000200865 | -0.177595382 | 0.00011418  | -0.172378121 |
| -0.035603218 | 0.442740626 | -0.068120036 | 0.141602638 | -0.099979924 |
| 0.010290855  | 0.824471799 | 0.004921453  | 0.915527516 | -0.016518727 |
| -0.094971996 | 0.040218186 | -0.111220957 | 0.016193352 | -0.093999318 |
| 0.055870905  | 0.228170023 | 0.064180334  | 0.166156562 | 0.031803552  |
| 0.052501528  | 0.257504946 | 0.114979548  | 0.01290715  | 0.135511607  |
| -0.03065675  | 0.508690648 | -0.036930685 | 0.425909011 | -0.041810827 |
| 0.102984175  | 0.026050195 | 0.092826007  | 0.044969282 | 0.14590972   |
| 0.008073669  | 0.861858605 | 0.005381456  | 0.907665684 | 0.001176704  |
| -0.18452278  | 6.04E-05    | -0.213165289 | 3.36E-06    | -0.207898333 |
| -0.084885951 | 0.066833217 | -0.086740315 | 0.061070875 | -0.050149855 |
| -0.040611045 | 0.381235879 | -0.021893696 | 0.636987194 | -0.028627234 |
| -0.090906884 | 0.049609428 | -0.071388721 | 0.123425141 | -0.073388719 |
| 0.145343726  | 0.001637039 | 0.138578852  | 0.002689342 | 0.159743289  |
| -0.119007088 | 0.01005227  | -0.108386065 | 0.019135985 | -0.15099904  |
| 0.031517486  | 0.496857767 | 0.001067489  | 0.981644837 | -0.025970945 |
| -0.013286461 | 0.774597807 | -0.017047994 | 0.713283652 | 0.020589957  |
| 0.07565317   | 0.102503053 | 0.083631659  | 0.070978308 | 0.086921812  |
| -0.167098534 | 0.000286862 | -0.164565046 | 0.00035545  | -0.184450849 |
| 0.06700362   | 0.148259954 | 0.073319412  | 0.113574278 | 0.084342829  |
| 0.009485699  | 0.838007387 | 0.047199842  | 0.308758272 | 0.035430708  |
| 0.054640001  | 0.238598731 | 0.078855772  | 0.088723098 | 0.104811688  |
| 0.055210823  | 0.233721539 | 0.043947228  | 0.343322771 | 0.063276356  |
| 0.10119514   | 0.028771695 | 0.062715455  | 0.176058031 | 0.09422133   |
| 0.049344396  | 0.287268913 | 0.07189694   | 0.120769794 | 0.092671404  |
| 0.051689219  | 0.264951035 | 0.063633778  | 0.16980088  | 0.074299006  |
| -0.033829278 | 0.465814239 | -0.042726443 | 0.356908167 | -0.036340162 |

|              |             |              |             |              |
|--------------|-------------|--------------|-------------|--------------|
| 0.011707392  | 0.800786392 | 0.012735011  | 0.783716157 | 0.033064323  |
| -0.195924466 | 2.01E-05    | -0.203542773 | 9.28E-06    | -0.210269353 |
| 0.204819264  | 8.13E-06    | 0.238941417  | 1.74E-07    | 0.196596139  |
| 0.011245952  | 0.808483057 | -0.042340275 | 0.361274932 | -0.031640754 |
| 0.156000012  | 0.00071728  | 0.163605279  | 0.000385212 | 0.173229884  |
| 0.027964955  | 0.546624374 | 0.018621075  | 0.688154206 | 0.034846776  |
| 0.128171307  | 0.005540035 | 0.109261666  | 0.018180962 | 0.090525245  |
| 0.022552809  | 0.62687781  | 0.007913415  | 0.864573913 | 0.007357893  |
| -0.031633499 | 0.495274148 | -0.009737318 | 0.833772047 | -0.000368192 |
| 0.196116467  | 1.97E-05    | 0.173632784  | 0.000162685 | 0.177567268  |
| -0.044486415 | 0.337428735 | -0.074467186 | 0.108017327 | -0.072461669 |
| -0.017489641 | 0.706195692 | -0.055452951 | 0.231674184 | -0.035519658 |
| 0.123541068  | 0.007521294 | 0.105013408  | 0.023234562 | 0.115900341  |
| -0.082007066 | 0.076656989 | -0.101136155 | 0.028865431 | -0.06455614  |
| 0.049972334  | 0.281171863 | 0.047522145  | 0.305462719 | 0.085244315  |
| 0.168625686  | 0.000251713 | 0.195582817  | 2.08E-05    | 0.217647645  |
| -0.09882776  | 0.032745344 | -0.098518268 | 0.033297933 | -0.090463083 |
| 0.11125111   | 0.016164312 | 0.11209891   | 0.015366287 | 0.136516624  |
| -0.116689945 | 0.011617341 | -0.16101092  | 0.000477686 | -0.175478779 |
| -0.222439818 | 1.20E-06    | -0.265779862 | 5.43E-09    | -0.252547421 |
| -0.230335949 | 4.85E-07    | -0.234462077 | 2.98E-07    | -0.234965273 |
| -0.054177314 | 0.242604201 | -0.018997349 | 0.682192638 | 0.009412439  |
| 0.008918931  | 0.847564385 | -0.030260206 | 0.514191227 | -0.018496119 |
| 0.047364141  | 0.307075397 | 0.027899099  | 0.547569648 | 0.019011514  |
| 0.005217894  | 0.91046009  | 0.01865967   | 0.687541821 | 0.021517799  |
| -0.008181129 | 0.860038751 | -0.018109331 | 0.69629316  | 0.001978161  |
| 0.088840218  | 0.055047246 | 0.061679991  | 0.183317073 | 0.101661676  |
| 0.175779229  | 0.000134423 | 0.141053734  | 0.002248227 | 0.169501093  |
| 0.023922242  | 0.60609722  | -0.008732895 | 0.850706325 | 0.001783624  |
| 0.014225816  | 0.759137105 | 0.007497125  | 0.871634775 | 0.036627265  |
| 0.01786614   | 0.700173274 | 0.041116801  | 0.375329157 | 0.083528932  |
| -0.106005713 | 0.021956335 | -0.088733836 | 0.055340063 | -0.081395548 |
| 0.104780658  | 0.023543536 | 0.057129733  | 0.217843781 | 0.087290807  |
| -0.058293659 | 0.208597945 | -0.113875697 | 0.013805146 | -0.11591899  |
| 0.058497654  | 0.20700712  | 0.034088828  | 0.462397243 | 0.053231383  |
| -0.116571945 | 0.011702517 | -0.101229882 | 0.028716608 | -0.097550431 |
| -0.131410714 | 0.004447504 | -0.11476372  | 0.013078566 | -0.129157871 |
| 0.227178905  | 7.00E-07    | 0.223570084  | 1.06E-06    | 0.243735543  |
| 0.020391269  | 0.660282034 | 0.011208556  | 0.809107638 | 0.029626519  |
| 0.070862422  | 0.126222609 | 0.033561594  | 0.469352907 | 0.025928382  |
| -0.052030033 | 0.261809123 | -0.061867695 | 0.181985042 | -0.051058002 |
| 0.045633751  | 0.325103941 | 0.062129589  | 0.180138503 | 0.068939059  |
| 0.135382128  | 0.003375484 | 0.136629036  | 0.003090888 | 0.141411822  |
| 0.02906484   | 0.530957131 | -0.002051907 | 0.964726417 | 0.028749208  |
| 0.128502675  | 0.005418124 | 0.060274249  | 0.193522435 | 0.085768258  |

|              |             |              |             |              |
|--------------|-------------|--------------|-------------|--------------|
| 0.167551691  | 0.000275981 | 0.142638257  | 0.002001618 | 0.184610273  |
| 0.093740121  | 0.042890728 | 0.103257747  | 0.025654231 | 0.144874598  |
| -0.092556307 | 0.04559848  | -0.106312831 | 0.021573288 | -0.119858587 |
| -0.053044265 | 0.252611287 | -0.061072133 | 0.187680115 | -0.048823194 |
| 0.001634522  | 0.971898188 | -0.009870139 | 0.831538287 | 0.015399354  |
| 0.049621526  | 0.284567198 | 0.052193234  | 0.260313719 | 0.070568773  |
| 0.06087445   | 0.189115362 | 0.023411299  | 0.613814681 | 0.040580593  |
| -0.196330044 | 1.93E-05    | -0.217792634 | 2.02E-06    | -0.198991682 |
| 0.210904566  | 4.28E-06    | 0.170486097  | 0.000214333 | 0.186941361  |
| -0.08204236  | 0.076529809 | -0.105539875 | 0.0225486   | -0.101865889 |
| -0.091830911 | 0.04732758  | -0.095383355 | 0.039357697 | -0.145726438 |
| 0.120233604  | 0.009302084 | 0.102399633  | 0.026913932 | 0.101169185  |
| -0.071846661 | 0.121030491 | -0.106784542 | 0.020996247 | -0.09066923  |
| -0.013238446 | 0.775390531 | -0.055075103 | 0.234874716 | -0.047462522 |
| -0.03708777  | 0.423942184 | -0.063354666 | 0.171684824 | -0.066922561 |
| -0.106695617 | 0.021103992 | -0.112785699 | 0.014745378 | -0.125033764 |
| 0.060053457  | 0.195162406 | 0.047484583  | 0.30584559  | 0.081429691  |
| -0.037804949 | 0.415030069 | -0.034699356 | 0.454414836 | -0.078371798 |
| -0.136926947 | 0.003026204 | -0.129571029 | 0.00504134  | -0.093144888 |
| -0.024210479 | 0.601762766 | -0.032628827 | 0.481798686 | -0.010781422 |
| -0.167076497 | 0.000287402 | -0.143323278 | 0.001902877 | -0.115947085 |
| 0.185003439  | 5.77E-05    | 0.170944163  | 0.000205962 | 0.203724083  |
| -0.053982027 | 0.244308859 | -0.058308484 | 0.208482036 | -0.031050006 |
| 0.187448654  | 4.58E-05    | 0.163815721  | 0.000378494 | 0.167445471  |
| 0.170993217  | 0.000205084 | 0.10304751   | 0.02595806  | 0.126843707  |
| 0.077775656  | 0.093193851 | 0.03664414   | 0.429510424 | 0.050881799  |
| -0.095651281 | 0.038805663 | -0.117715967 | 0.010899539 | -0.126149337 |
| 0.08116684   | 0.079735723 | 0.033157919  | 0.474717217 | 0.051630682  |
| -0.044295276 | 0.339510676 | -0.052563589 | 0.256942062 | -0.087595013 |
| 0.060854825  | 0.189258287 | 0.038405567  | 0.407652041 | 0.054348399  |
| 0.096652704  | 0.036800039 | 0.054269769  | 0.241800071 | 0.073685429  |
| -0.061016061 | 0.1880864   | -0.0622899   | 0.179015061 | -0.081339116 |
| 0.009633067  | 0.835526257 | -0.014835072 | 0.749160085 | 0.014219249  |
| -0.024341519 | 0.599796835 | -0.050126223 | 0.279691117 | -0.046154865 |
| 0.030855005  | 0.505952173 | -0.014249329 | 0.758751315 | -0.025392162 |
| 0.250721983  | 3.98E-08    | 0.199551031  | 1.40E-05    | 0.225233396  |
| -0.135079357 | 0.003448085 | -0.156527347 | 0.000687627 | -0.139116046 |
| -0.041698286 | 0.368608059 | -0.046847467 | 0.312388026 | -0.056901573 |
| -0.047549368 | 0.305185431 | -0.053894455 | 0.24507599  | -0.044652467 |
| -0.06367214  | 0.169543154 | -0.06490883  | 0.161390687 | -0.044219939 |
| 0.053808115  | 0.245833973 | 0.023563134  | 0.611516798 | 0.024114113  |
| -0.039552252 | 0.393784386 | -0.031693161 | 0.494460781 | -0.052115344 |
| -0.143576683 | 0.001867495 | -0.165899338 | 0.000317622 | -0.189151976 |
| 0.224455048  | 9.58E-07    | 0.18914693   | 3.89E-05    | 0.201513619  |
| 0.008233319  | 0.85915516  | -0.001712149 | 0.970564159 | -0.03108196  |

|              |             |              |             |              |
|--------------|-------------|--------------|-------------|--------------|
| -0.002277965 | 0.96084328  | -0.021263264 | 0.646720119 | -0.001178216 |
| -0.078150634 | 0.091621776 | -0.047330455 | 0.307419936 | -0.044697611 |
| 0.11499967   | 0.012891271 | 0.10182428   | 0.027788045 | 0.139876087  |
| 0.071509785  | 0.122788516 | 0.043122432  | 0.352464914 | 0.059898858  |
| 0.050448111  | 0.276610965 | 0.036991714  | 0.425144254 | 0.066939646  |
| -0.021712607 | 0.639776647 | -0.050063028 | 0.280298549 | -0.029395401 |
| -0.04121524  | 0.374186074 | -0.051621988 | 0.265573878 | -0.029198291 |
| 0.081744262  | 0.077609391 | 0.051093587  | 0.270504054 | 0.076170194  |
| 0.120357248  | 0.009229293 | 0.101846612  | 0.027753667 | 0.099766754  |
| 0.142644539  | 0.002000692 | 0.19938153   | 1.42E-05    | 0.196444278  |
| 0.079481097  | 0.086214571 | 0.037534037  | 0.418383538 | 0.011280499  |
| 0.317118824  | 2.27E-12    | 0.289416667  | 1.84E-10    | 0.273132217  |
| 0.01502115   | 0.746121169 | 0.006621443  | 0.886520253 | 0.023971834  |
| 0.057659493  | 0.213599766 | 0.069040178  | 0.136289856 | 0.101716892  |
| 0.109835672  | 0.017577706 | 0.084180264  | 0.069140167 | 0.072443007  |
| 0.100653298  | 0.029642664 | 0.132296023  | 0.004184901 | 0.147169294  |
| 0.01330168   | 0.774346588 | 0.010853501  | 0.815043626 | -0.010613118 |
| 0.068092535  | 0.141763831 | 0.094959983  | 0.040243552 | 0.138241465  |
| 0.03035823   | 0.512828643 | -0.031474238 | 0.497448811 | -0.019639881 |
| 0.085920988  | 0.063564216 | 0.043754499  | 0.34544537  | 0.040112307  |
| -0.209925213 | 4.75E-06    | -0.21840694  | 1.89E-06    | -0.247980868 |
| 0.157828033  | 0.000619273 | 0.158346331  | 0.000593836 | 0.193870491  |
| -0.02642775  | 0.568896471 | -0.007001396 | 0.880056326 | 0.003193127  |
| -0.011277432 | 0.807957395 | -0.039794808 | 0.390887884 | -0.009438246 |
| -0.19527259  | 2.14E-05    | -0.190267582 | 3.49E-05    | -0.186586016 |
| -0.157936581 | 0.000613864 | -0.181574487 | 7.94E-05    | -0.207399069 |
| 0.128635906  | 0.005369793 | 0.10892514   | 0.018542975 | 0.133711431  |
| -0.03908679  | 0.399378868 | -0.105571925 | 0.022507412 | -0.109671392 |
| -0.142543373 | 0.002015659 | -0.188270955 | 4.23E-05    | -0.206486687 |
| 0.004812116  | 0.917397423 | -0.013617032 | 0.769146461 | 0.001141472  |
| 0.20598816   | 7.20E-06    | 0.165276753  | 0.000334779 | 0.173731315  |
| 0.080127657  | 0.083681233 | 0.032320223  | 0.485955405 | 0.046158163  |
| 0.046500056  | 0.315993965 | 0.006221142  | 0.893338517 | 0.006555301  |
| 0.077837877  | 0.092931509 | 0.090684168  | 0.050172965 | 0.134630578  |
| 0.181061007  | 8.33E-05    | 0.155834019  | 0.000726857 | 0.144115119  |
| 0.110883345  | 0.016521628 | 0.092141484  | 0.046580664 | 0.099570415  |
| 0.055029129  | 0.235266259 | 0.025793101  | 0.578216089 | 0.057172652  |
| 0.153570473  | 0.000869823 | 0.092907135  | 0.044781451 | 0.084875925  |
| -0.038230203 | 0.409798127 | -0.078548703 | 0.08997621  | -0.058444991 |
| 0.108439913  | 0.019076016 | 0.065471154  | 0.157782846 | 0.083477346  |
| 0.070190297  | 0.12986647  | 0.017041183  | 0.713393146 | -0.039918271 |
| 0.011876993  | 0.797962289 | -0.03800826  | 0.412523817 | -0.047834915 |
| -0.005732429 | 0.901673276 | -0.032299688 | 0.48623268  | -0.060637864 |
| -0.010583297 | 0.819568149 | -0.010930391 | 0.813757228 | -0.038801206 |
| 0.194152605  | 2.39E-05    | 0.16334048   | 0.000393823 | 0.148995283  |

|              |             |              |             |              |
|--------------|-------------|--------------|-------------|--------------|
| 0.151416482  | 0.001029593 | 0.090361536  | 0.050998798 | 0.125989585  |
| 0.002475374  | 0.957453033 | 0.017262042  | 0.70984528  | 0.023650706  |
| -0.026923326 | 0.561669198 | -0.065713134 | 0.156249193 | -0.070166225 |
| 0.182876467  | 7.04E-05    | 0.144800584  | 0.001704935 | 0.166500817  |
| -0.039456326 | 0.39493345  | -0.062385972 | 0.178344294 | -0.034370737 |
| 0.061161107  | 0.187036752 | 0.011534832  | 0.80366242  | 0.044463061  |
| 0.092564814  | 0.045578521 | 0.046789372  | 0.31298913  | 0.053242608  |
| 0.047646308  | 0.304199375 | 0.034556959  | 0.456269678 | 0.001773375  |
| 0.122430232  | 0.008082118 | 0.090663705  | 0.05022501  | 0.109157937  |
| 0.076205847  | 0.100010788 | 0.067409723  | 0.145811264 | 0.039206795  |
| 0.200504929  | 1.27E-05    | 0.138653376  | 0.002674983 | 0.163523483  |
| -0.028226124 | 0.542883597 | -0.077160751 | 0.095818438 | -0.055053127 |
| -0.172124493 | 0.000185782 | -0.186925986 | 4.81E-05    | -0.221323922 |
| 0.115015658  | 0.012878666 | 0.082041578  | 0.076532626 | 0.067583578  |
| 0.042407646  | 0.360510712 | 0.032627138  | 0.481821391 | 0.042997033  |
| 0.036698546  | 0.428825274 | 0.012997434  | 0.779373151 | 0.033001089  |
| 0.129983799  | 0.004902207 | 0.102224921  | 0.027176828 | 0.112144276  |
| -0.00966386  | 0.835008023 | -0.047038581 | 0.310415931 | -0.051075178 |
| -0.010061653 | 0.828319838 | -0.009849081 | 0.831892359 | -0.00359624  |
| -0.116101899 | 0.012047316 | -0.149016657 | 0.001239213 | -0.145148365 |
| 0.079107069  | 0.087708048 | 0.032268139  | 0.486658848 | 0.004439217  |
| 0.032384953  | 0.485081932 | 0.014458669  | 0.755319147 | 0.042067824  |
| 0.193348549  | 2.59E-05    | 0.132862638  | 0.004024273 | 0.15463092   |
| 0.099262381  | 0.031982565 | 0.071182511  | 0.124515416 | 0.109573696  |
| 0.04895258   | 0.291118036 | 0.061748187  | 0.182832297 | 0.068959119  |
| 0.105105816  | 0.023112868 | 0.076836786  | 0.097224747 | 0.051239072  |
| -0.185660863 | 5.42E-05    | -0.23682543  | 2.24E-07    | -0.215556634 |
| 0.03960234   | 0.393185193 | -0.003420522 | 0.94123301  | -0.036682928 |
| 0.168735529  | 0.000249346 | 0.161950581  | 0.000442038 | 0.202091723  |
| 0.040393978  | 0.383788355 | 0.003594553  | 0.93824884  | 0.012369397  |
| 0.06870826   | 0.138188338 | 0.042861134  | 0.355392915 | 0.01926316   |
| 0.030736809  | 0.507583876 | -0.025702037 | 0.579559185 | -0.031816622 |
| 0.07315456   | 0.114390519 | 0.019124326  | 0.680185276 | 0.014737484  |
| -0.005390699 | 0.907507795 | -0.027639653 | 0.551301462 | -0.025279664 |
| -0.095845187 | 0.038410244 | -0.124852697 | 0.006904064 | -0.116042772 |
| 0.156380097  | 0.000695791 | 0.111915271  | 0.01553615  | 0.124908803  |
| 0.116595472  | 0.011685491 | 0.087083697  | 0.060050201 | 0.083246769  |
| -0.196963114 | 1.81E-05    | -0.255779551 | 2.07E-08    | -0.289812398 |
| 0.193218111  | 2.62E-05    | 0.141139213  | 0.002234246 | 0.157488504  |
| -0.034235269 | 0.460475507 | -0.028971565 | 0.532276919 | -0.05917     |
| -0.015711486 | 0.734881652 | -0.046783514 | 0.31304979  | -0.008954804 |
| 0.035411912  | 0.445197159 | 0.022993719  | 0.620153843 | 0.021595113  |
| 0.074402802  | 0.108323255 | 0.020551465  | 0.657782021 | 0.0424924    |
| -0.088318722 | 0.056495069 | -0.1022643   | 0.027117382 | -0.145451892 |
| 0.182714747  | 7.15E-05    | 0.182370708  | 7.38E-05    | 0.155560127  |

|              |             |              |             |              |
|--------------|-------------|--------------|-------------|--------------|
| 0.118518347  | 0.010365862 | 0.064318228  | 0.165246448 | 0.070117218  |
| -0.166976656 | 0.000289857 | -0.195718878 | 2.05E-05    | -0.215241405 |
| 0.183623989  | 6.57E-05    | 0.132391823  | 0.004157342 | 0.150743687  |
| -0.087210497 | 0.059676879 | -0.103457171 | 0.025368869 | -0.125565839 |
| -0.031309848 | 0.499698799 | -0.063009861 | 0.174033657 | -0.092776974 |
| 0.199085003  | 1.46E-05    | 0.172882699  | 0.000173812 | 0.172411106  |
| -0.075920129 | 0.101293137 | -0.121620085 | 0.008514363 | -0.115298258 |
| -0.031157309 | 0.501791401 | -0.048051698 | 0.300098707 | -0.019823542 |
| 0.028393407  | 0.540494273 | 0.027544225  | 0.552677195 | 0.047302271  |
| -0.240395444 | 1.45E-07    | -0.253200538 | 2.89E-08    | -0.247223044 |
| 0.207695851  | 6.02E-06    | 0.159004452  | 0.000562932 | 0.180297519  |
| 0.208848144  | 5.33E-06    | 0.203136383  | 9.68E-06    | 0.207398249  |
| 0.124900305  | 0.006882539 | 0.117676328  | 0.010926522 | 0.118991179  |
| 0.096804178  | 0.03650447  | 0.057493109  | 0.214926244 | 0.089010024  |
| 0.082418729  | 0.075184232 | 0.083585009  | 0.071136437 | 0.060863753  |
| -0.019470257 | 0.674728008 | -0.04738683  | 0.306843472 | -0.021620254 |
| -0.159411708 | 0.000544564 | -0.181687363 | 7.86E-05    | -0.164403064 |
| -0.18060223  | 8.68E-05    | -0.174809686 | 0.000146564 | -0.142294639 |
| -0.158213048 | 0.000600283 | -0.155347351 | 0.000755621 | -0.152107598 |
| -0.23760993  | 2.04E-07    | -0.231331129 | 4.32E-07    | -0.226846172 |
| 0.147438392  | 0.001397775 | 0.118600278  | 0.010312694 | 0.135815799  |
| 0.117749198  | 0.010876962 | 0.094751057  | 0.040686878 | 0.086792362  |
| 0.244568785  | 8.67E-08    | 0.19227207   | 2.88E-05    | 0.190771041  |
| 0.161804017  | 0.00044743  | 0.144469842  | 0.001747535 | 0.141945206  |
| 0.301723315  | 2.76E-11    | 0.233843006  | 3.21E-07    | 0.236755791  |
| 0.077246551  | 0.09544872  | 0.055573762  | 0.230657405 | 0.025884629  |
| 0.119845799  | 0.009533713 | 0.13424159   | 0.003656413 | 0.158294897  |
| 0.024786678  | 0.593140065 | 0.003998164  | 0.931331395 | 0.030328625  |
| 0.124022351  | 0.007289304 | 0.077441549  | 0.094612688 | 0.10010466   |
| 0.141655046  | 0.002151547 | 0.09880228   | 0.032790541 | 0.135971872  |
| 0.072431634  | 0.118024446 | 0.057627667  | 0.213853038 | 0.085600893  |
| 0.144482651  | 0.001745867 | 0.123993943  | 0.007302817 | 0.132296064  |
| 0.154221233  | 0.000826264 | 0.130576886  | 0.004708352 | 0.118028249  |
| 0.193017788  | 2.67E-05    | 0.183980319  | 6.35E-05    | 0.179067396  |
| 0.097299442  | 0.0355521   | 0.067580694  | 0.144789636 | 0.095484956  |
| 0.142967222  | 0.001953629 | 0.092519481  | 0.045684965 | 0.079627518  |
| 0.088205298  | 0.056814115 | 0.045141856  | 0.330351715 | 0.050524075  |
| 0.194683511  | 2.27E-05    | 0.163715085  | 0.000381693 | 0.2091848    |
| 0.079562845  | 0.085890898 | 0.100875025  | 0.029283561 | 0.131167025  |
| 0.340563614  | 3.81E-14    | 0.310751808  | 6.50E-12    | 0.330721012  |
| 0.044512165  | 0.337148882 | 0.020127884  | 0.66440063  | 0.033282338  |
| 0.18959843   | 3.73E-05    | 0.149926798  | 0.001155477 | 0.153961288  |
| 0.098228864  | 0.033821833 | 0.034172348  | 0.461300668 | 0.02309887   |
| 0.00584622   | 0.899731629 | -0.036579651 | 0.430323374 | -0.036643758 |
| 0.138601832  | 0.002684907 | 0.06974372   | 0.1323322   | 0.076284516  |

|              |             |              |             |              |
|--------------|-------------|--------------|-------------|--------------|
| 0.233897541  | 3.19E-07    | 0.167645644  | 0.000273774 | 0.160626712  |
| -0.020082877 | 0.66510543  | -0.075167651 | 0.10473288  | -0.088803071 |
| 0.184682394  | 5.95E-05    | 0.137156625  | 0.002977178 | 0.135304483  |
| 0.075722216  | 0.102189027 | 0.026245336  | 0.571567832 | 0.019714715  |
| 0.009283034  | 0.841422122 | -0.012680564 | 0.784618075 | -0.019321853 |
| 0.124614007  | 0.007012893 | 0.073342964  | 0.113458036 | 0.054111249  |
| 0.190822561  | 3.31E-05    | 0.146626317  | 0.001486436 | 0.155272222  |
| 0.22886956   | 5.76E-07    | 0.158426489  | 0.000589989 | 0.175664172  |
| 0.221973667  | 1.27E-06    | 0.173577344  | 0.000163484 | 0.193932461  |
| -0.102596473 | 0.026620363 | -0.136420072 | 0.003137007 | -0.140208101 |
| -0.035569474 | 0.44317336  | -0.056790111 | 0.220596143 | -0.029444736 |
| 0.162615029  | 0.000418342 | 0.126058877  | 0.00637691  | 0.136757214  |
| 0.096203102  | 0.037689335 | 0.050450687  | 0.276586403 | 0.079363621  |
| 0.105318939  | 0.022834302 | 0.094298205  | 0.041661979 | 0.108314545  |
| 0.12050483   | 0.009143073 | 0.083104856  | 0.072780798 | 0.067038687  |
| 0.293438999  | 9.98E-11    | 0.245836521  | 7.40E-08    | 0.25158142   |
| 0.006386078  | 0.890528207 | -0.032006516 | 0.490200596 | -0.013416016 |
| 0.27751577   | 1.05E-09    | 0.199308171  | 1.43E-05    | 0.232002762  |
| 0.26908461   | 3.45E-09    | 0.244290804  | 8.98E-08    | 0.25678494   |
| 0.384424265  | 6.78E-18    | 0.345986961  | 1.41E-14    | 0.359060414  |
| 0.21603951   | 2.45E-06    | 0.174599012  | 0.000149335 | 0.199873498  |
| 0.082557846  | 0.074691768 | 0.044863998  | 0.333340068 | 0.031969078  |
| -0.005248721 | 0.909933341 | -0.053273825 | 0.250561002 | -0.074289841 |
| 0.100786825  | 0.029425957 | 0.042135079  | 0.363608813 | 0.008788622  |
| 0.00255441   | 0.956095913 | -0.014131139 | 0.760691159 | -0.026611226 |
| 0.082187347  | 0.076009161 | 0.060857239  | 0.189240703 | 0.048080415  |
| 0.271984172  | 2.30E-09    | 0.245866503  | 7.37E-08    | 0.252068613  |
| 0.238158125  | 1.91E-07    | 0.208227831  | 5.69E-06    | 0.216766546  |
| 0.175910267  | 0.000132856 | 0.130009928  | 0.004893517 | 0.139343906  |
| 0.215987315  | 2.47E-06    | 0.171452845  | 0.000197026 | 0.173645442  |
| 0.223460302  | 1.07E-06    | 0.18672285   | 4.91E-05    | 0.213005013  |
| 0.121530296  | 0.008563515 | 0.05983573   | 0.196789533 | 0.075551422  |
| 0.24285234   | 1.07E-07    | 0.240878663  | 1.37E-07    | 0.228877533  |
| 0.078568556  | 0.089894766 | 0.014998992  | 0.746482839 | -0.005987262 |
| 0.124048364  | 0.007276949 | 0.083828229  | 0.070315147 | 0.098188139  |
| 0.325205982  | 5.77E-13    | 0.251562112  | 3.58E-08    | 0.246644152  |
| 0.149462045  | 0.001197562 | 0.118298487  | 0.010509739 | 0.123644549  |
| 0.19305779   | 2.66E-05    | 0.177925469  | 0.000110824 | 0.218158816  |
| 0.198887571  | 1.49E-05    | 0.156347927  | 0.000697586 | 0.141113658  |
| -0.076486961 | 0.098761734 | -0.10041885  | 0.030026469 | -0.100399374 |
| 0.161841484  | 0.000446046 | 0.151207068  | 0.00104649  | 0.12659745   |
| 0.227655239  | 6.63E-07    | 0.158004822  | 0.000610485 | 0.164781565  |
| 0.150989996  | 0.001064275 | 0.080867623  | 0.080856004 | 0.073474974  |
| 0.294274098  | 8.79E-11    | 0.256653911  | 1.84E-08    | 0.286868672  |
| 0.166679109  | 0.00029729  | 0.106673671  | 0.021130656 | 0.093565434  |

|              |             |              |             |              |
|--------------|-------------|--------------|-------------|--------------|
| 0.004755994  | 0.918357397 | -0.057846871 | 0.212112979 | -0.038611391 |
| 0.178941047  | 0.000101069 | 0.135582394  | 0.003328229 | 0.10859459   |
| 0.268774854  | 3.60E-09    | 0.234063782  | 3.12E-07    | 0.240808994  |
| 0.10497075   | 0.023290926 | 0.07248168   | 0.117770008 | 0.070625565  |
| 0.059189409  | 0.20167794  | 0.014055536  | 0.761932806 | 0.044413594  |
| 0.256681497  | 1.84E-08    | 0.209163664  | 5.15E-06    | 0.227994735  |
| -0.284815053 | 3.64E-10    | -0.255670351 | 2.10E-08    | -0.234924423 |
| 0.251646272  | 3.54E-08    | 0.213755528  | 3.15E-06    | 0.221763429  |
| 0.097671842  | 0.034849985 | 0.050633965  | 0.274843058 | 0.042882766  |
| 0.26169858   | 9.44E-09    | 0.194626585  | 2.28E-05    | 0.205801982  |
| 0.165538373  | 0.000327466 | 0.123010757  | 0.007784539 | 0.137974372  |
| 0.177077329  | 0.000119641 | 0.136315084  | 0.003160413 | 0.160992023  |
| 0.166658792  | 0.000297804 | 0.142830407  | 0.001973458 | 0.173393079  |
| 0.119698733  | 0.009622884 | 0.064900932  | 0.161441796 | 0.058342875  |
| 0.196477634  | 1.90E-05    | 0.134624724  | 0.003559763 | 0.128882548  |
| 0.311789186  | 5.49E-12    | 0.266468988  | 4.94E-09    | 0.237010536  |
| 0.208635488  | 5.45E-06    | 0.163918573  | 0.000375251 | 0.162166554  |
| 0.199106387  | 1.46E-05    | 0.14943062   | 0.001200458 | 0.167108144  |
| 0.166874387  | 0.000292392 | 0.122089941  | 0.008261233 | 0.149806776  |
| 0.054192354  | 0.242473261 | 0.017481387  | 0.706327929 | 0.016049481  |
| 0.103384455  | 0.025472602 | 0.059255089  | 0.20117718  | 0.057814277  |
| 0.068259305  | 0.14078848  | 0.030372376  | 0.51263217  | 0.022648035  |
| 0.159989823  | 0.000519443 | 0.111142574  | 0.016269054 | 0.117927357  |
| 0.081394681  | 0.078891136 | 0.048053005  | 0.30008554  | 0.079978041  |
| 0.277223403  | 1.10E-09    | 0.247993201  | 5.64E-08    | 0.267334257  |
| -0.036355162 | 0.43316021  | -0.052895672 | 0.25394463  | -0.035090989 |
| 0.299598513  | 3.86E-11    | 0.306091693  | 1.38E-11    | 0.322119353  |
| 0.16365279   | 0.000383686 | 0.134423349  | 0.003610269 | 0.13109641   |
| 0.157184286  | 0.000652275 | 0.078630894  | 0.089639416 | 0.088662514  |
| 0.182857181  | 7.05E-05    | 0.13410415   | 0.003691659 | 0.128055489  |
| 0.150824838  | 0.001077993 | 0.087912617  | 0.057644298 | 0.092049502  |
| 0.125560612  | 0.006590133 | 0.084402205  | 0.0684077   | 0.123436021  |
| 0.100510575  | 0.029875806 | 0.051397192  | 0.267663714 | 0.080664029  |
| 0.177972733  | 0.000110351 | 0.208849068  | 5.33E-06    | 0.197031663  |
| 0.197939557  | 1.64E-05    | 0.159148496  | 0.000556371 | 0.150531957  |
| 0.114772427  | 0.013071612 | 0.097934496  | 0.03436191  | 0.073223317  |
| 0.061511878  | 0.184516179 | 0.039292322  | 0.396902682 | 0.026035818  |
| 0.256977355  | 1.77E-08    | 0.197550595  | 1.71E-05    | 0.224683747  |
| 0.263570378  | 7.33E-09    | 0.204677592  | 8.25E-06    | 0.219064233  |
| 0.303963737  | 1.94E-11    | 0.288907276  | 1.98E-10    | 0.307757377  |
| 0.19157537   | 3.08E-05    | 0.167984583  | 0.000265947 | 0.192774982  |
| 0.342885073  | 2.49E-14    | 0.302607418  | 2.40E-11    | 0.30594649   |
| 0.038934037  | 0.401225174 | 0.04700601   | 0.310751449 | 0.047192519  |
| 0.131398624  | 0.004451191 | 0.090691977  | 0.050153115 | 0.110090985  |
| 0.141857004  | 0.002119938 | 0.083702697  | 0.070738062 | 0.084594211  |



|              |             |              |             |              |
|--------------|-------------|--------------|-------------|--------------|
| 0.269301502  | 3.35E-09    | 0.235080252  | 2.77E-07    | 0.229320529  |
| -0.038274814 | 0.409251548 | -0.076528613 | 0.098577722 | -0.048794092 |
| 0.120234391  | 0.009301619 | 0.064010173  | 0.167284819 | 0.059530422  |
| 0.24370459   | 9.66E-08    | 0.209449469  | 5.00E-06    | 0.218455346  |
| 0.127991272  | 0.0056073   | 0.072067287  | 0.119889805 | 0.074824693  |
| 0.149768293  | 0.001169675 | 0.094789397  | 0.040605216 | 0.114219564  |
| 0.279420548  | 8.00E-10    | 0.247523629  | 5.98E-08    | 0.248822634  |
| 0.024528612  | 0.596995003 | -0.037692597 | 0.416418887 | -0.038194341 |
| 0.152439384  | 0.000950617 | 0.09571378   | 0.038677839 | 0.106614659  |
| 0.154265772  | 0.000823358 | 0.150179813  | 0.001133143 | 0.148650536  |
| 0.157999811  | 0.000610733 | 0.113000556  | 0.014555711 | 0.115811952  |
| 0.110701051  | 0.016701292 | 0.057270814  | 0.216707694 | 0.073938121  |
| 0.240067191  | 1.51E-07    | 0.198786501  | 1.51E-05    | 0.212747197  |
| 0.225230557  | 8.76E-07    | 0.217207225  | 2.16E-06    | 0.202562489  |
| 0.063393951  | 0.17141872  | 0.024692214  | 0.59454983  | 0.023336195  |
| 0.165264402  | 0.000335128 | 0.124191377  | 0.00720936  | 0.116696849  |
| 0.187326405  | 4.63E-05    | 0.157566229  | 0.000632503 | 0.169325507  |
| 0.100466316  | 0.029948423 | 0.076008024  | 0.100897268 | 0.09719393   |
| -0.001545974 | 0.973419997 | -0.002222187 | 0.961801341 | -0.003062022 |
| 0.093357073  | 0.043751652 | 0.059292117  | 0.200895273 | 0.04436555   |
| -0.060533088 | 0.191612733 | -0.070281304 | 0.129368372 | -0.085648487 |
| -0.027784543 | 0.549215856 | -0.055561134 | 0.230763535 | -0.080694022 |
| 0.122155373  | 0.00822652  | 0.068288552  | 0.140617962 | 0.074782532  |
| -0.005158398 | 0.911476851 | 0.046511703  | 0.315872641 | 0.021147514  |
| 0.15297556   | 0.000911491 | 0.143095184  | 0.001935249 | 0.153402094  |
| -0.007140546 | 0.877691007 | 0.032447921  | 0.484233044 | -0.009667813 |
| 0.213709157  | 3.16E-06    | 0.235304552  | 2.69E-07    | 0.223601781  |
| 0.120751112  | 0.009000787 | 0.111497202  | 0.015929011 | 0.112441238  |
| 0.039052439  | 0.399793618 | 0.030580251  | 0.509749387 | 0.021383396  |
| 0.004355914  | 0.925204272 | -0.004673485 | 0.919768963 | -0.027621946 |
| 0.147718347  | 0.001368354 | 0.127755129  | 0.005696641 | 0.129847936  |
| 0.00679206   | 0.883616683 | -0.02447686  | 0.597769414 | -0.031129849 |
| 0.206653684  | 6.71E-06    | 0.206655754  | 6.71E-06    | 0.196191162  |
| 0.055981992  | 0.227245032 | 0.078139474  | 0.091668253 | 0.065208593  |
| 0.123457714  | 0.007562136 | 0.13495823   | 0.003477524 | 0.140253242  |
| -0.177218152 | 0.000118133 | -0.15216432  | 0.000971285 | -0.18824852  |
| -0.151088184 | 0.001056196 | -0.134226615 | 0.003660238 | -0.1509515   |
| 0.019986313  | 0.666618587 | 0.045388764  | 0.327710792 | 0.051690215  |
| -0.13971453  | 0.002477961 | -0.118357121 | 0.010471197 | -0.125885477 |
| 0.007228953  | 0.8761888   | -0.034709608 | 0.454281471 | -0.051439276 |
| -0.10835447  | 0.019171248 | -0.096658737 | 0.036788227 | -0.088838508 |
| 0.024588021  | 0.596106543 | 0.012510395  | 0.787438806 | -0.004463876 |
| 0.118423091  | 0.010427982 | 0.113719807  | 0.013936298 | 0.157100496  |
| -0.108004252 | 0.019565933 | -0.100346846 | 0.030145195 | -0.074015132 |
| 0.044577072  | 0.336444127 | 0.071986468  | 0.120306681 | 0.075865448  |

|              |             |              |             |              |
|--------------|-------------|--------------|-------------|--------------|
| 0.005526426  | 0.905189844 | -0.012662668 | 0.784914591 | -0.018725295 |
| 0.012244042  | 0.791859468 | -0.009431146 | 0.838926267 | 0.021303097  |
| -0.100852029 | 0.02932063  | -0.102956433 | 0.026090641 | -0.095593638 |
| -0.208877839 | 5.31E-06    | -0.232580752 | 3.72E-07    | -0.236541137 |
| -0.044577708 | 0.336437226 | -0.042750353 | 0.356638881 | -0.071391797 |
| -0.096586951 | 0.036928972 | -0.071986115 | 0.120308502 | -0.078672616 |
| -0.275483412 | 1.41E-09    | -0.290143824 | 1.65E-10    | -0.286855286 |
| 0.140313118  | 0.002372752 | 0.189790878  | 3.66E-05    | 0.199041715  |
| -0.047030735 | 0.31049673  | -0.053804731 | 0.245863716 | -0.0719286   |
| -0.125809517 | 0.006482833 | -0.127136891 | 0.005936633 | -0.13072805  |
| 0.052517322  | 0.257361616 | 0.043873179  | 0.344137317 | 0.042934534  |
| 0.007491848  | 0.871724346 | 0.047363827  | 0.307078603 | 0.017333076  |
| -0.16723151  | 0.000283629 | -0.122143041 | 0.008233052 | -0.151557748 |
| 0.050545634  | 0.275682333 | 0.069086125  | 0.136028644 | 0.066957988  |
| 0.087614821  | 0.058499276 | 0.072085939  | 0.119793756 | 0.059160662  |
| -0.226597462 | 7.49E-07    | -0.244694902 | 8.54E-08    | -0.276723616 |
| 0.064835954  | 0.161862764 | 0.044291161  | 0.339555586 | 0.031788579  |
| 0.100070979  | 0.030603795 | 0.110314409  | 0.017088023 | 0.090849726  |
| 0.113411848  | 0.014198613 | 0.136897222  | 0.003032602 | 0.095700007  |
| 0.098761406  | 0.032863154 | 0.127439342  | 0.005818113 | 0.117183768  |
| -0.181763336 | 7.80E-05    | -0.191282691 | 3.17E-05    | -0.207068196 |
| -0.249672873 | 4.56E-08    | -0.237057552 | 2.18E-07    | -0.244903899 |
| 0.194255166  | 2.37E-05    | 0.176960325  | 0.000120908 | 0.141599391  |
| -0.034386638 | 0.4584938   | -0.005957862 | 0.897827216 | 0.014843677  |
| 0.121113914  | 0.008794771 | 0.144937943  | 0.001687525 | 0.125571098  |
| 0.044425661  | 0.338089589 | 0.002060262  | 0.964582881 | -0.013757005 |
| -0.030264014 | 0.514138262 | -0.083901248 | 0.070070099 | -0.073235938 |
| -0.075249535 | 0.104354148 | -0.104953671 | 0.023313525 | -0.099651771 |
| 0.151399702  | 0.001030938 | 0.168659045  | 0.000250992 | 0.181993963  |
| -0.174359123 | 0.00015255  | -0.181988453 | 7.64E-05    | -0.192040706 |
| -0.103763353 | 0.024936072 | -0.088911878 | 0.054850728 | -0.07879245  |
| 0.048020254  | 0.300415446 | 0.076026074  | 0.100816125 | 0.074976233  |
| -0.25564371  | 2.11E-08    | -0.259416935 | 1.28E-08    | -0.293979715 |
| 0.019408179  | 0.67570609  | 0.053547929  | 0.248128073 | 0.043671462  |
| -0.076452009 | 0.098916354 | -0.070175669 | 0.129946668 | -0.054129519 |
| -0.019633019 | 0.672166211 | -0.05042697  | 0.276812554 | -0.065131543 |
| 0.127400704  | 0.005833135 | 0.121870105  | 0.00837882  | 0.128478525  |
| 0.023231358  | 0.616542823 | 0.020651231  | 0.656227006 | -0.02510719  |
| 0.164043596  | 0.000371343 | 0.179885188  | 9.27E-05    | 0.213280291  |
| -0.036811804 | 0.427401015 | -0.018970614 | 0.68261557  | -0.029364768 |
| -0.021760726 | 0.639034935 | -0.034355216 | 0.458904776 | -0.010876112 |
| -0.070411637 | 0.128657617 | -0.067648707 | 0.144384754 | -0.089139512 |
| 0.15055971   | 0.001100355 | 0.176772737  | 0.000122966 | 0.180273966  |
| -0.021359423 | 0.645231623 | 0.010630839  | 0.818771635 | 0.008172295  |
| -0.123282139 | 0.007648815 | -0.087187462 | 0.059744556 | -0.096655849 |

|              |             |              |             |              |
|--------------|-------------|--------------|-------------|--------------|
| 0.015572295  | 0.737143381 | -0.012546875 | 0.786833876 | -0.039211962 |
| -0.037471569 | 0.419159052 | -0.049393518 | 0.286788771 | -0.078203034 |
| 0.138144017  | 0.002774534 | 0.174222148  | 0.000154415 | 0.157689613  |
| -0.106156807 | 0.021767155 | -0.102100929 | 0.027364742 | -0.102685597 |
| 0.280286247  | 7.06E-10    | 0.296028577  | 6.71E-11    | 0.341050459  |
| -0.090145077 | 0.051559198 | -0.087851059 | 0.057820178 | -0.07200997  |
| -0.134891236 | 0.003493904 | -0.134611994 | 0.003562936 | -0.141439123 |
| -0.075272193 | 0.104249537 | -0.101032665 | 0.029030525 | -0.092279805 |
| 0.087528605  | 0.058748757 | 0.090597903  | 0.050392673 | 0.09330638   |
| 0.020012163  | 0.666213393 | 0.081879428  | 0.077118357 | 0.094006402  |
| 0.011083827  | 0.811191694 | 0.036984454  | 0.425235189 | 0.031781677  |
| 0.067934272  | 0.142694206 | 0.098542843  | 0.033253766 | 0.088772583  |
| -0.211514891 | 4.01E-06    | -0.228243571 | 6.19E-07    | -0.241042545 |
| 0.041163334  | 0.374788544 | 0.047552205  | 0.305156539 | 0.045212057  |
| -0.019676985 | 0.671474861 | -0.006530224 | 0.888073264 | -0.007053542 |
| -0.042816855 | 0.355890596 | -0.025722584 | 0.579256018 | -0.039726299 |
| 0.016304079  | 0.725278342 | 0.028315533  | 0.541605894 | 0.010436687  |
| -0.102464825 | 0.026816396 | -0.118818489 | 0.01017227  | -0.106169467 |
| -0.196255095 | 1.94E-05    | -0.208613505 | 5.46E-06    | -0.232515304 |
| -0.001729625 | 0.970263853 | 0.022927226  | 0.621165864 | 0.011026138  |
| 0.046805006  | 0.312827293 | 0.060025402  | 0.195371512 | 0.058016799  |
| -0.025841957 | 0.577496125 | -0.00695288  | 0.880881264 | -0.044057687 |
| -0.111646477 | 0.015787748 | -0.15067738  | 0.001090378 | -0.152631943 |
| 0.219962026  | 1.59E-06    | 0.206189109  | 7.05E-06    | 0.232855344  |
| -0.131406829 | 0.004448688 | -0.10967484  | 0.017744943 | -0.123685032 |
| 0.0468306    | 0.312562464 | 0.045307374  | 0.328579819 | 0.038150233  |
| -0.064437838 | 0.164460039 | -0.084817932 | 0.06705279  | -0.096459054 |
| 0.022873757  | 0.621980178 | 0.00670759   | 0.885054012 | -0.001450082 |
| -0.087179357 | 0.059768381 | -0.082103831 | 0.076308713 | -0.069963968 |
| 0.015812751  | 0.733237609 | 0.04272037   | 0.356976582 | 0.038908725  |
| -0.159276838 | 0.000550584 | -0.167929973 | 0.000267194 | -0.187956344 |
| 0.19188333   | 2.99E-05    | 0.162262714  | 0.000430755 | 0.161760868  |
| 0.157432922  | 0.00063934  | 0.159350924  | 0.00054727  | 0.176272901  |
| 0.026357386  | 0.56992622  | 0.07032278   | 0.129141857 | 0.097063147  |
| -0.159625112 | 0.000535163 | -0.144554876 | 0.001736491 | -0.169411297 |
| 0.171566772  | 0.000195075 | 0.146801741  | 0.001466857 | 0.140135808  |
| 0.221627653  | 1.32E-06    | 0.219634701  | 1.65E-06    | 0.224346586  |
| -0.057635658 | 0.213789427 | -0.02762243  | 0.551549627 | -0.056797398 |
| -0.109305891 | 0.01813385  | -0.079632445 | 0.085616097 | -0.091371742 |
| 0.055384332  | 0.232253105 | 0.071727326  | 0.121650993 | 0.052176511  |
| 0.040516694  | 0.38234407  | 0.070108278  | 0.130316646 | 0.092025853  |
| 0.020762601  | 0.654492867 | 0.016446543  | 0.722975977 | 0.027816745  |
| -0.055839861 | 0.228429004 | -0.035974878 | 0.437990338 | -0.062238039 |
| -0.101333396 | 0.02855301  | -0.058201585 | 0.20931886  | -0.058847679 |
| -0.003709595 | 0.936276662 | 0.018398906  | 0.691683308 | -0.006540482 |

|              |             |              |             |              |
|--------------|-------------|--------------|-------------|--------------|
| -0.050901581 | 0.272310934 | -0.05605064  | 0.226674744 | -0.053620232 |
| 0.033611881  | 0.468686999 | 0.069861361  | 0.131679174 | 0.064067274  |
| -0.020732714 | 0.654958062 | 0.016059663  | 0.72923413  | -0.002874522 |
| 0.008553988  | 0.853730087 | 0.039093164  | 0.399301942 | 0.033349298  |
| -0.022129368 | 0.633364626 | 0.007051348  | 0.879207108 | -0.007003825 |
| -0.174169861 | 0.000155133 | -0.168766771 | 0.000248677 | -0.145312335 |
| 0.051196112  | 0.269542601 | 0.052919223  | 0.25373298  | 0.068604277  |
| -0.019868396 | 0.668468194 | -0.022708197 | 0.62450454  | -0.028670802 |
| 0.133822516  | 0.003764848 | 0.112959842  | 0.014591486 | 0.128800232  |
| -0.07734806  | 0.095012776 | -0.070507329 | 0.128137696 | -0.1079881   |
| 0.083992915  | 0.069763463 | 0.030968001  | 0.504394828 | 0.009360975  |
| -0.011300848 | 0.807566431 | -0.037119167 | 0.423549701 | -0.063706712 |
| 0.018824496  | 0.684928841 | 0.050441672  | 0.276672349 | 0.06597977   |
| -0.108253981 | 0.01928378  | -0.117173656 | 0.011273887 | -0.119030843 |
| 0.041802826  | 0.367407701 | 0.025961677  | 0.575733631 | 0.013242874  |
| -0.154802414 | 0.000789076 | -0.193799925 | 2.48E-05    | -0.21837672  |
| 0.029539654  | 0.524264556 | 0.055513052  | 0.231167961 | 0.062356877  |
| -0.013296258 | 0.774436086 | -0.043631705 | 0.346802074 | -0.054623844 |
| -0.065503917 | 0.157574534 | -0.04397311  | 0.343038351 | -0.062108654 |
| 0.113947349  | 0.01374523  | 0.171695196  | 0.000192897 | 0.157629208  |
| 0.046850421  | 0.31235748  | 0.060342126  | 0.193020299 | 0.047798259  |
| -0.058692219 | 0.205498029 | -0.051037221 | 0.271033635 | -0.068750229 |
| -0.129755982 | 0.004978564 | -0.102269471 | 0.027109583 | -0.1322383   |
| -0.101030683 | 0.029033695 | -0.082247773 | 0.075793022 | -0.091803336 |
| -0.056255594 | 0.224978175 | -0.076385059 | 0.099213063 | -0.089551014 |
| -0.005114209 | 0.912232098 | -0.006555295 | 0.887646388 | -0.015060227 |
| 0.093101051  | 0.044335151 | 0.06812047   | 0.141600096 | 0.061394669  |
| 0.070312218  | 0.129199515 | 0.07678584   | 0.097447392 | 0.09135707   |
| -0.101412517 | 0.028428503 | -0.021367593 | 0.645105213 | -0.015337899 |
| -0.19467868  | 2.27E-05    | -0.145911808 | 0.001568686 | -0.173507197 |
| 0.012333807  | 0.79036889  | 0.030184314  | 0.515247446 | 0.019857629  |
| 0.117785603  | 0.010852276 | 0.091534452  | 0.048049891 | 0.096046523  |
| 0.190140204  | 3.54E-05    | 0.19117475   | 3.20E-05    | 0.181584691  |
| -0.048319857 | 0.297406456 | -0.048802824 | 0.292598297 | -0.067828182 |
| 0.083574049  | 0.071173628 | 0.117256193  | 0.011216189 | 0.123552992  |
| 0.077501067  | 0.094358678 | 0.088521257  | 0.055929066 | 0.087068906  |
| -0.103426859 | 0.025412066 | -0.090751892 | 0.05000104  | -0.070268458 |
| -0.06391356  | 0.167927961 | -0.041237791 | 0.373924511 | -0.044653271 |
| 0.021107584  | 0.649132977 | 0.037332768  | 0.420885213 | 0.049505459  |
| 0.179452982  | 9.65E-05    | 0.140796823  | 0.002290731 | 0.134771822  |
| -0.089070883 | 0.054416758 | -0.075840103 | 0.101654635 | -0.073183406 |
| -0.133201526 | 0.003930891 | -0.142706196 | 0.00199162  | -0.16012866  |
| 0.035875245  | 0.439260899 | 0.05369724   | 0.246809758 | 0.040473561  |
| 0.113689685  | 0.013961766 | 0.121325941  | 0.008676327 | 0.130472112  |
| -0.03148325  | 0.497325613 | -0.012771734 | 0.783107998 | -0.05273814  |

|              |             |              |             |              |
|--------------|-------------|--------------|-------------|--------------|
| 0.000344986  | 0.994067606 | -0.03322678  | 0.473799783 | -0.036339214 |
| 0.004656045  | 0.920067352 | 0.022809066  | 0.622966032 | 0.016570555  |
| -0.057018789 | 0.218740175 | -0.053871222 | 0.245279793 | -0.066385624 |
| -0.040498083 | 0.382562898 | -0.016497369 | 0.722155175 | -0.064027995 |
| -0.156280688 | 0.000701353 | -0.153934568 | 0.000845197 | -0.177019279 |
| -0.165909516 | 0.000317348 | -0.125020912 | 0.006828278 | -0.108740804 |
| -0.013166712 | 0.776575294 | -0.055054339 | 0.235051494 | -0.03637515  |
| -0.143252028 | 0.001912935 | -0.151600944 | 0.001014918 | -0.178137476 |
| -0.014348256 | 0.757128794 | -0.001394658 | 0.976020742 | -0.047588665 |
| 0.05074667   | 0.273774721 | 0.086747499  | 0.061049377 | 0.087693243  |
| 0.006139578  | 0.894728752 | -0.008846774 | 0.848782749 | -0.037371226 |
| 0.006342619  | 0.891268555 | -0.005202649 | 0.910720615 | 0.004004855  |
| 0.064211484  | 0.165950641 | 0.03632054   | 0.433598683 | 0.017949077  |
| 0.129601928  | 0.005030803 | 0.084548707  | 0.067927692 | 0.06658234   |
| -0.081601213 | 0.078131824 | -0.099541834 | 0.031500176 | -0.125513547 |
| 0.129408158  | 0.005097212 | 0.089971352  | 0.05201267  | 0.052599107  |
| 0.132871195  | 0.004021891 | 0.108443381  | 0.019072159 | 0.079528844  |
| -0.026448739 | 0.568589482 | -0.009574252 | 0.836516291 | -0.005782523 |
| 0.118273908  | 0.010525933 | 0.117757984  | 0.010870999 | 0.113825639  |
| -0.264997275 | 6.04E-09    | -0.261591987 | 9.57E-09    | -0.293323814 |
| -0.10858663  | 0.01891345  | -0.098029615 | 0.034186598 | -0.109798948 |
| -0.086672612 | 0.061273799 | -0.098847238 | 0.03271083  | -0.123717975 |
| -0.047357166 | 0.307146713 | -0.058296324 | 0.208577111 | -0.073419314 |
| -0.120372383 | 0.009220418 | -0.124646136 | 0.006998155 | -0.141002256 |
| -0.055787813 | 0.228863659 | -0.062200831 | 0.179638601 | -0.078805218 |
| 0.070583583  | 0.127724558 | 0.085048167  | 0.066311951 | 0.068494861  |
| 0.028927724  | 0.532897818 | 0.060464538  | 0.192117139 | 0.068848968  |
| -0.134683371 | 0.003545174 | -0.126141783 | 0.006342038 | -0.143932068 |
| 0.061354629  | 0.185643023 | 0.074033238  | 0.11009252  | 0.075315431  |
| -0.171421265 | 0.00019757  | -0.177051801 | 0.000119917 | -0.212835367 |
| 0.022166258  | 0.632798371 | 0.026116979  | 0.573451106 | 0.013440624  |
| 0.047666515  | 0.303994102 | 0.045669435  | 0.324725356 | 0.039862629  |
| 0.150366917  | 0.001116884 | 0.149146073  | 0.001226975 | 0.156421096  |
| -0.036798974 | 0.427562221 | -0.030372269 | 0.512633647 | -0.056804379 |
| -0.283652327 | 4.32E-10    | -0.287292777 | 2.52E-10    | -0.295077682 |
| 0.188682778  | 4.07E-05    | 0.190590054  | 3.39E-05    | 0.217999114  |
| 0.149781824  | 0.001168457 | 0.158772237  | 0.000573662 | 0.213383351  |
| -0.071698857 | 0.121799388 | -0.074101969 | 0.109761763 | -0.062288481 |
| -0.074584618 | 0.107461097 | -0.114821333 | 0.013032613 | -0.084103643 |
| 0.113479143  | 0.014140924 | 0.115209548  | 0.012726664 | 0.095840521  |
| 0.221061771  | 1.41E-06    | 0.224767213  | 9.24E-07    | 0.236155075  |
| -0.1131589   | 0.014417307 | -0.11796174  | 0.010733541 | -0.091835228 |
| 0.095866243  | 0.038367512 | 0.086786294  | 0.060933382 | 0.090564241  |
| 0.294150833  | 8.96E-11    | 0.307084459  | 1.18E-11    | 0.319556793  |
| 0.115623992  | 0.012407054 | 0.113819824  | 0.013852027 | 0.110747106  |

|              |             |              |             |              |
|--------------|-------------|--------------|-------------|--------------|
| -0.336291985 | 8.24E-14    | -0.34186936  | 3.00E-14    | -0.350795984 |
| 0.266682285  | 4.80E-09    | 0.239126947  | 1.70E-07    | 0.198111016  |
| -0.078703309 | 0.08934352  | -0.093938257 | 0.042451036 | -0.116605737 |
| 0.016112215  | 0.72838298  | 0.015419466  | 0.739629342 | 0.011633139  |
| -0.093043244 | 0.044467802 | -0.076901798 | 0.096941226 | -0.098730049 |
| 0.139752148  | 0.002471226 | 0.126128256  | 0.006347716 | 0.112515678  |
| 0.129852761  | 0.004945996 | 0.106086775  | 0.021854663 | 0.107278156  |
| -0.047775703 | 0.302886481 | -0.011420685 | 0.805566356 | -0.022059639 |
| 0.100903986  | 0.029236933 | 0.121437742  | 0.008614446 | 0.142011063  |
| 0.193903158  | 2.45E-05    | 0.169981026  | 0.000223931 | 0.158413947  |
| -0.020965194 | 0.651343066 | -0.015230811 | 0.742701798 | -0.006501863 |
| 0.182880847  | 7.04E-05    | 0.17325884   | 0.000168146 | 0.203163633  |
| -0.106062472 | 0.021885102 | -0.084223706 | 0.068996294 | -0.097512877 |
| 0.007534529  | 0.870999931 | 0.002258381  | 0.961179656 | -0.006983667 |
| -0.208891642 | 5.30E-06    | -0.190169725 | 3.53E-05    | -0.200919783 |
| -0.011177507 | 0.809626296 | 0.029809863  | 0.520475259 | 0.008195741  |
| -0.04752553  | 0.305428228 | -0.054746459 | 0.237683744 | -0.03891996  |
| -0.131216256 | 0.004507141 | -0.143469761 | 0.00188235  | -0.153097171 |
| 0.003967972  | 0.93184868  | 0.018625976  | 0.688076429 | 0.039800637  |
| -0.15940914  | 0.000544678 | -0.096095493 | 0.037904863 | -0.088836129 |
| -0.123883783 | 0.007355431 | -0.145761889 | 0.001586466 | -0.178038273 |
| -0.058763924 | 0.204943883 | -0.064138582 | 0.166432874 | -0.060724689 |
| -0.038536953 | 0.406048536 | -0.039759652 | 0.3913069   | -0.032359181 |
| -0.124601499 | 0.007018638 | -0.107849133 | 0.019742996 | -0.115674562 |
| -0.059770391 | 0.197279752 | -0.070968927 | 0.125652559 | -0.067410366 |
| -0.107357227 | 0.020313744 | -0.080132662 | 0.08366186  | -0.07218109  |
| -0.112554275 | 0.014952095 | -0.058690342 | 0.205512549 | -0.105495022 |
| -0.325529485 | 5.46E-13    | -0.320196481 | 1.36E-12    | -0.362084608 |
| 0.014605052  | 0.752922019 | 0.01599603   | 0.730265188 | 0.000575443  |
| 0.108861788  | 0.018611825 | 0.153841217  | 0.000851449 | 0.168329126  |
| 0.145769924  | 0.001585508 | 0.143191823  | 0.001921472 | 0.133354464  |
| -0.081339952 | 0.079093349 | -0.118632453 | 0.010291881 | -0.119369029 |
| -0.062256224 | 0.17925063  | 0.006975868  | 0.880490373 | -0.011336856 |
| 0.089957686  | 0.052048482 | 0.102809107  | 0.026306339 | 0.051192488  |
| -0.001292641 | 0.977774328 | 0.018738966  | 0.686284285 | 0.006632515  |
| -0.041443427 | 0.371544611 | -0.069394108 | 0.134287645 | -0.077823852 |
| 0.000810163  | 0.986068967 | -0.005739433 | 0.901553748 | 0.014537725  |
| 0.17916403   | 9.90E-05    | 0.114675994  | 0.013148811 | 0.147546457  |
| -0.110053221 | 0.017353683 | -0.091719919 | 0.047596933 | -0.102201089 |
| -0.189067884 | 3.92E-05    | -0.204860025 | 8.10E-06    | -0.221021202 |
| 0.033896958  | 0.464921875 | 0.037382102  | 0.420271205 | 0.005632543  |
| 0.112879193  | 0.01466258  | 0.082255374  | 0.075765869 | 0.061089102  |
| 0.150314306  | 0.001121434 | 0.181922627  | 7.69E-05    | 0.137060565  |
| 0.190553815  | 3.40E-05    | 0.194821407  | 2.24E-05    | 0.20297779   |
| 0.095641678  | 0.038825336 | 0.105416768  | 0.022707411 | 0.104680943  |

|              |             |              |             |              |
|--------------|-------------|--------------|-------------|--------------|
| -0.014696132 | 0.751431731 | 0.031268605  | 0.500264133 | 0.037172384  |
| -0.048723772 | 0.293381711 | -0.023553378 | 0.611664334 | -0.041580566 |
| -0.085078765 | 0.066214001 | -0.045253374 | 0.329157229 | -0.066283459 |
| -0.002562393 | 0.95595884  | 0.023835432  | 0.607405369 | -0.000312265 |
| -0.115235791 | 0.012706213 | -0.112160278 | 0.015309887 | -0.128221354 |
| 0.137907399  | 0.002821917 | 0.087155466  | 0.059838664 | 0.098588179  |
| -0.050348878 | 0.277558056 | -0.022558202 | 0.626795381 | -0.039388877 |
| 0.045113475  | 0.330656161 | 0.014245899  | 0.758807589 | -0.030730171 |
| -0.139169982 | 0.00257735  | -0.136420934 | 0.003136816 | -0.156458094 |
| -0.15154163  | 0.001019616 | -0.110197531 | 0.017206459 | -0.139159049 |
| -0.057119833 | 0.217923656 | -0.055449724 | 0.231701385 | -0.041503324 |
| -0.105729012 | 0.022306483 | -0.074321288 | 0.108711558 | -0.096616527 |
| 0.064450391  | 0.164377673 | 0.04311927   | 0.352500255 | 0.032703221  |
| -0.031365963 | 0.498930154 | 0.001831021  | 0.968521509 | -0.009237371 |
| -0.053558623 | 0.248033489 | -0.034257969 | 0.460178013 | -0.017583344 |
| -0.07492648  | 0.105854683 | -0.053147073 | 0.251691635 | -0.060246024 |
| 0.127926152  | 0.00563181  | 0.12659625   | 0.006153905 | 0.142886628  |
| -0.049212544 | 0.288560355 | -0.052601176 | 0.256601571 | -0.036192583 |
| -0.149198708 | 0.00122203  | -0.159900936 | 0.000523234 | -0.143085059 |
| 0.045388776  | 0.327710657 | 0.04850608   | 0.295546321 | 0.053044173  |
| 0.135813942  | 0.003274341 | 0.140808379  | 0.002288803 | 0.147008722  |
| -0.111116542 | 0.016294264 | -0.123517278 | 0.00753293  | -0.152975443 |
| -0.136227571 | 0.003180045 | -0.143772511 | 0.001840566 | -0.157848961 |
| -0.08283327  | 0.073724534 | -0.096172079 | 0.037751362 | -0.1080563   |
| -0.059525897 | 0.199122029 | -0.056026618 | 0.226874191 | -0.05815896  |
| -0.01072277  | 0.817231941 | -0.016160107 | 0.727607599 | -0.001570487 |
| 0.044473388  | 0.337570362 | 0.049015174  | 0.290500812 | 0.046894307  |
| -0.124124394 | 0.007240946 | -0.127519002 | 0.005787253 | -0.132565348 |
| -0.130047641 | 0.004881    | -0.148248728 | 0.001314172 | -0.146361857 |
| 0.126428316  | 0.006222832 | 0.116307773  | 0.011895209 | 0.111781051  |
| -0.292740612 | 1.11E-10    | -0.266940461 | 4.63E-09    | -0.263022562 |
| -0.165160756 | 0.00033807  | -0.156867399 | 0.000669112 | -0.162685453 |
| 0.11277556   | 0.014754382 | 0.11633824   | 0.011872844 | 0.122705171  |
| 0.057865003  | 0.211969498 | 0.027588696  | 0.552035879 | -0.00059111  |
| -0.01765882  | 0.703487242 | -0.043390212 | 0.34948011  | -0.044706774 |
| -0.226127016 | 7.91E-07    | -0.186445466 | 5.04E-05    | -0.208056166 |
| 0.034630428  | 0.455312149 | 0.037332129  | 0.420893165 | 0.039925777  |
| -0.170537667 | 0.000213375 | -0.130917654 | 0.004600125 | -0.136944018 |
| -0.103782716 | 0.024908917 | -0.10575801  | 0.022269562 | -0.094258474 |
| -0.050660891 | 0.274587567 | -0.07348973  | 0.112735778 | -0.049770129 |
| -0.085516647 | 0.06482524  | -0.07015828  | 0.130042058 | -0.064155615 |
| -0.132047322 | 0.004257218 | -0.11983493  | 0.009540277 | -0.118784195 |
| -0.012163046 | 0.793205088 | 0.0128364    | 0.782037394 | 0.007425641  |
| 0.012806004  | 0.782540583 | 0.012282788  | 0.791215972 | 0.008843641  |
| -0.046658373 | 0.314347356 | -0.047417424 | 0.306530934 | -0.064857076 |

|              |             |              |             |              |
|--------------|-------------|--------------|-------------|--------------|
| -0.120671081 | 0.009046806 | -0.092657797 | 0.045360846 | -0.063352542 |
| 0.218607776  | 1.85E-06    | 0.205904246  | 7.26E-06    | 0.229534681  |
| -0.172945029 | 0.000172861 | -0.079603002 | 0.085732258 | -0.079786859 |
| -0.040182792 | 0.386281666 | 0.006411559  | 0.890094157 | -0.015039911 |
| -0.193488972 | 2.55E-05    | -0.149766809 | 0.001169808 | -0.154657286 |
| -0.269429989 | 3.29E-09    | -0.217949844 | 1.99E-06    | -0.231047975 |
| -0.165538691 | 0.000327458 | -0.128531527 | 0.005407625 | -0.137464483 |
| 0.108774634  | 0.018706905 | 0.148853268  | 0.001254824 | 0.171546536  |
| -0.215949588 | 2.48E-06    | -0.172833483 | 0.000174567 | -0.182907153 |
| -0.20734679  | 6.24E-06    | -0.178554257 | 0.000104685 | -0.218956558 |
| 0.140892726  | 0.002274779 | 0.088369371  | 0.056353082 | 0.093462186  |
| 0.365308012  | 3.44E-16    | 0.356584185  | 1.90E-15    | 0.363860616  |
| -0.222062614 | 1.26E-06    | -0.185960863 | 5.27E-05    | -0.200159975 |
| -0.246973059 | 6.42E-08    | -0.228538537 | 5.98E-07    | -0.240208214 |
| 0.236465583  | 2.34E-07    | 0.231425617  | 4.27E-07    | 0.222574117  |
| -0.344177766 | 1.97E-14    | -0.350791065 | 5.72E-15    | -0.363173868 |
| -0.132641614 | 0.004086255 | -0.09492705  | 0.040313161 | -0.152226801 |
| -0.106751703 | 0.021035981 | -0.083658458 | 0.070887598 | -0.099650144 |
| -0.270733108 | 2.74E-09    | -0.234891938 | 2.83E-07    | -0.245255419 |
| -0.067475109 | 0.145419908 | -0.03374624  | 0.466910371 | -0.034200526 |
| -0.127754979 | 0.005696698 | -0.091465668 | 0.048218794 | -0.115336853 |
| -0.067886928 | 0.142973431 | -0.040959986 | 0.377154538 | -0.058967264 |
| -0.077587338 | 0.093991465 | -0.038128492 | 0.411045913 | -0.057497437 |
| 0.040251482  | 0.385469616 | 0.041049771  | 0.37610874  | 0.06290696   |
| 0.12300861   | 0.007785621 | 0.136286931  | 0.003166717 | 0.103064242  |
| -0.224677484 | 9.34E-07    | -0.217570163 | 2.07E-06    | -0.221025894 |
| -0.110843872 | 0.016560387 | -0.036993334 | 0.42512396  | -0.065667563 |
| -0.427937245 | 3.22E-22    | -0.399792443 | 2.38E-19    | -0.409209062 |
| -0.28217998  | 5.36E-10    | -0.23115281  | 4.41E-07    | -0.24271723  |
| -0.169669342 | 0.000230053 | -0.13409727  | 0.003693432 | -0.149743209 |
| -0.24273727  | 1.09E-07    | -0.212557865 | 3.58E-06    | -0.194399056 |
| -0.064823988 | 0.161940373 | -0.095462577 | 0.039193781 | -0.072149256 |
| -0.125688647 | 0.006534742 | -0.096262019 | 0.037571771 | -0.102343459 |
| -0.326983544 | 4.25E-13    | -0.302964279 | 2.27E-11    | -0.352402534 |
| -0.138885217 | 0.002630758 | -0.126030788 | 0.006388764 | -0.157493367 |
| -0.285174127 | 3.45E-10    | -0.289570812 | 1.79E-10    | -0.319738036 |
| -0.210997869 | 4.24E-06    | -0.198121078 | 1.61E-05    | -0.217596855 |
| -0.270277328 | 2.92E-09    | -0.256061872 | 1.99E-08    | -0.275494262 |
| -0.256000422 | 2.01E-08    | -0.227941572 | 6.41E-07    | -0.289137331 |
| -0.345460542 | 1.55E-14    | -0.36102068  | 8.01E-16    | -0.42461317  |
| -0.173704899 | 0.000161652 | -0.15579602  | 0.000729066 | -0.166734267 |
| -0.21620773  | 2.41E-06    | -0.189208373 | 3.87E-05    | -0.201169246 |
| -0.381465512 | 1.27E-17    | -0.353583541 | 3.37E-15    | -0.384202712 |
| 0.194409805  | 2.33E-05    | 0.169520459  | 0.000233033 | 0.150213561  |
| -0.269828051 | 3.11E-09    | -0.275848325 | 1.33E-09    | -0.312585265 |



|              |             |              |             |              |
|--------------|-------------|--------------|-------------|--------------|
| 0.030894033  | 0.505413988 | 0.050430793  | 0.27677609  | 0.056536533  |
| -0.27630778  | 1.25E-09    | -0.311024652 | 6.22E-12    | -0.270090499 |
| -0.238689008 | 1.79E-07    | -0.226721415 | 7.38E-07    | -0.231955362 |
| -0.298584375 | 4.52E-11    | -0.280539674 | 6.80E-10    | -0.277481151 |
| -0.092536783 | 0.045644315 | -0.066011451 | 0.154374024 | -0.037587507 |
| 0.229455683  | 5.38E-07    | 0.230225326  | 4.92E-07    | 0.195848451  |
| 0.015980552  | 0.730516052 | -0.02527184  | 0.585923762 | -0.042238459 |
| 0.102819749  | 0.026290708 | 0.063067719  | 0.173637858 | 0.064272225  |
| -0.172598494 | 0.000178212 | -0.152986936 | 0.000910677 | -0.161964833 |
| 0.082325373  | 0.075516184 | 0.055056718  | 0.23503124  | 0.056337589  |
| -0.206733277 | 6.66E-06    | -0.16690249  | 0.000291693 | -0.177363919 |
| -0.200038424 | 1.33E-05    | -0.186611736 | 4.96E-05    | -0.201675559 |
| -0.268694553 | 3.64E-09    | -0.229135771 | 5.58E-07    | -0.245303396 |
| 0.364237647  | 4.25E-16    | 0.376224618  | 3.77E-17    | 0.415754575  |
| -0.121574921 | 0.008539055 | -0.0863715   | 0.062183061 | -0.095854531 |
| -0.355036479 | 2.55E-15    | -0.332791014 | 1.54E-13    | -0.356232946 |
| -0.032180872 | 0.487838701 | -0.005180818 | 0.91109368  | 0.017251845  |
| -0.099813512 | 0.031037185 | -0.091522989 | 0.048078005 | -0.109264042 |
| 0.253304581  | 2.86E-08    | 0.183455382  | 6.67E-05    | 0.174845318  |
| -0.209086913 | 5.19E-06    | -0.191140073 | 3.21E-05    | -0.186741114 |
| -0.172528874 | 0.000179305 | -0.140410877 | 0.002355962 | -0.123284932 |
| 0.184295682  | 6.17E-05    | 0.21054805   | 4.45E-06    | 0.170547101  |
| -0.205013068 | 7.97E-06    | -0.155686327 | 0.000735477 | -0.144831417 |
| -0.155044344 | 0.000774058 | -0.092250412 | 0.04632105  | -0.120833634 |
| -0.222621043 | 1.18E-06    | -0.174867068 | 0.000145818 | -0.164353044 |
| -0.322197404 | 9.66E-13    | -0.327767799 | 3.71E-13    | -0.338822486 |
| -0.245420757 | 7.80E-08    | -0.237146097 | 2.16E-07    | -0.255655633 |
| -0.361675615 | 7.05E-16    | -0.386204774 | 4.64E-18    | -0.422352749 |
| -0.021765459 | 0.638961992 | 0.031451028  | 0.497766147 | 0.04435094   |
| 0.16914215   | 0.000240766 | 0.132542419  | 0.004114352 | 0.135196954  |
| -0.219950388 | 1.59E-06    | -0.188637881 | 4.09E-05    | -0.20645416  |
| -0.471700466 | 3.01E-27    | -0.438654004 | 2.20E-23    | -0.453619503 |
| 0.078522124  | 0.090085341 | 0.062542195  | 0.17725754  | 0.057441316  |
| -0.120338329 | 0.009240398 | -0.053084908 | 0.252247442 | -0.046705224 |
| -0.137390213 | 0.002928059 | -0.135769572 | 0.003284605 | -0.177919799 |
| -0.154613971 | 0.000800961 | -0.131363469 | 0.004461927 | -0.146870247 |
| -0.274124843 | 1.70E-09    | -0.241577372 | 1.26E-07    | -0.260196759 |
| 0.337670719  | 6.43E-14    | 0.289382968  | 1.84E-10    | 0.271566209  |
| -0.236559532 | 2.32E-07    | -0.201867195 | 1.10E-05    | -0.227460609 |
| -0.195010775 | 2.20E-05    | -0.180599632 | 8.69E-05    | -0.169534496 |
| -0.438193257 | 2.48E-23    | -0.391643603 | 1.44E-18    | -0.410636558 |
| 0.172046328  | 0.000187059 | 0.161001071  | 0.000478074 | 0.157088204  |
| 0.274610481  | 1.59E-09    | 0.239725601  | 1.58E-07    | 0.238489487  |
| -0.219471069 | 1.68E-06    | -0.189771859 | 3.67E-05    | -0.169742395 |
| -0.223879798 | 1.02E-06    | -0.211907452 | 3.84E-06    | -0.20513741  |

|              |             |              |             |              |
|--------------|-------------|--------------|-------------|--------------|
| -0.207858269 | 5.92E-06    | -0.166279576 | 0.00030755  | -0.19601424  |
| -0.096658013 | 0.036789645 | -0.051309225 | 0.268484574 | -0.059922124 |
| -0.101381922 | 0.028476592 | -0.057785329 | 0.212600473 | -0.084987489 |
| -0.300663194 | 3.27E-11    | -0.251919379 | 3.42E-08    | -0.288872764 |
| -0.458335347 | 1.24E-25    | -0.455450615 | 2.70E-25    | -0.457198112 |
| -0.16658949  | 0.000299563 | -0.131346509 | 0.004467115 | -0.144589857 |
| -0.274376478 | 1.64E-09    | -0.256892689 | 1.79E-08    | -0.269400773 |
| -0.02029093  | 0.661849846 | 0.027312574  | 0.556023777 | 0.006664551  |
| -0.343067669 | 2.41E-14    | -0.323167675 | 8.19E-13    | -0.326659095 |
| 0.100526492  | 0.029849726 | 0.105445438  | 0.022670339 | 0.130117209  |
| -0.311332124 | 5.92E-12    | -0.278380722 | 9.29E-10    | -0.275381044 |
| -0.11403594  | 0.013671466 | -0.065214849 | 0.159419658 | -0.084887042 |
| -0.182074182 | 7.58E-05    | -0.14619633  | 0.001535446 | -0.131621166 |
| 0.092667352  | 0.045338527 | 0.088443727  | 0.056145171 | 0.074959477  |
| -0.489532948 | 1.63E-29    | -0.456140449 | 2.24E-25    | -0.410120556 |
| -0.124136226 | 0.007235358 | -0.072817567 | 0.116073405 | -0.066436749 |
| -0.50279363  | 2.74E-31    | -0.465111775 | 1.92E-26    | -0.498441134 |
| -0.429930271 | 1.97E-22    | -0.369149188 | 1.60E-16    | -0.3869845   |
| -0.235969636 | 2.49E-07    | -0.249005125 | 4.96E-08    | -0.30923797  |
| -0.240406421 | 1.45E-07    | -0.250762497 | 3.96E-08    | -0.276896928 |
| -0.160566885 | 0.000495446 | -0.125717514 | 0.006522311 | -0.144912608 |
| 0.239011252  | 1.72E-07    | 0.205654906  | 7.45E-06    | 0.255149964  |
| 0.144565944  | 0.001735058 | 0.127777713  | 0.005688042 | 0.191467533  |
| -0.23072395  | 4.64E-07    | -0.221504817 | 1.34E-06    | -0.211731423 |
| -0.155087545 | 0.000771404 | -0.127286796 | 0.005877622 | -0.14963941  |
| -0.145552866 | 0.001611564 | -0.11950982  | 0.009738516 | -0.14174318  |
| -0.249636704 | 4.58E-08    | -0.210443194 | 4.50E-06    | -0.233363736 |
| -0.093850352 | 0.042645638 | -0.053483978 | 0.248694223 | -0.056152795 |
| 0.14417368   | 0.001786506 | 0.112672467  | 0.014846206 | 0.130016359  |
| -0.07931428  | 0.086878117 | -0.041291602 | 0.373300829 | -0.029989143 |
| -0.297667938 | 5.21E-11    | -0.267373327 | 4.37E-09    | -0.256411049 |
| 0.136137091  | 0.003200458 | 0.116079016  | 0.012064328 | 0.140035355  |
| 0.284781446  | 3.66E-10    | 0.262275725  | 8.73E-09    | 0.297422657  |
| -0.382074619 | 1.11E-17    | -0.349080931 | 7.90E-15    | -0.356520232 |
| 0.132367692  | 0.004164269 | 0.089624805  | 0.052927192 | 0.126710034  |
| 0.139018895  | 0.002605562 | 0.07814728   | 0.091635741 | 0.110073362  |
| -0.314011208 | 3.81E-12    | -0.26020561  | 1.15E-08    | -0.289548255 |
| -0.38600338  | 4.84E-18    | -0.323143416 | 8.22E-13    | -0.334265969 |
| -0.189001374 | 3.95E-05    | -0.138874279 | 0.00263283  | -0.167098878 |
| -0.286389199 | 2.88E-10    | -0.267295367 | 4.41E-09    | -0.254756958 |
| -0.267623465 | 4.22E-09    | -0.203477585 | 9.34E-06    | -0.219820835 |
| -0.30370611  | 2.02E-11    | -0.311912279 | 5.38E-12    | -0.331319737 |
| 0.240501273  | 1.43E-07    | 0.201789925  | 1.11E-05    | 0.213054535  |
| -0.305704943 | 1.47E-11    | -0.28917445  | 1.90E-10    | -0.294881187 |
| -0.080104384 | 0.083771366 | -0.015736436 | 0.734476481 | 0.002874839  |

|              |             |              |             |              |
|--------------|-------------|--------------|-------------|--------------|
| 0.218157229  | 1.94E-06    | 0.157457763  | 0.000638061 | 0.194442716  |
| -0.191224011 | 3.19E-05    | -0.17924749  | 9.83E-05    | -0.167368169 |
| -0.390391144 | 1.88E-18    | -0.362575564 | 5.90E-16    | -0.359704373 |
| -0.044493648 | 0.337350103 | 0.01289475   | 0.78107172  | 0.010038157  |
| -0.322888221 | 8.59E-13    | -0.270634109 | 2.78E-09    | -0.273640025 |
| 0.349315037  | 7.56E-15    | 0.291708904  | 1.30E-10    | 0.267990087  |
| -0.133175264 | 0.003938056 | -0.129773396 | 0.004972689 | -0.158505204 |
| -0.262118441 | 8.92E-09    | -0.229451643 | 5.38E-07    | -0.256944142 |
| -0.128506877 | 0.005416594 | -0.080094269 | 0.083810565 | -0.055739903 |
| 0.162195945  | 0.000433146 | 0.128669968  | 0.005357499 | 0.104600063  |
| -0.126685577 | 0.006117521 | -0.148563597 | 0.001282946 | -0.152925257 |
| -0.378726987 | 2.24E-17    | -0.326717833 | 4.45E-13    | -0.356880534 |
| -0.255997085 | 2.01E-08    | -0.216152466 | 2.42E-06    | -0.228208289 |
| -0.219808859 | 1.62E-06    | -0.244123999 | 9.17E-08    | -0.260241368 |
| -0.417125204 | 4.39E-21    | -0.367155528 | 2.38E-16    | -0.383940795 |
| 0.119722559  | 0.009608387 | 0.090811445  | 0.049850265 | 0.072440912  |
| -0.175754465 | 0.000134721 | -0.186992043 | 4.78E-05    | -0.160513395 |
| -0.275927806 | 1.32E-09    | -0.248664253 | 5.18E-08    | -0.258256598 |
| -0.229450266 | 5.38E-07    | -0.212211069 | 3.72E-06    | -0.23555246  |
| -0.18683956  | 4.85E-05    | -0.188861084 | 4.00E-05    | -0.18806602  |
| -0.292221292 | 1.20E-10    | -0.271613781 | 2.43E-09    | -0.28952448  |
| -0.349740484 | 6.98E-15    | -0.338700404 | 5.34E-14    | -0.340443477 |
| 0.036810336  | 0.427419461 | 0.050972871  | 0.271639095 | 0.065419822  |
| -0.238916249 | 1.74E-07    | -0.196764097 | 1.85E-05    | -0.205193233 |
| -0.411423387 | 1.67E-20    | -0.376168419 | 3.81E-17    | -0.330265224 |
| -0.126440158 | 0.006217949 | -0.108039768 | 0.019525588 | -0.100200041 |
| -0.110717171 | 0.016685335 | -0.04369965  | 0.346050962 | -0.048465905 |
| -0.275370028 | 1.43E-09    | -0.265090701 | 5.97E-09    | -0.273240719 |
| -0.328291453 | 3.39E-13    | -0.307592768 | 1.09E-11    | -0.307611242 |
| -0.123846152 | 0.007373483 | -0.08014617  | 0.083609588 | -0.088619641 |
| -0.368917509 | 1.67E-16    | -0.335642183 | 9.26E-14    | -0.351843046 |
| -0.005190823 | 0.910922712 | 0.000287216  | 0.995060995 | 0.020724535  |
| 0.193532232  | 2.54E-05    | 0.176575339  | 0.000125167 | 0.184815567  |
| 0.14749969   | 0.001391284 | 0.11577196   | 0.012294672 | 0.138377209  |
| -0.091429214 | 0.048308511 | -0.066814084 | 0.149413461 | -0.08119094  |
| 0.112111145  | 0.015355028 | 0.094251375  | 0.041763932 | 0.052216955  |
| -0.258156855 | 1.51E-08    | -0.240159479 | 1.50E-07    | -0.228548787 |
| -0.216752352 | 2.27E-06    | -0.192306161 | 2.87E-05    | -0.19441546  |
| -0.242463787 | 1.13E-07    | -0.210325693 | 4.55E-06    | -0.228982588 |
| -0.278528053 | 9.10E-10    | -0.225961965 | 8.06E-07    | -0.242051952 |
| -0.299100558 | 4.17E-11    | -0.267937942 | 4.04E-09    | -0.302482658 |
| -0.305934238 | 1.42E-11    | -0.276022384 | 1.30E-09    | -0.294453027 |
| -0.14581909  | 0.001579661 | -0.156530758 | 0.000687439 | -0.176471973 |
| -0.038974162 | 0.400739702 | -0.044194476 | 0.340611922 | -0.052101125 |
| -0.36607268  | 2.95E-16    | -0.353067349 | 3.72E-15    | -0.345269362 |

|              |             |              |             |              |
|--------------|-------------|--------------|-------------|--------------|
| -0.321660185 | 1.06E-12    | -0.332428328 | 1.64E-13    | -0.412265053 |
| -0.219902705 | 1.60E-06    | -0.16799505  | 0.000265709 | -0.177016484 |
| -0.225111366 | 8.88E-07    | -0.204220266 | 8.65E-06    | -0.221458712 |
| -0.026685827 | 0.565127262 | 0.00581221   | 0.900311884 | 0.004155486  |
| -0.226422045 | 7.64E-07    | -0.198477849 | 1.56E-05    | -0.200745716 |
| -0.454017229 | 3.97E-25    | -0.430953338 | 1.53E-22    | -0.450356392 |
| -0.303549291 | 2.07E-11    | -0.28950691  | 1.81E-10    | -0.302552344 |
| -0.397249055 | 4.19E-19    | -0.365469565 | 3.33E-16    | -0.397102813 |
| -0.26769819  | 4.18E-09    | -0.250771967 | 3.96E-08    | -0.271729412 |
| -0.229001309 | 5.67E-07    | -0.198156344 | 1.61E-05    | -0.180702468 |
| -0.321413203 | 1.10E-12    | -0.277311521 | 1.08E-09    | -0.286736234 |
| -0.123943234 | 0.007326995 | -0.087261901 | 0.059526084 | -0.085875684 |
| -0.23410659  | 3.11E-07    | -0.223647131 | 1.05E-06    | -0.213043767 |
| -0.174843822 | 0.00014612  | -0.127696059 | 0.005719188 | -0.141922794 |
| -0.248755394 | 5.12E-08    | -0.18706213  | 4.75E-05    | -0.201171835 |
| -0.183195269 | 6.83E-05    | -0.143919608 | 0.001820572 | -0.165227336 |
| -0.275024282 | 1.50E-09    | -0.257379603 | 1.68E-08    | -0.280612837 |
| -0.293353396 | 1.01E-10    | -0.238255183 | 1.89E-07    | -0.254612228 |
| -0.187810126 | 4.42E-05    | -0.193309071 | 2.60E-05    | -0.192221892 |
| -0.230175736 | 4.94E-07    | -0.193756543 | 2.49E-05    | -0.187308662 |
| -0.179374553 | 9.72E-05    | -0.119827665 | 0.009544668 | -0.122051954 |
| -0.235764682 | 2.55E-07    | -0.219661291 | 1.64E-06    | -0.264449817 |
| 0.062277407  | 0.179102425 | 0.011439696  | 0.805249177 | 0.012636064  |
| -0.238628234 | 1.80E-07    | -0.211815092 | 3.88E-06    | -0.228860836 |
| -0.100426822 | 0.030013349 | -0.084941472 | 0.066654427 | -0.096994471 |
| 0.094108333  | 0.042076648 | 0.091957817  | 0.04702117  | 0.127014788  |
| -0.29760774  | 5.26E-11    | -0.268898779 | 3.54E-09    | -0.280443691 |
| 0.172406278  | 0.000181246 | 0.142098297  | 0.002082729 | 0.157728708  |
| -0.144217023 | 0.001780754 | -0.132862937 | 0.00402419  | -0.151506454 |
| 0.278089648  | 9.69E-10    | 0.292349347  | 1.18E-10    | 0.310918506  |
| -0.167015642 | 0.000288896 | -0.14147826  | 0.002179569 | -0.155070149 |
| -0.212915862 | 3.45E-06    | -0.184071127 | 6.30E-05    | -0.188501645 |
| -0.226293239 | 7.76E-07    | -0.209981255 | 4.72E-06    | -0.235937904 |
| -0.111069096 | 0.016340299 | -0.102456532 | 0.026828786 | -0.1389416   |
| -0.239471984 | 1.63E-07    | -0.204264822 | 8.61E-06    | -0.232475286 |
| -0.318097575 | 1.93E-12    | -0.297747679 | 5.15E-11    | -0.310755583 |
| -0.224034363 | 1.00E-06    | -0.184411963 | 6.10E-05    | -0.22719696  |
| 0.182815329  | 7.08E-05    | 0.15440486   | 0.000814343 | 0.164456381  |
| -0.27602879  | 1.30E-09    | -0.245816175 | 7.42E-08    | -0.240207199 |
| 0.139537726  | 0.002509841 | 0.143850438  | 0.001829949 | 0.170530132  |
| -0.273543215 | 1.85E-09    | -0.261897769 | 9.19E-09    | -0.282152434 |
| -0.13293408  | 0.004004422 | -0.081424464 | 0.078781274 | -0.117551905 |
| -0.009660235 | 0.835069037 | 0.002810989  | 0.951691075 | -0.009072149 |
| -0.290235016 | 1.62E-10    | -0.234480628 | 2.97E-07    | -0.26661647  |
| -0.422085223 | 1.34E-21    | -0.38633612  | 4.51E-18    | -0.403567762 |

|              |             |              |             |              |
|--------------|-------------|--------------|-------------|--------------|
| -0.300370477 | 3.42E-11    | -0.25839282  | 1.47E-08    | -0.265495286 |
| -0.282587648 | 5.05E-10    | -0.311711803 | 5.56E-12    | -0.302719766 |
| -0.274865505 | 1.53E-09    | -0.253717234 | 2.71E-08    | -0.275453589 |
| 0.165603933  | 0.000325658 | 0.113861717  | 0.013816863 | 0.123328055  |
| -0.259519262 | 1.26E-08    | -0.208991628 | 5.25E-06    | -0.220943759 |
| -0.081567355 | 0.078255896 | -0.029563555 | 0.523928806 | -0.025841943 |
| -0.29670617  | 6.05E-11    | -0.29033883  | 1.60E-10    | -0.301399245 |
| -0.222763018 | 1.16E-06    | -0.189032825 | 3.94E-05    | -0.207262661 |
| -0.183155577 | 6.86E-05    | -0.134752616 | 0.00352802  | -0.156273266 |
| -0.178047718 | 0.000109604 | -0.143233522 | 0.001915556 | -0.128612368 |
| -0.209960422 | 4.73E-06    | -0.179776318 | 9.37E-05    | -0.197787771 |
| -0.200501285 | 1.27E-05    | -0.144631957 | 0.001726534 | -0.16520968  |
| -0.140913642 | 0.002271314 | -0.11974555  | 0.009594417 | -0.100103726 |
| -0.20030326  | 1.29E-05    | -0.172884613 | 0.000173783 | -0.188441808 |
| -0.24669511  | 6.64E-08    | -0.18570432  | 5.40E-05    | -0.222994973 |
| -0.215362442 | 2.64E-06    | -0.210736631 | 4.36E-06    | -0.259474906 |
| -0.24755349  | 5.96E-08    | -0.227554052 | 6.71E-07    | -0.18263694  |
| -0.166491639 | 0.000302064 | -0.183080448 | 6.91E-05    | -0.209468644 |
| -0.091946341 | 0.047048812 | -0.060134599 | 0.194558533 | -0.061263949 |
| -0.216078878 | 2.44E-06    | -0.240898306 | 1.37E-07    | -0.248406836 |
| -0.265107935 | 5.95E-09    | -0.238815167 | 1.76E-07    | -0.256788418 |
| -0.327280983 | 4.03E-13    | -0.292144465 | 1.22E-10    | -0.308119726 |
| -0.308946878 | 8.72E-12    | -0.298603615 | 4.50E-11    | -0.298047244 |
| -0.035864614 | 0.439396593 | 0.006768942  | 0.884010016 | -0.017166612 |
| -0.282640793 | 5.01E-10    | -0.228113229 | 6.29E-07    | -0.235306466 |
| -0.093161565 | 0.044196646 | -0.074414819 | 0.108266105 | -0.109626992 |
| -0.243252915 | 1.02E-07    | -0.224228532 | 9.83E-07    | -0.22485745  |
| 0.045354857  | 0.328072648 | 0.091358507  | 0.048482924 | 0.116493503  |
| 0.066675554  | 0.150260861 | 0.081573264  | 0.078234231 | 0.087824079  |
| 0.141058119  | 0.002247508 | 0.124554517  | 0.007040255 | 0.134500399  |
| -0.172193217 | 0.000184666 | -0.174165423 | 0.000155194 | -0.202704117 |
| -0.249203768 | 4.84E-08    | -0.208223662 | 5.69E-06    | -0.232414235 |
| -0.283669406 | 4.31E-10    | -0.248818143 | 5.08E-08    | -0.267716606 |
| -0.135398806 | 0.003371526 | -0.117321175 | 0.011170947 | -0.13181823  |
| -0.222542253 | 1.19E-06    | -0.165309303 | 0.000333861 | -0.182757216 |
| -0.149312061 | 0.001211442 | -0.122549454 | 0.008020189 | -0.183830191 |
| -0.242516218 | 1.12E-07    | -0.229965038 | 5.07E-07    | -0.224649254 |
| -0.265113929 | 5.95E-09    | -0.259963859 | 1.19E-08    | -0.249029816 |
| -0.111096528 | 0.016313668 | -0.096990281 | 0.03614409  | -0.123637896 |
| -0.238418541 | 1.85E-07    | -0.220514299 | 1.49E-06    | -0.222629763 |
| -0.176397551 | 0.00012718  | -0.189682089 | 3.70E-05    | -0.198602851 |
| -0.389202816 | 2.44E-18    | -0.371928432 | 9.09E-17    | -0.364263224 |
| -0.285470262 | 3.30E-10    | -0.232339104 | 3.83E-07    | -0.233413315 |
| -0.30166772  | 2.79E-11    | -0.28076503  | 6.58E-10    | -0.284627607 |
| -0.064182904 | 0.166139568 | -0.033778814 | 0.46648021  | -0.042540024 |

|              |             |              |             |              |
|--------------|-------------|--------------|-------------|--------------|
| -0.185592341 | 5.46E-05    | -0.156463835 | 0.000691137 | -0.170597236 |
| -0.155793447 | 0.000729216 | -0.147395697 | 0.001402312 | -0.124850293 |
| -0.227404547 | 6.82E-07    | -0.220074228 | 1.57E-06    | -0.232418463 |
| -0.227244164 | 6.95E-07    | -0.19356745  | 2.53E-05    | -0.193829839 |
| -0.152833941 | 0.000921678 | -0.125288439 | 0.006709284 | -0.141690434 |
| -0.256462207 | 1.89E-08    | -0.242348578 | 1.14E-07    | -0.31454717  |
| -0.075978337 | 0.101030837 | -0.054020545 | 0.243971971 | -0.04350515  |
| -0.281109048 | 6.26E-10    | -0.234258408 | 3.05E-07    | -0.238207042 |
| -0.066011219 | 0.154375477 | 0.011539952  | 0.803577046 | 0.030402989  |
| -0.213320683 | 3.30E-06    | -0.179668869 | 9.46E-05    | -0.19344827  |
| -0.107598544 | 0.020031981 | -0.054035444 | 0.243841749 | -0.076606677 |
| -0.041909215 | 0.366188601 | 0.028553328  | 0.538214998 | 0.050722737  |
| -0.147870805 | 0.001352573 | -0.099440836 | 0.031673796 | -0.111747376 |
| -0.345594724 | 1.51E-14    | -0.302970953 | 2.27E-11    | -0.304669145 |
| -0.252728072 | 3.08E-08    | -0.212445638 | 3.63E-06    | -0.200312478 |
| -0.288692381 | 2.05E-10    | -0.253074131 | 2.94E-08    | -0.251389812 |
| 0.192711226  | 2.76E-05    | 0.194141041  | 2.40E-05    | 0.180132151  |
| 0.2571746    | 1.72E-08    | 0.248555302  | 5.25E-08    | 0.235488114  |
| -0.349947339 | 6.71E-15    | -0.312290343 | 5.06E-12    | -0.31089669  |
| 0.33334393   | 1.39E-13    | 0.319092568  | 1.63E-12    | 0.328236562  |
| -0.269291545 | 3.35E-09    | -0.289156845 | 1.91E-10    | -0.330023893 |
| -0.292838768 | 1.09E-10    | -0.295882694 | 6.87E-11    | -0.285944164 |
| 0.303089921  | 2.23E-11    | 0.222043426  | 1.26E-06    | 0.234953744  |
| -0.220593018 | 1.48E-06    | -0.195639537 | 2.07E-05    | -0.191269628 |
| -0.116714703 | 0.01159954  | -0.098814764 | 0.03276839  | -0.140126628 |
| -0.333781646 | 1.29E-13    | -0.30033368  | 3.44E-11    | -0.29399491  |
| -0.355452644 | 2.36E-15    | -0.331811817 | 1.83E-13    | -0.356764693 |
| -0.234356689 | 3.02E-07    | -0.186123151 | 5.19E-05    | -0.184402099 |
| -0.201425726 | 1.15E-05    | -0.150880738 | 0.001073332 | -0.172960005 |
| -0.37384554  | 6.15E-17    | -0.332548197 | 1.60E-13    | -0.332667334 |
| -0.194286324 | 2.36E-05    | -0.169544749 | 0.000232544 | -0.192855511 |
| -0.320479822 | 1.29E-12    | -0.269720544 | 3.16E-09    | -0.286172621 |
| -0.299243047 | 4.08E-11    | -0.255604711 | 2.12E-08    | -0.271798905 |
| -0.312681721 | 4.74E-12    | -0.281025144 | 6.34E-10    | -0.302440697 |
| -0.167932346 | 0.00026714  | -0.121257387 | 0.008714467 | -0.113379119 |
| -0.332125781 | 1.73E-13    | -0.306701219 | 1.25E-11    | -0.289836275 |
| -0.133689855 | 0.003799776 | -0.074442465 | 0.108134711 | -0.079193356 |
| -0.280488524 | 6.85E-10    | -0.245456078 | 7.76E-08    | -0.249664307 |
| -0.062679566 | 0.176306001 | -0.029694639 | 0.522089387 | -0.014176385 |
| -0.062338577 | 0.178674972 | -0.028482107 | 0.539229485 | -0.036595567 |
| -0.078026801 | 0.092138572 | -0.043951886 | 0.34327157  | -0.054499803 |
| 0.26683471   | 4.70E-09    | 0.22497029   | 9.03E-07    | 0.223674712  |
| -0.152342402 | 0.000957857 | -0.104224293 | 0.024296542 | -0.120632499 |
| -0.128680149 | 0.005353829 | -0.104554182 | 0.023847586 | -0.139022119 |
| -0.00834169  | 0.857320992 | 0.0169018    | 0.715635372 | 0.032278911  |

|              |             |              |             |              |
|--------------|-------------|--------------|-------------|--------------|
| -0.087879059 | 0.057740122 | -0.046717757 | 0.313731176 | -0.043223206 |
| -0.100289372 | 0.030240251 | -0.066337128 | 0.152346393 | -0.022172956 |
| -0.273007658 | 1.99E-09    | -0.230365002 | 4.84E-07    | -0.242357201 |
| -0.383068127 | 9.03E-18    | -0.366681798 | 2.62E-16    | -0.360620305 |
| -0.219072822 | 1.76E-06    | -0.193641309 | 2.52E-05    | -0.223495799 |
| -0.148749161 | 0.001264865 | -0.104589078 | 0.023800517 | -0.113576037 |
| -0.179559239 | 9.55E-05    | -0.117794918 | 0.010845968 | -0.134191827 |
| -0.217167881 | 2.17E-06    | -0.205766004 | 7.37E-06    | -0.172990993 |
| -0.269665839 | 3.18E-09    | -0.262715854 | 8.23E-09    | -0.274808365 |
| -0.175775099 | 0.000134473 | -0.157618798 | 0.000629826 | -0.197287408 |
| -0.326114682 | 4.94E-13    | -0.307149627 | 1.17E-11    | -0.320658031 |
| -0.261326611 | 9.92E-09    | -0.237847054 | 1.98E-07    | -0.256383216 |
| -0.158835187 | 0.000570735 | -0.137845092 | 0.002834516 | -0.152372176 |
| -0.134775703 | 0.003522317 | -0.099933897 | 0.030833893 | -0.084660734 |
| -0.21801406  | 1.97E-06    | -0.203177564 | 9.64E-06    | -0.232564371 |
| -0.359265972 | 1.13E-15    | -0.312206635 | 5.13E-12    | -0.316910715 |
| -0.153868456 | 0.00084962  | -0.100886866 | 0.029264488 | -0.097097171 |
| -0.19400351  | 2.43E-05    | -0.157951332 | 0.000613132 | -0.181720703 |
| -0.153692924 | 0.000861468 | -0.128137462 | 0.005552625 | -0.099775724 |
| -0.251859204 | 3.44E-08    | -0.221287745 | 1.37E-06    | -0.237303483 |
| 0.047500696  | 0.30568131  | 0.063810424  | 0.168616568 | 0.054022655  |
| 0.302001605  | 2.65E-11    | 0.276858111  | 1.16E-09    | 0.241890313  |
| 0.32997296   | 2.52E-13    | 0.277596056  | 1.04E-09    | 0.325809763  |
| -0.172005613 | 0.000187727 | -0.137761712 | 0.002851456 | -0.210214847 |
| -0.308575196 | 9.26E-12    | -0.281153912 | 6.22E-10    | -0.302223761 |
| -0.256838125 | 1.80E-08    | -0.196755934 | 1.85E-05    | -0.189418924 |
| -0.150858987 | 0.001075143 | -0.145565542 | 0.001610031 | -0.143293688 |
| -0.238384245 | 1.86E-07    | -0.22332592  | 1.09E-06    | -0.23037175  |
| -0.267673737 | 4.19E-09    | -0.208192071 | 5.71E-06    | -0.199965567 |
| -0.204340061 | 8.55E-06    | -0.175057602 | 0.000143365 | -0.161476739 |
| -0.284616469 | 3.75E-10    | -0.236732931 | 2.27E-07    | -0.251772135 |
| 0.186974397  | 4.79E-05    | 0.157019818  | 0.000660964 | 0.119875317  |
| -0.278800844 | 8.75E-10    | -0.24851476  | 5.28E-08    | -0.285845345 |
| -0.249672694 | 4.56E-08    | -0.238501568 | 1.83E-07    | -0.255830706 |
| 0.059992566  | 0.195616465 | 0.054618556  | 0.238783345 | 0.014757976  |
| -0.171672536 | 0.00019328  | -0.146863991 | 0.001459967 | -0.180431091 |
| -0.141992597 | 0.002098954 | -0.102024372 | 0.027481325 | -0.098417314 |
| -0.37927625  | 2.00E-17    | -0.33534237  | 9.77E-14    | -0.35172461  |
| -0.199159254 | 1.45E-05    | -0.157353965 | 0.000643422 | -0.182416541 |
| -0.156120393 | 0.000710409 | -0.142314291 | 0.002049929 | -0.162850753 |
| -0.28829302  | 2.17E-10    | -0.245174054 | 8.04E-08    | -0.216296258 |
| -0.199096183 | 1.46E-05    | -0.172139116 | 0.000185544 | -0.183763372 |
| -0.206443888 | 6.86E-06    | -0.167296991 | 0.000282049 | -0.177303965 |
| -0.084978356 | 0.066535869 | -0.032884127 | 0.478374568 | -0.013411915 |
| -0.186240363 | 5.14E-05    | -0.131552408 | 0.004404498 | -0.109584131 |

|              |             |              |             |              |
|--------------|-------------|--------------|-------------|--------------|
| -0.08513177  | 0.066044604 | -0.059041895 | 0.20280592  | -0.067506703 |
| -0.209006043 | 5.24E-06    | -0.166451365 | 0.000303099 | -0.181596744 |
| -0.146554932 | 0.001494472 | -0.121061617 | 0.008824207 | -0.124816992 |
| -0.266905722 | 4.66E-09    | -0.255700591 | 2.09E-08    | -0.245979054 |
| -0.374031706 | 5.92E-17    | -0.33545227  | 9.58E-14    | -0.318702485 |
| -0.125520394 | 0.00660762  | -0.088931756 | 0.054796319 | -0.080743567 |
| -0.186206089 | 5.15E-05    | -0.115665051 | 0.012375779 | -0.136420536 |
| 0.220543274  | 1.49E-06    | 0.206353403  | 6.93E-06    | 0.195320974  |
| -0.219410233 | 1.69E-06    | -0.183099621 | 6.89E-05    | -0.181076882 |
| -0.234565711 | 2.94E-07    | -0.193039684 | 2.67E-05    | -0.195218716 |
| -0.150032163 | 0.001146128 | -0.102603725 | 0.026609599 | -0.148993784 |
| -0.129636084 | 0.005019178 | -0.115670242 | 0.01237183  | -0.128624062 |
| -0.094328852 | 0.041595373 | -0.081331529 | 0.079124504 | -0.087882994 |
| -0.176231703 | 0.000129086 | -0.192907125 | 2.70E-05    | -0.16109191  |
| -0.274274459 | 1.67E-09    | -0.234826183 | 2.85E-07    | -0.243591273 |
| -0.273625156 | 1.83E-09    | -0.287000891 | 2.63E-10    | -0.340843086 |
| -0.298677548 | 4.45E-11    | -0.283249232 | 4.58E-10    | -0.297681307 |
| 0.110117847  | 0.017287616 | 0.098685562  | 0.032998255 | 0.136003311  |
| -0.087356128 | 0.059250486 | -0.052354252 | 0.258844109 | -0.065692835 |
| -0.397665767 | 3.82E-19    | -0.382319259 | 1.06E-17    | -0.391626191 |
| 0.299307638  | 4.04E-11    | 0.254304261  | 2.51E-08    | 0.287962518  |
| -0.115638301 | 0.012396147 | -0.08043967  | 0.082480384 | -0.105553423 |
| -0.039688598 | 0.392154607 | -0.01113345  | 0.810362401 | -0.042877204 |
| -0.452109248 | 6.61E-25    | -0.398598072 | 3.11E-19    | -0.363348947 |
| -0.20398123  | 8.87E-06    | -0.184537398 | 6.03E-05    | -0.166555555 |
| -0.021134408 | 0.648716977 | -0.02718179  | 0.557917513 | -0.018286535 |
| -0.157163154 | 0.000653385 | -0.173805208 | 0.000160224 | -0.197620432 |
| -0.422675468 | 1.16E-21    | -0.410199761 | 2.22E-20    | -0.438832293 |
| -0.229956861 | 5.07E-07    | -0.183679268 | 6.53E-05    | -0.195096324 |
| -0.06354394  | 0.170405571 | -0.018540881 | 0.689427286 | 0.017100698  |
| 0.087517372  | 0.058781325 | 0.083266209  | 0.072224793 | 0.082504552  |
| -0.183350385 | 6.74E-05    | -0.131145169 | 0.004529122 | -0.11060713  |
| -0.2602509   | 1.15E-08    | -0.206344543 | 6.94E-06    | -0.205241763 |
| -0.166700479 | 0.00029675  | -0.147901833 | 0.001349381 | -0.146602085 |
| -0.185585369 | 5.46E-05    | -0.159530192 | 0.000539325 | -0.151330366 |
| -0.353956518 | 3.14E-15    | -0.33052592  | 2.29E-13    | -0.314113547 |
| -0.381862224 | 1.16E-17    | -0.353596241 | 3.36E-15    | -0.328211266 |
| -0.199445499 | 1.41E-05    | -0.224919523 | 9.08E-07    | -0.199606178 |
| 0.083168678  | 0.072560459 | 0.055222903  | 0.233619095 | 0.090212273  |
| 0.149060536  | 0.001235051 | 0.168822278  | 0.000247492 | 0.202642023  |
| -0.359064331 | 1.17E-15    | -0.320052189 | 1.39E-12    | -0.327616397 |
| -0.082166625 | 0.076083396 | -0.044277544 | 0.339704238 | -0.038698313 |
| -0.189098353 | 3.91E-05    | -0.147972066 | 0.001342184 | -0.15056038  |
| -0.096726619 | 0.036655555 | -0.079482082 | 0.086210664 | -0.118438251 |
| -0.182890771 | 7.03E-05    | -0.174623228 | 0.000149014 | -0.176299263 |



|              |             |              |             |              |
|--------------|-------------|--------------|-------------|--------------|
| -0.345876583 | 1.44E-14    | -0.332748707 | 1.55E-13    | -0.366514922 |
| -0.214704732 | 2.84E-06    | -0.167412069 | 0.000279292 | -0.172432305 |
| -0.102948732 | 0.026101877 | -0.113935802 | 0.013754871 | -0.104321874 |
| -0.209453792 | 5.00E-06    | -0.154114611 | 0.00083326  | -0.14674276  |
| -0.214695626 | 2.84E-06    | -0.201258411 | 1.17E-05    | -0.176242491 |
| -0.363200143 | 5.22E-16    | -0.386388538 | 4.46E-18    | -0.386341305 |
| -0.14996199  | 0.001152347 | -0.152058535 | 0.000979344 | -0.172162519 |
| 0.181817077  | 7.76E-05    | 0.150069475  | 0.001142834 | 0.136575014  |
| -0.216280646 | 2.39E-06    | -0.199723489 | 1.37E-05    | -0.225600476 |
| -0.259267216 | 1.31E-08    | -0.212619069 | 3.56E-06    | -0.220342386 |
| -0.127791566 | 0.005682773 | -0.07086451  | 0.126211414 | -0.073659217 |
| 0.26532809   | 5.78E-09    | 0.256463669  | 1.89E-08    | 0.219181031  |
| -0.264765855 | 6.24E-09    | -0.251797616 | 3.47E-08    | -0.280329956 |
| -0.169440151 | 0.000234655 | -0.118658349 | 0.010275157 | -0.124258903 |
| -0.003103696 | 0.946667797 | 0.040283876  | 0.385087016 | 0.03651795   |
| -0.181789493 | 7.78E-05    | -0.148833429 | 0.001256732 | -0.15868205  |
| -0.320089736 | 1.38E-12    | -0.311335834 | 5.91E-12    | -0.316788445 |
| -0.347974895 | 9.71E-15    | -0.325226118 | 5.75E-13    | -0.345035896 |
| -0.041092912 | 0.375606881 | -0.026895114 | 0.562079441 | -0.017219576 |
| 0.14791713   | 0.001347811 | 0.082675454  | 0.074277494 | 0.086972976  |
| 0.256061847  | 1.99E-08    | 0.187660357  | 4.49E-05    | 0.141990905  |
| -0.445475591 | 3.80E-24    | -0.379196058 | 2.04E-17    | -0.37509348  |
| -0.305507515 | 1.52E-11    | -0.258987527 | 1.36E-08    | -0.264003109 |
| -0.183111637 | 6.89E-05    | -0.130130489 | 0.004853602 | -0.137046777 |
| 0.182873907  | 7.04E-05    | 0.164034796  | 0.000371617 | 0.143341982  |
| -0.30888993  | 8.80E-12    | -0.301926884 | 2.68E-11    | -0.327532837 |
| 0.190948076  | 3.27E-05    | 0.198636232  | 1.53E-05    | 0.167318557  |
| -0.237461767 | 2.08E-07    | -0.194512578 | 2.31E-05    | -0.157775319 |
| -0.251089539 | 3.80E-08    | -0.201476707 | 1.15E-05    | -0.215334442 |
| -0.001047725 | 0.981984615 | -0.017261359 | 0.709856242 | -0.033134431 |
| -0.073488934 | 0.112739689 | -0.03595398  | 0.438256663 | 0.003678421  |
| 0.295005409  | 7.86E-11    | 0.276538306  | 1.21E-09    | 0.303979933  |
| -0.514021779 | 7.47E-33    | -0.520785581 | 8.00E-34    | -0.520114084 |
| -0.00563741  | 0.903295067 | 0.0247731    | 0.593342605 | 0.027472639  |
| -0.25491623  | 2.32E-08    | -0.240751284 | 1.39E-07    | -0.246530707 |
| 0.059632341  | 0.198318437 | 0.078278798  | 0.09108935  | 0.067861754  |
| -0.255667263 | 2.10E-08    | -0.224975404 | 9.02E-07    | -0.240570397 |
| -0.077073763 | 0.096194442 | -0.045360098 | 0.328016699 | -0.047460894 |
| -0.37705552  | 3.18E-17    | -0.327476969 | 3.90E-13    | -0.330770791 |
| -0.1629948   | 0.000405335 | -0.139106963 | 0.002589083 | -0.131079506 |
| -0.193742443 | 2.49E-05    | -0.188119883 | 4.30E-05    | -0.20398529  |
| -0.151021161 | 0.001061705 | -0.13748976  | 0.002907351 | -0.162576907 |
| -0.050938453 | 0.27196331  | 0.022950459  | 0.620812166 | 0.037835868  |
| -0.301296733 | 2.96E-11    | -0.299775875 | 3.75E-11    | -0.278466733 |
| 0.019380697  | 0.67613925  | 0.018745917  | 0.686174079 | 0.016328322  |

|              |             |              |             |              |
|--------------|-------------|--------------|-------------|--------------|
| -0.207003549 | 6.47E-06    | -0.227191009 | 6.99E-07    | -0.233640132 |
| -0.201699576 | 1.12E-05    | -0.17776311  | 0.000112463 | -0.175325271 |
| -0.162988278 | 0.000405555 | -0.116152595 | 0.012009702 | -0.130637329 |
| -0.230354923 | 4.84E-07    | -0.234763658 | 2.87E-07    | -0.215506826 |
| -0.210596256 | 4.42E-06    | -0.211695317 | 3.93E-06    | -0.251828449 |
| -0.061077021 | 0.187644725 | -0.047132237 | 0.309452498 | -0.031140583 |
| -0.214689248 | 2.84E-06    | -0.19141712  | 3.13E-05    | -0.2176697   |
| -0.322051688 | 9.90E-13    | -0.285502789 | 3.29E-10    | -0.301581588 |
| -0.328062765 | 3.52E-13    | -0.302774033 | 2.34E-11    | -0.326375083 |
| -0.111110896 | 0.016299736 | -0.140745033 | 0.002299387 | -0.123299798 |
| 0.012520123  | 0.787277473 | 0.072069941  | 0.119876131 | 0.064650205  |
| 0.191085152  | 3.23E-05    | 0.19344997   | 2.56E-05    | 0.194216491  |
| -0.349995457 | 6.65E-15    | -0.345762147 | 1.47E-14    | -0.358033133 |
| -0.143428346 | 0.001888133 | -0.101461916 | 0.028351004 | -0.087477684 |
| -0.349744034 | 6.97E-15    | -0.33182393  | 1.82E-13    | -0.349413676 |
| -0.27855107  | 9.07E-10    | -0.281416172 | 5.99E-10    | -0.278670454 |
| -0.175517021 | 0.00013761  | -0.14417841  | 0.001785878 | -0.163185965 |
| -0.225906913 | 8.11E-07    | -0.194082148 | 2.41E-05    | -0.181386147 |
| -0.426463821 | 4.62E-22    | -0.432354865 | 1.08E-22    | -0.458734878 |
| -0.159737113 | 0.000530289 | -0.154553572 | 0.000804805 | -0.176855385 |
| -0.218628442 | 1.84E-06    | -0.163557442 | 0.000386755 | -0.15256688  |
| -0.279888184 | 7.48E-10    | -0.248582549 | 5.23E-08    | -0.290626828 |
| -0.213436508 | 3.26E-06    | -0.204822897 | 8.13E-06    | -0.217716403 |
| -0.226636381 | 7.46E-07    | -0.186342649 | 5.09E-05    | -0.166436738 |
| -0.247136414 | 6.28E-08    | -0.19951003  | 1.40E-05    | -0.215149169 |
| -0.153925954 | 0.000845772 | -0.122465364 | 0.008063824 | -0.101771902 |
| -0.240022265 | 1.52E-07    | -0.207074564 | 6.42E-06    | -0.227287163 |
| -0.203449183 | 9.37E-06    | -0.15952979  | 0.000539343 | -0.177034166 |
| -0.286707739 | 2.75E-10    | -0.269506853 | 3.25E-09    | -0.298949014 |
| -0.279270566 | 8.17E-10    | -0.264535867 | 6.43E-09    | -0.238068786 |
| -0.156396269 | 0.00069489  | -0.119315414 | 0.009858798 | -0.124866731 |
| -0.057275285 | 0.21667176  | -0.050491344 | 0.276199028 | -0.02039322  |
| -0.088827559 | 0.055082022 | -0.074990477 | 0.105556077 | -0.081426036 |
| -0.193527411 | 2.54E-05    | -0.184981661 | 5.78E-05    | -0.189549553 |
| -0.223179823 | 1.11E-06    | -0.17189359  | 0.000189578 | -0.17205591  |
| -0.275898009 | 1.33E-09    | -0.211453941 | 4.04E-06    | -0.211092009 |
| 0.239377327  | 1.65E-07    | 0.209062769  | 5.21E-06    | 0.217626463  |
| -0.210127981 | 4.65E-06    | -0.183964352 | 6.36E-05    | -0.182940892 |
| -0.250642543 | 4.02E-08    | -0.241117394 | 1.33E-07    | -0.259876986 |
| -0.24437511  | 8.89E-08    | -0.184911133 | 5.82E-05    | -0.187736885 |
| -0.321902197 | 1.02E-12    | -0.312207927 | 5.13E-12    | -0.299206677 |
| -0.061777611 | 0.182623421 | -0.04486452  | 0.33333444  | -0.063210681 |
| -0.09455459  | 0.041107527 | -0.034899411 | 0.451816143 | -0.056297444 |
| -0.337460656 | 6.68E-14    | -0.344370261 | 1.90E-14    | -0.349548018 |
| -0.321376758 | 1.11E-12    | -0.314582738 | 3.47E-12    | -0.316906205 |

|              |             |              |             |              |
|--------------|-------------|--------------|-------------|--------------|
| -0.050625994 | 0.27491872  | -0.01183313  | 0.798692421 | -0.011042733 |
| -0.119162425 | 0.00995438  | -0.085362705 | 0.065310717 | -0.092996237 |
| -0.255799534 | 2.06E-08    | -0.246261299 | 7.02E-08    | -0.241450205 |
| -0.086460578 | 0.061912923 | -0.070578582 | 0.127751619 | -0.09494171  |
| -0.076828587 | 0.097260552 | -0.04539825  | 0.327609593 | -0.053885005 |
| -0.250897691 | 3.89E-08    | -0.217234355 | 2.15E-06    | -0.219424346 |
| -0.241003568 | 1.35E-07    | -0.200426633 | 1.28E-05    | -0.206311261 |
| -0.145853994 | 0.001575521 | -0.09802948  | 0.034186846 | -0.092090896 |
| -0.153111346 | 0.000901821 | -0.086698839 | 0.061195123 | -0.061459146 |
| -0.302784613 | 2.34E-11    | -0.289364285 | 1.85E-10    | -0.285983516 |
| -0.020406334 | 0.660046777 | 0.003518595  | 0.93955122  | 0.0350548    |
| -0.13039704  | 0.004766392 | -0.10832781  | 0.019201047 | -0.138617725 |
| 0.104274352  | 0.02422795  | 0.088855965  | 0.05500401  | 0.096830654  |
| -0.234393281 | 3.00E-07    | -0.217406656 | 2.11E-06    | -0.22419048  |
| -0.159635558 | 0.000534706 | -0.154812087 | 0.000788471 | -0.221258326 |
| -0.159588221 | 0.000536777 | -0.080487002 | 0.082299439 | -0.074044322 |
| -0.166571343 | 0.000300025 | -0.130316787 | 0.004792499 | -0.150028319 |
| -0.195799458 | 2.03E-05    | -0.169566298 | 0.000232112 | -0.207773062 |
| -0.224648432 | 9.37E-07    | -0.163882547 | 0.000376384 | -0.12533404  |
| -0.177603682 | 0.000114095 | -0.196181783 | 1.96E-05    | -0.212950669 |
| -0.324599664 | 6.41E-13    | -0.31617825  | 2.66E-12    | -0.339207072 |
| -0.411166682 | 1.78E-20    | -0.403792843 | 9.66E-20    | -0.417454247 |
| -0.088036595 | 0.057291418 | -0.03633154  | 0.433459347 | -0.020469619 |
| -0.289723832 | 1.75E-10    | -0.257535169 | 1.64E-08    | -0.257826683 |
| -0.204008197 | 8.84E-06    | -0.20456085  | 8.35E-06    | -0.207438722 |
| -0.244733291 | 8.50E-08    | -0.258108511 | 1.52E-08    | -0.249495087 |
| -0.240341825 | 1.46E-07    | -0.223393587 | 1.08E-06    | -0.217997623 |
| -0.207739246 | 5.99E-06    | -0.18426968  | 6.18E-05    | -0.187003793 |
| -0.337633697 | 6.48E-14    | -0.308670633 | 9.12E-12    | -0.338800783 |
| -0.167414191 | 0.000279241 | -0.132158564 | 0.004224733 | -0.178061308 |
| 0.248570697  | 5.24E-08    | 0.210908173  | 4.28E-06    | 0.209243472  |
| -0.121127246 | 0.008787282 | -0.110656767 | 0.016745194 | -0.123011576 |
| -0.159094251 | 0.000558834 | -0.180239667 | 8.98E-05    | -0.221368555 |
| 0.159979367  | 0.000519888 | 0.130955535  | 0.004588234 | 0.113529645  |
| 0.327967182  | 3.58E-13    | 0.274504153  | 1.61E-09    | 0.280434435  |
| -0.308504832 | 9.37E-12    | -0.260776385 | 1.07E-08    | -0.274669601 |
| -0.254109558 | 2.57E-08    | -0.250865624 | 3.91E-08    | -0.261034735 |
| -0.319606219 | 1.50E-12    | -0.324984446 | 6.00E-13    | -0.358560444 |
| -0.290392388 | 1.58E-10    | -0.260721227 | 1.08E-08    | -0.240453758 |
| -0.173279668 | 0.000167838 | -0.160206488 | 0.000510309 | -0.203048098 |
| -0.104681619 | 0.023676084 | -0.086728506 | 0.061106231 | -0.071342922 |
| -0.230057386 | 5.01E-07    | -0.190339064 | 3.47E-05    | -0.204399247 |
| -0.227160984 | 7.02E-07    | -0.206836407 | 6.59E-06    | -0.216841635 |
| -0.171336334 | 0.00019904  | -0.169422843 | 0.000235006 | -0.160600504 |
| 0.365747836  | 3.15E-16    | 0.347610146  | 1.04E-14    | 0.358529163  |

|              |             |              |             |              |
|--------------|-------------|--------------|-------------|--------------|
| -0.219967134 | 1.59E-06    | -0.163890542 | 0.000376132 | -0.17151655  |
| -0.104941084 | 0.023330193 | -0.065774574 | 0.15586159  | -0.060436885 |
| -0.229545557 | 5.32E-07    | -0.206800122 | 6.61E-06    | -0.193549959 |
| -0.294163456 | 8.94E-11    | -0.287943144 | 2.29E-10    | -0.308624183 |
| -0.086285169 | 0.062445794 | -0.076112819 | 0.100426889 | -0.071546337 |
| -0.300937003 | 3.13E-11    | -0.252406463 | 3.21E-08    | -0.274513784 |
| 0.097541684  | 0.035094029 | 0.057347724  | 0.216090151 | 0.036154351  |
| -0.203965485 | 8.88E-06    | -0.179707466 | 9.42E-05    | -0.173570095 |
| -0.18029918  | 8.93E-05    | -0.203653261 | 9.17E-06    | -0.213938352 |
| -0.072291349 | 0.118739964 | -0.048238231 | 0.298224246 | -0.031855451 |
| -0.29116751  | 1.41E-10    | -0.277355738 | 1.08E-09    | -0.291781104 |
| -0.380261136 | 1.63E-17    | -0.367368795 | 2.28E-16    | -0.370636605 |
| -0.244041534 | 9.26E-08    | -0.184010989 | 6.33E-05    | -0.220507145 |
| -0.160771678 | 0.00048718  | -0.12943415  | 0.005088258 | -0.150719684 |
| -0.233095953 | 3.50E-07    | -0.25350299  | 2.78E-08    | -0.274504306 |
| -0.296817944 | 5.94E-11    | -0.282863131 | 4.85E-10    | -0.298071558 |
| -0.143709928 | 0.001849133 | -0.103997881 | 0.024608884 | -0.101754421 |
| -0.158975532 | 0.000564259 | -0.142041699 | 0.002091403 | -0.154302271 |
| -0.230906718 | 4.54E-07    | -0.223251847 | 1.10E-06    | -0.259588792 |
| -0.284531797 | 3.80E-10    | -0.227372389 | 6.85E-07    | -0.223877433 |
| 0.301629504  | 2.81E-11    | 0.276503374  | 1.22E-09    | 0.275503332  |
| 0.31887256   | 1.70E-12    | 0.302207557  | 2.56E-11    | 0.306890944  |
| -0.018033814 | 0.697497188 | 0.041780244  | 0.367666787 | 0.018479029  |
| -0.262277917 | 8.73E-09    | -0.238772352 | 1.77E-07    | -0.271088493 |
| -0.177020266 | 0.000120258 | -0.167646143 | 0.000273762 | -0.1849803   |
| -0.257210222 | 1.71E-08    | -0.290550389 | 1.55E-10    | -0.310911057 |
| -0.118780348 | 0.010196691 | -0.069209451 | 0.13532942  | -0.069172135 |
| -0.15588097  | 0.000724136 | -0.117685579 | 0.01092022  | -0.122165947 |
| -0.214337373 | 2.96E-06    | -0.175487171 | 0.000137977 | -0.207290807 |
| 0.24512574   | 8.09E-08    | 0.237886542  | 1.97E-07    | 0.239289163  |
| 0.340003179  | 4.22E-14    | 0.322913599  | 8.55E-13    | 0.279051635  |
| 0.220173644  | 1.55E-06    | 0.153706714  | 0.000860531 | 0.140623004  |
| -0.238894646 | 1.75E-07    | -0.224725425 | 9.28E-07    | -0.244977505 |
| -0.272375994 | 2.18E-09    | -0.249727237 | 4.52E-08    | -0.281138638 |
| -0.216526426 | 2.33E-06    | -0.184335294 | 6.14E-05    | -0.17749282  |
| -0.194430288 | 2.33E-05    | -0.143703399 | 0.001850029 | -0.153142512 |
| -0.309582625 | 7.87E-12    | -0.273744875 | 1.80E-09    | -0.29962248  |
| -0.168508631 | 0.000254257 | -0.18043611  | 8.82E-05    | -0.211169727 |
| -0.108023913 | 0.019543589 | -0.072445627 | 0.117953259 | -0.086915758 |
| -0.290474054 | 1.57E-10    | -0.303591153 | 2.06E-11    | -0.284737952 |
| -0.263805466 | 7.10E-09    | -0.233539435 | 3.32E-07    | -0.218835154 |
| -0.242979886 | 1.06E-07    | -0.23287406  | 3.60E-07    | -0.25954224  |
| -0.484694978 | 6.92E-29    | -0.473016685 | 2.07E-27    | -0.476477323 |
| -0.226755759 | 7.36E-07    | -0.18377131  | 6.48E-05    | -0.208419163 |
| -0.213036156 | 3.40E-06    | -0.182241657 | 7.47E-05    | -0.188067365 |

|              |             |              |             |              |
|--------------|-------------|--------------|-------------|--------------|
| -0.279679394 | 7.70E-10    | -0.284494587 | 3.82E-10    | -0.308356586 |
| -0.268220427 | 3.89E-09    | -0.235809577 | 2.53E-07    | -0.247026127 |
| -0.301017426 | 3.09E-11    | -0.245176234 | 8.04E-08    | -0.259901181 |
| -0.309969708 | 7.39E-12    | -0.252546096 | 3.15E-08    | -0.25485277  |
| 0.344941505  | 1.71E-14    | 0.321579993  | 1.07E-12    | 0.352570063  |
| -0.402155593 | 1.40E-19    | -0.399611015 | 2.48E-19    | -0.408607436 |
| -0.136777987 | 0.003058392 | -0.110491379 | 0.016910051 | -0.119055412 |
| -0.268115731 | 3.94E-09    | -0.224358398 | 9.68E-07    | -0.247627781 |
| -0.218461249 | 1.88E-06    | -0.197110988 | 1.78E-05    | -0.233629878 |
| -0.126388066 | 0.006239455 | -0.127301387 | 0.005871907 | -0.146714897 |
| -0.228620927 | 5.93E-07    | -0.181160688 | 8.25E-05    | -0.185284484 |
| -0.081930826 | 0.076932297 | -0.059307999 | 0.200774444 | -0.089779865 |
| -0.032358618 | 0.485437202 | -0.020755117 | 0.654609342 | -0.027286905 |
| -0.455919479 | 2.38E-25    | -0.435612856 | 4.76E-23    | -0.464553581 |
| 0.312623932  | 4.79E-12    | 0.291143657  | 1.41E-10    | 0.304212926  |
| -0.43853924  | 2.27E-23    | -0.444011225 | 5.56E-24    | -0.44137651  |
| -0.285331098 | 3.37E-10    | -0.247546913 | 5.97E-08    | -0.260839703 |
| -0.193288708 | 2.60E-05    | -0.150054569 | 0.001144148 | -0.167490498 |
| -0.287542143 | 2.43E-10    | -0.232921774 | 3.58E-07    | -0.250168715 |
| -0.084703438 | 0.067423726 | -0.065734687 | 0.15611314  | -0.073280393 |
| 0.273045513  | 1.98E-09    | 0.23375837   | 3.24E-07    | 0.268550605  |
| -0.112207686 | 0.015266442 | -0.051629061 | 0.265508304 | -0.052943538 |
| -0.320443138 | 1.30E-12    | -0.282235705 | 5.32E-10    | -0.297075029 |
| -0.11534066  | 0.012624776 | -0.099222064 | 0.032052679 | -0.061803206 |
| -0.316266531 | 2.62E-12    | -0.26526402  | 5.83E-09    | -0.274470395 |
| -0.191715714 | 3.04E-05    | -0.191725676 | 3.03E-05    | -0.203558361 |
| -0.176618761 | 0.000124679 | -0.15441057  | 0.000813975 | -0.161762122 |
| -0.042583957 | 0.358515519 | -0.031256358 | 0.500432072 | -0.041062436 |
| -0.26908809  | 3.45E-09    | -0.243685975 | 9.68E-08    | -0.245116841 |
| -0.211134155 | 4.18E-06    | -0.160765494 | 0.000487428 | -0.138085369 |
| 0.377929107  | 2.65E-17    | 0.326216167  | 4.85E-13    | 0.349860715  |
| -0.187655694 | 4.49E-05    | -0.148579368 | 0.0012814   | -0.134114922 |
| -0.326971152 | 4.26E-13    | -0.317405341 | 2.17E-12    | -0.340344789 |
| -0.190041958 | 3.57E-05    | -0.148429466 | 0.001296164 | -0.145495542 |
| 0.272166906  | 2.24E-09    | 0.25881426   | 1.39E-08    | 0.286484358  |
| 0.266406788  | 4.98E-09    | 0.250418311  | 4.14E-08    | 0.24028489   |
| 0.252103946  | 3.34E-08    | 0.241853037  | 1.21E-07    | 0.270312726  |
| -0.238898062 | 1.74E-07    | -0.18972774  | 3.68E-05    | -0.222604061 |
| -0.219846468 | 1.61E-06    | -0.208439607 | 5.56E-06    | -0.228679871 |
| 0.315385958  | 3.03E-12    | 0.320567916  | 1.27E-12    | 0.320220737  |
| -0.089300036 | 0.053796363 | -0.031631163 | 0.495306007 | -0.079859791 |
| 0.033450493  | 0.470825952 | 0.023736635  | 0.608895697 | 0.026849809  |
| -0.160028053 | 0.000517821 | -0.119970317 | 0.009458787 | -0.129946133 |
| 0.106681843  | 0.021120723 | 0.139086618  | 0.002592882 | 0.160791309  |
| 0.0562509    | 0.225016934 | 0.091794678  | 0.047415369 | 0.122791142  |

|              |             |              |             |              |
|--------------|-------------|--------------|-------------|--------------|
| -0.068642496 | 0.138566895 | -0.076015991 | 0.100861444 | -0.099746667 |
| -0.164936267 | 0.000344524 | -0.145182683 | 0.001656907 | -0.205973447 |
| -0.255529024 | 2.14E-08    | -0.207271561 | 6.29E-06    | -0.233964633 |
| -0.167769935 | 0.000270879 | -0.128256277 | 0.005508542 | -0.140878956 |
| -0.089521512 | 0.053202354 | -0.106305149 | 0.021582798 | -0.141770692 |
| -0.096037295 | 0.038021861 | -0.103307732 | 0.025582447 | -0.077488415 |
| -0.048235094 | 0.298255705 | 0.001253759  | 0.978442703 | -0.017638205 |
| -0.227490295 | 6.76E-07    | -0.182071839 | 7.58E-05    | -0.214178303 |
| -0.20348958  | 9.33E-06    | -0.181946629 | 7.67E-05    | -0.195785989 |
| -0.207793031 | 5.96E-06    | -0.174689436 | 0.00014814  | -0.214700478 |
| -0.279380107 | 8.05E-10    | -0.253730097 | 2.70E-08    | -0.269886707 |
| -0.333515143 | 1.35E-13    | -0.319160824 | 1.62E-12    | -0.351571365 |
| -0.18197837  | 7.65E-05    | -0.156092273 | 0.000712008 | -0.177156154 |
| -0.211122438 | 4.18E-06    | -0.182893635 | 7.03E-05    | -0.185638965 |
| -0.341778763 | 3.05E-14    | -0.330021082 | 2.50E-13    | -0.333077153 |
| -0.221970077 | 1.27E-06    | -0.185039305 | 5.75E-05    | -0.208147612 |
| -0.107720902 | 0.019890418 | -0.111657207 | 0.015777637 | -0.149860285 |
| -0.089031835 | 0.054523066 | -0.096890014 | 0.036337874 | -0.105452647 |
| -0.144758549 | 0.001710296 | -0.122663197 | 0.007961501 | -0.110498274 |
| -0.213926604 | 3.09E-06    | -0.162589764 | 0.000419221 | -0.168231046 |
| -0.043708066 | 0.345957987 | -0.016837153 | 0.716676175 | 0.031559623  |
| -0.113613572 | 0.014026301 | -0.088780325 | 0.055211942 | -0.098236561 |
| 0.372940537  | 7.40E-17    | 0.33304914   | 1.47E-13    | 0.339862891  |
| -0.321042367 | 1.18E-12    | -0.284949051 | 3.57E-10    | -0.28338338  |
| -0.321305098 | 1.12E-12    | -0.336596302 | 7.80E-14    | -0.340155054 |
| -0.094613267 | 0.040981512 | -0.088880408 | 0.054936958 | -0.093798695 |
| -0.358398122 | 1.34E-15    | -0.352691046 | 3.99E-15    | -0.371398967 |
| -0.101183421 | 0.028790298 | -0.100317409 | 0.030193849 | -0.140162678 |
| -0.100285978 | 0.030245873 | -0.045374661 | 0.32786127  | -0.061175496 |
| 0.137239699  | 0.002959623 | 0.109569306  | 0.017855435 | 0.146889114  |
| 0.001651916  | 0.971599259 | -0.003829831 | 0.934215844 | 0.023103645  |
| -0.240548821 | 1.43E-07    | -0.254468528 | 2.46E-08    | -0.275907612 |
| 0.181976183  | 7.65E-05    | 0.178494278  | 0.000105256 | 0.144094267  |
| -0.2818271   | 5.64E-10    | -0.255806204 | 2.06E-08    | -0.302768967 |
| -0.309931107 | 7.43E-12    | -0.29308465  | 1.05E-10    | -0.285281222 |
| -0.116596419 | 0.011684806 | -0.099077155 | 0.032305768 | -0.098581787 |
| -0.099066068 | 0.032325202 | -0.071020936 | 0.125374917 | -0.098223556 |
| -0.218893165 | 1.79E-06    | -0.184247223 | 6.19E-05    | -0.203460759 |
| -0.1239054   | 0.00734508  | -0.102958609 | 0.026087467 | -0.065338304 |
| -0.438907135 | 2.07E-23    | -0.418024319 | 3.54E-21    | -0.44872711  |
| -0.238526694 | 1.83E-07    | -0.201170888 | 1.18E-05    | -0.177009549 |
| -0.392628793 | 1.16E-18    | -0.394987959 | 6.91E-19    | -0.387655623 |
| -0.172221193 | 0.000184213 | -0.140449293 | 0.002349394 | -0.143616312 |
| -0.162538452 | 0.000421011 | -0.157785643 | 0.000621398 | -0.197778125 |
| -0.018242724 | 0.694168226 | 0.008231471  | 0.859186451 | 0.005764651  |

|              |             |              |             |              |
|--------------|-------------|--------------|-------------|--------------|
| -0.335214105 | 9.99E-14    | -0.337572555 | 6.55E-14    | -0.365131472 |
| -0.20252496  | 1.03E-05    | -0.163733055 | 0.00038112  | -0.155326579 |
| -0.104844495 | 0.02345844  | -0.070612835 | 0.127566347 | -0.053250715 |
| -0.173688251 | 0.00016189  | -0.142928024 | 0.001959292 | -0.153730298 |
| 0.029241336  | 0.528464365 | 0.067347146  | 0.146186562 | 0.062467625  |
| -0.260235336 | 1.15E-08    | -0.19626289  | 1.94E-05    | -0.231126652 |
| 0.070896412  | 0.126040465 | 0.085391417  | 0.065219943 | 0.121579768  |
| -0.095842241 | 0.038416226 | -0.031803282 | 0.492961393 | -0.058211067 |
| -0.066157948 | 0.153459435 | -0.042696863 | 0.357241472 | -0.003183201 |
| -0.112485416 | 0.015014092 | -0.121351434 | 0.008662182 | -0.153115482 |
| -0.191407466 | 3.13E-05    | -0.149177294 | 0.00122404  | -0.136615152 |
| -0.264069707 | 6.85E-09    | -0.218427933 | 1.89E-06    | -0.229078097 |
| -0.157833071 | 0.000619021 | -0.115892152 | 0.01220405  | -0.141357117 |
| -0.23699719  | 2.20E-07    | -0.215846527 | 2.51E-06    | -0.257014747 |
| -0.272480529 | 2.15E-09    | -0.232551699 | 3.74E-07    | -0.242344272 |
| -0.184330121 | 6.15E-05    | -0.145629768 | 0.001602288 | -0.152170668 |
| -0.247653856 | 5.89E-08    | -0.191205031 | 3.19E-05    | -0.200045528 |
| -0.184920973 | 5.82E-05    | -0.171129851 | 0.000202657 | -0.189348785 |
| -0.217928574 | 1.99E-06    | -0.186458791 | 5.03E-05    | -0.203465631 |
| -0.138942645 | 0.002619907 | -0.13467366  | 0.003547586 | -0.131118208 |
| -0.247540804 | 5.97E-08    | -0.229786286 | 5.17E-07    | -0.231817969 |
| -0.210480781 | 4.48E-06    | -0.153166854 | 0.000897895 | -0.175786417 |
| -0.19116211  | 3.21E-05    | -0.155899041 | 0.000723092 | -0.16488748  |
| -0.181010233 | 8.36E-05    | -0.171378594 | 0.000198307 | -0.183477755 |
| -0.26519605  | 5.88E-09    | -0.240396907 | 1.45E-07    | -0.251098248 |
| -0.044212486 | 0.340414992 | -0.028198893 | 0.543273036 | -0.042604341 |
| -0.109838614 | 0.017574659 | -0.07917962  | 0.087416741 | -0.067801858 |
| -0.325981693 | 5.05E-13    | -0.375291627 | 4.57E-17    | -0.402822316 |
| -0.207716416 | 6.00E-06    | -0.190140959 | 3.54E-05    | -0.180556611 |
| -0.160217202 | 0.000509862 | -0.188594385 | 4.10E-05    | -0.225036315 |
| -0.09437309  | 0.041499386 | -0.052927224 | 0.2536611   | -0.077436628 |
| -0.12296337  | 0.007808458 | -0.110047084 | 0.017359968 | -0.130554145 |
| 0.066595847  | 0.150750086 | 0.118668487  | 0.010268617 | 0.11641574   |
| -0.183617852 | 6.57E-05    | -0.152254279 | 0.00096448  | -0.131281518 |
| -0.372053768 | 8.86E-17    | -0.330829991 | 2.17E-13    | -0.363027249 |
| -0.197585274 | 1.70E-05    | -0.193344598 | 2.59E-05    | -0.222506917 |
| -0.295112043 | 7.73E-11    | -0.250228666 | 4.24E-08    | -0.285726723 |
| -0.201189251 | 1.18E-05    | -0.155833858 | 0.000726866 | -0.193892365 |
| -0.25700621  | 1.76E-08    | -0.206261014 | 7.00E-06    | -0.220331741 |
| -0.267569233 | 4.25E-09    | -0.222337468 | 1.22E-06    | -0.259006205 |
| -0.195862957 | 2.02E-05    | -0.162039729 | 0.000438788 | -0.177725546 |
| -0.041456999 | 0.371387871 | -0.00476514  | 0.918200943 | 0.001064495  |
| -0.187132453 | 4.72E-05    | -0.145088448 | 0.001668636 | -0.152550524 |
| -0.172459925 | 0.000180394 | -0.1315365   | 0.004409307 | -0.136233687 |
| -0.185375232 | 5.57E-05    | -0.171876194 | 0.000189867 | -0.201286758 |

|              |             |              |             |              |
|--------------|-------------|--------------|-------------|--------------|
| -0.166336258 | 0.000306075 | -0.122438782 | 0.008077662 | -0.106471286 |
| -0.162131737 | 0.000435456 | -0.134320869 | 0.003636221 | -0.155249415 |
| -0.073904048 | 0.110716346 | -0.057679165 | 0.213443328 | -0.077090751 |
| 0.04118698   | 0.374514014 | 0.074083382  | 0.109851129 | 0.056247885  |
| -0.249859923 | 4.45E-08    | -0.213256545 | 3.32E-06    | -0.19319527  |
| -0.213820163 | 3.13E-06    | -0.171592786 | 0.000194632 | -0.156002992 |
| -0.25195348  | 3.40E-08    | -0.197288217 | 1.75E-05    | -0.203355132 |
| -0.112198115 | 0.015275204 | -0.099235364 | 0.032029536 | -0.113907446 |
| -0.045993772 | 0.321297515 | -0.052061111 | 0.261523903 | -0.067530329 |
| -0.194055382 | 2.42E-05    | -0.159383897 | 0.0005458   | -0.178975394 |
| -0.186918411 | 4.82E-05    | -0.17380465  | 0.000160232 | -0.190468758 |
| -0.236733678 | 2.27E-07    | -0.203666701 | 9.16E-06    | -0.214817943 |
| -0.080767377 | 0.081234168 | -0.031780505 | 0.493271333 | -0.087418501 |
| -0.092339058 | 0.046110673 | -0.119461132 | 0.009768517 | -0.149840101 |
| -0.276899728 | 1.15E-09    | -0.243046369 | 1.05E-07    | -0.280566354 |
| -0.175011909 | 0.00014395  | -0.174106888 | 0.000156001 | -0.181667443 |
| -0.332465921 | 1.63E-13    | -0.297607411 | 5.26E-11    | -0.298956331 |
| -0.121308274 | 0.008686142 | -0.10307833  | 0.025913326 | -0.071734325 |
| 0.093329832  | 0.043813428 | 0.038040053  | 0.412132709 | 0.053083841  |
| -0.269683541 | 3.17E-09    | -0.229459459 | 5.38E-07    | -0.226066051 |
| -0.37312593  | 7.12E-17    | -0.365507911 | 3.31E-16    | -0.383445735 |
| -0.238915486 | 1.74E-07    | -0.216501845 | 2.33E-06    | -0.210743781 |
| -0.232439903 | 3.79E-07    | -0.208276463 | 5.66E-06    | -0.209083498 |
| -0.207535957 | 6.12E-06    | -0.17355781  | 0.000163767 | -0.181177098 |
| -0.210841449 | 4.31E-06    | -0.157442281 | 0.000638858 | -0.151805348 |
| -0.07561731  | 0.102666447 | -0.064654467 | 0.163042917 | -0.059229043 |
| -0.222657472 | 1.17E-06    | -0.184954282 | 5.80E-05    | -0.188461089 |
| -0.095927492 | 0.03824344  | -0.053940114 | 0.244675805 | -0.047395123 |
| -0.088712218 | 0.055399724 | -0.072367946 | 0.118348866 | -0.061044485 |
| -0.314913595 | 3.28E-12    | -0.268713217 | 3.63E-09    | -0.274898793 |
| -0.317155083 | 2.26E-12    | -0.318733269 | 1.74E-12    | -0.314435687 |
| -0.157040894 | 0.000659844 | -0.169017694 | 0.000243363 | -0.200163002 |
| -0.212371646 | 3.66E-06    | -0.195428412 | 2.11E-05    | -0.209242742 |
| -0.206944707 | 6.51E-06    | -0.149836937 | 0.001163507 | -0.150174105 |
| -0.340205627 | 4.07E-14    | -0.281045127 | 6.32E-10    | -0.282435817 |
| -0.237559599 | 2.05E-07    | -0.231791199 | 4.09E-07    | -0.231415382 |
| -0.073832405 | 0.111063494 | -0.013042418 | 0.778629373 | 0.001638205  |
| -0.246780961 | 6.57E-08    | -0.234164543 | 3.09E-07    | -0.240501109 |
| -0.062007576 | 0.180997044 | 0.014619261  | 0.752689473 | -0.000678552 |
| -0.272616969 | 2.11E-09    | -0.25481877  | 2.35E-08    | -0.286134372 |
| -0.183409866 | 6.70E-05    | -0.147563761 | 0.001384528 | -0.164318854 |
| -0.400164453 | 2.19E-19    | -0.396030956 | 5.49E-19    | -0.404145337 |
| -0.240048578 | 1.52E-07    | -0.202301492 | 1.05E-05    | -0.214445948 |
| -0.247032458 | 6.37E-08    | -0.242594071 | 1.11E-07    | -0.244736363 |
| 0.073270769  | 0.113814645 | 0.136428807  | 0.003135067 | 0.139770133  |



|              |             |              |             |              |
|--------------|-------------|--------------|-------------|--------------|
| 0.180451695  | 8.80E-05    | 0.153115669  | 0.000901515 | 0.146054161  |
| -0.237349572 | 2.11E-07    | -0.198283978 | 1.59E-05    | -0.199587867 |
| -0.116954089 | 0.011428659 | -0.04085053  | 0.378431883 | -0.027753427 |
| -0.143546549 | 0.00187167  | -0.076510127 | 0.098659356 | -0.091297339 |
| -0.454074171 | 3.91E-25    | -0.419357567 | 2.58E-21    | -0.430242451 |
| -0.321924947 | 1.01E-12    | -0.272501731 | 2.14E-09    | -0.277214527 |
| -0.243033422 | 1.05E-07    | -0.187826587 | 4.42E-05    | -0.191236636 |
| -0.060887585 | 0.18901975  | 0.017755989  | 0.70193331  | 0.012970877  |
| -0.200505127 | 1.27E-05    | -0.193040126 | 2.67E-05    | -0.182325418 |
| -0.243864106 | 9.47E-08    | -0.232612446 | 3.71E-07    | -0.245684333 |
| -0.199356066 | 1.42E-05    | -0.147978744 | 0.001341501 | -0.172178458 |
| -0.17730912  | 0.000117168 | -0.134451735 | 0.003603111 | -0.141954782 |
| -0.248126775 | 5.55E-08    | -0.219151358 | 1.74E-06    | -0.25375888  |
| -0.284072888 | 4.06E-10    | -0.231734842 | 4.12E-07    | -0.231839738 |
| -0.283366841 | 4.50E-10    | -0.255878922 | 2.04E-08    | -0.254279965 |
| -0.1227087   | 0.007938131 | -0.107681445 | 0.019935972 | -0.125554833 |
| -0.207709516 | 6.01E-06    | -0.197031029 | 1.80E-05    | -0.176664045 |
| -0.234640139 | 2.92E-07    | -0.210524646 | 4.46E-06    | -0.222450231 |
| -0.131439853 | 0.004438629 | -0.131272601 | 0.004489787 | -0.14932485  |
| -0.227809169 | 6.51E-07    | -0.202985209 | 9.83E-06    | -0.215806557 |
| 0.102812991  | 0.026300633 | 0.067744672  | 0.143814938 | 0.051383597  |
| -0.221824751 | 1.29E-06    | -0.207294031 | 6.28E-06    | -0.213390827 |
| -0.159775147 | 0.000528643 | -0.143659127 | 0.001856114 | -0.125325838 |
| -0.217374443 | 2.12E-06    | -0.188723778 | 4.05E-05    | -0.205233726 |
| -0.191704394 | 3.04E-05    | -0.144112262 | 0.001794687 | -0.142050378 |
| -0.356921369 | 1.78E-15    | -0.350081065 | 6.54E-15    | -0.327031839 |
| -0.24513858  | 8.08E-08    | -0.229647966 | 5.26E-07    | -0.24532384  |
| -0.510916046 | 2.05E-32    | -0.502439187 | 3.06E-31    | -0.5354086   |
| -0.325509528 | 5.48E-13    | -0.316755077 | 2.42E-12    | -0.305080783 |
| -0.438612568 | 2.23E-23    | -0.403210522 | 1.10E-19    | -0.406570551 |
| -0.30042936  | 3.39E-11    | -0.25479705  | 2.35E-08    | -0.270593325 |
| -0.283404633 | 4.48E-10    | -0.274921611 | 1.52E-09    | -0.278703432 |
| -0.189475703 | 3.77E-05    | -0.136642931 | 0.003087844 | -0.140408388 |
| -0.015728545 | 0.734604615 | 0.007390555  | 0.873444021 | -0.042070491 |
| 0.131659392  | 0.004372276 | 0.116583379  | 0.01169424  | 0.139286013  |
| -0.169568089 | 0.000232076 | -0.124025171 | 0.007287963 | -0.109328701 |
| -0.334572255 | 1.12E-13    | -0.326259746 | 4.81E-13    | -0.36280094  |
| 0.003749894  | 0.9355859   | -0.002568916 | 0.955846832 | 0.036304322  |
| 0.330097453  | 2.47E-13    | 0.301297963  | 2.96E-11    | 0.315634665  |
| -0.349238093 | 7.67E-15    | -0.316349085 | 2.59E-12    | -0.318311071 |
| -0.278702766 | 8.87E-10    | -0.233708257 | 3.26E-07    | -0.253018517 |
| -0.183873896 | 6.41E-05    | -0.148496609 | 0.001289532 | -0.157898298 |
| -0.374703404 | 5.16E-17    | -0.362491229 | 6.00E-16    | -0.40238106  |
| -0.322609359 | 9.01E-13    | -0.286072293 | 3.02E-10    | -0.303834909 |
| -0.166606651 | 0.000299126 | -0.185556468 | 5.48E-05    | -0.217324626 |

|              |             |              |             |              |
|--------------|-------------|--------------|-------------|--------------|
| 0.119918738  | 0.00948976  | 0.091479224  | 0.048185467 | 0.074075164  |
| 0.027626974  | 0.551484141 | 0.07640994   | 0.099102712 | 0.101752689  |
| 0.014861391  | 0.748730032 | 0.081868343  | 0.07715853  | 0.053757016  |
| 0.183000007  | 6.96E-05    | 0.200249554  | 1.30E-05    | 0.240303874  |
| -0.234088913 | 3.11E-07    | -0.186668883 | 4.93E-05    | -0.189794636 |
| -0.184245188 | 6.20E-05    | -0.169882523 | 0.000225849 | -0.178376209 |
| -0.167815425 | 0.000269827 | -0.133640824 | 0.003812759 | -0.151354571 |
| -0.183874597 | 6.41E-05    | -0.14590476  | 0.001569518 | -0.167330847 |
| 0.090641522  | 0.05028148  | 0.105415945  | 0.022708476 | 0.131565888  |
| -0.218605009 | 1.85E-06    | -0.208880273 | 5.31E-06    | -0.197624991 |
| 0.180903148  | 8.45E-05    | 0.157248247  | 0.000648924 | 0.177080691  |
| -0.133780087 | 0.003775987 | -0.107963905 | 0.019611853 | -0.097379809 |
| -0.143756745 | 0.00184272  | -0.116316641 | 0.011888695 | -0.14516417  |
| -0.280182948 | 7.16E-10    | -0.302623173 | 2.40E-11    | -0.332649107 |
| -0.305417019 | 1.54E-11    | -0.278745246 | 8.82E-10    | -0.300131821 |
| -0.205473736 | 7.60E-06    | -0.1703011   | 0.000217803 | -0.173229417 |
| -0.241213713 | 1.31E-07    | -0.195411978 | 2.11E-05    | -0.211175187 |
| -0.049910549 | 0.281767866 | -0.011306524 | 0.807471673 | -0.036721983 |
| -0.049100497 | 0.289660884 | -0.045029908 | 0.331553624 | -0.065727657 |
| -0.223208067 | 1.10E-06    | -0.16614036  | 0.000311203 | -0.171280477 |
| -0.278042623 | 9.75E-10    | -0.27828034  | 9.43E-10    | -0.273641467 |
| -0.211441458 | 4.04E-06    | -0.171643077 | 0.000193778 | -0.18697214  |
| -0.013130922 | 0.777166605 | -0.011958255 | 0.7966101   | 0.021748666  |
| -0.032952689 | 0.47745728  | 0.02816536   | 0.543752789 | 0.043336718  |
| -0.311236468 | 6.01E-12    | -0.28792278  | 2.30E-10    | -0.29940707  |
| -0.218034083 | 1.97E-06    | -0.201420394 | 1.15E-05    | -0.201472776 |
| -0.204044691 | 8.81E-06    | -0.162189796 | 0.000433366 | -0.141601767 |
| 0.121858806  | 0.008384904 | 0.063583321  | 0.170140305 | 0.036859804  |
| -0.104962868 | 0.023301353 | -0.080281916 | 0.08308578  | -0.059411035 |
| 0.005533829  | 0.905063443 | 0.007472633  | 0.872050522 | 0.008499474  |
| -0.27246538  | 2.15E-09    | -0.232065451 | 3.96E-07    | -0.192889654 |
| -0.131755445 | 0.004343529 | -0.060758034 | 0.189964347 | -0.079496159 |
| -0.238586454 | 1.81E-07    | -0.202298456 | 1.05E-05    | -0.180759548 |
| 0.22407576   | 1.00E-06    | 0.201145266  | 1.19E-05    | 0.191862834  |
| -0.19912273  | 1.46E-05    | -0.139399017 | 0.002535113 | -0.133866174 |
| -0.27038114  | 2.88E-09    | -0.230116811 | 4.98E-07    | -0.234329813 |
| -0.184256192 | 6.19E-05    | -0.165732774 | 0.00032213  | -0.2185642   |
| -0.163861449 | 0.000377049 | -0.161634888 | 0.000453729 | -0.183382778 |
| -0.177278232 | 0.000117495 | -0.195884535 | 2.02E-05    | -0.189460986 |
| -0.343720424 | 2.14E-14    | -0.328650719 | 3.18E-13    | -0.390144217 |
| 0.140840949  | 0.002283379 | 0.118123203  | 0.010625712 | 0.146305393  |
| 0.031114594  | 0.502378208 | -0.01331174  | 0.774180548 | -0.024070255 |
| -0.131080349 | 0.00454925  | -0.09165532  | 0.047754294 | -0.075243818 |
| -0.361738116 | 6.96E-16    | -0.323520623 | 7.71E-13    | -0.323601151 |
| -0.228616227 | 5.93E-07    | -0.207001451 | 6.47E-06    | -0.198232973 |

|              |             |              |             |              |
|--------------|-------------|--------------|-------------|--------------|
| 0.151797783  | 0.000999472 | 0.147041045  | 0.001440531 | 0.162669947  |
| -0.164151568 | 0.000367999 | -0.128028184 | 0.00559345  | -0.158906855 |
| -0.286830693 | 2.70E-10    | -0.252660864 | 3.10E-08    | -0.261898119 |
| -0.198736489 | 1.52E-05    | -0.152938354 | 0.000914157 | -0.157645561 |
| -0.195200985 | 2.16E-05    | -0.162311715 | 0.000429008 | -0.171538568 |
| -0.029832629 | 0.520156633 | -0.01355877  | 0.770106434 | 0.00497072   |
| -0.186270573 | 5.12E-05    | -0.145814719 | 0.00158018  | -0.134383229 |
| 0.136980827  | 0.003014637 | 0.151131078  | 0.001052685 | 0.136405278  |
| 0.095949873  | 0.038198187 | 0.071367015  | 0.123539552 | 0.100886016  |
| 0.183453261  | 6.67E-05    | 0.17483414   | 0.000146246 | 0.188485228  |
| -0.143399015 | 0.001892238 | -0.162828917 | 0.000410969 | -0.13786882  |
| -0.138417703 | 0.002720632 | -0.087628042 | 0.058461097 | -0.113187091 |
| -0.17582702  | 0.00013385  | -0.186394245 | 5.06E-05    | -0.156442917 |
| 0.202826739  | 9.99E-06    | 0.212307687  | 3.68E-06    | 0.184058203  |
| 0.097730371  | 0.034740716 | 0.092436006  | 0.045881513 | 0.110092313  |
| -0.294804518 | 8.10E-11    | -0.259635196 | 1.24E-08    | -0.265483409 |
| -0.101083917 | 0.028948665 | -0.063901945 | 0.168005409 | -0.061670041 |
| -0.172061392 | 0.000186812 | -0.167749844 | 0.000271345 | -0.156251188 |
| -0.184566362 | 6.01E-05    | -0.139438538 | 0.002527889 | -0.145238803 |
| -0.121782999 | 0.008425822 | -0.074683981 | 0.106992214 | -0.096788426 |
| -0.12042107  | 0.009191919 | -0.086030809 | 0.063225225 | -0.098664064 |
| -0.180477142 | 8.78E-05    | -0.12434157  | 0.007138983 | -0.161674296 |
| -0.227799467 | 6.52E-07    | -0.228095723 | 6.30E-07    | -0.215269973 |
| -0.211032812 | 4.22E-06    | -0.175808152 | 0.000134076 | -0.190379955 |
| 0.09864083   | 0.033078159 | 0.113553218  | 0.014077662 | 0.144143923  |
| -0.200411323 | 1.28E-05    | -0.164478458 | 0.000358044 | -0.182082394 |
| -0.265121644 | 5.94E-09    | -0.263672669 | 7.23E-09    | -0.306742311 |
| -0.001701412 | 0.970748672 | 0.007898735  | 0.864822716 | -0.011610016 |
| -0.163915954 | 0.000375333 | -0.104529489 | 0.023880941 | -0.142372239 |
| -0.294267181 | 8.80E-11    | -0.285859755 | 3.12E-10    | -0.29866974  |
| -0.141122832 | 0.002236919 | -0.117976743 | 0.010723482 | -0.122905358 |
| -0.368773185 | 1.72E-16    | -0.342443229 | 2.70E-14    | -0.349800564 |
| -0.367547865 | 2.20E-16    | -0.292428845 | 1.16E-10    | -0.319336843 |
| -0.333775543 | 1.29E-13    | -0.320363372 | 1.32E-12    | -0.322525094 |
| -0.343521137 | 2.22E-14    | -0.319780348 | 1.46E-12    | -0.310301564 |
| 0.063275274  | 0.17222354  | 0.01701291   | 0.713847775 | 0.025453921  |
| -0.017340962 | 0.708579032 | -0.017807194 | 0.701114928 | -0.02303335  |
| -0.267591783 | 4.24E-09    | -0.231564098 | 4.20E-07    | -0.278004543 |
| -0.357030557 | 1.74E-15    | -0.293834794 | 9.40E-11    | -0.316434627 |
| -0.126884303 | 0.00603727  | -0.065272068 | 0.159053141 | -0.077669233 |
| -0.168482465 | 0.000254829 | -0.133423184 | 0.003870877 | -0.143345832 |
| -0.266808473 | 4.72E-09    | -0.216981033 | 2.21E-06    | -0.201007213 |
| -0.219007212 | 1.77E-06    | -0.171784633 | 0.000191394 | -0.189135186 |
| 0.240493842  | 1.44E-07    | 0.244995839  | 8.22E-08    | 0.268060191  |
| -0.22423922  | 9.81E-07    | -0.239215716 | 1.68E-07    | -0.24526974  |

|              |             |              |             |              |
|--------------|-------------|--------------|-------------|--------------|
| -0.214862835 | 2.79E-06    | -0.191359563 | 3.14E-05    | -0.199217108 |
| -0.213339118 | 3.29E-06    | -0.229090636 | 5.61E-07    | -0.252896271 |
| -0.265867122 | 5.37E-09    | -0.223420658 | 1.08E-06    | -0.225755808 |
| -0.266082854 | 5.21E-09    | -0.220967821 | 1.42E-06    | -0.226248879 |
| -0.109013707 | 0.018447097 | -0.076393717 | 0.099174656 | -0.036038029 |
| -0.309518343 | 7.95E-12    | -0.290919355 | 1.46E-10    | -0.297714353 |
| -0.370291098 | 1.27E-16    | -0.336190612 | 8.39E-14    | -0.367126604 |
| -0.039019969 | 0.400185902 | -0.106665959 | 0.021140032 | -0.100095253 |
| -0.11539798  | 0.012580459 | -0.040157177 | 0.38658474  | -0.059650074 |
| -0.198902446 | 1.49E-05    | -0.170458086 | 0.000214855 | -0.181312918 |
| -0.185504699 | 5.50E-05    | -0.145238623 | 0.001649981 | -0.142618322 |
| 0.324382982  | 6.65E-13    | 0.363583978  | 4.84E-16    | 0.370867539  |
| -0.247920001 | 5.69E-08    | -0.217057653 | 2.19E-06    | -0.222676887 |
| 0.159721576  | 0.000530962 | 0.145081168  | 0.001669545 | 0.137260602  |
| -0.263951963 | 6.96E-09    | -0.262915941 | 8.01E-09    | -0.260508891 |
| -0.099007101 | 0.032428732 | -0.093267159 | 0.043955836 | -0.11217384  |
| -0.242327609 | 1.15E-07    | -0.21049805  | 4.47E-06    | -0.210804271 |
| -0.124960511 | 0.006855405 | -0.119079776 | 0.010006358 | -0.13466883  |
| -0.227171676 | 7.01E-07    | -0.188271935 | 4.23E-05    | -0.222022178 |
| -0.25686965  | 1.79E-08    | -0.231219079 | 4.37E-07    | -0.202099457 |
| -0.214447346 | 2.92E-06    | -0.215979673 | 2.47E-06    | -0.204414128 |
| -0.135538137 | 0.00333862  | -0.132873889 | 0.004021141 | -0.142743838 |
| -0.180663726 | 8.63E-05    | -0.145368242 | 0.001634034 | -0.1632842   |
| -0.238077208 | 1.93E-07    | -0.215840752 | 2.51E-06    | -0.218937453 |
| -0.338718656 | 5.32E-14    | -0.323458756 | 7.79E-13    | -0.356947555 |
| -0.232702226 | 3.67E-07    | -0.178224954 | 0.000107859 | -0.16291107  |
| -0.2188719   | 1.80E-06    | -0.186755042 | 4.89E-05    | -0.198749691 |
| -0.332570551 | 1.60E-13    | -0.352778961 | 3.93E-15    | -0.368258004 |
| -0.410645429 | 2.01E-20    | -0.392107978 | 1.30E-18    | -0.39941945  |
| -0.194324245 | 2.35E-05    | -0.196895812 | 1.82E-05    | -0.221252907 |
| -0.261070868 | 1.03E-08    | -0.231039932 | 4.47E-07    | -0.26285316  |
| -0.111877173 | 0.015571595 | -0.060162236 | 0.194353166 | -0.089761381 |
| -0.395655856 | 5.96E-19    | -0.368071588 | 1.98E-16    | -0.39456416  |
| -0.169903141 | 0.000225446 | -0.137336077 | 0.002939376 | -0.163967096 |
| -0.403260114 | 1.09E-19    | -0.392061077 | 1.31E-18    | -0.438659611 |
| -0.329445774 | 2.77E-13    | -0.280644122 | 6.70E-10    | -0.298914107 |
| -0.090579421 | 0.050439849 | -0.063120116 | 0.173280006 | -0.068582307 |
| -0.240893337 | 1.37E-07    | -0.206975956 | 6.49E-06    | -0.208154904 |
| -0.176036543 | 0.000131363 | -0.149432176 | 0.001200314 | -0.155817061 |
| -0.23226523  | 3.87E-07    | -0.188486619 | 4.15E-05    | -0.184063896 |
| -0.135733378 | 0.003293    | -0.108191785 | 0.019353717 | -0.103501972 |
| -0.070348071 | 0.129003888 | -0.117333068 | 0.011162684 | -0.129215272 |
| -0.377317929 | 3.01E-17    | -0.36812081  | 1.96E-16    | -0.426116589 |
| -0.164607073 | 0.000354197 | -0.113814062 | 0.01385687  | -0.15188192  |
| -0.01541435  | 0.739712609 | 0.025501675  | 0.58251943  | 0.019763624  |

|              |             |              |             |              |
|--------------|-------------|--------------|-------------|--------------|
| 0.136358645  | 0.003150683 | 0.169811772  | 0.000227236 | 0.141941419  |
| -0.096972659 | 0.036178085 | -0.062244698 | 0.179331303 | -0.068199154 |
| -0.201931096 | 1.10E-05    | -0.139186122 | 0.002574352 | -0.135575915 |
| -0.084190932 | 0.069104815 | -0.028484609 | 0.539193831 | -0.004061852 |
| -0.330151306 | 2.45E-13    | -0.311535434 | 5.72E-12    | -0.332414313 |
| -0.046350559 | 0.317554024 | -0.025680505 | 0.57987697  | -0.054438108 |
| 0.235971773  | 2.49E-07    | 0.284989752  | 3.55E-10    | 0.253903321  |
| -0.043434002 | 0.348993533 | -0.001698775 | 0.970793995 | 0.013273123  |
| -0.275179124 | 1.47E-09    | -0.2326076   | 3.71E-07    | -0.259338077 |
| -0.284472213 | 3.83E-10    | -0.278324228 | 9.37E-10    | -0.28184551  |
| -0.101993469 | 0.027528505 | -0.108158447 | 0.019391296 | -0.126211801 |
| -0.427396016 | 3.68E-22    | -0.373614643 | 6.45E-17    | -0.358029882 |
| -0.402006232 | 1.45E-19    | -0.347075134 | 1.15E-14    | -0.357335954 |
| 0.024255977  | 0.60107985  | 0.061630991  | 0.183665984 | 0.032254808  |
| -0.185838442 | 5.33E-05    | -0.198917219 | 1.49E-05    | -0.191055989 |
| -0.336304483 | 8.22E-14    | -0.290208145 | 1.63E-10    | -0.326756864 |
| -0.209211051 | 5.13E-06    | -0.198491055 | 1.55E-05    | -0.195929111 |
| -0.422086856 | 1.34E-21    | -0.413964155 | 9.25E-21    | -0.425877451 |
| -0.349019231 | 7.99E-15    | -0.316383989 | 2.57E-12    | -0.298714541 |
| 0.296112595  | 6.63E-11    | 0.260713014  | 1.08E-08    | 0.285692964  |
| -0.254591037 | 2.42E-08    | -0.209641225 | 4.90E-06    | -0.221564552 |
| -0.196057868 | 1.98E-05    | -0.194234598 | 2.37E-05    | -0.210542511 |
| -0.289315319 | 1.86E-10    | -0.247050959 | 6.35E-08    | -0.243094719 |
| -0.137695047 | 0.002865067 | -0.124529881 | 0.007051614 | -0.121428479 |
| -0.152256437 | 0.000964318 | -0.11775849  | 0.010870656 | -0.10409656  |
| -0.229633299 | 5.27E-07    | -0.186648299 | 4.94E-05    | -0.20135579  |
| -0.140355504 | 0.002365459 | -0.106783558 | 0.020997437 | -0.099077628 |
| -0.168836195 | 0.000247196 | -0.117532852 | 0.01102469  | -0.158235786 |
| -0.168863546 | 0.000246615 | -0.122517123 | 0.008036941 | -0.154324594 |
| 0.234293402  | 3.04E-07    | 0.177931639  | 0.000110762 | 0.178120888  |
| -0.254983764 | 2.30E-08    | -0.224008826 | 1.01E-06    | -0.227790469 |
| -0.044706356 | 0.33504321  | -0.017985942 | 0.698260849 | -0.041772729 |
| 0.003747571  | 0.935625707 | 0.028183763  | 0.543489476 | 0.032369089  |
| -0.32766782  | 3.77E-13    | -0.286476276 | 2.85E-10    | -0.281163984 |
| -0.223243794 | 1.10E-06    | -0.199325521 | 1.43E-05    | -0.202906245 |
| -0.102329478 | 0.027019233 | -0.091013291 | 0.049342059 | -0.081794502 |
| -0.245629345 | 7.60E-08    | -0.234196575 | 3.07E-07    | -0.23362588  |
| -0.000580573 | 0.990016599 | 0.005184556  | 0.911029811 | -0.006054591 |
| -0.337488198 | 6.65E-14    | -0.300322595 | 3.44E-11    | -0.320914173 |
| 0.274346064  | 1.65E-09    | 0.290573114  | 1.54E-10    | 0.307526853  |
| -0.160942199 | 0.000480396 | -0.114832086 | 0.013024052 | -0.105636215 |
| -0.13359581  | 0.003824714 | -0.096960071 | 0.036202384 | -0.095868148 |
| -0.339616268 | 4.53E-14    | -0.296880079 | 5.89E-11    | -0.313220275 |
| -0.248544452 | 5.26E-08    | -0.199103978 | 1.46E-05    | -0.182951488 |
| -0.289269941 | 1.88E-10    | -0.254521779 | 2.44E-08    | -0.25368979  |

|              |             |              |             |              |
|--------------|-------------|--------------|-------------|--------------|
| 0.17029822   | 0.000217857 | 0.17985575   | 9.30E-05    | 0.178223168  |
| -0.260212647 | 1.15E-08    | -0.217503444 | 2.09E-06    | -0.232392449 |
| -0.277764049 | 1.02E-09    | -0.249147917 | 4.87E-08    | -0.275904161 |
| 0.04805804   | 0.300034848 | 0.11508529   | 0.012823894 | 0.124093899  |
| -0.32151228  | 1.09E-12    | -0.348094232 | 9.50E-15    | -0.362033361 |
| -0.193626088 | 2.52E-05    | -0.156372011 | 0.000696242 | -0.157660152 |
| -0.431428994 | 1.36E-22    | -0.430793474 | 1.59E-22    | -0.437187813 |
| -0.187102211 | 4.73E-05    | -0.142129979 | 0.002077888 | -0.164960211 |
| 0.45270177   | 5.65E-25    | 0.401800041  | 1.52E-19    | 0.413121526  |
| -0.156279131 | 0.00070144  | -0.124135403 | 0.007235747 | -0.108806494 |
| -0.114102043 | 0.013616654 | -0.069766891 | 0.132203378 | -0.043902483 |
| -0.087151954 | 0.059849    | -0.021230173 | 0.647232682 | -0.030246117 |
| -0.07084769  | 0.126301621 | -0.028667612 | 0.53658913  | -0.052931068 |
| -0.267372761 | 4.37E-09    | -0.26287378  | 8.06E-09    | -0.257501719 |
| 0.215340578  | 2.65E-06    | 0.17748635   | 0.00011531  | 0.194139253  |
| -0.289339334 | 1.86E-10    | -0.289092374 | 1.93E-10    | -0.321068229 |
| -0.175138065 | 0.000142341 | -0.123358842 | 0.007610839 | -0.082436647 |
| -0.084848926 | 0.066952664 | -0.039380912 | 0.395838226 | -0.057496745 |
| -0.189677417 | 3.70E-05    | -0.159021533 | 0.000562151 | -0.126601    |
| -0.048160427 | 0.299005147 | -0.033343482 | 0.472247166 | -0.000758161 |
| -0.205995934 | 7.19E-06    | -0.167485502 | 0.000277546 | -0.164586945 |
| -0.061679968 | 0.183317237 | -0.032440946 | 0.484327044 | -0.001882452 |
| -0.315790898 | 2.84E-12    | -0.291655277 | 1.31E-10    | -0.3126225   |
| -0.256218406 | 1.95E-08    | -0.228187523 | 6.23E-07    | -0.232050764 |
| -0.32299801  | 8.43E-13    | -0.283569114 | 4.37E-10    | -0.295123898 |
| -0.219452008 | 1.68E-06    | -0.184263219 | 6.18E-05    | -0.174507999 |
| -0.032662035 | 0.481352548 | -0.024163937 | 0.60246171  | -0.011101407 |
| -0.185326021 | 5.60E-05    | -0.154285137 | 0.000822097 | -0.15236171  |
| -0.259797403 | 1.22E-08    | -0.233438869 | 3.36E-07    | -0.237214231 |
| -0.258191593 | 1.51E-08    | -0.235378794 | 2.67E-07    | -0.242460006 |
| -0.228238504 | 6.20E-07    | -0.193231693 | 2.62E-05    | -0.201024085 |
| -0.24935056  | 4.75E-08    | -0.232655036 | 3.69E-07    | -0.233071431 |
| -0.198101819 | 1.62E-05    | -0.187736979 | 4.46E-05    | -0.193100226 |
| -0.182588883 | 7.23E-05    | -0.148027914 | 0.001336485 | -0.114846715 |
| -0.156700478 | 0.000678142 | -0.140796241 | 0.002290828 | -0.128099713 |
| -0.093530219 | 0.043360712 | -0.075801501 | 0.101829377 | -0.069255286 |
| 0.040572082  | 0.381693281 | 0.021161424  | 0.648298098 | -0.027664449 |
| -0.128675723 | 0.005355424 | -0.091378685 | 0.048433097 | -0.066758255 |
| -0.23339018  | 3.38E-07    | -0.224337088 | 9.70E-07    | -0.202502748 |
| -0.223176885 | 1.11E-06    | -0.202299347 | 1.05E-05    | -0.226529108 |
| -0.158073715 | 0.000607092 | -0.166900225 | 0.000291749 | -0.199724063 |
| -0.247475893 | 6.02E-08    | -0.217805035 | 2.02E-06    | -0.229264657 |
| -0.204288044 | 8.59E-06    | -0.144941397 | 0.001687089 | -0.141240861 |
| -0.317191038 | 2.25E-12    | -0.2501247   | 4.30E-08    | -0.25632943  |
| -0.199374665 | 1.42E-05    | -0.157648012 | 0.000628343 | -0.161445597 |

|              |             |              |             |              |
|--------------|-------------|--------------|-------------|--------------|
| -0.16049495  | 0.00049838  | -0.10106675  | 0.028976061 | -0.098608387 |
| -0.186674942 | 4.93E-05    | -0.154144932 | 0.000831265 | -0.100340797 |
| -0.122083274 | 0.008264777 | -0.087202408 | 0.059700638 | -0.116724489 |
| 0.160650584  | 0.000492052 | 0.148309751  | 0.001308066 | 0.153081579  |
| -0.109554592 | 0.017870888 | -0.069385394 | 0.134336671 | -0.116893746 |
| -0.062169937 | 0.179855256 | -0.035745289 | 0.440921313 | -0.025692505 |
| -0.17009889  | 0.000221656 | -0.150049875 | 0.001144563 | -0.155804681 |
| -0.225022412 | 8.97E-07    | -0.254649007 | 2.40E-08    | -0.250320001 |
| -0.353833679 | 3.21E-15    | -0.308494555 | 9.38E-12    | -0.300049141 |
| -0.213577067 | 3.21E-06    | -0.231146889 | 4.41E-07    | -0.254307963 |
| -0.092448542 | 0.045851949 | -0.032691874 | 0.480951866 | -0.022270517 |
| -0.195172178 | 2.16E-05    | -0.191216724 | 3.19E-05    | -0.216025627 |
| -0.170849615 | 0.000207664 | -0.129339153 | 0.005121051 | -0.142543256 |
| -0.048495847 | 0.295648327 | -0.074698107 | 0.106925686 | -0.066895419 |
| -0.317831731 | 2.02E-12    | -0.283375231 | 4.50E-10    | -0.302028617 |
| -0.081866405 | 0.077165555 | -0.092270121 | 0.046274206 | -0.084893902 |
| -0.198064423 | 1.62E-05    | -0.187169213 | 4.70E-05    | -0.197416193 |
| -0.195177675 | 2.16E-05    | -0.170409411 | 0.000215765 | -0.15338464  |
| -0.327645987 | 3.79E-13    | -0.306895644 | 1.21E-11    | -0.341402534 |
| 0.214604363  | 2.87E-06    | 0.2172178    | 2.16E-06    | 0.252905417  |
| 0.310904875  | 6.34E-12    | 0.309593533  | 7.85E-12    | 0.344705569  |
| 0.252497628  | 3.17E-08    | 0.246193047  | 7.08E-08    | 0.252946081  |
| -0.153514076 | 0.000873696 | -0.132207246 | 0.004210587 | -0.154391084 |
| -0.219988474 | 1.59E-06    | -0.198830569 | 1.50E-05    | -0.219776788 |
| -0.225207304 | 8.79E-07    | -0.190742457 | 3.34E-05    | -0.175467395 |
| 0.323401269  | 7.87E-13    | 0.290185786  | 1.63E-10    | 0.288767066  |
| -0.110569503 | 0.016832001 | -0.064864426 | 0.161678202 | -0.064531935 |
| -0.279942797 | 7.42E-10    | -0.251772413 | 3.48E-08    | -0.27102928  |
| -0.215233457 | 2.68E-06    | -0.174850783 | 0.00014603  | -0.158181305 |
| -0.191855069 | 3.00E-05    | -0.163877217 | 0.000376552 | -0.178009571 |
| -0.253257505 | 2.87E-08    | -0.208283023 | 5.66E-06    | -0.195768756 |
| -0.299566636 | 3.88E-11    | -0.252764635 | 3.06E-08    | -0.243051927 |
| -0.202306893 | 1.05E-05    | -0.180457897 | 8.80E-05    | -0.166976442 |
| -0.235863009 | 2.52E-07    | -0.201924348 | 1.10E-05    | -0.167582641 |
| -0.256751512 | 1.82E-08    | -0.220918573 | 1.43E-06    | -0.242524731 |
| 0.215733713  | 2.54E-06    | 0.153500488  | 0.000874631 | 0.165319008  |
| -0.159862233 | 0.000524893 | -0.159007745 | 0.000562782 | -0.130477382 |
| -0.078666242 | 0.089494881 | -0.031207213 | 0.501106287 | -0.026263411 |
| -0.131257489 | 0.004494436 | -0.137434028 | 0.002918928 | -0.143762033 |
| -0.235834795 | 2.53E-07    | -0.158426826 | 0.000589973 | -0.145306676 |
| -0.154479758 | 0.000809526 | -0.140658266 | 0.002313957 | -0.125694956 |
| 0.274943149  | 1.52E-09    | 0.226831692  | 7.29E-07    | 0.219178513  |
| -0.209368493 | 5.04E-06    | -0.215282566 | 2.67E-06    | -0.254381751 |
| -0.09051804  | 0.050596791 | -0.026863351 | 0.56254149  | -0.039223495 |
| -0.239822932 | 1.56E-07    | -0.214266955 | 2.98E-06    | -0.221915302 |

|              |             |              |             |              |
|--------------|-------------|--------------|-------------|--------------|
| -0.213584233 | 3.21E-06    | -0.183765125 | 6.48E-05    | -0.180911469 |
| -0.26709806  | 4.53E-09    | -0.250565659 | 4.06E-08    | -0.263084002 |
| -0.070740633 | 0.126876922 | -0.086646383 | 0.061352564 | -0.084334305 |
| -0.200084237 | 1.32E-05    | -0.157859938 | 0.000617679 | -0.183920342 |
| -0.105971804 | 0.021998986 | -0.083843421 | 0.070264106 | -0.116513719 |
| -0.177866051 | 0.000111421 | -0.152103043 | 0.000975946 | -0.180343446 |
| -0.15363968  | 0.000865091 | -0.117156416 | 0.011285972 | -0.137991183 |
| 0.182919033  | 7.01E-05    | 0.175396691  | 0.000139096 | 0.22928982   |
| -0.163345602 | 0.000393655 | -0.134179206 | 0.003672373 | -0.144103482 |
| -0.310689631 | 6.57E-12    | -0.270414209 | 2.87E-09    | -0.310023705 |
| -0.125071093 | 0.006805815 | -0.061312667 | 0.185944579 | -0.068039997 |
| -0.217261503 | 2.15E-06    | -0.196878501 | 1.83E-05    | -0.205919443 |
| -0.134875895 | 0.003497665 | -0.103390295 | 0.025464257 | -0.107264526 |
| 0.004641621  | 0.920314157 | -0.059631284 | 0.1983264   | -0.060514115 |
| -0.471108133 | 3.56E-27    | -0.444399395 | 5.02E-24    | -0.456497926 |
| -0.310244218 | 7.06E-12    | -0.260754128 | 1.07E-08    | -0.261553197 |
| 0.083071341  | 0.072896722 | 0.080013018  | 0.084125972 | 0.126566611  |
| 0.144215042  | 0.001781016 | 0.11178578   | 0.015656914 | 0.101566151  |
| -0.20517588  | 7.83E-06    | -0.185363384 | 5.58E-05    | -0.216907088 |
| -0.163093043 | 0.000402032 | -0.13799414  | 0.002804462 | -0.155443685 |
| 0.169585202  | 0.000231733 | 0.127808217  | 0.005676445 | 0.127151412  |
| -0.10950323  | 0.017924921 | -0.069610202 | 0.133076378 | -0.075199123 |
| -0.232385384 | 3.81E-07    | -0.221471419 | 1.34E-06    | -0.201864996 |
| -0.309012251 | 8.63E-12    | -0.257603914 | 1.63E-08    | -0.249542542 |
| 0.094956739  | 0.040250404 | 0.107460588  | 0.02019264  | 0.133631719  |
| -0.215994833 | 2.47E-06    | -0.1662361   | 0.000308687 | -0.174073138 |
| -0.208433206 | 5.57E-06    | -0.192052426 | 2.94E-05    | -0.22283187  |
| -0.176560769 | 0.00012533  | -0.135943969 | 0.003244428 | -0.155333498 |
| -0.256563848 | 1.87E-08    | -0.239307738 | 1.66E-07    | -0.262111729 |
| -0.18061792  | 8.67E-05    | -0.17528523  | 0.000140486 | -0.161646312 |
| -0.121479206 | 0.008591596 | -0.112496484 | 0.015004112 | -0.125128331 |
| -0.264374825 | 6.58E-09    | -0.246652417 | 6.68E-08    | -0.233146648 |
| 0.066973692  | 0.14844164  | 0.056604941  | 0.222107231 | 0.122328979  |
| -0.369873084 | 1.38E-16    | -0.355355241 | 2.40E-15    | -0.383944551 |
| -0.384093801 | 7.27E-18    | -0.335046688 | 1.03E-13    | -0.33580233  |
| -0.174640249 | 0.000148789 | -0.135405525 | 0.003369932 | -0.145228546 |
| -0.165869422 | 0.000318427 | -0.148271097 | 0.001311931 | -0.159312428 |
| -0.221259466 | 1.37E-06    | -0.166246449 | 0.000308416 | -0.132818121 |
| -0.291422545 | 1.36E-10    | -0.222582667 | 1.18E-06    | -0.194263194 |
| -0.346959374 | 1.17E-14    | -0.360477476 | 8.91E-16    | -0.395398239 |
| -0.323258878 | 8.06E-13    | -0.305889749 | 1.43E-11    | -0.31019986  |
| -0.046453306 | 0.316481284 | 0.003457628  | 0.940596665 | -0.02549335  |
| 0.133884217  | 0.003748702 | 0.085683726  | 0.064301695 | 0.059888669  |
| -0.297538273 | 5.32E-11    | -0.270349734 | 2.89E-09    | -0.269115654 |
| 0.215393987  | 2.63E-06    | 0.201615262  | 1.13E-05    | 0.201050693  |



|              |             |              |             |              |
|--------------|-------------|--------------|-------------|--------------|
| -0.363526291 | 4.90E-16    | -0.294135602 | 8.98E-11    | -0.304944447 |
| -0.214125533 | 3.02E-06    | -0.175644557 | 0.000136051 | -0.178555927 |
| -0.141533505 | 0.002170776 | -0.117245216 | 0.011223848 | -0.128458386 |
| -0.040392458 | 0.383806263 | 0.006206035  | 0.893595985 | -0.006727961 |
| -0.107660894 | 0.019959735 | -0.116098958 | 0.012049502 | -0.089893491 |
| -0.443513288 | 6.32E-24    | -0.433417541 | 8.27E-23    | -0.436303443 |
| -0.20849332  | 5.53E-06    | -0.184475813 | 6.06E-05    | -0.216783896 |
| -0.235666814 | 2.58E-07    | -0.195526369 | 2.09E-05    | -0.214317623 |
| -0.329787766 | 2.61E-13    | -0.282782297 | 4.91E-10    | -0.302136768 |
| 0.204013357  | 8.84E-06    | 0.203235494  | 9.58E-06    | 0.200784061  |
| -0.22476832  | 9.24E-07    | -0.185960574 | 5.27E-05    | -0.152923303 |
| 0.004247891  | 0.927053914 | 0.041669093  | 0.368943695 | 0.037460638  |
| 0.225794123  | 8.22E-07    | 0.206080992  | 7.13E-06    | 0.268883429  |
| 0.100637228  | 0.029668836 | 0.073497029  | 0.112699952 | 0.089119365  |
| -0.36456502  | 3.99E-16    | -0.357901114 | 1.47E-15    | -0.363961276 |
| -0.129311863 | 0.005130506 | -0.094311354 | 0.041633392 | -0.085666343 |
| -0.172090782 | 0.000186331 | -0.14177643  | 0.002132497 | -0.145831037 |
| 0.056318776  | 0.224457001 | 0.146485881  | 0.001502283 | 0.13249743   |
| -0.116392294 | 0.011833255 | -0.074304592 | 0.108791228 | -0.054467612 |
| -0.209907282 | 4.76E-06    | -0.192082035 | 2.93E-05    | -0.191882283 |
| -0.219254166 | 1.72E-06    | -0.181845066 | 7.74E-05    | -0.228380658 |
| -0.233932381 | 3.17E-07    | -0.212558439 | 3.58E-06    | -0.237386306 |
| -0.335430691 | 9.61E-14    | -0.296122584 | 6.62E-11    | -0.300071848 |
| -0.017771208 | 0.701690039 | 0.010284106  | 0.82458506  | 0.052434501  |
| -0.007523772 | 0.871182491 | -0.008037559 | 0.86247031  | 0.014372253  |
| -0.140575168 | 0.00232799  | -0.107746962 | 0.019860381 | -0.113705389 |
| -0.193509666 | 2.55E-05    | -0.155956515 | 0.000719779 | -0.189439733 |
| -0.123217822 | 0.007680789 | -0.125387389 | 0.006665745 | -0.102725463 |
| -0.223962605 | 1.01E-06    | -0.216461422 | 2.34E-06    | -0.194706784 |
| -0.10085037  | 0.029323305 | -0.062138806 | 0.180073772 | -0.067214599 |
| -0.168908867 | 0.000245654 | -0.137607952 | 0.002882937 | -0.162981607 |
| -0.103921717 | 0.024714731 | -0.111136859 | 0.016274585 | -0.109124835 |
| -0.189845301 | 3.64E-05    | -0.162709545 | 0.000415069 | -0.184415658 |
| -0.255824485 | 2.06E-08    | -0.248928692 | 5.01E-08    | -0.251983861 |
| -0.298930398 | 4.28E-11    | -0.25536178  | 2.18E-08    | -0.254372357 |
| -0.197329408 | 1.75E-05    | -0.154503503 | 0.000808005 | -0.141751927 |
| -0.277743649 | 1.02E-09    | -0.193881885 | 2.46E-05    | -0.170639746 |
| 0.2045377    | 8.37E-06    | 0.171918823  | 0.000189159 | 0.150986752  |
| -0.063631522 | 0.169816043 | -0.05151264  | 0.266589038 | -0.022093266 |
| -0.138022198 | 0.002798837 | -0.144530652 | 0.00173963  | -0.201949714 |
| -0.206863828 | 6.57E-06    | -0.200950988 | 1.21E-05    | -0.189642453 |
| -0.013143457 | 0.776959495 | 0.030887441  | 0.505504875 | 0.008363642  |
| -0.194344957 | 2.35E-05    | -0.178420617 | 0.000105962 | -0.180777879 |
| -0.326568904 | 4.56E-13    | -0.278789835 | 8.76E-10    | -0.277883587 |
| 0.313658544  | 4.04E-12    | 0.307630867  | 1.08E-11    | 0.300682379  |

|              |             |              |             |              |
|--------------|-------------|--------------|-------------|--------------|
| -0.251801221 | 3.47E-08    | -0.247357521 | 6.11E-08    | -0.272477456 |
| -0.044943125 | 0.332487298 | -0.048286052 | 0.297744962 | -0.05051506  |
| -0.269300603 | 3.35E-09    | -0.257303731 | 1.69E-08    | -0.269021247 |
| 0.18259507   | 7.23E-05    | 0.146859197  | 0.001460496 | 0.10471448   |
| 0.235739763  | 2.56E-07    | 0.226520298  | 7.56E-07    | 0.213283269  |
| -0.159453813 | 0.000542697 | -0.09641149  | 0.03727491  | -0.107139227 |
| -0.299909771 | 3.67E-11    | -0.264305557 | 6.64E-09    | -0.284215137 |
| -0.081196593 | 0.079625016 | -0.052173155 | 0.260497388 | -0.05503543  |
| -0.34999095  | 6.66E-15    | -0.345474389 | 1.55E-14    | -0.359083915 |
| -0.162059489 | 0.00043807  | -0.134362064 | 0.003625768 | -0.170287673 |
| -0.210002823 | 4.71E-06    | -0.179977312 | 9.20E-05    | -0.190921685 |
| -0.30064504  | 3.27E-11    | -0.254185338 | 2.55E-08    | -0.275080281 |
| -0.255597607 | 2.12E-08    | -0.252597236 | 3.13E-08    | -0.269667526 |
| -0.209509492 | 4.97E-06    | -0.201175968 | 1.18E-05    | -0.18674378  |
| -0.209829965 | 4.80E-06    | -0.15005665  | 0.001143965 | -0.146918594 |
| -0.288054023 | 2.25E-10    | -0.293508377 | 9.88E-11    | -0.305967283 |
| -0.237635534 | 2.03E-07    | -0.212133505 | 3.75E-06    | -0.257494162 |
| -0.253031929 | 2.96E-08    | -0.231163726 | 4.40E-07    | -0.264597421 |
| -0.145035211 | 0.001675295 | -0.127764045 | 0.005693244 | -0.154288201 |
| -0.050551623 | 0.275625373 | -0.060435438 | 0.192331557 | -0.086597441 |
| -0.122856728 | 0.007862526 | -0.057954579 | 0.211261728 | -0.048881798 |
| -0.079112342 | 0.087686851 | -0.036980783 | 0.42528117  | -0.100531904 |
| -0.255913147 | 2.03E-08    | -0.22612018  | 7.91E-07    | -0.242251466 |
| -0.195486507 | 2.10E-05    | -0.175610588 | 0.000136465 | -0.162999008 |
| -0.299796756 | 3.74E-11    | -0.278530012 | 9.09E-10    | -0.27192215  |
| -0.165906622 | 0.000317426 | -0.08554795  | 0.064726884 | -0.088950439 |
| -0.258742393 | 1.40E-08    | -0.239529227 | 1.62E-07    | -0.246327059 |
| -0.062729117 | 0.175963705 | -0.085926142 | 0.063548274 | -0.107123909 |
| -0.076849089 | 0.097171042 | -0.040191444 | 0.386179321 | -0.057208504 |
| 0.302617445  | 2.40E-11    | 0.284021863  | 4.09E-10    | 0.267198773  |
| -0.249741423 | 4.52E-08    | -0.215275125 | 2.67E-06    | -0.207382306 |
| -0.218316487 | 1.91E-06    | -0.225025978 | 8.97E-07    | -0.213724823 |
| -0.051882018 | 0.263170484 | -0.032941467 | 0.477607347 | -0.006851192 |
| -0.239093077 | 1.70E-07    | -0.214555413 | 2.89E-06    | -0.21787033  |
| -0.356660742 | 1.87E-15    | -0.268075197 | 3.96E-09    | -0.297252583 |
| -0.325668329 | 5.33E-13    | -0.284192233 | 3.99E-10    | -0.296166666 |
| -0.122953619 | 0.007813388 | -0.116797661 | 0.011540068 | -0.138198892 |
| -0.282892198 | 4.83E-10    | -0.253993648 | 2.61E-08    | -0.283527195 |
| 0.13812842   | 0.002777635 | 0.131467997  | 0.004430072 | 0.111791295  |
| -0.289174123 | 1.90E-10    | -0.254315962 | 2.50E-08    | -0.274903802 |
| -0.245231059 | 7.99E-08    | -0.200707824 | 1.24E-05    | -0.21276958  |
| -0.28282346  | 4.88E-10    | -0.245714806 | 7.52E-08    | -0.242834954 |
| -0.300183151 | 3.52E-11    | -0.28458051  | 3.77E-10    | -0.270341044 |
| 0.000667252  | 0.988526184 | 0.063407207  | 0.171328993 | 0.057811015  |
| -0.261545234 | 9.63E-09    | -0.260133998 | 1.16E-08    | -0.255602961 |

|              |             |              |             |              |
|--------------|-------------|--------------|-------------|--------------|
| -0.404616289 | 8.01E-20    | -0.344200994 | 1.96E-14    | -0.379617309 |
| -0.168309826 | 0.000258634 | -0.133041706 | 0.003974683 | -0.134479679 |
| -0.208984759 | 5.25E-06    | -0.184046584 | 6.31E-05    | -0.198818825 |
| -0.338658069 | 5.38E-14    | -0.34514599  | 1.64E-14    | -0.355842879 |
| 0.003469185  | 0.940398485 | 0.023018549  | 0.61977611  | 0.029191781  |
| 0.016649599  | 0.719698709 | 0.031653319  | 0.49500386  | 0.028515112  |
| 0.226664766  | 7.43E-07    | 0.195241387  | 2.15E-05    | 0.212791179  |
| -0.008957528 | 0.846912816 | 0.009141181  | 0.843813998 | -0.021925208 |
| -0.375654551 | 4.24E-17    | -0.359962132 | 9.85E-16    | -0.388861794 |
| -0.193469176 | 2.56E-05    | -0.185030796 | 5.76E-05    | -0.177216897 |
| -0.301828898 | 2.72E-11    | -0.27373228  | 1.80E-09    | -0.295398799 |
| 0.191741577  | 3.03E-05    | 0.124258241  | 0.007177953 | 0.112564993  |
| -0.010100674 | 0.827664428 | 0.02151716   | 0.642792972 | -0.010612087 |
| -0.293570809 | 9.79E-11    | -0.294374    | 8.65E-11    | -0.306070738 |
| -0.321312771 | 1.12E-12    | -0.278443445 | 9.21E-10    | -0.276436559 |
| -0.249312625 | 4.77E-08    | -0.19442845  | 2.33E-05    | -0.205950702 |
| -0.155062281 | 0.000772955 | -0.151706461 | 0.001006611 | -0.190185936 |
| -0.276584312 | 1.20E-09    | -0.233775513 | 3.23E-07    | -0.250513665 |
| -0.10717992  | 0.020522961 | -0.068883398 | 0.137184084 | -0.070594649 |
| -0.187199696 | 4.69E-05    | -0.122416439 | 0.00808931  | -0.154584342 |
| -0.07072689  | 0.126950925 | -0.028422024 | 0.54008605  | -0.077428242 |
| -0.161779225 | 0.000448348 | -0.141159047 | 0.002231013 | -0.152521593 |
| 0.015610337  | 0.736525005 | -0.011594636 | 0.802665377 | -0.027706149 |
| -0.222186826 | 1.24E-06    | -0.198246662 | 1.59E-05    | -0.232277458 |
| 0.413977309  | 9.22E-21    | 0.392605076  | 1.16E-18    | 0.38651059   |
| -0.146470502 | 0.001504027 | -0.143992648 | 0.001810718 | -0.127421995 |
| -0.453004414 | 5.21E-25    | -0.436111424 | 4.20E-23    | -0.475779137 |
| -0.254007268 | 2.61E-08    | -0.232068022 | 3.96E-07    | -0.25703593  |
| -0.341336007 | 3.31E-14    | -0.326357169 | 4.73E-13    | -0.339122644 |
| 0.147882478  | 0.001351371 | 0.122895084  | 0.007843041 | 0.116035169  |
| 0.247214476  | 6.22E-08    | 0.251157682  | 3.77E-08    | 0.253362194  |
| -0.129061926 | 0.005217841 | -0.116609658 | 0.011675235 | -0.105716335 |
| -0.254159308 | 2.56E-08    | -0.207428332 | 6.19E-06    | -0.215158064 |
| -0.237879066 | 1.97E-07    | -0.206969989 | 6.50E-06    | -0.236417451 |
| -0.116491082 | 0.011761205 | -0.101838508 | 0.027766138 | -0.130344078 |
| -0.189205673 | 3.87E-05    | -0.179558311 | 9.55E-05    | -0.179194533 |
| 0.324658655  | 6.34E-13    | 0.271475884  | 2.47E-09    | 0.288067019  |
| -0.182589228 | 7.23E-05    | -0.147152447 | 0.001428424 | -0.133116198 |
| 0.159392047  | 0.000545438 | 0.090880026  | 0.049677104 | 0.105696297  |
| -0.377564113 | 2.86E-17    | -0.336167518 | 8.43E-14    | -0.35378054  |
| -0.240131222 | 1.50E-07    | -0.24351531  | 9.89E-08    | -0.279531234 |
| -0.220583155 | 1.48E-06    | -0.190590998 | 3.39E-05    | -0.199743403 |
| -0.121398689 | 0.008636016 | -0.102830925 | 0.0262743   | -0.109317413 |
| 0.119405765  | 0.009802734 | 0.115463936  | 0.012529636 | 0.175469663  |
| -0.078942993 | 0.088369726 | -0.05048051  | 0.27630222  | -0.09388585  |

|              |             |              |             |              |
|--------------|-------------|--------------|-------------|--------------|
| -0.162038623 | 0.000438828 | -0.138820698 | 0.002642998 | -0.149695399 |
| -0.269355967 | 3.32E-09    | -0.243405681 | 1.00E-07    | -0.241633561 |
| -0.155528272 | 0.000744807 | -0.176784031 | 0.000122841 | -0.218958041 |
| -0.334003317 | 1.24E-13    | -0.307945691 | 1.03E-11    | -0.31572583  |
| -0.268412235 | 3.78E-09    | -0.280255371 | 7.09E-10    | -0.257905457 |
| -0.126087968 | 0.006364654 | -0.099545141 | 0.031494505 | -0.102912457 |
| -0.153141456 | 0.00089969  | -0.125650475 | 0.006551212 | -0.146244457 |
| -0.143704618 | 0.001849861 | -0.09863667  | 0.033085597 | -0.128345872 |
| 0.321462559  | 1.09E-12    | 0.317856827  | 2.01E-12    | 0.338277731  |
| -0.308218216 | 9.81E-12    | -0.280521139 | 6.82E-10    | -0.283435772 |
| 0.237999422  | 1.95E-07    | 0.263186612  | 7.72E-09    | 0.263310305  |
| -0.184278517 | 6.18E-05    | -0.161053791 | 0.000476003 | -0.174921352 |
| -0.101286894 | 0.028626404 | -0.083627489 | 0.070992432 | -0.083331534 |
| -0.092972427 | 0.044630761 | -0.059299682 | 0.200837708 | -0.069519327 |
| 0.14098687   | 0.002259219 | 0.141815615  | 0.002126381 | 0.108053041  |
| -0.135391712 | 0.003373209 | -0.054848653 | 0.236807734 | -0.075663344 |
| 0.178026635  | 0.000109814 | 0.164008452  | 0.000372438 | 0.151108904  |
| 0.014069268  | 0.761707228 | 0.024193094  | 0.602023803 | 0.033047213  |
| -0.44350251  | 6.34E-24    | -0.389013585 | 2.54E-18    | -0.384924368 |
| -0.19555955  | 2.08E-05    | -0.170796555 | 0.000208626 | -0.129261502 |
| -0.34855271  | 8.72E-15    | -0.322634557 | 8.97E-13    | -0.3384504   |
| 0.003780508  | 0.935061165 | 0.021034627  | 0.650264992 | 0.032046909  |
| -0.075656803 | 0.102486508 | -0.037143663 | 0.42324364  | -0.035027182 |
| -0.287151383 | 2.58E-10    | -0.242156185 | 1.17E-07    | -0.246793822 |
| -0.115531847 | 0.012477495 | -0.04231577  | 0.361553155 | -0.061643001 |
| 0.396974789  | 4.45E-19    | 0.388369664  | 2.92E-18    | 0.408887665  |
| -0.33287194  | 1.52E-13    | -0.285092898 | 3.49E-10    | -0.291173237 |
| -0.162719788 | 0.000414715 | -0.114433248 | 0.013344922 | -0.123139582 |
| -0.122361202 | 0.00811817  | -0.105098061 | 0.023123059 | -0.105871835 |
| -0.276937009 | 1.14E-09    | -0.257000018 | 1.76E-08    | -0.264633776 |
| -0.220794872 | 1.45E-06    | -0.193958163 | 2.44E-05    | -0.173690648 |
| -0.056682036 | 0.2214772   | -0.008699977 | 0.851262513 | -0.003680723 |
| -0.2313445   | 4.31E-07    | -0.190048029 | 3.57E-05    | -0.189460483 |
| -0.222499292 | 1.20E-06    | -0.165066637 | 0.000340762 | -0.158726322 |
| -0.135578747 | 0.003329084 | -0.12186404  | 0.008382085 | -0.152510929 |
| -0.286935307 | 2.66E-10    | -0.222914973 | 1.14E-06    | -0.208235236 |
| 0.266108786  | 5.19E-09    | 0.262628754  | 8.33E-09    | 0.2444375    |
| -0.233753702 | 3.24E-07    | -0.213016977 | 3.41E-06    | -0.15030523  |
| -0.174215442 | 0.000154507 | -0.175638957 | 0.000136119 | -0.187078066 |
| -0.057147875 | 0.217697446 | -0.016357623 | 0.724412728 | -0.011430487 |
| -0.082719458 | 0.074122973 | -0.047576949 | 0.304904664 | -0.030317675 |
| 0.122489598  | 0.008051227 | 0.121502846  | 0.008578593 | 0.103594112  |
| -0.244510463 | 8.74E-08    | -0.205815107 | 7.33E-06    | -0.219865169 |
| 0.128090199  | 0.005570249 | 0.093957729  | 0.04240803  | 0.08128131   |
| -0.279613685 | 7.78E-10    | -0.236425396 | 2.35E-07    | -0.257894445 |

|              |             |              |             |              |
|--------------|-------------|--------------|-------------|--------------|
| -0.201119357 | 1.19E-05    | -0.171571827 | 0.000194988 | -0.203080867 |
| -0.387123383 | 3.81E-18    | -0.375184715 | 4.67E-17    | -0.3704396   |
| -0.239461858 | 1.63E-07    | -0.22794716  | 6.41E-07    | -0.260083744 |
| -0.329270752 | 2.85E-13    | -0.308317059 | 9.65E-12    | -0.304914222 |
| -0.242167799 | 1.17E-07    | -0.219371305 | 1.70E-06    | -0.234214576 |
| 0.247542933  | 5.97E-08    | 0.213134682  | 3.37E-06    | 0.216760634  |
| -0.195793864 | 2.03E-05    | -0.201813887 | 1.11E-05    | -0.214639738 |
| -0.129235935 | 0.005156897 | -0.108610611 | 0.018886994 | -0.089812626 |
| 0.196955349  | 1.81E-05    | 0.214085545  | 3.04E-06    | 0.258807677  |
| -0.328356173 | 3.35E-13    | -0.331207637 | 2.03E-13    | -0.349141661 |
| 0.084990092  | 0.066498183 | 0.057935502  | 0.211412317 | 0.075619365  |
| -0.240766711 | 1.39E-07    | -0.205021781 | 7.96E-06    | -0.211560335 |
| -0.202402849 | 1.04E-05    | -0.17973551  | 9.40E-05    | -0.204079948 |
| 0.266681381  | 4.80E-09    | 0.260194261  | 1.15E-08    | 0.321626849  |
| 0.268526345  | 3.72E-09    | 0.284227068  | 3.97E-10    | 0.26505249   |
| -0.265926134 | 5.32E-09    | -0.242861887 | 1.07E-07    | -0.242037843 |
| 0.211875708  | 3.86E-06    | 0.183091606  | 6.90E-05    | 0.166395062  |
| -0.03582     | 0.439966314 | -0.06223945  | 0.179368049 | -0.092829138 |
| -0.007926488 | 0.864352348 | 0.017677277  | 0.703191978 | 0.013053414  |
| -0.174844802 | 0.000146107 | -0.131699353 | 0.004360295 | -0.162559939 |
| 0.384746244  | 6.33E-18    | 0.359342722  | 1.11E-15    | 0.370661963  |
| -0.425304131 | 6.14E-22    | -0.391526394 | 1.47E-18    | -0.400044131 |
| -0.123588564 | 0.007498109 | -0.127071658 | 0.005962478 | -0.165973148 |
| -0.098403583 | 0.033504711 | -0.050462438 | 0.276474403 | -0.044012254 |
| -0.213733871 | 3.16E-06    | -0.198953967 | 1.48E-05    | -0.199192623 |
| -0.190727422 | 3.34E-05    | -0.171030213 | 0.000204424 | -0.193180728 |
| 0.012288005  | 0.791129344 | 0.068862608  | 0.137302999 | 0.094695662  |
| 0.118446505  | 0.010412682 | 0.112782469  | 0.014748246 | 0.130980385  |
| -0.411012591 | 1.84E-20    | -0.402017311 | 1.44E-19    | -0.423939962 |
| -0.149772834 | 0.001169266 | -0.126521783 | 0.006184384 | -0.104924782 |
| -0.116458086 | 0.011785227 | -0.086539531 | 0.061674297 | -0.11308289  |
| -0.150471221 | 0.001107913 | -0.118790718 | 0.010190046 | -0.120799495 |
| -0.133078982 | 0.00396443  | -0.063033008 | 0.173875231 | -0.041956794 |
| -0.364074373 | 4.39E-16    | -0.37485866  | 4.99E-17    | -0.38042734  |
| -0.340304283 | 3.99E-14    | -0.339476653 | 4.64E-14    | -0.35756355  |
| -0.182716613 | 7.14E-05    | -0.151201552 | 0.001046939 | -0.122758359 |
| -0.267619703 | 4.22E-09    | -0.235850675 | 2.52E-07    | -0.238083209 |
| -0.169034786 | 0.000243005 | -0.137524844 | 0.002900084 | -0.126014045 |
| -0.181565335 | 7.95E-05    | -0.168876201 | 0.000246346 | -0.200283317 |
| -0.128545817 | 0.005402431 | -0.09051863  | 0.050595281 | -0.117785263 |
| 0.026408514  | 0.569177892 | 0.057973084  | 0.21111572  | 0.052871575  |
| -0.158671266 | 0.000578386 | -0.159724358 | 0.000530842 | -0.164686717 |
| -0.220864021 | 1.44E-06    | -0.181495485 | 8.00E-05    | -0.17385716  |
| -0.213336854 | 3.29E-06    | -0.180210004 | 9.00E-05    | -0.179310277 |
| -0.098650821 | 0.033060297 | -0.070146697 | 0.130105625 | -0.065215932 |

|              |             |              |             |              |
|--------------|-------------|--------------|-------------|--------------|
| -0.170066603 | 0.000222277 | -0.153287806 | 0.000889396 | -0.170395816 |
| -0.231897782 | 4.04E-07    | -0.20326268  | 9.55E-06    | -0.22505965  |
| -0.104367569 | 0.024100665 | -0.084093837 | 0.069427135 | -0.079036065 |
| 0.223684858  | 1.05E-06    | 0.19938193   | 1.42E-05    | 0.216311925  |
| -0.207848774 | 5.92E-06    | -0.17406186  | 0.000156624 | -0.178850447 |
| -0.386481629 | 4.37E-18    | -0.401174065 | 1.74E-19    | -0.418783536 |
| 0.083031719  | 0.073033966 | 0.075207857  | 0.104546784 | 0.072746968  |
| -0.191861409 | 2.99E-05    | -0.205654299 | 7.45E-06    | -0.199698077 |
| 0.042668747  | 0.357558469 | 0.004011062  | 0.931110422 | 0.045536861  |
| -0.243287641 | 1.02E-07    | -0.253806682 | 2.68E-08    | -0.273593622 |
| 0.443900784  | 5.72E-24    | 0.439820877  | 1.64E-23    | 0.456629317  |
| -0.171762778 | 0.00019176  | -0.159590506 | 0.000536677 | -0.185825088 |
| -0.21921752  | 1.73E-06    | -0.187262283 | 4.66E-05    | -0.239410009 |
| 0.251636878  | 3.54E-08    | 0.259182373  | 1.32E-08    | 0.254202705  |
| -0.368854438 | 1.69E-16    | -0.335730883 | 9.11E-14    | -0.347640897 |
| -0.122435619 | 0.00807931  | -0.130310159 | 0.004794661 | -0.15002162  |
| -0.176017198 | 0.000131591 | -0.14614881  | 0.001540952 | -0.172996403 |
| -0.352193726 | 4.39E-15    | -0.333384704 | 1.38E-13    | -0.359676605 |
| -0.353148203 | 3.66E-15    | -0.319461032 | 1.54E-12    | -0.339349642 |
| -0.219000264 | 1.77E-06    | -0.205635661 | 7.47E-06    | -0.208024457 |
| -0.221372988 | 1.36E-06    | -0.174162109 | 0.000155239 | -0.179219416 |
| -0.24156466  | 1.26E-07    | -0.237910743 | 1.97E-07    | -0.246954063 |
| -0.166830851 | 0.000293477 | -0.139022158 | 0.00260495  | -0.165358599 |
| -0.154088337 | 0.000834992 | -0.104860854 | 0.023436677 | -0.136642621 |
| -0.180346348 | 8.89E-05    | -0.152890682 | 0.000917584 | -0.136778875 |
| -0.301468963 | 2.88E-11    | -0.258148001 | 1.51E-08    | -0.270612276 |
| -0.252383252 | 3.22E-08    | -0.22557348  | 8.43E-07    | -0.267865258 |
| -0.301974723 | 2.66E-11    | -0.262210636 | 8.81E-09    | -0.284373267 |
| -0.166457301 | 0.000302946 | -0.142965159 | 0.001953927 | -0.158174058 |
| -0.088461271 | 0.05609621  | -0.034259464 | 0.460158432 | -0.035201026 |
| -0.00835936  | 0.857021993 | 0.007209738  | 0.876515265 | -0.006072174 |
| -0.254610172 | 2.41E-08    | -0.208053613 | 5.80E-06    | -0.210446757 |
| -0.130687032 | 0.004673121 | -0.073009421 | 0.115112955 | -0.089464597 |
| 0.122368295  | 0.008114459 | 0.085768455  | 0.06403753  | 0.119951602  |
| -0.092785871 | 0.045062454 | -0.044294982 | 0.339513882 | -0.056025995 |
| -0.175054719 | 0.000143402 | -0.204220235 | 8.65E-06    | -0.222527747 |
| -0.405189018 | 7.03E-20    | -0.38031802  | 1.61E-17    | -0.386187126 |
| -0.186675545 | 4.93E-05    | -0.169755849 | 0.000228339 | -0.182259762 |
| -0.252764843 | 3.06E-08    | -0.278184768 | 9.56E-10    | -0.301556297 |
| -0.115559624 | 0.012456224 | -0.081870481 | 0.077150781 | -0.113135154 |
| -0.259826935 | 1.21E-08    | -0.251073221 | 3.81E-08    | -0.264209502 |
| -0.11108851  | 0.016321449 | -0.12739587  | 0.005835017 | -0.098687146 |
| -0.322017541 | 9.96E-13    | -0.268963047 | 3.51E-09    | -0.255867342 |
| -0.179781161 | 9.36E-05    | -0.11909601  | 0.00999613  | -0.125945414 |
| -0.217115694 | 2.18E-06    | -0.173757015 | 0.000160908 | -0.174646746 |

|              |             |              |             |              |
|--------------|-------------|--------------|-------------|--------------|
| 0.213132649  | 3.37E-06    | 0.211573795  | 3.98E-06    | 0.228851589  |
| -0.173140132 | 0.000169915 | -0.163722578 | 0.000381454 | -0.176818508 |
| -0.281092276 | 6.28E-10    | -0.237982828 | 1.95E-07    | -0.264737407 |
| -0.187450598 | 4.58E-05    | -0.176021667 | 0.000131538 | -0.196197318 |
| -0.181503702 | 7.99E-05    | -0.178015885 | 0.000109921 | -0.188567884 |
| -0.214377092 | 2.94E-06    | -0.216801101 | 2.26E-06    | -0.225523277 |
| -0.196450257 | 1.91E-05    | -0.156677948 | 0.000679369 | -0.166423834 |
| -0.103951035 | 0.02467394  | -0.109551242 | 0.017874407 | -0.093869484 |
| -0.180181977 | 9.02E-05    | -0.156652898 | 0.000680736 | -0.117170247 |
| -0.253816539 | 2.67E-08    | -0.229655223 | 5.25E-07    | -0.245145264 |
| -0.267006434 | 4.59E-09    | -0.240145754 | 1.50E-07    | -0.264498022 |
| -0.159545809 | 0.000538638 | -0.094446757 | 0.041339959 | -0.100864315 |
| -0.134316578 | 0.003637311 | -0.091690791 | 0.047667835 | -0.123928234 |
| -0.160857447 | 0.000483757 | -0.126335741 | 0.006261124 | -0.124845541 |
| -0.149477707 | 0.001196121 | -0.125097077 | 0.006794209 | -0.148800352 |
| -0.146928896 | 0.001452814 | -0.118901072 | 0.01011957  | -0.122709206 |
| -0.236384354 | 2.37E-07    | -0.199018755 | 1.47E-05    | -0.21456088  |
| 0.334078121  | 1.22E-13    | 0.300704187  | 3.24E-11    | 0.290443032  |
| -0.090114289 | 0.051639321 | -0.1241604   | 0.007223952 | -0.138030534 |
| -0.118227666 | 0.01055646  | -0.087692893 | 0.058274121 | -0.07469736  |
| -0.171371262 | 0.000198434 | -0.130565959 | 0.00471186  | -0.161236942 |
| 0.122430817  | 0.008081813 | 0.130855993  | 0.00461954  | 0.132505154  |
| -0.195442284 | 2.11E-05    | -0.142754333 | 0.001984563 | -0.135695748 |
| -0.18335572  | 6.73E-05    | -0.172275443 | 0.000183339 | -0.147354188 |
| -0.219591084 | 1.66E-06    | -0.187055585 | 4.75E-05    | -0.180865974 |
| -0.012414316 | 0.789032652 | 0.029504818  | 0.524754107 | 0.024203726  |
| -0.151065002 | 0.001058099 | -0.102296034 | 0.027069557 | -0.115997153 |
| -0.290071935 | 1.66E-10    | -0.226535032 | 7.54E-07    | -0.226684878 |
| -0.167383324 | 0.000279978 | -0.127031116 | 0.005978591 | -0.14309136  |
| -0.189030165 | 3.94E-05    | -0.17103661  | 0.00020431  | -0.165624557 |
| -0.497698099 | 1.34E-30    | -0.439223331 | 1.91E-23    | -0.444323211 |
| -0.21044043  | 4.50E-06    | -0.171367357 | 0.000198502 | -0.186201501 |
| -0.306421506 | 1.31E-11    | -0.251175832 | 3.76E-08    | -0.249149171 |
| -0.204195998 | 8.67E-06    | -0.170043399 | 0.000222724 | -0.146850059 |
| -0.231071617 | 4.45E-07    | -0.20405897  | 8.80E-06    | -0.22240045  |
| -0.253190483 | 2.90E-08    | -0.208914747 | 5.29E-06    | -0.172878069 |
| -0.209652935 | 4.89E-06    | -0.208450377 | 5.56E-06    | -0.189540373 |
| -0.191811943 | 3.01E-05    | -0.188451365 | 4.16E-05    | -0.211026278 |
| -0.213208555 | 3.34E-06    | -0.215111697 | 2.72E-06    | -0.220704861 |
| -0.196740741 | 1.85E-05    | -0.175020609 | 0.000143839 | -0.170535977 |
| -0.260929477 | 1.05E-08    | -0.215518716 | 2.60E-06    | -0.224584165 |
| 0.223249122  | 1.10E-06    | 0.219108549  | 1.75E-06    | 0.241731213  |
| -0.084312546 | 0.068702831 | -0.061017317 | 0.188077293 | -0.068261709 |
| -0.179765781 | 9.37E-05    | -0.142884655 | 0.001965574 | -0.14399468  |
| -0.082077607 | 0.076402972 | -0.06329489  | 0.172090314 | -0.033076796 |

|              |             |              |             |              |
|--------------|-------------|--------------|-------------|--------------|
| -0.274600304 | 1.59E-09    | -0.255544149 | 2.13E-08    | -0.286242303 |
| -0.172684366 | 0.000176871 | -0.163135227 | 0.000400621 | -0.192529664 |
| -0.131219091 | 0.004506266 | -0.101001664 | 0.029080138 | -0.098339878 |
| -0.210272237 | 4.58E-06    | -0.189483332 | 3.77E-05    | -0.225772055 |
| -0.190632057 | 3.37E-05    | -0.184866849 | 5.84E-05    | -0.187343364 |
| -0.393181792 | 1.03E-18    | -0.396371501 | 5.09E-19    | -0.392525322 |
| -0.347850735 | 9.94E-15    | -0.315667217 | 2.90E-12    | -0.313576715 |
| -0.347062656 | 1.15E-14    | -0.329814361 | 2.60E-13    | -0.327669606 |
| -0.242147479 | 1.17E-07    | -0.214607619 | 2.87E-06    | -0.221057262 |
| 0.074332553  | 0.10865783  | 0.110861604  | 0.016542965 | 0.137164542  |
| 0.252904514  | 3.01E-08    | 0.22048218   | 1.50E-06    | 0.219360054  |
| 0.216096088  | 2.44E-06    | 0.159128989  | 0.000557255 | 0.144310131  |
| -0.314037977 | 3.79E-12    | -0.280288992 | 7.05E-10    | -0.312208854 |
| -0.229494253 | 5.35E-07    | -0.200423498 | 1.28E-05    | -0.197854293 |
| -0.097361097 | 0.035435033 | -0.067899334 | 0.142900221 | -0.088885912 |
| 0.174825343  | 0.00014636  | 0.122659666  | 0.007963317 | 0.159527818  |
| -0.026187035 | 0.572422864 | -0.049222446 | 0.288463232 | -0.075766098 |
| -0.190163714 | 3.53E-05    | -0.173353352 | 0.00016675  | -0.184737717 |
| 0.29733141   | 5.49E-11    | 0.259645224  | 1.24E-08    | 0.326250858  |
| -0.32562475  | 5.37E-13    | -0.293909519 | 9.29E-11    | -0.315075208 |
| -0.054764019 | 0.237533055 | -0.037941024 | 0.413351651 | 0.012207552  |
| 0.104303919  | 0.024187513 | 0.109352999  | 0.018083782 | 0.094535593  |
| -0.176257109 | 0.000128792 | -0.127497767 | 0.005795465 | -0.161963267 |
| -0.277435499 | 1.06E-09    | -0.216420131 | 2.35E-06    | -0.22600945  |
| -0.192400223 | 2.84E-05    | -0.172900258 | 0.000173544 | -0.18852302  |
| -0.150667935 | 0.001091176 | -0.118033791 | 0.010685304 | -0.123659363 |
| 0.056519904  | 0.222803652 | 0.145516148  | 0.00161601  | 0.093967854  |
| 0.293434792  | 9.99E-11    | 0.250237421  | 4.24E-08    | 0.241455708  |
| -0.261305094 | 9.95E-09    | -0.230174223 | 4.94E-07    | -0.237882688 |
| -0.463322039 | 3.15E-26    | -0.425385385 | 6.02E-22    | -0.423621935 |
| -0.187021751 | 4.77E-05    | -0.169704033 | 0.000229364 | -0.188217439 |
| -0.141501424 | 0.002175878 | -0.086655448 | 0.061325331 | -0.053914596 |
| -0.236765229 | 2.26E-07    | -0.167454606 | 0.000278279 | -0.173749974 |
| -0.135099821 | 0.003443134 | -0.09223835  | 0.046349738 | -0.11184537  |
| -0.236151889 | 2.43E-07    | -0.219256304 | 1.72E-06    | -0.243591566 |
| 0.301918739  | 2.68E-11    | 0.27034472   | 2.89E-09    | 0.292799861  |
| -0.124412868 | 0.00710579  | -0.103923218 | 0.02471264  | -0.066818668 |
| 0.281927509  | 5.56E-10    | 0.227571903  | 6.69E-07    | 0.2540058    |
| -0.1167824   | 0.011550988 | -0.113559884 | 0.01407198  | -0.098929899 |
| -0.115687741 | 0.012358526 | -0.13892537  | 0.002623167 | -0.160037059 |
| -0.27666725  | 1.19E-09    | -0.223187534 | 1.11E-06    | -0.232422628 |
| 0.117500933  | 0.011046635 | 0.118962947  | 0.010080242 | 0.106452335  |
| -0.16314935  | 0.00040015  | -0.141866344 | 0.002118486 | -0.152348741 |
| -0.196396774 | 1.92E-05    | -0.180773298 | 8.55E-05    | -0.217059089 |
| -0.265514977 | 5.63E-09    | -0.24580128  | 7.43E-08    | -0.274529227 |



|              |             |              |             |              |
|--------------|-------------|--------------|-------------|--------------|
| -0.134737496 | 0.003531759 | -0.106917646 | 0.020835867 | -0.130636043 |
| -0.250307102 | 4.20E-08    | -0.207795036 | 5.96E-06    | -0.224120385 |
| 0.280380351  | 6.96E-10    | 0.243617357  | 9.77E-08    | 0.239994196  |
| -0.154289839 | 0.000821791 | -0.142375974 | 0.002040649 | -0.16648597  |
| -0.122776955 | 0.007903189 | -0.132553759 | 0.004111131 | -0.148647712 |
| -0.209702312 | 4.87E-06    | -0.174344686 | 0.000152746 | -0.178971883 |
| 0.185417127  | 5.55E-05    | 0.133628904  | 0.003815922 | 0.099808254  |
| -0.079897987 | 0.084574151 | -0.074768102 | 0.106596524 | -0.111303045 |
| -0.114575484 | 0.013229701 | -0.107299144 | 0.020382075 | -0.131306245 |
| -0.081369723 | 0.078983298 | -0.072191779 | 0.119249868 | -0.086787699 |
| -0.196221093 | 1.95E-05    | -0.175845842 | 0.000133625 | -0.185433481 |
| 0.199989055  | 1.34E-05    | 0.153784127  | 0.000855293 | 0.160819292  |
| -0.206985379 | 6.48E-06    | -0.167053012 | 0.000287977 | -0.207094229 |
| -0.143709936 | 0.001849132 | -0.135008149 | 0.003465364 | -0.164010923 |
| -0.281149174 | 6.23E-10    | -0.264457492 | 6.50E-09    | -0.30265015  |
| -0.259658602 | 1.24E-08    | -0.208565424 | 5.49E-06    | -0.217975548 |
| -0.223436146 | 1.08E-06    | -0.184829441 | 5.87E-05    | -0.215674508 |
| -0.147114326 | 0.001432556 | -0.14928632  | 0.001213839 | -0.218578587 |
| -0.173545044 | 0.000163952 | -0.159861346 | 0.000524931 | -0.150723993 |
| -0.113292905 | 0.014301083 | -0.104151556 | 0.024396511 | -0.090632085 |
| -0.110399186 | 0.017002563 | -0.069233064 | 0.135195856 | -0.072912474 |
| -0.592773342 | 1.21E-45    | -0.587472915 | 1.13E-44    | -0.589282953 |
| -0.37302182  | 7.28E-17    | -0.352564523 | 4.09E-15    | -0.375278326 |
| -0.196704524 | 1.86E-05    | -0.158543799 | 0.000584402 | -0.163685982 |
| 0.282248833  | 5.31E-10    | 0.286881345  | 2.68E-10    | 0.251539998  |
| -0.163841809 | 0.000377669 | -0.157625694 | 0.000629475 | -0.133770419 |
| 0.234751943  | 2.88E-07    | 0.223531895  | 1.06E-06    | 0.237145632  |
| 0.037642362  | 0.417040736 | 0.027599191  | 0.55188458  | 0.036623356  |
| -0.320360998 | 1.32E-12    | -0.339831343 | 4.35E-14    | -0.349012543 |
| -0.188937564 | 3.97E-05    | -0.160555843 | 0.000495895 | -0.186643393 |
| -0.237085473 | 2.17E-07    | -0.208708168 | 5.41E-06    | -0.199942777 |
| -0.295529106 | 7.25E-11    | -0.241501196 | 1.27E-07    | -0.253039633 |
| -0.185417434 | 5.55E-05    | -0.140004321 | 0.002426507 | -0.135082176 |
| 0.072584071  | 0.117250773 | 0.047662288  | 0.304037029 | 0.035119518  |
| -0.291785762 | 1.28E-10    | -0.29485343  | 8.04E-11    | -0.314720445 |
| -0.330970628 | 2.12E-13    | -0.318816802 | 1.71E-12    | -0.336702935 |
| 0.019928192  | 0.66753     | -0.022153428 | 0.63299528  | -0.046622933 |
| -0.247710746 | 5.84E-08    | -0.249835412 | 4.46E-08    | -0.28691591  |
| -0.017046042 | 0.713315024 | 0.031100743  | 0.502568581 | 0.071374634  |
| -0.270657948 | 2.77E-09    | -0.272227441 | 2.23E-09    | -0.259113974 |
| -0.056836007 | 0.220222751 | -0.038370594 | 0.408079495 | -0.031935325 |
| -0.248912716 | 5.02E-08    | -0.201424408 | 1.15E-05    | -0.181950982 |
| -0.444596166 | 4.77E-24    | -0.422581458 | 1.19E-21    | -0.453553789 |
| 0.244082678  | 9.22E-08    | 0.189545539  | 3.75E-05    | 0.199738914  |
| -0.259826536 | 1.21E-08    | -0.244682487 | 8.55E-08    | -0.276541588 |

|              |             |              |             |              |
|--------------|-------------|--------------|-------------|--------------|
| -0.418062972 | 3.51E-21    | -0.394413654 | 7.84E-19    | -0.408424039 |
| -0.300091351 | 3.57E-11    | -0.306514831 | 1.29E-11    | -0.323780829 |
| -0.068182678 | 0.141235996 | -0.022012795 | 0.635155397 | -0.030173558 |
| -0.25288824  | 3.01E-08    | -0.231614283 | 4.18E-07    | -0.268400345 |
| -0.187349183 | 4.62E-05    | -0.161956632 | 0.000441817 | -0.141418055 |
| -0.143780573 | 0.001839465 | -0.117894505 | 0.010778728 | -0.072276443 |
| -0.359870993 | 1.00E-15    | -0.33427003  | 1.18E-13    | -0.320785115 |
| -0.272240121 | 2.22E-09    | -0.254990918 | 2.29E-08    | -0.280515849 |
| -0.031137384 | 0.50206509  | 0.023796009  | 0.607999861 | 0.007055503  |
| -0.03301001  | 0.476691102 | 0.053509594  | 0.24846734  | 0.014718893  |
| 0.174994152  | 0.000144178 | 0.130606216  | 0.004698947 | 0.142598361  |
| 0.163727239  | 0.000381306 | 0.146611347  | 0.001488118 | 0.153429226  |
| -0.069127609 | 0.135793128 | -0.048620968 | 0.294402613 | -0.032159462 |
| 0.187302848  | 4.64E-05    | 0.174270497  | 0.000153754 | 0.192188631  |
| 0.083400581  | 0.071764413 | 0.016959115  | 0.714713073 | 0.004732467  |
| 0.178728513  | 0.000103041 | 0.180592153  | 8.69E-05    | 0.159989168  |
| -0.379691821 | 1.84E-17    | -0.341230208 | 3.37E-14    | -0.343982875 |
| -0.420160915 | 2.13E-21    | -0.401190191 | 1.74E-19    | -0.437331818 |
| -0.357636444 | 1.55E-15    | -0.341457675 | 3.24E-14    | -0.363276929 |
| 0.017871452  | 0.700088439 | 0.042383946  | 0.360779432 | 0.067266753  |
| -0.288123608 | 2.23E-10    | -0.264113233 | 6.81E-09    | -0.240021697 |
| -0.140339536 | 0.002368204 | -0.142571006 | 0.00201156  | -0.141133707 |
| 0.177587323  | 0.000114263 | 0.204323856  | 8.56E-06    | 0.198720306  |
| -0.239276896 | 1.67E-07    | -0.198876222 | 1.49E-05    | -0.191819889 |
| -0.238062876 | 1.93E-07    | -0.18904272  | 3.93E-05    | -0.206201953 |
| -0.202042261 | 1.08E-05    | -0.161444703 | 0.00046091  | -0.168277301 |
| 0.29430496   | 8.75E-11    | 0.292585942  | 1.14E-10    | 0.307925277  |
| -0.222211868 | 1.24E-06    | -0.18450639  | 6.05E-05    | -0.193531013 |
| -0.24868647  | 5.16E-08    | -0.216935405 | 2.22E-06    | -0.219826648 |
| -0.326879731 | 4.33E-13    | -0.293454702 | 9.96E-11    | -0.306719173 |
| -0.322094571 | 9.83E-13    | -0.271579171 | 2.44E-09    | -0.311196924 |
| 0.338239282  | 5.81E-14    | 0.353436964  | 3.47E-15    | 0.352343272  |
| -0.348750646 | 8.40E-15    | -0.349117669 | 7.84E-15    | -0.349396785 |
| -0.190222687 | 3.51E-05    | -0.168988308 | 0.00024398  | -0.167130762 |
| -0.216870406 | 2.24E-06    | -0.214136041 | 3.02E-06    | -0.212960469 |
| -0.261968201 | 9.10E-09    | -0.250899112 | 3.89E-08    | -0.281190701 |
| -0.221232241 | 1.38E-06    | -0.188079765 | 4.31E-05    | -0.192007249 |
| -0.197765912 | 1.67E-05    | -0.17818576  | 0.000108243 | -0.183312464 |
| -0.398261262 | 3.35E-19    | -0.386994955 | 3.92E-18    | -0.424938692 |
| -0.205884015 | 7.28E-06    | -0.217547923 | 2.08E-06    | -0.203080455 |
| -0.270231541 | 2.94E-09    | -0.229588484 | 5.30E-07    | -0.230119492 |
| -0.100107787 | 0.030542263 | -0.094792782 | 0.040598012 | -0.049691438 |
| -0.15668093  | 0.000679207 | -0.135337123 | 0.003386188 | -0.123167363 |
| -0.233581953 | 3.31E-07    | -0.210182656 | 4.62E-06    | -0.217231161 |
| 0.191622235  | 3.06E-05    | 0.217443319  | 2.10E-06    | 0.213004714  |

|              |             |              |             |              |
|--------------|-------------|--------------|-------------|--------------|
| -0.376025387 | 3.93E-17    | -0.338168206 | 5.88E-14    | -0.329164136 |
| 0.211082167  | 4.20E-06    | 0.230175064  | 4.94E-07    | 0.290277483  |
| -0.220500145 | 1.50E-06    | -0.198478392 | 1.56E-05    | -0.199367506 |
| -0.050426603 | 0.276816055 | -0.011549668 | 0.80341505  | 0.012329741  |
| -0.4258891   | 5.32E-22    | -0.440455435 | 1.39E-23    | -0.464157417 |
| -0.191424641 | 3.12E-05    | -0.184098853 | 6.28E-05    | -0.169560447 |
| -0.38161407  | 1.23E-17    | -0.346627943 | 1.25E-14    | -0.347469487 |
| -0.13035285  | 0.004780752 | -0.088319462 | 0.056492995 | -0.086053567 |
| -0.298706121 | 4.43E-11    | -0.234829446 | 2.85E-07    | -0.212223292 |
| -0.287926368 | 2.29E-10    | -0.248221151 | 5.48E-08    | -0.25827301  |
| -0.13356302  | 0.003833444 | -0.109024576 | 0.01843536  | -0.118097103 |
| -0.39101848  | 1.64E-18    | -0.35633426  | 1.99E-15    | -0.378782984 |
| -0.284996719 | 3.54E-10    | -0.278685001 | 8.89E-10    | -0.262381772 |
| -0.354694676 | 2.73E-15    | -0.344858886 | 1.73E-14    | -0.360600487 |
| 0.202366371  | 1.05E-05    | 0.21969925   | 1.64E-06    | 0.253619268  |
| -0.224550303 | 9.47E-07    | -0.162719805 | 0.000414715 | -0.161355736 |
| -0.26324771  | 7.66E-09    | -0.206525341 | 6.81E-06    | -0.228808978 |
| -0.341475402 | 3.23E-14    | -0.304251482 | 1.85E-11    | -0.327723122 |
| -0.028630381 | 0.537118522 | -0.005342424 | 0.908332432 | 0.013808406  |
| -0.091045368 | 0.049261696 | -0.101103845 | 0.028916888 | -0.118551673 |
| -0.309431399 | 8.06E-12    | -0.285917619 | 3.09E-10    | -0.312893432 |
| -0.473449016 | 1.83E-27    | -0.457554884 | 1.53E-25    | -0.480138719 |
| -0.194499866 | 2.31E-05    | -0.116453997 | 0.011788207 | -0.104768234 |
| -0.316782912 | 2.41E-12    | -0.292523171 | 1.15E-10    | -0.274232792 |
| -0.23343786  | 3.36E-07    | -0.191190657 | 3.20E-05    | -0.184261099 |
| -0.157924139 | 0.000614482 | -0.111830322 | 0.015615282 | -0.147966698 |
| -0.302860071 | 2.31E-11    | -0.265682039 | 5.50E-09    | -0.281914983 |
| -0.413779978 | 9.65E-21    | -0.360688891 | 8.55E-16    | -0.365684052 |
| -0.431088331 | 1.48E-22    | -0.375235148 | 4.62E-17    | -0.389471906 |
| -0.17187592  | 0.000189871 | -0.137073965 | 0.002994738 | -0.134913535 |
| -0.160848199 | 0.000484125 | -0.115967577 | 0.012147482 | -0.119009235 |
| -0.294282237 | 8.78E-11    | -0.239941948 | 1.54E-07    | -0.24310696  |
| -0.043436107 | 0.34897016  | -0.043936478 | 0.343440946 | -0.060814962 |
| -0.345748028 | 1.47E-14    | -0.319609124 | 1.50E-12    | -0.327965415 |
| -0.488692546 | 2.10E-29    | -0.445700629 | 3.58E-24    | -0.493732404 |
| 0.313958928  | 3.84E-12    | 0.303347972  | 2.14E-11    | 0.298502027  |
| -0.28387399  | 4.18E-10    | -0.263812084 | 7.10E-09    | -0.285432401 |
| -0.405228908 | 6.97E-20    | -0.367222735 | 2.35E-16    | -0.392778153 |
| -0.22338847  | 1.08E-06    | -0.197763628 | 1.67E-05    | -0.185687055 |
| -0.329458516 | 2.76E-13    | -0.347691149 | 1.02E-14    | -0.402366048 |
| -0.34538806  | 1.57E-14    | -0.327816577 | 3.68E-13    | -0.327166135 |
| -0.102633877 | 0.02656489  | -0.091185922 | 0.048910856 | -0.095216433 |
| -0.113739651 | 0.013919542 | -0.102696093 | 0.026472842 | -0.116628995 |
| -0.055410326 | 0.232033683 | -0.04002639  | 0.38813451  | -0.037837875 |
| -0.098853268 | 0.032700151 | -0.067185186 | 0.147161316 | -0.095973748 |

|              |             |              |             |              |
|--------------|-------------|--------------|-------------|--------------|
| -0.056817608 | 0.220372385 | -0.051129794 | 0.270164245 | -0.057736394 |
| -0.105405555 | 0.022721924 | -0.062432842 | 0.17801773  | -0.070596732 |
| -0.043854514 | 0.344342825 | -0.027724946 | 0.550073253 | -0.033879485 |
| -0.046675214 | 0.314172531 | -0.047141122 | 0.309361197 | -0.0407869   |
| -0.077566827 | 0.094078668 | -0.04554352  | 0.3260625   | -0.051549832 |
| -0.081494952 | 0.078521748 | -0.044708686 | 0.335017988 | -0.067426289 |
| -0.140374016 | 0.00236228  | -0.12405731  | 0.007272704 | -0.139941847 |
| -0.088475312 | 0.056057048 | -0.097646259 | 0.034897839 | -0.08868306  |
| -0.062321758 | 0.178792422 | -0.044200015 | 0.340551347 | -0.055296251 |
| -0.077756646 | 0.093274121 | -0.095426436 | 0.039268488 | -0.109580464 |
| -0.125764961 | 0.006501925 | -0.117865884 | 0.010798015 | -0.1410956   |
| -0.047092389 | 0.30986217  | -0.014478707 | 0.754990867 | -0.024098846 |
| -0.038654478 | 0.404617378 | -0.021610478 | 0.641352056 | -0.048410015 |
| -0.082846479 | 0.073678405 | -0.046630268 | 0.314639256 | -0.070400215 |
| -0.116185536 | 0.011985316 | -0.0873762   | 0.059191916 | -0.10418084  |
| -0.051454673 | 0.267128268 | -0.051437127 | 0.267291636 | -0.027591382 |
| -0.022007623 | 0.635234909 | -0.027596457 | 0.551923992 | -0.040166802 |
| -0.080535108 | 0.082115864 | -0.046643662 | 0.314500126 | -0.064339568 |
| -0.045046767 | 0.331372443 | -0.019323333 | 0.677043769 | -0.03398525  |
| -0.081858892 | 0.077192797 | -0.073917482 | 0.11065135  | -0.080617405 |
| 0.030645956  | 0.508839965 | 0.042590344  | 0.358443369 | 0.024614017  |
| -0.071399595 | 0.123367854 | -0.04902214  | 0.290432178 | -0.061996439 |
| -0.05586273  | 0.228238204 | -0.049493557 | 0.285812619 | -0.035973346 |
| -0.127122627 | 0.005942276 | -0.096044085 | 0.038008196 | -0.100564739 |
| -0.115463969 | 0.01252961  | -0.097572877 | 0.03503541  | -0.105341066 |
| -0.028176877 | 0.543587998 | -0.008904421 | 0.84780936  | -0.015611    |
| -0.087965081 | 0.057494748 | -0.047433117 | 0.306370696 | -0.065358945 |
| -0.072895823 | 0.115680886 | -0.048813716 | 0.29249046  | -0.073863172 |
| -0.095745959 | 0.038612164 | -0.065413065 | 0.158152702 | -0.07896137  |
| -0.071546491 | 0.122596004 | -0.05122688  | 0.269254521 | -0.043112255 |
| -0.122875839 | 0.007852812 | -0.103055947 | 0.025945808 | -0.126489113 |
| -0.020226544 | 0.66285668  | 0.042523004  | 0.359204501 | 0.042084056  |
| -0.082692222 | 0.074218583 | -0.057744497 | 0.212924362 | -0.062304186 |
| -0.048000728 | 0.300612254 | -0.049781213 | 0.283018238 | -0.060955281 |
| -0.020271599 | 0.662152079 | 0.032431018  | 0.484460833 | 0.003486128  |
| -0.008206882 | 0.859602733 | 0.033061191  | 0.47600757  | 0.020737247  |
| -0.067014261 | 0.148195392 | -0.04126823  | 0.373571639 | -0.040778093 |
| -0.051323481 | 0.268351424 | -0.027579857 | 0.552163311 | -0.046892365 |
| -0.10929825  | 0.018141982 | -0.09428171  | 0.041697865 | -0.102877362 |
| -0.144797842 | 0.001705285 | -0.110396991 | 0.01700477  | -0.12689092  |
| -0.047342998 | 0.307291612 | -0.018347741 | 0.692496995 | -0.023823227 |
| 0.011415961  | 0.805645174 | 0.040329121  | 0.384553025 | 0.023870483  |
| 0.002207227  | 0.962058306 | 0.030456667  | 0.511462216 | -0.001642442 |
| -0.070613799 | 0.127561136 | -0.029876422 | 0.519544024 | -0.042296984 |
| -0.049507652 | 0.285675261 | -0.040622488 | 0.381101614 | -0.026344822 |

|              |             |              |             |              |
|--------------|-------------|--------------|-------------|--------------|
| -0.062740121 | 0.175887753 | -0.035683025 | 0.441718124 | -0.055281623 |
| -0.077917269 | 0.092597627 | -0.036286435 | 0.434030855 | -0.050571669 |
| -0.051995049 | 0.262130446 | -0.042635943 | 0.357928553 | -0.041049299 |
| -0.086544556 | 0.061659135 | -0.061690953 | 0.183239088 | -0.08411961  |
| -0.116765903 | 0.011562803 | -0.095199672 | 0.039739984 | -0.124370964 |
| -0.091657631 | 0.047748656 | -0.067905415 | 0.14286435  | -0.079162982 |
| -0.234116215 | 3.10E-07    | -0.193119526 | 2.65E-05    | -0.215641169 |
| -0.095972072 | 0.038153346 | -0.046831854 | 0.312549502 | -0.043747354 |
| -0.036967907 | 0.425442481 | -0.019281572 | 0.677702543 | -0.023734419 |
| -0.107480796 | 0.020169036 | -0.100195015 | 0.030396864 | -0.136624637 |
| -0.043918276 | 0.343641093 | -0.031256298 | 0.500432895 | -0.015414519 |
| -0.031932397 | 0.491206487 | -0.048205885 | 0.298548731 | -0.018879001 |
| -0.200969439 | 1.21E-05    | -0.188474777 | 4.15E-05    | -0.196604532 |
| -0.104523625 | 0.023888868 | -0.048343299 | 0.297171868 | -0.086320241 |
| -0.14344673  | 0.001885564 | -0.107363249 | 0.020306672 | -0.116684945 |
| -0.072789021 | 0.116216846 | -0.049390022 | 0.286822928 | -0.04849488  |
| -0.065527556 | 0.157424362 | -0.04826374  | 0.297968517 | -0.054481293 |
| -0.086945344 | 0.060459733 | -0.055372173 | 0.2323558   | -0.066436563 |
| -0.048725084 | 0.293368694 | -0.067375892 | 0.14601407  | -0.073031596 |
| -0.0438286   | 0.344628276 | -0.005272639 | 0.909524666 | -0.027605418 |
| -0.111339426 | 0.016079521 | -0.088038157 | 0.057286984 | -0.097310255 |
| -0.149438068 | 0.001199771 | -0.120057039 | 0.009406915 | -0.118250649 |
| -0.073696916 | 0.111722342 | -0.055034173 | 0.235223273 | -0.067226594 |
| -0.067283165 | 0.146571044 | -0.043259261 | 0.350937751 | -0.050926277 |
| -0.063925848 | 0.167846058 | -0.043490815 | 0.348362893 | -0.0565939   |
| -0.064094528 | 0.166724785 | -0.040986428 | 0.376846364 | -0.058672257 |
| -0.043063991 | 0.353118457 | -0.036099878 | 0.436399272 | -0.060388214 |
| -0.068870409 | 0.13725837  | -0.061320684 | 0.185886935 | -0.070632132 |
| -0.030345611 | 0.513003945 | -0.023285331 | 0.615723967 | -0.033854141 |
| -0.04704243  | 0.310376299 | -0.015190365 | 0.743361052 | -0.037565031 |
| -0.024301239 | 0.600400832 | 0.004641106  | 0.920322966 | -0.022679952 |
| 0.016116978  | 0.728305853 | 0.054989479  | 0.235604309 | 0.031785828  |
| -0.046973365 | 0.311087966 | -0.018108119 | 0.696312469 | -0.031912138 |
| -0.06833683  | 0.140336837 | -0.035252168 | 0.447254326 | -0.059276413 |
| -0.160899298 | 0.000482094 | -0.185049953 | 5.75E-05    | -0.196183984 |
| -0.034234802 | 0.460481628 | -0.024152874 | 0.602627905 | -0.035066223 |
| -0.000965987 | 0.983389875 | 0.041902319  | 0.366267542 | 0.018784419  |
| -0.066393574 | 0.151997032 | -0.026308598 | 0.570640716 | -0.047010506 |
| -0.090424628 | 0.050836417 | -0.060999993 | 0.188202945 | -0.074918551 |
| 0.009131349  | 0.843979841 | 0.004401119  | 0.924430344 | -0.013919409 |
| 0.060317547  | 0.193202018 | 0.072420325  | 0.118081999 | 0.04860579   |
| -0.043817349 | 0.344752263 | -0.017522857 | 0.705663633 | -0.042270451 |
| 0.037378463  | 0.420316483 | 0.052254344  | 0.259755292 | 0.022030319  |
| -0.140663438 | 0.002313086 | -0.103464266 | 0.025358767 | -0.116425628 |
| -0.149252124 | 0.00121703  | -0.131594351 | 0.00439184  | -0.156185269 |

|              |             |              |             |              |
|--------------|-------------|--------------|-------------|--------------|
| -0.067341078 | 0.146222996 | -0.092980273 | 0.044612681 | -0.104658144 |
| -0.058973425 | 0.203331029 | -0.051439708 | 0.267267604 | -0.056604654 |
| -0.052125253 | 0.260935912 | -0.027300292 | 0.556201494 | -0.046831864 |
| -0.085813145 | 0.063898556 | -0.080838174 | 0.080966947 | -0.054970429 |
| -0.071723301 | 0.121671968 | -0.036721594 | 0.42853522  | -0.029055556 |
| -0.019051144 | 0.681341933 | -0.019242401 | 0.678320678 | -0.009191999 |
| -0.108627247 | 0.01886866  | -0.077070215 | 0.096209806 | -0.08753734  |
| -0.10474079  | 0.023596815 | -0.135918385 | 0.003250294 | -0.163530406 |
| -0.057767943 | 0.212738338 | -0.056845553 | 0.220145143 | -0.069133513 |
| -0.104586687 | 0.02380374  | -0.074970949 | 0.105647122 | -0.077830759 |
| -0.005525557 | 0.905204682 | -0.013085909 | 0.777910463 | -0.037687409 |
| -0.066228332 | 0.153021488 | -0.044784352 | 0.33419985  | -0.058139798 |
| -0.040521598 | 0.382286421 | 0.000638942  | 0.989012956 | -0.02669214  |
| -0.03837903  | 0.407976367 | 0.001701626  | 0.970745006 | -0.019054135 |
| 0.023249852  | 0.616262182 | 0.009875602  | 0.83144645  | 0.022916218  |
| -0.101135148 | 0.028867034 | -0.08292426  | 0.073407245 | -0.10062755  |
| -0.069718412 | 0.132473007 | -0.056405692 | 0.223741443 | -0.066404882 |
| -0.134149291 | 0.003680049 | -0.097148878 | 0.035839367 | -0.097597986 |
| -0.082434845 | 0.075127047 | -0.052492449 | 0.257587354 | -0.071935984 |
| -0.05523751  | 0.233495256 | -0.076014712 | 0.100867196 | -0.054376146 |
| -0.101039625 | 0.029019397 | -0.077667114 | 0.093652915 | -0.093886578 |
| -0.070033329 | 0.130729067 | -0.042613266 | 0.358184514 | -0.060619408 |
| -0.070860489 | 0.126232975 | -0.045967868 | 0.321570415 | -0.046834457 |
| -0.046246292 | 0.318645059 | -0.038424764 | 0.407417514 | -0.059185152 |
| -0.106502056 | 0.021340177 | -0.089883649 | 0.05224286  | -0.1022193   |
| -0.006109746 | 0.895237312 | 0.023404389  | 0.613919357 | 0.023942143  |
| -0.124593659 | 0.007022241 | -0.094136324 | 0.042015301 | -0.107696896 |
| -0.094507394 | 0.041209121 | -0.066383528 | 0.152059165 | -0.089738523 |
| -0.055630362 | 0.23018213  | -0.02599384  | 0.575260571 | -0.034767046 |
| -0.048197303 | 0.298634857 | -0.024071568 | 0.603849952 | -0.033297725 |
| -0.055456308 | 0.231645881 | -0.035175109 | 0.448248611 | -0.058065224 |
| -0.077138819 | 0.09591313  | -0.058204727 | 0.209294227 | -0.065095481 |
| -0.122479034 | 0.008056717 | -0.106417944 | 0.021443525 | -0.130100058 |
| 0.015030978  | 0.745960764 | 0.037862184  | 0.41432361  | 0.006318029  |
| 0.029116542  | 0.530226301 | 0.044245345  | 0.340055897 | 0.039840968  |
| -0.026307556 | 0.570655987 | -0.013250098 | 0.775198127 | -0.018901365 |
| -0.033976858 | 0.463869629 | 0.005815463  | 0.900256389 | 0.018247218  |
| -0.346356971 | 1.31E-14    | -0.308397536 | 9.53E-12    | -0.324475117 |
| -0.14113338  | 0.002235197 | -0.108024809 | 0.019542572 | -0.112986471 |
| -0.046851778 | 0.312343453 | -0.05199225  | 0.262156175 | -0.052356364 |
| -0.16018409  | 0.000511247 | -0.160229249 | 0.000509359 | -0.151921084 |
| -0.082897341 | 0.073500997 | -0.057753483 | 0.212853051 | -0.071699186 |
| -0.000129357 | 0.997775553 | -0.007903227 | 0.864746587 | -0.011371432 |
| -0.057560804 | 0.214385843 | -0.008423728 | 0.855933019 | -0.016055123 |
| -0.065617633 | 0.156853123 | -0.069512182 | 0.13362476  | -0.074749033 |

|              |             |              |             |              |
|--------------|-------------|--------------|-------------|--------------|
| -0.068504833 | 0.13936189  | -0.063347967 | 0.171730229 | -0.076976591 |
| -0.026404081 | 0.569242753 | -0.048780337 | 0.292821006 | -0.088706813 |
| -0.084118154 | 0.069346294 | -0.068499005 | 0.139395621 | -0.075454038 |
| -0.082744113 | 0.074036512 | -0.068351559 | 0.140251154 | -0.086670722 |
| -0.019078002 | 0.680917354 | -0.02547363  | 0.582934337 | 0.001286197  |
| -0.079776315 | 0.085050295 | -0.087434256 | 0.059022776 | -0.095016144 |
| -0.076615776 | 0.09819354  | -0.087677885 | 0.058317347 | -0.092673659 |
| -0.048574483 | 0.294865014 | -0.039842146 | 0.390324112 | -0.066373393 |
| -0.034193114 | 0.461028255 | -0.0471397   | 0.309375804 | -0.049204945 |
| -0.034845555 | 0.45251491  | -0.020433623 | 0.659620688 | -0.027334652 |
| -0.05039809  | 0.277088094 | -0.023640529 | 0.610346969 | -0.032582874 |
| -0.052454511 | 0.257931941 | -0.036513433 | 0.431159038 | -0.04441763  |
| -0.132426851 | 0.004147307 | -0.097531175 | 0.035113796 | -0.097028506 |
| -0.154069028 | 0.000836267 | -0.13359999  | 0.003823603 | -0.143673514 |
| -0.129298159 | 0.005135261 | -0.11031468  | 0.017087749 | -0.123038892 |
| -0.055428227 | 0.231882653 | -0.031467228 | 0.497544639 | -0.049754584 |
| -0.0415818   | 0.369948445 | -0.014179405 | 0.759898783 | -0.023145597 |
| -0.101638892 | 0.028074846 | -0.116451026 | 0.011790373 | -0.109330934 |
| -0.019446805 | 0.675097454 | -0.012641826 | 0.78525995  | -0.033170829 |
| -0.16394023  | 0.000374571 | -0.185086786 | 5.73E-05    | -0.201701103 |
| -0.17924632  | 9.83E-05    | -0.137813637 | 0.002840896 | -0.144820809 |
| -0.003126018 | 0.946284813 | 0.009448387  | 0.83863584  | 0.039282878  |
| 0.039250593  | 0.397404671 | 0.063256511  | 0.172351036 | 0.053788878  |
| -0.050015817 | 0.280752929 | -0.038932771 | 0.401240502 | -0.042856364 |
| -0.031523155 | 0.496780319 | -0.04571485  | 0.324243955 | -0.034851521 |
| -0.026066061 | 0.574199002 | -0.022826181 | 0.622705138 | -0.020399829 |
| -0.023257112 | 0.616152035 | -0.001580894 | 0.972819831 | -0.017891984 |
| -0.057346834 | 0.21609729  | -0.038226408 | 0.409844635 | -0.047402482 |
| -0.085376838 | 0.065266024 | -0.082979857 | 0.073213926 | -0.091300648 |
| -0.059638215 | 0.198274157 | -0.048526173 | 0.295346079 | -0.037213443 |
| -0.035687065 | 0.441666396 | -0.031115028 | 0.502372255 | -0.027924554 |
| 0.006772111  | 0.883956096 | 0.020511084  | 0.658411851 | -0.008260736 |
| 0.017340039  | 0.70859384  | 0.024158527  | 0.602542986 | 0.045504787  |
| -0.114311127 | 0.013444553 | -0.068361579 | 0.140192885 | -0.090578818 |
| -0.130686532 | 0.004673281 | -0.121649563 | 0.008498282 | -0.155612019 |
| -0.096744159 | 0.036621341 | -0.087081184 | 0.06005762  | -0.088743178 |
| -0.081094939 | 0.08000377  | -0.104245935 | 0.024266868 | -0.113101852 |
| -0.090307764 | 0.051137533 | -0.0685756   | 0.138952776 | -0.073430733 |
| -0.054924072 | 0.236162702 | -0.035986428 | 0.43784318  | -0.042662825 |
| -0.051052144 | 0.270893359 | -0.050755918 | 0.273687189 | -0.058015803 |
| -0.101499845 | 0.028291624 | -0.074765375 | 0.106609333 | -0.089513849 |
| -0.073961852 | 0.11043688  | -0.058446325 | 0.207406571 | -0.064538068 |
| -0.060171713 | 0.194282776 | -0.061296542 | 0.186060552 | -0.08398867  |
| -0.117422893 | 0.011100452 | -0.114964666 | 0.012918907 | -0.132112566 |
| -0.076685503 | 0.097887067 | -0.087560456 | 0.058656488 | -0.093333433 |

|              |             |              |             |              |
|--------------|-------------|--------------|-------------|--------------|
| -0.081273473 | 0.079339537 | -0.075472878 | 0.10332664  | -0.057659177 |
| -0.079015382 | 0.088077308 | -0.080130945 | 0.083668505 | -0.059105117 |
| -0.043734163 | 0.345669818 | -0.046137905 | 0.319781793 | -0.060967568 |
| -0.068407195 | 0.13992786  | -0.069922271 | 0.131342047 | -0.034978654 |
| -0.006256944 | 0.892728379 | -0.031252554 | 0.500484248 | 0.007721676  |
| -0.003394533 | 0.941678713 | 0.017129769  | 0.711969365 | 0.03628973   |
| -0.202203187 | 1.07E-05    | -0.180977894 | 8.39E-05    | -0.203431815 |
| -0.114762603 | 0.013079458 | -0.100281684 | 0.030252986 | -0.103804752 |
| -0.163744518 | 0.000380755 | -0.146620839 | 0.001487051 | -0.146332214 |
| 0.056237671  | 0.22512618  | 0.081142053  | 0.079828047 | 0.080470346  |
| -0.151770286 | 0.001001616 | -0.146641053 | 0.001484782 | -0.163243487 |
| -0.024877572 | 0.591785019 | -0.033264676 | 0.473295308 | -0.024783489 |
| -0.138596104 | 0.002686012 | -0.093843124 | 0.042661673 | -0.092655027 |
| -0.002079    | 0.964260972 | 0.022660711  | 0.625229401 | 0.056491509  |
| -0.117235274 | 0.011230788 | -0.090270246 | 0.05123452  | -0.105198556 |
| -0.03136633  | 0.498925126 | -0.024491449 | 0.59755107  | -0.011161245 |
| -0.05337753  | 0.24963858  | -0.028327016 | 0.541441911 | -0.040001638 |
| 0.001190453  | 0.979530949 | 0.039205933  | 0.397942347 | 0.009702705  |
| -0.063330519 | 0.171848542 | -0.059002345 | 0.203109116 | -0.057754537 |
| -0.008384965 | 0.856588781 | 0.006652507  | 0.885991496 | -0.021064239 |
| -0.040460377 | 0.383006472 | -0.033717592 | 0.467288877 | -0.025542311 |
| -0.101266999 | 0.028657854 | -0.095952757 | 0.038192359 | -0.091257816 |
| -0.032450972 | 0.484191939 | 0.001145681  | 0.980300614 | 0.006022325  |
| -0.148249718 | 0.001314072 | -0.13442517  | 0.00360981  | -0.133246325 |
| -0.052729127 | 0.255444847 | -0.059256202 | 0.201168702 | -0.056699177 |
| -0.030390317 | 0.512383034 | -0.014325248 | 0.757506054 | -0.010726252 |
| -0.080271514 | 0.083125825 | -0.066108231 | 0.153769358 | -0.052143042 |
| -0.108142512 | 0.01940928  | -0.096387478 | 0.037322465 | -0.090848696 |
| 0.001154315  | 0.980152185 | -5.60E-05    | 0.999036191 | 0.013300241  |
| -0.076290363 | 0.099633954 | -0.043669038 | 0.346389242 | -0.0605685   |
| -0.014816936 | 0.749456488 | 0.012467868  | 0.788144179 | -0.002712416 |
| -0.051654383 | 0.265273642 | -0.024070558 | 0.603865142 | -0.05324633  |
| 0.020511009  | 0.65841302  | 0.048682842  | 0.293787885 | 0.025437837  |
| -0.121316193 | 0.008681741 | -0.093847544 | 0.042651866 | -0.112921817 |
| -0.051592345 | 0.265848811 | -0.031053142 | 0.50322307  | -0.01441427  |
| -0.024404174 | 0.598857881 | -0.02556178  | 0.581630664 | -0.013466043 |
| -0.072078408 | 0.119832531 | -0.04571423  | 0.324250525 | -0.070355614 |
| -0.069187421 | 0.135454118 | -0.049450563 | 0.286231867 | -0.06178705  |
| -0.048570736 | 0.294902307 | -0.046963334 | 0.311191419 | -0.039482766 |
| -0.051617803 | 0.265612681 | -0.035155761 | 0.448498459 | -0.038279683 |
| -0.10276732  | 0.026367798 | -0.091493707 | 0.048149882 | -0.090102747 |
| -0.081962807 | 0.076816714 | -0.082082381 | 0.076385805 | -0.067643086 |
| -0.006271095 | 0.892487228 | 0.003545356  | 0.93909235  | 0.002708084  |
| -0.073631453 | 0.112041775 | -0.052970961 | 0.253268441 | -0.053655708 |
| -0.070882685 | 0.126114001 | -0.061907281 | 0.181705041 | -0.073722658 |



|              |             |              |             |              |
|--------------|-------------|--------------|-------------|--------------|
| -0.074094201 | 0.109799105 | -0.067615346 | 0.144583246 | -0.057727252 |
| -0.078511378 | 0.090129493 | -0.071898047 | 0.120764059 | -0.056771389 |
| -0.047391556 | 0.306795176 | -0.024826833 | 0.592541263 | -0.035383032 |
| -0.10222247  | 0.027180532 | -0.081704329 | 0.077754943 | -0.088128561 |
| -0.060192716 | 0.194126851 | -0.044784089 | 0.334202689 | -0.051388165 |
| -0.02514013  | 0.587878799 | -0.024907025 | 0.59134623  | -0.01342977  |
| -0.00302966  | 0.947938175 | 0.024974843  | 0.590336481 | 0.018467289  |
| -0.070179209 | 0.129927258 | -0.051652343 | 0.265292538 | -0.07948174  |
| -0.099266456 | 0.031975487 | -0.109291921 | 0.01814872  | -0.097285427 |
| -0.046023988 | 0.320979369 | -0.064968212 | 0.161006785 | -0.019577435 |
| 0.058181967  | 0.209472697 | 0.062388589  | 0.178326049 | 0.059445384  |
| -0.101193615 | 0.028774116 | -0.099521425 | 0.031535194 | -0.104588303 |
| -0.140207325 | 0.002391045 | -0.154289917 | 0.000821786 | -0.169126817 |
| -0.059314262 | 0.200726803 | -0.042851027 | 0.355506475 | -0.055289769 |
| -0.066693539 | 0.150150637 | -0.059303117 | 0.200811574 | -0.071358659 |
| -0.087529816 | 0.058745245 | -0.081486832 | 0.078551608 | -0.080417779 |
| -0.079455985 | 0.086314196 | -0.090553325 | 0.050506523 | -0.11795837  |
| -0.060810314 | 0.189582742 | -0.046366877 | 0.317383495 | -0.042643598 |
| 0.104325141  | 0.024158527 | 0.117477155  | 0.011063008 | 0.09133516   |
| 0.019553053  | 0.673424373 | 0.024948236  | 0.590732548 | 0.043267687  |
| 0.025734653  | 0.579077971 | 0.006526516  | 0.888136402 | -0.014084332 |
| 0.023390431  | 0.614130799 | -0.011829717 | 0.798749235 | 0.025499092  |
| -0.038346996 | 0.408368079 | -0.03961151  | 0.393075555 | -0.033932013 |
| -0.104448558 | 0.023990546 | -0.100446699 | 0.029980656 | -0.109355632 |
| -0.075512873 | 0.103143489 | -0.036160072 | 0.435634275 | -0.054573267 |
| -0.07305868  | 0.114867368 | -0.046788757 | 0.312995504 | -0.061045025 |
| -0.001660509 | 0.971451598 | 0.008361016  | 0.856993986 | 0.015065399  |
| -0.044908229 | 0.332863201 | -0.020116656 | 0.664576428 | -0.026699191 |
| -0.111747233 | 0.015693022 | -0.112686918 | 0.014833305 | -0.137803757 |
| -0.073979954 | 0.110349478 | -0.052630041 | 0.256340307 | -0.056208636 |
| -0.147180164 | 0.001425426 | -0.118694942 | 0.010251566 | -0.125329637 |
| -0.025825055 | 0.577745145 | 0.006315397  | 0.89173236  | -0.014864665 |
| -0.160941683 | 0.000480416 | -0.117069627 | 0.011346984 | -0.152658952 |
| -0.14251422  | 0.002019991 | -0.132677864 | 0.004076031 | -0.137500197 |
| -0.08551224  | 0.064839097 | -0.087999605 | 0.057396516 | -0.0971736   |
| -0.012051626 | 0.79505715  | -0.027843557 | 0.548367494 | 0.021498051  |
| 0.000539065  | 0.990730334 | 0.006025616  | 0.896671753 | 0.020454135  |
| -0.001436752 | 0.975297232 | -0.003481524 | 0.940186885 | -0.009803925 |
| -0.093260809 | 0.043970284 | -0.070442608 | 0.128489163 | -0.078594827 |
| -0.030615543 | 0.509260807 | -0.030770958 | 0.507112154 | -0.024023224 |
| -0.182490764 | 7.30E-05    | -0.167502116 | 0.000277152 | -0.203400535 |
| -0.101314051 | 0.028583522 | -0.060769036 | 0.189883994 | -0.07639807  |
| -0.117153719 | 0.011287864 | -0.103394743 | 0.025457903 | -0.096755643 |
| -0.065690517 | 0.156392059 | -0.049257723 | 0.288117402 | -0.041385419 |
| -0.134386004 | 0.003619707 | -0.133358089 | 0.003888415 | -0.138780618 |

|              |             |              |             |              |
|--------------|-------------|--------------|-------------|--------------|
| -0.064462184 | 0.16430032  | -0.05050446  | 0.276074136 | -0.050431937 |
| -0.107340723 | 0.02033314  | -0.071848775 | 0.121019518 | -0.068326605 |
| -0.031367324 | 0.498911518 | -0.017329782 | 0.708758364 | -0.035360321 |
| 0.084431245  | 0.06831233  | 0.102318645  | 0.027035524 | 0.078127942  |
| -0.036865026 | 0.426732685 | 0.009786776  | 0.832940118 | -0.001562151 |
| 0.13584163   | 0.00326795  | 0.171512863  | 0.000195996 | 0.159057721  |
| 0.058512648  | 0.206890537 | 0.098757745  | 0.032869664 | 0.060132632  |
| 0.166738754  | 0.000295785 | 0.155809287  | 0.000728294 | 0.15192511   |
| 0.146531286  | 0.001497142 | 0.158422636  | 0.000590174 | 0.175367852  |
| 0.256483424  | 1.89E-08    | 0.289967882  | 1.69E-10    | 0.252339293  |
| 0.130969869  | 0.004583741 | 0.176532911  | 0.000125644 | 0.141973036  |
| 0.24561166   | 7.61E-08    | 0.264292183  | 6.65E-09    | 0.254954707  |
| 0.09222004   | 0.046393315 | 0.125179602  | 0.006757468 | 0.138986853  |
| 0.198505147  | 1.55E-05    | 0.199318844  | 1.43E-05    | 0.206135463  |
| 0.085634933  | 0.064454228 | 0.112046866  | 0.01541426  | 0.102041744  |
| 0.107135123  | 0.020576115 | 0.152978418  | 0.000911286 | 0.143847836  |
| -0.01020819  | 0.825859172 | 0.032254318  | 0.486845599 | -0.009396801 |
| 0.171319136  | 0.000199339 | 0.172359392  | 0.000181993 | 0.156475702  |
| 0.127376854  | 0.005842424 | 0.178029601  | 0.000109784 | 0.143185344  |
| 0.028056714  | 0.545308631 | 0.061040478  | 0.187909399 | 0.028811275  |
| -0.082773159 | 0.073934756 | -0.065575182 | 0.157122136 | -0.088279423 |
| 0.126384312  | 0.006241007 | 0.125461155  | 0.006633452 | 0.105803454  |
| 0.13329164   | 0.003906391 | 0.163892325  | 0.000376076 | 0.176603172  |
| -0.033082247 | 0.475726522 | 0.007012866  | 0.879861319 | -0.020594698 |
| 0.074340522  | 0.108619837 | 0.096758241  | 0.036593891 | 0.075517778  |
| 0.15463462   | 0.000799651 | 0.184827017  | 5.87E-05    | 0.165612828  |
| -0.041412092 | 0.37190665  | -0.057814572 | 0.21236873  | -0.06113038  |
| 0.34800073   | 9.67E-15    | 0.330087891  | 2.47E-13    | 0.316960037  |
| 0.177563849  | 0.000114506 | 0.205912576  | 7.26E-06    | 0.2108503    |
| 0.083324111  | 0.072026116 | 0.105903694  | 0.022084875 | 0.074943227  |
| 0.075110427  | 0.104998201 | 0.092616431  | 0.045457577 | 0.09214732   |
| 0.167671687  | 0.000273165 | 0.203115528  | 9.70E-06    | 0.193437441  |
| -0.143626743 | 0.001860577 | -0.119524146 | 0.009729705 | -0.128971561 |
| 0.300090383  | 3.57E-11    | 0.273222302  | 1.94E-09    | 0.259229139  |
| 0.235818108  | 2.53E-07    | 0.277009312  | 1.13E-09    | 0.268658377  |
| 0.149262125  | 0.001216096 | 0.139227719  | 0.002566642 | 0.134173971  |
| 0.210323447  | 4.55E-06    | 0.249418049  | 4.71E-08    | 0.239279186  |
| 0.207309827  | 6.27E-06    | 0.237196203  | 2.14E-07    | 0.216022499  |
| 0.253806676  | 2.68E-08    | 0.286374132  | 2.89E-10    | 0.254014035  |
| 0.058744692  | 0.205092399 | 0.077404779  | 0.094769885 | 0.055802221  |
| 0.199351769  | 1.42E-05    | 0.191816916  | 3.01E-05    | 0.162388639  |
| 0.113699987  | 0.013953051 | 0.115535704  | 0.012474539 | 0.099544902  |
| -0.075832975 | 0.101686885 | -0.037843301 | 0.414556612 | -0.055564852 |
| 0.120018548  | 0.009429907 | 0.125845778  | 0.006467333 | 0.121055146  |
| 0.121456598  | 0.008604048 | 0.164820232  | 0.000347905 | 0.139454672  |

|              |             |              |             |              |
|--------------|-------------|--------------|-------------|--------------|
| -0.052460322 | 0.257879137 | -0.033890303 | 0.465009579 | -0.039756595 |
| 0.239942294  | 1.54E-07    | 0.242074602  | 1.18E-07    | 0.229926002  |
| -0.017627949 | 0.703981187 | 0.009889809  | 0.831207609 | -0.019238273 |
| 0.101242847  | 0.028696074 | 0.143330176  | 0.001901906 | 0.118191724  |
| 0.269557728  | 3.23E-09    | 0.283943779  | 4.14E-10    | 0.243125976  |
| 0.044790652  | 0.334131789 | 0.103626164  | 0.025129198 | 0.072360812  |
| 0.201492531  | 1.15E-05    | 0.259385892  | 1.29E-08    | 0.246484573  |
| 0.023766648  | 0.608442788 | 0.072270514  | 0.11884652  | 0.073041362  |
| 0.092850388  | 0.044912764 | 0.137709991  | 0.002862011 | 0.113548631  |
| 0.094845994  | 0.040484919 | 0.116636187  | 0.011656077 | 0.118912926  |
| 0.152649819  | 0.00093508  | 0.175397533  | 0.000139086 | 0.141987105  |
| 0.145670815  | 0.001597357 | 0.185231176  | 5.65E-05    | 0.168084325  |
| -0.049973314 | 0.28116242  | -0.019192738 | 0.679104707 | -0.02744284  |
| -0.010827379 | 0.815480775 | 0.033453341  | 0.470788162 | 0.037137713  |
| 0.068023401  | 0.142169673 | 0.102400698  | 0.026912337 | 0.126586459  |
| -0.135523469 | 0.00334207  | -0.093332318 | 0.043807788 | -0.114722177 |
| -0.020727178 | 0.655044238 | -0.011244623 | 0.808505253 | -0.021321583 |
| -0.070239579 | 0.129596557 | -0.027532854 | 0.552841251 | -0.060641313 |
| 0.075230295  | 0.104443037 | 0.07981421   | 0.08490177  | 0.086468634  |
| 0.151556004  | 0.001018476 | 0.183320644  | 6.75E-05    | 0.165279953  |
| 0.352466131  | 4.17E-15    | 0.35028283   | 6.30E-15    | 0.334473337  |
| 0.12349529   | 0.0075437   | 0.146486537  | 0.001502208 | 0.140548093  |
| -0.032807874 | 0.479395899 | 3.14E-06     | 0.999945948 | -0.007598621 |
| 0.338637087  | 5.40E-14    | 0.355822367  | 2.20E-15    | 0.340441197  |
| -0.007913157 | 0.864578278 | 0.048936758  | 0.291274182 | 0.018889862  |
| 0.162674501  | 0.000416279 | 0.154808922  | 0.000788669 | 0.140641983  |
| 0.083058181  | 0.072942282 | 0.10801585   | 0.01955275  | 0.097986683  |
| 0.078862032  | 0.088697697 | 0.11505522   | 0.012847522 | 0.082110179  |
| 0.159067914  | 0.000560033 | 0.187392818  | 4.60E-05    | 0.167575797  |
| 0.087655858  | 0.058380838 | 0.122519812  | 0.008035547 | 0.095323411  |
| 0.281694836  | 5.75E-10    | 0.292289523  | 1.19E-10    | 0.31408628   |
| 0.003006084  | 0.94834274  | 0.026111502  | 0.573531531 | 0.007259481  |
| 0.100030062  | 0.030672323 | 0.109006952  | 0.018454394 | 0.0993604    |
| 0.217860512  | 2.01E-06    | 0.264308969  | 6.63E-09    | 0.247297746  |
| 0.311986062  | 5.32E-12    | 0.339897499  | 4.30E-14    | 0.361908285  |
| 0.021585399  | 0.641739167 | 0.04244618   | 0.36007406  | 0.010178882  |
| 0.224700382  | 9.31E-07    | 0.271683281  | 2.40E-09    | 0.257509156  |
| 0.142712028  | 0.001990764 | 0.182345594  | 7.39E-05    | 0.156003322  |
| 0.06388479   | 0.168119838 | 0.095678366  | 0.038750225 | 0.068403771  |
| 0.151920553  | 0.000989948 | 0.170917519  | 0.000206441 | 0.15159206   |
| 0.072791866  | 0.116202541 | 0.118119169  | 0.010628394 | 0.102049574  |
| 0.21001789   | 4.71E-06    | 0.257878026  | 1.57E-08    | 0.227408245  |
| 0.077774763  | 0.09319762  | 0.110902421  | 0.016502925 | 0.115525604  |
| 0.353753092  | 3.26E-15    | 0.368848301  | 1.69E-16    | 0.352733043  |
| 0.154681058  | 0.000796711 | 0.169253601  | 0.000238464 | 0.148545247  |

|              |             |              |             |              |
|--------------|-------------|--------------|-------------|--------------|
| 0.117710334  | 0.010903369 | 0.139871628  | 0.002449945 | 0.138371988  |
| -0.004783067 | 0.9178943   | 0.041959151  | 0.365617256 | 0.011111707  |
| 0.011828282  | 0.798773124 | 0.033398059  | 0.471522034 | 0.034231954  |
| 0.065414951  | 0.158140684 | 0.077345714  | 0.095022836 | 0.057556953  |
| -0.019206884 | 0.678881346 | 0.00161597   | 0.972217018 | -0.009481719 |
| 0.137096364  | 0.00298997  | 0.16655336   | 0.000300484 | 0.156310247  |
| -0.015647415 | 0.735922468 | 0.019609935  | 0.67252932  | 0.00680011   |
| 0.079668967  | 0.085472179 | 0.12432865   | 0.007145013 | 0.12462914   |
| -0.031465948 | 0.497562135 | -0.016199356 | 0.726972366 | -0.016853487 |

| p.GS.cg20186445 | GS.cg24636477 | p.GS.cg24636477 | MMskyblue   | p.MMskyblue | MMskyblue |
|-----------------|---------------|-----------------|-------------|-------------|-----------|
| 0.011340036     | -0.117853588  | 0.01080631      | -0.16711306 | 0.00028651  | -0.18135  |
| 0.00033908      | -0.167034921  | 0.000288422     | 0.109101567 | 0.01835241  | -0.25914  |
| 0.00317629      | -0.137377949  | 0.002930619     | 0.092946398 | 0.04469078  | -0.08599  |
| 0.041373303     | -0.094350143  | 0.041549152     | 0.071941428 | 0.12053949  | -0.25219  |
| 2.23E-09        | -0.273592751  | 1.84E-09        | 0.100512692 | 0.02987234  | -0.17026  |
| 0.002229616     | -0.139044455  | 0.00260077      | -0.03352867 | 0.46978918  | -0.19913  |
| 0.003316536     | -0.128821794  | 0.005303007     | -0.04379765 | 0.34496937  | -0.13999  |
| 0.00186908      | -0.1425428    | 0.002015744     | 0.005651657 | 0.90305186  | -0.24165  |
| 0.017602012     | -0.110640031  | 0.016761812     | 0.094661066 | 0.0408791   | -0.13493  |
| 2.79E-09        | -0.269472423  | 3.27E-09        | 0.074928239 | 0.10584646  | -0.05391  |
| 0.029924081     | -0.09256495   | 0.045578202     | -0.03026831 | 0.51407857  | -0.14101  |
| 0.000101139     | -0.179236034  | 9.84E-05        | -0.01171401 | 0.80067621  | -0.06566  |
| 3.34E-07        | -0.232961259  | 3.56E-07        | 0.093806089 | 0.04274391  | -0.02464  |
| 0.18721705      | -0.081228761  | 0.079505464     | -0.11021522 | 0.01718849  | -0.23065  |
| 0.002566635     | -0.143354879  | 0.001898431     | 0.021677349 | 0.64032035  | -0.19428  |
| 0.003216774     | -0.147878735  | 0.001351757     | 0.081997047 | 0.07669312  | -0.13062  |
| 0.007930091     | -0.117644136  | 0.010948481     | -0.01224503 | 0.79184298  | -0.09777  |
| 0.073078059     | -0.077520106  | 0.094277542     | -0.06893127 | 0.13691053  | -0.20245  |
| 0.01548963      | -0.115080666  | 0.012827524     | 0.071762603 | 0.12146731  | -0.02817  |
| 0.173317726     | -0.059025665  | 0.202930296     | -0.00542158 | 0.90698029  | -0.16624  |
| 5.65E-06        | -0.209629375  | 4.90E-06        | -0.01386967 | 0.76498799  | 0.01797   |
| 0.01091838      | -0.12282385   | 0.007879262     | -0.00138295 | 0.976222    | 0.057474  |
| 0.468560614     | -0.03550563   | 0.443992769     | -0.03435115 | 0.45895802  | -0.19902  |
| 0.215563188     | -0.062287735  | 0.179030196     | 0.090370785 | 0.05097497  | -0.10059  |
| 0.958740723     | -0.009142858  | 0.843785711     | 0.155799688 | 0.00072885  | 0.00094   |
| 3.50E-05        | -0.192039561  | 2.94E-05        | -0.00202381 | 0.96520907  | -0.34669  |
| 0.044083165     | -0.087772561  | 0.058045102     | -0.07493301 | 0.10582418  | -0.17675  |
| 2.80E-06        | -0.215751746  | 2.53E-06        | -0.01462988 | 0.75251571  | -0.10777  |
| 0.002944307     | -0.135739247  | 0.003291637     | 0.086069395 | 0.06310647  | -0.04226  |
| 0.073533077     | -0.072392366  | 0.118224388     | 0.145796387 | 0.00158236  | -0.04625  |
| 0.012791469     | -0.110504303  | 0.016897117     | 0.123901002 | 0.00734719  | -0.25192  |
| 9.75E-06        | -0.217054071  | 2.20E-06        | 0.021130985 | 0.64877005  | -0.25745  |
| 1.09E-05        | -0.201192415  | 1.18E-05        | 0.144525766 | 0.00174026  | -0.32528  |
| 0.024028131     | -0.105061082  | 0.02317171      | 0.032773243 | 0.47986014  | -0.1109   |
| 0.720724778     | -0.029726453  | 0.521643458     | -0.11743345 | 0.01109316  | -0.16943  |
| 0.390123431     | -0.045716364  | 0.324227913     | 0.063071109 | 0.17361469  | -0.13399  |
| 0.005135404     | -0.134288588  | 0.00364443      | 0.019122193 | 0.68021898  | -0.24777  |
| 0.437333388     | -0.032579591  | 0.482460572     | 0.138983304 | 0.00261225  | -0.03814  |
| 0.464618016     | -0.043599082  | 0.347163086     | 0.09290328  | 0.04479036  | -0.14534  |
| 0.005981052     | -0.132857181  | 0.004025794     | -0.10104226 | 0.02901518  | -0.36132  |
| 0.015520757     | -0.11467889   | 0.013146487     | 0.021545807 | 0.6423505   | -0.20383  |
| 2.27E-05        | -0.199187612  | 1.45E-05        | 0.134403791 | 0.00361521  | -0.17311  |
| 1.82E-06        | -0.233487698  | 3.35E-07        | -0.26576449 | 5.44E-09    | -0.04209  |
| 0.010122884     | -0.120137755  | 0.009358862     | -0.26976236 | 3.14E-09    | 0.029654  |

|             |              |             |             |            |          |
|-------------|--------------|-------------|-------------|------------|----------|
| 3.43E-05    | 0.186344898  | 5.08E-05    | -0.29140719 | 1.36E-10   | -0.27195 |
| 0.007664125 | 0.114312785  | 0.013443196 | -0.20320363 | 9.61E-06   | -0.2625  |
| 0.620215861 | -0.024363348 | 0.599469627 | -0.30952991 | 7.93E-12   | -0.02151 |
| 0.575932591 | 0.0228021    | 0.623072223 | -0.15111685 | 0.00105385 | -0.22305 |
| 0.823148369 | -0.000195979 | 0.996629904 | -0.29037225 | 1.59E-10   | -0.21688 |
| 1.97E-06    | 0.208741134  | 5.39E-06    | -0.10188289 | 0.02769789 | -0.00484 |
| 0.322907699 | -0.039715417 | 0.391834516 | -0.26989976 | 3.08E-09   | 0.097756 |
| 0.002093609 | 0.131881131  | 0.00430617  | -0.38357401 | 8.11E-18   | -0.15945 |
| 0.018699906 | 0.115330335  | 0.012632774 | -0.24477011 | 8.46E-08   | -0.21628 |
| 1.52E-08    | 0.251702743  | 3.51E-08    | -0.28291958 | 4.81E-10   | -0.15123 |
| 0.00374566  | 0.129125666  | 0.005195442 | -0.16316332 | 0.00039968 | 0.080803 |
| 0.032878293 | 0.098183402  | 0.033904767 | -0.34149438 | 3.22E-14   | -0.36477 |
| 0.002980594 | -0.143484318 | 0.001880321 | -0.53670603 | 3.39E-36   | -0.08667 |
| 1.73E-09    | 0.268409393  | 3.79E-09    | -0.3931841  | 1.03E-18   | -0.2937  |
| 0.51321145  | -0.027302997 | 0.556162353 | -0.40859607 | 3.22E-20   | 0.090796 |
| 2.66E-16    | 0.359415373  | 1.10E-15    | -0.27672878 | 1.18E-09   | -0.14808 |
| 0.006085503 | 0.122607084  | 0.007990405 | -0.3501486  | 6.46E-15   | -0.04668 |
| 5.49E-05    | -0.197635586 | 1.69E-05    | -0.36308674 | 5.34E-16   | -0.11691 |
| 0.425046165 | -0.053586574 | 0.247786398 | -0.39844164 | 3.22E-19   | -0.27969 |
| 0.023027888 | -0.103084914 | 0.025903779 | 0.230592229 | 4.71E-07   | 0.13458  |
| 0.013521345 | -0.118043832 | 0.010678597 | -0.45376003 | 4.25E-25   | -0.24309 |
| 3.22E-06    | 0.22225333   | 1.23E-06    | -0.31587727 | 2.80E-12   | -0.17373 |
| 0.384260584 | 0.026733559  | 0.56443145  | -0.3464404  | 1.29E-14   | -0.34741 |
| 0.848936319 | -0.005693923 | 0.902330446 | -0.0082592  | 0.85871714 | 0.23601  |
| 6.25E-07    | -0.228520451 | 6.00E-07    | -0.15238759 | 0.00095448 | 0.029647 |
| 0.000239271 | -0.171077981 | 0.000203575 | -0.16805043 | 0.00026445 | -0.27023 |
| 1.40E-05    | 0.206647837  | 6.72E-06    | -0.11230126 | 0.01518101 | -0.04469 |
| 0.923120863 | -0.000553418 | 0.990483521 | -0.19306079 | 2.66E-05   | -0.06416 |
| 0.006875811 | -0.147284869 | 0.001414154 | -0.36588615 | 3.07E-16   | -0.14254 |
| 0.987066641 | -0.015160242 | 0.743852146 | -0.29317558 | 1.04E-10   | -0.24592 |
| 9.81E-05    | -0.196941907 | 1.81E-05    | -0.24753036 | 5.98E-08   | 0.004798 |
| 0.017779154 | 0.103556779  | 0.025227364 | -0.49840075 | 1.08E-30   | -0.23306 |
| 0.007210718 | -0.134191975 | 0.003669101 | -0.39715129 | 4.28E-19   | 0.004728 |
| 0.710899082 | -0.017780608 | 0.701539792 | 0.251718123 | 3.51E-08   | 0.243735 |
| 0.206874819 | -0.069093712 | 0.135985544 | -0.29280404 | 1.10E-10   | -0.50352 |
| 0.072854301 | 0.07566502   | 0.102449101 | -0.48433902 | 7.69E-29   | -0.29213 |
| 0.016692233 | 0.102453671  | 0.026833063 | -0.28246943 | 5.14E-10   | -0.09495 |
| 0.381481292 | 0.047247895  | 0.308265447 | 0.455915166 | 2.38E-25   | 0.145953 |
| 0.338272633 | -0.053583379 | 0.247814636 | -0.41353102 | 1.02E-20   | 0.142621 |
| 0.058495086 | 0.087336456  | 0.059307938 | -0.21542085 | 2.63E-06   | -0.14871 |
| 0.861179396 | 0.000518553  | 0.991083025 | -0.46212075 | 4.39E-26   | -0.20196 |
| 0.926697785 | -0.013623875 | 0.76903375  | -0.16329379 | 0.00039536 | 0.093865 |
| 0.473243386 | 0.033759299  | 0.466737893 | -0.29955235 | 3.89E-11   | -0.33697 |
| 0.033317769 | -0.110638379 | 0.016763453 | -0.31576923 | 2.85E-12   | -0.37337 |
| 0.982656611 | -0.010288023 | 0.824519325 | -0.18224081 | 7.47E-05   | -0.00149 |

|             |              |             |             |            |          |
|-------------|--------------|-------------|-------------|------------|----------|
| 0.854801004 | 0.001807319  | 0.968928765 | -0.24566182 | 7.57E-08   | -0.08209 |
| 0.010779297 | 0.113089487  | 0.014477836 | -0.32399458 | 7.11E-13   | -0.22508 |
| 1.56E-06    | -0.234653624 | 2.91E-07    | -0.43048632 | 1.72E-22   | -0.15595 |
| 0.161249338 | -0.063732677 | 0.169137052 | -0.57604899 | 1.23E-42   | -0.07621 |
| 0.001230473 | 0.145962281  | 0.001562742 | -0.44302699 | 7.17E-24   | -0.26395 |
| 0.667127454 | -0.025777595 | 0.57844468  | -0.50746285 | 6.23E-32   | -0.38559 |
| 0.280280629 | 0.034017071  | 0.463340538 | -0.4118336  | 1.52E-20   | -0.05846 |
| 0.000673123 | -0.154195053 | 0.000827977 | -0.35301234 | 3.76E-15   | -0.52674 |
| 0.069967342 | -0.090217152 | 0.051372033 | -0.45915979 | 9.89E-26   | -0.00049 |
| 0.0003538   | -0.173734429 | 0.00016123  | -0.12991307 | 0.0049258  | -0.17092 |
| 0.45846691  | 0.036188538  | 0.435272774 | -0.21552712 | 2.60E-06   | -0.15165 |
| 0.165194231 | -0.07361924  | 0.112101449 | -0.375634   | 4.26E-17   | 0.022002 |
| 0.033439395 | -0.116163981 | 0.012001267 | -0.25537836 | 2.18E-08   | -0.10109 |
| 0.596582247 | -0.024307261 | 0.600310507 | -0.27676806 | 1.17E-09   | -0.17135 |
| 0.035870042 | -0.101438485 | 0.028387741 | -0.10517525 | 0.02302179 | 0.519665 |
| 0.044412063 | 0.0719997    | 0.12023835  | -0.095171   | 0.03979994 | 0.001287 |
| 0.150175918 | 0.064623155  | 0.163247185 | -0.33464695 | 1.11E-13   | -0.01551 |
| 0.004579762 | -0.136054408 | 0.003219217 | -0.21659642 | 2.31E-06   | -0.31509 |
| 0.106305529 | 0.068353572  | 0.140239444 | -0.25773331 | 1.60E-08   | -0.11652 |
| 7.38E-07    | -0.246067256 | 7.19E-08    | -0.27210195 | 2.26E-09   | 0.094148 |
| 0.862653504 | 0.012134462  | 0.793680102 | 0.292941052 | 1.08E-10   | 0.185001 |
| 0.61327069  | 0.008852998  | 0.848677637 | -0.28384685 | 4.20E-10   | -0.2217  |
| 0.114290723 | 0.075565794  | 0.102901541 | 0.430981665 | 1.52E-22   | 0.352306 |
| 0.093981083 | -0.088992503 | 0.05463032  | -0.41923405 | 2.66E-21   | -0.29059 |
| 0.00066153  | 0.143775209  | 0.001840197 | -0.27733168 | 1.08E-09   | -0.12248 |
| 0.058697282 | -0.091341279 | 0.0485255   | -0.34831841 | 9.11E-15   | 0.269599 |
| 0.002061026 | 0.140590114  | 0.00232546  | -0.08112785 | 0.079881   | -0.29704 |
| 0.051391636 | 0.078397465  | 0.090598594 | -0.22559212 | 8.41E-07   | -0.29844 |
| 0.226322628 | 0.056034979  | 0.226804763 | -0.37162436 | 9.67E-17   | 0.065256 |
| 0.41797814  | 0.032784738  | 0.479706011 | 0.458635875 | 1.14E-25   | 0.386479 |
| 0.001750414 | 0.145270211  | 0.001646082 | -0.29936129 | 4.00E-11   | 0.045192 |
| 1.80E-05    | -0.19335167  | 2.59E-05    | 0.496905287 | 1.72E-30   | -0.12706 |
| 0.695846318 | 0.02668079   | 0.565200724 | 0.075934336 | 0.10122907 | 0.389426 |
| 0.750773898 | -0.017242097 | 0.710165425 | 0.391143212 | 1.60E-18   | 0.440199 |
| 0.33903208  | 0.035635236  | 0.442330236 | -0.43982668 | 1.63E-23   | -0.0898  |
| 0.074358043 | 0.076105887  | 0.100457951 | 0.196589286 | 1.88E-05   | -0.00819 |
| 0.647024763 | -0.031039816 | 0.503406377 | -0.11849943 | 0.01037817 | -0.09629 |
| 5.65E-10    | -0.275336784 | 1.44E-09    | 0.180935166 | 8.42E-05   | 0.215576 |
| 0.029999349 | -0.093626403 | 0.043144814 | 0.135938335 | 0.00324572 | 0.259731 |
| 2.19E-05    | 0.196978358  | 1.81E-05    | 0.226398077 | 7.66E-07   | 0.341353 |
| 5.64E-05    | -0.187649519 | 4.49E-05    | -0.16609477 | 0.00031241 | -0.21073 |
| 0.199969328 | 0.04306595   | 0.353096533 | -0.03071677 | 0.5078608  | -0.03939 |
| 0.366642818 | -0.055088676 | 0.234759211 | -0.29255469 | 1.14E-10   | -0.11832 |
| 2.13E-06    | 0.205734248  | 7.39E-06    | -0.35844531 | 1.32E-15   | 0.078171 |
| 0.105657601 | -0.079477482 | 0.086228906 | -0.30964527 | 7.79E-12   | -0.24807 |

|             |              |             |             |            |          |
|-------------|--------------|-------------|-------------|------------|----------|
| 0.028784232 | -0.100308144 | 0.030209175 | 0.472517137 | 2.39E-27   | 0.175786 |
| 0.05506321  | 0.081714343  | 0.077718424 | -0.44578884 | 3.50E-24   | -0.15859 |
| 0.686558273 | 0.025091857  | 0.588596081 | 0.496255648 | 2.10E-30   | 0.444425 |
| 0.672056158 | 0.020762093  | 0.654500779 | 0.248972689 | 4.98E-08   | 0.210744 |
| 1.85E-09    | 0.269231566  | 3.38E-09    | 0.261192946 | 1.01E-08   | 0.008091 |
| 0.000783666 | -0.16414252  | 0.000368278 | 0.208478365 | 5.54E-06   | 0.340308 |
| 0.698575601 | 0.017289326  | 0.709407434 | 0.29999689  | 3.62E-11   | 0.277098 |
| 0.000239158 | -0.177138753 | 0.000118981 | -0.37968214 | 1.84E-17   | -0.20734 |
| 0.016324138 | -0.111705788 | 0.015731926 | 0.216594377 | 2.31E-06   | 0.218721 |
| 0.447544185 | 0.039511618  | 0.394270883 | -0.04730182 | 0.30771303 | -0.38862 |
| 0.422276217 | -0.039611588 | 0.393074627 | -0.45314188 | 5.02E-25   | -0.20291 |
| 0.633696996 | -0.023534025 | 0.611957046 | 0.443037615 | 7.15E-24   | 0.415622 |
| 4.00E-06    | 0.215061842  | 2.73E-06    | 0.295427511 | 7.36E-11   | 0.287971 |
| 0.52020116  | 0.022644544  | 0.625476266 | -0.29837644 | 4.67E-11   | -0.24478 |
| 0.005640132 | 0.104538535  | 0.023868718 | -0.12035978 | 0.00922781 | -0.04878 |
| 0.177905435 | -0.094649604 | 0.040903638 | 0.03022508  | 0.51467996 | -0.08285 |
| 0.858271477 | -0.00732898  | 0.874489685 | -0.26771611 | 4.16E-09   | -0.05027 |
| 1.02E-06    | 0.225374559  | 8.62E-07    | 0.152767284 | 0.00092651 | 0.193352 |
| 0.092030382 | -0.080669514 | 0.081604718 | -0.30569657 | 1.47E-11   | -0.03238 |
| 0.182611386 | -0.062423481 | 0.178082913 | 0.428866184 | 2.56E-22   | 0.067359 |
| 0.676374283 | 0.021130182  | 0.648782513 | -0.23489545 | 2.83E-07   | -0.17442 |
| 0.012059171 | 0.109733319  | 0.017683975 | -0.14097725 | 0.0022608  | 0.135045 |
| 0.007651529 | -0.119892446 | 0.009505583 | -0.22190768 | 1.28E-06   | -0.27693 |
| 0.019876366 | -0.108166997 | 0.019381653 | 0.28067276  | 6.67E-10   | 0.459726 |
| 0.002422958 | 0.130292847  | 0.004800312 | -0.27783811 | 1.00E-09   | -0.01776 |
| 0.139400974 | -0.069924447 | 0.131330016 | -0.21014344 | 4.64E-06   | -0.39733 |
| 0.059955125 | -0.09939976  | 0.03174464  | -0.46143835 | 5.30E-26   | 0.166948 |
| 0.001322194 | 0.142508747  | 0.002020805 | -0.41389926 | 9.39E-21   | -0.09992 |
| 0.087250811 | 0.083241154  | 0.072310903 | 0.517241156 | 2.60E-33   | 0.226322 |
| 0.090916233 | 0.076656594  | 0.09801404  | -0.28955675 | 1.80E-10   | -0.32387 |
| 0.000438541 | 0.168778088  | 0.000248435 | 0.185288928 | 5.62E-05   | 0.26788  |
| 0.012959496 | -0.124697614 | 0.006974599 | -0.2482115  | 5.49E-08   | 0.062866 |
| 0.003337997 | 0.128538087  | 0.00540524  | 0.016655738 | 0.71959969 | -0.32763 |
| 0.225194969 | 0.052014872  | 0.261948343 | -0.28040653 | 6.94E-10   | -0.54026 |
| 0.493722954 | 0.025178643  | 0.587306813 | -0.09918439 | 0.03211832 | -0.16521 |
| 0.93931738  | -0.01300666  | 0.779220594 | -0.24053914 | 1.43E-07   | -0.33681 |
| 0.401580029 | -0.049157833 | 0.289097372 | 0.084382138 | 0.06847366 | 0.133861 |
| 0.001206416 | -0.161894603 | 0.00044409  | -0.17405824 | 0.00015667 | -0.29684 |
| 0.002227322 | 0.133281372  | 0.003909176 | -0.42576555 | 5.48E-22   | -0.26346 |
| 2.74E-05    | 0.19952189   | 1.40E-05    | -0.30844898 | 9.45E-12   | -0.13724 |
| 0.159813627 | -0.073905089 | 0.11071131  | -0.3071601  | 1.16E-11   | -0.05115 |
| 0.344156737 | 0.044635608  | 0.335809368 | 0.212118368 | 3.76E-06   | 0.200426 |
| 0.010598133 | 0.123527501  | 0.007527928 | -0.13739342 | 0.00292739 | -0.09267 |
| 0.288220508 | 0.040264756  | 0.385312808 | -0.29745754 | 5.38E-11   | -0.12449 |
| 0.501212091 | 0.019316504  | 0.67715147  | -0.48246444 | 1.34E-28   | -0.2549  |



|             |              |             |             |            |          |
|-------------|--------------|-------------|-------------|------------|----------|
| 2.00E-06    | -0.213528812 | 3.23E-06    | -0.31187089 | 5.42E-12   | -0.17168 |
| 1.27E-05    | -0.207762976 | 5.98E-06    | -0.41590998 | 5.85E-21   | 0.190787 |
| 0.013592599 | 0.118320151  | 0.010495484 | -0.20359418 | 9.23E-06   | -0.18118 |
| 0.357031217 | -0.056674481 | 0.221538886 | -0.20723473 | 6.32E-06   | -0.26858 |
| 0.033477517 | -0.113644723 | 0.013999857 | -0.1146394  | 0.01317821 | 0.26949  |
| 0.107948152 | -0.080525168 | 0.082153768 | -0.06199681 | 0.18107296 | -0.21715 |
| 0.028700623 | 0.099991828  | 0.030736474 | -0.34700584 | 1.16E-14   | -0.33223 |
| 0.728522239 | 0.003674207  | 0.936883282 | -0.28145363 | 5.96E-10   | 0.015792 |
| 0.468532433 | -0.056498973 | 0.222975303 | -0.27596257 | 1.31E-09   | 0.068724 |
| 5.67E-07    | -0.239853463 | 1.55E-07    | -0.284398   | 3.87E-10   | 0.060523 |
| 0.091206532 | 0.083776481  | 0.070489235 | -0.41399428 | 9.18E-21   | 0.123484 |
| 6.08E-06    | -0.217760463 | 2.03E-06    | -0.40351709 | 1.03E-19   | -0.11685 |
| 0.004937675 | 0.116704395  | 0.011606949 | -0.48960969 | 1.59E-29   | -0.15607 |
| 1.69E-05    | -0.200005784 | 1.33E-05    | 0.306977608 | 1.20E-11   | 0.412937 |
| 0.454260739 | 0.027723993  | 0.550086958 | -0.29137005 | 1.37E-10   | -0.38536 |
| 0.660916929 | 0.008981927  | 0.846501004 | -0.34725382 | 1.11E-14   | -0.2977  |
| 0.855446665 | -0.002572404 | 0.955786945 | -0.49707958 | 1.63E-30   | -0.3274  |
| 1.13E-06    | 0.218249428  | 1.92E-06    | -0.5016435  | 3.93E-31   | 0.004946 |
| 2.99E-05    | 0.183353567  | 6.73E-05    | -0.07905495 | 0.08791778 | 0.201628 |
| 0.238336738 | 0.048441275  | 0.296192753 | -0.18194867 | 7.67E-05   | -0.17748 |
| 0.279214566 | -0.059186132 | 0.201702946 | -0.22885937 | 5.76E-07   | -0.00331 |
| 0.869013073 | -0.025598761 | 0.581084161 | -0.05105584 | 0.27085858 | 0.174999 |
| 0.267087642 | 0.049509424  | 0.285657996 | 0.092543831 | 0.04562776 | -0.27104 |
| 0.569601617 | -0.034921151 | 0.451534249 | -0.30377571 | 2.00E-11   | -0.30038 |
| 0.245186881 | 0.052042985  | 0.26169023  | -0.42720791 | 3.85E-22   | -0.45078 |
| 0.000434339 | 0.161336125  | 0.000465057 | -0.39533171 | 6.40E-19   | -0.36285 |
| 0.349267808 | 0.048918511  | 0.291454349 | -0.27726895 | 1.09E-09   | -0.13551 |
| 0.817458317 | 0.001796976  | 0.969106502 | -0.24991776 | 4.42E-08   | -0.34028 |
| 0.000108754 | 0.186091869  | 5.21E-05    | -0.38865066 | 2.74E-18   | -0.07677 |
| 4.13E-07    | 0.22708684   | 7.08E-07    | -0.33539372 | 9.68E-14   | 0.100195 |
| 0.144040429 | 0.057488848  | 0.214960294 | -0.16476448 | 0.00034954 | -0.09717 |
| 0.07498056  | 0.086765936  | 0.060994228 | -0.40769894 | 3.96E-20   | -0.45094 |
| 0.010003667 | -0.122483387 | 0.008054454 | -0.22256854 | 1.19E-06   | 0.020764 |
| 3.81E-05    | -0.200593724 | 1.26E-05    | -0.40424242 | 8.72E-20   | -0.08502 |
| 0.015073249 | -0.099334134 | 0.031858108 | 0.471319016 | 3.36E-27   | 0.345434 |
| 0.004172846 | -0.134939667 | 0.003482056 | -0.25966106 | 1.24E-08   | -0.287   |
| 0.265749277 | 0.040988538  | 0.376821786 | -0.2175185  | 2.09E-06   | -0.2106  |
| 0.003280565 | -0.136912923 | 0.003029221 | -0.24331302 | 1.01E-07   | -0.30938 |
| 6.10E-10    | 0.275690425  | 1.36E-09    | -0.37010953 | 1.31E-16   | -0.10914 |
| 0.005361961 | -0.140369771 | 0.002363009 | -0.24440403 | 8.85E-08   | -0.17042 |
| 0.273114708 | -0.06299551  | 0.174131928 | -0.14630502 | 0.00152292 | -0.10693 |
| 0.15841946  | -0.05461854  | 0.238783478 | -0.18047423 | 8.79E-05   | -0.35011 |
| 0.547916147 | -0.040273993 | 0.385203719 | -0.42729653 | 3.77E-22   | -0.0478  |
| 0.005040566 | -0.137164276 | 0.002975557 | -0.24200185 | 1.19E-07   | 0.150232 |
| 0.652496334 | 0.017019831  | 0.713736471 | 0.434431462 | 6.41E-23   | -0.21082 |

|             |              |             |             |            |          |
|-------------|--------------|-------------|-------------|------------|----------|
| 0.145730889 | -0.067145865 | 0.147398719 | -0.117714   | 0.01090087 | -0.11027 |
| 0.358411574 | 0.047713472  | 0.303517435 | -0.37709993 | 3.15E-17   | -0.09419 |
| 0.039549999 | -0.101258477 | 0.028671335 | -0.35312412 | 3.68E-15   | -0.37573 |
| 0.262720475 | 0.047044141  | 0.310358681 | 0.469468238 | 5.67E-27   | 0.285655 |
| 0.619471057 | -0.03486311  | 0.452287068 | -0.418093   | 3.49E-21   | -0.32131 |
| 2.33E-06    | -0.228995155 | 5.67E-07    | -0.25845502 | 1.45E-08   | -0.18845 |
| 0.004567229 | 0.132279766  | 0.004189594 | -0.38764465 | 3.41E-18   | -0.02601 |
| 0.660871354 | -0.031586346 | 0.495917482 | 0.031904389 | 0.49158689 | -0.09559 |
| 0.000928721 | -0.1694986   | 0.000233473 | -0.34356211 | 2.20E-14   | -0.41123 |
| 9.78E-05    | 0.181998846  | 7.64E-05    | 0.45925924  | 9.62E-26   | 0.110168 |
| 0.697239113 | 0.018966809  | 0.682675767 | -0.34121693 | 3.38E-14   | -0.07184 |
| 0.25173026  | 0.026707668  | 0.56480883  | -0.3373073  | 6.87E-14   | -0.10539 |
| 0.00182335  | 0.137852849  | 0.002832945 | -0.33269961 | 1.56E-13   | 0.070301 |
| 0.154656889 | -0.072705836 | 0.116635631 | 0.199462436 | 1.41E-05   | 0.154452 |
| 0.000281113 | 0.162961555  | 0.000406458 | -0.34828167 | 9.17E-15   | 0.034789 |
| 0.869877318 | -0.021773476 | 0.638838463 | -0.2183319  | 1.91E-06   | -0.27043 |
| 0.104822714 | 0.073879593  | 0.110834748 | -0.37177201 | 9.38E-17   | -0.02077 |
| 0.005499349 | 0.120570044  | 0.009105203 | -0.50412912 | 1.80E-31   | -0.10296 |
| 9.72E-05    | 0.181291548  | 8.15E-05    | -0.30941371 | 8.08E-12   | -0.19402 |
| 0.017163165 | 0.112986987  | 0.014567626 | 0.253225456 | 2.89E-08   | 0.213413 |
| 0.584983654 | 0.015732706  | 0.73453704  | -0.27873351 | 8.83E-10   | -0.24486 |
| 0.010689833 | -0.126615872 | 0.006145896 | -0.46351695 | 2.99E-26   | -0.37971 |
| 5.75E-05    | -0.194264432 | 2.37E-05    | -0.09310941 | 0.04431599 | -0.13469 |
| 0.489763005 | -0.031391201 | 0.498584661 | -0.04179941 | 0.36744688 | -0.11734 |
| 0.032021442 | -0.103226753 | 0.025698829 | -0.2763015  | 1.25E-09   | -0.35365 |
| 5.78E-06    | 0.217848785  | 2.01E-06    | -0.25524176 | 2.22E-08   | -0.26916 |
| 0.624133157 | 0.025313364  | 0.585308019 | 0.557878074 | 1.49E-39   | 0.198354 |
| 0.060070917 | -0.100084968 | 0.030580398 | -0.23629404 | 2.39E-07   | 0.090025 |
| 0.128761073 | 0.066099969  | 0.153820908 | -0.2806246  | 6.72E-10   | -0.12788 |
| 0.039438953 | 0.090460948  | 0.050743133 | -0.32744918 | 3.92E-13   | -0.01357 |
| 8.24E-05    | 0.178934624  | 0.000101128 | -0.0725394  | 0.11747706 | -0.15727 |
| 0.698279739 | -0.025925849 | 0.576260822 | -0.45870948 | 1.12E-25   | -0.2142  |
| 0.000281725 | 0.159902032  | 0.000523188 | -0.22546837 | 8.53E-07   | -0.01832 |
| 2.38E-07    | -0.237253457 | 2.13E-07    | -0.09666631 | 0.0367734  | -0.17233 |
| 5.75E-05    | 0.178590074  | 0.000104345 | -0.48125724 | 1.91E-28   | -0.09361 |
| 2.67E-05    | 0.172522954  | 0.000179398 | -0.21731751 | 2.13E-06   | -0.19853 |
| 0.673905013 | 0.028492163  | 0.539086187 | -0.39843288 | 3.22E-19   | 0.139904 |
| 4.36E-05    | 0.198456851  | 1.56E-05    | -0.19214123 | 2.91E-05   | -0.35814 |
| 3.31E-09    | 0.259460286  | 1.27E-08    | -0.19321777 | 2.62E-05   | -0.0552  |
| 0.750320067 | 0.004857264  | 0.916625232 | -0.36871419 | 1.74E-16   | -0.134   |
| 3.46E-05    | -0.189150725 | 3.89E-05    | -0.30661763 | 1.27E-11   | 0.084415 |
| 0.056207524 | 0.078503424  | 0.090162182 | -0.09885173 | 0.03270287 | -0.27718 |
| 0.09494899  | -0.097440381 | 0.035284974 | -0.31123445 | 6.01E-12   | -0.26718 |
| 0.086200728 | 0.061480848  | 0.18473814  | -0.16412787 | 0.00036873 | -0.28344 |
| 0.415360183 | -0.048622694 | 0.294385449 | -0.31211756 | 5.20E-12   | -0.45519 |

|             |              |             |             |            |          |
|-------------|--------------|-------------|-------------|------------|----------|
| 0.023133056 | -0.106394977 | 0.02147182  | -0.19031992 | 3.48E-05   | -0.14217 |
| 0.000476114 | 0.154191702  | 0.000828196 | -0.2157059  | 2.55E-06   | 0.064294 |
| 7.75E-06    | 0.199175126  | 1.45E-05    | -0.31817815 | 1.90E-12   | 0.105996 |
| 0.037086459 | 0.100815132  | 0.029380192 | -0.35708064 | 1.72E-15   | -0.32071 |
| 0.380749006 | 0.04446325   | 0.337680615 | -0.289937   | 1.70E-10   | -0.36446 |
| 0.007890865 | 0.118966811  | 0.010077791 | -0.22718921 | 7.00E-07   | -0.19398 |
| 0.806757632 | -0.024053336 | 0.604124123 | -0.44915976 | 1.45E-24   | -0.27199 |
| 8.50E-10    | 0.260425703  | 1.12E-08    | -0.14509937 | 0.00166727 | -0.08378 |
| 0.38857565  | 0.040693009  | 0.380274781 | -0.21838321 | 1.90E-06   | -0.1868  |
| 0.038834773 | 0.099093665  | 0.032276848 | 0.604043883 | 8.93E-48   | 0.01097  |
| 0.894970394 | -0.016139384 | 0.727943073 | -0.42221278 | 1.30E-21   | -0.17649 |
| 0.809924902 | -0.002474753 | 0.957463694 | -0.25520912 | 2.23E-08   | 0.080015 |
| 0.769614837 | -0.001719106 | 0.97044461  | 0.15047511  | 0.00110758 | 0.389514 |
| 0.011867403 | -0.125902936 | 0.006442967 | -0.37467436 | 5.19E-17   | -0.40009 |
| 0.625657718 | -0.027452    | 0.554008364 | 0.270766156 | 2.73E-09   | 0.219803 |
| 2.79E-06    | 0.219094116  | 1.75E-06    | 0.206005273 | 7.19E-06   | 0.229126 |
| 0.02753639  | -0.122621103 | 0.007983175 | -0.15131666 | 0.00103762 | -0.15602 |
| 0.980083181 | -0.001060272 | 0.981768907 | -0.18838531 | 4.19E-05   | -0.3093  |
| 0.463055456 | -0.033207769 | 0.47405297  | -0.3791476  | 2.06E-17   | -0.17005 |
| 0.813064358 | 0.009925856  | 0.830601666 | -0.43793474 | 2.65E-23   | -0.28512 |
| 0.703705551 | -0.015619376 | 0.736378102 | -0.18995858 | 3.60E-05   | -0.1434  |
| 0.184223872 | 0.052238352  | 0.259901348 | -0.27971614 | 7.66E-10   | -0.09826 |
| 0.00040859  | 0.163274211  | 0.000396006 | -0.46201139 | 4.53E-26   | -0.35081 |
| 0.56414321  | -0.032586565 | 0.482366793 | 0.120412667 | 0.00919683 | 0.041238 |
| 0.877738362 | -0.002609045 | 0.955157831 | -0.35965732 | 1.05E-15   | -0.33628 |
| 0.41282715  | 0.031860392  | 0.492184751 | 0.285738856 | 3.18E-10   | 0.181076 |
| 0.010050299 | -0.114290946 | 0.01346108  | 0.166572291 | 0.0003     | 0.22631  |
| 0.130671156 | -0.066128989 | 0.153639906 | -0.51690952 | 2.90E-33   | -0.07611 |
| 0.00235996  | 0.141123452  | 0.002236818 | -0.32299678 | 8.43E-13   | 0.163676 |
| 6.08E-07    | 0.223925527  | 1.02E-06    | -0.27890313 | 8.62E-10   | 0.08114  |
| 0.767263295 | -0.027636511 | 0.551346722 | -0.4062063  | 5.58E-20   | 0.059539 |
| 0.97784457  | -0.000641927 | 0.98896163  | 0.312873852 | 4.59E-12   | 0.217796 |
| 0.106877283 | -0.073904867 | 0.110712382 | 0.444191847 | 5.30E-24   | 0.298496 |
| 0.0150536   | -0.122985482 | 0.007797288 | -0.17501186 | 0.00014395 | -0.13345 |
| 0.021849154 | 0.094735004  | 0.040721112 | -0.33359403 | 1.33E-13   | 0.096173 |
| 0.000508238 | 0.154102228  | 0.000834076 | -0.33534536 | 9.76E-14   | -0.16501 |
| 0.073247161 | 0.07891685   | 0.088475525 | -0.38848745 | 2.84E-18   | -0.49418 |
| 2.59E-07    | -0.231539527 | 4.21E-07    | 0.418728109 | 3.00E-21   | 0.186317 |
| 0.006099541 | 0.117932562  | 0.010753131 | -0.29485268 | 8.04E-11   | -0.31636 |
| 5.80E-06    | 0.199135007  | 1.46E-05    | -0.26160158 | 9.56E-09   | -0.39675 |
| 0.134731812 | 0.061111194  | 0.187397466 | -0.41077088 | 1.95E-20   | -0.38323 |
| 0.019405689 | 0.106673116  | 0.02113133  | -0.51600318 | 3.90E-33   | 0.211334 |
| 0.167214542 | -0.065537272 | 0.157362674 | -0.47996892 | 2.78E-28   | -0.22266 |
| 0.069088233 | 0.077434069  | 0.094644651 | -0.30415316 | 1.88E-11   | -0.27791 |
| 2.10E-09    | -0.272554156 | 2.13E-09    | -0.35286321 | 3.87E-15   | -0.3636  |

|             |              |             |             |            |          |
|-------------|--------------|-------------|-------------|------------|----------|
| 0.538172371 | -0.046520928 | 0.31577656  | -0.31720254 | 2.24E-12   | 0.066625 |
| 0.169909997 | 0.053961549  | 0.244488093 | -0.18849939 | 4.14E-05   | -0.07912 |
| 0.002767513 | -0.137057966 | 0.002998148 | 0.28578908  | 3.15E-10   | 0.055322 |
| 0.475335855 | -0.038697352 | 0.404096032 | -0.15744142 | 0.0006389  | -0.29582 |
| 0.351901574 | 0.033041639  | 0.476268637 | -0.46079355 | 6.32E-26   | -0.27074 |
| 0.026521916 | -0.113350421 | 0.014251451 | -0.28641869 | 2.87E-10   | -0.22333 |
| 0.124405837 | -0.07691937  | 0.096864706 | -0.26196834 | 9.10E-09   | -0.2957  |
| 0.678131932 | -0.034179543 | 0.461206272 | -0.18905038 | 3.93E-05   | -0.32405 |
| 0.498742336 | 0.027216228  | 0.557418552 | -0.34452394 | 1.84E-14   | -0.32382 |
| 0.358555342 | -0.046832056 | 0.312547404 | -0.53066781 | 2.78E-35   | 0.108058 |
| 0.188990289 | 0.056335647  | 0.224317975 | -0.15300916 | 0.00090909 | 0.191561 |
| 0.858704082 | -0.012486715 | 0.78783155  | -0.27263536 | 2.10E-09   | 0.150501 |
| 0.982952206 | -0.007613491 | 0.86965999  | -0.4456048  | 3.67E-24   | -0.2779  |
| 2.61E-08    | 0.242071011  | 1.18E-07    | -0.32877488 | 3.11E-13   | -0.01607 |
| 0.972449683 | -0.011773038 | 0.799692984 | -0.30558958 | 1.50E-11   | 0.049046 |
| 0.398875832 | -0.03734204  | 0.42076977  | -0.1367193  | 0.00307116 | -0.13365 |
| 0.048885886 | 0.087124137  | 0.059930928 | -0.2855994  | 3.24E-10   | -0.1353  |
| 0.261745661 | -0.061853558 | 0.182085118 | -0.31045028 | 6.83E-12   | -0.13336 |
| 0.416435589 | 0.030303183  | 0.513593601 | -0.3246696  | 6.33E-13   | -0.00888 |
| 0.096401714 | 0.065678151  | 0.156470217 | -0.16121662 | 0.00046966 | -0.09641 |
| 0.323803737 | 0.034636307  | 0.455235574 | -0.27992203 | 7.44E-10   | 0.0181   |
| 0.081247992 | 0.081315381  | 0.079184267 | -0.37656243 | 3.52E-17   | -0.22579 |
| 0.053801619 | 0.088413238  | 0.056230347 | -0.26323159 | 7.68E-09   | -0.22947 |
| 0.004023213 | -0.145481702 | 0.001620191 | -0.34660878 | 1.25E-14   | -0.37228 |
| 0.000102901 | -0.186585061 | 4.97E-05    | -0.33680738 | 7.51E-14   | -0.3214  |
| 8.24E-17    | 0.368615084  | 1.78E-16    | -0.31093995 | 6.31E-12   | -0.14897 |
| 0.000221342 | -0.181039578 | 8.34E-05    | -0.41617778 | 5.49E-21   | -0.23639 |
| 4.83E-10    | -0.299215241 | 4.10E-11    | -0.21750098 | 2.09E-06   | 0.093818 |
| 0.390339914 | -0.045270535 | 0.328973657 | -0.32848959 | 3.27E-13   | -0.317   |
| 1.35E-05    | -0.20712285  | 6.39E-06    | -0.33627691 | 8.26E-14   | -0.25148 |
| 5.52E-09    | 0.263823798  | 7.09E-09    | -0.45246077 | 6.02E-25   | 0.06011  |
| 0.726577206 | -0.022795343 | 0.623175237 | -0.32350402 | 7.73E-13   | -0.45511 |
| 0.625954895 | -0.03156277  | 0.496239309 | -0.48215925 | 1.46E-28   | -0.36897 |
| 0.054406013 | 0.090493726  | 0.050659071 | 0.370832788 | 1.14E-16   | 0.273904 |
| 0.005774028 | -0.128579918 | 0.005390056 | -0.3257123  | 5.29E-13   | -0.06599 |
| 0.217915985 | -0.072317711 | 0.118605245 | -0.20013758 | 1.32E-05   | -0.4012  |
| 0.039886484 | 0.084970045  | 0.066562569 | -0.22166449 | 1.31E-06   | -0.22193 |
| 0.112500802 | -0.080295265 | 0.083034413 | -0.19816908 | 1.60E-05   | 0.017841 |
| 5.17E-06    | 0.201618938  | 1.13E-05    | -0.3606864  | 8.55E-16   | -0.10502 |
| 0.01339693  | -0.121124802 | 0.008788654 | -0.29619766 | 6.54E-11   | -0.00258 |
| 5.05E-09    | 0.263266207  | 7.64E-09    | -0.34864506 | 8.57E-15   | -0.02047 |
| 8.01E-05    | 0.170814835  | 0.000208294 | 0.217321307 | 2.13E-06   | 0.233751 |
| 0.461654391 | -0.038166694 | 0.410576992 | -0.33398078 | 1.24E-13   | -0.04452 |
| 0.813565957 | -0.016368589 | 0.724235486 | -0.5689899  | 2.05E-41   | -0.04359 |
| 0.000111102 | 0.179434307  | 9.66E-05    | -0.2994208  | 3.97E-11   | -0.16571 |

|             |              |             |             |            |          |
|-------------|--------------|-------------|-------------|------------|----------|
| 2.03E-07    | -0.232461754 | 3.78E-07    | -0.40134728 | 1.68E-19   | -0.08536 |
| 2.06E-11    | 0.302836885  | 2.32E-11    | -0.35958222 | 1.06E-15   | -0.21257 |
| 0.739092035 | -0.016320811 | 0.725007804 | -0.31591978 | 2.78E-12   | -0.2108  |
| 2.18E-05    | 0.196575847  | 1.88E-05    | -0.24437992 | 8.88E-08   | 0.083481 |
| 0.083236262 | 0.079018031  | 0.088066619 | -0.41249347 | 1.30E-20   | 0.007716 |
| 0.000268148 | 0.156920856  | 0.000666244 | -0.30271383 | 2.36E-11   | -0.05328 |
| 1.69E-09    | 0.271405144  | 2.50E-09    | -0.40503823 | 7.28E-20   | 0.140643 |
| 0.381584805 | 0.036982004  | 0.425265879 | -0.23134684 | 4.31E-07   | -0.20998 |
| 0.248466556 | 0.049209412  | 0.288591077 | 0.208792203 | 5.36E-06   | 0.006582 |
| 0.220098698 | -0.070342099 | 0.129036457 | -0.42191096 | 1.40E-21   | -0.32264 |
| 0.16278786  | -0.066165246 | 0.153413985 | 0.052463884 | 0.25784678 | -0.00522 |
| 0.956890334 | 0.000438992  | 0.99245111  | -0.3658873  | 3.07E-16   | -0.10382 |
| 0.047104125 | 0.113524753  | 0.014101941 | 0.105624956 | 0.02243941 | 0.265143 |
| 0.058801729 | -0.100332828 | 0.030168355 | -0.43186882 | 1.22E-22   | -0.2939  |
| 0.020329012 | 0.094886853  | 0.040398261 | -0.11702916 | 0.01137553 | -0.3082  |
| 0.526725478 | 0.027858814  | 0.548148269 | 0.26018348  | 1.16E-08   | 0.112823 |
| 0.619566922 | 0.014414339  | 0.756045545 | -0.23602195 | 2.47E-07   | -0.13518 |
| 0.879410566 | -0.00057472  | 0.990117247 | 0.183268283 | 6.79E-05   | -0.0903  |
| 0.697510842 | -0.024888341 | 0.591624572 | -0.13413979 | 0.00368249 | -0.07816 |
| 0.073275031 | 0.075427772  | 0.103533503 | -0.32947834 | 2.75E-13   | -0.10126 |
| 0.006548678 | 0.121255609  | 0.008715458 | -0.45533305 | 2.79E-25   | -0.2725  |
| 6.25E-05    | -0.189682224 | 3.70E-05    | -0.16754057 | 0.00027624 | -0.25466 |
| 0.104705723 | 0.070228756  | 0.129655799 | -0.42456613 | 7.35E-22   | 0.352267 |
| 0.050164733 | -0.104777868 | 0.023547261 | -0.31629596 | 2.61E-12   | 0.020942 |
| 0.644431977 | -0.015646187 | 0.735942412 | 0.415623018 | 6.26E-21   | 0.314836 |
| 0.158446797 | 0.066235981  | 0.152973947 | -0.38417031 | 7.15E-18   | -0.0641  |
| 0.910608373 | 0.010718576  | 0.817302176 | -0.29245215 | 1.16E-10   | -0.1666  |
| 0.899128739 | -0.002548452 | 0.956198198 | -0.22093951 | 1.43E-06   | -0.20831 |
| 0.014088515 | 0.10693574   | 0.020814148 | -0.50391925 | 1.92E-31   | -0.15472 |
| 1.83E-05    | -0.186928599 | 4.81E-05    | -0.17902799 | 0.00010027 | -0.07139 |
| 0.899458111 | 0.00207586   | 0.964314921 | -0.14567325 | 0.00159706 | 0.116085 |
| 0.618061253 | 0.014400634  | 0.756270159 | -0.48814216 | 2.47E-29   | -0.35166 |
| 0.338757647 | -0.047379242 | 0.30692102  | -0.3831142  | 8.94E-18   | 0.097016 |
| 6.06E-06    | -0.199937101 | 1.34E-05    | 0.246019895 | 7.23E-08   | 0.265177 |
| 0.000664159 | 0.145640227  | 0.00160103  | -0.40912827 | 2.85E-20   | 0.078455 |
| 0.161754226 | 0.075621425  | 0.102647687 | 0.471960264 | 2.80E-27   | 0.228708 |
| 0.357306771 | -0.035676933 | 0.441796124 | 0.407412225 | 4.23E-20   | 0.514231 |
| 0.709596283 | -0.007568507 | 0.870423292 | 0.453123653 | 5.04E-25   | -0.011   |
| 0.153560265 | 0.062074126  | 0.180528391 | -0.01582115 | 0.73310137 | 0.152951 |
| 0.271088772 | -0.033528855 | 0.469786717 | -0.1634016  | 0.00039182 | -0.06324 |
| 0.068277075 | -0.079706617 | 0.085324019 | 0.426443695 | 4.65E-22   | 0.110482 |
| 0.000167717 | 0.171413906  | 0.000197697 | 0.326780016 | 4.40E-13   | 0.141367 |
| 0.003926933 | -0.147403873 | 0.001401442 | 0.130836252 | 0.00462577 | -0.12038 |
| 0.088218849 | -0.078451638 | 0.09037526  | -0.46746828 | 9.94E-27   | -0.1912  |
| 0.908087508 | 0.006198916  | 0.893717308 | 0.064690469 | 0.16280829 | 0.288249 |

|             |              |             |             |            |          |
|-------------|--------------|-------------|-------------|------------|----------|
| 0.845808413 | 0.005289929  | 0.909229251 | -0.41458452 | 7.99E-21   | 0.018989 |
| 0.005459715 | -0.129836631 | 0.004951411 | -0.34776691 | 1.01E-14   | -0.174   |
| 0.000144639 | 0.16735953   | 0.000280547 | -0.41179599 | 1.53E-20   | 0.10127  |
| 1.07E-05    | -0.211503308 | 4.01E-06    | 0.063897585 | 0.16803448 | 0.01399  |
| 0.066394196 | -0.088511628 | 0.055955867 | -0.25353072 | 2.77E-08   | -0.09962 |
| 0.302461515 | 0.04768432   | 0.303813305 | -0.41050869 | 2.07E-20   | -0.08294 |
| 0.136669063 | 0.069919903  | 0.131355141 | 0.353229457 | 3.61E-15   | 0.230077 |
| 6.88E-06    | 0.210100822  | 4.66E-06    | -0.37432569 | 5.57E-17   | -0.35538 |
| 0.002569185 | 0.141015119  | 0.002254569 | -0.38224037 | 1.08E-17   | -0.39876 |
| 0.758961817 | 0.012133934  | 0.793688881 | -0.20809819 | 5.77E-06   | -0.10547 |
| 0.000157653 | 0.166736506  | 0.000295842 | -0.3105795  | 6.69E-12   | -0.01021 |
| 0.001912964 | 0.140213598  | 0.002389956 | -0.11168171 | 0.01575456 | -0.21357 |
| 0.395637827 | 0.031217004  | 0.500971929 | -0.31348336 | 4.16E-12   | -0.15916 |
| 0.015569854 | -0.129728703 | 0.004987778 | -0.39777573 | 3.73E-19   | -0.33225 |
| 0.414887884 | 0.036429188  | 0.432223565 | -0.21163556 | 3.96E-06   | -0.42554 |
| 0.844254375 | -0.019643816 | 0.671996406 | -0.50482271 | 1.44E-31   | 0.058264 |
| 4.12E-06    | 0.204375777  | 8.51E-06    | -0.32527335 | 5.71E-13   | -0.347   |
| 0.000269364 | 0.167374237  | 0.000280195 | -0.37575922 | 4.15E-17   | -0.29192 |
| 0.010102177 | 0.118797622  | 0.010185625 | 0.50350854  | 2.19E-31   | 0.148604 |
| 0.001411894 | 0.145449742  | 0.001624079 | 0.481831147 | 1.61E-28   | 0.204138 |
| 0.002969873 | 0.144008049  | 0.001808647 | 0.550551568 | 2.30E-38   | 0.189523 |
| 0.63453736  | -0.015732747 | 0.734536375 | 0.390465604 | 1.85E-18   | 0.001862 |
| 0.033911297 | -0.105588704 | 0.022485876 | -0.2446049  | 8.64E-08   | -0.1314  |
| 9.51E-05    | 0.175754062  | 0.000134726 | 0.394414622 | 7.83E-19   | 0.102213 |
| 1.01E-10    | -0.281536697 | 5.89E-10    | -0.14210241 | 0.0020821  | -0.05918 |
| 0.0014171   | 0.139453964  | 0.002525074 | -0.43029606 | 1.80E-22   | -0.11519 |
| 0.139200043 | 0.074313088  | 0.108750679 | -0.33755422 | 6.57E-14   | -0.25352 |
| 0.199806163 | 0.050684788  | 0.27436095  | -0.21206577 | 3.78E-06   | 0.172591 |
| 0.097666836 | 0.072879206  | 0.115764149 | -0.20416311 | 8.70E-06   | -0.15582 |
| 0.472301186 | 0.023491461  | 0.612601031 | -0.14610094 | 0.00154652 | -0.17076 |
| 0.779483473 | 0.009137066  | 0.843883412 | -0.33473262 | 1.09E-13   | -0.10352 |
| 2.76E-05    | 0.199023731  | 1.47E-05    | 0.330707864 | 2.22E-13   | 0.226248 |
| 0.602876401 | 0.022536019  | 0.627134479 | -0.25538936 | 2.18E-08   | 0.338953 |
| 0.929454859 | -0.011778679 | 0.799599042 | -0.27077208 | 2.73E-09   | 0.08892  |
| 0.000663173 | -0.165577483 | 0.000326386 | -0.48182804 | 1.61E-28   | -0.2072  |
| 0.137184087 | -0.080659622 | 0.081642251 | -0.42535855 | 6.06E-22   | 0.170705 |
| 0.558490966 | -0.029405353 | 0.526153167 | 0.251583944 | 3.57E-08   | 0.229068 |
| 0.808303749 | 0.003747082  | 0.935634096 | -0.24969959 | 4.54E-08   | -0.40608 |
| 0.52438073  | -0.032815816 | 0.479289464 | -0.44603619 | 3.28E-24   | -0.12437 |
| 0.047616225 | 0.090860114  | 0.049727328 | -0.49948251 | 7.73E-31   | -0.2779  |
| 0.000696449 | 0.161903857  | 0.00044375  | -0.45063539 | 9.78E-25   | -0.34331 |
| 0.000902287 | -0.155552372 | 0.000743377 | -0.44122236 | 1.14E-23   | -0.13311 |
| 0.555857735 | -0.034014    | 0.463380921 | -0.35564686 | 2.27E-15   | -0.1921  |
| 1.57E-19    | 0.396561643  | 4.88E-19    | -0.25385464 | 2.66E-08   | 0.258175 |
| 0.280022897 | -0.056661719 | 0.221643112 | -0.27176002 | 2.38E-09   | 0.098767 |

|             |              |             |             |            |          |
|-------------|--------------|-------------|-------------|------------|----------|
| 0.060810261 | 0.084456622  | 0.068229081 | -0.40983025 | 2.42E-20   | -0.13662 |
| 0.739215856 | 0.021722651  | 0.639621801 | 0.246916491 | 6.46E-08   | 0.004663 |
| 0.520855543 | -0.019579707 | 0.673004901 | 0.296932958 | 5.84E-11   | 0.150265 |
| 4.68E-05    | 0.196486224  | 1.90E-05    | -0.34572317 | 1.48E-14   | 0.011838 |
| 6.87E-06    | -0.205403622 | 7.65E-06    | 0.181564818 | 7.95E-05   | 0.446096 |
| 0.061530059 | -0.08096836  | 0.080477427 | 0.223206778 | 1.10E-06   | 0.048614 |
| 0.10550685  | -0.069118232 | 0.13584634  | -0.27914376 | 8.32E-10   | -0.01462 |
| 6.71E-09    | 0.267326768  | 4.39E-09    | 0.338633782 | 5.41E-14   | 0.200278 |
| 0.053269375 | -0.090165637 | 0.051505749 | 0.405050872 | 7.26E-20   | 0.105858 |
| 0.007624989 | -0.135512931 | 0.003344551 | -0.14425397 | 0.00177586 | -0.05198 |
| 0.021524263 | 0.112734415  | 0.014790969 | -0.33531294 | 9.82E-14   | -0.25439 |
| 0.232257593 | 0.056822192  | 0.220335096 | -0.51988259 | 1.08E-33   | -0.04149 |
| 6.34E-05    | 0.190944503  | 3.27E-05    | -0.22320862 | 1.10E-06   | -0.19096 |
| 0.348197783 | 0.037629909  | 0.417194983 | -0.40207389 | 1.42E-19   | -0.08528 |
| 0.129641286 | -0.079141163 | 0.087571056 | -0.16338376 | 0.0003924  | -0.22754 |
| 0.204132215 | -0.067254861 | 0.146741372 | -0.30665061 | 1.26E-11   | -0.32543 |
| 0.001043249 | 0.139060359  | 0.002597792 | -0.26652792 | 4.90E-09   | 0.052403 |
| 0.032466379 | 0.093881173  | 0.042577322 | 0.211568468 | 3.99E-06   | 0.117208 |
| 0.000292756 | -0.17343107  | 0.00016561  | -0.15386904 | 0.00084958 | 0.08592  |
| 2.04E-05    | 0.188632775  | 4.09E-05    | -0.12572794 | 0.00651783 | -0.15645 |
| 0.148654075 | -0.070631236 | 0.127466903 | 0.067347593 | 0.14618388 | 0.186149 |
| 0.038594663 | 0.097431069  | 0.035302571 | 0.576834359 | 9.00E-43   | 0.165842 |
| 0.082240826 | 0.08640104   | 0.06209337  | -0.29863833 | 4.48E-11   | 0.077178 |
| 0.034479125 | -0.109529537 | 0.017897228 | 0.04642314  | 0.31679599 | 0.188194 |
| 0.000236517 | 0.168553007  | 0.00025329  | -0.17207989 | 0.00018651 | 0.196032 |
| 7.07E-13    | -0.332082592 | 1.74E-13    | -0.02335488 | 0.61466946 | -0.08489 |
| 8.56E-08    | -0.246771611 | 6.58E-08    | -0.32566749 | 5.33E-13   | 0.242305 |
| 0.790120152 | 0.018546455  | 0.689338768 | -0.37215026 | 8.69E-17   | -0.02358 |
| 0.044358567 | -0.101631051 | 0.028087033 | -0.1955472  | 2.08E-05   | -0.12995 |
| 0.986514431 | -0.006381963 | 0.890598303 | -0.36643206 | 2.75E-16   | -0.05786 |
| 0.036658774 | 0.080041063  | 0.084016998 | -0.28526987 | 3.40E-10   | -0.29657 |
| 0.001397124 | 0.15360077   | 0.000867749 | -0.4157219  | 6.11E-21   | 0.052762 |
| 0.054188508 | 0.086009845  | 0.063289821 | -0.14520435 | 0.00165422 | -0.05849 |
| 0.605920999 | 0.024252761  | 0.601128113 | 0.167078624 | 0.00028735 | 0.416868 |
| 1.93E-05    | -0.192820696 | 2.73E-05    | -0.3745225  | 5.35E-17   | -0.17303 |
| 0.005407361 | 0.131174766  | 0.004519959 | -0.20444032 | 8.46E-06   | 0.297895 |
| 0.469466253 | -0.028680939 | 0.536399691 | -0.15203108 | 0.00098145 | 0.194179 |
| 1.53E-07    | 0.232660232  | 3.69E-07    | -0.32720119 | 4.09E-13   | -0.08635 |
| 0.001013846 | 0.145847511  | 0.001576289 | -0.34731179 | 1.10E-14   | 0.050884 |
| 0.002033161 | 0.139182065  | 0.002575105 | -0.26540292 | 5.72E-09   | 0.267036 |
| 0.040988926 | -0.103629416 | 0.025124605 | -0.37286999 | 7.50E-17   | -0.07206 |
| 0.672860707 | 0.019914755  | 0.667740779 | 0.367799947 | 2.09E-16   | 0.241794 |
| 0.000363586 | -0.168576848 | 0.000252771 | -0.43009337 | 1.89E-22   | -0.17669 |
| 0.540869541 | 0.02167572   | 0.640345472 | -0.44462141 | 4.74E-24   | 0.077157 |
| 0.049695391 | 0.078018071  | 0.092175092 | -0.10130105 | 0.02860404 | -0.25044 |

|             |              |             |             |            |          |
|-------------|--------------|-------------|-------------|------------|----------|
| 8.06E-07    | 0.224337602  | 9.70E-07    | -0.1502613  | 0.00112604 | -0.00761 |
| 0.066089835 | 0.067819046  | 0.143374511 | -0.21704087 | 2.20E-06   | -0.07653 |
| 0.101678154 | 0.0827084    | 0.074161781 | -0.11907748 | 0.01000781 | -0.03345 |
| 3.66E-05    | -0.199257501 | 1.44E-05    | -0.32918804 | 2.90E-13   | 0.210507 |
| 0.106533675 | 0.063175467  | 0.172902564 | -0.1951505  | 2.17E-05   | 0.029995 |
| 0.238917268 | 0.054495679  | 0.239843093 | -0.47726094 | 6.11E-28   | 0.033856 |
| 0.066768539 | 0.092763248  | 0.045115042 | -0.45569045 | 2.53E-25   | -0.01403 |
| 0.367076831 | 0.031088079  | 0.502742654 | -0.12674781 | 0.00609229 | -0.2981  |
| 1.39E-09    | -0.274672193 | 1.58E-09    | -0.10085911 | 0.02930921 | -0.07407 |
| 2.40E-06    | -0.217539146 | 2.08E-06    | -0.10060676 | 0.02971851 | 0.145619 |
| 0.451147431 | 0.038343349  | 0.408412687 | 0.139258924 | 0.00256087 | 0.166112 |
| 0.368048669 | 0.034192705  | 0.461033614 | -0.42364927 | 9.18E-22   | 0.038748 |
| 0.003003594 | -0.136009519 | 0.003229443 | -0.29331718 | 1.02E-10   | -0.27403 |
| 0.935369793 | -0.010813018 | 0.815721128 | -0.55362175 | 7.35E-39   | -0.16044 |
| 0.143019477 | 0.056520365  | 0.222799868 | -0.11642845 | 0.01180684 | 0.2768   |
| 0.049184377 | 0.088023398  | 0.057328896 | -0.40370562 | 9.85E-20   | -0.27613 |
| 5.11E-06    | 0.19543016   | 2.11E-05    | -0.20764823 | 6.05E-06   | 0.083342 |
| 0.002235152 | 0.135257897  | 0.003405104 | -0.41329521 | 1.08E-20   | 0.090693 |
| 0.370094764 | -0.047126106 | 0.309515506 | -0.44701385 | 2.54E-24   | 0.139264 |
| 0.012428497 | -0.124498621 | 0.007066051 | -0.2849331  | 3.58E-10   | -0.00913 |
| 0.007644614 | 0.115645576  | 0.012390604 | -0.47380519 | 1.65E-27   | -0.05215 |
| 5.80E-07    | 0.2343884    | 3.00E-07    | 0.288904624 | 1.98E-10   | 0.218478 |
| 0.470195355 | 0.038041092  | 0.412119927 | 0.230011861 | 5.04E-07   | 0.223042 |
| 0.013271989 | -0.124085191 | 0.00725949  | -0.26316922 | 7.74E-09   | 0.327853 |
| 0.095891618 | -0.081789937 | 0.077443176 | -0.22210814 | 1.25E-06   | 0.025444 |
| 0.028849014 | 0.103746863  | 0.024959217 | -0.20222466 | 1.06E-05   | 0.002978 |
| 0.344883023 | -0.050466266 | 0.276437931 | -0.57769596 | 6.35E-43   | -0.05715 |
| 0.000525765 | -0.172186016 | 0.000184782 | -0.18290692 | 7.02E-05   | 0.001019 |
| 0.091603313 | 0.080474893  | 0.082345699 | -0.33402552 | 1.23E-13   | -0.05542 |
| 0.193142704 | -0.051382144 | 0.267804015 | -0.44783303 | 2.05E-24   | -0.1911  |
| 0.756790491 | 0.009210139  | 0.842651077 | -0.51260585 | 1.19E-32   | -0.16371 |
| 4.75E-07    | 0.226622262  | 7.47E-07    | -0.50339425 | 2.27E-31   | -0.06466 |
| 0.106423359 | 0.080640394  | 0.081715242 | 0.085428817 | 0.06510186 | 0.164576 |
| 0.766945794 | 0.002690897  | 0.953752576 | -0.34419227 | 1.96E-14   | 0.011958 |
| 5.79E-09    | 0.271804799  | 2.36E-09    | 0.513302113 | 9.45E-33   | -0.01552 |
| 0.263927751 | -0.051725263 | 0.264617534 | -0.38054073 | 1.54E-17   | -0.03953 |
| 0.812897195 | 0.000548279  | 0.990571897 | -0.33707203 | 7.16E-14   | -0.4513  |
| 0.559297035 | 0.017663683  | 0.703409443 | -0.35534812 | 2.40E-15   | -0.46991 |
| 0.008834754 | -0.133863346 | 0.003754157 | -0.19611249 | 1.97E-05   | -0.18504 |
| 0.955628017 | -0.000452687 | 0.992215618 | -0.32545198 | 5.53E-13   | -0.31409 |
| 0.001945364 | -0.136490596 | 0.003121373 | 0.197984177 | 1.63E-05   | 0.161789 |
| 0.999652508 | -0.007441817 | 0.872573658 | -0.41298241 | 1.16E-20   | -0.04459 |
| 0.673375442 | 0.012221353  | 0.792236348 | -0.25651738 | 1.88E-08   | -0.16437 |
| 4.46E-05    | -0.196378409 | 1.92E-05    | -0.33915355 | 4.92E-14   | -0.128   |
| 0.01705731  | -0.122225818 | 0.008189293 | -0.20528224 | 7.75E-06   | -0.35997 |



|             |              |             |             |            |          |
|-------------|--------------|-------------|-------------|------------|----------|
| 0.817126996 | 0.009695451  | 0.834476434 | 0.103211157 | 0.0257213  | 0.221424 |
| 1.98E-08    | -0.250469253 | 4.11E-08    | -0.36699103 | 2.46E-16   | -0.23309 |
| 0.375549776 | -0.050885061 | 0.272466784 | -0.3301753  | 2.44E-13   | -0.06839 |
| 0.010437183 | -0.119135868 | 0.009971056 | 0.452955203 | 5.28E-25   | 0.396072 |
| 0.067287222 | -0.068229103 | 0.140964735 | 0.207878493 | 5.90E-06   | 0.083556 |
| 0.122042673 | 0.066831525  | 0.149307034 | -0.51180795 | 1.54E-32   | -0.33644 |
| 0.308627877 | 0.035016452  | 0.450299685 | -0.27531345 | 1.44E-09   | -0.03205 |
| 0.002622836 | -0.145188166 | 0.001656227 | -0.38781187 | 3.29E-18   | -0.41946 |
| 0.000680303 | -0.169551943 | 0.0002324   | -0.32711935 | 4.15E-13   | -0.15304 |
| 0.026583164 | 0.084131002  | 0.069303614 | -0.22440931 | 9.63E-07   | -0.21097 |
| 0.004171273 | 0.142441414  | 0.002030846 | 0.211851998 | 3.87E-06   | 0.106364 |
| 0.000736769 | 0.153431163  | 0.000879419 | -0.25594355 | 2.02E-08   | 0.040742 |
| 0.81107466  | -0.014717113 | 0.751088543 | -0.13420053 | 0.00366691 | -0.17259 |
| 0.890903913 | -0.004869749 | 0.916411702 | -0.35105213 | 5.45E-15   | -0.15525 |
| 7.70E-11    | 0.293085733  | 1.05E-10    | -0.48355132 | 9.71E-29   | -0.1357  |
| 1.58E-05    | -0.198361689 | 1.57E-05    | 0.029891052 | 0.51933945 | 0.195444 |
| 0.002719248 | -0.133088456 | 0.003961827 | 0.329086857 | 2.95E-13   | 0.185932 |
| 1.07E-10    | 0.290099742  | 1.66E-10    | -0.19148867 | 3.11E-05   | -0.24364 |
| 4.06E-09    | -0.282579265 | 5.06E-10    | -0.05669387 | 0.22138057 | 0.024008 |
| 0.000501838 | -0.157911388 | 0.000615115 | 0.132070717 | 0.00425037 | 0.152025 |
| 0.020232852 | -0.113576482 | 0.014057845 | -0.25010751 | 4.31E-08   | -0.17327 |
| 0.000799802 | -0.148828978 | 0.00125716  | 0.399058159 | 2.80E-19   | 0.338034 |
| 0.900675373 | 0.007009352  | 0.879921064 | -0.31277877 | 4.67E-12   | -0.18776 |
| 0.082224765 | -0.089315796 | 0.053753911 | -0.33480645 | 1.07E-13   | 0.083155 |
| 1.28E-06    | 0.219552772  | 1.66E-06    | -0.16559428 | 0.00032592 | -0.01724 |
| 0.343860325 | -0.039772985 | 0.391147953 | 0.149915571 | 0.00115648 | 0.168666 |
| 2.27E-21    | 0.423906073  | 8.62E-22    | -0.25553622 | 2.14E-08   | -0.02139 |
| 2.59E-09    | 0.273182659  | 1.95E-09    | -0.2670056  | 4.59E-09   | 0.081706 |
| 0.019098471 | 0.102327632  | 0.027022008 | -0.38379032 | 7.75E-18   | -0.40674 |
| 7.20E-05    | 0.187860149  | 4.40E-05    | -0.42809643 | 3.10E-22   | -0.35222 |
| 0.129856788 | 0.078335118  | 0.090856169 | 0.281401263 | 6.00E-10   | -0.04766 |
| 2.24E-05    | 0.183473094  | 6.66E-05    | 0.39691145  | 4.52E-19   | -0.04532 |
| 0.54313727  | 0.023688656  | 0.609620014 | -0.41246825 | 1.31E-20   | -0.27134 |
| 0.488080293 | 0.022357026  | 0.629873525 | -0.46647569 | 1.31E-26   | -0.11519 |
| 0.214582813 | -0.057348241 | 0.216086007 | -0.2178086  | 2.02E-06   | 0.092751 |
| 0.04966052  | 0.092187242  | 0.046471458 | -0.15109476 | 0.00105566 | 0.062176 |
| 0.005499031 | 0.128453059  | 0.005436223 | -0.11692282 | 0.01145085 | 0.194012 |
| 0.244998832 | 0.055481204  | 0.231436112 | 0.58299473  | 7.28E-44   | 0.192462 |
| 0.009736733 | 0.125378847  | 0.006669493 | -0.34885505 | 8.24E-15   | 0.128549 |
| 5.87E-08    | 0.241427878  | 1.28E-07    | -0.24540073 | 7.82E-08   | -0.02447 |
| 0.020882082 | 0.08779651   | 0.057976402 | -0.25917646 | 1.32E-08   | -0.20551 |
| 0.001965972 | 0.155979848  | 0.000718438 | -0.42480167 | 6.94E-22   | -0.08011 |
| 0.316023326 | 0.059565054  | 0.198826138 | -0.37675667 | 3.38E-17   | -0.03333 |
| 0.780513156 | -0.021878276 | 0.637224513 | -0.32030979 | 1.33E-12   | -0.21215 |
| 1.84E-06    | -0.23105276  | 4.46E-07    | -0.25028663 | 4.21E-08   | 0.042146 |

|             |              |             |             |            |          |
|-------------|--------------|-------------|-------------|------------|----------|
| 0.001126805 | 0.152794104  | 0.000924562 | -0.51097731 | 2.01E-32   | 0.221613 |
| 0.00144887  | -0.159382643 | 0.000545856 | -0.34247019 | 2.69E-14   | -0.14156 |
| 3.84E-15    | 0.33770807   | 6.39E-14    | -0.22410456 | 9.97E-07   | -0.22636 |
| 0.0307356   | 0.084160058  | 0.069207172 | -0.39959    | 2.49E-19   | -0.43293 |
| 0.030663078 | 0.095831563  | 0.038437915 | -0.23030043 | 4.87E-07   | -0.26713 |
| 3.72E-05    | 0.178708716  | 0.000103227 | -0.27131576 | 2.53E-09   | 0.098552 |
| 0.004783512 | 0.127585734  | 0.005761515 | 0.333701134 | 1.31E-13   | 0.146649 |
| 0.172514754 | 0.067510929  | 0.145205852 | -0.28842478 | 2.13E-10   | -0.08821 |
| 0.524574764 | -0.033943987 | 0.464302368 | -0.16475198 | 0.00034991 | -0.09109 |
| 0.00105648  | -0.147445746 | 0.001396994 | 0.139424857 | 0.00253039 | 0.413398 |
| 0.450366785 | -0.03858216  | 0.40549767  | -0.34049721 | 3.86E-14   | 0.135426 |
| 0.397797303 | 0.022422518  | 0.628870747 | -0.26206054 | 8.99E-09   | -0.09802 |
| 0.150838733 | 0.045281875  | 0.32885239  | -0.46847488 | 7.50E-27   | 0.020467 |
| 0.138369997 | 0.073614442  | 0.112124897 | -0.12593934 | 0.00642749 | 0.196426 |
| 0.166332615 | -0.063697766 | 0.169371159 | -0.27738458 | 1.07E-09   | -0.12159 |
| 0.000160394 | 0.165155119  | 0.00033823  | -0.10319063 | 0.02575089 | -0.22358 |
| 0.888725128 | -0.007276588 | 0.87537958  | -0.24910376 | 4.90E-08   | -0.06639 |
| 0.000220011 | 0.168349402  | 0.000257757 | -0.23903854 | 1.72E-07   | 0.03596  |
| 0.254635484 | 0.052070845  | 0.261434615 | -0.2032014  | 9.61E-06   | -0.07449 |
| 0.262243087 | -0.056847541 | 0.220128982 | -0.37730308 | 3.02E-17   | -0.32866 |
| 4.08E-05    | -0.193622654 | 2.52E-05    | -0.20872489 | 5.40E-06   | -0.16758 |
| 0.003507274 | 0.126398601  | 0.0062351   | -0.23848775 | 1.83E-07   | 0.057362 |
| 0.062196901 | 0.078597174  | 0.089777468 | -0.41361766 | 1.00E-20   | -0.11726 |
| 7.65E-11    | 0.299763907  | 3.76E-11    | 0.408753346 | 3.11E-20   | -0.01604 |
| 0.001269191 | 0.162651906  | 0.000417062 | 0.115082675 | 0.01282595 | 0.124506 |
| 0.003840479 | -0.13359692  | 0.003824419 | -0.45335912 | 4.74E-25   | -0.17943 |
| 0.002306611 | -0.13995421  | 0.002435334 | -0.16667423 | 0.00029741 | 0.119514 |
| 0.074877581 | 0.084601491  | 0.067755425 | 0.553071919 | 9.02E-39   | 0.173668 |
| 0.425311706 | 0.042359505  | 0.361056697 | -0.13600265 | 0.00323101 | -0.35704 |
| 0.602058286 | 0.024057036  | 0.60406848  | -0.23000512 | 5.04E-07   | -0.42613 |
| 0.159974447 | 0.053496549  | 0.24858286  | -0.38030132 | 1.62E-17   | -0.33442 |
| 0.000184044 | 0.180639923  | 8.65E-05    | 0.205397535 | 7.66E-06   | 0.234171 |
| 0.085999332 | 0.077647619  | 0.093735555 | -0.47487373 | 1.22E-27   | -0.15668 |
| 0.679886943 | -0.021257009 | 0.646816999 | -0.39519165 | 6.60E-19   | -0.24291 |
| 0.054155534 | 0.078167547  | 0.091551373 | -0.2874143  | 2.48E-10   | -0.42912 |
| 0.710039031 | -0.028727492 | 0.535738211 | -0.37505017 | 4.80E-17   | -0.29454 |
| 0.08358502  | 0.077715927  | 0.093446244 | -0.2486802  | 5.17E-08   | -0.03137 |
| 0.325869681 | 0.038931298  | 0.40125833  | -0.34401606 | 2.03E-14   | 0.124597 |
| 2.89E-11    | 0.301415517  | 2.90E-11    | -0.34815016 | 9.40E-15   | -0.35626 |
| 9.24E-08    | 0.239338172  | 1.65E-07    | 0.141643518 | 0.00215336 | 0.206926 |
| 0.609804965 | -0.032837453 | 0.478999579 | -0.26642057 | 4.98E-09   | -0.0229  |
| 0.214956903 | -0.070854792 | 0.126263524 | -0.33947368 | 4.64E-14   | -0.24586 |
| 0.802086105 | 0.012004335  | 0.795843587 | 0.34831951  | 9.11E-15   | 0.314626 |
| 0.134660315 | 0.057689588  | 0.213360466 | -0.10112274 | 0.02888679 | -0.35104 |
| 6.48E-07    | 0.210108555  | 4.66E-06    | -0.04894785 | 0.29116472 | -0.22092 |

|             |              |             |             |            |          |
|-------------|--------------|-------------|-------------|------------|----------|
| 0.861791214 | 0.022754234  | 0.623802159 | 0.174131211 | 0.00015566 | 0.351801 |
| 0.087555733 | 0.074473656  | 0.107986625 | -0.40736344 | 4.28E-20   | -0.38157 |
| 0.429693727 | 0.025592724  | 0.581173358 | -0.4565422  | 2.01E-25   | 0.210176 |
| 1.76E-11    | 0.28481585   | 3.64E-10    | -0.26394236 | 6.97E-09   | 0.102584 |
| 2.48E-05    | 0.194739237  | 2.26E-05    | -0.2374858  | 2.07E-07   | 0.075189 |
| 0.009039774 | -0.131022124 | 0.004567398 | -0.4291451  | 2.39E-22   | -0.25961 |
| 0.936854796 | -0.002869571 | 0.950685555 | 0.194424503 | 2.33E-05   | 0.022404 |
| 0.161834307 | -0.069444813 | 0.134002673 | -0.43269225 | 9.91E-23   | -0.31573 |
| 0.017163923 | 0.11504572   | 0.012854994 | -0.41102851 | 1.84E-20   | -0.19057 |
| 3.46E-09    | 0.268820019  | 3.58E-09    | -0.27680847 | 1.16E-09   | -0.17271 |
| 0.367582541 | -0.051336423 | 0.268230587 | -0.51102043 | 1.98E-32   | 0.217801 |
| 0.719093507 | -0.01443386  | 0.755725638 | -0.22541714 | 8.58E-07   | 0.184534 |
| 0.071614407 | -0.085733679 | 0.064145846 | -0.25303676 | 2.96E-08   | -0.166   |
| 3.95E-09    | 0.269640527  | 3.19E-09    | -0.05218529 | 0.26038635 | -0.02437 |
| 0.003154813 | 0.110402739  | 0.016998988 | -0.0926482  | 0.04538327 | -0.04055 |
| 0.000129869 | 0.175559368  | 0.00013709  | 0.017235491 | 0.71027147 | -0.03878 |
| 0.962284901 | -0.007929957 | 0.864293558 | -0.22760362 | 6.67E-07   | 0.130612 |
| 0.411899462 | 0.041005261  | 0.376626962 | -0.39682457 | 4.60E-19   | -0.1345  |
| 0.089265298 | 0.071248325  | 0.124166632 | -0.3118929  | 5.40E-12   | -0.24952 |
| 1.19E-15    | -0.361682868 | 7.04E-16    | -0.12655818 | 0.00616947 | -0.22725 |
| 0.004960735 | 0.130127367  | 0.004854632 | -0.17656401 | 0.00012529 | -0.15095 |
| 0.051294677 | -0.100230443 | 0.030337981 | -0.39598686 | 5.54E-19   | -0.31829 |
| 6.35E-06    | -0.211370301 | 4.07E-06    | -0.23974139 | 1.57E-07   | 0.152022 |
| 1.26E-07    | 0.234842515  | 2.85E-07    | -0.01022852 | 0.825518   | -0.17913 |
| 0.208146095 | -0.053545249 | 0.248151779 | 0.238940849 | 1.74E-07   | -0.08965 |
| 0.457822783 | 0.038307518  | 0.408851126 | 0.265823938 | 5.40E-09   | 0.251277 |
| 0.82771057  | -0.023429551 | 0.613538261 | -0.45043597 | 1.03E-24   | -0.07715 |
| 0.212548704 | 0.050230451  | 0.278691225 | -0.2780473  | 9.75E-10   | -0.3548  |
| 2.19E-07    | -0.241824567 | 1.22E-07    | 0.197134206 | 1.78E-05   | 0.304131 |
| 0.047877549 | 0.0861665    | 0.062808439 | -0.46177489 | 4.83E-26   | -0.00061 |
| 0.394941297 | 0.032493113  | 0.4836243   | -0.14375873 | 0.00184245 | -0.07968 |
| 0.099408708 | 0.06559804   | 0.156977241 | -0.4998301  | 6.93E-31   | 0.03732  |
| 0.00090499  | -0.15645106  | 0.000691845 | -0.263959   | 6.96E-09   | -0.20974 |
| 0.255509532 | 0.042482748  | 0.359659981 | -0.20099018 | 1.21E-05   | 0.175548 |
| 0.004574409 | -0.125156645 | 0.006767671 | -0.29025626 | 1.62E-10   | -0.06336 |
| 0.247189434 | -0.050655259 | 0.274640992 | -0.07514356 | 0.10484452 | -0.30131 |
| 0.536516074 | -0.039416345 | 0.395412974 | -0.39781496 | 3.70E-19   | -0.01551 |
| 0.880953999 | -0.010798792 | 0.815959229 | -0.34949568 | 7.31E-15   | -0.33244 |
| 0.998021382 | -0.008341063 | 0.857331607 | -0.28345825 | 4.44E-10   | -0.263   |
| 0.698785272 | 0.020973943  | 0.651207187 | 0.112316394 | 0.01516723 | -0.01016 |
| 6.01E-15    | 0.341201224  | 3.39E-14    | -0.23671971 | 2.27E-07   | -0.21925 |
| 0.11023426  | -0.079467281 | 0.086269373 | -0.2972834  | 5.53E-11   | -0.43544 |
| 1.28E-05    | 0.201764899  | 1.11E-05    | -0.22975558 | 5.19E-07   | -0.11707 |
| 8.53E-05    | -0.184956933 | 5.80E-05    | -0.33003805 | 2.50E-13   | 0.207525 |
| 0.337933269 | 0.046207889  | 0.319047516 | -0.29181889 | 1.28E-10   | -0.15649 |

|             |              |             |             |            |          |
|-------------|--------------|-------------|-------------|------------|----------|
| 0.013372641 | -0.110738044 | 0.016664694 | -0.17342395 | 0.00016571 | 0.123709 |
| 3.98E-05    | -0.203044957 | 9.77E-06    | -0.10096627 | 0.02913688 | 0.090121 |
| 0.00027148  | 0.152697761  | 0.000931573 | -0.43380446 | 7.51E-23   | -0.25945 |
| 2.56E-05    | -0.202280059 | 1.06E-05    | -0.1384396  | 0.00271636 | -0.09783 |
| 5.47E-05    | -0.192871443 | 2.71E-05    | -0.38587058 | 4.98E-18   | 0.116937 |
| 0.001316494 | 0.156591608  | 0.000684092 | 0.441342436 | 1.11E-23   | 0.179118 |
| 0.000340103 | 0.160092272  | 0.000515106 | -0.2337308  | 3.25E-07   | 0.15742  |
| 0.017294788 | -0.108994389 | 0.018467972 | -0.30134707 | 2.93E-11   | -0.22037 |
| 0.213030993 | -0.05570558  | 0.2295516   | 0.298164819 | 4.82E-11   | 0.265282 |
| 0.747863005 | 0.014946519  | 0.74733953  | 0.288477248 | 2.11E-10   | 0.025537 |
| 0.00102804  | 0.157670231  | 0.000627217 | 0.375213746 | 4.64E-17   | 0.274224 |
| 0.630545056 | 0.019530555  | 0.673778508 | -0.35148885 | 5.02E-15   | -0.0346  |
| 4.88E-10    | 0.285683868  | 3.20E-10    | -0.27474203 | 1.56E-09   | -0.01726 |
| 0.00012158  | -0.170668798 | 0.000210957 | 0.200848017 | 1.22E-05   | 0.351114 |
| 7.08E-06    | 0.197743255  | 1.67E-05    | -0.26859064 | 3.69E-09   | -0.15595 |
| 0.047635893 | 0.091759765  | 0.047500088 | -0.43773093 | 2.79E-23   | -0.25717 |
| 0.035567738 | 0.098214605  | 0.033847826 | -0.33876367 | 5.28E-14   | -0.20334 |
| 0.126258048 | 0.071246426  | 0.124176687 | -0.38473834 | 6.34E-18   | -0.1763  |
| 0.829843897 | 0.004935332  | 0.915290187 | -0.40360151 | 1.01E-19   | 0.081842 |
| 0.201157835 | -0.065596212 | 0.156988825 | -0.62816581 | 1.24E-52   | -0.02001 |
| 0.435544834 | -0.033346136 | 0.472211892 | 0.391056923 | 1.63E-18   | 0.032864 |
| 0.000982675 | 0.138734155  | 0.002659498 | -0.33119511 | 2.04E-13   | -0.12021 |
| 2.87E-09    | 0.261386557  | 9.84E-09    | -0.16500827 | 0.00034244 | -0.21561 |
| 0.941767886 | -0.011631873 | 0.802044724 | -0.36942229 | 1.51E-16   | -0.31888 |
| 0.420683027 | -0.043565745 | 0.347532244 | -0.56111085 | 4.34E-40   | -0.00177 |
| 0.258698593 | -0.055531971 | 0.23100877  | -0.06775566 | 0.14374981 | -0.32908 |
| 0.000641953 | 0.149958667  | 0.001152642 | -0.16307416 | 0.00040266 | -0.17393 |
| 0.947848201 | -0.005843049 | 0.899785718 | -0.14002467 | 0.00242293 | -0.25037 |
| 0.550894941 | 0.02152623   | 0.642652864 | -0.45096939 | 8.95E-25   | -0.30263 |
| 0.888431158 | -0.007429832 | 0.872777131 | -0.21752008 | 2.09E-06   | -0.144   |
| 1.87E-06    | -0.224254816 | 9.80E-07    | -0.2496117  | 4.59E-08   | -0.0557  |
| 4.35E-10    | 0.279984572  | 7.37E-10    | -0.18346669 | 6.66E-05   | -0.12478 |
| 0.021010589 | 0.094507398  | 0.041209111 | -0.29912272 | 4.15E-11   | -0.02973 |
| 0.4136111   | 0.036353621  | 0.433179726 | -0.28835123 | 2.15E-10   | 0.140771 |
| 0.000358522 | -0.169941621 | 0.000224697 | 0.196465671 | 1.90E-05   | 0.229888 |
| 0.019990772 | 0.100797504  | 0.029408684 | -0.44117316 | 1.16E-23   | 0.200449 |
| 0.008045558 | -0.140505002 | 0.002339899 | -0.20710268 | 6.41E-06   | -0.18867 |
| 0.083063145 | -0.094809835 | 0.040561739 | -0.27188102 | 2.34E-09   | -0.32391 |
| 0.184786661 | -0.063572741 | 0.170211539 | -0.59036055 | 3.36E-45   | -0.09608 |
| 1.77E-08    | 0.269497478  | 3.26E-09    | 0.253440819 | 2.81E-08   | 0.097212 |
| 0.000439244 | 0.162655529  | 0.000416936 | -0.36416445 | 4.31E-16   | -0.02888 |
| 0.642003177 | 0.016980326  | 0.71437185  | -0.47974217 | 2.97E-28   | 0.013061 |
| 2.41E-05    | 0.19218442   | 2.90E-05    | -0.37772409 | 2.76E-17   | 0.135391 |
| 2.98E-13    | 0.311637195  | 5.63E-12    | -0.26914863 | 3.42E-09   | -0.06696 |
| 0.001121708 | 0.137146018  | 0.002979426 | -0.26822119 | 3.88E-09   | 0.015279 |

|             |              |             |             |            |          |
|-------------|--------------|-------------|-------------|------------|----------|
| 0.004030245 | -0.141785461 | 0.002131086 | -0.3130268  | 4.48E-12   | 0.057415 |
| 0.009207355 | 0.111716157  | 0.015722185 | -0.24992494 | 4.41E-08   | 0.307176 |
| 0.011723517 | 0.11509518   | 0.012816131 | -0.36524408 | 3.48E-16   | 0.160482 |
| 0.020880223 | 0.114718693  | 0.013114578 | 0.469994325 | 4.88E-27   | 0.095298 |
| 0.001153027 | 0.146598231  | 0.001489593 | -0.17566988 | 0.00013574 | -0.08383 |
| 0.042524817 | -0.101113637 | 0.028901284 | -0.16056799 | 0.0004954  | -0.14892 |
| 0.001478785 | -0.158752616 | 0.000574577 | -0.1632318  | 0.00039741 | 0.13023  |
| 1.91E-10    | 0.285941272  | 3.08E-10    | -0.30741617 | 1.12E-11   | -0.09691 |
| 0.000386224 | 0.152913676  | 0.000915929 | -0.23630936 | 2.39E-07   | -0.21708 |
| 0.388381751 | -0.036729526 | 0.428435425 | -0.45567911 | 2.54E-25   | -0.2195  |
| 0.849361512 | -0.014643537 | 0.752292193 | -0.29771492 | 5.17E-11   | -0.38804 |
| 0.321470309 | 0.050707848  | 0.274142399 | -0.33002082 | 2.50E-13   | 0.024244 |
| 0.023754573 | -0.118994965 | 0.010059946 | -0.34862907 | 8.59E-15   | -0.35809 |
| 0.088550742 | 0.075169992  | 0.104722038 | -0.2421373  | 1.17E-07   | -0.28855 |
| 0.782442389 | 0.009539023  | 0.837109425 | -0.3964255  | 5.03E-19   | -0.1451  |
| 0.000743801 | 0.154325651  | 0.000819465 | -0.38118124 | 1.34E-17   | 0.003644 |
| 0.560120156 | 0.0159695    | 0.730695206 | -0.19226348 | 2.88E-05   | 0.008158 |
| 0.017399375 | -0.122253788 | 0.008174553 | -0.40834202 | 3.42E-20   | -0.10407 |
| 0.001747692 | 0.15326133   | 0.00089125  | -0.2350159  | 2.79E-07   | 0.036149 |
| 5.72E-09    | 0.265986618  | 5.28E-09    | -0.18326654 | 6.79E-05   | -0.15325 |
| 0.531707843 | -0.027100569 | 0.55909515  | 0.396879868 | 4.55E-19   | 0.432998 |
| 1.27E-05    | 0.185641189  | 5.43E-05    | -0.27947845 | 7.93E-10   | -0.19262 |
| 0.37672472  | -0.043824892 | 0.344669141 | -0.10343359 | 0.02540246 | -0.0748  |
| 0.451556545 | -0.048605287 | 0.29455854  | -0.50868202 | 4.21E-32   | -0.27548 |
| 0.64818645  | -0.031687756 | 0.494534446 | -0.28562718 | 3.23E-10   | -0.1746  |
| 0.003738358 | 0.143139852  | 0.00192887  | -0.15057339 | 0.00109919 | -0.10137 |
| 1.04E-10    | 0.279317364  | 8.12E-10    | -0.35819485 | 1.39E-15   | 0.08007  |
| 0.091625698 | 0.069720044  | 0.132463924 | -0.307152   | 1.16E-11   | -0.20523 |
| 0.591317913 | -0.027222915 | 0.557321694 | 0.281424259 | 5.98E-10   | 0.382099 |
| 0.018173724 | -0.113485987 | 0.014135068 | -0.07280401 | 0.11614153 | -0.04133 |
| 0.668502175 | -0.020306618 | 0.661604632 | 0.326279176 | 4.80E-13   | 0.169413 |
| 0.028432582 | 0.092972301  | 0.044631051 | -0.34238214 | 2.73E-14   | -0.1521  |
| 0.22436955  | -0.055188542 | 0.233910575 | -0.45013381 | 1.12E-24   | -0.13096 |
| 0.503524863 | -0.043397319 | 0.349401109 | -0.2668983  | 4.66E-09   | 0.103006 |
| 0.000529346 | 0.155020246  | 0.000775542 | -0.41615982 | 5.51E-21   | 0.117395 |
| 8.89E-05    | 0.178710324  | 0.000103212 | -0.23771891 | 2.01E-07   | -0.11713 |
| 4.57E-06    | -0.215145111 | 2.71E-06    | -0.40258297 | 1.27E-19   | 0.269527 |
| 0.227743229 | 0.064863907  | 0.161681568 | -0.27684289 | 1.16E-09   | -0.37375 |
| 0.054629376 | -0.095124001 | 0.039898384 | -0.42481342 | 6.92E-22   | -0.27902 |
| 0.643486682 | 0.011337217  | 0.806959294 | -0.30660348 | 1.27E-11   | -0.04163 |
| 0.007882947 | -0.125844948 | 0.006467687 | -0.26218694 | 8.84E-09   | -0.22053 |
| 0.435311536 | 0.038136678  | 0.410945408 | 0.305189481 | 1.60E-11   | 0.180771 |
| 1.84E-06    | -0.228888124 | 5.75E-07    | 0.176971927 | 0.00012078 | 0.367673 |
| 5.21E-06    | -0.209185744 | 5.14E-06    | -0.1629103  | 0.0004082  | -0.1112  |
| 0.000434293 | -0.171282217 | 0.000199982 | -0.30895725 | 8.70E-12   | -0.1861  |

|             |              |             |             |            |          |
|-------------|--------------|-------------|-------------|------------|----------|
| 0.0003041   | -0.17777604  | 0.000112332 | -0.20438517 | 8.51E-06   | 0.216714 |
| 0.222460523 | 0.037506469  | 0.418725682 | -0.42835282 | 2.91E-22   | 0.315844 |
| 0.003243999 | 0.130449017  | 0.004749552 | -0.39186913 | 1.37E-18   | -0.22571 |
| 0.003041546 | 0.135493784  | 0.003349063 | -0.45094434 | 9.01E-25   | -0.05886 |
| 0.420572711 | 0.02511007   | 0.588325406 | -0.07063039 | 0.12747145 | -0.02147 |
| 0.002526227 | -0.155971688 | 0.000718906 | -0.39699608 | 4.43E-19   | -0.1121  |
| 1.81E-05    | 0.183707941  | 6.51E-05    | -0.17869724 | 0.00010333 | -0.06582 |
| 0.072620756 | -0.101740281 | 0.027917681 | -0.05342428 | 0.24922349 | -0.06198 |
| 1.72E-05    | 0.199775172  | 1.36E-05    | -0.43617966 | 4.13E-23   | -0.01473 |
| 6.71E-06    | 0.215950998  | 2.48E-06    | 0.580959908 | 1.68E-43   | 0.269062 |
| 0.000495731 | -0.172084845 | 0.000186428 | -0.31461862 | 3.45E-12   | 0.328639 |
| 0.000107421 | -0.181478936 | 8.01E-05    | -0.33128951 | 2.00E-13   | -0.34153 |
| 0.000104151 | -0.175639369 | 0.000136114 | -0.24795317 | 5.67E-08   | -0.04071 |
| 0.014102299 | 0.111125518  | 0.016285567 | -0.42187231 | 1.41E-21   | -0.24929 |
| 0.00529066  | -0.131375541 | 0.004458237 | -0.3090874  | 8.52E-12   | 0.047244 |
| 0.526708863 | -0.032432301 | 0.484443545 | -0.25576139 | 2.07E-08   | -0.09356 |
| 0.830420547 | 0.008594329  | 0.853048083 | -0.33782569 | 6.26E-14   | 0.282512 |
| 0.08540479  | 0.081591776  | 0.07816639  | 0.347943829 | 9.77E-15   | 0.133021 |
| 0.063325058 | -0.099523477 | 0.031531672 | -0.11178025 | 0.01566209 | 0.00926  |
| 0.033502405 | 0.099070288  | 0.032317804 | 0.271983647 | 2.30E-09   | 0.269262 |
| 0.00060667  | 0.146809959  | 0.001465946 | -0.39236419 | 1.23E-18   | 0.025441 |
| 0.501018839 | -0.037201432 | 0.422522352 | -0.42050253 | 1.96E-21   | -0.30625 |
| 0.412155738 | 0.029729778  | 0.521596859 | 0.370029239 | 1.34E-16   | 0.077515 |
| 0.136546638 | 0.060777146  | 0.189824779 | -0.25409841 | 2.58E-08   | 0.190188 |
| 0.024586541 | 0.096635046  | 0.036834626 | -0.10929534 | 0.01814507 | -0.1111  |
| 0.288278341 | -0.063707819 | 0.169303721 | -0.29545666 | 7.33E-11   | -0.23291 |
| 0.352769933 | 0.033739026  | 0.467005675 | -0.08649415 | 0.06181136 | -0.05969 |
| 0.457843423 | 0.038135926  | 0.410954636 | -0.33196365 | 1.78E-13   | -0.04895 |
| 0.008463265 | -0.129305541 | 0.005132699 | -0.35028549 | 6.30E-15   | -0.28573 |
| 5.67E-07    | 0.232048433  | 3.97E-07    | 0.300821317 | 3.19E-11   | -0.14241 |
| 0.015343864 | 0.103889795  | 0.02475921  | -0.22282569 | 1.15E-06   | 0.214827 |
| 1.70E-05    | -0.202927051 | 9.89E-06    | -0.27907374 | 8.41E-10   | -0.1288  |
| 1.21E-07    | -0.244040377 | 9.26E-08    | -0.41463466 | 7.90E-21   | 0.083121 |
| 0.030559967 | -0.083371389 | 0.071864226 | -0.06763956 | 0.14443914 | -0.41824 |
| 0.380636742 | -0.039401064 | 0.395596338 | -0.14634397 | 0.00151845 | -0.27601 |
| 0.037948223 | 0.098431247  | 0.033454732 | -0.14122851 | 0.00221972 | -0.35101 |
| 2.58E-05    | -0.208714487 | 5.40E-06    | -0.2129238  | 3.45E-06   | -0.35838 |
| 0.152030102 | -0.059193394 | 0.201647533 | -0.16216761 | 0.00043416 | -0.32025 |
| 1.15E-06    | -0.232421765 | 3.80E-07    | -0.29802812 | 4.93E-11   | -0.3152  |
| 0.344930331 | 0.043741805  | 0.345585461 | -0.03431718 | 0.45940258 | -0.36051 |
| 0.000149155 | -0.181659833 | 7.88E-05    | -0.39371887 | 9.13E-19   | -0.38862 |
| 0.262336652 | 0.039269651  | 0.397175364 | -0.2158865  | 2.50E-06   | -0.29727 |
| 0.020586401 | -0.102981117 | 0.026054651 | 0.093207324 | 0.04409215 | 0.580581 |
| 0.007204269 | 0.127664725  | 0.005731181 | -0.09532036 | 0.03948845 | 0.440898 |
| 0.974822436 | -0.005374002 | 0.907793003 | -0.27981442 | 7.56E-10   | -0.29369 |

|             |              |             |             |            |          |
|-------------|--------------|-------------|-------------|------------|----------|
| 0.263016785 | 0.053641171  | 0.247304234 | -0.16858899 | 0.00025251 | -0.42223 |
| 0.32478203  | -0.043335235 | 0.350091609 | 0.15017495  | 0.00113357 | 0.348346 |
| 0.001144744 | -0.165026424 | 0.000341918 | -0.19829111 | 1.58E-05   | -0.33183 |
| 5.19E-09    | -0.275775295 | 1.35E-09    | -0.14127542 | 0.00221213 | -0.11616 |
| 3.43E-05    | -0.196379809 | 1.92E-05    | -0.14427405 | 0.00177321 | -0.29063 |
| 0.007106349 | 0.127353051  | 0.005851709 | 0.015393884 | 0.74004574 | 0.401144 |
| 0.032458349 | 0.098403139  | 0.033505514 | -0.14557762 | 0.00160857 | -0.33218 |
| 0.038002466 | -0.103584618 | 0.025187938 | -0.16863177 | 0.00025158 | -0.29486 |
| 0.125080255 | -0.072150375 | 0.119462402 | 0.172996451 | 0.00017208 | 0.679184 |
| 0.135618527 | 0.069320237  | 0.134703661 | -0.37698427 | 3.22E-17   | -0.4833  |
| 0.218706088 | 0.048050891  | 0.30010683  | -0.43460773 | 6.13E-23   | -0.51252 |
| 0.221518597 | -0.062916605 | 0.174673011 | 0.16592303  | 0.00031699 | 0.43822  |
| 0.125260655 | 0.0696334    | 0.132946849 | -0.21541533 | 2.63E-06   | -0.18135 |
| 0.009760974 | -0.133782211 | 0.003775429 | -0.35834707 | 1.35E-15   | -0.28505 |
| 0.00624678  | 0.141359362  | 0.002198602 | 0.1374213   | 0.00292158 | 0.376534 |
| 0.444111413 | 0.030227817  | 0.514641869 | -0.28712838 | 2.58E-10   | -0.26982 |
| 0.4536879   | 0.045910133  | 0.322179217 | 0.055627923 | 0.23020259 | 0.400708 |
| 0.531933736 | -0.006105762 | 0.895305239 | -0.39391108 | 8.75E-19   | -0.34551 |
| 0.004489264 | -0.132272789 | 0.00419161  | 0.299544698 | 3.89E-11   | 0.411183 |
| 0.874574856 | 0.003925452  | 0.932577237 | -0.31882291 | 1.71E-12   | -0.42279 |
| 0.234485789 | -0.061765095 | 0.182712246 | -0.35370619 | 3.29E-15   | -0.61418 |
| 0.263795715 | -0.052041123 | 0.261707323 | -0.28447575 | 3.83E-10   | -0.307   |
| 0.372307805 | -0.04444891  | 0.337836605 | -0.34610604 | 1.38E-14   | -0.45738 |
| 5.91E-05    | -0.185273467 | 5.63E-05    | -0.03504686 | 0.44990615 | -0.22728 |
| 0.037344541 | -0.096741308 | 0.036626901 | -0.09592126 | 0.03825605 | -0.36593 |
| 0.897464721 | -0.002686881 | 0.953821518 | -0.44062426 | 1.33E-23   | -0.28808 |
| 0.012287136 | 0.098457372  | 0.033407592 | -0.00313846 | 0.94607136 | -0.29818 |
| 0.332500332 | -0.051490001 | 0.266799547 | -0.02021242 | 0.66307758 | -0.47423 |
| 0.240633038 | -0.05559996  | 0.230437329 | -0.30237344 | 2.49E-11   | -0.3382  |
| 0.398565924 | -0.037903187 | 0.413817946 | -0.44353979 | 6.28E-24   | -0.23415 |
| 0.662803245 | 0.022343424  | 0.630081888 | 0.018629617 | 0.68801866 | 0.513813 |
| 0.00044298  | -0.159628683 | 0.000535006 | -0.08183621 | 0.07727508 | -0.15862 |
| 0.000506075 | 0.160121686  | 0.000513867 | -0.21154444 | 4.00E-06   | -0.3013  |
| 0.389995452 | -0.048484241 | 0.295764058 | -0.43977793 | 1.65E-23   | -0.35753 |
| 0.714096029 | 0.011711395  | 0.800719693 | -0.08277736 | 0.07392007 | -0.3607  |
| 0.164611805 | -0.068174264 | 0.141285196 | -0.26042926 | 1.12E-08   | -0.54235 |
| 1.63E-07    | -0.237128737 | 2.16E-07    | -0.29071283 | 1.51E-10   | -0.22009 |
| 0.814834706 | -0.000935619 | 0.983911969 | -0.2553227  | 2.20E-08   | -0.46019 |
| 0.009036937 | -0.11779133  | 0.010848397 | -0.39662632 | 4.81E-19   | -0.28221 |
| 0.010363577 | -0.11805719  | 0.01066968  | -0.19836988 | 1.57E-05   | -0.3649  |
| 0.186912347 | 0.060181875  | 0.194207328 | -0.38945825 | 2.31E-18   | -0.41483 |
| 5.37E-07    | -0.230441844 | 4.79E-07    | -0.05628521 | 0.22473375 | -0.27875 |
| 0.001909992 | 0.141970732  | 0.002102325 | -0.3169765  | 2.33E-12   | -0.42313 |
| 0.060998417 | 0.090417998  | 0.050853459 | -0.03050816 | 0.51074822 | 0.50517  |
| 0.129679694 | -0.088065175 | 0.057210324 | -0.22621674 | 7.83E-07   | -0.28981 |

|             |              |             |             |            |          |
|-------------|--------------|-------------|-------------|------------|----------|
| 0.906122817 | -0.006960646 | 0.880749206 | -0.39006979 | 2.02E-18   | -0.47522 |
| 0.001516573 | -0.160284726 | 0.000507048 | -0.04549174 | 0.32661341 | -0.41265 |
| 0.613590517 | -0.03221839  | 0.487331262 | -0.3185622  | 1.79E-12   | -0.29637 |
| 0.101067166 | -0.078548162 | 0.089978429 | -0.23685232 | 2.24E-07   | -0.49303 |
| 0.570313669 | 0.022863546  | 0.622135747 | -0.14451755 | 0.00174133 | -0.37304 |
| 0.656090796 | 0.020732923  | 0.654954809 | -0.21681723 | 2.25E-06   | -0.27818 |
| 2.38E-05    | 0.182087119  | 7.57E-05    | -0.30250424 | 2.44E-11   | -0.33604 |
| 0.459077794 | -0.022452689 | 0.628409011 | -0.31338769 | 4.22E-12   | -0.34909 |
| 0.005540782 | -0.131708347 | 0.004357603 | 0.115201418 | 0.01273301 | 0.541066 |
| 4.75E-07    | -0.229096071 | 5.61E-07    | 0.205632984 | 7.47E-06   | 0.392701 |
| 0.293182073 | 0.045544601  | 0.326051003 | -0.26638644 | 5.00E-09   | -0.46677 |
| 0.188932739 | -0.077890517 | 0.092710026 | -0.31255695 | 4.84E-12   | -0.40895 |
| 1.19E-09    | -0.295755123 | 7.00E-11    | -0.09002011 | 0.05188506 | -0.2709  |
| 0.334110836 | -0.049314325 | 0.287563103 | -0.3594089  | 1.10E-15   | -0.39286 |
| 0.076000841 | -0.089692543 | 0.052747389 | -0.31039358 | 6.89E-12   | -0.49172 |
| 0.172469947 | 0.055054449  | 0.23505056  | -0.45031411 | 1.07E-24   | -0.43846 |
| 0.533138366 | -0.040643745 | 0.380852271 | -0.32318349 | 8.17E-13   | -0.23844 |
| 0.075789624 | 0.057115833  | 0.217955943 | -0.07014468 | 0.1301167  | -0.33264 |
| 0.485523386 | 0.020368186  | 0.66064258  | -0.4143697  | 8.41E-21   | -0.24439 |
| 0.127295559 | -0.078891723 | 0.088577307 | -0.18617022 | 5.17E-05   | -0.5657  |
| 8.34E-05    | -0.175444698 | 0.000138501 | -0.28205645 | 5.46E-10   | -0.39579 |
| 0.58044672  | 0.018670659  | 0.687367493 | -0.33933384 | 4.76E-14   | -0.51185 |
| 0.002710474 | -0.136125318 | 0.003203123 | -0.21183341 | 3.87E-06   | -0.46655 |
| 7.25E-06    | -0.210038034 | 4.70E-06    | 0.437491238 | 2.96E-23   | 0.359764 |
| 0.694928221 | -0.019954697 | 0.667114307 | -0.18204301 | 7.60E-05   | -0.44264 |
| 0.109640072 | -0.077195612 | 0.095668081 | 0.307969053 | 1.02E-11   | 0.331911 |
| 0.033099817 | 0.099608038  | 0.03138681  | -0.15254066 | 0.00094311 | -0.48388 |
| 0.700039816 | 0.016861203  | 0.716288925 | -0.41147593 | 1.65E-20   | -0.37778 |
| 0.509242128 | 0.037805321  | 0.415025464 | -0.08235157 | 0.07542292 | 0.366599 |
| 0.002311105 | 0.131252371  | 0.004496011 | -0.17488441 | 0.00014559 | -0.31215 |
| 0.0050297   | 0.12614608   | 0.006340236 | -0.16982971 | 0.00022688 | -0.49729 |
| 4.08E-09    | 0.277698349  | 1.02E-09    | -0.03271464 | 0.48064632 | 0.470832 |
| 0.212441808 | 0.062413818  | 0.178150225 | -0.24939345 | 4.72E-08   | -0.48674 |
| 0.005036037 | -0.137589683 | 0.002886699 | -0.27295906 | 2.01E-09   | -0.32585 |
| 0.020404517 | -0.114817821 | 0.01303541  | -0.04567835 | 0.32463086 | -0.30925 |
| 0.714153339 | 0.006167334  | 0.89425562  | -0.35812144 | 1.41E-15   | -0.36398 |
| 0.333808728 | 0.03724075   | 0.422031854 | -0.17320209 | 0.00016899 | -0.46353 |
| 0.320844339 | -0.047112705 | 0.30965326  | -0.33853493 | 5.50E-14   | -0.48705 |
| 2.99E-05    | 0.182098137  | 7.57E-05    | -0.24566042 | 7.57E-08   | -0.47891 |
| 0.020651988 | -0.112482401 | 0.015016812 | -0.38596061 | 4.89E-18   | -0.31952 |
| 0.026862535 | -0.111456844 | 0.015967392 | -0.40343695 | 1.05E-19   | -0.48003 |
| 0.963938397 | 0.002195452  | 0.962260556 | 0.046156741 | 0.31958405 | 0.578147 |
| 0.253441005 | 0.055502991  | 0.231252644 | -0.27742235 | 1.07E-09   | -0.40283 |
| 0.005664249 | -0.139978827 | 0.002430994 | -0.2735153  | 1.86E-09   | -0.54248 |
| 2.17E-06    | -0.21989758  | 1.60E-06    | -0.34187143 | 3.00E-14   | -0.31434 |



|             |              |             |             |            |          |
|-------------|--------------|-------------|-------------|------------|----------|
| 0.001313462 | -0.156624044 | 0.000682314 | -0.18332852 | 6.75E-05   | -0.40919 |
| 0.191654384 | -0.074783465 | 0.106524384 | -0.18500494 | 5.77E-05   | -0.32157 |
| 0.492203965 | -0.031998974 | 0.490302897 | -0.19898906 | 1.48E-05   | -0.32569 |
| 0.9057933   | -0.009997958 | 0.829389946 | -0.3755316  | 4.35E-17   | -0.45777 |
| 0.242741844 | 0.046456321  | 0.316449834 | -0.04743621 | 0.30633909 | -0.34116 |
| 0.158151861 | -0.06457679  | 0.16355     | -0.43628368 | 4.02E-23   | -0.23523 |
| 0.815096794 | 0.001228323  | 0.978879952 | -0.29011557 | 1.65E-10   | -0.56393 |
| 0.581324494 | -0.030334117 | 0.513163652 | -0.38081375 | 1.45E-17   | -0.54614 |
| 0.049510257 | 0.09171336   | 0.047612892 | -0.46188458 | 4.69E-26   | -0.39274 |
| 0.165680786 | -0.064041034 | 0.167079767 | -0.26842935 | 3.77E-09   | -0.27349 |
| 7.70E-12    | -0.317474412 | 2.14E-12    | -0.04600874 | 0.32113992 | -0.23988 |
| 0.092924813 | 0.08350589   | 0.071405284 | 0.205053916 | 7.94E-06   | 0.524631 |
| 9.71E-05    | -0.180034077 | 9.15E-05    | -0.39802036 | 3.53E-19   | -0.46031 |
| 0.395140024 | -0.051097476 | 0.270467537 | -0.31834614 | 1.85E-12   | -0.56584 |
| 0.526619824 | 0.029618896  | 0.523151846 | 0.064081839 | 0.16680894 | -0.56389 |
| 1.26E-10    | -0.303363379 | 2.13E-11    | -0.08216489 | 0.07608962 | -0.42034 |
| 0.116608842 | -0.078854616 | 0.088727791 | -0.14133869 | 0.00220193 | -0.40037 |
| 0.847507026 | 0.008911755  | 0.847685528 | -0.39397545 | 8.63E-19   | -0.47325 |
| 0.100168856 | 0.068891157  | 0.13713972  | 0.089178504 | 0.05412465 | -0.57389 |
| 0.403275973 | -0.035014897 | 0.450319811 | 0.25469415  | 2.38E-08   | 0.547411 |
| 0.496045427 | -0.037201065 | 0.422526932 | -0.32237563 | 9.37E-13   | -0.52557 |
| 2.97E-35    | -0.525210818 | 1.80E-34    | -0.0374091  | 0.41993541 | -0.08722 |
| 2.04E-08    | -0.263547803 | 7.36E-09    | -0.0966771  | 0.0367523  | -0.36995 |
| 0.000830404 | -0.156602475 | 0.000683496 | -0.13917629 | 0.00257618 | -0.19773 |
| 0.004815566 | -0.146789559 | 0.001468209 | 0.163798126 | 0.00037905 | -0.32621 |
| 0.23402084  | 0.055337784  | 0.232646406 | -0.04764096 | 0.30425374 | -0.55033 |
| 0.088324076 | 0.086414383  | 0.062052891 | 0.037651086 | 0.41693271 | 0.350545 |
| 0.149260369 | 0.055375309  | 0.232329313 | -0.00461633 | 0.92074686 | -0.44374 |
| 0.03361015  | -0.110001601 | 0.017406612 | -0.40638754 | 5.35E-20   | -0.55632 |
| 0.078088264 | -0.082351909 | 0.075421708 | -0.08173778 | 0.07763301 | -0.63882 |
| 0.145218403 | 0.065977447  | 0.154586905 | 0.183276976 | 6.78E-05   | 0.476299 |
| 0.09008803  | -0.087446603 | 0.058986857 | -0.33897223 | 5.09E-14   | -0.45193 |
| 0.222918214 | -0.044555992 | 0.336672912 | 0.248228023 | 5.47E-08   | 0.333931 |
| 0.630135401 | 0.015419353  | 0.739631183 | -0.38182576 | 1.17E-17   | -0.34463 |
| 0.462766623 | 0.021317254  | 0.645884201 | -0.36752018 | 2.21E-16   | -0.38385 |
| 0.93432922  | 0.008167578  | 0.8602682   | -0.39714172 | 4.29E-19   | -0.22837 |
| 0.850028306 | -0.02080358  | 0.653855253 | -0.44310545 | 7.03E-24   | -0.35831 |
| 0.004112438 | -0.127785749 | 0.005684985 | -0.15826467 | 0.00059778 | -0.26824 |
| 0.002832423 | 0.135264451  | 0.003403536 | -0.0131575  | 0.7767274  | -0.39658 |
| 5.67E-05    | 0.184985042  | 5.78E-05    | -0.06166711 | 0.18340876 | 0.35556  |
| 0.62662259  | -0.037436868 | 0.419590215 | -0.3904644  | 1.85E-18   | -0.25835 |
| 0.757266045 | 0.009041318  | 0.845498722 | -0.0267101  | 0.56477334 | -0.3602  |
| 0.01571913  | 0.116491619  | 0.011760815 | 0.563646283 | 1.64E-40   | 0.2335   |
| 4.05E-05    | -0.191292031 | 3.16E-05    | -0.15786075 | 0.00061764 | -0.12919 |
| 0.155541818 | -0.081952301 | 0.076854668 | -0.05726187 | 0.2167796  | -0.41307 |

|             |              |             |             |            |          |
|-------------|--------------|-------------|-------------|------------|----------|
| 0.238930212 | -0.037937172 | 0.413399106 | 0.053175633 | 0.25143657 | -0.08396 |
| 0.000328807 | -0.174746057 | 0.000147396 | -0.12002399 | 0.00942665 | -0.14051 |
| 0.000501552 | 0.149097924  | 0.001231515 | -0.22256024 | 1.19E-06   | -0.28883 |
| 0.019352408 | -0.101095197 | 0.028930673 | -0.40838475 | 3.38E-20   | -0.24398 |
| 0.000245664 | -0.173364114 | 0.000166592 | -0.31144845 | 5.80E-12   | -0.44473 |
| 0.000419884 | -0.171846362 | 0.000190363 | -0.16244106 | 0.00042443 | -0.30951 |
| 2.71E-07    | -0.244551222 | 8.69E-08    | 0.057269671 | 0.21671688 | -0.28694 |
| 0.014541891 | -0.107009544 | 0.02072576  | -0.08518829 | 0.06586436 | -0.26464 |
| 0.001851187 | 0.147519401  | 0.001389202 | -0.19649093 | 1.90E-05   | -0.34056 |
| 0.022690838 | 0.114979495  | 0.012907193 | 0.104173533 | 0.02436627 | 0.536503 |
| 0.74418321  | -0.022364649 | 0.629756778 | -0.20643017 | 6.87E-06   | -0.51296 |
| 0.009832909 | 0.122735594  | 0.007924346 | 0.140907917 | 0.00227226 | 0.36708  |
| 0.099686327 | -0.079077227 | 0.087828098 | -0.24644028 | 6.86E-08   | -0.17504 |
| 0.056386468 | -0.091537427 | 0.048042596 | -0.09833996 | 0.0336199  | -0.53622 |
| 0.889805088 | 0.009824346  | 0.832308275 | -0.11728442 | 0.01119652 | -0.28988 |
| 0.996794643 | 0.003481461  | 0.940187969 | -0.11776076 | 0.01086911 | -0.46971 |
| 0.642104871 | 0.022087085  | 0.634013917 | 0.052258201 | 0.25972008 | 0.156258 |
| 0.721522805 | 0.013796388  | 0.766193507 | -0.21758978 | 2.07E-06   | -0.15356 |
| 0.000212522 | 0.174621956  | 0.000149031 | 0.053106491 | 0.25205438 | 0.514551 |
| 0.055899529 | -0.090532307 | 0.050560278 | -0.0672926  | 0.14651427 | -0.46893 |
| 0.000231578 | 0.160770786  | 0.000487216 | -0.13454676 | 0.00357924 | -0.4252  |
| 0.002251159 | -0.139758335 | 0.00247012  | -0.21477044 | 2.82E-06   | -0.37471 |
| 9.05E-05    | 0.180909201  | 8.44E-05    | -0.17911602 | 9.95E-05   | -0.30407 |
| 0.382974477 | -0.045868109 | 0.322622812 | -0.2194703  | 1.68E-06   | -0.41766 |
| 7.68E-05    | 0.179929242  | 9.24E-05    | 0.094368066 | 0.04151028 | 0.397165 |
| 0.01556598  | -0.12117633  | 0.008759756 | -0.13177079 | 0.00433895 | -0.52632 |
| 0.381410475 | 0.041965835  | 0.365540827 | -0.15023006 | 0.00112876 | -0.58178 |
| 0.146660135 | -0.072598181 | 0.117179363 | -0.43799436 | 2.61E-23   | -0.32323 |
| 0.020845361 | 0.108120954  | 0.019433634 | -0.30917545 | 8.40E-12   | -0.34287 |
| 0.281058712 | -0.05761501  | 0.213953822 | 0.010506551 | 0.82085436 | -0.41097 |
| 0.655445744 | -0.012857378 | 0.781690182 | -0.01011794 | 0.82737445 | -0.52037 |
| 0.588233888 | 0.026026269  | 0.574783789 | 0.339368103 | 4.73E-14   | 0.655251 |
| 0.361953003 | -0.043594844 | 0.347210005 | -0.29981216 | 3.73E-11   | -0.40661 |
| 0.139215615 | -0.064666861 | 0.162962114 | -0.07597473 | 0.10104708 | -0.27598 |
| 0.794754371 | 0.013195627  | 0.776097676 | -0.11166336 | 0.01577184 | -0.42243 |
| 0.0934926   | 0.073265827  | 0.113839091 | -0.31972707 | 1.47E-12   | -0.49222 |
| 3.23E-10    | -0.280451023 | 6.89E-10    | -0.07530002 | 0.1041212  | -0.49295 |
| 0.046394348 | -0.084769682 | 0.067208906 | -0.1470225  | 0.00144256 | -0.329   |
| 0.001779925 | -0.138271648 | 0.002749278 | -0.11959972 | 0.00968334 | -0.36106 |
| 0.02613982  | -0.108534618 | 0.018970942 | -0.17388009 | 0.00015917 | -0.55554 |
| 0.00608305  | -0.129931822 | 0.004919534 | 0.48698256  | 3.50E-29   | 0.38391  |
| 1.21E-05    | -0.209041446 | 5.22E-06    | -0.24304542 | 1.05E-07   | -0.33643 |
| 0.002933581 | -0.136217901 | 0.003182221 | -0.12309839 | 0.00774048 | -0.54063 |
| 0.95701021  | 0.002114957  | 0.963643275 | 0.053889494 | 0.2451195  | 0.532931 |
| 0.354462996 | -0.044198766 | 0.340565011 | -0.21571472 | 2.54E-06   | -0.40463 |

|             |              |             |             |            |          |
|-------------|--------------|-------------|-------------|------------|----------|
| 0.005084398 | -0.136954848 | 0.003020209 | -0.2839395  | 4.14E-10   | -0.36017 |
| 0.239243097 | 0.051940426  | 0.2626327   | -0.19134431 | 3.15E-05   | -0.39277 |
| 1.13E-07    | 0.243883786  | 9.45E-08    | -0.17893318 | 0.00010114 | -0.55849 |
| 0.079851479 | -0.077843551 | 0.092907616 | -0.05582334 | 0.22856691 | -0.30659 |
| 0.002054523 | 0.150092629  | 0.001140794 | 0.058282724 | 0.20868347 | 0.370566 |
| 0.047028053 | 0.089873579  | 0.052269343 | -0.11496281 | 0.01292037 | -0.40903 |
| 0.067738519 | -0.089548268 | 0.053130964 | -0.19784009 | 1.66E-05   | -0.37083 |
| 0.008194813 | -0.131176099 | 0.004519546 | -0.45471547 | 3.29E-25   | -0.27371 |
| 0.100698928 | -0.085659128 | 0.064378556 | -0.08792008 | 0.05762301 | -0.33518 |
| 3.15E-05    | -0.193283429 | 2.61E-05    | -0.25507622 | 2.27E-08   | -0.62457 |
| 0.01218375  | -0.130639863 | 0.004688179 | -0.26720256 | 4.47E-09   | -0.25221 |
| 0.000589632 | 0.173376765  | 0.000166406 | 0.077141191 | 0.09590288 | 0.404222 |
| 6.56E-05    | -0.192240519 | 2.89E-05    | -0.32121931 | 1.14E-12   | -0.31741 |
| 0.819929243 | -0.00273763  | 0.952950325 | 0.191452496 | 3.12E-05   | 0.449879 |
| 0.044116461 | -0.098126187 | 0.034009388 | -0.13184278 | 0.00431754 | -0.49939 |
| 0.682327518 | 0.010551327  | 0.82010389  | -0.01984886 | 0.66877481 | -0.60809 |
| 0.315573899 | -0.047538482 | 0.305296294 | -0.27401212 | 1.73E-09   | -0.20671 |
| 0.021192569 | -0.105810782 | 0.022202507 | -0.26750122 | 4.29E-09   | -0.45419 |
| 0.058707202 | 0.087704653  | 0.058240267 | -0.03126495 | 0.5003142  | -0.20114 |
| 0.034219432 | -0.101307488 | 0.028593881 | -0.40295715 | 1.17E-19   | -0.22352 |
| 0.638289947 | -0.026548857 | 0.567126223 | -0.38495817 | 6.05E-18   | -0.27283 |
| 0.001613845 | -0.144256888 | 0.001775478 | -0.12764163 | 0.00574003 | -0.2964  |
| 0.000106395 | -0.194335753 | 2.35E-05    | -0.05537855 | 0.23230198 | -0.37193 |
| 9.20E-05    | -0.18560979  | 5.45E-05    | -0.1175102  | 0.01104026 | -0.52952 |
| 0.799289412 | -0.015175675 | 0.743600528 | -0.34591263 | 1.43E-14   | -0.32271 |
| 0.333843522 | -0.047404648 | 0.306661418 | -0.31659876 | 2.48E-12   | -0.44714 |
| 0.028816042 | 0.098778145  | 0.0328334   | -0.09906605 | 0.03232523 | -0.53222 |
| 0.126293868 | -0.067989756 | 0.142367503 | -0.4248249  | 6.90E-22   | -0.35151 |
| 0.27242996  | -0.059340358 | 0.200528422 | -0.09639021 | 0.03731705 | -0.48666 |
| 0.730883314 | 0.01162732   | 0.802120609 | -0.17809753 | 0.00010911 | -0.53062 |
| 0.573326302 | 0.016435518  | 0.723154064 | -0.37529489 | 4.57E-17   | -0.40616 |
| 0.050222701 | -0.102371754 | 0.026955736 | -0.42634529 | 4.76E-22   | -0.33067 |
| 0.289981405 | 0.041853985  | 0.366821157 | -0.26129704 | 9.96E-09   | -0.64553 |
| 0.023730806 | -0.098784818 | 0.032821545 | -0.22449588 | 9.53E-07   | -0.56767 |
| 0.003660395 | 0.137253752  | 0.002956663 | 0.305569467 | 1.50E-11   | 0.417471 |
| 3.13E-05    | -0.197525793 | 1.71E-05    | -0.33876647 | 5.28E-14   | -0.42863 |
| 0.002568433 | -0.136035933 | 0.003223422 | 0.228642043 | 5.91E-07   | 0.406091 |
| 0.367318763 | -0.036391581 | 0.432699257 | -0.21533924 | 2.65E-06   | -0.33112 |
| 8.13E-06    | 0.198684405  | 1.52E-05    | 0.002333806 | 0.95988421 | 0.232026 |
| 0.205917004 | -0.069180004 | 0.135496126 | -0.23338044 | 3.39E-07   | -0.35236 |
| 0.514712125 | 0.038374355  | 0.408033509 | -0.03353322 | 0.46972882 | -0.49889 |
| 1.08E-17    | 0.392723135  | 1.13E-18    | 0.144722237 | 0.00171494 | 0.229313 |
| 0.246306174 | 0.044913148  | 0.332810196 | -0.23968828 | 1.58E-07   | -0.48688 |
| 0.067799681 | -0.100748804 | 0.029487524 | -0.25481607 | 2.35E-08   | -0.21938 |
| 1.87E-13    | -0.337336261 | 6.83E-14    | -0.23867521 | 1.79E-07   | -0.18996 |

|             |              |             |             |            |          |
|-------------|--------------|-------------|-------------|------------|----------|
| 0.055357279 | 0.087622461  | 0.058477212 | -0.21463841 | 2.86E-06   | -0.35463 |
| 0.001246969 | -0.154805542 | 0.000788881 | -0.13363616 | 0.003814   | -0.49404 |
| 0.001678534 | -0.150786568 | 0.001081194 | -0.17281331 | 0.00017488 | -0.53328 |
| 0.049623008 | 0.088059712  | 0.057225818 | -0.44786923 | 2.03E-24   | -0.53497 |
| 1.22E-15    | -0.358544796 | 1.30E-15    | -0.18889583 | 3.99E-05   | -0.35108 |
| 0.92330558  | -0.001816546 | 0.968770231 | -0.40776312 | 3.90E-20   | -0.49566 |
| 0.000338525 | 0.164799616  | 0.000348509 | 0.245969114 | 7.28E-08   | 0.336697 |
| 0.366759044 | 0.040173051  | 0.386396903 | -0.23374459 | 3.24E-07   | -0.44194 |
| 0.000194422 | 0.163953465  | 0.000374156 | 0.023773312 | 0.60834224 | 0.340228 |
| 0.237490312 | 0.059924081  | 0.196128069 | -0.22120174 | 1.38E-06   | -0.22328 |
| 0.103729773 | -0.087299533 | 0.05941589  | -0.14531333 | 0.00164077 | -0.3488  |
| 0.016609054 | -0.119493568 | 0.009748522 | -0.25412565 | 2.57E-08   | -0.46542 |
| 0.397233537 | 0.03903833   | 0.399964047 | -0.18730274 | 4.64E-05   | -0.49428 |
| 0.526646876 | -0.032395137 | 0.484944582 | -0.01002542 | 0.82892854 | -0.42641 |
| 0.219206559 | 0.059804338  | 0.197024943 | -0.11497707 | 0.0129091  | -0.32736 |
| 0.575793305 | -0.036119143 | 0.436154354 | -0.33831357 | 5.73E-14   | -0.48023 |
| 6.51E-05    | 0.192092853  | 2.93E-05    | -0.24041552 | 1.45E-07   | -0.37018 |
| 0.079966386 | 0.064680957  | 0.16287026  | -0.08527155 | 0.06559959 | -0.37819 |
| 7.48E-12    | 0.314588279  | 3.46E-12    | -0.01454065 | 0.75397643 | 0.267997 |
| 1.59E-07    | 0.244403963  | 8.85E-08    | 0.220481451 | 1.50E-06   | 0.558722 |
| 2.22E-08    | 0.270248293  | 2.93E-09    | -0.13399759 | 0.0037192  | 0.479479 |
| 0.531273933 | -0.031805424 | 0.492932262 | -0.27847381 | 9.17E-10   | -0.55232 |
| 0.004732407 | 0.136153749  | 0.003196691 | -0.25170859 | 3.51E-08   | -0.34051 |
| 0.017052231 | 0.109487048  | 0.017941973 | -0.43069441 | 1.63E-22   | -0.63945 |
| 1.55E-13    | -0.318732495 | 1.74E-12    | -0.21168017 | 3.94E-06   | -0.29715 |
| 0.086775197 | 0.076000891  | 0.100929346 | 0.223039301 | 1.12E-06   | 0.524125 |
| 0.088054266 | 0.081998612  | 0.076687477 | 0.068468454 | 0.13957256 | 0.468764 |
| 0.039851663 | -0.11687497  | 0.011484889 | -0.19579777 | 2.03E-05   | -0.08581 |
| 1.62E-06    | -0.224731392 | 9.28E-07    | 0.022079926 | 0.63412388 | -0.51754 |
| 6.05E-05    | -0.188457609 | 4.16E-05    | -0.31825054 | 1.88E-12   | -0.4466  |
| 0.021612228 | 0.107509057  | 0.020136067 | -0.26102643 | 1.03E-08   | -0.31498 |
| 0.217133271 | -0.054445231 | 0.240279143 | -0.04633781 | 0.31768725 | -0.54215 |
| 0.015663671 | -0.117624312 | 0.010962022 | -0.30077435 | 3.21E-11   | -0.30819 |
| 0.015461986 | 0.120862895  | 0.008936858 | 0.03448182  | 0.45725012 | 0.36625  |
| 0.033407978 | 0.084514618  | 0.068039136 | -0.18746682 | 4.57E-05   | -0.21047 |
| 0.205663368 | 0.056588067  | 0.222245302 | -0.26327926 | 7.63E-09   | -0.3685  |
| 0.625223725 | -0.040964405 | 0.377103028 | -0.0520829  | 0.26132402 | -0.36488 |
| 0.100752896 | -0.082949128 | 0.073320725 | -0.22521453 | 8.78E-07   | -0.48858 |
| 0.600255127 | -0.041070501 | 0.375867541 | -0.0851764  | 0.06590224 | -0.52636 |
| 0.976655178 | -0.010597267 | 0.819334083 | -0.37569764 | 4.20E-17   | -0.19022 |
| 0.009416665 | -0.122977085 | 0.007801528 | -0.22376116 | 1.04E-06   | -0.44638 |
| 0.022832397 | -0.104977487 | 0.023282016 | -0.1270001  | 0.00599095 | -0.46178 |
| 0.008825344 | -0.121581853 | 0.008535261 | -0.13026023 | 0.00481097 | -0.17301 |
| 0.646779599 | 0.01000399   | 0.829288591 | -0.17722114 | 0.0001181  | -0.44841 |
| 0.000669088 | -0.16593653  | 0.000316623 | -0.44403061 | 5.53E-24   | -0.40482 |

|             |              |             |             |            |          |
|-------------|--------------|-------------|-------------|------------|----------|
| 0.001379045 | -0.161317454 | 0.000465773 | -0.06621826 | 0.15308409 | -0.41781 |
| 0.743691164 | -0.022102477 | 0.633777529 | 0.455690181 | 2.53E-25   | 0.551972 |
| 0.000237041 | -0.179047562 | 0.000100094 | 0.029527891 | 0.52442983 | -0.44879 |
| 0.005222389 | 0.132532082  | 0.00411729  | 0.228576945 | 5.96E-07   | 0.558197 |
| 6.58E-12    | 0.328318768  | 3.37E-13    | 0.011651435 | 0.80171872 | 0.458559 |
| 0.000642374 | 0.176563411  | 0.000125301 | 0.091386156 | 0.04841466 | 0.380858 |
| 0.009516834 | 0.110117459  | 0.017288012 | -0.13780546 | 0.00284256 | -0.31731 |
| 0.484742572 | 0.029297422  | 0.52767346  | 0.031671303 | 0.49475869 | -0.3589  |
| 0.240880366 | 0.05182481   | 0.263697961 | -0.12787182 | 0.00565233 | -0.39904 |
| 0.503554771 | -0.026475461 | 0.568198753 | -0.08824555 | 0.05670071 | -0.21495 |
| 0.799697686 | -0.019762755 | 0.670126931 | -0.23106813 | 4.45E-07   | -0.32388 |
| 0.116285018 | -0.078724412 | 0.089257435 | -0.07144494 | 0.12312918 | -0.21781 |
| 0.0145103   | -0.12120938  | 0.008741265 | -0.25192171 | 3.41E-08   | -0.44093 |
| 0.502127786 | 0.025314526  | 0.585290791 | -0.32698417 | 4.25E-13   | -0.24898 |
| 0.792773305 | -0.003337274 | 0.942660784 | -0.14502881 | 0.0016761  | -0.1479  |
| 0.762622298 | 0.005266286  | 0.909633208 | -0.13484521 | 0.0035052  | -0.29641 |
| 0.020379869 | 0.09908624   | 0.032289852 | -0.06764098 | 0.14443071 | -0.46559 |
| 0.78090207  | 0.004809384  | 0.917444145 | -0.25934949 | 1.29E-08   | -0.46877 |
| 0.229700827 | 0.050124489  | 0.279707773 | -0.15810771 | 0.00060542 | -0.45674 |
| 0.000552698 | -0.166889841 | 0.000292007 | 0.222199304 | 1.24E-06   | 0.320934 |
| 0.488826345 | 0.02203475   | 0.634817963 | -0.27925867 | 8.19E-10   | -0.36455 |
| 0.088383208 | 0.072708817  | 0.116620604 | -0.30398515 | 1.93E-11   | -0.28225 |
| 0.091462711 | 0.092533665  | 0.045651638 | 0.235009957 | 2.79E-07   | 0.471288 |
| 0.085121106 | 0.088909498  | 0.054857244 | 0.141884235 | 0.00211571 | 0.664537 |
| 0.135862924 | 0.074972356  | 0.10564056  | 0.248921412 | 5.01E-08   | 0.626627 |
| 0.213229029 | 0.051970281  | 0.262358103 | -0.18939392 | 3.80E-05   | -0.30804 |
| 0.494175622 | 0.024310441  | 0.600262828 | -0.17933023 | 9.76E-05   | -0.44151 |
| 0.001618822 | 0.137543582  | 0.00289621  | 0.108328462 | 0.01920032 | 0.379836 |
| 1.08E-17    | 0.386683378  | 4.19E-18    | 0.164147525 | 0.00036812 | 0.357149 |
| 0.007615911 | -0.1486009   | 0.001279293 | -0.24736366 | 6.11E-08   | -0.30171 |
| 0.813419053 | 0.004013366  | 0.931070954 | -0.17298832 | 0.0001722  | -0.65471 |
| 0.521525074 | -0.035459252 | 0.444588546 | -0.36495169 | 3.69E-16   | -0.49485 |
| 8.49E-10    | -0.28003667  | 7.32E-10    | -0.18088256 | 8.46E-05   | -0.25454 |
| 0.480701749 | -0.04515835  | 0.330174868 | -0.1534444  | 0.0008785  | -0.40051 |
| 0.277940396 | 0.067165484  | 0.147280232 | -0.02856118 | 0.53810315 | -0.37358 |
| 0.572834519 | 0.029491426  | 0.524942367 | -0.06638041 | 0.15207844 | 0.586415 |
| 0.306904593 | 0.036179523  | 0.435387243 | 0.021456215 | 0.64373475 | -0.47624 |
| 0.571086256 | 0.025150539  | 0.587724177 | 0.327770216 | 3.71E-13   | 0.436965 |
| 0.472427126 | 0.027755133  | 0.549638884 | 0.070605922 | 0.12760372 | 0.397988 |
| 0.079374775 | 0.081123056  | 0.079898864 | 0.320023873 | 1.40E-12   | 0.316472 |
| 0.635372747 | -0.026653661 | 0.565596401 | -0.06461109 | 0.16332594 | -0.25793 |
| 0.022208384 | -0.101686509 | 0.028000941 | -0.02258642 | 0.62636418 | -0.4504  |
| 0.678881936 | -0.023023433 | 0.619701813 | -0.39781005 | 3.70E-19   | -0.47148 |
| 0.001930607 | 0.14171701   | 0.002141803 | -0.01709757 | 0.71248677 | -0.22752 |
| 0.97316229  | -0.009667342 | 0.834949437 | -0.3800546  | 1.70E-17   | -0.54862 |

|             |              |             |             |            |          |
|-------------|--------------|-------------|-------------|------------|----------|
| 0.967277958 | 0.003507987  | 0.939733107 | -0.22916654 | 5.56E-07   | -0.63823 |
| 0.2719118   | 0.04983955   | 0.282453796 | 0.242704888 | 1.09E-07   | 0.309838 |
| 5.59E-05    | -0.179004174 | 0.000100491 | -0.12056848 | 0.00910611 | -0.57982 |
| 4.07E-06    | -0.218974643 | 1.77E-06    | -0.25049046 | 4.10E-08   | -0.30654 |
| 0.000608018 | -0.169050082 | 0.000242685 | -0.49225646 | 7.14E-30   | -0.35476 |
| 0.334765045 | 0.047209755  | 0.30865656  | -0.30958255 | 7.87E-12   | -0.25366 |
| 0.64202401  | -0.022493434 | 0.627785677 | -0.31795757 | 1.98E-12   | -0.4551  |
| 6.55E-05    | -0.194242477 | 2.37E-05    | -0.18150581 | 7.99E-05   | -0.53659 |
| 1.21E-06    | 0.223912138  | 1.02E-06    | 0.370159071 | 1.30E-16   | 0.242833 |
| 0.001842315 | 0.139231559  | 0.002565931 | 0.072275767 | 0.11881965 | 0.358953 |
| 0.015214013 | -0.114402982 | 0.013369553 | -0.18193258 | 7.68E-05   | -0.37457 |
| 0.375778775 | -0.042476983 | 0.359725244 | -0.3840087  | 7.40E-18   | -0.46641 |
| 0.838299564 | -0.01583356  | 0.732899938 | -0.02402172 | 0.60459977 | -0.34486 |
| 2.91E-10    | 0.288954636  | 1.97E-10    | 0.303208504 | 2.19E-11   | 0.409163 |
| 9.51E-06    | 0.207380941  | 6.22E-06    | 0.281895999 | 5.59E-10   | 0.281522 |
| 0.47711033  | 0.035157451  | 0.448476627 | -0.25665312 | 1.84E-08   | -0.60495 |
| 0.029206953 | -0.109529957 | 0.017896786 | -0.20627717 | 6.98E-06   | -0.37597 |
| 0.000113432 | -0.192369465 | 2.85E-05    | -0.19560939 | 2.07E-05   | -0.32912 |
| 0.04492897  | 0.089705957  | 0.052711843 | 0.238328719 | 1.87E-07   | -0.60735 |
| 0.010635052 | 0.126973171  | 0.00600169  | -0.28723114 | 2.54E-10   | -0.34942 |
| 8.13E-06    | 0.201825564  | 1.11E-05    | -0.09492921 | 0.0403086  | 0.265974 |
| 0.719442591 | 0.015576489  | 0.737075208 | 0.089315528 | 0.05375463 | 0.526528 |
| 0.054144538 | -0.08796843  | 0.057485214 | -0.47430148 | 1.43E-27   | -0.34079 |
| 0.170365356 | -0.058993176 | 0.203179451 | 0.488251138 | 2.40E-29   | 0.361688 |
| 0.000124949 | 0.177980763  | 0.000110271 | -0.05144667 | 0.26720276 | -0.20568 |
| 0.803071752 | -0.016381037 | 0.724034314 | -0.30654487 | 1.28E-11   | -0.6531  |
| 0.073196556 | -0.087896346 | 0.057690741 | 0.149179569 | 0.00122383 | 0.565147 |
| 0.982539401 | -0.004892827 | 0.916017044 | -0.36532173 | 3.43E-16   | -0.45033 |
| 0.157494346 | -0.063259658 | 0.172329649 | -0.08722499 | 0.05963432 | -0.40939 |
| 0.006861991 | -0.128434471 | 0.005443018 | -0.40568444 | 6.28E-20   | -0.31757 |
| 1.46E-06    | -0.234815018 | 2.86E-07    | -0.13868128 | 0.00266962 | -0.55791 |
| 0.797798351 | -0.016737577 | 0.718280349 | 0.174944386 | 0.00014482 | -0.53808 |
| 0.001108933 | 0.147911653  | 0.001348373 | -0.21178376 | 3.90E-06   | -0.22479 |
| 0.002631813 | 0.128347384  | 0.005474952 | 0.306450092 | 1.30E-11   | 0.517169 |
| 0.341466932 | -0.04711958  | 0.309582578 | 0.494101631 | 4.07E-30   | 0.394558 |
| 0.000248904 | -0.166821418 | 0.000293713 | 0.503472693 | 2.21E-31   | 0.408552 |
| 0.860497887 | 0.007422958  | 0.872893851 | -0.22324768 | 1.10E-06   | -0.20624 |
| 1.58E-07    | -0.248302504 | 5.42E-08    | -0.00040841 | 0.99297704 | -0.34413 |
| 8.40E-05    | -0.178159904 | 0.000108496 | -0.09556413 | 0.03898451 | -0.34809 |
| 0.360165502 | -0.04727784  | 0.307958594 | -0.29109593 | 1.43E-10   | -0.39352 |
| 0.091713513 | -0.074583702 | 0.107465423 | 0.359736494 | 1.03E-15   | 0.625778 |
| 0.386374502 | -0.045028285 | 0.33157107  | -0.26480383 | 6.20E-09   | -0.45667 |
| 0.154129177 | -0.061079376 | 0.18762768  | -0.39886118 | 2.93E-19   | -0.46042 |
| 0.129590242 | -0.072021286 | 0.120126943 | 0.344100403 | 1.99E-14   | 0.489675 |
| 0.478000781 | -0.043346243 | 0.349969117 | 0.163351507 | 0.00039346 | -0.27245 |

|             |              |             |             |            |          |
|-------------|--------------|-------------|-------------|------------|----------|
| 0.001200879 | 0.155226615  | 0.000762918 | 0.223649804 | 1.05E-06   | 0.370873 |
| 0.127151375 | -0.073314827 | 0.113596913 | -0.36896009 | 1.66E-16   | -0.15199 |
| 5.11E-06    | 0.211136084  | 4.18E-06    | -0.35062532 | 5.91E-15   | -0.12006 |
| 0.010639976 | 0.112607616  | 0.014904224 | -0.17460747 | 0.00014922 | -0.47635 |
| 0.404239049 | -0.027301815 | 0.556179445 | -0.10786038 | 0.01973011 | -0.26433 |
| 0.130469415 | -0.078592909 | 0.089794942 | -0.34888579 | 8.19E-15   | -0.18202 |
| 0.282600202 | -0.061504602 | 0.184568205 | -0.19960385 | 1.39E-05   | -0.43122 |
| 1.62E-34    | -0.534961905 | 6.25E-36    | -0.11090439 | 0.01650099 | -0.24083 |
| 0.603276246 | -0.017737368 | 0.702230991 | 0.035228242 | 0.4475629  | 0.609775 |
| 0.002855445 | -0.145368128 | 0.001634048 | -0.2901494  | 1.64E-10   | -0.54172 |
| 0.000354666 | 0.172080506  | 0.000186499 | -0.28337254 | 4.50E-10   | -0.52776 |
| 0.093306014 | 0.065633942  | 0.156749863 | 0.148169302 | 0.00132216 | 0.561825 |
| 0.048182004 | -0.096236478 | 0.037622696 | -0.25831121 | 1.48E-08   | -0.39581 |
| 0.671673076 | 0.027984692  | 0.546341231 | -0.31792957 | 1.99E-12   | -0.34267 |
| 0.971360696 | -0.007966565 | 0.863673174 | -0.25584708 | 2.05E-08   | -0.54453 |
| 0.731090599 | 0.012077191  | 0.794632105 | 0.24764542  | 5.89E-08   | 0.573943 |
| 0.035024759 | -0.102896804 | 0.026177759 | -0.10843624 | 0.0190801  | -0.27712 |
| 0.001140346 | 0.144086637  | 0.001798111 | -0.22350352 | 1.07E-06   | -0.48745 |
| 0.013545939 | 0.112126606  | 0.01534081  | -0.18369531 | 6.52E-05   | -0.34479 |
| 0.188375003 | 0.053893102  | 0.245087853 | -0.30964713 | 7.78E-12   | -0.14129 |
| 0.250903541 | 0.048038174  | 0.300234913 | 0.040598278 | 0.38138572 | -0.38949 |
| 0.003711627 | 0.132803928  | 0.004040654 | 0.473628411 | 1.74E-27   | 0.408277 |
| 0.581867866 | -0.025607639 | 0.580952996 | -0.360245   | 9.32E-16   | -0.55689 |
| 0.480937418 | -0.037269871 | 0.421668783 | -0.10930746 | 0.01813218 | -0.39774 |
| 1.50E-09    | 0.27668208   | 1.18E-09    | -0.2199984  | 1.58E-06   | -0.18998 |
| 0.256715199 | -0.068352383 | 0.14024636  | 0.109636451 | 0.01778507 | -0.39923 |
| 0.056819344 | 0.07769073   | 0.093552877 | -0.24331463 | 1.01E-07   | -0.32107 |
| 0.344353294 | 0.028212158  | 0.543083307 | -0.2665195  | 4.91E-09   | -0.3521  |
| 0.008185178 | -0.127035527 | 0.005976836 | -0.15837239 | 0.00059258 | -0.21656 |
| 0.590356589 | 0.020967677  | 0.651304501 | -0.08632485 | 0.06232493 | -0.51711 |
| 0.001430375 | -0.150083804 | 0.001141571 | -0.25566001 | 2.10E-08   | -0.17468 |
| 0.061387449 | -0.081775621 | 0.077495243 | -0.06812011 | 0.1416022  | -0.29701 |
| 0.565589481 | -0.035970398 | 0.43804742  | -0.22246087 | 1.20E-06   | -0.50803 |
| 0.000727499 | -0.15683455  | 0.00067088  | -0.36027998 | 9.26E-16   | -0.46728 |
| 0.000619742 | 0.153503449  | 0.000874427 | -0.13765428 | 0.00287342 | -0.35679 |
| 0.138804985 | -0.077963756 | 0.092402577 | -0.24381074 | 9.53E-08   | -0.49896 |
| 0.456877129 | 0.028511693  | 0.538807942 | -0.1303421  | 0.00478425 | -0.54446 |
| 0.000231876 | -0.175899443 | 0.000132985 | -0.02892142 | 0.53298711 | -0.24615 |
| 0.933020801 | -0.013900242 | 0.764485171 | -0.16375131 | 0.00038054 | -0.2451  |
| 0.254114829 | -0.059756306 | 0.197385544 | 0.035234758 | 0.44747886 | -0.54144 |
| 0.002147829 | -0.149569563 | 0.001187702 | 0.107771043 | 0.01983266 | -0.53156 |
| 0.829001801 | -0.010325651 | 0.823887979 | -0.1320652  | 0.00425198 | -0.45644 |
| 2.33E-13    | -0.331867466 | 1.81E-13    | -0.06532103 | 0.15874005 | -0.24804 |
| 0.460082466 | -0.049107201 | 0.289594958 | -0.00546545 | 0.90623106 | -0.52006 |
| 0.274055038 | -0.053002426 | 0.25298622  | -0.08970276 | 0.05272032 | -0.34153 |

|             |              |             |             |            |          |
|-------------|--------------|-------------|-------------|------------|----------|
| 0.518250616 | -0.02393531  | 0.605900408 | 0.376144537 | 3.83E-17   | 0.594435 |
| 0.145076702 | -0.071047957 | 0.125230862 | -0.28658181 | 2.80E-10   | -0.36109 |
| 0.183135515 | -0.064867629 | 0.161657448 | -0.4522434  | 6.38E-25   | -0.27126 |
| 8.50E-06    | 0.20456193   | 8.35E-06    | -0.20757557 | 6.09E-06   | -0.50978 |
| 0.000235115 | -0.187684184 | 4.48E-05    | -0.093863   | 0.04261759 | -0.36673 |
| 0.869482353 | 0.01376582   | 0.766696542 | 0.142145076 | 0.00207558 | -0.49577 |
| 0.103440446 | -0.083733712 | 0.070633379 | 0.259374675 | 1.29E-08   | 0.475525 |
| 0.167084082 | -0.059463422 | 0.199594785 | 0.231466311 | 4.25E-07   | 0.594616 |
| 0.001644097 | -0.148618022 | 0.001277619 | -0.28353377 | 4.40E-10   | -0.59734 |
| 0.00017065  | -0.181091842 | 8.30E-05    | -0.30688599 | 1.22E-11   | -0.46982 |
| 0.781346802 | -0.008758549 | 0.850272918 | -0.03843572 | 0.40728375 | -0.42327 |
| 0.237126414 | -0.05659932  | 0.222153217 | -0.12859371 | 0.00538506 | -0.55533 |
| 0.01258014  | 0.10631997   | 0.021564453 | -0.09102313 | 0.04931741 | -0.41767 |
| 0.001380281 | -0.154764207 | 0.000791473 | 0.468650758 | 7.13E-27   | 0.519139 |
| 0.000116684 | 0.186065866  | 5.22E-05    | 0.332783247 | 1.54E-13   | 0.518358 |
| 0.727116599 | 0.0019815    | 0.965936005 | -0.09229102 | 0.04622457 | -0.52882 |
| 2.43E-05    | -0.199598812 | 1.39E-05    | -0.14584514 | 0.00157657 | -0.51135 |
| 0.964491156 | -0.011511319 | 0.804054521 | -0.27173363 | 2.38E-09   | -0.39448 |
| 0.001070153 | 0.153578184  | 0.000869294 | -0.1799354  | 9.23E-05   | -0.5321  |
| 0.868820643 | -0.00110387  | 0.981019385 | -0.16668209 | 0.00029721 | -0.52024 |
| 0.022896542 | -0.110945283 | 0.016460969 | -0.30117875 | 3.01E-11   | -0.57215 |
| 0.587424787 | 0.017099503  | 0.712455696 | -0.31298581 | 4.51E-12   | -0.49456 |
| 0.395432992 | 0.035010252  | 0.450379943 | -0.2340812  | 3.12E-07   | -0.03645 |
| 0.000340415 | -0.173946779 | 0.000158229 | 0.187805733 | 4.43E-05   | 0.371406 |
| 0.003317649 | -0.133238504 | 0.003920821 | -0.11019175 | 0.01721233 | -0.20485 |
| 0.271895909 | -0.041906425 | 0.366220544 | -0.14723603 | 0.0014194  | -0.41458 |
| 0.807616373 | -0.002129212 | 0.963398405 | -0.16100267 | 0.00047801 | -0.21526 |
| 1.42E-09    | 0.285902579  | 3.10E-10    | -0.03663653 | 0.42960634 | 0.462966 |
| 0.223280185 | 0.056525621  | 0.222756782 | -0.24223266 | 1.16E-07   | -0.61105 |
| 0.022771807 | -0.101349897 | 0.028527004 | -0.19228037 | 2.87E-05   | -0.28168 |
| 0.014474532 | -0.116481773 | 0.011767978 | -0.21079931 | 4.33E-06   | -0.51625 |
| 0.014763458 | 0.107803889  | 0.019794902 | -0.31635714 | 2.58E-12   | -0.50846 |
| 0.122531776 | -0.086278475 | 0.062466205 | -0.29357432 | 9.78E-11   | -0.51381 |
| 5.21E-07    | -0.229884294 | 5.12E-07    | -0.09161998 | 0.04784057 | -0.53226 |
| 0.85385937  | 0.010273149  | 0.824768915 | -0.36028482 | 9.25E-16   | -0.21217 |
| 0.026714659 | 0.105367012  | 0.022771872 | -0.41766281 | 3.86E-21   | -0.42214 |
| 0.182419444 | -0.061252767 | 0.186375668 | 0.40202303  | 1.44E-19   | 0.44393  |
| 0.665057587 | -0.024724443 | 0.594068669 | 0.081428782 | 0.07876535 | 0.445283 |
| 0.000642736 | 0.150326329  | 0.001120392 | -0.18916596 | 3.89E-05   | -0.42155 |
| 0.749142185 | 0.015943183  | 0.731121845 | 0.225787028 | 8.22E-07   | 0.495923 |
| 0.030685614 | 0.100267935  | 0.030275771 | -0.1464078  | 0.00151116 | -0.4328  |
| 1.27E-06    | -0.226402627 | 7.66E-07    | 0.163491438 | 0.00038889 | 0.421143 |
| 0.019582272 | 0.121331472  | 0.008673256 | 0.008590056 | 0.85312031 | 0.408848 |
| 0.017200813 | -0.10827761  | 0.019257268 | -0.26275642 | 8.19E-09   | -0.26427 |
| 0.027799732 | 0.096917825  | 0.036284036 | -0.25569025 | 2.09E-08   | -0.53327 |



|             |              |             |             |            |          |
|-------------|--------------|-------------|-------------|------------|----------|
| 0.297585803 | 0.053638496  | 0.247327844 | -0.42134434 | 1.60E-21   | -0.31297 |
| 0.691769823 | -0.022058638 | 0.634450918 | -0.35830543 | 1.36E-15   | -0.50698 |
| 0.001464905 | 0.143029478  | 0.001944667 | -0.36086043 | 8.27E-16   | -0.51855 |
| 0.062613444 | -0.092250328 | 0.04632125  | -0.3146529  | 3.43E-12   | -0.45414 |
| 0.330369658 | -0.04603536  | 0.320859693 | -0.29969266 | 3.80E-11   | -0.38732 |
| 0.009919446 | 0.132689057  | 0.004072878 | 0.290863158 | 1.48E-10   | 0.467475 |
| 0.286930439 | 0.044072772  | 0.341944587 | -0.27626103 | 1.26E-09   | -0.29009 |
| 0.272167971 | -0.059785717 | 0.197164689 | -0.3485373  | 8.74E-15   | -0.46353 |
| 0.00399538  | 0.129235012  | 0.005157219 | -0.37427268 | 5.63E-17   | -0.40097 |
| 0.002465973 | 0.139697568  | 0.002481003 | -0.18337834 | 6.72E-05   | -0.23763 |
| 0.193819574 | 0.050725172  | 0.273978286 | -0.28378489 | 4.24E-10   | -0.13301 |
| 2.70E-09    | 0.268438964  | 3.77E-09    | 0.12191641  | 0.00835393 | 0.407935 |
| 0.220220807 | -0.06455576  | 0.163687489 | -0.26337098 | 7.53E-09   | -0.55743 |
| 0.043152213 | 0.088406409  | 0.05624944  | -0.22982442 | 5.15E-07   | -0.32346 |
| 0.069045801 | 0.076568805  | 0.098400423 | -0.22873439 | 5.85E-07   | -0.2042  |
| 5.02E-07    | 0.217251741  | 2.15E-06    | -0.26347413 | 7.43E-09   | -0.33645 |
| 0.004274746 | 0.130605949  | 0.004699033 | -0.37404755 | 5.90E-17   | -0.34549 |
| 0.35310127  | 0.0384441    | 0.407181367 | -0.32816498 | 3.46E-13   | -0.15157 |
| 0.139749266 | 0.067398781  | 0.145876837 | 0.029672603 | 0.52239837 | -0.41233 |
| 0.076306713 | -0.080958954 | 0.080512716 | -0.33532972 | 9.79E-14   | -0.54827 |
| 0.217993663 | -0.056842876 | 0.220166904 | -0.0185144  | 0.68984783 | -0.1752  |
| 1.04E-08    | -0.273891837 | 1.76E-09    | -0.06955552 | 0.13338209 | -0.19051 |
| 0.364788316 | -0.042904472 | 0.354906232 | -0.4683193  | 7.83E-27   | -0.31625 |
| 0.0150699   | 0.118253894  | 0.010539136 | -0.34522502 | 1.62E-14   | -0.2322  |
| 0.724326341 | -0.020306305 | 0.661609528 | -0.19039467 | 3.45E-05   | -0.15456 |
| 4.53E-06    | -0.210721608 | 4.36E-06    | -0.25937358 | 1.29E-08   | -0.33889 |
| 0.000273718 | -0.167920583 | 0.000267409 | -0.29971591 | 3.79E-11   | -0.4081  |
| 0.005166746 | -0.12777262  | 0.00568998  | -0.1551555  | 0.00076725 | -0.32625 |
| 0.138986538 | 0.063614565  | 0.169930069 | -0.1730814  | 0.0001708  | -0.5528  |
| 0.281079737 | -0.051977608 | 0.262290742 | 0.118881365 | 0.01013212 | 0.495704 |
| 0.862894025 | 0.009204077  | 0.842753288 | -0.15634231 | 0.0006979  | -0.6002  |
| 0.580039789 | -0.03243004  | 0.48447402  | -0.04150312 | 0.37085556 | -0.48637 |
| 5.34E-05    | 0.186311518  | 5.10E-05    | -0.33226194 | 1.69E-13   | -0.23797 |
| 4.13E-11    | 0.29390057   | 9.31E-11    | -0.1833172  | 6.76E-05   | -0.29199 |
| 0.001020333 | -0.142728769 | 0.001988308 | 0.051898205 | 0.26302137 | -0.44765 |
| 0.047928118 | -0.08420256  | 0.069066296 | -0.04440127 | 0.3383551  | -0.27503 |
| 0.932753649 | -0.004873768 | 0.916342975 | -0.29603147 | 6.71E-11   | -0.4078  |
| 0.190082119 | 0.063549674  | 0.170366932 | -0.08953301 | 0.05317167 | -0.20097 |
| 0.097243039 | 0.077444253  | 0.094601137 | -0.22070834 | 1.46E-06   | -0.35722 |
| 0.002357002 | 0.135891114  | 0.003256557 | -0.15695448 | 0.00066445 | -0.4424  |
| 0.495654207 | -0.039648674 | 0.392631406 | -0.05412522 | 0.24305814 | -0.31132 |
| 0.001463571 | 0.143064147  | 0.001939692 | -0.05386338 | 0.24534862 | -0.30637 |
| 0.950998153 | 0.003786168  | 0.934964164 | -0.16955962 | 0.00023225 | -0.15969 |
| 0.001066495 | -0.153433955 | 0.000879226 | -0.11559514 | 0.01242907 | -0.13897 |
| 0.407020883 | -0.037855096 | 0.414411065 | -0.26449314 | 6.47E-09   | -0.16577 |

|             |              |             |             |            |          |
|-------------|--------------|-------------|-------------|------------|----------|
| 0.260978984 | 0.077729081  | 0.093390613 | 0.212527108 | 3.60E-06   | 0.443752 |
| 7.25E-05    | -0.170068875 | 0.000222233 | -0.02874138 | 0.53554094 | -0.34608 |
| 0.234078472 | 0.054608173  | 0.238872763 | -0.26570916 | 5.48E-09   | -0.13891 |
| 0.175135581 | 0.068608158  | 0.138764867 | -0.13393249 | 0.00373611 | 0.457831 |
| 0.830638367 | 0.021988894  | 0.635522823 | 0.151685186 | 0.00100828 | 0.550721 |
| 0.368373849 | -0.03131289  | 0.499657113 | 0.101135058 | 0.02886718 | 0.569453 |
| 0.064065626 | -0.090966969 | 0.049458303 | -0.21911653 | 1.75E-06   | -0.1531  |
| 7.14E-05    | 0.183223852  | 6.81E-05    | 0.209264359 | 5.10E-06   | 0.434342 |
| 0.132514785 | 0.07319272   | 0.114201164 | 0.213687548 | 3.17E-06   | 0.499503 |
| 0.000744921 | 0.165643969  | 0.000324557 | 0.163343739 | 0.00039372 | 0.530024 |
| 0.206797693 | 0.065852663  | 0.155370008 | -0.0803988  | 0.08263688 | -0.52447 |
| 0.013975951 | -0.109755689 | 0.017660701 | -0.25938484 | 1.29E-08   | -0.08255 |
| 0.186249574 | -0.06094917  | 0.188571925 | -0.1112536  | 0.01616192 | -0.13571 |
| 0.003397068 | -0.14342008  | 0.001889289 | -0.23064629 | 4.68E-07   | -0.17554 |
| 0.034932295 | -0.108729945 | 0.018755822 | -0.34163535 | 3.13E-14   | -0.41477 |
| 0.134452154 | -0.076961026 | 0.096683497 | -0.25259823 | 3.13E-08   | -0.60366 |
| 0.231025269 | 0.053144298  | 0.251716429 | -0.22988537 | 5.11E-07   | -0.37924 |
| 4.48E-22    | -0.42495685  | 6.68E-22    | -0.14509196 | 0.0016682  | -0.29411 |
| 0.237354257 | 0.05800891   | 0.210833261 | -0.3367734  | 7.56E-14   | -0.33341 |
| 0.003085644 | 0.126380521  | 0.006242575 | -0.40993761 | 2.36E-20   | -0.37128 |
| 0.020483959 | -0.115226057 | 0.012713795 | -0.14874986 | 0.0012648  | -0.10419 |
| 0.018025253 | -0.115840594 | 0.012242851 | -0.32406443 | 7.02E-13   | -0.47437 |
| 0.000627066 | -0.15970257  | 0.000531788 | -0.16760764 | 0.00027466 | -0.51746 |
| 0.569649498 | -0.034755428 | 0.453685624 | -0.4478513  | 2.04E-24   | -0.42046 |
| 0.044675932 | 0.09864461   | 0.033071401 | -0.36141337 | 7.42E-16   | -0.44075 |
| 0.494027795 | 0.032694778  | 0.480912879 | -0.16066185 | 0.0004916  | -0.4543  |
| 0.00435592  | -0.141827218 | 0.002124573 | -0.19354389 | 2.54E-05   | -0.39634 |
| 6.69E-12    | -0.314066407 | 3.78E-12    | -0.07330838 | 0.11362873 | -0.23523 |
| 0.009114754 | 0.127890647  | 0.005645215 | -0.19311695 | 2.65E-05   | -0.24071 |
| 0.065642604 | -0.083233339 | 0.072337779 | -0.3373256  | 6.85E-14   | -0.56068 |
| 0.094995979 | -0.072095268 | 0.119745736 | 0.137491866 | 0.00290691 | 0.45301  |
| 0.896207085 | -0.029764368 | 0.521112275 | -0.29871566 | 4.43E-11   | -0.38933 |
| 0.034720864 | -0.106165171 | 0.021756724 | -0.19096246 | 3.27E-05   | -0.36071 |
| 0.970070419 | -0.002923709 | 0.949756391 | -0.2886992  | 2.04E-10   | -0.42544 |
| 0.296078898 | -0.047027339 | 0.310531704 | -0.03277899 | 0.47978311 | -0.20868 |
| 0.526296146 | -0.035440865 | 0.444824882 | 0.228528182 | 5.99E-07   | 0.47857  |
| 0.06442642  | 0.090413068  | 0.050866135 | 0.156384506 | 0.00069555 | 0.260657 |
| 0.063502588 | 0.078711052  | 0.089311924 | 0.025890239 | 0.57678502 | 0.258203 |
| 0.0227971   | 0.106396771  | 0.021469609 | -0.18191474 | 7.69E-05   | -0.4946  |
| 0.017617859 | 0.109550437  | 0.017875254 | -0.00311276 | 0.94651229 | -0.44212 |
| 0.001142945 | 0.137715732  | 0.002860837 | -0.23350865 | 3.34E-07   | -0.37233 |
| 0.000504079 | -0.168564383 | 0.000253042 | -0.28055496 | 6.79E-10   | -0.48633 |
| 0.297064424 | -0.050109442 | 0.279852336 | -0.20201374 | 1.09E-05   | -0.3255  |
| 0.021410221 | -0.100475843 | 0.029932778 | -0.22759569 | 6.68E-07   | -0.53768 |
| 0.368520283 | 0.042657289  | 0.357687709 | -0.44590848 | 3.39E-24   | -0.35811 |

|             |              |             |             |            |          |
|-------------|--------------|-------------|-------------|------------|----------|
| 8.37E-07    | -0.228057488 | 6.33E-07    | -0.2295014  | 5.35E-07   | -0.20319 |
| 0.369469505 | -0.046948798 | 0.311341375 | -0.04360986 | 0.34704384 | -0.56407 |
| 0.880421022 | 0.004683678  | 0.919594566 | -0.24325699 | 1.02E-07   | -0.39842 |
| 0.011217611 | -0.116866943 | 0.011490606 | -0.35238789 | 4.23E-15   | -0.22063 |
| 0.463683818 | 0.034639253  | 0.45519721  | -0.24282295 | 1.08E-07   | -0.69266 |
| 8.75E-06    | 0.206817055  | 6.60E-06    | -0.0143507  | 0.75708869 | 0.44685  |
| 0.003136824 | 0.13554452   | 0.003337119 | -0.33102697 | 2.10E-13   | -0.11654 |
| 0.019240808 | -0.111055908 | 0.016353115 | -0.06375989 | 0.16895473 | -0.42711 |
| 0.432682793 | -0.035988755 | 0.437813535 | -0.41069017 | 1.98E-20   | -0.54668 |
| 0.203434723 | -0.046855645 | 0.312303473 | -0.33971494 | 4.45E-14   | -0.50404 |
| 0.904130439 | -0.012562751 | 0.786570656 | -0.14739234 | 0.00140267 | -0.47922 |
| 0.791905554 | -0.017032842 | 0.713527257 | -0.2736171  | 1.83E-09   | -0.42315 |
| 0.031513209 | 0.098286532  | 0.033716882 | -0.25336498 | 2.83E-08   | -0.30887 |
| 0.184442938 | -0.060627497 | 0.190919644 | -0.03522264 | 0.44763511 | -0.29393 |
| 0.000135415 | 0.167631116  | 0.000274114 | -0.16586695 | 0.00031849 | -0.31759 |
| 0.021144638 | -0.110223994 | 0.017179581 | -0.34367564 | 2.16E-14   | -0.37646 |
| 0.000494174 | 0.166056147  | 0.000313432 | 0.173819908 | 0.00016002 | 0.509571 |
| 0.017403743 | -0.113726737 | 0.013930444 | -0.3671348  | 2.39E-16   | -0.46486 |
| 0.007177852 | -0.126817783 | 0.006064027 | -0.44802215 | 1.95E-24   | -0.15868 |
| 0.497825008 | 0.028378758  | 0.540703285 | -0.17552583 | 0.0001375  | -0.38681 |
| 0.001829889 | -0.158599854 | 0.000581749 | -0.34382028 | 2.10E-14   | -0.31245 |
| 0.96728771  | 0.006537406  | 0.887950973 | -0.41596106 | 5.78E-21   | -0.44115 |
| 0.469968573 | -0.025861642 | 0.577206153 | -0.20876186 | 5.38E-06   | -0.65834 |
| 0.332152209 | -0.052502204 | 0.257498807 | -0.33960783 | 4.53E-14   | -0.55332 |
| 0.001326614 | 0.145556547  | 0.001611118 | -0.18070809 | 8.60E-05   | -0.09522 |
| 0.006179045 | 0.126156241  | 0.006335975 | 0.158452078 | 0.00058877 | 0.429691 |
| 1.18E-05    | -0.210881559 | 4.29E-06    | -0.23611702 | 2.44E-07   | -0.45832 |
| 0.140411392 | 0.070153171  | 0.130070095 | 0.31728133  | 2.21E-12   | 0.330787 |
| 0.701004719 | -0.029525286 | 0.524466438 | -0.18325873 | 6.79E-05   | -0.40187 |
| 9.06E-05    | -0.178614969 | 0.00010411  | -0.34735852 | 1.09E-14   | -0.52138 |
| 3.33E-14    | -0.361259867 | 7.64E-16    | -0.22998624 | 5.05E-07   | -0.08601 |
| 0.616536344 | 0.025000735  | 0.589951169 | -0.13600575 | 0.0032303  | -0.40746 |
| 0.000733137 | -0.158575587 | 0.000582896 | -0.32526177 | 5.72E-13   | -0.33067 |
| 0.705909227 | 0.019991851  | 0.666531767 | 0.137348413 | 0.00293679 | -0.47453 |
| 0.178040406 | 0.053467189  | 0.248842998 | 0.12394716  | 0.00732512 | -0.18898 |
| 0.003091731 | 0.118253792  | 0.010539203 | -0.06349081 | 0.17076396 | -0.32139 |
| 8.51E-06    | -0.216116742 | 2.43E-06    | -0.11168744 | 0.01574918 | -0.37769 |
| 5.53E-16    | -0.361955803 | 6.67E-16    | -0.14200895 | 0.00209644 | -0.3303  |
| 0.129218977 | -0.07169949  | 0.121796088 | -0.07824436 | 0.09123215 | -0.24623 |
| 0.001054883 | 0.145144787  | 0.001661615 | -0.07214656 | 0.11948202 | -0.45326 |
| 0.080653415 | -0.091518813 | 0.04808825  | -0.28701468 | 2.63E-10   | -0.1918  |
| 0.005610058 | 0.122324078  | 0.008137617 | -0.18337219 | 6.72E-05   | -0.36284 |
| 9.31E-14    | 0.3292978    | 2.84E-13    | -0.34445689 | 1.87E-14   | -0.38612 |
| 0.245739556 | 0.042986955  | 0.353981114 | -0.25217768 | 3.30E-08   | -0.40241 |
| 8.45E-05    | 0.182224779  | 7.48E-05    | -0.14533425 | 0.0016382  | -0.22642 |

|             |              |             |             |            |          |
|-------------|--------------|-------------|-------------|------------|----------|
| 0.027182546 | -0.112202859 | 0.01527086  | -0.15639675 | 0.00069486 | -0.4478  |
| 1.06E-05    | 0.189464075  | 3.78E-05    | -0.28687485 | 2.68E-10   | -0.32875 |
| 0.274160727 | 0.047640474  | 0.304258656 | -0.16582416 | 0.00031965 | -0.25486 |
| 0.39904944  | 0.040902908  | 0.3778203   | -0.28065773 | 6.69E-10   | -0.22459 |
| 0.686575125 | 0.010359254  | 0.823324274 | -0.30244482 | 2.47E-11   | -0.14912 |
| 0.451343964 | -0.038920033 | 0.401394704 | -0.27811674 | 9.65E-10   | -0.5967  |
| 0.458754301 | -0.038035216 | 0.412192195 | -0.41609661 | 5.60E-21   | -0.51963 |
| 1.29E-05    | -0.219129173 | 1.74E-06    | -0.13842373 | 0.00271946 | -0.09837 |
| 3.71E-05    | -0.197917116 | 1.65E-05    | -0.0290623  | 0.53099299 | -0.35458 |
| 0.002894384 | 0.137858794  | 0.002831741 | -0.38524956 | 5.69E-18   | -0.27561 |
| 0.000395447 | -0.147469395 | 0.001394488 | -0.14784169 | 0.00135557 | -0.2376  |
| 0.00132331  | 0.153362293  | 0.000884199 | 0.08928837  | 0.0538278  | 0.580719 |
| 0.633145442 | -0.027164556 | 0.558167295 | -0.40708445 | 4.56E-20   | -0.50754 |
| 0.900335735 | 0.007737508  | 0.867556258 | -0.4333208  | 8.47E-23   | -0.4266  |
| 0.781980165 | 0.018494535  | 0.690163432 | -0.23822854 | 1.89E-07   | -0.25318 |
| 0.222060989 | 0.05432179   | 0.241348446 | -0.26558116 | 5.58E-09   | -0.38869 |
| 0.381554224 | -0.035669766 | 0.441887897 | -0.20496335 | 8.01E-06   | -0.42853 |
| 8.42E-10    | -0.286520361 | 2.83E-10    | -0.19609955 | 1.97E-05   | -0.29359 |
| 0.293793865 | 0.047502162  | 0.30566636  | -0.31595519 | 2.76E-12   | -0.45926 |
| 0.047292305 | -0.091189148 | 0.048902827 | -0.15518734 | 0.00076531 | -0.50761 |
| 1.00E-06    | -0.226252407 | 7.79E-07    | -0.26451808 | 6.45E-09   | -0.2772  |
| 0.533379738 | 0.011603079  | 0.802524646 | -0.23031782 | 4.86E-07   | -0.29768 |
| 0.004051308 | -0.141216376 | 0.002221693 | 0.201922137 | 1.10E-05   | 0.709534 |
| 0.059714845 | -0.087809128 | 0.057940235 | -0.21984842 | 1.61E-06   | -0.35346 |
| 0.704948656 | 0.01467183   | 0.751829283 | -0.30069466 | 3.25E-11   | -0.55831 |
| 0.197649145 | -0.086197061 | 0.062714881 | -0.15891218 | 0.00056717 | -0.36078 |
| 1.12E-12    | -0.31553979  | 2.96E-12    | -0.37245349 | 8.17E-17   | -0.33801 |
| 0.640360783 | -0.028157237 | 0.543869035 | -0.20264858 | 1.02E-05   | -0.4688  |
| 0.031301742 | 0.095123302  | 0.03989985  | -0.50850961 | 4.45E-32   | -0.41266 |
| 0.002962134 | -0.144688886 | 0.001719214 | 0.03946564  | 0.39482179 | -0.59885 |
| 1.65E-10    | -0.288334711 | 2.16E-10    | -0.019807   | 0.66943203 | -0.30041 |
| 0.006789477 | -0.132680499 | 0.004075288 | -0.27937115 | 8.06E-10   | -0.41335 |
| 0.07801326  | -0.074891999 | 0.106015842 | 0.013968459 | 0.76336366 | -0.43772 |
| 0.010568936 | -0.126559851 | 0.006168786 | 0.01253169  | 0.78708566 | -0.22087 |
| 0.573745302 | -0.026419499 | 0.56901718  | -0.1727366  | 0.00017606 | -0.30091 |
| 2.51E-05    | -0.193049564 | 2.67E-05    | -0.00656492 | 0.88748254 | -0.34973 |
| 0.95161108  | -0.004317124 | 0.925868412 | -0.29478708 | 8.12E-11   | -0.33615 |
| 0.297320871 | 0.044581392  | 0.336397257 | -0.40476013 | 7.75E-20   | -0.50372 |
| 0.828391415 | -0.015719039 | 0.734758989 | 0.39730616  | 4.14E-19   | 0.323451 |
| 0.182723785 | -0.053026638 | 0.252769201 | -0.35195253 | 4.59E-15   | -0.34506 |
| 0.013561448 | -0.128789372 | 0.005314602 | -0.09821396 | 0.033849   | -0.14715 |
| 0.609659355 | 0.009754905  | 0.833476205 | -0.20672657 | 6.66E-06   | -0.42173 |
| 0.018633136 | -0.114956418 | 0.012925426 | -0.25650707 | 1.88E-08   | -0.59453 |
| 0.615950076 | -0.03321471  | 0.473960522 | -0.24327274 | 1.02E-07   | -0.44664 |
| 0.132145415 | 0.06549022   | 0.157661596 | -0.23841006 | 1.85E-07   | -0.45928 |

|             |              |             |             |            |          |
|-------------|--------------|-------------|-------------|------------|----------|
| 0.000758588 | 0.145238814  | 0.001649957 | -0.24870085 | 5.16E-08   | -0.5087  |
| 0.129547184 | -0.073821885 | 0.111114538 | -0.29668485 | 6.07E-11   | -0.16025 |
| 0.732160424 | 0.028956966  | 0.532483631 | -0.15338725 | 0.00088246 | -0.37789 |
| 0.47483132  | 0.033009793  | 0.476694004 | -0.19103464 | 3.24E-05   | -0.31188 |
| 0.003113341 | 0.142453265  | 0.002029076 | 0.186590364 | 4.97E-05   | 0.523767 |
| 0.339663235 | 0.044232001  | 0.340201693 | -0.35407007 | 3.07E-15   | -0.36727 |
| 0.061106034 | -0.081998192 | 0.076688993 | -0.28803952 | 2.26E-10   | -0.43655 |
| 7.70E-06    | 0.208316456  | 5.64E-06    | -0.33685587 | 7.45E-14   | -0.31562 |
| 0.830692405 | -0.007410444 | 0.873106318 | -0.15886892 | 0.00056917 | -0.34193 |
| 0.162540923 | -0.073651631 | 0.111943238 | -0.22589116 | 8.12E-07   | -0.56526 |
| 1.06E-06    | -0.246299311 | 6.98E-08    | -0.36894213 | 1.66E-16   | -0.17985 |
| 6.81E-06    | -0.218896011 | 1.79E-06    | -0.29931977 | 4.03E-11   | -0.29629 |
| 0.006166887 | -0.144733603 | 0.001713485 | -0.30235324 | 2.50E-11   | -0.35064 |
| 0.034935389 | -0.10310817  | 0.025870079 | -0.30049288 | 3.35E-11   | -0.31878 |
| 0.016377654 | -0.122804858 | 0.007888945 | -0.06301957 | 0.17396716 | -0.23099 |
| 0.016863277 | 0.106360494  | 0.021514363 | -0.30808267 | 1.00E-11   | -0.49112 |
| 0.135426173 | 0.059271563  | 0.201051721 | -0.14610898 | 0.00154558 | -0.41516 |
| 0.166450348 | -0.073962837 | 0.110432125 | 0.022015891 | 0.63510782 | -0.41412 |
| 0.001760014 | -0.152415132 | 0.000952423 | -0.33282753 | 1.53E-13   | -0.51045 |
| 0.044591221 | 0.078060866  | 0.091996173 | 0.116163771 | 0.01200142 | -0.47313 |
| 0.05505442  | 0.091484032  | 0.048173651 | -0.19092695 | 3.28E-05   | -0.59997 |
| 0.010310809 | 0.109412191  | 0.018021044 | -0.40522408 | 6.98E-20   | -0.55258 |
| 1.17E-05    | 0.203333588  | 9.48E-06    | 0.304055445 | 1.91E-11   | 0.356696 |
| 0.48350943  | 0.041637516  | 0.369306961 | 0.135891489 | 0.00325647 | 0.475289 |
| 0.346814347 | 0.03398772   | 0.46372667  | -0.41871486 | 3.01E-21   | -0.35429 |
| 0.049239316 | -0.091479605 | 0.048184531 | -0.23261992 | 3.71E-07   | -0.20732 |
| 0.006787465 | 0.120364298  | 0.009225158 | -0.32172566 | 1.05E-12   | -0.45191 |
| 6.60E-06    | 0.211264184  | 4.12E-06    | 0.289245528 | 1.88E-10   | 0.397569 |
| 5.78E-06    | 0.196348763  | 1.92E-05    | -0.21161215 | 3.97E-06   | -0.44572 |
| 0.652384999 | -0.026328156 | 0.570354242 | -0.28348377 | 4.43E-10   | -0.48812 |
| 0.683271468 | -0.019878117 | 0.668315626 | -0.07496982 | 0.1056524  | 0.518238 |
| 3.27E-08    | 0.243728038  | 9.63E-08    | -0.24223015 | 1.16E-07   | -0.38975 |
| 0.29425825  | -0.042136043 | 0.363597829 | -0.22858249 | 5.95E-07   | -0.30401 |
| 0.175519451 | -0.058141738 | 0.20978841  | -0.4414056  | 1.09E-23   | -0.53686 |
| 0.669514109 | 0.005118419  | 0.912160141 | -0.1849486  | 5.80E-05   | -0.18257 |
| 0.126940815 | -0.074687543 | 0.106975435 | -0.28131808 | 6.08E-10   | -0.39016 |
| 0.012340057 | -0.110226995 | 0.017176535 | -0.30196874 | 2.66E-11   | -0.27684 |
| 0.006230537 | -0.135117055 | 0.003438969 | -0.26073867 | 1.07E-08   | -0.45486 |
| 0.151555161 | -0.076777727 | 0.097482884 | -0.15049448 | 0.00110592 | -0.53807 |
| 0.985325192 | 0.002400197  | 0.958744014 | -0.14281381 | 0.00197588 | -0.44689 |
| 1.34E-05    | -0.213659325 | 3.18E-06    | -0.37679987 | 3.35E-17   | -0.25977 |
| 0.008940739 | 0.113647033  | 0.013997898 | -0.15692537 | 0.000666   | -0.31579 |
| 0.661753879 | -0.028837761 | 0.534173054 | 0.005676264 | 0.90263185 | -0.46846 |
| 0.049185789 | -0.094091814 | 0.04211289  | -0.24875218 | 5.12E-08   | -0.64265 |
| 5.06E-11    | -0.306078883 | 1.38E-11    | -0.21166833 | 3.94E-06   | -0.58662 |

|             |              |             |             |            |          |
|-------------|--------------|-------------|-------------|------------|----------|
| 0.090047686 | -0.067004399 | 0.148255225 | -0.23868346 | 1.79E-07   | -0.36951 |
| 0.037526219 | -0.106969266 | 0.020773956 | -0.2545439  | 2.43E-08   | -0.29551 |
| 0.024907438 | 0.08960384   | 0.052982944 | -0.06188484 | 0.18186374 | -0.3611  |
| 0.24176426  | 0.049248189  | 0.288210837 | -0.38996055 | 2.07E-18   | -0.20592 |
| 0.776430012 | 0.023970428  | 0.605371644 | 0.158838115 | 0.0005706  | 0.409509 |
| 0.000514127 | -0.177171826 | 0.000118627 | -0.39234879 | 1.23E-18   | -0.23408 |
| 0.313650091 | -0.034068445 | 0.462665085 | -0.20118373 | 1.18E-05   | 0.008381 |
| 0.229457633 | -0.062952946 | 0.174423652 | -0.38030502 | 1.61E-17   | -0.40079 |
| 0.000695983 | -0.171766463 | 0.000191698 | -0.40878857 | 3.08E-20   | -0.48631 |
| 0.16058981  | 0.058695687  | 0.205471203 | -0.39417573 | 8.26E-19   | -0.37844 |
| 0.01193413  | -0.12197424  | 0.008322935 | -0.03847814 | 0.40676586 | -0.14256 |
| 0.072459761 | 0.080548933  | 0.082063167 | -0.27342937 | 1.88E-09   | -0.10077 |
| 0.0027506   | 0.148156363  | 0.001323463 | -0.00382376 | 0.93431996 | -0.46099 |
| 0.375568973 | 0.031087771  | 0.502746887 | 0.016024133 | 0.72980977 | -0.35819 |
| 0.947259067 | 0.011150485  | 0.810077766 | 0.038433743 | 0.40730784 | -0.39977 |
| 0.211878434 | -0.059350574 | 0.200450795 | -0.34821895 | 9.28E-15   | -0.31307 |
| 0.001167567 | 0.151638729  | 0.001011936 | 0.131598415 | 0.00439061 | 0.545775 |
| 0.13581254  | 0.064301115  | 0.165359191 | 0.162254713 | 0.00043104 | 0.478638 |
| 0.05083099  | -0.087705913 | 0.058236642 | -0.11598421 | 0.01213504 | -0.39341 |
| 0.341752474 | -0.045262104 | 0.329063834 | -0.35259193 | 4.07E-15   | -0.37212 |
| 0.267113544 | 0.042190335  | 0.362979409 | 0.053275446 | 0.25054657 | -0.34118 |
| 0.074232713 | -0.09133297  | 0.048546046 | -0.34061071 | 3.78E-14   | -0.4152  |
| 0.436368019 | 0.01892215   | 0.683382501 | -0.33172391 | 1.86E-13   | -0.28015 |
| 0.4669993   | -0.035052209 | 0.449836969 | -0.24434881 | 8.92E-08   | -0.48059 |
| 0.990741617 | -0.007322721 | 0.874595983 | -0.2212623  | 1.37E-06   | -0.48069 |
| 4.09E-05    | 0.189404957  | 3.80E-05    | 0.267477115 | 4.30E-09   | 0.518715 |
| 0.032164305 | -0.099961385 | 0.030787636 | -0.44469941 | 4.65E-24   | -0.40593 |
| 0.02879282  | -0.107310163 | 0.020369097 | -0.19531982 | 2.13E-05   | -0.33131 |
| 0.021190749 | -0.113932988 | 0.01375722  | -0.35978959 | 1.02E-15   | -0.29636 |
| 0.00371393  | 0.126681979  | 0.006118983 | -0.37131278 | 1.03E-16   | -0.25603 |
| 0.291907654 | -0.054251418 | 0.241959533 | -0.17235758 | 0.00018202 | -0.39551 |
| 0.646451376 | 0.018817616  | 0.68503784  | 0.377664583 | 2.80E-17   | 0.218571 |
| 2.63E-08    | -0.253404179 | 2.82E-08    | -0.04264065 | 0.35787542 | -0.25204 |
| 7.17E-08    | 0.248521062  | 5.27E-08    | 0.106881032 | 0.02087988 | 0.461532 |
| 0.24329702  | -0.066862886 | 0.149115805 | -0.30983503 | 7.55E-12   | -0.54394 |
| 0.015354173 | -0.119707457 | 0.009617574 | -0.32050257 | 1.29E-12   | -0.58253 |
| 0.001126612 | -0.158360278 | 0.000593165 | 0.050515967 | 0.2759646  | -0.44942 |
| 0.0084652   | 0.118639871  | 0.010287088 | -0.29398743 | 9.18E-11   | -0.44857 |
| 0.040442062 | -0.09979136  | 0.031074717 | -0.21745692 | 2.10E-06   | -0.54747 |
| 0.196321908 | 0.055038855  | 0.235183388 | 0.008494159 | 0.85474176 | -0.42635 |
| 0.137901895 | -0.067259252 | 0.146714937 | -0.14669677 | 0.00147854 | -0.27856 |
| 5.63E-08    | 0.254740387  | 2.37E-08    | 0.387105348 | 3.83E-18   | 0.260172 |
| 4.57E-05    | -0.183939461 | 6.38E-05    | 0.310639682 | 6.62E-12   | 0.707609 |
| 2.96E-09    | 0.273862832  | 1.77E-09    | 0.390109993 | 2.00E-18   | 0.350915 |
| 0.00019629  | 0.172427251  | 0.000180912 | 0.209088004 | 5.19E-06   | 0.596469 |

|             |              |             |             |            |          |
|-------------|--------------|-------------|-------------|------------|----------|
| 0.018414132 | 0.109349715  | 0.018087269 | 0.401079523 | 1.78E-19   | 0.562749 |
| 0.33555522  | -0.054050296 | 0.243711982 | -0.14977269 | 0.00116928 | -0.37507 |
| 3.02E-05    | -0.190019515 | 3.58E-05    | -0.09075033 | 0.05000499 | -0.36327 |
| 0.004472876 | 0.129282434  | 0.005140721 | -0.22195736 | 1.27E-06   | -0.2825  |
| 6.38E-05    | -0.191851782 | 3.00E-05    | -0.1818745  | 7.72E-05   | -0.30816 |
| 0.501632489 | 0.040477968  | 0.38279949  | -0.00250834 | 0.95688693 | 0.307446 |
| 0.033511704 | 0.087747337  | 0.058117531 | 0.228587508 | 5.95E-07   | 0.171957 |
| 0.009893519 | 0.117191207  | 0.011261596 | 0.15627373  | 0.00070174 | 0.226321 |
| 0.136240433 | -0.065028931 | 0.160614958 | -0.10495894 | 0.02330655 | -0.18531 |
| 0.000126815 | -0.175994076 | 0.000131864 | -0.35317092 | 3.65E-15   | -0.37798 |
| 0.037407944 | -0.105253268 | 0.022919827 | -0.03894527 | 0.40108926 | -0.3947  |
| 0.02558685  | -0.113713764 | 0.013941404 | -0.19534085 | 2.13E-05   | -0.35134 |
| 0.00056136  | 0.152042528  | 0.000980569 | -0.17737539 | 0.00011647 | -0.59254 |
| 0.2855135   | -0.051417522 | 0.267474256 | -0.20240177 | 1.04E-05   | -0.45216 |
| 6.97E-08    | -0.244827828 | 8.40E-08    | -0.27416729 | 1.69E-09   | -0.3889  |
| 0.181840799 | -0.077643658 | 0.093752355 | 0.023379314 | 0.61429923 | -0.30808 |
| 1.98E-09    | 0.271652491  | 2.41E-09    | -0.25746245 | 1.66E-08   | -0.46944 |
| 0.003185294 | -0.144860981 | 0.00169726  | -0.09506908 | 0.04001368 | -0.39293 |
| 0.297647407 | 0.044512999  | 0.33713982  | -0.32382833 | 7.31E-13   | -0.26108 |
| 0.029989304 | -0.120683669 | 0.009039554 | 0.092760955 | 0.04512038 | -0.35868 |
| 0.483271321 | 0.036406719  | 0.432507743 | -0.08858255 | 0.05575871 | -0.20077 |
| 0.034862774 | -0.093038025 | 0.044479794 | -0.29610904 | 6.63E-11   | -0.32294 |
| 0.019379622 | 0.114320232  | 0.013437102 | -0.41790735 | 3.64E-21   | -0.16554 |
| 0.020773943 | -0.112801006 | 0.014731794 | -0.33896201 | 5.10E-14   | -0.54667 |
| 0.909247898 | 0.010114384  | 0.827434186 | -0.05327968 | 0.25050889 | -0.29611 |
| 0.409802175 | 0.030630966  | 0.509047376 | -0.28740315 | 2.48E-10   | -0.36318 |
| 0.415341967 | -0.036457429 | 0.431866543 | 0.055514733 | 0.23115381 | -0.23372 |
| 3.20E-07    | 0.235924009  | 2.50E-07    | 0.132468053 | 0.00413553 | 0.364437 |
| 0.725879215 | 0.025898302  | 0.576666315 | -0.16813107 | 0.00026263 | -0.39277 |
| 1.25E-07    | -0.247669746 | 5.88E-08    | -0.24542104 | 7.80E-08   | -0.26931 |
| 4.50E-05    | 0.186501434  | 5.01E-05    | 0.218766399 | 1.82E-06   | 0.248704 |
| 0.550686418 | 0.032381868  | 0.485123535 | 0.099392936 | 0.03175642 | 0.433914 |
| 0.024226071 | 0.102934581  | 0.026122537 | -0.20196735 | 1.09E-05   | -0.39299 |
| 0.26427646  | -0.054416068 | 0.240531466 | -0.23542313 | 2.66E-07   | -0.41488 |
| 0.258795505 | -0.050419992 | 0.276879109 | -0.23085792 | 4.56E-07   | -0.27849 |
| 0.265683726 | -0.058029229 | 0.210673187 | -0.19413014 | 2.40E-05   | -0.29412 |
| 0.271125324 | -0.05326414  | 0.250647269 | -0.08427919 | 0.0688129  | -0.20607 |
| 0.092221623 | -0.081850465 | 0.077223361 | -0.26907493 | 3.45E-09   | -0.30843 |
| 0.004175413 | -0.1332253   | 0.003924414 | -0.05476051 | 0.23756314 | -0.06844 |
| 1.99E-08    | 0.260055139  | 1.18E-08    | -0.16643935 | 0.00030341 | -0.25893 |
| 0.126464933 | -0.073452734 | 0.112917503 | -0.14732068 | 0.00141032 | -0.41344 |
| 0.937844623 | 0.004529283  | 0.922236568 | -0.10466501 | 0.02369837 | -0.27411 |
| 0.015657451 | 0.107547563  | 0.020091221 | -0.08974451 | 0.0526098  | -0.49625 |
| 0.815208896 | 0.004765358  | 0.918197218 | -0.46753231 | 9.77E-27   | -0.34589 |
| 0.677367487 | 0.016129932  | 0.728096106 | -0.18944333 | 3.78E-05   | -0.17631 |

|             |              |             |             |            |          |
|-------------|--------------|-------------|-------------|------------|----------|
| 0.548021141 | -0.037656648 | 0.416863844 | -0.3861738  | 4.67E-18   | -0.2777  |
| 0.001772163 | -0.140751248 | 0.002298347 | -0.3688662  | 1.69E-16   | -0.25285 |
| 0.004610797 | 0.133792336  | 0.003772768 | 0.175757075 | 0.00013469 | 0.3874   |
| 0.382151384 | 0.038635227  | 0.404851603 | -0.12380715 | 0.00739223 | -0.54153 |
| 0.585784595 | -0.012876065 | 0.781380925 | -0.28782591 | 2.33E-10   | -0.52103 |
| 0.119798445 | -0.075972666 | 0.101056365 | -0.02924196 | 0.52845553 | -0.37294 |
| 0.514778196 | -0.031353423 | 0.499101869 | -0.38287253 | 9.41E-18   | -0.38667 |
| 0.21718372  | -0.066471148 | 0.151517888 | -0.1546498  | 0.00079869 | 0.036336 |
| 0.988866627 | -0.014620699 | 0.752665928 | -0.40611738 | 5.69E-20   | -0.44259 |
| 0.283967892 | -0.048623179 | 0.294380628 | -0.31398308 | 3.83E-12   | -0.46274 |
| 6.22E-08    | 0.243420812  | 1.00E-07    | -0.00755285 | 0.87068894 | -0.2444  |
| 0.888279308 | 0.015151381  | 0.743996638 | 0.031571639 | 0.49611822 | 0.268869 |
| 0.041680812 | 0.100470582  | 0.029941416 | 0.15991585  | 0.0005226  | 0.503588 |
| 0.095889197 | 0.075644255  | 0.102543653 | -0.26429346 | 6.65E-09   | -0.17674 |
| 0.270290162 | 0.047080383  | 0.30998567  | -0.19068962 | 3.36E-05   | -0.5027  |
| 0.764072302 | -0.008084166 | 0.861680817 | -0.23010073 | 4.99E-07   | -0.46638 |
| 0.057754114 | 0.086332664  | 0.062301139 | -0.13046756 | 0.00474356 | -0.33063 |
| 0.065868979 | 0.065301703  | 0.158863567 | -0.30295471 | 2.28E-11   | -0.37767 |
| 0.010592476 | 0.11642998   | 0.011805723 | -0.27251466 | 2.14E-09   | -0.13587 |
| 2.12E-05    | -0.198388376 | 1.57E-05    | -0.37138327 | 1.02E-16   | -0.34876 |
| 2.38E-08    | 0.253000107  | 2.97E-08    | 0.221702473 | 1.31E-06   | 0.263907 |
| 0.441880295 | -0.045954329 | 0.321713119 | -0.38608681 | 4.76E-18   | -0.41257 |
| 0.004760549 | 0.134529585  | 0.003583544 | 0.502927003 | 2.63E-31   | 0.514194 |
| 8.11E-06    | 0.198364069  | 1.57E-05    | 0.004214527 | 0.92762527 | 0.448194 |
| 9.59E-06    | -0.199449877 | 1.41E-05    | -0.071686   | 0.12186646 | -0.46481 |
| 0.205894448 | -0.069098551 | 0.135958065 | -0.46161637 | 5.05E-26   | -0.31738 |
| 0.193378457 | -0.058875213 | 0.204085966 | -0.18119623 | 8.22E-05   | -0.15429 |
| 0.007371634 | 0.125579889  | 0.006581767 | -0.31956639 | 1.51E-12   | -0.42276 |
| 0.301620893 | 0.043029267  | 0.353507135 | 0.119941292 | 0.00947621 | 0.526802 |
| 0.066132761 | -0.08414642  | 0.069252424 | -0.21941604 | 1.69E-06   | -0.13587 |
| 0.070442393 | 0.08029481   | 0.083036165 | 0.54855725  | 4.78E-38   | 0.385496 |
| 0.882935386 | 0.008787935  | 0.849776514 | -0.33306156 | 1.47E-13   | -0.44107 |
| 0.088234239 | -0.087628195 | 0.058460656 | 0.024094507 | 0.60350506 | -0.23919 |
| 0.939967887 | 0.019504536  | 0.674188171 | 0.248227948 | 5.47E-08   | 0.490493 |
| 4.44E-07    | 0.235540149  | 2.62E-07    | 0.140566673 | 0.00232943 | 0.553765 |
| 3.48E-07    | 0.240060862  | 1.51E-07    | 0.06846091  | 0.13961628 | 0.471192 |
| 0.704538044 | -0.016301515 | 0.7253198   | -0.32987337 | 2.57E-13   | -0.38391 |
| 0.195172602 | -0.070038226 | 0.130702093 | -0.15828076 | 0.000597   | -0.22218 |
| 0.497069902 | -0.047086706 | 0.309920619 | -0.24272394 | 1.09E-07   | -0.38569 |
| 0.196886067 | 0.060233451  | 0.193824704 | 0.228760878 | 5.83E-07   | 0.422473 |
| 0.11253763  | -0.083655178 | 0.070898694 | -0.14489285 | 0.00169322 | -0.47849 |
| 0.703595807 | -0.001887895 | 0.967544262 | -0.34083285 | 3.63E-14   | -0.40738 |
| 0.960012076 | 0.009119547  | 0.844178911 | -0.22959867 | 5.29E-07   | -0.20377 |
| 0.256172172 | -0.056498444 | 0.222979645 | -0.32258709 | 9.04E-13   | -0.5684  |
| 1.31E-05    | -0.197138932 | 1.78E-05    | -0.29587478 | 6.87E-11   | -0.38313 |



|             |              |             |             |            |          |
|-------------|--------------|-------------|-------------|------------|----------|
| 0.269459163 | 0.053075613  | 0.252330622 | 0.293604298 | 9.74E-11   | 0.427124 |
| 0.424611236 | 0.035706109  | 0.441422612 | -0.21140616 | 4.06E-06   | -0.56914 |
| 2.79E-15    | -0.35254741  | 4.10E-15    | -0.11059858 | 0.01680304 | -0.31109 |
| 0.299447783 | -0.059194868 | 0.201636285 | -0.29872992 | 4.42E-11   | -0.252   |
| 0.021613685 | -0.099444991 | 0.031666636 | -0.41526621 | 6.81E-21   | -0.42175 |
| 0.615153128 | -0.028137381 | 0.544153251 | -0.15489179 | 0.0007835  | -0.41112 |
| 7.07E-10    | 0.289873519  | 1.71E-10    | 0.088817172 | 0.05511057 | 0.347699 |
| 5.44E-07    | -0.231942133 | 4.02E-07    | -0.07281742 | 0.11607413 | -0.2883  |
| 6.14E-08    | -0.25746213  | 1.66E-08    | 0.034746558 | 0.45380094 | -0.07204 |
| 0.090190868 | 0.072654809  | 0.116893108 | -0.12248079 | 0.0080558  | -0.53204 |
| 7.88E-05    | -0.189726717 | 3.68E-05    | -0.26503783 | 6.01E-09   | -0.41947 |
| 0.412364295 | 0.030724653  | 0.507751838 | -0.22696337 | 7.18E-07   | -0.45808 |
| 0.095969842 | -0.085776384 | 0.064012854 | -0.06244903 | 0.17790504 | -0.12309 |
| 0.662177099 | -0.006656019 | 0.885931718 | -0.01101917 | 0.81227249 | 0.51113  |
| 9.65E-08    | -0.241504831 | 1.27E-07    | -0.07885067 | 0.0887438  | -0.40549 |
| 0.863166886 | -0.003250675 | 0.94414621  | -0.20663167 | 6.73E-06   | -0.27894 |
| 0.053506362 | -0.098417375 | 0.033479785 | -0.14671041 | 0.00147702 | -0.53898 |
| 0.002732537 | -0.146576557 | 0.001492033 | -0.08049282 | 0.08227721 | -0.40149 |
| 0.874126333 | -0.018132022 | 0.69593153  | 0.026369833 | 0.569744   | -0.18874 |
| 0.075210483 | 0.076038337  | 0.100761026 | 0.129799642 | 0.00496385 | 0.399294 |
| 0.819754092 | -0.00301896  | 0.948121781 | -0.1554451  | 0.00074976 | -0.42348 |
| 0.987445069 | -0.005076602 | 0.912874923 | -0.20819799 | 5.71E-06   | -0.48718 |
| 0.288586517 | -0.056829935 | 0.220272119 | -0.26032048 | 1.13E-08   | -0.32042 |
| 0.931293946 | -0.002999444 | 0.948456685 | 0.182127939 | 7.54E-05   | -0.45931 |
| 0.0338191   | 0.092862871  | 0.044883851 | -0.27234828 | 2.19E-09   | -0.40463 |
| 0.514626879 | -0.032637856 | 0.481677365 | -0.09439067 | 0.04146129 | -0.23807 |
| 0.06250767  | 0.070246692  | 0.129557638 | -0.16247629 | 0.00042319 | -0.46364 |
| 0.316430807 | 0.04024683   | 0.385524575 | -0.28586272 | 3.12E-10   | -0.33066 |
| 0.063013464 | -0.078668683 | 0.089484905 | -0.1495625  | 0.00118835 | -0.36684 |
| 0.00120468  | 0.157749725  | 0.000623203 | -0.26412444 | 6.80E-09   | -0.53636 |
| 0.035129882 | 0.098251536  | 0.033780539 | -0.30518904 | 1.60E-11   | -0.24507 |
| 0.931272925 | -0.006863113 | 0.882407962 | -0.36930283 | 1.55E-16   | -0.33543 |
| 0.164425271 | -0.079913986 | 0.084511702 | -0.12255379 | 0.00801794 | -0.25973 |
| 0.000560275 | -0.171676395 | 0.000193214 | -0.20404979 | 8.81E-06   | -0.51787 |
| 0.483358406 | -0.026804855 | 0.563392907 | -0.13673887 | 0.0030669  | 0.422029 |
| 0.361202058 | -0.054135313 | 0.242970117 | -0.38635207 | 4.49E-18   | -0.37555 |
| 2.47E-19    | -0.394422852 | 7.82E-19    | -0.16642982 | 0.00030365 | -0.19797 |
| 0.002350052 | 0.130387697  | 0.004769425 | -0.21177675 | 3.90E-06   | -0.31893 |
| 0.630843022 | -0.028307724 | 0.541717431 | 0.038736933 | 0.40361509 | -0.3693  |
| 0.776173406 | 0.011740914  | 0.800227988 | 0.052022087 | 0.26188209 | 0.512788 |
| 0.007205697 | 0.129709206  | 0.004994373 | 0.345707892 | 1.48E-14   | 0.537828 |
| 6.96E-06    | 0.215634899  | 2.57E-06    | -0.07740532 | 0.09476756 | 0.62746  |
| 5.58E-09    | 0.267225779  | 4.46E-09    | 0.175531546 | 0.00013743 | 0.5241   |
| 0.085946797 | -0.095790706 | 0.038520998 | -0.13849549 | 0.00270549 | -0.31468 |
| 0.935710922 | -0.014948461 | 0.747307811 | 0.01563945  | 0.73605189 | -0.23877 |

|             |              |             |             |            |          |
|-------------|--------------|-------------|-------------|------------|----------|
| 0.20882909  | 0.060075663  | 0.194997007 | -0.33175019 | 1.85E-13   | -0.27922 |
| 0.002888293 | -0.133055541 | 0.003970875 | -0.37154428 | 9.83E-17   | -0.46351 |
| 0.047457358 | -0.102387517 | 0.026932093 | -0.38604066 | 4.80E-18   | -0.23002 |
| 0.002522023 | -0.158304427 | 0.000595856 | -0.1796361  | 9.49E-05   | -0.27107 |
| 0.000157412 | -0.179134719 | 9.93E-05    | -0.27226516 | 2.21E-09   | -0.4923  |
| 0.013343431 | -0.114072292 | 0.013641299 | -0.26832871 | 3.83E-09   | -0.39933 |
| 1.33E-18    | 0.3882793    | 2.97E-18    | -0.16181551 | 0.000447   | -0.42896 |
| 0.049049405 | -0.095298055 | 0.039534838 | -0.36736434 | 2.28E-16   | -0.46924 |
| 0.432058485 | -0.043611755 | 0.347022822 | -0.38861225 | 2.77E-18   | -0.5318  |
| 3.93E-06    | 0.208967021  | 5.26E-06    | 0.062593123 | 0.17690433 | 0.507143 |
| 0.462807949 | 0.027696688  | 0.550480012 | -0.35749615 | 1.59E-15   | -0.52522 |
| 0.000241562 | -0.173599542 | 0.000163164 | -0.16815879 | 0.00026201 | -0.38883 |
| 0.919477047 | -0.012647384 | 0.785167841 | -0.45971546 | 8.50E-26   | -0.45045 |
| 0.124158344 | 0.071475567  | 0.122968195 | 0.364555963 | 3.99E-16   | 0.359828 |
| 0.423696573 | 0.028244106  | 0.542626502 | -0.23419601 | 3.07E-07   | -0.64374 |
| 0.028603204 | -0.104840071 | 0.023464329 | -0.3031773  | 2.20E-11   | -0.43733 |
| 0.24876586  | 0.054726823  | 0.23785233  | -0.02561429 | 0.5808548  | -0.09107 |
| 3.93E-13    | -0.33307979  | 1.46E-13    | -0.29697715 | 5.80E-11   | -0.26522 |
| 0.025766692 | 0.108113716  | 0.019441816 | -0.1192637  | 0.00989101 | -0.30941 |
| 3.00E-06    | 0.211399428  | 4.06E-06    | -0.11309538 | 0.01447269 | -0.31254 |
| 1.03E-05    | 0.197689229  | 1.68E-05    | -0.09938869 | 0.03176376 | -0.27171 |
| 0.125233004 | -0.066597993 | 0.150736896 | -0.07296822 | 0.11531866 | -0.26974 |
| 8.98E-05    | -0.186050228 | 5.23E-05    | -0.30357693 | 2.06E-11   | -0.36002 |
| 0.000897934 | 0.145094393  | 0.001667893 | -0.23133923 | 4.31E-07   | -0.35557 |
| 0.001716311 | -0.146250288 | 0.001529215 | -0.30044114 | 3.38E-11   | -0.53511 |
| 7.92E-05    | 0.179301353  | 9.78E-05    | -0.14612101 | 0.00154418 | -0.36    |
| 4.40E-12    | -0.300968215 | 3.11E-11    | 0.092557002 | 0.04559685 | 0.277842 |
| 0.519777528 | 0.035731755  | 0.44109444  | -0.35273238 | 3.96E-15   | -0.20784 |
| 0.583961312 | 0.021983204  | 0.635610314 | -0.10015594 | 0.03046192 | 0.367866 |
| 4.00E-08    | -0.254527922 | 2.44E-08    | -0.06901677 | 0.13642308 | -0.30678 |
| 1.46E-08    | -0.249921457 | 4.41E-08    | -0.08231657 | 0.07554756 | -0.51434 |
| 9.13E-07    | -0.245235081 | 7.98E-08    | -0.00307935 | 0.94708554 | -0.26196 |
| 0.018420968 | 0.112175516  | 0.015295911 | -0.2613644  | 9.87E-09   | -0.635   |
| 0.105517311 | -0.076369734 | 0.099281084 | 0.107985519 | 0.01958724 | -0.64669 |
| 0.123154542 | -0.077371388 | 0.094912817 | -0.34224405 | 2.80E-14   | -0.21756 |
| 0.190191121 | 0.062127601  | 0.180152465 | 0.112084508 | 0.01537955 | 0.486602 |
| 4.55E-08    | -0.260188669 | 1.16E-08    | -0.31664172 | 2.46E-12   | -0.28587 |
| 0.597217751 | 0.018100239  | 0.696438081 | -0.17912075 | 9.94E-05   | -0.48021 |
| 0.380662904 | -0.040364303 | 0.384138116 | -0.24315271 | 1.03E-07   | -0.48029 |
| 0.298509994 | -0.053958995 | 0.244510458 | -0.17735285 | 0.00011671 | -0.33511 |
| 0.015010388 | 0.099441575  | 0.031672521 | -0.14626906 | 0.00152705 | -0.38584 |
| 0.018210328 | -0.119175705 | 0.009946051 | -0.2849412  | 3.57E-10   | -0.59711 |
| 4.43E-06    | -0.217317684 | 2.13E-06    | -0.09752696 | 0.03512172 | -0.34282 |
| 2.09E-05    | 0.189436326  | 3.79E-05    | -0.21543472 | 2.62E-06   | -0.37259 |
| 0.153488452 | 0.055583469  | 0.230575847 | -0.34314427 | 2.38E-14   | -0.3655  |

|             |              |             |             |            |          |
|-------------|--------------|-------------|-------------|------------|----------|
| 0.268456088 | 0.050413703  | 0.27693911  | -0.24074153 | 1.39E-07   | -0.28874 |
| 0.000139016 | 0.172387346  | 0.000181547 | 0.132644184 | 0.00408553 | 0.568304 |
| 1.08E-10    | -0.302725668 | 2.36E-11    | -0.2845906  | 3.76E-10   | -0.29719 |
| 0.960102456 | -0.004933246 | 0.915325847 | 0.24373501  | 9.62E-08   | 0.518763 |
| 0.917287771 | -0.013622866 | 0.769050358 | -0.16103035 | 0.00047692 | -0.4283  |
| 0.628348504 | -0.03099057  | 0.504084087 | 0.004469531 | 0.92325927 | -0.4756  |
| 0.012682522 | -0.108427278 | 0.019090072 | -0.31491959 | 3.28E-12   | -0.14002 |
| 0.273829723 | 0.03967698   | 0.392293323 | -0.31884013 | 1.70E-12   | -0.21739 |
| 0.077789519 | -0.075235172 | 0.104420503 | -0.20058145 | 1.26E-05   | -0.23049 |
| 0.014909376 | -0.129573669 | 0.005040439 | -0.37966061 | 1.85E-17   | -0.39425 |
| 0.183346862 | -0.058650024 | 0.205824623 | -0.2499623  | 4.39E-08   | -0.42828 |
| 0.318358262 | 0.057734065  | 0.213007166 | -0.29596802 | 6.78E-11   | -0.1929  |
| 0.070008361 | -0.083761198 | 0.070540714 | -0.32309688 | 8.29E-13   | -0.54929 |
| 0.000610094 | -0.161603598 | 0.000454903 | -0.28440132 | 3.87E-10   | -0.37077 |
| 0.836902099 | -0.018443491 | 0.690974545 | -0.11861816 | 0.01030112 | -0.34251 |
| 0.07911811  | -0.079076845 | 0.087829635 | -0.10780926 | 0.01978874 | -0.50743 |
| 0.33577279  | -0.051762227 | 0.264275816 | -0.22197814 | 1.27E-06   | -0.58111 |
| 0.031546294 | -0.100611519 | 0.029710749 | 0.273091104 | 1.97E-09   | 0.563209 |
| 0.918157536 | 0.007444694  | 0.872524823 | -0.15315915 | 0.00089844 | 0.502556 |
| 0.000769449 | -0.163914069 | 0.000375392 | -0.27298225 | 2.00E-09   | -0.3928  |
| 0.000252174 | -0.175664527 | 0.000135809 | 0.064219533 | 0.16589746 | -0.23034 |
| 0.624232047 | 0.018848233  | 0.684552844 | 0.143420352 | 0.00188925 | 0.611532 |
| 0.668003575 | 0.024741427  | 0.593815184 | -0.18157844 | 7.94E-05   | -0.32473 |
| 0.0801634   | -0.084314335 | 0.068696932 | -0.24304992 | 1.05E-07   | -0.31281 |
| 6.10E-07    | -0.229487086 | 5.36E-07    | 0.245712114 | 7.52E-08   | 0.545535 |
| 1.12E-10    | -0.292181379 | 1.21E-10    | -0.24538372 | 7.83E-08   | -0.33272 |
| 0.009924265 | -0.123677273 | 0.007454979 | -0.08407514 | 0.06948934 | -0.43272 |
| 0.118724602 | -0.084189966 | 0.069108015 | -0.24933715 | 4.75E-08   | -0.36298 |
| 0.541872174 | -0.034293305 | 0.459715142 | -0.27718214 | 1.10E-09   | -0.61917 |
| 0.032597192 | 0.096247349  | 0.037601014 | 0.17005696  | 0.00022246 | 0.550532 |
| 0.79920264  | 0.003328927  | 0.942803955 | 0.244814497 | 8.41E-08   | 0.504901 |
| 0.977931857 | -0.00035077  | 0.993968134 | 0.009414592 | 0.83920514 | -0.49377 |
| 0.83859508  | -0.015250674 | 0.74237812  | -0.24687778 | 6.49E-08   | -0.33265 |
| 0.068580539 | 0.082083234  | 0.076382737 | -0.28184268 | 5.63E-10   | -0.42946 |
| 2.02E-09    | -0.272089131 | 2.27E-09    | -0.25613548 | 1.97E-08   | -0.31818 |
| 0.210127572 | 0.055414305  | 0.232000102 | -0.30201543 | 2.64E-11   | -0.4701  |
| 0.919602061 | -0.011312537 | 0.807371287 | -0.29824459 | 4.76E-11   | -0.31816 |
| 0.244699985 | -0.062508772 | 0.177489629 | -0.30427763 | 1.84E-11   | -0.40395 |
| 0.28501463  | -0.049095327 | 0.289711727 | -0.24733184 | 6.13E-08   | -0.61211 |
| 0.093182002 | 0.086340544  | 0.062277165 | 0.245369939 | 7.85E-08   | 0.679331 |
| 0.784040071 | 0.011626331  | 0.802137081 | -0.25384968 | 2.66E-08   | -0.41226 |
| 0.022596542 | 0.110729027  | 0.016673609 | 0.115764891 | 0.01230002 | 0.583354 |
| 0.025933972 | -0.096752108 | 0.036605844 | -0.10732454 | 0.02035217 | 0.436417 |
| 0.761033466 | -0.019488902 | 0.674434356 | -0.15035197 | 0.00111817 | -0.46287 |
| 0.033734907 | 0.106760094  | 0.021025822 | 0.124974138 | 0.00684928 | 0.458305 |

|             |              |             |             |            |          |
|-------------|--------------|-------------|-------------|------------|----------|
| 0.009967385 | -0.128156337 | 0.005545601 | -0.26605694 | 5.23E-09   | -0.39911 |
| 3.61E-05    | -0.194438038 | 2.33E-05    | -0.08092527 | 0.08063917 | -0.41398 |
| 3.46E-05    | 0.185920882  | 5.29E-05    | 0.363615821 | 4.81E-16   | 0.46386  |
| 1.10E-07    | -0.242568445 | 1.11E-07    | -0.26693072 | 4.64E-09   | -0.54357 |
| 0.938395949 | -0.001928509 | 0.966846448 | -0.26859397 | 3.69E-09   | -0.29169 |
| 0.276925741 | -0.056029329 | 0.226851674 | 0.378282229 | 2.46E-17   | 0.487826 |
| 0.017450563 | -0.131313571 | 0.004477206 | -0.07938351 | 0.08660225 | -0.30122 |
| 0.75387411  | -0.026306015 | 0.570678562 | -0.12032514 | 0.00924815 | -0.46821 |
| 0.029611533 | -0.104062625 | 0.024519216 | -0.31665161 | 2.46E-12   | -0.36808 |
| 0.367902557 | 0.025550469  | 0.581797869 | -0.16079557 | 0.00048622 | -0.53596 |
| 0.72768796  | -0.018669529 | 0.687385425 | -0.1408299  | 0.00228522 | -0.63973 |
| 0.000875037 | -0.156750565 | 0.00067542  | -0.30117572 | 3.01E-11   | -0.46013 |
| 0.008954821 | -0.126212325 | 0.006312502 | -0.15215864 | 0.00097172 | -0.65901 |
| 0.006784831 | -0.133030246 | 0.00397784  | 0.23786443  | 1.98E-07   | 0.396996 |
| 0.02340951  | 0.093420608  | 0.043607855 | -0.1346771  | 0.00354673 | -0.42236 |
| 0.829342522 | 0.002787222  | 0.952099031 | -0.18371625 | 6.51E-05   | -0.36169 |
| 0.000167049 | 0.178779113  | 0.000102569 | 0.178982492 | 0.00010069 | 0.554205 |
| 0.786239015 | -0.01813075  | 0.695951792 | -0.10865229 | 0.01884109 | -0.34944 |
| 0.107558274 | 0.074989685  | 0.105559772 | -0.06402323 | 0.16719803 | -0.38162 |
| 2.86E-09    | -0.268868118 | 3.55E-09    | -0.12633628 | 0.0062609  | -0.16639 |
| 0.016655725 | -0.117636865 | 0.010953446 | -0.23925662 | 1.67E-07   | -0.26108 |
| 7.55E-06    | -0.203442956 | 9.38E-06    | -0.27345784 | 1.87E-09   | -0.37347 |
| 0.356866918 | 0.03384548   | 0.465600521 | -0.26386607 | 7.05E-09   | -0.48421 |
| 0.010865099 | -0.114343581 | 0.013418012 | -0.14227062 | 0.00205652 | -0.31011 |
| 0.493124642 | -0.030878831 | 0.505623586 | 0.212687022 | 3.53E-06   | 0.633695 |
| 0.093070259 | 0.076284968  | 0.099657971 | -0.17601441 | 0.00013162 | -0.39827 |
| 0.397148579 | 0.037251537  | 0.421897346 | -0.20868412 | 5.42E-06   | -0.47085 |
| 0.098800974 | -0.077674339 | 0.093622301 | -0.22125681 | 1.38E-06   | -0.54018 |
| 0.000982795 | -0.157092343 | 0.000657119 | -0.2217128  | 1.31E-06   | -0.54618 |
| 0.06909641  | 0.070635981  | 0.127441266 | -0.42500732 | 6.60E-22   | -0.50379 |
| 5.23E-06    | -0.208468316 | 5.55E-06    | -0.38315572 | 8.87E-18   | -0.32817 |
| 0.137701389 | -0.069066593 | 0.136139636 | -0.10950363 | 0.0179245  | -0.46303 |
| 0.004443797 | -0.136294771 | 0.00316496  | -0.17735995 | 0.00011663 | -0.34317 |
| 0.634606419 | -0.02849869  | 0.538993183 | -0.12419665 | 0.00720688 | -0.4214  |
| 2.38E-07    | -0.23417082  | 3.08E-07    | -0.11819704 | 0.01057672 | -0.2095  |
| 0.003247889 | 0.122566338  | 0.008011453 | 0.002469231 | 0.95755852 | -0.23866 |
| 0.65134248  | -0.022234313 | 0.631754293 | -0.26773852 | 4.15E-09   | -0.31617 |
| 0.019885108 | -0.100407227 | 0.030045607 | 0.059897    | 0.19633064 | 0.448411 |
| 0.722283901 | -0.018293409 | 0.693361446 | 0.310274861 | 7.03E-12   | 0.589928 |
| 0.000997047 | -0.151853528 | 0.000995137 | -0.33380384 | 1.28E-13   | -0.27245 |
| 0.550138162 | -0.041266049 | 0.373596917 | -0.05974946 | 0.19743701 | -0.39863 |
| 0.4421199   | -0.030176487 | 0.515356447 | -0.31072687 | 6.53E-12   | -0.39188 |
| 5.34E-05    | -0.181249438 | 8.18E-05    | 0.349131287 | 7.82E-15   | 0.538547 |
| 0.003203468 | -0.133872295 | 0.003751817 | -0.02863255 | 0.53708769 | -0.52513 |
| 5.29E-05    | -0.191892375 | 2.99E-05    | -0.0151437  | 0.7441219  | -0.3604  |

|             |              |             |             |            |          |
|-------------|--------------|-------------|-------------|------------|----------|
| 4.78E-19    | -0.403346266 | 1.07E-19    | -0.21653215 | 2.32E-06   | -0.48022 |
| 0.016803515 | -0.10924792  | 0.018195628 | -0.17645401 | 0.00012654 | -0.29225 |
| 0.014469802 | 0.10022016   | 0.030355061 | 0.065315504 | 0.15877534 | -0.44616 |
| 0.001437709 | 0.130061711  | 0.004876337 | -0.26757197 | 4.25E-09   | -0.29579 |
| 0.265398325 | 0.04875031   | 0.293118565 | -0.17323062 | 0.00016857 | -0.35592 |
| 0.426111641 | -0.037657874 | 0.416848655 | -0.3145985  | 3.46E-12   | -0.45345 |
| 0.762356905 | 0.000956952  | 0.983545206 | -0.30743903 | 1.11E-11   | -0.42564 |
| 0.012593702 | 0.109970157  | 0.017438922 | -0.25485399 | 2.33E-08   | -0.38138 |
| 0.085269451 | -0.073001158 | 0.115154192 | 0.370170928 | 1.30E-16   | 0.555233 |
| 0.035591853 | 0.097430598  | 0.035303462 | -0.0384807  | 0.40673459 | 0.477427 |
| 0.947866707 | 0.001669077  | 0.971304355 | -0.03084983 | 0.50602356 | -0.31153 |
| 0.000134465 | -0.1864807   | 5.02E-05    | -0.09621024 | 0.03767507 | -0.32124 |
| 0.007677072 | 0.123607488  | 0.00748889  | 0.060767803 | 0.189893   | 0.345148 |
| 4.01E-14    | -0.344626462 | 1.81E-14    | -0.07874364 | 0.08917907 | -0.44754 |
| 0.54611451  | -0.01379464  | 0.766222263 | -0.08894053 | 0.05477233 | -0.31553 |
| 0.077325206 | -0.093141991 | 0.044241407 | -0.45174269 | 7.29E-25   | -0.47577 |
| 0.055344481 | -0.096738831 | 0.03663173  | -0.2058254  | 7.32E-06   | -0.39005 |
| 7.33E-11    | -0.294403639 | 8.62E-11    | -0.29785465 | 5.06E-11   | -0.50386 |
| 7.75E-06    | -0.212309986 | 3.68E-06    | -0.30420269 | 1.87E-11   | -0.36853 |
| 0.266610192 | 0.047034774  | 0.310455128 | -0.15574255 | 0.00073218 | -0.26637 |
| 0.008988333 | -0.125495156 | 0.006618614 | -0.38881714 | 2.65E-18   | -0.26127 |
| 0.174787938 | -0.062764215 | 0.175721544 | -0.37077179 | 1.15E-16   | -0.38956 |
| 1.49E-09    | -0.277886585 | 9.97E-10    | -0.10519655 | 0.02299391 | -0.52327 |
| 0.327077228 | -0.050249004 | 0.278513494 | -0.28167363 | 5.77E-10   | -0.20524 |
| 0.229421579 | 0.056887629  | 0.21980331  | -0.21327    | 3.32E-06   | -0.50725 |
| 1.71E-05    | -0.20728208  | 6.29E-06    | -0.17577633 | 0.00013446 | -0.32701 |
| 0.713827429 | 0.017214222  | 0.710612941 | -0.16830618 | 0.00025872 | -0.52756 |
| 0.043887954 | -0.094826618 | 0.04052607  | -0.23797536 | 1.95E-07   | -0.52848 |
| 0.586373286 | -0.02802293  | 0.545792882 | -0.08399125 | 0.06976901 | -0.37686 |
| 0.202500413 | -0.061331918 | 0.185806191 | -0.23612744 | 2.44E-07   | -0.49702 |
| 0.000358912 | 0.162460026  | 0.000423761 | -0.19672742 | 1.85E-05   | -0.34253 |
| 6.70E-06    | -0.214052061 | 3.05E-06    | -0.14900055 | 0.00124074 | -0.42574 |
| 1.46E-13    | -0.326252794 | 4.82E-13    | -0.11430043 | 0.01345331 | -0.25552 |
| 0.386910651 | -0.055895917 | 0.227961524 | -0.09093292 | 0.0495439  | -0.20347 |
| 0.450237247 | -0.023819143 | 0.607650976 | -0.03610595 | 0.43632211 | -0.41331 |
| 0.037516947 | 0.103034621  | 0.025976788 | 0.13682577  | 0.00304803 | 0.525249 |
| 7.62E-05    | -0.185151976 | 5.69E-05    | -0.48409216 | 8.27E-29   | -0.33281 |
| 4.33E-05    | 0.196847433  | 1.83E-05    | 0.100230984 | 0.03033708 | 0.514207 |
| 5.97E-12    | -0.312452172 | 4.92E-12    | -0.17107586 | 0.00020361 | -0.39488 |
| 3.14E-08    | 0.251888393  | 3.43E-08    | -0.06554573 | 0.15730901 | 0.454543 |
| 0.071878875 | -0.092122086 | 0.046627023 | -0.37828641 | 2.46E-17   | -0.4732  |
| 0.051886391 | -0.099558501 | 0.031471603 | -0.30835679 | 9.59E-12   | -0.55403 |
| 0.677011341 | -0.022154018 | 0.632986229 | -0.05882369 | 0.20448281 | -0.31536 |
| 0.325155513 | -0.055560692 | 0.230767249 | -0.17739894 | 0.00011622 | -0.5328  |
| 0.036697052 | -0.102968049 | 0.0260737   | -0.04579934 | 0.32334962 | -0.1466  |

|             |              |             |             |            |          |
|-------------|--------------|-------------|-------------|------------|----------|
| 0.699187026 | 0.022584187  | 0.626398264 | -0.40152632 | 1.61E-19   | -0.4516  |
| 0.908090858 | -0.009577753 | 0.836457348 | -0.2405128  | 1.43E-07   | -0.26122 |
| 0.914842114 | -0.014436759 | 0.755678141 | 0.667452856 | 1.59E-61   | 0.620683 |
| 0.069421708 | -0.090572787 | 0.050456792 | -0.04245704 | 0.35995111 | -0.19327 |
| 6.97E-09    | -0.273745135 | 1.80E-09    | -0.22496194 | 9.04E-07   | -0.16041 |
| 0.00242626  | -0.140025856 | 0.002422722 | 0.630103823 | 4.85E-53   | 0.464322 |
| 0.008419537 | -0.126321978 | 0.006266835 | -0.35765447 | 1.54E-15   | -0.44976 |
| 0.324505633 | 0.052396361  | 0.258460724 | -0.08714588 | 0.05986688 | 0.466809 |
| 0.001023473 | 0.141358128  | 0.002198801 | -0.09560364 | 0.03890335 | -0.3497  |
| 9.33E-09    | -0.269485007 | 3.26E-09    | -0.00435755 | 0.92517624 | -0.26769 |
| 0.178127546 | 0.057586119  | 0.214184005 | 0.330433517 | 2.33E-13   | 0.617113 |
| 0.03871822  | -0.103112198 | 0.025864246 | -0.19535809 | 2.12E-05   | -0.51088 |
| 0.781041459 | -0.019966115 | 0.66693526  | -0.29403185 | 9.12E-11   | -0.32211 |
| 0.001619361 | -0.15791815  | 0.000614779 | -0.24008106 | 1.51E-07   | -0.40112 |
| 1.21E-10    | 0.292190161  | 1.21E-10    | -0.27347628 | 1.87E-09   | -0.37737 |
| 0.253813951 | -0.051969154 | 0.26236847  | -0.19086303 | 3.30E-05   | -0.46958 |
| 0.033178858 | 0.094220317  | 0.041831662 | -0.25215554 | 3.31E-08   | -0.19685 |
| 0.630849954 | 0.01640411   | 0.723661477 | -0.14532187 | 0.00163972 | -0.55664 |
| 3.62E-10    | -0.28684749  | 2.69E-10    | -0.2071766  | 6.36E-06   | -0.39059 |
| 0.195254513 | 0.045411946  | 0.32746354  | -0.16872489 | 0.00024957 | -0.4585  |
| 0.00014478  | -0.186949882 | 4.80E-05    | -0.16009129 | 0.00051515 | -0.36302 |
| 0.003709305 | -0.14339525  | 0.001892766 | -0.24408361 | 9.22E-08   | -0.34791 |
| 0.381081206 | 0.040728394  | 0.37986032  | -0.23106954 | 4.45E-07   | -0.4777  |
| 0.063877462 | -0.097021645 | 0.036083654 | -0.19872859 | 1.52E-05   | -0.3503  |
| 0.0834725   | -0.083772591 | 0.070502336 | -0.24257461 | 1.11E-07   | -0.47422 |
| 0.004825986 | -0.130493409 | 0.004735212 | 0.413946364 | 9.28E-21   | 0.527658 |
| 0.000117504 | -0.182821283 | 7.07E-05    | -0.4375074  | 2.95E-23   | -0.37268 |
| 0.073742226 | 0.073960832  | 0.110441809 | -0.40500695 | 7.33E-20   | -0.5508  |
| 0.156291053 | -0.064931918 | 0.161241341 | -0.30164104 | 2.80E-11   | -0.42741 |
| 0.008679444 | -0.130049797 | 0.004880285 | -0.355183   | 2.48E-15   | -0.40752 |
| 0.005451506 | -0.136671736 | 0.00308154  | -0.09747672 | 0.03521638 | -0.38979 |
| 0.0861594   | 0.072445156  | 0.117955656 | 0.005521227 | 0.90527863 | -0.50101 |
| 0.800928487 | -0.021259353 | 0.646780693 | -0.22759389 | 6.68E-07   | -0.43787 |
| 1.02E-05    | 0.21200916   | 3.80E-06    | 0.150543291 | 0.00110175 | 0.459155 |
| 0.05061247  | 0.086339353  | 0.062280788 | -0.18843748 | 4.17E-05   | -0.4457  |
| 0.109906221 | -0.074164209 | 0.109462919 | -0.06896357 | 0.13672626 | -0.25136 |
| 0.000298862 | 0.187881879  | 4.39E-05    | 0.2349392   | 2.81E-07   | 0.340917 |
| 0.903624695 | -0.004772278 | 0.91807885  | -0.22255463 | 1.19E-06   | -0.47077 |
| 0.000567042 | 0.156912036  | 0.000666716 | -0.46067386 | 6.54E-26   | -0.39948 |
| 0.806566565 | -0.017166746 | 0.711375353 | -0.33957559 | 4.56E-14   | -0.39267 |
| 0.393678419 | 0.040182153  | 0.386289218 | -0.08617314 | 0.06278811 | -0.32358 |
| 0.028073525 | 0.09767844   | 0.034837653 | -0.29890034 | 4.30E-11   | -0.61963 |
| 0.323375088 | -0.0478492   | 0.302142429 | -0.39737473 | 4.08E-19   | -0.48001 |
| 0.37147157  | 0.031195102  | 0.501272505 | -0.1107533  | 0.01664962 | -0.36631 |
| 0.918832465 | 0.010748957  | 0.816793478 | -0.1224738  | 0.00805944 | -0.32162 |

|             |              |             |             |            |          |
|-------------|--------------|-------------|-------------|------------|----------|
| 1.31E-08    | -0.253609744 | 2.74E-08    | -0.02737518 | 0.55511831 | -0.40597 |
| 0.149550466 | -0.070522575 | 0.128055012 | -0.17027654 | 0.00021827 | -0.49815 |
| 0.318669973 | -0.05340021  | 0.249437162 | -0.34592389 | 1.42E-14   | -0.30286 |
| 0.894659128 | -0.00273105  | 0.953063282 | -0.25897726 | 1.36E-08   | -0.42705 |
| 7.11E-05    | 0.174854947  | 0.000145975 | -0.37023437 | 1.28E-16   | -0.23189 |
| 0.000193689 | -0.175961005 | 0.000132255 | -0.24421529 | 9.07E-08   | -0.51029 |
| 0.065265119 | -0.093079603 | 0.04438433  | -0.25466089 | 2.39E-08   | -0.42306 |
| 0.668233898 | -0.019038733 | 0.681538153 | 0.149624094 | 0.00118273 | 0.151461 |
| 0.072178023 | -0.095247811 | 0.039639493 | -0.30762866 | 1.08E-11   | -0.18595 |
| 0.000133895 | 0.169863666  | 0.000226218 | 0.079870899 | 0.08467997 | -0.54445 |
| 7.17E-05    | 0.163411657  | 0.000391491 | -0.08161156 | 0.07809393 | -0.43003 |
| 0.000694129 | 0.152835827  | 0.000921541 | -0.43503643 | 5.51E-23   | -0.3131  |
| 0.524153505 | -0.039264893 | 0.397232604 | 0.024469939 | 0.59787303 | -0.53679 |
| 0.123374673 | 0.069086852  | 0.136024513 | 0.233077258 | 3.51E-07   | -0.29862 |
| 0.4338948   | 0.032338701  | 0.485705979 | -0.36292508 | 5.51E-16   | -0.44992 |
| 0.097418922 | -0.086377654 | 0.062164367 | -0.34771761 | 1.02E-14   | -0.30258 |
| 0.390152138 | -0.039282431 | 0.397021632 | -0.43305883 | 9.05E-23   | -0.2304  |
| 0.102113245 | -0.086944201 | 0.060463129 | -0.32277669 | 8.75E-13   | -0.10286 |
| 0.593018478 | 0.029243791  | 0.528429729 | -0.24121833 | 1.31E-07   | -0.34532 |
| 0.509881513 | 0.052562319  | 0.256953578 | -0.33590534 | 8.83E-14   | -0.50789 |
| 0.704224815 | 0.014183097  | 0.759838188 | -0.10238044 | 0.02694271 | -0.42989 |
| 0.004542493 | -0.137724682 | 0.002859009 | -0.14864181 | 0.0012753  | -0.48445 |
| 0.045469185 | -0.092383255 | 0.046006082 | -0.09905187 | 0.0323501  | 0.411756 |
| 0.136306535 | -0.065210294 | 0.159448862 | -0.11622969 | 0.0119527  | -0.32797 |
| 0.020594875 | -0.106153841 | 0.021770854 | -0.14792533 | 0.00134697 | -0.57796 |
| 2.92E-06    | 0.210391509  | 4.52E-06    | 0.077234825 | 0.09549918 | 0.202753 |
| 0.259944372 | 0.064017581  | 0.167235585 | -0.14087323 | 0.00227801 | 0.422842 |
| 0.015607023 | -0.10812209  | 0.01943235  | -0.12923859 | 0.00515597 | 0.524312 |
| 0.021334646 | 0.104158617  | 0.02438679  | -0.11364969 | 0.01399564 | -0.58102 |
| 0.001467053 | 0.16025957   | 0.000508094 | 0.169302321 | 0.00023746 | 0.397886 |
| 4.07E-15    | -0.358282733 | 1.37E-15    | -0.03153571 | 0.49660879 | -0.06456 |
| 0.20650297  | 0.072288392  | 0.118755082 | 0.105702407 | 0.0223404  | 0.46001  |
| 0.292161677 | -0.055335902 | 0.232662319 | -0.14788363 | 0.00135125 | -0.48353 |
| 5.53E-05    | -0.181287018 | 8.15E-05    | -0.32785981 | 3.65E-13   | -0.33155 |
| 0.028613507 | 0.097733891  | 0.034734154 | -0.30103473 | 3.08E-11   | -0.4926  |
| 0.001926581 | 0.148371338  | 0.00130193  | -0.30872077 | 9.04E-12   | -0.50786 |
| 0.326585333 | 0.04774588   | 0.303188747 | -0.20139368 | 1.16E-05   | -0.35476 |
| 0.000211233 | -0.161527189 | 0.000457782 | -0.2784821  | 9.16E-10   | -0.353   |
| 0.391342527 | 0.049677542  | 0.284023198 | -0.26936716 | 3.32E-09   | -0.32697 |
| 7.26E-10    | 0.282705241  | 4.96E-10    | 0.051276795 | 0.26878762 | 0.513475 |
| 6.76E-05    | 0.178341686  | 0.000106724 | 0.2800909   | 7.26E-10   | 0.555228 |
| 3.83E-07    | -0.243403873 | 1.00E-07    | -0.11264763 | 0.0148684  | -0.23758 |
| 0.16144715  | 0.069924718  | 0.131328517 | -0.22814074 | 6.27E-07   | -0.24016 |
| 0.119230197 | 0.068794924  | 0.137690696 | -0.23852612 | 1.83E-07   | -0.47149 |
| 0.007280866 | -0.122302317 | 0.008149037 | -0.20832705 | 5.63E-06   | -0.47495 |

|             |              |             |             |            |          |
|-------------|--------------|-------------|-------------|------------|----------|
| 0.001695497 | 0.139281398  | 0.002556724 | 0.362414964 | 6.09E-16   | 0.392379 |
| 0.112082008 | 0.068016011  | 0.142213109 | 0.423966837 | 8.50E-22   | 0.360536 |
| 2.64E-05    | -0.19243785  | 2.83E-05    | -0.26322797 | 7.68E-09   | -0.48674 |
| 0.895602984 | -0.001573068 | 0.972954336 | 0.037901676 | 0.41383658 | 0.483514 |
| 0.002011505 | -0.14845399  | 0.001293738 | -0.24742689 | 6.06E-08   | -0.54183 |
| 0.089220155 | 0.080851364  | 0.080917244 | -0.34023988 | 4.04E-14   | -0.41806 |
| 0.001289554 | -0.163588224 | 0.000385762 | -0.15823293 | 0.00059932 | -0.23653 |
| 0.634147902 | 0.018399614  | 0.691672052 | -0.4262974  | 4.82E-22   | -0.31092 |
| 6.14E-05    | -0.182051133 | 7.60E-05    | -0.33901961 | 5.04E-14   | -0.20962 |
| 1.79E-07    | -0.231464081 | 4.25E-07    | -0.23521887 | 2.72E-07   | -0.2588  |
| 0.001043109 | 0.13972459   | 0.002476158 | -0.29016613 | 1.64E-10   | -0.34458 |
| 1.02E-08    | -0.264759156 | 6.24E-09    | -0.17697566 | 0.00012074 | -0.30441 |
| 1.95E-08    | -0.255453253 | 2.16E-08    | -0.19899414 | 1.48E-05   | -0.23    |
| 0.010005788 | -0.123687718 | 0.007449915 | -0.24338356 | 1.01E-07   | -0.23108 |
| 0.023037798 | 0.100595845  | 0.029736326 | -0.39415839 | 8.29E-19   | -0.35608 |
| 0.001601573 | -0.140636716 | 0.002317589 | -0.31624178 | 2.63E-12   | -0.2296  |
| 0.818926456 | -0.012800932 | 0.782624543 | -0.3248711  | 6.12E-13   | -0.27335 |
| 0.434302253 | -0.051983174 | 0.262239586 | 0.031021025 | 0.50366491 | -0.39701 |
| 0.291362471 | -0.044897104 | 0.332983102 | -0.22469221 | 9.32E-07   | -0.28378 |
| 0.032359707 | 0.092215466  | 0.046404207 | -0.1503063  | 0.00112213 | -0.50363 |
| 0.225474057 | -0.056806705 | 0.220461089 | -0.29058894 | 1.54E-10   | -0.58207 |
| 0.191710477 | 0.058644048  | 0.205870907 | -0.17000798 | 0.00022341 | -0.32631 |
| 0.617871908 | -0.022534098 | 0.627163853 | -0.27407535 | 1.72E-09   | -0.39442 |
| 0.094879059 | -0.079094424 | 0.087758902 | -0.09001773 | 0.05189128 | -0.44401 |
| 0.621741203 | 0.015460304  | 0.73896479  | -0.14869384 | 0.00127023 | -0.55233 |
| 0.343488891 | -0.040954476 | 0.377218781 | -0.15894582 | 0.00056562 | -0.43889 |
| 0.252265928 | 0.045604162  | 0.325418076 | -0.25106308 | 3.81E-08   | -0.43661 |
| 0.986363209 | -0.003210561 | 0.944834366 | -0.18471069 | 5.93E-05   | -0.47518 |
| 0.000259    | -0.177786303 | 0.000112227 | -0.30143865 | 2.89E-11   | -0.4081  |
| 0.002283911 | -0.144858273 | 0.001697603 | -0.45817914 | 1.29E-25   | -0.34275 |
| 0.012642096 | -0.121458391 | 0.00860306  | -0.19285887 | 2.72E-05   | -0.226   |
| 0.812302835 | -0.013382641 | 0.773010574 | -0.28412767 | 4.03E-10   | -0.45298 |
| 0.030408815 | -0.097297228 | 0.03555631  | -0.28236668 | 5.21E-10   | -0.58541 |
| 0.000503999 | -0.162004811 | 0.000440058 | -0.31191982 | 5.37E-12   | -0.42937 |
| 0.268093492 | -0.055953535 | 0.227481728 | -0.2807755  | 6.57E-10   | -0.50727 |
| 0.003531263 | -0.145225376 | 0.001651619 | -0.15137907 | 0.00103259 | -0.43934 |
| 0.629038748 | 0.019573487  | 0.673102783 | -0.0861605  | 0.06282683 | 0.479221 |
| 0.207923435 | -0.062371916 | 0.178442316 | -0.37611349 | 3.86E-17   | -0.38955 |
| 7.84E-06    | -0.212581465 | 3.57E-06    | -0.26581282 | 5.41E-09   | -0.49872 |
| 0.018547385 | 0.107646984  | 0.019975833 | -0.27798006 | 9.84E-10   | -0.40347 |
| 2.84E-06    | -0.221140028 | 1.39E-06    | -0.39737597 | 4.07E-19   | -0.3317  |
| 0.016234288 | -0.123021784 | 0.007778983 | -0.33302734 | 1.47E-13   | -0.50479 |
| 5.85E-07    | -0.233251039 | 3.44E-07    | -0.18900468 | 3.95E-05   | -0.26405 |
| 0.046416403 | -0.088747535 | 0.055302285 | -0.08572002 | 0.06418842 | -0.30123 |
| 0.352346758 | 0.036588866  | 0.430207155 | -0.44233364 | 8.58E-24   | -0.42262 |



|             |              |             |             |            |          |
|-------------|--------------|-------------|-------------|------------|----------|
| 0.000200964 | -0.177969498 | 0.000110383 | -0.34855193 | 8.72E-15   | -0.39729 |
| 0.008304175 | -0.128153681 | 0.005546588 | -0.19960924 | 1.39E-05   | -0.37621 |
| 0.814998027 | 0.004795025  | 0.917689747 | -0.29214657 | 1.22E-10   | -0.50476 |
| 0.969518883 | 8.26E-05     | 0.998580162 | -0.24369245 | 9.67E-08   | -0.45903 |
| 0.773747381 | -0.015766321 | 0.73399126  | -0.30208196 | 2.61E-11   | -0.25729 |
| 6.68E-05    | -0.175408402 | 0.000138951 | -0.04183572 | 0.36703055 | -0.49419 |
| 0.037086749 | -0.096300943 | 0.037494271 | -0.33762198 | 6.49E-14   | -0.24813 |
| 0.955104627 | 0.004717587  | 0.919014435 | -0.24201256 | 1.19E-07   | -0.43458 |
| 0.003413029 | -0.150185316 | 0.001132662 | -0.13099633 | 0.00457546 | -0.19399 |
| 1.45E-05    | -0.200273189 | 1.30E-05    | -0.36884909 | 1.69E-16   | -0.42163 |
| 0.524271925 | 0.02525688   | 0.586145661 | -0.17019959 | 0.00021973 | -0.6004  |
| 9.58E-05    | -0.17120456  | 0.000201341 | -0.20650369 | 6.82E-06   | -0.22064 |
| 1.56E-06    | -0.235259317 | 2.71E-07    | -0.15625575 | 0.00070276 | -0.3967  |
| 0.166804978 | 0.052635918  | 0.256287131 | 0.059074748 | 0.20255431 | -0.26184 |
| 0.521631732 | -0.032409258 | 0.484754178 | -0.27878999 | 8.76E-10   | -0.10665 |
| 0.182074544 | -0.077785729 | 0.093151342 | -0.37087    | 1.13E-16   | 0.095618 |
| 0.000457048 | 0.167949978  | 0.000266737 | -0.35350101 | 3.42E-15   | -0.30405 |
| 0.252148823 | 0.051734174  | 0.264535129 | -0.45987274 | 8.14E-26   | -0.16493 |
| 0.540191186 | -0.042697    | 0.357239935 | -0.24986299 | 4.45E-08   | -0.44966 |
| 2.73E-16    | 0.371862892  | 9.21E-17    | 0.174030154 | 0.00015706 | 0.280498 |
| 1.97E-07    | 0.241094497  | 1.33E-07    | 0.120096614 | 0.00938333 | 0.396868 |
| 6.99E-07    | 0.220468666  | 1.50E-06    | -0.16523184 | 0.00033605 | -0.23811 |
| 2.95E-06    | -0.212313645 | 3.68E-06    | -0.07313057 | 0.11450968 | -0.36233 |
| 0.000155614 | -0.175826699 | 0.000133854 | -0.35529695 | 2.43E-15   | -0.30519 |
| 3.14E-05    | -0.20872102  | 5.40E-06    | -0.24976294 | 4.50E-08   | -0.27715 |
| 0.557364687 | 0.011885895  | 0.797814127 | -0.43779678 | 2.74E-23   | -0.38049 |
| 0.628256639 | -0.02754731  | 0.5526327   | -0.37450382 | 5.37E-17   | -0.40976 |
| 0.031249544 | 0.096176667  | 0.037742184 | -0.35355641 | 3.39E-15   | -0.40884 |
| 0.012635328 | -0.113761054 | 0.01390149  | 0.210661851 | 4.39E-06   | 0.34732  |
| 0.181953059 | 0.054399053  | 0.240678765 | 0.184046877 | 6.31E-05   | 0.330021 |
| 0.002202427 | -0.14745731  | 0.001395768 | -0.17399386 | 0.00015757 | -0.5592  |
| 0.824967206 | -0.011135273 | 0.81033193  | -0.20868936 | 5.42E-06   | -0.44753 |
| 0.00249125  | 0.134035283  | 0.003709436 | -0.31643876 | 2.55E-12   | -0.36411 |
| 0.293532366 | -0.054403811 | 0.240637567 | 0.274703203 | 1.57E-09   | 0.567161 |
| 0.000193108 | -0.185307492 | 5.61E-05    | -0.11527712 | 0.01267406 | -0.32978 |
| 0.765053155 | -0.015434606 | 0.739382961 | -0.29026591 | 1.62E-10   | -0.24776 |
| 0.485292687 | -0.030981782 | 0.504205069 | -0.16195134 | 0.00044201 | -0.29567 |
| 2.18E-08    | 0.254353144  | 2.49E-08    | -0.26831818 | 3.83E-09   | -0.51233 |
| 0.240147738 | -0.055487694 | 0.231381452 | 0.396096454 | 5.41E-19   | 0.362621 |
| 0.375173638 | 0.041944631  | 0.365783331 | 0.125621348 | 0.00656381 | 0.507878 |
| 0.880013022 | -0.014321159 | 0.757573104 | -0.4788941  | 3.80E-28   | -0.47335 |
| 0.592646415 | 0.033725541  | 0.467183833 | -0.24311169 | 1.04E-07   | -0.49807 |
| 0.144195025 | -0.066915777 | 0.148793716 | -0.36579194 | 3.12E-16   | -0.37076 |
| 1.51E-06    | -0.224701696 | 9.31E-07    | -0.3751596  | 4.70E-17   | -0.36276 |
| 0.004682664 | -0.139885877 | 0.002447418 | -0.35485556 | 2.64E-15   | -0.54844 |

|             |              |             |             |            |          |
|-------------|--------------|-------------|-------------|------------|----------|
| 0.000343121 | -0.172447445 | 0.000180592 | -0.47961937 | 3.08E-28   | 0.089018 |
| 0.554941955 | -0.039825845 | 0.390518193 | -0.0724511  | 0.11792543 | -0.35288 |
| 0.747715859 | 0.005899364  | 0.898825016 | -0.44152967 | 1.06E-23   | -0.50982 |
| 0.061964881 | -0.092303009 | 0.046196129 | -0.31805273 | 1.95E-12   | -0.38755 |
| 0.000192246 | 0.171066402  | 0.000203781 | -0.01372451 | 0.76737659 | -0.39523 |
| 0.204032713 | -0.070445687 | 0.128472424 | 0.091883874 | 0.0471995  | -0.3521  |
| 5.36E-05    | -0.184960422 | 5.79E-05    | -0.18363989 | 6.56E-05   | -0.2351  |
| 0.000127191 | -0.174226568 | 0.000154355 | -0.25044454 | 4.13E-08   | -0.32353 |
| 0.016879217 | 0.101951924  | 0.027592042 | -0.25912967 | 1.33E-08   | -0.42875 |
| 2.26E-06    | -0.222079164 | 1.25E-06    | -0.13953782 | 0.00250982 | -0.46259 |
| 0.17643112  | -0.062420695 | 0.178102322 | -0.17734531 | 0.00011679 | -0.47165 |
| 0.005511236 | -0.132527718 | 0.004118531 | -0.25642486 | 1.90E-08   | -0.4296  |
| 0.668518414 | -0.032231647 | 0.487152034 | 0.011961135 | 0.79656218 | -0.39368 |
| 0.06744815  | -0.082299587 | 0.075608086 | -0.21769222 | 2.05E-06   | -0.45789 |
| 0.016795248 | -0.119561629 | 0.009706683 | 0.230053299 | 5.02E-07   | 0.532628 |
| 0.001932602 | -0.142304198 | 0.002051451 | -0.29638118 | 6.36E-11   | -0.48811 |
| 0.936065286 | -0.001935734 | 0.96672231  | -0.19672086 | 1.85E-05   | -0.41007 |
| 0.462377944 | 0.029766559  | 0.521081587 | -0.07164751 | 0.12206741 | -0.4938  |
| 0.813257107 | 0.008576801  | 0.853344396 | -0.01157843 | 0.80293551 | -0.23936 |
| 0.170271024 | 0.058383607  | 0.207895415 | -0.12527449 | 0.00671544 | -0.11151 |
| 0.000486029 | 0.148119119  | 0.001327227 | -0.28051647 | 6.83E-10   | -0.38384 |
| 0.002482563 | 0.131402099  | 0.00445013  | 0.237160664 | 2.15E-07   | -0.4527  |
| 0.240646296 | -0.040358856 | 0.384202333 | -0.22916517 | 5.56E-07   | -0.23758 |
| 0.000134169 | -0.1809972   | 8.37E-05    | -0.35457687 | 2.79E-15   | -0.42571 |
| 0.010610332 | 0.114105336  | 0.013613928 | 0.224181593 | 9.88E-07   | 0.486066 |
| 1.40E-05    | 0.1815909    | 7.93E-05    | -0.35572356 | 2.24E-15   | -0.4745  |
| 0.105967874 | -0.082026958 | 0.076585289 | -0.25979098 | 1.22E-08   | -0.53597 |
| 3.54E-05    | -0.187550428 | 4.53E-05    | 0.042414972 | 0.36042767 | -0.39957 |
| 0.528845711 | 0.026074281  | 0.574078233 | 0.335838243 | 8.94E-14   | 0.518262 |
| 0.072633232 | 0.08639586   | 0.06210909  | -0.12592057 | 0.00643546 | -0.54236 |
| 6.48E-07    | -0.235424245 | 2.65E-07    | 0.146811778 | 0.00146574 | 0.310356 |
| 0.013969911 | -0.108676489 | 0.018814483 | -0.19611547 | 1.97E-05   | -0.3971  |
| 0.265183446 | 0.056291139  | 0.224684867 | -0.04198036 | 0.36537475 | -0.50696 |
| 6.03E-18    | -0.393431448 | 9.72E-19    | -0.03094946 | 0.50465015 | -0.29335 |
| 0.001380059 | -0.151906409 | 0.000991041 | -0.1430267  | 0.00194507 | -0.62708 |
| 0.917073988 | -0.006078791 | 0.895765068 | -0.47024612 | 4.55E-27   | -0.20931 |
| 4.62E-13    | -0.325479681 | 5.51E-13    | -0.24756037 | 5.96E-08   | -0.23789 |
| 0.724232126 | 0.006572835  | 0.887347752 | -0.29593793 | 6.81E-11   | -0.43026 |
| 0.036826144 | 0.104754921  | 0.023577918 | 0.256405116 | 1.91E-08   | 0.459373 |
| 0.041598055 | -0.090956198 | 0.049485367 | -0.2091411  | 5.17E-06   | -0.53242 |
| 0.918972342 | -0.005112328 | 0.91226426  | 0.262507135 | 8.47E-09   | 0.266424 |
| 0.609650405 | -0.024621596 | 0.595604718 | -0.22057576 | 1.48E-06   | -0.44915 |
| 0.012402891 | 0.112820756  | 0.014714284 | 0.267976621 | 4.02E-09   | 0.558051 |
| 0.815523696 | -0.01064779  | 0.818487675 | -0.21227792 | 3.69E-06   | -0.4295  |
| 0.343624271 | 0.039168261  | 0.39839623  | -0.10306415 | 0.02593389 | -0.48399 |

|             |              |             |             |            |          |
|-------------|--------------|-------------|-------------|------------|----------|
| 2.37E-11    | -0.316350192 | 2.59E-12    | -0.18101742 | 8.36E-05   | -0.29652 |
| 0.000254024 | 0.155512586  | 0.000745739 | -0.28784185 | 2.32E-10   | -0.35612 |
| 0.00091519  | 0.152705205  | 0.000931029 | 0.100819998 | 0.02937233 | 0.350711 |
| 0.095544576 | 0.089507803  | 0.053238964 | -0.11324288 | 0.01434438 | -0.24715 |
| 0.062745868 | 0.085163323  | 0.065943934 | 0.356260984 | 2.02E-15   | 0.449685 |
| 5.48E-05    | 0.183603482  | 6.58E-05    | 0.1912512   | 3.18E-05   | 0.415114 |
| 6.48E-06    | -0.211988898 | 3.81E-06    | -0.19880733 | 1.50E-05   | -0.49343 |
| 0.168278819 | 0.068569908  | 0.138985649 | -0.27260439 | 2.11E-09   | -0.44013 |
| 0.00856804  | -0.129451664 | 0.005082233 | -0.35692623 | 1.78E-15   | -0.248   |
| 6.72E-07    | -0.232195536 | 3.90E-07    | -0.04782069 | 0.30243089 | -0.24245 |
| 0.003288555 | 0.139379366  | 0.002538712 | -0.0564874  | 0.22307026 | 0.300852 |
| 0.387173438 | 0.035787107  | 0.440386624 | -0.00643407 | 0.88971079 | 0.310306 |
| 8.28E-05    | 0.182503208  | 7.29E-05    | -0.06575916 | 0.15595878 | -0.39229 |
| 0.004106063 | -0.135822836 | 0.003272287 | -0.15217159 | 0.00097073 | -0.42853 |
| 6.30E-05    | -0.193573804 | 2.53E-05    | -0.13389339 | 0.00374631 | -0.32149 |
| 7.40E-11    | 0.299085276  | 4.18E-11    | 0.192379612 | 2.85E-05   | 0.446952 |
| 0.017766476 | 0.113936958  | 0.013753905 | -0.30575471 | 1.46E-11   | -0.47491 |
| 1.44E-09    | -0.281037775 | 6.33E-10    | -0.17807821 | 0.0001093  | -0.20615 |
| 0.000231808 | 0.162305885  | 0.000429216 | -0.27270582 | 2.08E-09   | -0.27085 |
| 0.153135627 | 0.060990541  | 0.188271527 | -0.12601221 | 0.00639662 | -0.54495 |
| 0.001248529 | 0.149804301  | 0.001166436 | 0.074270795 | 0.10895264 | 0.384254 |
| 0.35594994  | 0.038374059  | 0.408037128 | -0.30437808 | 1.82E-11   | -0.45104 |
| 0.022650785 | -0.115926792 | 0.012178041 | -0.32049761 | 1.29E-12   | -0.35933 |
| 0.005162928 | -0.142877685 | 0.001966585 | 0.444919723 | 4.39E-24   | 0.545587 |
| 0.18644392  | -0.068499157 | 0.139394743 | -0.18671728 | 4.91E-05   | -0.40227 |
| 1.05E-08    | 0.270052926  | 3.01E-09    | 0.079227989 | 0.08722296 | 0.477614 |
| 0.261257382 | 0.04758134   | 0.30485998  | -0.2456825  | 7.55E-08   | -0.28254 |
| 0.720748946 | -0.019179178 | 0.679318837 | -0.21881209 | 1.81E-06   | -0.38955 |
| 0.000267578 | -0.165869078 | 0.000318436 | 0.211002396 | 4.24E-06   | 0.614829 |
| 9.40E-24    | -0.434193843 | 6.81E-23    | -0.15781861 | 0.00061975 | -0.15031 |
| 1.86E-12    | 0.321056404  | 1.17E-12    | 0.071049908 | 0.12522046 | 0.559415 |
| 0.049897239 | 0.09910389   | 0.032258947 | 0.210621055 | 4.41E-06   | 0.565136 |
| 0.777534114 | -0.021759184 | 0.639058702 | -0.38335865 | 8.49E-18   | -0.43073 |
| 0.002062217 | -0.153097345 | 0.000902814 | -0.37181633 | 9.30E-17   | -0.39057 |
| 0.068210601 | 0.084079099  | 0.069476167 | -0.26953176 | 3.24E-09   | -0.41467 |
| 0.853749142 | 0.004319167  | 0.925833422 | -0.36944791 | 1.50E-16   | -0.42088 |
| 0.730595578 | 0.019473148  | 0.674682475 | -0.06604682 | 0.15415283 | -0.22681 |
| 0.000506343 | 0.149238297  | 0.001218322 | 0.035629938 | 0.44239813 | -0.50026 |
| 0.098215184 | -0.080980889 | 0.080430443 | -0.12997433 | 0.00490536 | -0.57216 |
| 0.924474028 | -0.010007185 | 0.829234903 | 0.153910463 | 0.00084681 | 0.640688 |
| 0.677041944 | -0.033181268 | 0.474406029 | -0.29683739 | 5.92E-11   | -0.37901 |
| 6.53E-05    | -0.183462078 | 6.67E-05    | -0.24634857 | 6.94E-08   | -0.20417 |
| 0.305542511 | 0.050611078  | 0.27506035  | -0.20167281 | 1.12E-05   | -0.35297 |
| 0.264735771 | -0.043107317 | 0.352633872 | -0.17380963 | 0.00016016 | -0.40339 |
| 0.037057294 | 0.089214906  | 0.054026148 | -0.19308738 | 2.66E-05   | -0.17641 |

|             |              |             |             |            |          |
|-------------|--------------|-------------|-------------|------------|----------|
| 0.92495851  | -0.003762669 | 0.935366927 | -0.31475774 | 3.37E-12   | -0.4407  |
| 0.985683046 | -0.007749447 | 0.867353777 | -0.04396659 | 0.34310998 | -0.47857 |
| 3.10E-05    | -0.196036738 | 1.99E-05    | 0.272512783 | 2.14E-09   | 0.458142 |
| 0.001630336 | -0.152905064 | 0.000916549 | -0.1771315  | 0.00011906 | -0.29866 |
| 9.51E-05    | -0.177480666 | 0.000115369 | 0.265429055 | 5.70E-09   | 0.551533 |
| 0.008428884 | 0.113745895  | 0.013914273 | -0.25804408 | 1.54E-08   | -0.49736 |
| 3.18E-08    | 0.236827413  | 2.24E-07    | -0.26994304 | 3.06E-09   | -0.17644 |
| 1.64E-07    | 0.242065842  | 1.18E-07    | 0.227411392 | 6.82E-07   | 0.47539  |
| 0.700567703 | -0.025121299 | 0.588158561 | -0.15443267 | 0.00081255 | -0.32159 |
| 2.56E-10    | -0.290342766 | 1.60E-10    | -0.50830538 | 4.76E-32   | -0.32346 |
| 5.57E-11    | 0.298589136  | 4.52E-11    | 0.233891176 | 3.19E-07   | 0.365296 |
| 4.91E-07    | -0.247666273 | 5.88E-08    | -0.17668004 | 0.00012399 | -0.31974 |
| 0.762421671 | -0.005861562 | 0.899469893 | 0.41259429  | 1.27E-20   | 0.529871 |
| 0.006576197 | 0.141746742  | 0.002137142 | 0.26991694  | 3.07E-09   | 0.248577 |
| 0.246416836 | -0.060873594 | 0.189121595 | -0.17047466 | 0.00021455 | -0.65135 |
| 1.64E-05    | -0.204881018 | 8.08E-06    | -0.15750898 | 0.00063543 | -0.24577 |
| 0.027561129 | -0.108132397 | 0.019420704 | -0.19599361 | 1.99E-05   | -0.35772 |
| 0.268355076 | 0.048958498  | 0.291059635 | -0.17555297 | 0.00013717 | -0.37576 |
| 0.055635366 | -0.090852782 | 0.049745833 | -0.09587629 | 0.03834714 | -0.54721 |
| 0.413427343 | -0.03527591  | 0.446948245 | -0.27014759 | 2.98E-09   | -0.42525 |
| 0.72658808  | 0.01632753   | 0.724899179 | -0.21908476 | 1.75E-06   | -0.34229 |
| 0.215990305 | -0.068021887 | 0.142178572 | -0.23908848 | 1.70E-07   | -0.22973 |
| 0.001340221 | 0.150219325  | 0.001129691 | 0.283599402 | 4.35E-10   | 0.458146 |
| 1.39E-07    | -0.244988256 | 8.23E-08    | -0.16190804 | 0.0004436  | -0.3876  |
| 1.16E-05    | 0.21012628   | 4.65E-06    | 0.253027072 | 2.96E-08   | 0.466016 |
| 0.275531753 | -0.042652625 | 0.357740323 | -0.08085481 | 0.08090426 | -0.37152 |
| 0.127680224 | 0.065847756  | 0.155400865 | -0.30904462 | 8.58E-12   | -0.35413 |
| 0.822203814 | 0.002651064  | 0.954436425 | 0.125290801 | 0.00670824 | 0.455425 |
| 0.15773567  | -0.059879684 | 0.19646026  | 0.09747996  | 0.03521027 | 0.515834 |
| 0.404664686 | 0.043784194  | 0.345117785 | -0.14794955 | 0.00134449 | -0.12741 |
| 0.286919438 | 0.041295436  | 0.373256423 | -0.08815307 | 0.05696154 | -0.46535 |
| 0.566776645 | 0.013143919  | 0.77695185  | -0.37162808 | 9.66E-17   | -0.28913 |
| 0.438415883 | -0.042167926 | 0.363234583 | -0.13125619 | 0.00449484 | -0.64456 |
| 0.000144334 | 0.176511879  | 0.000125882 | -0.32212551 | 9.78E-13   | -0.56402 |
| 0.000280133 | -0.175029094 | 0.00014373  | -0.43377838 | 7.55E-23   | -0.31739 |
| 0.425765177 | 0.031336419  | 0.499334759 | -0.40381602 | 9.61E-20   | -0.42743 |
| 0.82199235  | -0.006561518 | 0.88754043  | 0.018313139 | 0.69304748 | 0.411347 |
| 5.61E-05    | 0.185736478  | 5.39E-05    | -0.24441538 | 8.84E-08   | -0.48314 |
| 0.023615435 | -0.095846508 | 0.038407562 | 0.259839303 | 1.21E-08   | 0.494555 |
| 0.032446099 | -0.104105484 | 0.024460013 | -0.13421114 | 0.0036642  | -0.41345 |
| 0.001035132 | 0.145368568  | 0.001633994 | -0.28550352 | 3.29E-10   | -0.35666 |
| 0.046671126 | -0.102490652 | 0.026777841 | -0.26266451 | 8.29E-09   | -0.40618 |
| 0.688362506 | 0.007081119  | 0.878701044 | -0.07720199 | 0.09564057 | -0.26361 |
| 9.95E-06    | 0.209324867  | 5.07E-06    | 0.204235414 | 8.64E-06   | 0.696363 |
| 0.066325046 | -0.091627733 | 0.047821626 | 0.289814655 | 1.73E-10   | 0.511788 |

|             |              |             |             |            |          |
|-------------|--------------|-------------|-------------|------------|----------|
| 7.03E-06    | -0.208404864 | 5.58E-06    | 0.230493108 | 4.76E-07   | 0.489376 |
| 0.012610832 | -0.118420915 | 0.010429405 | -0.2261105  | 7.92E-07   | -0.51152 |
| 0.092797273 | -0.089346424 | 0.053671493 | -0.09815601 | 0.03395482 | -0.08308 |
| 0.788023642 | -0.016343927 | 0.724634111 | -0.283479   | 4.43E-10   | -0.42966 |
| 0.015760963 | -0.113755471 | 0.013906197 | -0.28314372 | 4.65E-10   | -0.48634 |
| 0.002904235 | 0.134389072  | 0.003618931 | -0.11340759 | 0.01420227 | -0.3313  |
| 0.010618411 | -0.117041569 | 0.011366771 | -0.31708554 | 2.29E-12   | -0.37422 |
| 0.000134392 | -0.175536852 | 0.000137366 | -0.28613851 | 2.99E-10   | -0.09083 |
| 0.924684887 | -0.014330356 | 0.757422289 | -0.30174988 | 2.75E-11   | -0.24753 |
| 0.314699487 | 0.045118087  | 0.330606675 | -0.16675611 | 0.00029535 | -0.50884 |
| 0.000214991 | -0.179867116 | 9.29E-05    | -0.27345257 | 1.87E-09   | -0.09635 |
| 0.119040249 | 0.073575111  | 0.112317273 | -0.12072054 | 0.00901834 | -0.43132 |
| 0.020632889 | 0.102470482  | 0.026807948 | -0.172718   | 0.00017635 | -0.53835 |
| 0.121482124 | 0.071667716  | 0.121961874 | -0.24594698 | 7.30E-08   | -0.2021  |
| 0.577228077 | -0.022300011 | 0.630747072 | -0.37322359 | 6.98E-17   | -0.53706 |
| 7.56E-17    | -0.377096088 | 3.15E-17    | -0.2758081  | 1.34E-09   | -0.15728 |
| 0.000660214 | 0.153109645  | 0.000901941 | -0.32882339 | 3.09E-13   | -0.03249 |
| 7.55E-05    | -0.174575033 | 0.000149654 | -0.05520777 | 0.23374741 | -0.40434 |
| 0.35621442  | 0.034451665  | 0.457643935 | 0.084788212 | 0.06714892 | 0.425148 |
| 0.020359033 | -0.10857372  | 0.018927707 | -0.44357913 | 6.22E-24   | -0.30896 |
| 0.095301432 | -0.076924452 | 0.096842582 | 0.153273107 | 0.00089043 | 0.343361 |
| 0.028711072 | -0.101326331 | 0.028564149 | -0.133572   | 0.00383105 | -0.31051 |
| 0.710096601 | 0.015146799  | 0.744071351 | -0.37379507 | 6.21E-17   | -0.53307 |
| 0.024411262 | 0.107272958  | 0.020412946 | -0.38530203 | 5.62E-18   | -0.56183 |
| 0.965808518 | -0.010507631 | 0.820836255 | -0.42022149 | 2.10E-21   | -0.36192 |
| 0.751184112 | -0.019029988 | 0.681676446 | 0.108933544 | 0.01853386 | 0.427442 |
| 0.074889353 | 0.074057304  | 0.109976616 | -0.15147951 | 0.00102456 | -0.49869 |
| 0.357354665 | -0.055655865 | 0.22996821  | -0.28974918 | 1.75E-10   | -0.29591 |
| 0.578080095 | 0.015426508  | 0.739514736 | -0.14287975 | 0.00196629 | -0.37317 |
| 8.06E-05    | -0.194365672 | 2.34E-05    | -0.33847213 | 5.57E-14   | -0.22347 |
| 4.13E-05    | 0.189874456  | 3.63E-05    | -0.13295042 | 0.00399989 | -0.41542 |
| 0.159004514 | -0.066227666 | 0.153025625 | -0.11487254 | 0.01299189 | -0.111   |
| 0.031642577 | -0.088641454 | 0.055595393 | -0.01262158 | 0.78559552 | -0.33836 |
| 0.60376165  | 0.026074354  | 0.574077163 | -0.32508241 | 5.90E-13   | -0.4793  |
| 0.152376372 | -0.07275224  | 0.116401872 | -0.3369177  | 7.37E-14   | -0.43202 |
| 0.00518986  | 0.119756594  | 0.009587713 | -0.18150782 | 7.99E-05   | -0.25071 |
| 0.156218068 | 0.0574521    | 0.215254095 | -0.46873118 | 6.97E-27   | -0.3631  |
| 0.35704238  | 0.038751463  | 0.40343862  | -0.26897764 | 3.50E-09   | -0.37644 |
| 0.268669557 | -0.052024518 | 0.261859765 | -0.39424729 | 8.13E-19   | -0.24772 |
| 0.000139512 | -0.184457233 | 6.07E-05    | -0.06064555 | 0.1907873  | -0.33927 |
| 0.814742164 | 0.003367578  | 0.942141011 | -0.16558269 | 0.00032624 | -0.45164 |
| 0.320329383 | -0.055967227 | 0.227367819 | -0.32671101 | 4.45E-13   | -0.53307 |
| 0.305204448 | -0.053777505 | 0.246103092 | -0.34047827 | 3.87E-14   | -0.36646 |
| 0.070671488 | -0.087547431 | 0.058694206 | -0.07063036 | 0.12747166 | -0.29517 |
| 0.984598846 | 0.003963009  | 0.931933719 | -0.1886885  | 4.07E-05   | -0.19171 |

|             |              |             |             |            |          |
|-------------|--------------|-------------|-------------|------------|----------|
| 0.628423265 | -0.019997851 | 0.666437725 | 0.479264011 | 3.42E-28   | 0.460837 |
| 0.00057385  | 0.173718931  | 0.000161451 | -0.21199893 | 3.81E-06   | -0.17426 |
| 0.63147321  | 0.006346832  | 0.891196784 | -0.27385566 | 1.77E-09   | -0.35955 |
| 4.02E-10    | -0.27863461  | 8.96E-10    | -0.32419416 | 6.87E-13   | -0.32924 |
| 0.551603508 | 0.01713395   | 0.711902188 | -0.24912469 | 4.88E-08   | -0.34917 |
| 0.011766277 | 0.109052969  | 0.018404732 | -0.3945681  | 7.57E-19   | -0.4071  |
| 0.689898768 | -0.024813866 | 0.592734591 | -0.34513977 | 1.65E-14   | -0.35299 |
| 0.002679236 | -0.143909842 | 0.001821893 | -0.43772912 | 2.79E-23   | -0.46984 |
| 0.050442381 | -0.094740971 | 0.040708384 | -0.28815784 | 2.22E-10   | -0.40477 |
| 1.31E-07    | -0.240035475 | 1.52E-07    | -0.19839028 | 1.57E-05   | -0.45586 |
| 6.07E-06    | -0.211153553 | 4.17E-06    | -0.12377032 | 0.00740998 | -0.46893 |
| 0.026875547 | -0.111096811 | 0.016313394 | -0.15909856 | 0.00055864 | -0.37878 |
| 3.43E-07    | 0.222412961  | 1.21E-06    | -0.1240706  | 0.0072664  | -0.32891 |
| 0.007403273 | -0.136168139 | 0.00319344  | -0.36436113 | 4.15E-16   | -0.30461 |
| 0.472147143 | 0.029572893  | 0.523797673 | -0.26621446 | 5.12E-09   | -0.17117 |
| 0.591366369 | -0.03066467  | 0.508581107 | -0.36132828 | 7.54E-16   | -0.4142  |
| 0.013752991 | -0.115394784 | 0.012582927 | -0.27445266 | 1.63E-09   | -0.45995 |
| 0.011665939 | -0.128840231 | 0.005296424 | -0.13946301 | 0.00252343 | -0.29038 |
| 0.007482417 | 0.131168003  | 0.004522051 | 0.034867174 | 0.45223434 | 0.492002 |
| 0.923201794 | -0.005647257 | 0.903126968 | -0.27293593 | 2.01E-09   | -0.45417 |
| 0.007231523 | -0.122661787 | 0.007962226 | -0.03344938 | 0.47084076 | -0.49788 |
| 0.00582295  | -0.137443264 | 0.002917006 | -0.33561361 | 9.30E-14   | -0.29492 |
| 0.651793308 | -0.021038483 | 0.650205134 | -0.42021212 | 2.10E-21   | -0.38419 |
| 0.002850687 | -0.140111728 | 0.002407685 | -0.23433051 | 3.03E-07   | -0.33976 |
| 6.02E-06    | 0.203893383  | 8.95E-06    | 0.025970093 | 0.57560984 | 0.486365 |
| 0.891365667 | -0.015834074 | 0.732891597 | -0.03591022 | 0.43881459 | -0.45432 |
| 0.008539868 | -0.137464244 | 0.002912646 | -0.07939044 | 0.08657466 | -0.47206 |
| 4.12E-08    | -0.249936936 | 4.40E-08    | -0.24695504 | 6.43E-08   | -0.45983 |
| 0.393216121 | -0.049634944 | 0.284436828 | -0.25079719 | 3.95E-08   | -0.41511 |
| 0.013913396 | -0.115831817 | 0.012249467 | -0.17949522 | 9.61E-05   | -0.54278 |
| 0.935801807 | -0.001603246 | 0.972435685 | -0.29475699 | 8.16E-11   | -0.38784 |
| 0.351638457 | 0.043095867  | 0.352761892 | -0.34121638 | 3.38E-14   | -0.27401 |
| 0.165248934 | 0.070756416  | 0.126791982 | -0.1165302  | 0.01173278 | -0.43653 |
| 0.00037686  | 0.158899955  | 0.000567738 | -0.3164274  | 2.55E-12   | -0.49671 |
| 0.354895534 | 0.048569513  | 0.294914477 | 0.010438833 | 0.82198965 | -0.52445 |
| 9.24E-11    | 0.297589315  | 5.27E-11    | 0.145729502 | 0.00159033 | 0.569109 |
| 0.01899023  | 0.116604175  | 0.011679198 | -0.03142328 | 0.49814563 | -0.34696 |
| 0.141413672 | -0.068580259 | 0.138925878 | -0.23105598 | 4.46E-07   | -0.46676 |
| 4.71E-07    | 0.238691611  | 1.79E-07    | -0.04638094 | 0.31723659 | 0.437903 |
| 0.519984425 | 0.027329663  | 0.55577657  | 0.344833923 | 1.74E-14   | 0.431687 |
| 0.40629943  | -0.032314408 | 0.486033914 | -0.13002028 | 0.00489008 | -0.25002 |
| 0.565506282 | 0.029604     | 0.523360918 | -0.17530554 | 0.00014023 | -0.56142 |
| 0.516148706 | 0.017582809  | 0.704703672 | 0.027806028 | 0.54890692 | -0.45247 |
| 0.94751656  | 4.02E-05     | 0.999309247 | 0.147539612 | 0.00138707 | -0.43113 |
| 5.01E-21    | -0.427200354 | 3.86E-22    | -0.15080022 | 0.00108005 | -0.16036 |

|             |              |             |             |            |          |
|-------------|--------------|-------------|-------------|------------|----------|
| 0.270028235 | -0.051843855 | 0.263522276 | -0.03641544 | 0.43239738 | -0.35308 |
| 0.217404626 | 0.046565051  | 0.315317289 | 0.064290798 | 0.16542719 | -0.46332 |
| 0.062362883 | 0.071849858  | 0.1210139   | 0.000730577 | 0.98743735 | -0.31239 |
| 0.023017806 | -0.105029852 | 0.023212865 | -0.39584996 | 5.71E-19   | -0.42276 |
| 0.290097006 | 0.040663306  | 0.380622905 | -0.2136936  | 3.17E-06   | -0.60288 |
| 0.003575804 | -0.145140145 | 0.001662192 | -0.23155077 | 4.21E-07   | -0.31786 |
| 0.53611304  | 0.015448678  | 0.739153964 | -0.15407874 | 0.00083563 | -0.3889  |
| 0.288311979 | -0.058052843 | 0.210487259 | -0.10064274 | 0.02965986 | -0.0958  |
| 9.12E-16    | -0.375829996 | 4.09E-17    | -0.03431695 | 0.45940553 | -0.19293 |
| 1.27E-07    | -0.249912499 | 4.42E-08    | -0.25289558 | 3.01E-08   | -0.35611 |
| 0.155561127 | 0.064938708  | 0.161197439 | -0.22618729 | 7.85E-07   | -0.50622 |
| 0.00173801  | -0.154756321 | 0.000791968 | -0.2710456  | 2.63E-09   | -0.26704 |
| 0.632973782 | 0.016411692  | 0.72353898  | -0.22697701 | 7.17E-07   | -0.37816 |
| 0.0355091   | -0.106316512 | 0.021568731 | -0.24847961 | 5.30E-08   | -0.26174 |
| 0.035275436 | 0.087696713  | 0.058263122 | -0.28871758 | 2.04E-10   | -0.45399 |
| 0.407650637 | -0.035159221 | 0.448453774 | -0.32517505 | 5.80E-13   | -0.27554 |
| 0.675871009 | 0.017934243  | 0.699085897 | -0.13386471 | 0.0037538  | -0.23828 |
| 0.000399762 | -0.168368066 | 0.000257345 | -0.30144145 | 2.89E-11   | -0.37165 |
| 0.033081576 | 0.098633993  | 0.033090387 | -0.11542454 | 0.01255997 | -0.08709 |
| 0.061692399 | -0.087323483 | 0.059345847 | -0.19462823 | 2.28E-05   | -0.23893 |
| 0.000774011 | -0.155852889 | 0.000725762 | -0.16046698 | 0.00049953 | -0.32149 |
| 0.001680357 | -0.145394546 | 0.001630815 | -0.38408728 | 7.28E-18   | -0.40981 |
| 0.938290997 | -0.003351539 | 0.942416117 | -0.26436694 | 6.58E-09   | -0.30321 |
| 0.13742287  | -0.068832841 | 0.137473402 | -0.20768284 | 6.03E-06   | -0.13216 |
| 2.45E-05    | -0.205478363 | 7.59E-06    | -0.05113529 | 0.27011271 | -0.37085 |
| 0.0028788   | -0.132275549 | 0.004190812 | -0.08348252 | 0.07148485 | -0.35075 |
| 0.797978059 | 0.001975534  | 0.966038507 | -0.05016329 | 0.27933528 | -0.52718 |
| 0.528212103 | -0.041591823 | 0.369832993 | -0.02138665 | 0.64481036 | -0.31367 |
| 0.039513998 | -0.12056244  | 0.009109612 | -0.06221741 | 0.17952239 | -0.00373 |
| 0.002400885 | 0.132471964  | 0.004134414 | -0.27966126 | 7.72E-10   | -0.12068 |
| 0.005576047 | 0.121716286  | 0.00846198  | 0.252058856 | 3.35E-08   | 0.501516 |
| 2.41E-10    | -0.289992432 | 1.68E-10    | -0.00454465 | 0.92197358 | -0.30823 |
| 0.062723578 | -0.094835688 | 0.040506803 | -0.41649987 | 5.09E-21   | -0.1321  |
| 0.86290644  | -0.008184127 | 0.859987981 | -0.29384056 | 9.39E-11   | -0.29611 |
| 0.420744011 | -0.039899459 | 0.389642181 | -0.12167289 | 0.00848557 | -0.42099 |
| 3.24E-12    | -0.322099823 | 9.82E-13    | -0.07522477 | 0.10446859 | -0.25799 |
| 0.024634406 | -0.096126977 | 0.037841695 | -0.27421578 | 1.68E-09   | -0.4219  |
| 3.28E-06    | -0.215473024 | 2.61E-06    | -0.22626862 | 7.78E-07   | -0.08164 |
| 0.854111385 | -0.015295131 | 0.741653825 | -0.31878402 | 1.72E-12   | -0.29066 |
| 0.668266121 | 0.015983027  | 0.730475935 | -0.01412181 | 0.76084439 | -0.64142 |
| 0.81105541  | -0.022045379 | 0.634654634 | -0.01054509 | 0.82020847 | -0.24872 |
| 0.012841446 | -0.127701326 | 0.005717175 | 0.060136366 | 0.1945454  | -0.26133 |
| 0.374081911 | 0.031938094  | 0.491129139 | -0.05207186 | 0.26142528 | -0.29832 |
| 0.73350323  | -0.020998233 | 0.650829981 | -0.39644235 | 5.01E-19   | -0.43903 |
| 0.682755314 | 0.012481474  | 0.787918476 | -0.15440021 | 0.00081464 | -0.05081 |

|             |              |             |             |            |          |
|-------------|--------------|-------------|-------------|------------|----------|
| 8.42E-06    | -0.216002689 | 2.46E-06    | -0.10495438 | 0.02331259 | -0.30077 |
| 0.01412294  | -0.117268207 | 0.011207813 | -0.29721999 | 5.58E-11   | -0.18986 |
| 0.354135582 | -0.041060555 | 0.375983253 | -0.10370812 | 0.02501366 | -0.35294 |
| 0.89862384  | 0.010498402  | 0.820990949 | 0.092220903 | 0.04639126 | -0.42706 |
| 3.18E-17    | -0.384239507 | 7.05E-18    | -0.10668135 | 0.02112132 | -0.28528 |
| 0.00516528  | -0.139081407 | 0.002593855 | -0.25584734 | 2.05E-08   | -0.34087 |
| 0.301856188 | -0.058301269 | 0.208538443 | -0.04142736 | 0.37173025 | -0.26561 |
| 0.825765514 | -0.015063426 | 0.745431277 | 0.246432972 | 6.87E-08   | 0.572968 |
| 0.383220418 | -0.041485809 | 0.371055277 | -0.4227514  | 1.14E-21   | -0.34301 |
| 0.483546506 | 0.026151671  | 0.572941807 | -0.0715131  | 0.12277112 | -0.28766 |
| 0.977588265 | -0.013199113 | 0.776040099 | -0.24178837 | 1.22E-07   | -0.27174 |
| 3.66E-06    | -0.216303316 | 2.38E-06    | -0.09867552 | 0.03301617 | -0.40407 |
| 0.165078035 | -0.066148723 | 0.153516906 | -0.06337378 | 0.1715553  | -0.30798 |
| 0.782070134 | -0.019548289 | 0.67349935  | -0.26803808 | 3.98E-09   | -0.15641 |
| 0.004673786 | -0.135849474 | 0.003266142 | -0.31669817 | 2.44E-12   | -0.44321 |
| 0.997505757 | 0.00166484   | 0.971377167 | -0.33493888 | 1.05E-13   | -0.46075 |
| 0.000148074 | 0.164738268  | 0.000350312 | -0.06998709 | 0.130984   | -0.26888 |
| 0.131495344 | 0.06269724   | 0.176183851 | -0.1752128  | 0.0001414  | -0.51905 |
| 0.166624627 | 0.068536284  | 0.139179956 | -0.24139532 | 1.29E-07   | -0.45459 |
| 0.04372121  | -0.097444782 | 0.035276662 | -0.2582253  | 1.50E-08   | -0.28998 |
| 1.01E-07    | -0.249771703 | 4.50E-08    | -0.18588849 | 5.31E-05   | -0.31536 |
| 0.224139737 | 0.048346964  | 0.297135209 | -0.1985942  | 1.54E-05   | 0.016003 |
| 0.198154715 | 0.04401158   | 0.342615887 | -0.11645295 | 0.01178897 | -0.38224 |
| 0.235009114 | -0.058880875 | 0.204042393 | -0.06391238 | 0.16793584 | -0.20307 |
| 0.0097479   | 0.105493443  | 0.022608385 | -0.0531484  | 0.25167982 | -0.31835 |
| 0.000151289 | 0.169956679  | 0.000224404 | -0.22223341 | 1.23E-06   | -0.16773 |
| 0.000575773 | -0.156427829 | 0.000693135 | 0.280230137 | 7.11E-10   | 0.490815 |
| 0.057482298 | 0.084851828  | 0.066943296 | 0.370984954 | 1.10E-16   | 0.333769 |
| 0.080055369 | -0.086675833 | 0.061264131 | -0.08176662 | 0.07752799 | -0.28582 |
| 0.003004924 | -0.149494387 | 0.001194588 | -0.07091642 | 0.12593332 | -0.23196 |
| 0.000401588 | 0.162052581  | 0.000438321 | -0.15241683 | 0.0009523  | -0.22389 |
| 0.017160374 | 0.102670546  | 0.026510606 | -0.31773987 | 2.05E-12   | -0.30298 |
| 0.644471505 | -0.032960421 | 0.477353886 | -0.10034245 | 0.03015246 | -0.50816 |
| 0.002215428 | -0.147021047 | 0.001442714 | -0.15296656 | 0.00091213 | -0.19467 |
| 0.421726156 | -0.037118466 | 0.423558463 | -0.00467636 | 0.91971978 | 0.649991 |
| 0.607242759 | -0.027222465 | 0.557328211 | -0.20160461 | 1.13E-05   | -0.33691 |
| 0.774885168 | -0.021803317 | 0.638378723 | -0.16120696 | 0.00047004 | -0.4617  |
| 2.06E-06    | -0.22042063  | 1.51E-06    | -0.29670183 | 6.05E-11   | -0.41047 |
| 7.28E-05    | 0.186227678  | 5.14E-05    | -0.28477902 | 3.66E-10   | -0.29044 |
| 0.095947765 | 0.075229793  | 0.104445361 | 0.192284111 | 2.87E-05   | 0.438054 |
| 0.155884043 | 0.060805934  | 0.189614688 | -0.26203685 | 9.02E-09   | -0.46396 |
| 0.012523533 | -0.130558511 | 0.004714253 | -0.18833039 | 4.21E-05   | -0.36718 |
| 0.213956102 | -0.070984405 | 0.125569887 | 0.0942862   | 0.0416881  | -0.37028 |
| 2.15E-18    | -0.404717783 | 7.83E-20    | -0.01949179 | 0.67438892 | -0.2217  |
| 0.00128835  | -0.143393724 | 0.00189298  | -0.28664299 | 2.78E-10   | -0.34809 |



|             |              |             |             |            |          |
|-------------|--------------|-------------|-------------|------------|----------|
| 0.332353021 | -0.063519756 | 0.170568624 | -0.26354933 | 7.35E-09   | -0.28139 |
| 0.571148337 | 0.029396131  | 0.526282984 | -0.36447431 | 4.06E-16   | -0.12183 |
| 0.116554231 | 0.065823057  | 0.155556242 | -0.03364171 | 0.4682922  | -0.2376  |
| 1.38E-07    | -0.257729686 | 1.60E-08    | -0.04744035 | 0.30629687 | -0.28631 |
| 0.388035601 | 0.035089313  | 0.449357101 | -0.19111139 | 3.22E-05   | -0.17315 |
| 1.63E-22    | -0.431388885 | 1.37E-22    | -0.09653121 | 0.03703858 | -0.22872 |
| 3.62E-10    | -0.280097343 | 7.25E-10    | -0.25010994 | 4.31E-08   | -0.24708 |
| 0.315109698 | -0.046909781 | 0.311744105 | -0.23440772 | 3.00E-07   | -0.45569 |
| 8.05E-05    | -0.187819212 | 4.42E-05    | -0.27589574 | 1.33E-09   | -0.0621  |
| 0.968809862 | -0.000147668 | 0.997460675 | -0.21986359 | 1.61E-06   | -0.23223 |
| 0.762444194 | 0.011971972  | 0.796381905 | -0.19588786 | 2.02E-05   | -0.27986 |
| 0.148334183 | 0.060666557  | 0.190633422 | -0.32702421 | 4.22E-13   | -0.07963 |
| 5.54E-14    | -0.342892555 | 2.49E-14    | -0.16602795 | 0.00031418 | -0.14315 |
| 0.04697464  | -0.093056395 | 0.044437594 | -0.17345916 | 0.0001652  | -0.17319 |
| 0.033537046 | -0.106105717 | 0.021830964 | -0.10688588 | 0.02087405 | -0.3035  |
| 0.544881489 | 0.022500101  | 0.627683711 | -0.32534422 | 5.64E-13   | -0.50877 |
| 1.93E-08    | 0.255759791  | 2.07E-08    | -0.10574282 | 0.0222889  | -0.13741 |
| 0.588553135 | 0.033560488  | 0.469367559 | -0.07689011 | 0.09699217 | -0.04742 |
| 0.127170126 | 0.062584672  | 0.176962907 | -0.3544714  | 2.84E-15   | -0.23653 |
| 0.233851717 | -0.055592024 | 0.230503977 | -0.09641433 | 0.03726928 | -0.17604 |
| 0.002063001 | -0.154191062 | 0.000828238 | -0.0392323  | 0.39762485 | -0.321   |
| 0.47922307  | -0.032794901 | 0.479569775 | 0.120230549 | 0.00930389 | 0.480089 |
| 0.454876631 | -0.036711641 | 0.428660458 | -0.31484286 | 3.32E-12   | -0.42605 |
| 0.31640353  | -0.046787474 | 0.313008783 | 0.23567011  | 2.58E-07   | 0.373633 |
| 1.44E-20    | -0.415266728 | 6.81E-21    | -0.09084867 | 0.04975621 | -0.31221 |
| 0.595931859 | -0.036417224 | 0.432374862 | 0.11752654  | 0.01102903 | -0.19997 |
| 2.66E-11    | -0.307293146 | 1.14E-11    | 0.076693302 | 0.09785283 | -0.28815 |
| 0.001123988 | 0.142293565  | 0.002053056 | -0.27574546 | 1.35E-09   | -0.23768 |
| 0.5078547   | 0.025436165  | 0.583488823 | -0.2114354  | 4.04E-06   | -0.30674 |
| 0.325102782 | 0.043417284  | 0.349179251 | -0.40364357 | 9.99E-20   | -0.33253 |
| 8.11E-07    | -0.235153487 | 2.74E-07    | -0.22048407 | 1.50E-06   | -0.39575 |
| 0.013145282 | -0.127472198 | 0.005805367 | -0.2216768  | 1.31E-06   | -0.45313 |
| 4.08E-06    | -0.216834868 | 2.25E-06    | -0.29214939 | 1.21E-10   | -0.45269 |
| 0.001789078 | -0.152581749 | 0.00094008  | -0.31129138 | 5.95E-12   | -0.34203 |
| 0.226555999 | 0.055542298  | 0.230921903 | -0.04583668 | 0.32295483 | -0.16481 |
| 0.175319395 | -0.060134008 | 0.194562924 | -0.14872779 | 0.00126694 | -0.18249 |
| 0.072382589 | -0.076816112 | 0.097315046 | -0.04180124 | 0.36742588 | -0.17451 |
| 0.028424411 | -0.094493743 | 0.041238546 | -0.14237851 | 0.00204027 | 0.135382 |
| 1.69E-06    | -0.218319678 | 1.91E-06    | -0.21769426 | 2.05E-06   | 0.322862 |
| 2.68E-05    | 0.183580263  | 6.59E-05    | 0.020692336 | 0.65558674 | -0.2683  |
| 0.008987733 | -0.108797431 | 0.018681994 | -0.10151882 | 0.02826195 | 0.107794 |
| 0.025581219 | 0.111564776  | 0.015864926 | 0.194890177 | 2.22E-05   | 0.050061 |
| 0.256085754 | 0.060181957  | 0.194206712 | 0.092973345 | 0.04462864 | -0.03597 |
| 0.198518642 | -0.055099021 | 0.234671203 | 0.036142726 | 0.43585465 | -0.23974 |
| 0.025687984 | -0.108606869 | 0.01889112  | -0.00076105 | 0.98691343 | -0.15899 |

|             |              |             |             |            |          |
|-------------|--------------|-------------|-------------|------------|----------|
| 0.256781269 | -0.046963785 | 0.311186764 | -0.12742415 | 0.00582401 | -0.13604 |
| 0.000315109 | 0.170083102  | 0.000221959 | 0.13458707  | 0.00356916 | 0.049713 |
| 0.078864187 | 0.09460488   | 0.040999504 | 0.051480589 | 0.2668871  | -0.07982 |
| 0.446829191 | -0.029765293 | 0.521099308 | 0.00885262  | 0.84868402 | -0.02642 |
| 0.306448248 | -0.036401753 | 0.432570555 | 0.237459233 | 2.08E-07   | 0.201579 |
| 0.008606125 | 0.11650188   | 0.011753353 | 0.096277218 | 0.03754149 | 0.198614 |
| 0.433635371 | 0.030450365  | 0.511549633 | -0.08490361 | 0.06677632 | -0.13667 |
| 0.032534497 | -0.102012686 | 0.027499158 | 0.161499843 | 0.00045882 | -0.01038 |
| 0.341136657 | 0.037761371  | 0.415568418 | 0.021108779 | 0.64911444 | 0.501733 |
| 0.907005077 | -0.00329643  | 0.943361352 | -0.07809227 | 0.09186506 | -0.03994 |
| 0.162752211 | 0.06555479   | 0.157251491 | -0.04002073 | 0.38820161 | -0.25232 |
| 0.026241476 | -0.088297871 | 0.056553609 | -0.06493784 | 0.16120302 | 0.109546 |
| 0.001704247 | -0.13730117  | 0.002946695 | 0.198869946 | 1.50E-05   | -0.18592 |
| 0.355391558 | -0.029092717 | 0.530563016 | 0.038808211 | 0.40274986 | -0.12536 |
| 0.027129746 | 0.095996117  | 0.03810483  | -0.0232439  | 0.61635257 | -0.1019  |
| 0.841221539 | 0.00203288   | 0.965053295 | 0.037712564 | 0.41617187 | -0.18289 |
| 0.581742867 | 0.035378252  | 0.445630177 | 0.003718783 | 0.93611917 | -0.19697 |
| 0.168604004 | 0.075986966  | 0.100991996 | -0.02878216 | 0.53496196 | -0.14854 |
| 0.002526417 | 0.149173782  | 0.001224369 | 0.002847681 | 0.95106127 | -0.21736 |
| 0.02404023  | 0.10188844   | 0.027689376 | -0.04182541 | 0.36714872 | -0.00494 |
| 0.08051808  | 0.091285069  | 0.048664632 | 0.13919259  | 0.00257315 | 0.148011 |
| 0.811197297 | -0.001937824 | 0.966686394 | 0.009259951 | 0.84181124 | -0.15326 |
| 0.000713562 | -0.159499281 | 0.000540688 | -0.10470905 | 0.0236393  | -0.17924 |
| 0.114067743 | -0.088194924 | 0.056843373 | -0.04338164 | 0.34957542 | 0.281795 |
| 1.09E-11    | 0.325538388  | 5.45E-13    | 0.015468298 | 0.73883474 | -0.0719  |
| 0.206380943 | 0.078009139  | 0.092212471 | 0.06890416  | 0.1370654  | -0.14065 |
| 0.010015348 | 0.128351591  | 0.005473406 | -0.03961082 | 0.39308377 | -0.11005 |
| 0.008093179 | 0.130234252  | 0.004819483 | 0.118489391 | 0.01038471 | -0.06875 |
| 0.01611161  | 0.116299997  | 0.011900923 | -0.08723349 | 0.0596094  | -0.31319 |
| 0.098494931 | 0.088179947  | 0.056885631 | 0.091004113 | 0.04936507 | -0.10876 |
| 0.584211433 | 0.034651424  | 0.455038726 | -0.10646754 | 0.02138253 | -0.33668 |
| 0.049856438 | 0.100740201  | 0.02950147  | -0.07479555 | 0.10646767 | -0.0925  |
| 0.751534823 | 0.024013632  | 0.604721408 | -0.11624812 | 0.01193911 | -0.04397 |
| 0.000210213 | 0.187599209  | 4.51E-05    | 0.037057697 | 0.42431831 | 0.143484 |
| 4.74E-05    | -0.182035405 | 7.61E-05    | -0.10982663 | 0.01758707 | 0.064849 |
| 0.166891567 | 0.050726954  | 0.273961409 | 0.063411574 | 0.17129945 | 0.118759 |
| 0.000685843 | 0.168888521  | 0.000246085 | 0.166980858 | 0.00028975 | -0.01693 |
| 0.339782346 | 0.054935485  | 0.236065201 | 0.017741352 | 0.7021673  | 0.214672 |
| 0.005556911 | 0.1157099    | 0.012341697 | -0.18235844 | 7.39E-05   | 0.08835  |
| 0.060876864 | 0.095090967  | 0.0399677   | -0.23499933 | 2.79E-07   | -0.3692  |
| 0.018700923 | 0.125041778  | 0.00681893  | 0.019914521 | 0.66774445 | 0.052604 |
| 0.007430786 | -0.117738608 | 0.010884152 | -0.03897612 | 0.40071607 | -0.21867 |
| 0.248649024 | 0.07057912   | 0.12774871  | -0.2467479  | 6.60E-08   | -0.26725 |
| 0.933366846 | -0.00955398  | 0.836857593 | 0.103872674 | 0.02478309 | -0.07167 |
| 0.002310059 | 0.149978665  | 0.001150866 | 0.129956886 | 0.00491117 | -0.28865 |

|             |              |             |             |            |          |
|-------------|--------------|-------------|-------------|------------|----------|
| 0.603166305 | 0.038629042  | 0.40492687  | -0.04975986 | 0.28322503 | -0.26078 |
| 2.67E-08    | 0.254473875  | 2.45E-08    | 0.006480739 | 0.88891591 | -0.20134 |
| 0.054901661 | 0.092858122  | 0.044894849 | 0.022021417 | 0.63502287 | -0.04659 |
| 0.032427141 | 0.107242252  | 0.020449199 | 0.007885363 | 0.86504937 | 0.018057 |
| 0.0002254   | -0.160817341 | 0.000485355 | -0.06892939 | 0.13692128 | -0.30406 |
| 1.27E-06    | 0.21742084   | 2.11E-06    | -0.05941055 | 0.19999551 | -0.10471 |
| 7.16E-12    | 0.31505783   | 3.20E-12    | 0.019690008 | 0.67127013 | -0.07897 |
| 0.03199712  | 0.101590554  | 0.028150044 | -0.15315091 | 0.00089902 | -0.32615 |
| 0.14590366  | -0.057906974 | 0.211637655 | -0.07236768 | 0.11835023 | -0.16862 |
| 1.12E-06    | -0.213301573 | 3.31E-06    | 0.036808808 | 0.42743867 | -0.02436 |
| 1.05E-06    | 0.23396806   | 3.16E-07    | 0.148150818 | 0.00132402 | 0.253083 |
| 0.000951492 | -0.13937613  | 0.002539305 | 0.09022983  | 0.05133917 | 0.072088 |
| 0.142834534 | 0.07960971   | 0.085705782 | 0.052857177 | 0.25429084 | -0.12822 |
| 0.964952088 | 0.013521104  | 0.77072722  | -0.1511237  | 0.00105329 | 0.005753 |
| 0.631807662 | 0.032687128  | 0.481015586 | -0.06608443 | 0.15391789 | -0.19714 |
| 5.53E-05    | -0.176145668 | 0.000130085 | 0.064349499 | 0.16504058 | -0.17486 |
| 0.256542637 | 0.056510327  | 0.222882176 | -0.0614382  | 0.18504351 | -0.05646 |
| 0.50401927  | -0.024850366 | 0.592190449 | -0.05752648 | 0.21465976 | -0.08369 |
| 7.26E-05    | 0.176488298  | 0.000126149 | 0.022084989 | 0.63404612 | 0.020539 |
| 0.016917861 | 0.120246556  | 0.009294435 | 0.02481964  | 0.5926485  | -0.17587 |
| 2.72E-09    | 0.274758747  | 1.56E-09    | 0.166712903 | 0.00029644 | 0.098914 |
| 0.235805364 | -0.055023244 | 0.235316408 | -0.02447742 | 0.597761   | -0.15125 |
| 2.30E-06    | 0.21601146   | 2.46E-06    | -0.11161259 | 0.01581971 | 0.008352 |
| 0.125934574 | -0.055800934 | 0.228754031 | -0.03353317 | 0.46972946 | -0.20359 |
| 0.015293508 | 0.125430118  | 0.006647022 | -0.06506539 | 0.16038004 | -0.51831 |
| 7.39E-07    | 0.23665665   | 2.29E-07    | -0.16045941 | 0.00049984 | -0.22051 |
| 0.018915112 | -0.113251948 | 0.014336518 | -0.01569377 | 0.73516933 | -0.11833 |
| 7.98E-07    | -0.220550329 | 1.49E-06    | -0.00303535 | 0.94784052 | -0.22397 |
| 9.47E-08    | 0.261054861  | 1.03E-08    | -0.13113252 | 0.00453304 | -0.27742 |
| 0.023603788 | 0.106454076  | 0.021399077 | 0.391398165 | 1.51E-18   | -0.01901 |
| 0.705060879 | -0.011221544 | 0.80889071  | -0.09159692 | 0.04789693 | -0.36696 |
| 0.844750061 | 0.022427312  | 0.628797368 | -0.10821297 | 0.01932987 | -0.21139 |
| 0.001687104 | 0.158814706  | 0.000571686 | -0.02509732 | 0.58851497 | -0.10706 |
| 0.614068645 | 0.033155138  | 0.474754286 | 0.088038852 | 0.05728501 | -0.21184 |
| 0.000576626 | 0.15563682   | 0.000738388 | 0.038993289 | 0.4005084  | -0.22674 |
| 0.186093174 | 0.066041596  | 0.154185494 | 0.007462219 | 0.87222731 | -0.03264 |
| 7.30E-08    | 0.262407045  | 8.58E-09    | 0.035306839 | 0.44654967 | 0.059171 |
| 0.660686058 | 0.008309157  | 0.857871534 | 0.093890541 | 0.04255658 | -0.03917 |
| 0.011882959 | -0.117072284 | 0.011345112 | -0.05055001 | 0.27564067 | -0.06403 |
| 0.575505113 | -0.022551931 | 0.626891231 | -0.0205742  | 0.65742756 | 0.143986 |
| 0.00054311  | -0.160120414 | 0.00051392  | 0.116888179 | 0.01147548 | 0.090956 |
| 0.506979324 | -0.027875364 | 0.547910523 | -0.01718198 | 0.71113068 | -0.13296 |
| 0.538011571 | -0.023051248 | 0.619278815 | 0.07283354  | 0.1159932  | -0.41548 |
| 0.038953265 | 0.087063944  | 0.06010853  | 0.114814987 | 0.01303767 | -0.0753  |
| 0.061265339 | 0.088798035  | 0.055163199 | -0.26561448 | 5.55E-09   | -0.26694 |

|             |              |             |             |            |          |
|-------------|--------------|-------------|-------------|------------|----------|
| 0.927948608 | -0.006243445 | 0.892958419 | 0.091555591 | 0.04799808 | 0.042931 |
| 0.123139664 | 0.086636873  | 0.061381143 | -0.07866389 | 0.08950451 | -0.10445 |
| 0.001646851 | 0.156912213  | 0.000666706 | 0.072562374 | 0.11736065 | -0.01783 |
| 0.001552632 | 0.16048755   | 0.000498683 | -0.11401282 | 0.01369068 | -0.07398 |
| 0.896585389 | 0.010114404  | 0.827433849 | 0.075279793 | 0.10421447 | 0.150756 |
| 0.02326563  | 0.108861833  | 0.018611776 | 0.21922096  | 1.73E-06   | 0.102286 |
| 0.000832667 | 0.169450887  | 0.000234437 | 0.146672728 | 0.00148123 | 0.296758 |
| 0.063953166 | 0.095600869  | 0.038909029 | -0.00418137 | 0.92819304 | 0.052991 |
| 0.939251553 | -0.007437411 | 0.872648471 | -0.01682569 | 0.71686082 | 0.231177 |
| 0.341581161 | 0.051198498  | 0.269520253 | -0.14754425 | 0.00138658 | -0.05741 |
| 0.248082138 | -0.047685786 | 0.30379842  | -0.04225865 | 0.36220223 | -0.41724 |
| 5.87E-07    | 0.224291211  | 9.76E-07    | -0.04822296 | 0.29837739 | -0.27469 |
| 0.762754261 | 0.025316129  | 0.585267032 | -0.02288382 | 0.62182695 | -0.08291 |
| 0.414023593 | -0.038983972 | 0.400621063 | -0.14305466 | 0.00194105 | -0.09439 |
| 0.191372213 | -0.068201137 | 0.141128091 | -0.14940334 | 0.00120298 | -0.08056 |
| 0.004314609 | -0.124072529 | 0.007265488 | -0.05332869 | 0.25007268 | -0.32868 |
| 0.674631733 | 0.036001828  | 0.437647028 | 0.099251546 | 0.0320014  | 0.090233 |
| 3.64E-18    | -0.383441335 | 8.35E-18    | -0.00357275 | 0.93862273 | 0.139157 |
| 0.283569347 | 0.055270579  | 0.233215077 | -0.04845725 | 0.29603331 | -0.14667 |
| 0.417035135 | 0.031811266  | 0.492852787 | -0.11529113 | 0.01266318 | -0.17564 |
| 1.92E-05    | 0.217109394  | 2.18E-06    | 0.036509611 | 0.4312073  | -0.12441 |
| 0.079281846 | -0.079948268 | 0.084378014 | -0.38173011 | 1.20E-17   | -0.10341 |
| 0.80541521  | -0.006505612 | 0.888492349 | 0.04323985  | 0.35115414 | -0.13287 |
| 0.40524311  | 0.047152636  | 0.309242912 | 0.16465442  | 0.00035279 | -0.27476 |
| 0.002328329 | -0.134703704 | 0.003540129 | 0.004099075 | 0.92960268 | -0.04612 |
| 0.011149872 | -0.113862549 | 0.013816165 | 0.002144167 | 0.96314151 | -0.10715 |
| 0.012407608 | 0.126221647  | 0.006308609 | 0.04829954  | 0.29760987 | -0.09174 |
| 4.79E-05    | 0.188590927  | 4.11E-05    | 0.137783346 | 0.00284705 | 0.1662   |
| 0.131922801 | 0.073518928  | 0.112592526 | -0.05758334 | 0.21420614 | -0.05177 |
| 0.001644296 | 0.146072896  | 0.001549786 | -0.02647297 | 0.56823518 | -0.2755  |
| 0.393031908 | -0.027287841 | 0.556381669 | 0.126481252 | 0.00620103 | -0.23304 |
| 0.900566833 | -0.007091143 | 0.878530649 | 0.363795764 | 4.64E-16   | -0.17017 |
| 0.172438915 | -0.056878884 | 0.219874319 | 0.106463236 | 0.02138782 | -0.12765 |
| 0.124669431 | -0.060434574 | 0.192337928 | -0.08116999 | 0.07972399 | 0.027741 |
| 0.084371505 | -0.064803424 | 0.162073823 | 0.124388292 | 0.00711722 | -0.05715 |
| 0.000998623 | 0.160796455  | 0.000486189 | -0.23609307 | 2.45E-07   | -0.26499 |
| 0.043124527 | -0.08689741  | 0.06060216  | 0.108352893 | 0.01917301 | -0.10472 |
| 3.97E-05    | -0.17719691  | 0.000118359 | -0.10848285 | 0.01902832 | -0.17694 |
| 0.025858337 | 0.123748938  | 0.007420298 | 0.071819072 | 0.12117372 | -0.0662  |
| 0.352633841 | 0.049888051  | 0.281985101 | 0.017851259 | 0.70041095 | -0.03382 |
| 0.626492845 | -0.013314973 | 0.774127176 | 0.299406478 | 3.97E-11   | 0.190236 |
| 0.661743216 | -0.027942464 | 0.546947102 | 0.277254496 | 1.09E-09   | 0.05896  |
| 0.013253727 | 0.125642841  | 0.00655451  | 0.010083493 | 0.82795298 | -0.1414  |
| 8.58E-10    | 0.293807178  | 9.44E-11    | 0.157960142 | 0.0006127  | -0.24106 |
| 0.000359353 | 0.171334722  | 0.000199068 | -0.01989313 | 0.66808012 | -0.19619 |

|             |              |             |             |            |          |
|-------------|--------------|-------------|-------------|------------|----------|
| 0.012412989 | 0.129710107  | 0.004994068 | 0.043034289 | 0.3534509  | -0.06479 |
| 0.004261662 | 0.138389957  | 0.002726053 | 0.089223569 | 0.05400273 | 0.201645 |
| 0.375875607 | 0.05975142   | 0.197422251 | 0.067137371 | 0.14745004 | 0.018398 |
| 0.000589223 | 0.164461129  | 0.000358565 | 0.120003133 | 0.00943913 | -0.02461 |
| 1.77E-08    | 0.255125421  | 2.25E-08    | 0.038977084 | 0.40070436 | -0.23237 |
| 0.014037317 | 0.111457898  | 0.015966388 | 0.236247951 | 2.40E-07   | -0.11861 |
| 3.75E-11    | 0.285035409  | 3.52E-10    | -0.10290685 | 0.02616306 | 0.274031 |
| 0.000232768 | -0.173459771 | 0.000165191 | 0.212092005 | 3.77E-06   | 0.157627 |
| 0.523999789 | -0.020390844 | 0.660288681 | -0.11426767 | 0.01348017 | -0.34166 |
| 0.098886376 | 0.079316921  | 0.086867579 | -0.09388427 | 0.04257046 | -0.0513  |
| 0.00554286  | 0.135026963  | 0.003460791 | 0.024753285 | 0.59363824 | -0.01037 |
| 0.042419038 | 0.106211205  | 0.021699392 | 0.0553841   | 0.23225507 | -0.06844 |
| 0.581085106 | 0.033438828  | 0.470980763 | -0.08243993 | 0.07510902 | -0.32082 |
| 0.521548171 | -0.006084676 | 0.89566473  | -0.05489005 | 0.2364535  | 0.04865  |
| 0.018263811 | 0.118697102  | 0.010250175 | 0.077447593 | 0.09458687 | -0.12249 |
| 0.003953007 | 0.14712161   | 0.001431766 | 0.095006682 | 0.04014502 | -0.091   |
| 0.022267644 | 0.115487315  | 0.012511664 | 0.098959531 | 0.03251246 | 0.059845 |
| 0.262115189 | -0.042943297 | 0.354470578 | 0.027232033 | 0.55718963 | -0.1497  |
| 0.010809063 | -0.115291646 | 0.012662781 | -0.08102729 | 0.08025662 | 0.186843 |
| 0.021328997 | 0.105755563  | 0.022272676 | 0.093571722 | 0.04326744 | -0.01989 |
| 0.004044688 | -0.133901406 | 0.003744215 | -0.17720703 | 0.00011825 | 0.156684 |
| 0.269623349 | 0.062692195  | 0.176218713 | 0.104693344 | 0.02366036 | -0.08715 |
| 0.33941281  | -0.036742321 | 0.428274458 | 0.199694551 | 1.38E-05   | 0.124188 |
| 0.071317949 | 0.09283225   | 0.044954806 | 0.056909542 | 0.21962543 | 0.211624 |
| 0.049502352 | 0.100014766  | 0.030697973 | 0.309120358 | 8.48E-12   | 0.015638 |
| 0.050325507 | 0.098217949  | 0.03384173  | 0.089597689 | 0.05299931 | -0.08265 |
| 0.059528156 | -0.087366712 | 0.059219595 | -0.0552087  | 0.23373954 | -0.23708 |
| 0.521608422 | -0.026418914 | 0.569025738 | 0.007012382 | 0.87986955 | -0.04818 |
| 1.23E-08    | 0.259030259  | 1.35E-08    | -0.21657001 | 2.32E-06   | 0.212339 |
| 0.257886847 | 0.070680375  | 0.12720163  | -0.00314293 | 0.9459946  | -0.01232 |
| 0.236797305 | -0.040905409 | 0.37779112  | 0.010159297 | 0.82668    | 0.127433 |
| 0.865979342 | 0.018768492  | 0.685816249 | 0.088290669 | 0.05657384 | -0.17078 |
| 0.075615629 | 0.090530582  | 0.050564691 | 0.153554642 | 0.00087091 | 0.107528 |
| 0.017765913 | 0.126383792  | 0.006241222 | -0.04028388 | 0.38508697 | -0.16654 |
| 0.571261689 | 0.037798654  | 0.415107809 | 0.077829804 | 0.09296551 | -0.16606 |
| 2.20E-05    | 0.215458981  | 2.62E-06    | -0.05016234 | 0.27934434 | -0.24453 |
| 0.012177207 | 0.134749849  | 0.003528704 | 0.080871254 | 0.08084233 | -0.13469 |
| 0.566972162 | 0.045996785  | 0.321265778 | 0.072227407 | 0.11906722 | -0.05139 |
| 0.827680795 | -0.005990305 | 0.897273915 | -0.04044236 | 0.38321852 | -0.14461 |
| 0.272187625 | -0.046973129 | 0.311090405 | 0.038075617 | 0.41169547 | -0.20609 |
| 0.068953574 | 0.098006933  | 0.034228334 | 0.043290066 | 0.35059451 | -0.12626 |
| 0.706310846 | 0.028095312  | 0.544755648 | -0.06775416 | 0.14375872 | -0.24357 |
| 0.877112716 | 0.011252582  | 0.808372347 | -0.17606484 | 0.00013103 | -0.28768 |
| 0.053179837 | 0.088041507  | 0.057277473 | -0.18018939 | 9.02E-05   | 0.19986  |
| 0.453460469 | -0.033787567 | 0.466364663 | -0.04630321 | 0.31804914 | -0.12949 |

|             |              |             |             |            |          |
|-------------|--------------|-------------|-------------|------------|----------|
| 1.56E-10    | 0.296314212  | 6.42E-11    | 0.102992555 | 0.02603799 | 0.108819 |
| 0.838801619 | -0.000391454 | 0.993268545 | 0.29678053  | 5.98E-11   | 0.050409 |
| 0.119534756 | 0.08504996   | 0.066306207 | -0.01556196 | 0.73731134 | -0.11144 |
| 0.367285251 | 0.050670935  | 0.274492304 | -0.01505151 | 0.74562568 | -0.17408 |
| 0.004996863 | 0.137030196  | 0.003004075 | -0.17410322 | 0.00015605 | -0.18248 |
| 4.25E-05    | -0.189847748 | 3.64E-05    | 0.08717987  | 0.05976687 | -0.21774 |
| 7.74E-08    | 0.261328642  | 9.92E-09    | 0.17585868  | 0.00013347 | 0.080854 |
| 0.013714268 | 0.124583797  | 0.007026776 | 0.039392833 | 0.39569513 | -0.02066 |
| 0.052883309 | -0.080587825 | 0.081915076 | 0.102534906 | 0.02671189 | -0.07945 |
| 0.08369416  | 0.09388755   | 0.042563199 | 0.073494369 | 0.11271301 | -0.05901 |
| 0.023549596 | 0.119457563  | 0.00977072  | 0.065088241 | 0.16023291 | -0.03892 |
| 0.579748407 | 0.036436516  | 0.432130907 | 0.183061288 | 6.92E-05   | 0.029457 |
| 0.152815197 | -0.060009679 | 0.195488777 | 0.14424787  | 0.00177667 | 0.051627 |
| 0.000114278 | 0.179680496  | 9.45E-05    | 0.153098641 | 0.00090272 | -0.10828 |
| 0.206489281 | 0.065334375  | 0.158654758 | -0.13309401 | 0.0039603  | 0.166031 |
| 3.62E-09    | -0.27974499  | 7.63E-10    | -0.12871778 | 0.00534028 | 0.183468 |
| 7.17E-11    | -0.290287782 | 1.61E-10    | 0.05564685  | 0.23004381 | 0.005325 |
| 0.000320187 | 0.17763169   | 0.000113806 | -0.13778647 | 0.00284642 | -0.0582  |
| 5.56E-13    | 0.341520682  | 3.20E-14    | -0.05375274 | 0.246321   | -0.07394 |
| 0.159881373 | 0.063700412  | 0.169353406 | -0.07670638 | 0.09779544 | -0.04855 |
| 0.207037759 | 0.065332345  | 0.158667726 | 0.040231601 | 0.38570453 | 0.137089 |
| 1.18E-11    | 0.319084688  | 1.64E-12    | 0.108105257 | 0.01945138 | 0.126367 |
| 0.284408046 | -0.044915539 | 0.332784442 | -0.03162168 | 0.49543532 | -0.44809 |
| 0.032894673 | 0.116560156  | 0.011711057 | 0.084516864 | 0.06803179 | -0.10053 |
| 0.533148479 | 0.025071313  | 0.588901473 | 0.016639312 | 0.71986461 | 0.09241  |
| 0.051381159 | 0.103426576  | 0.025412469 | 0.022434001 | 0.62869499 | -0.15771 |
| 0.640682895 | 0.019823175  | 0.669178043 | -0.08891168 | 0.05485128 | -0.03225 |
| 0.100789794 | 0.092061234  | 0.046772709 | 0.079712037 | 0.08530271 | -0.03546 |
| 0.559903172 | 0.038593044  | 0.405365115 | 0.069133998 | 0.13575689 | -0.10902 |
| 3.84E-08    | 0.258349821  | 1.47E-08    | 0.373573142 | 6.50E-17   | -0.02795 |
| 0.679833416 | 0.021693618  | 0.640069444 | -0.0015261  | 0.97376161 | -0.40555 |
| 0.81973373  | -0.008522284 | 0.854266151 | -0.02161575 | 0.64127067 | -0.0779  |
| 0.213188087 | 0.07021569   | 0.129727342 | 0.073434715 | 0.11300609 | -0.11634 |
| 0.000619595 | 0.172915861  | 0.000173306 | -0.02849281 | 0.53907694 | -0.11515 |
| 0.028172766 | 0.114424741  | 0.013351842 | -0.00355862 | 0.93886491 | 0.051466 |
| 1.46E-19    | 0.41262391   | 1.27E-20    | 0.044942898 | 0.33248974 | -0.08737 |
| 0.267925329 | 0.060316153  | 0.193212327 | 0.032450413 | 0.48419947 | -0.09829 |
| 0.064291119 | 0.092276251  | 0.046259645 | -0.07130141 | 0.12388587 | -0.08997 |
| 0.007575043 | 0.13570305   | 0.003300049 | 0.070541505 | 0.12795241 | -0.14846 |
| 0.142340284 | 0.079507842  | 0.086108571 | -0.10807774 | 0.01948253 | -0.41573 |
| 0.243388479 | -0.043389432 | 0.349488784 | 0.09447277  | 0.04128379 | 0.1      |
| 0.456255522 | -0.02327471  | 0.615885062 | 0.142724702 | 0.0019889  | 0.043284 |
| 0.562083614 | 0.034583638  | 0.455921838 | 0.05917963  | 0.20175257 | 0.23535  |
| 1.55E-10    | 0.300165435  | 3.53E-11    | 0.083079177 | 0.07286961 | -0.1543  |
| 0.545338988 | 0.038108101  | 0.41129634  | 0.059284973 | 0.20094964 | -0.11671 |

|             |              |             |             |            |          |
|-------------|--------------|-------------|-------------|------------|----------|
| 0.023593851 | 0.1193458    | 0.009839912 | 0.128390431 | 0.00545915 | -0.23751 |
| 0.130015989 | 0.08432076   | 0.068675749 | 0.003149043 | 0.94588977 | -0.15569 |
| 0.080990802 | 0.09208493   | 0.046715934 | -0.00168076 | 0.97110358 | -0.32276 |
| 0.017836926 | -0.103372563 | 0.025489601 | -0.04247208 | 0.35978071 | -0.24172 |
| 0.992649799 | 0.006537848  | 0.887943443 | 0.156704799 | 0.00067791 | 0.285152 |
| 0.125804968 | 0.077937137  | 0.092514223 | 0.148701899 | 0.00126945 | -0.20749 |
| 0.155907211 | -0.058700679 | 0.205432587 | -0.10178672 | 0.02784595 | -0.261   |
| 0.83053735  | 0.021473918  | 0.643461119 | 0.050277053 | 0.27824494 | -0.08225 |
| 0.109103728 | 0.089189325  | 0.054095355 | 0.054043103 | 0.24377482 | -0.0495  |
| 0.011249727 | -0.110141558 | 0.017263432 | -0.05381586 | 0.24576593 | -0.32331 |
| 0.003136353 | 0.14986098   | 0.001161353 | -0.06331603 | 0.17194681 | -0.01881 |
| 0.015078178 | 0.126176241  | 0.006327595 | 0.087850789 | 0.05782095 | 0.003071 |
| 0.003520865 | 0.133745809  | 0.003785008 | 0.098364895 | 0.03357471 | 0.063181 |
| 0.142341402 | 0.084490561  | 0.068117874 | -0.02801419 | 0.54591825 | -0.14648 |
| 0.598724575 | 0.036639678  | 0.429566645 | -0.02247749 | 0.62802958 | -0.17669 |
| 9.87E-12    | -0.30721219  | 1.15E-11    | 0.009717935 | 0.83409815 | -0.07217 |
| 0.64772166  | -0.0126764   | 0.784687058 | 0.17768864  | 0.00011322 | 0.028543 |
| 0.141941576 | -0.073254043 | 0.11389739  | 0.151313387 | 0.00103788 | -0.04307 |
| 0.075781577 | 0.098434203  | 0.033449395 | 0.114829188 | 0.01302636 | 0.021973 |
| 1.19E-06    | -0.218518508 | 1.87E-06    | 0.03413944  | 0.46173256 | -0.24713 |
| 0.883625529 | -0.012525749 | 0.787184191 | -0.12925028 | 0.0051519  | 0.068916 |
| 3.63E-08    | 0.250684447  | 4.00E-08    | -0.24915723 | 4.86E-08   | 0.125059 |
| 2.17E-07    | -0.235557312 | 2.61E-07    | 0.021483001 | 0.64332075 | -0.19901 |
| 0.002684286 | 0.155335481  | 0.000756335 | 0.119085124 | 0.01000299 | -0.04108 |
| 0.143037707 | -0.057551229 | 0.214462222 | -0.01872691 | 0.68647547 | -0.15153 |
| 0.062305486 | -0.080470108 | 0.082363987 | 0.059276162 | 0.20101671 | -0.11315 |
| 1.62E-06    | 0.230345118  | 4.85E-07    | -0.13648677 | 0.00312222 | -0.1393  |
| 0.000202281 | 0.184267299  | 6.18E-05    | -0.03136578 | 0.49893271 | 0.016169 |
| 6.62E-08    | 0.2631395    | 7.77E-09    | 0.060508    | 0.19179723 | 0.227888 |
| 0.002009792 | 0.141420135  | 0.002188855 | 0.188662363 | 4.08E-05   | -0.1523  |
| 0.115891909 | 0.081677313  | 0.077853544 | 0.132375855 | 0.00416192 | 0.062526 |
| 6.32E-05    | 0.201130033  | 1.19E-05    | 0.001931303 | 0.96679845 | -0.03689 |
| 3.80E-06    | -0.21641985  | 2.35E-06    | -0.08913257 | 0.05424918 | 0.354742 |
| 0.764246853 | -0.002399613 | 0.958754043 | -0.16863516 | 0.00025151 | 0.02067  |
| 0.088122136 | 0.089077526  | 0.05439869  | 0.050964275 | 0.27172005 | -0.14185 |
| 0.003921902 | 0.145618656  | 0.001603625 | 0.029248231 | 0.5283671  | -0.09267 |
| 0.001182603 | 0.161624783  | 0.000454108 | -0.04575375 | 0.32383202 | -0.03074 |
| 0.09325352  | -0.071533156 | 0.122665917 | -0.09746526 | 0.03523799 | -0.37545 |
| 1.78E-23    | 0.442597669  | 8.01E-24    | -0.05261473 | 0.25647887 | -0.1306  |
| 0.314178901 | -0.045229925 | 0.329408163 | 0.152573944 | 0.00094065 | -0.23845 |
| 0.004823082 | 0.140770138  | 0.002295187 | -0.13355877 | 0.00383458 | -0.01679 |
| 6.62E-05    | 0.184972741  | 5.79E-05    | -0.1491164  | 0.00122977 | -0.0772  |
| 0.639826303 | -0.016195572 | 0.727033591 | 0.106157804 | 0.02176591 | -0.15081 |
| 0.000418639 | 0.174363486  | 0.000152491 | 0.03938233  | 0.3958212  | 0.047533 |
| 0.652105919 | -0.019358809 | 0.67648433  | 0.004016096 | 0.93102418 | 0.036012 |

|             |              |             |             |            |          |
|-------------|--------------|-------------|-------------|------------|----------|
| 8.61E-05    | -0.206710671 | 6.67E-06    | -0.01868144 | 0.6871965  | 0.062308 |
| 0.000886762 | -0.143899782 | 0.001823255 | -0.10177257 | 0.02786778 | -0.094   |
| 0.529630615 | 0.030763271  | 0.507218318 | 0.019130165 | 0.68009303 | -0.1525  |
| 0.065425341 | 0.089112209  | 0.054304437 | 0.007452329 | 0.8723952  | -0.31601 |
| 0.01140621  | -0.126441575 | 0.006217365 | -0.01379236 | 0.76625976 | 0.208015 |
| 1.59E-07    | 0.258388739  | 1.47E-08    | -0.1027075  | 0.026456   | -0.31741 |
| 0.0034349   | -0.142503773 | 0.002021545 | -0.02132667 | 0.64573843 | -0.06546 |
| 0.329672341 | -0.035205793 | 0.447852548 | 0.233818463 | 3.22E-07   | -0.16095 |
| 0.540346628 | 0.046912365  | 0.311717427 | -0.06545339 | 0.15789588 | -0.17926 |
| 0.136281396 | 0.072497849  | 0.117687892 | 0.413891676 | 9.40E-21   | -0.25353 |
| 0.082802224 | 0.094087428  | 0.042122517 | 0.037783003 | 0.41530113 | -0.19042 |
| 0.002596288 | 0.156451679  | 0.000691811 | 0.093351843 | 0.04376351 | -0.02832 |
| 0.953925291 | 0.008409461  | 0.856174365 | 0.011383443 | 0.80618779 | -0.08282 |
| 0.223088159 | -0.047485253 | 0.305838755 | 0.054519009 | 0.23964163 | -0.08696 |
| 0.315171388 | 0.061120082  | 0.187333199 | 0.10541572  | 0.02270877 | -0.1126  |
| 0.08986511  | -0.068733609 | 0.138042636 | -0.15254297 | 0.00094294 | -0.2841  |
| 0.221793764 | 0.070175199  | 0.129949249 | 0.046958445 | 0.31124184 | -0.11606 |
| 0.644725808 | -0.016378256 | 0.72407926  | 0.075291923 | 0.10415852 | -0.30949 |
| 0.414972061 | 0.047029535  | 0.310509091 | -0.04640296 | 0.31700659 | -0.13429 |
| 0.88785307  | -0.000604078 | 0.989612428 | -0.04591719 | 0.32210479 | -0.35154 |
| 0.828576205 | -0.0035213   | 0.939504831 | -0.00666518 | 0.88577573 | -0.21311 |
| 0.08028473  | 0.087477686  | 0.058896511 | 0.033593253 | 0.46893362 | -0.07083 |
| 0.034116445 | 0.109192447  | 0.018254916 | 0.032261989 | 0.48674195 | -0.0342  |
| 3.36E-05    | -0.178221688 | 0.000107891 | -0.04287467 | 0.35524089 | -0.19524 |
| 0.58238552  | 0.032479     | 0.483814361 | -0.02155175 | 0.64225876 | -0.03388 |
| 0.025459598 | 0.102434307  | 0.026862018 | -0.04437553 | 0.3386355  | -0.07051 |
| 0.008363008 | 0.136829631  | 0.003047197 | -0.00083357 | 0.98566654 | 0.052584 |
| 0.533900769 | 0.045929834  | 0.321971384 | 0.025838791 | 0.57754276 | -0.01116 |
| 0.118705242 | -0.073003878 | 0.115140616 | -0.00279791 | 0.95191562 | -0.29042 |
| 0.00228903  | 0.149277166  | 0.001214692 | -0.2266821  | 7.42E-07   | 0.107956 |
| 0.051244994 | 0.109310332  | 0.018129124 | -0.22143774 | 1.35E-06   | -0.03665 |
| 0.819484601 | 0.021313449  | 0.645943101 | 0.013902226 | 0.76445255 | -0.01525 |
| 1.28E-13    | 0.341554492  | 3.18E-14    | -0.19619468 | 1.95E-05   | 0.037877 |
| 0.028404389 | -0.102719315 | 0.026438555 | -0.09635382 | 0.0373892  | -0.02554 |
| 0.123400781 | -0.067057629 | 0.147932497 | -0.15967849 | 0.00053283 | -0.21652 |
| 0.306830185 | 0.061163033  | 0.18702284  | 0.075807521 | 0.10180211 | -0.00684 |
| 0.112713746 | 0.074259053  | 0.109008762 | -0.07424408 | 0.10908037 | -0.30867 |
| 0.155276986 | -0.062438524 | 0.177978173 | -0.0813438  | 0.07907912 | -0.02627 |
| 0.084500549 | 0.08164489   | 0.077972007 | -0.29243732 | 1.16E-10   | -0.15507 |
| 0.877784849 | -0.008754455 | 0.850342085 | 0.182956089 | 6.99E-05   | -0.2965  |
| 0.046946451 | 0.10208877   | 0.027383229 | 0.011368027 | 0.80644505 | -0.11933 |
| 0.049091647 | 0.085180152  | 0.065890293 | -0.06617052 | 0.15338111 | 0.213924 |
| 0.195536455 | 0.072030124  | 0.120081357 | -0.07288753 | 0.11572245 | -0.10872 |
| 0.550674955 | -0.028060531 | 0.545253945 | -0.19475584 | 2.25E-05   | -0.25949 |
| 0.0485662   | -0.091143425 | 0.049016712 | -0.07243355 | 0.1180147  | -0.14785 |



|             |              |             |             |            |          |
|-------------|--------------|-------------|-------------|------------|----------|
| 0.031453513 | -0.096948444 | 0.036224841 | -0.16059547 | 0.00049428 | -0.04879 |
| 0.466489016 | -0.033698786 | 0.467537429 | -0.0859192  | 0.06356975 | -0.17107 |
| 0.866483412 | -0.003374568 | 0.942021126 | 0.08170409  | 0.07775582 | -0.11954 |
| 0.00208576  | 0.148874913  | 0.001252746 | -0.12375232 | 0.00741866 | -0.00149 |
| 1.26E-08    | 0.260605475  | 1.09E-08    | -0.14713743 | 0.00143005 | 0.045763 |
| 0.333185736 | 0.044328714  | 0.339145869 | -0.10335766 | 0.02551091 | -0.24774 |
| 0.038101684 | 0.089617416  | 0.052946836 | -0.04674454 | 0.31345354 | -0.22632 |
| 0.735596223 | -0.017935868 | 0.699059954 | 0.050779146 | 0.2734674  | -0.1558  |
| 6.85E-05    | -0.182426309 | 7.34E-05    | 0.038010712 | 0.41249365 | -0.10288 |
| 0.925133063 | -0.012229539 | 0.792100361 | 0.220370283 | 1.52E-06   | -0.0249  |
| 3.55E-06    | 0.219564342  | 1.66E-06    | 0.277035318 | 1.13E-09   | 0.279836 |
| 0.994553471 | 0.006883384  | 0.88206316  | 0.185906129 | 5.30E-05   | 0.115693 |
| 0.018183181 | 0.117275881  | 0.011202465 | 0.002472913 | 0.95749529 | -0.14296 |
| 1.59E-08    | 0.255879106  | 2.04E-08    | -0.15571063 | 0.00073405 | 0.118675 |
| 0.084919887 | 0.086419675  | 0.062036843 | -0.02190796 | 0.63676773 | -0.1442  |
| 0.117849709 | -0.060983029 | 0.188326049 | -0.0998786  | 0.03092714 | -0.04428 |
| 0.000719877 | -0.155104796 | 0.000770347 | 0.028905409 | 0.53321399 | -0.11129 |
| 0.205062842 | -0.050131661 | 0.279638888 | -0.03817293 | 0.41050044 | -0.21329 |
| 0.549188179 | -0.027700764 | 0.550421324 | -0.01572418 | 0.73467555 | 0.011357 |
| 0.019763501 | -0.109315217 | 0.018123928 | 0.244557727 | 8.69E-08   | 0.042365 |
| 0.761342443 | -0.014688792 | 0.751551785 | -0.26866228 | 3.66E-09   | -0.18721 |
| 0.072280126 | -0.072148082 | 0.119474183 | 0.037725579 | 0.4160109  | -0.06272 |
| 0.561815631 | -0.029383138 | 0.526465908 | -0.01597026 | 0.73068288 | -0.11538 |
| 0.625396143 | 0.028028605  | 0.545711531 | 0.12558738  | 0.00657852 | -0.01863 |
| 0.24434581  | 0.054918648  | 0.23620905  | 0.145598459 | 0.00160606 | 0.348546 |
| 0.802390992 | 0.018078386  | 0.696786451 | -0.04799347 | 0.30068544 | -0.30069 |
| 2.51E-09    | 0.288621542  | 2.07E-10    | -0.02620687 | 0.5721319  | 0.142756 |
| 0.011573657 | 0.127095487  | 0.005953025 | 0.03261989  | 0.4819188  | -0.15112 |
| 0.194478815 | -0.053231291 | 0.250940007 | -0.19379494 | 2.48E-05   | -0.01514 |
| 0.00059613  | 0.171322647  | 0.000199278 | -0.07427482 | 0.1089334  | 0.043336 |
| 0.012655214 | 0.133801241  | 0.00377043  | -0.08068778 | 0.08153546 | -0.28156 |
| 5.06E-08    | 0.270933909  | 2.67E-09    | -0.14600592 | 0.00155762 | -0.19376 |
| 0.002415444 | 0.15239451   | 0.000953961 | -0.19538066 | 2.12E-05   | -0.16551 |
| 0.059723437 | 0.094475106  | 0.041278745 | -0.24621    | 7.06E-08   | -0.18368 |
| 0.759785783 | 0.030121115  | 0.516127879 | -0.18817085 | 4.27E-05   | -0.26463 |
| 0.844846649 | 0.003307426  | 0.943172735 | -0.15938879 | 0.00054558 | -0.24863 |
| 0.200633237 | 0.061433048  | 0.18508044  | 0.079044151 | 0.08796131 | -0.23992 |
| 1.98E-05    | -0.196124123 | 1.97E-05    | 0.024855575 | 0.59211282 | -0.11921 |
| 0.36214582  | -0.04461902  | 0.335989172 | -0.0813824  | 0.07893648 | 0.032241 |
| 1.80E-06    | 0.237391161  | 2.10E-07    | 0.010961878 | 0.81323058 | 0.076119 |
| 0.005319484 | 0.125549709  | 0.00659487  | -0.27222187 | 2.23E-09   | -0.05206 |
| 0.002670294 | -0.139075649 | 0.002594932 | 0.071567937 | 0.12248363 | -0.08394 |
| 1.65E-14    | 0.338870241  | 5.18E-14    | 0.014432863 | 0.75574198 | 0.04114  |
| 0.784351788 | 0.020272286  | 0.662141334 | -0.12604419 | 0.0063831  | -0.29561 |
| 0.001440671 | -0.124729545 | 0.006960024 | -0.11728292 | 0.01119756 | -0.02165 |

|             |              |             |             |            |          |
|-------------|--------------|-------------|-------------|------------|----------|
| 0.436535453 | -0.033070605 | 0.475881912 | -0.07892846 | 0.08842854 | -0.2264  |
| 0.093414497 | -0.054043413 | 0.243772117 | -0.01738615 | 0.7078544  | -0.2268  |
| 5.68E-06    | 0.215372505  | 2.64E-06    | 0.112074139 | 0.0153891  | 0.11403  |
| 0.000197832 | 0.164960839  | 0.000343812 | -0.11421213 | 0.0135258  | -0.14089 |
| 0.057985061 | 0.09308361   | 0.044375138 | 0.065795588 | 0.15572919 | 0.117419 |
| 7.77E-18    | 0.395951319  | 5.59E-19    | 0.134026477 | 0.00371171 | 0.129786 |
| 0.018137239 | -0.097347843 | 0.035460172 | -0.13676678 | 0.00306083 | -0.11355 |
| 0.034149499 | 0.091929001  | 0.0470906   | 0.021139357 | 0.64864023 | 0.123514 |
| 0.299775435 | 0.052701361  | 0.255695552 | 0.044914304 | 0.33279774 | -0.08432 |
| 0.039995841 | 0.104224859  | 0.024295766 | -0.01928888 | 0.67758724 | -0.07282 |
| 0.003451476 | 0.146268104  | 0.001527163 | 0.057681748 | 0.21342279 | -0.09486 |
| 0.02770392  | 0.114625257  | 0.013189589 | 0.091245866 | 0.04876187 | 0.073609 |
| 0.556278761 | 0.034389962  | 0.458450325 | -0.01238349 | 0.78954427 | -0.16769 |
| 0.006373399 | 0.135233183  | 0.003411024 | -0.1426654  | 0.00199762 | -0.25958 |
| 0.185675767 | 0.070256932  | 0.129501619 | 0.031759155 | 0.49356193 | -0.18343 |
| 0.040393493 | -0.087678965 | 0.058314236 | -0.01399504 | 0.76292681 | 0.037745 |
| 0.067920768 | 0.094825381  | 0.040528696 | -0.06658246 | 0.1508324  | -0.12443 |
| 0.429373423 | 0.041676405  | 0.368859609 | -0.13586511 | 0.00326254 | -0.22458 |
| 0.676797586 | 0.032254257  | 0.486846423 | -0.03196336 | 0.4907862  | -0.23309 |
| 0.476474193 | -0.024951306 | 0.590686838 | -0.18104804 | 8.34E-05   | -0.31168 |
| 0.133674565 | 0.082401401  | 0.075245757 | 0.011980038 | 0.79624772 | -0.16053 |
| 0.142639049 | 0.081944543  | 0.076882705 | 0.024010739 | 0.60476494 | -0.10339 |
| 0.964636469 | 0.012280966  | 0.791246233 | 0.048575991 | 0.29485    | -0.09903 |
| 0.015215674 | 0.124242108  | 0.007185519 | -0.19925543 | 1.44E-05   | -0.09289 |
| 0.010152021 | 0.1332744    | 0.003911068 | 0.034450283 | 0.45766198 | -0.04511 |
| 0.015649155 | 0.116745698  | 0.011577288 | -0.0459723  | 0.32152372 | -0.31375 |
| 0.145532605 | 0.07090179   | 0.126011668 | -0.14226798 | 0.00205692 | -0.3298  |
| 0.000686282 | 0.165308479  | 0.000333884 | 0.101914084 | 0.02765002 | 0.201556 |
| 0.06560241  | -0.077586048 | 0.093996948 | 0.082369875 | 0.0753578  | 0.077605 |
| 0.361018972 | -0.033318602 | 0.472577941 | 0.06865954  | 0.1384687  | 0.066763 |
| 1.59E-09    | 0.286933213  | 2.66E-10    | 0.368216131 | 1.92E-16   | 0.266433 |
| 0.039384694 | -0.08416543  | 0.069189353 | 0.0718109   | 0.12121617 | -0.02511 |
| 0.464853214 | 0.050238126  | 0.278617695 | 0.075478896 | 0.10329906 | -0.07422 |
| 0.014392893 | 0.131452738  | 0.004434709 | 0.035175767 | 0.44824012 | -0.03069 |
| 0.329469794 | 0.044354645  | 0.338863132 | -0.00065182 | 0.98879157 | -0.02932 |
| 0.475600305 | 0.044011733  | 0.342614212 | -0.02700171 | 0.5605302  | -0.23889 |
| 0.062282098 | 0.087535991  | 0.058727347 | -0.1974085  | 1.73E-05   | -0.0381  |
| 0.034906413 | 0.090474751  | 0.050707721 | -0.19492044 | 2.22E-05   | -0.01892 |
| 0.083679652 | 0.069214996  | 0.135298047 | -0.17038413 | 0.00021624 | -0.05137 |
| 0.455385094 | 0.02997767   | 0.518129093 | -0.16389759 | 0.00037591 | 0.039505 |
| 5.66E-08    | 0.239364259  | 1.65E-07    | -0.104907   | 0.02337537 | 0.021925 |
| 0.641797944 | 0.020188527  | 0.663451445 | -0.20249546 | 1.03E-05   | -0.07313 |
| 0.168499519 | -0.061774169 | 0.182647848 | -0.06970613 | 0.13254137 | -0.41967 |
| 0.252644154 | -0.052592924 | 0.256676296 | -0.23784459 | 1.98E-07   | -0.2062  |
| 0.402207169 | 0.055602815  | 0.230413356 | 0.102402441 | 0.02690972 | -0.09096 |

|             |              |             |             |            |          |
|-------------|--------------|-------------|-------------|------------|----------|
| 0.344666343 | -0.024726627 | 0.594036077 | 0.109507859 | 0.01792004 | -0.05654 |
| 0.001639897 | -0.146794261 | 0.001467687 | -0.14903591 | 0.00123739 | -0.44566 |
| 0.502348836 | -0.024896984 | 0.591495812 | 0.12466645  | 0.00698885 | -0.40519 |
| 0.019152626 | 0.119741712  | 0.009596748 | 0.233550621 | 3.32E-07   | 0.205296 |
| 0.144196869 | 0.083178795  | 0.072525579 | 0.141744352 | 0.00213752 | -0.16757 |
| 1.05E-15    | 0.367541111  | 2.20E-16    | 0.078041391 | 0.09207756 | 0.168001 |
| 0.533311357 | 0.027918135  | 0.547296323 | -0.13634861 | 0.00315292 | -0.24915 |
| 0.007449124 | 0.137578313  | 0.002889042 | 0.205334634 | 7.71E-06   | -0.16238 |
| 0.056995397 | -0.091484147 | 0.048173369 | -0.19595364 | 2.00E-05   | -0.12399 |
| 0.130039588 | -0.05983334  | 0.196807448 | -0.04204631 | 0.36462131 | -0.26048 |
| 0.119253884 | 0.072900986  | 0.115655028 | -0.038316   | 0.40874731 | -0.35011 |
| 0.001171758 | 0.157100709  | 0.000656677 | 0.011803936 | 0.79917846 | 0.101726 |
| 0.370431763 | -0.03858638  | 0.405446275 | 0.13818131  | 0.00276713 | -0.02913 |
| 0.287092229 | 0.059327848  | 0.200623506 | 0.239983604 | 1.53E-07   | -0.05236 |
| 0.381679312 | -0.038419061 | 0.407487174 | -0.03993652 | 0.38920162 | -0.24212 |
| 5.86E-06    | 0.208265148  | 5.67E-06    | -0.13123065 | 0.0045027  | 0.128704 |
| 0.792772472 | 0.000153804  | 0.997355164 | 0.080152142 | 0.08358649 | -0.17618 |
| 0.108694226 | 0.086495763  | 0.061806487 | 0.027969805 | 0.54655479 | -0.19683 |
| 2.07E-06    | 0.225045862  | 8.95E-07    | 0.04248409  | 0.35964479 | -0.09346 |
| 0.200397494 | 0.072142579  | 0.119502456 | -0.00894414 | 0.84713888 | -0.03464 |
| 0.869538327 | 0.004124474  | 0.929167617 | -0.01341499 | 0.77247688 | -0.1678  |
| 0.873328678 | -0.000388017 | 0.993327652 | -0.03631709 | 0.43364239 | -0.27126 |
| 0.783557957 | 0.021405845  | 0.64451353  | 0.044969435 | 0.33220406 | -0.13819 |
| 0.839217706 | -0.003059199 | 0.947431306 | -0.02505204 | 0.589188   | -0.18988 |
| 0.024159449 | -0.097111123 | 0.035911709 | -0.10849475 | 0.01901511 | -0.2426  |
| 4.19E-06    | 0.229914793  | 5.10E-07    | -0.10129904 | 0.02860721 | 0.02209  |
| 9.45E-09    | -0.246205509 | 7.07E-08    | 0.356456146 | 1.94E-15   | 0.097121 |
| 5.21E-08    | 0.255831663  | 2.05E-08    | 0.015653204 | 0.7358284  | 0.091567 |
| 0.000701153 | -0.158112713 | 0.000605179 | -0.00881131 | 0.84938167 | -0.23652 |
| 2.74E-14    | 0.34859367   | 8.65E-15    | 0.059005377 | 0.20308586 | -0.07137 |
| 5.24E-05    | 0.190624956  | 3.38E-05    | 0.355888684 | 2.17E-15   | 0.06082  |
| 0.049973732 | 0.105102599  | 0.023117095 | 0.067982045 | 0.14241287 | -0.14419 |
| 0.086986285 | 0.091373187  | 0.048446668 | -0.04409119 | 0.34174272 | -0.14459 |
| 0.026847058 | 0.110713512  | 0.016688956 | -0.2163533  | 2.37E-06   | -0.10661 |
| 0.14381049  | 0.073575654  | 0.112314617 | -0.09204552 | 0.04681038 | -0.19546 |
| 0.004946372 | -0.124685236 | 0.006980257 | -0.01649055 | 0.72226522 | -0.14013 |
| 0.000517907 | 0.166979285  | 0.000289792 | 0.231003001 | 4.49E-07   | -0.1221  |
| 0.000772173 | 0.164105444  | 0.000369424 | 0.040585302 | 0.38153805 | -0.23821 |
| 0.000239731 | -0.164213229 | 0.000366101 | -0.02693411 | 0.56151239 | 0.166146 |
| 0.045073297 | 0.091995774  | 0.046929849 | 0.086255347 | 0.06253677 | 0.047886 |
| 8.52E-14    | -0.320620194 | 1.26E-12    | -0.07364749 | 0.11196346 | -0.00151 |
| 0.006093703 | 0.114010493  | 0.013692618 | 0.083696562 | 0.07075878 | 0.208047 |
| 0.398511466 | 0.026394067  | 0.569389297 | -0.06354575 | 0.17039334 | -0.06135 |
| 1.15E-07    | 0.253316411  | 2.85E-08    | 0.060726003 | 0.19019843 | 0.079873 |
| 0.016660708 | -0.106367427 | 0.021505804 | -0.12199954 | 0.00830941 | 0.060075 |

|             |              |             |             |            |          |
|-------------|--------------|-------------|-------------|------------|----------|
| 0.00060932  | -0.150408509 | 0.001113299 | 0.188864081 | 4.00E-05   | 0.063702 |
| 0.070241076 | -0.071225636 | 0.124286789 | 0.040318302 | 0.38468067 | -0.17654 |
| 0.009857797 | -0.111962976 | 0.015491866 | 0.082642159 | 0.07439458 | 0.013782 |
| 0.479207329 | 0.04143998   | 0.371584425 | -0.26166479 | 9.48E-09   | -0.11426 |
| 0.734201279 | -0.010768486 | 0.816466544 | 0.346155414 | 1.36E-14   | -0.19098 |
| 0.137242185 | 0.097579818  | 0.035022378 | -0.06475344 | 0.16239855 | -0.14152 |
| 5.33E-09    | 0.275861936  | 1.33E-09    | 0.031352725 | 0.49911142 | -0.13404 |
| 0.090959405 | 0.0849201    | 0.066723204 | 0.092058085 | 0.04678026 | -0.28888 |
| 5.85E-07    | 0.234079378  | 3.12E-07    | -0.21166223 | 3.95E-06   | -0.19824 |
| 0.791356088 | -0.012915143 | 0.780734308 | -0.07960253 | 0.08573413 | -0.11725 |
| 0.096953928 | 0.087454884  | 0.058962776 | 0.025608892 | 0.58093448 | -0.19767 |
| 0.004928106 | 0.126459513  | 0.006209976 | -0.08403092 | 0.06963667 | -0.06469 |
| 0.129637654 | -0.067429442 | 0.145693156 | -0.05453549 | 0.23949939 | -0.29541 |
| 0.519642251 | -0.030570336 | 0.509886698 | -0.0189906  | 0.68229946 | 0.009931 |
| 0.026438261 | 0.118119482  | 0.010628186 | 0.092072997 | 0.04674452 | -0.09366 |
| 0.094120063 | 0.081659885  | 0.077917202 | 0.018020671 | 0.69770682 | -0.02167 |
| 2.48E-06    | 0.226788966  | 7.33E-07    | 0.032372096 | 0.48525536 | -0.14152 |
| 0.728498153 | 0.022487013  | 0.627883895 | 0.012731668 | 0.78377153 | -0.11842 |
| 6.18E-13    | -0.32810595  | 3.50E-13    | -0.23120605 | 4.38E-07   | -0.43642 |
| 0.339856479 | -0.033878528 | 0.465164776 | 0.098838684 | 0.03272598 | 0.212603 |
| 0.677072862 | 0.019076859  | 0.680935423 | 0.121405776 | 0.0086321  | -0.04709 |
| 0.193314552 | -0.067011585 | 0.148211624 | -0.04737018 | 0.30701366 | -0.09554 |
| 0.083190678 | 0.094269568  | 0.041724299 | 0.123212108 | 0.00768364 | -0.03413 |
| 0.20493295  | -0.044884832 | 0.333115402 | 0.113628136 | 0.01401393 | -0.05916 |
| 0.021160507 | 0.116139725  | 0.012019241 | 0.006771932 | 0.88395914 | -0.31852 |
| 0.013315642 | 0.124757357  | 0.006947351 | 0.04177629  | 0.36771216 | -0.19001 |
| 0.624278197 | -0.011231388 | 0.8087263   | -0.17920805 | 9.86E-05   | -0.12281 |
| 0.416497699 | 0.024741944  | 0.593807479 | -0.20011258 | 1.32E-05   | 0.212978 |
| 0.642973439 | 0.02756338   | 0.552400917 | -0.17019043 | 0.0002199  | -0.118   |
| 0.355888069 | -0.034471033 | 0.457390972 | 0.252577755 | 3.14E-08   | -0.19923 |
| 0.509194119 | -0.014025822 | 0.762420974 | 0.194916499 | 2.22E-05   | 0.10746  |
| 0.069407765 | 0.095256307  | 0.039621779 | 0.041962232 | 0.36558203 | -0.25596 |
| 0.000219674 | 0.174591151  | 0.00014944  | 0.041391634 | 0.37214314 | -0.21092 |
| 0.189387002 | 0.07750187   | 0.094355255 | 0.086692015 | 0.06121559 | -0.14519 |
| 0.727045945 | -0.017141317 | 0.711783824 | -0.01180625 | 0.79913999 | 0.084867 |
| 0.023285374 | 0.104945146  | 0.023324813 | 0.200646054 | 1.25E-05   | 0.078918 |
| 0.689239788 | 0.013179959  | 0.776356471 | -0.01518912 | 0.74338141 | 0.044484 |
| 0.017513786 | 0.120991388  | 0.008863873 | 0.078370503 | 0.09070991 | -0.09853 |
| 0.108023135 | 0.066811073  | 0.149431839 | 0.132470624 | 0.0041348  | -0.21223 |
| 0.002377834 | 0.152437857  | 0.00095073  | 0.069900785 | 0.13146089 | -0.14613 |
| 0.411247091 | -0.034957574 | 0.451062182 | -0.19134913 | 3.15E-05   | -0.36209 |
| 1.90E-05    | -0.200976362 | 1.21E-05    | -0.12019852 | 0.00932283 | -0.21573 |
| 0.830323986 | -0.008915774 | 0.847617687 | 0.083363789 | 0.07189023 | -0.10313 |
| 2.54E-14    | 0.350700427  | 5.82E-15    | 0.07044943  | 0.12845208 | 0.050266 |
| 0.000841867 | 0.155219737  | 0.000763335 | -0.08013774 | 0.08364219 | -0.19234 |

|             |              |             |             |            |          |
|-------------|--------------|-------------|-------------|------------|----------|
| 0.772659288 | 0.019106741  | 0.68046314  | -0.04353497 | 0.34787327 | 0.005598 |
| 0.015132644 | 0.116004731  | 0.012119702 | 0.156601956 | 0.00068352 | 0.447226 |
| 0.060292752 | 0.083537232  | 0.071298685 | -0.01612657 | 0.72815058 | 0.008298 |
| 0.760543803 | 0.017765872  | 0.70177532  | -0.26569853 | 5.49E-09   | -0.1015  |
| 0.389432562 | -0.039635954 | 0.392783389 | 0.05297532  | 0.25322933 | 0.048765 |
| 0.494657008 | 0.039036583  | 0.39998516  | -0.04026471 | 0.38531332 | -0.12553 |
| 0.226938773 | -0.046975318 | 0.311067824 | 0.039968374 | 0.38882318 | -0.23311 |
| 0.016951423 | 0.115029547  | 0.012867724 | 0.072835843 | 0.11598164 | -0.14504 |
| 0.407963401 | 0.053805754  | 0.245854724 | -0.03405051 | 0.46290078 | -0.15274 |
| 0.04920629  | 0.090860411  | 0.04972658  | 0.21694935  | 2.22E-06   | -0.01568 |
| 0.000533672 | -0.171700613 | 0.000192806 | -0.16224454 | 0.0004314  | -0.21533 |
| 0.176438186 | -0.061803593 | 0.182439131 | -0.05821188 | 0.20923813 | -0.03799 |
| 0.234558563 | 0.056842521  | 0.220169787 | -0.317408   | 2.17E-12   | -0.28953 |
| 0.209059624 | -0.058599174 | 0.206218711 | -0.10283624 | 0.0262665  | -0.26679 |
| 0.77625718  | -0.009605368 | 0.835992484 | -0.14377451 | 0.00184029 | -0.30831 |
| 0.184513272 | 0.076987235  | 0.096569625 | -0.0931974  | 0.0441148  | -0.00816 |
| 0.022777973 | 0.098638281  | 0.033082717 | -0.07202223 | 0.12012205 | 0.075749 |
| 4.68E-05    | 0.197619881  | 1.70E-05    | -0.09563966 | 0.03882947 | 0.111701 |
| 0.079969194 | 0.092595538  | 0.045506498 | 0.000597054 | 0.98973321 | 0.03501  |
| 0.693164672 | -0.023041497 | 0.61942709  | -0.04201474 | 0.36498191 | 0.070862 |
| 0.033859357 | 0.103452636  | 0.025375327 | -0.01728518 | 0.70947394 | -0.07866 |
| 0.012936758 | 0.143868739  | 0.001827464 | 0.028392618 | 0.54050553 | 0.145734 |
| 0.03885567  | 0.106181039  | 0.021736946 | 0.010732746 | 0.8170649  | 0.102359 |
| 0.26012906  | 0.051752881  | 0.264362189 | 0.290654865 | 1.52E-10   | 0.20802  |
| 0.000841438 | 0.161851429  | 0.000445679 | -0.07058679 | 0.12770722 | -0.15999 |
| 0.013198419 | 0.11638172   | 0.01184099  | -0.12226244 | 0.00817    | -0.37805 |
| 0.005480042 | -0.117792468 | 0.010847627 | 0.031812571 | 0.49283503 | -0.28236 |
| 0.06066069  | -0.090596588 | 0.050396029 | 0.074927884 | 0.10584812 | -0.0397  |
| 6.78E-08    | 0.252576006  | 3.14E-08    | -0.05477527 | 0.23743652 | -0.1692  |
| 1.51E-09    | -0.276198079 | 1.27E-09    | 0.155153416 | 0.00076737 | 0.24587  |
| 0.485219954 | 0.033911339  | 0.46473239  | -0.1285566  | 0.00539852 | -0.13825 |
| 5.61E-06    | -0.203650954 | 9.18E-06    | -0.15294685 | 0.00091355 | -0.35384 |
| 0.001071108 | 0.148645144  | 0.001274971 | -0.19822346 | 1.60E-05   | 0.191656 |
| 0.605767182 | 0.029972378  | 0.518202995 | 0.034959278 | 0.45104011 | 0.180522 |
| 0.004080153 | 0.146629948  | 0.001486028 | 0.037085166 | 0.42397475 | -0.0789  |
| 2.30E-09    | 0.2713907    | 2.50E-09    | 0.068746761 | 0.13796709 | 0.060123 |
| 2.01E-06    | -0.223150565 | 1.11E-06    | -0.02014984 | 0.66405698 | -0.11154 |
| 5.72E-09    | 0.260194954  | 1.15E-08    | 0.162684759 | 0.00041592 | -0.06524 |
| 6.44E-09    | 0.259383851  | 1.29E-08    | -0.11283748 | 0.01469947 | 0.094137 |
| 0.744867423 | 0.026887402  | 0.562191619 | 0.001849866 | 0.9681977  | -0.0629  |
| 0.021269486 | -0.098494365 | 0.03334094  | -0.0516976  | 0.26487346 | -0.028   |
| 0.536168945 | 0.040422115  | 0.383456907 | -0.26115533 | 1.02E-08   | -0.31761 |
| 0.836708017 | 0.007437117  | 0.872653461 | 0.039704051 | 0.39197015 | -0.0213  |
| 0.11346142  | 0.073027213  | 0.115024202 | 0.132449958 | 0.0041407  | 0.123399 |
| 0.077967216 | -0.092103747 | 0.046670889 | -0.09830576 | 0.03368195 | -0.13502 |

|             |              |             |             |            |          |
|-------------|--------------|-------------|-------------|------------|----------|
| 0.003625156 | 0.146672243  | 0.001481287 | 0.000795366 | 0.98632339 | -0.24383 |
| 0.031480258 | 0.09792489   | 0.034379657 | 0.171808333 | 0.000191   | -0.11277 |
| 8.89E-06    | 0.20318448   | 9.63E-06    | 0.019688268 | 0.67129748 | -0.18363 |
| 0.000266411 | 0.182071713  | 7.58E-05    | 0.033149255 | 0.47483272 | 0.169562 |
| 0.305312551 | 0.053570311  | 0.247930143 | 0.00641792  | 0.88998582 | -0.09379 |
| 0.026075766 | 0.113905801  | 0.013779945 | 0.171557483 | 0.00019523 | 0.088684 |
| 2.73E-08    | -0.263939413 | 6.98E-09    | 0.322515242 | 9.15E-13   | 0.281904 |
| 0.939795859 | 0.003147284  | 0.945919939 | -0.01850019 | 0.69007364 | 0.178527 |
| 0.390003014 | -0.043578051 | 0.347395947 | -0.03939588 | 0.39565853 | -0.2303  |
| 0.199163309 | -0.054374116 | 0.240894764 | -0.0845907  | 0.06779061 | -0.127   |
| 0.294793745 | -0.047173483 | 0.309028828 | -0.08137279 | 0.07897196 | -0.189   |
| 0.896995389 | -0.001661425 | 0.971435844 | -0.10646371 | 0.02138724 | -0.07586 |
| 0.01982572  | -0.106273508 | 0.021622006 | -0.00052273 | 0.99101117 | -0.1704  |
| 4.75E-11    | 0.313971592  | 3.83E-12    | -0.02555042 | 0.58179858 | -0.08417 |
| 8.55E-10    | 0.285132594  | 3.47E-10    | -0.22100632 | 1.41E-06   | 0.089279 |
| 0.17372786  | 0.072580617  | 0.117268259 | -0.07352493 | 0.11256309 | -0.08583 |
| 0.060381137 | -0.084274123 | 0.068829625 | -0.13863528 | 0.00267846 | -0.06257 |
| 0.819663039 | -0.003341311 | 0.942591533 | -0.09225427 | 0.04631188 | 0.291614 |
| 0.00054615  | -0.156960438 | 0.000664127 | -0.00495394 | 0.91497201 | -0.05587 |
| 7.52E-05    | -0.178049514 | 0.000109586 | -0.00901414 | 0.84595728 | -0.33473 |
| 0.000779625 | -0.153289449 | 0.000889281 | 0.052851215 | 0.25434449 | -0.03013 |
| 0.837692703 | -0.004162398 | 0.928518066 | -0.07581445 | 0.10177075 | 0.176929 |
| 0.753841911 | -0.006848854 | 0.882650505 | -0.09856054 | 0.033222   | -0.11274 |
| 0.157393736 | -0.062354937 | 0.178560776 | -0.09978541 | 0.0310848  | -0.26608 |
| 0.245099938 | -0.040711111 | 0.380062717 | -0.06686731 | 0.14908881 | 0.069273 |
| 0.827895405 | -0.00053644  | 0.990775456 | -0.04125892 | 0.37367949 | -0.12405 |
| 0.221730444 | -0.057734062 | 0.213007189 | -0.08038642 | 0.08268434 | 0.103823 |
| 0.774825246 | 0.027206587  | 0.557558219 | -0.02168906 | 0.64013978 | -0.02174 |
| 0.035622782 | -0.104790399 | 0.023530534 | -0.16392434 | 0.00037507 | -0.06688 |
| 0.006594928 | 0.121360476  | 0.00865717  | -0.00928872 | 0.84132636 | -0.35695 |
| 0.080630212 | -0.072172831 | 0.119347093 | 0.055092014 | 0.23473081 | -0.04834 |
| 0.875813611 | 0.002447436  | 0.957932785 | 0.110328745 | 0.01707354 | -0.15882 |
| 0.006241897 | -0.129046806 | 0.005223166 | 0.263949511 | 6.97E-09   | -0.29681 |
| 0.682567307 | -0.015471931 | 0.738775633 | -0.13448631 | 0.00359441 | -0.2785  |
| 0.52085241  | 0.04233328   | 0.361354337 | 0.042282188 | 0.36193465 | 0.032838 |
| 0.806925456 | 0.002790799  | 0.952037628 | -0.08427313 | 0.06883291 | -0.08364 |
| 0.000176205 | -0.174575654 | 0.000149646 | -0.18310585 | 6.89E-05   | 0.01299  |
| 0.054594248 | -0.088352806 | 0.056399488 | -0.1397547  | 0.00247077 | -0.13158 |
| 1.94E-07    | 0.222949823  | 1.14E-06    | 0.078764157 | 0.08909549 | -0.14146 |
| 0.066182029 | -0.079220096 | 0.08725456  | 0.058200622 | 0.20932641 | -0.05241 |
| 0.014549978 | 0.101058912  | 0.028988578 | -0.10650873 | 0.021332   | -0.3055  |
| 0.019984389 | -0.10373834  | 0.024971187 | 0.019396285 | 0.67589354 | -0.1053  |
| 0.018520101 | -0.095965217 | 0.038167189 | -0.08781888 | 0.05791228 | -0.11873 |
| 0.14058395  | 0.054718077  | 0.237927443 | -0.32223112 | 9.61E-13   | -0.09223 |
| 1.02E-06    | 0.21868632   | 1.83E-06    | -0.15864696 | 0.00057953 | 0.042897 |

|             |              |             |             |            |          |
|-------------|--------------|-------------|-------------|------------|----------|
| 1.23E-06    | 0.241229292  | 1.31E-07    | -0.11162461 | 0.01580837 | 0.076476 |
| 2.65E-05    | 0.20716725   | 6.36E-06    | -0.06292142 | 0.17463996 | 0.048218 |
| 0.395858324 | -0.028238196 | 0.542710998 | -0.11312404 | 0.01444768 | -0.03975 |
| 0.000651775 | -0.137181739 | 0.002971861 | -0.08260491 | 0.07452576 | 0.088565 |
| 0.01872345  | -0.096692409 | 0.036722367 | -0.09959799 | 0.03140399 | -0.03859 |
| 0.001346673 | -0.136380986 | 0.003145703 | -0.05541113 | 0.23202692 | 0.016987 |
| 0.601736194 | -0.004381017 | 0.924774485 | 0.000141951 | 0.99755899 | 0.119984 |
| 0.525253265 | -0.007976102 | 0.86351157  | -0.0518404  | 0.26355411 | 0.12098  |
| 0.003798506 | -0.115898875 | 0.012198998 | -0.06558003 | 0.15709138 | 0.050709 |
| 0.00050582  | -0.164808806 | 0.00034824  | -0.02187712 | 0.63724225 | 0.155916 |
| 2.01E-13    | 0.331315784  | 1.99E-13    | 0.279664258 | 7.72E-10   | -0.03827 |
| 0.6541325   | -0.014892901 | 0.748215236 | 0.070056857 | 0.13059949 | -0.00586 |
| 0.005269094 | -0.122416081 | 0.008089497 | 0.046522978 | 0.31575522 | -0.21107 |
| 0.098634278 | -0.065659709 | 0.156586825 | -0.05431362 | 0.24141932 | -0.16475 |
| 0.032928492 | -0.089433102 | 0.053438816 | -0.00835098 | 0.85716386 | -0.33983 |
| 7.82E-13    | 0.342900365  | 2.49E-14    | 0.173746584 | 0.00016106 | -0.17836 |
| 0.886450829 | -0.009013151 | 0.845974028 | -0.14381591 | 0.00183465 | 0.211483 |
| 0.052032205 | 0.091081206  | 0.04917204  | -0.07576035 | 0.10201593 | 0.001094 |
| 0.360103502 | -0.041175872 | 0.374642958 | -0.03957997 | 0.39345268 | 0.050631 |
| 0.47569046  | 0.042758017  | 0.356552595 | 0.173443916 | 0.00016542 | 0.101348 |
| 0.306170653 | 0.047513513  | 0.305550678 | 0.2446387   | 8.60E-08   | -0.04012 |
| 0.089677924 | 0.088749283  | 0.055297465 | 0.32097357  | 1.19E-12   | 0.162733 |
| 0.637030209 | 0.01573109   | 0.734563291 | 0.209103507 | 5.19E-06   | -0.09042 |
| 5.97E-06    | -0.193096049 | 2.65E-05    | -0.01907526 | 0.68096068 | -0.11004 |
| 0.237858609 | -0.045419202 | 0.327386173 | 0.112123757 | 0.01534343 | -0.34614 |
| 0.145536595 | 0.067680856  | 0.144193671 | 0.065079268 | 0.16029067 | -0.42867 |
| 0.010738562 | 0.118504654  | 0.010374772 | -0.01670734 | 0.71876776 | -0.1646  |
| 0.832682313 | -0.006837178 | 0.882849134 | 0.316796549 | 2.40E-12   | -0.03255 |
| 0.000828076 | -0.155252183 | 0.000761367 | -0.05059496 | 0.27521344 | 0.007531 |
| 0.002071416 | 0.152333216  | 0.000958546 | -0.15357768 | 0.00086933 | -0.23907 |
| 0.001132277 | 0.16031705   | 0.000505706 | -0.06661905 | 0.15060757 | -0.01449 |
| 0.163040336 | 0.067507698  | 0.145225151 | 0.048513173 | 0.29547562 | -0.0935  |
| 0.693577356 | 0.034612955  | 0.455539772 | 0.034881912 | 0.45204312 | -0.17386 |
| 0.248129738 | 0.065129508  | 0.159967495 | 0.018274246 | 0.69366643 | -0.16546 |
| 0.392894871 | -0.027407381 | 0.554652941 | -0.17304157 | 0.0001714  | -0.36256 |
| 0.128566204 | 0.069719688  | 0.132465909 | -0.01923905 | 0.67837353 | 0.116584 |
| 0.683313853 | -0.008519769 | 0.854308681 | 0.057612829 | 0.2139712  | -0.01459 |
| 0.253509938 | 0.054502214  | 0.239786654 | -0.16226552 | 0.00043065 | -0.38847 |
| 0.88917973  | 0.004495729  | 0.922810858 | -0.04986912 | 0.28216797 | -0.31927 |
| 0.556510835 | -0.028288671 | 0.541989608 | 0.157144987 | 0.00065434 | 0.250127 |
| 0.060339952 | 0.101360869  | 0.028509724 | 0.058863184 | 0.20417858 | 0.060271 |
| 0.010346014 | 0.11706193   | 0.011352409 | -0.12548556 | 0.0066228  | 0.081912 |
| 0.439328466 | 0.048416193  | 0.296443205 | 0.056559582 | 0.22247851 | -0.08714 |
| 0.016513558 | 0.106016273  | 0.021943067 | -0.0614921  | 0.18465762 | -0.24151 |
| 0.595175744 | 0.03181299   | 0.492829337 | -0.0615277  | 0.18440305 | -0.19835 |

|             |              |             |             |            |          |
|-------------|--------------|-------------|-------------|------------|----------|
| 0.000995617 | 0.160534076  | 0.000496782 | -0.14679183 | 0.00146796 | -0.20589 |
| 0.011580764 | 0.127997986  | 0.005604778 | -0.03713886 | 0.42330364 | -0.22253 |
| 0.497914172 | 0.051932987  | 0.262701156 | -0.08863381 | 0.05561655 | 0.087198 |
| 0.760438974 | 0.024950741  | 0.590695246 | 0.009083068 | 0.8447943  | -0.05172 |
| 0.262015389 | -0.045480544 | 0.326732603 | 0.015584863 | 0.73693907 | -0.0874  |
| 0.042153844 | -0.081413727 | 0.078820866 | 6.73E-05    | 0.99884303 | 0.055948 |
| 4.46E-08    | 0.254675088  | 2.39E-08    | 0.003129454 | 0.94622586 | 0.294543 |
| 0.006694225 | -0.110889488 | 0.016515603 | -0.05399673 | 0.24418022 | -0.00327 |
| 0.101153687 | 0.087044835  | 0.060165003 | -0.10578629 | 0.02223361 | -0.13975 |
| 0.004111519 | 0.135312481  | 0.003392061 | -0.07144945 | 0.12310546 | 0.210253 |
| 0.581804199 | -0.027431711 | 0.55430142  | -0.07613615 | 0.10032241 | 0.016215 |
| 5.71E-06    | -0.205974225 | 7.21E-06    | 0.045643502 | 0.32500046 | -0.3292  |
| 0.00812487  | -0.120845026 | 0.00894705  | -0.1071816  | 0.02052097 | -0.32952 |
| 0.000384269 | 0.170990425  | 0.000205134 | -0.00015201 | 0.99738603 | -0.18527 |
| 0.000402113 | -0.179361374 | 9.73E-05    | 0.169786083 | 0.00022774 | 0.174742 |
| 0.334472814 | 0.044901461  | 0.332936141 | 0.06124483  | 0.18643284 | -0.2835  |
| 0.190156682 | -0.061535499 | 0.184347351 | -0.09977521 | 0.0311021  | -0.01212 |
| 0.217394961 | 0.062088655  | 0.180426195 | -0.27876065 | 8.80E-10   | -0.07455 |
| 0.863845444 | 0.009337319  | 0.840507173 | -0.23973965 | 1.57E-07   | -0.455   |
| 0.273817967 | -0.037169818 | 0.422916984 | -0.1355518  | 0.00333541 | -0.01057 |
| 0.034617474 | 0.097136771  | 0.035862552 | 0.035674032 | 0.44183327 | 0.087425 |
| 0.143610028 | -0.062981446 | 0.174228282 | 0.001294391 | 0.97774425 | -0.40775 |
| 0.809327659 | 0.013759946  | 0.766793228 | -0.01841058 | 0.69149777 | -0.28813 |
| 0.593716128 | -0.03153113  | 0.496671379 | 0.004674769 | 0.91974699 | -0.31852 |
| 0.003020007 | 0.140243792  | 0.002384725 | -0.16293624 | 0.00040732 | -0.10485 |
| 0.447643975 | -0.030716804 | 0.507860309 | -0.01452633 | 0.75421079 | 0.268646 |
| 0.030552268 | -0.097053565 | 0.036022236 | 0.01626361  | 0.72593282 | -0.16842 |
| 0.000204953 | -0.169273718 | 0.00023805  | -0.01067884 | 0.81796752 | -0.13581 |
| 0.717512407 | 0.028400606  | 0.540391565 | 0.074088753 | 0.1098253  | -0.05722 |
| 0.009615374 | 0.127760061  | 0.005694762 | -0.24807283 | 5.58E-08   | 0.115113 |
| 0.003256393 | 0.142169767  | 0.002071823 | -0.22577254 | 8.24E-07   | -0.32617 |
| 0.789894714 | -0.013497037 | 0.771123967 | -0.05107131 | 0.27071329 | -0.15748 |
| 3.53E-05    | 0.206749466  | 6.65E-06    | 0.168495884 | 0.00025454 | 0.06545  |
| 0.877613509 | 0.000266267  | 0.995421231 | -0.17416031 | 0.00015526 | -0.14826 |
| 4.62E-06    | 0.230579187  | 4.72E-07    | 0.210845126 | 4.31E-06   | 0.161291 |
| 0.528258946 | 0.026413609  | 0.569103344 | -0.13140155 | 0.0044503  | -0.25285 |
| 9.08E-05    | -0.169778488 | 0.000227892 | 0.002689892 | 0.95376984 | -0.10287 |
| 0.812663544 | -0.012712367 | 0.78409122  | -0.01693313 | 0.71513122 | -0.21935 |
| 0.66079251  | 0.029587595  | 0.523591228 | -0.16060775 | 0.00049379 | -0.21055 |
| 0.051328088 | 0.097141187  | 0.035854093 | 0.008414013 | 0.85609736 | 0.065437 |
| 4.40E-05    | 0.183818051  | 6.45E-05    | -0.0593726  | 0.2002835  | -0.13654 |
| 0.2374092   | 0.065707109  | 0.156287244 | 0.043298979 | 0.35049524 | -0.04529 |
| 0.000992016 | -0.14719674  | 0.001423636 | 0.096997079 | 0.03613098 | -0.24631 |
| 0.396254994 | 0.044382306  | 0.338561703 | -0.17269177 | 0.00017676 | -0.04531 |
| 0.003531512 | 0.150468479  | 0.001108148 | -0.20563277 | 7.47E-06   | -0.10785 |



|             |              |             |             |            |          |
|-------------|--------------|-------------|-------------|------------|----------|
| 0.1570216   | 0.078064558  | 0.091980751 | 0.15314745  | 0.00089927 | -0.04204 |
| 0.010496982 | -0.114692024 | 0.01313595  | -0.06410913 | 0.16662798 | -0.48104 |
| 0.073967075 | 0.093097288  | 0.044343776 | -0.00475939 | 0.9182993  | -0.2897  |
| 0.081615456 | 0.094957215  | 0.040249398 | 0.015722458 | 0.73470345 | -0.06339 |
| 3.06E-05    | -0.18567165  | 5.42E-05    | -0.07323765 | 0.11397851 | -0.23219 |
| 0.0590799   | -0.078556013 | 0.089946214 | -0.04575941 | 0.32377205 | 0.33185  |
| 0.081700108 | -0.064365223 | 0.164937135 | 0.078112055 | 0.09178253 | 0.134071 |
| 0.028399887 | 0.099359077  | 0.03181494  | -0.32280596 | 8.71E-13   | -0.07203 |
| 0.520445796 | 0.035631055  | 0.44238381  | -0.05066839 | 0.27451644 | -0.20677 |
| 0.071969853 | 0.092173982  | 0.046503083 | -0.02057352 | 0.65743821 | -0.05408 |
| 0.08782934  | -0.077644184 | 0.093750124 | -0.03060433 | 0.50941607 | -0.05105 |
| 9.77E-05    | -0.168053886 | 0.000264373 | -0.02696346 | 0.56108584 | 0.094984 |
| 0.062271924 | 0.095117828  | 0.03991133  | 0.04018837  | 0.38621568 | 0.029254 |
| 0.029338556 | 0.114623892  | 0.013190688 | -0.0542241  | 0.24219702 | -0.14383 |
| 0.058505548 | 0.09581994   | 0.038461535 | -0.08729983 | 0.05941502 | 0.027668 |
| 0.000101333 | 0.185784626  | 5.36E-05    | -0.18962536 | 3.72E-05   | -0.168   |
| 0.028677294 | 0.109384228  | 0.018050659 | -0.05169268 | 0.26491898 | -0.27714 |
| 0.315241245 | 0.055372918  | 0.232349502 | 0.052724759 | 0.25548427 | -0.04787 |
| 0.045177929 | 0.084243413  | 0.068931108 | -0.00324718 | 0.94420609 | -0.17192 |
| 0.071867659 | 0.093411431  | 0.043628602 | 0.023408359 | 0.61385921 | -0.15209 |
| 0.150747291 | 0.081679769  | 0.077844573 | 0.231789069 | 4.09E-07   | -0.02256 |
| 0.259579148 | 0.057317729  | 0.216330845 | 0.286325391 | 2.91E-10   | -0.05014 |
| 8.64E-08    | -0.237150908 | 2.16E-07    | -0.09523845 | 0.03965901 | -0.20279 |
| 0.001085591 | 0.147523669  | 0.001388752 | 0.06169789  | 0.18318974 | -0.13526 |
| 0.655530195 | 0.029454583  | 0.525460467 | 0.039172483 | 0.39834534 | -0.08487 |
| 0.039255168 | 0.113411802  | 0.014198651 | 0.009162412 | 0.84345592 | 0.008489 |
| 0.000970954 | 0.16529224   | 0.000334342 | 0.107085084 | 0.02063563 | -0.06883 |
| 0.015406778 | 0.120172196  | 0.009338425 | 0.03262152  | 0.48189689 | -0.14479 |
| 0.826994898 | 0.005191615  | 0.910909164 | 0.081947159 | 0.07687325 | -0.42812 |
| 7.40E-06    | 0.207354996  | 6.24E-06    | 0.024254289 | 0.60110519 | 0.190674 |
| 0.131540559 | 0.076726719  | 0.097706267 | -0.07500465 | 0.10549005 | -0.1155  |
| 0.333709901 | -0.037102467 | 0.423758436 | -0.03636149 | 0.43308009 | -0.23958 |
| 0.013433506 | 0.125343071  | 0.006685214 | 0.081877895 | 0.07712391 | -0.05345 |
| 0.270760997 | 0.063905199  | 0.167983706 | 0.16815462  | 0.0002621  | 0.22514  |
| 0.107444127 | 0.083171326  | 0.072551327 | 0.063291742 | 0.17211169 | -0.10526 |
| 0.081080495 | -0.067222412 | 0.146936833 | -0.08242886 | 0.07514827 | -0.24815 |
| 0.571274532 | -0.015891025 | 0.731967677 | -0.02019409 | 0.66336437 | -0.23895 |
| 1.81E-05    | 0.199115203  | 1.46E-05    | 0.02882963  | 0.53428838 | -0.0471  |
| 0.000253146 | 0.174526892  | 0.000150295 | 0.040165352 | 0.386488   | 0.400005 |
| 0.018649416 | 0.114463696  | 0.013320183 | -0.08612892 | 0.06292364 | -0.08297 |
| 7.00E-09    | 0.271124062  | 2.60E-09    | 0.184357879 | 6.13E-05   | 0.023341 |
| 0.922400752 | 0.027273218  | 0.556593315 | -0.16980572 | 0.00022736 | -0.14739 |
| 0.683032423 | -0.016089987 | 0.728742954 | 0.027402609 | 0.55472191 | -0.40112 |
| 3.58E-07    | -0.226134745 | 7.90E-07    | -0.02023229 | 0.66276682 | -0.20763 |
| 6.63E-08    | 0.239748705  | 1.57E-07    | -0.09737916 | 0.0354008  | -0.21381 |

|             |              |             |             |            |          |
|-------------|--------------|-------------|-------------|------------|----------|
| 0.83154411  | 0.004152611  | 0.928685686 | -0.18405228 | 6.31E-05   | -0.23623 |
| 0.684827216 | -0.020108818 | 0.664699161 | -0.11590823 | 0.01219197 | -0.28108 |
| 0.053601238 | 0.102456924  | 0.026828201 | -0.01453913 | 0.75400117 | -0.1698  |
| 0.005048946 | -0.123635801 | 0.007475115 | 0.061126096 | 0.18728972 | -0.26628 |
| 0.074259239 | 0.078216309  | 0.091348634 | 0.027258302 | 0.55680925 | 0.105416 |
| 0.731796729 | -0.014849847 | 0.748918653 | 0.090621961 | 0.05033132 | 0.344246 |
| 0.301302717 | -0.045954902 | 0.321707077 | 0.096482406 | 0.03713476 | 0.304887 |
| 0.396021292 | 0.042280509  | 0.361953733 | -0.01391838 | 0.76418688 | -0.17061 |
| 0.026589048 | -0.095710255 | 0.038685039 | 0.102197137 | 0.02721884 | -0.06    |
| 0.213339158 | -0.058872619 | 0.204105937 | 0.031301607 | 0.49981174 | -0.02477 |
| 0.00044253  | -0.173041883 | 0.000171393 | -0.07028606 | 0.1293424  | 0.281292 |
| 0.94047868  | -0.019691626 | 0.671244691 | -0.21084915 | 4.31E-06   | 0.219806 |
| 0.000188578 | 0.18484691   | 5.86E-05    | -0.01649869 | 0.72213393 | -0.00183 |
| 0.071341017 | -0.076827853 | 0.097263758 | 0.14856848  | 0.00128247 | -0.0728  |
| 0.305521532 | 0.049858374  | 0.282271826 | -0.07547708 | 0.1033074  | -0.08746 |
| 0.000289829 | 0.178772123  | 0.000102634 | -0.04621681 | 0.31895397 | 0.078716 |
| 0.51636991  | -0.021784434 | 0.63866963  | 0.034393325 | 0.45840635 | -0.13343 |
| 0.851701714 | 0.012615836  | 0.785690686 | -0.01733503 | 0.70867417 | -0.37655 |
| 1.42E-16    | 0.374679172  | 5.18E-17    | -0.11334732 | 0.01425412 | -0.27765 |
| 0.552636714 | -0.026025314 | 0.574797823 | -0.06411869 | 0.16656461 | 0.39347  |
| 0.358182788 | -0.033392128 | 0.471600806 | 0.176040254 | 0.00013132 | -0.00973 |
| 1.15E-07    | -0.229664649 | 5.25E-07    | -0.0050294  | 0.91368187 | -0.05667 |
| 0.280397636 | 0.049266331  | 0.288033064 | -0.02860934 | 0.53741784 | -0.36392 |
| 2.69E-06    | 0.227749348  | 6.56E-07    | -0.11474229 | 0.0130957  | -0.13671 |
| 0.603682517 | 0.035432472  | 0.444932777 | -0.01166558 | 0.80148306 | -0.06141 |
| 2.37E-08    | 0.27280121   | 2.05E-09    | 0.322142981 | 9.75E-13   | -0.10188 |
| 0.019072017 | 0.118960084  | 0.010082059 | -0.06141172 | 0.18523334 | 0.202625 |
| 9.24E-07    | 0.225032707  | 8.96E-07    | -0.00357792 | 0.93853402 | 0.048731 |
| 0.920312041 | 0.010425105  | 0.822219854 | 0.20535517  | 7.69E-06   | 0.111706 |
| 0.486477349 | -0.029241569 | 0.528461068 | 0.015819103 | 0.73313454 | -0.19205 |
| 0.128075193 | 0.068559891  | 0.139043511 | -0.18694302 | 4.80E-05   | 0.01167  |
| 0.3335532   | -0.029009731 | 0.531736688 | 0.052331859 | 0.25904814 | -0.14777 |
| 0.000246322 | -0.181505037 | 7.99E-05    | -0.02089128 | 0.65249155 | -0.07228 |
| 0.667799927 | 0.025630533  | 0.580614817 | 0.007445379 | 0.87251319 | -0.01639 |
| 0.023926088 | -0.096010045 | 0.038076748 | 0.096270117 | 0.03755564 | 0.09968  |
| 0.062845799 | 0.101059607  | 0.028987468 | 0.205396838 | 7.66E-06   | -0.06044 |
| 0.019175483 | 0.115964022  | 0.012150143 | 0.108799567 | 0.01867966 | 0.056227 |
| 0.004930107 | 0.128902111  | 0.005274383 | 0.241605653 | 1.25E-07   | -0.05419 |
| 0.525385643 | 0.042562484  | 0.358758138 | 0.135573786 | 0.00333025 | -0.13225 |
| 0.001787639 | 0.143246789  | 0.001913677 | -0.04137465 | 0.37233954 | -0.16447 |
| 1.49E-08    | 0.264328182  | 6.62E-09    | 0.117446216 | 0.01108434 | -0.14658 |
| 0.193099731 | 0.065759444  | 0.155956973 | -0.03655358 | 0.43065232 | -0.20491 |
| 0.9248937   | 0.005608644  | 0.903786119 | -0.00342371 | 0.94117833 | -0.14694 |
| 0.002730895 | -0.132953175 | 0.003999131 | 0.249146806 | 4.87E-08   | -0.03565 |
| 0.001848732 | 0.142165869  | 0.002072417 | -0.03144688 | 0.49782288 | 0.035246 |

|             |              |             |             |            |          |
|-------------|--------------|-------------|-------------|------------|----------|
| 2.69E-13    | 0.331492728  | 1.93E-13    | 0.10242542  | 0.02687531 | -0.13297 |
| 7.15E-05    | 0.178982772  | 0.000100686 | 0.142829837 | 0.00197354 | -0.03654 |
| 0.818219523 | 0.022816392  | 0.622854345 | -0.11477825 | 0.01306696 | -0.19647 |
| 4.44E-05    | 0.208423152  | 5.57E-06    | -0.0913375  | 0.04853485 | -0.14205 |
| 0.000139752 | -0.16887246  | 0.000246426 | -0.28043563 | 6.91E-10   | 0.084403 |
| 6.86E-07    | 0.226403956  | 7.66E-07    | 0.018675394 | 0.68729239 | 0.020244 |
| 3.03E-06    | 0.225964741  | 8.06E-07    | -0.06151637 | 0.18448405 | 0.019533 |
| 0.048663718 | 0.099223901  | 0.032049482 | 0.086536015 | 0.06168491 | -0.13088 |
| 0.400350364 | 0.042062422  | 0.364437453 | -0.06076182 | 0.18993673 | -0.12337 |
| 2.42E-07    | -0.251186453 | 3.75E-08    | 0.038495902 | 0.40654914 | 0.326748 |
| 0.085659405 | 0.085131224  | 0.066046347 | 0.355243811 | 2.45E-15   | -0.12833 |
| 0.114900083 | -0.075415885 | 0.103588075 | -0.02804814 | 0.54543145 | -0.12074 |
| 0.021011145 | -0.114000805 | 0.013700679 | -0.12479438 | 0.00693051 | 0.113656 |
| 0.233316138 | -0.059934025 | 0.196053724 | -0.25524366 | 2.22E-08   | 0.097934 |
| 4.23E-09    | 0.270862344  | 2.69E-09    | 0.131175028 | 0.00451988 | -0.10122 |
| 0.037633797 | 0.107588557  | 0.020043574 | -0.08794895 | 0.0575407  | -0.24336 |
| 0.863489793 | 0.017634872  | 0.703870405 | -0.08305279 | 0.07296095 | -0.1746  |
| 0.147654099 | 0.081172413  | 0.079714978 | -0.0005372  | 0.99076246 | -0.24434 |
| 1.29E-06    | -0.226036768 | 7.99E-07    | 0.033719297 | 0.46726634 | 0.103822 |
| 0.06113181  | 0.094579291  | 0.041054438 | 0.145414538 | 0.00162837 | -0.08336 |
| 0.082823869 | 0.07335022   | 0.11342224  | 0.030056641 | 0.51702686 | 0.190953 |
| 0.062777855 | -0.07556608  | 0.102900234 | -0.07195591 | 0.12046458 | -0.22758 |
| 0.00131463  | 0.160222536  | 0.000509639 | 0.118486862 | 0.01038636 | -0.25186 |
| 0.59554974  | -0.017568543 | 0.70493205  | 0.074946056 | 0.10576327 | -0.2668  |
| 0.672441665 | 0.031400949  | 0.49845124  | 0.006888803 | 0.88197101 | -0.13977 |
| 0.718479438 | 0.023402706  | 0.61394485  | -0.1027931  | 0.02632986 | -0.07867 |
| 0.214778161 | -0.047061845 | 0.310176427 | -0.15925038 | 0.00055177 | -0.23816 |
| 0.071312679 | 0.094191164  | 0.041895324 | 0.089097692 | 0.05434387 | -0.05187 |
| 0.896286998 | 0.007464243  | 0.872192943 | -0.02115159 | 0.64845062 | -0.23439 |
| 0.17742686  | 0.0584921    | 0.207050316 | -0.31700993 | 2.32E-12   | 0.131792 |
| 6.11E-16    | 0.382251791  | 1.07E-17    | -0.05977631 | 0.19723528 | -0.033   |
| 0.060751057 | -0.077585453 | 0.093999474 | -0.10154544 | 0.02822038 | -0.04228 |
| 0.037573526 | -0.105622105 | 0.022443058 | 0.082058991 | 0.07646994 | 0.107402 |
| 6.55E-05    | -0.169099683 | 0.000241649 | -0.09237347 | 0.04602922 | -0.03257 |
| 0.305083181 | -0.060508549 | 0.191793187 | 0.115995283 | 0.01212676 | 0.347114 |
| 5.53E-06    | 0.2197547    | 1.63E-06    | -0.0261193  | 0.57341708 | 0.262559 |
| 0.129412638 | -0.059425008 | 0.199885876 | -0.11336013 | 0.01424309 | -0.01616 |
| 0.056364103 | 0.086270502  | 0.062490522 | -0.12702586 | 0.00598068 | -0.06618 |
| 1.23E-05    | 0.207745196  | 5.99E-06    | 0.192777077 | 2.74E-05   | -0.29652 |
| 0.005133745 | 0.148519423  | 0.001287286 | -0.10981109 | 0.01760317 | -0.17598 |
| 4.65E-05    | 0.19026899   | 3.49E-05    | -0.11736323 | 0.01114175 | -0.10113 |
| 0.253080641 | 0.059377474  | 0.200246503 | 0.046645116 | 0.31448502 | -0.11079 |
| 0.294005357 | 0.069007875  | 0.136473738 | 0.078032865 | 0.09211321 | -0.1257  |
| 8.12E-10    | 0.285992252  | 3.06E-10    | -0.01021455 | 0.82575236 | 0.078897 |
| 0.049981342 | 0.09231022   | 0.046179025 | -0.11247762 | 0.01502112 | -0.34503 |

|             |              |             |             |            |          |
|-------------|--------------|-------------|-------------|------------|----------|
| 0.144542352 | 0.088346273  | 0.056417797 | 0.072908561 | 0.1156171  | 0.04417  |
| 0.122773544 | -0.063894504 | 0.168055034 | -0.11768665 | 0.01091949 | -0.0954  |
| 0.012049427 | 0.127014785  | 0.005985093 | -0.01842123 | 0.69132839 | -0.00794 |
| 0.000700191 | 0.16770421   | 0.000272406 | -0.02787809 | 0.54787143 | -0.21518 |
| 0.461731876 | -0.03131665  | 0.499605592 | -0.15707586 | 0.00065799 | -0.07449 |
| 0.018475897 | 0.093523718  | 0.043375336 | -0.11885346 | 0.01014992 | -0.04666 |
| 0.007795793 | 0.137068529  | 0.002995896 | 0.119567271 | 0.00970322 | -0.07262 |
| 0.003142125 | 0.135450641  | 0.00335925  | -0.18349759 | 6.64E-05   | 0.029368 |
| 0.447208333 | 0.046901018  | 0.311834604 | 0.11788041  | 0.01078822 | -0.14368 |
| 1.06E-07    | -0.244886527 | 8.34E-08    | 0.017500886 | 0.70601555 | -0.15019 |
| 4.77E-05    | -0.188578023 | 4.11E-05    | -0.0104175  | 0.82234739 | 0.074383 |
| 1.10E-05    | 0.210147503  | 4.64E-06    | 0.020462643 | 0.65916771 | 0.250976 |
| 0.34931947  | -0.038090985 | 0.411506612 | 0.110609009 | 0.01679265 | -0.21422 |
| 0.18985469  | 0.045539094  | 0.32610956  | 5.60E-05    | 0.99903661 | -0.07246 |
| 0.005042121 | 0.134634792  | 0.003557254 | 0.054316758 | 0.2413921  | -0.44293 |
| 0.047520417 | 0.094398539  | 0.041444252 | -0.09849934 | 0.03333199 | -0.36619 |
| 1.92E-05    | 0.195692214  | 2.05E-05    | -0.10241841 | 0.02688581 | -0.15775 |
| 2.49E-05    | 0.211616835  | 3.97E-06    | -0.13442631 | 0.00360952 | -0.33065 |
| 1.91E-09    | -0.277030032 | 1.13E-09    | -0.12350954 | 0.00753672 | -0.11764 |
| 0.000268772 | 0.168633465  | 0.000251544 | 0.090799    | 0.04988174 | 0.272076 |
| 0.132269962 | 0.061442229  | 0.185014662 | 0.162891411 | 0.00040884 | -0.03588 |
| 0.167373745 | 0.064290917  | 0.165426409 | -0.06252422 | 0.17738235 | -0.1733  |
| 4.52E-08    | 0.256049222  | 2.00E-08    | 0.092521187 | 0.04568095 | -0.00233 |
| 0.001202239 | 0.147547319  | 0.001386259 | 0.00241609  | 0.95847108 | -0.07665 |
| 0.312174033 | -0.052673762 | 0.255944922 | 0.200069442 | 1.32E-05   | 0.293346 |
| 0.027520735 | 0.117837835  | 0.010816945 | -0.16329588 | 0.00039529 | -0.0168  |
| 0.0881697   | -0.071036982 | 0.125289356 | 0.114500359 | 0.01329045 | 0.006032 |
| 0.002405269 | -0.152365802 | 0.000956105 | 0.033253488 | 0.4734442  | 0.160926 |
| 4.45E-11    | 0.307122815  | 1.17E-11    | 0.001639806 | 0.97180738 | -0.04409 |
| 0.564381913 | 0.028017146  | 0.545875806 | -0.20499799 | 7.98E-06   | -0.07888 |
| 0.010308942 | 0.126783152  | 0.006077999 | -0.03480886 | 0.45299135 | -0.0796  |
| 0.149204062 | 0.087191049  | 0.059734013 | 0.066472904 | 0.15150706 | -0.13472 |
| 0.126474756 | 0.086973489  | 0.060376236 | 0.091089796 | 0.04915057 | -0.16368 |
| 0.228690358 | 0.068580574  | 0.138924056 | 0.092376067 | 0.04602308 | -0.16431 |
| 0.000177232 | 0.183123084  | 6.88E-05    | -0.08179221 | 0.07743493 | -0.30007 |
| 5.07E-06    | 0.207583218  | 6.09E-06    | -0.1353607  | 0.00338058 | -0.24867 |
| 0.15168249  | 0.077955428  | 0.092437494 | -0.3417974  | 3.04E-14   | 0.348182 |
| 0.591003662 | 0.034167609  | 0.46136285  | -0.08098482 | 0.08041569 | -0.02693 |
| 0.0016935   | 0.146598193  | 0.001489597 | -0.11720059 | 0.01125503 | -0.15515 |
| 1.14E-07    | 0.242597726  | 1.11E-07    | -0.02700731 | 0.56044884 | 0.056216 |
| 0.737422544 | 0.028311257  | 0.541666966 | -0.01903025 | 0.6816723  | -0.11154 |
| 0.00286439  | 0.123304163  | 0.007637893 | -0.01461286 | 0.75279426 | 0.421751 |
| 3.18E-05    | 0.197644034  | 1.69E-05    | -0.16985936 | 0.0002263  | -0.07043 |
| 0.024530888 | 0.10523779   | 0.022940025 | 0.014173523 | 0.75999533 | 0.159106 |
| 9.82E-05    | 0.182036278  | 7.61E-05    | -0.01982842 | 0.66909567 | -0.28195 |

|             |              |             |             |            |          |
|-------------|--------------|-------------|-------------|------------|----------|
| 6.19E-06    | 0.201108537  | 1.19E-05    | -0.20212    | 1.07E-05   | 0.000484 |
| 1.90E-12    | 0.337144536  | 7.07E-14    | -0.15488085 | 0.00078418 | -0.12106 |
| 0.659304331 | 0.024417809  | 0.598653623 | -0.02580163 | 0.57809036 | -0.08796 |
| 1.56E-05    | -0.20068655  | 1.24E-05    | -0.12538914 | 0.00666497 | -0.04762 |
| 0.655512155 | -0.024602123 | 0.59589575  | -0.08287354 | 0.07358398 | 0.307317 |
| 0.632516826 | -0.017009132 | 0.713908537 | -0.01240174 | 0.78924126 | -0.02928 |
| 0.827024913 | 0.026487003  | 0.568030026 | -0.13568876 | 0.00330337 | -0.19667 |
| 0.062624201 | -0.08337186  | 0.071862612 | -0.20799086 | 5.83E-06   | 0.078357 |
| 3.50E-15    | 0.3604032    | 9.04E-16    | -0.02336101 | 0.61457656 | -0.07284 |
| 0.386670232 | 0.056022189  | 0.226910976 | -0.0038791  | 0.93337159 | -0.15576 |
| 0.176859153 | -0.055213305 | 0.233700487 | -0.03555602 | 0.44334594 | -0.15855 |
| 0.09331887  | 0.079958391  | 0.084338567 | 0.205214956 | 7.80E-06   | 0.176226 |
| 0.709345263 | -0.009143523 | 0.843774505 | -0.27556841 | 1.39E-09   | 0.179368 |
| 0.071915594 | -0.08513798  | 0.066024782 | -0.11096801 | 0.01643876 | 0.117678 |
| 0.027951357 | 0.112429409  | 0.015064684 | 0.102285635 | 0.02708522 | -0.04922 |
| 0.096120499 | 0.078679055  | 0.089442535 | 0.010830554 | 0.81542764 | -0.17096 |
| 0.763475291 | 0.024339505  | 0.599827021 | 0.108233556 | 0.01930672 | -0.15277 |
| 0.460553557 | 0.037090604  | 0.423906749 | -0.05141924 | 0.26745828 | -0.1252  |
| 0.059695838 | -0.087085065 | 0.060046162 | 0.047274775 | 0.30799    | -0.07126 |
| 0.983099592 | 0.013722683  | 0.767406594 | -0.0688606  | 0.13731448 | 0.117117 |
| 0.034876229 | -0.087524677 | 0.058760143 | 0.029391255 | 0.52635162 | -0.00912 |
| 0.968038039 | 0.01827588   | 0.693640428 | 0.077078922 | 0.09617211 | -0.0622  |
| 0.371177607 | 0.03625183   | 0.434469619 | 0.047120819 | 0.30956985 | 0.003016 |
| 0.00088279  | -0.157616794 | 0.000629928 | -0.03738705 | 0.42020963 | 0.143956 |
| 3.51E-05    | -0.184811111 | 5.88E-05    | -0.06640591 | 0.15192078 | -0.07974 |
| 0.670038209 | -0.004280447 | 0.926496423 | 0.312206271 | 5.13E-12   | 0.082076 |
| 0.645479899 | -0.013914365 | 0.764252948 | 0.180600601 | 8.68E-05   | -0.06926 |
| 0.221568133 | -0.045375422 | 0.327853147 | -0.14333803 | 0.0019008  | -0.44295 |
| 0.08104067  | -0.078788716 | 0.088995543 | -0.05603452 | 0.22680861 | -0.19477 |
| 3.97E-09    | -0.267061139 | 4.56E-09    | -0.03608029 | 0.43664834 | -0.01193 |
| 0.002261119 | 0.153846902  | 0.000851067 | 0.053528818 | 0.24829717 | 0.075274 |
| 0.039925214 | 0.101119135  | 0.028892528 | -0.03099568 | 0.5040137  | -0.16659 |
| 0.000174499 | 0.152146234  | 0.000972659 | -0.04274977 | 0.35664548 | 0.205256 |
| 0.170510211 | 0.070548575  | 0.127914098 | -0.07937837 | 0.08662268 | 1.45E-05 |
| 0.14353951  | -0.06719709  | 0.147089504 | -0.01715551 | 0.71155584 | -0.22843 |
| 0.007338023 | -0.11859494  | 0.010316151 | -0.00930452 | 0.84106    | -0.09777 |
| 0.004303843 | 0.137026685  | 0.003004825 | 0.019375633 | 0.67621908 | -0.12109 |
| 0.124939603 | 0.082057021  | 0.076477029 | -0.11671711 | 0.01159781 | -0.19084 |
| 0.030243384 | 0.097378969  | 0.035401161 | -0.27384098 | 1.77E-09   | -0.05789 |
| 7.39E-06    | -0.207807388 | 5.95E-06    | -0.10051262 | 0.02987245 | 0.193016 |
| 0.303713589 | 0.060426818  | 0.19239511  | 0.05163424  | 0.2654603  | -0.06121 |
| 0.000360706 | 0.17227644   | 0.000183323 | -0.21710818 | 2.18E-06   | -0.12068 |
| 0.803319037 | 0.023339802  | 0.614898033 | -0.03845161 | 0.40708964 | 0.031607 |
| 0.053609668 | 0.087058248  | 0.06012536  | 0.114282102 | 0.01346833 | 0.196307 |
| 0.465516698 | 0.03984556   | 0.390283462 | -0.04648167 | 0.31618555 | -0.1791  |

|             |              |             |             |            |          |
|-------------|--------------|-------------|-------------|------------|----------|
| 0.019663794 | 0.114699873  | 0.013129658 | -0.194513   | 2.31E-05   | -0.30358 |
| 0.054246335 | 0.072514633  | 0.117602702 | 0.00235995  | 0.95943521 | 0.080515 |
| 5.07E-05    | -0.180971593 | 8.39E-05    | 0.050786991 | 0.2733932  | -0.29522 |
| 0.345535483 | -0.051718022 | 0.26468451  | -0.06991076 | 0.13140568 | -0.12403 |
| 0.221654868 | -0.057312701 | 0.216371207 | -0.06791563 | 0.14280409 | -0.30756 |
| 0.008116703 | -0.117963257 | 0.010732524 | 0.054816954 | 0.23707922 | 0.185167 |
| 0.000175626 | 0.186486847  | 5.02E-05    | 0.080911009 | 0.08069278 | -0.01137 |
| 0.01001966  | 0.12935535   | 0.005115446 | 0.038301835 | 0.40892069 | 0.133112 |
| 0.059447507 | 0.097166725  | 0.035805212 | 0.128586107 | 0.00538781 | -0.12648 |
| 0.001612362 | 0.163183736  | 0.000399005 | 0.209812063 | 4.81E-06   | -0.21159 |
| 0.250858001 | 0.04307449   | 0.353000992 | 0.047605512 | 0.30461409 | 0.066594 |
| 0.012501853 | 0.114783999  | 0.013062375 | 0.115981495 | 0.01213707 | -0.04597 |
| 1.68E-05    | -0.192336972 | 2.86E-05    | -0.09911294 | 0.03224311 | -0.14025 |
| 0.000740172 | 0.159967229  | 0.000520405 | -0.13379122 | 0.00377306 | -0.11794 |
| 0.137763649 | 0.048537814  | 0.295230108 | -0.10554136 | 0.02254668 | 0.007906 |
| 0.009342335 | 0.137656171  | 0.002873031 | 0.071363719 | 0.12355693 | -0.06666 |
| 0.191128112 | -0.052979258 | 0.253194002 | -0.1492112  | 0.00122086 | -0.22052 |
| 0.043642693 | 0.096347461  | 0.037401831 | -0.17233516 | 0.00018238 | 0.013254 |
| 0.055033175 | -0.084630645 | 0.067660432 | -0.13394054 | 0.00373402 | -0.11872 |
| 0.001346547 | -0.143469807 | 0.001882343 | -0.10342015 | 0.02542163 | -0.12772 |
| 0.775460936 | 0.018336617  | 0.692673945 | -0.05324168 | 0.2508474  | -0.15388 |
| 0.000255695 | 0.176246916  | 0.00012891  | -0.07221008 | 0.11915602 | -0.23408 |
| 0.755667672 | 0.025482676  | 0.582800496 | 0.084013203 | 0.06969575 | -0.13053 |
| 0.733748813 | -0.011547995 | 0.80344294  | -0.06347687 | 0.17085808 | -0.06734 |
| 0.003087735 | 0.147854569  | 0.001354245 | -0.053058   | 0.25248833 | -0.01197 |
| 0.360680578 | -0.033761497 | 0.466708872 | -0.03579796 | 0.44024792 | -0.14563 |
| 0.009898027 | -0.12663007  | 0.006140107 | -0.03230953 | 0.48609978 | -0.16229 |
| 0.820750604 | -0.006461214 | 0.889248439 | -0.07863483 | 0.0896233  | -0.04984 |
| 0.152208787 | -0.062123479 | 0.18018142  | -0.08512255 | 0.06607403 | -0.35788 |
| 0.008785695 | 0.122124935  | 0.008242652 | -0.12847145 | 0.00542951 | -0.31057 |
| 0.157781204 | -0.043077012 | 0.352972772 | 0.046817679 | 0.31269615 | -0.14548 |
| 0.002932071 | 0.153435589  | 0.000879113 | 0.076305759 | 0.09956543 | -0.04222 |
| 0.882526439 | -0.001169632 | 0.97988887  | 0.035879238 | 0.43920994 | -0.11273 |
| 0.825165467 | -0.002906697 | 0.950048363 | 0.012461025 | 0.78825769 | -0.13798 |
| 0.462069747 | 0.047044949  | 0.310350356 | 0.10343072  | 0.02540656 | -0.01219 |
| 0.034954324 | 0.10184458   | 0.027756793 | -0.25026023 | 4.23E-08   | -0.30539 |
| 0.033889203 | 0.111692444  | 0.01574447  | -0.00384022 | 0.93403773 | -0.17991 |
| 0.050185175 | -0.082509339 | 0.074863181 | 0.080412242 | 0.08258539 | -0.08862 |
| 0.91473403  | -0.014120168 | 0.760871295 | -0.07417092 | 0.10943075 | -0.12057 |
| 0.033300544 | 0.096879752  | 0.036357757 | 0.138951086 | 0.00261832 | 0.064076 |
| 1.96E-09    | 0.277725454  | 1.02E-09    | -0.19050048 | 3.42E-05   | -0.11692 |
| 0.416600754 | 0.044958542  | 0.332321301 | -0.14073297 | 0.00230141 | -0.11572 |
| 1.69E-18    | 0.385280834  | 5.65E-18    | 0.033588238 | 0.46900001 | -0.08355 |
| 7.86E-20    | 0.405119559  | 7.15E-20    | -0.0551558  | 0.23418861 | 0.18628  |
| 0.023679728 | 0.112358242  | 0.015129186 | 0.024013274 | 0.6047268  | 0.114064 |

|             |              |             |             |            |          |
|-------------|--------------|-------------|-------------|------------|----------|
| 0.000234907 | 0.180960573  | 8.40E-05    | 0.108548069 | 0.01895606 | 0.011065 |
| 0.148144874 | 0.080546111  | 0.082073922 | 0.066342829 | 0.15231108 | -0.11339 |
| 1.67E-10    | 0.303595965  | 2.06E-11    | 0.097466558 | 0.03523555 | -0.02456 |
| 1.81E-06    | 0.225946904  | 8.07E-07    | 0.126211225 | 0.00631296 | -0.1009  |
| 0.188023706 | -0.069460485 | 0.133914685 | -0.06267756 | 0.17631985 | -0.17464 |
| 4.62E-05    | 0.18687937   | 4.83E-05    | -0.14047058 | 0.00234576 | 0.013889 |
| 0.127953611 | 0.078575083  | 0.089868002 | -0.10754536 | 0.02009379 | -0.0669  |
| 1.78E-11    | -0.301053317 | 3.07E-11    | -0.06233709 | 0.17868532 | 0.061816 |
| 0.072782573 | 0.08789585   | 0.057692158 | 0.081307569 | 0.07921319 | -0.03111 |
| 0.329750468 | 0.04954867   | 0.285275803 | -0.05154618 | 0.26627741 | -0.05038 |
| 0.250242952 | 0.053842833  | 0.245528984 | -0.08696054 | 0.06041466 | 0.029145 |
| 0.308730258 | 0.055193264  | 0.233870508 | -0.01348365 | 0.77134467 | -0.23915 |
| 0.605069763 | -0.008454624 | 0.855410413 | 0.058195171 | 0.20936914 | -0.06694 |
| 0.096645206 | 0.078900811  | 0.088540485 | -0.00952234 | 0.83739037 | -0.11204 |
| 2.00E-05    | 0.210923633  | 4.27E-06    | 0.045438724 | 0.32717808 | -0.05858 |
| 0.061728763 | 0.09601099   | 0.038074844 | 0.047357754 | 0.3071407  | -0.11924 |
| 0.884653508 | 0.015745387  | 0.734331128 | 0.042265556 | 0.36212369 | -0.11193 |
| 0.001732965 | -0.144291862 | 0.001770861 | -0.03042646 | 0.51188129 | 0.241701 |
| 0.008879245 | -0.106635859 | 0.021176666 | 0.04199936  | 0.36515761 | -0.13477 |
| 0.001657691 | 0.137748379  | 0.002854174 | -0.04479879 | 0.33404384 | 0.214991 |
| 0.572322785 | 0.031904811  | 0.491581156 | -0.00927869 | 0.84149537 | -0.27734 |
| 0.010496851 | -0.115607049 | 0.012419979 | -0.02221495 | 0.63205121 | 0.111558 |
| 0.022904662 | 0.109014876  | 0.018445834 | 0.144336809 | 0.00176494 | -0.13572 |
| 0.11331509  | -0.081411247 | 0.078830013 | -0.12242316 | 0.0080858  | 0.438251 |
| 0.073717624 | -0.091232182 | 0.048795843 | 0.057285144 | 0.21659253 | -0.02949 |
| 3.17E-10    | 0.296078145  | 6.66E-11    | -0.11589007 | 0.01220561 | -0.00818 |
| 0.026242981 | -0.106546562 | 0.021285669 | -0.00113078 | 0.98055678 | -0.19661 |
| 1.35E-05    | 0.200740418  | 1.24E-05    | 0.057359172 | 0.21599834 | -0.25839 |
| 0.034356928 | 0.106174724  | 0.021744815 | -0.29317587 | 1.04E-10   | -0.06431 |
| 1.33E-07    | 0.242642071  | 1.10E-07    | 0.086600349 | 0.061491   | 0.157749 |
| 0.015220812 | -0.111504086 | 0.015922472 | -0.09872069 | 0.03293562 | -0.08752 |
| 5.32E-06    | 0.210896925  | 4.28E-06    | -0.19995821 | 1.34E-05   | -0.06445 |
| 4.05E-08    | 0.246048472  | 7.21E-08    | -0.32543529 | 5.55E-13   | 0.002393 |
| 0.784031222 | -0.010082062 | 0.827977022 | -0.04463192 | 0.33584933 | -0.13855 |
| 5.15E-06    | 0.219162497  | 1.74E-06    | -0.10863953 | 0.01885514 | -0.17863 |
| 0.35185034  | 0.036447593  | 0.431990864 | -0.03798486 | 0.41281178 | -0.07971 |
| 0.000377663 | 0.156322564  | 0.000699005 | -0.23068425 | 4.66E-07   | 0.069879 |
| 0.357665916 | 0.053693471  | 0.246842979 | -0.14195143 | 0.00210531 | -0.26243 |
| 3.71E-05    | 0.192036367  | 2.94E-05    | -0.11640662 | 0.01182279 | -0.09674 |
| 0.191496288 | 0.070466314  | 0.128360342 | -0.09225226 | 0.04631666 | -0.0856  |
| 0.29051249  | 0.04914212   | 0.289251736 | 0.150871718 | 0.00107408 | -0.10337 |
| 6.52E-09    | 0.270324708  | 2.90E-09    | 0.072837831 | 0.11597166 | 0.003147 |
| 0.006008619 | -0.12473702  | 0.006956615 | 0.022004689 | 0.63528001 | -0.23864 |
| 0.007951086 | 0.118485412  | 0.010387303 | -0.22050556 | 1.50E-06   | -0.18858 |
| 0.338515177 | 0.036569833  | 0.43044722  | -0.01365063 | 0.76859313 | 0.021351 |

|             |              |             |             |            |          |
|-------------|--------------|-------------|-------------|------------|----------|
| 0.79473911  | 0.02416945   | 0.602378901 | -0.08755968 | 0.05865874 | -0.01726 |
| 2.84E-05    | -0.187078707 | 4.74E-05    | -0.09404429 | 0.0422173  | 0.146652 |
| 0.942326548 | 0.001332432  | 0.977090336 | 0.04596476  | 0.32160318 | 0.331963 |
| 0.003935153 | 0.1504731    | 0.001107752 | -0.09526765 | 0.03959815 | -0.29205 |
| 0.973726107 | 0.014329984  | 0.757428399 | -0.1437091  | 0.00184925 | 0.012496 |
| 0.001661019 | -0.147946794 | 0.00134477  | -0.02355687 | 0.61161159 | -0.11444 |
| 0.019369966 | 0.106160722  | 0.021762272 | -0.0744781  | 0.10796552 | -0.17447 |
| 0.440018314 | 0.044341485  | 0.3390066   | -0.00827075 | 0.85852158 | -0.09341 |
| 0.000110349 | -0.187156603 | 4.71E-05    | -0.03983189 | 0.39044617 | 0.199343 |
| 0.73432478  | -0.011747919 | 0.800111319 | -0.17925082 | 9.83E-05   | -0.14407 |
| 0.942591546 | 0.009321142  | 0.840779796 | -0.14776472 | 0.00136354 | -0.12634 |
| 0.430613601 | -0.044788235 | 0.334157898 | -0.20283798 | 9.98E-06   | 0.119644 |
| 0.341456751 | 0.048222371  | 0.298383318 | -0.03310526 | 0.47541945 | 0.134969 |
| 0.275604289 | 0.055266648  | 0.233248368 | -0.09286374 | 0.04488185 | -0.14158 |
| 6.00E-05    | 0.19393901   | 2.44E-05    | -0.07034593 | 0.12901557 | 0.280564 |
| 0.009772378 | -0.11040593  | 0.01699578  | -0.08402661 | 0.06965102 | -0.24957 |
| 0.588989387 | 0.031158738  | 0.50177178  | -0.14850803 | 0.00128841 | 0.087566 |
| 0.756926206 | -0.022255572 | 0.631428302 | 0.025059023 | 0.5890842  | -0.12463 |
| 0.764946353 | -0.008961096 | 0.846852594 | -0.17544664 | 0.00013848 | 0.039699 |
| 0.001330984 | 0.168881894  | 0.000246226 | 0.104780167 | 0.02354419 | -0.10019 |
| 0.003058569 | -0.126197294 | 0.006318786 | 0.270496346 | 2.83E-09   | 0.252596 |
| 0.052126755 | -0.084925891 | 0.066704562 | -0.00279466 | 0.95197135 | -0.14886 |
| 0.30966584  | 0.054211619  | 0.242305611 | -0.08946956 | 0.0533412  | 0.212954 |
| 0.000801231 | 0.16549876   | 0.000328564 | 0.158091163 | 0.00060624 | 0.352687 |
| 2.99E-11    | 0.308536923  | 9.32E-12    | -0.07879146 | 0.08898439 | -0.0778  |
| 0.291670932 | 0.053324196  | 0.250112673 | 0.213480788 | 3.24E-06   | 0.409616 |
| 0.418234644 | 0.048562832  | 0.294980981 | 0.088983035 | 0.05465616 | -0.18671 |
| 0.72483406  | 0.009474393  | 0.838197798 | -0.03580514 | 0.44015617 | -0.09686 |
| 2.13E-13    | 0.333426565  | 1.37E-13    | -0.04179456 | 0.3675025  | -0.37687 |
| 0.000430608 | -0.159129221 | 0.000557245 | -0.10485189 | 0.0234486  | 0.160693 |
| 2.65E-05    | 0.209864559  | 4.78E-06    | 0.149064903 | 0.00123464 | 0.122211 |
| 0.002686382 | -0.140461822 | 0.002347256 | 0.126422432 | 0.00622526 | -0.08581 |
| 3.13E-07    | -0.233789705 | 3.23E-07    | -0.15837865 | 0.00059228 | -0.02653 |
| 1.69E-08    | 0.269680232  | 3.17E-09    | 0.148763426 | 0.00126349 | -0.13409 |
| 0.647409828 | 0.035019141  | 0.450264873 | -0.26928728 | 3.35E-09   | -0.19589 |
| 9.27E-15    | -0.347749582 | 1.01E-14    | 0.040535044 | 0.38212839 | -0.31214 |
| 0.006226687 | -0.119585537 | 0.009692023 | -0.10301487 | 0.02600551 | -0.20245 |
| 1.85E-08    | -0.258743752 | 1.40E-08    | 0.035580635 | 0.44303021 | -0.06245 |
| 0.29217325  | 0.060109503  | 0.194745149 | 0.090214449 | 0.05137904 | -0.09174 |
| 0.019206805 | 0.122536372  | 0.008026963 | 0.074277168 | 0.10892218 | -0.14185 |
| 8.97E-11    | 0.302741506  | 2.35E-11    | -0.0025436  | 0.95628159 | -0.25053 |
| 0.063903565 | -0.078106237 | 0.091806791 | 0.31295858  | 4.53E-12   | -0.00282 |
| 2.10E-08    | 0.260548224  | 1.10E-08    | 0.173886594 | 0.00015907 | 0.195399 |
| 0.053970458 | -0.080416379 | 0.08256954  | 0.076073381 | 0.1006037  | -0.1781  |
| 0.001934129 | 0.142727387  | 0.001988511 | -0.07302604 | 0.11503004 | -0.41617 |



|             |              |             |             |            |          |
|-------------|--------------|-------------|-------------|------------|----------|
| 0.672651182 | -0.006017277 | 0.896813957 | -0.08619923 | 0.06270825 | -0.29214 |
| 0.005083313 | -0.128070445 | 0.005577629 | 0.212811368 | 3.49E-06   | -0.43126 |
| 0.165782137 | 0.071614642  | 0.122239192 | 0.08195224  | 0.07685489 | -0.07136 |
| 0.004896126 | 0.153126926  | 0.000900718 | -0.0755141  | 0.10313787 | -0.1651  |
| 0.210581605 | 0.075463066  | 0.103371609 | 0.090413171 | 0.05086587 | 0.084501 |
| 0.211574233 | -0.048887998 | 0.291755778 | 0.050722011 | 0.27400823 | -0.31055 |
| 0.445239346 | -0.039729393 | 0.391667772 | 0.100465164 | 0.02995031 | 0.281395 |
| 0.294522702 | -0.044445828 | 0.337870133 | 0.074670841 | 0.10705413 | 0.042466 |
| 1.43E-13    | 0.33726063   | 6.93E-14    | 0.126517192 | 0.00618627 | 0.326295 |
| 6.49E-08    | 0.24624103   | 7.04E-08    | -0.26611344 | 5.19E-09   | -0.25621 |
| 0.126815906 | -0.074137654 | 0.109590341 | -0.105761   | 0.02226576 | 0.145152 |
| 0.266021699 | 0.056987506  | 0.218993408 | 0.001669057 | 0.97130469 | -0.18475 |
| 0.711731705 | -0.011608317 | 0.802437333 | -0.12295111 | 0.00781466 | 0.001002 |
| 9.93E-05    | -0.177384668 | 0.000116373 | -0.06763146 | 0.14448733 | -0.11232 |
| 0.000277671 | -0.155726802 | 0.000733105 | -0.11783859 | 0.01081644 | -0.16976 |
| 0.005399799 | 0.123939399  | 0.007328826 | 0.021319478 | 0.64584977 | 0.030355 |
| 0.00013272  | -0.179348664 | 9.74E-05    | -0.16134783 | 0.00046461 | -0.15166 |
| 0.054401251 | -0.076583805 | 0.098334317 | 0.047395494 | 0.30675494 | -0.3356  |
| 0.417786267 | 0.037741903  | 0.415809067 | -0.18390412 | 6.40E-05   | 0.028165 |
| 0.069816841 | 0.097499895  | 0.03517269  | 0.071788802 | 0.12133103 | -0.13946 |
| 0.250643333 | 0.065319073  | 0.15875253  | 0.07350988  | 0.1126369  | -0.1288  |
| 0.245751626 | 0.061219836  | 0.186612976 | -0.03845419 | 0.4070582  | -0.00999 |
| 1.79E-07    | 0.247647518  | 5.89E-08    | -0.05128365 | 0.26872355 | -0.09972 |
| 1.42E-09    | 0.287545056  | 2.43E-10    | 0.086924819 | 0.06052068 | -0.10843 |
| 2.02E-10    | -0.299564799 | 3.88E-11    | -0.03178914 | 0.49315386 | 0.020606 |
| 0.764871415 | -0.000876858 | 0.984922255 | 0.158221353 | 0.00059988 | 0.117541 |
| 0.002631656 | 0.13940526   | 0.00253397  | -0.05017828 | 0.27919143 | 0.190563 |
| 2.07E-06    | -0.208522158 | 5.52E-06    | -0.17330398 | 0.00016748 | -0.02766 |
| 0.071222274 | -0.070546946 | 0.127922927 | -0.1741214  | 0.0001558  | 0.013045 |
| 6.60E-08    | -0.236917244 | 2.22E-07    | 0.073013628 | 0.11509197 | 0.010132 |
| 0.262919946 | -0.059956726 | 0.195884082 | 0.053315688 | 0.25018836 | 0.149893 |
| 0.00030592  | 0.172754147  | 0.000175789 | -0.0687404  | 0.13800362 | 0.092641 |
| 1.62E-06    | 0.225465812  | 8.53E-07    | -0.20616454 | 7.07E-06   | -0.04435 |
| 0.018580187 | -0.107601289 | 0.020028795 | 0.001704151 | 0.9707016  | -0.14188 |
| 0.062675872 | -0.099140828 | 0.032194352 | -0.15351388 | 0.00087371 | -0.31179 |
| 0.996852121 | 0.002574677  | 0.955747925 | -0.03134282 | 0.4992471  | -0.1511  |
| 1.25E-06    | 0.227240778  | 6.95E-07    | -0.37202582 | 8.91E-17   | -0.16387 |
| 0.00699705  | 0.116414416  | 0.011817087 | -0.03413812 | 0.46174987 | -0.06266 |
| 1.08E-05    | -0.199749229 | 1.37E-05    | 0.148730003 | 0.00126672 | 0.061374 |
| 0.112363028 | 0.083419317  | 0.071700411 | 0.001139192 | 0.98041216 | -0.07034 |
| 1.45E-05    | -0.197483375 | 1.72E-05    | 0.010373721 | 0.82308161 | -0.24846 |
| 0.059194045 | 0.094835289  | 0.040507651 | 0.272211095 | 2.23E-09   | 0.081515 |
| 0.03865922  | 0.11580529   | 0.012269483 | 0.041216799 | 0.37416798 | -0.01712 |
| 0.110388886 | 0.085176338  | 0.065902447 | 0.045234406 | 0.3293602  | -0.2102  |
| 0.16535606  | 0.071686635  | 0.121863139 | -0.03744641 | 0.41947166 | -0.00098 |

|             |              |             |             |            |          |
|-------------|--------------|-------------|-------------|------------|----------|
| 4.06E-10    | -0.285431331 | 3.32E-10    | 2.70E-06    | 0.99995351 | -0.21225 |
| 0.73778271  | 0.028972222  | 0.532267614 | 0.082865186 | 0.07361311 | -0.10404 |
| 0.179717416 | 0.076277828  | 0.09968977  | 0.075400477 | 0.10365885 | 0.141122 |
| 0.435503186 | 0.041929904  | 0.365951825 | 0.089326813 | 0.05372425 | -0.14074 |
| 0.003313929 | 0.149728334  | 0.001173279 | 0.064699337 | 0.16275054 | -0.01384 |
| 0.128945626 | -0.064582727 | 0.163511196 | -0.01304153 | 0.77864398 | -0.03977 |
| 0.255425373 | 0.061232841  | 0.186519231 | -0.06162671 | 0.18369649 | -0.38026 |
| 3.45E-09    | 0.272147646  | 2.25E-09    | 0.021815363 | 0.63819319 | 0.023739 |
| 1.34E-07    | 0.247054921  | 6.35E-08    | -0.05371431 | 0.24665937 | -0.02414 |
| 1.04E-06    | -0.218720138 | 1.83E-06    | -0.06407567 | 0.16684983 | -0.06217 |
| 0.228812636 | 0.060202976  | 0.194050716 | -0.04312279 | 0.3524609  | -0.29123 |
| 0.011929163 | 0.121400593  | 0.008634964 | -0.08709203 | 0.06002561 | -0.08384 |
| 0.088202076 | -0.073893434 | 0.110767725 | -0.07620765 | 0.10000275 | -0.16729 |
| 0.437501661 | 0.051997644  | 0.262106604 | -0.07980567 | 0.08493523 | -0.13339 |
| 2.82E-05    | 0.207826558  | 5.94E-06    | 0.096467386 | 0.03716441 | -0.19545 |
| 0.010548583 | 0.127135107  | 0.005937338 | 0.128167716 | 0.00554137 | -0.11729 |
| 4.08E-09    | 0.276721892  | 1.18E-09    | -0.01057491 | 0.81970863 | -0.03104 |
| 0.550287825 | 0.032945051  | 0.477559411 | 0.081573909 | 0.07823187 | 0.169224 |
| 0.451145527 | 0.035403016  | 0.445311578 | -0.04363079 | 0.34681219 | -0.13256 |
| 0.570020946 | 0.019822585  | 0.669187302 | 0.137615362 | 0.00288141 | 0.074866 |
| 0.353413213 | 0.044417455  | 0.338178917 | -0.02763275 | 0.55140094 | 0.153645 |
| 4.22E-07    | 0.231923775  | 4.03E-07    | -0.32278026 | 8.75E-13   | -0.3321  |
| 0.035105758 | -0.089752959 | 0.052587451 | 0.065311979 | 0.15879787 | -0.27367 |
| 0.013582707 | -0.119395026 | 0.009809382 | -0.1263521  | 0.00625434 | 0.162156 |
| 0.732750165 | -0.012884115 | 0.781247698 | 0.105305283 | 0.02285206 | 0.055882 |
| 0.331011414 | -0.04014436  | 0.386736454 | 0.156613611 | 0.00068289 | -0.03334 |
| 0.013105933 | -0.108982397 | 0.018480942 | -0.05783976 | 0.21216929 | -0.00108 |
| 0.222218926 | -0.048618611 | 0.294426043 | 0.052833338 | 0.25450541 | -0.18146 |
| 0.002988189 | 0.147248332  | 0.001418078 | 0.079659692 | 0.08550871 | -0.12804 |
| 0.697541107 | 0.026435573  | 0.568782047 | 0.036708082 | 0.42870525 | -0.26581 |
| 0.076714488 | -0.077098468 | 0.096087536 | 0.119492343 | 0.00974928 | 0.264933 |
| 9.93E-13    | 0.322009511  | 9.98E-13    | 0.08851317  | 0.05595157 | -0.07062 |
| 0.017241269 | -0.118996991 | 0.010058663 | -0.09358813 | 0.04323061 | 0.096552 |
| 0.010922762 | -0.114089818 | 0.013626776 | 0.102544812 | 0.02669714 | 0.055433 |
| 0.800902506 | 0.013998131  | 0.762875996 | -0.09694215 | 0.036237   | -0.02586 |
| 0.005173488 | 0.132429087  | 0.004146667 | -0.12114696 | 0.00877622 | 0.022992 |
| 0.137599428 | -0.068654834 | 0.138495813 | -0.15392669 | 0.00084572 | -0.26019 |
| 1.75E-11    | 0.306986845  | 1.20E-11    | -0.13447574 | 0.00359707 | 0.070911 |
| 0.059564622 | -0.072365348 | 0.118362112 | -0.12868797 | 0.00535101 | 0.149698 |
| 0.021132383 | -0.10272186  | 0.0264348   | -0.07421734 | 0.10920834 | -0.08819 |
| 0.333497489 | 0.058723256  | 0.205258038 | 0.052784661 | 0.25494392 | 0.079979 |
| 0.098922216 | -0.071652347 | 0.122042126 | 0.150841673 | 0.00107659 | 0.096874 |
| 0.40818268  | 0.046681707  | 0.314105147 | 0.062865104 | 0.17502685 | 0.167605 |
| 0.002451824 | 0.148287601  | 0.001310279 | 0.098754915 | 0.0328747  | -0.06861 |
| 1.09E-13    | 0.344815129  | 1.75E-14    | -0.05531141 | 0.23286944 | 0.064609 |

|             |              |             |             |            |          |
|-------------|--------------|-------------|-------------|------------|----------|
| 0.000749587 | -0.167686237 | 0.000272825 | -0.2351868  | 2.73E-07   | 0.202473 |
| 0.01296573  | -0.098456635 | 0.033408922 | -0.13808344 | 0.0027866  | -0.14291 |
| 0.044409287 | 0.106251556  | 0.021649245 | 0.120146607 | 0.00935361 | -0.1065  |
| 0.533262865 | -0.025865568 | 0.577148332 | -0.20217721 | 1.07E-05   | 0.100487 |
| 0.23563845  | 0.06247163   | 0.177747809 | -0.18180158 | 7.78E-05   | -0.28187 |
| 1.44E-05    | 0.216480728  | 2.34E-06    | -0.10838306 | 0.01913933 | -0.05077 |
| 0.033138423 | -0.095114339 | 0.039918648 | -0.11079403 | 0.01660944 | 0.328199 |
| 0.973131407 | 0.016173673  | 0.727388022 | -0.14217124 | 0.0020716  | -0.00279 |
| 0.304084923 | 0.066645636  | 0.150444347 | -0.03206482 | 0.48941007 | 0.042577 |
| 0.131027223 | 0.085421877  | 0.065123756 | -0.07487468 | 0.10609688 | -0.06324 |
| 0.332462183 | 0.033007364  | 0.476726463 | 0.021533606 | 0.64253894 | 0.211651 |
| 0.750344    | 0.026282295  | 0.571026107 | -0.03997743 | 0.38871567 | -0.17906 |
| 0.729531853 | 0.011902622  | 0.797535757 | 0.111534541 | 0.01589357 | 0.025891 |
| 0.149562964 | -0.062412609 | 0.178158648 | 0.248872851 | 5.04E-08   | -0.00014 |
| 0.578058365 | -0.016847443 | 0.716510469 | -0.04612127 | 0.31995652 | -0.19838 |
| 0.029596082 | 0.111688839  | 0.015747861 | 0.15875665  | 0.00057439 | -0.02263 |
| 0.003397743 | 0.160453279  | 0.000500087 | -0.04226415 | 0.36213966 | 0.082942 |
| 0.024291819 | -0.095638921 | 0.038830985 | -0.03170865 | 0.49424979 | -0.16384 |
| 0.710091884 | 0.025900749  | 0.576630288 | -0.0047027  | 0.91926916 | -0.11455 |
| 1.06E-06    | 0.21771452   | 2.04E-06    | 0.059520127 | 0.19916566 | -0.00761 |
| 0.641160757 | 0.026591256  | 0.566507083 | 0.027047929 | 0.55985904 | -0.05755 |
| 0.023756529 | 0.113836106  | 0.013838351 | 0.045652344 | 0.32490664 | -0.03891 |
| 0.865092899 | 0.014832263  | 0.749205994 | 0.007544299 | 0.87083412 | -0.18959 |
| 0.064794051 | 0.098157374  | 0.033952326 | 0.119078171 | 0.01000737 | -0.16225 |
| 0.098734306 | 0.086345787  | 0.062261218 | -0.0918234  | 0.04734578 | -0.23311 |
| 0.24476983  | 0.067448417  | 0.145579569 | 0.038637914 | 0.4048189  | -0.18226 |
| 1.28E-10    | -0.280176248 | 7.17E-10    | -0.13878137 | 0.00265048 | -0.14559 |
| 0.001134524 | -0.14585648  | 0.001575227 | -0.07154163 | 0.12262146 | -0.14467 |
| 7.32E-05    | -0.179079042 | 9.98E-05    | -0.00331462 | 0.94304936 | -0.07706 |
| 0.277250818 | -0.043766961 | 0.345307861 | -0.08661026 | 0.06146119 | -0.06531 |
| 0.148003119 | 0.073749974  | 0.111463969 | -0.05876267 | 0.20495359 | -0.0054  |
| 0.025131069 | 0.094642968  | 0.04091785  | -0.01673845 | 0.71826626 | -0.28435 |
| 3.28E-08    | 0.244862622  | 8.36E-08    | 0.100518504 | 0.02986281 | 0.128385 |
| 0.073996887 | 0.095220152  | 0.039697204 | -0.01675903 | 0.71793462 | -0.03418 |
| 0.477127671 | 0.029454104  | 0.525467207 | -0.28639243 | 2.88E-10   | -0.08286 |
| 0.011911939 | -0.107313688 | 0.020364947 | 0.007209066 | 0.87652669 | -0.12984 |
| 0.162856349 | 0.060127239  | 0.194613245 | -0.13171397 | 0.00435592 | -0.38646 |
| 0.502360749 | -0.017292936 | 0.709349507 | -0.04829826 | 0.29762264 | -0.09374 |
| 0.059608201 | 0.090966119  | 0.04946044  | -0.0997323  | 0.03117498 | 0.242774 |
| 0.002966463 | -0.141421352 | 0.00218866  | 0.037580023 | 0.41781319 | -0.24474 |
| 0.000316795 | 0.177806971  | 0.000112018 | 0.006659073 | 0.88587974 | -0.19718 |
| 0.171932108 | 0.079500506  | 0.086137636 | 0.175100649 | 0.00014282 | 0.272305 |
| 0.903457916 | -0.002595977 | 0.955382206 | 0.032079747 | 0.48920783 | -0.02022 |
| 1.05E-06    | 0.229138861  | 5.58E-07    | 0.369550708 | 1.47E-16   | -0.03029 |
| 0.001021949 | -0.132711167 | 0.004066658 | 0.0532534   | 0.25074295 | -0.08529 |

|             |              |             |             |            |          |
|-------------|--------------|-------------|-------------|------------|----------|
| 3.24E-06    | 0.220730928  | 1.46E-06    | -0.22172496 | 1.30E-06   | 0.111649 |
| 0.021910733 | -0.099613552 | 0.031377384 | -0.07585471 | 0.10158856 | -0.23315 |
| 0.266866791 | -0.040362026 | 0.384164964 | -0.0179777  | 0.69839238 | 0.039165 |
| 0.009887086 | -0.128121377 | 0.005558617 | -0.16900896 | 0.00024355 | -0.06104 |
| 0.000142965 | 0.179583442  | 9.53E-05    | -0.06196692 | 0.18128381 | 0.049486 |
| 0.164350148 | -0.055535201 | 0.230981595 | -0.01405647 | 0.76191748 | 0.073451 |
| 0.482417545 | 0.043886125  | 0.343994813 | -0.08799779 | 0.05740168 | 0.029552 |
| 0.71761626  | -0.008598973 | 0.852969575 | -0.08922538 | 0.05399782 | 0.089164 |
| 0.002366988 | -0.126590275 | 0.006156345 | -0.02905153 | 0.5311454  | -0.06404 |
| 0.096139143 | 0.065493824  | 0.157638689 | -0.08594128 | 0.06350146 | 0.047246 |
| 0.022984637 | -0.089254173 | 0.053920055 | -0.17312729 | 0.00017011 | -0.08316 |
| 0.237773757 | -0.054954928 | 0.235899159 | 0.051807549 | 0.26385725 | 0.046402 |
| 0.792463362 | 0.023764467  | 0.608475694 | -0.17036719 | 0.00021656 | -0.13022 |
| 0.483444156 | 0.040315888  | 0.384709162 | 0.015029661 | 0.74598226 | 0.20755  |
| 0.009737269 | -0.136064219 | 0.003216986 | -0.08020554 | 0.08338017 | 0.036897 |
| 0.053707907 | 0.09462421   | 0.040958046 | 0.088734266 | 0.05533888 | -0.13274 |
| 0.235392984 | 0.0663866    | 0.152040159 | 0.015380693 | 0.74026047 | -0.13327 |
| 0.014384141 | -0.107157417 | 0.020549646 | -0.19321068 | 2.62E-05   | 0.001578 |
| 0.000164876 | 0.184808925  | 5.88E-05    | -0.028005   | 0.54604998 | 0.10339  |
| 0.000131565 | -0.168644886 | 0.000251297 | -0.25871524 | 1.41E-08   | -0.1043  |
| 0.215547572 | 0.061531318  | 0.184377224 | 0.160339052 | 0.00050479 | 0.099697 |
| 0.703539759 | -0.002784661 | 0.952142985 | 0.037217405 | 0.42232305 | 0.264948 |
| 0.036324771 | -0.0975339   | 0.03510867  | -0.1147002  | 0.01312939 | -0.30919 |
| 2.61E-11    | 0.299326415  | 4.02E-11    | -0.11323665 | 0.01434978 | -0.18544 |
| 0.054803412 | 0.104635974  | 0.023737389 | 0.058150585 | 0.20971895 | -0.05619 |
| 0.50367206  | 0.045429353  | 0.327277953 | -0.0066599  | 0.88586558 | -0.19663 |
| 0.161406658 | 0.07005889   | 0.130588302 | 0.191584233 | 3.08E-05   | 0.308023 |
| 0.013599462 | -0.116324251 | 0.011883108 | -0.05569597 | 0.22963206 | -0.15026 |
| 0.989920053 | -0.006015264 | 0.89684829  | -0.20062531 | 1.25E-05   | -0.31302 |
| 0.333859891 | 0.056061784  | 0.226582262 | 0.029604128 | 0.52335911 | -0.18328 |
| 0.023005449 | 0.115079819  | 0.01282819  | 0.033132319 | 0.47505854 | -0.13298 |
| 0.378739923 | 0.052074157  | 0.261404241 | 0.119663834 | 0.00964415 | 0.201967 |
| 0.190789813 | 0.072379334  | 0.118290806 | -0.00514458 | 0.91171303 | -0.25897 |
| 2.63E-06    | 0.219860492  | 1.61E-06    | -0.15923978 | 0.00055225 | 0.356575 |
| 0.005227765 | -0.12191916  | 0.008352453 | 0.217049854 | 2.20E-06   | -0.21894 |
| 0.16459765  | 0.072989567  | 0.115212059 | 0.04166602  | 0.36897904 | -0.09996 |
| 0.846793147 | -0.005232    | 0.910219061 | 0.099669674 | 0.03128158 | 0.08387  |
| 0.012565198 | 0.122513866  | 0.00803863  | 0.042985683 | 0.35399536 | -0.14524 |
| 0.003419068 | -0.121121511 | 0.008790503 | -0.30635765 | 1.32E-11   | -0.03241 |
| 0.030572484 | 0.105005663  | 0.023244786 | 0.076416894 | 0.09907189 | -0.26468 |
| 1.23E-09    | 0.27997661   | 7.38E-10    | 0.019643367 | 0.67200347 | -0.1061  |
| 1.49E-06    | 0.224947891  | 9.05E-07    | -0.21163364 | 3.96E-06   | -0.1129  |
| 0.724523009 | 0.030483728  | 0.511086898 | 0.024230775 | 0.60145809 | -0.17232 |
| 2.83E-07    | 0.242354118  | 1.14E-07    | -0.12271313 | 0.00793586 | -0.2405  |
| 0.751815314 | 0.032245602  | 0.486963402 | 0.064085199 | 0.16678665 | -0.03194 |

|             |              |             |             |            |          |
|-------------|--------------|-------------|-------------|------------|----------|
| 3.23E-09    | -0.264653421 | 6.33E-09    | 0.212071735 | 3.78E-06   | -0.19234 |
| 1.04E-08    | 0.270452365  | 2.85E-09    | 0.076558043 | 0.09844787 | -0.10204 |
| 0.014890846 | -0.104958565 | 0.023307048 | -0.12967046 | 0.0050075  | 0.068089 |
| 2.24E-08    | -0.251165364 | 3.76E-08    | -0.0650252  | 0.16063904 | -0.01951 |
| 0.001184742 | 0.144087811  | 0.001797954 | -0.14704577 | 0.00144002 | 0.278131 |
| 0.074834082 | 0.085158846  | 0.06595821  | -0.1891594  | 3.89E-05   | 0.068563 |
| 0.163853302 | 0.070814565  | 0.126479409 | 0.122519034 | 0.00803595 | 0.107132 |
| 0.057589417 | -0.081438997 | 0.078727707 | -0.14038059 | 0.00236115 | -0.05753 |
| 0.001064961 | 0.166816067  | 0.000293846 | 0.072068141 | 0.1198854  | 0.07856  |
| 0.068602131 | 0.093331391  | 0.043809892 | 0.051702681 | 0.26482644 | -0.16642 |
| 2.18E-11    | -0.306214441 | 1.35E-11    | -0.09347284 | 0.04348994 | -0.2929  |
| 0.29181876  | 0.054147911  | 0.242860318 | 0.178387655 | 0.00010628 | -0.35741 |
| 0.790827566 | 0.017795933  | 0.701294888 | 0.06762537  | 0.14452358 | -0.1131  |
| 0.734633207 | -0.020073005 | 0.665260056 | 0.221599973 | 1.32E-06   | -0.11708 |
| 0.425409904 | 0.042723611  | 0.356940071 | -0.01493787 | 0.74748073 | -0.29341 |
| 0.677587399 | 0.019177463  | 0.679345922 | -0.02184563 | 0.63772716 | -0.19869 |
| 0.360157345 | 0.049510033  | 0.285652068 | -0.19683766 | 1.83E-05   | -0.14065 |
| 0.006826732 | 0.125038379  | 0.006820452 | 0.349268089 | 7.62E-15   | 0.190174 |
| 0.095233582 | -0.076456431 | 0.098896781 | -0.05445711 | 0.24017638 | 0.137396 |
| 0.022779387 | 0.1193254    | 0.009852588 | -0.02753097 | 0.55286844 | -0.1682  |
| 0.099938035 | 0.089330231  | 0.053715055 | 0.050444895 | 0.27664162 | -0.22199 |
| 0.000958316 | 0.155085012  | 0.000771559 | -0.00525618 | 0.90980591 | 0.246246 |
| 0.774629673 | 0.008902813  | 0.847836498 | -0.01764763 | 0.70366627 | 0.166526 |
| 4.57E-07    | -0.24402032  | 9.29E-08    | 0.038268018 | 0.40933478 | -0.11567 |
| 0.184494083 | 0.066438596  | 0.151718808 | -0.02502835 | 0.58954043 | -0.16732 |
| 0.000937168 | 0.155886987  | 0.000723788 | -0.11946358 | 0.00976701 | -0.10216 |
| 0.000166912 | 0.178835072  | 0.000102048 | -0.09814242 | 0.03397968 | -0.15476 |
| 0.347721855 | -0.045848112 | 0.322834038 | -0.03918213 | 0.39822911 | -0.10005 |
| 0.01604392  | -0.096193179 | 0.037709164 | -0.01284251 | 0.78193632 | 0.010508 |
| 0.001303602 | 0.146131509  | 0.001542962 | -0.14275996 | 0.00198374 | -0.17165 |
| 1.57E-05    | 0.203335902  | 9.48E-06    | -0.27305596 | 1.98E-09   | -0.22145 |
| 0.095834262 | 0.063254831  | 0.172362461 | 0.033030422 | 0.47641844 | -0.08452 |
| 1.51E-12    | 0.312785189  | 4.66E-12    | -0.20838906 | 5.59E-06   | -0.07675 |
| 0.441279574 | 0.033075874  | 0.475811576 | -0.26379448 | 7.11E-09   | -0.26533 |
| 0.004994004 | 0.133529072  | 0.003842502 | -0.07892687 | 0.08843496 | -0.01956 |
| 6.71E-08    | 0.235493282  | 2.63E-07    | -0.0898067  | 0.05244551 | -0.43104 |
| 3.93E-08    | 0.254936361  | 2.31E-08    | 0.193309868 | 2.60E-05   | 0.156486 |
| 1.41E-06    | 0.217268756  | 2.14E-06    | 0.094969642 | 0.04022316 | -0.19296 |
| 5.02E-11    | 0.296222814  | 6.51E-11    | 0.150386529 | 0.00111519 | -0.02843 |
| 8.88E-09    | 0.261098863  | 1.02E-08    | -0.26861755 | 3.68E-09   | -0.14399 |
| 0.009953292 | 0.121406389  | 0.00863176  | -0.06804213 | 0.14205965 | -0.27402 |
| 0.000131065 | 0.169812317  | 0.000227226 | 0.078165705 | 0.09155904 | -0.32682 |
| 0.043728937 | 0.081474435  | 0.078597218 | -0.18478233 | 5.89E-05   | -0.32035 |
| 3.03E-10    | 0.27537159   | 1.43E-09    | -0.29032675 | 1.60E-10   | -0.30524 |
| 0.058498386 | 0.080072655  | 0.083894376 | -0.16676898 | 0.00029503 | -0.18031 |

|             |              |             |             |            |          |
|-------------|--------------|-------------|-------------|------------|----------|
| 1.01E-06    | 0.216923082  | 2.23E-06    | -0.15136066 | 0.00103407 | -0.2168  |
| 2.93E-05    | 0.195701066  | 2.05E-05    | 0.045205828 | 0.32966616 | -0.1859  |
| 9.02E-19    | 0.393044068  | 1.06E-18    | 0.020197956 | 0.6633039  | 0.12243  |
| 2.63E-08    | 0.243635794  | 9.74E-08    | -0.16456885 | 0.00035534 | -0.15666 |
| 1.44E-09    | 0.273234549  | 1.93E-09    | 0.184050056 | 6.31E-05   | 0.029451 |
| 0.155326628 | 0.058752843  | 0.205029445 | -0.1548815  | 0.00078414 | -0.33972 |
| 9.59E-13    | 0.326141054  | 4.91E-13    | 0.11278866  | 0.01474275 | -0.10866 |
| 4.51E-14    | 0.336339981  | 8.17E-14    | 0.051070365 | 0.27072215 | 0.105021 |
| 0.000947081 | 0.149370899  | 0.001205979 | -0.1960647  | 1.98E-05   | -0.44017 |
| 2.20E-06    | 0.212214909  | 3.72E-06    | 0.058578445 | 0.20637951 | -0.31076 |
| 0.746972639 | 0.005487306  | 0.90585787  | -0.14127473 | 0.00221224 | -0.38509 |
| 0.001164529 | 0.152761073  | 0.00092696  | 0.016696258 | 0.71894637 | 0.062968 |
| 0.027992515 | 0.093758996  | 0.042848677 | -0.08882887 | 0.05507842 | -0.18335 |
| 7.58E-09    | 0.251388694  | 3.66E-08    | -0.05531302 | 0.23285585 | -0.30402 |
| 0.548443709 | -0.036658241 | 0.42933279  | -0.23339596 | 3.38E-07   | -0.44298 |
| 2.45E-06    | 0.219499459  | 1.67E-06    | 0.223294092 | 1.09E-06   | 0.153181 |
| 0.000160207 | 0.174941543  | 0.000144855 | -0.11265327 | 0.01486336 | -0.38646 |
| 0.204136857 | 0.048329116  | 0.297313783 | -0.23048617 | 4.77E-07   | -0.34023 |
| 0.012239289 | 0.111327284  | 0.016091155 | -0.06209806 | 0.18036009 | 0.174384 |
| 0.049048597 | 0.08547889   | 0.064944037 | -0.14500478 | 0.00167911 | -0.37875 |
| 1.30E-05    | 0.188882703  | 3.99E-05    | -0.19948356 | 1.41E-05   | -0.28848 |
| 0.040800009 | 0.101531809  | 0.028241665 | -0.05184503 | 0.26351143 | -0.27802 |
| 0.069029228 | 0.084856414  | 0.066928495 | -0.05596987 | 0.22734587 | -0.19693 |
| 0.003020374 | 0.132264247  | 0.004194079 | 0.032078472 | 0.48922511 | -0.39569 |
| 0.006647657 | 0.119971535  | 0.009458057 | 0.088012403 | 0.05736013 | -0.05637 |
| 7.35E-21    | 0.412068071  | 1.44E-20    | -0.18092883 | 8.43E-05   | -0.06736 |
| 0.000894025 | 0.152260219  | 0.000964033 | -0.27612839 | 1.28E-09   | -0.35045 |
| 4.44E-11    | 0.294979418  | 7.89E-11    | -0.075615   | 0.10267698 | 0.03263  |
| 0.412205929 | 0.043189883  | 0.351711565 | 0.133455545 | 0.00386218 | -0.21486 |
| 1.94E-05    | 0.197370493  | 1.74E-05    | -0.24197805 | 1.20E-07   | -0.43965 |
| 0.251206718 | 0.047460228  | 0.306094006 | -0.30589277 | 1.43E-11   | -0.31386 |
| 2.77E-06    | 0.202872802  | 9.94E-06    | -0.26386889 | 7.04E-09   | -0.07527 |
| 0.001335239 | 0.134682121  | 0.003545485 | 0.048587967 | 0.29473083 | -0.03351 |
| 0.870510193 | -0.007649506 | 0.869048967 | -0.24613465 | 7.13E-08   | -0.25303 |
| 0.207489368 | -0.052321078 | 0.259146421 | -0.13386996 | 0.00375243 | -0.14747 |
| 0.877754531 | 0.008848809  | 0.848748382 | -0.13035959 | 0.00477856 | -0.13327 |
| 0.233247287 | -0.044093414 | 0.341718317 | -0.04647186 | 0.31628784 | -0.03739 |
| 0.038242331 | -0.092809609 | 0.04500733  | -0.2273818  | 6.84E-07   | -0.1131  |
| 0.604081549 | 0.034017649  | 0.463332932 | -0.18979872 | 3.66E-05   | -0.13383 |
| 0.021796939 | -0.099885928 | 0.03091476  | -0.12409149 | 0.00725651 | -0.35343 |
| 0.18010373  | -0.053715428 | 0.246649502 | -0.18670205 | 4.92E-05   | -0.14978 |
| 0.587686331 | -0.021062781 | 0.649828057 | -0.21413516 | 3.02E-06   | -0.18973 |
| 0.569138889 | -0.020213019 | 0.663068241 | -0.18529472 | 5.61E-05   | -0.21299 |
| 0.947612599 | 0.00233267   | 0.95990373  | -0.03497108 | 0.45088723 | -0.14698 |
| 0.608473115 | -0.008698015 | 0.851295679 | -0.12675624 | 0.00608888 | -0.19011 |

|             |              |             |             |            |          |
|-------------|--------------|-------------|-------------|------------|----------|
| 0.512802422 | -0.026281678 | 0.57103515  | -0.18523293 | 5.65E-05   | -0.2183  |
| 0.91154904  | 0.008064385  | 0.862015871 | -0.12411172 | 0.00724694 | -0.13427 |
| 0.395292607 | -0.032905221 | 0.47809225  | -0.18304    | 6.93E-05   | -0.22732 |
| 0.167714196 | -0.057671297 | 0.213505887 | -0.16003965 | 0.00051733 | -0.08147 |
| 0.347973168 | 0.049233925  | 0.288350672 | -0.10669907 | 0.02109979 | -0.25305 |
| 0.499456744 | -0.026070271 | 0.574137139 | -0.22382846 | 1.03E-06   | -0.22793 |
| 0.286996738 | -0.050321206 | 0.277822556 | -0.07404003 | 0.11005978 | -0.12014 |
| 0.439031287 | -0.031671822 | 0.494751619 | -0.14074239 | 0.00229983 | -0.11553 |
| 0.18880608  | -0.053302102 | 0.250309247 | -0.18801273 | 4.34E-05   | -0.12619 |
| 0.583021876 | -0.024437641 | 0.598356604 | -0.23765999 | 2.03E-07   | -0.07203 |
| 0.001226515 | -0.141939922 | 0.002107083 | -0.15695985 | 0.00066416 | -0.0438  |
| 0.811602424 | 0.019877576  | 0.668324121 | -0.18780592 | 4.43E-05   | -0.16675 |
| 0.004268577 | -0.138845649 | 0.002638259 | -0.23207808 | 3.95E-07   | -0.06052 |
| 0.133393279 | -0.067045736 | 0.148004559 | -0.25582944 | 2.06E-08   | -0.20145 |
| 0.776254626 | -0.008446159 | 0.855553586 | -0.18501376 | 5.76E-05   | -0.19228 |
| 0.002674025 | -0.135519967 | 0.003342895 | -0.06683838 | 0.1492652  | -0.40195 |
| 0.292235202 | -0.040349373 | 0.384314148 | -0.18508958 | 5.72E-05   | -0.18685 |
| 0.442255997 | -0.03209117  | 0.489053067 | -0.0948758  | 0.04042169 | -0.04885 |
| 0.602649881 | 0.018264693  | 0.693818491 | -0.11869849 | 0.01024928 | -0.05938 |
| 0.02548717  | -0.10101253  | 0.02906274  | -0.19045193 | 3.43E-05   | -0.24758 |
| 0.370579446 | -0.03316783  | 0.474585111 | -0.17534262 | 0.00013977 | -0.0341  |
| 0.31866124  | -0.030498058 | 0.510888221 | -0.19742066 | 1.73E-05   | -0.2372  |
| 2.11E-07    | -0.233150458 | 3.48E-07    | -0.12306437 | 0.00775755 | -0.25821 |
| 0.526575175 | -0.029367682 | 0.52668354  | -0.10674167 | 0.02104813 | -0.09338 |
| 0.320481989 | 0.053104965  | 0.25206802  | -0.22492351 | 9.08E-07   | -0.20933 |
| 0.613382162 | 0.029755265  | 0.52123978  | -0.1644687  | 0.00035834 | -0.20774 |
| 0.677559463 | -0.019021254 | 0.68181456  | -0.21271304 | 3.52E-06   | -0.19976 |
| 2.54E-05    | -0.183601028 | 6.58E-05    | -0.10243975 | 0.02685387 | -0.06347 |
| 0.437514176 | -0.028423813 | 0.540060537 | -0.22042985 | 1.51E-06   | -0.23104 |
| 0.504596289 | -0.024659753 | 0.595034614 | -0.2022323  | 1.06E-05   | -0.21849 |
| 0.947735058 | 0.002904998  | 0.950077514 | -0.10526799 | 0.02290063 | -0.17064 |
| 0.531094435 | -0.023106028 | 0.618446113 | -0.19899738 | 1.48E-05   | -0.20522 |
| 0.964385943 | 0.002122578  | 0.963512369 | -0.19213395 | 2.92E-05   | -0.09558 |
| 0.634637452 | -0.031318304 | 0.49958293  | -0.13596713 | 0.00323913 | -0.07946 |
| 0.696851082 | -0.017524778 | 0.705632869 | -0.15463526 | 0.00079961 | -0.169   |
| 0.001352384 | -0.140858665 | 0.002280433 | -0.19672622 | 1.85E-05   | -0.16204 |
| 0.02665041  | -0.106139155 | 0.021789183 | -0.06856294 | 0.1390259  | -0.10592 |
| 0.172657672 | -0.059766983 | 0.197305345 | -0.02591928 | 0.5763575  | -0.03507 |
| 0.792364407 | 0.001066268  | 0.981665819 | -0.16576286 | 0.00032131 | -0.0839  |
| 0.24048491  | -0.050515705 | 0.275967099 | -0.15037633 | 0.00111607 | -0.15123 |
| 0.304979969 | -0.045529039 | 0.326216508 | -0.08386446 | 0.07019347 | -0.18347 |
| 0.130184103 | -0.064947941 | 0.161137762 | -0.23502727 | 2.78E-07   | -0.26285 |
| 0.063936476 | 0.090488971  | 0.050671259 | -0.12472172 | 0.00696359 | -0.08007 |
| 0.49903212  | -0.028078285 | 0.544999566 | -0.15912995 | 0.00055721 | -0.1612  |
| 0.28780629  | -0.044452964 | 0.337792495 | -0.15158038 | 0.00101654 | -0.07048 |

|             |              |             |             |            |          |
|-------------|--------------|-------------|-------------|------------|----------|
| 0.289925153 | -0.042205308 | 0.362808979 | -0.25632472 | 1.93E-08   | -0.28641 |
| 0.133162383 | -0.063863647 | 0.168260951 | -0.21470094 | 2.84E-06   | -0.24058 |
| 0.090365202 | -0.070746102 | 0.126847485 | -0.10819862 | 0.01934602 | -0.13504 |
| 0.425843819 | -0.034655701 | 0.454983038 | -0.03178439 | 0.4932184  | -0.07327 |
| 0.621774446 | 0.022186391  | 0.632489422 | -0.07949344 | 0.08616564 | 0.087428 |
| 0.169839265 | -0.053935932 | 0.244712443 | -0.19208854 | 2.93E-05   | -0.18159 |
| 0.354189086 | -0.037555565 | 0.418116485 | -0.24902041 | 4.95E-08   | -0.24249 |
| 0.004599468 | -0.127289714 | 0.005876479 | -0.14330549 | 0.00190538 | -0.16787 |
| 0.032801787 | -0.093593478 | 0.043218616 | -0.07557326 | 0.10286746 | 0.068138 |
| 0.000727057 | -0.150570444 | 0.001099441 | -0.09845946 | 0.03340383 | -0.06981 |
| 0.012696044 | -0.112406439 | 0.015085476 | -0.22008635 | 1.57E-06   | -0.1905  |
| 0.01484616  | -0.112018535 | 0.015440431 | -0.09334346 | 0.04378251 | -0.01929 |
| 0.823648266 | 0.016086581  | 0.72879811  | -0.1258254  | 0.00647604 | -0.12757 |
| 0.721735519 | -0.010181557 | 0.826306275 | -0.09829884 | 0.03369452 | -0.0972  |
| 0.425481702 | -0.030297225 | 0.51367642  | -0.23701114 | 2.19E-07   | -0.20695 |
| 0.794801829 | -0.001896608 | 0.967394557 | -0.13142311 | 0.00444373 | -0.06477 |
| 0.199901935 | 0.04791921   | 0.30143481  | -0.18444222 | 6.08E-05   | -0.11065 |
| 0.992858183 | 0.015198379  | 0.74323041  | -0.18046836 | 8.79E-05   | -0.19129 |
| 0.692244295 | -0.012946249 | 0.780219714 | -0.25121804 | 3.74E-08   | -0.25297 |
| 0.643010372 | -0.014381647 | 0.756581382 | -0.21068095 | 4.38E-06   | -0.24042 |
| 0.447471804 | -0.045311677 | 0.328533839 | -0.1385579  | 0.00269339 | -0.09697 |
| 0.53926941  | -0.02785211  | 0.548244591 | -0.15215894 | 0.00097169 | -0.16282 |
| 0.20434092  | -0.061780521 | 0.182602774 | -0.17465437 | 0.0001486  | -0.14614 |
| 0.220483004 | -0.050256241 | 0.278444185 | -0.12324257 | 0.00766847 | -0.145   |
| 0.296373765 | 0.053544727  | 0.248156406 | -0.13850841 | 0.00270298 | -0.11149 |
| 0.057238919 | -0.086610527 | 0.061460373 | -0.16505624 | 0.00034106 | -0.11847 |
| 0.90972748  | 0.000312525  | 0.994625794 | -0.17563386 | 0.00013618 | -0.14047 |
| 0.384461803 | -0.028643437 | 0.536932843 | -0.20501465 | 7.97E-06   | -0.17056 |
| 9.30E-08    | -0.239409989 | 1.64E-07    | -0.07855069 | 0.08996806 | -0.20479 |
| 0.254588198 | -0.042288015 | 0.361868439 | -0.12471439 | 0.00696694 | -0.07949 |
| 0.231554693 | -0.049828789 | 0.282557853 | -0.14922251 | 0.0012198  | -0.07362 |
| 0.045687606 | -0.093059238 | 0.044431067 | -0.05188838 | 0.26311184 | -0.04686 |
| 0.611021809 | -0.015886711 | 0.732037644 | -0.12839304 | 0.00545819 | -0.13897 |
| 0.079934577 | -0.073497117 | 0.112699522 | -0.16731501 | 0.00028162 | -0.15561 |
| 0.470474855 | -0.024835541 | 0.59241143  | -0.20114646 | 1.19E-05   | -0.22462 |
| 0.368473545 | -0.035206372 | 0.447845083 | -0.19747723 | 1.72E-05   | -0.19258 |
| 0.806314839 | -0.00344875  | 0.940748911 | -0.10127158 | 0.0286506  | -0.07781 |
| 0.051103863 | -0.090057299 | 0.051787908 | -0.05313302 | 0.25181721 | 0.022127 |
| 0.619542242 | -0.017175833 | 0.711229407 | -0.16733298 | 0.00028118 | -0.18965 |
| 0.169166008 | 0.050623772  | 0.274939813 | -0.15767635 | 0.00062691 | -0.08232 |
| 0.480666619 | 0.026109557  | 0.573560099 | -0.1744032  | 0.00015195 | -0.17495 |
| 0.203405685 | -0.053948439 | 0.244602886 | -0.10562685 | 0.02243697 | -0.0713  |
| 0.578555432 | 0.020336958  | 0.661130469 | -0.1297671  | 0.00497481 | -0.12238 |
| 0.685885479 | -0.013416067 | 0.772459184 | -0.03547416 | 0.44439705 | -0.09794 |
| 0.582303642 | -0.013321229 | 0.774023928 | -0.1598262  | 0.00052644 | -0.14459 |



|             |              |             |             |            |          |
|-------------|--------------|-------------|-------------|------------|----------|
| 0.932098837 | 0.002572353  | 0.955787829 | -0.20161277 | 1.13E-05   | -0.14003 |
| 0.801792133 | -0.001962463 | 0.966263072 | -0.12427435 | 0.00717041 | -0.12461 |
| 0.034852825 | -0.089467848 | 0.05334578  | -0.17394263 | 0.00015829 | -0.2541  |
| 0.261303802 | -0.039679464 | 0.39226366  | -0.16788738 | 0.00026817 | -0.18327 |
| 0.929442696 | 0.008290596  | 0.858185667 | -0.1714897  | 0.00019639 | -0.14596 |
| 0.079047412 | -0.073747654 | 0.111475256 | -0.15389781 | 0.00084765 | -0.10038 |
| 0.20772264  | -0.05378301  | 0.246054678 | -0.15453984 | 0.00080568 | -0.19767 |
| 0.410630308 | 0.050984136  | 0.271533039 | -0.19428137 | 2.36E-05   | -0.10904 |
| 0.135469264 | 0.057913735  | 0.211584239 | -0.00379747 | 0.93477053 | -0.07768 |
| 0.830233733 | 0.000285266  | 0.995094528 | -0.20966688 | 4.88E-06   | -0.20051 |
| 0.758809306 | 0.019289561  | 0.677576504 | -0.17905533 | 0.00010002 | -0.17846 |
| 0.628158089 | 0.01939298   | 0.67594564  | -0.09857306 | 0.03319953 | -0.02939 |
| 0.479123913 | -0.029126006 | 0.530092576 | -0.11898557 | 0.0100659  | -0.18109 |
| 0.444805134 | -0.027365076 | 0.555264441 | -0.16700358 | 0.00028919 | -0.17643 |
| 0.836921777 | -0.001262752 | 0.978288109 | -0.20381295 | 9.02E-06   | -0.21154 |
| 0.74432998  | -0.019265232 | 0.677960367 | -0.03607133 | 0.4367624  | 0.054834 |
| 0.582046537 | -0.01977756  | 0.669894378 | -0.18961016 | 3.72E-05   | -0.19863 |
| 0.693508964 | -0.014895766 | 0.748168438 | -0.15393654 | 0.00084507 | -0.09294 |
| 0.970914313 | 0.013269006  | 0.774885954 | -0.17406895 | 0.00015653 | -0.21813 |
| 0.429528997 | -0.035581461 | 0.443019606 | -0.14233801 | 0.00204636 | -0.11434 |
| 0.330740598 | 0.048979977  | 0.290847769 | -0.11617778 | 0.01199105 | -0.1426  |
| 0.439784511 | -0.034066586 | 0.462689509 | -0.18314302 | 6.87E-05   | -0.17085 |
| 0.174770976 | -0.053271374 | 0.250582828 | -0.23385081 | 3.20E-07   | -0.23868 |
| 0.964835923 | 0.000418377  | 0.992805598 | -0.09619612 | 0.03770329 | -0.09302 |
| 0.979478846 | 0.008855594  | 0.848633813 | -0.20739624 | 6.21E-06   | -0.2796  |
| 0.204599906 | -0.049976348 | 0.281133177 | -0.16255176 | 0.00042055 | -0.20058 |
| 0.007359498 | -0.113714228 | 0.013941011 | -0.04607523 | 0.32044033 | -0.07335 |
| 0.17525775  | -0.054881064 | 0.236530383 | -0.23209285 | 3.95E-07   | -0.15046 |
| 0.854007189 | -0.001275374 | 0.978071134 | -0.22974793 | 5.20E-07   | -0.11104 |
| 0.388134122 | -0.033427889 | 0.471125954 | -0.22160605 | 1.32E-06   | 0.000397 |
| 0.181981398 | -0.061897385 | 0.181775006 | -0.11170097 | 0.01573645 | -0.06212 |
| 0.134937508 | -0.063874134 | 0.168190948 | -0.21018931 | 4.62E-06   | -0.14155 |
| 0.128871024 | -0.062612516 | 0.176769967 | -0.12697359 | 0.00600152 | -0.09774 |
| 0.626060856 | -0.019190365 | 0.679142171 | -0.243766   | 9.59E-08   | -0.26822 |
| 0.045816754 | -0.080700744 | 0.081486319 | -0.23951396 | 1.62E-07   | -0.17212 |
| 0.408749192 | 0.042986391  | 0.353987424 | -0.15474453 | 0.00079271 | -0.15414 |
| 0.456546524 | -0.027837204 | 0.548458788 | -0.21344755 | 3.26E-06   | -0.23496 |
| 0.478229354 | -0.029355645 | 0.526853071 | -0.13641203 | 0.00313879 | -0.09833 |
| 0.768371055 | -0.013859413 | 0.765156637 | -0.09775202 | 0.03470037 | -0.1137  |
| 0.015272317 | -0.104649069 | 0.023719787 | -0.1491575  | 0.0012259  | -0.08163 |
| 0.126629375 | -0.062343083 | 0.178643512 | -0.20246762 | 1.04E-05   | -0.08719 |
| 0.0395181   | -0.08948195  | 0.053308058 | -0.09259654 | 0.04550414 | -0.11962 |
| 0.146932721 | -0.067629692 | 0.14449786  | -0.14330031 | 0.00190611 | -0.08967 |
| 0.30138236  | -0.044734487 | 0.334738869 | -0.21951076 | 1.67E-06   | -0.25236 |
| 0.769555748 | -0.007082839 | 0.878671801 | -0.13192708 | 0.00429258 | -0.15276 |

|             |              |             |             |            |          |
|-------------|--------------|-------------|-------------|------------|----------|
| 0.490010495 | -0.023990726 | 0.605066108 | -0.15077801 | 0.00108191 | -0.09451 |
| 0.189321699 | -0.061615266 | 0.183778059 | -0.08958777 | 0.05302573 | 0.044144 |
| 0.160841116 | -0.061612852 | 0.183795265 | -0.13795901 | 0.00281152 | -0.12572 |
| 0.334865908 | -0.037988643 | 0.412765245 | -0.14213282 | 0.00207745 | -0.20676 |
| 0.289582861 | -0.039226367 | 0.397696276 | -0.13544914 | 0.00335961 | -0.1492  |
| 0.705903302 | -0.011745173 | 0.800157059 | -0.19002061 | 3.58E-05   | -0.2187  |
| 0.850691799 | -0.002060343 | 0.964581483 | -0.2321785  | 3.91E-07   | -0.25524 |
| 0.57552556  | -0.020411954 | 0.659959016 | -0.16798982 | 0.00026583 | -0.04303 |
| 0.96516136  | 0.007744498  | 0.867437708 | -0.2014337  | 1.15E-05   | -0.20689 |
| 0.403079215 | -0.029845677 | 0.519974064 | -0.19606489 | 1.98E-05   | -0.1291  |
| 0.553716356 | -0.019810498 | 0.669377092 | -0.17404974 | 0.00015679 | -0.03816 |
| 0.366171089 | -0.03465453  | 0.454998279 | -0.18527402 | 5.63E-05   | -0.23035 |
| 0.568763653 | -0.024175257 | 0.602291678 | -0.14011181 | 0.00240767 | -0.17592 |
| 0.820304574 | 0.011176124  | 0.8096494   | -0.17987002 | 9.29E-05   | -0.21863 |
| 0.323671092 | -0.04672372  | 0.313669339 | -0.02541795 | 0.5837585  | -0.04112 |
| 0.216308067 | -0.053955685 | 0.244539434 | -0.20840113 | 5.59E-06   | -0.28002 |
| 0.410579799 | -0.031282297 | 0.500076413 | -0.09959327 | 0.03141207 | -0.05106 |
| 0.235796003 | -0.044869934 | 0.333276041 | -0.20740714 | 6.20E-06   | -0.16549 |
| 0.871051899 | -0.00960718  | 0.835961985 | -0.15836567 | 0.00059291 | -0.20011 |
| 0.765816874 | -0.011545318 | 0.803487573 | -0.19020223 | 3.52E-05   | -0.21683 |
| 0.307533043 | -0.037705505 | 0.416259185 | -0.17255037 | 0.00017897 | -0.13778 |
| 0.188529334 | -0.053459589 | 0.248910367 | -0.25857034 | 1.43E-08   | -0.26061 |
| 0.257280827 | 0.047710832  | 0.303544222 | -0.11749278 | 0.01105225 | -0.13733 |
| 0.907033589 | -0.00445963  | 0.923428752 | -0.27787536 | 9.99E-10   | -0.2223  |
| 0.07535042  | -0.07444676  | 0.10811431  | -0.16993835 | 0.00022476 | -0.18392 |
| 0.345168293 | 0.041072677  | 0.375842223 | -0.12798483 | 0.00560972 | -0.11802 |
| 0.293124141 | -0.040112508 | 0.387113623 | -0.23073372 | 4.63E-07   | -0.22119 |
| 0.052013368 | -0.084632673 | 0.06765383  | -0.24537171 | 7.85E-08   | -0.0737  |
| 0.010134102 | -0.113445656 | 0.014169604 | -0.17018406 | 0.00022003 | -0.30327 |
| 0.038299037 | -0.090897952 | 0.049631926 | -0.24765112 | 5.89E-08   | -0.20533 |
| 0.399612427 | -0.031844491 | 0.492400929 | -0.1755161  | 0.00013762 | -0.18281 |
| 0.360389456 | 0.03391987   | 0.464619998 | -0.12656677 | 0.00616596 | -0.13688 |
| 0.349212942 | -0.036768636 | 0.427943548 | -0.14872708 | 0.001267   | -0.07276 |
| 0.533749859 | -0.018666342 | 0.687435979 | -0.187477   | 4.57E-05   | -0.23321 |
| 0.350685589 | -0.042059232 | 0.364473856 | -0.19222939 | 2.89E-05   | -0.15595 |
| 0.261238392 | -0.043936132 | 0.343444744 | -0.21810284 | 1.96E-06   | -0.21816 |
| 0.344398556 | -0.035880139 | 0.439198437 | -0.16440938 | 0.00036013 | -0.16936 |
| 0.473281687 | -0.026699317 | 0.564930573 | -0.23258217 | 3.72E-07   | -0.2283  |
| 0.576067247 | -0.021717094 | 0.639707461 | -0.18766456 | 4.49E-05   | -0.15832 |
| 0.577496019 | -0.014574752 | 0.753418015 | -0.23309432 | 3.50E-07   | -0.28694 |
| 0.212199153 | -0.050423541 | 0.276845255 | -0.08783426 | 0.05786826 | -0.15471 |
| 0.758953476 | -0.013665759 | 0.768343875 | -0.19523784 | 2.15E-05   | -0.1745  |
| 0.422175657 | 0.046729242  | 0.313612088 | -0.13568661 | 0.00330387 | -0.1287  |
| 0.954384079 | 0.001098354  | 0.981114219 | -0.10247287 | 0.02680438 | -0.01879 |
| 0.169776752 | -0.058883868 | 0.204019361 | -0.11930659 | 0.00986429 | -0.12047 |

|             |              |             |             |            |          |
|-------------|--------------|-------------|-------------|------------|----------|
| 0.596212293 | -0.020785577 | 0.654135351 | -0.20327747 | 9.54E-06   | -0.20609 |
| 0.303730848 | -0.045614745 | 0.325305689 | -0.2426078  | 1.11E-07   | -0.215   |
| 0.973532206 | -0.002032606 | 0.965057996 | -0.12685666 | 0.00604837 | -0.11877 |
| 0.620953417 | -0.014847667 | 0.748954279 | -0.13074238 | 0.00465551 | -0.06135 |
| 0.802045667 | -0.00718527  | 0.876931013 | -0.1958679  | 2.02E-05   | -0.16947 |
| 0.585554872 | 0.035103628  | 0.449172046 | -0.10088057 | 0.02927464 | -0.10638 |
| 0.252216217 | -0.054034145 | 0.243853102 | -0.1315618  | 0.00440166 | -0.15969 |
| 0.751981994 | 0.012604601  | 0.7858769   | -0.18276857 | 7.11E-05   | -0.1963  |
| 0.262113277 | 0.062042279  | 0.180752552 | -0.21355294 | 3.22E-06   | -0.25014 |
| 0.068535066 | 0.090247973  | 0.051292167 | -0.13323008 | 0.00392311 | -0.15641 |
| 0.931342089 | 0.009959892  | 0.830029605 | -0.19879258 | 1.51E-05   | -0.20574 |
| 0.204480433 | -0.050029864 | 0.280617687 | -0.09739049 | 0.03537933 | -0.03297 |
| 0.625280202 | -0.014044417 | 0.762115468 | -0.19799129 | 1.63E-05   | -0.21042 |
| 0.596262521 | -0.015829145 | 0.732971571 | -0.19888131 | 1.49E-05   | -0.20385 |
| 0.637017086 | -0.013399436 | 0.772733502 | -0.19861386 | 1.53E-05   | -0.21282 |
| 0.072705223 | -0.073177652 | 0.114275905 | -0.10783674 | 0.0197572  | -0.04233 |
| 0.555654215 | -0.019743105 | 0.670435652 | -0.17697117 | 0.00012079 | -0.21846 |
| 0.291523632 | -0.052068701 | 0.261454279 | -0.07327121 | 0.11381246 | -0.11116 |
| 0.317832811 | -0.037840229 | 0.414594515 | -0.2132359  | 3.33E-06   | -0.2371  |
| 0.784497072 | -0.005643127 | 0.903197468 | -0.1986052  | 1.54E-05   | -0.17897 |
| 0.24786462  | -0.051959078 | 0.262461124 | -0.14536799 | 0.00163406 | -0.16587 |
| 0.682385389 | -0.021885416 | 0.637114621 | -0.11935041 | 0.00983705 | -0.10339 |
| 0.384858548 | -0.034431278 | 0.45791028  | -0.07710206 | 0.09607199 | -0.14424 |
| 0.730187656 | -0.009553247 | 0.836869933 | -0.17405095 | 0.00015678 | -0.09047 |
| 0.13800663  | -0.072144627 | 0.119491931 | -0.141747   | 0.0021371  | -0.1647  |
| 0.775901499 | 0.017142162  | 0.71177025  | -0.14098986 | 0.00225873 | -0.13115 |
| 0.432643252 | -0.04057402  | 0.381670526 | -0.14962647 | 0.00118251 | -0.2877  |
| 0.002642697 | -0.133358837 | 0.003888213 | -0.00905806 | 0.84521624 | -0.14217 |
| 0.50445845  | -0.022668617 | 0.625108696 | -0.15958328 | 0.00053699 | -0.18936 |
| 0.38251513  | 0.050486674  | 0.276243509 | -0.10735868 | 0.02031204 | -0.09414 |
| 0.835496415 | -0.003515872 | 0.939597915 | -0.07850225 | 0.09016699 | -0.10283 |
| 0.50272658  | -0.031211646 | 0.501045458 | -0.19668542 | 1.86E-05   | -0.20775 |
| 0.617829451 | -0.012674075 | 0.784725591 | -0.18485145 | 5.85E-05   | -0.15896 |
| 0.740102442 | 0.014894472  | 0.748189583 | -0.25038005 | 4.16E-08   | -0.21904 |
| 0.154675152 | -0.059169353 | 0.201831027 | -0.09267889 | 0.0453116  | -0.1772  |
| 0.717199409 | 0.021271373  | 0.64659454  | -0.19516104 | 2.17E-05   | -0.18679 |
| 0.059980111 | -0.085860238 | 0.063752379 | -0.14043058 | 0.00235259 | -0.0277  |
| 0.548801001 | -0.023943347 | 0.605779381 | -0.18750179 | 4.56E-05   | -0.24341 |
| 0.001249929 | -0.138698836 | 0.002666258 | -0.09974902 | 0.03114656 | -0.08044 |
| 0.41967424  | -0.014408909 | 0.756134529 | -0.11756161 | 0.01100495 | -0.19247 |
| 0.901919075 | -0.008873529 | 0.848330948 | -0.10310857 | 0.0258695  | -0.04996 |
| 0.157685782 | 0.06871725   | 0.138136652 | -0.2269301  | 7.21E-07   | -0.09655 |
| 0.379700164 | -0.034766736 | 0.453538642 | -0.23129983 | 4.33E-07   | -0.22943 |
| 0.315686142 | -0.042588242 | 0.358467115 | -0.03323327 | 0.47371332 | 0.002097 |
| 0.193071056 | -0.055260198 | 0.233303006 | -0.0903068  | 0.05114002 | -0.01964 |

|             |              |             |             |            |          |
|-------------|--------------|-------------|-------------|------------|----------|
| 0.189071168 | -0.062449887 | 0.177899076 | -0.13309912 | 0.0039589  | -0.08555 |
| 0.616455628 | 0.026588801  | 0.566542923 | -0.16187377 | 0.00044486 | -0.1441  |
| 0.772156903 | -0.00643662  | 0.889667304 | -0.17214712 | 0.00018541 | -0.09092 |
| 0.511370112 | 0.03333541   | 0.472354474 | -0.18307214 | 6.91E-05   | -0.14435 |
| 0.768969762 | 0.010286746  | 0.824540749 | -0.11346995 | 0.01414879 | -0.04595 |
| 0.416781131 | -0.03222398  | 0.487255685 | -0.16504333 | 0.00034143 | -0.13634 |
| 0.712451555 | 0.014428036  | 0.755821083 | -0.13890233 | 0.00262752 | -0.13956 |
| 0.734684999 | -0.007552359 | 0.870697332 | -0.19563367 | 2.07E-05   | -0.21886 |
| 0.794499099 | -0.010569478 | 0.819799714 | -0.14174553 | 0.00213733 | -0.18738 |
| 0.606195868 | 0.019347573  | 0.676661492 | -0.1264408  | 0.00621769 | -0.12987 |
| 0.620955785 | -0.016270249 | 0.72582544  | -0.18894062 | 3.97E-05   | -0.16923 |
| 0.153545529 | -0.066778837 | 0.149628722 | -0.06817442 | 0.14128428 | -0.02465 |
| 0.323228098 | 0.047339904  | 0.307323269 | -0.18717387 | 4.70E-05   | -0.11235 |
| 0.131413021 | -0.066216331 | 0.153096091 | -0.09802047 | 0.03420342 | -0.11038 |
| 0.010151759 | -0.116222662 | 0.011957885 | -0.00383845 | 0.93406811 | 0.032166 |
| 0.323671092 | -0.04672372  | 0.313669339 | -0.02541795 | 0.5837585  | -0.04112 |
| 0.31489135  | -0.042336909 | 0.361313145 | -0.1616534  | 0.00045304 | -0.18844 |
| 0.144710666 | -0.058188243 | 0.209423475 | -0.19702891 | 1.80E-05   | -0.0521  |
| 0.65252815  | 0.03110445   | 0.502517629 | -0.17971348 | 9.42E-05   | -0.22948 |
| 0.069067522 | -0.073841229 | 0.11102069  | -0.19265767 | 2.77E-05   | -0.32735 |
| 0.103009508 | -0.069884684 | 0.131550007 | -0.00034561 | 0.99405693 | -0.11063 |
| 0.499056709 | -0.02459606  | 0.595986378 | -0.15683849 | 0.00067067 | -0.12648 |
| 0.108136553 | -0.071525579 | 0.122705652 | -0.16266011 | 0.00041678 | -0.14137 |
| 0.150123289 | -0.062762911 | 0.175730536 | -0.08195649 | 0.07683952 | -0.07624 |
| 0.405236398 | 0.042893089  | 0.355034017 | -0.15388849 | 0.00084828 | -0.20557 |
| 0.405494287 | 0.04633589   | 0.317707367 | -0.12054622 | 0.00911902 | -0.16956 |
| 0.396964585 | -0.031617959 | 0.495486114 | -0.19078466 | 3.32E-05   | -0.19837 |
| 0.004068958 | -0.121575206 | 0.008538899 | -0.07528304 | 0.10419951 | -0.34549 |
| 1.31E-05    | -0.201569369 | 1.14E-05    | -0.07959131 | 0.08577841 | -0.41978 |
| 9.70E-08    | -0.243133135 | 1.04E-07    | 0.030869115 | 0.50575757 | -0.48462 |
| 0.001203176 | -0.162507247 | 0.000422103 | -0.09862704 | 0.03310283 | -0.20937 |
| 0.034694351 | -0.098331212 | 0.033635758 | 0.042283253 | 0.36192255 | -0.26622 |
| 0.023023033 | -0.101677888 | 0.028014309 | -0.04613405 | 0.31982229 | -0.2137  |
| 0.062534308 | 0.084677963  | 0.067506488 | -0.21480475 | 2.81E-06   | -0.22605 |
| 0.017253476 | -0.105973743 | 0.021996546 | -0.03719756 | 0.42257062 | -0.25679 |
| 1.37E-13    | -0.321768913 | 1.04E-12    | -0.1486748  | 0.00127208 | -0.24008 |
| 0.520239006 | -0.030387251 | 0.512425596 | -0.11624113 | 0.01194426 | -0.26107 |
| 0.116872269 | 0.066593752  | 0.150762963 | -0.10226033 | 0.02712337 | -0.13108 |
| 0.003483751 | -0.130185177 | 0.004835593 | -0.00809103 | 0.86156455 | -0.35937 |
| 0.00183468  | -0.143567329 | 0.00186879  | -0.24366585 | 9.71E-08   | -0.52747 |
| 0.007755095 | -0.121202537 | 0.00874509  | -0.02257819 | 0.62648992 | -0.3625  |
| 0.005971522 | -0.11910607  | 0.009989796 | -0.19370255 | 2.50E-05   | -0.54275 |
| 3.42E-06    | -0.220443755 | 1.51E-06    | 0.076972153 | 0.09663514 | -0.00956 |
| 1.78E-05    | 0.189579409  | 3.73E-05    | -0.09166701 | 0.04772579 | -0.60898 |
| 0.000358516 | -0.165290444 | 0.000334393 | -0.01519363 | 0.74330778 | -0.42407 |

|             |              |             |             |            |          |
|-------------|--------------|-------------|-------------|------------|----------|
| 0.002229062 | -0.142124648 | 0.002078702 | -0.27948526 | 7.92E-10   | -0.17627 |
| 0.494080486 | -0.03887729  | 0.401912373 | -0.31991348 | 1.42E-12   | 0.008606 |
| 8.05E-05    | -0.173842402 | 0.000159697 | -0.03503005 | 0.45012374 | -0.25541 |
| 0.496324152 | 0.031255091  | 0.500449458 | -0.10541447 | 0.02271038 | -0.30185 |
| 8.12E-07    | -0.218133624 | 1.95E-06    | -0.08105434 | 0.08015545 | -0.15346 |
| 0.171649094 | -0.060342788 | 0.193015403 | -0.17505521 | 0.0001434  | -0.46402 |
| 0.042290976 | -0.094086549 | 0.042124446 | -0.03095986 | 0.504507   | -0.24059 |
| 0.000493056 | -0.162488576 | 0.000422758 | -0.03267359 | 0.4811974  | -0.16695 |
| 0.000206611 | -0.169109501 | 0.000241445 | 0.034024799 | 0.4632389  | -0.38138 |
| 3.00E-13    | -0.327641989 | 3.79E-13    | 0.030281053 | 0.51390128 | -0.15195 |
| 0.000491997 | -0.152337295 | 0.00095824  | -0.02494737 | 0.5907455  | -0.35871 |
| 0.280029807 | -0.052083841 | 0.261315429 | -0.27747046 | 1.06E-09   | -0.50636 |
| 0.000520154 | -0.141797037 | 0.002129279 | -0.06555062 | 0.15727794 | -0.02135 |
| 0.709758546 | 0.020515623  | 0.658341039 | -0.29780361 | 5.10E-11   | -0.32568 |
| 0.00511124  | -0.119934205 | 0.009480462 | 0.023421612 | 0.61365849 | -0.08737 |
| 0.000147527 | -0.172639412 | 0.000177572 | 0.155366755 | 0.00075445 | -0.13741 |
| 0.009367887 | -0.113156838 | 0.014419102 | 0.018316068 | 0.69300087 | -0.33523 |
| 0.000131778 | -0.18258008  | 7.24E-05    | -0.04869926 | 0.29362492 | -0.52671 |
| 1.47E-05    | -0.190682847 | 3.36E-05    | 0.145929393 | 0.00156661 | -0.4492  |
| 0.000302727 | -0.167838013 | 0.000269306 | 0.203065609 | 9.75E-06   | -0.35369 |
| 0.000176449 | -0.171258951 | 0.000200388 | -0.01634235 | 0.72465956 | -0.42302 |
| 1.94E-05    | -0.189718528 | 3.68E-05    | 0.02429775  | 0.60045316 | -0.58676 |
| 0.163749722 | -0.060169653 | 0.194298072 | -0.16999521 | 0.00022366 | -0.1723  |
| 0.593868582 | 0.015410863  | 0.739769368 | -0.14201687 | 0.00209522 | -0.15728 |
| 1.72E-05    | -0.197510565 | 1.71E-05    | 0.001679477 | 0.97112563 | -0.45395 |
| 0.016556897 | 0.11164115   | 0.01579277  | 0.1556012   | 0.00074049 | -0.2026  |
| 3.08E-13    | -0.325549393 | 5.44E-13    | -0.03166897 | 0.49479047 | -0.423   |
| 0.573505367 | -0.018972977 | 0.682578187 | -0.08151577 | 0.07844524 | -0.2166  |
| 0.808602501 | -0.008414228 | 0.856093717 | -0.1821555  | 7.53E-05   | -0.2157  |
| 0.036716236 | -0.087483903 | 0.058878453 | -0.26919619 | 3.40E-09   | -0.11498 |
| 0.016393907 | -0.114210249 | 0.013527346 | 0.277779535 | 1.01E-09   | -0.32986 |
| 0.000686457 | -0.155376424 | 0.000753873 | -0.14834503 | 0.00130455 | -0.33375 |
| 5.95E-05    | -0.182616263 | 7.21E-05    | 0.113526016 | 0.01410086 | -0.00707 |
| 0.102216601 | -0.075100483 | 0.105044362 | -0.05149355 | 0.26676653 | -0.06503 |
| 0.069127478 | -0.085285185 | 0.065556316 | -0.22293449 | 1.14E-06   | -0.2541  |
| 0.015126156 | -0.109086692 | 0.018368411 | -0.06616393 | 0.1534222  | -0.58241 |
| 1.53E-05    | -0.197909868 | 1.65E-05    | 0.050771724 | 0.27353762 | -0.54178 |
| 0.002278443 | -0.137221497 | 0.002963462 | -0.00595499 | 0.89787618 | -0.17413 |
| 1.54E-09    | -0.267035019 | 4.57E-09    | -0.09931433 | 0.03189242 | -0.38575 |
| 0.455722448 | 0.029861326  | 0.519755151 | -0.07033133 | 0.1290952  | -0.51145 |
| 0.022137855 | 0.106316489  | 0.02156876  | -0.38080946 | 1.45E-17   | -0.38815 |
| 0.985979567 | 5.76E-05     | 0.999010181 | -0.06142711 | 0.18512302 | -0.4308  |
| 0.109394733 | -0.065601287 | 0.156956667 | -0.06997744 | 0.13103728 | -0.29914 |
| 0.283079349 | -0.041586429 | 0.369895124 | -0.33238519 | 1.65E-13   | -0.4951  |
| 0.049465858 | 0.095647398  | 0.038813617 | 0.077427377 | 0.09467325 | 0.060704 |

|             |              |             |             |            |          |
|-------------|--------------|-------------|-------------|------------|----------|
| 0.27605256  | -0.042944872 | 0.354452922 | -0.02958137 | 0.52367861 | -0.1767  |
| 0.000441883 | -0.163764856 | 0.000380108 | 0.120055972 | 0.00940755 | -0.32278 |
| 0.00922922  | -0.128448504 | 0.005437887 | -0.03199898 | 0.4903028  | -0.34673 |
| 0.326338446 | -0.04599822  | 0.321250664 | 0.246598748 | 6.73E-08   | -0.00123 |
| 0.001502664 | -0.154318787 | 0.000819911 | 0.15310702  | 0.00090213 | -0.06584 |
| 1.98E-06    | -0.221404457 | 1.35E-06    | -0.12554582 | 0.00659656 | -0.29531 |
| 0.00013586  | -0.169451703 | 0.000234421 | -0.12534135 | 0.00668597 | -0.47837 |
| 0.545714463 | 0.033300539  | 0.472818165 | -0.29816273 | 4.82E-11   | -0.50432 |
| 0.000129958 | -0.178207814 | 0.000108027 | -0.00495081 | 0.91502546 | -0.28527 |
| 0.543112039 | 0.036332113  | 0.433452084 | 0.023010787 | 0.61989417 | -0.38722 |
| 0.324774752 | 0.05150573   | 0.266653281 | 0.186759647 | 4.89E-05   | -0.02194 |
| 0.000697192 | -0.1503692   | 0.001116687 | 0.104708029 | 0.02364067 | -0.34778 |
| 0.419791688 | -0.023388258 | 0.614163719 | -0.10566404 | 0.0223894  | -0.3871  |
| 0.027073981 | -0.091371921 | 0.048449795 | 0.034935741 | 0.45134512 | -0.41362 |
| 0.001903472 | -0.145214765 | 0.001652932 | -0.13502554 | 0.00346114 | -0.50223 |
| 0.004169666 | -0.126308711 | 0.006272345 | -0.08648313 | 0.06184468 | -0.46126 |
| 0.017444153 | -0.099294941 | 0.031926037 | 0.005292472 | 0.90918581 | -0.38306 |
| 0.000312546 | -0.164351369 | 0.000361884 | -0.01561021 | 0.7365271  | -0.47353 |
| 0.027700029 | -0.10179552  | 0.027832371 | -0.00650455 | 0.8885105  | -0.24534 |
| 0.014545438 | -0.105929087 | 0.02205282  | 0.187052625 | 4.75E-05   | -0.07447 |
| 0.257868216 | -0.0619735   | 0.181237364 | -0.06017272 | 0.19427533 | -0.27409 |
| 0.053059917 | 0.08389351   | 0.070096036 | -0.0753732  | 0.10378422 | 0.086599 |
| 0.017975457 | -0.103337754 | 0.025539416 | -0.2770046  | 1.13E-09   | -0.55247 |
| 0.05296717  | 0.095301398  | 0.039527881 | -0.21770168 | 2.04E-06   | -0.12808 |
| 7.39E-07    | -0.221768375 | 1.30E-06    | -0.09020874 | 0.05139386 | -0.34021 |
| 0.211097815 | -0.046557771 | 0.315393036 | 0.163731885 | 0.00038116 | -0.26962 |
| 0.003724796 | 0.133710017  | 0.003794449 | -0.2431031  | 1.04E-07   | -0.45347 |
| 1.14E-05    | -0.198874455 | 1.49E-05    | 0.12145013  | 0.00860761 | -0.25172 |
| 1.52E-05    | -0.191331349 | 3.15E-05    | -0.34643408 | 1.29E-14   | -0.46066 |
| 0.165135641 | -0.066137861 | 0.153584595 | -0.03097593 | 0.50428562 | -0.25669 |
| 4.79E-14    | -0.336148267 | 8.46E-14    | 0.006388099 | 0.89049377 | -0.22175 |
| 0.054538788 | -0.087266146 | 0.059513648 | 0.18412812  | 6.26E-05   | -0.30687 |
| 0.003178262 | -0.145311057 | 0.001641052 | -0.11296954 | 0.01458296 | 0.086567 |
| 0.004150753 | -0.141808658 | 0.002127466 | -0.10048646 | 0.02991535 | -0.34861 |
| 0.023561802 | -0.119442699 | 0.009779897 | -0.01629484 | 0.72542778 | -0.24384 |
| 0.000399198 | -0.172799495 | 0.00017509  | -0.04261651 | 0.35814785 | -0.31268 |
| 0.000180446 | -0.186298884 | 5.11E-05    | 0.014382999 | 0.75655922 | -0.14993 |
| 0.000936853 | -0.157818919 | 0.00061973  | 0.023274039 | 0.61589524 | -0.27868 |
| 0.002642918 | -0.147911798 | 0.001348358 | 0.05145427  | 0.26713202 | -0.18246 |
| 0.007297839 | -0.123244154 | 0.007667684 | -0.06517673 | 0.15966418 | 0.059256 |
| 1.00E-08    | -0.261370764 | 9.86E-09    | 0.048526109 | 0.29534672 | -0.30879 |
| 0.002361977 | -0.141108133 | 0.00223932  | -0.04368032 | 0.34626452 | -0.12262 |
| 2.24E-07    | -0.222617686 | 1.18E-06    | -0.01142543 | 0.80548714 | -0.18973 |
| 4.73E-05    | -0.180943306 | 8.42E-05    | 0.026675299 | 0.56528079 | -0.29492 |
| 0.032030026 | -0.078423954 | 0.090489335 | -0.0454951  | 0.32657763 | -0.40737 |

|             |              |             |             |            |          |
|-------------|--------------|-------------|-------------|------------|----------|
| 0.844792804 | 0.005553203  | 0.904732649 | -0.08630153 | 0.06239594 | -0.57627 |
| 0.000203077 | -0.167105781 | 0.000286685 | 0.012697567 | 0.78433638 | -0.01962 |
| 0.41397396  | -0.034933064 | 0.451379815 | 0.244042679 | 9.26E-08   | -0.21862 |
| 2.79E-05    | -0.201278666 | 1.17E-05    | -0.19652188 | 1.89E-05   | -0.31438 |
| 2.41E-05    | -0.185021689 | 5.76E-05    | -0.25982104 | 1.21E-08   | -0.4707  |
| 0.509895301 | 0.02584395   | 0.57746676  | -0.23250321 | 3.76E-07   | -0.50503 |
| 0.116518885 | -0.074520659 | 0.107763765 | -0.30021095 | 3.51E-11   | -0.27151 |
| 0.000997212 | -0.1467914   | 0.001468005 | 0.055235509 | 0.23351222 | -0.21018 |
| 0.021138419 | -0.105156495 | 0.023046362 | -0.20012462 | 1.32E-05   | -0.49462 |
| 7.61E-07    | -0.230435499 | 4.80E-07    | -0.11398848 | 0.01371094 | -0.44276 |
| 2.26E-08    | -0.250957401 | 3.87E-08    | -0.09063906 | 0.05028776 | -0.16159 |
| 1.87E-05    | -0.185425061 | 5.55E-05    | 0.172463444 | 0.00018034 | -0.08246 |
| 0.006074818 | 0.119649418  | 0.009652951 | 0.098949174 | 0.03253071 | -0.03531 |
| 0.00019785  | -0.176156392 | 0.00012996  | -0.18893463 | 3.97E-05   | -0.20484 |
| 0.63698966  | 0.030783056  | 0.506945101 | 0.104995558 | 0.02325813 | -0.17892 |
| 3.30E-05    | -0.186484977 | 5.02E-05    | -0.09481985 | 0.04054046 | -0.53432 |
| 0.000491874 | -0.156588088 | 0.000684285 | -0.09996517 | 0.03078127 | -0.34995 |
| 1.01E-05    | -0.202475066 | 1.04E-05    | -0.00303254 | 0.9478888  | -0.58299 |
| 0.871352755 | 0.009896337  | 0.831097858 | -0.18574507 | 5.38E-05   | -0.05227 |
| 0.13159472  | -0.068344582 | 0.140291735 | -0.19282394 | 2.73E-05   | -0.30973 |
| 9.05E-10    | -0.281555199 | 5.87E-10    | -0.12188236 | 0.00837223 | -0.21614 |
| 0.096150664 | -0.061167003 | 0.186994179 | -0.1665887  | 0.00029958 | -0.44534 |
| 2.75E-07    | 0.237900138  | 1.97E-07    | -0.04818375 | 0.29877092 | -0.18922 |
| 0.023118289 | 0.102497841  | 0.026767117 | -0.06328153 | 0.17218107 | -0.29823 |
| 0.000366834 | -0.163908258 | 0.000375575 | -0.1052125  | 0.02297306 | -0.37206 |
| 0.098259653 | -0.07529042  | 0.104165448 | -0.07359789 | 0.11220584 | -0.2794  |
| 0.053179622 | -0.09099958  | 0.049376445 | -0.30487932 | 1.68E-11   | -0.39012 |
| 0.352315598 | -0.042294304 | 0.36179699  | -0.14834385 | 0.00130467 | -0.38239 |
| 4.04E-08    | -0.251835375 | 3.45E-08    | 0.019253083 | 0.67815209 | -0.325   |
| 0.008251502 | 0.121502396  | 0.00857884  | -0.20926165 | 5.10E-06   | 0.064488 |
| 0.000136972 | -0.180339329 | 8.90E-05    | -0.25131922 | 3.69E-08   | -0.01392 |
| 0.373679257 | -0.030671274 | 0.508489764 | -0.07338813 | 0.11323539 | -0.38643 |
| 0.033694424 | 0.098324934  | 0.033647147 | 0.053108034 | 0.25204057 | -0.05174 |
| 0.003154198 | -0.141748221 | 0.002136911 | -0.13814656 | 0.00277403 | -0.27758 |
| 0.001628831 | 0.148934805  | 0.001247011 | -0.27350412 | 1.86E-09   | -0.4075  |
| 0.010264465 | -0.101913635 | 0.027650711 | -0.03501347 | 0.45033828 | -0.01939 |
| 0.091544731 | -0.076900156 | 0.096948376 | -0.20271989 | 1.01E-05   | -0.56157 |
| 0.000674058 | -0.153269169 | 0.000890701 | 0.097987189 | 0.0342647  | -0.15489 |
| 0.165846971 | 0.073422211  | 0.113067598 | 0.150219382 | 0.00112969 | -0.08464 |
| 3.15E-05    | -0.181603643 | 7.92E-05    | 0.044200167 | 0.34054969 | -0.2175  |
| 0.000827042 | -0.142497427 | 0.00202249  | 0.068424026 | 0.13983017 | 0.049692 |
| 0.000201716 | -0.162571934 | 0.000419842 | 0.018713081 | 0.68669468 | -0.18476 |
| 3.30E-08    | -0.247285562 | 6.17E-08    | -0.06127419 | 0.18622139 | -0.35783 |
| 0.16063389  | -0.056165868 | 0.225719793 | -0.02585928 | 0.57724099 | -0.35192 |
| 0.741882738 | -0.011735376 | 0.800320236 | -0.14186649 | 0.00211846 | -0.5556  |

|             |              |             |             |            |          |
|-------------|--------------|-------------|-------------|------------|----------|
| 5.65E-07    | -0.230572909 | 4.72E-07    | -0.06095689 | 0.18851583 | -0.47243 |
| 0.027716189 | -0.101902942 | 0.027667116 | -0.01728147 | 0.70953349 | -0.37658 |
| 0.399732063 | -0.03780692  | 0.415005722 | -0.16895735 | 0.00024463 | -0.53902 |
| 0.007879925 | -0.117614789 | 0.010968533 | -0.14198352 | 0.00210035 | -0.31191 |
| 0.023515676 | -0.102589324 | 0.026630976 | -0.06283778 | 0.17521482 | -0.42681 |
| 0.285680599 | 0.04548216   | 0.326715396 | -0.00124084 | 0.9786648  | -0.14743 |
| 0.138590472 | -0.066912417 | 0.148814159 | -0.07927403 | 0.08703884 | -0.03925 |
| 0.429635166 | 0.034451711  | 0.45764333  | -0.2471298  | 6.29E-08   | -0.28474 |
| 0.007623238 | -0.123704702 | 0.007441688 | -0.1041356  | 0.02441849 | -0.47132 |
| 0.000620291 | -0.148532906 | 0.00128596  | -0.40077195 | 1.91E-19   | -0.38285 |
| 0.039129581 | -0.091105467 | 0.049111426 | -0.10632611 | 0.02155685 | -0.20928 |
| 1.10E-06    | -0.219572134 | 1.66E-06    | -0.09627107 | 0.03755375 | -0.49196 |
| 0.000186495 | -0.174360685 | 0.000152529 | -0.18805723 | 4.32E-05   | -0.15232 |
| 0.306468124 | 0.048995866  | 0.290691111 | -0.30599779 | 1.40E-11   | 0.276152 |
| 1.10E-05    | -0.197391273 | 1.73E-05    | -0.07097318 | 0.12562981 | -0.44364 |
| 1.51E-08    | -0.252772186 | 3.06E-08    | 0.107253799 | 0.02043556 | 0.001371 |
| 3.77E-05    | -0.184652569 | 5.96E-05    | -0.19864028 | 1.53E-05   | -0.36343 |
| 0.007495288 | -0.115566666 | 0.012450835 | -0.13089488 | 0.00460729 | -0.52355 |
| 0.725201406 | -0.009341046 | 0.840444353 | -0.19587614 | 2.02E-05   | -0.45175 |
| 0.001759328 | -0.135610881 | 0.003321556 | -0.13097616 | 0.00458177 | -0.42906 |
| 0.052249707 | -0.094642272 | 0.040919341 | 0.000611298 | 0.98948828 | -0.15451 |
| 0.163858182 | -0.062718465 | 0.176037245 | -0.15570367 | 0.00073446 | -0.50366 |
| 0.004756508 | -0.126555107 | 0.006170728 | -0.14634947 | 0.00151782 | -0.02512 |
| 0.004608076 | -0.12620522  | 0.006315471 | -0.37256675 | 7.98E-17   | -0.48723 |
| 0.074891478 | -0.092668999 | 0.045334681 | -0.14370327 | 0.00185005 | -0.44266 |
| 0.536536424 | -0.030665047 | 0.508575888 | -0.02700433 | 0.5604921  | -0.41585 |
| 7.36E-07    | -0.225413457 | 8.58E-07    | -0.12461395 | 0.00701292 | -0.26369 |
| 0.000425125 | 0.150567196  | 0.001099718 | -0.0998775  | 0.03092898 | -0.4682  |
| 0.007331185 | -0.121842506 | 0.008393687 | -0.03436278 | 0.45880587 | -0.52433 |
| 0.093316376 | -0.07885535  | 0.088724808 | -0.08126119 | 0.07938509 | -0.24977 |
| 0.000545863 | -0.156169697 | 0.000707612 | 0.041767599 | 0.36781191 | -0.25663 |
| 0.871807098 | 0.008250198  | 0.858869444 | -0.34922614 | 7.68E-15   | -0.27749 |
| 0.000345871 | -0.164329631 | 0.000362545 | 0.116449949 | 0.01179116 | -0.12954 |
| 0.12265852  | -0.074898433 | 0.105985755 | 0.083301421 | 0.07210392 | -0.3294  |
| 0.730330932 | 0.019716718  | 0.670850296 | -0.22475266 | 9.26E-07   | -0.14994 |
| 0.939337867 | 0.007198204  | 0.876711236 | 0.106851675 | 0.02091522 | -0.20289 |
| 0.02437966  | -0.106214875 | 0.021694827 | -0.25883984 | 1.38E-08   | -0.40141 |
| 0.457431726 | -0.034269206 | 0.460030788 | -0.03784115 | 0.41458315 | -0.11758 |
| 0.000891096 | 0.147768369  | 0.001363158 | -0.21214222 | 3.75E-06   | -0.314   |
| 4.28E-05    | 0.188092405  | 4.31E-05    | -0.29581331 | 6.94E-11   | -0.12796 |
| 0.004490558 | -0.136774491 | 0.003059151 | -0.25860831 | 1.43E-08   | -0.10693 |
| 0.940725225 | -0.00979268  | 0.832840828 | -0.24786235 | 5.73E-08   | -0.11958 |
| 0.035318278 | 0.088273285  | 0.056622701 | -0.08701299 | 0.06025922 | 0.242656 |
| 0.037068884 | 0.090456744  | 0.050753925 | -0.39036193 | 1.90E-18   | -0.12836 |
| 0.62316166  | 0.012332593  | 0.790389041 | -0.01064854 | 0.81847508 | 0.225323 |



|             |              |             |             |            |          |
|-------------|--------------|-------------|-------------|------------|----------|
| 4.27E-05    | -0.193103461 | 2.65E-05    | -0.04641285 | 0.31690338 | 0.08851  |
| 0.073795025 | -0.091346724 | 0.048512041 | -0.17886224 | 0.0001018  | 0.026481 |
| 0.536473842 | 0.019550083  | 0.673471113 | -0.28624082 | 2.95E-10   | -0.13258 |
| 0.473816583 | -0.041360978 | 0.372497693 | -0.31661665 | 2.47E-12   | -0.18952 |
| 0.023398045 | 0.100103799  | 0.030548924 | -0.23895519 | 1.73E-07   | -0.21685 |
| 0.122878203 | 0.074901848  | 0.105969789 | -0.09420488 | 0.04186537 | 0.279484 |
| 0.133176559 | -0.07637969  | 0.099236893 | -0.19597961 | 2.00E-05   | -0.10944 |
| 0.279281526 | -0.051224061 | 0.269280911 | -0.30522072 | 1.59E-11   | -0.2717  |
| 0.250275464 | 0.045321838  | 0.328425277 | 0.032325544 | 0.48588357 | -0.02859 |
| 0.198004342 | 0.054850967  | 0.236787924 | -0.21872244 | 1.83E-06   | -0.17342 |
| 5.52E-06    | -0.217942142 | 1.99E-06    | -0.14488683 | 0.00169398 | 0.237575 |
| 0.001518082 | -0.150146923 | 0.001136024 | -0.1879296  | 4.37E-05   | 0.325605 |
| 0.003728843 | 0.132065764  | 0.004251817 | -0.35362241 | 3.35E-15   | -0.22268 |
| 0.359007605 | -0.044036341 | 0.34234415  | -0.28517613 | 3.45E-10   | -0.10527 |
| 0.001276163 | 0.136674417  | 0.003080955 | -0.1294378  | 0.005087   | 0.172977 |
| 0.013553557 | 0.108865976  | 0.018607266 | -0.21145068 | 4.04E-06   | -0.19396 |
| 0.5546592   | -0.039059765 | 0.399705144 | -0.2856057  | 3.24E-10   | -0.25386 |
| 0.803291671 | -0.012372197 | 0.789731635 | -0.3326689  | 1.57E-13   | 0.016486 |
| 0.378441684 | 0.034761193  | 0.453610693 | -0.35000064 | 6.64E-15   | -0.03122 |
| 0.413470411 | 0.035417888  | 0.445120307 | 0.086994677 | 0.06031344 | 0.101243 |
| 0.091395556 | 0.075423753  | 0.103551953 | -0.33901252 | 5.05E-14   | -0.07613 |
| 0.428786188 | 0.016078294  | 0.728932346 | -0.13818767 | 0.00276587 | 0.099279 |
| 0.583558014 | 0.026336303  | 0.570234927 | -0.26676164 | 4.75E-09   | 0.010318 |
| 0.403790165 | -0.033461961 | 0.470673785 | -0.16314629 | 0.00040025 | -0.05942 |
| 0.599261387 | -0.023160546 | 0.617617881 | -0.30031944 | 3.45E-11   | 0.114939 |
| 0.169673512 | -0.072922738 | 0.115546128 | -0.30726394 | 1.14E-11   | -0.03864 |
| 0.447811764 | 0.023985168  | 0.605149759 | -0.28788714 | 2.31E-10   | -0.16453 |
| 0.123154222 | 0.068500617  | 0.139386291 | -0.20091362 | 1.22E-05   | -0.25228 |
| 0.149805998 | -0.06102195  | 0.188043701 | -0.35913512 | 1.16E-15   | -0.11685 |
| 0.071708471 | -0.093110548 | 0.044313391 | -0.09935121 | 0.03182855 | 0.128027 |
| 4.33E-05    | 0.187887731  | 4.39E-05    | -0.31931036 | 1.57E-12   | -0.16213 |
| 0.461790449 | -0.049733634 | 0.283479156 | -0.20461633 | 8.30E-06   | 0.005553 |
| 0.601276337 | 0.022724591  | 0.624254387 | -0.26682623 | 4.71E-09   | -0.31    |
| 0.01430049  | -0.108577959 | 0.018923024 | -0.18799829 | 4.35E-05   | -0.0866  |
| 0.976221029 | 0.000266942  | 0.995409626 | -0.19769519 | 1.68E-05   | -0.1121  |
| 0.161010307 | -0.065568444 | 0.157164868 | -0.32577293 | 5.24E-13   | -0.09026 |
| 0.729584937 | -0.019756775 | 0.670220884 | -0.26456986 | 6.40E-09   | -0.31382 |
| 0.108876585 | 0.067972403  | 0.14246962  | -0.01748356 | 0.70629314 | 0.323099 |
| 0.069115612 | -0.090307947 | 0.051137059 | -0.08266503 | 0.07431414 | -0.06461 |
| 1.60E-11    | 0.309657156  | 7.77E-12    | 0.090473404 | 0.05071118 | 0.014352 |
| 0.000224258 | 0.167427171  | 0.000278932 | 0.040423    | 0.38344649 | 0.043058 |
| 0.174898469 | -0.067489289 | 0.145335141 | -0.26550408 | 5.64E-09   | -0.14691 |
| 0.984650496 | 0.001043317  | 0.982060397 | -0.31403078 | 3.80E-12   | -0.12604 |
| 0.227208007 | -0.052877819 | 0.254105155 | -0.16673198 | 0.00029596 | 0.060565 |
| 0.004696519 | 0.131925482  | 0.004293057 | -0.2776775  | 1.03E-09   | -0.18359 |

|             |              |             |             |            |          |
|-------------|--------------|-------------|-------------|------------|----------|
| 0.000469541 | 0.163421136  | 0.000391182 | -0.14566421 | 0.00159815 | -0.16459 |
| 0.588729645 | 0.016394545  | 0.723816032 | -0.19257072 | 2.79E-05   | -0.12437 |
| 0.00033012  | -0.166677518 | 0.00029733  | -0.15181307 | 0.00099828 | -0.2279  |
| 0.153565467 | 0.057784649  | 0.21260586  | -0.32394937 | 7.16E-13   | -0.26496 |
| 0.61193006  | -0.025959702 | 0.575762698 | 0.091360048 | 0.04847912 | 0.107178 |
| 9.09E-10    | 0.278802627  | 8.74E-10    | -0.09072099 | 0.05007943 | 0.062292 |
| 0.014382031 | 0.108852187  | 0.018622278 | 0.003482236 | 0.94017467 | -0.21106 |
| 0.058963899 | -0.099002341 | 0.032437101 | -0.17638516 | 0.00012732 | 0.195099 |
| 0.004279021 | 0.136303521  | 0.003163001 | -0.23294268 | 3.57E-07   | -0.1128  |
| 0.062295113 | 0.081034894  | 0.080228175 | -0.37077837 | 1.15E-16   | -0.20127 |
| 0.018764316 | 0.092816998  | 0.044990184 | -0.1345594  | 0.00357608 | -0.22344 |
| 0.001685686 | 0.149098942  | 0.001231419 | -0.16552266 | 0.0003279  | -0.29189 |
| 0.480343629 | 0.031766838  | 0.493457344 | -0.28171074 | 5.74E-10   | -0.27849 |
| 0.493361211 | -0.034975855 | 0.450825356 | -0.29766096 | 5.22E-11   | -0.10207 |
| 0.084144652 | 0.070184043  | 0.129900755 | -0.32282219 | 8.69E-13   | -0.21709 |
| 9.18E-05    | -0.186902624 | 4.82E-05    | -0.0824186  | 0.07518469 | 0.11748  |
| 1.16E-06    | 0.213219869  | 3.34E-06    | -0.04296066 | 0.35427588 | 0.121464 |
| 0.022944254 | -0.116597898 | 0.011683736 | -0.35951983 | 1.07E-15   | -0.0397  |
| 0.000318561 | 0.166518138  | 0.000301385 | 0.033396814 | 0.47153856 | -0.35158 |
| 1.06E-05    | 0.200250321  | 1.30E-05    | -0.30483652 | 1.69E-11   | -0.20136 |
| 0.522339925 | -0.026763542 | 0.563994585 | -0.37849409 | 2.36E-17   | -0.16065 |
| 0.1126006   | 0.066631014  | 0.15053409  | -0.31067209 | 6.59E-12   | 0.081579 |
| 0.951103192 | -0.01009953  | 0.827683651 | -0.18308841 | 6.90E-05   | 0.203569 |
| 0.749235109 | 0.005467532  | 0.906195553 | -0.34245201 | 2.70E-14   | -0.08868 |
| 0.03459655  | -0.096344258 | 0.03740819  | -0.01780911 | 0.70108434 | 0.086971 |
| 0.485274594 | 0.034378773  | 0.458596643 | -0.33309549 | 1.46E-13   | 0.093217 |
| 0.093863895 | -0.082941234 | 0.073348182 | -0.3693671  | 1.53E-16   | -0.0122  |
| 0.1774326   | 0.054321672  | 0.241349471 | -0.1390952  | 0.00259128 | -0.11839 |
| 0.552800734 | -0.032621318 | 0.481899604 | -0.26390509 | 7.01E-09   | 0.116928 |
| 0.981463629 | -0.012423406 | 0.788881825 | -0.22916574 | 5.56E-07   | 0.031723 |
| 0.000665552 | 0.161759282  | 0.000449088 | -0.17629876 | 0.00012831 | -0.22328 |
| 0.000459203 | 0.157643627  | 0.000628565 | -0.21717833 | 2.17E-06   | -0.18503 |
| 9.47E-05    | 0.177024749  | 0.000120209 | -0.21812314 | 1.95E-06   | 0.042106 |
| 0.017617967 | 0.10730711   | 0.020372692 | -0.36759174 | 2.18E-16   | -0.16908 |
| 0.00785435  | 0.123763645  | 0.007413198 | -0.36323387 | 5.19E-16   | -0.23747 |
| 0.680423929 | -0.030107816 | 0.516313241 | -0.40227539 | 1.36E-19   | 0.009254 |
| 0.006558922 | 0.123913523  | 0.007341194 | -0.33716887 | 7.04E-14   | -0.06988 |
| 0.069950345 | 0.073697847  | 0.111717804 | -0.25370569 | 2.71E-08   | -0.04422 |
| 0.417253697 | -0.045178641 | 0.329957402 | 0.000154585 | 0.99734172 | 0.104672 |
| 0.49275743  | 0.021828154  | 0.6379962   | -0.29594955 | 6.79E-11   | -0.01821 |
| 0.30525912  | -0.054325232 | 0.241318579 | -0.20833865 | 5.62E-06   | -0.0861  |
| 0.363359688 | 0.040020109  | 0.388209034 | -0.16263102 | 0.00041779 | -0.11881 |
| 0.000261543 | 0.15389934   | 0.000847551 | -0.31546047 | 3.00E-12   | 0.026719 |
| 0.002387932 | 0.14760663   | 0.001380025 | -0.02537905 | 0.58433462 | -0.35607 |
| 0.234158311 | -0.064582826 | 0.163510554 | -0.32509385 | 5.89E-13   | -0.03172 |

|             |              |             |             |            |          |
|-------------|--------------|-------------|-------------|------------|----------|
| 0.004482057 | -0.141401743 | 0.002191801 | -0.27415966 | 1.70E-09   | 0.046069 |
| 0.715060202 | 0.015221948  | 0.742846253 | -0.33013594 | 2.45E-13   | -0.11264 |
| 0.330391629 | -0.051329384 | 0.268296304 | -0.13372031 | 0.00379173 | 0.034635 |
| 0.398444281 | 0.037426622  | 0.419717568 | -0.02204838 | 0.6346085  | -0.10311 |
| 2.17E-05    | 0.196416643  | 1.91E-05    | -0.00602185 | 0.89673592 | -0.43199 |
| 0.030206738 | -0.110244746 | 0.017158529 | -0.34514496 | 1.64E-14   | 0.074452 |
| 0.145361387 | -0.063948044 | 0.167698192 | -0.17870538 | 0.00010326 | -0.00268 |
| 0.00233285  | 0.143008653  | 0.001947661 | -0.12721276 | 0.0059067  | -0.33617 |
| 0.001226663 | 0.149483333  | 0.001195604 | -0.10390117 | 0.02474335 | -0.41666 |
| 3.39E-05    | 0.197773758  | 1.67E-05    | -0.12865375 | 0.00536335 | -0.26274 |
| 0.12040253  | -0.073429681 | 0.113030853 | -0.27169901 | 2.40E-09   | -0.0091  |
| 0.77039344  | 0.012510297  | 0.787440431 | -0.20436041 | 8.53E-06   | -0.11929 |
| 0.581133024 | -0.029186399 | 0.529239637 | -0.23430054 | 3.04E-07   | -0.2266  |
| 0.025784131 | 0.105844362  | 0.02215993  | -0.07064934 | 0.12736911 | -0.46914 |
| 0.81476937  | 0.00399931   | 0.931311761 | -0.14838169 | 0.0013009  | -0.21085 |
| 0.391253458 | 0.030950722  | 0.504632811 | 0.010101304 | 0.82765384 | -0.3111  |
| 0.009999804 | 0.118225116  | 0.010558146 | -0.38337449 | 8.46E-18   | 0.047016 |
| 0.277812504 | -0.060943127 | 0.188615833 | -0.23571665 | 2.56E-07   | 0.033553 |
| 0.003518501 | 0.125516698  | 0.006609229 | -0.10851573 | 0.01899186 | 0.087525 |
| 0.896864184 | -0.009874698 | 0.831461647 | -0.21393575 | 3.09E-06   | 0.008397 |
| 0.159197046 | -0.063820323 | 0.168550387 | -0.20709897 | 6.41E-06   | -0.27195 |
| 0.513051364 | -0.029837571 | 0.520087488 | 0.035289812 | 0.44676907 | 0.19556  |
| 7.59E-12    | 0.314551529  | 3.48E-12    | -0.22994076 | 5.08E-07   | -0.01669 |
| 0.014243426 | 0.108984898  | 0.018478236 | -0.38809588 | 3.09E-18   | -0.01475 |
| 0.67312973  | -0.02232878  | 0.630306232 | -0.14368122 | 0.00185307 | -0.25816 |
| 0.71921203  | -0.02154599  | 0.642347669 | -0.202305   | 1.05E-05   | -0.15166 |
| 0.569463797 | -0.025210944 | 0.5868273   | -0.30032743 | 3.44E-11   | -0.32737 |
| 0.657932158 | 0.013180796  | 0.776342642 | -0.15397459 | 0.00084253 | -0.0766  |
| 0.849115932 | 0.007982743  | 0.86339904  | -0.3555918  | 2.29E-15   | -0.1767  |
| 0.00384717  | 0.133723066  | 0.003791004 | -0.22959215 | 5.29E-07   | 0.107783 |
| 0.00047558  | -0.17039991  | 0.000215943 | -0.24896708 | 4.98E-08   | 0.038865 |
| 0.656429612 | 0.011043641  | 0.811863431 | -0.07433859 | 0.10862902 | -0.14702 |
| 0.627656015 | -0.026836025 | 0.562939153 | -0.20184727 | 1.10E-05   | 0.211393 |
| 0.521011925 | 0.017942309  | 0.698957144 | -0.17344836 | 0.00016536 | -0.15127 |
| 0.201372731 | 0.052614699  | 0.256479147 | -0.26899435 | 3.49E-09   | 0.02369  |
| 0.003123685 | 0.137087031  | 0.002991956 | 0.022823123 | 0.62275175 | 0.010862 |
| 0.01016108  | 0.117777419  | 0.010857821 | -0.16697762 | 0.00028983 | -0.07226 |
| 0.015345034 | 0.110961359  | 0.016445257 | -0.22849661 | 6.01E-07   | -0.2727  |
| 0.088816513 | 0.078764548  | 0.089093898 | -0.19888349 | 1.49E-05   | -0.16505 |
| 0.027994942 | -0.108266019 | 0.019270269 | -0.12141879 | 0.00862491 | -0.12587 |
| 0.000746046 | 0.145962098  | 0.001562763 | -0.1535205  | 0.00087325 | 0.026916 |
| 0.009247894 | 0.117052932  | 0.011358754 | -0.44353292 | 6.29E-24   | -0.16499 |
| 0.764523167 | -0.011941877 | 0.796882572 | -0.18387649 | 6.41E-05   | -0.02999 |
| 0.004375938 | 0.130943001  | 0.004592165 | -0.25552227 | 2.14E-08   | -0.33264 |
| 0.041115327 | -0.096332241 | 0.037432055 | -0.27613853 | 1.28E-09   | -0.09241 |

|             |              |             |             |            |          |
|-------------|--------------|-------------|-------------|------------|----------|
| 0.000711455 | -0.165815919 | 0.000319872 | -0.36396262 | 4.49E-16   | -0.13999 |
| 0.16564746  | -0.067606248 | 0.14463741  | -0.40532662 | 6.82E-20   | -0.09172 |
| 0.001467715 | -0.145409736 | 0.001628959 | -0.15344144 | 0.00087871 | 0.01169  |
| 0.002816789 | -0.147851279 | 0.001354585 | -0.10762614 | 0.01999997 | 0.194645 |
| 0.004809753 | -0.136501561 | 0.003118949 | -0.2720037  | 2.30E-09   | -0.18418 |
| 0.041319217 | 0.087587327  | 0.058578738 | -0.30459129 | 1.75E-11   | -0.14766 |
| 0.587721466 | -0.036672753 | 0.42915001  | -0.14925555 | 0.00121671 | -0.13203 |
| 0.65305845  | -0.030558965 | 0.510044197 | -0.2147835  | 2.82E-06   | 0.000779 |
| 0.740348507 | 0.012801474  | 0.78261558  | -0.0590773  | 0.20253479 | -0.48971 |
| 0.000458165 | 0.162202651  | 0.000432905 | -0.03062808 | 0.50908732 | 0.12252  |
| 0.046008179 | 0.0884074    | 0.056246669 | -0.3905922  | 1.80E-18   | -0.09343 |
| 0.00019695  | 0.161635209  | 0.000453717 | -0.19585963 | 2.02E-05   | 0.031996 |
| 7.07E-05    | 0.172330364  | 0.000182458 | -0.09234209 | 0.04610348 | -0.01142 |
| 0.509090161 | -0.036648459 | 0.42945601  | 0.044258915 | 0.33990766 | -0.16495 |
| 0.78108986  | 0.015420461  | 0.739613154 | 0.006020981 | 0.89675079 | 0.00556  |
| 1.25E-05    | 0.181723075  | 7.83E-05    | -0.03970656 | 0.39194015 | 0.008265 |
| 0.246145186 | 0.036600166  | 0.430064665 | -0.01458574 | 0.75323819 | 0.143322 |
| 2.51E-07    | 0.233102474  | 3.50E-07    | -0.11775386 | 0.0108738  | -0.03163 |
| 0.416848844 | 0.040772602  | 0.379342905 | -0.16163413 | 0.00045376 | -0.10817 |
| 0.079006454 | 0.074145354  | 0.10955338  | -0.06680654 | 0.1494595  | -0.07418 |
| 0.111989917 | 0.066281848  | 0.152689133 | -0.01175843 | 0.79993623 | -0.02432 |
| 0.234400451 | 0.049361631  | 0.287100384 | -0.08841484 | 0.05622586 | 0.00608  |
| 0.002311639 | 0.139271238  | 0.002558598 | -0.00135105 | 0.9767704  | -0.00759 |
| 6.25E-05    | 0.173515098  | 0.000164386 | -0.04366199 | 0.34646718 | -0.01549 |
| 0.016751109 | 0.104218198  | 0.024304907 | -0.04237987 | 0.36082567 | -0.08545 |
| 0.47971032  | 0.017155361  | 0.711558218 | -0.02655558 | 0.56702796 | -0.11522 |
| 0.001457814 | 0.128025102  | 0.005594605 | 0.029525418 | 0.52446459 | -0.17629 |
| 0.042211375 | 0.07717883   | 0.095740441 | -0.10155275 | 0.02820898 | -0.13518 |
| 1.37E-05    | 0.176113791  | 0.000130457 | 0.056290736 | 0.22468819 | -0.03398 |
| 2.03E-08    | 0.259385255  | 1.29E-08    | -0.12254094 | 0.0080246  | -0.06195 |
| 3.18E-08    | 0.250521118  | 4.09E-08    | -0.22757955 | 6.69E-07   | -0.13125 |
| 0.023493423 | 0.093540646  | 0.043337262 | -0.06444734 | 0.16439768 | -0.02128 |
| 0.057471643 | 0.064105647  | 0.166651076 | -0.20305704 | 9.76E-06   | -0.009   |
| 0.155063541 | 0.044287211  | 0.339598705 | -0.28148515 | 5.93E-10   | 0.166873 |
| 0.844644318 | 0.014259665  | 0.758581734 | -0.26065601 | 1.09E-08   | 0.089438 |
| 0.596149613 | 0.021887806  | 0.637077838 | -0.11575338 | 0.01230873 | -0.0279  |
| 3.89E-05    | 0.176929582  | 0.000121243 | -0.03006773 | 0.51687219 | -0.01079 |
| 0.143564001 | 0.070510517  | 0.128120405 | -0.0675384  | 0.14504186 | -0.09226 |
| 0.159533743 | 0.068747625  | 0.137962128 | -0.04521082 | 0.32961269 | -0.11073 |
| 0.090746087 | 0.069057042  | 0.136193939 | -0.05235674 | 0.25882145 | -0.01404 |
| 0.185130312 | 0.050417907  | 0.276899007 | 0.031722632 | 0.49405927 | 0.13667  |
| 3.25E-07    | 0.219303033  | 1.71E-06    | -0.04592839 | 0.32198659 | 0.106194 |
| 0.869832795 | -0.01734674  | 0.708486356 | -0.02015661 | 0.66395089 | 0.225707 |
| 0.352613141 | 0.031860361  | 0.492185176 | -0.03451994 | 0.45675254 | -0.00498 |
| 0.034756346 | 0.091643006  | 0.04778434  | -0.05037724 | 0.27728712 | -0.04626 |

|             |              |             |             |            |          |
|-------------|--------------|-------------|-------------|------------|----------|
| 0.351270991 | 0.035419833  | 0.445095288 | -0.04502578 | 0.33159803 | -0.05201 |
| 0.108868952 | 0.066330464  | 0.15238768  | -0.08463002 | 0.06766248 | 0.127509 |
| 1.42E-05    | 0.186545204  | 4.99E-05    | -0.13953348 | 0.00251061 | 0.097587 |
| 0.002104967 | 0.126981086  | 0.00599853  | -0.06838233 | 0.14007228 | 0.110383 |
| 0.011392253 | 0.111597402  | 0.015834067 | -0.04988976 | 0.28196856 | 0.038567 |
| 0.595359438 | 0.036351695  | 0.433204104 | -0.0270408  | 0.55996257 | -0.02219 |
| 0.181660999 | 0.058027859  | 0.210683979 | -0.1096322  | 0.01778952 | -0.03912 |
| 0.002771317 | 0.12935049   | 0.005117127 | -0.10249838 | 0.02676632 | 0.069612 |
| 0.00208529  | 0.127000175  | 0.005990915 | -0.00531232 | 0.90884667 | 0.00843  |
| 0.023086736 | 0.095227789  | 0.039681263 | -0.06019069 | 0.19414192 | 0.033793 |
| 0.055143986 | 0.086055261  | 0.063149952 | -0.01848074 | 0.69038261 | -0.0422  |
| 0.459906167 | 0.031370466  | 0.498868507 | -0.03778166 | 0.41531771 | -0.0997  |
| 0.098633787 | 0.074226668  | 0.109163668 | -0.02380919 | 0.607801   | -0.01402 |
| 0.039172357 | 0.093001884  | 0.044562915 | -0.01390072 | 0.76447727 | -0.04047 |
| 0.000903767 | 0.14137508   | 0.002196077 | -0.13093133 | 0.00459583 | -0.08172 |
| 0.416179894 | 0.035573607  | 0.44312034  | -0.07336318 | 0.11335834 | 0.122218 |
| 0.082223346 | 0.057476774  | 0.215056791 | -0.16473588 | 0.00035038 | 0.110839 |
| 0.610984738 | -0.023155532 | 0.617694031 | -0.05938037 | 0.20022451 | -0.0858  |
| 2.02E-06    | 0.206999828  | 6.47E-06    | 0.069844708 | 0.13177147 | -0.07048 |
| 0.04351727  | -0.0945439   | 0.041130519 | -0.2620433  | 9.01E-09   | 0.112122 |
| 0.005862896 | 0.113433704  | 0.014179853 | -0.14544571 | 0.00162457 | -0.00516 |
| 0.4703739   | 0.030466406  | 0.511327125 | -0.15829117 | 0.0005965  | 0.026883 |
| 0.091046744 | 0.076719702  | 0.097737031 | -0.10987733 | 0.01753461 | 0.175446 |
| 0.023398563 | 0.070962557  | 0.125686597 | -0.12288613 | 0.00784759 | 0.084154 |
| 0.095179852 | 0.065827397  | 0.155528932 | -0.12777987 | 0.00568722 | -0.04606 |
| 0.541939254 | 0.009457297  | 0.838485756 | -0.10179038 | 0.02784031 | 0.150718 |
| 0.009746167 | 0.102055082  | 0.027434507 | -0.03429903 | 0.45964015 | -0.02361 |
| 3.28E-08    | 0.234715547  | 2.89E-07    | -0.18365528 | 6.55E-05   | -0.01657 |
| 0.612580623 | 0.015634859  | 0.736126501 | -0.0839057  | 0.07005517 | 0.111265 |
| 5.91E-05    | 0.180794753  | 8.53E-05    | -0.08763165 | 0.05845069 | -0.05197 |
| 4.61E-05    | 0.16969525   | 0.000229539 | -0.04021776 | 0.38586814 | -0.04273 |
| 0.580368522 | 0.022514723  | 0.627460092 | -0.13641533 | 0.00313806 | -0.11133 |
| 0.066032122 | 0.094318713  | 0.041617397 | -0.02213735 | 0.63324215 | 0.255397 |
| 0.001268684 | 0.137037553  | 0.003002503 | 0.02341922  | 0.61369471 | 0.028647 |
| 0.008428419 | 0.11221499   | 0.015259758 | -0.09421784 | 0.04183706 | 0.006467 |
| 0.575603223 | 0.016234548  | 0.726402945 | -0.17610744 | 0.00013053 | -0.01683 |
| 0.010070337 | 0.115513782  | 0.012491346 | -0.08043677 | 0.0824915  | 0.005112 |
| 0.038044364 | 0.089187885  | 0.054099253 | -0.165312   | 0.00033379 | 0.13096  |
| 6.75E-09    | 0.252615316  | 3.12E-08    | -0.10710433 | 0.02061272 | 0.114079 |
| 0.028778585 | 0.086632599  | 0.061393989 | -0.02820762 | 0.54314824 | 0.080295 |
| 0.329361992 | 0.02711857   | 0.558834044 | -0.03795937 | 0.41312566 | -0.11648 |
| 0.00394093  | 0.126607123  | 0.006149466 | -0.05156843 | 0.26607074 | -0.03756 |
| 0.024965307 | 0.080551328  | 0.082054045 | -0.04937179 | 0.28700107 | -0.06052 |
| 0.052240313 | 0.081081164  | 0.080055204 | -0.1500373  | 0.00114567 | -0.05028 |
| 0.009549284 | 0.104592655  | 0.023795696 | -0.06782102 | 0.14336282 | -0.02192 |

|             |              |             |             |            |          |
|-------------|--------------|-------------|-------------|------------|----------|
| 3.14E-11    | 0.296156941  | 6.58E-11    | -0.17644485 | 0.00012664 | -0.18001 |
| 0.180572781 | 0.046993848  | 0.310876785 | -0.05196541 | 0.26240294 | 0.106861 |
| 1.87E-05    | 0.193303701  | 2.60E-05    | -0.06766043 | 0.14431505 | -0.15656 |
| 9.50E-06    | 0.196379054  | 1.92E-05    | -0.04964358 | 0.28435297 | -0.06901 |
| 0.000107864 | 0.158767434  | 0.000573886 | 0.004065946 | 0.93017018 | -0.06897 |
| 0.001004357 | 0.138831657  | 0.002640915 | -0.0243844  | 0.59915421 | -0.07497 |
| 0.006927048 | 0.114614521  | 0.013198232 | -0.04921812 | 0.2885057  | -0.11992 |
| 8.32E-06    | 0.188027945  | 4.33E-05    | -0.00373464 | 0.93584733 | 0.054441 |
| 2.65E-06    | 0.19801285   | 1.63E-05    | -0.01073344 | 0.81705328 | 0.036255 |
| 0.000617229 | 0.139306411  | 0.002552114 | -0.05412672 | 0.24304502 | -0.02323 |
| 0.017888938 | 0.101295638  | 0.028612591 | -0.01180178 | 0.79921437 | -0.06474 |
| 5.10E-07    | 0.210068864  | 4.68E-06    | -0.03085127 | 0.50600373 | -0.04492 |
| 0.000433745 | 0.144765294  | 0.001709435 | -0.03919879 | 0.39802833 | -0.02498 |
| 0.013788356 | 0.097042173  | 0.036044145 | -0.0095363  | 0.83715519 | -0.09506 |
| 0.075080097 | 0.070911072  | 0.125961971 | -0.06272457 | 0.17599507 | -0.00849 |
| 8.48E-06    | 0.185128231  | 5.70E-05    | -0.0532258  | 0.250989   | -0.0282  |
| 1.28E-07    | 0.229156233  | 5.57E-07    | -0.09042295 | 0.05084074 | -0.13096 |
| 0.266475208 | 0.040965112  | 0.377094787 | -0.07246145 | 0.11787283 | 0.043253 |
| 0.025350398 | 0.08888744   | 0.05491768  | -0.06331676 | 0.17194188 | -0.03919 |
| 0.058991211 | 0.082428354  | 0.075150075 | -0.05930956 | 0.20076259 | -0.01306 |
| 0.001838027 | 0.132859338  | 0.004025193 | -0.12837668 | 0.00546419 | -0.06849 |
| 1.52E-09    | 0.256079598  | 1.99E-08    | -0.12577867 | 0.00649604 | -0.01104 |
| 0.109411861 | -0.085369727 | 0.065288508 | -0.18281629 | 7.08E-05   | 0.181511 |
| 0.000941681 | 0.14092474   | 0.002269477 | -0.0370479  | 0.42444088 | -0.0432  |
| 9.25E-06    | 0.190706691  | 3.35E-05    | -0.05284139 | 0.2544329  | -0.05753 |
| 1.91E-09    | 0.252247748  | 3.27E-08    | -0.23877684 | 1.77E-07   | -0.01588 |
| 0.000340535 | 0.167162102  | 0.000285312 | -0.18980719 | 3.65E-05   | -0.28024 |
| 0.238164043 | 0.052420493  | 0.258241186 | -0.44946914 | 1.33E-24   | -0.28216 |
| 0.040353305 | 0.09626437   | 0.037567085 | -0.32771123 | 3.74E-13   | -0.37232 |
| 2.06E-10    | 0.291107903  | 1.42E-10    | -0.2161777  | 2.42E-06   | -0.06824 |
| 1.18E-13    | 0.330942976  | 2.13E-13    | -0.04011311 | 0.38710648 | -0.26038 |
| 0.182701624 | 0.05813908   | 0.209809278 | -0.13355273 | 0.00383619 | -0.39143 |
| 0.001023904 | 0.146096037  | 0.001547089 | -0.51395219 | 7.65E-33   | -0.01233 |
| 0.532637753 | -0.037313387 | 0.421126564 | -0.13423915 | 0.00365704 | 0.068927 |
| 0.238572211 | 0.050179269  | 0.27918193  | -0.26649035 | 4.93E-09   | -0.47335 |
| 0.476678267 | 0.026223072  | 0.571894287 | -0.23391546 | 3.18E-07   | -0.27859 |
| 0.322809374 | 0.044743233  | 0.334644291 | -0.17889376 | 0.0001015  | -0.19791 |
| 0.838211662 | 0.012651068  | 0.785106801 | -0.19357286 | 2.53E-05   | -0.43177 |
| 0.001255938 | 0.152721146  | 0.000929867 | -0.19765474 | 1.69E-05   | -0.34242 |
| 0.025972442 | 0.098279239  | 0.033730139 | -0.24781885 | 5.77E-08   | -0.06799 |
| 0.004031737 | 0.135893256  | 0.003256065 | -0.08995407 | 0.05205797 | -0.35849 |
| 0.271970751 | -0.062483608 | 0.177664521 | -0.17536995 | 0.00013943 | -0.49812 |
| 0.000447579 | 0.165860072  | 0.000318679 | -0.33985728 | 4.33E-14   | -0.40165 |
| 0.106118047 | 0.06998792   | 0.130979434 | -0.28458674 | 3.77E-10   | -0.38733 |
| 0.079094977 | 0.076176543  | 0.100141713 | -0.39021666 | 1.96E-18   | -0.0506  |

|             |              |             |             |            |          |
|-------------|--------------|-------------|-------------|------------|----------|
| 0.004208075 | 0.132311603  | 0.004180408 | -0.23035546 | 4.84E-07   | -0.31999 |
| 0.293536831 | 0.042946187  | 0.354438168 | -0.2510108  | 3.84E-08   | -0.44721 |
| 0.073011027 | 0.080376095  | 0.082723929 | -0.3874374  | 3.56E-18   | -0.42017 |
| 0.668181816 | 0.00633976   | 0.89131727  | -0.31970147 | 1.47E-12   | -0.31142 |
| 0.000670776 | 0.157039265  | 0.000659931 | -0.42776141 | 3.36E-22   | -0.1444  |
| 0.022463768 | 0.10615895   | 0.021764482 | -0.14106396 | 0.00224655 | -0.31508 |
| 0.066358149 | -0.09147043  | 0.048207084 | 0.02761099  | 0.5517145  | -0.19233 |
| 0.020838725 | 0.111283388  | 0.016133277 | -0.14420843 | 0.00178189 | -0.37462 |
| 2.70E-08    | 0.259078158  | 1.34E-08    | -0.28388975 | 4.17E-10   | -0.30437 |
| 0.004464807 | 0.131135738  | 0.004532046 | -0.24652075 | 6.79E-08   | -0.24002 |
| 0.304085021 | -0.049209558 | 0.288589645 | -0.17325282 | 0.00016824 | -0.14014 |
| 0.015784062 | 0.106269937  | 0.021626435 | -0.25014546 | 4.29E-08   | -0.18693 |
| 0.017256969 | 0.098558889  | 0.033224955 | -0.21006117 | 4.68E-06   | -0.16158 |
| 0.003372857 | 0.13188732   | 0.004304338 | -0.31318933 | 4.36E-12   | -0.42968 |
| 0.100753212 | 0.076421334  | 0.099052214 | -0.27032013 | 2.90E-09   | -0.29749 |
| 0.000842867 | 0.144697507  | 0.001718108 | -0.2384347  | 1.85E-07   | -0.32106 |
| 0.35096781  | 0.050091656  | 0.280023271 | -0.34812503 | 9.45E-15   | -0.12944 |
| 0.001687851 | 0.149008618  | 0.001239977 | -0.29833252 | 4.70E-11   | -0.1377  |
| 0.900083694 | -0.005797747 | 0.900558667 | -0.32792914 | 3.61E-13   | -0.43562 |
| 0.417007542 | -0.046093753 | 0.320245607 | -0.13227425 | 0.00419119 | -0.2669  |
| 0.016165383 | 0.110833603  | 0.016570483 | -0.21153676 | 4.00E-06   | -0.36637 |
| 5.40E-11    | 0.29656656   | 6.18E-11    | -0.11775111 | 0.01087566 | -0.25788 |
| 0.003857272 | 0.132653874  | 0.004082795 | -0.20097672 | 1.21E-05   | -0.32628 |
| 0.137192553 | 0.077939032  | 0.092506272 | -0.08080392 | 0.08109614 | -0.28352 |
| 0.061330556 | -0.093904    | 0.042526785 | -0.40032212 | 2.11E-19   | -0.10895 |
| 0.001401114 | 0.146161765  | 0.001539449 | -0.17020332 | 0.00021966 | -0.35687 |
| 0.01838613  | 0.11089058   | 0.016514532 | -0.24947768 | 4.67E-08   | -0.32233 |
| 0.28850918  | -0.05032266  | 0.277808656 | -0.35404071 | 3.09E-15   | -0.05142 |
| 0.225698279 | 0.064065073  | 0.16692018  | -0.11565735 | 0.01238164 | -0.34674 |
| 1.65E-05    | 0.201180835  | 1.18E-05    | -0.2227938  | 1.16E-06   | -0.16724 |
| 0.049593493 | 0.090474371  | 0.050708695 | -0.19812141 | 1.61E-05   | -0.31263 |
| 0.000700761 | 0.150071882  | 0.001142621 | -0.29014171 | 1.65E-10   | -0.13928 |
| 0.000278073 | 0.156312019  | 0.000699596 | -0.10944587 | 0.01798543 | -0.31032 |
| 4.99E-08    | 0.251382283  | 3.66E-08    | -0.16824946 | 0.00025998 | -0.02607 |
| 0.000192544 | 0.181798555  | 7.78E-05    | -0.20626958 | 6.99E-06   | -0.36797 |
| 2.08E-05    | 0.199547171  | 1.40E-05    | -0.24536769 | 7.85E-08   | -0.30388 |
| 0.021614428 | 0.098365666  | 0.033573316 | -0.13786898 | 0.00282968 | -0.29507 |
| 0.529826178 | 0.025886431  | 0.576841092 | -0.2719023  | 2.33E-09   | -0.25261 |
| 5.21E-05    | 0.17539545   | 0.000139111 | -0.23910887 | 1.70E-07   | -0.35234 |
| 3.78E-10    | 0.282686198  | 4.98E-10    | -0.16984407 | 0.0002266  | -0.17934 |
| 0.085100694 | 0.087993453  | 0.057414009 | -0.22340566 | 1.08E-06   | -0.42276 |
| 0.040404938 | 0.090349524  | 0.051029763 | -0.37871226 | 2.25E-17   | -0.16654 |
| 0.00329664  | 0.136662507  | 0.003083559 | -0.30191178 | 2.68E-11   | -0.16284 |
| 1.39E-06    | 0.225794443  | 8.21E-07    | -0.31852302 | 1.80E-12   | 0.003052 |
| 0.610730173 | -0.022716263 | 0.624381465 | 0.01438898  | 0.75646118 | -0.23196 |

|             |              |             |             |            |          |
|-------------|--------------|-------------|-------------|------------|----------|
| 0.029572692 | 0.095176819  | 0.039787765 | -0.1901816  | 3.52E-05   | -0.25273 |
| 0.688007209 | 0.017976982  | 0.698403804 | -0.19734871 | 1.74E-05   | -0.08284 |
| 0.11453204  | 0.080463659  | 0.082388638 | -0.11652259 | 0.01173831 | -0.13476 |
| 1.24E-10    | 0.301494559  | 2.87E-11    | -0.31436404 | 3.59E-12   | -0.1869  |
| 0.00158825  | 0.152281427  | 0.000962435 | -0.28854088 | 2.09E-10   | -0.06697 |
| 0.89185556  | 0.003923725  | 0.932606823 | -0.38981981 | 2.13E-18   | -0.16196 |
| 0.556826648 | 0.021731467  | 0.639485887 | -0.24400852 | 9.30E-08   | -0.12156 |
| 0.066673123 | -0.093916199 | 0.042499797 | -0.3032529  | 2.17E-11   | -0.15142 |
| 0.970196801 | 0.005530482  | 0.905120596 | -0.33949479 | 4.63E-14   | -0.34003 |
| 0.008418145 | 0.128657357  | 0.005362047 | -0.08009099 | 0.08382328 | -0.28039 |
| 0.011293868 | -0.113406493 | 0.014203212 | -0.19352423 | 2.55E-05   | -0.0374  |
| 0.030278868 | 0.095390953  | 0.039341951 | -0.30754503 | 1.09E-11   | -0.4188  |
| 5.92E-07    | 0.223190064  | 1.11E-06    | -0.16610918 | 0.00031203 | -0.46287 |
| 0.017295848 | 0.104627718  | 0.023748492 | -0.3974111  | 4.04E-19   | -0.43445 |
| 0.324159321 | 0.045994483  | 0.321290025 | -0.20691033 | 6.54E-06   | -0.16765 |
| 0.91216374  | -0.003283973 | 0.943575038 | -0.34512169 | 1.65E-14   | -0.52463 |
| 0.828348191 | 0.001618193  | 0.972178817 | -0.19603893 | 1.99E-05   | -0.36497 |
| 0.11286073  | 0.079323046  | 0.086843145 | -0.33572652 | 9.12E-14   | -0.17831 |
| 0.288466363 | -0.048442992 | 0.29617562  | -0.11601011 | 0.01211569 | -0.2847  |
| 0.851176444 | -0.005342921 | 0.908323947 | -0.22827421 | 6.17E-07   | -0.29801 |
| 0.850046286 | -0.011412824 | 0.805697513 | -0.25151488 | 3.60E-08   | -0.35406 |
| 0.00012831  | 0.170093106  | 0.000221767 | -0.1762559  | 0.00012881 | -0.3575  |
| 0.020358803 | 0.11500679   | 0.012885656 | -0.03614262 | 0.43585597 | -0.27027 |
| 0.146956177 | 0.067806573  | 0.143448304 | -0.34691935 | 1.18E-14   | -0.40416 |
| 0.585019794 | -0.030190209 | 0.515165369 | -0.30178718 | 2.74E-11   | -0.13927 |
| 3.07E-14    | 0.333283012  | 1.41E-13    | -0.26114094 | 1.02E-08   | -0.19458 |
| 1.22E-07    | 0.239188526  | 1.68E-07    | -0.31259936 | 4.81E-12   | -0.38765 |
| 0.076536176 | 0.079229902  | 0.087215306 | -0.23409557 | 3.11E-07   | 0.025402 |
| 0.00117864  | 0.151067997  | 0.001057853 | -0.3030663  | 2.24E-11   | -0.24221 |
| 0.979172097 | -0.018884332 | 0.68398119  | -0.23236594 | 3.82E-07   | 0.004776 |
| 0.090624183 | 0.069706604  | 0.132538744 | -0.16289818 | 0.00040861 | -0.34494 |
| 0.456862824 | 0.029146911  | 0.529797251 | -0.13790637 | 0.00282212 | -0.41966 |
| 0.291333969 | 0.044998533  | 0.331890982 | -0.11754823 | 0.01101413 | -0.28476 |
| 0.000529579 | 0.163870309  | 0.00037677  | -0.4078819  | 3.80E-20   | -0.01105 |
| 0.054082038 | 0.087923432  | 0.057613443 | -0.15059898 | 0.00109702 | -0.5803  |
| 0.126704979 | 0.077903109  | 0.092657106 | -0.27490077 | 1.53E-09   | -0.08515 |
| 0.222198343 | -0.066474972 | 0.151494301 | -0.38214655 | 1.10E-17   | -0.12027 |
| 0.000531606 | 0.157284132  | 0.000647052 | -0.06620602 | 0.15316022 | -0.29388 |
| 0.100521902 | 0.072087257  | 0.119786972 | -0.33819149 | 5.86E-14   | -0.44709 |
| 0.016993391 | 0.111639638  | 0.015794195 | -0.27492779 | 1.52E-09   | 0.076553 |
| 1.34E-09    | 0.271374491  | 2.51E-09    | -0.05469793 | 0.23810055 | -0.17449 |
| 0.134115295 | 0.067776765  | 0.143624763 | -0.37167476 | 9.57E-17   | 0.209836 |
| 0.00064873  | 0.166659558  | 0.000297784 | -0.27135001 | 2.52E-09   | -0.31825 |
| 0.212937649 | 0.056955166  | 0.219255413 | -0.11628598 | 0.01191123 | -0.55005 |
| 0.192781708 | 0.064349003  | 0.16504384  | -0.43063883 | 1.65E-22   | -0.3445  |



|             |              |             |             |            |          |
|-------------|--------------|-------------|-------------|------------|----------|
| 0.054225327 | 0.096022184  | 0.038052291 | -0.19249858 | 2.81E-05   | -0.08768 |
| 0.003787039 | 0.136196789  | 0.003186977 | -0.25878328 | 1.39E-08   | -0.3692  |
| 0.018796683 | 0.102044572  | 0.027450523 | -0.10810951 | 0.01944658 | -0.03775 |
| 0.622740386 | 0.023280495  | 0.615797323 | -0.32933466 | 2.82E-13   | -0.40509 |
| 0.002590323 | 0.140923623  | 0.002269662 | -0.29742345 | 5.41E-11   | -0.43753 |
| 0.046838934 | 0.092443502  | 0.045863833 | -0.26357466 | 7.33E-09   | -0.44911 |
| 0.126691333 | 0.076440201  | 0.098968635 | -0.32500941 | 5.97E-13   | -0.25205 |
| 0.963997782 | -0.000678151 | 0.988338777 | -0.38906596 | 2.51E-18   | -0.30968 |
| 0.040428221 | 0.089708319  | 0.052705586 | -0.21368821 | 3.17E-06   | -0.03781 |
| 0.564842628 | 0.026065615  | 0.574205552 | -0.20779665 | 5.95E-06   | -0.39207 |
| 2.24E-06    | 0.213354711  | 3.29E-06    | -0.19933801 | 1.43E-05   | 0.193864 |
| 3.03E-05    | 0.207251687  | 6.31E-06    | 0.048449537 | 0.29611029 | 0.427354 |
| 1.05E-10    | 0.29331323   | 1.02E-10    | -0.34080489 | 3.65E-14   | 0.18386  |
| 4.58E-09    | 0.27706558   | 1.12E-09    | -0.06168028 | 0.18331504 | 0.407092 |
| 0.004742168 | 0.130615594  | 0.004695944 | -0.21756534 | 2.07E-06   | 0.383242 |
| 4.59E-21    | 0.425000684  | 6.61E-22    | -0.05542771 | 0.23188705 | 0.269708 |
| 0.015470943 | -0.100087244 | 0.030576592 | -0.31098968 | 6.26E-12   | 0.263264 |
| 0.008591971 | 0.137832913  | 0.002836985 | -0.14060002 | 0.00232378 | 0.400051 |
| 0.005111463 | -0.117171205 | 0.011275605 | -0.24123834 | 1.31E-07   | 0.364866 |
| 2.77E-08    | 0.263944229  | 6.97E-09    | -0.01282127 | 0.78228787 | 0.476265 |
| 0.014435723 | 0.120602423  | 0.009086452 | -0.26948109 | 3.26E-09   | 0.398961 |
| 0.128146451 | 0.075290899  | 0.104163242 | 0.074413113 | 0.10827422 | 0.394513 |
| 1.92E-07    | 0.238352526  | 1.86E-07    | -0.0625824  | 0.17697865 | 0.26771  |
| 0.000996954 | 0.168647041  | 0.000251251 | -0.15762375 | 0.00062957 | 0.036721 |
| 0.040075789 | 0.111955693  | 0.015498619 | -0.19856866 | 1.54E-05   | 0.220258 |
| 0.933197901 | 0.011324541  | 0.807170893 | -0.17929487 | 9.79E-05   | 0.124823 |
| 1.15E-05    | 0.205534018  | 7.55E-06    | -0.2408938  | 1.37E-07   | 0.364316 |
| 6.35E-10    | 0.285357236  | 3.36E-10    | -0.36444042 | 4.09E-16   | 0.149831 |
| 6.28E-08    | 0.261602769  | 9.56E-09    | -0.18091893 | 8.43E-05   | 0.183492 |
| 0.033240457 | 0.098600174  | 0.033150925 | -0.34597853 | 1.41E-14   | 0.194767 |
| 0.880169307 | -0.004830388 | 0.917084885 | -0.33714703 | 7.07E-14   | 0.310187 |
| 0.219235061 | -0.051389357 | 0.267736759 | -0.31271974 | 4.71E-12   | 0.240162 |
| 0.026376798 | 0.103072617  | 0.025921614 | -0.05007296 | 0.28020305 | 0.206715 |
| 0.582855883 | 0.042739966  | 0.356755847 | -0.02028587 | 0.66192894 | 0.488844 |
| 0.10011239  | 0.086917147  | 0.060543483 | -0.19146361 | 3.11E-05   | 0.394174 |
| 0.000258955 | 0.182818204  | 7.08E-05    | -0.06101903 | 0.18806488 | 0.430219 |
| 2.57E-05    | 0.208780657  | 5.37E-06    | -0.15888446 | 0.00056845 | 0.168832 |
| 0.045985219 | 0.104832415  | 0.023474523 | -0.00378037 | 0.93506357 | 0.375192 |
| 2.06E-05    | 0.200490503  | 1.27E-05    | -0.25584966 | 2.05E-08   | 0.050792 |
| 4.03E-09    | 0.281268627  | 6.12E-10    | 0.020031577 | 0.66590914 | 0.422344 |
| 0.797052676 | 0.0119216    | 0.797219954 | -0.29267531 | 1.12E-10   | 0.27585  |
| 0.576871193 | 0.032283529  | 0.486450931 | -0.09797093 | 0.03429468 | 0.144649 |
| 0.026054444 | 0.118071728  | 0.010659983 | -0.12980792 | 0.00496106 | 0.245498 |
| 0.045395357 | 0.101932787  | 0.027621351 | 0.054625109 | 0.23872692 | 0.319374 |
| 0.003948867 | 0.150723881  | 0.001086458 | -0.00036502 | 0.99372314 | 0.243819 |

|             |              |             |             |            |          |
|-------------|--------------|-------------|-------------|------------|----------|
| 0.001811033 | 0.146201637  | 0.001534832 | -0.15210755 | 0.0009756  | 0.391274 |
| 2.48E-09    | 0.275492891  | 1.40E-09    | -0.08257283 | 0.07463889 | 0.326554 |
| 0.222084433 | -0.040264495 | 0.38531589  | -0.03566673 | 0.44192672 | 0.337571 |
| 0.03691324  | 0.108051466  | 0.019512315 | -0.11781461 | 0.01083265 | 0.409405 |
| 0.142513553 | 0.072224433  | 0.119082457 | -0.09176031 | 0.04749877 | 0.244344 |
| 0.227062178 | 0.061440067  | 0.185030151 | -0.11774978 | 0.01087656 | 0.2835   |
| 9.53E-06    | 0.208923743  | 5.29E-06    | -0.24972416 | 4.53E-08   | 0.378574 |
| 0.002063601 | 0.147781083  | 0.00136184  | -0.10831173 | 0.01921904 | 0.389055 |
| 3.16E-06    | 0.229395112  | 5.42E-07    | -0.02016093 | 0.66388328 | 0.144089 |
| 0.000211466 | 0.178399237  | 0.000106168 | -0.20990972 | 4.76E-06   | 0.069555 |
| 9.14E-09    | 0.26346116   | 7.44E-09    | -0.24922451 | 4.82E-08   | 0.247554 |
| 0.017733768 | 0.123183541  | 0.00769788  | -0.12584483 | 0.00646774 | 0.070754 |
| 0.00197603  | 0.144103991  | 0.001795792 | -0.13734497 | 0.00293751 | 0.671727 |
| 4.56E-10    | 0.284100481  | 4.04E-10    | -0.26094559 | 1.04E-08   | 0.086474 |
| 5.32E-06    | 0.208730331  | 5.39E-06    | -0.04999221 | 0.28098032 | 0.13139  |
| 0.215804436 | 0.060352045  | 0.192946996 | -0.0763489  | 0.09937362 | 0.338879 |
| 0.047628037 | 0.10555589   | 0.022528011 | -0.11364473 | 0.01399985 | 0.171792 |
| 0.042720159 | 0.102240538  | 0.027153239 | -0.32405968 | 7.03E-13   | 0.257863 |
| 8.69E-09    | 0.271345432  | 2.52E-09    | -0.23644189 | 2.35E-07   | 0.228522 |
| 2.54E-09    | 0.271994057  | 2.30E-09    | 0.014989209 | 0.74664253 | 0.313637 |
| 1.26E-06    | 0.225957035  | 8.06E-07    | 0.069293712 | 0.13485328 | -0.03625 |
| 2.10E-05    | 0.210451327  | 4.49E-06    | -0.23082009 | 4.58E-07   | 0.167661 |
| 1.43E-06    | 0.222827202  | 1.15E-06    | -0.14255329 | 0.00201419 | 0.056263 |
| 0.000246482 | -0.16340187  | 0.000391811 | -0.21048441 | 4.48E-06   | 0.058808 |
| 0.349615583 | 0.043264034  | 0.350884553 | -0.14529293 | 0.00164328 | 0.386769 |
| 0.000112905 | 0.189750369  | 3.67E-05    | -0.07755488 | 0.09412949 | 0.475114 |
| 0.483180177 | 0.045487149  | 0.32666228  | -0.29618709 | 6.55E-11   | 0.418601 |
| 0.002434342 | 0.143976733  | 0.001812861 | -0.20678931 | 6.62E-06   | -0.01087 |
| 6.24E-06    | 0.217179349  | 2.17E-06    | 0.149000626 | 0.00124074 | 0.425122 |
| 0.347460372 | 0.040843492  | 0.378514108 | 0.00606462  | 0.89600669 | 0.25235  |
| 0.000211745 | 0.180385552  | 8.86E-05    | 0.050376293 | 0.27729619 | 0.463123 |
| 0.604051185 | 0.021427399  | 0.644180232 | -0.27774509 | 1.02E-09   | 0.118472 |
| 0.060270328 | 0.098016521  | 0.034210686 | 0.174525853 | 0.00015031 | 0.451843 |
| 5.22E-10    | 0.297784436  | 5.12E-11    | -0.03813154 | 0.41100852 | 0.252212 |
| 0.725307455 | -0.001872285 | 0.967812487 | -0.20703564 | 6.45E-06   | 0.166744 |
| 8.03E-06    | 0.203453686  | 9.37E-06    | -0.15912097 | 0.00055762 | -0.02285 |
| 0.026365236 | 0.11088233   | 0.016522623 | -0.12141434 | 0.00862736 | 0.05227  |
| 1.73E-05    | 0.209862791  | 4.78E-06    | -0.15807377 | 0.00060709 | 0.431047 |
| 0.00471032  | 0.146972412  | 0.001448037 | -0.04103858 | 0.37623898 | 0.021691 |
| 0.211546331 | 0.068232049  | 0.140947536 | -0.11147709 | 0.01594813 | 0.528711 |
| 0.269930946 | -0.04668003  | 0.314122544 | -0.21244647 | 3.63E-06   | 0.206992 |
| 0.039368111 | -0.094844094 | 0.040488954 | -0.10284556 | 0.02625283 | 0.243818 |
| 0.018999901 | 0.114567678  | 0.013236002 | -0.27339969 | 1.89E-09   | 0.079002 |
| 4.19E-06    | 0.220157379  | 1.56E-06    | -0.25158521 | 3.57E-08   | 0.238341 |
| 1.53E-11    | 0.31724031   | 2.23E-12    | -0.13063832 | 0.00468867 | 0.063519 |

|             |              |             |             |            |          |
|-------------|--------------|-------------|-------------|------------|----------|
| 6.21E-09    | 0.284389791  | 3.88E-10    | -0.04643859 | 0.31663481 | 0.162188 |
| 0.344360998 | 0.056858195  | 0.220042394 | -0.07757227 | 0.09405553 | 0.309822 |
| 0.000122154 | 0.178231117  | 0.000107799 | -0.23491927 | 2.82E-07   | -0.12123 |
| 0.520572368 | 0.048825929  | 0.292369589 | -0.1076662  | 0.01995359 | 0.2267   |
| 0.001164035 | -0.138745775 | 0.002657277 | -0.19819329 | 1.60E-05   | 0.168901 |
| 0.907149608 | 0.011797666  | 0.799282872 | -0.26676124 | 4.75E-09   | 0.388917 |
| 0.003552944 | 0.14183162   | 0.002123887 | -0.3681816  | 1.94E-16   | 0.082502 |
| 5.58E-06    | 0.215727881  | 2.54E-06    | 0.041487644 | 0.37103409 | 0.304964 |
| 0.100241397 | 0.088004697  | 0.057382039 | -0.09088642 | 0.04966099 | 0.096314 |
| 8.38E-11    | 0.289831943  | 1.72E-10    | -0.1244945  | 0.00706796 | -0.00725 |
| 1.06E-05    | 0.213178151  | 3.35E-06    | -0.0031528  | 0.94582535 | 0.492441 |
| 0.951244644 | -0.004182547 | 0.928172976 | -0.38936607 | 2.35E-18   | 0.075621 |
| 2.02E-09    | 0.268060814  | 3.97E-09    | -0.27192379 | 2.32E-09   | 0.311604 |
| 0.000805641 | 0.153138528  | 0.000899897 | -0.24719188 | 6.24E-08   | 0.204975 |
| 2.19E-08    | 0.258696151  | 1.41E-08    | -0.00071255 | 0.98774732 | 0.053077 |
| 3.58E-06    | 0.224677192  | 9.34E-07    | -0.0127734  | 0.78308039 | 0.178117 |
| 8.83E-08    | 0.248480922  | 5.30E-08    | 0.064359853 | 0.16497246 | 0.42644  |
| 0.566925917 | 0.034885067  | 0.452002198 | -0.28588321 | 3.11E-10   | 0.111674 |
| 0.000339902 | 0.176029194  | 0.00013145  | 0.004115496 | 0.92932141 | 0.386896 |
| 0.040439084 | 0.0989171    | 0.032587293 | -0.20307372 | 9.74E-06   | 0.381092 |
| 1.98E-15    | 0.353415389  | 3.48E-15    | -0.19052286 | 3.41E-05   | -0.04746 |
| 0.016513614 | 0.107740442  | 0.019867892 | -0.38338565 | 8.44E-18   | 0.372793 |
| 5.06E-07    | 0.223866753  | 1.02E-06    | -0.24101998 | 1.35E-07   | 0.218526 |
| 2.24E-06    | 0.226370136  | 7.69E-07    | 0.000969336 | 0.98333228 | 0.282735 |
| 4.96E-05    | 0.184411128  | 6.10E-05    | -0.3298838  | 2.56E-13   | 0.196821 |
| 1.31E-07    | 0.255039412  | 2.28E-08    | -0.12468688 | 0.0069795  | 0.191918 |
| 0.00164654  | 0.149002565  | 0.001240552 | 0.087597437 | 0.05854951 | 0.355634 |
| 0.153433722 | 0.074849328  | 0.106215552 | -0.26371331 | 7.19E-09   | 0.331731 |
| 0.030637807 | 0.111733097  | 0.015706282 | -0.17377974 | 0.00016059 | 0.255754 |
| 2.48E-13    | 0.341652481  | 3.12E-14    | -0.27154911 | 2.45E-09   | 0.081101 |
| 7.72E-08    | 0.246134254  | 7.13E-08    | -0.26004234 | 1.18E-08   | 0.201354 |
| 0.015288172 | 0.119237325  | 0.009907483 | -0.42271257 | 1.15E-21   | 0.118838 |
| 0.00226535  | 0.13966499   | 0.002486856 | 0.057944236 | 0.21134336 | 0.26852  |
| 0.732076222 | -0.003418781 | 0.941262866 | -0.21986067 | 1.61E-06   | 0.079793 |
| 1.70E-14    | 0.34587765   | 1.44E-14    | -0.29772106 | 5.17E-11   | 0.131279 |
| 0.068176109 | 0.090400821  | 0.050897638 | -0.26736681 | 4.37E-09   | 0.089902 |
| 0.072465282 | 0.103041314  | 0.025967061 | -0.04578496 | 0.32350173 | 0.132613 |
| 0.002627317 | 0.146582336  | 0.001491382 | -0.06216549 | 0.17988649 | 0.403972 |
| 0.00179395  | 0.150670905  | 0.001090925 | -0.10494848 | 0.0233204  | 0.007189 |
| 8.76E-08    | 0.251038888  | 3.82E-08    | -0.06158238 | 0.1840126  | 0.380278 |
| 0.235201194 | 0.072204373  | 0.119185278 | 0.032257246 | 0.48680604 | 0.408109 |
| 7.46E-05    | 0.194763784  | 2.25E-05    | -0.09767072 | 0.03485207 | 0.491736 |
| 1.06E-11    | 0.317791692  | 2.03E-12    | 0.104797596 | 0.02352093 | 0.510255 |
| 0.001534601 | 0.158254794  | 0.000598257 | 0.202870896 | 9.95E-06   | 0.406927 |
| 0.005290034 | 0.141152374  | 0.0022321   | -0.00747598 | 0.87199369 | 0.395475 |

|             |              |             |             |            |          |
|-------------|--------------|-------------|-------------|------------|----------|
| 5.00E-20    | 0.415377435  | 6.63E-21    | 0.083032881 | 0.07302994 | 0.256236 |
| 0.005436391 | 0.130799367  | 0.004637436 | -0.20160452 | 1.13E-05   | 0.101091 |
| 3.73E-07    | 0.237448805  | 2.08E-07    | -0.02433869 | 0.59983925 | 0.275984 |
| 6.05E-20    | 0.418081118  | 3.50E-21    | -0.1017494  | 0.02790358 | 0.305274 |
| 0.000785685 | 0.163401356  | 0.000391828 | 0.065188811 | 0.15958666 | 0.229789 |
| 8.18E-07    | 0.225806409  | 8.20E-07    | -0.07279219 | 0.11620089 | 0.41293  |
| 0.097838641 | 0.089546875  | 0.053134679 | -0.06620755 | 0.15315069 | 0.425448 |
| 0.263568372 | 0.061220284  | 0.186609749 | 0.017137446 | 0.71184603 | 0.194084 |
| 4.54E-08    | 0.256610237  | 1.86E-08    | -0.22798413 | 6.38E-07   | 0.219961 |
| 0.706292254 | -0.009869357 | 0.831551449 | -0.21660539 | 2.31E-06   | 0.018961 |
| 2.02E-12    | 0.325102747  | 5.88E-13    | -0.13419203 | 0.00366909 | 0.288745 |
| 0.008040325 | 0.144502085  | 0.00174334  | -0.21598947 | 2.47E-06   | 0.196212 |
| 3.68E-06    | 0.219733     | 1.63E-06    | 0.276154344 | 1.28E-09   | 0.318247 |
| 4.06E-10    | 0.287191466  | 2.56E-10    | -0.14659579 | 0.00148987 | -0.00192 |
| 0.051256391 | 0.09862166   | 0.033112451 | 0.146102221 | 0.00154637 | 0.403126 |
| 0.598002454 | -0.010869639 | 0.814773593 | -0.21684052 | 2.25E-06   | 0.107157 |
| 0.76358475  | 0.042327317  | 0.361422045 | -0.00224346 | 0.96143602 | 0.180711 |
| 0.059990134 | 0.097584453  | 0.035013678 | -0.1624957  | 0.00042251 | 0.276804 |
| 0.938406838 | 0.002333459  | 0.959890176 | -0.09344318 | 0.04355686 | 0.445759 |
| 0.586605161 | 0.020878521  | 0.652689852 | -0.07628504 | 0.09965764 | 0.472848 |
| 8.02E-09    | 0.267877041  | 4.07E-09    | -0.24393076 | 9.39E-08   | 0.28321  |
| 7.10E-05    | -0.196337643 | 1.93E-05    | -0.0515555  | 0.2661908  | -0.39712 |
| 0.081290396 | -0.089685386 | 0.052766361 | -0.08285727 | 0.07364075 | -0.30297 |
| 0.019496684 | -0.123970884 | 0.007313803 | -0.17056403 | 0.00021289 | -0.16808 |
| 0.499940365 | 0.012924721  | 0.78057584  | -0.2999156  | 3.67E-11   | -0.262   |
| 2.77E-07    | -0.24184504  | 1.22E-07    | -0.1550657  | 0.00077274 | -0.3255  |
| 0.018612333 | -0.116425197 | 0.011809215 | -0.06922174 | 0.13525988 | -0.25768 |
| 0.362265146 | -0.050881234 | 0.272502897 | -0.19273353 | 2.75E-05   | -0.17732 |
| 0.222177529 | -0.063428054 | 0.171187963 | 0.109253611 | 0.01818955 | -0.21132 |
| 0.002166683 | -0.149476199 | 0.00119626  | -0.16606222 | 0.00031327 | -0.18352 |
| 0.957790311 | -0.011375244 | 0.806324618 | -0.07042099 | 0.1286067  | -0.31863 |
| 0.617204279 | 0.019422038  | 0.675487687 | 0.072431235 | 0.11802648 | -0.25289 |
| 0.281267723 | -0.056774624 | 0.220722245 | -0.00529918 | 0.90907124 | -0.24711 |
| 0.579112539 | -0.035782587 | 0.440444408 | -0.00301781 | 0.9481415  | -0.29219 |
| 0.595594938 | -0.035667655 | 0.441914932 | -0.2828136  | 4.88E-10   | -0.24797 |
| 0.019802959 | -0.116657984 | 0.011640357 | -0.23005671 | 5.01E-07   | -0.32732 |
| 9.61E-05    | -0.188378095 | 4.19E-05    | -0.03405809 | 0.46280116 | -0.05792 |
| 0.931088869 | -0.008343301 | 0.857293724 | -0.17923047 | 9.84E-05   | -0.25658 |
| 0.858420028 | -0.006724876 | 0.884759841 | 0.085680432 | 0.06431198 | -0.01891 |
| 0.000860042 | -0.167061761 | 0.000287763 | -0.26476518 | 6.24E-09   | -0.14184 |
| 0.579378969 | 0.017149958  | 0.711645013 | -0.04051985 | 0.38230693 | -0.06077 |
| 0.477041291 | 0.016827572  | 0.716830479 | -0.31016562 | 7.15E-12   | -0.31467 |
| 0.086520193 | -0.083012485 | 0.073100666 | -0.03071396 | 0.5078996  | -0.22397 |
| 0.002254911 | 0.127501173  | 0.005794147 | -0.02886606 | 0.53377172 | -0.27072 |
| 0.084885326 | -0.097929816 | 0.034370556 | 0.024555115 | 0.59659858 | -0.01245 |

|             |              |             |             |            |          |
|-------------|--------------|-------------|-------------|------------|----------|
| 0.184943692 | -0.072376836 | 0.118303538 | 0.064583892 | 0.16350359 | -0.05853 |
| 0.510470611 | -0.042640585 | 0.357876171 | -0.19946291 | 1.41E-05   | -0.21739 |
| 0.106023664 | 0.061486517  | 0.184697575 | -0.10689812 | 0.02085932 | -0.27881 |
| 9.92E-06    | -0.213767423 | 3.14E-06    | -0.02869673 | 0.5361752  | -0.39447 |
| 0.092025574 | 0.064325112  | 0.165201113 | -0.15732785 | 0.00064478 | -0.16045 |
| 0.020183381 | 0.095397445  | 0.039328501 | 0.044884097 | 0.33312332 | -0.07406 |
| 0.008259024 | -0.136597114 | 0.003097893 | -0.1611944  | 0.00047052 | -0.36572 |
| 0.825799938 | -0.021402387 | 0.644566999 | -0.10041104 | 0.03003933 | -0.11724 |
| 0.005009347 | -0.14394977  | 0.001816497 | -0.18766734 | 4.48E-05   | -0.21496 |
| 0.680539534 | -0.030279499 | 0.5139229   | -0.01228565 | 0.79116838 | -0.39081 |
| 0.000341417 | -0.17229504  | 0.000183024 | -0.00417326 | 0.92833198 | -0.11572 |
| 0.799955774 | -0.018626021 | 0.688075713 | -0.01678312 | 0.71754643 | -0.13191 |
| 0.477345816 | 0.02198988   | 0.635507669 | -0.19957707 | 1.39E-05   | -0.11591 |
| 0.143532049 | -0.081132261 | 0.079864541 | -0.17414933 | 0.00015542 | -0.35352 |
| 0.926918571 | -0.022853101 | 0.622294894 | -0.17544636 | 0.00013848 | -0.39057 |
| 0.407760976 | 0.029442417  | 0.525631611 | -0.09085251 | 0.04974651 | -0.18382 |
| 0.212444911 | -0.068190023 | 0.141193049 | -0.12090117 | 0.00891506 | -0.1636  |
| 0.527696476 | -0.037218142 | 0.422313858 | 0.016126967 | 0.72814411 | -0.19625 |
| 0.279004512 | 0.043456035  | 0.348748871 | 0.049648668 | 0.28430353 | -0.06175 |
| 0.018014609 | -0.120258646 | 0.0092873   | 0.025210155 | 0.58683901 | -0.02769 |
| 0.751821998 | 0.008938851  | 0.847228094 | -0.29387078 | 9.35E-11   | -0.21882 |
| 0.49969893  | 0.023472236  | 0.612892005 | 0.035952353 | 0.43827739 | -0.02569 |
| 0.157676235 | 0.046356102  | 0.317496092 | 0.041944512 | 0.36578469 | -0.16394 |
| 0.029457816 | 0.088174857  | 0.056899998 | -0.09215204 | 0.04655545 | -0.18288 |
| 4.30E-06    | -0.214831273 | 2.80E-06    | 0.23783302  | 1.99E-07   | -0.11267 |
| 0.004451407 | 0.149197703  | 0.001222124 | -0.05815442 | 0.20968881 | -0.26389 |
| 3.51E-13    | 0.333834505  | 1.28E-13    | 0.035856081 | 0.43950553 | -0.22151 |
| 4.66E-05    | 0.197098421  | 1.79E-05    | -0.00030045 | 0.99483346 | -0.25257 |
| 3.75E-06    | 0.218598427  | 1.85E-06    | -0.00239028 | 0.95891427 | -0.38309 |
| 0.037665791 | 0.090302174  | 0.051151974 | -0.08929257 | 0.05381649 | -0.44154 |
| 0.000694055 | 0.162049252  | 0.000438442 | -0.03517219 | 0.44828629 | -0.42473 |
| 3.15E-10    | 0.28914173   | 1.91E-10    | -0.32462653 | 6.38E-13   | -0.33136 |
| 1.24E-17    | 0.389624374  | 2.22E-18    | -0.0987891  | 0.03281395 | -0.29535 |
| 6.14E-06    | 0.213996525  | 3.07E-06    | -0.066415   | 0.15186456 | -0.51031 |
| 0.003228544 | 0.135863655  | 0.003262875 | 0.034715189 | 0.45420887 | -0.33411 |
| 1.25E-05    | 0.20127696   | 1.17E-05    | -0.01935405 | 0.67655929 | -0.4306  |
| 1.98E-14    | 0.348331613  | 9.09E-15    | 0.069510274 | 0.13363545 | -0.3615  |
| 2.41E-05    | 0.197278173  | 1.75E-05    | -0.01886127 | 0.68434645 | -0.42173 |
| 8.27E-06    | 0.216514614  | 2.33E-06    | -0.12628055 | 0.00628405 | -0.1842  |
| 2.78E-07    | 0.233204582  | 3.46E-07    | -0.33477144 | 1.08E-13   | -0.20305 |
| 0.527656184 | 0.042385772  | 0.360758724 | -0.19247761 | 2.82E-05   | -0.25205 |
| 0.000255664 | 0.171681639  | 0.000193126 | -0.31539908 | 3.03E-12   | -0.25864 |
| 8.07E-05    | 0.179948881  | 9.22E-05    | 0.310462792 | 6.82E-12   | -0.5228  |
| 4.43E-05    | 0.190569286  | 3.39E-05    | -0.07099794 | 0.1254976  | -0.37954 |
| 5.43E-08    | -0.258702691 | 1.41E-08    | 0.309659717 | 7.77E-12   | 0.438093 |

|             |              |             |             |            |          |
|-------------|--------------|-------------|-------------|------------|----------|
| 1.40E-05    | 0.216170246  | 2.42E-06    | 0.173316614 | 0.00016729 | -0.15011 |
| 0.395332477 | 0.03671673   | 0.428596424 | -0.14662764 | 0.00148629 | -0.39826 |
| 0.104739512 | 0.073874627  | 0.110858802 | -0.19126137 | 3.17E-05   | -0.56504 |
| 0.000232744 | 0.172018747  | 0.000187511 | -0.22218758 | 1.24E-06   | -0.15199 |
| 2.82E-07    | 0.244730398  | 8.50E-08    | -0.09288297 | 0.04483732 | -0.2753  |
| 0.364812378 | 0.047516551  | 0.305519718 | 0.004522717 | 0.92234895 | -0.33961 |
| 0.002684166 | 0.148230735  | 0.001315977 | -0.12381139 | 0.00739019 | -0.62966 |
| 9.73E-07    | 0.225890279  | 8.12E-07    | -0.22614138 | 7.89E-07   | -0.41917 |
| 2.44E-08    | 0.257859557  | 1.57E-08    | 0.246669678 | 6.67E-08   | -0.17179 |
| 1.62E-07    | 0.246192271  | 7.08E-08    | -0.29701041 | 5.77E-11   | -0.24499 |
| 1.70E-26    | 0.458863575  | 1.07E-25    | -0.13026312 | 0.00481003 | -0.11889 |
| 2.49E-09    | 0.271704523  | 2.39E-09    | -0.26188889 | 9.20E-09   | -0.38544 |
| 0.000510856 | 0.165681378  | 0.000323533 | -0.13096387 | 0.00458562 | -0.43302 |
| 0.415537001 | 0.045954393  | 0.321712437 | -0.15245761 | 0.00094926 | -0.2698  |
| 0.000206791 | 0.171329078  | 0.000199166 | -0.24650898 | 6.80E-08   | -0.42653 |
| 0.023146321 | 0.100574709  | 0.029770848 | -0.28811685 | 2.23E-10   | -0.49722 |
| 5.57E-16    | 0.369050377  | 1.63E-16    | -0.02429608 | 0.60047819 | -0.1225  |
| 8.54E-07    | 0.228917287  | 5.73E-07    | -0.33331913 | 1.40E-13   | -0.33926 |
| 3.30E-07    | -0.23241742  | 3.80E-07    | 0.034426505 | 0.45797265 | 0.424883 |
| 0.033685493 | 0.106492781  | 0.021351552 | -0.01853715 | 0.68948652 | -0.38269 |
| 0.006412985 | 0.138666285  | 0.002672503 | 0.061197822 | 0.18677174 | -0.24749 |
| 0.000410541 | 0.175098929  | 0.000142839 | -0.04187804 | 0.36654553 | -0.39359 |
| 4.95E-15    | 0.366490127  | 2.72E-16    | -0.16480737 | 0.00034828 | -0.15955 |
| 1.52E-08    | 0.256379594  | 1.91E-08    | 0.08727685  | 0.05948229 | -0.4337  |
| 0.056584925 | 0.090096851  | 0.05168475  | -0.0994631  | 0.03163545 | -0.56852 |
| 3.99E-06    | 0.218683433  | 1.83E-06    | -0.24135631 | 1.29E-07   | -0.44139 |
| 0.090977359 | 0.083876439  | 0.07015328  | 0.100990541 | 0.02909796 | -0.30204 |
| 0.710239154 | 0.018073892  | 0.696858099 | -0.06302831 | 0.17390739 | -0.57004 |
| 0.008484252 | -0.127904281 | 0.005640064 | 0.052125495 | 0.26093369 | 0.647256 |
| 0.0004267   | 0.167442995  | 0.000278555 | -0.23628734 | 2.39E-07   | -0.44818 |
| 1.27E-07    | 0.248091322  | 5.57E-08    | -0.18386331 | 6.42E-05   | -0.26708 |
| 3.24E-06    | 0.223019898  | 1.13E-06    | -0.26254597 | 8.42E-09   | -0.26749 |
| 0.000165582 | 0.174399562  | 0.000152004 | -0.31224648 | 5.09E-12   | -0.49272 |
| 0.000830701 | 0.150477385  | 0.001107385 | -0.06711292 | 0.14759787 | -0.44285 |
| 2.16E-10    | 0.296104161  | 6.63E-11    | -0.25352039 | 2.78E-08   | -0.1926  |
| 4.76E-12    | 0.315253949  | 3.10E-12    | -0.05398096 | 0.24431821 | -0.2452  |
| 0.000885419 | 0.164012022  | 0.000372326 | -0.26825402 | 3.87E-09   | -0.42025 |
| 0.037302222 | 0.088426598  | 0.056193012 | 0.034007996 | 0.4634599  | -0.53729 |
| 1.29E-18    | 0.397255941  | 4.18E-19    | -0.18064303 | 8.65E-05   | -0.26041 |
| 0.000815094 | 0.152958693  | 0.000912699 | 0.101387453 | 0.02846789 | -0.25823 |
| 0.002745168 | 0.14279399   | 0.001978767 | -0.09788393 | 0.03445543 | -0.4105  |
| 0.188289298 | 0.058175774  | 0.209521278 | 0.218841381 | 1.80E-06   | -0.33969 |
| 0.246038708 | 0.058784166  | 0.204787645 | -0.26973043 | 3.15E-09   | -0.12621 |
| 9.21E-13    | 0.335331219  | 9.79E-14    | -0.16463827 | 0.00035327 | -0.32914 |
| 0.000457026 | 0.175412563  | 0.000138899 | -0.3691411  | 1.60E-16   | -0.28904 |

|             |              |             |             |            |          |
|-------------|--------------|-------------|-------------|------------|----------|
| 0.039628794 | 0.098863519  | 0.032682005 | -0.0585713  | 0.20643497 | -0.44991 |
| 1.44E-05    | 0.206087809  | 7.12E-06    | -0.01828707 | 0.69346237 | -0.25647 |
| 5.05E-07    | 0.240574567  | 1.42E-07    | -0.25201833 | 3.37E-08   | -0.29682 |
| 1.07E-05    | 0.211873355  | 3.86E-06    | -0.20154665 | 1.14E-05   | -0.31117 |
| 8.66E-05    | 0.191215631  | 3.19E-05    | -0.44313794 | 6.97E-24   | -0.3685  |
| 1.38E-07    | 0.257453285  | 1.66E-08    | -0.14009709 | 0.00241024 | -0.15739 |
| 5.56E-11    | 0.295606865  | 7.16E-11    | -0.14757075 | 0.00138379 | -0.31869 |
| 6.81E-16    | 0.363045958  | 5.38E-16    | 0.094279823 | 0.04170197 | -0.35072 |
| 9.17E-18    | 0.39240973   | 1.22E-18    | -0.19320164 | 2.63E-05   | -0.00759 |
| 2.40E-09    | -0.275922923 | 1.32E-09    | 0.147568669 | 0.00138401 | 0.446804 |
| 0.001739536 | 0.143655408  | 0.001856626 | -0.00172323 | 0.97037373 | -0.32462 |
| 0.000490149 | 0.154872231  | 0.000784715 | 0.051036407 | 0.27104129 | -0.26863 |
| 9.83E-05    | -0.184501822 | 6.05E-05    | 0.121225985 | 0.00873199 | 0.474506 |
| 0.000214552 | -0.168562479 | 0.000253084 | -0.00834003 | 0.85734901 | -0.50211 |
| 0.353960079 | 0.050148231  | 0.279479786 | -0.11549759 | 0.01250377 | -0.10165 |
| 0.000592219 | 0.158022939  | 0.000609591 | 0.107772961 | 0.01983045 | -0.22615 |
| 1.53E-13    | 0.348797349  | 8.33E-15    | -0.33973907 | 4.43E-14   | -0.12131 |
| 4.85E-07    | 0.226276222  | 7.77E-07    | -0.28447988 | 3.82E-10   | -0.32514 |
| 0.002345232 | 0.146313447  | 0.001521952 | -0.20335922 | 9.46E-06   | -0.52905 |
| 0.04274143  | 0.102826081  | 0.02628141  | -0.02985671 | 0.51981974 | -0.39782 |
| 0.006033412 | 0.132341697  | 0.004171741 | -0.13377016 | 0.0037786  | -0.42084 |
| 0.046154382 | 0.088739508  | 0.055324417 | -0.048333   | 0.29727494 | -0.4606  |
| 0.537806254 | 0.034847155  | 0.452494131 | -0.2017465  | 1.12E-05   | -0.40356 |
| 0.064273531 | -0.08358638  | 0.071131786 | -0.13551772 | 0.00334342 | -0.46111 |
| 1.32E-08    | 0.263450263  | 7.45E-09    | -0.18628649 | 5.11E-05   | -0.14063 |
| 1.94E-11    | 0.301048047  | 3.07E-11    | 0.003304519 | 0.9432226  | -0.51137 |
| 4.96E-06    | 0.208989501  | 5.25E-06    | 0.042460594 | 0.35991081 | -0.45178 |
| 5.92E-11    | 0.296582519  | 6.16E-11    | -0.30098949 | 3.10E-11   | -0.38803 |
| 4.57E-14    | 0.347389863  | 1.08E-14    | -0.17199166 | 0.00018796 | 0.000126 |
| 0.000445764 | 0.152685511  | 0.000932468 | 0.09452517  | 0.04117083 | -0.30673 |
| 2.42E-05    | 0.191733415  | 3.03E-05    | -0.12341202 | 0.00758461 | -0.37463 |
| 2.04E-11    | 0.300564042  | 3.32E-11    | -0.1225847  | 0.00800196 | -0.17387 |
| 5.30E-11    | 0.293693741  | 9.60E-11    | -0.26559884 | 5.57E-09   | -0.15999 |
| 8.47E-07    | 0.227559293  | 6.70E-07    | -0.13809164 | 0.00278496 | -0.09102 |
| 0.003250071 | 0.150782388  | 0.001081545 | -0.13925617 | 0.00256138 | -0.27246 |
| 4.30E-05    | 0.182869015  | 7.04E-05    | 0.1049893   | 0.0232664  | -0.33474 |
| 2.79E-10    | 0.286515236  | 2.83E-10    | -0.15709248 | 0.00065711 | -0.26579 |
| 1.07E-08    | 0.268268099  | 3.86E-09    | 0.076465841 | 0.09885514 | -0.1157  |
| 2.86E-09    | -0.269382732 | 3.31E-09    | 0.104879788 | 0.02341151 | 0.31264  |
| 1.10E-14    | 0.353461062  | 3.45E-15    | -0.24242497 | 1.13E-07   | -0.20523 |
| 1.32E-11    | -0.304833584 | 1.69E-11    | 0.334930523 | 1.05E-13   | 0.242089 |
| 2.80E-10    | 0.291771785  | 1.29E-10    | 0.024131678 | 0.60294639 | -0.27315 |
| 0.642788218 | 0.024577624  | 0.596261987 | 0.060863961 | 0.18919174 | -0.36391 |
| 0.005083484 | 0.13699946   | 0.003010647 | 0.139848906 | 0.00245398 | -0.18582 |
| 0.000308969 | 0.170517147  | 0.000213756 | 0.024218926 | 0.60163596 | -0.35825 |

|             |              |             |             |            |          |
|-------------|--------------|-------------|-------------|------------|----------|
| 0.102012463 | -0.078720465 | 0.089273532 | -0.06924363 | 0.1351361  | 0.498212 |
| 1.40E-12    | 0.3241177    | 6.96E-13    | -0.17324293 | 0.00016838 | -0.16208 |
| 1.30E-07    | -0.246225033 | 7.05E-08    | 0.189404811 | 3.80E-05   | 0.359801 |
| 1.03E-12    | 0.321730805  | 1.05E-12    | 0.023440465 | 0.61337298 | -0.13653 |
| 0.00309928  | 0.136889711  | 0.003034221 | -0.07586994 | 0.10151972 | -0.54501 |
| 0.785451291 | 0.014527511  | 0.754191522 | -0.05059232 | 0.27523853 | -0.5297  |
| 2.50E-06    | 0.223094223  | 1.12E-06    | -0.12352208 | 0.00753058 | -0.4036  |
| 0.000185679 | 0.169116732  | 0.000241295 | 0.068062686 | 0.14193895 | -0.19488 |
| 2.13E-11    | -0.303905665 | 1.96E-11    | 0.262031294 | 9.02E-09   | 0.464986 |
| 0.73601517  | 0.018296822  | 0.693307123 | -0.2998483  | 3.71E-11   | -0.53749 |
| 1.04E-12    | 0.322008792  | 9.98E-13    | -0.00437741 | 0.92483616 | -0.31509 |
| 8.68E-16    | 0.365232588  | 3.49E-16    | -0.0643801  | 0.16483932 | -0.09588 |
| 6.41E-08    | 0.255865708  | 2.05E-08    | -0.09540421 | 0.03931448 | -0.15098 |
| 0.032434339 | 0.092856209  | 0.04489928  | -0.05547875 | 0.23145679 | -0.2216  |
| 3.16E-05    | 0.188061111  | 4.32E-05    | -0.32152692 | 1.08E-12   | -0.42914 |
| 0.000898124 | 0.172540731  | 0.000179118 | -0.26795245 | 4.03E-09   | -0.1239  |
| 3.06E-06    | 0.21816824   | 1.94E-06    | -0.00336593 | 0.94216935 | -0.37544 |
| 2.42E-08    | 0.257678673  | 1.61E-08    | -0.00070481 | 0.98788039 | -0.37311 |
| 1.66E-06    | 0.226890096  | 7.24E-07    | -0.27698889 | 1.13E-09   | -0.16417 |
| 1.49E-21    | 0.428170526  | 3.04E-22    | -0.1358872  | 0.00325746 | -0.15002 |
| 0.000265421 | 0.169915367  | 0.000225208 | -0.20949646 | 4.97E-06   | -0.48934 |
| 0.000133323 | 0.174991041  | 0.000144218 | 0.215303168 | 2.66E-06   | -0.26208 |
| 2.79E-08    | 0.252822297  | 3.04E-08    | -0.16009134 | 0.00051514 | -0.21142 |
| 4.43E-11    | 0.307344181  | 1.13E-11    | -0.01440548 | 0.75619078 | -0.01701 |
| 0.002668582 | 0.141058249  | 0.002247487 | -0.31990369 | 1.43E-12   | -0.37262 |
| 2.60E-09    | 0.281778045  | 5.68E-10    | -0.29108965 | 1.43E-10   | -0.33158 |
| 8.53E-06    | 0.214984587  | 2.75E-06    | -0.09610449 | 0.03788681 | -0.43137 |
| 6.54E-16    | 0.365716849  | 3.17E-16    | -0.2328692  | 3.60E-07   | -0.13311 |
| 3.86E-10    | 0.279738476  | 7.64E-10    | -0.0211379  | 0.64866283 | -0.44568 |
| 0.070147657 | 0.075608342  | 0.102707343 | -0.26740864 | 4.34E-09   | -0.59019 |
| 4.73E-09    | 0.277261101  | 1.09E-09    | -0.03943235 | 0.39522097 | -0.16416 |
| 5.32E-11    | 0.29024404   | 1.62E-10    | -0.29664793 | 6.10E-11   | -0.11079 |
| 0.574480902 | 0.039018624  | 0.40020215  | -0.01561232 | 0.73649276 | -0.18331 |
| 6.98E-10    | 0.277393469  | 1.07E-09    | -0.17398499 | 0.00015769 | -0.24174 |
| 0.000793921 | 0.160079883  | 0.000515628 | -0.09856339 | 0.03321687 | -0.3558  |
| 0.000803221 | 0.161198171  | 0.000470376 | -0.32932221 | 2.83E-13   | -0.35599 |
| 0.055635166 | 0.095438226  | 0.039244104 | -0.28588449 | 3.11E-10   | -0.28057 |
| 1.60E-07    | 0.245086967  | 8.13E-08    | -0.04751602 | 0.30552508 | -0.39888 |
| 0.010773369 | 0.122741112  | 0.007921521 | -0.22632644 | 7.73E-07   | -0.42076 |
| 4.31E-10    | 0.290807947  | 1.49E-10    | -0.18358261 | 6.59E-05   | -0.40926 |
| 0.003166154 | 0.143390083  | 0.00189349  | 0.090000674 | 0.0519359  | -0.37406 |
| 0.008472534 | 0.121226956  | 0.008731445 | -0.17179335 | 0.00019125 | -0.56339 |
| 6.90E-10    | 0.290457307  | 1.57E-10    | -0.22063917 | 1.47E-06   | -0.31204 |
| 0.085629249 | 0.084917803  | 0.066730599 | -0.0203001  | 0.66170646 | -0.52896 |
| 7.86E-07    | 0.23535365   | 2.68E-07    | -0.26696115 | 4.62E-09   | -0.44818 |



|             |              |             |             |            |          |
|-------------|--------------|-------------|-------------|------------|----------|
| 0.000268569 | 0.169416163  | 0.000235141 | 0.171472443 | 0.00019669 | -0.25442 |
| 0.158617399 | 0.060872315  | 0.18913091  | -0.34006097 | 4.18E-14   | -0.58119 |
| 0.00015258  | 0.171531875  | 0.00019567  | -0.1103458  | 0.01705634 | -0.39805 |
| 3.64E-05    | 0.206096594  | 7.12E-06    | -0.31584911 | 2.81E-12   | -0.29835 |
| 0.004489378 | 0.127180999  | 0.005919215 | -0.10568955 | 0.02235682 | -0.63657 |
| 1.35E-06    | 0.227492307  | 6.76E-07    | 0.136329891 | 0.0031571  | -0.29717 |
| 4.65E-07    | 0.237730555  | 2.01E-07    | 0.079012403 | 0.08808932 | -0.28809 |
| 2.51E-13    | 0.338451879  | 5.59E-14    | -0.06734356 | 0.14620808 | -0.08322 |
| 4.49E-06    | 0.212158082  | 3.74E-06    | -0.17448213 | 0.00015089 | -0.08096 |
| 0.041531851 | 0.092849506  | 0.044914809 | -0.22413233 | 9.93E-07   | -0.48938 |
| 0.05951867  | 0.101111612  | 0.028904511 | -0.26345954 | 7.44E-09   | -0.37295 |
| 9.28E-14    | -0.344322005 | 1.91E-14    | 0.169366907 | 0.00023614 | 0.349828 |
| 0.047335672 | 0.088840214  | 0.055047257 | 0.21696954  | 2.22E-06   | -0.40311 |
| 0.008498536 | 0.143064516  | 0.001939639 | -0.0927386  | 0.04517239 | -0.37618 |
| 0.000189829 | 0.172505178  | 0.000179679 | -0.10179539 | 0.02783258 | -0.01501 |
| 5.24E-06    | 0.214393896  | 2.94E-06    | -0.13427482 | 0.00364794 | -0.24941 |
| 0.433425659 | 0.039496385  | 0.394453354 | -0.12001911 | 0.00942957 | -0.55638 |
| 0.00075285  | 0.140462491  | 0.002347141 | -0.09179017 | 0.04742631 | -0.32261 |
| 7.18E-16    | 0.377632271  | 2.82E-17    | -0.17175445 | 0.0001919  | -0.33605 |
| 7.06E-07    | 0.230750274  | 4.62E-07    | -0.14059147 | 0.00232523 | -0.20385 |
| 0.640329219 | 0.021422333  | 0.644258559 | 0.012116303 | 0.79398192 | -0.50269 |
| 3.15E-06    | 0.220137625  | 1.56E-06    | -0.12165186 | 0.00849703 | -0.35447 |
| 4.63E-08    | 0.252656782  | 3.11E-08    | -0.28138172 | 6.02E-10   | -0.28548 |
| 0.000274009 | -0.178029727 | 0.000109783 | 0.040597365 | 0.38139644 | 0.415845 |
| 8.66E-10    | 0.284883731  | 3.60E-10    | -0.11581702 | 0.01226063 | -0.18514 |
| 0.033979779 | 0.10364536   | 0.025102098 | -0.00958741 | 0.8362947  | -0.22099 |
| 0.986815114 | 0.003867177  | 0.933575838 | -0.03588267 | 0.43916617 | -0.28382 |
| 1.65E-07    | 0.24135481   | 1.29E-07    | 0.01649669  | 0.72216614 | -0.36278 |
| 0.002004339 | 0.143853112  | 0.001829585 | -0.3255553  | 5.44E-13   | -0.40447 |
| 7.47E-10    | 0.291677166  | 1.31E-10    | -0.01270826 | 0.78415923 | -0.21391 |
| 3.61E-08    | 0.249175016  | 4.85E-08    | -0.24659656 | 6.73E-08   | -0.45419 |
| 0.000237499 | 0.17054921   | 0.000213161 | -0.04527397 | 0.32893692 | -0.47151 |
| 0.036139364 | 0.100949192  | 0.029164276 | -0.32678364 | 4.40E-13   | -0.1773  |
| 4.25E-14    | 0.349863531  | 6.82E-15    | -0.28668806 | 2.76E-10   | -0.35542 |
| 1.69E-10    | 0.303974591  | 1.94E-11    | -0.11445593 | 0.01332649 | -0.12905 |
| 2.06E-06    | 0.230776843  | 4.61E-07    | -0.07193749 | 0.12055985 | -0.43075 |
| 1.14E-05    | 0.206617761  | 6.74E-06    | -0.14788937 | 0.00135066 | -0.42185 |
| 0.032982878 | 0.100471077  | 0.029940604 | -0.18511278 | 5.71E-05   | -0.52195 |
| 0.266641079 | 0.057533588  | 0.214602986 | -0.28760062 | 2.41E-10   | -0.44636 |
| 0.00044489  | -0.175574055 | 0.000136911 | -0.00563055 | 0.9034121  | 0.63247  |
| 0.282434799 | 0.047373926  | 0.306975361 | -0.20165657 | 1.13E-05   | -0.54133 |
| 0.154007586 | 0.074730833  | 0.106771688 | -0.11182042 | 0.01562453 | -0.47949 |
| 1.18E-09    | 0.288309666  | 2.17E-10    | -0.21172686 | 3.92E-06   | -0.15489 |
| 0.15662056  | 0.068149204  | 0.141431828 | -0.16443757 | 0.00035928 | -0.47423 |
| 0.01901825  | -0.114711379 | 0.013120437 | -0.102866   | 0.02622287 | 0.500817 |

|             |              |             |             |            |          |
|-------------|--------------|-------------|-------------|------------|----------|
| 0.019080004 | -0.121814555 | 0.008408768 | -0.10473938 | 0.0235987  | -0.3463  |
| 3.68E-06    | -0.211739951 | 3.91E-06    | 0.270094905 | 3.00E-09   | -0.18408 |
| 0.033539059 | -0.103534533 | 0.025258909 | -0.05623495 | 0.22514869 | -0.09599 |
| 0.008266847 | -0.128038477 | 0.005589593 | -0.12007951 | 0.00939351 | -0.45266 |
| 0.695316608 | -0.028534403 | 0.538484479 | -0.25007995 | 4.32E-08   | -0.29977 |
| 1.21E-16    | -0.377123288 | 3.13E-17    | 0.008458571 | 0.85534366 | -0.14965 |
| 8.03E-12    | -0.316269918 | 2.62E-12    | -0.02519111 | 0.58712165 | -0.42418 |
| 0.053808975 | -0.094507021 | 0.041209924 | -0.2155828  | 2.58E-06   | -0.26086 |
| 0.20495534  | 0.05025385   | 0.278467088 | 0.027816547 | 0.5487557  | -0.1017  |
| 1.29E-26    | -0.474824984 | 1.23E-27    | -0.04657314 | 0.31523312 | -0.28203 |
| 1.00E-33    | -0.517485393 | 2.39E-33    | -0.01588369 | 0.73208666 | -0.05349 |
| 1.18E-28    | -0.480747346 | 2.22E-28    | -0.06824115 | 0.14089439 | -0.19792 |
| 4.51E-07    | -0.237475905 | 2.07E-07    | -0.14285239 | 0.00197026 | -0.27827 |
| 6.94E-06    | -0.213340291 | 3.29E-06    | -0.12721154 | 0.00590718 | -0.20054 |
| 2.95E-05    | -0.200918341 | 1.21E-05    | -0.03632779 | 0.43350683 | -0.39931 |
| 1.79E-11    | -0.301840926 | 2.71E-11    | 0.053021981 | 0.25281093 | -0.22936 |
| 8.82E-05    | -0.192133494 | 2.92E-05    | 0.062305679 | 0.17890477 | -0.31093 |
| 0.000164971 | -0.18135701  | 8.10E-05    | -0.19041941 | 3.44E-05   | -0.31067 |
| 1.28E-10    | -0.303692313 | 2.02E-11    | -0.21561733 | 2.57E-06   | -0.30602 |
| 0.001567018 | -0.158671984 | 0.000578353 | -0.09041169 | 0.05086969 | -0.31787 |
| 6.13E-06    | -0.212832651 | 3.48E-06    | -0.13597991 | 0.0032362  | -0.31512 |
| 0.000690415 | -0.160041591 | 0.000517247 | -0.1011837  | 0.02878986 | -0.32957 |
| 0.002456635 | -0.137388857 | 0.002928342 | -0.10934223 | 0.01809521 | -0.10425 |
| 8.76E-07    | -0.235785855 | 2.54E-07    | -0.10133868 | 0.02854468 | -0.38515 |
| 0.021183341 | -0.116326579 | 0.0118814   | -0.29249046 | 1.15E-10   | -0.28915 |
| 2.13E-15    | -0.362940015 | 5.50E-16    | -0.11230007 | 0.01518209 | -0.22976 |
| 0.062023547 | -0.091084664 | 0.049163399 | -0.01779909 | 0.70124438 | -0.27828 |
| 0.41172947  | -0.049465873 | 0.286082524 | -0.15243798 | 0.00095072 | -0.35188 |
| 0.016900687 | -0.115330754 | 0.012632449 | -0.15801844 | 0.00060981 | -0.43022 |
| 6.36E-05    | -0.194457424 | 2.32E-05    | -0.27668223 | 1.18E-09   | -0.33951 |
| 0.000108635 | -0.188075744 | 4.31E-05    | -0.30358387 | 2.06E-11   | -0.21871 |
| 9.25E-05    | -0.189252749 | 3.85E-05    | -0.1324012  | 0.00415465 | 0.122215 |
| 9.71E-23    | -0.439822951 | 1.63E-23    | 0.030429924 | 0.51183326 | -0.06045 |
| 0.016170291 | -0.118450238 | 0.010410245 | -0.13525306 | 0.00340626 | -0.33505 |
| 0.006807268 | -0.13393744  | 0.003734825 | -0.26336277 | 7.54E-09   | -0.32648 |
| 0.551197403 | -0.02749936  | 0.553324584 | -0.19003204 | 3.58E-05   | -0.30703 |
| 6.01E-05    | -0.199478007 | 1.41E-05    | -0.18663995 | 4.94E-05   | -0.24782 |
| 3.45E-20    | -0.411548783 | 1.63E-20    | -0.17616042 | 0.00012991 | -0.10122 |
| 1.57E-05    | -0.203869525 | 8.97E-06    | -0.23994604 | 1.54E-07   | 0.073878 |
| 2.06E-08    | -0.266688322 | 4.80E-09    | -0.03461359 | 0.45553145 | -0.12397 |
| 0.62705283  | -0.022048737 | 0.634603036 | -0.08602917 | 0.06323026 | -0.20957 |
| 0.00788052  | 0.105089104  | 0.023134835 | 0.066085342 | 0.15391221 | -0.11801 |
| 0.045494744 | 0.069314739  | 0.134734662 | -0.02943619 | 0.5257192  | -0.0796  |
| 1.65E-05    | 0.183485859  | 6.65E-05    | -0.01866734 | 0.68742019 | -0.12623 |
| 0.005449007 | 0.116793275  | 0.011543205 | 0.122595422 | 0.00799642 | -0.21907 |

|             |              |             |             |            |          |
|-------------|--------------|-------------|-------------|------------|----------|
| 0.429030978 | 0.034075143  | 0.462577061 | 0.023437704 | 0.61341479 | -0.01286 |
| 0.156740271 | 0.05886415   | 0.204171134 | -0.03169592 | 0.49442315 | -0.04676 |
| 0.001007626 | 0.134131595  | 0.003684596 | -0.14073091 | 0.00230175 | -0.2017  |
| 0.702942688 | 0.011261389  | 0.808225276 | 0.047821569 | 0.30242202 | -0.09133 |
| 0.890371533 | -0.011430535 | 0.805402016 | 0.000474947 | 0.99183285 | -0.16186 |
| 0.0140976   | 0.108407502  | 0.019112091 | 0.099687956 | 0.03125043 | 0.020743 |
| 0.248706176 | 0.046637488  | 0.314564258 | 0.053893007 | 0.24508868 | -0.25211 |
| 0.000540075 | 0.151383694  | 0.001032222 | 0.012169989 | 0.79308972 | -0.12328 |
| 0.055981807 | 0.078983411  | 0.088206359 | 0.013328897 | 0.77389738 | -0.08533 |
| 0.189433078 | 0.049136145  | 0.289310441 | 0.037124278 | 0.42348584 | -0.16136 |
| 0.816476793 | -0.001407328 | 0.975802973 | -0.02644605 | 0.56862875 | -0.01621 |
| 0.50043099  | 0.018018531  | 0.697740958 | -0.10680312 | 0.0209738  | -0.09119 |
| 0.000382325 | 0.162584399  | 0.000419408 | -0.01939201 | 0.67596092 | -0.16807 |
| 0.000216538 | 0.162730493  | 0.000414347 | 0.081466229 | 0.07862742 | -0.08651 |
| 0.128543433 | 0.04922116   | 0.288475849 | 0.012042983 | 0.79520088 | -0.01212 |
| 0.072389037 | 0.084576577  | 0.067836692 | 0.041532963 | 0.37051131 | -0.04781 |
| 0.001756804 | 0.125166953  | 0.006763088 | 0.096525609 | 0.0370496  | -0.00456 |
| 0.804868768 | 0.003249212  | 0.944171318 | 0.030660383 | 0.5086404  | -0.26303 |
| 0.001281065 | 0.149058331  | 0.00123526  | 0.109581197 | 0.01784295 | -0.02272 |
| 0.000726165 | 0.158841041  | 0.000570463 | -0.06320251 | 0.17271841 | -0.14661 |
| 0.18292741  | 0.051816267  | 0.263776785 | 0.024655847 | 0.59509297 | -0.06533 |
| 0.77419335  | 0.00905271   | 0.845306496 | -0.04826766 | 0.29792921 | -0.18797 |
| 0.928214166 | -0.009982621 | 0.829647649 | 0.010425461 | 0.82221389 | 0.056455 |
| 0.011637098 | 0.114894819  | 0.012974206 | 0.12738384  | 0.0058397  | -0.01926 |
| 0.104633895 | 0.074098804  | 0.109776974 | 0.101516153 | 0.02826612 | -0.03579 |
| 0.000716826 | 0.148321969  | 0.001306847 | 0.100502178 | 0.02988957 | -0.01177 |
| 0.034163383 | 0.092352862  | 0.046077985 | 0.028743597 | 0.53550948 | -0.01812 |
| 0.206092765 | 0.046855763  | 0.312302247 | 0.101447763 | 0.02837319 | 0.038795 |
| 0.61244313  | -0.038486216 | 0.406667312 | -0.00081321 | 0.98601658 | 0.066222 |
| 0.910971453 | -0.009192317 | 0.842951585 | -0.08181942 | 0.07733605 | 0.068397 |
| 1.10E-09    | 0.282223055  | 5.33E-10    | 0.066066169 | 0.15403193 | -0.08874 |
| 0.019221791 | 0.106105697  | 0.02183099  | 0.06847648  | 0.13952606 | -0.05746 |
| 0.310120653 | 0.046628358  | 0.314659101 | -0.02192472 | 0.63650986 | -0.26164 |
| 0.123350297 | 0.056851585  | 0.220096112 | 0.080110229 | 0.08374872 | -0.03824 |
| 0.146570254 | 0.050469451  | 0.276407578 | 0.042585335 | 0.35849995 | -0.0328  |
| 0.1656882   | -0.071531631 | 0.122673914 | -0.11391079 | 0.01377578 | -0.06776 |
| 0.723572607 | 0.011356538  | 0.806636812 | 0.076275711 | 0.0996992  | -0.07807 |
| 7.29E-05    | 0.174064591  | 0.000156587 | -0.03206005 | 0.48947475 | -0.14033 |
| 0.000394225 | 0.160243521  | 0.000508763 | 0.106778254 | 0.02100385 | -0.0422  |
| 0.17020424  | -0.081977798 | 0.076762581 | 0.014699618 | 0.7513747  | 0.184214 |
| 0.18764191  | 0.058246366  | 0.208968012 | 0.080776739 | 0.08119879 | -0.02418 |
| 0.760987939 | 0.002932919  | 0.949598336 | -0.07186706 | 0.12092469 | 0.044668 |
| 5.37E-08    | 0.232961143  | 3.56E-07    | 0.055531404 | 0.23101354 | -0.20381 |
| 0.037032988 | 0.089237572  | 0.053964887 | -0.0783475  | 0.09080495 | -0.08308 |
| 0.498605788 | 0.030031256  | 0.517381047 | 0.119989921 | 0.00944704 | -0.14032 |

|             |              |             |             |            |          |
|-------------|--------------|-------------|-------------|------------|----------|
| 1.16E-06    | 0.205905485  | 7.26E-06    | -0.03013557 | 0.51592641 | -0.13986 |
| 0.544336513 | 0.013532139  | 0.77054533  | 0.010151051 | 0.82681845 | -0.01929 |
| 0.853374587 | -0.022973538 | 0.620460909 | -0.02061828 | 0.65674041 | -0.04765 |
| 0.112876779 | 0.065874362  | 0.155233617 | 0.13094418  | 0.0045918  | 0.090127 |
| 0.230426408 | 0.052008315  | 0.262008569 | 0.028924546 | 0.53294283 | -0.01988 |
| 0.118402853 | -0.084950917 | 0.066624052 | 0.029924517 | 0.51887166 | 0.060126 |
| 7.49E-07    | 0.220693954  | 1.46E-06    | -0.02218117 | 0.63256946 | -0.06333 |
| 0.001099017 | 0.142759313  | 0.001983835 | 0.08056754  | 0.08199229 | -0.06922 |
| 0.000124753 | 0.172251706  | 0.000183721 | 0.153292751 | 0.00088905 | -0.08617 |
| 0.224843519 | 0.050908144  | 0.272249035 | 0.089156688 | 0.05418376 | 0.016625 |
| 0.000908405 | 0.139485771  | 0.002519279 | 0.034990237 | 0.45063909 | -0.06762 |
| 0.487057665 | 0.023162495  | 0.617588274 | 0.115394585 | 0.01258308 | 0.037564 |
| 2.31E-08    | 0.251864629  | 3.44E-08    | 0.072996792 | 0.11517599 | -0.08221 |
| 0.1679585   | -0.078324535 | 0.09089995  | 0.005602427 | 0.90389225 | 0.012321 |
| 0.004246195 | -0.133015972 | 0.003981775 | 0.034611076 | 0.45556425 | 0.119536 |
| 5.45E-07    | 0.226884017  | 7.25E-07    | 0.029400756 | 0.52621787 | -0.029   |
| 2.61E-13    | 0.330206364  | 2.42E-13    | 0.049685562 | 0.28394536 | -0.06414 |
| 0.341161222 | -0.040786218 | 0.379183624 | 0.071445634 | 0.12312554 | -0.15215 |
| 0.201422402 | -0.059035589 | 0.202854236 | 0.073573787 | 0.11232375 | -0.14539 |
| 0.795008368 | -0.003534005 | 0.939286975 | -0.05668914 | 0.22141924 | -0.02367 |
| 0.385742031 | 0.035316457  | 0.446425771 | -0.02908382 | 0.53068874 | -0.03684 |
| 7.17E-05    | 0.175745381  | 0.00013483  | -0.0531013  | 0.2521008  | -0.2468  |
| 0.069442922 | -0.088188684 | 0.056860973 | -0.07578321 | 0.10191225 | -0.26393 |
| 0.30054313  | 0.039635985  | 0.392783021 | -0.00879319 | 0.84968777 | -0.05556 |
| 1.56E-05    | 0.199055693  | 1.47E-05    | -0.01974451 | 0.67041359 | -0.05423 |
| 0.190969515 | 0.057486983  | 0.214975199 | 0.122246299 | 0.0081785  | -0.22097 |
| 0.065284503 | -0.086625872 | 0.061414213 | -0.03744596 | 0.41947727 | -0.10625 |
| 0.099367311 | 0.071422455  | 0.123247491 | -0.08463713 | 0.0676393  | -0.04757 |
| 0.524397612 | 0.020653198  | 0.656196355 | 0.008937182 | 0.84725627 | -0.10132 |
| 0.096320276 | 0.072461631  | 0.117871884 | -0.01781874 | 0.70093038 | -0.14898 |
| 0.000574217 | 0.151517972  | 0.001021495 | -0.03900481 | 0.4003691  | -0.13011 |
| 0.22296545  | -0.05800859  | 0.210835787 | 0.050063546 | 0.28029357 | -0.17304 |
| 0.013770414 | -0.123381249 | 0.007599777 | -0.15491119 | 0.00078229 | -0.01861 |
| 0.932798091 | 0.003269138  | 0.943829503 | -0.07553848 | 0.10302638 | 0.031807 |
| 0.809915888 | -0.007647346 | 0.869085616 | -0.02724633 | 0.55698262 | -0.05742 |
| 0.014543484 | -0.112743766 | 0.014782647 | -0.15000547 | 0.00114849 | -0.08592 |
| 0.964378456 | -0.019903037 | 0.667924621 | 0.03865602  | 0.40459862 | -0.2018  |
| 0.051368486 | -0.105031142 | 0.023211164 | -0.00493722 | 0.91525795 | 0.08132  |
| 0.688886433 | 0.011469246  | 0.804756241 | -0.0803102  | 0.08297697 | -0.11528 |
| 0.430250735 | -0.051090805 | 0.270530175 | -0.03302824 | 0.47644765 | -0.09475 |
| 0.254105108 | 0.036602926  | 0.430029866 | -0.07317925 | 0.11426797 | -0.05103 |
| 2.74E-08    | 0.249814693  | 4.47E-08    | -0.20807493 | 5.78E-06   | -0.06601 |
| 0.022983071 | 0.10818516   | 0.01936118  | 0.259944984 | 1.19E-08   | -0.17631 |
| 0.1656467   | 0.065944752  | 0.154791799 | 0.12237756  | 0.00810961 | -0.14916 |
| 0.005054629 | 0.104057879  | 0.024525779 | 0.029127166 | 0.53007618 | -0.03972 |

|             |              |             |             |            |          |
|-------------|--------------|-------------|-------------|------------|----------|
| 0.213007218 | 0.061907107  | 0.18170627  | -0.00052717 | 0.99093487 | -0.03615 |
| 0.222941342 | 0.056543757  | 0.222608144 | 0.201016184 | 1.20E-05   | -0.08765 |
| 2.16E-06    | 0.220369628  | 1.52E-06    | 0.054077669 | 0.24347296 | -0.09775 |
| 3.18E-09    | 0.257557574  | 1.64E-08    | -0.03414084 | 0.46171416 | -0.01109 |
| 0.372431825 | 0.040619917  | 0.381131782 | -0.10216791 | 0.02726309 | -0.18103 |
| 0.066769468 | 0.068879801  | 0.137204649 | 0.063192961 | 0.1727834  | 0.017698 |
| 0.714849529 | 0.007413177  | 0.873059907 | 0.03572423  | 0.44119072 | -0.04406 |
| 1.73E-05    | 0.190912923  | 3.28E-05    | 0.039481664 | 0.39462974 | -0.09542 |
| 0.000557638 | 0.160444099  | 0.000500464 | 0.024325018 | 0.60004423 | -0.03011 |
| 0.149436882 | 0.056324955  | 0.224406073 | 0.080019039 | 0.08410257 | -0.04117 |
| 0.674525094 | -0.018904398 | 0.6836635   | -0.0043203  | 0.92581411 | -0.05655 |
| 0.119965199 | 0.062233871  | 0.179407118 | 0.05506523  | 0.23495877 | -0.15132 |
| 0.043541747 | -0.097319354 | 0.035514256 | -0.04808662 | 0.29974716 | 0.23977  |
| 0.742487508 | -0.015310548 | 0.74140269  | -0.04940921 | 0.28663555 | -0.05802 |
| 0.70480314  | 0.0168638    | 0.716247101 | 0.144628069 | 0.00172704 | 0.047048 |
| 0.825849588 | -0.006394968 | 0.89037677  | -0.0634254  | 0.17120591 | -0.047   |
| 0.325846583 | 0.037086296  | 0.423960614 | -0.09352316 | 0.04337659 | -0.11442 |
| 0.054264495 | -0.084343471 | 0.068600916 | -0.04433812 | 0.33904333 | 0.025763 |
| 0.743941836 | -0.026694583 | 0.564999589 | 0.015160199 | 0.74385285 | -0.0459  |
| 6.36E-10    | 0.272799372  | 2.05E-09    | -0.08889192 | 0.05490541 | -0.22257 |
| 0.023485097 | 0.082435223  | 0.075125707 | -0.05778456 | 0.21260655 | -0.05112 |
| 0.259359803 | 0.050801067  | 0.273260105 | 0.158103193 | 0.00060565 | -0.04778 |
| 0.208177771 | 0.052018659  | 0.261913567 | -0.00528536 | 0.90930739 | -0.30375 |
| 0.017882263 | 0.10771696   | 0.019894964 | 0.029562264 | 0.52394695 | -0.08778 |
| 0.684199544 | 0.013617126  | 0.769144914 | -0.25923804 | 1.31E-08   | -0.22515 |
| 0.010833641 | 0.120273244  | 0.009278692 | 0.151591871 | 0.00101564 | -0.15289 |
| 0.020229646 | -0.124271125 | 0.007171915 | 0.12171752  | 0.00846131 | -0.12627 |
| 0.015324751 | 0.107003406  | 0.020733098 | -0.01559519 | 0.73677123 | 0.076492 |
| 0.351199261 | -0.046541087 | 0.315566673 | -0.04704625 | 0.310337   | 0.014026 |
| 0.774829607 | -0.024740594 | 0.593827616 | -0.12218953 | 0.00820845 | -0.19064 |
| 0.65296987  | -0.020420642 | 0.659823367 | 0.044715134 | 0.33494823 | -0.27547 |
| 0.321080389 | 0.035844107  | 0.439658413 | 0.001079587 | 0.98143686 | -0.03916 |
| 0.097423372 | 0.072940338  | 0.115458072 | 0.098913794 | 0.03259313 | -0.23062 |
| 0.011021397 | 0.113720784  | 0.013935472 | 0.055045952 | 0.23512293 | -0.14851 |
| 0.899255893 | -0.008157747 | 0.860434659 | -0.08190696 | 0.07701864 | 0.004989 |
| 5.76E-05    | 0.169850203  | 0.000226482 | 0.103647154 | 0.02509957 | -0.17585 |
| 0.2498016   | -0.066946607 | 0.148606213 | -0.04473834 | 0.33469723 | -0.08624 |
| 0.377012877 | 0.039673465  | 0.392335293 | -0.13438368 | 0.00362029 | -0.29216 |
| 0.013903468 | 0.116061458  | 0.012077397 | -0.03047593 | 0.51119503 | -0.0361  |
| 0.229956543 | 0.061023923  | 0.188029397 | 0.010122531 | 0.82729736 | -0.20228 |
| 2.01E-05    | 0.191300099  | 3.16E-05    | 0.020536651 | 0.65801305 | -0.01348 |
| 3.26E-05    | 0.186932616  | 4.81E-05    | 0.114839681 | 0.01301801 | -0.07225 |
| 0.910803903 | -0.015294385 | 0.741665969 | -0.04052957 | 0.3821927  | 0.054035 |
| 0.20213204  | 0.052774837  | 0.255032489 | 0.013516613 | 0.77080126 | -0.0607  |
| 0.124292982 | -0.075227372 | 0.104456549 | -0.11084628 | 0.01655802 | -0.05687 |

|             |              |             |             |            |          |
|-------------|--------------|-------------|-------------|------------|----------|
| 0.000309651 | 0.160182259  | 0.000511323 | -0.12915015 | 0.00518686 | -0.00753 |
| 0.277787575 | -0.059951852 | 0.195920492 | -0.04068125 | 0.3804126  | -0.0977  |
| 1.92E-05    | 0.19788635   | 1.65E-05    | 0.025732489 | 0.57910989 | -0.13538 |
| 0.002818231 | -0.14028406  | 0.002377764 | -0.08487695 | 0.06686222 | 0.015579 |
| 0.107702455 | 0.078740882  | 0.089190297 | 0.147343979 | 0.00140783 | 0.085698 |
| 0.986070293 | -0.007807867 | 0.86636315  | -0.01472688 | 0.75092886 | -0.14934 |
| 0.129474161 | 0.06677759   | 0.149636346 | 0.056774367 | 0.22072434 | -0.11171 |
| 3.56E-05    | 0.18201139   | 7.63E-05    | -0.01900703 | 0.68203952 | -0.10439 |
| 4.09E-12    | 0.307049315  | 1.18E-11    | 0.066876612 | 0.14903217 | -0.20877 |
| 1.64E-05    | 0.183393091  | 6.71E-05    | -0.07389603 | 0.11075517 | -0.16685 |
| 7.60E-18    | 0.372095103  | 8.79E-17    | -0.12421518 | 0.00719817 | -0.02152 |
| 0.01259453  | 0.100410216  | 0.030040684 | 0.115090505 | 0.0128198  | -0.03904 |
| 0.00144298  | 0.137953004  | 0.002812728 | -0.13741506 | 0.00292288 | 0.019539 |
| 0.003470904 | 0.127049289  | 0.005971364 | 0.080945192 | 0.08056437 | -0.10808 |
| 0.218630537 | -0.072078901 | 0.11982999  | -0.0912627  | 0.0487201  | -0.06688 |
| 3.67E-05    | -0.1915424   | 3.09E-05    | 0.116629706 | 0.01166075 | 0.079356 |
| 0.406111622 | 0.02705267   | 0.559790215 | 0.089075054 | 0.05440541 | -0.02954 |
| 0.297810734 | -0.045104273 | 0.330754911 | -0.13290917 | 0.00401133 | -0.08847 |
| 0.915800251 | -0.005023712 | 0.913779081 | 0.071195049 | 0.12444891 | 0.108436 |
| 0.104533885 | -0.076487352 | 0.098760004 | -0.21239982 | 3.65E-06   | -0.16432 |
| 0.209753416 | 0.057935112  | 0.211415393 | -0.1201383  | 0.00935854 | -0.10564 |
| 0.00643719  | -0.127146739 | 0.00593274  | -0.24384111 | 9.50E-08   | -0.07263 |
| 0.38959867  | -0.0356829   | 0.441719721 | -0.19101909 | 3.25E-05   | -0.06085 |
| 0.253719782 | 0.05479872   | 0.237235484 | -0.130274   | 0.00480647 | -0.04531 |
| 0.203541746 | 0.063118715  | 0.173289563 | -0.31792304 | 1.99E-12   | -0.03163 |
| 0.00512487  | 0.135353976  | 0.003382176 | -0.03703929 | 0.42454868 | 0.093694 |
| 0.047786691 | 0.09512872   | 0.03988849  | -0.25802202 | 1.54E-08   | -0.0308  |
| 0.775464863 | -0.010445812 | 0.821872627 | -0.19059377 | 3.39E-05   | -0.02198 |
| 0.405283311 | -0.040534984 | 0.3821291   | -0.2782244  | 9.50E-10   | -0.03696 |
| 0.634450696 | 0.035754428  | 0.440804428 | -0.12234186 | 0.0081283  | -0.02235 |
| 0.46278343  | 0.04013774   | 0.38681482  | -0.19747006 | 1.72E-05   | 0.019903 |
| 0.081660313 | 0.087613636  | 0.0585027   | -0.13616776 | 0.00319353 | 0.004783 |
| 0.225584666 | 0.06325308   | 0.172374361 | -0.27790776 | 9.94E-10   | 0.00027  |
| 0.244937999 | 0.057304111  | 0.216440179 | -0.15697307 | 0.00066345 | 0.095458 |
| 0.01251126  | 0.115561691  | 0.012454641 | -0.07581514 | 0.10176759 | -0.0551  |
| 0.878479611 | -0.008064618 | 0.862011926 | -0.33513641 | 1.01E-13   | -0.06164 |
| 0.227149964 | 0.057041712  | 0.218554741 | -0.26841732 | 3.78E-09   | 0.026608 |
| 0.976654452 | 0.014354498  | 0.757026446 | -0.20270258 | 1.01E-05   | 0.218127 |
| 0.085938211 | -0.075030228 | 0.105370941 | -0.28881016 | 2.01E-10   | -0.10726 |
| 0.397133287 | -0.032520716 | 0.483252689 | -0.18263525 | 7.20E-05   | 0.154521 |
| 0.082967876 | -0.076162356 | 0.100205148 | -0.16874113 | 0.00024923 | 0.091249 |
| 0.667962851 | -0.016969677 | 0.714543144 | -0.23641398 | 2.36E-07   | 0.045811 |
| 0.904016777 | -0.006311964 | 0.891790846 | -0.2070896  | 6.41E-06   | -0.08962 |
| 0.137103578 | -0.06708787  | 0.147749392 | -0.188418   | 4.17E-05   | -0.09155 |
| 0.036526829 | -0.096116351 | 0.037863004 | -0.28713522 | 2.58E-10   | 0.08059  |

|             |              |             |             |            |          |
|-------------|--------------|-------------|-------------|------------|----------|
| 0.240468528 | 0.059665159  | 0.198071154 | -0.16365959 | 0.00038347 | -0.08132 |
| 0.22630607  | -0.053717606 | 0.246630324 | -0.20072092 | 1.24E-05   | 0.001758 |
| 0.167335225 | -0.063188441 | 0.172814184 | -0.14734216 | 0.00140802 | -0.00449 |
| 0.016138229 | 0.117959524  | 0.010735028 | -0.23399905 | 3.15E-07   | 0.119225 |
| 0.033117103 | -0.089198445 | 0.054070675 | -0.18557925 | 5.47E-05   | 0.06943  |
| 0.040565105 | -0.091947284 | 0.047046538 | -0.16247561 | 0.00042321 | 0.062047 |
| 0.068439571 | 0.083009787  | 0.073110027 | -0.12500548 | 0.0068352  | 0.141008 |
| 0.074539009 | -0.078099495 | 0.091834915 | -0.16073718 | 0.00048856 | -0.04909 |
| 0.716919941 | 0.02636896   | 0.569756771 | -0.2116234  | 3.96E-06   | -0.04112 |
| 0.646512498 | 0.025637342  | 0.580514252 | -0.24218252 | 1.17E-07   | -0.04035 |
| 0.929180036 | -0.005033979 | 0.913603565 | -0.19546263 | 2.10E-05   | -0.06815 |
| 0.064657347 | -0.086456058 | 0.061926606 | -0.19235593 | 2.85E-05   | -0.1219  |
| 0.780132844 | 0.022216873  | 0.63202178  | -0.23536322 | 2.67E-07   | -0.0834  |
| 0.348851984 | 0.041097922  | 0.375548628 | -0.24432188 | 8.95E-08   | -0.00652 |
| 0.37039733  | -0.040455411 | 0.383064921 | -0.24979501 | 4.48E-08   | -0.12551 |
| 0.146492976 | -0.068139362 | 0.141489447 | -0.36351184 | 4.91E-16   | 0.103918 |
| 0.120209641 | -0.070740664 | 0.126876757 | -0.04202283 | 0.36488949 | 0.016825 |
| 0.2483874   | -0.052803689 | 0.254772439 | -0.05637502 | 0.22399378 | -0.07209 |
| 0.142344804 | -0.064893521 | 0.16148977  | -0.2234353  | 1.08E-06   | -0.13351 |
| 0.418550722 | -0.032009069 | 0.490165969 | -0.22915387 | 5.57E-07   | -0.12981 |
| 0.124165896 | 0.079651081  | 0.085542632 | 0.009913491 | 0.8308095  | 0.210298 |
| 7.21E-05    | 0.176503532  | 0.000125976 | -0.18263446 | 7.20E-05   | -0.10084 |
| 0.239953255 | 0.051269163  | 0.268858976 | -0.24849855 | 5.29E-08   | -0.19067 |
| 0.304555498 | -0.044419232 | 0.338159578 | -0.16294508 | 0.00040702 | -0.08584 |
| 0.027813673 | -0.089896519 | 0.052209026 | -0.21075394 | 4.35E-06   | 0.051684 |
| 0.002676927 | -0.141468127 | 0.002181185 | -0.04420692 | 0.3404759  | 0.169488 |
| 2.85E-09    | 0.276747632  | 1.17E-09    | -0.10112032 | 0.02889064 | 0.070036 |
| 0.000245216 | -0.168533667 | 0.000253711 | -0.14614776 | 0.00154107 | 0.440914 |
| 0.014134731 | 0.122176687  | 0.00821524  | -0.32148417 | 1.09E-12   | 0.015993 |
| 9.78E-07    | -0.235961628 | 2.49E-07    | 0.095447754 | 0.03922441 | 0.128159 |
| 0.001680955 | 0.154589789  | 0.000802498 | 0.146595068 | 0.00148995 | 0.201554 |
| 0.130203958 | -0.074438671 | 0.108152736 | -0.09952271 | 0.031533   | 0.550471 |
| 0.004316454 | 0.126534353  | 0.00617923  | 0.030109455 | 0.5162904  | 0.230967 |
| 5.25E-08    | -0.250140906 | 4.29E-08    | -0.12412955 | 0.00723851 | 0.131765 |
| 0.805349059 | -0.001125235 | 0.9806521   | 0.108030815 | 0.01953575 | 0.061922 |
| 0.001280966 | -0.149569788 | 0.001187682 | -0.13103794 | 0.00456246 | 0.099269 |
| 1.38E-09    | -0.277241187 | 1.09E-09    | -0.0065181  | 0.88827977 | 0.287042 |
| 2.06E-13    | -0.337018256 | 7.23E-14    | -0.07736974 | 0.09491988 | 0.220476 |
| 0.000151539 | -0.169169059 | 0.000240209 | 0.037383894 | 0.42024891 | -0.12703 |
| 0.000320317 | -0.15746538  | 0.000637669 | 0.012258336 | 0.79162206 | 0.273594 |
| 0.545487715 | -0.03864669  | 0.404712118 | 0.10850288  | 0.0190061  | 0.065513 |
| 0.732472979 | 0.019501469  | 0.674236453 | 0.251830525 | 3.45E-08   | 0.502706 |
| 0.001388403 | 0.142728665  | 0.001988323 | 0.065554233 | 0.15725502 | 0.203807 |
| 4.18E-13    | -0.331467656 | 1.94E-13    | -0.11228068 | 0.01519976 | 0.272304 |
| 0.076578638 | 0.083130927  | 0.072690724 | 0.131747416 | 0.00434593 | -0.06632 |

|             |              |             |             |            |          |
|-------------|--------------|-------------|-------------|------------|----------|
| 0.019189462 | 0.101023997  | 0.02904439  | -0.10811835 | 0.01943657 | 0.436786 |
| 0.146198572 | 0.0706514    | 0.127357996 | -0.33099754 | 2.11E-13   | 0.165494 |
| 0.622845201 | 0.02772135   | 0.550125006 | -0.32299747 | 8.43E-13   | 0.403843 |
| 0.650403762 | -0.011466629 | 0.804799893 | -0.00653302 | 0.88802561 | 0.353272 |
| 1.54E-05    | -0.196975069 | 1.81E-05    | -0.12947717 | 0.00507347 | 0.287616 |
| 0.443639394 | -0.025547396 | 0.581843311 | -0.13397932 | 0.00372394 | 0.367858 |
| 0.068398029 | 0.088828546  | 0.055079311 | -0.15711181 | 0.00065609 | 0.166164 |
| 0.583464485 | -0.027081124 | 0.559377273 | -0.29487642 | 8.01E-11   | 0.183999 |
| 0.202479703 | -0.062860374 | 0.175059373 | -0.0580755  | 0.210309   | 0.256589 |
| 0.123225727 | -0.073101742 | 0.114653009 | -0.0883073  | 0.05652712 | -0.17302 |
| 0.050116789 | 0.095278725  | 0.039575073 | -0.00660693 | 0.88676729 | 0.445971 |
| 0.000261317 | 0.153542466  | 0.000871744 | -0.30413147 | 1.89E-11   | 0.147812 |
| 4.19E-05    | -0.189889255 | 3.62E-05    | -0.09856662 | 0.03321108 | 0.163321 |
| 0.724176803 | 0.030158822  | 0.515602489 | -0.08528683 | 0.06555109 | 0.022546 |
| 0.001553328 | -0.140060664 | 0.002416617 | -0.33703331 | 7.21E-14   | 0.039719 |
| 0.000648663 | 0.167621996  | 0.000274328 | -0.07697575 | 0.09661949 | 0.542669 |
| 0.081674933 | 0.082709168  | 0.074159084 | 0.117007546 | 0.01139081 | 0.575535 |
| 0.745490943 | -0.012096219 | 0.794315775 | 0.107356552 | 0.02031454 | 0.225453 |
| 0.588405979 | 0.028026604  | 0.545740211 | -0.27800185 | 9.81E-10   | 0.131322 |
| 0.082031183 | -0.086861221 | 0.060709872 | -0.29724707 | 5.56E-11   | 0.234992 |
| 0.645346592 | -0.021474692 | 0.643449162 | -0.273812   | 1.78E-09   | -0.07501 |
| 0.146354808 | 0.063390845  | 0.171439745 | -0.02907029 | 0.53088008 | 0.305679 |
| 0.001684902 | -0.136511098 | 0.003116841 | 0.090056883 | 0.05178899 | 0.381488 |
| 0.307236949 | 0.051420103  | 0.267450205 | -0.10102347 | 0.02904524 | 0.541588 |
| 0.03815123  | 0.101596119  | 0.028141378 | -0.12212284 | 0.00824377 | 0.078568 |
| 0.061912759 | 0.090243812  | 0.051302944 | 0.348348368 | 9.06E-15   | 0.208893 |
| 0.495997241 | 0.040567669  | 0.381745112 | 0.069968648 | 0.1310858  | 0.15684  |
| 0.657714338 | -0.014288867 | 0.758102711 | -0.04212855 | 0.36368323 | 0.381429 |
| 0.30224233  | -0.046103639 | 0.320141712 | -0.12925656 | 0.00514972 | 0.412383 |
| 0.003149993 | 0.142543447  | 0.002015648 | 0.026533616 | 0.56734886 | 0.605633 |
| 0.000178119 | -0.166084644 | 0.000312676 | -0.11414738 | 0.01357917 | 0.442363 |
| 0.155545003 | 0.054055287  | 0.243668387 | -0.33515508 | 1.01E-13   | -0.12    |
| 0.70514058  | 0.024688475  | 0.594605653 | 0.243453217 | 9.97E-08   | 0.656857 |
| 5.14E-06    | -0.210086198 | 4.67E-06    | -0.25652829 | 1.88E-08   | -0.18456 |
| 0.381919331 | -0.049892698 | 0.281940214 | -0.30992059 | 7.45E-12   | 0.341716 |
| 0.262712599 | 0.054856284  | 0.236742417 | 0.052916349 | 0.2537588  | 0.54763  |
| 0.649896911 | 0.023655236  | 0.610124789 | -0.08606203 | 0.06312912 | 0.222666 |
| 1.95E-09    | 0.285626132  | 3.23E-10    | 0.096600574 | 0.03690223 | -0.00822 |
| 0.128220677 | 0.07860556   | 0.089743118 | 0.215185163 | 2.69E-06   | 0.30445  |
| 0.980242964 | 0.005951702  | 0.897932295 | -0.26881886 | 3.58E-09   | 0.085085 |
| 1.30E-06    | 0.227412537  | 6.82E-07    | -0.18921853 | 3.87E-05   | 0.05747  |
| 0.950055075 | 0.000620407  | 0.98933166  | -0.32933632 | 2.82E-13   | -0.03704 |
| 3.01E-12    | 0.324868044  | 6.12E-13    | -0.161501   | 0.00045877 | 0.243384 |
| 0.032775969 | 0.091781866  | 0.047446443 | -0.18761282 | 4.51E-05   | 0.038616 |
| 0.793006675 | -0.005666315 | 0.902801676 | -0.2403352  | 1.46E-07   | 0.305204 |



|             |              |             |             |            |          |
|-------------|--------------|-------------|-------------|------------|----------|
| 0.105354824 | 0.079458385  | 0.086304673 | -0.16421412 | 0.00036607 | 0.249022 |
| 3.62E-08    | 0.261912045  | 9.17E-09    | 0.002463595 | 0.95765531 | 0.041992 |
| 0.030293603 | -0.106506687 | 0.0213345   | 0.167203191 | 0.00028431 | 0.610698 |
| 0.274074607 | -0.054509179 | 0.239726502 | 0.096120187 | 0.03785531 | 0.141292 |
| 0.008350218 | 0.128946218  | 0.005258723 | 0.116922111 | 0.01145136 | 0.544234 |
| 0.682719037 | -0.022258951 | 0.63137649  | -0.05140044 | 0.26763345 | 0.49326  |
| 0.383394568 | -0.040573223 | 0.381679876 | 0.407413353 | 4.23E-20   | 0.247536 |
| 0.008707513 | 0.127209224  | 0.005908093 | 0.129415186 | 0.00509479 | 0.654623 |
| 0.197396158 | -0.043604128 | 0.347107232 | 0.089626641 | 0.05292231 | -0.04763 |
| 0.826766065 | 0.000896279  | 0.984588336 | -0.01917065 | 0.67945351 | 0.492005 |
| 6.40E-05    | -0.191216522 | 3.19E-05    | 0.251717165 | 3.51E-08   | 0.37464  |
| 0.018897701 | -0.112253849 | 0.015224241 | -0.16704655 | 0.00028814 | -0.13717 |
| 0.031842459 | -0.104521151 | 0.023892214 | 0.059068422 | 0.20260274 | 0.32762  |
| 0.157178144 | -0.06001261  | 0.195466911 | 0.145034466 | 0.00167539 | 0.384768 |
| 0.00011293  | -0.18263609  | 7.20E-05    | 0.00014669  | 0.99747749 | 0.340024 |
| 0.766423744 | -0.015790898 | 0.733592299 | -0.29260887 | 1.13E-10   | 0.094288 |
| 0.000254597 | 0.163905308  | 0.000375668 | 0.018262581 | 0.6938521  | -0.20977 |
| 0.001019487 | -0.142387769 | 0.002038879 | 0.075357743 | 0.10385532 | 0.291056 |
| 2.34E-08    | -0.263195485 | 7.71E-09    | 0.034714208 | 0.45422162 | 0.338391 |
| 0.13809947  | 0.065931111  | 0.154877346 | -0.08183428 | 0.07728208 | -0.08888 |
| 2.57E-05    | -0.182892317 | 7.03E-05    | -0.15267276 | 0.0009334  | 0.054757 |
| 0.059244501 | 0.094897052  | 0.040376654 | 0.129253089 | 0.00515092 | 0.045076 |
| 0.000316337 | -0.17519626  | 0.000141605 | -0.27886803 | 8.66E-10   | 0.41199  |
| 0.029193966 | 0.090495834  | 0.050653669 | -0.02186126 | 0.63748644 | 0.325676 |
| 7.80E-05    | 0.184405558  | 6.10E-05    | -0.10822168 | 0.01932007 | -0.3658  |
| 0.098325679 | 0.08236993   | 0.075357604 | 0.017544807 | 0.70531212 | 0.169587 |
| 2.22E-05    | 0.198648531  | 1.53E-05    | -0.29185919 | 1.27E-10   | 0.09731  |
| 1.10E-05    | -0.199890666 | 1.35E-05    | -0.08377659 | 0.07048887 | 0.301744 |
| 0.850990398 | 0.009406383  | 0.839343435 | -0.00288685 | 0.95038897 | 0.376462 |
| 0.368246401 | -0.044623795 | 0.335937405 | -0.26487405 | 6.14E-09   | -0.07107 |
| 0.781672788 | -0.011155689 | 0.80999082  | -0.38177601 | 1.19E-17   | 0.216711 |
| 0.005623433 | -0.144665247 | 0.00172225  | -0.17197536 | 0.00018823 | 0.269407 |
| 2.01E-05    | -0.187604215 | 4.51E-05    | -0.1228777  | 0.00785186 | 0.11259  |
| 0.277824357 | -0.048773321 | 0.292890513 | -0.17512358 | 0.00014253 | -0.04666 |
| 0.127006592 | 0.077549519  | 0.0941523   | 0.319748139 | 1.46E-12   | 0.074128 |
| 1.12E-05    | -0.202909195 | 9.91E-06    | 0.17671273  | 0.00012363 | 0.216652 |
| 0.005190283 | 0.132870332  | 0.004022131 | -0.09742859 | 0.03530726 | 0.321116 |
| 0.004742779 | 0.1396828    | 0.002483655 | -0.00726287 | 0.87561257 | 0.474511 |
| 0.014411553 | 0.124086041  | 0.007259088 | -0.04349366 | 0.34833135 | 0.490285 |
| 6.20E-05    | -0.178357372 | 0.000106572 | -0.06645181 | 0.15163724 | 0.433597 |
| 0.055114276 | 0.087867103  | 0.057774295 | -0.23151011 | 4.23E-07   | 0.091324 |
| 0.078208359 | 0.078331105  | 0.090872766 | -0.13547647 | 0.00335315 | 0.575469 |
| 0.145863891 | 0.070526148  | 0.128035642 | 0.250472453 | 4.11E-08   | 0.418192 |
| 0.147517529 | 0.070492017  | 0.128220783 | 0.004325101 | 0.92573183 | 0.133389 |
| 0.167731488 | -0.073448783 | 0.112936921 | 0.088424163 | 0.05619981 | 0.399381 |

|             |              |             |             |            |          |
|-------------|--------------|-------------|-------------|------------|----------|
| 0.676135488 | -0.005130887 | 0.911947045 | -0.04755403 | 0.305138   | -0.32609 |
| 0.007656809 | -0.123403204 | 0.007588953 | 0.199923401 | 1.34E-05   | 0.151313 |
| 0.186587359 | 0.060934417  | 0.188679128 | 0.158421946 | 0.00059021 | 0.2636   |
| 0.187972802 | 0.067579815  | 0.144794876 | -0.01978261 | 0.669815   | 0.65243  |
| 0.289512323 | 0.049128735  | 0.289383267 | -0.02899197 | 0.53198808 | 0.418136 |
| 0.989593762 | 0.002102939  | 0.963849726 | 0.055038433 | 0.23518698 | 0.449342 |
| 0.003315681 | 0.1373614    | 0.002934077 | -0.0359876  | 0.43782827 | 0.536971 |
| 1.22E-06    | 0.224698453  | 9.31E-07    | -0.00917614 | 0.84322441 | 0.355214 |
| 0.528299249 | -0.028020885 | 0.545822206 | -0.09104626 | 0.04925945 | 0.192802 |
| 0.000500847 | 0.163201155  | 0.000398426 | -0.13278194 | 0.0040468  | 0.274858 |
| 0.139338403 | 0.071287292  | 0.123960487 | 0.04709255  | 0.30986051 | 0.57333  |
| 0.604265061 | 0.023313808  | 0.615292116 | -0.01645979 | 0.72276197 | 0.50923  |
| 0.799435995 | 0.015504779  | 0.738241286 | 0.045244332 | 0.32925397 | 0.556545 |
| 1.50E-10    | 0.294205746  | 8.88E-11    | -0.02066334 | 0.65603837 | 0.05526  |
| 0.289105182 | 0.05440805   | 0.240600873 | -0.18481153 | 5.88E-05   | 0.545139 |
| 0.002458513 | 0.129414564  | 0.005095003 | -0.07056269 | 0.12783765 | 0.305369 |
| 0.005222783 | 0.136335645  | 0.003155817 | 0.024035213 | 0.60439672 | 0.199132 |
| 0.658528334 | 0.020950415  | 0.65157264  | -0.23214373 | 3.92E-07   | 0.534546 |
| 0.807454649 | -0.01887969  | 0.684054692 | -0.14685163 | 0.00146133 | 0.087353 |
| 0.00032405  | -0.167084109 | 0.000287215 | 0.167879668 | 0.00026835 | 0.434687 |
| 4.47E-17    | -0.365669573 | 3.20E-16    | -0.07932573 | 0.08683245 | 0.36255  |
| 0.061619749 | 0.091102129  | 0.049119761 | 0.018842894 | 0.68463741 | 0.394537 |
| 0.003083219 | -0.137418762 | 0.002922106 | -0.26202378 | 9.03E-09   | 0.318919 |
| 2.40E-09    | 0.275960593  | 1.31E-09    | 0.071049676 | 0.1252217  | 0.665054 |
| 0.697422804 | 0.006466133  | 0.889164666 | -0.10640048 | 0.02146504 | 0.243235 |
| 0.193046896 | -0.053590013 | 0.247756009 | -0.00767434 | 0.86862775 | 0.418969 |
| 0.628349745 | 0.023071592  | 0.61896952  | -0.23147967 | 4.24E-07   | 0.09512  |
| 0.138383025 | 0.078251153  | 0.091203984 | -0.22695091 | 7.19E-07   | 0.228516 |
| 0.004732162 | 0.131577877  | 0.004396808 | 0.245257892 | 7.96E-08   | 0.285786 |
| 0.902439223 | -0.007239196 | 0.87601479  | -0.33413069 | 1.21E-13   | 0.159576 |
| 0.00200675  | 0.149714596  | 0.001174521 | -0.06235414 | 0.17856634 | 0.002865 |
| 0.899001135 | 0.011305087  | 0.807495663 | -0.21357632 | 3.21E-06   | 0.157768 |
| 0.000158714 | 0.178543856  | 0.000104784 | -0.03019317 | 0.51512412 | 0.270847 |
| 0.491313028 | -0.035991981 | 0.437772444 | -0.13588608 | 0.00325771 | 0.460673 |
| 0.346901409 | -0.046567221 | 0.315294713 | -0.1487797  | 0.00126191 | -0.02693 |
| 6.80E-05    | 0.189931758  | 3.61E-05    | -0.0381045  | 0.41134057 | 0.218888 |
| 0.22018875  | -0.051282921 | 0.26873036  | 0.16872897  | 0.00024949 | 0.300553 |
| 0.006372909 | 0.134115956  | 0.00368862  | -0.09045828 | 0.05074998 | 0.279575 |
| 0.001346565 | -0.14364481  | 0.001858086 | -0.20382541 | 9.01E-06   | 0.291875 |
| 0.040299634 | 0.094104265  | 0.042085571 | -0.31119958 | 6.04E-12   | 0.177873 |
| 0.002844064 | -0.143037198 | 0.001943558 | 0.087706878 | 0.05823386 | 0.186649 |
| 0.625669669 | -0.027935463 | 0.547047593 | 0.262379955 | 8.61E-09   | 0.315374 |
| 0.924348913 | -0.009417109 | 0.839162737 | -0.03933199 | 0.3964258  | -0.23374 |
| 0.15544772  | 0.068050308  | 0.142011613 | -0.05023876 | 0.2786116  | 0.02414  |
| 4.96E-12    | 0.315030275  | 3.22E-12    | -0.01896526 | 0.68270025 | 0.50745  |

|             |              |             |             |            |          |
|-------------|--------------|-------------|-------------|------------|----------|
| 2.40E-05    | 0.194119637  | 2.40E-05    | 0.039062711 | 0.39966957 | 0.436611 |
| 0.117767697 | 0.067667409  | 0.144273572 | 0.003701108 | 0.93642213 | 0.23834  |
| 0.904981581 | -0.004126701 | 0.929129473 | 0.148701138 | 0.00126952 | 0.251532 |
| 4.66E-05    | -0.192625339 | 2.78E-05    | -0.01258568 | 0.78619061 | 0.291566 |
| 0.025302113 | 0.087443767  | 0.058995105 | 0.03611843  | 0.43616342 | 0.153598 |
| 3.83E-07    | -0.237216138 | 2.14E-07    | -0.21414409 | 3.02E-06   | 0.259799 |
| 2.64E-07    | -0.233491568 | 3.34E-07    | -0.04228352 | 0.36191956 | 0.37035  |
| 0.004176392 | 0.121188214  | 0.008753103 | 0.476580148 | 7.44E-28   | -0.18138 |
| 0.345491446 | 0.033800644  | 0.466192061 | -0.33908102 | 4.99E-14   | 0.3377   |
| 0.237732239 | 0.050828395  | 0.273001822 | -0.13397175 | 0.0037259  | 0.090332 |
| 0.630513066 | 0.018703577  | 0.686845395 | -0.26234275 | 8.65E-09   | 0.214616 |
| 0.28403779  | 0.045354944  | 0.328071718 | -0.26721255 | 4.46E-09   | 0.112515 |
| 0.076349963 | -0.078375445 | 0.0906895   | 0.14230351  | 0.00205156 | 0.414632 |
| 0.001662217 | 0.157665527  | 0.000627455 | 0.151093441 | 0.00105577 | 0.400911 |
| 0.000351243 | -0.173324617 | 0.000167173 | -0.10526397 | 0.02290587 | 0.52925  |
| 0.832102787 | 0.014199769  | 0.759564547 | 0.180410145 | 8.84E-05   | 0.28971  |
| 2.05E-05    | 0.198510175  | 1.55E-05    | -0.28971348 | 1.76E-10   | 0.431463 |
| 0.238884188 | -0.039418372 | 0.395388651 | -0.14692088 | 0.0014537  | 0.504598 |
| 0.030171921 | 0.090740814  | 0.05002913  | -0.36906532 | 1.62E-16   | 0.203159 |
| 0.258708351 | -0.043167208 | 0.351964698 | 0.012365073 | 0.78984989 | -0.13949 |
| 1.37E-05    | 0.209505351  | 4.97E-06    | 0.140540891 | 0.0023338  | 0.064129 |
| 0.048330897 | 0.081611608  | 0.078093764 | 0.096791005 | 0.03653009 | 0.037973 |
| 0.437600933 | -0.045330866 | 0.328328833 | -0.12438428 | 0.00711908 | 0.450435 |
| 6.48E-08    | 0.244496577  | 8.75E-08    | 0.211027707 | 4.22E-06   | 0.0366   |
| 0.039779994 | 0.091454983  | 0.048245075 | -0.03269628 | 0.48089271 | 0.39383  |
| 1.62E-05    | 0.200242171  | 1.30E-05    | 0.130942473 | 0.00459233 | -0.02429 |
| 0.839821421 | 0.016917432  | 0.715383785 | 0.343720836 | 2.14E-14   | 0.152427 |
| 0.566884558 | 0.019324428  | 0.677026491 | 0.180571381 | 8.71E-05   | 0.307367 |
| 0.86092247  | -0.001502744 | 0.974162981 | 0.206896513 | 6.55E-06   | 0.485825 |
| 0.213296777 | -0.061569358 | 0.18410554  | -0.07752806 | 0.09424368 | -0.21986 |
| 0.025091301 | -0.109412671 | 0.018020535 | 0.013313154 | 0.7741572  | 0.174426 |
| 0.205310429 | -0.066683627 | 0.150211376 | -0.03943595 | 0.39517781 | 0.177807 |
| 0.291994706 | 0.05427743   | 0.241733522 | -0.08351539 | 0.07137297 | 0.384368 |
| 0.028474092 | 0.100937094  | 0.029183705 | -0.09671227 | 0.03668357 | 0.264312 |
| 0.002491721 | -0.141969268 | 0.002102551 | -0.10256997 | 0.02665973 | 0.137698 |
| 0.030401669 | -0.105083483 | 0.023142228 | -0.11170245 | 0.01573506 | -0.03665 |
| 0.461379837 | -0.030446726 | 0.511600127 | 0.162020159 | 0.0004395  | 0.16238  |
| 0.003041911 | -0.132534501 | 0.004116602 | -0.08847788 | 0.05604989 | -0.28341 |
| 4.89E-05    | 0.17812489   | 0.000108841 | 0.175194178 | 0.00014163 | -0.14642 |
| 0.056051364 | -0.089711753 | 0.052696491 | 0.030060605 | 0.51697157 | -0.12222 |
| 0.003404931 | 0.132969429  | 0.003994632 | -0.13328848 | 0.00390725 | 0.119378 |
| 0.420800332 | -0.047700396 | 0.30365012  | 0.179969501 | 9.20E-05   | 0.46333  |
| 2.03E-08    | 0.257312294  | 1.69E-08    | 0.254466173 | 2.46E-08   | 0.442026 |
| 0.677548683 | -0.017441625 | 0.706965089 | 0.01685005  | 0.71646849 | 0.047455 |
| 0.323067066 | -0.04023436  | 0.385671937 | -0.11191235 | 0.01553887 | 0.297512 |

|             |              |             |             |            |          |
|-------------|--------------|-------------|-------------|------------|----------|
| 0.1584987   | -0.073437653 | 0.112991646 | 0.070572839 | 0.12778271 | 0.378103 |
| 0.001954986 | -0.145920826 | 0.001567623 | -0.07495227 | 0.10573428 | 0.524435 |
| 0.14045073  | 0.061674786  | 0.18335411  | -0.27925646 | 8.19E-10   | 0.138722 |
| 0.329660241 | -0.043535526 | 0.347867096 | 0.146512123 | 0.00149931 | 0.209362 |
| 0.667315176 | -0.018979269 | 0.682478651 | -0.20146753 | 1.15E-05   | 0.10246  |
| 0.008194306 | 0.112799485  | 0.014733143 | 0.019057474 | 0.68124185 | 0.401472 |
| 1.77E-12    | -0.316900591 | 2.36E-12    | 0.058505482 | 0.20694625 | 0.308771 |
| 0.905528202 | 0.006917668  | 0.881480076 | -0.21141823 | 4.05E-06   | 0.187663 |
| 0.929009257 | 0.00460734   | 0.920900751 | -0.13182837 | 0.00432182 | 0.21027  |
| 0.444415455 | -0.043328703 | 0.350164303 | 0.012613679 | 0.78572644 | 0.165215 |
| 1.49E-05    | -0.198712184 | 1.52E-05    | -0.06848747 | 0.13946244 | 0.343968 |
| 0.351194976 | 0.040506498  | 0.382463947 | -0.27687109 | 1.15E-09   | 0.367903 |
| 2.55E-05    | 0.185351368  | 5.58E-05    | -0.08138205 | 0.07893778 | 0.527421 |
| 8.63E-05    | 0.183429871  | 6.69E-05    | -0.09900881 | 0.03242572 | 0.087446 |
| 0.816418425 | -0.020585337 | 0.657253908 | 0.322518583 | 9.15E-13   | -0.13658 |
| 0.221216928 | 0.05865255   | 0.205805058 | -0.04867217 | 0.2938939  | 0.567398 |
| 0.036866719 | 0.100486184  | 0.029915806 | -0.2411685  | 1.32E-07   | 0.100088 |
| 0.667302806 | 0.023881469  | 0.60671148  | -0.1067266  | 0.0210664  | 0.312576 |
| 0.128043945 | 0.071562077  | 0.122514331 | -0.22377796 | 1.03E-06   | 0.080825 |
| 8.08E-05    | -0.179219012 | 9.85E-05    | 0.130394994 | 0.00476706 | 0.21002  |
| 1.93E-08    | -0.251049705 | 3.82E-08    | 0.263054521 | 7.86E-09   | 0.069768 |
| 0.132620741 | 0.067920875  | 0.142773177 | -0.09824052 | 0.0338006  | 0.200167 |
| 0.009888275 | 0.123623549  | 0.007481073 | 0.147200837 | 0.00142319 | 0.385154 |
| 0.013072488 | 0.120181392  | 0.009332975 | -0.33286684 | 1.52E-13   | 0.335457 |
| 0.000337265 | -0.174215064 | 0.000154512 | -0.16889305 | 0.00024599 | 0.228753 |
| 0.340170385 | 0.046763041  | 0.313261831 | -0.20321716 | 9.60E-06   | 0.262229 |
| 0.010464639 | 0.112129244  | 0.015338386 | -0.10432439 | 0.02415956 | 0.158197 |
| 0.08516212  | -0.082737246 | 0.074060583 | -0.03545535 | 0.44463875 | 0.254771 |
| 0.022219791 | -0.106233221 | 0.021672019 | -0.11619017 | 0.01198189 | 0.534823 |
| 0.752288939 | 0.012862236  | 0.781609772 | 0.305527224 | 1.51E-11   | 0.302969 |
| 1.63E-06    | -0.227385968 | 6.84E-07    | -0.14681359 | 0.00146554 | 0.087286 |
| 0.834604106 | -0.0128555   | 0.781721262 | 0.051223129 | 0.26928963 | 0.306904 |
| 0.111756181 | -0.074011972 | 0.110195015 | 0.07256024  | 0.11737147 | 0.306241 |
| 0.657403623 | -0.022084621 | 0.634051767 | 0.285452547 | 3.31E-10   | 0.251271 |
| 1.27E-06    | 0.221963829  | 1.27E-06    | -0.13279594 | 0.00404289 | 0.213102 |
| 2.60E-05    | 0.197614879  | 1.70E-05    | 0.27240279  | 2.17E-09   | 0.520838 |
| 4.61E-10    | -0.282877932 | 4.84E-10    | -0.01093082 | 0.81375003 | 0.292944 |
| 0.257450642 | -0.052340646 | 0.258968063 | 0.008740647 | 0.85057535 | 0.626996 |
| 0.015665188 | 0.105347361  | 0.022797374 | -0.10648344 | 0.02136301 | 0.483197 |
| 0.027765044 | -0.102644946 | 0.026548495 | -0.31398711 | 3.82E-12   | 0.11923  |
| 4.63E-09    | 0.271132359  | 2.59E-09    | -0.20892808 | 5.28E-06   | 0.069646 |
| 0.071879762 | 0.087690109  | 0.058282136 | -0.31427969 | 3.64E-12   | 0.257176 |
| 0.088705139 | 0.073515571  | 0.112608985 | 0.196468063 | 1.90E-05   | 0.417816 |
| 0.892612271 | 0.01227658   | 0.791319074 | -0.25030009 | 4.20E-08   | 0.133454 |
| 0.250847202 | -0.056062655 | 0.226575037 | -0.06249207 | 0.17760567 | 0.380337 |

|             |              |             |             |            |          |
|-------------|--------------|-------------|-------------|------------|----------|
| 0.002206834 | 0.136965647  | 0.003017892 | -0.04945871 | 0.28615238 | 0.247007 |
| 0.057118824 | -0.084427416 | 0.068324898 | 0.222335513 | 1.22E-06   | 0.212091 |
| 8.34E-07    | 0.225049173  | 8.95E-07    | -0.08168804 | 0.07781438 | 0.134077 |
| 0.002544416 | 0.130811917  | 0.004633464 | -0.04165144 | 0.36914671 | 0.121253 |
| 0.86992642  | -0.007129066 | 0.877886109 | -0.19263438 | 2.78E-05   | 0.207027 |
| 0.723804453 | 0.02309605   | 0.618597757 | -0.01648924 | 0.7222865  | 0.383216 |
| 2.45E-10    | 0.289502546  | 1.81E-10    | 0.061417933 | 0.18518878 | 0.143475 |
| 0.183607557 | -0.055495975 | 0.231311717 | 0.115116409 | 0.01279948 | -0.18685 |
| 0.759471736 | 0.013954771  | 0.763588648 | -0.28574835 | 3.17E-10   | 0.062887 |
| 0.279651287 | 0.057069649  | 0.21832891  | 0.224815667 | 9.19E-07   | 0.488685 |
| 0.998561733 | 0.007101065  | 0.878362002 | -0.1936002  | 2.53E-05   | 0.21105  |
| 0.003487763 | 0.137409385  | 0.00292406  | 0.200312354 | 1.29E-05   | 0.15084  |
| 3.87E-07    | 0.230786367  | 4.60E-07    | -0.22052641 | 1.49E-06   | 0.07885  |
| 0.077886019 | 0.089169613  | 0.054148736 | -0.1119706  | 0.0154848  | 0.00763  |
| 0.289856559 | -0.051447232 | 0.267197541 | -0.22528043 | 8.71E-07   | 0.496407 |
| 2.34E-08    | -0.257535328 | 1.64E-08    | 0.094868167 | 0.04043787 | -0.24493 |
| 0.061659944 | 0.092172823  | 0.046505847 | 0.075510539 | 0.10315417 | 0.174747 |
| 0.005371874 | 0.131536081  | 0.004409434 | -0.06380419 | 0.16865827 | 0.309758 |
| 0.037538025 | -0.099486947 | 0.031594427 | 0.037579864 | 0.41781516 | 0.118897 |
| 0.996335328 | -0.010568871 | 0.819809889 | 0.268682979 | 3.64E-09   | 0.241406 |
| 0.080765051 | -0.077048048 | 0.096305821 | 0.130761115 | 0.00464956 | 0.081744 |
| 0.337951603 | 0.04279621   | 0.356122795 | -0.06560234 | 0.15694998 | 0.383624 |
| 0.26478999  | 0.043173232  | 0.351897436 | 0.040374098 | 0.38402265 | 0.156218 |
| 0.007246526 | 0.117514808  | 0.011037091 | -0.09528007 | 0.03957226 | 0.050539 |
| 1.67E-17    | 0.375063775  | 4.79E-17    | -0.07968832 | 0.08539598 | 0.214352 |
| 0.962400947 | -0.000736247 | 0.987339868 | 0.068618375 | 0.13870594 | 0.112495 |
| 6.49E-05    | 0.179978412  | 9.19E-05    | -0.26076364 | 1.07E-08   | 0.185539 |
| 0.260608671 | -0.029048917 | 0.531182311 | -0.19354144 | 2.54E-05   | 0.183469 |
| 0.062038147 | 0.092610309  | 0.045471907 | 0.204513045 | 8.39E-06   | 0.394531 |
| 0.000442    | -0.165088351 | 0.000340139 | 0.279166654 | 8.30E-10   | 0.268292 |
| 0.759917686 | 0.000905463  | 0.984430447 | -0.13407053 | 0.00370033 | -0.12003 |
| 0.164462695 | 0.059992013  | 0.195620588 | 0.000728438 | 0.98747414 | 0.453864 |
| 0.168974449 | -0.059029826 | 0.202898404 | -0.13016116 | 0.00484349 | 0.063715 |
| 0.016834052 | -0.109772218 | 0.017643522 | -0.12980838 | 0.00496091 | 0.115854 |
| 0.395253813 | -0.026731675 | 0.564458913 | 0.064532445 | 0.16384001 | 0.139511 |
| 0.095542405 | -0.074797855 | 0.10645685  | 0.057452054 | 0.21525446 | 0.108476 |
| 0.758327041 | 0.013518604  | 0.770768439 | -0.27659562 | 1.20E-09   | 0.432012 |
| 3.08E-05    | 0.186906172  | 4.82E-05    | -0.249094   | 4.90E-08   | 0.407068 |
| 0.253263001 | -0.048236679 | 0.298239811 | -0.24212069 | 1.18E-07   | -0.00505 |
| 4.20E-06    | 0.20946518   | 4.99E-06    | -0.0901496  | 0.05154743 | 0.12594  |
| 0.087771867 | 0.078964512  | 0.088282719 | -0.17624142 | 0.00012897 | 0.291121 |
| 0.006981148 | -0.143261787 | 0.001911555 | -0.04067611 | 0.38047277 | 0.330173 |
| 0.054507387 | 0.084302804  | 0.068734962 | 0.143473988 | 0.00188176 | 0.418903 |
| 4.10E-05    | 0.189944645  | 3.61E-05    | -0.12268849 | 0.0079485  | 0.260181 |
| 0.917779272 | 0.00252833   | 0.956543714 | 0.192005839 | 2.95E-05   | 0.619519 |

|             |              |             |             |            |          |
|-------------|--------------|-------------|-------------|------------|----------|
| 0.083749072 | 0.060010177  | 0.19548506  | 0.306381892 | 1.32E-11   | 0.163437 |
| 0.000238131 | 0.16524563   | 0.000335659 | -0.32111988 | 1.16E-12   | 0.499118 |
| 0.313388454 | -0.043875629 | 0.34411034  | -0.0070309  | 0.87955474 | -0.01761 |
| 0.832411509 | 4.60E-06     | 0.999920881 | -0.17362595 | 0.00016278 | 0.08998  |
| 0.192615563 | -0.063512935 | 0.170614634 | -0.05754338 | 0.21452481 | 0.459712 |
| 0.081315554 | 0.073955269  | 0.11046868  | 0.112463483 | 0.01503389 | -0.15685 |
| 0.002629332 | -0.143605927 | 0.00186345  | -0.28123416 | 6.15E-10   | 0.273782 |
| 0.801992887 | -0.005857577 | 0.899537867 | 0.007819865 | 0.86615974 | 0.158639 |
| 0.161642012 | -0.068628067 | 0.138650054 | -0.11282201 | 0.01471318 | 0.107188 |
| 0.169388114 | -0.064082145 | 0.166806911 | -0.11699075 | 0.01140269 | 0.032502 |
| 0.000168855 | 0.178585607  | 0.000104388 | 0.072646624 | 0.11693445 | 0.57063  |
| 0.083518905 | -0.084955183 | 0.066610337 | -0.21968159 | 1.64E-06   | -0.09723 |
| 0.025300782 | -0.100270032 | 0.030272296 | 0.232689369 | 3.68E-07   | 0.476832 |
| 0.955015021 | -0.016608452 | 0.720362385 | -0.19717638 | 1.77E-05   | 0.412453 |
| 0.022757078 | 0.106800426  | 0.020977053 | -0.27307138 | 1.98E-09   | 0.478518 |
| 0.000291749 | 0.160924616  | 0.000481091 | -0.23734368 | 2.11E-07   | 0.286597 |
| 0.051568716 | 0.09782118   | 0.034571759 | -0.03142509 | 0.49812096 | 0.197037 |
| 0.035802951 | -0.102456429 | 0.026828941 | 0.056195364 | 0.22547581 | 0.28496  |
| 0.06854799  | 0.090760022  | 0.049980435 | 0.106328567 | 0.02155382 | -0.12981 |
| 0.068270373 | 0.089567765  | 0.053078994 | 0.2395094   | 1.62E-07   | -0.07183 |
| 0.358514007 | 0.043088672  | 0.35284236  | 0.002279685 | 0.96081375 | 0.259493 |
| 0.764368655 | -0.007019192 | 0.879753766 | -0.19870112 | 1.52E-05   | 0.059668 |
| 0.429077466 | 0.025348262  | 0.58479077  | -0.25753307 | 1.64E-08   | 0.300723 |
| 0.977283913 | 0.008837947  | 0.848931814 | 0.194220788 | 2.38E-05   | 0.2566   |
| 0.364713043 | -0.033796561 | 0.46624595  | 0.176632259 | 0.00012453 | 0.154634 |
| 0.047519067 | -0.090741799 | 0.050026632 | 0.241498729 | 1.27E-07   | 0.514032 |
| 0.147137526 | -0.063411742 | 0.171298308 | 0.135597595 | 0.00332467 | 0.168196 |
| 0.328056801 | -0.047169878 | 0.309065839 | -0.18148445 | 8.01E-05   | 0.01505  |
| 0.126484439 | 0.066259662  | 0.152826847 | 0.007719073 | 0.86786893 | 0.228563 |
| 1.33E-05    | -0.21204998  | 3.79E-06    | -0.12752018 | 0.0057868  | 0.36482  |
| 0.41697853  | 0.041181174  | 0.374581411 | -0.16022458 | 0.00050955 | 0.362839 |
| 1.77E-09    | 0.270502256  | 2.83E-09    | 0.212314471 | 3.68E-06   | 0.410317 |
| 1.41E-10    | 0.292276129  | 1.19E-10    | 0.005402981 | 0.90729801 | 0.113902 |
| 0.730700135 | -0.024843263 | 0.592296326 | -0.29790695 | 5.02E-11   | 0.314944 |
| 0.011271407 | 0.113881541  | 0.013800251 | 0.180915564 | 8.44E-05   | 0.157985 |
| 6.45E-07    | -0.229942502 | 5.08E-07    | -0.08162514 | 0.07804426 | 0.282096 |
| 0.003823103 | -0.143670038 | 0.001854612 | -0.17592452 | 0.00013269 | 0.534834 |
| 0.883703312 | -0.001248901 | 0.978526208 | 0.099672366 | 0.03127699 | 0.287467 |
| 0.096734686 | -0.07939914  | 0.086540057 | -0.21357049 | 3.21E-06   | -0.00565 |
| 0.006887704 | 0.125384764  | 0.006666896 | 0.108548436 | 0.01895565 | 0.16613  |
| 0.014221355 | -0.122513733 | 0.008038699 | 0.042061723 | 0.36444543 | 0.187012 |
| 0.71899753  | 0.007697812  | 0.868229535 | -0.02944996 | 0.5255255  | -0.10207 |
| 1.72E-13    | -0.330993745 | 2.11E-13    | -0.1370223  | 0.00300576 | 0.230986 |
| 0.059425213 | 0.084008217  | 0.069712382 | -0.15935829 | 0.00054694 | 0.227428 |
| 0.720431612 | 0.017021799  | 0.713704824 | -0.28545004 | 3.31E-10   | -0.00303 |

|             |              |             |             |            |          |
|-------------|--------------|-------------|-------------|------------|----------|
| 0.865100468 | -0.002849059 | 0.951037613 | 0.085023168 | 0.06639206 | 0.59795  |
| 0.000598925 | 0.157334052  | 0.000644455 | -0.23947305 | 1.63E-07   | 0.320172 |
| 0.168313189 | -0.071053355 | 0.125202098 | -0.16976661 | 0.00022813 | 0.345625 |
| 0.368879534 | -0.045512087 | 0.326396854 | -0.25544752 | 2.16E-08   | 0.279816 |
| 0.717847873 | -0.023835091 | 0.607410514 | -0.38630252 | 4.54E-18   | 0.340949 |
| 0.002059199 | -0.14843287  | 0.001295827 | 0.13357034  | 0.00383149 | 0.487142 |
| 0.302707542 | -0.049729548 | 0.283518763 | -0.03108181 | 0.50282883 | 0.182605 |
| 0.000978297 | 0.153877361  | 0.000849023 | -0.17170852 | 0.00019267 | 0.436794 |
| 0.772637706 | 0.017089516  | 0.712616203 | 0.000809933 | 0.98607292 | 0.111059 |
| 3.09E-06    | 0.221184986  | 1.39E-06    | 0.185954897 | 5.28E-05   | 0.592986 |
| 6.91E-05    | 0.179901909  | 9.26E-05    | -0.1247889  | 0.006933   | 0.238052 |
| 2.77E-08    | 0.267217808  | 4.46E-09    | 0.126825917 | 0.00606075 | 0.338638 |
| 0.024255255 | 0.105900935  | 0.022088361 | -0.16550814 | 0.0003283  | -0.00793 |
| 0.001334756 | -0.153260418 | 0.000891314 | 0.055423104 | 0.23192587 | 0.334758 |
| 0.255812517 | -0.048985915 | 0.290789218 | 0.132794047 | 0.00404342 | 0.444312 |
| 0.480613921 | 0.029678223  | 0.522319558 | 0.024822411 | 0.59260718 | 0.271131 |
| 0.004808506 | 0.124680991  | 0.006982198 | 0.079550266 | 0.08594064 | -0.02783 |
| 0.159863804 | -0.057733479 | 0.213011819 | 0.054877882 | 0.23655761 | 0.346025 |
| 0.001013184 | 0.147070594  | 0.00143731  | -0.15071034 | 0.0010876  | 0.025144 |
| 1.22E-25    | -0.457524304 | 1.54E-25    | -0.05356548 | 0.24797283 | 0.236669 |
| 0.746767366 | -0.023432788 | 0.61348924  | 0.043785519 | 0.34510317 | 0.256883 |
| 0.693488375 | 0.018182877  | 0.695121286 | -0.08190335 | 0.0770317  | 0.427941 |
| 0.620685542 | 0.024040525  | 0.604316823 | 0.156329379 | 0.00069862 | 0.412929 |
| 0.018783842 | -0.104454332 | 0.023982712 | -0.04808674 | 0.29974598 | 0.535073 |
| 0.514641478 | -0.023447251 | 0.613270247 | 0.153735147 | 0.0008586  | 0.229503 |
| 0.012502877 | 0.119184843  | 0.009940323 | 0.092514523 | 0.04569662 | 0.414343 |
| 0.325384766 | 0.044921687  | 0.3327182   | -0.12933578 | 0.00512222 | 0.125864 |
| 9.14E-05    | 0.184842473  | 5.86E-05    | 0.107267226 | 0.02041971 | 0.480768 |
| 0.003216573 | 0.143785279  | 0.001838822 | 0.126572121 | 0.00616377 | 0.338253 |
| 3.58E-20    | -0.403009897 | 1.15E-19    | 0.051021025 | 0.27118594 | 0.415432 |
| 0.040894249 | 0.107126119  | 0.020586812 | 0.05076965  | 0.27355724 | -0.02864 |
| 9.14E-08    | -0.243669667 | 9.70E-08    | -0.06984539 | 0.1317677  | 0.185849 |
| 0.408455498 | 0.033630727  | 0.468437576 | -0.20635253 | 6.93E-06   | 0.040832 |
| 0.109223032 | 0.078538696  | 0.090017286 | -0.02835286 | 0.54107295 | 0.111246 |
| 0.577829832 | -0.018298888 | 0.693274254 | 0.135252086 | 0.0034065  | 0.158445 |
| 0.006014245 | 0.117220178  | 0.011241333 | -0.4049429  | 7.44E-20   | 0.260562 |
| 0.028018738 | 0.100444428  | 0.029984391 | -0.04754681 | 0.3052115  | 0.542528 |
| 0.223588842 | -0.059207051 | 0.201543344 | 0.157090607 | 0.00065721 | -0.30472 |
| 0.038248017 | 0.100144939  | 0.030480263 | 0.027082163 | 0.55936219 | 0.337943 |
| 0.266542712 | -0.058493861 | 0.207036618 | -0.0021816  | 0.96249848 | 0.290797 |
| 0.072027397 | -0.083152042 | 0.072617838 | 0.233997154 | 3.15E-07   | 0.370973 |
| 0.076006573 | 0.085436797  | 0.065076687 | -0.17434694 | 0.00015272 | 0.32111  |
| 0.01712123  | -0.115056312 | 0.012846663 | -0.15685739 | 0.00066965 | 0.180665 |
| 0.214636399 | 0.059095498  | 0.20239551  | -0.37613829 | 3.84E-17   | 0.38617  |
| 0.520079661 | 0.031905578  | 0.491570729 | -0.09926458 | 0.03197874 | 0.007567 |

|             |              |             |             |            |          |
|-------------|--------------|-------------|-------------|------------|----------|
| 0.043244434 | 0.094035938  | 0.04223567  | -0.33891448 | 5.14E-14   | 0.404423 |
| 0.363656163 | -0.039658314 | 0.392516243 | -0.14277906 | 0.00198095 | 0.45049  |
| 0.001358068 | -0.153031901 | 0.000907467 | -0.14560728 | 0.00160499 | -0.13741 |
| 0.000441933 | 0.157512534  | 0.000635249 | 0.065984819 | 0.15454073 | -0.25392 |
| 0.000481679 | -0.159863625 | 0.000524833 | -0.06177959 | 0.18260939 | 0.186171 |
| 0.168250561 | 0.059719126  | 0.197665007 | 0.051208185 | 0.26942954 | 0.279753 |
| 1.14E-11    | 0.321000786  | 1.18E-12    | 0.08568348  | 0.06430247 | 0.291628 |
| 0.057843769 | -0.085404363 | 0.065179049 | -0.26290919 | 8.02E-09   | 0.092314 |
| 2.88E-06    | -0.216423643 | 2.35E-06    | 0.004036112 | 0.93068127 | -0.05345 |
| 0.006145789 | 0.127973792  | 0.00561387  | -0.06497731 | 0.16094802 | 0.259523 |
| 0.062904196 | 0.085423877  | 0.065117448 | -0.321347   | 1.12E-12   | 0.098484 |
| 0.261516338 | 0.055312663  | 0.232858861 | -0.14089949 | 0.00227366 | 0.214841 |
| 0.853484069 | -0.002840639 | 0.951182146 | -0.19156497 | 3.08E-05   | 0.158192 |
| 0.123895954 | 0.075224318  | 0.104470665 | -0.18981005 | 3.65E-05   | 0.522682 |
| 1.49E-07    | -0.24535574  | 7.86E-08    | -0.13316615 | 0.00394055 | 0.329934 |
| 0.094531009 | 0.080157332  | 0.083566416 | -0.22426288 | 9.79E-07   | 0.404195 |
| 0.296835636 | 0.045306812  | 0.32858583  | -0.15111442 | 0.00105405 | -0.06941 |
| 0.686723769 | -0.014906278 | 0.747996732 | 0.216091072 | 2.44E-06   | 0.549184 |
| 0.733014284 | 0.017139494  | 0.711813121 | -0.2329761  | 3.55E-07   | 0.295165 |
| 0.549588364 | -0.022136216 | 0.633259491 | -0.02684729 | 0.56277523 | 0.547815 |
| 0.295947515 | 0.053257298  | 0.250708219 | -0.14295897 | 0.00195482 | 0.417856 |
| 0.09406925  | 0.078069711  | 0.091959229 | -0.17729131 | 0.00011736 | 0.044743 |
| 0.588269936 | 0.029503743  | 0.524769224 | -0.09835828 | 0.03358669 | 0.610731 |
| 0.043831534 | -0.095345673 | 0.039435867 | -0.12036081 | 0.00922721 | 0.389701 |
| 0.045655468 | -0.075335278 | 0.103958724 | -0.07442934 | 0.10819708 | 0.143638 |
| 1.77E-08    | -0.257907962 | 1.56E-08    | -0.08995376 | 0.05205877 | 0.328842 |
| 0.735357864 | -0.017970186 | 0.698512247 | 0.095273922 | 0.03958508 | 0.269132 |
| 0.151697951 | 0.071259572  | 0.124107108 | -0.0186035  | 0.68843313 | 0.319866 |
| 0.752406987 | 0.014317486  | 0.757633332 | -0.26177209 | 9.34E-09   | 0.094403 |
| 0.016694348 | 0.118181276  | 0.010587164 | -0.16005104 | 0.00051685 | 0.324844 |
| 0.001663618 | -0.14848781  | 0.001290399 | 0.235106537 | 2.76E-07   | 0.408049 |
| 0.005409963 | 0.123824036  | 0.007384109 | 0.377665673 | 2.80E-17   | 0.311432 |
| 0.130744959 | 0.068343919  | 0.140295592 | -0.22923143 | 5.52E-07   | 0.045966 |
| 0.452364629 | -0.024465892 | 0.59793361  | -0.09794872 | 0.03433565 | 0.258607 |
| 1.66E-12    | 0.323532348  | 7.69E-13    | -0.09847098 | 0.03338305 | 0.113985 |
| 1.53E-08    | -0.251117553 | 3.79E-08    | 0.0163859   | 0.72395573 | 0.473474 |
| 0.000241278 | 0.166755219  | 0.000295372 | -0.18926705 | 3.85E-05   | 0.518937 |
| 0.020934486 | 0.105245718  | 0.022929677 | 0.021551551 | 0.6422618  | 0.545865 |
| 0.153408148 | -0.06510862  | 0.160101799 | -0.34970029 | 7.03E-15   | 0.354045 |
| 0.081025651 | 0.086764189  | 0.060999452 | -0.33236803 | 1.66E-13   | 0.000415 |
| 0.000398227 | 0.168432283  | 0.00025593  | -0.15587245 | 0.00072463 | 0.338342 |
| 1.63E-06    | 0.218716837  | 1.83E-06    | -0.00216605 | 0.96276568 | 0.535827 |
| 0.628455916 | 0.03074757   | 0.507435199 | -0.07402311 | 0.11014132 | 0.21993  |
| 0.000300986 | -0.167396173 | 0.000279671 | -0.28237885 | 5.21E-10   | 0.200446 |
| 0.269664613 | 0.057990533  | 0.210978118 | 0.135294971 | 0.00339624 | 0.12244  |



|             |              |             |             |            |          |
|-------------|--------------|-------------|-------------|------------|----------|
| 0.711950622 | 0.02492829   | 0.591029534 | -0.19544553 | 2.11E-05   | 0.131777 |
| 4.84E-05    | -0.186114358 | 5.20E-05    | -0.08592092 | 0.06356442 | 0.209854 |
| 1.11E-10    | 0.275811761  | 1.34E-09    | 0.085837265 | 0.06382365 | 0.255346 |
| 0.138064847 | 0.065961659  | 0.154685822 | 0.095096632 | 0.03995581 | 0.081136 |
| 0.009571361 | -0.118669107 | 0.010268217 | -0.23844841 | 1.84E-07   | 0.114992 |
| 3.88E-07    | -0.238869489 | 1.75E-07    | -0.24197409 | 1.20E-07   | 0.274629 |
| 0.539385176 | 0.027088824  | 0.559265549 | 0.389998201 | 2.05E-18   | 0.527509 |
| 0.070238304 | 0.090899035  | 0.049629198 | 0.347521019 | 1.06E-14   | 0.546969 |
| 0.040281488 | -0.086750354 | 0.061040833 | 0.227954483 | 6.40E-07   | 0.085217 |
| 0.052195978 | 0.071752138  | 0.121521778 | -0.22344743 | 1.07E-06   | 0.326153 |
| 0.031606022 | -0.110562095 | 0.016839389 | -0.1061135  | 0.02182123 | 0.022873 |
| 0.919024028 | -0.008075958 | 0.861819841 | 0.293094051 | 1.05E-10   | -0.2238  |
| 0.212233154 | 0.068898204  | 0.137099441 | -0.008453   | 0.85543784 | 0.224433 |
| 0.96073392  | -0.009019734 | 0.845862942 | 0.178030183 | 0.00010978 | 0.514486 |
| 6.55E-08    | -0.250196258 | 4.26E-08    | 0.145087199 | 0.00166879 | 0.266008 |
| 0.003550454 | -0.124406869 | 0.007108578 | 0.322519361 | 9.15E-13   | 0.269833 |
| 0.604808155 | 0.014647168  | 0.752232791 | -0.20805774 | 5.79E-06   | 0.366788 |
| 0.000359871 | -0.171028716 | 0.000204451 | 0.082936613 | 0.07336426 | 0.438877 |
| 8.61E-06    | -0.215670494 | 2.56E-06    | -0.12207387 | 0.00826978 | 0.17809  |
| 0.201883995 | 0.05871154   | 0.205348602 | -0.18242878 | 7.34E-05   | 0.474913 |
| 0.000139609 | -0.183626756 | 6.56E-05    | -0.01608075 | 0.72889257 | 0.406554 |
| 0.662629723 | -0.021522979 | 0.642703084 | -0.25592902 | 2.03E-08   | 0.051582 |
| 0.529414609 | 0.02718105   | 0.557928237 | -0.14695376 | 0.00145008 | 0.318096 |
| 0.857807783 | 0.01042258   | 0.822262198 | -0.17561214 | 0.00013645 | 0.582224 |
| 0.168090214 | -0.066472825 | 0.151507544 | 3.61E-05    | 0.99938006 | 0.437371 |
| 0.111026782 | 0.071964692  | 0.120419193 | -0.18310006 | 6.89E-05   | 0.46305  |
| 0.02654271  | 0.104567186  | 0.023830036 | -0.09566853 | 0.03877036 | 0.568982 |
| 0.370493544 | 0.040108543  | 0.38716059  | -0.06745292 | 0.14555261 | 0.295782 |
| 0.826292304 | -0.014811291 | 0.749548744 | 0.144254491 | 0.00177579 | 0.588454 |
| 0.000584823 | -0.162587979 | 0.000419283 | -0.32297131 | 8.47E-13   | 0.111441 |
| 9.33E-06    | -0.210917849 | 4.27E-06    | -0.19429916 | 2.36E-05   | 0.080865 |
| 0.05855013  | -0.100168606 | 0.030440822 | -0.15705524 | 0.00065908 | 0.191451 |
| 0.000240522 | -0.173099005 | 0.000170532 | -0.12125925 | 0.00871343 | 0.264995 |
| 0.120379805 | -0.067458213 | 0.145520958 | -0.05560708 | 0.23037755 | 0.411999 |
| 0.009294968 | 0.127027118  | 0.005980182 | -0.15192753 | 0.00098941 | 0.329613 |
| 0.002766364 | -0.125563565 | 0.006588851 | 0.046448622 | 0.31653013 | 0.160821 |
| 0.092129914 | -0.073744705 | 0.111489608 | 0.133496492 | 0.00385121 | 0.329276 |
| 0.002665409 | 0.135854702  | 0.003264937 | 0.229607103 | 5.28E-07   | 0.097964 |
| 0.202276009 | 0.053132862  | 0.251818616 | -0.05764977 | 0.21367714 | 0.282265 |
| 3.46E-13    | 0.334046293  | 1.23E-13    | -0.18156044 | 7.95E-05   | 0.164406 |
| 0.133105329 | 0.059215747  | 0.201477024 | -0.21967477 | 1.64E-06   | -0.21632 |
| 0.007684852 | -0.12282635  | 0.007877988 | -0.0296427  | 0.52281777 | 0.228535 |
| 0.166893108 | 0.082436292  | 0.075121915 | -0.27232905 | 2.19E-09   | 0.115693 |
| 0.519284825 | -0.023908853 | 0.606298893 | 0.085141308 | 0.06601416 | 0.294282 |
| 0.000618838 | 0.161415313  | 0.000462029 | -0.20733456 | 6.25E-06   | 0.391562 |

|             |              |             |             |            |          |
|-------------|--------------|-------------|-------------|------------|----------|
| 0.083674625 | 0.082593823  | 0.074564841 | -0.03599719 | 0.43770614 | 0.288143 |
| 0.198303086 | -0.063279689 | 0.172193544 | -0.34096575 | 3.54E-14   | -0.13136 |
| 1.97E-05    | 0.203776933  | 9.06E-06    | 0.192853943 | 2.72E-05   | 0.247913 |
| 0.571805082 | -0.043786828 | 0.345088728 | -0.16730239 | 0.00028192 | 0.17346  |
| 8.31E-08    | -0.253661853 | 2.73E-08    | 0.076925922 | 0.09683619 | 0.457437 |
| 0.001753227 | -0.138841535 | 0.002639039 | 0.467604568 | 9.57E-27   | 0.460893 |
| 0.043619208 | -0.086652281 | 0.061334846 | 0.137750886 | 0.00285366 | 0.406355 |
| 0.039628131 | -0.091070319 | 0.049199262 | -0.10858576 | 0.01891441 | 0.088603 |
| 0.111037826 | 0.072719128  | 0.116568636 | 0.226478598 | 7.59E-07   | 0.523945 |
| 0.000987274 | -0.147089717 | 0.00143523  | 0.28440605  | 3.87E-10   | 0.212529 |
| 0.11783579  | 0.072201951  | 0.119197698 | 0.454524284 | 3.47E-25   | 0.228862 |
| 0.199032011 | 0.061833704  | 0.182225723 | 0.256977425 | 1.77E-08   | 0.341723 |
| 0.549766891 | 0.032144808  | 0.488326735 | 0.236466149 | 2.34E-07   | 0.520741 |
| 0.415203633 | -0.036244074 | 0.434567997 | 0.43779227  | 2.74E-23   | 0.505481 |
| 0.22007155  | -0.064257379 | 0.165647599 | -0.16254792 | 0.00042068 | 0.099385 |
| 0.297183729 | -0.054598856 | 0.238953023 | -0.00670489 | 0.88509991 | 0.304089 |
| 1.19E-08    | 0.251308614  | 3.69E-08    | 0.043806345 | 0.34487354 | 0.437928 |
| 5.28E-06    | -0.217172337 | 2.17E-06    | -0.26066254 | 1.08E-08   | 0.059564 |
| 3.36E-08    | 0.256197406  | 1.96E-08    | -0.04234662 | 0.36120295 | 0.251461 |
| 0.552319827 | -0.015948793 | 0.731030904 | -0.05209545 | 0.261209   | 0.313726 |
| 0.002740294 | 0.131626736  | 0.004382089 | -0.04994053 | 0.2814785  | 0.213757 |
| 0.037896182 | -0.096010032 | 0.038076776 | -0.07032563 | 0.12912632 | 0.31068  |
| 0.728125051 | 0.016882426  | 0.715947237 | -0.08583113 | 0.06384268 | 0.19996  |
| 0.092543856 | -0.073084655 | 0.114738026 | 0.180716109 | 8.59E-05   | 0.148209 |
| 0.263638994 | -0.058293324 | 0.208600571 | -0.22796322 | 6.40E-07   | 0.067583 |
| 0.060701529 | 0.092530833  | 0.04565829  | -0.07128737 | 0.12396009 | 0.631025 |
| 4.08E-07    | -0.242951593 | 1.06E-07    | -0.03323642 | 0.47367138 | 0.301289 |
| 2.14E-06    | 0.210971467  | 4.25E-06    | -0.20337922 | 9.44E-06   | 0.262557 |
| 0.062463624 | -0.09653516  | 0.037030798 | -0.27595008 | 1.32E-09   | 0.313855 |
| 0.650460238 | 0.02602137   | 0.574855796 | -0.25011653 | 4.30E-08   | 0.253854 |
| 0.411660135 | 0.031715766  | 0.494152799 | -0.26694238 | 4.63E-09   | -0.05062 |
| 5.27E-05    | 0.187852449  | 4.41E-05    | 0.14710733  | 0.00143332 | 0.153122 |
| 0.107504919 | -0.077366643 | 0.094933145 | 0.190857568 | 3.30E-05   | 0.262987 |
| 0.884914879 | -0.003433528 | 0.941009952 | 0.065604705 | 0.15693501 | 0.35139  |
| 0.567745871 | -0.02740671  | 0.554662639 | -0.15543091 | 0.00075061 | 0.394388 |
| 2.86E-05    | 0.191832469  | 3.00E-05    | -0.31083893 | 6.41E-12   | 0.233465 |
| 0.019806231 | 0.112433972  | 0.015060556 | -0.10118126 | 0.02879373 | 0.319313 |
| 0.490318306 | 0.028513048  | 0.538788637 | -0.28981446 | 1.73E-10   | 0.156505 |
| 0.230591917 | 0.058507261  | 0.206932419 | -0.19865168 | 1.53E-05   | 0.411141 |
| 1.60E-07    | -0.243506594 | 9.90E-08    | 0.107492667 | 0.02015518 | 0.077016 |
| 0.741251229 | -0.017672984 | 0.703260652 | -0.08724142 | 0.05958612 | 0.131431 |
| 0.006632379 | -0.118711067 | 0.010241185 | -0.00910549 | 0.84441596 | 0.271102 |
| 0.131028698 | 0.07368002   | 0.111804721 | -0.25480216 | 2.35E-08   | 0.477704 |
| 0.412200932 | -0.047574053 | 0.304934136 | 0.029856601 | 0.51982125 | -0.18849 |
| 0.272592131 | -0.050670562 | 0.274495846 | 0.122355534 | 0.00812114 | -0.01078 |

|             |              |             |             |            |          |
|-------------|--------------|-------------|-------------|------------|----------|
| 7.15E-05    | -0.174741357 | 0.000147458 | 0.295633621 | 7.13E-11   | -0.06926 |
| 0.958434336 | 0.005835737  | 0.899910474 | -0.17651243 | 0.00012588 | 0.229539 |
| 8.20E-05    | 0.19352681   | 2.54E-05    | -0.13521068 | 0.00341642 | 0.302136 |
| 0.05368672  | -0.094912271 | 0.040344431 | -0.09527414 | 0.03958463 | 0.472001 |
| 0.519384356 | 0.031215903  | 0.500987033 | -0.08784921 | 0.05782546 | 0.136492 |
| 2.43E-08    | 0.254331699  | 2.50E-08    | -0.04555778 | 0.32591086 | -0.16313 |
| 3.27E-06    | 0.206408558  | 6.89E-06    | -0.35916979 | 1.15E-15   | 0.100812 |
| 0.00071807  | -0.155070329 | 0.00077246  | -0.13421473 | 0.00366328 | 0.203039 |
| 0.690433581 | 0.015071684  | 0.745296543 | 0.084256785 | 0.06888691 | 0.352847 |
| 1.45E-05    | 0.189981225  | 3.59E-05    | -0.02216929 | 0.63275178 | 0.260576 |
| 0.01219739  | -0.107067114 | 0.020657039 | 0.14388654  | 0.00182505 | 0.380896 |
| 0.351191218 | -0.042234676 | 0.362474829 | -0.07966477 | 0.08548871 | 0.321945 |
| 0.53224571  | 0.033936305  | 0.464403526 | 0.122527618 | 0.0080315  | 0.502089 |
| 0.00038125  | -0.165167175 | 0.000337887 | 0.257442365 | 1.66E-08   | 0.40076  |
| 6.98E-11    | 0.300010019  | 3.62E-11    | 0.214999964 | 2.75E-06   | -0.07885 |
| 0.00706501  | -0.133275164 | 0.00391086  | -0.39129152 | 1.55E-18   | 0.342643 |
| 0.718758106 | 0.017140993  | 0.711789045 | -0.00755903 | 0.87058405 | -0.17236 |
| 0.90021869  | 0.00470285   | 0.919266559 | 0.389857904 | 2.12E-18   | 0.361322 |
| 1.85E-06    | -0.231436222 | 4.26E-07    | -0.21407986 | 3.04E-06   | 0.140809 |
| 0.238388399 | -0.053544228 | 0.248160812 | -0.19040558 | 3.45E-05   | 0.04894  |
| 0.043694133 | -0.087208564 | 0.059682557 | -0.2189981  | 1.77E-06   | 0.074016 |
| 0.800520489 | -0.005379967 | 0.90769112  | -0.1815839  | 7.93E-05   | 0.202001 |
| 0.317687025 | -0.063514605 | 0.170603375 | 0.097372178 | 0.03541403 | 0.580611 |
| 0.28295971  | 0.056548375  | 0.222570309 | 0.009946807 | 0.83024953 | 0.004548 |
| 0.655674854 | -0.021387859 | 0.644791703 | -0.12126609 | 0.00870962 | 0.102721 |
| 0.009518256 | -0.107092901 | 0.020626323 | -0.01622514 | 0.72655508 | 0.122699 |
| 0.000272577 | 0.168582273  | 0.000252654 | 0.127693584 | 0.00572013 | 0.305847 |
| 0.85110199  | 0.01456744   | 0.753537715 | -0.04040454 | 0.38366396 | 0.256198 |
| 0.001513334 | -0.143005627 | 0.001948096 | -0.10030838 | 0.03020878 | 0.054328 |
| 0.015450391 | -0.116435295 | 0.011801845 | -0.30653192 | 1.29E-11   | 0.093928 |
| 6.46E-05    | 0.186578201  | 4.97E-05    | -0.24515283 | 8.06E-08   | 0.506756 |
| 0.030529313 | 0.101376448  | 0.028485204 | -0.09185825 | 0.04726142 | 0.094821 |
| 0.386244383 | 0.036953098  | 0.42562806  | -0.20008471 | 1.32E-05   | 0.468864 |
| 0.094542735 | -0.083892391 | 0.070099786 | 0.067992416 | 0.14235185 | 0.388019 |
| 2.40E-06    | 0.203786393  | 9.05E-06    | -0.04989161 | 0.28195074 | 0.213586 |
| 0.000103336 | 0.176208279  | 0.000129357 | -0.08246245 | 0.07502917 | 0.342952 |
| 0.000259534 | 0.171701881  | 0.000192784 | -0.06946057 | 0.1339142  | 0.297203 |
| 0.001748446 | -0.148897844 | 0.001250547 | -0.08519697 | 0.06583674 | 0.339704 |
| 0.002285466 | -0.138620217 | 0.002681363 | 0.352430659 | 4.20E-15   | 0.416105 |
| 0.012098162 | -0.121421398 | 0.008623468 | 0.02787785  | 0.54787482 | 0.199542 |
| 0.001949862 | 0.151379476  | 0.001032561 | 0.003308599 | 0.94315262 | 0.37167  |
| 0.011909765 | 0.114901645  | 0.012968793 | -0.1157885  | 0.01228216 | 0.457314 |
| 0.017186504 | 0.119672801  | 0.009638685 | -0.06836964 | 0.140146   | 0.310953 |
| 5.46E-05    | 0.184640333  | 5.97E-05    | -0.20436112 | 8.53E-06   | 0.387792 |
| 0.006515006 | -0.119163424 | 0.009953754 | -0.13183346 | 0.00432031 | 0.041911 |

|             |              |             |             |            |          |
|-------------|--------------|-------------|-------------|------------|----------|
| 0.271714752 | -0.0524444   | 0.258023835 | 0.423285448 | 1.00E-21   | 0.401139 |
| 8.82E-05    | 0.175371786  | 0.000139406 | 0.077968513 | 0.09238264 | 0.150442 |
| 5.30E-13    | -0.323574409 | 7.64E-13    | 0.311809317 | 5.47E-12   | 0.301154 |
| 0.487911933 | -0.029565461 | 0.523902042 | 0.052507382 | 0.25745181 | 0.207346 |
| 0.908506268 | 0.007065527  | 0.878966078 | -0.0688576  | 0.13733168 | 0.065284 |
| 0.000373028 | 0.159608986  | 0.000535868 | -0.23312024 | 3.49E-07   | 0.276704 |
| 5.54E-07    | 0.232874011  | 3.60E-07    | -0.02329327 | 0.61560359 | 0.293811 |
| 0.391429086 | -0.04501587  | 0.331704549 | 0.105798262 | 0.0222184  | -0.11821 |
| 0.000520676 | 0.176234912  | 0.000129049 | -0.07403611 | 0.11007866 | 0.460382 |
| 2.59E-06    | 0.212711613  | 3.52E-06    | -0.01422278 | 0.75918689 | 0.492588 |
| 0.001133512 | 0.150951862  | 0.001067428 | -0.03013024 | 0.51600075 | 0.410941 |
| 0.310341687 | -0.058594746 | 0.206253052 | -0.30262663 | 2.40E-11   | 0.272019 |
| 0.977930736 | -0.002639991 | 0.954626537 | -0.24934844 | 4.75E-08   | 0.58933  |
| 0.259807437 | -0.048591543 | 0.294695256 | 0.297297964 | 5.52E-11   | 0.372464 |
| 2.66E-05    | -0.194744969 | 2.26E-05    | 0.307869571 | 1.04E-11   | 0.220869 |
| 0.034854187 | 0.089847047  | 0.052339178 | -0.27880549 | 8.74E-10   | 0.099539 |
| 0.001355155 | -0.143769519 | 0.001840974 | 0.020448639 | 0.65938628 | 0.357931 |
| 5.57E-10    | 0.27318182   | 1.95E-09    | -0.18404192 | 6.31E-05   | 0.098339 |
| 1.70E-05    | -0.191153814 | 3.21E-05    | -0.04133576 | 0.37278956 | -0.02247 |
| 2.90E-05    | -0.189753282 | 3.67E-05    | 0.284052223 | 4.07E-10   | 0.52116  |
| 0.223228866 | 0.052920865  | 0.253718222 | -0.01527134 | 0.74204139 | 0.233114 |
| 2.05E-05    | 0.205281401  | 7.75E-06    | -0.07701603 | 0.09644466 | 0.512916 |
| 0.001786399 | 0.1482717    | 0.00131187  | 0.07675189  | 0.09759598 | 0.16533  |
| 0.998784386 | -0.000743005 | 0.987223671 | 0.052596101 | 0.25664753 | 0.408405 |
| 0.609914075 | -0.016946176 | 0.714921245 | 0.042605944 | 0.35826719 | 0.492708 |
| 0.002238966 | -0.148564577 | 0.00128285  | 0.054188147 | 0.24250988 | 0.008533 |
| 0.000480889 | 0.165996609  | 0.000315016 | -0.08500714 | 0.06644347 | 0.656897 |
| 1.94E-06    | 0.225632909  | 8.37E-07    | 0.141137216 | 0.00223457 | 0.333578 |
| 1.26E-10    | 0.291545902  | 1.33E-10    | -0.04478264 | 0.33421839 | 0.128303 |
| 0.981977404 | -0.025139091 | 0.587894231 | -0.00935709 | 0.84017392 | 0.072919 |
| 0.795501556 | 0.010492701  | 0.821086518 | -0.07995547 | 0.08434995 | 0.409428 |
| 0.028001381 | 0.104027878  | 0.024567305 | -0.16882662 | 0.0002474  | 0.623881 |
| 0.000762886 | 0.168172395  | 0.000261701 | -0.14453967 | 0.00173846 | 0.141064 |
| 1.49E-07    | 0.247555581  | 5.96E-08    | -0.12592    | 0.00643571 | 0.27668  |
| 0.462504714 | 0.026165554  | 0.572738063 | 0.045172471 | 0.33002351 | -0.11068 |
| 0.003396797 | 0.144823335  | 0.00170204  | 0.02902999  | 0.53145005 | 0.600935 |
| 0.775923608 | -0.001019389 | 0.982471772 | -0.21062232 | 4.41E-06   | -0.11817 |
| 0.037831476 | 0.104665666  | 0.023697494 | 0.035958684 | 0.4381967  | 0.526287 |
| 0.503726639 | 0.032058934  | 0.489489874 | -0.00715441 | 0.87745537 | 0.702465 |
| 0.291513759 | 0.045471724  | 0.326826515 | -0.16269116 | 0.0004157  | -0.12537 |
| 0.00436891  | 0.125825685  | 0.006475918 | -0.11448265 | 0.01330481 | 0.48967  |
| 0.036405185 | 0.098200776  | 0.033873052 | -0.02075512 | 0.65460929 | 0.131002 |
| 0.09920373  | -0.071393247 | 0.123401294 | -0.31318482 | 4.37E-12   | 0.16594  |
| 0.792375564 | 0.006646609  | 0.886091882 | 0.019250417 | 0.67819417 | 0.210814 |
| 0.773232755 | -0.017113006 | 0.712238708 | -0.075808   | 0.10179992 | 0.27469  |

|             |              |             |             |            |          |
|-------------|--------------|-------------|-------------|------------|----------|
| 0.991940802 | -0.008340811 | 0.857335866 | -0.10708905 | 0.0206309  | 0.284525 |
| 5.95E-07    | -0.224343456 | 9.70E-07    | 0.14492247  | 0.00168948 | 0.255768 |
| 0.00220871  | 0.141852386  | 0.002120656 | 0.226516537 | 7.56E-07   | 0.396477 |
| 0.358538896 | 0.053293617  | 0.250384777 | 0.016765285 | 0.71783384 | 0.546566 |
| 0.537241597 | 0.031716056  | 0.494148852 | 0.423816846 | 8.81E-22   | 0.418738 |
| 0.009104765 | 0.118302146  | 0.01050733  | 0.156229324 | 0.00070424 | 0.61726  |
| 0.012330261 | 0.117143952  | 0.011294717 | -0.20505895 | 7.93E-06   | 0.356332 |
| 1.00E-06    | 0.225605748  | 8.39E-07    | 0.269449176 | 3.28E-09   | 0.450885 |
| 0.37510232  | 0.054264196  | 0.24184849  | 0.238372464 | 1.86E-07   | 0.562774 |
| 0.816236659 | 0.012709465  | 0.784139285 | -0.32957995 | 2.70E-13   | 0.382887 |
| 0.477593412 | 0.027990882  | 0.546252438 | 0.048006314 | 0.30055594 | 0.142477 |
| 0.001205116 | -0.150775452 | 0.001082126 | -0.12538773 | 0.0066656  | 0.071604 |
| 0.001427975 | 0.155349381  | 0.000755499 | -0.00746216 | 0.87222839 | 0.149903 |
| 0.98122758  | -0.008892005 | 0.84801898  | 0.05727519  | 0.21667252 | 0.128551 |
| 0.669222892 | -0.016593298 | 0.720606881 | -0.09051996 | 0.05059188 | 0.328226 |
| 0.463962103 | 0.037505783  | 0.4187342   | -0.01526337 | 0.74217124 | 0.430263 |
| 0.638995755 | -0.020477799 | 0.65893118  | -0.0255736  | 0.5814559  | 0.256187 |
| 0.617804473 | 0.038702473  | 0.404033787 | 0.189268252 | 3.85E-05   | 0.312602 |
| 0.376994181 | -0.03676433  | 0.427997688 | 0.062923224 | 0.17462758 | 0.527445 |
| 0.994844167 | 0.012334484  | 0.790357644 | 0.012321715 | 0.79056962 | 0.458771 |
| 0.824106025 | 0.011664678  | 0.801498042 | -0.00654263 | 0.88786208 | 0.113754 |
| 0.003862802 | 0.136610978  | 0.003094849 | -0.042491   | 0.3595666  | 0.198436 |
| 0.22274814  | 0.053596126  | 0.247701996 | -0.06839498 | 0.13999878 | 0.097725 |
| 0.076310352 | 0.091051544  | 0.049246236 | -0.15741878 | 0.00064007 | 0.179294 |
| 0.030461484 | -0.099259343 | 0.031987845 | -0.18192511 | 7.69E-05   | 0.549031 |
| 0.798890477 | -0.014353318 | 0.757045799 | 0.086719207 | 0.06113408 | 0.518431 |
| 1.89E-11    | 0.301353381  | 2.93E-11    | -0.04937795 | 0.28694085 | 0.418535 |
| 0.639719357 | -0.031334079 | 0.49936681  | -0.0369578  | 0.42556916 | 0.396156 |
| 0.110013972 | 0.078632226  | 0.089633965 | 0.217254608 | 2.15E-06   | 0.239354 |
| 0.047468796 | 0.098427233  | 0.03346198  | 0.176927334 | 0.00012127 | 0.470407 |
| 0.632779737 | 0.0115718    | 0.803046049 | -0.07777362 | 0.09320243 | -0.03249 |
| 6.09E-05    | 0.18481983   | 5.87E-05    | -0.09654866 | 0.03700423 | 0.179254 |
| 6.92E-09    | 0.248594245  | 5.23E-08    | -0.19411369 | 2.40E-05   | 0.328139 |
| 0.031213786 | 0.104103617  | 0.024462589 | 0.34958652  | 7.18E-15   | 0.316677 |
| 0.033142107 | 0.088757375  | 0.05527516  | -0.30069488 | 3.25E-11   | 0.081021 |
| 0.00085093  | 0.135279075  | 0.003400038 | -0.28732356 | 2.51E-10   | 0.218616 |
| 0.465844317 | -0.026627051 | 0.565984637 | -0.13138805 | 0.00445442 | 0.22521  |
| 0.562647155 | 0.02625521   | 0.571423081 | 0.12062201  | 0.00907513 | 0.613088 |
| 0.260456597 | 0.049094799  | 0.289716922 | -0.19566942 | 2.06E-05   | 0.36195  |
| 0.208155781 | -0.057429977 | 0.215431109 | -0.14724087 | 0.00141888 | 0.004081 |
| 0.097840305 | -0.069388463 | 0.134319402 | 0.070107656 | 0.13032006 | 0.268022 |
| 0.001183274 | 0.153860044  | 0.000850185 | 0.048279204 | 0.29781356 | 0.454856 |
| 0.306440631 | -0.045451472 | 0.327042241 | -0.16392699 | 0.00037499 | 0.19535  |
| 0.01396034  | -0.10291139  | 0.026156426 | -0.14347605 | 0.00188147 | 0.034185 |
| 0.73491126  | -0.010383306 | 0.822920845 | -0.18104727 | 8.34E-05   | 0.459683 |

|             |              |             |             |            |          |
|-------------|--------------|-------------|-------------|------------|----------|
| 2.41E-09    | -0.278171799 | 9.57E-10    | 0.07877493  | 0.08905164 | 0.310423 |
| 0.803818332 | -0.009208847 | 0.842672852 | 0.303447592 | 2.10E-11   | 0.375539 |
| 0.000799565 | 0.148708024  | 0.001268853 | -0.01344473 | 0.77198645 | -0.03022 |
| 0.000442637 | 0.164562222  | 0.000355534 | -0.13235961 | 0.00416659 | -0.18739 |
| 0.861397358 | -0.015580906 | 0.737003401 | -0.10928034 | 0.01816105 | -0.02293 |
| 0.436163695 | -0.030874098 | 0.505688852 | -0.19740225 | 1.73E-05   | -0.08783 |
| 0.000433385 | -0.163093262 | 0.000402024 | -0.13085507 | 0.00461983 | 0.091596 |
| 0.776320684 | -0.012926916 | 0.780539534 | -0.14749867 | 0.00139139 | -0.38571 |
| 0.064895984 | 0.09562087   | 0.038867991 | 0.004129962 | 0.92907362 | 0.455537 |
| 0.002818426 | 0.145776317  | 0.001584747 | -0.14929103 | 0.0012134  | 0.404753 |
| 0.002063705 | 0.146257825  | 0.001528347 | 0.175183012 | 0.00014177 | 0.289429 |
| 0.367032091 | -0.04609218  | 0.320262139 | 0.055161365 | 0.23414131 | 0.567976 |
| 0.513785916 | -0.032403731 | 0.484828692 | 0.075237936 | 0.10440773 | 0.313088 |
| 0.449205184 | -0.026383098 | 0.569549828 | 0.147419912 | 0.00139974 | 0.322334 |
| 0.036066655 | 0.097246927  | 0.035652073 | 0.03378442  | 0.4664062  | 0.797792 |
| 0.001162992 | 0.155934378  | 0.000721053 | 0.004712625 | 0.91909933 | 0.638534 |
| 0.64936589  | 0.023214254  | 0.616802415 | -0.27531042 | 1.44E-09   | 0.394441 |
| 0.00111903  | 0.146259928  | 0.001528105 | 0.144554219 | 0.00173658 | 0.532266 |
| 0.042456566 | 0.091800974  | 0.047400104 | -0.14289703 | 0.00196378 | 0.010356 |
| 4.43E-05    | -0.184517538 | 6.04E-05    | 0.106005133 | 0.02195706 | 0.354815 |
| 0.92321213  | -0.007889406 | 0.864980843 | 0.028253994 | 0.54248516 | 0.155174 |
| 0.704703309 | -0.013838723 | 0.765496974 | 0.161456488 | 0.00046046 | 0.340831 |
| 4.10E-08    | 0.248070991  | 5.58E-08    | -0.24291296 | 1.07E-07   | 0.103816 |
| 0.210205398 | 0.056250456  | 0.225020602 | 0.045927959 | 0.32199116 | 0.173061 |
| 0.40237416  | -0.035680116 | 0.441755365 | 0.05261803  | 0.256449   | 0.406096 |
| 0.048170097 | -0.093210629 | 0.044084616 | -0.12589039 | 0.00644831 | 0.204489 |
| 0.269292256 | 0.05177969   | 0.264114487 | 0.17282861  | 0.00017464 | 0.643732 |
| 0.000101477 | 0.181297427  | 8.15E-05    | -0.22787593 | 6.46E-07   | 0.190828 |
| 0.988311378 | 9.89E-05     | 0.998299976 | 0.016813563 | 0.7170561  | 0.125283 |
| 0.008936917 | 0.122651219  | 0.007967663 | -0.0263217  | 0.57044885 | 0.438056 |
| 0.301416091 | -0.050336712 | 0.277674328 | 0.222505149 | 1.19E-06   | 0.392834 |
| 0.133889857 | 0.076689586  | 0.097869144 | 0.08348273  | 0.07148414 | 0.138621 |
| 0.220435188 | 0.061368151  | 0.185545925 | 0.298720884 | 4.42E-11   | 0.159363 |
| 0.000624454 | 0.151085201  | 0.001056441 | 0.13852597  | 0.00269957 | 0.09738  |
| 0.090039762 | 0.071909465  | 0.120704918 | 0.075869885 | 0.10151998 | 0.258905 |
| 1.22E-07    | -0.233876492 | 3.19E-07    | 0.132841085 | 0.00403028 | 0.336738 |
| 0.492129373 | 0.036252177  | 0.434465219 | 0.343056325 | 2.42E-14   | 0.211141 |
| 0.018145467 | -0.10923967  | 0.018204434 | 0.208795853 | 5.36E-06   | 0.269633 |
| 5.94E-06    | 0.201775903  | 1.11E-05    | -0.22202949 | 1.26E-06   | 0.108935 |
| 3.96E-06    | 0.209101295  | 5.19E-06    | -0.0248341  | 0.59243289 | 0.107643 |
| 3.60E-07    | 0.236294232  | 2.39E-07    | -0.13635802 | 0.00315082 | 0.339475 |
| 0.733454117 | 0.014327604  | 0.757467417 | 0.141401555 | 0.00219183 | 0.428911 |
| 0.002435017 | -0.14602343  | 0.001555568 | 0.204803128 | 8.14E-06   | 0.41879  |
| 0.419764665 | 0.039075493  | 0.399515237 | -0.11024382 | 0.01715947 | 0.086983 |
| 0.147971439 | -0.062723351 | 0.17600351  | 0.084533822 | 0.06797633 | 0.474482 |

|             |              |             |             |            |          |
|-------------|--------------|-------------|-------------|------------|----------|
| 3.34E-13    | 0.335971928  | 8.73E-14    | 0.009714949 | 0.83414838 | 0.470215 |
| 0.140669814 | -0.065404606 | 0.158206614 | -0.14931854 | 0.00121084 | -0.06162 |
| 2.64E-18    | 0.391283553  | 1.55E-18    | -0.12125277 | 0.00871704 | 0.168795 |
| 2.75E-05    | 0.189876885  | 3.63E-05    | 0.279710418 | 7.67E-10   | 0.370786 |
| 0.026702691 | -0.108681761 | 0.01880869  | -0.21588151 | 2.50E-06   | 0.047221 |
| 0.812730802 | -0.005880774 | 0.899142138 | -0.27039656 | 2.87E-09   | 0.187899 |
| 0.162621743 | -0.081814729 | 0.07735308  | -0.29040525 | 1.58E-10   | -0.19112 |
| 0.497371845 | 0.027555823  | 0.552509908 | 0.11936802  | 0.00982612 | 0.2945   |
| 0.133005395 | -0.072895387 | 0.115683071 | -0.22510136 | 8.89E-07   | 0.271899 |
| 0.026548416 | -0.11006753  | 0.017339036 | 0.305627662 | 1.49E-11   | -0.1143  |
| 0.145383265 | 0.071718642  | 0.121696243 | 0.062799282 | 0.17547985 | 0.152374 |
| 5.76E-05    | -0.177916316 | 0.000110915 | -0.25600039 | 2.01E-08   | 0.200716 |
| 2.37E-05    | 0.190778422  | 3.33E-05    | -0.08463763 | 0.06763768 | 0.06243  |
| 0.877572172 | 0.007242924  | 0.875951444 | -0.17395239 | 0.00015815 | -0.19735 |
| 0.032384039 | -0.097971418 | 0.034293768 | -0.12084871 | 0.00894495 | 0.400913 |
| 0.820496775 | 0.016823167  | 0.716901413 | -0.11965576 | 0.00964908 | 0.209923 |
| 0.859341234 | -0.004754416 | 0.9183844   | -0.16818045 | 0.00026152 | 0.050357 |
| 1.32E-06    | 0.223563548  | 1.06E-06    | -0.19556596 | 2.08E-05   | 0.246034 |
| 0.033296485 | 0.094760508  | 0.040666736 | 0.095220018 | 0.03969748 | 0.53681  |
| 0.000184955 | 0.159183749  | 0.000554776 | 0.089865936 | 0.05228945 | 0.371496 |
| 0.022627574 | 0.113704387  | 0.01394933  | -0.04211974 | 0.36378371 | 0.379929 |
| 0.002410469 | 0.144311247  | 0.001768306 | -0.01697151 | 0.71451358 | 0.350871 |
| 0.101488002 | 0.079612833  | 0.085693457 | -0.0825699  | 0.07464924 | 0.07941  |
| 0.050150113 | 0.091904096  | 0.047150675 | 0.040058659 | 0.38775179 | 0.141859 |
| 3.62E-05    | -0.188744291 | 4.05E-05    | -0.17387902 | 0.00015918 | 0.022386 |
| 6.36E-07    | -0.232084929 | 3.95E-07    | 0.121452829 | 0.00860613 | -0.03206 |
| 3.89E-06    | 0.202396823  | 1.04E-05    | -0.21604354 | 2.45E-06   | 0.00145  |
| 0.006614928 | -0.117423067 | 0.011100332 | -0.0255872  | 0.58125501 | 0.316815 |
| 0.02309996  | 0.117371498  | 0.011136022 | 0.123405421 | 0.00758786 | 0.134197 |
| 0.488944756 | 0.026417085  | 0.569052493 | 0.059621711 | 0.19839858 | 0.060213 |
| 0.19626047  | -0.05283415  | 0.254498096 | -0.01135115 | 0.80672672 | 0.55366  |
| 0.405036357 | -0.023855751 | 0.607099078 | -0.32035886 | 1.32E-12   | 0.314319 |
| 0.004632364 | -0.141481673 | 0.002179025 | -0.14059031 | 0.00232543 | 0.293897 |
| 0.677103141 | 0.00574477   | 0.901462668 | -0.07304974 | 0.11491191 | 0.419681 |
| 1.89E-12    | -0.321700438 | 1.05E-12    | 0.079639942 | 0.08558654 | 0.248439 |
| 1.24E-08    | 0.250637388  | 4.03E-08    | -0.39651717 | 4.93E-19   | 0.228961 |
| 0.939597034 | -0.011348176 | 0.806776384 | -0.08841572 | 0.05622342 | 0.216196 |
| 1.66E-08    | -0.256446043 | 1.90E-08    | -0.13536285 | 0.00338007 | 0.219822 |
| 1.61E-05    | 0.198450386  | 1.56E-05    | -0.16075022 | 0.00048804 | -0.02384 |
| 0.418855895 | -0.040520771 | 0.382296142 | -0.36460589 | 3.95E-16   | -0.01746 |
| 0.035882724 | -0.096291649 | 0.037512763 | -0.24475515 | 8.47E-08   | 0.511675 |
| 0.023490483 | -0.10797682  | 0.019597144 | -0.25590486 | 2.04E-08   | 0.395739 |
| 0.021483412 | 0.114936077  | 0.012941516 | 0.193972956 | 2.44E-05   | 0.277441 |
| 0.738919412 | 0.021452533  | 0.643791661 | 0.341881872 | 3.00E-14   | 0.545651 |
| 0.037126535 | -0.093585181 | 0.04323723  | 0.367271446 | 2.33E-16   | 0.583253 |

|             |              |             |             |            |          |
|-------------|--------------|-------------|-------------|------------|----------|
| 0.688743907 | 0.024333198  | 0.599921592 | 0.389843093 | 2.12E-18   | 0.360463 |
| 0.073689307 | 0.088927836  | 0.054807043 | 0.366288494 | 2.83E-16   | 0.386529 |
| 0.666814392 | 0.027014413  | 0.560345666 | 0.042573622 | 0.35863228 | -0.12878 |
| 1.41E-06    | -0.222043405 | 1.26E-06    | 0.12962251  | 0.0050238  | 0.476096 |
| 0.167690988 | 0.069148662  | 0.135673731 | -0.06248081 | 0.17768398 | 0.375933 |
| 0.31365051  | 0.053259508  | 0.250688528 | 0.078510563 | 0.09013284 | 0.516647 |
| 0.828544954 | 0.015019675  | 0.746145232 | -0.01324543 | 0.77527525 | 0.352197 |
| 0.115581972 | -0.073782905 | 0.111303842 | -0.043801   | 0.34493242 | 0.105051 |
| 0.094228972 | 0.076204124  | 0.100018485 | -0.01194697 | 0.79679778 | -0.03278 |
| 0.022359184 | -0.104002546 | 0.024602415 | -0.13996105 | 0.00243413 | 0.092966 |
| 0.706427058 | 0.016709457  | 0.718733578 | 0.199391053 | 1.42E-05   | 0.624668 |
| 0.063877237 | 0.094621863  | 0.040963078 | -0.41762306 | 3.90E-21   | 0.17843  |
| 0.631928083 | 0.027800339  | 0.54898871  | 0.006461702 | 0.88924012 | 0.455789 |
| 0.871129517 | 0.005613747  | 0.903699011 | 0.177775725 | 0.00011233 | 0.138699 |
| 2.71E-06    | -0.215928909 | 2.48E-06    | -0.07742785 | 0.09467123 | 0.318945 |
| 0.276399665 | -0.038694589 | 0.404129616 | 0.011248717 | 0.80843688 | 0.528504 |
| 0.829721537 | 0.010745356  | 0.816853762 | -0.06601815 | 0.1543321  | 0.102287 |
| 0.04451659  | -0.088227866 | 0.056750517 | 0.120141024 | 0.00935692 | 0.29263  |
| 0.132576906 | -0.069500339 | 0.133691133 | -0.10877121 | 0.01871064 | 0.393714 |
| 7.50E-19    | -0.393898901 | 8.77E-19    | -0.13817976 | 0.00276744 | 0.180355 |
| 0.424411777 | 0.044355821  | 0.338850317 | 0.048711867 | 0.29349982 | 0.58853  |
| 0.004993988 | -0.13466339  | 0.003550139 | 0.162880208 | 0.00040922 | 0.191797 |
| 0.850974388 | -0.008808612 | 0.849427256 | 0.038242892 | 0.40964261 | 0.008129 |
| 0.30192305  | -0.044090288 | 0.341752574 | -0.07965275 | 0.08553604 | 0.058185 |
| 0.340420054 | 0.033595567  | 0.46890297  | 0.231441048 | 4.26E-07   | 0.337538 |
| 0.007108294 | -0.125960356 | 0.006418573 | -0.12295076 | 0.00781483 | 0.191018 |
| 0.062635346 | 0.094860251  | 0.040454664 | -0.15132014 | 0.00103734 | 0.324105 |
| 7.44E-12    | 0.308529446  | 9.33E-12    | -0.01833906 | 0.69263508 | 0.360711 |
| 0.204323515 | -0.064459657 | 0.16431689  | 0.305143731 | 1.61E-11   | 0.429129 |
| 3.87E-05    | 0.197220346  | 1.76E-05    | -0.07335386 | 0.11340428 | 0.159058 |
| 0.410093864 | -0.042296583 | 0.361771097 | -0.20150973 | 1.14E-05   | 0.17361  |
| 0.087077337 | -0.084471989 | 0.068178708 | -0.0459362  | 0.3219043  | 0.231944 |
| 0.00267125  | -0.13785595  | 0.002832317 | 0.029353988 | 0.52687641 | 0.460278 |
| 0.082524604 | 0.07467293   | 0.107044282 | 0.122788137 | 0.00789748 | 0.337162 |
| 9.34E-07    | -0.227231389 | 6.96E-07    | 0.250968096 | 3.86E-08   | 0.337414 |
| 0.053731293 | -0.078986248 | 0.088194903 | -0.29630618 | 6.43E-11   | 0.105122 |
| 0.022443474 | 0.106963314  | 0.020781087 | -0.25117584 | 3.76E-08   | 0.109667 |
| 0.288530387 | -0.03469787  | 0.454434175 | 0.118095774 | 0.01064396 | 0.346727 |
| 0.031153378 | -0.108356029 | 0.019169507 | -0.00783771 | 0.86585724 | 0.259146 |
| 0.439952133 | 0.033479658  | 0.47043902  | -0.17305224 | 0.00017124 | 0.395256 |
| 0.001087054 | 0.151743973  | 0.001003673 | 0.084133965 | 0.06929377 | 0.385472 |
| 0.126891067 | 0.071796681  | 0.121290067 | -0.15836608 | 0.00059289 | 0.394574 |
| 8.54E-06    | 0.208782611  | 5.37E-06    | 0.215732086 | 2.54E-06   | 0.218293 |
| 0.001613265 | -0.145789619 | 0.001583164 | 0.264084019 | 6.84E-09   | 0.241898 |
| 1.95E-07    | 0.237159183  | 2.15E-07    | 0.229249138 | 5.51E-07   | 0.15433  |



|             |              |             |             |            |          |
|-------------|--------------|-------------|-------------|------------|----------|
| 0.001949473 | 0.150838646  | 0.00107684  | -0.03431491 | 0.45943229 | 0.643016 |
| 0.059163742 | 0.083234803  | 0.072332743 | -0.30757074 | 1.09E-11   | 0.473721 |
| 0.000469988 | 0.163203965  | 0.000398333 | 0.023608879 | 0.61082525 | 0.332585 |
| 0.005597392 | -0.126614863 | 0.006146308 | -0.02600436 | 0.57510588 | -0.18466 |
| 2.52E-09    | 0.269839215  | 3.11E-09    | -0.02526739 | 0.58598977 | 0.301251 |
| 0.501032598 | 0.031727443  | 0.493993751 | -0.06357434 | 0.17020078 | 0.242456 |
| 0.009227302 | -0.125880108 | 0.006452688 | -0.28517931 | 3.45E-10   | -0.03617 |
| 0.632248801 | -0.029731101 | 0.521578324 | -0.08596721 | 0.06342137 | 0.535114 |
| 0.000542106 | 0.152049919  | 0.000980003 | -0.09177138 | 0.04747188 | 0.157864 |
| 0.002982325 | -0.145171712 | 0.001658269 | -0.00951902 | 0.83744623 | 0.419754 |
| 5.98E-14    | -0.343955202 | 2.05E-14    | -0.05571963 | 0.22943393 | 0.264753 |
| 0.009096265 | 0.113552889  | 0.014077941 | 0.151216202 | 0.00104575 | 0.230411 |
| 0.547855928 | 0.039810725  | 0.390698267 | -0.17141849 | 0.00019762 | -0.01929 |
| 0.032520138 | -0.113178619 | 0.014400153 | 0.040307758 | 0.3848051  | 0.102202 |
| 0.013849114 | 0.111812259  | 0.015632153 | 0.196856878 | 1.83E-05   | -0.23457 |
| 0.673680477 | -0.035517379 | 0.443841911 | -0.14008269 | 0.00241276 | 0.209528 |
| 0.567262395 | 0.015838477  | 0.732820149 | -0.22712656 | 7.05E-07   | -0.22945 |
| 0.266983505 | -0.041719484 | 0.36836446  | 0.103027988 | 0.02598643 | 0.407217 |
| 0.952666669 | 0.007496081  | 0.871652495 | 0.197950536 | 1.64E-05   | 0.659167 |
| 0.529301232 | -0.027429353 | 0.554335489 | 0.28529389  | 3.39E-10   | 0.206795 |
| 0.285304118 | 0.046744088  | 0.313458208 | -0.04412847 | 0.34133431 | 0.772291 |
| 0.005252838 | 0.131851662  | 0.004314903 | -0.16913996 | 0.00024081 | 0.249871 |
| 4.25E-13    | 0.320497518  | 1.29E-12    | -0.16186402 | 0.00044522 | 0.183923 |
| 0.000605179 | -0.163596816 | 0.000385485 | -0.33670225 | 7.66E-14   | 0.030084 |
| 0.000432307 | -0.170876897 | 0.000207172 | -0.21249737 | 3.61E-06   | -0.0347  |
| 0.005418712 | 0.127046445  | 0.005972494 | -0.03872182 | 0.40379867 | 0.143886 |
| 0.071528795 | 0.093718631  | 0.042938648 | -0.12734774 | 0.00585378 | 0.051396 |
| 0.445300504 | 0.038257275  | 0.409466383 | 0.066230913 | 0.15300545 | -0.04988 |
| 0.73599112  | -0.010241755 | 0.825295785 | -0.09510294 | 0.03994257 | 0.458333 |
| 0.005610198 | -0.134482655 | 0.003595328 | -0.10167322 | 0.02802154 | -0.08214 |
| 0.088372178 | -0.072473316 | 0.117812502 | 0.084632916 | 0.06765304 | 0.60236  |
| 0.49146111  | 0.034151993  | 0.461567794 | -0.08792593 | 0.05760631 | -0.05206 |
| 0.082398879 | -0.070245438 | 0.129564497 | -0.08953837 | 0.05315736 | 0.368262 |
| 0.729816842 | 0.020425242  | 0.659751534 | 0.008467262 | 0.85519665 | 0.545275 |
| 0.387623071 | 0.031346346  | 0.499198787 | -0.17640338 | 0.00012711 | 0.467029 |
| 0.843256492 | 0.004437962  | 0.923799651 | -0.04726241 | 0.3081167  | 0.153316 |
| 0.354188102 | 0.041248216  | 0.373803634 | -0.37332308 | 6.84E-17   | 0.120122 |
| 0.000654073 | -0.168663473 | 0.000250896 | -0.32355648 | 7.66E-13   | 0.256971 |
| 0.021658813 | -0.101464005 | 0.028347731 | -0.17566262 | 0.00013583 | 0.243198 |
| 0.458114721 | -0.051751376 | 0.264376102 | -0.1797431  | 9.39E-05   | 0.081806 |
| 0.951706195 | -0.012889044 | 0.781166141 | -0.34426188 | 1.94E-14   | 0.18932  |
| 0.008923619 | 0.11779701   | 0.010844552 | -0.43563088 | 4.74E-23   | 0.365424 |
| 0.033747798 | 0.102380645  | 0.026942398 | -0.161902   | 0.00044382 | 0.482633 |
| 0.166530698 | -0.068742817 | 0.137989741 | 0.093277928 | 0.04393134 | 0.487119 |
| 0.797482188 | 0.00216664   | 0.962755463 | -0.13600321 | 0.00323088 | 0.150252 |

|             |              |             |             |            |          |
|-------------|--------------|-------------|-------------|------------|----------|
| 0.014001643 | 0.116553104  | 0.011716168 | 0.012790425 | 0.78279851 | 0.399841 |
| 0.27550742  | 0.046524213  | 0.315742356 | 0.00988287  | 0.83132425 | 0.457595 |
| 0.016020758 | 0.108741803  | 0.018742831 | -0.2904324  | 1.58E-10   | 0.420444 |
| 0.764719063 | 0.02138902   | 0.644773749 | 0.004450968 | 0.92357701 | 0.500059 |
| 0.6077134   | 0.013931596  | 0.763969631 | -0.08289166 | 0.0735208  | 0.420743 |
| 0.902074676 | -0.002252406 | 0.961282285 | 0.260411811 | 1.12E-08   | 0.537355 |
| 8.06E-08    | 0.250933229  | 3.88E-08    | 0.026152355 | 0.57293177 | 0.407597 |
| 0.231932725 | 0.046327317  | 0.317797015 | 0.131419397 | 0.00444486 | 0.54213  |
| 2.35E-21    | -0.413637246 | 9.98E-21    | -0.0564104  | 0.22370273 | 0.253571 |
| 0.008078911 | 0.111259066  | 0.016156657 | 0.03582666  | 0.43988124 | 0.239393 |
| 0.00054507  | 0.165045711  | 0.000341363 | 0.133716175 | 0.00379282 | 0.250133 |
| 4.69E-12    | 0.317322526  | 2.20E-12    | -0.20381445 | 9.02E-06   | 0.366845 |
| 0.007369368 | 0.129942458  | 0.004915984 | -0.13804069 | 0.00279514 | 0.089807 |
| 0.00398653  | -0.134124777 | 0.00368635  | -0.02254939 | 0.62693003 | 0.293663 |
| 0.628467413 | 0.011743064  | 0.80019218  | -0.05538854 | 0.23221754 | 0.309235 |
| 0.682759716 | 0.020176704  | 0.663636464 | 0.074583621 | 0.10746581 | 0.282633 |
| 0.628306459 | -0.034902717 | 0.451773263 | -0.09058843 | 0.05041685 | 0.302814 |
| 3.59E-07    | 0.242910418  | 1.07E-07    | 0.053917505 | 0.2448739  | 0.131394 |
| 0.012936193 | 0.114014647  | 0.013689163 | 0.118547134 | 0.01034715 | 0.249058 |
| 0.017156688 | -0.100251253 | 0.030303438 | 0.085216452 | 0.06577471 | 0.092655 |
| 7.25E-05    | -0.186198988 | 5.16E-05    | 0.11943187  | 0.00978659 | -0.1256  |
| 0.006489312 | 0.116064074  | 0.012075449 | -0.01244307 | 0.78855551 | -0.12992 |
| 0.400587818 | 0.036759355  | 0.428060239 | -0.15570183 | 0.00073457 | 0.128045 |
| 3.15E-12    | -0.319269534 | 1.59E-12    | 0.070706056 | 0.12706317 | 0.24525  |
| 0.10294545  | 0.078574277  | 0.089871304 | -0.14566421 | 0.00159815 | 0.536816 |
| 5.54E-10    | -0.282976229 | 4.77E-10    | 0.201543343 | 1.14E-05   | 0.087225 |
| 5.83E-08    | 0.244315373  | 8.95E-08    | -0.088828   | 0.05508082 | 0.181067 |
| 0.024348746 | 0.093669813  | 0.043047671 | 0.02684147  | 0.5628599  | -0.0221  |
| 0.00069828  | 0.156445662  | 0.000692145 | -0.36787361 | 2.06E-16   | 0.273994 |
| 2.81E-08    | 0.254192995  | 2.54E-08    | 0.057104503 | 0.2180474  | 0.488153 |
| 0.095602595 | -0.078010019 | 0.092208787 | -0.10473931 | 0.0235988  | 0.337811 |
| 0.001395068 | -0.155507405 | 0.000746047 | -0.15562813 | 0.0007389  | 0.364014 |
| 0.7642186   | 0.017798662  | 0.701251271 | -0.23578439 | 2.54E-07   | 0.128513 |
| 0.702970875 | 0.025115071  | 0.588251107 | 0.031163557 | 0.5017056  | 0.535122 |
| 0.010308947 | -0.123523869 | 0.007529705 | -0.02502955 | 0.58952248 | 0.282107 |
| 0.000606357 | 0.160747847  | 0.000488135 | -0.1547441  | 0.00079274 | 0.180199 |
| 0.032692843 | 0.108042774  | 0.019522175 | -0.00593374 | 0.89823873 | 0.342222 |
| 1.30E-05    | 0.211100288  | 4.19E-06    | 0.11103467  | 0.01637377 | 0.130964 |
| 0.027885747 | -0.096499147 | 0.037101744 | 0.089851804 | 0.05232665 | 0.289345 |
| 2.68E-07    | -0.233469925 | 3.35E-07    | -0.14019071 | 0.00239393 | 0.295862 |
| 0.581857464 | -0.023812153 | 0.607756387 | -0.0315077  | 0.49699154 | 0.444166 |
| 0.902595522 | 0.000721119  | 0.987599971 | -0.06859642 | 0.13883257 | 0.182988 |
| 0.001675849 | -0.150100071 | 0.001140139 | -0.22787493 | 6.46E-07   | 0.285831 |
| 4.03E-05    | -0.196388377 | 1.92E-05    | -0.19543938 | 2.11E-05   | -0.04216 |
| 1.60E-10    | 0.287405019  | 2.48E-10    | -0.10676457 | 0.0210204  | -0.11875 |

|             |              |             |             |            |          |
|-------------|--------------|-------------|-------------|------------|----------|
| 0.106747711 | -0.07649424  | 0.098729555 | 0.269684031 | 3.17E-09   | 0.25151  |
| 0.91144121  | 0.005493956  | 0.905744303 | 0.160682377 | 0.00049077 | 0.337252 |
| 0.1220317   | 0.068680504  | 0.138348016 | 0.075384739 | 0.10373117 | 0.054421 |
| 0.942880131 | -0.007288449 | 0.875178102 | -0.1863247  | 5.09E-05   | -0.03216 |
| 0.40810763  | -0.033954289 | 0.464166713 | -0.2750806  | 1.49E-09   | -0.09895 |
| 0.001042387 | 0.154083972  | 0.00083528  | -0.13062083 | 0.00469427 | 0.036938 |
| 0.479278806 | -0.040785269 | 0.379194727 | 0.185539282 | 5.49E-05   | 0.434696 |
| 5.18E-11    | -0.296173621 | 6.56E-11    | -0.11643493 | 0.01180211 | 0.068762 |
| 0.075742677 | -0.091092276 | 0.049144374 | -0.06186702 | 0.18198981 | 0.220921 |
| 0.051647207 | -0.095121094 | 0.03990448  | -0.17266649 | 0.00017715 | 0.193722 |
| 5.56E-05    | -0.197294554 | 1.75E-05    | 0.132729658 | 0.00406146 | 0.221922 |
| 0.466101185 | -0.027252929 | 0.55688705  | -0.1655036  | 0.00032843 | 0.153349 |
| 3.72E-05    | -0.192384979 | 2.85E-05    | -0.08731125 | 0.05938163 | 0.061378 |
| 0.494448407 | 0.020737605  | 0.654881916 | -0.07407231 | 0.10990438 | -0.12628 |
| 0.007248323 | -0.129366912 | 0.005111449 | 0.10282969  | 0.02627611 | 0.261703 |
| 0.111018056 | 0.077370808  | 0.0949153   | 0.173590133 | 0.0001633  | 0.17191  |
| 0.002829118 | 0.143789815  | 0.001838203 | -0.01501356 | 0.74624512 | 0.006874 |
| 3.63E-06    | 0.218442765  | 1.88E-06    | -0.01145175 | 0.80504806 | 0.426668 |
| 6.70E-05    | -0.181905438 | 7.70E-05    | -0.16440776 | 0.00036018 | 0.164539 |
| 2.03E-07    | -0.252510403 | 3.16E-08    | -0.15986528 | 0.00052476 | 0.032777 |
| 0.408787234 | 0.0334824    | 0.470402642 | -0.03823969 | 0.40968188 | 0.147894 |
| 5.55E-08    | 0.241905664  | 1.21E-07    | -0.19891505 | 1.49E-05   | 0.206032 |
| 0.36875142  | -0.048768484 | 0.292938441 | 0.086019982 | 0.06325858 | -0.07799 |
| 0.345127575 | 0.040020257  | 0.388207271 | -0.09361664 | 0.04316669 | 0.025249 |
| 0.024449349 | -0.105808008 | 0.022206028 | 0.035215427 | 0.44772824 | -0.05353 |
| 0.275767028 | 0.049476733  | 0.285976626 | -0.01583237 | 0.73291924 | 0.012708 |
| 0.680062407 | 0.009990199  | 0.829520322 | -0.14063845 | 0.0023173  | -0.4705  |
| 0.002223771 | -0.145530944 | 0.001614217 | -0.03178819 | 0.49316668 | -0.11694 |
| 0.173345513 | 0.068246411  | 0.14086371  | -0.04085891 | 0.37833397 | -0.42553 |
| 0.09074748  | -0.079676515 | 0.08544246  | -0.08451455 | 0.06803935 | -0.21546 |
| 0.668399354 | -0.023624935 | 0.610582592 | -0.22405728 | 1.00E-06   | -0.40019 |
| 0.359836035 | -0.049814259 | 0.282698406 | -0.10118983 | 0.02878013 | -0.26319 |
| 0.00010593  | -0.18755307  | 4.53E-05    | 0.098722255 | 0.03293283 | -0.25497 |
| 0.521028393 | -0.026380432 | 0.569588845 | 0.053933778 | 0.24473131 | 0.550945 |
| 6.85E-07    | -0.231774997 | 4.10E-07    | -0.12044667 | 0.00917696 | -0.36815 |
| 0.627411138 | 0.019095146  | 0.680646379 | 0.019685948 | 0.67133394 | 0.033621 |
| 0.193819801 | 0.049279358  | 0.287905452 | -0.19147178 | 3.11E-05   | 0.509245 |
| 4.83E-09    | 0.274759163  | 1.56E-09    | -0.13929444 | 0.00255432 | 0.266517 |
| 8.96E-06    | -0.21151429  | 4.01E-06    | -0.11976871 | 0.00958036 | -0.41819 |
| 0.005977255 | -0.130154981 | 0.004845529 | -0.23741975 | 2.09E-07   | -0.42732 |
| 0.945100622 | -0.013882528 | 0.764776465 | 0.040136241 | 0.38683258 | -0.38438 |
| 5.12E-06    | -0.217293112 | 2.14E-06    | -0.10162986 | 0.02808888 | -0.60401 |
| 4.67E-07    | -0.241146357 | 1.33E-07    | 0.028821471 | 0.53440412 | -0.1726  |
| 0.021083184 | -0.113477895 | 0.014141991 | -0.08744118 | 0.05900262 | -0.38417 |
| 0.030692613 | -0.091474314 | 0.048197536 | -0.13568394 | 0.0033045  | -0.30752 |

|             |              |             |             |            |          |
|-------------|--------------|-------------|-------------|------------|----------|
| 0.231820895 | -0.058494894 | 0.207028585 | -0.06104555 | 0.18787268 | -0.06894 |
| 0.016098935 | 0.114725783  | 0.013108902 | 0.148967621 | 0.00124388 | -0.12907 |
| 0.480207516 | -0.037655245 | 0.416881205 | 0.047230841 | 0.30844029 | -0.33562 |
| 7.19E-09    | -0.261870349 | 9.22E-09    | 0.075501039 | 0.10319765 | -0.00137 |
| 0.379033632 | -0.034697825 | 0.45443476  | -0.0473897  | 0.30681409 | -0.29605 |
| 0.001283051 | -0.166285449 | 0.000307397 | -0.11357345 | 0.01406042 | -0.21559 |
| 0.012638188 | -0.123736874 | 0.007426126 | -0.14224012 | 0.00206114 | -0.49516 |
| 0.354508464 | -0.043601784 | 0.347133185 | -0.00663987 | 0.88620668 | -0.15716 |
| 0.354417422 | -0.042023246 | 0.364884737 | 0.072417937 | 0.11809416 | -0.08623 |
| 0.02661664  | 0.102330797  | 0.02701725  | -0.11926501 | 0.0098902  | -0.18249 |
| 0.631237202 | -0.020990685 | 0.650947189 | -0.17797691 | 0.00011031 | -0.19503 |
| 0.230342892 | -0.051777021 | 0.264139142 | -0.06984367 | 0.13177721 | -0.39397 |
| 0.498206587 | -0.03507003  | 0.449606446 | 0.005615787 | 0.90366418 | -0.03365 |
| 3.51E-08    | -0.251389203 | 3.66E-08    | -0.24404329 | 9.26E-08   | -0.27138 |
| 0.658972142 | -0.021878029 | 0.637228326 | -0.00447205 | 0.92321623 | 0.027782 |
| 0.028260111 | -0.109946919 | 0.017462834 | -0.34431597 | 1.92E-14   | -0.40711 |
| 0.540679489 | -0.035552351 | 0.443393037 | 0.14176168  | 0.0021348  | -0.12755 |
| 0.274407642 | 0.049033221  | 0.290323021 | 0.200410554 | 1.28E-05   | -0.18924 |
| 0.589774149 | 0.028064106  | 0.545202708 | -0.05789234 | 0.21175332 | -0.05763 |
| 0.120586251 | 0.07080314   | 0.126540776 | -0.09188984 | 0.04718509 | -0.41854 |
| 0.030267872 | -0.10425423  | 0.024255501 | -0.03893505 | 0.40121288 | -0.53471 |
| 0.074498848 | -0.082450575 | 0.075071266 | -0.125124   | 0.0067822  | -0.2672  |
| 0.000318046 | -0.171403695 | 0.000197873 | 0.054163005 | 0.24272882 | -0.26655 |
| 0.991206495 | -0.002675446 | 0.95401784  | -0.10376217 | 0.02493773 | -0.27215 |
| 0.002468612 | -0.14033656  | 0.002368716 | -0.08708446 | 0.06004794 | -0.45059 |
| 3.42E-05    | -0.193287672 | 2.60E-05    | -0.00870125 | 0.85124098 | -0.45923 |
| 0.235760426 | -0.058460742 | 0.207294323 | -0.05706054 | 0.21840251 | 0.040837 |
| 0.617898072 | 0.015232016  | 0.74268216  | -0.13261187 | 0.00409466 | -0.44547 |
| 0.147305933 | 0.065125118  | 0.159995718 | -0.06036066 | 0.19288337 | 0.384143 |
| 0.691357253 | -0.026154446 | 0.572901087 | -0.2326457  | 3.70E-07   | -0.40256 |
| 0.018257895 | -0.119372053 | 0.00982362  | -0.03627263 | 0.43420592 | -0.19028 |
| 0.000154547 | -0.177338007 | 0.000116863 | -0.15362271 | 0.00086625 | -0.34867 |
| 0.073250387 | -0.087420439 | 0.059062996 | -0.25192419 | 3.41E-08   | -0.01407 |
| 0.006739086 | -0.126163129 | 0.006333088 | -0.24339207 | 1.00E-07   | -0.30076 |
| 0.010139083 | -0.127109843 | 0.005947337 | 0.220160002 | 1.56E-06   | -0.17859 |
| 0.085661086 | -0.087487419 | 0.058868243 | -0.29122932 | 1.40E-10   | -0.37548 |
| 0.261265671 | 0.045080624  | 0.331008777 | -0.38823756 | 3.00E-18   | -0.35118 |
| 0.004716024 | -0.127919508 | 0.005634317 | -0.00051924 | 0.99107115 | -0.32199 |
| 0.000128874 | -0.178916255 | 0.000101298 | 0.158518993 | 0.00058558 | -0.07581 |
| 0.89557461  | 0.009314036  | 0.840899569 | -0.24099098 | 1.35E-07   | 0.339118 |
| 0.020030784 | 0.108647241  | 0.018846645 | -0.12466544 | 0.00698932 | -0.06743 |
| 0.035384294 | 0.10044942   | 0.029976184 | -0.140503   | 0.00234024 | 0.024992 |
| 0.000458653 | -0.160746918 | 0.000488173 | -0.11811744 | 0.01062954 | -0.32583 |
| 1.98E-12    | 0.312399943  | 4.97E-12    | 0.015936552 | 0.73122937 | 0.378191 |
| 0.517566862 | -0.029673874 | 0.522380546 | -0.19546983 | 2.10E-05   | -0.41792 |

|             |              |             |             |            |          |
|-------------|--------------|-------------|-------------|------------|----------|
| 0.683249363 | 0.009815832  | 0.832451463 | -0.1063548  | 0.0215214  | -0.22494 |
| 0.010562272 | 0.118331726  | 0.010487875 | -0.15796964 | 0.00061222 | -0.10868 |
| 0.362798129 | -0.03928002  | 0.39705063  | -0.43037023 | 1.77E-22   | -0.45686 |
| 0.685399414 | -0.02327928  | 0.615815747 | -0.03597148 | 0.43803363 | -0.41924 |
| 0.089634609 | -0.084175864 | 0.069154756 | -0.16188127 | 0.00044458 | -0.38994 |
| 0.438458296 | -0.032550631 | 0.482850115 | 0.082658916 | 0.07433564 | -0.22881 |
| 0.028082422 | -0.108908031 | 0.018561547 | 0.073686255 | 0.11177432 | -0.27267 |
| 1.14E-05    | -0.19261477  | 2.78E-05    | -0.08309423 | 0.07281752 | -0.19386 |
| 0.500081921 | 0.023793098  | 0.608043773 | -0.21175199 | 3.91E-06   | -0.43737 |
| 0.121410143 | -0.079008089 | 0.088106731 | -0.23320594 | 3.46E-07   | -0.27933 |
| 0.005897098 | -0.129272811 | 0.005144065 | 0.081535083 | 0.0783743  | -0.33386 |
| 0.282108177 | -0.04500613  | 0.331809276 | 0.136266254 | 0.00317135 | -0.48759 |
| 0.178287995 | -0.070216081 | 0.129725202 | 0.110851392 | 0.016553   | -0.16313 |
| 0.594699106 | 0.026690327  | 0.565061643 | 0.015495624 | 0.73839019 | -0.24129 |
| 0.942538493 | -0.005907532 | 0.898685683 | -0.00657146 | 0.88737124 | -0.23254 |
| 0.116933977 | -0.080810022 | 0.081073122 | 0.025073722 | 0.58886566 | -0.14007 |
| 0.269057402 | -0.055788674 | 0.228856468 | 0.127419567 | 0.0058258  | -0.119   |
| 0.000119403 | -0.188567365 | 4.12E-05    | -0.16024324 | 0.00050878 | -0.521   |
| 0.000175035 | -0.173635932 | 0.00016264  | 0.089258663 | 0.05390794 | -0.35044 |
| 0.054949872 | -0.090496612 | 0.050651676 | -0.14772008 | 0.00136817 | -0.36767 |
| 0.12619894  | -0.068895898 | 0.137112622 | -0.09232065 | 0.0461543  | -0.24485 |
| 1.48E-05    | -0.197797407 | 1.67E-05    | 0.314816242 | 3.34E-12   | -0.159   |
| 0.467605329 | -0.044263028 | 0.339862741 | -0.15081703 | 0.00107865 | -0.17077 |
| 3.67E-10    | -0.286211024 | 2.96E-10    | -0.08124371 | 0.07944997 | -0.06588 |
| 0.002991018 | -0.137864504 | 0.002830585 | -0.06021774 | 0.19394121 | -0.35993 |
| 0.107818971 | -0.070396729 | 0.128738761 | -0.07481858 | 0.10635962 | -0.21885 |
| 0.150538438 | 0.066366313  | 0.152165683 | 0.022977979 | 0.62039334 | -0.43341 |
| 0.018811921 | -0.108043814 | 0.019520996 | -0.18471301 | 5.93E-05   | -0.07259 |
| 0.000202921 | -0.176858828 | 0.000122017 | -0.13134902 | 0.00446635 | -0.38752 |
| 0.03441298  | -0.096946989 | 0.036227652 | 0.072855874 | 0.11588113 | -0.28184 |
| 0.022979023 | -0.107801088 | 0.019798119 | 0.000641299 | 0.98897243 | -0.16801 |
| 0.063760285 | -0.078925372 | 0.088441028 | 0.001876439 | 0.96774111 | -0.23842 |
| 8.84E-13    | -0.32203998  | 9.92E-13    | -0.13811203 | 0.0027809  | -0.00737 |
| 0.046074356 | 0.09533253   | 0.039463163 | -0.25526975 | 2.21E-08   | -0.39319 |
| 4.78E-07    | -0.230662237 | 4.67E-07    | 0.129152196 | 0.00518614 | -0.31072 |
| 0.000172301 | -0.171424811 | 0.000197509 | -0.07196252 | 0.12043044 | -0.11076 |
| 0.002965967 | -0.136376006 | 0.003146812 | 0.199482332 | 1.41E-05   | -0.31182 |
| 0.010751075 | -0.116033074 | 0.012098548 | -0.34012897 | 4.12E-14   | -0.20604 |
| 0.105334514 | -0.073791404 | 0.11126255  | -0.2561059  | 1.98E-08   | 0.04455  |
| 0.023350069 | -0.119954346 | 0.009468368 | 0.329930502 | 2.54E-13   | -0.10575 |
| 0.150855148 | -0.071729666 | 0.121638803 | -0.08452196 | 0.06801511 | -0.4228  |
| 0.025549261 | -0.099059916 | 0.03233599  | 0.129203707 | 0.00516814 | -0.23493 |
| 0.001490189 | -0.152547225 | 0.000942625 | -0.02867752 | 0.53644833 | -0.32317 |
| 0.265645711 | -0.049183727 | 0.288843125 | -0.22739676 | 6.83E-07   | 0.067094 |
| 0.238584109 | -0.057443894 | 0.215319737 | -0.01190738 | 0.79745654 | -0.13827 |

|             |              |             |             |            |          |
|-------------|--------------|-------------|-------------|------------|----------|
| 4.31E-07    | -0.232747748 | 3.65E-07    | -0.04733395 | 0.30738415 | -0.27381 |
| 0.035137693 | 0.100053444  | 0.030633146 | 0.214221875 | 2.99E-06   | -0.25886 |
| 0.000259423 | -0.175212098 | 0.000141405 | -0.18800218 | 4.34E-05   | -0.24927 |
| 0.128470023 | 0.071363729  | 0.123556881 | -0.10665341 | 0.02115529 | -0.19443 |
| 0.363804674 | -0.047495623 | 0.305733027 | -0.39178298 | 1.39E-18   | -0.44949 |
| 0.283900288 | -0.056570165 | 0.222391841 | -0.07627516 | 0.09970167 | -0.60845 |
| 0.855179007 | -0.014583776 | 0.753270281 | -0.14134665 | 0.00220065 | -0.40109 |
| 8.60E-08    | -0.248397711 | 5.36E-08    | -0.18260306 | 7.22E-05   | -0.30975 |
| 0.002158824 | -0.150107517 | 0.001139484 | 0.089883305 | 0.05224376 | -0.19838 |
| 0.735392172 | 0.011930549  | 0.797071054 | -0.23672495 | 2.27E-07   | 0.025896 |
| 0.018566309 | -0.113164247 | 0.014412654 | 0.208206676 | 5.70E-06   | -0.41379 |
| 0.522274094 | -0.036040098 | 0.437159771 | -0.28433652 | 3.91E-10   | -0.39817 |
| 0.000123749 | -0.185974409 | 5.27E-05    | -0.01472211 | 0.75100676 | -0.43172 |
| 0.626957663 | -0.039425303 | 0.395305502 | -0.0364227  | 0.43230563 | -0.30284 |
| 0.183632546 | -0.070218032 | 0.129714517 | 0.169390408 | 0.00023566 | -0.172   |
| 0.761747821 | -0.00473298  | 0.918751105 | 0.007345235 | 0.87421362 | -0.16589 |
| 0.116393921 | -0.079523659 | 0.086045927 | 0.057309796 | 0.21639453 | -0.15241 |
| 9.52E-08    | -0.258585519 | 1.43E-08    | -0.25081575 | 3.94E-08   | -0.23749 |
| 0.00119626  | 0.160018916  | 0.000518208 | 0.056164022 | 0.22573507 | 0.496903 |
| 1.53E-05    | -0.197127164 | 1.78E-05    | -0.04720915 | 0.30866279 | -0.18272 |
| 0.117001239 | -0.068372188 | 0.140131214 | 0.028547202 | 0.53830222 | -0.24138 |
| 0.014954512 | -0.121727696 | 0.008455786 | 0.079184605 | 0.08739675 | -0.16564 |
| 0.230923269 | -0.062514836 | 0.177447506 | -0.16256127 | 0.00042021 | -0.45935 |
| 0.630998254 | -0.029336579 | 0.527121642 | -0.15510091 | 0.00077058 | -0.29843 |
| 0.020529757 | -0.118281971 | 0.010520619 | -0.20055038 | 1.26E-05   | -0.418   |
| 0.033642247 | -0.10272045  | 0.02643688  | -0.12564135 | 0.00655516 | -0.54477 |
| 1.42E-08    | -0.273496775 | 1.86E-09    | -0.15976989 | 0.00052887 | -0.41047 |
| 0.000481217 | -0.153253637 | 0.00089179  | -0.15938974 | 0.00054554 | -0.13721 |
| 0.182058509 | -0.055621003 | 0.230260671 | -0.20837418 | 5.60E-06   | -0.21929 |
| 0.648673151 | 0.022977453  | 0.620401333 | -0.04728357 | 0.30789989 | -0.16702 |
| 0.253402494 | -0.057384206 | 0.215797664 | -0.00310853 | 0.94658494 | -0.29401 |
| 0.000861605 | -0.156842685 | 0.000670442 | -0.12424066 | 0.0071862  | -0.38544 |
| 0.234890453 | -0.04607262  | 0.320467763 | 0.063289144 | 0.17212933 | -0.25961 |
| 0.010676153 | -0.114530385 | 0.013266139 | 0.133963046 | 0.00372817 | -0.09119 |
| 0.107665758 | 0.073415004  | 0.113103063 | 0.022297776 | 0.63078132 | -0.43329 |
| 0.663334729 | -0.021196909 | 0.647748099 | 0.048641578 | 0.29419775 | -0.3644  |
| 0.1001209   | -0.077460215 | 0.094532968 | -0.12293105 | 0.00782481 | -0.3305  |
| 0.132475396 | -0.074345507 | 0.108596071 | 0.022385599 | 0.62943595 | -0.30466 |
| 4.76E-16    | -0.370771339 | 1.15E-16    | -0.07615603 | 0.10023346 | -0.28758 |
| 0.113674479 | -0.075652887 | 0.102504341 | -0.26312621 | 7.79E-09   | -0.44485 |
| 0.000137947 | -0.189523887 | 3.75E-05    | -0.04478682 | 0.33417314 | -0.05203 |
| 0.003403299 | 0.129577853  | 0.005039011 | -0.17476663 | 0.00014713 | -0.17258 |
| 2.09E-06    | -0.225590071 | 8.41E-07    | -0.30366419 | 2.03E-11   | -0.49727 |
| 0.037283168 | -0.099546991 | 0.031491332 | -0.13766014 | 0.00287222 | -0.35104 |
| 0.995021639 | -0.003560863 | 0.938826474 | -0.12157098 | 0.00854121 | -0.33481 |

|             |              |             |             |            |          |
|-------------|--------------|-------------|-------------|------------|----------|
| 8.59E-06    | -0.207644672 | 6.05E-06    | -0.05482621 | 0.23699992 | -0.25829 |
| 0.128508976 | 0.06304563   | 0.173788884 | -0.02156422 | 0.64206609 | -0.20106 |
| 0.01874583  | -0.114642366 | 0.013175826 | 0.198690769 | 1.52E-05   | -0.13129 |
| 0.000157109 | -0.174388288 | 0.000152156 | -0.1186631  | 0.01027209 | -0.24583 |
| 1.59E-10    | -0.292895988 | 1.08E-10    | -0.15614825 | 0.00070883 | -0.3042  |
| 0.000910464 | -0.140146673 | 0.00240159  | -0.07284283 | 0.11594659 | -0.00439 |
| 0.459362208 | -0.031927692 | 0.491270379 | -0.04828687 | 0.29773672 | -0.36971 |
| 0.892688906 | 0.002310279  | 0.960288294 | -0.11412192 | 0.01360021 | -0.18862 |
| 0.396498975 | -0.030771348 | 0.507106772 | -0.14977871 | 0.00116874 | -0.30008 |
| 0.001327304 | -0.150570323 | 0.001099452 | -0.18922332 | 3.86E-05   | -0.47064 |
| 0.016593826 | -0.117537057 | 0.011021802 | -0.1723471  | 0.00018219 | -0.50453 |
| 0.024319233 | 0.105591643  | 0.022482106 | -0.04247796 | 0.35971421 | -0.36082 |
| 0.075318088 | -0.076767739 | 0.097526594 | 0.021970661 | 0.63580318 | -0.00556 |
| 3.96E-08    | -0.252405694 | 3.21E-08    | 0.125020398 | 0.00682851 | -0.23738 |
| 0.321698488 | -0.044123184 | 0.341392164 | -0.12174423 | 0.00844682 | -0.38918 |
| 0.507592105 | -0.030329368 | 0.513229643 | 0.087875263 | 0.05775097 | -0.37959 |
| 0.416328564 | 0.030155919  | 0.515642933 | -0.26883281 | 3.57E-09   | -0.21842 |
| 0.274069517 | -0.043592438 | 0.347236641 | 0.127479447 | 0.00580256 | -0.3604  |
| 4.90E-05    | -0.187847755 | 4.41E-05    | -0.22793957 | 6.41E-07   | -0.11772 |
| 0.516919513 | 0.030496964  | 0.510903389 | -0.11884017 | 0.01015841 | -0.53575 |
| 0.8808175   | 0.003312101  | 0.943092558 | -0.22406667 | 1.00E-06   | 0.051872 |
| 0.888349029 | 0.003531169  | 0.939335608 | -0.20866736 | 5.43E-06   | -0.33257 |
| 0.024952795 | -0.112548345 | 0.014957425 | -0.14672543 | 0.00147535 | -0.3382  |
| 0.000193591 | -0.17555095  | 0.000137194 | 0.206203931 | 7.04E-06   | -0.2257  |
| 0.006613582 | -0.134421343 | 0.003610776 | 0.001136857 | 0.9804523  | 0.003976 |
| 8.60E-07    | -0.229143268 | 5.58E-07    | -0.07455523 | 0.10760009 | -0.15546 |
| 0.255947394 | 0.04958624   | 0.284910243 | -0.30445559 | 1.79E-11   | -0.27285 |
| 7.78E-06    | -0.207892535 | 5.89E-06    | -0.17346113 | 0.00016517 | 0.028465 |
| 0.562031558 | 0.032011577  | 0.490131943 | -0.13518206 | 0.0034233  | -0.05759 |
| 0.000557446 | -0.166155423 | 0.000310805 | -0.26668325 | 4.80E-09   | -0.32658 |
| 0.582045142 | -0.025270113 | 0.58594938  | -0.12162816 | 0.00850995 | -0.25361 |
| 0.205432655 | -0.066585539 | 0.150813442 | -0.18573125 | 5.39E-05   | -0.21662 |
| 1.67E-05    | -0.193481477 | 2.56E-05    | 0.076304697 | 0.09957015 | -0.19074 |
| 0.999889586 | -0.001085027 | 0.981343336 | -0.09676211 | 0.03658636 | -0.313   |
| 0.027727715 | -0.105958374 | 0.022015899 | 0.094391663 | 0.04145914 | -0.10326 |
| 0.378977857 | 0.031884137  | 0.491862041 | -0.22529235 | 8.70E-07   | -0.40029 |
| 0.13812553  | -0.074298047 | 0.108822471 | 0.157359955 | 0.00064311 | -0.17832 |
| 0.05943732  | -0.097029903 | 0.036067756 | -0.08232452 | 0.07551923 | -0.2912  |
| 0.007901698 | -0.128686255 | 0.005351629 | -0.15635034 | 0.00069745 | -0.2861  |
| 0.00222213  | -0.146582143 | 0.001491404 | 0.194078828 | 2.41E-05   | 0.033494 |
| 0.061199704 | 0.087845316  | 0.057836607 | -0.00548677 | 0.90586704 | -0.31349 |
| 0.032260477 | 0.09290329   | 0.044790338 | 0.065412004 | 0.15815946 | -0.29687 |
| 0.775949503 | -0.025082733 | 0.588731709 | 0.00997225  | 0.82982193 | 0.032537 |
| 0.04666914  | -0.104160616 | 0.02438404  | -0.08044628 | 0.08245511 | -0.34415 |
| 0.136245474 | 0.058571572  | 0.206432857 | 0.068182584 | 0.14123655 | -0.29338 |

|             |              |             |             |            |          |
|-------------|--------------|-------------|-------------|------------|----------|
| 0.036733778 | -0.100736155 | 0.029508031 | -0.03122661 | 0.50084012 | -0.37131 |
| 0.007856488 | -0.123551207 | 0.007516339 | 0.013688631 | 0.76796724 | -0.0521  |
| 6.83E-15    | -0.351200308 | 5.30E-15    | -0.09549707 | 0.03912259 | -0.34585 |
| 0.13605698  | -0.068688384 | 0.138302669 | -0.04940156 | 0.28671026 | -0.14192 |
| 0.038684524 | -0.102158129 | 0.027277916 | -0.11005763 | 0.01734917 | -0.52031 |
| 0.066264503 | 0.098297463  | 0.033697019 | -0.09982281 | 0.03102144 | -0.18612 |
| 0.045309025 | -0.091156899 | 0.048983131 | -0.28504239 | 3.52E-10   | -0.32824 |
| 0.000868644 | -0.154886249 | 0.000783842 | -0.10681721 | 0.02095678 | -0.27062 |
| 0.747280351 | -0.018539246 | 0.689453258 | -0.33719392 | 7.01E-14   | -0.41526 |
| 0.18927893  | -0.06174729  | 0.182838664 | 0.243691758 | 9.68E-08   | -0.11598 |
| 0.021888138 | -0.103346516 | 0.025526869 | -0.27763193 | 1.03E-09   | -0.39643 |
| 0.670087402 | -0.027670514 | 0.550856907 | -0.0614383  | 0.18504281 | -0.44701 |
| 0.072654093 | -0.086632695 | 0.0613937   | 0.115262137 | 0.01268571 | -0.24949 |
| 3.20E-09    | 0.270286294  | 2.92E-09    | -0.03451723 | 0.4567879  | 0.280623 |
| 0.000767699 | -0.164640519 | 0.000353202 | -0.10615968 | 0.02176357 | -0.10921 |
| 0.641075591 | -0.018931133 | 0.683240323 | 0.140262387 | 0.00238151 | -0.12374 |
| 0.056064628 | -0.09289751  | 0.044803699 | -0.2461861  | 7.08E-08   | -0.3528  |
| 0.101646269 | -0.077043041 | 0.096327522 | -0.12035214 | 0.00923229 | -0.57382 |
| 0.001719181 | -0.154015592 | 0.000839806 | 0.043291062 | 0.35058342 | -0.37833 |
| 0.011049138 | -0.121538944 | 0.00855877  | 0.156621362 | 0.00068246 | -0.36279 |
| 0.72102091  | 0.017963169  | 0.698624235 | -0.20441543 | 8.48E-06   | -0.36167 |
| 0.09256262  | -0.075644921 | 0.102540621 | -0.13887078 | 0.00263349 | -0.27883 |
| 5.07E-05    | -0.191426508 | 3.12E-05    | -0.20887864 | 5.31E-06   | -0.57453 |
| 0.0010614   | -0.157555734 | 0.000633039 | -0.26087944 | 1.05E-08   | -0.42027 |
| 0.995385681 | -0.003297806 | 0.943337747 | 0.016575821 | 0.72088888 | -0.20493 |
| 0.011853096 | -0.118368176 | 0.010463944 | -0.00925422 | 0.84190783 | -0.40896 |
| 0.833143962 | 0.012385177  | 0.789516215 | -0.21086226 | 4.30E-06   | -0.45476 |
| 0.001487105 | -0.148976325 | 0.00124305  | -0.04230351 | 0.36169241 | -0.44108 |
| 0.180220165 | -0.069868654 | 0.131638773 | -0.00018981 | 0.99673593 | -0.38015 |
| 0.314981495 | -0.045638268 | 0.325056004 | -0.18553429 | 5.49E-05   | -0.26098 |
| 0.52610665  | 0.037646796  | 0.416985827 | -0.04698151 | 0.31100402 | -0.20836 |
| 0.917316076 | 0.000524926  | 0.990973455 | -0.18417687 | 6.24E-05   | -0.37904 |
| 0.318137307 | -0.054712541 | 0.237974999 | -0.16209088 | 0.00043693 | -0.25397 |
| 5.42E-05    | 0.182831824  | 7.07E-05    | 0.215929548 | 2.48E-06   | -0.21626 |
| 0.553466941 | -0.029446333 | 0.525576522 | -0.01058326 | 0.81956878 | -0.18043 |
| 0.053642798 | -0.102738387 | 0.026410425 | 0.01920351  | 0.67893462 | -0.13243 |
| 0.560619203 | 0.021638054  | 0.640926526 | 0.08122068  | 0.07953549 | -0.30757 |
| 4.26E-07    | -0.241466804 | 1.27E-07    | -0.05712268 | 0.2179007  | 0.100673 |
| 0.467452133 | 0.036880616  | 0.426537027 | -0.25749494 | 1.65E-08   | -0.43617 |
| 0.025392126 | -0.110043158 | 0.017363989 | -0.14424136 | 0.00177753 | -0.23017 |
| 0.436582237 | 0.028548145  | 0.538288792 | 0.068426565 | 0.13981544 | -0.11191 |
| 0.510946859 | 0.02972754   | 0.521628219 | -0.02162981 | 0.64105372 | -0.34806 |
| 0.000132121 | -0.171827674 | 0.000190674 | -0.12364028 | 0.00747294 | -0.20391 |
| 0.020022629 | -0.11199548  | 0.015461756 | -0.15913311 | 0.00055707 | -0.38933 |
| 5.31E-05    | -0.187760968 | 4.44E-05    | -0.14201503 | 0.0020955  | -0.15529 |



|             |              |             |             |             |          |
|-------------|--------------|-------------|-------------|-------------|----------|
| 0.014332054 | -0.119855146 | 0.00952807  | 0.05860797  | 0.2061505   | -0.18562 |
| 0.002958621 | -0.139977643 | 0.002431202 | -0.10174492 | 0.0279105   | -0.32098 |
| 0.55727236  | 0.027529682  | 0.552887002 | -0.0738273  | 0.111108827 | -0.29877 |
| 0.179860456 | -0.064229724 | 0.165830154 | -0.12842738 | 0.00544561  | -0.14753 |
| 0.009886336 | -0.121649859 | 0.00849812  | -0.21655122 | 2.32E-06    | -0.39339 |
| 0.150055866 | -0.066797634 | 0.149513898 | -0.1748919  | 0.0001455   | -0.32654 |
| 0.000955061 | 0.140534863  | 0.002334824 | -0.15286332 | 0.00091956  | -0.2024  |
| 0.209500225 | 0.057545872  | 0.214504963 | -0.08117635 | 0.07970032  | -0.11586 |
| 8.44E-06    | -0.218153767 | 1.94E-06    | -0.10270317 | 0.02646239  | -0.1385  |
| 0.0020703   | -0.134774123 | 0.003522707 | -0.0674214  | 0.14574133  | -0.28565 |
| 0.013651291 | 0.109026277  | 0.018433524 | -0.10331095 | 0.02557783  | -0.21594 |
| 0.028246127 | -0.11274271  | 0.014783587 | -0.16624318 | 0.0003085   | -0.52457 |
| 0.239640551 | -0.055094283 | 0.23471151  | -0.12617712 | 0.00632723  | -0.40794 |
| 6.52E-06    | -0.222194294 | 1.24E-06    | -0.02745513 | 0.55396321  | -0.24142 |
| 0.030267187 | -0.110718079 | 0.016684437 | 0.068007234 | 0.14226471  | -0.24095 |
| 0.167847716 | 0.055166796  | 0.234095185 | 0.008132512 | 0.860862    | -0.26474 |
| 0.81578799  | 0.002538831  | 0.956363396 | -0.09168182 | 0.0476897   | -0.00363 |
| 0.117062805 | -0.080229839 | 0.083286418 | -0.04518434 | 0.32989631  | -0.21272 |
| 0.005702931 | -0.128594528 | 0.005384761 | -0.09132365 | 0.04856911  | -0.41169 |
| 0.349856983 | -0.036572253 | 0.430416687 | -0.27886973 | 8.66E-10    | -0.21614 |
| 0.633966371 | -0.024151436 | 0.602649506 | -0.31884968 | 1.70E-12    | -0.18731 |
| 0.850977599 | -0.001010362 | 0.982626956 | -0.22168838 | 1.31E-06    | -0.34471 |
| 0.3568364   | 0.041041664  | 0.3762031   | -0.13135312 | 0.00446509  | -0.20141 |
| 0.594886427 | 0.027188952  | 0.557813726 | -0.01564682 | 0.7359321   | -0.04099 |
| 1.37E-10    | -0.291700369 | 1.30E-10    | -0.10635354 | 0.02152295  | -0.18628 |
| 0.716584833 | 0.01277193   | 0.78310475  | -0.18909517 | 3.91E-05    | -0.20087 |
| 0.358568172 | -0.042470071 | 0.359803496 | -0.22893499 | 5.71E-07    | -0.31854 |
| 0.008247831 | -0.120831101 | 0.008955    | 0.046003293 | 0.32119724  | -0.06805 |
| 0.194301189 | 0.0572726    | 0.216693339 | -0.13938967 | 0.00253682  | -0.28485 |
| 1.06E-05    | -0.203185896 | 9.63E-06    | -0.30464463 | 1.74E-11    | -0.18845 |
| 0.016249964 | -0.114289065 | 0.013462622 | -0.10592406 | 0.02205916  | -0.05751 |
| 2.55E-08    | -0.264321036 | 6.62E-09    | -0.08073027 | 0.08137451  | -0.16558 |
| 0.019121702 | -0.112963003 | 0.014588706 | 0.205474213 | 7.60E-06    | -0.05481 |
| 0.815656393 | 0.014286366  | 0.758143726 | -0.20183253 | 1.11E-05    | -0.46348 |
| 0.843975536 | -0.005693134 | 0.902343922 | -0.13765401 | 0.00287347  | -0.12405 |
| 0.051351009 | 0.093153119  | 0.044215957 | -0.12215906 | 0.00822457  | -0.36149 |
| 0.109847306 | -0.071367252 | 0.123538301 | -0.13820092 | 0.00276325  | -0.19183 |
| 0.647613852 | -0.023767838 | 0.608424826 | -0.07260972 | 0.11712097  | -0.21827 |
| 0.671176663 | -0.027993432 | 0.546215876 | 0.032389969 | 0.48501427  | -0.33733 |
| 0.074452197 | -0.084518709 | 0.068025752 | 0.003404523 | 0.94150739  | -0.17991 |
| 0.580891032 | -0.023570071 | 0.611411903 | -0.17121214 | 0.00020121  | -0.22777 |
| 0.154077136 | 0.062673814  | 0.176345764 | -0.06676632 | 0.14970526  | 0.037763 |
| 0.000104375 | -0.18268247  | 7.17E-05    | 0.016829198 | 0.71680428  | -0.4202  |
| 0.014537884 | -0.122672031 | 0.007956959 | -0.18509103 | 5.72E-05    | -0.2886  |
| 0.420322932 | -0.037790989 | 0.41520248  | 0.0199575   | 0.66707036  | -0.09667 |

|             |              |             |             |            |          |
|-------------|--------------|-------------|-------------|------------|----------|
| 0.000386611 | -0.174574354 | 0.000149663 | -0.15411776 | 0.00083305 | 0.011426 |
| 0.001891253 | 0.146497416  | 0.001500975 | -0.05673531 | 0.22104257 | -0.00593 |
| 0.440957141 | -0.034010221 | 0.463430641 | -0.09690374 | 0.03631129 | 0.025229 |
| 0.173183988 | 0.062650975  | 0.176503731 | -0.05439487 | 0.24071497 | -0.03278 |
| 1.90E-07    | 0.232319377  | 3.84E-07    | 0.073191257 | 0.11420842 | -0.12333 |
| 1.09E-06    | -0.224393402 | 9.64E-07    | -0.00257638 | 0.95571864 | 0.149496 |
| 1.49E-12    | -0.323941579 | 7.17E-13    | -0.12292973 | 0.00782548 | 0.074898 |
| 0.585724167 | -0.029890019 | 0.519353885 | 0.259374436 | 1.29E-08   | 0.208445 |
| 7.10E-05    | -0.19466453  | 2.27E-05    | -0.09072081 | 0.05007988 | 0.203636 |
| 0.379346196 | 0.040420073  | 0.383480963 | -0.25585506 | 2.05E-08   | 0.283062 |
| 6.04E-09    | -0.279732629 | 7.65E-10    | -0.00560878 | 0.90378378 | 0.157512 |
| 0.029907793 | -0.103404262 | 0.025444311 | -0.1836947  | 6.52E-05   | 0.102206 |
| 0.000590956 | -0.153741914 | 0.000858146 | -0.08452532 | 0.06800414 | -0.12455 |
| 0.994297128 | 0.010123824  | 0.827275648 | -0.01070333 | 0.81755754 | 0.350977 |
| 0.035409796 | 0.104154587  | 0.024392337 | -0.04837292 | 0.29687562 | 0.392918 |
| 0.1805379   | -0.054120538 | 0.243098932 | -0.06919036 | 0.13543748 | -0.06783 |
| 0.743038654 | 0.009269957  | 0.841642559 | -0.09537306 | 0.03937904 | -0.12517 |
| 1.20E-08    | 0.270943554  | 2.66E-09    | -0.1772535  | 0.00011776 | 0.033811 |
| 0.026496439 | -0.109759886 | 0.017656338 | 0.036427817 | 0.4322409  | -0.11859 |
| 0.000879445 | -0.149639181 | 0.001181358 | 0.087917826 | 0.05762943 | 0.167446 |
| 0.000281491 | 0.168102592  | 0.000263272 | -0.20960031 | 4.92E-06   | 0.180563 |
| 1.82E-08    | -0.265473464 | 5.66E-09    | -0.19700213 | 1.80E-05   | 0.094274 |
| 3.54E-07    | -0.23471216  | 2.89E-07    | 0.040138729 | 0.38680312 | 0.081175 |
| 0.001477679 | 0.143689054  | 0.001851998 | 0.279171681 | 8.29E-10   | -0.15274 |
| 0.193780288 | -0.050083646 | 0.280100276 | 0.009673036 | 0.83485361 | 0.169087 |
| 0.000392992 | 0.156698073  | 0.000678273 | -0.08193394 | 0.07692103 | 0.03623  |
| 0.477930744 | 0.02386853   | 0.606906461 | -0.21258046 | 3.58E-06   | 0.034912 |
| 0.328892443 | -0.053179506 | 0.251401989 | 0.017502187 | 0.70599472 | 0.436998 |
| 0.124452484 | -0.069170847 | 0.135547996 | -0.15093869 | 0.00106852 | -0.15538 |
| 6.18E-07    | -0.238820239 | 1.76E-07    | -0.02451544 | 0.59719206 | 0.011149 |
| 3.73E-07    | 0.227149635  | 7.03E-07    | -0.12254332 | 0.00802336 | -0.0809  |
| 0.762932629 | 0.019566211  | 0.673217285 | -0.09712685 | 0.03588156 | -0.01089 |
| 0.704371893 | -0.013563198 | 0.770033462 | 0.136830252 | 0.00304706 | 0.150059 |
| 0.311827528 | 0.042215718  | 0.362690509 | -0.03414621 | 0.46164371 | -0.04641 |
| 0.000789442 | -0.161684293 | 0.00045188  | -0.11010187 | 0.01730393 | -0.01741 |
| 0.255339609 | -0.057186015 | 0.217390045 | -0.17408461 | 0.00015631 | -0.09709 |
| 1.21E-05    | -0.200885111 | 1.22E-05    | -0.07752631 | 0.09425112 | -0.01368 |
| 0.007187945 | -0.116780565 | 0.011552302 | 0.045228891 | 0.32941923 | -0.03572 |
| 0.006087065 | -0.132570232 | 0.004106456 | 0.125215896 | 0.00674137 | 0.15325  |
| 0.070640089 | -0.090024212 | 0.051874338 | -0.08340655 | 0.07174403 | 0.053534 |
| 0.393085442 | -0.04585719  | 0.32273814  | -0.13091312 | 0.00460155 | -0.02797 |
| 0.007467141 | -0.11394861  | 0.013744178 | 0.282496166 | 5.12E-10   | 0.03808  |
| 0.877480446 | -0.005791303 | 0.900668624 | -0.00152072 | 0.97385406 | 0.017893 |
| 0.582926945 | 0.024007467  | 0.604814182 | -0.04308006 | 0.35293865 | -0.05521 |
| 0.018696986 | -0.113173776 | 0.014404365 | -0.04906789 | 0.28998169 | 0.140419 |

|             |              |             |             |            |          |
|-------------|--------------|-------------|-------------|------------|----------|
| 0.044570918 | 0.099372214  | 0.031792225 | -0.00864903 | 0.85212348 | -0.00889 |
| 0.066168634 | -0.089968342 | 0.052020555 | -0.00382756 | 0.93425469 | 0.100796 |
| 0.015080635 | 0.117656097  | 0.010940318 | -0.1630429  | 0.00040371 | -0.04219 |
| 0.022108372 | -0.103061867 | 0.025937213 | 0.240041773 | 1.52E-07   | 0.069477 |
| 0.53390614  | 0.025264672  | 0.586030082 | -0.11050869 | 0.01689273 | 0.104439 |
| 0.007259565 | -0.119598189 | 0.009684274 | 0.061363519 | 0.18557918 | 0.015814 |
| 0.215592706 | -0.06374405  | 0.169060844 | 0.060936643 | 0.18866295 | 0.044449 |
| 0.124124518 | 0.076971487  | 0.096638035 | -0.02612972 | 0.57326405 | -0.00049 |
| 0.448156268 | 0.039388203  | 0.395750705 | 0.014440546 | 0.75561608 | -0.06841 |
| 0.850309669 | -0.012488254 | 0.787806026 | -0.0384482  | 0.40713136 | 0.037592 |
| 0.475624863 | -0.025972177 | 0.575579176 | -0.03211244 | 0.48876492 | 0.053388 |
| 0.069542982 | -0.086111504 | 0.06297709  | 0.037076307 | 0.42408554 | 0.038984 |
| 0.199144034 | 0.072019256  | 0.120137415 | -0.18632676 | 5.09E-05   | 0.052697 |
| 0.08516792  | -0.095580275 | 0.038951323 | -0.1256308  | 0.00655972 | -0.04279 |
| 0.271090675 | -0.056064771 | 0.226557485 | 0.05038484  | 0.27721458 | 0.086087 |
| 0.487616318 | -0.023605746 | 0.610872596 | 0.090804719 | 0.04986728 | 0.121642 |
| 0.201699509 | -0.053348455 | 0.249896954 | -0.01380782 | 0.76600546 | 0.091959 |
| 0.754393477 | -0.010351538 | 0.823453701 | 0.042409321 | 0.36049172 | 0.011284 |
| 0.001103492 | -0.150933539 | 0.001068946 | -0.10694583 | 0.02080204 | -0.10321 |
| 5.47E-07    | -0.219052652 | 1.76E-06    | 0.021721112 | 0.63964552 | 0.026654 |
| 0.387600145 | 0.034240351  | 0.460408906 | -0.18010123 | 9.09E-05   | 0.041189 |
| 0.724870924 | -0.006006165 | 0.897003444 | -0.05264695 | 0.25618738 | 0.075008 |
| 0.878524129 | 0.007330612  | 0.874461976 | 0.005351495 | 0.90817748 | -0.0359  |
| 0.215709343 | -0.056329326 | 0.224370055 | 0.007676369 | 0.86859326 | -0.15661 |
| 0.549045611 | -0.020021977 | 0.666059568 | 0.026796568 | 0.56351358 | 0.041437 |
| 2.46E-05    | 0.199467087  | 1.41E-05    | -0.13147418 | 0.0044282  | -0.04523 |
| 0.729583069 | -0.014216003 | 0.759298138 | 0.001320987 | 0.97728708 | -0.03272 |
| 0.438223483 | -0.040403198 | 0.383679731 | -0.12581035 | 0.00648248 | -0.1709  |
| 0.070489362 | -0.078324574 | 0.090899787 | -0.08831945 | 0.05649303 | 0.072393 |
| 0.296915574 | 0.04687956   | 0.312056282 | 0.037155491 | 0.42309591 | 0.017378 |
| 0.412604561 | -0.037874195 | 0.414175451 | -0.01160298 | 0.80252625 | 0.018696 |
| 0.012777074 | 0.104837858  | 0.023467275 | -0.02894229 | 0.53269152 | 0.086235 |
| 0.014974601 | 0.11435546   | 0.013408309 | -0.0414988  | 0.37090531 | 0.111783 |
| 0.268996821 | -0.055934359 | 0.227641329 | 0.025561933 | 0.58162841 | -0.11259 |
| 0.001560904 | -0.156285875 | 0.000701062 | -0.00076733 | 0.98680535 | -0.00935 |
| 0.082483488 | -0.078187552 | 0.091468153 | 0.01710639  | 0.71234503 | 0.029959 |
| 0.979461304 | -0.014188465 | 0.759750076 | -0.01551476 | 0.73807892 | -0.06788 |
| 0.215628537 | 0.05863942   | 0.205906755 | 0.027598521 | 0.55189424 | 0.020981 |
| 0.050367655 | 0.086446895  | 0.061954354 | -0.01611153 | 0.72839407 | 0.00377  |
| 0.466685164 | 0.044246532  | 0.340042924 | 0.04517231  | 0.33002525 | 0.003861 |
| 0.312029315 | -0.046376758 | 0.317280262 | -0.00389994 | 0.93301438 | -0.00133 |
| 0.329140917 | -0.04623341  | 0.31878002  | 0.030241482 | 0.51445172 | 0.122757 |
| 0.000209801 | -0.175216026 | 0.000141356 | 0.055799924 | 0.22876247 | -0.21983 |
| 0.000296081 | -0.164736191 | 0.000350373 | 0.053897957 | 0.24504527 | 0.088178 |
| 0.031134253 | -0.100387509 | 0.030078097 | 0.048487302 | 0.29573353 | 0.054134 |

|             |              |             |             |            |          |
|-------------|--------------|-------------|-------------|------------|----------|
| 1.96E-11    | -0.316729278 | 2.43E-12    | 0.134616733 | 0.00356175 | 0.063483 |
| 0.652071962 | -0.009751409 | 0.833535    | -0.03494926 | 0.45116996 | -0.16152 |
| 0.03470478  | -0.100870918 | 0.029290178 | -0.10769561 | 0.0199196  | 0.033598 |
| 0.518285267 | 0.039599314  | 0.393221375 | -0.30579883 | 1.45E-11   | 0.231552 |
| 0.71554475  | -0.006441648 | 0.889581662 | -0.10326305 | 0.02564661 | 0.092156 |
| 0.753527612 | -0.015327683 | 0.74112362  | 0.018172615 | 0.69528475 | 0.121855 |
| 0.492116141 | -0.021294349 | 0.646238779 | 0.144337985 | 0.00176479 | 0.267541 |
| 0.029395132 | -0.093348115 | 0.04377196  | -0.0581273  | 0.20990178 | 0.081891 |
| 0.353435259 | -0.055135523 | 0.234360845 | -0.11017912 | 0.01722518 | 0.008238 |
| 0.25321068  | -0.063949326 | 0.167689657 | -0.22810942 | 6.29E-07   | 0.13179  |
| 2.38E-06    | 0.221888975  | 1.28E-06    | -0.02448043 | 0.59771594 | 0.343364 |
| 7.56E-05    | 0.18279186   | 7.09E-05    | -0.14980068 | 0.00116676 | -0.07052 |
| 0.048331734 | 0.086374264  | 0.062174663 | -0.13419328 | 0.00366877 | 0.165213 |
| 0.99927435  | -0.007580671 | 0.870216888 | 0.40044981  | 2.05E-19   | 0.092179 |
| 0.460202342 | 0.023696928  | 0.609495117 | -0.148397   | 0.00129938 | 0.039422 |
| 0.26338716  | 0.067494935  | 0.1453014   | -0.19527159 | 2.14E-05   | -0.14838 |
| 7.56E-09    | -0.257277242 | 1.70E-08    | -0.04250639 | 0.35939239 | -0.04887 |
| 8.28E-11    | -0.28860232  | 2.07E-10    | -0.22051555 | 1.49E-06   | 0.063863 |
| 0.045201278 | 0.099642774  | 0.03132747  | -0.01912122 | 0.68023441 | 0.051903 |
| 0.48295883  | 0.031923025  | 0.491333766 | -0.35297381 | 3.78E-15   | 0.148816 |
| 0.023844139 | 0.111338561  | 0.016080349 | 0.02986728  | 0.51967187 | 0.06773  |
| 0.007662049 | 0.141047155  | 0.002249307 | -0.03819119 | 0.41027651 | 0.155401 |
| 0.183318747 | 0.048893402  | 0.291702376 | -0.01237021 | 0.7897646  | -0.18201 |
| 1.50E-13    | 0.320294253  | 1.33E-12    | -0.07513342 | 0.10489153 | 0.200394 |
| 2.41E-06    | 0.219573279  | 1.66E-06    | 0.003683771 | 0.93671933 | 0.036035 |
| 0.091511859 | -0.076058314 | 0.10067132  | -0.26721377 | 4.46E-09   | 0.00859  |
| 3.51E-13    | -0.324122728 | 6.95E-13    | -0.09738001 | 0.03539918 | 0.034183 |
| 0.874999477 | -0.012228742 | 0.792113594 | 0.088317291 | 0.05649909 | 0.252026 |
| 7.67E-06    | -0.211929895 | 3.83E-06    | -0.04760816 | 0.3045872  | -0.0953  |
| 1.70E-05    | -0.18727787  | 4.65E-05    | -0.01309127 | 0.7778219  | 0.266808 |
| 0.550138282 | -0.008924988 | 0.847462121 | -0.02796504 | 0.54662315 | -0.23558 |
| 0.154731304 | -0.068542394 | 0.139144632 | -0.16094051 | 0.00048046 | -0.02591 |
| 0.944368384 | -0.033614604 | 0.468650956 | -0.0922553  | 0.04630943 | 0.156294 |
| 0.462126361 | 0.039960866  | 0.388912352 | -0.1149191  | 0.01295496 | 0.184325 |
| 0.811709068 | 0.0006728    | 0.988430794 | -0.1467082  | 0.00147727 | -0.03839 |
| 5.95E-06    | 0.196628794  | 1.87E-05    | 0.001914439 | 0.96708819 | 0.247426 |
| 4.77E-10    | -0.275900944 | 1.32E-09    | -0.03367044 | 0.46791225 | 0.251976 |
| 1.50E-05    | -0.193592966 | 2.53E-05    | 0.02663879  | 0.56581335 | -0.00551 |
| 0.244332705 | -0.061792614 | 0.182516987 | -0.38824439 | 3.00E-18   | 0.086281 |
| 9.54E-12    | 0.306963764  | 1.20E-11    | 0.13714552  | 0.00297953 | 0.191687 |
| 0.61097612  | -0.029597766 | 0.523448424 | 0.196668845 | 1.86E-05   | 0.304952 |
| 0.000283769 | -0.162443408 | 0.000424346 | 0.040644845 | 0.38083937 | 0.047378 |
| 2.10E-12    | -0.299750293 | 3.77E-11    | 0.005655349 | 0.90298884 | 0.08957  |
| 0.645529266 | 0.026856671  | 0.562638697 | 0.10294731  | 0.02610395 | 0.050284 |
| 0.958276536 | -0.010546187 | 0.820190026 | 0.069264813 | 0.13501644 | -0.05064 |

|             |              |             |             |            |          |
|-------------|--------------|-------------|-------------|------------|----------|
| 0.342934785 | -0.058527452 | 0.20677548  | 0.077882992 | 0.09274166 | -0.03663 |
| 0.011734951 | -0.112678443 | 0.014840869 | -0.05780435 | 0.21244969 | -0.07158 |
| 1.10E-09    | 0.280804619  | 6.55E-10    | -0.03401388 | 0.46338255 | 0.321566 |
| 7.95E-07    | -0.229157366 | 5.57E-07    | -0.10684493 | 0.02092335 | -0.01399 |
| 0.486090929 | -0.032704291 | 0.480785177 | 0.097732571 | 0.03473661 | 0.153892 |
| 0.00028674  | -0.167848131 | 0.000269073 | -0.08251871 | 0.07483004 | 0.092299 |
| 1.03E-05    | -0.211472333 | 4.03E-06    | -0.16478304 | 0.000349   | 0.27194  |
| 8.06E-14    | -0.335540402 | 9.43E-14    | -0.07706153 | 0.09624744 | -0.09064 |
| 0.082872543 | -0.09947921  | 0.031607733 | -0.03311815 | 0.47524745 | 0.051474 |
| 0.001903563 | -0.147036589 | 0.001441017 | -0.16047998 | 0.00049899 | -0.05302 |
| 0.135949047 | -0.07280228  | 0.116150203 | -0.09659283 | 0.03691743 | 0.095594 |
| 0.005995011 | -0.129721248 | 0.004990299 | -0.19269046 | 2.76E-05   | -0.18194 |
| 2.49E-08    | -0.252125708 | 3.33E-08    | 0.03277792  | 0.47979742 | -0.03732 |
| 0.247383046 | 0.046779851  | 0.313087718 | 0.088092128 | 0.05713394 | 0.366535 |
| 0.001419792 | -0.144995839 | 0.001680236 | 0.318458043 | 1.82E-12   | 0.114564 |
| 0.392425303 | -0.038136056 | 0.410953041 | 0.103617062 | 0.02514206 | 0.417604 |
| 0.873560951 | 0.011663047  | 0.801525231 | 0.035037067 | 0.45003288 | 0.042297 |
| 1.44E-05    | -0.199615384 | 1.39E-05    | 0.073601712 | 0.11218713 | -0.08945 |
| 0.002853026 | 0.136972743  | 0.00301637  | 0.160142335 | 0.000513   | 0.124184 |
| 0.008483335 | -0.113770879 | 0.01389321  | -0.0793591  | 0.08669945 | -0.00646 |
| 0.065037897 | -0.088512055 | 0.05595468  | 0.010281398 | 0.8246305  | -0.05729 |
| 0.856439434 | -0.00973885  | 0.833746282 | -0.001653   | 0.97158065 | -0.01785 |
| 6.50E-17    | 0.384244532  | 7.04E-18    | -0.08415197 | 0.06923399 | 0.044466 |
| 0.033751049 | -0.102722527 | 0.026433815 | 0.158786691 | 0.00057299 | 0.185744 |
| 0.000741524 | -0.148165783 | 0.001322513 | -0.10686775 | 0.02089586 | 0.20656  |
| 0.000129568 | 0.173942835  | 0.000158284 | -0.12550422 | 0.00661466 | -0.05912 |
| 1.32E-12    | -0.314689331 | 3.41E-12    | -0.16871288 | 0.00024983 | 0.058641 |
| 8.69E-10    | -0.281829237 | 5.64E-10    | 0.060900731 | 0.18892409 | 0.182239 |
| 0.955508195 | -0.005148199 | 0.911651154 | -0.17234    | 0.0001823  | 0.091202 |
| 0.000713321 | -0.162996216 | 0.000405287 | -0.04536836 | 0.32792848 | 0.184815 |
| 2.43E-18    | 0.388669175  | 2.73E-18    | 0.000197397 | 0.99660553 | 0.082572 |
| 0.005443157 | -0.130425989 | 0.004757007 | 0.109167134 | 0.01828202 | -0.01379 |
| 0.709611774 | -0.013566315 | 0.769982095 | 0.052793924 | 0.25486043 | -0.02876 |
| 0.00384612  | 0.120393787  | 0.009207879 | -0.08101537 | 0.08030126 | -0.12033 |
| 0.162449958 | -0.060959231 | 0.188498836 | -0.00062267 | 0.98929278 | -0.08774 |
| 0.018955959 | 0.105434198  | 0.022684866 | 0.151464241 | 0.00102578 | 0.122849 |
| 2.35E-07    | 0.239541676  | 1.61E-07    | 0.052604203 | 0.25657416 | -0.14306 |
| 0.001776218 | -0.140742155 | 0.002299869 | -0.07350477 | 0.11266196 | 0.06205  |
| 0.001265088 | 0.162076955  | 0.000437437 | -0.34593901 | 1.42E-14   | 0.29982  |
| 0.011008576 | -0.112663134 | 0.014854543 | -0.1170611  | 0.011353   | -0.2512  |
| 0.103567299 | -0.080835472 | 0.080977135 | -0.03067276 | 0.50846928 | -0.13188 |
| 0.489071756 | -0.031383685 | 0.49868754  | -0.04758504 | 0.30482231 | -0.15099 |
| 4.84E-07    | -0.235054765 | 2.77E-07    | -0.20383046 | 9.01E-06   | 0.100712 |
| 0.000204391 | -0.173360647 | 0.000166643 | -0.25784467 | 1.58E-08   | -0.14419 |
| 0.02246126  | -0.106059288 | 0.021889092 | -0.26119738 | 1.01E-08   | 0.004134 |

|             |              |             |             |            |          |
|-------------|--------------|-------------|-------------|------------|----------|
| 2.46E-10    | -0.285681192 | 3.20E-10    | 0.082672235 | 0.07428881 | 0.299724 |
| 6.26E-05    | 0.198401092  | 1.57E-05    | 0.006448174 | 0.88947052 | 0.289008 |
| 0.002695685 | -0.127036062 | 0.005976624 | 0.088108637 | 0.05708719 | -0.06096 |
| 0.026081455 | 0.100294548  | 0.030231679 | -0.22893268 | 5.72E-07   | -0.17214 |
| 0.880509875 | -0.005906896 | 0.898696533 | -0.22543586 | 8.56E-07   | 0.237534 |
| 4.67E-08    | -0.254641938 | 2.40E-08    | -0.02783859 | 0.54843884 | 0.009352 |
| 0.156579791 | -0.060828534 | 0.189449878 | -0.00668763 | 0.88539368 | -0.07403 |
| 2.14E-08    | -0.26314042  | 7.77E-09    | 0.014852071 | 0.74888231 | -0.05137 |
| 0.129850157 | -0.072722806 | 0.116550101 | -0.06464276 | 0.16311923 | 0.062403 |
| 0.215812053 | 0.058104301  | 0.210082517 | 0.068170689 | 0.14130611 | 0.103656 |
| 0.005303472 | -0.128838338 | 0.0052971   | -0.03322769 | 0.47378771 | 0.034748 |
| 0.010620814 | -0.101016164 | 0.029056923 | -0.10133116 | 0.02855654 | -0.26116 |
| 0.000250483 | -0.180036077 | 9.15E-05    | -0.00591703 | 0.89852369 | 0.129614 |
| 2.25E-10    | -0.286776772 | 2.72E-10    | 0.217216051 | 2.16E-06   | 0.32752  |
| 4.91E-09    | 0.273508739  | 1.86E-09    | 0.10200526  | 0.02751049 | -0.11372 |
| 4.06E-17    | -0.380424696 | 1.57E-17    | 0.041848715 | 0.36688156 | 0.253602 |
| 0.047051221 | 0.101163265  | 0.028822317 | -0.13013886 | 0.00485084 | 0.008266 |
| 0.197355473 | 0.064132708  | 0.166471774 | -0.153956   | 0.00084377 | 0.006755 |
| 0.017205948 | 0.119637307  | 0.009660348 | -0.04562975 | 0.32514643 | -0.00461 |
| 0.012454575 | 0.124174156  | 0.007217469 | -0.06060349 | 0.19109568 | -0.00452 |
| 0.002640077 | -0.139035053 | 0.002602532 | -0.17941345 | 9.68E-05   | -0.05481 |
| 0.002964341 | 0.134282101  | 0.003646082 | 0.230079365 | 5.00E-07   | 0.287598 |
| 0.949095317 | 0.010763442  | 0.816550981 | 0.042112259 | 0.36386894 | 0.217745 |
| 1.85E-06    | -0.218250968 | 1.92E-06    | -0.24513301 | 8.08E-08   | 0.326218 |
| 0.091948285 | -0.0696396   | 0.132912247 | -0.01465837 | 0.75204947 | 0.05105  |
| 0.581201368 | -0.024068569 | 0.603895046 | -0.07888145 | 0.08861896 | 0.128834 |
| 0.001084174 | -0.144104552 | 0.001795717 | 0.095461259 | 0.0391965  | 0.040655 |
| 0.53727378  | 0.025108786  | 0.588344493 | -0.15916305 | 0.00055571 | -0.16735 |
| 0.130049737 | 0.063508081  | 0.170647383 | 0.034581062 | 0.45595541 | -0.09034 |
| 0.036194421 | 0.093025354  | 0.044508921 | 0.245136442 | 8.08E-08   | -0.03409 |
| 3.02E-05    | -0.187475395 | 4.57E-05    | -0.0103561  | 0.82337726 | 0.195528 |
| 0.768367591 | -0.000290351 | 0.995007093 | -0.0736173  | 0.11211092 | -0.01933 |
| 0.87111461  | -0.01073673  | 0.816998201 | -0.07270974 | 0.11661593 | 0.01765  |
| 0.260689995 | -0.058125706 | 0.209914319 | -0.01884341 | 0.68462926 | 0.026909 |
| 9.52E-12    | 0.3108478    | 6.40E-12    | -0.19636263 | 1.92E-05   | -0.11567 |
| 0.785222214 | 0.018964516  | 0.682712059 | -0.07650558 | 0.09867944 | -0.08843 |
| 0.01143049  | 0.112902065  | 0.014642387 | 0.045126812 | 0.33051307 | -0.21917 |
| 0.248145915 | 0.043031454  | 0.353482645 | -0.04296413 | 0.35423695 | -0.0324  |
| 0.056827643 | -0.099399079 | 0.031745815 | -0.28980876 | 1.73E-10   | -0.06338 |
| 0.001227262 | 0.162297309  | 0.000429521 | 0.135225166 | 0.00341295 | -0.09377 |
| 0.028936679 | 0.101007732  | 0.029070422 | 0.097253419 | 0.0356397  | 0.281423 |
| 0.010551162 | 0.111983338  | 0.015472997 | 0.229936281 | 5.08E-07   | 0.138881 |
| 0.121409526 | -0.077766227 | 0.09323366  | -0.09536585 | 0.039394   | 0.009886 |
| 1.20E-09    | -0.278443113 | 9.21E-10    | 0.110864747 | 0.01653988 | 0.015594 |
| 1.12E-08    | -0.261484848 | 9.71E-09    | -0.20087062 | 1.22E-05   | 0.101166 |

|             |              |             |             |            |          |
|-------------|--------------|-------------|-------------|------------|----------|
| 4.64E-30    | -0.48529241  | 5.80E-29    | 0.240801854 | 1.38E-07   | 0.010032 |
| 0.030164153 | -0.099479454 | 0.031607314 | 0.148907208 | 0.00124965 | 0.113251 |
| 0.417674629 | -0.046890102 | 0.311947363 | 0.002242116 | 0.96145903 | -0.10583 |
| 0.002156918 | -0.155215663 | 0.000763583 | -0.18452688 | 6.03E-05   | -0.13935 |
| 1.24E-05    | -0.199573582 | 1.39E-05    | -0.06811399 | 0.14163806 | 0.138771 |
| 0.500075384 | 0.046133243  | 0.319830742 | -0.05655052 | 0.22255278 | 0.033518 |
| 0.012201321 | -0.117492892 | 0.011052169 | -0.20002944 | 1.33E-05   | -0.04761 |
| 0.266936219 | -0.051844454 | 0.263516754 | -0.17672021 | 0.00012355 | -0.00885 |
| 0.703214999 | 0.012122998  | 0.793870644 | -0.01834391 | 0.69255787 | 0.184606 |
| 0.005262189 | 0.153627411  | 0.000865928 | -0.00436643 | 0.92502423 | 0.062253 |
| 0.19693001  | -0.060320955 | 0.193176811 | -0.20358248 | 9.24E-06   | 0.093864 |
| 9.90E-14    | -0.330913526 | 2.14E-13    | -0.17834129 | 0.00010673 | -0.03725 |
| 1.02E-07    | -0.240337786 | 1.46E-07    | -0.06703226 | 0.14808622 | -0.07208 |
| 5.29E-05    | -0.186126499 | 5.19E-05    | -0.06297489 | 0.17427319 | 0.143042 |
| 0.072364575 | -0.084819521 | 0.067047655 | -0.0383033  | 0.40890272 | 0.046106 |
| 4.99E-05    | 0.184562858  | 6.01E-05    | -0.10646107 | 0.02139048 | -0.11897 |
| 1.50E-05    | 0.216952299  | 2.22E-06    | 0.010819215 | 0.8156174  | 0.042481 |
| 0.001098877 | -0.149119218 | 0.001229505 | -0.04928092 | 0.28789011 | -0.00874 |
| 0.053007274 | -0.096714737 | 0.036678749 | -0.03572766 | 0.44114685 | -0.09132 |
| 0.994955869 | 0.00173367   | 0.970194347 | 0.060284033 | 0.19345    | -0.06996 |
| 0.000661873 | -0.151680993 | 0.00100861  | 0.028498896 | 0.53899025 | -0.04269 |
| 0.071766237 | -0.079499328 | 0.086142303 | 0.004174283 | 0.9283145  | 0.037918 |
| 9.81E-21    | 0.424608594  | 7.27E-22    | -0.04124005 | 0.37389836 | 0.196102 |
| 0.767421179 | -0.021555426 | 0.642201944 | 0.176730259 | 0.00012344 | 0.040282 |
| 0.001009763 | -0.147756853 | 0.001364352 | -0.11276118 | 0.01476716 | 0.282648 |
| 1.20E-14    | -0.357964537 | 1.45E-15    | -0.10360032 | 0.02516572 | 0.34733  |
| 0.163151158 | -0.071107628 | 0.124913186 | -0.14063159 | 0.00231845 | 0.100524 |
| 0.289277448 | -0.043803727 | 0.344902407 | -0.12686863 | 0.00604356 | -0.04576 |
| 0.19071885  | -0.050647545 | 0.274714179 | -0.13492418 | 0.00348584 | -0.06262 |
| 0.284074481 | -0.04105389  | 0.376060813 | 0.063520646 | 0.17056262 | -0.04736 |
| 9.90E-06    | -0.203365101 | 9.45E-06    | 0.086839385 | 0.06077494 | -0.10292 |
| 0.630344318 | -0.016948261 | 0.714887691 | 0.157289297 | 0.00064678 | 0.28722  |
| 0.661721898 | -0.01282583  | 0.782212367 | -0.23408513 | 3.12E-07   | -0.3098  |
| 0.045356383 | -0.105563786 | 0.022517866 | -0.03107621 | 0.50290578 | -0.10744 |
| 1.95E-10    | 0.286922104  | 2.66E-10    | -0.05655894 | 0.22248379 | 0.024109 |
| 0.074461833 | -0.082566764 | 0.074660288 | 0.071662451 | 0.12198936 | 0.008053 |
| 0.008869861 | 0.118732594  | 0.010227342 | -0.13150739 | 0.00441812 | 0.106407 |
| 0.002523364 | -0.132287057 | 0.004187489 | -0.22227166 | 1.23E-06   | -0.08083 |
| 0.33917764  | 0.038882512  | 0.40184911  | -0.05962281 | 0.19839029 | -0.09242 |
| 0.489490773 | -0.057305367 | 0.216430092 | 0.162702829 | 0.0004153  | 0.09146  |
| 0.912541992 | -0.006984141 | 0.880349698 | 0.345541915 | 1.53E-14   | 0.389502 |
| 0.082560844 | -0.074488349 | 0.10791692  | -0.016874   | 0.71608282 | -0.07291 |
| 0.000132471 | -0.16585388  | 0.000318846 | -0.06192557 | 0.18157582 | 0.143881 |
| 0.770562163 | 0.015156533  | 0.743912625 | -0.06858475 | 0.13889996 | -0.07116 |
| 0.064020075 | -0.084993954 | 0.066485785 | -0.04035177 | 0.38428585 | -0.11264 |

|             |              |             |             |            |          |
|-------------|--------------|-------------|-------------|------------|----------|
| 0.093166943 | -0.072169977 | 0.119361747 | -0.09167331 | 0.04771042 | -0.15214 |
| 1.41E-10    | -0.290453242 | 1.57E-10    | -0.09452982 | 0.04116083 | 0.112404 |
| 0.031257439 | -0.10178465  | 0.027849142 | -0.20523356 | 7.79E-06   | -0.03292 |
| 0.000134667 | -0.179342766 | 9.74E-05    | 0.025180121 | 0.58728487 | -0.04865 |
| 1.29E-23    | -0.43410499  | 6.96E-23    | -0.0340646  | 0.46271561 | -0.00176 |
| 0.929045729 | -0.013091708 | 0.777814614 | 0.040590384 | 0.38147839 | 0.199861 |
| 7.60E-11    | 0.296105572  | 6.63E-11    | -0.08709365 | 0.06002084 | -0.03655 |
| 6.71E-16    | -0.363834688 | 4.61E-16    | -0.04481299 | 0.33389051 | -0.0743  |
| 0.236845503 | -0.052345859 | 0.258920564 | -0.15015743 | 0.0011351  | -0.21571 |
| 0.939827695 | -0.00112119  | 0.980721634 | -0.12143498 | 0.00861597 | 0.204542 |
| 3.55E-07    | 0.218213501  | 1.93E-06    | -0.25813671 | 1.52E-08   | 0.223983 |
| 0.33767772  | 0.042797748  | 0.356105487 | -0.17360156 | 0.00016313 | 0.09162  |
| 0.196299443 | 0.075485024  | 0.103270992 | -0.1613776  | 0.00046347 | 0.171029 |
| 2.89E-05    | -0.190461677 | 3.43E-05    | -0.02452418 | 0.59706127 | 0.152931 |
| 2.33E-12    | 0.326672236  | 4.48E-13    | -0.15858594 | 0.00058241 | -0.1999  |
| 0.076392776 | -0.060116979 | 0.194689544 | 0.007287605 | 0.87519244 | 0.142333 |
| 9.73E-16    | 0.371178553  | 1.06E-16    | -0.03398599 | 0.46374946 | 0.02489  |
| 0.010663951 | 0.128477614  | 0.005427259 | 0.022756467 | 0.6237681  | -0.0204  |
| 0.270811433 | 0.066186511  | 0.153281593 | -0.09785763 | 0.03450413 | -0.1058  |
| 0.921734031 | 0.013323215  | 0.773991155 | -0.15145685 | 0.00102637 | -0.13075 |
| 0.002531649 | -0.140776772 | 0.002294078 | -0.10233321 | 0.02701362 | -0.10942 |
| 0.000176692 | -0.166400847 | 0.000304401 | -0.20813394 | 5.75E-06   | 0.191217 |
| 0.0010783   | 0.159627895  | 0.000535041 | -0.10047658 | 0.02993157 | -0.0481  |
| 4.18E-06    | -0.201095536 | 1.19E-05    | 0.135292597 | 0.00339681 | 0.055147 |
| 0.000986608 | -0.153106062 | 0.000902195 | -0.07598745 | 0.10098982 | -0.1939  |
| 0.414197293 | 0.031893904  | 0.49172933  | -0.00235077 | 0.95959292 | 0.127888 |
| 0.45756148  | -0.038107255 | 0.411306728 | 0.013331606 | 0.77385267 | 0.004016 |
| 0.652601296 | 0.020326656  | 0.661291459 | 0.148362951 | 0.00130276 | 0.202493 |
| 0.345565387 | 0.048005718  | 0.300561948 | -0.09426768 | 0.04172841 | 0.205938 |
| 0.030821628 | -0.094104349 | 0.042085387 | 0.035850158 | 0.43958115 | 0.071124 |
| 0.000240008 | 0.177432155  | 0.000115875 | 0.046164315 | 0.31950457 | -0.03889 |
| 2.27E-11    | 0.309712446  | 7.70E-12    | -0.23860124 | 1.81E-07   | 0.387935 |
| 0.005322101 | 0.143308571  | 0.001904949 | -0.13444903 | 0.00360379 | 0.235962 |
| 0.002770335 | -0.138713381 | 0.002663472 | 0.002885033 | 0.95042018 | 0.345429 |
| 4.38E-09    | 0.277464893  | 1.06E-09    | -0.13912193 | 0.00258629 | 0.234211 |
| 1.88E-16    | -0.370427869 | 1.23E-16    | -0.05604544 | 0.22671791 | 0.107108 |
| 1.84E-06    | 0.205166674  | 7.84E-06    | 0.004448629 | 0.92361706 | -0.12677 |
| 0.00050718  | 0.159776954  | 0.000528565 | 0.111222946 | 0.01619144 | 0.036632 |
| 0.016714168 | -0.103146049 | 0.025815269 | -0.25424972 | 2.53E-08   | 0.355229 |
| 0.0046597   | 0.134301923  | 0.003641037 | 0.055886343 | 0.22804132 | 0.263753 |
| 0.756556045 | 0.003714207  | 0.936197593 | -0.0166685  | 0.71939391 | 0.102113 |
| 0.739122638 | 0.008671012  | 0.851751985 | -0.15247619 | 0.00094788 | 0.02345  |
| 4.02E-06    | -0.215229489 | 2.68E-06    | -0.2044763  | 8.43E-06   | -0.0025  |
| 0.131403148 | -0.070656935 | 0.127328113 | 0.024281279 | 0.60070023 | -0.02265 |
| 0.593723399 | -0.041470339 | 0.371233835 | 0.00041532  | 0.99285815 | -0.03537 |



|             |              |             |             |            |          |
|-------------|--------------|-------------|-------------|------------|----------|
| 7.33E-12    | -0.306713265 | 1.25E-11    | 0.152280615 | 0.0009625  | 0.208716 |
| 0.480910052 | 0.031128507  | 0.502187045 | 0.022665386 | 0.62515802 | 0.021199 |
| 0.003318286 | -0.132484407 | 0.004130865 | 0.063300101 | 0.17205494 | 0.053433 |
| 0.103780708 | 0.077074478  | 0.09619135  | -0.11042028 | 0.01698135 | -0.02908 |
| 0.002299401 | -0.136152174 | 0.003197047 | 0.23985793  | 1.55E-07   | 0.046416 |
| 8.84E-08    | 0.245727378  | 7.50E-08    | 0.336959812 | 7.31E-14   | 0.102091 |
| 0.000701229 | -0.160634698 | 0.000492694 | -0.21039946 | 4.52E-06   | 0.062064 |
| 0.752534756 | 0.029064324  | 0.530964423 | -0.02904832 | 0.53119075 | -0.01062 |
| 0.372215047 | 0.056065352  | 0.226552664 | -0.04318347 | 0.35178314 | 0.036233 |
| 8.73E-05    | 0.169587803  | 0.000231681 | -0.09893076 | 0.03256318 | 0.055241 |
| 0.733327972 | -0.022777062 | 0.623453989 | 0.016077905 | 0.72893864 | 0.00949  |
| 0.116398227 | 0.070989199  | 0.125544285 | -0.06484264 | 0.16181939 | 0.09912  |
| 0.172524669 | -0.062572483 | 0.177047415 | -0.05989064 | 0.19637822 | 0.2521   |
| 0.000198907 | -0.17436819  | 0.000152428 | -0.08524551 | 0.0656823  | 0.167704 |
| 2.16E-05    | -0.195740297 | 2.04E-05    | -0.03393708 | 0.46439326 | -0.06614 |
| 0.000127553 | -0.181837385 | 7.75E-05    | -0.00371409 | 0.93619954 | -0.04906 |
| 0.047154736 | 0.088303979  | 0.056536458 | -0.11741432 | 0.01110638 | -0.08308 |
| 0.697801562 | 0.013936919  | 0.763882127 | -0.31089552 | 6.35E-12   | 0.11418  |
| 0.479852049 | -0.040125089 | 0.386964627 | 0.302450248 | 2.46E-11   | 0.409427 |
| 0.018660365 | 0.112236738  | 0.015239872 | -0.10044066 | 0.02999058 | -0.0828  |
| 8.72E-05    | 0.179261988  | 9.82E-05    | -0.30048737 | 3.36E-11   | -0.09059 |
| 1.26E-05    | -0.189576859 | 3.74E-05    | 0.133617728 | 0.00381889 | 0.198802 |
| 0.00052572  | -0.161322777 | 0.000465569 | -0.06200217 | 0.18103516 | 0.033179 |
| 0.001995287 | -0.140866546 | 0.002279124 | -0.16947071 | 0.00023404 | 0.100392 |
| 0.818680488 | 0.004272159  | 0.92663834  | 0.173324988 | 0.00016717 | 0.235849 |
| 0.301004093 | -0.028476054 | 0.539315748 | -0.28855513 | 2.09E-10   | 0.099867 |
| 0.396919871 | -0.035347978 | 0.446019845 | -0.12998393 | 0.00490216 | -0.25354 |
| 0.982463192 | 0.011095978  | 0.810988601 | -0.03864212 | 0.40476769 | -0.02438 |
| 0.000101337 | -0.195114407 | 2.18E-05    | -0.05690628 | 0.21965189 | 0.094106 |
| 0.371600174 | 0.033152995  | 0.474782866 | -0.21848937 | 1.87E-06   | 0.102799 |
| 0.013813276 | -0.109774249 | 0.017641412 | 0.019215128 | 0.6787512  | 0.136214 |
| 0.181302396 | 0.056417742  | 0.223642373 | 0.380253668 | 1.63E-17   | 0.054713 |
| 0.420886265 | -0.035654987 | 0.442077194 | -0.07853859 | 0.09001773 | -0.1007  |
| 9.43E-06    | -0.200808825 | 1.23E-05    | -0.12296876 | 0.00780573 | -0.07299 |
| 0.155626395 | -0.068352562 | 0.140245317 | -0.01395102 | 0.76365026 | -0.1604  |
| 0.000452454 | 0.166625253  | 0.000298654 | 0.193928286 | 2.45E-05   | -0.34505 |
| 1.40E-09    | 0.283976368  | 4.12E-10    | 0.175353703 | 0.00013963 | -0.06784 |
| 0.01708999  | 0.109951441  | 0.017458178 | -0.05326578 | 0.25063262 | 0.221657 |
| 0.101740598 | 0.082129262  | 0.076217396 | 0.215119159 | 2.71E-06   | 0.062221 |
| 0.004674367 | -0.14202745  | 0.002093592 | 0.060612461 | 0.1910299  | 0.034364 |
| 0.317767776 | 0.051347396  | 0.268128169 | 0.028411595 | 0.54023481 | 0.449555 |
| 1.20E-10    | -0.305386617 | 1.55E-11    | 0.038915767 | 0.40144635 | -0.17765 |
| 0.903361883 | -0.006185723 | 0.893942172 | 0.090251627 | 0.05128271 | -0.02621 |
| 0.251445642 | 0.048496856  | 0.295638275 | -0.03293671 | 0.47767092 | 0.356759 |
| 0.455148732 | 0.044313904  | 0.33930742  | 0.060356512 | 0.19291399 | -0.06677 |

|             |              |             |             |            |          |
|-------------|--------------|-------------|-------------|------------|----------|
| 0.000830867 | 0.137820624  | 0.002839478 | -0.08094494 | 0.08056531 | -0.02065 |
| 3.86E-09    | -0.281424078 | 5.98E-10    | -0.04602161 | 0.32100444 | -0.29122 |
| 4.47E-09    | 0.259790608  | 1.22E-08    | -0.22786318 | 6.47E-07   | 0.036814 |
| 0.011353023 | 0.114342234  | 0.013419113 | -0.1610175  | 0.00047743 | -0.23172 |
| 4.90E-14    | -0.343366084 | 2.28E-14    | 0.141309654 | 0.0022066  | 0.039816 |
| 0.4870968   | 0.040569551  | 0.381723004 | -0.04393565 | 0.34345006 | -0.02372 |
| 0.000915396 | 0.135642317  | 0.003314206 | -0.06826575 | 0.14075087 | 0.165874 |
| 7.59E-13    | -0.338957705 | 5.10E-14    | -0.17873526 | 0.00010298 | -0.01583 |
| 0.000253306 | -0.167780829 | 0.000270627 | -0.07602509 | 0.10082053 | 0.091818 |
| 0.11508078  | 0.06309724   | 0.17343617  | 0.225915072 | 8.10E-07   | 0.139623 |
| 0.475729648 | 0.032580675  | 0.482446004 | -0.30869354 | 9.08E-12   | -0.00821 |
| 0.840767329 | 0.005203729  | 0.910702151 | 0.020195445 | 0.6633432  | -0.09657 |
| 0.293405042 | -0.051579473 | 0.265968263 | 0.109429421 | 0.01800282 | 0.397731 |
| 0.054034585 | -0.082812498 | 0.073797123 | -0.03735869 | 0.42056248 | -0.06504 |
| 0.241353303 | 0.0462831    | 0.318259618 | 0.079740515 | 0.0851908  | 0.014978 |
| 3.00E-05    | 0.190431587  | 3.44E-05    | 0.151549842 | 0.00101896 | 0.175666 |
| 0.325829277 | -0.044024704 | 0.342471845 | -0.15482701 | 0.00078754 | -0.06931 |
| 0.64434377  | 0.014752387  | 0.750511701 | 0.005228191 | 0.91028415 | -0.0691  |
| 1.21E-05    | -0.201899174 | 1.10E-05    | 0.111740032 | 0.01569978 | 0.133243 |
| 7.32E-05    | 0.155166284  | 0.000766589 | 0.078791954 | 0.08898237 | 0.139223 |
| 0.871291334 | -0.000928817 | 0.984028913 | -0.02558595 | 0.58127344 | -0.14141 |
| 0.763547008 | -0.008393981 | 0.856436245 | 0.039864388 | 0.39005938 | 0.10052  |
| 0.040445519 | 0.109196964  | 0.018250081 | -0.02962803 | 0.52302368 | 0.367601 |
| 0.752100756 | 0.005528106  | 0.905161173 | 0.256319716 | 1.93E-08   | 0.194326 |
| 1.66E-05    | -0.201619532 | 1.13E-05    | -0.01088764 | 0.81447245 | -0.00028 |
| 0.0019135   | -0.133252201 | 0.003917096 | 0.107042756 | 0.02068609 | 0.165964 |
| 0.62120075  | 0.03113385   | 0.50211363  | -0.15508502 | 0.00077156 | 0.079195 |
| 0.000114849 | -0.178030159 | 0.000109779 | 0.110799328 | 0.01660422 | -0.0851  |
| 4.78E-14    | -0.323128719 | 8.24E-13    | -0.03392409 | 0.46456438 | 0.173312 |
| 1.74E-06    | -0.230271748 | 4.89E-07    | -0.0756611  | 0.10246697 | 0.130199 |
| 4.99E-06    | -0.20929402  | 5.08E-06    | 0.041207162 | 0.37427979 | -0.17897 |
| 7.68E-07    | -0.23546835  | 2.64E-07    | 0.04324451  | 0.35110218 | -0.19485 |
| 0.020274524 | -0.106425108 | 0.021434706 | 0.006526846 | 0.88813078 | 0.071864 |
| 0.426054915 | 0.040636928  | 0.380932227 | -0.06089823 | 0.18894231 | 0.019352 |
| 0.000397457 | -0.157836674 | 0.000618841 | -0.08461131 | 0.06772343 | -0.32287 |
| 0.084685956 | 0.080864186  | 0.080868947 | 0.403810862 | 9.62E-20   | 0.101138 |
| 1.32E-05    | 0.196824497  | 1.84E-05    | 0.089967643 | 0.05202239 | -0.12135 |
| 0.017431731 | -0.111544186 | 0.015884429 | -0.06945726 | 0.13393278 | 0.222148 |
| 8.81E-05    | 0.184679485  | 5.95E-05    | -0.08211505 | 0.0762684  | 0.003818 |
| 0.152450406 | -0.055524643 | 0.231070418 | -0.01319303 | 0.77614049 | 0.246066 |
| 0.123520226 | 0.075197133  | 0.104596394 | -0.02290781 | 0.62146154 | 0.04043  |
| 0.000388843 | -0.156823761 | 0.000671462 | 0.100099871 | 0.03055549 | 0.162905 |
| 6.26E-07    | -0.219613753 | 1.65E-06    | -0.10035136 | 0.03013773 | 0.109446 |
| 0.940124076 | 0.014169438  | 0.760062391 | -0.2980073  | 4.94E-11   | -0.03767 |
| 0.889779016 | -0.022944791 | 0.62089845  | -0.07083914 | 0.1263475  | 0.075895 |

|             |              |             |             |            |          |
|-------------|--------------|-------------|-------------|------------|----------|
| 0.707495566 | -0.009846539 | 0.831935088 | -0.19725148 | 1.76E-05   | -0.09178 |
| 0.593053059 | -0.015829764 | 0.732961532 | -0.10582684 | 0.02218214 | -0.00359 |
| 0.03954049  | 0.096050191  | 0.03799591  | -0.24501419 | 8.20E-08   | 0.201625 |
| 0.184037058 | -0.061760223 | 0.182746836 | 0.094507854 | 0.04120813 | -0.16408 |
| 0.011080297 | -0.118112065 | 0.010633119 | -0.0947401  | 0.04071025 | 0.186071 |
| 0.480069488 | 0.026739068  | 0.56435117  | -0.06897039 | 0.13668734 | 0.058571 |
| 0.000189437 | -0.171162709 | 0.000202077 | -0.25034391 | 4.18E-08   | -0.07279 |
| 0.637623244 | -0.02592239  | 0.576311734 | -0.01159624 | 0.80263867 | 0.176131 |
| 0.002450517 | 0.141399618  | 0.002192141 | 0.006549117 | 0.88775157 | 0.194735 |
| 0.599000356 | -0.020459289 | 0.659220062 | 0.047095628 | 0.30982885 | 0.248588 |
| 0.28159235  | 0.047175413  | 0.309009007 | -0.03521183 | 0.44777467 | 0.37186  |
| 2.32E-05    | 0.18219385   | 7.50E-05    | -0.13823696 | 0.00275612 | -0.00241 |
| 0.000128035 | 0.190821589  | 3.31E-05    | -0.14953488 | 0.00119087 | 0.008394 |
| 0.003928763 | 0.14335516   | 0.001898392 | 0.13401173  | 0.00371553 | 0.028238 |
| 9.28E-08    | 0.242323724  | 1.15E-07    | 0.143972237 | 0.00181347 | 0.323553 |
| 1.10E-05    | -0.200757761 | 1.23E-05    | -0.03579542 | 0.44028034 | 0.338258 |
| 2.00E-07    | 0.221037102  | 1.41E-06    | -0.07409598 | 0.10979057 | -0.01428 |
| 0.467917747 | 0.034975956  | 0.450824056 | 0.086117038 | 0.0629601  | -0.08365 |
| 0.061456152 | -0.093982213 | 0.042354007 | -0.01397086 | 0.7633242  | 0.075645 |
| 0.047983174 | -0.090926064 | 0.049561145 | -0.02509849 | 0.58849755 | -0.12818 |
| 0.039641837 | 0.111963023  | 0.015491822 | -0.01010253 | 0.82763318 | -0.06254 |
| 0.170469726 | 0.064853231  | 0.161750752 | -0.32454881 | 6.46E-13   | 0.164567 |
| 0.049887241 | 0.095545505  | 0.039022816 | 0.031084541 | 0.5027913  | -0.02727 |
| 4.45E-08    | -0.250317486 | 4.20E-08    | 0.074592122 | 0.10742563 | 0.265906 |
| 0.621146206 | -0.042328096 | 0.36141319  | -0.22652453 | 7.55E-07   | 0.063584 |
| 0.006977731 | 0.121773576  | 0.008430921 | 0.388926685 | 2.59E-18   | -0.1685  |
| 0.250129767 | -0.061462201 | 0.184871621 | -0.00743122 | 0.8727536  | 0.078142 |
| 0.004592818 | 0.140328272  | 0.002370142 | -0.26769735 | 4.18E-09   | 0.004605 |
| 0.444795431 | -0.035077412 | 0.449510984 | -0.15647102 | 0.00069074 | -0.0349  |
| 0.10623818  | -0.086347563 | 0.062255818 | 0.088206847 | 0.05680975 | -0.018   |
| 3.31E-10    | -0.285909462 | 3.10E-10    | -0.01243973 | 0.78861091 | -0.02933 |
| 0.143310801 | -0.077251223 | 0.095428617 | -0.09964042 | 0.03133149 | 0.018017 |
| 0.031676594 | -0.098965226 | 0.032502424 | -0.08543957 | 0.06506793 | 0.127197 |
| 0.053432371 | -0.085637859 | 0.064445072 | -0.05547605 | 0.23147953 | 0.018997 |
| 0.201275687 | -0.051667495 | 0.265152186 | -0.23270119 | 3.67E-07   | 0.210671 |
| 0.487920343 | 0.013782424  | 0.766423284 | -0.15231046 | 0.00096025 | 0.064877 |
| 0.00015009  | -0.169218142 | 0.000239194 | -0.27638642 | 1.24E-09   | 0.106249 |
| 1.24E-05    | -0.200990393 | 1.21E-05    | -0.04066652 | 0.38058517 | 0.077565 |
| 0.741131443 | 0.011470712  | 0.804731786 | -0.08207903 | 0.07639787 | 0.029667 |
| 0.002189395 | -0.148959969 | 0.001244609 | 0.216795402 | 2.26E-06   | 0.261155 |
| 4.64E-05    | 0.195934788  | 2.01E-05    | -0.20791591 | 5.88E-06   | -0.06465 |
| 1.88E-05    | -0.201737123 | 1.12E-05    | -0.10209741 | 0.0273701  | -0.07545 |
| 0.517933234 | -0.031339365 | 0.499294406 | -0.01835367 | 0.69240264 | -0.03966 |
| 0.003963513 | 0.136381827  | 0.003145515 | 0.388514384 | 2.83E-18   | 0.172386 |
| 0.00032809  | 0.174563149  | 0.000149812 | -0.10690604 | 0.02084981 | -0.15837 |

|             |              |             |             |            |          |
|-------------|--------------|-------------|-------------|------------|----------|
| 0.006322405 | 0.128986274  | 0.005244538 | -0.09116085 | 0.04897329 | -0.10182 |
| 0.091211195 | -0.091050106 | 0.049249836 | -0.00326788 | 0.94385104 | 0.048744 |
| 0.000424868 | -0.174364762 | 0.000152474 | -0.17134965 | 0.00019881 | 0.229974 |
| 2.40E-06    | -0.217892513 | 2.00E-06    | -0.07171567 | 0.12171173 | 0.224255 |
| 0.002366027 | 0.160907297  | 0.000481777 | -0.04562546 | 0.32519189 | 0.046753 |
| 0.479224716 | 0.015851148  | 0.732614566 | -0.04687595 | 0.31209361 | -0.02619 |
| 0.006175696 | -0.127523277 | 0.005785601 | -0.05478329 | 0.23736776 | 0.06284  |
| 3.28E-07    | -0.227826141 | 6.50E-07    | -0.05507804 | 0.23484969 | 0.089659 |
| 0.030556629 | 0.091341105  | 0.048525931 | 0.025083302 | 0.58872325 | -0.16916 |
| 0.057828466 | -0.084539634 | 0.067957339 | 0.042602621 | 0.35830471 | -0.00355 |
| 8.60E-17    | 0.381245942  | 1.33E-17    | 0.166554404 | 0.00030046 | 0.129197 |
| 3.77E-16    | -0.361205002 | 7.73E-16    | -0.03617636 | 0.43542743 | 0.28394  |
| 0.879049111 | -0.003268098 | 0.943847351 | -0.19954636 | 1.40E-05   | -0.00528 |
| 0.61975054  | -0.018038754 | 0.697418405 | -0.01944565 | 0.67511564 | -0.09499 |
| 6.17E-06    | -0.20970834  | 4.86E-06    | -0.05376449 | 0.24621756 | 0.122809 |
| 0.091655523 | -0.071686953 | 0.121861482 | -0.05751342 | 0.21476401 | 0.315976 |
| 0.604477265 | -0.02563888  | 0.580491533 | 0.174571478 | 0.0001497  | -0.06815 |
| 3.97E-06    | 0.229676899  | 5.24E-07    | -0.12014803 | 0.00935276 | -0.15219 |
| 0.900120508 | 0.026742578  | 0.564300022 | -0.13258311 | 0.0041028  | 0.013255 |
| 0.000591081 | -0.17002574  | 0.000223065 | -0.11367752 | 0.01397206 | -0.12539 |
| 0.010474758 | 0.123094159  | 0.007742601 | -0.06666175 | 0.15034549 | -0.06052 |
| 0.649417609 | -0.026832751 | 0.562986809 | -0.24592996 | 7.32E-08   | -0.06307 |
| 0.079403583 | -0.093975418 | 0.042368994 | -0.02289077 | 0.62172109 | -0.05056 |
| 2.93E-07    | -0.230363203 | 4.84E-07    | 0.201945933 | 1.09E-05   | -0.00621 |
| 7.97E-07    | 0.225421287  | 8.57E-07    | -0.03815431 | 0.41072895 | 0.04801  |
| 1.15E-07    | -0.248798534 | 5.09E-08    | 0.188751474 | 4.04E-05   | -0.00239 |
| 2.96E-34    | -0.519662402 | 1.16E-33    | 0.100603181 | 0.02972435 | 0.076435 |
| 7.48E-31    | -0.495262581 | 2.85E-30    | 0.099882812 | 0.03092002 | -0.14689 |
| 1.31E-10    | 0.293379354  | 1.01E-10    | 0.209075259 | 5.20E-06   | -0.00306 |
| 0.819505611 | 0.014975322  | 0.746869234 | 0.179456896 | 9.64E-05   | -0.12782 |
| 4.21E-09    | 0.263624193  | 7.28E-09    | -0.17679297 | 0.00012274 | 0.103965 |
| 0.00066421  | -0.145727683 | 0.001590548 | 0.14200695  | 0.00209674 | 0.05046  |
| 0.185629211 | 0.08276996   | 0.073945956 | -0.06774869 | 0.14379114 | -0.13099 |
| 0.06812872  | -0.075293041 | 0.10415336  | -0.03608265 | 0.43661839 | 0.009064 |
| 2.86E-05    | -0.188647798 | 4.08E-05    | -0.16453921 | 0.00035622 | -0.13719 |
| 9.57E-06    | -0.201874371 | 1.10E-05    | -0.18979348 | 3.66E-05   | -0.2665  |
| 0.416043389 | 0.039663983  | 0.392448529 | -0.0830288  | 0.0730441  | 0.268954 |
| 4.66E-12    | -0.290231861 | 1.62E-10    | 0.1064415   | 0.02141454 | 0.113239 |
| 4.41E-05    | -0.178433878 | 0.000105835 | -0.04543396 | 0.32722881 | 0.133601 |
| 0.704475723 | 0.00933691   | 0.840514059 | -0.06372168 | 0.16921075 | -0.10098 |
| 0.631019464 | 0.032552975  | 0.482818582 | 0.002732357 | 0.95304084 | 0.005106 |
| 0.151190887 | -0.07468332  | 0.106995329 | 0.180872387 | 8.47E-05   | 0.028589 |
| 1.28E-05    | 0.2076697    | 6.03E-06    | -0.06849328 | 0.13942875 | -0.11674 |
| 0.373860621 | -0.049683147 | 0.283968803 | -0.02006605 | 0.66536901 | 0.402709 |
| 0.396234952 | 0.042890369  | 0.355064561 | 0.122727637 | 0.00792842 | 0.454217 |

|             |              |             |             |            |          |
|-------------|--------------|-------------|-------------|------------|----------|
| 3.71E-05    | -0.193668409 | 2.51E-05    | 0.126261442 | 0.00629201 | -0.12523 |
| 0.362998412 | -0.033286413 | 0.473006065 | 0.196620336 | 1.87E-05   | 0.072398 |
| 0.001762055 | -0.148517404 | 0.001287484 | -0.14013165 | 0.00240421 | 0.013248 |
| 0.143926077 | -0.080533689 | 0.082121276 | -0.04452153 | 0.33704719 | 0.12039  |
| 2.31E-05    | -0.19894564  | 1.48E-05    | -0.12916107 | 0.00518304 | -0.02493 |
| 0.001046683 | 0.134574795  | 0.003572225 | -0.02396766 | 0.6054133  | 0.034194 |
| 3.07E-13    | -0.339924614 | 4.28E-14    | 0.004689783 | 0.91949011 | 0.296764 |
| 0.027758424 | -0.107429252 | 0.020229288 | -0.27129655 | 2.54E-09   | 0.236287 |
| 0.050583057 | 0.095676141  | 0.038754776 | 0.026409074 | 0.5691697  | -0.19489 |
| 0.000176873 | -0.186505652 | 5.01E-05    | -0.06656249 | 0.15095518 | -0.04214 |
| 0.931577629 | -0.00844085  | 0.855643379 | -0.06690831 | 0.14883917 | 0.106412 |
| 0.417065078 | 0.031253111  | 0.500476614 | 0.265334819 | 5.77E-09   | 0.198225 |
| 0.366786356 | 0.047336618  | 0.307356882 | -0.15577371 | 0.00073037 | 0.028461 |
| 0.006310778 | -0.129980903 | 0.004903171 | -0.12720392 | 0.00591018 | 0.129821 |
| 0.442088403 | 0.044129771  | 0.341320029 | -0.21195259 | 3.83E-06   | 0.075607 |
| 1.42E-09    | 0.273258781  | 1.93E-09    | -0.01376962 | 0.76663394 | -0.08653 |
| 0.226126628 | -0.056398582 | 0.223799921 | -0.03169937 | 0.49437621 | 0.058363 |
| 0.920717176 | -0.007788607 | 0.866689724 | -0.05152599 | 0.26646496 | -0.00122 |
| 0.002114153 | 0.144858343  | 0.001697594 | -0.02644621 | 0.56862653 | 0.013595 |
| 2.96E-05    | -0.197527663 | 1.71E-05    | -0.10618485 | 0.0217322  | 0.335011 |
| 0.068379743 | -0.086263746 | 0.062511133 | -0.14378068 | 0.00183945 | -0.06275 |
| 2.50E-11    | -0.311897613 | 5.39E-12    | -0.04381143 | 0.34481755 | -0.0419  |
| 0.909046924 | -0.004521216 | 0.922374629 | 0.03519048  | 0.44805018 | -0.07452 |
| 0.604875562 | 0.01169873   | 0.800930683 | -0.0071318  | 0.87783971 | -0.13003 |
| 0.000544201 | -0.171557577 | 0.000195231 | 0.007192185 | 0.8768135  | 0.154284 |
| 0.163464308 | -0.063216336 | 0.17262428  | -0.03836321 | 0.40816978 | 0.041939 |
| 0.1107761   | 0.072156844  | 0.119429176 | -0.08389333 | 0.07009664 | 0.201846 |
| 1.12E-05    | -0.205569928 | 7.52E-06    | -0.19733662 | 1.74E-05   | 0.102064 |
| 0.152440272 | -0.059581415 | 0.198702607 | -0.13571456 | 0.00329737 | -0.04401 |
| 0.03678743  | 0.098987278  | 0.032463599 | -0.14261489 | 0.00200507 | -0.02309 |
| 0.087405554 | 0.086256032  | 0.062534674 | 0.001420604 | 0.97557478 | -0.01831 |
| 4.12E-07    | -0.225442521 | 8.55E-07    | 0.049859035 | 0.28226544 | 0.107246 |
| 0.035186775 | -0.088416757 | 0.056220512 | -0.06564395 | 0.15668649 | -0.0915  |
| 0.000290116 | -0.171906231 | 0.000189368 | -0.03443273 | 0.45789134 | 0.015363 |
| 4.23E-05    | -0.200009577 | 1.33E-05    | 0.111502388 | 0.01592408 | -0.03132 |
| 0.047521051 | 0.099978882  | 0.030758221 | 0.187557628 | 4.53E-05   | -0.03329 |
| 0.89899316  | 0.01446948   | 0.755142025 | 0.017137241 | 0.71184931 | -0.09254 |
| 0.115555645 | -0.061819531 | 0.182326147 | -0.27595228 | 1.31E-09   | -0.12897 |
| 0.831362847 | 0.016605485  | 0.720410262 | -0.08269652 | 0.07420348 | 0.087896 |
| 0.004536585 | -0.133814811 | 0.003766868 | 0.135094466 | 0.00344443 | 0.113152 |
| 0.487136813 | -0.03289289  | 0.478257283 | -0.05617327 | 0.22565855 | -0.03276 |
| 0.01159161  | 0.138997587  | 0.002609563 | -0.08489923 | 0.06679042 | 0.068378 |
| 6.10E-09    | -0.268140322 | 3.93E-09    | -0.11163177 | 0.01580161 | 0.143823 |
| 0.001352105 | 0.141403476  | 0.002191523 | 0.215981482 | 2.47E-06   | -0.14892 |
| 0.137175922 | 0.052641852  | 0.256233457 | -0.1388678  | 0.00263406 | 0.178795 |

|             |              |             |             |            |          |
|-------------|--------------|-------------|-------------|------------|----------|
| 9.55E-07    | -0.223771666 | 1.03E-06    | -0.06114844 | 0.18712828 | 0.120837 |
| 0.281755232 | 0.047917525  | 0.30145183  | 0.002738698 | 0.95293199 | 0.163122 |
| 0.005809058 | 0.129049016  | 0.005222388 | 0.124449386 | 0.00708884 | 0.137138 |
| 0.679055714 | 0.027178032  | 0.557971972 | 0.41297564  | 1.17E-20   | 0.19868  |
| 0.416296983 | -0.051108929 | 0.270360036 | 0.08240845  | 0.07522072 | -0.216   |
| 0.431963887 | -0.037044673 | 0.424481265 | -0.08657637 | 0.06156322 | 0.109138 |
| 0.140898663 | 0.079629767  | 0.085626654 | 0.198366556 | 1.57E-05   | 0.054344 |
| 0.002934283 | 0.156510007  | 0.000688584 | -0.14018304 | 0.00239526 | -0.07321 |
| 0.46126468  | -0.025401388 | 0.584003761 | 0.256261211 | 1.94E-08   | 0.250346 |
| 1.61E-06    | -0.220301799 | 1.53E-06    | -0.0229609  | 0.62065324 | 0.179002 |
| 0.077727638 | -0.09432422  | 0.041605434 | 0.069503325 | 0.1336744  | -0.01394 |
| 0.080074883 | -0.072319765 | 0.118594756 | 0.029823567 | 0.52028345 | -0.20813 |
| 0.000178761 | -0.167422034 | 0.000279054 | -0.0294533  | 0.52547845 | 0.109707 |
| 0.143273633 | 0.061788621  | 0.182545313 | -0.03769024 | 0.41644804 | -0.17149 |
| 0.200315397 | 0.06845193   | 0.139668331 | 0.229347178 | 5.45E-07   | -0.1594  |
| 0.026850367 | -0.105752452 | 0.022276634 | 0.068995307 | 0.13654533 | -0.11648 |
| 0.081313786 | 0.083867943  | 0.070181782 | 0.205640952 | 7.46E-06   | 0.337301 |
| 0.128469742 | 0.065334474  | 0.158654129 | -0.0166343  | 0.71994549 | -0.16833 |
| 0.002782069 | -0.139179854 | 0.002575516 | 0.024930489 | 0.59099678 | 0.179546 |
| 0.004095809 | -0.135725337 | 0.003294867 | 0.006421388 | 0.88992674 | 0.042718 |
| 0.000344127 | -0.167927763 | 0.000267245 | 0.110157694 | 0.01724699 | -0.02632 |
| 0.146274327 | 0.064812331  | 0.162016011 | 0.31748766  | 2.14E-12   | -0.01685 |
| 0.031802057 | -0.10386403  | 0.024795162 | 0.124631897 | 0.00700468 | -0.15101 |
| 0.606751968 | 0.02549359   | 0.582639027 | -0.11479191 | 0.01305606 | 0.107113 |
| 0.171776446 | -0.068135271 | 0.141513402 | -0.03427723 | 0.45992574 | 0.059553 |
| 7.67E-11    | -0.295908987 | 6.84E-11    | 0.041887261 | 0.36643996 | 0.036698 |
| 3.12E-06    | -0.203132633 | 9.68E-06    | 0.155619984 | 0.00073938 | 0.17962  |
| 8.25E-06    | 0.190560441  | 3.40E-05    | 0.254417807 | 2.47E-08   | 0.12883  |
| 0.220062951 | -0.058639427 | 0.205906706 | -0.08114782 | 0.07980656 | 0.454106 |
| 2.50E-05    | -0.189338717 | 3.82E-05    | 0.283102192 | 4.68E-10   | 0.157904 |
| 0.003160092 | -0.12201948  | 0.00829876  | 0.255965015 | 2.02E-08   | 0.195209 |
| 0.645004469 | -0.01574131  | 0.734397336 | 0.145146094 | 0.00166145 | 0.125131 |
| 1.43E-06    | -0.224841482 | 9.16E-07    | -0.00330299 | 0.94324884 | 0.169812 |
| 2.33E-05    | 0.197234437  | 1.76E-05    | -0.27154417 | 2.45E-09   | 0.025511 |
| 0.124422178 | 0.064295887  | 0.165393647 | -0.04878704 | 0.29275458 | 0.047434 |
| 3.19E-06    | -0.224051425 | 1.00E-06    | -0.11447797 | 0.0133086  | 0.12575  |
| 0.013485276 | -0.126207821 | 0.006314384 | -0.01832738 | 0.69282097 | 0.129476 |
| 0.136895718 | 0.080097725  | 0.08379717  | -0.31434879 | 3.60E-12   | 0.162914 |
| 0.951060552 | 0.010803078  | 0.815887498 | 0.000579975 | 0.99002689 | 0.007483 |
| 0.314619466 | 0.050012991  | 0.280780143 | 0.115985427 | 0.01213413 | 0.098057 |
| 0.007406917 | -0.122721048 | 0.007931799 | -0.07255364 | 0.11740491 | 0.005501 |
| 0.088358499 | -0.08220323  | 0.075952298 | -0.00458769 | 0.92123708 | 0.018455 |
| 0.000527451 | -0.146417258 | 0.001510082 | -0.12900252 | 0.0052388  | -0.06483 |
| 5.49E-06    | -0.207431871 | 6.19E-06    | -0.06022758 | 0.19386822 | 0.072036 |
| 0.044383571 | -0.095555184 | 0.039002902 | 0.074934429 | 0.10581756 | 0.21876  |

|             |              |             |             |            |          |
|-------------|--------------|-------------|-------------|------------|----------|
| 8.26E-05    | -0.184427452 | 6.09E-05    | -0.08878895 | 0.0551882  | -0.28855 |
| 0.016728551 | 0.119253746  | 0.009897228 | 0.030847086 | 0.50606141 | 0.010468 |
| 0.00133239  | -0.153557812 | 0.000870691 | 0.061304768 | 0.18600138 | -0.17589 |
| 0.506306876 | -0.033369539 | 0.471900886 | 0.014963845 | 0.74705662 | 0.047663 |
| 0.817794489 | -0.006255403 | 0.892754639 | -0.14131234 | 0.00220617 | -0.06813 |
| 0.000333066 | -0.166864176 | 0.000292646 | 0.018123793 | 0.69606266 | -0.02647 |
| 0.010239658 | 0.116786067  | 0.011548363 | 0.224518721 | 9.51E-07   | 0.026016 |
| 0.02992743  | -0.103273297 | 0.025631881 | -0.08773613 | 0.05814973 | -0.07939 |
| 0.750678319 | -0.00575611  | 0.901269156 | 0.049657946 | 0.28421343 | 0.017792 |
| 0.233576906 | -0.04739104  | 0.306800446 | 0.128047342 | 0.00558627 | 0.18151  |
| 0.897109998 | -0.005853812 | 0.8996021   | -0.12665052 | 0.00613178 | 0.218045 |
| 0.001560519 | 0.149032794  | 0.001237681 | 0.172032698 | 0.00018728 | -0.04427 |
| 2.69E-05    | 0.185201227  | 5.66E-05    | 0.05050494  | 0.27606957 | -0.07704 |
| 0.079760956 | -0.084330195 | 0.068644652 | -0.13474496 | 0.00352991 | -0.10288 |
| 0.004085889 | 0.139897712  | 0.002445321 | -0.16367208 | 0.00038307 | -0.03091 |
| 0.009881638 | -0.102075106 | 0.027404018 | -0.05934174 | 0.20051791 | 0.026152 |
| 0.724752611 | 0.016168875  | 0.727465686 | -0.0030488  | 0.94760974 | 0.228504 |
| 7.48E-26    | -0.464829308 | 2.08E-26    | -0.11649227 | 0.01176034 | -0.06264 |
| 0.041673331 | -0.090551851 | 0.050510292 | -0.12435278 | 0.00713375 | 0.237324 |
| 0.112356085 | 0.07385361   | 0.110960653 | -0.13411956 | 0.00368769 | -0.05654 |
| 0.197324205 | -0.056571772 | 0.222378687 | -0.15469872 | 0.0007956  | 0.216154 |
| 0.429997224 | -0.042994102 | 0.353901025 | 0.012477265 | 0.7879883  | 0.005417 |
| 0.552524828 | -0.024890297 | 0.591595431 | 0.147987993 | 0.00134056 | 0.27168  |
| 0.025896083 | 0.098174841  | 0.033920403 | -0.04473378 | 0.33474657 | -0.17373 |
| 4.34E-13    | -0.31968032  | 1.48E-12    | 0.068392837 | 0.14001124 | -0.12514 |
| 0.012887712 | 0.121889636  | 0.008368313 | -0.2472008  | 6.23E-08   | -0.10104 |
| 0.012428886 | -0.115395025 | 0.012582741 | -0.03572244 | 0.44121364 | -0.03834 |
| 8.13E-14    | -0.340555234 | 3.82E-14    | -0.16043619 | 0.00050079 | 0.033445 |
| 6.74E-05    | -0.168194215 | 0.000261212 | -0.14296835 | 0.00195347 | -0.04514 |
| 0.006098757 | -0.113557623 | 0.014073907 | -0.12115649 | 0.00877087 | -0.01859 |
| 9.30E-05    | 0.191476588  | 3.11E-05    | -0.05765507 | 0.21363499 | -0.0807  |
| 0.036838346 | 0.118184068  | 0.010585314 | -0.24396852 | 9.35E-08   | -0.22153 |
| 0.018508345 | -0.103810606 | 0.024869849 | -0.0528533  | 0.25432571 | -0.24859 |
| 0.564651249 | 0.022257257  | 0.631402459 | -0.02835399 | 0.54105686 | -0.29999 |
| 0.004434355 | -0.137156688 | 0.002977164 | 0.031011313 | 0.50379857 | 0.082218 |
| 0.03364984  | 0.089922965  | 0.052139563 | -0.03509831 | 0.44924076 | 0.025819 |
| 0.004414375 | 0.127491261  | 0.005797983 | 0.082735108 | 0.07406808 | -0.05816 |
| 1.58E-08    | -0.249165185 | 4.86E-08    | 0.024811472 | 0.59277029 | -0.01672 |
| 0.004742163 | -0.124954581 | 0.006858073 | -0.03875881 | 0.40334935 | -0.0217  |
| 0.000809736 | -0.172038794 | 0.000187182 | -0.14801462 | 0.00133784 | -0.10602 |
| 0.150146946 | -0.059940455 | 0.196005661 | 0.102847532 | 0.02624993 | -0.2192  |
| 4.80E-05    | 0.189234867  | 3.86E-05    | -0.08394807 | 0.06991332 | 0.341999 |
| 0.800091361 | 0.015943663  | 0.731114073 | -0.0556543  | 0.22998135 | 0.004201 |
| 0.023371103 | 0.109065978  | 0.018390713 | -0.09322293 | 0.04405658 | -0.3116  |
| 0.010753818 | 0.109412006  | 0.01802124  | 0.248601796 | 5.22E-08   | -0.06289 |

|             |              |             |             |            |           |
|-------------|--------------|-------------|-------------|------------|-----------|
| 0.604004956 | -0.026583273 | 0.566623637 | -0.12358081 | 0.00750189 | 0.003129  |
| 1.67E-06    | -0.237655002 | 2.03E-07    | 0.187387627 | 4.61E-05   | -0.15676  |
| 0.003943758 | -0.130360259 | 0.004778342 | -0.0703717  | 0.1288751  | -0.06883  |
| 0.394299147 | -0.050057606 | 0.280350706 | -0.11745435 | 0.01107873 | -4.70E-05 |
| 1.17E-09    | 0.291594553  | 1.32E-10    | 0.035180364 | 0.44818077 | 0.199095  |
| 0.240597963 | -0.061775471 | 0.182638608 | 0.003085193 | 0.94698528 | 0.193369  |
| 0.000695574 | -0.150157351 | 0.00113511  | -0.1131703  | 0.01440739 | 0.084559  |
| 0.190278043 | 0.061320462  | 0.185888537 | 0.345082575 | 1.66E-14   | -0.04712  |
| 2.16E-07    | 0.228650518  | 5.91E-07    | -0.02324871 | 0.61627955 | -0.2669   |
| 2.02E-05    | -0.195721419 | 2.05E-05    | -0.01193234 | 0.79704124 | -0.1453   |
| 0.001030382 | 0.147804627  | 0.001359402 | 0.003680818 | 0.93676995 | 0.041805  |
| 6.00E-05    | 0.194200928  | 2.38E-05    | -0.11148784 | 0.01593791 | -0.26253  |
| 0.33300032  | -0.045453526 | 0.327020363 | 0.033735814 | 0.4670481  | -0.03515  |
| 0.000453019 | 0.162864499  | 0.000409754 | -0.15633986 | 0.00069804 | 0.111737  |
| 0.00041958  | -0.162086729 | 0.000437083 | 0.039194966 | 0.39807445 | -0.11294  |
| 0.030929341 | 0.111054657  | 0.016354332 | 0.02078603  | 0.6541283  | 0.172981  |
| 7.58E-06    | 0.201833533  | 1.11E-05    | -0.3115186  | 5.74E-12   | 0.14219   |
| 0.469590791 | -0.019738033 | 0.670515341 | 0.099916317 | 0.03086351 | 0.162548  |
| 0.690287281 | 0.016255635  | 0.726061817 | -0.04602737 | 0.32094377 | -0.0097   |
| 0.526738567 | -0.035546554 | 0.443467428 | 0.029219148 | 0.5287774  | 0.13531   |
| 4.47E-15    | -0.354729116 | 2.71E-15    | 0.058510895 | 0.20690416 | 0.124495  |
| 6.23E-09    | -0.266031865 | 5.25E-09    | -0.0412972  | 0.37323602 | 0.161129  |
| 0.420144977 | 0.037011046  | 0.424902163 | -0.2196707  | 1.64E-06   | -0.20643  |
| 2.09E-08    | -0.246759611 | 6.59E-08    | -0.00729038 | 0.87514527 | 0.095007  |
| 0.189871549 | -0.060555066 | 0.191451222 | -0.00531477 | 0.90880493 | 0.05087   |
| 6.16E-13    | -0.326034759 | 5.01E-13    | -0.09904768 | 0.03235745 | 0.119303  |
| 0.231934417 | -0.072875483 | 0.115782809 | -0.08141135 | 0.07882965 | 0.093709  |
| 0.062081939 | 0.063988441  | 0.167429325 | -0.0179485  | 0.69885828 | 0.02019   |
| 0.000341873 | -0.167947021 | 0.000266804 | -0.03129082 | 0.49995959 | 0.136926  |
| 0.17105269  | -0.062814891 | 0.175372343 | -0.07008044 | 0.13046974 | 0.047629  |
| 7.57E-07    | -0.223886532 | 1.02E-06    | -0.07690725 | 0.09691748 | 0.236586  |
| 0.176752201 | 0.063896073  | 0.168044567 | 0.01455225  | 0.75378642 | 0.084984  |
| 0.114762569 | -0.070516913 | 0.128085714 | -0.02455147 | 0.59665316 | 0.083892  |
| 1.41E-06    | -0.228111252 | 6.29E-07    | -0.10183779 | 0.02776725 | 0.054292  |
| 6.97E-06    | 0.193533429  | 2.54E-05    | -0.16482235 | 0.00034784 | -0.06611  |
| 0.044867438 | -0.103972004 | 0.024644802 | 0.060442114 | 0.19228236 | -0.04772  |
| 0.202849474 | -0.067028265 | 0.148110464 | -0.12529857 | 0.00670482 | -0.11316  |
| 0.056435465 | -0.078196977 | 0.091428969 | -0.22285868 | 1.15E-06   | -0.00463  |
| 0.312288432 | -0.053167598 | 0.251508312 | -0.07953229 | 0.08601176 | 0.066919  |
| 0.339752813 | -0.04815546  | 0.299055044 | 0.018665455 | 0.68745005 | 0.061498  |
| 0.005629998 | -0.119988799 | 0.009447711 | -0.05584852 | 0.22835677 | 0.077226  |
| 1.47E-05    | -0.196231882 | 1.95E-05    | -0.09434711 | 0.04155574 | 0.078397  |
| 0.001048686 | -0.154824808 | 0.000787675 | -0.02306102 | 0.61913028 | 0.195566  |
| 0.000545387 | 0.150591741  | 0.001097631 | 0.137399111 | 0.0029262  | 0.136736  |
| 0.121996747 | -0.065026336 | 0.160631689 | 0.037068034 | 0.42418901 | 0.175183  |



|             |              |             |             |            |          |
|-------------|--------------|-------------|-------------|------------|----------|
| 0.000204042 | -0.177885423 | 0.000111226 | -0.22479939 | 9.21E-07   | -0.03279 |
| 0.022537686 | -0.104947426 | 0.023321793 | 0.035446822 | 0.44474831 | -0.08321 |
| 4.75E-05    | -0.199209389 | 1.44E-05    | 0.081007737 | 0.08032984 | 0.281482 |
| 0.683244934 | -0.021431605 | 0.644115193 | -0.06028774 | 0.19342252 | 0.32708  |
| 0.220063797 | -0.065934929 | 0.154853396 | -0.11593948 | 0.01216853 | -0.25031 |
| 0.08255298  | -0.093875796 | 0.042589233 | -0.03393048 | 0.46448018 | -0.03173 |
| 0.015341703 | -0.109789243 | 0.017625842 | -0.03078144 | 0.50696744 | 0.190764 |
| 0.002907905 | 0.143300464  | 0.001906092 | -0.09345109 | 0.04353901 | 0.091985 |
| 7.09E-11    | 0.294769947  | 8.15E-11    | -0.17564999 | 0.00013599 | 0.168377 |
| 0.201535631 | 0.058336929  | 0.208259778 | 0.08766551  | 0.05835301 | 0.363593 |
| 0.109880469 | -0.065155631 | 0.159799651 | -0.10980461 | 0.0176099  | 0.072201 |
| 0.000307747 | 0.162476604  | 0.000423179 | -0.17695494 | 0.00012097 | 0.058484 |
| 0.765551567 | 0.014500987  | 0.754625914 | -0.22613649 | 7.90E-07   | -0.03505 |
| 3.98E-10    | -0.289547144 | 1.80E-10    | -0.25827156 | 1.49E-08   | 0.168634 |
| 4.85E-08    | 0.240929148  | 1.36E-07    | -0.12006151 | 0.00940425 | -0.00351 |
| 0.002554813 | 0.137928114  | 0.00281774  | -0.01703436 | 0.71350289 | -0.09324 |
| 0.925362524 | -0.012285526 | 0.791170515 | 0.058459404 | 0.20730474 | 0.033954 |
| 1.64E-06    | 0.238628578  | 1.80E-07    | -0.07361263 | 0.11213377 | 0.048452 |
| 0.970874057 | -0.023987664 | 0.605112193 | -0.21734606 | 2.13E-06   | 0.202734 |
| 0.317977635 | -0.03439728  | 0.458354657 | -0.19455746 | 2.30E-05   | -0.38266 |
| 2.05E-08    | -0.252319951 | 3.24E-08    | -0.11467897 | 0.01314642 | 0.153947 |
| 0.055646959 | -0.087626218 | 0.058466363 | -0.00042977 | 0.99260972 | 0.128781 |
| 1.34E-07    | -0.24788596  | 5.72E-08    | 0.019785759 | 0.6697656  | -0.02444 |
| 0.334573332 | 0.040729059  | 0.379852538 | -0.23830937 | 1.87E-07   | 0.307567 |
| 0.017633648 | 0.104124872  | 0.024433273 | -0.17855115 | 0.00010471 | 0.035367 |
| 0.024233439 | -0.104385848 | 0.024075773 | -0.07072074 | 0.12698407 | 0.030059 |
| 0.48893208  | -0.03656571  | 0.430499228 | -0.02819421 | 0.54334004 | 0.013985 |
| 0.002128957 | -0.135781158 | 0.003281922 | -0.13229011 | 0.00418661 | 0.066779 |
| 0.000115223 | 0.16532431   | 0.000333438 | -0.36948695 | 1.49E-16   | -0.01228 |
| 0.723041681 | -0.010445221 | 0.821882546 | 0.173767555 | 0.00016076 | 0.076404 |
| 0.066889371 | 0.089633245  | 0.052904761 | -0.16115648 | 0.00047199 | -0.19262 |
| 0.046697564 | -0.08675056  | 0.061040216 | -0.1775815  | 0.00011432 | 0.075397 |
| 0.011060287 | -0.120183709 | 0.009331601 | -0.02066317 | 0.65604104 | 0.031696 |
| 3.02E-09    | -0.279981986 | 7.37E-10    | -0.04173478 | 0.36818876 | 0.072567 |
| 3.60E-05    | -0.179362509 | 9.73E-05    | -0.008204   | 0.85965146 | 0.190049 |
| 0.975042311 | 0.003027059  | 0.947982802 | 0.153256872 | 0.00089156 | -0.05231 |
| 8.29E-06    | 0.200804937  | 1.23E-05    | -0.2072642  | 6.30E-06   | 0.216741 |
| 6.37E-07    | -0.223372855 | 1.08E-06    | -0.09335174 | 0.04376374 | 0.171566 |
| 0.251802531 | 0.06011889   | 0.19467533  | -0.16791595 | 0.00026752 | 0.337938 |
| 0.003255402 | 0.126637924  | 0.006136906 | 0.162841483 | 0.00041054 | 0.033588 |
| 4.98E-05    | -0.18353574  | 6.62E-05    | 0.176921754 | 0.00012133 | 0.053115 |
| 0.968417975 | 0.004490823  | 0.92289483  | -0.04228555 | 0.3618965  | -0.05279 |
| 0.000209819 | -0.165874074 | 0.000318302 | -0.03417989 | 0.46120166 | -0.25411 |
| 0.773652838 | -0.018602501 | 0.688448988 | 0.073153116 | 0.11439769 | 0.018773 |
| 1.43E-06    | -0.219715391 | 1.63E-06    | 0.112844701 | 0.01469308 | -0.02256 |

|             |              |             |             |            |          |
|-------------|--------------|-------------|-------------|------------|----------|
| 0.059725334 | -0.092680028 | 0.045308933 | -0.02985734 | 0.51981085 | 0.012115 |
| 0.01464274  | -0.104992389 | 0.02326232  | 0.245897558 | 7.35E-08   | 0.148554 |
| 0.042447951 | -0.096276238 | 0.037543445 | 0.026600912 | 0.56636613 | 0.189089 |
| 0.832054427 | -0.015770763 | 0.733919147 | -0.0451511  | 0.33025261 | 0.161529 |
| 0.000202697 | -0.185532625 | 5.49E-05    | -0.03721084 | 0.42240495 | 0.205825 |
| 0.032732724 | -0.087875958 | 0.057748984 | -0.0079332  | 0.86423856 | -0.22144 |
| 0.436874628 | 0.026333726  | 0.57027266  | 0.194216048 | 2.38E-05   | -0.20581 |
| 0.119596144 | -0.078603313 | 0.089752321 | 0.096107818 | 0.03788012 | -0.1776  |
| 0.00847307  | 0.12363522   | 0.007475398 | 0.316767329 | 2.41E-12   | 0.132617 |
| 1.13E-05    | -0.198387392 | 1.57E-05    | -0.12525778 | 0.00672283 | 0.118441 |
| 0.000261997 | -0.162754451 | 0.000413522 | 0.060183769 | 0.19419326 | 0.121189 |
| 0.085521441 | 0.072309323  | 0.118648097 | 0.280816772 | 6.53E-10   | -0.35025 |
| 8.48E-20    | -0.403714701 | 9.83E-20    | 0.116837549 | 0.01151157 | 0.083969 |
| 0.046858149 | 0.092286427  | 0.046235481 | -0.10890925 | 0.01856023 | -0.00215 |
| 0.001923321 | -0.146619861 | 0.001487161 | 0.018707223 | 0.68678759 | 0.074679 |
| 0.207769098 | -0.07587247  | 0.101508301 | -0.02582963 | 0.57767768 | 0.18184  |
| 0.54391269  | 0.035462388  | 0.444548248 | -0.01864857 | 0.68771792 | -0.12465 |
| 6.17E-10    | 0.258510186  | 1.44E-08    | -0.08987755 | 0.05225891 | -0.00769 |
| 0.82691604  | 0.007475475  | 0.872002273 | 0.102650551 | 0.02654019 | -0.18389 |
| 0.534441496 | 0.020533473  | 0.658062614 | -0.00169717 | 0.97082162 | -0.00269 |
| 0.087623741 | -0.065816165 | 0.155599624 | -0.25505285 | 2.27E-08   | -0.03028 |
| 0.558658939 | 0.023436592  | 0.613431632 | -0.18723356 | 4.67E-05   | -0.03194 |
| 6.07E-09    | 0.251552526  | 3.58E-08    | -0.06884849 | 0.13738378 | -0.03182 |
| 5.81E-08    | -0.253182233 | 2.90E-08    | -0.02903964 | 0.53131356 | 0.232195 |
| 6.30E-07    | -0.230306417 | 4.87E-07    | -0.14612245 | 0.00154401 | 0.157399 |
| 0.1680051   | -0.061428315 | 0.18511436  | -0.13063606 | 0.0046894  | 0.144751 |
| 0.661100074 | -0.01555501  | 0.73742441  | 0.104474774 | 0.02395499 | 0.075059 |
| 0.04589197  | 0.104047875  | 0.024539619 | -0.11113917 | 0.01627234 | -0.14865 |
| 0.86144176  | -0.021006831 | 0.65069649  | 0.008989294 | 0.84637666 | 0.050666 |
| 0.23856813  | 0.05950563   | 0.199275305 | -0.10481317 | 0.02350017 | 0.054114 |
| 0.178787357 | 0.053359907  | 0.249795161 | -0.07685464 | 0.09714681 | 0.02945  |
| 8.24E-20    | -0.401059153 | 1.79E-19    | 0.041780572 | 0.36766302 | -0.04466 |
| 1.02E-07    | 0.244204859  | 9.08E-08    | -0.12990729 | 0.00492773 | 0.314445 |
| 0.49049903  | -0.035280834 | 0.446884779 | 0.460009614 | 7.84E-26   | 0.188634 |
| 9.55E-09    | 0.256926168  | 1.78E-08    | -0.12023812 | 0.00929942 | -0.36602 |
| 0.32822456  | -0.036321714 | 0.433583812 | -0.23195985 | 4.01E-07   | -0.26983 |
| 0.000157927 | 0.172018232  | 0.00018752  | -0.11974291 | 0.00959602 | -0.26755 |
| 0.782734033 | 0.009619385  | 0.835756543 | -0.0697209  | 0.13245917 | -0.0322  |
| 5.40E-06    | -0.210348119 | 4.54E-06    | -0.00047452 | 0.9918402  | -0.07282 |
| 0.000412923 | 0.158272493  | 0.000597399 | 0.173894433 | 0.00015896 | -0.17199 |
| 0.815258657 | 0.000308424  | 0.994696307 | -0.07005976 | 0.13058353 | -0.0415  |
| 0.08387953  | 0.070405576  | 0.128690603 | 0.155708062 | 0.0007342  | 0.181994 |
| 0.527825942 | 0.028082058  | 0.544945504 | -0.01304192 | 0.77863761 | 0.076879 |
| 1.54E-08    | -0.257782724 | 1.59E-08    | -0.07167053 | 0.1219472  | 0.017786 |
| 0.552493284 | 0.015054931  | 0.74556989  | -0.07977405 | 0.08505918 | -0.09288 |

|             |              |             |             |            |          |
|-------------|--------------|-------------|-------------|------------|----------|
| 0.101004279 | -0.07968358  | 0.085414649 | -0.09535434 | 0.03941788 | -0.09711 |
| 0.89068929  | 0.014507945  | 0.754511953 | 0.037489067 | 0.41894174 | 0.132197 |
| 0.031806157 | -0.080338342 | 0.082868829 | -0.08056264 | 0.08201094 | 0.095728 |
| 0.570262955 | -0.012773667 | 0.783075991 | -0.10888154 | 0.01859034 | -0.05685 |
| 0.004218276 | -0.116920583 | 0.011452441 | -0.10936949 | 0.01806629 | 0.094126 |
| 4.15E-07    | -0.234919435 | 2.82E-07    | -0.06571247 | 0.1562534  | -0.21102 |
| 0.175022258 | -0.061811898 | 0.18238025  | 0.020704442 | 0.65539822 | -0.05544 |
| 0.000503457 | -0.161404052 | 0.000462458 | -0.0010115  | 0.98260736 | 0.079703 |
| 0.017678431 | -0.119753689 | 0.009589476 | 0.1261321   | 0.0063461  | 0.013691 |
| 0.003709595 | 0.138254109  | 0.002752736 | -0.25174554 | 3.49E-08   | -0.16827 |
| 0.126542447 | -0.057606465 | 0.21402189  | -0.14507327 | 0.00167053 | 0.184871 |
| 0.114922506 | -0.096205608 | 0.037684328 | 0.030848616 | 0.50604031 | -0.08749 |
| 4.24E-12    | -0.305756068 | 1.46E-11    | -0.16592266 | 0.000317   | 0.107104 |
| 0.003906655 | 0.147599255  | 0.001380799 | 0.069781724 | 0.13212097 | 0.03329  |
| 0.274168522 | 0.056438573  | 0.223471168 | -0.12476033 | 0.006946   | 0.000934 |
| 2.15E-07    | -0.240801122 | 1.38E-07    | 0.089274199 | 0.05386602 | 0.237017 |
| 0.510325965 | 0.035249406  | 0.447289952 | 0.067282098 | 0.14657746 | 0.118903 |
| 0.155681471 | 0.072107627  | 0.119682147 | 0.030383642 | 0.51247572 | 0.208446 |
| 0.510930957 | 0.037066381  | 0.424209681 | -0.24437523 | 8.89E-08   | 0.281523 |
| 0.000568982 | -0.158921925 | 0.000566724 | 0.018475698 | 0.69046272 | 0.039337 |
| 0.014850617 | -0.115090505 | 0.0128198   | -0.04901853 | 0.29046777 | 0.089275 |
| 1.07E-07    | -0.244766409 | 8.46E-08    | 0.15326008  | 0.00089134 | -0.04117 |
| 1.38E-05    | -0.201027246 | 1.20E-05    | -0.35099644 | 5.51E-15   | -0.10396 |
| 0.008702887 | -0.116160766 | 0.012003648 | 0.043787922 | 0.34507666 | 0.157726 |
| 0.142528972 | 0.071874079  | 0.120888273 | -0.04603292 | 0.32088539 | 0.036637 |
| 1.34E-06    | -0.216756587 | 2.27E-06    | 0.033570279 | 0.46923786 | -0.00934 |
| 0.241056568 | 0.058628572  | 0.205990807 | -0.07723942 | 0.09547939 | -0.07242 |
| 0.150744167 | -0.066394498 | 0.151991319 | 0.039529599 | 0.39405555 | -0.02049 |
| 6.09E-08    | -0.251924253 | 3.41E-08    | 0.078805898 | 0.08892567 | 0.096801 |
| 0.139864825 | 0.068045952  | 0.142037191 | -0.1422814  | 0.00205489 | 0.043741 |
| 5.03E-05    | 0.187583032  | 4.52E-05    | -0.23072188 | 4.64E-07   | 0.02135  |
| 0.022293961 | 0.106346929  | 0.021531119 | -0.24419926 | 9.08E-08   | 0.017206 |
| 0.354527706 | 0.05461693   | 0.238797343 | -0.21582725 | 2.51E-06   | 0.00283  |
| 2.14E-06    | -0.219935811 | 1.59E-06    | 0.004903343 | 0.9158372  | 0.185237 |
| 1.54E-05    | -0.189381025 | 3.81E-05    | -0.0809631  | 0.08049716 | 0.087221 |
| 0.083870526 | -0.070322686 | 0.129142373 | -0.0048589  | 0.91659732 | -0.12552 |
| 0.074027026 | 0.083246021  | 0.072294169 | 0.092860521 | 0.04488929 | 0.036128 |
| 4.78E-06    | 0.20558161   | 7.51E-06    | 0.018325653 | 0.69284838 | 0.054177 |
| 2.15E-05    | 0.192948031  | 2.69E-05    | 0.045272199 | 0.32895587 | 0.058345 |
| 1.45E-15    | -0.365618759 | 3.23E-16    | -0.06094623 | 0.1885933  | 0.090884 |
| 0.000109513 | -0.18272734  | 7.14E-05    | 0.120996781 | 0.00886082 | 0.11509  |
| 0.001811954 | -0.144112018 | 0.00179472  | 0.002604378 | 0.95523797 | 0.054967 |
| 3.86E-07    | -0.231851191 | 4.06E-07    | 0.273545452 | 1.85E-09   | 0.139098 |
| 4.07E-08    | 0.246562133  | 6.76E-08    | -0.10002317 | 0.03068388 | 0.305568 |
| 0.003085413 | -0.14342199  | 0.001889022 | -0.15480659 | 0.00078882 | -0.04337 |

|             |              |             |             |            |          |
|-------------|--------------|-------------|-------------|------------|----------|
| 0.606616352 | 0.023177968  | 0.617353303 | 0.038886118 | 0.40180542 | 0.265129 |
| 7.36E-08    | -0.261201607 | 1.01E-08    | 0.175060733 | 0.00014333 | 0.044664 |
| 0.107869869 | -0.068815708 | 0.137571554 | 0.029618692 | 0.5231547  | 0.021556 |
| 0.22204003  | -0.040392703 | 0.383803384 | 0.108352257 | 0.01917372 | -0.0772  |
| 0.284562781 | -0.043395111 | 0.349425651 | 0.025508075 | 0.58242476 | -0.12385 |
| 0.977060246 | 0.004500983  | 0.922720932 | -0.11263051 | 0.01488372 | -0.28057 |
| 0.798244839 | -0.008124374 | 0.860999822 | 0.088759014 | 0.05527064 | -0.1862  |
| 0.020194726 | 0.108473718  | 0.019038452 | 0.088570538 | 0.05579206 | -0.16785 |
| 0.065856717 | -0.078018178 | 0.092174645 | -0.12914465 | 0.00518879 | -0.21155 |
| 0.313727342 | 0.044897029  | 0.332983918 | 0.000791656 | 0.98638717 | -0.19962 |
| 0.124333647 | -0.065676697 | 0.156479406 | -0.01669914 | 0.71889995 | -0.0787  |
| 0.219999116 | 0.059904451  | 0.196274899 | -0.01031158 | 0.82412413 | -0.02307 |
| 0.971894016 | -0.004818858 | 0.917282102 | -0.05390865 | 0.24495151 | 0.076238 |
| 0.012663572 | -0.119031579 | 0.01003678  | 0.01118362  | 0.80952419 | 0.062694 |
| 0.001887701 | -0.145608257 | 0.001604877 | 0.100761821 | 0.02946643 | 0.168446 |
| 0.634887278 | 0.018624355  | 0.688102151 | -0.07302862 | 0.11501719 | 0.041225 |
| 0.962600447 | 0.00268554   | 0.953844545 | -0.06303818 | 0.17383985 | 0.016109 |
| 0.007413584 | -0.133937399 | 0.003734836 | 0.218666269 | 1.84E-06   | 0.098072 |
| 0.888947298 | 0.001044228  | 0.982044732 | -0.02641888 | 0.5690262  | -0.09861 |
| 0.310585378 | -0.054941866 | 0.236010697 | 0.03156273  | 0.49623986 | -0.06924 |
| 0.23799911  | -0.05789504  | 0.211731978 | 0.007449402 | 0.8724449  | -0.00272 |
| 0.041277127 | -0.087941782 | 0.057561123 | -0.0363334  | 0.43343579 | -0.3194  |
| 0.351599737 | -0.030260949 | 0.514180897 | 0.003433973 | 0.94100234 | -0.00177 |
| 0.065665697 | 0.073478297  | 0.112791912 | -0.00510168 | 0.9124462  | 0.282872 |
| 0.622549456 | -0.020345112 | 0.66100307  | 0.042706534 | 0.35713248 | 0.029512 |
| 0.734360621 | -0.029582153 | 0.523667642 | -0.03123055 | 0.50078612 | 0.140798 |
| 0.610480895 | -0.024375982 | 0.599280287 | 0.200599849 | 1.25E-05   | -0.16737 |
| 0.848071024 | 0.019344609  | 0.676708234 | -0.07530246 | 0.10410992 | 0.307508 |
| 0.000767996 | -0.152600371 | 0.000938709 | -0.24620283 | 7.07E-08   | 0.018198 |
| 0.612551292 | 0.036285822  | 0.434038628 | -0.08348352 | 0.07148144 | 0.022525 |
| 4.86E-13    | -0.321267847 | 1.13E-12    | 0.097741524 | 0.03471993 | 0.256584 |
| 0.004656183 | 0.121609693  | 0.008520039 | -0.10429757 | 0.02419619 | 0.036617 |
| 0.000136498 | -0.17946726  | 9.63E-05    | -0.03159313 | 0.49582484 | 0.002346 |
| 0.046435071 | 0.090520834  | 0.05058964  | -0.32452299 | 6.49E-13   | 0.176647 |
| 0.002254102 | -0.149989695 | 0.001149888 | 0.068147955 | 0.14143914 | -0.09892 |
| 0.513260523 | -0.019161059 | 0.679604992 | -0.16464386 | 0.0003531  | 0.067839 |
| 0.409661437 | 0.05208643   | 0.261291692 | -0.00483955 | 0.91692817 | -0.1199  |
| 0.000134975 | 0.179390315  | 9.70E-05    | -0.08721262 | 0.05967065 | -0.02398 |
| 4.43E-14    | -0.337690676 | 6.41E-14    | -0.1214652  | 0.00859931 | -0.05872 |
| 0.835119113 | 0.007920489  | 0.864454021 | 0.303014984 | 2.25E-11   | 0.334974 |
| 3.96E-11    | -0.304163617 | 1.88E-11    | -0.02595308 | 0.57586016 | 0.162833 |
| 0.013167892 | -0.115530499 | 0.012478527 | -0.13473518 | 0.00353233 | 0.143573 |
| 0.050837913 | -0.088470626 | 0.056070115 | -0.1874854  | 4.56E-05   | 0.000786 |
| 0.208503852 | -0.059832472 | 0.196813955 | -0.09423587 | 0.04179774 | 0.080113 |
| 0.844842446 | -0.011402164 | 0.805875391 | -0.00363479 | 0.937559   | -0.13007 |

|             |              |             |             |            |          |
|-------------|--------------|-------------|-------------|------------|----------|
| 0.334160914 | 0.032334008  | 0.485769319 | -0.09848007 | 0.03336668 | -0.17324 |
| 0.109973816 | 0.07296755   | 0.115322037 | -0.09181943 | 0.04735538 | 0.036701 |
| 0.00475821  | 0.122254449  | 0.008174205 | -0.00446074 | 0.92340972 | 0.105661 |
| 0.350964972 | 0.019996795  | 0.666454267 | -0.04979308 | 0.28290335 | -0.03145 |
| 5.08E-05    | -0.18184615  | 7.74E-05    | 0.032167613 | 0.48801809 | 0.014302 |
| 0.002193413 | -0.147051681 | 0.001439371 | -0.1554526  | 0.00074931 | -0.05511 |
| 0.0004554   | -0.165204228 | 0.000336833 | -0.22583495 | 8.18E-07   | 0.019787 |
| 0.000330665 | 0.152799782  | 0.000924151 | -0.10472362 | 0.02361979 | -0.01018 |
| 0.00312767  | -0.140756678 | 0.002297438 | -0.18224753 | 7.46E-05   | 0.144588 |
| 0.683763816 | -0.025773324 | 0.578507652 | -0.12935555 | 0.00511538 | -0.03259 |
| 0.000282154 | -0.177289457 | 0.000117376 | -0.08693392 | 0.06049366 | 0.099058 |
| 0.025170194 | -0.092560483 | 0.04558868  | -0.02866997 | 0.53655561 | -0.00982 |
| 0.000248074 | -0.181428875 | 8.05E-05    | -0.01015648 | 0.82672723 | 0.042502 |
| 0.236666646 | 0.074170867  | 0.109430986 | -0.08124208 | 0.07945599 | 0.017738 |
| 0.015720491 | -0.12354306  | 0.00752032  | 0.234632064 | 2.92E-07   | 0.075335 |
| 3.91E-09    | -0.25894806  | 1.36E-08    | -0.04782504 | 0.30238693 | 0.261492 |
| 0.240402881 | 0.040174658  | 0.386377894 | 0.128264905 | 0.00550535 | 0.033452 |
| 2.32E-08    | -0.256822105 | 1.80E-08    | -0.26256965 | 8.39E-09   | -0.13395 |
| 2.03E-07    | 0.22869009   | 5.88E-07    | -0.1700703  | 0.00022221 | -0.07095 |
| 2.82E-06    | 0.203830035  | 9.01E-06    | -0.11694483 | 0.01143523 | -0.14221 |
| 0.614941244 | 0.01746724   | 0.706554601 | 0.031437027 | 0.49795764 | -0.15492 |
| 0.000151791 | -0.171588507 | 0.000194704 | 0.054458486 | 0.24016451 | 0.029809 |
| 0.048365661 | -0.098182509 | 0.033906398 | -0.0721685  | 0.11936934 | -0.16885 |
| 0.95549885  | 0.001765245  | 0.969651749 | 0.063290709 | 0.17211871 | 0.156138 |
| 0.146734256 | -0.088216156 | 0.056783511 | 0.089603074 | 0.05298498 | 0.234091 |
| 0.012894881 | -0.117441436 | 0.011087644 | 0.029836527 | 0.52010209 | -0.01222 |
| 0.197051419 | 0.051067184  | 0.270752031 | 0.031431167 | 0.49803779 | 0.029566 |
| 0.000803275 | 0.160357327  | 0.000504039 | 0.09696702  | 0.03618897 | 0.034962 |
| 0.001462858 | -0.146603739 | 0.001488973 | 0.054862159 | 0.23669213 | 0.166917 |
| 0.67951223  | -0.022284083 | 0.630991214 | 0.058129783 | 0.20988229 | 0.225645 |
| 0.016420008 | 0.116351726  | 0.011862955 | 0.089889133 | 0.05222844 | 0.277261 |
| 0.094990875 | 0.083302137  | 0.072101463 | 0.040125901 | 0.38695501 | 0.256967 |
| 3.84E-05    | -0.186106013 | 5.20E-05    | -0.021384   | 0.64485148 | -0.18703 |
| 0.220024453 | -0.062760308 | 0.175748487 | -0.08090922 | 0.08069951 | -0.07251 |
| 1.66E-05    | 0.192383146  | 2.85E-05    | -0.12296218 | 0.00780906 | -0.13172 |
| 0.00903671  | -0.121476091 | 0.008593311 | -0.21323831 | 3.33E-06   | 0.06942  |
| 7.24E-15    | -0.33662938  | 7.76E-14    | -0.25486098 | 2.33E-08   | 0.046768 |
| 1.16E-06    | -0.213127398 | 3.37E-06    | -0.0526345  | 0.25629999 | 0.053575 |
| 7.88E-15    | -0.341796318 | 3.04E-14    | -0.07812165 | 0.09174253 | 0.204751 |
| 7.98E-09    | -0.254023095 | 2.60E-08    | -0.18948753 | 3.77E-05   | -0.15904 |
| 0.000773096 | -0.15481907  | 0.000788034 | -0.03958334 | 0.39341247 | -0.02977 |
| 0.409145121 | 0.046267245  | 0.318425607 | -0.11747096 | 0.01106728 | 0.081244 |
| 1.88E-08    | -0.250736042 | 3.98E-08    | -0.10871737 | 0.01876961 | 0.060703 |
| 0.214024453 | 0.039928534  | 0.389296526 | -0.05296118 | 0.25335626 | -0.01762 |
| 8.74E-07    | -0.229396685 | 5.41E-07    | -0.04313808 | 0.35229005 | 0.13569  |

|             |              |             |             |            |          |
|-------------|--------------|-------------|-------------|------------|----------|
| 0.272921148 | -0.040533428 | 0.382147378 | 0.046320586 | 0.3178674  | 0.001829 |
| 0.046755036 | 0.096721602  | 0.036665347 | -0.1234738  | 0.00755424 | 0.077964 |
| 0.000680112 | -0.152178841 | 0.000970184 | -0.06506971 | 0.16035223 | 0.006939 |
| 0.170846412 | 0.06216627   | 0.179880986 | -0.08223674 | 0.07583246 | -0.14326 |
| 4.21E-11    | -0.300335601 | 3.44E-11    | -0.12390564 | 0.00734497 | 0.287936 |
| 0.046257319 | -0.093614572 | 0.043171321 | 0.048440704 | 0.29619846 | 0.068525 |
| 0.000143454 | -0.174227448 | 0.000154343 | 0.068741716 | 0.13799606 | 0.111431 |
| 0.012416732 | -0.116933911 | 0.011442976 | 0.062195674 | 0.17967475 | 0.12417  |
| 0.784779303 | 0.014125157  | 0.760789369 | -0.04502494 | 0.33160703 | -0.04309 |
| 0.027048147 | -0.116713796 | 0.011600192 | -0.0596453  | 0.19822077 | 0.02489  |
| 0.163736566 | -0.066031576 | 0.154248142 | -0.05011835 | 0.2797667  | -0.05718 |
| 0.40850917  | 0.01772957   | 0.702355677 | -0.04755906 | 0.30508674 | 0.035443 |
| 0.00624113  | 0.129751719  | 0.004980002 | -0.0956505  | 0.03880726 | 0.260204 |
| 0.971245165 | -0.008393248 | 0.856448637 | -0.15859202 | 0.00058212 | -0.04047 |
| 0.652844729 | 0.018252016  | 0.694020285 | -0.10708704 | 0.0206333  | 0.196979 |
| 0.001532503 | 0.140374188  | 0.002362251 | -0.05330701 | 0.25026553 | 0.087432 |
| 0.602858034 | 0.035042824  | 0.449958387 | -0.06664323 | 0.15045911 | -0.10449 |
| 0.375266194 | 0.040100658  | 0.387254009 | -0.06713798 | 0.14744637 | 0.063292 |
| 0.015711524 | 0.11189432   | 0.015555633 | 0.021930671 | 0.63641827 | 0.108071 |
| 0.001822199 | 0.144974146  | 0.001682963 | 0.013316938 | 0.77409475 | 0.171105 |
| 0.449632517 | 0.035019136  | 0.45026494  | -0.22817533 | 6.24E-07   | 0.502808 |
| 0.046926189 | 0.109218727  | 0.018226807 | -0.08140845 | 0.07884035 | 0.043597 |
| 0.572307689 | 0.011247537  | 0.808456603 | -0.26226056 | 8.75E-09   | 0.096593 |
| 0.000379267 | -0.16748764  | 0.000277495 | -0.17358189 | 0.00016342 | 0.23608  |
| 0.004040653 | -0.148826925 | 0.001257358 | -0.20555834 | 7.53E-06   | 0.107629 |
| 0.452198624 | 0.031072904  | 0.502951295 | 0.048956099 | 0.29108331 | 0.034269 |
| 0.938004159 | 0.001478608  | 0.974577822 | 0.240553127 | 1.43E-07   | -0.04113 |
| 0.000430175 | 0.170289661  | 0.000218019 | 0.098729002 | 0.03292082 | -0.05381 |
| 0.332212604 | 0.043540209  | 0.347815188 | -0.03836191 | 0.40818564 | 0.101183 |
| 0.251228201 | 0.051754122  | 0.264350717 | -0.03049678 | 0.51090589 | -0.02571 |
| 0.151168768 | 0.059606144  | 0.198515986 | 0.171911655 | 0.00018928 | 0.177759 |
| 0.000313756 | 0.162744236  | 0.000413873 | -0.09473471 | 0.04072174 | 0.077017 |
| 0.002916254 | 0.128486057  | 0.00542418  | -0.08269746 | 0.0742002  | -0.18508 |
| 0.081640012 | -0.079244739 | 0.087155936 | -0.14711217 | 0.00143279 | 0.063462 |
| 0.012828736 | -0.106896336 | 0.020861473 | -0.13479247 | 0.00351818 | 0.053146 |
| 1.99E-11    | -0.303710171 | 2.02E-11    | -0.09664743 | 0.03681036 | -0.13347 |
| 4.67E-07    | 0.215742041  | 2.54E-06    | -0.22313829 | 1.11E-06   | -0.08522 |
| 2.98E-06    | 0.192354811  | 2.85E-05    | -0.09688945 | 0.03633897 | -0.14754 |
| 0.459829414 | 0.016341273  | 0.724677013 | 0.018962409 | 0.68274539 | -0.00736 |
| 5.63E-08    | -0.243926046 | 9.40E-08    | -0.14947658 | 0.00119623 | -0.13093 |
| 0.10808245  | -0.067165005 | 0.147283124 | -0.0607459  | 0.19005298 | 0.166561 |
| 5.90E-19    | -0.397220449 | 4.22E-19    | 0.032018835 | 0.49003351 | 0.039358 |
| 0.306977447 | -0.042900858 | 0.354946795 | -0.13470053 | 0.00354092 | -0.12407 |
| 0.124418751 | -0.065669443 | 0.15652527  | 0.040081863 | 0.38747673 | 0.040205 |
| 0.078570511 | -0.080081251 | 0.083861034 | -0.12143923 | 0.00861362 | -0.08663 |

|             |              |             |             |            |          |
|-------------|--------------|-------------|-------------|------------|----------|
| 0.128624614 | 0.058164186  | 0.209612197 | 0.212457265 | 3.62E-06   | 0.187129 |
| 0.405990855 | 0.042728438  | 0.356885687 | 0.089001473 | 0.05460585 | 0.111328 |
| 0.004951872 | 0.134239288  | 0.003657001 | -0.15535717 | 0.00075503 | -0.09649 |
| 0.100335177 | -0.070634069 | 0.127451597 | -0.08809953 | 0.05711299 | -0.08256 |
| 7.94E-10    | -0.285927874 | 3.09E-10    | -0.1242356  | 0.00718858 | 0.167934 |
| 0.267137497 | -0.043059509 | 0.353168613 | -0.02407988 | 0.60372502 | -0.02731 |
| 2.32E-10    | 0.281463203  | 5.95E-10    | -0.09466101 | 0.04087922 | -0.05657 |
| 0.001628303 | -0.128342268 | 0.005476834 | -0.01384527 | 0.76538934 | 0.242682 |
| 0.149240507 | -0.061441291 | 0.18502138  | -0.14445456 | 0.00174953 | -0.11268 |
| 2.77E-16    | -0.362157687 | 6.41E-16    | -0.15115402 | 0.00105081 | 0.030985 |
| 3.07E-09    | -0.263104736 | 7.81E-09    | 0.003095913 | 0.94680134 | 0.170032 |
| 4.35E-08    | -0.238350856 | 1.87E-07    | -0.14381557 | 0.00183469 | 0.072185 |
| 0.000125078 | -0.182816754 | 7.08E-05    | 0.061027031 | 0.18800686 | 0.260826 |
| 0.056910313 | -0.086351961 | 0.062242443 | 0.086425254 | 0.06201993 | -0.18818 |
| 0.111445148 | 0.072813395  | 0.116094361 | 0.005241489 | 0.91005691 | 0.090658 |
| 7.52E-07    | -0.227773436 | 6.54E-07    | -0.23167736 | 4.14E-07   | -0.14177 |
| 6.80E-10    | -0.282524201 | 5.10E-10    | -0.22334084 | 1.09E-06   | -0.1616  |
| 1.31E-05    | -0.196724352 | 1.85E-05    | -0.1235517  | 0.0075161  | 0.052602 |
| 8.95E-19    | -0.389220346 | 2.43E-18    | -0.09672654 | 0.03665571 | -0.03429 |
| 2.29E-12    | -0.310906383 | 6.34E-12    | -0.04881497 | 0.29247805 | 0.015911 |
| 3.94E-05    | -0.187753283 | 4.45E-05    | -0.0547541  | 0.23761813 | 0.216981 |
| 1.32E-07    | -0.24672899  | 6.62E-08    | 0.010387021 | 0.82285854 | 0.102789 |
| 0.000530889 | -0.167685008 | 0.000272854 | -0.1314949  | 0.00442191 | -0.05517 |
| 0.351914797 | -0.055665105 | 0.229890737 | 0.109791798 | 0.01762319 | -0.09774 |
| 3.00E-05    | 0.178076059  | 0.000109323 | 0.085251561 | 0.06566308 | -0.05437 |
| 0.72174343  | -0.006655105 | 0.885947283 | -0.00742336 | 0.87288696 | -0.01886 |
| 0.0005669   | -0.153168663 | 0.000897768 | -0.05738235 | 0.21581252 | 0.115017 |
| 0.000179055 | 0.186179098  | 5.17E-05    | 0.337573499 | 6.55E-14   | 0.095391 |
| 5.70E-05    | 0.198972371  | 1.48E-05    | 0.060021191 | 0.19540291 | 0.232211 |
| 7.68E-06    | -0.204368414 | 8.52E-06    | -0.0773662  | 0.09493504 | 0.03052  |
| 0.640354642 | 0.018418088  | 0.691378337 | 0.210266404 | 4.58E-06   | 0.076719 |
| 0.99959621  | 0.001378743  | 0.976294306 | 0.031963985 | 0.49077766 | 0.201803 |
| 1.50E-09    | -0.273303145 | 1.91E-09    | -0.00597217 | 0.89758315 | 0.167697 |
| 0.009445884 | -0.11929377  | 0.009872271 | -0.14513555 | 0.00166276 | 0.067976 |
| 0.008319877 | -0.117463331 | 0.011072537 | -0.06266753 | 0.17638923 | 0.051213 |
| 0.000726085 | -0.15682743  | 0.000671264 | -0.02140409 | 0.64454071 | 0.051031 |
| 0.018862894 | -0.093182    | 0.044149956 | -0.28906085 | 1.94E-10   | 0.052201 |
| 0.207853007 | -0.060742956 | 0.190074509 | -0.01025211 | 0.82512207 | 0.019444 |
| 0.083736252 | -0.084156076 | 0.069220384 | 0.050517154 | 0.2759533  | -0.00058 |
| 0.09909996  | 0.066453595  | 0.151626206 | -0.22651749 | 7.56E-07   | 0.050922 |
| 0.633788544 | -0.021085017 | 0.649483049 | -0.01227898 | 0.79127928 | 0.063479 |
| 0.239537771 | 0.041299362  | 0.37321094  | -0.10687996 | 0.02088117 | -0.01304 |
| 6.50E-10    | -0.285148073 | 3.47E-10    | -0.16680823 | 0.00029404 | 0.084649 |
| 0.867635078 | -0.009717037 | 0.834113244 | -0.05898039 | 0.20327757 | -0.1372  |
| 0.653922068 | 0.019411188  | 0.675658659 | 0.045177637 | 0.32996816 | 0.040872 |

|             |              |             |             |            |          |
|-------------|--------------|-------------|-------------|------------|----------|
| 0.369476644 | 0.040129826  | 0.386908525 | -0.02484056 | 0.59233664 | 0.098937 |
| 0.254102318 | 0.038789264  | 0.402979741 | 0.09031581  | 0.05111675 | -0.02507 |
| 0.006525287 | 0.134883769  | 0.003495734 | -0.10584738 | 0.0221561  | 0.008583 |
| 0.77998873  | 0.01777004   | 0.701708703 | -0.12597874 | 0.00641078 | -0.00402 |
| 1.54E-05    | 0.201968638  | 1.09E-05    | 0.147763646 | 0.00136365 | 0.148756 |
| 0.029317144 | -0.098511517 | 0.033310076 | -0.05279061 | 0.25489032 | -0.10267 |
| 0.800099934 | 0.022327148  | 0.630331239 | -0.21341494 | 3.27E-06   | -0.09931 |
| 0.050318082 | -0.09350267  | 0.043422716 | -0.02915852 | 0.52963325 | -0.09109 |
| 0.459046275 | -0.036427268 | 0.432247845 | -0.08184883 | 0.07722928 | -0.04203 |
| 0.93899985  | -0.010001546 | 0.829329659 | -0.32495105 | 6.03E-13   | -0.00787 |
| 0.000824464 | 0.157695354  | 0.000625946 | 0.060582829 | 0.19124733 | 0.113358 |
| 2.56E-05    | -0.20841864  | 5.58E-06    | 0.065753285 | 0.15599582 | 0.091947 |
| 5.95E-18    | -0.387675488 | 3.39E-18    | -0.02663489 | 0.5658703  | -0.09434 |
| 5.42E-07    | -0.220287006 | 1.53E-06    | -0.13815018 | 0.00277331 | 0.039061 |
| 0.016458094 | -0.127649368 | 0.005737067 | -0.04225058 | 0.36229399 | 0.277234 |
| 3.16E-11    | -0.317586295 | 2.10E-12    | -0.02079693 | 0.65395863 | 0.228159 |
| 0.235434538 | -0.075764767 | 0.101995883 | -0.1630081  | 0.00040489 | -0.07602 |
| 6.66E-14    | 0.342360383  | 2.74E-14    | 0.005748184 | 0.9014044  | 0.025556 |
| 3.90E-13    | -0.32645544  | 4.65E-13    | -0.0441665  | 0.34091799 | 0.060721 |
| 0.32759367  | 0.043054984  | 0.353219249 | -0.12683653 | 0.00605647 | -0.08903 |
| 0.460516237 | -0.030531246 | 0.510428228 | 0.166420444 | 0.0003039  | 0.208754 |
| 0.094093487 | -0.072050927 | 0.119974098 | -0.01808997 | 0.69660171 | -0.00578 |
| 2.62E-07    | -0.242254895 | 1.16E-07    | -0.11576149 | 0.01230259 | -0.04107 |
| 6.83E-09    | -0.259597735 | 1.25E-08    | 0.059204327 | 0.20156412 | 0.287733 |
| 0.430127314 | -0.039311108 | 0.396676815 | -0.11887213 | 0.01013801 | 0.023376 |
| 0.254828827 | -0.058018641 | 0.210756594 | -0.01438013 | 0.75660628 | 0.095644 |
| 0.338247396 | -0.051519098 | 0.26652901  | -0.00207834 | 0.96427223 | -0.0429  |
| 2.99E-17    | -0.38062391  | 1.51E-17    | -0.00129612 | 0.97771452 | 0.104584 |
| 0.00277527  | -0.144391097 | 0.00175782  | -0.06327574 | 0.17222037 | 0.294478 |
| 0.24969451  | -0.057424153 | 0.215477721 | -0.08650403 | 0.06178151 | 0.361123 |
| 1.89E-06    | -0.21829569  | 1.91E-06    | -0.060244   | 0.1937465  | -0.10528 |
| 0.017184002 | 0.104232495  | 0.024285292 | -0.01472067 | 0.75103036 | 0.030688 |
| 0.08450137  | 0.089949398  | 0.05207021  | -0.01324548 | 0.77527444 | 0.108163 |
| 0.107156039 | -0.073762359 | 0.111403726 | -0.01565455 | 0.73580654 | 0.100291 |
| 0.118225039 | -0.069652126 | 0.132842362 | 2.60E-05    | 0.99955244 | 0.089378 |
| 7.62E-11    | -0.287093601 | 2.60E-10    | 0.02744051  | 0.55417432 | -0.06504 |
| 0.378958991 | 0.032774618  | 0.479841701 | 0.160094693 | 0.000515   | -0.05891 |
| 0.943995147 | 0.004953823  | 0.914974008 | -0.07454971 | 0.10762621 | 0.081934 |
| 0.020536635 | -0.118327498 | 0.010490653 | -0.03955305 | 0.39377479 | 0.088568 |
| 0.142299397 | 0.07347898   | 0.112788561 | -0.08799582 | 0.05740728 | -0.02088 |
| 9.49E-07    | 0.223177797  | 1.11E-06    | -0.00107823 | 0.98146018 | -0.20773 |
| 0.500518916 | -0.038880759 | 0.401870339 | -0.02304935 | 0.61930769 | -0.01699 |
| 0.174567975 | -0.071086113 | 0.125027653 | -0.0752059  | 0.10455584 | 0.057845 |
| 0.095696794 | -0.078102841 | 0.091820953 | -0.01881902 | 0.68501559 | 0.069978 |
| 0.059710381 | 0.085340472  | 0.065381079 | 0.008232917 | 0.85916197 | -0.09267 |



|             |              |             |             |            |          |
|-------------|--------------|-------------|-------------|------------|----------|
| 0.168694352 | -0.065414207 | 0.158145425 | -0.10720347 | 0.02049507 | -0.02819 |
| 0.155940676 | 0.065321422  | 0.158737516 | -0.02785999 | 0.54813134 | -0.00771 |
| 0.002154418 | -0.158021866 | 0.000609644 | 0.144319603 | 0.00176721 | 0.052458 |
| 0.126093674 | -0.057986546 | 0.211009553 | -0.09126975 | 0.04870262 | -0.06521 |
| 0.038730771 | -0.093811603 | 0.042731659 | -0.07504259 | 0.10531341 | 0.182586 |
| 0.274000134 | -0.055283267 | 0.233107635 | -0.09573049 | 0.03864372 | 0.03395  |
| 0.073101505 | -0.085356293 | 0.065331002 | 0.030072243 | 0.51680925 | 0.015101 |
| 0.002762058 | -0.134588311 | 0.003568848 | 0.049675312 | 0.28404484 | 0.143695 |
| 0.161607882 | -0.067731006 | 0.143895983 | 0.034557211 | 0.45626638 | 0.048603 |
| 0.026826295 | -0.095699609 | 0.03870679  | 0.041320273 | 0.37296879 | 0.06985  |
| 0.020861935 | -0.102516391 | 0.026739464 | -0.05334504 | 0.24992732 | 0.096421 |
| 0.32339502  | 0.045713741  | 0.324255706 | 0.077103086 | 0.09606756 | 0.045861 |
| 0.322846522 | -0.045855117 | 0.322760037 | -0.06748996 | 0.14533114 | 0.071972 |
| 0.014046618 | -0.113132152 | 0.014440606 | -0.02014987 | 0.66405646 | 0.090212 |
| 0.35172362  | 0.03041575   | 0.512029969 | -0.02706278 | 0.55964343 | 0.061946 |
| 0.008689296 | -0.124109746 | 0.00724787  | 0.022566763 | 0.62666454 | 0.085356 |
| 0.074036275 | -0.08503813  | 0.066344105 | 0.051298398 | 0.26858572 | 0.095241 |
| 0.094665714 | -0.093213515 | 0.044078034 | 0.057596065 | 0.21410475 | 0.064572 |
| 0.025101272 | 0.111357483  | 0.016062233 | -0.03923781 | 0.39755852 | -0.0746  |
| 0.005597925 | 0.125357275  | 0.006678968 | -0.10792954 | 0.01965104 | -0.00996 |
| 0.143166108 | -0.072215733 | 0.119127043 | 0.085720858 | 0.06418582 | -0.04588 |
| 0.05452846  | 0.089548207  | 0.053131128 | -0.22877061 | 5.82E-07   | -0.12033 |
| 8.62E-05    | 0.187702568  | 4.47E-05    | 0.024192512 | 0.60203254 | 0.050586 |
| 0.048933794 | -0.090303696 | 0.051148041 | 0.010728805 | 0.81713089 | 0.052891 |
| 0.352717815 | 0.047445812  | 0.306241112 | 0.076226965 | 0.09991652 | 0.047674 |
| 0.005150831 | -0.124826455 | 0.006915954 | 0.25791633  | 1.56E-08   | 0.327382 |
| 0.482150192 | 0.020626518  | 0.656612056 | -0.04472297 | 0.3348634  | 0.037073 |
| 0.114657155 | 0.068285008  | 0.140638615 | 0.032098675 | 0.48895141 | -0.00251 |
| 0.003597609 | -0.137905403 | 0.00282232  | -0.11021694 | 0.01718675 | 0.102014 |
| 0.438535163 | -0.036193932 | 0.435204288 | 0.05505124  | 0.23507789 | 0.021711 |
| 0.862535778 | 0.000335989  | 0.994222311 | -0.10176172 | 0.02788455 | 0.051886 |
| 0.777562389 | -0.017177784 | 0.711198066 | -0.04105397 | 0.37605992 | -0.20574 |
| 0.134302508 | 0.074938794  | 0.105797176 | -0.0042222  | 0.92749386 | 0.014654 |
| 0.73540528  | -0.011949706 | 0.796752316 | -0.00036207 | 0.9937739  | -0.00146 |
| 3.07E-09    | 0.267820056  | 4.11E-09    | -0.01125313 | 0.80836315 | -0.09702 |
| 1.05E-10    | -0.301718899 | 2.77E-11    | -0.04207134 | 0.36433564 | 0.180822 |
| 0.833490647 | 0.019926368  | 0.667558606 | 0.093297641 | 0.04388652 | 0.10413  |
| 0.678165125 | -0.022545643 | 0.62698735  | -0.13914706 | 0.00258161 | -0.17815 |
| 0.016900184 | -0.109527223 | 0.017899662 | -0.01607583 | 0.72897226 | 0.055945 |
| 0.311262279 | 0.043726979  | 0.34574913  | -0.05556465 | 0.23073396 | -0.0205  |
| 0.844800523 | -0.021579187 | 0.641835077 | -0.06247492 | 0.17772495 | -0.1521  |
| 0.892688398 | 0.009879275  | 0.831384692 | -0.01691956 | 0.71534955 | 0.00032  |
| 0.01453466  | 0.108154277  | 0.019396001 | -0.03211379 | 0.48874668 | 0.142808 |
| 0.496340829 | 0.028327467  | 0.541435477 | -0.06368957 | 0.16942614 | 0.136609 |
| 0.526121753 | -0.027864121 | 0.548072037 | 0.029903566 | 0.51916449 | 0.012543 |

|             |              |             |             |            |          |
|-------------|--------------|-------------|-------------|------------|----------|
| 0.436096772 | -0.043458949 | 0.348716522 | 0.050024707 | 0.28066733 | -0.05571 |
| 0.270622944 | -0.055093649 | 0.2347169   | 0.069894382 | 0.13149633 | -0.00494 |
| 0.400890722 | -0.049513709 | 0.285616252 | 0.006120712 | 0.89505036 | -0.04504 |
| 0.442742607 | 0.041427296  | 0.371730961 | 0.122771372 | 0.00790604 | 0.081718 |
| 0.104956222 | -0.069527756 | 0.133537514 | 0.183327735 | 6.75E-05   | 0.179815 |
| 0.803107108 | -0.015690153 | 0.735228149 | 0.018073414 | 0.69686572 | -0.00546 |
| 0.082140136 | -0.078167637 | 0.091550996 | -0.04042929 | 0.38337237 | 0.000566 |
| 0.009042773 | 0.124890263  | 0.006887074 | -0.08521526 | 0.06577849 | 0.071324 |
| 0.762105078 | 0.009457816  | 0.838477006 | -0.05294297 | 0.25351973 | 0.018602 |
| 0.242708945 | -0.057574223 | 0.214278834 | -0.06630753 | 0.15252986 | -0.08234 |
| 0.558779689 | -0.027701834 | 0.550405919 | 0.144779121 | 0.00170767 | 0.09455  |
| 0.090402546 | 0.089807965  | 0.052442187 | 0.149970843 | 0.00115156 | 0.124339 |
| 0.100149289 | -0.075631568 | 0.102601456 | 0.303367671 | 2.13E-11   | 0.066454 |
| 0.947587179 | -0.00127266  | 0.978117795 | 0.015555973 | 0.73740876 | -0.03482 |
| 0.766784594 | 0.018285145  | 0.693492962 | -0.08803298 | 0.05730168 | 0.109979 |
| 0.870377628 | 0.015954482  | 0.730938668 | -0.00771842 | 0.86787996 | -0.01789 |
| 0.523926269 | 0.03994071   | 0.38915182  | -0.08281414 | 0.07379139 | -0.06624 |
| 0.022814627 | 0.108442731  | 0.019072882 | -0.13271342 | 0.00406602 | 0.373425 |
| 3.95E-08    | 0.246206083  | 7.07E-08    | 0.014948069 | 0.74731422 | -0.08541 |
| 1.36E-06    | 0.220648955  | 1.47E-06    | -0.0246842  | 0.59466954 | -0.0673  |
| 0.000370166 | -0.158962575 | 0.000564854 | -0.19186575 | 2.99E-05   | 0.044228 |
| 0.254401497 | 0.045299836  | 0.328660388 | -0.12781034 | 0.00567564 | 0.072086 |
| 0.24641892  | 0.048886443  | 0.291771145 | -0.20933205 | 5.06E-06   | 0.152067 |
| 0.693465568 | 0.015696535  | 0.735124475 | 0.031984334 | 0.49050152 | 0.031576 |
| 0.784814172 | -0.018443045 | 0.690981626 | -0.04290501 | 0.35490017 | 0.073312 |
| 0.047512539 | -0.077791187 | 0.093128311 | -0.15058166 | 0.00109849 | 0.367349 |
| 0.495208802 | 0.051879909  | 0.263189916 | -0.14124665 | 0.00221679 | -0.01596 |
| 3.33E-05    | 0.19785071   | 1.66E-05    | 0.097407365 | 0.0353474  | -0.07202 |
| 6.23E-15    | 0.361661182  | 7.07E-16    | -0.05116292 | 0.26985362 | 0.163978 |
| 0.002804174 | 0.142222245  | 0.002063849 | -0.18663079 | 4.95E-05   | 0.178557 |
| 2.69E-07    | -0.229987419 | 5.05E-07    | -0.12859726 | 0.00538377 | -0.14805 |
| 0.133257809 | 0.072781413  | 0.116255096 | -0.03460718 | 0.45561502 | -0.06892 |
| 0.805513575 | -0.007634757 | 0.869299192 | -0.14343953 | 0.00188657 | 0.309431 |
| 0.067329913 | -0.081490012 | 0.078539913 | 0.023503809 | 0.61241417 | -0.02668 |
| 8.85E-14    | -0.330294285 | 2.39E-13    | -0.0994863  | 0.03159553 | -0.05532 |
| 0.069707114 | -0.084658988 | 0.067568185 | 0.068179551 | 0.14125428 | -0.18376 |
| 0.008442351 | 0.114052131  | 0.013658022 | -0.18465054 | 5.96E-05   | -0.051   |
| 0.089263757 | -0.068647208 | 0.138539744 | -0.18961361 | 3.72E-05   | -0.17419 |
| 0.000139512 | 0.18630795   | 5.10E-05    | -0.25743914 | 1.66E-08   | -0.22072 |
| 0.075170196 | 0.08852456   | 0.055919873 | -0.19644303 | 1.91E-05   | -0.13284 |
| 0.298715196 | 0.059390663  | 0.200146392 | -0.06152673 | 0.18441004 | 0.042565 |
| 0.027549598 | -0.09215964  | 0.046537308 | -0.18723803 | 4.67E-05   | 0.033983 |
| 0.036139866 | -0.095654919 | 0.038798213 | 0.07164649  | 0.12207272 | 0.003058 |
| 0.235644926 | -0.055922238 | 0.227742257 | 0.115104901 | 0.0128085  | 0.101843 |
| 1.04E-05    | -0.198275521 | 1.59E-05    | -0.01626391 | 0.72592801 | 0.156551 |

|             |              |             |             |            |          |
|-------------|--------------|-------------|-------------|------------|----------|
| 1.16E-08    | -0.256365971 | 1.92E-08    | -0.04756103 | 0.30506674 | 0.214904 |
| 0.00049523  | -0.174642289 | 0.000148762 | -0.21192926 | 3.83E-06   | 0.074596 |
| 8.73E-06    | 0.211833462  | 3.87E-06    | -0.01969906 | 0.67112785 | -0.01876 |
| 8.40E-07    | 0.237928886  | 1.96E-07    | 0.006746615 | 0.88438992 | -0.1791  |
| 0.059074256 | 0.091662456  | 0.04773689  | 0.045603485 | 0.32542527 | 0.06109  |
| 0.268300292 | 0.051811208  | 0.263823481 | -0.2455617  | 7.66E-08   | 0.05263  |
| 5.82E-09    | -0.272112804 | 2.26E-09    | -0.14741833 | 0.00139991 | 0.152388 |
| 0.31141825  | -0.048141512 | 0.299195199 | 0.032535758 | 0.48305024 | 0.032036 |
| 0.686908769 | 0.027984931  | 0.546337803 | -0.02914311 | 0.52985091 | 0.059839 |
| 1.88E-06    | -0.214783003 | 2.82E-06    | -0.03506839 | 0.4496276  | 0.092398 |
| 0.233006477 | -0.049625973 | 0.284523994 | 0.035180789 | 0.44817528 | 0.039865 |
| 0.00313783  | 0.118845739  | 0.010154853 | -0.16759069 | 0.00027506 | -0.22198 |
| 0.622414953 | 0.002763032  | 0.952514259 | -0.09547777 | 0.03916242 | 0.185197 |
| 0.062418597 | -0.095448469 | 0.039222929 | -0.1095754  | 0.01784904 | -0.11793 |
| 2.55E-12    | -0.313045278 | 4.47E-12    | -0.07943131 | 0.08641217 | 0.121135 |
| 0.002128533 | 0.143258157  | 0.001912068 | -0.13682216 | 0.00304882 | 0.112552 |
| 0.00131406  | -0.146793544 | 0.001467767 | -0.06036165 | 0.19287605 | -0.09528 |
| 0.048979607 | -0.104056479 | 0.024527716 | -0.0792163  | 0.08726977 | -0.00966 |
| 0.069800322 | 0.085902213  | 0.06362232  | -0.08981165 | 0.05243248 | 0.074496 |
| 0.810720514 | 0.002650223  | 0.954450859 | -0.13143116 | 0.00444128 | 0.004927 |
| 0.441406529 | -0.032643195 | 0.481605628 | -0.09466416 | 0.04087247 | 0.035235 |
| 0.003918011 | 0.13800676   | 0.002801931 | -0.09752259 | 0.03512996 | 0.284552 |
| 0.36751867  | 0.036170398  | 0.435503118 | -0.02817212 | 0.54365602 | -0.00983 |
| 0.000116946 | -0.182246322 | 7.46E-05    | 0.097715464 | 0.03476852 | -0.09835 |
| 7.27E-13    | -0.316285653 | 2.61E-12    | -0.08699553 | 0.0603109  | 0.240946 |
| 0.003259893 | -0.135455466 | 0.003358109 | -0.00665814 | 0.88589559 | 0.115064 |
| 0.891854152 | 0.003364584  | 0.942192371 | -0.01898322 | 0.68241619 | -0.2689  |
| 0.900215654 | -0.006331177 | 0.891463501 | -0.15097202 | 0.00106576 | -0.18629 |
| 0.942648186 | -0.002542222 | 0.95630518  | -0.09898257 | 0.03247188 | 0.063819 |
| 0.267838387 | 0.060954633  | 0.188532238 | -0.13058948 | 0.00470431 | 0.146391 |
| 0.055483569 | -0.093046104 | 0.04446123  | -0.02331948 | 0.61520616 | -0.07479 |
| 0.636103372 | 0.026084443  | 0.573928941 | -0.15435156 | 0.00081779 | 0.07914  |
| 0.082896794 | -0.089528763 | 0.053182999 | -0.03091468 | 0.5051294  | 0.082583 |
| 0.553183807 | 0.020685533  | 0.655692692 | -0.18292003 | 7.01E-05   | -0.03361 |
| 0.104612384 | -0.066822024 | 0.149365003 | -0.01792935 | 0.69916394 | -0.24068 |
| 3.54E-07    | 0.220160124  | 1.56E-06    | 0.093787096 | 0.04278614 | 0.317683 |
| 1.68E-05    | 0.196126021  | 1.97E-05    | 0.143844343 | 0.00183078 | 0.171986 |
| 0.008492582 | -0.144502101 | 0.001743338 | 0.107818202 | 0.01977847 | 0.049781 |
| 1.99E-05    | -0.200505261 | 1.27E-05    | -0.119203   | 0.00992895 | -0.061   |
| 0.885783288 | 0.006029408  | 0.89660709  | -0.16991187 | 0.00022528 | -0.038   |
| 0.00092057  | -0.15507158  | 0.000772384 | 0.07335309  | 0.11340809 | -0.11706 |
| 1.98E-05    | 0.209076178  | 5.20E-06    | -0.25310395 | 2.93E-08   | -0.02084 |
| 0.023239784 | 0.102537174  | 0.02670851  | -0.34302356 | 2.43E-14   | -0.12897 |
| 5.95E-09    | 0.261829624  | 9.27E-09    | -0.12054803 | 0.00911797 | -0.022   |
| 0.988808804 | -0.01614013  | 0.727931005 | 0.176360052 | 0.00012761 | 0.134493 |

|             |              |             |             |            |          |
|-------------|--------------|-------------|-------------|------------|----------|
| 0.815158003 | -0.012107717 | 0.794124634 | 0.00960008  | 0.8360815  | -0.03182 |
| 0.286668727 | -0.04730902  | 0.30763931  | 0.005748944 | 0.90139144 | -0.03958 |
| 1.60E-05    | -0.198936532 | 1.49E-05    | 0.296910286 | 5.86E-11   | 0.284443 |
| 0.051355012 | -0.098279349 | 0.03372994  | -0.06711518 | 0.14758418 | 0.03781  |
| 0.206762101 | -0.056885893 | 0.219817403 | -0.03606329 | 0.43686461 | -0.08982 |
| 2.95E-24    | -0.447708858 | 2.12E-24    | -0.03704368 | 0.42449373 | 0.018211 |
| 5.95E-08    | -0.261871865 | 9.22E-09    | 0.041694978 | 0.36864608 | 0.172919 |
| 0.01044606  | -0.116370339 | 0.011849321 | -0.00555971 | 0.9046215  | 0.069048 |
| 0.018856097 | -0.106643094 | 0.021167855 | -0.0639222  | 0.16787039 | -0.05948 |
| 0.74932757  | 0.004664763  | 0.919918192 | -0.02665635 | 0.56555715 | -0.05552 |
| 2.78E-06    | 0.219118452  | 1.75E-06    | -0.20615931 | 7.07E-06   | -0.14044 |
| 0.002530361 | -0.140819812 | 0.002286898 | -0.13476563 | 0.0035248  | -0.05121 |
| 0.099853795 | 0.067789608  | 0.143548712 | -0.0216859  | 0.6401884  | 0.049666 |
| 0.695480892 | -0.035445256 | 0.444768431 | -0.0628795  | 0.17492789 | -0.01173 |
| 1.42E-07    | 0.240464558  | 1.44E-07    | 0.014121227 | 0.7608539  | 0.32502  |
| 0.071047346 | -0.089432244 | 0.053441114 | 0.095745549 | 0.038613   | -0.22872 |
| 1.50E-06    | 0.225236007  | 8.76E-07    | 0.059532344 | 0.19907329 | -0.06008 |
| 7.00E-09    | -0.27335167  | 1.90E-09    | 0.019277521 | 0.67776646 | 0.10757  |
| 0.460078945 | 0.02565015   | 0.580325106 | -0.0309937  | 0.50404104 | -0.18444 |
| 0.007807535 | -0.129382283 | 0.005106139 | -0.03100225 | 0.50392329 | 0.422357 |
| 1.23E-16    | 0.366842777  | 2.53E-16    | 0.157003329 | 0.00066184 | 0.074503 |
| 0.185256204 | -0.046023089 | 0.320988835 | -0.14036912 | 0.00236312 | 0.049986 |
| 0.034561132 | -0.088345029 | 0.056421285 | 0.272873855 | 2.03E-09   | 0.103408 |
| 5.81E-11    | 0.308751268  | 9.00E-12    | -0.10042494 | 0.03001645 | 0.043562 |
| 2.63E-08    | 0.254827596  | 2.34E-08    | -0.12370271 | 0.00744265 | -0.17139 |
| 0.07560968  | 0.065270869  | 0.159060816 | 0.088890645 | 0.0549089  | 0.185772 |
| 0.044663213 | -0.096533989 | 0.037033104 | 0.139967748 | 0.00243295 | 0.108116 |
| 2.26E-05    | 0.195374655  | 2.12E-05    | 0.352171068 | 4.41E-15   | -0.00659 |
| 8.34E-13    | -0.32010905  | 1.38E-12    | 0.001777098 | 0.96944807 | -0.02602 |
| 0.110787688 | -0.070593029 | 0.127673453 | -0.0087269  | 0.85080753 | -0.09621 |
| 0.522708129 | -0.03396106  | 0.464077575 | -0.000832   | 0.98569355 | -0.23447 |
| 0.712017931 | -0.01201317  | 0.795696651 | 0.094340435 | 0.04157022 | 0.383285 |
| 0.030593166 | 0.086636278  | 0.06138293  | 0.106607817 | 0.02121084 | 0.156103 |
| 0.687187817 | -0.010404114 | 0.822571869 | -0.04396091 | 0.34317235 | -0.03065 |
| 0.620276317 | -0.02123629  | 0.647137916 | -0.0950622  | 0.04002815 | 0.004633 |
| 1.57E-06    | 0.226336187  | 7.72E-07    | -0.05621419 | 0.22532022 | -0.04369 |
| 0.790848904 | 0.028354414  | 0.541050735 | -0.03569291 | 0.44159156 | -0.05937 |
| 0.715977636 | 0.017752592  | 0.701987605 | 0.046698859 | 0.31392718 | -0.05838 |
| 0.006629032 | 0.110138389  | 0.017266662 | 0.012090407 | 0.7944124  | -0.0448  |
| 0.729880685 | -0.017783119 | 0.701499663 | -5.54E-05   | 0.99904776 | -0.10722 |
| 0.72801541  | 0.027586813  | 0.552063025 | 0.007683753 | 0.86846801 | -0.06053 |
| 0.882448351 | 0.004563274  | 0.921654837 | -0.01877665 | 0.68568693 | 0.03825  |
| 0.497153403 | -0.03348318  | 0.470392295 | -0.01622555 | 0.72654849 | -0.05077 |
| 0.585663554 | 0.020326837  | 0.661288627 | 0.093271163 | 0.04394673 | 0.074386 |
| 0.018444271 | -0.12513188  | 0.006778693 | 0.087535671 | 0.05872827 | 0.200343 |

|             |              |             |             |            |          |
|-------------|--------------|-------------|-------------|------------|----------|
| 0.717061588 | 0.020550173  | 0.657802181 | -0.11321223 | 0.01437095 | -0.08765 |
| 0.584847905 | 0.00917171   | 0.843299101 | -0.12494989 | 0.00686019 | 0.028344 |
| 1.97E-10    | 0.282451766  | 5.15E-10    | -0.02396572 | 0.60544247 | -0.11337 |
| 0.001007487 | 0.156466994  | 0.000690962 | -0.04929168 | 0.28778482 | -0.09284 |
| 1.27E-05    | 0.207482123  | 6.15E-06    | -0.01254341 | 0.78689139 | 0.269443 |
| 0.985980858 | 0.00137617   | 0.976338541 | -0.02703579 | 0.5600353  | 0.118389 |
| 0.457263021 | -0.045799483 | 0.323348066 | -0.2790845  | 8.40E-10   | 0.236281 |
| 3.56E-05    | 0.18403379   | 6.32E-05    | -0.12794446 | 0.00562491 | -0.03738 |
| 0.884594688 | -0.000977489 | 0.983192125 | -0.03421956 | 0.46068148 | 0.235548 |
| 0.656555867 | 0.011034712  | 0.812012706 | -0.1651887  | 0.00033727 | 0.262912 |
| 3.65E-07    | 0.213991817  | 3.07E-06    | -0.2122634  | 3.70E-06   | -0.09163 |
| 3.28E-07    | -0.238567838 | 1.82E-07    | -0.06831645 | 0.14045544 | -0.08269 |
| 0.255559093 | -0.049788533 | 0.282947373 | -0.16604869 | 0.00031363 | 0.050783 |
| 1.50E-06    | 0.220503857  | 1.50E-06    | -0.28667488 | 2.76E-10   | 0.352385 |
| 0.003323477 | 0.133134208  | 0.003949283 | -0.28534193 | 3.37E-10   | 0.170264 |
| 0.916613136 | -0.001116236 | 0.980806803 | 0.076903117 | 0.09693548 | 0.328619 |
| 2.04E-09    | 0.270315393  | 2.91E-09    | 0.34334622  | 2.29E-14   | 0.147302 |
| 0.031635073 | 0.098924288  | 0.032574605 | 0.070214391 | 0.12973446 | 0.335543 |
| 0.072741011 | 0.072096787  | 0.119737922 | 0.005051364 | 0.91330636 | 0.164227 |
| 2.81E-08    | 0.251166177  | 3.76E-08    | 0.087692203 | 0.05827611 | -0.0971  |
| 0.818011519 | -0.001570452 | 0.972999297 | -0.13710953 | 0.00298717 | -0.06877 |
| 4.56E-13    | 0.326476556  | 4.64E-13    | 0.02574007  | 0.57899806 | 0.128787 |
| 0.352479698 | 0.046325981  | 0.317810985 | -0.29727984 | 5.53E-11   | -0.10962 |
| 0.142137514 | 0.054540691  | 0.239454506 | -0.0116271  | 0.80212429 | -0.12753 |
| 5.01E-10    | -0.275663662 | 1.37E-09    | -0.14135245 | 0.00219971 | -0.17688 |
| 0.483001202 | -0.043589445 | 0.347269781 | -0.09749895 | 0.03517448 | 0.152172 |
| 0.848750865 | 0.005343459  | 0.908314744 | -0.17692063 | 0.00012134 | -0.10298 |
| 0.000106432 | -0.179359957 | 9.73E-05    | -0.02555091 | 0.58179142 | -0.15103 |
| 0.726761049 | -0.020153468 | 0.664000123 | 0.119989494 | 0.00944729 | 0.184534 |
| 4.02E-05    | 0.193827048  | 2.47E-05    | -0.01220133 | 0.79256898 | 0.162866 |
| 0.586536208 | -0.026874107 | 0.562385014 | -0.01122694 | 0.80880056 | -0.10653 |
| 0.029595466 | -0.089125898 | 0.054267274 | -0.01802745 | 0.69759875 | -0.10967 |
| 9.31E-16    | -0.359316557 | 1.12E-15    | -0.0339441  | 0.46430088 | 0.226923 |
| 0.277044543 | -0.07074144  | 0.126872582 | -0.16033254 | 0.00050506 | 0.081792 |
| 1.11E-06    | -0.223626559 | 1.05E-06    | 0.060717709 | 0.19025908 | -0.00436 |
| 9.30E-06    | -0.21549632  | 2.60E-06    | -0.07445972 | 0.10805275 | 0.269343 |
| 0.002356142 | -0.140001077 | 0.002427077 | 0.081512954 | 0.07845558 | 0.208837 |
| 0.016826883 | 0.078741793  | 0.089186586 | -0.02945451 | 0.5254615  | 0.026841 |
| 0.021329008 | 0.073873269  | 0.110865382 | -0.03284056 | 0.47895793 | 0.027347 |
| 0.00301595  | -0.151166546 | 0.001049789 | -0.04942152 | 0.28651531 | 0.190987 |
| 4.87E-15    | 0.342655145  | 2.60E-14    | -0.00820436 | 0.8596454  | -0.03312 |
| 5.16E-10    | 0.274314398  | 1.66E-09    | -0.03989906 | 0.38964698 | -0.0066  |
| 0.05931429  | -0.078210018 | 0.091374769 | -0.16230875 | 0.00042911 | 0.213058 |
| 0.372821508 | 0.028573399  | 0.537929283 | -0.03121359 | 0.50101878 | 0.018049 |
| 2.02E-15    | -0.34877352  | 8.37E-15    | -0.14339344 | 0.00189302 | -0.29185 |

|             |              |             |             |            |          |
|-------------|--------------|-------------|-------------|------------|----------|
| 2.99E-05    | -0.181502428 | 7.99E-05    | 0.220606969 | 1.48E-06   | 0.178916 |
| 0.000130444 | -0.172083703 | 0.000186447 | -0.10850134 | 0.01900781 | 0.161545 |
| 0.74580106  | -0.017924189 | 0.699246389 | -0.11797567 | 0.0107242  | 0.170965 |
| 0.117578952 | -0.076167136 | 0.10018377  | -0.10664292 | 0.02116807 | 0.222327 |
| 0.098856289 | 0.085495685  | 0.064891171 | -0.12208642 | 0.00826311 | -0.0713  |
| 1.23E-08    | 0.273415997  | 1.88E-09    | 0.061072279 | 0.18767906 | 0.155587 |
| 0.014545901 | -0.111255884 | 0.016159719 | -0.01243226 | 0.78873488 | 0.041812 |
| 0.001350146 | -0.140449758 | 0.002349314 | 0.021220367 | 0.64738461 | -0.01057 |
| 0.007315265 | -0.12442678  | 0.007099329 | 0.127907244 | 0.00563895 | -0.13926 |
| 4.56E-05    | 0.186030678  | 5.24E-05    | -0.103897   | 0.02474916 | 0.132363 |
| 1.14E-08    | -0.273292174 | 1.92E-09    | -0.06396229 | 0.16760333 | 0.229657 |
| 0.06436569  | 0.089992215  | 0.051958036 | -0.21291765 | 3.45E-06   | -0.06354 |
| 0.786042107 | -0.016259857 | 0.725993529 | -0.21641831 | 2.35E-06   | -0.0069  |
| 0.300667235 | 0.051910687  | 0.262906426 | 0.046648702 | 0.31444778 | 0.101162 |
| 0.014414552 | 0.122267632  | 0.008167267 | 0.163474155 | 0.00038945 | 0.242843 |
| 0.004955706 | 0.127025473  | 0.005980837 | 0.218896322 | 1.79E-06   | -0.14442 |
| 0.000278435 | -0.15971597  | 0.000531206 | 0.202448837 | 1.04E-05   | -0.29671 |
| 2.16E-07    | 0.242643541  | 1.10E-07    | 0.045613837 | 0.32531533 | -0.17964 |
| 0.603529049 | -0.028128209 | 0.544284557 | 0.023026082 | 0.61966152 | 0.029814 |
| 0.790184766 | 0.014490271  | 0.754801446 | 0.367568892 | 2.19E-16   | 0.169456 |
| 0.716349971 | 0.007731697  | 0.867654822 | -0.14728955 | 0.00141365 | 0.152999 |
| 1.97E-05    | -0.204169633 | 8.70E-06    | -0.08049127 | 0.08228315 | -0.06179 |
| 0.031760969 | -0.092180808 | 0.046486801 | 0.111082892 | 0.0163269  | 0.170147 |
| 6.18E-15    | -0.358882295 | 1.22E-15    | -0.17142055 | 0.00019758 | 0.094649 |
| 1.40E-08    | 0.269637676  | 3.19E-09    | 0.005925814 | 0.89837384 | -0.3064  |
| 5.99E-05    | -0.185978289 | 5.26E-05    | -0.15164778 | 0.00101122 | -0.03033 |
| 1.31E-16    | -0.371717336 | 9.49E-17    | -0.17753433 | 0.00011481 | 0.123865 |
| 0.045530237 | -0.101885093 | 0.027694516 | -0.27602054 | 1.30E-09   | 0.045721 |
| 0.349331443 | -0.04190734  | 0.366210067 | -0.07123219 | 0.12425205 | 0.092546 |
| 1.27E-24    | -0.453021688 | 5.18E-25    | -0.02665666 | 0.56555263 | -0.00739 |
| 0.001581172 | -0.139224022 | 0.002567326 | 0.037483962 | 0.41900513 | 0.186435 |
| 0.318555339 | -0.039099549 | 0.399224888 | -0.16832065 | 0.00025839 | -0.11892 |
| 0.015758861 | -0.114823992 | 0.013030496 | -0.02262628 | 0.62575515 | 0.06589  |
| 0.166769436 | -0.041365082 | 0.372450216 | -0.11078403 | 0.0166193  | -0.13982 |
| 0.094795399 | -0.070492136 | 0.128220134 | -0.02642497 | 0.56893709 | 0.029589 |
| 0.49958447  | 0.034414573  | 0.458128592 | 0.037048755 | 0.42443019 | 0.035558 |
| 0.666839354 | -0.014466627 | 0.755188771 | -0.05146644 | 0.26701877 | -0.02308 |
| 0.009120685 | -0.11981466  | 0.009552532 | 0.041533235 | 0.37050817 | 0.044562 |
| 0.521802082 | -0.02969722  | 0.522053201 | -0.0247529  | 0.593644   | 0.034626 |
| 0.016308846 | -0.103754886 | 0.024947953 | -0.09991369 | 0.03086793 | -0.06981 |
| 8.21E-05    | -0.177800376 | 0.000112085 | -0.05240802 | 0.25835468 | 0.092969 |
| 0.701553035 | -0.014109798 | 0.761041576 | -0.08552984 | 0.06478377 | 0.14796  |
| 0.000582169 | -0.153126986 | 0.000900713 | -0.05910707 | 0.20230699 | -0.15718 |
| 3.19E-06    | -0.228107008 | 6.29E-07    | -0.05837424 | 0.20796847 | -0.02218 |
| 0.000464621 | -0.160097384 | 0.00051489  | -0.0241708  | 0.60235866 | 0.074741 |

|             |              |             |             |            |          |
|-------------|--------------|-------------|-------------|------------|----------|
| 0.005621231 | -0.128517969 | 0.005412556 | 0.058810326 | 0.20458586 | -0.02327 |
| 0.284250875 | 0.048915986  | 0.291479281 | -0.05622378 | 0.2252409  | -0.04753 |
| 0.001167942 | -0.153926781 | 0.000845717 | -0.02541246 | 0.58383978 | 0.04859  |
| 0.000284455 | -0.170366987 | 0.000216561 | -0.17605197 | 0.00013118 | -0.0008  |
| 1.83E-05    | -0.201077442 | 1.20E-05    | -0.04506333 | 0.33119446 | 0.131209 |
| 0.004134773 | -0.127829553 | 0.005668347 | 0.181034163 | 8.35E-05   | 0.301607 |
| 8.03E-11    | -0.293105714 | 1.05E-10    | -0.01778724 | 0.70143388 | 0.022571 |
| 0.000687691 | -0.165919965 | 0.000317067 | 0.101063445 | 0.02898134 | -0.05147 |
| 0.003909064 | -0.147846598 | 0.001355067 | -0.22870938 | 5.87E-07   | 0.059936 |
| 0.970870252 | 0.004592163  | 0.921160463 | 0.081106365 | 0.07996112 | 0.050485 |
| 5.97E-05    | 0.191878741  | 2.99E-05    | -0.31089655 | 6.35E-12   | -0.1171  |
| 0.423896053 | -0.035194885 | 0.447993332 | -0.09133892 | 0.04853133 | 0.104047 |
| 2.11E-16    | -0.36393128  | 4.52E-16    | 0.026685724 | 0.56512877 | 0.220109 |
| 6.10E-05    | -0.188631666 | 4.09E-05    | 0.104800536 | 0.02351701 | 0.055397 |
| 0.020495113 | -0.10971669  | 0.017701293 | 0.01063623  | 0.81868133 | -0.20433 |
| 0.416065479 | -0.033439695 | 0.470969258 | -0.07434481 | 0.1085994  | 0.020731 |
| 0.982128809 | 0.003596549  | 0.938214627 | 0.104737425 | 0.02360132 | 0.125044 |
| 3.88E-15    | 0.33878204   | 5.26E-14    | -0.16285411 | 0.00041011 | -0.0978  |
| 6.85E-13    | 0.316140243  | 2.68E-12    | -0.06029939 | 0.19333635 | -0.25008 |
| 2.19E-05    | 0.19349893   | 2.55E-05    | -0.11244032 | 0.01505481 | -0.04796 |
| 0.630848737 | 0.019679418  | 0.671436604 | -0.22771442 | 6.58E-07   | -0.14447 |
| 0.338262276 | -0.04032967  | 0.384546543 | 0.076922356 | 0.0968517  | 0.117297 |
| 0.002669117 | -0.136476327 | 0.00312453  | 0.03861821  | 0.40505871 | 0.349902 |
| 0.012583626 | 0.121254635  | 0.008716001 | -0.00590487 | 0.89873102 | 0.277512 |
| 0.007428421 | 0.120050637  | 0.009410736 | -0.32563753 | 5.36E-13   | 0.039807 |
| 0.007982574 | -0.118124485 | 0.010624859 | -0.00231076 | 0.9602801  | 0.193185 |
| 0.03596891  | -0.096355054 | 0.03738676  | -0.09044859 | 0.05077486 | 0.010482 |
| 0.012232349 | -0.113837666 | 0.013837041 | -0.04157614 | 0.37001371 | 0.220106 |
| 0.33837256  | 0.032034606  | 0.489819655 | 0.007874267 | 0.86523747 | 0.248209 |
| 0.004114768 | -0.129165765 | 0.005181395 | -0.09210278 | 0.04667321 | -0.0426  |
| 0.257413179 | 0.052522418  | 0.257315376 | -0.07752267 | 0.09426663 | 0.181865 |
| 3.35E-06    | -0.20383656  | 9.00E-06    | -0.03066725 | 0.50854541 | 0.151834 |
| 0.11200593  | -0.075387175 | 0.103719969 | -0.02607068 | 0.57413119 | -0.12843 |
| 0.050743383 | -0.094724023 | 0.040744542 | -0.08543359 | 0.0650868  | 0.174018 |
| 0.140094965 | 0.055529363  | 0.231030708 | -0.16451784 | 0.00035686 | 0.066599 |
| 6.79E-12    | -0.319111561 | 1.63E-12    | -0.04411971 | 0.34143025 | 0.188847 |
| 3.67E-13    | -0.332489054 | 1.62E-13    | -0.1598725  | 0.00052445 | -0.06752 |
| 4.60E-09    | -0.274725577 | 1.57E-09    | 0.013517951 | 0.7707792  | 0.089064 |
| 0.235345219 | 0.040581336  | 0.381584615 | -0.21036861 | 4.53E-06   | 0.136937 |
| 0.685981285 | 0.031670425  | 0.494770655 | -0.25516072 | 2.24E-08   | -0.02282 |
| 8.02E-09    | -0.257849484 | 1.58E-08    | -0.15669151 | 0.00067863 | 0.116041 |
| 1.28E-07    | -0.238346458 | 1.87E-07    | -0.13615316 | 0.00319682 | -0.17359 |
| 0.052309726 | 0.094598257  | 0.041013717 | -0.0839195  | 0.07000895 | -0.2936  |
| 0.33765535  | -0.042327816 | 0.361416377 | -0.02538735 | 0.58421167 | -0.01125 |
| 7.67E-08    | -0.250454019 | 4.12E-08    | -0.27053869 | 2.82E-09   | -0.07252 |

|             |              |             |             |            |          |
|-------------|--------------|-------------|-------------|------------|----------|
| 0.005627407 | 0.124709882  | 0.006968996 | -0.21843484 | 1.88E-06   | -0.17325 |
| 0.243504179 | 0.052278985  | 0.259530356 | -0.04035569 | 0.38423969 | -0.07739 |
| 7.38E-08    | 0.247950572  | 5.67E-08    | 0.226726532 | 7.38E-07   | -0.21103 |
| 0.861683998 | -0.007878098 | 0.865172522 | 0.159132525 | 0.00055709 | 0.015374 |
| 5.20E-08    | -0.255395078 | 2.18E-08    | 0.031758822 | 0.49356647 | -0.31042 |
| 3.40E-08    | 0.253308743  | 2.85E-08    | 0.130096454 | 0.00486484 | 0.085692 |
| 1.19E-16    | 0.37438031   | 5.51E-17    | 0.007705845 | 0.86809329 | 0.326714 |
| 0.004314054 | -0.132828144 | 0.00403389  | 0.000967966 | 0.98335584 | 0.026636 |
| 0.02344363  | 0.095725665  | 0.038653571 | -0.00765983 | 0.86887386 | -0.17627 |
| 0.008145318 | -0.119697501 | 0.009623634 | -0.05579155 | 0.22883242 | 0.059156 |
| 0.34626904  | -0.040191348 | 0.386180456 | -0.02031118 | 0.66153336 | -0.03681 |
| 5.50E-08    | -0.247849815 | 5.74E-08    | -0.32143266 | 1.10E-12   | 0.122929 |
| 2.22E-12    | 0.310274652  | 7.03E-12    | -0.10470262 | 0.02364792 | 0.030293 |
| 0.000190912 | -0.16997154  | 0.000224115 | -0.1446243  | 0.00172752 | 0.120591 |
| 0.636294194 | -0.030529422 | 0.510453501 | 0.046106515 | 0.3201115  | 0.016926 |
| 1.03E-13    | -0.326842071 | 4.35E-13    | -0.16232329 | 0.0004286  | -0.01058 |
| 5.03E-07    | -0.226553288 | 7.53E-07    | -0.10369741 | 0.02502874 | 0.215138 |
| 1.58E-13    | -0.338866386 | 5.18E-14    | -0.02423943 | 0.60132821 | -0.11078 |
| 0.012915264 | -0.112997739 | 0.014558184 | -0.07725542 | 0.09541058 | -0.01256 |
| 0.406774985 | 0.030802897  | 0.506671189 | 0.273605261 | 1.83E-09   | 0.047876 |
| 9.89E-07    | 0.22397747   | 1.01E-06    | 0.287866204 | 2.32E-10   | -0.09864 |
| 0.000356293 | 0.165109585  | 0.000339531 | 0.044617986 | 0.33600038 | 0.164288 |
| 0.001003553 | -0.150861609 | 0.001074925 | 0.176009927 | 0.00013168 | 0.20899  |
| 3.48E-05    | -0.174371129 | 0.000152388 | 0.126867669 | 0.00604395 | -0.06359 |
| 0.000397497 | 0.166542011  | 0.000300774 | -0.1613347  | 0.00046511 | 0.207848 |
| 0.966411562 | -0.010428402 | 0.822164557 | 0.057373343 | 0.21588472 | 0.213382 |
| 0.000136189 | 0.158302026  | 0.000595972 | -0.15978555 | 0.00052819 | -0.00286 |
| 0.219128164 | -0.051272217 | 0.268830417 | -0.03219875 | 0.48759691 | 0.122911 |
| 0.55087798  | -0.04343624  | 0.348968677 | 0.103243401 | 0.02567487 | -0.11875 |
| 0.068146428 | -0.088470649 | 0.056070051 | 0.009732461 | 0.83385377 | 0.140082 |
| 1.05E-06    | 0.234198679  | 3.07E-07    | 0.016870834 | 0.71613385 | -0.0439  |
| 6.43E-05    | 0.181614675  | 7.91E-05    | -0.17743221 | 0.00011587 | 0.002887 |
| 0.002069088 | -0.143593587 | 0.001865156 | 0.163542091 | 0.00038725 | 0.081608 |
| 0.901363209 | 0.008577449  | 0.853333447 | 0.081605577 | 0.07811585 | 0.072333 |
| 1.47E-11    | -0.315225009 | 3.12E-12    | 0.120066782 | 0.0094011  | 0.281355 |
| 0.002308825 | 0.136368057  | 0.003148584 | -0.06350324 | 0.17068005 | 0.1969   |
| 1.88E-05    | 0.19623494   | 1.95E-05    | -0.10188245 | 0.02769858 | -0.21144 |
| 0.340004032 | -0.036435121 | 0.43214855  | -0.20153152 | 1.14E-05   | -0.01473 |
| 0.142058925 | -0.053901055 | 0.245018117 | -0.03457465 | 0.45603905 | -0.06415 |
| 4.15E-06    | 0.219086236  | 1.75E-06    | -0.0610987  | 0.18748781 | 0.144495 |
| 1.46E-08    | -0.261554137 | 9.62E-09    | -0.2657302  | 5.47E-09   | 0.004051 |
| 0.000381127 | -0.148619392 | 0.001277485 | -0.08778987 | 0.05799545 | 0.157644 |
| 0.214778289 | -0.062129557 | 0.180138725 | -0.32482382 | 6.17E-13   | 0.054553 |
| 0.359848799 | -0.046913077 | 0.311710076 | 0.028781978 | 0.53496455 | 0.135624 |
| 5.28E-10    | -0.285007268 | 3.54E-10    | -0.12621051 | 0.00631326 | -0.04274 |



|             |              |             |             |            |          |
|-------------|--------------|-------------|-------------|------------|----------|
| 1.95E-05    | 0.173548256  | 0.000163905 | 0.050785484 | 0.27340746 | 0.102343 |
| 0.454420486 | 0.020001992  | 0.666372806 | 0.002167614 | 0.96273874 | 0.046497 |
| 0.0001049   | -0.184938795 | 5.81E-05    | -0.12648119 | 0.00620106 | 0.13341  |
| 1.89E-08    | -0.260507469 | 1.11E-08    | -0.05909029 | 0.20243532 | 0.073024 |
| 0.07021588  | -0.084251771 | 0.068903476 | 0.002318824 | 0.96014153 | 0.166856 |
| 3.06E-05    | -0.197045641 | 1.80E-05    | -0.30956044 | 7.89E-12   | 0.340798 |
| 0.000221546 | 0.180869657  | 8.47E-05    | -0.09387756 | 0.04258532 | -0.03466 |
| 0.154506936 | -0.0598771   | 0.196479605 | -0.18222416 | 7.48E-05   | -0.0727  |
| 0.065809919 | -0.078970939 | 0.088256747 | 0.046967026 | 0.31115334 | -0.16218 |
| 0.000397813 | -0.159992514 | 0.000519329 | 0.075872551 | 0.10150793 | 0.130918 |
| 0.003449641 | -0.136407698 | 0.003139758 | -0.11971785 | 0.00961125 | 0.235243 |
| 0.224693994 | 0.040888462  | 0.377988922 | -0.14615779 | 0.00153991 | -0.04199 |
| 0.0055634   | -0.128008299 | 0.005600907 | -0.01987901 | 0.66830169 | -0.07147 |
| 0.000281619 | 0.156848146  | 0.000670148 | -0.06142299 | 0.18515256 | 0.077653 |
| 1.97E-05    | -0.189731547 | 3.68E-05    | -0.16260159 | 0.00041881 | -0.24579 |
| 0.183641431 | -0.055696405 | 0.229628443 | -0.1084046  | 0.01911532 | 0.020242 |
| 6.60E-10    | -0.285904975 | 3.10E-10    | 0.112552625 | 0.01495358 | 0.032485 |
| 0.257512102 | -0.046288633 | 0.318201705 | -0.10811759 | 0.01943743 | 0.15728  |
| 0.003499628 | -0.134966781 | 0.003475438 | -0.00835847 | 0.85703711 | -0.00416 |
| 2.06E-08    | -0.254863407 | 2.33E-08    | 0.044458399 | 0.33773337 | 0.120766 |
| 0.208734871 | 0.055307192  | 0.232905147 | 0.048116403 | 0.2994476  | 0.045818 |
| 0.000747087 | 0.160195432  | 0.000510772 | -0.08427213 | 0.06883622 | -0.2729  |
| 0.797049687 | -0.00131289  | 0.977426249 | -0.04330755 | 0.35039984 | -0.10578 |
| 0.001202913 | 0.139260328  | 0.002560613 | -0.17467283 | 0.00014836 | 0.200492 |
| 0.357256521 | -0.050095484 | 0.279986471 | 0.032809584 | 0.47937298 | -0.00773 |
| 3.24E-05    | -0.18639931  | 5.06E-05    | 0.028108609 | 0.54456521 | 0.149424 |
| 1.80E-05    | -0.188808793 | 4.02E-05    | -0.07286768 | 0.11582194 | 0.353114 |
| 6.23E-06    | -0.205547832 | 7.54E-06    | -0.02653534 | 0.5673237  | 0.182812 |
| 0.693500215 | 0.020114286  | 0.664613534 | 0.169067604 | 0.00024232 | -0.13961 |
| 4.98E-10    | 0.269927086  | 3.07E-09    | -0.08959209 | 0.05301421 | -0.00366 |
| 0.011566243 | 0.119203113  | 0.00992888  | -0.1212178  | 0.00873656 | -0.02839 |
| 8.40E-16    | -0.358591616 | 1.29E-15    | -0.00171709 | 0.9704793  | 0.069812 |
| 0.152146512 | 0.059747893  | 0.197448756 | -0.16547912 | 0.00032911 | -0.21055 |
| 0.697083266 | -0.01124389  | 0.808517497 | -0.00344781 | 0.94076507 | 0.058716 |
| 0.082782646 | 0.086280684  | 0.062459469 | -0.18385823 | 6.42E-05   | -0.28307 |
| 0.021725387 | 0.114907258  | 0.012964343 | -0.08550419 | 0.06486443 | -0.14766 |
| 0.860825282 | 0.011609107  | 0.80242417  | -0.05184785 | 0.26348547 | 0.060394 |
| 0.540033967 | 0.0354186    | 0.445111142 | -0.03311999 | 0.47522296 | 0.059997 |
| 0.273686158 | -0.060406994 | 0.192541311 | 0.037218216 | 0.42231293 | -0.06738 |
| 3.82E-14    | 0.342323841  | 2.76E-14    | -0.06414794 | 0.1663709  | 0.207027 |
| 0.536024125 | -0.022875016 | 0.621961007 | 0.02132039  | 0.64583567 | 0.005659 |
| 0.258291443 | 0.05904248   | 0.202801436 | -0.12677616 | 0.00608082 | -0.10779 |
| 8.30E-16    | -0.350297371 | 6.28E-15    | 0.016248605 | 0.72617554 | -0.01691 |
| 0.432195502 | -0.043732982 | 0.345682856 | 0.030258491 | 0.51421509 | 0.040585 |
| 7.23E-10    | -0.271133362 | 2.59E-09    | -0.00236411 | 0.95936385 | 0.407229 |

|             |              |             |             |            |          |
|-------------|--------------|-------------|-------------|------------|----------|
| 0.404054324 | -0.064274982 | 0.165531476 | -0.09736282 | 0.03543176 | 0.161536 |
| 0.155347872 | -0.072280925 | 0.118793263 | 0.232141209 | 3.92E-07   | 0.270441 |
| 0.00042695  | 0.159929516  | 0.000522013 | 0.078328076 | 0.0908853  | 0.192681 |
| 0.027678063 | -0.111755727 | 0.015685059 | 0.246557213 | 6.76E-08   | 0.25046  |
| 0.00035551  | -0.182739127 | 7.13E-05    | 0.325671989 | 5.33E-13   | 0.06707  |
| 1.38E-05    | 0.198786283  | 1.51E-05    | 0.007317004 | 0.87469309 | -0.11158 |
| 3.59E-11    | -0.298590068 | 4.51E-11    | -0.141801   | 0.00212866 | -0.02123 |
| 0.193743173 | 0.069904308  | 0.131441398 | 0.157968125 | 0.0006123  | 0.26932  |
| 0.875958245 | -0.015699526 | 0.735075908 | 0.043770062 | 0.34527365 | -0.00867 |
| 0.112531582 | -0.075779772 | 0.101927845 | 0.070499364 | 0.12818091 | -0.15207 |
| 2.07E-05    | -0.205637639 | 7.47E-06    | -0.00961822 | 0.8357762  | 0.024586 |
| 0.025034936 | -0.107029144 | 0.020702341 | -0.00962252 | 0.83570376 | 0.021953 |
| 2.15E-11    | -0.296888593 | 5.88E-11    | 0.010866911 | 0.81481924 | 0.339175 |
| 3.55E-05    | -0.189682756 | 3.70E-05    | 0.088356218 | 0.05638993 | 0.335833 |
| 1.01E-08    | -0.264707434 | 6.29E-09    | -0.11703962 | 0.01136815 | -0.02821 |
| 0.137997586 | -0.077574059 | 0.094047911 | -0.01073033 | 0.81710539 | 0.355776 |
| 0.023579216 | -0.107742883 | 0.019865079 | -0.04766199 | 0.3040401  | -0.22005 |
| 3.81E-11    | 0.291506957  | 1.34E-10    | 0.220112306 | 1.56E-06   | 0.044707 |
| 0.000319901 | -0.158326819 | 0.000594776 | -0.10584917 | 0.02215384 | -0.02908 |
| 0.035310431 | -0.112412182 | 0.015080276 | -0.0518616  | 0.26335868 | -0.11003 |
| 0.001105804 | -0.159025051 | 0.00056199  | -0.08586525 | 0.06373682 | -0.14186 |
| 0.385840161 | 0.037550489  | 0.418179436 | 0.015376545 | 0.740328   | -0.18338 |
| 0.403221494 | -0.040483727 | 0.38273175  | 0.040889087 | 0.37798162 | 0.155492 |
| 0.080476602 | -0.07453517  | 0.107695035 | -0.02901038 | 0.53172755 | 0.014104 |
| 1.52E-10    | 0.282443982  | 5.16E-10    | -0.06463456 | 0.16317275 | 0.158072 |
| 0.000265414 | 0.170105296  | 0.000221533 | -0.04809583 | 0.29965456 | 0.113433 |
| 0.027004089 | -0.113729502 | 0.01392811  | -0.18155965 | 7.95E-05   | 0.107222 |
| 0.040105232 | 0.082722485  | 0.074112353 | 0.011737279 | 0.80028853 | -0.16343 |
| 0.000217557 | -0.187871691 | 4.40E-05    | -0.01805703 | 0.69712688 | 0.078311 |
| 0.832758433 | 0.009793474  | 0.832827464 | -0.04569322 | 0.32447321 | 0.391169 |
| 0.639839049 | -0.01619984  | 0.726964526 | 0.128836147 | 0.00529788 | -0.07584 |
| 0.657007307 | 0.021114262  | 0.649029402 | -0.05611379 | 0.22615104 | 0.03485  |
| 0.015435304 | 0.118887952  | 0.010127926 | 0.077866282 | 0.09281194 | -0.01468 |
| 5.84E-08    | 0.242793762  | 1.08E-07    | 0.207221327 | 6.33E-06   | -0.04244 |
| 0.020066    | -0.105898422 | 0.022091535 | -0.01522309 | 0.74282759 | -0.148   |
| 3.25E-08    | -0.258800372 | 1.39E-08    | 0.100293723 | 0.03023305 | 0.155356 |
| 0.002805724 | -0.153393218 | 0.00088205  | -0.03493002 | 0.45141926 | 0.086397 |
| 0.00360172  | -0.139655348 | 0.002488591 | 0.01151644  | 0.80396911 | 0.066257 |
| 0.015988807 | -0.102545115 | 0.026696691 | 0.116356023 | 0.01185981 | 0.036115 |
| 4.33E-10    | -0.278168057 | 9.58E-10    | -0.17143309 | 0.00019737 | -0.05203 |
| 4.65E-10    | -0.277847068 | 1.00E-09    | -0.07405339 | 0.10999545 | 0.200242 |
| 4.22E-07    | 0.218993877  | 1.77E-06    | 0.145338524 | 0.00163768 | -0.22797 |
| 0.039750601 | -0.085790253 | 0.063969711 | 0.111380058 | 0.01604064 | -0.00628 |
| 0.15702614  | -0.063817458 | 0.16856954  | -0.02450557 | 0.59733968 | 0.312184 |
| 0.192452655 | 0.045227008  | 0.329439384 | -0.21244828 | 3.63E-06   | 0.051977 |

|             |              |             |             |            |          |
|-------------|--------------|-------------|-------------|------------|----------|
| 0.001326942 | -0.144194515 | 0.001783739 | -0.04920338 | 0.28865025 | 0.075905 |
| 1.34E-36    | -0.535800525 | 4.66E-36    | -0.03458062 | 0.45596111 | -0.12617 |
| 0.023581803 | -0.101764188 | 0.027880732 | 0.051903527 | 0.26297236 | -0.31807 |
| 0.998651704 | -0.015192664 | 0.743323565 | 0.095194954 | 0.03974984 | -0.03757 |
| 0.827073621 | 0.008585328  | 0.853200254 | 0.034706662 | 0.45431979 | -0.06409 |
| 0.117174445 | 0.072100832  | 0.119717107 | -0.03710541 | 0.42372168 | -0.06637 |
| 1.58E-25    | -0.457897941 | 1.39E-25    | 0.022998435 | 0.62008209 | 0.070043 |
| 0.46445905  | 0.027854945  | 0.548203861 | 0.035497506 | 0.4440971  | -0.05896 |
| 0.002418494 | -0.136387466 | 0.003144259 | -0.02629979 | 0.57076973 | 0.139656 |
| 2.06E-07    | 0.230385731  | 4.82E-07    | -0.1231064  | 0.00773646 | -0.00647 |
| 0.000441573 | -0.176674733 | 0.000124054 | 0.146542061 | 0.00149592 | 0.012252 |
| 0.000234444 | -0.165686129 | 0.000323403 | -0.19870235 | 1.52E-05   | -0.38921 |
| 0.307796106 | -0.047978404 | 0.300837366 | -0.20304028 | 9.77E-06   | 0.033585 |
| 0.112660689 | -0.076934673 | 0.096798105 | 0.116063182 | 0.01207611 | -0.1135  |
| 5.08E-19    | -0.391067626 | 1.63E-18    | 0.057442643 | 0.21532975 | 0.073741 |
| 0.031793429 | -0.099046399 | 0.032359704 | -0.0358157  | 0.44002121 | 0.318691 |
| 0.401950519 | -0.0553583   | 0.232473007 | 0.083232262 | 0.07234148 | 0.058881 |
| 1.19E-17    | 0.38446183   | 6.72E-18    | -0.05597508 | 0.2273025  | 0.23886  |
| 0.951250136 | 0.00594683   | 0.898015384 | -0.11940073 | 0.00980585 | 0.171723 |
| 0.000481276 | -0.161456129 | 0.000460475 | 0.157013894 | 0.00066128 | 0.26918  |
| 0.698417035 | -0.028480738 | 0.539248993 | -0.09868186 | 0.03300486 | 0.0942   |
| 0.010172029 | -0.114633892 | 0.013182642 | -0.17098999 | 0.00020514 | -0.00824 |
| 0.253379447 | 0.053322885  | 0.250124335 | -0.10796672 | 0.01960864 | 0.038741 |
| 0.588721451 | -0.033413327 | 0.471319292 | -0.14275761 | 0.00198408 | -0.05028 |
| 0.274891102 | -0.051545257 | 0.266285951 | -0.15204631 | 0.00098028 | 0.223083 |
| 0.220154758 | -0.052732491 | 0.255414484 | -0.09629962 | 0.0374969  | 0.213933 |
| 0.000759272 | 0.148053373  | 0.001333895 | 0.149689404 | 0.0011768  | 0.412484 |
| 3.02E-16    | -0.362498166 | 5.99E-16    | 0.026830336 | 0.56302196 | 0.247739 |
| 0.06860222  | -0.089516951 | 0.053214531 | 0.059137562 | 0.20207387 | -0.12291 |
| 0.015143401 | 0.110943338  | 0.016462872 | 0.208543774 | 5.50E-06   | 0.251271 |
| 0.781340361 | 0.011879098  | 0.797927249 | 0.040263738 | 0.38532484 | 0.055585 |
| 0.329341244 | 0.045708299  | 0.324313369 | -0.2707196  | 2.75E-09   | 0.040164 |
| 0.206753432 | -0.056154889 | 0.225810662 | 0.087771684 | 0.05804762 | 0.063656 |
| 0.365131456 | -0.04883077  | 0.292321679 | 0.02672342  | 0.56457922 | -0.07605 |
| 0.268889571 | 0.04206745   | 0.364380067 | -0.20258529 | 1.02E-05   | -0.11393 |
| 0.002185297 | -0.13558378  | 0.003327904 | 0.126427894 | 0.00622301 | 0.151781 |
| 6.03E-11    | -0.301355608 | 2.93E-11    | -0.25499904 | 2.29E-08   | 0.091872 |
| 0.054319187 | 0.095919408  | 0.038259795 | -0.04797322 | 0.30088968 | -0.09805 |
| 8.90E-11    | -0.298064259 | 4.90E-11    | -0.06885188 | 0.13736442 | 0.25758  |
| 0.912808428 | -0.011751689 | 0.800048526 | -0.0361646  | 0.43557679 | 0.007372 |
| 0.042704001 | -0.096283791 | 0.037528406 | -0.11166128 | 0.0157738  | 0.080441 |
| 7.05E-05    | -0.182464394 | 7.31E-05    | -0.11340841 | 0.01420156 | 0.206527 |
| 0.811826515 | -0.007810286 | 0.866322138 | -0.06381835 | 0.16856355 | 0.139904 |
| 2.13E-09    | -0.266402976 | 4.99E-09    | 0.041035253 | 0.37627772 | 0.308795 |
| 0.543626605 | 0.028170096  | 0.543685029 | 0.123252376 | 0.0076636  | 0.030581 |

|             |              |             |             |            |          |
|-------------|--------------|-------------|-------------|------------|----------|
| 3.32E-13    | -0.321731104 | 1.05E-12    | -0.11839189 | 0.0104484  | 0.190637 |
| 0.772482774 | -0.028969503 | 0.532306107 | -0.02916767 | 0.52950408 | 0.427778 |
| 0.244588518 | 0.063656791  | 0.169646239 | -0.26037551 | 1.13E-08   | -0.2004  |
| 0.136382924 | -0.065478803 | 0.157734194 | 0.167411423 | 0.00027931 | 0.131049 |
| 0.000479545 | -0.170326327 | 0.000217327 | 0.024302695 | 0.60037899 | 0.082579 |
| 0.028726567 | -0.106547208 | 0.021284878 | -0.09370159 | 0.04297668 | 0.062657 |
| 0.020505025 | 0.111062425  | 0.016346781 | 0.007281345 | 0.87529877 | 0.100098 |
| 0.000306568 | 0.176169866  | 0.000129803 | -0.12253188 | 0.00802929 | -0.11267 |
| 1.35E-07    | -0.237711816 | 2.02E-07    | 0.011541185 | 0.8035565  | -0.05176 |
| 0.083218371 | -0.081172385 | 0.079715081 | -0.05817233 | 0.20954831 | -0.11008 |
| 1.41E-05    | 0.194480695  | 2.32E-05    | 0.15327364  | 0.00089039 | 0.052374 |
| 0.003663432 | 0.123817654  | 0.007387179 | -0.13406858 | 0.00370083 | 0.156706 |
| 1.02E-08    | -0.260659588 | 1.08E-08    | -0.15625954 | 0.00070254 | 0.033913 |
| 0.309368579 | -0.045423996 | 0.327335062 | 0.107629042 | 0.01999661 | 0.0498   |
| 0.033227485 | 0.09726592   | 0.035615888 | -0.03032252 | 0.5133248  | -0.14567 |
| 0.030895708 | 0.098293843  | 0.033703595 | -0.11542412 | 0.0125603  | -0.11033 |
| 0.911907744 | 0.008495421  | 0.854720414 | 0.080594367 | 0.08189018 | -0.04186 |
| 0.002171639 | 0.145624154  | 0.001602963 | -0.02456059 | 0.5965167  | 0.022123 |
| 0.997131709 | -0.00233698  | 0.959829708 | -0.07939043 | 0.0865747  | -0.01714 |
| 1.58E-11    | -0.30769902  | 1.07E-11    | 0.045616361 | 0.32528853 | -0.02586 |
| 0.004041948 | -0.138033464 | 0.002796581 | -0.10157686 | 0.02817138 | 0.140924 |
| 0.018369406 | -0.121932595 | 0.008345244 | -0.08263092 | 0.07443413 | 0.002282 |
| 9.59E-18    | -0.369989856 | 1.35E-16    | -0.1647154  | 0.00035099 | 0.024285 |
| 0.003486213 | -0.132118147 | 0.004236509 | 0.00602918  | 0.89661099 | -0.11403 |
| 0.049698043 | -0.092185976 | 0.046474477 | 0.12889089  | 0.00527837 | 0.086536 |
| 0.660154597 | 0.019645168  | 0.671975136 | -0.00822819 | 0.85924204 | 0.210342 |
| 0.210973395 | -0.045262686 | 0.329057608 | 0.009110243 | 0.84433586 | 0.121002 |
| 0.018710474 | 0.109521468  | 0.017905718 | 0.070295652 | 0.12928998 | -0.0313  |
| 0.39399727  | 0.025198436  | 0.587012954 | -0.04966339 | 0.28416052 | -0.02373 |
| 0.384253604 | 0.044913878  | 0.332802331 | -0.10558464 | 0.02249109 | -0.06792 |
| 0.086418113 | -0.089740098 | 0.052621462 | 0.015727003 | 0.73462966 | -0.12298 |
| 0.055276718 | 0.078225695  | 0.091309649 | 0.00527897  | 0.90941649 | -0.11665 |
| 0.372985143 | -0.045389968 | 0.327697947 | 0.30907156  | 8.54E-12   | 0.032141 |
| 0.020571523 | 0.088640756  | 0.055597327 | -0.18438614 | 6.11E-05   | 0.001359 |
| 0.050858882 | -0.094593363 | 0.04102422  | -0.05041535 | 0.27692336 | -0.11812 |
| 0.001796626 | -0.148151462 | 0.001323958 | -0.1297815  | 0.00496996 | 0.163807 |
| 0.076497762 | -0.074182838 | 0.109373597 | -0.01840698 | 0.69155494 | 0.283304 |
| 0.74137058  | 0.011769126  | 0.799758128 | -0.24749162 | 6.01E-08   | 0.312682 |
| 2.61E-06    | 0.215575061  | 2.58E-06    | 0.012868341 | 0.78150875 | -0.20168 |
| 0.458614137 | 0.039490067  | 0.394529049 | -0.27396207 | 1.74E-09   | 0.119001 |
| 0.233253696 | 0.067548426  | 0.144982036 | -0.13664977 | 0.00308635 | -0.25572 |
| 3.57E-07    | 0.232934436  | 3.57E-07    | 0.064187758 | 0.16610747 | 0.195443 |
| 0.013706877 | 0.119330878  | 0.009849183 | -0.09460758 | 0.04099371 | 0.090465 |
| 8.83E-09    | 0.263417001  | 7.49E-09    | -0.25681718 | 1.81E-08   | -0.20465 |
| 0.547986706 | 0.013559803  | 0.770089415 | 0.012382294 | 0.78956405 | 0.031446 |

|             |              |             |             |            |          |
|-------------|--------------|-------------|-------------|------------|----------|
| 1.23E-14    | -0.344922682 | 1.71E-14    | 0.049231819 | 0.28837133 | 0.08737  |
| 0.028482972 | -0.119398513 | 0.009807223 | 0.156613438 | 0.0006829  | 0.142007 |
| 0.001161803 | 0.149754467  | 0.001170921 | 0.223023836 | 1.13E-06   | -0.01546 |
| 3.79E-09    | -0.280814593 | 6.54E-10    | 0.088404164 | 0.05625572 | 0.199939 |
| 4.17E-05    | -0.176965852 | 0.000120848 | -0.03667914 | 0.42906964 | -0.03264 |
| 0.206482472 | -0.072447495 | 0.11794376  | -0.14828562 | 0.00131048 | -0.21594 |
| 0.02438877  | -0.110044299 | 0.01736282  | -0.21373676 | 3.15E-06   | 0.080315 |
| 0.004465202 | -0.125439246 | 0.006643028 | -0.0211152  | 0.64901482 | 0.167528 |
| 0.007799659 | -0.116249871 | 0.011937816 | -0.03585143 | 0.4395649  | -0.00701 |
| 0.022373941 | -0.11258022  | 0.014928795 | 0.139399225 | 0.00253507 | 0.071294 |
| 0.047714202 | -0.09058985  | 0.050413225 | -0.02441141 | 0.59874952 | -0.03956 |
| 0.578498551 | -0.02242528  | 0.628828478 | -0.03004943 | 0.51712746 | -0.08007 |
| 0.192937277 | -0.059039641 | 0.202823185 | -0.02887698 | 0.53361694 | 0.045374 |
| 0.911310736 | -0.005043933 | 0.91343339  | 0.151706263 | 0.00100663 | -0.01474 |
| 0.019128471 | -0.111402721 | 0.016018991 | -0.00932693 | 0.8406823  | 0.004226 |
| 0.001518494 | -0.150497003 | 0.001105706 | -0.17463058 | 0.00014892 | -0.00849 |
| 1.79E-05    | -0.1921287   | 2.92E-05    | -0.07780256 | 0.09308035 | -0.02615 |
| 8.85E-05    | -0.176304172 | 0.00012825  | -0.21175173 | 3.91E-06   | -0.168   |
| 0.012998685 | 0.101062486  | 0.02898287  | -0.05348124 | 0.24871845 | 0.068506 |
| 0.396927572 | -0.034514584 | 0.456822455 | 0.058968925 | 0.20336558 | -0.10791 |
| 0.558956595 | 0.034130262  | 0.461853063 | -0.04284052 | 0.3556246  | -0.00948 |
| 0.001829906 | -0.147504738 | 0.00139075  | -0.07938346 | 0.08660244 | 0.020862 |
| 9.21E-10    | 0.285137796  | 3.47E-10    | 0.07719702  | 0.09566201 | 0.24773  |
| 1.05E-08    | -0.27126168  | 2.55E-09    | -0.00606541 | 0.89599326 | -0.05636 |
| 0.859994807 | -0.019293976 | 0.677506845 | -0.03009177 | 0.51653694 | -0.0432  |
| 0.013323576 | 0.102105346  | 0.027358029 | 0.072748209 | 0.11642216 | 0.26642  |
| 0.146646229 | -0.072754815 | 0.11638891  | -0.02612267 | 0.57336753 | -0.02639 |
| 0.15528971  | -0.068878717 | 0.13721085  | -0.05101339 | 0.27125772 | 0.064685 |
| 0.004556114 | -0.112658841 | 0.01485838  | 0.000244157 | 0.99580144 | 0.224232 |
| 4.32E-09    | -0.264195888 | 6.74E-09    | 0.062009832 | 0.18098114 | 0.213275 |
| 0.378959733 | -0.038729443 | 0.403706077 | 0.000577698 | 0.99006603 | 0.157609 |
| 0.586687664 | 0.030844854  | 0.5060922   | -0.14409176 | 0.00179743 | -0.00914 |
| 6.01E-05    | 0.175553359  | 0.000137164 | -0.0238461  | 0.60724454 | -0.09921 |
| 0.430778686 | -0.050026882 | 0.280646386 | -0.11117887 | 0.01623396 | 0.084124 |
| 0.832466308 | 0.010308097  | 0.824182497 | -0.00698044 | 0.88041264 | 0.093296 |
| 0.000112595 | -0.176633052 | 0.000124519 | 0.005027733 | 0.91371035 | 0.266298 |
| 0.000178792 | 0.184194772  | 6.22E-05    | 0.079280418 | 0.08701331 | 0.128766 |
| 0.003723404 | 0.132469944  | 0.004134991 | -0.01736529 | 0.70818888 | 0.121069 |
| 0.101151833 | 0.069771082  | 0.132180093 | 0.008768929 | 0.85009756 | 0.050529 |
| 0.037171369 | 0.102251811  | 0.027136223 | 0.071938573 | 0.12055426 | 0.047033 |
| 0.001553915 | -0.142206309 | 0.002066267 | -0.1226857  | 0.00794994 | 0.034438 |
| 0.002593218 | 0.145556426  | 0.001611133 | -0.01415572 | 0.76028759 | 0.109766 |
| 0.57467257  | 0.040173386  | 0.386392935 | -0.12232624 | 0.00813649 | 0.208661 |
| 0.299115677 | -0.057047489 | 0.218508035 | -0.03817495 | 0.41047563 | 0.337251 |
| 0.179851822 | 0.066741553  | 0.149856686 | -0.09249893 | 0.04573328 | 0.047301 |

|             |              |             |             |            |          |
|-------------|--------------|-------------|-------------|------------|----------|
| 8.12E-08    | -0.242624865 | 1.10E-07    | -0.07612977 | 0.10035099 | 0.190233 |
| 6.21E-05    | -0.192408432 | 2.84E-05    | -0.0109064  | 0.81415862 | 0.107571 |
| 9.52E-16    | -0.374730314 | 5.13E-17    | -0.15607162 | 0.00071319 | 0.296046 |
| 0.095191711 | 0.076024369  | 0.100823787 | -0.11977503 | 0.00957653 | 0.086956 |
| 0.048512552 | -0.089195538 | 0.05407854  | 0.033749947 | 0.46686141 | 0.050343 |
| 1.70E-05    | -0.195474067 | 2.10E-05    | -0.09033957 | 0.05105544 | -0.00471 |
| 0.01234015  | 0.105523127  | 0.022570148 | -0.05576394 | 0.22906325 | -0.01953 |
| 0.228670334 | 0.045334336  | 0.328291777 | -0.04204361 | 0.36465216 | 0.018689 |
| 0.000145854 | -0.180341858 | 8.89E-05    | -0.09573748 | 0.03862946 | 0.011685 |
| 0.020148393 | -0.11856289  | 0.010336926 | -0.28241106 | 5.18E-10   | -0.10499 |
| 0.178117509 | -0.073333509 | 0.113504687 | -0.09691172 | 0.03629585 | 0.044254 |
| 0.997191595 | -0.011367164 | 0.806459455 | -0.10059727 | 0.029734   | -0.01658 |
| 0.000439388 | -0.147761752 | 0.001363844 | 0.044838225 | 0.33361813 | -0.30817 |
| 0.005182911 | -0.144847355 | 0.001698989 | 0.133409661 | 0.00387451 | 0.32841  |
| 0.072094796 | -0.085485137 | 0.064924369 | -0.0818965  | 0.07705651 | -0.1457  |
| 0.000442527 | -0.160075808 | 0.000515801 | -0.00290834 | 0.95002009 | 0.254449 |
| 0.231017637 | 0.053594443  | 0.247716859 | -0.10671011 | 0.0210864  | 0.179192 |
| 0.86611208  | 0.001760841  | 0.969727428 | -0.19532697 | 2.13E-05   | -0.0649  |
| 4.13E-10    | -0.288927254 | 1.98E-10    | 0.069669714 | 0.13274428 | 0.241527 |
| 0.262777336 | -0.037226235 | 0.42221289  | -0.08635067 | 0.06224638 | -0.10938 |
| 0.000294872 | -0.176155434 | 0.000129971 | -0.00377477 | 0.93515956 | 0.165263 |
| 0.000685489 | -0.1500236   | 0.001146885 | 0.084444963 | 0.06826732 | -0.03425 |
| 0.037634476 | -0.094823356 | 0.040533    | 0.048847459 | 0.29215657 | 0.102662 |
| 0.676977803 | 0.029899026  | 0.519227959 | -0.04133623 | 0.37278406 | 0.040067 |
| 0.041616971 | 0.089264584  | 0.053891955 | -0.23555673 | 2.61E-07   | 0.1603   |
| 0.003094893 | -0.149803158 | 0.001166538 | -0.0602059  | 0.19402904 | 0.317363 |
| 1.27E-11    | 0.317384736  | 2.18E-12    | -0.19537099 | 2.12E-05   | 0.021963 |
| 0.146319202 | -0.059937708 | 0.196026198 | -0.23503071 | 2.78E-07   | -0.18346 |
| 0.045584809 | -0.075133074 | 0.104893136 | -0.02626124 | 0.57133468 | 0.252367 |
| 2.09E-09    | 0.281754264  | 5.70E-10    | -0.10770172 | 0.01991255 | -0.0404  |
| 0.01999667  | -0.10599279  | 0.021972582 | -0.04333592 | 0.35008399 | 0.04467  |
| 0.821025624 | -0.003406605 | 0.941471673 | 0.104144163 | 0.02440669 | 0.177209 |
| 4.22E-15    | -0.352864644 | 3.86E-15    | 0.11177432  | 0.01566764 | 0.120192 |
| 0.835858128 | 0.006427358  | 0.889825051 | 0.082612635 | 0.07449854 | 0.345622 |
| 3.24E-06    | 0.207796726  | 5.95E-06    | -0.18579948 | 5.35E-05   | 0.067146 |
| 0.369846565 | -0.041335522 | 0.372792262 | -0.03551707 | 0.44384584 | 0.362738 |
| 0.000699927 | 0.178342834  | 0.000106712 | -0.05200221 | 0.26206462 | -0.17252 |
| 0.022460061 | 0.106671396  | 0.021133422 | -0.05623016 | 0.22518826 | 0.402013 |
| 0.400494099 | 0.038291963  | 0.40904155  | -0.01077706 | 0.81632294 | 0.228385 |
| 0.348383911 | -0.036097065 | 0.436435039 | -0.11837036 | 0.01046251 | 0.147201 |
| 0.000277734 | -0.177008545 | 0.000120385 | -0.03696522 | 0.42547613 | -0.06065 |
| 1.00E-06    | -0.240043443 | 1.52E-07    | -0.11918014 | 0.00994327 | 0.018606 |
| 0.023981807 | -0.11060258  | 0.016799051 | -0.0072804  | 0.87531489 | 0.061043 |
| 0.003951642 | 0.137592741  | 0.002886069 | 0.01640517  | 0.72364436 | 0.198655 |
| 3.05E-18    | -0.394436866 | 7.80E-19    | -0.2040152  | 8.84E-06   | -0.07096 |

|             |              |             |             |            |          |
|-------------|--------------|-------------|-------------|------------|----------|
| 0.029917984 | -0.100939067 | 0.029180536 | 0.05744266  | 0.21532961 | -0.08303 |
| 1.80E-05    | -0.192043016 | 2.94E-05    | -0.11024327 | 0.01716003 | 0.039402 |
| 0.010925053 | -0.11675649  | 0.011569549 | -0.04407848 | 0.34188205 | 0.092682 |
| 1.34E-12    | -0.329132487 | 2.92E-13    | -0.17962501 | 9.50E-05   | -0.08065 |
| 0.001401017 | -0.148690062 | 0.001270598 | -0.21255467 | 3.59E-06   | 0.028547 |
| 0.915454933 | -0.003284674 | 0.94356301  | -0.0097518  | 0.83352845 | 0.003688 |
| 0.000982154 | 0.148945827  | 0.001245958 | -0.0165411  | 0.72144915 | -0.19874 |
| 0.061498269 | -0.082818182 | 0.073777255 | -0.10584154 | 0.0221635  | -0.01784 |
| 0.016592948 | -0.109286293 | 0.018154713 | -0.05052421 | 0.27588611 | -0.05943 |
| 0.053195362 | -0.087804013 | 0.057954894 | -0.00196766 | 0.96617374 | 0.055174 |
| 0.0409209   | -0.096731742 | 0.03664556  | 0.01458122  | 0.75331213 | 0.088982 |
| 0.006371611 | -0.129480759 | 0.005072238 | 0.030147173 | 0.51576476 | 0.087436 |
| 2.50E-07    | 0.23919591   | 1.68E-07    | -0.2340538  | 3.13E-07   | 0.355883 |
| 1.67E-06    | -0.219709301 | 1.64E-06    | 0.168979382 | 0.00024417 | 0.27997  |
| 0.077908199 | -0.062693432 | 0.176210167 | -0.09085112 | 0.04975002 | 0.170331 |
| 0.707639097 | -0.029287623 | 0.527811604 | -0.24520823 | 8.01E-08   | 0.205571 |
| 2.90E-21    | -0.423042965 | 1.06E-21    | 0.00173705  | 0.97013626 | 0.049757 |
| 1.06E-08    | -0.255609337 | 2.12E-08    | -0.01354541 | 0.77032659 | -0.19234 |
| 0.003990845 | -0.127876326 | 0.005650629 | -0.12636054 | 0.00625084 | 0.188035 |
| 5.45E-05    | 0.18283694   | 7.06E-05    | -0.02193783 | 0.63630821 | -0.06275 |
| 0.005097621 | 0.145904855  | 0.001569507 | -0.18810288 | 4.30E-05   | -0.16974 |
| 2.24E-06    | -0.231507019 | 4.23E-07    | -0.04752394 | 0.30544447 | -0.02912 |
| 0.000233389 | -0.164736784 | 0.000350356 | 0.02179211  | 0.63855137 | 0.032415 |
| 0.35472329  | -0.038377023 | 0.4080009   | 0.051050074 | 0.27091281 | 0.11821  |
| 5.91E-06    | -0.203916075 | 8.93E-06    | -0.09609178 | 0.03791231 | 0.006351 |
| 0.153815318 | 0.058049999  | 0.210509651 | -0.03461967 | 0.45545231 | 0.268519 |
| 0.000651929 | -0.168630667 | 0.000251605 | 0.182645192 | 7.19E-05   | 0.306046 |
| 0.001003048 | 0.142848931  | 0.001970763 | 0.207576601 | 6.09E-06   | 0.15509  |
| 0.081627034 | -0.080315103 | 0.082958127 | -0.01841738 | 0.69138957 | -0.07124 |
| 3.13E-05    | -0.195848995 | 2.02E-05    | -0.04314145 | 0.3522524  | 0.229264 |
| 0.380596666 | -0.042344152 | 0.361230929 | 0.093560594 | 0.04329243 | -0.28175 |
| 1.82E-06    | 0.225494576  | 8.50E-07    | -0.11633952 | 0.0118719  | 0.296981 |
| 0.567738129 | 0.016564587  | 0.721070163 | 0.053075157 | 0.2523347  | 0.044163 |
| 0.083114213 | -0.082247384 | 0.075794408 | -0.03019619 | 0.51508214 | -0.06713 |
| 0.434688736 | -0.037535629 | 0.418363787 | -0.12053237 | 0.00912707 | -0.00778 |
| 5.93E-07    | -0.219580691 | 1.66E-06    | 0.149837063 | 0.0011635  | -0.03251 |
| 0.801543756 | 0.012907204  | 0.780865655 | -0.03393877 | 0.46437109 | -0.23368 |
| 0.003191532 | -0.144758068 | 0.001710358 | 0.169976082 | 0.00022403 | 0.12114  |
| 4.90E-07    | -0.232431071 | 3.79E-07    | 0.077240502 | 0.09547475 | -0.04796 |
| 0.053317482 | -0.099251828 | 0.032000905 | -0.09982327 | 0.03102066 | -0.14839 |
| 0.001402486 | -0.142031898 | 0.002092908 | -0.09590316 | 0.0382927  | 0.18434  |
| 0.183430015 | 0.068808037  | 0.137615517 | -0.00992005 | 0.83069922 | -0.05664 |
| 1.45E-07    | -0.242296187 | 1.15E-07    | -0.04098778 | 0.37683059 | 0.140063 |
| 1.09E-17    | -0.385300388 | 5.62E-18    | 0.056281209 | 0.22476678 | 0.040111 |
| 0.049157124 | -0.086216308 | 0.062656018 | -0.17340086 | 0.00016605 | 0.0706   |

|             |              |             |             |            |          |
|-------------|--------------|-------------|-------------|------------|----------|
| 0.000233595 | -0.169863536 | 0.000226221 | -0.1572396  | 0.00064938 | -0.28249 |
| 0.000122416 | 0.190457224  | 3.43E-05    | -0.21103623 | 4.22E-06   | -0.11886 |
| 0.004324581 | -0.135049475 | 0.003455326 | -0.00938305 | 0.83973651 | 0.076401 |
| 0.116234103 | 0.077233644  | 0.095504261 | 0.017563786 | 0.70500822 | -0.03924 |
| 0.38285403  | 0.035815427  | 0.440024728 | 0.002674088 | 0.95404114 | 0.072879 |
| 0.007096888 | -0.119810043 | 0.009555325 | -0.09002992 | 0.05185942 | -0.13497 |
| 0.839139611 | 0.00669616   | 0.885248537 | 0.008718793 | 0.85094458 | 0.062091 |
| 5.18E-07    | -0.231729313 | 4.12E-07    | 0.071273461 | 0.12403362 | 0.168111 |
| 0.213604134 | -0.069806125 | 0.131985479 | 0.048632283 | 0.29429014 | 0.042693 |
| 2.26E-14    | -0.34364064  | 2.17E-14    | -0.15217561 | 0.00097043 | 0.186617 |
| 2.40E-09    | 0.268285025  | 3.85E-09    | -0.12884233 | 0.00529568 | 0.190323 |
| 0.111109972 | -0.068004938 | 0.142278207 | 0.045934836 | 0.32191863 | 0.046229 |
| 2.64E-22    | -0.426249013 | 4.87E-22    | -0.21979675 | 1.62E-06   | 0.114313 |
| 3.60E-07    | -0.243805372 | 9.54E-08    | 0.11978242  | 0.00957205 | -0.05836 |
| 0.319780681 | 0.041931432  | 0.365934345 | 0.046019885 | 0.32102255 | 0.1918   |
| 0.071158231 | -0.09686283  | 0.036390564 | 0.023793512 | 0.60803753 | 0.029893 |
| 0.021377088 | 0.098575547  | 0.033195069 | -0.01725416 | 0.70997175 | 0.151494 |
| 0.001693703 | 0.142619454  | 0.002004393 | -0.20304233 | 9.77E-06   | 0.121311 |
| 2.83E-05    | -0.195721413 | 2.05E-05    | -0.29829604 | 4.73E-11   | 0.26809  |
| 2.76E-11    | 0.300208848  | 3.51E-11    | 0.127898557 | 0.00564223 | 0.017889 |
| 0.004465349 | -0.135593807 | 0.003325554 | -0.15999813 | 0.00051909 | 0.181325 |
| 7.79E-09    | 0.277835483  | 1.00E-09    | -0.0825376  | 0.07476329 | 0.106511 |
| 0.188697887 | -0.056468768 | 0.223223179 | -0.08025511 | 0.08318903 | 0.012028 |
| 1.15E-05    | -0.224452713 | 9.58E-07    | -0.05046403 | 0.27645922 | 0.226362 |
| 0.061689682 | 0.097560025  | 0.035059552 | 0.041571028 | 0.37007255 | 0.013137 |
| 0.000124109 | -0.175592774 | 0.000136682 | 0.072315364 | 0.11861724 | -0.05801 |
| 0.115488782 | -0.074811626 | 0.106392252 | 0.005215315 | 0.91050416 | -0.04401 |
| 0.087896999 | -0.080684391 | 0.081548301 | -0.01205479 | 0.79500454 | 0.08142  |
| 0.337449233 | -0.045427014 | 0.327302891 | -0.11774326 | 0.01088099 | -0.076   |
| 1.13E-05    | -0.210645642 | 4.40E-06    | 0.099029884 | 0.0323887  | 0.0532   |
| 0.738373424 | -0.01702914  | 0.713586781 | -0.05446802 | 0.2400821  | -0.02062 |
| 0.223696293 | -0.058355581 | 0.208114125 | -0.02870201 | 0.5361003  | -0.33122 |
| 0.153581158 | -0.079147091 | 0.087547256 | 0.078362333 | 0.09074366 | 0.399989 |
| 0.021593031 | -0.106270158 | 0.021626161 | -0.03079298 | 0.50680803 | -0.04576 |
| 7.42E-05    | 0.192489025  | 2.82E-05    | -0.04825224 | 0.29808383 | 0.08563  |
| 0.001455901 | -0.14389584  | 0.001823789 | -0.15226969 | 0.00096332 | 0.279517 |
| 0.176490678 | 0.062527578  | 0.177359011 | -0.17568552 | 0.00013555 | 0.107783 |
| 0.101975691 | 0.078128981  | 0.091711971 | -0.07012119 | 0.13024569 | 0.097039 |
| 0.348036695 | -0.053300969 | 0.250319337 | -0.01444251 | 0.75558383 | -0.1047  |
| 3.10E-07    | 0.240327386  | 1.47E-07    | -0.19043564 | 3.44E-05   | 0.165672 |
| 0.000313428 | -0.182934185 | 7.00E-05    | -0.12957436 | 0.0050402  | 0.079527 |
| 8.02E-05    | -0.171330068 | 0.000199149 | 0.122837274 | 0.00787243 | 0.162028 |
| 0.00225003  | -0.144991393 | 0.001680794 | -0.04255489 | 0.35884394 | 0.073987 |
| 0.904433794 | 0.014067943  | 0.761728997 | -0.15573576 | 0.00073258 | -0.09105 |
| 0.854703735 | -0.016655022 | 0.719611246 | -0.14908251 | 0.00123297 | 0.082744 |



|             |              |             |             |            |          |
|-------------|--------------|-------------|-------------|------------|----------|
| 1.42E-12    | 0.315123976  | 3.17E-12    | -0.02595692 | 0.57580359 | 0.029841 |
| 0.212212408 | 0.062230485  | 0.179430828 | 0.007331796 | 0.87444186 | 0.069833 |
| 7.87E-09    | 0.265422652  | 5.70E-09    | -0.06541048 | 0.15816916 | 0.050651 |
| 0.072555501 | -0.085454455 | 0.065021014 | -0.11680424 | 0.01153536 | -0.03495 |
| 0.071390565 | 0.074687194  | 0.10697708  | -0.10233176 | 0.02701579 | 0.199899 |
| 0.295666392 | 0.050826121  | 0.273023303 | 0.063298332 | 0.17206694 | 0.002665 |
| 0.001311691 | -0.16471294  | 0.000351059 | -0.01048556 | 0.82120618 | -0.02953 |
| 0.114826295 | -0.068891067 | 0.137140238 | -0.07367888 | 0.11181026 | 0.139931 |
| 0.114332686 | -0.097762639 | 0.0346806   | -0.03173865 | 0.49384106 | -0.10109 |
| 0.000352443 | -0.169941521 | 0.000224699 | 0.125313575 | 0.0066982  | 0.031036 |
| 0.000278335 | -0.176889862 | 0.000121677 | -0.1787562  | 0.00010278 | 0.12498  |
| 0.010472646 | 0.118589354  | 0.01031977  | -0.01060255 | 0.81924563 | 0.10029  |
| 0.765574413 | -0.008012744 | 0.86289072  | -0.02089177 | 0.65248399 | 0.055008 |
| 0.317795439 | -0.047431468 | 0.306387526 | 0.011143276 | 0.81019822 | 0.081942 |
| 0.782567577 | -0.024049097 | 0.604187882 | -0.12947548 | 0.00507405 | -0.07784 |
| 0.508034223 | -0.02432196  | 0.600090079 | 0.026367619 | 0.5697764  | 0.04402  |
| 0.068379589 | -0.083742722 | 0.070602994 | -0.07140136 | 0.12335856 | -0.04509 |
| 0.397853912 | 0.034831591  | 0.45269618  | -0.00079922 | 0.98625706 | -0.10845 |
| 0.010865668 | -0.113727664 | 0.013929662 | -0.10223678 | 0.02715892 | -0.12853 |
| 3.70E-17    | 0.38077187   | 1.46E-17    | 0.068273846 | 0.14070368 | 0.103528 |
| 0.002707799 | -0.148223907 | 0.001316663 | -0.04647882 | 0.31621527 | -0.18434 |
| 0.714014574 | 0.021193937  | 0.647794154 | 0.046485829 | 0.31614222 | -0.00487 |
| 0.04516674  | 0.099938435  | 0.030826253 | -0.17681069 | 0.00012255 | 0.044559 |
| 0.690974493 | -0.034414099 | 0.458134791 | 0.065205795 | 0.15947771 | 0.052348 |
| 9.32E-07    | -0.226364085 | 7.69E-07    | -0.00511002 | 0.91230363 | 0.112475 |
| 0.003988273 | -0.134849144 | 0.003504232 | -0.00827479 | 0.85845326 | -0.06046 |
| 4.21E-09    | 0.266223852  | 5.11E-09    | -0.12890905 | 0.00527192 | -0.03871 |
| 0.294781257 | -0.036693252 | 0.42889191  | -0.16570161 | 0.00032298 | 0.090947 |
| 0.000487542 | -0.158183474 | 0.000601722 | -0.01448518 | 0.75488475 | 0.183878 |
| 0.539875808 | -0.027020299 | 0.560260191 | -0.06665308 | 0.1503987  | 0.034071 |
| 0.034300653 | 0.102747982  | 0.026396282 | -0.00233039 | 0.95994294 | 0.359452 |
| 0.098109806 | -0.065713856 | 0.156244637 | -0.28696947 | 2.65E-10   | -0.07465 |
| 0.331218473 | -0.044954757 | 0.332362048 | -0.22169061 | 1.31E-06   | 0.018394 |
| 0.153256063 | -0.066514898 | 0.151248175 | -0.21413636 | 3.02E-06   | 0.004385 |
| 0.071635251 | 0.096329331  | 0.037437837 | -0.29653668 | 6.21E-11   | 0.071969 |
| 0.064799216 | -0.085771036 | 0.064029497 | -0.06318757 | 0.17282012 | -0.19034 |
| 5.25E-08    | -0.245198502 | 8.02E-08    | -0.08966261 | 0.05282677 | 0.020211 |
| 9.11E-06    | -0.20413779  | 8.73E-06    | -0.04413183 | 0.3412975  | 0.146992 |
| 0.124028417 | 0.083105581  | 0.072778291 | -0.2711261  | 2.60E-09   | -0.1283  |
| 0.325813673 | -0.062402564 | 0.178228636 | -0.17860795 | 0.00010418 | -0.00866 |
| 1.23E-14    | -0.338708509 | 5.33E-14    | -0.13147509 | 0.00442792 | 0.115212 |
| 6.13E-09    | 0.264250201  | 6.69E-09    | -0.11961915 | 0.00967145 | 0.077401 |
| 1.14E-13    | -0.335011565 | 1.04E-13    | -0.19827376 | 1.59E-05   | 0.065575 |
| 0.465683907 | -0.014757351 | 0.75043055  | -0.23174083 | 4.11E-07   | -0.02905 |
| 1.13E-11    | -0.305723691 | 1.46E-11    | 0.026923476 | 0.56166702 | 0.009245 |

|             |              |             |             |            |          |
|-------------|--------------|-------------|-------------|------------|----------|
| 0.000221478 | -0.162629573 | 0.000417836 | -0.12217435 | 0.00821648 | 0.01631  |
| 4.74E-05    | 0.197098714  | 1.79E-05    | -0.0358239  | 0.43991651 | 0.128335 |
| 0.001010722 | 0.14918509   | 0.001223307 | -0.19880616 | 1.50E-05   | -0.05344 |
| 0.288087546 | -0.041265051 | 0.373608485 | -0.06359498 | 0.17006184 | 0.144347 |
| 0.263618931 | -0.051956468 | 0.26248513  | -0.16732254 | 0.00028143 | 0.039145 |
| 0.98368223  | -0.018813987 | 0.685095321 | -0.0981332  | 0.03399655 | 0.061652 |
| 0.317206608 | 0.059326011  | 0.200637469 | -0.1511242  | 0.00105325 | 0.058112 |
| 0.997213625 | -0.001320044 | 0.977303291 | -0.00815525 | 0.86047694 | 0.041484 |
| 4.73E-07    | -0.219950777 | 1.59E-06    | 0.016566066 | 0.72104629 | 0.078204 |
| 0.258436821 | -0.047749513 | 0.303151917 | 0.039616574 | 0.39301501 | 0.026274 |
| 0.000438977 | -0.168125175 | 0.000262763 | -0.04808127 | 0.29980106 | -0.08427 |
| 0.520074526 | 0.036555303  | 0.430630535 | 0.084295421 | 0.06875932 | 0.083772 |
| 0.515610225 | -0.027000906 | 0.560541827 | 0.032352227 | 0.48552344 | -0.00096 |
| 0.000235749 | 0.1706358    | 0.000211563 | -0.11114263 | 0.016269   | -0.04974 |
| 0.007208333 | 0.120402271  | 0.009202914 | -0.25444693 | 2.46E-08   | -0.01735 |
| 5.96E-16    | -0.363095916 | 5.33E-16    | -0.03217296 | 0.48794576 | 0.11049  |
| 0.000474952 | -0.140673165 | 0.002311449 | -0.12361208 | 0.00748666 | 0.173834 |
| 1.65E-22    | -0.422665107 | 1.16E-21    | -0.04759283 | 0.3047431  | 0.326442 |
| 0.93721984  | 0.002551589  | 0.956144346 | -0.00367399 | 0.93688699 | 0.087603 |
| 2.71E-05    | -0.199282067 | 1.43E-05    | 0.059221479 | 0.20143332 | 0.123983 |
| 2.17E-05    | -0.198147578 | 1.61E-05    | -0.10675305 | 0.02103435 | 0.063119 |
| 0.094423569 | -0.082188213 | 0.076006058 | 0.047010415 | 0.31070606 | 0.170036 |
| 0.517702256 | -0.030147453 | 0.51576087  | -0.11743013 | 0.01109545 | 0.204301 |
| 4.34E-06    | -0.20387839  | 8.96E-06    | -0.18376109 | 6.48E-05   | -0.0496  |
| 9.14E-06    | 0.201225285  | 1.18E-05    | -0.19693478 | 1.82E-05   | 0.05372  |
| 0.170367592 | -0.065021503 | 0.160662851 | 0.13056491  | 0.0047122  | -0.24028 |
| 0.011383697 | 0.134300127  | 0.003641494 | 0.021344845 | 0.64545718 | 0.064121 |
| 1.23E-06    | -0.222897772 | 1.14E-06    | -0.07179094 | 0.12131994 | 0.321988 |
| 0.001930207 | 0.1235641    | 0.007510043 | -0.38867462 | 2.73E-18   | 0.0408   |
| 0.084189354 | -0.105608254 | 0.022460805 | 0.000296446 | 0.99490228 | -0.18768 |
| 5.49E-06    | -0.205427182 | 7.63E-06    | -0.05614143 | 0.2259221  | -0.12363 |
| 1.46E-06    | -0.230497945 | 4.76E-07    | -0.15851633 | 0.00058571 | 0.2674   |
| 0.983553495 | 0.007265194  | 0.875573117 | -0.02902288 | 0.53155059 | 0.015913 |
| 0.317308781 | -0.045495991 | 0.326568152 | -0.18621106 | 5.15E-05   | 0.152464 |
| 1.38E-27    | -0.464649537 | 2.18E-26    | 0.034637996 | 0.45521359 | 0.076346 |
| 5.66E-05    | -0.190646573 | 3.37E-05    | 0.004049327 | 0.93045488 | -0.17741 |
| 0.112767498 | -0.067600125 | 0.144673875 | -0.10685481 | 0.02091145 | 0.129486 |
| 2.74E-07    | 0.234463554  | 2.98E-07    | -0.070425   | 0.12858489 | 0.223014 |
| 0.271551726 | -0.04591537  | 0.322123958 | -0.05487671 | 0.23656763 | -0.17811 |
| 0.012272534 | -0.110078717 | 0.017327592 | -0.13829034 | 0.0027456  | 0.117206 |
| 3.44E-08    | -0.249482112 | 4.67E-08    | -0.07372892 | 0.11156646 | 0.115988 |
| 0.691986251 | -0.030992495 | 0.504057585 | 0.098307733 | 0.03367837 | -0.04021 |
| 0.391514344 | -0.037045248 | 0.424474067 | -0.12163345 | 0.00850707 | -0.01107 |
| 0.00270314  | 0.127386757  | 0.005838566 | -0.1813245  | 8.13E-05   | 0.097508 |
| 0.003450695 | -0.132784732 | 0.004046023 | -0.18693664 | 4.81E-05   | 0.19799  |

|             |              |             |             |            |          |
|-------------|--------------|-------------|-------------|------------|----------|
| 0.122062776 | -0.07687128  | 0.097074235 | -0.12423305 | 0.00718977 | -0.00032 |
| 0.381262444 | 0.051018739  | 0.271207435 | -0.08387901 | 0.07014464 | 0.020191 |
| 0.000309478 | 0.155804572  | 0.000728568 | -0.33173095 | 1.85E-13   | -0.06231 |
| 7.68E-07    | 0.221883577  | 1.28E-06    | -0.03823716 | 0.40971284 | 0.168279 |
| 0.484743042 | 0.03898326   | 0.400629675 | 0.028184391 | 0.54348049 | 0.170244 |
| 0.000137909 | -0.168944175 | 0.000244909 | -0.00766979 | 0.86870493 | -0.00244 |
| 0.54044457  | -0.035897856 | 0.438972373 | -0.29264346 | 1.13E-10   | 0.067108 |
| 0.003897511 | -0.128692906 | 0.005349234 | 0.008344745 | 0.85726929 | 0.033408 |
| 1.72E-24    | 0.452542119  | 5.89E-25    | -0.18959033 | 3.73E-05   | 0.055517 |
| 0.873468401 | 0.000672595  | 0.988434309 | 0.002402407 | 0.95870606 | -0.03533 |
| 0.458540981 | -0.021147928 | 0.648507331 | 0.129181414 | 0.00517592 | -0.07435 |
| 0.001466042 | -0.133850793 | 0.003757441 | 0.086210907 | 0.06267253 | 0.049125 |
| 3.07E-12    | -0.316033357 | 2.73E-12    | 0.022018954 | 0.63506074 | 0.170808 |
| 0.02745068  | 0.094529146  | 0.04116227  | 0.147998908 | 0.00133944 | 0.077726 |
| 0.530283309 | -0.031274326 | 0.500185693 | 0.126218158 | 0.00631007 | 0.113447 |
| 0.775832447 | -0.020746537 | 0.654742882 | -0.02196102 | 0.63595149 | -0.00619 |
| 0.252459327 | 0.053205558  | 0.251169505 | 0.005164183 | 0.91137797 | 0.099645 |
| 0.00218722  | -0.144909349 | 0.001691136 | 0.02373707  | 0.60888912 | -0.21079 |
| 0.603431498 | 0.026209599  | 0.572091871 | 0.122438195 | 0.00807797 | -0.1153  |
| 0.061247763 | -0.086310245 | 0.062369387 | 7.04E-06    | 0.999879   | 0.045817 |
| 0.005233484 | -0.116192312 | 0.011980305 | -0.02274475 | 0.62394679 | 0.067727 |
| 0.000398017 | -0.174716608 | 0.000147783 | -0.05587881 | 0.22810409 | -0.03576 |
| 0.032688647 | -0.100414029 | 0.030034405 | -0.05497362 | 0.23573964 | 0.016902 |
| 0.455318316 | -0.025640805 | 0.58046311  | -0.02345779 | 0.61311074 | 0.041061 |
| 0.997566803 | -0.004268982 | 0.926692744 | -0.04286361 | 0.35536512 | 0.113015 |
| 0.233623076 | 0.060660145  | 0.190680386 | -0.24989202 | 4.43E-08   | 0.362048 |
| 9.25E-10    | -0.277351858 | 1.08E-09    | 0.103734649 | 0.02497637 | 0.20215  |
| 0.740692832 | 0.013854796  | 0.765232587 | 0.055890004 | 0.22801081 | 0.378061 |
| 0.513593937 | 0.030596075  | 0.509530293 | -0.03175595 | 0.49360563 | 0.069902 |
| 0.517583727 | -0.028533246 | 0.538500954 | -0.02124857 | 0.64694763 | -0.19662 |
| 0.003436645 | 0.116828694  | 0.01151789  | 0.057281983 | 0.21661794 | -0.01504 |
| 0.840562481 | 0.000833342  | 0.985670435 | -0.0091083  | 0.84436864 | 0.032563 |
| 0.216670064 | -0.059760491 | 0.197354107 | -0.02841902 | 0.54012888 | 0.050104 |
| 0.595100405 | 0.024879966  | 0.59174934  | 0.117027936 | 0.0113764  | 0.054154 |
| 0.015751301 | -0.102989744 | 0.026042083 | 0.194626943 | 2.28E-05   | 0.072262 |
| 0.876260295 | -0.01503081  | 0.745963509 | 0.229416547 | 5.40E-07   | 0.122574 |
| 1.00E-06    | -0.231092077 | 4.44E-07    | 0.035595806 | 0.44283565 | 0.100069 |
| 0.712389762 | -0.009281183 | 0.841453316 | -0.0027536  | 0.95267617 | -0.01232 |
| 2.45E-07    | -0.244258312 | 9.02E-08    | 0.040231677 | 0.38570364 | 0.166274 |
| 0.922060005 | 5.80E-05     | 0.999002393 | -0.13851916 | 0.00270089 | 0.044767 |
| 0.00361208  | 0.126135388  | 0.006344722 | 0.320708391 | 1.24E-12   | 0.052903 |
| 0.10737189  | -0.073360398 | 0.113372052 | -0.11179624 | 0.01564713 | -0.07364 |
| 0.701573461 | 0.002611003  | 0.955124225 | -0.0432463  | 0.35108221 | 0.109295 |
| 0.155083231 | 0.05940866   | 0.20000985  | 0.021220474 | 0.64738294 | -0.10027 |
| 0.849657252 | -0.026815997 | 0.563230689 | 0.052752799 | 0.25523123 | 0.01775  |

|             |              |             |             |            |          |
|-------------|--------------|-------------|-------------|------------|----------|
| 0.275844181 | 0.069342738  | 0.13457684  | -0.05588293 | 0.22806978 | 0.259396 |
| 0.003756142 | -0.142322391 | 0.002048709 | -0.0210217  | 0.6504656  | -0.02242 |
| 3.05E-05    | 0.186879399  | 4.83E-05    | 0.231590857 | 4.19E-07   | 0.145288 |
| 0.610370279 | -0.030213804 | 0.514836898 | -0.10095884 | 0.02914879 | -0.24439 |
| 3.18E-14    | 0.326760554  | 4.42E-13    | -0.09545369 | 0.03921214 | -0.04312 |
| 0.645584683 | 0.035326196  | 0.446300338 | -0.24623544 | 7.04E-08   | 0.005313 |
| 0.223187873 | 0.058068941  | 0.210360584 | -0.1136415  | 0.0140026  | -0.01587 |
| 0.433728307 | 0.038838161  | 0.402386628 | 0.149736509 | 0.00117254 | -0.08486 |
| 0.549248339 | 0.033253607  | 0.473442619 | 0.023456614 | 0.61312849 | -0.16243 |
| 0.014050424 | -0.110836159 | 0.01656797  | 0.101958148 | 0.02758251 | -0.09542 |
| 0.000322205 | -0.164249748 | 0.000364982 | 0.046487615 | 0.3161236  | 0.00922  |
| 0.057169153 | -0.080992595 | 0.080386565 | 0.106357413 | 0.02151817 | 0.081952 |
| 0.644990808 | 0.022217594  | 0.632010728 | 0.191043661 | 3.24E-05   | 0.291618 |
| 0.025509525 | -0.103177261 | 0.025770183 | 0.001833946 | 0.96847123 | 0.094398 |
| 4.00E-10    | -0.284452033 | 3.84E-10    | -0.05970335 | 0.19778369 | 0.091945 |
| 0.948497621 | -0.005063672 | 0.913095962 | -0.26575467 | 5.45E-09   | 0.024946 |
| 0.129866496 | 0.072649216  | 0.116921355 | -0.31128987 | 5.96E-12   | -0.03978 |
| 0.820619455 | 0.001435719  | 0.975314976 | -0.0791052  | 0.08771556 | -0.09756 |
| 0.430754777 | 0.034494207  | 0.457088405 | 0.010397256 | 0.82268688 | -0.19024 |
| 0.364978233 | 0.032565626  | 0.482648403 | -0.113058   | 0.01450537 | 0.216945 |
| 0.001087769 | 0.13544153   | 0.003361405 | -0.10019209 | 0.03040172 | 0.184426 |
| 0.949046469 | -0.006636744 | 0.886259801 | -0.03578733 | 0.44038376 | 0.029233 |
| 0.000158299 | -0.173126561 | 0.000170119 | 0.039066291 | 0.39962634 | 0.276452 |
| 0.006793184 | -0.126755242 | 0.00608928  | -0.19172892 | 3.03E-05   | 0.191571 |
| 2.56E-14    | -0.345121577 | 1.65E-14    | -0.02843848 | 0.53985138 | 0.173734 |
| 0.971341099 | -0.001076958 | 0.981482047 | -0.08054887 | 0.08206342 | -0.20852 |
| 0.014676992 | 0.108587491  | 0.0189125   | 0.43825942  | 2.44E-23   | 0.286397 |
| 0.081899397 | 0.069897095  | 0.13148131  | -0.01251082 | 0.78743174 | 0.036119 |
| 0.226303876 | 0.067889206  | 0.142959984 | -0.09413018 | 0.04202876 | 0.129773 |
| 1.80E-10    | 0.282862724  | 4.85E-10    | -0.13616096 | 0.00319506 | 0.142045 |
| 5.99E-08    | -0.251784459 | 3.48E-08    | 0.143447227 | 0.00188549 | 0.017874 |
| 0.002291784 | 0.134570109  | 0.003573397 | -0.25228833 | 3.26E-08   | 0.374631 |
| 0.035163848 | -0.084874745 | 0.066869353 | -0.18162242 | 7.91E-05   | -0.05082 |
| 0.010473313 | -0.111727602 | 0.015711439 | -0.01116465 | 0.80984117 | 0.067949 |
| 0.016336083 | 0.110168191  | 0.017236302 | 0.263874391 | 7.04E-09   | 0.026196 |
| 0.165488192 | 0.078907033  | 0.08851528  | -0.11813527 | 0.01061769 | -0.0052  |
| 1.64E-06    | 0.228970045  | 5.69E-07    | -0.13093355 | 0.00459513 | 0.127165 |
| 0.134081561 | -0.075105254 | 0.105022215 | 0.12494782  | 0.00686112 | 0.008586 |
| 0.002569542 | 0.147498708  | 0.001391387 | 0.159041778 | 0.00056123 | 0.003862 |
| 1.77E-05    | 0.202750942  | 1.01E-05    | -0.03064107 | 0.50890752 | 0.022999 |
| 5.42E-05    | 0.187410795  | 4.60E-05    | 0.272875024 | 2.03E-09   | 0.095405 |
| 7.00E-05    | 0.167127626  | 0.000286152 | -0.03746311 | 0.41926411 | 0.017114 |
| 0.338642791 | 0.049012581  | 0.290526365 | -0.05804638 | 0.21053814 | 0.219691 |
| 0.003810601 | 0.136190467  | 0.003188402 | -0.02773318 | 0.54995476 | -0.19339 |
| 0.429334914 | -0.03862592  | 0.40496486  | 0.338391025 | 5.65E-14   | 0.211521 |

|             |              |             |             |            |          |
|-------------|--------------|-------------|-------------|------------|----------|
| 0.747284725 | 0.007071027  | 0.87887258  | -0.19869203 | 1.52E-05   | -0.03621 |
| 0.027083814 | 0.087076602  | 0.060071146 | 0.076020149 | 0.10084275 | 0.005293 |
| 0.962350519 | -0.000196312 | 0.996624191 | -0.00556248 | 0.90457422 | -0.02441 |
| 0.237693189 | -0.066908682 | 0.14883689  | 0.11730128  | 0.01118478 | -0.0106  |
| 0.717773237 | -0.01789646  | 0.699689089 | 0.053419815 | 0.24926315 | 0.022252 |
| 0.090227723 | -0.079154729 | 0.087516594 | -0.04038008 | 0.38395211 | 0.077887 |
| 0.246825625 | -0.065243166 | 0.159238198 | 0.009374202 | 0.83988565 | -0.04477 |
| 0.462083263 | 0.046498905  | 0.316005961 | 0.097566745 | 0.03504693 | 0.193386 |
| 3.84E-05    | 0.178825204  | 0.00010214  | -0.21459336 | 2.87E-06   | 0.209358 |
| 0.07574187  | 0.099599938  | 0.031400662 | -0.16191261 | 0.00044343 | -0.00852 |
| 6.53E-09    | 0.264573258  | 6.40E-09    | -0.18925878 | 3.85E-05   | 0.087954 |
| 1.04E-05    | -0.199618441 | 1.39E-05    | -0.03949328 | 0.39449058 | -0.19736 |
| 0.535026001 | 0.035536906  | 0.443591251 | -0.08104187 | 0.08020209 | 0.075568 |
| 2.76E-06    | 0.204697079  | 8.23E-06    | 0.192317887 | 2.86E-05   | -0.23319 |
| 0.453523991 | -0.038119471 | 0.41115669  | -0.00844657 | 0.85554656 | -0.00782 |
| 0.741617322 | 0.0026478    | 0.954492458 | -0.05820913 | 0.20925971 | -0.00145 |
| 0.584425857 | -0.029214635 | 0.528841095 | 0.046964302 | 0.31118144 | 0.097661 |
| 0.158567816 | -0.066075955 | 0.153970816 | -0.00235684 | 0.95948869 | 0.115354 |
| 0.011927584 | 0.121373233  | 0.008650103 | -0.02432898 | 0.59998484 | 0.140879 |
| 0.043679205 | 0.099779008  | 0.031095661 | -0.07753797 | 0.09420145 | 0.086683 |
| 0.273750612 | 0.059744678  | 0.197472917 | -0.06991854 | 0.13136268 | -0.0182  |
| 0.819531652 | 0.020342337  | 0.661046421 | -0.14042479 | 0.00235358 | 0.046355 |
| 0.708624746 | -0.024585498 | 0.596144265 | 0.027982662 | 0.54637035 | -0.02291 |
| 0.744062208 | -0.005883026 | 0.899103723 | 0.07345937  | 0.11288489 | 0.006502 |
| 0.01221862  | -0.1117362   | 0.01570337  | -0.04450284 | 0.33725017 | 0.021533 |
| 0.578310764 | -0.035228957 | 0.447553684 | 0.126042085 | 0.00638399 | 0.299953 |
| 0.084978828 | 0.081022864  | 0.080273196 | -0.0737524  | 0.11145217 | 0.164836 |
| 0.015897927 | -0.109384569 | 0.018050297 | -0.13132361 | 0.00447413 | -0.01597 |
| 0.356616189 | -0.051559177 | 0.26615668  | -0.09795488 | 0.03432429 | -0.01299 |
| 0.000916209 | 0.15935272   | 0.00054719  | 0.001300432 | 0.9776404  | -0.11701 |
| 0.000334931 | -0.178037519 | 0.000109706 | 0.035918837 | 0.43870474 | -0.01126 |
| 0.001907866 | -0.152288986 | 0.000961867 | 0.029958337 | 0.51839911 | -0.02178 |
| 0.01864759  | -0.114230694 | 0.013510531 | 0.050408464 | 0.2769891  | -0.05317 |
| 0.497750766 | -0.03524259  | 0.447377851 | -0.13896345 | 0.00261599 | -0.05582 |
| 0.957528412 | -0.014153929 | 0.760316981 | -0.03672963 | 0.42843405 | 0.02189  |
| 0.013662462 | 0.112162015  | 0.015308294 | 0.027941185 | 0.54696546 | -0.05161 |
| 1.25E-12    | 0.331366747  | 1.98E-13    | 0.005686857 | 0.90245105 | 0.071457 |
| 0.044178665 | -0.071056969 | 0.125182843 | 0.097162897 | 0.03581254 | 0.137411 |
| 0.198676028 | -0.04687368  | 0.312117049 | -0.03253503 | 0.48306006 | 0.141271 |
| 0.053434859 | -0.073327332 | 0.113535176 | -0.10511519 | 0.02310055 | 0.20868  |
| 0.000168732 | 0.179242966  | 9.83E-05    | -0.06625966 | 0.15282683 | 0.090783 |
| 6.65E-07    | 0.233148307  | 3.48E-07    | -0.0071349  | 0.87778694 | 0.095751 |
| 0.302117412 | 0.03859975   | 0.405283456 | -0.01044322 | 0.82191609 | 0.016324 |
| 0.108266952 | 0.065264731  | 0.159100106 | -0.00415813 | 0.92859109 | 0.100831 |
| 0.006051827 | -0.117907652 | 0.010769879 | 0.112407889 | 0.01508416 | 0.089106 |

|             |              |             |             |            |          |
|-------------|--------------|-------------|-------------|------------|----------|
| 0.025748631 | 0.107907853  | 0.019675805 | 0.009160765 | 0.84348369 | -0.00825 |
| 0.193534671 | 0.062675322  | 0.17633534  | 0.05846529  | 0.20725892 | -0.02874 |
| 0.001347336 | 0.152099485  | 0.000976217 | 0.029729991 | 0.52159387 | 0.076374 |
| 0.269146201 | 0.044018151  | 0.342543763 | -0.04006664 | 0.38765716 | -0.02862 |
| 0.63596028  | 0.017810654  | 0.701059647 | -0.01170754 | 0.80078386 | 0.052864 |
| 1.48E-05    | 0.194403392  | 2.33E-05    | 0.010557651 | 0.8199979  | -0.08947 |
| 3.70E-06    | -0.20432616  | 8.56E-06    | 0.090113698 | 0.05164086 | 0.029582 |
| 0.511371963 | -0.020119466 | 0.66453243  | 0.18427082  | 6.18E-05   | -0.10823 |
| 0.007916062 | -0.105133626 | 0.023076351 | -0.00692105 | 0.88142247 | 0.1056   |
| 0.489113943 | 0.038792095  | 0.402945384 | -0.00355925 | 0.93885412 | -0.16684 |
| 1.29E-07    | 0.243291142  | 1.02E-07    | 0.082459505 | 0.07503962 | 0.133531 |
| 3.57E-05    | 0.190543583  | 3.40E-05    | 0.163172015 | 0.00039939 | 0.381926 |
| 1.04E-09    | -0.274566559 | 1.60E-09    | -0.14074078 | 0.0023001  | -0.06167 |
| 0.012514529 | -0.132702696 | 0.00406904  | -0.10564049 | 0.02241951 | 0.153786 |
| 1.78E-10    | -0.280863006 | 6.49E-10    | -0.02288626 | 0.62178976 | 0.197683 |
| 0.369622945 | -0.04012077  | 0.387015778 | 0.003172517 | 0.94548704 | -0.20909 |
| 3.64E-05    | -0.175902881 | 0.000132944 | -0.14256793 | 0.00201202 | -0.22581 |
| 0.677818705 | 0.016229816  | 0.726479505 | -0.02136495 | 0.64514612 | 0.046268 |
| 0.000388857 | -0.173033867 | 0.000171514 | -0.07221573 | 0.11912706 | 0.094745 |
| 0.004191516 | 0.131231373  | 0.004502479 | 0.031244125 | 0.50059985 | 0.03226  |
| 9.34E-07    | 0.236310924  | 2.39E-07    | -0.05290928 | 0.2538223  | -0.11192 |
| 0.004546794 | 0.131627981  | 0.004381715 | -0.01164621 | 0.80180584 | -0.03709 |
| 0.001055311 | 0.129672509  | 0.005006808 | -0.05467932 | 0.23826051 | -0.12729 |
| 0.059073621 | -0.093551756 | 0.04331229  | -0.02447608 | 0.59778103 | 0.003783 |
| 0.305021901 | -0.056653573 | 0.221709654 | 0.028859856 | 0.53385971 | -0.01374 |
| 0.068584176 | 0.100519086  | 0.029861858 | 0.164857925 | 0.0003468  | 0.060191 |
| 6.13E-06    | 0.222699841  | 1.17E-06    | 0.101427022 | 0.02840573 | 0.153958 |
| 0.153113873 | 0.064749202  | 0.162426079 | 0.255899541 | 2.04E-08   | 0.217753 |
| 1.34E-12    | -0.316939907 | 2.34E-12    | 0.125169062 | 0.00676215 | 0.034542 |
| 1.24E-06    | 0.202172194  | 1.07E-05    | 0.017418147 | 0.7073414  | -0.01373 |
| 0.256462796 | -0.05324807  | 0.250790451 | 0.050852278 | 0.27277623 | -0.1416  |
| 3.39E-07    | 0.226777939  | 7.34E-07    | 0.152618669 | 0.00093736 | -0.1509  |
| 1.64E-06    | 0.219829043  | 1.61E-06    | 0.172629968 | 0.00017772 | 0.094774 |
| 0.89943771  | -0.007823783 | 0.866093302 | -0.1599235  | 0.00052227 | -0.06273 |
| 0.02102344  | -0.108927948 | 0.018539929 | 0.043123701 | 0.35245073 | -0.06037 |
| 0.605891751 | -0.01286857  | 0.781504961 | 0.029403431 | 0.52618022 | -0.07223 |
| 0.04780006  | -0.085197296 | 0.065835685 | -0.02005756 | 0.66550202 | 0.015964 |
| 1.69E-09    | -0.270338568 | 2.90E-09    | 0.061226479 | 0.18656509 | -0.07686 |
| 0.700199101 | 0.000783314  | 0.9865306   | 0.04620751  | 0.31905149 | 0.120453 |
| 0.088476002 | -0.096893077 | 0.036331942 | -0.1248149  | 0.0069212  | -0.16189 |
| 0.22894576  | 0.066359294  | 0.152209128 | 0.064978174 | 0.16094245 | 0.038258 |
| 0.0024528   | -0.136639751 | 0.00308854  | 0.066229851 | 0.15301204 | 0.296138 |
| 0.216266662 | 0.071137891  | 0.124752317 | -0.05432333 | 0.24133512 | 0.074836 |
| 0.425441055 | -0.032212793 | 0.48740695  | -0.11571101 | 0.01234085 | -0.07576 |
| 0.697354538 | 0.025417966  | 0.583758273 | -0.11990104 | 0.00950041 | -0.11849 |

|             |              |             |             |            |          |
|-------------|--------------|-------------|-------------|------------|----------|
| 0.002183101 | 0.144071722  | 0.001800106 | -0.03423134 | 0.46052705 | 0.057848 |
| 3.36E-05    | -0.188059797 | 4.32E-05    | -0.10267105 | 0.02650986 | -0.02007 |
| 0.000105814 | -0.171352838 | 0.000198753 | -0.16255904 | 0.00042029 | 0.141176 |
| 0.007290024 | -0.120764556 | 0.008993076 | -0.14071468 | 0.00230448 | 0.05232  |
| 0.868528825 | -0.007172585 | 0.87714656  | -0.0868681  | 0.06068937 | -0.0278  |
| 0.001352113 | -0.147065838 | 0.001437828 | -0.14931335 | 0.00121132 | 0.103673 |
| 0.087540282 | 0.082885842  | 0.073541075 | -0.06018419 | 0.19419011 | -0.14599 |
| 0.360920479 | -0.027616489 | 0.551635255 | -0.08648123 | 0.06185043 | 0.149606 |
| 0.031606728 | 0.094508273  | 0.041207227 | 0.077099834 | 0.09608163 | 0.379029 |
| 0.022402398 | 0.106718132  | 0.021076667 | -0.11543359 | 0.012553   | -0.06229 |
| 0.410710807 | -0.034307299 | 0.459531903 | 0.180160895 | 9.04E-05   | 0.077315 |
| 0.003045341 | 0.124233998  | 0.007189326 | 0.126292567 | 0.00627906 | -0.12867 |
| 0.017710924 | 0.109099199  | 0.018354957 | 0.100508504 | 0.0298792  | -0.13908 |
| 0.396744688 | -0.04341355  | 0.349220737 | 0.072072844 | 0.11986118 | 0.006923 |
| 0.008015883 | 0.116208712  | 0.011968186 | 0.075458569 | 0.10339222 | -0.06102 |
| 0.978101546 | -0.001541484 | 0.973497155 | -0.11142536 | 0.01599739 | 0.085225 |
| 0.367794195 | 0.044627954  | 0.335892324 | -0.13824392 | 0.00275475 | 0.000953 |
| 0.200549813 | -0.062748636 | 0.175829    | -0.03318187 | 0.47439798 | 0.168071 |
| 9.49E-05    | -0.178115267 | 0.000108936 | -0.02699376 | 0.56064568 | 0.246685 |
| 0.003690278 | 0.132996184  | 0.003987237 | 0.104878717 | 0.02341293 | -0.06965 |
| 0.000317053 | 0.147650591  | 0.001375422 | 0.034289381 | 0.45976654 | -0.33857 |
| 0.001671552 | 0.135908372  | 0.003252593 | 0.124809512 | 0.00692364 | -0.19489 |
| 0.007599391 | -0.112678919 | 0.014840444 | 0.225270124 | 8.72E-07   | -0.26227 |
| 0.036370978 | -0.098976304 | 0.032482915 | -0.06593472 | 0.15485469 | -0.04584 |
| 0.105328051 | -0.077309169 | 0.095179609 | 0.255557379 | 2.13E-08   | 0.031142 |
| 1.70E-06    | 0.225137058  | 8.86E-07    | -0.13706113 | 0.00299747 | -0.05223 |
| 7.69E-08    | 0.250791756  | 3.95E-08    | -0.05963514 | 0.19829737 | -0.11275 |
| 0.017882159 | 0.121915647  | 0.008354338 | 0.094371721 | 0.04150235 | 0.213633 |
| 0.998429114 | -0.005840094 | 0.899836132 | -0.15998701 | 0.00051956 | -0.18161 |
| 0.68627642  | 0.038712769  | 0.403908665 | -0.04130232 | 0.37317663 | 0.205699 |
| 0.645113512 | 0.026088206  | 0.573873677 | -0.12025531 | 0.00928927 | -0.02803 |
| 0.329514721 | -0.04808811  | 0.299732185 | -0.13805897 | 0.00279148 | -0.04858 |
| 0.001699829 | -0.157842893 | 0.00061853  | -0.1397278  | 0.00247558 | -0.04138 |
| 0.015104208 | 0.113403541  | 0.014205747 | -0.01299135 | 0.77947375 | -0.07459 |
| 0.790084779 | -0.025588936 | 0.581229335 | -0.16893733 | 0.00024505 | 0.08103  |
| 1.08E-09    | -0.290230228 | 1.62E-10    | -0.02424842 | 0.60119322 | 0.038046 |
| 0.070633521 | -0.078572652 | 0.08987797  | 0.183148447 | 6.86E-05   | -0.09198 |
| 3.23E-06    | -0.214556443 | 2.89E-06    | -0.11116474 | 0.01624761 | 0.112646 |
| 2.87E-05    | -0.183129338 | 6.88E-05    | -0.00968363 | 0.83467531 | 0.227932 |
| 0.000355056 | -0.157461556 | 0.000637866 | -0.01724191 | 0.71016836 | -0.11774 |
| 5.46E-06    | -0.208449477 | 5.56E-06    | 0.037498151 | 0.41882894 | 0.272426 |
| 0.709975758 | 0.028136552  | 0.544165118 | -0.15874286 | 0.00057503 | -0.23422 |
| 0.433191413 | 0.024794886  | 0.593017639 | -0.08583726 | 0.06382366 | 0.078524 |
| 0.401160469 | 0.028310309  | 0.541680509 | -0.07498246 | 0.10559347 | 0.0358   |
| 0.469223727 | 0.030866766  | 0.50578996  | -0.05393311 | 0.24473715 | -0.04342 |

|             |              |             |             |            |          |
|-------------|--------------|-------------|-------------|------------|----------|
| 0.462105932 | 0.02833452   | 0.541334763 | -0.09247242 | 0.04579568 | 0.23937  |
| 1.12E-07    | -0.245345225 | 7.87E-08    | -0.08161296 | 0.07808882 | 0.11002  |
| 0.000384608 | -0.166541133 | 0.000300796 | -0.10822893 | 0.01931192 | -0.02947 |
| 2.99E-05    | -0.199289341 | 1.43E-05    | -0.17576163 | 0.00013463 | -0.19322 |
| 0.083407875 | -0.071341496 | 0.123674169 | -0.09901583 | 0.03241338 | -0.0963  |
| 0.000646266 | -0.146773084 | 0.001470039 | 0.030262372 | 0.5141611  | 0.019779 |
| 7.91E-05    | -0.17097262  | 0.000205452 | -0.03312391 | 0.47517074 | 0.189912 |
| 3.70E-06    | -0.219404182 | 1.69E-06    | -0.24417446 | 9.11E-08   | 0.032044 |
| 0.026619954 | -0.095017004 | 0.040123269 | 0.024816971 | 0.59268829 | 0.024795 |
| 0.18617908  | -0.061115262 | 0.187368053 | -0.1914869  | 3.11E-05   | 0.008919 |
| 2.92E-05    | -0.175093205 | 0.000142911 | -0.17605453 | 0.00013115 | 0.100459 |
| 0.00163216  | -0.139525448 | 0.002512068 | 0.028536089 | 0.53846047 | -0.04337 |
| 0.088292706 | 0.092053241  | 0.046791871 | 0.015809537 | 0.73328978 | -0.08236 |
| 0.867730555 | 0.00089886   | 0.984543972 | 0.020103771 | 0.6647782  | -0.08215 |
| 0.001655874 | 0.138867464  | 0.002634121 | -0.08318757 | 0.07249533 | -0.0414  |
| 0.010144197 | 0.102765334  | 0.026370722 | -0.26977759 | 3.13E-09   | 0.015093 |
| 5.14E-07    | 0.236319088  | 2.38E-07    | -0.06519934 | 0.15951912 | 0.036273 |
| 0.001384415 | 0.145018885  | 0.001677342 | -0.07707302 | 0.09619768 | 0.24508  |
| 0.000858931 | 0.155392283  | 0.000752922 | -0.00744042 | 0.87259732 | 0.345482 |
| 0.062897356 | -0.08431209  | 0.068704333 | -0.2167357  | 2.27E-06   | -0.05185 |
| 3.45E-10    | 0.284845327  | 3.62E-10    | -0.09929262 | 0.03193007 | -0.07888 |
| 0.000330547 | 0.171923258  | 0.000189086 | -0.18982784 | 3.65E-05   | -0.21326 |
| 3.75E-08    | -0.242510876 | 1.12E-07    | -0.06210818 | 0.18028896 | 0.103354 |
| 0.490217137 | 0.025893891  | 0.576731247 | -0.067691   | 0.14413344 | -0.20114 |
| 0.082889565 | -0.083599036 | 0.07108886  | -0.16872554 | 0.00024956 | 0.109038 |
| 0.0001799   | -0.179234995 | 9.84E-05    | -0.14823254 | 0.0013158  | 0.195403 |
| 0.416136333 | -0.023492147 | 0.612590648 | -0.14826359 | 0.00131268 | -0.06388 |
| 0.002178192 | -0.136874447 | 0.003037513 | 0.117972485 | 0.01072634 | 0.181683 |
| 0.125544272 | 0.073801356  | 0.111214207 | -0.09371473 | 0.04294735 | -0.02772 |
| 0.380394879 | -0.035817534 | 0.439997813 | 0.018617839 | 0.68820555 | -0.02617 |
| 0.010848451 | -0.10949875  | 0.01792964  | -0.19147062 | 3.11E-05   | -0.2204  |
| 0.092796335 | -0.067264075 | 0.146685909 | -0.19111887 | 3.22E-05   | -0.23731 |
| 0.542672099 | 0.022482342  | 0.627955346 | -0.08514273 | 0.06600963 | -0.1413  |
| 6.26E-06    | -0.199557174 | 1.39E-05    | -0.02847651 | 0.53930929 | -0.04148 |
| 4.34E-07    | -0.2405225   | 1.43E-07    | 0.003712485 | 0.93622711 | -0.06616 |
| 0.122195195 | -0.061636905 | 0.183623842 | -0.16753544 | 0.00027636 | 0.387977 |
| 0.887958044 | 0.001105472  | 0.980991844 | -0.02334905 | 0.61475782 | 0.031018 |
| 1.55E-07    | -0.251422073 | 3.64E-08    | 0.278632161 | 8.96E-10   | 0.224873 |
| 0.000467087 | -0.17940865  | 9.69E-05    | 0.140043557 | 0.00241962 | 0.220048 |
| 0.361202336 | -0.048109579 | 0.299516222 | -0.04367025 | 0.34637588 | 0.025009 |
| 0.071923013 | -0.073431535 | 0.11302173  | -0.03264741 | 0.48154905 | 0.074523 |
| 0.013402542 | 0.114723856  | 0.013110445 | 0.088747259 | 0.05530304 | 0.075932 |
| 0.000342057 | 0.159241186  | 0.000552186 | 0.214025454 | 3.06E-06   | 0.266724 |
| 0.001528397 | -0.1363872   | 0.003144319 | -0.07390246 | 0.11072403 | -0.26097 |
| 0.823054416 | 0.009969035  | 0.829875958 | -0.09252001 | 0.04568373 | 0.287288 |



|             |              |             |             |            |          |
|-------------|--------------|-------------|-------------|------------|----------|
| 7.62E-05    | 0.179098954  | 9.96E-05    | -0.00341411 | 0.9413429  | 0.160152 |
| 0.159153908 | -0.074200796 | 0.109287548 | -0.17767025 | 0.00011341 | 0.385917 |
| 0.050044028 | -0.090464895 | 0.050733006 | 0.00364724  | 0.93734558 | 0.016362 |
| 0.004550559 | -0.132495889 | 0.004127592 | -0.05529649 | 0.23299572 | 0.021202 |
| 0.394381044 | 0.039817553  | 0.390616941 | -0.09071762 | 0.05008799 | 0.010151 |
| 0.011879063 | 0.116264414  | 0.011927102 | -0.10228498 | 0.02708621 | 0.015426 |
| 0.271781442 | 0.041764127  | 0.367851766 | -0.07537755 | 0.10376422 | 0.045666 |
| 0.699729422 | 0.029915844  | 0.518992865 | -0.02784444 | 0.54835486 | -0.02823 |
| 0.000363025 | -0.155919674 | 0.000721901 | -0.16247644 | 0.00042318 | 0.008465 |
| 0.000418301 | 0.157307606  | 0.000645829 | 0.049310261 | 0.28760287 | 0.489258 |
| 0.029990815 | 0.09505038   | 0.040053004 | 0.131554588 | 0.00440384 | 0.260688 |
| 2.32E-05    | -0.190379531 | 3.46E-05    | -0.11781081 | 0.01083521 | -0.06734 |
| 3.14E-27    | -0.479970921 | 2.78E-28    | -0.00120472 | 0.97928563 | -0.01395 |
| 0.623830874 | 0.007105287  | 0.878290256 | -0.01324679 | 0.77525283 | 0.049798 |
| 0.127313653 | 0.063223579  | 0.17257499  | -0.20052062 | 1.26E-05   | 0.058612 |
| 5.74E-05    | -0.198737061 | 1.52E-05    | -0.29222403 | 1.20E-10   | -0.00401 |
| 0.157920143 | 0.042609677  | 0.358225044 | -0.23467877 | 2.90E-07   | 0.148267 |
| 0.006173722 | -0.12351116  | 0.007535926 | -0.03701679 | 0.42483024 | 0.048122 |
| 0.020789728 | -0.102248604 | 0.027141063 | 0.112190697 | 0.015282   | 0.160273 |
| 6.35E-05    | 0.188830899  | 4.01E-05    | -0.10486682 | 0.02342875 | 0.109546 |
| 0.032726153 | -0.093579544 | 0.043249882 | -0.0825305  | 0.07478836 | 0.091268 |
| 0.451831033 | 0.023080675  | 0.618831443 | -0.04691656 | 0.31167413 | -0.02741 |
| 0.009790224 | 0.126054614  | 0.006378708 | -0.08257466 | 0.07463244 | 0.192617 |
| 0.590291013 | 0.018310738  | 0.693085685 | -0.1265675  | 0.00616566 | -0.05013 |
| 0.00739357  | -0.113789911 | 0.013877184 | -0.21848413 | 1.87E-06   | -0.07199 |
| 6.95E-11    | -0.296212017 | 6.53E-11    | -0.02991096 | 0.51906117 | -0.01908 |
| 0.190119924 | -0.060372775 | 0.192793878 | 0.016046657 | 0.72944484 | -0.02265 |
| 2.77E-06    | -0.224237417 | 9.82E-07    | 0.038765885 | 0.4032635  | 0.087162 |
| 0.121186442 | 0.058393605  | 0.207817431 | -0.09219071 | 0.0464632  | -0.242   |
| 0.517635674 | -0.029055904 | 0.531083499 | 0.063188479 | 0.17281393 | 0.289807 |
| 0.013330462 | -0.110762335 | 0.016640702 | -0.07132642 | 0.12375376 | -0.08638 |
| 0.028102577 | -0.099062834 | 0.032330874 | -0.3387588  | 5.29E-14   | -0.25215 |
| 0.098626424 | 0.076112354  | 0.10042897  | -0.20212085 | 1.07E-05   | 0.089892 |
| 0.163230574 | -0.065382415 | 0.158348109 | -0.17132607 | 0.00019922 | 0.114977 |
| 0.076806241 | 0.084321246  | 0.068674146 | -0.35747813 | 1.60E-15   | -0.05991 |
| 0.039397615 | -0.084377719 | 0.068488197 | -0.09712368 | 0.03588763 | -0.25454 |
| 0.065655895 | -0.08387416  | 0.070160924 | 0.073772458 | 0.11135462 | -0.04958 |
| 0.02957765  | 0.096772243  | 0.036566615 | 0.074136062 | 0.10959798 | -0.00235 |
| 0.785845346 | -0.013443027 | 0.772014532 | 0.059515858 | 0.19919794 | 0.289364 |
| 0.021768089 | -0.109581696 | 0.017842432 | -0.05446003 | 0.24015116 | 0.15796  |
| 0.000300138 | -0.180315981 | 8.91E-05    | -0.0725805  | 0.11726884 | 0.136261 |
| 9.47E-07    | 0.223498339  | 1.07E-06    | 0.197308681 | 1.75E-05   | 0.230113 |
| 0.006780018 | 0.146294325  | 0.001524148 | -0.18967317 | 3.70E-05   | -0.0423  |
| 0.037951161 | -0.105506041 | 0.02259215  | 0.023703005 | 0.60940336 | 0.099431 |
| 0.007680579 | -0.113138056 | 0.01443546  | -0.05324339 | 0.25083213 | -0.11091 |

|             |              |             |             |            |          |
|-------------|--------------|-------------|-------------|------------|----------|
| 0.04677411  | -0.091522631 | 0.048078883 | -0.18348597 | 6.65E-05   | 0.353379 |
| 1.76E-06    | -0.22323286  | 1.10E-06    | -0.07998192 | 0.08424693 | -0.16793 |
| 0.412960713 | -0.042061886 | 0.364443571 | -0.14953982 | 0.00119042 | -0.13272 |
| 0.001607206 | -0.142722864 | 0.001989174 | -0.10643435 | 0.02142333 | 0.028296 |
| 0.012792898 | 0.118362462  | 0.010467692 | 0.189409367 | 3.80E-05   | 0.223731 |
| 0.007771555 | -0.146762751 | 0.001471188 | -0.1670393  | 0.00028831 | -0.01707 |
| 2.32E-09    | -0.266849112 | 4.69E-09    | -0.11948038 | 0.00975664 | 0.069803 |
| 0.031802003 | -0.090638424 | 0.050289369 | -0.07004397 | 0.13067043 | -0.1443  |
| 0.178862666 | -0.06064305  | 0.190805637 | -0.0149185  | 0.74779712 | -0.09879 |
| 0.098810658 | -0.058826972 | 0.204457531 | 0.036616789 | 0.42985511 | 0.128788 |
| 0.740919504 | -0.02476317  | 0.593490753 | -0.21806932 | 1.96E-06   | -0.0423  |
| 0.098630366 | 0.074494646  | 0.10788706  | -0.17651645 | 0.00012583 | 0.126225 |
| 8.74E-07    | 0.234197651  | 3.07E-07    | 0.380010171 | 1.72E-17   | 0.155428 |
| 1.24E-06    | -0.221385001 | 1.36E-06    | 0.180891597 | 8.46E-05   | 0.08671  |
| 1.35E-06    | 0.227478472  | 6.77E-07    | 0.201669727 | 1.12E-05   | 0.157921 |
| 2.10E-05    | -0.192153507 | 2.91E-05    | -0.27214349 | 2.25E-09   | 0.078653 |
| 0.007329917 | -0.113309637 | 0.014286629 | 0.027852242 | 0.54824269 | -0.16794 |
| 0.00661022  | -0.122813761 | 0.007884405 | -0.06423836 | 0.1657731  | 0.097245 |
| 0.656526399 | 0.001745452  | 0.969991876 | 0.001420095 | 0.97558354 | -0.00194 |
| 0.010091957 | -0.125069696 | 0.006806439 | 0.033616004 | 0.46863243 | -0.09947 |
| 2.58E-13    | -0.333523872 | 1.35E-13    | -0.13521938 | 0.00341433 | -0.07584 |
| 4.58E-11    | -0.292481493 | 1.16E-10    | 0.183471581 | 6.66E-05   | 0.179713 |
| 0.017215239 | -0.094295403 | 0.041668073 | -0.11835128 | 0.01047503 | -0.01284 |
| 0.008152589 | -0.117419925 | 0.011102504 | -0.01780254 | 0.70118936 | 0.020078 |
| 1.44E-05    | -0.206482742 | 6.84E-06    | 0.083413995 | 0.07171859 | 0.116382 |
| 1.81E-11    | -0.308912086 | 8.77E-12    | -0.01559097 | 0.73683977 | 0.078322 |
| 0.024855423 | -0.101456779 | 0.028359055 | -0.13593985 | 0.00324537 | 0.081352 |
| 6.39E-11    | -0.294473092 | 8.52E-11    | 0.043500256 | 0.34825817 | -0.04532 |
| 0.000155879 | -0.172215927 | 0.000184298 | -0.00343417 | 0.94099894 | -0.11745 |
| 1.79E-17    | -0.386108026 | 4.73E-18    | 0.041039228 | 0.37623146 | 0.139112 |
| 0.542824915 | -0.02552291  | 0.58220536  | -0.08872565 | 0.05536266 | 0.001459 |
| 0.125537099 | 0.0714378    | 0.123166744 | 0.086906321 | 0.06057566 | 0.404572 |
| 2.11E-15    | -0.350565238 | 5.97E-15    | 0.047417798 | 0.30652711 | 0.182754 |
| 0.059786907 | -0.087237334 | 0.059598113 | 0.027631137 | 0.55142416 | 0.189562 |
| 0.008737686 | 0.123028581  | 0.00777556  | -0.16546452 | 0.00032952 | -0.05312 |
| 1.84E-06    | -0.213200879 | 3.34E-06    | -0.19869498 | 1.52E-05   | -0.05111 |
| 0.123706989 | 0.072861347  | 0.115853684 | -0.09656839 | 0.03696543 | 0.087324 |
| 0.772445119 | -0.013976165 | 0.763237009 | -0.20797367 | 5.84E-06   | -0.32373 |
| 0.234075429 | -0.066701659 | 0.150100897 | -0.01712557 | 0.71203686 | 0.003493 |
| 9.29E-11    | -0.290657432 | 1.52E-10    | 0.027953102 | 0.54679444 | 0.140054 |
| 0.066615139 | -0.081258581 | 0.079394769 | 0.082941498 | 0.07334726 | 0.004351 |
| 1.73E-09    | 0.283777416  | 4.24E-10    | -0.2091763  | 5.15E-06   | -0.04521 |
| 0.276319202 | -0.061685969 | 0.18327454  | -0.21227072 | 3.70E-06   | 0.00714  |
| 0.000599402 | -0.158249873 | 0.000598495 | -0.02063914 | 0.65641542 | 0.19254  |
| 0.437760049 | 0.044391299  | 0.338463742 | -0.08965465 | 0.05284791 | -0.05663 |

|             |              |             |             |            |          |
|-------------|--------------|-------------|-------------|------------|----------|
| 0.081278204 | -0.086967035 | 0.060395376 | 0.046515891 | 0.31582902 | 0.001431 |
| 0.232678048 | -0.056739332 | 0.221009796 | -0.08395526 | 0.06988928 | -0.08719 |
| 2.50E-07    | -0.230958763 | 4.51E-07    | -0.09814579 | 0.03397351 | 0.046512 |
| 0.688057413 | -0.006796566 | 0.883540023 | -0.12939379 | 0.00510217 | 0.2335   |
| 0.006059188 | -0.130709013 | 0.004666119 | 0.095495993 | 0.03912481 | 0.289993 |
| 2.05E-14    | -0.343767458 | 2.12E-14    | -0.0566876  | 0.22143174 | 0.240632 |
| 0.000249021 | -0.180249437 | 8.97E-05    | 0.019481306 | 0.67455399 | -0.02575 |
| 0.901285339 | -0.005420485 | 0.90699905  | 0.01314986  | 0.7768537  | 0.166684 |
| 2.60E-07    | 0.23133446   | 4.32E-07    | 0.066683656 | 0.1502112  | -0.02321 |
| 0.605436578 | -0.020593639 | 0.657124492 | -0.06323313 | 0.17251002 | 0.039113 |
| 0.011385492 | -0.109955109 | 0.017454403 | -0.03004376 | 0.51720663 | 0.110382 |
| 2.93E-06    | -0.215703347 | 2.55E-06    | -0.31123754 | 6.01E-12   | -0.01692 |
| 0.000301309 | -0.165504954 | 0.000328392 | -0.01129302 | 0.8076972  | 0.10748  |
| 9.79E-09    | -0.257655959 | 1.62E-08    | -0.13956688 | 0.00250456 | 0.230503 |
| 0.02098005  | -0.111438639 | 0.015984732 | -0.02601206 | 0.57499271 | -0.01727 |
| 2.29E-15    | -0.352625319 | 4.04E-15    | 0.043976734 | 0.34299855 | 0.185744 |
| 0.154933772 | -0.063329648 | 0.171854447 | -0.03848303 | 0.40670616 | -0.00539 |
| 0.01107582  | -0.120639135 | 0.009065234 | -0.15525718 | 0.00076106 | 0.004192 |
| 4.13E-07    | -0.228814753 | 5.79E-07    | -0.19024231 | 3.50E-05   | 0.197431 |
| 0.011310399 | 0.112267464  | 0.015211815 | 0.031803567 | 0.49295752 | -0.00097 |
| 0.00059437  | 0.166970047  | 0.00029002  | -0.06468563 | 0.16283979 | 0.149882 |
| 1.31E-07    | 0.244979915  | 8.24E-08    | 0.071665426 | 0.12197383 | 0.034492 |
| 0.007164853 | -0.127181176 | 0.005919145 | -0.10988363 | 0.01752811 | -0.25985 |
| 1.95E-07    | -0.252012885 | 3.37E-08    | 0.079482082 | 0.08621067 | 0.088065 |
| 0.804675273 | -0.030810363 | 0.506568137 | -0.1155837  | 0.01243781 | -0.07272 |
| 4.58E-05    | 0.187457263  | 4.58E-05    | -0.1843635  | 6.13E-05   | -0.11127 |
| 0.287360265 | -0.059176523 | 0.201776287 | 0.008567412 | 0.85350314 | -0.08311 |
| 0.000849603 | -0.14786844  | 0.001352816 | 0.159686843 | 0.00053247 | 0.088179 |
| 0.529278611 | -0.028238792 | 0.542702475 | 0.103253107 | 0.0256609  | 0.467499 |
| 5.27E-05    | -0.189157083 | 3.89E-05    | -0.08714422 | 0.05987177 | 0.168041 |
| 0.353042282 | -0.056998916 | 0.218901015 | -0.04938567 | 0.2868654  | -0.10986 |
| 1.66E-23    | -0.438175874 | 2.49E-23    | 0.047449613 | 0.30620232 | 0.147662 |
| 0.00533102  | -0.135372984 | 0.003377657 | -0.0030933  | 0.9468462  | -0.17283 |
| 0.459437699 | -0.030667159 | 0.50854668  | -0.04119702 | 0.37439751 | 0.073467 |
| 0.18928244  | 0.054650919  | 0.238504773 | 0.001577579 | 0.97287681 | -0.1766  |
| 0.000343349 | 0.165226621  | 0.000336197 | -0.23396005 | 3.16E-07   | 0.132196 |
| 2.50E-07    | 0.22912412   | 5.59E-07    | 0.003623339 | 0.93775532 | 0.143433 |
| 0.017679976 | 0.099665675  | 0.031288399 | -0.00482309 | 0.91720964 | 0.190092 |
| 0.674640465 | -0.035162269 | 0.448414414 | -0.02055234 | 0.6577683  | -0.01778 |
| 0.361326713 | -0.042394729 | 0.360657153 | -0.32199182 | 1.00E-12   | 0.120032 |
| 0.000180578 | -0.171736797 | 0.000192196 | -0.1637436  | 0.00038078 | 0.136585 |
| 0.064491044 | 0.087284197  | 0.059460778 | -0.24135482 | 1.29E-07   | -0.16207 |
| 0.469712375 | 0.04859192   | 0.294691504 | 0.055767238 | 0.22903565 | 0.048196 |
| 0.006113088 | 0.125960797  | 0.006418386 | -0.17565515 | 0.00013592 | 0.114859 |
| 0.000106287 | -0.188348614 | 4.20E-05    | 0.010020359 | 0.82901357 | 0.082613 |

|             |              |             |             |            |          |
|-------------|--------------|-------------|-------------|------------|----------|
| 2.03E-14    | -0.36187071  | 6.78E-16    | -0.07751427 | 0.09430241 | -0.07986 |
| 0.007578966 | -0.140995999 | 0.002257716 | -0.1177964  | 0.01084497 | -0.0252  |
| 1.11E-14    | -0.364624323 | 3.94E-16    | 0.060029209 | 0.19534312 | 0.110913 |
| 0.006191188 | -0.120062119 | 0.009403884 | -0.25207922 | 3.35E-08   | -0.00153 |
| 0.02441614  | -0.102092251 | 0.027377936 | -0.07172581 | 0.12165888 | -0.04842 |
| 0.029981197 | -0.100626413 | 0.029686462 | -0.06674748 | 0.14982045 | -0.05149 |
| 0.055441384 | -0.083660517 | 0.070880631 | -0.06893748 | 0.13687512 | -0.01964 |
| 0.61022261  | -0.019601105 | 0.67266823  | -0.09928119 | 0.0319499  | 0.014436 |
| 7.08E-05    | -0.178036374 | 0.000109717 | 0.016427435 | 0.72328463 | 0.144379 |
| 0.212030215 | 0.044717429  | 0.334923398 | -0.10050038 | 0.02989252 | 0.075449 |
| 0.000217299 | 0.170148379  | 0.000220707 | 0.07965097  | 0.08554307 | 0.108752 |
| 1.94E-09    | 0.285364824  | 3.36E-10    | -0.10549422 | 0.02260738 | 0.215867 |
| 0.000434334 | 0.160444532  | 0.000500446 | -0.23015668 | 4.95E-07   | 0.339037 |
| 3.37E-08    | -0.252279211 | 3.26E-08    | 0.10666674  | 0.02113908 | 0.32886  |
| 0.00289356  | -0.120834737 | 0.008952924 | 0.086820745 | 0.06083053 | 0.338646 |
| 0.147159558 | -0.083727153 | 0.070655509 | 0.065893402 | 0.15511401 | -0.04026 |
| 1.75E-07    | -0.239481678 | 1.63E-07    | 0.08902869  | 0.05453164 | -0.14706 |
| 6.45E-05    | 0.205086005  | 7.91E-06    | -0.22199645 | 1.27E-06   | 0.059288 |
| 0.872397536 | -0.011357823 | 0.806615364 | 0.030909651 | 0.50519871 | -0.02893 |
| 7.06E-11    | -0.296370389 | 6.37E-11    | 0.068759828 | 0.13789206 | 0.101226 |
| 0.000240777 | -0.166593355 | 0.000299465 | 0.011053174 | 0.81170407 | 0.037331 |
| 0.000180059 | 0.16625799   | 0.000308114 | -0.02220903 | 0.63214204 | 0.384963 |
| 3.67E-05    | 0.183531315  | 6.62E-05    | -0.06439328 | 0.16475267 | 0.29761  |
| 1.94E-09    | 0.263487198  | 7.42E-09    | 0.035137717 | 0.44873153 | 0.282154 |
| 1.88E-06    | -0.239789974 | 1.57E-07    | -0.29172866 | 1.30E-10   | -0.11332 |
| 1.01E-06    | -0.217216565 | 2.16E-06    | -0.2274899  | 6.76E-07   | 0.077016 |
| 0.095225057 | -0.073151907 | 0.114403689 | -0.20762674 | 6.06E-06   | 0.077894 |
| 0.012316388 | -0.107323449 | 0.020353458 | -0.13413898 | 0.0036827  | 0.358872 |
| 0.003950923 | -0.133786433 | 0.003774319 | 0.000785387 | 0.98649496 | -0.0093  |
| 4.16E-05    | -0.186552717 | 4.99E-05    | 0.09735642  | 0.0354439  | -0.05566 |
| 0.207046279 | -0.050198643 | 0.278996115 | -0.0002503  | 0.99569581 | 0.106293 |
| 3.34E-07    | 0.230083703  | 5.00E-07    | 0.017789566 | 0.70139663 | 0.008573 |
| 0.129658989 | -0.063636639 | 0.169781647 | -0.08385504 | 0.0702251  | 0.112695 |
| 0.006811825 | 0.121156273  | 0.008770994 | -0.02273348 | 0.62411882 | 0.08206  |
| 0.635125987 | 0.022420676  | 0.628898937 | 0.043033553 | 0.35345914 | -0.004   |
| 0.315909531 | 0.045954422  | 0.321712134 | 0.07765079  | 0.09372211 | -0.10172 |
| 0.542365685 | -0.033610042 | 0.46871134  | 0.040306793 | 0.38481649 | -0.00721 |
| 3.51E-09    | -0.272301678 | 2.20E-09    | -0.03137028 | 0.49887103 | 0.167948 |
| 1.92E-17    | -0.380668134 | 1.50E-17    | -0.04672728 | 0.31363241 | 0.144893 |
| 1.95E-15    | -0.358595663 | 1.29E-15    | -0.05587699 | 0.22811926 | 0.163798 |
| 4.09E-16    | -0.359277235 | 1.13E-15    | 0.018304861 | 0.69317921 | 0.213046 |
| 0.826084195 | -0.015060824 | 0.745473737 | -0.04690051 | 0.31183987 | 0.048625 |
| 0.007691139 | 0.123622257  | 0.007481702 | 0.095916147 | 0.03826639 | -0.11104 |
| 2.34E-06    | -0.206110148 | 7.11E-06    | -0.00998013 | 0.82968955 | -0.23606 |
| 0.016344106 | 0.110161864  | 0.017242744 | -0.0634381  | 0.17112001 | -0.21871 |

|             |              |             |             |            |          |
|-------------|--------------|-------------|-------------|------------|----------|
| 0.00092314  | -0.172485685 | 0.000179987 | 0.04723428  | 0.30840503 | 0.286508 |
| 0.004542133 | -0.135930971 | 0.003247407 | 0.071344078 | 0.12366054 | 0.393118 |
| 0.204743263 | 0.059944792  | 0.195973251 | 0.283685731 | 4.30E-10   | -0.09278 |
| 0.093520276 | 0.063074574  | 0.17359101  | -0.11565658 | 0.01238222 | 0.160432 |
| 0.331414746 | 0.027983203  | 0.546362584 | -0.02114976 | 0.64847901 | 0.017132 |
| 3.49E-08    | 0.247456599  | 6.04E-08    | -0.14517154 | 0.00165829 | 0.000513 |
| 0.088525136 | 0.081692005  | 0.077799908 | -0.01021826 | 0.82569012 | -0.08487 |
| 0.374790596 | -0.024376125 | 0.599278144 | -0.05425217 | 0.24195297 | -0.03857 |
| 0.783414053 | -0.011511622 | 0.804049471 | -0.01321398 | 0.77579457 | 0.095187 |
| 0.894120769 | 0.000791216  | 0.986394724 | -0.13710299 | 0.00298856 | 0.1276   |
| 0.000351564 | 0.146986883  | 0.001446451 | -0.10590629 | 0.02208159 | 0.001114 |
| 0.056040499 | -0.072856325 | 0.115878872 | -0.06732633 | 0.14631154 | 0.03572  |
| 0.27718985  | -0.033118917 | 0.475237275 | -0.05999545 | 0.1955949  | -0.01882 |
| 0.149632205 | 0.056385547  | 0.223907149 | -0.11684671 | 0.01150503 | 0.130924 |
| 0.054860352 | -0.085336423 | 0.0653939   | -0.04227212 | 0.36204907 | 0.031603 |
| 0.019967495 | 0.112898342  | 0.014645672 | 0.063230318 | 0.17252915 | 0.098916 |
| 0.127225717 | -0.070831666 | 0.126387599 | 0.014635999 | 0.75241556 | 0.123839 |
| 0.195490939 | -0.037598027 | 0.417590013 | 0.01432712  | 0.75747535 | 0.210305 |
| 0.184530982 | -0.058431019 | 0.207525798 | -0.16101377 | 0.00047757 | 0.055985 |
| 1.59E-05    | -0.198593014 | 1.54E-05    | -0.08713207 | 0.05990755 | 0.09038  |
| 0.865577982 | -0.011866813 | 0.798131727 | -0.0498336  | 0.28251136 | 0.070003 |
| 0.208251033 | 0.043575761  | 0.347421313 | -0.05096444 | 0.27171853 | -0.00669 |
| 0.968101454 | -0.003302908 | 0.943250234 | -0.10915168 | 0.0182986  | -0.07462 |
| 0.303308187 | -0.044305622 | 0.339397772 | -0.00187427 | 0.9677783  | 0.00127  |
| 0.000220739 | 0.180064626  | 9.12E-05    | -0.13322854 | 0.00392353 | 0.056916 |
| 0.751269805 | -0.015558842 | 0.737362106 | 0.058678475 | 0.20560436 | 0.214379 |
| 5.23E-06    | -0.202953085 | 9.86E-06    | -0.06560415 | 0.15693855 | 0.138865 |
| 0.492606475 | 0.034560589  | 0.456222333 | 0.031426512 | 0.49810147 | 0.140753 |
| 0.00012541  | -0.17387636  | 0.000159218 | 0.103199456 | 0.02573816 | 0.111002 |
| 0.004333408 | -0.148108647 | 0.001328287 | -0.26883864 | 3.57E-09   | 0.090487 |
| 0.947991889 | -0.007884265 | 0.865067989 | -0.01907011 | 0.68104209 | -0.0484  |
| 0.166109685 | -0.070394617 | 0.128750259 | 0.008522374 | 0.85426464 | -0.02074 |
| 7.45E-11    | 0.296383705  | 6.35E-11    | 0.028655167 | 0.53676605 | 0.211101 |
| 0.073299108 | -0.09513463  | 0.039876102 | 0.156268255 | 0.00070205 | -0.14918 |
| 0.259074193 | -0.038733215 | 0.403660255 | -0.15494428 | 0.00078024 | 0.078485 |
| 0.268580762 | -0.040681503 | 0.380409613 | -0.32433852 | 6.70E-13   | -0.17603 |
| 0.001030092 | -0.154425895 | 0.000812987 | -0.3586677  | 1.27E-15   | 0.318251 |
| 0.012313554 | -0.123495902 | 0.0075434   | -0.11512208 | 0.01279504 | 0.103752 |
| 2.06E-10    | -0.282668748 | 4.99E-10    | -0.06431138 | 0.16529155 | 0.111738 |
| 0.982662825 | -0.000864023 | 0.985142918 | -0.10507374 | 0.02315505 | 0.266442 |
| 7.41E-06    | -0.210833663 | 4.31E-06    | -0.01437834 | 0.75663564 | 0.014022 |
| 0.006002546 | -0.126588604 | 0.006157028 | 0.072837741 | 0.11597212 | -0.06083 |
| 0.004091964 | -0.121737739 | 0.008450338 | -0.15358263 | 0.00086899 | 0.038877 |
| 0.895927003 | -0.012825666 | 0.782215077 | 0.030063772 | 0.51692739 | 0.116316 |
| 0.000186042 | 0.181255031  | 8.18E-05    | 0.035714245 | 0.44131849 | 0.233533 |

|             |              |             |             |            |          |
|-------------|--------------|-------------|-------------|------------|----------|
| 0.057079869 | 0.084880214  | 0.066851715 | -0.10397129 | 0.0246458  | -0.05352 |
| 0.314974999 | 0.043989997  | 0.342852869 | 0.014103726 | 0.7611413  | -0.08874 |
| 0.046982204 | 0.092134071  | 0.046598377 | -0.05071395 | 0.27408457 | -0.02315 |
| 0.667618782 | 0.027266662  | 0.55668823  | -0.01856287 | 0.68907811 | -0.05436 |
| 0.933772949 | -0.004050679 | 0.930431719 | -0.03489888 | 0.45182309 | -0.10463 |
| 0.449200545 | 0.024223038  | 0.601574234 | -0.08197241 | 0.07678203 | -0.04104 |
| 0.997684167 | 0.006217309  | 0.89340383  | -0.02156085 | 0.64211819 | 0.009981 |
| 1.63E-06    | -0.219428234 | 1.69E-06    | -0.1155431  | 0.01246887 | 0.083725 |
| 0.204081042 | -0.060175224 | 0.194256706 | -0.07207726 | 0.11983844 | 0.027193 |
| 9.20E-05    | -0.179934234 | 9.23E-05    | 0.079899003 | 0.08457018 | -0.01636 |
| 0.001903198 | -0.136649512 | 0.003086403 | 0.082340236 | 0.07546326 | 0.161752 |
| 0.000503422 | 0.15046217   | 0.001108689 | 0.11506539  | 0.01283953 | 0.032255 |
| 0.310913715 | 0.063763012  | 0.168933828 | 0.09265631  | 0.04536432 | 0.030428 |
| 0.555867829 | 0.023882883  | 0.606690176 | -0.02003636 | 0.6658342  | -0.00429 |
| 1.44E-05    | -0.198457228 | 1.56E-05    | -0.10460274 | 0.02378211 | 0.097447 |
| 0.004772485 | -0.123445008 | 0.00756838  | 0.108621011 | 0.01887553 | 0.0949   |
| 1.49E-11    | 0.316729843  | 2.43E-12    | 0.055041617 | 0.23515986 | 0.067607 |
| 0.028362458 | 0.100598125  | 0.029732605 | -0.1387374  | 0.00265888 | 0.297967 |
| 1.28E-11    | -0.321063711 | 1.17E-12    | 0.048817241 | 0.29245558 | -0.03039 |
| 0.00169961  | 0.139701989  | 0.00248021  | 0.017695775 | 0.70289611 | -0.03893 |
| 8.05E-05    | -0.17935644  | 9.73E-05    | 0.018282758 | 0.69353095 | -0.01591 |
| 1.52E-06    | 0.225440045  | 8.56E-07    | -0.04953948 | 0.28536526 | 0.042666 |
| 0.811347775 | -0.008388945 | 0.856521444 | -0.07465043 | 0.10715034 | 0.077337 |
| 0.070009374 | 0.084627798  | 0.067669704 | -0.16905473 | 0.00024259 | -0.12172 |
| 0.102093222 | -0.083124154 | 0.072714114 | 0.31141166  | 5.84E-12   | -0.1775  |
| 5.51E-09    | 0.252422447  | 3.20E-08    | 0.053897521 | 0.2450491  | 0.177216 |
| 0.069925556 | 0.087554993  | 0.058672304 | -0.07095926 | 0.12570423 | -0.0207  |
| 0.02003926  | -0.108834681 | 0.018641352 | -0.08987118 | 0.05227566 | -0.02081 |
| 0.221752773 | 0.062213148  | 0.179552281 | -0.01364281 | 0.76872178 | -0.22745 |
| 0.119672519 | -0.065919154 | 0.154952358 | -0.0310708  | 0.50298026 | 0.022396 |
| 0.402227797 | -0.041731765 | 0.368223377 | -0.01546822 | 0.73883592 | 0.109798 |
| 0.444273013 | -0.04245166  | 0.360011985 | 0.087879209 | 0.05773969 | 0.296638 |
| 0.459727336 | 0.036853285  | 0.426880067 | -0.11929254 | 0.00987304 | 0.071498 |
| 0.28259148  | -0.040292047 | 0.384990549 | -0.00153119 | 0.97367413 | 0.026337 |
| 0.104890786 | -0.074423679 | 0.108223982 | 0.016668722 | 0.71939033 | -0.07542 |
| 0.850940223 | 0.003814385  | 0.93448055  | -0.14109301 | 0.00224179 | 0.012661 |
| 4.13E-05    | -0.189623351 | 3.72E-05    | 0.024481315 | 0.59770274 | 0.123696 |
| 0.654046377 | 0.012345643  | 0.790172396 | -0.05894405 | 0.20355662 | 0.021978 |
| 0.001066223 | -0.155155254 | 0.000767261 | -0.09432907 | 0.0415949  | -0.08028 |
| 0.305765739 | -0.047038927 | 0.310412369 | -0.00269472 | 0.95368698 | 0.070322 |
| 2.03E-06    | -0.220172672 | 1.55E-06    | -0.05966668 | 0.19805969 | 0.126612 |
| 0.124282596 | 0.071571241  | 0.122466327 | -0.03375451 | 0.46680109 | 0.217988 |
| 0.145651135 | -0.068550368 | 0.139098541 | 0.003068431 | 0.94727289 | 0.011433 |
| 0.501564174 | -0.01865943  | 0.687545625 | 0.069151986 | 0.13565488 | 0.134973 |
| 0.040349758 | -0.10222989  | 0.027169321 | -0.06533512 | 0.15865001 | -0.0015  |

|             |              |             |             |            |          |
|-------------|--------------|-------------|-------------|------------|----------|
| 0.344517799 | 0.056491286  | 0.223038369 | -0.01439791 | 0.75631474 | 0.042354 |
| 0.233655373 | 0.051696674  | 0.264882035 | -0.2726582  | 2.09E-09   | -0.07008 |
| 0.004850398 | -0.127677129 | 0.005726431 | -0.08065287 | 0.08166789 | 0.054831 |
| 0.689931696 | -0.012367324 | 0.789812522 | 0.010442268 | 0.82193206 | 0.323601 |
| 0.322646381 | -0.050518406 | 0.275941382 | -0.27012144 | 2.99E-09   | 0.164122 |
| 0.94307408  | 0.010850835  | 0.81508824  | 0.139536947 | 0.00250998 | -0.08787 |
| 0.683175455 | -0.014259678 | 0.75858153  | 0.113318492 | 0.01427898 | -0.03305 |
| 0.970658279 | -0.007901681 | 0.864772792 | -0.0405849  | 0.3815428  | -0.0155  |
| 6.39E-07    | -0.233255111 | 3.44E-07    | 0.243131357 | 1.04E-07   | 0.075904 |
| 0.737795802 | -0.003747463 | 0.935627562 | 0.078367236 | 0.09072341 | 0.019012 |
| 0.000370049 | -0.170638192 | 0.000211519 | -0.05237452 | 0.25865955 | 0.201174 |
| 0.518069222 | -0.026466595 | 0.568328381 | -0.05855407 | 0.20656874 | 0.301904 |
| 0.000312464 | 0.16268998   | 0.000415744 | -0.09359619 | 0.04321253 | -0.04405 |
| 4.69E-05    | -0.189837541 | 3.64E-05    | -0.08151607 | 0.07844412 | -0.01577 |
| 0.019890589 | -0.104175715 | 0.024363267 | -0.07734423 | 0.0950292  | 0.163656 |
| 0.911850693 | -0.005008587 | 0.914037665 | 0.003548387 | 0.93904039 | 0.010308 |
| 0.150227815 | -0.072298376 | 0.118704041 | -0.18738269 | 4.61E-05   | 0.104914 |
| 6.51E-14    | 0.328408246  | 3.32E-13    | -0.0695593  | 0.13336096 | -0.06611 |
| 2.56E-12    | -0.311510548 | 5.75E-12    | -0.0501982  | 0.27900033 | 0.036094 |
| 0.252135441 | 0.052668539  | 0.255992137 | -0.06252156 | 0.17740082 | 0.070106 |
| 0.003669528 | 0.129766906  | 0.004974878 | -0.02960666 | 0.52332356 | -0.01165 |
| 7.99E-05    | -0.190581515 | 3.39E-05    | 0.02537256  | 0.58443075 | 0.10588  |
| 0.92364414  | -0.023956181 | 0.605586135 | 0.024158178 | 0.60254823 | 0.072026 |
| 0.72864885  | 0.016008582  | 0.730061771 | 0.009919336 | 0.83071125 | 0.098705 |
| 2.57E-09    | 0.277957196  | 9.87E-10    | 0.103076854 | 0.02591547 | 0.270184 |
| 0.000314181 | -0.168283403 | 0.000259221 | -0.08259522 | 0.07455993 | 0.245174 |
| 0.619889454 | -0.031774319 | 0.493355513 | 0.072158837 | 0.11941894 | -0.1805  |
| 2.93E-10    | -0.276430107 | 1.23E-09    | -0.08078049 | 0.08118461 | -0.04265 |
| 0.498294306 | -0.041588153 | 0.36987527  | -0.05148784 | 0.26681963 | 0.108807 |
| 0.000680435 | -0.15555221  | 0.000743387 | -0.0415004  | 0.37088685 | -0.04952 |
| 0.006178764 | 0.124127396  | 0.007239528 | 0.015736296 | 0.73447874 | 0.275507 |
| 0.041980516 | -0.094098749 | 0.042097673 | -0.04115799 | 0.37485061 | 0.171829 |
| 0.161799804 | 0.059730841  | 0.197576919 | -0.071136   | 0.12476237 | 0.131744 |
| 0.218059545 | 0.050285476  | 0.278164331 | -0.27043086 | 2.86E-09   | -0.28879 |
| 0.000669554 | -0.152800766 | 0.000924079 | -0.09975977 | 0.03112831 | 0.232492 |
| 1.57E-10    | -0.30034772  | 3.43E-11    | -0.0446679  | 0.33545957 | 0.133086 |
| 0.016124409 | -0.123966127 | 0.00731607  | 0.036944186 | 0.42573976 | 0.122033 |
| 1.54E-07    | -0.258636702 | 1.42E-08    | 0.024440479 | 0.5983141  | 0.251735 |
| 0.027011448 | -0.107786093 | 0.01981535  | -0.09068939 | 0.0501597  | -0.1844  |
| 0.373592517 | -0.050908676 | 0.272244025 | -0.22004526 | 1.58E-06   | 0.162779 |
| 0.000104592 | -0.166080569 | 0.000312784 | -0.02834128 | 0.54123827 | -0.24918 |
| 0.617337261 | -0.021231708 | 0.647208903 | -0.01485231 | 0.74887846 | -0.00719 |
| 5.07E-05    | 0.174516497  | 0.000150434 | -0.046083   | 0.32035868 | 0.095093 |
| 0.452005043 | -0.025513601 | 0.582343036 | -0.24301767 | 1.05E-07   | -0.28194 |
| 0.06888015  | -0.09443904  | 0.041356636 | -0.04020245 | 0.38604916 | -0.09647 |

|             |              |             |             |            |          |
|-------------|--------------|-------------|-------------|------------|----------|
| 0.040128798 | 0.106630638  | 0.021183025 | -0.01175969 | 0.79991531 | -0.02443 |
| 0.000297798 | -0.165384678 | 0.000331744 | 0.195131256 | 2.17E-05   | 0.071688 |
| 6.44E-13    | -0.328357653 | 3.35E-13    | 0.032320357 | 0.48595359 | 0.278193 |
| 0.610445116 | -0.034124672 | 0.461926462 | -0.01633711 | 0.72474439 | 0.062405 |
| 0.076056699 | 0.094423794  | 0.0413896   | 0.065581758 | 0.15708044 | -0.04594 |
| 0.001080834 | -0.146631647 | 0.001485838 | -0.22832624 | 6.13E-07   | 0.133028 |
| 0.497958746 | 0.030413132  | 0.512066305 | 0.071750115 | 0.12153231 | 0.295794 |
| 0.270732508 | -0.071109575 | 0.124902834 | -0.08706204 | 0.06011415 | 0.113157 |
| 0.84826353  | 0.00957572   | 0.836491582 | -0.01486494 | 0.74867204 | 0.134119 |
| 0.67924305  | 0.013275856  | 0.774772869 | 0.05907078  | 0.20258469 | -0.21915 |
| 0.013096831 | 0.133803999  | 0.003769706 | -0.21010481 | 4.66E-06   | -0.03578 |
| 0.000724592 | -0.149746082 | 0.001171677 | -0.03650999 | 0.43120251 | -0.03383 |
| 2.04E-05    | -0.193139956 | 2.64E-05    | 0.12748683  | 0.0057997  | 0.070208 |
| 0.004897889 | 0.12809285   | 0.005569259 | -0.19268727 | 2.76E-05   | -0.05797 |
| 0.27380207  | -0.049135329 | 0.289318464 | -0.21946781 | 1.68E-06   | 0.013626 |
| 0.000131448 | -0.179241354 | 9.83E-05    | -0.00879891 | 0.8495912  | -0.03278 |
| 0.098131556 | -0.078921219 | 0.088457837 | -0.0492912  | 0.28778946 | 0.121372 |
| 0.391015467 | 0.038323192  | 0.408659297 | -0.08676309 | 0.06100273 | -0.03072 |
| 0.353394316 | -0.051251315 | 0.269025891 | 0.017415379 | 0.70738577 | -0.07898 |
| 0.003603607 | 0.145677707  | 0.00159653  | 0.093806488 | 0.04274302 | 0.278849 |
| 9.04E-06    | 0.192302032  | 2.87E-05    | -0.00419996 | 0.92787482 | -0.10346 |
| 0.035712021 | -0.091293426 | 0.048643925 | -0.1796554  | 9.47E-05   | -0.02673 |
| 1.32E-05    | -0.204575904 | 8.34E-06    | -0.1369835  | 0.00301406 | -0.12489 |
| 4.61E-16    | -0.372523247 | 8.05E-17    | -0.14341133 | 0.00189051 | -0.07685 |
| 5.38E-14    | -0.337228707 | 6.97E-14    | -0.09211368 | 0.04664713 | 0.260224 |
| 3.98E-07    | -0.215643652 | 2.56E-06    | -0.14918669 | 0.00122316 | 0.14848  |
| 0.002687382 | -0.145805797 | 0.00158124  | 0.063620574 | 0.16988966 | 0.175353 |
| 0.767065713 | 0.007194387  | 0.876776097 | -0.1032297  | 0.02569459 | -0.06161 |
| 0.002003124 | 0.122593421  | 0.007997458 | -0.03457222 | 0.45607075 | 0.014067 |
| 0.217652095 | 0.06737091   | 0.146043954 | -0.06052474 | 0.1916741  | 0.160565 |
| 4.28E-08    | -0.263163775 | 7.75E-09    | -0.16351068 | 0.00038827 | 0.180381 |
| 0.022012452 | 0.107282941  | 0.020401172 | -0.0100824  | 0.82797143 | 0.187958 |
| 0.136839912 | 0.07726041   | 0.095389104 | -0.02861564 | 0.53732814 | 0.155942 |
| 0.649913751 | 0.017596252  | 0.704488481 | 0.037578797 | 0.41782838 | 0.007432 |
| 0.001012306 | 0.165632039  | 0.000324885 | -0.20148457 | 1.15E-05   | -0.15448 |
| 0.312728962 | 0.038726293  | 0.403744338 | -0.0804642  | 0.08238656 | -0.03156 |
| 0.300279574 | -0.031121266 | 0.502286536 | -0.01460741 | 0.75288342 | -0.40101 |
| 2.22E-06    | -0.220472252 | 1.50E-06    | 0.120085862 | 0.00938973 | 0.030921 |
| 2.14E-05    | -0.202885983 | 9.93E-06    | -0.0527198  | 0.25552905 | 0.361196 |
| 0.272952932 | -0.045397122 | 0.327621629 | -0.07378533 | 0.11129208 | -0.06908 |
| 0.062244893 | 0.092282803  | 0.046244086 | 0.03938768  | 0.39575698 | 0.123437 |
| 1.75E-05    | -0.190055728 | 3.57E-05    | 0.129224221 | 0.00516098 | 0.118498 |
| 1.33E-05    | -0.200369878 | 1.28E-05    | -0.09577947 | 0.03854387 | 0.227392 |
| 0.340843293 | 0.044540851  | 0.336837296 | -0.15372169 | 0.00085952 | 0.052353 |
| 2.34E-10    | -0.286306616 | 2.92E-10    | -0.06220854 | 0.17958459 | 0.212079 |



|             |              |             |             |            |          |
|-------------|--------------|-------------|-------------|------------|----------|
| 6.05E-06    | -0.210228786 | 4.60E-06    | -0.02439882 | 0.59893806 | 0.108981 |
| 0.161315678 | 0.061651627  | 0.183518985 | 0.320594526 | 1.27E-12   | -0.42423 |
| 0.363284766 | -0.053119772 | 0.251935629 | -0.00470026 | 0.9193109  | 0.123691 |
| 0.208474658 | 0.048332645  | 0.297278467 | -0.10979497 | 0.0176199  | 0.211902 |
| 0.744844662 | -0.012825493 | 0.782217948 | -0.25740074 | 1.67E-08   | 0.024871 |
| 0.736756126 | 0.032174052  | 0.487930965 | -0.05797196 | 0.21112456 | 0.165666 |
| 3.85E-13    | -0.311746533 | 5.53E-12    | -0.19792603 | 1.64E-05   | -0.11471 |
| 0.860796703 | -0.013668926 | 0.768291734 | 0.032360455 | 0.48541241 | 0.074999 |
| 4.03E-05    | 0.179739441  | 9.40E-05    | -0.21761308 | 2.06E-06   | 0.013287 |
| 0.151722858 | 0.051493386  | 0.266768063 | -0.02180395 | 0.63836894 | 0.049535 |
| 0.001662963 | -0.140800222 | 0.002290164 | 0.015530324 | 0.73782583 | 0.262063 |
| 0.073371238 | 0.081270015  | 0.07935236  | -0.11535133 | 0.01261652 | -0.27994 |
| 1.13E-16    | -0.370947052 | 1.11E-16    | 0.098988028 | 0.03246228 | 0.035596 |
| 0.00419921  | -0.135735096 | 0.003292601 | -0.10630634 | 0.02158132 | 0.088687 |
| 1.67E-07    | -0.24706233  | 6.34E-08    | -0.06758975 | 0.1447357  | 0.055601 |
| 2.51E-06    | -0.219706999 | 1.64E-06    | -0.03397218 | 0.46393118 | 0.076079 |
| 0.121000663 | -0.087171737 | 0.059790791 | -0.05684933 | 0.22011442 | 0.065131 |
| 0.443295324 | -0.047760421 | 0.303041342 | -0.06849097 | 0.13944212 | 0.025048 |
| 9.15E-09    | -0.266989428 | 4.60E-09    | -0.08862189 | 0.05564958 | 0.134423 |
| 0.227876061 | -0.069036864 | 0.136308716 | -0.08111513 | 0.07992842 | 0.016624 |
| 0.367903319 | -0.048262048 | 0.297985479 | -0.01711031 | 0.71228197 | 0.034468 |
| 0.001088376 | -0.148080427 | 0.001331147 | -0.05607479 | 0.22647436 | -0.03015 |
| 0.038826078 | -0.102659453 | 0.026527017 | -0.08601835 | 0.0632636  | 0.085168 |
| 0.0084472   | -0.126412156 | 0.006229501 | -0.03935318 | 0.39617124 | 0.02169  |
| 0.540846654 | 0.034809878  | 0.452978134 | -0.03772646 | 0.41600003 | -0.05558 |
| 0.992030591 | -0.001637647 | 0.971844482 | -0.11658088 | 0.01169605 | 0.027109 |
| 0.00720017  | -0.12259562  | 0.007996322 | -0.00838715 | 0.85655189 | 0.002703 |
| 0.248967421 | -0.049869735 | 0.282162034 | -0.02114758 | 0.6485128  | 0.074443 |
| 0.26280508  | 0.038752333  | 0.403428057 | -0.04816991 | 0.29890994 | 0.017836 |
| 0.085074191 | -0.071241168 | 0.124204527 | -0.04765112 | 0.30415043 | 0.013564 |
| 0.040148609 | -0.092003677 | 0.046910856 | -0.05300415 | 0.25297078 | 0.103229 |
| 0.001347272 | -0.149499853 | 0.001194086 | -0.11361688 | 0.01402349 | 0.129722 |
| 0.604003268 | -0.025000802 | 0.589950173 | -0.08702205 | 0.06023239 | -0.08594 |
| 0.004001841 | -0.130655013 | 0.004683338 | -0.00758497 | 0.87014401 | 0.109645 |
| 1.28E-11    | -0.311709898 | 5.56E-12    | 0.104090736 | 0.02448037 | -0.0165  |
| 0.000172635 | -0.183366657 | 6.72E-05    | -0.05762872 | 0.21384467 | 0.090612 |
| 0.004505145 | -0.125887745 | 0.006449435 | 0.039587684 | 0.39336046 | 0.057169 |
| 5.48E-07    | 0.238136521  | 1.91E-07    | 0.200547156 | 1.26E-05   | 0.277607 |
| 1.09E-09    | 0.286135344  | 2.99E-10    | 0.003856609 | 0.93375693 | 0.213184 |
| 2.58E-10    | -0.298195839 | 4.80E-11    | 0.206631111 | 6.73E-06   | 0.128485 |
| 0.068867153 | 0.094131499  | 0.042025871 | -0.2354983  | 2.63E-07   | 0.299952 |
| 7.08E-07    | 0.216594808  | 2.31E-06    | -0.34406532 | 2.01E-14   | -0.00042 |
| 0.768551154 | -0.0106649   | 0.81820108  | -0.14078269 | 0.00229309 | 0.025825 |
| 0.000509368 | -0.165303849 | 0.000334015 | 0.315985727 | 2.75E-12   | 0.235288 |
| 0.067245091 | 0.079638448  | 0.085592425 | -0.02838476 | 0.54061759 | 0.139641 |

|             |              |             |             |             |          |
|-------------|--------------|-------------|-------------|-------------|----------|
| 0.865094097 | 0.000523007  | 0.991006445 | -0.05036075 | 0.277444466 | -0.30396 |
| 0.172181928 | -0.062990314 | 0.174167525 | 0.210529087 | 4.46E-06    | -0.20967 |
| 0.00017293  | -0.160378597 | 0.00050316  | -0.16906121 | 0.00024245  | -0.04041 |
| 0.610979255 | 0.008667406  | 0.851812917 | 0.227310588 | 6.90E-07    | 0.087817 |
| 0.052797229 | -0.100903203 | 0.029238192 | -0.07856138 | 0.08992422  | 0.223747 |
| 0.709653013 | -0.004274928 | 0.926590919 | -0.16843856 | 0.00025579  | -0.03337 |
| 1.62E-09    | -0.267029439 | 4.58E-09    | -0.11761388 | 0.01096915  | 0.063366 |
| 0.079222409 | 0.082699154  | 0.074194238 | -0.14392587 | 0.00181973  | 0.138385 |
| 0.000264368 | -0.166747657 | 0.000295562 | -0.2291743  | 5.56E-07    | -0.33602 |
| 7.67E-06    | -0.211417119 | 4.05E-06    | -0.03067712 | 0.50840886  | 0.001806 |
| 0.989878328 | -0.000217039 | 0.996267759 | -0.0135548  | 0.77017178  | 0.107107 |
| 0.349207102 | 0.036215531  | 0.434930137 | -0.13165549 | 0.00437345  | 0.125419 |
| 0.045206123 | 0.088596719  | 0.055719387 | -0.24276032 | 1.09E-07    | 0.224872 |
| 0.107833875 | -0.071529741 | 0.122683823 | -0.07586738 | 0.10153129  | -0.09909 |
| 1.56E-06    | 0.228821542  | 5.79E-07    | 0.05567564  | 0.22980243  | -0.20169 |
| 5.96E-07    | -0.226539656 | 7.54E-07    | 0.018493071 | 0.6901867   | 0.12929  |
| 0.000366524 | 0.156503172  | 0.000688961 | -0.17134556 | 0.00019888  | -0.03438 |
| 0.43458754  | -0.042837077 | 0.355663253 | -0.26099796 | 1.04E-08    | 0.114369 |
| 0.665171101 | -0.001976815 | 0.966016499 | -0.03951243 | 0.3942612   | 0.100525 |
| 0.143946072 | 0.081459928  | 0.078650615 | 0.120832512 | 0.00895419  | 0.019761 |
| 0.045932992 | -0.101128649 | 0.028877379 | -0.09603958 | 0.03801726  | -0.06854 |
| 0.000126597 | -0.173178318 | 0.000169344 | 0.012518483 | 0.78730468  | 0.206659 |
| 0.004681827 | -0.14415602  | 0.001788855 | -0.29370391 | 9.59E-11    | 0.046694 |
| 9.45E-06    | 0.193836979  | 2.47E-05    | -0.15532946 | 0.0007567   | 0.124643 |
| 0.000323705 | -0.161868452 | 0.000445052 | 0.05506293  | 0.23497835  | 0.048322 |
| 0.91902599  | -0.00998935  | 0.829534579 | -0.08384839 | 0.07024743  | 0.016903 |
| 0.002047111 | -0.126669663 | 0.006123989 | -0.12520438 | 0.00674647  | 0.07682  |
| 1.00E-18    | -0.391572049 | 1.46E-18    | -0.09306591 | 0.04441576  | -0.08668 |
| 0.478503167 | 0.029473911  | 0.525188642 | -0.12361301 | 0.0074862   | -0.29905 |
| 0.054680022 | -0.107443973 | 0.020212064 | -0.06200929 | 0.18098494  | 0.151007 |
| 0.136652393 | -0.075586464 | 0.10280716  | 0.305160376 | 1.60E-11    | 0.163146 |
| 5.67E-07    | -0.221228862 | 1.38E-06    | -0.11840127 | 0.01044226  | -0.1285  |
| 0.000423056 | -0.159215833 | 0.000553328 | 0.027846609 | 0.54832364  | -0.09152 |
| 0.518646487 | 0.021172888  | 0.6481204   | 0.252009363 | 3.38E-08    | 0.324681 |
| 1.91E-05    | -0.182722165 | 7.14E-05    | 0.091248579 | 0.04875513  | 0.124325 |
| 0.221147492 | -0.061871759 | 0.181956283 | -0.23213369 | 3.93E-07    | 0.132778 |
| 1.21E-07    | 0.246421471  | 6.88E-08    | 0.222820286 | 1.15E-06    | 0.203927 |
| 0.005495278 | -0.127722953 | 0.005708913 | 0.060201861 | 0.19405899  | 0.247507 |
| 0.00054484  | 0.159871215  | 0.000524508 | 0.172867206 | 0.00017405  | 0.021274 |
| 0.266856278 | -0.039915693 | 0.389449158 | 0.145603389 | 0.00160546  | 0.126626 |
| 0.002132472 | -0.133245502 | 0.003918917 | 0.227995694 | 6.37E-07    | -0.10517 |
| 0.011751562 | -0.115622114 | 0.012408486 | -0.13966173 | 0.00248744  | -0.16307 |
| 0.711356479 | -0.00262566  | 0.954872575 | -0.13984762 | 0.00245421  | -0.10591 |
| 1.27E-06    | -0.223880061 | 1.02E-06    | -0.12601755 | 0.00639435  | 0.214398 |
| 0.039813958 | -0.103552821 | 0.025232974 | -0.14842186 | 0.00129692  | 0.205498 |

|             |              |             |             |            |          |
|-------------|--------------|-------------|-------------|------------|----------|
| 0.000210241 | -0.173952708 | 0.000158146 | -0.12390274 | 0.00734635 | -0.04864 |
| 2.14E-06    | -0.222164192 | 1.24E-06    | 0.23620369  | 2.42E-07   | 0.36909  |
| 0.020026322 | 0.106665152  | 0.021141015 | -0.21661199 | 2.30E-06   | 0.01075  |
| 0.005593397 | 0.141680313  | 0.002147569 | -0.0080056  | 0.86301177 | 0.249776 |
| 0.224923154 | -0.049571166 | 0.28505688  | -0.23422871 | 3.06E-07   | -0.11878 |
| 0.723636671 | 0.020480053  | 0.658896013 | 0.053477226 | 0.24875405 | 0.239753 |
| 1.36E-16    | -0.369134373 | 1.60E-16    | -0.0559971  | 0.22711941 | 0.259951 |
| 0.104702011 | 0.060877564  | 0.189092695 | 0.11673899  | 0.0115821  | -0.10595 |
| 0.006752857 | -0.128575958 | 0.005391492 | 0.012018808 | 0.79560288 | 0.169528 |
| 0.004519995 | -0.118073691 | 0.010658674 | 0.004898284 | 0.91592371 | 0.284726 |
| 0.000167656 | -0.18098234  | 8.39E-05    | 0.024853738 | 0.5921402  | 0.251198 |
| 0.026135979 | -0.099228168 | 0.032042055 | -0.07304451 | 0.11493798 | -0.01342 |
| 6.89E-06    | -0.209420974 | 5.01E-06    | -0.07834648 | 0.09080919 | 0.332614 |
| 0.460856404 | -0.030915605 | 0.505116659 | 0.122097323 | 0.00825731 | -0.03845 |
| 0.556938936 | -0.049021561 | 0.290437877 | -0.09294544 | 0.044693   | 0.03493  |
| 0.001690414 | 0.153964843  | 0.000843179 | -0.22204097 | 1.26E-06   | -0.12518 |
| 1.30E-06    | -0.220722912 | 1.46E-06    | -0.03067617 | 0.5084221  | 0.299335 |
| 0.065746705 | -0.077764346 | 0.093241602 | -0.00603393 | 0.89652991 | 0.203215 |
| 0.178353932 | -0.05309045  | 0.252197863 | 0.012346232 | 0.79016263 | 0.259076 |
| 3.22E-09    | -0.257682262 | 1.61E-08    | -0.22585373 | 8.16E-07   | 0.114092 |
| 0.720380943 | -0.036605569 | 0.429996542 | -0.07295655 | 0.11537703 | 0.025291 |
| 0.063643641 | 0.106443102  | 0.021412568 | -0.00820671 | 0.85960563 | 0.008313 |
| 3.86E-05    | 0.192694065  | 2.76E-05    | 0.114178865 | 0.0135532  | 0.026452 |
| 0.052451173 | 0.087768966  | 0.058055421 | 0.053180275 | 0.25139513 | 0.041305 |
| 0.328223054 | 0.045198432  | 0.329745374 | 0.02168965  | 0.64013063 | 0.04311  |
| 0.600725958 | 0.027169406  | 0.558096997 | 0.097743388 | 0.03471645 | 0.025444 |
| 0.024681599 | 0.100999056  | 0.029084314 | -0.2404213  | 1.45E-07   | 0.160995 |
| 8.69E-05    | 0.188136531  | 4.29E-05    | -0.07842467 | 0.09048638 | 0.052503 |
| 0.648901322 | 0.025941707  | 0.57602745  | -0.01810439 | 0.69637197 | 0.190469 |
| 0.016889443 | 0.099282687  | 0.031947303 | 0.076555288 | 0.09846002 | 0.24389  |
| 0.853878713 | -0.005187601 | 0.910977766 | -0.05081264 | 0.2731507  | -0.04584 |
| 0.961819121 | 0.000866069  | 0.985107745 | -0.0856386  | 0.06444275 | 0.173852 |
| 1.78E-05    | -0.201251027 | 1.17E-05    | -0.0499858  | 0.28104207 | 0.095756 |
| 0.133219011 | -0.075422404 | 0.103558146 | -0.37202875 | 8.91E-17   | 0.185559 |
| 8.06E-27    | 0.475970785  | 8.87E-28    | -0.08923715 | 0.05396603 | 0.096792 |
| 1.82E-08    | 0.269054021  | 3.46E-09    | -0.11879549 | 0.01018699 | 0.063943 |
| 1.50E-08    | -0.261767103 | 9.35E-09    | -0.22023791 | 1.54E-06   | 0.118982 |
| 0.001839283 | -0.145323896 | 0.001639474 | 0.081637061 | 0.07800063 | 0.056702 |
| 1.79E-07    | 0.238832499  | 1.76E-07    | 0.047988681 | 0.30073372 | 0.076151 |
| 2.52E-25    | -0.450446065 | 1.03E-24    | -0.04207709 | 0.36427007 | 0.065222 |
| 2.21E-21    | -0.421473349 | 1.55E-21    | -0.07140736 | 0.12332696 | -0.06962 |
| 0.249203985 | 0.044163624  | 0.340949436 | 0.086479522 | 0.0618556  | 0.101086 |
| 0.023509562 | 0.107038384  | 0.020691309 | -0.00735802 | 0.87399642 | -0.2666  |
| 0.229109947 | -0.076721641 | 0.09772853  | -0.00296258 | 0.94908928 | -0.00582 |
| 0.298594247 | 0.050321057  | 0.27782398  | -0.22763157 | 6.65E-07   | 0.14349  |

|             |              |             |             |            |          |
|-------------|--------------|-------------|-------------|------------|----------|
| 0.978759163 | -0.007123129 | 0.877987012 | -0.1672104  | 0.00028414 | -0.03327 |
| 1.80E-05    | -0.186835906 | 4.85E-05    | 0.127154844 | 0.00592954 | 0.291796 |
| 0.791395143 | 0.021028804  | 0.650355379 | -0.0888831  | 0.05492958 | 0.213382 |
| 0.222626387 | 0.057245771  | 0.216909047 | -0.21193591 | 3.83E-06   | -0.00243 |
| 0.560377353 | -0.025295228 | 0.58557691  | -0.23549255 | 2.63E-07   | -0.15087 |
| 0.507991731 | 0.033887897  | 0.465041296 | 0.024501827 | 0.59739575 | 0.051261 |
| 0.00419885  | -0.132305384 | 0.004182201 | -0.09849051 | 0.03334788 | -0.04359 |
| 0.047365309 | -0.089784359 | 0.052504485 | 0.078968529 | 0.08826648 | 0.061214 |
| 0.005361085 | -0.125780908 | 0.006495086 | -0.068274   | 0.1407028  | -0.01705 |
| 0.844092589 | -0.008216274 | 0.859443723 | -0.20320422 | 9.61E-06   | -0.04682 |
| 0.015942166 | -0.099918444 | 0.030859924 | -0.06558646 | 0.15705064 | -0.06417 |
| 0.081727186 | -0.078331966 | 0.090869206 | -0.09613575 | 0.03782412 | -0.07257 |
| 1.66E-27    | 0.493060103  | 5.59E-30    | 0.090041355 | 0.05182954 | 0.080312 |
| 6.81E-05    | 0.192380624  | 2.85E-05    | -0.10736063 | 0.02030974 | 0.08142  |
| 0.216186697 | -0.058717949 | 0.205299058 | -0.00958509 | 0.83633384 | 0.055607 |
| 0.26014876  | 0.060786412  | 0.189757138 | -0.11459521 | 0.01321379 | -0.12937 |
| 0.634339238 | -0.014150846 | 0.760367591 | -0.19235856 | 2.85E-05   | 0.056009 |
| 2.20E-21    | 0.414212288  | 8.72E-21    | -0.14110366 | 0.00224005 | -0.06922 |
| 0.319272139 | 0.045780237  | 0.323551654 | 0.003605752 | 0.93805683 | -0.15886 |
| 0.158607616 | -0.062467612 | 0.177775758 | 0.057642255 | 0.21373692 | 0.136397 |
| 0.235075852 | -0.061057875 | 0.187783364 | -0.04095279 | 0.37723846 | -0.10479 |
| 0.916315912 | 0.011325405  | 0.807156471 | 0.016172133 | 0.72741294 | -0.21668 |
| 1.10E-10    | 0.285786792  | 3.15E-10    | 0.176756944 | 0.00012314 | 0.213074 |
| 0.010931364 | -0.111858662 | 0.015588843 | -0.08179883 | 0.07741086 | 0.077226 |
| 0.000150553 | -0.190758312 | 3.33E-05    | -0.11359454 | 0.01404248 | 0.065472 |
| 3.10E-14    | -0.34415291  | 1.97E-14    | -0.04012764 | 0.38693437 | 0.011653 |
| 0.000188464 | -0.167558104 | 0.00027583  | 0.088225918 | 0.05675601 | -0.15877 |
| 0.723761139 | 0.016655204  | 0.719608309 | -0.13785414 | 0.00283268 | 0.118335 |
| 1.63E-19    | -0.397509481 | 3.96E-19    | -0.04727404 | 0.30799748 | -0.07965 |
| 2.55E-09    | -0.27437702  | 1.64E-09    | 0.080400372 | 0.08263086 | -0.06652 |
| 0.047456193 | -0.101692119 | 0.027992243 | 0.099867562 | 0.03094577 | -0.13121 |
| 0.545815601 | -0.021448904 | 0.643847749 | -0.00425576 | 0.92691909 | 0.039504 |
| 0.610637602 | 0.015919104  | 0.731512286 | -0.09118292 | 0.04891832 | 0.197666 |
| 0.177273791 | 0.064392053  | 0.164760731 | 0.339658637 | 4.49E-14   | 0.271621 |
| 0.4954659   | -0.024428733 | 0.598490013 | -0.03608083 | 0.43664155 | -0.12704 |
| 0.450952389 | -0.026262103 | 0.571322033 | -0.06284902 | 0.17513746 | 0.040624 |
| 0.005156988 | -0.120835433 | 0.008952526 | -0.14559123 | 0.00160693 | 0.4979   |
| 0.000108023 | -0.179582871 | 9.53E-05    | -0.03997878 | 0.38869957 | -0.15205 |
| 1.82E-05    | -0.202573499 | 1.03E-05    | 0.109066089 | 0.01839059 | -0.13138 |
| 0.104371381 | -0.06881669  | 0.137565929 | 0.229943458 | 5.08E-07   | 0.368664 |
| 7.90E-11    | -0.29204468  | 1.23E-10    | -0.02706273 | 0.55964419 | 0.196778 |
| 0.232962153 | -0.055116818 | 0.23451985  | -0.14754613 | 0.00138638 | -0.12855 |
| 0.001392622 | 0.112736668  | 0.014788963 | 0.001443001 | 0.97518982 | -0.04836 |
| 0.019461411 | 0.095817139  | 0.038467228 | -0.04260056 | 0.35832798 | -0.02127 |
| 5.94E-05    | -0.17683317  | 0.000122299 | -0.05744224 | 0.21533298 | 0.180068 |

|             |              |             |             |            |          |
|-------------|--------------|-------------|-------------|------------|----------|
| 3.26E-05    | -0.188461678 | 4.16E-05    | -0.10400909 | 0.02459334 | 0.234436 |
| 7.84E-06    | 0.206566242  | 6.78E-06    | 0.122404463 | 0.00809556 | -0.17071 |
| 0.267418306 | -0.053453431 | 0.248964961 | 0.179348161 | 9.74E-05   | 0.265748 |
| 1.97E-14    | 0.355785129  | 2.21E-15    | -0.18487372 | 5.84E-05   | 0.165019 |
| 0.704840108 | 0.012908362  | 0.780846497 | 0.030423791 | 0.51191837 | -0.22248 |
| 0.95214333  | -0.00800539  | 0.863015309 | 0.128801836 | 0.00531014 | 0.124383 |
| 0.016731699 | 0.114781909  | 0.013064042 | 0.032957279 | 0.4773959  | 0.062909 |
| 0.023898143 | -0.10254438  | 0.026697785 | 0.082082204 | 0.07638644 | 0.097794 |
| 0.122671049 | 0.073625478  | 0.112070964 | 0.016879795 | 0.7159896  | 0.312518 |
| 0.090849447 | -0.076789843 | 0.097429882 | 0.001743085 | 0.97003255 | 0.247314 |
| 0.570387955 | 0.028364071  | 0.540912898 | -0.1676686  | 0.00027324 | 0.097397 |
| 0.17927025  | -0.069488949 | 0.133754995 | 0.024291179 | 0.60055172 | 0.160076 |
| 0.005085209 | 0.12377642   | 0.007407036 | 0.141612059 | 0.00215833 | 0.157619 |
| 0.894928006 | -0.005427678 | 0.906876186 | -0.0201813  | 0.66356455 | 0.374062 |
| 0.088555491 | -0.096790402 | 0.036531267 | -0.01619728 | 0.7270059  | -0.08073 |
| 0.450763985 | 0.023402007  | 0.613955429 | 0.273876351 | 1.76E-09   | -0.12546 |
| 0.001956791 | -0.155612203 | 0.000739839 | -0.14095644 | 0.00226424 | -0.00794 |
| 0.243995572 | -0.044739157 | 0.334688374 | 0.025037677 | 0.58940163 | -0.09228 |
| 0.457843614 | -0.040910548 | 0.377731154 | 0.082535783 | 0.07476969 | -0.14763 |
| 0.470044373 | 0.037415833  | 0.419851696 | -0.06950691 | 0.13365428 | -0.11618 |
| 0.405221904 | -0.033841766 | 0.465649505 | -0.01677861 | 0.71761923 | -0.16554 |
| 0.267903992 | 0.042650555  | 0.357763681 | 0.008161009 | 0.86037943 | -0.14605 |
| 0.237686344 | 0.059455647  | 0.199653683 | -0.04094608 | 0.37731673 | -0.13512 |
| 0.271856852 | 0.056233522  | 0.225160448 | -0.06183213 | 0.18223691 | -0.08642 |
| 0.174749544 | -0.075498997 | 0.103207002 | 0.037222683 | 0.4222572  | -0.1935  |
| 0.122761631 | -0.088496301 | 0.055998553 | -0.23364057 | 3.28E-07   | -0.09826 |
| 0.001489654 | 0.134674808  | 0.003547301 | -0.08721582 | 0.05966125 | -0.11013 |
| 0.069945008 | -0.079578015 | 0.085830939 | 0.068585602 | 0.13889503 | -0.04721 |
| 0.021299055 | -0.117087398 | 0.011334467 | -0.1194224  | 0.00979244 | -0.13975 |
| 0.673184215 | -0.001444568 | 0.975162887 | -0.28456302 | 3.78E-10   | 0.029168 |
| 0.757544011 | -0.018557517 | 0.689163119 | -0.1812331  | 8.19E-05   | 0.06911  |
| 0.002170044 | -0.135646811 | 0.003313157 | -0.15632195 | 0.00069904 | 0.058395 |
| 3.66E-06    | 0.217758851  | 2.03E-06    | 0.012697325 | 0.78434039 | -0.05818 |
| 0.009611421 | 0.108600165  | 0.018898515 | 0.020766006 | 0.65443989 | -0.02777 |
| 0.336308995 | 0.037167179  | 0.422949938 | 0.122662893 | 0.00796166 | 0.296608 |
| 0.005667407 | 0.125741407  | 0.006512038 | 0.077433105 | 0.09464877 | 0.210555 |
| 0.019512928 | -0.109935568 | 0.017474524 | -0.2944422  | 8.57E-11   | -0.0951  |
| 0.024079782 | 0.098566913  | 0.033210557 | -0.00853437 | 0.8540618  | 0.129505 |
| 0.216202951 | -0.05015074  | 0.279455703 | 0.009941956 | 0.83033105 | -0.04343 |
| 0.963327995 | 0.018891616  | 0.683865867 | -0.03699966 | 0.42504474 | 0.030795 |
| 0.744324427 | 0.027214003  | 0.557450777 | -0.00741055 | 0.87310458 | 0.082072 |
| 0.01025051  | -0.114786047 | 0.01306074  | -0.05453283 | 0.23952231 | 0.008705 |
| 0.00030186  | -0.166931165 | 0.000290982 | -0.11761393 | 0.01096912 | 0.099734 |
| 0.000331495 | 0.167977351  | 0.000266112 | -0.01856636 | 0.68902268 | 0.037391 |
| 4.36E-06    | 0.216481222  | 2.34E-06    | -0.10739386 | 0.02027075 | 0.075955 |

|             |              |             |             |            |          |
|-------------|--------------|-------------|-------------|------------|----------|
| 0.767352134 | -0.000533771 | 0.990821358 | 0.011232244 | 0.80871199 | 0.006811 |
| 0.262273585 | -0.052192701 | 0.260318596 | -0.07087737 | 0.12614248 | 0.068812 |
| 8.73E-06    | -0.204340406 | 8.55E-06    | 0.162309505 | 0.00042909 | -0.16404 |
| 0.003237031 | -0.126347952 | 0.006256061 | 0.057946005 | 0.2113294  | 0.099    |
| 0.074235982 | -0.07264509  | 0.116942196 | 0.004170019 | 0.92838753 | 0.07764  |
| 0.044812861 | -0.090351882 | 0.051023681 | -0.09162897 | 0.0478186  | -0.11414 |
| 0.221519753 | -0.058253374 | 0.208913146 | -0.00417868 | 0.92823911 | -0.01421 |
| 0.620154451 | 0.011427907  | 0.805445857 | 0.046382028 | 0.31722521 | -0.02226 |
| 0.114822035 | 0.074579216  | 0.107486634 | -0.03070111 | 0.5080772  | -0.0568  |
| 0.457280749 | -0.03140717  | 0.498366115 | 0.127246832 | 0.0058933  | 0.122079 |
| 0.233094062 | 0.056527484  | 0.22274151  | 0.082673727 | 0.07428356 | 0.026811 |
| 0.959571096 | -0.001808186 | 0.968913875 | 0.123434735 | 0.00757343 | 0.053288 |
| 8.26E-05    | -0.179449528 | 9.65E-05    | 0.096109808 | 0.03787613 | 0.186584 |
| 8.88E-07    | -0.216141395 | 2.43E-06    | -0.20330974 | 9.51E-06   | -0.0791  |
| 4.80E-05    | -0.188887717 | 3.99E-05    | -0.03394121 | 0.4643389  | 0.026524 |
| 0.952037235 | 0.000487543  | 0.991616263 | -0.075565   | 0.10290518 | 0.040928 |
| 0.403408634 | 0.043776679  | 0.345200667 | -0.11368695 | 0.01396408 | 0.071413 |
| 2.90E-07    | 0.232108952  | 3.94E-07    | -0.2525962  | 3.13E-08   | -0.03979 |
| 5.24E-07    | -0.223077327 | 1.12E-06    | -0.06399656 | 0.16737529 | 0.039641 |
| 0.02860919  | 0.101032296  | 0.029031116 | -0.17427911 | 0.00015364 | -0.12391 |
| 2.07E-05    | -0.188109182 | 4.30E-05    | -0.13751634 | 0.00290184 | 0.133496 |
| 0.000118312 | -0.173051932 | 0.000171241 | -0.08912072 | 0.05428134 | -0.186   |
| 8.52E-07    | -0.226407088 | 7.66E-07    | 0.006309697 | 0.89182947 | 0.15119  |
| 0.1079839   | -0.07262157  | 0.117061064 | -0.03507569 | 0.44953323 | -0.01345 |
| 1.39E-05    | -0.19919422  | 1.45E-05    | -0.15333239 | 0.00088628 | 0.027997 |
| 0.000183788 | -0.180792661 | 8.53E-05    | -0.06070427 | 0.1903574  | -0.27563 |
| 1.47E-12    | -0.317827502 | 2.02E-12    | 0.13462742  | 0.00355909 | 0.058428 |
| 0.124064864 | 0.067718836  | 0.14396818  | 0.048961368 | 0.29103133 | 0.377145 |
| 0.000479213 | -0.14410304  | 0.001795919 | -0.11091501 | 0.01649059 | 0.091813 |
| 0.951689262 | -0.006573228 | 0.887341066 | -0.09353854 | 0.04334199 | -0.07296 |
| 6.66E-13    | -0.325203404 | 5.78E-13    | -0.07163143 | 0.1221514  | 0.16064  |
| 0.293305537 | -0.057755316 | 0.212838506 | -0.04409885 | 0.34165875 | -0.0681  |
| 1.38E-10    | -0.304720455 | 1.72E-11    | 0.056356633 | 0.22414514 | 0.056045 |
| 0.01840136  | 0.103353364  | 0.025517066 | 0.018890287 | 0.68388691 | 0.055093 |
| 3.71E-10    | 0.27792776   | 9.91E-10    | -0.27952973 | 7.87E-10   | 0.141646 |
| 0.312588826 | 0.055815313  | 0.228633929 | -0.03493113 | 0.45140483 | 0.033484 |
| 0.011889069 | 0.106584212  | 0.021239651 | 0.035461417 | 0.44456073 | 0.285974 |
| 0.200208634 | 0.053374279  | 0.249667461 | 0.036860462 | 0.42678998 | -0.16589 |
| 0.060592308 | -0.076637574 | 0.098097649 | -0.04488657 | 0.33309668 | -0.0677  |
| 0.319733289 | 0.041258872  | 0.373680099 | 0.311082074 | 6.16E-12   | 0.234858 |
| 3.34E-11    | -0.299601433 | 3.86E-11    | -0.02290008 | 0.62157931 | -0.06321 |
| 0.023251835 | -0.091127439 | 0.049056582 | -0.08669007 | 0.06122142 | -0.00581 |
| 1.61E-07    | 0.253230855  | 2.88E-08    | -0.13827553 | 0.00274851 | -0.19135 |
| 0.952159086 | -0.023539056 | 0.611880942 | 0.204003566 | 8.85E-06   | 0.176995 |
| 6.41E-07    | -0.228413389 | 6.07E-07    | -0.10061873 | 0.02969898 | 0.143958 |

|             |              |             |             |            |          |
|-------------|--------------|-------------|-------------|------------|----------|
| 5.07E-08    | -0.250868234 | 3.91E-08    | -0.08586429 | 0.06373982 | 0.134139 |
| 0.006811642 | 0.134413638  | 0.003612721 | -0.1153882  | 0.01258801 | 0.003325 |
| 0.309274081 | -0.067548782 | 0.144979908 | -0.01691551 | 0.7154147  | -0.24256 |
| 0.214719844 | -0.05657867  | 0.222322212 | 0.010184561 | 0.82625583 | 0.076494 |
| 0.371363801 | 0.039079967  | 0.399461232 | -0.1559306  | 0.00072127 | 0.259085 |
| 0.49335762  | -0.019786123 | 0.669759883 | -0.28995202 | 1.69E-10   | -0.02509 |
| 2.25E-05    | 0.192235635  | 2.89E-05    | 0.001154316 | 0.98015216 | 0.474038 |
| 0.536249079 | -0.027042558 | 0.559936998 | -0.01530274 | 0.74152988 | 0.031365 |
| 0.066749276 | -0.092090044 | 0.046703687 | 0.044194813 | 0.34060824 | 0.029626 |
| 0.099359172 | 0.073173859  | 0.114294722 | -0.08053279 | 0.0821247  | -0.16491 |
| 0.312105676 | 0.044726658  | 0.334823551 | 0.231408809 | 4.28E-07   | 0.326625 |
| 0.484747177 | 0.02783514   | 0.548488453 | -0.00272564 | 0.9531562  | 0.190507 |
| 0.00435727  | -0.143900783 | 0.00182312  | -0.22263238 | 1.18E-06   | -0.10309 |
| 0.011251327 | -0.110314844 | 0.017087583 | -0.00126174 | 0.97830545 | 0.138337 |
| 0.007612446 | 0.112508309  | 0.014993455 | -0.28276276 | 4.92E-10   | -0.01416 |
| 9.92E-05    | 0.175140591  | 0.000142309 | 0.121189482 | 0.00875239 | 0.067861 |
| 2.71E-13    | -0.329446654 | 2.77E-13    | -0.00239096 | 0.9589026  | 0.087976 |
| 0.000797492 | -0.160820357 | 0.000485234 | -0.04759469 | 0.30472415 | 0.050676 |
| 0.089351495 | 0.083372233  | 0.071861339 | 0.102494961 | 0.02677141 | 0.247517 |
| 5.02E-07    | -0.231366382 | 4.30E-07    | 0.005461228 | 0.90630321 | 0.043932 |
| 0.078887368 | -0.094197867 | 0.04188068  | -0.0220415  | 0.63471428 | -0.12399 |
| 0.571930456 | -0.025444418 | 0.583366661 | -0.14510495 | 0.00166658 | -0.09591 |
| 0.005001129 | -0.135007975 | 0.003465406 | -0.02791314 | 0.54736805 | 0.198221 |
| 0.882393377 | -0.016304154 | 0.725277139 | -0.06482585 | 0.16192828 | 0.061828 |
| 0.41474266  | -0.035929597 | 0.438567521 | -0.06084513 | 0.18932891 | 0.005794 |
| 0.292182657 | 0.055877272  | 0.228116938 | -0.04015241 | 0.38664113 | 0.057711 |
| 0.001968494 | 0.142758391  | 0.00198397  | -0.04447366 | 0.33756738 | -0.01129 |
| 0.133051253 | 0.067150672  | 0.147369681 | 0.035260582 | 0.44714585 | 0.0101   |
| 0.002515442 | 0.128673959  | 0.00535606  | -0.1453885  | 0.00163155 | 0.1892   |
| 0.002590916 | -0.128194666 | 0.005531361 | -0.12120208 | 0.00874535 | -0.03917 |
| 0.020296797 | -0.111677677 | 0.015758362 | 0.032290698 | 0.4863541  | 0.133478 |
| 0.87356344  | -0.000900703 | 0.984512288 | -0.13845798 | 0.00271278 | -0.0152  |
| 0.112390464 | 0.068354257  | 0.140235463 | -0.07130126 | 0.12388664 | -0.11599 |
| 0.1891773   | -0.061344675 | 0.185714526 | -0.01358513 | 0.76967204 | -0.1113  |
| 0.001012958 | -0.142548118 | 0.002014954 | -0.09626022 | 0.03757536 | -0.08601 |
| 1.28E-06    | -0.220908149 | 1.43E-06    | -0.0256384  | 0.58049866 | 0.106572 |
| 0.024553332 | 0.099411289  | 0.031724742 | -0.27116201 | 2.58E-09   | -0.34178 |
| 0.907942212 | -0.005162927 | 0.911399453 | 0.049283269 | 0.28786715 | 0.274516 |
| 0.060875444 | 0.083217361  | 0.072392749 | -0.00164432 | 0.9717298  | 0.114216 |
| 1.62E-11    | -0.301600823 | 2.82E-11    | 0.203997239 | 8.85E-06   | 0.118344 |
| 0.549932505 | -0.028832587 | 0.534246441 | -0.11506646 | 0.01283869 | 0.101978 |
| 0.624621612 | -0.045982152 | 0.321419912 | -0.08067788 | 0.08157298 | -0.00691 |
| 1.24E-21    | -0.416080246 | 5.62E-21    | -0.14983789 | 0.00116342 | 0.267585 |
| 0.436021186 | 0.02793077   | 0.547114941 | -0.02234499 | 0.63005788 | -0.03299 |
| 0.474766564 | -0.023137963 | 0.617960904 | -0.19106154 | 3.24E-05   | 0.144243 |

|             |              |             |             |            |          |
|-------------|--------------|-------------|-------------|------------|----------|
| 2.35E-21    | 0.426244702  | 4.88E-22    | -0.2013821  | 1.16E-05   | -0.10948 |
| 0.001905815 | -0.150870756 | 0.001074163 | -0.20186354 | 1.10E-05   | -0.15533 |
| 0.003807029 | 0.134328482  | 0.003634287 | 0.032314934 | 0.48602682 | 0.286372 |
| 0.12423288  | -0.080335284 | 0.082880575 | 0.031981031 | 0.49054633 | 0.21316  |
| 0.011598736 | -0.117540172 | 0.011019662 | -0.0433892  | 0.3494914  | 0.003948 |
| 0.222314513 | -0.057978896 | 0.211069877 | -0.08000487 | 0.08415764 | 0.052707 |
| 3.21E-12    | -0.307970405 | 1.02E-11    | -0.09409743 | 0.04210057 | 0.108867 |
| 0.636660456 | -0.037602277 | 0.417537338 | -0.07189207 | 0.12079502 | 0.25077  |
| 0.325496505 | -0.043350389 | 0.349922984 | 0.036336876 | 0.43339176 | 0.086035 |
| 0.007859185 | 0.107552448  | 0.020085539 | -0.05060532 | 0.27511508 | 0.072146 |
| 0.963611538 | 0.012288075  | 0.791128187 | -0.01597812 | 0.73055544 | -0.00983 |
| 8.20E-08    | 0.2536795    | 2.72E-08    | 0.002553017 | 0.95611983 | 0.00399  |
| 0.531953633 | 0.023928844  | 0.605997788 | 0.093100687 | 0.04433599 | 0.099491 |
| 0.018576708 | -0.107012354 | 0.020722401 | 0.029117567 | 0.53021181 | 0.038635 |
| 0.052256926 | -0.093178694 | 0.044157508 | 0.046804315 | 0.31283445 | 0.208592 |
| 0.014981721 | -0.102773047 | 0.026359368 | -0.04645955 | 0.31641621 | 0.199932 |
| 0.001454887 | 0.148720042  | 0.001267687 | -0.09731515 | 0.03552224 | -0.17469 |
| 0.326016378 | -0.043585735 | 0.347310862 | -0.07484163 | 0.10625161 | 0.04985  |
| 0.056508521 | -0.082985082 | 0.073195777 | 0.068447111 | 0.13969627 | 0.181    |
| 0.000421131 | -0.167236495 | 0.000283508 | -0.02870322 | 0.536083   | -0.03533 |
| 0.007176765 | 0.111537608  | 0.015890664 | 0.04161128  | 0.36960895 | 0.099631 |
| 0.000555539 | 0.149264693  | 0.001215856 | 0.391099503 | 1.62E-18   | 0.301067 |
| 0.143719678 | -0.064026961 | 0.167173251 | -0.14906074 | 0.00123503 | -0.16352 |
| 0.710922131 | -0.020586646 | 0.657233504 | -0.10638952 | 0.02147854 | -0.03087 |
| 0.434235598 | -0.045182735 | 0.329913526 | -0.01890802 | 0.68360615 | -0.00787 |
| 0.926140084 | 0.001301652  | 0.977619436 | -0.00627745 | 0.89237897 | 0.128144 |
| 0.182440962 | -0.081688713 | 0.077811923 | -0.03829321 | 0.40902627 | 0.051162 |
| 3.50E-05    | -0.180781357 | 8.54E-05    | -0.05721164 | 0.21718371 | 0.186245 |
| 2.72E-09    | 0.270790041  | 2.72E-09    | -0.08526372 | 0.06562446 | 0.187412 |
| 0.230821149 | 0.060949249  | 0.18857135  | 0.239704561 | 1.58E-07   | 0.345504 |
| 0.0765111   | 0.083747819  | 0.070585809 | 0.257129946 | 1.73E-08   | 0.244639 |
| 0.246181666 | -0.047964553 | 0.300977097 | -0.11483138 | 0.01302461 | 0.163566 |
| 0.993054284 | 0.003180867  | 0.945343777 | -0.16235731 | 0.00042739 | -0.07433 |
| 2.97E-11    | -0.312435948 | 4.94E-12    | 0.102635607 | 0.02656233 | -0.00561 |
| 3.30E-12    | 0.319778999  | 1.46E-12    | 0.191017288 | 3.25E-05   | -0.27243 |
| 0.187989327 | 0.074932558  | 0.105826295 | -0.09889661 | 0.03262348 | -0.05478 |
| 0.743834358 | -0.012783229 | 0.78291766  | -0.00932307 | 0.84074729 | -0.14419 |
| 1.39E-06    | 0.21158339   | 3.98E-06    | 0.029058671 | 0.53104436 | -0.01891 |
| 3.47E-11    | 0.2981453    | 4.84E-11    | 0.137498657 | 0.00290551 | 0.095522 |
| 0.207892441 | -0.0625707   | 0.177059782 | -0.09390376 | 0.04252731 | 0.004395 |
| 1.04E-20    | -0.418626015 | 3.07E-21    | -0.27756754 | 1.04E-09   | 0.096976 |
| 2.01E-06    | -0.226921152 | 7.22E-07    | -0.09461899 | 0.04096925 | 0.034949 |
| 0.702076363 | -0.012399606 | 0.78927675  | -0.06578551 | 0.15579265 | -0.03666 |
| 0.037985819 | -0.099533112 | 0.031515137 | -0.03738868 | 0.42018933 | -0.06954 |
| 0.001309219 | -0.136678529 | 0.003080056 | -0.13877262 | 0.00265215 | -0.2181  |



|             |              |             |             |            |          |
|-------------|--------------|-------------|-------------|------------|----------|
| 0.281509362 | 0.052419054  | 0.258254273 | -0.16410738 | 0.00036936 | 0.168179 |
| 0.608103491 | 0.020098315  | 0.664863641 | 0.02642828  | 0.56888873 | 0.265349 |
| 0.552375983 | -0.025050876 | 0.58920534  | 0.16630776  | 0.00030682 | -0.05022 |
| 0.996359573 | -0.007119327 | 0.878051622 | -0.05788179 | 0.21183672 | 0.103217 |
| 0.273705187 | -0.050268484 | 0.278326962 | -0.08544291 | 0.06505741 | 0.039063 |
| 2.94E-08    | -0.265167509 | 5.90E-09    | -0.01491548 | 0.74784643 | 0.132146 |
| 0.004047502 | -0.128526937 | 0.005409294 | 0.158530048 | 0.00058505 | 0.043891 |
| 0.589531223 | 0.021323544  | 0.645786839 | -0.00607936 | 0.89575532 | -0.00871 |
| 0.784160017 | -0.011067114 | 0.811471041 | 0.061827736 | 0.18226801 | 0.036221 |
| 0.454451179 | -0.03609173  | 0.436502884 | 0.065248411 | 0.1592046  | -0.04385 |
| 0.073133775 | -0.082122136 | 0.076242977 | 0.061939084 | 0.18148032 | -0.01044 |
| 0.655521935 | -0.02181933  | 0.638132097 | -0.04568119 | 0.3246007  | 0.123047 |
| 0.619090565 | 0.03872589   | 0.403749234 | -0.02979115 | 0.52073721 | 0.080449 |
| 0.385552728 | -0.036837743 | 0.427075213 | 0.109611988 | 0.01781068 | -0.01272 |
| 0.646624087 | 0.025562162  | 0.581625025 | 0.115130991 | 0.01278806 | 0.062386 |
| 0.984834071 | -0.000638724 | 0.989016703 | -0.04647262 | 0.3162799  | 0.035419 |
| 0.004125883 | -0.132364112 | 0.004165297 | 0.088597222 | 0.05571799 | 0.004341 |
| 0.010369673 | 0.120520605  | 0.0091339   | 0.142346703 | 0.00204505 | 0.105765 |
| 0.512426982 | -0.024945431 | 0.590774301 | -0.041748   | 0.36803698 | -0.1884  |
| 0.041191871 | -0.088581078 | 0.055762794 | -0.10243266 | 0.02686449 | -0.00416 |
| 0.617356233 | 0.024905044  | 0.591375745 | -0.05953149 | 0.19907971 | 0.07979  |
| 0.390331767 | 0.04058875   | 0.381497568 | 0.032468901 | 0.48395039 | 0.094106 |
| 0.153027338 | 0.072725036  | 0.116538868 | -0.02162653 | 0.64110437 | -0.08185 |
| 0.544199541 | 0.024717086  | 0.594178484 | -0.0662298  | 0.15301236 | 0.047457 |
| 0.51614756  | 0.018881377  | 0.684027984 | 0.02156714  | 0.64202107 | -0.0847  |
| 3.00E-07    | -0.247170564 | 6.26E-08    | -0.15727651 | 0.00064745 | 0.090697 |
| 2.07E-20    | -0.409576517 | 2.57E-20    | -0.17772161 | 0.00011289 | 0.052441 |
| 0.023220409 | -0.103136746 | 0.025828723 | -0.04414924 | 0.34110686 | 0.046403 |
| 3.48E-06    | -0.211819513 | 3.88E-06    | 0.120132629 | 0.00936191 | 0.360671 |
| 6.94E-10    | -0.278019548 | 9.79E-10    | -0.06067621 | 0.19056276 | 0.058271 |
| 0.238583335 | 0.046189316  | 0.319242276 | 0.149311941 | 0.00121145 | 0.130401 |
| 0.000685358 | -0.150050619 | 0.001144497 | -0.11349642 | 0.01412615 | 0.079933 |
| 0.147812441 | -0.049090119 | 0.289762955 | 0.022939636 | 0.62097692 | 0.084494 |
| 5.83E-05    | -0.179276652 | 9.80E-05    | -0.04587938 | 0.32250383 | -0.05067 |
| 0.579521479 | 0.014360389  | 0.756929866 | -0.06267918 | 0.17630863 | 0.061928 |
| 0.745885339 | 0.020682441  | 0.655740846 | -0.07254202 | 0.11746378 | -0.19735 |
| 0.133359073 | -0.0650109   | 0.160731242 | -0.05096405 | 0.27172212 | -0.00924 |
| 0.053366841 | -0.079032625 | 0.088007768 | -0.2023293  | 1.05E-05   | 0.137521 |
| 0.151610357 | -0.074000251 | 0.11025154  | -0.0968904  | 0.03633713 | 0.227987 |
| 0.000149639 | -0.196653131 | 1.87E-05    | -0.1535222  | 0.00087314 | 0.245659 |
| 0.923476673 | 0.000788618  | 0.986439406 | -0.1610512  | 0.0004761  | 0.045638 |
| 0.001200121 | -0.143569321 | 0.001868514 | -0.13980858 | 0.00246115 | -0.17967 |
| 0.00163407  | -0.159053013 | 0.000560712 | 0.066363556 | 0.15218275 | -0.1388  |
| 8.08E-10    | -0.273624146 | 1.83E-09    | -0.0096462  | 0.83530518 | 0.0036   |
| 0.71261261  | 0.023865055  | 0.606958836 | 0.134504878 | 0.00358974 | 0.069348 |

|             |              |             |             |            |          |
|-------------|--------------|-------------|-------------|------------|----------|
| 3.11E-19    | -0.387957594 | 3.19E-18    | -0.19306704 | 2.66E-05   | -0.06749 |
| 0.018081456 | -0.098239146 | 0.0338031   | 0.053607391 | 0.24760248 | 0.195723 |
| 3.60E-06    | 0.23596014   | 2.49E-07    | 0.03774414  | 0.4157814  | -0.10396 |
| 0.000941735 | -0.16171048  | 0.000450903 | -0.00065737 | 0.98869618 | 0.323294 |
| 0.024463387 | -0.120890516 | 0.008921124 | 0.051704434 | 0.26481022 | -0.09487 |
| 0.000287086 | -0.163710384 | 0.000381843 | -0.02519716 | 0.58703186 | -0.13725 |
| 0.042909867 | -0.086398672 | 0.062100557 | 0.048262803 | 0.29797791 | 0.288775 |
| 0.024872159 | -0.112416407 | 0.01507645  | -0.00653327 | 0.88802147 | 0.281913 |
| 0.356050103 | 0.038570035  | 0.405645372 | -0.06790958 | 0.14283977 | 0.052901 |
| 0.037697643 | 0.08139235   | 0.078899742 | 0.380493876 | 1.55E-17   | 0.266671 |
| 0.120421036 | -0.077557045 | 0.094120279 | 0.216491522 | 2.34E-06   | 0.2493   |
| 1.31E-13    | -0.33457514  | 1.12E-13    | 0.032988273 | 0.47698158 | 0.024106 |
| 2.41E-10    | -0.294004489 | 9.16E-11    | -0.05611586 | 0.22613393 | 0.163071 |
| 9.57E-07    | -0.231351224 | 4.31E-07    | -0.28441574 | 3.86E-10   | 0.149864 |
| 0.000920929 | -0.168507776 | 0.000254276 | 0.133855822 | 0.00375612 | 0.044086 |
| 0.002322642 | -0.142291796 | 0.002053323 | -0.14499871 | 0.00167988 | -0.05108 |
| 1.71E-06    | -0.210265009 | 4.58E-06    | -0.13989027 | 0.00244664 | -0.00845 |
| 0.196107336 | 0.06298106   | 0.174230922 | -0.16999304 | 0.0002237  | -0.18807 |
| 0.514263486 | 0.024840299  | 0.592340505 | 0.07020674  | 0.12977636 | 0.032284 |
| 0.000449687 | -0.159844987 | 0.000525634 | -0.01975757 | 0.67020844 | 0.094521 |
| 1.65E-05    | 0.213168263  | 3.36E-06    | 0.035379806 | 0.44561019 | 0.015723 |
| 0.482906114 | -0.04960825  | 0.284696237 | -0.02966568 | 0.52249548 | 0.107181 |
| 2.08E-05    | -0.19029587  | 3.49E-05    | -0.04717026 | 0.30906195 | 0.103782 |
| 0.113969376 | -0.067573721 | 0.144831199 | -0.07126858 | 0.12405946 | 0.06365  |
| 0.172670312 | 0.066769882  | 0.149683454 | 0.042126878 | 0.36370229 | -0.07689 |
| 1.50E-17    | -0.372161028 | 8.67E-17    | -0.06987841 | 0.13158477 | 0.20415  |
| 0.157747882 | -0.062948613 | 0.174453372 | 0.009508101 | 0.83763011 | -0.00099 |
| 0.291620128 | -0.057267909 | 0.216731039 | -0.09099717 | 0.0493825  | -0.07625 |
| 0.121653309 | 0.069348942  | 0.134541887 | 0.050520189 | 0.27592442 | 0.047915 |
| 0.284754446 | 0.04121045   | 0.374241651 | -0.02533363 | 0.58500768 | -0.05575 |
| 0.474174814 | -0.024812234 | 0.59275893  | -0.05164664 | 0.26534539 | -0.07945 |
| 0.000347672 | 0.152558385  | 0.000941801 | -0.00401802 | 0.93099115 | 0.110309 |
| 0.13862479  | -0.057319453 | 0.216317    | -0.0019155  | 0.96706989 | -0.01309 |
| 0.155473812 | -0.081780661 | 0.077476911 | 0.0164127   | 0.7235227  | -0.02775 |
| 4.61E-08    | 0.237842721  | 1.98E-07    | -0.01975318 | 0.67027739 | -0.16546 |
| 0.837416904 | 0.01082402   | 0.815536978 | -0.10228975 | 0.02707902 | 0.031186 |
| 0.604079868 | 0.029600521  | 0.523409753 | -0.25004874 | 4.34E-08   | -0.13001 |
| 1.07E-12    | -0.328408748 | 3.32E-13    | -0.13534104 | 0.00338526 | 0.005554 |
| 0.113682007 | -0.065418583 | 0.158117541 | -0.11278599 | 0.01474512 | 0.14021  |
| 0.444116137 | 0.038278604  | 0.409205126 | 0.122098314 | 0.00825678 | -0.12079 |
| 1.11E-15    | 0.358969663  | 1.20E-15    | 0.003296089 | 0.94336721 | 0.107101 |
| 1.53E-05    | 0.19926992   | 1.44E-05    | 0.252513123 | 3.16E-08   | -0.11004 |
| 0.236417264 | 0.047020546  | 0.310601675 | 0.115860381 | 0.01222795 | -0.02096 |
| 1.60E-07    | 0.224871467  | 9.13E-07    | 0.090600402 | 0.0503863  | -0.07757 |
| 7.90E-10    | -0.287585364 | 2.41E-10    | -0.14393857 | 0.00181801 | 0.191709 |

|             |              |             |             |            |          |
|-------------|--------------|-------------|-------------|------------|----------|
| 7.63E-05    | -0.186598887 | 4.96E-05    | -0.01073859 | 0.81696704 | 0.227504 |
| 0.653936552 | -0.027303617 | 0.556153371 | -0.09504483 | 0.04006469 | -0.06543 |
| 4.32E-07    | -0.22389161  | 1.02E-06    | -0.14369211 | 0.00185158 | 0.154583 |
| 0.171503775 | -0.06190687  | 0.181707946 | -0.06387006 | 0.16821815 | -0.02425 |
| 0.000166901 | 0.171127759  | 0.000202694 | 0.06303014  | 0.17389485 | 0.119285 |
| 0.003012525 | -0.126603811 | 0.006150818 | 0.075009525 | 0.10546733 | 0.203779 |
| 4.68E-09    | -0.266669098 | 4.81E-09    | -0.07671675 | 0.09774999 | 0.003169 |
| 0.560359607 | 0.029300466  | 0.527630554 | -0.0498754  | 0.28210732 | -0.07311 |
| 0.579970461 | 0.03271272   | 0.480672042 | 0.035466041 | 0.44450131 | 0.066821 |
| 0.754976834 | -0.009297226 | 0.841182907 | -0.02513098 | 0.58801474 | 0.078961 |
| 0.008243486 | -0.123037418 | 0.007771111 | -0.23264889 | 3.69E-07   | 0.234147 |
| 0.000616338 | 0.173098686  | 0.000170537 | -0.05345121 | 0.24898463 | -0.02802 |
| 0.071666698 | -0.081737962 | 0.07763234  | -0.14055491 | 0.00233142 | 0.047033 |
| 2.28E-10    | 0.285020444  | 3.53E-10    | 0.019783589 | 0.66979967 | 0.01475  |
| 0.327271711 | -0.04182038  | 0.367206375 | 0.075601053 | 0.10274059 | 0.037381 |
| 0.117421289 | -0.071406161 | 0.123333273 | -0.11332633 | 0.01427222 | 0.302847 |
| 0.493756545 | 0.042072008  | 0.364328062 | -0.07394368 | 0.11052466 | -0.01414 |
| 0.002948767 | -0.14764987  | 0.001375497 | -0.11641367 | 0.01181763 | 0.034922 |
| 0.126052211 | 0.052073055  | 0.261414339 | -0.19863967 | 1.53E-05   | 0.093478 |
| 2.50E-06    | -0.2179208   | 1.99E-06    | -0.14160137 | 0.00216002 | 0.203786 |
| 0.465945358 | 0.026737063  | 0.564380394 | -0.11850279 | 0.01037599 | -0.07638 |
| 0.444727943 | -0.036796999 | 0.427587042 | -0.04587351 | 0.3225658  | -0.07572 |
| 0.564786902 | 0.030113221  | 0.516237908 | -0.02796177 | 0.5466701  | -0.00371 |
| 0.199319703 | -0.05789086  | 0.21176502  | 0.064054099 | 0.16699302 | -0.01259 |
| 0.379903555 | 0.030924095  | 0.504999658 | -0.15298694 | 0.00091068 | 0.09818  |
| 0.364283817 | 0.032288898  | 0.486378407 | -0.12065488 | 0.00905615 | 0.029611 |
| 0.297064255 | -0.046754331 | 0.313352062 | -0.05972108 | 0.19765028 | -0.04437 |
| 0.000398993 | -0.169717951 | 0.000229088 | -0.09881151 | 0.03277415 | 0.066974 |
| 0.708666795 | -0.023533082 | 0.611971315 | -0.04125612 | 0.37371196 | -0.14164 |
| 0.516270887 | 0.040689913  | 0.38031106  | -0.12105014 | 0.00883068 | -0.10281 |
| 0.036875602 | -0.104499773 | 0.023921135 | -0.03728269 | 0.42150902 | -0.00592 |
| 0.758823758 | -0.037644615 | 0.417012833 | -0.04711922 | 0.30958628 | -0.08667 |
| 0.001322656 | 0.163762399  | 0.000380186 | -0.19500406 | 2.20E-05   | 0.059771 |
| 0.382139542 | -0.040953805 | 0.377226608 | -0.10898668 | 0.01847631 | 0.010347 |
| 0.524223171 | -0.029478205 | 0.52512826  | -0.15323907 | 0.00089281 | -0.02192 |
| 0.767499336 | 0.019043405  | 0.681464282 | -0.12911383 | 0.00519959 | -0.13558 |
| 1.77E-05    | -0.197777095 | 1.67E-05    | 0.03867811  | 0.40432996 | -0.14694 |
| 0.009869152 | -0.119317522 | 0.009857487 | -0.06420707 | 0.16597979 | -0.04904 |
| 0.090373957 | -0.087679149 | 0.058313705 | -0.01617815 | 0.72731552 | -0.0123  |
| 0.030151254 | -0.099332319 | 0.03186125  | -0.03787127 | 0.41421148 | 0.013255 |
| 0.039696412 | -0.092317832 | 0.046160973 | 0.07965742  | 0.08551766 | 0.030905 |
| 5.57E-05    | -0.185109557 | 5.71E-05    | 0.036518041 | 0.43110086 | 0.051733 |
| 1.04E-07    | -0.243852184 | 9.48E-08    | 0.022121894 | 0.63347937 | 0.038738 |
| 0.361901306 | -0.045400897 | 0.327581367 | -0.05290091 | 0.25389754 | -0.02913 |
| 0.639737687 | 0.004616397  | 0.92074576  | -0.06834648 | 0.14028069 | -0.00977 |

|             |              |             |             |            |          |
|-------------|--------------|-------------|-------------|------------|----------|
| 0.124899579 | 0.060172406  | 0.194277628 | -0.00562701 | 0.90347261 | -0.00675 |
| 0.598037232 | -0.026133565 | 0.573207586 | -0.14009576 | 0.00241047 | -0.04205 |
| 0.988173552 | -0.005608613 | 0.903786658 | 0.125921658 | 0.006435   | 0.062444 |
| 0.298521742 | -0.047138611 | 0.309386992 | -0.0253459  | 0.5848257  | 0.002194 |
| 0.141759234 | -0.063485114 | 0.170802397 | -0.0794149  | 0.08647739 | -0.01517 |
| 0.075755995 | -0.081017246 | 0.080294227 | -0.04482398 | 0.33377193 | 0.020234 |
| 0.766467917 | 0.013529852  | 0.770583034 | -0.00876826 | 0.85010894 | -0.02482 |
| 0.495761837 | -0.044261737 | 0.339876845 | -0.01658398 | 0.72075727 | -0.04894 |
| 2.54E-06    | -0.211114033 | 4.19E-06    | -0.19662905 | 1.87E-05   | 0.021461 |
| 0.066628453 | -0.0824065   | 0.075227648 | -0.09674902 | 0.03661187 | -0.09546 |
| 0.000584703 | 0.142704749  | 0.001991832 | 0.01580166  | 0.73341762 | 0.073025 |
| 0.188875009 | -0.06597776  | 0.154584945 | -0.09445454 | 0.04132314 | -0.01792 |
| 0.000106618 | -0.177534275 | 0.000114812 | -0.09610186 | 0.03789207 | 0.074848 |
| 0.094283111 | -0.073395501 | 0.113199079 | -0.03747288 | 0.4191428  | -0.02114 |
| 0.028750605 | 0.091284201  | 0.048666782 | -0.04761709 | 0.30449637 | -0.01224 |
| 0.022048446 | 0.09445014   | 0.041332651 | -0.01988868 | 0.66814987 | -0.0044  |
| 0.696829301 | -0.016943638 | 0.714962084 | -0.00513347 | 0.91190293 | -0.00783 |
| 0.290042357 | -0.049343545 | 0.28727723  | -0.0023144  | 0.96021743 | 0.038291 |
| 0.587296958 | 0.022846738  | 0.622391853 | -0.03562    | 0.44252551 | -0.05825 |
| 0.006138323 | -0.136917065 | 0.00302833  | -0.10181954 | 0.02779534 | 0.184966 |
| 0.058632778 | -0.092563282 | 0.045582116 | 0.046253336 | 0.31857127 | 0.168725 |
| 0.000247181 | 0.171744316  | 0.00019207  | -0.002847   | 0.9510729  | -0.08821 |
| 1.45E-07    | 0.24347743   | 9.94E-08    | 0.054705799 | 0.23803292 | -0.12828 |
| 0.803295765 | -0.015757692 | 0.734131339 | 0.070855501 | 0.12625972 | 0.083633 |
| 0.841182162 | -0.017625855 | 0.704014692 | -0.28890155 | 1.98E-10   | 0.245109 |
| 7.41E-07    | -0.233208037 | 3.46E-07    | -0.37658311 | 3.50E-17   | 0.189511 |
| 0.174476481 | -0.057946231 | 0.211327616 | 0.024590305 | 0.59607241 | 0.002955 |
| 0.004999541 | 0.125964948  | 0.006416625 | 0.176922735 | 0.00012132 | 0.260051 |
| 5.18E-10    | 0.300206959  | 3.51E-11    | -0.00048968 | 0.99157946 | 0.134567 |
| 9.31E-21    | 0.415316535  | 6.73E-21    | -0.02560686 | 0.58096456 | -0.10823 |
| 0.000280007 | -0.168791931 | 0.000248139 | 0.05343044  | 0.24916888 | -0.11017 |
| 0.366348021 | 0.036021448  | 0.437397177 | -0.05247506 | 0.2577453  | 0.057571 |
| 0.001930885 | -0.148793559 | 0.001260574 | -0.05164009 | 0.26540608 | 0.127705 |
| 0.089125174 | -0.069714424 | 0.132495211 | -0.10027223 | 0.03026865 | 0.066155 |
| 0.998753737 | -0.012581389 | 0.78626167  | -0.09482324 | 0.04053325 | 0.043235 |
| 0.489640171 | -0.029664212 | 0.52251606  | -0.03844478 | 0.40717301 | -0.02004 |
| 0.334911903 | 0.056261426  | 0.224930032 | 0.012487179 | 0.78782386 | 0.042788 |
| 0.32571606  | -0.047005354 | 0.31075821  | -0.04749174 | 0.30577262 | 0.074323 |
| 6.38E-06    | -0.211417012 | 4.05E-06    | 0.067649522 | 0.14437991 | 0.300061 |
| 0.554290422 | -0.026748841 | 0.564208766 | -0.00725687 | 0.87571451 | 0.108913 |
| 0.037013697 | -0.092509338 | 0.045708808 | -0.11869103 | 0.01025409 | -0.10151 |
| 0.029612884 | -0.1059286   | 0.022053435 | -0.07557385 | 0.10286475 | 0.234756 |
| 0.417931464 | 0.046727962  | 0.313625359 | 0.33883052  | 5.22E-14   | 0.195001 |
| 4.00E-13    | -0.331655421 | 1.88E-13    | 0.132060245 | 0.00425343 | 0.107546 |
| 0.001638375 | -0.155512738 | 0.00074573  | -0.2065566  | 6.78E-06   | 0.074784 |

|             |              |             |             |            |          |
|-------------|--------------|-------------|-------------|------------|----------|
| 1.18E-05    | -0.205598911 | 7.50E-06    | 0.027106633 | 0.55900718 | 0.010853 |
| 0.295029119 | -0.057715232 | 0.213156714 | -0.05027189 | 0.27829441 | 0.063506 |
| 0.849201531 | 0.002065297  | 0.964496375 | -0.30000824 | 3.62E-11   | 0.277761 |
| 0.610454922 | -0.023717617 | 0.609182755 | 0.038165758 | 0.41058848 | 0.249704 |
| 0.001471499 | 0.131553157  | 0.004404272 | 0.266744424 | 4.76E-09   | 0.363635 |
| 2.15E-05    | 0.206717781  | 6.67E-06    | -0.20803037 | 5.81E-06   | 0.000484 |
| 0.006152714 | 0.121182886  | 0.008756085 | 0.225900675 | 8.12E-07   | 0.164809 |
| 0.000162331 | -0.173359676 | 0.000166657 | -0.07652581 | 0.09859011 | 0.282072 |
| 0.000889215 | -0.150234166 | 0.001128397 | -0.03679071 | 0.4276661  | -0.05723 |
| 0.004471476 | -0.132809788 | 0.004039016 | -0.00062535 | 0.98924673 | -0.05908 |
| 0.011964322 | 0.109617123  | 0.017805298 | -0.14255476 | 0.00201397 | 0.054727 |
| 0.000563923 | -0.156512343 | 0.000688455 | 0.077865969 | 0.09281326 | 0.10375  |
| 0.092177077 | -0.061512352 | 0.184512787 | 0.002252937 | 0.96127317 | 0.010427 |
| 0.48786689  | -0.036857437 | 0.426827955 | -0.29192581 | 1.26E-10   | 0.144313 |
| 1.57E-06    | 0.220633984  | 1.47E-06    | -0.2798106  | 7.56E-10   | -0.0124  |
| 0.001450928 | 0.144550876  | 0.001737009 | 0.268737875 | 3.62E-09   | 0.371516 |
| 0.044187765 | 0.090495069  | 0.050655631 | -0.14639168 | 0.001513   | 0.003076 |
| 0.008687444 | 0.131796001  | 0.004331442 | -0.22775304 | 6.55E-07   | 0.070984 |
| 0.384288848 | -0.046587239 | 0.315086502 | -0.07409787 | 0.10978147 | 0.083574 |
| 0.000207664 | -0.174834038 | 0.000146247 | 0.005704876 | 0.90214351 | -0.07479 |
| 0.241294328 | -0.050477294 | 0.276332851 | 0.232798566 | 3.63E-07   | 0.419176 |
| 0.928501124 | -0.000858571 | 0.98523666  | -0.01707943 | 0.71277834 | 0.11678  |
| 6.84E-05    | -0.178129337 | 0.000108797 | 0.01990298  | 0.66792551 | 0.124179 |
| 1.20E-05    | -0.201742165 | 1.12E-05    | -0.08364764 | 0.07092419 | 0.09499  |
| 0.114614626 | -0.073057999 | 0.11487076  | -0.02389371 | 0.606527   | -0.05149 |
| 0.000723443 | -0.154316211 | 0.000820078 | 0.079143208 | 0.08756285 | 0.108172 |
| 0.903208247 | -0.003820815 | 0.934370356 | 0.342236734 | 2.81E-14   | 0.130923 |
| 1.41E-06    | 0.210872641  | 4.30E-06    | -0.09880032 | 0.03279402 | 0.012088 |
| 0.732165102 | 0.023292236  | 0.615619244 | -0.17072386 | 0.00020995 | 0.431893 |
| 0.000208105 | -0.187594709 | 4.52E-05    | 0.039723091 | 0.39174295 | 0.061782 |
| 0.024538499 | -0.102207087 | 0.027203788 | 0.043859188 | 0.34429135 | 0.245514 |
| 0.018651443 | -0.11811929  | 0.010628313 | -0.11955415 | 0.00971127 | 0.036004 |
| 0.309865631 | -0.050595421 | 0.275209069 | -0.13167142 | 0.00436867 | 0.318797 |
| 0.09609147  | -0.062764416 | 0.175720159 | -0.14941867 | 0.00120156 | 0.301093 |
| 0.27923272  | 0.044408347  | 0.338278087 | 0.137893658 | 0.00282469 | 0.270393 |
| 0.560387875 | -0.035321817 | 0.446356734 | -0.07932669 | 0.0868286  | 0.139369 |
| 0.014259237 | -0.121271746 | 0.008706466 | 0.019602518 | 0.672646   | -0.08392 |
| 0.84650956  | 0.01689206   | 0.715792149 | -0.25371837 | 2.71E-08   | -0.28864 |
| 0.001401521 | -0.147820673 | 0.001357744 | -0.15381622 | 0.00085313 | 0.002685 |
| 6.76E-09    | 0.266735088  | 4.77E-09    | 0.057938994 | 0.21138475 | 0.245064 |
| 0.084505951 | -0.078790821 | 0.088986978 | 0.068035468 | 0.14209877 | 0.043046 |
| 6.20E-06    | -0.21166711  | 3.94E-06    | -0.0093422  | 0.84042494 | -0.19826 |
| 0.492220448 | 0.033619803  | 0.46858214  | -0.09018055 | 0.05146701 | 0.151901 |
| 0.659058924 | -0.0126509   | 0.785109594 | -0.14875804 | 0.00126401 | 0.06355  |
| 0.000180308 | -0.173796373 | 0.000160349 | -0.14332458 | 0.00190269 | 0.145182 |

|             |              |             |             |            |          |
|-------------|--------------|-------------|-------------|------------|----------|
| 0.568110683 | -0.026764569 | 0.563979634 | 0.208501704 | 5.53E-06   | 0.065597 |
| 0.022798019 | -0.109466873 | 0.017963253 | -0.02486854 | 0.59191957 | 0.065702 |
| 0.097918816 | 0.076325034  | 0.099479688 | 0.054707866 | 0.23801516 | 0.247884 |
| 0.004947466 | -0.132438464 | 0.004143985 | -0.04702739 | 0.31053121 | -0.01312 |
| 0.015150788 | -0.118247675 | 0.010543241 | -0.04496412 | 0.33226121 | 0.024033 |
| 0.08239792  | 0.067293341  | 0.146509838 | -0.00321989 | 0.94467439 | -0.00395 |
| 0.117892876 | 0.069987135  | 0.130983764 | -0.05938669 | 0.20017657 | 0.046615 |
| 1.43E-08    | 0.272331639  | 2.19E-09    | -0.0700532  | 0.13061962 | 0.032646 |
| 0.674129057 | 0.007475666  | 0.871999043 | -0.01465732 | 0.75206669 | 0.044908 |
| 1.12E-08    | 0.262667953  | 8.28E-09    | -0.09825004 | 0.03378327 | 0.095812 |
| 0.003318742 | -0.136879113 | 0.003036506 | 0.034953449 | 0.45111563 | 0.354088 |
| 0.007697287 | 0.128608127  | 0.005379838 | -0.12513446 | 0.00677755 | 0.445784 |
| 2.55E-05    | 0.18409898   | 6.28E-05    | -0.02467783 | 0.59476462 | -0.21989 |
| 0.401464544 | -0.038176373 | 0.410458229 | -0.37660572 | 3.49E-17   | 0.147164 |
| 2.45E-11    | -0.302804724 | 2.33E-11    | -0.01188677 | 0.79779953 | -0.06094 |
| 0.833286137 | -0.019405202 | 0.675753004 | -0.13829666 | 0.00274435 | -0.09283 |
| 0.047449686 | -0.093044433 | 0.044465071 | -0.15840149 | 0.00059119 | -0.08094 |
| 0.346784018 | -0.043015214 | 0.353664513 | -0.05019974 | 0.27898563 | 0.012839 |
| 0.004965691 | 0.125936433  | 0.006428726 | -0.08874273 | 0.05531553 | -0.00433 |
| 0.378774749 | -0.050125387 | 0.279699147 | -0.04063357 | 0.3809716  | 0.079435 |
| 0.529388659 | 0.025076912  | 0.588818236 | -0.12091162 | 0.00890912 | 0.089497 |
| 4.70E-05    | -0.19277309  | 2.74E-05    | -0.24281085 | 1.08E-07   | -0.0017  |
| 0.002281673 | -0.14546884  | 0.001621755 | -0.18928702 | 3.84E-05   | 0.090506 |
| 0.157547039 | -0.06293766  | 0.17452851  | -0.23982806 | 1.56E-07   | -0.03694 |
| 0.495579573 | -0.038586122 | 0.405449413 | -0.1707252  | 0.00020992 | -0.00586 |
| 0.124790448 | -0.074209935 | 0.109243774 | -0.10320468 | 0.02573063 | -0.18366 |
| 0.017671177 | 0.112815901  | 0.014718587 | -0.27570673 | 1.36E-09   | -0.03398 |
| 0.566841014 | -0.022506521 | 0.627585532 | -0.22702314 | 7.13E-07   | -0.0406  |
| 0.104285746 | -0.073610606 | 0.112143647 | -0.18400528 | 6.34E-05   | -0.04712 |
| 0.348106866 | 0.035030254  | 0.45012104  | -0.25593112 | 2.03E-08   | -0.21921 |
| 0.196812336 | -0.085762974 | 0.06405459  | -0.06512732 | 0.15998159 | -0.24633 |
| 0.762838799 | -0.022176391 | 0.632642854 | -0.0954255  | 0.03927043 | -0.04199 |
| 0.01161836  | -0.127572907 | 0.005766454 | -0.14730518 | 0.00141198 | -0.12716 |
| 9.72E-13    | -0.328354166 | 3.35E-13    | -0.00522163 | 0.91039631 | -0.13012 |
| 0.17796314  | 0.036115611  | 0.436199248 | -0.21532076 | 2.66E-06   | 0.071188 |
| 0.001541969 | -0.163531306 | 0.0003876   | -0.21301603 | 3.41E-06   | -0.04303 |
| 0.085021005 | 0.072714536  | 0.116591776 | -0.13895164 | 0.00261821 | -0.15302 |
| 0.987522544 | -0.018891767 | 0.68386347  | -0.25000004 | 4.37E-08   | -0.02154 |
| 0.002360752 | -0.140585196 | 0.002326292 | -0.1345307  | 0.00358326 | -0.15281 |
| 0.094101613 | -0.084710579 | 0.067400541 | -0.16168723 | 0.00045177 | -0.09655 |
| 0.144736471 | 0.054142619  | 0.242906435 | -0.01486145 | 0.74872904 | 0.286089 |
| 4.50E-05    | -0.192024342 | 2.95E-05    | -0.02569641 | 0.57964221 | 0.115462 |
| 1.15E-10    | -0.299110604 | 4.16E-11    | -0.01774148 | 0.70216526 | -0.11882 |
| 0.260409098 | -0.053174269 | 0.251448749 | 0.078097798 | 0.09184199 | -0.1123  |
| 0.003869915 | 0.110068837  | 0.017337698 | -0.17184239 | 0.00019043 | -0.12795 |

|             |              |             |             |            |          |
|-------------|--------------|-------------|-------------|------------|----------|
| 0.086250852 | -0.072949481 | 0.115412353 | -0.08958539 | 0.05303206 | -0.07003 |
| 6.16E-18    | -0.384137437 | 7.20E-18    | 0.060631971 | 0.19088684 | 0.246565 |
| 0.000391132 | -0.163859676 | 0.000377105 | -0.11054317 | 0.01685827 | -0.26293 |
| 0.812129839 | 0.006517339  | 0.888292661 | -0.21621103 | 2.41E-06   | 0.006018 |
| 1.43E-16    | 0.382238632  | 1.08E-17    | -0.06357368 | 0.17020523 | 0.090844 |
| 0.004954409 | 0.125442809  | 0.00664147  | -0.11494134 | 0.01293735 | -0.02317 |
| 2.90E-07    | -0.229013771 | 5.66E-07    | 0.02788239  | 0.54780961 | 0.14006  |
| 0.002759273 | -0.134260722 | 0.003651531 | 0.087536795 | 0.05872502 | -0.06974 |
| 0.006593003 | -0.135795153 | 0.003278684 | -0.11904457 | 0.01002857 | -0.11214 |
| 1.99E-05    | -0.200088533 | 1.32E-05    | -0.10882978 | 0.01864669 | -0.03099 |
| 0.006245852 | -0.126790304 | 0.006075111 | -0.0247058  | 0.59434697 | -0.01992 |
| 0.77585706  | 0.009778018  | 0.833087416 | -0.05380569 | 0.24585532 | 0.076895 |
| 8.37E-35    | -0.53043776  | 3.02E-35    | 0.012622356 | 0.78558261 | 0.251078 |
| 0.084321989 | 0.06787014   | 0.143072544 | -0.10691928 | 0.0208339  | -0.0209  |
| 1.65E-10    | -0.278079725 | 9.70E-10    | 0.016165866 | 0.72751439 | 0.148766 |
| 0.001869449 | -0.140104913 | 0.002408875 | 0.027343597 | 0.55557504 | 0.163996 |
| 0.166823506 | -0.058678744 | 0.205602281 | -0.08154612 | 0.07833378 | -0.10095 |
| 0.463368525 | 0.042507657  | 0.359378099 | 0.143582197 | 0.00186673 | 0.135905 |
| 6.16E-05    | 0.176913433  | 0.00012142  | 0.008517938 | 0.85433964 | 0.108077 |
| 0.248265482 | -0.050578796 | 0.275367036 | -0.09887072 | 0.03266927 | 0.052057 |
| 0.015590759 | 0.128842133  | 0.005295745 | 0.025778688 | 0.57842857 | 0.106331 |
| 0.001031535 | -0.153120484 | 0.000901174 | -0.0411096  | 0.37541286 | 0.134386 |
| 0.514805314 | -0.042167218 | 0.363242642 | -0.00333842 | 0.94264107 | 0.120498 |
| 0.813517781 | 0.022769051  | 0.623576171 | 0.002208633 | 0.96203415 | -0.11212 |
| 0.359992188 | 0.038529882  | 0.406134731 | -0.09382586 | 0.04269999 | -0.00346 |
| 0.976431003 | 0.00038323   | 0.99340996  | 0.157726227 | 0.00062439 | -0.13118 |
| 0.649616188 | -0.012222561 | 0.792216272 | -0.14571216 | 0.0015924  | -0.03063 |
| 7.40E-06    | -0.205407132 | 7.65E-06    | -0.20895353 | 5.27E-06   | 0.309856 |
| 0.726478274 | 0.000301706  | 0.994811825 | -0.03500552 | 0.45044117 | -0.00868 |
| 0.365829696 | 0.052869053  | 0.254183999 | -0.21255289 | 3.59E-06   | -0.13505 |
| 0.000122913 | 0.185960681  | 5.27E-05    | -0.1769129  | 0.00012143 | 0.109495 |
| 0.000673888 | -0.151864998 | 0.000994247 | 0.018283653 | 0.69351671 | 0.118538 |
| 0.005362835 | -0.124227867 | 0.007192205 | 0.04307056  | 0.35304495 | 0.01538  |
| 2.11E-10    | -0.289114823 | 1.92E-10    | 0.111244369 | 0.0161708  | 0.077175 |
| 0.052492644 | -0.087670414 | 0.058338876 | 0.067433961 | 0.1456661  | 0.198896 |
| 8.51E-05    | -0.17908335  | 9.98E-05    | -0.07890698 | 0.0885155  | -0.04402 |
| 5.26E-06    | -0.214699442 | 2.84E-06    | 0.106862598 | 0.02090207 | 0.031773 |
| 0.128202905 | 0.071695236  | 0.121818274 | -0.0111667  | 0.80980687 | 0.00431  |
| 0.714069072 | 0.018459923  | 0.690713391 | -0.0640948  | 0.16672299 | -0.02841 |
| 0.054041564 | -0.095431925 | 0.039257133 | -0.10826634 | 0.01926991 | 0.028644 |
| 0.001490373 | -0.154526036 | 0.000806563 | -0.18744832 | 4.58E-05   | 0.000555 |
| 2.01E-10    | -0.289582267 | 1.79E-10    | -0.09741346 | 0.03533587 | -0.12943 |
| 0.069647044 | -0.084448277 | 0.068256448 | 0.053562916 | 0.24799553 | 0.151749 |
| 0.559296025 | 0.029672719  | 0.522396754 | -0.14958977 | 0.00118586 | -0.25672 |
| 0.014183614 | 0.121127982  | 0.008786869 | 0.033521537 | 0.4698837  | -0.32184 |

|             |              |             |             |            |          |
|-------------|--------------|-------------|-------------|------------|----------|
| 0.723163596 | -0.010769235 | 0.816453998 | -0.03876836 | 0.40323351 | -0.00547 |
| 0.034548963 | -0.113176144 | 0.014402305 | -0.03829228 | 0.4090377  | 0.168566 |
| 3.42E-08    | 0.246910251  | 6.47E-08    | 0.068962713 | 0.13673113 | 0.097987 |
| 5.73E-05    | 0.15841077   | 0.000590742 | 0.157333049 | 0.00064451 | 0.183678 |
| 1.45E-07    | 0.22024108   | 1.54E-06    | -0.18093176 | 8.42E-05   | 0.004108 |
| 2.25E-09    | -0.269919501 | 3.07E-09    | -0.01539185 | 0.74007884 | 0.157701 |
| 7.54E-05    | -0.185439057 | 5.54E-05    | 0.057765556 | 0.21275727 | 0.169946 |
| 0.222710662 | -0.058000858 | 0.210896722 | -0.11075751 | 0.01664546 | 0.108334 |
| 0.873125575 | -2.37E-05    | 0.999592251 | 0.027063906 | 0.55962713 | -0.00047 |
| 1.38E-05    | 0.208307727  | 5.64E-06    | 0.182592778 | 7.23E-05   | -0.08709 |
| 0.013549145 | 0.115133295  | 0.012786253 | 0.032254305 | 0.48684578 | 0.15082  |
| 0.002593964 | -0.144460675 | 0.00174873  | -0.26523599 | 5.85E-09   | 0.145378 |
| 0.067391934 | 0.100432958  | 0.030003253 | 0.389001135 | 2.55E-18   | -0.05646 |
| 1.73E-06    | 0.218131876  | 1.95E-06    | 0.180594261 | 8.69E-05   | -0.16879 |
| 0.722401622 | 0.011064943  | 0.81150733  | -0.00712796 | 0.87790495 | 0.167812 |
| 0.773362318 | 0.013498649  | 0.771097385 | 0.022554741 | 0.62684828 | -0.05265 |
| 0.013740074 | -0.113263309 | 0.01432668  | -0.17778264 | 0.00011226 | 0.010395 |
| 1.70E-06    | -0.224243353 | 9.81E-07    | -0.05855537 | 0.20655863 | -0.09115 |
| 0.008631674 | 0.125901404  | 0.006443619 | -0.05842751 | 0.20755317 | 0.077812 |
| 0.000171716 | 0.185036737  | 5.75E-05    | -0.08858401 | 0.05575466 | -0.15979 |
| 0.216424884 | -0.077068086 | 0.096219023 | 0.127694558 | 0.00571976 | -0.1642  |
| 3.04E-08    | -0.253028273 | 2.96E-08    | 0.024433387 | 0.5984203  | 0.272516 |
| 2.59E-11    | -0.297177731 | 5.62E-11    | -0.02329829 | 0.61552736 | -0.0311  |
| 2.03E-07    | 0.251858284  | 3.44E-08    | 0.144373031 | 0.00176019 | -0.00882 |
| 5.64E-06    | -0.210308377 | 4.56E-06    | -0.1864821  | 5.02E-05   | 0.281088 |
| 3.76E-09    | 0.259617149  | 1.25E-08    | 0.125648612 | 0.00655202 | -0.16827 |
| 0.005250292 | -0.123124599 | 0.007727344 | -0.20874921 | 5.38E-06   | -0.0255  |
| 7.52E-06    | 0.214927452  | 2.77E-06    | -0.00669499 | 0.88526846 | 0.164137 |
| 0.127641974 | -0.057474993 | 0.215071034 | -0.12397096 | 0.00731377 | 0.154038 |
| 0.244775878 | -0.072613514 | 0.117101802 | 0.046850219 | 0.31235957 | 0.146321 |
| 0.934932177 | 0.004532115  | 0.922188101 | -0.06085073 | 0.18928808 | 0.033638 |
| 1.48E-09    | -0.27187734  | 2.34E-09    | -0.22250316 | 1.20E-06   | -0.19815 |
| 0.002575008 | 0.134139208  | 0.00368264  | -0.09397144 | 0.04237778 | 0.058828 |
| 1.02E-06    | 0.22665434   | 7.44E-07    | 0.069812443 | 0.13195042 | -0.15437 |
| 0.718997887 | 0.008106722  | 0.861298776 | -0.19036464 | 3.46E-05   | -0.13473 |
| 2.35E-19    | -0.407099037 | 4.55E-20    | -0.02641974 | 0.56901368 | -0.09078 |
| 0.000151573 | -0.168697499 | 0.000250163 | 0.060515908 | 0.19173906 | -0.11298 |
| 2.87E-05    | -0.191702103 | 3.04E-05    | -0.17220335 | 0.0001845  | 0.044883 |
| 0.315251294 | -0.025204761 | 0.586919069 | 0.026635609 | 0.56585976 | -0.1925  |
| 0.440302993 | 0.038614275  | 0.405106614 | -0.02173533 | 0.63942634 | 0.334553 |
| 0.000242899 | -0.160708552 | 0.000489714 | 0.063605366 | 0.16999194 | 0.086184 |
| 0.037051075 | -0.10122139  | 0.028730064 | 0.017842382 | 0.70055275 | -0.13396 |
| 1.67E-06    | 0.222213269  | 1.23E-06    | 0.030853876 | 0.50596775 | -0.19149 |
| 1.23E-10    | 0.28986633   | 1.72E-10    | -0.02643894 | 0.56873279 | -0.27031 |
| 0.238783258 | 0.041897381  | 0.366324086 | -0.08284217 | 0.07369345 | 0.095653 |



|             |              |             |             |            |          |
|-------------|--------------|-------------|-------------|------------|----------|
| 0.088465219 | 0.077383336  | 0.094861655 | 0.089707067 | 0.0527089  | 0.095149 |
| 9.39E-06    | -0.197700164 | 1.68E-05    | 0.043045728 | 0.35332285 | 0.070659 |
| 0.933192509 | -0.011623828 | 0.80217881  | 0.230616408 | 4.69E-07   | 0.114532 |
| 0.210387937 | 0.072689076  | 0.116720153 | -0.18350589 | 6.64E-05   | -0.06319 |
| 9.80E-07    | 0.228555508  | 5.97E-07    | -0.21141178 | 4.05E-06   | -0.0065  |
| 0.764455946 | -0.007379417 | 0.873633145 | -0.09712237 | 0.03589015 | -0.13515 |
| 2.95E-07    | -0.238449424 | 1.84E-07    | -0.12138906 | 0.00864134 | -0.05303 |
| 2.60E-06    | -0.221828168 | 1.29E-06    | -0.00553419 | 0.90505734 | 0.169094 |
| 0.01551847  | -0.111990891 | 0.015466004 | -0.18183539 | 7.75E-05   | -0.12052 |
| 0.003184878 | -0.136226772 | 0.003180225 | -0.25325827 | 2.87E-08   | -0.18409 |
| 0.009242108 | -0.12823931  | 0.005514818 | -0.08983199 | 0.05237883 | 0.141059 |
| 0.659005641 | 0.023632887  | 0.610462429 | -0.17621629 | 0.00012926 | -0.037   |
| 4.34E-05    | -0.189168634 | 3.88E-05    | -0.04921144 | 0.28857117 | 0.308415 |
| 0.004100968 | 0.118620184  | 0.010299814 | -0.02651614 | 0.56760414 | -0.1787  |
| 0.017743196 | 0.106744136  | 0.021045145 | 0.159789712 | 0.00052801 | 0.078511 |
| 0.29880269  | 0.052815844  | 0.254662948 | -0.00492069 | 0.91554054 | 0.191931 |
| 3.67E-09    | -0.267965919 | 4.02E-09    | 0.058837544 | 0.20437606 | 0.108727 |
| 0.037837065 | 0.113092628  | 0.014475093 | -0.29697869 | 5.80E-11   | -0.03531 |
| 0.022822854 | 0.103044803  | 0.025961991 | -0.22888177 | 5.75E-07   | 0.133868 |
| 0.000859314 | -0.16441788  | 0.00035987  | -0.1820406  | 7.61E-05   | 0.102396 |
| 0.00430783  | -0.134679939 | 0.003546027 | -0.19392849 | 2.45E-05   | 0.025238 |
| 0.120289859 | -0.081099157 | 0.079988022 | -0.05773288 | 0.21301659 | 0.230036 |
| 0.000804325 | -0.151135719 | 0.001052306 | 0.062724651 | 0.17599453 | 0.176607 |
| 0.130993583 | 0.058053107  | 0.210485188 | -0.20638051 | 6.91E-06   | 0.219407 |
| 6.58E-10    | 0.269966597  | 3.05E-09    | 0.054059568 | 0.243631   | 0.189157 |
| 3.56E-14    | 0.331733067  | 1.85E-13    | -0.30098914 | 3.10E-11   | 0.050166 |
| 0.167200612 | -0.065430695 | 0.158040383 | -0.17265448 | 0.00017734 | 0.270868 |
| 0.069485025 | -0.07996846  | 0.084299349 | 0.037444762 | 0.4194921  | -0.14501 |
| 0.272894741 | -0.046023532 | 0.320984171 | -0.04843886 | 0.29621691 | -0.12862 |
| 0.770042274 | 0.006557592  | 0.887607275 | -0.05194607 | 0.26258076 | -0.0444  |
| 2.07E-19    | 0.409033255  | 2.91E-20    | -0.07481049 | 0.10639756 | 0.087433 |
| 0.36285788  | 0.042528962  | 0.359137118 | 0.059850975 | 0.19667528 | -0.02365 |
| 0.102682791 | -0.068458091 | 0.139632617 | -0.18439418 | 6.11E-05   | -0.06187 |
| 0.7221701   | -0.020689804 | 0.655626178 | 0.152882937 | 0.00091814 | 0.181364 |
| 1.03E-11    | -0.304031788 | 1.92E-11    | 0.073460419 | 0.11287974 | 0.192682 |
| 0.004201573 | 0.135702475  | 0.003300183 | -0.25457527 | 2.42E-08   | -0.02529 |
| 1.87E-06    | -0.21779589  | 2.02E-06    | -0.15489345 | 0.00078339 | 0.043049 |
| 0.21540711  | 0.053118997  | 0.251942552 | -0.28721041 | 2.55E-10   | -0.03216 |
| 0.422775488 | 0.04756699   | 0.305006029 | -0.07541234 | 0.10360433 | -0.17037 |
| 0.105637289 | -0.074734295 | 0.106755407 | -0.03965572 | 0.3925472  | -0.00664 |
| 0.754086657 | 0.016232542  | 0.7264354   | -0.07326479 | 0.11384423 | 0.014563 |
| 0.001858263 | -0.148665229 | 0.001273014 | 0.091086169 | 0.04915964 | 0.199293 |
| 3.03E-07    | -0.237171265 | 2.15E-07    | -0.06073031 | 0.19016696 | -0.09352 |
| 2.07E-34    | -0.520586199 | 8.55E-34    | 0.034776182 | 0.45341589 | 0.210821 |
| 2.02E-17    | -0.374555348 | 5.32E-17    | 0.145061187 | 0.00167204 | 0.174248 |

|             |              |             |             |            |          |
|-------------|--------------|-------------|-------------|------------|----------|
| 3.60E-17    | -0.369669978 | 1.44E-16    | -0.01898432 | 0.68239869 | -0.01058 |
| 2.61E-05    | -0.198495606 | 1.55E-05    | 0.106591349 | 0.02123094 | 0.089629 |
| 1.92E-14    | -0.339944581 | 4.26E-14    | 0.006977555 | 0.88046169 | 0.122322 |
| 0.009763463 | 0.122942944  | 0.007818788 | -0.21264225 | 3.55E-06   | 0.142725 |
| 0.34602892  | 0.044550337  | 0.336734302 | 0.138767104 | 0.00265321 | -0.0438  |
| 1.80E-07    | -0.234617328 | 2.92E-07    | 0.008255954 | 0.85877201 | 0.154139 |
| 0.227525682 | -0.059965868 | 0.195815792 | -0.01628272 | 0.72562375 | 0.154248 |
| 0.872725766 | -0.01802975  | 0.697562002 | -0.15530498 | 0.00075817 | -0.13436 |
| 0.01956134  | -0.111328899 | 0.016089607 | 0.005113612 | 0.91224231 | 0.283767 |
| 0.022526122 | 0.097969807  | 0.03429674  | -0.09807045 | 0.03411157 | -0.01067 |
| 5.89E-05    | -0.184402581 | 6.10E-05    | 0.128916063 | 0.00526943 | -0.08815 |
| 0.698020754 | -0.031903615 | 0.491597399 | 0.051177506 | 0.26971691 | -0.06509 |
| 0.020767318 | -0.1165285   | 0.011734016 | -0.00683759 | 0.88284208 | 0.058196 |
| 0.511183305 | 0.023300392  | 0.615495554 | 0.036383525 | 0.43280119 | -0.03835 |
| 0.00494961  | -0.126475918 | 0.006203224 | -0.16600695 | 0.00031474 | 0.044416 |
| 0.336024527 | 0.046081272  | 0.320376797 | -0.03189802 | 0.4916734  | -0.03403 |
| 0.19994406  | 0.051230135  | 0.269224061 | 0.102976602 | 0.02606123 | 0.062949 |
| 0.216000685 | 0.050449761  | 0.276595237 | 0.121472411 | 0.00859534 | 0.382216 |
| 0.009817142 | 0.118410435  | 0.01043626  | 0.157572235 | 0.0006322  | 0.424265 |
| 0.156824079 | 0.057678628  | 0.213447595 | 0.179308104 | 9.77E-05   | 0.032878 |
| 0.935708362 | -0.001561177 | 0.973158694 | -0.00434841 | 0.92533276 | -0.11332 |
| 0.038072246 | -0.097297133 | 0.035556491 | -0.00914511 | 0.8437477  | -0.08141 |
| 0.536135439 | 0.02288509   | 0.621807542 | -0.06153986 | 0.18431617 | 0.011193 |
| 0.919512648 | -0.015056198 | 0.745549217 | -0.11108677 | 0.01632314 | 0.030104 |
| 0.522867216 | -0.038965034 | 0.400850107 | -0.01974171 | 0.67045753 | 0.099461 |
| 0.073961858 | -0.077281064 | 0.095300321 | 0.046800155 | 0.31287751 | -0.11241 |
| 0.092671527 | -0.0768988   | 0.096954284 | -0.01688527 | 0.71590141 | 0.038116 |
| 0.104227103 | -0.076022823 | 0.100830736 | -0.18039829 | 8.85E-05   | 0.09748  |
| 0.577430388 | -0.014835857 | 0.74914726  | -0.01574538 | 0.73433124 | -0.00553 |
| 0.08221528  | 0.078545266  | 0.089990316 | 0.06364817  | 0.16970416 | -0.09306 |
| 0.002761809 | 0.151650644  | 0.001010998 | 0.118506905 | 0.01037331 | -0.0151  |
| 3.87E-05    | -0.186729905 | 4.90E-05    | -0.0071256  | 0.87794508 | 0.253199 |
| 0.052340362 | 0.090045578  | 0.051818512 | -0.05653271 | 0.22269868 | -0.03046 |
| 1.48E-13    | -0.335354661 | 9.75E-14    | -0.17196645 | 0.00018837 | -0.11346 |
| 2.76E-05    | -0.195327479 | 2.13E-05    | -0.1531971  | 0.00089576 | -0.08132 |
| 0.270610713 | 0.051397852  | 0.267657561 | -0.09598755 | 0.03812212 | -0.05271 |
| 0.007087432 | -0.127054023 | 0.005969482 | -0.07784305 | 0.09290973 | -0.07507 |
| 0.530151961 | 0.036816929  | 0.427336635 | -0.18932412 | 3.83E-05   | 0.144859 |
| 0.644175026 | 0.014595579  | 0.753077086 | 0.02446149  | 0.59799951 | 0.013407 |
| 0.006114784 | 0.134404284  | 0.003615085 | 0.072813491 | 0.11609388 | -0.02517 |
| 0.183701731 | -0.043379432 | 0.349599959 | 0.058669365 | 0.20567488 | -0.04618 |
| 0.591753676 | -0.020459754 | 0.659212801 | 0.078304009 | 0.09098491 | 0.02223  |
| 0.167134002 | 0.079314369  | 0.086877761 | -0.12283421 | 0.00787399 | 0.00331  |
| 0.01234313  | 0.110716205  | 0.016686291 | 0.091399598 | 0.0483815  | -0.21731 |
| 0.022473649 | 0.110463458  | 0.016938021 | 0.162235352 | 0.00043173 | 0.116306 |

|             |              |             |             |            |          |
|-------------|--------------|-------------|-------------|------------|----------|
| 0.093705081 | -0.082387072 | 0.075296664 | 0.079848407 | 0.08476791 | 0.161337 |
| 5.36E-15    | 0.342509612  | 2.67E-14    | -0.22711786 | 7.05E-07   | 0.161252 |
| 6.00E-06    | 0.192117473  | 2.92E-05    | -0.02340927 | 0.61384541 | 0.121759 |
| 0.01268448  | -0.117298755 | 0.011186538 | -0.04474062 | 0.33467255 | -0.08726 |
| 0.561416459 | -0.027647105 | 0.551194101 | 0.108217483 | 0.01932479 | 0.11234  |
| 0.418966347 | -0.031446044 | 0.497834306 | 0.057268519 | 0.21672614 | -0.19603 |
| 0.394302537 | -0.043615535 | 0.346980984 | -0.08902574 | 0.05453968 | -0.09731 |
| 0.110005627 | -0.07818768  | 0.091467621 | 0.01823912  | 0.6942256  | 0.116767 |
| 3.41E-05    | 0.194358039  | 2.34E-05    | 0.071969024 | 0.1203968  | -0.01508 |
| 0.065154907 | -0.058094739 | 0.210157688 | -0.08504981 | 0.0663067  | 0.005572 |
| 0.202337645 | 0.063213536  | 0.172643334 | -0.04830695 | 0.29753569 | 0.210744 |
| 0.005677067 | 0.128041851  | 0.005588329 | -0.06468279 | 0.16285835 | 0.553108 |
| 0.008934962 | -0.124763469 | 0.006944568 | 0.092626626 | 0.04543372 | -0.12033 |
| 8.46E-07    | -0.215944321 | 2.48E-06    | 0.092409903 | 0.04594312 | -0.04735 |
| 0.01775899  | -0.1168243   | 0.011521028 | -0.06023073 | 0.19384489 | 0.045748 |
| 0.011169211 | 0.104557453  | 0.02384317  | -0.09502939 | 0.04009718 | 0.121503 |
| 1.12E-11    | -0.310020371 | 7.33E-12    | 0.060554472 | 0.19145559 | -0.01235 |
| 0.894935235 | -0.004350202 | 0.925302065 | 0.048170433 | 0.29890464 | -0.17818 |
| 0.921374362 | -0.001647664 | 0.971672342 | 0.043755338 | 0.34543611 | 0.218152 |
| 2.52E-05    | 0.183394432  | 6.71E-05    | -0.28134674 | 6.05E-10   | -0.04116 |
| 1.79E-06    | -0.218195057 | 1.94E-06    | -0.00159605 | 0.97255945 | -0.18952 |
| 2.34E-06    | 0.211257418  | 4.12E-06    | 0.043703681 | 0.34600643 | 0.304049 |
| 0.000640415 | -0.162118923 | 0.000435919 | -0.05731308 | 0.21636818 | -0.00466 |
| 0.001316742 | -0.143595594 | 0.001864878 | 0.019814902 | 0.66930793 | 0.104601 |
| 2.79E-06    | -0.197236673 | 1.76E-05    | -0.15454387 | 0.00080542 | 0.0898   |
| 0.40908138  | -0.039460962 | 0.394877876 | 0.008053584 | 0.86219884 | 0.003788 |
| 3.10E-07    | 0.244216775  | 9.06E-08    | 0.048317434 | 0.29743071 | 0.071712 |
| 0.229486865 | -0.057714432 | 0.213163068 | 0.013327292 | 0.77392387 | -0.00672 |
| 3.85E-06    | -0.204392296 | 8.50E-06    | -0.02181381 | 0.63821711 | 0.262399 |
| 0.994285365 | -0.008385956 | 0.856572018 | 0.084808447 | 0.06708346 | -0.12007 |
| 0.475420972 | -0.024815983 | 0.59270303  | 0.114544153 | 0.01325501 | 0.163032 |
| 0.535621622 | 0.044401095  | 0.338357046 | 0.111053429 | 0.01635553 | 0.049589 |
| 1.83E-06    | -0.221600022 | 1.32E-06    | -0.18774926 | 4.45E-05   | 0.33941  |
| 0.257810217 | -0.053542929 | 0.248172307 | 0.017684275 | 0.70308004 | -0.07207 |
| 3.34E-07    | -0.230112793 | 4.98E-07    | -0.0850824  | 0.06620236 | -0.15592 |
| 4.93E-05    | -0.187502047 | 4.56E-05    | -0.05819344 | 0.20938274 | -0.02418 |
| 0.176917727 | -0.064195697 | 0.166054982 | -0.01983616 | 0.66897418 | -0.2212  |
| 0.077853045 | -0.087470428 | 0.058917597 | 0.196994119 | 1.80E-05   | -0.09883 |
| 1.54E-05    | -0.206508386 | 6.82E-06    | 0.022903663 | 0.62152466 | 0.000541 |
| 0.000171244 | 0.172734896  | 0.000176087 | -0.05128074 | 0.26875073 | -0.04629 |
| 0.10924178  | -0.079877614 | 0.084653728 | -0.09718722 | 0.03576602 | 0.068406 |
| 7.62E-07    | -0.220318304 | 1.53E-06    | 0.224297877 | 9.75E-07   | 0.231826 |
| 2.36E-06    | -0.207188711 | 6.35E-06    | 0.033488459 | 0.47032229 | 0.103778 |
| 0.000761207 | -0.162271463 | 0.000430443 | 0.089443118 | 0.05341198 | -0.0035  |
| 0.594387143 | -0.033864877 | 0.465344741 | -0.13597185 | 0.00323805 | -0.17698 |

|             |              |             |             |            |          |
|-------------|--------------|-------------|-------------|------------|----------|
| 0.094507058 | 0.070034089  | 0.130724881 | -0.12180508 | 0.00841389 | 0.174998 |
| 0.014244934 | -0.120224028 | 0.009307743 | -0.02199643 | 0.63540705 | -0.09298 |
| 6.60E-06    | 0.209691454  | 4.87E-06    | 0.12292798  | 0.00782636 | 0.150528 |
| 0.015388465 | -0.112713628 | 0.014809484 | -0.0425772  | 0.35859182 | -0.11588 |
| 0.017103998 | -0.103164786 | 0.025788196 | -0.12832184 | 0.00548435 | 0.166402 |
| 0.001363661 | -0.146203876 | 0.001534573 | 0.115746489 | 0.01231395 | 0.157263 |
| 0.000679372 | 0.159887504  | 0.00052381  | -0.12449867 | 0.00706603 | 0.120308 |
| 0.006376125 | -0.1286562   | 0.005362465 | -0.07734448 | 0.09502811 | 0.025835 |
| 0.412046772 | -0.033671865 | 0.46789338  | -0.12617735 | 0.00632713 | 0.042035 |
| 6.62E-06    | -0.204722929 | 8.21E-06    | -0.13139541 | 0.00445217 | 0.14631  |
| 0.706904249 | 0.013246902  | 0.775250903 | -0.02034687 | 0.66097564 | 0.079062 |
| 0.344833488 | 0.041111116  | 0.375394724 | -0.14016714 | 0.00239803 | -0.07547 |
| 0.118909322 | -0.075721796 | 0.102190937 | -0.02989136 | 0.51933516 | 0.050619 |
| 0.592818544 | 0.036644184  | 0.429509867 | -0.0721181  | 0.11962829 | 0.022086 |
| 0.805423072 | -0.001301203 | 0.977627145 | 0.052050028 | 0.2616256  | 0.041871 |
| 0.64015893  | -0.024349069 | 0.599683653 | 0.00017861  | 0.99692859 | 0.094971 |
| 0.217686277 | 0.03851751   | 0.406285584 | 0.219412035 | 1.69E-06   | 0.21098  |
| 0.110697191 | -0.075398373 | 0.103668509 | 0.006068848 | 0.89593459 | 0.021361 |
| 0.170742255 | -0.059582231 | 0.198696442 | 0.078335172 | 0.09085595 | -0.01338 |
| 0.289908996 | 0.04812853   | 0.299325678 | -0.05831647 | 0.20841961 | 0.043428 |
| 0.731971585 | -0.028784376 | 0.534930512 | 3.50E-05    | 0.99939859 | 0.132445 |
| 0.000842127 | 0.173336917  | 0.000166992 | -0.15394617 | 0.00084442 | -0.02169 |
| 0.785616703 | -0.022142626 | 0.633161092 | -0.01012592 | 0.82724045 | 0.327907 |
| 6.22E-07    | -0.22690336  | 7.23E-07    | 0.013737904 | 0.76715604 | 0.032431 |
| 1.04E-07    | -0.231472034 | 4.25E-07    | 0.043337616 | 0.35006511 | 0.218743 |
| 0.052484593 | 0.111449058  | 0.015974806 | -0.0547204  | 0.23790748 | -0.02328 |
| 2.01E-11    | -0.310890367 | 6.36E-12    | 0.055264342 | 0.2332679  | 0.205374 |
| 0.005013438 | -0.119544825 | 0.009716998 | -0.03776311 | 0.41554696 | 0.075605 |
| 0.935012709 | 0.00619407   | 0.893799912 | 0.041597206 | 0.369771   | 0.024241 |
| 0.928326676 | -0.007016518 | 0.879799228 | 0.10426403  | 0.02424208 | 0.332886 |
| 0.001154034 | -0.149940532 | 0.001154255 | -0.03284363 | 0.47891689 | 0.139104 |
| 1.39E-12    | -0.318801457 | 1.72E-12    | -0.02083944 | 0.65329743 | 0.26098  |
| 0.219441876 | 0.05269191   | 0.255780931 | -0.13737691 | 0.00293084 | -0.04734 |
| 0.02534594  | 0.111505575  | 0.015921058 | 0.056969849 | 0.21913643 | -0.04261 |
| 7.13E-06    | -0.204411196 | 8.48E-06    | 0.147454919 | 0.00139602 | -0.02492 |
| 0.266053466 | -0.038980347 | 0.400664891 | -0.01241647 | 0.78899693 | 0.11959  |
| 0.131844787 | 0.073420822  | 0.113074435 | -0.02765596 | 0.55106656 | -0.05197 |
| 0.420804956 | 0.044848487  | 0.333507399 | -0.03056969 | 0.50989569 | 0.13571  |
| 0.00960551  | -0.12561879  | 0.006564912 | -0.07092534 | 0.12588559 | 0.066296 |
| 0.001829001 | 0.135701005  | 0.003300525 | -0.14944405 | 0.00119922 | 0.16034  |
| 0.000472191 | -0.158419855 | 0.000590307 | -0.0415435  | 0.37038977 | -0.00621 |
| 0.434007701 | 0.036778494  | 0.427819621 | -0.02830618 | 0.54173954 | 0.115152 |
| 0.160266243 | -0.06706181  | 0.147907173 | -0.0619886  | 0.18113084 | -0.03138 |
| 0.005712374 | -0.125169906 | 0.006761776 | 0.031850483 | 0.49231947 | 0.244928 |
| 0.257444141 | -0.045601659 | 0.325444653 | 0.108780303 | 0.01870071 | -0.01882 |

|             |              |             |             |            |          |
|-------------|--------------|-------------|-------------|------------|----------|
| 0.000149427 | 0.168655208  | 0.000251075 | 0.268986216 | 3.50E-09   | 0.013807 |
| 5.28E-09    | -0.261038996 | 1.03E-08    | 0.129148799 | 0.00518733 | -0.00933 |
| 0.002768262 | 0.129977491  | 0.004904307 | -0.13346232 | 0.00386037 | -0.13551 |
| 0.011190629 | 0.116189094  | 0.011982685 | 0.055663813 | 0.22990157 | 0.095588 |
| 0.002180827 | 0.137106355  | 0.002987846 | 0.01273716  | 0.78368056 | -0.23531 |
| 0.057679149 | 0.087121652  | 0.059938254 | 0.074295237 | 0.10883588 | -0.06342 |
| 2.24E-05    | -0.201103982 | 1.19E-05    | 0.044548554 | 0.33675366 | 0.249471 |
| 4.44E-09    | -0.273811185 | 1.78E-09    | -0.14430423 | 0.00176923 | 0.016632 |
| 0.116465819 | -0.08088327  | 0.080797109 | 0.060438854 | 0.19230638 | -0.16479 |
| 0.04647836  | 0.092008368  | 0.046899583 | 0.162320628 | 0.00042869 | -0.05119 |
| 3.07E-15    | -0.341284874 | 3.34E-14    | -0.03974849 | 0.39143997 | 0.208478 |
| 3.86E-07    | 0.223879283  | 1.02E-06    | -0.09882125 | 0.03275688 | -0.30315 |
| 0.892942777 | -0.014156364 | 0.760277006 | -0.13637794 | 0.00314638 | -0.08015 |
| 0.190773305 | 0.059182085  | 0.201733835 | 0.123145152 | 0.00771706 | 0.13914  |
| 0.343749245 | -0.037086446 | 0.423958738 | -0.16645672 | 0.00030296 | 0.036321 |
| 0.041390744 | 0.080970073  | 0.080471002 | -0.09128216 | 0.04867183 | -0.21422 |
| 0.001021806 | 0.151352327  | 0.001034743 | -0.1814687  | 8.02E-05   | 0.112255 |
| 0.790308233 | -0.021152555 | 0.648435604 | -0.15973095 | 0.00053056 | 0.142175 |
| 1.41E-16    | -0.364449708 | 4.08E-16    | 0.031757543 | 0.49358388 | 0.286511 |
| 1.25E-08    | -0.240357535 | 1.46E-07    | 0.085446229 | 0.06504694 | -0.15053 |
| 1.07E-05    | 0.206586602  | 6.76E-06    | 0.074697325 | 0.10692937 | 0.116101 |
| 1.96E-11    | -0.300588315 | 3.30E-11    | -0.12679238 | 0.00607427 | -0.08742 |
| 0.000193959 | -0.161951316 | 0.000442011 | -0.040521   | 0.38229345 | -0.05188 |
| 0.004879631 | 0.133302056  | 0.003903569 | -0.16215947 | 0.00043446 | -0.00198 |
| 3.62E-09    | -0.253425674 | 2.81E-08    | -0.14897991 | 0.00124271 | -0.24417 |
| 0.939835464 | -0.001431693 | 0.975384185 | -0.14223296 | 0.00206222 | 0.022177 |
| 0.954578356 | 0.001281495  | 0.977965919 | -0.0970639  | 0.03600237 | 0.234236 |
| 4.44E-06    | -0.215201993 | 2.69E-06    | -0.24856623 | 5.24E-08   | 0.149702 |
| 0.55199827  | 0.018388142  | 0.691854449 | -0.03241749 | 0.48464322 | -0.01945 |
| 0.000657359 | -0.165932304 | 0.000316736 | -0.03903768 | 0.39997194 | 0.080446 |
| 0.165575924 | -0.054811968 | 0.237121941 | -0.03474899 | 0.45376931 | -0.1617  |
| 9.50E-20    | -0.414950789 | 7.33E-21    | -0.01243854 | 0.78863077 | 0.050258 |
| 4.81E-08    | -0.245794766 | 7.44E-08    | -0.01688895 | 0.71584221 | 0.084509 |
| 0.096922809 | -0.063170553 | 0.172936049 | 0.0181962   | 0.69490907 | 0.142838 |
| 7.97E-25    | -0.446273459 | 3.08E-24    | -0.12492385 | 0.00687192 | 0.005122 |
| 0.008965453 | -0.115548778 | 0.012464525 | -0.28387477 | 4.18E-10   | 0.03337  |
| 0.575330609 | -0.032285807 | 0.486420169 | 0.075637023 | 0.1025766  | 0.031065 |
| 0.00015962  | -0.169217914 | 0.000239199 | -0.1075547  | 0.02008292 | -0.02103 |
| 0.002636337 | 0.15336228   | 0.0008842   | 0.183787138 | 6.47E-05   | 0.232706 |
| 1.86E-05    | -0.190388025 | 3.45E-05    | 0.009822933 | 0.83233204 | 0.12194  |
| 3.72E-06    | 0.212288243  | 3.69E-06    | -0.18760037 | 4.51E-05   | 0.292879 |
| 7.38E-05    | 0.180464526  | 8.79E-05    | 0.045771083 | 0.32364852 | -0.03351 |
| 0.925461667 | -0.003270973 | 0.943798033 | 0.166919346 | 0.00029127 | -0.03827 |
| 0.11193573  | 0.073824332  | 0.111102666 | 0.234156107 | 3.09E-07   | 0.18895  |
| 0.013388693 | -0.113461367 | 0.014156142 | -0.08254538 | 0.07473578 | -0.19761 |

|             |              |             |             |            |          |
|-------------|--------------|-------------|-------------|------------|----------|
| 6.14E-07    | -0.205623236 | 7.48E-06    | -0.05446922 | 0.24007171 | 0.00813  |
| 0.002270221 | -0.143915231 | 0.001821164 | -0.11691587 | 0.01145579 | 0.139185 |
| 0.007753029 | 0.127072567  | 0.005962117 | -0.16682168 | 0.00029371 | 0.182743 |
| 0.96311704  | -0.005344762 | 0.908292485 | 0.04476689  | 0.33438854 | 0.099896 |
| 9.40E-10    | 0.259962016  | 1.19E-08    | -0.07577026 | 0.10197096 | 0.194315 |
| 0.416085735 | -0.03521113  | 0.44778368  | 0.224800814 | 9.20E-07   | 0.226657 |
| 0.798714244 | -0.009121493 | 0.844146084 | -0.08486829 | 0.06689018 | -0.04096 |
| 0.500291948 | 0.022793756  | 0.623199441 | -0.00231933 | 0.96013289 | 0.244701 |
| 0.029305219 | 0.092765446  | 0.045109929 | -0.14543122 | 0.00162634 | 0.012396 |
| 0.649785577 | -0.029199941 | 0.529048477 | 0.052975546 | 0.25322731 | 0.035661 |
| 0.087385184 | 0.077002896  | 0.096501637 | 0.062806178 | 0.17543235 | 0.023409 |
| 2.17E-09    | -0.274962826 | 1.51E-09    | -0.12835384 | 0.00547258 | 0.134846 |
| 0.375917863 | -0.03517701  | 0.448224069 | -0.08332398 | 0.07202657 | -0.13819 |
| 0.14697803  | -0.062076948 | 0.180508542 | 0.106914267 | 0.02083993 | 0.136546 |
| 0.052307756 | 0.097234208  | 0.035676322 | 0.148083485 | 0.00133084 | -0.05031 |
| 0.070603675 | 0.084082024  | 0.069466433 | 0.109806964 | 0.01760746 | -0.10248 |
| 4.75E-11    | 0.289980277  | 1.69E-10    | -0.00036693 | 0.9936903  | -0.00212 |
| 0.563051176 | -0.033112365 | 0.475324675 | -0.02410229 | 0.60338801 | 0.117925 |
| 0.260905705 | 0.053837668  | 0.245574339 | -0.14959682 | 0.00118521 | 0.135481 |
| 0.072584601 | -0.082847171 | 0.073675988 | -0.05840153 | 0.20775567 | -0.01359 |
| 3.09E-06    | -0.199349799 | 1.42E-05    | -0.05035394 | 0.27750973 | -0.18469 |
| 9.79E-05    | 0.172708845  | 0.000176491 | -0.14117198 | 0.00222891 | 0.053316 |
| 0.000171322 | -0.172318232 | 0.000182652 | -0.0018537  | 0.96813188 | 0.016391 |
| 0.172493829 | 0.069239234  | 0.135160977 | -0.08482217 | 0.06703909 | 0.1117   |
| 5.23E-05    | -0.188562467 | 4.12E-05    | -0.05531965 | 0.23279972 | -0.02395 |
| 1.39E-07    | 0.227960909  | 6.40E-07    | -0.03436809 | 0.45873643 | 0.171013 |
| 0.003118385 | -0.138060506 | 0.002791174 | 0.059436861 | 0.19979602 | 0.197281 |
| 2.67E-07    | -0.254514437 | 2.44E-08    | -0.16519379 | 0.00033713 | 0.164623 |
| 8.23E-08    | -0.244608282 | 8.63E-08    | -0.22315441 | 1.11E-06   | -0.10507 |
| 4.76E-05    | -0.184963436 | 5.79E-05    | -0.13470994 | 0.00353858 | 0.318972 |
| 0.752811981 | 0.008530471  | 0.85412773  | -0.11793197 | 0.01075353 | -0.21606 |
| 0.000422698 | -0.159932806 | 0.000521872 | 0.042599985 | 0.35833449 | 0.216297 |
| 0.825142386 | -0.00457413  | 0.92146905  | 0.096882207 | 0.036353   | 0.167186 |
| 1.70E-09    | -0.275965004 | 1.31E-09    | 0.048479953 | 0.29580683 | 0.143528 |
| 0.08927258  | 0.082344209  | 0.075449111 | 0.19286322  | 2.72E-05   | 0.251449 |
| 1.01E-08    | -0.263589833 | 7.31E-09    | -0.03386701 | 0.4653166  | 0.184928 |
| 0.001675685 | -0.136014469 | 0.003228314 | -0.0884675  | 0.05607883 | 0.164669 |
| 0.02209776  | -0.095665252 | 0.038777058 | 0.156115818 | 0.00071067 | -0.0275  |
| 0.798927053 | -0.016288128 | 0.725536293 | 0.103970743 | 0.02464655 | -0.15438 |
| 0.010934471 | 0.123237878  | 0.007670806 | 0.278727148 | 8.84E-10   | 0.250084 |
| 3.91E-20    | -0.40041727  | 2.07E-19    | -0.01780891 | 0.70108752 | -0.18804 |
| 0.359900043 | -0.042285847 | 0.361893075 | 0.075656054 | 0.10248992 | 0.215957 |
| 2.25E-06    | 0.212007096  | 3.80E-06    | 0.192721476 | 2.75E-05   | -0.17864 |
| 0.035868075 | 0.09257858   | 0.045546239 | 0.013424061 | 0.77232733 | -0.07874 |
| 0.002071441 | -0.143055604 | 0.001940917 | 0.218971481 | 1.78E-06   | 0.137606 |

|             |              |             |             |            |          |
|-------------|--------------|-------------|-------------|------------|----------|
| 0.010830984 | -0.10798938  | 0.019582848 | -0.08366682 | 0.07085932 | -0.02824 |
| 0.035137537 | -0.09611809  | 0.037859517 | -0.00775846 | 0.86720097 | 0.078215 |
| 0.000679255 | 0.168577862  | 0.000252749 | -0.26547872 | 5.66E-09   | -0.28529 |
| 0.000185295 | -0.170427639 | 0.000215424 | 0.100001332 | 0.03072052 | -0.12496 |
| 0.095156327 | -0.069107696 | 0.135906143 | -0.14804029 | 0.00133523 | 0.082871 |
| 3.98E-05    | 0.191688396  | 3.05E-05    | -0.30768616 | 1.07E-11   | -0.0362  |
| 7.61E-07    | 0.22497228   | 9.03E-07    | -0.01173319 | 0.80035661 | -0.17454 |
| 0.259455522 | -0.056964858 | 0.219176872 | -0.10066725 | 0.02961995 | 0.299893 |
| 3.96E-10    | -0.296986371 | 5.79E-11    | 0.00711765  | 0.87808014 | 0.039267 |
| 0.767892081 | -0.014020873 | 0.76250229  | -0.08986083 | 0.0523029  | 0.012704 |
| 0.714488579 | -0.011867289 | 0.798123806 | 0.085937792 | 0.06351225 | 0.175852 |
| 1.38E-06    | -0.223114826 | 1.12E-06    | 0.116016179 | 0.01211115 | 0.36157  |
| 1.20E-06    | -0.236447345 | 2.35E-07    | 0.138251327 | 0.00275328 | 0.240929 |
| 0.004708676 | -0.123516169 | 0.007533473 | -0.0095125  | 0.83755608 | 0.003914 |
| 0.74049934  | -0.007545781 | 0.870808972 | -0.09073117 | 0.0500536  | 0.025522 |
| 0.656655727 | 0.029638443  | 0.522877552 | 0.010989589 | 0.81276717 | -0.06526 |
| 0.006638466 | -0.123974712 | 0.007311978 | 0.002179918 | 0.96252738 | 0.051943 |
| 0.710434647 | -0.002576194 | 0.955721872 | -0.03887801 | 0.40190368 | -0.046   |
| 0.02469718  | 0.116174612  | 0.011993398 | -0.03681815 | 0.42732124 | 0.209253 |
| 0.667760617 | -0.003360639 | 0.942260028 | -0.1907121  | 3.35E-05   | 0.193157 |
| 1.10E-07    | -0.238920151 | 1.74E-07    | -0.15100852 | 0.00106275 | -0.07092 |
| 0.959584616 | 0.019796403  | 0.669598426 | 0.021551261 | 0.64226626 | -0.01957 |
| 4.01E-09    | -0.263772732 | 7.14E-09    | 0.078291379 | 0.09103722 | -0.08278 |
| 2.60E-07    | 0.234583052  | 2.94E-07    | -0.09987548 | 0.0309324  | 0.381733 |
| 0.987878946 | -0.007588709 | 0.870080496 | -0.06296253 | 0.17435793 | 0.097172 |
| 2.17E-05    | 0.193886465  | 2.46E-05    | -0.2722846  | 2.21E-09   | 0.293217 |
| 0.846750374 | -0.006631898 | 0.886342296 | -0.04014846 | 0.38668787 | 0.026361 |
| 0.337818154 | -0.043237062 | 0.351185235 | -0.07154299 | 0.12261437 | 0.032705 |
| 0.037666806 | -0.10219759  | 0.027218154 | 0.032024953 | 0.48995055 | 0.040371 |
| 0.141793105 | -0.075427721 | 0.103533737 | -0.11057864 | 0.01682289 | -0.01866 |
| 0.161828385 | -0.048978886 | 0.290858534 | -0.11651445 | 0.01174422 | -0.19303 |
| 0.005033808 | 0.117547529  | 0.011014612 | -0.04576562 | 0.32370637 | 0.238682 |
| 0.778802606 | 0.017415564  | 0.707382798 | 0.001715246 | 0.97051094 | 0.219831 |
| 0.695934936 | -0.022105204 | 0.633735641 | -0.10949028 | 0.01793856 | -0.05603 |
| 0.504704345 | 0.024607092  | 0.595821477 | -0.07019801 | 0.12982418 | -0.08247 |
| 0.364026486 | -0.047567278 | 0.305003092 | -0.05533913 | 0.23263499 | -0.08285 |
| 7.90E-11    | 0.296570992  | 6.17E-11    | -0.02444169 | 0.59829596 | 0.039349 |
| 0.001677315 | 0.152125888  | 0.000974206 | 0.392677274 | 1.15E-18   | 0.032845 |
| 0.215749076 | -0.068974122 | 0.136666073 | 0.004108179 | 0.92944673 | 0.077728 |
| 0.215331683 | -0.048231326 | 0.298293494 | 0.001286278 | 0.97788371 | 0.299177 |
| 0.294495806 | -0.027592969 | 0.55197427  | -0.10296779 | 0.02607408 | -0.10847 |
| 0.886194606 | 0.00629398   | 0.892097268 | -0.03987175 | 0.38997184 | -0.02466 |
| 2.29E-08    | 0.268184381  | 3.90E-09    | -0.08141927 | 0.07880044 | -0.03483 |
| 0.301744179 | 0.045144267  | 0.330325862 | -0.02227204 | 0.63117588 | -0.04539 |
| 0.022856249 | -0.100532065 | 0.029840601 | 0.067007906 | 0.14823394 | 0.026826 |

|             |              |             |             |            |          |
|-------------|--------------|-------------|-------------|------------|----------|
| 0.000630277 | -0.160929749 | 0.000480888 | -0.12037228 | 0.00922048 | 0.163685 |
| 3.32E-06    | 0.202429809  | 1.04E-05    | -0.2968265  | 5.93E-11   | 0.10356  |
| 0.001644712 | -0.137976267 | 0.002808051 | -0.28639611 | 2.88E-10   | 0.348039 |
| 0.016644685 | 0.118534247  | 0.010355525 | -0.30506977 | 1.63E-11   | -0.02341 |
| 0.096176667 | -0.091742447 | 0.04754216  | 0.047000859 | 0.31080452 | -0.00625 |
| 0.017353744 | -0.103675899 | 0.025059036 | -0.10401808 | 0.02458088 | 0.030749 |
| 0.000249334 | -0.152930668 | 0.000914709 | -0.11975102 | 0.0095911  | 0.171668 |
| 0.001337341 | -0.150227101 | 0.001129013 | -0.05696114 | 0.21920702 | 0.082311 |
| 0.007034574 | 0.125549389  | 0.006595009 | 0.052415739 | 0.25828443 | 0.346613 |
| 0.000173469 | -0.158625648 | 0.000580532 | -0.12419871 | 0.00720591 | 0.230319 |
| 0.000305725 | -0.165901738 | 0.000317557 | -0.04393428 | 0.34346516 | 0.04565  |
| 0.025303475 | -0.103923985 | 0.024711574 | -0.05643579 | 0.22349405 | 0.105848 |
| 0.140762038 | -0.071724621 | 0.121665091 | -0.12544887 | 0.00663882 | 0.10081  |
| 0.004690746 | 0.123913179  | 0.007341358 | -0.0997045  | 0.03122226 | 0.25766  |
| 0.348968005 | 0.048267407  | 0.297931765 | -0.12559715 | 0.00657428 | -0.17177 |
| 0.792646493 | 0.002578362  | 0.955684655 | -0.18720792 | 4.69E-05   | 0.009837 |
| 0.140379296 | 0.060601706  | 0.191108796 | -0.05224199 | 0.25986813 | -0.12273 |
| 0.516058147 | 0.028535821  | 0.538464277 | 0.085699752 | 0.06425166 | -0.00139 |
| 1.44E-13    | 0.330952434  | 2.13E-13    | -0.12054989 | 0.00911689 | 0.100181 |
| 0.000114975 | -0.191120822 | 3.22E-05    | -0.16654769 | 0.00030063 | -0.13319 |
| 0.084703086 | 0.062244004  | 0.179336161 | -0.04274428 | 0.35670731 | -0.05408 |
| 4.53E-06    | -0.216575433 | 2.31E-06    | -0.02941255 | 0.52605195 | 0.069812 |
| 1.85E-05    | -0.201832082 | 1.11E-05    | 0.094718337 | 0.04075668 | 0.132428 |
| 0.000711194 | 0.165874225  | 0.000318298 | -0.10728725 | 0.02039609 | -0.02047 |
| 0.99623444  | -0.003693468 | 0.936553103 | -0.11985611 | 0.00952749 | 0.094173 |
| 0.71221148  | -0.017273527 | 0.709660964 | -0.00178479 | 0.96931598 | 0.012092 |
| 0.00135008  | -0.146608183 | 0.001488474 | 0.156666484 | 0.00067999 | -0.03452 |
| 7.55E-06    | 0.209521306  | 4.96E-06    | 0.050414901 | 0.27692768 | 0.149478 |
| 0.831990276 | 0.005113143  | 0.912250333 | -0.05120353 | 0.26947315 | -0.02118 |
| 1.09E-06    | -0.220360414 | 1.52E-06    | 0.06193891  | 0.18148154 | 0.014267 |
| 2.30E-05    | -0.193741798 | 2.49E-05    | 0.116145846 | 0.0120147  | 0.009449 |
| 0.337049264 | 0.035514685  | 0.443876504 | -0.02845005 | 0.5396864  | 0.41162  |
| 0.003820371 | -0.138264956 | 0.002750597 | 0.12526486  | 0.0067197  | -0.03517 |
| 0.787393893 | -0.022061888 | 0.634400985 | 0.039231075 | 0.3976396  | 0.15434  |
| 0.000242463 | -0.163346566 | 0.000393624 | -0.00827085 | 0.85851987 | -0.07009 |
| 1.14E-06    | 0.223960309  | 1.01E-06    | 0.131584781 | 0.00439473 | 0.12463  |
| 7.57E-06    | 0.201339617  | 1.16E-05    | 0.240806751 | 1.38E-07   | 0.064351 |
| 0.218507178 | 0.063615626  | 0.169922933 | 0.057525731 | 0.21466571 | -0.05637 |
| 0.000302013 | -0.171788395 | 0.000191331 | 0.01419305  | 0.75967483 | 0.144708 |
| 0.036777608 | 0.107482205  | 0.020167391 | -0.08024271 | 0.08323679 | 0.096034 |
| 0.301634867 | -0.044677458 | 0.335356023 | 0.050824402 | 0.27303955 | -0.06262 |
| 0.323279799 | 0.053975012  | 0.244370247 | -0.06655081 | 0.15102704 | -0.08953 |
| 0.091422665 | -0.075148733 | 0.104820536 | 0.146087858 | 0.00154804 | -0.11713 |
| 0.543943054 | -0.026100962 | 0.573686316 | -0.17625944 | 0.00012877 | -0.1244  |
| 0.236139405 | -0.061413258 | 0.185222301 | 0.055354744 | 0.23250305 | 0.035479 |



|             |              |             |             |            |          |
|-------------|--------------|-------------|-------------|------------|----------|
| 5.44E-05    | -0.183680611 | 6.53E-05    | -0.13039652 | 0.00476656 | 0.137231 |
| 2.83E-14    | -0.340968567 | 3.54E-14    | -0.14388969 | 0.00182462 | 0.042604 |
| 0.178036773 | -0.066918256 | 0.148778634 | -0.0707446  | 0.12685555 | -0.08981 |
| 0.001367352 | 0.145583314  | 0.001607885 | 0.027591246 | 0.55199911 | 0.03683  |
| 5.07E-11    | -0.30025894  | 3.48E-11    | -0.13451682 | 0.00358674 | 0.051652 |
| 0.337549293 | -0.037963158 | 0.413079024 | -0.09208125 | 0.04672474 | 0.056962 |
| 0.001156464 | -0.153877139 | 0.000849038 | -0.13594778 | 0.00324355 | 0.063264 |
| 1.77E-20    | -0.412306041 | 1.36E-20    | -0.00086985 | 0.98504281 | 0.18005  |
| 0.092844951 | -0.086267295 | 0.062500307 | 0.093762138 | 0.04284168 | 0.22185  |
| 3.98E-12    | 0.318631451  | 1.77E-12    | -0.05268666 | 0.25582838 | 0.119682 |
| 0.964284169 | -0.008527645 | 0.854175499 | -0.00094497 | 0.98375125 | 0.237415 |
| 0.395601161 | 0.035519083  | 0.443820039 | -0.1517508  | 0.00100314 | 0.15579  |
| 0.289994604 | 0.036666483  | 0.429228979 | -0.31037446 | 6.92E-12   | -0.07258 |
| 0.001050821 | 0.14840196   | 0.001298889 | -0.12195984 | 0.00833064 | -0.15566 |
| 9.27E-26    | -0.456317554 | 2.14E-25    | -0.08805991 | 0.05722525 | -0.15465 |
| 3.77E-19    | -0.393625691 | 9.31E-19    | 0.189897261 | 3.62E-05   | 0.024394 |
| 4.69E-05    | -0.187997899 | 4.35E-05    | 0.345207428 | 1.63E-14   | 0.07831  |
| 0.581168076 | 0.020717187  | 0.655199781 | 0.00662632  | 0.88643725 | -0.00879 |
| 0.857938302 | -0.009063802 | 0.845119336 | -0.04479514 | 0.33408334 | -0.24646 |
| 0.017345268 | 0.111105229  | 0.01630523  | -0.04523188 | 0.32938721 | -0.02951 |
| 0.835000431 | 0.018639318  | 0.687864725 | -0.10929242 | 0.01814819 | -0.05737 |
| 0.000613465 | -0.159961928 | 0.00052063  | 0.071306758 | 0.1238576  | -0.01243 |
| 0.45573302  | -0.039221236 | 0.397758059 | -0.06491257 | 0.16136647 | -0.02801 |
| 0.615931679 | 0.029858583  | 0.519793516 | 0.012033967 | 0.7953508  | -0.05519 |
| 0.019182354 | 0.107304185  | 0.020376137 | -0.1164883  | 0.01176323 | 0.057968 |
| 0.933028    | -0.005242129 | 0.910045977 | -0.07457603 | 0.10750169 | 0.040195 |
| 0.753769237 | 0.010804325  | 0.815866612 | -0.0254619  | 0.58310786 | -0.05749 |
| 0.142407646 | -0.070012746 | 0.130842507 | -0.00941155 | 0.83925643 | -0.0195  |
| 0.193116292 | -0.055331277 | 0.232701425 | -0.1216244  | 0.00851201 | 0.028071 |
| 0.038212467 | 0.088548467  | 0.055853385 | -0.05032737 | 0.2777636  | 0.180012 |
| 0.34622075  | 0.038740495  | 0.403571822 | -0.06089406 | 0.18897263 | -0.00795 |
| 0.284027831 | 0.055357241  | 0.23248195  | -0.0331363  | 0.4750054  | 0.057174 |
| 0.586438654 | -0.030142853 | 0.515824952 | 0.015017265 | 0.74618457 | 0.027784 |
| 0.077362057 | -0.07526779  | 0.10426986  | -0.20015879 | 1.31E-05   | -0.03393 |
| 0.001048926 | 0.137282593  | 0.002950597 | -0.01974881 | 0.67034606 | 0.013089 |
| 0.206311687 | 0.066887001  | 0.148968887 | -0.0226576  | 0.62527693 | -0.10163 |
| 0.342384484 | 0.033988277  | 0.463719342 | -0.04191023 | 0.36617694 | 0.007487 |
| 0.736626616 | -0.010383991 | 0.822909358 | 0.037644952 | 0.41700867 | 0.044642 |
| 0.081929177 | 0.073951254  | 0.110488079 | -0.01442911 | 0.75580348 | 0.038399 |
| 0.315439482 | -0.045944261 | 0.321819256 | -0.06637915 | 0.15208624 | -0.03059 |
| 0.42042214  | 0.044426355  | 0.338082041 | 0.127127899 | 0.00594019 | -0.05242 |
| 0.332116812 | 0.037227941  | 0.422191615 | -0.02416168 | 0.60249569 | -0.01096 |
| 0.021214078 | -0.1097842   | 0.017631076 | 0.057540009 | 0.21455175 | 0.023572 |
| 1.02E-05    | -0.202206655 | 1.06E-05    | 0.176682065 | 0.00012397 | -0.03677 |
| 0.047353506 | 0.078981942  | 0.088212294 | 0.004958841 | 0.9148882  | -0.00236 |

|             |              |             |             |            |          |
|-------------|--------------|-------------|-------------|------------|----------|
| 0.004385158 | 0.129337395  | 0.005121659 | 0.101790802 | 0.02783965 | 0.109733 |
| 0.772837732 | 0.017784134  | 0.701483444 | 0.103948289 | 0.02467776 | 0.121063 |
| 0.209892246 | -0.058688228 | 0.205528902 | 0.062581067 | 0.1769879  | -0.20032 |
| 0.067904583 | -0.091236842 | 0.048784271 | 0.363061641 | 5.37E-16   | 0.130648 |
| 0.009697132 | 0.114354734  | 0.013408902 | -0.07635373 | 0.09935217 | 0.001461 |
| 0.610316367 | -0.013414121 | 0.772491272 | -0.03360591 | 0.46876609 | 0.116012 |
| 0.316764707 | 0.040963152  | 0.377117631 | 0.080835067 | 0.08097866 | 0.033073 |
| 0.591474314 | 0.027799083  | 0.549006772 | -0.03437529 | 0.45864223 | 0.112652 |
| 0.010898794 | -0.11389768  | 0.013786739 | -0.10497001 | 0.0232919  | -0.05645 |
| 0.514155799 | -0.031328954 | 0.499437018 | 0.234235823 | 3.06E-07   | 0.128513 |
| 0.155003296 | -0.065914994 | 0.154978467 | -0.0015407  | 0.97351062 | -0.05366 |
| 0.014150327 | 0.124619094  | 0.007010558 | 0.250363209 | 4.17E-08   | -0.0575  |
| 0.127694977 | 0.064939163  | 0.161194502 | -0.03006725 | 0.51687893 | -0.00285 |
| 0.40908836  | -0.032146969 | 0.48829748  | 0.125983034 | 0.00640896 | 0.119961 |
| 0.031525959 | -0.103425814 | 0.025413556 | -0.04497448 | 0.33214977 | -0.00951 |
| 0.668286329 | -0.022439359 | 0.628612992 | -0.01232939 | 0.79044221 | 0.090903 |
| 0.169214508 | -0.055445161 | 0.231739848 | 0.072038541 | 0.12003795 | 0.108065 |
| 0.033406598 | 0.105190231  | 0.023002181 | -0.06224524 | 0.17932749 | -0.06428 |
| 0.543387762 | -0.024026107 | 0.604533717 | -0.01553585 | 0.73773601 | -0.06083 |
| 0.458264239 | -0.018646747 | 0.687746845 | -0.12650369 | 0.00619181 | 0.095978 |
| 0.390990646 | 0.037251952  | 0.421892166 | -0.03180384 | 0.49295377 | -0.07791 |
| 0.009284979 | -0.125913433 | 0.006438501 | -0.02535181 | 0.58473817 | 0.043652 |
| 0.339273399 | -0.043786532 | 0.345092001 | -0.00970985 | 0.83423422 | -0.02491 |
| 0.917179227 | -0.008342027 | 0.857315289 | 0.093033301 | 0.04449065 | 0.091232 |
| 0.387311653 | -0.044445083 | 0.337878235 | 0.036063182 | 0.43686601 | 0.031385 |
| 0.092496843 | 0.078656484  | 0.089534761 | 0.267061235 | 4.56E-09   | 0.113737 |
| 0.103527398 | -0.083937779 | 0.069947766 | -0.11673735 | 0.01158328 | 0.024752 |
| 0.994628908 | -0.016707099 | 0.71877159  | -0.10202905 | 0.02747419 | -0.04787 |
| 0.046402224 | 0.091383633  | 0.048420884 | 0.041124427 | 0.37524053 | 0.014287 |
| 0.071419021 | -0.0878821   | 0.057731432 | -0.03777227 | 0.4154337  | 0.067578 |
| 5.06E-05    | -0.177278481 | 0.000117492 | 2.52E-05    | 0.99956718 | 0.104081 |
| 0.888854029 | 0.013556893  | 0.770137368 | 0.048348663 | 0.29711821 | -0.0295  |
| 0.098969426 | 0.074939661  | 0.105793125 | 0.021724612 | 0.63959156 | -0.10055 |
| 0.521808708 | 0.038696427  | 0.404107284 | 0.090850896 | 0.04975059 | -0.1267  |
| 0.926427343 | 0.003004834  | 0.948364183 | 0.158959636 | 0.00056499 | 0.01367  |
| 0.369389299 | 0.042456886  | 0.359952795 | -0.19005228 | 3.57E-05   | -0.11648 |
| 0.12818685  | -0.076876174 | 0.097052896 | -0.09394285 | 0.04244089 | 0.030153 |
| 0.562441132 | 0.038314703  | 0.408763185 | -0.07738118 | 0.0948709  | -0.20605 |
| 0.694487602 | 0.024764215  | 0.593475159 | 0.042746781 | 0.35667911 | -0.09809 |
| 0.051049418 | 0.097910216  | 0.034406783 | 0.033252301 | 0.47346001 | 0.032444 |
| 0.843611279 | -0.018816865 | 0.68504973  | 0.070587276 | 0.12770458 | -0.01577 |
| 0.690986762 | -0.018999945 | 0.682151582 | -0.02886583 | 0.53377502 | -0.01899 |
| 0.759571399 | -0.006553548 | 0.887676129 | 0.060445343 | 0.19225856 | -0.0506  |
| 0.985923519 | -0.004441791 | 0.923734097 | -0.03751474 | 0.41862307 | -0.16314 |
| 0.162895967 | 0.06317866   | 0.172880811 | -0.04496763 | 0.33222353 | -0.03212 |

|             |              |             |             |            |           |
|-------------|--------------|-------------|-------------|------------|-----------|
| 0.839907936 | 0.00754602   | 0.870804913 | 0.111341124 | 0.01607789 | -0.01131  |
| 0.340407117 | -0.032583147 | 0.482412755 | -0.01196236 | 0.79654176 | -0.13467  |
| 0.11383328  | 0.066232402  | 0.152996189 | -0.02688093 | 0.56228575 | 0.035191  |
| 0.004613451 | 0.127544094  | 0.005777563 | -0.17692366 | 0.00012131 | 0.079365  |
| 0.177926586 | 0.073768475  | 0.111373989 | -0.0070048  | 0.87999847 | -0.05225  |
| 0.024671741 | -0.092900133 | 0.044797636 | 0.003443067 | 0.94084637 | 0.065571  |
| 0.082119699 | -0.08915705  | 0.054182781 | 0.018539282 | 0.68945268 | -0.0661   |
| 0.814093472 | 0.008271156  | 0.858514697 | -0.16306207 | 0.00040307 | 0.138842  |
| 0.579924853 | 0.030025792  | 0.517457289 | -0.02181222 | 0.63824161 | -0.00838  |
| 0.20916633  | 0.062845143  | 0.175164133 | 0.03428217  | 0.45986098 | -0.03198  |
| 0.000526542 | 0.163086179  | 0.000402262 | 0.0038903   | 0.93317958 | 0.026725  |
| 0.044400688 | 0.102661842  | 0.026523483 | 0.127633879 | 0.00574301 | 0.086308  |
| 0.878961423 | -0.011339209 | 0.806926044 | 0.036088142 | 0.43654851 | -0.03103  |
| 0.027723813 | -0.100323262 | 0.030184169 | 0.28943291  | 1.83E-10   | -0.07115  |
| 0.002425413 | 0.150906646  | 0.001071178 | 0.09196466  | 0.0470047  | -0.05034  |
| 0.679979949 | -0.016282526 | 0.725626886 | -0.05205031 | 0.26162299 | -0.00414  |
| 0.900327169 | -0.001336029 | 0.97702852  | -0.03424047 | 0.46040729 | -0.2      |
| 0.271642289 | 0.054755543  | 0.237605783 | -0.06344967 | 0.17104183 | -0.00187  |
| 0.068349361 | 0.089306502  | 0.053778942 | 0.019382694 | 0.67610777 | 0.001944  |
| 0.196592905 | 0.059278612  | 0.200998056 | 0.016897429 | 0.71570573 | 0.017114  |
| 0.971144828 | -0.003763661 | 0.935349932 | -0.12547615 | 0.0066269  | -0.03645  |
| 0.76537291  | -0.016256201 | 0.726052661 | 0.045438736 | 0.32717796 | -7.76E-05 |
| 0.963048039 | -0.000919919 | 0.984181899 | 0.157996231 | 0.00061091 | 0.108736  |
| 0.000886057 | -0.15088456  | 0.001073014 | 0.072960143 | 0.11535905 | 0.067281  |
| 0.330126421 | -0.048405736 | 0.296547658 | 0.067298876 | 0.14647656 | 0.160143  |
| 0.777634536 | -0.001896431 | 0.967397604 | -0.01594687 | 0.73106215 | 0.024434  |
| 0.11633148  | 0.078028101  | 0.092133135 | -0.00146281 | 0.97484927 | -0.07626  |
| 0.782355606 | 0.009779626  | 0.833060377 | 0.071203823 | 0.12440239 | -0.02472  |
| 0.208610987 | 0.066348562  | 0.152275577 | 0.030543476 | 0.51025876 | 0.102357  |
| 0.01639274  | 0.115950639  | 0.012160165 | 0.112071942 | 0.01539113 | 0.018591  |
| 0.00031617  | 0.161064134  | 0.000475598 | 0.209474178 | 4.99E-06   | -0.09575  |
| 0.01576684  | -0.118469867 | 0.010397437 | 0.097477752 | 0.03521443 | -0.02409  |
| 0.856615045 | 0.005417868  | 0.907043743 | 0.017875187 | 0.70002878 | 0.014021  |
| 0.447290971 | 0.036883852  | 0.42649643  | 0.094123443 | 0.04204352 | 0.1104    |
| 0.028266048 | 0.104643329  | 0.0237275   | 0.202290832 | 1.06E-05   | 0.17084   |
| 0.000161792 | -0.17122003  | 0.00020107  | -0.18574503 | 5.38E-05   | -0.07505  |
| 0.139796389 | 0.069843714  | 0.131776977 | 0.096706848 | 0.03669415 | 0.022703  |
| 0.946508354 | -0.005691618 | 0.902369789 | -0.12709402 | 0.00595361 | 0.036948  |
| 0.864750015 | 0.016298008  | 0.725376522 | -0.02412005 | 0.60312108 | 0.018745  |
| 0.382250238 | -0.042172708 | 0.363180114 | 0.049166644 | 0.28901085 | -0.06738  |
| 0.278687236 | 0.05771182   | 0.213183816 | -0.07416483 | 0.10945995 | -0.02596  |
| 0.007068975 | 0.124983925  | 0.006844878 | -0.1301945  | 0.00483253 | 0.101202  |
| 0.5657472   | 0.031926565  | 0.491285686 | -0.01318826 | 0.77621928 | 0.000816  |
| 0.501242414 | 0.028539926  | 0.538405826 | 0.304388203 | 1.81E-11   | 0.214393  |
| 0.521883063 | -0.031975401 | 0.490622739 | 0.01281539  | 0.78238519 | -0.13379  |

|             |              |             |             |            |          |
|-------------|--------------|-------------|-------------|------------|----------|
| 0.853354067 | 0.009688172  | 0.834598926 | -0.02009598 | 0.66490026 | 0.034865 |
| 0.000933554 | -0.150185645 | 0.001132633 | 0.056691818 | 0.22139735 | -0.0125  |
| 0.327462819 | -0.046989605 | 0.310920527 | -0.14358961 | 0.00186571 | -0.02513 |
| 0.211328078 | -0.05436639  | 0.24096171  | -0.03419052 | 0.46106222 | 0.073919 |
| 0.068942156 | -0.078306027 | 0.090976556 | 0.072251757 | 0.11894251 | 0.205743 |
| 0.113488457 | 0.072676483  | 0.116783691 | -0.00782842 | 0.86601469 | -0.09237 |
| 0.007797423 | -0.112542966 | 0.014962261 | 0.186529395 | 5.00E-05   | -0.08578 |
| 0.021450483 | 0.111047789  | 0.016361011 | 0.142249768 | 0.00205968 | -0.05056 |
| 0.859462558 | 0.002327861  | 0.959986319 | 0.005412668 | 0.90713256 | 0.027518 |
| 0.33065055  | 0.037673697  | 0.416652777 | -0.08457549 | 0.06784024 | -0.08398 |
| 0.323025702 | -0.057906416 | 0.211642066 | -0.05133001 | 0.26829049 | -0.01665 |
| 0.130672592 | -0.07027137  | 0.129422671 | -0.10026229 | 0.03028513 | -0.08558 |
| 0.002584607 | 0.140475015  | 0.002345005 | 0.067165729 | 0.14727875 | -0.02589 |
| 0.048725429 | 0.088333313  | 0.056454135 | 0.072215709 | 0.11912717 | 0.004609 |
| 0.804739527 | -0.0098708   | 0.831527181 | 0.05252846  | 0.25726057 | -0.07318 |
| 0.713120252 | -0.011788752 | 0.799431304 | -0.06686562 | 0.14909917 | 0.14683  |
| 0.031933239 | -0.090267777 | 0.051240907 | 0.26332041  | 7.59E-09   | 0.24135  |
| 0.816501906 | -0.010783979 | 0.81620719  | 0.109330233 | 0.01810796 | 0.061693 |
| 0.740755723 | -0.007598288 | 0.869917953 | -0.0052707  | 0.90955777 | -0.01816 |
| 0.423602986 | 0.041383687  | 0.372235036 | -0.00605753 | 0.89612752 | 0.211753 |
| 5.97E-08    | -0.241573981 | 1.26E-07    | -0.00951253 | 0.83755552 | -0.13459 |
| 0.046158112 | -0.078195933 | 0.091433309 | -0.18682655 | 4.86E-05   | -0.04782 |
| 0.00020344  | 0.177577968  | 0.00011436  | -0.16857397 | 0.00025283 | 0.166708 |
| 0.007498001 | 0.133706844  | 0.003795287 | 0.232616823 | 3.71E-07   | 0.228271 |
| 0.022956902 | 0.110406637  | 0.016995069 | 0.322964307 | 8.48E-13   | -0.08877 |
| 0.880242013 | 0.007901706  | 0.864772372 | -0.0106706  | 0.81810565 | 0.003334 |
| 0.408203697 | 0.046442571  | 0.316593252 | -0.13677068 | 0.00305998 | 0.23318  |
| 0.332355215 | 0.038784318  | 0.403039768 | -0.04909646 | 0.28970055 | -0.00504 |
| 0.011337523 | -0.111137952 | 0.016273527 | -0.09868565 | 0.0329981  | 0.203475 |
| 0.035098982 | -0.087000773 | 0.060295385 | -0.37672058 | 3.40E-17   | 0.10389  |
| 0.797372237 | -0.004164983 | 0.928473787 | -0.05558784 | 0.23053909 | 0.003195 |
| 1.33E-05    | -0.211757763 | 3.91E-06    | 0.002104732 | 0.96381892 | 0.161284 |
| 0.018573623 | -0.113471266 | 0.014147665 | -0.11699753 | 0.01139789 | 0.393407 |
| 0.047810962 | 0.070671325  | 0.127250456 | -0.07119048 | 0.12447316 | 0.062632 |
| 0.033031898 | 0.101546819  | 0.028218231 | -0.12875655 | 0.00532636 | 0.093108 |
| 0.248308257 | -0.046586908 | 0.315089951 | -0.03514668 | 0.4486157  | 0.020456 |
| 0.028523226 | -0.098404986 | 0.033502175 | -0.02759871 | 0.55189153 | 0.068633 |
| 4.93E-06    | -0.217285707 | 2.14E-06    | -0.03697203 | 0.42539079 | 0.079594 |
| 5.88E-08    | 0.243472276  | 9.94E-08    | -0.37585848 | 4.07E-17   | -0.06833 |
| 0.00095479  | -0.138399023 | 0.002724281 | -0.20116082 | 1.19E-05   | 0.146526 |
| 9.39E-06    | 0.200501965  | 1.27E-05    | -0.11117766 | 0.01623513 | 0.307806 |
| 0.949124798 | -0.004194415 | 0.927969711 | 0.264186507 | 6.75E-09   | -0.06566 |
| 0.642965628 | -0.0230484   | 0.619322122 | -0.12210548 | 0.00825298 | -0.26986 |
| 0.232348582 | -0.060487438 | 0.191948528 | -0.10381307 | 0.0248664  | -0.00818 |
| 0.005113265 | 0.125784251  | 0.006493653 | -0.00173309 | 0.97020437 | 0.162602 |

|             |              |             |             |            |          |
|-------------|--------------|-------------|-------------|------------|----------|
| 0.019836509 | -0.106591234 | 0.021231078 | -0.02314138 | 0.61790903 | 0.056121 |
| 1.33E-07    | -0.254503172 | 2.44E-08    | 0.069229736 | 0.13521467 | 0.285221 |
| 0.947388941 | 0.000349978  | 0.993981751 | 0.106891287 | 0.02086754 | -0.04201 |
| 2.21E-18    | -0.377953301 | 2.64E-17    | -0.0551643  | 0.23411641 | 0.257068 |
| 0.006903948 | 0.133964826  | 0.003727703 | 0.023661926 | 0.61002372 | -0.05457 |
| 0.131679279 | -0.06160416  | 0.183857244 | 0.007318803 | 0.87466254 | 0.224892 |
| 0.477147468 | -0.024099426 | 0.603431109 | -0.02196518 | 0.63588753 | 0.078153 |
| 0.973125268 | 0.004333747  | 0.925583787 | 0.139099307 | 0.00259051 | 0.086676 |
| 7.48E-10    | -0.273688955 | 1.81E-09    | 0.068510785 | 0.13932745 | 0.241433 |
| 0.898946587 | 0.010234047  | 0.825425165 | 0.069842197 | 0.13178539 | 0.089724 |
| 0.022916084 | -0.101571705 | 0.028179414 | -0.03628076 | 0.43410283 | 0.201408 |
| 0.043203724 | -0.099032423 | 0.032384239 | 0.055056615 | 0.23503212 | 0.130567 |
| 0.077661997 | 0.090924705  | 0.049564566 | -0.03242515 | 0.48453995 | 0.003622 |
| 0.006309773 | 0.136931963  | 0.003025125 | -0.08513568 | 0.06603212 | -0.08    |
| 0.050462971 | 0.099500957  | 0.031570346 | -0.02455845 | 0.59654876 | -0.06901 |
| 0.135253316 | 0.079999267  | 0.084179447 | -0.01630271 | 0.72530051 | -0.1109  |
| 0.142018221 | 0.072497209  | 0.117691142 | 0.334263199 | 1.18E-13   | 0.289094 |
| 0.0484967   | 0.090514043  | 0.050607026 | 0.308365362 | 9.58E-12   | 0.108133 |
| 0.474644149 | -0.040588231 | 0.381503658 | 0.005574002 | 0.90437755 | -0.00132 |
| 0.242093037 | -0.040978211 | 0.376942117 | 0.06060094  | 0.19111442 | 0.012721 |
| 8.07E-06    | -0.209855747 | 4.79E-06    | -0.22572213 | 8.28E-07   | 0.180673 |
| 6.77E-09    | -0.264600801 | 6.38E-09    | 0.15079554  | 0.00108044 | 0.038267 |
| 0.171798555 | -0.069587697 | 0.133202131 | 0.254128147 | 2.57E-08   | -0.22314 |
| 0.027901141 | -0.107436447 | 0.020220869 | -0.051945   | 0.26259059 | -0.0857  |
| 1.22E-05    | -0.207718328 | 6.00E-06    | -0.31755725 | 2.11E-12   | 0.196336 |
| 1.64E-13    | 0.325517651  | 5.47E-13    | 0.28666713  | 2.77E-10   | 0.188843 |
| 1.49E-05    | -0.189161365 | 3.89E-05    | 0.247779328 | 5.79E-08   | 0.313587 |
| 0.847970261 | 0.015917576  | 0.731537068 | 0.179965309 | 9.21E-05   | 0.228591 |
| 0.040392639 | -0.102844474 | 0.026254419 | 0.05266301  | 0.25604212 | -0.02833 |
| 3.09E-10    | 0.281053448  | 6.31E-10    | -0.12244177 | 0.00807611 | -0.06818 |
| 0.00176823  | -0.134647085 | 0.003554194 | 0.124999176 | 0.00683803 | 0.135124 |
| 0.000200336 | -0.17169934  | 0.000192827 | -0.02391232 | 0.60624662 | 0.03035  |
| 3.97E-05    | 0.196721304  | 1.85E-05    | -0.33950458 | 4.62E-14   | 0.201105 |
| 0.835482903 | -0.024011546 | 0.6047528   | -0.04399311 | 0.34281863 | -0.0605  |
| 2.57E-09    | 0.269670941  | 3.18E-09    | -0.16223777 | 0.00043165 | 0.261776 |
| 2.71E-07    | -0.245560188 | 7.66E-08    | 0.026778588 | 0.56377542 | 0.22387  |
| 0.019719804 | 0.120773261  | 0.008988087 | -0.00588969 | 0.89899002 | 0.250934 |
| 0.001189574 | 0.143803589  | 0.001836325 | 0.000392874 | 0.99324414 | -0.15719 |
| 0.029091116 | -0.092684124 | 0.045299375 | -0.27138026 | 2.51E-09   | -0.03203 |
| 0.843180924 | -0.002025084 | 0.965187216 | -0.04886533 | 0.29197985 | -0.10533 |
| 0.059309457 | -0.086145853 | 0.062871713 | -0.06718321 | 0.14717322 | -0.01244 |
| 1.24E-11    | -0.30878148  | 8.96E-12    | 0.106374488 | 0.02149709 | -0.05306 |
| 0.863646136 | -0.022025562 | 0.634959179 | 0.046921747 | 0.31162055 | 0.109795 |
| 0.534478935 | -0.039989269 | 0.388575068 | 0.083736458 | 0.07062412 | 0.111273 |
| 0.003786701 | 0.150764437  | 0.00108305  | 0.006573736 | 0.88733241 | 0.021863 |

|             |              |             |             |            |          |
|-------------|--------------|-------------|-------------|------------|----------|
| 0.252097519 | -0.065840891 | 0.155444037 | -0.08397674 | 0.06981749 | -0.00669 |
| 0.403217555 | 0.026673873  | 0.565301589 | -0.03832029 | 0.40869486 | -0.04455 |
| 0.000286361 | -0.150892477 | 0.001072355 | -0.21280039 | 3.49E-06   | -0.16711 |
| 0.007379193 | 0.11187566   | 0.015573004 | -0.15598003 | 0.00071843 | -0.09947 |
| 1.08E-05    | -0.197373355 | 1.74E-05    | -0.05118792 | 0.26961935 | 0.064798 |
| 4.02E-12    | -0.323682408 | 7.50E-13    | -0.02755189 | 0.55256665 | 0.031201 |
| 5.77E-15    | -0.350857113 | 5.65E-15    | -0.24002832 | 1.52E-07   | 0.102385 |
| 0.016745756 | -0.113965833 | 0.013729811 | -0.16770188 | 0.00027246 | -0.089   |
| 1.98E-05    | -0.198923485 | 1.49E-05    | 0.135724634 | 0.00329503 | 0.304328 |
| 0.202054407 | -0.052913676 | 0.253782818 | -0.14559444 | 0.00160654 | -0.15674 |
| 0.03953893  | -0.098436889 | 0.033444547 | -0.00770963 | 0.86802907 | 0.151618 |
| 0.629161138 | -0.02175462  | 0.639129028 | -0.0601722  | 0.19427919 | -0.05077 |
| 0.711282153 | -0.003045012 | 0.947674745 | -0.10146817 | 0.02834121 | -0.01124 |
| 0.663428049 | -0.008606007 | 0.852850675 | 0.003650746 | 0.93728547 | -0.0761  |
| 0.268640063 | -0.062275108 | 0.179118501 | -0.28640163 | 2.88E-10   | 0.043273 |
| 5.67E-05    | -0.188243784 | 4.24E-05    | 0.093910455 | 0.0425125  | 0.434446 |
| 0.98184345  | 0.012526711  | 0.787168238 | -0.18019466 | 9.01E-05   | 0.172921 |
| 1.67E-06    | 0.229226639  | 5.52E-07    | -0.148773   | 0.00126256 | 0.033146 |
| 0.269904373 | -0.048889242 | 0.291743483 | 0.132828952 | 0.00403366 | 0.241399 |
| 0.000175329 | -0.182889158 | 7.03E-05    | -0.10367988 | 0.02505342 | 0.035559 |
| 6.91E-09    | -0.266915819 | 4.65E-09    | -0.07375141 | 0.11145696 | -0.02818 |
| 8.08E-07    | -0.238373329 | 1.86E-07    | -0.09916252 | 0.03215646 | 0.100922 |
| 1.31E-11    | -0.294290259 | 8.77E-11    | -0.11616086 | 0.01200358 | -0.0703  |
| 2.21E-06    | 0.227629512  | 6.65E-07    | 0.266447907 | 4.96E-09   | -0.08709 |
| 0.165708809 | 0.066250057  | 0.152886501 | -0.01231206 | 0.79072991 | 0.045963 |
| 4.56E-06    | -0.204977858 | 8.00E-06    | -0.22909227 | 5.61E-07   | 0.142339 |
| 4.04E-06    | -0.208703341 | 5.41E-06    | -0.15710749 | 0.00065632 | -0.10262 |
| 0.013358376 | 0.113272613  | 0.014318629 | 0.091270826 | 0.04869994 | -0.14018 |
| 8.31E-07    | -0.220865132 | 1.44E-06    | 0.036967378 | 0.42544911 | 0.082954 |
| 0.035736478 | 0.108409205  | 0.019110194 | -0.04684437 | 0.31242003 | -0.11867 |
| 0.000965449 | -0.152742821 | 0.000928288 | -0.01369964 | 0.7677859  | 0.077353 |
| 0.731137499 | -0.021622637 | 0.641164425 | -0.18496042 | 5.79E-05   | 0.28464  |
| 0.519908138 | 0.005633202  | 0.903366898 | -0.07978911 | 0.08500012 | 0.228358 |
| 0.977791784 | 0.00303364   | 0.947869875 | -0.15899515 | 0.00056336 | 0.169901 |
| 0.896574368 | -0.003470889 | 0.940369263 | -0.06753774 | 0.14504581 | 0.103512 |
| 0.042545325 | -0.107085919 | 0.020634636 | -0.18694901 | 4.80E-05   | -0.17637 |
| 6.54E-10    | -0.287328907 | 2.51E-10    | 0.016866268 | 0.71620738 | 0.1154   |
| 2.37E-12    | -0.323711228 | 7.46E-13    | -0.00946917 | 0.83828573 | -0.10746 |
| 0.134093084 | 0.055683091  | 0.229739985 | -0.23523938 | 2.71E-07   | 0.032178 |
| 0.473295681 | -0.013854235 | 0.765241812 | -0.08427093 | 0.06884018 | -0.03561 |
| 0.515976317 | 0.036615368  | 0.429873017 | -0.11610325 | 0.01204631 | 0.009346 |
| 0.000400594 | 0.174381918  | 0.000152242 | -0.06385134 | 0.16834312 | -0.00982 |
| 1.19E-14    | 0.341434915  | 3.25E-14    | -0.11268716 | 0.01483309 | 0.075294 |
| 0.242662658 | -0.050413248 | 0.276943455 | -0.0972387  | 0.03566776 | 0.000294 |
| 8.00E-05    | -0.192816364 | 2.73E-05    | -0.10474825 | 0.02358684 | 0.071453 |

|             |              |             |             |            |          |
|-------------|--------------|-------------|-------------|------------|----------|
| 0.105400699 | -0.068226121 | 0.14098215  | -0.13126629 | 0.00449173 | -0.07144 |
| 0.696705806 | -0.012133084 | 0.793703014 | 0.001707062 | 0.97065158 | -0.02678 |
| 0.770199477 | 0.012481846  | 0.787912306 | -0.02109429 | 0.64933924 | 0.098186 |
| 0.027625291 | 0.111188392  | 0.016224765 | 0.045882318 | 0.32247278 | -0.06233 |
| 0.002595285 | 0.154889882  | 0.000783616 | -0.07040035 | 0.12871905 | -0.08875 |
| 0.089343238 | -0.069724231 | 0.132440624 | -0.06224547 | 0.17932592 | -0.10935 |
| 3.47E-06    | 0.21829699   | 1.91E-06    | 0.012636071 | 0.78535533 | -0.22781 |
| 0.002008879 | 0.145153093  | 0.001660582 | -0.06721082 | 0.14700671 | -0.20291 |
| 0.208879686 | -0.066472611 | 0.151508865 | -0.15173284 | 0.00100454 | -0.06855 |
| 4.76E-07    | 0.24712607   | 6.29E-08    | -0.02851037 | 0.53882678 | -0.16075 |
| 0.453207282 | 0.029422691  | 0.52590916  | -0.09047514 | 0.05070672 | -0.12125 |
| 0.004182416 | 0.127758895  | 0.005695206 | -0.13937055 | 0.00254033 | -0.04353 |
| 0.626467229 | 0.012931579  | 0.780462389 | -0.10012022 | 0.0305215  | -0.00762 |
| 0.887184627 | -0.006120656 | 0.895051324 | -0.13630279 | 0.00316317 | 0.031699 |
| 0.383282559 | 0.047021541  | 0.310591433 | -0.2242975  | 9.75E-07   | -0.24331 |
| 0.885190291 | -0.010915483 | 0.814006602 | -3.64E-05   | 0.99937337 | 0.051477 |
| 1.65E-05    | -0.201791021 | 1.11E-05    | 0.028151808 | 0.54394674 | -0.26749 |
| 0.006118096 | -0.128964635 | 0.005252197 | 0.141866363 | 0.00211848 | 0.005381 |
| 6.30E-09    | 0.262777043  | 8.16E-09    | -0.08661687 | 0.06144127 | 0.132032 |
| 0.171330219 | 0.070601882  | 0.127625566 | 0.00766595  | 0.86877001 | 0.137797 |
| 0.969803799 | -0.012250682 | 0.791749186 | -0.13033793 | 0.00478561 | -0.00491 |
| 0.013845002 | -0.108502426 | 0.019006602 | -0.0563982  | 0.22380304 | 0.154151 |
| 0.155341545 | 0.065113648  | 0.160069462 | -0.09635479 | 0.03738728 | 0.309442 |
| 0.580381536 | 0.032278707  | 0.486516066 | -0.11983515 | 0.00954015 | -0.01536 |
| 8.18E-09    | -0.267526851 | 4.27E-09    | 0.041366923 | 0.37242893 | -0.08224 |
| 0.046838552 | -0.093202059 | 0.044104168 | 0.073296661 | 0.11368665 | 0.13453  |
| 0.070939154 | 0.101895793  | 0.027678087 | -0.06387251 | 0.16820176 | 0.047866 |
| 0.759223027 | -0.001189997 | 0.979538776 | -0.00970386 | 0.83433488 | -0.00232 |
| 0.328934299 | -0.044019353 | 0.342530567 | -0.09927307 | 0.031964   | -0.07753 |
| 0.235241334 | 0.058512948  | 0.206888209 | -0.07788309 | 0.09274123 | -0.07296 |
| 0.973893886 | 0.017411408  | 0.707449421 | -0.09677757 | 0.03655624 | 0.016016 |
| 0.371057009 | -0.048221335 | 0.298393711 | -0.0216422  | 0.64086252 | -0.01767 |
| 0.007734866 | -0.12431242  | 0.007152594 | 0.075232283 | 0.10443385 | 0.096914 |
| 0.003502377 | 0.126387227  | 0.006239802 | 0.118684276 | 0.01025844 | 0.068008 |
| 0.250702766 | 0.047694608  | 0.303708868 | -0.04284923 | 0.35552667 | -0.28908 |
| 5.64E-10    | -0.28567742  | 3.21E-10    | 0.004467561 | 0.923293   | 0.04948  |
| 0.152182038 | -0.076523764 | 0.098599132 | -0.22845342 | 6.04E-07   | -0.36966 |
| 0.365581659 | 0.069380106  | 0.134366426 | -0.1212595  | 0.00871329 | 0.102235 |
| 8.56E-05    | 0.185152358  | 5.69E-05    | -0.20715457 | 6.37E-06   | 0.10814  |
| 0.001772697 | 0.146115107  | 0.001544869 | -0.08130622 | 0.0792182  | 0.263735 |
| 3.93E-15    | -0.350682774 | 5.84E-15    | -0.07035211 | 0.12898187 | -0.10383 |
| 1.11E-06    | 0.202691602  | 1.01E-05    | -0.09534116 | 0.03944524 | 0.21617  |
| 0.363647164 | -0.049028847 | 0.290366105 | 0.154878769 | 0.00078431 | 0.14067  |
| 0.001296347 | -0.149990758 | 0.001149793 | -0.23242565 | 3.79E-07   | 0.278717 |
| 0.782731483 | -0.014179285 | 0.759900752 | -0.13012079 | 0.0048568  | 0.211891 |

|             |              |             |             |            |          |
|-------------|--------------|-------------|-------------|------------|----------|
| 0.031417088 | -0.082632517 | 0.074428522 | 0.07432302  | 0.1087033  | -0.07188 |
| 0.000292903 | -0.168318063 | 0.000258452 | -0.14254849 | 0.0020149  | 0.000527 |
| 0.349100691 | -0.028127901 | 0.544288971 | -0.15698087 | 0.00066304 | 0.18262  |
| 0.188130064 | -0.063364801 | 0.171616144 | -0.25689654 | 1.79E-08   | -0.17279 |
| 0.000138199 | -0.167794247 | 0.000270316 | 0.034389555 | 0.45845566 | -0.01964 |
| 0.067493989 | -0.085447649 | 0.065042465 | 0.115056407 | 0.01284659 | 0.024346 |
| 0.853713234 | -0.005839922 | 0.899839067 | -0.03085592 | 0.5059395  | -0.17109 |
| 0.432112418 | -0.043842136 | 0.344479155 | -0.07420254 | 0.10927921 | -0.13436 |
| 0.604808472 | -0.019525546 | 0.673857372 | 0.039249102 | 0.39742261 | 0.107105 |
| 4.03E-05    | 0.190796735  | 3.32E-05    | -0.02630421 | 0.57070499 | -0.07286 |
| 0.628712749 | -0.022173516 | 0.63268698  | -0.06375006 | 0.16902054 | -0.10143 |
| 0.568908574 | -0.001152974 | 0.980175229 | -0.06112354 | 0.18730821 | -0.02185 |
| 0.00095485  | -0.159257171 | 0.000551468 | 0.014711287 | 0.75118383 | 0.18227  |
| 0.081466043 | -0.093157915 | 0.04420499  | -0.19711966 | 1.78E-05   | 0.081908 |
| 0.278469799 | -0.045271207 | 0.328966474 | -0.21806198 | 1.96E-06   | -0.02479 |
| 7.03E-09    | 0.260299378  | 1.14E-08    | 0.222786124 | 1.16E-06   | 0.112214 |
| 0.32297916  | -0.049679661 | 0.284002631 | 0.001942539 | 0.96660539 | 0.048187 |
| 0.735257243 | -0.026621644 | 0.566063534 | -0.32470288 | 6.30E-13   | 0.002113 |
| 0.859850489 | 0.008047881  | 0.86229544  | -0.08085139 | 0.08091713 | 0.04102  |
| 0.041549601 | 0.101253409  | 0.028679355 | -0.0990135  | 0.03241747 | 0.027039 |
| 0.391139665 | -0.047939465 | 0.301230287 | 0.001556572 | 0.97323784 | -0.15429 |
| 0.229727486 | -0.049397161 | 0.28675318  | -0.06096084 | 0.18848718 | 0.019221 |
| 0.09816665  | 0.082512249  | 0.074852887 | -0.11920413 | 0.00992824 | 0.210781 |
| 0.350628168 | -0.044387434 | 0.338505843 | 0.098271453 | 0.0337443  | 0.020802 |
| 0.00145488  | 0.143537112  | 0.00187298  | 0.215339641 | 2.65E-06   | 0.096717 |
| 0.000272302 | -0.158353489 | 0.000593491 | 0.225949452 | 8.07E-07   | -0.00454 |
| 0.704816959 | 0.018726835  | 0.686476599 | -0.20852399 | 5.51E-06   | 0.146137 |
| 0.521847074 | 0.021623919  | 0.641144639 | -0.12788095 | 0.00564888 | 0.183637 |
| 0.000907748 | -0.146076871 | 0.001549323 | -0.10792505 | 0.01965617 | 0.178686 |
| 0.000670153 | -0.134662166 | 0.003550443 | 0.109848999 | 0.01756391 | -0.05106 |
| 0.003096512 | -0.147065714 | 0.001437842 | -0.00339513 | 0.94166851 | -0.0571  |
| 0.671842038 | 0.015291846  | 0.741707335 | 0.033516178 | 0.46995475 | -0.00076 |
| 0.372176791 | 0.03695745   | 0.425573522 | -0.01611181 | 0.72838952 | 0.109556 |
| 0.254679348 | -0.046408414 | 0.316949689 | -0.07868581 | 0.08941495 | 0.002087 |
| 0.001737403 | -0.146345718 | 0.001518253 | 0.001618268 | 0.97217752 | 0.162628 |
| 0.982322063 | -0.007848157 | 0.865680082 | -0.05308384 | 0.25225698 | 0.019305 |
| 0.155028553 | -0.063606712 | 0.16998289  | -0.05871508 | 0.20532122 | 0.043499 |
| 3.62E-05    | -0.189806195 | 3.65E-05    | 0.02030283  | 0.66166383 | 0.293437 |
| 0.294578538 | 0.036313205  | 0.433691609 | 0.083132371 | 0.07268574 | 0.461833 |
| 0.170827702 | 0.056897442  | 0.219723637 | -0.13149147 | 0.00442295 | 0.108289 |
| 0.083650215 | -0.075193254 | 0.104614343 | 0.010984111 | 0.81285877 | -0.0715  |
| 8.99E-13    | -0.320623785 | 1.26E-12    | 0.041107719 | 0.37543473 | -0.00985 |
| 0.901005902 | -0.001911173 | 0.967144312 | -0.0377133  | 0.41616276 | -0.00829 |
| 0.00298007  | -0.13305889  | 0.003969953 | -0.16213229 | 0.00043544 | 0.020344 |
| 0.098822848 | -0.069787809 | 0.13208717  | -0.13880477 | 0.00264603 | 0.054882 |



|             |              |             |             |            |          |
|-------------|--------------|-------------|-------------|------------|----------|
| 0.000558205 | 0.144587954  | 0.001732212 | -0.03928832 | 0.39695082 | -0.17905 |
| 0.244655828 | 0.048834636  | 0.292283428 | -0.27668241 | 1.18E-09   | 0.14875  |
| 1.28E-08    | -0.26029888  | 1.14E-08    | -0.20043255 | 1.28E-05   | 0.151349 |
| 4.23E-05    | -0.18788591  | 4.39E-05    | -0.20020554 | 1.31E-05   | -0.23487 |
| 0.067471582 | 0.088002255  | 0.057388981 | -0.11592294 | 0.01218093 | 0.074906 |
| 0.001081572 | -0.144682717 | 0.001720006 | 0.059661156 | 0.1981013  | -0.22386 |
| 0.015159363 | -0.109743589 | 0.017673287 | 0.026015507 | 0.57494199 | -0.04099 |
| 0.044980412 | -0.08909895  | 0.054340453 | -0.08617735 | 0.06277522 | -0.05949 |
| 0.015667315 | -0.109119711 | 0.018332909 | 0.03459639  | 0.45575563 | 0.087646 |
| 2.64E-06    | -0.221756841 | 1.30E-06    | -0.09127849 | 0.04868094 | 0.152161 |
| 0.655822283 | -0.029026423 | 0.531500504 | -0.07004702 | 0.13065366 | 0.034788 |
| 0.60047997  | -0.006236185 | 0.893082137 | -0.15622138 | 0.00070469 | -0.07558 |
| 0.090439595 | -0.069028815 | 0.136354519 | -0.12099315 | 0.00886287 | 0.068335 |
| 1.09E-05    | -0.202020665 | 1.09E-05    | -0.08946158 | 0.05336256 | -0.00599 |
| 3.14E-06    | 0.224279026  | 9.77E-07    | -0.10578707 | 0.02223261 | -0.30048 |
| 0.013537869 | -0.111062217 | 0.016346984 | -0.1195554  | 0.00971051 | -0.05897 |
| 0.000220604 | 0.159446855  | 0.000543005 | -0.07616709 | 0.10018399 | -0.09567 |
| 0.513405769 | -0.019200485 | 0.678982382 | -0.02577233 | 0.57852224 | 0.207489 |
| 0.027842667 | -0.104450678 | 0.023987669 | -0.12240897 | 0.00809321 | 0.094301 |
| 0.251846777 | -0.070345894 | 0.129015758 | -0.34859795 | 8.65E-15   | 0.131834 |
| 0.939901566 | -0.00671022  | 0.885009249 | -0.09766961 | 0.03485416 | -0.01514 |
| 0.375135783 | 0.044164801  | 0.340936559 | -0.10856976 | 0.01893208 | 0.082332 |
| 7.88E-06    | -0.192573192 | 2.79E-05    | -0.0608968  | 0.18895272 | 0.138955 |
| 5.97E-09    | 0.277324114  | 1.08E-09    | -0.0961886  | 0.03771833 | 0.182941 |
| 0.01042266  | -0.100656085 | 0.029638127 | 0.005611801 | 0.90373222 | 0.228021 |
| 0.185149128 | -0.060672157 | 0.190592413 | -0.0672211  | 0.14694472 | -0.07384 |
| 0.868070891 | 0.00464471   | 0.92026131  | -0.0105372  | 0.82034058 | -0.02813 |
| 0.005363622 | -0.131852321 | 0.004314708 | -0.10869238 | 0.01879702 | -0.08644 |
| 0.002388186 | -0.135501998 | 0.003347127 | 0.032137762 | 0.48842211 | -0.00902 |
| 0.000460967 | 0.166009986  | 0.00031466  | 0.006880083 | 0.88211931 | -0.05241 |
| 0.697811427 | -0.02534893  | 0.58478088  | 0.111041724 | 0.01636691 | -0.13944 |
| 0.227055724 | -0.070331866 | 0.129092278 | -0.03977254 | 0.39115321 | 0.081472 |
| 0.493472906 | -0.033099565 | 0.475495435 | 0.329332282 | 2.82E-13   | 0.052173 |
| 0.079767697 | -0.07261693  | 0.117084524 | -0.0713147  | 0.12381564 | 0.183949 |
| 0.036431515 | -0.094371959 | 0.041501837 | -0.01084731 | 0.81514726 | -0.05941 |
| 0.000921348 | 0.136612139  | 0.003094595 | -0.10178923 | 0.02784207 | -0.13839 |
| 0.248899806 | 0.068102214  | 0.141707083 | 0.315909335 | 2.78E-12   | 0.165792 |
| 0.013607762 | -0.119879641 | 0.009513297 | 0.14389291  | 0.00182419 | 0.194283 |
| 8.31E-09    | 0.266263634  | 5.08E-09    | -0.06330672 | 0.17201002 | 0.124633 |
| 0.863758946 | 0.022800247  | 0.62310047  | 0.042526213 | 0.35916821 | 0.156987 |
| 0.000599617 | 0.164114347  | 0.000369148 | -0.04243463 | 0.36020492 | 0.10385  |
| 0.351474716 | 0.058669392  | 0.205674662 | -0.29001302 | 1.68E-10   | 0.236148 |
| 0.00620795  | -0.130043049 | 0.004882522 | -0.16384383 | 0.00037761 | 0.223004 |
| 0.766521131 | -0.015884687 | 0.732070479 | -0.06328022 | 0.17218997 | 1.10E-05 |
| 0.191264473 | 0.051990851  | 0.262169025 | -0.06907674 | 0.13608195 | -0.28503 |

|             |              |             |             |            |          |
|-------------|--------------|-------------|-------------|------------|----------|
| 0.017777506 | -0.115521133 | 0.012485708 | -0.07946264 | 0.08628779 | -0.08156 |
| 0.186082181 | 0.064187621  | 0.166108376 | -0.20124234 | 1.18E-05   | 0.017543 |
| 0.034597248 | -0.098666296 | 0.033032648 | 0.10692405  | 0.02082818 | 0.358863 |
| 0.217155776 | 0.06822647   | 0.140980107 | -0.12653744 | 0.00617796 | -0.07951 |
| 5.01E-08    | -0.253532764 | 2.77E-08    | 0.026577201 | 0.56671229 | 0.201824 |
| 0.709414091 | -0.01666316  | 0.719480007 | -0.06799137 | 0.142358   | 0.333079 |
| 3.94E-05    | -0.198058864 | 1.62E-05    | -0.33281591 | 1.53E-13   | -0.15171 |
| 0.004508506 | -0.139942147 | 0.002437463 | 0.091013965 | 0.04934037 | 0.058714 |
| 0.436361442 | -0.03603302  | 0.437249859 | -0.1314623  | 0.0044318  | -0.00811 |
| 0.535956405 | 0.029735552  | 0.521515955 | -0.13304821 | 0.00397289 | -0.06355 |
| 0.026870378 | -0.091280425 | 0.048676141 | -0.0940615  | 0.04217946 | 0.252695 |
| 0.006899459 | -0.138849843 | 0.002637463 | -0.01299481 | 0.77941654 | 0.09465  |
| 0.013358319 | -0.111960863 | 0.015493824 | -0.11477626 | 0.01306855 | -0.12936 |
| 0.159282001 | -0.062358474 | 0.178536096 | -0.04760634 | 0.3046057  | 0.199288 |
| 1.94E-06    | 0.215057767  | 2.73E-06    | -0.1919277  | 2.98E-05   | 0.257405 |
| 1.04E-05    | 0.207650617  | 6.05E-06    | 0.177109672 | 0.00011929 | -0.16019 |
| 4.29E-05    | 0.195736424  | 2.05E-05    | 0.036145382 | 0.43582089 | 0.05363  |
| 1.76E-05    | -0.194748747 | 2.26E-05    | -0.17675247 | 0.00012319 | 0.295094 |
| 0.483837347 | -0.021681927 | 0.640249732 | -0.10897968 | 0.01848388 | -0.05956 |
| 0.106860481 | 0.086908855  | 0.06056813  | -0.30616563 | 1.36E-11   | 0.241769 |
| 0.108703035 | 0.070552222  | 0.127894347 | -0.06702089 | 0.14815516 | 0.05728  |
| 0.010623983 | -0.117810527 | 0.010835404 | -0.14341791 | 0.00188959 | 0.062925 |
| 1.16E-09    | 0.278225414  | 9.50E-10    | 0.074040789 | 0.11005614 | 0.246186 |
| 0.300302838 | 0.049983507  | 0.281064179 | -0.1400692  | 0.00241512 | -0.1784  |
| 0.227002178 | -0.067834455 | 0.143283391 | 0.074664763 | 0.10708278 | -0.00135 |
| 0.507043355 | -0.01859242  | 0.688609008 | -0.08279814 | 0.07384732 | 0.195745 |
| 2.72E-07    | -0.233731824 | 3.25E-07    | 0.034271594 | 0.45999951 | 0.236821 |
| 0.08814005  | -0.077141212 | 0.095902794 | -0.13031502 | 0.00479308 | 0.081817 |
| 4.15E-05    | -0.181906213 | 7.70E-05    | -0.02199215 | 0.63547277 | 0.147244 |
| 0.247735575 | 0.06377778   | 0.168834963 | -0.10781444 | 0.01978278 | -0.16041 |
| 0.556012004 | -0.017482178 | 0.706315265 | -0.19429741 | 2.36E-05   | 0.039495 |
| 0.105994961 | -0.079061914 | 0.08788975  | 0.044459434 | 0.33772212 | 0.066887 |
| 2.74E-05    | 0.196873131  | 1.83E-05    | -0.16630044 | 0.00030701 | 0.290905 |
| 3.59E-18    | -0.382715647 | 9.73E-18    | -0.02271511 | 0.62439903 | 0.070498 |
| 4.07E-06    | -0.213135687 | 3.37E-06    | -0.08907344 | 0.05440979 | -0.00126 |
| 0.807960075 | 0.014362281  | 0.756898844 | -0.10930134 | 0.01813869 | -0.08954 |
| 0.603478689 | 0.029856473  | 0.519823038 | -0.23755334 | 2.05E-07   | 0.021164 |
| 0.299218909 | 0.04826714   | 0.297934441 | -0.24235059 | 1.14E-07   | 0.324305 |
| 2.61E-10    | -0.303045698 | 2.24E-11    | -0.03441528 | 0.45811935 | 0.127232 |
| 0.00205765  | -0.131381877 | 0.004456302 | -0.00129291 | 0.97776975 | 0.279246 |
| 0.422506157 | -0.035917365 | 0.438723503 | -0.12619363 | 0.00632032 | 0.028997 |
| 0.674101711 | 0.017087761  | 0.712644405 | -0.03583332 | 0.43979614 | -0.08682 |
| 0.007846973 | -0.125028279 | 0.006824977 | 0.027468836 | 0.55376523 | 0.045801 |
| 1.79E-22    | -0.425068714 | 6.50E-22    | -0.04069354 | 0.3802686  | 0.156417 |
| 1.19E-09    | -0.274481293 | 1.62E-09    | 0.00615592  | 0.89445018 | 0.160579 |

|             |              |              |             |            |          |
|-------------|--------------|--------------|-------------|------------|----------|
| 5.92E-15    | -0.355591798 | 2.29E-15     | 0.00975114  | 0.83353954 | 0.012985 |
| 0.840851489 | -0.006535819 | 0.8879777996 | -0.04251018 | 0.35934951 | -0.05685 |
| 0.000164927 | 0.178605135  | 0.000104203  | -0.1838343  | 6.44E-05   | -0.05199 |
| 1.60E-05    | -0.196987129 | 1.81E-05     | 0.014414188 | 0.75604802 | 0.012992 |
| 0.266523867 | -0.049149555 | 0.289178688  | -0.10333285 | 0.02554644 | -0.05595 |
| 0.50673833  | -0.032552006 | 0.482831619  | -0.08056637 | 0.08199676 | 0.418696 |
| 1.42E-05    | -0.190813764 | 3.32E-05     | -0.27279547 | 2.05E-09   | 0.287971 |
| 1.59E-13    | -0.331344914 | 1.98E-13     | -0.08365921 | 0.07088505 | 0.10646  |
| 1.90E-08    | 0.260683795  | 1.08E-08     | -0.1218186  | 0.00840658 | -0.09668 |
| 0.12882119  | -0.070350876 | 0.128988594  | -0.06979797 | 0.13203075 | -0.00067 |
| 0.001840221 | -0.1428443   | 0.001971436  | -0.07054358 | 0.12794116 | -0.26846 |
| 0.231039308 | -0.068411606 | 0.139902257  | -0.1517826  | 0.00100066 | 0.131294 |
| 0.983377454 | -0.00554067  | 0.904946634  | -0.2877412  | 2.36E-10   | -0.11372 |
| 1.63E-10    | -0.299691154 | 3.80E-11     | -0.09431853 | 0.04161779 | -0.12412 |
| 5.54E-10    | -0.276021346 | 1.30E-09     | -0.14603437 | 0.00155429 | -0.04721 |
| 0.53480008  | -0.01950446  | 0.674189355  | -0.12548283 | 0.00662399 | 0.211248 |
| 0.00028919  | 0.158025899  | 0.000609445  | -0.1745383  | 0.00015014 | -0.02794 |
| 0.084646132 | -0.077884444 | 0.092735558  | -0.11908421 | 0.01000356 | -0.00547 |
| 0.016329721 | 0.104598086  | 0.02378838   | -0.21184354 | 3.87E-06   | -0.02008 |
| 0.586072367 | 0.017410994  | 0.707456052  | -0.04318391 | 0.35177824 | 0.123073 |
| 0.809237881 | -0.027391491 | 0.55488259   | -0.41984172 | 2.30E-21   | 0.091027 |
| 0.037060445 | 0.10426062   | 0.02424675   | -0.01541125 | 0.73976314 | -0.01545 |
| 0.7774592   | 0.031950498  | 0.490960731  | -0.05469444 | 0.23813055 | -0.07024 |
| 6.20E-05    | -0.189354644 | 3.82E-05     | -0.2077875  | 5.96E-06   | -0.00535 |
| 0.000413697 | -0.151021383 | 0.001061686  | -0.10458338 | 0.0238082  | -0.2813  |
| 5.16E-13    | -0.32125844  | 1.13E-12     | -0.14349541 | 0.00187878 | 0.011112 |
| 0.002160741 | -0.137415926 | 0.002922697  | -0.04878091 | 0.29281531 | 0.176598 |
| 7.39E-07    | -0.23077655  | 4.61E-07     | -0.11866978 | 0.01026778 | -0.01493 |
| 2.97E-06    | -0.212808822 | 3.49E-06     | -0.05563931 | 0.23010703 | -0.12287 |
| 1.06E-06    | 0.21361394   | 3.20E-06     | 0.039606362 | 0.3931371  | -0.11052 |
| 0.080669013 | -0.081030004 | 0.080246474  | -0.05937913 | 0.20023394 | 0.054685 |
| 0.079262131 | -0.069135781 | 0.135746776  | 0.084322386 | 0.06867039 | 0.136297 |
| 0.001368406 | -0.145072202 | 0.001670665  | -0.08453227 | 0.0679814  | -0.05292 |
| 8.60E-07    | -0.224951601 | 9.05E-07     | -0.23271073 | 3.67E-07   | 0.116461 |
| 0.758387174 | -0.011099672 | 0.810926871  | -0.02540877 | 0.58389442 | 0.171382 |
| 5.01E-12    | -0.313945028 | 3.85E-12     | 0.128334594 | 0.00547966 | 0.049361 |
| 0.0004294   | -0.156383819 | 0.000695583  | -0.06291149 | 0.17470815 | 0.068647 |
| 0.099166751 | -0.080580771 | 0.08194192   | 0.172444571 | 0.00018064 | -0.02755 |
| 0.264441424 | 0.042838064  | 0.355652158  | 0.32099575  | 1.18E-12   | 0.008307 |
| 0.000965155 | -0.151397276 | 0.001031132  | -0.07791114 | 0.09262339 | -0.01734 |
| 0.338191417 | 0.061682066  | 0.183302307  | 0.038582763 | 0.40549032 | 0.079819 |
| 0.068247485 | -0.077672561 | 0.093629831  | -0.01881645 | 0.68505635 | 0.247007 |
| 0.011847139 | -0.126217549 | 0.00631032   | -0.03033389 | 0.5131668  | -0.19994 |
| 0.689175537 | -0.005068832 | 0.913007746  | 0.122097628 | 0.00825715 | -0.15538 |
| 0.000242693 | -0.181913999 | 7.70E-05     | -0.00777557 | 0.86691074 | 0.164689 |

|             |              |             |             |            |          |
|-------------|--------------|-------------|-------------|------------|----------|
| 0.004902411 | 0.127826612  | 0.005669462 | 0.002989714 | 0.94862365 | 0.056895 |
| 0.054697912 | 0.097986752  | 0.034265504 | -0.00012183 | 0.997905   | -0.07193 |
| 0.743227059 | -0.017375063 | 0.708032144 | 0.031123315 | 0.50225838 | -0.01731 |
| 0.022170809 | -0.106211746 | 0.021698718 | 0.106307274 | 0.02158017 | 0.080967 |
| 0.632136995 | -0.019168345 | 0.679489928 | -0.0265708  | 0.56680575 | -0.0594  |
| 0.057530463 | 0.078938967  | 0.088386014 | 0.136953029 | 0.0030206  | 0.043619 |
| 6.63E-08    | -0.233475846 | 3.35E-07    | -0.155648   | 0.00073773 | -0.10961 |
| 0.028450188 | 0.097368932  | 0.03542018  | -0.01043448 | 0.82206263 | -0.09193 |
| 0.018163331 | -0.107146478 | 0.020562629 | 0.054849667 | 0.23679906 | -0.14941 |
| 0.022229431 | -0.086640759 | 0.061369461 | 0.278001721 | 9.81E-10   | 0.006895 |
| 0.034739559 | -0.091242607 | 0.048769956 | -0.04246991 | 0.35980533 | 0.165553 |
| 3.93E-12    | -0.317824078 | 2.02E-12    | 0.159183562 | 0.00055478 | 0.101723 |
| 0.000126608 | 0.170914981  | 0.000206486 | 0.099868501 | 0.03094418 | 0.131185 |
| 0.614158107 | -0.014713423 | 0.751148903 | 0.230683665 | 4.66E-07   | -0.01277 |
| 2.76E-06    | -0.228194508 | 6.23E-07    | 0.098997445 | 0.03244571 | 0.342814 |
| 0.162570506 | 0.061511553  | 0.184518504 | -0.23562008 | 2.59E-07   | -0.02508 |
| 0.054090017 | -0.089652187 | 0.052854447 | -0.1312121  | 0.00450842 | 0.055404 |
| 0.003829866 | 0.140474777  | 0.002345046 | 0.091308825 | 0.04860579 | 0.20015  |
| 6.22E-21    | -0.428332972 | 2.92E-22    | -0.01534662 | 0.7408152  | 0.011959 |
| 7.24E-09    | -0.25274133  | 3.07E-08    | -0.21757812 | 2.07E-06   | -0.12759 |
| 0.024308631 | -0.100232663 | 0.030334294 | 0.009782552 | 0.83301116 | 0.097607 |
| 0.064167156 | -0.090749259 | 0.050007715 | 0.015760534 | 0.73408521 | -0.1268  |
| 2.33E-12    | -0.314672275 | 3.42E-12    | -0.1689068  | 0.0002457  | -0.04174 |
| 8.33E-06    | -0.214716284 | 2.84E-06    | -0.17042769 | 0.00021542 | -0.15731 |
| 4.52E-09    | 0.269720033  | 3.16E-09    | -0.0536185  | 0.24750435 | 0.081277 |
| 0.032372378 | -0.091917312 | 0.047118787 | -0.03243111 | 0.48445958 | -0.0378  |
| 2.77E-06    | -0.212348585 | 3.67E-06    | -0.02186278 | 0.63746298 | 0.016167 |
| 0.019876758 | -0.109211767 | 0.018234248 | 0.048341708 | 0.29718779 | 0.075193 |
| 1.12E-12    | -0.314682178 | 3.41E-12    | 0.007647813 | 0.86907769 | 0.074428 |
| 0.03635243  | 0.089942916  | 0.052087211 | -0.17656963 | 0.00012523 | 0.064694 |
| 0.547124548 | 0.016945593  | 0.714930617 | -0.15080001 | 0.00108007 | 0.122328 |
| 0.059523157 | 0.079523212  | 0.0860477   | -0.01875993 | 0.68595191 | 0.116344 |
| 0.010975572 | -0.112903206 | 0.014641381 | 0.092225485 | 0.04638035 | -0.0513  |
| 0.000522417 | 0.158948755  | 0.000565489 | -0.15896263 | 0.00056485 | -0.03593 |
| 0.956382366 | 0.005349729  | 0.908207634 | -0.05462587 | 0.23872034 | 0.086639 |
| 0.171597645 | 0.042775086  | 0.356360468 | -0.05220307 | 0.26022377 | 0.075599 |
| 0.487940774 | 0.027252255  | 0.556896799 | -0.01435814 | 0.75696677 | -0.03518 |
| 0.046959659 | 0.087884293  | 0.057725166 | 0.026987259 | 0.56074007 | 0.026139 |
| 0.076397907 | 0.078453273  | 0.090368529 | 0.045838581 | 0.32293474 | 0.030325 |
| 0.317496846 | -0.045364035 | 0.327974672 | 0.060959755 | 0.18849503 | 0.003428 |
| 0.110626911 | -0.078049048 | 0.092045558 | -0.06870341 | 0.13821625 | 0.00674  |
| 0.961912893 | -0.010196488 | 0.826055619 | -0.05130164 | 0.26855542 | -0.02927 |
| 0.165248688 | 0.054135355  | 0.242969753 | -0.06925169 | 0.1350906  | -0.02795 |
| 0.074048075 | 0.072007414  | 0.120198527 | -0.01549925 | 0.73833127 | 0.001083 |
| 0.933854371 | 0.011384498  | 0.806170186 | -0.03176681 | 0.49345769 | -0.0362  |

|             |              |             |             |            |          |
|-------------|--------------|-------------|-------------|------------|----------|
| 0.873348956 | -0.006962163 | 0.880723412 | -0.03018541 | 0.51523216 | -0.11112 |
| 0.010154563 | 0.122798465  | 0.007892206 | 0.093639107 | 0.04311637 | 0.184157 |
| 0.404368623 | -0.059066606 | 0.202616646 | -0.01563912 | 0.73605731 | -0.03176 |
| 4.36E-15    | -0.361186722 | 7.75E-16    | -0.06100298 | 0.18818131 | 0.009867 |
| 0.085034233 | -0.078357706 | 0.090762782 | -0.04771688 | 0.3034829  | -0.03863 |
| 0.325285286 | -0.046681822 | 0.314103954 | -0.0041044  | 0.92951152 | -0.04949 |
| 0.067447571 | -0.079749307 | 0.085156278 | -0.05844718 | 0.20739989 | 0.054754 |
| 0.591375418 | -0.019788981 | 0.669714992 | 0.009846283 | 0.8319394  | -0.0351  |
| 0.052085708 | 0.086889983  | 0.060624251 | 0.006710625 | 0.88500237 | -0.04624 |
| 0.288580573 | -0.047552157 | 0.305157029 | -0.00075054 | 0.98709412 | -0.06671 |
| 0.050838123 | -0.103135437 | 0.025830615 | 0.105401332 | 0.02272739 | 0.354683 |
| 0.000767903 | -0.129759947 | 0.004977226 | -0.21961975 | 1.65E-06   | -0.20919 |
| 0.002270581 | 0.140403552  | 0.002357216 | 0.100969245 | 0.0291321  | 0.192472 |
| 0.000687341 | -0.152895221 | 0.000917257 | -0.00118412 | 0.97963983 | 0.094285 |
| 0.947763578 | 0.014569357  | 0.753506329 | -0.03408093 | 0.46250099 | -0.03205 |
| 0.268525176 | 0.040126117  | 0.386952446 | -0.02480705 | 0.59283626 | -0.04232 |
| 0.689874683 | 0.018528933  | 0.689617044 | -0.05834703 | 0.20818087 | 0.111681 |
| 3.77E-05    | -0.190542945 | 3.40E-05    | -0.07058042 | 0.12774169 | 0.172271 |
| 0.002590144 | -0.138343213 | 0.002735208 | 0.033851001 | 0.46552771 | -0.096   |
| 0.225391941 | 0.051183498  | 0.269660763 | -0.19630767 | 1.93E-05   | 0.45261  |
| 0.292463055 | -0.067906958 | 0.142855246 | 0.011644332 | 0.80183709 | 0.131256 |
| 0.777202931 | 0.000266368  | 0.995419494 | -0.05878036 | 0.20481702 | 0.019668 |
| 0.259210354 | -0.052542375 | 0.257134375 | 0.060356285 | 0.19291567 | 0.074559 |
| 0.249562978 | 0.067132223  | 0.147481149 | -0.08084572 | 0.0809385  | -0.07514 |
| 0.18958042  | 0.051927354  | 0.262752994 | -0.24360011 | 9.79E-08   | -0.05174 |
| 0.11178101  | -0.07194227  | 0.120535135 | -0.13609304 | 0.00321044 | -0.03409 |
| 2.46E-06    | -0.219984426 | 1.59E-06    | -0.0545871  | 0.23905428 | -0.16126 |
| 1.93E-18    | -0.390384186 | 1.89E-18    | -0.07667759 | 0.0979218  | -0.01621 |
| 0.039258444 | -0.093571123 | 0.043268785 | -0.03560268 | 0.44274755 | -0.02511 |
| 0.566478535 | 0.036977014  | 0.425328386 | 0.146714989 | 0.00147651 | 0.238683 |
| 0.977739932 | -0.00182761  | 0.968580107 | -0.25330979 | 2.85E-08   | -0.03208 |
| 8.23E-05    | 0.167224499  | 0.000283798 | -0.24973546 | 4.52E-08   | -0.1001  |
| 0.000351658 | -0.172480168 | 0.000180074 | -0.00046059 | 0.9920797  | 0.137263 |
| 1.36E-06    | -0.232600055 | 3.72E-07    | -0.09948123 | 0.03160426 | 0.146487 |
| 0.063295319 | 0.079284823  | 0.08699571  | -0.08698334 | 0.06034703 | 0.140363 |
| 0.53904561  | 0.031357109  | 0.499051396 | 0.035467163 | 0.44448689 | -0.13692 |
| 0.722150964 | -0.000211721 | 0.996359212 | -0.11302513 | 0.01453416 | 0.013867 |
| 0.525884679 | -0.027304352 | 0.556142738 | -0.22299025 | 1.13E-06   | 0.149492 |
| 1.51E-08    | 0.261519212  | 9.67E-09    | -0.2231751  | 1.11E-06   | 0.218783 |
| 0.000255748 | 0.176325822  | 0.000128001 | 0.027122357 | 0.55877913 | -0.07381 |
| 1.13E-09    | 0.266808516  | 4.72E-09    | 0.048304602 | 0.29755918 | -0.15387 |
| 0.126059385 | -0.084385314 | 0.068463219 | 0.060372667 | 0.19279468 | -0.04794 |
| 0.000387161 | -0.159440531 | 0.000543285 | 0.034790031 | 0.45323595 | -0.11834 |
| 0.006396289 | 0.125663667  | 0.006545516 | -0.15971128 | 0.00053141 | 0.117927 |
| 0.123752712 | -0.070854709 | 0.126263969 | 0.026253085 | 0.57145423 | -0.01983 |

|             |              |             |             |            |          |
|-------------|--------------|-------------|-------------|------------|----------|
| 1.63E-11    | -0.308544534 | 9.31E-12    | 0.012758887 | 0.78332074 | 0.13802  |
| 2.30E-12    | -0.313337539 | 4.26E-12    | -0.06276455 | 0.17571924 | 0.218616 |
| 0.00036639  | 0.169102126  | 0.000241599 | -0.24053719 | 1.43E-07   | 0.271763 |
| 0.044975053 | -0.098937121 | 0.032551963 | -0.05275419 | 0.25521867 | 0.103829 |
| 4.39E-13    | -0.320237181 | 1.35E-12    | -0.03431077 | 0.45948649 | 0.195131 |
| 0.117929664 | -0.077302629 | 0.095207687 | -0.03232785 | 0.48585245 | -0.04999 |
| 0.082702508 | 0.086773999  | 0.060970124 | -0.07698304 | 0.09658784 | 0.082057 |
| 0.118229157 | -0.07733728  | 0.095058996 | -0.0248513  | 0.59217655 | 0.03954  |
| 0.074990531 | -0.083074391 | 0.072886166 | -0.08503997 | 0.06633822 | -0.07792 |
| 0.068726806 | -0.085133508 | 0.066039055 | -0.04894671 | 0.29117592 | 0.009096 |
| 0.299900348 | -0.051713082 | 0.264730214 | -0.00431129 | 0.9259683  | -0.00473 |
| 0.575093753 | -0.02984789  | 0.519943107 | 0.175795785 | 0.00013422 | 0.020209 |
| 0.000331456 | -0.169497488 | 0.000233496 | -0.2587654  | 1.40E-08   | -0.07461 |
| 0.316268009 | -0.06130879  | 0.185972461 | -0.03002611 | 0.51745281 | 0.067965 |
| 0.01351398  | -0.115003952 | 0.012887894 | -0.31082864 | 6.42E-12   | -0.05335 |
| 0.188865899 | -0.053775386 | 0.246121731 | 0.101862701 | 0.02772892 | 0.266204 |
| 5.10E-07    | -0.229822798 | 5.15E-07    | -0.06854215 | 0.13914603 | 0.021015 |
| 0.76207456  | 0.013522194  | 0.770709263 | 0.053357376 | 0.24981766 | -0.04044 |
| 2.53E-05    | -0.19465605  | 2.28E-05    | -0.0853905  | 0.06522283 | 0.105035 |
| 7.90E-06    | -0.202288348 | 1.06E-05    | -0.08285342 | 0.07365418 | 0.184629 |
| 0.675232011 | 0.025988282  | 0.575342314 | -0.16829121 | 0.00025905 | -0.08436 |
| 3.61E-10    | -0.290568062 | 1.54E-10    | -0.01042401 | 0.82223813 | -0.06263 |
| 0.444286443 | -0.036572967 | 0.430407682 | -0.07680946 | 0.09734412 | -0.00214 |
| 0.121558804 | -0.076013527 | 0.100872522 | 0.118619689 | 0.01030013 | -0.02622 |
| 0.203007992 | -0.06129807  | 0.18604956  | 0.098052053 | 0.03414535 | 0.227073 |
| 0.522032552 | 0.022630551  | 0.62568996  | -0.03829692 | 0.4089809  | -0.01514 |
| 0.233649891 | 0.045434368  | 0.327224501 | -0.17188174 | 0.00018977 | -0.09868 |
| 0.185107056 | -0.056168402 | 0.225698826 | -0.10774908 | 0.01985794 | -0.07237 |
| 3.39E-08    | 0.246295827  | 6.99E-08    | -0.21013058 | 4.65E-06   | -0.14304 |
| 0.000117353 | -0.174758887 | 0.000147228 | -0.10950186 | 0.01792637 | 0.082355 |
| 3.87E-06    | 0.218236675  | 1.93E-06    | -0.15481898 | 0.00078804 | 0.112191 |
| 0.441217457 | 0.03168676   | 0.494548014 | -0.00652314 | 0.88819385 | 0.347716 |
| 2.54E-05    | 0.185663467  | 5.42E-05    | 0.170556543 | 0.00021303 | 0.344804 |
| 0.053505472 | 0.076601723  | 0.098255399 | 0.111069306 | 0.0163401  | 0.548705 |
| 0.673457379 | 0.020791082  | 0.654049689 | -0.08593919 | 0.06350793 | -0.17877 |
| 0.150210725 | 0.057528822  | 0.214641027 | -0.01203538 | 0.79532734 | -0.06596 |
| 9.83E-05    | -0.167994762 | 0.000265716 | 0.200650689 | 1.25E-05   | 0.390199 |
| 0.022043522 | 0.10969249   | 0.017726523 | -0.11616127 | 0.01200327 | -0.18435 |
| 0.948069458 | 0.003820733  | 0.93437177  | 0.117810011 | 0.01083575 | -0.04881 |
| 0.902593886 | 0.000334981  | 0.994239643 | -0.05641533 | 0.22366219 | -0.11884 |
| 0.504096526 | -0.044772289 | 0.334330201 | -0.01834913 | 0.69247491 | -0.00507 |
| 0.000311735 | 0.168359424  | 0.000257536 | 0.092570497 | 0.04556519 | 0.124864 |
| 0.037117324 | -0.092852644 | 0.044907538 | -0.16150679 | 0.00045855 | 0.107237 |
| 0.728214711 | 0.010699807  | 0.817616474 | -0.13175453 | 0.0043438  | 0.028162 |
| 0.561236805 | 0.033704612  | 0.467460422 | -0.08858645 | 0.05574788 | 0.062234 |

|             |              |             |             |            |          |
|-------------|--------------|-------------|-------------|------------|----------|
| 0.207097539 | 0.069192553  | 0.135425062 | -0.03537515 | 0.44567015 | 0.096081 |
| 0.115589027 | -0.080038166 | 0.08402825  | -0.27178489 | 2.37E-09   | 0.041157 |
| 1.56E-05    | -0.20635514  | 6.93E-06    | -0.11525571 | 0.01269071 | 0.396522 |
| 0.001859662 | 0.154807562  | 0.000788754 | -0.21430659 | 2.97E-06   | -0.08858 |
| 0.030884481 | -0.086421845 | 0.062030263 | -0.04463057 | 0.33586395 | 0.167401 |
| 0.109474958 | -0.071851538 | 0.121005182 | -0.02288143 | 0.62186334 | 0.027898 |
| 0.228040965 | -0.060021813 | 0.195398276 | 0.071743685 | 0.12156579 | 0.036404 |
| 5.11E-07    | -0.198821866 | 1.50E-05    | -0.18711352 | 4.73E-05   | -0.11869 |
| 0.175148225 | -0.070345445 | 0.129018211 | -0.06777629 | 0.14362757 | -0.00723 |
| 1.49E-11    | 0.298007793  | 4.94E-11    | -0.08926492 | 0.05389104 | 0.155032 |
| 0.000156673 | -0.168706187 | 0.000249976 | 0.040622234 | 0.3811046  | 0.076559 |
| 0.182864527 | 0.06432291   | 0.165215612 | 0.024386004 | 0.59913011 | 0.029965 |
| 2.76E-06    | -0.223154266 | 1.11E-06    | 0.233286387 | 3.43E-07   | -0.06226 |
| 0.003643199 | -0.132067772 | 0.004251229 | 0.007439855 | 0.87260697 | 0.438078 |
| 0.2983845   | 0.04094864   | 0.377286831 | -0.10558588 | 0.0224895  | 0.109194 |
| 1.31E-21    | -0.412730191 | 1.23E-20    | 0.054901825 | 0.23635285 | 0.06657  |
| 5.14E-05    | -0.194563423 | 2.30E-05    | -0.17696999 | 0.0001208  | 0.220062 |
| 3.34E-10    | -0.301916519 | 2.68E-11    | -0.07434648 | 0.10859145 | -0.02418 |
| 3.02E-06    | -0.212483909 | 3.61E-06    | -0.04832663 | 0.29733864 | -0.1154  |
| 8.02E-07    | -0.219114155 | 1.75E-06    | -0.09007183 | 0.05174998 | -0.07849 |
| 0.58896619  | 0.012282791  | 0.791215928 | 0.020902093 | 0.65232346 | 0.040809 |
| 0.638634613 | -0.031521004 | 0.496809706 | 0.034845732 | 0.45251261 | -0.0408  |
| 0.001516886 | 0.154139219  | 0.00083164  | 0.064679489 | 0.16287982 | 0.18162  |
| 5.29E-10    | -0.27823262  | 9.49E-10    | -0.02764248 | 0.55126068 | 0.01222  |
| 0.294935846 | -0.057275372 | 0.216671055 | 0.049807672 | 0.28276214 | -0.09299 |
| 1.62E-14    | -0.345767401 | 1.47E-14    | 0.158648025 | 0.00057948 | -0.00149 |
| 0.042654357 | -0.097747277 | 0.034709207 | -0.05670226 | 0.22131211 | 0.044006 |
| 0.000241382 | -0.182140861 | 7.54E-05    | -0.05272647 | 0.25546883 | 0.029406 |
| 0.955232375 | -0.015587229 | 0.736900618 | 0.034938734 | 0.45130632 | 0.197479 |
| 0.433962958 | 0.040381987  | 0.383929657 | 0.20224544  | 1.06E-05   | -0.08708 |
| 0.123014069 | -0.077946882 | 0.092473337 | 0.063189986 | 0.17280367 | 0.068138 |
| 0.000915498 | -0.156040423 | 0.000714967 | 0.012945887 | 0.78022569 | -0.08843 |
| 0.001602366 | -0.136817717 | 0.003049776 | -0.07530608 | 0.10409326 | 0.263517 |
| 5.85E-06    | -0.20992825  | 4.75E-06    | -0.18385593 | 6.43E-05   | -0.04156 |
| 0.342390141 | -0.04610276  | 0.320150953 | -0.18669574 | 4.92E-05   | 0.182093 |
| 0.458996087 | 0.029542306  | 0.524227305 | -0.12205806 | 0.00827819 | 0.02248  |
| 4.52E-05    | -0.177166332 | 0.000118686 | -0.01044396 | 0.82190364 | 0.112184 |
| 0.97846079  | 0.00172169   | 0.970400214 | -0.02108512 | 0.6494815  | -0.02999 |
| 0.883252599 | -0.020963981 | 0.651361905 | -0.28486929 | 3.61E-10   | 0.096836 |
| 0.026693607 | 0.107088167  | 0.020631959 | -0.25295249 | 2.99E-08   | 0.180439 |
| 0.797373857 | 0.019006145  | 0.682053515 | -0.03187314 | 0.49201149 | 0.034247 |
| 0.047227354 | -0.081928164 | 0.076941927 | -0.05185423 | 0.26342662 | -0.03136 |
| 0.285658677 | 0.038646554  | 0.404713782 | -0.14482036 | 0.00170242 | -0.13529 |
| 0.000719337 | 0.145420015  | 0.001627704 | 0.079411828 | 0.0864896  | 0.030406 |
| 0.085694031 | 0.068690506  | 0.138290458 | 0.151950008 | 0.00098768 | -0.00016 |

|             |              |             |             |            |          |
|-------------|--------------|-------------|-------------|------------|----------|
| 1.08E-08    | 0.259636716  | 1.24E-08    | 0.223581675 | 1.06E-06   | 0.021104 |
| 0.055250817 | 0.086206364  | 0.062686423 | 0.084195746 | 0.06908887 | 0.150628 |
| 0.225239033 | 0.053616132  | 0.247525285 | 0.059198003 | 0.20161237 | 0.413998 |
| 0.001016847 | -0.157189146 | 0.00065202  | -0.11275385 | 0.01477367 | 0.051515 |
| 0.453440495 | -0.045336186 | 0.328272015 | -0.05685824 | 0.22004199 | 0.061888 |
| 0.25225477  | -0.060899986 | 0.188929513 | -0.02808939 | 0.54484052 | -0.04087 |
| 0.049597208 | 0.08393727   | 0.069949471 | 0.171211246 | 0.00020122 | -0.03809 |
| 0.614609332 | 0.024521261  | 0.597104975 | 0.018104623 | 0.69636819 | 0.152067 |
| 0.254061867 | -0.062170721 | 0.179849754 | -0.15985863 | 0.00052505 | 0.132649 |
| 0.1720294   | 0.070064832  | 0.130555593 | -0.04231088 | 0.36160864 | 0.054431 |
| 0.000782188 | -0.167443748 | 0.000278537 | -0.08260708 | 0.07451811 | 0.066823 |
| 0.36462265  | 0.032026924  | 0.489923817 | 0.018635016 | 0.68793298 | 0.42979  |
| 0.181704909 | -0.069187163 | 0.13545558  | 0.107505751 | 0.02013992 | 0.125446 |
| 0.017796063 | 0.099292659  | 0.031929997 | -0.24914348 | 4.87E-08   | 0.180061 |
| 1.99E-07    | 0.251634261  | 3.54E-08    | -0.26154584 | 9.63E-09   | 0.081109 |
| 0.79375712  | -0.024374018 | 0.599309723 | -0.35351787 | 3.41E-15   | -0.10999 |
| 0.008535614 | 0.115996734  | 0.012125677 | 0.047396185 | 0.30674788 | 0.16775  |
| 0.082619211 | 0.0793262    | 0.086830564 | -0.23397647 | 3.16E-07   | 0.28496  |
| 0.00193609  | -0.153634681 | 0.000865432 | -0.19827149 | 1.59E-05   | 0.163016 |
| 0.129232012 | -0.070156292 | 0.130052969 | -0.11983539 | 0.00954    | 0.092046 |
| 0.640874096 | -0.016069177 | 0.729080017 | -0.07976816 | 0.0850823  | 0.015074 |
| 0.140680705 | -0.06704113  | 0.148032475 | 0.080491241 | 0.08228325 | 0.052365 |
| 0.079135525 | -0.07772367  | 0.093413493 | -0.00037444 | 0.99356106 | 0.047295 |
| 0.187487342 | -0.059057301 | 0.202687897 | 0.189713066 | 3.69E-05   | 0.039282 |
| 0.008951808 | -0.110276661 | 0.017126196 | 0.212640578 | 3.55E-06   | 0.054431 |
| 0.09334528  | -0.076028283 | 0.100806196 | 0.053837276 | 0.24557778 | 0.064491 |
| 0.594797664 | -0.011384522 | 0.806169778 | 0.017157215 | 0.71152844 | -0.09085 |
| 0.463631752 | -0.022868085 | 0.6220666   | 0.024406247 | 0.59882682 | -0.00836 |
| 0.418053031 | -0.021378968 | 0.644929234 | -0.06435791 | 0.16498521 | 0.030364 |
| 0.173401093 | -0.071583814 | 0.122400492 | -0.00286553 | 0.95075491 | 0.110016 |
| 0.181560917 | -0.056875395 | 0.21990266  | 0.009295629 | 0.84120982 | -0.02052 |
| 0.049097518 | -0.09387138  | 0.042599018 | 0.221728533 | 1.30E-06   | -0.03875 |
| 0.132316197 | -0.072758733 | 0.116369192 | 0.093069982 | 0.0444064  | 0.293871 |
| 1.86E-11    | -0.303298181 | 2.16E-11    | 0.11515062  | 0.01277269 | 0.098655 |
| 0.301799201 | -0.032920172 | 0.477892202 | -0.07674939 | 0.09760694 | 0.09522  |
| 0.014956208 | -0.127413609 | 0.005828114 | -0.0066998  | 0.88518663 | 0.090044 |
| 0.023382027 | 0.106450627  | 0.021403316 | -0.00993027 | 0.83052745 | 0.043006 |
| 0.776358472 | 0.004318376  | 0.92584697  | -0.12919051 | 0.00517274 | 0.007216 |
| 4.89E-07    | 0.230826623  | 4.58E-07    | -0.08038816 | 0.08267766 | -0.01713 |
| 0.001524502 | -0.143811263 | 0.001835279 | -0.17518737 | 0.00014172 | -0.03432 |
| 0.694124357 | -0.034297351 | 0.459662155 | -0.26050373 | 1.11E-08   | -0.00755 |
| 0.332317771 | -0.043830961 | 0.344602265 | -0.0493708  | 0.2870108  | -0.03105 |
| 0.004241056 | -0.129562949 | 0.005044099 | -0.06586728 | 0.15527813 | 0.056301 |
| 0.310421164 | -0.070759453 | 0.126775643 | -0.04981463 | 0.28269478 | 0.118746 |
| 0.41054279  | 0.030060996  | 0.516966123 | -0.04432031 | 0.33923756 | 0.165674 |



|             |              |             |             |            |          |
|-------------|--------------|-------------|-------------|------------|----------|
| 7.51E-05    | -0.184979168 | 5.78E-05    | 0.18880025  | 4.02E-05   | 0.022218 |
| 0.776293897 | -0.018302824 | 0.69321161  | 0.049120725 | 0.28946199 | -0.01098 |
| 0.507141531 | -0.026562657 | 0.566924676 | 0.001161699 | 0.98002524 | -0.00075 |
| 0.001781729 | -0.142980118 | 0.00195177  | 0.051045098 | 0.27095958 | -0.0725  |
| 0.681396601 | 0.021039179  | 0.650194332 | -0.11812868 | 0.01062207 | 0.039455 |
| 0.050823158 | -0.109084692 | 0.018370563 | -0.12837035 | 0.00546652 | 0.120464 |
| 0.772313256 | 0.005816498  | 0.90023872  | -0.02433716 | 0.59986211 | 0.013732 |
| 1.87E-08    | 0.264487171  | 6.48E-09    | -0.11321555 | 0.01436807 | -0.18473 |
| 0.384343263 | -0.041988686 | 0.365279595 | -0.10207898 | 0.02739812 | 0.042729 |
| 3.77E-05    | -0.191938955 | 2.97E-05    | -0.06326343 | 0.17230404 | -0.07617 |
| 0.171905063 | -0.068189925 | 0.141193622 | -0.09688803 | 0.03634171 | 0.092842 |
| 0.105204386 | -0.067201114 | 0.147065236 | -0.05430562 | 0.24148873 | -0.05516 |
| 7.15E-05    | 0.18766753   | 4.48E-05    | -0.1887966  | 4.03E-05   | 0.148417 |
| 0.031488603 | -0.083362388 | 0.071895022 | -0.14670931 | 0.00147714 | -0.06927 |
| 1.44E-05    | -0.20080549  | 1.23E-05    | -0.11363522 | 0.01400792 | -0.06963 |
| 1.90E-08    | -0.254156625 | 2.56E-08    | -0.17810856 | 0.000109   | 0.069217 |
| 0.259143956 | -0.045289318 | 0.328772822 | -0.08499834 | 0.06647172 | 0.020296 |
| 0.005105966 | 0.147871281  | 0.001352524 | -0.08903351 | 0.05451851 | -0.01018 |
| 2.63E-06    | 0.206537828  | 6.80E-06    | -0.04788592 | 0.30177116 | 0.191399 |
| 2.65E-10    | -0.291646358 | 1.31E-10    | -0.19543627 | 2.11E-05   | -0.10161 |
| 0.500906554 | 0.039341384  | 0.396312962 | 0.001700137 | 0.97077059 | -0.07216 |
| 0.007460315 | 0.132978347  | 0.003992166 | 0.009015312 | 0.84593757 | 0.190599 |
| 0.575416017 | -0.016603786 | 0.720437667 | -0.07198576 | 0.12031031 | -0.00836 |
| 4.54E-05    | -0.186292679 | 5.11E-05    | -0.00670577 | 0.88508503 | 0.110536 |
| 0.000341123 | -0.163094189 | 0.000401993 | -0.14009746 | 0.00241018 | -0.07062 |
| 0.140397992 | -0.088970007 | 0.054691744 | -0.07356761 | 0.11235398 | -0.00728 |
| 0.00433165  | -0.127465416 | 0.005807996 | -0.10412279 | 0.02443614 | -0.06049 |
| 2.17E-10    | -0.300259483 | 3.48E-11    | -0.16264584 | 0.00041727 | 0.028743 |
| 2.75E-15    | -0.350313998 | 6.26E-15    | 0.107593757 | 0.02003754 | -0.00694 |
| 1.62E-06    | 0.234474359  | 2.97E-07    | 0.141501557 | 0.00217586 | -0.08822 |
| 0.001631178 | 0.151145919  | 0.001051472 | -0.22684685 | 7.28E-07   | 0.219016 |
| 2.51E-05    | -0.199684208 | 1.38E-05    | -0.07313088 | 0.11450816 | 0.02543  |
| 0.114081765 | -0.069947461 | 0.131202818 | -0.08436474 | 0.0685309  | -0.05481 |
| 0.539692983 | -0.022715616 | 0.624391325 | 0.072064991 | 0.11990163 | 0.161795 |
| 0.801362085 | 0.019530562  | 0.6737784   | 0.140316786 | 0.00237212 | 0.194503 |
| 0.583775138 | -0.026391228 | 0.569430852 | 0.036350287 | 0.43322193 | 0.082356 |
| 0.276288438 | -0.053319801 | 0.250151766 | -0.07319049 | 0.11421221 | -0.03551 |
| 0.004323699 | 0.135466593  | 0.00335548  | -0.09763573 | 0.03491755 | -0.04838 |
| 0.546806585 | -0.025280337 | 0.585797744 | -0.09345988 | 0.04351916 | -0.10106 |
| 0.70138751  | -0.026148383 | 0.572990075 | -0.19876811 | 1.51E-05   | -0.00628 |
| 0.000581621 | -0.158599278 | 0.000581777 | 0.08237475  | 0.07534046 | 0.221021 |
| 5.47E-09    | 0.263341117  | 7.56E-09    | 0.163985515 | 0.00037315 | -0.08621 |
| 0.051278629 | 0.101577638  | 0.028170166 | -0.30308703 | 2.23E-11   | 0.108037 |
| 0.033452081 | 0.09680387   | 0.036505068 | -0.01238806 | 0.78946835 | 0.07783  |
| 0.004357553 | 0.134777898  | 0.003521775 | -0.05183745 | 0.26358137 | -0.14335 |

|             |              |             |             |            |          |
|-------------|--------------|-------------|-------------|------------|----------|
| 0.439778151 | 0.042484681  | 0.359638105 | -0.11541663 | 0.01256607 | -0.12254 |
| 1.27E-05    | 0.201472252  | 1.15E-05    | -0.26771602 | 4.16E-09   | -0.10906 |
| 0.498349694 | 0.028043368  | 0.545499902 | 0.202609501 | 1.02E-05   | 0.119034 |
| 0.003125299 | 0.134856079  | 0.003502528 | -0.0556257  | 0.23022122 | -0.13808 |
| 1.39E-16    | -0.374800141 | 5.06E-17    | 0.090412376 | 0.05086791 | 0.222633 |
| 9.79E-06    | -0.206674502 | 6.70E-06    | 0.119986601 | 0.00944903 | 0.077308 |
| 0.598361151 | -0.022501782 | 0.627658009 | 0.048742399 | 0.29319699 | -0.03888 |
| 5.18E-08    | -0.246208105 | 7.06E-08    | 0.018326316 | 0.69283782 | 0.184139 |
| 0.07923724  | 0.080864368  | 0.080868262 | -0.20581342 | 7.33E-06   | 0.011535 |
| 0.547920973 | 0.031918248  | 0.491398638 | -0.04116685 | 0.37474767 | 0.15811  |
| 1.40E-05    | -0.208360223 | 5.61E-06    | 0.034512026 | 0.45685584 | 0.122106 |
| 3.47E-10    | -0.288084347 | 2.24E-10    | 0.03050776  | 0.51075372 | -0.08943 |
| 4.85E-11    | -0.305088899 | 1.62E-11    | -0.04375747 | 0.34541262 | 0.125413 |
| 0.445491392 | -0.041281721 | 0.373415304 | -0.08714651 | 0.05986504 | -0.13614 |
| 0.023184484 | -0.100075602 | 0.030596061 | 0.041756375 | 0.36794076 | -0.08185 |
| 0.113802776 | -0.074608793 | 0.107346867 | -0.06195804 | 0.18134647 | 0.026125 |
| 1.67E-07    | -0.230164567 | 4.95E-07    | 0.043155511 | 0.35209534 | 0.026271 |
| 0.969051803 | -0.002526894 | 0.956568366 | -0.03186377 | 0.49213881 | 0.153091 |
| 2.28E-06    | -0.215051043 | 2.73E-06    | -0.21057108 | 4.44E-06   | -0.10127 |
| 1.18E-08    | 0.26117211   | 1.01E-08    | -0.16313292 | 0.0004007  | 0.199506 |
| 0.00053601  | 0.148722443  | 0.001267454 | 0.011912648 | 0.79736891 | -0.03093 |
| 0.000455505 | -0.174576838 | 0.00014963  | -0.00782062 | 0.866147   | -0.13091 |
| 0.232873885 | -0.047840554 | 0.3022299   | -0.0776918  | 0.09354836 | -0.00962 |
| 0.003254732 | 0.147457735  | 0.001395723 | -0.24284458 | 1.07E-07   | -0.08092 |
| 1.63E-09    | -0.287420828 | 2.47E-10    | -0.11387023 | 0.01380973 | 0.257532 |
| 1.75E-05    | -0.196178348 | 1.96E-05    | 0.002815752 | 0.95160931 | 0.176026 |
| 0.106322351 | -0.074212919 | 0.109229486 | -0.23482148 | 2.85E-07   | 0.025877 |
| 0.108179833 | 0.074564357  | 0.107556901 | -0.17875451 | 0.0001028  | -0.10031 |
| 2.92E-07    | -0.223954391 | 1.01E-06    | -0.15945796 | 0.00054251 | -0.00339 |
| 0.000168238 | 0.175317523  | 0.000140082 | -0.15358469 | 0.00086885 | 0.068835 |
| 7.17E-08    | 0.23439195   | 3.00E-07    | -0.17175394 | 0.00019191 | 0.243992 |
| 1.04E-23    | 0.438063834  | 2.56E-23    | 0.090131501 | 0.05159452 | 0.150921 |
| 0.182050778 | -0.067324817 | 0.146320658 | 0.06095951  | 0.18849681 | 0.06558  |
| 0.911666551 | -0.001435634 | 0.975316444 | -0.22631008 | 7.74E-07   | 0.034953 |
| 0.00162275  | 0.138512625  | 0.002702161 | -0.17234934 | 0.00018215 | -0.21799 |
| 0.706359941 | -0.018981436 | 0.682444357 | 0.082666504 | 0.07430896 | 0.085014 |
| 0.010010838 | -0.118367779 | 0.010464204 | 0.048008057 | 0.30053838 | 0.042213 |
| 0.214367244 | -0.059458991 | 0.199628347 | 0.002304435 | 0.96038866 | 0.237343 |
| 0.220855298 | 0.054748085  | 0.237669786 | -0.04996387 | 0.28125343 | 0.188387 |
| 0.388892812 | 0.037356129  | 0.420594391 | -0.02697666 | 0.56089405 | -0.21295 |
| 0.513999348 | -0.023956012 | 0.605588675 | -0.08082855 | 0.08100323 | 0.084093 |
| 0.028516875 | -0.094127752 | 0.042034081 | -0.06253602 | 0.17730039 | -0.03684 |
| 0.520012476 | -0.019421326 | 0.675498912 | -0.07794687 | 0.09247337 | -0.06915 |
| 0.000133529 | -0.177376417 | 0.000116459 | 0.017649829 | 0.70363108 | 0.136197 |
| 0.000958571 | -0.154369332 | 0.000816637 | -0.20722431 | 6.32E-06   | -0.03261 |

|             |              |             |             |            |          |
|-------------|--------------|-------------|-------------|------------|----------|
| 0.014243072 | -0.120499988 | 0.009145891 | -0.21494087 | 2.77E-06   | -0.07661 |
| 2.82E-15    | -0.368214855 | 1.92E-16    | -0.05653367 | 0.22269085 | 0.082442 |
| 6.41E-06    | -0.211347072 | 4.08E-06    | 0.002970378 | 0.94895547 | -0.17045 |
| 0.036918874 | 0.101598531  | 0.028137623 | -0.15141437 | 0.00102976 | 0.124602 |
| 0.017809254 | -0.127010144 | 0.005986942 | 0.197261556 | 1.76E-05   | 0.277808 |
| 8.85E-05    | -0.19665463  | 1.87E-05    | 0.02137072  | 0.64505683 | -0.18206 |
| 0.022061784 | 0.108171605  | 0.019376457 | 0.048362607 | 0.29697874 | 0.077209 |
| 4.27E-17    | -0.391974705 | 1.34E-18    | -0.09323822 | 0.04402172 | 0.067538 |
| 0.019329544 | 0.111121574  | 0.016289387 | 0.079500226 | 0.08613874 | 0.031416 |
| 0.014251128 | 0.119543794  | 0.009717631 | -0.0217024  | 0.6399341  | -0.0297  |
| 3.89E-07    | -0.240137021 | 1.50E-07    | 0.03024492  | 0.51440388 | 0.325987 |
| 0.071430363 | 0.08801687   | 0.057347442 | 0.144675284 | 0.00172096 | 0.397501 |
| 2.34E-10    | -0.286960595 | 2.65E-10    | -0.04360428 | 0.34710556 | -0.03173 |
| 8.17E-05    | -0.174185451 | 0.000154918 | -0.04897239 | 0.29092259 | -0.07426 |
| 0.006414435 | -0.129343187 | 0.005119654 | 0.003867898 | 0.93356347 | -0.05828 |
| 0.031881007 | 0.112971011  | 0.014581665 | -0.0420178  | 0.36494693 | -0.01123 |
| 0.181155847 | 0.056339929  | 0.2242827   | -0.04417517 | 0.34082308 | 0.155224 |
| 0.470923169 | 0.027835563  | 0.548482382 | 0.038787981 | 0.40299532 | 0.186855 |
| 3.52E-05    | -0.199664025 | 1.38E-05    | -0.00984172 | 0.8320162  | 0.323817 |
| 2.39E-05    | 0.18924766   | 3.86E-05    | -0.01041829 | 0.82233414 | -0.28121 |
| 0.049956133 | -0.08218391  | 0.076021467 | 0.025071637 | 0.58889665 | 0.112221 |
| 0.020523396 | -0.113271962 | 0.014319193 | -0.058697   | 0.20546107 | 0.019428 |
| 0.077075576 | -0.084842258 | 0.066974196 | 0.088368701 | 0.05635496 | 0.058941 |
| 0.000456493 | 0.162343515  | 0.000427878 | 0.062840771 | 0.17519421 | -0.29937 |
| 3.67E-05    | -0.190539329 | 3.40E-05    | -0.17846184 | 0.00010557 | -0.00604 |
| 1.95E-16    | -0.354880808 | 2.63E-15    | -0.05076488 | 0.27360242 | 0.069973 |
| 0.035969914 | -0.106888369 | 0.020871052 | -0.16950534 | 0.00023334 | -0.16074 |
| 0.130679825 | -0.0721899   | 0.119259505 | -0.03282792 | 0.47912735 | -0.02666 |
| 0.231858343 | 0.069030535  | 0.136344728 | 0.054152821 | 0.24281754 | 0.236926 |
| 0.031799242 | -0.118003618 | 0.010705481 | 0.113315852 | 0.01428126 | 0.114113 |
| 0.141684887 | -0.070822295 | 0.126437905 | 0.462175606 | 4.33E-26   | 0.242526 |
| 0.058320581 | -0.087596902 | 0.058551056 | -0.01761369 | 0.70420943 | -0.01084 |
| 6.70E-07    | 0.245400369  | 7.82E-08    | -0.12846843 | 0.00543061 | -0.00485 |
| 7.20E-07    | -0.224814292 | 9.19E-07    | 0.208196896 | 5.71E-06   | 0.213315 |
| 0.966713646 | 0.002277231  | 0.960855893 | -0.18584619 | 5.33E-05   | 0.044906 |
| 4.25E-11    | -0.296714747 | 6.04E-11    | 0.144806635 | 0.00170416 | 0.033614 |
| 2.91E-05    | -0.190853624 | 3.30E-05    | -0.01634695 | 0.72458524 | -0.15856 |
| 2.90E-08    | 0.253746166  | 2.70E-08    | -0.12446364 | 0.00708224 | -0.02146 |
| 0.551210402 | 0.024311581  | 0.600245731 | -0.08550457 | 0.06486322 | -0.1833  |
| 0.508967013 | 0.040759534  | 0.37949581  | -0.18303083 | 6.94E-05   | -0.21213 |
| 0.319176644 | -0.061369905 | 0.185533335 | -0.04263434 | 0.35794664 | 0.138131 |
| 0.355925903 | -0.03110159  | 0.502556936 | -0.12307952 | 0.00774995 | -0.26007 |
| 0.071068761 | 0.07678325   | 0.097458719 | -0.05930246 | 0.2008166  | -0.08696 |
| 0.814965223 | -0.018477734 | 0.690430373 | 0.073929414 | 0.11059364 | -0.22967 |
| 0.497142961 | 0.036002479  | 0.437638726 | 0.258313129 | 1.48E-08   | 0.285289 |

|             |              |             |             |            |          |
|-------------|--------------|-------------|-------------|------------|----------|
| 0.41338861  | -0.033760035 | 0.466728182 | -0.120381   | 0.00921537 | 0.133178 |
| 0.187357748 | 0.075589139  | 0.102794952 | 0.163853544 | 0.0003773  | -0.15708 |
| 0.002635493 | 0.158281855  | 0.000596947 | -0.03294503 | 0.47755976 | -0.0237  |
| 0.002800382 | -0.132154163 | 0.004226014 | 0.354936208 | 2.60E-15   | 0.118494 |
| 0.001452535 | -0.160816619 | 0.000485383 | 0.02939532  | 0.5262944  | 0.161982 |
| 0.569707168 | -0.012687011 | 0.784511258 | -0.07865963 | 0.08952189 | 0.09663  |
| 8.67E-06    | -0.209766029 | 4.83E-06    | 0.043129477 | 0.35238618 | 0.019083 |
| 0.871366517 | -0.012379964 | 0.789602722 | -0.10232271 | 0.02702942 | 0.222096 |
| 1.27E-10    | -0.298814435 | 4.36E-11    | -0.27150642 | 2.46E-09   | 0.244175 |
| 0.009828796 | 0.124616092  | 0.007011935 | -0.12761341 | 0.00575087 | 0.066871 |
| 0.667032562 | -0.04193008  | 0.365949814 | -0.03217727 | 0.48788738 | 0.019332 |
| 0.003212906 | -0.138615646 | 0.002682244 | -0.05102519 | 0.27114675 | 0.172828 |
| 0.00227818  | 0.11537821   | 0.012595729 | -0.19995562 | 1.34E-05   | 0.36601  |
| 0.143513771 | 0.07609726   | 0.100496615 | 0.110547409 | 0.01685404 | -0.04654 |
| 0.318109486 | 0.044406407  | 0.338299201 | 0.114780185 | 0.01306542 | 0.156164 |
| 0.134084258 | -0.059921394 | 0.196148163 | -0.06732604 | 0.14631332 | 0.123494 |
| 7.89E-06    | -0.205384891 | 7.67E-06    | -0.10347575 | 0.02534242 | 0.188889 |
| 0.116354475 | -0.076411433 | 0.099096094 | 0.05381609  | 0.24576389 | 0.034584 |
| 0.711413834 | 0.029732875  | 0.521553466 | -0.08470878 | 0.06740638 | 0.031927 |
| 0.611276419 | -0.035084907 | 0.449414072 | 0.200090794 | 1.32E-05   | -0.14507 |
| 0.903805691 | 0.010078388  | 0.828038736 | 0.140340327 | 0.00236807 | -0.02906 |
| 1.55E-10    | -0.289548336 | 1.80E-10    | 0.028762176 | 0.53524567 | 0.198219 |
| 0.158328972 | -0.059999169 | 0.195567191 | -0.0913043  | 0.048617   | -0.07813 |
| 0.193809399 | -0.061759955 | 0.182748736 | 0.085613972 | 0.06451985 | -0.01805 |
| 0.444862376 | 0.038180917  | 0.410402479 | -0.02862346 | 0.53721693 | -0.09683 |
| 0.102086191 | -0.082173338 | 0.07605934  | 0.025011022 | 0.58979811 | 0.089114 |
| 5.51E-09    | -0.25632067  | 1.93E-08    | 0.046926249 | 0.31157409 | 0.112886 |
| 1.36E-05    | 0.189018478  | 3.94E-05    | 0.147714659 | 0.00136874 | 0.051756 |
| 0.031687881 | 0.091804708  | 0.047391053 | 0.110655433 | 0.01674652 | -0.01911 |
| 0.001917169 | 0.13553863   | 0.003338504 | 0.015701956 | 0.73503643 | 0.073827 |
| 0.01883366  | -0.112963616 | 0.014588167 | 0.010171438 | 0.82647617 | -0.18998 |
| 0.017674402 | -0.095430804 | 0.039259451 | -0.15310516 | 0.00090226 | 0.101663 |
| 0.02385009  | -0.092925076 | 0.04474     | -0.30278107 | 2.34E-11   | 0.169707 |
| 0.467463054 | -0.024746875 | 0.593733881 | -0.32331377 | 7.99E-13   | -0.26838 |
| 0.002534451 | -0.125866203 | 0.006458616 | -0.30656407 | 1.28E-11   | -0.13706 |
| 2.11E-05    | 0.194130037  | 2.40E-05    | -0.04635545 | 0.31750295 | 0.020484 |
| 0.239809628 | 0.038729807  | 0.40370165  | -0.10931547 | 0.01812366 | -0.19859 |
| 0.012093402 | -0.10569954  | 0.022344061 | -0.1998795  | 1.35E-05   | -0.10814 |
| 0.448063989 | -0.043594097 | 0.347218276 | -0.19240892 | 2.84E-05   | -0.17012 |
| 0.984219956 | 0.008026854  | 0.862651658 | -0.10358871 | 0.02518215 | 0.164599 |
| 0.000148408 | -0.175188109 | 0.000141708 | -0.13613038 | 0.00320198 | 0.26133  |
| 0.000213881 | 0.185701984  | 5.40E-05    | -0.03132147 | 0.49953959 | 0.31656  |
| 0.648396357 | -0.021142926 | 0.648584896 | -0.0741183  | 0.10968328 | 0.02863  |
| 0.012912526 | 0.113409142  | 0.014200936 | -0.31969724 | 1.48E-12   | 0.006686 |
| 0.462576581 | -0.026106626 | 0.57360313  | -0.00048883 | 0.99159419 | 0.278531 |

|             |              |             |             |            |          |
|-------------|--------------|-------------|-------------|------------|----------|
| 0.048202276 | 0.096415481  | 0.03726701  | -0.04011141 | 0.38712659 | -0.04351 |
| 0.54905455  | -0.014540733 | 0.753975003 | 0.087814115 | 0.05792594 | 0.001015 |
| 0.000403364 | 0.180105779  | 9.09E-05    | -0.22710016 | 7.07E-07   | -0.19619 |
| 0.160364921 | 0.061536558  | 0.184339782 | -0.12659284 | 0.0061553  | -0.11629 |
| 0.154099696 | -0.058775557 | 0.20485408  | -0.03303461 | 0.47636253 | -0.14219 |
| 0.001454746 | 0.166215697  | 0.000309221 | 0.01573742  | 0.73446049 | 0.062435 |
| 2.16E-05    | -0.195844266 | 2.02E-05    | -0.18114181 | 8.26E-05   | -0.16181 |
| 0.0029626   | 0.144179201  | 0.001785773 | 0.062113567 | 0.18025107 | 0.126956 |
| 1.44E-13    | -0.346101401 | 1.38E-14    | 0.008214182 | 0.85947913 | 0.305952 |
| 0.043291029 | 0.089467931  | 0.053345557 | -0.25099337 | 3.85E-08   | 0.095508 |
| 0.000112842 | -0.180990878 | 8.38E-05    | -0.08642572 | 0.06201853 | -0.07833 |
| 0.076876801 | -0.090933709 | 0.04954191  | -0.12669463 | 0.00611384 | -0.04322 |
| 0.230978196 | 0.063597312  | 0.170046137 | 0.028750035 | 0.53541805 | 0.262629 |
| 0.568655079 | 0.029686275  | 0.52220666  | -0.05049903 | 0.27612588 | 0.092896 |
| 0.643938442 | -0.02052333  | 0.658220833 | 0.009933148 | 0.83047909 | -0.27787 |
| 0.016465028 | 0.108729554  | 0.01875625  | 0.034062899 | 0.46273798 | 0.076181 |
| 1.60E-08    | -0.264727851 | 6.27E-09    | 0.061944829 | 0.18143975 | -0.08409 |
| 0.011843883 | -0.121242227 | 0.008722921 | -0.02176235 | 0.63900992 | 0.11289  |
| 0.094357294 | -0.064429058 | 0.164517669 | -0.02827416 | 0.54219692 | 0.03052  |
| 0.00167085  | -0.135212233 | 0.00341605  | -0.11057788 | 0.01682365 | 0.003055 |
| 4.58E-10    | -0.289183866 | 1.90E-10    | -0.03527469 | 0.44696394 | 0.086457 |
| 7.52E-09    | 0.276969585  | 1.14E-09    | -0.21140496 | 4.06E-06   | -0.07297 |
| 1.71E-08    | 0.254614983  | 2.41E-08    | -0.01265915 | 0.78497287 | 0.104826 |
| 6.52E-07    | 0.226355696  | 7.70E-07    | 0.206928383 | 6.52E-06   | 0.225262 |
| 0.041387645 | -0.102484448 | 0.026787099 | -0.07004117 | 0.1306859  | -0.12    |
| 0.304217143 | 0.04958644   | 0.2849083   | -0.04141887 | 0.37182827 | 0.013468 |
| 2.38E-12    | -0.322772203 | 8.76E-13    | -0.00385459 | 0.93379155 | -0.04474 |
| 0.000872081 | 0.129368364  | 0.005110947 | -0.09409189 | 0.04211271 | -0.04761 |
| 0.001633494 | 0.149446654  | 0.00119898  | -0.30844077 | 9.46E-12   | -0.20043 |
| 5.24E-06    | -0.200743131 | 1.24E-05    | -0.0806193  | 0.08179539 | 0.164213 |
| 0.22431717  | -0.051087843 | 0.270557986 | -0.04441416 | 0.33821478 | 0.069227 |
| 1.72E-09    | -0.274576759 | 1.60E-09    | -0.0329492  | 0.47750396 | 0.364806 |
| 0.147152857 | -0.054730535 | 0.237820454 | -0.08928963 | 0.05382441 | -0.03707 |
| 0.111443547 | -0.082609711 | 0.074508841 | -0.15193295 | 0.00098899 | -0.03887 |
| 0.485688426 | 0.03262806   | 0.481808993 | 0.018632278 | 0.68797643 | -0.14671 |
| 0.005184191 | -0.127348798 | 0.005853369 | -0.08252655 | 0.07480232 | 0.036375 |
| 0.714524963 | -0.017981304 | 0.698334842 | 0.002661731 | 0.9542533  | -0.10725 |
| 0.740946449 | -0.011439447 | 0.805253324 | 0.085402023 | 0.06518644 | -0.05461 |
| 0.008745273 | -0.122469485 | 0.008061681 | -0.0605808  | 0.19126225 | -0.04903 |
| 0.393474928 | 0.035392184  | 0.445450922 | -0.01802241 | 0.69767908 | -0.04301 |
| 0.013679422 | 0.104690149  | 0.023664642 | 0.183105572 | 6.89E-05   | 0.115447 |
| 0.524629132 | 0.040390274  | 0.383832003 | -0.14067405 | 0.0023113  | -0.05693 |
| 0.000224479 | -0.169716478 | 0.000229118 | -0.09595792 | 0.03818192 | 0.051798 |
| 0.047661671 | 0.087909137  | 0.057654228 | 0.006367515 | 0.89084442 | 0.031606 |
| 0.365143438 | -0.048270887 | 0.29789689  | 0.150179466 | 0.00113317 | 0.258065 |

|             |              |             |             |            |          |
|-------------|--------------|-------------|-------------|------------|----------|
| 7.98E-08    | -0.243779    | 9.57E-08    | -0.08105987 | 0.08013477 | -0.08116 |
| 0.001146303 | -0.155749185 | 0.000731797 | -0.21106774 | 4.21E-06   | -0.09009 |
| 6.54E-07    | -0.242842912 | 1.08E-07    | -0.03386498 | 0.46534335 | -0.17689 |
| 6.48E-06    | -0.20834052  | 5.62E-06    | -0.07058078 | 0.1277397  | -0.00786 |
| 0.002651066 | 0.152252163  | 0.00096464  | 0.096314489 | 0.03746733 | 0.275433 |
| 1.16E-07    | 0.250689615  | 4.00E-08    | -0.02708243 | 0.55935828 | -0.01831 |
| 0.000347683 | 0.173390238  | 0.000166208 | 0.088786864 | 0.05519394 | 0.069259 |
| 4.88E-05    | -0.176161568 | 0.0001299   | -0.06433131 | 0.16516031 | 0.154623 |
| 0.949352148 | 0.003071435  | 0.947221341 | -0.10389428 | 0.02475295 | -0.01766 |
| 0.000245961 | 0.171543451  | 0.000195472 | -0.25578333 | 2.07E-08   | 0.197047 |
| 0.399010411 | -0.036486462 | 0.431499682 | -0.05172629 | 0.26460805 | 0.271451 |
| 6.06E-07    | 0.238081259  | 1.93E-07    | -0.1583504  | 0.00059364 | 0.002755 |
| 2.41E-11    | -0.307074843 | 1.18E-11    | 0.082880967 | 0.07355807 | -0.02955 |
| 0.074478495 | 0.092113516  | 0.046647519 | 0.181625631 | 7.90E-05   | 0.073277 |
| 3.30E-06    | -0.215223879 | 2.68E-06    | -0.06760654 | 0.14463569 | 0.171454 |
| 0.00068748  | -0.148366452 | 0.001302416 | -0.01124126 | 0.80856135 | 0.113461 |
| 0.049145365 | -0.090279843 | 0.051209696 | -0.0344715  | 0.45738491 | -0.00129 |
| 2.36E-06    | -0.204733094 | 8.20E-06    | 0.057491794 | 0.21493676 | 0.100343 |
| 0.115474572 | -0.0749062   | 0.105949447 | 0.071960553 | 0.12044059 | 0.161345 |
| 1.40E-06    | -0.223642364 | 1.05E-06    | -0.06816224 | 0.14135551 | -0.0233  |
| 0.080742979 | -0.080144485 | 0.083616107 | -0.0840133  | 0.06969542 | -0.1331  |
| 0.278763213 | -0.066315092 | 0.152482949 | -0.4605744  | 6.72E-26   | 0.223888 |
| 0.441794409 | 0.038159867  | 0.410660766 | 0.007677711 | 0.8685705  | -0.01927 |
| 0.02718224  | 0.094656326  | 0.040889247 | 0.263764801 | 7.14E-09   | 0.209456 |
| 0.527632396 | -0.043115629 | 0.352540951 | -0.05031656 | 0.27786694 | 0.011319 |
| 0.152291287 | -0.067234994 | 0.146861022 | -0.02095338 | 0.65152662 | 0.02234  |
| 0.002920204 | 0.132859754  | 0.004025077 | 0.128347805 | 0.0054748  | 0.001661 |
| 0.000242486 | -0.177595683 | 0.000114177 | 0.138837474 | 0.00263981 | 0.150838 |
| 0.115783124 | -0.083449495 | 0.07159742  | 0.05347012  | 0.24881702 | 0.016614 |
| 7.50E-08    | -0.228170313 | 6.25E-07    | -0.04225589 | 0.36223354 | 0.086405 |
| 0.00430034  | -0.135058048 | 0.003453247 | -0.0828159  | 0.07378524 | -0.13694 |
| 0.121913925 | 0.073091865  | 0.114702146 | -0.04590735 | 0.32220853 | -0.33916 |
| 0.008980007 | -0.126409491 | 0.006230602 | -0.09653882 | 0.03702359 | 0.076616 |
| 0.030857896 | -0.100417355 | 0.03002893  | -0.06219083 | 0.17970872 | -0.00454 |
| 0.009622154 | 0.112973401  | 0.014579563 | -0.14473889 | 0.00171281 | -0.1231  |
| 0.074831434 | 0.091984468  | 0.046957036 | -0.13287802 | 0.00401999 | -0.05497 |
| 0.000121328 | -0.18944753  | 3.78E-05    | -0.24881609 | 5.08E-08   | -0.0111  |
| 0.002584149 | 0.137137848  | 0.002981158 | -0.2878621  | 2.32E-10   | 0.223835 |
| 0.997031135 | -0.004265227 | 0.926757046 | -0.08829809 | 0.05655299 | 0.189457 |
| 0.002221457 | -0.136646846 | 0.003086986 | 0.095845353 | 0.03840991 | 0.27262  |
| 3.20E-05    | -0.189597842 | 3.73E-05    | -0.16429913 | 0.00036347 | -0.07899 |
| 0.039349641 | -0.106118046 | 0.021815551 | 0.143218699 | 0.00191766 | 0.017629 |
| 0.06917602  | -0.078239371 | 0.091252875 | 0.084571026 | 0.06785481 | 0.150955 |
| 0.000196649 | -0.167521077 | 0.000276704 | -0.16885257 | 0.00024685 | -0.13253 |
| 0.000562826 | 0.167060464  | 0.000287795 | -0.28988595 | 1.71E-10   | 0.175457 |

|             |              |             |             |            |          |
|-------------|--------------|-------------|-------------|------------|----------|
| 4.92E-05    | -0.193842076 | 2.47E-05    | -0.07145963 | 0.12305195 | 0.03885  |
| 0.192401142 | 0.062013868  | 0.180952699 | 0.013032319 | 0.77879633 | 0.055977 |
| 0.303667499 | -0.046485572 | 0.316144896 | -0.09057002 | 0.05046385 | 0.05603  |
| 5.93E-08    | -0.242822275 | 1.08E-07    | 0.265815243 | 5.40E-09   | 0.278951 |
| 8.11E-06    | -0.203578833 | 9.25E-06    | -0.10438527 | 0.02407656 | 0.198623 |
| 2.86E-06    | -0.206156261 | 7.07E-06    | -0.20376586 | 9.07E-06   | 0.200888 |
| 0.018666678 | 0.105007981  | 0.023241726 | 0.077814532 | 0.09302987 | -0.22026 |
| 0.129306106 | -0.076770817 | 0.09751312  | -0.0791445  | 0.08755764 | 0.090035 |
| 1.66E-24    | 0.448305215  | 1.81E-24    | 0.062460637 | 0.17782428 | 0.156737 |
| 0.150212019 | 0.082429868  | 0.075144704 | -0.28823453 | 2.19E-10   | 0.138168 |
| 0.055613515 | 0.086184786  | 0.062752445 | -0.24468076 | 8.55E-08   | 0.243576 |
| 0.027095299 | 0.095310475  | 0.039509003 | 0.063438458 | 0.17111762 | 0.14227  |
| 0.179581838 | 0.075389798  | 0.103707915 | -0.01854512 | 0.68935995 | -0.24949 |
| 0.000239113 | -0.165274648 | 0.000334838 | -0.01755092 | 0.70521416 | -0.1084  |
| 0.719606214 | 0.018684625  | 0.687145971 | -0.16788568 | 0.00026821 | 0.030122 |
| 8.61E-06    | -0.206852822 | 6.58E-06    | 0.059921469 | 0.19614761 | 0.02599  |
| 0.53548665  | -0.04321619  | 0.351418016 | 0.113478736 | 0.01414127 | -0.11263 |
| 0.842168021 | -0.00661823  | 0.88657496  | 0.093603775 | 0.04319552 | 0.066948 |
| 0.39375537  | 0.047835155  | 0.30228452  | 0.160179699 | 0.00051143 | -0.0243  |
| 2.57E-05    | -0.201864214 | 1.10E-05    | -0.06228917 | 0.17902015 | -0.01085 |
| 1.01E-07    | -0.252766948 | 3.06E-08    | 0.040761575 | 0.37947192 | 0.068112 |
| 0.557651031 | -0.029110822 | 0.530307131 | 0.015441528 | 0.73927032 | 0.079714 |
| 0.000225742 | 0.159662021  | 0.000533552 | -0.17260776 | 0.00017807 | 0.094066 |
| 2.02E-09    | -0.281518156 | 5.90E-10    | -0.1211095  | 0.00879725 | 0.120826 |
| 0.386545591 | -0.057320164 | 0.216311299 | -0.07431645 | 0.10873463 | -0.17439 |
| 4.58E-08    | 0.258844397  | 1.38E-08    | -0.03298581 | 0.47701446 | 0.085173 |
| 6.53E-05    | 0.190374771  | 3.46E-05    | 0.243492087 | 9.92E-08   | -0.00626 |
| 0.000108902 | -0.185080883 | 5.73E-05    | 0.025488397 | 0.58271586 | 0.109924 |
| 0.026242469 | -0.115710328 | 0.012341372 | 0.067766497 | 0.14368559 | 0.035509 |
| 0.134862228 | -0.067207617 | 0.147026019 | -0.09584361 | 0.03841344 | -0.00136 |
| 0.197126455 | 0.057653119  | 0.213650478 | 0.009719171 | 0.83407735 | -0.08988 |
| 3.58E-10    | 0.29154693   | 1.33E-10    | -0.1482435  | 0.0013147  | 0.147948 |
| 0.877737272 | 0.003896249  | 0.933077636 | 0.310138717 | 7.19E-12   | 0.272452 |
| 0.370920796 | 0.045689504  | 0.324512567 | 0.137931569 | 0.00281704 | 0.312155 |
| 0.146691846 | 0.073535543  | 0.112511067 | -0.2653614  | 5.75E-09   | -0.05751 |
| 0.000485484 | 0.163219049  | 0.000397832 | 0.139202337 | 0.00257134 | -0.07574 |
| 9.56E-06    | 0.210011164  | 4.71E-06    | -0.01314195 | 0.77698435 | 0.081602 |
| 0.026898427 | 0.103028699  | 0.025985396 | -0.23052479 | 4.75E-07   | 0.238767 |
| 1.21E-05    | 0.213900183  | 3.10E-06    | 0.043510944 | 0.34813962 | -0.10431 |
| 0.880702436 | 0.01919721   | 0.679034086 | 0.165357256 | 0.00033251 | 0.000688 |
| 1.04E-19    | -0.395234165 | 6.54E-19    | -0.02856026 | 0.53811633 | -0.1512  |
| 0.279546603 | 0.039308501  | 0.396708156 | 0.319741954 | 1.46E-12   | 0.058843 |
| 1.78E-05    | 0.198353475  | 1.57E-05    | 0.253155821 | 2.91E-08   | 0.110444 |
| 0.334652997 | -0.03492989  | 0.45142096  | 0.08931334  | 0.05376052 | -0.11887 |
| 0.000127715 | -0.177935191 | 0.000110726 | 0.004683362 | 0.91959998 | 0.070147 |

|             |              |             |             |            |          |
|-------------|--------------|-------------|-------------|------------|----------|
| 0.051256878 | 0.07802068   | 0.092164178 | 0.034039334 | 0.46304776 | 0.201006 |
| 0.000662451 | -0.169361612 | 0.000236251 | 0.068134485 | 0.141518   | 0.254859 |
| 0.542843588 | -0.019028532 | 0.681699462 | -0.02584858 | 0.57739848 | -0.17049 |
| 0.206686054 | -0.05094089  | 0.271940344 | -0.09010593 | 0.0516611  | 0.042443 |
| 0.000910105 | -0.152457035 | 0.000949304 | -0.19063554 | 3.37E-05   | 0.080078 |
| 0.006958391 | -0.111910033 | 0.015541019 | -0.00561901 | 0.90360921 | 0.003656 |
| 0.205323341 | -0.071657508 | 0.122015173 | -0.1300438  | 0.00488227 | 0.071915 |
| 0.161036948 | -0.066043284 | 0.154174939 | -0.05754234 | 0.2145331  | -0.02404 |
| 0.780367318 | -0.004477453 | 0.92312367  | -0.14832776 | 0.00130627 | -0.00836 |
| 0.279166436 | -0.050035589 | 0.280562573 | -0.05618121 | 0.22559284 | -0.03976 |
| 0.030571812 | -0.096794776 | 0.036522756 | -0.02160399 | 0.64145227 | 0.010559 |
| 0.228131663 | -0.05401565  | 0.244014766 | -0.01563437 | 0.73613452 | 0.11569  |
| 0.023018    | -0.098424679 | 0.033466592 | -0.0207734  | 0.65432486 | -0.02389 |
| 0.003969276 | -0.129938138 | 0.004917426 | -0.00157415 | 0.9729358  | -0.06348 |
| 0.169460715 | -0.0569292   | 0.219465953 | -0.10759196 | 0.02003962 | -0.05271 |
| 0.011311027 | -0.110302246 | 0.017100315 | -0.10951968 | 0.0179076  | 0.010094 |
| 0.410380992 | 0.041901379  | 0.366278309 | 0.022633288 | 0.62564816 | -0.10097 |
| 0.004204297 | -0.134437718 | 0.003606644 | -0.12574973 | 0.00650846 | 0.046291 |
| 0.018570043 | -0.107567566 | 0.020067959 | -0.06075334 | 0.18999864 | 0.119652 |
| 0.012632886 | 0.124139037  | 0.007234031 | -0.10186511 | 0.02772522 | -0.06846 |
| 3.73E-08    | 0.252359732  | 3.23E-08    | 0.064840987 | 0.16183013 | 0.266798 |
| 0.667148825 | -0.023693692 | 0.60954397  | -0.01737804 | 0.7079844  | 0.116139 |
| 0.865326872 | 0.001395743  | 0.976002097 | 0.02522048  | 0.58668577 | 0.017033 |
| 0.005182997 | -0.114516381 | 0.013277472 | -0.14117671 | 0.00222814 | 0.116934 |
| 0.233217345 | 0.055553041  | 0.230831575 | -0.09368698 | 0.0430093  | -0.18414 |
| 0.026277982 | -0.09345794  | 0.043523548 | -0.07539463 | 0.10368573 | -0.04244 |
| 4.01E-07    | -0.226252334 | 7.79E-07    | -0.04480249 | 0.3340039  | -0.24603 |
| 0.000118879 | 0.188887387  | 3.99E-05    | -0.11250807 | 0.01499367 | -0.02822 |
| 0.508467874 | -0.030579234 | 0.509763476 | -0.05277895 | 0.2549954  | 0.049673 |
| 0.003262921 | -0.141830299 | 0.002124093 | -0.12968992 | 0.0050009  | 0.10742  |
| 0.005308276 | -0.12656941  | 0.006164875 | -0.13632116 | 0.00315905 | 0.22938  |
| 7.02E-05    | -0.187733861 | 4.46E-05    | -0.08659818 | 0.06149752 | 0.195717 |
| 0.31866925  | 0.033549274  | 0.469516127 | 0.063443085 | 0.17108633 | 0.181335 |
| 2.70E-10    | -0.285444292 | 3.32E-10    | -0.03911622 | 0.39902377 | 0.258105 |
| 0.024259031 | -0.095534172 | 0.039046142 | 0.186295108 | 5.11E-05   | 0.071008 |
| 0.328836528 | 0.057318043  | 0.216328319 | -0.11265795 | 0.01485918 | 0.116065 |
| 2.50E-08    | -0.255115083 | 2.26E-08    | 0.011297336 | 0.80762507 | 0.077306 |
| 2.47E-08    | 0.259550687  | 1.26E-08    | 0.312266678 | 5.08E-12   | -0.0172  |
| 1.36E-05    | 0.200508693  | 1.27E-05    | 0.226489602 | 7.58E-07   | 0.168581 |
| 0.023233309 | -0.099023692 | 0.032399575 | -0.02288196 | 0.62185527 | -0.02511 |
| 0.933757298 | -0.007235955 | 0.876069851 | -0.08716486 | 0.05981101 | 0.048554 |
| 0.877705225 | 0.014900232  | 0.748095487 | 0.136983767 | 0.00301401 | 0.130311 |
| 1.86E-13    | 0.329374431  | 2.80E-13    | -0.27911133 | 8.36E-10   | 0.169906 |
| 0.271049711 | 0.051282721  | 0.268732227 | -0.09430047 | 0.04165705 | -0.05057 |
| 4.03E-15    | -0.35776767  | 1.51E-15    | -0.16914004 | 0.00024081 | 0.104059 |



|             |              |             |             |            |          |
|-------------|--------------|-------------|-------------|------------|----------|
| 0.612997186 | 0.030712656  | 0.507917648 | 0.023150431 | 0.6177715  | -0.0311  |
| 0.781982975 | -0.011505976 | 0.804143628 | 0.091411444 | 0.04835229 | 0.006842 |
| 0.506434177 | -0.028418855 | 0.540131248 | -0.04411545 | 0.34147691 | -0.0285  |
| 0.113482356 | -0.078024954 | 0.092146299 | -0.16188713 | 0.00044436 | -0.09345 |
| 0.086004911 | 0.072756908  | 0.116378375 | 0.155777673 | 0.00073013 | 0.170617 |
| 0.048160192 | -0.110828545 | 0.016575458 | -0.22941709 | 5.40E-07   | 0.075545 |
| 1.65E-10    | -0.301281475 | 2.96E-11    | -0.03675777 | 0.42808014 | -0.17548 |
| 0.000879736 | -0.155697723 | 0.000734809 | -0.051237   | 0.2691598  | -0.08311 |
| 0.015803573 | -0.106439465 | 0.021417042 | 0.192336478 | 2.86E-05   | 0.100077 |
| 0.597398483 | -0.017750147 | 0.702026698 | 0.073721675 | 0.11160172 | -0.02978 |
| 0.209810815 | -0.064844175 | 0.16180946  | -0.12290808 | 0.00783645 | 0.093046 |
| 0.034711798 | -0.095925583 | 0.0382473   | -0.12127336 | 0.00870557 | -0.02504 |
| 0.765439744 | -0.018100547 | 0.69643316  | -0.1673353  | 0.00028113 | 0.121027 |
| 6.13E-19    | -0.390489952 | 1.84E-18    | -0.11099296 | 0.01641441 | 0.22395  |
| 0.69562365  | -0.016878266 | 0.71601421  | -0.02487    | 0.59189782 | 0.094989 |
| 0.739782318 | 0.009634623  | 0.835500081 | -0.11513475 | 0.01278511 | 0.06734  |
| 0.001552218 | 0.155362028  | 0.000754738 | -0.06442617 | 0.16453662 | 0.162903 |
| 0.009627704 | 0.104613035  | 0.023768249 | -0.00225115 | 0.96130379 | 0.127957 |
| 0.311704382 | -0.046823146 | 0.312639581 | 0.044288524 | 0.33958437 | 0.051148 |
| 0.995120452 | -0.001059919 | 0.981774973 | 0.058142267 | 0.20978426 | 0.058397 |
| 3.33E-06    | 0.224868497  | 9.13E-07    | -0.25289736 | 3.01E-08   | 0.083649 |
| 0.560297138 | 0.02448269   | 0.597682155 | -0.30062446 | 3.29E-11   | 0.032572 |
| 1.49E-08    | -0.262918515 | 8.01E-09    | -0.18471276 | 5.93E-05   | 0.193398 |
| 0.073690689 | -0.090901894 | 0.049621996 | 0.026298815 | 0.57078404 | -0.05547 |
| 0.082332627 | 0.085148243  | 0.065992032 | -0.12477458 | 0.00693951 | 0.06252  |
| 0.004235201 | -0.132972059 | 0.003993905 | -0.02250008 | 0.62768398 | 0.062614 |
| 1.04E-07    | 0.244125661  | 9.17E-08    | 0.235134603 | 2.75E-07   | -0.01346 |
| 7.24E-11    | 0.277808414  | 1.01E-09    | -0.05993781 | 0.19602544 | 0.072377 |
| 1.19E-05    | 0.20663286   | 6.73E-06    | -0.11635675 | 0.01185927 | -0.28475 |
| 0.316427813 | 0.044415393  | 0.338201366 | -0.14412368 | 0.00179316 | -0.13202 |
| 0.994106657 | 0.002800629  | 0.951868894 | 0.190326769 | 3.47E-05   | 0.010715 |
| 0.365843108 | 0.046385135  | 0.317192766 | -0.07582531 | 0.10172159 | -0.01054 |
| 1.46E-17    | 0.367952006  | 2.03E-16    | -0.02229969 | 0.63075206 | 0.113421 |
| 0.552982634 | 0.025217834  | 0.586725031 | 0.039691382 | 0.39212138 | 0.198931 |
| 0.671923524 | 0.02703217   | 0.560087823 | 0.136597414 | 0.00309783 | 0.35837  |
| 5.24E-05    | 0.178389816  | 0.000106259 | -0.18680785 | 4.87E-05   | -0.03788 |
| 7.27E-12    | 0.305084949  | 1.62E-11    | -0.31748111 | 2.14E-12   | 0.075273 |
| 0.7553956   | -0.015238864 | 0.742570561 | -0.09929811 | 0.03192054 | -0.08037 |
| 0.017575197 | 0.101490187  | 0.028306733 | 0.054505619 | 0.23975725 | -0.03559 |
| 0.033107964 | -0.095280421 | 0.039571542 | -0.00297554 | 0.94886691 | -0.02892 |
| 0.450267613 | -0.035876189 | 0.43924885  | 0.026589486 | 0.56653293 | 0.030201 |
| 0.000111065 | -0.181910038 | 7.70E-05    | -0.05467969 | 0.23825729 | 0.047702 |
| 4.40E-07    | -0.229447844 | 5.38E-07    | -0.03891501 | 0.40145554 | 0.052719 |
| 1.02E-06    | -0.230986961 | 4.50E-07    | -0.12519604 | 0.00675017 | 0.077895 |
| 0.005087969 | -0.123371161 | 0.007604756 | 0.044368832 | 0.33870851 | -0.21639 |

|             |              |             |             |            |          |
|-------------|--------------|-------------|-------------|------------|----------|
| 0.213140831 | -0.042642785 | 0.357851337 | 0.042360572 | 0.36104459 | 0.005168 |
| 0.423455247 | 0.046796155  | 0.312918912 | -0.11880446 | 0.01018125 | -0.31446 |
| 1.34E-08    | -0.269165653 | 3.41E-09    | 0.140052285 | 0.00241808 | 0.147125 |
| 0.02858226  | 0.095687865  | 0.038730798 | 0.12159871  | 0.00852604 | 0.120192 |
| 0.464156921 | -0.024143938 | 0.602762166 | 0.154801864 | 0.00078911 | 0.248602 |
| 0.000189842 | 0.169144469  | 0.000240718 | 0.073783294 | 0.11130195 | -0.03848 |
| 0.1902249   | -0.052717617 | 0.255548749 | -0.0059835  | 0.89739003 | -0.03634 |
| 0.001199062 | -0.161524331 | 0.00045789  | 0.07909379  | 0.08776145 | 0.033916 |
| 0.760109573 | -0.005500724 | 0.905628734 | -0.14892847 | 0.00124762 | 0.099689 |
| 0.38578044  | 0.032763979  | 0.479984365 | 0.005607055 | 0.90381326 | -0.01612 |
| 0.073185373 | 0.07685067   | 0.097164143 | -0.07236345 | 0.11837177 | 0.161605 |
| 5.23E-05    | 0.17215765   | 0.000185243 | -0.33750545 | 6.63E-14   | -0.15954 |
| 9.21E-06    | -0.20292193  | 9.89E-06    | -0.06038377 | 0.19271273 | 0.322338 |
| 1.47E-07    | -0.236247328 | 2.40E-07    | -0.02249217 | 0.62780504 | 0.035742 |
| 1.44E-05    | 0.199727778  | 1.37E-05    | -0.09072619 | 0.05006622 | 0.118974 |
| 0.925123666 | 0.016211429  | 0.726776996 | -0.0447043  | 0.33506543 | 0.006149 |
| 0.393542879 | -0.036336941 | 0.433390941 | -0.07169037 | 0.12184363 | -0.00574 |
| 7.51E-12    | -0.310016587 | 7.33E-12    | -0.02961866 | 0.52315522 | 0.187237 |
| 0.484792032 | -0.041049231 | 0.376115025 | 0.00981622  | 0.83244492 | 0.052132 |
| 6.30E-06    | -0.206552775 | 6.79E-06    | 0.095480914 | 0.03915592 | 0.162603 |
| 0.000143516 | -0.172851677 | 0.000174287 | -0.15781081 | 0.00062014 | 0.133547 |
| 0.332409492 | 0.054522281  | 0.239613383 | 0.051197579 | 0.26952886 | 0.108064 |
| 0.000303847 | -0.1834391   | 6.68E-05    | 0.10179352  | 0.02783546 | 0.069703 |
| 1.21E-13    | -0.326365956 | 4.73E-13    | -0.09818582 | 0.03390036 | 0.181312 |
| 0.503611449 | -0.032424051 | 0.484554747 | -0.19106678 | 3.23E-05   | 0.167725 |
| 0.012951226 | -0.113413593 | 0.014197113 | -0.09025143 | 0.05128321 | 0.116917 |
| 0.005785573 | -0.133566045 | 0.003832638 | 0.040555313 | 0.38189024 | -0.01732 |
| 1.29E-18    | -0.396370333 | 5.09E-19    | -0.03515224 | 0.4485439  | 0.124074 |
| 0.36023891  | -0.044023124 | 0.34248918  | 0.029499086 | 0.52483468 | -0.1742  |
| 0.042588511 | -0.097320127 | 0.035512788 | -0.04566283 | 0.32479538 | -0.01198 |
| 0.033108124 | -0.105134237 | 0.02307555  | -0.02007315 | 0.66525785 | 0.029907 |
| 4.99E-11    | -0.299215437 | 4.10E-11    | -0.0544232  | 0.2404697  | 0.133854 |
| 0.002383252 | -0.129030302 | 0.005228986 | -0.02453019 | 0.59697144 | 0.066768 |
| 0.0199411   | -0.105152875 | 0.023051106 | 0.016648975 | 0.71970877 | 0.051916 |
| 3.12E-06    | -0.218873119 | 1.79E-06    | -0.01959519 | 0.67276135 | 0.017325 |
| 0.002926592 | 0.139468452  | 0.002522433 | -0.27488402 | 1.53E-09   | -0.04209 |
| 0.088853904 | 0.081838314  | 0.077267449 | -0.09865758 | 0.03304822 | -0.09964 |
| 7.89E-05    | -0.175177913 | 0.000141837 | -0.18745043 | 4.58E-05   | -0.05693 |
| 0.529027313 | -0.024979997 | 0.590259768 | -0.12695907 | 0.00600732 | -0.09369 |
| 6.73E-05    | -0.185453093 | 5.53E-05    | -0.1029382  | 0.02611725 | -0.01139 |
| 0.576486538 | 0.024564072  | 0.596464628 | 0.01551712  | 0.73804056 | 0.199095 |
| 9.79E-05    | -0.179755433 | 9.38E-05    | -0.16751228 | 0.00027691 | 0.051175 |
| 2.66E-07    | 0.220215979  | 1.55E-06    | 0.136715659 | 0.00307195 | 0.052    |
| 0.884722056 | 0.01418059   | 0.75987934  | -0.11666362 | 0.0116363  | 0.007483 |
| 1.82E-05    | 0.206909461  | 6.54E-06    | -0.22071499 | 1.46E-06   | 0.044834 |

|             |              |             |             |            |          |
|-------------|--------------|-------------|-------------|------------|----------|
| 0.002494352 | -0.135509009 | 0.003345475 | -0.01377103 | 0.76661081 | 0.073392 |
| 0.022983167 | 0.10782015   | 0.019776233 | 0.03245725  | 0.48410735 | -0.02387 |
| 0.097254754 | 0.07451356   | 0.107797401 | 0.071092958 | 0.12499123 | 0.316959 |
| 3.17E-05    | -0.185597816 | 5.46E-05    | 0.09336545  | 0.04373267 | -0.18002 |
| 0.552565772 | -0.030260994 | 0.514180262 | 0.002865982 | 0.95074716 | -0.1414  |
| 0.32899105  | -0.038939251 | 0.401162072 | 0.120377166 | 0.00921761 | 0.175848 |
| 0.119671324 | -0.081684957 | 0.077825633 | -0.06628866 | 0.15264685 | 0.132188 |
| 0.00303389  | 0.145195294  | 0.001655344 | -0.16534228 | 0.00033293 | -0.04674 |
| 0.003904764 | -0.137871853 | 0.002829099 | 0.003017726 | 0.94814295 | 0.032604 |
| 1.36E-13    | 0.336986696  | 7.28E-14    | -0.13431319 | 0.00363817 | 0.039632 |
| 0.330251293 | -0.033298201 | 0.472849262 | -0.11778986 | 0.01084939 | 0.072609 |
| 0.000556527 | -0.155372402 | 0.000754115 | 0.010850734 | 0.81508993 | 0.288836 |
| 6.75E-09    | -0.271676175 | 2.40E-09    | 0.100546395 | 0.02981715 | 0.183994 |
| 0.808113345 | 0.002437877  | 0.958096942 | -0.07811505 | 0.09177004 | 0.239829 |
| 0.465913712 | -0.03500094  | 0.450500501 | -0.10617669 | 0.02174237 | 0.070227 |
| 0.00048996  | -0.16743217  | 0.000278813 | -0.09175857 | 0.04750298 | 0.085445 |
| 0.005442707 | -0.129346823 | 0.005118396 | 0.139978792 | 0.002431   | 0.122158 |
| 6.01E-08    | 0.244447752  | 8.81E-08    | -0.24319122 | 1.03E-07   | -0.06598 |
| 1.39E-05    | -0.208177804 | 5.72E-06    | 0.101868068 | 0.02772067 | -0.16391 |
| 1.43E-09    | -0.272741457 | 2.07E-09    | 0.017033572 | 0.71351552 | 0.286319 |
| 1.48E-05    | 0.191220256  | 3.19E-05    | -0.10081393 | 0.02938214 | -0.04356 |
| 0.661764737 | 0.020306488  | 0.661606663 | 0.20662687  | 6.73E-06   | 0.140735 |
| 7.37E-05    | -0.189128839 | 3.90E-05    | -0.15941734 | 0.00054431 | -0.1076  |
| 0.942693846 | 0.001591764  | 0.972633027 | -0.17411983 | 0.00015582 | -0.37837 |
| 0.716950359 | -0.021711131 | 0.639799398 | -0.1082013  | 0.019343   | 0.041468 |
| 1.97E-21    | -0.426007679 | 5.17E-22    | -0.07093249 | 0.12584733 | 0.045124 |
| 0.003254185 | -0.13042917  | 0.004755976 | -0.05136434 | 0.26797003 | 0.216166 |
| 0.152881391 | -0.062832132 | 0.175253661 | -0.07675382 | 0.09758751 | -0.08641 |
| 1.10E-09    | -0.270868536 | 2.69E-09    | -0.11952803 | 0.00972731 | 0.373974 |
| 0.119228865 | 0.079644654  | 0.085567964 | 0.02413797  | 0.60285183 | 0.11197  |
| 0.22664454  | 0.063528277  | 0.170511165 | -0.12198534 | 0.008317   | 0.132275 |
| 0.403986234 | -0.042574974 | 0.358617    | -0.06313676 | 0.17316645 | -0.01502 |
| 0.623359805 | 0.032837484  | 0.478999158 | 0.008400423 | 0.85632726 | 0.043629 |
| 0.976369043 | 0.007457496  | 0.872307489 | -0.09735379 | 0.03544888 | 0.077838 |
| 1.25E-20    | -0.412513186 | 1.30E-20    | -0.07541513 | 0.10359153 | -0.10195 |
| 0.0202126   | -0.116609899 | 0.011675061 | 0.076305154 | 0.09956812 | -0.03615 |
| 0.069460661 | 0.078168986  | 0.091545384 | -0.26432006 | 6.62E-09   | 0.418131 |
| 0.026847648 | 0.083605036  | 0.071068516 | -0.12213998 | 0.00823467 | 0.049432 |
| 0.065400985 | -0.08952879  | 0.053182929 | -0.0154808  | 0.73863139 | 0.184797 |
| 2.56E-05    | -0.201930043 | 1.10E-05    | 0.047691921 | 0.30373614 | 0.110979 |
| 9.55E-29    | -0.494105197 | 4.06E-30    | -0.00488789 | 0.91610153 | -0.03659 |
| 6.56E-06    | -0.216719124 | 2.28E-06    | -0.23485603 | 2.84E-07   | -0.08183 |
| 0.387650301 | -0.054112026 | 0.243173167 | 0.102200891 | 0.02721316 | 0.200112 |
| 0.485948549 | -0.036215926 | 0.434925117 | -0.12572158 | 0.00652056 | -0.22412 |
| 0.019705633 | -0.117734631 | 0.010886853 | 0.123387471 | 0.00759671 | 0.161571 |

|             |              |             |             |            |          |
|-------------|--------------|-------------|-------------|------------|----------|
| 0.00607518  | 0.122128632  | 0.00824069  | 0.179813995 | 9.33E-05   | 0.094639 |
| 0.177492374 | -0.061876431 | 0.181923224 | -0.04865909 | 0.29402374 | -0.1257  |
| 0.282486173 | 0.034147862  | 0.461622005 | 0.227019807 | 7.13E-07   | -0.05212 |
| 0.000244104 | 0.168879195  | 0.000246283 | 0.096514103 | 0.03707227 | 0.11646  |
| 0.003113613 | 0.128971967  | 0.005249601 | -0.0125885  | 0.78614379 | 0.059311 |
| 8.32E-10    | 0.272446124  | 2.16E-09    | 0.073360192 | 0.11337307 | 0.275157 |
| 7.42E-23    | -0.443958463 | 5.63E-24    | 0.096730441 | 0.0366481  | -0.06984 |
| 1.76E-31    | -0.504145357 | 1.79E-31    | -0.03419907 | 0.46095015 | -0.14815 |
| 0.546141053 | 0.036109344  | 0.43627892  | 0.02434767  | 0.59970463 | -0.08068 |
| 0.590444064 | -0.033717005 | 0.467296628 | -0.09248772 | 0.04575966 | 0.30082  |
| 0.170432737 | 0.047707672  | 0.303576281 | -0.10889868 | 0.01857171 | 0.280468 |
| 0.578703878 | -0.034497836 | 0.457041037 | -0.25922185 | 1.31E-08   | 0.381537 |
| 0.005387552 | -0.137413604 | 0.002923181 | 0.146398803 | 0.00151219 | 0.178498 |
| 8.52E-05    | -0.192685191 | 2.76E-05    | -0.0694069  | 0.13421573 | 0.134614 |
| 0.040513747 | -0.100030667 | 0.030671308 | -0.2035835  | 9.24E-06   | -0.18975 |
| 0.780482104 | -0.01816562  | 0.695396185 | -0.02343284 | 0.61348841 | 0.17256  |
| 5.42E-10    | 0.274879056  | 1.53E-09    | 0.035651185 | 0.4421259  | -0.11659 |
| 1.10E-05    | -0.213506633 | 3.23E-06    | 0.054611773 | 0.23884176 | 0.056727 |
| 8.21E-07    | -0.228820192 | 5.79E-07    | 0.313511258 | 4.14E-12   | -0.05872 |
| 1.93E-10    | -0.293309348 | 1.02E-10    | -0.08770889 | 0.05822807 | -0.11077 |
| 0.002226677 | -0.14336363  | 0.001897202 | -0.15961753 | 0.00053549 | -0.01783 |
| 0.008362378 | -0.116728649 | 0.011589523 | -0.06415099 | 0.16635075 | 0.230163 |
| 0.001671779 | -0.143610893 | 0.001862764 | -0.03175994 | 0.49355118 | -0.11785 |
| 0.001941876 | -0.149672083 | 0.001178371 | -0.03920059 | 0.39800666 | 0.065081 |
| 0.000172805 | -0.170843311 | 0.000207778 | 0.035396768 | 0.44539195 | 0.060273 |
| 0.210995196 | 0.055972706  | 0.22732225  | -0.04888181 | 0.29181693 | 0.301091 |
| 0.18567439  | -0.066557441 | 0.150986243 | -0.05525338 | 0.23336074 | 0.433579 |
| 3.05E-05    | -0.191437551 | 3.12E-05    | -0.04672703 | 0.31363503 | -0.02595 |
| 0.132315856 | -0.069751661 | 0.132288039 | -0.09254321 | 0.04562922 | 0.125788 |
| 6.14E-12    | -0.315728701 | 2.87E-12    | -0.0408116  | 0.37888682 | 0.123457 |
| 0.000488747 | 0.168294177  | 0.000258982 | -0.23602446 | 2.47E-07   | -0.04172 |
| 0.478507615 | 0.016942144  | 0.714986125 | 0.183963933 | 6.36E-05   | -0.00254 |
| 0.246055202 | 0.046045114  | 0.320757054 | 0.176105302 | 0.00013056 | 0.060292 |
| 0.070180556 | -0.082094102 | 0.07634367  | 0.088151979 | 0.05696461 | -0.13554 |
| 0.362146302 | -0.045781896 | 0.32353411  | -0.05485225 | 0.23677695 | 0.54381  |
| 0.192053513 | -0.068776189 | 0.137798158 | 0.166893151 | 0.00029192 | 0.382828 |
| 1.08E-05    | 0.21099445   | 4.24E-06    | -0.04609495 | 0.32023301 | -0.20324 |
| 0.240886362 | 0.054523043  | 0.239606814 | 0.064194318 | 0.1660641  | 0.078258 |
| 0.031593304 | -0.093768888 | 0.042826654 | 0.065338553 | 0.15862807 | 0.015419 |
| 2.54E-06    | -0.213002371 | 3.42E-06    | -0.00825711 | 0.85875247 | -0.16765 |
| 0.012140782 | -0.107763783 | 0.019841013 | -0.10203187 | 0.02746989 | -0.00257 |
| 5.19E-05    | -0.187496572 | 4.56E-05    | -0.2000162  | 1.33E-05   | -0.02759 |
| 0.589212789 | -0.02052635  | 0.658173726 | 0.10767853  | 0.01993934 | -0.03278 |
| 0.497376666 | -0.043506835 | 0.348185194 | -0.00080924 | 0.98608487 | 0.272168 |
| 0.226455452 | -0.06807304  | 0.141878187 | 0.217853238 | 2.01E-06   | 0.004865 |

|             |              |             |             |            |          |
|-------------|--------------|-------------|-------------|------------|----------|
| 0.846611955 | -0.00682207  | 0.883106132 | -0.10627362 | 0.02162187 | 0.410985 |
| 0.48805358  | -0.040898439 | 0.377872457 | 0.03889235  | 0.40172994 | 0.067217 |
| 0.611518839 | -0.030004932 | 0.517748447 | 0.212207311 | 3.72E-06   | 0.404298 |
| 1.47E-08    | 0.260322976  | 1.13E-08    | -0.17095596 | 0.00020575 | 0.115407 |
| 0.001750598 | -0.147731367 | 0.001367    | 0.27699594  | 1.13E-09   | 0.255229 |
| 6.02E-06    | -0.220584589 | 1.48E-06    | 0.110318596 | 0.01708379 | 0.17693  |
| 0.049773567 | -0.101682982 | 0.028006408 | 0.028587811 | 0.53772417 | -0.15184 |
| 0.32393851  | 0.033211756  | 0.473999858 | 0.033650909 | 0.46817055 | -0.10319 |
| 0.163429694 | -0.058632172 | 0.205962916 | -0.09217732 | 0.04649511 | -0.04853 |
| 1.50E-09    | -0.274956398 | 1.51E-09    | 0.078691896 | 0.0893901  | 0.123847 |
| 0.000100142 | -0.173598423 | 0.00016318  | -0.01169129 | 0.80105462 | 0.056961 |
| 7.96E-11    | 0.30428204   | 1.84E-11    | 0.100753938 | 0.0294792  | 0.289256 |
| 0.021825121 | -0.105633662 | 0.022428258 | -0.02335605 | 0.61465181 | -0.15951 |
| 0.00344635  | -0.127057794 | 0.005967984 | -0.09561887 | 0.03887209 | -0.01795 |
| 0.000151504 | -0.17427245  | 0.000153728 | 0.118808189 | 0.01017886 | 0.198274 |
| 0.507811905 | -0.047520542 | 0.305479044 | 0.017642437 | 0.70374935 | 0.144467 |
| 0.19552545  | 0.046763839  | 0.313253556 | 0.083806914 | 0.07038681 | 0.141818 |
| 0.441604571 | -0.027195607 | 0.557717297 | -0.13853039 | 0.00269872 | -0.15831 |
| 0.515573493 | 0.041515111  | 0.370717194 | -0.00022954 | 0.99605283 | 0.047274 |
| 1.52E-08    | -0.258155505 | 1.51E-08    | -0.10894907 | 0.01851702 | 0.221436 |
| 0.000502142 | -0.166496486 | 0.000301939 | -0.27037458 | 2.88E-09   | 0.228277 |
| 0.000837207 | 0.136948565  | 0.003021558 | -0.1249714  | 0.00685051 | -0.15584 |
| 0.742199867 | 0.026856791  | 0.562636944 | 0.102560955 | 0.02667313 | -0.01052 |
| 0.533219626 | 0.027073135  | 0.55949319  | 0.009852702 | 0.83183146 | -0.01048 |
| 0.030068497 | 0.098072218  | 0.034108324 | -0.09330888 | 0.04386099 | -0.26451 |
| 0.352635321 | -0.043699178 | 0.34605617  | -0.13190916 | 0.00429788 | -0.11897 |
| 1.62E-17    | 0.370407146  | 1.24E-16    | -0.00716889 | 0.87720927 | -0.07138 |
| 2.37E-06    | -0.21635405  | 2.37E-06    | 0.054858285 | 0.23672529 | -0.20602 |
| 0.001410623 | -0.13122292  | 0.004505085 | 0.00093342  | 0.98394978 | -0.10073 |
| 1.40E-07    | -0.22695249  | 7.19E-07    | 0.00236657  | 0.95932152 | -0.10729 |
| 0.347456858 | 0.051685736  | 0.264983277 | 0.025720805 | 0.57928226 | -0.01939 |
| 0.847826164 | 0.017170452  | 0.711315831 | -0.05743966 | 0.21535363 | -0.26754 |
| 0.624331748 | 0.041530378  | 0.370541119 | -0.05141273 | 0.26751889 | -0.00558 |
| 0.02642234  | -0.089167442 | 0.054154619 | -0.06213066 | 0.18013095 | -0.11866 |
| 0.204538801 | 0.060629778  | 0.190902916 | 0.075095171 | 0.10506903 | 0.240738 |
| 0.001956673 | 0.149069699  | 0.001234184 | -0.18410389 | 6.28E-05   | 0.035928 |
| 0.000873328 | 0.148450219  | 0.00129411  | -0.19282121 | 2.73E-05   | 0.068135 |
| 0.015542432 | 0.123932848  | 0.007331956 | 0.049671294 | 0.28408384 | 0.124249 |
| 0.593446817 | -0.023428953 | 0.613547315 | -0.16010044 | 0.00051476 | -0.1273  |
| 0.162467538 | -0.067135612 | 0.147460667 | -0.00805387 | 0.86219399 | 0.039994 |
| 0.470886848 | -0.020410145 | 0.659987269 | -0.1308065  | 0.00463518 | -0.14806 |
| 0.138730265 | -0.065603142 | 0.156944915 | -0.09403645 | 0.04223454 | 0.049836 |
| 0.004894956 | -0.126728952 | 0.006099924 | 0.017227388 | 0.71040156 | -0.07587 |
| 0.809550331 | 0.021634579  | 0.640980147 | -0.16188198 | 0.00044455 | -0.09552 |
| 0.008724842 | 0.11248869   | 0.015011139 | 0.049837633 | 0.28247233 | -0.02609 |

|             |              |             |             |            |          |
|-------------|--------------|-------------|-------------|------------|----------|
| 0.518819729 | -0.021461396 | 0.643654658 | 0.030824668 | 0.50637071 | -0.08003 |
| 0.70341282  | 0.001424846  | 0.975501868 | 0.11742892  | 0.01109629 | 0.006847 |
| 0.552674403 | -0.025189781 | 0.587141447 | -0.08988352 | 0.05224319 | -0.17973 |
| 0.890830296 | 0.008035204  | 0.862510206 | -0.05119521 | 0.26955103 | -0.08711 |
| 0.172961775 | 0.073853609  | 0.110960658 | -0.12771337 | 0.00571257 | 0.026647 |
| 0.002902606 | 0.140636825  | 0.00231757  | -0.20893829 | 5.28E-06   | 0.114921 |
| 0.412577329 | -0.027149572 | 0.558384506 | 0.066595288 | 0.15075352 | 0.132609 |
| 0.20894701  | 0.076219819  | 0.099948415 | 0.070419408 | 0.12861533 | -0.0722  |
| 0.875611253 | -9.23E-05    | 0.998412011 | 0.018517603 | 0.68979699 | -0.12925 |
| 0.598843799 | 0.043408186  | 0.349280343 | -0.00710462 | 0.87830155 | -0.01882 |
| 0.025505852 | 0.118796659  | 0.010186241 | -0.01160141 | 0.80255243 | 0.065345 |
| 0.997166038 | 0.013849961  | 0.76531212  | -0.13612087 | 0.00320413 | -0.22115 |
| 0.871815924 | 0.008026666  | 0.862654852 | -0.16948657 | 0.00023372 | -0.01081 |
| 0.427105883 | -0.020706063 | 0.655372994 | -0.16005047 | 0.00051687 | -0.07237 |
| 0.025743123 | 0.123346298  | 0.007617038 | 0.100232088 | 0.03033525 | 0.035626 |
| 0.111928912 | 0.091610793  | 0.047863011 | -0.01910434 | 0.68050102 | -0.04704 |
| 0.282874539 | 0.066036924  | 0.154214704 | -0.11993115 | 0.0094823  | -0.10415 |
| 0.739732207 | -0.002229581 | 0.961674331 | -0.11969178 | 0.00962712 | -0.21385 |
| 0.513020264 | -0.009314368 | 0.840893971 | -0.00014321 | 0.99753731 | -0.09595 |
| 0.039350109 | 0.104208008  | 0.024318894 | -0.07566254 | 0.10246038 | -0.12314 |
| 0.39863789  | 0.056476112  | 0.223162896 | 0.099456931 | 0.03164607 | 0.004731 |
| 0.891863703 | 0.006663318  | 0.885807491 | -0.00367727 | 0.93683082 | 0.06536  |
| 0.627730627 | 0.039762197  | 0.39127656  | -0.00090871 | 0.9843746  | 0.15258  |
| 0.385586774 | -0.022167527 | 0.632778896 | 0.012088793 | 0.79443922 | 0.113191 |
| 0.299924837 | 0.056746661  | 0.220950059 | -0.07311177 | 0.11460314 | 0.022946 |
| 0.001592225 | -0.140799498 | 0.002290284 | 0.147443167 | 0.00139727 | -0.05108 |
| 0.352027126 | 0.057897581  | 0.211711894 | -0.0105871  | 0.8195044  | -0.08692 |
| 0.853756544 | 0.007490507  | 0.871747113 | 0.020197581 | 0.66330977 | 0.023221 |
| 0.303764282 | 0.063566134  | 0.170256034 | -0.08262789 | 0.07444482 | -0.19784 |
| 0.010390608 | -0.113416779 | 0.014194378 | -0.03684239 | 0.42701681 | -0.30665 |
| 0.799477429 | 0.021281796  | 0.646433144 | -0.17049074 | 0.00021425 | -0.01873 |
| 0.558765375 | 0.040789238  | 0.379148307 | 0.020434478 | 0.65960734 | 0.171817 |
| 0.00221363  | -0.145429892 | 0.001626499 | -0.14841111 | 0.00129798 | -0.09406 |
| 0.622853599 | -0.012068721 | 0.79477291  | -0.03089705 | 0.5053724  | -0.11455 |
| 0.661416318 | 0.035370013  | 0.445736204 | 0.035302713 | 0.44660283 | -0.04027 |
| 0.006110092 | 0.139112985  | 0.00258796  | 0.004040901 | 0.93059922 | -0.04717 |
| 0.426234512 | -0.022627736 | 0.625732952 | 0.076579503 | 0.09835327 | 0.023458 |
| 0.017308849 | 0.124163743  | 0.007222376 | -0.00250736 | 0.95690371 | -0.04128 |
| 0.00107487  | 0.167241936  | 0.000283376 | -0.06457689 | 0.16354936 | -0.02462 |
| 0.100631609 | 0.089835513  | 0.05236956  | -0.03197825 | 0.49058413 | 0.087132 |
| 0.91520725  | -0.002759165 | 0.952580639 | -0.14760434 | 0.00138027 | 0.044234 |
| 0.376593877 | 0.056999487  | 0.218896392 | -0.08849764 | 0.05599481 | -0.13243 |
| 0.653302872 | -0.015754253 | 0.734187173 | 0.000219264 | 0.9962295  | 0.024362 |
| 0.996213466 | 0.016689274  | 0.719058957 | -0.18036969 | 8.87E-05   | -0.24965 |
| 0.000236491 | 0.164525214  | 0.000356641 | 0.082413002 | 0.07520456 | 0.333999 |

|             |              |             |             |            |          |
|-------------|--------------|-------------|-------------|------------|----------|
| 0.04680781  | 0.10246675   | 0.026813521 | -0.08670415 | 0.06117919 | 0.136923 |
| 0.05853422  | 0.099261683  | 0.031983778 | 0.039778968 | 0.39107664 | 0.122137 |
| 1.11E-10    | 0.288518669  | 2.10E-10    | -0.10830008 | 0.01923209 | 0.144144 |
| 6.25E-07    | 0.237159006  | 2.15E-07    | -0.00864255 | 0.85223301 | -0.03443 |
| 0.797942465 | -0.007286764 | 0.875206722 | -0.04418056 | 0.34076411 | -0.08968 |
| 0.185618997 | 0.066790842  | 0.149555382 | -0.18483246 | 5.86E-05   | -0.06052 |
| 0.004325345 | -0.127793597 | 0.005682001 | 0.117351327 | 0.01115001 | 0.072056 |
| 0.245487221 | -0.045527559 | 0.326232251 | -0.05615609 | 0.22580075 | -0.01552 |
| 0.030658653 | 0.108186866  | 0.019359258 | 0.000208309 | 0.99641789 | -0.07084 |
| 3.51E-05    | 0.214119407  | 3.03E-06    | -0.04058374 | 0.38155637 | 0.233519 |
| 0.924309618 | 0.011568366  | 0.803103299 | -0.05184633 | 0.26349945 | -0.04156 |
| 0.709998053 | 0.025687821  | 0.579768987 | -0.18061537 | 8.67E-05   | -0.10364 |
| 0.172407925 | 0.073006442  | 0.115127821 | -0.10150551 | 0.02828276 | -0.08501 |
| 0.833162034 | 0.00092037   | 0.984174142 | -0.10160745 | 0.02812374 | -0.08729 |
| 0.596759409 | 0.026598979  | 0.566394342 | -0.15959676 | 0.0005364  | -0.05691 |
| 0.343904284 | 0.044096847  | 0.341680696 | -0.09677073 | 0.03656956 | -0.18831 |
| 0.471711948 | 0.041606329  | 0.369665945 | -0.07972599 | 0.08524785 | -0.03157 |
| 0.173664621 | -0.050152536 | 0.279438463 | -0.16502346 | 0.000342   | 0.214438 |
| 0.033005559 | 0.114003195  | 0.01369869  | -0.17477782 | 0.00014698 | 0.168013 |
| 0.097326433 | 0.095058395  | 0.040036146 | -0.18742257 | 4.59E-05   | -0.04083 |
| 0.269265752 | 0.061558344  | 0.184184176 | -0.20948521 | 4.98E-06   | -0.04408 |
| 0.049902931 | -0.076897636 | 0.096959355 | 0.249505867 | 4.65E-08   | -0.09902 |
| 0.00489926  | -0.118006675 | 0.010703435 | 0.174083008 | 0.00015633 | -0.02373 |
| 0.395362667 | -0.024802139 | 0.592909461 | 0.116162313 | 0.0120025  | 0.001899 |
| 0.001204208 | 0.155070953  | 0.000772422 | -0.11491063 | 0.01296167 | 0.122937 |
| 0.996989341 | 0.010786409  | 0.816166513 | -0.15881985 | 0.00057145 | -0.24493 |
| 0.891966507 | 0.017057117  | 0.713136986 | -0.3019229  | 2.68E-11   | -0.21635 |
| 0.094536576 | 0.097055022  | 0.036019433 | -0.12471641 | 0.00696601 | 0.179814 |
| 9.15E-08    | 0.250957259  | 3.87E-08    | -0.13285496 | 0.00402641 | 0.031824 |
| 0.125304086 | -0.059440168 | 0.199770961 | -0.02304246 | 0.61941245 | 0.077837 |
| 0.514207206 | -0.012419915 | 0.78893975  | -0.09582041 | 0.03846059 | -0.15135 |
| 0.458509901 | 0.053503504  | 0.248521265 | 0.152396499 | 0.00095381 | -0.113   |
| 0.074727002 | 0.092501051  | 0.045728299 | 0.0806935   | 0.08151377 | 0.051421 |
| 0.887673712 | 0.0198528    | 0.668712975 | 0.182189203 | 7.50E-05   | -0.04817 |
| 0.538512715 | -0.014548655 | 0.753845281 | 0.038388486 | 0.40786077 | -0.20495 |
| 0.371181813 | -0.023771354 | 0.608371778 | 0.1185577   | 0.01034029 | 0.007327 |
| 0.208418535 | -0.044753509 | 0.334533188 | 0.171816927 | 0.00019085 | 0.181517 |
| 0.174078049 | -0.052612537 | 0.256498719 | -0.05975098 | 0.19742558 | -0.09531 |
| 0.369343833 | 0.052611327  | 0.256509676 | -0.1277646  | 0.00569303 | -0.00069 |
| 0.075000376 | 0.101274766  | 0.028645573 | -0.12409683 | 0.00725398 | -0.11246 |
| 0.025139086 | 0.114499636  | 0.013291034 | 0.026833636 | 0.56297392 | 0.017252 |
| 0.421918278 | 0.056974594  | 0.219097987 | -0.08498198 | 0.06652424 | -0.20969 |
| 0.440334712 | 0.027397185  | 0.554800288 | -0.06642391 | 0.15180954 | 0.013703 |
| 0.022803687 | 0.119374435  | 0.009822142 | -0.09080075 | 0.04987731 | 0.029543 |
| 0.367041827 | 0.045153411  | 0.33022782  | -0.19226462 | 2.88E-05   | -0.04184 |

|             |              |             |             |            |          |
|-------------|--------------|-------------|-------------|------------|----------|
| 0.367022816 | 0.061407322  | 0.18526486  | -0.09040896 | 0.05087671 | 0.049201 |
| 0.15634988  | -0.05729605  | 0.216504924 | -0.0864246  | 0.06202192 | -0.21306 |
| 0.8767042   | 0.006309232  | 0.891837389 | -0.192371   | 2.85E-05   | -0.0131  |
| 0.675539763 | 0.027567078  | 0.552347591 | -0.08878685 | 0.05519397 | -0.14735 |
| 0.286391779 | 0.059879883  | 0.19645877  | -0.07225211 | 0.11894072 | 0.043382 |
| 0.190960827 | 0.077539945  | 0.094193052 | -0.1625523  | 0.00042053 | -0.07496 |
| 0.814172031 | 0.030817935  | 0.506463631 | 0.020815645 | 0.65366757 | 0.014989 |
| 0.094562925 | 0.091166039  | 0.048960359 | -0.20110487 | 1.19E-05   | 0.01734  |
| 0.656454099 | 0.021556522  | 0.642185034 | -0.14567746 | 0.00159656 | -0.12536 |
| 0.055568764 | 0.103821464  | 0.024854654 | -0.03600136 | 0.43765299 | 0.194083 |
| 1.85E-06    | 0.223644117  | 1.05E-06    | 0.192540621 | 2.80E-05   | 0.175822 |
| 0.297664493 | 0.061346294  | 0.185702895 | -0.0879017  | 0.05767546 | -0.0596  |
| 0.799734232 | 0.02254809   | 0.626949957 | -0.22787555 | 6.46E-07   | -0.29206 |
| 0.016890164 | 0.12219149   | 0.008207414 | -0.01473694 | 0.75076429 | 0.075988 |
| 0.228167332 | 0.06284105   | 0.175192293 | -0.30421183 | 1.86E-11   | -0.03753 |
| 0.912232382 | 0.016061266  | 0.72920816  | -0.10815397 | 0.01939634 | -0.01499 |
| 0.676845686 | -0.003377959 | 0.941962977 | 0.110482218 | 0.01691922 | -0.25906 |
| 0.047203036 | -0.078285499 | 0.09106158  | -0.02133336 | 0.64563493 | -0.16219 |
| 0.774164964 | 0.016665073  | 0.719449168 | -0.01652479 | 0.72171246 | -0.16434 |
| 0.660183732 | -0.009103424 | 0.84445089  | -0.11186587 | 0.01558212 | -0.21926 |
| 0.396305417 | -0.03946186  | 0.394867108 | -0.1034531  | 0.02537467 | -0.11337 |
| 0.588987426 | -0.008181827 | 0.86002693  | 0.130377151 | 0.00477285 | 0.04557  |
| 0.242355323 | 0.0538947    | 0.245073842 | -0.00246336 | 0.95765941 | 0.013563 |
| 0.015947404 | -0.106029715 | 0.021926188 | -0.11714197 | 0.01129611 | 0.082512 |
| 0.187079553 | 0.059659875  | 0.198110949 | -0.23593287 | 2.50E-07   | -0.11307 |
| 0.132905313 | 0.083846924  | 0.070252341 | -0.02263572 | 0.62561105 | 0.071627 |
| 0.876175072 | 0.018138433  | 0.69582936  | -0.06385595 | 0.16831236 | -0.20764 |
| 0.271967715 | 0.06324079   | 0.172457924 | 0.017629976 | 0.70394874 | 0.131243 |
| 0.412689837 | 0.045417142  | 0.327408136 | -0.11206447 | 0.01539802 | -0.04434 |
| 3.09E-08    | -0.235351379 | 2.68E-07    | 0.001764596 | 0.96966291 | 0.242723 |
| 0.002839004 | -0.122954635 | 0.007812874 | 0.249466729 | 4.68E-08   | 0.122658 |
| 0.825573637 | -0.00447779  | 0.923117904 | -0.06915096 | 0.13566071 | 0.035632 |
| 0.030513192 | -0.115448436 | 0.012541564 | -0.02707721 | 0.55943406 | -0.06716 |
| 0.0002617   | 0.176920517  | 0.000121342 | 0.025697531 | 0.57962567 | -0.24209 |
| 0.883176866 | 0.016799152  | 0.717288221 | -0.10386515 | 0.0247936  | -0.11155 |
| 0.802209049 | 0.032832135  | 0.479070827 | -0.14365627 | 0.00185651 | 0.125721 |
| 0.00504618  | -0.125358217 | 0.006678554 | -0.15108833 | 0.00105618 | 0.091564 |
| 0.110644146 | 0.088631113  | 0.055624035 | -0.01469907 | 0.75138373 | 0.033568 |
| 0.270796423 | -0.046502111 | 0.315972557 | -0.12078518 | 0.00898126 | -0.04382 |
| 0.650576027 | 0.037825857  | 0.41477192  | 0.007410726 | 0.87310153 | 0.097468 |
| 0.645770628 | -0.003442448 | 0.940856991 | 0.094475445 | 0.04127801 | 0.049355 |
| 0.588432259 | 0.034369744  | 0.45871474  | -0.15219515 | 0.00096895 | -0.30495 |
| 0.151884344 | 0.077081118  | 0.096162608 | -0.1487446  | 0.00126531 | 0.070473 |
| 0.159387227 | 0.069018832  | 0.136411341 | -0.15324239 | 0.00089258 | -0.07411 |
| 0.057062383 | -0.093594359 | 0.043216641 | -0.09299304 | 0.04458328 | -0.20725 |



|             |              |             |             |            |          |
|-------------|--------------|-------------|-------------|------------|----------|
| 0.038485223 | -0.094114811 | 0.042062444 | 0.030130494 | 0.51599717 | 0.15409  |
| 0.293991957 | 0.0617182    | 0.183045342 | -0.24503898 | 8.18E-08   | -0.17971 |
| 0.836050788 | 0.015118074  | 0.744539804 | -0.09480334 | 0.04057556 | -0.05722 |
| 0.163183747 | -0.056006812 | 0.227038728 | -0.24217257 | 1.17E-07   | -0.24437 |
| 5.33E-06    | 0.212947981  | 3.44E-06    | 0.005260928 | 0.90972477 | -0.13718 |
| 0.026118118 | 0.118173027  | 0.010592631 | 0.021001995 | 0.65077157 | 0.099472 |
| 0.426432949 | 0.051976163  | 0.262304034 | -0.06611568 | 0.15372288 | 0.088843 |
| 0.44046037  | 0.044566846  | 0.336555097 | -0.01392009 | 0.76415881 | 0.101913 |
| 0.437822392 | 0.038042206  | 0.412106228 | -0.13824068 | 0.00275539 | -0.03144 |
| 0.767351777 | 0.031975062  | 0.490627327 | -0.03440138 | 0.45830101 | -0.03141 |
| 0.939658666 | 0.003806747  | 0.934611455 | 0.069488085 | 0.13375984 | 0.094953 |
| 0.513985963 | 0.046083369  | 0.320354747 | -0.01921757 | 0.67871269 | 0.043147 |
| 0.469778863 | 0.046701392  | 0.313900901 | -0.07592478 | 0.10127214 | -0.17731 |
| 0.000284094 | -0.163846591 | 0.000377518 | 0.097843906 | 0.03452959 | 0.05826  |
| 0.790337894 | -0.004569015 | 0.921556588 | -0.05527463 | 0.23318078 | -0.09034 |
| 0.06589732  | -0.065811723 | 0.155627587 | -0.06488227 | 0.1615626  | 0.064372 |
| 0.582585519 | 0.041581478  | 0.369952159 | -0.00519178 | 0.91090635 | 0.03419  |
| 0.195659578 | 0.07338572   | 0.113247255 | -0.15484106 | 0.00078666 | -0.14712 |
| 0.045682156 | -0.084867233 | 0.066893584 | 0.00111038  | 0.98090747 | 0.23382  |
| 0.50646458  | 0.044044154  | 0.342258431 | -0.11332909 | 0.01426984 | -0.00329 |
| 0.692021068 | 0.020693959  | 0.655561474 | -0.0385007  | 0.40649066 | -0.00564 |
| 0.124962451 | 0.085317815  | 0.065452844 | 0.034730366 | 0.45401148 | 0.079917 |
| 0.552389097 | 0.044495509  | 0.33732988  | -0.03101769 | 0.5037108  | 0.0032   |
| 0.070735953 | -0.075789977 | 0.10188159  | -0.0879247  | 0.05760982 | -0.11542 |
| 0.894699824 | 0.016995525  | 0.714127367 | -0.15073107 | 0.00108585 | -0.20906 |
| 0.47448018  | 0.053947571  | 0.244610491 | -0.07404217 | 0.1100495  | 0.045461 |
| 0.854718071 | 0.013622155  | 0.769062081 | 0.153127059 | 0.00090071 | 0.017739 |
| 0.59190386  | 0.039600192  | 0.393210883 | -0.01639653 | 0.72378399 | -0.16639 |
| 0.588882383 | -0.0199463   | 0.667245995 | -0.19434793 | 2.35E-05   | -0.22502 |
| 9.68E-07    | -0.203335258 | 9.48E-06    | 0.048966959 | 0.29097617 | 0.253179 |
| 0.028386931 | 0.114788555  | 0.01305874  | -0.02548696 | 0.58273711 | 0.038635 |
| 0.031560904 | 0.113544992  | 0.014084674 | 0.060249071 | 0.19370894 | 0.027618 |
| 0.62705418  | 0.034964277  | 0.450975342 | -0.07892836 | 0.08842892 | -0.06804 |
| 0.315397942 | 0.056697147  | 0.22135386  | -0.09684747 | 0.03642037 | -0.09996 |
| 0.862728948 | 0.019177732  | 0.679341677 | -0.09161565 | 0.04785113 | -0.11936 |
| 0.565900857 | 0.037400766  | 0.420039053 | -0.06510236 | 0.16014207 | 0.00084  |
| 0.223837948 | -0.046761123 | 0.313281693 | 0.038113738 | 0.4112271  | 0.139832 |
| 0.66976483  | 0.033757404  | 0.466762925 | -0.01733981 | 0.70859752 | 0.001651 |
| 0.019015878 | -0.102382142 | 0.026940152 | -0.0257457  | 0.57891509 | 0.072195 |
| 0.34967361  | -0.030598343 | 0.509498895 | -0.11206017 | 0.01540198 | -0.05454 |
| 0.819072221 | 0.02374524   | 0.608765821 | -0.14871241 | 0.00126843 | -0.04876 |
| 2.70E-07    | -0.225816627 | 8.19E-07    | -0.00979097 | 0.83286954 | 0.245948 |
| 0.474013068 | -0.015413519 | 0.739726131 | -0.12274875 | 0.00791761 | -0.30145 |
| 0.016585283 | -0.092541031 | 0.045634338 | 0.016014619 | 0.72996394 | 0.159071 |
| 0.713043583 | 0.031947338  | 0.491003629 | 0.045406757 | 0.32751887 | 0.006116 |

|             |              |             |             |            |          |
|-------------|--------------|-------------|-------------|------------|----------|
| 0.287038109 | -0.043107841 | 0.352628012 | -0.0419004  | 0.36628957 | 0.059225 |
| 0.132422571 | -0.06025158  | 0.193690342 | -0.03613921 | 0.4358993  | -0.27951 |
| 0.196418597 | 0.061462378  | 0.184870349 | -0.13039184 | 0.00476808 | -0.29225 |
| 0.040846639 | 0.115681681  | 0.012363132 | -0.05384204 | 0.24553593 | -0.06014 |
| 0.332049165 | -0.036215109 | 0.434935498 | -0.04358291 | 0.34734211 | 0.06615  |
| 0.462344257 | -0.025678235 | 0.57991048  | -0.08026431 | 0.08315359 | -0.17159 |
| 0.258093462 | -0.037348609 | 0.420688001 | 0.086723092 | 0.06112244 | 0.019972 |
| 0.56309484  | 0.031656134  | 0.494965489 | -0.07188624 | 0.12082523 | -0.00774 |
| 0.307169789 | 0.056347115  | 0.22422351  | -0.04451078 | 0.3371639  | -0.02834 |
| 0.006044972 | -0.122282872 | 0.008159252 | 0.023650307 | 0.61019924 | -0.06616 |
| 0.897073237 | 0.023900036  | 0.606431733 | -0.2034809  | 9.34E-06   | -0.0536  |
| 0.87113976  | 0.009290997  | 0.841287891 | -0.07268284 | 0.1167516  | -0.10079 |
| 0.481668909 | 0.049189426  | 0.288787187 | -0.11144879 | 0.01597506 | -0.1876  |
| 0.805234344 | 0.02643091   | 0.568850247 | -0.12570572 | 0.00652739 | -0.23841 |
| 1.96E-08    | -0.254567867 | 2.42E-08    | 0.066326166 | 0.15241431 | -0.07323 |
| 0.133936818 | 0.073960318  | 0.110444289 | -0.11956568 | 0.00970419 | -0.03665 |
| 0.520695801 | 0.041694754  | 0.368648657 | -0.03882282 | 0.40257269 | -0.02308 |
| 0.793475037 | 0.017869371  | 0.700121667 | -0.03348614 | 0.470353   | 0.229906 |
| 0.589662414 | 0.045270104  | 0.328978263 | -0.02324908 | 0.61627393 | 0.100082 |
| 0.006764289 | -0.114137832 | 0.013587058 | -0.02448262 | 0.59768327 | -0.14369 |
| 0.139226393 | 0.077521664  | 0.094270906 | -0.01926385 | 0.67798223 | 0.065613 |
| 0.008404    | -0.113042433 | 0.014518995 | -0.03050589 | 0.51077961 | 0.100356 |
| 0.002770593 | -0.131583514 | 0.004395107 | -0.10720775 | 0.02049    | 0.109645 |
| 0.170752998 | -0.057365216 | 0.215949875 | -0.0779925  | 0.09228211 | 0.02976  |
| 0.715572109 | -0.013159744 | 0.776690411 | -0.24292338 | 1.06E-07   | -0.11155 |
| 0.283344586 | 0.067869444  | 0.143076654 | 0.045607128 | 0.32538657 | 0.060591 |
| 0.508923548 | 0.038657669  | 0.404578569 | -0.14576779 | 0.00158576 | -0.21231 |
| 1.19E-05    | -0.19962733  | 1.38E-05    | -0.02147541 | 0.643438   | 0.048256 |
| 0.940664801 | -0.022964237 | 0.620602463 | 0.027506665 | 0.55321915 | -0.0936  |
| 0.001086491 | -0.167937019 | 0.000267033 | 0.034909992 | 0.45167893 | -0.30683 |
| 0.159918148 | -0.073890845 | 0.110780257 | 0.012179344 | 0.79293427 | -0.03429 |
| 0.035250457 | -0.118782947 | 0.010195026 | 0.034882315 | 0.45203789 | -0.20248 |
| 0.015009332 | -0.116707609 | 0.011604638 | -0.08860428 | 0.05569841 | -0.0223  |
| 0.036030689 | -0.094932488 | 0.040301659 | -0.11235551 | 0.01513167 | -0.09878 |
| 0.011368765 | -0.124548835 | 0.007042873 | -0.13789729 | 0.00282396 | -0.2333  |
| 0.877951035 | -0.011656285 | 0.801637899 | 0.019742411 | 0.67044656 | 0.004536 |
| 0.501486755 | -0.047681698 | 0.303839925 | -0.18309296 | 6.90E-05   | -0.27949 |
| 0.113929028 | -0.079277941 | 0.087023204 | -0.20750193 | 6.14E-06   | -0.10952 |
| 0.693094149 | 0.003369061  | 0.942115581 | 0.029027659 | 0.53148302 | 0.074661 |
| 0.054228725 | 0.063460016  | 0.170971907 | 0.065849206 | 0.15539175 | 0.053787 |
| 0.336554916 | 0.032664608  | 0.481317992 | -0.10875719 | 0.01872598 | -0.17544 |
| 0.040341559 | -0.097498324 | 0.03517565  | -0.11265422 | 0.01486251 | -0.10703 |
| 0.01435891  | -0.116532066 | 0.011731427 | 0.049325326 | 0.28745545 | 0.03784  |
| 0.213290134 | -0.083112641 | 0.072753892 | -0.04703249 | 0.31047862 | 0.018494 |
| 0.16590792  | -0.071789486 | 0.121327472 | -0.05849463 | 0.2070306  | -0.00854 |

|             |              |             |             |            |          |
|-------------|--------------|-------------|-------------|------------|----------|
| 0.27154887  | -0.059644552 | 0.198226402 | -0.03010007 | 0.51642119 | 0.002218 |
| 0.42494627  | 0.014504083  | 0.754575213 | 0.03896928  | 0.40079875 | -0.00783 |
| 0.902093203 | -0.015720613 | 0.734733427 | 0.042212618 | 0.36272579 | -0.02722 |
| 0.540904855 | -0.035949414 | 0.438314865 | -0.01955098 | 0.673457   | -0.07027 |
| 0.550561002 | 0.008624865  | 0.852531919 | -0.05569651 | 0.22962758 | 0.023269 |
| 0.213483986 | 0.025760411  | 0.578698067 | 0.037590186 | 0.4176872  | -0.0298  |
| 1.32E-06    | -0.218486078 | 1.87E-06    | -0.06472803 | 0.1625638  | -0.06817 |
| 0.884486678 | -0.015588605 | 0.736878246 | 0.048640108 | 0.29421236 | 0.03085  |
| 0.677165411 | -0.044962793 | 0.332275541 | 0.013183658 | 0.77629537 | -0.17012 |
| 0.036086749 | -0.094221515 | 0.041829048 | -0.08505681 | 0.06628428 | 0.004495 |
| 0.424276289 | -0.048206787 | 0.298539683 | 0.012746437 | 0.78352691 | 0.058833 |
| 0.248422545 | -0.051444679 | 0.267221309 | -0.12508021 | 0.00680174 | -0.08053 |
| 0.242455421 | -0.052852779 | 0.25433042  | -0.06123638 | 0.18649372 | 0.039108 |
| 0.095288471 | -0.076644871 | 0.098065563 | -0.03704857 | 0.42443247 | -0.00656 |
| 0.127286054 | -0.066322045 | 0.152439848 | -0.07961932 | 0.08566787 | 0.00139  |
| 0.011425923 | -0.117714261 | 0.010900698 | 0.066411109 | 0.15188862 | 0.09191  |
| 0.572044121 | -0.02895574  | 0.532500989 | -0.03990353 | 0.38959379 | -0.00372 |
| 0.481950204 | 0.027628177  | 0.551466811 | 0.008756507 | 0.85030742 | 0.033981 |
| 0.456111628 | -0.037832412 | 0.414691003 | -0.02168521 | 0.64019905 | 0.016217 |
| 0.2527237   | -0.051074542 | 0.270682912 | -0.07687453 | 0.09706005 | -0.00534 |
| 0.407613084 | -0.034492921 | 0.457105199 | -0.03240137 | 0.48486056 | 0.01062  |
| 0.282493565 | -0.055023142 | 0.235317276 | -0.08787169 | 0.05776119 | -0.07787 |
| 0.872669831 | -0.008165616 | 0.860301421 | -0.03191972 | 0.49137861 | -0.05511 |
| 0.211354961 | -0.054307849 | 0.241469415 | -0.05378678 | 0.24602155 | -0.01515 |
| 0.006127551 | -0.123430439 | 0.007575544 | -0.06054986 | 0.19148949 | 0.005115 |
| 0.040322369 | -0.095256257 | 0.039621883 | -0.15559914 | 0.00074061 | -0.11953 |
| 0.046164642 | -0.08731288  | 0.059376849 | -0.0013299  | 0.97713386 | 0.023983 |
| 0.590208214 | 0.00581815   | 0.900210529 | -0.02094034 | 0.65172922 | 0.024338 |
| 0.692158272 | 0.016864413  | 0.716237239 | -0.0132342  | 0.77546059 | -0.00553 |
| 0.89468319  | -0.021768252 | 0.638918961 | -0.03798313 | 0.41283306 | -0.0072  |
| 0.67910263  | 0.012154624  | 0.793345042 | -0.02656357 | 0.56691138 | -0.02584 |
| 0.713650998 | -0.004604832 | 0.920943664 | -0.08888367 | 0.05492801 | -0.06236 |
| 0.653306181 | 0.004664551  | 0.919921828 | -0.02594385 | 0.57599587 | -0.04125 |
| 0.087515982 | -0.076445484 | 0.098945239 | -0.06594645 | 0.15478114 | 0.080476 |
| 0.070478999 | -0.089991819 | 0.051959072 | -0.03226952 | 0.48664023 | -0.00143 |
| 0.023766234 | -0.099600136 | 0.031400322 | -0.0217747  | 0.63881966 | 0.039506 |
| 0.285158234 | -0.047700295 | 0.303651149 | -0.14055919 | 0.0023307  | -0.13969 |
| 0.955630649 | -0.023864529 | 0.606966765 | -0.06747592 | 0.14541503 | -0.06332 |
| 5.82E-07    | -0.223519073 | 1.07E-06    | -0.00731304 | 0.87476038 | -0.20583 |
| 0.752502282 | -0.020523262 | 0.65822188  | -0.29979358 | 3.74E-11   | -0.2381  |
| 0.235874574 | -0.037385561 | 0.420228177 | -0.1769561  | 0.00012095 | -0.01976 |
| 0.463869616 | -0.028190658 | 0.543390836 | -0.25867923 | 1.41E-08   | -0.21744 |
| 0.137605013 | -0.055860298 | 0.228258492 | -0.0925194  | 0.04568515 | -0.03251 |
| 0.015611757 | -0.10840171  | 0.019118545 | -0.25876742 | 1.40E-08   | -0.46811 |
| 0.010538572 | -0.105939975 | 0.022039088 | -0.07071802 | 0.1269987  | -0.09383 |

|             |              |             |             |            |          |
|-------------|--------------|-------------|-------------|------------|----------|
| 0.147159716 | -0.047675289 | 0.303904992 | -0.11484532 | 0.01301352 | -0.15141 |
| 0.000611223 | -0.143573195 | 0.001867978 | 0.024576314 | 0.59628157 | -0.24071 |
| 0.502374336 | -0.023403289 | 0.613936017 | -0.13271396 | 0.00406587 | -0.17259 |
| 4.34E-05    | -0.180329378 | 8.90E-05    | -0.07296276 | 0.11534598 | -0.28925 |
| 0.730345124 | 0.028767016  | 0.535176947 | -0.18167826 | 7.86E-05   | -0.02978 |
| 0.00097722  | -0.151354382 | 0.001034578 | -0.07495895 | 0.10570308 | 0.003209 |
| 0.623393645 | 0.052782224  | 0.254965884 | -0.14661759 | 0.00148742 | -0.06882 |
| 0.333781083 | -0.032920902 | 0.477882444 | -0.22124411 | 1.38E-06   | -0.32309 |
| 0.056426198 | -0.075412982 | 0.103601407 | -0.07252767 | 0.11753658 | -0.15367 |
| 0.271883325 | -0.044010112 | 0.342632004 | -0.14586973 | 0.00157366 | -0.17569 |
| 0.050542244 | -0.073114396 | 0.114590081 | -0.0709467  | 0.12577138 | -0.151   |
| 4.83E-06    | -0.190883388 | 3.29E-05    | -0.06105984 | 0.18776913 | -0.31202 |
| 0.394603123 | -0.029093555 | 0.530551172 | -0.18927657 | 3.84E-05   | -0.10863 |
| 4.13E-13    | -0.309718743 | 7.69E-12    | -0.28396675 | 4.12E-10   | -0.18662 |
| 0.654111073 | -0.012999936 | 0.779331781 | -0.06046771 | 0.19209379 | -0.22432 |
| 0.549215903 | 0.035773376  | 0.440562149 | -0.07739524 | 0.09481068 | -0.10201 |
| 0.000170759 | -0.16753684  | 0.000276331 | -0.2856853  | 3.20E-10   | -0.19317 |
| 0.071033817 | 0.085005624  | 0.066448333 | 0.066536712 | 0.15111382 | 0.01738  |
| 0.004932966 | -0.115122097 | 0.012795025 | -0.28666014 | 2.77E-10   | -0.14705 |
| 0.040063326 | 0.107089639  | 0.020630206 | -0.26859929 | 3.69E-09   | -0.16    |
| 0.381176782 | 0.053629769  | 0.247404874 | -0.28880265 | 2.01E-10   | -0.00872 |
| 0.292440768 | -0.040106397 | 0.387186013 | -0.1151679  | 0.01275918 | -0.24222 |
| 0.000462153 | -0.147002583 | 0.001444733 | -0.16575296 | 0.00032158 | -0.07402 |
| 0.000388524 | -0.152999667 | 0.000909767 | -0.13079567 | 0.0046386  | -0.04122 |
| 0.435669423 | 0.039643553  | 0.392692589 | -0.07253142 | 0.11751755 | -0.12245 |
| 0.984975506 | 0.015952524  | 0.730970415 | -0.03655301 | 0.43065947 | -0.12702 |
| 0.022015521 | -0.094936043 | 0.040294142 | -0.32189222 | 1.02E-12   | -0.32517 |
| 0.723743719 | -0.011865033 | 0.798161353 | -0.05083215 | 0.27296634 | -0.115   |
| 0.59442155  | -0.018586776 | 0.688698601 | -0.2203937  | 1.52E-06   | -0.41649 |
| 0.110163129 | -0.059363049 | 0.200356036 | -0.20924147 | 5.11E-06   | -0.2315  |
| 0.405367286 | -0.022138593 | 0.633222999 | -0.06120352 | 0.18673067 | -0.09634 |
| 0.787310399 | 0.031230336  | 0.500789014 | -0.19397529 | 2.43E-05   | -0.17885 |
| 0.478831476 | -0.021705188 | 0.639891032 | -0.12975107 | 0.00498022 | -0.24858 |
| 0.257409823 | -0.04083483  | 0.378615311 | -0.2568563  | 1.80E-08   | -0.15588 |
| 0.457015086 | -0.019865312 | 0.668516597 | -0.24455781 | 8.69E-08   | -0.19792 |
| 0.366616764 | -0.025465994 | 0.583047333 | -0.04992175 | 0.28165972 | -0.13744 |
| 0.9727591   | 0.00300485   | 0.948363918 | 0.017292198 | 0.70936135 | -0.17873 |
| 0.23749769  | -0.055590764 | 0.230514566 | -0.01915439 | 0.67971026 | -0.12377 |
| 0.02760017  | -0.102866343 | 0.026222359 | -0.22077838 | 1.45E-06   | -0.24174 |
| 0.037980549 | -0.082317926 | 0.075542718 | -0.01691229 | 0.71546654 | -0.2151  |
| 0.295323998 | -0.038369645 | 0.408091099 | -0.0832906  | 0.07214104 | -0.10824 |
| 0.987711108 | 0.013216388  | 0.775754791 | -0.21018422 | 4.62E-06   | -0.107   |
| 0.996552404 | 0.006768674  | 0.884014576 | -0.22397143 | 1.01E-06   | -0.18797 |
| 0.85180649  | 0.030698196  | 0.508117517 | -0.22130883 | 1.37E-06   | -0.23081 |
| 0.355907128 | -0.02845747  | 0.539580637 | -0.01129757 | 0.80762113 | -0.13847 |

|             |              |             |             |            |          |
|-------------|--------------|-------------|-------------|------------|----------|
| 0.001694405 | -0.139191134 | 0.002573422 | -0.00204699 | 0.96481094 | -0.2036  |
| 0.565162322 | -0.02714082  | 0.558511393 | -0.30422588 | 1.86E-11   | -0.23479 |
| 0.230501005 | -0.050107349 | 0.279872446 | -0.12734106 | 0.00585639 | -0.11121 |
| 0.576869459 | -0.016209128 | 0.726814239 | -0.25473769 | 2.37E-08   | -0.2756  |
| 0.15020586  | 0.077749034  | 0.093306279 | -0.07403145 | 0.11010112 | -0.03852 |
| 1.14E-10    | -0.267732161 | 4.16E-09    | 0.088274526 | 0.05661921 | -0.08183 |
| 0.041084827 | 0.116892426  | 0.011472462 | -0.15158003 | 0.00101657 | -0.23182 |
| 0.390964417 | -0.013201577 | 0.77599939  | -0.07704363 | 0.09632496 | 0.041786 |
| 0.110644747 | -0.051013696 | 0.27125487  | -0.06770986 | 0.14402145 | -0.00494 |
| 0.003227065 | -0.121462066 | 0.008601035 | -0.15355861 | 0.00087064 | -0.19455 |
| 0.38307764  | -0.024322192 | 0.600086612 | -0.12978858 | 0.00496757 | -0.21624 |
| 0.144259289 | 0.074606448  | 0.107357941 | -0.28206216 | 5.45E-10   | -0.50287 |
| 0.43169832  | -0.029743838 | 0.521399867 | -0.23164865 | 4.16E-07   | -0.32223 |
| 0.82391078  | 0.022847967  | 0.622373129 | -0.31811629 | 1.92E-12   | -0.28239 |
| 7.18E-09    | -0.260031512 | 1.18E-08    | -0.34810951 | 9.47E-15   | -0.08626 |
| 0.969288964 | 0.003356372  | 0.942333215 | -0.05301613 | 0.25286334 | 0.017774 |
| 0.046330101 | -0.081514943 | 0.078448271 | -0.33345619 | 1.37E-13   | -0.40659 |
| 0.672899645 | -0.006514569 | 0.888339827 | -0.29175143 | 1.29E-10   | -0.17142 |
| 0.252333369 | -0.04533832  | 0.328249226 | -0.40047525 | 2.04E-19   | -0.15368 |
| 0.181446423 | 0.080163979  | 0.083540719 | -0.11149324 | 0.01593277 | -0.17257 |
| 0.0128013   | -0.116675459 | 0.011627768 | -0.05346853 | 0.24883114 | -0.2565  |
| 0.382517474 | -0.036321867 | 0.433581872 | -0.3876788  | 3.38E-18   | -0.154   |
| 0.61562329  | 0.033324934  | 0.472493742 | -0.3136557  | 4.04E-12   | -0.14523 |
| 0.117147364 | -0.052042634 | 0.26169345  | -0.14256147 | 0.00201297 | -0.41472 |
| 0.299379742 | -0.032844418 | 0.478906283 | -0.14787704 | 0.00135193 | -0.31546 |
| 6.37E-05    | -0.183925857 | 6.38E-05    | -0.16987161 | 0.00022606 | -0.19977 |
| 0.535916622 | -0.025696718 | 0.579637685 | -0.37341146 | 6.72E-17   | -0.14656 |
| 0.680734221 | -5.58E-05    | 0.999040796 | -0.11791995 | 0.01076161 | -0.21917 |
| 0.453663494 | -0.015673291 | 0.735502067 | -0.00107987 | 0.98143203 | -0.04683 |
| 0.000376331 | -0.150907379 | 0.001071117 | -0.20779945 | 5.95E-06   | -0.01653 |
| 0.105492949 | -0.071358042 | 0.123586874 | -0.03096661 | 0.50441392 | -0.46213 |
| 0.076155039 | -0.074512099 | 0.107804326 | -0.15011766 | 0.00113859 | -0.22828 |
| 0.000393948 | -0.157188878 | 0.000652034 | -0.07148907 | 0.12289725 | -0.08625 |
| 0.152431015 | -0.06571411  | 0.156243029 | -0.15578793 | 0.00072954 | -0.05079 |
| 0.9907636   | 0.007714517  | 0.867946196 | -0.34100838 | 3.51E-14   | -0.20343 |
| 0.091957274 | -0.061151586 | 0.18710552  | -0.19926759 | 1.44E-05   | -0.10759 |
| 0.292620073 | -0.030071731 | 0.516816383 | -0.22122292 | 1.38E-06   | -0.31136 |
| 0.000753548 | -0.144082922 | 0.001798607 | -0.15430961 | 0.00082051 | -0.38017 |
| 0.006004717 | -0.123051479 | 0.007764037 | -0.11932059 | 0.00985558 | -0.3221  |
| 0.000196702 | -0.156742391 | 0.000675864 | -0.14153826 | 0.00217002 | -0.15658 |
| 0.033929012 | -0.08664919  | 0.061344131 | 0.042334616 | 0.36133917 | -0.29355 |
| 0.064265493 | -0.065848806 | 0.155394259 | -0.10196756 | 0.02756811 | -0.24392 |
| 3.47E-06    | -0.203426261 | 9.39E-06    | -0.27779263 | 1.01E-09   | -0.38183 |
| 4.03E-08    | -0.246654058 | 6.68E-08    | -0.25804671 | 1.54E-08   | -0.21089 |
| 0.007195908 | -0.101895906 | 0.027677912 | -0.1979926  | 1.63E-05   | -0.44174 |

|             |              |             |             |            |          |
|-------------|--------------|-------------|-------------|------------|----------|
| 0.00091328  | -0.138278381 | 0.002747951 | -0.16817929 | 0.00026155 | -0.50198 |
| 0.07009694  | -0.066216356 | 0.153095936 | -0.13276946 | 0.0040503  | -0.2351  |
| 0.830677805 | -0.002213467 | 0.961951114 | -0.2097784  | 4.83E-06   | -0.33897 |
| 0.00073314  | -0.138212343 | 0.002760987 | -0.05135156 | 0.26808934 | -0.01084 |
| 1.85E-05    | -0.202344439 | 1.05E-05    | -0.37069702 | 1.17E-16   | -0.15838 |
| 0.707733327 | -0.012361135 | 0.789915245 | -0.02830544 | 0.54175004 | -0.2439  |
| 0.790054872 | -0.006963553 | 0.880699773 | -0.11882459 | 0.01016837 | -0.07107 |
| 0.094772949 | -0.059899624 | 0.196311015 | -0.34548251 | 1.54E-14   | -0.03156 |
| 0.863849305 | 0.0024891    | 0.957217347 | -0.24553648 | 7.69E-08   | -0.1942  |
| 0.722397641 | -0.006035268 | 0.896507162 | -0.16124519 | 0.00046856 | -0.11258 |
| 0.393333022 | -0.032905615 | 0.478086985 | -0.14426142 | 0.00177488 | -0.19277 |
| 4.02E-06    | -0.193060734 | 2.66E-05    | -0.12736527 | 0.00584694 | -0.27439 |
| 1.46E-05    | -0.172081108 | 0.000186489 | 0.06357765  | 0.17017849 | -0.14054 |
| 0.226334217 | 0.058319624  | 0.208394978 | -0.17148555 | 0.00019646 | -0.20409 |
| 0.002380366 | 0.146676437  | 0.001480818 | -0.18679678 | 4.87E-05   | -0.15855 |
| 0.276308428 | -0.047278184 | 0.307955069 | -0.14953541 | 0.00119083 | -0.13801 |
| 0.289582308 | 0.062675994  | 0.176330694 | -0.11182884 | 0.01561666 | -0.07723 |
| 0.30217726  | 0.059613613  | 0.198459651 | -0.24619703 | 7.07E-08   | -0.16217 |
| 0.828609307 | 0.019318623  | 0.67711805  | -0.30145354 | 2.88E-11   | -0.30984 |
| 0.374849533 | -0.034026177 | 0.463220774 | -0.08153844 | 0.07836199 | -0.18367 |
| 0.018792137 | -0.095645774 | 0.038816943 | -0.08492155 | 0.06671854 | -0.13822 |
| 0.550272654 | -0.025469715 | 0.582992267 | -0.17640819 | 0.00012706 | -0.08594 |
| 0.000979256 | 0.167713538  | 0.000272189 | -0.31196494 | 5.33E-12   | 0.097297 |
| 0.635337504 | -0.021705242 | 0.639890202 | -0.27388622 | 1.76E-09   | -0.16089 |
| 0.81519318  | -0.010312613 | 0.824106724 | -0.32770776 | 3.75E-13   | -0.17615 |
| 0.672571032 | -0.024972014 | 0.590378581 | -0.05620921 | 0.22536131 | 0.024644 |
| 0.035541354 | 0.097535197  | 0.03510623  | -0.35955144 | 1.07E-15   | -0.13778 |
| 0.407579176 | -0.026501207 | 0.567822418 | -0.16583036 | 0.00031948 | -0.17827 |
| 0.999175459 | 0.001091589  | 0.981230518 | -0.25066401 | 4.01E-08   | -0.32238 |
| 0.310340213 | -0.039282418 | 0.397021793 | -0.19969684 | 1.38E-05   | -0.31321 |
| 0.027950894 | -0.09671435  | 0.036679505 | 0.025896163 | 0.5766978  | -0.25416 |
| 0.770472409 | -0.007793016 | 0.866614971 | -0.15547137 | 0.00074819 | -0.26755 |
| 0.028806251 | 0.110166552  | 0.017237971 | -0.18651402 | 5.00E-05   | -0.24526 |
| 0.003799344 | 0.149211599  | 0.001220821 | -0.09464763 | 0.04090786 | -0.19803 |
| 0.545436083 | 0.034936832  | 0.451330974 | -0.1159724  | 0.01214387 | -0.15472 |
| 0.970836282 | 0.014278372  | 0.758274864 | -0.19461114 | 2.29E-05   | -0.26204 |
| 0.998406374 | -0.00319036  | 0.945180914 | 0.035585638 | 0.44296604 | -0.04397 |
| 0.002694786 | -0.128866938 | 0.005286901 | -0.2196838  | 1.64E-06   | -0.32122 |
| 3.72E-05    | -0.176911657 | 0.000121439 | 0.150580164 | 0.00109861 | -0.35998 |
| 0.008409107 | 0.133847432  | 0.00375832  | -0.28766999 | 2.38E-10   | -0.07959 |
| 0.000465138 | -0.148147249 | 0.001324383 | 0.097838567 | 0.03453949 | -0.31865 |
| 0.066641318 | 0.09652162   | 0.037057459 | -0.13416471 | 0.00367609 | -0.13339 |
| 0.003594371 | -0.135321486 | 0.003389914 | -0.19328705 | 2.61E-05   | -0.09277 |
| 0.000925188 | -0.140464942 | 0.002346723 | -0.27714278 | 1.11E-09   | -0.35746 |
| 9.00E-07    | -0.212481783 | 3.61E-06    | 0.048998715 | 0.29066302 | 0.024488 |

|             |              |             |             |            |          |
|-------------|--------------|-------------|-------------|------------|----------|
| 0.761431837 | -0.010230591 | 0.825483166 | -0.31914168 | 1.62E-12   | -0.06591 |
| 0.057825091 | 0.103203185  | 0.025732787 | -0.12394756 | 0.00732493 | -0.00123 |
| 0.215287665 | -0.041310338 | 0.373083827 | -0.11295654 | 0.01459439 | -0.19091 |
| 0.037352055 | -0.083612908 | 0.071041834 | -0.11594163 | 0.01216691 | -0.19676 |
| 0.001794483 | -0.1367084   | 0.003073535 | 0.019409244 | 0.67568931 | -0.23482 |
| 0.02538706  | -0.10526698  | 0.022901947 | -0.08965948 | 0.05283508 | -0.38735 |
| 0.051705179 | -0.080582035 | 0.081937107 | -0.22129458 | 1.37E-06   | -0.26525 |
| 0.018303572 | -0.090786721 | 0.049912813 | -0.0328853  | 0.47835888 | -0.18462 |
| 0.09665626  | -0.059240396 | 0.201289127 | -0.02858203 | 0.5378064  | -0.20905 |
| 0.009348763 | -0.108322541 | 0.019206941 | -0.1399717  | 0.00243225 | -0.3089  |
| 0.010129236 | -0.101580664 | 0.028165452 | -0.14484056 | 0.00169985 | -0.19063 |
| 0.002026001 | 0.150283371  | 0.001124117 | -0.20355983 | 9.26E-06   | -0.10523 |
| 0.991129853 | 0.015133672  | 0.744285425 | -0.17824656 | 0.00010765 | -0.09426 |
| 0.671277646 | -0.01472453  | 0.750967244 | 0.07758858  | 0.09398619 | 0.017253 |
| 3.34E-05    | -0.181301234 | 8.14E-05    | -0.13443717 | 0.00360678 | -0.18233 |
| 0.002088803 | -0.129337185 | 0.005121732 | -0.23666918 | 2.29E-07   | -0.29528 |
| 0.000272994 | 0.178519203  | 0.000105019 | -0.23752798 | 2.06E-07   | -0.03437 |
| 0.313472604 | -0.03011137  | 0.51626371  | -0.14146839 | 0.00218114 | -0.12796 |
| 1.69E-08    | -0.251604052 | 3.56E-08    | -0.11943065 | 0.00978734 | 0.059852 |
| 0.007561442 | -0.113644407 | 0.014000125 | 0.136073449 | 0.00321489 | -0.08999 |
| 0.054000995 | -0.076540301 | 0.098526137 | -0.15052587 | 0.00110324 | -0.19653 |
| 0.001671948 | -0.143574771 | 0.001867759 | -0.06962202 | 0.13301039 | -0.38358 |
| 0.638973088 | -0.016270918 | 0.72581462  | -0.1216802  | 0.0084816  | -0.30758 |
| 0.840727072 | 0.008753378  | 0.85036027  | -0.34269862 | 2.58E-14   | -0.36778 |
| 0.000200313 | -0.153867594 | 0.000849678 | -0.13801345 | 0.00280059 | -0.02753 |
| 0.006154001 | -0.11324322  | 0.014344079 | -0.12786757 | 0.00565394 | -0.29602 |
| 0.504592431 | -0.03504432  | 0.44993903  | -0.35742137 | 1.61E-15   | -0.32074 |
| 0.015064607 | -0.096399313 | 0.03729902  | -0.23778075 | 2.00E-07   | -0.07372 |
| 3.93E-11    | -0.290001716 | 1.68E-10    | -0.14661948 | 0.0014872  | -0.03717 |
| 0.062507717 | -0.08162626  | 0.078040145 | -0.20010526 | 1.32E-05   | -0.03828 |
| 0.021300902 | -0.106856239 | 0.020909726 | 0.045629336 | 0.3251508  | -0.07802 |
| 0.400360452 | -0.022137127 | 0.633245501 | -0.13763763 | 0.00287684 | -0.16932 |
| 0.000134448 | -0.170023857 | 0.000223102 | -0.25989271 | 1.20E-08   | -0.44611 |
| 2.09E-07    | -0.231992329 | 3.99E-07    | -0.33167068 | 1.87E-13   | 0.100612 |
| 0.001146365 | -0.147139907 | 0.001429782 | -0.17590158 | 0.00013296 | -0.27842 |
| 0.006150796 | -0.113081514 | 0.014484803 | -0.04301762 | 0.35363752 | -0.21662 |
| 0.000472693 | -0.16286397  | 0.000409772 | -0.21530019 | 2.66E-06   | -0.16304 |
| 0.012864851 | 0.125617827  | 0.006565329 | -0.2013492  | 1.16E-05   | -0.33523 |
| 0.970343788 | 0.020719521  | 0.65516345  | -0.25212356 | 3.33E-08   | -0.33568 |
| 0.613406382 | 0.030124088  | 0.516086439 | -0.17365679 | 0.00016234 | -0.43455 |
| 0.009646728 | -0.110378685 | 0.017023194 | -0.20372053 | 9.11E-06   | -0.28875 |
| 0.012808518 | -0.107775261 | 0.019827807 | -0.29973439 | 3.78E-11   | -0.36521 |
| 0.384444398 | 0.043633108  | 0.346786559 | -0.16407887 | 0.00037025 | -0.2023  |
| 0.481491653 | -0.023378735 | 0.614308003 | -0.15040972 | 0.00111319 | -0.36725 |
| 0.204152676 | -0.03808486  | 0.411581881 | -0.12981191 | 0.00495972 | -0.35341 |

|             |              |             |             |            |          |
|-------------|--------------|-------------|-------------|------------|----------|
| 0.034006622 | -0.088006512 | 0.057376879 | -0.19717681 | 1.77E-05   | -0.46051 |
| 0.000440936 | -0.155088466 | 0.000771347 | -0.08429086 | 0.06877438 | -0.43143 |
| 0.367271467 | -0.025135963 | 0.587940696 | -0.17893435 | 0.00010113 | -0.34962 |
| 0.789991242 | -0.002580918 | 0.955640758 | -0.11410477 | 0.0136144  | -0.12291 |
| 0.000400786 | -0.159075497 | 0.000559687 | -0.37561262 | 4.28E-17   | -0.23886 |
| 0.567298311 | -0.021831832 | 0.637939554 | -0.20461358 | 8.31E-06   | -0.05198 |
| 0.278725253 | -0.04408823  | 0.341775134 | -0.28855659 | 2.09E-10   | -0.1095  |
| 0.284272662 | -0.047661125 | 0.304048849 | -0.20709854 | 6.41E-06   | -0.14615 |
| 0.392470397 | -0.023025316 | 0.619673183 | -0.23090453 | 4.54E-07   | -0.22104 |
| 0.215378844 | -0.046924974 | 0.311587243 | -0.10331038 | 0.02557865 | -0.39411 |
| 0.279881656 | 0.056633586  | 0.221872991 | -0.30216176 | 2.58E-11   | -0.07934 |
| 0.03218643  | -0.09448688  | 0.041253346 | -0.2794962  | 7.91E-10   | -0.37105 |
| 0.010345607 | -0.106913803 | 0.020840483 | -0.17613887 | 0.00013016 | -0.25286 |
| 0.014273759 | -0.107159743 | 0.020546887 | -0.25966167 | 1.24E-08   | -0.26961 |
| 1.40E-07    | 0.23248428   | 3.77E-07    | -0.30921833 | 8.34E-12   | -0.03191 |
| 0.001613087 | -0.138824801 | 0.002642218 | -0.21520936 | 2.69E-06   | -0.16698 |
| 0.363469181 | 0.056018817  | 0.226938988 | -0.23651373 | 2.33E-07   | -0.23188 |
| 0.009033968 | -0.103765166 | 0.024933528 | -0.0636676  | 0.16957363 | -0.40142 |
| 0.000104271 | -0.167567758 | 0.000275602 | -0.18396658 | 6.36E-05   | -0.29341 |
| 0.392542725 | 0.028834155  | 0.534224196 | -0.09830517 | 0.03368303 | -0.32805 |
| 0.361421909 | -0.028873395 | 0.533667744 | -0.04043163 | 0.38334487 | -0.17741 |
| 0.847035193 | 0.010956711  | 0.813317003 | -0.2729776  | 2.00E-09   | 0.044042 |
| 0.338635735 | -0.040866754 | 0.378242378 | -0.38212158 | 1.10E-17   | -0.34445 |
| 0.066147512 | -0.078340686 | 0.090833141 | -0.31584495 | 2.81E-12   | -0.12276 |
| 0.348051808 | -0.037321532 | 0.421025129 | -0.20766878 | 6.04E-06   | -0.14963 |
| 0.098801564 | -0.060742606 | 0.190077071 | -0.25798483 | 1.55E-08   | -0.23041 |
| 0.109622188 | -0.064800379 | 0.162093589 | -0.1768987  | 0.00012158 | -0.47035 |
| 0.489844287 | -0.023992412 | 0.605040742 | -0.13107775 | 0.00455006 | -0.24425 |
| 0.018200723 | 0.122376911  | 0.008109953 | -0.21890496 | 1.79E-06   | -0.22614 |
| 0.842854865 | -0.003661863 | 0.937094887 | -0.19788253 | 1.65E-05   | -0.2872  |
| 0.043389703 | -0.081250656 | 0.079424175 | -0.17154699 | 0.00019541 | -0.27486 |
| 0.495032121 | -0.025827364 | 0.577711121 | -0.18838991 | 4.19E-05   | -0.18009 |
| 0.000296374 | -0.152143145 | 0.000972893 | -0.31373208 | 3.99E-12   | -0.47372 |
| 0.01485432  | -0.098445088 | 0.033429751 | -0.14435622 | 0.00176239 | -0.26186 |
| 5.14E-05    | -0.179120732 | 9.94E-05    | -0.33363498 | 1.32E-13   | -0.21701 |
| 0.194356392 | -0.066881013 | 0.149005358 | -0.29043508 | 1.57E-10   | -0.36766 |
| 0.226965727 | -0.048697634 | 0.293641051 | -0.13783639 | 0.00283628 | -0.33413 |
| 0.136552074 | -0.051974533 | 0.262319014 | -0.03710381 | 0.42374168 | -0.2138  |
| 0.356611528 | 0.039600439  | 0.39320792  | -0.06264098 | 0.17657286 | -0.13731 |
| 0.022492183 | 0.116579176  | 0.011697282 | -0.12925063 | 0.00515178 | -0.08183 |
| 0.01068767  | -0.107692602 | 0.019923082 | -0.10666847 | 0.02113698 | -0.33417 |
| 0.719476438 | 0.002207247  | 0.962057956 | -0.18558753 | 5.46E-05   | -0.13935 |
| 0.029244944 | -0.089168724 | 0.054151145 | -0.06042074 | 0.19243995 | -0.08874 |
| 0.277756203 | 0.065617177  | 0.156856012 | -0.25358638 | 2.75E-08   | -0.07875 |
| 0.000662933 | -0.151369468 | 0.001033365 | -0.16656345 | 0.00030023 | -0.46735 |



|             |              |             |             |            |          |
|-------------|--------------|-------------|-------------|------------|----------|
| 0.115273697 | -0.068702529 | 0.138221297 | -0.16869322 | 0.00025026 | -0.14986 |
| 0.622772723 | -0.026977368 | 0.560883769 | -0.21409124 | 3.04E-06   | -0.14365 |
| 0.068187955 | -0.08248338  | 0.074955045 | -0.14334928 | 0.00189922 | -0.10435 |
| 0.005566452 | -0.125892001 | 0.006447622 | -0.18159794 | 7.92E-05   | -0.13753 |
| 0.861787416 | -0.019972603 | 0.666833539 | -0.11855619 | 0.01034128 | 0.066588 |
| 0.072858283 | -0.083356371 | 0.071915617 | -0.01751723 | 0.70575381 | -0.04115 |
| 0.160919057 | -0.066332136 | 0.15237732  | 0.027822905 | 0.5486643  | -0.1191  |
| 0.214775375 | -0.057800852 | 0.212477434 | -0.02289697 | 0.62162665 | -0.04296 |
| 0.869625666 | -0.006925263 | 0.881350903 | -0.00058674 | 0.98991055 | 0.023214 |
| 0.167724532 | -0.065137413 | 0.159916693 | -0.07925179 | 0.08712773 | -0.0923  |
| 0.427565846 | -0.037786774 | 0.415254549 | 0.02403871  | 0.60434412 | -0.03212 |
| 0.953308884 | -0.00372861  | 0.935950713 | 0.097932966 | 0.03436474 | -0.12674 |
| 0.40797844  | 0.050135936  | 0.27959784  | -0.15903731 | 0.00056143 | -0.05551 |
| 0.666164081 | 0.026327801  | 0.570359441 | -0.06198046 | 0.18118825 | -0.11233 |
| 0.457727904 | -0.03673111  | 0.428415489 | -0.06320006 | 0.17273509 | -0.07843 |
| 0.274897131 | -0.048028931 | 0.300328023 | -0.05858657 | 0.20631645 | -0.03342 |
| 0.545162763 | -0.024618744 | 0.595647333 | -0.0084676  | 0.85519086 | -0.12484 |
| 0.293382337 | 0.055072726  | 0.234894951 | -0.16375635 | 0.00038038 | -0.12619 |
| 0.142878533 | -0.066720622 | 0.149984778 | -0.09198214 | 0.04696264 | -0.11339 |
| 0.886073288 | -0.00097386  | 0.983254518 | -0.13913885 | 0.00258314 | -0.15378 |
| 0.903249166 | 0.010780744  | 0.81626134  | -0.06346886 | 0.17091215 | 0.025268 |
| 0.155670465 | -0.062589291 | 0.176930891 | -0.17377012 | 0.00016072 | 0.00123  |
| 0.005429359 | -0.132150195 | 0.004227169 | -0.08001768 | 0.08410785 | -0.19279 |
| 0.615549046 | 0.019699308  | 0.671123936 | -0.09478344 | 0.04061789 | -0.11278 |
| 0.248448124 | 0.046250582  | 0.318600115 | -0.07586638 | 0.10153582 | -0.09264 |
| 0.236207293 | -0.056356697 | 0.224144603 | -0.1061854  | 0.02173152 | -0.08247 |
| 0.000412095 | -0.163833558 | 0.00037793  | -0.06985353 | 0.13172258 | -0.06364 |
| 0.543976883 | 0.019233858  | 0.678455524 | -0.24164135 | 1.25E-07   | -0.05669 |
| 0.477871724 | -0.042467359 | 0.359834199 | -0.01473015 | 0.75087532 | -0.03715 |
| 0.022671706 | -0.092435762 | 0.045882087 | -0.0375516  | 0.41816562 | 0.018716 |
| 0.0265805   | -0.106003917 | 0.021958593 | -0.03140607 | 0.49838114 | -0.09586 |
| 0.004239754 | -0.132430882 | 0.004146153 | -0.08722521 | 0.05963367 | -0.06773 |
| 0.238447624 | -0.049925773 | 0.281620926 | -0.12582244 | 0.00647731 | -0.07288 |
| 0.465105543 | -0.033658955 | 0.468064123 | -0.06484667 | 0.16179325 | -0.05233 |
| 0.099564064 | -0.078721969 | 0.089267399 | 0.028131661 | 0.54423514 | -0.23393 |
| 0.004692863 | -0.131851893 | 0.004314834 | -0.04004328 | 0.38793412 | -0.03936 |
| 0.001632246 | -0.138432817 | 0.002717684 | -0.01427761 | 0.75828729 | -0.05518 |
| 0.41703691  | -0.036326104 | 0.4335282   | -0.09369506 | 0.04299127 | -0.11134 |
| 0.086994061 | -0.074816054 | 0.106371484 | -0.09749106 | 0.03518933 | -0.13398 |
| 0.33245886  | 0.051799443  | 0.263932077 | -0.05639293 | 0.2238464  | -0.01241 |
| 0.443688209 | -0.037032036 | 0.424639409 | -0.08896474 | 0.05470613 | -0.14139 |
| 0.415097757 | -0.036680584 | 0.429051403 | -0.07952893 | 0.08602507 | -0.02612 |
| 0.128514381 | -0.073352843 | 0.113409306 | -0.06550669 | 0.15755691 | -0.01475 |
| 0.443096039 | -0.036955774 | 0.425594522 | -0.12362022 | 0.0074827  | -0.06094 |
| 0.039251762 | -0.092499115 | 0.045732852 | -0.16049493 | 0.00049838 | -0.10413 |

|             |              |             |             |            |          |
|-------------|--------------|-------------|-------------|------------|----------|
| 0.606447816 | -0.024000795 | 0.604914583 | -0.17327536 | 0.0001679  | -0.16161 |
| 0.019137641 | -0.10498863  | 0.023267286 | -0.17556992 | 0.00013696 | -0.23499 |
| 0.068907236 | -0.080684699 | 0.081547133 | -0.04178944 | 0.36756127 | -0.11405 |
| 0.627603309 | 0.023208394  | 0.616891375 | -0.00404344 | 0.93055574 | -0.08302 |
| 0.585168185 | -0.027919669 | 0.547274299 | -0.029753   | 0.52127152 | -0.30445 |
| 0.125878776 | -0.066581724 | 0.150836897 | -0.06472472 | 0.16258532 | -0.07202 |
| 0.043261867 | -0.092777176 | 0.04508266  | -0.18726444 | 4.66E-05   | -0.17422 |
| 0.2123775   | -0.056201808 | 0.225422535 | -0.06520028 | 0.15951309 | -0.02415 |
| 0.077194553 | -0.07758984  | 0.09398083  | -0.18152952 | 7.97E-05   | -0.25847 |
| 0.695640438 | -0.017217399 | 0.71056193  | -0.03092524 | 0.50498386 | -0.05086 |
| 0.477724528 | -0.029679804 | 0.522297388 | -0.12796835 | 0.00561592 | 0.019604 |
| 0.297461286 | 0.053109327  | 0.252029017 | -0.13469598 | 0.00354205 | 0.229296 |
| 0.079918719 | -0.075999287 | 0.100936561 | -0.05717412 | 0.21748589 | 0.063313 |
| 0.134227328 | -0.0677827   | 0.143589617 | -0.02779104 | 0.54912244 | -0.10257 |
| 0.183262999 | -0.057333094 | 0.216207526 | -0.05931986 | 0.20068424 | -0.0413  |
| 0.77419654  | 0.016018333  | 0.729903754 | -0.00528323 | 0.90934369 | -0.05246 |
| 0.000161928 | -0.174910731 | 0.000145253 | 0.022056405 | 0.63448522 | 0.161113 |
| 0.001280558 | -0.149210528 | 0.001220922 | 0.050036174 | 0.28055695 | 0.11498  |
| 0.002782742 | -0.139751505 | 0.002471341 | 0.020207003 | 0.66316236 | 0.081137 |
| 0.000145222 | -0.177493473 | 0.000115236 | -0.01151421 | 0.80400631 | -0.2172  |
| 0.035506013 | -0.097815456 | 0.034582388 | 0.040835635 | 0.37860591 | 0.500053 |
| 0.000110254 | -0.186069486 | 5.22E-05    | 0.126356364 | 0.00625258 | 0.18935  |
| 0.099916221 | 0.088413736  | 0.056228956 | -0.06468262 | 0.16285944 | 0.25185  |
| 7.49E-05    | -0.185338992 | 5.59E-05    | -0.05332908 | 0.25006924 | 0.486627 |
| 0.086745584 | 0.070994289  | 0.125517111 | -0.10715715 | 0.02054997 | 0.390497 |
| 0.000229383 | -0.170857715 | 0.000207518 | 0.148728634 | 0.00126685 | 0.412847 |
| 0.052940886 | 0.086009188  | 0.063291845 | 0.170122516 | 0.0002212  | 0.287302 |
| 0.198340002 | -0.064468592 | 0.164258296 | 0.002857847 | 0.95088678 | 0.338378 |
| 0.005768057 | -0.138299239 | 0.002743845 | -0.00280767 | 0.95174801 | 0.254598 |
| 0.640691322 | 0.035436416  | 0.444882068 | 0.199064493 | 1.47E-05   | 0.415164 |
| 0.142944806 | 0.07519413   | 0.104610288 | -0.05803039 | 0.21066405 | 0.359249 |
| 1.47E-08    | 0.260170433  | 1.16E-08    | -0.30523006 | 1.58E-11   | 0.256094 |
| 2.91E-06    | 0.220940686  | 1.42E-06    | -0.0182325  | 0.694331   | 0.303691 |
| 0.761860672 | -0.022217723 | 0.632008739 | 0.149465011 | 0.00119729 | -0.05133 |
| 0.700108497 | 0.021402224  | 0.644569532 | 0.482531997 | 1.31E-28   | 0.155003 |
| 0.118269777 | 0.068856415  | 0.137338437 | 0.305971289 | 1.41E-11   | 0.307432 |
| 0.324999835 | -0.040859486 | 0.378327266 | -0.01118879 | 0.8094378  | 0.242102 |
| 0.229779996 | -0.05546899  | 0.231539007 | -0.20698551 | 6.48E-06   | 0.038546 |
| 0.008579753 | 0.127273729  | 0.005882745 | 0.133587966 | 0.0038268  | 0.291247 |
| 0.562594559 | 0.027981039  | 0.546393623 | 0.068271085 | 0.14071978 | 0.405242 |
| 0.143008898 | 0.07251413   | 0.117605254 | 0.205172305 | 7.84E-06   | 0.120231 |
| 0.824002342 | 0.016165752  | 0.727516226 | 0.153038356 | 0.00090701 | 0.298671 |
| 0.583638915 | 0.034576697  | 0.456012315 | -0.00251384 | 0.95679247 | 0.22961  |
| 0.731873665 | -0.014839083 | 0.749094544 | 0.23501912  | 2.79E-07   | 0.359954 |
| 0.485640311 | 0.036804225  | 0.427496242 | 0.273943737 | 1.75E-09   | 0.448324 |

|             |              |             |             |            |          |
|-------------|--------------|-------------|-------------|------------|----------|
| 1.52E-06    | 0.224301981  | 9.74E-07    | 0.231031861 | 4.47E-07   | 0.31735  |
| 0.001871613 | -0.13291407  | 0.004009973 | -0.04500357 | 0.33183684 | 0.156903 |
| 1.12E-05    | -0.198877149 | 1.49E-05    | -0.35692391 | 1.78E-15   | 0.291697 |
| 0.018274643 | -0.110436782 | 0.016964783 | 0.068127478 | 0.14155904 | 0.200514 |
| 0.634437419 | 0.012123903  | 0.79385561  | 0.052149277 | 0.26071592 | 0.394065 |
| 0.103683159 | 0.075826443  | 0.101716445 | -0.01013845 | 0.82702998 | 0.374455 |
| 0.132109383 | 0.080406461  | 0.08260753  | 0.189299447 | 3.84E-05   | 0.421756 |
| 0.434302532 | 0.042378315  | 0.360843303 | 0.14058466  | 0.00232638 | 0.45088  |
| 0.149639586 | -0.071885105 | 0.120831116 | 0.137621055 | 0.00288024 | 0.341012 |
| 0.341743691 | 0.040783317  | 0.379217556 | 0.032010465 | 0.49014704 | 0.247617 |
| 0.765550548 | 0.01911078   | 0.680399323 | -0.06072425 | 0.19021123 | 0.343874 |
| 0.160134269 | 0.066609435  | 0.150666599 | 0.333821248 | 1.28E-13   | 0.520332 |
| 0.535844    | -0.033661527 | 0.468030097 | 0.044431982 | 0.3380208  | 0.226064 |
| 9.09E-07    | 0.222129501  | 1.25E-06    | 0.128192168 | 0.00553229 | 0.394542 |
| 0.010782244 | 0.124317683  | 0.007150135 | 0.345368209 | 1.58E-14   | 0.382249 |
| 0.057058586 | -0.082330953 | 0.075496312 | 0.081426171 | 0.07877498 | 0.055445 |
| 1.85E-08    | 0.261562123  | 9.61E-09    | 0.039678642 | 0.39227348 | 0.325346 |
| 0.018806317 | -0.111212599 | 0.016201409 | -0.10878876 | 0.01869147 | 0.250984 |
| 0.000148434 | 0.179366007  | 9.72E-05    | -0.02633891 | 0.57019679 | 0.317242 |
| 1.63E-07    | 0.245459878  | 7.76E-08    | -0.02579379 | 0.57820588 | 0.284868 |
| 1.78E-05    | -0.209955289 | 4.74E-06    | -0.12977238 | 0.00497303 | 0.306962 |
| 0.955367707 | -0.005191184 | 0.910916544 | 0.158894327 | 0.000568   | -0.08439 |
| 0.018541659 | 0.104353719  | 0.02411954  | 0.053463799 | 0.24887304 | 0.180645 |
| 0.886352991 | 0.00275102   | 0.952720465 | -0.03965596 | 0.39254436 | 0.21519  |
| 0.164797727 | 0.06125789   | 0.186338767 | -0.06592648 | 0.15490638 | 0.429892 |
| 0.740823229 | -0.031038021 | 0.50343107  | 0.320927291 | 1.20E-12   | 0.173674 |
| 0.803308176 | 0.008285387  | 0.85827383  | 0.279418241 | 8.00E-10   | 0.30953  |
| 0.112421623 | 0.067653704  | 0.144355038 | 0.248301191 | 5.42E-08   | 0.371852 |
| 0.085326074 | 0.086154407  | 0.062845491 | 0.010643449 | 0.8185604  | 0.351576 |
| 0.147839388 | 0.065410315  | 0.158170225 | -0.05644359 | 0.22342995 | 0.305614 |
| 1.08E-07    | 0.248643185  | 5.19E-08    | -0.16724132 | 0.00028339 | 0.341284 |
| 0.179926338 | -0.066634919 | 0.150510119 | -0.18772399 | 4.46E-05   | 0.447226 |
| 0.132545815 | -0.069411428 | 0.134190249 | 0.056675945 | 0.22152693 | 0.245174 |
| 3.52E-08    | 0.252227879  | 3.28E-08    | 0.044192635 | 0.34063206 | 0.373199 |
| 2.92E-20    | 0.413484723  | 1.03E-20    | 0.030123589 | 0.51609339 | 0.266969 |
| 1.03E-09    | 0.267884672  | 4.07E-09    | 0.160361575 | 0.00050386 | 0.361711 |
| 0.932032015 | -0.001151871 | 0.980194204 | 0.056122152 | 0.22608176 | 0.321746 |
| 0.584969789 | 0.027606677  | 0.551776663 | -0.02331678 | 0.61524698 | 0.343578 |
| 0.133396439 | -0.065761761 | 0.155942368 | 0.246045758 | 7.21E-08   | 0.287746 |
| 0.079794057 | -0.079568346 | 0.085869151 | -0.05807425 | 0.21031883 | 0.388841 |
| 0.150645171 | -0.06527697  | 0.159021775 | -0.30438072 | 1.81E-11   | 0.440325 |
| 0.023689094 | 0.110370431  | 0.017031507 | 0.053258588 | 0.25069673 | 0.376996 |
| 1.87E-07    | 0.244762528  | 8.47E-08    | 0.084126419 | 0.06931884 | 0.393784 |
| 0.473987437 | -0.035743234 | 0.4409476   | -0.16231677 | 0.00042883 | 0.19201  |
| 4.30E-10    | 0.286977957  | 2.64E-10    | 0.002318977 | 0.9601389  | 0.038183 |

|             |              |             |             |            |          |
|-------------|--------------|-------------|-------------|------------|----------|
| 0.253866863 | 0.060760695  | 0.18994491  | 0.016622962 | 0.72012832 | 0.298813 |
| 0.640816218 | -0.019535179 | 0.673705718 | 0.174524758 | 0.00015032 | 0.315215 |
| 0.020722548 | 0.106680642  | 0.021122183 | 0.053621909 | 0.24747427 | 0.315921 |
| 0.667046631 | -0.032349597 | 0.485558917 | 0.130486097 | 0.00473757 | 0.125315 |
| 0.015783502 | 0.116561054  | 0.011710406 | 0.046441181 | 0.31660775 | 0.16623  |
| 0.094539938 | -0.074424807 | 0.108218619 | 0.16703391  | 0.00028845 | 0.266782 |
| 0.000134505 | 0.166295513  | 0.000307135 | 0.032233835 | 0.48712246 | 0.095997 |
| 0.324206128 | 0.044815419  | 0.333864314 | -0.18715436 | 4.71E-05   | 0.206034 |
| 0.00224109  | -0.135083425 | 0.0034471   | -0.12906928 | 0.00521525 | 0.363984 |
| 0.028758916 | -0.105642673 | 0.022416726 | -0.01403884 | 0.76220706 | -0.04596 |
| 0.002759617 | 0.142893979  | 0.001964222 | 0.166032342 | 0.00031406 | 0.260198 |
| 0.109266509 | -0.058171377 | 0.209555769 | 0.072812074 | 0.11610099 | 0.356701 |
| 0.000342675 | -0.171295655 | 0.000199748 | 0.06562629  | 0.1567983  | 0.194352 |
| 2.74E-06    | 0.215844118  | 2.51E-06    | 0.207915025 | 5.88E-06   | 0.324994 |
| 0.772071669 | -0.007623338 | 0.869492931 | -0.07111822 | 0.12485689 | 0.165133 |
| 0.891059509 | -0.018250675 | 0.694041642 | 0.162189991 | 0.00043336 | 0.246521 |
| 8.22E-09    | 0.262848638  | 8.08E-09    | 0.365273062 | 3.46E-16   | 0.121513 |
| 0.82052732  | 0.009927344  | 0.830576653 | -0.0126159  | 0.78568956 | 0.383273 |
| 0.83260916  | -0.007283789 | 0.87525725  | 0.168380933 | 0.00025706 | 0.121103 |
| 0.10988408  | 0.074244375  | 0.109078947 | 0.069927152 | 0.13131506 | 0.304587 |
| 0.000187087 | -0.164345139 | 0.000362073 | 0.130326021 | 0.00478949 | 0.227606 |
| 0.175270734 | 0.07537237   | 0.103788036 | 0.077946902 | 0.09247326 | 0.161042 |
| 0.215644126 | 0.059577963  | 0.198728662 | -0.10925836 | 0.01818448 | 0.094717 |
| 0.022223914 | -0.112481243 | 0.015017856 | 0.1883809   | 4.19E-05   | 0.376276 |
| 0.493690889 | -0.030373339 | 0.512618793 | 0.081934934 | 0.07691744 | 0.132066 |
| 0.001672012 | -0.139620299 | 0.002494906 | 0.136548436 | 0.0031086  | 0.183395 |
| 0.051332113 | -0.08181473  | 0.077353075 | 0.323926694 | 7.19E-13   | 0.125519 |
| 0.051028722 | -0.084914178 | 0.066742271 | -0.14282801 | 0.00197381 | 0.211569 |
| 0.044364287 | -0.094740303 | 0.04070981  | -0.00070839 | 0.98781886 | 0.195158 |
| 0.160179398 | -0.070742605 | 0.126866307 | 0.144063573 | 0.0018012  | 0.344453 |
| 0.561479721 | 0.031208106  | 0.50109403  | 0.080747148 | 0.08131065 | 0.44176  |
| 2.82E-05    | -0.196900963 | 1.82E-05    | -0.07470411 | 0.10689743 | 0.239683 |
| 0.590906104 | 0.025674934  | 0.579959201 | 0.068957379 | 0.13676156 | 0.090783 |
| 0.009852607 | 0.117746436  | 0.010878836 | 0.13320639  | 0.00392956 | 0.487801 |
| 0.384866843 | 0.031244513  | 0.500594538 | 0.059521624 | 0.19915434 | 0.241242 |
| 0.042805468 | 0.093485458  | 0.043461493 | -0.0650404  | 0.16054103 | 0.229749 |
| 2.14E-07    | -0.248439124 | 5.33E-08    | -0.16119875 | 0.00047035 | 0.283199 |
| 0.555006562 | -0.026791993 | 0.563580199 | 0.266380071 | 5.00E-09   | 0.582622 |
| 0.069314056 | 0.080939921  | 0.080584158 | 0.161055916 | 0.00047592 | 0.074035 |
| 0.38642136  | 0.037001667  | 0.425019613 | 0.361882493 | 6.77E-16   | 0.030958 |
| 0.174722893 | 0.062058618  | 0.180637521 | -0.10264742 | 0.02654483 | 0.185819 |
| 0.056301159 | -0.087460202 | 0.058947316 | 0.02680005  | 0.56346287 | 0.421587 |
| 0.101755747 | -0.064050536 | 0.167016674 | 0.347929682 | 9.80E-15   | 0.351264 |
| 0.121383521 | 0.078116579  | 0.091763665 | 0.172321667 | 0.0001826  | 0.442823 |
| 0.643192753 | 0.016590424  | 0.720653249 | -0.14074064 | 0.00230012 | -0.10176 |

|             |              |             |             |            |          |
|-------------|--------------|-------------|-------------|------------|----------|
| 0.748445721 | 0.009524696  | 0.837350671 | -0.25518461 | 2.24E-08   | -0.26665 |
| 0.914003825 | -0.012620854 | 0.785607509 | -0.19197324 | 2.96E-05   | -0.25493 |
| 0.66979493  | -0.019337391 | 0.676822059 | -0.02326007 | 0.61610713 | -0.00808 |
| 0.843581388 | 0.008573987  | 0.853391982 | -0.02957033 | 0.52383361 | -0.17931 |
| 0.749823314 | -0.017773527 | 0.701652975 | -0.17280661 | 0.00017498 | -0.19446 |
| 0.783102886 | 0.004896043  | 0.915962047 | -0.14561828 | 0.00160367 | -0.11768 |
| 0.185720679 | -0.064578647 | 0.163537861 | -0.04839508 | 0.29665418 | -0.11514 |
| 0.130307255 | -0.073744811 | 0.111489093 | 0.117321542 | 0.01117069 | -0.16712 |
| 0.583086774 | 0.021734905  | 0.639432895 | -0.22093753 | 1.43E-06   | -0.154   |
| 0.233604208 | 0.052661496  | 0.256055804 | -0.40778137 | 3.89E-20   | -0.12927 |
| 0.117510046 | -0.081680814 | 0.077840759 | -0.3239002  | 7.22E-13   | -0.22885 |
| 0.011139441 | -0.133356108 | 0.003888949 | -0.07429286 | 0.10884726 | -0.22229 |
| 8.16E-07    | -0.23078276  | 4.60E-07    | -0.140028   | 0.00242235 | 0.454871 |
| 0.490514747 | 0.042862158  | 0.355381415 | 0.103623546 | 0.0251329  | 0.192771 |
| 0.04354975  | 0.099322404  | 0.031878425 | -0.22179587 | 1.29E-06   | 0.303086 |
| 0.027181858 | -0.109201547 | 0.018245178 | 0.188006202 | 4.34E-05   | 0.195267 |
| 0.108244028 | -0.076837818 | 0.097220244 | 0.489075114 | 1.87E-29   | 0.406021 |
| 0.000458105 | 0.161163776  | 0.000471711 | 0.295972462 | 6.77E-11   | 0.161351 |
| 0.225023366 | -0.055240726 | 0.233467996 | 0.141772105 | 0.00213317 | 0.558494 |
| 0.061845794 | 0.091115088  | 0.049087404 | 0.067000195 | 0.14828074 | 0.109092 |
| 0.000371208 | 0.157889704  | 0.000616194 | 0.095803315 | 0.03849534 | 0.230405 |
| 0.001426178 | 0.155700646  | 0.000734637 | 0.279573197 | 7.82E-10   | 0.324749 |
| 0.093238978 | 0.079900814  | 0.084563113 | 0.223637869 | 1.05E-06   | 0.125194 |
| 0.404111636 | 0.053267698  | 0.250615571 | -0.07825065 | 0.09120606 | 0.334838 |
| 0.766568609 | 0.012924123  | 0.780585728 | 0.066580684 | 0.15084329 | 0.081282 |
| 0.000274936 | -0.167478194 | 0.000277719 | -0.07122642 | 0.12428264 | 0.424    |
| 0.878866906 | -0.001118841 | 0.980762023 | 0.077103305 | 0.09606662 | 0.304963 |
| 0.025720017 | 0.1135016    | 0.014121718 | -0.08843208 | 0.05617769 | 0.459134 |
| 0.635672953 | -0.015575094 | 0.737097878 | -0.16809344 | 0.00026348 | 0.123355 |
| 0.00625025  | 0.12417884   | 0.007215263 | -0.22145105 | 1.35E-06   | 0.350064 |
| 0.593872798 | -0.026259487 | 0.571360389 | 0.264364937 | 6.58E-09   | 0.495517 |
| 0.944380757 | 0.004417127  | 0.924156306 | -0.17844428 | 0.00010574 | 0.349194 |
| 2.01E-06    | 0.219764825  | 1.63E-06    | -0.10296435 | 0.02607909 | 0.039745 |
| 0.005130443 | 0.134269335  | 0.003649335 | -0.19244159 | 2.83E-05   | 0.095033 |
| 0.000407356 | 0.164047369  | 0.000371226 | -0.15637461 | 0.0006961  | 0.126702 |
| 0.559773538 | 0.025686615  | 0.579786793 | 0.197691262 | 1.68E-05   | 0.550435 |
| 7.54E-07    | 0.223583889  | 1.06E-06    | 0.181513053 | 7.99E-05   | 0.257139 |
| 0.001415767 | 0.146471246  | 0.001503943 | -0.21841932 | 1.89E-06   | 0.198913 |
| 0.22499226  | -0.055959521 | 0.227431924 | -0.05166474 | 0.26517773 | 0.389416 |
| 0.089513563 | -0.073437949 | 0.112990188 | -0.06632141 | 0.1524438  | 0.120296 |
| 0.860844498 | -0.003241011 | 0.944311991 | -0.08970432 | 0.05271618 | 0.163806 |
| 0.303800323 | -0.04624636  | 0.318644346 | 0.064160539 | 0.16628752 | 0.207572 |
| 0.375425202 | 0.032336507  | 0.485735588 | -0.0762897  | 0.09963692 | 0.369565 |
| 0.622524372 | -0.026276743 | 0.571107464 | -0.25230482 | 3.25E-08   | 0.431624 |
| 8.93E-05    | 0.180728531  | 8.58E-05    | 0.304474566 | 1.79E-11   | 0.246632 |

|             |              |             |             |            |          |
|-------------|--------------|-------------|-------------|------------|----------|
| 0.008405556 | 0.121775202  | 0.008430042 | 0.149249456 | 0.00121728 | 0.062401 |
| 0.000149827 | 0.179688108  | 9.44E-05    | 0.24405813  | 9.24E-08   | 0.521429 |
| 0.740101353 | -0.019128486 | 0.680119561 | -0.14594637 | 0.00156461 | 0.176029 |
| 0.836984083 | -0.010555642 | 0.820031568 | 0.038469439 | 0.40687204 | 0.346098 |
| 3.83E-07    | 0.233972236  | 3.16E-07    | 0.068017672 | 0.14220334 | 0.070092 |
| 0.372309623 | 0.050810759  | 0.27316848  | 0.344438952 | 1.87E-14   | 0.265155 |
| 0.000126532 | 0.179889509  | 9.27E-05    | 0.327926526 | 3.61E-13   | 0.349778 |
| 0.286722531 | 0.053309981  | 0.250239138 | 0.120660775 | 0.00905275 | 0.325377 |
| 0.004704844 | 0.117369169  | 0.011137636 | -0.05049533 | 0.27616106 | 0.240863 |
| 0.056815177 | -0.09616879  | 0.037757943 | -0.13325099 | 0.00391743 | 0.389527 |
| 0.050738602 | -0.099429907 | 0.031692631 | -0.09676064 | 0.03658921 | 0.398948 |
| 0.008423384 | -0.112558603 | 0.014948206 | -0.03605507 | 0.43696925 | 0.112444 |
| 0.326711223 | 0.046856362  | 0.312296053 | -0.07307592 | 0.11478153 | 0.359653 |
| 0.008287357 | 0.117049704  | 0.011361031 | 0.229082566 | 5.62E-07   | 0.046898 |
| 0.000455324 | 0.162448507  | 0.000424167 | 0.156554949 | 0.00068611 | 0.514166 |
| 0.145195943 | 0.066004552  | 0.154417201 | -0.00430886 | 0.9260099  | 0.272895 |
| 0.034242023 | 0.093165965  | 0.044186591 | -0.03131446 | 0.49963562 | 0.293725 |
| 2.65E-05    | 0.202299277  | 1.05E-05    | 0.116321618 | 0.01188504 | 0.005603 |
| 0.794504105 | -0.012912074 | 0.780785084 | 0.23507342  | 2.77E-07   | 0.261167 |
| 0.040689545 | 0.101988376  | 0.027536287 | -0.06985393 | 0.13172034 | 0.408951 |
| 0.535791728 | 0.03902629   | 0.400109513 | 0.16346666  | 0.0003897  | 0.211229 |
| 0.472964454 | -0.041860249 | 0.366749382 | 0.306857857 | 1.22E-11   | 0.230489 |
| 3.45E-05    | -0.197822381 | 1.66E-05    | 0.217224523 | 2.15E-06   | 0.251972 |
| 0.519894966 | -0.025687141 | 0.579779029 | 0.171854666 | 0.00019022 | 0.266628 |
| 0.330035606 | 0.044447699  | 0.337849777 | 0.316330598 | 2.59E-12   | 0.130213 |
| 2.14E-09    | 0.285016761  | 3.53E-10    | 0.081051553 | 0.08016586 | 0.118722 |
| 0.122721055 | 0.068673233  | 0.138389867 | 0.003878261 | 0.93338588 | 0.373186 |
| 0.072636341 | -0.090522508 | 0.050585354 | -0.11960198 | 0.00968195 | 0.163201 |
| 0.291821885 | 0.044724681  | 0.334844943 | 0.094185002 | 0.04190879 | 0.341359 |
| 0.028964261 | 0.108196172  | 0.019348778 | 0.043538378 | 0.34783548 | 0.409014 |
| 0.029263817 | -0.101646531 | 0.028062979 | -0.16681888 | 0.00029378 | 0.291736 |
| 0.079943993 | -0.088105639 | 0.057095675 | -0.04370092 | 0.34603696 | 0.132692 |
| 0.189837807 | 0.065006551  | 0.160759298 | 0.115293051 | 0.01266169 | 0.40126  |
| 0.507571092 | 0.025394355  | 0.58410791  | 0.112938547 | 0.01461023 | 0.359642 |
| 0.009149324 | -0.119292352 | 0.009873154 | 0.141748638 | 0.00213685 | 0.458748 |
| 0.536924658 | 0.028671511  | 0.536533693 | 0.023619844 | 0.61065953 | 0.201573 |
| 1.86E-08    | -0.263674346 | 7.23E-09    | -0.36143494 | 7.39E-16   | 0.266779 |
| 0.11110091  | -0.075559371 | 0.102930881 | 0.074219442 | 0.10919826 | 0.158619 |
| 0.02436732  | 0.100723342  | 0.029528817 | 0.057053333 | 0.21846078 | 0.053033 |
| 0.016026579 | 0.117341153  | 0.01115707  | -0.03048386 | 0.51108504 | 0.328196 |
| 0.480496792 | 0.026367587  | 0.569776872 | 0.085701442 | 0.06424639 | 0.318926 |
| 3.81E-06    | -0.219084896 | 1.75E-06    | -0.06603729 | 0.15421241 | 0.23156  |
| 0.0248996   | -0.099472877 | 0.031618628 | 0.12702861  | 0.00597959 | 0.283224 |
| 0.047465866 | 0.095419563  | 0.039282708 | 0.354290673 | 2.94E-15   | 0.505721 |
| 8.26E-08    | 0.247020699  | 6.38E-08    | -0.19197816 | 2.96E-05   | 0.111395 |

|             |              |             |             |            |          |
|-------------|--------------|-------------|-------------|------------|----------|
| 0.038203101 | 0.098053331  | 0.034143006 | 0.07364343  | 0.11198328 | 0.208443 |
| 0.012307722 | 0.114593561  | 0.013215121 | 0.132544292 | 0.00411382 | 0.250325 |
| 0.0353874   | -0.089279618 | 0.053851401 | 0.088987887 | 0.05464292 | 0.315579 |
| 0.208651342 | -0.056018238 | 0.226943793 | 0.382456681 | 1.03E-17   | 0.310953 |
| 0.14966573  | -0.066837194 | 0.149272453 | 0.194301825 | 2.36E-05   | 0.103905 |
| 0.456939975 | 0.026334007  | 0.570268547 | 0.102200083 | 0.02721438 | 0.431569 |
| 0.071472181 | -0.077255204 | 0.095411494 | -0.06666983 | 0.15029598 | 0.154784 |
| 0.094267638 | 0.076003564  | 0.100917325 | -0.23922386 | 1.68E-07   | 0.250254 |
| 0.244132156 | -0.04382371  | 0.344682161 | -0.07950991 | 0.08610037 | 0.092917 |
| 0.017319392 | 0.099825045  | 0.031017658 | 0.253225193 | 2.89E-08   | 0.366176 |
| 9.06E-05    | -0.175834074 | 0.000133765 | 0.174721771 | 0.00014771 | 0.22599  |
| 0.654819618 | 0.01928731   | 0.677612005 | 0.068841043 | 0.13742643 | 0.572099 |
| 2.29E-06    | 0.219411785  | 1.69E-06    | -0.10009478 | 0.030564   | 0.311735 |
| 0.972857499 | -0.006970869 | 0.88057538  | 0.222910778 | 1.14E-06   | 0.395159 |
| 5.00E-06    | 0.200506953  | 1.27E-05    | 0.051458567 | 0.26709202 | 0.08255  |
| 0.000998595 | 0.152952588  | 0.000913136 | 0.294753101 | 8.17E-11   | 0.175631 |
| 0.659878453 | 0.022615238  | 0.625923864 | 0.000638926 | 0.98901323 | 0.234028 |
| 0.635974917 | 0.022941179  | 0.620953443 | -0.13567255 | 0.00330715 | 0.399687 |
| 0.005421647 | -0.130411891 | 0.004761575 | 0.276572811 | 1.20E-09   | 0.036984 |
| 0.005555144 | -0.119252284 | 0.00989814  | 0.334005662 | 1.24E-13   | 0.299107 |
| 0.001180636 | -0.146999518 | 0.001445068 | -0.14120554 | 0.00222345 | 0.070913 |
| 7.74E-08    | -0.228337267 | 6.13E-07    | 0.143311363 | 0.00190456 | 0.246221 |
| 4.05E-10    | -0.274239693 | 1.68E-09    | -0.02945787 | 0.52541422 | 0.001614 |
| 1.36E-07    | -0.230954481 | 4.51E-07    | -0.26791238 | 4.05E-09   | -0.0043  |
| 3.08E-05    | -0.184904244 | 5.82E-05    | -0.2241365  | 9.93E-07   | -0.03781 |
| 0.000662314 | -0.143836075 | 0.001831901 | -0.30068971 | 3.25E-11   | -0.24645 |
| 0.073061413 | -0.075881708 | 0.101466565 | -0.24621755 | 7.06E-08   | -0.29658 |
| 6.97E-06    | -0.197097155 | 1.79E-05    | -0.22281609 | 1.15E-06   | -0.06938 |
| 1.80E-07    | -0.242216381 | 1.16E-07    | -0.35843088 | 1.33E-15   | -0.18294 |
| 3.57E-06    | -0.198799391 | 1.51E-05    | -0.17083765 | 0.00020788 | -0.03841 |
| 0.037107172 | -0.092264472 | 0.046287629 | -0.07789855 | 0.09267627 | -0.04059 |
| 3.00E-05    | -0.192800689 | 2.73E-05    | -0.44538382 | 3.89E-24   | 0.336365 |
| 6.69E-24    | -0.429718823 | 2.08E-22    | -0.11963079 | 0.00966433 | -0.06756 |
| 1.69E-05    | -0.187159176 | 4.71E-05    | -0.1537077  | 0.00086046 | -0.01761 |
| 0.14991432  | -0.049771617 | 0.283111155 | -0.01026973 | 0.82482622 | 0.162449 |
| 7.41E-11    | -0.282624447 | 5.02E-10    | -0.10763388 | 0.01999101 | -0.34619 |
| 0.000104844 | -0.162686399 | 0.000415868 | -0.02154189 | 0.64241105 | 0.225219 |
| 5.23E-09    | -0.251340672 | 3.68E-08    | -0.10956299 | 0.01786207 | 0.016324 |
| 8.29E-12    | -0.291732418 | 1.29E-10    | -0.12885908 | 0.0052897  | -0.03683 |
| 6.28E-05    | -0.169913453 | 0.000225245 | -0.01306366 | 0.77827814 | 0.223976 |
| 7.80E-05    | -0.173645426 | 0.000162504 | -0.21149033 | 4.02E-06   | -0.11036 |
| 1.18E-09    | -0.268240877 | 3.87E-09    | -0.10545262 | 0.02266106 | 0.037383 |
| 2.01E-10    | -0.276108929 | 1.29E-09    | -0.18341855 | 6.69E-05   | -0.12566 |
| 1.55E-09    | -0.256544069 | 1.87E-08    | -0.14178392 | 0.00213133 | -0.04075 |
| 6.46E-06    | -0.209500946 | 4.97E-06    | -0.06811056 | 0.14165818 | -0.29307 |

|             |              |             |             |            |          |
|-------------|--------------|-------------|-------------|------------|----------|
| 1.59E-05    | -0.196600147 | 1.88E-05    | -0.08207512 | 0.07641191 | 0.01729  |
| 0.267173177 | -0.036031173 | 0.437273376 | -0.02656133 | 0.56694402 | 0.37163  |
| 5.07E-07    | -0.216165207 | 2.42E-06    | -0.23409229 | 3.11E-07   | 0.110484 |
| 0.111090631 | -0.06223784  | 0.179379321 | 0.047243741 | 0.30830803 | 0.408388 |
| 2.69E-07    | -0.216065653 | 2.45E-06    | -0.27671143 | 1.18E-09   | 0.163467 |
| 0.206425559 | -0.046059466 | 0.320606083 | -0.15230837 | 0.00096041 | 0.061562 |
| 5.80E-09    | -0.267540249 | 4.27E-09    | -0.05947475 | 0.19950901 | 0.383351 |
| 2.33E-07    | -0.225686685 | 8.32E-07    | -0.1479303  | 0.00134646 | 0.19127  |
| 1.67E-29    | -0.484909601 | 6.49E-29    | -0.21864612 | 1.84E-06   | 0.108886 |
| 0.000777004 | -0.135627412 | 0.003317689 | 0.023544518 | 0.61179833 | -0.07777 |
| 3.32E-06    | -0.19934487  | 1.43E-05    | -0.21456739 | 2.88E-06   | 0.170258 |
| 0.007640594 | -0.104741859 | 0.023595385 | -0.22943109 | 5.39E-07   | 0.020557 |
| 0.023434042 | -0.089452525 | 0.053386792 | -0.37941219 | 1.95E-17   | 0.137538 |
| 0.002171635 | -0.125516133 | 0.006609475 | -0.13842405 | 0.00271939 | 0.247412 |
| 1.02E-13    | -0.329677187 | 2.66E-13    | 0.01043756  | 0.822011   | -0.04502 |
| 3.06E-07    | -0.222399211 | 1.21E-06    | -0.17577758 | 0.00013444 | 0.256951 |
| 1.35E-06    | -0.201059126 | 1.20E-05    | -0.39058192 | 1.81E-18   | -0.05069 |
| 0.001210101 | -0.138110113 | 0.002781279 | -0.37338301 | 6.76E-17   | -0.0723  |
| 2.26E-09    | -0.258235671 | 1.50E-08    | -0.27235304 | 2.19E-09   | -0.13071 |
| 4.37E-06    | -0.202823483 | 9.99E-06    | -0.43150654 | 1.33E-22   | 0.046389 |
| 3.86E-09    | -0.258139765 | 1.52E-08    | -0.2124646  | 3.62E-06   | 0.039566 |
| 2.32E-17    | -0.355085846 | 2.53E-15    | 0.027647176 | 0.55119307 | 0.039133 |
| 0.000348361 | -0.151287998 | 0.00103993  | -0.06943337 | 0.13406692 | 0.114007 |
| 1.60E-07    | -0.230436366 | 4.80E-07    | -0.33244288 | 1.63E-13   | -0.21771 |
| 2.42E-05    | -0.177900752 | 0.000111072 | -0.30244406 | 2.47E-11   | -0.27397 |
| 2.97E-08    | -0.251948567 | 3.40E-08    | -0.21237445 | 3.66E-06   | 0.097677 |
| 1.76E-08    | -0.250097499 | 4.31E-08    | -0.15847673 | 0.00058759 | -0.34505 |
| 5.17E-09    | -0.260380997 | 1.13E-08    | 0.001536601 | 0.97358108 | -0.06037 |
| 1.02E-09    | -0.267257156 | 4.44E-09    | -0.19668972 | 1.86E-05   | -0.07904 |
| 1.45E-05    | -0.185067176 | 5.74E-05    | -0.30118413 | 3.01E-11   | 0.023103 |
| 6.89E-07    | -0.23282878  | 3.62E-07    | -0.33729733 | 6.88E-14   | 0.076997 |
| 1.29E-08    | -0.250161826 | 4.28E-08    | -0.23733328 | 2.11E-07   | 0.267126 |
| 1.63E-15    | -0.342396687 | 2.73E-14    | -0.01372679 | 0.767339   | -0.0033  |
| 0.970339416 | 0.008806851  | 0.849457009 | -0.25605807 | 1.99E-08   | 0.057854 |
| 0.844319194 | 0.018214128  | 0.694623548 | -0.04828993 | 0.29770612 | -0.04625 |
| 0.003896927 | -0.133395555 | 0.003878312 | -0.25117157 | 3.76E-08   | -0.23203 |
| 0.001791538 | -0.13506409  | 0.003451783 | -0.04427937 | 0.33968425 | -0.17689 |
| 4.41E-12    | -0.290712052 | 1.51E-10    | -0.12215201 | 0.0082283  | 0.134926 |
| 0.585098236 | -0.013306319 | 0.774270018 | -0.28667077 | 2.77E-10   | 0.255518 |
| 3.86E-08    | -0.242254899 | 1.16E-07    | -0.40758397 | 4.07E-20   | -0.13468 |
| 1.77E-05    | -0.193420186 | 2.57E-05    | -0.54104243 | 7.27E-37   | -0.04863 |
| 0.561100858 | -0.031544413 | 0.496489969 | -0.0734496  | 0.11293289 | -0.39907 |
| 5.10E-12    | 0.311722852  | 5.55E-12    | -0.17071116 | 0.00021018 | 0.24249  |
| 2.94E-08    | 0.257144427  | 1.73E-08    | -0.37723066 | 3.06E-17   | -0.25297 |
| 0.789394306 | -0.010585813 | 0.819526003 | -0.05151771 | 0.26654195 | -0.28384 |



|             |              |             |             |            |          |
|-------------|--------------|-------------|-------------|------------|----------|
| 0.07846791  | -0.081265968 | 0.07936737  | -0.17348806 | 0.00016478 | -0.52717 |
| 9.57E-06    | 0.20173734   | 1.12E-05    | 0.235668113 | 2.58E-07   | 0.312468 |
| 8.24E-18    | 0.38893458   | 2.58E-18    | -0.4141634  | 8.82E-21   | -0.09216 |
| 0.17604201  | 0.050681543  | 0.274391716 | -0.29054733 | 1.55E-10   | -0.367   |
| 0.224103357 | -0.055293528 | 0.233020776 | -0.04735525 | 0.3071663  | -0.30967 |
| 0.011474106 | 0.117663477  | 0.010935284 | 0.168123719 | 0.0002628  | -0.14165 |
| 8.85E-09    | 0.262869527  | 8.06E-09    | -0.29321288 | 1.03E-10   | -0.27368 |
| 0.005041626 | 0.142221339  | 0.002063986 | 0.05527793  | 0.23315283 | -0.03641 |
| 1.93E-06    | 0.213387903  | 3.28E-06    | -0.2362278  | 2.41E-07   | -0.25457 |
| 0.86202721  | 0.007693428  | 0.868303889 | -0.23582265 | 2.53E-07   | -0.31011 |
| 0.270383869 | -0.055163758 | 0.234120985 | -0.37314431 | 7.10E-17   | -0.14437 |
| 0.043269025 | 0.099936474  | 0.030829554 | 0.082078518 | 0.0763997  | -0.22854 |
| 0.064851575 | 0.081893624  | 0.077066929 | -0.33685031 | 7.46E-14   | -0.3697  |
| 1.52E-07    | 0.247370151  | 6.10E-08    | 0.004068523 | 0.93012604 | -0.26881 |
| 0.019682993 | -0.120806703 | 0.008968944 | -0.28492407 | 3.58E-10   | 0.025984 |
| 2.64E-08    | 0.25210951   | 3.33E-08    | 0.132309564 | 0.004181   | 0.019281 |
| 0.064810705 | -0.090025963 | 0.051869761 | 0.03561362  | 0.44260728 | -0.2011  |
| 0.000368811 | 0.167815417  | 0.000269827 | -0.0183618  | 0.69227344 | -0.11429 |
| 0.005643305 | -0.130221841 | 0.004823553 | -0.19674643 | 1.85E-05   | -0.4946  |
| 0.001132572 | -0.149116906 | 0.001229724 | -0.07592211 | 0.10128418 | 0.17065  |
| 0.716302534 | 0.017750491  | 0.702021195 | -0.0658453  | 0.15541633 | -0.40898 |
| 0.018068659 | 0.104623065  | 0.023754751 | -0.05890494 | 0.20385727 | -0.29356 |
| 0.203579253 | 0.045013285  | 0.331732334 | -0.22789088 | 6.45E-07   | -0.28226 |
| 0.017127371 | 0.1161572    | 0.01200629  | -0.1930039  | 2.68E-05   | -0.35773 |
| 0.640113637 | -0.021146933 | 0.648522767 | -0.23145327 | 4.26E-07   | -0.36943 |
| 0.535628531 | 0.035178041  | 0.448210764 | -0.20007692 | 1.32E-05   | -0.08068 |
| 0.002477868 | -0.140010161 | 0.00242548  | -0.28401372 | 4.10E-10   | -0.11204 |
| 3.07E-05    | -0.198840367 | 1.50E-05    | -0.14004583 | 0.00241922 | -0.04294 |
| 0.956603366 | -0.002791357 | 0.952028053 | -0.02585645 | 0.57728267 | -0.39631 |
| 0.004309445 | -0.127469447 | 0.005806433 | 0.045119531 | 0.33059118 | 0.060765 |
| 0.324290754 | 0.044992158  | 0.331959558 | 0.033047847 | 0.47618573 | -0.04712 |
| 0.000689531 | -0.151230897 | 0.001044555 | -0.11408688 | 0.01362921 | -0.03367 |
| 0.023161644 | 0.097964774  | 0.034306022 | -0.07172534 | 0.12166134 | -0.20031 |
| 0.011862564 | 0.119502812  | 0.00974283  | -0.31088818 | 6.36E-12   | -0.13832 |
| 0.350725156 | -0.048060771 | 0.300007352 | 0.259286863 | 1.30E-08   | -0.16453 |
| 0.395612774 | 0.040253051  | 0.385451072 | -0.27621052 | 1.27E-09   | -0.07661 |
| 0.004900436 | 0.132565466  | 0.004107808 | -0.04921632 | 0.28852336 | 0.460276 |
| 0.016618718 | 0.10910371   | 0.018350105 | -0.09173619 | 0.04755738 | -0.23448 |
| 0.1390894   | 0.074495355  | 0.107883693 | -0.18905195 | 3.93E-05   | -0.23949 |
| 0.067012878 | 0.085276922  | 0.065582539 | -0.17605117 | 0.00013119 | -0.37992 |
| 0.128963956 | 0.065727825  | 0.156156451 | -0.02003449 | 0.66586342 | -0.29654 |
| 1.08E-07    | 0.238963025  | 1.73E-07    | -0.21095178 | 4.26E-06   | -0.04352 |
| 6.29E-06    | 0.203734083  | 9.10E-06    | -0.15570808 | 0.0007342  | -0.33906 |
| 0.020876455 | 0.102698638  | 0.026469082 | -0.19867614 | 1.52E-05   | -0.24711 |
| 0.295666015 | 0.047229955  | 0.308449376 | -0.23875564 | 1.78E-07   | -0.39074 |

|             |              |             |             |            |          |
|-------------|--------------|-------------|-------------|------------|----------|
| 0.175197433 | 0.062279187  | 0.179089973 | 0.013323514 | 0.77398622 | -0.28161 |
| 0.019328066 | 0.112987937  | 0.014566791 | 0.098044541 | 0.03415916 | -0.18246 |
| 0.003470238 | 0.128389125  | 0.005459625 | -0.29102974 | 1.44E-10   | -0.31685 |
| 0.000885913 | 0.164508432  | 0.000357144 | -0.1422127  | 0.0020653  | -0.27319 |
| 0.025346794 | 0.101730147  | 0.027933356 | -0.12505072 | 0.00681493 | -0.0781  |
| 0.000101223 | 0.172881152  | 0.000173836 | 0.010312592 | 0.82410708 | -0.09964 |
| 0.01571357  | -0.11503356  | 0.012864565 | -0.22456866 | 9.45E-07   | -0.46699 |
| 0.839814626 | -0.01412795  | 0.760743509 | -0.28749228 | 2.45E-10   | -0.34249 |
| 0.040752301 | 0.098254485  | 0.033775171 | 0.209393034 | 5.03E-06   | -0.18932 |
| 0.7028018   | 0.010381018  | 0.822959216 | -0.08238401 | 0.07530755 | -0.29127 |
| 0.25614679  | -0.053010198 | 0.252916547 | 0.014853618 | 0.74885704 | -0.08758 |
| 0.277742812 | 0.054467244  | 0.240088802 | -0.05468124 | 0.23824397 | -0.33009 |
| 0.001160861 | 0.154547528  | 0.000805191 | 0.21142768  | 4.05E-06   | -0.22096 |
| 0.934516827 | -0.006205694 | 0.893601798 | -0.11326408 | 0.01432601 | -0.00817 |
| 0.013341881 | -0.116219084 | 0.011960527 | 0.143766432 | 0.0018414  | -0.26281 |
| 0.041728749 | 0.087662189  | 0.058362583 | -0.26108719 | 1.02E-08   | -0.27779 |
| 0.937327088 | -0.00737643  | 0.873683875 | 0.086832244 | 0.06079623 | -0.05687 |
| 0.527072833 | 0.021925511  | 0.636497654 | 0.075594192 | 0.10277189 | -0.36627 |
| 0.009582994 | -0.121065641 | 0.008821939 | -0.18995036 | 3.60E-05   | -0.3546  |
| 0.043863979 | 0.109041824  | 0.018416748 | -0.04666927 | 0.31423426 | -0.00253 |
| 0.486476492 | -0.025386202 | 0.584228679 | -0.17419228 | 0.00015482 | -0.28501 |
| 0.000216319 | 0.161336941  | 0.000465026 | -0.06909453 | 0.13598092 | -0.29995 |
| 0.000512364 | 0.153976385  | 0.000842411 | -0.31041113 | 6.87E-12   | -0.19665 |
| 0.00144148  | -0.144715077 | 0.001715856 | -0.12136805 | 0.00865297 | -0.22756 |
| 0.046469791 | 0.098470932  | 0.033383147 | -0.38755381 | 3.47E-18   | -0.18918 |
| 0.00284427  | 0.146565466  | 0.001493284 | 0.046020398 | 0.32101716 | -0.19285 |
| 0.484231519 | 0.035496729  | 0.444107072 | -0.04575    | 0.32387165 | -0.28483 |
| 0.009248149 | 0.119706009  | 0.009618455 | -0.35891781 | 1.21E-15   | -0.15248 |
| 0.439840738 | 0.035109302  | 0.4490987   | -0.1511856  | 0.00104824 | -0.29616 |
| 0.676908049 | -0.01263913  | 0.785304633 | -0.15930588 | 0.00054928 | -0.20216 |
| 0.164538268 | -0.064966454 | 0.161018144 | -0.33087318 | 2.16E-13   | -0.36547 |
| 8.49E-09    | 0.257609278  | 1.63E-08    | -0.18304925 | 6.93E-05   | -0.18729 |
| 0.694822694 | 0.016217454  | 0.726679517 | 0.078068762 | 0.09196319 | -0.4061  |
| 0.272439682 | -0.051584161 | 0.265924755 | 0.066097581 | 0.15383581 | -0.10177 |
| 0.415741794 | 0.04199258   | 0.365235099 | -0.16206434 | 0.00043789 | -0.30336 |
| 0.050900621 | 0.092733654  | 0.045183911 | -0.3319751  | 1.78E-13   | -0.34653 |
| 0.006803455 | 0.124520885  | 0.007055766 | -0.15287491 | 0.00091872 | -0.18305 |
| 0.051176831 | 0.103703723  | 0.025019857 | -0.03348067 | 0.47042564 | -0.09364 |
| 0.009338469 | 0.127605229  | 0.005754015 | -0.20379514 | 9.04E-06   | 0.188823 |
| 0.55986374  | 0.024715523  | 0.594201825 | -0.05970185 | 0.19779498 | -0.50557 |
| 0.111537954 | 0.074540023  | 0.107672058 | 0.166626124 | 0.00029863 | -0.10557 |
| 0.732129876 | -0.023359894 | 0.614593501 | -0.19713986 | 1.78E-05   | -0.42953 |
| 3.11E-07    | -0.236389169 | 2.36E-07    | -0.03594616 | 0.43835635 | -0.19575 |
| 0.02963308  | -0.110194949 | 0.017209083 | -0.04965114 | 0.28427949 | -0.29174 |
| 0.575763276 | 0.026038913  | 0.574597933 | 0.171036299 | 0.00020432 | 0.086925 |

|             |              |             |             |            |          |
|-------------|--------------|-------------|-------------|------------|----------|
| 1.17E-05    | -0.204731296 | 8.21E-06    | 0.347183209 | 1.13E-14   | 0.020037 |
| 0.125246026 | 0.07417963   | 0.109388973 | -0.16906768 | 0.00024232 | -0.07622 |
| 0.000167396 | 0.179893456  | 9.27E-05    | -0.25621057 | 1.96E-08   | -0.10023 |
| 0.010472225 | 0.121313582  | 0.008683192 | 0.180876881 | 8.47E-05   | -0.17767 |
| 4.61E-08    | -0.255477732 | 2.15E-08    | -0.0662814  | 0.15269189 | -0.27433 |
| 0.730121088 | 0.007947477  | 0.863996631 | -0.16697567 | 0.00028988 | -0.0953  |
| 0.262521815 | 0.052651987  | 0.256141793 | -0.05278004 | 0.25498558 | -0.33784 |
| 0.039819059 | 0.095647027  | 0.038814377 | -0.26281729 | 8.12E-09   | -0.25045 |
| 0.614682013 | 0.024497983  | 0.59745328  | 0.103367701 | 0.02549655 | -0.1987  |
| 0.485818728 | 0.025597602  | 0.581101274 | 0.271521267 | 2.46E-09   | 0.102535 |
| 0.178597766 | -0.064624166 | 0.163240586 | -0.14547667 | 0.0016208  | -0.27014 |
| 3.59E-10    | 0.281351752  | 6.05E-10    | -0.02221492 | 0.63205177 | -0.18    |
| 0.441053214 | -0.037892887 | 0.41394494  | 0.103349139 | 0.02552311 | -0.30134 |
| 0.142764974 | -0.0800215   | 0.084093003 | 0.076201934 | 0.10002826 | -0.29062 |
| 0.747300602 | -0.017109384 | 0.712296902 | -0.04474536 | 0.33462124 | -0.39569 |
| 0.66528314  | -0.026085526 | 0.573913034 | -0.06727566 | 0.1466162  | -0.25376 |
| 0.000473101 | 0.165960029  | 0.000315994 | -0.15508702 | 0.00077144 | -0.10005 |
| 0.099588134 | -0.081325333 | 0.079147431 | -0.12628528 | 0.00628208 | -0.19727 |
| 0.229388654 | 0.052378795  | 0.258620611 | -0.3023605  | 2.50E-11   | -0.3776  |
| 0.008065013 | 0.122005885  | 0.008306018 | -0.14384891 | 0.00183016 | -0.22379 |
| 0.488678914 | -0.033517832 | 0.469932824 | 0.204542666 | 8.37E-06   | -0.10925 |
| 0.08488619  | 0.086442359  | 0.061968094 | 0.079235329 | 0.08719359 | -0.31412 |
| 0.031466888 | -0.09451276  | 0.041197558 | 0.074735997 | 0.1067474  | -0.25106 |
| 0.631321367 | -0.014302172 | 0.757884489 | -0.28231712 | 5.25E-10   | -0.25858 |
| 0.027113645 | 0.102674321  | 0.026505022 | 0.061933351 | 0.18152081 | -0.15586 |
| 0.025747199 | 0.106968978  | 0.020774301 | -0.03259788 | 0.48221461 | 0.171641 |
| 0.334892049 | -0.031012865 | 0.503777202 | 0.293368294 | 1.01E-10   | 0.233467 |
| 0.000171013 | -0.177045037 | 0.00011999  | -0.14953488 | 0.00119087 | -0.43536 |
| 0.422287783 | -0.037752948 | 0.415672523 | -0.27718662 | 1.10E-09   | -0.35626 |
| 0.000353953 | -0.166649772 | 0.000298032 | 0.188001675 | 4.34E-05   | -0.08057 |
| 0.631927731 | 0.021810373  | 0.638270049 | -0.14168997 | 0.00214605 | -0.30631 |
| 0.036750468 | 0.105496781  | 0.022604081 | 0.127580077 | 0.00576369 | -0.28052 |
| 0.110081036 | 0.080094829  | 0.083808392 | -0.04221941 | 0.36264849 | -0.29855 |
| 0.52776331  | -0.025206131 | 0.58689874  | -0.24917791 | 4.85E-08   | -0.12675 |
| 0.012371968 | -0.114310756 | 0.013444857 | -0.2859158  | 3.09E-10   | -0.39699 |
| 0.002477839 | 0.142206159  | 0.00206629  | -0.07493383 | 0.10582036 | -0.23433 |
| 0.056443876 | -0.080112138 | 0.083741327 | -0.10881328 | 0.01866469 | 0.073512 |
| 0.003066173 | 0.137417071  | 0.002922458 | -0.10352531 | 0.025272   | -0.42917 |
| 0.66036709  | 0.01166772   | 0.801447357 | 0.155951767 | 0.00072005 | -0.38986 |
| 0.005544    | -0.124826681 | 0.006915852 | -0.32875007 | 3.13E-13   | -0.34574 |
| 0.280714303 | -0.038087987 | 0.41154345  | -0.23914709 | 1.69E-07   | -0.21138 |
| 0.026302625 | -0.108437849 | 0.019078311 | -0.25598411 | 2.01E-08   | -0.31846 |
| 0.590914757 | 0.026371038  | 0.569726352 | -0.09740011 | 0.03536114 | -0.36483 |
| 0.336870396 | -0.056082965 | 0.226406562 | -0.27157654 | 2.44E-09   | -0.17318 |
| 0.008339103 | 0.126506516  | 0.00619065  | -0.27597238 | 1.31E-09   | -0.25576 |

|             |              |             |             |            |          |
|-------------|--------------|-------------|-------------|------------|----------|
| 0.298021284 | -0.046831556 | 0.312552583 | -0.1334736  | 0.00385734 | -0.39168 |
| 0.061036195 | 0.071846101  | 0.121033395 | 0.014958704 | 0.74714057 | -0.13305 |
| 2.47E-09    | 0.278033762  | 9.77E-10    | -0.23028785 | 4.88E-07   | -0.08445 |
| 0.471297626 | -0.023523988 | 0.612108881 | -0.34934292 | 7.52E-15   | -0.18832 |
| 0.570055853 | 0.031613467  | 0.4955474   | -0.1133398  | 0.01426061 | -0.5368  |
| 2.63E-12    | 0.319553844  | 1.51E-12    | -0.1308103  | 0.00463398 | -0.32049 |
| 0.006440207 | -0.125841001 | 0.006469373 | -0.07760528 | 0.09391522 | -0.1374  |
| 0.40825729  | -0.028831988 | 0.534254928 | -0.05969964 | 0.19781161 | -0.1377  |
| 0.236811733 | -0.054358231 | 0.241032426 | 0.071454698 | 0.12307788 | -0.07437 |
| 0.000356606 | 0.159255546  | 0.000551541 | 0.172712701 | 0.00017643 | -0.30623 |
| 0.000695427 | -0.163975545 | 0.000373465 | 0.048939402 | 0.29124809 | -0.08885 |
| 0.275999454 | 0.046627623  | 0.314666738 | -0.22782486 | 6.50E-07   | -0.39271 |
| 0.861059529 | -0.015793325 | 0.7335529   | -0.09307699 | 0.04439033 | -0.08109 |
| 0.500644301 | 0.034885516  | 0.451996374 | -0.14369373 | 0.00185136 | -0.16535 |
| 0.109993645 | 0.078237673  | 0.091259921 | -0.09109    | 0.04915006 | -0.23662 |
| 0.025662018 | 0.102967858  | 0.026073978 | 0.134068294 | 0.00370091 | -0.40402 |
| 0.000198381 | 0.177154601  | 0.000118811 | -0.18840462 | 4.18E-05   | -0.13164 |
| 0.002205724 | -0.154172395 | 0.000829461 | -0.09789651 | 0.03443214 | -0.11947 |
| 0.04682468  | -0.096098168 | 0.037899493 | -0.42437338 | 7.70E-22   | -0.19717 |
| 0.100671321 | -0.078716291 | 0.089290553 | 0.255136498 | 2.25E-08   | 0.075726 |
| 0.123548102 | -0.066665426 | 0.150322954 | -0.08272808 | 0.07409272 | -0.05247 |
| 0.369474226 | -0.039681218 | 0.392242713 | -0.13433099 | 0.00363365 | -0.13951 |
| 0.807949399 | -0.007000031 | 0.880079532 | -0.30790494 | 1.03E-11   | -0.3155  |
| 0.91683752  | 0.002438515  | 0.958085984 | -0.20869546 | 5.41E-06   | -0.22279 |
| 0.171562834 | 0.058578298  | 0.206380655 | 0.264601365 | 6.38E-09   | -0.31057 |
| 0.936212506 | -0.004329977 | 0.925648333 | -0.15002097 | 0.00114712 | -0.41708 |
| 0.016070504 | -0.10581343  | 0.022199148 | 0.147410353 | 0.00140075 | 0.087449 |
| 0.07357896  | -0.089150024 | 0.054201826 | -0.1074598  | 0.02019356 | -0.20924 |
| 0.001241129 | -0.152470519 | 0.000948303 | 0.004402078 | 0.92441393 | 0.061651 |
| 0.002595425 | 0.145910891  | 0.001568795 | -0.16630184 | 0.00030697 | -0.0464  |
| 0.978197393 | -0.011612208 | 0.802372482 | -0.17157901 | 0.00019487 | -0.11385 |
| 0.793973067 | -0.00905421  | 0.845281184 | 0.178251317 | 0.0001076  | 0.337408 |
| 3.91E-06    | -0.224404241 | 9.63E-07    | 0.019607169 | 0.67257283 | -0.20558 |
| 0.062165283 | -0.086477979 | 0.061860263 | -0.06927971 | 0.13493233 | -0.30372 |
| 0.825457231 | 0.007135824  | 0.87777126  | -0.21130148 | 4.10E-06   | -0.25032 |
| 0.001187381 | -0.150828275 | 0.001077706 | -0.16581908 | 0.00031979 | -0.20101 |
| 1.17E-06    | -0.230196022 | 4.93E-07    | -0.28409421 | 4.05E-10   | -0.08684 |
| 4.23E-05    | -0.190492566 | 3.42E-05    | 0.02966453  | 0.5225116  | -0.20486 |
| 0.372646073 | -0.048071874 | 0.299895583 | -0.23217711 | 3.91E-07   | -0.1893  |
| 0.005435734 | 0.12906952   | 0.005215167 | -0.32889541 | 3.05E-13   | -0.02478 |
| 0.295868965 | -0.056013078 | 0.226986659 | -0.0810365  | 0.08022215 | -0.39743 |
| 0.009622006 | -0.125551786 | 0.006593967 | -0.02288288 | 0.62184116 | -0.33748 |
| 0.166860433 | -0.052718371 | 0.255541944 | 0.006777703 | 0.88386096 | -0.15953 |
| 0.090204324 | -0.079658097 | 0.085514993 | -0.25194578 | 3.40E-08   | 0.037153 |
| 0.001219819 | 0.150813607  | 0.001078931 | -0.0407996  | 0.37902707 | -0.17913 |

|             |              |             |             |            |          |
|-------------|--------------|-------------|-------------|------------|----------|
| 0.458818907 | 0.022454558  | 0.628380408 | -0.2378726  | 1.98E-07   | -0.24584 |
| 0.057866175 | 0.086330147  | 0.062308797 | 0.034668583 | 0.45481533 | 0.02701  |
| 0.702671218 | 0.02684836   | 0.56275963  | -0.07163314 | 0.12214247 | -0.25555 |
| 0.766559877 | -0.013081386 | 0.777985225 | -0.1060166  | 0.02194266 | -0.2876  |
| 0.858952864 | 0.009275627  | 0.841546975 | -0.12716087 | 0.00592716 | -0.43238 |
| 0.137789949 | 0.058816418  | 0.204538882 | -0.06961946 | 0.13302465 | -0.37088 |
| 0.184197878 | -0.053683226 | 0.246933285 | -0.05669713 | 0.22135399 | -0.17707 |
| 0.000768656 | -0.163041022 | 0.000403777 | -0.16786708 | 0.00026864 | 0.230179 |
| 0.003134817 | 0.13609678   | 0.003209592 | -0.22767563 | 6.61E-07   | -0.31171 |
| 0.001149586 | 0.147088269  | 0.001435387 | -0.17889173 | 0.00010152 | -0.12285 |
| 0.025823102 | -0.101721016 | 0.027947485 | 0.27779691  | 1.01E-09   | 0.105121 |
| 0.36994989  | -0.036800961 | 0.42753725  | -0.42700495 | 4.05E-22   | -0.20208 |
| 0.665788889 | -0.026732568 | 0.564445892 | 0.09093076  | 0.04954933 | -0.2287  |
| 0.089430204 | -0.083457406 | 0.071570443 | 0.232418316 | 3.80E-07   | 0.085588 |
| 0.169453436 | 0.062849846  | 0.175131779 | -0.07060395 | 0.12761436 | -0.25071 |
| 0.467650254 | -0.035793758 | 0.440301625 | 0.027792612 | 0.54909982 | -0.19556 |
| 3.95E-11    | -0.303674319 | 2.03E-11    | 0.13733285  | 0.00294005 | -0.06813 |
| 2.58E-06    | 0.218265465  | 1.92E-06    | -0.18172634 | 7.83E-05   | -0.41661 |
| 0.247428828 | 0.050891915  | 0.272402115 | 0.093052002 | 0.04444768 | -0.39291 |
| 7.50E-08    | 0.247119309  | 6.30E-08    | -0.08931802 | 0.05374793 | -0.07811 |
| 0.006973144 | 0.119235403  | 0.009908684 | -0.2916294  | 1.31E-10   | -0.20033 |
| 0.188642283 | 0.061481614  | 0.184732661 | -0.08006767 | 0.08391373 | -0.24651 |
| 0.260880228 | -0.053861458 | 0.245365478 | -0.05012646 | 0.27968882 | -0.01038 |
| 0.000390518 | -0.161738592 | 0.000449857 | -0.0593535  | 0.2004286  | 0.205209 |
| 0.002320493 | 0.133253156  | 0.003916837 | -0.04539982 | 0.32759282 | 0.056267 |
| 0.471814205 | -0.033869482 | 0.465284035 | 0.101799168 | 0.02782675 | -0.18174 |
| 0.01280287  | 0.125723454  | 0.006519756 | 0.103216644 | 0.02571339 | -0.26657 |
| 0.009881253 | 0.126410894  | 0.006230022 | -0.29510261 | 7.74E-11   | -0.28356 |
| 0.110803275 | 0.079523993  | 0.086044607 | -0.43428106 | 6.66E-23   | -0.05434 |
| 0.104293632 | 0.064453328  | 0.164358404 | 0.010360391 | 0.82330521 | -0.0919  |
| 0.046066386 | 0.086160374  | 0.062827205 | 0.12428861  | 0.00716373 | -0.2141  |
| 0.046572453 | -0.100954969 | 0.029155004 | 0.059195814 | 0.20162907 | -0.28713 |
| 0.329577218 | 0.049851636  | 0.282336945 | -0.30561529 | 1.49E-11   | -0.41246 |
| 1.01E-10    | 0.300101467  | 3.57E-11    | -0.00093577 | 0.98390932 | -0.00941 |
| 0.143531313 | 0.06587895   | 0.155204791 | 0.070160517 | 0.13002978 | -0.29548 |
| 1.11E-10    | 0.299286051  | 4.05E-11    | 0.133690813 | 0.00379952 | -0.09928 |
| 0.106558004 | 0.075407789  | 0.103625253 | -0.11027903 | 0.0171238  | -0.17445 |
| 0.001989878 | 0.142422476  | 0.002033679 | -0.19205232 | 2.94E-05   | -0.19312 |
| 0.385788677 | -0.031413259 | 0.498282799 | -0.14754135 | 0.00138689 | 0.010561 |
| 0.000403793 | -0.159645535 | 0.000534271 | -0.08259933 | 0.07454542 | -0.37879 |
| 0.022568909 | -0.106352962 | 0.021523666 | 0.075524911 | 0.10308841 | -0.16054 |
| 0.250291289 | -0.052364242 | 0.258753121 | -0.19139766 | 3.13E-05   | -0.35894 |
| 0.000359698 | -0.173878683 | 0.000159186 | -0.15825937 | 0.00059803 | -0.04035 |
| 0.054334427 | 0.085748975  | 0.064098183 | 0.013260853 | 0.77502056 | -0.20989 |
| 0.526665863 | 0.033489753  | 0.470305126 | 0.192720367 | 2.75E-05   | 0.264965 |

|             |              |             |             |            |          |
|-------------|--------------|-------------|-------------|------------|----------|
| 0.351120102 | 0.041444375  | 0.371533662 | -0.03834206 | 0.40842849 | -0.23061 |
| 0.203733209 | 0.071747913  | 0.121543772 | 0.045230315 | 0.32940399 | -0.18296 |
| 0.035952089 | 0.098322381  | 0.033651779 | 0.089335127 | 0.05370188 | -0.34478 |
| 0.881921103 | -0.012130405 | 0.793747532 | -0.01570195 | 0.73503652 | -0.01816 |
| 0.00278819  | 0.131029512  | 0.004565092 | -0.12214044 | 0.00823443 | -0.37205 |
| 0.885475323 | 0.003764628  | 0.935333354 | -0.27764131 | 1.03E-09   | -0.13698 |
| 0.433401877 | 0.037860581  | 0.414343392 | -0.15452631 | 0.00080655 | -0.1196  |
| 0.683120758 | -0.023880925 | 0.606719674 | -0.15831147 | 0.00059552 | -0.42002 |
| 0.004683724 | -0.129220548 | 0.00516226  | -0.02694704 | 0.56132441 | -0.38096 |
| 0.531779579 | -0.025602627 | 0.581027034 | 0.271559052 | 2.44E-09   | -0.16669 |
| 1.85E-07    | 0.241632414  | 1.25E-07    | -0.01404207 | 0.76215398 | -0.05357 |
| 7.43E-07    | -0.227506725 | 6.74E-07    | -0.07120961 | 0.12437169 | -0.02843 |
| 4.72E-07    | 0.230699506  | 4.65E-07    | -0.19056318 | 3.40E-05   | -0.42146 |
| 0.000131715 | 0.168629931  | 0.000251621 | 0.204683488 | 8.25E-06   | 0.430891 |
| 0.144364083 | 0.062884173  | 0.174895772 | -0.13745943 | 0.00291365 | -0.27459 |
| 0.003752503 | 0.136143649  | 0.003198975 | -0.31507678 | 3.19E-12   | -0.01202 |
| 0.206445746 | 0.059427089  | 0.199870099 | -0.20068119 | 1.24E-05   | -0.25603 |
| 0.000515728 | 0.153860885  | 0.000850128 | -0.16532686 | 0.00033337 | -0.10172 |
| 0.717506587 | -0.024841399 | 0.59232412  | 0.058386993 | 0.207869   | -0.07982 |
| 0.304707298 | -0.053868046 | 0.245307662 | 0.122075243 | 0.00826905 | -0.15775 |
| 0.003193945 | -0.139070435 | 0.002595906 | -0.15023169 | 0.00112861 | -0.28267 |
| 0.389994458 | 0.0445198    | 0.337065926 | 0.030120053 | 0.51614268 | -0.02892 |
| 0.087685241 | 0.073248425  | 0.113925196 | -0.17246557 | 0.0001803  | -0.21116 |
| 0.203659917 | 0.057748434  | 0.212893113 | -0.32254706 | 9.10E-13   | -0.42958 |
| 0.956989353 | -0.002336649 | 0.95983538  | -0.12772967 | 0.00570635 | -0.21396 |
| 0.420168976 | -0.040122202 | 0.386998813 | 0.239405208 | 1.64E-07   | -0.16739 |
| 0.524951402 | -0.035249038 | 0.447294689 | -0.02467513 | 0.59480497 | -0.10863 |
| 0.000183398 | -0.173610081 | 0.000163012 | -0.02382018 | 0.60763536 | -0.1361  |
| 0.049046737 | 0.091476326  | 0.048192589 | 0.014075897 | 0.76159835 | -0.16448 |
| 3.29E-08    | 0.246759406  | 6.59E-08    | 0.048280692 | 0.29779865 | 0.103228 |
| 9.58E-05    | 0.176741731  | 0.000123309 | -0.28732506 | 2.51E-10   | 0.092467 |
| 0.000992127 | 0.147437236  | 0.001397897 | -0.16192841 | 0.00044285 | -0.36816 |
| 1.48E-08    | 0.260776046  | 1.07E-08    | -0.09472855 | 0.04073489 | -0.13985 |
| 0.448707692 | 0.02558571   | 0.581277005 | -0.0973821  | 0.03539524 | -0.43058 |
| 0.005458808 | 0.127306512  | 0.0058699   | -0.15429413 | 0.00082151 | -0.1161  |
| 0.11067812  | 0.078532645  | 0.090042128 | -0.12540787 | 0.00665676 | -0.15554 |
| 0.60768951  | 0.027579051  | 0.552174941 | 0.040506063 | 0.38246906 | -0.05036 |
| 0.017970149 | -0.097619824 | 0.034947344 | -0.034702   | 0.45438038 | 0.091598 |
| 0.003029858 | 0.13894536   | 0.002619395 | 0.083619945 | 0.07101799 | -0.30977 |
| 0.009844742 | -0.118215122 | 0.010564755 | -0.09647683 | 0.03714576 | -0.28942 |
| 0.96490385  | -0.000994016 | 0.982907979 | -0.03262973 | 0.48178652 | -0.046   |
| 0.314957264 | -0.053338298 | 0.249987251 | -0.10659572 | 0.02122561 | -0.22721 |
| 0.000313779 | -0.163179138 | 0.000399158 | -0.04457738 | 0.33644076 | -0.31379 |
| 0.000205123 | -0.169149705 | 0.00024061  | 0.005739367 | 0.90155488 | -0.11719 |
| 0.000155094 | 0.179813435  | 9.33E-05    | -0.15199327 | 0.00098435 | -0.40955 |

|             |              |             |             |            |          |
|-------------|--------------|-------------|-------------|------------|----------|
| 0.002099011 | -0.14750316  | 0.001390917 | -0.18910465 | 3.91E-05   | -0.40886 |
| 0.017423688 | -0.108303169 | 0.019228625 | 0.077638271 | 0.0937752  | 0.192727 |
| 3.09E-07    | 0.230205923  | 4.93E-07    | -0.16671301 | 0.00029643 | 0.030487 |
| 5.18E-05    | 0.188997295  | 3.95E-05    | -0.26693611 | 4.64E-09   | 0.021835 |
| 0.074135095 | 0.082393823  | 0.075272675 | 0.096253704 | 0.03758834 | -0.26845 |
| 0.128137531 | -0.067807414 | 0.143443329 | 0.015715168 | 0.73482185 | -0.23297 |
| 0.001800661 | 0.148128651  | 0.001326263 | 0.101066385 | 0.02897664 | 0.217908 |
| 4.95E-05    | 0.18434262   | 6.14E-05    | 0.114378159 | 0.01338978 | -0.20482 |
| 0.016980793 | 0.11040027   | 0.017001472 | 0.029314133 | 0.52743793 | 0.55679  |
| 0.000616477 | 0.162157861  | 0.000434515 | -0.25312141 | 2.92E-08   | -0.18187 |
| 0.143445551 | 0.06382962   | 0.168488244 | -0.11516208 | 0.01276373 | -0.20226 |
| 0.262301728 | -0.047003547 | 0.310776829 | 0.015745458 | 0.73432998 | -0.25183 |
| 3.07E-09    | 0.271877269  | 2.34E-09    | -0.07509422 | 0.10507345 | -0.09001 |
| 4.28E-10    | 0.281624562  | 5.81E-10    | 0.153812149 | 0.0008534  | 0.051957 |
| 0.545079248 | 0.026711864  | 0.564747665 | -0.39820717 | 3.39E-19   | -0.29979 |
| 0.090087999 | 0.074882926  | 0.106058282 | -0.00357883 | 0.93851838 | -0.13235 |
| 0.938392954 | 0.00054672   | 0.990598703 | 0.160854599 | 0.00048387 | -0.23274 |
| 0.046548904 | 0.094242607  | 0.041783043 | 0.12769634  | 0.00571908 | -0.25691 |
| 5.52E-05    | 0.183368983  | 6.72E-05    | 0.018275152 | 0.69365201 | -0.35976 |
| 0.915480433 | -0.020130441 | 0.664360591 | -0.11427523 | 0.01347396 | -0.15923 |
| 0.034022493 | 0.096487543  | 0.037124628 | -0.29203263 | 1.24E-10   | -0.36099 |
| 0.021255711 | -0.108300256 | 0.019231888 | -0.14781474 | 0.00135836 | -0.15476 |
| 0.011370402 | 0.127430972  | 0.005821364 | 0.222737973 | 1.16E-06   | -0.03549 |
| 7.65E-13    | 0.327339641  | 3.99E-13    | -0.13973095 | 0.00247502 | -0.02711 |
| 9.25E-05    | 0.186975739  | 4.79E-05    | -0.14251237 | 0.00202027 | -0.03251 |
| 0.525203771 | 0.026447646  | 0.568605476 | -8.95E-05   | 0.99846154 | -0.32957 |
| 0.349590757 | 0.037691541  | 0.416431957 | 0.027511506 | 0.55314929 | -0.35929 |
| 4.15E-08    | 0.250802717  | 3.94E-08    | -0.17986128 | 9.29E-05   | -0.18293 |
| 0.00119453  | 0.147352719  | 0.001406893 | -0.03304839 | 0.47617852 | -0.18364 |
| 5.40E-06    | 0.207346719  | 6.24E-06    | -0.01938068 | 0.67613951 | -0.20831 |
| 0.924189888 | -0.000593571 | 0.989793101 | -0.12299021 | 0.0077949  | -0.15628 |
| 1.01E-05    | -0.20039329  | 1.28E-05    | 0.209183884 | 5.14E-06   | 0.204972 |
| 0.407328267 | 0.035143961  | 0.448650869 | -0.16107903 | 0.00047502 | -0.23491 |
| 5.72E-05    | 0.191707757  | 3.04E-05    | 0.203030646 | 9.78E-06   | 0.1791   |
| 0.113987834 | 0.073016125  | 0.115079508 | -0.20368923 | 9.14E-06   | -0.42939 |
| 1.44E-06    | 0.219319614  | 1.71E-06    | -0.06830553 | 0.14051906 | -0.32404 |
| 0.000175855 | -0.181817946 | 7.76E-05    | -0.07535016 | 0.10389023 | -0.06172 |
| 0.56572809  | 0.019995362  | 0.666476728 | -0.21739193 | 2.11E-06   | -0.18483 |
| 0.701322552 | -0.024650336 | 0.595175294 | -0.12165384 | 0.00849595 | -0.09284 |
| 0.008286017 | 0.127717201  | 0.005711109 | -0.06157566 | 0.18406054 | -0.13531 |
| 0.000704861 | 0.151942622  | 0.000988245 | 0.036286106 | 0.43403502 | -0.20115 |
| 1.36E-05    | -0.213378505 | 3.28E-06    | 0.139983957 | 0.00243009 | 0.218478 |
| 0.799880072 | 0.008207836  | 0.859586572 | 0.011284988 | 0.80783122 | -0.25815 |
| 0.228680109 | 0.057958818  | 0.211228276 | -0.06588823 | 0.15514647 | -0.14139 |
| 0.434920996 | -0.037458973 | 0.419315532 | -0.0690607  | 0.13617315 | -0.2993  |

|             |              |             |             |            |          |
|-------------|--------------|-------------|-------------|------------|----------|
| 0.000556738 | 0.158588391  | 0.000582291 | -0.03754373 | 0.41826331 | -0.23066 |
| 0.006078041 | 0.126508319  | 0.00618991  | -0.02173185 | 0.63947992 | -0.20041 |
| 0.43884912  | 0.036488704  | 0.431471363 | -0.22953324 | 5.33E-07   | -0.37928 |
| 0.14660332  | -0.078936069 | 0.088397738 | 0.140187951 | 0.00239441 | -0.16154 |
| 0.017534912 | 0.111259654  | 0.016156092 | 0.14073916  | 0.00230037 | -0.26211 |
| 0.019389329 | 0.100505781  | 0.029883664 | 0.211335885 | 4.09E-06   | -0.29792 |
| 0.001175775 | -0.15242305  | 0.000951833 | -0.13517004 | 0.00342619 | -0.04929 |
| 0.017066179 | -0.107321472 | 0.020355784 | 0.210236356 | 4.60E-06   | -0.19216 |
| 0.000123505 | -0.184159245 | 6.25E-05    | 0.142703767 | 0.00199198 | -0.24028 |
| 0.368796858 | -0.04716036  | 0.309163581 | -0.09997933 | 0.03075747 | -0.13369 |
| 0.015703145 | 0.102599048  | 0.026616541 | 0.16883662  | 0.00024719 | -0.21952 |
| 0.023731108 | 0.114961175  | 0.012921665 | -0.06039987 | 0.19259388 | -0.42929 |
| 0.066834697 | 0.081025811  | 0.080262166 | 0.158842877 | 0.00057038 | -0.14854 |
| 0.004352275 | -0.132245143 | 0.004199605 | -0.20196799 | 1.09E-05   | 0.104098 |
| 0.081925698 | 0.093620025  | 0.043159102 | 0.096122585 | 0.0378505  | -0.0532  |
| 7.86E-05    | 0.179382654  | 9.71E-05    | -0.01929335 | 0.67751667 | -0.15859 |
| 0.079978183 | 0.07948878   | 0.086184111 | 0.093652982 | 0.04308531 | -0.34312 |
| 0.298860425 | -0.039349998 | 0.396209478 | -0.15278379 | 0.00092531 | -0.39924 |
| 0.956946727 | 0.001232811  | 0.978802792 | -0.31578383 | 2.84E-12   | 0.055162 |
| 1.62E-10    | 0.295853527  | 6.90E-11    | -0.17935356 | 9.73E-05   | -0.0904  |
| 0.00903317  | -0.12078584  | 0.008980882 | -0.06222672 | 0.17945722 | -0.16184 |
| 0.373252739 | 0.047938405  | 0.30124099  | -0.34544013 | 1.56E-14   | -0.1912  |
| 0.190254369 | 0.06372071   | 0.169217278 | 0.052443853 | 0.2580288  | -0.08182 |
| 2.87E-06    | 0.219261324  | 1.72E-06    | -0.10743111 | 0.02022711 | -0.03308 |
| 0.017475062 | -0.114700073 | 0.013129497 | -0.01212414 | 0.7938516  | -0.56712 |
| 0.185489229 | 0.049856497  | 0.282289965 | -0.10182157 | 0.02779222 | -0.09888 |
| 0.681006811 | -0.02072294  | 0.655110224 | 0.09466714  | 0.0408661  | 0.269096 |
| 9.91E-05    | 0.1783938    | 0.00010622  | -0.368533   | 1.81E-16   | -0.19512 |
| 0.001159563 | 0.136105046  | 0.003207717 | -0.11435094 | 0.013412   | -0.15066 |
| 0.001389556 | 0.140018116  | 0.002424082 | -0.1297562  | 0.00497849 | -0.13253 |
| 0.334996246 | 0.040412076  | 0.383575151 | -0.17256294 | 0.00017877 | -0.27833 |
| 0.018264825 | 0.106096536  | 0.021842448 | -0.26903815 | 3.47E-09   | -0.30822 |
| 0.003122035 | -0.140447126 | 0.002349764 | -0.05595248 | 0.22749052 | -0.52548 |
| 0.002068335 | -0.144780686 | 0.001707471 | 0.064742318 | 0.16247085 | -0.33328 |
| 1.51E-07    | 0.240868144  | 1.37E-07    | -0.13273974 | 0.00405863 | -0.29851 |
| 0.222333262 | -0.05910464  | 0.202325572 | -0.06791106 | 0.14283102 | 0.118727 |
| 0.017121282 | 0.107444401  | 0.020211565 | 0.016388857 | 0.72390795 | -0.22078 |
| 2.26E-12    | 0.316633812  | 2.47E-12    | -0.15496651 | 0.00077886 | -0.31931 |
| 0.399841045 | 0.053431389  | 0.249160458 | -0.04104611 | 0.37615141 | -0.22027 |
| 0.000152018 | 0.176529261  | 0.000125686 | -0.22435998 | 9.68E-07   | -0.06385 |
| 0.379516465 | 0.057821929  | 0.212310451 | -0.26968263 | 3.17E-09   | -0.20615 |
| 1.51E-05    | 0.201326677  | 1.17E-05    | -0.04965442 | 0.28424764 | 0.015754 |
| 0.033372596 | 0.091267365  | 0.048708522 | 0.22626213  | 7.79E-07   | -0.12618 |
| 0.611531269 | 0.01263123   | 0.785435552 | 0.004136287 | 0.92896528 | -0.12144 |
| 3.03E-06    | 0.220411029  | 1.51E-06    | -0.04309884 | 0.3527287  | -0.18532 |



|             |              |             |             |            |          |
|-------------|--------------|-------------|-------------|------------|----------|
| 0.287077289 | 0.043152273  | 0.352131492 | -0.20428095 | 8.60E-06   | -0.31093 |
| 0.006458726 | 0.136813744  | 0.003050637 | 0.027662725 | 0.55096909 | -0.10133 |
| 0.000511284 | -0.160290365 | 0.000506814 | 0.051366346 | 0.26795136 | -0.4395  |
| 0.530598573 | 0.016946035  | 0.714923519 | 0.187889011 | 4.39E-05   | -0.28698 |
| 0.763931884 | 0.009156743  | 0.843551526 | -0.20155404 | 1.14E-05   | -0.22756 |
| 0.719518642 | 0.016830771  | 0.716778959 | -0.15519843 | 0.00076463 | -0.32799 |
| 0.115956728 | -0.070415527 | 0.128636446 | 0.093774355 | 0.04281449 | -0.26225 |
| 2.22E-12    | 0.328121568  | 3.49E-13    | -0.10985333 | 0.01755943 | -0.142   |
| 0.444949107 | 0.034819034  | 0.452859223 | -0.29531366 | 7.49E-11   | -0.41154 |
| 0.871792575 | 0.0146769    | 0.751746325 | -0.15749825 | 0.00063598 | -0.30592 |
| 7.80E-06    | -0.217035954 | 2.20E-06    | -0.05715568 | 0.21763451 | -0.15408 |
| 0.569020968 | 0.030747961  | 0.507429799 | -0.36408    | 4.39E-16   | -0.26736 |
| 0.048103431 | -0.087155795 | 0.059837696 | -0.05483982 | 0.23688338 | -0.36787 |
| 0.030516936 | -0.106119758 | 0.021813411 | -0.02815498 | 0.54390127 | -0.43612 |
| 0.252644362 | 0.039439005  | 0.395141154 | -0.02752936 | 0.55289161 | -0.17661 |
| 0.28166771  | 0.054007291  | 0.244087859 | -0.3148495  | 3.32E-12   | -0.21046 |
| 0.048041619 | -0.088458517 | 0.056103894 | 0.110195753 | 0.01720827 | -0.07296 |
| 0.035173755 | 0.098975629  | 0.032484103 | -0.32304374 | 8.36E-13   | -0.27764 |
| 0.84593855  | -0.016248819 | 0.726172072 | 0.052556184 | 0.25700918 | -0.20249 |
| 0.011697999 | 0.116262304  | 0.011928657 | 0.035050128 | 0.44986389 | -0.04696 |
| 6.13E-07    | 0.240217017  | 1.49E-07    | -0.20134296 | 1.16E-05   | -0.16605 |
| 6.28E-05    | 0.179605759  | 9.51E-05    | -0.11270959 | 0.01481308 | -0.19638 |
| 0.000981243 | 0.134565765  | 0.003574483 | 0.180423308 | 8.83E-05   | -0.23524 |
| 0.67223303  | -0.0269114   | 0.561842613 | -0.27058196 | 2.80E-09   | -0.36047 |
| 0.547525756 | -0.029767893 | 0.521062896 | -0.33289787 | 1.51E-13   | -0.06992 |
| 0.81099323  | -0.008662905 | 0.851888988 | -0.03819431 | 0.41023821 | -0.33421 |
| 0.49065874  | 0.037077412  | 0.424071715 | -0.11460566 | 0.01320537 | -0.11935 |
| 0.120608289 | -0.077790617 | 0.093130718 | -0.05603639 | 0.226793   | -0.41195 |
| 0.001675721 | -0.134610913 | 0.003563206 | 0.062401586 | 0.17823546 | -0.15023 |
| 4.42E-05    | 0.183511625  | 6.63E-05    | 0.095171893 | 0.03979807 | -0.15152 |
| 0.826313057 | 0.016392529  | 0.723848603 | 0.030014798 | 0.51761073 | -0.21505 |
| 0.012891165 | 0.12100822   | 0.008854352 | 0.073881916 | 0.1108235  | 0.001655 |
| 0.000975748 | 0.146240598  | 0.001530333 | -0.05741293 | 0.21556754 | -0.14719 |
| 0.80513725  | -0.01076499  | 0.816525062 | -0.11594267 | 0.01216613 | -0.03525 |
| 0.000262624 | 0.163585316  | 0.000385855 | -0.18737534 | 4.61E-05   | -0.23753 |
| 0.000848949 | 0.151057993  | 0.001058674 | 0.252132113 | 3.32E-08   | -0.08681 |
| 0.058624092 | -0.090580992 | 0.050435837 | -0.10118451 | 0.02878857 | -0.16561 |
| 0.670251234 | -0.026605927 | 0.566292927 | -0.15118797 | 0.00104804 | -0.27352 |
| 0.219198371 | -0.061689119 | 0.183252134 | 0.030595883 | 0.50953295 | -0.02752 |
| 9.35E-06    | -0.203590367 | 9.23E-06    | 0.069426725 | 0.13410427 | -0.27507 |
| 7.93E-13    | 0.33472474   | 1.09E-13    | -0.14559876 | 0.00160602 | 0.042774 |
| 0.286285245 | -0.050427684 | 0.276805746 | 0.139740822 | 0.00247325 | -0.40641 |
| 1.72E-09    | 0.27958043   | 7.82E-10    | 0.098898562 | 0.03262003 | -0.15163 |
| 0.302603289 | 0.054594444  | 0.238991034 | 0.365927163 | 3.04E-16   | 0.308971 |
| 0.36687651  | -0.046632692 | 0.314614073 | -0.30654417 | 1.28E-11   | -0.37029 |

|             |              |             |             |            |           |
|-------------|--------------|-------------|-------------|------------|-----------|
| 0.092089686 | -0.069278532 | 0.134938962 | -0.15019224 | 0.00113206 | -0.2007   |
| 0.103314966 | 0.076630898  | 0.098127009 | 0.059793018 | 0.19710989 | -0.23085  |
| 0.661843381 | 0.026906268  | 0.561917236 | -0.0366535  | 0.42939249 | -0.21905  |
| 0.00050005  | 0.163103731  | 0.000401674 | -0.12383069 | 0.00738091 | -0.31311  |
| 0.899957158 | 0.009236691  | 0.842203387 | 0.029013604 | 0.53168189 | 0.088361  |
| 1.44E-07    | 0.248293933  | 5.43E-08    | -0.12676926 | 0.00608361 | -0.03986  |
| 0.082845336 | 0.078595281  | 0.089785223 | -0.29328224 | 1.02E-10   | -0.1153   |
| 0.235397588 | -0.050421455 | 0.27686516  | 0.125940872 | 0.00642684 | -0.20016  |
| 0.468327716 | 0.028235395  | 0.542751039 | 0.233719394 | 3.25E-07   | -0.305    |
| 0.130754951 | -0.071545867 | 0.122599273 | -0.05797479 | 0.21110225 | -0.2543   |
| 0.000520333 | -0.162188582 | 0.00043341  | 0.016013735 | 0.72997826 | -0.11272  |
| 0.517485982 | -0.035019328 | 0.450262457 | -0.16837816 | 0.00025712 | -0.3196   |
| 0.830471985 | -0.014475455 | 0.755044146 | -0.06960271 | 0.13311826 | -0.23399  |
| 0.242649092 | 0.057999348  | 0.210908624 | -0.01284386 | 0.78191396 | -0.12946  |
| 0.564229839 | 0.017139583  | 0.71181169  | -0.26896431 | 3.51E-09   | -0.26154  |
| 0.202686723 | 0.06389545   | 0.168048723 | -0.2442763  | 9.00E-08   | -5.95E-05 |
| 0.521990208 | 0.023522692  | 0.612128477 | -0.12959777 | 0.00503222 | -0.34127  |
| 0.00898066  | 0.12053027   | 0.009128283 | -0.03539565 | 0.44540639 | -0.44055  |
| 0.058900854 | -0.09748438  | 0.035201932 | 0.039192198 | 0.39810779 | -0.30999  |
| 0.019363758 | 0.12446552   | 0.007081367 | -0.01584261 | 0.73275308 | 0.062015  |
| 0.067405913 | -0.087519282 | 0.058775785 | -0.21163768 | 3.96E-06   | -0.43732  |
| 1.58E-05    | 0.203356495  | 9.46E-06    | -0.18768602 | 4.48E-05   | -0.06597  |
| 0.744159893 | -0.011849776 | 0.798415315 | -0.10858815 | 0.01891177 | -0.12119  |
| 0.015018695 | -0.114980413 | 0.012906468 | 0.076229004 | 0.09990742 | -0.10881  |
| 0.4348684   | 0.041787272  | 0.367586144 | -0.35545298 | 2.36E-15   | -0.00501  |
| 3.37E-14    | 0.336430605  | 8.04E-14    | -0.11481035 | 0.01304137 | -0.22101  |
| 0.0249413   | 0.10656926   | 0.021257915 | 0.042803842 | 0.35603694 | 0.489704  |
| 0.000193891 | 0.166975692  | 0.00028988  | -0.02452921 | 0.59698605 | -0.09163  |
| 0.108245614 | 0.077052313  | 0.096287343 | 0.061548233 | 0.18425638 | 0.175244  |
| 0.016224257 | -0.105045107 | 0.023192755 | -0.13248906 | 0.00412954 | -0.21347  |
| 0.256045098 | -0.046718468 | 0.313723804 | 0.138001515 | 0.00280298 | -0.11501  |
| 6.02E-08    | -0.243761048 | 9.59E-08    | 0.022738829 | 0.62403715 | -0.05277  |
| 0.184004796 | -0.061105987 | 0.187435129 | -0.07193912 | 0.12055145 | -0.32499  |
| 0.001228933 | -0.143312756 | 0.001904359 | 0.048304291 | 0.29756229 | -0.33035  |
| 0.103692181 | -0.076775572 | 0.097492311 | -0.15372406 | 0.00085936 | -0.34205  |
| 0.001267494 | -0.150681824 | 0.001090003 | 0.285995695 | 3.06E-10   | -0.3174   |
| 0.044998981 | -0.095561345 | 0.038990232 | -0.09938261 | 0.03177425 | -0.34563  |
| 0.29418134  | 0.059205788  | 0.201552976 | 0.150013663 | 0.00114776 | 0.082451  |
| 6.07E-12    | 0.309065744  | 8.55E-12    | -0.11875073 | 0.01021569 | -0.16898  |
| 0.187692976 | -0.062335388 | 0.178697235 | -0.17359183 | 0.00016328 | -0.32526  |
| 0.009923932 | 0.11799419   | 0.010711792 | 0.007725622 | 0.86775784 | -0.20561  |
| 0.340044856 | 0.033080605  | 0.475748438 | -0.12756122 | 0.00577096 | 0.043968  |
| 0.001388389 | 0.153070917  | 0.00090469  | -0.28931609 | 1.86E-10   | -0.36282  |
| 0.027639916 | 0.099603891  | 0.031393902 | -0.08058548 | 0.08192401 | -0.32827  |
| 0.271194012 | 0.040457682  | 0.383038192 | 0.077300902 | 0.0952151  | -0.22288  |

|             |              |             |             |            |          |
|-------------|--------------|-------------|-------------|------------|----------|
| 0.000457928 | 0.158352072  | 0.000593559 | -0.15122322 | 0.00104518 | -0.42356 |
| 0.761507629 | 0.001010854  | 0.982618498 | -0.15408092 | 0.00083548 | -0.35396 |
| 0.060019641 | 0.085107454  | 0.066122268 | -0.28462237 | 3.75E-10   | -0.35241 |
| 0.113520513 | 0.072064775  | 0.119902746 | -0.22405303 | 1.00E-06   | -0.39874 |
| 0.20771913  | -0.056211789 | 0.225340023 | -0.10445845 | 0.02397712 | -0.10488 |
| 0.000300661 | 0.168533078  | 0.000253724 | -0.14437984 | 0.00175929 | -0.37554 |
| 0.002784542 | -0.148285012 | 0.001310538 | -0.11573754 | 0.01232074 | -0.04264 |
| 0.001363522 | -0.150605979 | 0.001096422 | 0.112710347 | 0.01481241 | -0.03818 |
| 0.61182722  | -0.029388531 | 0.52638998  | -0.22870591 | 5.87E-07   | 0.016677 |
| 0.024390057 | -0.115513609 | 0.012491479 | 0.070371355 | 0.12887696 | -0.21326 |
| 0.00954886  | -0.120693294 | 0.009034012 | 0.057690097 | 0.21335642 | -0.41252 |
| 0.176390389 | -0.064407858 | 0.16465689  | 0.223503193 | 1.07E-06   | -0.1831  |
| 0.512790631 | 0.03665233   | 0.429407241 | 0.102697158 | 0.02647127 | -0.00443 |
| 0.590518042 | 0.02299366   | 0.620154738 | 0.051054605 | 0.27087023 | -0.46707 |
| 0.20374445  | 0.049312643  | 0.287579564 | -0.09254549 | 0.04562386 | -0.2338  |
| 0.000671789 | 0.156016079  | 0.00071636  | -0.11830602 | 0.01050478 | -0.20352 |
| 0.107065815 | -0.083584213 | 0.071139137 | -0.01785916 | 0.70028473 | -0.35814 |
| 8.56E-07    | 0.234711546  | 2.89E-07    | -0.1740747  | 0.00015645 | -0.0995  |
| 4.55E-06    | 0.20847505   | 5.54E-06    | -0.28517794 | 3.45E-10   | -0.38486 |
| 0.000550999 | 0.146956958  | 0.001449732 | -0.19212061 | 2.92E-05   | -0.45856 |
| 0.003702533 | -0.139386794 | 0.002537351 | -0.101287   | 0.02862624 | -0.24165 |
| 0.844621611 | 0.005445056  | 0.90657939  | -0.14972195 | 0.00117386 | -0.3037  |
| 0.010052078 | 0.119489444  | 0.009751062 | -0.23171017 | 4.13E-07   | -0.29111 |
| 0.050773983 | 0.087930715  | 0.057592672 | -0.25956003 | 1.26E-08   | -0.39009 |
| 0.001196087 | 0.148376438  | 0.001301423 | -0.08529709 | 0.06551853 | -0.0545  |
| 0.830280909 | 0.005898835  | 0.898834046 | -0.28676343 | 2.73E-10   | -0.25409 |
| 0.008817625 | -0.122610562 | 0.007988611 | 0.001157743 | 0.98009325 | -0.38836 |
| 0.031587465 | -0.106055952 | 0.021893275 | -0.01471786 | 0.75107633 | -0.43723 |
| 0.255443933 | -0.048998509 | 0.290665052 | -0.11606166 | 0.01207725 | -0.37188 |
| 0.00214452  | 0.139072578  | 0.002595506 | -0.22400586 | 1.01E-06   | -0.26095 |
| 0.013511341 | 0.122702237  | 0.007941446 | -0.15519802 | 0.00076466 | -0.30348 |
| 0.009736971 | 0.101442374  | 0.02838164  | 0.165027612 | 0.00034188 | -0.20462 |
| 0.240068116 | -0.05667321  | 0.22154926  | -0.08644922 | 0.06194731 | -0.31245 |
| 0.795922962 | -0.01837637  | 0.692041654 | -0.00348857 | 0.94006609 | -0.03393 |
| 1.44E-10    | 0.294950917  | 7.92E-11    | 0.036573295 | 0.43040354 | -0.0797  |
| 0.0185698   | 0.087477442  | 0.058897218 | -0.04464971 | 0.33565658 | -0.25953 |
| 0.078681465 | 0.087160529  | 0.059823763 | -0.30788755 | 1.03E-11   | -0.19846 |
| 0.115144347 | 0.07155862   | 0.122532442 | 0.008994354 | 0.84629125 | 0.330685 |
| 0.17733719  | 0.070561386  | 0.127844715 | 0.091100556 | 0.04912369 | 0.244155 |
| 0.057909522 | -0.090383426 | 0.050942409 | -0.06850014 | 0.13938906 | -0.23037 |
| 0.368470894 | 0.053552302  | 0.248089393 | -0.3147357  | 3.38E-12   | -0.1615  |
| 0.431849445 | 0.020705145  | 0.655387287 | -0.21314195 | 3.36E-06   | -0.32652 |
| 1.10E-06    | 0.218018661  | 1.97E-06    | 0.099571569 | 0.03144922 | 0.016247 |
| 2.82E-07    | -0.231977657 | 4.00E-07    | -0.0984335  | 0.03345066 | -0.27138 |
| 0.249017553 | -0.05639084  | 0.223863606 | -0.05450967 | 0.23972225 | -0.06921 |

|             |              |             |             |            |          |
|-------------|--------------|-------------|-------------|------------|----------|
| 0.922750928 | -0.004795701 | 0.917678184 | -0.2056834  | 7.43E-06   | -0.37501 |
| 4.39E-06    | 0.198763026  | 1.51E-05    | -0.17262366 | 0.00017782 | -0.28976 |
| 0.000484158 | 0.161967954  | 0.000441403 | 0.109870454 | 0.01754172 | 0.167314 |
| 0.005511971 | 0.121561707  | 0.008546292 | -0.38222892 | 1.08E-17   | -0.11948 |
| 0.913774982 | 0.000508338  | 0.991258687 | -0.06024677 | 0.19372602 | -0.22008 |
| 0.078287171 | 0.080636477  | 0.08173012  | 0.265234939 | 5.85E-09   | 0.268651 |
| 0.003507978 | -0.137884315 | 0.002826579 | 0.402072134 | 1.43E-19   | -0.1385  |
| 0.868151511 | -0.002313157 | 0.960238862 | 0.01918149  | 0.67928232 | -0.24023 |
| 0.92198306  | -0.002959442 | 0.949143151 | 0.027048884 | 0.55984518 | -0.2042  |
| 0.549161466 | -0.023231032 | 0.616547769 | -0.28925138 | 1.88E-10   | -0.25708 |
| 0.319581649 | 0.053823615  | 0.245697777 | -0.0462072  | 0.31905479 | -0.10797 |
| 0.004036194 | 0.13579094   | 0.003279658 | -0.22650927 | 7.57E-07   | -0.18328 |
| 0.224312002 | 0.062194603  | 0.179682264 | -0.26045153 | 1.12E-08   | -0.26917 |
| 0.006109351 | 0.127242547  | 0.005894986 | -0.22622703 | 7.82E-07   | -0.25595 |
| 0.000204396 | -0.175843954 | 0.000133647 | -0.07318958 | 0.11421676 | -0.08448 |
| 2.28E-05    | 0.195179762  | 2.16E-05    | -0.02449467 | 0.5975029  | -0.17515 |
| 0.015594797 | -0.123647293 | 0.007469531 | -0.20419593 | 8.67E-06   | -0.48417 |
| 0.09376938  | -0.076033976 | 0.100780615 | 0.061441277 | 0.18502148 | -0.37712 |
| 0.460817366 | -0.030734658 | 0.507613589 | -0.10016652 | 0.03044429 | -0.37353 |
| 8.78E-06    | -0.200562132 | 1.26E-05    | 0.0737686   | 0.11137338 | -0.24498 |
| 0.027221699 | -0.104082108 | 0.024492288 | -0.05015168 | 0.27944667 | -0.17634 |
| 0.194069437 | -0.056087243 | 0.226371092 | -0.03219869 | 0.48759772 | -0.28713 |
| 0.938946214 | -0.004727074 | 0.91885213  | -0.13628468 | 0.00316722 | 0.246083 |
| 0.001606144 | -0.148328212 | 0.001306224 | -0.1771713  | 0.00011863 | -0.35317 |
| 0.214779428 | -0.053443025 | 0.249057243 | -0.24849262 | 5.29E-08   | -0.37327 |
| 0.074664128 | 0.075293141  | 0.104152899 | -0.02153724 | 0.64248279 | 0.423828 |
| 0.41540365  | 0.041834027  | 0.367049912 | -0.26187956 | 9.21E-09   | -0.09603 |
| 3.03E-05    | 0.201126525  | 1.19E-05    | -0.14105603 | 0.00224785 | -0.27506 |
| 0.846192648 | 0.000957503  | 0.983535726 | -0.24703532 | 6.37E-08   | -0.26712 |
| 0.473918467 | -0.038782074 | 0.403066996 | 0.052825617 | 0.25457492 | -0.39586 |
| 6.79E-12    | 0.314737256  | 3.38E-12    | 0.145352725 | 0.00163594 | -0.1154  |
| 0.154205146 | 0.056581057  | 0.222302672 | 0.117511113 | 0.01103963 | -0.1834  |
| 0.04777915  | -0.089684032 | 0.052769953 | 0.190559853 | 3.40E-05   | -0.25349 |
| 0.633500068 | -0.018141852 | 0.695774872 | -0.04886989 | 0.29193474 | -0.46649 |
| 0.573067097 | -0.030393832 | 0.51233422  | 0.01390248  | 0.76444837 | -0.06544 |
| 0.048372857 | 0.09482236   | 0.040535117 | 0.125287964 | 0.00670949 | 0.135785 |
| 0.003635407 | -0.139386178 | 0.002537464 | 0.04911802  | 0.28948859 | 0.00806  |
| 0.032558649 | -0.111962089 | 0.015492688 | -0.02203294 | 0.63484578 | -0.12784 |
| 0.63129069  | 0.022343029  | 0.63008794  | 0.0542951   | 0.24158008 | -0.36001 |
| 0.013210754 | 0.118917513  | 0.010109106 | 0.141302208 | 0.00220781 | -0.01664 |
| 0.029667447 | 0.094938353  | 0.040289259 | -0.19589066 | 2.01E-05   | 0.006287 |
| 0.442431797 | -0.037558517 | 0.418079866 | -0.20298176 | 9.83E-06   | -0.32754 |
| 0.621946504 | 0.005176513  | 0.911167264 | -0.15278637 | 0.00092512 | -0.19461 |
| 0.173008524 | -0.060681826 | 0.190521622 | -0.02591332 | 0.57644518 | 0.397289 |
| 0.007406964 | 0.144037287  | 0.001804721 | -0.07087688 | 0.12614513 | 0.263889 |

|             |              |             |             |            |          |
|-------------|--------------|-------------|-------------|------------|----------|
| 0.334474534 | 0.043714128  | 0.345891038 | -0.02445799 | 0.59805189 | -0.10011 |
| 0.006479268 | -0.117312051 | 0.011177289 | -0.1379503  | 0.00281327 | -0.15579 |
| 0.016669952 | 0.103650343  | 0.025095067 | -0.01254185 | 0.78691715 | -0.12782 |
| 0.004991042 | 0.114391883  | 0.013378596 | -0.20066188 | 1.25E-05   | -0.16887 |
| 0.018770322 | -0.11707319  | 0.011344474 | -0.01128439 | 0.80784119 | -0.21077 |
| 0.27579777  | -0.054816945 | 0.237079298 | -0.16823192 | 0.00026037 | -0.21099 |
| 0.002910444 | -0.151122075 | 0.001053421 | -0.1555779  | 0.00074187 | -0.13578 |
| 0.555956105 | -0.029371093 | 0.526635506 | -0.00811921 | 0.8610873  | -0.23923 |
| 0.019028338 | -0.119429514 | 0.009788044 | -0.23500869 | 2.79E-07   | -0.18208 |
| 0.230212168 | -0.049073728 | 0.289924223 | -0.3133018  | 4.28E-12   | -0.35309 |
| 1.96E-05    | 0.197513421  | 1.71E-05    | 0.155665853 | 0.00073668 | -0.30676 |
| 0.235493201 | 0.064327328  | 0.165186518 | -0.37330486 | 6.87E-17   | -0.15397 |
| 0.068172711 | 0.081802644  | 0.077396986 | -0.29583196 | 6.92E-11   | -0.27828 |
| 0.012866773 | 0.110894503  | 0.016510685 | 0.242984073 | 1.06E-07   | -0.04158 |
| 0.013700558 | 0.122753704  | 0.007915077 | -0.06168314 | 0.18329463 | -0.1246  |
| 0.028282645 | 0.103053222  | 0.025949764 | 0.139638373 | 0.00249165 | -0.052   |
| 0.101308552 | 0.072718915  | 0.116569706 | -0.02423396 | 0.60141031 | -0.31616 |
| 0.163363208 | -0.057407461 | 0.215611372 | 0.263944281 | 6.97E-09   | 0.17772  |
| 3.03E-11    | 0.300491185  | 3.35E-11    | 0.300987644 | 3.10E-11   | -0.13795 |
| 0.557217874 | -0.018650865 | 0.687681518 | 0.030596958 | 0.50951808 | -0.20392 |
| 0.223971236 | 0.051360048  | 0.268010115 | 0.165136995 | 0.00033875 | 0.012989 |
| 0.213993176 | -0.050320557 | 0.277828761 | -0.11610793 | 0.01204283 | 0.08125  |
| 0.224215477 | 0.061310399  | 0.185960891 | -0.10672103 | 0.02107316 | -0.3654  |
| 5.44E-07    | -0.244526123 | 8.72E-08    | -0.0413475  | 0.37265368 | 0.003648 |
| 0.410248938 | 0.029384201  | 0.526450943 | -0.00442988 | 0.92393808 | -0.21131 |
| 0.47036526  | 0.029221483  | 0.528744464 | -0.12310888 | 0.00773522 | -0.02899 |
| 2.24E-07    | 0.234372428  | 3.01E-07    | -0.00917574 | 0.84323112 | -0.22981 |
| 0.015453797 | -0.117471897 | 0.011066632 | -0.06855949 | 0.13904584 | -0.23827 |
| 0.291180723 | 0.048225358  | 0.298353362 | 0.25444029  | 2.46E-08   | -0.10837 |
| 0.089203822 | 0.091736421  | 0.047556806 | 0.003417458 | 0.94128555 | -0.20234 |
| 0.278989188 | 0.041196784  | 0.374400218 | -0.22181816 | 1.29E-06   | -0.30214 |
| 0.901351006 | 0.004417757  | 0.92414553  | -0.1229107  | 0.00783512 | -0.19988 |
| 0.109502449 | -0.081728418 | 0.077667116 | -0.21343094 | 3.26E-06   | -0.3872  |
| 0.001859089 | -0.14651589  | 0.001498884 | 0.071283535 | 0.12398035 | -0.2863  |
| 0.810792397 | -0.005026357 | 0.913733867 | -0.04700983 | 0.31071208 | -0.045   |
| 0.166164572 | 0.054728671  | 0.23783646  | -0.1037047  | 0.02501849 | -0.24107 |
| 0.985429751 | 0.002276192  | 0.960873734 | -0.25727017 | 1.70E-08   | -0.25339 |
| 0.026512439 | 0.104461876  | 0.02397248  | -0.04977555 | 0.28307305 | 0.177643 |
| 0.70968694  | 0.023783342  | 0.60819093  | -0.11321546 | 0.01436815 | -0.24023 |
| 0.004452459 | -0.132699946 | 0.004069814 | -0.16106534 | 0.00047555 | -0.35139 |
| 0.071240553 | -0.081461824 | 0.078643634 | -0.16273651 | 0.00041414 | -0.06013 |
| 0.000236582 | -0.164780361 | 0.000349074 | 0.012873636 | 0.78142112 | -0.20765 |
| 5.45E-12    | 0.307604312  | 1.08E-11    | 0.015957883 | 0.73088353 | 0.258522 |
| 0.00070694  | 0.153323194  | 0.000886924 | 0.093924245 | 0.042482   | -0.15064 |
| 0.466671945 | -0.030319099 | 0.513372366 | -0.15490303 | 0.0007828  | -0.32339 |

|             |              |             |             |            |          |
|-------------|--------------|-------------|-------------|------------|----------|
| 0.283169689 | -0.045007507 | 0.331794468 | -0.2808762  | 6.48E-10   | -0.43172 |
| 0.008084872 | 0.127527817  | 0.005783847 | -0.21949466 | 1.68E-06   | -0.09603 |
| 0.324313213 | -0.050918313 | 0.272153152 | -0.03196284 | 0.49079321 | -0.0539  |
| 0.300319582 | -0.047977774 | 0.300843722 | -0.37371075 | 6.32E-17   | -0.35961 |
| 0.014939177 | -0.117505244 | 0.011043669 | 0.017900116 | 0.69963072 | 0.147552 |
| 0.064043113 | 0.08309095   | 0.072828879 | -0.20767069 | 6.03E-06   | -0.30899 |
| 0.095177248 | -0.087338387 | 0.059302297 | 0.039467402 | 0.39480067 | 0.007011 |
| 0.035882351 | 0.09420878   | 0.041856847 | -0.21725344 | 2.15E-06   | -0.33272 |
| 0.672948344 | -0.027601585 | 0.551850072 | -0.19403214 | 2.42E-05   | -0.39172 |
| 2.74E-07    | 0.225721719  | 8.28E-07    | -0.07444241 | 0.10813499 | -0.32195 |
| 3.47E-05    | -0.186830815 | 4.86E-05    | -0.1290677  | 0.00521581 | -0.36271 |
| 5.13E-06    | 0.206066397  | 7.14E-06    | -0.04462474 | 0.33592719 | -0.14206 |
| 0.533513263 | -0.029090689 | 0.530591684 | -0.10565505 | 0.02240089 | -0.25429 |
| 0.08777643  | 0.086139713  | 0.062890538 | 0.011830626 | 0.79873411 | 0.246408 |
| 0.469862382 | 0.034482145  | 0.457245879 | 0.098497744 | 0.03333486 | -0.00711 |
| 0.040744193 | -0.101140294 | 0.028858846 | 0.060740991 | 0.19008887 | -0.37992 |
| 0.213813045 | -0.066575423 | 0.150875637 | 0.125820072 | 0.00647832 | -0.17131 |
| 0.84667386  | 0.004886962  | 0.91611734  | -0.18036857 | 8.87E-05   | -0.24731 |
| 2.46E-06    | 0.211739767  | 3.91E-06    | -0.04310786 | 0.35262775 | -0.03126 |
| 0.924762275 | -0.00132381  | 0.977238548 | -0.11467273 | 0.01315143 | -0.37185 |
| 3.89E-06    | 0.213929269  | 3.09E-06    | 0.0165582   | 0.72117322 | -0.10408 |
| 0.166160124 | 0.071188251  | 0.124484965 | -0.30571649 | 1.47E-11   | -0.15222 |
| 0.292154247 | -0.056490384 | 0.22304577  | 0.059955707 | 0.19589169 | -0.23962 |
| 0.018704521 | -0.110721469 | 0.016681083 | 0.045471096 | 0.32683321 | -0.04839 |
| 0.650485247 | 0.018455408  | 0.690785153 | -0.19171778 | 3.04E-05   | -0.30578 |
| 0.118988009 | 0.074473249  | 0.107988556 | -0.23374183 | 3.25E-07   | 0.072483 |
| 0.048191309 | 0.08780463   | 0.057953125 | -0.14095111 | 0.00226512 | 0.110529 |
| 0.151754331 | 0.074369668  | 0.108480963 | 0.135641208 | 0.00331447 | 0.206118 |
| 0.006942779 | -0.113880398 | 0.013801208 | -0.27674375 | 1.17E-09   | -0.08244 |
| 0.040841683 | -0.095053399 | 0.040046654 | 0.008422641 | 0.85595141 | -0.28524 |
| 0.729848314 | -0.021691174 | 0.640107126 | 0.0129567   | 0.78004684 | -0.48976 |
| 0.000138563 | 0.166071112  | 0.000313034 | 0.009369628 | 0.83996272 | -0.32585 |
| 0.064037314 | 0.082077068  | 0.07640491  | -0.05744045 | 0.21534729 | -0.34644 |
| 0.165531084 | 0.06292834   | 0.174592462 | -0.04176607 | 0.36782952 | -0.36228 |
| 0.393591715 | -0.041581195 | 0.369955419 | 0.065243255 | 0.15923762 | -0.13586 |
| 0.052379384 | 0.083172655  | 0.072546744 | -0.15990963 | 0.00052286 | -0.16144 |
| 0.242412577 | -0.052987854 | 0.253116898 | -0.03035299 | 0.51290143 | -0.31338 |
| 0.027290165 | 0.09634496   | 0.037406796 | -0.29506757 | 7.78E-11   | -0.37042 |
| 0.33155627  | -0.050332784 | 0.277711868 | -0.10224817 | 0.02714172 | -0.39682 |
| 0.329152924 | 0.037324599  | 0.420986928 | -0.13284803 | 0.00402834 | -0.18049 |
| 1.58E-12    | 0.308803431  | 8.92E-12    | 0.008988865 | 0.8463839  | -0.18929 |
| 0.582917034 | -0.028364754 | 0.540903146 | 0.210770733 | 4.34E-06   | -0.02348 |
| 0.04295229  | 0.091072375  | 0.049194121 | 0.133959628 | 0.00372905 | -0.0914  |
| 0.000440047 | 0.16183413   | 0.000446317 | -0.27444196 | 1.63E-09   | -0.27398 |
| 0.05035344  | -0.094007552 | 0.042298159 | -0.29341867 | 1.00E-10   | -0.05441 |

|             |              |             |             |            |          |
|-------------|--------------|-------------|-------------|------------|----------|
| 0.015136088 | 0.104678199  | 0.023680672 | -0.08765453 | 0.05838466 | -0.1586  |
| 0.286426444 | 0.034923689  | 0.451501347 | -0.31022863 | 7.08E-12   | -0.1641  |
| 8.64E-07    | 0.235556659  | 2.61E-07    | 0.058349086 | 0.20816484 | 0.208378 |
| 0.010859527 | 0.11898232   | 0.010067957 | 0.040975139 | 0.37697792 | -0.14808 |
| 0.600847042 | -0.021494898 | 0.643136923 | -0.02484866 | 0.59221591 | -0.28799 |
| 0.032971176 | 0.090972065  | 0.049445506 | -0.06359212 | 0.17008108 | -0.2325  |
| 0.091345301 | -0.071988475 | 0.120296314 | -0.04237358 | 0.36089706 | -0.26788 |
| 0.690122245 | -0.018902611 | 0.683691801 | -0.00395999 | 0.93198543 | -0.30057 |
| 7.35E-06    | 0.193026351  | 2.67E-05    | 0.023300497 | 0.61549395 | 0.045134 |
| 0.967238773 | -0.007071136 | 0.878870727 | -0.31468487 | 3.41E-12   | -0.37337 |
| 0.013202468 | -0.118675248 | 0.010264257 | -0.36777617 | 2.10E-16   | -0.07322 |
| 0.000245477 | 0.175721264  | 0.000135122 | -0.1569687  | 0.00066369 | -0.42668 |
| 0.499608754 | -0.027344353 | 0.555564096 | -0.2525114  | 3.16E-08   | -0.27596 |
| 0.011778261 | 0.110707176  | 0.016695227 | 0.142531002 | 0.0020175  | -0.17259 |
| 0.061858917 | 0.080235275  | 0.083265456 | -0.29547959 | 7.30E-11   | -0.37937 |
| 0.031151755 | 0.099969896  | 0.030773324 | 0.066349027 | 0.1522727  | -0.23191 |
| 0.000792136 | -0.153842018 | 0.000851395 | 0.003568157 | 0.9387014  | -0.03568 |
| 0.182691204 | -0.057852074 | 0.2120718   | -0.00252779 | 0.95655304 | 0.022118 |
| 7.04E-05    | -0.179950015 | 9.22E-05    | -0.12965635 | 0.00501229 | -0.16463 |
| 0.328037023 | -0.037944029 | 0.413314639 | 0.107277359 | 0.02040776 | -0.21144 |
| 6.00E-05    | 0.185060736  | 5.74E-05    | -0.33013341 | 2.45E-13   | -0.16206 |
| 7.44E-10    | 0.286142201  | 2.99E-10    | -0.15405632 | 0.00083711 | -0.05793 |
| 0.033349748 | 0.095416347  | 0.039289363 | -0.06622952 | 0.15301408 | -0.30231 |
| 0.007555248 | 0.12066925   | 0.009047861 | -0.2602934  | 1.14E-08   | -0.08229 |
| 3.23E-06    | 0.209294744  | 5.08E-06    | -0.22793206 | 6.42E-07   | -0.30696 |
| 8.92E-05    | 0.179228769  | 9.85E-05    | -0.18535644 | 5.58E-05   | -0.05453 |
| 0.000116484 | 0.190551796  | 3.40E-05    | -0.3389297  | 5.13E-14   | 0.010882 |
| 6.25E-12    | 0.310636763  | 6.63E-12    | -0.21218102 | 3.73E-06   | -0.34326 |
| 0.009187902 | 0.125426682  | 0.006648526 | -0.27686924 | 1.15E-09   | -0.24587 |
| 0.007262669 | -0.121566131 | 0.008543869 | -0.20780815 | 5.95E-06   | -0.26873 |
| 0.003193885 | -0.143994503 | 0.001810469 | -0.09738143 | 0.0353965  | -0.01438 |
| 0.000199138 | 0.162333177  | 0.000428245 | -0.17884386 | 0.00010197 | -0.30679 |
| 4.20E-06    | 0.215360888  | 2.64E-06    | -0.21551372 | 2.60E-06   | -0.24027 |
| 0.037228271 | -0.098443559 | 0.03343251  | 0.009235247 | 0.84222772 | -0.27715 |
| 0.025872884 | 0.107608567  | 0.020020351 | 0.158118474 | 0.0006049  | -0.27781 |
| 0.356436834 | 0.038208963  | 0.410058513 | 0.039522487 | 0.39414071 | -0.2674  |
| 0.059224933 | -0.097400675 | 0.035360058 | -0.01238248 | 0.789561   | -0.31252 |
| 0.43974205  | -0.053519388 | 0.248380631 | -0.09162952 | 0.04781725 | -0.04073 |
| 0.800657166 | 0.011948247  | 0.796776588 | 0.106720011 | 0.02107439 | -0.1956  |
| 0.00764074  | -0.131242904 | 0.004498926 | -0.19690375 | 1.82E-05   | -0.22829 |
| 0.011369034 | -0.108678885 | 0.01881185  | 0.130114472 | 0.00485889 | -0.2072  |
| 0.214654941 | -0.071993253 | 0.120271636 | -0.16595994 | 0.000316   | -0.26957 |
| 6.32E-07    | 0.235144159  | 2.75E-07    | 0.00103718  | 0.9821659  | -0.30456 |
| 0.21991205  | 0.058467034  | 0.207245349 | -0.22997798 | 5.06E-07   | -0.25731 |
| 0.089790178 | 0.085744002  | 0.064113677 | -0.07855322 | 0.08995768 | -0.00743 |

|             |              |             |             |            |          |
|-------------|--------------|-------------|-------------|------------|----------|
| 0.009469213 | -0.123279491 | 0.007650129 | -0.16116439 | 0.00047169 | -0.39442 |
| 8.81E-07    | 0.217829006  | 2.02E-06    | -0.17875661 | 0.00010278 | -0.28702 |
| 0.71309054  | 0.014508383  | 0.754504779 | -0.04020544 | 0.38601377 | -0.02657 |
| 0.929257785 | 0.003042003  | 0.94772637  | -0.34965764 | 7.09E-15   | -0.20665 |
| 0.743411461 | 0.011321629  | 0.807219512 | -0.21292378 | 3.45E-06   | -0.17356 |
| 0.123802948 | 0.080761946  | 0.081254697 | -0.00363612 | 0.93753621 | -0.14486 |
| 0.234196312 | 0.056847799  | 0.220126886 | -0.12671784 | 0.00610443 | -0.15635 |
| 0.066380371 | 0.081774571  | 0.077499062 | -0.34728573 | 1.10E-14   | -0.21135 |
| 0.119530079 | 0.089071872  | 0.054414068 | -0.14276202 | 0.00198344 | -0.23259 |
| 0.068878439 | 0.089118461  | 0.054287462 | 0.085867876 | 0.06372869 | -0.25532 |
| 1.09E-08    | 0.26774727   | 4.15E-09    | -0.35351798 | 3.41E-15   | -0.03235 |
| 0.101313152 | 0.075959635  | 0.101115051 | -0.0068971  | 0.88182989 | -0.44586 |
| 0.014637499 | 0.113682195  | 0.013968105 | -0.40131657 | 1.69E-19   | -0.14212 |
| 0.003477663 | 0.129640718  | 0.005017603 | 0.115867234 | 0.01222279 | -0.12208 |
| 0.525757068 | -0.028277317 | 0.542151847 | 0.029525954 | 0.52445705 | -0.10691 |
| 0.34746762  | -0.041714282 | 0.368424226 | -0.10389397 | 0.0247534  | 0.408836 |
| 0.013190809 | 0.11329075   | 0.014302945 | -0.00312483 | 0.94630512 | 0.38797  |
| 0.010447197 | -0.11837376  | 0.010460282 | -0.11404065 | 0.01366756 | -0.00567 |
| 0.88268765  | 0.004979997  | 0.914526481 | 0.043124219 | 0.35244494 | -0.38943 |
| 0.000209379 | 0.171376416  | 0.000198345 | 0.137254352 | 0.00295654 | 0.052639 |
| 0.112341579 | 0.077035386  | 0.096360703 | 0.02594378  | 0.57599694 | -0.02048 |
| 4.26E-07    | -0.241563853 | 1.26E-07    | 0.110549903 | 0.01685155 | -0.22088 |
| 0.112954189 | 0.068732602  | 0.138048426 | 0.12122081  | 0.00873488 | -0.05263 |
| 0.010883029 | 0.123065282  | 0.007757099 | -0.11499875 | 0.012892   | -0.2123  |
| 6.79E-05    | -0.183558148 | 6.61E-05    | -0.0599981  | 0.19557516 | -0.32021 |
| 0.006053213 | 0.126375617  | 0.006244604 | 0.205518608 | 7.56E-06   | 0.056262 |
| 0.107426473 | 0.063304902  | 0.172022348 | 0.016765254 | 0.71783435 | -0.13254 |
| 0.863749502 | -0.00953967  | 0.837098527 | -0.11172868 | 0.01571043 | -0.04739 |
| 0.000456465 | 0.167299048  | 0.000281999 | 0.050836927 | 0.27292122 | -0.23281 |
| 0.088656792 | -0.082953786 | 0.073304527 | -0.07388569 | 0.11080521 | -0.33994 |
| 0.033659525 | -0.095828176 | 0.038444796 | -0.11867074 | 0.01026716 | -0.42693 |
| 0.629113658 | -0.030195281 | 0.515094752 | -0.28994068 | 1.70E-10   | -0.27108 |
| 0.077661904 | -0.074342207 | 0.108611804 | -0.14813829 | 0.00132529 | -0.44317 |
| 0.265029597 | -0.057044109 | 0.218535365 | -0.06425307 | 0.16567606 | -0.38709 |
| 9.17E-14    | 0.33048476   | 2.31E-13    | -0.22511262 | 8.88E-07   | -0.18322 |
| 0.858317583 | -0.007055303 | 0.879139863 | -0.03861411 | 0.40510862 | -0.38735 |
| 0.45711943  | 0.035878822  | 0.43921525  | -0.15458191 | 0.000803   | -0.39074 |
| 0.120269958 | -0.078491294 | 0.090212058 | -0.03379855 | 0.46621966 | -0.32558 |
| 0.05754658  | -0.086543535 | 0.061662215 | -0.23945794 | 1.63E-07   | -0.35089 |
| 0.029684587 | -0.113309457 | 0.014286784 | 0.007051939 | 0.87919705 | -0.213   |
| 2.01E-07    | 0.25014401   | 4.29E-08    | -0.069656   | 0.13282074 | -0.15611 |
| 0.008552486 | 0.12032779   | 0.009246589 | -0.27311539 | 1.96E-09   | -0.16176 |
| 0.589833048 | 0.015904284  | 0.731752623 | -0.07434954 | 0.10857686 | -0.22584 |
| 3.55E-05    | -0.198341689 | 1.58E-05    | -0.06236389 | 0.17849829 | 0.072256 |
| 0.135783287 | -0.066511323 | 0.151270196 | 0.15088741  | 0.00107278 | -0.22493 |



|             |              |             |             |            |          |
|-------------|--------------|-------------|-------------|------------|----------|
| 0.010834873 | -0.116432098 | 0.011804178 | 0.128631041 | 0.00537155 | -0.09494 |
| 0.205352697 | -0.061305247 | 0.185997936 | -0.18785777 | 4.40E-05   | -0.23661 |
| 0.022291959 | 0.107191104  | 0.020509708 | -0.06013309 | 0.19456977 | -0.10612 |
| 0.004377703 | 0.129829705  | 0.004953738 | 0.159138351 | 0.00055683 | -0.07971 |
| 0.556453738 | 0.028348372  | 0.541136989 | -0.32719949 | 4.09E-13   | -0.17069 |
| 0.341150546 | -0.037661872 | 0.416799159 | -0.03120941 | 0.50107612 | -0.04745 |
| 0.638464823 | -0.016839378 | 0.716640354 | -0.08368861 | 0.07078566 | -0.1305  |
| 0.896301313 | 0.007994029  | 0.863207801 | -0.14733674 | 0.0014086  | -0.1795  |
| 0.185547091 | -0.064431431 | 0.164502097 | -0.26842594 | 3.78E-09   | -0.11021 |
| 0.845040812 | -0.004294308 | 0.926259071 | 0.140018696 | 0.00242398 | 0.340202 |
| 0.001336955 | 0.144316356  | 0.001767634 | 0.02779515  | 0.54906332 | -0.01743 |
| 0.000274814 | 0.169441529  | 0.000234627 | 0.04140485  | 0.37199036 | 0.124482 |
| 1.23E-05    | 0.202332102  | 1.05E-05    | -0.23207793 | 3.95E-07   | -0.36909 |
| 0.281703868 | 0.03579541   | 0.440280507 | 0.03632103  | 0.43359248 | -0.21038 |
| 0.009052194 | 0.13016895   | 0.00484093  | -0.20652671 | 6.80E-06   | -0.26117 |
| 0.890427555 | 0.000507525  | 0.991272657 | 0.17401927  | 0.00015722 | -0.17392 |
| 0.199051743 | 0.064761478  | 0.162346277 | -0.26312235 | 7.79E-09   | -0.39054 |
| 0.000290392 | -0.162325757 | 0.000428509 | -0.10639225 | 0.02147518 | -0.15604 |
| 0.261414695 | 0.047882852  | 0.30180216  | -0.30868612 | 9.09E-12   | -0.17476 |
| 0.964772287 | -0.004822991 | 0.917211401 | -0.34123311 | 3.37E-14   | -0.38459 |
| 0.4619235   | -0.037299778 | 0.421296087 | 0.234184704 | 3.08E-07   | 0.033937 |
| 0.14454963  | -0.076718487 | 0.097742358 | -0.00863414 | 0.85237509 | -0.07777 |
| 0.779895084 | 0.027476681  | 0.553651975 | 0.214282956 | 2.97E-06   | 0.183814 |
| 0.000755101 | 0.159244002  | 0.00055206  | -0.04958046 | 0.28496643 | -0.08661 |
| 0.492176126 | 0.03435693   | 0.45888235  | -0.11251711 | 0.01498553 | -0.133   |
| 0.767548246 | 0.015473085  | 0.73875686  | -0.2379419  | 1.96E-07   | -0.24333 |
| 4.77E-13    | -0.332109838 | 1.73E-13    | 0.001840194 | 0.96836388 | -0.40959 |
| 0.534954089 | 0.019079237  | 0.680897824 | -0.19625122 | 1.94E-05   | -0.52465 |
| 0.297071474 | 0.05023783   | 0.278620529 | -0.20970807 | 4.86E-06   | -0.24399 |
| 0.065316093 | -0.089151967 | 0.054196559 | -0.19580578 | 2.03E-05   | -0.50877 |
| 5.79E-05    | 0.193675409  | 2.51E-05    | -0.17904152 | 0.00010015 | -0.23478 |
| 0.354863897 | -0.042257382 | 0.362216618 | 0.026563833 | 0.5669075  | -0.35712 |
| 1.90E-07    | -0.231303506 | 4.33E-07    | 0.11811942  | 0.01062823 | -0.00566 |
| 0.819884723 | -0.011114212 | 0.81068388  | -0.16680067 | 0.00029423 | -0.03228 |
| 0.000723831 | -0.167353345 | 0.000280695 | -0.12462502 | 0.00700784 | -0.21478 |
| 0.830490363 | -0.021568641 | 0.641997893 | -0.17985082 | 9.30E-05   | -0.3553  |
| 0.010666201 | -0.127069003 | 0.005963532 | -0.28690448 | 2.67E-10   | -0.05917 |
| 0.645443299 | 0.012831749  | 0.782114387 | -0.14583305 | 0.001578   | -0.15744 |
| 0.044297291 | -0.091157542 | 0.048981528 | 0.173303666 | 0.00016748 | -0.25246 |
| 0.46968807  | 0.034838863  | 0.452601773 | -0.12185757 | 0.00838557 | -0.34923 |
| 0.27428841  | -0.051329473 | 0.268295473 | -0.07399118 | 0.1102953  | -0.08667 |
| 0.619556492 | -0.025316109 | 0.585267329 | 0.204016589 | 8.84E-06   | 0.03186  |
| 0.022280412 | -0.108168072 | 0.019380441 | 0.083464214 | 0.07154723 | -0.00408 |
| 0.030735178 | -0.106824957 | 0.020947437 | -0.0579587  | 0.21122917 | -0.39742 |
| 0.312230193 | -0.051385939 | 0.267768627 | -0.37331288 | 6.86E-17   | -0.24395 |

|             |              |             |             |            |          |
|-------------|--------------|-------------|-------------|------------|----------|
| 0.003649676 | -0.136076875 | 0.00321411  | -0.07066289 | 0.12729597 | -0.56359 |
| 6.02E-09    | 0.261447096  | 9.76E-09    | -0.09667092 | 0.03676439 | -0.12182 |
| 0.088539229 | -0.083386568 | 0.071812313 | -0.26327723 | 7.63E-09   | -0.37428 |
| 0.876265608 | -0.007814328 | 0.866253613 | 0.023835701 | 0.60740132 | -0.19818 |
| 0.602738775 | 0.024604619  | 0.595858435 | -0.12012931 | 0.00936388 | -0.17393 |
| 0.002046311 | 0.127819708  | 0.005672082 | -0.27398568 | 1.74E-09   | -0.19618 |
| 0.069767653 | -0.093864403 | 0.042614482 | 0.264048313 | 6.87E-09   | -0.09663 |
| 0.000693389 | -0.158458086 | 0.00058848  | -0.01047565 | 0.82137232 | -0.46776 |
| 0.255297347 | -0.054323597 | 0.241332762 | 0.056793336 | 0.2205699  | -0.08902 |
| 0.83049825  | 0.011069756  | 0.811426888 | 0.021940384 | 0.63626884 | -0.13437 |
| 0.027740069 | 0.092798     | 0.045034282 | 0.056027944 | 0.22686318 | -0.4164  |
| 0.125306893 | -0.079909766 | 0.08452817  | 0.212404216 | 3.64E-06   | -0.19682 |
| 0.006031646 | -0.128351402 | 0.005473475 | 0.088247146 | 0.05669623 | -0.01411 |
| 0.600477199 | 0.021454448  | 0.643762061 | 0.063406715 | 0.17133233 | -0.17608 |
| 0.067185023 | 0.085574335  | 0.064644079 | -0.27270112 | 2.08E-09   | -0.39908 |
| 0.004899006 | 0.126264883  | 0.006290576 | -0.20543166 | 7.63E-06   | -0.46737 |
| 1.23E-05    | 0.185035446  | 5.75E-05    | 0.000866328 | 0.98510329 | -0.26793 |
| 0.000336189 | 0.171426872  | 0.000197473 | 0.010738307 | 0.81697179 | -0.36822 |
| 0.709260579 | 0.025243332  | 0.586346659 | -0.21596852 | 2.47E-06   | -0.03202 |
| 0.514633541 | 0.03092544   | 0.504981124 | -0.01456222 | 0.75362314 | -0.35706 |
| 0.078088691 | 0.077305407  | 0.09519576  | 0.109102925 | 0.01835095 | -0.20017 |
| 0.169662333 | -0.061866257 | 0.18199522  | 0.122498784 | 0.00804646 | -0.22159 |
| 0.001622847 | 0.147428521  | 0.001398822 | 0.05200236  | 0.26206327 | -0.20797 |
| 0.094755698 | 0.068839628  | 0.137434535 | -0.12148287 | 0.00858958 | -0.47431 |
| 0.000140926 | -0.178479371 | 0.000105399 | 0.035828859 | 0.43985315 | 0.004148 |
| 0.065555994 | -0.081009279 | 0.080324062 | -0.21944236 | 1.68E-06   | -0.29845 |
| 4.07E-06    | 0.206469085  | 6.85E-06    | -0.11772929 | 0.01089048 | -0.10248 |
| 0.191649257 | -0.056210176 | 0.225353359 | -0.0784359  | 0.09044011 | -0.31411 |
| 2.47E-06    | 0.204283932  | 8.60E-06    | -0.18894061 | 3.97E-05   | -0.19677 |
| 0.986295526 | -0.002075544 | 0.964320339 | -0.01706112 | 0.71307263 | -0.25055 |
| 0.610932758 | -0.029092906 | 0.530560345 | -0.05949584 | 0.19934939 | -0.15668 |
| 0.110980401 | -0.077972972 | 0.092363947 | -0.0469366  | 0.31146726 | -0.28296 |
| 0.000222816 | 0.182316151  | 7.41E-05    | -0.09784344 | 0.03453045 | -0.2818  |
| 0.3918444   | -0.047385057 | 0.306861585 | -0.15492422 | 0.00078148 | -0.29779 |
| 0.003841897 | 0.131289279  | 0.004484662 | 0.002535834 | 0.95641486 | 0.393181 |
| 0.243354939 | 0.062047826  | 0.180713493 | -0.1296495  | 0.00501462 | 0.147591 |
| 0.164026093 | 0.066221934  | 0.153061259 | 0.1410865   | 0.00224286 | -0.04895 |
| 0.011304377 | -0.114440917 | 0.013338687 | 0.017116669 | 0.71217985 | -0.21176 |
| 0.007554867 | -0.121656476 | 0.008494514 | -0.17021687 | 0.0002194  | -0.27499 |
| 0.291707895 | -0.050132534 | 0.279630506 | -0.00186846 | 0.96787827 | 0.094092 |
| 0.582194228 | 0.01543726   | 0.739339766 | -0.12312657 | 0.00772636 | -0.22964 |
| 0.239596274 | -0.058703541 | 0.205410456 | -0.04064358 | 0.38085416 | -0.38784 |
| 0.000131111 | -0.169782564 | 0.000227811 | -0.09630667 | 0.03748289 | -0.13886 |
| 5.65E-10    | -0.283985969 | 4.11E-10    | 0.132467547 | 0.00413567 | 0.05652  |
| 0.01801187  | -0.108391095 | 0.019130376 | 0.01868024  | 0.68721552 | -0.24016 |

|             |              |             |             |            |          |
|-------------|--------------|-------------|-------------|------------|----------|
| 0.068833372 | 0.088552228  | 0.055842929 | -0.22916041 | 5.57E-07   | -0.26096 |
| 0.582330902 | 0.025925654  | 0.576263687 | -0.00353485 | 0.93927251 | -0.23354 |
| 0.086223277 | -0.086123628 | 0.062939879 | -0.06340358 | 0.17135356 | 0.077734 |
| 0.014468473 | 0.104617705  | 0.023761964 | -0.12001786 | 0.00943032 | -0.37123 |
| 0.112343046 | 0.075522865  | 0.103097772 | -0.03493796 | 0.4513163  | -0.04742 |
| 2.94E-06    | 0.203687033  | 9.14E-06    | 0.070146979 | 0.13010408 | -0.1646  |
| 0.800718085 | -0.008656478 | 0.851997615 | 0.026252144 | 0.57146802 | 0.030879 |
| 0.656494007 | -0.026390137 | 0.569446817 | 0.126401054 | 0.00623409 | -0.20577 |
| 0.005262349 | -0.126264412 | 0.006290773 | 0.121040355 | 0.0088362  | -0.27846 |
| 0.48969323  | 0.031389556  | 0.498607166 | 0.067023871 | 0.14813711 | -0.23469 |
| 0.224538094 | -0.059555835 | 0.198895774 | -0.0413921  | 0.37213775 | -0.44514 |
| 0.000181458 | -0.172790311 | 0.000175231 | -0.02113288 | 0.64874069 | -0.41616 |
| 0.742692298 | -0.015263734 | 0.742165324 | -0.20719311 | 6.34E-06   | -0.19331 |
| 0.525248657 | 0.029392295  | 0.526336991 | -0.13263718 | 0.00408751 | -0.47642 |
| 0.273384424 | 0.052570237  | 0.256881819 | -0.01175651 | 0.79996827 | -0.34793 |
| 2.84E-06    | 0.220526924  | 1.49E-06    | -0.00721071 | 0.8764988  | -0.05486 |
| 0.015543778 | 0.11317062   | 0.01440711  | -0.33362826 | 1.33E-13   | -0.40988 |
| 0.393032441 | -0.027256173 | 0.556840081 | -0.1558421  | 0.00072639 | -0.37527 |
| 0.91258226  | 0.007423673  | 0.872881699 | -0.32176527 | 1.04E-12   | -0.3447  |
| 0.011447568 | 0.110330489  | 0.017071784 | -0.17575694 | 0.00013469 | -0.27497 |
| 0.024808992 | 0.105031917  | 0.023210142 | -0.2142366  | 2.99E-06   | -0.31853 |
| 3.53E-06    | -0.210540944 | 4.45E-06    | 0.042558562 | 0.35880246 | -0.41584 |
| 0.212189592 | -0.059594802 | 0.198601566 | -0.07964935 | 0.08554944 | -0.47381 |
| 0.530701694 | -0.032166258 | 0.488036434 | -0.0537267  | 0.24655022 | -0.01386 |
| 1.86E-06    | 0.212689981  | 3.53E-06    | 0.204313233 | 8.57E-06   | 0.461664 |
| 0.862987884 | 0.009772894  | 0.833173618 | -0.24059425 | 1.42E-07   | -0.2369  |
| 0.029330879 | -0.106803045 | 0.020973889 | -0.12141639 | 0.00862624 | -0.5254  |
| 0.804644454 | 0.009320704  | 0.840787191 | 0.121965022 | 0.00832787 | -0.07871 |
| 0.013416902 | -0.114377755 | 0.013390115 | 0.018194818 | 0.69493108 | -0.18347 |
| 0.832633488 | 0.000710033  | 0.987790593 | 0.08578506  | 0.06398586 | -0.10204 |
| 0.237133687 | 0.061154406  | 0.187085151 | 0.169128226 | 0.00024106 | -0.08461 |
| 0.107089912 | -0.070847411 | 0.126303113 | -0.02855331 | 0.53821519 | -0.30105 |
| 8.02E-05    | 0.183710095  | 6.51E-05    | -0.01257114 | 0.78643165 | -0.17    |
| 0.000102777 | 0.172706402  | 0.000176529 | 0.115898977 | 0.01219892 | 0.280525 |
| 0.001636978 | 0.142731782  | 0.001987866 | -0.13025262 | 0.00481347 | -0.17846 |
| 0.040592653 | 0.09974518   | 0.031153084 | -0.24500584 | 8.21E-08   | 0.063955 |
| 0.891605213 | -0.006895467 | 0.88185765  | -0.18586602 | 5.32E-05   | -0.19766 |
| 0.3753128   | 0.036765061  | 0.427988497 | -0.03410995 | 0.46211977 | -0.40766 |
| 0.001673348 | 0.154021836  | 0.000839391 | -0.2828921  | 4.83E-10   | -0.15071 |
| 0.31112962  | 0.048376949  | 0.296835351 | -0.2103843  | 4.53E-06   | 0.01417  |
| 0.000538931 | 0.154515159  | 0.000807259 | 0.008355892 | 0.85708068 | -0.15519 |
| 0.556717009 | -0.026923025 | 0.56167358  | -0.26356235 | 7.34E-09   | -0.34716 |
| 0.075234197 | 0.077580054  | 0.094022427 | -0.14262463 | 0.00200363 | -0.37609 |
| 0.014683967 | 0.105031762  | 0.023210347 | -0.05343424 | 0.24913517 | -0.24476 |
| 0.871987246 | -0.011066226 | 0.811485889 | -0.19053265 | 3.41E-05   | -0.3365  |

|             |              |             |             |            |          |
|-------------|--------------|-------------|-------------|------------|----------|
| 0.734441337 | 0.016579334  | 0.720832182 | -0.13346255 | 0.00386031 | -0.5088  |
| 0.411057057 | -0.03070035  | 0.508087743 | -0.18445583 | 6.07E-05   | -0.22618 |
| 3.18E-07    | 0.217003687  | 2.21E-06    | -0.02238196 | 0.62949166 | -0.15386 |
| 3.83E-09    | 0.265415351  | 5.71E-09    | -0.27823999 | 9.48E-10   | -0.21391 |
| 0.000596702 | -0.16022733  | 0.000509439 | 0.005327565 | 0.90858628 | -0.06967 |
| 0.000153518 | 0.180526787  | 8.74E-05    | 0.096674692 | 0.03675701 | 0.227221 |
| 0.264232811 | -0.054326266 | 0.241309609 | -0.14913602 | 0.00122792 | -0.08224 |
| 0.00808543  | -0.139822627 | 0.002458653 | -0.11974606 | 0.00959411 | -0.12243 |
| 0.024749161 | -0.117989581 | 0.01071488  | -0.04749929 | 0.30569562 | -0.38352 |
| 0.558418959 | 0.032154916  | 0.48818992  | -0.17763617 | 0.00011376 | -0.30723 |
| 0.013071025 | 0.108929738  | 0.018537987 | 0.211792611 | 3.89E-06   | -0.43426 |
| 0.564325964 | -0.025103524 | 0.588422688 | -0.18733438 | 4.63E-05   | -0.35726 |
| 0.151221984 | -0.063575229 | 0.170194788 | -0.16866262 | 0.00025091 | -0.37027 |
| 0.294474328 | -0.053105605 | 0.252062304 | 0.131445335 | 0.00443696 | 0.314919 |
| 0.17853799  | -0.063318202 | 0.171932093 | -0.00502104 | 0.91382474 | -0.34629 |
| 0.707994151 | -0.016135974 | 0.72799829  | 0.058346088 | 0.20818824 | -0.07275 |
| 0.000396262 | 0.164881943  | 0.000346103 | -0.17814959 | 0.0001086  | -0.40206 |
| 0.854480165 | -0.008520198 | 0.854301427 | -0.14113754 | 0.00223452 | -0.23769 |
| 0.001137251 | 0.154798318  | 0.000789333 | -0.09976234 | 0.03112395 | -0.31879 |
| 0.002551912 | -0.139857951 | 0.002452373 | -0.12273184 | 0.00792627 | -0.19826 |
| 0.02319286  | -0.105138812 | 0.023069548 | -0.1212116  | 0.00874002 | -0.15021 |
| 0.011416611 | 0.107615353  | 0.020012482 | -0.10753309 | 0.02010807 | -0.36493 |
| 0.977359682 | 0.010260231  | 0.824985706 | -0.00394055 | 0.93231857 | -0.38514 |
| 0.224627783 | -0.057959814 | 0.211220412 | -0.26503069 | 6.01E-09   | -0.22236 |
| 0.034705365 | -0.098038809 | 0.034169692 | -0.00377122 | 0.9352203  | -0.12025 |
| 0.297803022 | -0.047167307 | 0.309092242 | -0.15142886 | 0.0010286  | -0.31814 |
| 0.155635191 | 0.071157544  | 0.124647932 | -0.0163458  | 0.72460391 | -0.2858  |
| 0.666530845 | 0.020977197  | 0.651156652 | -0.28182028 | 5.65E-10   | -0.42812 |
| 0.00243378  | 0.142818623  | 0.001975175 | -0.3251739  | 5.81E-13   | 0.076753 |
| 0.000284701 | 0.159826333  | 0.000526436 | -0.03866815 | 0.4044511  | -0.07751 |
| 2.76E-08    | 0.262518411  | 8.45E-09    | 0.134836262 | 0.0035074  | -0.03861 |
| 1.16E-11    | 0.299105774  | 4.17E-11    | -0.07229159 | 0.11873871 | -0.08501 |
| 0.602138435 | 0.027498274  | 0.55334026  | 0.044845691 | 0.33353756 | -0.04922 |
| 0.076029851 | 0.078403919  | 0.090571964 | -0.33305223 | 1.47E-13   | -0.1841  |
| 0.272519742 | -0.048003896 | 0.300580323 | 0.200904736 | 1.22E-05   | -0.47777 |
| 0.003713705 | -0.135184844 | 0.003422631 | 0.118618853 | 0.01030067 | -0.00701 |
| 0.834849652 | -0.008088833 | 0.861601761 | -0.16920366 | 0.00023949 | -0.15272 |
| 0.126808085 | 0.067722378  | 0.143947163 | -0.11175485 | 0.01568588 | -0.19867 |
| 0.480537517 | 0.030808846  | 0.506589069 | -0.27288078 | 2.03E-09   | -0.31493 |
| 0.121595774 | 0.069490659  | 0.133745405 | -0.18429874 | 6.16E-05   | -0.37525 |
| 0.134500351 | 0.0701655    | 0.130002448 | -0.24332825 | 1.01E-07   | -0.38503 |
| 0.555170294 | -0.031524942 | 0.496755904 | 0.27517566  | 1.47E-09   | -0.05485 |
| 0.022277701 | 0.106295016  | 0.021595348 | -0.14760002 | 0.00138072 | -0.1389  |
| 0.028700307 | 0.100718835  | 0.02953613  | -0.0407951  | 0.37907975 | -0.29209 |
| 0.767040153 | 0.011876742  | 0.797966471 | -0.19034598 | 3.47E-05   | -0.02348 |

|             |              |             |             |            |          |
|-------------|--------------|-------------|-------------|------------|----------|
| 0.000224589 | 0.168642782  | 0.000251343 | -0.22421599 | 9.84E-07   | -0.232   |
| 0.291653775 | 0.045153964  | 0.330221897 | -0.20674293 | 6.65E-06   | -0.26202 |
| 0.722785428 | 0.019860257  | 0.668595926 | -0.05545544 | 0.2316532  | -0.1989  |
| 0.041529314 | 0.101427492  | 0.028404991 | -0.1033355  | 0.02554265 | -0.2773  |
| 0.789123577 | 0.015137771  | 0.744218569 | 0.167690737 | 0.00027272 | -0.34346 |
| 0.010086831 | -0.122218349 | 0.008193232 | 0.05166947  | 0.2651339  | -0.23544 |
| 0.734948668 | -0.019814124 | 0.669320155 | -0.29198233 | 1.25E-10   | -0.29765 |
| 0.005704935 | -0.116761303 | 0.011566099 | -0.13688343 | 0.00303557 | -0.32596 |
| 0.71833184  | 0.017647543  | 0.703667658 | -0.22706318 | 7.10E-07   | -0.32874 |
| 0.019520533 | -0.113699153 | 0.013953756 | -0.2947525  | 8.17E-11   | -0.08259 |
| 0.467813604 | 0.04020678   | 0.385997953 | -0.1871365  | 4.72E-05   | -0.22382 |
| 0.088273589 | -0.084473229 | 0.068174645 | -0.14334572 | 0.00189972 | -0.41505 |
| 0.734449352 | -0.015034649 | 0.745900861 | -0.08561121 | 0.06452849 | -0.15389 |
| 0.82565329  | -0.008449354 | 0.855499547 | 0.032000727 | 0.49027912 | -0.04144 |
| 9.07E-07    | 0.229134369  | 5.58E-07    | -0.11308715 | 0.01447988 | -0.00545 |
| 0.060600985 | 0.076194984  | 0.100059306 | -0.02470546 | 0.59435206 | -0.32864 |
| 0.155446874 | 0.075244549  | 0.104377178 | -0.29145465 | 1.35E-10   | -0.05723 |
| 0.001027015 | -0.154795666 | 0.000789499 | -0.17579615 | 0.00013422 | -0.46732 |
| 0.36466741  | 0.044506784  | 0.337207343 | -0.11840139 | 0.01044218 | -0.32151 |
| 0.006803664 | 0.121540223  | 0.008558069 | -0.14756451 | 0.00138445 | -0.29409 |
| 0.084109861 | 0.076710124  | 0.097779033 | -0.12493461 | 0.00686706 | -0.26102 |
| 0.981871707 | -0.001481794 | 0.974523062 | -0.15898515 | 0.00056382 | 0.023083 |
| 0.33601075  | 0.043913225  | 0.343696654 | 0.158302454 | 0.00059595 | -0.39027 |
| 0.053580691 | -0.090848102 | 0.049757646 | 0.192478671 | 2.82E-05   | 0.070821 |
| 0.105231472 | 0.071765104  | 0.121454293 | -0.13361781 | 0.00381887 | -0.33187 |
| 0.694662768 | 0.018096338  | 0.696500259 | -0.09108142 | 0.04917151 | -0.23181 |
| 0.653351414 | 0.016304721  | 0.725267961 | -0.076819   | 0.09730244 | -0.42428 |
| 0.008088399 | 0.136818386  | 0.003049632 | -0.11489699 | 0.01297249 | -0.12902 |
| 0.005540861 | -0.128850605 | 0.005292723 | -0.19901767 | 1.47E-05   | -0.23835 |
| 0.03396149  | -0.096910939 | 0.036297362 | 0.237478921 | 2.07E-07   | -0.29122 |
| 0.152976517 | -0.065396591 | 0.158257707 | 0.042553516 | 0.3588595  | -0.282   |
| 0.272880298 | 0.043819156  | 0.344732343 | 0.17473264  | 0.00014757 | -0.34011 |
| 0.27725818  | 0.050736969  | 0.27386657  | -0.2492682  | 4.80E-08   | 0.34554  |
| 0.124949363 | -0.062915196 | 0.174682682 | -0.2315146  | 4.22E-07   | -0.33664 |
| 0.077612496 | -0.091864168 | 0.04724712  | 0.073402603 | 0.11316411 | 0.211507 |
| 0.843642676 | 0.005024232  | 0.913770191 | -0.17672347 | 0.00012351 | -0.42647 |
| 9.80E-05    | -0.185820615 | 5.34E-05    | -0.15858812 | 0.0005823  | 0.030083 |
| 0.00180764  | -0.145563374 | 0.001610293 | 0.088801768 | 0.05515293 | -0.25373 |
| 0.005475361 | -0.129317241 | 0.005128642 | 0.23508837  | 2.76E-07   | -0.4334  |
| 0.850565791 | 0.006062691  | 0.89603957  | -0.08996558 | 0.0520278  | -0.0862  |
| 0.009204816 | 0.12996037   | 0.004910011 | -0.02153421 | 0.64252968 | 0.279304 |
| 0.592148492 | 0.029128276  | 0.530060498 | 0.046396958 | 0.3170693  | 0.005355 |
| 1.76E-09    | 0.272439774  | 2.16E-09    | 0.147588743 | 0.0013819  | -0.14022 |
| 4.05E-05    | 0.185437448  | 5.54E-05    | -0.1764451  | 0.00012664 | -0.13721 |
| 0.85403541  | 0.010316326  | 0.824044435 | 0.051632573 | 0.26547575 | -0.20443 |

|             |              |             |             |            |          |
|-------------|--------------|-------------|-------------|------------|----------|
| 0.003017745 | -0.146544532 | 0.001495646 | -0.04372694 | 0.34574958 | -0.12432 |
| 0.002323395 | 0.135110049  | 0.003440661 | 0.034981189 | 0.45075627 | -0.14013 |
| 0.962622727 | 0.010310481  | 0.824142501 | -0.24293943 | 1.06E-07   | -0.26891 |
| 0.153021539 | -0.073331172 | 0.113516223 | 0.099035884 | 0.03237816 | -0.11211 |
| 0.084137647 | -0.079764963 | 0.08509483  | -0.02047742 | 0.65893709 | -0.15148 |
| 0.199143638 | -0.0639892   | 0.16742428  | -0.08684382 | 0.06076171 | -0.16353 |
| 0.177404864 | -0.061029472 | 0.187989171 | -0.01584318 | 0.73274377 | -0.32556 |
| 0.050122951 | -0.089711386 | 0.052697462 | -0.0071123  | 0.87817103 | -0.28198 |
| 0.228494475 | -0.055845543 | 0.228381588 | -0.07411619 | 0.1096934  | -0.25118 |
| 0.735818501 | -0.019723335 | 0.670746315 | -0.01172158 | 0.80054997 | -0.52472 |
| 0.002677486 | -0.137328541 | 0.002940955 | 0.081423468 | 0.07878495 | -0.09719 |
| 0.000116308 | 0.184952139  | 5.80E-05    | -0.10594283 | 0.02203548 | -0.03692 |
| 0.746660042 | 0.018120728  | 0.696111502 | 0.094681649 | 0.04083507 | -0.23559 |
| 5.80E-08    | 0.248520506  | 5.27E-08    | -0.04001629 | 0.3882544  | -0.21597 |
| 1.61E-06    | 0.2256929    | 8.31E-07    | -0.17809967 | 0.00010909 | -0.09447 |
| 0.39351702  | 0.035691349  | 0.441611552 | 0.122998183 | 0.00779088 | -0.37372 |
| 0.787711923 | 0.015995816  | 0.730268665 | 0.094125232 | 0.0420396  | -0.04317 |
| 0.402609406 | -0.049732053 | 0.283494483 | -0.20393649 | 8.91E-06   | -0.46024 |
| 0.00187391  | -0.139273743 | 0.002558136 | 0.078436681 | 0.09043688 | -0.25308 |
| 0.000258165 | -0.177338782 | 0.000116855 | -0.09405833 | 0.04218644 | -0.39955 |
| 0.001938096 | 0.138507492  | 0.002703157 | 0.057544651 | 0.2145147  | -0.23807 |
| 8.42E-06    | 0.203710928  | 9.12E-06    | -0.16103719 | 0.00047665 | -0.01975 |
| 0.916274121 | 0.002134356  | 0.963310033 | -0.11451997 | 0.01327457 | -0.26666 |
| 0.001084676 | 0.150984759  | 0.001064708 | 0.031851692 | 0.49230303 | -0.4423  |
| 0.000258539 | 0.17925275   | 9.82E-05    | 0.043909275 | 0.3437401  | -0.21809 |
| 0.082318169 | 0.088496148  | 0.055998979 | -0.20356797 | 9.26E-06   | -0.34324 |
| 0.052994559 | 0.078485535  | 0.090235743 | -0.10795396 | 0.01962319 | -0.25516 |
| 0.154563021 | 0.06073066   | 0.190164388 | -0.15487384 | 0.00078461 | -0.46408 |
| 0.677168047 | 0.022142418  | 0.633164276 | 0.087871934 | 0.05776048 | -0.31239 |
| 0.853493301 | -0.008136947 | 0.860786896 | 0.026542655 | 0.56721681 | -0.16085 |
| 0.034372969 | 0.093835051  | 0.042679589 | -0.17383296 | 0.00015983 | -0.41935 |
| 0.28930731  | -0.051056063 | 0.270856526 | 0.019491245 | 0.67439746 | -0.07004 |
| 0.090961747 | 0.076002244  | 0.10092326  | -0.10227607 | 0.02709963 | -0.35541 |
| 9.99E-07    | 0.228436971  | 6.05E-07    | -0.1655552  | 0.000327   | 0.335146 |
| 0.983279421 | -0.005814055 | 0.900280405 | -0.23798113 | 1.95E-07   | -0.20954 |
| 0.604849773 | 0.02573974   | 0.57900293  | -0.32352465 | 7.70E-13   | -0.32024 |
| 0.031788484 | -0.098969779 | 0.032494404 | -0.21667961 | 2.29E-06   | -0.1623  |
| 0.000171593 | 0.169272733  | 0.00023807  | 0.230698764 | 4.65E-07   | -0.23889 |
| 0.062187732 | -0.070536292 | 0.127980658 | 0.132891921 | 0.00401613 | -0.31734 |
| 0.229071462 | 0.0718476    | 0.121025616 | 0.176563112 | 0.0001253  | -0.05216 |
| 0.153007636 | -0.058337192 | 0.208257722 | -0.10352633 | 0.02527054 | -0.46789 |
| 0.000533699 | 0.166325775  | 0.000306347 | -0.27591376 | 1.32E-09   | -0.18157 |
| 0.029449065 | -0.099112111 | 0.03224456  | -0.04923273 | 0.2883624  | -0.25384 |
| 0.707732888 | -0.016405073 | 0.723645915 | 0.178277977 | 0.00010734 | -0.16651 |
| 0.302318138 | -0.050264015 | 0.27836975  | 0.010142584 | 0.82696062 | -0.25205 |

|             |              |             |             |            |          |
|-------------|--------------|-------------|-------------|------------|----------|
| 0.042231769 | 0.086434042  | 0.061993294 | -0.01053494 | 0.82037855 | -0.25867 |
| 0.102324976 | -0.075657477 | 0.102483442 | 0.106101988 | 0.02183563 | -0.03513 |
| 1.35E-08    | 0.258841564  | 1.38E-08    | -0.24148418 | 1.27E-07   | -0.15866 |
| 0.005909052 | 0.119825512  | 0.009545969 | -0.24800368 | 5.63E-08   | -0.51249 |
| 0.583234279 | 0.010637596  | 0.818658447 | -0.0975347  | 0.03510717 | -0.02049 |
| 0.070085375 | 0.084539728  | 0.067957033 | -0.06936769 | 0.13443629 | -0.26511 |
| 0.032348343 | 0.098318858  | 0.033658172 | -0.27344623 | 1.88E-09   | -0.39259 |
| 0.000126466 | -0.18353564  | 6.62E-05    | 0.037658668 | 0.41683882 | -0.19178 |
| 0.029976038 | 0.096752622  | 0.036604841 | -0.28580241 | 3.15E-10   | -0.17156 |
| 0.960454493 | -0.005139001 | 0.911808371 | -0.07690633 | 0.09692151 | -0.27478 |
| 7.27E-05    | -0.194152742 | 2.39E-05    | -0.12515536 | 0.00676824 | -0.29143 |
| 0.00579892  | -0.126797527 | 0.006072196 | -0.11026078 | 0.01714228 | -0.32171 |
| 0.005320267 | 0.112768373  | 0.014760767 | 0.061517829 | 0.18447364 | 0.174993 |
| 0.000488224 | 0.157843847  | 0.000618482 | -0.06797475 | 0.14245583 | -0.36862 |
| 0.009571519 | 0.116184709  | 0.011985928 | 0.022715548 | 0.62439237 | -0.22823 |
| 0.706604152 | 0.016671865  | 0.719339644 | 0.011367659 | 0.8064512  | -0.26516 |
| 0.002247977 | 0.130826433  | 0.004628874 | -0.1710317  | 0.0002044  | -0.16045 |
| 0.000158651 | 0.183893576  | 6.40E-05    | 0.076701132 | 0.09781848 | -0.23455 |
| 2.06E-08    | 0.261942507  | 9.13E-09    | -0.02148079 | 0.64335499 | -0.19478 |
| 0.856260755 | -0.004394677 | 0.924540627 | -0.07857696 | 0.0898603  | -0.37666 |
| 0.000778269 | 0.146115802  | 0.001544788 | -0.18863518 | 4.09E-05   | -0.01902 |
| 0.033680077 | -0.104052297 | 0.024533501 | -0.05739926 | 0.21567705 | 0.017502 |
| 0.573768129 | 0.025761976  | 0.578674983 | -0.16284788 | 0.00041032 | -0.35148 |
| 0.860835566 | 0.009472248  | 0.838233931 | 0.016203825 | 0.72690005 | -0.03499 |
| 0.006896222 | -0.128426422 | 0.005445962 | 0.069147811 | 0.13567856 | -0.13653 |
| 1.73E-06    | -0.220506311 | 1.50E-06    | 0.125294667 | 0.00670654 | -0.33307 |
| 0.049790044 | -0.088009304 | 0.057368942 | 0.037619447 | 0.41732458 | 0.00309  |
| 8.66E-16    | 0.359129441  | 1.16E-15    | 0.130016949 | 0.00489118 | -0.18384 |
| 0.004491419 | -0.137666488 | 0.002870916 | 0.208655361 | 5.44E-06   | 0.00322  |
| 0.000207122 | -0.170685182 | 0.000210656 | 0.0586083   | 0.20614794 | -0.15839 |
| 0.074767209 | -0.08101906  | 0.080287434 | 0.11173859  | 0.01570113 | -0.1859  |
| 0.280815856 | -0.048886104 | 0.291774496 | 0.044103038 | 0.34161286 | -0.21106 |
| 2.59E-08    | 0.248889926  | 5.03E-08    | -0.19681172 | 1.84E-05   | -0.08313 |
| 0.738104868 | -0.002803742 | 0.951815469 | 6.52E-05    | 0.99887844 | -0.2704  |
| 0.572702628 | -0.028650285 | 0.536835467 | -0.11446014 | 0.01332307 | -0.41402 |
| 0.838447052 | 0.001745322  | 0.969994107 | -0.07953901 | 0.08598517 | -0.18458 |
| 0.50915467  | -0.038535187 | 0.406070055 | -0.16095692 | 0.00047981 | -0.27312 |
| 0.186222395 | 0.07465753   | 0.107116878 | -0.28369221 | 4.29E-10   | -0.07942 |
| 0.221236241 | -0.060832378 | 0.189421862 | -0.06369372 | 0.16939833 | -0.17723 |
| 0.569712633 | 0.030901664  | 0.5053088   | 0.109165688 | 0.01828357 | -0.30192 |
| 0.23652705  | 0.048224831  | 0.298358639 | -0.05773585 | 0.21299301 | -0.30099 |
| 0.232636546 | 0.053296437  | 0.250359671 | -0.19965915 | 1.38E-05   | -0.09933 |
| 0.035962308 | 0.103014102  | 0.026006624 | -0.06766207 | 0.14430528 | -0.28523 |
| 0.958822746 | -0.000887808 | 0.984733984 | -0.10346767 | 0.02535392 | -0.34676 |
| 0.509099768 | 0.035021114  | 0.450239342 | 0.021535238 | 0.64251374 | -0.40246 |

|             |              |             |             |            |          |
|-------------|--------------|-------------|-------------|------------|----------|
| 0.097096005 | -0.076093241 | 0.100514635 | 0.079107648 | 0.08770572 | -0.2003  |
| 0.20523695  | 0.067262417  | 0.146695889 | 0.017451791 | 0.70680217 | -0.04453 |
| 0.002862009 | 0.129097837  | 0.005205211 | -0.27080855 | 2.71E-09   | -0.24088 |
| 0.584511604 | 0.034064726  | 0.462713966 | -0.28600509 | 3.05E-10   | -0.05644 |
| 2.10E-07    | 0.237442702  | 2.08E-07    | -0.22344561 | 1.07E-06   | -0.14143 |
| 0.003399348 | 0.130253741  | 0.004813099 | 0.058566928 | 0.2064689  | -0.17501 |
| 0.149005639 | 0.067568039  | 0.144865067 | -0.13128079 | 0.00448727 | -0.44255 |
| 0.947160114 | -0.000617479 | 0.989382012 | 0.11275727  | 0.01477064 | -0.03828 |
| 0.318138083 | -0.05817874  | 0.209498004 | -0.20518481 | 7.83E-06   | -0.17986 |
| 0.000783525 | 0.153621284  | 0.000866347 | -0.18259227 | 7.23E-05   | -0.10195 |
| 0.199959792 | -0.065770647 | 0.155886343 | -0.08590579 | 0.06361124 | -0.31128 |
| 0.426214058 | -0.045299055 | 0.328668736 | -0.19267746 | 2.77E-05   | -0.14929 |
| 0.223633909 | 0.052180695  | 0.260428407 | 0.217078191 | 2.19E-06   | -0.30472 |
| 0.007433731 | -0.123618335 | 0.00748361  | -0.04025365 | 0.38544397 | -0.12542 |
| 0.171524817 | -0.067584848 | 0.144764883 | -0.14480455 | 0.00170443 | -0.2409  |
| 0.080414259 | 0.081248067  | 0.079433786 | -0.13278515 | 0.00404591 | -0.37457 |
| 0.069733761 | -0.089156189 | 0.054185115 | -0.13832229 | 0.00273931 | -0.10685 |
| 0.735353519 | -0.01823273  | 0.694327342 | -0.20239251 | 1.04E-05   | -0.07938 |
| 0.336234058 | -0.040166174 | 0.386478273 | -0.11045668 | 0.01694482 | -0.43616 |
| 0.42764734  | -0.045920747 | 0.322067231 | -0.34307775 | 2.41E-14   | -0.05741 |
| 0.760779795 | -0.007397179 | 0.87333154  | -0.37135242 | 1.02E-16   | -0.362   |
| 0.768291482 | 0.008431142  | 0.855807603 | -0.12201841 | 0.00829933 | -0.21155 |
| 7.13E-07    | 0.214015389  | 3.06E-06    | -0.11860393 | 0.01031033 | -0.14321 |
| 0.000817525 | 0.149521514  | 0.001192099 | -0.02966747 | 0.52247033 | -0.23664 |
| 0.780564401 | -0.0139431   | 0.763780515 | 0.188162641 | 4.28E-05   | -0.04701 |
| 0.444190956 | -0.038665904 | 0.404478402 | 0.160661248 | 0.00049162 | 0.000586 |
| 0.490335455 | 0.029920384  | 0.518929408 | 0.179004383 | 0.00010049 | -0.04642 |
| 0.419675536 | -0.032232084 | 0.487146124 | -0.19757258 | 1.70E-05   | -0.05055 |
| 0.663614945 | 0.025360231  | 0.584613423 | -0.23649739 | 2.33E-07   | -0.50137 |
| 0.058687549 | -0.104800651 | 0.023516857 | -0.3354419  | 9.59E-14   | -0.10859 |
| 0.511289513 | -0.045243828 | 0.32925937  | -0.12186066 | 0.0083839  | -0.13013 |
| 0.732231754 | -0.015007118 | 0.746350189 | 0.189931563 | 3.61E-05   | 0.105491 |
| 0.083713373 | 0.073555207  | 0.112414728 | -0.21590436 | 2.49E-06   | -0.43478 |
| 0.700302717 | -0.02986729  | 0.519671729 | -0.09247814 | 0.04578221 | -0.03739 |
| 0.122488096 | -0.076855024 | 0.097145143 | -0.11039268 | 0.01700911 | -0.05957 |
| 0.117486604 | -0.073404168 | 0.1131564   | -0.19833646 | 1.58E-05   | -0.22924 |
| 0.586746447 | 0.024468777  | 0.597890411 | 0.046127981 | 0.319886   | -0.25841 |
| 0.000397197 | 0.168037451  | 0.000264746 | -0.05934311 | 0.20050748 | -0.38955 |
| 0.442279691 | 0.034878793  | 0.452083589 | -0.23663451 | 2.30E-07   | -0.30962 |
| 0.006098767 | 0.126722408  | 0.006102576 | 0.098819173 | 0.03276057 | 0.265481 |
| 0.481520731 | -0.032803671 | 0.479452232 | -0.22352749 | 1.06E-06   | -0.28989 |
| 0.147776851 | -0.065211425 | 0.159441615 | -0.15238697 | 0.00095452 | -0.19487 |
| 0.134439504 | 0.069867759  | 0.13164373  | -0.10361513 | 0.02514479 | -0.14547 |
| 0.714238735 | -0.010946697 | 0.813484483 | 0.102914995 | 0.02615116 | -0.11712 |
| 0.328720113 | -0.030998869 | 0.503969836 | -0.09614432 | 0.03780695 | 0.20959  |



|             |              |             |             |            |          |
|-------------|--------------|-------------|-------------|------------|----------|
| 9.06E-05    | 0.187301036  | 4.64E-05    | 0.05299695  | 0.25303532 | 0.025067 |
| 0.768173346 | -0.026346925 | 0.570079379 | -0.26854914 | 3.71E-09   | -0.34018 |
| 0.120367049 | 0.070425881  | 0.128580118 | -0.1855179  | 5.50E-05   | -0.24691 |
| 0.045955131 | 0.088435574  | 0.056167938 | 0.080119628 | 0.08371232 | -0.1155  |
| 0.39771626  | 0.03137574   | 0.498796297 | 0.085591151 | 0.06459135 | -0.45338 |
| 7.95E-11    | -0.293118005 | 1.05E-10    | 0.183790407 | 6.46E-05   | -0.29798 |
| 0.707436767 | -0.019155414 | 0.679694156 | -0.07954773 | 0.08595069 | 0.09619  |
| 0.162918085 | -0.058287098 | 0.208649255 | 0.190714952 | 3.35E-05   | 0.336961 |
| 0.001942921 | 0.141729405  | 0.002139859 | -0.05141515 | 0.26749636 | 0.5395   |
| 0.042096647 | -0.101794261 | 0.027834313 | -0.11861733 | 0.01030166 | -0.03409 |
| 0.005321665 | 0.120129709  | 0.009363642 | 0.037223746 | 0.42224395 | -0.33908 |
| 4.64E-06    | -0.218569814 | 1.86E-06    | -0.0535409  | 0.24819025 | -0.11294 |
| 0.207948688 | -0.056747259 | 0.220945187 | -0.22149268 | 1.34E-06   | -0.20128 |
| 0.132981656 | -0.084053716 | 0.069560679 | 0.106192481 | 0.02172269 | 0.206814 |
| 2.37E-05    | 0.189260106  | 3.85E-05    | -0.18177415 | 7.80E-05   | -0.29085 |
| 9.87E-17    | 0.364702329  | 3.88E-16    | -0.22680558 | 7.31E-07   | 0.02923  |
| 0.002697631 | -0.141022924 | 0.002253286 | -0.02129261 | 0.64626568 | -0.29018 |
| 0.02959088  | 0.09842685   | 0.033462672 | 0.292078868 | 1.23E-10   | 0.442672 |
| 3.36E-10    | 0.285902866  | 3.10E-10    | 0.005016142 | 0.9139085  | 0.041272 |
| 0.747662281 | 0.004455899  | 0.923492602 | -0.15362662 | 0.00086598 | -0.09702 |
| 0.669245265 | 0.026925789  | 0.561633403 | 0.092189101 | 0.04646703 | -0.14823 |
| 0.696167227 | 0.010017258  | 0.829065651 | -0.02461327 | 0.59572919 | -0.07867 |
| 0.032185592 | 0.103884813  | 0.024766158 | 0.129716042 | 0.00499206 | -0.09324 |
| 0.837843635 | -0.00653267  | 0.888031603 | -0.223564   | 1.06E-06   | -0.27975 |
| 4.53E-10    | -0.290344001 | 1.60E-10    | 0.050532656 | 0.27580578 | -0.37818 |
| 0.209555069 | -0.060077986 | 0.194979711 | -0.13604777 | 0.00322073 | -0.40798 |
| 0.591514685 | -0.033811881 | 0.466043758 | -0.19114757 | 3.21E-05   | -0.4448  |
| 0.427133626 | 0.028667265  | 0.536594063 | -0.18063302 | 8.66E-05   | -0.2591  |
| 2.18E-08    | -0.264963428 | 6.07E-09    | 0.12988236  | 0.00493607 | 0.126741 |
| 0.045412513 | 0.092885839  | 0.044830692 | 0.016726388 | 0.71846068 | -0.04593 |
| 0.0038453   | -0.140470101 | 0.002345843 | -0.11367989 | 0.01397006 | -0.09593 |
| 2.63E-06    | 0.211227566  | 4.13E-06    | -0.01085071 | 0.81509025 | -0.15931 |
| 0.000567551 | -0.150524837 | 0.001103328 | -0.16042415 | 0.00050128 | -0.11607 |
| 0.083445517 | -0.078833639 | 0.088812951 | -0.11051227 | 0.01688915 | -0.17541 |
| 6.65E-05    | 0.180409802  | 8.84E-05    | -0.33959532 | 4.54E-14   | -0.3569  |
| 1.42E-05    | 0.19760482   | 1.70E-05    | 0.070057552 | 0.13059567 | -0.18589 |
| 0.156428775 | 0.060301639  | 0.193319692 | -0.22186733 | 1.28E-06   | -0.39672 |
| 0.094331343 | 0.072418015  | 0.11809376  | 0.107717756 | 0.01989405 | 0.23735  |
| 0.007443254 | -0.122432199 | 0.008081093 | -0.13499251 | 0.00346917 | -0.32015 |
| 1.25E-07    | -0.231608225 | 4.18E-07    | 0.124872199 | 0.00689524 | -0.13048 |
| 0.5125653   | -0.040326844 | 0.384579889 | -0.22535165 | 8.64E-07   | -0.45223 |
| 0.007238879 | 0.127067595  | 0.005964091 | -0.18046326 | 8.79E-05   | 0.003242 |
| 0.025291379 | -0.108961171 | 0.018503918 | 0.049322861 | 0.28747957 | -0.23815 |
| 0.053768373 | 0.077713529  | 0.093456388 | 0.145147127 | 0.00166132 | -0.05393 |
| 0.437384233 | -0.037470316 | 0.419174611 | -0.1748994  | 0.0001454  | -0.20331 |

|             |              |             |             |            |          |
|-------------|--------------|-------------|-------------|------------|----------|
| 0.7469888   | -0.015529281 | 0.737842791 | 0.148644837 | 0.001275   | -0.44725 |
| 0.10948456  | 0.072308117  | 0.118654262 | -0.2609926  | 1.04E-08   | -0.20712 |
| 0.000986922 | -0.153289168 | 0.000889301 | -0.18135884 | 8.10E-05   | -0.33886 |
| 0.455477555 | -0.019251781 | 0.678172647 | -0.02877784 | 0.53502322 | -0.23098 |
| 0.102528626 | 0.070761956  | 0.126762178 | -0.17996534 | 9.21E-05   | 0.437077 |
| 0.095057735 | 0.072323175  | 0.118577341 | -0.08912355 | 0.05427364 | -0.08658 |
| 0.001756592 | 0.141880704  | 0.002116256 | -0.01441136 | 0.75609434 | -0.12677 |
| 1.13E-12    | 0.310982808  | 6.26E-12    | 0.04917626  | 0.28891643 | -0.07263 |
| 0.092291649 | 0.0844       | 0.068414945 | -0.13062973 | 0.00469142 | -0.13584 |
| 0.055205591 | -0.084655042 | 0.067581024 | -0.1135301  | 0.01409738 | -0.16857 |
| 0.463843767 | -0.040054971 | 0.387795512 | 0.238315704 | 1.87E-07   | -0.22116 |
| 0.024372463 | 0.107646862  | 0.019975974 | 0.162644314 | 0.00041733 | 0.344984 |
| 0.152804297 | 0.069741971  | 0.132341926 | 0.259208805 | 1.32E-08   | 0.017491 |
| 0.000221814 | -0.175461719 | 0.000138291 | -0.18107709 | 8.31E-05   | -0.37099 |
| 0.60881099  | 0.024758451  | 0.593561154 | -0.22531296 | 8.68E-07   | -0.23243 |
| 0.031250204 | -0.101781349 | 0.027854235 | -0.07271622 | 0.11658331 | -0.20616 |
| 0.249312665 | 0.053675629  | 0.247000263 | -0.17515337 | 0.00014215 | -0.20394 |
| 0.100739583 | 0.068217026  | 0.14103526  | -0.12048045 | 0.00915726 | -0.03974 |
| 0.097944441 | 0.072065912  | 0.119896888 | -0.30535877 | 1.55E-11   | 0.339    |
| 4.37E-08    | 0.237647647  | 2.03E-07    | -0.28543717 | 3.32E-10   | 0.070439 |
| 9.27E-22    | 0.420006823  | 2.21E-21    | -0.29260864 | 1.13E-10   | -0.03328 |
| 0.000324168 | 0.171014956  | 0.000204696 | -0.33475005 | 1.09E-13   | 0.184028 |
| 0.334985825 | 0.03708895   | 0.423927433 | -0.04785163 | 0.30211783 | 0.374038 |
| 6.29E-05    | -0.185753147 | 5.38E-05    | -0.32863923 | 3.19E-13   | 0.213222 |
| 0.060082523 | 0.085884542  | 0.063677047 | -0.36254994 | 5.93E-16   | 0.105191 |
| 0.821775558 | 0.000788158  | 0.986447311 | -0.26524514 | 5.84E-09   | -0.20015 |
| 0.043352152 | -0.103553918 | 0.025231418 | -0.4431354  | 6.97E-24   | -0.01181 |
| 3.01E-07    | 0.224183257  | 9.88E-07    | -0.07442255 | 0.10822934 | 0.09037  |
| 3.82E-05    | 0.188011094  | 4.34E-05    | -0.29092068 | 1.46E-10   | 0.392403 |
| 0.811350597 | -0.01393693  | 0.763881953 | -0.36848663 | 1.82E-16   | 0.063551 |
| 0.013024535 | 0.104502947  | 0.02391684  | -0.18199812 | 7.64E-05   | -0.13669 |
| 0.002552073 | 0.129553713  | 0.005047254 | -0.52866439 | 5.55E-35   | -0.14933 |
| 0.002037151 | 0.130848337  | 0.004621956 | -0.39566408 | 5.95E-19   | -0.01763 |
| 0.215740576 | 0.043858276  | 0.3443014   | -0.47038114 | 4.38E-27   | 0.218338 |
| 0.237106118 | 0.049815641  | 0.282685038 | -0.25670609 | 1.83E-08   | 0.309573 |
| 1.64E-10    | 0.294631289  | 8.32E-11    | -0.16506462 | 0.00034082 | -0.11411 |
| 0.001195127 | 0.14131941   | 0.002205032 | -0.29058576 | 1.54E-10   | -0.09497 |
| 0.505041553 | -0.049738187 | 0.283435034 | -0.38281789 | 9.52E-18   | 0.033773 |
| 0.000393393 | 0.160461254  | 0.00049976  | -0.23735754 | 2.10E-07   | -0.01228 |
| 0.476319886 | -0.034259768 | 0.460154449 | -0.4324865  | 1.04E-22   | 0.064371 |
| 0.507729601 | -0.026302764 | 0.570726192 | 0.487738592 | 2.79E-29   | 0.278631 |
| 0.021250932 | -0.117472597 | 0.011066149 | -0.08833715 | 0.05644336 | 0.225917 |
| 0.172688769 | -0.065614981 | 0.156869915 | -0.30811701 | 9.97E-12   | 0.443572 |
| 0.928369927 | -0.005526479 | 0.905188943 | -0.14920217 | 0.00122171 | 0.224327 |
| 0.006436759 | 0.124672357  | 0.006986148 | -0.54063531 | 8.41E-37   | -0.01756 |

|             |              |             |             |            |          |
|-------------|--------------|-------------|-------------|------------|----------|
| 0.004118273 | 0.135216301  | 0.003415074 | -0.60141761 | 2.85E-47   | -0.07815 |
| 0.867495554 | -0.006153202 | 0.894496517 | -0.39380412 | 8.96E-19   | -0.07233 |
| 0.000141155 | 0.163800242  | 0.000378985 | 0.037144223 | 0.42323664 | -0.11629 |
| 0.433572239 | -0.041169471 | 0.374717283 | -0.49047791 | 1.22E-29   | -0.2984  |
| 0.762649449 | 0.011080816  | 0.811242017 | -0.48230126 | 1.40E-28   | -0.06386 |
| 0.150895286 | 0.066560558  | 0.150967071 | -0.40479042 | 7.70E-20   | 0.298781 |
| 0.532557037 | 0.024830893  | 0.592480722 | -0.23645405 | 2.35E-07   | 0.192857 |
| 0.132510338 | 0.070488361  | 0.128240623 | -0.32195168 | 1.01E-12   | 0.347837 |
| 0.605633902 | 0.017722803  | 0.702463885 | 0.017795032 | 0.70130928 | 0.503275 |
| 0.087743164 | -0.093281855 | 0.043922408 | -0.51878038 | 1.56E-33   | 0.013657 |
| 0.000505253 | 0.152808095  | 0.000923548 | -0.02087527 | 0.65274038 | -0.34708 |
| 0.597709654 | -0.021659052 | 0.64060257  | -0.1173944  | 0.01112016 | 0.119265 |
| 0.362937362 | -0.050400787 | 0.277062361 | 0.48626987  | 4.33E-29   | 0.283831 |
| 0.613690578 | -0.030500679 | 0.510851876 | -0.53824128 | 1.97E-36   | 0.019471 |
| 0.000698261 | 0.16211459   | 0.000436075 | -0.2775895  | 1.04E-09   | -0.1123  |
| 0.525656013 | 0.024212673  | 0.601729832 | -0.27331984 | 1.91E-09   | 0.06875  |
| 0.221472477 | 0.044444419  | 0.33788546  | -0.2947753  | 8.14E-11   | -0.0621  |
| 0.473604041 | 0.029449048  | 0.525538328 | -0.20660119 | 6.75E-06   | 0.148341 |
| 0.559511441 | -0.034793683 | 0.453188499 | -0.29148707 | 1.34E-10   | 0.232556 |
| 0.002877412 | -0.145368472 | 0.001634006 | -0.50813189 | 5.03E-32   | -0.05848 |
| 0.003416339 | -0.133333429 | 0.003895077 | -0.27653474 | 1.21E-09   | -0.0874  |
| 0.000294967 | -0.161611757 | 0.000454596 | -0.18144546 | 8.04E-05   | 0.356548 |
| 0.837785764 | -0.010071166 | 0.828160053 | -0.28651735 | 2.83E-10   | -0.00179 |
| 0.016131085 | 0.111001597  | 0.016405989 | -0.42208775 | 1.34E-21   | 0.042301 |
| 0.000505092 | 0.165708911  | 0.00032278  | -0.15856709 | 0.0005833  | -0.15396 |
| 0.004990489 | -0.137635111 | 0.002877354 | -0.22581668 | 8.19E-07   | 0.43722  |
| 0.037192168 | -0.098606421 | 0.033139734 | 0.111845611 | 0.01560101 | -0.10301 |
| 7.11E-05    | 0.166225641  | 0.000308961 | -0.2027665  | 1.01E-05   | -0.01736 |
| 0.120731598 | 0.073327163  | 0.113536011 | -0.33743603 | 6.71E-14   | 0.253542 |
| 0.33202622  | 0.04740787   | 0.30662851  | 0.100037722 | 0.03065948 | 0.431402 |
| 0.001369731 | -0.149144298 | 0.001227142 | -0.31129174 | 5.95E-12   | 0.142935 |
| 0.288983181 | -0.055167248 | 0.234091344 | -0.48123229 | 1.92E-28   | 0.061928 |
| 0.127191817 | -0.079008063 | 0.088106837 | -0.17728401 | 0.00011743 | -0.0548  |
| 0.14763476  | 0.070660115  | 0.127310949 | -0.40686351 | 4.80E-20   | 0.406352 |
| 3.96E-06    | 0.208117603  | 5.76E-06    | -0.08437918 | 0.06848339 | -0.03862 |
| 0.824548574 | -0.02196288  | 0.63592285  | -0.3942345  | 8.15E-19   | 0.064093 |
| 0.879645179 | 0.005909312  | 0.898655325 | 0.303250118 | 2.17E-11   | 0.061448 |
| 0.001771535 | 0.139105409  | 0.002589373 | -0.03031454 | 0.51343574 | -0.07804 |
| 0.000135467 | -0.185126329 | 5.70E-05    | -0.30137957 | 2.92E-11   | 0.232139 |
| 0.878701417 | -0.014184873 | 0.759809026 | 0.009620209 | 0.83574269 | 0.191235 |
| 0.553622501 | 0.019919596  | 0.667664833 | -0.1712512  | 0.00020052 | -0.02326 |
| 0.127904125 | 0.07471144   | 0.106862926 | -0.38484354 | 6.20E-18   | 0.398646 |
| 0.655557734 | 0.008864916  | 0.848476386 | 0.380196222 | 1.65E-17   | 0.108382 |
| 0.003672691 | 0.134875174  | 0.003497842 | -0.35025877 | 6.33E-15   | -0.25716 |
| 0.706099354 | 0.01021241   | 0.825788339 | -0.45008768 | 1.13E-24   | -0.0232  |

|             |              |             |             |            |          |
|-------------|--------------|-------------|-------------|------------|----------|
| 0.295726086 | 0.03582043   | 0.439960822 | -0.16507016 | 0.00034066 | 0.269023 |
| 0.460855028 | 0.030087463  | 0.516597    | -0.24705571 | 6.35E-08   | 0.471066 |
| 0.337191681 | -0.056827138 | 0.220294872 | -0.50541657 | 1.20E-31   | -0.08017 |
| 0.01988053  | -0.113281588 | 0.014310866 | -0.39277176 | 1.12E-18   | -0.12965 |
| 0.07024666  | -0.088734144 | 0.055339212 | -0.17816064 | 0.00010849 | 0.345685 |
| 8.62E-05    | 0.170360955  | 0.000216674 | -0.08475753 | 0.06724829 | 0.052562 |
| 0.047519406 | 0.094388477  | 0.041466044 | -0.03057589 | 0.50980977 | 0.42937  |
| 0.50549889  | -0.034759991 | 0.453626317 | -0.29634685 | 6.39E-11   | 0.097763 |
| 8.61E-13    | -0.340332588 | 3.97E-14    | -0.3020248  | 2.64E-11   | -0.11144 |
| 4.31E-08    | 0.245962261  | 7.29E-08    | -0.28138526 | 6.02E-10   | -0.04211 |
| 5.29E-05    | -0.196452733 | 1.91E-05    | -0.12428735 | 0.00716432 | 0.369738 |
| 0.089117831 | 0.078271469  | 0.091119731 | -0.21446109 | 2.92E-06   | 0.109981 |
| 0.035835247 | 0.099085151  | 0.03229176  | -0.13593515 | 0.00324645 | -0.09448 |
| 3.82E-12    | 0.306845278  | 1.22E-11    | -0.32928593 | 2.85E-13   | 0.009478 |
| 0.002454944 | 0.123750112  | 0.00741973  | -0.341322   | 3.32E-14   | 0.10642  |
| 0.052773823 | 0.089045911  | 0.054484724 | -0.37953395 | 1.90E-17   | 0.206028 |
| 0.12773642  | 0.074766997  | 0.106601717 | 0.028651012 | 0.53682513 | 0.35305  |
| 0.006431863 | 0.118238818  | 0.010549091 | -0.18678276 | 4.88E-05   | 0.065603 |
| 0.226042343 | -0.061692435 | 0.183228545 | -0.18078268 | 8.54E-05   | 0.239946 |
| 0.233178993 | -0.052169141 | 0.260534115 | -0.00809812 | 0.86144444 | -0.10392 |
| 0.000500505 | 0.152627492  | 0.000936717 | -0.11996731 | 0.00946059 | 0.322256 |
| 0.036152935 | 0.094291581  | 0.041676388 | -0.05337808 | 0.24963372 | 0.547849 |
| 0.002837098 | 0.137015249  | 0.003007269 | -0.14689872 | 0.00145614 | 0.123086 |
| 1.21E-07    | 0.236789763  | 2.25E-07    | -0.24577527 | 7.46E-08   | 0.070946 |
| 0.012091466 | 0.108624723  | 0.018871441 | -0.46280584 | 3.64E-26   | -0.02551 |
| 0.004522302 | 0.118554618  | 0.010342295 | -0.45536069 | 2.77E-25   | -0.04907 |
| 0.163552653 | 0.0568548    | 0.220069986 | -0.24469204 | 8.54E-08   | 0.115223 |
| 0.001961842 | 0.143863565  | 0.001828166 | -0.23610691 | 2.45E-07   | 0.282813 |
| 0.014952857 | 0.115553408  | 0.01246098  | -0.20170295 | 1.12E-05   | 0.255796 |
| 0.236039904 | 0.051070475  | 0.270721118 | -0.31235476 | 5.00E-12   | 0.062394 |
| 0.872886943 | -0.001630875 | 0.971960862 | -0.36355362 | 4.87E-16   | 0.308171 |
| 0.002035829 | -0.147113794 | 0.001432614 | -0.06231883 | 0.1788129  | 0.206653 |
| 0.023040095 | 0.096930038  | 0.036260415 | -0.17762518 | 0.00011387 | 0.213613 |
| 4.93E-06    | 0.212986823  | 3.42E-06    | -0.02941765 | 0.52598016 | 0.123506 |
| 0.044283198 | 0.090466981  | 0.050727654 | -0.41502137 | 7.21E-21   | 0.131184 |
| 0.000455234 | 0.168555166  | 0.000253243 | -0.01421583 | 0.75930091 | 0.204466 |
| 0.000163409 | 0.175153342  | 0.000142148 | -0.40845802 | 3.33E-20   | 0.130191 |
| 0.164952512 | 0.060915309  | 0.188818054 | 0.252829824 | 3.04E-08   | -0.17127 |
| 0.233726352 | -0.059212278 | 0.201503477 | 0.581186703 | 1.53E-43   | 0.020417 |
| 0.021802642 | 0.109866068  | 0.017546253 | -0.04971537 | 0.28365618 | 0.40051  |
| 0.000343299 | -0.165933246 | 0.000316711 | 0.337976637 | 6.09E-14   | 0.266344 |
| 0.624263326 | -0.031848782 | 0.492342591 | -0.1375352  | 0.00289794 | 0.019696 |
| 0.094613566 | 0.071783101  | 0.121360671 | -0.11111429 | 0.01629644 | -0.18734 |
| 0.909539302 | -0.002524279 | 0.956613264 | 0.284456711 | 3.84E-10   | -0.42676 |
| 0.005332759 | -0.140732796 | 0.002301437 | -0.20723083 | 6.32E-06   | -0.02851 |

|             |              |             |             |            |          |
|-------------|--------------|-------------|-------------|------------|----------|
| 0.726157837 | -0.015975432 | 0.730599042 | -0.10307393 | 0.02591971 | -0.06495 |
| 0.044138969 | -0.104947059 | 0.02332228  | -0.19996656 | 1.34E-05   | 0.157895 |
| 0.017814899 | -0.117320987 | 0.011171077 | -0.53782882 | 2.28E-36   | -0.19323 |
| 0.023874499 | 0.091433311  | 0.048298419 | -0.60983328 | 6.66E-49   | -0.19214 |
| 0.645006808 | 0.01219562   | 0.792663838 | -0.39913697 | 2.75E-19   | -0.035   |
| 0.000126992 | -0.182827419 | 7.07E-05    | -0.10111251 | 0.02890308 | 0.223197 |
| 0.08419519  | -0.087145302 | 0.059868583 | -0.37396494 | 6.00E-17   | 0.044881 |
| 0.000486578 | -0.175895159 | 0.000133036 | -0.29088737 | 1.47E-10   | -0.0952  |
| 0.000463945 | 0.148839552  | 0.001256143 | -0.21266984 | 3.54E-06   | -0.16976 |
| 0.006890362 | -0.130321357 | 0.004791009 | -0.16741949 | 0.00027912 | 0.076537 |
| 0.867736966 | 0.00608714   | 0.895622721 | -0.39982133 | 2.36E-19   | 0.178285 |
| 0.884795367 | 0.002772389  | 0.95235364  | -0.51275279 | 1.13E-32   | 0.232637 |
| 0.122318308 | -0.078154185 | 0.091606988 | -0.30964695 | 7.78E-12   | -0.13311 |
| 0.003058735 | -0.141282429 | 0.002210999 | -0.27399461 | 1.74E-09   | -0.04446 |
| 0.325338152 | -0.048514853 | 0.295458878 | -0.21355172 | 3.22E-06   | -0.00415 |
| 4.91E-05    | 0.195608213  | 2.07E-05    | -0.31386473 | 3.90E-12   | 0.233189 |
| 0.001021512 | -0.154151579 | 0.000830828 | 0.374494226 | 5.38E-17   | 0.236883 |
| 7.38E-05    | -0.193345752 | 2.59E-05    | -0.29374209 | 9.53E-11   | -0.04165 |
| 3.07E-07    | -0.235882161 | 2.51E-07    | -0.1422108  | 0.00206558 | 0.331824 |
| 0.054634894 | 0.095433036  | 0.039254834 | -0.31723058 | 2.23E-12   | 0.316314 |
| 0.000529382 | 0.153218364  | 0.000894267 | -0.24459501 | 8.65E-08   | -0.39331 |
| 0.287015802 | -0.057265187 | 0.216752927 | -0.49031046 | 1.29E-29   | 0.062569 |
| 0.034643111 | 0.086946895  | 0.060455131 | -0.13085346 | 0.00462034 | 0.271297 |
| 2.01E-10    | 0.285181732  | 3.45E-10    | -0.42139077 | 1.58E-21   | -0.00295 |
| 0.114816822 | 0.071161524  | 0.124626796 | -0.19259443 | 2.79E-05   | -0.00738 |
| 0.380000049 | -0.037806516 | 0.415010709 | -0.18525502 | 5.64E-05   | 0.325443 |
| 0.019220255 | 0.104972668  | 0.023288389 | -0.13204852 | 0.00425687 | -0.10205 |
| 0.06577202  | 0.078105645  | 0.09180926  | -0.15229066 | 0.00096174 | 0.282481 |
| 0.108619013 | 0.069058901  | 0.136183369 | -0.34554727 | 1.53E-14   | -0.05628 |
| 0.586039529 | -0.022842229 | 0.622460558 | 0.150021041 | 0.00114711 | -0.01218 |
| 1.48E-06    | 0.214576164  | 2.88E-06    | -0.08735233 | 0.05926156 | 0.04245  |
| 0.654772285 | -0.029907682 | 0.519106957 | -0.32927252 | 2.85E-13   | -0.09283 |
| 0.311313769 | 0.040319624  | 0.38466507  | -0.52289199 | 3.95E-34   | 0.061393 |
| 0.053965401 | 0.085448498  | 0.065039789 | -0.39120576 | 1.58E-18   | 0.131417 |
| 0.003729203 | 0.120467926  | 0.009164566 | -0.35189369 | 4.65E-15   | -0.05729 |
| 0.393330946 | 0.028569335  | 0.537987121 | -0.2268035  | 7.31E-07   | 0.225127 |
| 0.00019162  | 0.182392332  | 7.36E-05    | -0.24722927 | 6.21E-08   | 0.156198 |
| 0.244044949 | -0.056152167 | 0.225833194 | 0.450012278 | 1.15E-24   | 0.276089 |
| 0.279038168 | 0.040821003  | 0.378776906 | -0.42565509 | 5.63E-22   | 0.336859 |
| 0.191374869 | 0.049742156  | 0.283396565 | -0.53604582 | 4.27E-36   | -0.18228 |
| 0.413183121 | 0.027296066  | 0.556262635 | -0.40158573 | 1.59E-19   | 0.023702 |
| 0.664457519 | -0.016938502 | 0.715044717 | -0.34272771 | 2.57E-14   | 0.302708 |
| 3.98E-07    | -0.245603644 | 7.62E-08    | -0.27050744 | 2.83E-09   | 0.128568 |
| 0.647492391 | 0.012911039  | 0.780802213 | -0.12941877 | 0.00509355 | 0.14163  |
| 0.107280959 | -0.075210974 | 0.104532368 | -0.48376752 | 9.11E-29   | -0.01899 |

|             |              |             |             |            |          |
|-------------|--------------|-------------|-------------|------------|----------|
| 0.369382928 | 0.032689732  | 0.480980619 | -0.56999499 | 1.38E-41   | -0.10869 |
| 0.023023378 | -0.106391041 | 0.021476672 | -0.14968067 | 0.00117759 | -0.03252 |
| 0.393941611 | -0.041407043 | 0.371965006 | -0.10995621 | 0.01745327 | -0.24102 |
| 0.050592853 | 0.086587709  | 0.06152906  | -0.32557091 | 5.42E-13   | -0.13303 |
| 0.26075474  | -0.065396481 | 0.158258406 | -0.22552946 | 8.47E-07   | 0.127165 |
| 0.107755391 | 0.072699232  | 0.116668929 | -0.50823598 | 4.86E-32   | -0.01682 |
| 0.167627697 | 0.07159806   | 0.122325935 | -0.3179629  | 1.97E-12   | -0.31398 |
| 2.47E-12    | -0.325873055 | 5.15E-13    | -0.2975918  | 5.27E-11   | 0.163945 |
| 0.492801666 | -0.021318881 | 0.645859013 | -0.21834996 | 1.90E-06   | 0.109932 |
| 0.255930128 | 0.049456135  | 0.28617751  | -0.35622903 | 2.03E-15   | -0.06099 |
| 0.022145613 | 0.101569613  | 0.028182676 | -0.20536447 | 7.68E-06   | 0.157713 |
| 9.30E-05    | 0.172571188  | 0.00017864  | -0.38819622 | 3.03E-18   | 0.161776 |
| 0.020292965 | -0.115249588 | 0.012695472 | -0.35102746 | 5.47E-15   | -0.00807 |
| 0.012026907 | 0.105731992  | 0.022302687 | -0.1636349  | 0.00038426 | 0.285937 |
| 0.008668814 | -0.13393948  | 0.003734294 | -0.38672436 | 4.15E-18   | -0.02713 |
| 0.424174933 | -0.033769081 | 0.466608725 | -0.22695501 | 7.19E-07   | -0.21336 |
| 0.180539178 | -0.064835905 | 0.161863081 | -0.1724043  | 0.00018128 | 0.222932 |
| 0.054947203 | 0.082399541  | 0.075252363 | -0.30546566 | 1.53E-11   | -0.09373 |
| 0.041321174 | -0.103280794 | 0.025621112 | -0.37685565 | 3.31E-17   | 0.246496 |
| 0.507041313 | -0.044448529 | 0.337840741 | -0.58222602 | 1.00E-43   | -0.04849 |
| 1.24E-05    | 0.201242694  | 1.18E-05    | -0.27879144 | 8.76E-10   | 0.134757 |
| 0.361827594 | -0.045193837 | 0.329794597 | -0.198189   | 1.60E-05   | 0.069592 |
| 0.588672191 | 0.006427417  | 0.889824052 | -0.25063213 | 4.03E-08   | -0.06499 |
| 0.002426178 | 0.131633275  | 0.004380123 | -0.16322548 | 0.00039762 | 0.026538 |
| 0.444286665 | -0.047362081 | 0.307096451 | -0.29881272 | 4.36E-11   | 0.213918 |
| 0.178348107 | 0.057933232  | 0.211430243 | -0.47772245 | 5.35E-28   | 0.023628 |
| 0.086485719 | -0.079129183 | 0.087619174 | -0.46340267 | 3.08E-26   | 0.114083 |
| 0.028191023 | 0.090720593  | 0.050080434 | -0.12179884 | 0.00841726 | 0.248545 |
| 0.263723226 | -0.059036702 | 0.202845711 | -0.10984654 | 0.01756645 | 0.287478 |
| 0.000903302 | 0.146902838  | 0.001455682 | -0.24445557 | 8.80E-08   | 0.257035 |
| 4.88E-13    | 0.337583235  | 6.54E-14    | -0.18073427 | 8.58E-05   | 0.186733 |
| 0.583365598 | -0.023233226 | 0.616514479 | -0.36273574 | 5.72E-16   | -0.07229 |
| 0.129939306 | 0.070293216  | 0.129303284 | -0.2309149  | 4.53E-07   | 0.392694 |
| 0.025115793 | -0.111075187 | 0.016334383 | -0.32257077 | 9.07E-13   | -0.05012 |
| 0.278524383 | 0.047798355  | 0.302657037 | -0.40785373 | 3.82E-20   | 0.08669  |
| 0.003196873 | 0.122907378  | 0.007836805 | -0.25260832 | 3.12E-08   | 0.080384 |
| 0.047792743 | 0.09016678   | 0.051502779 | -0.24239423 | 1.14E-07   | 0.3392   |
| 0.497642699 | -0.027398588 | 0.554780012 | -0.26530838 | 5.79E-09   | 0.042326 |
| 0.000126186 | 0.168862454  | 0.000246638 | -0.13727668 | 0.00295184 | -0.17357 |
| 0.38868674  | 0.034151192  | 0.461578301 | -0.31437041 | 3.59E-12   | 0.011371 |
| 0.044277089 | -0.101923181 | 0.027636075 | -0.48307662 | 1.12E-28   | 0.105142 |
| 0.213618208 | 0.054910424  | 0.23627934  | -0.16005992 | 0.00051647 | -0.00235 |
| 0.425890022 | -0.052215701 | 0.26010832  | -0.26118291 | 1.01E-08   | -0.01439 |
| 0.002194881 | 0.141156215  | 0.002231474 | -0.31593514 | 2.77E-12   | 0.056653 |
| 1.04E-18    | 0.395392125  | 6.32E-19    | -0.04433819 | 0.33904254 | 0.030239 |

|             |              |             |             |            |          |
|-------------|--------------|-------------|-------------|------------|----------|
| 0.154869369 | 0.070075229  | 0.130498379 | -0.10452171 | 0.02389146 | -0.0997  |
| 0.14889579  | -0.078442953 | 0.090411037 | -0.12958409 | 0.00503688 | -0.29363 |
| 0.531369029 | 0.006080277  | 0.895739728 | -0.43755056 | 2.92E-23   | 0.130966 |
| 0.003596622 | 0.143524995  | 0.001874662 | -0.32639889 | 4.70E-13   | -0.04008 |
| 0.482917338 | -0.03524593  | 0.447334769 | -0.00591277 | 0.89859635 | 0.074006 |
| 3.62E-06    | 0.204024834  | 8.83E-06    | -0.42601474 | 5.16E-22   | 0.064467 |
| 0.042115449 | -0.09358535  | 0.043236851 | -0.33704811 | 7.20E-14   | -0.0597  |
| 4.03E-05    | 0.184975666  | 5.79E-05    | -0.24583287 | 7.41E-08   | -0.08907 |
| 0.078518371 | 0.064283021  | 0.165478459 | -0.33737741 | 6.78E-14   | -0.3168  |
| 0.000787048 | 0.164978885  | 0.00034329  | -0.26582234 | 5.40E-09   | 0.126245 |
| 0.432919794 | -0.039602223 | 0.393186593 | -0.29890063 | 4.30E-11   | 0.023034 |
| 0.108905805 | -0.090640784 | 0.05028336  | -0.37251119 | 8.07E-17   | 0.026463 |
| 0.411737618 | 0.031440858  | 0.497905235 | -0.05428047 | 0.2417071  | 0.426972 |
| 0.026986157 | 0.093091096  | 0.044357972 | -0.12680817 | 0.0060679  | 0.281855 |
| 0.405563204 | -0.036408546 | 0.432484623 | -0.12358508 | 0.00749981 | -0.16085 |
| 0.039831874 | -0.095171545 | 0.039798798 | -0.21652546 | 2.33E-06   | 0.303006 |
| 0.005714393 | 0.115166407  | 0.012760347 | -0.07510994 | 0.10500047 | 0.173183 |
| 0.05470391  | 0.088318849  | 0.056494714 | -0.10395623 | 0.02466671 | 0.133488 |
| 3.48E-05    | 0.194156531  | 2.39E-05    | 0.173359803 | 0.00016666 | 0.01651  |
| 0.431603016 | -0.044427878 | 0.33806546  | -0.41149007 | 1.65E-20   | -0.03044 |
| 0.094329436 | -0.081116133 | 0.079924682 | -0.43171854 | 1.26E-22   | -0.0314  |
| 0.126422814 | -0.070969961 | 0.125647039 | -0.10111067 | 0.02890602 | 0.180922 |
| 0.351611091 | 0.039330778  | 0.396440407 | -0.35454837 | 2.80E-15   | 0.153046 |
| 1.08E-17    | 0.381529349  | 1.25E-17    | -0.3142745  | 3.65E-12   | -0.0662  |
| 0.598632425 | 0.015411804  | 0.739754051 | -0.27634746 | 1.24E-09   | -0.0474  |
| 0.002519795 | 0.143027244  | 0.001944988 | -0.4731623  | 1.99E-27   | 0.149102 |
| 0.094779558 | -0.094012749 | 0.042286712 | 0.037180014 | 0.42278969 | 0.131249 |
| 0.039712278 | -0.099457995 | 0.03164424  | -0.22402012 | 1.01E-06   | -0.03176 |
| 0.215029011 | 0.047828249  | 0.30235441  | -0.3051136  | 1.61E-11   | -0.26115 |
| 0.236717859 | 0.057274303  | 0.216679654 | -0.2964804  | 6.26E-11   | 0.14187  |
| 5.55E-06    | -0.216834853 | 2.25E-06    | 0.064867552 | 0.16165795 | 0.266896 |
| 0.437421592 | -0.036584825 | 0.430258116 | -0.22848229 | 6.02E-07   | -0.12153 |
| 0.13118802  | 0.067277581  | 0.146604636 | -0.48920847 | 1.80E-29   | 0.025565 |
| 0.932515951 | 0.000878194  | 0.984899272 | -0.27062499 | 2.78E-09   | -0.04446 |
| 0.000168559 | -0.179775014 | 9.37E-05    | -0.10004864 | 0.03064119 | 0.069795 |
| 0.000527912 | 0.152125132  | 0.000974263 | -0.10375783 | 0.02494382 | 0.036342 |
| 0.011464842 | -0.123723793 | 0.00743245  | -0.17778273 | 0.00011226 | 0.410693 |
| 0.045370093 | -0.107532759 | 0.020108453 | -0.34461238 | 1.81E-14   | 0.3783   |
| 1.62E-05    | 0.207960218  | 5.85E-06    | -0.2042786  | 8.60E-06   | 0.066455 |
| 0.004488283 | 0.121929371  | 0.008346973 | -0.02281038 | 0.62294594 | 0.024515 |
| 0.001749625 | 0.138116752  | 0.002779957 | -0.2997938  | 3.74E-11   | 0.122598 |
| 0.69538702  | -0.035177086 | 0.448223092 | -0.27285941 | 2.04E-09   | 0.219925 |
| 0.026036672 | 0.095680864  | 0.038745114 | -0.45401103 | 3.98E-25   | 0.093355 |
| 0.520994191 | 0.029637896  | 0.522885222 | -0.24301895 | 1.05E-07   | 0.239834 |
| 0.99573955  | -0.00990457  | 0.830959465 | -0.39380289 | 8.96E-19   | 0.053269 |

|             |              |             |             |            |          |
|-------------|--------------|-------------|-------------|------------|----------|
| 0.099876758 | 0.063825677  | 0.168514593 | -0.22283819 | 1.15E-06   | 0.212369 |
| 4.03E-05    | 0.192105129  | 2.92E-05    | -0.27538803 | 1.42E-09   | 0.256489 |
| 0.069353691 | 0.091127145  | 0.049057317 | -0.40660262 | 5.09E-20   | 0.30657  |
| 0.748100253 | -0.018401193 | 0.691646937 | -0.20745196 | 6.17E-06   | -0.12361 |
| 0.757628043 | -0.015385582 | 0.740180886 | -0.11781999 | 0.01082901 | 0.194137 |
| 0.000253273 | 0.162749423  | 0.000413695 | -0.33261077 | 1.59E-13   | 0.139107 |
| 0.049717401 | -0.092846441 | 0.044921912 | 0.013772153 | 0.76659232 | 0.03759  |
| 0.154147557 | 0.05900842   | 0.203062519 | -0.31405127 | 3.78E-12   | 0.227871 |
| 0.67151235  | 0.013343404  | 0.773657969 | -0.45303153 | 5.17E-25   | -0.04836 |
| 0.65717763  | 0.009169163  | 0.843342065 | -0.17412144 | 0.0001558  | 0.141634 |
| 1.77E-10    | 0.281979345  | 5.52E-10    | -0.23202552 | 3.98E-07   | 0.086685 |
| 6.67E-06    | 0.20014705   | 1.31E-05    | -0.26228094 | 8.73E-09   | -0.17468 |
| 0.011161829 | 0.111024108  | 0.016384055 | -0.38195528 | 1.14E-17   | 0.355487 |
| 6.54E-05    | 0.171880336  | 0.000189798 | -0.2874473  | 2.46E-10   | -0.12919 |
| 0.216512137 | 0.050977656  | 0.271594048 | -0.3252745  | 5.71E-13   | 0.017431 |
| 1.77E-09    | 0.279016476  | 8.48E-10    | -0.39459789 | 7.53E-19   | 0.110184 |
| 0.009655712 | 0.12068255   | 0.009040198 | -0.16289215 | 0.00040881 | 0.210553 |
| 0.035653566 | -0.093026441 | 0.044506423 | -0.42486087 | 6.84E-22   | 0.160184 |
| 0.066982857 | 0.091404182  | 0.048370196 | -0.11091989 | 0.01648581 | 0.082035 |
| 0.014680259 | 0.112375931  | 0.015113131 | -0.40232541 | 1.35E-19   | 0.080094 |
| 0.000108268 | 0.170177353  | 0.000220153 | -0.28539095 | 3.34E-10   | -0.05117 |
| 0.429688147 | 0.034131652  | 0.461834809 | -0.3718679  | 9.20E-17   | -0.05825 |
| 0.247834127 | 0.055090714  | 0.234741869 | -0.39835975 | 3.27E-19   | 0.203906 |
| 0.03978094  | 0.093361285  | 0.043742108 | -0.15713833 | 0.00065469 | 0.338365 |
| 0.395352567 | -0.036196023 | 0.435177747 | -0.15437703 | 0.00081614 | 0.128444 |
| 0.215146719 | -0.064557992 | 0.163672888 | -0.38317164 | 8.84E-18   | -0.27889 |
| 1.23E-17    | 0.37458342   | 5.29E-17    | -0.29755994 | 5.30E-11   | 0.004646 |
| 4.54E-07    | 0.231258038  | 4.35E-07    | -0.39601637 | 5.51E-19   | -0.23822 |
| 0.272184737 | -0.053213586 | 0.251097892 | -0.22601395 | 8.01E-07   | 0.30047  |
| 0.065048881 | -0.095860758 | 0.03837864  | -0.24588588 | 7.36E-08   | -0.014   |
| 0.00454937  | 0.129325918  | 0.005125635 | -0.43989826 | 1.60E-23   | 0.15249  |
| 0.69096626  | -0.01520746  | 0.743082392 | -0.32793528 | 3.60E-13   | 0.071515 |
| 0.003185277 | -0.135735445 | 0.00329252  | -0.24435715 | 8.91E-08   | -0.00363 |
| 0.041592249 | -0.097337055 | 0.035480644 | -0.42989709 | 1.99E-22   | 0.17036  |
| 0.91518275  | -0.005403242 | 0.907293561 | -0.31540723 | 3.02E-12   | 0.090154 |
| 0.00017415  | -0.178133687 | 0.000108754 | -0.3535676  | 3.38E-15   | 0.187358 |
| 1.23E-07    | 0.233410278  | 3.38E-07    | -0.0948661  | 0.04044225 | 0.235595 |
| 0.102767714 | -0.086121709 | 0.062945768 | -0.33872349 | 5.32E-14   | 0.208972 |
| 0.798881952 | -6.98E-05    | 0.998799982 | -0.40497968 | 7.38E-20   | 0.211067 |
| 0.091360058 | 0.062106849  | 0.180298283 | -0.33557283 | 9.37E-14   | 0.174651 |
| 0.096038606 | 0.072860332  | 0.115858776 | -0.10435283 | 0.02412075 | 0.562892 |
| 4.42E-12    | -0.324635528 | 6.37E-13    | -0.28801575 | 2.26E-10   | 0.015633 |
| 1.73E-05    | 0.189583775  | 3.73E-05    | -0.37184607 | 9.24E-17   | -0.12669 |
| 0.062948301 | 0.082103521  | 0.076309825 | -0.51181361 | 1.53E-32   | -0.06574 |
| 0.000741858 | -0.16451914  | 0.000356823 | -0.19940614 | 1.42E-05   | 0.061797 |



|             |              |             |             |            |          |
|-------------|--------------|-------------|-------------|------------|----------|
| 0.07535925  | 0.069716107  | 0.132485838 | -0.40789276 | 3.79E-20   | 0.071665 |
| 0.00327896  | 0.139293108  | 0.002554565 | -0.22930351 | 5.47E-07   | 0.311028 |
| 0.026040476 | -0.112262032 | 0.015216771 | -0.12684659 | 0.00605243 | 0.44689  |
| 0.249426719 | 0.046013162  | 0.321093335 | -0.37014281 | 1.31E-16   | 0.089881 |
| 0.912064009 | -0.006668267 | 0.885723255 | -0.11600674 | 0.0121182  | 0.1606   |
| 0.330277962 | -0.053792063 | 0.245975079 | -0.25483789 | 2.34E-08   | 0.044371 |
| 0.664936267 | -0.019714626 | 0.670883183 | -0.1132158  | 0.01436786 | 0.18851  |
| 0.462491605 | -0.036910484 | 0.426162329 | -0.21820575 | 1.93E-06   | -0.26751 |
| 7.63E-07    | 0.230775283  | 4.61E-07    | 0.126203959 | 0.006316   | 0.26944  |
| 7.04E-10    | 0.284628951  | 3.74E-10    | -0.33149941 | 1.93E-13   | -0.07915 |
| 0.473460519 | -0.040216949 | 0.385877729 | -0.44586372 | 3.43E-24   | -0.02405 |
| 0.281268067 | 0.036892989  | 0.426381787 | -0.40887847 | 3.02E-20   | -0.20969 |
| 0.035238023 | 0.086193504  | 0.062725765 | -0.24586989 | 7.37E-08   | -0.11417 |
| 0.016404762 | -0.117422927 | 0.011100429 | -0.41407122 | 9.02E-21   | 0.253691 |
| 0.00235823  | -0.153899936 | 0.000847511 | -0.04477633 | 0.33428656 | -0.0976  |
| 0.003505903 | -0.153606799 | 0.000867336 | -0.20106055 | 1.20E-05   | -0.05268 |
| 8.21E-08    | -0.26011337  | 1.17E-08    | -0.38918191 | 2.45E-18   | 0.128892 |
| 0.121228378 | 0.06869268   | 0.138277951 | -0.31545636 | 3.00E-12   | 0.04264  |
| 0.810809654 | -0.021768117 | 0.638921037 | -0.51706341 | 2.75E-33   | -0.08913 |
| 0.016367568 | -0.112018076 | 0.015440855 | -0.33118714 | 2.04E-13   | 0.268122 |
| 0.918094792 | 0.005924742  | 0.89839212  | -0.22361143 | 1.05E-06   | -0.04619 |
| 0.104817279 | 0.066712128  | 0.150036778 | -0.14458568 | 0.00173251 | -0.11889 |
| 0.158945941 | 0.050610141  | 0.275069252 | -0.39306455 | 1.05E-18   | -0.02895 |
| 0.00227258  | -0.149463949 | 0.001197387 | -0.33160016 | 1.90E-13   | 0.067731 |
| 0.000118607 | 0.168971485  | 0.000244333 | -0.21720014 | 2.16E-06   | 0.426554 |
| 0.097710095 | 0.066076763  | 0.153965768 | -0.19621651 | 1.95E-05   | -0.05964 |
| 0.06687539  | -0.095003663 | 0.040151383 | -0.00839993 | 0.85633565 | 0.079514 |
| 0.000688005 | 0.166264642  | 0.00030794  | -0.49695137 | 1.69E-30   | -0.19357 |
| 0.894875342 | 0.004840996  | 0.916903466 | -0.15102811 | 0.00106113 | 0.270272 |
| 0.309090697 | 0.048726307  | 0.293356566 | -0.31305244 | 4.46E-12   | 0.070454 |
| 6.58E-05    | 0.173290852  | 0.000167672 | -0.22573309 | 8.27E-07   | 0.129611 |
| 0.000624076 | 0.149967013  | 0.001151901 | -0.29503877 | 7.82E-11   | 0.17102  |
| 0.95722596  | -0.003062074 | 0.94738197  | -0.29621531 | 6.52E-11   | -0.00788 |
| 0.573148677 | -0.025303434 | 0.585455247 | -0.02328114 | 0.61578757 | 0.082117 |
| 8.60E-07    | -0.229661591 | 5.25E-07    | -0.25894004 | 1.36E-08   | -0.11877 |
| 0.629499014 | -0.023364673 | 0.614521088 | 0.007287174 | 0.87519976 | 0.002783 |
| 0.114902118 | 0.074557737  | 0.107588222 | -0.13778052 | 0.00284763 | 0.165399 |
| 0.219686725 | 0.050942985  | 0.27192061  | 0.015470793 | 0.73879415 | -0.02371 |
| 0.225120437 | -0.066198653 | 0.153206045 | -0.46285002 | 3.59E-26   | 0.096577 |
| 0.850083402 | 0.007477212  | 0.871972786 | -0.11922329 | 0.00991626 | 0.284082 |
| 1.08E-07    | 0.248146064  | 5.53E-08    | -0.18631431 | 5.10E-05   | -0.00328 |
| 0.51081673  | 0.020823777  | 0.65354109  | -0.31998065 | 1.41E-12   | 0.184083 |
| 0.094799058 | 0.094160231  | 0.041962962 | -0.35083847 | 5.67E-15   | -0.17803 |
| 6.35E-11    | 0.301439297  | 2.89E-11    | -0.11997368 | 0.00945677 | -0.15176 |
| 0.498283449 | -0.032813095 | 0.479325933 | -0.12493265 | 0.00686795 | 0.023533 |

|             |              |             |             |            |          |
|-------------|--------------|-------------|-------------|------------|----------|
| 0.353345717 | -0.052851886 | 0.254338449 | -0.23312919 | 3.49E-07   | 0.317356 |
| 0.002663866 | -0.145413899 | 0.00162845  | -0.41826327 | 3.35E-21   | 0.136295 |
| 0.000749644 | 0.159630647  | 0.000534921 | -0.27669664 | 1.18E-09   | 0.397234 |
| 1.26E-11    | -0.315889759 | 2.79E-12    | -0.38350387 | 8.24E-18   | -0.15714 |
| 1.35E-05    | 0.200949947  | 1.21E-05    | -0.07422833 | 0.1091557  | 0.302408 |
| 0.024138279 | 0.095887401  | 0.038324612 | -0.0469796  | 0.31102363 | 0.407082 |
| 0.007167751 | 0.116527344  | 0.011734855 | -0.40442847 | 8.36E-20   | 0.016164 |
| 0.002197453 | 0.139702245  | 0.002480164 | -0.15110773 | 0.00105459 | 0.356703 |
| 0.090498147 | 0.067389637  | 0.145931645 | -0.44101472 | 1.20E-23   | -0.07433 |
| 0.136045218 | 0.066214812  | 0.15310554  | -0.4170189  | 4.50E-21   | 0.117008 |
| 0.079479776 | -0.098745302 | 0.0328918   | -0.1806948  | 8.61E-05   | 0.266224 |
| 0.008314944 | -0.129422565 | 0.005092247 | -0.06014806 | 0.19445847 | -0.13131 |
| 0.005241068 | 0.13126887   | 0.004490934 | 0.045825051 | 0.32307774 | -0.06962 |
| 0.333911745 | 0.032293546  | 0.486315634 | -0.34190751 | 2.98E-14   | -0.19496 |
| 0.651991224 | -0.02183015  | 0.637965463 | -0.17952654 | 9.58E-05   | 0.300812 |
| 0.481322503 | 0.022759335  | 0.623724355 | -0.21288954 | 3.46E-06   | -0.03266 |
| 0.001555148 | 0.135606834  | 0.003322503 | 0.530679006 | 2.77E-35   | 0.107153 |
| 0.097647107 | 0.070315349  | 0.12918242  | -0.38765647 | 3.40E-18   | 0.021603 |
| 0.000822359 | 0.158707273  | 0.000576697 | -0.20039622 | 1.28E-05   | 0.208602 |
| 0.419759391 | -0.040274034 | 0.385203238 | 0.093726157 | 0.04292186 | 0.286061 |
| 0.282838911 | -0.052257408 | 0.259727319 | -0.31747261 | 2.14E-12   | 0.194612 |
| 0.018188366 | -0.125163573 | 0.006764591 | -0.29449455 | 8.50E-11   | -0.19458 |
| 0.00383629  | -0.137542869 | 0.002896358 | 0.423838249 | 8.77E-22   | 0.241519 |
| 1.14E-06    | 0.22114578   | 1.39E-06    | -0.25247884 | 3.18E-08   | 0.138832 |
| 0.002883936 | 0.132063112  | 0.004252593 | -0.16257234 | 0.00041983 | 0.205157 |
| 0.460608401 | 0.025916794  | 0.576394091 | -0.18936948 | 3.81E-05   | 0.165238 |
| 0.1240217   | -0.072883092 | 0.115744674 | -0.29445914 | 8.54E-11   | 0.020373 |
| 1.51E-07    | 0.245433643  | 7.79E-08    | -0.13719641 | 0.00296876 | -0.02458 |
| 0.295083872 | 0.039722212  | 0.391753437 | -0.1146164  | 0.01319672 | -0.16553 |
| 0.017613709 | 0.10093605   | 0.029185382 | -0.24428719 | 8.98E-08   | 0.456448 |
| 7.02E-05    | -0.199677825 | 1.38E-05    | -0.26503474 | 6.01E-09   | -0.08481 |
| 0.022885403 | 0.095731798  | 0.038641053 | -0.34469573 | 1.79E-14   | 0.114713 |
| 0.233811232 | 0.045634252  | 0.325098617 | -0.33253708 | 1.61E-13   | -0.00174 |
| 0.728568094 | 0.005151704  | 0.911591258 | -0.35454266 | 2.81E-15   | -0.25793 |
| 0.259644372 | -0.060457022 | 0.192172505 | -0.13408487 | 0.00369663 | 0.248058 |
| 0.1373279   | -0.069521439 | 0.133572898 | -0.50080879 | 5.11E-31   | 0.069811 |
| 0.089859332 | -0.092791901 | 0.045048446 | -0.32199755 | 1.00E-12   | 0.314129 |
| 0.02612422  | 0.099100476  | 0.032264922 | -0.2685448  | 3.72E-09   | 0.000523 |
| 0.173054654 | -0.073543421 | 0.112472465 | -0.42372305 | 9.01E-22   | 0.068911 |
| 0.877393013 | -0.014961    | 0.747103067 | 0.027486218 | 0.55351428 | 0.091837 |
| 0.335363095 | 0.039372013  | 0.395945079 | 0.046815385 | 0.31271988 | 0.18871  |
| 0.080380068 | 0.077991346  | 0.092286966 | -0.3690427  | 1.63E-16   | 0.06602  |
| 0.257008218 | -0.062687722 | 0.176249622 | -0.24413108 | 9.16E-08   | 0.161686 |
| 0.000744898 | 0.152263253  | 0.000963804 | -0.31418572 | 3.70E-12   | 0.354858 |
| 3.52E-08    | 0.245854734  | 7.38E-08    | -0.49809501 | 1.19E-30   | 0.140927 |

|             |              |             |             |            |          |
|-------------|--------------|-------------|-------------|------------|----------|
| 0.049621024 | 0.084081511  | 0.069468139 | -0.09405935 | 0.04218419 | 0.321346 |
| 4.35E-05    | -0.19349096  | 2.55E-05    | -0.09502782 | 0.04010048 | 0.075168 |
| 0.621500843 | 0.01998509   | 0.666637761 | -0.05856345 | 0.20649588 | 0.43932  |
| 0.000136442 | 0.171388917  | 0.000198128 | -0.3699465  | 1.36E-16   | 0.049474 |
| 0.000430737 | 0.152364652  | 0.000956192 | -0.50807259 | 5.12E-32   | -0.13503 |
| 0.870611792 | 0.000968657  | 0.983343972 | -0.24075077 | 1.39E-07   | -0.24567 |
| 0.000103188 | -0.176471371 | 0.00012634  | -0.29196069 | 1.25E-10   | -0.28665 |
| 0.256041544 | -0.046646399 | 0.314471695 | -0.30394024 | 1.95E-11   | -0.17933 |
| 3.75E-08    | -0.242742448 | 1.09E-07    | -0.01992303 | 0.66761101 | -0.14009 |
| 4.99E-06    | -0.205669066 | 7.44E-06    | -0.17030018 | 0.00021782 | -0.26604 |
| 0.012042714 | -0.118875988 | 0.010135551 | -0.1704767  | 0.00021451 | -0.44252 |
| 0.744594769 | -0.016151203 | 0.727751747 | -0.05184649 | 0.263498   | -0.02752 |
| 0.162890068 | -0.06099449  | 0.188242872 | -0.18347459 | 6.66E-05   | -0.15666 |
| 0.000312765 | -0.168499407 | 0.000254459 | -0.0193378  | 0.67681567 | -0.15229 |
| 0.176095126 | -0.062721836 | 0.176013968 | -0.18750199 | 4.56E-05   | -0.43994 |
| 0.000455094 | -0.159649305 | 0.000534106 | -0.1861549  | 5.18E-05   | -0.1871  |
| 0.361244999 | 0.06201207   | 0.180965373 | -0.2280853  | 6.31E-07   | -0.20253 |
| 0.609661919 | 0.028282917  | 0.542071819 | -0.19194894 | 2.97E-05   | -0.43166 |
| 0.753539711 | 0.017627822  | 0.703983215 | -0.2461174  | 7.15E-08   | -0.07919 |
| 0.236085462 | 0.054365671  | 0.240967941 | -0.22384536 | 1.03E-06   | -0.23705 |
| 0.22141996  | -0.055576743 | 0.230632356 | -0.23985752 | 1.55E-07   | -0.31693 |
| 0.492498935 | -0.02992554  | 0.518857354 | -0.41066333 | 2.00E-20   | -0.1889  |
| 0.001941589 | -0.141948087 | 0.002105821 | -0.28377894 | 4.24E-10   | -0.04575 |
| 0.006247808 | -0.124417635 | 0.007103576 | -0.15729772 | 0.00064634 | -0.29598 |
| 0.288554773 | 0.048245516  | 0.298151198 | -0.25398378 | 2.61E-08   | -0.31062 |
| 7.78E-06    | -0.194440596 | 2.33E-05    | -0.08103317 | 0.08023461 | -0.10522 |
| 2.91E-05    | -0.18265762  | 7.18E-05    | -0.07891458 | 0.08848472 | -0.05402 |
| 0.000617845 | -0.158434926 | 0.000589586 | -0.26342865 | 7.48E-09   | -0.37701 |
| 0.301393815 | 0.057473677  | 0.21508155  | -0.2166557  | 2.29E-06   | -0.23869 |
| 0.017649964 | 0.107814007  | 0.019783283 | -0.17118968 | 0.0002016  | -0.25845 |
| 0.000642544 | -0.165886986 | 0.000317954 | -0.03488775 | 0.45196738 | -0.29387 |
| 0.133452093 | -0.068540329 | 0.139156567 | 0.028467772 | 0.53943378 | -0.27249 |
| 0.665282651 | 0.013780493  | 0.766455073 | -0.06792777 | 0.1427325  | -0.3461  |
| 0.920428391 | -0.004656044 | 0.920067373 | -0.23247846 | 3.77E-07   | -0.32482 |
| 0.000910846 | -0.146902879 | 0.001455677 | -0.20261074 | 1.02E-05   | -0.46504 |
| 0.016596317 | -0.116197382 | 0.011976558 | -0.18644061 | 5.04E-05   | -0.46053 |
| 0.113857137 | -0.06917646  | 0.135516196 | -0.36821576 | 1.92E-16   | -0.23165 |
| 0.832787055 | 0.031554648  | 0.496350197 | -0.35273078 | 3.96E-15   | -0.15649 |
| 0.763821795 | 0.010112923  | 0.827458717 | -0.06235325 | 0.17857252 | -0.24309 |
| 0.294799427 | 0.05361325   | 0.247550729 | -0.26977365 | 3.13E-09   | -0.39789 |
| 0.002554489 | -0.13687262  | 0.003037907 | 0.074495147 | 0.10788468 | -0.16112 |
| 0.002531502 | 0.14045138   | 0.002349038 | -0.19179932 | 3.01E-05   | -0.25052 |
| 0.000310898 | 0.16022157   | 0.000509679 | -0.29964629 | 3.83E-11   | -0.01268 |
| 0.103913281 | -0.063681811 | 0.16947823  | -0.11841374 | 0.0104341  | -0.44309 |
| 0.789264241 | 0.027719165  | 0.550156453 | -0.11003459 | 0.01737277 | 0.138096 |

|             |              |             |             |            |          |
|-------------|--------------|-------------|-------------|------------|----------|
| 0.534886046 | 0.026818463  | 0.563194781 | -0.14999638 | 0.0011493  | -0.01321 |
| 0.398262884 | 0.034349702  | 0.458976923 | -0.03344088 | 0.47095356 | -0.28227 |
| 0.017499894 | 0.102454742  | 0.026831462 | 0.041532636 | 0.37051508 | -0.24843 |
| 9.98E-10    | -0.273250897 | 1.93E-09    | -0.01282018 | 0.78230587 | -0.11453 |
| 0.714118557 | -0.019440737 | 0.675193055 | -0.31268594 | 4.74E-12   | -0.37903 |
| 0.074719849 | -0.076542504 | 0.098516417 | -0.3485605  | 8.71E-15   | -0.18951 |
| 0.702071049 | 0.024666841  | 0.594928739 | -0.15202261 | 0.00098209 | -0.05144 |
| 0.22657872  | 0.063851575  | 0.168341565 | -0.18387994 | 6.41E-05   | -0.19109 |
| 0.670150723 | 0.01011075   | 0.827495215 | -0.12007547 | 0.00939592 | -0.14556 |
| 0.000366587 | -0.154374927 | 0.000816275 | -0.05260563 | 0.25656127 | -0.31073 |
| 7.74E-06    | -0.205611453 | 7.49E-06    | 0.089754596 | 0.05258312 | -0.02291 |
| 0.011454188 | -0.118229403 | 0.010555312 | -0.20880046 | 5.36E-06   | -0.10446 |
| 0.088420726 | -0.073475062 | 0.1128078   | -0.21750707 | 2.09E-06   | -0.36576 |
| 0.289966393 | 0.032522832  | 0.483224206 | -0.1454569  | 0.00162321 | -0.27443 |
| 0.791838359 | 0.011673861  | 0.801345039 | -0.27655273 | 1.21E-09   | -0.4622  |
| 2.45E-14    | -0.352263797 | 4.33E-15    | -0.2656476  | 5.53E-09   | -0.06428 |
| 0.101813758 | -0.072810937 | 0.116106707 | -0.20567084 | 7.44E-06   | -0.32709 |
| 0.825284856 | 0.00105398   | 0.98187708  | -0.0874845  | 0.05887673 | -0.27449 |
| 0.839708315 | -0.001752227 | 0.969875449 | -0.080644   | 0.08170154 | -0.17048 |
| 0.103104889 | -0.068956161 | 0.136768505 | -0.1670822  | 0.00028726 | -0.20352 |
| 0.029474414 | 0.10875477   | 0.018728635 | -0.30997457 | 7.38E-12   | -0.21542 |
| 6.09E-06    | -0.214604039 | 2.87E-06    | -0.02355023 | 0.61171195 | -0.24186 |
| 0.045853022 | 0.08256894   | 0.074652609 | -0.07269194 | 0.1167057  | -0.16191 |
| 0.172047628 | -0.059774513 | 0.197248803 | -0.27665154 | 1.19E-09   | -0.40858 |
| 0.08695387  | -0.071526057 | 0.122703148 | -0.19633856 | 1.93E-05   | -0.30707 |
| 0.00012842  | -0.172918137 | 0.000173271 | 0.022621383 | 0.62583    | -0.02545 |
| 7.12E-05    | 0.184168721  | 6.24E-05    | -0.32902926 | 2.98E-13   | -0.21555 |
| 0.728578255 | 0.005588499  | 0.904130038 | -0.26548224 | 5.66E-09   | -0.27041 |
| 0.030927588 | -0.097476994 | 0.035215861 | -0.29395358 | 9.23E-11   | -0.41247 |
| 0.276994723 | -0.037279917 | 0.421543565 | -0.0830995  | 0.07279931 | -0.24009 |
| 0.463154313 | -0.03654612  | 0.430746418 | -0.21058783 | 4.43E-06   | -0.35538 |
| 0.154270111 | -0.06363719  | 0.169777945 | -0.29453658 | 8.44E-11   | -0.22764 |
| 0.41588135  | -0.022338656 | 0.630154936 | 0.058445851 | 0.20741027 | -0.06172 |
| 0.010926087 | -0.101717461 | 0.027952989 | 0.032061763 | 0.48945153 | 0.191968 |
| 0.306471932 | -0.026269423 | 0.571214755 | -0.20117728 | 1.18E-05   | 0.277433 |
| 0.721435383 | 0.002574527  | 0.955750499 | -0.06041283 | 0.19249827 | -0.05609 |
| 0.00811673  | -0.110320912 | 0.017081454 | 0.024835462 | 0.59241262 | -0.01843 |
| 0.048301174 | -0.074750491 | 0.10667927  | 0.238755544 | 1.78E-07   | -0.12679 |
| 5.64E-06    | -0.209384049 | 5.03E-06    | -0.07155769 | 0.1225373  | 0.098678 |
| 1.08E-05    | -0.186034806 | 5.24E-05    | -0.25582311 | 2.06E-08   | 0.072294 |
| 0.665085372 | 0.034273383  | 0.459976075 | -0.12777193 | 0.00569024 | -0.11356 |
| 0.693526457 | 0.029236245  | 0.52853618  | 0.037462971 | 0.41926585 | -0.14364 |
| 0.054515816 | 0.103489514  | 0.025322847 | 0.03052801  | 0.51047306 | 0.107855 |
| 0.171363083 | -0.039094337 | 0.399287786 | 0.254841948 | 2.34E-08   | 0.174599 |
| 0.153792602 | -0.059983179 | 0.195686529 | 0.062080333 | 0.18048473 | 0.015943 |

|             |              |             |             |            |          |
|-------------|--------------|-------------|-------------|------------|----------|
| 0.152280438 | -0.060108305 | 0.194754062 | -0.00049249 | 0.99153121 | -0.02146 |
| 4.74E-07    | -0.206033176 | 7.16E-06    | 0.090985298 | 0.04941228 | 0.288268 |
| 7.07E-05    | -0.192451599 | 2.83E-05    | 0.095112439 | 0.03992263 | 0.277535 |
| 0.721459795 | -0.020700649 | 0.655457297 | 0.016415486 | 0.72347768 | 0.367434 |
| 0.003986789 | -0.133215329 | 0.003927129 | 0.063514217 | 0.17060599 | -0.06737 |
| 0.010976526 | -0.12126184  | 0.008711985 | 0.106137478 | 0.02179128 | 0.127124 |
| 0.093061478 | 0.090382022  | 0.050946024 | -0.08719758 | 0.05971482 | -0.11575 |
| 0.926757606 | 0.024272613  | 0.600830238 | -0.02217172 | 0.63271455 | 0.007666 |
| 0.438557955 | -0.029951583 | 0.518493462 | -0.16071688 | 0.00048938 | -0.04426 |
| 0.000215061 | -0.157054316 | 0.000659132 | 0.134712923 | 0.00353784 | 0.074756 |
| 0.003016533 | -0.122806864 | 0.007887922 | 0.137390574 | 0.00292798 | -0.14379 |
| 0.010319195 | -0.114731085 | 0.013104658 | 0.266148632 | 5.16E-09   | -0.1653  |
| 0.02936444  | -0.080345267 | 0.082842235 | 0.158669341 | 0.00057848 | 0.066636 |
| 0.402373905 | -0.019920969 | 0.667643295 | 0.027515885 | 0.55308609 | 0.111891 |
| 0.336292904 | -0.025314132 | 0.585296632 | -0.06314599 | 0.17310346 | 0.135479 |
| 1.17E-05    | -0.18992203  | 3.61E-05    | 0.055986173 | 0.22721027 | 0.186641 |
| 0.804932932 | 5.39E-05     | 0.999073807 | -0.10475836 | 0.02357332 | -0.10412 |
| 0.865358343 | 0.013251731  | 0.775171171 | -0.26638066 | 5.00E-09   | -0.09719 |
| 0.000308776 | -0.162614176 | 0.000418371 | -0.07381038 | 0.11117036 | -0.07336 |
| 0.00139258  | -0.144785164 | 0.0017069   | 0.049176929 | 0.28890986 | 0.386247 |
| 1.41E-13    | -0.322718187 | 8.84E-13    | -0.08027701 | 0.08310467 | 0.16863  |
| 0.195827699 | -0.047157348 | 0.309194509 | 0.163815722 | 0.00037849 | -0.12604 |
| 0.000932372 | -0.141185108 | 0.002226772 | 0.047073497 | 0.31005652 | 0.291045 |
| 0.834501153 | 0.007004686  | 0.880000393 | -0.04462295 | 0.33594659 | -0.20124 |
| 0.055928904 | 0.091865696  | 0.047243427 | 0.233761068 | 3.24E-07   | 0.178692 |
| 0.673854762 | 0.015303322  | 0.741520389 | 0.0158512   | 0.73261372 | 0.031821 |
| 0.697482732 | 0.02297525   | 0.620434864 | -0.08409214 | 0.06943278 | 0.09556  |
| 0.019055728 | -0.096153707 | 0.037788137 | 0.036473371 | 0.43166508 | -0.19329 |
| 0.000533271 | -0.153607254 | 0.000867305 | 0.136910252 | 0.0030298  | 0.214218 |
| 0.772445056 | -0.000227204 | 0.996092961 | 0.129713144 | 0.00499304 | 0.110471 |
| 0.757716616 | 0.001562098  | 0.97314288  | 0.117416918 | 0.01110458 | 0.059439 |
| 0.938836984 | 0.020522857  | 0.6582282   | -0.01913897 | 0.67995399 | -0.06363 |
| 0.981599787 | 0.019150196  | 0.679776593 | 0.036796718 | 0.42759058 | -0.00581 |
| 0.442831322 | -0.02687583  | 0.562359949 | -0.06048711 | 0.19195093 | 0.037037 |
| 0.092243289 | -0.059038717 | 0.202830271 | 0.000661379 | 0.98862716 | 0.064837 |
| 0.108363384 | -0.054950655 | 0.235935649 | 0.051701004 | 0.26484196 | 0.096088 |
| 0.726479887 | 0.020016843  | 0.666140037 | -0.04015181 | 0.3866483  | -0.05592 |
| 0.804005787 | -0.002617842 | 0.955006804 | -0.0013941  | 0.97603034 | -0.17913 |
| 0.276792745 | -0.042844505 | 0.355579769 | -0.04234697 | 0.36119891 | -0.15155 |
| 0.409742708 | -0.020487348 | 0.658782175 | -0.01660841 | 0.72036313 | 0.017749 |
| 0.185366984 | -0.045970545 | 0.32154221  | -0.11634431 | 0.01186839 | 0.103531 |
| 0.002611511 | -0.13579424  | 0.003278895 | -0.11992815 | 0.0094841  | -0.02592 |
| 0.020417107 | -0.097659131 | 0.034873754 | -0.10398736 | 0.02462348 | -0.06698 |
| 0.795211205 | 0.023766403  | 0.60844648  | -0.01933152 | 0.67691457 | 0.067076 |
| 0.030213354 | -0.092972908 | 0.044629651 | -0.04472979 | 0.33478973 | -0.10224 |

|             |              |             |             |            |          |
|-------------|--------------|-------------|-------------|------------|----------|
| 1.05E-12    | -0.316464925 | 2.54E-12    | -0.05652437 | 0.22276707 | 0.017984 |
| 0.989276154 | 0.006867337  | 0.882336108 | 0.19562379  | 2.07E-05   | 0.051179 |
| 0.051446287 | -0.077464368 | 0.094515237 | 0.118712233 | 0.01024044 | 0.169093 |
| 0.342612491 | 0.062674291  | 0.17634247  | 0.059781934 | 0.19719308 | -0.04341 |
| 0.163561491 | 0.073430339  | 0.113027615 | -0.15344129 | 0.00087872 | -0.02139 |
| 0.524171048 | -0.027974122 | 0.546492859 | -0.00036998 | 0.99363777 | -0.01436 |
| 0.996441852 | 0.002295545  | 0.960541344 | 0.119074551 | 0.01000965 | 0.090576 |
| 0.963161957 | 0.004315393  | 0.925898055 | 0.014889701 | 0.74826751 | -0.00372 |
| 0.168057194 | -0.045751521 | 0.323855572 | -0.19493266 | 2.22E-05   | -0.05571 |
| 0.658780584 | -0.016812914 | 0.717066546 | 0.034560098 | 0.45622874 | -0.16817 |
| 0.071561022 | -0.078818335 | 0.088875117 | -0.08539383 | 0.06521232 | -0.07185 |
| 0.012154937 | 0.122447114  | 0.008073323 | 0.05908379  | 0.2024851  | 0.036643 |
| 0.360471151 | 0.043378404  | 0.349611388 | 0.074527678 | 0.10773052 | 0.103122 |
| 0.01034976  | -0.0949341   | 0.040298251 | -0.14184061 | 0.00212249 | -0.0698  |
| 0.122300593 | -0.056997458 | 0.218912823 | -0.14090412 | 0.00227289 | -0.0805  |
| 0.249168411 | -0.044385012 | 0.338532226 | -0.21026292 | 4.58E-06   | -0.0658  |
| 0.638431983 | -0.024827126 | 0.592536889 | -0.00509129 | 0.91262387 | -0.0128  |
| 0.938591479 | 0.006961487  | 0.880734915 | 0.126990256 | 0.00599487 | 0.078013 |
| 0.000111488 | 0.187444234  | 4.58E-05    | -0.10637222 | 0.02149989 | 0.071312 |
| 0.449217341 | -0.018973853 | 0.682564327 | 0.024057317 | 0.60406426 | 0.37977  |
| 0.018433056 | 0.114429275  | 0.013348153 | -0.02440937 | 0.59878002 | 0.314876 |
| 0.057063182 | -0.07058     | 0.127743945 | -0.23260098 | 3.72E-07   | 0.233189 |
| 0.314142968 | -0.030962071 | 0.504476494 | -0.04274055 | 0.35674924 | -0.00715 |
| 0.935613534 | 0.012021923  | 0.795551091 | 0.107285044 | 0.02039869 | 0.081869 |
| 0.01724158  | 0.120042152  | 0.009415802 | -0.17149983 | 0.00019622 | 0.150645 |
| 0.14510305  | -0.054708979 | 0.238005599 | -0.01637366 | 0.72415357 | -0.12774 |
| 0.113000039 | -0.060752488 | 0.190004867 | -0.06280524 | 0.17543881 | 0.088808 |
| 0.584402806 | 0.031856808  | 0.492233478 | -0.01474648 | 0.75060825 | 0.311897 |
| 0.000246424 | -0.167578005 | 0.000275361 | 0.00913078  | 0.84398944 | -0.00217 |
| 0.28271979  | -0.035553714 | 0.443375553 | 0.049864647 | 0.2822112  | 0.079606 |
| 2.59E-08    | 0.26246251   | 8.52E-09    | 0.018535527 | 0.68951231 | 0.073676 |
| 0.006511667 | -0.125234534 | 0.00673311  | 0.024942629 | 0.59081603 | -0.31536 |
| 0.718826476 | 0.002292729  | 0.960589716 | 0.015018479 | 0.74616475 | -0.02045 |
| 0.536121725 | -0.013862343 | 0.765108448 | 0.085782065 | 0.06399518 | 0.050514 |
| 0.250138066 | -0.037500716 | 0.418797105 | 0.067482798 | 0.14537394 | 0.012304 |
| 0.150015119 | -0.051292629 | 0.268639623 | -0.08838836 | 0.05629993 | -0.08938 |
| 0.217669103 | -0.053249225 | 0.25078016  | -0.00918949 | 0.84299919 | 0.014172 |
| 0.864752021 | 0.011535038  | 0.803658982 | -0.01392362 | 0.76410071 | 0.137067 |
| 0.039335214 | 0.097777034  | 0.03465381  | -0.1036866  | 0.02504397 | -0.03786 |
| 0.044214473 | 0.100699462  | 0.029567588 | 0.012304329 | 0.79085829 | 0.252497 |
| 1.02E-06    | -0.213912975 | 3.10E-06    | 0.336065894 | 8.58E-14   | -0.04876 |
| 7.51E-05    | -0.177420566 | 0.000115996 | 0.141684609 | 0.00214689 | -0.06795 |
| 0.636950976 | 0.030327772  | 0.513251825 | -0.22902124 | 5.66E-07   | -0.05539 |
| 0.150471196 | -0.048912583 | 0.291512886 | 0.177541084 | 0.00011474 | 0.175911 |
| 0.927515164 | 0.005622691  | 0.903546322 | 0.143872976 | 0.00182689 | 0.167294 |

|             |              |             |             |            |          |
|-------------|--------------|-------------|-------------|------------|----------|
| 1.12E-09    | -0.27560471  | 1.38E-09    | 0.072420375 | 0.11808174 | 0.012714 |
| 0.005592402 | -0.130490697 | 0.004736087 | -0.0158317  | 0.73293014 | -0.063   |
| 0.054040421 | -0.062756991 | 0.17577137  | 0.083188706 | 0.07249142 | 0.128229 |
| 0.001319814 | 0.137389488  | 0.00292821  | -0.0078244  | 0.86608291 | 0.024152 |
| 0.000205303 | 0.169592971  | 0.000231577 | -0.14962874 | 0.00118231 | 0.128354 |
| 0.306613228 | 0.061420339  | 0.185171529 | -0.15530138 | 0.00075839 | 0.1091   |
| 0.440031377 | -0.022166439 | 0.632795589 | 0.093142715 | 0.04423975 | 0.046422 |
| 0.594605447 | -0.003641379 | 0.937446051 | -0.05672279 | 0.22114466 | -0.04672 |
| 0.034873662 | -0.084408908 | 0.068385677 | -0.14888236 | 0.00125203 | 0.092826 |
| 0.956547265 | 0.011874314  | 0.798006884 | -0.05944447 | 0.19973834 | 0.226759 |
| 0.080530771 | 0.102764997  | 0.026371218 | 0.090663013 | 0.05022677 | -0.07761 |
| 2.55E-05    | 0.209272755  | 5.09E-06    | 0.000694553 | 0.98805675 | -0.06277 |
| 2.36E-05    | -0.175652562 | 0.000135954 | -0.04200653 | 0.36507569 | -0.11688 |
| 0.767662751 | 0.005391459  | 0.907494821 | -0.03008826 | 0.51658594 | -0.20404 |
| 0.492730699 | -0.012355026 | 0.790016652 | 0.0921274   | 0.04661432 | -0.09735 |
| 0.773794215 | 0.006649975  | 0.886034587 | 0.007590377 | 0.87005218 | -0.10461 |
| 0.062208593 | -0.065071507 | 0.160340633 | -0.02454043 | 0.59681826 | -0.10224 |
| 0.473596196 | 0.051807425  | 0.263858392 | 0.097295853 | 0.03555893 | -0.00101 |
| 0.530300701 | 0.038620212  | 0.405034341 | -0.05925031 | 0.2012136  | -0.06128 |
| 0.855657231 | 0.029806653  | 0.520520189 | -0.03145309 | 0.49773795 | -0.16864 |
| 0.813289438 | 0.007185431  | 0.876928273 | 0.115300745 | 0.01265572 | -0.07138 |
| 0.750716366 | 0.0127748    | 0.78305722  | 0.020422575 | 0.65979318 | -0.09528 |
| 0.000711433 | 0.177439824  | 0.000115795 | -0.05071402 | 0.27408394 | 0.290743 |
| 0.992741902 | 0.023444898  | 0.613305874 | -0.13557953 | 0.0033289  | -0.0032  |
| 0.21262376  | -0.050818547 | 0.273094879 | -0.06943268 | 0.13407084 | -0.00408 |
| 0.32283534  | -0.031201722 | 0.501181643 | -0.05126306 | 0.26891608 | 0.204172 |
| 0.66533586  | 0.027835913  | 0.548477346 | 0.098265279 | 0.03375553 | 0.200897 |
| 0.412302528 | 0.048310519  | 0.297499931 | -0.05196435 | 0.26241265 | -0.15003 |
| 0.008168168 | 0.134137518  | 0.003683074 | 0.002628834 | 0.95481809 | -0.10205 |
| 0.017792138 | 0.11056723   | 0.016834267 | -0.01990375 | 0.66791339 | 0.152663 |
| 0.488983125 | -0.006088656 | 0.89559688  | 0.027315123 | 0.5559869  | 0.152797 |
| 0.005606396 | -0.107225154 | 0.020469409 | -0.08107942 | 0.08006172 | 0.283085 |
| 8.59E-05    | -0.17822017  | 0.000107906 | -0.0680018  | 0.14229666 | 0.148733 |
| 0.089919481 | -0.055629224 | 0.230191677 | -0.07378453 | 0.11129596 | 0.022186 |
| 6.10E-05    | -0.174858131 | 0.000145934 | -0.15596482 | 0.0007193  | 0.234709 |
| 0.156617924 | -0.052021214 | 0.261890099 | -0.22964898 | 5.26E-07   | 0.032218 |
| 0.31227638  | -0.03120568  | 0.501127322 | -0.21969905 | 1.64E-06   | -0.03237 |
| 0.822729608 | 0.006242891  | 0.892967852 | -0.10945982 | 0.0179707  | 0.068184 |
| 6.23E-07    | -0.223767853 | 1.04E-06    | -0.09830808 | 0.03367774 | 0.057993 |
| 0.011010632 | -0.108071944 | 0.019489099 | -0.04578023 | 0.32355171 | 0.04664  |
| 0.858575    | -0.006651356 | 0.886011094 | -0.17269321 | 0.00017673 | 0.089761 |
| 0.395353889 | -0.036060195 | 0.43690402  | -0.22136138 | 1.36E-06   | 0.209685 |
| 0.216298769 | -0.040891434 | 0.37795423  | -0.07450411 | 0.10784219 | -0.04375 |
| 0.743826196 | 0.009540036  | 0.837092374 | -0.04083154 | 0.37865372 | -0.01165 |
| 0.752325801 | 0.001433631  | 0.97535087  | -0.03483321 | 0.4526752  | -0.03832 |

|             |              |             |             |            |          |
|-------------|--------------|-------------|-------------|------------|----------|
| 0.089454715 | -0.068627454 | 0.138653593 | 0.103434662 | 0.02540094 | 0.029333 |
| 0.244140086 | -0.047967553 | 0.300946822 | -0.17457652 | 0.00014963 | -0.14023 |
| 0.410063808 | -0.03195302  | 0.490926497 | -0.13312728 | 0.00395118 | -0.04732 |
| 0.35870579  | -0.038000819 | 0.412615382 | 0.000962037 | 0.98345778 | 0.086158 |
| 0.635828259 | -0.009192048 | 0.842956126 | 0.024625176 | 0.59555121 | -0.00347 |
| 0.424807164 | -0.026118602 | 0.573427277 | -0.09394875 | 0.04242786 | 0.008498 |
| 0.385571372 | -0.033629046 | 0.468459825 | -0.10684267 | 0.02092608 | -0.00219 |
| 0.526866267 | -0.018252642 | 0.694010326 | -0.07872872 | 0.08923985 | 0.00909  |
| 0.815099987 | -0.004997589 | 0.91422569  | -0.04840691 | 0.29653593 | -0.05078 |
| 0.931183525 | 0.012163637  | 0.793195259 | -0.0469017  | 0.31182753 | 0.102748 |
| 0.061320706 | -0.084627104 | 0.067671964 | 0.077898516 | 0.09267641 | 0.291459 |
| 0.024129999 | -0.108802973 | 0.018675942 | -0.17481142 | 0.00014654 | 0.086436 |
| 0.100769381 | -0.060814431 | 0.189552712 | -0.08273617 | 0.07406434 | 0.041679 |
| 0.490990987 | -0.015705745 | 0.734974891 | 0.062117739 | 0.18022175 | -0.05493 |
| 0.449026634 | -0.019335181 | 0.676856905 | 0.164069851 | 0.00037053 | 0.013768 |
| 0.003383609 | -0.112054409 | 0.015407299 | 0.13911458  | 0.00258766 | 0.248512 |
| 0.003199807 | -0.11607009  | 0.012070971 | 0.163473226 | 0.00038948 | -0.12207 |
| 0.023754632 | -0.098209163 | 0.033857751 | 0.056867525 | 0.21996659 | 0.111324 |
| 0.420403029 | 0.041850128  | 0.366865365 | -0.19981026 | 1.36E-05   | 0.104938 |
| 0.930963086 | 0.007201022  | 0.876663349 | -0.1392144  | 0.00256911 | -0.15721 |
| 0.812241538 | -0.006118469 | 0.895088609 | -0.16613319 | 0.00031139 | 0.062886 |
| 0.029898912 | 0.121932482  | 0.008345304 | -0.03842703 | 0.40738989 | 0.252649 |
| 0.501800043 | 0.046758228  | 0.313311686 | -0.07403178 | 0.11009955 | 0.012565 |
| 0.171461374 | -0.066935284 | 0.148675059 | -0.03318645 | 0.47433695 | 0.17247  |
| 0.972441005 | 0.010041536  | 0.828657776 | -0.05699276 | 0.21895083 | 0.142719 |
| 0.870641256 | 0.02517094   | 0.587421194 | 0.027493514 | 0.55340896 | 0.055267 |
| 0.232587956 | -0.030798154 | 0.506736664 | -0.1059994  | 0.02196427 | 0.185723 |
| 0.06780178  | 0.09409426   | 0.042107521 | -0.10734687 | 0.02032592 | 0.09526  |
| 0.018512915 | -0.097222972 | 0.035697755 | 0.074902883 | 0.10596495 | 0.391162 |
| 0.6480674   | -0.010529567 | 0.820468576 | 0.2301202   | 4.98E-07   | 0.156755 |
| 0.189588058 | -0.046014876 | 0.32107529  | 0.042681763 | 0.35741171 | 0.128676 |
| 0.585346048 | 0.04033443   | 0.384490398 | -0.16186352 | 0.00044523 | -0.04371 |
| 0.020791688 | -0.090390149 | 0.050925101 | -0.28296157 | 4.78E-10   | 0.213993 |
| 3.44E-10    | 0.296759734  | 6.00E-11    | 0.086641774 | 0.06136641 | 0.114325 |
| 0.01233013  | -0.111005828 | 0.016401864 | -0.11651277 | 0.01174544 | -0.03262 |
| 2.01E-06    | -0.205348807 | 7.70E-06    | -0.00464153 | 0.92031577 | 0.173462 |
| 0.12644664  | -0.061134571 | 0.187228463 | 0.036422866 | 0.43230351 | 0.116024 |
| 0.056001785 | -0.078447534 | 0.090392165 | -0.04901298 | 0.2905224  | 0.01104  |
| 0.000996945 | -0.143081934 | 0.001937145 | -0.02251694 | 0.62742624 | -0.00051 |
| 0.227122794 | -0.058362174 | 0.208062665 | 0.317470428 | 2.14E-12   | 0.057072 |
| 4.53E-05    | -0.181360032 | 8.10E-05    | 0.039936442 | 0.38920254 | -0.03266 |
| 0.031111851 | -0.0987197   | 0.032937386 | -0.05930324 | 0.20081063 | -0.00812 |
| 0.403030391 | -0.035802662 | 0.440187839 | 0.138615724 | 0.00268223 | 0.023328 |
| 0.010551033 | 0.141672701  | 0.002148766 | 0.049507881 | 0.28567303 | 0.185751 |
| 0.119513805 | -0.060593611 | 0.191168202 | 0.393139731 | 1.04E-18   | 0.284919 |



|             |              |             |             |            |          |
|-------------|--------------|-------------|-------------|------------|----------|
| 0.241232573 | 0.069763238  | 0.132223682 | 0.3287677   | 3.12E-13   | 0.321261 |
| 0.812293748 | -0.00724965  | 0.875837191 | -0.2342809  | 3.04E-07   | 0.053246 |
| 0.412601501 | -0.032685184 | 0.481041683 | 0.047677009 | 0.30388753 | 0.144102 |
| 0.003230583 | 0.145274992  | 0.001645492 | -0.18689434 | 4.83E-05   | -0.11176 |
| 1.62E-06    | -0.204788373 | 8.16E-06    | -0.11911825 | 0.00998213 | 0.107879 |
| 0.109075479 | -0.050417323 | 0.276904577 | 0.063854405 | 0.16832267 | 0.024224 |
| 0.001562066 | -0.141712519 | 0.002142508 | -0.25554725 | 2.13E-08   | -0.19153 |
| 0.620729255 | 0.030569048  | 0.509904537 | -0.05332078 | 0.25014303 | 0.072806 |
| 1.15E-05    | -0.192761578 | 2.74E-05    | -0.06329186 | 0.17211091 | 0.328001 |
| 0.000362678 | -0.158603625 | 0.000581571 | 0.057077606 | 0.21826462 | 0.32179  |
| 0.017046154 | -0.098119712 | 0.034021245 | 0.035827508 | 0.43987041 | 0.144361 |
| 0.000171869 | -0.161072406 | 0.000475274 | -0.25651504 | 1.88E-08   | 0.415234 |
| 0.010061013 | -0.108535726 | 0.018969716 | -0.22206482 | 1.26E-06   | 0.029275 |
| 0.879355924 | 0.007932418  | 0.864251844 | -0.1694907  | 0.00023363 | -0.10691 |
| 0.100256094 | 0.084077551  | 0.069481318 | 0.107654269 | 0.0199674  | -0.19623 |
| 0.096853274 | 0.080047132  | 0.08399343  | 0.193716189 | 2.50E-05   | 0.269437 |
| 0.138768686 | -0.062303768 | 0.178918121 | 0.094558263 | 0.04109963 | -0.04935 |
| 0.200145403 | 0.076137056  | 0.100318348 | -0.04612637 | 0.31990291 | 0.047012 |
| 0.16822873  | -0.04058748  | 0.381512474 | -0.09499006 | 0.04018008 | 0.16164  |
| 0.000308131 | -0.15511187  | 0.000769913 | -0.13367267 | 0.00380432 | 0.181511 |
| 0.335782475 | -0.034303585 | 0.459580527 | -0.11295635 | 0.01459456 | 0.011817 |
| 0.490752797 | 0.04070313   | 0.380156207 | -0.06034852 | 0.19297306 | 0.084202 |
| 0.208248462 | -0.049529028 | 0.285467043 | -0.19895886 | 1.48E-05   | 0.036094 |
| 0.399996479 | -0.034380812 | 0.458569986 | -0.14052199 | 0.00233701 | -0.13432 |
| 0.227721549 | -0.04111738  | 0.375322423 | -0.08994507 | 0.05208156 | 0.079351 |
| 0.218589172 | -0.051393937 | 0.267694064 | 0.011309712 | 0.80741846 | -0.01719 |
| 0.271297596 | -0.035549559 | 0.443428865 | -0.06754213 | 0.14501959 | 0.016532 |
| 0.00059022  | -0.156710324 | 0.000677606 | -0.09249561 | 0.04574109 | -0.07982 |
| 0.390876406 | 0.058624734  | 0.206020554 | -0.0655874  | 0.1570447  | 0.070401 |
| 0.215963544 | -0.04664354  | 0.314501391 | -0.20366196 | 9.17E-06   | 0.20886  |
| 1.90E-05    | -0.175857202 | 0.000133489 | -0.06261469 | 0.17675492 | 0.117816 |
| 0.008867493 | -0.09995904  | 0.030791579 | -0.1092047  | 0.01824181 | 0.095838 |
| 0.853668433 | 0.01599144   | 0.730339581 | -0.14002429 | 0.002423   | 0.090579 |
| 0.000993363 | -0.132613473 | 0.004094208 | -0.09423594 | 0.04179759 | -0.00644 |
| 0.007960308 | -0.117443502 | 0.011086218 | 0.041699642 | 0.36859247 | 0.156441 |
| 0.106104154 | 0.085008943  | 0.066437686 | 0.036745922 | 0.42822917 | 0.321903 |
| 0.574559533 | 0.031304903  | 0.499766569 | -0.19270017 | 2.76E-05   | 0.182942 |
| 0.016793686 | -0.114664399 | 0.01315812  | -0.1256053  | 0.00657075 | 0.177222 |
| 0.983697036 | 0.02239646   | 0.629269653 | -0.06587392 | 0.15523638 | 0.130802 |
| 0.069657559 | -0.079705896 | 0.085326857 | -0.01038254 | 0.82293365 | 0.073214 |
| 3.58E-14    | 0.357654118  | 1.54E-15    | 0.083974544 | 0.06982483 | -0.03353 |
| 0.030454932 | -0.087373851 | 0.059198769 | -0.13873015 | 0.00266026 | -0.03326 |
| 0.006648122 | 0.133367899  | 0.003885767 | 0.248290781 | 5.43E-08   | 0.163924 |
| 0.000307284 | -0.15264697  | 0.000935288 | 0.074540141 | 0.1076715  | -0.07094 |
| 0.217085275 | -0.040668928 | 0.380556999 | -0.01749177 | 0.70616158 | -0.01228 |

|             |              |             |             |            |          |
|-------------|--------------|-------------|-------------|------------|----------|
| 0.007317908 | -0.122798454 | 0.007892212 | -0.04253415 | 0.35907846 | 0.113188 |
| 0.973726948 | -0.000151641 | 0.997392357 | -0.05945443 | 0.19966289 | 0.084911 |
| 0.00276527  | -0.127788527 | 0.005683928 | -0.04853556 | 0.29525255 | 0.03755  |
| 0.98256759  | 0.011786331  | 0.799471614 | -0.09491423 | 0.04034029 | 0.179729 |
| 9.51E-17    | -0.351877564 | 4.66E-15    | -0.04913049 | 0.28936601 | 0.07138  |
| 1.47E-06    | -0.210339211 | 4.55E-06    | -0.10877995 | 0.01870109 | 0.028588 |
| 0.279442085 | -0.030363586 | 0.512754256 | 0.083505236 | 0.07140751 | 0.060296 |
| 0.195194313 | 0.076583975  | 0.098333571 | 0.073824449 | 0.1111021  | -0.02776 |
| 0.003263224 | -0.122318153 | 0.008140725 | -0.00436119 | 0.92511398 | -0.11967 |
| 0.893953353 | 0.000698078  | 0.987996139 | 0.157704029 | 0.00062551 | 0.234615 |
| 0.000402616 | 0.17014595   | 0.000220754 | -0.1887549  | 4.04E-05   | -0.12494 |
| 0.508169099 | -0.011771722 | 0.799714899 | 0.130499573 | 0.00473322 | 0.11052  |
| 0.047534669 | -0.089233616 | 0.053975576 | -0.14352112 | 0.0018752  | -0.07857 |
| 0.675325136 | -0.006128933 | 0.894910222 | -0.00764842 | 0.86906731 | 0.021229 |
| 0.310182922 | 0.068232025  | 0.140947675 | -0.08125676 | 0.07940154 | 0.228672 |
| 0.344749278 | -0.02332605  | 0.615106509 | 0.06984255  | 0.13178343 | 0.171601 |
| 0.262924395 | -0.030225699 | 0.514671336 | 0.014306446 | 0.7578144  | 0.024239 |
| 1.88E-06    | -0.215221181 | 2.68E-06    | -0.07886882 | 0.08867017 | 0.167662 |
| 0.029488532 | -0.091137899 | 0.049030491 | 0.243059716 | 1.05E-07   | -0.01388 |
| 0.040822284 | -0.082619787 | 0.074473346 | -0.05288507 | 0.25403994 | 0.148537 |
| 0.000908155 | -0.14387659  | 0.001826398 | 0.112986328 | 0.0145682  | -0.12043 |
| 0.436825128 | 0.044677464  | 0.33535596  | 0.092903533 | 0.04478978 | 0.176405 |
| 0.178479823 | -0.060512675 | 0.191762837 | 0.011568984 | 0.803093   | -0.03089 |
| 1.36E-05    | -0.186879413 | 4.83E-05    | -0.11255101 | 0.01495503 | 0.23868  |
| 0.008153494 | -0.123010747 | 0.007784544 | 0.13284537  | 0.00402909 | -0.34336 |
| 0.983555943 | 0.005017367  | 0.913887559 | 0.369723375 | 1.42E-16   | -0.246   |
| 0.159459022 | -0.064574203 | 0.163566908 | 0.046796078 | 0.31291971 | -0.46252 |
| 3.50E-05    | 0.186135859  | 5.19E-05    | 0.366843535 | 2.53E-16   | -0.15773 |
| 0.590154069 | -0.014223686 | 0.759172053 | -0.0152428  | 0.74250642 | -0.40764 |
| 0.99999274  | 0.006778426  | 0.88384865  | 0.192943904 | 2.69E-05   | -0.25723 |
| 0.00564841  | 0.138113771  | 0.00278055  | 0.360852551 | 8.28E-16   | -0.31256 |
| 0.72025013  | 0.015929314  | 0.731346727 | 0.138900409 | 0.00262788 | -0.41871 |
| 0.101785496 | -0.076037533 | 0.100764637 | 0.212361438 | 3.66E-06   | -0.429   |
| 0.963370159 | -0.006004502 | 0.897031816 | 0.037659936 | 0.41682314 | -0.31682 |
| 0.046469317 | 0.087740405  | 0.05813745  | 0.120243117 | 0.00929646 | -0.51148 |
| 0.025230634 | -0.111088761 | 0.016321205 | 0.084121612 | 0.06933481 | -0.41973 |
| 0.023351176 | 0.102819734  | 0.02629073  | 0.221569776 | 1.33E-06   | -0.33189 |
| 0.179724952 | 0.049687072  | 0.283930712 | 0.30737415  | 1.12E-11   | -0.09967 |
| 0.75454977  | 0.020482546  | 0.658857114 | 0.265097615 | 5.96E-09   | -0.21949 |
| 0.326380122 | 0.051253935  | 0.269001379 | 0.151521602 | 0.00102121 | -0.39692 |
| 0.323437626 | 0.039707639  | 0.391927333 | 0.662129706 | 3.05E-60   | -0.15689 |
| 0.71041624  | -0.01649935  | 0.722123193 | 0.221348604 | 1.36E-06   | -0.2168  |
| 0.744421429 | 0.023080519  | 0.618833807 | 0.015470601 | 0.73879728 | -0.34587 |
| 0.011751561 | -0.112855072 | 0.014683902 | 0.109337513 | 0.01810023 | -0.26744 |
| 0.003542986 | -0.148527011 | 0.001286539 | 0.487135824 | 3.35E-29   | -0.35329 |

|             |              |             |             |            |          |
|-------------|--------------|-------------|-------------|------------|----------|
| 0.000166672 | 0.174622419  | 0.000149025 | 0.044153908 | 0.34105578 | -0.36186 |
| 0.399746456 | -0.044144041 | 0.341163781 | 0.064591214 | 0.16345575 | -0.28569 |
| 0.836035843 | 0.003992329  | 0.931431366 | 0.125781817 | 0.0064947  | -0.38455 |
| 4.94E-05    | 0.187439635  | 4.58E-05    | 0.144879177 | 0.00169495 | -0.41314 |
| 0.55906821  | -0.020716913 | 0.655204047 | 0.06403367  | 0.16712868 | -0.48397 |
| 0.997122216 | -0.000122637 | 0.997891107 | 0.0533206   | 0.25014466 | -0.34091 |
| 0.111425892 | 0.070361487  | 0.128930746 | 0.347534098 | 1.05E-14   | -0.28918 |
| 0.000341386 | -0.166722587 | 0.000296192 | 0.207036306 | 6.45E-06   | -0.36738 |
| 2.46E-06    | -0.216822851 | 2.25E-06    | 0.289750724 | 1.75E-10   | -0.35531 |
| 0.110885987 | 0.070996583  | 0.125504863 | 0.033651405 | 0.46816399 | -0.4069  |
| 0.088164053 | 0.080182203  | 0.083470289 | 0.128922274 | 0.00526722 | -0.55952 |
| 0.016640001 | -0.104980659 | 0.023277823 | 0.235647871 | 2.58E-07   | -0.18665 |
| 0.867663996 | -0.007169686 | 0.877195806 | 0.181550732 | 7.96E-05   | -0.33537 |
| 0.572046016 | -0.026682742 | 0.565172245 | 0.094602719 | 0.04100414 | -0.32233 |
| 0.013166684 | 0.113228452  | 0.01435688  | 0.197037034 | 1.80E-05   | -0.1701  |
| 0.052220164 | 0.091390798  | 0.048403207 | 0.179522637 | 9.59E-05   | -0.32874 |
| 0.356367095 | -0.044252439 | 0.339978398 | 0.579204889 | 3.44E-43   | -0.15921 |
| 3.94E-06    | -0.209918616 | 4.76E-06    | 0.039879001 | 0.38988552 | -0.32419 |
| 0.100161288 | 0.075747999  | 0.102071959 | 0.488563486 | 2.18E-29   | -0.05372 |
| 0.008012202 | -0.122213114 | 0.008195995 | 0.255249624 | 2.22E-08   | -0.05965 |
| 0.075437035 | 0.076730398  | 0.097690141 | 0.162582822 | 0.00041946 | -0.32118 |
| 8.97E-11    | -0.293278648 | 1.02E-10    | 0.197266821 | 1.76E-05   | -0.19004 |
| 0.114892464 | -0.070493962 | 0.128210224 | 0.181538543 | 7.97E-05   | -0.42666 |
| 0.261075582 | -0.065131491 | 0.15995475  | 0.410699716 | 1.98E-20   | -0.30667 |
| 0.011196597 | 0.121394613  | 0.008638271 | 0.110636193 | 0.01676562 | -0.36268 |
| 0.001598654 | 0.137219147  | 0.002963957 | 0.115712692 | 0.01233958 | -0.25024 |
| 0.014555337 | 0.119413255  | 0.009798098 | 0.181433294 | 8.04E-05   | -0.25977 |
| 0.232839091 | -0.05725153  | 0.216862728 | 0.341554005 | 3.18E-14   | -0.41457 |
| 0.667860906 | -0.015001759 | 0.746437671 | 0.152026833 | 0.00098177 | -0.27091 |
| 0.043972112 | 0.086271048  | 0.062488856 | 0.434097355 | 6.97E-23   | -0.32508 |
| 1.94E-06    | 0.215068199  | 2.73E-06    | 0.351292687 | 5.21E-15   | -0.04353 |
| 0.02432116  | -0.09747261  | 0.035224131 | 0.302433773 | 2.47E-11   | -0.29354 |
| 0.053950395 | -0.092192346 | 0.04645929  | 0.086100546 | 0.06301074 | -0.37764 |
| 0.636580545 | 0.025209636  | 0.586846703 | 0.11218839  | 0.01528411 | -0.21421 |
| 0.11352565  | 0.085342361  | 0.065375099 | 0.237462974 | 2.08E-07   | -0.22047 |
| 0.102492063 | -0.066965361 | 0.148492248 | 0.104840318 | 0.023464   | -0.42825 |
| 0.587799419 | 0.031207314  | 0.501104906 | 0.180255293 | 8.96E-05   | -0.36056 |
| 0.253715754 | -0.051597053 | 0.265805132 | 0.467049562 | 1.12E-26   | -0.1274  |
| 0.161485547 | 0.070851863  | 0.126279234 | 0.090654399 | 0.05024869 | -0.3791  |
| 0.054268303 | 0.099595039  | 0.031409042 | -0.01217585 | 0.7929923  | -0.25909 |
| 0.169139784 | -0.062310673 | 0.178869871 | 0.056054144 | 0.22664566 | -0.21696 |
| 2.18E-05    | 0.198780614  | 1.51E-05    | 0.201313742 | 1.17E-05   | -0.1493  |
| 0.373347615 | -0.039772875 | 0.391149271 | 0.322011629 | 9.97E-13   | -0.36384 |
| 0.000158205 | -0.183259677 | 6.79E-05    | 0.104761706 | 0.02356885 | -0.27419 |
| 0.416347259 | 0.041314676  | 0.373033595 | 0.04194812  | 0.36574343 | -0.41258 |

|             |              |             |             |            |          |
|-------------|--------------|-------------|-------------|------------|----------|
| 0.081631883 | -0.084584989 | 0.067809244 | -0.00541443 | 0.90710255 | -0.47839 |
| 0.259422736 | -0.053669761 | 0.247052012 | 0.083946548 | 0.06991843 | -0.43098 |
| 0.046299027 | -0.094439235 | 0.041356214 | 0.031448489 | 0.49780087 | -0.41763 |
| 0.000235817 | 0.173328616  | 0.000167114 | 0.231432754 | 4.27E-07   | -0.37147 |
| 4.78E-08    | 0.254571488  | 2.42E-08    | 0.410991919 | 1.85E-20   | -0.16938 |
| 5.71E-07    | 0.231749565  | 4.11E-07    | 0.149889716 | 0.00115878 | -0.24994 |
| 0.01035128  | -0.124565772 | 0.007035071 | 0.505612139 | 1.12E-31   | -0.38415 |
| 0.006191059 | 0.119349956  | 0.009837331 | 0.164862414 | 0.00034667 | -0.41307 |
| 0.069337949 | -0.078823124 | 0.088855661 | 0.198868428 | 1.50E-05   | -0.24936 |
| 0.438020913 | -0.033998216 | 0.463588571 | 0.253487493 | 2.79E-08   | -0.39608 |
| 3.69E-14    | 0.345961833  | 1.41E-14    | 0.353983187 | 3.12E-15   | -0.08593 |
| 0.200729325 | 0.059201997  | 0.201581897 | 0.419710309 | 2.37E-21   | -0.06168 |
| 0.030080528 | -0.100375999 | 0.030097077 | 0.144948178 | 0.00168623 | -0.2689  |
| 0.000897865 | -0.157965843 | 0.000612413 | 0.319065998 | 1.64E-12   | -0.18634 |
| 0.767821952 | -0.014815246 | 0.749484102 | 0.07981477  | 0.08489957 | -0.38642 |
| 0.302761516 | -0.049480537 | 0.285939541 | 0.518177214 | 1.90E-33   | -0.20516 |
| 0.003960121 | 0.132795021  | 0.004043144 | 0.53858991  | 1.74E-36   | -0.3201  |
| 0.904405953 | 0.015091386  | 0.744975128 | 0.062227414 | 0.17945234 | -0.2803  |
| 0.775980927 | -0.011052095 | 0.811722108 | 0.275830372 | 1.34E-09   | -0.16188 |
| 0.728858472 | 0.018646127  | 0.687756689 | 0.185033826 | 5.75E-05   | -0.29569 |
| 0.000237829 | 0.174177385  | 0.000155029 | 0.33967085  | 4.48E-14   | -0.25644 |
| 1.58E-05    | -0.194538208 | 2.30E-05    | 0.062108013 | 0.1802901  | -0.44004 |
| 0.12733786  | 0.067032919  | 0.148082244 | 0.264284629 | 6.66E-09   | 0.006524 |
| 0.725048856 | -0.022296577 | 0.630799701 | 0.206713856 | 6.67E-06   | -0.21168 |
| 0.0099174   | 0.121102876  | 0.008800977 | 0.367651972 | 2.15E-16   | -0.29725 |
| 0.03633914  | -0.097766864 | 0.034672735 | 0.00229936  | 0.96047581 | -0.30752 |
| 0.474863786 | -0.034423507 | 0.458011835 | 0.192265343 | 2.88E-05   | -0.24336 |
| 0.361895771 | 0.037375124  | 0.420358025 | -0.0476208  | 0.30445866 | -0.28011 |
| 0.960840391 | 0.002851008  | 0.951004168 | 0.147235078 | 0.0014195  | -0.29428 |
| 0.224369844 | 0.05845661   | 0.207326492 | -0.04137099 | 0.3723819  | -0.38506 |
| 0.962448507 | -0.006271688 | 0.892477124 | 0.162493517 | 0.00042258 | -0.25174 |
| 0.000802638 | -0.160022091 | 0.000518074 | 0.158682698 | 0.00057785 | -0.2709  |
| 0.000220824 | 0.16838174   | 0.000257043 | 0.284007632 | 4.10E-10   | -0.17286 |
| 0.356045239 | 0.043436065  | 0.348970627 | -0.1435312  | 0.0018738  | -0.42373 |
| 0.324396861 | 0.04255388   | 0.35885539  | 0.07162504  | 0.12218482 | -0.31038 |
| 0.146854809 | -0.063291153 | 0.172115691 | 0.256498235 | 1.88E-08   | -0.32944 |
| 0.891553236 | 0.003885768  | 0.933257251 | 0.246393781 | 6.90E-08   | -0.36448 |
| 9.26E-05    | 0.178523668  | 0.000104976 | -0.00054633 | 0.99060539 | -0.43305 |
| 5.95E-17    | 0.377996303  | 2.61E-17    | 0.33516589  | 1.01E-13   | -0.30803 |
| 0.996085751 | -0.003017354 | 0.948149345 | 0.568828387 | 2.18E-41   | -0.14613 |
| 0.971071305 | -7.12E-05    | 0.998775847 | 0.530529257 | 2.92E-35   | -0.43273 |
| 0.299581401 | 0.0568202    | 0.2203513   | 0.124154266 | 0.00722684 | -0.3309  |
| 0.430520856 | 0.048468927  | 0.295916811 | -0.02692537 | 0.56163943 | -0.42435 |
| 0.004894781 | -0.1235831   | 0.007500774 | 0.13286363  | 0.004024   | -0.33056 |
| 8.75E-10    | 0.284074359  | 4.06E-10    | 0.433043929 | 9.08E-23   | -0.11092 |

|             |              |             |             |            |          |
|-------------|--------------|-------------|-------------|------------|----------|
| 0.357872436 | -0.037376642 | 0.420339132 | 0.099795941 | 0.03106695 | -0.32355 |
| 0.871461659 | 0.009708248  | 0.834261132 | 0.262534101 | 8.43E-09   | -0.29752 |
| 0.01588002  | -0.112164629 | 0.015305895 | 0.076476607 | 0.09880752 | -0.45484 |
| 0.255901644 | -0.051116813 | 0.27028604  | 0.268603621 | 3.69E-09   | -0.26833 |
| 0.056021489 | -0.097776537 | 0.034654734 | 0.154327298 | 0.00081936 | -0.37429 |
| 0.002158191 | 0.151695967  | 0.001007434 | 0.433554043 | 7.99E-23   | -0.08558 |
| 0.537392115 | -0.02307817  | 0.618869516 | 0.161842402 | 0.00044601 | -0.26689 |
| 0.397386715 | -0.037118356 | 0.423559843 | 0.18009155  | 9.10E-05   | -0.17217 |
| 0.173425222 | 0.058206574  | 0.209279752 | 0.261610292 | 9.55E-09   | -0.22497 |
| 0.097524597 | 0.078864494  | 0.088687711 | 0.274846641 | 1.54E-09   | -0.35874 |
| 6.89E-05    | 0.186525909  | 5.00E-05    | 0.371035981 | 1.09E-16   | -0.08735 |
| 0.919767874 | 0.005737479  | 0.901587101 | 0.243255536 | 1.02E-07   | -0.42894 |
| 0.097162589 | -0.076752942 | 0.097591375 | 0.491285458 | 9.59E-30   | -0.311   |
| 0.023404237 | 0.107444099  | 0.020211917 | 0.176849834 | 0.00012212 | -0.15896 |
| 3.50E-09    | 0.278025397  | 9.78E-10    | 0.268312503 | 3.84E-09   | -0.13034 |
| 2.77E-06    | 0.22734029   | 6.88E-07    | -0.00315298 | 0.94582223 | -0.32428 |
| 0.932004428 | 0.001128095  | 0.980602936 | 0.279805305 | 7.57E-10   | -0.30944 |
| 0.516363224 | 0.035829868  | 0.439840265 | 0.306263362 | 1.34E-11   | -0.45819 |
| 0.00231695  | -0.140660402 | 0.002313597 | 0.06335301  | 0.17169605 | -0.30873 |
| 0.022716205 | -0.110267711 | 0.017135258 | 0.23558666  | 2.60E-07   | -0.17546 |
| 0.316086949 | -0.042022724 | 0.3648907   | -0.05736332 | 0.21596506 | -0.30314 |
| 0.000849241 | 0.158887928  | 0.000568293 | 0.337982427 | 6.08E-14   | -0.24548 |
| 0.000254913 | 0.164365182  | 0.000361465 | 0.022384423 | 0.62945395 | -0.31142 |
| 0.001370847 | -0.151262842 | 0.001041965 | 0.162460132 | 0.00042376 | -0.44956 |
| 0.951494745 | -0.001636884 | 0.97185759  | 0.068199798 | 0.14113592 | -0.48278 |
| 0.020508094 | 0.113667489  | 0.013980558 | -6.92E-05   | 0.99881075 | -0.49546 |
| 0.306159754 | -0.050190252 | 0.279076581 | -0.01269856 | 0.78431991 | -0.40679 |
| 0.257009833 | -0.055174167 | 0.234032598 | 0.081872685 | 0.07714279 | -0.32866 |
| 0.110108301 | -0.071247992 | 0.124168394 | -0.00600583 | 0.89700909 | -0.4112  |
| 0.750012492 | 0.019417438  | 0.675560172 | 0.263863991 | 7.05E-09   | -0.28306 |
| 0.783758321 | 0.009841195  | 0.832024954 | 0.403933011 | 9.36E-20   | -0.3118  |
| 0.005803634 | 0.127507329  | 0.005791766 | 0.215417211 | 2.63E-06   | -0.43062 |
| 0.228661078 | -0.06171461  | 0.183070862 | 0.152174568 | 0.00097051 | -0.39862 |
| 0.018940761 | -0.104454105 | 0.02398302  | 0.151647115 | 0.00101128 | -0.37021 |
| 0.579308684 | 0.027624947  | 0.551513357 | 0.339262352 | 4.83E-14   | -0.18419 |
| 0.573336575 | 0.02931399   | 0.52743994  | -0.09541474 | 0.03929269 | -0.41423 |
| 0.000184945 | -0.172930597 | 0.000173081 | 0.299554161 | 3.88E-11   | -0.22786 |
| 0.396671908 | -0.044276352 | 0.33971725  | -0.16176299 | 0.00044895 | -0.04685 |
| 0.002066786 | 0.119176842  | 0.009945338 | -0.03214019 | 0.48838918 | -0.03694 |
| 0.104652114 | -0.070075556 | 0.130496584 | 0.002901865 | 0.9501313  | -0.03111 |
| 0.059779314 | 0.090558875  | 0.050492338 | -0.15629908 | 0.00070032 | 0.047284 |
| 0.118962663 | -0.069740391 | 0.132350717 | -0.08995545 | 0.05205433 | -0.04781 |
| 0.716332215 | -0.019462147 | 0.674855768 | -0.10548638 | 0.0226175  | -0.03279 |
| 0.444206607 | 0.023352635  | 0.614703519 | -0.04678203 | 0.31306517 | 0.026318 |
| 0.75360123  | 0.016736055  | 0.718304878 | -0.02464598 | 0.5952404  | -0.06408 |

|             |              |             |             |            |          |
|-------------|--------------|-------------|-------------|------------|----------|
| 0.298971886 | -0.048804155 | 0.292585114 | -0.13235262 | 0.0041686  | -0.09615 |
| 0.25932889  | 0.047013238  | 0.310676968 | -0.0342474  | 0.46031648 | -0.06283 |
| 0.127026719 | -0.068611183 | 0.13874742  | -0.02492996 | 0.59100471 | -0.12054 |
| 0.258253022 | 0.052817547  | 0.254647603 | -0.08310166 | 0.07279185 | -0.0251  |
| 0.448864821 | -0.038069217 | 0.411774135 | -0.07219223 | 0.11924754 | -0.05478 |
| 0.947933349 | 0.009356914  | 0.840176961 | -0.05811991 | 0.20995985 | -0.05248 |
| 0.402145304 | 0.03203598   | 0.489801036 | 0.008007817 | 0.8629742  | 0.022509 |
| 0.955677057 | 0.015319989  | 0.741248933 | -0.07741892 | 0.0947094  | -0.04873 |
| 0.914061696 | 0.009724907  | 0.833980851 | -0.02398565 | 0.60514254 | -0.05727 |
| 0.082537935 | -0.079705964 | 0.085326587 | -0.08642345 | 0.06202538 | 0.03941  |
| 0.211120848 | 0.053711571  | 0.246683485 | -0.02400539 | 0.60484537 | 0.00597  |
| 0.359856813 | -0.037664122 | 0.416771303 | -0.13811077 | 0.00278115 | -0.0616  |
| 0.030686551 | -0.09807879  | 0.034096263 | -0.06079041 | 0.18972794 | 0.021996 |
| 0.098945748 | -0.084452289 | 0.068243289 | -0.02537733 | 0.58436008 | -0.00907 |
| 0.173328652 | -0.060314588 | 0.193223898 | -0.07388108 | 0.11082756 | -0.01877 |
| 0.040425425 | -0.097747102 | 0.034709534 | -0.0568646  | 0.21999036 | -0.05954 |
| 0.038036332 | -0.096126828 | 0.037841995 | -0.11670103 | 0.01160937 | -0.07869 |
| 0.746683331 | 0.016407929  | 0.723599775 | -0.01499629 | 0.74652699 | -0.05348 |
| 0.696107085 | -0.01877945  | 0.685642584 | -0.0108063  | 0.81583353 | -0.0132  |
| 0.989068135 | 0.00316481   | 0.945619266 | -0.02613277 | 0.57321924 | -0.07762 |
| 0.361936268 | -0.039691387 | 0.392121311 | -0.0382437  | 0.40963266 | 0.027566 |
| 0.627560918 | -0.030613404 | 0.509290418 | -0.00820098 | 0.85970262 | -0.14176 |
| 0.847829071 | -0.011242383 | 0.808542666 | -0.02245088 | 0.62843663 | -0.06059 |
| 0.466024336 | -0.029524521 | 0.524477197 | -0.01731336 | 0.70902176 | -0.07425 |
| 0.760731475 | 1.05E-05     | 0.999820298 | -0.03162567 | 0.49538094 | -0.00416 |
| 0.502641556 | -0.02974914  | 0.521325586 | -0.02798257 | 0.54637168 | -0.0692  |
| 0.264954129 | -0.052649744 | 0.25616207  | -0.01957732 | 0.67304248 | -0.01488 |
| 0.093212022 | -0.079517412 | 0.086070666 | -0.05208001 | 0.26135054 | -0.0377  |
| 0.458782096 | -0.029670882 | 0.522422507 | -0.04050889 | 0.38243581 | -0.0592  |
| 0.879281749 | -0.005411645 | 0.907150037 | -0.02386575 | 0.60694832 | -0.0623  |
| 0.223465154 | -0.061358957 | 0.185611939 | -0.02748907 | 0.55347316 | -0.04655 |
| 0.821226062 | -0.015979149 | 0.730538797 | -0.04903315 | 0.29032371 | 0.036074 |
| 0.987964745 | -0.001586728 | 0.972719566 | -0.05026823 | 0.27832943 | -0.03589 |
| 0.017062262 | 0.103498124  | 0.025310608 | -0.01399422 | 0.7629402  | -0.03805 |
| 0.049847497 | -0.094106526 | 0.042080612 | -0.11767013 | 0.01093075 | 0.129205 |
| 0.205190494 | -0.058513681 | 0.206882511 | -0.00513197 | 0.91192846 | -0.00498 |
| 0.228330599 | -0.054971276 | 0.235759616 | -0.03953129 | 0.39403536 | 0.008282 |
| 0.374787    | -0.039865822 | 0.390042312 | -0.01185135 | 0.7983891  | -0.02285 |
| 0.368549355 | -0.040087195 | 0.387413534 | -0.0057092  | 0.90206973 | -0.03032 |
| 0.391734715 | -0.037123956 | 0.423489858 | -0.0238231  | 0.6075913  | -0.01553 |
| 0.237845054 | -0.052124604 | 0.260941861 | -0.0108738  | 0.81470403 | -0.03717 |
| 0.424263366 | -0.036923168 | 0.426003272 | -0.03396909 | 0.46397182 | 0.009994 |
| 0.48802279  | 0.022904988  | 0.621504481 | -0.03917376 | 0.39832993 | -0.00948 |
| 0.740545352 | -0.022330444 | 0.630280739 | -0.0309318  | 0.50489353 | -0.00612 |
| 0.089998016 | 0.066892791  | 0.148933624 | -0.04491429 | 0.33279791 | -0.01961 |

|             |              |             |             |            |          |
|-------------|--------------|-------------|-------------|------------|----------|
| 0.067751289 | 0.093617167  | 0.043165506 | -0.07395721 | 0.11045932 | -0.1125  |
| 0.294384921 | -0.047755542 | 0.303090799 | -0.04178777 | 0.36758038 | 0.0307   |
| 0.111353407 | -0.071147006 | 0.12470389  | -0.19880289 | 1.51E-05   | -0.0929  |
| 0.885005316 | 0.00789389   | 0.864904845 | -0.0147066  | 0.75126052 | -0.05079 |
| 0.766079077 | -0.012978252 | 0.77969038  | -0.03298302 | 0.47705174 | -0.05576 |
| 0.847361536 | -0.006280947 | 0.892319345 | -0.01703325 | 0.71352063 | -0.05304 |
| 0.091569557 | -0.075967887 | 0.101077888 | -0.01506294 | 0.74543915 | 0.002403 |
| 0.439246695 | -0.034737226 | 0.453922276 | -0.02619376 | 0.57232427 | -0.0115  |
| 0.432556472 | -0.031187896 | 0.501371429 | -0.0702587  | 0.12949195 | -0.01241 |
| 0.770766444 | 0.010953922  | 0.813363652 | 0.008361366 | 0.85698806 | 0.022131 |
| 0.590611893 | -0.024954989 | 0.59063201  | -0.00904021 | 0.84551745 | -0.03153 |
| 0.531557586 | -0.032268174 | 0.48665838  | -0.04818756 | 0.29873268 | 0.0427   |
| 0.46220632  | -0.032293155 | 0.486320921 | -0.02253826 | 0.62710027 | 0.005953 |
| 0.2908797   | -0.048008372 | 0.300535205 | -0.0239349  | 0.60590653 | -0.0088  |
| 0.794896207 | -0.014064458 | 0.761786252 | -0.0692376  | 0.13517023 | -0.02845 |
| 0.182216497 | -0.061586375 | 0.183984097 | -0.08370936 | 0.07071555 | 0.017105 |
| 0.091528637 | -0.080049961 | 0.083982444 | -0.15291706 | 0.00091569 | -0.01383 |
| 0.440118236 | 0.026380446  | 0.569588647 | -0.0573721  | 0.21589469 | 0.002044 |
| 0.325690628 | -0.039473902 | 0.394722757 | -0.08072374 | 0.08139924 | -0.101   |
| 6.06E-05    | 0.190065273  | 3.56E-05    | 0.065010101 | 0.16073639 | 0.417611 |
| 1.90E-10    | 0.287818774  | 2.33E-10    | 0.099991279 | 0.0307374  | 0.327002 |
| 4.45E-11    | 0.316671872  | 2.45E-12    | 0.206031269 | 7.17E-06   | 0.339118 |
| 0.000981385 | 0.145106755  | 0.001666351 | 0.301269763 | 2.97E-11   | 0.246035 |
| 9.09E-07    | 0.228562223  | 5.97E-07    | 0.203226678 | 9.59E-06   | 0.232542 |
| 6.09E-08    | 0.259572033  | 1.25E-08    | -0.1143015  | 0.01345243 | 0.405757 |
| 0.00231903  | 0.140931869  | 0.002268298 | -0.23145677 | 4.25E-07   | 0.546779 |
| 3.50E-12    | 0.320371588  | 1.32E-12    | 0.178207387 | 0.00010803 | 0.436071 |
| 3.18E-06    | 0.216136474  | 2.43E-06    | 0.58190019  | 1.14E-43   | 0.289661 |
| 7.31E-06    | 0.209570605  | 4.93E-06    | 0.049207972 | 0.28860521 | 0.408953 |
| 2.96E-20    | 0.409394384  | 2.68E-20    | -0.26406861 | 6.85E-09   | 0.234499 |
| 2.46E-08    | 0.257425489  | 1.67E-08    | -0.09281283 | 0.04499985 | 0.392461 |
| 4.89E-07    | 0.234781588  | 2.87E-07    | 0.504107174 | 1.81E-31   | 0.478791 |
| 7.01E-09    | 0.265285608  | 5.81E-09    | 0.468074338 | 8.39E-27   | 0.459604 |
| 6.65E-22    | 0.435198052  | 5.29E-23    | 0.06366235  | 0.1696089  | 0.25131  |
| 1.61E-11    | 0.310356219  | 6.94E-12    | 0.312706124 | 4.72E-12   | 0.332872 |
| 1.33E-09    | 0.273857103  | 1.77E-09    | 0.103760373 | 0.02494025 | 0.462138 |
| 1.76E-08    | 0.258838187  | 1.38E-08    | 0.362121051 | 6.46E-16   | 0.198883 |
| 1.23E-13    | 0.341387622  | 3.28E-14    | 0.337873544 | 6.20E-14   | 0.472584 |
| 1.78E-10    | 0.29694387   | 5.83E-11    | 0.311968047 | 5.33E-12   | 0.281777 |
| 2.10E-06    | 0.216386618  | 2.36E-06    | 0.561860608 | 3.26E-40   | 0.312794 |
| 2.63E-07    | 0.234666538  | 2.91E-07    | 0.368184176 | 1.94E-16   | 0.426079 |
| 0.000321918 | 0.174518678  | 0.000150405 | 0.221669036 | 1.31E-06   | 0.413809 |
| 1.14E-09    | 0.274359385  | 1.65E-09    | 0.210252962 | 4.59E-06   | 0.356685 |
| 1.27E-06    | 0.229470656  | 5.37E-07    | 0.45492267  | 3.11E-25   | 0.335583 |
| 0.000829484 | 0.155763279  | 0.000730974 | 0.4080239   | 3.68E-20   | 0.467888 |

|             |             |             |             |            |          |
|-------------|-------------|-------------|-------------|------------|----------|
| 0.001642911 | 0.146879289 | 0.001458278 | 0.330161307 | 2.44E-13   | 0.496224 |
| 3.96E-12    | 0.316828451 | 2.39E-12    | 0.112859421 | 0.01468006 | 0.484291 |
| 1.77E-14    | 0.340123817 | 4.13E-14    | 0.269866176 | 3.09E-09   | 0.518356 |
| 2.52E-08    | 0.251979301 | 3.39E-08    | 0.141718999 | 0.00214149 | 0.317175 |
| 3.87E-07    | 0.238754276 | 1.78E-07    | 0.564608031 | 1.13E-40   | 0.346394 |
| 9.31E-19    | 0.398095456 | 3.47E-19    | 0.118119617 | 0.0106281  | 0.277285 |
| 5.67E-10    | 0.279339504 | 8.09E-10    | -0.03822821 | 0.40982249 | 0.511166 |
| 2.26E-11    | 0.301690453 | 2.78E-11    | -0.00463969 | 0.92034717 | 0.417646 |
| 8.58E-07    | 0.221760005 | 1.30E-06    | 0.277760164 | 1.02E-09   | 0.282609 |
| 7.05E-11    | 0.303148513 | 2.21E-11    | 0.295674528 | 7.09E-11   | 0.455804 |
| 4.85E-16    | 0.363538871 | 4.88E-16    | 0.245440777 | 7.78E-08   | 0.423316 |
| 1.64E-05    | 0.197369202 | 1.74E-05    | 0.156546192 | 0.00068659 | 0.264596 |
| 0.186522893 | 0.064017181 | 0.167238237 | 0.2301423   | 4.96E-07   | 0.410076 |
| 2.95E-13    | 0.337017594 | 7.24E-14    | 0.304496337 | 1.78E-11   | 0.49548  |
| 3.15E-09    | 0.266648087 | 4.82E-09    | 0.235157143 | 2.74E-07   | 0.331324 |
| 3.63E-18    | 0.377653238 | 2.81E-17    | -0.26568733 | 5.50E-09   | 0.358175 |
| 4.77E-10    | 0.282871119 | 4.84E-10    | 0.254350468 | 2.49E-08   | 0.360361 |
| 8.97E-11    | 0.297927967 | 5.00E-11    | 0.258197263 | 1.50E-08   | 0.362384 |
| 0.034311765 | 0.097821128 | 0.034571856 | 0.272304769 | 2.20E-09   | 0.237923 |
| 1.10E-06    | 0.228750917 | 5.84E-07    | 0.250273135 | 4.22E-08   | 0.497579 |
| 0.000191562 | 0.172430504 | 0.000180861 | 0.228479659 | 6.02E-07   | 0.528428 |
| 7.00E-12    | 0.304935467 | 1.66E-11    | 0.303346787 | 2.14E-11   | 0.299502 |
| 1.36E-15    | 0.367569446 | 2.19E-16    | 0.053079465 | 0.25229615 | 0.316581 |
| 1.88E-13    | 0.325203742 | 5.78E-13    | 0.029221362 | 0.52874616 | 0.49038  |
| 2.08E-16    | 0.376161242 | 3.82E-17    | 0.232993411 | 3.55E-07   | 0.220923 |
| 7.99E-07    | 0.222676255 | 1.17E-06    | 0.172936419 | 0.00017299 | 0.432946 |
| 4.53E-15    | 0.35905549  | 1.18E-15    | -0.12274012 | 0.00792203 | 0.348715 |
| 9.19E-14    | 0.342218807 | 2.82E-14    | 0.192785516 | 2.74E-05   | 0.486854 |
| 2.35E-08    | 0.251189969 | 3.75E-08    | 0.308728836 | 9.03E-12   | 0.239403 |
| 2.80E-25    | 0.455157053 | 2.92E-25    | 0.295317678 | 7.49E-11   | 0.280576 |
| 2.18E-11    | 0.31506915  | 3.20E-12    | 0.153492615 | 0.00087517 | 0.226492 |
| 2.96E-06    | 0.21277854  | 3.50E-06    | 0.214158871 | 3.01E-06   | 0.380126 |
| 0.000369914 | 0.161746284 | 0.000449571 | 0.372280395 | 8.46E-17   | 0.323207 |
| 1.41E-13    | 0.339009561 | 5.05E-14    | 0.062627578 | 0.17666566 | 0.563979 |
| 3.45E-17    | 0.380086128 | 1.69E-17    | 0.351296849 | 5.20E-15   | 0.529686 |
| 5.03E-11    | 0.298442873 | 4.62E-11    | 0.404390678 | 8.43E-20   | 0.472754 |
| 2.22E-08    | 0.253232474 | 2.88E-08    | 0.408430245 | 3.35E-20   | 0.432775 |
| 3.84E-06    | 0.216911802 | 2.23E-06    | 0.306527753 | 1.29E-11   | 0.398732 |
| 1.14E-08    | 0.258826606 | 1.38E-08    | 0.086924166 | 0.06052263 | 0.472586 |
| 6.80E-11    | 0.306587298 | 1.28E-11    | -0.00902521 | 0.8457706  | 0.433703 |
| 6.06E-11    | 0.292768066 | 1.11E-10    | 0.075989429 | 0.10098091 | 0.112197 |
| 9.63E-15    | 0.342804153 | 2.53E-14    | 0.065695234 | 0.15636226 | 0.017994 |
| 1.21E-17    | 0.375705272 | 4.20E-17    | 0.385268061 | 5.66E-18   | 0.404964 |
| 7.21E-10    | 0.287090304 | 2.60E-10    | 0.600755022 | 3.81E-47   | 0.148219 |
| 7.92E-16    | 0.36165844  | 7.07E-16    | 0.231907964 | 4.03E-07   | 0.454392 |



|             |             |             |             |            |          |
|-------------|-------------|-------------|-------------|------------|----------|
| 1.47E-17    | 0.385746405 | 5.11E-18    | 0.371241435 | 1.05E-16   | 0.249203 |
| 2.99E-19    | 0.401426132 | 1.65E-19    | 0.152672231 | 0.00093344 | 0.581147 |
| 1.97E-09    | 0.2812241   | 6.16E-10    | 0.506490791 | 8.49E-32   | 0.338587 |
| 8.26E-11    | 0.301212945 | 3.00E-11    | 0.270536107 | 2.82E-09   | 0.504172 |
| 0.015075938 | 0.117557309 | 0.011007901 | 0.14222724  | 0.00206309 | 0.539959 |
| 1.19E-06    | 0.221449782 | 1.35E-06    | 0.394990637 | 6.90E-19   | 0.30009  |
| 3.09E-23    | 0.439845093 | 1.63E-23    | 0.225825617 | 8.19E-07   | 0.230818 |
| 2.21E-10    | 0.292297733 | 1.19E-10    | 0.207215232 | 6.33E-06   | 0.438266 |
| 3.29E-10    | 0.297225914 | 5.58E-11    | 0.388894407 | 2.60E-18   | 0.329661 |
| 2.89E-15    | 0.354706976 | 2.72E-15    | 0.147077025 | 0.00143661 | 0.279844 |
| 1.11E-06    | 0.220472883 | 1.50E-06    | 0.247871667 | 5.73E-08   | 0.289831 |
| 5.14E-14    | 0.339988639 | 4.23E-14    | 0.275822245 | 1.34E-09   | 0.195716 |
| 5.50E-16    | 0.362916173 | 5.52E-16    | 0.111869258 | 0.01557897 | 0.313783 |
| 4.81E-12    | 0.316549496 | 2.50E-12    | 0.314787498 | 3.35E-12   | 0.526008 |
| 1.99E-11    | 0.30657202  | 1.28E-11    | 0.236588111 | 2.31E-07   | 0.5561   |
| 5.28E-06    | 0.201814737 | 1.11E-05    | 0.091929958 | 0.04708829 | 0.320157 |
| 1.64E-06    | 0.222981801 | 1.13E-06    | 0.205920776 | 7.25E-06   | 0.5572   |
| 6.21E-17    | 0.37891833  | 2.16E-17    | 0.241927948 | 1.20E-07   | 0.213935 |
| 0.002132466 | 0.143478056 | 0.001881193 | 0.102416727 | 0.02688833 | 0.462278 |
| 1.55E-10    | 0.290612669 | 1.53E-10    | 0.208746125 | 5.39E-06   | 0.332556 |
| 3.49E-05    | 0.185409743 | 5.55E-05    | 0.411595615 | 1.61E-20   | 0.161242 |
| 3.42E-18    | 0.389750199 | 2.17E-18    | 0.123604736 | 0.00749023 | 0.230431 |
| 0.000157278 | 0.172675585 | 0.000177008 | -0.02954905 | 0.52413253 | 0.373288 |
| 6.63E-14    | 0.328010558 | 3.55E-13    | 0.1327002   | 0.00406974 | 0.176275 |
| 2.38E-12    | 0.320983185 | 1.19E-12    | 0.106765193 | 0.02101965 | 0.522499 |
| 4.00E-11    | 0.300488586 | 3.36E-11    | 0.594640383 | 5.42E-46   | 0.335707 |
| 0.000394127 | 0.166481159 | 0.000302333 | 0.331426052 | 1.96E-13   | 0.377714 |
| 2.04E-09    | 0.280854077 | 6.50E-10    | 0.116196982 | 0.01197685 | 0.500796 |
| 9.82E-06    | 0.203118913 | 9.69E-06    | 0.337175358 | 7.03E-14   | 0.257787 |
| 5.64E-17    | 0.379719919 | 1.82E-17    | 0.05728241  | 0.2166145  | 0.331166 |
| 9.39E-18    | 0.380973917 | 1.40E-17    | 0.323365612 | 7.92E-13   | 0.426798 |
| 1.37E-19    | 0.397684651 | 3.80E-19    | 0.109772572 | 0.01764315 | 0.418096 |
| 1.05E-06    | 0.222952102 | 1.14E-06    | 0.27383586  | 1.77E-09   | 0.29456  |
| 2.04E-19    | 0.404315892 | 8.58E-20    | 0.30466521  | 1.73E-11   | 0.401168 |
| 0.001336074 | 0.139844615 | 0.002454742 | 0.23684832  | 2.24E-07   | 0.376581 |
| 4.89E-14    | 0.34487147  | 1.73E-14    | 0.180478636 | 8.78E-05   | 0.453614 |
| 4.70E-13    | 0.321028272 | 1.18E-12    | 0.229248877 | 5.51E-07   | 0.467746 |
| 2.85E-08    | 0.254772212 | 2.36E-08    | 0.333373876 | 1.39E-13   | 0.255603 |
| 1.54E-09    | 0.279017879 | 8.48E-10    | 0.130155448 | 0.00484538 | 0.43147  |
| 1.09E-05    | 0.195263988 | 2.14E-05    | -0.11928113 | 0.00988015 | 0.46753  |
| 3.04E-08    | 0.249954786 | 4.39E-08    | 0.245183632 | 8.03E-08   | 0.195067 |
| 1.43E-12    | 0.323901928 | 7.22E-13    | 0.325782498 | 5.23E-13   | 0.411538 |
| 3.58E-22    | 0.429168428 | 2.38E-22    | 0.205164452 | 7.84E-06   | 0.58237  |
| 1.21E-11    | 0.309307472 | 8.22E-12    | 0.478459278 | 4.32E-28   | 0.589161 |
| 4.51E-19    | 0.398886242 | 2.91E-19    | 0.153169067 | 0.00089774 | 0.227296 |

|             |              |             |             |            |          |
|-------------|--------------|-------------|-------------|------------|----------|
| 2.35E-05    | 0.198795662  | 1.51E-05    | 0.365833121 | 3.10E-16   | 0.39054  |
| 4.58E-06    | 0.212684016  | 3.54E-06    | 0.006343874 | 0.89124718 | 0.496996 |
| 2.06E-09    | 0.270744841  | 2.74E-09    | 0.209303555 | 5.08E-06   | 0.543905 |
| 2.97E-06    | 0.214418815  | 2.93E-06    | 0.177182799 | 0.00011851 | 0.364658 |
| 0.011428091 | 0.12457709   | 0.007029861 | 0.193751567 | 2.49E-05   | 0.215747 |
| 8.05E-07    | 0.228051108  | 6.33E-07    | 0.417270701 | 4.24E-21   | 0.389412 |
| 6.85E-08    | 0.244983994  | 8.24E-08    | 0.207814689 | 5.94E-06   | 0.336588 |
| 2.03E-23    | 0.440286309  | 1.45E-23    | -0.08175812 | 0.07755893 | 0.452187 |
| 0.00867821  | 0.124709155  | 0.006969328 | 0.198362132 | 1.57E-05   | 0.413977 |
| 6.55E-10    | 0.283781926  | 4.24E-10    | 0.413402863 | 1.05E-20   | 0.41475  |
| 1.20E-08    | 0.263543225  | 7.36E-09    | 0.298329869 | 4.70E-11   | 0.268119 |
| 1.22E-13    | 0.341519103  | 3.20E-14    | 0.522814709 | 4.05E-34   | 0.290168 |
| 0.000305589 | 0.172595253  | 0.000178262 | -0.06662693 | 0.15055914 | 0.425227 |
| 0.000198012 | 0.167538253  | 0.000276298 | 0.30854479  | 9.31E-12   | 0.202808 |
| 1.72E-10    | 0.29761302   | 5.25E-11    | 0.195691896 | 2.05E-05   | 0.634851 |
| 0.038431522 | 0.088836307  | 0.055057987 | 0.469420792 | 5.74E-27   | 0.285372 |
| 8.77E-05    | 0.181988025  | 7.64E-05    | 0.189840731 | 3.64E-05   | 0.404092 |
| 7.31E-07    | 0.224745866  | 9.26E-07    | 0.456036254 | 2.31E-25   | 0.269205 |
| 1.07E-17    | 0.385428632  | 5.47E-18    | 0.419642058 | 2.41E-21   | 0.024076 |
| 0.445999694 | -0.040959266 | 0.377162935 | -0.08021542 | 0.08334203 | 0.002866 |
| 9.46E-09    | -0.254568258 | 2.42E-08    | 0.023576662 | 0.61131226 | -0.00157 |
| 0.965559839 | 0.003057132  | 0.947466775 | -0.25263453 | 3.11E-08   | -0.07627 |
| 0.209990768 | -0.059945673 | 0.195966667 | -0.08259023 | 0.07457749 | 0.054971 |
| 0.266954249 | -0.04191162  | 0.36616107  | -0.11341538 | 0.01419558 | 0.019144 |
| 0.30865971  | -0.042542659 | 0.358982232 | -0.05396574 | 0.24445137 | 0.054488 |
| 0.293863216 | -0.048840727 | 0.292223168 | -0.17538852 | 0.0001392  | 0.124213 |
| 0.642798018 | -0.019330074 | 0.676937458 | -0.11193885 | 0.01551425 | -0.05871 |
| 0.939152066 | -0.005738914 | 0.901562605 | -0.18255181 | 7.25E-05   | 0.001264 |
| 0.863300011 | -0.005609542 | 0.903770791 | -0.11869896 | 0.01024898 | -0.09631 |
| 0.487981612 | -0.036324126 | 0.433553256 | 0.01645997  | 0.72275911 | -0.05245 |
| 0.351385617 | -0.040414488 | 0.38354674  | -0.20907762 | 5.20E-06   | -0.12831 |
| 0.793291081 | -0.006991777 | 0.880219863 | -0.03728089 | 0.42153146 | 0.058332 |
| 0.887206182 | -0.006443193 | 0.889555359 | -0.14009684 | 0.00241029 | -0.0344  |
| 0.646590251 | -0.015431513 | 0.73943329  | -0.07062331 | 0.12750971 | -0.01319 |
| 0.355497061 | -0.0449494   | 0.332419724 | -0.11032089 | 0.01708147 | -0.05748 |
| 0.01239686  | -0.113756468 | 0.013905357 | -0.07572026 | 0.10219793 | 0.05766  |
| 0.235855423 | -0.054618472 | 0.23878407  | -0.08874908 | 0.05529803 | -0.00131 |
| 0.0178824   | 0.104472139  | 0.023958566 | -0.08478909 | 0.06714608 | -0.01477 |
| 0.331169007 | -0.044047984 | 0.342216421 | -0.05594982 | 0.22751261 | 0.092542 |
| 0.381949111 | -0.038688464 | 0.404204074 | -0.11209144 | 0.01537317 | -0.11476 |
| 0.150714812 | -0.061211334 | 0.186674283 | -0.13260126 | 0.00409766 | 0.002149 |
| 0.556865639 | -0.023161336 | 0.61760587  | -0.0717802  | 0.12137576 | 0.088816 |
| 0.583725332 | -0.027879203 | 0.547855373 | -0.0718756  | 0.12088038 | 0.038401 |
| 0.860244719 | -0.0072952   | 0.875063435 | -0.05702876 | 0.21865951 | -0.04084 |
| 0.031562778 | -0.080033552 | 0.084046171 | -0.13487211 | 0.00349859 | 0.176053 |

|             |              |             |             |            |          |
|-------------|--------------|-------------|-------------|------------|----------|
| 0.001904839 | -0.146896166 | 0.001456417 | -0.02656747 | 0.56685444 | -0.11198 |
| 0.280623634 | 0.059637746  | 0.198277695 | -0.05794709 | 0.21132083 | 0.027782 |
| 0.000228458 | 0.165442476  | 0.000330129 | -0.00916587 | 0.84339756 | 0.061778 |
| 0.132902582 | -0.064624046 | 0.163241367 | -0.07396039 | 0.11044392 | 0.036577 |
| 0.476216099 | -0.033178064 | 0.474448722 | -0.12840124 | 0.00545518 | -0.06703 |
| 0.175888515 | -0.059000116 | 0.203126211 | -0.05239864 | 0.25844    | 0.039013 |
| 0.313994694 | -0.043462916 | 0.348672488 | -0.25371809 | 2.71E-08   | -0.16763 |
| 0.055385333 | -0.082531061 | 0.07478638  | -0.12659786 | 0.00615325 | 0.002678 |
| 0.210999068 | -0.056551076 | 0.22254818  | -0.07198056 | 0.12033718 | 0.06261  |
| 2.18E-06    | -0.216991149 | 2.21E-06    | -0.05685599 | 0.22006032 | 0.052069 |
| 0.877788418 | 0.019813441  | 0.669330883 | -0.09948519 | 0.03159746 | 0.088127 |
| 0.003349308 | -0.135848662 | 0.003266329 | 0.059787007 | 0.197155   | 0.035694 |
| 0.016982959 | -0.101405469 | 0.028439576 | -0.05905288 | 0.20272179 | 0.066891 |
| 0.17619642  | -0.060645722 | 0.190786056 | 0.024895031 | 0.5915249  | 0.104236 |
| 0.983854929 | -0.003004449 | 0.948370795 | -0.04653666 | 0.31561275 | 0.010531 |
| 0.275523229 | -0.048306461 | 0.297540561 | -0.10257677 | 0.02664963 | 0.028814 |
| 0.009714231 | -0.114943908 | 0.012935319 | -0.16908344 | 0.00024199 | -0.0777  |
| 7.47E-10    | -0.283677181 | 4.30E-10    | -0.03025975 | 0.51419751 | -0.18216 |
| 0.98212065  | 0.000746923  | 0.987156298 | -0.0535144  | 0.24842482 | -0.05188 |
| 0.022581811 | -0.104988769 | 0.023267102 | -0.07387274 | 0.11086793 | 0.000768 |
| 0.588944901 | -0.023650992 | 0.610188887 | -0.09620166 | 0.03769222 | -0.06954 |
| 0.779887536 | -0.013247649 | 0.775238571 | -0.1065427  | 0.02129039 | 0.002101 |
| 0.677880456 | -0.01932208  | 0.677063535 | -0.10471866 | 0.02362644 | -0.06354 |
| 0.726448032 | 0.018354843  | 0.692384029 | -0.10809142 | 0.01946704 | -0.0753  |
| 0.743002229 | -0.021071391 | 0.649694459 | -0.13150648 | 0.0044184  | -0.03127 |
| 1.32E-05    | -0.199060183 | 1.47E-05    | -0.06387526 | 0.16818341 | -0.04264 |
| 0.913000182 | -0.002910049 | 0.949990841 | -0.13736704 | 0.0029329  | -0.09899 |
| 0.001546941 | -0.135775032 | 0.003283341 | -0.01634641 | 0.72459397 | 0.104416 |
| 0.986738986 | -0.004520054 | 0.922394517 | 0.00410802  | 0.92944946 | 0.117064 |
| 0.010860694 | -0.119404113 | 0.009803756 | -0.08662054 | 0.06143024 | 0.065354 |
| 0.000321294 | -0.171392936 | 0.000198059 | -0.06558358 | 0.15706888 | -0.0921  |
| 0.009886743 | -0.114386834 | 0.013382712 | -0.12305589 | 0.00776182 | 0.005732 |
| 0.098284078 | -0.076325316 | 0.099478436 | -0.11370343 | 0.01395014 | 0.065473 |
| 0.664502574 | -0.02271681  | 0.624373104 | -0.11550203 | 0.01250037 | -0.09507 |
| 0.05552772  | -0.084818709 | 0.067050279 | -0.05449544 | 0.23984519 | 0.053306 |
| 0.044270037 | -0.096285408 | 0.037525186 | -0.14840215 | 0.00129887 | -0.04945 |
| 0.971667531 | 0.020183967  | 0.663522797 | -0.12669783 | 0.00611255 | -0.02147 |
| 0.147303409 | -0.063647999 | 0.169705309 | -0.19070985 | 3.35E-05   | -0.04497 |
| 0.525162138 | -0.031063856 | 0.503075721 | -0.25017006 | 4.28E-08   | -0.07183 |
| 4.00E-05    | -0.184768819 | 5.90E-05    | -0.03301861 | 0.47657619 | 0.087872 |
| 0.109006457 | -0.074251708 | 0.109043879 | -0.10897233 | 0.01849184 | -0.09282 |
| 0.453447605 | -0.032564047 | 0.482669634 | -0.13178638 | 0.00433431 | 0.005853 |
| 0.94748894  | 0.015193467  | 0.74331047  | -0.01676186 | 0.71788909 | 0.106744 |
| 0.485915739 | 0.032974718  | 0.477162755 | -0.12815347 | 0.00554667 | -0.07025 |
| 0.555017685 | 0.019870899  | 0.668428912 | -0.07692007 | 0.09686166 | 0.018919 |

|             |              |             |             |            |          |
|-------------|--------------|-------------|-------------|------------|----------|
| 0.023304107 | -0.100831417 | 0.02935389  | -0.06482988 | 0.16190219 | 0.023511 |
| 0.35088967  | -0.041904583 | 0.366241624 | -0.07234897 | 0.11844567 | 0.020945 |
| 0.145353914 | -0.066148866 | 0.153516017 | -0.07252238 | 0.1175634  | -0.06139 |
| 0.850148535 | -0.006681942 | 0.8854905   | -0.09761892 | 0.03494903 | 0.007124 |
| 0.213369215 | -0.053426727 | 0.249201812 | -0.07680053 | 0.09738314 | 0.046429 |
| 0.007272243 | -0.118180426 | 0.010587727 | 0.07780218  | 0.09308195 | 0.161086 |
| 0.385960432 | -0.035647357 | 0.442174935 | -0.04613008 | 0.31986391 | 0.070058 |
| 0.036758183 | -0.094177495 | 0.041925203 | -0.05611982 | 0.22610105 | 0.055601 |
| 0.152131041 | -0.066024206 | 0.154294232 | -0.09660458 | 0.03689437 | 0.046347 |
| 6.46E-07    | -0.22615282  | 7.88E-07    | -0.08171966 | 0.07769902 | -0.06615 |
| 0.421146808 | -0.028941719 | 0.532699565 | -0.02382222 | 0.60760461 | 0.133081 |
| 0.417881008 | -0.029934631 | 0.518730311 | -0.24027125 | 1.48E-07   | -0.18565 |
| 0.059474959 | -0.085986429 | 0.063362035 | -0.07616565 | 0.10019041 | -0.01336 |
| 0.400413889 | -0.037089033 | 0.423926398 | -0.08277391 | 0.07393214 | 0.026106 |
| 0.543804071 | 0.032709647  | 0.480713291 | -0.09704169 | 0.03604507 | 0.037683 |
| 0.998211523 | -0.002526262 | 0.956579221 | -0.04693588 | 0.31147469 | -0.04473 |
| 0.645626696 | 0.01883601   | 0.684746445 | -0.02792898 | 0.54714066 | 0.051681 |
| 0.69232604  | -0.01679607  | 0.717337871 | -0.11118109 | 0.01623182 | -0.01877 |
| 0.195830044 | -0.06315119  | 0.173068035 | 0.019294824 | 0.67749347 | 0.120516 |
| 0.055770761 | -0.086637328 | 0.061379774 | -0.07129897 | 0.12389874 | -0.00288 |
| 0.025128386 | -0.101129408 | 0.02887617  | -0.10090752 | 0.02923125 | 0.007612 |
| 0.114933862 | 0.066103043  | 0.153801729 | -0.05645204 | 0.22336053 | 0.050425 |
| 0.083885141 | -0.078861158 | 0.088701246 | -0.0104754  | 0.82137659 | 0.166678 |
| 1.42E-05    | -0.198683978 | 1.52E-05    | -0.09293107 | 0.04472617 | -0.00129 |
| 0.063989087 | -0.085759104 | 0.064066639 | -0.04245092 | 0.36002037 | -0.03832 |
| 1.28E-06    | -0.225656103 | 8.35E-07    | 0.004193464 | 0.92798599 | 0.044816 |
| 0.20989864  | -0.054346637 | 0.241132939 | -0.12388881 | 0.00735302 | 0.023937 |
| 0.184266202 | -0.058451158 | 0.207368936 | -0.10125788 | 0.02867228 | 0.00541  |
| 5.10E-05    | -0.186927184 | 4.81E-05    | -0.06369709 | 0.16937569 | 0.104737 |
| 0.0131194   | -0.11380226  | 0.013866793 | 0.006499432 | 0.88859758 | 0.152839 |
| 0.04405655  | -0.091635859 | 0.047801783 | -0.15215987 | 0.00097162 | 0.030208 |
| 3.39E-05    | -0.185719398 | 5.39E-05    | -0.20357828 | 9.25E-06   | -0.01958 |
| 0.33503894  | -0.036168193 | 0.43553113  | -0.11737387 | 0.01113438 | 0.050402 |
| 0.15767935  | -0.076345873 | 0.099387061 | -0.19559347 | 2.07E-05   | -0.11333 |
| 0.432838993 | -0.037337452 | 0.420826896 | -0.06412878 | 0.16649776 | 0.004626 |
| 0.857057315 | -0.008664279 | 0.851865766 | -0.09410662 | 0.0420804  | 0.045646 |
| 0.02611186  | -0.10343958  | 0.02539393  | 0.01749152  | 0.7061656  | 0.05931  |
| 0.389200914 | -0.039616992 | 0.393010023 | -0.02558186 | 0.58133383 | 0.12294  |
| 0.022237387 | -0.103688968 | 0.025040627 | -0.04901112 | 0.29054075 | 0.193417 |
| 0.040465153 | -0.093844716 | 0.04265814  | -0.04929994 | 0.28770388 | 0.076222 |
| 0.447860284 | -0.015408641 | 0.739805528 | -0.13279237 | 0.00404388 | 0.000179 |
| 0.08140415  | -0.082761745 | 0.073974729 | -0.22028046 | 1.53E-06   | -0.09948 |
| 0.17623093  | -0.069228833 | 0.135219781 | -0.07219998 | 0.11920782 | 0.098603 |
| 0.222261205 | -0.047231173 | 0.30843689  | -0.05397106 | 0.24440486 | -0.06442 |
| 0.81972905  | 0.007256232  | 0.875725377 | -0.13840426 | 0.00272326 | -0.04646 |

|             |              |             |             |            |          |
|-------------|--------------|-------------|-------------|------------|----------|
| 0.437971543 | -0.032995836 | 0.476880494 | -0.14323264 | 0.00191568 | 0.008506 |
| 0.015212405 | -0.112836822 | 0.014700053 | -0.09152283 | 0.04807841 | 0.2162   |
| 0.076856485 | -0.08843141  | 0.05617957  | -0.16881172 | 0.00024772 | 0.153586 |
| 5.14E-11    | -0.299591181 | 3.86E-11    | -0.10825318 | 0.01928468 | -0.07369 |
| 0.008596894 | -0.127797073 | 0.005680679 | -0.04890364 | 0.29160118 | 0.059909 |
| 0.068236354 | -0.082418462 | 0.075185179 | -0.00581629 | 0.90024228 | 0.184859 |
| 0.242171118 | -0.054300596 | 0.241532369 | 0.003169515 | 0.94553855 | -0.03652 |
| 0.000105237 | 0.176643353  | 0.000124404 | -0.17908265 | 9.98E-05   | 0.099501 |
| 4.83E-08    | 0.250746872  | 3.97E-08    | 0.035760425 | 0.44072774 | 0.090894 |
| 0.010844818 | -0.118064726 | 0.010664652 | -0.08065533 | 0.08165854 | -0.06726 |
| 0.40658466  | 0.03492339   | 0.451505216 | -0.07926374 | 0.08707994 | -0.04385 |
| 0.146283288 | -0.062374877 | 0.178421665 | -0.09116233 | 0.0489696  | -0.00573 |
| 0.553831692 | -0.025317115 | 0.58525242  | -0.06691946 | 0.14877128 | -0.02389 |
| 0.196048537 | -0.058619972 | 0.206057463 | -0.11004088 | 0.01736633 | -0.07087 |
| 0.302460507 | -0.042425012 | 0.360313884 | 0.006703353 | 0.88512612 | 0.131984 |
| 0.815005079 | 0.01005655   | 0.828405566 | -0.11092774 | 0.01647813 | -0.07346 |
| 0.696062915 | -0.013541257 | 0.770395048 | -0.09979072 | 0.03107581 | 0.108565 |
| 6.38E-09    | -0.262001877 | 9.06E-09    | -0.21260303 | 3.57E-06   | 0.127491 |
| 0.003151359 | -0.136477901 | 0.003124182 | -0.06995388 | 0.13116734 | -0.09374 |
| 0.096374642 | -0.063258936 | 0.172334553 | -0.02536996 | 0.58446924 | 0.107223 |
| 0.041717685 | -0.097302299 | 0.035546668 | -0.12224267 | 0.00818041 | 0.047808 |
| 0.416116258 | -0.031998979 | 0.490302828 | -0.08892644 | 0.05481086 | 0.100276 |
| 0.068057719 | 0.068562481  | 0.139028553 | 0.073947801 | 0.11050476 | 0.053337 |
| 0.066539021 | -0.077167021 | 0.095791382 | -0.13789733 | 0.00282395 | 0.068496 |
| 0.251619072 | -0.057589374 | 0.214158062 | -0.16264731 | 0.00041722 | -0.1574  |
| 0.014096644 | -0.111446689 | 0.015977062 | -0.17274344 | 0.00017596 | 0.148571 |
| 0.294053475 | -0.047952292 | 0.301100821 | -0.03569278 | 0.4415932  | 0.050607 |
| 0.0076919   | -0.123426511 | 0.007577476 | -0.0176288  | 0.70396753 | 0.02914  |
| 0.212660346 | -0.055231933 | 0.233542528 | -0.22667013 | 7.43E-07   | 0.029654 |
| 0.006223448 | -0.129936514 | 0.004917968 | 0.018963515 | 0.6827279  | -0.0072  |
| 0.291580394 | -0.04478344  | 0.3342097   | -0.22571643 | 8.29E-07   | -0.16639 |
| 0.02987457  | 0.103439113  | 0.025394595 | -0.00798304 | 0.86339403 | -0.04416 |
| 0.206440426 | -0.058252748 | 0.208918047 | -0.08202713 | 0.07658466 | -0.07522 |
| 0.381538981 | 0.045963158  | 0.321620059 | -0.10330687 | 0.02558368 | -0.0295  |
| 0.094503389 | -0.067891918 | 0.142943979 | -0.15915159 | 0.00055623 | -0.03825 |
| 0.075599195 | -0.08006948  | 0.083906692 | -0.16564788 | 0.00032445 | -0.01988 |
| 0.790347701 | 0.018370384  | 0.692136854 | -0.07930361 | 0.08692068 | -0.00593 |
| 0.799082365 | 0.020346877  | 0.660975489 | -0.00741855 | 0.87296861 | 0.003512 |
| 0.863339951 | 0.015339556  | 0.740930265 | -0.14773702 | 0.00136641 | -0.05301 |
| 0.013586296 | -0.110867055 | 0.016537613 | -0.14245896 | 0.00202822 | -0.00095 |
| 0.586330752 | -0.024590396 | 0.596071051 | -0.02719019 | 0.55779572 | 0.017941 |
| 0.77601745  | 0.017334871  | 0.708676739 | -0.1487153  | 0.00126815 | -0.07503 |
| 0.100101008 | -0.07539465  | 0.103685618 | -0.19652912 | 1.89E-05   | -0.18252 |
| 0.516955088 | -0.03369426  | 0.467597263 | -0.11208908 | 0.01537534 | -0.07367 |
| 0.000850412 | -0.151466372 | 0.001025605 | -0.12140076 | 0.00863487 | -0.05956 |

|             |              |             |             |            |          |
|-------------|--------------|-------------|-------------|------------|----------|
| 0.008321642 | -0.111037424 | 0.016371094 | 0.017793674 | 0.70133097 | -0.06692 |
| 0.011109883 | -0.11710539  | 0.011321808 | -0.07708477 | 0.09614679 | -0.11625 |
| 0.814696076 | -0.004330305 | 0.925642716 | -0.02848303 | 0.53921632 | -0.00396 |
| 0.275448801 | 0.054812319  | 0.237118931 | -0.06429432 | 0.165404   | 0.062568 |
| 0.455300644 | 0.032572326  | 0.482558287 | 0.067617996 | 0.14456747 | 0.076045 |
| 0.333231094 | -0.050976281 | 0.27160699  | -0.01089896 | 0.81428308 | 0.03767  |
| 0.353068277 | -0.043054381 | 0.353225994 | -0.04798312 | 0.30078983 | 0.021145 |
| 0.000161826 | -0.168902814 | 0.000245782 | -0.0797925  | 0.08498685 | 0.146784 |
| 0.604013008 | -0.028388869 | 0.540559012 | -0.08459214 | 0.06778593 | -0.02547 |
| 0.900215278 | -0.007771396 | 0.866981569 | -0.03428933 | 0.45976726 | 0.025175 |
| 0.004894047 | -0.127983654 | 0.005610162 | -0.08362688 | 0.07099451 | 0.132759 |
| 0.52648874  | -0.02855525  | 0.538187637 | -0.13107582 | 0.00455066 | 0.020303 |
| 0.131078546 | -0.075682496 | 0.102369583 | -0.1069239  | 0.02082835 | -0.00451 |
| 0.464898816 | -0.030612366 | 0.50930479  | -0.06477883 | 0.16223354 | 0.116364 |
| 0.169144576 | -0.068249024 | 0.140848464 | -0.04603985 | 0.32081247 | 0.07371  |
| 0.256897944 | -0.051943155 | 0.262607592 | -0.09008052 | 0.05172731 | -0.02148 |
| 0.459966383 | -0.032939923 | 0.477627999 | -0.14176482 | 0.00213431 | -0.03537 |
| 0.473832664 | -0.032304201 | 0.486171735 | -0.03618726 | 0.43528895 | 0.033125 |
| 0.06189787  | -0.078269537 | 0.091127738 | -0.05990923 | 0.19623916 | 0.086685 |
| 0.168094777 | -0.067865609 | 0.143099301 | -0.07034122 | 0.12904123 | 0.114645 |
| 0.258169604 | -0.045930171 | 0.321967836 | -0.11536546 | 0.01260559 | 0.075273 |
| 0.910324036 | -0.004239345 | 0.927200264 | -0.07378787 | 0.1112797  | 0.097233 |
| 0.180444209 | -0.058691516 | 0.205503467 | -0.12225227 | 0.00817535 | -0.02045 |
| 0.449689919 | -0.025868281 | 0.577108367 | -0.0863677  | 0.06219461 | -0.02942 |
| 0.550340517 | -0.019595901 | 0.672750103 | -0.09007548 | 0.05174047 | -0.01712 |
| 0.050938268 | -0.094401907 | 0.041436961 | -0.1093036  | 0.01813629 | -0.04308 |
| 0.803579276 | -0.009141395 | 0.843810391 | -0.0942018  | 0.04187209 | 0.004984 |
| 0.329664264 | -0.043760549 | 0.345378613 | -0.2153172  | 2.66E-06   | -0.1213  |
| 0.010044439 | -0.117708156 | 0.010904851 | -0.11400111 | 0.01370042 | -0.184   |
| 1.52E-07    | -0.233238058 | 3.45E-07    | -0.11091876 | 0.01648692 | -0.01471 |
| 0.458677271 | 0.046380484  | 0.31724134  | 0.028623905 | 0.53721064 | -0.017   |
| 0.001068648 | -0.155134489 | 0.00076853  | 0.001426957 | 0.97546558 | -0.07801 |
| 0.32787629  | -0.049747358 | 0.283346161 | -0.06477094 | 0.16228482 | -0.11541 |
| 0.190246483 | -0.059678685 | 0.197969299 | -0.09188473 | 0.04719743 | 0.065022 |
| 0.393011136 | 0.042249477  | 0.362306506 | -0.01619028 | 0.72711919 | -0.04045 |
| 0.047120713 | -0.083748479 | 0.070583582 | -0.10545601 | 0.02265668 | -0.0055  |
| 0.267708873 | -0.044833703 | 0.333666937 | -0.17567038 | 0.00013574 | 0.006236 |
| 0.000118536 | -0.171377328 | 0.000198329 | -0.08521428 | 0.06578163 | 0.127052 |
| 0.015860917 | -0.100795788 | 0.029411459 | -0.03503977 | 0.44999795 | 0.132678 |
| 0.001763222 | -0.131567518 | 0.004399934 | -0.03216061 | 0.48811283 | 0.077538 |
| 0.385344431 | -0.051640366 | 0.265403525 | -0.16576417 | 0.00032128 | -0.14604 |
| 0.44248278  | -0.024909308 | 0.591312231 | -0.03797209 | 0.41296909 | -0.07131 |
| 0.420540715 | -0.035054096 | 0.449812555 | -0.06276591 | 0.17570983 | 0.016088 |
| 0.000143293 | -0.171253873 | 0.000200477 | -0.14720688 | 0.00142254 | 0.050317 |
| 0.355469976 | 0.035879921  | 0.439201223 | -0.05443352 | 0.24038044 | 0.084132 |

|             |              |             |             |            |          |
|-------------|--------------|-------------|-------------|------------|----------|
| 0.530086412 | -0.025140883 | 0.587867614 | -0.07880212 | 0.08894102 | 0.066961 |
| 0.003418158 | 0.131973364  | 0.00427894  | -0.15225612 | 0.00096434 | 0.075006 |
| 0.248070508 | -0.050073546 | 0.280197393 | -0.11537444 | 0.01259864 | 0.089649 |
| 0.001132548 | -0.154154687 | 0.000830624 | -0.18310462 | 6.89E-05   | 0.100614 |
| 0.307085395 | -0.045558878 | 0.325899211 | -0.15314388 | 0.00089952 | 0.003536 |
| 0.689220559 | -0.016594054 | 0.720594685 | -0.0853508  | 0.06534838 | -0.00106 |
| 0.291297495 | -0.043696461 | 0.346086187 | -0.10100896 | 0.02906846 | -0.00429 |
| 0.85637883  | 0.014660981  | 0.752006767 | -0.12705351 | 0.00596969 | 0.024784 |
| 0.078617636 | -0.082254175 | 0.075770151 | -0.18981815 | 3.65E-05   | -0.07592 |
| 0.301667748 | -0.04378069  | 0.345156422 | -0.07811847 | 0.09175578 | 0.05851  |
| 0.006726148 | -0.126471207 | 0.006205162 | -0.12994451 | 0.0049153  | -0.01967 |
| 0.000108169 | -0.176884733 | 0.000121733 | -0.00411217 | 0.9293783  | 0.070223 |
| 0.946183221 | -0.005226153 | 0.91031897  | -0.06374007 | 0.16908748 | 0.059217 |
| 0.398514795 | -0.02984664  | 0.519960602 | -0.09479229 | 0.04059906 | -0.00569 |
| 0.421465194 | -0.039152534 | 0.398585797 | -0.10821561 | 0.0193269  | -0.04464 |
| 5.46E-05    | -0.187343357 | 4.63E-05    | -0.02601095 | 0.57500892 | -0.24318 |
| 0.260869365 | 0.035640385  | 0.44226426  | -0.05545975 | 0.23161691 | 0.001159 |
| 0.42116207  | 0.020763036  | 0.654486094 | -0.0653976  | 0.15825126 | 0.027991 |
| 0.537337429 | -0.03087756  | 0.505641114 | -0.02717093 | 0.55807492 | 0.111796 |
| 0.228193784 | -0.060020216 | 0.195410183 | -0.04131991 | 0.37297298 | 0.104687 |
| 0.11335133  | -0.07399521  | 0.110275858 | -0.08809214 | 0.05713389 | 0.105841 |
| 0.133440046 | -0.072132397 | 0.119554778 | -0.06262777 | 0.17666434 | 0.065426 |
| 0.205959589 | -0.055283137 | 0.233108742 | -0.06231378 | 0.17884819 | 0.131214 |
| 0.242001042 | -0.053533121 | 0.248259088 | -0.06318559 | 0.1728336  | 0.013872 |
| 0.190080985 | -0.058677782 | 0.205609726 | -0.07958341 | 0.08580963 | 0.102799 |
| 0.478436861 | -0.032419433 | 0.484616996 | -0.07629469 | 0.09961469 | 0.130531 |
| 0.065960246 | -0.084256866 | 0.068886637 | -0.0970161  | 0.03609434 | 0.039434 |
| 0.15237421  | -0.066356669 | 0.152225379 | -0.0576358  | 0.21378832 | 0.021309 |
| 0.732708653 | -0.014912115 | 0.747901385 | -0.07243553 | 0.11800465 | 0.058896 |
| 0.730885168 | -0.015867732 | 0.732345518 | -0.07257129 | 0.11731549 | -0.02914 |
| 0.90830768  | -0.005027104 | 0.913721093 | -0.10410377 | 0.02446238 | -0.03689 |
| 0.004811185 | -0.127956064 | 0.00562054  | -0.12143695 | 0.00861488 | -0.0417  |
| 0.148109983 | -0.06150552  | 0.184561644 | -0.14674644 | 0.001473   | 0.088693 |
| 0.59529407  | -0.021564752 | 0.642057951 | -0.10971626 | 0.01770174 | 0.048118 |
| 0.492853527 | -0.027353424 | 0.55543292  | -0.05517448 | 0.23402998 | 0.037546 |
| 0.713204914 | -0.017335892 | 0.708660352 | -0.07305982 | 0.11486167 | 0.052143 |
| 0.631417999 | -0.025643101 | 0.580429201 | -0.0742396  | 0.10910181 | 0.151257 |
| 0.946258652 | -0.002105417 | 0.963807163 | -0.16156709 | 0.00045628 | -0.02843 |
| 0.571384147 | -0.016135376 | 0.728007967 | -0.04071774 | 0.37998507 | 0.054749 |
| 0.210661356 | -0.06144996  | 0.184959278 | -0.00177229 | 0.9695307  | 0.018606 |
| 0.372293094 | 0.043605426  | 0.347092872 | -0.03787229 | 0.41419897 | -0.04822 |
| 0.492920604 | -0.031614598 | 0.495531974 | -0.11535626 | 0.0126127  | 0.023051 |
| 0.60190072  | -0.019244403 | 0.678289086 | -0.07498429 | 0.10558493 | 0.054194 |
| 0.121205708 | -0.069459224 | 0.133921764 | -0.10904694 | 0.01841123 | -0.00727 |
| 0.622955185 | 0.024754376  | 0.593621963 | -0.05634715 | 0.22422322 | 0.06403  |

|             |              |             |             |            |          |
|-------------|--------------|-------------|-------------|------------|----------|
| 0.736024907 | 0.017531808  | 0.705520281 | -0.09600115 | 0.03809468 | 0.046297 |
| 0.96730069  | 0.003076941  | 0.947126871 | -0.10700275 | 0.02073388 | -0.04405 |
| 0.011536404 | 0.119173464  | 0.009947456 | -0.12539736 | 0.00666137 | -0.17578 |
| 7.30E-05    | -0.180276668 | 8.95E-05    | -0.0929839  | 0.04460432 | -0.06041 |
| 0.308149215 | 0.046272227  | 0.318373449 | -0.00986993 | 0.83154177 | -0.03517 |
| 0.40583543  | -0.036286293 | 0.434032654 | -0.04155272 | 0.37028351 | 0.039275 |
| 0.061786413 | -0.083015503 | 0.073090195 | -0.11930267 | 0.00986673 | 0.028236 |
| 0.39355318  | -0.050040141 | 0.280518761 | -0.0479164  | 0.30146315 | 0.02159  |
| 0.944913986 | -0.012397168 | 0.789317209 | 0.028861959 | 0.53382988 | -0.01689 |
| 0.804362744 | -0.00777445  | 0.866929781 | -0.08077117 | 0.08121984 | 0.073521 |
| 0.075655426 | 0.092569829  | 0.045566759 | -0.12465244 | 0.00699527 | -0.03266 |
| 0.08481919  | -0.072204481 | 0.119184724 | -0.15784829 | 0.00061826 | -0.10101 |
| 0.245268266 | -0.063108819 | 0.173357114 | -0.14643231 | 0.00150837 | -0.0156  |
| 0.256884386 | -0.051961011 | 0.262443346 | -0.06956841 | 0.13330996 | -0.00801 |
| 0.041967124 | -0.095512709 | 0.039090352 | -0.16858754 | 0.00025254 | -0.01033 |
| 0.06947016  | -0.087222667 | 0.05964115  | -0.05631904 | 0.22445486 | -0.00742 |
| 0.261687579 | 0.055803344  | 0.228733901 | -0.09191318 | 0.04712877 | 0.006225 |
| 0.70571169  | -0.026364483 | 0.569822309 | -0.12312265 | 0.00772832 | 0.024269 |
| 0.167635658 | -0.064867494 | 0.161658328 | 0.000642371 | 0.988954   | 0.003909 |
| 0.291341947 | -0.048757346 | 0.293048819 | -0.02671654 | 0.5646795  | 0.018673 |
| 0.175021886 | -0.058452499 | 0.207358498 | -0.07117148 | 0.12457394 | -0.00513 |
| 1.24E-05    | -0.20445925  | 8.44E-06    | -0.18036884 | 8.87E-05   | -0.08604 |
| 0.064594166 | -0.074026469 | 0.110125133 | -0.17600796 | 0.0001317  | -0.09391 |
| 0.095279867 | -0.072970667 | 0.11530646  | -0.11735249 | 0.0111492  | 0.043443 |
| 0.489709672 | -0.03277436  | 0.479845159 | -0.1225573  | 0.00801613 | -0.02128 |
| 0.165055221 | -0.066849739 | 0.149195947 | -0.01954961 | 0.67347861 | -0.03441 |
| 0.683253244 | -0.011839259 | 0.798590393 | -0.05210951 | 0.26108019 | 0.033844 |
| 4.52E-07    | -0.236865024 | 2.23E-07    | -0.04235379 | 0.3611216  | -0.11273 |
| 0.139151801 | -0.063500181 | 0.17070069  | -0.09797818 | 0.0342813  | -0.05423 |
| 0.04240582  | -0.08703913  | 0.060181871 | -0.14740824 | 0.00140098 | -0.00683 |
| 0.3183609   | -0.043892915 | 0.343920097 | -0.09639451 | 0.03730853 | 0.006004 |
| 0.000229419 | -0.18359837  | 6.58E-05    | 0.077336094 | 0.09506408 | 0.068966 |
| 0.000478444 | -0.156406013 | 0.000694348 | -0.14113032 | 0.0022357  | -0.07245 |
| 0.931345533 | 0.010892262  | 0.814395087 | -0.13223733 | 0.00420187 | -0.11237 |
| 0.229878207 | -0.056953972 | 0.219265095 | -0.05587613 | 0.2281265  | 0.007474 |
| 0.37576657  | -0.02801208  | 0.545948452 | -0.12254494 | 0.00802253 | 0.007703 |
| 0.075905912 | -0.077691417 | 0.093549971 | -0.02594255 | 0.57601499 | 0.146255 |
| 0.498134292 | -0.02688019  | 0.562296526 | 0.007822907 | 0.86610816 | 0.072112 |
| 0.755244392 | -0.015385381 | 0.74018415  | -0.11791027 | 0.01076812 | -0.03521 |
| 0.443419536 | -0.033240651 | 0.473615095 | -0.11895824 | 0.01008323 | -0.00572 |
| 0.501813955 | -0.033900783 | 0.464871469 | -0.03309109 | 0.47560847 | -0.00883 |
| 0.646802551 | 0.019980994  | 0.666701979 | -0.10146268 | 0.02834981 | 0.040502 |
| 0.558617336 | -0.035435538 | 0.444893357 | -0.07463655 | 0.10721582 | -0.01026 |
| 0.818151442 | -0.011852541 | 0.798369285 | -0.11171437 | 0.01572386 | -0.10364 |
| 0.001375722 | -0.141355643 | 0.0021992   | -0.01181081 | 0.79906395 | 0.012651 |



|             |              |             |             |            |          |
|-------------|--------------|-------------|-------------|------------|----------|
| 0.134530701 | -0.075941517 | 0.101196694 | -0.08640672 | 0.06207613 | 0.016939 |
| 0.00103393  | -0.147211421 | 0.001422053 | 0.010722797 | 0.81723149 | 0.112513 |
| 0.090985176 | -0.0772814   | 0.095298875 | -0.00683696 | 0.8828528  | 0.026738 |
| 4.83E-14    | -0.335274414 | 9.89E-14    | -0.06164602 | 0.18355894 | 0.072583 |
| 0.005437764 | -0.133671689 | 0.003804582 | -0.07124656 | 0.12417596 | -0.04408 |
| 0.686710441 | -0.016368161 | 0.724242412 | -0.11552124 | 0.01248563 | 0.013568 |
| 0.013873849 | -0.118017019 | 0.010696516 | -0.08757739 | 0.05860747 | 0.02586  |
| 0.544513453 | -0.03739603  | 0.420097952 | 0.126118788 | 0.00635169 | -0.02479 |
| 0.197264819 | -0.05799502  | 0.210942745 | -0.07122642 | 0.12428266 | 0.034374 |
| 0.489430328 | -0.034340362 | 0.459099134 | -0.00047311 | 0.99186452 | 0.003454 |
| 0.959780605 | 0.001309774  | 0.977479821 | -0.08010598 | 0.0837652  | 0.01057  |
| 0.000335821 | -0.158019279 | 0.000609772 | -0.04049715 | 0.38257384 | -0.01923 |
| 0.001793648 | -0.138518829 | 0.002700958 | -0.06742266 | 0.14573375 | 0.096933 |
| 0.658570729 | -0.015805225 | 0.733359757 | -0.07686848 | 0.09708646 | 0.019992 |
| 0.032037401 | -0.100326958 | 0.030178059 | -0.03730203 | 0.42126806 | 0.07187  |
| 0.192864205 | -0.0582416   | 0.209005332 | -0.21374137 | 3.15E-06   | -0.106   |
| 0.089370402 | -0.071750486 | 0.121530374 | -0.24913113 | 4.88E-08   | -0.17083 |
| 0.196354154 | -0.052513609 | 0.2573953   | -0.09451369 | 0.04119556 | 0.117048 |
| 0.573168047 | -0.023464179 | 0.613013963 | -0.0767636  | 0.09754473 | 0.065836 |
| 0.167709569 | -0.064352926 | 0.165018029 | -0.05711276 | 0.21798078 | 0.107691 |
| 0.633268044 | -0.023742923 | 0.608800783 | -0.07951414 | 0.08608361 | 0.087347 |
| 0.020229899 | -0.103056968 | 0.025944325 | -0.07141193 | 0.12330291 | -0.01174 |
| 0.585180938 | -0.023112343 | 0.618350153 | -0.08650506 | 0.0617784  | 0.055438 |
| 0.863013053 | 0.00563049   | 0.90341319  | -0.03806255 | 0.41185603 | 0.012967 |
| 0.54874687  | -0.022672217 | 0.625053724 | -0.09246195 | 0.04582035 | -0.04697 |
| 0.863781324 | -0.004568265 | 0.92156943  | -0.09725816 | 0.03563067 | 0.030121 |
| 0.225557451 | -0.055848549 | 0.2283565   | -0.05717242 | 0.21749959 | 0.081653 |
| 0.720010812 | -0.014010798 | 0.762667842 | -0.12859034 | 0.00538628 | -0.08871 |
| 0.211307145 | -0.057370703 | 0.215905891 | -0.03968639 | 0.39218092 | 0.065727 |
| 0.064651278 | -0.084257869 | 0.068883322 | -0.08974972 | 0.052596   | 0.025494 |
| 0.29076704  | -0.050339688 | 0.277645883 | -0.0760172  | 0.10085601 | 0.012068 |
| 0.493442603 | -0.03376233  | 0.466697869 | -0.07279018 | 0.116211   | 0.028899 |
| 0.442031574 | -0.031484139 | 0.497313463 | -0.05757851 | 0.21424466 | 0.013602 |
| 0.95197666  | -0.004679382 | 0.91966807  | -0.15681264 | 0.00067206 | -0.13367 |
| 0.940260337 | -0.00211682  | 0.963611276 | -0.11876634 | 0.01020568 | -0.04992 |
| 0.289724071 | -0.049791951 | 0.282914282 | -0.07590563 | 0.10135857 | -0.04782 |
| 0.890285179 | 0.007379176  | 0.873637239 | -0.06102697 | 0.18800732 | 0.066005 |
| 0.32285978  | -0.040244158 | 0.385556153 | -0.08335979 | 0.07190392 | 0.000886 |
| 0.534654704 | -0.03754192  | 0.418285743 | -0.05657364 | 0.22236337 | -0.05601 |
| 0.429186804 | -0.034887046 | 0.451976526 | -0.07320555 | 0.11413757 | 0.07741  |
| 0.616958674 | -0.02548449  | 0.58277365  | -0.03972572 | 0.39171163 | 0.034279 |
| 0.634242578 | -0.023755159 | 0.608616145 | -0.09731864 | 0.03551561 | 0.020528 |
| 0.808606882 | -0.018680097 | 0.687217788 | -0.05530691 | 0.23290756 | 0.078531 |
| 0.448894637 | -0.031693616 | 0.494454579 | -0.1078897  | 0.01969656 | 0.062197 |
| 0.677627234 | -0.018973783 | 0.682565433 | -0.08836833 | 0.05635601 | 0.096857 |

|             |              |             |             |            |          |
|-------------|--------------|-------------|-------------|------------|----------|
| 0.38242106  | -0.03627616  | 0.434161103 | 0.016041866 | 0.72952244 | 0.048151 |
| 0.135402957 | -0.065147126 | 0.159854282 | -0.15849603 | 0.00058667 | 0.04312  |
| 0.271442284 | -0.046614836 | 0.314799617 | -0.09849067 | 0.03334759 | 0.079965 |
| 0.265062528 | -0.054025425 | 0.24392931  | -0.03321779 | 0.47391944 | 0.099158 |
| 0.907340442 | -0.005973396 | 0.897562297 | -0.06507922 | 0.16029099 | 0.026459 |
| 0.402668154 | 0.037779687  | 0.415342094 | -0.09084466 | 0.04976633 | 0.042662 |
| 0.050033558 | -0.089404571 | 0.05351531  | -0.05709399 | 0.21813231 | 0.060916 |
| 3.38E-05    | -0.193916703 | 2.45E-05    | -0.07303703 | 0.11497524 | -0.00626 |
| 0.000180911 | -0.173085782 | 0.000170731 | 0.028835937 | 0.53419892 | 0.153852 |
| 0.334636067 | -0.034673792 | 0.454747515 | -0.10396487 | 0.02465472 | -0.07346 |
| 0.687962107 | -0.014614696 | 0.752764187 | -0.09963894 | 0.03133401 | -0.00926 |
| 0.283430275 | -0.054301338 | 0.241525927 | -0.08388903 | 0.07011105 | 0.07485  |
| 0.249279571 | -0.053664596 | 0.247097566 | -0.02932278 | 0.52731607 | 0.028994 |
| 0.713719972 | -0.015532025 | 0.73779817  | -0.05219946 | 0.2602568  | 0.09024  |
| 0.799337893 | 0.009402341  | 0.839411532 | -0.04185713 | 0.36678507 | 0.11295  |
| 0.273062111 | -0.047333554 | 0.307388229 | -0.06002139 | 0.19540144 | 0.087507 |
| 0.513361703 | -0.030269987 | 0.514055183 | -0.02890956 | 0.53315523 | 0.135746 |
| 0.808021864 | 0.01365159   | 0.768577235 | -0.08111165 | 0.07994141 | 0.060857 |
| 0.177819396 | -0.052495589 | 0.257558853 | -0.03984144 | 0.39033254 | 0.042501 |
| 0.489597689 | -0.032040959 | 0.489733532 | -0.0751854  | 0.10465071 | 0.09141  |
| 0.370046403 | -0.046290328 | 0.318183975 | -0.08610894 | 0.06298498 | 0.044447 |
| 0.80390004  | 0.014726859  | 0.750929158 | -0.04254903 | 0.35891023 | 0.045775 |
| 0.387802851 | -0.03315208  | 0.47479506  | -0.10761119 | 0.0200173  | 0.000549 |
| 0.516119863 | -0.029063814 | 0.530971636 | -0.06758429 | 0.14476822 | -0.01946 |
| 0.232668622 | -0.053748784 | 0.246355795 | -0.0636747  | 0.16952594 | 0.010765 |
| 0.811639197 | -0.0140182   | 0.762546211 | -0.0990342  | 0.03238111 | 0.027011 |
| 0.394490753 | -0.035745471 | 0.44091899  | -0.18297437 | 6.97E-05   | -0.07299 |
| 0.433126592 | -0.039703278 | 0.391979382 | -0.03731354 | 0.42112469 | 0.089217 |
| 0.241031856 | -0.053934972 | 0.244720848 | -0.05089304 | 0.27239149 | 0.063585 |
| 0.886873859 | 0.009632384  | 0.835537751 | -0.10442778 | 0.02401875 | -0.01985 |
| 0.430677016 | -0.038558918 | 0.405780831 | -0.06030321 | 0.19330806 | 0.055612 |
| 0.190239626 | -0.0550019   | 0.235498367 | -0.140146   | 0.00240171 | -0.07875 |
| 0.810795697 | 0.005770838  | 0.901017817 | -0.03378522 | 0.46639559 | -0.01867 |
| 0.694605689 | -0.019068534 | 0.681067007 | -0.10217345 | 0.0272547  | -0.01546 |
| 0.856698814 | -0.00094454  | 0.983758591 | -0.06015956 | 0.19437302 | 0.025117 |
| 0.301029847 | -0.042484378 | 0.359641531 | -0.10593292 | 0.02204798 | -0.0547  |
| 0.680466168 | 0.020497415  | 0.658625111 | -0.08029407 | 0.08303901 | 0.0256   |
| 0.312192058 | 0.051908574  | 0.262925881 | -0.19380164 | 2.48E-05   | -0.04725 |
| 0.136471475 | -0.071700099 | 0.121792914 | -0.03223859 | 0.48705815 | 0.089869 |
| 0.379673804 | -0.045416471 | 0.327415285 | -0.04254947 | 0.35890524 | 0.07007  |
| 0.390308179 | 0.045711737  | 0.324276934 | -0.06955266 | 0.13339808 | -0.0148  |
| 0.349712086 | -0.045622641 | 0.325221866 | -0.0365627  | 0.43053716 | 0.024835 |
| 0.884632255 | -0.005915735 | 0.898545754 | -0.03165827 | 0.49493633 | 0.005634 |
| 0.591538665 | -0.022622927 | 0.625806418 | -0.0911914  | 0.04889723 | 0.041818 |
| 0.811828897 | -0.004690912 | 0.919470797 | -0.12259152 | 0.00799844 | 0.011928 |

|             |              |             |             |            |          |
|-------------|--------------|-------------|-------------|------------|----------|
| 0.081659234 | -0.078928196 | 0.088429597 | -0.1298782  | 0.00493747 | -0.06254 |
| 0.739897213 | 0.016729198  | 0.718415394 | -0.07571789 | 0.10220867 | 0.017105 |
| 0.166302674 | -0.058967217 | 0.203378693 | -0.23243395 | 3.79E-07   | -0.11178 |
| 0.025584211 | -0.105852356 | 0.022149806 | -0.26375479 | 7.15E-09   | -0.03208 |
| 0.420278845 | -0.032042381 | 0.489714258 | -0.1174515  | 0.0110807  | -0.01098 |
| 0.255143427 | -0.048653927 | 0.294075051 | -0.13049519 | 0.00473464 | -0.07572 |
| 0.492090965 | -0.029174275 | 0.529410813 | -0.04491399 | 0.3328011  | -0.04778 |
| 0.984344806 | 0.000608369  | 0.989538643 | -0.08191171 | 0.07700146 | 0.100403 |
| 0.484413527 | -0.034161264 | 0.461446114 | -0.13332871 | 0.00389635 | 0.039007 |
| 0.659629018 | -0.019800625 | 0.669532127 | -0.21517276 | 2.70E-06   | -0.10879 |
| 0.16747654  | -0.063093553 | 0.173461352 | -0.12342192 | 0.00757973 | -0.02046 |
| 0.103406648 | -0.079329422 | 0.086817715 | -0.09163839 | 0.04779561 | 0.019847 |
| 0.88294629  | -0.010012631 | 0.829143394 | -0.08331165 | 0.07206883 | -0.05667 |
| 0.089614713 | -0.076952291 | 0.096721472 | -0.06473046 | 0.16254794 | -0.01729 |
| 0.252678003 | 0.047005527  | 0.310756426 | -0.06347387 | 0.17087831 | 0.055766 |
| 0.634265556 | -0.025580576 | 0.581352872 | -0.04763563 | 0.30430789 | 0.059585 |
| 0.844756227 | -0.006024049 | 0.896698467 | -0.10088197 | 0.02927237 | -0.03883 |
| 0.674432328 | -0.018190456 | 0.695000561 | -0.08671785 | 0.06113813 | 0.099373 |
| 0.87653277  | 0.009239727  | 0.842152187 | -0.09251063 | 0.04570576 | 0.055118 |
| 0.020299158 | -0.11145759  | 0.015966682 | -0.07417673 | 0.10940287 | -0.02583 |
| 0.346950334 | -0.043447732 | 0.348841059 | -0.06468284 | 0.16285796 | 0.03527  |
| 0.132758984 | -0.075150342 | 0.104813078 | -0.0271815  | 0.55792165 | 0.071992 |
| 0.06697374  | -0.077509505 | 0.094322714 | -0.11061595 | 0.01678575 | -0.00487 |
| 0.091523607 | -0.077832117 | 0.092955772 | -0.03425075 | 0.46027258 | 0.007479 |
| 0.226372543 | -0.05575405  | 0.229145936 | -0.00940494 | 0.83936769 | -0.03908 |
| 0.14390488  | -0.063272137 | 0.17224485  | -0.05635875 | 0.22412773 | 0.091967 |
| 0.103107692 | -0.073859282 | 0.110933162 | -0.01727944 | 0.70956609 | -0.0835  |
| 0.834309553 | 0.013255561  | 0.775107927 | -0.07141642 | 0.12327928 | 0.010544 |
| 0.297113746 | -0.044344986 | 0.338968434 | -0.04753989 | 0.30528199 | -0.02039 |
| 0.08013382  | -0.077155258 | 0.095842146 | -0.08195606 | 0.07684108 | -0.07753 |
| 0.043150361 | -0.091758341 | 0.047503547 | -0.20607664 | 7.13E-06   | -0.08789 |
| 0.245324365 | -0.055293634 | 0.233019879 | -0.10159536 | 0.02814255 | 0.043314 |
| 0.521337062 | -0.028118592 | 0.544422257 | -0.03958106 | 0.3934397  | 0.104441 |
| 0.090785389 | -0.081637778 | 0.077998012 | -0.1142521  | 0.01349295 | -0.01017 |
| 0.005238576 | -0.123747038 | 0.007421215 | -0.04879917 | 0.29263449 | -0.10533 |
| 0.353806871 | -0.046241889 | 0.31869118  | -0.13026634 | 0.00480898 | 0.026327 |
| 0.790587387 | -0.013580669 | 0.769745574 | -0.0977727  | 0.03466188 | 0.020847 |
| 0.113502968 | -0.06520607  | 0.159475948 | -0.05439198 | 0.24074006 | -0.00264 |
| 7.57E-05    | -0.172266957 | 0.000183475 | 0.007699368 | 0.86820314 | 0.035632 |
| 0.364915738 | -0.039074836 | 0.399523177 | -0.16097236 | 0.0004792  | -0.12144 |
| 0.000553187 | 0.148677332  | 0.001271836 | -0.04498915 | 0.33199189 | 0.046825 |
| 0.274718984 | -0.051926294 | 0.26276275  | -0.14887525 | 0.00125271 | -0.00465 |
| 0.011846343 | -0.109850382 | 0.017562478 | -0.05082221 | 0.27306023 | 0.073324 |
| 0.16636079  | -0.061410946 | 0.185238877 | -0.08454178 | 0.06795032 | 0.053326 |
| 0.426238505 | -0.031771642 | 0.493391951 | -0.08745162 | 0.05897226 | 0.048323 |

|             |              |             |             |            |          |
|-------------|--------------|-------------|-------------|------------|----------|
| 0.998095809 | -0.006926065 | 0.881337277 | -0.10826839 | 0.0192676  | 0.101618 |
| 0.184245826 | -0.061789836 | 0.18253669  | -0.0858738  | 0.06371033 | 0.004328 |
| 0.051600533 | -0.086605709 | 0.061474871 | -0.08611    | 0.06298172 | -0.00831 |
| 0.686680842 | 0.019040919  | 0.681503588 | -0.13090856 | 0.00460299 | -0.06808 |
| 0.811939991 | -0.008902662 | 0.847839062 | -0.05764728 | 0.21369692 | -0.03807 |
| 0.26753474  | -0.046893369 | 0.311913614 | -0.16698566 | 0.00028963 | -0.10973 |
| 0.67962464  | -0.021070733 | 0.649704655 | -0.099316   | 0.03188953 | -0.03991 |
| 0.943327506 | -0.006519009 | 0.888264228 | -0.02037276 | 0.66057118 | 0.018137 |
| 0.137153068 | -0.073623582 | 0.11208023  | -0.06042401 | 0.19241584 | 0.063468 |
| 0.17498982  | -0.067657741 | 0.14433104  | -0.06393241 | 0.16780231 | 0.036825 |
| 0.615680116 | -0.025134657 | 0.587960096 | -0.06741129 | 0.14580189 | 0.078605 |
| 0.603670922 | -0.024289526 | 0.60057651  | -0.04693585 | 0.311475   | 0.048291 |
| 0.266485519 | -0.051303229 | 0.268540587 | -0.00128954 | 0.97782768 | 0.053555 |
| 0.706361433 | -0.016693016 | 0.718998623 | -0.16336105 | 0.00039315 | -0.10532 |
| 0.501902126 | -0.03193566  | 0.491162187 | -0.07256294 | 0.11735779 | 0.063239 |
| 0.153715009 | -0.064354801 | 0.165005691 | -0.05244341 | 0.25803283 | -0.01002 |
| 0.334359423 | -0.041990897 | 0.365254326 | -0.11757551 | 0.01099542 | 0.032915 |
| 0.444145938 | -0.031636983 | 0.495226631 | -0.08704045 | 0.06017796 | 0.130595 |
| 0.827520527 | 0.011962054  | 0.796546897 | -0.05204993 | 0.26162651 | -0.0205  |
| 0.108822333 | -0.070086258 | 0.130437712 | -0.06900245 | 0.13650466 | 0.057554 |
| 0.111909841 | -0.069766454 | 0.132205807 | -0.06353655 | 0.17045536 | -0.00322 |
| 0.628044258 | -0.015275143 | 0.741979432 | -0.0690258  | 0.13637169 | 0.037756 |
| 0.08334084  | -0.080377476 | 0.082718631 | -0.07826432 | 0.09114937 | 0.016705 |
| 0.262868002 | -0.051826655 | 0.263680935 | -0.03694102 | 0.42577941 | -0.06347 |
| 0.746666882 | 0.016637542  | 0.719893149 | -0.17949494 | 9.61E-05   | -0.10635 |
| 0.346003948 | -0.045688908 | 0.324518891 | -0.16583016 | 0.00031949 | -0.0643  |
| 0.388076738 | -0.038601127 | 0.405266689 | -0.0342436  | 0.46036637 | 0.113236 |
| 0.026954127 | -0.100384149 | 0.030083637 | -0.12206358 | 0.00827526 | -0.07587 |
| 0.17206791  | 0.048616468  | 0.294447352 | -0.02002207 | 0.66605805 | 0.062934 |
| 0.073651344 | -0.080046035 | 0.08399769  | -0.09610236 | 0.03789108 | 0.046404 |
| 3.11E-06    | -0.208212121 | 5.70E-06    | -0.06330583 | 0.17201607 | 0.096909 |
| 0.019681357 | -0.114539758 | 0.013258559 | -0.10171825 | 0.02795177 | -0.09766 |
| 0.381869609 | -0.033603735 | 0.468794831 | -0.06082757 | 0.18945687 | 0.050021 |
| 0.096348432 | -0.072464227 | 0.117858692 | -0.11065831 | 0.01674366 | 0.045833 |
| 0.195285523 | -0.064965974 | 0.161021241 | -0.03382843 | 0.46582546 | -0.00734 |
| 0.123531193 | -0.083985103 | 0.069789552 | -0.01336656 | 0.77327592 | -0.04469 |
| 0.164952521 | -0.064235497 | 0.165792033 | -0.10667379 | 0.02113051 | -0.10465 |
| 0.915565905 | -0.007498048 | 0.871619116 | -0.20451347 | 8.39E-06   | -0.04704 |
| 0.019891294 | -0.10843726  | 0.019078967 | -0.12358514 | 0.00749978 | 0.072607 |
| 0.123234934 | -0.065427168 | 0.158062843 | -0.25070745 | 3.99E-08   | -0.07845 |
| 0.153028737 | -0.071161204 | 0.124628497 | -0.10986191 | 0.01755055 | -0.00457 |
| 0.649158438 | -0.024232149 | 0.601437465 | -0.06166526 | 0.18342188 | 0.063662 |
| 0.224488479 | 0.051664759  | 0.265177523 | -0.04432704 | 0.33916418 | 0.067617 |
| 0.452390398 | -0.032566659 | 0.482634501 | -0.0388085  | 0.40274632 | 0.153587 |
| 0.805048464 | 0.00812552   | 0.860980412 | -0.05023196 | 0.27867677 | -0.0099  |

|             |              |             |             |            |          |
|-------------|--------------|-------------|-------------|------------|----------|
| 0.9620936   | -0.003319848 | 0.94295968  | -0.02505244 | 0.58918204 | 0.082437 |
| 0.023140986 | -0.102707269 | 0.026456337 | -0.13376237 | 0.00378065 | 0.064178 |
| 0.176152961 | -0.0630314   | 0.173886229 | 0.114668595 | 0.01315475 | 0.202166 |
| 0.957384529 | 0.001190744  | 0.979525939 | 0.013132553 | 0.77713964 | 0.154466 |
| 0.018379395 | -0.109783733 | 0.017631562 | -0.08042703 | 0.08252875 | 0.027772 |
| 0.89688212  | 0.008378824  | 0.85669268  | -0.14176396 | 0.00213445 | -0.01451 |
| 0.025519896 | -0.105708928 | 0.022332086 | 0.002755875 | 0.95263712 | -0.0817  |
| 0.050604405 | -0.090688972 | 0.050160752 | -0.06338571 | 0.17147449 | 0.100234 |
| 0.029096175 | -0.096678406 | 0.036749744 | -0.15572183 | 0.0007334  | -0.01255 |
| 0.573534387 | -0.026636611 | 0.565845139 | -0.05424992 | 0.24197253 | -0.01293 |
| 0.057849581 | 0.084262314  | 0.068868636 | -0.0223663  | 0.62973152 | 0.112453 |
| 0.013387026 | -0.113253795 | 0.014334918 | -0.26933946 | 3.33E-09   | -0.0547  |
| 0.03077409  | -0.098769781 | 0.032848263 | -0.0937395  | 0.04289211 | 0.022073 |
| 0.012906314 | -0.124171084 | 0.007218916 | -0.10492759 | 0.02334808 | -0.0291  |
| 0.148399402 | -0.065053097 | 0.160459212 | -0.16771564 | 0.00027214 | -0.09441 |
| 0.137602468 | -0.060576153 | 0.191296351 | -0.11287562 | 0.01466573 | -0.20873 |
| 0.018642936 | -0.104391347 | 0.024068289 | -0.00799542 | 0.86318432 | -0.07395 |
| 0.007535532 | -0.122938279 | 0.007821149 | -0.09220723 | 0.04642383 | 0.028959 |
| 0.729057457 | -0.020238333 | 0.66267228  | -0.22467032 | 9.34E-07   | 0.034519 |
| 0.657059094 | -0.019477907 | 0.674607522 | -0.0902565  | 0.05127009 | 0.059931 |
| 0.082814286 | -0.080291887 | 0.08304741  | -0.14287562 | 0.00196689 | -0.02429 |
| 0.202435716 | -0.061506861 | 0.184552053 | -0.12208692 | 0.00826284 | -0.03202 |
| 0.626129101 | -0.021488831 | 0.643230658 | -0.19862473 | 1.53E-05   | -0.13249 |
| 0.581833213 | -0.018857324 | 0.684408866 | -0.1346059  | 0.00356446 | 7.13E-05 |
| 0.182016903 | -0.062825147 | 0.175301736 | -0.04615944 | 0.31955568 | -0.00829 |
| 0.635504948 | -0.016136037 | 0.727997261 | -0.0372785  | 0.42156121 | 0.039833 |
| 0.031779289 | -0.095688242 | 0.038730026 | -0.08030309 | 0.08300432 | 0.035204 |
| 0.078823804 | -0.078757594 | 0.089122217 | -0.06908786 | 0.13601878 | -0.00467 |
| 0.402435423 | -0.037477191 | 0.419089222 | -0.07849739 | 0.09018701 | 0.030909 |
| 0.100158244 | -0.074356962 | 0.108541485 | -0.13002215 | 0.00488946 | 0.010497 |
| 0.040469931 | -0.091302437 | 0.048621607 | -0.02415099 | 0.60265619 | 0.072854 |
| 0.045336577 | -0.08103929  | 0.080211727 | -0.10088859 | 0.02926171 | -0.15173 |
| 0.064546101 | -0.086007976 | 0.063295583 | -0.08828435 | 0.05659159 | -0.06742 |
| 0.157591045 | -0.071265548 | 0.124075487 | -0.00860563 | 0.85285697 | 0.028071 |
| 0.505768177 | -0.026524192 | 0.56748654  | -0.10073372 | 0.02951198 | -0.07413 |
| 9.49E-06    | -0.201911056 | 1.10E-05    | -0.02774128 | 0.54983818 | -0.0414  |
| 0.063494608 | -0.094528365 | 0.041163953 | 0.098120186 | 0.03402038 | 0.068984 |
| 0.28826124  | 0.039747916  | 0.391446838 | 0.041532561 | 0.37051594 | 0.000546 |
| 0.588393918 | -0.022653115 | 0.625345377 | -0.08392133 | 0.07000282 | -0.01627 |
| 0.383748326 | -0.04058709  | 0.381517054 | -0.09034141 | 0.05105069 | -0.07902 |
| 0.615241861 | -0.022570629 | 0.626605449 | -0.03026586 | 0.51411257 | 0.008672 |
| 0.11992057  | -0.070575035 | 0.12777082  | -0.14404038 | 0.00180431 | -0.17665 |
| 0.062150011 | -0.085203659 | 0.065815424 | -0.03369491 | 0.46758871 | -0.02301 |
| 0.006812894 | -0.123277805 | 0.007650966 | 0.003280615 | 0.94363263 | 0.079801 |
| 0.326947025 | -0.045664947 | 0.324772953 | -0.05430369 | 0.24150552 | 0.067391 |

|             |              |             |             |            |          |
|-------------|--------------|-------------|-------------|------------|----------|
| 0.019910608 | -0.098084303 | 0.034086149 | -0.03612646 | 0.43606132 | 0.051742 |
| 0.014584886 | -0.103801736 | 0.024882269 | -0.03039055 | 0.51237986 | -0.07295 |
| 0.549856943 | -0.023796303 | 0.607995435 | -0.14199396 | 0.00209875 | 0.046163 |
| 0.54482888  | -0.02573031  | 0.579142026 | -0.09550051 | 0.0391155  | 0.040094 |
| 0.632213732 | -0.025762117 | 0.578672906 | -0.05511363 | 0.23454693 | -0.01795 |
| 0.174107844 | -0.06302354  | 0.173940021 | -0.07707693 | 0.09618072 | -0.01628 |
| 7.32E-07    | -0.22487528  | 9.13E-07    | -0.17885101 | 0.0001019  | 0.05941  |
| 0.13218197  | -0.068452544 | 0.139664769 | -0.04054103 | 0.38205807 | 0.07125  |
| 0.368260673 | -0.039091463 | 0.399322466 | -0.04789401 | 0.30168935 | 0.001218 |
| 0.627637391 | -0.02344228  | 0.613345508 | -0.06270873 | 0.17610447 | 0.033552 |
| 0.774752213 | -0.010224677 | 0.825582423 | -0.02130295 | 0.64610556 | 0.08045  |
| 0.697812506 | -0.01793487  | 0.699075878 | -0.07332051 | 0.11356886 | 0.155903 |
| 0.573936274 | 0.016830706  | 0.716780007 | -0.13802692 | 0.00279789 | -0.01833 |
| 0.001010504 | -0.149218834 | 0.001220144 | -0.09055065 | 0.05051337 | -0.10525 |
| 0.581134317 | -0.022035819 | 0.63480154  | -0.07262881 | 0.11702447 | -0.02368 |
| 0.001440574 | -0.144043196 | 0.001803928 | -0.14418247 | 0.00178534 | -0.05299 |
| 6.03E-05    | -0.177833729 | 0.000111747 | -0.09870132 | 0.03297015 | -0.04241 |
| 0.429083878 | -0.037362392 | 0.420516453 | -0.01214439 | 0.79351516 | 0.067248 |
| 0.599579935 | -0.01893027  | 0.683253977 | -0.17755534 | 0.00011459 | -0.00852 |
| 0.247913928 | -0.051378722 | 0.267835921 | -0.09598044 | 0.03813645 | -0.07211 |
| 0.169709547 | -0.061389209 | 0.185394792 | 0.024754294 | 0.59362319 | 0.088677 |
| 0.956327036 | 0.001058768  | 0.981794768 | -0.04509553 | 0.33084876 | -0.04235 |
| 0.008183225 | -0.120390874 | 0.009209585 | -0.09294741 | 0.04468844 | -0.0257  |
| 0.078486468 | -0.080545201 | 0.082077392 | 0.024491128 | 0.59755586 | -0.00895 |
| 0.912250755 | 0.008910948  | 0.84769916  | -0.10090102 | 0.0292417  | 0.032083 |
| 0.267441799 | -0.049827114 | 0.282574053 | -0.10831204 | 0.0192187  | 0.070717 |
| 0.598083151 | -0.022725974 | 0.624233279 | -0.15658524 | 0.00068444 | -0.08084 |
| 0.215356748 | -0.052752052 | 0.255237974 | -0.13030761 | 0.00479549 | -0.01898 |
| 0.912002308 | -0.002300107 | 0.960462988 | -0.09832866 | 0.0336404  | 0.06767  |
| 0.197176164 | -0.06326608  | 0.172286003 | -0.03038504 | 0.51245628 | 0.073043 |
| 0.01816712  | -0.107698539 | 0.019916225 | -0.15681867 | 0.00067174 | 0.047708 |
| 0.979239866 | -0.00708962  | 0.878556541 | 0.080518353 | 0.08217976 | 0.132662 |
| 0.867053206 | -0.00921334  | 0.842597101 | -0.07129266 | 0.12393208 | -0.04991 |
| 0.343642968 | -0.045298529 | 0.328674355 | -0.22504177 | 8.95E-07   | -0.08554 |
| 0.000984142 | 0.148412369  | 0.001297857 | -0.09462385 | 0.04095881 | 0.036563 |
| 0.000133578 | -0.175802658 | 0.000134142 | -0.06614235 | 0.15355566 | 0.031217 |
| 0.060687894 | -0.084133036 | 0.069296859 | 0.005489787 | 0.9058155  | -0.05789 |
| 0.071618217 | -0.086655273 | 0.061325858 | -0.14999819 | 0.00114913 | -0.07104 |
| 0.001323108 | -0.150478255 | 0.001107311 | 0.014942031 | 0.74741282 | 0.039242 |
| 0.387231205 | -0.036151453 | 0.435743762 | -0.07281963 | 0.11606306 | -0.00375 |
| 0.132129345 | -0.065008686 | 0.160745519 | -0.05535799 | 0.23247561 | 0.049736 |
| 0.045483095 | -0.088074022 | 0.057185243 | -0.07732956 | 0.0950921  | -0.00338 |
| 0.17917968  | -0.055988301 | 0.227192573 | -0.13706099 | 0.0029975  | -0.03729 |
| 0.14285734  | -0.063662071 | 0.169610774 | -0.07802552 | 0.09214392 | 0.086739 |
| 0.076187583 | -0.081298705 | 0.079246022 | -0.07676325 | 0.09754624 | 0.100813 |

|             |              |             |             |            |          |
|-------------|--------------|-------------|-------------|------------|----------|
| 0.834309325 | 0.017822354  | 0.700872715 | 0.032447969 | 0.48423239 | 0.056226 |
| 0.102374047 | -0.068667967 | 0.138420182 | -0.06981472 | 0.13193777 | 0.07271  |
| 0.177663552 | -0.062323123 | 0.178782887 | -0.11123628 | 0.01617859 | 0.032707 |
| 0.034451301 | -0.094247439 | 0.041772511 | -0.15015846 | 0.00113501 | -0.07503 |
| 0.095241745 | -0.075845489 | 0.101630272 | -0.04213709 | 0.36358586 | 0.03527  |
| 0.194862126 | -0.060244261 | 0.193744577 | -0.1163715  | 0.01184847 | -0.04308 |
| 0.453016203 | -0.032576359 | 0.482504036 | -0.01329992 | 0.77437565 | 0.113008 |
| 0.454609478 | -0.042515653 | 0.359287643 | -0.00575305 | 0.90132129 | 0.030422 |
| 0.276580619 | -0.047459094 | 0.306105575 | -0.09523059 | 0.03967542 | 0.060399 |
| 0.39888175  | -0.033619074 | 0.468591791 | -0.09702662 | 0.03607408 | 0.031317 |
| 0.149976792 | -0.056064097 | 0.226563078 | -0.06643521 | 0.15173974 | 0.103475 |
| 0.000116795 | -0.179126872 | 9.94E-05    | -0.14485665 | 0.00169781 | -0.14403 |
| 0.360245072 | -0.041323519 | 0.372931209 | -0.08932599 | 0.05372647 | -0.04111 |
| 5.18E-06    | -0.209502382 | 4.97E-06    | -0.12523962 | 0.00673086 | -0.31729 |
| 0.000379389 | -0.15961414  | 0.000535642 | -0.19168248 | 3.05E-05   | -0.01661 |
| 0.717955471 | 0.021447439  | 0.643870408 | -0.07456336 | 0.10756162 | 0.082399 |
| 0.000384384 | -0.16134036  | 0.000464894 | -0.03326409 | 0.47330307 | 0.108341 |
| 0.109256217 | -0.072226301 | 0.119072882 | -0.10051317 | 0.02987155 | -0.0555  |
| 0.597979381 | -0.018897879 | 0.683766699 | -0.0684151  | 0.13988196 | -0.02315 |
| 8.76E-06    | -0.2143222   | 2.96E-06    | -0.0651514  | 0.15982685 | -0.22555 |
| 0.88068554  | 0.002941039  | 0.949458981 | -0.44045271 | 1.39E-23   | -0.12667 |
| 0.004601748 | -0.136568008 | 0.003104293 | -0.11730314 | 0.01118349 | -0.21061 |
| 0.001000967 | -0.159603011 | 0.000536129 | -0.3407353  | 3.69E-14   | -0.05482 |
| 0.446609083 | 0.038223887  | 0.409875541 | -0.14198249 | 0.00210051 | 0.181461 |
| 0.029084618 | 0.102604898  | 0.026607859 | -0.22612728 | 7.91E-07   | -0.15735 |
| 0.116999697 | -0.074036012 | 0.110079154 | 0.180654953 | 8.64E-05   | 0.273784 |
| 0.008295093 | -0.129153746 | 0.005185602 | -0.28502824 | 3.53E-10   | 0.106668 |
| 0.733139164 | 0.011720284  | 0.800571618 | 0.008147393 | 0.86061    | 0.1751   |
| 0.840066345 | -0.020812289 | 0.653719787 | -0.29202206 | 1.24E-10   | -0.25055 |
| 0.023457819 | -0.112150244 | 0.015319097 | -0.03115294 | 0.50185142 | 0.211325 |
| 1.37E-07    | -0.241071422 | 1.34E-07    | -0.1510216  | 0.00106167 | 0.058084 |
| 0.00041095  | -0.169844875 | 0.000226586 | -0.23836825 | 1.86E-07   | -0.2786  |
| 0.042026079 | -0.100663373 | 0.029626265 | -0.12188904 | 0.00836863 | -0.01156 |
| 0.129569567 | -0.072926216 | 0.115528724 | 0.004833337 | 0.91703445 | -0.08069 |
| 0.287625905 | -0.069458185 | 0.133927594 | 0.372751233 | 7.69E-17   | 0.079888 |
| 0.972502292 | -0.007497305 | 0.871631722 | -0.03735283 | 0.4206354  | -0.24553 |
| 0.126216246 | -0.07091789  | 0.125925479 | 0.208094486 | 5.77E-06   | 0.146362 |
| 6.06E-08    | -0.254605772 | 2.41E-08    | -0.27979806 | 7.57E-10   | 0.106545 |
| 0.021087737 | -0.113695642 | 0.013956726 | -0.27670142 | 1.18E-09   | 0.084043 |
| 0.007199052 | -0.131387372 | 0.004454624 | -0.36316009 | 5.26E-16   | -0.19424 |
| 0.001273368 | -0.154246937 | 0.000824585 | -0.05982469 | 0.19687227 | -0.00847 |
| 0.374093315 | -0.04358162  | 0.347356423 | -0.15992192 | 0.00052234 | -0.35425 |
| 0.202105559 | -0.061403624 | 0.185291385 | -0.30458633 | 1.76E-11   | -0.14653 |
| 1.29E-05    | -0.207904058 | 5.89E-06    | -0.24682252 | 6.54E-08   | -0.09296 |
| 0.061283399 | -0.082452529 | 0.075064341 | -0.08335533 | 0.07191917 | 0.014506 |

|             |              |             |             |            |          |
|-------------|--------------|-------------|-------------|------------|----------|
| 0.107860455 | 0.079774398  | 0.085057816 | -0.15884195 | 0.00057042 | -0.14816 |
| 1.04E-07    | -0.248385906 | 5.37E-08    | 0.09663156  | 0.03684146 | 0.096111 |
| 0.579900214 | 0.02470957   | 0.594290692 | 0.109426322 | 0.01800609 | 0.33283  |
| 0.319595047 | -0.043268001 | 0.350840342 | 0.273821344 | 1.78E-09   | 0.1463   |
| 0.149248798 | 0.061460345  | 0.18488491  | -0.20945393 | 5.00E-06   | -0.17971 |
| 0.081025411 | -0.082848167 | 0.073672511 | 0.097694918 | 0.03480687 | 0.084244 |
| 0.011214582 | 0.113362772  | 0.014240813 | -0.15593959 | 0.00072075 | -0.09714 |
| 0.775160106 | -0.009460026 | 0.838439789 | -0.24518291 | 8.03E-08   | -0.31256 |
| 0.111405079 | -0.084579167 | 0.067828239 | -0.52090656 | 7.68E-34   | -0.1998  |
| 0.006300811 | -0.123620896 | 0.007482364 | 0.044618487 | 0.33599495 | 0.186687 |
| 1.03E-05    | -0.211283089 | 4.11E-06    | 0.102619877 | 0.02658564 | 0.193483 |
| 0.003886868 | -0.132295063 | 0.004185178 | -0.0906351  | 0.05029783 | 0.076207 |
| 0.095367991 | -0.076206049 | 0.100009888 | -0.1829825  | 6.97E-05   | -0.29198 |
| 0.008736642 | -0.128173842 | 0.005539093 | -0.16951975 | 0.00023305 | -0.18999 |
| 0.202656346 | 0.055111349  | 0.234566349 | 0.035456193 | 0.44462786 | 0.169148 |
| 0.109565811 | 0.068832354  | 0.137476194 | -0.0284167  | 0.54016199 | -0.16011 |
| 0.710673371 | -0.018397139 | 0.691711401 | -0.21133902 | 4.09E-06   | -0.21425 |
| 0.024156616 | -0.104895285 | 0.023390928 | 0.056896995 | 0.21972727 | -0.02598 |
| 0.481547405 | -0.043255106 | 0.350984066 | -0.41180385 | 1.53E-20   | -0.01403 |
| 0.098095069 | -0.08087599  | 0.080824508 | -0.17569549 | 0.00013543 | -0.13457 |
| 0.018364484 | -0.117350724 | 0.011150428 | -0.21240262 | 3.64E-06   | 0.002563 |
| 2.06E-08    | -0.263641412 | 7.26E-09    | -0.2528768  | 3.02E-08   | -0.28979 |
| 0.463186041 | 0.022646119  | 0.625452208 | 0.105598288 | 0.02247358 | -0.06537 |
| 9.33E-05    | -0.190673374 | 3.36E-05    | -0.22293143 | 1.14E-06   | -0.07104 |
| 0.005533022 | -0.133838708 | 0.003760605 | -0.19792274 | 1.64E-05   | -0.23727 |
| 0.883358086 | -0.012479164 | 0.787956801 | -0.13729985 | 0.00294697 | 0.143917 |
| 0.42096122  | -0.043002964 | 0.353801728 | -0.25240718 | 3.21E-08   | -0.11062 |
| 0.000951978 | -0.159155681 | 0.000556045 | -0.22421829 | 9.84E-07   | -0.32548 |
| 0.155128957 | -0.084835845 | 0.066994908 | -0.42969199 | 2.09E-22   | -0.14665 |
| 5.57E-07    | -0.235471088 | 2.64E-07    | 0.178599655 | 0.00010425 | -0.03357 |
| 0.249362092 | -0.053240617 | 0.250856874 | -0.00925773 | 0.84184861 | -0.23396 |
| 0.094855694 | -0.076205941 | 0.100010372 | 0.120245236 | 0.00929521 | 0.393596 |
| 0.001056222 | -0.164092518 | 0.000369824 | -0.3449337  | 1.71E-14   | -0.0989  |
| 0.456101621 | 0.027308338  | 0.556085067 | -0.02720691 | 0.55755349 | -0.15962 |
| 0.677098984 | -0.018438534 | 0.691053335 | 0.035871914 | 0.43930341 | 0.123185 |
| 0.035834849 | 0.105811988  | 0.022200977 | -0.13923274 | 0.00256571 | 0.080894 |
| 0.000636937 | -0.164069787 | 0.000370529 | -0.03712974 | 0.42341759 | 0.219387 |
| 0.636420599 | -0.023229596 | 0.616569562 | 0.085656665 | 0.06438626 | -0.10077 |
| 0.001605817 | -0.149826549 | 0.001164438 | -0.29751651 | 5.33E-11   | -0.30316 |
| 0.01857885  | -0.125719835 | 0.006521312 | -0.49369779 | 4.60E-30   | -0.09142 |
| 1.95E-05    | -0.212435638 | 3.63E-06    | -0.09687469 | 0.03636758 | -0.20192 |
| 0.081599085 | -0.082422074 | 0.07517236  | -0.15540421 | 0.00075221 | -0.04049 |
| 0.000213635 | -0.174234118 | 0.000154251 | -0.15990765 | 0.00052295 | -0.2473  |
| 0.023884915 | -0.110341149 | 0.017061027 | 0.077424442 | 0.0946858  | -0.31989 |
| 0.000107978 | -0.187141939 | 4.71E-05    | 0.103828787 | 0.02484441 | 0.343665 |



|             |              |             |             |            |          |
|-------------|--------------|-------------|-------------|------------|----------|
| 2.87E-06    | -0.226557644 | 7.52E-07    | -0.2100996  | 4.66E-06   | 0.204493 |
| 1.66E-16    | -0.376602336 | 3.49E-17    | -0.0568174  | 0.22037405 | 0.055719 |
| 3.49E-05    | -0.203272584 | 9.54E-06    | -0.34222917 | 2.81E-14   | 0.155325 |
| 0.000419457 | -0.177524341 | 0.000114915 | 0.03262532  | 0.48184582 | 0.236151 |
| 0.238298153 | -0.048527538 | 0.295332477 | -0.01723193 | 0.71032868 | 0.035606 |
| 0.003696218 | -0.108062532 | 0.019499766 | -0.09870807 | 0.03295811 | 0.032969 |
| 0.116973185 | -0.058365087 | 0.208039927 | -0.0611847  | 0.18686644 | 0.032783 |
| 0.026291626 | -0.084716174 | 0.067382381 | -0.28089864 | 6.46E-10   | -0.26041 |
| 0.586206867 | -0.004389892 | 0.924622547 | -0.02780826 | 0.54887485 | -0.27178 |
| 0.337782018 | -0.020261552 | 0.662309168 | -0.0843229  | 0.06866868 | 0.105211 |
| 0.484892733 | 0.036307496  | 0.433763942 | -0.1290377  | 0.00522638 | -0.07415 |
| 0.252070619 | -0.042700416 | 0.35720143  | -0.15287605 | 0.00091864 | -0.27335 |
| 0.037986103 | -0.081561011 | 0.07827916  | 0.055553147 | 0.23083068 | -0.16625 |
| 0.001958981 | -0.127630283 | 0.00574439  | -0.08445038 | 0.06824954 | -0.24929 |
| 4.30E-09    | -0.254135926 | 2.56E-08    | -0.01334508 | 0.77363035 | 0.152519 |
| 0.716594828 | 0.022009899  | 0.63519992  | -0.06198607 | 0.1811487  | 0.101379 |
| 0.145571644 | -0.04921295  | 0.288556375 | -0.02929509 | 0.5277063  | 0.203047 |
| 0.038352192 | 0.112106596  | 0.015359213 | -0.16163738 | 0.00045364 | -0.24996 |
| 0.091236504 | -0.05548699  | 0.231387375 | 0.033632736 | 0.468411   | 0.149043 |
| 0.066504817 | -0.059904533 | 0.196274286 | 0.007419795 | 0.87294755 | 0.088071 |
| 0.485507279 | -0.011043087 | 0.811872692 | -0.04876118 | 0.29301086 | 0.165308 |
| 0.00375103  | -0.117840713 | 0.010815002 | 0.048533406 | 0.29527402 | -0.11297 |
| 1.22E-07    | -0.219325413 | 1.71E-06    | 0.044480466 | 0.33749341 | 0.067889 |
| 0.439942104 | -0.017617508 | 0.704148278 | -0.16137869 | 0.00046343 | 0.142058 |
| 0.517456003 | 0.040120918  | 0.387014014 | -0.15949922 | 0.00054069 | 0.012859 |
| 0.000692449 | -0.136320403 | 0.003159224 | 0.10905778  | 0.01839955 | 0.187027 |
| 0.001630539 | -0.132999133 | 0.003986422 | -0.03517321 | 0.44827318 | 0.11854  |
| 0.020850855 | -0.103452635 | 0.025375329 | 0.003508839 | 0.9397185  | -0.02513 |
| 8.37E-10    | -0.265328072 | 5.78E-09    | 0.060791278 | 0.18972163 | 0.199867 |
| 0.000179145 | -0.166694054 | 0.000296912 | 0.048333898 | 0.29726593 | 0.243685 |
| 0.849506734 | 0.029472578  | 0.525207378 | -0.00900444 | 0.84612107 | 0.175993 |
| 0.031448599 | -0.089720869 | 0.05267235  | -0.09108044 | 0.04917396 | 0.107184 |
| 0.215433938 | -0.039413242 | 0.395450201 | -0.22783009 | 6.50E-07   | 0.072516 |
| 0.006268469 | -0.112219002 | 0.015256088 | -0.19551205 | 2.09E-05   | 0.116703 |
| 0.11610938  | -0.055859266 | 0.228267099 | 0.102703657 | 0.02646167 | 0.186863 |
| 0.150324335 | -0.043699099 | 0.346057048 | 0.049548429 | 0.28527815 | 0.143196 |
| 0.824186434 | 0.008583337  | 0.853233909 | -0.00534206 | 0.90833869 | 0.132376 |
| 0.249283954 | -0.041862344 | 0.366725381 | -0.12111244 | 0.0087956  | 0.171463 |
| 4.76E-06    | -0.195177291 | 2.16E-05    | -0.00318053 | 0.94534957 | 0.090094 |
| 0.576173924 | -0.00782544  | 0.866065209 | -0.16444919 | 0.00035893 | 0.353255 |
| 2.09E-05    | -0.183513018 | 6.63E-05    | -0.11863448 | 0.01029057 | 0.15357  |
| 0.044165694 | -0.079547358 | 0.085952142 | -0.20676195 | 6.64E-06   | -0.36715 |
| 8.90E-05    | -0.156751688 | 0.00067536  | -0.0657913  | 0.15575621 | 0.078964 |
| 0.347258648 | -0.024585888 | 0.596138443 | -0.15965679 | 0.00053378 | 0.122528 |
| 0.006817069 | 0.132843078  | 0.004029724 | 0.056773347 | 0.22073265 | 0.53044  |

|             |              |             |             |            |          |
|-------------|--------------|-------------|-------------|------------|----------|
| 3.33E-08    | 0.257599257  | 1.63E-08    | 0.140203403 | 0.00239173 | 0.265282 |
| 2.96E-05    | 0.202281281  | 1.06E-05    | 0.061790482 | 0.18253211 | 0.328718 |
| 0.012812226 | -0.101644981 | 0.028065387 | 0.194621164 | 2.28E-05   | 0.559092 |
| 3.04E-10    | -0.289458886 | 1.82E-10    | -0.29761892 | 5.25E-11   | -0.15177 |
| 0.018650127 | 0.105056387  | 0.023177892 | 0.303957986 | 1.94E-11   | 0.365309 |
| 0.00017151  | 0.16156329   | 0.00045642  | 0.233163973 | 3.48E-07   | 0.388956 |
| 0.664576977 | 0.024122223  | 0.603088471 | 0.285433281 | 3.32E-10   | 0.559352 |
| 0.007600809 | -0.120939561 | 0.008893247 | 0.395291668 | 6.46E-19   | 0.296509 |
| 0.000316873 | 0.17875636   | 0.000102781 | 0.208390328 | 5.59E-06   | 0.448404 |
| 0.174862164 | -0.06102961  | 0.187988166 | 0.235158385 | 2.74E-07   | 0.430969 |
| 0.339414832 | 0.049244202  | 0.288249926 | 0.3475098   | 1.06E-14   | 0.432615 |
| 0.454111196 | -0.033141528 | 0.474935737 | 0.489049684 | 1.88E-29   | 0.354359 |
| 0.000926526 | 0.155101277  | 0.000770562 | 0.490760718 | 1.12E-29   | 0.444169 |
| 0.107445499 | 0.077182585  | 0.095724244 | 0.487740101 | 2.79E-29   | 0.155059 |
| 0.869802754 | -0.005775403 | 0.900939926 | 0.527590339 | 8.02E-35   | 0.397823 |
| 0.003467587 | 0.140288439  | 0.002377008 | 0.294824803 | 8.08E-11   | 0.475326 |
| 0.27539481  | 0.055573643  | 0.230658404 | 0.529320188 | 4.43E-35   | 0.282432 |
| 0.290804161 | -0.046987865 | 0.310938468 | 0.660303925 | 8.30E-60   | 0.202725 |
| 1.33E-12    | 0.331285462  | 2.00E-13    | 0.297427228 | 5.41E-11   | 0.195072 |
| 0.147229789 | 0.073780102  | 0.111317468 | 0.478537348 | 4.22E-28   | 0.552699 |
| 0.011880572 | -0.116314178 | 0.011890504 | 0.339858489 | 4.33E-14   | 0.480938 |
| 0.077061585 | 0.088729965  | 0.055350743 | 0.447524424 | 2.22E-24   | 0.292964 |
| 1.44E-08    | 0.258283018  | 1.49E-08    | 0.328489613 | 3.27E-13   | 0.462376 |
| 0.236156471 | 0.0624372    | 0.17798739  | 0.219521913 | 1.67E-06   | 0.457873 |
| 0.419220924 | -0.042600571 | 0.358327861 | 0.276602076 | 1.20E-09   | 0.493782 |
| 4.12E-05    | 0.197004325  | 1.80E-05    | 0.370417555 | 1.23E-16   | 0.164761 |
| 0.000402826 | 0.159528759  | 0.000539389 | 0.253065928 | 2.95E-08   | 0.547689 |
| 0.00398999  | 0.129319205  | 0.005127961 | 0.049882051 | 0.28204305 | 0.43217  |
| 0.00485304  | 0.133230201  | 0.00392308  | 0.20712128  | 6.39E-06   | 0.306009 |
| 0.692576599 | 0.028323777  | 0.541488161 | 0.403233011 | 1.10E-19   | 0.606946 |
| 1.02E-05    | 0.20410299   | 8.76E-06    | 0.117543776 | 0.01101719 | 0.369776 |
| 0.597756288 | 0.038395891  | 0.407770272 | 0.460868574 | 6.20E-26   | 0.496853 |
| 1.04E-08    | 0.262706115  | 8.24E-09    | 0.468597998 | 7.24E-27   | 0.068537 |
| 0.023098761 | 0.115983674  | 0.01213544  | 0.396999128 | 4.43E-19   | 0.383761 |
| 0.000546263 | 0.161859055  | 0.000445398 | 0.38800897  | 3.15E-18   | 0.46457  |
| 1.98E-05    | 0.186711925  | 4.91E-05    | 0.301817003 | 2.72E-11   | 0.250768 |
| 0.049104621 | 0.096971082  | 0.036181129 | 0.448326834 | 1.80E-24   | 0.481993 |
| 9.30E-10    | 0.277949081  | 9.88E-10    | 0.196006295 | 1.99E-05   | 0.346061 |
| 0.484817919 | -0.022425744 | 0.628821376 | 0.256865574 | 1.79E-08   | 0.499286 |
| 0.441415765 | 0.044117904  | 0.341450002 | 0.307335517 | 1.13E-11   | 0.506823 |
| 0.010450941 | 0.115109057  | 0.012805246 | 0.351274268 | 5.22E-15   | 0.341636 |
| 0.123519541 | -0.063412231 | 0.171295002 | 0.11854491  | 0.0103486  | 0.573206 |
| 0.71373395  | 0.019252304  | 0.678164382 | 0.209640372 | 4.90E-06   | 0.388003 |
| 0.138831975 | 0.074085376  | 0.109841539 | 0.408357154 | 3.40E-20   | 0.439192 |
| 1.18E-05    | 0.208277452  | 5.66E-06    | 0.42921091  | 2.35E-22   | 0.350699 |

|             |              |             |             |            |          |
|-------------|--------------|-------------|-------------|------------|----------|
| 0.051753792 | 0.089127605  | 0.054262642 | 0.200910728 | 1.22E-05   | 0.362535 |
| 1.37E-10    | 0.293417467  | 1.00E-10    | 0.188767553 | 4.04E-05   | 0.29754  |
| 0.211240814 | 0.056038539  | 0.226775198 | 0.060932522 | 0.1886929  | 0.473203 |
| 0.406045113 | 0.037043224  | 0.424499399 | 0.251696765 | 3.51E-08   | 0.557397 |
| 0.063276356 | 0.091161088  | 0.048972694 | 0.30370778  | 2.02E-11   | 0.576395 |
| 0.212542199 | -0.048302274 | 0.297582485 | 0.241062422 | 1.34E-07   | 0.480645 |
| 4.25E-08    | 0.24742418   | 6.06E-08    | 0.232784785 | 3.64E-07   | 0.485448 |
| 0.377465875 | 0.031753059  | 0.493644927 | 0.511179108 | 1.88E-32   | 0.223896 |
| 0.608489144 | -0.015768103 | 0.733962323 | 0.126146114 | 0.00634022 | 0.409573 |
| 0.067285165 | 0.081702366  | 0.077762104 | 0.234144352 | 3.09E-07   | 0.308311 |
| 2.56E-08    | 0.263242882  | 7.67E-09    | 0.479578076 | 3.12E-28   | 0.300488 |
| 0.169803666 | -0.06990405  | 0.131442826 | 0.394375956 | 7.90E-19   | 0.478961 |
| 5.13E-06    | 0.212384175  | 3.65E-06    | 0.422090432 | 1.34E-21   | 0.365863 |
| 0.000735084 | 0.157825901  | 0.00061938  | 0.346759808 | 1.22E-14   | 0.389945 |
| 0.29671712  | 0.050974435  | 0.271624373 | 0.382454333 | 1.03E-17   | 0.346284 |
| 3.24E-17    | 0.380678114  | 1.49E-17    | 0.19449286  | 2.31E-05   | 0.22326  |
| 2.73E-05    | 0.193338188  | 2.59E-05    | 0.254889914 | 2.32E-08   | 0.392509 |
| 4.91E-11    | 0.299431291  | 3.96E-11    | 0.171916247 | 0.0001892  | 0.512673 |
| 0.010786754 | 0.128455632  | 0.005435283 | 0.399183539 | 2.73E-19   | 0.320062 |
| 2.14E-06    | 0.232855033  | 3.61E-07    | 0.263073835 | 7.84E-09   | 0.20923  |
| 0.009063203 | 0.119901762  | 0.009499973 | 0.354420593 | 2.87E-15   | 0.447599 |
| 7.78E-14    | 0.34949338   | 7.31E-15    | 0.19319416  | 2.63E-05   | 0.442011 |
| 0.769600972 | 0.017417935  | 0.7073448   | 0.48818902  | 2.44E-29   | 0.212207 |
| 5.45E-07    | 0.230153651  | 4.96E-07    | 0.395534933 | 6.12E-19   | 0.51471  |
| 0.108989882 | -0.077029094 | 0.096387982 | 0.314595646 | 3.46E-12   | 0.287876 |
| 2.50E-06    | 0.218164382  | 1.94E-06    | 0.198660635 | 1.53E-05   | 0.308409 |
| 0.000685918 | 0.161867329  | 0.000445093 | 0.464262105 | 2.43E-26   | 0.191194 |
| 0.542053244 | 0.03635772   | 0.433127827 | 0.398871865 | 2.92E-19   | 0.391583 |
| 0.551788309 | 0.032083872  | 0.489151947 | 0.349122464 | 7.84E-15   | 0.492448 |
| 0.000105364 | 0.189966512  | 3.60E-05    | 0.392195954 | 1.27E-18   | 0.475114 |
| 0.999618786 | 0.005630683  | 0.9034099   | 0.390707859 | 1.76E-18   | 0.469867 |
| 0.000380996 | 0.175337925  | 0.000139827 | 0.41332832  | 1.07E-20   | 0.213689 |
| 0.553156045 | 0.031231021  | 0.50077961  | 0.254220553 | 2.54E-08   | 0.402702 |
| 0.003868069 | 0.14133051   | 0.002203244 | 0.649788541 | 2.31E-57   | 0.088482 |
| 2.69E-14    | 0.355826548  | 2.19E-15    | 0.08891375  | 0.0548456  | 0.323164 |
| 0.000664739 | 0.170489272  | 0.000214274 | 0.108935046 | 0.01853223 | 0.252132 |
| 0.011008224 | -0.116052184 | 0.012084304 | 0.473678671 | 1.71E-27   | 0.423372 |
| 5.72E-06    | 0.202413006  | 1.04E-05    | 0.156162136 | 0.00070804 | 0.283147 |
| 0.371541652 | -0.050476825 | 0.276337327 | 0.374526007 | 5.35E-17   | 0.467578 |
| 0.189129918 | 0.060121234  | 0.194657898 | 0.320486041 | 1.29E-12   | 0.423832 |
| 0.003144393 | -0.130241017 | 0.004817267 | 0.169813345 | 0.00022721 | 0.491745 |
| 0.644915195 | 0.020264107  | 0.662269212 | 0.363609209 | 4.82E-16   | 0.357027 |
| 2.30E-06    | 0.222657878  | 1.17E-06    | 0.312775453 | 4.67E-12   | 0.456052 |
| 0.013655671 | -0.104640828 | 0.023730862 | 0.224228685 | 9.83E-07   | 0.486176 |
| 3.49E-08    | 0.265862394  | 5.37E-09    | 0.382537851 | 1.01E-17   | 0.43087  |

|             |              |             |             |            |          |
|-------------|--------------|-------------|-------------|------------|----------|
| 9.87E-09    | 0.276330843  | 1.25E-09    | 0.314534408 | 3.49E-12   | 0.442164 |
| 0.00422647  | 0.140567123  | 0.002329352 | 0.619701767 | 7.03E-51   | 0.362911 |
| 0.001991306 | 0.150165545  | 0.001134392 | 0.390292279 | 1.93E-18   | 0.480256 |
| 1.41E-05    | 0.195151088  | 2.17E-05    | 0.432381981 | 1.07E-22   | 0.28901  |
| 1.40E-07    | 0.240888783  | 1.37E-07    | 0.287081209 | 2.60E-10   | 0.446477 |
| 1.11E-05    | 0.207273751  | 6.29E-06    | 0.312141681 | 5.18E-12   | 0.443817 |
| 2.12E-09    | 0.285188599  | 3.45E-10    | 0.220180642 | 1.55E-06   | 0.483254 |
| 0.075324703 | 0.077381228  | 0.09487068  | 0.234598514 | 2.93E-07   | 0.369017 |
| 0.381329213 | -0.04182677  | 0.367133104 | 0.113905336 | 0.01378033 | 0.322284 |
| 6.70E-08    | -0.254209258 | 2.54E-08    | -0.37572873 | 4.18E-17   | -0.34006 |
| 0.055459261 | -0.089776846 | 0.052524327 | 0.385548252 | 5.34E-18   | 0.585223 |
| 0.16809311  | 0.067821647  | 0.143359128 | 0.359902054 | 9.97E-16   | 0.501766 |
| 5.53E-11    | 0.299586828  | 3.86E-11    | 0.160631932 | 0.00049281 | 0.349706 |
| 0.000322527 | 0.177106488  | 0.000119328 | 0.25774254  | 1.60E-08   | 0.183078 |
| 0.000141103 | 0.184856698  | 5.85E-05    | 0.249820908 | 4.47E-08   | 0.507902 |
| 5.17E-06    | 0.224130186  | 9.94E-07    | 0.293849608 | 9.38E-11   | 0.503995 |
| 0.001258898 | 0.149679322  | 0.001177714 | 0.293862014 | 9.36E-11   | 0.47833  |
| 0.707035964 | 0.017828113  | 0.700780703 | 0.196306089 | 1.93E-05   | 0.3831   |
| 0.201146394 | -0.053812757 | 0.24579318  | 0.450751873 | 9.49E-25   | 0.347884 |
| 0.009266762 | -0.121845235 | 0.008392216 | 0.370551508 | 1.20E-16   | 0.49993  |
| 1.94E-05    | -0.188471132 | 4.15E-05    | 0.261358458 | 9.88E-09   | 0.45157  |
| 0.853953612 | 0.010530601  | 0.820451242 | 0.547106317 | 8.13E-38   | 0.416388 |
| 0.000165616 | 0.173750089  | 0.000161007 | 0.291000514 | 1.45E-10   | 0.41864  |
| 0.334740187 | -0.042826927 | 0.355777348 | 0.352100512 | 4.47E-15   | 0.428246 |
| 1.25E-05    | 0.197776499  | 1.67E-05    | 0.056264525 | 0.22490446 | 0.341679 |
| 0.018297697 | -0.107629875 | 0.019995649 | 0.39348966  | 9.60E-19   | 0.353567 |
| 6.57E-09    | 0.268935534  | 3.52E-09    | 0.271808636 | 2.36E-09   | 0.247187 |
| 0.236583015 | 0.054912766  | 0.236259325 | 0.388515467 | 2.83E-18   | 0.209893 |
| 0.007761599 | 0.12017996   | 0.009333823 | 0.549529619 | 3.35E-38   | 0.391853 |
| 1.15E-15    | 0.377016039  | 3.20E-17    | 0.13420899  | 0.00366475 | 0.280764 |
| 7.59E-08    | 0.245442721  | 7.78E-08    | 0.143063336 | 0.00193981 | 0.012495 |
| 2.39E-05    | 0.200922313  | 1.21E-05    | 0.043830009 | 0.34461276 | 0.282642 |
| 0.036788709 | -0.115838308 | 0.012244574 | -0.33400995 | 1.24E-13   | -0.10578 |
| 0.237003096 | 0.062174012  | 0.179826672 | 0.550395426 | 2.43E-38   | 0.257992 |
| 0.004061333 | 0.134637415  | 0.003556601 | 0.51673636  | 3.07E-33   | 0.366936 |
| 0.130932931 | 0.071866922  | 0.120925381 | 0.309161088 | 8.42E-12   | 0.6429   |
| 0.00047153  | 0.168668268  | 0.000250793 | 0.345414517 | 1.56E-14   | 0.358973 |
| 7.62E-05    | -0.18371486  | 6.51E-05    | -0.23973141 | 1.58E-07   | -0.18362 |
| 2.30E-06    | 0.221927723  | 1.28E-06    | 0.542430995 | 4.42E-37   | 0.271214 |
| 0.026180769 | -0.091723357 | 0.047588571 | 0.425675623 | 5.61E-22   | 0.416539 |
| 0.487822585 | 0.032793925  | 0.479582859 | 0.412930151 | 1.18E-20   | 0.418616 |
| 2.26E-15    | 0.367579108  | 2.19E-16    | 0.106433974 | 0.0214238  | 0.243988 |
| 0.178992331 | 0.054792918  | 0.23728522  | 0.31806833  | 1.94E-12   | 0.354308 |
| 2.88E-19    | -0.403945865 | 9.33E-20    | -0.26348733 | 7.42E-09   | -0.14908 |
| 0.329115085 | 0.046343716  | 0.317625548 | 0.295564035 | 7.21E-11   | 0.537306 |

|             |              |             |             |            |          |
|-------------|--------------|-------------|-------------|------------|----------|
| 3.51E-09    | 0.273268394  | 1.92E-09    | 0.324285788 | 6.76E-13   | 0.467889 |
| 0.184113045 | -0.068898764 | 0.137096238 | 0.33110939  | 2.07E-13   | 0.524963 |
| 3.98E-05    | 0.179281367  | 9.80E-05    | 0.162344111 | 0.00042786 | 0.371382 |
| 0.000417933 | -0.171708619 | 0.000192671 | -0.46740219 | 1.01E-26   | -0.35256 |
| 0.338040914 | 0.042712343  | 0.357067017 | 0.231733177 | 4.12E-07   | 0.657981 |
| 0.570179134 | -0.025979786 | 0.57546727  | 0.287777626 | 2.35E-10   | 0.54056  |
| 2.95E-14    | 0.3490155    | 7.99E-15    | 0.262767997 | 8.17E-09   | 0.222185 |
| 0.066716458 | 0.085102416  | 0.06613837  | 0.284690856 | 3.71E-10   | 0.213085 |
| 0.105804734 | 0.078473715  | 0.090284375 | 0.286446957 | 2.86E-10   | 0.362911 |
| 0.062507447 | -0.09774185  | 0.03471932  | -0.43205827 | 1.16E-22   | -0.51818 |
| 0.202782349 | -0.057281605 | 0.216620967 | 0.15173931  | 0.00100404 | 0.40477  |
| 2.94E-07    | 0.246100965  | 7.16E-08    | 0.010474071 | 0.82139884 | 0.273586 |
| 0.04420206  | -0.099408933 | 0.031728807 | 0.444460684 | 4.95E-24   | 0.476555 |
| 0.405862045 | 0.036892293  | 0.426390524 | 0.436502161 | 3.80E-23   | 0.390019 |
| 2.85E-16    | 0.37457396   | 5.30E-17    | 0.237010984 | 2.19E-07   | 0.342496 |
| 0.09938599  | 0.077784016  | 0.09315857  | 0.095165836 | 0.03981074 | 0.525063 |
| 0.581161455 | -0.016939582 | 0.715027339 | 0.476276921 | 8.12E-28   | 0.588635 |
| 0.273519473 | 0.061039297  | 0.187917955 | 0.394535151 | 7.63E-19   | 0.570318 |
| 6.02E-05    | 0.192326401  | 2.86E-05    | 0.357962751 | 1.45E-15   | 0.288179 |
| 0.140061019 | 0.07890821   | 0.088510513 | 0.489314769 | 1.74E-29   | 0.328595 |
| 0.180166858 | -0.059636919 | 0.198283928 | 0.404257891 | 8.69E-20   | 0.411373 |
| 0.000977991 | 0.158464523  | 0.000588172 | 0.354296711 | 2.94E-15   | 0.252679 |
| 1.93E-08    | 0.26614382   | 5.17E-09    | 0.463813277 | 2.75E-26   | 0.463554 |
| 3.48E-05    | 0.191390948  | 3.13E-05    | 0.445991556 | 3.32E-24   | 0.386809 |
| 0.010361179 | 0.127598025  | 0.005756785 | 0.481116262 | 1.99E-28   | 0.429165 |
| 0.823762761 | 0.011337314  | 0.806957688 | 0.346779551 | 1.21E-14   | 0.234259 |
| 0.371489662 | -0.029976555 | 0.518144671 | 0.244514383 | 8.73E-08   | 0.462243 |
| 1.10E-08    | 0.263586613  | 7.32E-09    | 0.357431917 | 1.61E-15   | 0.348735 |
| 0.102099731 | 0.078860067  | 0.088705671 | 0.554280381 | 5.75E-39   | 0.381899 |
| 0.248835394 | 0.04787498   | 0.30188173  | 0.225620532 | 8.38E-07   | 0.38881  |
| 3.97E-11    | 0.300723532  | 3.23E-11    | 0.32878969  | 3.10E-13   | 0.342408 |
| 0.00345219  | 0.144111599  | 0.001794776 | 0.392152081 | 1.29E-18   | 0.254258 |
| 0.737535341 | 0.018991173  | 0.682290336 | 0.382393359 | 1.04E-17   | 0.306136 |
| 0.000339744 | -0.163455189 | 0.000390071 | 0.330772801 | 2.19E-13   | 0.361094 |
| 6.59E-06    | -0.201781531 | 1.11E-05    | -0.29260047 | 1.13E-10   | -0.23429 |
| 0.010686966 | -0.124329773 | 0.007144488 | 0.079383052 | 0.08660407 | 0.536262 |
| 0.740701023 | 0.017070493  | 0.712921957 | 0.145246589 | 0.001649   | 0.380521 |
| 0.930637683 | -0.001960107 | 0.966303554 | 0.163743889 | 0.00038078 | 0.445072 |
| 0.000125129 | 0.181142818  | 8.26E-05    | 0.040312379 | 0.38475057 | 0.47585  |
| 0.023170526 | 0.107515048  | 0.020129084 | 0.580378191 | 2.13E-43   | 0.319361 |
| 0.680805405 | -0.014360329 | 0.756930847 | 0.575174932 | 1.75E-42   | 0.453261 |
| 0.18649037  | 0.056410088  | 0.223705297 | 0.414425239 | 8.30E-21   | 0.524942 |
| 1.83E-05    | 0.201680738  | 1.12E-05    | 0.385995504 | 4.85E-18   | 0.581494 |
| 0.235235206 | 0.057564189  | 0.214358849 | 0.290789759 | 1.49E-10   | 0.509443 |
| 3.44E-19    | 0.407290446  | 4.35E-20    | 0.257648372 | 1.62E-08   | 0.131809 |

|             |              |             |             |            |          |
|-------------|--------------|-------------|-------------|------------|----------|
| 0.969723451 | 0.002296623  | 0.960522836 | 0.414963524 | 7.31E-21   | 0.364723 |
| 0.811084133 | 0.01635385   | 0.724473721 | 0.480304038 | 2.52E-28   | 0.226437 |
| 0.000303378 | 0.168489288  | 0.00025468  | 0.253599091 | 2.75E-08   | 0.300062 |
| 0.066366502 | 0.087253632  | 0.059550322 | 0.482238546 | 1.43E-28   | 0.473921 |
| 0.00010766  | 0.183858973  | 6.42E-05    | 0.496564603 | 1.91E-30   | 0.425444 |
| 0.002583725 | 0.139332938  | 0.002547233 | 0.341815431 | 3.03E-14   | 0.47745  |
| 3.23E-15    | 0.352658527  | 4.02E-15    | 0.234862337 | 2.84E-07   | 0.284624 |
| 0.000145771 | 0.184755471  | 5.91E-05    | 0.478841439 | 3.86E-28   | 0.323712 |
| 0.988115324 | 0.008486571  | 0.854870085 | 0.30656312  | 1.28E-11   | 0.44538  |
| 0.515148653 | 0.033893342  | 0.464969529 | 0.428152889 | 3.06E-22   | 0.523039 |
| 0.14517574  | 0.073293119  | 0.113704154 | 0.428355115 | 2.91E-22   | 0.325779 |
| 2.04E-05    | 0.198120235  | 1.61E-05    | 0.151584584 | 0.00101621 | 0.131237 |
| 0.236784096 | -0.051891772 | 0.263080629 | 0.461299579 | 5.50E-26   | 0.590414 |
| 0.00170384  | -0.149527585 | 0.001191543 | 0.394832113 | 7.15E-19   | 0.541159 |
| 5.04E-09    | 0.281651135  | 5.79E-10    | 0.395317859 | 6.42E-19   | 0.009102 |
| 1.10E-05    | 0.203881565  | 8.96E-06    | 0.404397448 | 8.42E-20   | 0.417793 |
| 0.479996495 | -0.021219825 | 0.647392996 | 0.385343549 | 5.57E-18   | 0.591398 |
| 0.003303673 | 0.141509362  | 0.002174615 | 0.249146908 | 4.87E-08   | 0.637999 |
| 0.000547579 | 0.168583412  | 0.000252629 | 0.292049396 | 1.23E-10   | 0.408225 |
| 0.00253613  | -0.137797099 | 0.002844256 | 0.48364609  | 9.44E-29   | 0.528472 |
| 0.00035164  | 0.170181859  | 0.000220067 | 0.401954488 | 1.46E-19   | 0.483796 |
| 0.092231094 | 0.080656267  | 0.081654981 | 0.245257573 | 7.96E-08   | 0.243693 |
| 2.86E-14    | 0.338743255  | 5.30E-14    | 0.35780764  | 1.50E-15   | 0.287524 |
| 0.389071366 | 0.044010735  | 0.342625171 | 0.458520337 | 1.18E-25   | 0.454933 |
| 0.000318264 | 0.161991289  | 0.000440551 | 0.250778301 | 3.95E-08   | 0.542957 |
| 0.582778887 | -0.015148597 | 0.744042036 | 0.357701114 | 1.53E-15   | 0.638168 |
| 3.49E-06    | -0.21453751  | 2.89E-06    | -0.25291813 | 3.00E-08   | -0.27959 |
| 0.040172013 | 0.109192288  | 0.018255085 | 0.452468621 | 6.01E-25   | 0.379417 |
| 0.450637895 | 0.039204188  | 0.397963363 | 0.353131522 | 3.67E-15   | 0.54235  |
| 0.041678847 | -0.080996208 | 0.080373024 | -0.44409231 | 5.44E-24   | -0.27993 |
| 0.697438919 | -0.011348023 | 0.806778927 | 0.325905077 | 5.12E-13   | 0.306322 |
| 5.04E-06    | 0.209942293  | 4.74E-06    | 0.156222248 | 0.00070464 | 0.158912 |
| 0.00026067  | 0.172191967  | 0.000184686 | 0.566687447 | 5.04E-41   | 0.245905 |
| 0.629330575 | 0.026405783  | 0.569217857 | 0.390818821 | 1.72E-18   | 0.433906 |
| 0.056131596 | 0.079799574  | 0.084959107 | 0.265491014 | 5.65E-09   | 0.146397 |
| 0.121856423 | 0.064844514  | 0.161807262 | 0.371647086 | 9.63E-17   | 0.478168 |
| 0.142092661 | -0.065658842 | 0.156592311 | 0.40948677  | 2.62E-20   | 0.339241 |
| 7.59E-09    | 0.271091294  | 2.61E-09    | 0.398439219 | 3.22E-19   | 0.433719 |
| 0.008044209 | 0.129545517  | 0.005050055 | 0.153453227 | 0.00087789 | 0.430433 |
| 3.15E-11    | 0.295694258  | 7.07E-11    | 0.165973991 | 0.00031562 | 0.455575 |
| 0.096862928 | -0.078324416 | 0.090900441 | 0.29670457  | 6.05E-11   | 0.529899 |
| 0.427618493 | -0.039656773 | 0.392534652 | 0.462594196 | 3.85E-26   | 0.14678  |
| 0.072447289 | 0.087945914  | 0.057549345 | 0.316102394 | 2.69E-12   | 0.346409 |
| 6.40E-05    | 0.191708983  | 3.04E-05    | 0.336946239 | 7.33E-14   | 0.512446 |
| 1.53E-07    | 0.236519332  | 2.33E-07    | 0.381276681 | 1.32E-17   | 0.37601  |

|             |              |             |             |            |          |
|-------------|--------------|-------------|-------------|------------|----------|
| 0.543891097 | -0.023593704 | 0.611054609 | 0.331194667 | 2.04E-13   | 0.213083 |
| 0.004162765 | -0.131021934 | 0.004567457 | 0.377636695 | 2.82E-17   | 0.54755  |
| 0.236726826 | 0.058917003  | 0.203764485 | 0.470145698 | 4.68E-27   | 0.466858 |
| 0.002445078 | 0.153883864  | 0.000848587 | 0.340509263 | 3.85E-14   | 0.50368  |
| 0.057697796 | 0.086199852  | 0.062706342 | 0.396237069 | 5.24E-19   | 0.599629 |
| 0.064327677 | -0.081412016 | 0.078827177 | 0.506217662 | 9.27E-32   | 0.346501 |
| 3.16E-08    | 0.257212728  | 1.71E-08    | 0.349613334 | 7.15E-15   | 0.221384 |
| 4.57E-12    | 0.30492658   | 1.66E-11    | 0.099930242 | 0.03084005 | 0.362913 |
| 0.0063553   | -0.118844016 | 0.010155954 | 0.314806023 | 3.34E-12   | 0.437078 |
| 0.251216724 | 0.05623705   | 0.225131308 | 0.328736145 | 3.13E-13   | 0.436741 |
| 0.09211175  | 0.082160323  | 0.076105984 | 0.416765136 | 4.78E-21   | 0.45255  |
| 1.56E-12    | 0.319837898  | 1.44E-12    | 0.364221359 | 4.27E-16   | 0.253629 |
| 0.000343325 | 0.180027672  | 9.15E-05    | 0.24297567  | 1.06E-07   | 0.339424 |
| 0.525993637 | -0.032148071 | 0.488282564 | 0.374757772 | 5.10E-17   | 0.2441   |
| 0.653049097 | 0.023459285  | 0.613088056 | 0.443540941 | 6.28E-24   | 0.366017 |
| 0.028165575 | 0.107159997  | 0.020546585 | 0.348146683 | 9.41E-15   | 0.514795 |
| 3.66E-05    | 0.193093974  | 2.65E-05    | 0.351055957 | 5.44E-15   | 0.518805 |
| 0.010494447 | 0.122556229  | 0.008016682 | 0.468996519 | 6.47E-27   | 0.463336 |
| 0.283563199 | -0.044938679 | 0.33253517  | 0.042383695 | 0.36078229 | 0.469386 |
| 0.146162735 | 0.065734931  | 0.1561116   | 0.453254518 | 4.87E-25   | 0.398021 |
| 0.016249843 | 0.11452617   | 0.013269549 | 0.476826893 | 6.93E-28   | 0.288779 |
| 7.25E-06    | 0.213214661  | 3.34E-06    | 0.338848471 | 5.20E-14   | 0.541633 |
| 3.10E-06    | 0.223461823  | 1.07E-06    | 0.384572117 | 6.57E-18   | 0.247584 |
| 0.476718841 | 0.035696768  | 0.441542183 | 0.337227571 | 6.97E-14   | 0.188433 |
| 0.011284582 | 0.122844466  | 0.007868764 | 0.275585433 | 1.39E-09   | 0.502593 |
| 5.68E-05    | 0.186915157  | 4.82E-05    | -0.0880855  | 0.05715271 | 0.322398 |
| 4.38E-05    | 0.189082501  | 3.92E-05    | 0.146510771 | 0.00149946 | 0.36701  |
| 2.35E-09    | 0.279135797  | 8.33E-10    | 0.283961794 | 4.13E-10   | 0.521469 |
| 0.015101435 | -0.106965118 | 0.020778925 | 0.1234433   | 0.00756922 | 0.448625 |
| 0.000100097 | 0.190701655  | 3.35E-05    | 0.187140607 | 4.72E-05   | 0.472453 |
| 0.000297533 | -0.18238761  | 7.37E-05    | -0.34223174 | 2.81E-14   | -0.35684 |
| 6.43E-05    | 0.187586267  | 4.52E-05    | 0.329067866 | 2.96E-13   | 0.160004 |
| 0.776172848 | 0.017968556  | 0.698538261 | 0.42981983  | 2.02E-22   | 0.465726 |
| 7.67E-06    | 0.201227633  | 1.18E-05    | -0.01724675 | 0.71009069 | 0.346753 |
| 0.000378998 | 0.161492784  | 0.000459084 | 0.161406193 | 0.00046238 | 0.610669 |
| 0.702613277 | 0.021699762  | 0.639974698 | 0.381942054 | 1.15E-17   | 0.546649 |
| 5.60E-07    | 0.236252054  | 2.40E-07    | 0.329237334 | 2.87E-13   | 0.422045 |
| 0.334065862 | 0.051765748  | 0.264243289 | 0.382147016 | 1.10E-17   | 0.635847 |
| 0.911040777 | 0.011528786  | 0.803763232 | 0.382743337 | 9.67E-18   | 0.123349 |
| 0.213505437 | -0.067477978 | 0.145402752 | 0.393970272 | 8.64E-19   | 0.209335 |
| 0.003158119 | 0.137982885  | 0.002806722 | 0.318769569 | 1.72E-12   | 0.472487 |
| 0.59540938  | -0.023717378 | 0.609186368 | 0.453563732 | 4.48E-25   | 0.427307 |
| 0.943878916 | 0.005552368  | 0.904746904 | 0.156746499 | 0.00067564 | 0.344742 |
| 0.001287599 | 0.154856972  | 0.000785666 | 0.436357581 | 3.95E-23   | 0.388283 |
| 3.05E-05    | 0.189162459  | 3.89E-05    | 0.348610978 | 8.62E-15   | 0.524355 |

|             |              |             |             |            |          |
|-------------|--------------|-------------|-------------|------------|----------|
| 0.010347592 | 0.108689417  | 0.018800281 | 0.234231706 | 3.06E-07   | 0.518912 |
| 0.027912174 | -0.100633928 | 0.029674213 | 0.410888261 | 1.90E-20   | 0.59421  |
| 7.36E-06    | 0.207083992  | 6.42E-06    | 0.261490217 | 9.71E-09   | -0.07174 |
| 0.272483229 | -0.051613968 | 0.265648246 | 0.576203921 | 1.16E-42   | 0.322987 |
| 0.465970245 | 0.041490834  | 0.370997277 | 0.267275259 | 4.43E-09   | 0.525825 |
| 6.41E-14    | 0.347836438  | 9.97E-15    | 0.478305946 | 4.51E-28   | -0.00365 |
| 6.75E-08    | 0.253965046  | 2.62E-08    | 0.340571296 | 3.81E-14   | 0.367217 |
| 0.031189995 | 0.108122502  | 0.019431884 | 0.434492577 | 6.31E-23   | 0.249523 |
| 0.176015174 | 0.067168812  | 0.147260139 | 0.480060835 | 2.71E-28   | 0.276927 |
| 6.30E-10    | -0.282366588 | 5.21E-10    | -0.30600576 | 1.40E-11   | -0.25236 |
| 3.34E-07    | 0.23569832   | 2.57E-07    | 0.217917316 | 2.00E-06   | 0.3159   |
| 0.004920958 | 0.142612755  | 0.002005383 | 0.407172911 | 4.47E-20   | 0.254028 |
| 0.269541044 | -0.046326758 | 0.317802854 | 0.320405575 | 1.31E-12   | 0.364132 |
| 0.265471244 | 0.050927811  | 0.272063614 | 0.37423274  | 5.68E-17   | 0.373064 |
| 0.302788092 | -0.045661403 | 0.324810548 | 0.617022965 | 2.46E-50   | 0.504216 |
| 0.035811653 | 0.102317815  | 0.027036774 | 0.399258655 | 2.68E-19   | 0.450786 |
| 0.980298032 | 0.012657633  | 0.784998014 | 0.41198721  | 1.47E-20   | 0.371    |
| 2.09E-09    | 0.275170102  | 1.47E-09    | 0.311648661 | 5.62E-12   | 0.364078 |
| 0.009848173 | 0.12479813   | 0.006928809 | 0.395811734 | 5.76E-19   | 0.296816 |
| 5.92E-07    | 0.23885503   | 1.75E-07    | 0.378536097 | 2.34E-17   | 0.543549 |
| 1.80E-08    | 0.258431221  | 1.46E-08    | 0.38367544  | 7.94E-18   | 0.200483 |
| 0.649097837 | -0.015668726 | 0.735576223 | 0.331370757 | 1.97E-13   | 0.594119 |
| 0.073678899 | 0.089460982  | 0.053364155 | 0.378866714 | 2.18E-17   | 0.312538 |
| 0.247551845 | 0.05036161   | 0.277436421 | 0.271755543 | 2.38E-09   | 0.508882 |
| 0.710853194 | 0.024643443  | 0.595278271 | 0.294266568 | 8.80E-11   | 0.330956 |
| 4.89E-06    | 0.215762476  | 2.53E-06    | 0.435571126 | 4.81E-23   | 0.31767  |
| 0.038308224 | 0.09751733   | 0.035139853 | 0.539530682 | 1.25E-36   | 0.470091 |
| 0.056057835 | 0.09069397   | 0.05014805  | 0.422948416 | 1.09E-21   | 0.250171 |
| 0.664978872 | -0.013475507 | 0.771478927 | 0.302327127 | 2.51E-11   | 0.469986 |
| 1.89E-05    | 0.201838498  | 1.11E-05    | 0.227372626 | 6.85E-07   | 0.376393 |
| 0.078229506 | 0.081451375  | 0.07868211  | 0.406363728 | 5.38E-20   | 0.525275 |
| 0.019980813 | 0.1181992    | 0.010575291 | 0.424732101 | 7.06E-22   | 0.463328 |
| 0.666356015 | -0.013580669 | 0.769745561 | 0.238132306 | 1.92E-07   | 0.509426 |
| 0.016997955 | 0.111781835  | 0.015660606 | 0.185163172 | 5.68E-05   | 0.373438 |
| 0.007051896 | 0.123801292  | 0.007395052 | 0.289049756 | 1.94E-10   | 0.460152 |
| 0.027137935 | -0.097166775 | 0.035805117 | 0.263569505 | 7.33E-09   | 0.464698 |
| 1.69E-05    | 0.196995496  | 1.80E-05    | 0.370613462 | 1.19E-16   | 0.520567 |
| 6.23E-07    | 0.225161787  | 8.83E-07    | 0.163035205 | 0.00040397 | 0.444496 |
| 0.027066288 | -0.096504858 | 0.037090485 | 0.298862592 | 4.33E-11   | 0.388916 |
| 8.28E-07    | 0.228288078  | 6.16E-07    | 0.481105719 | 1.99E-28   | 0.376506 |
| 0.018796577 | 0.100766364  | 0.029459075 | 0.118224187 | 0.01055876 | 0.406741 |
| 0.965671698 | -0.002934606 | 0.949569383 | 0.275091593 | 1.49E-09   | 0.319067 |
| 0.023848762 | 0.110352795  | 0.017049281 | 0.244781006 | 8.45E-08   | 0.528285 |
| 0.001481287 | 0.143253163  | 0.001912775 | 0.090962394 | 0.0494698  | 0.293219 |
| 0.804563314 | -0.007775363 | 0.866914305 | 0.222487708 | 1.20E-06   | 0.551064 |



|             |              |             |             |            |          |
|-------------|--------------|-------------|-------------|------------|----------|
| 0.904879554 | -0.003383956 | 0.941860125 | 0.43304254  | 9.08E-23   | 0.515732 |
| 9.63E-08    | 0.256237793  | 1.95E-08    | 0.095948977 | 0.0382     | 0.477315 |
| 0.774713151 | 0.016730963  | 0.718386943 | 0.256441588 | 1.90E-08   | 0.452684 |
| 0.491931061 | -0.03039748  | 0.512283573 | 0.449649728 | 1.27E-24   | 0.4552   |
| 3.31E-10    | 0.296049561  | 6.69E-11    | 0.398591844 | 3.11E-19   | 0.037078 |
| 4.09E-14    | 0.349092742  | 7.88E-15    | 0.272435233 | 2.16E-09   | 0.369234 |
| 0.674838947 | 0.021236745  | 0.647130877 | 0.27888889  | 8.64E-10   | 0.16521  |
| 0.023227916 | -0.101946258 | 0.027600717 | 0.243414002 | 1.00E-07   | 0.482278 |
| 0.440054029 | 0.039345267  | 0.396266318 | 0.444584413 | 4.79E-24   | 0.317573 |
| 0.001292132 | 0.142840577  | 0.001971978 | 0.361437567 | 7.38E-16   | 0.489756 |
| 0.000265815 | 0.171431342  | 0.000197396 | 0.31694291  | 2.34E-12   | 0.080165 |
| 3.44E-06    | 0.214787042  | 2.81E-06    | 0.282048423 | 5.46E-10   | 0.336961 |
| 0.730428707 | -0.010245156 | 0.825238713 | 0.379899357 | 1.76E-17   | 0.382378 |
| 0.147702026 | 0.069339461  | 0.134595299 | 0.459883141 | 8.11E-26   | 0.60259  |
| 1.52E-11    | 0.310349119  | 6.94E-12    | 0.467056477 | 1.12E-26   | 0.409031 |
| 9.26E-05    | 0.186433604  | 5.04E-05    | 0.418642524 | 3.06E-21   | 0.308763 |
| 0.04515588  | 0.099072438  | 0.032314036 | 0.349909104 | 6.76E-15   | 0.331305 |
| 0.001370256 | 0.142302633  | 0.002051687 | 0.116161849 | 0.01200285 | 0.497696 |
| 6.21E-08    | 0.251402391  | 3.65E-08    | 0.133750641 | 0.00378374 | 0.378809 |
| 0.983079981 | 0.007224795  | 0.876259448 | 0.386101563 | 4.74E-18   | 0.358382 |
| 1.97E-15    | 0.360496944  | 8.87E-16    | 0.263375574 | 7.53E-09   | 0.48754  |
| 0.006731501 | -0.128795961 | 0.005312244 | 0.332532838 | 1.61E-13   | 0.58861  |
| 0.000133406 | -0.177595689 | 0.000114177 | 0.37628046  | 3.73E-17   | 0.527169 |
| 0.012333754 | 0.117540966  | 0.011019118 | 0.432717687 | 9.85E-23   | 0.25016  |
| 7.18E-05    | 0.188007444  | 4.34E-05    | 0.280630073 | 6.71E-10   | 0.399739 |
| 0.003260197 | -0.140965353 | 0.002262767 | -0.3675618  | 2.19E-16   | -0.60881 |
| 0.027996605 | 0.103384936  | 0.025471915 | 0.263932698 | 6.98E-09   | 0.112548 |
| 2.58E-14    | 0.335571238  | 9.38E-14    | 0.277156868 | 1.11E-09   | 0.276352 |
| 0.004107812 | 0.139498762  | 0.002516916 | 0.338780967 | 5.27E-14   | 0.511283 |
| 0.718184738 | 0.012203471  | 0.792533403 | 0.14359356  | 0.00186516 | 0.548788 |
| 0.570020879 | -0.027934585 | 0.547060189 | 0.049665835 | 0.28413684 | 0.411229 |
| 0.053147046 | 0.085634656  | 0.064455094 | 0.511031735 | 1.98E-32   | 0.401521 |
| 0.072112609 | 0.088944954  | 0.054760218 | 0.474600662 | 1.32E-27   | 0.262003 |
| 0.039457965 | -0.089939499 | 0.052096175 | -0.23309022 | 3.51E-07   | -0.26475 |
| 0.184538532 | -0.0521307   | 0.260886021 | -0.25064999 | 4.02E-08   | -0.31454 |
| 0.022538405 | 0.111259754  | 0.016155996 | -0.28801977 | 2.26E-10   | -0.1187  |
| 0.036322401 | -0.101081364 | 0.028952736 | -0.37003079 | 1.34E-16   | -0.19729 |
| 0.003712233 | -0.134453157 | 0.003602752 | -0.20628066 | 6.98E-06   | -0.35534 |
| 0.061294616 | -0.08124011  | 0.079463321 | -0.28303448 | 4.73E-10   | -0.30089 |
| 0.329099758 | -0.037906506 | 0.413777034 | -0.31367494 | 4.03E-12   | -0.35483 |
| 0.132916231 | -0.069484122 | 0.133782066 | -0.03050097 | 0.5108478  | -0.10327 |
| 0.009696085 | -0.116195091 | 0.011978251 | -0.09900944 | 0.03242462 | -0.14912 |
| 0.078704669 | -0.086520021 | 0.061733194 | -0.14739274 | 0.00140263 | -0.00675 |
| 0.259029131 | -0.044230795 | 0.340214878 | -0.27460212 | 1.59E-09   | -0.30907 |
| 0.122127917 | -0.064884812 | 0.161546158 | -0.26885897 | 3.56E-09   | -0.35486 |

|             |              |             |             |            |          |
|-------------|--------------|-------------|-------------|------------|----------|
| 0.116889331 | -0.062958217 | 0.174387506 | -0.16188836 | 0.00044432 | -0.25221 |
| 0.861796852 | -0.010363674 | 0.823250131 | -0.21098817 | 4.24E-06   | -0.16984 |
| 0.662779369 | -0.016737878 | 0.718275501 | -0.06892814 | 0.13692841 | -0.18935 |
| 0.235602941 | -0.048828752 | 0.292341645 | -0.362059   | 6.54E-16   | -0.28116 |
| 0.000223635 | -0.169305021 | 0.000237408 | -0.31047821 | 6.80E-12   | -0.1492  |
| 0.654112526 | -0.019789738 | 0.669703109 | -0.27493097 | 1.52E-09   | -0.23097 |
| 0.03574056  | -0.09795988  | 0.03431505  | -0.26927719 | 3.36E-09   | -0.27905 |
| 0.136742765 | -0.062698296 | 0.176176557 | -0.30391525 | 1.95E-11   | -0.33231 |
| 0.116916029 | -0.066373163 | 0.152123289 | -0.35408305 | 3.06E-15   | -0.33962 |
| 0.216478049 | -0.050684937 | 0.274359542 | -0.2410461  | 1.34E-07   | -0.25765 |
| 0.777908927 | -0.005485915 | 0.905881611 | -0.1538325  | 0.00085203 | -0.20845 |
| 0.033332442 | -0.10287945  | 0.02620316  | -0.19811135 | 1.61E-05   | -0.18587 |
| 0.520339539 | 0.042201584  | 0.362851368 | -0.30270841 | 2.37E-11   | -0.27054 |
| 0.315815141 | -0.038789612 | 0.402975517 | -0.33783383 | 6.25E-14   | -0.34579 |
| 0.121998823 | -0.063542617 | 0.170414487 | -0.32340766 | 7.86E-13   | -0.30355 |
| 0.126073103 | -0.060334429 | 0.193077188 | -0.2987367  | 4.41E-11   | -0.34695 |
| 0.768708698 | -0.017876287 | 0.700011222 | -0.0844508  | 0.06824818 | -0.10319 |
| 0.053177563 | -0.082086036 | 0.076372664 | -0.23580825 | 2.54E-07   | -0.29802 |
| 0.11825131  | -0.066796487 | 0.149520905 | -0.33457885 | 1.12E-13   | -0.35528 |
| 2.03E-05    | -0.188116535 | 4.30E-05    | -0.2767998  | 1.17E-09   | -0.14098 |
| 0.028204638 | -0.095117497 | 0.039912023 | -0.28580001 | 3.15E-10   | -0.26634 |
| 0.699347185 | -0.011896754 | 0.797633414 | -0.29414326 | 8.97E-11   | -0.33107 |
| 0.595193289 | -0.017852302 | 0.700394297 | -0.22837324 | 6.10E-07   | -0.17335 |
| 0.004419038 | -0.126617391 | 0.006145276 | -0.2242253  | 9.83E-07   | -0.3294  |
| 7.28E-09    | -0.271586617 | 2.43E-09    | -0.40392548 | 9.37E-20   | -0.22402 |
| 0.129136703 | -0.064977205 | 0.16094871  | -0.35395725 | 3.14E-15   | -0.36636 |
| 0.555424529 | -0.021953664 | 0.636064585 | -0.29660659 | 6.14E-11   | -0.30028 |
| 0.161792009 | -0.053053639 | 0.252527339 | -0.31566287 | 2.90E-12   | -0.13699 |
| 0.135766164 | -0.066869837 | 0.149073442 | -0.3331212  | 1.45E-13   | -0.24874 |
| 0.202277256 | -0.050170017 | 0.27927069  | -0.23814006 | 1.91E-07   | -0.2454  |
| 0.30721746  | -0.044296222 | 0.339500353 | -0.32828001 | 3.39E-13   | -0.25921 |
| 0.030763758 | -0.097274343 | 0.035599852 | -0.33638106 | 8.11E-14   | -0.30941 |
| 0.150132632 | -0.058619003 | 0.20606497  | -0.19495324 | 2.21E-05   | -0.21745 |
| 0.016864746 | -0.110796608 | 0.016606901 | -0.31206444 | 5.25E-12   | -0.27923 |
| 0.080834028 | -0.077422024 | 0.094696135 | -0.25809791 | 1.52E-08   | -0.39741 |
| 0.481998055 | -0.021666463 | 0.640488255 | -0.37692379 | 3.26E-17   | 0.051092 |
| 0.013620561 | -0.100912343 | 0.029223489 | -0.24806746 | 5.59E-08   | -0.18954 |
| 0.060185822 | -0.0826519   | 0.074360314 | -0.0646898  | 0.16281264 | -0.00043 |
| 0.003593245 | -0.134227324 | 0.003660057 | 0.024624682 | 0.59555859 | 0.085334 |
| 0.02372869  | -0.101360452 | 0.028510382 | -0.293577   | 9.78E-11   | -0.28858 |
| 0.855534681 | -0.002686713 | 0.953824405 | -0.22961131 | 5.28E-07   | -0.13064 |
| 0.043200581 | -0.09313277  | 0.044262508 | -0.28153759 | 5.88E-10   | -0.30533 |
| 0.002294188 | -0.134440164 | 0.003606027 | -0.05441992 | 0.24049816 | -0.20933 |
| 0.432121603 | 0.038179523  | 0.410419588 | -0.26107062 | 1.03E-08   | -0.18246 |
| 0.165032966 | -0.062048359 | 0.180709742 | -0.21101239 | 4.23E-06   | -0.41362 |

|             |              |             |             |            |          |
|-------------|--------------|-------------|-------------|------------|----------|
| 6.35E-05    | 0.183181945  | 6.84E-05    | -0.15943154 | 0.00054368 | -0.34434 |
| 0.997829669 | -0.002610679 | 0.955129782 | -0.26106432 | 1.03E-08   | -0.15037 |
| 0.194307571 | 0.06451991   | 0.163922068 | -0.22040513 | 1.51E-06   | -0.1126  |
| 0.001202492 | -0.137651531 | 0.002873983 | -0.07794057 | 0.09249984 | -0.40818 |
| 4.18E-12    | -0.304958655 | 1.66E-11    | -0.19618022 | 1.96E-05   | -0.17172 |
| 1.36E-05    | -0.200547106 | 1.26E-05    | -0.31983968 | 1.44E-12   | -0.26017 |
| 0.265009708 | -0.043323249 | 0.350225006 | -0.32911234 | 2.93E-13   | -0.26225 |
| 0.168480994 | -0.053691445 | 0.24686083  | -0.25214296 | 3.32E-08   | -0.31073 |
| 0.513053058 | 0.027030722  | 0.560108833 | -0.20356661 | 9.26E-06   | -0.31018 |
| 0.164645074 | -0.054711025 | 0.237988015 | -0.24840035 | 5.36E-08   | -0.30397 |
| 0.543056617 | 0.034288606  | 0.459776682 | -0.29030779 | 1.61E-10   | -0.31209 |
| 0.815948401 | 0.002697741  | 0.95363509  | -0.2876397  | 2.39E-10   | -0.29826 |
| 0.232487396 | -0.053616569 | 0.247521424 | -0.31123167 | 6.01E-12   | -0.29269 |
| 0.781718383 | -0.010723248 | 0.817223932 | -0.1743214  | 0.00015306 | -0.22334 |
| 0.552319579 | -0.018707436 | 0.686784211 | -0.1216226  | 0.00851299 | -0.23489 |
| 0.034872236 | -0.093394527 | 0.043666836 | -0.30660974 | 1.27E-11   | -0.31111 |
| 0.622653777 | -0.018904868 | 0.683656064 | -0.2142005  | 3.00E-06   | -0.30596 |
| 0.825490283 | -0.005433353 | 0.906779276 | -0.33387374 | 1.27E-13   | -0.30859 |
| 0.000133175 | -0.174613289 | 0.000149146 | -0.20662429 | 6.74E-06   | -0.28036 |
| 0.070566424 | -0.077231199 | 0.095514789 | -0.31992586 | 1.42E-12   | -0.37157 |
| 0.043621478 | -0.097361185 | 0.035434865 | -0.18910589 | 3.91E-05   | -0.23765 |
| 0.000393481 | -0.160610297 | 0.000493683 | -0.17138109 | 0.00019826 | -0.48736 |
| 0.630826356 | 0.026957367  | 0.561174388 | -0.07353182 | 0.11252932 | -0.27674 |
| 1.14E-07    | 0.243001678  | 1.05E-07    | 0.166331997 | 0.00030619 | -0.32525 |
| 0.193111312 | -0.051061739 | 0.270803191 | -0.19412475 | 2.40E-05   | -0.33398 |
| 1.62E-08    | -0.256722655 | 1.83E-08    | -0.03545673 | 0.44462091 | -0.20491 |
| 0.03036309  | -0.100026693 | 0.03067797  | -0.33433209 | 1.17E-13   | -0.40571 |
| 0.119432166 | -0.070069655 | 0.130529053 | -0.35475895 | 2.69E-15   | -0.35485 |
| 0.122793924 | -0.068512025 | 0.139320267 | -0.30829302 | 9.69E-12   | -0.3828  |
| 0.110987279 | -0.075286738 | 0.104182432 | -0.18497273 | 5.79E-05   | -0.23556 |
| 0.108790956 | -0.071735418 | 0.121608841 | -0.47429693 | 1.44E-27   | -0.20855 |
| 0.011226712 | -0.115286561 | 0.01266673  | -0.31840924 | 1.83E-12   | -0.2079  |
| 0.411137943 | -0.016460657 | 0.722748018 | -0.18362218 | 6.57E-05   | -0.18738 |
| 0.002706114 | -0.140336744 | 0.002368684 | -0.11304429 | 0.01451736 | -0.33464 |
| 5.05E-07    | -0.230821327 | 4.58E-07    | -0.13543161 | 0.00336375 | -0.29192 |
| 0.104575024 | -0.092921516 | 0.044748222 | -0.12314957 | 0.00771485 | -0.19472 |
| 0.159574732 | -0.058543656 | 0.206649594 | -0.21943997 | 1.69E-06   | -0.37716 |
| 0.004700444 | -0.122110907 | 0.008250096 | -0.08160281 | 0.07812598 | 0.044004 |
| 0.17849928  | 0.060875287  | 0.189109268 | -0.26645786 | 4.95E-09   | 0.02558  |
| 0.004572863 | 0.123961382  | 0.007318333 | 0.161797467 | 0.00044767 | 0.400123 |
| 0.229292874 | -0.054850381 | 0.236792947 | -0.33009006 | 2.47E-13   | -0.42493 |
| 0.516262129 | -0.030160839 | 0.515574394 | -0.23967423 | 1.59E-07   | -0.34792 |
| 0.272245522 | -0.067971721 | 0.142473635 | 0.031075385 | 0.50291717 | -0.28451 |
| 0.659976676 | -0.020516818 | 0.6583224   | -0.06362643 | 0.16985028 | -0.3404  |
| 0.007222921 | -0.117813486 | 0.010833403 | -0.20344657 | 9.37E-06   | -0.16444 |

|             |              |             |             |            |          |
|-------------|--------------|-------------|-------------|------------|----------|
| 0.061149374 | -0.079900718 | 0.084563489 | -0.22815611 | 6.26E-07   | -0.18091 |
| 0.556108771 | -0.028659471 | 0.53670486  | -0.11738222 | 0.01112859 | 0.209159 |
| 0.617684675 | -0.015460642 | 0.738959295 | -0.28701018 | 2.63E-10   | -0.16055 |
| 0.720663178 | -0.018236471 | 0.694267772 | -0.35394345 | 3.15E-15   | -0.12321 |
| 0.568870341 | -0.023897161 | 0.606475036 | -0.19321358 | 2.62E-05   | -0.34196 |
| 0.000436296 | -0.156343637 | 0.000697826 | -0.27539062 | 1.42E-09   | -0.26227 |
| 0.003099144 | -0.144507485 | 0.001742638 | -0.21707721 | 2.19E-06   | -0.15226 |
| 0.884209645 | 0.010647168  | 0.818498101 | 0.050451662 | 0.27657711 | 0.283037 |
| 0.05094283  | -0.084660345 | 0.067563773 | -0.25036655 | 4.17E-08   | -0.27187 |
| 0.579586052 | -0.022860431 | 0.622183212 | -0.2165054  | 2.33E-06   | -0.26415 |
| 0.130592923 | -0.062692799 | 0.176214541 | -0.33354937 | 1.34E-13   | -0.29356 |
| 0.062163949 | -0.082734154 | 0.074071425 | -0.34910841 | 7.86E-15   | -0.33447 |
| 0.056793935 | -0.095696987 | 0.038712149 | -0.26142959 | 9.78E-09   | -0.33769 |
| 0.085538039 | -0.07906199  | 0.087889442 | -0.33355417 | 1.34E-13   | -0.26773 |
| 0.440593827 | -0.029676955 | 0.522337338 | -0.2014156  | 1.15E-05   | -0.2622  |
| 0.725835538 | -0.016116618 | 0.728311693 | -0.29778223 | 5.12E-11   | -0.16291 |
| 0.484567879 | -0.024392914 | 0.599026567 | -0.14966552 | 0.00117897 | -0.26741 |
| 0.059931944 | -0.095117541 | 0.039911932 | 0.287897147 | 2.30E-10   | 0.199474 |
| 0.298407957 | -0.046952831 | 0.311299759 | -0.31755889 | 2.11E-12   | -0.3195  |
| 0.20823942  | -0.056569426 | 0.222397896 | -0.27264146 | 2.10E-09   | -0.2757  |
| 0.728831622 | 0.011569764  | 0.803080005 | -0.14894416 | 0.00124612 | -0.25144 |
| 0.173051368 | -0.061642108 | 0.183586777 | -0.29229606 | 1.19E-10   | -0.25553 |
| 0.000968836 | -0.161690365 | 0.000451654 | -0.16959587 | 0.00023152 | -0.11859 |
| 0.133695088 | -0.062969401 | 0.174310832 | -0.2873323  | 2.51E-10   | -0.31129 |
| 0.011352861 | -0.109921064 | 0.017489473 | -0.28537682 | 3.35E-10   | -0.21665 |
| 0.44321501  | -0.029642769 | 0.522816848 | 0.088285384 | 0.05658869 | -0.00015 |
| 0.404753454 | 0.045597875  | 0.325484841 | -0.13862075 | 0.00268126 | -0.21963 |
| 0.414850008 | -0.040776809 | 0.37929369  | -0.20302887 | 9.79E-06   | -0.21746 |
| 0.333415675 | -0.041961658 | 0.365588593 | -0.4428511  | 7.50E-24   | -0.32437 |
| 0.036347255 | -0.099433002 | 0.031687297 | -0.0155486  | 0.73752863 | -0.28981 |
| 0.030366713 | -0.093616586 | 0.043166807 | -0.34824077 | 9.24E-15   | -0.32416 |
| 0.091674842 | -0.073362836 | 0.113360032 | -0.25149958 | 3.61E-08   | -0.21036 |
| 0.412828952 | -0.03665742  | 0.429343122 | -0.25716989 | 1.72E-08   | 0.05795  |
| 0.000772095 | -0.142163984 | 0.002072704 | -0.27997782 | 7.38E-10   | -0.12937 |
| 0.058459429 | -0.09023936  | 0.051314477 | -0.26907461 | 3.45E-09   | -0.41478 |
| 0.010258758 | -0.113775044 | 0.013889701 | -0.30951255 | 7.96E-12   | -0.37002 |
| 0.001136044 | -0.143908433 | 0.001822084 | -0.14143051 | 0.00218719 | -0.09054 |
| 0.104860323 | -0.06806025  | 0.141953244 | -0.26975232 | 3.14E-09   | -0.20622 |
| 0.607279575 | 0.031709465  | 0.494238647 | -0.02519163 | 0.58711397 | -0.30611 |
| 0.002030227 | -0.135042135 | 0.003457107 | -0.09669059 | 0.03672592 | -0.27891 |
| 0.047555756 | -0.089432256 | 0.053441082 | -0.21993736 | 1.59E-06   | -0.30498 |
| 0.111320892 | -0.065842285 | 0.155435273 | -0.33247887 | 1.62E-13   | -0.29424 |
| 0.037385729 | -0.09214791  | 0.046565315 | -0.26925576 | 3.37E-09   | -0.26856 |
| 0.004914475 | -0.127283807 | 0.005878794 | -0.24223622 | 1.16E-07   | -0.40815 |
| 0.360547724 | -0.034598142 | 0.455732802 | -0.23310534 | 3.50E-07   | -0.38073 |

|             |              |             |             |            |          |
|-------------|--------------|-------------|-------------|------------|----------|
| 0.031139094 | -0.092813194 | 0.044999009 | -0.33066157 | 2.24E-13   | -0.33629 |
| 0.105510993 | -0.08111284  | 0.079936966 | -0.25466172 | 2.39E-08   | -0.27859 |
| 0.299856706 | -0.041601153 | 0.36972555  | -0.23464996 | 2.91E-07   | -0.17578 |
| 0.007081182 | 0.126311395  | 0.00627123  | 0.170930801 | 0.0002062  | 0.037264 |
| 0.003827713 | -0.130091785 | 0.004866384 | -0.18666155 | 4.93E-05   | -0.03159 |
| 0.009263864 | -0.11554809  | 0.012465052 | -0.26528726 | 5.81E-09   | -0.29714 |
| 0.046936312 | -0.08746032  | 0.058946974 | -0.13311049 | 0.00395578 | -0.24092 |
| 0.0209678   | -0.103283599 | 0.025617083 | -0.28979577 | 1.73E-10   | -0.48783 |
| 0.231684551 | -0.052747166 | 0.255282058 | -0.22701106 | 7.14E-07   | -0.29423 |
| 3.89E-11    | -0.296026296 | 6.71E-11    | -0.11211712 | 0.01534953 | -0.32908 |
| 0.163041931 | -0.061338337 | 0.185760064 | -0.15919229 | 0.00055439 | -0.26877 |
| 0.529970754 | -0.028544248 | 0.538344283 | -0.30022522 | 3.50E-11   | -0.35869 |
| 6.07E-05    | -0.180603387 | 8.68E-05    | -0.29021109 | 1.63E-10   | -0.35539 |
| 0.001686718 | -0.135615092 | 0.00332057  | -0.16282746 | 0.00041102 | -0.25733 |
| 0.73033812  | 0.000948878  | 0.98368402  | -0.2769914  | 1.13E-09   | -0.25179 |
| 0.0012662   | 0.154195743  | 0.000827931 | -0.1447807  | 0.00170747 | -0.34657 |
| 0.072251338 | -0.078063152 | 0.091986626 | -0.23392327 | 3.18E-07   | -0.21598 |
| 0.003494052 | -0.127569917 | 0.005767606 | -0.15511938 | 0.00076945 | -0.20241 |
| 0.348496198 | 0.046299101  | 0.318092162 | 0.176640866 | 0.00012443 | 0.297919 |
| 0.323879837 | -0.037041924 | 0.424515664 | -0.31973222 | 1.47E-12   | -0.32959 |
| 0.230985658 | -0.054496372 | 0.239837112 | -0.3146614  | 3.42E-12   | -0.34628 |
| 0.039955306 | -0.092550519 | 0.045612064 | -0.363537   | 4.88E-16   | -0.38496 |
| 0.294249351 | -0.042547634 | 0.358925992 | -0.33235855 | 1.66E-13   | -0.28381 |
| 0.92276276  | -0.000909772 | 0.984356359 | 0.241604537 | 1.25E-07   | 0.419673 |
| 0.196370311 | -0.052767189 | 0.255101444 | -0.28897735 | 1.96E-10   | -0.15976 |
| 0.003514747 | -0.12749118  | 0.005798015 | 0.13021504  | 0.00482578 | -0.22832 |
| 0.304972049 | -0.038704527 | 0.404008821 | -0.12843079 | 0.00544436 | -0.13767 |
| 0.220730422 | -0.056805161 | 0.220473657 | -0.24429291 | 8.98E-08   | -0.25563 |
| 0.118409421 | -0.070962107 | 0.125689004 | -0.16793365 | 0.00026711 | -0.13822 |
| 0.614015434 | -0.015235187 | 0.742630495 | -0.16394904 | 0.00037429 | -0.33696 |
| 0.822023089 | 0.006801541  | 0.883455378 | -0.21321883 | 3.34E-06   | -0.14815 |
| 2.27E-08    | -0.257225789 | 1.71E-08    | -0.10725047 | 0.02043949 | -0.15684 |
| 3.12E-05    | -0.186042559 | 5.23E-05    | -0.24193237 | 1.20E-07   | -0.17884 |
| 0.224051244 | -0.043817835 | 0.344746901 | -0.08546875 | 0.06497597 | -0.17241 |
| 0.053301391 | -0.085243676 | 0.065688136 | -0.32553013 | 5.46E-13   | -0.25863 |
| 0.132451204 | -0.078423965 | 0.090489291 | -0.30616426 | 1.36E-11   | -0.16616 |
| 0.122386588 | -0.05859757  | 0.206231147 | -0.21694846 | 2.22E-06   | -0.01565 |
| 0.317003793 | -0.033898646 | 0.46489963  | -0.06972756 | 0.13242209 | -0.09478 |
| 0.559365432 | -0.022166511 | 0.632794473 | -0.11117853 | 0.01623429 | -0.15845 |
| 0.125310223 | -0.065649439 | 0.156651795 | -0.37687455 | 3.30E-17   | -0.37313 |
| 0.004409047 | 0.120921315  | 0.008903609 | 0.117430038 | 0.01109552 | 0.431096 |
| 0.002153598 | -0.128081465 | 0.005573511 | -0.30896983 | 8.69E-12   | -0.29787 |
| 7.69E-10    | -0.282220522 | 5.33E-10    | -0.1840884  | 6.29E-05   | -0.38087 |
| 0.016728695 | 0.115306572  | 0.012651197 | 0.01254007  | 0.78694671 | 0.277514 |
| 0.00469771  | -0.127124235 | 0.005941639 | -0.17700074 | 0.00012047 | -0.04411 |

|             |              |             |             |            |          |
|-------------|--------------|-------------|-------------|------------|----------|
| 0.000138538 | 0.18099542   | 8.38E-05    | 0.233556371 | 3.32E-07   | 0.228947 |
| 0.056484845 | -0.084693952 | 0.067454533 | -0.3093875  | 8.12E-12   | -0.24991 |
| 0.800853173 | 0.01828448   | 0.693503551 | -0.24285581 | 1.07E-07   | -0.09413 |
| 0.03432702  | -0.0989385   | 0.03254953  | -0.14037531 | 0.00236206 | -0.21753 |
| 0.801508256 | -0.000793733 | 0.986351463 | -0.25545923 | 2.16E-08   | -0.14743 |
| 0.025690412 | -0.106091892 | 0.021848259 | -0.20233723 | 1.05E-05   | -0.21885 |
| 0.214469797 | -0.059621074 | 0.19840338  | -0.29437171 | 8.66E-11   | -0.33627 |
| 0.430685453 | -0.032392741 | 0.484976899 | -0.3225963  | 9.03E-13   | -0.24232 |
| 0.002040329 | -0.138280958 | 0.002747444 | -0.29391193 | 9.29E-11   | -0.36112 |
| 0.086523752 | -0.07473147  | 0.106768695 | -0.3381716  | 5.88E-14   | -0.36802 |
| 0.941605407 | -0.013825996 | 0.765706355 | -0.06668998 | 0.15017247 | -0.13653 |
| 0.148380314 | -0.063006817 | 0.174054498 | -0.32368581 | 7.49E-13   | -0.33826 |
| 0.249495163 | -0.070742425 | 0.126867278 | 0.191660439 | 3.05E-05   | 0.154165 |
| 0.032606142 | -0.091898837 | 0.047163369 | -0.0838584  | 0.07021381 | -0.02165 |
| 0.024332873 | -0.105468057 | 0.02264113  | -0.29609562 | 6.64E-11   | -0.26275 |
| 0.026267513 | -0.098146578 | 0.033972069 | -0.19809309 | 1.62E-05   | -0.19566 |
| 0.684567337 | -0.015753306 | 0.734202549 | -0.23885971 | 1.75E-07   | -0.24796 |
| 0.059170123 | -0.085917903 | 0.063573761 | -0.30769951 | 1.07E-11   | -0.13919 |
| 4.25E-10    | -0.282260639 | 5.30E-10    | -0.25907377 | 1.34E-08   | -0.39518 |
| 0.010409412 | -0.104567981 | 0.023828964 | -0.37724187 | 3.06E-17   | -0.10733 |
| 0.903490749 | 0.003381029  | 0.941910324 | -0.30442192 | 1.80E-11   | -0.05741 |
| 0.000587571 | -0.150467239 | 0.001108254 | -0.13003759 | 0.00488433 | -0.23334 |
| 0.253022157 | -0.061047383 | 0.187859367 | 0.012420033 | 0.78893778 | -0.05324 |
| 0.071891259 | -0.077145485 | 0.095884341 | -0.25722875 | 1.71E-08   | -0.31463 |
| 0.230873988 | -0.0594451   | 0.199733587 | -0.21453863 | 2.89E-06   | -0.30262 |
| 0.657376156 | 0.025448625  | 0.583304393 | -0.08288615 | 0.07353999 | -0.12643 |
| 0.646339213 | 0.025280823  | 0.585790526 | -0.1878272  | 4.42E-05   | -0.20728 |
| 0.097161881 | -0.075247191 | 0.104364972 | -0.11095937 | 0.0164472  | -0.02902 |
| 0.471120009 | -0.033040304 | 0.476286457 | -0.26250599 | 8.47E-09   | -0.5435  |
| 0.181079754 | -0.051189476 | 0.269604757 | -0.29683759 | 5.92E-11   | -0.28581 |
| 0.429616943 | -0.039927002 | 0.389314736 | -0.19687382 | 1.83E-05   | -0.18106 |
| 0.055557669 | 0.093825446  | 0.042700911 | -0.12732095 | 0.00586425 | -0.32594 |
| 0.01790858  | -0.101893342 | 0.02768185  | -0.31365441 | 4.04E-12   | -0.28374 |
| 0.276290836 | -0.049232674 | 0.288362935 | -0.33660793 | 7.79E-14   | -0.24128 |
| 0.868607699 | 0.000609017  | 0.9895275   | -0.1859237  | 5.29E-05   | -0.22616 |
| 0.008153744 | -0.118119446 | 0.01062821  | -0.25994436 | 1.19E-08   | -0.36094 |
| 9.85E-05    | -0.171579235 | 0.000194862 | -0.25137985 | 3.66E-08   | -0.02303 |
| 9.30E-05    | -0.183457635 | 6.67E-05    | -0.30197937 | 2.65E-11   | -0.3804  |
| 0.171936971 | -0.064612289 | 0.163318112 | -0.22465247 | 9.36E-07   | -0.14367 |
| 0.288753716 | -0.04621933  | 0.318927576 | -0.34666103 | 1.24E-14   | -0.1688  |
| 0.552400104 | -0.028657079 | 0.536738874 | -0.40652523 | 5.18E-20   | -0.32635 |
| 0.001972506 | -0.136240163 | 0.003177214 | -0.13101162 | 0.00457068 | -0.13785 |
| 0.048760143 | -0.091136181 | 0.049034777 | -0.29193238 | 1.26E-10   | -0.3549  |
| 0.605422896 | -0.015361628 | 0.740570864 | -0.22097066 | 1.42E-06   | -0.20507 |
| 0.485245977 | -0.039064184 | 0.399651786 | 0.327765047 | 3.71E-13   | 0.288374 |

|             |              |             |             |            |          |
|-------------|--------------|-------------|-------------|------------|----------|
| 0.972311278 | -0.000986527 | 0.983036728 | -0.22138055 | 1.36E-06   | -0.1478  |
| 0.002428482 | -0.138143963 | 0.002774545 | -0.25105411 | 3.82E-08   | -0.28991 |
| 0.194866559 | -0.04860388  | 0.294572538 | -0.19681821 | 1.84E-05   | -0.24671 |
| 0.495325744 | -0.033949198 | 0.464233745 | -0.26468711 | 6.30E-09   | -0.23703 |
| 0.351602996 | 0.050928375  | 0.272058294 | -0.15637701 | 0.00069596 | -0.28343 |
| 1.92E-05    | -0.190301121 | 3.48E-05    | -0.04940961 | 0.28663161 | -0.18    |
| 0.005500248 | -0.130686554 | 0.004673274 | -0.21366184 | 3.18E-06   | -0.1695  |
| 0.703892432 | -0.014683607 | 0.751636606 | -0.2190461  | 1.76E-06   | -0.31781 |
| 0.00038063  | -0.159828535 | 0.000526341 | -0.30087954 | 3.16E-11   | -0.31721 |
| 0.461331906 | 0.032840163  | 0.478963275 | -0.19718757 | 1.77E-05   | -0.09898 |
| 0.975383858 | -0.004224983 | 0.927446204 | -0.20617246 | 7.06E-06   | -0.12503 |
| 0.068418122 | -0.067245236 | 0.146799328 | -0.38303739 | 9.09E-18   | -0.18945 |
| 1.03E-08    | -0.270024207 | 3.03E-09    | -0.26796464 | 4.02E-09   | -0.06429 |
| 0.026824444 | -0.094648176 | 0.040906697 | -0.31458658 | 3.46E-12   | -0.37395 |
| 0.771912337 | 0.012634029  | 0.785389156 | -0.20284796 | 9.97E-06   | -0.14228 |
| 0.125285551 | -0.070423153 | 0.12859496  | -0.31555833 | 2.95E-12   | -0.35899 |
| 0.606919039 | -0.037357845 | 0.420573037 | 0.085932715 | 0.06352795 | 0.367414 |
| 1.68E-05    | -0.19097463  | 3.26E-05    | -0.12349197 | 0.00754533 | -0.21818 |
| 0.014693939 | -0.108002427 | 0.019568007 | -0.25602761 | 2.00E-08   | -0.09332 |
| 0.766159343 | 0.01596852   | 0.73071109  | -0.28155681 | 5.87E-10   | -0.25075 |
| 0.580395304 | 0.039756268  | 0.391347255 | -0.25952475 | 1.26E-08   | -0.32453 |
| 0.995228524 | 0.005190259  | 0.910932339 | -0.28336999 | 4.50E-10   | -0.29703 |
| 0.017239907 | -0.104236439 | 0.024279885 | -0.28656011 | 2.81E-10   | -0.14898 |
| 0.444217774 | 0.035980343  | 0.437920705 | -0.21705485 | 2.20E-06   | -0.14709 |
| 2.51E-06    | -0.216913957 | 2.23E-06    | -0.20054219 | 1.26E-05   | -0.20717 |
| 0.002918882 | -0.13984353  | 0.002454935 | -0.24210209 | 1.18E-07   | -0.30128 |
| 0.115005127 | -0.075341694 | 0.103929187 | -0.04558765 | 0.32559346 | -0.06411 |
| 0.175281719 | -0.058021424 | 0.210734669 | -0.26951968 | 3.25E-09   | -0.31725 |
| 0.012190976 | -0.108731219 | 0.018754426 | 0.006511601 | 0.88839037 | -0.04737 |
| 0.150028141 | -0.066235662 | 0.152975935 | -0.17681075 | 0.00012255 | -0.18396 |
| 0.065974117 | -0.07622437  | 0.0999281   | -0.30087991 | 3.16E-11   | -0.31949 |
| 0.75317663  | 0.009094882  | 0.844594989 | -0.10651633 | 0.02132269 | -0.12245 |
| 0.102433799 | -0.07454374  | 0.107654465 | -0.07242683 | 0.1180489  | -0.13485 |
| 0.505057232 | -0.030520742 | 0.510573781 | -0.30118709 | 3.01E-11   | -0.21907 |
| 0.054336069 | -0.083579481 | 0.071155195 | -0.14373062 | 0.0018463  | -0.44516 |
| 0.201880017 | -0.052763003 | 0.255139193 | -0.29364562 | 9.67E-11   | -0.32686 |
| 0.099052755 | -0.076039954 | 0.100753763 | -0.32162771 | 1.06E-12   | -0.35847 |
| 0.008178266 | -0.11388357  | 0.013798551 | -0.17125262 | 0.0002005  | -0.20793 |
| 0.000367511 | -0.166061176 | 0.000313298 | -0.17541378 | 0.00013888 | -0.07804 |
| 9.48E-05    | -0.181219425 | 8.20E-05    | -0.40604613 | 5.78E-20   | -0.15949 |
| 0.061256263 | -0.086512643 | 0.061755479 | -0.27737193 | 1.07E-09   | -0.13919 |
| 0.016574419 | -0.107670856 | 0.019948213 | -0.2304955  | 4.76E-07   | -0.20552 |
| 0.231927766 | -0.038631303 | 0.404899349 | -0.35074991 | 5.77E-15   | -0.24687 |
| 0.018709116 | -0.105248127 | 0.022926534 | -0.29438645 | 8.64E-11   | -0.29613 |
| 0.041443341 | -0.090782457 | 0.04992361  | -0.39787757 | 3.65E-19   | -0.33379 |

|             |              |             |             |            |          |
|-------------|--------------|-------------|-------------|------------|----------|
| 0.395842194 | -0.034637213 | 0.455223784 | -0.35232573 | 4.28E-15   | -0.35209 |
| 0.781085591 | -0.0091119   | 0.844307909 | 0.017600628 | 0.70441844 | 0.282937 |
| 0.025511705 | -0.103509589 | 0.025294318 | -0.24488315 | 8.34E-08   | -0.12421 |
| 0.012338154 | -0.108584844 | 0.018915422 | -0.04193244 | 0.36592276 | -0.03807 |
| 0.122823995 | -0.070950844 | 0.125749207 | -0.22036134 | 1.52E-06   | -0.06597 |
| 0.088868963 | -0.076436536 | 0.098984864 | -0.25807669 | 1.53E-08   | -0.21465 |
| 0.722349688 | -0.008338009 | 0.857383273 | -0.31731177 | 2.20E-12   | -0.30777 |
| 0.054265017 | -0.085478546 | 0.064945118 | -0.20831871 | 5.64E-06   | -0.28559 |
| 0.007192437 | -0.1200425   | 0.009415594 | -0.23846057 | 1.84E-07   | -0.45827 |
| 0.000305261 | 0.168491824  | 0.000254625 | 0.050880494 | 0.27250988 | 0.501916 |
| 0.188933791 | -0.058788689 | 0.204752745 | -0.29370788 | 9.58E-11   | -0.35681 |
| 0.069340756 | -0.078561526 | 0.089923597 | -0.05660101 | 0.22213936 | -0.23151 |
| 0.000451305 | -0.158272765 | 0.000597386 | -0.22753144 | 6.72E-07   | -0.18541 |
| 6.29E-06    | -0.20604837  | 7.15E-06    | -0.22843985 | 6.05E-07   | 0.064533 |
| 0.648570975 | -0.008674115 | 0.851699552 | -0.2791341  | 8.34E-10   | -0.3143  |
| 0.154895599 | -0.058260673 | 0.208856012 | -0.23114488 | 4.41E-07   | -0.3894  |
| 0.004341603 | -0.132077544 | 0.00424837  | -0.1476584  | 0.00137461 | -0.48221 |
| 0.153362555 | -0.062026602 | 0.180862971 | -0.3518866  | 4.65E-15   | -0.32839 |
| 3.12E-07    | -0.226370643 | 7.69E-07    | -0.00581305 | 0.90029755 | -0.02379 |
| 0.015288406 | -0.101537395 | 0.028232942 | -0.30731839 | 1.13E-11   | -0.34845 |
| 0.452735459 | 0.022962544  | 0.620628235 | -0.18185177 | 7.74E-05   | -0.13849 |
| 0.144134851 | -0.063446204 | 0.171065248 | -0.17965983 | 9.47E-05   | -0.22624 |
| 0.000471954 | -0.155431914 | 0.000750548 | -0.12101622 | 0.00884983 | -0.10034 |
| 5.58E-05    | -0.185553866 | 5.48E-05    | -0.24006646 | 1.51E-07   | -0.03033 |
| 0.567247423 | -0.020427333 | 0.6597189   | -0.18574108 | 5.38E-05   | -0.18513 |
| 0.556435094 | -0.019030047 | 0.681675504 | -0.29724248 | 5.56E-11   | -0.29999 |
| 0.772436498 | 0.009581695  | 0.836390982 | 0.113795426 | 0.01387254 | 0.390146 |
| 0.005313255 | -0.124258808 | 0.007177687 | -0.2738823  | 1.76E-09   | -0.2768  |
| 0.01396016  | -0.110143098 | 0.017261862 | -0.11529546 | 0.01265982 | -0.16232 |
| 0.028337908 | -0.097947258 | 0.034338345 | -0.2173738  | 2.12E-06   | -0.22729 |
| 1.49E-05    | -0.196402327 | 1.91E-05    | -0.1600579  | 0.00051656 | -0.22181 |
| 0.54176006  | -0.038126525 | 0.411070062 | 0.230610936 | 4.70E-07   | 0.446902 |
| 0.020678555 | -0.106806476 | 0.020969745 | -0.27011139 | 2.99E-09   | -0.15755 |
| 4.79E-05    | -0.173507887 | 0.000164491 | -0.28314861 | 4.65E-10   | -0.12447 |
| 0.200552255 | -0.05628237  | 0.224757199 | -0.29324157 | 1.03E-10   | -0.37755 |
| 0.066132382 | -0.081577945 | 0.078217073 | -0.08432908 | 0.06864832 | -0.10444 |
| 0.219061234 | -0.054016571 | 0.244006715 | -0.24008068 | 1.51E-07   | -0.21841 |
| 0.76100937  | 0.018065121  | 0.696997942 | -0.27776376 | 1.02E-09   | -0.11217 |
| 0.000364302 | -0.155117563 | 0.000769565 | -0.35589651 | 2.16E-15   | -0.24563 |
| 0.167490485 | -0.057551064 | 0.214463537 | -0.31238923 | 4.98E-12   | -0.33631 |
| 0.001997604 | -0.138018208 | 0.002799637 | -0.26368303 | 7.22E-09   | -0.26333 |
| 8.66E-05    | -0.183039952 | 6.93E-05    | -0.23507734 | 2.77E-07   | -0.09879 |
| 2.62E-08    | -0.257423914 | 1.67E-08    | -0.12798129 | 0.00561105 | -0.1598  |
| 0.025996717 | -0.100583466 | 0.02975654  | -0.23057274 | 4.72E-07   | -0.20747 |
| 0.046917989 | -0.085123023 | 0.066072533 | -0.21966149 | 1.64E-06   | -0.23253 |



|             |              |             |             |            |          |
|-------------|--------------|-------------|-------------|------------|----------|
| 0.00698369  | -0.119529159 | 0.009726623 | -0.29679834 | 5.96E-11   | -0.30853 |
| 0.081735773 | -0.070628021 | 0.127484271 | -0.16203263 | 0.00043905 | -0.22054 |
| 0.104846002 | -0.069347476 | 0.134550146 | -0.31742214 | 2.16E-12   | -0.34905 |
| 0.156976634 | -0.06444228  | 0.164430888 | -0.21006072 | 4.68E-06   | -0.26184 |
| 0.062852257 | -0.087863291 | 0.057785193 | -0.30345538 | 2.10E-11   | -0.23126 |
| 0.373240107 | -0.032534293 | 0.483069959 | -0.25137441 | 3.66E-08   | -0.28691 |
| 0.041863735 | -0.088144589 | 0.056985495 | -0.26394697 | 6.97E-09   | -0.3682  |
| 0.260952313 | -0.048030298 | 0.300314246 | -0.37425492 | 5.65E-17   | -0.34741 |
| 0.446914057 | -0.036080255 | 0.436648826 | -0.16759539 | 0.00027495 | -0.11159 |
| 0.032526271 | -0.102548038 | 0.026692342 | 0.25813211  | 1.52E-08   | 0.435918 |
| 0.003077393 | -0.133744165 | 0.003785441 | -0.22356982 | 1.06E-06   | -0.17708 |
| 8.27E-08    | -0.238898878 | 1.74E-07    | -0.19935509 | 1.42E-05   | -0.29756 |
| 0.008362748 | 0.12360047   | 0.007492308 | -0.35528346 | 2.43E-15   | -0.16192 |
| 0.000225847 | -0.168383162 | 0.000257012 | -0.21437829 | 2.94E-06   | 0.00828  |
| 0.018483694 | -0.113911033 | 0.013775569 | -0.23597579 | 2.48E-07   | -0.06892 |
| 3.02E-07    | -0.253739511 | 2.70E-08    | -0.13201247 | 0.00426744 | -0.13271 |
| 0.003351743 | -0.13178348  | 0.00433517  | -0.21456337 | 2.88E-06   | -0.21555 |
| 2.07E-09    | -0.271296219 | 2.54E-09    | -0.24336656 | 1.01E-07   | -0.02056 |
| 0.000175101 | -0.178628062 | 0.000103986 | -0.20682148 | 6.60E-06   | -0.42269 |
| 0.002329723 | -0.135676391 | 0.003306257 | -0.30682691 | 1.23E-11   | -0.16225 |
| 0.11632343  | -0.066239419 | 0.152952585 | -0.32692172 | 4.29E-13   | -0.34627 |
| 0.004742429 | 0.127608764  | 0.005752656 | 0.146828576 | 0.00146388 | 0.306093 |
| 0.0087924   | -0.11780552  | 0.010838792 | -0.28100267 | 6.36E-10   | -0.43291 |
| 0.001657854 | -0.140856931 | 0.002280721 | -0.35919921 | 1.14E-15   | -0.27368 |
| 0.148467126 | -0.054069822 | 0.243541462 | -0.37739576 | 2.96E-17   | -0.19418 |
| 0.010756177 | -0.115503926 | 0.012498908 | 0.074427062 | 0.1082079  | 0.011276 |
| 0.166708934 | -0.063495151 | 0.17073464  | -0.07868371 | 0.08942351 | -0.10693 |
| 0.868123811 | 0.005342478  | 0.908331507 | -0.10731587 | 0.02036238 | -0.25114 |
| 5.01E-05    | -0.179589232 | 9.53E-05    | -0.25903623 | 1.35E-08   | -0.12778 |
| 0.005560378 | -0.123229038 | 0.007675204 | -0.23767477 | 2.02E-07   | -0.27628 |
| 0.067543112 | -0.084356134 | 0.06855922  | -0.35701082 | 1.75E-15   | -0.27609 |
| 0.567021828 | -0.026583116 | 0.566625928 | -0.25897841 | 1.36E-08   | -0.08376 |
| 0.015261345 | -0.094918099 | 0.040332097 | -0.20352433 | 9.30E-06   | -0.0986  |
| 0.000538328 | -0.159576885 | 0.000537274 | -0.13293849 | 0.0040032  | -0.29055 |
| 0.467126201 | -0.027233594 | 0.55716702  | -0.3405241  | 3.84E-14   | -0.18886 |
| 1.79E-05    | -0.194074659 | 2.41E-05    | -0.25505932 | 2.27E-08   | -0.47229 |
| 0.277117784 | -0.04694571  | 0.311373233 | -0.29170553 | 1.30E-10   | -0.27496 |
| 0.898193496 | -0.00051111  | 0.991211013 | -0.12891252 | 0.00527068 | -0.17176 |
| 0.016257214 | -0.10866648  | 0.018825484 | -0.28156408 | 5.86E-10   | -0.20161 |
| 0.010591332 | -0.104880119 | 0.02341107  | -0.21810192 | 1.96E-06   | -0.19602 |
| 0.256406526 | -0.061694014 | 0.18321731  | -0.13572046 | 0.003296   | -0.3081  |
| 0.101849621 | -0.072064566 | 0.119903819 | -0.19212501 | 2.92E-05   | -0.2991  |
| 0.45144705  | -0.028580675 | 0.537825718 | -0.22711654 | 7.06E-07   | -0.1368  |
| 0.043022025 | -0.095994133 | 0.038108831 | -0.16639518 | 0.00030455 | -0.1845  |
| 1.84E-13    | -0.333140092 | 1.44E-13    | -0.19468578 | 2.27E-05   | -0.06681 |

|             |              |             |             |            |          |
|-------------|--------------|-------------|-------------|------------|----------|
| 5.98E-06    | -0.202618511 | 1.02E-05    | -0.14683293 | 0.0014634  | -0.227   |
| 0.033278712 | -0.091274004 | 0.04869206  | -0.11723146 | 0.01123345 | -0.22695 |
| 0.52709547  | -0.028022495 | 0.545799119 | -0.13054912 | 0.00471727 | -0.21887 |
| 0.006122179 | -0.12205561  | 0.008279498 | -0.31842086 | 1.83E-12   | -0.37106 |
| 0.012839227 | -0.114337774 | 0.013422758 | -0.19620255 | 1.95E-05   | -0.13002 |
| 0.263755407 | -0.053709135 | 0.246704945 | -0.1917736  | 3.02E-05   | -0.1897  |
| 0.050968697 | -0.079106485 | 0.087710397 | -0.14271856 | 0.0019898  | -0.02806 |
| 0.680471847 | -0.016523982 | 0.72172553  | 0.261528123 | 9.66E-09   | 0.310836 |
| 0.000182288 | -0.176025324 | 0.000131495 | -0.18563839 | 5.44E-05   | -0.28091 |
| 0.104283104 | -0.071121165 | 0.124841208 | -0.32169074 | 1.05E-12   | -0.33919 |
| 0.967222542 | 0.006318561  | 0.891678446 | -0.41905359 | 2.77E-21   | -0.16084 |
| 2.61E-06    | -0.220535232 | 1.49E-06    | -0.1530393  | 0.00090694 | -0.21357 |
| 0.003777832 | -0.137220154 | 0.002963745 | -0.32020642 | 1.35E-12   | -0.24148 |
| 0.030033255 | -0.098904633 | 0.032609309 | -0.28970057 | 1.76E-10   | -0.4489  |
| 1.75E-05    | -0.20272194  | 1.01E-05    | -0.24985125 | 4.45E-08   | -0.13521 |
| 2.97E-06    | -0.213575569 | 3.21E-06    | -0.0666462  | 0.15044087 | -0.211   |
| 0.596420156 | -0.028859372 | 0.533866567 | -0.22703967 | 7.12E-07   | -0.3749  |
| 0.019559587 | -0.104734585 | 0.023605117 | -0.24959525 | 4.60E-08   | -0.23217 |
| 0.003240589 | -0.144723521 | 0.001714775 | -0.14947889 | 0.00119601 | -0.4019  |
| 0.934944765 | -0.001292792 | 0.977771732 | -0.24089539 | 1.37E-07   | -0.21539 |
| 0.000343843 | -0.164025207 | 0.000371915 | -0.15742424 | 0.00063979 | -0.42176 |
| 0.006382017 | -0.125187267 | 0.006754064 | -0.28228354 | 5.28E-10   | -0.11121 |
| 0.603644986 | 0.035193635  | 0.448009465 | -0.16322313 | 0.0003977  | -0.29772 |
| 0.216590115 | -0.053953504 | 0.244558536 | -0.32141504 | 1.10E-12   | -0.29307 |
| 0.213843891 | 0.054625023  | 0.238727661 | 0.208030082 | 5.81E-06   | 0.598514 |
| 0.001396624 | -0.146923547 | 0.001453402 | -0.191223   | 3.19E-05   | -0.08911 |
| 0.042643209 | -0.088007496 | 0.057374082 | -0.15145295 | 0.00102668 | -0.3231  |
| 0.185963334 | 0.050384818  | 0.277214788 | 0.067228054 | 0.14690284 | 0.48239  |
| 3.29E-13    | 0.327274539  | 4.04E-13    | 0.350543641 | 6.00E-15   | 0.298991 |
| 0.028078395 | -0.097298814 | 0.035553294 | -0.28631383 | 2.92E-10   | -0.31536 |
| 0.010130237 | -0.11260075  | 0.014910379 | -0.19023509 | 3.51E-05   | -0.08142 |
| 0.565974105 | 0.02191194   | 0.63670644  | 0.247714308 | 5.84E-08   | 0.146298 |
| 0.210199038 | -0.043172411 | 0.351906608 | -0.14077358 | 0.00229461 | -0.15753 |
| 0.016968635 | -0.105626523 | 0.022437399 | -0.16539632 | 0.00033142 | -0.19648 |
| 0.006748799 | -0.119273022 | 0.009885201 | -0.14157054 | 0.0021649  | -0.35433 |
| 0.708602089 | -0.012827976 | 0.78217684  | -0.17037061 | 0.00021649 | -0.20519 |
| 0.00130934  | -0.136786973 | 0.003056441 | -0.12961929 | 0.00502489 | 0.060807 |
| 0.001077803 | -0.148177858 | 0.001321296 | -0.29234793 | 1.18E-10   | -0.34356 |
| 0.012673532 | -0.113619541 | 0.014021231 | -0.23570717 | 2.57E-07   | -0.03404 |
| 0.773689621 | 0.020040075  | 0.665775972 | -0.21118717 | 4.15E-06   | -0.26382 |
| 0.105553721 | -0.076771883 | 0.097508454 | -0.25401701 | 2.60E-08   | -0.24816 |
| 0.23281956  | -0.047322312 | 0.30750326  | -0.25374341 | 2.70E-08   | -0.21134 |
| 0.066132061 | -0.079218162 | 0.087262303 | -0.17152066 | 0.00019586 | -0.21722 |
| 0.093732719 | -0.0755194   | 0.103113623 | -0.25332492 | 2.85E-08   | -0.18494 |
| 0.007977268 | -0.122820758 | 0.007880838 | -0.12446206 | 0.00708297 | -0.18593 |

|             |              |             |             |            |          |
|-------------|--------------|-------------|-------------|------------|----------|
| 0.044116485 | -0.088088327 | 0.057144705 | -0.25549687 | 2.15E-08   | -0.26806 |
| 0.638900695 | 0.0163994    | 0.723737583 | -0.11495491 | 0.01292662 | -0.11179 |
| 0.000254315 | -0.169759549 | 0.000228266 | -0.13418038 | 0.00367207 | -0.0514  |
| 0.003630091 | -0.132799879 | 0.004041786 | -0.2238885  | 1.02E-06   | -0.24888 |
| 0.232849186 | -0.065813891 | 0.15561394  | -0.25565371 | 2.10E-08   | -0.27808 |
| 0.306809978 | -0.043628954 | 0.346832519 | -0.44208343 | 9.15E-24   | -0.38378 |
| 0.021968691 | -0.115066619 | 0.01283856  | -0.3853127  | 5.61E-18   | -0.22377 |
| 0.172246971 | -0.054257155 | 0.24190967  | -0.34645758 | 1.29E-14   | -0.14465 |
| 0.266509084 | 0.056105554  | 0.226219293 | 0.463805157 | 2.76E-26   | 0.288349 |
| 0.096086644 | -0.07407305  | 0.109900835 | -0.32279744 | 8.72E-13   | -0.39227 |
| 4.48E-07    | -0.229388781 | 5.42E-07    | -0.08999447 | 0.05195213 | -0.23205 |
| 0.002763626 | -0.131706741 | 0.004358084 | -0.23007643 | 5.00E-07   | -0.09541 |
| 0.000949539 | -0.14157571  | 0.002164081 | -0.21779696 | 2.02E-06   | -0.12314 |
| 0.132519632 | -0.070735643 | 0.126903787 | -0.30218683 | 2.57E-11   | -0.28274 |
| 0.164179265 | -0.055969583 | 0.227348223 | -0.32247411 | 9.22E-13   | -0.29357 |
| 0.407036775 | -0.033833409 | 0.465759738 | -0.35093395 | 5.57E-15   | -0.31395 |
| 0.155306018 | -0.065855378 | 0.155352936 | -0.36288339 | 5.56E-16   | -0.22389 |
| 0.548426006 | 0.029197278  | 0.529086063 | 0.154699093 | 0.00079557 | 0.35244  |
| 0.000545661 | 0.152457615  | 0.000949261 | -0.01599603 | 0.73026514 | -0.35154 |
| 0.164884269 | -0.061712507 | 0.18308581  | -0.23582782 | 2.53E-07   | -0.2096  |
| 0.213082448 | -0.050499273 | 0.276123528 | -0.14114049 | 0.00223404 | -0.15767 |
| 0.904204936 | -0.000609022 | 0.989527428 | -0.21431915 | 2.96E-06   | -0.26871 |
| 0.000592356 | -0.154503696 | 0.000807992 | -0.06255286 | 0.17718356 | -0.05847 |
| 0.000102989 | -0.16675661  | 0.000295337 | -0.03676194 | 0.42802779 | -0.09286 |
| 0.307277951 | -0.042332461 | 0.361363642 | -0.26743061 | 4.33E-09   | -0.33244 |
| 0.009378605 | 0.120931612  | 0.00889776  | -0.12292955 | 0.00782557 | -0.29723 |
| 0.830590329 | 0.010785681  | 0.816178692 | -0.42761692 | 3.49E-22   | -0.31593 |
| 0.030675863 | -0.094894802 | 0.04038142  | -0.31366711 | 4.03E-12   | -0.27519 |
| 0.034027076 | -0.094073727 | 0.0421526   | -0.24122364 | 1.31E-07   | -0.02479 |
| 0.18856831  | -0.05255756  | 0.256996707 | -0.23083294 | 4.58E-07   | -0.05052 |
| 0.291608673 | -0.047023312 | 0.310573182 | -0.27234577 | 2.19E-09   | -0.23711 |
| 0.023812467 | -0.103713288 | 0.025006401 | -0.31135285 | 5.90E-12   | -0.12823 |
| 0.295950542 | -0.039118822 | 0.398992351 | -0.26190291 | 9.18E-09   | -0.27236 |
| 0.190861277 | -0.049905146 | 0.281820026 | -0.23084152 | 4.57E-07   | -0.26361 |
| 0.442053338 | -0.028333191 | 0.54135373  | -0.22484369 | 9.16E-07   | -0.23206 |
| 0.121241926 | -0.067523426 | 0.14513123  | -0.34342475 | 2.26E-14   | -0.31176 |
| 0.346223158 | -0.040201845 | 0.386056317 | -0.1940503  | 2.42E-05   | -0.25953 |
| 0.122762921 | -0.061922643 | 0.181596464 | -0.22808014 | 6.31E-07   | -0.26994 |
| 0.29198177  | -0.042180761 | 0.363088419 | -0.32030321 | 1.33E-12   | -0.32219 |
| 0.000101829 | -0.184332485 | 6.15E-05    | -0.12170374 | 0.00846879 | 0.007698 |
| 0.674873222 | -0.027272788 | 0.556599545 | -0.200909   | 1.22E-05   | -0.2315  |
| 0.014755476 | -0.112079589 | 0.015384082 | -0.28549865 | 3.29E-10   | -0.1832  |
| 0.187724893 | -0.05893817  | 0.203601795 | -0.28323294 | 4.59E-10   | -0.22163 |
| 0.042849561 | -0.093022145 | 0.044516301 | -0.22186932 | 1.28E-06   | -0.11689 |
| 0.09542697  | -0.079222015 | 0.087246878 | -0.25989605 | 1.20E-08   | -0.3046  |

|             |              |             |             |            |          |
|-------------|--------------|-------------|-------------|------------|----------|
| 0.047085841 | -0.089939795 | 0.052095397 | -0.23005059 | 5.02E-07   | -0.27086 |
| 0.000968032 | -0.149873209 | 0.00116026  | -0.08593133 | 0.06353224 | -0.20507 |
| 0.39381917  | -0.035465991 | 0.444501957 | -0.10124168 | 0.02869792 | -0.1857  |
| 0.843462753 | 0.013371942  | 0.773187084 | -0.13097258 | 0.00458289 | -0.21171 |
| 0.28149297  | -0.039558023 | 0.393715315 | -0.17185985 | 0.00019014 | -0.1276  |
| 0.111866645 | -0.073246087 | 0.113936766 | -0.18629274 | 5.11E-05   | -0.06764 |
| 0.002120327 | -0.139197003 | 0.002572333 | -0.13390251 | 0.00374393 | -0.12072 |
| 0.174314103 | -0.056419181 | 0.223630542 | -0.26821009 | 3.89E-09   | -0.27703 |
| 0.068149396 | -0.089166369 | 0.054157525 | -0.19267412 | 2.77E-05   | -0.19784 |
| 0.428010414 | -0.036532057 | 0.430923916 | -0.26512692 | 5.94E-09   | -0.17533 |
| 0.108420842 | -0.069082243 | 0.136050695 | -0.24636818 | 6.92E-08   | -0.24489 |
| 0.087371689 | -0.074577954 | 0.107492601 | -0.22822736 | 6.20E-07   | -0.25506 |
| 0.025524015 | -0.10846702  | 0.019045889 | -0.20536538 | 7.68E-06   | -0.16618 |
| 0.141242647 | -0.06253841  | 0.177283815 | -0.29126065 | 1.39E-10   | -0.20867 |
| 0.035588529 | -0.093747327 | 0.04287467  | -0.27602368 | 1.30E-09   | -0.2997  |
| 0.359557754 | -0.042901177 | 0.354943214 | -0.24417642 | 9.11E-08   | -0.2091  |
| 0.276837378 | -0.044784418 | 0.334199135 | -0.27175957 | 2.38E-09   | -0.24677 |
| 0.064223611 | -0.08061608  | 0.081807619 | -0.270406   | 2.87E-09   | -0.23828 |
| 0.765282561 | -0.018694735 | 0.686985618 | -0.11127507 | 0.01614127 | -0.20099 |
| 0.080421425 | -0.077401249 | 0.094784989 | -0.28869114 | 2.05E-10   | -0.29096 |
| 0.491990911 | 0.032018139  | 0.490042947 | -0.25704331 | 1.75E-08   | -0.26267 |
| 0.175036507 | -0.060251654 | 0.193689796 | -0.28264928 | 5.00E-10   | -0.29296 |
| 0.15905806  | -0.059417182 | 0.199945219 | -0.10164577 | 0.02806416 | -0.13249 |
| 0.153253632 | -0.06475102  | 0.162414262 | -0.26142121 | 9.80E-09   | -0.29835 |
| 0.002834846 | -0.134990795 | 0.003469587 | -0.24542011 | 7.80E-08   | -0.10132 |
| 0.280286831 | -0.044880217 | 0.333165156 | -0.26751487 | 4.28E-09   | -0.28056 |
| 0.175455364 | -0.063103786 | 0.173391472 | -0.29920697 | 4.10E-11   | -0.22727 |
| 0.517416752 | 0.03684463   | 0.426988742 | -0.19252178 | 2.81E-05   | -0.13499 |
| 0.17768254  | -0.060947662 | 0.188582877 | -0.23781781 | 1.99E-07   | -0.09616 |
| 0.148731139 | -0.06285241  | 0.175114139 | -0.33265341 | 1.57E-13   | -0.29704 |
| 0.77388013  | 0.018131924  | 0.695933076 | -0.20630394 | 6.96E-06   | -0.2156  |
| 0.219079936 | -0.049722595 | 0.283586166 | -0.09046433 | 0.05073445 | -0.19198 |
| 0.062085611 | -0.081654994 | 0.077935074 | -0.22364183 | 1.05E-06   | -0.19624 |
| 0.14580333  | -0.061509452 | 0.184533526 | -0.37973437 | 1.82E-17   | -0.05445 |
| 0.678459173 | 0.012758726  | 0.783323392 | -0.24686788 | 6.50E-08   | 0.038952 |
| 0.063782307 | -0.095610165 | 0.038889951 | -0.2672091  | 4.47E-09   | -0.29017 |
| 0.138084354 | -0.064811324 | 0.162022546 | -0.25454781 | 2.43E-08   | -0.34018 |
| 0.119334518 | -0.068755463 | 0.137917122 | -0.26638115 | 5.00E-09   | -0.24972 |
| 0.00869202  | -0.117855768 | 0.010804839 | -0.24712029 | 6.30E-08   | -0.20564 |
| 0.044829869 | -0.090237083 | 0.051320375 | -0.23897619 | 1.73E-07   | -0.21344 |
| 0.059628363 | -0.084581707 | 0.06781995  | -0.27250261 | 2.14E-09   | -0.24909 |
| 0.350417587 | -0.035772985 | 0.440567155 | -0.32491737 | 6.07E-13   | -0.36568 |
| 0.088188238 | -0.073075491 | 0.114783644 | -0.20973876 | 4.85E-06   | -0.15299 |
| 0.000574677 | -0.153499022 | 0.000874732 | -0.20277625 | 1.00E-05   | -0.29195 |
| 0.11169369  | -0.088900611 | 0.054881586 | -0.19983692 | 1.36E-05   | -0.08049 |

|             |              |             |             |            |          |
|-------------|--------------|-------------|-------------|------------|----------|
| 0.106767268 | -0.077031993 | 0.09637541  | -0.26953781 | 3.24E-09   | -0.06493 |
| 0.143193053 | -0.062869063 | 0.17499963  | -0.34617781 | 1.36E-14   | -0.30926 |
| 0.02012058  | -0.104592081 | 0.02379647  | -0.29958878 | 3.86E-11   | -0.44748 |
| 0.214368802 | -0.05924847  | 0.2012276   | -0.29455888 | 8.41E-11   | -0.28244 |
| 0.134440307 | -0.079515455 | 0.086078416 | -0.33285589 | 1.52E-13   | -0.33267 |
| 0.163961049 | -0.063105153 | 0.173382143 | -0.31706099 | 2.30E-12   | -0.30311 |
| 0.358308461 | -0.041812088 | 0.36730147  | -0.03218505 | 0.48778219 | -0.26027 |
| 0.003164545 | -0.127434939 | 0.005819823 | -0.17969352 | 9.44E-05   | -0.36899 |
| 0.024010633 | -0.101020923 | 0.029049308 | 0.161671109 | 0.00045237 | 0.309135 |
| 7.34E-06    | 0.203231876  | 9.58E-06    | -0.13093596 | 0.00459438 | 0.002622 |
| 0.301729498 | -0.041865207 | 0.366692581 | -0.09570669 | 0.03869232 | -0.31255 |
| 0.790141223 | 0.00845234   | 0.855449045 | -0.11488269 | 0.01298383 | -0.02761 |
| 0.016468259 | -0.102859185 | 0.026232849 | -0.28622174 | 2.96E-10   | -0.35844 |
| 0.009184647 | -0.109585408 | 0.017838538 | -0.26484771 | 6.17E-09   | -0.1348  |
| 0.026501619 | -0.099033955 | 0.032381548 | -0.30507474 | 1.62E-11   | -0.32981 |
| 2.46E-06    | -0.204564319 | 8.35E-06    | -0.28767153 | 2.38E-10   | -0.08503 |
| 0.053587183 | -0.089748547 | 0.052599116 | -0.34273682 | 2.56E-14   | -0.21493 |
| 0.248903017 | -0.050455119 | 0.276544158 | -0.42482405 | 6.90E-22   | -0.21689 |
| 0.399444019 | -0.044014746 | 0.342581136 | -0.19194532 | 2.97E-05   | -0.15238 |
| 0.270029557 | -0.055447327 | 0.231721588 | -0.13940783 | 0.0025335  | -0.22795 |
| 0.219298921 | -0.048961564 | 0.291029387 | -0.30071746 | 3.24E-11   | -0.33968 |
| 0.000188469 | -0.182528865 | 7.27E-05    | -0.18678299 | 4.88E-05   | -0.01185 |
| 0.035827187 | -0.089379504 | 0.053582593 | -0.33875    | 5.29E-14   | -0.38857 |
| 0.882744346 | -0.005741977 | 0.901510327 | -0.2430619  | 1.05E-07   | -0.25036 |
| 0.717178528 | 0.002882425  | 0.950464938 | -0.13908142 | 0.00259385 | -0.08326 |
| 0.01119218  | -0.117555672 | 0.011009024 | -0.17042849 | 0.00021541 | 0.028208 |
| 0.808447053 | -0.021710856 | 0.639803645 | -0.16542579 | 0.00033059 | -0.12337 |
| 0.0836117   | -0.079178736 | 0.087420284 | -0.29335178 | 1.01E-10   | -0.2324  |
| 0.89481128  | -0.015258876 | 0.742244471 | 0.202155873 | 1.07E-05   | 0.405916 |
| 0.000963114 | -0.151737758 | 0.001004159 | -0.13804693 | 0.00279389 | -0.24859 |
| 0.407828315 | -0.028348422 | 0.541136272 | -0.24842064 | 5.34E-08   | -0.24627 |
| 0.117478532 | -0.06773434  | 0.143876207 | -0.36695278 | 2.48E-16   | -0.31158 |
| 0.361975632 | -0.033967048 | 0.463998744 | -0.31161603 | 5.65E-12   | -0.28466 |
| 0.035676927 | -0.098837096 | 0.032728797 | -0.15852713 | 0.00058519 | -0.24319 |
| 0.105245443 | -0.064196733 | 0.166048133 | -0.29088122 | 1.47E-10   | -0.37829 |
| 0.080894334 | -0.084450322 | 0.068249739 | -0.22987676 | 5.12E-07   | -0.04962 |
| 0.142624207 | -0.0608337   | 0.18941222  | -0.29932443 | 4.03E-11   | -0.32179 |
| 1.11E-05    | -0.2040034   | 8.85E-06    | -0.19143524 | 3.12E-05   | -0.14503 |
| 3.92E-06    | -0.206071823 | 7.14E-06    | -0.20485208 | 8.10E-06   | 0.026297 |
| 0.085004669 | -0.073779808 | 0.111318897 | -0.32861123 | 3.20E-13   | -0.31986 |
| 0.244586348 | -0.05490199  | 0.236351441 | -0.18101115 | 8.36E-05   | -0.13593 |
| 0.281274084 | -0.047918065 | 0.301446376 | -0.1936926  | 2.50E-05   | -0.14093 |
| 0.271405686 | -0.044545662 | 0.336785057 | -0.18889169 | 3.99E-05   | -0.07327 |
| 0.087132145 | -0.079003253 | 0.088126248 | -0.22347218 | 1.07E-06   | -0.24013 |
| 0.07096179  | -0.085240894 | 0.065696978 | -0.19540352 | 2.11E-05   | -0.15321 |

|             |              |             |             |            |          |
|-------------|--------------|-------------|-------------|------------|----------|
| 0.157616511 | -0.064250429 | 0.165693461 | -0.19460325 | 2.29E-05   | -0.18284 |
| 0.36623715  | -0.053806225 | 0.245850586 | 0.421805652 | 1.43E-21   | 0.323838 |
| 0.632799775 | 0.030272818  | 0.514015806 | 0.009958832 | 0.83004743 | -0.34489 |
| 0.014879142 | -0.113210152 | 0.014372757 | -0.34520606 | 1.63E-14   | -0.34978 |
| 0.018630019 | -0.110552013 | 0.016849447 | -0.18881273 | 4.02E-05   | -0.12189 |
| 6.11E-09    | 0.270605658  | 2.79E-09    | 0.023317215 | 0.61524045 | 0.390283 |
| 0.000160831 | -0.161221307 | 0.00046948  | -0.4145508  | 8.06E-21   | -0.16687 |
| 1.29E-13    | -0.335463179 | 9.56E-14    | -0.02635589 | 0.56994807 | -0.24587 |
| 0.005123548 | -0.126050398 | 0.006380486 | -0.32220066 | 9.66E-13   | -0.29828 |
| 0.00077563  | -0.150929088 | 0.001069315 | -0.27702631 | 1.13E-09   | -0.236   |
| 0.000143973 | -0.171094642 | 0.00020328  | -0.16969903 | 0.00022946 | -0.33758 |
| 0.000809129 | 0.155620124  | 0.000739372 | -0.53253105 | 1.46E-35   | -0.29306 |
| 0.033020716 | -0.094420899 | 0.041395861 | -0.27841143 | 9.25E-10   | -0.09482 |
| 0.083837517 | -0.08673724  | 0.061080081 | -0.29725479 | 5.55E-11   | -0.37046 |
| 0.063295551 | -0.086798613 | 0.060896588 | -0.24625804 | 7.02E-08   | -0.20681 |
| 0.10134637  | -0.076192072 | 0.100072315 | -0.28100781 | 6.36E-10   | -0.29204 |
| 0.001655893 | -0.144122775 | 0.001793285 | -0.16316798 | 0.00039953 | -0.06326 |
| 0.247533208 | 0.050414293  | 0.276933485 | -0.14701236 | 0.00144366 | -0.11182 |
| 0.606298331 | -0.018494077 | 0.690170709 | -0.23647121 | 2.34E-07   | -0.23663 |
| 0.396112656 | -0.051108356 | 0.270365412 | -0.27021285 | 2.95E-09   | -0.16768 |
| 0.424612345 | -0.028112398 | 0.544510954 | -0.21274037 | 3.51E-06   | -0.23873 |
| 0.091464841 | -0.076249661 | 0.099815293 | -0.10570581 | 0.02233606 | -0.09114 |
| 2.54E-10    | -0.295133157 | 7.70E-11    | -0.28583539 | 3.13E-10   | -0.3793  |
| 0.916948108 | 0.002891356  | 0.950311659 | -0.16307573 | 0.00040261 | -0.2993  |
| 0.000140142 | -0.176200237 | 0.000129451 | -0.01510105 | 0.74481756 | -0.21268 |
| 0.017349524 | -0.100593572 | 0.029740037 | -0.13183725 | 0.00431918 | -0.16111 |
| 0.153916272 | -0.062012288 | 0.180963838 | -0.34197073 | 2.95E-14   | -0.31475 |
| 0.626545786 | -0.025105579 | 0.588392157 | -0.29851898 | 4.56E-11   | -0.36762 |
| 0.573463046 | -0.029017291 | 0.531629714 | -0.28389712 | 4.17E-10   | -0.25495 |
| 0.010386814 | 0.11296007   | 0.014591286 | 0.155247801 | 0.00076163 | 0.255854 |
| 0.039666254 | -0.095982855 | 0.038131583 | -0.21803793 | 1.97E-06   | -0.24109 |
| 0.00160859  | 0.151276528  | 0.001040858 | 0.053683709 | 0.24692903 | 0.244455 |
| 0.012129777 | -0.112001319 | 0.015456352 | -0.28991315 | 1.70E-10   | -0.38764 |
| 0.00691808  | -0.123299945 | 0.007639984 | -0.27579835 | 1.34E-09   | -0.2725  |
| 0.255612969 | -0.054688863 | 0.238178463 | -0.18261843 | 7.21E-05   | -0.27109 |
| 0.643961657 | 0.02311044   | 0.618379066 | -0.26792776 | 4.05E-09   | -0.1686  |
| 0.03371206  | -0.095654389 | 0.038799299 | -0.32193786 | 1.01E-12   | -0.42462 |
| 0.011658467 | -0.115794871 | 0.012277352 | -0.21291691 | 3.45E-06   | -0.39973 |
| 0.046207633 | -0.086791483 | 0.06091788  | -0.33742754 | 6.72E-14   | -0.30453 |
| 0.000384075 | -0.159095713 | 0.000558767 | -0.2009464  | 1.21E-05   | -0.20568 |
| 0.035586774 | -0.095600647 | 0.038909484 | -0.07769371 | 0.09354024 | -0.18859 |
| 0.037626642 | -0.103601493 | 0.025164064 | -0.23284001 | 3.61E-07   | -0.40031 |
| 0.37202072  | -0.037009073 | 0.424926872 | -0.37300905 | 7.29E-17   | -0.32624 |
| 0.776943079 | -0.011000813 | 0.812579487 | -0.32909844 | 2.94E-13   | -0.27531 |
| 0.675552944 | 0.01189154   | 0.797720189 | -0.33214327 | 1.72E-13   | -0.2046  |

|             |              |             |             |            |          |
|-------------|--------------|-------------|-------------|------------|----------|
| 0.248016026 | -0.05023668  | 0.278631541 | -0.29845702 | 4.61E-11   | -0.30914 |
| 0.525815939 | -0.021121984 | 0.64890964  | -0.12539546 | 0.0066622  | -0.17281 |
| 0.013501688 | -0.117325586 | 0.011167882 | -0.20429173 | 8.59E-06   | -0.27315 |
| 0.186878247 | -0.052149624 | 0.260712741 | -0.36914786 | 1.60E-16   | -0.35034 |
| 0.697228866 | -0.010044109 | 0.828614561 | -0.28719976 | 2.56E-10   | -0.29033 |
| 0.006074905 | 0.124925815  | 0.00687103  | -0.38351248 | 8.22E-18   | -0.10392 |
| 0.211815153 | -0.052024986 | 0.261855462 | -0.04565032 | 0.32492811 | -0.1195  |
| 0.038054976 | -0.0968997   | 0.036319116 | -0.17466206 | 0.0001485  | -0.35066 |
| 0.229244616 | -0.053898715 | 0.245038629 | -0.25427672 | 2.52E-08   | -0.17982 |
| 0.019376103 | -0.101806855 | 0.027814894 | -0.15275099 | 0.00092769 | -0.25813 |
| 0.277292019 | -0.049939527 | 0.281488225 | -0.12334966 | 0.00761538 | -0.1126  |
| 0.84649064  | -0.004898169 | 0.915925679 | -0.17988319 | 9.27E-05   | -0.15366 |
| 0.08824082  | -0.075252801 | 0.104339063 | -0.30317311 | 2.20E-11   | -0.31419 |
| 0.611698753 | -0.019437205 | 0.675248697 | -0.24653698 | 6.78E-08   | -0.40259 |
| 0.012345063 | -0.111088392 | 0.016321563 | -0.30728932 | 1.14E-11   | -0.4781  |
| 0.098506389 | -0.071789155 | 0.121329193 | -0.39140202 | 1.51E-18   | -0.34401 |
| 0.339484552 | -0.032763269 | 0.479993882 | -0.28094309 | 6.42E-10   | -0.09218 |
| 0.018341846 | -0.120007125 | 0.00943674  | -0.23498608 | 2.80E-07   | -0.05333 |
| 0.001161247 | -0.13999317  | 0.002428469 | -0.03338543 | 0.47168979 | -0.15529 |
| 0.043087795 | -0.090239319 | 0.051314582 | -0.23174436 | 4.11E-07   | -0.06788 |
| 0.054912914 | -0.083757098 | 0.070554532 | -0.16181485 | 0.00044703 | -0.1964  |
| 0.325751404 | -0.040003419 | 0.388407089 | -0.30126676 | 2.97E-11   | -0.30197 |
| 0.995031979 | 0.005669521  | 0.902746942 | -0.13826233 | 0.00275111 | -0.2605  |
| 0.203540653 | -0.05064973  | 0.274693448 | -0.30253317 | 2.43E-11   | -0.34978 |
| 0.23293582  | -0.044718263 | 0.334914373 | -0.2634026  | 7.50E-09   | -0.31215 |
| 0.001517326 | -0.146231649 | 0.001531365 | -0.26174411 | 9.38E-09   | -0.20514 |
| 0.001861799 | -0.138993407 | 0.002610349 | -0.13184571 | 0.00431667 | -0.25023 |
| 0.260517541 | -0.048061506 | 0.299999951 | -0.33023175 | 2.41E-13   | -0.16389 |
| 0.706973792 | -0.018632252 | 0.687976847 | -0.24221477 | 1.16E-07   | -0.20693 |
| 0.002447384 | 0.128976447  | 0.005248015 | -0.08219742 | 0.07597308 | -0.16123 |
| 1.40E-05    | -0.187349283 | 4.62E-05    | -0.29357384 | 9.78E-11   | -0.19851 |
| 0.032687066 | -0.092396362 | 0.045975103 | 0.255298503 | 2.20E-08   | -0.19891 |
| 0.971935159 | 0.003029316  | 0.947944077 | 0.055222063 | 0.23362622 | 0.612161 |
| 4.01E-07    | -0.227162924 | 7.02E-07    | -0.2581415  | 1.52E-08   | -0.06698 |
| 4.56E-07    | -0.228303543 | 6.15E-07    | -0.2717716  | 2.37E-09   | -0.25453 |
| 0.410710535 | 0.035725779  | 0.441170901 | -0.00673983 | 0.88450532 | 0.142958 |
| 1.32E-12    | -0.320382865 | 1.31E-12    | -0.11362435 | 0.01401714 | -0.08287 |
| 0.013908141 | -0.105848541 | 0.022154637 | -0.22424531 | 9.81E-07   | -0.23495 |
| 0.991494609 | 0.002665778  | 0.954183822 | -0.2433193  | 1.01E-07   | -0.24815 |
| 8.43E-05    | 0.186809931  | 4.87E-05    | -0.00416293 | 0.92850898 | 0.42485  |
| 0.243152807 | -0.052379953 | 0.258610068 | -0.25625713 | 1.94E-08   | -0.21344 |
| 0.020322365 | 0.110973894  | 0.016433015 | -0.09668425 | 0.03673831 | -0.27371 |
| 0.085798864 | -0.071299091 | 0.123898117 | -0.19782869 | 1.66E-05   | -0.04664 |
| 0.016654483 | -0.108279311 | 0.01925536  | -0.21815017 | 1.94E-06   | -0.12451 |
| 0.002572577 | -0.13313572  | 0.003948869 | -0.28788265 | 2.31E-10   | -0.25207 |

|             |              |             |             |            |          |
|-------------|--------------|-------------|-------------|------------|----------|
| 0.059910835 | -0.097627295 | 0.034933347 | -0.03261814 | 0.48194231 | 0.351526 |
| 0.935694927 | -0.012892205 | 0.781113833 | -0.15928897 | 0.00055004 | -0.15881 |
| 0.041343382 | -0.090564278 | 0.050478529 | -0.23845829 | 1.84E-07   | -0.26508 |
| 0.02872081  | -0.097041558 | 0.036045329 | -0.16799501 | 0.00026571 | -0.06923 |
| 0.157081385 | 0.066501524  | 0.151330586 | -0.14285827 | 0.00196941 | -0.25688 |
| 1.52E-08    | -0.254022866 | 2.60E-08    | -0.28037354 | 6.97E-10   | -0.23883 |
| 0.009605586 | -0.119250506 | 0.00989925  | -0.22685635 | 7.27E-07   | -0.28719 |
| 0.350800057 | 0.053889476  | 0.245119655 | -0.11835508 | 0.01047254 | -0.23197 |
| 0.017097782 | -0.113129266 | 0.014443121 | -0.23802234 | 1.94E-07   | -0.06155 |
| 0.078790492 | 0.0846549    | 0.067581484 | -0.2708566  | 2.70E-09   | -0.21505 |
| 0.028799496 | -0.098277177 | 0.033733889 | -0.18185318 | 7.74E-05   | -0.00751 |
| 1.97E-11    | 0.296036873  | 6.70E-11    | -0.05476881 | 0.237492   | 0.411675 |
| 0.000284092 | -0.169433233 | 0.000234795 | -0.27012982 | 2.98E-09   | -0.36119 |
| 0.013134085 | -0.130219104 | 0.004824451 | -0.15680293 | 0.00067259 | -0.17564 |
| 0.066169961 | -0.078569001 | 0.08989294  | -0.0567652  | 0.220799   | -0.2282  |
| 0.003519964 | -0.127460285 | 0.005809986 | -0.0166149  | 0.7202583  | -0.11138 |
| 0.179967185 | -0.070990812 | 0.125535676 | -0.21981676 | 1.62E-06   | -0.03468 |
| 0.032318367 | -0.097864349 | 0.034491686 | -0.28451271 | 3.81E-10   | -0.27762 |
| 0.765181526 | -0.004504634 | 0.922658436 | -0.16858194 | 0.00025266 | -0.20986 |
| 0.053129953 | -0.084769067 | 0.067210897 | -0.15691141 | 0.00066675 | -0.05937 |
| 0.068729299 | -0.079562944 | 0.085890508 | -0.24050354 | 1.43E-07   | -0.30164 |
| 0.00245803  | -0.14715609  | 0.001428029 | -0.19105826 | 3.24E-05   | -0.05106 |
| 0.96891571  | 0.005952828  | 0.897913083 | -0.12073032 | 0.00901272 | -0.16694 |
| 0.001103112 | -0.150397511 | 0.001114246 | -0.17459486 | 0.00014939 | -0.12491 |
| 0.000869193 | -0.14723728  | 0.001419267 | -0.43320317 | 8.73E-23   | -0.23376 |
| 0.176407381 | -0.062068313 | 0.180569294 | -0.10379169 | 0.02489634 | -0.04662 |
| 1.46E-05    | -0.200608568 | 1.25E-05    | -0.03482228 | 0.45281708 | -0.36786 |
| 0.455908368 | -0.028858842 | 0.53387408  | -0.33760785 | 6.51E-14   | -0.34792 |
| 9.05E-05    | 0.179071018  | 9.99E-05    | 0.321594809 | 1.07E-12   | 0.00132  |
| 0.002337824 | -0.130581519 | 0.004706865 | -0.16751815 | 0.00027677 | -0.23601 |
| 0.55812012  | -0.030209638 | 0.51489488  | 0.223135848 | 1.11E-06   | 0.316491 |
| 0.002264498 | -0.144091209 | 0.001797499 | -0.18101464 | 8.36E-05   | -0.39865 |
| 0.163907591 | -0.056776091 | 0.2207103   | -0.22307856 | 1.12E-06   | -0.21512 |
| 0.416116117 | 0.047532789  | 0.305354283 | -0.19568782 | 2.06E-05   | -0.10867 |
| 0.872536933 | 0.01064055   | 0.818608957 | -0.33129883 | 2.00E-13   | -0.04034 |
| 0.195840985 | -0.050149443 | 0.279468149 | -0.24480263 | 8.42E-08   | -0.32264 |
| 0.102288668 | -0.067025271 | 0.148128619 | -0.37755311 | 2.86E-17   | -0.29448 |
| 0.207567157 | -0.057525079 | 0.21467091  | -0.39647483 | 4.97E-19   | -0.26793 |
| 0.611540052 | -0.022013521 | 0.635144238 | -0.19957016 | 1.39E-05   | -0.12359 |
| 0.089706468 | -0.077640501 | 0.093765745 | -0.32549577 | 5.49E-13   | -0.27655 |
| 0.29935231  | -0.042205232 | 0.362809839 | -0.26191745 | 9.16E-09   | 0.105149 |
| 0.332569924 | -0.045163386 | 0.330120885 | -0.17809732 | 0.00010911 | -0.1493  |
| 9.89E-05    | -0.179194576 | 9.88E-05    | -0.33224438 | 1.69E-13   | -0.30801 |
| 0.011166274 | 0.118118145  | 0.010629075 | -0.18161607 | 7.91E-05   | -0.24735 |
| 0.201608652 | -0.052083578 | 0.261317843 | -0.28043007 | 6.91E-10   | -0.29291 |



|             |              |             |             |            |          |
|-------------|--------------|-------------|-------------|------------|----------|
| 0.047725465 | -0.085488655 | 0.064913296 | -0.23229369 | 3.85E-07   | -0.26776 |
| 0.428228676 | -0.035458951 | 0.444592419 | -0.30404034 | 1.92E-11   | -0.20148 |
| 6.28E-05    | -0.176142666 | 0.00013012  | -0.18223816 | 7.47E-05   | -0.02323 |
| 0.001346336 | -0.139962791 | 0.00243382  | -0.29206136 | 1.23E-10   | -0.3734  |
| 0.085698449 | 0.078214862  | 0.091354644 | 0.174519234 | 0.0001504  | 0.449423 |
| 0.260297481 | -0.043599339 | 0.347160243 | -0.30598109 | 1.41E-11   | -0.33112 |
| 0.067256871 | -0.076327239 | 0.099469884 | -0.36720545 | 2.36E-16   | -0.3007  |
| 4.42E-07    | -0.234742338 | 2.88E-07    | -0.28621937 | 2.96E-10   | -0.02895 |
| 9.24E-11    | -0.293575973 | 9.78E-11    | -0.06015518 | 0.19440557 | -0.06439 |
| 0.163712922 | -0.065331588 | 0.15867256  | -0.30713928 | 1.17E-11   | -0.33428 |
| 0.000186876 | -0.180821729 | 8.51E-05    | -0.22328817 | 1.09E-06   | -0.03589 |
| 0.029536947 | -0.098884352 | 0.032645151 | -0.10695534 | 0.02079064 | -0.11053 |
| 0.000328852 | -0.166169902 | 0.000310424 | -0.32513153 | 5.85E-13   | -0.26682 |
| 0.01833338  | -0.105480135 | 0.022625545 | -0.18043073 | 8.82E-05   | -0.15751 |
| 0.003595366 | -0.126925944 | 0.006020575 | -0.22518273 | 8.81E-07   | -0.16062 |
| 8.23E-05    | 0.169405737  | 0.000235353 | 0.092201922 | 0.04643647 | 0.274191 |
| 0.283055198 | -0.036326134 | 0.433527816 | -0.27440381 | 1.64E-09   | -0.16909 |
| 0.011156196 | -0.119315964 | 0.009858456 | -0.14467372 | 0.00172116 | -0.11838 |
| 0.113193899 | -0.076483888 | 0.09877532  | -0.25781895 | 1.58E-08   | -0.27836 |
| 0.155777919 | -0.058530554 | 0.20675138  | -0.33743927 | 6.71E-14   | -0.34491 |
| 0.000162134 | -0.169775122 | 0.000227958 | -0.18543845 | 5.54E-05   | -0.41498 |
| 0.000148377 | -0.17216102  | 0.000185188 | -0.26913687 | 3.42E-09   | -0.32701 |
| 0.003426069 | -0.127482932 | 0.005801208 | -0.26797332 | 4.02E-09   | -0.38949 |
| 0.070469336 | -0.078152911 | 0.091612292 | -0.35374353 | 3.27E-15   | -0.3503  |
| 0.065301192 | -0.079684266 | 0.08541195  | -0.32712839 | 4.14E-13   | -0.34645 |
| 0.00358702  | -0.133335059 | 0.003894636 | -0.31886397 | 1.70E-12   | -0.33664 |
| 0.000592934 | -0.156528912 | 0.000687541 | -0.20905723 | 5.21E-06   | -0.39864 |
| 0.468888262 | -0.026778639 | 0.563774683 | -0.30188281 | 2.70E-11   | -0.30882 |
| 0.076794941 | -0.076964845 | 0.096666899 | -0.25286707 | 3.02E-08   | -0.25029 |
| 0.481527556 | -0.022288213 | 0.630927897 | -0.29190303 | 1.26E-10   | -0.29296 |
| 0.025409121 | -0.100942651 | 0.02917478  | -0.28989641 | 1.71E-10   | -0.28872 |
| 0.040789661 | -0.088133495 | 0.057016861 | -0.32722728 | 4.07E-13   | -0.35292 |
| 0.061681676 | -0.080317112 | 0.082950404 | -0.34115316 | 3.42E-14   | -0.3558  |
| 0.142296956 | -0.065290859 | 0.158932917 | -0.25954368 | 1.26E-08   | -0.24294 |
| 0.598488259 | -0.018282372 | 0.693537093 | -0.28379456 | 4.23E-10   | -0.21081 |
| 0.426933125 | -0.028084286 | 0.54491359  | -0.29889519 | 4.30E-11   | -0.32157 |
| 0.005745309 | -0.116380044 | 0.011842217 | -0.22791769 | 6.43E-07   | -0.17578 |
| 0.397194717 | -0.032710383 | 0.480703407 | -0.08255688 | 0.07469517 | -0.12636 |
| 0.314552933 | -0.040672122 | 0.380519564 | -0.21713325 | 2.18E-06   | -0.17344 |
| 0.001012666 | -0.152190699 | 0.000969285 | -0.08486573 | 0.06689844 | -0.35068 |
| 0.153484492 | -0.065168948 | 0.159714141 | -0.25497749 | 2.30E-08   | -0.26977 |
| 0.020674569 | -0.104620822 | 0.023757769 | -0.13457319 | 0.00357263 | -0.27614 |
| 0.001871622 | -0.140388799 | 0.002359744 | 6.42E-05    | 0.99889579 | 0.132875 |
| 0.033593886 | -0.098867897 | 0.032674256 | -0.27764513 | 1.03E-09   | -0.38839 |
| 0.143962639 | -0.061973984 | 0.181233948 | 0.028795905 | 0.53476689 | -0.01297 |

|             |              |             |             |            |          |
|-------------|--------------|-------------|-------------|------------|----------|
| 5.10E-06    | -0.211627709 | 3.96E-06    | -0.16801698 | 0.00026521 | -0.1183  |
| 0.058605103 | -0.08998442  | 0.051978444 | 0.326483712 | 4.63E-13   | 0.447262 |
| 0.084339172 | -0.074325887 | 0.10868962  | -0.33108693 | 2.08E-13   | -0.33138 |
| 0.082973757 | 0.081906905  | 0.077018845 | 0.147094174 | 0.00143475 | 0.334173 |
| 6.05E-12    | 0.301395509  | 2.91E-11    | -0.14208229 | 0.00208518 | 0.199524 |
| 0.016871949 | -0.106183434 | 0.021733963 | -0.28012006 | 7.23E-10   | -0.24521 |
| 5.92E-06    | -0.213585415 | 3.21E-06    | -0.14977722 | 0.00116887 | -0.09433 |
| 0.210033195 | -0.060922132 | 0.188768438 | -0.20583205 | 7.32E-06   | -0.16664 |
| 0.001496252 | -0.136850769 | 0.003042626 | -0.24144608 | 1.28E-07   | -0.05677 |
| 0.193923372 | -0.064971021 | 0.160988644 | -0.28299405 | 4.76E-10   | -0.29842 |
| 0.501743933 | 0.021740425  | 0.639347817 | -0.26375865 | 7.15E-09   | -0.25365 |
| 0.081492366 | -0.075794306 | 0.101861973 | -0.23906031 | 1.71E-07   | -0.224   |
| 0.009965768 | -0.112711876 | 0.014811046 | -0.24895123 | 4.99E-08   | -0.17525 |
| 0.294313188 | -0.06094647  | 0.188591541 | -0.17560513 | 0.00013653 | -0.14401 |
| 0.15144286  | -0.066908531 | 0.148837809 | -0.19590592 | 2.01E-05   | -0.17228 |
| 0.000594453 | 0.160477929  | 0.000499077 | -0.12500907 | 0.00683359 | 0.291088 |
| 0.15392727  | -0.068029951 | 0.142131185 | 0.048152082 | 0.29908898 | -0.23918 |
| 0.070424027 | -0.084875694 | 0.066866292 | -0.3476312  | 1.04E-14   | -0.22751 |
| 0.000197581 | -0.1719599   | 0.00018848  | -0.41161353 | 1.60E-20   | -0.1763  |
| 0.305024052 | -0.042034857 | 0.364752138 | -0.29295069 | 1.08E-10   | -0.27429 |
| 0.121243684 | -0.068517015 | 0.139291398 | -0.31245532 | 4.92E-12   | -0.2617  |
| 0.089537036 | -0.085227587 | 0.06573929  | -0.05084165 | 0.27287661 | -0.38095 |
| 7.36E-07    | -0.223736769 | 1.04E-06    | 0.005921536 | 0.89844681 | -0.28269 |
| 8.18E-05    | -0.185119827 | 5.71E-05    | -0.19535831 | 2.12E-05   | -0.02663 |
| 0.220004878 | -0.054412843 | 0.240559377 | -0.21531693 | 2.66E-06   | -0.19785 |
| 0.868445608 | -0.011626064 | 0.802141536 | -0.16239763 | 0.00042596 | -0.25536 |
| 0.047680815 | -0.086608757 | 0.061465697 | -0.24995726 | 4.39E-08   | -0.26817 |
| 0.106460308 | -0.071871511 | 0.120901586 | -0.35524536 | 2.45E-15   | -0.13085 |
| 0.153203577 | 0.057381103  | 0.215822534 | 0.176636417 | 0.00012448 | 0.46337  |
| 0.520464579 | -0.033289622 | 0.472963373 | -0.17661637 | 0.00012471 | -0.14319 |
| 0.000177988 | -0.16222196  | 0.000432213 | -0.31006839 | 7.27E-12   | -0.15408 |
| 0.058537493 | -0.081599253 | 0.078139    | -0.31523592 | 3.11E-12   | -0.29395 |
| 0.426055056 | 0.032766527  | 0.479950191 | -0.06684438 | 0.14922863 | -0.15508 |
| 0.020586055 | -0.108601746 | 0.018896771 | -0.31239789 | 4.97E-12   | -0.23118 |
| 0.556716155 | -0.034786864 | 0.453277095 | -0.37793813 | 2.64E-17   | -0.32364 |
| 0.015085147 | -0.10658689  | 0.021236381 | -0.30275647 | 2.35E-11   | -0.35182 |
| 1.71E-05    | -0.191689405 | 3.05E-05    | -0.05898486 | 0.20324329 | 0.073301 |
| 0.193895547 | -0.056530398 | 0.222717624 | -0.38460271 | 6.52E-18   | -0.20024 |
| 0.974942884 | 0.008251468  | 0.858847936 | -0.00388856 | 0.93320934 | -0.31138 |
| 0.371555226 | -0.034804042 | 0.453053933 | -0.25778486 | 1.59E-08   | -0.29988 |
| 0.820504418 | 0.01254468   | 0.78687027  | -0.09949306 | 0.03158393 | -0.24097 |
| 0.000281926 | -0.158304928 | 0.000595832 | -0.32273141 | 8.82E-13   | -0.2469  |
| 0.085583305 | -0.074359811 | 0.108527913 | -0.33759168 | 6.53E-14   | -0.32963 |
| 0.064605083 | -0.085859676 | 0.06375412  | -0.04125782 | 0.37369227 | -0.27017 |
| 0.086436526 | -0.075048736 | 0.10528483  | -0.27532087 | 1.44E-09   | -0.27525 |

|             |              |             |             |            |          |
|-------------|--------------|-------------|-------------|------------|----------|
| 0.010546662 | -0.120044327 | 0.009414502 | -0.23334122 | 3.40E-07   | -0.19172 |
| 0.12319635  | 0.066954136  | 0.148560452 | 0.06744064  | 0.14562611 | 0.371132 |
| 0.316623934 | -0.022699166 | 0.62464238  | -0.24750265 | 6.00E-08   | -0.29666 |
| 0.064752167 | -0.081450355 | 0.078685866 | -0.17728589 | 0.00011741 | -0.0703  |
| 0.195754119 | -0.053246866 | 0.250801177 | -0.27647226 | 1.22E-09   | -0.17875 |
| 0.510025982 | -0.021573424 | 0.641924052 | -0.22981631 | 5.16E-07   | -0.14831 |
| 0.950551491 | 0.014262395  | 0.758536957 | -0.23153592 | 4.21E-07   | -0.24531 |
| 3.27E-05    | -0.192789684 | 2.74E-05    | -0.11484736 | 0.0130119  | -0.34555 |
| 0.189031904 | -0.057565802 | 0.214345984 | -0.15376162 | 0.00085681 | -0.12801 |
| 5.35E-09    | -0.269706326 | 3.16E-09    | -0.14547778 | 0.00162067 | -0.16584 |
| 0.006300043 | -0.123635469 | 0.007475277 | -0.27258324 | 2.12E-09   | -0.29711 |
| 0.391320086 | -0.03671157  | 0.428661353 | 0.003392298 | 0.94171706 | 0.220361 |
| 0.025983605 | -0.104471566 | 0.023959342 | -0.08098531 | 0.08041387 | -0.16012 |
| 0.090111558 | -0.078485321 | 0.090236626 | -0.26099056 | 1.04E-08   | -0.36257 |
| 0.500001323 | -0.02363591  | 0.610416762 | -0.16902285 | 0.00024325 | -0.25766 |
| 0.002189215 | -0.137377309 | 0.002930753 | -0.16004539 | 0.00051709 | -0.0324  |
| 0.086749005 | -0.076061557 | 0.100656761 | -0.21094413 | 4.26E-06   | -0.29069 |
| 0.098235089 | -0.072376287 | 0.118306338 | -0.26320622 | 7.70E-09   | -0.21254 |
| 7.89E-16    | -0.361013894 | 8.02E-16    | -0.29686471 | 5.90E-11   | -0.13797 |
| 1.99E-12    | -0.308967908 | 8.69E-12    | -0.18517746 | 5.68E-05   | -0.12827 |
| 0.571355619 | -0.023431596 | 0.613507291 | 0.196995282 | 1.80E-05   | 0.387719 |
| 0.146479986 | 0.064685743  | 0.162839076 | -0.28093069 | 6.43E-10   | -0.04549 |
| 0.035294893 | 0.093091928  | 0.044356065 | 0.045126894 | 0.33051219 | 0.447831 |
| 0.029763937 | -0.098600232 | 0.033150821 | 0.174806417 | 0.00014661 | -0.05422 |
| 0.440672217 | -0.032123858 | 0.488610363 | -0.36373525 | 4.70E-16   | -0.31254 |
| 0.870787532 | 0.000562665  | 0.990324521 | -0.20022997 | 1.30E-05   | -0.22992 |
| 0.006165094 | -0.119441368 | 0.009780719 | -0.20771858 | 6.00E-06   | -0.16432 |
| 0.000137162 | -0.169135489 | 0.000240905 | -0.30310473 | 2.22E-11   | -0.38033 |
| 0.349463085 | -0.038305361 | 0.408877531 | -0.15386184 | 0.00085006 | -0.12343 |
| 0.01198728  | -0.120486699 | 0.009153627 | -0.08998584 | 0.05197471 | -0.02618 |
| 1.78E-15    | -0.351174548 | 5.32E-15    | -0.22300956 | 1.13E-06   | -0.12903 |
| 0.032787103 | -0.095745918 | 0.038612248 | -0.37586738 | 4.06E-17   | -0.38328 |
| 1.92E-05    | -0.196563182 | 1.88E-05    | -0.14675253 | 0.00147233 | -0.49258 |
| 4.16E-09    | -0.27314514  | 1.96E-09    | -0.12517449 | 0.00675974 | -0.22746 |
| 0.000115268 | -0.17453     | 0.000150254 | -0.17680213 | 0.00012264 | -0.39944 |
| 0.078340824 | -0.075102723 | 0.105033963 | -0.22243928 | 1.20E-06   | -0.28082 |
| 0.104653746 | -0.079600332 | 0.0857428   | -0.3338156  | 1.28E-13   | -0.26222 |
| 2.49E-12    | -0.316335677 | 2.59E-12    | -0.20028    | 1.30E-05   | -0.05487 |
| 0.000689338 | 0.168885312  | 0.000246153 | -0.23737459 | 2.10E-07   | -0.05072 |
| 9.17E-05    | -0.17800552  | 0.000110024 | -0.22576314 | 8.24E-07   | -0.09669 |
| 1.92E-07    | -0.238600484 | 1.81E-07    | -0.14993964 | 0.00115433 | -0.17883 |
| 0.218836271 | -0.05875063  | 0.205046535 | -0.48818459 | 2.44E-29   | -0.32727 |
| 0.799251506 | 0.013698052  | 0.767812122 | -0.36123799 | 7.68E-16   | -0.29188 |
| 0.259689233 | -0.0481729   | 0.298879867 | -0.28665807 | 2.77E-10   | -0.08621 |
| 0.006572769 | -0.131240097 | 0.004499791 | -0.20651186 | 6.81E-06   | -0.38133 |

|             |              |             |             |            |          |
|-------------|--------------|-------------|-------------|------------|----------|
| 4.20E-15    | -0.347657948 | 1.03E-14    | -0.23490317 | 2.83E-07   | -0.12199 |
| 1.44E-07    | -0.239218429 | 1.68E-07    | -0.23424398 | 3.06E-07   | -0.17331 |
| 4.14E-06    | -0.210500453 | 4.47E-06    | -0.1255065  | 0.00661367 | -0.24744 |
| 0.804441148 | 0.008990641  | 0.846353925 | -0.21980433 | 1.62E-06   | -0.30872 |
| 9.60E-08    | -0.252152921 | 3.31E-08    | -0.28712129 | 2.59E-10   | -0.34543 |
| 0.321227715 | -0.037838444 | 0.414616555 | -0.14672722 | 0.00147515 | -0.10039 |
| 2.72E-05    | 0.191519253  | 3.10E-05    | 0.382296547 | 1.06E-17   | 0.029678 |
| 2.59E-06    | 0.242601938  | 1.11E-07    | -0.02382559 | 0.60755378 | 0.104057 |
| 3.26E-08    | 0.244228846  | 9.05E-08    | 0.275264153 | 1.45E-09   | 0.18731  |
| 0.062577812 | -0.08976974  | 0.052543097 | -0.17802783 | 0.0001098  | -0.19289 |
| 7.21E-05    | -0.188344495 | 4.20E-05    | -0.18556188 | 5.47E-05   | 0.066734 |
| 1.51E-08    | -0.273626734 | 1.83E-09    | -0.33614251 | 8.46E-14   | 0.076372 |
| 0.000585752 | -0.169606963 | 0.000231297 | -0.07484515 | 0.10623514 | 0.029626 |
| 1.24E-15    | -0.35813818  | 1.40E-15    | -0.3389419  | 5.11E-14   | -0.17848 |
| 5.59E-05    | -0.195111516 | 2.18E-05    | -0.15485331 | 0.00078589 | -0.15062 |
| 1.08E-08    | -0.258948619 | 1.36E-08    | -0.3445445  | 1.84E-14   | -0.1983  |
| 3.39E-13    | 0.332671884  | 1.57E-13    | 0.045085782 | 0.33095339 | 0.188126 |
| 3.93E-10    | -0.287969473 | 2.28E-10    | -0.19591064 | 2.01E-05   | -0.07676 |
| 2.92E-06    | -0.213292625 | 3.31E-06    | -0.27169977 | 2.40E-09   | -0.27096 |
| 0.005963327 | -0.127506364 | 0.005792139 | -0.42568365 | 5.60E-22   | -0.24825 |
| 0.000977556 | -0.155259385 | 0.000760931 | -0.20377881 | 9.06E-06   | -0.03793 |
| 0.008601035 | 0.125192729  | 0.00675164  | 0.100544142 | 0.02982083 | 0.182082 |
| 0.046963928 | -0.096931971 | 0.036256677 | 0.006264921 | 0.89259244 | 0.049219 |
| 0.004886934 | -0.128145992 | 0.005549449 | -0.22374422 | 1.04E-06   | -0.05391 |
| 0.001797877 | -0.148876819 | 0.001252563 | 0.037144282 | 0.4232359  | 0.091704 |
| 3.41E-06    | -0.214062773 | 3.05E-06    | -0.07927543 | 0.08703322 | -0.25582 |
| 0.001847551 | -0.139615177 | 0.00249583  | -0.00924669 | 0.84203486 | 0.011452 |
| 1.01E-06    | -0.221651381 | 1.32E-06    | -0.10479486 | 0.02352458 | -0.15449 |
| 0.001632348 | -0.155958502 | 0.000719664 | -0.34651665 | 1.27E-14   | 0.215271 |
| 0.081510543 | -0.074153199 | 0.109515737 | -0.22743854 | 6.80E-07   | 0.071298 |
| 2.92E-15    | -0.338147268 | 5.90E-14    | -0.15277153 | 0.0009262  | -0.00954 |
| 1.93E-07    | -0.236905209 | 2.22E-07    | -0.21667778 | 2.29E-06   | -0.06709 |
| 8.10E-07    | -0.226986443 | 7.16E-07    | -0.10404689 | 0.02454098 | 0.012375 |
| 6.90E-10    | -0.285836189 | 3.13E-10    | -0.12175261 | 0.00844227 | -0.1332  |
| 6.14E-11    | -0.299378632 | 3.99E-11    | -0.22408546 | 9.99E-07   | 0.215041 |
| 0.001932552 | -0.144199847 | 0.001783031 | -0.12207709 | 0.00826807 | -0.24705 |
| 3.83E-07    | -0.238387356 | 1.86E-07    | -0.25000111 | 4.37E-08   | -0.25143 |
| 0.290578385 | -0.042928187 | 0.354640094 | -0.00624554 | 0.89292277 | 0.060388 |
| 6.98E-09    | -0.260065575 | 1.17E-08    | -0.13751464 | 0.0029022  | -0.1308  |
| 0.777802443 | -0.006873512 | 0.882231073 | 0.010381094 | 0.82295795 | -0.12081 |
| 2.24E-06    | -0.225732867 | 8.27E-07    | -0.32619899 | 4.87E-13   | -0.33312 |
| 0.000683033 | -0.169469188 | 0.000234067 | -0.05841332 | 0.20766368 | -0.08421 |
| 0.197390099 | -0.061635766 | 0.18363196  | -0.37058406 | 1.19E-16   | 0.033583 |
| 0.045379351 | -0.102566491 | 0.026664899 | -0.3508759  | 5.63E-15   | -0.28113 |
| 2.03E-09    | -0.277740721 | 1.02E-09    | -0.28668114 | 2.76E-10   | -0.05846 |

|             |              |             |             |            |          |
|-------------|--------------|-------------|-------------|------------|----------|
| 0.001299623 | -0.161123823 | 0.000473266 | -0.42172714 | 1.46E-21   | 0.345349 |
| 2.21E-08    | -0.248195886 | 5.50E-08    | -0.43659535 | 3.72E-23   | -0.10922 |
| 8.39E-06    | -0.210785312 | 4.34E-06    | -0.02281166 | 0.62292647 | -0.13125 |
| 0.834588551 | 0.010671803  | 0.81808546  | -0.20719936 | 6.34E-06   | -0.05265 |
| 1.47E-11    | -0.299608209 | 3.85E-11    | -0.09353817 | 0.04334282 | -0.09624 |
| 3.76E-07    | -0.231581751 | 4.19E-07    | -0.22963206 | 5.27E-07   | -0.07876 |
| 0.000108823 | -0.166739    | 0.000295779 | -0.19482564 | 2.24E-05   | 0.009242 |
| 0.306613097 | -0.046057008 | 0.320631942 | -0.1521528  | 0.00097216 | -0.30424 |
| 4.93E-10    | -0.292057837 | 1.23E-10    | -0.10044342 | 0.02998605 | 0.105123 |
| 8.09E-11    | -0.299995643 | 3.63E-11    | -0.18568024 | 5.41E-05   | 0.133595 |
| 2.82E-11    | -0.312622352 | 4.79E-12    | 0.147213496 | 0.00142183 | -0.03817 |
| 0.000277751 | -0.171241331 | 0.000200696 | -0.13000713 | 0.00489445 | -0.28031 |
| 0.105503659 | -0.073788049 | 0.111278848 | -0.28429002 | 3.93E-10   | -0.24925 |
| 0.000862104 | -0.152677266 | 0.00093307  | -0.15135167 | 0.0010348  | -0.15613 |
| 0.002207841 | -0.14464175  | 0.001725273 | -0.12411193 | 0.00724684 | -0.15384 |
| 3.04E-18    | 0.391480025  | 1.49E-18    | 0.164198424 | 0.00036656 | 0.152384 |
| 8.10E-09    | 0.263847751  | 7.06E-09    | 0.295621225 | 7.15E-11   | 0.238621 |
| 4.57E-05    | -0.188603617 | 4.10E-05    | -0.2611608  | 1.01E-08   | -0.12019 |
| 7.80E-06    | -0.210850513 | 4.31E-06    | -0.21822262 | 1.93E-06   | -0.30485 |
| 2.20E-09    | -0.273164241 | 1.95E-09    | -0.15151407 | 0.00102181 | -0.04545 |
| 7.57E-11    | -0.29357936  | 9.77E-11    | 0.019524588 | 0.67387244 | -0.10427 |
| 5.18E-09    | -0.279314265 | 8.12E-10    | -0.24566301 | 7.56E-08   | -0.22072 |
| 0.004597163 | -0.137394194 | 0.002927228 | -0.23811245 | 1.92E-07   | -0.26684 |
| 0.001957882 | -0.143314471 | 0.001904117 | -0.33420805 | 1.20E-13   | -0.11792 |
| 7.24E-06    | 0.208569275  | 5.49E-06    | 0.189215376 | 3.87E-05   | 0.088766 |
| 2.87E-11    | -0.310692841 | 6.57E-12    | -0.00785982 | 0.86548244 | 0.025484 |
| 0.001171445 | -0.153824173 | 0.000852595 | -0.29483643 | 8.06E-11   | -0.15686 |
| 3.91E-08    | 0.251901254  | 3.42E-08    | 0.012902888 | 0.78093707 | 0.157478 |
| 0.016619089 | -0.118602909 | 0.010310991 | -0.19690435 | 1.82E-05   | -0.03641 |
| 0.554730663 | 0.018923377  | 0.683363074 | -0.43775475 | 2.77E-23   | -0.21194 |
| 0.098498896 | -0.080924355 | 0.080642625 | -0.15471721 | 0.00079443 | -0.26121 |
| 0.054190702 | -0.08966833  | 0.052811602 | -0.24722417 | 6.22E-08   | -0.14035 |
| 0.003932874 | -0.12510825  | 0.006789225 | -0.36252032 | 5.97E-16   | -0.16763 |
| 0.011482952 | -0.117270489 | 0.011206222 | 0.029245512 | 0.52840546 | 0.020849 |
| 3.70E-08    | -0.254417332 | 2.47E-08    | -0.3363641  | 8.14E-14   | -0.24146 |
| 0.006719322 | 0.14574192   | 0.001588848 | 0.006711338 | 0.88499023 | 0.187527 |
| 1.54E-06    | 0.216255917  | 2.40E-06    | 0.250262133 | 4.23E-08   | 0.126056 |
| 0.00057447  | -0.159197761 | 0.000554143 | -0.28444243 | 3.85E-10   | -0.22018 |
| 7.51E-07    | -0.241436799 | 1.28E-07    | -0.41529953 | 6.75E-21   | 0.243372 |
| 1.33E-11    | -0.306791933 | 1.23E-11    | -0.32572351 | 5.28E-13   | -0.22816 |
| 0.001122986 | -0.151439159 | 0.001027779 | -0.42039821 | 2.01E-21   | -0.32681 |
| 4.09E-05    | -0.19002989  | 3.58E-05    | -0.26347479 | 7.43E-09   | -0.27132 |
| 0.028004811 | -0.102620557 | 0.026584633 | -0.26574242 | 5.46E-09   | -0.13139 |
| 3.52E-09    | 0.276882703  | 1.15E-09    | 0.263467905 | 7.44E-09   | 0.110893 |
| 8.71E-05    | 0.168236221  | 0.000260273 | 0.136839317 | 0.0030451  | 0.068449 |

|             |              |             |             |            |          |
|-------------|--------------|-------------|-------------|------------|----------|
| 0.001876315 | -0.142551252 | 0.002014489 | -0.13047135 | 0.00474233 | -0.08253 |
| 6.43E-09    | 0.262639456  | 8.32E-09    | -0.01923453 | 0.67844494 | 0.34203  |
| 8.57E-12    | -0.31560015  | 2.93E-12    | -0.17977309 | 9.37E-05   | -0.00913 |
| 0.558114014 | -0.030830863 | 0.506285227 | -0.2852751  | 3.40E-10   | -0.33809 |
| 3.72E-05    | -0.200380235 | 1.28E-05    | -0.17749272 | 0.00011524 | -0.24184 |
| 0.062771627 | -0.087819671 | 0.057910028 | -0.12639652 | 0.00623596 | 0.068079 |
| 4.22E-16    | -0.355933038 | 2.15E-15    | -0.10746642 | 0.02018582 | -0.11329 |
| 0.049693108 | -0.088691452 | 0.055457086 | -0.10918935 | 0.01825823 | 0.023091 |
| 9.22E-07    | 0.232546675  | 3.74E-07    | 0.058347069 | 0.20818058 | 0.144497 |
| 3.89E-05    | -0.170430242 | 0.000215375 | -0.23279505 | 3.63E-07   | -0.08619 |
| 2.91E-21    | -0.423383431 | 9.79E-22    | -0.08833147 | 0.05645931 | -0.1379  |
| 4.88E-11    | -0.314702571 | 3.40E-12    | -0.17994858 | 9.22E-05   | -0.05312 |
| 0.005956586 | -0.134024208 | 0.003712302 | -0.10931432 | 0.01812488 | -0.3289  |
| 0.000220781 | -0.178554032 | 0.000104687 | -0.13520566 | 0.00341763 | 0.202002 |
| 0.04242479  | -0.096903373 | 0.036312005 | -0.26159106 | 9.57E-09   | 0.111814 |
| 0.000188776 | -0.173901468 | 0.000158865 | -0.18481025 | 5.88E-05   | -0.26314 |
| 6.96E-05    | -0.185114756 | 5.71E-05    | -0.27978438 | 7.59E-10   | -0.10788 |
| 2.60E-08    | -0.241168463 | 1.32E-07    | -0.34779629 | 1.00E-14   | -0.12963 |
| 1.27E-05    | -0.204593627 | 8.32E-06    | -0.17322521 | 0.00016865 | -0.27574 |
| 0.09901165  | -0.068952172 | 0.136791261 | -0.25174434 | 3.49E-08   | 0.063046 |
| 3.15E-05    | -0.184914884 | 5.82E-05    | -0.10676271 | 0.02102265 | -0.09596 |
| 2.12E-07    | -0.249718822 | 4.53E-08    | -0.10988506 | 0.01752662 | -0.27039 |
| 0.12692566  | 0.067971427  | 0.142475363 | -0.07802573 | 0.09214303 | -0.03639 |
| 0.029794913 | -0.10825313  | 0.019284735 | -0.0728068  | 0.11612747 | -0.13603 |
| 0.000415792 | -0.17646459  | 0.000126417 | -0.05910404 | 0.20233018 | 0.039197 |
| 3.39E-10    | -0.282225836 | 5.32E-10    | -0.06061743 | 0.19099349 | -0.23089 |
| 0.00884349  | -0.124602374 | 0.007018236 | -0.20331675 | 9.50E-06   | -0.24772 |
| 1.03E-06    | -0.224795396 | 9.21E-07    | 0.050301947 | 0.27800674 | -0.10917 |
| 2.22E-05    | -0.203906256 | 8.94E-06    | -0.11524059 | 0.01270248 | 0.17784  |
| 1.25E-05    | -0.209277137 | 5.09E-06    | 0.003193345 | 0.94512971 | -0.10606 |
| 0.007484129 | -0.126574864 | 0.006162644 | -0.02661518 | 0.56615792 | -0.12768 |
| 0.000650713 | -0.156789766 | 0.000673298 | -0.25841284 | 1.46E-08   | -0.2103  |
| 0.622877052 | -0.024422629 | 0.598581435 | -0.14899329 | 0.00124143 | -0.20465 |
| 5.47E-05    | -0.184209703 | 6.22E-05    | -0.14430764 | 0.00176878 | -0.24423 |
| 1.35E-06    | -0.215200622 | 2.69E-06    | -0.40700594 | 4.64E-20   | -0.18107 |
| 3.26E-13    | -0.331557042 | 1.91E-13    | 0.024555638 | 0.59659075 | 0.021885 |
| 0.010811568 | -0.125205147 | 0.006746131 | -0.25546613 | 2.16E-08   | -0.17976 |
| 3.73E-06    | -0.213257147 | 3.32E-06    | -0.15629388 | 0.00070061 | -0.03358 |
| 5.63E-09    | -0.274006479 | 1.73E-09    | -0.24020659 | 1.49E-07   | 0.035908 |
| 1.27E-07    | -0.234802281 | 2.86E-07    | -0.35844941 | 1.32E-15   | -0.03882 |
| 2.02E-16    | -0.375224789 | 4.63E-17    | 0.016143555 | 0.72787555 | 0.055326 |
| 5.64E-06    | -0.214591249 | 2.88E-06    | -0.27370107 | 1.81E-09   | -0.10266 |
| 2.37E-05    | 0.20203615   | 1.08E-05    | 0.273828846 | 1.78E-09   | 0.264052 |
| 3.76E-05    | -0.204695691 | 8.24E-06    | 0.101268512 | 0.02865546 | 0.036552 |
| 0.787139075 | 0.005698701  | 0.902248897 | -0.1917889  | 3.02E-05   | -0.27943 |

|             |              |             |             |            |          |
|-------------|--------------|-------------|-------------|------------|----------|
| 1.92E-13    | -0.334822331 | 1.07E-13    | -0.30451274 | 1.78E-11   | -0.28597 |
| 2.62E-21    | -0.417817662 | 3.72E-21    | -0.19699346 | 1.80E-05   | -0.09005 |
| 8.89E-14    | 0.337086177  | 7.15E-14    | 0.183936358 | 6.38E-05   | 0.037553 |
| 3.86E-11    | -0.303842295 | 1.98E-11    | 0.090666092 | 0.05021894 | -0.10111 |
| 0.598602218 | -0.021064385 | 0.649803168 | -0.08513437 | 0.06603629 | -0.13756 |
| 3.57E-13    | -0.328196896 | 3.44E-13    | -0.20282179 | 1.00E-05   | -0.01104 |
| 0.662681706 | -0.022962971 | 0.620621733 | 0.035644696 | 0.44220903 | -0.24679 |
| 4.90E-11    | -0.308571376 | 9.27E-12    | 0.04862068  | 0.29440547 | -0.04064 |
| 0.636687485 | 0.012446382  | 0.78850061  | -0.08784959 | 0.05782438 | 0.010441 |
| 4.80E-08    | -0.246152621 | 7.11E-08    | -0.00237711 | 0.95914042 | -0.10805 |
| 0.000864329 | -0.160751611 | 0.000487984 | -0.16087246 | 0.00048316 | -0.29327 |
| 4.27E-05    | -0.17761699  | 0.000113958 | -0.20400187 | 8.85E-06   | -0.07867 |
| 0.055457025 | -0.095066457 | 0.040019195 | -0.3185167  | 1.80E-12   | -0.15076 |
| 0.00331599  | -0.142368918 | 0.002041709 | -0.35882654 | 1.23E-15   | -0.27679 |
| 1.59E-13    | -0.336549909 | 7.87E-14    | -0.10194208 | 0.02760712 | 0.028136 |
| 5.52E-06    | -0.220823863 | 1.44E-06    | -0.45580216 | 2.46E-25   | -0.25908 |
| 8.41E-06    | 0.205473824  | 7.60E-06    | 0.143852543 | 0.00182966 | 0.08305  |
| 0.025698852 | -0.10300903  | 0.026014004 | -0.33505115 | 1.03E-13   | -0.30484 |
| 0.052599467 | 0.09004902   | 0.051809525 | 0.127752039 | 0.00569782 | 0.056641 |
| 1.23E-05    | -0.199818131 | 1.36E-05    | -0.14388881 | 0.00182474 | 0.096677 |
| 0.078495982 | -0.090478854 | 0.050697197 | -0.37670852 | 3.41E-17   | 0.106373 |
| 1.01E-05    | -0.198655722 | 1.53E-05    | -0.12331767 | 0.0076312  | -0.05854 |
| 3.48E-11    | -0.302117331 | 2.60E-11    | -0.02232974 | 0.63029154 | -0.02447 |
| 0.000225306 | -0.171896493 | 0.000189529 | 0.027124469 | 0.5587485  | -0.1847  |
| 1.78E-15    | -0.366268901 | 2.84E-16    | -0.17853562 | 0.00010486 | -0.0884  |
| 1.97E-11    | -0.310553763 | 6.72E-12    | -0.33479427 | 1.08E-13   | -0.02831 |
| 0.001799936 | -0.150363893 | 0.001117145 | -0.2511859  | 3.75E-08   | -0.22206 |
| 1.12E-19    | -0.400784279 | 1.90E-19    | 0.050806586 | 0.27320793 | 0.108552 |
| 3.77E-07    | -0.240217849 | 1.49E-07    | 0.130603778 | 0.00469973 | -0.04647 |
| 8.77E-05    | -0.187346609 | 4.62E-05    | -0.25531892 | 2.20E-08   | -0.1408  |
| 0.051579314 | -0.093826791 | 0.042697924 | -0.09430835 | 0.04163992 | -0.04479 |
| 2.08E-06    | -0.221495989 | 1.34E-06    | -0.23506761 | 2.77E-07   | -0.16503 |
| 9.60E-07    | -0.22973661  | 5.20E-07    | -0.23175828 | 4.10E-07   | -0.01891 |
| 0.000274895 | -0.166397411 | 0.00030449  | -0.27475659 | 1.56E-09   | -0.05842 |
| 0.159834563 | -0.083305191 | 0.072090987 | -0.14375847 | 0.00184248 | -0.19988 |
| 1.05E-09    | -0.287916711 | 2.30E-10    | -0.19019784 | 3.52E-05   | -0.10789 |
| 0.000106983 | -0.185970162 | 5.27E-05    | -0.13186003 | 0.00431242 | -0.08573 |
| 0.149284161 | -0.074953618 | 0.105727978 | -0.03945008 | 0.3950084  | -0.26929 |
| 6.46E-11    | -0.290827364 | 1.48E-10    | -0.10373863 | 0.02497079 | 0.015909 |
| 0.139264355 | -0.074664893 | 0.107082164 | -0.19316387 | 2.64E-05   | -0.18583 |
| 4.64E-05    | -0.195326465 | 2.13E-05    | -0.18806084 | 4.32E-05   | 0.071045 |
| 2.31E-07    | 0.235737772  | 2.56E-07    | 0.297266704 | 5.54E-11   | 0.054402 |
| 3.88E-07    | -0.236069732 | 2.46E-07    | -0.21046994 | 4.48E-06   | -0.27169 |
| 7.36E-11    | -0.306495251 | 1.29E-11    | -0.12306652 | 0.00775648 | -0.09006 |
| 0.014921348 | -0.118367318 | 0.010464507 | -0.29551397 | 7.27E-11   | 0.133171 |

|             |              |             |             |            |          |
|-------------|--------------|-------------|-------------|------------|----------|
| 0.106701989 | -0.077509163 | 0.094324172 | -0.29420717 | 8.88E-11   | -0.00054 |
| 7.35E-11    | -0.291461299 | 1.35E-10    | -0.28971287 | 1.76E-10   | -0.17205 |
| 5.71E-10    | -0.294669453 | 8.27E-11    | -0.04230052 | 0.36172636 | 0.012248 |
| 6.71E-05    | -0.188827657 | 4.01E-05    | -0.14698754 | 0.00144638 | -0.09962 |
| 3.83E-05    | 0.168657492  | 0.000251025 | 0.050663719 | 0.27456074 | 0.10459  |
| 4.31E-19    | -0.40387896  | 9.47E-20    | 0.002483585 | 0.95731204 | -0.0991  |
| 0.002618209 | -0.140312386 | 0.002372878 | -0.24792965 | 5.69E-08   | -0.07361 |
| 9.64E-08    | -0.248573143 | 5.24E-08    | -0.05450731 | 0.23974266 | -0.13569 |
| 0.002783733 | -0.147398351 | 0.00140203  | -0.0800804  | 0.08386432 | -0.14306 |
| 1.65E-11    | 0.307436568  | 1.11E-11    | 0.003320811 | 0.94294316 | 0.137257 |
| 7.24E-13    | 0.329398778  | 2.79E-13    | 0.173544222 | 0.00016396 | 0.104239 |
| 9.03E-13    | -0.320594611 | 1.27E-12    | 0.045440796 | 0.327156   | -0.09287 |
| 0.000501746 | -0.160934308 | 0.000480708 | -0.01192175 | 0.7972175  | 0.003134 |
| 0.003534706 | -0.146849618 | 0.001461555 | -0.22872825 | 5.85E-07   | 0.054168 |
| 2.39E-05    | -0.205658479 | 7.45E-06    | -0.10090003 | 0.02924329 | -0.13538 |
| 9.03E-07    | -0.228722703 | 5.86E-07    | 0.095714387 | 0.0386766  | -0.03888 |
| 9.15E-05    | -0.178767209 | 0.00010268  | -0.26746072 | 4.31E-09   | -0.2473  |
| 1.49E-07    | -0.246378145 | 6.91E-08    | -0.33732905 | 6.84E-14   | -0.26974 |
| 1.15E-13    | -0.339062269 | 5.00E-14    | 0.047999529 | 0.30062434 | -0.00698 |
| 1.65E-08    | -0.261560926 | 9.61E-09    | -0.16514725 | 0.00033845 | 0.10455  |
| 0.008863127 | -0.122038113 | 0.008288822 | -0.05429825 | 0.24155273 | -0.11219 |
| 1.83E-07    | -0.244884767 | 8.34E-08    | -0.13266714 | 0.00407905 | -0.01107 |
| 0.000500426 | -0.163997848 | 0.000372769 | -0.08712478 | 0.05992904 | -0.15002 |
| 0.00016602  | -0.18156931  | 7.94E-05    | -0.33395479 | 1.25E-13   | 0.140493 |
| 3.64E-07    | -0.234683113 | 2.90E-07    | -0.29231493 | 1.18E-10   | -0.10432 |
| 1.18E-18    | -0.394566775 | 7.58E-19    | -0.06962758 | 0.13297936 | -0.1151  |
| 0.022060033 | -0.112099117 | 0.015366097 | -0.20018107 | 1.31E-05   | -0.2293  |
| 1.89E-07    | -0.244159353 | 9.13E-08    | 0.091630347 | 0.04781524 | -0.1726  |
| 7.69E-07    | -0.233047757 | 3.52E-07    | 0.089438254 | 0.05342501 | 0.088561 |
| 0.0400413   | -0.102362476 | 0.026969659 | -0.21072979 | 4.36E-06   | -0.04149 |
| 0.458014887 | -0.03333584  | 0.472348752 | -0.30446814 | 1.79E-11   | 0.018298 |
| 9.26E-09    | -0.27099255  | 2.64E-09    | -0.071616   | 0.12223207 | -0.12857 |
| 3.41E-06    | -0.225370207 | 8.62E-07    | -0.00840888 | 0.85618424 | -0.04282 |
| 0.277403304 | -0.060997154 | 0.188223541 | -0.07999822 | 0.08418352 | -0.00886 |
| 0.000184426 | -0.175649792 | 0.000135987 | -0.10370251 | 0.02502157 | -0.21912 |
| 3.33E-07    | -0.247759071 | 5.81E-08    | 0.029938016 | 0.51868301 | 0.108749 |
| 1.49E-11    | -0.313452213 | 4.18E-12    | -0.05732803 | 0.21624819 | 0.083063 |
| 0.201218158 | -0.065063709 | 0.160390852 | 0.158903505 | 0.00056757 | -0.00775 |
| 1.15E-26    | -0.473639299 | 1.73E-27    | 0.104281148 | 0.02421865 | -0.14645 |
| 1.10E-08    | -0.262648111 | 8.31E-09    | -0.07206259 | 0.11991401 | -0.09363 |
| 0.393609284 | 0.033363174  | 0.471985467 | -0.22476083 | 9.25E-07   | -0.07304 |
| 9.19E-10    | 0.293615143  | 9.72E-11    | -0.15033417 | 0.00111971 | 0.236207 |
| 2.15E-10    | 0.300763282  | 3.21E-11    | -0.33851087 | 5.53E-14   | -0.01871 |
| 5.36E-05    | -0.19700066  | 1.80E-05    | 0.017301822 | 0.70920693 | 0.015918 |
| 0.000188923 | 0.181466701  | 8.02E-05    | 0.114425707 | 0.01335106 | -0.22682 |



|             |              |             |             |            |          |
|-------------|--------------|-------------|-------------|------------|----------|
| 1.32E-11    | 0.306967263  | 1.20E-11    | -0.05908039 | 0.20251109 | -0.22717 |
| 2.98E-06    | 0.230141781  | 4.96E-07    | -0.07210725 | 0.11968406 | -0.22891 |
| 1.46E-07    | 0.24467603   | 8.56E-08    | -0.04261829 | 0.35812775 | 0.209915 |
| 3.28E-13    | 0.335528666  | 9.45E-14    | -0.1987852  | 1.51E-05   | 0.270584 |
| 2.96E-19    | 0.40491704   | 7.48E-20    | 0.178974128 | 0.00010077 | 0.179905 |
| 1.66E-18    | 0.397814251  | 3.70E-19    | -0.0183652  | 0.69221927 | -0.06131 |
| 2.48E-24    | 0.448509774  | 1.72E-24    | -0.00829862 | 0.85804987 | 0.095411 |
| 4.60E-16    | 0.366162832  | 2.90E-16    | 0.026998105 | 0.56058252 | 0.157557 |
| 5.63E-14    | 0.360985258  | 8.07E-16    | -0.06370451 | 0.16932591 | -0.02946 |
| 0.005224749 | 0.131790066  | 0.004333209 | -0.04992386 | 0.28163943 | -0.11315 |
| 3.96E-10    | -0.287560229 | 2.42E-10    | 0.006164916 | 0.89429684 | 0.217493 |
| 7.58E-08    | 0.260873874  | 1.05E-08    | 0.057756254 | 0.21283106 | -0.07323 |
| 1.16E-08    | 0.265886032  | 5.35E-09    | -0.07207718 | 0.11983887 | -0.20887 |
| 3.69E-07    | 0.248543875  | 5.26E-08    | 0.06059239  | 0.19117716 | -0.11952 |
| 7.14E-25    | 0.460045652  | 7.76E-26    | -0.0428586  | 0.35542134 | -0.14753 |
| 2.15E-10    | 0.282238968  | 5.31E-10    | -0.02898504 | 0.53208622 | -0.10329 |
| 4.96E-08    | 0.254182486  | 2.55E-08    | -0.05508992 | 0.23474865 | -0.19273 |
| 0.00256002  | 0.143067215  | 0.001939253 | -0.03516891 | 0.44832865 | -0.07817 |
| 3.09E-18    | 0.386638916  | 4.23E-18    | -0.20361702 | 9.21E-06   | -0.15741 |
| 7.64E-19    | 0.400258248  | 2.14E-19    | 0.135268434 | 0.00340258 | 0.038293 |
| 3.87E-14    | 0.351886002  | 4.65E-15    | -0.04442777 | 0.3380666  | 0.090381 |
| 3.14E-12    | 0.333909456  | 1.26E-13    | -0.07633671 | 0.09942776 | 0.021397 |
| 4.83E-16    | -0.362968099 | 5.46E-16    | -0.03799757 | 0.41265538 | 0.199755 |
| 9.48E-28    | -0.468517596 | 7.41E-27    | -0.01493853 | 0.74747006 | -0.00528 |
| 3.28E-13    | 0.332167548  | 1.72E-13    | -0.07462269 | 0.10728125 | -0.22741 |
| 3.25E-18    | 0.401310317  | 1.69E-19    | 0.104053735 | 0.02453151 | 0.099524 |
| 3.34E-15    | 0.36483662   | 3.78E-16    | 0.025178694 | 0.58730606 | -0.13692 |
| 1.61E-18    | 0.382278084  | 1.07E-17    | 0.025651916 | 0.58029904 | 0.215067 |
| 2.77E-12    | 0.324719069  | 6.28E-13    | 0.021184278 | 0.64794384 | 0.192151 |
| 1.63E-06    | 0.226334038  | 7.72E-07    | 0.071343558 | 0.12366329 | -0.06301 |
| 0.000933692 | 0.155034497  | 0.000774664 | -0.09322712 | 0.04404701 | 0.037147 |
| 2.26E-09    | 0.271753432  | 2.38E-09    | -0.20389363 | 8.95E-06   | -0.06188 |
| 0.002185472 | 0.141997277  | 0.002098234 | 0.105466444 | 0.02264321 | 0.037177 |
| 8.18E-08    | 0.263240352  | 7.67E-09    | -0.04936459 | 0.28707146 | 0.05859  |
| 2.47E-10    | 0.295738726  | 7.02E-11    | -0.04378612 | 0.34509649 | -0.01048 |
| 3.74E-08    | 0.256377088  | 1.91E-08    | -0.05644165 | 0.22344587 | -0.27464 |
| 1.45E-13    | 0.326432557  | 4.67E-13    | -0.05463661 | 0.23862795 | -0.10913 |
| 9.11E-18    | -0.383021805 | 9.12E-18    | -0.1910717  | 3.23E-05   | 0.317274 |
| 5.84E-19    | 0.404885148  | 7.54E-20    | 0.021300815 | 0.64613867 | 0.087029 |
| 1.54E-15    | 0.362996547  | 5.43E-16    | -0.19529409 | 2.14E-05   | 0.047607 |
| 7.84E-12    | 0.315729986  | 2.87E-12    | 0.002949728 | 0.94930987 | -0.03278 |
| 7.91E-08    | 0.254117377  | 2.57E-08    | 0.012232267 | 0.79205505 | -0.27434 |
| 8.40E-09    | 0.270965772  | 2.65E-09    | 0.085199623 | 0.06582828 | 0.105071 |
| 0.001177517 | 0.148636289  | 0.001275835 | 0.054539313 | 0.2394664  | -0.23942 |
| 3.08E-16    | 0.361213103  | 7.71E-16    | -0.11529257 | 0.01266206 | -0.17721 |

|             |              |             |             |            |          |
|-------------|--------------|-------------|-------------|------------|----------|
| 0.020330734 | 0.118998297  | 0.010057836 | 0.095972447 | 0.03815259 | 0.033361 |
| 1.05E-09    | -0.275329547 | 1.44E-09    | -0.05626387 | 0.22490989 | 0.36171  |
| 5.56E-07    | 0.242541573  | 1.12E-07    | 0.09113647  | 0.04903406 | -0.08495 |
| 2.18E-21    | 0.422212778  | 1.30E-21    | 0.110113596 | 0.01729196 | -0.02381 |
| 2.60E-27    | 0.464355126  | 2.37E-26    | -0.0171468  | 0.7116958  | -0.08651 |
| 2.78E-08    | 0.253483577  | 2.79E-08    | -0.05039594 | 0.27710861 | -0.03143 |
| 5.91E-10    | 0.287760347  | 2.35E-10    | -0.04909129 | 0.28975146 | -0.15228 |
| 3.31E-12    | 0.327078863  | 4.18E-13    | -0.09813253 | 0.03399778 | -0.0142  |
| 1.49E-09    | 0.286686058  | 2.76E-10    | -0.17460536 | 0.00014925 | -0.13635 |
| 0.002248345 | 0.149557637  | 0.001188792 | 0.076695918 | 0.09784135 | 0.118595 |
| 4.00E-22    | -0.425646152 | 5.65E-22    | -0.15612579 | 0.0007101  | 0.045923 |
| 7.71E-20    | 0.404762037  | 7.75E-20    | -0.04610933 | 0.32008195 | -0.06252 |
| 0.000639156 | 0.158712659  | 0.000576445 | 0.015332692 | 0.74104205 | -0.24179 |
| 0.007526102 | 0.123703283  | 0.007442375 | -0.00795972 | 0.86378911 | -0.2846  |
| 1.44E-19    | 0.398398017  | 3.25E-19    | -0.01422396 | 0.75916749 | 0.137167 |
| 3.69E-13    | 0.33285475   | 1.52E-13    | 0.170764436 | 0.00020921 | -0.04186 |
| 2.40E-17    | 0.399504023  | 2.54E-19    | -0.1142283  | 0.0135125  | -0.02684 |
| 2.46E-08    | 0.250563037  | 4.07E-08    | -0.06784179 | 0.14324004 | 0.27049  |
| 1.28E-32    | -0.516400838 | 3.42E-33    | -0.07514745 | 0.10482649 | 0.051214 |
| 3.99E-06    | -0.218211245 | 1.93E-06    | -0.05314393 | 0.25171971 | 0.0404   |
| 6.34E-10    | -0.288580828 | 2.08E-10    | 0.094340562 | 0.04156995 | 0.055322 |
| 5.57E-05    | 0.193990496  | 2.43E-05    | -0.01849353 | 0.69017943 | -0.0361  |
| 1.06E-16    | -0.383691256 | 7.92E-18    | -0.08106216 | 0.0801262  | 0.06202  |
| 1.64E-09    | 0.276967144  | 1.14E-09    | 0.150921888 | 0.00106991 | -0.16043 |
| 2.31E-14    | 0.337456012  | 6.69E-14    | 0.070435369 | 0.12852852 | -0.22925 |
| 1.57E-12    | -0.326131414 | 4.92E-13    | -0.24436301 | 8.90E-08   | -0.03771 |
| 9.81E-14    | -0.338379112 | 5.66E-14    | -0.08800856 | 0.05737106 | 0.183417 |
| 5.60E-32    | 0.505527996  | 1.15E-31    | -0.00755136 | 0.87071424 | 0.00383  |
| 2.00E-21    | 0.426938673  | 4.12E-22    | 0.009805858 | 0.8326192  | -0.06632 |
| 2.02E-20    | -0.4099788   | 2.34E-20    | -0.14512474 | 0.00166411 | 0.180765 |
| 5.39E-06    | 0.212113397  | 3.76E-06    | -0.0736762  | 0.11182334 | 0.022258 |
| 6.12E-21    | 0.4154628    | 6.50E-21    | -0.00340822 | 0.94144401 | 0.099254 |
| 1.52E-11    | -0.311078389 | 6.17E-12    | -0.014811   | 0.74955344 | 0.131002 |
| 4.15E-05    | -0.18018471  | 9.02E-05    | -0.05314353 | 0.25172329 | 0.268572 |
| 2.75E-17    | 0.383283198  | 8.63E-18    | -0.07963838 | 0.08559271 | -0.13556 |
| 1.52E-11    | 0.323187065  | 8.16E-13    | -0.08788171 | 0.05773255 | -0.0553  |
| 2.50E-11    | 0.298000143  | 4.95E-11    | -0.20972261 | 4.86E-06   | -0.00301 |
| 7.92E-16    | 0.373885413  | 6.10E-17    | 0.046087158 | 0.32031492 | -0.04841 |
| 0.023482272 | 0.101503343  | 0.028286152 | 0.093991265 | 0.04233405 | -0.1829  |
| 0.002169339 | 0.152729462  | 0.000929261 | -0.2001849  | 1.31E-05   | 0.002217 |
| 3.06E-13    | 0.34080079   | 3.65E-14    | -0.16308413 | 0.00040233 | -0.04264 |
| 1.23E-05    | 0.205064404  | 7.93E-06    | -0.0141049  | 0.76112196 | -0.10381 |
| 6.58E-09    | 0.275953605  | 1.31E-09    | -0.12316127 | 0.007709   | -0.00825 |
| 2.17E-05    | 0.19455881   | 2.30E-05    | 0.059552099 | 0.198924   | -0.37975 |
| 1.52E-14    | 0.365919583  | 3.05E-16    | -0.08051055 | 0.08220954 | -0.11317 |

|             |              |             |             |            |          |
|-------------|--------------|-------------|-------------|------------|----------|
| 1.64E-24    | 0.450068331  | 1.14E-24    | -0.14254151 | 0.00201593 | -0.00125 |
| 3.64E-06    | 0.218253331  | 1.92E-06    | 0.052514487 | 0.25738733 | 0.172029 |
| 3.78E-10    | 0.285842294  | 3.13E-10    | -0.10331016 | 0.02557897 | -0.08842 |
| 0.001070004 | 0.151984781  | 0.000984999 | -0.09220008 | 0.04644086 | 0.087608 |
| 3.35E-23    | 0.45065177   | 9.74E-25    | 0.012773773 | 0.78307423 | 0.143162 |
| 4.61E-12    | 0.32305299   | 8.35E-13    | 0.067382693 | 0.14597328 | 0.024675 |
| 3.00E-11    | 0.317309201  | 2.20E-12    | -0.01828578 | 0.69348282 | 0.063899 |
| 1.49E-25    | -0.459574634 | 8.83E-26    | -0.08821532 | 0.05678586 | 0.218727 |
| 7.25E-15    | 0.352417527  | 4.21E-15    | -0.03846122 | 0.40697232 | -0.06585 |
| 2.21E-05    | 0.194516059  | 2.31E-05    | 0.046178735 | 0.31935326 | 0.091744 |
| 1.64E-14    | 0.359501711  | 1.08E-15    | -0.09524645 | 0.03964233 | 0.272997 |
| 6.25E-15    | 0.357421493  | 1.61E-15    | -0.03656389 | 0.4305222  | -0.00745 |
| 1.24E-10    | 0.297352177  | 5.47E-11    | 0.101214634 | 0.02874077 | -0.01439 |
| 2.53E-08    | 0.260991878  | 1.04E-08    | 0.134100678 | 0.00369255 | -0.03792 |
| 1.27E-06    | 0.223599492  | 1.06E-06    | -0.05754384 | 0.21452115 | -0.09036 |
| 2.80E-11    | 0.309614014  | 7.83E-12    | 0.119355268 | 0.00983403 | -0.17147 |
| 1.22E-15    | 0.345023666  | 1.68E-14    | -0.102272   | 0.02710577 | -0.11235 |
| 1.10E-17    | -0.370603881 | 1.19E-16    | -0.13009755 | 0.00486448 | 0.167392 |
| 1.17E-18    | -0.395563322 | 6.08E-19    | -0.16673803 | 0.0002958  | 0.084442 |
| 2.37E-26    | 0.476628773  | 7.34E-28    | 0.056156466 | 0.22579761 | 0.001023 |
| 5.39E-08    | 0.261439338  | 9.77E-09    | 0.169518563 | 0.00023307 | -0.02443 |
| 7.47E-19    | 0.397776301  | 3.73E-19    | -0.03752632 | 0.41847934 | 0.011302 |
| 1.08E-06    | 0.235956823  | 2.49E-07    | -0.15080969 | 0.00107926 | -0.01954 |
| 9.07E-13    | 0.31885183   | 1.70E-12    | 0.027334226 | 0.55571056 | -0.15643 |
| 2.17E-08    | 0.268833127  | 3.57E-09    | 0.029299689 | 0.5276415  | -0.21233 |
| 7.52E-10    | 0.288967789  | 1.96E-10    | 0.043390496 | 0.34947695 | 0.074683 |
| 2.05E-14    | 0.348576166  | 8.68E-15    | -0.07184742 | 0.12102655 | -0.17207 |
| 4.72E-24    | 0.454066201  | 3.92E-25    | 0.057766819 | 0.21274725 | -0.01032 |
| 3.42E-12    | 0.324362055  | 6.67E-13    | -0.15240031 | 0.00095353 | -0.15008 |
| 5.98E-18    | 0.383258813  | 8.67E-18    | -0.01745464 | 0.70675656 | 0.084059 |
| 1.86E-11    | 0.303811843  | 1.99E-11    | 0.069166968 | 0.13556997 | -0.04064 |
| 1.54E-23    | 0.45667387   | 1.94E-25    | 0.021172486 | 0.64812663 | -0.06065 |
| 5.05E-12    | 0.317242986  | 2.23E-12    | -0.25564362 | 2.11E-08   | 0.103704 |
| 8.89E-11    | 0.289199587  | 1.90E-10    | -0.07340803 | 0.11313739 | 0.153395 |
| 1.43E-09    | -0.270134522 | 2.98E-09    | 0.05014085  | 0.27955065 | 0.358759 |
| 5.34E-12    | 0.314215351  | 3.68E-12    | -0.18326922 | 6.79E-05   | -0.0546  |
| 4.63E-21    | 0.417779624  | 3.75E-21    | -0.08392458 | 0.06999194 | 0.123699 |
| 1.60E-11    | 0.317792816  | 2.03E-12    | -0.13534352 | 0.00338466 | -0.05081 |
| 4.78E-07    | 0.245982143  | 7.27E-08    | 0.115489401 | 0.01251006 | -0.24217 |
| 0.970578046 | 0.008750416  | 0.850410315 | 0.164146514 | 0.00036815 | -0.06684 |
| 1.74E-11    | -0.30354175  | 2.07E-11    | -0.05375985 | 0.24625845 | 0.185032 |
| 0.001867284 | 0.148304908  | 0.00130855  | 0.253305563 | 2.86E-08   | -0.22314 |
| 4.68E-22    | 0.432277118  | 1.10E-22    | 0.032858932 | 0.4787119  | -0.03877 |
| 9.98E-11    | 0.289445257  | 1.83E-10    | 0.025224609 | 0.58662449 | -0.0692  |
| 0.414197364 | 0.038060874  | 0.411876689 | 0.020438657 | 0.6595421  | -0.27285 |

|             |              |             |             |            |          |
|-------------|--------------|-------------|-------------|------------|----------|
| 0.403551581 | 0.030187084  | 0.515208878 | 0.281280902 | 6.11E-10   | 0.465446 |
| 2.40E-06    | -0.225915689 | 8.10E-07    | -0.46668625 | 1.24E-26   | -0.27159 |
| 0.001656892 | -0.139785584 | 0.002465254 | -0.39210184 | 1.30E-18   | -0.26711 |
| 0.113659785 | -0.074535978 | 0.107691211 | -0.25874594 | 1.40E-08   | -0.23053 |
| 0.008683972 | 0.116737838  | 0.011582928 | -0.20754351 | 6.12E-06   | -0.11163 |
| 1.90E-05    | -0.193808934 | 2.47E-05    | -0.37578749 | 4.13E-17   | -0.22363 |
| 0.115322266 | -0.073595423 | 0.11221789  | -0.20598829 | 7.20E-06   | -0.0706  |
| 1.38E-05    | -0.210419791 | 4.51E-06    | -0.45340884 | 4.67E-25   | 0.010165 |
| 0.000545495 | -0.172219678 | 0.000184238 | -0.49708889 | 1.62E-30   | 0.062245 |
| 3.90E-05    | -0.196983699 | 1.81E-05    | -0.38298366 | 9.19E-18   | -0.37751 |
| 0.482295983 | 0.041657036  | 0.369082374 | 0.341866634 | 3.00E-14   | 0.079402 |
| 0.75204329  | 0.006278639  | 0.892358672 | -0.41968308 | 2.38E-21   | -0.5009  |
| 0.442387341 | -0.042109579 | 0.363899494 | 0.359395178 | 1.10E-15   | 0.570682 |
| 1.63E-08    | -0.259369172 | 1.29E-08    | -0.15600175 | 0.00071718 | -0.13982 |
| 0.000193288 | 0.173547484  | 0.000163916 | 0.322817653 | 8.69E-13   | 0.569688 |
| 0.151595967 | -0.071388386 | 0.123426905 | -0.60714715 | 2.24E-48   | -0.23613 |
| 0.000551415 | 0.148128265  | 0.001326302 | -0.31392907 | 3.86E-12   | -0.28031 |
| 0.004214973 | 0.132968875  | 0.003994785 | 0.43454225  | 6.24E-23   | 0.337814 |
| 2.34E-16    | -0.381213853 | 1.33E-17    | -0.17776643 | 0.00011243 | 0.098679 |
| 0.057635724 | -0.09829657  | 0.033698642 | -0.46970554 | 5.30E-27   | -0.37073 |
| 7.75E-05    | 0.178832254  | 0.000102074 | 0.568745695 | 2.25E-41   | 0.319827 |
| 0.1385372   | 0.070832368  | 0.126383834 | 0.3058213   | 1.44E-11   | 0.442359 |
| 0.009970526 | 0.11024407   | 0.017159214 | -0.39326484 | 1.01E-18   | -0.1863  |
| 0.304097637 | -0.052640448 | 0.256246155 | 0.350985809 | 5.52E-15   | 0.26445  |
| 0.002785172 | 0.126793932  | 0.006073646 | -0.49161954 | 8.67E-30   | -0.16817 |
| 0.006166538 | -0.13223906  | 0.004201366 | 0.325681951 | 5.32E-13   | 0.476951 |
| 0.203364722 | -0.051697774 | 0.264871853 | 0.557650947 | 1.62E-39   | 0.389373 |
| 0.199239402 | -0.066068831 | 0.154015312 | -0.58136548 | 1.42E-43   | -0.29    |
| 0.144994817 | 0.067492121  | 0.145318214 | -0.44619803 | 3.15E-24   | -0.26197 |
| 0.063196176 | -0.093208815 | 0.044088754 | -0.4248401  | 6.87E-22   | -0.41141 |
| 0.352613243 | 0.049809486  | 0.282744583 | -0.45415218 | 3.83E-25   | -0.19569 |
| 0.43998065  | -0.039393694 | 0.39568479  | 0.51755017  | 2.34E-33   | 0.371791 |
| 0.002187885 | 0.141941768  | 0.002106798 | 0.211934945 | 3.83E-06   | 0.182452 |
| 0.655252752 | -0.018424906 | 0.69126996  | 0.39713463  | 4.30E-19   | 0.428433 |
| 0.95271869  | -0.002916969 | 0.949872068 | -0.28675291 | 2.73E-10   | -0.29561 |
| 1.39E-11    | -0.314336457 | 3.61E-12    | -0.22543949 | 8.56E-07   | -0.10669 |
| 2.41E-05    | -0.192111521 | 2.92E-05    | -0.40516372 | 7.07E-20   | -0.35155 |
| 0.252665748 | 0.056080455  | 0.226427378 | 0.552773506 | 1.01E-38   | 0.248158 |
| 0.011978351 | -0.128689442 | 0.005350481 | -0.50542357 | 1.19E-31   | -0.2689  |
| 0.004209574 | 0.138026025  | 0.002798071 | 0.284454336 | 3.84E-10   | 0.177911 |
| 7.51E-09    | 0.262603011  | 8.36E-09    | -0.36793624 | 2.04E-16   | -0.00262 |
| 0.083562997 | 0.08176617   | 0.077529632 | 0.402283545 | 1.36E-19   | 0.174294 |
| 0.132081295 | 0.071750127  | 0.121532246 | 0.37364531  | 6.41E-17   | 0.245557 |
| 7.60E-09    | -0.272853945 | 2.04E-09    | -0.19085768 | 3.30E-05   | -0.23286 |
| 1.66E-08    | -0.249814692 | 4.47E-08    | -0.24489052 | 8.33E-08   | -0.09085 |

|             |              |             |             |            |          |
|-------------|--------------|-------------|-------------|------------|----------|
| 1.67E-06    | -0.230713656 | 4.64E-07    | -0.35648616 | 1.93E-15   | -0.34735 |
| 6.12E-06    | 0.198908954  | 1.49E-05    | 0.428018188 | 3.16E-22   | 0.167174 |
| 0.426852236 | -0.050091542 | 0.280024364 | -0.21699156 | 2.21E-06   | -0.29787 |
| 0.045564535 | -0.101002068 | 0.02907949  | -0.52903579 | 4.89E-35   | -0.20449 |
| 0.118975686 | -0.062976648 | 0.174261161 | 0.383065389 | 9.04E-18   | 0.454234 |
| 0.569847886 | 0.03052613   | 0.510499115 | -0.34210712 | 2.88E-14   | -0.26667 |
| 0.576838922 | 0.022233761  | 0.63176276  | 0.37807164  | 2.57E-17   | 0.46049  |
| 0.000712113 | -0.153810046 | 0.000853546 | -0.43064436 | 1.65E-22   | -0.49645 |
| 0.573969808 | -0.029123531 | 0.530127534 | -0.23769854 | 2.02E-07   | -0.09853 |
| 0.734450302 | 0.000917447  | 0.984224406 | -0.31705526 | 2.30E-12   | -0.06767 |
| 0.152412636 | 0.065200998  | 0.159508476 | 0.218418788 | 1.89E-06   | 0.26043  |
| 0.142275253 | 0.069454375  | 0.133948982 | 0.453550897 | 4.50E-25   | 0.439549 |
| 0.13122634  | 0.071923998  | 0.12062968  | 0.517601328 | 2.30E-33   | 0.282285 |
| 5.81E-07    | 0.22300698   | 1.13E-06    | 0.493214419 | 5.34E-30   | 0.151036 |
| 6.23E-07    | -0.225006527 | 8.99E-07    | -0.35097066 | 5.53E-15   | -0.54892 |
| 0.154595312 | -0.067565431 | 0.144880616 | 0.430001583 | 1.94E-22   | 0.459372 |
| 9.19E-06    | -0.207139237 | 6.38E-06    | -0.36526304 | 3.47E-16   | -0.40881 |
| 0.91940377  | -0.007232181 | 0.876133959 | 0.356422788 | 1.96E-15   | 0.377643 |
| 0.206698129 | 0.063994341  | 0.167390083 | 0.251349982 | 3.68E-08   | 0.373236 |
| 0.262413141 | -0.060500331 | 0.191853647 | -0.40507964 | 7.21E-20   | -0.26561 |
| 0.237044625 | -0.054484742 | 0.239937579 | -0.49645332 | 1.98E-30   | -0.28565 |
| 1.99E-06    | -0.215888967 | 2.50E-06    | -0.10408104 | 0.02449376 | -0.1973  |
| 0.601584409 | 0.018690291  | 0.687056102 | 0.438726425 | 2.16E-23   | 0.210125 |
| 0.000523917 | 0.166781773  | 0.000294705 | 0.406117142 | 5.69E-20   | 0.269502 |
| 0.16006921  | 0.072697861  | 0.116675843 | -0.48388933 | 8.79E-29   | -0.14939 |
| 0.590778091 | 0.022933482  | 0.621070616 | -0.20773436 | 5.99E-06   | -0.261   |
| 0.888580448 | -0.007967513 | 0.863657104 | -0.31131931 | 5.93E-12   | -0.10463 |
| 0.964685548 | -0.006630397 | 0.886367839 | 0.402989034 | 1.16E-19   | 0.276736 |
| 0.620386675 | -0.022170807 | 0.632728556 | 0.675995042 | 1.21E-63   | 0.375836 |
| 0.944421806 | 0.005625128  | 0.903504724 | -0.46965338 | 5.38E-27   | -0.13253 |
| 0.003610731 | 0.119041149  | 0.010030733 | -0.28248617 | 5.12E-10   | -0.27627 |
| 0.313218166 | 0.039342823  | 0.39629568  | -0.35063691 | 5.89E-15   | -0.29522 |
| 0.041320608 | -0.100942375 | 0.029175223 | -0.478158   | 4.71E-28   | -0.41233 |
| 0.008431278 | 0.138542584  | 0.002696356 | -0.32804303 | 3.53E-13   | -0.22447 |
| 0.038540046 | 0.095668843  | 0.038769709 | 0.220657745 | 1.47E-06   | 0.215538 |
| 0.000260327 | 0.163705959  | 0.000381985 | -0.42246036 | 1.22E-21   | 0.05679  |
| 0.001895327 | -0.149748427 | 0.001171465 | -0.39342906 | 9.72E-19   | -0.41985 |
| 1.82E-08    | -0.26860961  | 3.68E-09    | -0.18367645 | 6.53E-05   | -0.04766 |
| 0.000168431 | -0.174997631 | 0.000144133 | -0.44889389 | 1.55E-24   | -0.17686 |
| 4.87E-10    | 0.28780309   | 2.34E-10    | 0.183255246 | 6.80E-05   | 0.057855 |
| 0.003144581 | -0.132312335 | 0.004180197 | -0.34621808 | 1.35E-14   | -0.31311 |
| 0.031750428 | -0.096849831 | 0.036415782 | -0.43375132 | 7.61E-23   | -0.19774 |
| 0.247487049 | -0.058488906 | 0.207075163 | -0.44060618 | 1.34E-23   | -0.44516 |
| 0.012894596 | 0.119954903  | 0.009468034 | 0.209400367 | 5.02E-06   | 0.063927 |
| 0.018757991 | -0.109640617 | 0.017780709 | -0.45652399 | 2.02E-25   | -0.11009 |

|             |              |             |             |          |          |
|-------------|--------------|-------------|-------------|----------|----------|
| 0.091000967 | -0.080499671 | 0.082251062 | -0.58126256 | 1.48E-43 | -0.2312  |
| 5.85E-06    | -0.200873857 | 1.22E-05    | -0.4309212  | 1.54E-22 | -0.24968 |
| 0.840209661 | -0.013517362 | 0.770788907 | -0.28541184 | 3.33E-10 | -0.1988  |
| 0.003888183 | 0.139680656  | 0.00248404  | 0.375943787 | 4.00E-17 | 0.244878 |
| 4.30E-10    | -0.280194879 | 7.15E-10    | 0.437051791 | 3.31E-23 | -0.01009 |
| 6.45E-08    | -0.242934144 | 1.06E-07    | -0.36407969 | 4.39E-16 | -0.16301 |
| 0.000385929 | -0.169036698 | 0.000242965 | -0.29715891 | 5.64E-11 | 0.072914 |
| 4.27E-08    | -0.260296958 | 1.14E-08    | -0.52414047 | 2.59E-34 | -0.11814 |
| 0.015235185 | 0.118148808  | 0.0106087   | -0.39262633 | 1.16E-18 | -0.35126 |
| 0.902542473 | -0.002099411 | 0.963910332 | 0.407543138 | 4.10E-20 | 0.446841 |
| 0.000704098 | -0.174188786 | 0.000154873 | -0.24839486 | 5.36E-08 | 0.141789 |
| 2.73E-11    | -0.301663362 | 2.79E-11    | -0.37291162 | 7.44E-17 | -0.28663 |
| 0.012493557 | -0.131635622 | 0.004379417 | -0.52284461 | 4.01E-34 | -0.09569 |
| 0.013852617 | -0.123306022 | 0.007636973 | -0.38143976 | 1.27E-17 | -0.19382 |
| 0.00221816  | -0.152786823 | 0.00092509  | -0.4710872  | 3.58E-27 | -0.29346 |
| 0.224792561 | 0.056273351  | 0.224831615 | -0.49649047 | 1.95E-30 | -0.34332 |
| 0.083145112 | 0.070669997  | 0.127257621 | -0.21132203 | 4.09E-06 | -0.0532  |
| 0.049988951 | 0.081473589  | 0.078600328 | -0.51371274 | 8.27E-33 | -0.15169 |
| 0.144361063 | -0.083143244 | 0.0726482   | -0.38705933 | 3.86E-18 | -0.42633 |
| 0.584465663 | 0.019880822  | 0.668273178 | -0.36877643 | 1.72E-16 | -0.16491 |
| 0.679724841 | 0.020704737  | 0.655393643 | 0.563247934 | 1.91E-40 | 0.509023 |
| 0.006619392 | 0.127123821  | 0.005941803 | -0.37379244 | 6.22E-17 | 0.068426 |
| 0.309716144 | -0.047932437 | 0.301301237 | 0.530170669 | 3.31E-35 | 0.155227 |
| 0.08718839  | 0.077959325  | 0.092421151 | -0.34076996 | 3.67E-14 | -0.15855 |
| 0.947150725 | 0.012438687  | 0.788628283 | -0.23673863 | 2.27E-07 | -0.07277 |
| 0.000160488 | -0.177375971 | 0.000116464 | -0.31246985 | 4.91E-12 | 0.008235 |
| 3.33E-05    | -0.182863903 | 7.05E-05    | -0.31389308 | 3.88E-12 | -0.13065 |
| 0.031556996 | -0.112010578 | 0.015447788 | -0.43368016 | 7.74E-23 | -0.44521 |
| 0.000915851 | 0.146368784  | 0.001515614 | -0.43827219 | 2.43E-23 | 0.059662 |
| 0.013142884 | -0.126487654 | 0.006198399 | -0.41146779 | 1.66E-20 | -0.26508 |
| 0.000174639 | 0.175674108  | 0.000135692 | -0.3533481  | 3.52E-15 | -0.04626 |
| 0.00180871  | -0.152934708 | 0.000914419 | -0.31232828 | 5.03E-12 | -0.30241 |
| 0.668773215 | 0.020232912  | 0.662757065 | 0.204674129 | 8.25E-06 | 0.22268  |
| 0.177146487 | -0.069050476 | 0.13623128  | -0.4283064  | 2.94E-22 | -0.40223 |
| 8.16E-06    | 0.206829415  | 6.59E-06    | 0.461418982 | 5.33E-26 | 0.161102 |
| 0.028771891 | -0.098965989 | 0.032501079 | 0.355991162 | 2.13E-15 | 0.344468 |
| 0.008381374 | -0.128748677 | 0.005329187 | -0.40057576 | 2.00E-19 | -0.40154 |
| 0.267874974 | -0.052584025 | 0.256756905 | 0.448630922 | 1.66E-24 | 0.29906  |
| 7.61E-06    | -0.214273861 | 2.98E-06    | -0.37323453 | 6.97E-17 | -0.36738 |
| 0.291825606 | -0.04952488  | 0.285507441 | 0.512173396 | 1.36E-32 | 0.35589  |
| 0.1809795   | 0.063104934  | 0.173383634 | 0.639244548 | 5.22E-55 | 0.43108  |
| 0.003333556 | -0.151913918 | 0.00099046  | -0.31393016 | 3.86E-12 | -0.26319 |
| 0.668057868 | -0.015972594 | 0.730645056 | 0.439016876 | 2.01E-23 | 0.442083 |
| 0.703400662 | 0.016990574  | 0.714207011 | -0.53667624 | 3.42E-36 | -0.43855 |
| 0.003063378 | -0.143320246 | 0.001903304 | 0.592381367 | 1.42E-45 | 0.395705 |

|             |              |             |             |            |          |
|-------------|--------------|-------------|-------------|------------|----------|
| 0.31369472  | -0.050555413 | 0.27558933  | -0.36459527 | 3.96E-16   | -0.29131 |
| 0.242657309 | -0.066292325 | 0.152624128 | -0.20798927 | 5.83E-06   | -0.2791  |
| 0.300122772 | 0.05116124   | 0.269869357 | -0.48564856 | 5.21E-29   | -0.00412 |
| 0.004697826 | 0.144332931  | 0.001765453 | 0.278735492 | 8.83E-10   | 0.27936  |
| 0.961786707 | 0.008089167  | 0.861596103 | 0.12136378  | 0.00865534 | 0.214083 |
| 0.549794772 | 0.024242747  | 0.601278393 | 0.583511749 | 5.88E-44   | 0.359365 |
| 0.164818479 | -0.059643132 | 0.198237099 | -0.3409912  | 3.53E-14   | -0.01263 |
| 0.285713335 | -0.039658483 | 0.392514227 | -0.38550829 | 5.38E-18   | -0.11378 |
| 3.92E-05    | -0.199043066 | 1.47E-05    | -0.35109839 | 5.40E-15   | -0.32276 |
| 0.037985408 | -0.107137203 | 0.020573643 | -0.34530855 | 1.60E-14   | -0.25264 |
| 0.041878566 | 0.087108175  | 0.059977983 | -0.24951215 | 4.65E-08   | -0.11025 |
| 0.885937217 | -0.001889168 | 0.967522398 | -0.30278333 | 2.34E-11   | -0.12711 |
| 0.026785984 | -0.11263377  | 0.014880802 | -0.3478872  | 9.87E-15   | -0.43786 |
| 0.294527512 | 0.036704941  | 0.428744785 | -0.49623908 | 2.11E-30   | -0.14548 |
| 0.000278097 | 0.185549225  | 5.48E-05    | 0.214884573 | 2.78E-06   | 0.015575 |
| 0.000207587 | -0.193207531 | 2.63E-05    | -0.34747627 | 1.07E-14   | -0.2341  |
| 0.344923293 | -0.052608694 | 0.256533512 | -0.42907414 | 2.43E-22   | -0.46354 |
| 0.000108664 | 0.183429537  | 6.69E-05    | 0.469423526 | 5.74E-27   | 0.208376 |
| 0.089668997 | 0.065754042  | 0.155991041 | -0.38181943 | 1.18E-17   | -0.32707 |
| 0.000770076 | 0.158094904  | 0.000606052 | 0.340587123 | 3.79E-14   | 0.433233 |
| 0.50040995  | 0.032519856  | 0.483264253 | 0.39067416  | 1.77E-18   | 0.425033 |
| 8.90E-06    | -0.20439951  | 8.49E-06    | -0.54806209 | 5.74E-38   | -0.33026 |
| 0.074203352 | -0.090663112 | 0.050226518 | -0.39262317 | 1.16E-18   | -0.31913 |
| 0.001874393 | -0.146065433 | 0.001550657 | -0.57361494 | 3.28E-42   | -0.27908 |
| 0.018003348 | -0.09732571  | 0.035502185 | 0.446890146 | 2.62E-24   | 0.250229 |
| 0.022002669 | 0.095381118  | 0.039362334 | -0.54492538 | 1.80E-37   | 0.051552 |
| 0.737856889 | -0.024739172 | 0.593848834 | -0.40903494 | 2.91E-20   | -0.23122 |
| 1.87E-08    | 0.270821449  | 2.71E-09    | 0.417399826 | 4.11E-21   | 0.141417 |
| 0.936548677 | 0.004073359  | 0.930043195 | 0.427138517 | 3.92E-22   | 0.436773 |
| 3.65E-10    | -0.287042159 | 2.62E-10    | -0.35406649 | 3.07E-15   | -0.23614 |
| 0.225707173 | 0.063576586  | 0.17018565  | 0.180604576 | 8.68E-05   | 0.355819 |
| 0.190648835 | 0.053285186  | 0.250459835 | -0.48504247 | 6.24E-29   | -0.2327  |
| 0.207034425 | 0.067807705  | 0.143441608 | 0.286258241 | 2.94E-10   | 0.484689 |
| 0.531697241 | 0.03382576   | 0.465860647 | 0.281352714 | 6.05E-10   | 0.506429 |
| 0.000376935 | -0.164304257 | 0.000363317 | -0.37375269 | 6.27E-17   | -0.35663 |
| 0.928973087 | 0.008517226  | 0.85435169  | 0.526095953 | 1.33E-34   | 0.354715 |
| 0.095081924 | 0.077120372  | 0.095992832 | 0.388080847 | 3.10E-18   | 0.126983 |
| 0.404649195 | -0.033676608 | 0.46783065  | 0.337241457 | 6.95E-14   | 0.2788   |
| 0.687202328 | 0.00483282   | 0.917043293 | -0.43006542 | 1.91E-22   | -0.0477  |
| 3.99E-06    | 0.204662779  | 8.26E-06    | -0.54274648 | 3.95E-37   | -0.18376 |
| 0.008601166 | -0.137167059 | 0.002974968 | -0.5289394  | 5.05E-35   | -0.15905 |
| 0.558858257 | 0.024466268  | 0.597927975 | -0.571834   | 6.66E-42   | -0.3681  |
| 0.00983959  | 0.110777672  | 0.016625569 | -0.53691342 | 3.15E-36   | -0.20683 |
| 6.09E-09    | 0.262244501  | 8.77E-09    | 0.253843114 | 2.66E-08   | 0.104049 |
| 0.000352481 | -0.168870088 | 0.000246476 | 0.311065264 | 6.18E-12   | 0.278318 |

|             |              |             |             |           |          |
|-------------|--------------|-------------|-------------|-----------|----------|
| 0.002540508 | -0.145606431 | 0.001605097 | -0.30273056 | 2.36E-11  | -0.21086 |
| 0.754342434 | -0.02204745  | 0.634622814 | -0.48993697 | 1.44E-29  | -0.38684 |
| 0.124223213 | -0.076433788 | 0.098997034 | 0.393566949 | 9.44E-19  | 0.443919 |
| 0.022356663 | 0.103642765  | 0.02510576  | -0.2691134  | 3.43E-09  | -0.13423 |
| 0.190355957 | -0.063285579 | 0.172153542 | -0.22923611 | 5.52E-07  | -0.16479 |
| 0.819630109 | -0.018810776 | 0.685146207 | -0.34319071 | 2.36E-14  | -0.08224 |
| 0.063630524 | 0.087058941  | 0.060123312 | 0.482364257 | 1.38E-28  | 0.462341 |
| 0.094831537 | -0.077622325 | 0.093842868 | 0.637691906 | 1.14E-54  | 0.335087 |
| 0.087739107 | -0.082919414 | 0.073424117 | -0.48913482 | 1.84E-29  | 0.013796 |
| 8.72E-06    | -0.202014637 | 1.09E-05    | -0.4046193  | 8.01E-20  | -0.13624 |
| 1.42E-08    | 0.25552516   | 2.14E-08    | 0.482867873 | 1.19E-28  | 0.005151 |
| 0.06825587  | -0.08098553  | 0.080413046 | 0.325317871 | 5.66E-13  | 0.33159  |
| 0.007705811 | 0.118466243  | 0.0103998   | 0.431288847 | 1.41E-22  | 0.231529 |
| 0.002483762 | 0.147340486  | 0.0014082   | 0.267644253 | 4.21E-09  | 0.033858 |
| 2.56E-05    | 0.194637162  | 2.28E-05    | 0.062447958 | 0.1779125 | 0.321416 |
| 0.048357625 | -0.097516038 | 0.035142285 | -0.45503503 | 3.02E-25  | -0.43018 |
| 1.77E-05    | -0.211282432 | 4.11E-06    | -0.37788514 | 2.67E-17  | -0.35104 |
| 0.464935356 | 0.01441276   | 0.756071428 | -0.3506805  | 5.84E-15  | -0.29825 |
| 0.120581533 | -0.081121481 | 0.079904736 | -0.37492796 | 4.92E-17  | -0.20199 |
| 0.172375718 | 0.050915535  | 0.272179347 | -0.32330098 | 8.00E-13  | -0.04684 |
| 0.000139898 | -0.170017504 | 0.000223225 | -0.19911075 | 1.46E-05  | -0.21954 |
| 0.524814682 | 0.04022023   | 0.385838942 | -0.27232913 | 2.19E-09  | -0.21311 |
| 0.442709067 | 0.033567996  | 0.469268099 | 0.464363718 | 2.36E-26  | 0.135219 |
| 7.35E-08    | -0.244491293 | 8.76E-08    | -0.35497697 | 2.58E-15  | -0.11091 |
| 0.010540666 | -0.125775362 | 0.006497464 | -0.4665029  | 1.30E-26  | -0.00437 |
| 0.009447113 | -0.132815566 | 0.004037402 | -0.31529999 | 3.08E-12  | -0.30769 |
| 0.020963233 | -0.109079616 | 0.018376026 | 0.221058993 | 1.41E-06  | 0.329676 |
| 1.05E-05    | 0.200110906  | 1.32E-05    | 0.481330661 | 1.87E-28  | -0.04417 |
| 0.000439019 | -0.146821308 | 0.001464688 | 0.267446656 | 4.32E-09  | 0.29865  |
| 5.62E-09    | -0.267738081 | 4.15E-09    | -0.35907331 | 1.17E-15  | -0.27112 |
| 0.621240414 | -0.01750095  | 0.706014534 | -0.43636567 | 3.94E-23  | -0.25639 |
| 1.53E-10    | -0.302984996 | 2.26E-11    | -0.24900852 | 4.96E-08  | -0.11573 |
| 0.546006986 | 0.02375294   | 0.60864963  | -0.45520383 | 2.89E-25  | -0.2615  |
| 1.74E-06    | -0.231834755 | 4.07E-07    | -0.40490768 | 7.50E-20  | 0.010575 |
| 0.001622568 | 0.144909731  | 0.001691087 | 0.464295479 | 2.41E-26  | 0.304007 |
| 0.726936197 | 0.004848616  | 0.91677314  | -0.54327215 | 3.27E-37  | -0.40245 |
| 4.61E-18    | -0.392811254 | 1.11E-18    | -0.34499846 | 1.69E-14  | -0.10915 |
| 0.658493735 | -0.019762661 | 0.670128406 | -0.45458927 | 3.41E-25  | -0.22402 |
| 0.982724628 | -0.011509704 | 0.804081449 | -0.28469274 | 3.71E-10  | -0.26637 |
| 0.125415649 | -0.071084133 | 0.125038194 | -0.47108971 | 3.58E-27  | -0.33374 |
| 3.90E-08    | 0.249674185  | 4.55E-08    | -0.42585205 | 5.37E-22  | -0.26251 |
| 0.284414983 | -0.066724054 | 0.149963766 | -0.18818239 | 4.27E-05  | -0.13647 |
| 0.698109479 | 0.021161188  | 0.648301766 | 0.585030454 | 3.14E-44  | 0.222884 |
| 0.086568192 | 0.07677285   | 0.097504222 | 0.377733938 | 2.76E-17  | 0.369215 |
| 2.68E-05    | 0.202456555  | 1.04E-05    | 0.364921505 | 3.71E-16  | 0.381004 |



|             |              |             |             |            |          |
|-------------|--------------|-------------|-------------|------------|----------|
| 0.000118257 | 0.169482909  | 0.00023379  | 0.591080078 | 2.48E-45   | 0.118726 |
| 0.670082314 | 0.028260951  | 0.542385723 | -0.54733665 | 7.48E-38   | -0.06208 |
| 0.495029415 | -0.037338877 | 0.420809154 | -0.49874734 | 9.71E-31   | -0.33055 |
| 3.27E-05    | 0.192039439  | 2.94E-05    | 0.312643506 | 4.77E-12   | 0.413815 |
| 0.064087007 | 0.083029514  | 0.073041612 | 0.417634524 | 3.89E-21   | 0.421651 |
| 8.50E-06    | -0.205972693 | 7.21E-06    | -0.58038042 | 2.13E-43   | -0.17717 |
| 0.182892833 | -0.053361647 | 0.249779695 | 0.528544769 | 5.78E-35   | 0.325549 |
| 0.661399484 | 0.016183026  | 0.727236643 | -0.14732134 | 0.00141025 | -0.30303 |
| 0.01765632  | 0.103200162  | 0.025737146 | -0.54248728 | 4.33E-37   | -0.21713 |
| 0.056529889 | -0.092016123 | 0.046880952 | 0.635780458 | 2.96E-54   | 0.348404 |
| 8.11E-06    | -0.205127511 | 7.87E-06    | 0.515532746 | 4.56E-33   | 0.351466 |
| 0.034292939 | -0.099821722 | 0.031023283 | -0.38530119 | 5.62E-18   | -0.11408 |
| 2.93E-06    | -0.21455043  | 2.89E-06    | -0.41685149 | 4.68E-21   | -0.28769 |
| 0.407268764 | -0.046925856 | 0.311578138 | -0.57211225 | 5.96E-42   | -0.35204 |
| 0.306010028 | 0.040399573  | 0.383722433 | -0.52498625 | 1.95E-34   | -0.28303 |
| 0.049993317 | -0.104023851 | 0.024572883 | -0.48979128 | 1.51E-29   | -0.35693 |
| 0.024278588 | 0.104693033  | 0.023660775 | -0.41955755 | 2.46E-21   | -0.41996 |
| 0.145946045 | 0.065097721  | 0.160171912 | -0.53411743 | 8.40E-36   | -0.35688 |
| 0.68840522  | -0.016170304 | 0.727442545 | -0.43352304 | 8.05E-23   | -0.11767 |
| 0.007558529 | -0.134638497 | 0.003556332 | -0.45802269 | 1.35E-25   | -0.24506 |
| 1.28E-05    | 0.196209122  | 1.95E-05    | -0.29046903 | 1.57E-10   | -0.17658 |
| 0.8354996   | -0.009572142 | 0.83655182  | -0.45667842 | 1.94E-25   | -0.04832 |
| 0.004448899 | -0.145237917 | 0.001650068 | -0.2986415  | 4.48E-11   | -0.14484 |
| 0.0719947   | 0.085515803  | 0.064827893 | 0.34555557  | 1.52E-14   | 0.191095 |
| 0.102096108 | 0.072092926  | 0.119757793 | -0.33399956 | 1.24E-13   | -0.24259 |
| 0.423283924 | 0.033390219  | 0.47162617  | -0.47099442 | 3.68E-27   | -0.20347 |
| 0.263514926 | 0.045318453  | 0.328461438 | -0.36085434 | 8.28E-16   | -0.32625 |
| 0.002171152 | -0.149042177 | 0.001236791 | -0.28752325 | 2.44E-10   | -0.18602 |
| 0.046656612 | -0.095155448 | 0.039832491 | -0.43527197 | 5.19E-23   | -0.3109  |
| 0.26029376  | -0.064885511 | 0.161541629 | -0.23136333 | 4.30E-07   | -0.25151 |
| 0.082088089 | -0.076080388 | 0.10057227  | -0.51901211 | 1.44E-33   | -0.22175 |
| 0.006464083 | -0.14083731  | 0.002283984 | -0.25326508 | 2.87E-08   | -0.23152 |
| 0.909103492 | 0.003651494  | 0.937272645 | -0.49745981 | 1.45E-30   | -0.17145 |
| 0.740502975 | -0.023756377 | 0.608597755 | -0.36189036 | 6.76E-16   | -0.1492  |
| 0.062021906 | -0.093299077 | 0.043883262 | -0.30429957 | 1.84E-11   | -0.11357 |
| 0.005099183 | 0.119618992  | 0.009671543 | -0.17634267 | 0.00012781 | -0.14504 |
| 0.682834358 | 0.021616252  | 0.641262953 | -0.45654819 | 2.01E-25   | -0.03626 |
| 0.585636831 | -0.029861469 | 0.519753152 | -0.47637133 | 7.90E-28   | -0.21023 |
| 0.862822958 | -0.011923428 | 0.79718953  | -0.29659157 | 6.15E-11   | -0.07174 |
| 0.995319848 | -0.015624708 | 0.736291448 | -0.38117902 | 1.34E-17   | -0.42815 |
| 0.054669086 | -0.099539534 | 0.031504121 | -0.3144329  | 3.55E-12   | -0.11263 |
| 0.614217975 | 0.021002889  | 0.650757701 | -0.45393752 | 4.06E-25   | -0.05026 |
| 5.79E-18    | -0.385358878 | 5.56E-18    | -0.17954635 | 9.56E-05   | -0.26131 |
| 0.101682732 | 0.06492258   | 0.161301733 | -0.27949957 | 7.91E-10   | 0.073261 |
| 0.713273438 | 0.005725427  | 0.901792766 | -0.38145884 | 1.27E-17   | -0.0791  |

|             |              |             |             |            |          |
|-------------|--------------|-------------|-------------|------------|----------|
| 0.507588301 | 0.026018989  | 0.574890807 | -0.31622441 | 2.64E-12   | 0.081379 |
| 0.117465146 | -0.087151546 | 0.059850201 | -0.34448721 | 1.86E-14   | -0.00772 |
| 0.360373465 | -0.04628449  | 0.318245075 | -0.53609818 | 4.20E-36   | -0.21557 |
| 0.826131721 | -0.007026544 | 0.879628776 | -0.40496176 | 7.41E-20   | -0.20133 |
| 0.327918204 | 0.033678068  | 0.467811347 | -0.17363619 | 0.00016264 | 0.10587  |
| 0.966411169 | -0.016976823 | 0.714428199 | -0.35679549 | 1.82E-15   | -0.34628 |
| 0.633024436 | 0.014721543  | 0.751016091 | -0.37040255 | 1.24E-16   | -0.18259 |
| 0.092562379 | -0.074416736 | 0.108256991 | 0.475746631 | 9.46E-28   | 0.478449 |
| 0.073715698 | 0.075024934  | 0.105395584 | -0.3328621  | 1.52E-13   | -0.09608 |
| 0.001322493 | -0.160729071 | 0.000488889 | -0.35481878 | 2.66E-15   | -0.2227  |
| 0.007315813 | -0.119816034 | 0.009551701 | -0.07527183 | 0.10425119 | -0.16292 |
| 1.26E-05    | -0.18943354  | 3.79E-05    | -0.0631631  | 0.17298686 | 0.10093  |
| 2.23E-05    | -0.19235111  | 2.85E-05    | -0.02507669 | 0.5888216  | -0.27754 |
| 0.047996879 | -0.093497868 | 0.04343353  | -0.06427798 | 0.16551172 | 0.004695 |
| 3.17E-05    | -0.197654577 | 1.69E-05    | -0.02347237 | 0.61289003 | 0.18235  |
| 0.008830344 | -0.106897952 | 0.020859529 | -0.08668141 | 0.0612474  | -0.03987 |
| 0.419192516 | -0.036589695 | 0.4301967   | -0.05426475 | 0.24184368 | 0.032574 |
| 0.019181035 | -0.106055202 | 0.021894214 | -0.01039536 | 0.82271874 | 0.000946 |
| 0.260870978 | -0.04924081  | 0.288283169 | -0.01763311 | 0.70389855 | -0.05218 |
| 3.65E-13    | -0.325846525 | 5.17E-13    | 0.037225317 | 0.42222435 | -0.12117 |
| 0.000183099 | -0.187907525 | 4.38E-05    | -0.18869593 | 4.07E-05   | -0.07727 |
| 0.077938758 | 0.073162316  | 0.114352014 | -0.07137606 | 0.12349188 | 0.059232 |
| 4.06E-05    | -0.187078184 | 4.74E-05    | 0.013745274 | 0.76703471 | 0.174065 |
| 0.521760643 | -0.038014961 | 0.412441367 | -0.04660158 | 0.31493737 | -0.06128 |
| 0.026588157 | -0.101771883 | 0.027868849 | 0.074231402 | 0.10914101 | -0.03899 |
| 0.034885302 | -0.096957119 | 0.036208085 | -0.03377036 | 0.46659186 | 0.059982 |
| 0.0110241   | -0.11555507  | 0.012459709 | -0.21126116 | 4.12E-06   | -0.15546 |
| 0.318996734 | -0.055080218 | 0.234831186 | -0.02834106 | 0.54124136 | 0.018735 |
| 0.005489579 | -0.125055343 | 0.006812859 | -0.09907878 | 0.03230291 | 0.161644 |
| 0.463699435 | -0.046945793 | 0.31137238  | -0.03741607 | 0.4198488  | -0.01544 |
| 0.273400276 | -0.057713007 | 0.213174383 | -0.03908839 | 0.39935957 | 0.014699 |
| 0.026397051 | -0.098926698 | 0.032570352 | -0.14068845 | 0.00230888 | -0.00296 |
| 0.093573073 | -0.090870298 | 0.049701635 | -0.07658875 | 0.09831255 | -0.15373 |
| 0.99123117  | -0.003553537 | 0.938952082 | 0.073801467 | 0.11121367 | -0.07047 |
| 0.09940392  | -0.07284026  | 0.115959472 | -0.02637453 | 0.56967517 | -0.00373 |
| 6.77E-05    | -0.181383036 | 8.08E-05    | -0.12450238 | 0.00706431 | -0.05912 |
| 0.002449528 | -0.139826097 | 0.002458035 | -0.05510985 | 0.23457911 | -0.17393 |
| 0.565387856 | 0.032816293  | 0.479283079 | 0.038479225 | 0.40675262 | 0.095197 |
| 0.064384711 | -0.083172192 | 0.072548343 | -0.15447517 | 0.00080982 | -0.30187 |
| 0.879665814 | -0.000163987 | 0.997180051 | -0.02058132 | 0.65731656 | -0.32287 |
| 0.811534114 | 0.007403171  | 0.873229808 | -0.0581022  | 0.21009903 | -0.01848 |
| 0.056611954 | -0.083629162 | 0.070986765 | -0.01588721 | 0.73202961 | -0.00561 |
| 0.004009515 | -0.123723536 | 0.007432574 | 0.049375326 | 0.28696653 | 0.05377  |
| 0.022126492 | -0.099248727 | 0.032006296 | -0.00816824 | 0.860257   | 0.209464 |
| 0.49316807  | -0.027350408 | 0.555476527 | -0.09062131 | 0.05033298 | 0.039257 |

|             |              |             |             |            |          |
|-------------|--------------|-------------|-------------|------------|----------|
| 8.43E-09    | -0.268187153 | 3.90E-09    | 0.026836874 | 0.56292679 | -0.1678  |
| 0.153984747 | -0.065909002 | 0.155016072 | -0.00885662 | 0.84861643 | 0.162686 |
| 0.000258053 | -0.161632218 | 0.000453829 | 0.008435206 | 0.85573886 | -0.01197 |
| 0.000796897 | -0.152444298 | 0.000950251 | -0.09998408 | 0.03074948 | 0.010184 |
| 0.681019055 | 0.015122038  | 0.744475154 | -0.03503544 | 0.45005398 | 0.008877 |
| 0.653335076 | -0.021358365 | 0.64524798  | -0.05718278 | 0.21741612 | 0.03444  |
| 0.001466879 | -0.144831189 | 0.001701042 | 0.082278203 | 0.07568436 | 0.060888 |
| 6.73E-09    | -0.266457348 | 4.95E-09    | -0.04889282 | 0.29170812 | 0.058765 |
| 0.328102702 | -0.050441901 | 0.276670172 | -0.03574542 | 0.4409196  | 0.054136 |
| 0.212230746 | -0.061647406 | 0.183549046 | -0.07665267 | 0.0980313  | 0.078299 |
| 0.000425788 | -0.15286804  | 0.000919215 | 0.024303832 | 0.60036195 | -0.00343 |
| 0.143857095 | -0.061005462 | 0.188163269 | -0.14932552 | 0.00121019 | -0.13882 |
| 0.033990987 | -0.096509043 | 0.037082237 | 0.027947613 | 0.54687321 | -0.01305 |
| 0.995088334 | 0.001570894  | 0.972991694 | -0.04387752 | 0.34408948 | -0.02466 |
| 0.002122944 | -0.139863906 | 0.002451315 | -0.0732791  | 0.11377347 | 0.086169 |
| 0.006817906 | -0.12968022  | 0.005004193 | -0.03727977 | 0.42154545 | 0.07039  |
| 0.007412654 | -0.12667544  | 0.00612164  | -0.17756165 | 0.00011453 | -0.04272 |
| 1.67E-08    | -0.256749377 | 1.82E-08    | -0.00189641 | 0.96739804 | 0.010457 |
| 0.539404787 | 0.037384428  | 0.420242271 | -0.08637439 | 0.06217428 | 0.02198  |
| 0.462794481 | -0.031123929 | 0.502249937 | -0.09029624 | 0.05116731 | -0.20869 |
| 0.001883634 | -0.13452182  | 0.003585491 | -0.03746541 | 0.41923557 | -0.13567 |
| 0.055047302 | -0.083829636 | 0.070310418 | -0.08446053 | 0.06821625 | -0.23719 |
| 0.532706105 | 0.007095644  | 0.878454143 | 0.008293302 | 0.85813986 | 0.050639 |
| 0.502170741 | -0.048908425 | 0.291553962 | 0.040633341 | 0.3809743  | 0.066716 |
| 0.000119766 | -0.173726425 | 0.000161344 | -0.01747338 | 0.70645619 | 0.058235 |
| 0.300637221 | -0.052056899 | 0.261562545 | -0.06130518 | 0.18599841 | -0.00475 |
| 0.000190245 | -0.168379018 | 0.000257103 | 0.057003794 | 0.21886153 | 0.084415 |
| 0.187964362 | -0.058269464 | 0.208787216 | -0.18176927 | 7.80E-05   | -0.07196 |
| 0.25342907  | -0.05426515  | 0.241840198 | 0.048120548 | 0.29940593 | 0.056301 |
| 0.102415341 | -0.069789906 | 0.132075525 | -0.32454422 | 6.47E-13   | -0.26423 |
| 0.4117411   | -0.055328569 | 0.232724321 | -0.01565506 | 0.73579825 | -0.01112 |
| 0.00140069  | -0.153799508 | 0.000854256 | -0.04287408 | 0.35524752 | 0.107535 |
| 0.060747403 | -0.096277201 | 0.037541527 | -0.17623113 | 0.00012909 | 0.066912 |
| 4.29E-07    | -0.246377252 | 6.92E-08    | -0.05730387 | 0.21644212 | 0.112857 |
| 0.270616053 | 0.028195364  | 0.543323511 | -0.01836913 | 0.69215676 | -0.03102 |
| 0.012223156 | 0.105736503  | 0.02229694  | -0.03373998 | 0.46699301 | 0.097654 |
| 0.813088354 | 0.003348745  | 0.942464026 | -0.08222652 | 0.07586898 | -0.04444 |
| 0.02241384  | -0.114498941 | 0.013291597 | -0.11221628 | 0.01525857 | -0.05907 |
| 0.322006914 | -0.045685671 | 0.324553202 | -0.0128101  | 0.78247284 | 0.011687 |
| 0.002287779 | -0.153791972 | 0.000854764 | -0.0730179  | 0.11507064 | -0.08446 |
| 0.090926206 | -0.074338108 | 0.108631343 | -0.11534447 | 0.01262183 | -0.16348 |
| 0.397678406 | -0.036811719 | 0.427402086 | -0.06675806 | 0.14975574 | -0.04981 |
| 0.004060566 | -0.130309863 | 0.004794758 | -0.0084557  | 0.85539223 | 0.067792 |
| 0.577408084 | -0.029383077 | 0.526466769 | 7.36E-05    | 0.99873489 | 0.121627 |
| 0.069477006 | -0.086666491 | 0.061292171 | -0.09177998 | 0.04745103 | 0.010102 |

|             |              |             |             |            |          |
|-------------|--------------|-------------|-------------|------------|----------|
| 0.497572324 | -0.027186409 | 0.557850576 | -0.15602662 | 0.00071576 | 0.063963 |
| 0.025207687 | -0.102072987 | 0.027407244 | -0.06129454 | 0.18607496 | 0.04904  |
| 0.484815314 | -0.033505034 | 0.470102489 | -0.08312537 | 0.07270992 | -0.04872 |
| 0.081829497 | -0.077656442 | 0.093698146 | -0.10228951 | 0.02707939 | 0.036628 |
| 0.693246896 | 0.004710935  | 0.919128243 | -0.02722177 | 0.55733821 | -0.00616 |
| 0.823944408 | -0.006797057 | 0.883531671 | -0.04062136 | 0.38111481 | 0.001054 |
| 0.000192745 | -0.17017777  | 0.000220145 | -0.19752737 | 1.71E-05   | 0.077883 |
| 0.031415511 | -0.101043654 | 0.029012956 | 0.044767155 | 0.33438568 | 0.082665 |
| 0.121537486 | -0.068484054 | 0.139482191 | -0.1703255  | 0.00021734 | -0.07257 |
| 0.497690398 | 0.012408362  | 0.789131443 | -0.02063671 | 0.6564532  | -0.00132 |
| 0.021400654 | -0.097442474 | 0.035281022 | -0.046935   | 0.31148378 | 0.02746  |
| 0.004580369 | 0.132983698  | 0.003990687 | -0.03517721 | 0.44822148 | 0.084313 |
| 0.299583371 | -0.04725197  | 0.308223681 | 0.000125502 | 0.99784184 | 0.202086 |
| 0.480205686 | -0.027793856 | 0.549081928 | -0.07839731 | 0.09059924 | -0.02662 |
| 7.36E-05    | -0.176618409 | 0.000124683 | -0.0112036  | 0.80919038 | 0.210497 |
| 0.637517135 | 0.008178909  | 0.860076331 | -0.04018594 | 0.38624448 | 0.092524 |
| 0.111465341 | -0.083084844 | 0.072849998 | 0.024697102 | 0.59447683 | 0.051925 |
| 3.52E-05    | -0.1825277   | 7.27E-05    | -0.00921298 | 0.8426032  | 0.066061 |
| 0.000181694 | -0.185302289 | 5.61E-05    | -0.00342229 | 0.9412027  | 0.013642 |
| 0.030756471 | -0.105242597 | 0.02293375  | -0.01000518 | 0.82926858 | 0.023683 |
| 0.721810366 | -0.025164387 | 0.587518505 | -0.07943249 | 0.08640748 | -0.03462 |
| 0.042316301 | -0.106858309 | 0.020907232 | 0.486409148 | 4.16E-29   | 0.099759 |
| 0.492957732 | 0.042001031  | 0.36513852  | -0.27759987 | 1.04E-09   | 0.065597 |
| 0.003344863 | 0.136405487  | 0.003140249 | 0.487269578 | 3.21E-29   | -0.40466 |
| 0.367315926 | -0.052663479 | 0.256037881 | 0.614439633 | 8.12E-50   | 0.27831  |
| 0.001568933 | 0.135523281  | 0.003342115 | 0.415777156 | 6.03E-21   | -0.08454 |
| 0.979767295 | 0.004801892  | 0.917572294 | -0.27249312 | 2.14E-09   | 0.000221 |
| 5.89E-06    | -0.207064666 | 6.43E-06    | 0.463524327 | 2.98E-26   | 0.023215 |
| 0.279464197 | -0.055831294 | 0.228500504 | 0.494899328 | 3.19E-30   | -0.04553 |
| 0.537163291 | -0.029517477 | 0.524576184 | -0.43623448 | 4.07E-23   | 0.191121 |
| 0.113232478 | -0.077566061 | 0.094081925 | 0.709917014 | 8.30E-73   | -0.11821 |
| 0.000530021 | 0.160247152  | 0.000508612 | 0.642727832 | 8.91E-56   | 0.252238 |
| 0.001063529 | -0.151964296 | 0.000986575 | 0.328724564 | 3.14E-13   | 0.022747 |
| 0.575597304 | -0.032646948 | 0.481555211 | -0.38120121 | 1.34E-17   | 0.384597 |
| 0.657181882 | 0.019553864  | 0.673411608 | 0.463855937 | 2.72E-26   | -0.0654  |
| 0.060529619 | 0.080897709  | 0.080742788 | 0.723045628 | 1.02E-76   | -0.03187 |
| 6.08E-05    | -0.192184603 | 2.90E-05    | 0.414369424 | 8.41E-21   | 0.347405 |
| 0.068603032 | 0.084462583  | 0.068209539 | 0.459126388 | 9.98E-26   | -0.08734 |
| 0.444955463 | 0.027513176  | 0.553125188 | 0.335594712 | 9.34E-14   | 0.219836 |
| 0.023502139 | 0.100297975  | 0.030226007 | 0.560373714 | 5.76E-40   | 0.073231 |
| 0.172216187 | 0.058085721  | 0.210228592 | 0.756369849 | 9.48E-88   | -0.0342  |
| 0.041829452 | 0.085162352  | 0.065947029 | 0.625693736 | 4.09E-52   | 0.241138 |
| 0.045329066 | 0.084114693  | 0.069357798 | 0.502434529 | 3.07E-31   | -0.06065 |
| 0.10881789  | 0.084974153  | 0.066549371 | 0.529181912 | 4.65E-35   | -0.00381 |
| 0.433350151 | -0.042318907 | 0.361517535 | 0.576167669 | 1.18E-42   | -0.26475 |

|             |              |             |             |           |          |
|-------------|--------------|-------------|-------------|-----------|----------|
| 0.475965766 | 0.023697831  | 0.609481472 | 0.632949805 | 1.20E-53  | 0.250349 |
| 4.58E-06    | -0.208514352 | 5.52E-06    | 0.558583793 | 1.14E-39  | 0.216298 |
| 1.88E-05    | 0.201737381  | 1.12E-05    | -0.37466838 | 5.19E-17  | 0.010055 |
| 0.495175207 | -0.026966912 | 0.561035687 | 0.487588667 | 2.92E-29  | 0.27938  |
| 0.000168576 | 0.179553392  | 9.56E-05    | 0.518064621 | 1.98E-33  | -0.20813 |
| 0.452499058 | 0.027550601  | 0.552585224 | 0.799816907 | 3.86E-105 | -0.11763 |
| 0.050578348 | 0.090479228  | 0.050696239 | 0.633706388 | 8.28E-54  | -0.0448  |
| 0.873998657 | 0.0012315    | 0.978825338 | -0.41509662 | 7.08E-21  | 0.058564 |
| 0.993668551 | -0.00864452  | 0.852199711 | -0.5392893  | 1.36E-36  | -0.08997 |
| 0.00011447  | 0.177134233  | 0.00011903  | 0.458481857 | 1.19E-25  | -0.03421 |
| 0.117871695 | -0.07331235  | 0.113609148 | 0.76107517  | 1.88E-89  | 0.091987 |
| 0.443812649 | -0.034439503 | 0.457802809 | 0.582804927 | 7.88E-44  | 0.3887   |
| 0.012197897 | 0.108142239  | 0.019409589 | -0.35065132 | 5.88E-15  | 0.004517 |
| 0.163685003 | -0.084217528 | 0.06901674  | -0.42931061 | 2.30E-22  | 0.397811 |
| 0.065686108 | 0.082522716  | 0.074815878 | 0.49446747  | 3.64E-30  | 0.238569 |
| 2.06E-06    | 0.218285425  | 1.92E-06    | 0.584666131 | 3.65E-44  | -0.08877 |
| 0.050737654 | -0.104510088 | 0.023907177 | 0.54088901  | 7.68E-37  | -0.01724 |
| 0.003115621 | 0.13040588   | 0.004763525 | -0.38883261 | 2.64E-18  | 0.201476 |
| 0.000138081 | -0.17146973  | 0.000196735 | 0.440921291 | 1.23E-23  | 0.428221 |
| 3.15E-08    | -0.249784525 | 4.49E-08    | 0.223849417 | 1.03E-06  | 0.277555 |
| 2.80E-07    | -0.250236963 | 4.24E-08    | 0.313922547 | 3.87E-12  | 0.169643 |
| 0.839241407 | 0.012289445  | 0.791105431 | 0.352341168 | 4.27E-15  | -0.13035 |
| 0.690138278 | -0.031979145 | 0.490571925 | 0.496575371 | 1.90E-30  | 0.188876 |
| 0.6819686   | 0.016284651  | 0.725592514 | 0.74986539  | 1.85E-85  | -0.03877 |
| 0.642783096 | 0.011071776  | 0.811393123 | 0.734232483 | 3.09E-80  | 0.073815 |
| 0.965993365 | 0.001746997  | 0.969965329 | 0.867571986 | 3.64E-143 | -0.0484  |
| 0.028039463 | 0.099828318  | 0.031012119 | 0.752878451 | 1.64E-86  | 0.065852 |
| 0.000233423 | 0.169435767  | 0.000234744 | 0.7407906   | 2.21E-82  | 0.160731 |
| 0.969335938 | -0.002522865 | 0.956637544 | 0.862564951 | 1.10E-139 | 0.184543 |
| 0.429723062 | 0.032921078  | 0.47788008  | 0.860740088 | 1.88E-138 | 0.033065 |
| 0.071326903 | 0.072521927  | 0.117565698 | 0.706426191 | 8.37E-72  | -0.18242 |
| 0.078887938 | -0.082193691 | 0.075986444 | 0.52150315  | 6.29E-34  | -0.11194 |
| 0.059441427 | 0.086124522  | 0.062937136 | 0.705507134 | 1.53E-71  | 0.2759   |
| 0.012183895 | -0.11641416  | 0.011817274 | 0.70607513  | 1.05E-71  | 0.33088  |
| 0.250939192 | 0.052476953  | 0.257728069 | 0.746443505 | 2.77E-84  | 0.139286 |
| 0.035077583 | -0.100381498 | 0.030088009 | 0.697224345 | 3.15E-69  | -0.17656 |
| 0.005184158 | -0.131864896 | 0.004310979 | 0.688746598 | 6.12E-67  | -0.25218 |
| 9.62E-08    | 0.249910168  | 4.42E-08    | 0.498865717 | 9.36E-31  | 0.016906 |
| 0.523044857 | 0.023893988  | 0.606522851 | 0.786905866 | 1.51E-99  | -0.05755 |
| 0.576223549 | 0.022245516  | 0.631582489 | 0.759986719 | 4.70E-89  | 0.102769 |
| 0.270838312 | -0.0517922   | 0.263998955 | 0.807671684 | 9.56E-109 | -0.05012 |
| 0.136866095 | 0.067019016  | 0.148166553 | 0.780757119 | 5.08E-97  | -0.11627 |
| 0.002190186 | 0.141463767  | 0.002181881 | 0.816500324 | 5.28E-113 | 0.077563 |
| 0.535429792 | 0.030758328  | 0.507286593 | 0.867158135 | 7.15E-143 | 0.087047 |
| 0.064038143 | 0.085064732  | 0.066258907 | 0.544705164 | 1.95E-37  | 0.483671 |

|             |              |             |             |           |          |
|-------------|--------------|-------------|-------------|-----------|----------|
| 5.99E-05    | 0.182211679  | 7.49E-05    | 0.772462177 | 9.74E-94  | 0.219831 |
| 0.001695534 | 0.141111611  | 0.002238752 | 0.721340359 | 3.37E-76  | 0.108942 |
| 0.009525993 | -0.12038753  | 0.009211543 | 0.687268869 | 1.50E-66  | 0.222089 |
| 0.292396648 | -0.054913014 | 0.236257205 | 0.880237923 | 1.22E-152 | -0.04843 |
| 0.739956705 | 0.013922066  | 0.764126329 | 0.892608886 | 5.42E-163 | 0.108457 |
| 0.127804717 | 0.072682298  | 0.116754346 | 0.855868627 | 3.05E-135 | -0.07823 |
| 0.381593343 | 0.04163125   | 0.369379069 | 0.813153899 | 2.31E-111 | 0.196861 |
| 1.48E-05    | -0.204390153 | 8.50E-06    | 0.736758299 | 4.70E-81  | 0.086759 |
| 4.81E-05    | 0.186509112  | 5.01E-05    | 0.790905825 | 3.08E-101 | 0.273733 |
| 0.027724021 | -0.102629536 | 0.026571323 | 0.816404055 | 5.90E-113 | -0.00941 |
| 0.001590697 | -0.138962442 | 0.002616175 | 0.455614744 | 2.58E-25  | 0.004197 |
| 0.02881291  | 0.10194923   | 0.027596166 | 0.680259864 | 9.99E-65  | 0.014261 |
| 0.050210954 | -0.090727818 | 0.050062097 | 0.78503729  | 9.01E-99  | 0.219466 |
| 0.306070597 | -0.050176793 | 0.279205677 | 0.860332094 | 3.53E-138 | 0.168013 |
| 0.148752443 | -0.064696988 | 0.162765838 | 0.829561342 | 9.64E-120 | 0.15824  |
| 0.006822519 | -0.126198112 | 0.006318443 | 0.631625777 | 2.30E-53  | -0.13795 |
| 0.078762004 | 0.078893984  | 0.088568146 | 0.848165176 | 2.11E-130 | -0.10843 |
| 0.09070456  | -0.079631805 | 0.085618617 | 0.547601745 | 6.79E-38  | 0.087773 |
| 0.044234781 | -0.105612805 | 0.022454972 | 0.854277837 | 3.21E-134 | -0.12445 |
| 0.816249991 | -0.014037347 | 0.762231617 | 0.819109849 | 2.63E-114 | -0.13387 |
| 0.012162828 | -0.123208223 | 0.007685571 | 0.631754717 | 2.16E-53  | 0.030971 |
| 9.11E-06    | 0.201028193  | 1.20E-05    | 0.721070466 | 4.07E-76  | 0.147666 |
| 0.503266205 | -0.034153149 | 0.461552611 | 0.767945969 | 5.22E-92  | -0.22935 |
| 0.000278496 | 0.167985064  | 0.000265937 | 0.632621856 | 1.41E-53  | 0.307393 |
| 0.006053586 | 0.127107271  | 0.005948356 | 0.702014864 | 1.48E-70  | 0.288703 |
| 0.272497566 | 0.05631437   | 0.224493314 | 0.699443725 | 7.70E-70  | 0.3651   |
| 0.00633887  | -0.122943313 | 0.007818601 | 0.788775511 | 2.47E-100 | 0.198506 |
| 0.265493283 | 0.051222231  | 0.269298039 | 0.784867415 | 1.06E-98  | 0.266006 |
| 0.058556515 | -0.086293017 | 0.062421875 | 0.678925191 | 2.19E-64  | 0.118641 |
| 0.24111766  | 0.052052669  | 0.261601357 | 0.815926508 | 1.02E-112 | -0.0705  |
| 0.111778346 | 0.069990721  | 0.130963981 | 0.775930558 | 4.30E-95  | 0.231836 |
| 0.079096438 | -0.081950715 | 0.076860402 | 0.780175217 | 8.72E-97  | -0.03322 |
| 0.759244869 | 0.009019888  | 0.845860333 | 0.879119742 | 9.24E-152 | -0.01093 |
| 0.319603741 | -0.04984121  | 0.282437746 | 0.748642319 | 4.89E-85  | 0.257056 |
| 0.584140402 | -0.022793286 | 0.623206602 | 0.778746665 | 3.27E-96  | 0.334097 |
| 8.76E-07    | 0.223387758  | 1.08E-06    | 0.514455233 | 6.49E-33  | 0.408805 |
| 0.002587389 | -0.136736766 | 0.003067354 | 0.746258201 | 3.20E-84  | 0.046265 |
| 0.219690108 | -0.058098296 | 0.210129721 | 0.819998508 | 9.37E-115 | -0.15437 |
| 0.335626691 | -0.046026625 | 0.320951611 | 0.825693104 | 1.09E-117 | -0.03015 |
| 0.340333525 | -0.048013774 | 0.300480752 | 0.745859465 | 4.38E-84  | -0.22202 |
| 0.603210359 | 0.025562147  | 0.581625239 | 0.498329838 | 1.11E-30  | 0.300387 |
| 0.261026693 | -0.053100747 | 0.252105747 | 0.683307477 | 1.64E-65  | -0.05825 |
| 3.89E-05    | -0.187158983 | 4.71E-05    | 0.744473641 | 1.29E-83  | 0.081827 |
| 1.14E-05    | 0.200394315  | 1.28E-05    | 0.546342544 | 1.07E-37  | 0.361065 |
| 0.502826776 | -0.025939192 | 0.576064458 | 0.738676052 | 1.11E-81  | 0.179477 |

|             |              |             |             |            |          |
|-------------|--------------|-------------|-------------|------------|----------|
| 0.979741304 | -0.007897784 | 0.864838844 | 0.803394229 | 9.22E-107  | 0.271778 |
| 0.335137844 | -0.044358566 | 0.338820396 | 0.768404235 | 3.50E-92   | -0.24366 |
| 0.002449154 | 0.129800379  | 0.004963599 | 0.828830088 | 2.38E-119  | -0.01461 |
| 0.196316746 | 0.052584725  | 0.256750563 | 0.64541525  | 2.24E-56   | 0.348574 |
| 0.148648537 | 0.064656522  | 0.163029519 | 0.837173407 | 6.11E-124  | -0.03659 |
| 0.526293253 | -0.036054826 | 0.436972331 | 0.75971121  | 5.92E-89   | -0.08612 |
| 0.529071759 | -0.033686855 | 0.467695165 | 0.894394013 | 1.37E-164  | 0.079262 |
| 0.100170098 | 0.073240955  | 0.113962172 | 0.865972795 | 4.88E-142  | 0.23668  |
| 0.031116451 | 0.108393447  | 0.019127753 | 0.742014485 | 8.65E-83   | 0.346667 |
| 1.91E-05    | 0.189743354  | 3.68E-05    | 0.410319616 | 2.16E-20   | 0.116396 |
| 0.807906189 | 0.027968492  | 0.546573619 | -0.4268999  | 4.16E-22   | 0.322527 |
| 1.96E-09    | 0.278973291  | 8.53E-10    | -0.36514876 | 3.55E-16   | 0.254722 |
| 0.605350479 | 0.019933049  | 0.667453824 | 0.506743284 | 7.84E-32   | -0.13218 |
| 0.02795387  | 0.098313505  | 0.033667888 | 0.591218006 | 2.34E-45   | 0.041209 |
| 0.117966584 | 0.070193158  | 0.129850787 | 0.357386844 | 1.62E-15   | -0.09001 |
| 0.001426601 | 0.147133232  | 0.001430505 | -0.41395277 | 9.27E-21   | 0.280565 |
| 0.819068516 | -0.010801624 | 0.815911824 | 0.660135368 | 9.10E-60   | 0.001259 |
| 0.002755231 | 0.137976985  | 0.002807907 | 0.561346691 | 3.97E-40   | -0.40547 |
| 0.67205829  | -0.022902683 | 0.621539597 | 0.555257768 | 3.99E-39   | 0.478641 |
| 0.387116005 | 0.047200241  | 0.308754178 | 0.62640242  | 2.91E-52   | 0.089308 |
| 5.65E-08    | -0.242581482 | 1.11E-07    | 0.294405527 | 8.61E-11   | 0.226031 |
| 2.46E-05    | 0.193729487  | 2.49E-05    | 0.512574106 | 1.20E-32   | 0.100186 |
| 0.945133447 | -0.00404614  | 0.930509472 | 0.549603976 | 3.26E-38   | -0.0226  |
| 0.838806658 | -0.016251412 | 0.726130136 | 0.59047483  | 3.20E-45   | 0.474233 |
| 4.97E-05    | -0.19251951  | 2.81E-05    | 0.425317931 | 6.12E-22   | 0.212337 |
| 6.21E-06    | -0.203015923 | 9.80E-06    | -0.0566303  | 0.22189987 | 0.592646 |
| 0.003794075 | 0.127826524  | 0.005669496 | 0.132307822 | 0.0041815  | 0.717005 |
| 0.017748544 | -0.110325563 | 0.017076757 | 0.019853781 | 0.66869758 | 0.68476  |
| 6.83E-06    | -0.204316775 | 8.57E-06    | 0.015134357 | 0.74427425 | 0.586319 |
| 0.980372969 | 2.72E-05     | 0.9995331   | -0.17673779 | 0.00012335 | 0.559005 |
| 0.000161274 | 0.173514994  | 0.000164387 | 0.187923266 | 4.38E-05   | 0.670468 |
| 0.319569131 | 0.041011048  | 0.376559562 | 0.175938597 | 0.00013252 | 0.871824 |
| 0.887646281 | 0.000353152  | 0.993927183 | 0.246331824 | 6.96E-08   | 0.691587 |
| 0.003558304 | 0.131169666  | 0.004521536 | -0.15980351 | 0.00052742 | -0.47388 |
| 0.001794306 | 0.143548714  | 0.00187137  | -0.06623078 | 0.15300625 | 0.689575 |
| 0.031451192 | 0.102020316  | 0.027487512 | 0.196021797 | 1.99E-05   | 0.72126  |
| 0.21749771  | 0.052019493  | 0.261905902 | -0.04163877 | 0.36929253 | 0.76858  |
| 0.066865545 | 0.085056622  | 0.066284872 | 0.108136436 | 0.01941614 | 0.816563 |
| 0.207416967 | -0.069329142 | 0.134653457 | 0.201700227 | 1.12E-05   | 0.82292  |
| 0.071502479 | 0.079917915  | 0.084496371 | -0.00406131 | 0.93024958 | 0.734863 |
| 0.389418513 | -0.038211089 | 0.410032439 | 0.083149765 | 0.0726257  | 0.506104 |
| 0.302286957 | -0.043989528 | 0.342858016 | 0.048900708 | 0.29163019 | 0.674192 |
| 0.190843647 | -0.061492342 | 0.184655902 | 0.091113054 | 0.04909248 | 0.532413 |
| 0.402834834 | -0.039670971 | 0.392365077 | 0.250603688 | 4.04E-08   | 0.568803 |
| 0.001241245 | 0.140829785  | 0.002285237 | -0.23029759 | 4.87E-07   | 0.494893 |

|             |              |             |             |            |          |
|-------------|--------------|-------------|-------------|------------|----------|
| 0.006406187 | 0.120798786  | 0.008973472 | 0.2944031   | 8.62E-11   | 0.837794 |
| 0.610193219 | 0.028033792  | 0.545637169 | 0.194721688 | 2.26E-05   | 0.132777 |
| 0.129998467 | -0.063132513 | 0.173195416 | 0.073443028 | 0.11296521 | 0.487602 |
| 0.000301828 | 0.166158958  | 0.000310712 | 0.154508608 | 0.00080768 | 0.777738 |
| 0.458701746 | -0.042633277 | 0.357958633 | 0.186297883 | 5.11E-05   | 0.525208 |
| 0.337682669 | 0.034062055  | 0.462749063 | 0.00994706  | 0.83024528 | 0.807544 |
| 0.250839126 | 0.053435169  | 0.249126922 | -0.01544558 | 0.73920431 | 0.555917 |
| 0.969512056 | 0.002663431  | 0.954224101 | 0.056844077 | 0.22015714 | 0.422092 |
| 0.018291884 | 0.11514861   | 0.012774265 | -0.13994027 | 0.00243779 | 0.658347 |
| 0.397931962 | 0.03759714   | 0.417601006 | 0.146311271 | 0.0015222  | 0.545724 |
| 0.000387853 | 0.159223411  | 0.000552986 | 0.120891068 | 0.00892081 | 0.805221 |
| 0.235061819 | -0.056588214 | 0.222244093 | -0.01929873 | 0.67743185 | 0.760576 |
| 1.36E-06    | -0.21777797  | 2.03E-06    | 0.15777658  | 0.00062185 | 0.547575 |
| 0.144772449 | 0.062637066  | 0.176599979 | 0.179492321 | 9.61E-05   | 0.685722 |
| 0.353868182 | 0.044368374  | 0.338713501 | -0.15272193 | 0.00092981 | 0.583184 |
| 0.476810297 | 0.026593997  | 0.566467072 | -0.21097268 | 4.25E-06   | 0.483789 |
| 0.015324576 | 0.101054995  | 0.028994835 | -0.14765333 | 0.00137514 | 0.514967 |
| 0.270676937 | -0.044524903 | 0.337010494 | 0.070630035 | 0.12747339 | 0.618683 |
| 0.938219913 | -0.012449886 | 0.788442484 | 0.002418499 | 0.95842972 | 0.682657 |
| 0.00166117  | -0.147991771 | 0.00134017  | 0.192360033 | 2.85E-05   | 0.705182 |
| 0.92377816  | 0.016749637  | 0.718085988 | -0.06356419 | 0.17026916 | 0.568596 |
| 0.364375801 | 0.032662603  | 0.481344917 | 0.121491453 | 0.00858486 | 0.597798 |
| 0.000799885 | 0.154855402  | 0.000785764 | 0.218957336 | 1.78E-06   | 0.808296 |
| 0.017850826 | 0.104212942  | 0.024312121 | -0.27871314 | 8.86E-10   | 0.634314 |
| 0.136751629 | 0.062719639  | 0.176029138 | 0.009149193 | 0.84367886 | 0.529236 |
| 0.26914043  | 0.05745867   | 0.215201547 | 0.096621912 | 0.03686037 | 0.495976 |
| 2.59E-06    | -0.210818946 | 4.32E-06    | -0.01203383 | 0.79535304 | 0.514343 |
| 0.429021892 | -0.03082269  | 0.506398009 | 0.2403715   | 1.46E-07   | 0.708821 |
| 1.08E-05    | 0.195355059  | 2.12E-05    | -0.14605095 | 0.00155235 | 0.592986 |
| 0.789778104 | 0.01744813   | 0.706860828 | 0.059336918 | 0.20055457 | 0.682488 |
| 0.677993064 | 0.01714639   | 0.711702341 | 0.295732888 | 7.03E-11   | 0.657664 |
| 0.492779936 | -0.031419417 | 0.498198534 | 0.252679789 | 3.10E-08   | 0.624011 |
| 0.750755397 | 0.022795288  | 0.623176082 | 0.144362474 | 0.00176157 | 0.778211 |
| 0.585807714 | -0.029317136 | 0.527395613 | 0.335237869 | 9.95E-14   | 0.598635 |
| 0.012091318 | -0.117097362 | 0.011327455 | 0.099044278 | 0.03236343 | 0.832148 |
| 0.006878703 | 0.123576456  | 0.007504014 | 0.116625015 | 0.01166414 | 0.827793 |
| 0.072291598 | 0.080814948  | 0.081054536 | 0.044947083 | 0.33244467 | 0.698692 |
| 1.73E-10    | -0.281258891 | 6.13E-10    | -0.05788009 | 0.21185021 | 0.483176 |
| 0.000636481 | 0.160383799  | 0.000502946 | 0.004161627 | 0.92853127 | 0.622461 |
| 0.201826089 | -0.06197293  | 0.181241382 | 0.174470654 | 0.00015105 | 0.519041 |
| 0.846958801 | -0.013299646 | 0.774380166 | -0.15073428 | 0.00108558 | 0.781221 |
| 0.641589226 | 0.028393146  | 0.540497989 | 0.016882633 | 0.71594391 | 0.609208 |
| 0.359550743 | 0.039367748  | 0.395996296 | 0.147077661 | 0.00143654 | 0.80025  |
| 0.001623818 | -0.144357353 | 0.001762245 | -0.1008854  | 0.02926685 | 0.600129 |
| 0.000742918 | 0.163391838  | 0.000392139 | 0.021574506 | 0.64190735 | 0.615816 |



|             |              |             |             |            |          |
|-------------|--------------|-------------|-------------|------------|----------|
| 0.130267517 | 0.077542302  | 0.094183019 | 0.077938825 | 0.09250714 | 0.68762  |
| 2.68E-06    | -0.208996774 | 5.24E-06    | -0.27994091 | 7.42E-10   | 0.388938 |
| 0.001084792 | 0.150918804  | 0.001070168 | -0.05240328 | 0.25839781 | 0.844355 |
| 0.006587864 | -0.131489928 | 0.004423415 | 0.196149176 | 1.96E-05   | 0.439336 |
| 0.045083128 | -0.090072231 | 0.051748943 | 0.148002014 | 0.00133913 | 0.664306 |
| 0.000181169 | 0.172146491  | 0.000185424 | -0.02225676 | 0.63141016 | 0.570917 |
| 0.012657648 | -0.124022694 | 0.00728914  | 0.102763581 | 0.0263733  | 0.674285 |
| 0.669172283 | -0.024980853 | 0.59024703  | 0.145459235 | 0.00162292 | 0.394972 |
| 0.307708397 | 0.035940777  | 0.438424974 | -0.26120814 | 1.01E-08   | 0.512687 |
| 6.22E-08    | -0.247687612 | 5.86E-08    | 0.051977586 | 0.26229095 | 0.458472 |
| 8.93E-05    | 0.182318694  | 7.41E-05    | 0.020840187 | 0.65328588 | 0.801168 |
| 6.21E-06    | 0.192281323  | 2.87E-05    | -0.00337369 | 0.94203614 | 0.4182   |
| 0.010062344 | 0.116307787  | 0.011895199 | 0.014832098 | 0.74920869 | 0.643549 |
| 0.054582521 | 0.08348004   | 0.071493303 | 0.347046156 | 1.16E-14   | 0.683536 |
| 0.189193253 | 0.065099006  | 0.160163642 | 0.004834211 | 0.9170195  | 0.524393 |
| 0.641201191 | -0.023784106 | 0.608179401 | -0.2659282  | 5.32E-09   | 0.625567 |
| 0.000360317 | -0.180651005 | 8.64E-05    | -0.02384714 | 0.60722883 | 0.609488 |
| 0.002052894 | -0.158484573 | 0.000587217 | 0.065929104 | 0.15488993 | 0.483278 |
| 0.000975598 | -0.164387249 | 0.000360796 | -0.00580053 | 0.90051112 | 0.5039   |
| 7.28E-07    | -0.233303639 | 3.42E-07    | -0.11863329 | 0.01029134 | 0.631829 |
| 0.003273912 | 0.133851456  | 0.003757267 | 0.310195845 | 7.12E-12   | 0.42278  |
| 0.060915254 | 0.093960121  | 0.04240275  | 0.194010068 | 2.43E-05   | 0.514179 |
| 3.33E-05    | 0.195798644  | 2.03E-05    | 0.179198595 | 9.87E-05   | 0.683044 |
| 0.002106267 | 0.144879853  | 0.001694868 | 0.259146716 | 1.33E-08   | 0.401981 |
| 2.26E-07    | 0.241854163  | 1.21E-07    | 0.168497081 | 0.00025451 | 0.618949 |
| 0.576867623 | 0.025686771  | 0.579784477 | 0.091604063 | 0.04787946 | 0.621318 |
| 0.000596316 | 0.158693879  | 0.000577325 | 0.000140772 | 0.99757926 | 0.373319 |
| 0.513239975 | 0.026851718  | 0.562710772 | 0.264398938 | 6.55E-09   | 0.32325  |
| 0.030547487 | 0.096225635  | 0.037644334 | 0.32600112  | 5.03E-13   | 0.557754 |
| 0.003238041 | 0.132127645  | 0.004233739 | 0.323844546 | 7.29E-13   | 0.56775  |
| 0.064560818 | 0.078663477  | 0.08950618  | 0.243538301 | 9.86E-08   | 0.601419 |
| 0.004184889 | 0.129425326  | 0.005091296 | 0.028323559 | 0.54149128 | 0.473047 |
| 0.010689008 | 0.133772673  | 0.003777937 | 0.230538078 | 4.74E-07   | 0.646016 |
| 9.99E-05    | 0.181666964  | 7.87E-05    | -0.01990262 | 0.66793118 | 0.491871 |
| 0.039147582 | 0.088666897  | 0.055524977 | 0.010296847 | 0.82437127 | 0.58813  |
| 0.085635526 | 0.080772497  | 0.081214817 | 0.384786562 | 6.27E-18   | 0.616018 |
| 0.275887438 | 0.050366621  | 0.277388559 | 0.360721023 | 8.49E-16   | 0.53497  |
| 5.14E-06    | 0.210182507  | 4.62E-06    | 0.214140603 | 3.02E-06   | 0.393108 |
| 0.004522354 | 0.129494665  | 0.005067467 | 0.318759457 | 1.73E-12   | 0.389781 |
| 2.21E-13    | 0.338649246  | 5.39E-14    | 0.088783752 | 0.05520251 | 0.59157  |
| 0.473060287 | 0.0312097    | 0.501072152 | 0.245789108 | 7.45E-08   | 0.644254 |
| 0.000843416 | 0.153091131  | 0.000903254 | 0.139052742 | 0.00259922 | 0.548534 |
| 0.618554886 | 0.026838119  | 0.56290867  | 0.252331945 | 3.24E-08   | 0.422779 |
| 0.429515239 | -0.030276551 | 0.513963898 | 0.102538868 | 0.02670599 | 0.670625 |
| 0.099659984 | 0.080644911  | 0.081698092 | 0.235035202 | 2.78E-07   | 0.563784 |

|             |              |             |             |            |          |
|-------------|--------------|-------------|-------------|------------|----------|
| 0.000493018 | 0.166045091  | 0.000313725 | 0.217678588 | 2.05E-06   | 0.638803 |
| 0.055149345 | -0.088749462 | 0.055296972 | 0.277358609 | 1.08E-09   | 0.511704 |
| 0.003393969 | 0.136591015  | 0.003099234 | 0.30217507  | 2.57E-11   | 0.544584 |
| 0.670881783 | 0.018723246  | 0.686533504 | 0.080557944 | 0.08202884 | 0.625499 |
| 0.677067112 | -0.019155802 | 0.679688041 | 0.002473011 | 0.95749361 | 0.551155 |
| 0.24317994  | 0.058292754  | 0.208605028 | 0.36303116  | 5.40E-16   | 0.563921 |
| 0.000760154 | 0.167156497  | 0.000285449 | 0.218384208 | 1.90E-06   | 0.571618 |
| 0.000135813 | 0.175350132  | 0.000139675 | 0.172000284 | 0.00018781 | 0.493822 |
| 2.45E-05    | 0.198032527  | 1.63E-05    | 0.286807383 | 2.71E-10   | 0.610867 |
| 0.00239091  | -0.138104397 | 0.002782417 | 0.207478407 | 6.16E-06   | 0.650306 |
| 0.525598981 | -0.032831633 | 0.479077547 | 0.434647056 | 6.07E-23   | 0.386014 |
| 0.003062905 | 0.13182811   | 0.004321894 | 0.298052865 | 4.91E-11   | 0.654841 |
| 0.086681425 | 0.0759611    | 0.101108452 | 0.286678033 | 2.76E-10   | 0.340342 |
| 0.019215889 | 0.109219156  | 0.018226348 | 0.092110094 | 0.0466557  | 0.522131 |
| 0.14804728  | 0.073282977  | 0.113754286 | 0.155871357 | 0.00072469 | 0.628333 |
| 3.57E-08    | 0.251898927  | 3.42E-08    | 0.331497717 | 1.93E-13   | 0.51781  |
| 0.772460025 | -0.014012621 | 0.762637879 | 0.164523375 | 0.0003567  | 0.680552 |
| 3.99E-07    | 0.233225883  | 3.45E-07    | 0.084215656 | 0.06902294 | 0.44129  |
| 1.81E-08    | 0.253243521  | 2.88E-08    | 0.239007332 | 1.72E-07   | 0.584566 |
| 1.17E-15    | 0.361866656  | 6.79E-16    | 0.17264369  | 0.00017751 | 0.343676 |
| 1.35E-05    | 0.198626633  | 1.53E-05    | 0.308148171 | 9.92E-12   | 0.558548 |
| 0.490708539 | 0.039318542  | 0.396587455 | 0.318661236 | 1.76E-12   | 0.540945 |
| 0.108861652 | -0.074010048 | 0.110204293 | 0.322616267 | 9.00E-13   | 0.491678 |
| 0.84976491  | 0.016342103  | 0.724663603 | 0.305398157 | 1.54E-11   | 0.57656  |
| 0.566215587 | -0.024935722 | 0.59091886  | 0.401612947 | 1.58E-19   | 0.424796 |
| 0.299809616 | 0.051880445  | 0.26318498  | 0.234442207 | 2.99E-07   | 0.426542 |
| 3.35E-08    | 0.25297906   | 2.98E-08    | 0.276468684 | 1.22E-09   | 0.476364 |
| 2.27E-06    | 0.218352868  | 1.90E-06    | 0.256770089 | 1.82E-08   | 0.55061  |
| 0.002545218 | 0.145242451  | 0.001649508 | 0.259711153 | 1.23E-08   | 0.596414 |
| 0.000162503 | 0.170328     | 0.000217295 | 0.180735761 | 8.58E-05   | 0.665743 |
| 3.41E-06    | 0.217499645  | 2.09E-06    | 0.315676029 | 2.89E-12   | 0.469089 |
| 0.102967204 | 0.078892468  | 0.088574286 | 0.429019355 | 2.47E-22   | 0.600347 |
| 5.75E-07    | 0.237365569  | 2.10E-07    | 0.205901334 | 7.26E-06   | 0.423391 |
| 0.897325807 | -0.001741285 | 0.970063488 | 0.288136468 | 2.22E-10   | 0.674113 |
| 0.033896117 | 0.108048901  | 0.019515224 | 0.374668576 | 5.19E-17   | 0.608768 |
| 6.69E-08    | 0.24916904   | 4.86E-08    | 0.335875942 | 8.88E-14   | 0.64269  |
| 0.007470864 | 0.129480644  | 0.005072277 | 0.277523237 | 1.05E-09   | 0.492683 |
| 1.94E-06    | 0.211082169  | 4.20E-06    | 0.204237471 | 8.64E-06   | 0.471649 |
| 0.002238417 | 0.141128907  | 0.002235927 | 0.322382082 | 9.36E-13   | 0.423649 |
| 0.030058543 | -0.096262339 | 0.037571133 | 0.410545886 | 2.05E-20   | 0.368167 |
| 0.006153415 | 0.124868034  | 0.006897123 | 0.241366134 | 1.29E-07   | 0.474621 |
| 0.000349038 | 0.164235139  | 0.00036543  | 0.434157001 | 6.87E-23   | 0.511055 |
| 0.112808231 | 0.076789022  | 0.097433472 | 0.426248899 | 4.87E-22   | 0.530266 |
| 2.69E-10    | 0.282936595  | 4.80E-10    | 0.309205955 | 8.36E-12   | 0.435147 |
| 0.043281562 | 0.101055763  | 0.028993607 | 0.357749211 | 1.51E-15   | 0.641631 |

|             |              |             |             |            |          |
|-------------|--------------|-------------|-------------|------------|----------|
| 0.405141724 | -0.045877535 | 0.322523273 | 0.333690253 | 1.31E-13   | 0.596243 |
| 0.018904665 | 0.103052183  | 0.025951273 | 0.401277081 | 1.70E-19   | 0.570934 |
| 1.38E-07    | 0.240964633  | 1.36E-07    | 0.340905277 | 3.58E-14   | 0.616883 |
| 0.12749754  | 0.077060213  | 0.096253121 | 0.245526284 | 7.70E-08   | 0.610983 |
| 0.338220955 | 0.038510045  | 0.406376627 | 0.339894201 | 4.30E-14   | 0.568476 |
| 6.37E-07    | 0.226872587  | 7.26E-07    | 0.239321685 | 1.66E-07   | 0.650769 |
| 2.82E-07    | -0.239080167 | 1.71E-07    | -0.22048689 | 1.50E-06   | -0.45749 |
| 1.30E-06    | 0.226218732  | 7.82E-07    | 0.248329435 | 5.40E-08   | 0.467699 |
| 0.355149931 | 0.047373854  | 0.306976095 | 0.208637805 | 5.45E-06   | 0.500988 |
| 7.34E-06    | 0.210227661  | 4.60E-06    | 0.150198308 | 0.00113153 | 0.597218 |
| 0.002808431 | 0.135150004  | 0.003431019 | 0.454020505 | 3.97E-25   | 0.559496 |
| 0.00047843  | 0.159904811  | 0.000523069 | 0.177699152 | 0.00011311 | 0.507892 |
| 0.000166166 | 0.172382264  | 0.000181628 | 0.232437507 | 3.79E-07   | 0.539359 |
| 0.208213338 | 0.059888699  | 0.196392773 | 0.280803193 | 6.55E-10   | 0.602221 |
| 0.005281342 | 0.136643657  | 0.003087685 | 0.257288648 | 1.70E-08   | 0.663897 |
| 2.19E-07    | 0.23921324   | 1.68E-07    | 0.145209768 | 0.00165355 | 0.495627 |
| 0.000434202 | 0.168745778  | 0.000249127 | 0.078436916 | 0.09043591 | 0.694598 |
| 0.000286628 | 0.173302124  | 0.000167505 | 0.1225147   | 0.0080382  | 0.638108 |
| 0.001166213 | 0.15420913   | 0.000827055 | -0.00244325 | 0.95800472 | 0.584618 |
| 0.72939908  | 0.016761032  | 0.717902378 | 0.470704028 | 4.00E-27   | 0.606322 |
| 0.212371063 | 0.060099825  | 0.194817156 | 0.307818715 | 1.05E-11   | 0.599856 |
| 0.625422946 | 0.019920434  | 0.667651692 | 0.060016752 | 0.19543601 | 0.507526 |
| 0.010756628 | 0.120995781  | 0.008861387 | 0.249667135 | 4.56E-08   | 0.628857 |
| 0.084262046 | 0.078628653  | 0.089648584 | 0.397855156 | 3.66E-19   | 0.543067 |
| 4.39E-09    | 0.260700536  | 1.08E-08    | -0.01964162 | 0.67203091 | 0.498711 |
| 0.449335432 | -0.036873519 | 0.42662609  | 0.422611843 | 1.18E-21   | 0.491098 |
| 9.79E-13    | 0.330860032  | 2.16E-13    | 0.136771809 | 0.00305973 | 0.556045 |
| 0.004544255 | 0.137624969  | 0.002879438 | -0.01171763 | 0.80061576 | 0.644485 |
| 0.055537101 | 0.086994437  | 0.060314152 | 0.12708237  | 0.00595823 | 0.709905 |
| 0.005583223 | 0.135210097  | 0.003416563 | 0.229075431 | 5.62E-07   | 0.616694 |
| 0.046800839 | 0.09275207   | 0.045141045 | 0.302634588 | 2.39E-11   | 0.73834  |
| 0.007572798 | 0.106656558  | 0.021151468 | 0.19734493  | 1.74E-05   | 0.473114 |
| 0.081625529 | 0.083007269  | 0.073118761 | 0.391157262 | 1.60E-18   | 0.566837 |
| 1.80E-05    | 0.20581844   | 7.33E-06    | -0.02790939 | 0.54742191 | 0.463976 |
| 0.00110272  | 0.153418777  | 0.000880277 | 0.40842556  | 3.35E-20   | 0.595821 |
| 0.114049519 | 0.07779669   | 0.093105098 | -0.01397953 | 0.7631817  | 0.481233 |
| 0.574643426 | 0.032857517  | 0.478730849 | 0.14467623  | 0.00172084 | 0.656906 |
| 9.33E-07    | 0.230221687  | 4.92E-07    | 0.215345071 | 2.65E-06   | 0.579766 |
| 1.76E-06    | 0.226938915  | 7.20E-07    | 0.133448668 | 0.00386403 | 0.676392 |
| 1.06E-11    | 0.31216662   | 5.16E-12    | 0.023960681 | 0.60551838 | 0.539594 |
| 2.74E-05    | 0.188663204  | 4.08E-05    | 0.122506271 | 0.00804257 | 0.483939 |
| 1.41E-11    | 0.308864439  | 8.84E-12    | 0.263666502 | 7.24E-09   | 0.520007 |
| 0.308833417 | 0.042776042  | 0.356349716 | 0.404695712 | 7.87E-20   | 0.45662  |
| 0.01731505  | 0.10560209   | 0.022468707 | 0.51717098  | 2.66E-33   | 0.495021 |
| 0.067779165 | 0.082952969  | 0.073307368 | 0.220755237 | 1.45E-06   | 0.581551 |

|             |              |             |             |            |          |
|-------------|--------------|-------------|-------------|------------|----------|
| 5.46E-07    | 0.233199087  | 3.46E-07    | 0.299773853 | 3.75E-11   | 0.53337  |
| 0.292684764 | -0.062285659 | 0.179044717 | 0.05434059  | 0.24118537 | 0.566214 |
| 0.199087823 | 0.058956889  | 0.203457996 | 0.134691762 | 0.00354309 | 0.697333 |
| 1.88E-06    | 0.212136013  | 3.75E-06    | 0.215204256 | 2.69E-06   | 0.601526 |
| 0.10633098  | 0.074999136  | 0.105515729 | 0.273349075 | 1.90E-09   | 0.530304 |
| 0.013519683 | 0.118541999  | 0.010350489 | 0.348772225 | 8.37E-15   | 0.600127 |
| 5.08E-08    | 0.256121473  | 1.98E-08    | 0.224017401 | 1.01E-06   | 0.435711 |
| 0.410237824 | -0.034970597 | 0.450893463 | 0.20119051  | 1.18E-05   | 0.643146 |
| 0.021202501 | 0.110325498  | 0.017076822 | 0.224912743 | 9.09E-07   | 0.613486 |
| 0.001274446 | 0.148891722  | 0.001251134 | 0.197669914 | 1.69E-05   | 0.455906 |
| 0.012264453 | 0.11882038   | 0.01017106  | 0.297764321 | 5.13E-11   | 0.628095 |
| 0.110551546 | 0.072513823  | 0.117606813 | 0.32673174  | 4.44E-13   | 0.57514  |
| 3.51E-06    | 0.221670806  | 1.31E-06    | 0.266741475 | 4.76E-09   | 0.490155 |
| 1.03E-05    | 0.20675509   | 6.64E-06    | 0.152254676 | 0.00096445 | 0.48021  |
| 0.614952706 | 0.029325836  | 0.527273008 | 0.249563537 | 4.62E-08   | 0.589961 |
| 0.011612375 | 0.122173217  | 0.008217076 | 0.217150987 | 2.17E-06   | 0.626827 |
| 0.000236989 | 0.170576186  | 0.000212662 | 0.075648084 | 0.10252621 | 0.627213 |
| 0.035753204 | 0.094330544  | 0.041591698 | 0.437267747 | 3.13E-23   | 0.438167 |
| 0.947382863 | -0.0013938   | 0.976035499 | 0.395790922 | 5.79E-19   | 0.359916 |
| 0.338744277 | 0.041675928  | 0.3688651   | -0.10236815 | 0.02696114 | 0.557197 |
| 0.064411829 | -0.086710902 | 0.061158967 | 0.360077484 | 9.63E-16   | 0.438815 |
| 0.081511794 | -0.075766343 | 0.101988737 | 0.329765976 | 2.62E-13   | 0.471454 |
| 0.106528764 | 0.08885568   | 0.055004793 | 0.372339662 | 8.36E-17   | 0.531157 |
| 0.648513753 | 0.023367243  | 0.614482146 | 0.269766058 | 3.14E-09   | -0.03484 |
| 0.000881434 | 0.155886926  | 0.000723792 | 0.140146143 | 0.00240168 | 0.034492 |
| 0.834941508 | -4.27E-05    | 0.999265016 | 0.176357659 | 0.00012764 | -0.08162 |
| 1.06E-06    | 0.221797769  | 1.29E-06    | -0.38163491 | 1.22E-17   | 0.221611 |
| 0.015053986 | 0.114354926  | 0.013408745 | 0.385079656 | 5.90E-18   | 0.156571 |
| 0.644860737 | 0.032551834  | 0.482833938 | 0.385403594 | 5.50E-18   | 0.017797 |
| 0.551556604 | -0.018616486 | 0.688227031 | 0.308189847 | 9.85E-12   | 0.165209 |
| 0.004947616 | 0.141303374  | 0.002207618 | 0.351247551 | 5.25E-15   | -0.03189 |
| 0.502168606 | -0.029334437 | 0.527151826 | 0.512593134 | 1.19E-32   | 0.089954 |
| 1.96E-05    | 0.202853874  | 9.96E-06    | -0.197709   | 1.68E-05   | 0.233979 |
| 0.159459769 | 0.072928136  | 0.115519117 | 0.31447032  | 3.53E-12   | -0.00264 |
| 0.002383089 | 0.146568604  | 0.00149293  | 0.170034537 | 0.0002229  | -0.05429 |
| 4.24E-05    | -0.184171533 | 6.24E-05    | 0.301953986 | 2.67E-11   | -0.0853  |
| 0.001067458 | -0.146563859 | 0.001493465 | 0.176405501 | 0.00012709 | -0.04968 |
| 0.264941816 | 0.048210803  | 0.298499384 | 0.328163282 | 3.46E-13   | 0.156204 |
| 0.006450401 | -0.119634784 | 0.009661889 | 0.142847112 | 0.00197103 | -0.19674 |
| 0.267271627 | -0.045196758 | 0.329763306 | 0.409364435 | 2.70E-20   | 0.056173 |
| 0.055051941 | -0.095972566 | 0.03815235  | 0.334107993 | 1.22E-13   | -0.01368 |
| 0.923356062 | 0.000584792  | 0.989944046 | 0.469038896 | 6.40E-27   | 0.178086 |
| 0.000656688 | 0.15623727   | 0.000703795 | 0.540711001 | 8.18E-37   | -0.03324 |
| 0.110179781 | -0.073099877 | 0.114662284 | 0.507578235 | 6.00E-32   | -0.07096 |
| 0.101540036 | 0.078689284  | 0.089400763 | 0.467094021 | 1.10E-26   | -0.14095 |

|             |              |             |             |            |          |
|-------------|--------------|-------------|-------------|------------|----------|
| 0.686501021 | -0.021074616 | 0.649644408 | 0.406028622 | 5.81E-20   | -0.02755 |
| 0.646103342 | 0.018761687  | 0.685924107 | 0.212855534 | 3.47E-06   | 0.014721 |
| 0.038923874 | -0.098470694 | 0.033383576 | 0.48418441  | 8.05E-29   | -0.02635 |
| 2.32E-07    | -0.238105965 | 1.92E-07    | 0.157961525 | 0.00061263 | 0.05968  |
| 0.123408935 | -0.063778476 | 0.168830303 | 0.096471449 | 0.03715639 | -0.04718 |
| 0.089468839 | -0.080328575 | 0.082906351 | 0.148735184 | 0.00126622 | -0.04317 |
| 2.69E-10    | -0.286068173 | 3.02E-10    | 0.404373428 | 8.47E-20   | 0.025386 |
| 1.47E-05    | 0.202038398  | 1.08E-05    | 0.104433844 | 0.02401052 | -0.13701 |
| 0.12060586  | -0.066209558 | 0.15313821  | 0.296244421 | 6.49E-11   | 0.084453 |
| 0.004660062 | -0.130371132 | 0.004774806 | 0.269737546 | 3.15E-09   | -0.14295 |
| 0.354568885 | 0.043946747  | 0.343328056 | 0.242536494 | 1.12E-07   | 0.087824 |
| 0.708705533 | 0.029301427  | 0.52761701  | 0.360042863 | 9.70E-16   | -0.03246 |
| 0.001018337 | -0.147597791 | 0.001380953 | -0.00434277 | 0.92542929 | -0.17051 |
| 0.148537046 | 0.062220859  | 0.179498254 | 0.528650505 | 5.58E-35   | -0.1759  |
| 0.201897396 | 0.066445144  | 0.151678378 | 0.319456394 | 1.54E-12   | 0.205943 |
| 1.18E-09    | -0.267586432 | 4.24E-09    | 0.106883144 | 0.02087734 | 0.223987 |
| 0.493161449 | 0.038980339  | 0.400664997 | 0.291095763 | 1.43E-10   | 0.059376 |
| 0.049753546 | 0.098993846  | 0.032452042 | 0.230841427 | 4.57E-07   | -0.02419 |
| 0.038705976 | 0.10017485   | 0.030430425 | 0.28042528  | 6.92E-10   | 0.041337 |
| 0.011266805 | 0.122033192  | 0.008291445 | 0.22954573  | 5.32E-07   | -0.0594  |
| 6.43E-06    | -0.205611218 | 7.49E-06    | 0.277095695 | 1.12E-09   | 0.137385 |
| 8.32E-08    | -0.2438034   | 9.54E-08    | 0.206104076 | 7.11E-06   | -0.1078  |
| 0.002160333 | 0.158033782  | 0.000609057 | 0.330992495 | 2.11E-13   | 0.069178 |
| 0.749019476 | 0.010434786  | 0.822057513 | 0.434124353 | 6.93E-23   | -0.02177 |
| 0.006585581 | 0.13459461   | 0.003567274 | 0.46138819  | 5.37E-26   | -0.01869 |
| 0.766841632 | -0.003912417 | 0.932800594 | 0.316729104 | 2.43E-12   | 0.079561 |
| 0.113987012 | -0.07189685  | 0.12077026  | 0.417258896 | 4.25E-21   | 0.306813 |
| 0.031312115 | -0.101107598 | 0.028910906 | 0.369842127 | 1.39E-16   | -0.16184 |
| 7.64E-05    | 0.176640725  | 0.000124433 | -0.27279642 | 2.05E-09   | 0.211688 |
| 2.94E-05    | -0.187468856 | 4.57E-05    | 0.244848445 | 8.38E-08   | -0.18852 |
| 0.088980353 | -0.070726049 | 0.12695545  | 0.059837371 | 0.19677723 | -0.05876 |
| 0.105622484 | 0.078114353  | 0.091772945 | 0.157642833 | 0.00062861 | -0.05548 |
| 9.19E-11    | -0.296646828 | 6.10E-11    | 0.313154757 | 4.39E-12   | 0.248704 |
| 0.346362443 | 0.040477202  | 0.382808499 | 0.408061703 | 3.64E-20   | -0.0697  |
| 0.243020623 | -0.054280975 | 0.241702735 | 0.409091806 | 2.87E-20   | -0.04936 |
| 0.159954413 | -0.059349637 | 0.200457917 | 0.189173528 | 3.88E-05   | -0.0167  |
| 0.005426927 | 0.131099381  | 0.004543331 | 0.478240936 | 4.60E-28   | 0.085672 |
| 0.588368204 | -0.019807467 | 0.669424678 | 0.467738236 | 9.22E-27   | 0.204263 |
| 3.31E-06    | 0.21734983   | 2.12E-06    | 0.292013613 | 1.24E-10   | 0.050793 |
| 0.526724573 | -0.02487549  | 0.591816034 | 0.163265475 | 0.00039629 | -0.0783  |
| 0.814665285 | -0.01302557  | 0.778907914 | 0.481248717 | 1.91E-28   | 0.210529 |
| 0.054230336 | -0.085101584 | 0.06614103  | 0.074692466 | 0.10695225 | -0.18013 |
| 8.95E-05    | 0.187227881  | 4.68E-05    | 0.258838438 | 1.38E-08   | -0.0093  |
| 0.860188334 | 0.010272009  | 0.824788053 | 0.294304719 | 8.75E-11   | 0.002094 |
| 0.03679388  | -0.095297584 | 0.039535817 | 0.222751458 | 1.16E-06   | -0.1118  |

|             |              |             |             |            |          |
|-------------|--------------|-------------|-------------|------------|----------|
| 0.397869732 | -0.028347442 | 0.541150274 | 0.269146032 | 3.42E-09   | 0.101541 |
| 0.091403793 | -0.078353127 | 0.090781707 | 0.341955049 | 2.96E-14   | 0.383691 |
| 0.000626236 | 0.165204587  | 0.000336823 | 0.500538249 | 5.56E-31   | 0.056115 |
| 0.026488352 | -0.093475259 | 0.043484483 | 0.19363052  | 2.52E-05   | 0.07328  |
| 3.49E-14    | 0.333390457  | 1.38E-13    | 0.193869038 | 2.46E-05   | 0.038124 |
| 0.120185335 | -0.07185026  | 0.121011813 | 0.17119848  | 0.00020145 | -0.02561 |
| 0.002185817 | -0.139788631 | 0.00246471  | 0.556368936 | 2.63E-39   | -0.11533 |
| 0.046251206 | -0.089881933 | 0.052247372 | 0.219765232 | 1.63E-06   | -0.06309 |
| 0.043866672 | 0.09873466   | 0.032910742 | 0.248986766 | 4.97E-08   | 0.215432 |
| 0.042300693 | 0.091320971  | 0.048575728 | 0.277840773 | 1.00E-09   | -0.05517 |
| 0.493255377 | 0.03045731   | 0.511453294 | 0.268405945 | 3.79E-09   | 0.009348 |
| 0.055233263 | 0.100857278  | 0.029312165 | 0.108718206 | 0.01876869 | -0.04507 |
| 1.34E-07    | -0.234543443 | 2.95E-07    | 0.208547569 | 5.50E-06   | -0.01438 |
| 0.329599454 | 0.046954499  | 0.311282551 | 0.35079626  | 5.72E-15   | 0.02091  |
| 0.879169808 | -0.006432897 | 0.889730722 | 0.527449835 | 8.41E-35   | -0.13324 |
| 0.391704675 | -0.037665383 | 0.416755699 | 0.190850788 | 3.30E-05   | 0.208894 |
| 0.822025638 | 0.029613397  | 0.52322902  | 0.082214198 | 0.07591305 | 0.003749 |
| 0.021751368 | -0.097651957 | 0.034887174 | 0.205072059 | 7.92E-06   | -0.02168 |
| 3.75E-07    | -0.23382154  | 3.21E-07    | 0.301046836 | 3.07E-11   | -0.06545 |
| 0.812156051 | 0.011341536  | 0.806887201 | 0.471107286 | 3.56E-27   | -0.1545  |
| 0.210771105 | 0.068082926  | 0.141820189 | 0.447316535 | 2.35E-24   | 0.266147 |
| 0.342109995 | -0.038184263 | 0.410361437 | 0.388608058 | 2.77E-18   | 0.043559 |
| 0.00093639  | -0.152629544 | 0.000936566 | 0.452330637 | 6.23E-25   | 0.161819 |
| 3.61E-07    | 0.242273697  | 1.15E-07    | 0.293585468 | 9.76E-11   | 0.146477 |
| 0.007451217 | -0.130600653 | 0.00470073  | 0.143350289 | 0.00189908 | -0.07876 |
| 0.410779006 | 0.039090642  | 0.399332377 | 0.23230476  | 3.85E-07   | 0.016655 |
| 0.037180862 | -0.090505253 | 0.050629537 | 0.270168111 | 2.97E-09   | 0.264843 |
| 0.975068112 | 0.007312539  | 0.874768925 | 0.196340122 | 1.93E-05   | 0.06656  |
| 0.13111164  | -0.073447783 | 0.112941839 | 0.229518881 | 5.34E-07   | 0.138639 |
| 0.401531612 | 0.037888578  | 0.413998076 | 0.151356754 | 0.00103439 | 0.114415 |
| 4.36E-05    | -0.193741878 | 2.49E-05    | 0.44042497  | 1.40E-23   | 0.27945  |
| 0.000449029 | 0.165980546  | 0.000315445 | 0.240306514 | 1.47E-07   | 0.234912 |
| 0.00012861  | 0.182153045  | 7.53E-05    | 0.372922994 | 7.42E-17   | -0.22395 |
| 0.036003815 | 0.092249936  | 0.046322181 | 0.331302029 | 2.00E-13   | -0.20493 |
| 0.00023524  | -0.172748963 | 0.00017587  | 0.189790385 | 3.66E-05   | 0.049815 |
| 0.002403483 | 0.144277361  | 0.001772774 | 0.383577677 | 8.11E-18   | -0.01358 |
| 9.69E-07    | 0.229374351  | 5.43E-07    | 0.306076216 | 1.38E-11   | 0.113477 |
| 0.220536834 | -0.049363715 | 0.287080016 | 0.182811391 | 7.08E-05   | -0.22468 |
| 0.048450237 | -0.091648929 | 0.047769885 | 0.294822431 | 8.08E-11   | -0.11443 |
| 0.260466681 | 0.052625531  | 0.256381113 | 0.223133604 | 1.11E-06   | 0.072382 |
| 0.046857587 | 0.08901161   | 0.054578196 | 0.297357338 | 5.47E-11   | -0.0595  |
| 0.54875285  | 0.029368513  | 0.526671836 | 0.390812152 | 1.72E-18   | 0.064172 |
| 0.179377926 | -0.054923958 | 0.236163678 | 0.045629654 | 0.32514742 | -0.06004 |
| 0.204297979 | -0.060559559 | 0.191418216 | 0.303796888 | 1.99E-11   | -0.22312 |
| 0.88789859  | -0.00113581  | 0.980470301 | 0.204654914 | 8.27E-06   | 0.101822 |

|             |              |             |             |            |          |
|-------------|--------------|-------------|-------------|------------|----------|
| 0.247489074 | -0.04929686  | 0.287734059 | 0.325930059 | 5.10E-13   | -0.07172 |
| 0.166905571 | 0.064440727  | 0.164441079 | 0.035753327 | 0.44081851 | -0.04506 |
| 0.950600582 | 0.000183379  | 0.99684658  | 0.255697981 | 2.09E-08   | -0.13336 |
| 0.472169862 | 0.033057058  | 0.476062758 | 0.22331255  | 1.09E-06   | 0.047926 |
| 0.880015034 | -0.00985748  | 0.831751128 | 0.158058543 | 0.00060784 | 0.070111 |
| 0.001640895 | -0.157513237 | 0.000635213 | 0.291861449 | 1.27E-10   | 0.05994  |
| 0.138787256 | 0.070148395  | 0.130096305 | 0.206712399 | 6.67E-06   | 0.072828 |
| 0.536543776 | -0.018029894 | 0.697559701 | 0.223953936 | 1.01E-06   | 0.035454 |
| 0.005310715 | 0.131935733  | 0.004290031 | 0.124392479 | 0.00711527 | 0.085618 |
| 0.019584304 | -0.104985304 | 0.023271683 | 0.262977386 | 7.95E-09   | -0.0791  |
| 0.840108528 | 0.020759805  | 0.654536388 | 0.328929005 | 3.03E-13   | 0.288488 |
| 0.169311146 | -0.061150687 | 0.187112011 | 0.128493562 | 0.00542144 | 0.038492 |
| 0.154572354 | 0.072730436  | 0.116511661 | 0.293419641 | 1.00E-10   | -0.09963 |
| 0.010037245 | -0.11414363  | 0.013582269 | 0.257350652 | 1.68E-08   | 0.163327 |
| 0.775317413 | 0.022547255  | 0.62696271  | 0.256687269 | 1.84E-08   | 0.14781  |
| 1.90E-06    | -0.22846693  | 6.03E-07    | 0.222554815 | 1.19E-06   | -0.01317 |
| 0.178547234 | 0.068980148  | 0.136631718 | 0.179721712 | 9.41E-05   | -0.14656 |
| 0.238737814 | -0.053669574 | 0.247053657 | 0.574387127 | 2.41E-42   | 0.033821 |
| 0.180285598 | -0.062590847 | 0.1769201   | 0.304423027 | 1.80E-11   | -0.02513 |
| 0.000629297 | 0.165503813  | 0.000328424 | 0.026037184 | 0.57462335 | -0.15649 |
| 0.302658008 | 0.056818159  | 0.220367898 | 0.386742251 | 4.13E-18   | 0.112033 |
| 0.137947173 | -0.058530107 | 0.206754852 | 0.367097441 | 2.41E-16   | 0.076272 |
| 0.004201586 | -0.124188539 | 0.007210696 | 0.262886426 | 8.04E-09   | -0.09442 |
| 0.047394379 | -0.0900722   | 0.051749023 | 0.176929508 | 0.00012124 | -0.11842 |
| 0.053123642 | -0.08553224  | 0.064776231 | 0.278439551 | 9.21E-10   | 0.15306  |
| 0.745483469 | -0.012255713 | 0.791665623 | 0.195562016 | 2.08E-05   | -0.02576 |
| 0.185355618 | 0.066225524  | 0.153038942 | 0.349984254 | 6.66E-15   | 0.059103 |
| 0.048486473 | 0.098783707  | 0.032823519 | -0.27261636 | 2.11E-09   | 0.217696 |
| 0.740957244 | -0.018291522 | 0.693391477 | 0.210738081 | 4.36E-06   | -0.32838 |
| 0.000164501 | -0.168310973 | 0.000258609 | 0.150941111 | 0.00106832 | -0.15946 |
| 0.668637168 | 0.019626158  | 0.672274124 | 0.359991845 | 9.79E-16   | 0.041218 |
| 0.03800329  | 0.093383759  | 0.043691206 | 0.300483851 | 3.36E-11   | 0.111896 |
| 7.93E-05    | 0.183043358  | 6.93E-05    | -0.38917318 | 2.45E-18   | 0.27303  |
| 0.143320485 | -0.069893732 | 0.131499923 | 0.272182849 | 2.24E-09   | 0.008308 |
| 0.007515467 | 0.118183896  | 0.010585428 | -0.32839603 | 3.32E-13   | 0.147856 |
| 0.060093873 | 0.10262033   | 0.02658497  | 0.113878536 | 0.01380277 | -0.10013 |
| 0.129438591 | -0.073402041 | 0.113166875 | 0.179534034 | 9.58E-05   | -0.20217 |
| 0.33561798  | -0.037376451 | 0.42034151  | 0.174305225 | 0.00015328 | -0.01269 |
| 0.285696635 | 0.054313448  | 0.241420825 | 0.488557485 | 2.18E-29   | -0.07295 |
| 0.003523275 | 0.143007792  | 0.001947785 | 0.274476232 | 1.62E-09   | 0.066914 |
| 0.114247358 | -0.067076932 | 0.1478156   | 0.251979312 | 3.39E-08   | -0.08833 |
| 0.000513573 | -0.156242039 | 0.000703527 | 0.363072083 | 5.35E-16   | -0.04906 |
| 0.382851334 | 0.041396562  | 0.372086168 | 0.192288459 | 2.87E-05   | -0.08038 |
| 0.004742087 | 0.135998628  | 0.003231928 | 0.167571593 | 0.00027551 | 0.057715 |
| 0.255363497 | -0.045870862 | 0.322593743 | 0.314659514 | 3.42E-12   | 0.096229 |

|             |              |             |             |            |          |
|-------------|--------------|-------------|-------------|------------|----------|
| 0.433362151 | -0.035799803 | 0.440224365 | 0.514435062 | 6.53E-33   | 0.303652 |
| 0.720973848 | 0.016699401  | 0.718895691 | 0.085216555 | 0.06577438 | -0.06053 |
| 0.152046197 | -0.069927926 | 0.131310779 | 0.462048062 | 4.48E-26   | 0.258668 |
| 0.167166385 | -0.053280576 | 0.25050088  | 0.263968402 | 6.95E-09   | 0.018486 |
| 0.000120268 | -0.17080441  | 0.000208483 | 0.141223585 | 0.00222052 | -0.01964 |
| 0.018743925 | -0.113484101 | 0.014136681 | 0.273430367 | 1.88E-09   | -0.23169 |
| 0.432907187 | -0.033274588 | 0.473163402 | 0.425202519 | 6.29E-22   | 0.045825 |
| 0.000108717 | -0.16809953  | 0.000263341 | 0.266973921 | 4.61E-09   | -0.01193 |
| 0.304785451 | -0.041969519 | 0.365498705 | 0.451040008 | 8.79E-25   | 0.104936 |
| 0.058273112 | 0.090410494  | 0.050872754 | 0.128383898 | 0.00546154 | -0.17931 |
| 0.420406528 | -0.027387419 | 0.55494145  | 0.095547487 | 0.03901874 | -0.11058 |
| 0.931216774 | -0.002913553 | 0.949930692 | -0.32385522 | 7.28E-13   | 0.191986 |
| 0.698849132 | 0.026232549  | 0.571755308 | 0.409363669 | 2.70E-20   | 0.036514 |
| 0.150833107 | 0.073535281  | 0.112512355 | 0.396961969 | 4.47E-19   | 0.322133 |
| 0.006610601 | -0.119149476 | 0.009962508 | 0.394134743 | 8.33E-19   | 0.058664 |
| 0.256620306 | 0.061266216  | 0.186278814 | 0.251038435 | 3.83E-08   | 0.119389 |
| 0.086025403 | 0.082140927  | 0.076175538 | 0.437642959 | 2.85E-23   | 0.092573 |
| 0.900818439 | -0.004516753 | 0.922451012 | 0.467452624 | 9.99E-27   | 0.078778 |
| 0.013847141 | 0.122208575  | 0.008198391 | 0.329788714 | 2.61E-13   | -0.12547 |
| 1.02E-10    | -0.287112872 | 2.59E-10    | 0.286993387 | 2.64E-10   | 0.184463 |
| 0.01761577  | -0.109661397 | 0.017758985 | 0.29077865  | 1.50E-10   | -0.11668 |
| 0.007435264 | -0.117481437 | 0.011060058 | 0.287984886 | 2.27E-10   | 0.123565 |
| 0.113081855 | -0.077532644 | 0.094224138 | 0.108047943 | 0.01951631 | 0.086496 |
| 0.002256685 | -0.13783828  | 0.002835897 | 0.431037859 | 1.50E-22   | 0.066725 |
| 0.088928432 | -0.079868355 | 0.084689914 | 0.225603012 | 8.40E-07   | 0.066842 |
| 0.139419613 | 0.067236709  | 0.146850693 | 0.374419266 | 5.47E-17   | -0.14051 |
| 0.137381062 | 0.063261599  | 0.172316457 | 0.36055063  | 8.78E-16   | -0.06327 |
| 0.001818888 | -0.14034948  | 0.002366494 | 0.335818034 | 8.97E-14   | -0.07241 |
| 0.104050151 | 0.082455464  | 0.075053937 | 0.46358507  | 2.93E-26   | -0.0007  |
| 3.48E-06    | -0.212105472 | 3.76E-06    | 0.284512117 | 3.81E-10   | -0.10277 |
| 0.772054154 | 0.010931717  | 0.813735056 | 0.288521568 | 2.10E-10   | -0.06356 |
| 0.390080314 | 0.041369784  | 0.372395833 | 0.320179966 | 1.36E-12   | 0.120906 |
| 0.000693509 | 0.158555961  | 0.000583825 | 0.126621176 | 0.00614373 | 0.105385 |
| 0.220480015 | -0.047716093 | 0.303490843 | 0.346839073 | 1.20E-14   | 0.025487 |
| 7.77E-11    | -0.302543231 | 2.43E-11    | 0.372241869 | 8.53E-17   | -0.10105 |
| 1.98E-06    | 0.213746613  | 3.15E-06    | 0.458551436 | 1.17E-25   | 0.131935 |
| 3.28E-06    | 0.198955464  | 1.48E-05    | -0.16347295 | 0.00038949 | 0.038037 |
| 0.179024987 | -0.061833796 | 0.182225071 | 0.279382357 | 8.04E-10   | 0.137105 |
| 0.069394526 | -0.094060704 | 0.042181212 | -0.40905044 | 2.90E-20   | 0.286997 |
| 0.038419718 | 0.103646392  | 0.025100642 | 0.256485999 | 1.89E-08   | -0.06705 |
| 2.43E-07    | 0.23521643   | 2.72E-07    | -0.29971275 | 3.79E-11   | 0.283152 |
| 0.04731713  | -0.100102121 | 0.030551728 | 0.113543234 | 0.01408617 | 0.11745  |
| 0.050478626 | 0.101476883  | 0.02832756  | 0.384590724 | 6.54E-18   | 0.030437 |
| 1.51E-12    | 0.321177416  | 1.15E-12    | 0.250075639 | 4.33E-08   | -0.06145 |
| 0.01665574  | 0.120350317  | 0.00923336  | 0.1344138   | 0.00361268 | -0.02068 |



|             |              |             |             |            |          |
|-------------|--------------|-------------|-------------|------------|----------|
| 5.72E-15    | -0.361675326 | 7.05E-16    | 0.134578038 | 0.00357141 | -0.00108 |
| 1.61E-05    | 0.208602921  | 5.47E-06    | 0.138892369 | 0.0026294  | 0.245289 |
| 0.011678069 | -0.114919414 | 0.01295471  | 0.400174517 | 2.18E-19   | 0.110667 |
| 0.802023622 | 0.019755735  | 0.670237211 | 0.312719642 | 4.71E-12   | -0.05394 |
| 0.032918952 | -0.090604121 | 0.050376811 | 0.393160377 | 1.03E-18   | -0.07605 |
| 0.014986819 | 0.13048948   | 0.00473648  | 0.158501341 | 0.00058642 | 0.084897 |
| 0.020406815 | 0.115921228  | 0.012182215 | 0.339646252 | 4.50E-14   | 0.121765 |
| 0.634435536 | -0.013414305 | 0.772488234 | 0.093186819 | 0.04413895 | -0.17428 |
| 0.002096112 | 0.150012272  | 0.001147887 | 0.052280535 | 0.25951621 | 0.037121 |
| 0.00059059  | 0.166423779  | 0.000303809 | 0.283284457 | 4.56E-10   | 0.161834 |
| 0.888556183 | -0.003876828 | 0.933410443 | 0.299543816 | 3.89E-11   | -0.12332 |
| 9.65E-06    | 0.195050424  | 2.19E-05    | 0.125685993 | 0.00653589 | -0.03656 |
| 0.035148238 | -0.088053596 | 0.057243168 | 0.465477351 | 1.73E-26   | -0.22095 |
| 0.880357758 | -0.007461842 | 0.872233702 | 0.234697347 | 2.90E-07   | 0.041372 |
| 1.21E-05    | -0.197453122 | 1.72E-05    | 0.251807214 | 3.47E-08   | 0.119208 |
| 0.859791356 | 0.008935664  | 0.847281898 | 0.242399403 | 1.14E-07   | 0.228526 |
| 0.401395579 | -0.047308686 | 0.307642729 | 0.52892031  | 5.08E-35   | -0.13949 |
| 0.000902826 | -0.145262505 | 0.001647032 | 0.269870826 | 3.09E-09   | -0.10598 |
| 0.390818439 | 0.035068653  | 0.449624257 | 0.339475394 | 4.64E-14   | 0.008227 |
| 0.055058477 | -0.101176792 | 0.028800824 | 0.301044256 | 3.08E-11   | -0.29423 |
| 0.000109698 | -0.17183387  | 0.000190571 | 0.33940604  | 4.70E-14   | 0.25173  |
| 0.190208039 | -0.058358213 | 0.20809358  | 0.189773691 | 3.67E-05   | 0.114404 |
| 0.485429605 | -0.03401128  | 0.463416711 | 0.292680474 | 1.12E-10   | 0.056314 |
| 0.012368544 | -0.116186941 | 0.011984277 | 0.282460396 | 5.14E-10   | -0.11402 |
| 0.145807412 | -0.074914488 | 0.105910708 | 0.314697981 | 3.40E-12   | -0.06048 |
| 0.119304708 | -0.072141741 | 0.119506759 | 0.419583933 | 2.44E-21   | -0.06892 |
| 0.02260635  | -0.103789475 | 0.024899444 | 0.32648921  | 4.63E-13   | -0.15738 |
| 6.50E-16    | -0.367898764 | 2.05E-16    | 0.167874541 | 0.00026847 | 0.077773 |
| 0.9901048   | 0.003674516  | 0.936877974 | 0.443272189 | 6.73E-24   | -0.22566 |
| 0.000258206 | 0.163871453  | 0.000376734 | 0.348946905 | 8.10E-15   | 0.031782 |
| 0.003889393 | 0.141578289  | 0.002163673 | 0.40013943  | 2.20E-19   | 0.107107 |
| 0.009825495 | -0.119361102 | 0.009830412 | 0.373518704 | 6.57E-17   | 0.158073 |
| 0.806965328 | -0.012166959 | 0.793140057 | -0.06445074 | 0.16437541 | 0.092728 |
| 0.269576544 | 0.060961012  | 0.1884859   | 0.099250275 | 0.03200361 | 0.029897 |
| 0.886331791 | 0.013015719  | 0.779070789 | 0.107175596 | 0.02052809 | -0.09424 |
| 0.092990591 | -0.079855239 | 0.084741193 | 0.421655231 | 1.49E-21   | -0.01703 |
| 0.754024258 | 0.015097893  | 0.744868985 | 0.295655978 | 7.11E-11   | -0.14754 |
| 0.00138635  | 0.152609984  | 0.000938003 | 0.19785549  | 1.66E-05   | 0.076902 |
| 0.02721286  | -0.099740534 | 0.031160978 | 0.092929713 | 0.04472929 | -0.29396 |
| 1.41E-06    | -0.218840986 | 1.80E-06    | 0.320682553 | 1.25E-12   | -0.04321 |
| 0.903378148 | 0.012497937  | 0.787645424 | 0.49566129  | 2.52E-30   | 0.155105 |
| 0.187557284 | 0.067913983  | 0.142813815 | 0.361606706 | 7.14E-16   | 0.206932 |
| 0.002997594 | 0.146198295  | 0.001535219 | 0.26543032  | 5.70E-09   | 0.072325 |
| 9.84E-06    | 0.203939891  | 8.91E-06    | 0.249228321 | 4.82E-08   | 0.07918  |
| 0.02367699  | 0.111303532  | 0.016113935 | 0.366748651 | 2.58E-16   | -0.15766 |

|             |              |             |             |            |          |
|-------------|--------------|-------------|-------------|------------|----------|
| 0.422884954 | 0.035398733  | 0.44536667  | 0.078027062 | 0.09213748 | -0.09072 |
| 0.369962662 | -0.041720501 | 0.368352774 | 0.133510082 | 0.00384758 | 0.032679 |
| 0.152679133 | -0.071223306 | 0.124299134 | 0.302393228 | 2.49E-11   | -0.06751 |
| 0.994630255 | -0.003698751 | 0.936462533 | 0.024998666 | 0.58998196 | 0.155586 |
| 0.005521466 | -0.125768957 | 0.00650021  | 0.18693938  | 4.81E-05   | -0.11374 |
| 0.033172419 | 0.099755712  | 0.031135196 | 0.392431814 | 1.21E-18   | 0.129778 |
| 0.395742614 | -0.036605194 | 0.430001267 | 0.222919611 | 1.14E-06   | -0.21501 |
| 0.507675586 | -0.027137929 | 0.558553315 | 0.325778875 | 5.23E-13   | 0.237756 |
| 0.000691455 | -0.15434363  | 0.0008183   | 0.228368107 | 6.10E-07   | -0.08715 |
| 0.002579382 | -0.137930017 | 0.002817356 | 0.305006558 | 1.64E-11   | -0.12698 |
| 0.370853166 | -0.046265478 | 0.31844411  | 0.298968516 | 4.26E-11   | 0.180359 |
| 0.03687093  | -0.097198126 | 0.035745189 | 0.282297428 | 5.27E-10   | 0.046971 |
| 0.480799533 | 0.034902601  | 0.451774775 | 0.486376643 | 4.20E-29   | -0.12635 |
| 0.842191923 | -0.011436699 | 0.805299173 | 0.122784231 | 0.00789947 | -0.19329 |
| 0.704695108 | -0.028169243 | 0.543697232 | -0.41983795 | 2.30E-21   | 0.127866 |
| 0.193731513 | -0.061928944 | 0.181551945 | 0.169474074 | 0.00023397 | -0.03426 |
| 0.001965288 | 0.146433771  | 0.001508202 | 0.407100779 | 4.54E-20   | -0.11376 |
| 0.435221417 | -0.036078439 | 0.436671915 | 0.609855454 | 6.59E-49   | -0.17733 |
| 0.001936697 | -0.13841082  | 0.002721976 | 0.057929898 | 0.21145657 | 0.144876 |
| 0.252612112 | 0.059371771  | 0.200289806 | 0.537549101 | 2.52E-36   | 0.026211 |
| 0.001444061 | 0.150291731  | 0.001123391 | 0.298900859 | 4.30E-11   | 0.01004  |
| 0.000911499 | -0.141327596 | 0.002203713 | 0.234336002 | 3.02E-07   | 0.129556 |
| 0.000618227 | -0.152163249 | 0.000971366 | 0.361340084 | 7.53E-16   | 0.09562  |
| 0.019506832 | -0.107707614 | 0.01990575  | 0.143488845 | 0.00187969 | 0.043788 |
| 0.209653207 | -0.054936186 | 0.236059213 | 0.294244588 | 8.83E-11   | -0.22666 |
| 0.972998699 | -0.001451874 | 0.975037305 | 0.309937893 | 7.42E-12   | -0.03768 |
| 0.311903929 | 0.050283847  | 0.278179921 | 0.408306388 | 3.44E-20   | 0.258756 |
| 0.004107842 | -0.135064002 | 0.003451804 | 0.206235749 | 7.01E-06   | 0.048829 |
| 0.001516406 | -0.144751333 | 0.001711218 | 0.457316596 | 1.63E-25   | -0.11367 |
| 0.01566134  | 0.124648487  | 0.006997078 | 0.387678877 | 3.38E-18   | 0.159926 |
| 7.90E-09    | -0.266317718 | 5.05E-09    | 0.136444413 | 0.0031316  | -0.04391 |
| 0.000415901 | -0.158908326 | 0.000567351 | 0.205943825 | 7.23E-06   | -0.011   |
| 0.007939941 | 0.117910353  | 0.010768062 | -0.21129163 | 4.11E-06   | 0.366928 |
| 0.989835412 | 0.001941837  | 0.966617449 | 0.363565378 | 4.86E-16   | 0.380023 |
| 0.335038681 | -0.047002105 | 0.310791691 | 0.491666419 | 8.54E-30   | 0.047625 |
| 5.79E-06    | -0.213287583 | 3.31E-06    | 0.208943644 | 5.27E-06   | 0.04373  |
| 0.389329286 | 0.056509248  | 0.222891028 | 0.184740431 | 5.91E-05   | 0.060851 |
| 0.003022535 | -0.1326595   | 0.004081207 | 0.085342502 | 0.06537465 | -0.2472  |
| 0.041748463 | -0.094389748 | 0.04146329  | 0.078319454 | 0.09092097 | -0.06779 |
| 0.283125567 | -0.052133915 | 0.260856579 | 0.642956845 | 7.93E-56   | -0.02232 |
| 0.166320107 | -0.063987815 | 0.16743349  | 0.333085127 | 1.46E-13   | -0.12297 |
| 0.010194226 | -0.130057983 | 0.004877572 | 0.401981153 | 1.45E-19   | -0.0169  |
| 0.872848301 | 0.004742689  | 0.918584998 | 0.116407673 | 0.01182201 | -0.16745 |
| 0.848835664 | 0.016992011  | 0.714183883 | 0.205783902 | 7.35E-06   | -0.15205 |
| 0.16172583  | -0.05721155  | 0.217184412 | 0.326775907 | 4.40E-13   | -0.04058 |

|             |              |             |             |            |          |
|-------------|--------------|-------------|-------------|------------|----------|
| 0.171699218 | -0.06153256  | 0.184368347 | 0.241169533 | 1.32E-07   | -0.15186 |
| 5.33E-07    | 0.228181541  | 6.24E-07    | -0.22373265 | 1.04E-06   | 0.333423 |
| 0.085008946 | -0.08828656  | 0.056585385 | -0.06746836 | 0.14546026 | -0.49623 |
| 0.745814992 | -0.011521719 | 0.803881076 | 0.008785098 | 0.84982444 | -0.44881 |
| 0.000798215 | -0.151686919 | 0.001008145 | -0.06337812 | 0.1715259  | -0.5281  |
| 4.46E-07    | -0.232011415 | 3.98E-07    | 0.056171305 | 0.22567481 | -0.50875 |
| 0.002912596 | -0.133427475 | 0.003869723 | 0.002792231 | 0.95201304 | -0.51271 |
| 0.00019542  | 0.168064064  | 0.000264143 | -0.25962205 | 1.25E-08   | 0.1475   |
| 7.02E-05    | -0.182494153 | 7.29E-05    | -0.08478888 | 0.06714676 | -0.56314 |
| 1.78E-06    | -0.220644643 | 1.47E-06    | -0.02030103 | 0.66169203 | -0.44797 |
| 0.043513969 | 0.101135365  | 0.028866689 | 0.028881851 | 0.53354788 | 0.505767 |
| 4.58E-16    | 0.37224471   | 8.52E-17    | -0.1591004  | 0.00055855 | 0.071924 |
| 1.31E-05    | -0.198499154 | 1.55E-05    | -0.02121254 | 0.64750584 | -0.47825 |
| 1.49E-07    | -0.247069013 | 6.34E-08    | -0.10916724 | 0.01828191 | -0.33757 |
| 1.19E-06    | 0.230465049  | 4.78E-07    | 0.011579062 | 0.80292499 | 0.091831 |
| 5.25E-16    | -0.372259514 | 8.50E-17    | -0.06002409 | 0.19538127 | -0.16882 |
| 0.000966554 | -0.135146564 | 0.003431848 | -0.18779644 | 4.43E-05   | -0.43171 |
| 0.031314892 | -0.106230646 | 0.021675218 | 0.054136607 | 0.24295884 | -0.24949 |
| 7.96E-08    | -0.246497692 | 6.81E-08    | 0.004988675 | 0.9143781  | -0.33042 |
| 0.460931039 | -0.031800292 | 0.493002078 | 0.037351701 | 0.42064951 | -0.3322  |
| 0.012627724 | -0.117632966 | 0.010956109 | 0.033033316 | 0.47637978 | -0.1264  |
| 0.203378334 | -0.055502177 | 0.231259501 | 0.056674671 | 0.22153733 | -0.30737 |
| 0.214891668 | -0.061422693 | 0.185154656 | -0.29235    | 1.18E-10   | -0.15915 |
| 0.174739235 | 0.05286683   | 0.254203993 | 0.147798206 | 0.00136007 | 0.30891  |
| 0.025933766 | 0.110636508  | 0.016765312 | 0.108459908 | 0.01905379 | 0.364225 |
| 1.41E-06    | -0.231764589 | 4.10E-07    | 0.113792181 | 0.01387527 | 0.026251 |
| 0.156537156 | -0.077708667 | 0.093476957 | -0.06124245 | 0.18644997 | -0.38666 |
| 2.80E-20    | -0.413684288 | 9.87E-21    | 0.005228817 | 0.91027344 | -0.16403 |
| 1.09E-07    | -0.237574897 | 2.05E-07    | -0.15513477 | 0.00076851 | -0.29287 |
| 0.001171936 | -0.158887935 | 0.000568293 | -0.09078575 | 0.04991528 | -0.17799 |
| 2.34E-05    | -0.197509183 | 1.71E-05    | -0.11261151 | 0.01490073 | -0.4388  |
| 0.119468152 | -0.071674301 | 0.121927503 | -0.07281232 | 0.11609975 | -0.31179 |
| 0.026998219 | -0.103197762 | 0.025740606 | -0.09344775 | 0.04354656 | -0.25465 |
| 4.22E-15    | -0.350028093 | 6.61E-15    | -0.1361942  | 0.00318756 | -0.24989 |
| 0.000636232 | -0.161313411 | 0.000465929 | -0.0091561  | 0.84356233 | -0.22387 |
| 1.47E-12    | -0.324521392 | 6.49E-13    | -0.08116035 | 0.07975988 | -0.18973 |
| 2.07E-06    | -0.223985543 | 1.01E-06    | -0.05043527 | 0.27673343 | -0.23937 |
| 1.40E-09    | -0.295325043 | 7.48E-11    | -0.2720169  | 2.29E-09   | -0.03995 |
| 1.91E-10    | -0.276238652 | 1.26E-09    | -0.1443012  | 0.00176963 | 0.013776 |
| 7.26E-22    | -0.413879806 | 9.43E-21    | -0.20677223 | 6.63E-06   | -0.06276 |
| 0.000295898 | -0.170013365 | 0.000223305 | -0.0068692  | 0.88230439 | -0.17281 |
| 1.18E-05    | -0.206387651 | 6.90E-06    | 0.091822965 | 0.04734682 | -0.43576 |
| 7.10E-18    | -0.385269089 | 5.66E-18    | 0.013884258 | 0.76474803 | -0.17174 |
| 0.001130194 | 0.155032583  | 0.000774782 | -0.18818171 | 4.27E-05   | 0.261497 |
| 4.82E-12    | -0.31671664  | 2.43E-12    | 0.055816706 | 0.2286223  | -0.25307 |

|             |              |             |             |            |          |
|-------------|--------------|-------------|-------------|------------|----------|
| 0.22266734  | 0.068937581  | 0.136874532 | -0.03157246 | 0.49610701 | -0.19398 |
| 3.00E-09    | -0.27749936  | 1.05E-09    | 0.064678198 | 0.16288824 | 0.022509 |
| 4.01E-07    | -0.22730637  | 6.90E-07    | -0.10688665 | 0.02087312 | -0.37781 |
| 1.06E-09    | -0.280522516 | 6.82E-10    | -0.06667384 | 0.15027135 | -0.23895 |
| 0.417720406 | -0.040101239 | 0.38724712  | -0.03096005 | 0.50450427 | -0.31516 |
| 2.02E-05    | 0.221948241  | 1.27E-06    | -0.02982622 | 0.52024627 | 0.18893  |
| 0.362431803 | -0.031194093 | 0.501286362 | -0.30535908 | 1.55E-11   | 0.441756 |
| 0.165549653 | 0.062373627  | 0.178430381 | 0.193286488 | 2.61E-05   | 0.568183 |
| 0.000441517 | -0.169948649 | 0.00022456  | -0.25641273 | 1.90E-08   | -0.39443 |
| 0.224301977 | 0.072457724  | 0.117891748 | 0.118768192 | 0.01020449 | 0.28284  |
| 0.000116591 | -0.180393227 | 8.85E-05    | -0.272723   | 2.08E-09   | -0.48807 |
| 1.12E-05    | -0.20564305  | 7.46E-06    | -0.06907512 | 0.13609117 | -0.28895 |
| 7.91E-08    | -0.241006484 | 1.35E-07    | -0.11850839 | 0.01037234 | -0.56786 |
| 6.07E-21    | 0.427564377  | 3.53E-22    | -0.06845623 | 0.13964342 | 0.053865 |
| 0.038391276 | -0.096443843 | 0.037210916 | -0.02126424 | 0.64670503 | -0.30181 |
| 2.03E-15    | -0.352570258 | 4.09E-15    | -0.01949028 | 0.67441273 | -0.37734 |
| 0.710008946 | 0.012826128  | 0.78220743  | -0.07728358 | 0.09528953 | -0.40233 |
| 0.018178428 | -0.115087197 | 0.012822397 | 0.076501476 | 0.09869758 | -0.06922 |
| 0.000146101 | 0.182813589  | 7.08E-05    | 0.032131407 | 0.48850814 | 0.516787 |
| 4.90E-05    | -0.184704236 | 5.93E-05    | -0.03330023 | 0.47282225 | -0.06043 |
| 0.007647429 | -0.128631631 | 0.005371338 | -0.00236062 | 0.95942374 | -0.25816 |
| 0.0002132   | 0.176741819  | 0.000123308 | 0.240352222 | 1.46E-07   | -0.13177 |
| 0.001701013 | -0.149276553 | 0.001214749 | -0.17834562 | 0.00010669 | -0.35864 |
| 0.008953553 | -0.120927613 | 0.008900031 | -0.02071313 | 0.65526298 | -0.46359 |
| 0.000361833 | -0.16784827  | 0.00026907  | -0.09887798 | 0.03265642 | -0.35961 |
| 5.23E-14    | -0.344355127 | 1.90E-14    | -0.11052512 | 0.0168763  | -0.18196 |
| 2.10E-08    | -0.264942429 | 6.09E-09    | 0.012557528 | 0.78665724 | -0.45273 |
| 1.26E-21    | -0.41994254  | 2.24E-21    | -0.13313042 | 0.00395032 | -0.08711 |
| 0.338903522 | 0.027915585  | 0.547332927 | -0.0747853  | 0.10651576 | -0.26113 |
| 0.00341972  | 0.138419683  | 0.002720246 | 0.193837579 | 2.47E-05   | 0.261412 |
| 6.86E-06    | -0.204757482 | 8.18E-06    | -0.07150866 | 0.12279442 | -0.33964 |
| 4.42E-25    | -0.449996581 | 1.16E-24    | -0.10450725 | 0.02391102 | -0.34945 |
| 0.215340368 | 0.063813356  | 0.168596962 | -0.05802383 | 0.21071568 | 0.424484 |
| 0.313861156 | -0.045619976 | 0.32525016  | -0.02952881 | 0.5244169  | -0.56469 |
| 0.000110881 | -0.173689906 | 0.000161866 | 0.061635638 | 0.18363287 | -0.16004 |
| 0.001459276 | -0.146797043 | 0.001467378 | 0.013951086 | 0.76364923 | -0.37928 |
| 1.15E-08    | -0.262280223 | 8.73E-09    | 0.05035358  | 0.27751314 | -0.39575 |
| 2.44E-09    | 0.274841254  | 1.54E-09    | 0.147315902 | 0.00141083 | 0.433065 |
| 6.78E-07    | -0.226007521 | 8.02E-07    | 0.058094768 | 0.21015746 | -0.29508 |
| 0.00023275  | -0.183433411 | 6.68E-05    | -0.20550221 | 7.57E-06   | -0.30378 |
| 2.01E-20    | -0.417759199 | 3.77E-21    | 0.067695313 | 0.14410781 | -0.09807 |
| 0.000657338 | 0.15921961   | 0.000553158 | 0.07441498  | 0.10826534 | 0.580557 |
| 1.83E-07    | 0.238641535  | 1.80E-07    | -0.0438994  | 0.34384879 | 0.421432 |
| 0.000228605 | -0.162961928 | 0.000406445 | 0.166979195 | 0.00028979 | -0.30605 |
| 7.87E-06    | -0.208531133 | 5.51E-06    | -0.07164795 | 0.12206507 | -0.42765 |

|             |              |             |             |            |          |
|-------------|--------------|-------------|-------------|------------|----------|
| 1.99E-05    | -0.19950105  | 1.40E-05    | 0.092898668 | 0.04480102 | -0.10358 |
| 0.196142705 | -0.053732059 | 0.246503038 | 0.030689371 | 0.50823953 | -0.25787 |
| 0.066506543 | -0.081249196 | 0.079429597 | 0.036512019 | 0.4311769  | -0.29103 |
| 1.99E-10    | -0.293082374 | 1.05E-10    | 0.013131012 | 0.7771651  | -0.47454 |
| 1.69E-25    | -0.459589005 | 8.79E-26    | -0.12233934 | 0.00812962 | -0.10288 |
| 0.001731966 | -0.140132553 | 0.002404051 | -0.19986603 | 1.35E-05   | -0.37115 |
| 3.30E-09    | -0.273973385 | 1.74E-09    | -0.02562717 | 0.58066451 | -0.43915 |
| 0.885786495 | 0.007371073  | 0.873774841 | -0.20289824 | 9.92E-06   | -0.25119 |
| 4.49E-13    | -0.329144787 | 2.92E-13    | -0.30572357 | 1.46E-11   | -0.07117 |
| 0.004857984 | 0.13189225   | 0.004302879 | 0.065078918 | 0.16029292 | 0.39523  |
| 1.43E-09    | -0.288895122 | 1.98E-10    | 0.121046537 | 0.00883271 | -0.21046 |
| 0.066829701 | -0.094813531 | 0.040553882 | -0.06178899 | 0.18254271 | -0.28337 |
| 0.004383765 | -0.14432685  | 0.001766253 | -0.15733269 | 0.00064453 | -0.14677 |
| 0.10570064  | 0.077043777  | 0.096324331 | -0.03191116 | 0.49149493 | 0.236713 |
| 2.27E-20    | -0.426262402 | 4.86E-22    | -0.13557018 | 0.00333109 | -0.18202 |
| 0.151730215 | -0.06695805  | 0.148536666 | -0.02030683 | 0.66160132 | -0.24408 |
| 1.07E-30    | -0.497464133 | 1.45E-30    | -0.03870823 | 0.40396381 | -0.32125 |
| 3.93E-18    | -0.392225382 | 1.26E-18    | -0.08843899 | 0.0561584  | -0.30667 |
| 8.32E-12    | -0.298365198 | 4.68E-11    | -0.13176782 | 0.00433984 | -0.05769 |
| 1.15E-09    | -0.277226816 | 1.10E-09    | -0.0782407  | 0.09124735 | -0.1028  |
| 0.001690724 | -0.143860653 | 0.001828561 | -0.1291994  | 0.00516964 | -0.50369 |
| 2.25E-08    | 0.246605998  | 6.72E-08    | -0.0780875  | 0.09188497 | 0.300342 |
| 3.11E-05    | 0.188841103  | 4.01E-05    | -0.04603795 | 0.32083241 | 0.429662 |
| 3.92E-06    | -0.228315543 | 6.14E-07    | -0.03681157 | 0.42740396 | -0.02272 |
| 0.001181337 | -0.146431738 | 0.001508433 | 0.039433487 | 0.39520733 | -0.22628 |
| 0.0021377   | -0.141900347 | 0.00211321  | -0.0100004  | 0.82934893 | -0.30329 |
| 3.39E-07    | -0.238776093 | 1.77E-07    | 0.10871082  | 0.01877679 | -0.4452  |
| 0.225827992 | -0.046067041 | 0.320526419 | 0.002514243 | 0.95678559 | -0.52895 |
| 0.004891381 | 0.116285517  | 0.011911571 | 0.23292722  | 3.58E-07   | 0.341317 |
| 0.517968884 | -0.042386345 | 0.360752234 | -0.15919032 | 0.00055448 | -0.37911 |
| 1.90E-08    | -0.272723571 | 2.08E-09    | 0.137067759 | 0.00299606 | -0.27604 |
| 0.002421055 | 0.138977648  | 0.002613313 | -0.00517709 | 0.91115738 | 0.546893 |
| 5.41E-11    | 0.291164286  | 1.41E-10    | -0.14985804 | 0.00116162 | 0.533194 |
| 1.92E-15    | -0.356308095 | 2.00E-15    | 0.05906184  | 0.20265314 | -0.30071 |
| 0.006107593 | 0.124137501  | 0.007234756 | -0.08978683 | 0.05249796 | 0.41735  |
| 0.017333069 | 0.110066022  | 0.017340579 | 0.105367814 | 0.02277083 | 0.623407 |
| 1.80E-10    | -0.295952243 | 6.79E-11    | 0.050425598 | 0.27682564 | -0.17423 |
| 1.18E-13    | -0.339950252 | 4.26E-14    | -0.24129267 | 1.30E-07   | -0.22864 |
| 0.000286854 | -0.1668847   | 0.000292135 | -0.1240049  | 0.0072976  | -0.60385 |
| 2.36E-08    | -0.253071376 | 2.94E-08    | -0.13382295 | 0.00376473 | -0.32149 |
| 1.62E-06    | -0.216097401 | 2.44E-06    | -0.14227377 | 0.00205605 | -0.45828 |
| 1.99E-13    | -0.338166385 | 5.88E-14    | 0.0609615   | 0.18848236 | -0.07687 |
| 3.40E-06    | 0.208162349  | 5.73E-06    | -0.08862342 | 0.05564535 | 0.472514 |
| 8.01E-11    | -0.29043666  | 1.57E-10    | -0.13573366 | 0.00329294 | -0.31646 |
| 0.950595149 | 0.002016257  | 0.965338872 | -0.07148855 | 0.12290001 | -0.38274 |

|             |              |             |             |            |          |
|-------------|--------------|-------------|-------------|------------|----------|
| 2.33E-05    | 0.19918279   | 1.45E-05    | -0.07490416 | 0.10595898 | 0.28202  |
| 0.000280341 | -0.1809274   | 8.43E-05    | 0.23110889  | 4.43E-07   | 0.006982 |
| 1.04E-15    | -0.36297948  | 5.45E-16    | -0.14065981 | 0.0023137  | -0.28144 |
| 0.828714537 | 0.014421755  | 0.755924003 | -0.04079376 | 0.37909539 | -0.36276 |
| 1.82E-09    | -0.280267591 | 7.08E-10    | -0.00837646 | 0.85673269 | -0.35807 |
| 4.01E-09    | 0.26976708   | 3.14E-09    | -0.13070787 | 0.00466648 | 0.349724 |
| 0.000586235 | -0.162709421 | 0.000415073 | 0.032137639 | 0.48842378 | -0.12389 |
| 1.78E-08    | -0.258724331 | 1.40E-08    | 0.075028021 | 0.10538121 | -0.44357 |
| 0.229264286 | -0.068140637 | 0.141481982 | 0.060334234 | 0.19307863 | -0.3936  |
| 0.023785716 | 0.112759593  | 0.014768571 | -0.10282314 | 0.02628572 | 0.37362  |
| 0.000915097 | -0.161623435 | 0.000454158 | 0.044125287 | 0.34136914 | -0.06008 |
| 1.79E-15    | -0.357055923 | 1.73E-15    | -0.15158077 | 0.00101651 | -0.2633  |
| 6.22E-07    | -0.227430768 | 6.80E-07    | -0.08532186 | 0.06544001 | -0.19982 |
| 1.15E-08    | -0.249370769 | 4.73E-08    | -0.07594589 | 0.10117697 | -0.13253 |
| 7.51E-18    | -0.376278606 | 3.73E-17    | -0.15999536 | 0.00051921 | -0.21802 |
| 0.117977243 | 0.077955036  | 0.092439139 | 0.087836708 | 0.05786124 | 0.220315 |
| 0.000497626 | -0.170756146 | 0.00020936  | -0.14141776 | 0.00218923 | -0.18175 |
| 1.49E-08    | -0.260181979 | 1.16E-08    | -0.02799998 | 0.54612189 | -0.46257 |
| 2.61E-07    | -0.241112313 | 1.33E-07    | -0.18944893 | 3.78E-05   | -0.16408 |
| 4.32E-05    | -0.188842445 | 4.01E-05    | -0.00160623 | 0.97238438 | -0.17802 |
| 1.81E-10    | -0.286617269 | 2.79E-10    | -0.0118775  | 0.79795381 | -0.28967 |
| 3.89E-14    | -0.340400342 | 3.93E-14    | -0.20489073 | 8.07E-06   | -0.2443  |
| 0.158109642 | 0.058005867  | 0.210857243 | 0.03943103  | 0.3952368  | -0.57471 |
| 7.82E-06    | -0.205575282 | 7.52E-06    | -0.13117434 | 0.00452009 | -0.28096 |
| 2.40E-13    | -0.349223309 | 7.69E-15    | 0.000706187 | 0.98785672 | -0.25505 |
| 0.030388505 | -0.096261962 | 0.037571883 | 0.113367559 | 0.01423669 | -0.34044 |
| 0.29594696  | -0.050826318 | 0.273021445 | 0.21759645  | 2.07E-06   | -0.55414 |
| 1.93E-09    | -0.278387281 | 9.28E-10    | -0.12235923 | 0.0081192  | -0.16562 |
| 1.08E-11    | -0.303717642 | 2.02E-11    | -0.02493996 | 0.59085575 | -0.38102 |
| 0.055655823 | -0.089764371 | 0.052557286 | 0.275843103 | 1.34E-09   | -0.0278  |
| 4.69E-15    | -0.360733312 | 8.47E-16    | -0.04748653 | 0.30582575 | -0.19166 |
| 0.65508539  | 0.023568735  | 0.611432118 | 0.082334333 | 0.07548427 | -0.17998 |
| 5.87E-05    | 0.189004954  | 3.95E-05    | 0.020071053 | 0.66529063 | 0.43899  |
| 0.002728547 | 0.139534124  | 0.002510494 | 0.096949675 | 0.03622246 | 0.492541 |
| 0.079646041 | -0.078994977 | 0.088159657 | 0.172894549 | 0.00017363 | -0.37557 |
| 0.260096861 | 0.083153208  | 0.072613815 | -0.0231184  | 0.61825815 | 0.244299 |
| 5.98E-07    | -0.229830375 | 5.15E-07    | -0.01689966 | 0.71566978 | -0.29837 |
| 2.33E-05    | -0.199265898 | 1.44E-05    | 0.052806909 | 0.25474343 | -0.31675 |
| 5.68E-07    | -0.228239992 | 6.19E-07    | 0.088861121 | 0.05498986 | -0.06378 |
| 1.19E-07    | -0.243202276 | 1.03E-07    | -0.01376357 | 0.7667335  | -0.54765 |
| 2.45E-11    | -0.289939605 | 1.70E-10    | 0.070990031 | 0.12553984 | -0.07325 |
| 8.55E-11    | -0.280230791 | 7.11E-10    | -0.03144352 | 0.49786885 | -0.29766 |
| 0.000126334 | -0.176733599 | 0.000123399 | 0.111176766 | 0.01623599 | -0.05385 |
| 0.261156983 | -0.041087333 | 0.375671757 | 0.029497518 | 0.52485673 | 0.076883 |
| 1.61E-14    | -0.340779287 | 3.66E-14    | 0.110693443 | 0.01670883 | -0.18162 |

|             |              |             |             |            |          |
|-------------|--------------|-------------|-------------|------------|----------|
| 1.38E-20    | -0.402813754 | 1.21E-19    | 0.180790972 | 8.53E-05   | -0.26875 |
| 0.000120299 | -0.184655239 | 5.96E-05    | 0.125384465 | 0.00666703 | -0.04915 |
| 1.34E-06    | -0.223754208 | 1.04E-06    | -0.05561    | 0.23035307 | -0.42106 |
| 0.928636449 | 0.001923887  | 0.966925857 | -0.0067014  | 0.88515942 | -0.50474 |
| 1.24E-05    | -0.206630319 | 6.73E-06    | 0.072947471 | 0.1154224  | -0.41266 |
| 1.05E-24    | -0.452397168 | 6.12E-25    | 0.053938692 | 0.24468826 | -0.20612 |
| 2.43E-11    | -0.311584741 | 5.68E-12    | 0.007678038 | 0.86856495 | -0.25175 |
| 4.33E-19    | -0.397625989 | 3.85E-19    | -0.03187275 | 0.49201685 | -0.36412 |
| 2.39E-09    | -0.269191417 | 3.40E-09    | 0.041584157 | 0.3699213  | -0.3747  |
| 8.60E-05    | -0.197344074 | 1.74E-05    | 0.245313305 | 7.90E-08   | -0.08445 |
| 2.74E-10    | -0.290631543 | 1.53E-10    | -0.01970683 | 0.67100568 | -0.3005  |
| 0.063704492 | -0.098395622 | 0.033519105 | 0.01467179  | 0.75182993 | -0.35673 |
| 3.40E-06    | -0.216098574 | 2.44E-06    | 0.057813085 | 0.21238051 | -0.19424 |
| 0.002109733 | -0.145308756 | 0.001641335 | -0.1019445  | 0.02760341 | -0.41566 |
| 1.18E-05    | -0.215069081 | 2.73E-06    | -0.01071342 | 0.81738846 | -0.22228 |
| 0.000336177 | -0.162637395 | 0.000417565 | -0.03809113 | 0.4115048  | -0.32637 |
| 6.73E-10    | -0.28033336  | 7.01E-10    | -0.07199748 | 0.12024982 | -0.36933 |
| 2.41E-08    | -0.260604633 | 1.09E-08    | -0.02610426 | 0.57363795 | -0.48065 |
| 2.89E-05    | -0.201851329 | 1.10E-05    | 0.0039589   | 0.93200412 | -0.21423 |
| 4.64E-05    | -0.199866999 | 1.35E-05    | -0.17256614 | 0.00017872 | -0.31059 |
| 0.008281446 | -0.119657578 | 0.00964797  | -0.07120028 | 0.12442115 | -0.58341 |
| 6.51E-09    | -0.266438792 | 4.96E-09    | -0.04687419 | 0.31211182 | -0.14199 |
| 0.785355436 | 0.024618762  | 0.595647059 | 0.109721143 | 0.01769665 | 0.526004 |
| 5.76E-07    | -0.234983993 | 2.80E-07    | 0.038875534 | 0.40193365 | -0.4099  |
| 0.036136012 | -0.113928182 | 0.013761235 | -0.13354509 | 0.00383823 | -0.17468 |
| 0.005985092 | 0.124046488  | 0.007277839 | 0.059152632 | 0.20195873 | 0.011246 |
| 6.90E-10    | -0.287934733 | 2.29E-10    | -0.12512859 | 0.00678016 | 0.040506 |
| 0.000624262 | 0.155337042  | 0.000756241 | -0.23146677 | 4.25E-07   | 0.459491 |
| 0.001022411 | -0.158908588 | 0.000567339 | -0.17075991 | 0.00020929 | 0.129879 |
| 6.33E-12    | 0.329686308  | 2.65E-13    | 0.026499913 | 0.56784133 | 0.154669 |
| 0.000772472 | -0.164239455 | 0.000365297 | 0.026998754 | 0.56057309 | -0.38242 |
| 4.14E-05    | -0.186689114 | 4.92E-05    | -0.04224298 | 0.3623804  | -0.5089  |
| 2.50E-07    | -0.229829508 | 5.15E-07    | -0.09101691 | 0.049333   | -0.50577 |
| 0.002620104 | -0.136748496 | 0.003064801 | 0.052318245 | 0.25917225 | -0.19323 |
| 3.77E-07    | -0.234486676 | 2.97E-07    | 0.10110263  | 0.02891882 | -0.34359 |
| 6.50E-12    | -0.322471955 | 9.22E-13    | -0.05993605 | 0.1960386  | -0.11259 |
| 6.99E-07    | -0.228425857 | 6.06E-07    | 0.008757172 | 0.85029617 | -0.35419 |
| 0.000358708 | 0.162538634  | 0.000421005 | 0.178645481 | 0.00010382 | 0.349581 |
| 1.49E-07    | -0.24878837  | 5.10E-08    | 0.148497579 | 0.00128944 | -0.36339 |
| 0.000213515 | 0.176413313  | 0.000127    | -0.01450859 | 0.75450145 | 0.324466 |
| 5.38E-10    | -0.290900936 | 1.47E-10    | -0.01385961 | 0.76515343 | -0.26393 |
| 0.011011609 | -0.113170927 | 0.014406842 | -0.08703175 | 0.06020371 | -0.34726 |
| 0.844978515 | 0.000435587  | 0.992509663 | -0.05126676 | 0.26888141 | -0.28081 |
| 4.84E-09    | -0.262132236 | 8.90E-09    | 0.092495725 | 0.04574083 | -0.34861 |
| 1.02E-19    | -0.400060559 | 2.24E-19    | 0.123287325 | 0.00764624 | -0.27649 |

|             |              |             |             |            |          |
|-------------|--------------|-------------|-------------|------------|----------|
| 5.65E-09    | -0.264936305 | 6.09E-09    | 0.131089409 | 0.00454643 | -0.29402 |
| 2.36E-11    | -0.308835808 | 8.88E-12    | 0.002256278 | 0.96121578 | -0.12509 |
| 1.41E-09    | -0.274020141 | 1.73E-09    | -0.12972031 | 0.00499062 | -0.38062 |
| 0.007626062 | 0.123154915  | 0.007712177 | -0.22739368 | 6.83E-07   | 0.247115 |
| 1.42E-06    | -0.211625054 | 3.96E-06    | -0.04963621 | 0.28442452 | -0.3846  |
| 0.577496325 | -0.039502289 | 0.394382621 | -0.03495006 | 0.45115953 | -0.2774  |
| 2.91E-11    | -0.302989674 | 2.26E-11    | -0.10147301 | 0.02833363 | -0.11566 |
| 6.30E-06    | -0.213349543 | 3.29E-06    | 0.116160646 | 0.01200374 | -0.44261 |
| 0.00070177  | -0.16270968  | 0.000415064 | 0.020574621 | 0.65742097 | -0.36872 |
| 0.005378303 | -0.125510749 | 0.006611819 | 0.111658742 | 0.01577619 | -0.29154 |
| 1.67E-05    | -0.199338625 | 1.43E-05    | 0.106955351 | 0.02079063 | -0.35287 |
| 0.000336678 | -0.165860962 | 0.000318655 | -0.03713375 | 0.4233675  | -0.43552 |
| 0.030549046 | -0.089580404 | 0.053045327 | 0.022404761 | 0.62914257 | -0.30404 |
| 4.17E-05    | -0.192346218 | 2.86E-05    | 0.058170386 | 0.20956354 | -0.35784 |
| 1.13E-06    | -0.222626022 | 1.18E-06    | -0.11818475 | 0.01058486 | -0.60689 |
| 1.27E-08    | -0.269528949 | 3.24E-09    | 0.068675783 | 0.13837519 | -0.14131 |
| 7.20E-05    | -0.196197643 | 1.95E-05    | -0.03716738 | 0.42294745 | -0.52644 |
| 4.99E-06    | -0.206065614 | 7.14E-06    | 0.208323844 | 5.63E-06   | -0.09861 |
| 0.186295134 | -0.065844813 | 0.155419369 | -0.0539666  | 0.24444383 | -0.46431 |
| 5.35E-08    | -0.24614905  | 7.12E-08    | -0.02045119 | 0.65934652 | -0.00849 |
| 1.81E-08    | -0.259382006 | 1.29E-08    | -0.0689095  | 0.1370349  | 0.012273 |
| 9.97E-12    | -0.308493817 | 9.38E-12    | 0.119056917 | 0.01002078 | -0.27805 |
| 4.91E-11    | -0.311348593 | 5.90E-12    | -0.11552219 | 0.01248489 | -0.29286 |
| 0.711377508 | -0.011772423 | 0.799703217 | -0.07101426 | 0.12541053 | -0.44765 |
| 2.69E-07    | -0.223630025 | 1.05E-06    | -0.05087677 | 0.27254505 | -0.52521 |
| 0.017794965 | -0.113305521 | 0.014290183 | 0.010584202 | 0.81955298 | -0.19938 |
| 9.15E-07    | -0.228585565 | 5.95E-07    | 0.058209943 | 0.20925334 | -0.42843 |
| 0.011759444 | 0.112771998  | 0.014757547 | -0.0218926  | 0.63700403 | -0.42388 |
| 0.057897404 | 0.08777353   | 0.058042322 | -0.05015226 | 0.27944106 | 0.174457 |
| 0.003590868 | 0.133207473  | 0.003929269 | -0.15725385 | 0.00064863 | 0.325527 |
| 1.01E-05    | -0.209697034 | 4.87E-06    | 0.058408701 | 0.20769972 | -0.23562 |
| 3.80E-07    | -0.223497101 | 1.07E-06    | -0.11966509 | 0.00964338 | -0.21012 |
| 4.16E-09    | -0.267976159 | 4.02E-09    | 0.066210906 | 0.15312983 | -0.34023 |
| 0.00432483  | -0.130360524 | 0.004778255 | 0.019125762 | 0.68016259 | -0.31732 |
| 7.12E-05    | -0.189933981 | 3.61E-05    | -0.20656636 | 6.78E-06   | -0.32416 |
| 6.44E-05    | -0.181267465 | 8.17E-05    | 0.078876278 | 0.08863992 | -0.19723 |
| 9.37E-07    | -0.226411799 | 7.65E-07    | -0.00704237 | 0.87935971 | -0.13459 |
| 4.94E-08    | -0.250375341 | 4.16E-08    | -0.01791725 | 0.69935715 | -0.17775 |
| 0.007474097 | -0.121978135 | 0.008320851 | 0.048806231 | 0.29256457 | -0.1507  |
| 1.18E-06    | -0.226428029 | 7.64E-07    | 0.138317401 | 0.00274027 | -0.23006 |
| 1.54E-05    | -0.198762478 | 1.51E-05    | -0.19877946 | 1.51E-05   | 0.052013 |
| 4.23E-16    | -0.365829764 | 3.10E-16    | -0.00417613 | 0.92828279 | -0.28786 |
| 3.37E-07    | -0.233698687 | 3.26E-07    | -0.04759732 | 0.30469742 | -0.50498 |
| 3.74E-10    | -0.286683114 | 2.76E-10    | -0.19275372 | 2.74E-05   | -0.26747 |
| 0.359012025 | -0.040568097 | 0.381740082 | 0.070694979 | 0.12712288 | -0.24355 |



|             |              |             |             |            |          |
|-------------|--------------|-------------|-------------|------------|----------|
| 0.000212273 | -0.175238181 | 0.000141077 | 0.013238404 | 0.77539123 | -0.32533 |
| 0.006905152 | -0.137133124 | 0.002982161 | 0.122439538 | 0.00807727 | -0.12904 |
| 3.80E-07    | -0.233394038 | 3.38E-07    | 0.136748835 | 0.00306473 | -0.19902 |
| 2.47E-05    | -0.198095961 | 1.62E-05    | -0.25022474 | 4.25E-08   | -0.40411 |
| 0.002145977 | -0.138326633 | 0.002738461 | 0.073052311 | 0.1148991  | -0.33166 |
| 3.49E-12    | -0.303931028 | 1.95E-11    | -0.01444941 | 0.75547079 | -0.20825 |
| 0.348203878 | -0.048472347 | 0.295882691 | 0.212426395 | 3.63E-06   | -0.15355 |
| 1.90E-07    | -0.237047862 | 2.18E-07    | 0.054388423 | 0.24077082 | -0.51016 |
| 0.512207094 | 0.005665884  | 0.902809026 | -0.07712271 | 0.09598272 | -0.34848 |
| 2.56E-05    | -0.192706221 | 2.76E-05    | -0.04435318 | 0.33887908 | -0.45399 |
| 0.098233588 | -0.087395867 | 0.059134575 | -0.15149755 | 0.00102312 | -0.22812 |
| 0.274001347 | 0.057132152  | 0.217824264 | -0.18382361 | 6.44E-05   | -0.29902 |
| 0.015692888 | -0.116279142 | 0.011916261 | -0.04670648 | 0.31384809 | -0.27399 |
| 1.73E-11    | -0.312461595 | 4.92E-12    | 0.006924666 | 0.88136107 | -0.24714 |
| 1.29E-05    | -0.218483881 | 1.87E-06    | 0.047452173 | 0.3061762  | -0.42391 |
| 3.66E-08    | -0.252686939 | 3.09E-08    | -0.05677157 | 0.22074713 | -0.32704 |
| 9.07E-05    | 0.189579692  | 3.73E-05    | -0.34516191 | 1.64E-14   | 0.34221  |
| 2.63E-07    | 0.240972506  | 1.35E-07    | 0.351470652 | 5.03E-15   | 0.16339  |
| 6.35E-12    | -0.305507794 | 1.52E-11    | 0.074814294 | 0.10637974 | -0.19026 |
| 3.42E-13    | 0.338080774  | 5.97E-14    | 0.06180809  | 0.18240725 | 0.322209 |
| 2.50E-13    | -0.338457696 | 5.58E-14    | 0.064082129 | 0.16680702 | -0.26049 |
| 3.08E-10    | -0.29013623  | 1.65E-10    | 0.140087157 | 0.00241198 | -0.06717 |
| 2.81E-07    | 0.241171493  | 1.32E-07    | 0.317871846 | 2.01E-12   | 0.370886 |
| 3.17E-05    | -0.189522563 | 3.76E-05    | 0.263634028 | 7.27E-09   | -0.28948 |
| 0.002405084 | -0.131478549 | 0.004426868 | -0.11256761 | 0.01494011 | -0.38698 |
| 9.17E-11    | -0.288244733 | 2.19E-10    | -0.05312765 | 0.25186524 | -0.28505 |
| 1.83E-15    | -0.359960896 | 9.85E-16    | 0.093599106 | 0.04320599 | -0.29896 |
| 6.11E-05    | -0.186897981 | 4.83E-05    | -0.05823072 | 0.20909051 | -0.60142 |
| 0.000172633 | -0.169427627 | 0.000234909 | -0.10408442 | 0.0244891  | -0.39641 |
| 1.57E-13    | -0.327873597 | 3.64E-13    | 0.037221207 | 0.42227561 | -0.00761 |
| 2.72E-05    | -0.189478659 | 3.77E-05    | -0.04690687 | 0.31177412 | -0.14213 |
| 2.98E-10    | -0.290175826 | 1.64E-10    | -0.1551676  | 0.00076651 | -0.62678 |
| 2.36E-09    | -0.273285123 | 1.92E-09    | 0.022357883 | 0.62986041 | -0.43108 |
| 2.47E-11    | -0.303552934 | 2.07E-11    | -0.30354981 | 2.07E-11   | -0.42677 |
| 0.014226744 | -0.120124314 | 0.009366849 | -0.11853034 | 0.01035806 | -0.44891 |
| 1.72E-10    | -0.302865655 | 2.31E-11    | -0.01336393 | 0.77331935 | -0.13772 |
| 0.087361678 | -0.08182523  | 0.077314943 | 0.198353866 | 1.57E-05   | -0.3408  |
| 4.56E-08    | -0.250789511 | 3.95E-08    | 0.04105609  | 0.37603521 | -0.32891 |
| 0.759948361 | -0.023900409 | 0.606426108 | -0.16622755 | 0.00030891 | -0.46352 |
| 0.430122646 | -0.027131911 | 0.558640579 | -0.16913912 | 0.00024083 | -0.21406 |
| 0.239807475 | -0.05976592  | 0.197313329 | 0.057367183 | 0.2159341  | -0.36275 |
| 1.05E-06    | 0.225633926  | 8.37E-07    | -0.00841234 | 0.85612566 | 0.380801 |
| 0.009069066 | -0.125063764 | 0.006809092 | -0.13291181 | 0.0040106  | -0.41084 |
| 0.002604957 | -0.142820834 | 0.001974853 | 0.046535457 | 0.31562528 | -0.31037 |
| 0.486513321 | 0.024262128  | 0.600987559 | 0.056313797 | 0.22449804 | -0.08907 |

|             |              |             |             |            |          |
|-------------|--------------|-------------|-------------|------------|----------|
| 0.35133976  | -0.034524622 | 0.456691475 | -0.23676094 | 2.26E-07   | -0.39636 |
| 0.632695566 | -0.04142179  | 0.371794586 | -0.06350009 | 0.1707013  | -0.16467 |
| 1.14E-07    | -0.246144245 | 7.12E-08    | -0.00043983 | 0.99243662 | -0.45631 |
| 8.66E-16    | -0.369865372 | 1.38E-16    | 0.171509168 | 0.00019606 | 0.031819 |
| 1.07E-06    | -0.226420522 | 7.64E-07    | 0.06560277  | 0.15694727 | -0.24103 |
| 0.014058223 | -0.10577025  | 0.022253993 | -0.06798631 | 0.1423878  | -0.41153 |
| 0.003669139 | -0.123733049 | 0.007427974 | -0.04363845 | 0.34672744 | -0.53211 |
| 0.000172163 | -0.190900977 | 3.29E-05    | -0.18230437 | 7.42E-05   | -0.26657 |
| 1.55E-09    | -0.27318001  | 1.95E-09    | -1.14E-05   | 0.99980356 | -0.43536 |
| 1.75E-05    | -0.203003134 | 9.81E-06    | 0.089083898 | 0.05438136 | -0.29172 |
| 1.25E-12    | -0.326349585 | 4.74E-13    | -0.07717313 | 0.09576503 | -0.50506 |
| 1.91E-08    | -0.251713106 | 3.51E-08    | -0.11234919 | 0.01513741 | -0.43151 |
| 0.000955629 | -0.152401708 | 0.000953423 | -0.0155614  | 0.73732054 | -0.44384 |
| 0.067562509 | -0.088551241 | 0.055845673 | -0.10811474 | 0.01944066 | -0.3795  |
| 3.73E-07    | -0.229547071 | 5.32E-07    | -0.0726745  | 0.11679369 | -0.18481 |
| 2.35E-12    | -0.327578292 | 3.83E-13    | 0.060180664 | 0.19421632 | -0.14861 |
| 0.035938475 | -0.113958174 | 0.013736198 | -0.21215169 | 3.74E-06   | -0.244   |
| 7.83E-05    | -0.175571969 | 0.000136936 | -0.13871843 | 0.00266251 | -0.55669 |
| 0.031101232 | -0.100486085 | 0.029915969 | -0.00758886 | 0.87007793 | -0.41548 |
| 2.12E-07    | -0.242476042 | 1.12E-07    | 0.078206586 | 0.09138903 | -0.38676 |
| 0.243953524 | 0.058781693  | 0.204806726 | 0.006086375 | 0.89563576 | 0.463992 |
| 1.21E-07    | 0.24133988   | 1.29E-07    | 0.092419527 | 0.0459204  | 0.244987 |
| 5.20E-13    | 0.324672949  | 6.33E-13    | 0.023994976 | 0.60500215 | 0.424902 |
| 4.61E-06    | -0.209993017 | 4.72E-06    | -0.04699631 | 0.31085136 | -0.09815 |
| 2.55E-11    | -0.301374637 | 2.92E-11    | -0.00552046 | 0.90529169 | -0.1789  |
| 3.79E-05    | -0.198864315 | 1.50E-05    | -0.27403045 | 1.73E-09   | -0.26148 |
| 0.001907048 | -0.152562238 | 0.000941517 | -0.09640298 | 0.03729175 | -0.22877 |
| 4.83E-07    | -0.240108158 | 1.51E-07    | -0.15049372 | 0.00110599 | -0.25183 |
| 1.34E-05    | -0.196180323 | 1.96E-05    | 0.005311384 | 0.9088627  | -0.49586 |
| 0.000459693 | -0.168104045 | 0.000263239 | 0.104118595 | 0.02444193 | -0.16928 |
| 3.48E-08    | -0.254142846 | 2.56E-08    | -0.14698887 | 0.00144623 | -0.52748 |
| 0.009515904 | 0.125017738  | 0.006829701 | 0.239592708 | 1.60E-07   | 0.566589 |
| 3.13E-10    | -0.291203439 | 1.40E-10    | 0.15227234  | 0.00096312 | -0.12294 |
| 2.05E-08    | -0.257559707 | 1.64E-08    | -0.03377944 | 0.466472   | -0.255   |
| 0.750420331 | 0.036854376  | 0.426866381 | -0.15120901 | 0.00104633 | 0.163765 |
| 8.82E-05    | -0.176167642 | 0.000129829 | 0.106021895 | 0.02193601 | -0.25985 |
| 0.033479896 | -0.098120973 | 0.034018936 | -0.00507765 | 0.91285707 | -0.33471 |
| 4.80E-15    | -0.350403904 | 6.16E-15    | -0.15421715 | 0.00082653 | -0.32407 |
| 7.35E-05    | -0.182903694 | 7.02E-05    | 0.006929504 | 0.88127879 | -0.43146 |
| 0.000410223 | -0.166824918 | 0.000293625 | 0.049279193 | 0.28790706 | -0.27924 |
| 2.39E-06    | -0.227377352 | 6.85E-07    | -0.23041437 | 4.81E-07   | -0.24558 |
| 6.48E-05    | -0.19281312  | 2.73E-05    | 0.092104681 | 0.04666865 | -0.21466 |
| 0.000117223 | -0.187599417 | 4.51E-05    | -0.07603759 | 0.10076439 | -0.5725  |
| 0.772527667 | -0.016340614 | 0.724687667 | -0.1560634  | 0.00071365 | -0.57664 |
| 0.017839877 | -0.127413444 | 0.005828178 | -0.08777268 | 0.05804475 | -0.18523 |

|             |              |             |             |            |          |
|-------------|--------------|-------------|-------------|------------|----------|
| 0.145231091 | -0.076326183 | 0.09947458  | -0.12111989 | 0.00879141 | -0.18855 |
| 7.92E-05    | -0.181265743 | 8.17E-05    | -0.14220276 | 0.00206681 | -0.53186 |
| 0.006920246 | -0.130485833 | 0.004737657 | 0.086580988 | 0.06154931 | -0.04803 |
| 7.27E-08    | -0.251133046 | 3.78E-08    | -0.11233971 | 0.01514602 | -0.12921 |
| 1.74E-12    | -0.336165152 | 8.43E-14    | 0.118968232 | 0.01007689 | -0.3395  |
| 0.081324197 | -0.094226702 | 0.041817731 | 0.075870484 | 0.10151727 | -0.29711 |
| 0.003136904 | -0.137650571 | 0.00287418  | -0.0856653  | 0.06435926 | -0.3692  |
| 2.13E-05    | 0.207825542  | 5.94E-06    | -0.13271753 | 0.00406487 | 0.519781 |
| 8.31E-05    | -0.189954242 | 3.60E-05    | 0.032982589 | 0.47705754 | -0.33813 |
| 2.15E-05    | -0.203453782 | 9.37E-06    | 0.124334354 | 0.00714235 | -0.40099 |
| 0.001241388 | -0.136632397 | 0.003090152 | -0.14257198 | 0.00201142 | -0.50316 |
| 0.005374074 | -0.127767349 | 0.005691986 | -0.15066039 | 0.00109181 | -0.33303 |
| 0.057728878 | -0.095390824 | 0.039342218 | -0.01847278 | 0.69050914 | -0.23601 |
| 0.000474512 | -0.165328045 | 0.000333333 | -0.10586401 | 0.02213505 | -0.00281 |
| 9.80E-08    | -0.249334238 | 4.76E-08    | -0.18585815 | 5.32E-05   | -0.31505 |
| 3.62E-14    | -0.335815544 | 8.97E-14    | -0.06203253 | 0.18082123 | -0.06214 |
| 5.20E-11    | -0.299354485 | 4.01E-11    | -0.05108733 | 0.27056281 | -0.21554 |
| 0.003230859 | 0.135027538  | 0.003460652 | -0.33299267 | 1.48E-13   | 0.154545 |
| 0.156377414 | -0.069659215 | 0.132802825 | 0.139573172 | 0.00250342 | -0.53337 |
| 1.44E-18    | -0.394474953 | 7.73E-19    | -0.08098234 | 0.08042502 | -0.19973 |
| 2.28E-10    | 0.28462946   | 3.74E-10    | 0.013721772 | 0.7674216  | 0.368503 |
| 0.022531181 | -0.101559249 | 0.028198837 | -0.14259042 | 0.00200868 | -0.4433  |
| 0.355212402 | -0.037583213 | 0.417773641 | -0.27024543 | 2.94E-09   | -0.31133 |
| 5.07E-16    | -0.379557936 | 1.89E-17    | -0.04997573 | 0.2811391  | -0.28201 |
| 0.000300428 | -0.17644011  | 0.000126695 | -0.07807842 | 0.09192285 | -0.43012 |
| 0.693470835 | -0.022292336 | 0.6308647   | -0.0407382  | 0.37974556 | -0.23188 |
| 1.70E-05    | -0.191136426 | 3.21E-05    | 0.002116436 | 0.96361787 | -0.21898 |
| 2.11E-23    | -0.437398018 | 3.03E-23    | -0.01776557 | 0.7017801  | -0.02376 |
| 2.18E-05    | -0.191001659 | 3.26E-05    | -0.03602234 | 0.43738584 | -0.60074 |
| 0.712436486 | 0.004790254  | 0.917771356 | -0.03571732 | 0.4412792  | -0.36479 |
| 0.074880115 | 0.086335595  | 0.06229222  | 0.09771383  | 0.03477157 | 0.394982 |
| 0.016794523 | -0.108866169 | 0.018607057 | -0.05108673 | 0.2705684  | -0.56514 |
| 7.78E-06    | -0.204263226 | 8.61E-06    | -0.07777466 | 0.09319806 | -0.53692 |
| 0.001489159 | -0.15048224  | 0.001106969 | -0.02245985 | 0.62829938 | -0.50781 |
| 0.001036511 | -0.152886913 | 0.000917855 | 0.151036109 | 0.00106047 | -0.21232 |
| 3.75E-12    | -0.315817921 | 2.82E-12    | -0.00770913 | 0.8680376  | -0.37347 |
| 3.43E-13    | -0.330123083 | 2.46E-13    | 0.049560259 | 0.28516301 | 0.059165 |
| 1.39E-05    | -0.208040972 | 5.80E-06    | -0.1192573  | 0.00989501 | -0.12784 |
| 0.051384682 | 0.082193114  | 0.075988511 | 0.093545479 | 0.0433264  | 0.25434  |
| 1.02E-05    | 0.200454263  | 1.27E-05    | 0.180052192 | 9.13E-05   | 0.261226 |
| 3.81E-13    | -0.343512754 | 2.22E-14    | -0.09595278 | 0.03819232 | -0.02863 |
| 0.404084358 | -0.042834772 | 0.355689162 | -0.1196067  | 0.00967907 | -0.30522 |
| 0.001100298 | -0.152961334 | 0.000912509 | -0.13703522 | 0.003003   | -0.32331 |
| 0.010418074 | -0.124072145 | 0.00726567  | -0.15166372 | 0.00100997 | 0.061327 |
| 0.000128306 | -0.177516884 | 0.000114992 | -0.05333627 | 0.25000526 | -0.2692  |

|             |              |             |             |            |          |
|-------------|--------------|-------------|-------------|------------|----------|
| 2.70E-16    | -0.358874416 | 1.22E-15    | -0.06786804 | 0.14308492 | -0.28186 |
| 0.000180832 | -0.177368381 | 0.000116544 | -0.23482754 | 2.85E-07   | -0.54155 |
| 0.024162988 | -0.108965513 | 0.018499215 | -0.05712248 | 0.21790227 | -0.04343 |
| 0.001473414 | -0.14656583  | 0.001493243 | 0.046399856 | 0.31703904 | -0.27442 |
| 0.000128961 | -0.188325409 | 4.21E-05    | 0.010840864 | 0.81525509 | -0.15252 |
| 4.50E-18    | -0.379554742 | 1.89E-17    | -0.20659593 | 6.76E-06   | -0.2278  |
| 0.000185163 | -0.171251886 | 0.000200512 | 0.15115296  | 0.0010509  | -0.0996  |
| 0.003102752 | 0.14723907   | 0.001419075 | 0.049440561 | 0.28632946 | 0.473195 |
| 8.40E-07    | -0.226366325 | 7.69E-07    | -0.00692325 | 0.8813852  | -0.30508 |
| 1.52E-06    | -0.218688092 | 1.83E-06    | -0.11618795 | 0.01198353 | -0.4662  |
| 0.111906211 | -0.084381035 | 0.068477292 | -0.10782283 | 0.01977315 | -0.43445 |
| 1.73E-06    | 0.228754628  | 5.84E-07    | -0.10077835 | 0.02943966 | 0.555755 |
| 7.01E-10    | -0.275715327 | 1.36E-09    | -0.12792745 | 0.00563132 | -0.44443 |
| 0.007177642 | -0.111405671 | 0.016016176 | -0.00119364 | 0.97947613 | -0.33633 |
| 0.431102009 | 0.027193388  | 0.557749449 | -0.14951063 | 0.0011931  | -0.3555  |
| 0.00057788  | -0.162046568 | 0.000438539 | 0.029040274 | 0.53130457 | -0.23515 |
| 2.40E-12    | -0.329573836 | 2.71E-13    | 0.074973836 | 0.10563366 | 0.032005 |
| 1.68E-14    | -0.345885355 | 1.43E-14    | -0.04978711 | 0.28296119 | -0.40219 |
| 0.710526965 | -0.031524501 | 0.496761932 | 0.072887084 | 0.11572467 | -0.1137  |
| 0.060377759 | 0.10855124   | 0.018952552 | -0.03522478 | 0.44760762 | 0.376926 |
| 0.002099215 | 0.14835211   | 0.001303843 | 0.053482793 | 0.24870472 | 0.422352 |
| 4.76E-17    | -0.379738195 | 1.82E-17    | -0.01321525 | 0.7757736  | -0.18055 |
| 6.92E-09    | -0.275944144 | 1.32E-09    | 0.017409253 | 0.70748397 | -0.20491 |
| 0.003000535 | -0.142919885 | 0.001960469 | -0.01003249 | 0.82880969 | -0.34475 |
| 0.001900245 | 0.157772684  | 0.000622049 | -0.25159246 | 3.56E-08   | 0.180564 |
| 3.86E-13    | -0.329038039 | 2.97E-13    | 0.140367366 | 0.00236342 | -0.23409 |
| 0.00028153  | 0.163878205  | 0.000376521 | 0.103460626 | 0.02536395 | 0.330014 |
| 0.000621916 | -0.156524634 | 0.000687777 | -0.11348329 | 0.01413738 | -0.34795 |
| 2.65E-06    | -0.218598382 | 1.85E-06    | -0.12473604 | 0.00695706 | -0.53549 |
| 0.475030382 | -0.026850674 | 0.562725963 | -0.02952724 | 0.52443905 | 0.135108 |
| 0.936811033 | -0.017962281 | 0.698638406 | -0.0718977  | 0.12076584 | -0.10483 |
| 1.93E-11    | 0.303445754  | 2.11E-11    | -0.04554258 | 0.32607245 | 0.436562 |
| 1.00E-33    | -0.52096368  | 7.53E-34    | -0.03289035 | 0.47829129 | -0.01472 |
| 0.553710333 | 0.02734943   | 0.555490675 | -0.25856704 | 1.43E-08   | -0.33316 |
| 6.78E-08    | -0.250594171 | 4.05E-08    | 0.056738572 | 0.22101599 | -0.15866 |
| 0.14312207  | 0.067406725  | 0.145829228 | -0.14897525 | 0.00124315 | -0.32258 |
| 1.42E-07    | -0.246005431 | 7.25E-08    | -0.06373057 | 0.16915118 | -0.356   |
| 0.30608721  | -0.047056415 | 0.310232319 | 0.065551164 | 0.1572745  | -0.43526 |
| 2.19E-13    | -0.323736893 | 7.43E-13    | 0.004459528 | 0.92343049 | -0.28923 |
| 0.004549512 | -0.135848992 | 0.003266253 | -0.00885187 | 0.84869675 | -0.37333 |
| 8.87E-06    | -0.204753951 | 8.19E-06    | 0.010570527 | 0.81978213 | -0.20034 |
| 0.000419669 | -0.15929463  | 0.000549787 | -0.00642296 | 0.88989988 | -0.19098 |
| 0.41464834  | 0.036057912  | 0.436933068 | -0.04017873 | 0.38632977 | -0.56331 |
| 9.18E-10    | -0.284432619 | 3.85E-10    | 0.077891483 | 0.09270597 | -0.10483 |
| 0.724886385 | -0.00775227  | 0.867305908 | -0.03373861 | 0.46701119 | -0.23836 |

|             |              |             |             |            |          |
|-------------|--------------|-------------|-------------|------------|----------|
| 3.28E-07    | -0.241877405 | 1.21E-07    | -0.31868735 | 1.75E-12   | -0.01368 |
| 0.000139985 | -0.178071738 | 0.000109366 | 0.250683658 | 4.00E-08   | -0.313   |
| 0.004688989 | -0.12765782  | 0.005733827 | -0.08997297 | 0.05200844 | -0.45505 |
| 2.60E-06    | -0.231690013 | 4.14E-07    | -0.0825468  | 0.07473077 | -0.03174 |
| 3.46E-08    | -0.250316753 | 4.20E-08    | -0.0873871  | 0.05916013 | -0.44026 |
| 0.502021137 | -0.037529446 | 0.418440507 | -0.16590388 | 0.0003175  | -0.06931 |
| 2.05E-06    | -0.216278928 | 2.39E-06    | -0.06438762 | 0.16478985 | -0.46198 |
| 2.83E-11    | -0.3023178   | 2.52E-11    | -0.12351432 | 0.00753438 | -0.31179 |
| 4.72E-13    | -0.329815371 | 2.59E-13    | -0.07842665 | 0.0904782  | -0.42891 |
| 0.007640057 | -0.117549662 | 0.011013148 | 0.288830443 | 2.00E-10   | 0.357255 |
| 0.163070706 | 0.060122701  | 0.194646991 | 0.089522258 | 0.05320036 | -0.31772 |
| 2.38E-05    | 0.195249063  | 2.15E-05    | -0.07127355 | 0.12403317 | 0.214388 |
| 1.43E-15    | -0.360855758 | 8.27E-16    | 0.039472937 | 0.39473432 | -0.23617 |
| 0.058896517 | -0.096593329 | 0.036916449 | -0.19689424 | 1.82E-05   | -0.42216 |
| 7.42E-15    | -0.354442564 | 2.86E-15    | 0.084463718 | 0.06820582 | -0.36556 |
| 8.91E-10    | -0.275119656 | 1.48E-09    | -0.11384883 | 0.01382768 | -0.28739 |
| 0.000398931 | -0.163936529 | 0.000374687 | 0.122243732 | 0.00817985 | -0.35934 |
| 8.08E-05    | -0.179287209 | 9.79E-05    | -0.01713939 | 0.71181478 | -0.40862 |
| 1.11E-25    | -0.457412431 | 1.59E-25    | -0.01737016 | 0.70811084 | -0.04763 |
| 0.000122055 | -0.179664574 | 9.46E-05    | -0.11732719 | 0.01116677 | -0.38935 |
| 0.000941175 | -0.16454231  | 0.000356129 | -0.13865319 | 0.00267502 | -0.47945 |
| 1.53E-10    | -0.283647251 | 4.32E-10    | 0.135095393 | 0.0034442  | 0.042243 |
| 2.04E-06    | -0.220613136 | 1.48E-06    | 0.113539406 | 0.01408944 | -0.29397 |
| 0.000303475 | -0.153953536 | 0.000843932 | -0.11983824 | 0.00953828 | -0.27626 |
| 2.71E-06    | -0.2210294   | 1.41E-06    | 0.103189805 | 0.02575208 | -0.42128 |
| 0.027868819 | -0.119609031 | 0.009677637 | 0.063831494 | 0.16847572 | -0.37052 |
| 6.92E-07    | -0.232223767 | 3.89E-07    | -0.02211496 | 0.63358582 | -0.50622 |
| 0.000120107 | -0.177157759 | 0.000118778 | 0.014387552 | 0.75648458 | -0.52715 |
| 4.27E-11    | -0.297202734 | 5.60E-11    | 0.009570644 | 0.83657704 | -0.42006 |
| 1.93E-07    | -0.245857024 | 7.38E-08    | 0.199320587 | 1.43E-05   | 0.016735 |
| 0.006897713 | -0.127120214 | 0.005943231 | -0.00918482 | 0.84307801 | -0.52821 |
| 0.660251571 | -0.030419713 | 0.511974963 | -0.0325568  | 0.4827671  | -0.35013 |
| 0.078775475 | -0.079179816 | 0.087415955 | 0.10823533  | 0.01930473 | -0.34291 |
| 3.75E-05    | -0.184083132 | 6.29E-05    | 0.046026015 | 0.32095803 | -0.35691 |
| 0.000186902 | -0.169214377 | 0.000239272 | -0.18098691 | 8.38E-05   | -0.51752 |
| 4.20E-06    | -0.216661287 | 2.29E-06    | 0.127568068 | 0.00576832 | -0.49786 |
| 2.06E-06    | 0.221631981  | 1.32E-06    | 0.036490907 | 0.43144353 | 0.583951 |
| 7.00E-05    | -0.192756112 | 2.74E-05    | -0.22273238 | 1.16E-06   | -0.0806  |
| 1.20E-08    | -0.26055258  | 1.10E-08    | -0.05557729 | 0.23062775 | -0.29404 |
| 4.46E-05    | -0.201469984 | 1.15E-05    | -0.00408946 | 0.9297673  | -0.42874 |
| 4.10E-11    | -0.306188995 | 1.36E-11    | -0.23360791 | 3.30E-07   | -0.08309 |
| 0.172662762 | -0.067658943 | 0.144323895 | -0.03400132 | 0.46354767 | -0.25913 |
| 0.224632867 | -0.051815522 | 0.263783659 | 0.000937259 | 0.98388378 | -0.32422 |
| 7.23E-15    | -0.351173485 | 5.32E-15    | -0.17240345 | 0.00018129 | -0.19288 |
| 2.36E-12    | -0.31909429  | 1.63E-12    | 0.058341559 | 0.20822361 | -0.1296  |

|             |              |             |             |            |          |
|-------------|--------------|-------------|-------------|------------|----------|
| 0.811878605 | -0.009247474 | 0.842021583 | -0.09799083 | 0.03425799 | -0.33647 |
| 0.044575915 | -0.097006885 | 0.036112085 | 0.005488642 | 0.90583505 | -0.35025 |
| 1.28E-07    | -0.240334917 | 1.46E-07    | -0.19746885 | 1.72E-05   | -0.24336 |
| 0.040282161 | -0.093189586 | 0.044132636 | -0.1104854  | 0.01691603 | -0.03706 |
| 0.245158868 | -0.067696961 | 0.144098021 | -0.15593509 | 0.00072101 | -0.2077  |
| 1.69E-06    | -0.22119306  | 1.39E-06    | 0.125331716 | 0.00669021 | -0.28023 |
| 6.96E-06    | -0.207696888 | 6.02E-06    | -0.06145372 | 0.18493235 | -0.40984 |
| 0.046701648 | -0.098955691 | 0.032519224 | -0.21932546 | 1.71E-06   | -0.47402 |
| 0.184893492 | -0.064437837 | 0.164460049 | -0.20658056 | 6.77E-06   | -0.43687 |
| 3.06E-10    | -0.297923229 | 5.01E-11    | 0.004867701 | 0.91644674 | -0.22315 |
| 0.449803449 | 0.021284854  | 0.646385793 | -0.01348346 | 0.77134782 | -0.46113 |
| 0.002681844 | -0.137716053 | 0.002860772 | 0.05346555  | 0.24885753 | -0.41155 |
| 0.036453014 | 0.106756859  | 0.021029738 | 0.260141564 | 1.16E-08   | 0.356973 |
| 9.87E-07    | -0.227832433 | 6.49E-07    | -0.12297403 | 0.00780307 | -0.3484  |
| 1.38E-06    | -0.214632649 | 2.86E-06    | -0.15643603 | 0.00069268 | -0.41893 |
| 0.110039126 | -0.087620075 | 0.058484101 | -0.10026871 | 0.03027449 | -0.5389  |
| 0.001146468 | -0.150761321 | 0.001083312 | -0.03911292 | 0.39906355 | -0.41318 |
| 5.97E-06    | -0.201667978 | 1.13E-05    | -0.18186157 | 7.73E-05   | -0.52007 |
| 0.006689188 | -0.135901609 | 0.003254146 | -0.27140528 | 2.50E-09   | -0.35519 |
| 3.44E-06    | -0.215316931 | 2.66E-06    | 0.023590341 | 0.61110546 | 0.07431  |
| 4.87E-14    | -0.342625139 | 2.61E-14    | 0.229875337 | 5.12E-07   | -0.25176 |
| 4.06E-21    | -0.423661899 | 9.15E-22    | 0.050563636 | 0.27551114 | -0.06373 |
| 0.659058842 | -0.027154407 | 0.558314416 | -0.29794904 | 4.99E-11   | -0.47595 |
| 1.58E-08    | -0.263625761 | 7.28E-09    | -0.01462131 | 0.75265591 | -0.28536 |
| 6.18E-06    | -0.222630385 | 1.18E-06    | -0.1240739  | 0.00726484 | -0.34874 |
| 4.66E-08    | -0.25784052  | 1.58E-08    | -0.10537168 | 0.02276582 | -0.08511 |
| 1.98E-06    | -0.234735666 | 2.88E-07    | -0.13162871 | 0.0043815  | -0.14998 |
| 4.78E-05    | -0.177817926 | 0.000111907 | -0.10642735 | 0.02143195 | -0.32348 |
| 5.25E-14    | -0.348034129 | 9.61E-15    | -0.02274032 | 0.62401445 | -0.15164 |
| 0.00010947  | -0.1753272   | 0.000139961 | 0.055339862 | 0.23262884 | -0.22299 |
| 5.11E-06    | 0.225085625  | 8.91E-07    | -0.04164849 | 0.3691807  | 0.364367 |
| 0.007784126 | -0.115841011 | 0.012242537 | 0.008834923 | 0.84898289 | -0.38121 |
| 1.36E-06    | -0.210503377 | 4.47E-06    | -0.0998606  | 0.03095754 | -0.00259 |
| 0.014097766 | 0.131634156  | 0.004379858 | -0.01516645 | 0.74375087 | 0.15879  |
| 6.91E-10    | 0.285888518  | 3.11E-10    | 0.13362576  | 0.00381676 | 0.535146 |
| 1.58E-09    | -0.288424416 | 2.13E-10    | 0.029448138 | 0.52555112 | -0.36619 |
| 1.03E-08    | -0.263130611 | 7.78E-09    | -0.02914322 | 0.52984939 | -0.31479 |
| 1.29E-15    | -0.354602289 | 2.77E-15    | 0.119245567 | 0.00990233 | -0.13699 |
| 1.44E-07    | -0.234384102 | 3.01E-07    | -0.03284454 | 0.47890459 | -0.26292 |
| 9.77E-06    | -0.20187943  | 1.10E-05    | 0.077710612 | 0.09346873 | -0.35335 |
| 0.123666645 | -0.081131588 | 0.079867052 | -0.1782931  | 0.00010719 | -0.37314 |
| 8.49E-06    | -0.205861271 | 7.29E-06    | -0.17377373 | 0.00016067 | -0.44765 |
| 2.25E-06    | -0.214944548 | 2.77E-06    | -0.02904909 | 0.53117993 | -0.16959 |
| 0.00049408  | -0.162808686 | 0.000411661 | -0.00099696 | 0.98285734 | -0.21468 |
| 1.30E-15    | 0.367579847  | 2.19E-16    | -0.07879348 | 0.08897616 | 0.146857 |

|             |              |             |             |            |          |
|-------------|--------------|-------------|-------------|------------|----------|
| 0.000195932 | -0.182535644 | 7.26E-05    | -0.05853517 | 0.20671551 | -0.32911 |
| 0.192320897 | -0.060351866 | 0.192948322 | -0.19909635 | 1.46E-05   | -0.50175 |
| 2.54E-05    | -0.195196719 | 2.16E-05    | -0.02521492 | 0.58676822 | -0.25608 |
| 9.19E-12    | -0.304957885 | 1.66E-11    | 0.071178521 | 0.12453659 | -0.20791 |
| 0.122596809 | -0.063291932 | 0.172110403 | 0.077624675 | 0.09383289 | -0.15852 |
| 1.61E-09    | -0.278482175 | 9.16E-10    | -0.0606646  | 0.19064773 | -0.42776 |
| 0.435706941 | 0.040840354  | 0.37855077  | 0.008277786 | 0.85840248 | 0.547219 |
| 0.000163589 | -0.175741559 | 0.000134877 | -0.12828338 | 0.00549853 | -0.36516 |
| 3.09E-06    | -0.213295512 | 3.31E-06    | 0.15325432  | 0.00089174 | 0.001083 |
| 0.492251921 | -0.040071207 | 0.387603027 | 0.063184321 | 0.17284225 | -0.26991 |
| 1.28E-10    | -0.296459188 | 6.28E-11    | -0.0422169  | 0.36267712 | -0.22216 |
| 1.18E-16    | -0.376157396 | 3.82E-17    | -0.12008906 | 0.00938782 | -0.23981 |
| 1.50E-06    | -0.213973331 | 3.07E-06    | -0.12995401 | 0.00491213 | -0.57211 |
| 0.001086811 | -0.15597368  | 0.000718792 | 0.150943662 | 0.00106811 | -0.36731 |
| 1.61E-09    | -0.272741273 | 2.07E-09    | 0.081003742 | 0.0803448  | -0.0546  |
| 4.89E-11    | -0.294806959 | 8.10E-11    | 0.010627401 | 0.81882923 | -0.11142 |
| 0.027895823 | -0.116796864 | 0.011540638 | 0.007237052 | 0.87605121 | -0.28098 |
| 0.000820983 | -0.16115287  | 0.000472135 | -0.0036281  | 0.93767375 | -0.329   |
| 1.25E-08    | -0.266949041 | 4.63E-09    | 0.007020554 | 0.87973061 | -0.24029 |
| 1.02E-06    | -0.233439555 | 3.36E-07    | -0.02595775 | 0.57579142 | -0.50775 |
| 1.40E-09    | 0.290835077  | 1.48E-10    | 0.1326199   | 0.00409239 | 0.245777 |
| 1.21E-11    | 0.306337319  | 1.33E-11    | -0.16384475 | 0.00037758 | 0.385666 |
| 0.69040979  | 0.023828698  | 0.607506907 | -0.05661245 | 0.22204585 | -0.48158 |
| 2.61E-09    | -0.271320545 | 2.53E-09    | -0.09297615 | 0.04462219 | -0.27042 |
| 5.78E-05    | -0.189459553 | 3.78E-05    | -0.11441725 | 0.01335794 | -0.27251 |
| 6.34E-12    | -0.316614525 | 2.47E-12    | -0.0119389  | 0.79693204 | 0.009262 |
| 0.135540696 | -0.065418207 | 0.158119932 | 0.204913115 | 8.05E-06   | -0.45793 |
| 0.008220922 | -0.117398836 | 0.011117089 | -0.0490952  | 0.28971295 | -0.47949 |
| 6.28E-06    | -0.209784943 | 4.82E-06    | 0.131228757 | 0.00450329 | -0.22239 |
| 1.66E-07    | 0.249344895  | 4.75E-08    | 0.054452864 | 0.24021313 | 0.125573 |
| 8.44E-10    | 0.293939708  | 9.25E-11    | 0.075986245 | 0.10099524 | 0.30555  |
| 0.002319902 | 0.145852727  | 0.001575671 | -0.02993356 | 0.5187453  | 0.477139 |
| 8.24E-08    | -0.248275649 | 5.44E-08    | 0.148808071 | 0.00125917 | -0.33843 |
| 6.24E-10    | -0.282602255 | 5.04E-10    | 0.047157115 | 0.30919691 | -0.38121 |
| 0.000115242 | -0.183646652 | 6.55E-05    | -0.14841515 | 0.00129758 | -0.46249 |
| 0.000899615 | -0.154380229 | 0.000815932 | -0.18215924 | 7.52E-05   | -0.35817 |
| 3.84E-11    | -0.303866727 | 1.97E-11    | 0.029086416 | 0.53065208 | -0.35589 |
| 4.16E-06    | -0.200200208 | 1.31E-05    | -0.23982985 | 1.56E-07   | -0.30305 |
| 0.060547609 | -0.084738328 | 0.067310511 | -0.26719954 | 4.47E-09   | -0.16362 |
| 3.68E-10    | -0.304604703 | 1.75E-11    | -0.19561028 | 2.07E-05   | 0.025511 |
| 1.80E-06    | -0.233787151 | 3.23E-07    | -0.1098733  | 0.01753878 | -0.22361 |
| 1.26E-08    | -0.250129537 | 4.30E-08    | -0.14537788 | 0.00163285 | -0.19562 |
| 7.67E-28    | -0.48245298  | 1.34E-28    | -0.02558761 | 0.58124886 | 0.08127  |
| 5.58E-06    | -0.196152563 | 1.96E-05    | -0.20574878 | 7.38E-06   | -0.19777 |
| 4.32E-05    | -0.192019929 | 2.95E-05    | -0.04306162 | 0.353145   | -0.43549 |

|             |              |             |             |            |          |
|-------------|--------------|-------------|-------------|------------|----------|
| 9.59E-12    | -0.307160709 | 1.16E-11    | -0.23163306 | 4.17E-07   | -0.0708  |
| 6.37E-08    | -0.246241468 | 7.03E-08    | 0.020186524 | 0.66348279 | -0.19599 |
| 1.20E-08    | -0.261507339 | 9.68E-09    | 0.029390349 | 0.52636438 | -0.55251 |
| 2.34E-08    | -0.264329644 | 6.62E-09    | 0.028124383 | 0.54433934 | -0.45584 |
| 4.09E-15    | 0.362137647  | 6.44E-16    | 0.021881852 | 0.63716947 | 0.425023 |
| 3.21E-20    | -0.411928779 | 1.49E-20    | 0.127354231 | 0.00585125 | -0.14179 |
| 0.010021726 | -0.111071326 | 0.016338133 | -0.20386708 | 8.97E-06   | -0.39018 |
| 5.91E-08    | -0.251390598 | 3.66E-08    | -0.14420701 | 0.00178208 | -0.39715 |
| 3.29E-07    | -0.22902559  | 5.65E-07    | -0.0334934  | 0.47025681 | -0.33973 |
| 0.00147652  | -0.150722026 | 0.001086614 | 0.011256387 | 0.80830881 | -0.37283 |
| 5.62E-05    | -0.196948626 | 1.81E-05    | -0.07821915 | 0.09133682 | -0.3344  |
| 0.052516352 | -0.087023472 | 0.060228188 | 0.130318771 | 0.00479185 | -0.20685 |
| 0.556395218 | -0.028425496 | 0.54003654  | 0.03386162  | 0.46538768 | -0.16068 |
| 2.24E-26    | -0.462111815 | 4.40E-26    | -0.03271789 | 0.48060262 | -0.26955 |
| 1.86E-11    | 0.299288905  | 4.05E-11    | 0.074929769 | 0.10583932 | 0.485028 |
| 1.10E-23    | -0.447534832 | 2.22E-24    | 0.077864929 | 0.09281763 | -0.09719 |
| 1.06E-08    | -0.266638302 | 4.83E-09    | 0.174562106 | 0.00014983 | -0.429   |
| 0.000277428 | -0.16875088  | 0.000249017 | 0.272345728 | 2.19E-09   | -0.34182 |
| 4.28E-08    | -0.248534072 | 5.27E-08    | -0.11696335 | 0.01142209 | -0.58745 |
| 0.113767059 | -0.070619482 | 0.127530414 | -0.19681824 | 1.84E-05   | -0.33466 |
| 3.71E-09    | 0.257182213  | 1.72E-08    | -0.10143326 | 0.02839593 | 0.395242 |
| 0.25351459  | -0.06247188  | 0.177746074 | -0.17170817 | 0.00019268 | -0.19281 |
| 5.71E-11    | -0.300352171 | 3.43E-11    | -0.00789534 | 0.86488033 | -0.18123 |
| 0.182441878 | -0.068103085 | 0.141701976 | 0.184817384 | 5.87E-05   | -0.258   |
| 1.62E-09    | -0.275578117 | 1.39E-09    | 0.106594824 | 0.0212267  | -0.41457 |
| 9.27E-06    | -0.206905552 | 6.54E-06    | 0.121418698 | 0.00862496 | -0.10631 |
| 0.000448983 | -0.165119878 | 0.000339236 | -0.03946383 | 0.39484346 | -0.23859 |
| 0.375961366 | -0.040577758 | 0.381626626 | -0.10085679 | 0.02931294 | -0.33449 |
| 8.10E-08    | -0.256261041 | 1.94E-08    | 0.02293089  | 0.62111007 | 0.054759 |
| 0.00278621  | -0.137715326 | 0.00286092  | -0.07288045 | 0.11575792 | -0.38397 |
| 6.82E-15    | 0.362788199  | 5.66E-16    | 0.189803495 | 3.65E-05   | 0.256333 |
| 0.003688886 | -0.139607041 | 0.002497298 | -0.11178548 | 0.01565719 | -0.48013 |
| 3.97E-14    | -0.334464687 | 1.14E-13    | -0.09668679 | 0.03673336 | 0.037068 |
| 0.00161851  | -0.147554959 | 0.001385455 | 0.025446554 | 0.58333504 | -0.29969 |
| 2.84E-10    | 0.291325468  | 1.38E-10    | -0.01593232 | 0.731298   | 0.137342 |
| 1.47E-07    | 0.249710262  | 4.53E-08    | -0.13297957 | 0.00399183 | 0.355237 |
| 2.91E-09    | 0.270768621  | 2.73E-09    | -0.23286553 | 3.60E-07   | 0.160757 |
| 1.18E-06    | -0.231055544 | 4.46E-07    | 0.033027544 | 0.47645688 | -0.44076 |
| 5.89E-07    | -0.231674465 | 4.15E-07    | -0.0681336  | 0.14152318 | -0.21672 |
| 1.35E-12    | 0.327466831  | 3.91E-13    | -0.01989873 | 0.66799215 | 0.109529 |
| 0.084723395 | -0.072152259 | 0.119452725 | 0.076535505 | 0.0985473  | -0.52289 |
| 0.562738545 | 0.028464767  | 0.53947661  | 0.068509856 | 0.13933282 | 0.375699 |
| 0.004914758 | -0.119217818 | 0.009919678 | -0.05830304 | 0.20852461 | -0.31796 |
| 0.000486394 | 0.164328357  | 0.000362583 | 0.067012659 | 0.14820511 | -0.26355 |
| 0.007895944 | 0.125649453  | 0.006551654 | 0.06428062  | 0.16549429 | -0.24501 |



|             |              |             |             |            |          |
|-------------|--------------|-------------|-------------|------------|----------|
| 0.031150557 | -0.099202342 | 0.032087024 | -0.06226847 | 0.17916495 | -0.21076 |
| 7.21E-06    | -0.200394489 | 1.28E-05    | 0.047549372 | 0.30518539 | -0.39674 |
| 3.16E-07    | -0.236114044 | 2.44E-07    | 0.04339044  | 0.34947758 | -0.31772 |
| 0.002277063 | -0.141744581 | 0.002137481 | 0.118027903 | 0.01068924 | -0.14875 |
| 0.002133394 | -0.132792857 | 0.004043749 | 0.128349433 | 0.0054742  | 0.02137  |
| 0.09441263  | -0.075492972 | 0.103234589 | -0.0953755  | 0.03937399 | 0.308617 |
| 0.703817067 | -0.02598658  | 0.575367347 | -0.18245461 | 7.32E-05   | -0.28566 |
| 3.01E-06    | -0.205892764 | 7.27E-06    | 0.129013492 | 0.00523492 | -0.37087 |
| 2.04E-05    | -0.198239455 | 1.59E-05    | 0.038444404 | 0.40717765 | -0.39484 |
| 2.84E-06    | -0.2134046   | 3.27E-06    | 0.040534476 | 0.38213506 | -0.36606 |
| 3.09E-09    | -0.271052284 | 2.62E-09    | 0.066194669 | 0.15323083 | -0.24317 |
| 4.94E-15    | -0.356228912 | 2.03E-15    | 0.210346867 | 4.54E-06   | -0.24978 |
| 0.000118795 | -0.183083865 | 6.90E-05    | 0.083872707 | 0.0701658  | -0.29431 |
| 5.44E-05    | -0.191895194 | 2.98E-05    | 0.01254034  | 0.78694224 | -0.33578 |
| 1.46E-13    | -0.337185658 | 7.02E-14    | 0.136179451 | 0.00319089 | -0.16959 |
| 5.74E-06    | -0.205901362 | 7.26E-06    | 0.045031964 | 0.33153153 | -0.40434 |
| 0.001161416 | -0.134281417 | 0.003646256 | -0.08878171 | 0.05520813 | -0.42349 |
| 0.022661026 | -0.101569712 | 0.028182521 | -0.18636476 | 5.08E-05   | -0.11717 |
| 0.016903149 | -0.123130931 | 0.007724175 | -0.08560172 | 0.06455823 | -0.34777 |
| 0.000260388 | -0.166241434 | 0.000308547 | -0.1427275  | 0.00198849 | -0.43715 |
| 0.496282273 | 0.025737276  | 0.579039279 | 0.126060646 | 0.00637616 | -0.27474 |
| 0.033807808 | -0.080767039 | 0.081235443 | 0.075595891 | 0.10276414 | -0.09021 |
| 4.33E-14    | 0.346505047  | 1.28E-14    | -0.08340861 | 0.07173698 | 0.366102 |
| 4.49E-10    | -0.283116615 | 4.67E-10    | -0.17629538 | 0.00012835 | -0.25572 |
| 4.10E-14    | -0.336488284 | 7.96E-14    | -0.15462224 | 0.00080044 | 0.036145 |
| 0.042760347 | -0.095942359 | 0.038213375 | -0.12174012 | 0.00844905 | -0.27649 |
| 1.01E-16    | -0.370093682 | 1.32E-16    | 0.182271284 | 7.45E-05   | -0.12852 |
| 0.002398803 | -0.139103357 | 0.002589756 | -0.0065902  | 0.8870521  | -0.19858 |
| 0.186932863 | -0.061969578 | 0.181265039 | -0.05783376 | 0.21221676 | -0.58711 |
| 0.001457194 | 0.144992233  | 0.001680689 | 0.037669616 | 0.4167033  | 0.389737 |
| 0.61848232  | 0.010942483  | 0.813554965 | -0.06265413 | 0.17648192 | 0.349091 |
| 1.32E-09    | -0.28117747  | 6.20E-10    | -0.04989786 | 0.28189036 | -0.2313  |
| 0.001797091 | 0.148777267  | 0.001262147 | -0.13980884 | 0.00246111 | 0.386027 |
| 2.34E-11    | -0.310631519 | 6.63E-12    | 0.138632744 | 0.00267895 | -0.07698 |
| 3.40E-10    | -0.279499069 | 7.91E-10    | 0.195004887 | 2.20E-05   | -0.11255 |
| 0.033183878 | -0.101678094 | 0.028013989 | 0.075405821 | 0.10363429 | -0.31416 |
| 0.033831507 | -0.098971573 | 0.032491245 | -0.06271894 | 0.17603395 | -0.36531 |
| 9.36E-06    | -0.208612351 | 5.46E-06    | -0.11126056 | 0.01615522 | -0.21509 |
| 0.15862966  | -0.082584747 | 0.074596843 | -0.27146141 | 2.48E-09   | -0.13484 |
| 1.62E-24    | -0.447589964 | 2.18E-24    | 0.039684576 | 0.39220262 | -0.10681 |
| 0.000120374 | -0.189251715 | 3.85E-05    | -0.18430233 | 6.16E-05   | -0.33844 |
| 3.40E-18    | -0.400670965 | 1.95E-19    | -0.00903236 | 0.84564996 | -0.16928 |
| 0.001862016 | -0.147844357 | 0.001355298 | 0.068366571 | 0.14016386 | -0.31537 |
| 1.67E-05    | -0.186476984 | 5.02E-05    | 0.208168303 | 5.73E-06   | -0.29077 |
| 0.9011234   | 0.011066023  | 0.811489282 | -0.12595863 | 0.0064193  | -0.31741 |

|             |              |             |             |            |          |
|-------------|--------------|-------------|-------------|------------|----------|
| 3.56E-16    | -0.363735624 | 4.70E-16    | -0.05204883 | 0.26163656 | -0.06686 |
| 0.000756871 | -0.160510806 | 0.000497732 | -0.00624722 | 0.89289407 | -0.54813 |
| 0.250766877 | -0.052602191 | 0.256592386 | -0.13472066 | 0.00353593 | -0.25265 |
| 0.000858932 | -0.159102612 | 0.000558453 | 0.033329784 | 0.47242927 | -0.30717 |
| 0.177775669 | 0.055933516  | 0.227648349 | -0.03548116 | 0.44430712 | -0.18456 |
| 4.42E-07    | -0.226881002 | 7.25E-07    | 0.036245571 | 0.43454901 | -0.43698 |
| 0.008536402 | 0.106962137  | 0.020782497 | -0.06172975 | 0.18296329 | -0.23297 |
| 0.209244537 | -0.06384749  | 0.168368849 | -0.17068512 | 0.00021066 | -0.56723 |
| 0.945303741 | -0.012290275 | 0.791091651 | -0.09387625 | 0.04258823 | -0.3944  |
| 0.000901528 | -0.157334303 | 0.000644442 | -0.18319427 | 6.83E-05   | -0.09748 |
| 0.003093933 | -0.14285215  | 0.001970295 | 0.026746538 | 0.56424232 | -0.45854 |
| 5.62E-07    | -0.231858138 | 4.06E-07    | 0.045242085 | 0.32927802 | -0.43475 |
| 0.002198963 | -0.137412855 | 0.002923337 | -0.02514209 | 0.58784965 | -0.54125 |
| 1.76E-08    | -0.252998037 | 2.97E-08    | 0.027251526 | 0.55690736 | -0.31742 |
| 1.14E-07    | -0.252553261 | 3.15E-08    | 0.065397417 | 0.15825244 | -0.4128  |
| 0.000970803 | -0.161836648 | 0.000446224 | -0.13962219 | 0.00249457 | -0.3057  |
| 1.33E-05    | -0.211582746 | 3.98E-06    | -0.1558566  | 0.00072555 | -0.52515 |
| 3.82E-05    | -0.184978888 | 5.78E-05    | 0.055508099 | 0.23120965 | -0.17702 |
| 9.35E-06    | -0.201642827 | 1.13E-05    | -0.1335352  | 0.00384087 | -0.3555  |
| 0.004537484 | -0.140992029 | 0.002258369 | -0.06141732 | 0.18519319 | -0.25128 |
| 4.08E-07    | -0.228693721 | 5.88E-07    | -0.00208236 | 0.9642032  | -0.21229 |
| 0.000134337 | -0.177516527 | 0.000114996 | -0.08334547 | 0.07195293 | -0.58184 |
| 0.000345942 | -0.166812618 | 0.000293933 | 0.039930087 | 0.38927806 | -0.24261 |
| 6.66E-05    | -0.195069535 | 2.19E-05    | 0.029241195 | 0.52846635 | -0.40439 |
| 3.80E-08    | -0.253466961 | 2.80E-08    | -0.12225478 | 0.00817403 | -0.35732 |
| 0.358285296 | -0.049005289 | 0.290598221 | -0.02594332 | 0.57600366 | -0.43024 |
| 0.143476205 | -0.069426258 | 0.134106902 | -0.00581396 | 0.90028211 | -0.46491 |
| 1.20E-19    | -0.402555482 | 1.28E-19    | -0.09825738 | 0.0337699  | 0.096964 |
| 8.72E-05    | -0.177341486 | 0.000116827 | 0.087572122 | 0.05862272 | -0.42034 |
| 8.96E-07    | -0.22131934  | 1.37E-06    | -0.07840263 | 0.09057727 | -0.15113 |
| 0.094633714 | -0.084441744 | 0.068277877 | 0.038426503 | 0.40739627 | -0.40586 |
| 0.004715656 | -0.129024116 | 0.005231168 | 0.02285283  | 0.62229903 | -0.37064 |
| 0.01181612  | 0.108450491  | 0.019064255 | 0.034200432 | 0.46093226 | -0.18263 |
| 0.004487046 | -0.146087146 | 0.001548125 | -0.33599303 | 8.69E-14   | -0.31177 |
| 5.40E-16    | -0.365001576 | 3.66E-16    | -0.09608426 | 0.03792741 | -0.37577 |
| 1.19E-06    | -0.234306281 | 3.03E-07    | 0.071323685 | 0.12376819 | -0.11863 |
| 3.18E-10    | -0.293599602 | 9.74E-11    | 0.055709065 | 0.22952241 | 0.144092 |
| 2.45E-05    | -0.203820678 | 9.02E-06    | -0.19606944 | 1.98E-05   | -0.36122 |
| 1.53E-06    | -0.225845346 | 8.17E-07    | 0.018835523 | 0.68475416 | -0.36642 |
| 1.35E-08    | -0.265315785 | 5.79E-09    | 0.049209277 | 0.28859241 | -0.26676 |
| 0.000112845 | -0.176574499 | 0.000125176 | -0.01351756 | 0.7707857  | -0.51038 |
| 0.981696311 | 0.00573501   | 0.901629221 | -0.16724736 | 0.00028325 | -0.26095 |
| 0.000942381 | -0.157614056 | 0.000630067 | -0.05701202 | 0.21879494 | -0.37808 |
| 0.00317867  | -0.130844046 | 0.004623311 | 0.059242853 | 0.2012704  | -0.36086 |
| 1.17E-05    | -0.21055077  | 4.45E-06    | 0.003149252 | 0.94588618 | -0.15816 |

|             |              |             |             |            |          |
|-------------|--------------|-------------|-------------|------------|----------|
| 0.021377934 | -0.118768901 | 0.010204031 | -0.10434054 | 0.02413751 | -0.30952 |
| 0.000761535 | -0.156093319 | 0.000711949 | -0.04044184 | 0.38322467 | -0.34273 |
| 0.096120923 | -0.069525744 | 0.133548781 | 0.036820519 | 0.42729154 | -0.33733 |
| 0.225041825 | 0.047764755  | 0.302997421 | -0.19602041 | 1.99E-05   | -0.41002 |
| 2.63E-05    | -0.206496829 | 6.83E-06    | -0.27247394 | 2.15E-09   | -0.52111 |
| 0.00071711  | -0.158577563 | 0.000582803 | -0.04692004 | 0.31163821 | -0.60711 |
| 9.46E-06    | -0.207032808 | 6.45E-06    | -0.00762123 | 0.8695287  | -0.59203 |
| 0.013778569 | -0.10842592  | 0.019091584 | -0.10906383 | 0.01839303 | -0.3627  |
| 0.145090019 | -0.072293383 | 0.118729565 | -0.24751192 | 5.99E-08   | -0.1085  |
| 0.000100754 | -0.177236408 | 0.000117939 | 0.055757439 | 0.22911759 | -0.30611 |
| 3.43E-05    | -0.192436777 | 2.83E-05    | -0.03971709 | 0.39181456 | -0.36169 |
| 2.80E-06    | -0.221674244 | 1.31E-06    | 0.072549908 | 0.11742382 | -0.46944 |
| 0.059068639 | -0.092052351 | 0.046794005 | 0.015873226 | 0.73225639 | -0.33356 |
| 0.001163223 | -0.151541801 | 0.001019602 | -0.03643552 | 0.43214354 | 0.376757 |
| 6.78E-10    | -0.277449081 | 1.06E-09    | -0.26769497 | 4.18E-09   | -0.27982 |
| 7.87E-05    | -0.183053268 | 6.92E-05    | -0.01369499 | 0.76786246 | -0.26781 |
| 4.26E-11    | -0.300877794 | 3.16E-11    | -0.15643555 | 0.00069271 | -0.37678 |
| 0.121614533 | -0.074092124 | 0.109809092 | -0.1611961  | 0.00047046 | -0.49475 |
| 0.252256991 | 0.05925109   | 0.201207641 | 0.29038361  | 1.59E-10   | 0.344385 |
| 7.96E-07    | -0.228767886 | 5.83E-07    | -0.39314509 | 1.03E-18   | -0.42007 |
| 8.34E-18    | -0.386940569 | 3.96E-18    | 0.074857298 | 0.10617823 | -0.33061 |
| 4.35E-06    | -0.210312349 | 4.56E-06    | -0.19324142 | 2.62E-05   | -0.11687 |
| 5.20E-06    | -0.213514387 | 3.23E-06    | 0.029904495 | 0.5191515  | -0.29623 |
| 8.24E-05    | -0.184485699 | 6.06E-05    | 0.066488213 | 0.15141264 | -0.35187 |
| 0.000998883 | -0.155747687 | 0.000731884 | -0.02329864 | 0.6155221  | -0.57503 |
| 0.201375652 | -0.056802168 | 0.220498014 | -0.01297466 | 0.77974985 | -0.26374 |
| 4.16E-05    | -0.188916562 | 3.98E-05    | -0.07820023 | 0.09141543 | -0.26581 |
| 0.306758726 | -0.055120023 | 0.234492603 | -0.20254963 | 1.03E-05   | -0.50502 |
| 0.187880361 | -0.059976265 | 0.195738146 | 0.050923784 | 0.27210157 | -0.26314 |
| 1.53E-09    | -0.274188758 | 1.69E-09    | -0.07904835 | 0.0879444  | -0.54872 |
| 3.55E-12    | -0.317233005 | 2.23E-12    | -0.00806498 | 0.86200574 | -0.24228 |
| 1.31E-05    | -0.198193095 | 1.60E-05    | 0.050837101 | 0.27291957 | -0.1181  |
| 5.11E-06    | -0.209353425 | 5.05E-06    | 0.086237685 | 0.06259069 | -0.37357 |
| 0.001133643 | -0.151587683 | 0.001015967 | -0.14425297 | 0.001776   | -0.44154 |
| 5.16E-10    | -0.285087301 | 3.50E-10    | -0.14723689 | 0.00141931 | -0.54539 |
| 4.27E-07    | -0.226259746 | 7.79E-07    | 0.110546153 | 0.0168553  | -0.11656 |
| 0.971834904 | -0.006893457 | 0.881891841 | -0.01289686 | 0.78103685 | -0.4467  |
| 1.43E-07    | -0.251910607 | 3.42E-08    | -0.01434204 | 0.7572307  | -0.22003 |
| 0.988331887 | -0.000948342 | 0.983693234 | 0.008318467 | 0.85771398 | -0.50732 |
| 3.00E-10    | -0.279949062 | 7.41E-10    | 0.010140261 | 0.82699963 | -0.2964  |
| 0.000362873 | -0.161456346 | 0.000460467 | 0.043264692 | 0.35087722 | -0.40269 |
| 8.92E-20    | -0.40693418  | 4.72E-20    | 0.140708581 | 0.0023055  | -0.10271 |
| 2.92E-06    | -0.220170739 | 1.55E-06    | -0.08542353 | 0.06511853 | -0.44053 |
| 8.49E-08    | -0.24984768  | 4.45E-08    | -0.04747321 | 0.30596157 | -0.16219 |
| 0.002468012 | 0.138671226  | 0.002671554 | -0.08089996 | 0.08073431 | -0.37848 |

|             |              |             |             |            |          |
|-------------|--------------|-------------|-------------|------------|----------|
| 0.001551974 | 0.14950347   | 0.001193754 | 0.063899244 | 0.16802342 | 0.589597 |
| 1.39E-05    | -0.203565996 | 9.26E-06    | -0.11911916 | 0.00998156 | -0.35519 |
| 0.549663424 | -0.034812517 | 0.452943862 | 0.012016278 | 0.79564496 | -0.57894 |
| 0.048634234 | -0.09386487  | 0.042613447 | -0.33642534 | 8.05E-14   | -0.58444 |
| 1.82E-22    | -0.430706338 | 1.63E-22    | -0.10333947 | 0.02553697 | -0.41703 |
| 1.10E-09    | -0.28482987  | 3.63E-10    | -0.00516414 | 0.91137878 | -0.19541 |
| 3.18E-05    | -0.200880626 | 1.22E-05    | -0.32085019 | 1.21E-12   | -0.21199 |
| 0.779812348 | 0.005627335  | 0.903467042 | 0.136601808 | 0.00309686 | -0.43318 |
| 7.41E-05    | -0.17869567  | 0.000103349 | -0.10381878 | 0.02485841 | -0.26845 |
| 7.54E-08    | -0.244185507 | 9.10E-08    | 0.0312684   | 0.50026695 | -0.16586 |
| 0.000184905 | -0.168309644 | 0.000258638 | -0.13209711 | 0.00424265 | -0.634   |
| 0.002104787 | -0.149115817 | 0.001229826 | -0.21517954 | 2.70E-06   | -0.53716 |
| 2.69E-08    | -0.252214292 | 3.29E-08    | -0.17265109 | 0.00017739 | -0.51803 |
| 4.07E-07    | -0.228781854 | 5.82E-07    | 0.116075654 | 0.01206683 | -0.41501 |
| 2.52E-08    | -0.265121469 | 5.94E-09    | -0.0687441  | 0.13798236 | -0.27598 |
| 0.006592644 | -0.131574111 | 0.004397944 | -0.03967034 | 0.39237267 | -0.22066 |
| 0.000124173 | -0.184060019 | 6.30E-05    | -0.22180092 | 1.29E-06   | -0.16833 |
| 1.20E-06    | -0.229702992 | 5.22E-07    | 0.049007555 | 0.29057589 | -0.16835 |
| 0.001210253 | -0.147909979 | 0.001348545 | 0.19954907  | 1.40E-05   | -0.18484 |
| 2.52E-06    | -0.213097868 | 3.38E-06    | 0.045179099 | 0.32995249 | -0.12725 |
| 0.267790466 | 0.061636672  | 0.183625506 | 0.118224263 | 0.01055871 | 0.533312 |
| 3.28E-06    | -0.203664696 | 9.16E-06    | 0.058124863 | 0.20992095 | -0.33011 |
| 0.006692798 | -0.14445783  | 0.0017491   | 0.109433433 | 0.01799858 | -0.06557 |
| 7.79E-06    | -0.201022636 | 1.20E-05    | -0.04945869 | 0.28615261 | -0.51624 |
| 0.002090071 | -0.147049579 | 0.0014396   | -0.0201986  | 0.66329382 | -0.52265 |
| 4.21E-13    | -0.339929821 | 4.28E-14    | -0.03046263 | 0.51137945 | -0.13209 |
| 7.89E-08    | -0.242906651 | 1.07E-07    | -0.12561849 | 0.00656504 | -0.26414 |
| 5.35E-36    | -0.531253699 | 2.27E-35    | 0.028911321 | 0.53313021 | -0.23432 |
| 1.62E-11    | -0.309445913 | 8.04E-12    | -0.03536837 | 0.4457574  | -0.16375 |
| 5.13E-20    | -0.408233506 | 3.50E-20    | -0.03659838 | 0.43008716 | -0.36127 |
| 2.80E-09    | -0.273139367 | 1.96E-09    | 0.022657823 | 0.62527349 | -0.49717 |
| 8.87E-10    | -0.288739872 | 2.03E-10    | -0.15326503 | 0.00089099 | -0.14213 |
| 0.002356388 | -0.135899019 | 0.003254741 | -0.15780172 | 0.00062059 | -0.46611 |
| 0.36434537  | -0.043599132 | 0.347162533 | 0.02287118  | 0.62201945 | -0.40112 |
| 0.002555872 | 0.142143323  | 0.002075852 | 0.298796332 | 4.37E-11   | 0.236697 |
| 0.018109592 | -0.108016868 | 0.019551593 | 0.05615859  | 0.22578003 | -0.41383 |
| 5.65E-16    | -0.36494298  | 3.70E-16    | -0.10126757 | 0.02865696 | -0.24706 |
| 0.433804167 | 0.028967014  | 0.53234135  | -0.1244866  | 0.00707161 | -0.37885 |
| 2.91E-12    | 0.328050165  | 3.53E-13    | 0.010768242 | 0.81647062 | 0.242865 |
| 1.86E-12    | -0.330027319 | 2.50E-13    | -0.19224914 | 2.88E-05   | -0.17877 |
| 2.96E-08    | -0.258861865 | 1.38E-08    | -0.25346798 | 2.80E-08   | -0.28367 |
| 0.000615767 | -0.153315422 | 0.000887466 | -0.05364636 | 0.2472584  | -0.40978 |
| 1.33E-19    | -0.410861199 | 1.91E-20    | 0.030262145 | 0.51416426 | -0.26885 |
| 1.98E-11    | -0.303525204 | 2.08E-11    | -0.10460038 | 0.02378529 | -0.37811 |
| 2.13E-06    | -0.2261775   | 7.86E-07    | 0.001073214 | 0.98154642 | 0.178257 |

|             |              |             |             |            |          |
|-------------|--------------|-------------|-------------|------------|----------|
| 0.109890661 | 0.074883023  | 0.106057828 | -0.02416872 | 0.60238991 | 0.473816 |
| 0.027898499 | 0.088348137  | 0.056412573 | -0.22365723 | 1.05E-06   | -0.20679 |
| 0.246283347 | 0.047741878  | 0.303229328 | -0.11925894 | 0.00989398 | -0.34696 |
| 1.47E-07    | 0.241432554  | 1.28E-07    | 0.131105166 | 0.00454153 | 0.39009  |
| 3.66E-05    | -0.199181895 | 1.45E-05    | 0.091663383 | 0.04773463 | -0.06391 |
| 0.00010639  | -0.179110179 | 9.95E-05    | -0.04843848 | 0.29622068 | -0.35569 |
| 0.001034562 | -0.151822252 | 0.000997567 | -0.06869768 | 0.13824919 | -0.37793 |
| 0.000281235 | -0.169156122 | 0.000240477 | 0.021182005 | 0.64797908 | -0.43333 |
| 0.004400426 | 0.125049729  | 0.006815371 | -0.09991625 | 0.03086362 | -0.43988 |
| 1.69E-05    | -0.19337983  | 2.58E-05    | 0.020949261 | 0.65159056 | -0.16101 |
| 0.000119605 | 0.175679955  | 0.000135621 | -0.04294753 | 0.35442309 | 0.509238 |
| 0.035399569 | -0.111023955 | 0.016384205 | -0.02552453 | 0.58218147 | -0.24855 |
| 0.001659205 | -0.144743348 | 0.001712239 | -0.04146093 | 0.37134243 | -0.50143 |
| 1.58E-13    | -0.327108715 | 4.16E-13    | -0.15498112 | 0.00077796 | -0.12013 |
| 3.55E-11    | -0.305878485 | 1.43E-11    | -0.19899685 | 1.48E-05   | -0.29981 |
| 0.000168583 | -0.175470157 | 0.000138187 | -0.04591238 | 0.32215554 | -0.4623  |
| 4.16E-06    | -0.208265132 | 5.67E-06    | -0.07360003 | 0.11219534 | -0.60746 |
| 0.42853032  | -0.046428659 | 0.316738391 | -0.33542752 | 9.62E-14   | -0.21744 |
| 0.156157508 | -0.057695954 | 0.213309872 | 0.002099318 | 0.96391194 | -0.35426 |
| 0.000200012 | -0.172938192 | 0.000172965 | 0.048838544 | 0.29224476 | -0.32092 |
| 1.82E-09    | -0.271305028 | 2.53E-09    | 0.030730689 | 0.50766843 | -0.04792 |
| 4.79E-05    | -0.189346257 | 3.82E-05    | 0.05835343  | 0.20813092 | -0.25248 |
| 0.639220788 | 0.00794846   | 0.863979979 | 0.118307609 | 0.01050373 | -0.28778 |
| 0.350075095 | 0.027709025  | 0.550302408 | -0.15730438 | 0.000646   | -0.20097 |
| 3.97E-11    | -0.300295183 | 3.46E-11    | -0.01663226 | 0.71997835 | -0.28888 |
| 1.15E-05    | -0.193583037 | 2.53E-05    | -0.06139211 | 0.18537398 | -0.25225 |
| 0.002159957 | -0.145750796 | 0.001587789 | 0.16545064  | 0.0003299  | -0.40466 |
| 0.426798236 | 0.042756631  | 0.356568204 | -0.18798687 | 4.35E-05   | 0.494592 |
| 0.199991837 | -0.058952013 | 0.203495452 | 0.042014309 | 0.36498682 | -0.36545 |
| 0.854651882 | 0.014701375  | 0.75134597  | -0.36770328 | 2.13E-16   | -0.25932 |
| 2.71E-05    | -0.199780177 | 1.36E-05    | -0.00197921 | 0.96597538 | -0.53496 |
| 0.086154861 | -0.075423123 | 0.103554842 | -0.18507181 | 5.73E-05   | -0.5577  |
| 8.56E-05    | -0.184813159 | 5.87E-05    | -0.13205754 | 0.00425422 | -0.29702 |
| 2.99E-05    | 0.204956115  | 8.02E-06    | -0.0299563  | 0.51842758 | 0.376345 |
| 0.003753417 | -0.151335941 | 0.001036062 | -0.10034478 | 0.03014861 | -0.39346 |
| 3.03E-07    | -0.229720977 | 5.21E-07    | -0.15014785 | 0.00113594 | -0.36547 |
| 1.86E-06    | -0.210554179 | 4.44E-06    | -0.15724292 | 0.0006492  | -0.14979 |
| 6.71E-05    | -0.184489259 | 6.06E-05    | 0.091417007 | 0.04833858 | -0.32352 |
| 3.78E-05    | -0.19558494  | 2.08E-05    | -0.04731566 | 0.30757137 | -0.22303 |
| 1.99E-18    | -0.384478217 | 6.70E-18    | -0.11755437 | 0.01100992 | -0.0719  |
| 0.001522876 | 0.148104852  | 0.001328671 | 0.067457784 | 0.14552353 | 0.587654 |
| 0.603869687 | -0.022290631 | 0.630890837 | -0.10405158 | 0.02453449 | 0.428654 |
| 0.104380554 | -0.08454995  | 0.067923632 | -0.19208079 | 2.93E-05   | -0.3368  |
| 7.60E-13    | -0.328775442 | 3.11E-13    | -0.22335107 | 1.09E-06   | -0.15997 |
| 1.59E-05    | -0.200045881 | 1.33E-05    | 0.021767909 | 0.63892424 | -0.1135  |

|             |              |             |             |            |          |
|-------------|--------------|-------------|-------------|------------|----------|
| 0.000416437 | 0.166655613  | 0.000297884 | -0.15151561 | 0.00102168 | 0.036247 |
| 0.000567419 | -0.159398799 | 0.000545138 | -0.03614835 | 0.43578323 | -0.19513 |
| 9.19E-09    | -0.259678138 | 1.24E-08    | 0.057815647 | 0.21236021 | -0.31256 |
| 0.000628467 | -0.154100447 | 0.000834193 | -0.0564504  | 0.22337397 | -0.4704  |
| 0.000195556 | -0.173329448 | 0.000167102 | -0.11314974 | 0.01442529 | -0.49139 |
| 0.914685091 | 0.014146107  | 0.760445398 | 0.012892857 | 0.78110304 | -0.19177 |
| 0.003620409 | -0.136927573 | 0.003026069 | -0.04330986 | 0.35037405 | -0.48774 |
| 0.003140296 | 0.134082656  | 0.003697199 | 0.109488367 | 0.01794058 | 0.405978 |
| 0.029265857 | 0.099152649  | 0.032173704 | 0.048256296 | 0.29804313 | 0.370629 |
| 4.15E-05    | 0.195156517  | 2.17E-05    | 0.231565812 | 4.20E-07   | 0.478525 |
| 0.002829712 | -0.146074243 | 0.001549629 | 0.016170814 | 0.72743429 | 0.340381 |
| 0.014392788 | -0.121195926 | 0.008748788 | -0.19219174 | 2.90E-05   | -0.34226 |
| 0.000692297 | -0.171554147 | 0.00019529  | 0.005256823 | 0.9097949  | -0.25168 |
| 6.30E-05    | 0.198293381  | 1.58E-05    | -0.00396326 | 0.93192934 | 0.359646 |
| 0.017313693 | 0.096355083  | 0.037386704 | 0.102170758 | 0.02725878 | -0.0386  |
| 5.66E-09    | -0.26791138  | 4.05E-09    | -0.03283185 | 0.47907469 | -0.45983 |
| 0.183387885 | -0.067548241 | 0.144983138 | 0.142740501 | 0.00198659 | -0.18686 |
| 0.000703012 | -0.162213026 | 0.000432533 | -0.04962981 | 0.2844867  | -0.10589 |
| 0.001649959 | -0.155577562 | 0.000741886 | 0.011115605 | 0.81066061 | -0.27976 |
| 0.03653511  | -0.093776924 | 0.042808768 | -0.1917153  | 3.04E-05   | -0.3254  |
| 0.033036636 | -0.096344224 | 0.037408258 | 0.044078393 | 0.34188296 | -0.38827 |
| 0.000452254 | -0.161087125 | 0.000474699 | 0.115914414 | 0.01218733 | -0.08906 |
| 2.67E-06    | -0.220501829 | 1.50E-06    | 0.170808447 | 0.00020841 | -0.20989 |
| 3.46E-05    | -0.188818223 | 4.02E-05    | -0.10298278 | 0.02605222 | -0.49012 |
| 0.001790466 | 0.146852509  | 0.001461236 | -0.35256047 | 4.09E-15   | 0.094492 |
| 7.58E-05    | -0.187684307 | 4.48E-05    | 0.056194022 | 0.2254869  | -0.44753 |
| 1.24E-11    | -0.303200802 | 2.19E-11    | 0.010128207 | 0.82720205 | -0.27318 |
| 0.802409011 | -0.011101987 | 0.810888172 | 0.115100473 | 0.01281198 | -0.13914 |
| 0.00204121  | -0.144572817 | 0.001734168 | 0.031997714 | 0.49032    | -0.37692 |
| 4.46E-11    | -0.306151823 | 1.37E-11    | 0.016207874 | 0.72683452 | -0.14793 |
| 0.007837829 | -0.127791324 | 0.005682865 | 0.054623588 | 0.23874001 | -0.45102 |
| 6.90E-15    | -0.343903631 | 2.07E-14    | 0.146160755 | 0.00153957 | -0.3797  |
| 1.57E-12    | -0.325781127 | 5.23E-13    | -0.02495964 | 0.5905627  | -0.4468  |
| 9.14E-13    | -0.326211254 | 4.86E-13    | 0.121075316 | 0.00881649 | -0.10911 |
| 7.00E-12    | -0.320026645 | 1.40E-12    | 0.041410095 | 0.37192973 | -0.03361 |
| 0.583226005 | 0.028041509  | 0.545526554 | -0.1884642  | 4.16E-05   | 0.573504 |
| 0.619550991 | -0.024436682 | 0.598370968 | -0.26094496 | 1.04E-08   | -0.16203 |
| 9.81E-10    | -0.270212795 | 2.95E-09    | 0.048904542 | 0.29159231 | -0.33579 |
| 2.55E-12    | -0.324229024 | 6.83E-13    | 0.058450563 | 0.20737357 | -0.41068 |
| 0.093643936 | -0.086981183 | 0.060353427 | 0.052031102 | 0.26179931 | -0.46669 |
| 0.001899703 | -0.141035968 | 0.002251143 | -0.0258706  | 0.57707427 | -0.27952 |
| 1.20E-05    | -0.208919311 | 5.29E-06    | -0.04759978 | 0.3046724  | -0.40759 |
| 3.90E-05    | -0.196658094 | 1.87E-05    | -0.23558769 | 2.60E-07   | -0.42179 |
| 3.97E-09    | 0.264174341  | 6.76E-09    | -0.29407875 | 9.05E-11   | 0.350737 |
| 7.95E-08    | -0.239048289 | 1.71E-07    | 0.156409828 | 0.00069414 | -0.08501 |

|             |              |             |             |            |          |
|-------------|--------------|-------------|-------------|------------|----------|
| 1.44E-05    | -0.204557469 | 8.35E-06    | 0.063555676 | 0.17032649 | -0.29891 |
| 3.01E-08    | -0.251999492 | 3.38E-08    | -0.0074519  | 0.87240247 | 0.003402 |
| 8.25E-07    | -0.222089352 | 1.25E-06    | 0.127337019 | 0.00585797 | -0.39005 |
| 7.80E-07    | -0.227221504 | 6.97E-07    | -0.033978   | 0.46385458 | -0.33117 |
| 0.437186106 | -0.036059593 | 0.43691168  | 0.139132468 | 0.00258433 | -0.22234 |
| 5.17E-11    | -0.301476987 | 2.87E-11    | -0.11650089 | 0.01175407 | -0.09728 |
| 2.39E-16    | -0.370620174 | 1.19E-16    | 0.060816296 | 0.18953911 | -0.40591 |
| 0.030563205 | -0.10237866  | 0.026945375 | 0.146867025 | 0.00145963 | 0.448111 |
| 0.19818479  | -0.064333547 | 0.165145575 | -0.18249778 | 7.29E-05   | -0.5896  |
| 8.13E-05    | -0.19038377  | 3.46E-05    | 0.0476641   | 0.30401863 | -0.36716 |
| 0.002004561 | -0.150868504 | 0.00107435  | 0.100365175 | 0.03011493 | -0.4341  |
| 1.13E-16    | 0.386697993  | 4.17E-18    | -0.25964575 | 1.24E-08   | 0.195099 |
| 1.17E-06    | -0.224771644 | 9.24E-07    | 0.098445749 | 0.03342856 | -0.12748 |
| 0.002955222 | 0.148010368  | 0.001338273 | -0.05348709 | 0.24866667 | 0.384925 |
| 1.11E-08    | -0.269985711 | 3.04E-09    | 0.041289221 | 0.37332841 | -0.05639 |
| 0.015297448 | -0.11507614  | 0.012831079 | -0.07472616 | 0.10679365 | -0.17485 |
| 4.33E-06    | -0.213860615 | 3.11E-06    | -0.02034667 | 0.6609787  | -0.49511 |
| 0.003548786 | -0.132799845 | 0.004041796 | 0.020565381 | 0.65756503 | -0.34662 |
| 1.26E-06    | -0.217335492 | 2.13E-06    | -0.27845559 | 9.19E-10   | -0.38656 |
| 1.08E-05    | -0.219110783 | 1.75E-06    | 0.160437061 | 0.00050075 | -0.05855 |
| 8.48E-06    | -0.210326225 | 4.55E-06    | 0.076477888 | 0.09880185 | -0.27496 |
| 0.0019861   | -0.161407906 | 0.000462311 | 0.011663037 | 0.80152539 | -0.1045  |
| 0.000395677 | -0.167360824 | 0.000280516 | -0.13657782 | 0.00310214 | -0.30277 |
| 1.78E-06    | -0.225322489 | 8.67E-07    | 0.095931415 | 0.0382355  | -0.47577 |
| 1.77E-15    | -0.351279879 | 5.22E-15    | -0.08675988 | 0.06101235 | -0.1669  |
| 0.00040817  | -0.184060911 | 6.30E-05    | -0.09651825 | 0.0370641  | 0.02394  |
| 1.51E-05    | -0.204897063 | 8.07E-06    | 0.025847744 | 0.57741087 | -0.2566  |
| 1.91E-16    | -0.37621064  | 3.78E-17    | 0.010860545 | 0.81492575 | -0.22987 |
| 2.59E-19    | -0.415706067 | 6.14E-21    | 0.093911359 | 0.0425105  | -0.2421  |
| 1.38E-06    | -0.224879878 | 9.12E-07    | 0.063560884 | 0.1702914  | -0.19568 |
| 8.08E-09    | -0.259948018 | 1.19E-08    | -0.24374275 | 9.61E-08   | -0.31539 |
| 0.052565187 | -0.083531269 | 0.071318956 | 0.043146667 | 0.35219412 | -0.59626 |
| 7.58E-19    | -0.397341296 | 4.11E-19    | 0.048108751 | 0.29952456 | -0.25372 |
| 0.00037373  | -0.169632243 | 0.000230792 | 0.000791669 | 0.98638695 | -0.32305 |
| 2.20E-23    | -0.430135659 | 1.87E-22    | -0.01147946 | 0.80458585 | 0.03999  |
| 4.29E-11    | -0.302801239 | 2.33E-11    | 0.034001481 | 0.46354561 | -0.31377 |
| 0.138914054 | -0.06801025  | 0.142246976 | -0.11958575 | 0.00969189 | -0.32747 |
| 5.73E-06    | -0.213226473 | 3.33E-06    | -0.00298187 | 0.94875831 | -0.28713 |
| 0.000727842 | -0.157788776 | 0.000621241 | -0.05862136 | 0.20604671 | -0.26014 |
| 6.30E-05    | -0.186883093 | 4.83E-05    | 0.038775835 | 0.40314272 | -0.24317 |
| 0.02530514  | -0.102899031 | 0.026174501 | -0.08200722 | 0.07665643 | -0.36698 |
| 0.0051641   | -0.117162484 | 0.011281718 | 0.019610767 | 0.67251622 | 0.545429 |
| 5.03E-22    | -0.422970093 | 1.08E-21    | -0.15305357 | 0.00090592 | -0.39834 |
| 0.000992936 | -0.147599312 | 0.001380793 | -0.18810335 | 4.30E-05   | -0.44477 |
| 0.670113282 | 0.016031193  | 0.729695378 | -0.14434252 | 0.00176419 | -0.30274 |

|             |              |             |             |            |          |
|-------------|--------------|-------------|-------------|------------|----------|
| 0.002106852 | 0.142517479  | 0.002019506 | -0.08504477 | 0.06632283 | -0.33946 |
| 0.141139679 | -0.06842614  | 0.139817906 | -0.17357131 | 0.00016357 | -0.41665 |
| 0.003329748 | -0.143183252 | 0.001922691 | 0.01251716  | 0.78732662 | -0.39915 |
| 0.930240309 | -0.012420365 | 0.788932273 | -0.16317353 | 0.00039934 | -0.30656 |
| 1.64E-13    | -0.327299655 | 4.02E-13    | 0.051250696 | 0.26903168 | -0.17962 |
| 0.240340754 | -0.065242443 | 0.159242826 | -0.26174874 | 9.37E-09   | -0.28363 |
| 2.64E-08    | 0.261867901  | 9.23E-09    | -0.07470547 | 0.10689104 | -0.37457 |
| 0.774817987 | 0.008735232  | 0.850666843 | -0.00500517 | 0.91409607 | -0.17195 |
| 1.29E-08    | -0.257948219 | 1.56E-08    | -0.08685208 | 0.0607371  | -0.33796 |
| 5.63E-10    | -0.278570503 | 9.04E-10    | -0.21676666 | 2.27E-06   | -0.24203 |
| 0.006312721 | -0.114651459 | 0.013168516 | -0.23734914 | 2.11E-07   | 0.243258 |
| 1.43E-15    | -0.363755043 | 4.68E-16    | 0.087530444 | 0.05874342 | -0.36641 |
| 1.64E-15    | -0.361834136 | 6.83E-16    | 0.054865933 | 0.23665984 | -0.26714 |
| 0.486838986 | 0.036304896  | 0.433796893 | 0.19497873  | 2.21E-05   | -0.34176 |
| 3.24E-05    | -0.205587944 | 7.51E-06    | -0.10697834 | 0.02076309 | 0.030985 |
| 4.42E-13    | -0.339523621 | 4.60E-14    | -0.13206414 | 0.00425229 | -0.33318 |
| 2.01E-05    | -0.20006843  | 1.32E-05    | 0.09944948  | 0.0316589  | -0.35448 |
| 5.34E-22    | -0.434667124 | 6.04E-23    | 0.047707237 | 0.3035807  | -0.06784 |
| 4.43E-11    | -0.299179025 | 4.12E-11    | 0.123182067 | 0.00769862 | -0.07658 |
| 3.20E-10    | 0.297363114  | 5.46E-11    | 0.206173918 | 7.06E-06   | 0.197285 |
| 1.33E-06    | -0.228545602 | 5.98E-07    | 0.063806233 | 0.16864459 | -0.52426 |
| 4.45E-06    | -0.215961641 | 2.48E-06    | 0.047546205 | 0.30521764 | -0.23404 |
| 1.04E-07    | -0.2419222   | 1.20E-07    | -0.01494681 | 0.74733475 | -0.46444 |
| 0.008619558 | -0.122269517 | 0.008166275 | -0.06995525 | 0.13115979 | -0.34718 |
| 0.02447233  | -0.10491689  | 0.02336226  | 0.127776665 | 0.00568844 | -0.35602 |
| 1.16E-05    | -0.203962391 | 8.89E-06    | -0.02793654 | 0.54703214 | -0.5692  |
| 0.03230494  | -0.100293736 | 0.030233025 | 0.127982808 | 0.00561048 | -0.37764 |
| 0.000599178 | -0.159788369 | 0.000528072 | -0.04125475 | 0.37372792 | -0.31642 |
| 0.000819534 | -0.156759205 | 0.000674952 | 0.011716951 | 0.80062715 | -0.43702 |
| 0.000108881 | 0.183504236  | 6.64E-05    | 0.050968167 | 0.27168339 | 0.480123 |
| 6.53E-07    | -0.249115688 | 4.89E-08    | -0.04220606 | 0.36280037 | -0.42264 |
| 0.367753036 | -0.047637999 | 0.304283811 | -0.11051829 | 0.01688313 | -0.16963 |
| 0.485295926 | 0.014585365  | 0.753244268 | 0.071258719 | 0.12411162 | -0.20427 |
| 6.21E-10    | -0.286084718 | 3.02E-10    | 0.067554908 | 0.14494337 | -0.23865 |
| 9.91E-06    | -0.205177226 | 7.83E-06    | 0.040867692 | 0.37823143 | -0.2149  |
| 0.077426581 | -0.089567715 | 0.053079128 | -0.05726957 | 0.2167177  | -0.1588  |
| 3.29E-07    | -0.24307615  | 1.04E-07    | -0.03041668 | 0.512017   | -0.21559 |
| 0.89617769  | -0.012116891 | 0.793972148 | -0.23343902 | 3.36E-07   | 0.298586 |
| 1.20E-12    | -0.32251995  | 9.15E-13    | -0.02947917 | 0.52511465 | -0.06431 |
| 1.10E-11    | 0.312943828  | 4.54E-12    | 0.162244555 | 0.0004314  | 0.155847 |
| 0.02242499  | -0.101364546 | 0.028503935 | -0.00895725 | 0.84691748 | -0.49404 |
| 0.038363648 | -0.092326016 | 0.046141574 | -0.01958088 | 0.67298648 | -0.41025 |
| 4.34E-12    | -0.313602904 | 4.08E-12    | -0.15038288 | 0.00111551 | -0.23256 |
| 6.99E-05    | -0.187438415 | 4.58E-05    | 0.144168365 | 0.00178721 | -0.02161 |
| 2.72E-08    | -0.25921477  | 1.31E-08    | 0.06841673  | 0.13987251 | -0.53876 |



|             |              |             |             |            |          |
|-------------|--------------|-------------|-------------|------------|----------|
| 0.000107876 | 0.187387828  | 4.61E-05    | -0.15604257 | 0.00071484 | 0.242353 |
| 3.81E-07    | -0.23660814  | 2.30E-07    | 0.125910345 | 0.00643981 | -0.259   |
| 1.32E-09    | -0.276349875 | 1.24E-09    | -0.01007384 | 0.82811512 | -0.29745 |
| 0.007255367 | 0.12258224   | 0.008003233 | -0.16054477 | 0.00049635 | -0.49803 |
| 6.57E-16    | -0.364713249 | 3.87E-16    | 0.088973748 | 0.05468152 | 0.043604 |
| 0.000627727 | -0.167477535 | 0.000277735 | -0.20329691 | 9.52E-06   | -0.40732 |
| 3.20E-23    | -0.439075948 | 1.98E-23    | -0.17570259 | 0.00013535 | -0.12333 |
| 0.00034383  | -0.169562662 | 0.000232185 | -0.16204006 | 0.00043878 | -0.47148 |
| 1.13E-20    | 0.414111344  | 8.93E-21    | -0.15798815 | 0.00061131 | 0.362443 |
| 0.018672098 | -0.117099814 | 0.01132573  | 0.008544258 | 0.85389461 | -0.29411 |
| 0.34381482  | -0.04565637  | 0.32486393  | -0.10048112 | 0.02992411 | -0.39144 |
| 0.514387223 | -0.025453563 | 0.583231309 | -0.10361537 | 0.02514445 | -0.46389 |
| 0.253626572 | -0.035288279 | 0.446788829 | -0.06868084 | 0.13834607 | 0.258988 |
| 1.65E-08    | -0.268647339 | 3.66E-09    | -0.05712526 | 0.21787983 | -0.31151 |
| 2.40E-05    | 0.206326069  | 6.95E-06    | 0.234472834 | 2.97E-07   | 0.305736 |
| 1.17E-12    | -0.321590175 | 1.07E-12    | 0.118031298 | 0.01068697 | -0.21842 |
| 0.075120657 | -0.095205009 | 0.039728832 | -0.08487602 | 0.06686523 | -0.46295 |
| 0.2148972   | -0.071880443 | 0.120855279 | 0.02147048  | 0.64351425 | -0.29391 |
| 0.006151965 | -0.142898724 | 0.001963534 | -0.13298101 | 0.00399143 | -0.3278  |
| 0.986963072 | -0.010366958 | 0.823195052 | -0.14789174 | 0.00135042 | -0.09323 |
| 0.000354796 | -0.174195682 | 0.000154778 | -0.11752021 | 0.01103337 | -0.38884 |
| 0.96763778  | -0.01658126  | 0.720801112 | -0.10024392 | 0.0303156  | -0.30255 |
| 4.79E-12    | -0.317011308 | 2.32E-12    | 0.023051595 | 0.61927354 | -0.39459 |
| 3.97E-07    | -0.244898988 | 8.32E-08    | -0.04490499 | 0.33289807 | -0.46286 |
| 7.71E-11    | -0.297710025 | 5.18E-11    | -0.07982346 | 0.08486555 | -0.23041 |
| 0.000150548 | -0.187585665 | 4.52E-05    | -0.10844957 | 0.01906528 | -0.18695 |
| 0.810897871 | -0.021292231 | 0.646271579 | -0.11398137 | 0.01371686 | -0.13013 |
| 0.000956412 | -0.159039198 | 0.000561343 | -0.20516687 | 7.84E-06   | -0.39134 |
| 2.14E-07    | -0.247213069 | 6.22E-08    | -0.10499389 | 0.02326033 | -0.43948 |
| 1.13E-07    | -0.249336033 | 4.76E-08    | -0.14438835 | 0.00175818 | -0.36748 |
| 1.20E-05    | -0.208422005 | 5.57E-06    | -0.1973435  | 1.74E-05   | -0.42566 |
| 3.51E-07    | -0.245357795 | 7.86E-08    | -0.17529949 | 0.00014031 | -0.37686 |
| 2.65E-05    | -0.204937394 | 8.03E-06    | -0.15154156 | 0.00101962 | -0.28312 |
| 0.013012413 | -0.128341328 | 0.00547718  | -0.17349216 | 0.00016472 | -0.27634 |
| 0.005566697 | -0.130620572 | 0.00469435  | -0.13870833 | 0.00266444 | -0.26019 |
| 0.135070257 | -0.070383225 | 0.128812298 | -0.20112928 | 1.19E-05   | -0.26396 |
| 0.550944264 | -0.010769906 | 0.816442757 | -0.0965344  | 0.03703228 | 0.338333 |
| 0.149754536 | -0.075057383 | 0.105244616 | -0.17748984 | 0.00011527 | -0.41315 |
| 1.03E-05    | -0.207297423 | 6.28E-06    | 0.033803824 | 0.46615008 | -0.43782 |
| 7.55E-07    | -0.221811354 | 1.29E-06    | 0.054547044 | 0.2393997  | -0.23709 |
| 1.37E-05    | -0.199900767 | 1.35E-05    | 0.049433575 | 0.28639764 | -0.32197 |
| 5.50E-07    | -0.230937935 | 4.52E-07    | 0.047628784 | 0.30437747 | -0.41015 |
| 0.002217723 | -0.144514499 | 0.001741727 | -0.1781643  | 0.00010845 | -0.5483  |
| 1.92E-08    | -0.261773354 | 9.34E-09    | -0.11882932 | 0.01016534 | -0.47833 |
| 0.000460876 | -0.169024354 | 0.000243223 | -0.02670581 | 0.56483595 | -0.49875 |

|             |              |             |             |            |          |
|-------------|--------------|-------------|-------------|------------|----------|
| 0.033136214 | -0.099230007 | 0.032038856 | -0.02536294 | 0.58457334 | -0.46185 |
| 0.030155187 | -0.107201797 | 0.020497045 | -0.04244064 | 0.36013684 | -0.46443 |
| 0.01159251  | -0.109718106 | 0.017699818 | 0.03061873  | 0.50921671 | -0.23206 |
| 0.000903933 | 0.16187288   | 0.000444889 | -0.03364606 | 0.4682347  | 0.249169 |
| 0.011471522 | -0.10725414  | 0.020435157 | -0.05871325 | 0.20533539 | -0.56385 |
| 0.579699853 | -0.039224    | 0.39772478  | 0.019875884 | 0.66835067 | -0.00134 |
| 0.000728562 | -0.156361575 | 0.000696824 | 0.001404444 | 0.97585254 | -0.41457 |
| 4.19E-08    | -0.255733305 | 2.08E-08    | 0.091892838 | 0.04717785 | 0.106069 |
| 3.60E-11    | -0.3006545   | 3.27E-11    | 0.010462615 | 0.82159091 | -0.1538  |
| 2.51E-08    | -0.253059516 | 2.95E-08    | 0.110338593 | 0.01706361 | -0.16511 |
| 0.631199167 | -0.021864723 | 0.637433142 | 0.066216451 | 0.15309535 | -0.28361 |
| 2.46E-06    | -0.215726957 | 2.54E-06    | 0.074904052 | 0.10595949 | -0.37793 |
| 0.002015676 | -0.142833949 | 0.001972943 | -0.14691188 | 0.00145469 | -0.40741 |
| 0.148917625 | -0.074713659 | 0.106852483 | -0.08025703 | 0.08318161 | 0.030611 |
| 2.63E-11    | -0.306484849 | 1.30E-11    | 0.025879385 | 0.57694484 | -0.4127  |
| 0.066807589 | -0.098825502 | 0.032749347 | 0.121382152 | 0.00864517 | 0.22451  |
| 1.73E-05    | -0.202431252 | 1.04E-05    | 0.086013238 | 0.06327936 | -0.15163 |
| 0.000882646 | -0.162720633 | 0.000414686 | -0.09257121 | 0.04556352 | -0.25629 |
| 3.27E-14    | -0.337402142 | 6.75E-14    | -0.17705695 | 0.00011986 | -0.27386 |
| 3.01E-08    | 0.250352492  | 4.18E-08    | -0.1713944  | 0.00019803 | 0.286489 |
| 1.78E-14    | 0.338032339  | 6.03E-14    | 0.010027573 | 0.82889236 | 0.385935 |
| 2.99E-08    | 0.258950724  | 1.36E-08    | -0.03593729 | 0.43846938 | 0.416647 |
| 0.000815232 | -0.15324529  | 0.000892375 | 0.055848369 | 0.228358   | -0.3732  |
| 1.62E-06    | -0.222309218 | 1.22E-06    | 0.120293856 | 0.00926655 | -0.09536 |
| 0.000138221 | -0.186888059 | 4.83E-05    | 0.139432494 | 0.00252899 | -0.19992 |
| 2.02E-10    | 0.298219313  | 4.78E-11    | -0.11815644 | 0.01060364 | 0.229884 |
| 0.163843356 | -0.072261932 | 0.11889043  | -0.18610507 | 5.20E-05   | -0.48646 |
| 2.63E-09    | -0.274309284 | 1.66E-09    | 0.12602915  | 0.00638946 | -0.34777 |
| 0.000601828 | -0.176462084 | 0.000126446 | -0.09904899 | 0.03235515 | -0.46621 |
| 0.000109983 | -0.181478995 | 8.01E-05    | 0.020196387 | 0.66332846 | -0.32786 |
| 2.04E-05    | -0.204642938 | 8.28E-06    | 0.00403575  | 0.93068748 | -0.18149 |
| 1.05E-07    | -0.249998344 | 4.37E-08    | 0.034706206 | 0.45432573 | -0.41381 |
| 0.000289862 | -0.169095012 | 0.000241747 | -0.19552483 | 2.09E-05   | -0.40578 |
| 0.000275252 | -0.178777979 | 0.000102579 | 0.014029881 | 0.76235429 | -0.20328 |
| 1.12E-07    | -0.244455037 | 8.80E-08    | 0.026015785 | 0.57493791 | -0.22127 |
| 0.000333588 | 0.165682084  | 0.000323513 | -0.17486424 | 0.00014585 | 0.376492 |
| 0.004740385 | -0.138274643 | 0.002748687 | -0.01322406 | 0.77562808 | -0.28102 |
| 0.571302869 | -0.034402017 | 0.458292725 | -0.05757522 | 0.21427088 | -0.54772 |
| 0.001841997 | -0.160492107 | 0.000498496 | -0.15277069 | 0.00092626 | -0.00552 |
| 0.001641591 | -0.155748863 | 0.000731816 | -0.23656862 | 2.31E-07   | -0.60107 |
| 0.006532023 | -0.122502762 | 0.008044392 | 0.180239798 | 8.98E-05   | -0.25941 |
| 1.74E-06    | 0.228827962  | 5.79E-07    | -0.16183089 | 0.00044644 | 0.469167 |
| 2.48E-08    | -0.250753136 | 3.97E-08    | 0.037096878 | 0.42382831 | -0.19108 |
| 0.39773086  | -0.049647781 | 0.284312139 | -0.18386657 | 6.42E-05   | -0.46859 |
| 1.28E-06    | -0.228010475 | 6.36E-07    | 0.092610816 | 0.04547072 | -0.38086 |

|             |              |             |             |            |          |
|-------------|--------------|-------------|-------------|------------|----------|
| 8.44E-05    | -0.182726656 | 7.14E-05    | -0.07901103 | 0.08809487 | -0.26915 |
| 7.83E-09    | -0.26995643  | 3.06E-09    | -0.02690298 | 0.56196508 | -0.43929 |
| 0.068631109 | -0.087704184 | 0.058241617 | -0.22849814 | 6.01E-07   | 0.373359 |
| 6.39E-05    | -0.185685566 | 5.41E-05    | -0.13568119 | 0.00330514 | -0.40006 |
| 0.011744749 | -0.122760727 | 0.007911484 | -0.00623324 | 0.89313234 | -0.23822 |
| 8.89E-05    | -0.182335694 | 7.40E-05    | 0.118053063 | 0.01067243 | -0.23273 |
| 0.002805056 | -0.134122621 | 0.003686905 | 0.013405281 | 0.77263709 | -0.50389 |
| 5.48E-07    | 0.22848513   | 6.02E-07    | 0.042282417 | 0.36193206 | 0.338293 |
| 0.00179586  | -0.154826894 | 0.000787545 | 0.052793382 | 0.25486532 | -0.34252 |
| 7.32E-12    | -0.308536044 | 9.32E-12    | -0.07543175 | 0.10351525 | -0.52994 |
| 0.142072171 | -0.064116153 | 0.166581444 | -0.08959606 | 0.05300365 | -0.40313 |
| 7.25E-06    | -0.198794659 | 1.51E-05    | -0.11552066 | 0.01248607 | -0.43829 |
| 0.020422895 | -0.104455785 | 0.023980741 | 0.029255144 | 0.52826959 | -0.41653 |
| 0.191752246 | -0.056173993 | 0.22565257  | -0.12738197 | 0.00584043 | 0.409826 |
| 2.04E-25    | -0.458818662 | 1.08E-25    | 0.097024578 | 0.03607801 | -0.02384 |
| 9.62E-09    | -0.262378979 | 8.61E-09    | 0.000906209 | 0.98441761 | -0.2728  |
| 0.00616602  | 0.124078834  | 0.007262501 | 0.017582271 | 0.70471229 | 0.412603 |
| 0.028188073 | 0.10651836   | 0.021320195 | 0.098525409 | 0.03328509 | 0.481817 |
| 2.23E-06    | -0.216570573 | 2.32E-06    | -0.02117644 | 0.64806531 | 0.17199  |
| 0.000749845 | -0.154847335 | 0.000786268 | 0.02163384  | 0.64099154 | -0.30546 |
| 0.005930894 | 0.131726927  | 0.004352046 | -0.22063758 | 1.47E-06   | 0.49725  |
| 0.104587186 | -0.071929521 | 0.120601097 | -0.14225301 | 0.00205919 | -0.34379 |
| 1.10E-05    | -0.21597918  | 2.47E-06    | 0.012653093 | 0.78507324 | -0.20257 |
| 4.63E-08    | -0.253932141 | 2.63E-08    | 0.062843005 | 0.17517884 | -0.29697 |
| 0.003815175 | 0.131812656  | 0.004326487 | -0.15768717 | 0.00062636 | 0.107926 |
| 0.000156468 | -0.186757743 | 4.89E-05    | 0.045875665 | 0.32254302 | -0.22448 |
| 1.15E-06    | -0.225326775 | 8.67E-07    | -0.0487657  | 0.29296599 | -0.43307 |
| 0.000756455 | -0.154602962 | 0.00080166  | -0.09401437 | 0.04228313 | -0.50908 |
| 8.93E-09    | -0.264628346 | 6.35E-09    | 0.171404149 | 0.00019787 | 0.004611 |
| 0.000453301 | -0.164586046 | 0.000354823 | 0.258924801 | 1.37E-08   | -0.04689 |
| 0.006780274 | -0.132438233 | 0.00414405  | -0.16092183 | 0.0004812  | -0.1444  |
| 3.48E-07    | -0.238519372 | 1.83E-07    | -0.03063388 | 0.50900705 | -0.45321 |
| 0.008135047 | 0.121622852  | 0.008512853 | 0.002781462 | 0.9521979  | 0.244868 |
| 7.50E-18    | -0.389185865 | 2.45E-18    | -0.1403557  | 0.00236542 | -0.09376 |
| 9.00E-14    | -0.337343046 | 6.82E-14    | -0.0023423  | 0.95973833 | -0.40869 |
| 0.001651227 | -0.152459109 | 0.00094915  | 0.052039399 | 0.26172314 | -0.38424 |
| 0.00054899  | -0.156386888 | 0.000695412 | 0.071750501 | 0.1215303  | -0.36421 |
| 0.004036689 | -0.148215553 | 0.001317502 | 0.055557491 | 0.23079416 | -0.3541  |
| 2.37E-05    | -0.212761215 | 3.51E-06    | -0.01144421 | 0.8051739  | -0.47526 |
| 6.31E-19    | -0.391158752 | 1.60E-18    | -0.05326234 | 0.25066327 | 0.012439 |
| 7.11E-12    | -0.312168571 | 5.16E-12    | -0.08225856 | 0.07575448 | -0.32623 |
| 0.582642574 | -0.025718324 | 0.579318862 | -0.0602654  | 0.19358793 | -0.385   |
| 0.196392999 | 0.06773161   | 0.143892396 | -0.17750511 | 0.00011511 | 0.380762 |
| 3.43E-09    | -0.275735968 | 1.36E-09    | 0.098086599 | 0.03408194 | -0.07826 |
| 1.20E-05    | 0.20367614   | 9.15E-06    | -0.13541091 | 0.00336866 | 0.380065 |

|             |              |             |             |            |          |
|-------------|--------------|-------------|-------------|------------|----------|
| 1.66E-11    | -0.306517452 | 1.29E-11    | -0.10178186 | 0.02785345 | -0.28345 |
| 0.000104669 | -0.181796037 | 7.78E-05    | -0.03092066 | 0.505047   | -0.5445  |
| 0.005434277 | -0.130358912 | 0.00477878  | 0.013330987 | 0.77386289 | -0.3157  |
| 0.884707355 | 0.003842459  | 0.933999425 | -0.11373229 | 0.01392576 | -0.41286 |
| 0.052216986 | -0.109491344 | 0.017937445 | 0.002133024 | 0.96333291 | -0.26207 |
| 4.00E-23    | -0.440052457 | 1.54E-23    | -0.0215706  | 0.6419676  | -0.27131 |
| 2.26E-06    | -0.216439719 | 2.35E-06    | -0.1055316  | 0.02255925 | -0.10422 |
| 2.96E-06    | -0.215344907 | 2.65E-06    | 0.10907193  | 0.0183843  | -0.32401 |
| 2.59E-11    | -0.303562289 | 2.07E-11    | -0.06723039 | 0.14688878 | -0.51037 |
| 1.23E-05    | 0.211820911  | 3.88E-06    | 0.008129857 | 0.86090696 | 0.263645 |
| 0.000915238 | -0.16555813  | 0.00032692  | -0.10729233 | 0.02039011 | -0.20469 |
| 0.419294838 | 0.033527865  | 0.469799839 | -0.10911693 | 0.0183359  | -0.28955 |
| 3.55E-09    | 0.260377589  | 1.13E-08    | 0.015260853 | 0.74221226 | 0.389412 |
| 0.054285006 | 0.096350207  | 0.03739638  | 0.122833773 | 0.00787421 | 0.520672 |
| 4.49E-16    | -0.361063197 | 7.94E-16    | -0.09878794 | 0.032816   | -0.25364 |
| 0.064356002 | -0.094017439 | 0.042276386 | 0.258288909 | 1.49E-08   | -0.08772 |
| 0.001578243 | -0.156913032 | 0.000666663 | 0.143336667 | 0.00190099 | -0.20512 |
| 0.004127153 | 0.132113797  | 0.004237778 | -0.07869589 | 0.08937379 | -0.44857 |
| 0.24008562  | -0.056789938 | 0.220597556 | -0.13993565 | 0.00243861 | -0.35305 |
| 2.99E-05    | -0.190816298 | 3.31E-05    | -0.02829229 | 0.54193795 | -0.22724 |
| 6.09E-07    | -0.224512995 | 9.51E-07    | -0.05595903 | 0.22743597 | -0.46967 |
| 2.10E-07    | -0.248432153 | 5.33E-08    | 0.146542057 | 0.00149593 | -0.13565 |
| 3.58E-11    | -0.302915923 | 2.29E-11    | 0.147412117 | 0.00140057 | -0.214   |
| 0.25811382  | 0.038956778  | 0.400949982 | -0.06847361 | 0.13954266 | -0.25815 |
| 0.756735373 | 0.010762905  | 0.816559974 | 0.012929131 | 0.78050289 | -0.1075  |
| 0.013948483 | -0.122741823 | 0.007921157 | -0.11927754 | 0.00988239 | -0.33073 |
| 3.79E-05    | -0.181834378 | 7.75E-05    | -0.08418613 | 0.06912074 | -0.43921 |
| 0.026429485 | -0.114307745 | 0.013447321 | -0.01696969 | 0.71454295 | -0.17761 |
| 2.27E-05    | -0.185864531 | 5.32E-05    | 0.112790604 | 0.01474102 | -0.04751 |
| 0.146983927 | -0.060196541 | 0.194098466 | -0.1758811  | 0.0001332  | -0.39942 |
| 0.00040578  | -0.163613684 | 0.000384942 | -0.01520699 | 0.74309001 | -0.41519 |
| 0.018327405 | -0.122096583 | 0.008257703 | -0.01611979 | 0.72826031 | -0.20725 |
| 6.10E-05    | -0.186071698 | 5.22E-05    | 0.033200342 | 0.4741519  | -0.47072 |
| 3.39E-08    | -0.251960921 | 3.40E-08    | 0.053659663 | 0.24714107 | -0.35199 |
| 2.49E-08    | -0.258283434 | 1.49E-08    | 0.042364529 | 0.36099969 | -0.1738  |
| 0.00213633  | -0.153096874 | 0.000902847 | 0.036096068 | 0.43644772 | -0.26292 |
| 0.00021149  | -0.191150941 | 3.21E-05    | -0.2492634  | 4.80E-08   | -0.34865 |
| 0.001064543 | 0.164291681  | 0.000363701 | 0.013475493 | 0.77147916 | 0.462755 |
| 0.633918979 | -0.023753037 | 0.608648156 | -0.11087672 | 0.01652813 | -0.23466 |
| 1.09E-05    | -0.199916059 | 1.34E-05    | 0.078343785 | 0.09082033 | -0.3589  |
| 3.71E-05    | -0.195325879 | 2.13E-05    | -0.07645218 | 0.0989156  | -0.31048 |
| 0.856949556 | 0.014726526  | 0.750934611 | -0.07123524 | 0.1242359  | -0.33173 |
| 8.54E-05    | -0.187863512 | 4.40E-05    | 0.104223055 | 0.02429824 | -0.30268 |
| 9.98E-10    | -0.291720084 | 1.30E-10    | 0.00086781  | 0.98507781 | -0.37323 |
| 3.26E-11    | 0.303176955  | 2.20E-11    | 0.006452729 | 0.88939295 | 0.444349 |

|             |              |             |             |            |          |
|-------------|--------------|-------------|-------------|------------|----------|
| 2.15E-09    | -0.274605935 | 1.59E-09    | 0.062881491 | 0.17491421 | -0.19291 |
| 0.275973229 | -0.036848376 | 0.426941709 | -0.13511489 | 0.00343949 | 0.367081 |
| 3.48E-09    | -0.268050163 | 3.98E-09    | -0.2310128  | 4.48E-07   | -0.16124 |
| 0.023632033 | 0.122653296  | 0.007966594 | 0.160581294 | 0.00049486 | 0.289945 |
| 3.31E-06    | 0.23078596   | 4.60E-07    | 0.031702768 | 0.49432988 | 0.20302  |
| 0.02057124  | -0.111863259 | 0.015584558 | -0.29158682 | 1.32E-10   | -0.50945 |
| 3.98E-10    | -0.269827466 | 3.11E-09    | -0.18632181 | 5.10E-05   | -0.4802  |
| 0.235212569 | -0.063888994 | 0.16809179  | -0.03527424 | 0.44696973 | -0.28425 |
| 1.17E-15    | -0.354624559 | 2.76E-15    | 0.096025463 | 0.03804569 | -0.0638  |
| 0.000218057 | -0.178235794 | 0.000107753 | 0.053653474 | 0.24719567 | -0.30403 |
| 3.28E-05    | -0.200949109 | 1.21E-05    | 0.020256235 | 0.66239232 | -0.27258 |
| 1.49E-09    | -0.276184398 | 1.27E-09    | -0.05350809 | 0.24848063 | -0.44349 |
| 3.18E-09    | -0.269969634 | 3.05E-09    | 0.081929447 | 0.07693729 | -0.05029 |
| 4.90E-05    | -0.18108141  | 8.31E-05    | 0.129291365 | 0.00513762 | -0.18741 |
| 0.001453947 | -0.150816996 | 0.001078648 | -0.08532179 | 0.06544025 | -0.54925 |
| 1.41E-11    | -0.30017309  | 3.53E-11    | 0.210374394 | 4.53E-06   | -0.05172 |
| 1.65E-08    | -0.256649435 | 1.85E-08    | -0.11724729 | 0.0112224  | -0.28212 |
| 6.38E-09    | -0.269774474 | 3.13E-09    | -0.06092423 | 0.18875316 | -0.36635 |
| 0.000821898 | -0.162456063 | 0.000423901 | 0.008928568 | 0.84740169 | -0.27985 |
| 0.061499757 | -0.083249006 | 0.072283908 | -0.11078417 | 0.01661916 | -0.18218 |
| 0.291817045 | -0.05063634  | 0.274820516 | -0.01549022 | 0.73847817 | -0.51531 |
| 0.029840865 | -0.086973997 | 0.060374732 | 0.086863334 | 0.06070358 | -0.20196 |
| 1.16E-07    | -0.238489108 | 1.83E-07    | 0.058143772 | 0.20977243 | -0.34792 |
| 0.000405193 | -0.175220745 | 0.000141296 | -0.07975885 | 0.08511882 | -0.39114 |
| 2.32E-09    | -0.275468923 | 1.41E-09    | -0.1514484  | 0.00102704 | -0.55288 |
| 0.054745219 | -0.103442605 | 0.025389618 | -0.26298421 | 7.94E-09   | -0.44014 |
| 6.96E-08    | -0.248248908 | 5.46E-08    | 0.006903097 | 0.88172789 | -0.21727 |
| 0.020589439 | -0.106020411 | 0.02193787  | 0.00543145  | 0.90681176 | -0.33125 |
| 0.217208934 | -0.050256524 | 0.278441481 | 0.032599213 | 0.48219673 | -0.42702 |
| 4.47E-09    | 0.283113767  | 4.67E-10    | -0.27076371 | 2.73E-09   | 0.12876  |
| 6.22E-06    | -0.210171052 | 4.63E-06    | -0.09518566 | 0.03976928 | -0.50738 |
| 3.16E-06    | -0.224534157 | 9.49E-07    | 0.223276078 | 1.09E-06   | -0.08523 |
| 0.882610738 | -0.011296722 | 0.807635316 | -0.00546286 | 0.9062754  | -0.04538 |
| 2.01E-06    | -0.217540698 | 2.08E-06    | -0.10516903 | 0.02302994 | -0.37871 |
| 5.56E-11    | -0.305133525 | 1.61E-11    | -0.1051224  | 0.02309109 | -0.34349 |
| 6.57E-11    | -0.300677768 | 3.26E-11    | -0.04173543 | 0.36818128 | -0.45559 |
| 0.002763649 | -0.13379629  | 0.00377173  | -0.01269479 | 0.78438235 | -0.30225 |
| 4.40E-10    | -0.282717615 | 4.95E-10    | 0.103661987 | 0.02507864 | -0.23395 |
| 0.015651754 | 0.120900653  | 0.008915356 | 0.025873035 | 0.57703836 | 0.380474 |
| 1.53E-09    | -0.275401356 | 1.42E-09    | -0.00136544 | 0.976523   | -0.47318 |
| 3.50E-06    | -0.216858047 | 2.24E-06    | 0.132036057 | 0.00426052 | -0.39229 |
| 1.08E-07    | -0.243491153 | 9.92E-08    | -0.07879149 | 0.08898425 | -0.55361 |
| 2.90E-09    | -0.281351955 | 6.05E-10    | -0.02843683 | 0.53987488 | -0.2731  |
| 0.212396905 | 0.05453014   | 0.239545555 | -0.11108231 | 0.01632747 | -0.50897 |
| 2.12E-08    | -0.261034    | 1.03E-08    | -0.02240175 | 0.62918867 | -0.05116 |

|             |              |             |             |            |          |
|-------------|--------------|-------------|-------------|------------|----------|
| 1.86E-17    | -0.372361637 | 8.32E-17    | 0.029436023 | 0.52572156 | -0.26684 |
| 0.003596076 | -0.134259536 | 0.003651833 | 0.082153186 | 0.07613157 | -0.43941 |
| 1.50E-05    | -0.196397521 | 1.92E-05    | -0.19602448 | 1.99E-05   | -0.30867 |
| 2.19E-15    | -0.36119768  | 7.74E-16    | 0.116100744 | 0.01204817 | -0.08058 |
| 0.529163662 | 0.031189218  | 0.501353283 | -0.11126552 | 0.01615045 | -0.33574 |
| 0.538759233 | 0.016362435  | 0.724334956 | 0.000832432 | 0.98568608 | -0.02522 |
| 3.49E-06    | 0.213936889  | 3.09E-06    | 0.013608158 | 0.76929267 | 0.181317 |
| 0.636502309 | -0.007984242 | 0.863373635 | -0.29806849 | 4.90E-11   | 0.102093 |
| 2.62E-18    | -0.390368574 | 1.89E-18    | -0.01070774 | 0.81748366 | -0.30243 |
| 0.000118146 | -0.178721484 | 0.000103107 | 0.055647894 | 0.23003506 | 0.059756 |
| 7.40E-11    | -0.301324777 | 2.94E-11    | -0.17827064 | 0.00010741 | -0.11972 |
| 0.014942466 | 0.117116204  | 0.011314205 | 0.099887354 | 0.03091235 | 0.492325 |
| 0.819085773 | -0.011254584 | 0.808338922 | 0.310104623 | 7.23E-12   | -0.33988 |
| 1.39E-11    | -0.301654213 | 2.79E-11    | 0.047428746 | 0.30641532 | -0.12985 |
| 1.23E-09    | -0.293191807 | 1.04E-10    | -0.18515492 | 5.69E-05   | -0.24807 |
| 7.23E-06    | -0.211000937 | 4.24E-06    | -0.07003663 | 0.13071088 | -0.341   |
| 3.52E-05    | -0.191197456 | 3.19E-05    | -0.06012075 | 0.19466149 | -0.22832 |
| 4.09E-08    | -0.247629674 | 5.91E-08    | -0.06786833 | 0.14308321 | -0.27162 |
| 0.127664689 | -0.076824757 | 0.097277279 | 0.043804622 | 0.34489255 | -0.23946 |
| 0.000802845 | -0.162232233 | 0.000431845 | 0.14858531  | 0.00128082 | -0.33779 |
| 0.094669554 | -0.078910068 | 0.088502988 | 0.220236403 | 1.54E-06   | -0.31878 |
| 0.000944519 | -0.15399861  | 0.000840933 | 0.138486472 | 0.00270724 | -0.27586 |
| 0.550343805 | -0.015547439 | 0.73754751  | -0.0588462  | 0.20430936 | 0.478809 |
| 3.86E-07    | -0.241141676 | 1.33E-07    | 0.049389544 | 0.28682759 | -0.24136 |
| 4.34E-18    | 0.39293151   | 1.08E-18    | -0.11979707 | 0.00956318 | 0.269422 |
| 0.005824853 | -0.133181098 | 0.003936464 | -0.27550851 | 1.40E-09   | -0.32367 |
| 9.38E-28    | -0.477658685 | 5.45E-28    | -0.02265569 | 0.62530603 | -0.24646 |
| 1.75E-08    | -0.257378424 | 1.68E-08    | 0.111061969 | 0.01634722 | -0.30482 |
| 4.95E-14    | -0.341931959 | 2.97E-14    | 0.016237039 | 0.72636265 | -0.23602 |
| 0.012096986 | 0.116642046  | 0.01165185  | -0.01844228 | 0.69099387 | 0.550537 |
| 2.83E-08    | 0.257399658  | 1.67E-08    | 0.1531234   | 0.00090097 | 0.227108 |
| 0.022322641 | -0.100140779 | 0.0304872   | 0.031612614 | 0.49555903 | -0.39348 |
| 2.70E-06    | -0.217702747 | 2.04E-06    | -0.02477313 | 0.59334212 | -0.47408 |
| 2.36E-07    | -0.238268184 | 1.88E-07    | -0.16868146 | 0.00025051 | -0.2408  |
| 0.004783607 | -0.112955452 | 0.014595349 | -0.14608387 | 0.00154851 | -0.29133 |
| 9.88E-05    | -0.184642822 | 5.97E-05    | -0.01622393 | 0.72657465 | -0.42318 |
| 2.25E-10    | 0.293553105  | 9.81E-11    | -0.10617243 | 0.02174768 | 0.208458 |
| 0.003954217 | -0.137205592 | 0.002966819 | -0.19235733 | 2.85E-05   | -0.34877 |
| 0.0223482   | 0.103856575  | 0.024805571 | 0.05321159  | 0.2511157  | 0.594342 |
| 3.25E-15    | -0.352470474 | 4.16E-15    | -0.19934109 | 1.43E-05   | -0.39268 |
| 7.87E-10    | -0.274232727 | 1.68E-09    | -0.1699185  | 0.00022515 | -0.38283 |
| 1.37E-05    | -0.211400866 | 4.06E-06    | 0.040307361 | 0.38480979 | -0.34979 |
| 0.018121592 | -0.103383028 | 0.025474641 | -0.08774007 | 0.05813842 | -0.37252 |
| 0.000138193 | 0.171121019  | 0.000202813 | -0.07800936 | 0.09221155 | 0.370261 |
| 0.042566964 | -0.096089069 | 0.037917763 | -0.0889844  | 0.05465244 | -0.07403 |

|             |              |             |             |            |          |
|-------------|--------------|-------------|-------------|------------|----------|
| 0.001176258 | -0.158549712 | 0.000584122 | 0.083704438 | 0.07073218 | -0.25923 |
| 1.25E-07    | -0.245130199 | 8.09E-08    | -0.03723636 | 0.42208663 | 0.080719 |
| 1.78E-06    | -0.210675821 | 4.39E-06    | -0.04467874 | 0.33534218 | -0.18277 |
| 2.87E-12    | -0.322461236 | 9.24E-13    | 0.056350719 | 0.22419383 | -0.26504 |
| 1.56E-08    | -0.275000717 | 1.51E-09    | -0.07734902 | 0.09500866 | -0.24994 |
| 0.026154866 | -0.110208349 | 0.017195467 | 0.010712331 | 0.81740674 | -0.34861 |
| 0.001529888 | -0.14138938  | 0.002193783 | 0.059018293 | 0.20298681 | -0.42633 |
| 0.005475509 | -0.128582487 | 0.005389125 | -0.11984872 | 0.00953195 | -0.44504 |
| 5.77E-14    | 0.332217072  | 1.70E-13    | -0.19821938 | 1.60E-05   | 0.290403 |
| 4.46E-10    | -0.28235134  | 5.23E-10    | 0.048905056 | 0.29158724 | -0.48169 |
| 7.60E-09    | 0.264234003  | 6.70E-09    | -0.11694323 | 0.01143636 | 0.425281 |
| 0.000145115 | -0.181394483 | 8.07E-05    | 0.002755318 | 0.95264668 | -0.39021 |
| 0.072000678 | -0.082156661 | 0.076119111 | -0.0978822  | 0.03445862 | -0.37035 |
| 0.133584731 | -0.068634855 | 0.13861093  | 0.213117575 | 3.37E-06   | -0.07892 |
| 0.019510528 | 0.115759559  | 0.012304056 | -0.14561131 | 0.00160451 | 0.2598   |
| 0.102456734 | -0.076780631 | 0.097470179 | -0.20292182 | 9.89E-06   | -0.26014 |
| 0.001054499 | 0.15590493   | 0.000722752 | 0.012255442 | 0.79167013 | 0.185623 |
| 0.4761942   | 0.035667163  | 0.441921234 | 0.042623505 | 0.35806893 | -0.20081 |
| 6.09E-18    | -0.387838083 | 3.27E-18    | 0.208317612 | 5.64E-06   | -0.23514 |
| 0.005147997 | -0.129491304 | 0.00506862  | 0.056972914 | 0.2191116  | -0.30342 |
| 5.59E-14    | -0.323535958 | 7.69E-13    | 0.022291592 | 0.63087612 | -0.18912 |
| 0.48965287  | 0.009937978  | 0.830397918 | -0.10672334 | 0.02107035 | -0.34522 |
| 0.450160801 | -0.03395889  | 0.464106146 | 0.12543606  | 0.00664442 | -0.36599 |
| 6.56E-08    | -0.249904334 | 4.42E-08    | -0.2161969  | 2.41E-06   | -0.44356 |
| 0.183580419 | -0.071988529 | 0.120296031 | -0.18059401 | 8.69E-05   | -0.51744 |
| 3.01E-20    | 0.408166186  | 3.56E-20    | -0.00370092 | 0.93642544 | 0.298089 |
| 1.41E-10    | -0.29541225  | 7.38E-11    | -0.04392451 | 0.34357255 | -0.30668 |
| 0.007719845 | -0.114126528 | 0.0135964   | 0.036334155 | 0.43342622 | -0.3052  |
| 0.02212515  | -0.110979163 | 0.016427872 | 0.06545362  | 0.15789442 | -0.34631 |
| 6.35E-09    | -0.27227     | 2.21E-09    | -0.06797577 | 0.14244981 | -0.25974 |
| 0.000161855 | -0.172353475 | 0.000182088 | -0.18381252 | 6.45E-05   | -0.38787 |
| 0.93677157  | -0.015809371 | 0.733292471 | 0.036718248 | 0.42857732 | -0.62855 |
| 3.78E-05    | -0.203564581 | 9.26E-06    | -0.17534515 | 0.00013974 | -0.27488 |
| 0.000575806 | -0.16383675  | 0.000377829 | -0.15110577 | 0.00105476 | -0.34989 |
| 0.000945308 | -0.150466499 | 0.001108318 | 0.059923718 | 0.19613079 | -0.13696 |
| 5.68E-06    | -0.21759684  | 2.07E-06    | 0.229656451 | 5.25E-07   | -0.10122 |
| 8.82E-08    | 0.248847709  | 5.06E-08    | 0.04913244  | 0.28934685 | 0.257341 |
| 0.00112222  | -0.166991838 | 0.000289482 | -0.1080227  | 0.01954497 | 0.023879 |
| 4.74E-05    | -0.187099587 | 4.73E-05    | -0.1858594  | 5.32E-05   | -0.27954 |
| 0.805402821 | -0.01299721  | 0.779376863 | -0.26154141 | 9.64E-09   | -0.35501 |
| 0.513392157 | -0.037338878 | 0.420809144 | -0.23485674 | 2.84E-07   | -0.07365 |
| 0.025174504 | 0.115708013  | 0.012343129 | -0.24367755 | 9.69E-08   | 0.170973 |
| 1.61E-06    | -0.227447755 | 6.79E-07    | -0.06147002 | 0.18481564 | -0.27836 |
| 0.07931048  | 0.087932954  | 0.057586288 | -0.19084536 | 3.30E-05   | 0.321031 |
| 1.57E-08    | -0.260481852 | 1.11E-08    | -0.19431148 | 2.36E-05   | -0.53324 |

|             |              |             |             |            |          |
|-------------|--------------|-------------|-------------|------------|----------|
| 9.73E-06    | -0.213314423 | 3.30E-06    | 0.095249884 | 0.03963517 | -0.38894 |
| 1.23E-16    | -0.383958923 | 7.48E-18    | -0.00284843 | 0.95104846 | 0.02907  |
| 1.17E-08    | -0.266636146 | 4.83E-09    | 0.052254096 | 0.25975756 | -0.41442 |
| 1.67E-11    | -0.317854431 | 2.01E-12    | -0.1882785  | 4.23E-05   | -0.26361 |
| 3.07E-07    | -0.242918562 | 1.07E-07    | -0.010213   | 0.82577837 | -0.33851 |
| 2.27E-06    | 0.228133518  | 6.27E-07    | -0.02642423 | 0.56894794 | 0.563522 |
| 2.86E-06    | -0.224068103 | 1.00E-06    | 0.028354472 | 0.54104991 | 0.013015 |
| 0.052429893 | -0.099213411 | 0.032067744 | -0.06701853 | 0.14816951 | -0.04465 |
| 1.39E-08    | 0.255339182  | 2.19E-08    | -0.02068916 | 0.65563618 | 0.407133 |
| 7.81E-15    | -0.357658023 | 1.54E-15    | -0.0113489  | 0.80676427 | -0.26136 |
| 0.102657076 | 0.084280401  | 0.068808897 | -0.09925369 | 0.03199766 | 0.380957 |
| 3.99E-06    | -0.214279813 | 2.97E-06    | -0.00474976 | 0.91846399 | -0.27999 |
| 8.78E-06    | -0.205868738 | 7.29E-06    | -0.21179748 | 3.89E-06   | -0.3707  |
| 1.06E-12    | 0.319275234  | 1.58E-12    | -0.19786136 | 1.65E-05   | 0.292198 |
| 6.00E-09    | 0.269536238  | 3.24E-09    | -0.21103266 | 4.22E-06   | 0.114324 |
| 1.19E-07    | -0.258046133 | 1.54E-08    | 0.094947882 | 0.04026912 | -0.1616  |
| 0.000304551 | 0.18359487   | 6.58E-05    | 0.002431745 | 0.95820224 | 0.402315 |
| 0.044962022 | -0.084216804 | 0.069019136 | 0.016189626 | 0.72712982 | -0.25511 |
| 0.778447587 | 0.021727396  | 0.639548645 | -0.16684918 | 0.00029302 | -0.35835 |
| 0.00042026  | -0.160692901 | 0.000490344 | -0.00679461 | 0.88357332 | -0.21212 |
| 1.18E-16    | 0.375579978  | 4.31E-17    | -0.15043222 | 0.00111126 | 0.243717 |
| 2.25E-19    | -0.398946984 | 2.87E-19    | -0.17815482 | 0.00010855 | -0.27924 |
| 0.000315643 | -0.169410169 | 0.000235263 | -0.04022012 | 0.3858402  | -0.25186 |
| 0.342608487 | -0.05777491  | 0.212683083 | 0.143279623 | 0.00190903 | -0.43485 |
| 1.45E-05    | -0.211146166 | 4.17E-06    | -0.10746312 | 0.02018969 | -0.2696  |
| 2.63E-05    | -0.194824439 | 2.24E-05    | 0.087581544 | 0.05859546 | -0.32657 |
| 0.040805112 | 0.08877461   | 0.05522768  | -0.01612358 | 0.72819892 | -0.41376 |
| 0.004580448 | 0.127805985  | 0.005677293 | -0.13399832 | 0.00371901 | 0.395043 |
| 8.55E-22    | -0.430637411 | 1.65E-22    | 0.204845401 | 8.11E-06   | -0.31572 |
| 0.023351795 | -0.115114847 | 0.012800706 | 0.00804054  | 0.8624198  | -0.34756 |
| 0.0144836   | -0.103465627 | 0.025356829 | -0.01426861 | 0.75843507 | -0.45136 |
| 0.008973067 | -0.127726487 | 0.005707564 | 0.019251348 | 0.67817947 | -0.15334 |
| 0.365644218 | -0.057908984 | 0.211621774 | -0.06275921 | 0.17575609 | -0.4692  |
| 1.57E-17    | -0.389633933 | 2.22E-18    | -0.07288068 | 0.11575675 | -0.26072 |
| 1.57E-15    | -0.358003273 | 1.44E-15    | -0.01088722 | 0.81447938 | -0.37853 |
| 0.007912695 | -0.129855861 | 0.004944956 | -0.08041719 | 0.08256643 | -0.43421 |
| 1.93E-07    | -0.245181776 | 8.03E-08    | -0.08583306 | 0.06383671 | -0.33857 |
| 0.006395838 | -0.135399705 | 0.003371313 | -0.15330345 | 0.0008883  | -0.18142 |
| 1.30E-05    | -0.199645584 | 1.38E-05    | -0.03294527 | 0.47755649 | -0.27631 |
| 0.010852506 | -0.130015998 | 0.004891501 | 0.195222146 | 2.15E-05   | -0.03931 |
| 0.254161308 | 0.047206783  | 0.308687052 | -0.24467518 | 8.56E-08   | -0.21914 |
| 0.000351834 | -0.174656809 | 0.00014857  | -0.0953142  | 0.03950125 | -0.15784 |
| 0.000159489 | -0.180754579 | 8.56E-05    | 0.035041246 | 0.44997881 | -0.51232 |
| 9.77E-05    | -0.18393446  | 6.38E-05    | -0.07074566 | 0.12684987 | -0.48136 |
| 0.159412717 | -0.072868691 | 0.11581686  | 0.074636646 | 0.10721538 | 0.030631 |



|             |              |             |             |            |          |
|-------------|--------------|-------------|-------------|------------|----------|
| 0.00021602  | -0.170272036 | 0.000218353 | 0.014245537 | 0.75881353 | -0.21449 |
| 8.94E-07    | -0.23278083  | 3.64E-07    | 0.051506272 | 0.26664824 | -0.23484 |
| 0.0879939   | -0.083107756 | 0.072770774 | 0.01173726  | 0.80028884 | -0.41309 |
| 2.38E-06    | 0.236018782  | 2.47E-07    | 0.078446632 | 0.09039588 | 0.179118 |
| 0.000101906 | -0.176578032 | 0.000125136 | -0.01153114 | 0.80372399 | -0.49022 |
| 2.96E-21    | -0.428373123 | 2.89E-22    | -0.01289232 | 0.78111191 | -0.19254 |
| 0.11642841  | 0.085012522  | 0.066426204 | -0.25429376 | 2.51E-08   | 0.079334 |
| 1.37E-05    | -0.196175074 | 1.96E-05    | -0.24728558 | 6.17E-08   | -0.16109 |
| 0.326133315 | 0.036504506  | 0.43127177  | -0.27046009 | 2.85E-09   | 0.432368 |
| 1.84E-09    | -0.270556044 | 2.81E-09    | 0.063926234 | 0.16784348 | -0.00874 |
| 1.97E-25    | 0.463738646  | 2.81E-26    | -0.11291501 | 0.01463097 | 0.24267  |
| 5.34E-05    | -0.199518316 | 1.40E-05    | -0.08466389 | 0.06755226 | 0.089555 |
| 1.64E-07    | -0.244745649 | 8.48E-08    | 0.041861834 | 0.36673123 | -0.32459 |
| 2.54E-08    | 0.260447566  | 1.12E-08    | 0.258419915 | 1.46E-08   | 0.186065 |
| 1.03E-14    | -0.35631783  | 2.00E-15    | 0.038961387 | 0.40089423 | -0.26136 |
| 0.00114706  | -0.144747263 | 0.001711738 | -0.03115449 | 0.50183019 | -0.39085 |
| 0.000172081 | -0.173194877 | 0.000169097 | -0.10127551 | 0.02864439 | -0.28383 |
| 1.04E-15    | -0.354076407 | 3.07E-15    | -0.01336137 | 0.7733616  | -0.44712 |
| 4.75E-14    | -0.335111673 | 1.02E-13    | -0.1777194  | 0.00011291 | -0.16022 |
| 5.81E-06    | -0.210777111 | 4.34E-06    | 0.055610128 | 0.23035196 | -0.19125 |
| 9.85E-05    | -0.183650233 | 6.55E-05    | -0.05804779 | 0.21052708 | -0.0143  |
| 6.43E-08    | -0.252852387 | 3.03E-08    | 0.145828197 | 0.00157858 | 0.057938 |
| 0.000332475 | -0.168379726 | 0.000257087 | 0.099779525 | 0.03109478 | -0.32356 |
| 0.003087912 | -0.138319053 | 0.00273995  | -0.22246781 | 1.20E-06   | -0.41839 |
| 0.003058199 | -0.149037986 | 0.001237189 | -0.07291949 | 0.11556237 | -0.21789 |
| 2.79E-09    | -0.282862344 | 4.85E-10    | 0.000405422 | 0.99302837 | -0.34937 |
| 4.08E-09    | -0.27109162  | 2.61E-09    | 0.198239299 | 1.59E-05   | -0.10008 |
| 3.89E-10    | -0.282582168 | 5.05E-10    | -0.00123999 | 0.97867937 | -0.3964  |
| 0.000602181 | -0.163824497 | 0.000378217 | -0.06554181 | 0.15733386 | -0.29944 |
| 0.447914066 | -0.031790769 | 0.493131645 | -0.25390728 | 2.64E-08   | -0.52283 |
| 0.895877888 | -0.01188717  | 0.797792915 | -0.16203007 | 0.00043914 | -0.34225 |
| 4.50E-06    | -0.224239899 | 9.81E-07    | -0.06817522 | 0.14127958 | -0.46879 |
| 0.05335448  | -0.093461157 | 0.04351629  | -0.07364713 | 0.11196523 | -0.41287 |
| 0.009470015 | 0.128222126  | 0.00552118  | -0.06150768 | 0.1845462  | 0.160777 |
| 0.226879362 | -0.064879944 | 0.16157768  | -0.16292642 | 0.00040765 | -0.44306 |
| 1.19E-06    | -0.225927561 | 8.09E-07    | 0.089912856 | 0.05216611 | 0.003744 |
| 4.66E-18    | -0.394493707 | 7.70E-19    | -0.00561807 | 0.90362514 | -0.34487 |
| 7.45E-05    | -0.184027481 | 6.32E-05    | 0.077804732 | 0.09307119 | -0.26287 |
| 2.84E-11    | -0.306574894 | 1.28E-11    | -0.09679907 | 0.03651441 | -0.03159 |
| 0.014437989 | -0.110876265 | 0.016528574 | -0.09520845 | 0.03972163 | -0.39679 |
| 6.72E-09    | -0.273074848 | 1.98E-09    | -0.05278513 | 0.25493972 | -0.15733 |
| 0.032995429 | -0.104593723 | 0.023794258 | -0.10002597 | 0.03067919 | -0.26513 |
| 2.05E-08    | -0.255767796 | 2.07E-08    | -0.11227489 | 0.01520504 | -0.25334 |
| 0.006424913 | -0.119766074 | 0.009581961 | -0.16549621 | 0.00032863 | -0.42719 |
| 0.000148703 | -0.185666436 | 5.42E-05    | -0.21273587 | 3.52E-06   | -0.38493 |

|             |              |             |             |            |          |
|-------------|--------------|-------------|-------------|------------|----------|
| 5.77E-07    | 0.233122367  | 3.49E-07    | -0.01410752 | 0.76107901 | 0.138687 |
| 0.000122461 | -0.179268106 | 9.81E-05    | -0.16673771 | 0.00029581 | -0.33041 |
| 6.26E-09    | -0.262034383 | 9.02E-09    | -0.1588059  | 0.00057209 | -0.55707 |
| 1.95E-05    | -0.199741868 | 1.37E-05    | -0.10019429 | 0.03039807 | -0.37771 |
| 4.12E-05    | -0.195555215 | 2.08E-05    | -0.06910614 | 0.13591497 | -0.35267 |
| 8.47E-07    | -0.227785791 | 6.53E-07    | -0.13285754 | 0.00402569 | -0.25796 |
| 0.000303808 | -0.164549473 | 0.000355915 | -0.05023415 | 0.27865578 | -0.52468 |
| 0.042603221 | -0.095602254 | 0.038906187 | -0.07115396 | 0.12466694 | -0.25811 |
| 0.011276276 | -0.128003107 | 0.005602856 | -0.08327082 | 0.07220897 | -0.28318 |
| 8.07E-08    | -0.251432044 | 3.64E-08    | 0.025597148 | 0.58110798 | -0.4319  |
| 6.47E-09    | -0.26350119  | 7.40E-09    | -0.0216156  | 0.64127296 | -0.21871 |
| 0.02930082  | -0.110607506 | 0.016794149 | -0.01577848 | 0.73379381 | -0.48242 |
| 0.00733416  | -0.128970618 | 0.005250078 | -0.13937648 | 0.00253924 | -0.33881 |
| 0.006907305 | -0.131564098 | 0.004400966 | -0.18487013 | 5.84E-05   | -0.55504 |
| 0.001259919 | -0.147976148 | 0.001341766 | 0.026884252 | 0.56223743 | -0.27908 |
| 0.007937871 | -0.119497813 | 0.009745907 | 0.090667891 | 0.05021436 | -0.30538 |
| 2.88E-06    | -0.214738879 | 2.83E-06    | 0.009649227 | 0.83525429 | -0.46111 |
| 1.57E-10    | 0.301575543  | 2.83E-11    | 0.201430492 | 1.15E-05   | 0.400987 |
| 0.002797168 | -0.139488554 | 0.002518773 | 0.232503728 | 3.76E-07   | 0.635092 |
| 0.106929208 | -0.080808776 | 0.081077824 | 0.007185303 | 0.87693045 | -0.27027 |
| 0.000468875 | -0.169122279 | 0.000241179 | -0.20098594 | 1.21E-05   | -0.3828  |
| 0.004124952 | 0.134121778  | 0.003687122 | 0.049350777 | 0.28720651 | 0.401474 |
| 0.003301748 | -0.156218178 | 0.000704872 | -0.1624195  | 0.00042519 | -0.23483 |
| 0.001406737 | -0.166338629 | 0.000306013 | 0.074070822 | 0.10991155 | -0.11297 |
| 8.48E-05    | -0.184735005 | 5.92E-05    | -0.00100986 | 0.98263559 | -0.3676  |
| 0.601864162 | 0.023527905  | 0.612049626 | -0.19431128 | 2.36E-05   | -0.40638 |
| 0.012125364 | -0.118414974 | 0.010433291 | 0.21253448  | 3.59E-06   | -0.53709 |
| 7.42E-07    | -0.230323646 | 4.86E-07    | 0.156314101 | 0.00069948 | -0.18963 |
| 0.001935796 | -0.141537002 | 0.002170221 | 0.267844037 | 4.09E-09   | -0.29776 |
| 0.00032509  | -0.169452353 | 0.000234408 | 0.386720032 | 4.15E-18   | -0.3237  |
| 5.13E-24    | -0.449887434 | 1.19E-24    | 0.063074294 | 0.17359292 | -0.14043 |
| 5.15E-05    | -0.18828176  | 4.23E-05    | 0.159085311 | 0.00055924 | -0.38041 |
| 4.87E-08    | -0.25159646  | 3.56E-08    | 0.112545809 | 0.01495971 | -0.53028 |
| 0.001461506 | -0.154318764 | 0.000819912 | 0.081701446 | 0.07776546 | -0.35974 |
| 1.21E-06    | -0.225451146 | 8.54E-07    | 0.126390463 | 0.00623846 | -0.36998 |
| 0.000173883 | -0.176530766 | 0.000125669 | -0.06457152 | 0.16358447 | -0.53569 |
| 3.75E-05    | -0.198024913 | 1.63E-05    | -0.1317509  | 0.00434488 | -0.25967 |
| 4.22E-06    | -0.206272813 | 6.99E-06    | 0.027019511 | 0.56027162 | -0.24495 |
| 1.46E-06    | -0.234889247 | 2.83E-07    | -0.25273732 | 3.07E-08   | 0.012189 |
| 0.000213406 | -0.179757335 | 9.38E-05    | 0.070823681 | 0.12643046 | -0.2341  |
| 9.44E-07    | -0.22953926  | 5.33E-07    | -0.14581562 | 0.00158007 | -0.34796 |
| 1.23E-07    | 0.240951324  | 1.36E-07    | -0.17205591 | 0.0001869  | 0.176161 |
| 0.140774461 | -0.063013828 | 0.174006493 | -0.05468897 | 0.23817751 | -0.42615 |
| 0.001810445 | -0.151647871 | 0.001011216 | 0.052960226 | 0.25336478 | -0.28434 |
| 0.475799279 | -0.040123512 | 0.386983303 | -0.13497726 | 0.00347288 | -0.30182 |

|             |              |             |             |            |          |
|-------------|--------------|-------------|-------------|------------|----------|
| 2.95E-10    | -0.288518745 | 2.10E-10    | -0.02981795 | 0.520362   | -0.39876 |
| 2.81E-05    | -0.184510901 | 6.04E-05    | -0.19620243 | 1.95E-05   | -0.26515 |
| 0.033620043 | -0.089713757 | 0.052691183 | 0.087561978 | 0.05865208 | -0.07988 |
| 8.24E-07    | -0.216855957 | 2.24E-06    | -0.06353071 | 0.17049474 | -0.03967 |
| 4.63E-05    | -0.195002145 | 2.20E-05    | 0.004007367 | 0.93117373 | -0.13439 |
| 1.18E-18    | -0.39179146  | 1.39E-18    | -0.17500295 | 0.00014406 | -0.14818 |
| 4.09E-12    | -0.328869031 | 3.06E-13    | -0.14191964 | 0.00211022 | -0.29532 |
| 3.77E-13    | -0.327247427 | 4.06E-13    | -0.09245469 | 0.04583747 | -0.30438 |
| 1.41E-06    | -0.22762835  | 6.65E-07    | -0.14445861 | 0.001749   | -0.30968 |
| 0.002975501 | 0.134553734  | 0.003577494 | -0.0447606  | 0.33445658 | -0.24424 |
| 1.70E-06    | 0.241345956  | 1.29E-07    | 0.161818374 | 0.0004469  | 0.412859 |
| 0.001768453 | 0.153901786  | 0.000847388 | 0.067866475 | 0.14309419 | 0.44409  |
| 5.12E-12    | -0.307744593 | 1.06E-11    | -0.14285195 | 0.00197032 | -0.33322 |
| 1.66E-05    | -0.199420969 | 1.41E-05    | -0.13646833 | 0.0031263  | -0.30731 |
| 0.054921869 | -0.088053933 | 0.057242212 | -0.35644914 | 1.95E-15   | -0.18373 |
| 0.00053943  | 0.158370379  | 0.000592679 | 0.137575938 | 0.00288953 | 0.583145 |
| 0.101989848 | -0.071875531 | 0.120880745 | -0.22293679 | 1.14E-06   | 0.456266 |
| 5.92E-05    | -0.181316053 | 8.13E-05    | 0.054480467 | 0.23997452 | -0.27519 |
| 4.82E-13    | 0.328190145  | 3.45E-13    | -0.03272212 | 0.48054592 | 0.363653 |
| 3.20E-12    | -0.325537246 | 5.45E-13    | 0.100393217 | 0.03006869 | -0.30379 |
| 0.792465606 | 0.002792064  | 0.952015916 | 0.030059852 | 0.51698207 | -0.18309 |
| 0.041148393 | 0.097869091  | 0.0344829   | 0.199839167 | 1.36E-05   | 0.429054 |
| 0.000441574 | -0.172763709 | 0.000175642 | 0.068744911 | 0.13797771 | -0.21531 |
| 8.01E-07    | -0.219758237 | 1.63E-06    | -0.13047474 | 0.00474124 | -0.51407 |
| 4.13E-05    | -0.184381443 | 6.12E-05    | -0.00689206 | 0.88191552 | -0.36861 |
| 0.007463669 | -0.125573522 | 0.006584529 | -0.14550306 | 0.0016176  | -0.24186 |
| 0.042385682 | 0.101433331  | 0.028395828 | 0.087681977 | 0.05830556 | -0.27788 |
| 1.28E-07    | 0.249172363  | 4.86E-08    | 0.097671533 | 0.03485056 | 0.546079 |
| 1.97E-07    | -0.236917196 | 2.22E-07    | 0.193106889 | 2.65E-05   | -0.1375  |
| 9.24E-22    | -0.444369257 | 5.06E-24    | 0.068956642 | 0.13676576 | -0.17973 |
| 4.26E-05    | -0.190818412 | 3.31E-05    | -0.0003889  | 0.99331241 | -0.33438 |
| 0.244899403 | -0.071909326 | 0.120705638 | 0.027162484 | 0.55819733 | -0.27319 |
| 0.000161009 | -0.181562805 | 7.95E-05    | -0.0932691  | 0.04395143 | -0.35785 |
| 0.015601238 | -0.097326248 | 0.035501162 | -0.10391551 | 0.02472337 | -0.45005 |
| 9.80E-08    | -0.245390742 | 7.83E-08    | -0.11052755 | 0.01687388 | -0.41515 |
| 1.10E-10    | 0.289766815  | 1.74E-10    | -0.26249419 | 8.48E-09   | 0.549617 |
| 0.149385482 | -0.071789566 | 0.121327058 | 0.218267488 | 1.92E-06   | -0.19188 |
| 2.61E-08    | 0.259334245  | 1.29E-08    | -0.2827816  | 4.91E-10   | 0.515929 |
| 0.032564704 | -0.11230805  | 0.015174823 | 0.036013452 | 0.43749899 | 0.06868  |
| 0.000517439 | -0.150315394 | 0.001121339 | -0.10390666 | 0.0247357  | -0.20654 |
| 3.80E-07    | -0.239315235 | 1.66E-07    | -0.08932147 | 0.05373863 | -0.50507 |
| 0.021401217 | 0.118915942  | 0.010110106 | -0.29717081 | 5.63E-11   | 0.245451 |
| 0.000957382 | -0.157129149 | 0.000655176 | 0.064027389 | 0.16717041 | -0.44845 |
| 2.19E-06    | -0.225856703 | 8.16E-07    | -0.0723302  | 0.11854148 | -0.13063 |
| 1.61E-09    | -0.271860102 | 2.34E-09    | -0.22327451 | 1.10E-06   | -0.41979 |

|             |              |             |             |            |          |
|-------------|--------------|-------------|-------------|------------|----------|
| 0.004689401 | -0.129816997 | 0.004958009 | -0.09049006 | 0.05066847 | -0.33634 |
| 9.95E-07    | -0.223928173 | 1.02E-06    | -0.02611493 | 0.57348126 | -0.40825 |
| 1.53E-07    | 0.247115089  | 6.30E-08    | 0.165785028 | 0.00032071 | 0.56144  |
| 0.000302209 | -0.169901394 | 0.000225481 | -0.07453895 | 0.10767715 | -0.38452 |
| 0.001274721 | -0.151314517 | 0.001037789 | 0.271650872 | 2.41E-09   | -0.1144  |
| 0.000100786 | -0.181484264 | 8.01E-05    | -0.02415823 | 0.6025474  | -0.26409 |
| 0.031046088 | 0.107075897  | 0.020646573 | 0.199932734 | 1.34E-05   | 0.523465 |
| 0.016114402 | -0.098830927 | 0.03273973  | -0.04811739 | 0.29943764 | -0.16284 |
| 0.004479454 | -0.121166181 | 0.008765441 | -0.00227372 | 0.96091625 | -0.21482 |
| 0.060929184 | -0.083792671 | 0.070434732 | -0.06458432 | 0.1635008  | -0.11841 |
| 5.54E-05    | -0.187562061 | 4.53E-05    | 0.062056116 | 0.18065514 | -0.35947 |
| 0.000485277 | 0.162910249  | 0.000408197 | -0.09531686 | 0.03949573 | 0.498226 |
| 6.41E-06    | -0.202755644 | 1.01E-05    | -0.31288251 | 4.59E-12   | -0.31088 |
| 0.000372361 | -0.161763604 | 0.000448928 | 0.045591053 | 0.32555731 | -0.23362 |
| 2.39E-11    | -0.316902513 | 2.36E-12    | -0.19281261 | 2.73E-05   | -0.22909 |
| 1.98E-06    | -0.22735326  | 6.86E-07    | 0.171218423 | 0.0002011  | -0.13938 |
| 2.55E-06    | -0.216298234 | 2.39E-06    | 0.002728846 | 0.95310111 | -0.38104 |
| 1.85E-06    | -0.21404479  | 3.05E-06    | -0.14082469 | 0.00228608 | -0.30779 |
| 0.001086449 | -0.154052283 | 0.000837374 | 0.012687072 | 0.78451026 | -0.28994 |
| 0.050305518 | -0.087775285 | 0.058037284 | -0.02527346 | 0.58589971 | -0.25599 |
| 0.115597504 | -0.079050859 | 0.087934279 | 0.141909215 | 0.00211184 | -0.07886 |
| 5.30E-45    | -0.598545135 | 1.00E-46    | -0.0047147  | 0.91906384 | 0.006816 |
| 4.58E-17    | -0.380989974 | 1.40E-17    | -0.05295957 | 0.25337063 | -0.4116  |
| 0.000382623 | -0.162326358 | 0.000428487 | -0.06103872 | 0.18792213 | -0.42145 |
| 3.59E-08    | 0.269863336  | 3.10E-09    | 0.046227039 | 0.31884678 | 0.316996 |
| 0.00377853  | -0.14781249  | 0.001358589 | -0.03124753 | 0.50055319 | -0.25983 |
| 2.16E-07    | 0.242334377  | 1.14E-07    | 0.241187979 | 1.32E-07   | 0.407405 |
| 0.429772324 | 0.051223797  | 0.269283377 | -0.04805717 | 0.30004361 | 0.152953 |
| 8.00E-15    | -0.347973295 | 9.72E-15    | -0.00018492 | 0.99682015 | -0.22394 |
| 4.94E-05    | -0.186887195 | 4.83E-05    | -0.05453751 | 0.23948195 | -0.48748 |
| 1.34E-05    | -0.195620514 | 2.07E-05    | -0.18281606 | 7.08E-05   | -0.37817 |
| 2.96E-08    | -0.25526659  | 2.21E-08    | -0.05072463 | 0.2739834  | -0.50321 |
| 0.003447402 | -0.141727851 | 0.002140102 | 0.082943901 | 0.0733389  | -0.35839 |
| 0.448966676 | 0.037351256  | 0.420655052 | 0.017991112 | 0.69817836 | 0.52419  |
| 3.39E-12    | -0.316220343 | 2.64E-12    | -0.09226788 | 0.04627954 | -0.31622 |
| 7.66E-14    | -0.337127688 | 7.09E-14    | 0.026473119 | 0.56823299 | -0.42128 |
| 0.314715473 | -0.039845012 | 0.390289991 | 0.048496203 | 0.29564478 | 0.333204 |
| 2.67E-10    | -0.279746716 | 7.63E-10    | -0.05299021 | 0.25309576 | 0.148309 |
| 0.123499381 | 0.057582629  | 0.214211828 | 0.046533088 | 0.31564995 | -0.41228 |
| 1.33E-08    | -0.262671238 | 8.28E-09    | 0.054279282 | 0.24171744 | -0.18815 |
| 0.491166732 | -0.037702711 | 0.416293746 | -0.12344422 | 0.00756877 | -0.0905  |
| 7.67E-05    | -0.193302313 | 2.60E-05    | 0.150900176 | 0.00107172 | -0.1981  |
| 4.50E-25    | -0.454220071 | 3.76E-25    | -0.09595423 | 0.03818938 | -0.26211 |
| 1.37E-05    | 0.200281902  | 1.30E-05    | -0.03107546 | 0.50291619 | 0.449988 |
| 1.21E-09    | -0.280086578 | 7.26E-10    | -0.01880497 | 0.68523818 | -0.20915 |

|             |              |             |             |            |          |
|-------------|--------------|-------------|-------------|------------|----------|
| 3.35E-20    | -0.413962685 | 9.25E-21    | -0.00650726 | 0.8884643  | -0.26427 |
| 7.37E-13    | -0.322884852 | 8.59E-13    | -0.10866979 | 0.01882185 | -0.01145 |
| 0.515397245 | -0.047919037 | 0.301436556 | -0.06069917 | 0.19039471 | 0.056289 |
| 3.79E-09    | -0.269331181 | 3.33E-09    | 0.063234799 | 0.17249866 | -0.07768 |
| 0.002189188 | -0.142558201 | 0.002013459 | 0.074420574 | 0.10823874 | -0.27989 |
| 0.118816186 | -0.078442896 | 0.090411271 | 0.032321128 | 0.48594318 | -0.14733 |
| 1.23E-12    | -0.326585676 | 4.55E-13    | 0.061134103 | 0.18723184 | -0.23335 |
| 6.83E-10    | -0.27903218  | 8.46E-10    | -0.01091864 | 0.81395384 | -0.42935 |
| 0.879136473 | -0.004203555 | 0.927813179 | 0.084078829 | 0.06947707 | -0.44468 |
| 0.751059445 | 0.018608839  | 0.688348392 | -0.08977114 | 0.05253941 | -0.41971 |
| 0.002007511 | 0.14954664   | 0.001189798 | 0.304126481 | 1.89E-11   | 0.458718 |
| 0.000879553 | 0.145934803  | 0.001565976 | 0.304037421 | 1.92E-11   | 0.489309 |
| 0.488128393 | -0.042309572 | 0.361623548 | -0.04980126 | 0.28282416 | -0.19217 |
| 2.90E-05    | 0.204338755  | 8.55E-06    | -0.02969799 | 0.52204236 | 0.355561 |
| 0.918759868 | 0.013545881  | 0.770318841 | -0.13631136 | 0.00316125 | 0.56605  |
| 0.000519471 | 0.16389278   | 0.000376062 | 0.26639239  | 4.99E-09   | 0.40025  |
| 2.04E-14    | -0.359436948 | 1.09E-15    | -0.00107438 | 0.98152645 | -0.21614 |
| 3.08E-23    | -0.43997845  | 1.57E-23    | -0.06635797 | 0.15221732 | -0.2065  |
| 5.14E-16    | -0.370955176 | 1.11E-16    | -0.02781541 | 0.54877203 | -0.30796 |
| 0.14666979  | 0.051385524  | 0.267772497 | 0.149716824 | 0.00117432 | -0.24882 |
| 1.52E-07    | -0.251984528 | 3.39E-08    | -0.10757112 | 0.02006383 | -0.14467 |
| 0.002235144 | -0.146368154 | 0.001515686 | -0.03557947 | 0.44304515 | -0.23819 |
| 1.52E-05    | 0.214787293  | 2.81E-06    | -0.17151602 | 0.00019594 | 0.037244 |
| 3.01E-05    | -0.195971822 | 2.00E-05    | -0.14032314 | 0.00237102 | -0.53987 |
| 7.04E-06    | -0.211818549 | 3.88E-06    | 0.046722817 | 0.31367871 | -0.44346 |
| 0.000259357 | -0.159381402 | 0.000545911 | -0.02710299 | 0.55906002 | -0.30336 |
| 1.03E-11    | 0.309927286  | 7.44E-12    | 0.014301696 | 0.7578923  | 0.290974 |
| 2.54E-05    | -0.190700781 | 3.35E-05    | 0.036936271 | 0.42583899 | -0.4353  |
| 1.61E-06    | -0.225856939 | 8.16E-07    | 0.089895482 | 0.05221175 | -0.29808 |
| 1.25E-11    | -0.308709502 | 9.06E-12    | 0.132196267 | 0.00421377 | -0.10944 |
| 6.05E-12    | -0.313135991 | 4.40E-12    | -0.07196507 | 0.12041722 | -0.3671  |
| 4.27E-15    | 0.343133658  | 2.38E-14    | -0.13250747 | 0.00412429 | 0.100632 |
| 7.44E-15    | -0.346799341 | 1.21E-14    | 0.048122804 | 0.29938325 | -0.11774 |
| 0.000286075 | -0.169749813 | 0.000228458 | 0.047731413 | 0.30333544 | -0.33521 |
| 3.43E-06    | -0.216153512 | 2.42E-06    | -0.11482383 | 0.01303063 | -0.35787 |
| 6.19E-10    | -0.286426237 | 2.87E-10    | 0.050829326 | 0.27299303 | -0.14827 |
| 2.95E-05    | -0.196699018 | 1.86E-05    | -0.13690654 | 0.00303059 | -0.29187 |
| 6.76E-05    | -0.192991851 | 2.68E-05    | -0.00950551 | 0.83767371 | -0.3008  |
| 6.71E-22    | -0.424242995 | 7.95E-22    | 0.069479215 | 0.13380959 | -0.1385  |
| 9.73E-06    | -0.21855492  | 1.86E-06    | -0.3510832  | 5.42E-15   | -0.22847 |
| 4.98E-07    | -0.239686051 | 1.59E-07    | -0.24001187 | 1.52E-07   | -0.36784 |
| 0.283888357 | -0.057132455 | 0.217821818 | -0.10514339 | 0.02306354 | -0.16614 |
| 0.007705957 | -0.135118061 | 0.003438726 | 0.06543466  | 0.15801513 | -0.21451 |
| 2.15E-06    | -0.23085244  | 4.57E-07    | -0.14831735 | 0.00130731 | -0.35056 |
| 3.42E-06    | 0.223777353  | 1.03E-06    | 0.072384251 | 0.11826574 | 0.066262 |

|             |              |             |             |            |          |
|-------------|--------------|-------------|-------------|------------|----------|
| 2.91E-13    | -0.336040177 | 8.62E-14    | -0.07732689 | 0.09510356 | -0.34518 |
| 1.61E-10    | 0.287333558  | 2.51E-10    | 0.146367259 | 0.00151579 | 0.231935 |
| 1.42E-05    | -0.207161113 | 6.37E-06    | 0.005774066 | 0.90096274 | -0.4245  |
| 0.79043638  | 0.000359954  | 0.993810218 | -0.13289774 | 0.00401451 | -0.42824 |
| 2.50E-26    | -0.4629878   | 3.46E-26    | -0.06077444 | 0.18984452 | -0.02407 |
| 0.000232229 | -0.172113916 | 0.000185954 | -0.23653657 | 2.32E-07   | -0.08051 |
| 1.07E-14    | -0.355650216 | 2.27E-15    | -0.05890233 | 0.20387732 | -0.38144 |
| 0.063155164 | -0.098332589 | 0.03363326  | 0.089992697 | 0.05195677 | -0.3727  |
| 3.72E-06    | -0.21783303  | 2.01E-06    | 0.167610085 | 0.00027461 | -0.19651 |
| 1.49E-08    | -0.262571505 | 8.39E-09    | -0.04037099 | 0.38405926 | -0.4313  |
| 0.010643077 | -0.121298861 | 0.008691375 | -0.07894489 | 0.08836205 | -0.32187 |
| 2.22E-17    | -0.37772179  | 2.77E-17    | -0.2556263  | 2.11E-08   | -0.3361  |
| 8.61E-09    | -0.273702678 | 1.81E-09    | -0.03740565 | 0.41997837 | -0.12439 |
| 8.70E-16    | -0.359650419 | 1.05E-15    | -0.06069749 | 0.190407   | -0.3091  |
| 2.74E-08    | 0.252117334  | 3.33E-08    | 0.042732171 | 0.35684364 | 0.392177 |
| 0.000464305 | -0.166251919 | 0.000308273 | -0.12654308 | 0.00617565 | -0.60702 |
| 5.80E-07    | -0.223960146 | 1.01E-06    | -0.1801575  | 9.04E-05   | -0.62    |
| 3.74E-13    | -0.328732296 | 3.14E-13    | -0.0824078  | 0.07522303 | -0.45589 |
| 0.765995751 | 0.011064417  | 0.811516135 | -0.07047453 | 0.12831573 | -0.09502 |
| 0.010344207 | -0.100453319 | 0.029969776 | 0.077843528 | 0.09290772 | 0.098746 |
| 4.58E-12    | -0.313721208 | 4.00E-12    | -0.05482876 | 0.23697807 | -0.23975 |
| 2.65E-28    | -0.483656487 | 9.41E-29    | -0.05309389 | 0.25216711 | -0.12439 |
| 0.023560127 | -0.113301547 | 0.014293616 | -0.04508549 | 0.33095653 | -0.59425 |
| 1.68E-09    | -0.284023796 | 4.09E-10    | 0.07392897  | 0.11059579 | 0.082074 |
| 6.19E-05    | -0.194068419 | 2.41E-05    | -0.15643757 | 0.00069259 | -0.40149 |
| 0.001342732 | -0.142006214 | 0.002096858 | 0.056333672 | 0.22433425 | -0.30244 |
| 5.57E-10    | -0.290178135 | 1.64E-10    | -0.15048825 | 0.00110646 | -0.33433 |
| 3.19E-16    | -0.371231207 | 1.05E-16    | -0.07263774 | 0.11697934 | -0.22225 |
| 2.30E-18    | -0.393593279 | 9.38E-19    | 0.032585569 | 0.48238018 | -0.25165 |
| 0.003488445 | -0.135596971 | 0.003324813 | -0.00942654 | 0.83900378 | -0.40812 |
| 0.010050912 | -0.127425529 | 0.005823479 | 0.068376102 | 0.14010846 | -0.51983 |
| 1.04E-07    | -0.250140286 | 4.29E-08    | 0.053303583 | 0.25029607 | -0.29733 |
| 0.189548841 | -0.06961341  | 0.133058461 | -0.01102173 | 0.81222979 | -0.08486 |
| 3.58E-13    | -0.331315934 | 1.99E-13    | 0.134009834 | 0.00371602 | -0.20122 |
| 4.55E-30    | -0.491149653 | 9.99E-30    | -0.08269118 | 0.07422225 | -0.19874 |
| 4.58E-11    | 0.306199248  | 1.36E-11    | -0.04408829 | 0.34177443 | 0.490572 |
| 3.32E-10    | -0.289272839 | 1.88E-10    | -0.06172978 | 0.18296302 | -0.26704 |
| 1.12E-18    | -0.402108852 | 1.41E-19    | -0.00523648 | 0.91014257 | -0.20864 |
| 5.41E-05    | -0.199379058 | 1.42E-05    | 0.083790836 | 0.07044091 | -0.38836 |
| 1.33E-19    | -0.400898238 | 1.86E-19    | 0.062294049 | 0.17898605 | -0.1237  |
| 4.12E-13    | -0.33110901  | 2.07E-13    | 0.098340537 | 0.03361885 | -0.15788 |
| 0.039704971 | -0.10045343  | 0.029969593 | 0.02170818  | 0.6398449  | -0.03787 |
| 0.011661268 | -0.115047395 | 0.012853676 | -0.23169522 | 4.14E-07   | -0.04742 |
| 0.414623577 | -0.04020121  | 0.386063818 | -0.18700747 | 4.78E-05   | -0.13312 |
| 0.038149964 | -0.088056378 | 0.057235277 | -0.24119651 | 1.32E-07   | -0.22216 |

|             |              |             |             |            |          |
|-------------|--------------|-------------|-------------|------------|----------|
| 0.212988678 | -0.052964908 | 0.253322761 | -0.23344959 | 3.36E-07   | -0.1823  |
| 0.127653419 | -0.070610423 | 0.127579384 | -0.11400568 | 0.01369662 | -0.13012 |
| 0.465152162 | -0.027668477 | 0.55088624  | -0.14287665 | 0.00196674 | -0.1059  |
| 0.37917565  | -0.04224871  | 0.36231522  | -0.16824471 | 0.00026008 | -0.08707 |
| 0.266243463 | -0.051166919 | 0.26981613  | -0.15141507 | 0.00102971 | -0.13035 |
| 0.145712034 | -0.061075443 | 0.187656151 | -0.16664031 | 0.00029827 | -0.19533 |
| 0.002437516 | -0.135810879 | 0.003275048 | -0.10183125 | 0.02777731 | 0.038949 |
| 0.055480281 | -0.095791078 | 0.03852024  | 0.041470646 | 0.3712303  | -0.12257 |
| 0.232997732 | -0.052426719 | 0.258184576 | -0.12992156 | 0.00492296 | -0.16699 |
| 0.017843724 | -0.102021718 | 0.027485373 | -0.0742892  | 0.1088647  | -0.02485 |
| 0.002241369 | -0.13523757  | 0.003409973 | -0.06663831 | 0.15048932 | 0.031662 |
| 0.603439825 | -0.021688255 | 0.640152153 | -0.22944232 | 5.39E-07   | -0.19496 |
| 0.296504913 | -0.042415434 | 0.360422434 | -0.12331497 | 0.00763254 | -0.12974 |
| 0.128719782 | -0.067687928 | 0.144151664 | -0.22205181 | 1.26E-06   | -0.2195  |
| 0.024356221 | -0.101643921 | 0.028067033 | -0.08040232 | 0.08262339 | -0.16303 |
| 0.551997149 | -0.030838332 | 0.50618218  | -0.00700046 | 0.88007222 | 0.013886 |
| 0.386470839 | -0.035194398 | 0.447999611 | -0.16379239 | 0.00037923 | -0.14378 |
| 0.165105939 | -0.060811733 | 0.189572391 | -0.05899549 | 0.20316167 | -0.2117  |
| 0.463759185 | -0.028044195 | 0.545488049 | -0.16434912 | 0.00036195 | -0.09355 |
| 0.081802582 | -0.075726708 | 0.102168625 | 0.025787022 | 0.5783057  | -0.0336  |
| 0.595717974 | 0.025780562  | 0.578400934 | -0.17368407 | 0.00016195 | -0.1116  |
| 0.181075561 | -0.057276132 | 0.216664951 | -0.10080589 | 0.02939513 | -0.15811 |
| 0.438009853 | -0.035508785 | 0.443952262 | -0.10535627 | 0.0227858  | -0.14733 |
| 0.029787143 | -0.100096943 | 0.03056038  | -0.24651241 | 6.80E-08   | -0.04418 |
| 0.022805549 | -0.098998245 | 0.032444305 | -0.21208309 | 3.77E-06   | -0.14567 |
| 0.736514242 | -0.011515992 | 0.803976587 | -0.08957621 | 0.0530565  | -0.10471 |
| 0.158497867 | -0.058325673 | 0.208347712 | -0.15326408 | 0.00089106 | -0.28937 |
| 0.110914308 | -0.067733356 | 0.143882042 | -0.11469814 | 0.01313105 | -0.15307 |
| 0.088295418 | -0.074330623 | 0.108667034 | -0.11024956 | 0.01715365 | -0.15438 |
| 0.352578667 | -0.041071623 | 0.375854484 | -0.09567234 | 0.03876256 | -0.16747 |
| 0.006197799 | -0.125257945 | 0.006722753 | -0.00558359 | 0.90421392 | -0.21787 |
| 0.364190595 | 0.054409338  | 0.240589719 | -0.25904495 | 1.34E-08   | -0.22946 |
| 0.178915197 | -0.063229179 | 0.172536893 | -0.08292063 | 0.07341989 | -0.11491 |
| 0.18852753  | -0.050759041 | 0.273657627 | -0.12328562 | 0.00764709 | -0.23718 |
| 0.940107937 | -0.001006414 | 0.982694836 | -0.13562731 | 0.00331771 | -0.09196 |
| 0.65488749  | 0.009856901  | 0.831760874 | -0.08710087 | 0.05999951 | -0.11296 |
| 0.379278674 | -0.037040158 | 0.424537769 | -0.09738752 | 0.03538496 | -0.11853 |
| 0.311923991 | -0.038115725 | 0.411202702 | -0.23828216 | 1.88E-07   | -0.22197 |
| 0.026206218 | -0.095311895 | 0.039506049 | -0.14693624 | 0.00145201 | -0.15527 |
| 0.006034614 | -0.124828142 | 0.006915189 | -0.16056741 | 0.00049542 | -0.15715 |
| 0.607589401 | -0.027323046 | 0.555872286 | -0.11670223 | 0.01160851 | -0.15715 |
| 0.606877028 | 0.041983012  | 0.365344456 | -0.00838789 | 0.85653921 | -0.05115 |
| 0.971762083 | 0.012643073  | 0.785239284 | -0.14978382 | 0.00116828 | -0.21518 |
| 0.361766538 | -0.03751807  | 0.418581681 | -0.14713439 | 0.00143038 | -0.19137 |
| 0.570110175 | -0.023028625 | 0.619622854 | -0.14292259 | 0.00196008 | -0.10575 |

|             |              |             |             |            |          |
|-------------|--------------|-------------|-------------|------------|----------|
| 0.233121554 | -0.049005304 | 0.290598074 | -0.20369398 | 9.14E-06   | -0.2293  |
| 0.275434781 | -0.042897848 | 0.354980591 | -0.11935775 | 0.00983249 | -0.18588 |
| 0.376114243 | -0.045726869 | 0.324116626 | -0.1644919  | 0.00035764 | -0.22551 |
| 0.069341457 | -0.07962591  | 0.085641869 | -0.1537499  | 0.00085761 | -0.24298 |
| 0.007125282 | -0.117523229 | 0.011031302 | -0.1596498  | 0.00053408 | -0.20681 |
| 0.087483477 | -0.072088918 | 0.119778422 | -0.13528698 | 0.00339815 | -0.27512 |
| 2.56E-06    | -0.215145511 | 2.71E-06    | -0.12874266 | 0.00533135 | -0.22362 |
| 0.345524214 | -0.035450366 | 0.444702755 | -0.0422603  | 0.36218343 | -0.18215 |
| 0.608929136 | -0.018343214 | 0.692569004 | -0.00597313 | 0.89756683 | -0.03004 |
| 0.003091853 | -0.130143072 | 0.004849453 | -0.12307392 | 0.00775276 | -0.13539 |
| 0.739709864 | -0.018034091 | 0.697492776 | -0.10475717 | 0.02357492 | -0.18393 |
| 0.684065592 | -0.017837496 | 0.700630793 | -0.16744737 | 0.00027845 | -0.1111  |
| 1.88E-05    | -0.18872589  | 4.05E-05    | -0.12156281 | 0.00854569 | -0.02238 |
| 0.062338947 | -0.082073864 | 0.076416432 | -0.1582086  | 0.0006005  | -0.12777 |
| 0.01162094  | -0.110078656 | 0.017327655 | -0.1226507  | 0.00796793 | -0.10135 |
| 0.295657974 | -0.053955852 | 0.24453797  | -0.20879361 | 5.36E-06   | -0.26525 |
| 0.239967383 | -0.054227109 | 0.242170869 | -0.10651429 | 0.02132518 | -0.05251 |
| 0.151731362 | -0.057927375 | 0.211476497 | -0.23730344 | 2.12E-07   | -0.29001 |
| 0.115002345 | -0.072436854 | 0.117997888 | -0.16633348 | 0.00030615 | -0.13281 |
| 0.551794821 | -0.024869571 | 0.591904239 | -0.14983948 | 0.00116328 | -0.18367 |
| 0.035531546 | -0.095253036 | 0.039628597 | -0.07497109 | 0.10564647 | -0.07314 |
| 0.010541278 | -0.120125856 | 0.009365932 | -0.21830018 | 1.91E-06   | -0.13192 |
| 0.146911634 | -0.059012877 | 0.203028342 | -0.08688052 | 0.0606524  | -0.14157 |
| 0.272078073 | -0.046540377 | 0.315574064 | -0.0633451  | 0.17174966 | -0.11485 |
| 0.222197564 | -0.050329742 | 0.277740947 | -0.12516144 | 0.00676554 | -0.15929 |
| 0.205652489 | -0.053168278 | 0.251502237 | -0.12739701 | 0.00583457 | -0.15878 |
| 0.192679899 | -0.056599799 | 0.222149298 | -0.15359155 | 0.00086838 | -0.0874  |
| 0.127462062 | -0.065775698 | 0.155854507 | -0.09537428 | 0.03937651 | -0.10681 |
| 0.465486302 | -0.027114471 | 0.558893496 | -0.15695281 | 0.00066453 | -0.07888 |
| 0.417999079 | -0.030477422 | 0.511174342 | -0.14554082 | 0.00161302 | -0.17006 |
| 0.624935649 | -0.012007691 | 0.795787784 | -0.18086592 | 8.48E-05   | -0.14906 |
| 0.493198892 | 0.039165908  | 0.398424591 | -0.17213705 | 0.00018558 | -0.20059 |
| 0.491481629 | -0.026828898 | 0.56304289  | -0.17239835 | 0.00018137 | -0.19505 |
| 0.201014798 | -0.056875987 | 0.219897855 | -0.21043797 | 4.50E-06   | -0.23525 |
| 1.96E-05    | -0.191434801 | 3.12E-05    | -0.29320131 | 1.04E-10   | -0.17142 |
| 0.449655691 | -0.026468057 | 0.568307001 | -0.11054379 | 0.01685766 | 0.028593 |
| 0.685563834 | 0.02222353   | 0.631919665 | -0.1434922  | 0.00187922 | -0.11915 |
| 0.310705118 | -0.039414356 | 0.395436832 | -0.09920686 | 0.03207916 | -0.09228 |
| 0.105891723 | -0.068324454 | 0.140408859 | -0.10719338 | 0.02050702 | 0.002239 |
| 0.764170012 | -0.002138803 | 0.963233644 | -0.14832418 | 0.00130663 | -0.00646 |
| 0.29455354  | 0.068209166  | 0.14108118  | -0.17064116 | 0.00021146 | -0.05342 |
| 0.362068049 | -0.0399129   | 0.389482363 | -0.21117177 | 4.16E-06   | -0.11279 |
| 0.634886072 | 0.037498655  | 0.418822689 | -0.17004519 | 0.00022269 | -0.05105 |
| 0.0118089   | -0.116120679 | 0.01203337  | -0.2043994  | 8.49E-06   | -0.12898 |
| 0.000706731 | -0.150811806 | 0.001079082 | -0.07516857 | 0.10472861 | -0.16845 |



|             |              |             |             |            |          |
|-------------|--------------|-------------|-------------|------------|----------|
| 0.023707594 | -0.10151724  | 0.028264426 | -0.11237737 | 0.01511183 | 0.005269 |
| 0.222109576 | -0.052421441 | 0.258232567 | -0.14360815 | 0.00186314 | -0.11747 |
| 0.312549393 | -0.033920272 | 0.464614709 | -0.13256759 | 0.00410721 | -0.23401 |
| 0.235766848 | -0.050280771 | 0.278209361 | -0.11588398 | 0.01221019 | -0.14645 |
| 0.53108842  | -0.023266657 | 0.616007224 | -0.13823156 | 0.00275719 | -0.18482 |
| 0.84295696  | -0.012777074 | 0.783019571 | -0.12146578 | 0.00859899 | -0.09862 |
| 0.058723439 | -0.086825599 | 0.060816049 | -0.05561746 | 0.23029044 | -0.25409 |
| 0.000387629 | -0.161967049 | 0.000441436 | -0.18430322 | 6.16E-05   | -0.08324 |
| 0.135759638 | -0.064709023 | 0.162687476 | -0.17500233 | 0.00014407 | -0.09937 |
| 0.092961492 | -0.076744754 | 0.097627239 | -0.20579062 | 7.35E-06   | -0.15894 |
| 0.416483085 | -0.035736004 | 0.441040081 | -0.17572613 | 0.00013506 | -0.15189 |
| 0.209803642 | -0.048825655 | 0.292372293 | -0.20071518 | 1.24E-05   | -0.22776 |
| 0.565035216 | -0.019065115 | 0.681121064 | -0.17447801 | 0.00015095 | -0.16342 |
| 0.681294634 | -0.016206608 | 0.726855012 | -0.16797538 | 0.00026616 | -0.16645 |
| 0.621333475 | 0.026382681  | 0.569555938 | -0.13796461 | 0.00281039 | -0.12461 |
| 0.029684608 | -0.087683676 | 0.058300664 | -0.14835562 | 0.00130349 | -0.13357 |
| 0.151927111 | -0.059876375 | 0.196485029 | -0.12550193 | 0.00661566 | -0.17606 |
| 0.034988285 | -0.100318973 | 0.030191263 | -0.02422953 | 0.60147674 | -0.37251 |
| 0.120567656 | -0.065108524 | 0.16010242  | -0.22930695 | 5.47E-07   | -0.24255 |
| 0.240877176 | -0.058403791 | 0.207738005 | -0.08863478 | 0.05561387 | -0.02279 |
| 0.042565351 | -0.09143025  | 0.048305958 | -0.19107963 | 3.23E-05   | -0.15749 |
| 0.190978953 | -0.059937737 | 0.196025979 | -0.21230622 | 3.68E-06   | -0.20486 |
| 0.312522577 | -0.045137518 | 0.330398239 | -0.18930821 | 3.83E-05   | -0.18793 |
| 0.201710422 | -0.053305042 | 0.250283085 | -0.16966683 | 0.0002301  | -0.16881 |
| 0.027185324 | -0.086979419 | 0.060358657 | -0.17505437 | 0.00014341 | -0.15525 |
| 0.60579751  | 0.016645489  | 0.719764984 | -0.11750449 | 0.01104419 | -0.12266 |
| 0.019918123 | -0.103629642 | 0.025124286 | -0.10023116 | 0.03033679 | -0.10058 |
| 0.052625629 | -0.081263139 | 0.079377861 | -0.17205016 | 0.000187   | -0.16421 |
| 0.453534623 | -0.04198789  | 0.365288701 | -0.09336823 | 0.04372638 | -0.09313 |
| 0.472855592 | -0.030726169 | 0.507730893 | -0.14158073 | 0.00216329 | -0.16204 |
| 0.210389831 | -0.054284997 | 0.241667807 | -0.1988257  | 1.50E-05   | -0.12806 |
| 0.16018632  | -0.058539537 | 0.206681591 | -0.15177527 | 0.00100123 | -0.16351 |
| 0.004863649 | -0.125731758 | 0.006516185 | -0.20353624 | 9.29E-06   | -0.10556 |
| 0.891687507 | 0.014190528  | 0.759716214 | -0.14324308 | 0.0019142  | -0.05431 |
| 0.390338126 | 0.040711628  | 0.380056667 | -0.13052907 | 0.00472372 | -0.0767  |
| 0.683711517 | -0.015690961 | 0.735215028 | -0.05918414 | 0.20171815 | -0.09706 |
| 0.694096681 | 0.015797551  | 0.733484315 | -0.04838442 | 0.29676063 | -0.18926 |
| 6.55E-13    | -0.323322541 | 7.98E-13    | -0.1731049  | 0.00017044 | -0.15085 |
| 0.014568079 | -0.115926266 | 0.012178436 | -0.12340081 | 0.00759013 | -0.15211 |
| 0.258824868 | -0.051437077 | 0.267292104 | -0.00394577 | 0.93222917 | -0.00026 |
| 0.000989907 | -0.153322093 | 0.000887001 | 0.000444566 | 0.99235526 | -0.01232 |
| 0.121797673 | -0.071147074 | 0.124703529 | -0.14330682 | 0.0019052  | -0.09829 |
| 0.806388237 | -0.000263627 | 0.995466628 | 0.033469418 | 0.47057485 | -0.0018  |
| 0.729307678 | -0.016178315 | 0.727312885 | -0.08812708 | 0.05703501 | -0.17704 |
| 0.10668612  | -0.061317215 | 0.18591188  | -0.13428014 | 0.00364658 | -0.07826 |

|             |              |             |             |            |          |
|-------------|--------------|-------------|-------------|------------|----------|
| 0.09661586  | -0.073500218 | 0.112684307 | -0.06129823 | 0.18604844 | -0.07507 |
| 0.05541465  | -0.083305649 | 0.072089417 | -0.0989665  | 0.03250017 | -0.11248 |
| 0.103413005 | -0.073669179 | 0.111857599 | -0.04991642 | 0.28171123 | -0.05062 |
| 0.061279471 | -0.101420041 | 0.028416687 | -0.0577019  | 0.21326264 | -0.07873 |
| 0.977885096 | 0.001952386  | 0.966436209 | 0.013924005 | 0.76409444 | -0.13552 |
| 0.04012508  | -0.093498556 | 0.043431982 | 0.108006109 | 0.01956382 | 0.121662 |
| 0.0453238   | -0.089512801 | 0.053225614 | -0.08568456 | 0.06429909 | 0.017671 |
| 0.15212187  | -0.067873158 | 0.143054721 | -0.14782982 | 0.0013568  | -0.15146 |
| 0.288634908 | -0.044156895 | 0.341023076 | -0.1976515  | 1.69E-05   | -0.13478 |
| 0.555704398 | -0.026772008 | 0.56387126  | -0.12348639 | 0.00754806 | -0.11835 |
| 0.482416431 | -0.032047461 | 0.489645386 | 0.016586899 | 0.72071012 | -0.07435 |
| 0.338177017 | -0.039989486 | 0.388572486 | -0.07938896 | 0.08658056 | -0.05039 |
| 0.036070445 | -0.087435665 | 0.059018678 | -0.18941783 | 3.79E-05   | -0.16632 |
| 0.001854134 | -0.149074178 | 0.00123376  | -0.10654978 | 0.02128173 | -0.12142 |
| 0.007770369 | -0.119289744 | 0.009874779 | -0.12817101 | 0.00554015 | -0.10668 |
| 0.28327614  | -0.04396483  | 0.343129323 | -0.12964421 | 0.00501642 | -0.11248 |
| 0.617844927 | -0.02063112  | 0.656540348 | -0.10104503 | 0.02901075 | -0.08175 |
| 0.018107218 | -0.117927016 | 0.010756858 | -0.06657145 | 0.15090007 | 0.106022 |
| 0.474545151 | -0.033405436 | 0.471424073 | -0.14551605 | 0.00161602 | -0.14459 |
| 1.12E-05    | -0.199690175 | 1.38E-05    | 0.041917191 | 0.36609731 | -0.04112 |
| 0.001702362 | -0.138375994 | 0.002728785 | -0.14097867 | 0.00226057 | -0.07008 |
| 0.397016264 | 0.039310599  | 0.39668294  | -0.08026297 | 0.08315873 | -0.0942  |
| 0.24600308  | 0.043824591  | 0.344672456 | 0.000989575 | 0.98298433 | -0.0304  |
| 0.355446503 | -0.042784647 | 0.356252883 | -0.11984152 | 0.0095363  | -0.10398 |
| 0.45243747  | -0.034087472 | 0.462415062 | -0.07194373 | 0.1205276  | -0.09288 |
| 0.660148363 | -0.014213525 | 0.759338795 | -0.14142049 | 0.0021888  | -0.16926 |
| 0.699760548 | -0.012764075 | 0.783234826 | -0.04757768 | 0.3048972  | -0.02672 |
| 0.30668355  | -0.049211675 | 0.288568882 | -0.06564251 | 0.15669566 | -0.06335 |
| 0.048626037 | -0.08615439  | 0.062845543 | 0.020051912 | 0.66559051 | 0.042678 |
| 0.422372485 | -0.040565692 | 0.381768324 | -0.00778224 | 0.86679773 | -0.13093 |
| 0.547204173 | -0.027362302 | 0.555304552 | -0.00482521 | 0.9171735  | -0.00397 |
| 0.858691056 | -0.000864853 | 0.985128648 | -0.02147575 | 0.6434328  | -0.02118 |
| 0.326474528 | 0.044212571  | 0.340414071 | -0.09730391 | 0.03554361 | -0.17935 |
| 0.050441389 | -0.08907013  | 0.054418807 | -0.06914402 | 0.13570006 | -0.09546 |
| 0.00073985  | -0.147865772 | 0.001353091 | -0.10205142 | 0.02744008 | -0.08046 |
| 0.055314298 | -0.087325092 | 0.059341146 | -0.04923589 | 0.28833138 | -0.06245 |
| 0.014467037 | -0.109675269 | 0.017744496 | -0.14237939 | 0.00204014 | -0.04391 |
| 0.113025679 | -0.069138084 | 0.135733711 | -0.08809193 | 0.05713448 | -0.07795 |
| 0.35762527  | -0.035750084 | 0.440859993 | -0.07816616 | 0.09155716 | -0.10733 |
| 0.210778947 | -0.058684492 | 0.205557804 | -0.07351631 | 0.11260536 | -0.06821 |
| 0.053222814 | -0.085972331 | 0.063405546 | -0.07405098 | 0.11000704 | -0.0428  |
| 0.163803222 | -0.063676317 | 0.169515116 | -0.08949212 | 0.05328086 | -0.08949 |
| 0.069777637 | -0.081451253 | 0.07868256  | 0.036301479 | 0.43384019 | -0.04441 |
| 0.004238138 | -0.117176945 | 0.011271583 | -0.08550206 | 0.06487112 | -0.07662 |
| 0.043805259 | -0.089678167 | 0.052785505 | 0.01589841  | 0.7318479  | 0.063994 |

|             |              |             |             |            |          |
|-------------|--------------|-------------|-------------|------------|----------|
| 0.213602281 | -0.054597095 | 0.238968196 | -0.06823862 | 0.14090917 | 0.010792 |
| 0.202321926 | -0.059702101 | 0.197793065 | -0.0077965  | 0.86655591 | -0.20257 |
| 0.188438289 | -0.057162944 | 0.217575954 | 0.082910593 | 0.07345483 | 0.039058 |
| 0.450789101 | -0.057785291 | 0.212600773 | 0.038157212 | 0.41069335 | -0.00626 |
| 0.867824767 | 0.008181765  | 0.860027977 | -0.04208127 | 0.36422235 | -0.02197 |
| 0.433989089 | 0.03338313   | 0.47172033  | -0.01977475 | 0.66993851 | 0.004918 |
| 9.39E-06    | -0.201823818 | 1.11E-05    | -0.03975872 | 0.39131798 | -0.17833 |
| 0.024878044 | -0.103762538 | 0.024937215 | -0.02148247 | 0.64332894 | -0.04016 |
| 0.0015198   | -0.148060692 | 0.001333151 | -0.00764903 | 0.86905702 | 0.019883 |
| 0.082363077 | 0.07369939   | 0.111710285 | -0.10435388 | 0.02411932 | -0.09207 |
| 0.000397022 | -0.168701184 | 0.000250084 | -0.04461905 | 0.33598888 | 0.020684 |
| 0.593187631 | -0.028294031 | 0.541913037 | -0.07388157 | 0.11082518 | -0.02702 |
| 0.045367318 | -0.108261359 | 0.019275498 | -0.05246941 | 0.25779655 | -0.11136 |
| 0.223036537 | 0.043626663  | 0.346857857 | 0.084276114 | 0.06882305 | -0.10836 |
| 0.022991291 | -0.1016177   | 0.028107793 | 0.004646987 | 0.92022234 | 0.000113 |
| 0.809897976 | -0.016177695 | 0.727322914 | 0.020736101 | 0.65490533 | -0.03724 |
| 0.38842823  | -0.038046287 | 0.412056045 | -0.0608072  | 0.18960543 | -0.04941 |
| 0.834354383 | 0.018524738  | 0.689683671 | -0.1315628  | 0.00440136 | -0.10354 |
| 0.212844684 | -0.055948428 | 0.22752423  | -0.20282262 | 1.00E-05   | -0.08746 |
| 0.649805432 | -0.012256008 | 0.791660723 | -0.15271129 | 0.00093059 | -0.12815 |
| 0.581918481 | -0.019341387 | 0.67675904  | -0.07314611 | 0.1144325  | -0.10985 |
| 0.04873221  | -0.088399844 | 0.056267799 | -0.13110487 | 0.00454163 | -0.01655 |
| 0.896727873 | 0.00567876   | 0.902589252 | -0.09139558 | 0.04839141 | -0.14093 |
| 0.003918694 | -0.13372648  | 0.003790104 | -0.05406904 | 0.24354827 | -0.03866 |
| 0.221337294 | -0.049396606 | 0.286758602 | 0.028950333 | 0.53257757 | -0.05076 |
| 0.817173631 | -0.013982502 | 0.763132855 | -0.06303796 | 0.17384138 | -0.0305  |
| 0.260773002 | -0.056770648 | 0.220754631 | 0.011732204 | 0.80037307 | 0.005719 |
| 0.049756147 | -0.089922202 | 0.052141567 | -0.05178639 | 0.26405262 | -0.07341 |
| 0.774370335 | 0.01084732   | 0.81514706  | -0.04641155 | 0.31691694 | -0.02057 |
| 0.191352542 | -0.056950103 | 0.219296454 | -0.12355852 | 0.00751277 | -0.10678 |
| 0.953383156 | 0.002766363  | 0.952457088 | -0.04254633 | 0.3589407  | -0.05342 |
| 0.250805957 | -0.047142886 | 0.309343071 | -0.15062269 | 0.001095   | -0.07088 |
| 0.583464073 | 0.021286769  | 0.646356141 | 0.016237937 | 0.72634812 | -0.03903 |
| 0.014624969 | -0.108859758 | 0.018614034 | -0.06807764 | 0.14185119 | -0.1665  |
| 0.756046667 | -0.019277571 | 0.677765674 | -0.11700689 | 0.01139127 | -0.11384 |
| 0.771634988 | -0.010010536 | 0.829178607 | -0.02603708 | 0.57462493 | -0.05387 |
| 0.128962758 | -0.066046788 | 0.154153036 | -0.10654843 | 0.02128338 | -0.12079 |
| 0.182556453 | -0.057902493 | 0.211673068 | -0.03155644 | 0.49632568 | -0.06645 |
| 0.394616535 | -0.041884409 | 0.366472625 | -0.03550404 | 0.44401317 | -0.01455 |
| 0.40919191  | -0.033963693 | 0.464042916 | -0.09593611 | 0.038226   | -0.1204  |
| 0.051669386 | -0.087985744 | 0.057435936 | -0.00292816 | 0.94967992 | 0.003822 |
| 0.144418185 | -0.064910463 | 0.16138012  | -0.04168281 | 0.36878591 | -0.09032 |
| 0.953457529 | 0.009232222  | 0.84227873  | -0.095028   | 0.04010011 | -0.12549 |
| 0.247175971 | -0.054977804 | 0.235703914 | -0.10868247 | 0.01880791 | -0.10889 |
| 0.11159693  | -0.068702105 | 0.138223738 | -0.11521122 | 0.01272536 | -0.10964 |

|             |              |             |             |            |          |
|-------------|--------------|-------------|-------------|------------|----------|
| 0.213061258 | -0.062298002 | 0.178958423 | 0.024331623 | 0.5999452  | -0.0033  |
| 0.220748589 | -0.056166695 | 0.225712956 | -0.05027036 | 0.27830901 | -0.01347 |
| 0.445568678 | -0.030986058 | 0.504146199 | -0.07408383 | 0.10984899 | -0.11128 |
| 0.057030813 | -0.086264643 | 0.062508398 | -0.15915497 | 0.00055608 | -0.13472 |
| 0.267747868 | -0.047481804 | 0.305873928 | -0.07417715 | 0.10940087 | -0.11272 |
| 0.772233163 | -0.013962531 | 0.763461098 | -0.04660082 | 0.31494531 | -0.08804 |
| 0.690596344 | 0.017271967  | 0.709685998 | -0.05390098 | 0.2450188  | 0.011708 |
| 0.086212023 | -0.071582609 | 0.1224068   | 0.026390985 | 0.56943439 | -0.02929 |
| 0.035578756 | -0.096771777 | 0.036567522 | -0.01005472 | 0.82843638 | -0.06465 |
| 0.673040658 | -0.02411471  | 0.603201373 | -0.06601676 | 0.15434084 | -0.07558 |
| 0.199731439 | 0.065068569  | 0.160359555 | -0.12607112 | 0.00637175 | -0.05833 |
| 0.023801561 | -0.097574985 | 0.035031453 | 0.024135963 | 0.60288199 | 0.162657 |
| 0.000241085 | -0.163912331 | 0.000375447 | 0.04608152  | 0.32037418 | -0.24264 |
| 0.233052595 | -0.051948523 | 0.262558212 | -0.05383581 | 0.24559068 | -0.09517 |
| 0.12358362  | -0.070662027 | 0.127300631 | -0.00437767 | 0.92483184 | 0.018183 |
| 0.08256418  | -0.080904359 | 0.080717782 | -0.08877202 | 0.05523482 | -0.13623 |
| 0.010735802 | -0.112576308 | 0.014932306 | 0.069495187 | 0.13372002 | -0.11915 |
| 0.357842167 | -0.042827591 | 0.355769891 | -0.08440588 | 0.06839561 | -0.08988 |
| 0.04854063  | 0.09924751   | 0.032008413 | -0.21127034 | 4.12E-06   | -0.1362  |
| 0.350843839 | 0.041799073  | 0.367450751 | -0.01139213 | 0.80604274 | -0.02959 |
| 0.761459804 | -0.020106257 | 0.664739268 | -0.05724219 | 0.21693786 | 0.115498 |
| 0.582557638 | 0.019758739  | 0.670190032 | 0.014022876 | 0.76246939 | -0.06144 |
| 0.46446005  | -0.037899894 | 0.413858542 | -0.01870879 | 0.68676272 | 0.012915 |
| 0.018080988 | -0.115148192 | 0.012774592 | -0.04287267 | 0.35526327 | 0.028092 |
| 0.239173554 | -0.041644573 | 0.369225749 | -0.12372488 | 0.00743192 | -0.13181 |
| 0.187876452 | -0.064088318 | 0.16676597  | 0.09137794  | 0.04843494 | -0.12347 |
| 0.745399087 | 0.014704259  | 0.751298792 | -0.05851187 | 0.20689658 | -0.07883 |
| 0.564932404 | -0.021184772 | 0.647936196 | -0.08955375 | 0.05311635 | -0.09306 |
| 0.002842903 | -0.136219729 | 0.00318181  | -0.00681309 | 0.88325889 | -0.06626 |
| 0.225366087 | -0.05094503  | 0.271901339 | -0.08881787 | 0.05510866 | -0.09776 |
| 0.006691126 | -0.125857423 | 0.006462362 | -0.03902822 | 0.40008619 | -0.10743 |
| 0.748676527 | -0.006575973 | 0.887294335 | -0.11838692 | 0.01045166 | -0.10379 |
| 0.000934411 | -0.146669538 | 0.00148159  | -0.12882715 | 0.00530109 | -0.00982 |
| 0.002905187 | -0.138061612 | 0.002790953 | -0.0527049  | 0.2556636  | -0.05876 |
| 0.035792065 | -0.0974542   | 0.035258876 | -0.01073617 | 0.81700761 | -0.17581 |
| 0.643088198 | 0.022393413  | 0.62931631  | -0.0263499  | 0.57003583 | -0.02251 |
| 0.659300503 | 0.012403658  | 0.789209508 | 0.032303605 | 0.48617979 | 0.058326 |
| 0.832651705 | -0.010969411 | 0.813104604 | -0.07186538 | 0.12093338 | -0.02581 |
| 0.089787083 | -0.087552974 | 0.058678151 | 0.048827829 | 0.29235078 | -0.01383 |
| 0.604577089 | -0.025003261 | 0.589913586 | -0.08200752 | 0.07665537 | -0.04744 |
| 9.42E-06    | -0.200107091 | 1.32E-05    | -0.16453949 | 0.00035621 | 0.032382 |
| 0.099155349 | -0.063311402 | 0.171978238 | -0.123482   | 0.00755021 | -0.08769 |
| 0.036598955 | -0.095887894 | 0.038323615 | -0.07709024 | 0.09612314 | -0.01386 |
| 0.37221501  | -0.042970322 | 0.354167542 | -0.05152482 | 0.26647585 | -0.07198 |
| 0.002650628 | -0.143421285 | 0.00188912  | 0.028465933 | 0.53945999 | 0.104486 |

|             |              |             |             |            |          |
|-------------|--------------|-------------|-------------|------------|----------|
| 0.276765177 | -0.051906249 | 0.262947288 | -0.04671315 | 0.31377892 | -0.06101 |
| 0.14039634  | -0.071703672 | 0.12177428  | -0.03170927 | 0.49424127 | -0.1523  |
| 0.445860951 | -0.033781812 | 0.466440639 | -0.06961171 | 0.13306798 | -0.05067 |
| 0.091716302 | 0.08185001   | 0.077225012 | -0.13784049 | 0.00283545 | -0.2539  |
| 0.97314197  | -0.003160242 | 0.945697625 | -0.22612664 | 7.91E-07   | -0.28688 |
| 0.000560498 | 0.159856826  | 0.000525125 | -0.06078971 | 0.18973306 | -0.13994 |
| 0.194573155 | 0.060986045  | 0.188304155 | 0.04043486  | 0.38330683 | -0.17375 |
| 0.000989596 | 0.154970148  | 0.000778635 | -0.00334476 | 0.94253236 | -0.08872 |
| 0.000139454 | 0.171838175  | 0.000190499 | 0.043890004 | 0.34395213 | 0.322874 |
| 3.24E-08    | 0.259940637  | 1.19E-08    | -0.1861429  | 5.18E-05   | 0.087643 |
| 0.00210197  | 0.151314935  | 0.001037755 | -0.01789771 | 0.69966907 | -0.08431 |
| 2.30E-08    | 0.262275117  | 8.73E-09    | 0.071851954 | 0.12100302 | 0.081091 |
| 0.002611581 | 0.132270966  | 0.004192137 | -0.19808728 | 1.62E-05   | 0.083392 |
| 7.09E-06    | 0.207455227  | 6.17E-06    | 0.234862419 | 2.84E-07   | 0.013453 |
| 0.027454833 | 0.10944216   | 0.017989351 | -0.2497557  | 4.51E-08   | -0.09769 |
| 0.001830302 | 0.141332342  | 0.002202949 | 0.043609035 | 0.34705292 | -0.06118 |
| 0.839504866 | -0.00477832  | 0.91797549  | 0.116851364 | 0.01150171 | 0.203591 |
| 0.00069048  | 0.164066666  | 0.000370626 | -0.11595135 | 0.01215963 | 0.093283 |
| 0.001922393 | 0.145427717  | 0.001626764 | -0.00809295 | 0.86153204 | -0.09259 |
| 0.534548783 | 0.035330586  | 0.446243794 | 0.140778997 | 0.00229371 | -0.08046 |
| 0.056605444 | -0.083009893 | 0.073109657 | 0.124475852 | 0.00707658 | -0.29808 |
| 0.022211808 | 0.113159187  | 0.014417057 | 0.124236027 | 0.00718837 | 0.20437  |
| 0.000124854 | 0.168762801  | 0.000248762 | 0.050905044 | 0.27227827 | -0.01085 |
| 0.657107979 | -0.022802447 | 0.62306694  | 0.161385028 | 0.00046318 | 0.108633 |
| 0.103121043 | 0.081679415  | 0.077845868 | 0.221601094 | 1.32E-06   | -0.00155 |
| 0.000325413 | 0.170038705  | 0.000222815 | -0.12383537 | 0.00737866 | -0.0798  |
| 0.187258753 | -0.068239014 | 0.140906878 | -0.05715156 | 0.21766772 | 0.460289 |
| 2.34E-12    | 0.325180526  | 5.80E-13    | 0.148425974 | 0.00129651 | 0.269696 |
| 4.31E-06    | 0.207196142  | 6.34E-06    | -0.13159976 | 0.00439021 | 0.04128  |
| 0.105776476 | 0.076582256  | 0.098341143 | -0.26716693 | 4.49E-09   | 0.130652 |
| 0.046566723 | 0.10006246   | 0.030618052 | -0.30183968 | 2.71E-11   | 0.291346 |
| 2.57E-05    | 0.201783295  | 1.11E-05    | 0.042415651 | 0.36041998 | -0.31587 |
| 0.005249745 | -0.129148326 | 0.0051875   | -0.13859685 | 0.00268587 | 0.285685 |
| 1.31E-08    | 0.25936428   | 1.29E-08    | 0.184839149 | 5.86E-05   | 0.002241 |
| 3.66E-09    | 0.277537623  | 1.05E-09    | 0.112885317 | 0.01465717 | -0.17142 |
| 0.003673715 | 0.136094536  | 0.003210101 | 0.272388961 | 2.18E-09   | 0.125986 |
| 1.67E-07    | 0.243311455  | 1.01E-07    | 0.04429856  | 0.33947484 | 0.039927 |
| 2.46E-06    | 0.218726187  | 1.82E-06    | -0.14455861 | 0.00173601 | -0.10126 |
| 2.60E-08    | 0.261356267  | 9.88E-09    | -0.26188426 | 9.20E-09   | 0.048355 |
| 0.228743278 | 0.050007377  | 0.280834207 | -0.12304884 | 0.00776536 | 0.253399 |
| 0.000426279 | 0.1735571    | 0.000163777 | 0.297047603 | 5.74E-11   | 0.306815 |
| 0.031494914 | 0.098297976  | 0.033696087 | 0.279948227 | 7.41E-10   | 0.260623 |
| 0.23073228  | -0.051721471 | 0.264652611 | -0.08150564 | 0.07848244 | -0.07132 |
| 0.008827855 | 0.137477686  | 0.002909855 | 0.073416337 | 0.1130965  | 0.204698 |
| 0.002524945 | 0.13968955   | 0.002482443 | -0.12455339 | 0.00704077 | 0.230085 |

|             |              |             |             |            |          |
|-------------|--------------|-------------|-------------|------------|----------|
| 0.391343346 | -0.040192173 | 0.386170703 | 0.288435271 | 2.13E-10   | -0.20339 |
| 5.09E-07    | 0.239939601  | 1.54E-07    | 0.116797458 | 0.01154021 | -0.17893 |
| 0.678385835 | -0.014943158 | 0.747394417 | 0.124435355 | 0.00709535 | 0.176186 |
| 0.010580242 | 0.120572482  | 0.00910379  | 0.194079255 | 2.41E-05   | -0.13321 |
| 1.04E-07    | 0.245427382  | 7.79E-08    | 0.09360999  | 0.04318159 | 0.357321 |
| 0.118385247 | 0.072996171  | 0.115179085 | 0.073864035 | 0.11091013 | -0.25986 |
| 6.82E-08    | 0.259828092  | 1.21E-08    | 0.208690501 | 5.42E-06   | -0.13569 |
| 0.11495366  | 0.067020767  | 0.14815593  | -0.06897355 | 0.13666934 | -0.16709 |
| 0.014081571 | 0.113658146  | 0.013988475 | -0.02445623 | 0.5980782  | -0.02805 |
| 0.010112025 | 0.120564001  | 0.009108706 | 0.002391898 | 0.95888654 | 0.053815 |
| 0.002099801 | 0.14459139   | 0.001731768 | -0.09809457 | 0.03406731 | 0.244699 |
| 0.000263684 | 0.168122581  | 0.000262821 | -0.02434878 | 0.59968799 | -0.03521 |
| 0.554140657 | -0.031537126 | 0.49658949  | -0.07117246 | 0.12456876 | -0.0876  |
| 0.423317968 | 0.031264835  | 0.500315824 | 0.043228883 | 0.35127644 | -0.01897 |
| 0.006157905 | 0.113176337  | 0.014402137 | 0.039733362 | 0.39162042 | -0.08147 |
| 0.013111789 | -0.123820625 | 0.00738575  | 0.010510192 | 0.82079333 | 0.166825 |
| 0.645817202 | -0.021956849 | 0.6360156   | 0.159460155 | 0.00054242 | 0.30535  |
| 0.190818369 | -0.055151946 | 0.23422131  | -0.00092103 | 0.98416283 | 0.031404 |
| 0.061888539 | 0.082299683  | 0.075607742 | 0.095454021 | 0.03921146 | 0.281213 |
| 0.000334689 | 0.176311309  | 0.000128168 | 0.056569475 | 0.2223975  | -0.195   |
| 1.14E-13    | 0.339026061  | 5.04E-14    | -0.13003143 | 0.00488638 | 0.213808 |
| 0.002332578 | 0.138801463  | 0.002646657 | 0.148235361 | 0.00131551 | -0.14764 |
| 0.869912301 | -0.008257994 | 0.858737479 | 0.000430956 | 0.99258929 | 0.021924 |
| 3.90E-14    | 0.349046544  | 7.95E-15    | 0.054187205 | 0.24251808 | 0.188527 |
| 0.683893636 | 0.021110221  | 0.649092081 | 0.041836208 | 0.36702491 | -0.2294  |
| 0.0023167   | 0.142455683  | 0.002028715 | 0.095897235 | 0.03830469 | 0.512016 |
| 0.03426563  | 0.093551034  | 0.043313913 | 0.121783314 | 0.00842565 | 0.060771 |
| 0.076285911 | 0.086929415  | 0.060507032 | -0.05893878 | 0.20359709 | -0.10464 |
| 0.000275413 | 0.166439275  | 0.00030341  | -0.11790928 | 0.01076878 | 0.326314 |
| 0.039482111 | 0.093268216  | 0.04395343  | -0.33726521 | 6.92E-14   | 0.207319 |
| 3.76E-12    | 0.312140914  | 5.18E-12    | -0.024022   | 0.60459557 | -0.08328 |
| 0.875670182 | 0.00281488   | 0.951624271 | -0.06447234 | 0.16423371 | 0.170214 |
| 0.031812652 | 0.099953713  | 0.030800541 | 0.150094374 | 0.00114064 | 0.029572 |
| 6.16E-08    | 0.25608538   | 1.99E-08    | -0.00512825 | 0.91199211 | -0.18394 |
| 6.73E-16    | 0.369516642  | 1.48E-16    | -0.09249037 | 0.04575344 | -0.07283 |
| 0.826351189 | 0.02135235   | 0.645341051 | 0.034668397 | 0.45481774 | 0.35203  |
| 1.65E-08    | 0.255064805  | 2.27E-08    | 0.114963975 | 0.01291945 | -0.21024 |
| 0.000717091 | 0.158749551  | 0.00057472  | -0.04513077 | 0.33047062 | -0.08639 |
| 0.13994774  | 0.073528988  | 0.112543201 | 0.004430584 | 0.92392595 | 0.051221 |
| 0.001015621 | 0.158564702  | 0.000583411 | 0.178996592 | 0.00010056 | 0.014855 |
| 0.027442899 | 0.104162236  | 0.024381809 | 0.012416224 | 0.78900099 | -0.34042 |
| 6.82E-07    | 0.234801345  | 2.86E-07    | 0.086285273 | 0.06244548 | 0.001135 |
| 0.01248228  | 0.11503595   | 0.012862683 | 0.310555321 | 6.71E-12   | -0.22259 |
| 3.96E-15    | 0.362555087  | 5.93E-16    | 0.131759665 | 0.00434227 | 0.159038 |
| 0.001284747 | 0.156884876  | 0.000668173 | -0.09253643 | 0.04564514 | 0.110506 |

|             |              |             |             |            |          |
|-------------|--------------|-------------|-------------|------------|----------|
| 0.002729569 | 0.143112061  | 0.001932836 | 0.055547248 | 0.23088028 | -0.11448 |
| 0.810725747 | 0.013431341  | 0.772207261 | 0.085558101 | 0.06469502 | -0.28025 |
| 0.460518964 | 0.033928496  | 0.46450638  | -0.08686644 | 0.06069434 | -0.01032 |
| 0.214416563 | 0.059365309  | 0.200338871 | -0.07347017 | 0.1128318  | 0.061646 |
| 0.838074417 | -0.019225599 | 0.678585896 | -0.09313673 | 0.04425344 | 0.217354 |
| 0.000699695 | 0.161738498  | 0.00044986  | -0.07313607 | 0.11448234 | -0.20039 |
| 0.883479732 | 0.004296406  | 0.926223156 | 0.040957566 | 0.37718276 | 0.16531  |
| 0.007005947 | 0.126881907  | 0.006038232 | -0.02339062 | 0.61412796 | -0.09724 |
| 0.716413147 | -0.016694286 | 0.718978145 | 0.206802148 | 6.61E-06   | 0.30598  |

| p.MMskyl | MMpaletu | p.MMpale | MMpurple | p.MMpuri | MMsteelbl | p.MMstee | MMdarkor | p.MMdarl |
|----------|----------|----------|----------|----------|-----------|----------|----------|----------|
| 8.11E-05 | -0.29335 | 1.01E-10 | -0.24826 | 5.45E-08 | -0.28088  | 6.48E-10 | -0.18724 | 4.67E-05 |
| 1.33E-08 | -0.15594 | 0.00072  | -0.28292 | 4.81E-10 | -0.2976   | 5.27E-11 | -0.44439 | 5.04E-24 |
| 0.06334  | -0.07135 | 0.12362  | -0.1108  | 0.01661  | -0.10811  | 0.01945  | -0.28705 | 2.62E-10 |
| 3.30E-08 | -0.15004 | 0.00115  | -0.23162 | 4.17E-07 | -0.2739   | 1.76E-09 | -0.30339 | 2.12E-11 |
| 0.00022  | -0.18787 | 4.40E-05 | -0.1801  | 9.10E-05 | -0.19593  | 2.01E-05 | -0.43702 | 3.34E-23 |
| 1.46E-05 | -0.21815 | 1.95E-06 | -0.24933 | 4.76E-08 | -0.26053  | 1.10E-08 | -0.29716 | 5.64E-11 |
| 0.00243  | -0.18015 | 9.05E-05 | -0.15917 | 0.00056  | -0.19065  | 3.37E-05 | -0.14289 | 0.00197  |
| 1.24E-07 | -0.23025 | 4.90E-07 | -0.27807 | 9.72E-10 | -0.27674  | 1.18E-09 | -0.37315 | 7.08E-17 |
| 0.00348  | -0.12302 | 0.00778  | -0.15837 | 0.00059  | -0.17381  | 0.00016  | -0.26428 | 6.66E-09 |
| 0.24492  | -0.16671 | 0.0003   | -0.14129 | 0.00221  | -0.13247  | 0.00413  | -0.30234 | 2.51E-11 |
| 0.00226  | -0.1467  | 0.00148  | -0.17766 | 0.00011  | -0.19008  | 3.56E-05 | -0.21052 | 4.46E-06 |
| 0.15657  | -0.11933 | 0.00985  | -0.13574 | 0.00329  | -0.15565  | 0.00074  | -0.18985 | 3.64E-05 |
| 0.59535  | -0.05536 | 0.23244  | -0.10559 | 0.02248  | -0.08758  | 0.05859  | -0.34612 | 1.37E-14 |
| 4.67E-07 | -0.22313 | 1.11E-06 | -0.3445  | 1.85E-14 | -0.32979  | 2.61E-13 | -0.22898 | 5.68E-07 |
| 2.36E-05 | -0.16033 | 0.00051  | -0.21898 | 1.77E-06 | -0.23529  | 2.70E-07 | -0.34781 | 1.00E-14 |
| 0.00469  | -0.14395 | 0.00182  | -0.17509 | 0.00014  | -0.18487  | 5.84E-05 | -0.21998 | 1.59E-06 |
| 0.03467  | -0.10702 | 0.02071  | -0.1757  | 0.00014  | -0.16421  | 0.00037  | -0.29577 | 6.98E-11 |
| 1.04E-05 | -0.17732 | 0.00012  | -0.2118  | 3.89E-06 | -0.23584  | 2.52E-07 | -0.27241 | 2.17E-09 |
| 0.54362  | -0.06136 | 0.18562  | -0.04074 | 0.37969  | -0.04663  | 0.31459  | -0.24113 | 1.33E-07 |
| 0.00031  | -0.08473 | 0.06733  | -0.17413 | 0.00016  | -0.17742  | 0.00012  | -0.33898 | 5.08E-14 |
| 0.69851  | -0.14683 | 0.00146  | -0.0874  | 0.05912  | -0.09004  | 0.05182  | -0.21748 | 2.09E-06 |
| 0.21508  | -0.03099 | 0.50415  | -0.04825 | 0.29815  | -0.03376  | 0.4667   | -0.10429 | 0.0242   |
| 1.47E-05 | -0.16755 | 0.00028  | -0.22755 | 6.71E-07 | -0.24857  | 5.24E-08 | -0.29854 | 4.55E-11 |
| 0.02974  | -0.09264 | 0.04541  | -0.10658 | 0.02125  | -0.12623  | 0.0063   | -0.28458 | 3.77E-10 |
| 0.98383  | 0.035819 | 0.43998  | 0.051137 | 0.2701   | 0.029488  | 0.52499  | -0.24977 | 4.50E-08 |
| 1.24E-14 | -0.29849 | 4.58E-11 | -0.37091 | 1.12E-16 | -0.40467  | 7.92E-20 | -0.52702 | 9.73E-35 |
| 0.00012  | -0.15558 | 0.00074  | -0.25445 | 2.46E-08 | -0.23805  | 1.93E-07 | -0.30272 | 2.36E-11 |
| 0.01983  | -0.21345 | 3.25E-06 | -0.19466 | 2.28E-05 | -0.18748  | 4.57E-05 | -0.37861 | 2.30E-17 |
| 0.36214  | -0.06884 | 0.13744  | -0.07232 | 0.11859  | -0.08302  | 0.07307  | -0.24016 | 1.50E-07 |
| 0.31857  | 0.044179 | 0.34078  | 0.018935 | 0.68317  | 0.001598  | 0.97252  | -0.16766 | 0.00027  |
| 3.42E-08 | -0.11707 | 0.01135  | -0.22841 | 6.08E-07 | -0.25601  | 2.01E-08 | -0.45103 | 8.82E-25 |
| 1.66E-08 | -0.24386 | 9.48E-08 | -0.3072  | 1.16E-11 | -0.33095  | 2.13E-13 | -0.47521 | 1.10E-27 |
| 5.70E-13 | -0.21181 | 3.88E-06 | -0.30207 | 2.62E-11 | -0.35471  | 2.72E-15 | -0.45508 | 2.99E-25 |
| 0.01651  | -0.04951 | 0.2857   | -0.08069 | 0.08151  | -0.11023  | 0.01717  | -0.15047 | 0.00111  |
| 0.00023  | -0.14714 | 0.00143  | -0.26563 | 5.55E-09 | -0.21407  | 3.04E-06 | -0.25829 | 1.49E-08 |
| 0.00372  | -0.01418 | 0.75986  | -0.14461 | 0.00173  | -0.12023  | 0.0093   | -0.31362 | 4.06E-12 |
| 5.80E-08 | -0.18586 | 5.32E-05 | -0.22601 | 8.01E-07 | -0.26431  | 6.64E-09 | -0.36414 | 4.33E-16 |
| 0.41087  | 0.043472 | 0.34858  | 0.039773 | 0.39115  | 0.006536  | 0.88798  | -0.25068 | 4.00E-08 |
| 0.00164  | -0.03995 | 0.38907  | -0.13035 | 0.00478  | -0.1416   | 0.00216  | -0.23495 | 2.81E-07 |
| 7.55E-16 | -0.30178 | 2.74E-11 | -0.38299 | 9.19E-18 | -0.42256  | 1.19E-21 | -0.48838 | 2.31E-29 |
| 9.01E-06 | -0.12862 | 0.00538  | -0.23299 | 3.55E-07 | -0.23099  | 4.49E-07 | -0.36738 | 2.28E-16 |
| 0.00017  | -0.14681 | 0.00147  | -0.217   | 2.21E-06 | -0.21892  | 1.79E-06 | -0.3445  | 1.85E-14 |
| 0.36409  | -0.36734 | 2.29E-16 | -0.37903 | 2.11E-17 | -0.32741  | 3.94E-13 | 0.018555 | 0.6892   |
| 0.52266  | -0.28092 | 6.43E-10 | -0.22401 | 1.01E-06 | -0.21125  | 4.13E-06 | 0.110132 | 0.01727  |



|          |          |          |          |          |          |          |          |          |
|----------|----------|----------|----------|----------|----------|----------|----------|----------|
| 2.31E-09 | -0.04721 | 0.30867  | -0.41706 | 4.45E-21 | -0.33263 | 1.58E-13 | 0.049923 | 0.28165  |
| 8.47E-09 | -0.02327 | 0.61592  | -0.4485  | 1.72E-24 | -0.32379 | 7.36E-13 | -0.16918 | 0.00024  |
| 0.64286  | -0.14028 | 0.00238  | -0.35591 | 2.16E-15 | -0.1959  | 2.01E-05 | -0.0438  | 0.34492  |
| 1.12E-06 | -0.24451 | 8.74E-08 | -0.2849  | 3.59E-10 | -0.28684 | 2.70E-10 | -0.14311 | 0.00193  |
| 2.24E-06 | -0.20796 | 5.85E-06 | -0.39846 | 3.20E-19 | -0.34746 | 1.07E-14 | -0.25918 | 1.32E-08 |
| 0.91685  | 0.033305 | 0.47276  | -0.14997 | 0.00115  | -0.09227 | 0.04628  | 0.118566 | 0.01034  |
| 0.03469  | -0.22921 | 5.53E-07 | -0.18031 | 8.92E-05 | -0.08792 | 0.05762  | 0.257143 | 1.73E-08 |
| 0.00054  | -0.2176  | 2.07E-06 | -0.51443 | 6.54E-33 | -0.3844  | 6.82E-18 | 0.121152 | 0.00877  |
| 2.39E-06 | -0.16735 | 0.00028  | -0.31058 | 6.69E-12 | -0.25769 | 1.61E-08 | -0.19937 | 1.42E-05 |
| 0.00104  | -0.08205 | 0.0765   | -0.2177  | 2.05E-06 | -0.17045 | 0.00022  | 0.224669 | 9.34E-07 |
| 0.0811   | -0.03076 | 0.50721  | -0.10653 | 0.02131  | -0.0858  | 0.06393  | 0.06516  | 0.15977  |
| 3.83E-16 | -0.26622 | 5.12E-09 | -0.59754 | 1.55E-46 | -0.51066 | 2.23E-32 | -0.05595 | 0.22751  |
| 0.0613   | -0.51334 | 9.35E-33 | -0.54781 | 6.28E-38 | -0.42298 | 1.08E-21 | 0.160804 | 0.00049  |
| 9.59E-11 | -0.20494 | 8.03E-06 | -0.41806 | 3.52E-21 | -0.40324 | 1.09E-19 | 0.184482 | 6.06E-05 |
| 0.04989  | -0.26602 | 5.25E-09 | -0.23595 | 2.49E-07 | -0.16387 | 0.00038  | 0.232511 | 3.76E-07 |
| 0.00133  | 0.05221  | 0.26016  | -0.18975 | 3.68E-05 | -0.16905 | 0.00024  | 0.18792  | 4.38E-05 |
| 0.31414  | -0.05778 | 0.21263  | -0.32448 | 6.55E-13 | -0.20234 | 1.05E-05 | 0.111721 | 0.01572  |
| 0.01146  | -0.53173 | 1.93E-35 | -0.46108 | 5.85E-26 | -0.41549 | 6.46E-21 | -0.01519 | 0.74335  |
| 7.69E-10 | -0.26512 | 5.94E-09 | -0.58492 | 3.28E-44 | -0.46354 | 2.97E-26 | -0.08043 | 0.0825   |
| 0.00357  | 0.106868 | 0.02089  | 0.33778  | 6.31E-14 | 0.219443 | 1.68E-06 | -0.06597 | 0.15461  |
| 1.04E-07 | -0.5368  | 3.28E-36 | -0.53083 | 2.64E-35 | -0.49962 | 7.41E-31 | -0.01368 | 0.76808  |
| 0.00016  | -0.10576 | 0.02226  | -0.31955 | 1.51E-12 | -0.25946 | 1.27E-08 | 0.291457 | 1.35E-10 |
| 1.08E-14 | -0.36404 | 4.42E-16 | -0.53716 | 2.89E-36 | -0.51212 | 1.39E-32 | -0.0388  | 0.40284  |
| 2.47E-07 | 0.125013 | 0.00683  | 0.308947 | 8.72E-12 | 0.271848 | 2.35E-09 | 0.122048 | 0.00828  |
| 0.52276  | -0.31503 | 3.22E-12 | -0.28686 | 2.69E-10 | -0.21798 | 1.98E-06 | -0.12278 | 0.0079   |
| 2.94E-09 | -0.34825 | 9.22E-15 | -0.43057 | 1.68E-22 | -0.4018  | 1.52E-19 | -0.30104 | 3.08E-11 |
| 0.33523  | 0.121719 | 0.00846  | -0.08873 | 0.05534  | -0.03012 | 0.51612  | 0.039859 | 0.39013  |
| 0.16631  | -0.2253  | 8.70E-07 | -0.35337 | 3.51E-15 | -0.22473 | 9.27E-07 | -0.01676 | 0.71789  |
| 0.00202  | -0.41517 | 6.96E-21 | -0.51988 | 1.08E-33 | -0.41545 | 6.52E-21 | -0.06321 | 0.17266  |
| 7.32E-08 | -0.17636 | 0.00013  | -0.51362 | 8.52E-33 | -0.36016 | 9.47E-16 | -0.16581 | 0.00032  |
| 0.91764  | -0.26761 | 4.23E-09 | -0.33841 | 5.63E-14 | -0.2104  | 4.52E-06 | -0.06483 | 0.16189  |
| 3.52E-07 | -0.37956 | 1.89E-17 | -0.57872 | 4.19E-43 | -0.48223 | 1.44E-28 | 0.108739 | 0.01875  |
| 0.91883  | -0.31084 | 6.41E-12 | -0.45557 | 2.62E-25 | -0.32306 | 8.34E-13 | 0.122458 | 0.00807  |
| 9.62E-08 | 0.362801 | 5.65E-16 | 0.406878 | 4.78E-20 | 0.414588 | 7.99E-21 | -0.00711 | 0.87828  |
| 2.18E-31 | -0.42992 | 1.97E-22 | -0.67507 | 2.07E-63 | -0.6609  | 6.00E-60 | -0.36875 | 1.73E-16 |
| 1.22E-10 | -0.41526 | 6.82E-21 | -0.55499 | 4.41E-39 | -0.48555 | 5.37E-29 | -0.0454  | 0.32763  |
| 0.04026  | -0.14545 | 0.00162  | -0.29955 | 3.89E-11 | -0.23501 | 2.79E-07 | 0.117668 | 0.01093  |
| 0.00156  | 0.289624 | 1.78E-10 | 0.599555 | 6.45E-47 | 0.400389 | 2.08E-19 | 0.067359 | 0.14611  |
| 0.002    | -0.23886 | 1.75E-07 | -0.22726 | 6.94E-07 | -0.1307  | 0.00467  | 0.340666 | 3.74E-14 |
| 0.00127  | -0.06707 | 0.14786  | -0.27135 | 2.52E-09 | -0.16359 | 0.00039  | -0.0402  | 0.38608  |
| 1.09E-05 | -0.36844 | 1.84E-16 | -0.62523 | 5.12E-52 | -0.47058 | 4.14E-27 | 0.011374 | 0.80634  |
| 0.04261  | -0.10779 | 0.01981  | -0.07428 | 0.10889  | -0.05711 | 0.21801  | -0.13223 | 0.0042   |
| 7.30E-14 | -0.28193 | 5.56E-10 | -0.57805 | 5.50E-43 | -0.51925 | 1.33E-33 | -0.15899 | 0.00056  |
| 6.77E-17 | -0.53855 | 1.77E-36 | -0.59571 | 3.42E-46 | -0.59381 | 7.73E-46 | -0.24905 | 4.93E-08 |
| 0.97434  | -0.10569 | 0.02235  | -0.25638 | 1.91E-08 | -0.1333  | 0.0039   | 0.131381 | 0.00446  |

|          |          |          |          |          |          |          |          |          |
|----------|----------|----------|----------|----------|----------|----------|----------|----------|
| 0.07637  | -0.19859 | 1.54E-05 | -0.26086 | 1.06E-08 | -0.21845 | 1.88E-06 | -0.00961 | 0.83592  |
| 8.92E-07 | -0.12722 | 0.0059   | -0.32682 | 4.37E-13 | -0.26084 | 1.06E-08 | -0.10417 | 0.02437  |
| 0.00072  | -0.55688 | 2.17E-39 | -0.56294 | 2.15E-40 | -0.50817 | 4.97E-32 | -0.26608 | 5.21E-09 |
| 0.09997  | -0.36829 | 1.89E-16 | -0.58388 | 5.06E-44 | -0.39669 | 4.75E-19 | 0.140919 | 0.00227  |
| 6.97E-09 | -0.3274  | 3.95E-13 | -0.4429  | 7.41E-24 | -0.40283 | 1.20E-19 | 0.0952   | 0.03974  |
| 5.28E-18 | -0.56833 | 2.65E-41 | -0.72754 | 4.13E-78 | -0.67574 | 1.41E-63 | -0.081   | 0.08036  |
| 0.20733  | -0.22466 | 9.36E-07 | -0.29707 | 5.71E-11 | -0.25095 | 3.87E-08 | 0.165342 | 0.00033  |
| 1.07E-34 | -0.50109 | 4.68E-31 | -0.67134 | 1.76E-62 | -0.66651 | 2.69E-61 | -0.29014 | 1.65E-10 |
| 0.99156  | -0.35779 | 1.50E-15 | -0.42901 | 2.47E-22 | -0.29526 | 7.55E-11 | 0.138026 | 0.0028   |
| 0.00021  | -0.36413 | 4.34E-16 | -0.38729 | 3.68E-18 | -0.37542 | 4.45E-17 | -0.02356 | 0.61157  |
| 0.00101  | 0.024999 | 0.58997  | -0.32052 | 1.28E-12 | -0.20001 | 1.33E-05 | -0.02136 | 0.64516  |
| 0.63533  | -0.30418 | 1.87E-11 | -0.28509 | 3.50E-10 | -0.2122  | 3.73E-06 | 0.133978 | 0.00372  |
| 0.02894  | -0.27085 | 2.70E-09 | -0.43124 | 1.42E-22 | -0.35881 | 1.23E-15 | -0.19789 | 1.65E-05 |
| 0.0002   | -0.25405 | 2.59E-08 | -0.33355 | 1.34E-13 | -0.29591 | 6.83E-11 | 0.165553 | 0.00033  |
| 1.16E-33 | 0.19198  | 2.96E-05 | 0.216237 | 2.40E-06 | 0.358749 | 1.25E-15 | 0.252408 | 3.21E-08 |
| 0.97788  | 0.068264 | 0.14076  | -0.21356 | 3.22E-06 | -0.12983 | 0.00495  | -0.03269 | 0.481    |
| 0.73808  | -0.25583 | 2.05E-08 | -0.25007 | 4.33E-08 | -0.17744 | 0.00012  | 0.223373 | 1.08E-06 |
| 3.19E-12 | -0.35586 | 2.18E-15 | -0.51687 | 2.93E-33 | -0.50937 | 3.38E-32 | -0.2206  | 1.48E-06 |
| 0.01174  | -0.30372 | 2.02E-11 | -0.3939  | 8.76E-19 | -0.33026 | 2.40E-13 | 0.205589 | 7.50E-06 |
| 0.04199  | -0.27483 | 1.54E-09 | -0.26962 | 3.20E-09 | -0.17063 | 0.00021  | -0.05698 | 0.21908  |
| 5.77E-05 | 0.190364 | 3.46E-05 | 0.349556 | 7.22E-15 | 0.253527 | 2.77E-08 | 0.01725  | 0.71003  |
| 1.31E-06 | -0.21719 | 2.16E-06 | -0.50945 | 3.30E-32 | -0.39133 | 1.54E-18 | -0.26464 | 6.35E-09 |
| 4.30E-15 | 0.530507 | 2.94E-35 | 0.747299 | 1.41E-84 | 0.632449 | 1.54E-53 | 0.069866 | 0.13165  |
| 1.54E-10 | -0.48612 | 4.53E-29 | -0.59773 | 1.43E-46 | -0.53118 | 2.33E-35 | -0.03138 | 0.49872  |
| 0.00806  | -0.01326 | 0.77498  | -0.42554 | 5.79E-22 | -0.26532 | 5.79E-09 | 0.040857 | 0.37835  |
| 3.21E-09 | -0.079   | 0.08813  | -0.1481  | 0.00133  | 0.078689 | 0.0894   | 0.143011 | 0.00195  |
| 5.74E-11 | -0.02554 | 0.58194  | -0.29218 | 1.21E-10 | -0.31573 | 2.87E-12 | 0.016783 | 0.71755  |
| 4.62E-11 | -0.21151 | 4.01E-06 | -0.49215 | 7.37E-30 | -0.42054 | 1.94E-21 | -0.04379 | 0.34502  |
| 0.15916  | -0.15003 | 0.00115  | -0.22419 | 9.87E-07 | -0.13871 | 0.00266  | 0.180905 | 8.45E-05 |
| 4.37E-18 | 0.480918 | 2.11E-28 | 0.683671 | 1.32E-65 | 0.630211 | 4.60E-53 | 0.076332 | 0.09945  |
| 0.32981  | 0.079443 | 0.08637  | -0.27354 | 1.85E-09 | -0.12233 | 0.00813  | 0.118224 | 0.01056  |
| 0.00597  | 0.05574  | 0.22927  | 0.27029  | 2.92E-09 | 0.074509 | 0.10782  | -0.40871 | 3.14E-20 |
| 2.32E-18 | 0.229885 | 5.11E-07 | 0.38978  | 2.15E-18 | 0.371655 | 9.61E-17 | 0.161142 | 0.00047  |
| 1.48E-23 | 0.472424 | 2.45E-27 | 0.624268 | 8.10E-52 | 0.58789  | 9.51E-45 | -0.01777 | 0.70167  |
| 0.05245  | -0.20832 | 5.64E-06 | -0.37188 | 9.18E-17 | -0.25878 | 1.39E-08 | 0.18776  | 4.45E-05 |
| 0.85987  | 0.092868 | 0.04487  | 0.31953  | 1.52E-12 | 0.162475 | 0.00042  | -0.04994 | 0.28145  |
| 0.03751  | -0.14898 | 0.00124  | -0.28589 | 3.11E-10 | -0.2584  | 1.46E-08 | -0.01976 | 0.67018  |
| 2.58E-06 | -0.00315 | 0.94581  | 0.259189 | 1.32E-08 | 0.201437 | 1.15E-05 | -0.03073 | 0.5077   |
| 1.23E-08 | 0.179765 | 9.38E-05 | 0.391402 | 1.51E-18 | 0.297519 | 5.33E-11 | 0.040517 | 0.38234  |
| 3.30E-14 | 0.545168 | 1.65E-37 | 0.540321 | 9.40E-37 | 0.546742 | 9.29E-38 | 0.329793 | 2.60E-13 |
| 4.36E-06 | -0.38546 | 5.44E-18 | -0.46829 | 7.89E-27 | -0.41208 | 1.44E-20 | -0.1252  | 0.00675  |
| 0.39568  | 0.025076 | 0.58883  | -0.19538 | 2.12E-05 | -0.14105 | 0.00225  | -0.13536 | 0.00338  |
| 0.01049  | -0.34591 | 1.43E-14 | -0.37993 | 1.75E-17 | -0.32815 | 3.47E-13 | -0.03504 | 0.44997  |
| 0.09154  | -0.0279  | 0.54754  | -0.15749 | 0.00064  | -0.06078 | 0.18982  | 0.263857 | 7.05E-09 |
| 5.59E-08 | -0.41166 | 1.59E-20 | -0.48258 | 1.29E-28 | -0.46926 | 6.01E-27 | -0.10309 | 0.02589  |

|          |          |          |          |          |          |          |          |          |
|----------|----------|----------|----------|----------|----------|----------|----------|----------|
| 0.00013  | 0.336368 | 8.13E-14 | 0.383488 | 8.26E-18 | 0.383242 | 8.70E-18 | -0.16463 | 0.00035  |
| 0.00058  | -0.32591 | 5.12E-13 | -0.50318 | 2.43E-31 | -0.42281 | 1.12E-21 | 0.010424 | 0.82224  |
| 4.99E-24 | 0.555841 | 3.20E-39 | 0.753168 | 1.30E-86 | 0.668897 | 7.04E-62 | 0.095758 | 0.03859  |
| 4.35E-06 | 0.263636 | 7.27E-09 | 0.367226 | 2.35E-16 | 0.336576 | 7.83E-14 | 0.143481 | 0.00188  |
| 0.86157  | 0.368232 | 1.92E-16 | 0.379917 | 1.75E-17 | 0.241852 | 1.22E-07 | 0.161141 | 0.00047  |
| 3.99E-14 | 0.162839 | 0.00041  | 0.476163 | 8.39E-28 | 0.398816 | 2.96E-19 | -0.08891 | 0.05485  |
| 1.12E-09 | 0.436483 | 3.82E-23 | 0.383138 | 8.90E-18 | 0.435504 | 4.90E-23 | 0.068154 | 0.1414   |
| 6.25E-06 | -0.44678 | 2.70E-24 | -0.50878 | 4.08E-32 | -0.47978 | 2.94E-28 | -0.21959 | 1.66E-06 |
| 1.83E-06 | 0.115584 | 0.01244  | 0.356856 | 1.80E-15 | 0.297208 | 5.59E-11 | -0.09241 | 0.04594  |
| 2.77E-18 | -0.27432 | 1.66E-09 | -0.53967 | 1.19E-36 | -0.52585 | 1.45E-34 | -0.18379 | 6.46E-05 |
| 9.90E-06 | -0.47987 | 2.86E-28 | -0.51461 | 6.18E-33 | -0.46512 | 1.91E-26 | 0.069575 | 0.13327  |
| 6.26E-21 | 0.421948 | 1.38E-21 | 0.610242 | 5.53E-49 | 0.564149 | 1.35E-40 | 0.025696 | 0.57965  |
| 2.28E-10 | 0.559341 | 8.53E-40 | 0.490053 | 1.39E-29 | 0.461937 | 4.62E-26 | 0.148133 | 0.00133  |
| 8.45E-08 | -0.3739  | 6.08E-17 | -0.39714 | 4.29E-19 | -0.40289 | 1.18E-19 | 0.016148 | 0.7278   |
| 0.29284  | -0.01585 | 0.73256  | -0.1868  | 4.87E-05 | -0.10942 | 0.01801  | -0.09891 | 0.0326   |
| 0.07367  | -0.06287 | 0.175    | -0.23193 | 4.02E-07 | -0.1815  | 8.00E-05 | -0.18626 | 5.13E-05 |
| 0.27828  | -0.254   | 2.61E-08 | -0.3505  | 6.05E-15 | -0.28984 | 1.72E-10 | 0.041517 | 0.37069  |
| 2.59E-05 | 0.453031 | 5.17E-25 | 0.365165 | 3.54E-16 | 0.352282 | 4.32E-15 | 0.269855 | 3.10E-09 |
| 0.48508  | -0.27041 | 2.87E-09 | -0.33676 | 7.58E-14 | -0.27035 | 2.89E-09 | 0.304195 | 1.87E-11 |
| 0.14611  | 0.163079 | 0.0004   | 0.506817 | 7.66E-32 | 0.28404  | 4.08E-10 | -0.07245 | 0.11793  |
| 0.00015  | -0.26657 | 4.87E-09 | -0.39458 | 7.55E-19 | -0.36097 | 8.10E-16 | 0.174509 | 0.00015  |
| 0.00346  | 0.07638  | 0.09924  | -0.08055 | 0.08205  | 0.025839 | 0.57754  | -0.02403 | 0.60448  |
| 1.14E-09 | -0.28279 | 4.90E-10 | -0.4811  | 2.00E-28 | -0.42627 | 4.85E-22 | -0.22362 | 1.05E-06 |
| 8.47E-26 | 0.313934 | 3.86E-12 | 0.484944 | 6.43E-29 | 0.530436 | 3.02E-35 | 0.065914 | 0.15499  |
| 0.70186  | -0.10332 | 0.02557  | -0.24066 | 1.41E-07 | -0.19156 | 3.08E-05 | 0.284359 | 3.89E-10 |
| 4.12E-19 | -0.31547 | 2.99E-12 | -0.50441 | 1.64E-31 | -0.45078 | 9.42E-25 | -0.22057 | 1.48E-06 |
| 0.00029  | -0.24319 | 1.03E-07 | -0.30276 | 2.35E-11 | -0.15036 | 0.00112  | 0.36711  | 2.40E-16 |
| 0.03086  | -0.16563 | 0.00032  | -0.49783 | 1.29E-30 | -0.34751 | 1.06E-14 | 0.091383 | 0.04842  |
| 7.73E-07 | 0.285083 | 3.50E-10 | 0.676917 | 7.09E-64 | 0.437531 | 2.93E-23 | 0.134936 | 0.00348  |
| 7.27E-13 | -0.19637 | 1.92E-05 | -0.40692 | 4.73E-20 | -0.35817 | 1.39E-15 | -0.34441 | 1.88E-14 |
| 4.07E-09 | 0.581746 | 1.22E-43 | 0.523032 | 3.76E-34 | 0.538908 | 1.56E-36 | 0.142066 | 0.00209  |
| 0.17502  | -0.25568 | 2.10E-08 | -0.23639 | 2.36E-07 | -0.14984 | 0.00116  | -0.0754  | 0.10368  |
| 3.80E-13 | -0.02666 | 0.56548  | -0.24242 | 1.13E-07 | -0.2976  | 5.27E-11 | -0.11447 | 0.01332  |
| 9.62E-37 | -0.28878 | 2.02E-10 | -0.64793 | 6.10E-57 | -0.60262 | 1.68E-47 | -0.24887 | 5.04E-08 |
| 0.00034  | -0.17247 | 0.00018  | -0.28344 | 4.46E-10 | -0.24744 | 6.05E-08 | -0.00906 | 0.84525  |
| 7.51E-14 | -0.2393  | 1.66E-07 | -0.57261 | 4.90E-42 | -0.46009 | 7.67E-26 | -0.26038 | 1.13E-08 |
| 0.00375  | 0.117479 | 0.01106  | 0.242779 | 1.08E-07 | 0.195622 | 2.07E-05 | 0.097148 | 0.03584  |
| 5.92E-11 | -0.48171 | 1.67E-28 | -0.50507 | 1.33E-31 | -0.50913 | 3.65E-32 | -0.20706 | 6.44E-06 |
| 7.44E-09 | -0.27736 | 1.08E-09 | -0.55002 | 2.79E-38 | -0.45307 | 5.12E-25 | 0.087797 | 0.05797  |
| 0.00296  | -0.12527 | 0.00672  | -0.25922 | 1.31E-08 | -0.24669 | 6.65E-08 | 0.210451 | 4.49E-06 |
| 0.26995  | -0.32491 | 6.08E-13 | -0.28973 | 1.75E-10 | -0.23265 | 3.70E-07 | -0.01131 | 0.80743  |
| 1.28E-05 | 0.134528 | 0.00358  | 0.364383 | 4.13E-16 | 0.269598 | 3.21E-09 | 0.176409 | 0.00013  |
| 0.04534  | -0.17498 | 0.00014  | -0.30216 | 2.58E-11 | -0.2399  | 1.54E-07 | 0.169884 | 0.00023  |
| 0.00707  | -0.21744 | 2.10E-06 | -0.45406 | 3.92E-25 | -0.33715 | 7.07E-14 | -0.04589 | 0.32244  |
| 2.32E-08 | -0.39651 | 4.94E-19 | -0.5706  | 1.09E-41 | -0.49517 | 2.94E-30 | 0.137431 | 0.00292  |

|          |          |          |          |          |          |          |          |          |
|----------|----------|----------|----------|----------|----------|----------|----------|----------|
| 0.00019  | -0.31599 | 2.74E-12 | -0.47378 | 1.66E-27 | -0.39474 | 7.29E-19 | -0.26298 | 7.94E-09 |
| 3.32E-05 | -0.15673 | 0.00068  | -0.22884 | 5.78E-07 | -0.03334 | 0.47228  | -0.00125 | 0.97848  |
| 8.23E-05 | -0.09786 | 0.0345   | -0.27228 | 2.21E-09 | -0.26225 | 8.76E-09 | 0.210874 | 4.29E-06 |
| 3.70E-09 | -0.38264 | 9.88E-18 | -0.46091 | 6.13E-26 | -0.4611  | 5.82E-26 | -0.27725 | 1.09E-09 |
| 3.26E-09 | 0.076981 | 0.0966   | -0.14397 | 0.00181  | 0.052918 | 0.25375  | -0.0046  | 0.92106  |
| 2.17E-06 | -0.25448 | 2.45E-08 | -0.32386 | 7.28E-13 | -0.34096 | 3.54E-14 | -0.04489 | 0.33303  |
| 1.70E-13 | -0.20739 | 6.21E-06 | -0.58339 | 6.18E-44 | -0.48416 | 8.12E-29 | -0.25956 | 1.26E-08 |
| 0.73358  | -0.11155 | 0.01588  | -0.28343 | 4.46E-10 | -0.17248 | 0.00018  | 0.054778 | 0.23741  |
| 0.1381   | -0.11473 | 0.0131   | -0.2727  | 2.08E-09 | -0.13781 | 0.00284  | -0.20012 | 1.32E-05 |
| 0.19169  | -0.37341 | 6.73E-17 | -0.28403 | 4.09E-10 | -0.19322 | 2.62E-05 | -0.10268 | 0.0265   |
| 0.00755  | -0.09558 | 0.03895  | -0.19017 | 3.53E-05 | -0.06496 | 0.16106  | 0.415797 | 6.01E-21 |
| 0.0115   | -0.40984 | 2.42E-20 | -0.52155 | 6.19E-34 | -0.42291 | 1.10E-21 | -0.10771 | 0.01991  |
| 0.00071  | -0.30773 | 1.06E-11 | -0.4591  | 1.01E-25 | -0.36098 | 8.08E-16 | 0.094711 | 0.04077  |
| 1.18E-20 | 0.274276 | 1.67E-09 | 0.538296 | 1.93E-36 | 0.472014 | 2.75E-27 | 0.035955 | 0.43824  |
| 5.56E-18 | -0.32377 | 7.38E-13 | -0.63115 | 2.90E-53 | -0.53137 | 2.18E-35 | -0.14755 | 0.00139  |
| 5.19E-11 | -0.44729 | 2.36E-24 | -0.56528 | 8.72E-41 | -0.53934 | 1.33E-36 | -0.05804 | 0.21058  |
| 3.95E-13 | -0.37941 | 1.95E-17 | -0.7006  | 3.67E-70 | -0.58093 | 1.70E-43 | 0.062532 | 0.17733  |
| 0.91511  | -0.05967 | 0.19806  | -0.23783 | 1.99E-07 | -0.14078 | 0.00229  | 0.397085 | 4.35E-19 |
| 1.13E-05 | 0.205691 | 7.43E-06 | 0.046724 | 0.31367  | 0.179747 | 9.39E-05 | 0.377051 | 3.18E-17 |
| 0.00012  | -0.20338 | 9.44E-06 | -0.35508 | 2.53E-15 | -0.29698 | 5.79E-11 | 0.122401 | 0.0081   |
| 0.94315  | -0.10074 | 0.02949  | -0.30516 | 1.60E-11 | -0.16141 | 0.00046  | -0.18578 | 5.37E-05 |
| 0.00014  | 0.10459  | 0.0238   | -0.0875  | 0.05884  | 0.048268 | 0.29792  | -0.18846 | 4.16E-05 |
| 2.63E-09 | -0.16326 | 0.0004   | -0.3245  | 6.52E-13 | -0.34951 | 7.29E-15 | -0.2257  | 8.30E-07 |
| 3.41E-11 | -0.37774 | 2.75E-17 | -0.52128 | 6.77E-34 | -0.48825 | 2.39E-29 | -0.04057 | 0.3817   |
| 9.43E-25 | -0.41294 | 1.18E-20 | -0.69692 | 3.82E-69 | -0.65337 | 3.47E-58 | -0.10992 | 0.01749  |
| 5.59E-16 | -0.28835 | 2.16E-10 | -0.4848  | 6.70E-29 | -0.48019 | 2.61E-28 | -0.01025 | 0.82523  |
| 0.00334  | -0.19064 | 3.37E-05 | -0.34436 | 1.90E-14 | -0.25037 | 4.17E-08 | 0.129566 | 0.00504  |
| 4.01E-14 | -0.30203 | 2.63E-11 | -0.55258 | 1.08E-38 | -0.4961  | 2.20E-30 | 0.009227 | 0.84237  |
| 0.09752  | -0.14829 | 0.00131  | -0.29849 | 4.59E-11 | -0.22434 | 9.70E-07 | 0.56069  | 5.10E-40 |
| 0.0304   | 0.202011 | 1.09E-05 | -0.23833 | 1.87E-07 | -0.02723 | 0.55725  | 0.193851 | 2.46E-05 |
| 0.03581  | -0.13277 | 0.00405  | -0.29854 | 4.55E-11 | -0.17758 | 0.00011  | -0.02074 | 0.65491  |
| 9.01E-25 | -0.40283 | 1.20E-19 | -0.63488 | 4.63E-54 | -0.60402 | 9.02E-48 | 0.137245 | 0.00296  |
| 0.65447  | -0.18889 | 3.99E-05 | -0.23146 | 4.25E-07 | -0.15722 | 0.00065  | -0.05537 | 0.23234  |
| 0.06641  | -0.38991 | 2.09E-18 | -0.38373 | 7.86E-18 | -0.31624 | 2.63E-12 | -0.09317 | 0.04417  |
| 1.56E-14 | 0.218815 | 1.81E-06 | 0.629543 | 6.37E-53 | 0.461899 | 4.67E-26 | -0.02186 | 0.63745  |
| 2.63E-10 | -0.3411  | 3.46E-14 | -0.42237 | 1.25E-21 | -0.40657 | 5.13E-20 | -0.04098 | 0.37688  |
| 4.42E-06 | -0.17483 | 0.00015  | -0.35595 | 2.14E-15 | -0.32614 | 4.91E-13 | -0.07389 | 0.11077  |
| 8.12E-12 | -0.4534  | 4.68E-25 | -0.52864 | 5.60E-35 | -0.53475 | 6.74E-36 | -0.11692 | 0.01145  |
| 0.01831  | -0.12553 | 0.0066   | -0.27791 | 9.94E-10 | -0.20986 | 4.78E-06 | 0.316689 | 2.44E-12 |
| 0.00022  | -0.2972  | 5.60E-11 | -0.3916  | 1.45E-18 | -0.35841 | 1.33E-15 | -0.11451 | 0.01328  |
| 0.02082  | -0.08493 | 0.06668  | -0.35832 | 1.36E-15 | -0.24301 | 1.05E-07 | -0.14059 | 0.00233  |
| 6.51E-15 | -0.33765 | 6.46E-14 | -0.45619 | 2.21E-25 | -0.46066 | 6.56E-26 | 0.090373 | 0.05097  |
| 0.30259  | -0.24085 | 1.37E-07 | -0.49912 | 8.66E-31 | -0.33305 | 1.47E-13 | 0.005783 | 0.9008   |
| 0.00113  | -0.20874 | 5.39E-06 | -0.19785 | 1.66E-05 | -0.1174  | 0.01111  | 0.08413  | 0.06931  |
| 4.32E-06 | 0.024073 | 0.60383  | 0.320535 | 1.28E-12 | 0.027717 | 0.55018  | -0.09913 | 0.03222  |

|          |          |          |          |          |          |          |           |          |
|----------|----------|----------|----------|----------|----------|----------|-----------|----------|
| 0.01713  | -0.23095 | 4.51E-07 | -0.21027 | 4.58E-06 | -0.24744 | 6.05E-08 | 0.028328  | 0.54143  |
| 0.0419   | -0.28077 | 6.58E-10 | -0.27278 | 2.06E-09 | -0.22913 | 5.58E-07 | 0.368395  | 1.86E-16 |
| 4.17E-17 | -0.45789 | 1.40E-25 | -0.59237 | 1.43E-45 | -0.60331 | 1.24E-47 | -0.08776  | 0.05808  |
| 3.22E-10 | 0.413826 | 9.55E-21 | 0.586479 | 1.72E-44 | 0.514523 | 6.34E-33 | 0.018453  | 0.69083  |
| 1.12E-12 | -0.53824 | 1.97E-36 | -0.63001 | 5.08E-53 | -0.59418 | 6.61E-46 | 0.009751  | 0.83354  |
| 4.16E-05 | -0.3424  | 2.73E-14 | -0.55444 | 5.41E-39 | -0.44529 | 3.99E-24 | -0.29601  | 6.73E-11 |
| 0.57505  | -0.1817  | 7.85E-05 | -0.25958 | 1.25E-08 | -0.2021  | 1.08E-05 | 0.048841  | 0.29222  |
| 0.03893  | -0.0974  | 0.03536  | -0.22609 | 7.94E-07 | -0.22716 | 7.02E-07 | -0.02347  | 0.61299  |
| 1.75E-20 | -0.56578 | 7.18E-41 | -0.68857 | 6.80E-67 | -0.64631 | 1.41E-56 | -0.3222   | 9.66E-13 |
| 0.01724  | 0.267756 | 4.14E-09 | 0.514857 | 5.69E-33 | 0.35384  | 3.21E-15 | 0.079649  | 0.08555  |
| 0.12106  | -0.28774 | 2.36E-10 | -0.29206 | 1.23E-10 | -0.23844 | 1.84E-07 | 0.10662   | 0.0212   |
| 0.02274  | -0.21467 | 2.85E-06 | -0.39295 | 1.08E-18 | -0.29662 | 6.13E-11 | -0.01593  | 0.73135  |
| 0.12926  | 0.064037 | 0.16711  | -0.22351 | 1.07E-06 | -0.05558 | 0.23058  | 0.164006  | 0.00037  |
| 0.00081  | 0.19998  | 1.34E-05 | 0.328283 | 3.39E-13 | 0.283136 | 4.66E-10 | -3.98E-05 | 0.99932  |
| 0.45325  | 0.011444 | 0.80518  | -0.17717 | 0.00012  | -0.04259 | 0.35841  | 0.368005  | 2.01E-16 |
| 2.86E-09 | -0.37461 | 5.25E-17 | -0.50991 | 2.84E-32 | -0.50362 | 2.11E-31 | -0.15315  | 0.0009   |
| 0.65441  | -0.17992 | 9.24E-05 | -0.36971 | 1.43E-16 | -0.23642 | 2.36E-07 | 0.247428  | 6.06E-08 |
| 0.02608  | -0.28038 | 6.96E-10 | -0.48017 | 2.62E-28 | -0.34753 | 1.06E-14 | 0.13104   | 0.00456  |
| 2.42E-05 | -0.07748 | 0.09446  | -0.37999 | 1.73E-17 | -0.26474 | 6.26E-09 | -0.04081  | 0.37887  |
| 3.27E-06 | 0.379655 | 1.85E-17 | 0.503022 | 2.55E-31 | 0.423253 | 1.01E-21 | 0.061967  | 0.18129  |
| 8.37E-08 | -0.22621 | 7.83E-07 | -0.43195 | 1.19E-22 | -0.34948 | 7.33E-15 | 0.040258  | 0.38539  |
| 1.83E-17 | -0.60419 | 8.38E-48 | -0.71559 | 1.80E-74 | -0.65716 | 4.57E-59 | -0.15026  | 0.00113  |
| 0.00354  | -0.26072 | 1.08E-08 | -0.43059 | 1.67E-22 | -0.35897 | 1.19E-15 | -0.02409  | 0.6036   |
| 0.01116  | -0.06987 | 0.13164  | -0.17527 | 0.00014  | -0.19643 | 1.91E-05 | -0.02379  | 0.60813  |
| 3.33E-15 | -0.45136 | 8.07E-25 | -0.61679 | 2.73E-50 | -0.57201 | 6.21E-42 | -0.1735   | 0.00016  |
| 3.41E-09 | -0.05418 | 0.2426   | -0.27074 | 2.74E-09 | -0.2765  | 1.22E-09 | 0.089536  | 0.05316  |
| 1.57E-05 | 0.402746 | 1.22E-19 | 0.686063 | 3.12E-66 | 0.48626  | 4.34E-29 | 0.034814  | 0.45293  |
| 0.05187  | -0.18111 | 8.28E-05 | -0.29209 | 1.23E-10 | -0.18407 | 6.30E-05 | 0.068414  | 0.13989  |
| 0.00565  | -0.07349 | 0.11276  | -0.30045 | 3.38E-11 | -0.24729 | 6.17E-08 | -0.11942  | 0.00979  |
| 0.76984  | -0.02023 | 0.66279  | -0.32356 | 7.66E-13 | -0.18755 | 4.53E-05 | 0.164161  | 0.00037  |
| 0.00065  | -0.05862 | 0.20608  | -0.23715 | 2.16E-07 | -0.22239 | 1.21E-06 | 0.057549  | 0.21448  |
| 3.00E-06 | -0.42723 | 3.83E-22 | -0.58055 | 1.99E-43 | -0.49534 | 2.78E-30 | -0.06268  | 0.17631  |
| 0.69298  | -0.0707  | 0.12709  | -0.25101 | 3.84E-08 | -0.13764 | 0.00288  | 0.210879  | 4.29E-06 |
| 0.00018  | -0.33939 | 4.72E-14 | -0.28321 | 4.61E-10 | -0.32902 | 2.98E-13 | -0.1804   | 8.85E-05 |
| 0.04318  | -0.18192 | 7.69E-05 | -0.41583 | 5.96E-21 | -0.27935 | 8.08E-10 | 0.259024  | 1.35E-08 |
| 1.55E-05 | 0.004232 | 0.92732  | -0.39758 | 3.90E-19 | -0.26412 | 6.81E-09 | -0.08172  | 0.0777   |
| 0.00244  | -0.12095 | 0.00889  | -0.16815 | 0.00026  | -0.03999 | 0.3886   | 0.374575  | 5.29E-17 |
| 1.40E-15 | -0.15078 | 0.00108  | -0.38229 | 1.06E-17 | -0.39447 | 7.74E-19 | 0.040933  | 0.37747  |
| 0.23379  | 0.047624 | 0.30443  | -0.21766 | 2.05E-06 | -0.12379 | 0.0074   | 0.244114  | 9.18E-08 |
| 0.00372  | -0.40574 | 6.20E-20 | -0.46993 | 4.97E-27 | -0.38889 | 2.61E-18 | -0.02186  | 0.63747  |
| 0.06837  | -0.29025 | 1.62E-10 | -0.23613 | 2.44E-07 | -0.16876 | 0.00025  | 0.059312  | 0.20074  |
| 1.10E-09 | -0.15184 | 0.001    | -0.41232 | 1.36E-20 | -0.34753 | 1.06E-14 | -0.33345  | 1.37E-13 |
| 4.48E-09 | -0.45549 | 2.67E-25 | -0.55875 | 1.07E-39 | -0.52431 | 2.44E-34 | -0.08359  | 0.07114  |
| 4.45E-10 | -0.27461 | 1.59E-09 | -0.37911 | 2.07E-17 | -0.3768  | 3.35E-17 | -0.03294  | 0.47763  |
| 2.90E-25 | -0.4273  | 3.77E-22 | -0.70871 | 1.85E-72 | -0.6762  | 1.08E-63 | -0.20797  | 5.85E-06 |

|          |          |          |          |          |          |          |          |          |
|----------|----------|----------|----------|----------|----------|----------|----------|----------|
| 0.00207  | -0.33799 | 6.08E-14 | -0.27727 | 1.09E-09 | -0.26243 | 8.55E-09 | -0.05637 | 0.22405  |
| 0.1654   | 0.034211 | 0.46079  | -0.14217 | 0.00207  | -0.00613 | 0.89497  | 0.133297 | 0.0039   |
| 0.02197  | 0.078272 | 0.09112  | -0.18155 | 7.96E-05 | -0.00645 | 0.88941  | 0.074659 | 0.10711  |
| 1.24E-12 | -0.177   | 0.00012  | -0.4117  | 1.57E-20 | -0.35754 | 1.58E-15 | -0.07729 | 0.09527  |
| 4.07E-16 | -0.27345 | 1.87E-09 | -0.43779 | 2.75E-23 | -0.47041 | 4.34E-27 | -0.08883 | 0.05507  |
| 2.43E-05 | -0.06956 | 0.13334  | -0.26083 | 1.06E-08 | -0.2413  | 1.30E-07 | 0.051961 | 0.26244  |
| 2.30E-09 | -0.38361 | 8.06E-18 | -0.64563 | 2.01E-56 | -0.51119 | 1.87E-32 | -0.07658 | 0.09835  |
| 0.07046  | 0.024955 | 0.59063  | -0.19638 | 1.92E-05 | -0.13563 | 0.00332  | -0.00846 | 0.8553   |
| 4.87E-05 | -0.20997 | 4.73E-06 | -0.31243 | 4.95E-12 | -0.31559 | 2.93E-12 | -0.03093 | 0.50488  |
| 0.81309  | 0.319721 | 1.47E-12 | 0.51537  | 4.81E-33 | 0.308145 | 9.93E-12 | -0.10722 | 0.02048  |
| 0.00013  | -0.40592 | 5.95E-20 | -0.56185 | 3.27E-40 | -0.47492 | 1.20E-27 | 0.086021 | 0.06326  |
| 0.08412  | 0.073973 | 0.11038  | -0.25244 | 3.20E-08 | -0.07219 | 0.11928  | 0.024062 | 0.60399  |
| 2.28E-18 | 0.266441 | 4.96E-09 | 0.431331 | 1.39E-22 | 0.442447 | 8.33E-24 | 0.204654 | 8.27E-06 |
| 2.22E-19 | -0.49146 | 9.10E-30 | -0.73878 | 1.02E-81 | -0.69111 | 1.44E-67 | -0.1149  | 0.01297  |
| 1.62E-06 | 0.349048 | 7.95E-15 | 0.445263 | 4.01E-24 | 0.44386  | 5.78E-24 | -0.12935 | 0.00512  |
| 5.59E-07 | 0.509027 | 3.77E-32 | 0.455919 | 2.38E-25 | 0.445863 | 3.43E-24 | 0.11145  | 0.01597  |
| 0.00072  | -0.24044 | 1.45E-07 | -0.43096 | 1.53E-22 | -0.35569 | 2.25E-15 | -0.27082 | 2.71E-09 |
| 8.23E-12 | -0.32341 | 7.85E-13 | -0.46264 | 3.81E-26 | -0.48444 | 7.48E-29 | -0.04345 | 0.34877  |
| 0.00022  | -0.49367 | 4.64E-30 | -0.47528 | 1.08E-27 | -0.45257 | 5.85E-25 | 0.031076 | 0.50291  |
| 3.48E-10 | -0.42751 | 3.57E-22 | -0.572   | 6.23E-42 | -0.51813 | 1.93E-33 | 0.02118  | 0.64801  |
| 0.00189  | -0.19996 | 1.34E-05 | -0.38136 | 1.29E-17 | -0.30357 | 2.07E-11 | -0.12075 | 0.009    |
| 0.03376  | -0.21241 | 3.64E-06 | -0.32921 | 2.89E-13 | -0.26222 | 8.80E-09 | 0.111291 | 0.01613  |
| 5.71E-15 | -0.29168 | 1.30E-10 | -0.57234 | 5.44E-42 | -0.50217 | 3.33E-31 | 0.14197  | 0.0021   |
| 0.37393  | 0.109015 | 0.01845  | 0.277533 | 1.05E-09 | 0.167256 | 0.00028  | 0.050274 | 0.27827  |
| 8.26E-14 | -0.42155 | 1.52E-21 | -0.62748 | 1.73E-52 | -0.55906 | 9.48E-40 | -0.15677 | 0.00067  |
| 8.31E-05 | 0.331153 | 2.05E-13 | 0.28327  | 4.57E-10 | 0.244885 | 8.34E-08 | 0.032301 | 0.48622  |
| 7.74E-07 | 0.123283 | 0.00765  | 0.351737 | 4.79E-15 | 0.298452 | 4.61E-11 | 0.102411 | 0.0269   |
| 0.10043  | -0.23883 | 1.76E-07 | -0.6164  | 3.28E-50 | -0.34688 | 1.19E-14 | 0.058332 | 0.2083   |
| 0.00038  | 0.01481  | 0.74956  | -0.16731 | 0.00028  | -0.0133  | 0.77433  | 0.292584 | 1.14E-10 |
| 0.07984  | 0.112864 | 0.01468  | -0.07945 | 0.08634  | 0.01759  | 0.70459  | 0.216318 | 2.38E-06 |
| 0.19902  | -0.26794 | 4.04E-09 | -0.25147 | 3.62E-08 | -0.15609 | 0.00071  | 0.286412 | 2.87E-10 |
| 2.02E-06 | 0.481119 | 1.99E-28 | 0.482678 | 1.26E-28 | 0.470781 | 3.91E-27 | -0.14919 | 0.00122  |
| 4.58E-11 | 0.30893  | 8.74E-12 | 0.568006 | 3.01E-41 | 0.449338 | 1.38E-24 | 0.09819  | 0.03389  |
| 0.00386  | -0.20551 | 7.57E-06 | -0.35051 | 6.04E-15 | -0.31625 | 2.63E-12 | -0.26014 | 1.16E-08 |
| 0.03775  | -0.1872  | 4.69E-05 | -0.19837 | 1.57E-05 | -0.10414 | 0.02441  | 0.029009 | 0.53175  |
| 0.00034  | -0.20321 | 9.61E-06 | -0.36699 | 2.46E-16 | -0.34196 | 2.95E-14 | 0.060699 | 0.1904   |
| 3.98E-30 | -0.38449 | 6.69E-18 | -0.6375  | 1.26E-54 | -0.62096 | 3.89E-51 | -0.0974  | 0.03537  |
| 5.10E-05 | 0.050277 | 0.27825  | 0.513312 | 9.42E-33 | 0.297648 | 5.23E-11 | -0.12796 | 0.00562  |
| 2.58E-12 | -0.23662 | 2.30E-07 | -0.47796 | 5.00E-28 | -0.44181 | 9.82E-24 | 0.138378 | 0.00273  |
| 4.69E-19 | -0.15474 | 0.00079  | -0.42814 | 3.06E-22 | -0.40573 | 6.22E-20 | 0.055389 | 0.23221  |
| 8.73E-18 | -0.39397 | 8.63E-19 | -0.65467 | 1.74E-58 | -0.59219 | 1.54E-45 | -0.10815 | 0.0194   |
| 4.09E-06 | -0.0544  | 0.24066  | -0.2655  | 5.64E-09 | -0.04106 | 0.376    | 0.56916  | 1.91E-41 |
| 1.17E-06 | -0.34343 | 2.25E-14 | -0.64966 | 2.46E-57 | -0.47071 | 3.99E-27 | -0.05436 | 0.24105  |
| 9.94E-10 | -0.15953 | 0.00054  | -0.47045 | 4.30E-27 | -0.37595 | 3.99E-17 | 0.033086 | 0.47567  |
| 4.82E-16 | -0.47827 | 4.56E-28 | -0.60811 | 1.45E-48 | -0.58097 | 1.68E-43 | -0.1326  | 0.0041   |

|          |          |          |          |          |          |          |          |          |
|----------|----------|----------|----------|----------|----------|----------|----------|----------|
| 0.15057  | -0.24056 | 1.42E-07 | -0.19712 | 1.78E-05 | -0.13533 | 0.00339  | 0.132277 | 0.00419  |
| 0.08764  | -0.11939 | 0.00981  | -0.28008 | 7.27E-10 | -0.22501 | 8.99E-07 | -0.0457  | 0.32437  |
| 0.23278  | 0.121101 | 0.0088   | 0.249272 | 4.79E-08 | 0.209924 | 4.75E-06 | -0.11786 | 0.0108   |
| 6.93E-11 | -0.30487 | 1.68E-11 | -0.51315 | 9.93E-33 | -0.42504 | 6.54E-22 | -0.22357 | 1.06E-06 |
| 2.74E-09 | -0.32814 | 3.48E-13 | -0.60522 | 5.28E-48 | -0.47191 | 2.84E-27 | -0.03743 | 0.41965  |
| 1.09E-06 | -0.42152 | 1.53E-21 | -0.54106 | 7.23E-37 | -0.46678 | 1.21E-26 | -0.17061 | 0.00021  |
| 7.06E-11 | -0.38295 | 9.26E-18 | -0.54574 | 1.34E-37 | -0.5051  | 1.32E-31 | -0.11652 | 0.01174  |
| 7.04E-13 | -0.37239 | 8.28E-17 | -0.50171 | 3.86E-31 | -0.50202 | 3.49E-31 | -0.03381 | 0.46608  |
| 7.32E-13 | -0.37737 | 2.98E-17 | -0.53002 | 3.48E-35 | -0.50291 | 2.64E-31 | -0.27129 | 2.54E-09 |
| 0.0195   | -0.2647  | 6.29E-09 | -0.33337 | 1.39E-13 | -0.19175 | 3.03E-05 | 0.213688 | 3.17E-06 |
| 3.08E-05 | 0.037323 | 0.42101  | -0.10421 | 0.02432  | 0.069805 | 0.13199  | 0.109195 | 0.01825  |
| 0.00111  | -0.14378 | 0.00184  | -0.21407 | 3.04E-06 | -0.11052 | 0.01688  | 0.176394 | 0.00013  |
| 9.95E-10 | -0.40515 | 7.09E-20 | -0.58939 | 5.06E-45 | -0.52516 | 1.83E-34 | 0.018834 | 0.68478  |
| 0.72909  | 0.143299 | 0.00191  | -0.2978  | 5.11E-11 | -0.10905 | 0.0184   | 0.141872 | 0.00212  |
| 0.2902   | -0.11658 | 0.0117   | -0.28125 | 6.13E-10 | -0.14774 | 0.00137  | 0.144263 | 0.00177  |
| 0.00381  | -0.153   | 0.00091  | -0.24682 | 6.54E-08 | -0.211   | 4.24E-06 | -0.3403  | 4.00E-14 |
| 0.00339  | -0.26382 | 7.09E-09 | -0.36501 | 3.65E-16 | -0.36216 | 6.41E-16 | 0.214586 | 2.88E-06 |
| 0.00389  | -0.25179 | 3.47E-08 | -0.42862 | 2.72E-22 | -0.33316 | 1.44E-13 | -0.13079 | 0.00464  |
| 0.84828  | -0.22916 | 5.56E-07 | -0.25741 | 1.67E-08 | -0.19132 | 3.16E-05 | 0.496562 | 1.91E-30 |
| 0.03728  | -0.11945 | 0.00978  | -0.20985 | 4.79E-06 | -0.18503 | 5.76E-05 | -0.03208 | 0.4892   |
| 0.69645  | -0.14143 | 0.00219  | -0.3353  | 9.84E-14 | -0.18848 | 4.15E-05 | 0.080174 | 0.0835   |
| 8.22E-07 | -0.21995 | 1.59E-06 | -0.47083 | 3.85E-27 | -0.39933 | 2.64E-19 | 0.282184 | 5.36E-10 |
| 5.37E-07 | -0.27224 | 2.22E-09 | -0.42457 | 7.33E-22 | -0.38348 | 8.28E-18 | -0.01442 | 0.75589  |
| 8.46E-17 | -0.55243 | 1.15E-38 | -0.66945 | 5.17E-62 | -0.63124 | 2.79E-53 | -0.18436 | 6.13E-05 |
| 1.11E-12 | -0.46798 | 8.61E-27 | -0.64525 | 2.44E-56 | -0.59113 | 2.42E-45 | -0.26948 | 3.26E-09 |
| 0.00124  | 0.150259 | 0.00113  | -0.2394  | 1.64E-07 | -0.16224 | 0.00043  | 0.349838 | 6.85E-15 |
| 2.36E-07 | -0.53529 | 5.58E-36 | -0.552   | 1.34E-38 | -0.50634 | 8.90E-32 | -0.15053 | 0.0011   |
| 0.04272  | -0.28751 | 2.44E-10 | -0.26865 | 3.66E-09 | -0.16904 | 0.00024  | -0.1759  | 0.00013  |
| 2.32E-12 | -0.34538 | 1.57E-14 | -0.60005 | 5.20E-47 | -0.53832 | 1.92E-36 | -0.05904 | 0.2028   |
| 3.62E-08 | -0.46632 | 1.37E-26 | -0.59659 | 2.34E-46 | -0.52925 | 4.54E-35 | -0.20623 | 7.02E-06 |
| 0.19474  | -0.01308 | 0.77806  | -0.2007  | 1.24E-05 | -0.09624 | 0.03763  | 0.136346 | 0.00315  |
| 2.96E-25 | -0.47392 | 1.60E-27 | -0.61293 | 1.62E-49 | -0.62008 | 5.89E-51 | -0.25981 | 1.21E-08 |
| 1.65E-16 | -0.47712 | 6.37E-28 | -0.6769  | 7.17E-64 | -0.60068 | 3.95E-47 | -0.10232 | 0.02704  |
| 1.76E-09 | 0.287331 | 2.51E-10 | 0.604176 | 8.42E-48 | 0.446182 | 3.16E-24 | 0.160346 | 0.0005   |
| 0.1545   | -0.37195 | 9.05E-17 | -0.3226  | 9.02E-13 | -0.25574 | 2.08E-08 | 0.049531 | 0.28545  |
| 1.73E-19 | -0.45154 | 7.70E-25 | -0.53899 | 1.51E-36 | -0.56804 | 2.97E-41 | -0.18791 | 4.38E-05 |
| 1.28E-06 | -0.10673 | 0.02106  | -0.45821 | 1.28E-25 | -0.33269 | 1.56E-13 | -0.14222 | 0.00206  |
| 0.70057  | -0.11618 | 0.01199  | -0.20994 | 4.75E-06 | -0.11331 | 0.01429  | 0.108081 | 0.01948  |
| 0.02322  | -0.0157  | 0.73514  | -0.29237 | 1.18E-10 | -0.17047 | 0.00021  | 0.107527 | 0.02012  |
| 0.95561  | -0.15565 | 0.00074  | -0.35688 | 1.79E-15 | -0.17535 | 0.00014  | 0.052258 | 0.25972  |
| 0.65908  | -0.03006 | 0.51694  | -0.25041 | 4.14E-08 | -0.1639  | 0.00038  | 0.205768 | 7.37E-06 |
| 3.24E-07 | 0.509036 | 3.76E-32 | 0.49271  | 6.22E-30 | 0.476088 | 8.58E-28 | -0.06054 | 0.19153  |
| 0.33705  | -0.2375  | 2.07E-07 | -0.21274 | 3.52E-06 | -0.19585 | 2.02E-05 | 0.265521 | 5.63E-09 |
| 0.3473   | -0.32931 | 2.84E-13 | -0.45154 | 7.69E-25 | -0.34452 | 1.85E-14 | 0.190187 | 3.52E-05 |
| 0.00032  | -0.23448 | 2.97E-07 | -0.36199 | 6.63E-16 | -0.31347 | 4.17E-12 | 0.247409 | 6.07E-08 |

|          |          |          |          |          |          |          |          |          |
|----------|----------|----------|----------|----------|----------|----------|----------|----------|
| 0.06533  | -0.39007 | 2.02E-18 | -0.39339 | 9.81E-19 | -0.32577 | 5.24E-13 | 0.064462 | 0.1643   |
| 3.58E-06 | -0.13967 | 0.00249  | -0.37569 | 4.21E-17 | -0.33153 | 1.92E-13 | 0.338767 | 5.28E-14 |
| 4.33E-06 | -0.27462 | 1.59E-09 | -0.50661 | 8.17E-32 | -0.40448 | 8.27E-20 | 0.00237  | 0.95926  |
| 0.07149  | 0.207946 | 5.86E-06 | -0.23351 | 3.34E-07 | -0.04454 | 0.33685  | 0.222065 | 1.26E-06 |
| 0.86793  | -0.15697 | 0.00066  | -0.22239 | 1.21E-06 | -0.15751 | 0.00064  | 0.442849 | 7.51E-24 |
| 0.25055  | 0.141185 | 0.00223  | -0.34146 | 3.24E-14 | -0.13619 | 0.00319  | 0.02858  | 0.53783  |
| 0.00232  | 0.086779 | 0.06096  | -0.22447 | 9.56E-07 | -0.04928 | 0.28785  | 0.484985 | 6.35E-29 |
| 4.73E-06 | -0.19793 | 1.64E-05 | -0.39191 | 1.35E-18 | -0.30845 | 9.44E-12 | -0.15095 | 0.00107  |
| 0.88719  | 0.1271   | 0.00595  | 0.289738 | 1.75E-10 | 0.195439 | 2.11E-05 | 0.015016 | 0.7462   |
| 8.97E-13 | -0.38044 | 1.57E-17 | -0.59601 | 3.01E-46 | -0.51261 | 1.18E-32 | -0.22358 | 1.06E-06 |
| 0.91047  | -0.25536 | 2.18E-08 | -0.03831 | 0.40876  | -0.12597 | 0.00641  | -0.03318 | 0.47448  |
| 0.02486  | -0.12346 | 0.00756  | -0.43087 | 1.56E-22 | -0.30048 | 3.36E-11 | 0.083753 | 0.07057  |
| 5.92E-09 | 0.310601 | 6.66E-12 | 0.476839 | 6.90E-28 | 0.42759  | 3.51E-22 | 0.386668 | 4.20E-18 |
| 9.31E-11 | -0.43711 | 3.26E-23 | -0.60772 | 1.73E-48 | -0.53055 | 2.90E-35 | 0.065742 | 0.15607  |
| 9.84E-12 | -0.11016 | 0.01724  | -0.47338 | 1.87E-27 | -0.40715 | 4.49E-20 | -0.04067 | 0.3805   |
| 0.01471  | 0.344832 | 1.74E-14 | 0.339406 | 4.70E-14 | 0.281391 | 6.01E-10 | 0.008173 | 0.86018  |
| 0.00342  | -0.16134 | 0.00046  | -0.22805 | 6.33E-07 | -0.21103 | 4.22E-06 | 0.063948 | 0.1677   |
| 0.05115  | 0.042014 | 0.365    | -0.13366 | 0.00381  | -0.15033 | 0.00112  | -0.19771 | 1.68E-05 |
| 0.09159  | -0.09701 | 0.03611  | -0.33378 | 1.29E-13 | -0.22306 | 1.12E-06 | -0.20624 | 7.01E-06 |
| 0.02867  | -0.15841 | 0.00059  | -0.24822 | 5.48E-08 | -0.18679 | 4.87E-05 | 0.049319 | 0.28752  |
| 2.14E-09 | -0.28787 | 2.32E-10 | -0.57684 | 8.98E-43 | -0.47817 | 4.69E-28 | 0.019698 | 0.67114  |
| 2.39E-08 | -0.30351 | 2.09E-11 | -0.46646 | 1.32E-26 | -0.43071 | 1.62E-22 | -0.19066 | 3.36E-05 |
| 4.33E-15 | 0.05599  | 0.22718  | -0.04535 | 0.32813  | 0.147874 | 0.00135  | 0.502471 | 3.03E-31 |
| 0.6517   | -0.1583  | 0.0006   | -0.38541 | 5.50E-18 | -0.21119 | 4.15E-06 | 0.042389 | 0.36072  |
| 3.32E-12 | 0.411834 | 1.52E-20 | 0.512593 | 1.19E-32 | 0.453283 | 4.83E-25 | -0.07412 | 0.10966  |
| 0.1667   | -0.16975 | 0.00023  | -0.39329 | 1.00E-18 | -0.25502 | 2.28E-08 | 0.337404 | 6.75E-14 |
| 0.0003   | -0.11829 | 0.01052  | -0.33029 | 2.39E-13 | -0.28197 | 5.53E-10 | 0.308179 | 9.87E-12 |
| 5.64E-06 | -0.31434 | 3.61E-12 | -0.41061 | 2.02E-20 | -0.37321 | 7.00E-17 | -0.10388 | 0.02477  |
| 0.00079  | -0.31121 | 6.03E-12 | -0.40337 | 1.06E-19 | -0.32991 | 2.55E-13 | 0.141496 | 0.00218  |
| 0.12339  | -0.28788 | 2.31E-10 | -0.28336 | 4.51E-10 | -0.20969 | 4.87E-06 | 0.036795 | 0.42762  |
| 0.01206  | -0.10012 | 0.03051  | -0.09264 | 0.04539  | -0.03848 | 0.40675  | 0.101566 | 0.02819  |
| 4.86E-15 | -0.47908 | 3.60E-28 | -0.67293 | 7.09E-63 | -0.59119 | 2.37E-45 | -0.01895 | 0.68288  |
| 0.03609  | -0.12034 | 0.00924  | -0.29829 | 4.73E-11 | -0.12874 | 0.00533  | -0.02727 | 0.55661  |
| 5.90E-09 | 0.078734 | 0.08922  | 0.39716  | 4.27E-19 | 0.303681 | 2.03E-11 | 0.010607 | 0.81918  |
| 0.09036  | -0.11172 | 0.01572  | -0.1707  | 0.00021  | -0.06902 | 0.13639  | 0.387849 | 3.26E-18 |
| 5.87E-07 | 0.407382 | 4.26E-20 | 0.476848 | 6.89E-28 | 0.419575 | 2.45E-21 | 0.044138 | 0.34123  |
| 6.98E-33 | 0.468211 | 8.07E-27 | 0.704174 | 3.65E-71 | 0.679436 | 1.62E-64 | 0.016309 | 0.72519  |
| 0.8126   | 0.156603 | 0.00068  | 0.480061 | 2.71E-28 | 0.239379 | 1.65E-07 | -0.1319  | 0.0043   |
| 0.00091  | 0.026018 | 0.57491  | -0.14616 | 0.00154  | -0.00478 | 0.91794  | 0.117108 | 0.01132  |
| 0.17247  | -0.14568 | 0.0016   | -0.24096 | 1.36E-07 | -0.18901 | 3.94E-05 | 0.182232 | 7.47E-05 |
| 0.01692  | 0.102143 | 0.0273   | 0.401521 | 1.61E-19 | 0.258633 | 1.42E-08 | -0.02431 | 0.60033  |
| 0.0022   | 0.419348 | 2.58E-21 | 0.401614 | 1.58E-19 | 0.355096 | 2.52E-15 | 0.042942 | 0.35448  |
| 0.00922  | -0.17374 | 0.00016  | -0.2016  | 1.13E-05 | -0.22724 | 6.96E-07 | -0.2329  | 3.58E-07 |
| 3.19E-05 | -0.36142 | 7.41E-16 | -0.50896 | 3.85E-32 | -0.44412 | 5.40E-24 | 0.061192 | 0.18681  |
| 2.19E-10 | 0.184517 | 6.04E-05 | 0.281187 | 6.19E-10 | 0.276731 | 1.18E-09 | 0.188007 | 4.34E-05 |



|          |          |          |          |          |          |          |          |          |
|----------|----------|----------|----------|----------|----------|----------|----------|----------|
| 0.68233  | -0.25238 | 3.22E-08 | -0.33247 | 1.63E-13 | -0.22949 | 5.36E-07 | 0.262402 | 8.59E-09 |
| 0.00016  | -0.38255 | 1.01E-17 | -0.46444 | 2.31E-26 | -0.41365 | 9.95E-21 | -0.03549 | 0.44418  |
| 0.02865  | -0.12077 | 0.00899  | -0.27861 | 8.99E-10 | -0.11481 | 0.01304  | 0.270014 | 3.03E-09 |
| 0.76301  | -0.24946 | 4.68E-08 | -0.28657 | 2.81E-10 | -0.22799 | 6.38E-07 | -0.12859 | 0.00539  |
| 0.03137  | -0.24383 | 9.51E-08 | -0.40784 | 3.83E-20 | -0.28037 | 6.98E-10 | -0.20024 | 1.30E-05 |
| 0.07334  | -0.03749 | 0.41891  | -0.46125 | 5.58E-26 | -0.23801 | 1.94E-07 | -0.02583 | 0.57773  |
| 5.00E-07 | 0.320428 | 1.30E-12 | 0.481482 | 1.79E-28 | 0.358068 | 1.42E-15 | 0.059449 | 0.19971  |
| 2.39E-15 | -0.09725 | 0.03565  | -0.46387 | 2.71E-26 | -0.39135 | 1.53E-18 | 0.126917 | 0.00602  |
| 2.99E-19 | -0.20662 | 6.74E-06 | -0.54959 | 3.27E-38 | -0.48687 | 3.63E-29 | 0.073475 | 0.11281  |
| 0.02264  | 0.018415 | 0.69142  | -0.35669 | 1.86E-15 | -0.2437  | 9.67E-08 | 0.057125 | 0.21789  |
| 0.8259   | -0.0985  | 0.03332  | -0.25693 | 1.78E-08 | -0.14414 | 0.00179  | 0.291714 | 1.30E-10 |
| 3.21E-06 | -0.10133 | 0.02856  | -0.36488 | 3.74E-16 | -0.31329 | 4.29E-12 | -0.0486  | 0.29462  |
| 0.00056  | -0.29533 | 7.48E-11 | -0.42838 | 2.89E-22 | -0.36179 | 6.89E-16 | 0.114359 | 0.01341  |
| 1.69E-13 | -0.44858 | 1.69E-24 | -0.62466 | 6.71E-52 | -0.55447 | 5.35E-39 | -0.18375 | 6.49E-05 |
| 5.80E-22 | -0.39212 | 1.29E-18 | -0.54728 | 7.62E-38 | -0.55369 | 7.18E-39 | -0.02329 | 0.61572  |
| 0.20883  | -0.30614 | 1.37E-11 | -0.3914  | 1.52E-18 | -0.23665 | 2.29E-07 | 0.171384 | 0.0002   |
| 1.16E-14 | -0.17974 | 9.40E-05 | -0.48708 | 3.40E-29 | -0.42748 | 3.60E-22 | -0.11804 | 0.01068  |
| 1.26E-10 | -0.10609 | 0.02186  | -0.47853 | 4.23E-28 | -0.39387 | 8.83E-19 | -0.01402 | 0.76246  |
| 0.00128  | 0.383237 | 8.71E-18 | 0.667151 | 1.88E-61 | 0.43725  | 3.15E-23 | 0.047203 | 0.30873  |
| 8.73E-06 | 0.402205 | 1.38E-19 | 0.742313 | 6.88E-83 | 0.526136 | 1.32E-34 | 0.062023 | 0.18089  |
| 3.76E-05 | 0.42912  | 2.41E-22 | 0.717321 | 5.50E-75 | 0.521782 | 5.73E-34 | -0.02695 | 0.56121  |
| 0.96799  | 0.044652 | 0.33563  | 0.530696 | 2.76E-35 | 0.209604 | 4.92E-06 | -0.0241  | 0.60344  |
| 0.00445  | -0.28445 | 3.84E-10 | -0.35655 | 1.91E-15 | -0.25431 | 2.51E-08 | 0.09743  | 0.0353   |
| 0.02719  | 0.349498 | 7.30E-15 | 0.458511 | 1.18E-25 | 0.328519 | 3.25E-13 | -0.06393 | 0.16783  |
| 0.20175  | -0.31449 | 3.52E-12 | -0.33835 | 5.69E-14 | -0.28159 | 5.84E-10 | -0.03705 | 0.42437  |
| 0.01274  | -0.07669 | 0.09788  | -0.48154 | 1.76E-28 | -0.28573 | 3.18E-10 | -0.02994 | 0.51862  |
| 2.78E-08 | -0.20151 | 1.14E-05 | -0.54833 | 5.21E-38 | -0.44655 | 2.87E-24 | 0.020162 | 0.66386  |
| 0.00018  | 0.029453 | 0.52548  | -0.23593 | 2.50E-07 | -0.04119 | 0.37448  | 0.067518 | 0.14516  |
| 0.00073  | -0.21417 | 3.01E-06 | -0.28801 | 2.26E-10 | -0.25759 | 1.63E-08 | -0.03444 | 0.45781  |
| 0.00021  | -0.27799 | 9.82E-10 | -0.36744 | 2.25E-16 | -0.36047 | 8.92E-16 | -0.06343 | 0.17117  |
| 0.02527  | -0.18763 | 4.50E-05 | -0.33844 | 5.60E-14 | -0.2712  | 2.57E-09 | 0.32532  | 5.66E-13 |
| 7.80E-07 | 0.549204 | 3.77E-38 | 0.471302 | 3.37E-27 | 0.470799 | 3.89E-27 | 0.037166 | 0.42297  |
| 5.10E-14 | 0.09367  | 0.04305  | -0.0343  | 0.45961  | 0.17459  | 0.00015  | 0.199134 | 1.46E-05 |
| 0.05483  | -0.14812 | 0.00133  | -0.23745 | 2.08E-07 | -0.1148  | 0.01305  | -0.01406 | 0.7618   |
| 6.34E-06 | -0.44423 | 5.24E-24 | -0.67093 | 2.23E-62 | -0.5048  | 1.45E-31 | -0.07337 | 0.11333  |
| 0.00021  | -0.13677 | 0.00306  | -0.29401 | 9.15E-11 | -0.04737 | 0.30703  | 0.173665 | 0.00016  |
| 5.63E-07 | 0.268107 | 3.95E-09 | 0.449649 | 1.27E-24 | 0.358333 | 1.35E-15 | 0.055041 | 0.23516  |
| 5.74E-20 | -0.28683 | 2.70E-10 | -0.54183 | 5.48E-37 | -0.50755 | 6.06E-32 | -0.14642 | 0.00151  |
| 0.00713  | -0.36521 | 3.51E-16 | -0.43167 | 1.28E-22 | -0.33274 | 1.55E-13 | 0.087327 | 0.05933  |
| 9.96E-10 | -0.41302 | 1.15E-20 | -0.65421 | 2.22E-58 | -0.54825 | 5.36E-38 | 0.175655 | 0.00014  |
| 2.31E-14 | -0.22243 | 1.20E-06 | -0.5188  | 1.55E-33 | -0.4374  | 3.03E-23 | 0.116698 | 0.01161  |
| 0.00395  | -0.51186 | 1.51E-32 | -0.484   | 8.50E-29 | -0.42837 | 2.90E-22 | -0.03914 | 0.39878  |
| 2.93E-05 | -0.40803 | 3.67E-20 | -0.49487 | 3.22E-30 | -0.41468 | 7.82E-21 | -0.07263 | 0.11702  |
| 1.51E-08 | 0.347335 | 1.09E-14 | 0.011998 | 0.79594  | 0.211106 | 4.19E-06 | 0.197067 | 1.79E-05 |
| 0.03285  | -0.03405 | 0.46293  | -0.20991 | 4.76E-06 | -0.08067 | 0.08162  | 0.122062 | 0.00828  |

|          |          |          |          |          |          |          |          |          |
|----------|----------|----------|----------|----------|----------|----------|----------|----------|
| 0.00309  | -0.25445 | 2.46E-08 | -0.4504  | 1.04E-24 | -0.33765 | 6.46E-14 | 0.051512 | 0.2666   |
| 0.91995  | 0.180093 | 9.10E-05 | 0.280743 | 6.60E-10 | 0.186136 | 5.19E-05 | -0.03134 | 0.49934  |
| 0.00113  | 0.219604 | 1.65E-06 | 0.443406 | 6.50E-24 | 0.330815 | 2.18E-13 | 0.187426 | 4.59E-05 |
| 0.79861  | -0.11878 | 0.0102   | -0.2455  | 7.72E-08 | -0.15246 | 0.00095  | 0.544972 | 1.77E-37 |
| 3.23E-24 | 0.305113 | 1.61E-11 | 0.510366 | 2.45E-32 | 0.504999 | 1.36E-31 | 0.044532 | 0.33693  |
| 0.29447  | 0.110874 | 0.01653  | 0.227383 | 6.84E-07 | 0.157279 | 0.00065  | 0.026382 | 0.56957  |
| 0.75266  | -0.2707  | 2.76E-09 | -0.22272 | 1.17E-06 | -0.21366 | 3.18E-06 | 0.105757 | 0.02227  |
| 1.30E-05 | 0.493161 | 5.42E-30 | 0.470517 | 4.21E-27 | 0.424943 | 6.70E-22 | 0.166953 | 0.00029  |
| 0.02214  | 0.025714 | 0.57938  | 0.480655 | 2.28E-28 | 0.258479 | 1.45E-08 | -0.05494 | 0.23601  |
| 0.26226  | -0.27076 | 2.73E-09 | -0.28598 | 3.06E-10 | -0.25572 | 2.09E-08 | -0.03081 | 0.50659  |
| 2.48E-08 | -0.3062  | 1.36E-11 | -0.44646 | 2.94E-24 | -0.41289 | 1.19E-20 | 0.255753 | 2.08E-08 |
| 0.37098  | -0.27538 | 1.43E-09 | -0.35805 | 1.43E-15 | -0.21642 | 2.35E-06 | 0.117385 | 0.01113  |
| 3.27E-05 | -0.07164 | 0.12209  | -0.31125 | 5.99E-12 | -0.25229 | 3.26E-08 | 0.098315 | 0.03366  |
| 0.06556  | -0.1733  | 0.00017  | -0.29759 | 5.27E-11 | -0.20678 | 6.62E-06 | 0.016305 | 0.72527  |
| 6.72E-07 | -0.21559 | 2.58E-06 | -0.38575 | 5.11E-18 | -0.31217 | 5.16E-12 | -0.13675 | 0.00307  |
| 5.55E-13 | -0.25124 | 3.72E-08 | -0.64574 | 1.89E-56 | -0.48263 | 1.27E-28 | -0.24559 | 7.64E-08 |
| 0.2584   | 0.06444  | 0.16445  | -0.11005 | 0.01736  | -0.03737 | 0.42046  | 0.166297 | 0.00031  |
| 0.01125  | 0.263636 | 7.27E-09 | 0.333837 | 1.28E-13 | 0.242563 | 1.11E-07 | 0.190968 | 3.27E-05 |
| 0.06357  | -0.03131 | 0.49968  | -0.31756 | 2.11E-12 | -0.11943 | 0.00979  | -0.07317 | 0.11432  |
| 0.00069  | -0.04955 | 0.28529  | -0.2685  | 3.74E-09 | -0.24687 | 6.50E-08 | -0.10709 | 0.02063  |
| 5.18E-05 | 0.050539 | 0.27575  | 0.272559 | 2.12E-09 | 0.211884 | 3.85E-06 | 0.185828 | 5.34E-05 |
| 0.00032  | 0.429093 | 2.42E-22 | 0.734423 | 2.69E-80 | 0.476271 | 8.14E-28 | 0.052346 | 0.25892  |
| 0.09575  | -0.03399 | 0.46365  | -0.19707 | 1.79E-05 | -0.06976 | 0.13221  | 0.271962 | 2.31E-09 |
| 4.27E-05 | -0.0203  | 0.66172  | -0.14244 | 0.00203  | -0.03626 | 0.43435  | -0.08452 | 0.06801  |
| 1.99E-05 | 0.117768 | 0.01086  | -0.08956 | 0.0531   | 0.093267 | 0.04396  | 0.10858  | 0.01892  |
| 0.06681  | -0.33614 | 8.47E-14 | -0.3385  | 5.54E-14 | -0.30024 | 3.49E-11 | -0.34849 | 8.83E-15 |
| 1.15E-07 | -0.20461 | 8.31E-06 | -0.15198 | 0.00099  | -0.01051 | 0.82074  | 0.182079 | 7.58E-05 |
| 0.61133  | -0.2021  | 1.08E-05 | -0.27762 | 1.04E-09 | -0.18591 | 5.30E-05 | 0.280986 | 6.38E-10 |
| 0.00491  | -0.28462 | 3.75E-10 | -0.44533 | 3.94E-24 | -0.34239 | 2.73E-14 | -0.11879 | 0.01019  |
| 0.21201  | -0.20664 | 6.72E-06 | -0.34748 | 1.07E-14 | -0.23173 | 4.12E-07 | 0.110005 | 0.0174   |
| 6.18E-11 | -0.15013 | 0.00114  | -0.52167 | 5.94E-34 | -0.41026 | 2.20E-20 | -0.11028 | 0.01713  |
| 0.25515  | -0.07814 | 0.09166  | -0.21646 | 2.34E-06 | -0.10076 | 0.02947  | 0.291502 | 1.34E-10 |
| 0.20709  | -0.1345  | 0.00359  | -0.17487 | 0.00015  | -0.16258 | 0.00042  | 0.107253 | 0.02044  |
| 4.66E-21 | 0.294386 | 8.64E-11 | 0.607587 | 1.84E-48 | 0.558382 | 1.23E-39 | 0.260018 | 1.18E-08 |
| 0.00017  | -0.33012 | 2.46E-13 | -0.52078 | 8.01E-34 | -0.38884 | 2.63E-18 | -0.15073 | 0.00109  |
| 5.03E-11 | 0.24137  | 1.29E-07 | -0.00701 | 0.87998  | 0.167713 | 0.00027  | 0.156437 | 0.00069  |
| 2.39E-05 | -0.07097 | 0.12566  | -0.07504 | 0.10533  | -0.00884 | 0.84885  | 0.132487 | 0.00413  |
| 0.06224  | -0.12002 | 0.00943  | -0.28386 | 4.19E-10 | -0.20817 | 5.72E-06 | 0.322683 | 8.89E-13 |
| 0.27247  | 0.031864 | 0.49214  | -0.20031 | 1.29E-05 | -0.09965 | 0.03132  | 0.328665 | 3.17E-13 |
| 4.57E-09 | 0.118536 | 0.01035  | -0.09509 | 0.03997  | 0.093939 | 0.04245  | 0.366622 | 2.65E-16 |
| 0.11995  | -0.24155 | 1.26E-07 | -0.37471 | 5.15E-17 | -0.27452 | 1.61E-09 | 0.029928 | 0.51882  |
| 1.22E-07 | 0.298353 | 4.68E-11 | 0.58593  | 2.16E-44 | 0.464831 | 2.08E-26 | 0.082974 | 0.07323  |
| 0.00012  | -0.54604 | 1.20E-37 | -0.52131 | 6.71E-34 | -0.48925 | 1.77E-29 | -0.05179 | 0.26405  |
| 0.09583  | -0.17028 | 0.00022  | -0.24382 | 9.52E-08 | -0.14807 | 0.00133  | 0.328058 | 3.53E-13 |
| 4.13E-08 | -0.04918 | 0.28889  | -0.31272 | 4.71E-12 | -0.28143 | 5.98E-10 | 0.001003 | 0.98275  |

|          |          |          |          |          |          |          |          |          |
|----------|----------|----------|----------|----------|----------|----------|----------|----------|
| 0.8698   | 0.156021 | 0.00072  | -0.18831 | 4.22E-05 | -0.09368 | 0.04301  | 0.246237 | 7.04E-08 |
| 0.09857  | -0.00845 | 0.8555   | -0.30099 | 3.10E-11 | -0.2117  | 3.93E-06 | 0.094978 | 0.0402   |
| 0.47088  | -0.1219  | 0.00836  | -0.20261 | 1.02E-05 | -0.14958 | 0.00119  | 0.366494 | 2.72E-16 |
| 4.47E-06 | -0.29376 | 9.51E-11 | -0.22189 | 1.28E-06 | -0.08676 | 0.061    | 0.248714 | 5.15E-08 |
| 0.51789  | 0.004239 | 0.92721  | -0.22897 | 5.69E-07 | -0.06962 | 0.13301  | -0.20102 | 1.20E-05 |
| 0.46546  | -0.14756 | 0.00138  | -0.37684 | 3.32E-17 | -0.21768 | 2.05E-06 | 0.407034 | 4.61E-20 |
| 0.76228  | -0.18733 | 4.63E-05 | -0.23663 | 2.30E-07 | -0.19644 | 1.91E-05 | 0.35987  | 1.00E-15 |
| 4.87E-11 | -0.209   | 5.24E-06 | -0.35986 | 1.01E-15 | -0.34389 | 2.07E-14 | -0.06843 | 0.13982  |
| 0.10993  | -0.26582 | 5.40E-09 | -0.34423 | 1.95E-14 | -0.28576 | 3.16E-10 | -0.23044 | 4.79E-07 |
| 0.0016   | -0.28297 | 4.78E-10 | -0.13353 | 0.00384  | -0.07875 | 0.08914  | 0.05625  | 0.22503  |
| 0.00031  | 0.279756 | 7.62E-10 | 0.326199 | 4.87E-13 | 0.250798 | 3.95E-08 | 0.102519 | 0.02674  |
| 0.40349  | -0.20548 | 7.59E-06 | -0.28165 | 5.79E-10 | -0.18209 | 7.57E-05 | 0.140803 | 0.00229  |
| 1.73E-09 | -0.3734  | 6.74E-17 | -0.5422  | 4.81E-37 | -0.46671 | 1.23E-26 | -0.12877 | 0.00532  |
| 0.0005   | -0.44149 | 1.07E-23 | -0.50311 | 2.48E-31 | -0.41714 | 4.37E-21 | 0.012407 | 0.78915  |
| 1.17E-09 | 0.04404  | 0.3423   | -0.15458 | 0.0008   | 0.058206 | 0.20929  | 0.094053 | 0.0422   |
| 1.28E-09 | -0.3943  | 8.03E-19 | -0.55011 | 2.71E-38 | -0.49391 | 4.32E-30 | 0.030424 | 0.51192  |
| 0.07196  | 0.040082 | 0.38748  | -0.11342 | 0.01419  | 0.022295 | 0.63082  | 0.167442 | 0.00028  |
| 0.05015  | -0.12833 | 0.00548  | -0.21751 | 2.09E-06 | -0.08106 | 0.08013  | 0.340629 | 3.77E-14 |
| 0.00256  | -0.13484 | 0.00351  | -0.28922 | 1.89E-10 | -0.0667  | 0.15012  | 0.224545 | 9.48E-07 |
| 0.84406  | -0.25815 | 1.51E-08 | -0.32202 | 9.95E-13 | -0.25471 | 2.38E-08 | 0.074223 | 0.10918  |
| 0.26074  | -0.24636 | 6.93E-08 | -0.41533 | 6.70E-21 | -0.3082  | 9.85E-12 | 0.205395 | 7.66E-06 |
| 1.88E-06 | 0.44785  | 2.04E-24 | 0.484639 | 7.04E-29 | 0.429011 | 2.47E-22 | 0.193709 | 2.50E-05 |
| 1.12E-06 | 0.414338 | 8.47E-21 | 0.429004 | 2.48E-22 | 0.410828 | 1.92E-20 | 0.11375  | 0.01391  |
| 3.65E-13 | -0.02129 | 0.64628  | -0.12354 | 0.00752  | 0.078838 | 0.0888   | 0.074759 | 0.10664  |
| 0.58338  | -0.34298 | 2.45E-14 | -0.21935 | 1.70E-06 | -0.21204 | 3.79E-06 | 0.078483 | 0.09024  |
| 0.94882  | -0.07721 | 0.09561  | -0.21873 | 1.82E-06 | -0.1486  | 0.00128  | 0.059436 | 0.1998   |
| 0.21769  | -0.2657  | 5.49E-09 | -0.42069 | 1.87E-21 | -0.27922 | 8.24E-10 | 0.036484 | 0.43153  |
| 0.98247  | -0.20555 | 7.53E-06 | -0.31175 | 5.52E-12 | -0.21379 | 3.14E-06 | -0.11176 | 0.01568  |
| 0.23198  | -0.12071 | 0.00902  | -0.19331 | 2.60E-05 | -0.16105 | 0.00048  | 0.240807 | 1.38E-07 |
| 3.22E-05 | -0.35115 | 5.35E-15 | -0.43169 | 1.27E-22 | -0.36604 | 2.97E-16 | 0.296741 | 6.01E-11 |
| 0.00038  | -0.37328 | 6.90E-17 | -0.52335 | 3.38E-34 | -0.40652 | 5.19E-20 | 0.19839  | 1.57E-05 |
| 0.16304  | -0.11706 | 0.01136  | -0.36083 | 8.32E-16 | -0.25169 | 3.52E-08 | 0.404444 | 8.33E-20 |
| 0.00036  | 0.3545   | 2.83E-15 | 0.470127 | 4.70E-27 | 0.419839 | 2.30E-21 | 0.181745 | 7.82E-05 |
| 0.79661  | -0.20494 | 8.03E-06 | -0.29271 | 1.12E-10 | -0.2069  | 6.54E-06 | -0.02756 | 0.55251  |
| 0.73799  | 0.419557 | 2.46E-21 | 0.432032 | 1.17E-22 | 0.290399 | 1.58E-10 | -0.03605 | 0.43709  |
| 0.39403  | -0.19034 | 3.47E-05 | -0.25316 | 2.91E-08 | -0.17825 | 0.00011  | 0.058523 | 0.20681  |
| 8.21E-25 | -0.44726 | 2.38E-24 | -0.67663 | 8.40E-64 | -0.64599 | 1.67E-56 | -0.06887 | 0.13727  |
| 5.00E-27 | -0.42362 | 9.25E-22 | -0.70213 | 1.38E-70 | -0.66149 | 4.34E-60 | -0.1245  | 0.00706  |
| 5.75E-05 | -0.29099 | 1.45E-10 | -0.47001 | 4.86E-27 | -0.40054 | 2.01E-19 | -0.35253 | 4.12E-15 |
| 3.76E-12 | -0.37366 | 6.38E-17 | -0.48939 | 1.70E-29 | -0.49264 | 6.36E-30 | -0.11274 | 0.01478  |
| 0.00045  | 0.244281 | 8.99E-08 | 0.274311 | 1.66E-09 | 0.285415 | 3.33E-10 | -0.26998 | 3.05E-09 |
| 0.33634  | -0.34819 | 9.34E-15 | -0.36454 | 4.01E-16 | -0.28045 | 6.89E-10 | 0.132717 | 0.00406  |
| 0.00036  | -0.2842  | 3.99E-10 | -0.37334 | 6.82E-17 | -0.33797 | 6.10E-14 | 0.041898 | 0.36632  |
| 0.0056   | -0.34741 | 1.08E-14 | -0.49567 | 2.51E-30 | -0.35392 | 3.16E-15 | -0.0471  | 0.30974  |
| 9.84E-16 | -0.31677 | 2.41E-12 | -0.48403 | 8.42E-29 | -0.47294 | 2.11E-27 | -0.08541 | 0.06515  |

|          |          |          |          |          |          |          |          |          |
|----------|----------|----------|----------|----------|----------|----------|----------|----------|
| 1.35E-06 | 0.249714 | 4.53E-08 | 0.395007 | 6.88E-19 | 0.319585 | 1.50E-12 | 0.055792 | 0.22883  |
| 3.51E-07 | -0.47403 | 1.55E-27 | -0.57741 | 7.13E-43 | -0.50656 | 8.30E-32 | 0.011401 | 0.8059   |
| 0.14004  | -0.15972 | 0.00053  | -0.25651 | 1.88E-08 | -0.24562 | 7.61E-08 | 0.012415 | 0.78902  |
| 5.44E-19 | 0.385601 | 5.28E-18 | 0.623707 | 1.06E-51 | 0.568227 | 2.76E-41 | -0.16575 | 0.00032  |
| 0.07123  | 0.070141 | 0.13014  | 0.336213 | 8.36E-14 | 0.224473 | 9.56E-07 | 0.24037  | 1.46E-07 |
| 8.03E-14 | -0.3592  | 1.14E-15 | -0.68851 | 7.06E-67 | -0.56402 | 1.42E-40 | 0.000944 | 0.98378  |
| 0.48955  | -0.20055 | 1.26E-05 | -0.30044 | 3.38E-11 | -0.2057  | 7.42E-06 | 0.019684 | 0.67136  |
| 2.52E-21 | -0.53087 | 2.59E-35 | -0.72573 | 1.51E-77 | -0.66317 | 1.72E-60 | -0.27496 | 1.51E-09 |
| 0.00091  | -0.46548 | 1.73E-26 | -0.51282 | 1.11E-32 | -0.44984 | 1.21E-24 | -0.02682 | 0.56316  |
| 4.25E-06 | -0.13961 | 0.0025   | -0.36833 | 1.88E-16 | -0.30063 | 3.28E-11 | -0.17856 | 0.0001   |
| 0.02151  | 0.272157 | 2.25E-09 | 0.446    | 3.31E-24 | 0.339911 | 4.29E-14 | 0.163815 | 0.00038  |
| 0.3797   | -0.12364 | 0.00747  | -0.21272 | 3.52E-06 | -0.15196 | 0.00099  | 0.2926   | 1.13E-10 |
| 0.00018  | -0.23459 | 2.93E-07 | -0.29676 | 5.99E-11 | -0.28793 | 2.29E-10 | -0.05092 | 0.27214  |
| 0.00076  | -0.41686 | 4.67E-21 | -0.44573 | 3.55E-24 | -0.39742 | 4.03E-19 | 0.084275 | 0.06883  |
| 0.0033   | -0.06638 | 0.15205  | -0.36756 | 2.19E-16 | -0.23433 | 3.03E-07 | 0.416881 | 4.65E-21 |
| 2.11E-05 | -0.13629 | 0.00317  | 0.171313 | 0.0002   | 0.09625  | 0.03759  | 0.245253 | 7.96E-08 |
| 5.29E-05 | 0.094784 | 0.04062  | 0.460062 | 7.73E-26 | 0.266106 | 5.19E-09 | 0.143856 | 0.00183  |
| 9.74E-08 | 0.020872 | 0.65279  | -0.3018  | 2.73E-11 | -0.23952 | 1.62E-07 | 0.100836 | 0.02935  |
| 0.6048   | -0.21783 | 2.01E-06 | -0.31444 | 3.55E-12 | -0.19453 | 2.30E-05 | -0.25671 | 1.83E-08 |
| 0.00098  | 0.035508 | 0.44396  | 0.289464 | 1.82E-10 | 0.185252 | 5.64E-05 | -0.02044 | 0.65945  |
| 0.00017  | -0.21267 | 3.54E-06 | -0.4648  | 2.10E-26 | -0.36302 | 5.41E-16 | -0.09431 | 0.04163  |
| 6.03E-14 | 0.182682 | 7.17E-05 | 0.575366 | 1.63E-42 | 0.48936  | 1.72E-29 | 0.07206  | 0.11993  |
| 4.44E-05 | -0.38259 | 9.99E-18 | -0.42321 | 1.02E-21 | -0.39851 | 3.17E-19 | -0.06683 | 0.14934  |
| 0.07261  | -0.22053 | 1.49E-06 | -0.25923 | 1.31E-08 | -0.11893 | 0.0101   | 0.045096 | 0.33084  |
| 0.71019  | 0.084805 | 0.0671   | -0.10154 | 0.02823  | -0.04255 | 0.35895  | 0.124796 | 0.00693  |
| 0.00025  | 0.16344  | 0.00039  | 0.244988 | 8.23E-08 | 0.225699 | 8.31E-07 | -0.01044 | 0.8219   |
| 0.64477  | 0.261585 | 9.58E-09 | -0.11121 | 0.01621  | -0.01322 | 0.77577  | 0.323339 | 7.95E-13 |
| 0.07775  | 0.083072 | 0.07289  | -0.11633 | 0.01188  | -0.01908 | 0.68084  | 0.378511 | 2.35E-17 |
| 4.93E-20 | -0.3765  | 3.56E-17 | -0.63805 | 9.54E-55 | -0.59746 | 1.60E-46 | -0.06152 | 0.18444  |
| 4.37E-15 | -0.21277 | 3.50E-06 | -0.5431  | 3.48E-37 | -0.45686 | 1.85E-25 | 0.057776 | 0.21268  |
| 0.30405  | 0.170758 | 0.00021  | 0.361047 | 7.97E-16 | 0.167858 | 0.00027  | -0.1446  | 0.00173  |
| 0.32844  | 0.291351 | 1.37E-10 | 0.269616 | 3.20E-09 | 0.168812 | 0.00025  | -0.16193 | 0.00044  |
| 2.52E-09 | -0.4287  | 2.67E-22 | -0.54292 | 3.71E-37 | -0.5048  | 1.46E-31 | 0.006503 | 0.88853  |
| 0.01274  | -0.37489 | 4.96E-17 | -0.44645 | 2.95E-24 | -0.37366 | 6.39E-17 | 0.088012 | 0.05736  |
| 0.04514  | -0.30717 | 1.16E-11 | -0.20376 | 9.08E-06 | -0.16468 | 0.00035  | 0.191064 | 3.24E-05 |
| 0.17981  | -0.05114 | 0.27005  | -0.12861 | 0.00538  | -0.02667 | 0.56538  | 0.053076 | 0.25232  |
| 2.43E-05 | 0.104001 | 0.0246   | -0.08547 | 0.06498  | 0.058772 | 0.20488  | 0.116889 | 0.01147  |
| 2.82E-05 | 0.214538 | 2.89E-06 | 0.524624 | 2.20E-34 | 0.340461 | 3.88E-14 | 0.006542 | 0.88787  |
| 0.0054   | -0.07869 | 0.08939  | -0.16519 | 0.00034  | -0.05404 | 0.24385  | 0.426466 | 4.62E-22 |
| 0.59794  | 0.066995 | 0.14831  | -0.236   | 2.48E-07 | -0.10525 | 0.02293  | 0.277052 | 1.12E-09 |
| 7.57E-06 | -0.07547 | 0.10332  | -0.43649 | 3.82E-23 | -0.28626 | 2.94E-10 | -0.1239  | 0.00735  |
| 0.08373  | -0.18961 | 3.72E-05 | -0.37011 | 1.31E-16 | -0.26696 | 4.62E-09 | 0.266318 | 5.05E-09 |
| 0.47241  | -0.16738 | 0.00028  | -0.23382 | 3.22E-07 | -0.16007 | 0.00052  | 0.518583 | 1.66E-33 |
| 3.75E-06 | -0.28022 | 7.12E-10 | -0.54608 | 1.18E-37 | -0.42832 | 2.94E-22 | -0.08997 | 0.05201  |
| 0.36349  | -0.1945  | 2.31E-05 | -0.31577 | 2.85E-12 | -0.16262 | 0.00042  | -0.12948 | 0.00507  |

|          |          |          |          |          |          |          |          |          |
|----------|----------|----------|----------|----------|----------|----------|----------|----------|
| 1.32E-06 | 0.017566 | 0.70497  | -0.17886 | 0.0001   | 0.05643  | 0.22354  | 0.496146 | 2.17E-30 |
| 0.00217  | -0.32478 | 6.21E-13 | -0.57751 | 6.83E-43 | -0.39132 | 1.54E-18 | -0.20808 | 5.78E-06 |
| 7.70E-07 | -0.01529 | 0.74168  | -0.31272 | 4.71E-12 | -0.25144 | 3.63E-08 | 0.122269 | 0.00817  |
| 9.33E-23 | -0.30318 | 2.19E-11 | -0.62882 | 9.07E-53 | -0.57654 | 1.01E-42 | -0.02489 | 0.59162  |
| 4.51E-09 | -0.1232  | 0.00769  | -0.49922 | 8.38E-31 | -0.40723 | 4.41E-20 | 0.020462 | 0.65918  |
| 0.03324  | -0.02904 | 0.53126  | -0.21318 | 3.35E-06 | -0.06702 | 0.14815  | 0.199182 | 1.45E-05 |
| 0.00148  | 0.41497  | 7.30E-21 | 0.423331 | 9.91E-22 | 0.370161 | 1.30E-16 | -0.0973  | 0.03555  |
| 0.05681  | -0.23578 | 2.54E-07 | -0.23143 | 4.27E-07 | -0.18292 | 7.01E-05 | 0.057935 | 0.21142  |
| 0.04916  | -0.16324 | 0.0004   | -0.25136 | 3.67E-08 | -0.22244 | 1.20E-06 | -0.01145 | 0.80513  |
| 1.06E-20 | 0.171451 | 0.0002   | 0.389513 | 2.28E-18 | 0.375711 | 4.19E-17 | 0.249998 | 4.37E-08 |
| 0.00337  | -0.21708 | 2.19E-06 | -0.23914 | 1.70E-07 | -0.13118 | 0.00452  | 0.264206 | 6.73E-09 |
| 0.0342   | -0.19759 | 1.70E-05 | -0.4081  | 3.61E-20 | -0.29836 | 4.68E-11 | 0.047116 | 0.30962  |
| 0.65909  | -0.17908 | 9.98E-05 | -0.24276 | 1.09E-07 | -0.12258 | 0.008    | -0.0023  | 0.96051  |
| 1.91E-05 | -0.00381 | 0.93455  | -0.00718 | 0.87699  | 0.048303 | 0.29757  | 0.252894 | 3.01E-08 |
| 0.00853  | -0.32704 | 4.21E-13 | -0.34113 | 3.44E-14 | -0.30266 | 2.39E-11 | -0.19836 | 1.57E-05 |
| 1.06E-06 | -0.0895  | 0.05327  | -0.3842  | 7.10E-18 | -0.32756 | 3.84E-13 | 0.043421 | 0.34914  |
| 0.15204  | -0.22622 | 7.82E-07 | -0.35322 | 3.61E-15 | -0.28696 | 2.65E-10 | 0.0071   | 0.87839  |
| 0.43818  | 0.001115 | 0.98083  | -0.17357 | 0.00016  | -0.04382 | 0.34475  | 0.279248 | 8.20E-10 |
| 0.10789  | -0.10722 | 0.02047  | -0.24132 | 1.30E-07 | -0.20917 | 5.15E-06 | -0.04202 | 0.36495  |
| 3.17E-13 | -0.39439 | 7.88E-19 | -0.65532 | 1.23E-58 | -0.57334 | 3.66E-42 | -0.07741 | 0.09474  |
| 0.00028  | -0.27334 | 1.90E-09 | -0.43994 | 1.59E-23 | -0.35002 | 6.62E-15 | -0.07759 | 0.09399  |
| 0.21598  | -0.18109 | 8.31E-05 | -0.23582 | 2.53E-07 | -0.15802 | 0.00061  | 0.213308 | 3.30E-06 |
| 0.01121  | -0.16396 | 0.00037  | -0.48987 | 1.47E-29 | -0.34682 | 1.21E-14 | 0.06057  | 0.19134  |
| 0.7296   | 0.508692 | 4.20E-32 | 0.376397 | 3.64E-17 | 0.280365 | 6.98E-10 | 0.0305   | 0.51086  |
| 0.00706  | 0.269787 | 3.13E-09 | 0.357703 | 1.53E-15 | 0.291728 | 1.30E-10 | 0.554222 | 5.88E-39 |
| 9.67E-05 | -0.41147 | 1.66E-20 | -0.43823 | 2.45E-23 | -0.43357 | 7.96E-23 | 0.071599 | 0.12232  |
| 0.00974  | -0.13871 | 0.00266  | -0.12805 | 0.00558  | -0.02653 | 0.56743  | 0.000489 | 0.99159  |
| 0.00016  | 0.418236 | 3.37E-21 | 0.653048 | 4.13E-58 | 0.44829  | 1.82E-24 | -0.0045  | 0.9228   |
| 1.74E-15 | -0.20447 | 8.43E-06 | -0.44211 | 9.09E-24 | -0.43342 | 8.26E-23 | -0.13711 | 0.00299  |
| 5.01E-22 | -0.31953 | 1.52E-12 | -0.54765 | 6.67E-38 | -0.53064 | 2.82E-35 | -0.23741 | 2.09E-07 |
| 1.15E-13 | -0.29748 | 5.36E-11 | -0.53967 | 1.19E-36 | -0.49074 | 1.13E-29 | 0.007911 | 0.86462  |
| 3.08E-07 | 0.382176 | 1.09E-17 | 0.467238 | 1.06E-26 | 0.412988 | 1.16E-20 | 0.076514 | 0.09864  |
| 0.00068  | -0.35329 | 3.56E-15 | -0.44923 | 1.42E-24 | -0.36974 | 1.42E-16 | 0.101849 | 0.02775  |
| 1.07E-07 | -0.22651 | 7.57E-07 | -0.48002 | 2.74E-28 | -0.38717 | 3.77E-18 | 0.014789 | 0.74991  |
| 2.40E-22 | -0.35044 | 6.12E-15 | -0.55799 | 1.42E-39 | -0.55539 | 3.80E-39 | -0.19906 | 1.47E-05 |
| 8.43E-11 | -0.44419 | 5.31E-24 | -0.53605 | 4.26E-36 | -0.53167 | 1.97E-35 | -0.10887 | 0.0186   |
| 0.49883  | -0.17759 | 0.00011  | -0.26257 | 8.40E-09 | -0.20289 | 9.93E-06 | 0.406733 | 4.94E-20 |
| 0.00702  | -0.13551 | 0.00335  | -0.21094 | 4.26E-06 | -0.13141 | 0.00445  | 0.525785 | 1.48E-34 |
| 2.02E-15 | -0.16897 | 0.00024  | -0.49224 | 7.17E-30 | -0.45373 | 4.29E-25 | 0.180848 | 8.49E-05 |
| 6.53E-06 | 0.526977 | 9.89E-35 | 0.261733 | 9.39E-09 | 0.324871 | 6.12E-13 | 0.084404 | 0.0684   |
| 0.62157  | -0.26049 | 1.11E-08 | -0.38505 | 5.94E-18 | -0.33276 | 1.55E-13 | 0.039424 | 0.39532  |
| 7.38E-08 | -0.44104 | 1.20E-23 | -0.56357 | 1.69E-40 | -0.47797 | 4.97E-28 | -0.12024 | 0.0093   |
| 3.44E-12 | 0.390747 | 1.74E-18 | 0.526427 | 1.19E-34 | 0.456275 | 2.16E-25 | 0.033078 | 0.47578  |
| 5.46E-15 | -0.16357 | 0.00039  | -0.40248 | 1.30E-19 | -0.3777  | 2.78E-17 | -0.08089 | 0.08077  |
| 1.43E-06 | 0.022442 | 0.62858  | -0.30093 | 3.13E-11 | -0.23852 | 1.83E-07 | -0.12482 | 0.00692  |

|          |          |          |          |          |          |          |          |          |
|----------|----------|----------|----------|----------|----------|----------|----------|----------|
| 4.73E-15 | 0.346373 | 1.31E-14 | 0.458782 | 1.10E-25 | 0.437544 | 2.92E-23 | 0.213736 | 3.15E-06 |
| 1.24E-17 | -0.25667 | 1.84E-08 | -0.64933 | 2.93E-57 | -0.52095 | 7.57E-34 | -0.15958 | 0.00054  |
| 4.63E-06 | -0.05052 | 0.27597  | -0.25867 | 1.41E-08 | -0.01121 | 0.80911  | 0.294426 | 8.59E-11 |
| 0.02664  | 0.219318 | 1.71E-06 | -0.16605 | 0.00031  | 0.009126 | 0.84408  | 0.133518 | 0.00385  |
| 0.10463  | 0.147567 | 0.00138  | -0.12101 | 0.00886  | 0.027315 | 0.55598  | 0.253208 | 2.89E-08 |
| 1.25E-08 | -0.37543 | 4.44E-17 | -0.64744 | 7.85E-57 | -0.51183 | 1.53E-32 | -0.20852 | 5.51E-06 |
| 0.62916  | 0.006883 | 0.88207  | 0.355213 | 2.47E-15 | 0.167351 | 0.00028  | 0.028551 | 0.53824  |
| 2.87E-12 | -0.51454 | 6.30E-33 | -0.64087 | 2.29E-55 | -0.58672 | 1.55E-44 | -0.146   | 0.00156  |
| 3.39E-05 | -0.13514 | 0.00343  | -0.38926 | 2.41E-18 | -0.29842 | 4.64E-11 | 0.258749 | 1.40E-08 |
| 0.00018  | 0.135588 | 0.00333  | -0.31737 | 2.18E-12 | -0.18684 | 4.85E-05 | 0.100716 | 0.02954  |
| 2.02E-06 | -0.17106 | 0.0002   | -0.23916 | 1.69E-07 | -0.0483  | 0.29759  | 0.257131 | 1.73E-08 |
| 6.03E-05 | 0.101996 | 0.02752  | -0.14234 | 0.00205  | 0.016305 | 0.72527  | 0.085325 | 0.06543  |
| 0.00031  | -0.25012 | 4.30E-08 | -0.33639 | 8.10E-14 | -0.3196  | 1.50E-12 | -0.01237 | 0.78973  |
| 0.5994   | 0.070363 | 0.12892  | -0.13448 | 0.0036   | -0.05569 | 0.22966  | 0.149393 | 0.0012   |
| 0.38192  | -0.04449 | 0.3374   | -0.31785 | 2.01E-12 | -0.18468 | 5.95E-05 | -0.08386 | 0.07022  |
| 0.40314  | 0.098864 | 0.03268  | -0.10137 | 0.02849  | -0.11421 | 0.01353  | 0.216825 | 2.25E-06 |
| 0.0047   | 0.086124 | 0.06294  | -0.18093 | 8.43E-05 | 0.025106 | 0.58838  | 0.020582 | 0.6573   |
| 0.00359  | -0.19142 | 3.13E-05 | -0.29906 | 4.19E-11 | -0.242   | 1.19E-07 | 0.201838 | 1.11E-05 |
| 4.65E-08 | -0.22528 | 8.72E-07 | -0.33141 | 1.96E-13 | -0.33448 | 1.14E-13 | 0.051183 | 0.26967  |
| 6.94E-07 | -0.42925 | 2.33E-22 | -0.43477 | 5.89E-23 | -0.39789 | 3.63E-19 | -0.32085 | 1.21E-12 |
| 0.00107  | -0.03469 | 0.4545   | -0.2746  | 1.59E-09 | -0.22605 | 7.97E-07 | 0.121718 | 0.00846  |
| 1.87E-12 | -0.54297 | 3.64E-37 | -0.66042 | 7.77E-60 | -0.58972 | 4.41E-45 | -0.11862 | 0.0103   |
| 0.00098  | -0.20237 | 1.05E-05 | -0.13052 | 0.00473  | -0.06012 | 0.19465  | 0.106776 | 0.02101  |
| 9.93E-05 | 0.085788 | 0.06398  | -0.23622 | 2.41E-07 | -0.1862  | 5.16E-05 | -0.30952 | 7.95E-12 |
| 0.05285  | 0.063378 | 0.17153  | 0.292664 | 1.12E-10 | 0.074993 | 0.10554  | 0.017208 | 0.71071  |
| 3.71E-08 | 0.351496 | 5.01E-15 | 0.498698 | 9.86E-31 | 0.42067  | 1.88E-21 | 0.059544 | 0.19899  |
| 0.09586  | -0.32361 | 7.59E-13 | -0.58001 | 2.48E-43 | -0.42644 | 4.65E-22 | 0.05875  | 0.20505  |
| 2.67E-15 | -0.36488 | 3.75E-16 | -0.57149 | 7.63E-42 | -0.53724 | 2.80E-36 | -0.12029 | 0.00927  |
| 1.89E-11 | -0.06383 | 0.16847  | 0.30448  | 1.79E-11 | 0.261608 | 9.55E-09 | -0.07097 | 0.12562  |
| 0.98948  | -0.1908  | 3.32E-05 | -0.3653  | 3.44E-16 | -0.23175 | 4.11E-07 | 0.249823 | 4.47E-08 |
| 0.08544  | -0.08885 | 0.05501  | -0.14247 | 0.00203  | -0.15182 | 0.001    | -0.02441 | 0.59875  |
| 0.42104  | -0.29351 | 9.87E-11 | -0.33756 | 6.56E-14 | -0.22198 | 1.27E-06 | 0.332852 | 1.52E-13 |
| 4.85E-06 | -0.3968  | 4.63E-19 | -0.44738 | 2.31E-24 | -0.42911 | 2.41E-22 | -0.03617 | 0.43551  |
| 0.00014  | 0.02383  | 0.60749  | -0.10173 | 0.02793  | -0.00343 | 0.94101  | 0.113129 | 0.01444  |
| 0.17167  | -0.16277 | 0.00041  | -0.37208 | 8.81E-17 | -0.25145 | 3.63E-08 | -0.05488 | 0.23657  |
| 2.95E-11 | -0.28022 | 7.13E-10 | -0.41881 | 2.94E-21 | -0.41921 | 2.67E-21 | -0.19009 | 3.56E-05 |
| 0.73808  | -0.24799 | 5.64E-08 | -0.46891 | 6.63E-27 | -0.2975  | 5.34E-11 | 0.026508 | 0.56773  |
| 1.64E-13 | -0.41669 | 4.86E-21 | -0.56083 | 4.83E-40 | -0.5508  | 2.09E-38 | 0.040327 | 0.38458  |
| 7.92E-09 | -0.41043 | 2.11E-20 | -0.48324 | 1.06E-28 | -0.4645  | 2.28E-26 | -0.07726 | 0.0954   |
| 0.82666  | 0.224677 | 9.34E-07 | 0.199786 | 1.36E-05 | 0.188783 | 4.03E-05 | -0.07446 | 0.10805  |
| 1.72E-06 | 0.08587  | 0.06372  | -0.36505 | 3.62E-16 | -0.27797 | 9.86E-10 | -0.04303 | 0.35355  |
| 4.98E-23 | -0.43046 | 1.73E-22 | -0.66229 | 2.79E-60 | -0.5971  | 1.88E-46 | -0.17145 | 0.0002   |
| 0.01134  | -0.04    | 0.38843  | -0.18886 | 4.00E-05 | -0.19701 | 1.80E-05 | 0.420196 | 2.11E-21 |
| 6.13E-06 | -0.23197 | 4.00E-07 | -0.21755 | 2.08E-06 | -0.05876 | 0.20494  | 0.220559 | 1.49E-06 |
| 0.00069  | -0.09714 | 0.03585  | -0.41991 | 2.26E-21 | -0.30685 | 1.22E-11 | 0.05106  | 0.27082  |

|          |          |          |          |          |          |          |          |          |
|----------|----------|----------|----------|----------|----------|----------|----------|----------|
| 0.00744  | -0.21499 | 2.75E-06 | -0.17715 | 0.00012  | -0.12601 | 0.0064   | 0.188604 | 4.10E-05 |
| 0.05162  | -0.23171 | 4.13E-07 | -0.17099 | 0.00021  | -0.09869 | 0.03299  | -0.09874 | 0.03291  |
| 1.27E-08 | -0.23294 | 3.57E-07 | -0.45527 | 2.84E-25 | -0.39513 | 6.70E-19 | 0.121456 | 0.0086   |
| 0.03456  | -0.23294 | 3.57E-07 | -0.36646 | 2.74E-16 | -0.31443 | 3.55E-12 | -0.16959 | 0.00023  |
| 0.01144  | -0.33044 | 2.33E-13 | -0.35653 | 1.91E-15 | -0.1874  | 4.60E-05 | 0.182664 | 7.18E-05 |
| 9.95E-05 | 0.511959 | 1.46E-32 | 0.568193 | 2.80E-41 | 0.460395 | 7.05E-26 | 0.200584 | 1.26E-05 |
| 0.00064  | 0.017392 | 0.70776  | -0.06644 | 0.1517   | 0.003031 | 0.94791  | 0.235985 | 2.48E-07 |
| 1.52E-06 | -0.30362 | 2.05E-11 | -0.46714 | 1.09E-26 | -0.40401 | 9.19E-20 | -0.06408 | 0.16685  |
| 5.81E-09 | 0.316094 | 2.70E-12 | 0.508065 | 5.14E-32 | 0.442746 | 7.71E-24 | 0.004965 | 0.91479  |
| 0.582    | 0.2533   | 2.86E-08 | 0.251153 | 3.77E-08 | 0.203863 | 8.98E-06 | -0.12231 | 0.00815  |
| 1.68E-09 | 0.429555 | 2.16E-22 | 0.706401 | 8.51E-72 | 0.544804 | 1.88E-37 | 0.183506 | 6.64E-05 |
| 0.45577  | -0.09727 | 0.03562  | -0.24535 | 7.87E-08 | -0.11755 | 0.01101  | 0.234765 | 2.87E-07 |
| 0.70987  | 0.035646 | 0.44219  | -0.16294 | 0.00041  | -0.10535 | 0.0228   | 0.345768 | 1.46E-14 |
| 5.39E-15 | 0.070125 | 0.13023  | 0.451577 | 7.62E-25 | 0.35559  | 2.30E-15 | 0.143079 | 0.00194  |
| 0.00072  | -0.07032 | 0.12916  | -0.40354 | 1.02E-19 | -0.29341 | 1.00E-10 | 0.149572 | 0.00119  |
| 1.72E-08 | -0.29439 | 8.63E-11 | -0.58306 | 7.08E-44 | -0.47225 | 2.58E-27 | 0.07688  | 0.09704  |
| 9.47E-06 | -0.03987 | 0.38998  | -0.37964 | 1.86E-17 | -0.25021 | 4.26E-08 | -0.1257  | 0.00653  |
| 0.00013  | -0.37917 | 2.05E-17 | -0.45839 | 1.22E-25 | -0.41454 | 8.07E-21 | 0.07897  | 0.08826  |
| 0.07726  | -0.19277 | 2.74E-05 | -0.20535 | 7.70E-06 | -0.11217 | 0.01531  | 0.317773 | 2.04E-12 |
| 0.66627  | -0.35261 | 4.06E-15 | -0.55482 | 4.69E-39 | -0.37281 | 7.60E-17 | 0.128688 | 0.00535  |
| 0.47865  | 0.121665 | 0.00849  | 0.447389 | 2.30E-24 | 0.23181  | 4.08E-07 | -0.06518 | 0.15963  |
| 0.00932  | -0.01586 | 0.73251  | -0.42348 | 9.55E-22 | -0.27006 | 3.01E-09 | -0.10171 | 0.02796  |
| 2.57E-06 | 0.064575 | 0.16356  | -0.27154 | 2.45E-09 | -0.22221 | 1.24E-06 | 0.150455 | 0.00111  |
| 1.69E-12 | -0.45258 | 5.84E-25 | -0.49685 | 1.75E-30 | -0.51826 | 1.85E-33 | -0.00314 | 0.94601  |
| 0.96953  | -0.28167 | 5.78E-10 | -0.51011 | 2.66E-32 | -0.31424 | 3.67E-12 | 0.059644 | 0.19823  |
| 2.95E-13 | -0.2868  | 2.71E-10 | -0.51108 | 1.94E-32 | -0.45689 | 1.83E-25 | -0.06181 | 0.18237  |
| 0.00016  | -0.10228 | 0.0271   | -0.27919 | 8.27E-10 | -0.24408 | 9.22E-08 | 0.001283 | 0.97793  |
| 4.17E-08 | -0.28385 | 4.20E-10 | -0.44627 | 3.08E-24 | -0.42924 | 2.34E-22 | -0.07534 | 0.10395  |
| 2.39E-11 | -0.35129 | 5.21E-15 | -0.69    | 2.84E-67 | -0.56886 | 2.15E-41 | -0.0197  | 0.67105  |
| 0.00181  | -0.2465  | 6.81E-08 | -0.33012 | 2.46E-13 | -0.29768 | 5.20E-11 | 0.070879 | 0.12613  |
| 0.2296   | -0.27151 | 2.46E-09 | -0.373   | 7.31E-17 | -0.25323 | 2.88E-08 | -0.30383 | 1.98E-11 |
| 0.00694  | 0.030939 | 0.5048   | -0.17684 | 0.00012  | -0.16327 | 0.0004   | 0.0572   | 0.21728  |
| 0.52162  | 0.017156 | 0.71155  | -0.32074 | 1.24E-12 | -0.16439 | 0.00036  | -0.02362 | 0.6106   |
| 0.00229  | 0.075594 | 0.10277  | -0.07064 | 0.12743  | 0.026765 | 0.56398  | 0.045209 | 0.32963  |
| 5.11E-07 | 0.121979 | 0.00832  | 0.416884 | 4.64E-21 | 0.344192 | 1.96E-14 | 0.014173 | 0.76     |
| 1.27E-05 | -0.06916 | 0.1356   | -0.21627 | 2.39E-06 | 0.000547 | 0.99059  | 0.296549 | 6.19E-11 |
| 4.08E-05 | -0.4218  | 1.44E-21 | -0.45765 | 1.49E-25 | -0.4369  | 3.44E-23 | -0.07703 | 0.09638  |
| 7.22E-13 | -0.4006  | 1.99E-19 | -0.558   | 1.42E-39 | -0.52073 | 8.16E-34 | -0.17838 | 0.00011  |
| 0.03794  | -0.32569 | 5.31E-13 | -0.61965 | 7.19E-51 | -0.42018 | 2.12E-21 | 0.015264 | 0.74215  |
| 0.03572  | 0.393401 | 9.78E-19 | 0.341726 | 3.08E-14 | 0.270842 | 2.70E-09 | 0.01728  | 0.70956  |
| 0.53363  | -0.14448 | 0.00175  | -0.23972 | 1.58E-07 | -0.14449 | 0.00174  | 0.285758 | 3.17E-10 |
| 0.77833  | -0.31146 | 5.79E-12 | -0.3051  | 1.62E-11 | -0.23198 | 4.00E-07 | 0.144016 | 0.00181  |
| 0.00337  | 0.021784 | 0.63868  | -0.20211 | 1.07E-05 | -0.00033 | 0.99429  | 0.332379 | 1.65E-13 |
| 0.14851  | 0.109923 | 0.01749  | -0.18218 | 7.51E-05 | -0.08497 | 0.06656  | 0.189939 | 3.61E-05 |
| 0.74191  | 0.008501 | 0.85463  | -0.26667 | 4.81E-09 | -0.12803 | 0.00559  | 0.15099  | 0.00106  |

|          |          |          |          |          |          |          |          |          |
|----------|----------|----------|----------|----------|----------|----------|----------|----------|
| 0.21555  | -0.1757  | 0.00014  | -0.40466 | 7.93E-20 | -0.17962 | 9.50E-05 | -0.15686 | 0.00067  |
| 1.16E-11 | 0.193835 | 2.47E-05 | -0.03007 | 0.51684  | 0.180167 | 9.04E-05 | 0.293361 | 1.01E-10 |
| 0.0005   | -0.14163 | 0.00216  | -0.22209 | 1.25E-06 | -0.09835 | 0.0336   | 0.17969  | 9.44E-05 |
| 0.03953  | 0.144329 | 0.00177  | 0.589787 | 4.28E-45 | 0.328406 | 3.32E-13 | 0.044942 | 0.3325   |
| 0.07032  | -0.07183 | 0.12113  | -0.30902 | 8.62E-12 | -0.23635 | 2.38E-07 | 0.029881 | 0.51948  |
| 0.00125  | -0.26088 | 1.05E-08 | -0.37031 | 1.26E-16 | -0.32799 | 3.57E-13 | -0.1668  | 0.00029  |
| 0.00482  | -0.1779  | 0.00011  | -0.21553 | 2.59E-06 | -0.08829 | 0.05657  | -0.04846 | 0.29604  |
| 0.0363   | -0.04488 | 0.33313  | -0.31646 | 2.54E-12 | -0.20493 | 8.03E-06 | 0.317535 | 2.12E-12 |
| 2.19E-06 | -0.2199  | 1.60E-06 | -0.39624 | 5.24E-19 | -0.33336 | 1.39E-13 | 0.105381 | 0.02275  |
| 1.67E-06 | -0.40144 | 1.64E-19 | -0.4625  | 3.96E-26 | -0.41104 | 1.83E-20 | 0.076357 | 0.09934  |
| 3.13E-18 | -0.45    | 1.16E-24 | -0.57908 | 3.62E-43 | -0.58107 | 1.61E-43 | -0.05574 | 0.2293   |
| 0.60126  | -0.17155 | 0.0002   | -0.22518 | 8.82E-07 | -0.14457 | 0.00173  | 0.471695 | 3.02E-27 |
| 1.42E-15 | -0.44364 | 6.12E-24 | -0.63261 | 1.42E-53 | -0.56199 | 3.10E-40 | -0.26151 | 9.68E-09 |
| 2.09E-10 | -0.25139 | 3.66E-08 | -0.50186 | 3.68E-31 | -0.45296 | 5.27E-25 | 0.036181 | 0.43537  |
| 0.00167  | -0.27039 | 2.87E-09 | -0.59124 | 2.32E-45 | -0.44467 | 4.69E-24 | 0.051668 | 0.26515  |
| 0.93741  | -0.15902 | 0.00056  | -0.31067 | 6.59E-12 | -0.20555 | 7.53E-06 | 0.191808 | 3.01E-05 |
| 0.86043  | 0.068542 | 0.13914  | -0.26113 | 1.02E-08 | -0.10004 | 0.03065  | -0.0153  | 0.74165  |
| 0.02451  | -0.32449 | 6.53E-13 | -0.48983 | 1.49E-29 | -0.37495 | 4.90E-17 | 0.008232 | 0.85918  |
| 0.43578  | 0.015566 | 0.73724  | -0.09334 | 0.0438   | -0.04448 | 0.33747  | 0.446558 | 2.86E-24 |
| 0.00089  | -0.08677 | 0.06099  | -0.29513 | 7.71E-11 | -0.236   | 2.48E-07 | 0.011817 | 0.79895  |
| 9.18E-23 | 0.420463 | 1.98E-21 | 0.624621 | 6.84E-52 | 0.59517  | 4.32E-46 | 0.090649 | 0.05026  |
| 2.78E-05 | -0.11149 | 0.01594  | -0.24285 | 1.07E-07 | -0.22466 | 9.36E-07 | 0.178088 | 0.00011  |
| 0.10647  | -0.15157 | 0.00102  | -0.2675  | 4.29E-09 | -0.19321 | 2.63E-05 | 0.005652 | 0.90305  |
| 1.41E-09 | -0.44136 | 1.10E-23 | -0.63045 | 4.09E-53 | -0.53965 | 1.19E-36 | -0.14196 | 0.0021   |
| 0.00015  | -0.29755 | 5.31E-11 | -0.51424 | 6.97E-33 | -0.41128 | 1.73E-20 | -0.05197 | 0.26232  |
| 0.02849  | -0.01522 | 0.74294  | -0.24545 | 7.77E-08 | -0.12864 | 0.00537  | 0.151026 | 0.00106  |
| 0.0839   | 0.082714 | 0.07414  | -0.23659 | 2.31E-07 | -0.06076 | 0.18994  | 0.303222 | 2.18E-11 |
| 7.79E-06 | -0.14909 | 0.00123  | -0.43314 | 8.86E-23 | -0.33774 | 6.36E-14 | -0.13743 | 0.00292  |
| 1.11E-17 | 0.378098 | 2.56E-17 | 0.479458 | 3.23E-28 | 0.477002 | 6.59E-28 | 0.089511 | 0.05323  |
| 0.37288  | -0.19493 | 2.22E-05 | -0.22766 | 6.63E-07 | -0.20981 | 4.81E-06 | -0.14168 | 0.00215  |
| 0.00024  | 0.194315 | 2.35E-05 | 0.387098 | 3.83E-18 | 0.287506 | 2.44E-10 | -0.05556 | 0.23077  |
| 0.00098  | -0.27567 | 1.37E-09 | -0.41463 | 7.90E-21 | -0.32742 | 3.94E-13 | 0.056168 | 0.2257   |
| 0.00459  | -0.39813 | 3.44E-19 | -0.45528 | 2.82E-25 | -0.38569 | 5.18E-18 | 0.029172 | 0.52944  |
| 0.02602  | -0.06838 | 0.14006  | -0.16722 | 0.00028  | -0.10628 | 0.02162  | 0.076712 | 0.09777  |
| 0.01112  | -0.0427  | 0.3572   | -0.13265 | 0.00408  | -0.02724 | 0.55705  | 0.382709 | 9.74E-18 |
| 0.0113   | 0.092007 | 0.0469   | -0.24069 | 1.40E-07 | -0.183   | 6.96E-05 | 0.026271 | 0.57119  |
| 3.24E-09 | -0.26634 | 5.03E-09 | -0.23871 | 1.78E-07 | -0.08385 | 0.07025  | 0.176105 | 0.00013  |
| 6.27E-17 | -0.31415 | 3.72E-12 | -0.57106 | 9.03E-42 | -0.4953  | 2.82E-30 | -0.04007 | 0.38758  |
| 8.48E-10 | -0.52662 | 1.11E-34 | -0.61121 | 3.57E-49 | -0.56437 | 1.24E-40 | -0.06263 | 0.17668  |
| 0.36939  | 0.051678 | 0.26505  | -0.31414 | 3.73E-12 | -0.16893 | 0.00025  | 0.019699 | 0.67114  |
| 1.49E-06 | -0.45588 | 2.41E-25 | -0.5536  | 7.43E-39 | -0.48049 | 2.39E-28 | -0.16122 | 0.00047  |
| 8.55E-05 | 0.289707 | 1.76E-10 | 0.477939 | 5.02E-28 | 0.353115 | 3.68E-15 | 0.037439 | 0.41957  |
| 2.15E-16 | 0.024657 | 0.59507  | 0.458402 | 1.22E-25 | 0.357671 | 1.54E-15 | -0.03872 | 0.40385  |
| 0.01621  | -0.30768 | 1.07E-11 | -0.43085 | 1.57E-22 | -0.35492 | 2.61E-15 | -0.03172 | 0.49405  |
| 5.21E-05 | -0.36238 | 6.14E-16 | -0.58779 | 9.90E-45 | -0.43644 | 3.86E-23 | -0.15019 | 0.00113  |



|          |          |          |          |          |          |          |          |          |
|----------|----------|----------|----------|----------|----------|----------|----------|----------|
| 2.28E-06 | -0.17118 | 0.0002   | -0.17884 | 0.0001   | -0.03811 | 0.41133  | 0.060319 | 0.19319  |
| 2.81E-12 | 0.058954 | 0.20348  | -0.21787 | 2.01E-06 | 0.076446 | 0.09894  | 0.179577 | 9.54E-05 |
| 8.29E-07 | -0.25499 | 2.29E-08 | -0.52693 | 1.00E-34 | -0.4227  | 1.16E-21 | -0.03159 | 0.4959   |
| 0.20422  | -0.2532  | 2.89E-08 | -0.33885 | 5.20E-14 | -0.23426 | 3.05E-07 | 0.320759 | 1.23E-12 |
| 0.64353  | -0.0212  | 0.64767  | -0.12989 | 0.00493  | -0.10693 | 0.02082  | 0.000977 | 0.98321  |
| 0.01536  | -0.45044 | 1.03E-24 | -0.48291 | 1.17E-28 | -0.41419 | 8.76E-21 | -0.16947 | 0.00023  |
| 0.15555  | -0.0287  | 0.53606  | -0.23348 | 3.35E-07 | -0.18636 | 5.08E-05 | 0.05924  | 0.20129  |
| 0.18117  | -0.16186 | 0.00045  | -0.36378 | 4.65E-16 | -0.28928 | 1.87E-10 | -0.08109 | 0.08003  |
| 0.7508   | -0.14919 | 0.00122  | -0.23806 | 1.93E-07 | -0.14619 | 0.00154  | 0.410559 | 2.05E-20 |
| 3.46E-09 | 0.526392 | 1.21E-34 | 0.698099 | 1.81E-69 | 0.566613 | 5.19E-41 | 0.035263 | 0.44711  |
| 3.19E-13 | -0.11582 | 0.01226  | -0.12447 | 0.00708  | 0.046651 | 0.31442  | 0.045214 | 0.32958  |
| 3.20E-14 | -0.45235 | 6.20E-25 | -0.64794 | 6.06E-57 | -0.56632 | 5.82E-41 | -0.24875 | 5.12E-08 |
| 0.38012  | -0.33785 | 6.23E-14 | -0.32214 | 9.75E-13 | -0.26599 | 5.28E-09 | 0.118019 | 0.01069  |
| 4.78E-08 | -0.20595 | 7.22E-06 | -0.55504 | 4.33E-39 | -0.42088 | 1.79E-21 | -0.00315 | 0.94579  |
| 0.30831  | -0.23213 | 3.93E-07 | -0.3207  | 1.25E-12 | -0.16955 | 0.00023  | 0.057149 | 0.21769  |
| 0.0433   | -0.33668 | 7.68E-14 | -0.40764 | 4.02E-20 | -0.35393 | 3.15E-15 | -0.03272 | 0.48058  |
| 5.10E-10 | -0.11614 | 0.01202  | -0.20296 | 9.86E-06 | -0.02307 | 0.61898  | 0.299576 | 3.87E-11 |
| 0.00398  | 0.45795  | 1.37E-25 | 0.405983 | 5.87E-20 | 0.36149  | 7.31E-16 | 0.078776 | 0.08905  |
| 0.84181  | -0.13091 | 0.0046   | -0.24831 | 5.42E-08 | -0.14027 | 0.00238  | -0.11494 | 0.01294  |
| 3.36E-09 | 0.263999 | 6.92E-09 | 0.488063 | 2.53E-29 | 0.371547 | 9.82E-17 | 0.201386 | 1.16E-05 |
| 0.58341  | -0.01709 | 0.71266  | -0.32275 | 8.80E-13 | -0.17725 | 0.00012  | 0.14802  | 0.00134  |
| 1.35E-11 | -0.51126 | 1.84E-32 | -0.64365 | 5.56E-56 | -0.58588 | 2.21E-44 | 0.023962 | 0.60551  |
| 0.0943   | 0.397099 | 4.33E-19 | 0.325438 | 5.55E-13 | 0.293487 | 9.91E-11 | -0.11611 | 0.01204  |
| 3.52E-05 | 0.044552 | 0.33671  | -0.13836 | 0.00273  | -0.00176 | 0.96972  | 0.192157 | 2.91E-05 |
| 0.01631  | 0.065318 | 0.15876  | -0.15468 | 0.0008   | -0.14573 | 0.00159  | -0.09617 | 0.03775  |
| 3.58E-07 | -0.35863 | 1.28E-15 | -0.50273 | 2.79E-31 | -0.4214  | 1.58E-21 | -0.00973 | 0.83383  |
| 0.19785  | -0.05577 | 0.22901  | -0.22967 | 5.25E-07 | -0.19488 | 2.23E-05 | -0.10807 | 0.01949  |
| 0.29118  | -0.26572 | 5.47E-09 | -0.24373 | 9.63E-08 | -0.23352 | 3.33E-07 | 0.227555 | 6.71E-07 |
| 3.18E-10 | -0.49749 | 1.43E-30 | -0.6894  | 4.11E-67 | -0.58614 | 1.98E-44 | -0.19096 | 3.27E-05 |
| 0.00204  | 0.225078 | 8.92E-07 | 0.357443 | 1.61E-15 | 0.133288 | 0.00391  | -0.02637 | 0.56977  |
| 2.80E-06 | 0.071009 | 0.12544  | -0.07636 | 0.09933  | 0.093886 | 0.04257  | 0.100568 | 0.02978  |
| 0.00531  | -0.37534 | 4.53E-17 | -0.4497  | 1.25E-24 | -0.38591 | 4.94E-18 | -0.12347 | 0.00755  |
| 0.07273  | -0.40437 | 8.47E-20 | -0.36439 | 4.12E-16 | -0.26334 | 7.57E-09 | 0.136163 | 0.00319  |
| 3.36E-21 | -0.32049 | 1.29E-12 | -0.32259 | 9.04E-13 | -0.42433 | 7.77E-22 | -0.24792 | 5.69E-08 |
| 1.30E-09 | -0.37726 | 3.05E-17 | -0.3908  | 1.73E-18 | -0.46778 | 9.11E-27 | -0.05972 | 0.19767  |
| 5.50E-15 | -0.2223  | 1.22E-06 | -0.18868 | 4.07E-05 | -0.32257 | 9.06E-13 | 0.022938 | 0.621    |
| 1.34E-15 | -0.51863 | 1.64E-33 | -0.53978 | 1.14E-36 | -0.5498  | 3.03E-38 | -0.31785 | 2.01E-12 |
| 1.34E-12 | -0.37427 | 5.63E-17 | -0.34325 | 2.33E-14 | -0.41801 | 3.55E-21 | -0.20891 | 5.29E-06 |
| 3.13E-12 | -0.62706 | 2.12E-52 | -0.48908 | 1.87E-29 | -0.55918 | 9.06E-40 | -0.22803 | 6.35E-07 |
| 8.86E-16 | -0.33773 | 6.36E-14 | -0.37533 | 4.53E-17 | -0.44137 | 1.10E-23 | -0.24204 | 1.19E-07 |
| 2.77E-18 | -0.64463 | 3.37E-56 | -0.54965 | 3.21E-38 | -0.61787 | 1.66E-50 | -0.15694 | 0.00067  |
| 5.54E-11 | -0.26535 | 5.76E-09 | -0.25193 | 3.41E-08 | -0.28892 | 1.98E-10 | -0.03871 | 0.40393  |
| 1.96E-43 | 0.379887 | 1.76E-17 | 0.555296 | 3.93E-39 | 0.590289 | 3.46E-45 | 0.201167 | 1.18E-05 |
| 1.24E-23 | 0.409429 | 2.66E-20 | 0.310556 | 6.71E-12 | 0.476445 | 7.74E-28 | 0.341502 | 3.21E-14 |
| 9.61E-11 | -0.3325  | 1.62E-13 | -0.36138 | 7.46E-16 | -0.38827 | 2.98E-18 | -0.14596 | 0.00156  |

|          |          |          |          |          |          |          |          |          |
|----------|----------|----------|----------|----------|----------|----------|----------|----------|
| 1.29E-21 | -0.36452 | 4.02E-16 | -0.39198 | 1.33E-18 | -0.46078 | 6.35E-26 | 0.04797  | 0.30092  |
| 9.06E-15 | 0.299766 | 3.76E-11 | 0.416784 | 4.76E-21 | 0.413613 | 1.00E-20 | 0.298111 | 4.86E-11 |
| 1.82E-13 | -0.47874 | 3.98E-28 | -0.43616 | 4.14E-23 | -0.49035 | 1.27E-29 | -0.12269 | 0.00795  |
| 0.01201  | -0.44757 | 2.20E-24 | -0.38946 | 2.31E-18 | -0.3869  | 4.00E-18 | -0.10238 | 0.02694  |
| 1.53E-10 | -0.42337 | 9.82E-22 | -0.38733 | 3.64E-18 | -0.4173  | 4.21E-21 | -0.36006 | 9.67E-16 |
| 1.76E-19 | 0.435268 | 5.20E-23 | 0.315259 | 3.10E-12 | 0.44795  | 1.99E-24 | 0.245514 | 7.71E-08 |
| 1.71E-13 | -0.28916 | 1.91E-10 | -0.36346 | 4.96E-16 | -0.411   | 1.85E-20 | 0.085248 | 0.06567  |
| 8.03E-11 | -0.2913  | 1.38E-10 | -0.39347 | 9.63E-19 | -0.39477 | 7.24E-19 | -0.0494  | 0.28669  |
| 1.88E-64 | 0.485214 | 5.93E-29 | 0.669342 | 5.48E-62 | 0.723885 | 5.61E-77 | 0.205216 | 7.80E-06 |
| 1.05E-28 | -0.42194 | 1.39E-21 | -0.62405 | 9.00E-52 | -0.63813 | 9.16E-55 | -0.05644 | 0.22343  |
| 1.22E-32 | -0.53597 | 4.40E-36 | -0.68684 | 1.95E-66 | -0.69526 | 1.09E-68 | -0.07708 | 0.09615  |
| 2.46E-23 | 0.374156 | 5.77E-17 | 0.267743 | 4.15E-09 | 0.37921  | 2.03E-17 | -0.03388 | 0.4652   |
| 8.11E-05 | -0.31076 | 6.49E-12 | -0.21653 | 2.33E-06 | -0.29776 | 5.13E-11 | 0.037504 | 0.41875  |
| 3.52E-10 | -0.44799 | 1.97E-24 | -0.49576 | 2.45E-30 | -0.51101 | 1.99E-32 | -0.14412 | 0.00179  |
| 3.54E-17 | 0.402377 | 1.33E-19 | 0.465584 | 1.68E-26 | 0.475815 | 9.28E-28 | 0.448912 | 1.54E-24 |
| 3.11E-09 | -0.37653 | 3.54E-17 | -0.3624  | 6.11E-16 | -0.40274 | 1.23E-19 | -0.02336 | 0.61457  |
| 1.94E-19 | 0.365923 | 3.04E-16 | 0.420908 | 1.78E-21 | 0.465797 | 1.59E-26 | 0.442053 | 9.22E-24 |
| 1.54E-14 | -0.35531 | 2.42E-15 | -0.45729 | 1.64E-25 | -0.45    | 1.16E-24 | 0.145735 | 0.00159  |
| 1.77E-20 | 0.446334 | 3.04E-24 | 0.412906 | 1.18E-20 | 0.504159 | 1.78E-31 | -0.10073 | 0.02951  |
| 1.13E-21 | -0.38387 | 7.62E-18 | -0.50976 | 2.98E-32 | -0.54087 | 7.74E-37 | -0.09193 | 0.0471   |
| 9.16E-50 | -0.59454 | 5.65E-46 | -0.72171 | 2.61E-76 | -0.76434 | 1.17E-90 | -0.20374 | 9.09E-06 |
| 1.19E-11 | -0.31417 | 3.71E-12 | -0.32395 | 7.16E-13 | -0.36805 | 1.99E-16 | -0.28521 | 3.43E-10 |
| 1.60E-25 | -0.52906 | 4.85E-35 | -0.59165 | 1.94E-45 | -0.65224 | 6.32E-58 | -0.05127 | 0.26883  |
| 6.92E-07 | -0.36482 | 3.79E-16 | -0.31104 | 6.20E-12 | -0.37465 | 5.21E-17 | -0.25655 | 1.87E-08 |
| 3.04E-16 | -0.46368 | 2.85E-26 | -0.32164 | 1.06E-12 | -0.45449 | 3.50E-25 | -0.08653 | 0.06171  |
| 2.24E-10 | -0.4777  | 5.39E-28 | -0.50468 | 1.51E-31 | -0.50728 | 6.61E-32 | 0.002324 | 0.96006  |
| 4.81E-11 | -0.19817 | 1.60E-05 | -0.25711 | 1.74E-08 | -0.3193  | 1.58E-12 | -0.30817 | 9.88E-12 |
| 1.46E-27 | -0.37542 | 4.45E-17 | -0.42916 | 2.39E-22 | -0.52017 | 9.82E-34 | -0.32184 | 1.03E-12 |
| 5.85E-14 | -0.48011 | 2.67E-28 | -0.50806 | 5.14E-32 | -0.5371  | 2.95E-36 | -0.10181 | 0.0278   |
| 3.09E-07 | -0.47163 | 3.07E-27 | -0.47397 | 1.58E-27 | -0.46971 | 5.29E-27 | 0.036784 | 0.42775  |
| 8.00E-33 | 0.4922   | 7.27E-30 | 0.35844  | 1.32E-15 | 0.533297 | 1.12E-35 | 0.175854 | 0.00013  |
| 0.00058  | -0.2652  | 5.88E-09 | -0.23152 | 4.22E-07 | -0.25462 | 2.41E-08 | 0.035653 | 0.44211  |
| 2.95E-11 | -0.20232 | 1.05E-05 | -0.38086 | 1.44E-17 | -0.38044 | 1.57E-17 | 0.254256 | 2.52E-08 |
| 1.58E-15 | -0.53849 | 1.81E-36 | -0.56767 | 3.43E-41 | -0.56328 | 1.89E-40 | 0.037101 | 0.42377  |
| 8.53E-16 | -0.23751 | 2.06E-07 | -0.32573 | 5.28E-13 | -0.41819 | 3.41E-21 | -0.17601 | 0.00013  |
| 4.55E-37 | -0.54887 | 4.27E-38 | -0.51117 | 1.89E-32 | -0.64299 | 7.77E-56 | -0.2831  | 4.69E-10 |
| 1.57E-06 | -0.45369 | 4.34E-25 | -0.28087 | 6.49E-10 | -0.35874 | 1.25E-15 | -0.03913 | 0.39885  |
| 7.46E-26 | -0.51216 | 1.37E-32 | -0.46672 | 1.23E-26 | -0.58016 | 2.33E-43 | -0.12541 | 0.00665  |
| 5.33E-10 | -0.5754  | 1.61E-42 | -0.5274  | 8.56E-35 | -0.55695 | 2.11E-39 | 0.060014 | 0.19545  |
| 3.73E-16 | -0.42496 | 6.67E-22 | -0.4836  | 9.58E-29 | -0.50543 | 1.19E-31 | -0.31997 | 1.41E-12 |
| 7.53E-21 | -0.38752 | 3.50E-18 | -0.56936 | 1.77E-41 | -0.56128 | 4.07E-40 | -0.14353 | 0.00187  |
| 8.81E-10 | -0.36518 | 3.53E-16 | -0.36292 | 5.52E-16 | -0.41142 | 1.68E-20 | -0.24902 | 4.95E-08 |
| 1.04E-21 | -0.31337 | 4.23E-12 | -0.47125 | 3.42E-27 | -0.51045 | 2.38E-32 | -0.19982 | 1.36E-05 |
| 1.29E-31 | 0.529499 | 4.17E-35 | 0.423715 | 9.03E-22 | 0.514403 | 6.60E-33 | 0.239894 | 1.55E-07 |
| 1.73E-10 | -0.32964 | 2.68E-13 | -0.43893 | 2.05E-23 | -0.43048 | 1.72E-22 | -0.24908 | 4.91E-08 |

|          |          |          |          |          |          |          |          |          |
|----------|----------|----------|----------|----------|----------|----------|----------|----------|
| 1.10E-27 | -0.50594 | 1.01E-31 | -0.63816 | 9.03E-55 | -0.64346 | 6.13E-56 | -0.18615 | 5.18E-05 |
| 1.26E-20 | -0.31485 | 3.31E-12 | -0.40185 | 1.50E-19 | -0.48689 | 3.60E-29 | -0.27375 | 1.80E-09 |
| 6.37E-11 | -0.48704 | 3.44E-29 | -0.50174 | 3.81E-31 | -0.51768 | 2.24E-33 | -0.00973 | 0.8339   |
| 5.64E-30 | -0.52057 | 8.61E-34 | -0.57314 | 3.95E-42 | -0.62913 | 7.78E-53 | -0.20338 | 9.44E-06 |
| 7.25E-17 | -0.44462 | 4.75E-24 | -0.4551  | 2.97E-25 | -0.54647 | 1.03E-37 | -0.19698 | 1.81E-05 |
| 9.56E-10 | -0.33422 | 1.19E-13 | -0.40605 | 5.78E-20 | -0.4192  | 2.68E-21 | 0.060336 | 0.19307  |
| 8.62E-14 | -0.28148 | 5.94E-10 | -0.41441 | 8.32E-21 | -0.42639 | 4.71E-22 | 0.042795 | 0.35614  |
| 7.88E-15 | -0.38056 | 1.53E-17 | -0.35667 | 1.86E-15 | -0.45069 | 9.65E-25 | 0.135998 | 0.00323  |
| 7.21E-37 | 0.404739 | 7.79E-20 | 0.530172 | 3.30E-35 | 0.595927 | 3.12E-46 | 0.100691 | 0.02958  |
| 1.14E-18 | 0.319694 | 1.48E-12 | 0.370703 | 1.17E-16 | 0.393877 | 8.82E-19 | -0.08556 | 0.0647   |
| 1.21E-26 | -0.46149 | 5.23E-26 | -0.46216 | 4.34E-26 | -0.56396 | 1.45E-40 | 0.065289 | 0.15895  |
| 2.97E-20 | -0.44684 | 2.66E-24 | -0.5752  | 1.74E-42 | -0.59268 | 1.25E-45 | -0.23804 | 1.94E-07 |
| 2.68E-09 | -0.43684 | 3.49E-23 | -0.33662 | 7.78E-14 | -0.39296 | 1.08E-18 | -0.33392 | 1.26E-13 |
| 1.10E-18 | -0.3956  | 6.04E-19 | -0.53448 | 7.41E-36 | -0.51482 | 5.75E-33 | -0.13995 | 0.00244  |
| 8.41E-30 | -0.64108 | 2.06E-55 | -0.60322 | 1.29E-47 | -0.68363 | 1.35E-65 | -0.14098 | 0.00226  |
| 2.31E-23 | -0.46311 | 3.34E-26 | -0.67704 | 6.59E-64 | -0.64126 | 1.88E-55 | 0.006767 | 0.88404  |
| 1.84E-07 | -0.2873  | 2.52E-10 | -0.43269 | 9.92E-23 | -0.37636 | 3.67E-17 | -0.08459 | 0.0678   |
| 1.58E-13 | -0.17715 | 0.00012  | -0.3125  | 4.88E-12 | -0.34472 | 1.78E-14 | -0.23118 | 4.39E-07 |
| 8.87E-08 | -0.45208 | 6.66E-25 | -0.45809 | 1.32E-25 | -0.45522 | 2.88E-25 | 0.001705 | 0.97068  |
| 7.41E-41 | -0.55302 | 9.19E-39 | -0.55884 | 1.03E-39 | -0.6709  | 2.27E-62 | -0.31396 | 3.84E-12 |
| 5.79E-19 | -0.5331  | 1.20E-35 | -0.59976 | 5.88E-47 | -0.59057 | 3.07E-45 | -0.20689 | 6.55E-06 |
| 1.51E-32 | -0.50942 | 3.32E-32 | -0.65648 | 6.59E-59 | -0.67442 | 3.02E-63 | -0.16544 | 0.00033  |
| 1.28E-26 | -0.51987 | 1.08E-33 | -0.4876  | 2.91E-29 | -0.58648 | 1.72E-44 | -0.16341 | 0.00039  |
| 1.02E-15 | 0.393534 | 9.50E-19 | 0.484819 | 6.67E-29 | 0.516669 | 3.14E-33 | -0.1457  | 0.00159  |
| 7.92E-24 | -0.42081 | 1.82E-21 | -0.36771 | 2.13E-16 | -0.52401 | 2.71E-34 | -0.15163 | 0.00101  |
| 1.80E-13 | 0.441688 | 1.01E-23 | 0.430996 | 1.51E-22 | 0.479902 | 2.84E-28 | -0.03016 | 0.51564  |
| 8.81E-29 | -0.32524 | 5.74E-13 | -0.42602 | 5.15E-22 | -0.51179 | 1.54E-32 | -0.12044 | 0.00918  |
| 2.73E-17 | -0.32216 | 9.73E-13 | -0.4959  | 2.34E-30 | -0.49859 | 1.02E-30 | -0.02931 | 0.52748  |
| 2.66E-16 | 0.250892 | 3.90E-08 | 0.336073 | 8.57E-14 | 0.35669  | 1.86E-15 | 0.374196 | 5.72E-17 |
| 5.18E-12 | -0.09784 | 0.03455  | -0.34343 | 2.25E-14 | -0.31881 | 1.71E-12 | -0.10884 | 0.01864  |
| 1.52E-30 | -0.34718 | 1.13E-14 | -0.43751 | 2.95E-23 | -0.53682 | 3.26E-36 | -0.2276  | 6.67E-07 |
| 3.85E-27 | 0.56835  | 2.63E-41 | 0.483879 | 8.81E-29 | 0.574406 | 2.39E-42 | 0.645012 | 2.76E-56 |
| 3.77E-29 | -0.41076 | 1.95E-20 | -0.52984 | 3.71E-35 | -0.57388 | 2.94E-42 | 0.045734 | 0.32405  |
| 5.17E-13 | -0.50115 | 4.59E-31 | -0.48364 | 9.47E-29 | -0.50137 | 4.28E-31 | -0.06221 | 0.17959  |
| 8.30E-12 | -0.31782 | 2.02E-12 | -0.25691 | 1.78E-08 | -0.36631 | 2.82E-16 | -0.16883 | 0.00025  |
| 4.48E-16 | -0.52036 | 9.22E-34 | -0.44296 | 7.29E-24 | -0.51159 | 1.65E-32 | -0.02247 | 0.62817  |
| 2.98E-26 | -0.43601 | 4.31E-23 | -0.53467 | 6.92E-36 | -0.57458 | 2.23E-42 | -0.16596 | 0.00032  |
| 3.43E-29 | -0.5642  | 1.33E-40 | -0.61422 | 8.98E-50 | -0.63702 | 1.59E-54 | -0.16345 | 0.00039  |
| 3.79E-28 | -0.23129 | 4.34E-07 | -0.53816 | 2.03E-36 | -0.49644 | 1.99E-30 | -0.13558 | 0.00333  |
| 1.52E-12 | -0.51467 | 6.04E-33 | -0.51049 | 2.35E-32 | -0.5031  | 2.49E-31 | -0.03912 | 0.39897  |
| 2.73E-28 | -0.55131 | 1.74E-38 | -0.63045 | 4.10E-53 | -0.65788 | 3.10E-59 | -0.19536 | 2.12E-05 |
| 5.29E-43 | 0.420293 | 2.06E-21 | 0.436335 | 3.97E-23 | 0.559487 | 8.07E-40 | 0.229698 | 5.23E-07 |
| 1.20E-19 | -0.38266 | 9.84E-18 | -0.37533 | 4.53E-17 | -0.48101 | 2.05E-28 | -0.1854  | 5.56E-05 |
| 4.35E-37 | -0.58306 | 7.09E-44 | -0.65245 | 5.67E-58 | -0.69667 | 4.48E-69 | -0.29855 | 4.54E-11 |
| 3.61E-12 | -0.48646 | 4.09E-29 | -0.44821 | 1.85E-24 | -0.47915 | 3.53E-28 | -0.19338 | 2.58E-05 |

|          |          |          |          |          |          |          |          |          |
|----------|----------|----------|----------|----------|----------|----------|----------|----------|
| 2.81E-20 | -0.53779 | 2.31E-36 | -0.52061 | 8.47E-34 | -0.56754 | 3.61E-41 | -0.29233 | 1.18E-10 |
| 1.07E-12 | -0.4768  | 6.98E-28 | -0.38989 | 2.10E-18 | -0.4587  | 1.12E-25 | -0.06549 | 0.15765  |
| 5.31E-13 | -0.36371 | 4.72E-16 | -0.49071 | 1.14E-29 | -0.48702 | 3.47E-29 | -0.13192 | 0.0043   |
| 1.44E-25 | -0.47895 | 3.74E-28 | -0.55372 | 7.08E-39 | -0.60764 | 1.79E-48 | -0.04625 | 0.31865  |
| 3.42E-14 | -0.24468 | 8.55E-08 | -0.29999 | 3.63E-11 | -0.38846 | 2.86E-18 | -0.15049 | 0.00111  |
| 2.72E-07 | -0.48505 | 6.22E-29 | -0.39835 | 3.28E-19 | -0.43927 | 1.88E-23 | 0.148293 | 0.00131  |
| 1.47E-40 | -0.57366 | 3.22E-42 | -0.60763 | 1.80E-48 | -0.68324 | 1.70E-65 | -0.20814 | 5.74E-06 |
| 1.16E-37 | -0.43424 | 6.73E-23 | -0.67021 | 3.36E-62 | -0.65745 | 3.91E-59 | -0.21104 | 4.22E-06 |
| 1.13E-18 | -0.45572 | 2.51E-25 | -0.54783 | 6.24E-38 | -0.58301 | 7.23E-44 | 0.031672 | 0.49475  |
| 1.86E-09 | -0.41935 | 2.58E-21 | -0.3567  | 1.86E-15 | -0.41796 | 3.60E-21 | 0.086059 | 0.06314  |
| 1.55E-07 | -0.43618 | 4.13E-23 | -0.2891  | 1.93E-10 | -0.37035 | 1.25E-16 | -0.34829 | 9.15E-15 |
| 2.19E-34 | 0.607302 | 2.09E-48 | 0.551055 | 1.91E-38 | 0.674454 | 2.96E-63 | 0.304155 | 1.88E-11 |
| 7.22E-26 | -0.61981 | 6.67E-51 | -0.63657 | 2.00E-54 | -0.67156 | 1.55E-62 | -0.20199 | 1.09E-05 |
| 7.02E-41 | -0.5834  | 6.16E-44 | -0.63939 | 4.85E-55 | -0.71013 | 7.19E-73 | -0.13268 | 0.00408  |
| 1.49E-40 | -0.32162 | 1.07E-12 | -0.29986 | 3.70E-11 | -0.49499 | 3.09E-30 | -0.2942  | 8.89E-11 |
| 2.04E-21 | -0.60474 | 6.56E-48 | -0.48912 | 1.85E-29 | -0.58135 | 1.43E-43 | -0.32762 | 3.81E-13 |
| 2.09E-19 | -0.35904 | 1.18E-15 | -0.45797 | 1.37E-25 | -0.50825 | 4.84E-32 | -0.10931 | 0.01813  |
| 1.94E-27 | -0.53805 | 2.11E-36 | -0.64238 | 1.07E-55 | -0.67414 | 3.54E-63 | -0.09602 | 0.03807  |
| 2.93E-42 | -0.24815 | 5.53E-08 | -0.23291 | 3.58E-07 | -0.45439 | 3.59E-25 | -0.39435 | 7.95E-19 |
| 7.28E-38 | 0.443442 | 6.44E-24 | 0.584033 | 4.74E-44 | 0.609095 | 9.30E-49 | 0.269664 | 3.18E-09 |
| 1.60E-34 | -0.58267 | 8.32E-44 | -0.62469 | 6.60E-52 | -0.68705 | 1.71E-66 | -0.18181 | 7.77E-05 |
| 0.05966  | -0.42622 | 4.90E-22 | -0.2826  | 5.04E-10 | -0.30251 | 2.44E-11 | -0.10281 | 0.02631  |
| 1.36E-16 | -0.54321 | 3.34E-37 | -0.49451 | 3.59E-30 | -0.54454 | 2.07E-37 | -0.3668  | 2.56E-16 |
| 1.68E-05 | -0.41724 | 4.27E-21 | -0.33649 | 7.95E-14 | -0.35053 | 6.01E-15 | 0.058525 | 0.2068   |
| 4.86E-13 | -0.2384  | 1.85E-07 | -0.12705 | 0.00597  | -0.29441 | 8.61E-11 | -0.30473 | 1.72E-11 |
| 2.49E-38 | -0.38888 | 2.61E-18 | -0.46239 | 4.07E-26 | -0.58833 | 7.92E-45 | -0.31979 | 1.45E-12 |
| 6.00E-15 | 0.389002 | 2.54E-18 | 0.351426 | 5.08E-15 | 0.448349 | 1.79E-24 | 0.133675 | 0.0038   |
| 5.96E-24 | -0.35984 | 1.01E-15 | -0.47028 | 4.50E-27 | -0.52595 | 1.40E-34 | -0.24293 | 1.06E-07 |
| 2.68E-39 | -0.61168 | 2.87E-49 | -0.7441  | 1.72E-83 | -0.74475 | 1.04E-83 | -0.22937 | 5.43E-07 |
| 6.45E-55 | -0.52562 | 1.57E-34 | -0.56649 | 5.44E-41 | -0.70184 | 1.66E-70 | -0.40011 | 2.21E-19 |
| 8.07E-28 | 0.478033 | 4.89E-28 | 0.60066  | 3.98E-47 | 0.653473 | 3.29E-58 | 0.19734  | 1.74E-05 |
| 6.94E-25 | -0.5829  | 7.57E-44 | -0.58842 | 7.61E-45 | -0.65494 | 1.51E-58 | -0.1654  | 0.00033  |
| 1.26E-13 | 0.312322 | 5.03E-12 | 0.438263 | 2.43E-23 | 0.381821 | 1.17E-17 | 0.047746 | 0.30318  |
| 1.81E-14 | -0.5177  | 2.23E-33 | -0.47641 | 7.81E-28 | -0.51521 | 5.07E-33 | 0.087911 | 0.05765  |
| 7.66E-18 | -0.47436 | 1.41E-27 | -0.5977  | 1.44E-46 | -0.58513 | 3.01E-44 | -0.09248 | 0.04578  |
| 6.10E-07 | -0.30327 | 2.16E-11 | -0.41119 | 1.77E-20 | -0.35109 | 5.41E-15 | 0.131435 | 0.00444  |
| 1.36E-15 | -0.4588  | 1.09E-25 | -0.60296 | 1.44E-47 | -0.56096 | 4.59E-40 | -0.00324 | 0.94429  |
| 3.88E-09 | -0.40184 | 1.50E-19 | -0.31655 | 2.50E-12 | -0.40208 | 1.42E-19 | 0.23367  | 3.27E-07 |
| 4.86E-19 | -0.16982 | 0.00023  | -0.3629  | 5.54E-16 | -0.39603 | 5.49E-19 | -0.03782 | 0.41488  |
| 2.31E-15 | 0.400416 | 2.07E-19 | 0.241305 | 1.30E-07 | 0.441236 | 1.14E-23 | 0.053366 | 0.24974  |
| 1.47E-08 | -0.41577 | 6.04E-21 | -0.50219 | 3.32E-31 | -0.44391 | 5.71E-24 | -0.12544 | 0.00664  |
| 9.40E-16 | -0.30414 | 1.89E-11 | -0.27553 | 1.40E-09 | -0.41303 | 1.15E-20 | -0.04308 | 0.35294  |
| 3.34E-07 | 0.592729 | 1.23E-45 | 0.497129 | 1.60E-30 | 0.487532 | 2.97E-29 | -0.16882 | 0.00025  |
| 0.00517  | -0.34873 | 8.43E-15 | -0.33426 | 1.18E-13 | -0.30638 | 1.32E-11 | -0.2595  | 1.27E-08 |
| 1.14E-20 | -0.37401 | 5.95E-17 | -0.34195 | 2.96E-14 | -0.43184 | 1.23E-22 | -0.31242 | 4.95E-12 |

|          |          |          |          |          |          |          |          |          |
|----------|----------|----------|----------|----------|----------|----------|----------|----------|
| 0.06988  | -0.07043 | 0.12856  | -0.00594 | 0.89809  | -0.07792 | 0.09258  | -0.20009 | 1.32E-05 |
| 0.00234  | -0.28812 | 2.23E-10 | -0.24639 | 6.91E-08 | -0.23879 | 1.77E-07 | -0.11433 | 0.01343  |
| 2.01E-10 | -0.16009 | 0.00052  | -0.32967 | 2.66E-13 | -0.35924 | 1.13E-15 | -0.03931 | 0.39665  |
| 9.33E-08 | -0.49165 | 8.60E-30 | -0.45887 | 1.07E-25 | -0.47636 | 7.94E-28 | 0.049643 | 0.28435  |
| 4.61E-24 | -0.43948 | 1.79E-23 | -0.55886 | 1.02E-39 | -0.55251 | 1.11E-38 | -0.26527 | 5.82E-09 |
| 7.96E-12 | -0.51094 | 2.04E-32 | -0.38597 | 4.88E-18 | -0.47097 | 3.70E-27 | -0.23497 | 2.80E-07 |
| 2.66E-10 | -0.35724 | 1.67E-15 | -0.25375 | 2.69E-08 | -0.40186 | 1.49E-19 | -0.20923 | 5.12E-06 |
| 6.34E-09 | -0.28703 | 2.62E-10 | -0.25398 | 2.62E-08 | -0.34724 | 1.11E-14 | -0.14643 | 0.00151  |
| 3.81E-14 | -0.2898  | 1.73E-10 | -0.23509 | 2.76E-07 | -0.36086 | 8.27E-16 | 0.044731 | 0.33478  |
| 3.64E-36 | 0.577    | 8.41E-43 | 0.541214 | 6.84E-37 | 0.63862  | 7.15E-55 | 0.363019 | 5.41E-16 |
| 1.06E-32 | -0.51457 | 6.24E-33 | -0.517   | 2.81E-33 | -0.61237 | 2.10E-49 | -0.22247 | 1.20E-06 |
| 2.42E-16 | 0.491352 | 9.40E-30 | 0.473436 | 1.84E-27 | 0.481657 | 1.70E-28 | 0.115967 | 0.01215  |
| 0.00014  | -0.38722 | 3.73E-18 | -0.34816 | 9.39E-15 | -0.34194 | 2.96E-14 | -0.17145 | 0.0002   |
| 4.02E-36 | -0.51147 | 1.71E-32 | -0.47438 | 1.40E-27 | -0.61119 | 3.60E-49 | -0.30665 | 1.26E-11 |
| 1.71E-10 | -0.31646 | 2.54E-12 | -0.38784 | 3.27E-18 | -0.41854 | 3.14E-21 | -0.10239 | 0.02693  |
| 5.29E-27 | -0.39649 | 4.96E-19 | -0.37965 | 1.85E-17 | -0.49493 | 3.16E-30 | -0.0509  | 0.27235  |
| 0.0007   | 0.294326 | 8.72E-11 | 0.179796 | 9.35E-05 | 0.234795 | 2.86E-07 | 0.111395 | 0.01603  |
| 0.00087  | -0.30549 | 1.52E-11 | -0.26952 | 3.25E-09 | -0.3333  | 1.40E-13 | 0.224113 | 9.96E-07 |
| 6.29E-33 | 0.542897 | 3.74E-37 | 0.468807 | 6.83E-27 | 0.5356   | 5.00E-36 | 0.489872 | 1.47E-29 |
| 6.59E-27 | -0.30973 | 7.69E-12 | -0.39226 | 1.25E-18 | -0.4983  | 1.12E-30 | -0.28051 | 6.83E-10 |
| 6.30E-22 | -0.1963  | 1.94E-05 | -0.40494 | 7.45E-20 | -0.43096 | 1.53E-22 | -0.19119 | 3.19E-05 |
| 5.15E-17 | -0.43102 | 1.50E-22 | -0.48297 | 1.15E-28 | -0.5022  | 3.30E-31 | -0.298   | 4.95E-11 |
| 1.91E-11 | -0.06154 | 0.18431  | -0.34197 | 2.95E-14 | -0.36999 | 1.35E-16 | 0.030658 | 0.50867  |
| 3.86E-21 | -0.52247 | 4.55E-34 | -0.4785  | 4.27E-28 | -0.58947 | 4.89E-45 | -0.17245 | 0.00018  |
| 4.27E-19 | 0.566169 | 6.17E-41 | 0.454012 | 3.98E-25 | 0.584833 | 3.41E-44 | 0.332625 | 1.58E-13 |
| 1.23E-34 | -0.50616 | 9.45E-32 | -0.53567 | 4.87E-36 | -0.64793 | 6.09E-57 | -0.17596 | 0.00013  |
| 1.20E-43 | -0.43154 | 1.32E-22 | -0.50527 | 1.25E-31 | -0.62934 | 7.04E-53 | -0.21082 | 4.32E-06 |
| 8.11E-13 | -0.58283 | 7.80E-44 | -0.52613 | 1.32E-34 | -0.54697 | 8.56E-38 | -0.1541  | 0.00083  |
| 2.50E-14 | -0.289   | 1.95E-10 | -0.40143 | 1.65E-19 | -0.42716 | 3.90E-22 | 0.03825  | 0.40956  |
| 1.86E-20 | -0.37333 | 6.83E-17 | -0.41901 | 2.80E-21 | -0.52876 | 5.36E-35 | -0.21731 | 2.13E-06 |
| 9.19E-34 | -0.39643 | 5.02E-19 | -0.39856 | 3.13E-19 | -0.53554 | 5.11E-36 | -0.05881 | 0.20461  |
| 1.28E-58 | 0.583356 | 6.28E-44 | 0.696012 | 6.77E-69 | 0.784493 | 1.51E-98 | 0.210553 | 4.44E-06 |
| 5.09E-20 | -0.49687 | 1.74E-30 | -0.46386 | 2.71E-26 | -0.58003 | 2.46E-43 | -0.05098 | 0.27161  |
| 1.31E-09 | -0.36249 | 6.00E-16 | -0.26805 | 3.98E-09 | -0.33581 | 8.98E-14 | -0.04242 | 0.36037  |
| 1.23E-21 | -0.35554 | 2.32E-15 | -0.38458 | 6.55E-18 | -0.44586 | 3.44E-24 | -0.23119 | 4.39E-07 |
| 7.22E-30 | -0.49308 | 5.56E-30 | -0.57341 | 3.56E-42 | -0.63979 | 3.96E-55 | 0.07069  | 0.12715  |
| 5.78E-30 | -0.58454 | 3.84E-44 | -0.47145 | 3.24E-27 | -0.62258 | 1.81E-51 | -0.40651 | 5.20E-20 |
| 2.99E-13 | -0.26609 | 5.21E-09 | -0.34814 | 9.42E-15 | -0.37528 | 4.58E-17 | -0.18595 | 5.28E-05 |
| 7.94E-16 | -0.34011 | 4.14E-14 | -0.35386 | 3.20E-15 | -0.45104 | 8.79E-25 | -0.11213 | 0.01534  |
| 3.59E-39 | -0.51862 | 1.65E-33 | -0.45112 | 8.60E-25 | -0.6018  | 2.41E-47 | -0.22524 | 8.76E-07 |
| 7.56E-18 | 0.422425 | 1.23E-21 | 0.464802 | 2.09E-26 | 0.496707 | 1.83E-30 | -0.18649 | 5.02E-05 |
| 8.05E-14 | -0.46522 | 1.86E-26 | -0.35467 | 2.74E-15 | -0.41717 | 4.34E-21 | -0.49872 | 9.81E-31 |
| 8.41E-37 | -0.54187 | 5.41E-37 | -0.40866 | 3.17E-20 | -0.59287 | 1.15E-45 | -0.1944  | 2.33E-05 |
| 1.27E-35 | 0.477916 | 5.06E-28 | 0.500398 | 5.81E-31 | 0.582993 | 7.29E-44 | 0.103733 | 0.02498  |
| 7.98E-20 | -0.49445 | 3.65E-30 | -0.44497 | 4.33E-24 | -0.54313 | 3.44E-37 | -0.05645 | 0.22341  |

|          |          |          |          |          |          |          |          |          |
|----------|----------|----------|----------|----------|----------|----------|----------|----------|
| 9.46E-16 | -0.57671 | 9.46E-43 | -0.53144 | 2.13E-35 | -0.58464 | 3.69E-44 | -0.16268 | 0.00042  |
| 1.12E-18 | -0.34532 | 1.59E-14 | -0.42171 | 1.47E-21 | -0.47433 | 1.42E-27 | -0.10231 | 0.02705  |
| 1.18E-39 | -0.27758 | 1.04E-09 | -0.46874 | 6.96E-27 | -0.53929 | 1.36E-36 | -0.20387 | 8.97E-06 |
| 1.27E-11 | -0.28006 | 7.29E-10 | -0.39509 | 6.75E-19 | -0.4035  | 1.03E-19 | -0.19432 | 2.35E-05 |
| 1.20E-16 | 0.480913 | 2.11E-28 | 0.280534 | 6.81E-10 | 0.425057 | 6.52E-22 | 0.256961 | 1.77E-08 |
| 2.91E-20 | -0.2788  | 8.75E-10 | -0.38753 | 3.49E-18 | -0.44867 | 1.64E-24 | -0.05783 | 0.21222  |
| 1.14E-16 | -0.38942 | 2.32E-18 | -0.48942 | 1.68E-29 | -0.50879 | 4.07E-32 | -0.02105 | 0.65006  |
| 1.81E-09 | -0.56045 | 5.58E-40 | -0.56409 | 1.38E-40 | -0.55014 | 2.67E-38 | -0.00354 | 0.93926  |
| 1.01E-13 | -0.2657  | 5.49E-09 | -0.36547 | 3.33E-16 | -0.40471 | 7.84E-20 | -0.17773 | 0.00011  |
| 7.02E-52 | -0.63229 | 1.66E-53 | -0.63897 | 5.99E-55 | -0.74182 | 1.00E-82 | -0.37633 | 3.69E-17 |
| 3.29E-08 | -0.48069 | 2.25E-28 | -0.42053 | 1.95E-21 | -0.42919 | 2.37E-22 | -0.14736 | 0.00141  |
| 8.76E-20 | 0.497759 | 1.32E-30 | 0.547647 | 6.68E-38 | 0.60104  | 3.37E-47 | 0.417465 | 4.05E-21 |
| 2.17E-12 | -0.39914 | 2.75E-19 | -0.50037 | 5.86E-31 | -0.4639  | 2.69E-26 | -0.39126 | 1.56E-18 |
| 1.20E-24 | 0.520985 | 7.48E-34 | 0.366599 | 2.66E-16 | 0.513065 | 1.02E-32 | -0.02607 | 0.57419  |
| 7.96E-31 | -0.49341 | 5.03E-30 | -0.5205  | 8.80E-34 | -0.62409 | 8.80E-52 | -0.28967 | 1.77E-10 |
| 1.46E-48 | -0.36615 | 2.91E-16 | -0.4863  | 4.29E-29 | -0.60592 | 3.88E-48 | -0.36796 | 2.03E-16 |
| 6.68E-06 | -0.41584 | 5.94E-21 | -0.27596 | 1.31E-09 | -0.31387 | 3.90E-12 | -0.02462 | 0.59556  |
| 3.79E-25 | -0.56751 | 3.66E-41 | -0.47754 | 5.63E-28 | -0.57678 | 9.21E-43 | -0.21049 | 4.47E-06 |
| 1.19E-05 | -0.19944 | 1.41E-05 | -0.06918 | 0.13551  | -0.16471 | 0.00035  | -0.09939 | 0.03176  |
| 1.07E-06 | -0.48944 | 1.67E-29 | -0.47183 | 2.90E-27 | -0.45492 | 3.12E-25 | -0.05872 | 0.20527  |
| 2.04E-09 | -0.50941 | 3.33E-32 | -0.37722 | 3.07E-17 | -0.4499  | 1.19E-24 | -0.09539 | 0.03934  |
| 6.34E-11 | -0.37732 | 3.01E-17 | -0.24395 | 9.37E-08 | -0.33747 | 6.67E-14 | -0.11262 | 0.01489  |
| 9.09E-17 | -0.47714 | 6.32E-28 | -0.57449 | 2.31E-42 | -0.57569 | 1.43E-42 | -0.39888 | 2.91E-19 |
| 4.13E-35 | -0.54331 | 3.22E-37 | -0.54528 | 1.58E-37 | -0.62437 | 7.71E-52 | -0.39279 | 1.12E-18 |
| 8.86E-13 | -0.39464 | 7.45E-19 | -0.42654 | 4.54E-22 | -0.46905 | 6.38E-27 | -0.05117 | 0.26979  |
| 2.46E-24 | -0.56048 | 5.53E-40 | -0.58772 | 1.02E-44 | -0.65132 | 1.03E-57 | -0.0326  | 0.48219  |
| 1.63E-35 | -0.40255 | 1.28E-19 | -0.51555 | 4.53E-33 | -0.6079  | 1.59E-48 | -0.20156 | 1.14E-05 |
| 5.00E-15 | -0.38037 | 1.59E-17 | -0.42171 | 1.46E-21 | -0.49172 | 8.40E-30 | 0.059359 | 0.20039  |
| 3.86E-29 | -0.47464 | 1.30E-27 | -0.44736 | 2.32E-24 | -0.57919 | 3.46E-43 | -0.26975 | 3.14E-09 |
| 2.83E-35 | -0.49512 | 2.98E-30 | -0.44281 | 7.58E-24 | -0.57878 | 4.09E-43 | -0.14474 | 0.00171  |
| 5.63E-20 | -0.40839 | 3.38E-20 | -0.58192 | 1.13E-43 | -0.56122 | 4.16E-40 | -0.11257 | 0.01494  |
| 2.23E-13 | -0.52599 | 1.38E-34 | -0.57751 | 6.86E-43 | -0.54077 | 8.00E-37 | -0.06815 | 0.1414   |
| 2.12E-56 | -0.46715 | 1.09E-26 | -0.64732 | 8.38E-57 | -0.723   | 1.05E-76 | -0.30632 | 1.33E-11 |
| 3.43E-41 | -0.52971 | 3.88E-35 | -0.4936  | 4.74E-30 | -0.63418 | 6.55E-54 | -0.14864 | 0.00128  |
| 4.04E-21 | 0.53084  | 2.62E-35 | 0.398879 | 2.92E-19 | 0.484148 | 8.14E-29 | 0.238915 | 1.74E-07 |
| 2.71E-22 | -0.60043 | 4.39E-47 | -0.61786 | 1.66E-50 | -0.65308 | 4.07E-58 | -0.1501  | 0.00114  |
| 5.72E-20 | 0.224321 | 9.72E-07 | 0.501344 | 4.32E-31 | 0.448385 | 1.77E-24 | 0.25965  | 1.24E-08 |
| 2.06E-13 | -0.4362  | 4.11E-23 | -0.26172 | 9.41E-09 | -0.39184 | 1.38E-18 | -0.07502 | 0.10543  |
| 3.98E-07 | 0.441959 | 9.45E-24 | 0.158938 | 0.00057  | 0.313032 | 4.48E-12 | 0.277862 | 1.00E-09 |
| 4.25E-15 | -0.39945 | 2.57E-19 | -0.48591 | 4.83E-29 | -0.46087 | 6.20E-26 | -0.23184 | 4.07E-07 |
| 9.28E-31 | -0.343   | 2.44E-14 | -0.44737 | 2.31E-24 | -0.54939 | 3.53E-38 | -0.24945 | 4.69E-08 |
| 5.47E-07 | 0.620054 | 5.96E-51 | 0.490124 | 1.36E-29 | 0.491677 | 8.52E-30 | 0.495074 | 3.02E-30 |
| 3.61E-29 | -0.49918 | 8.48E-31 | -0.54667 | 9.53E-38 | -0.62251 | 1.87E-51 | -0.22174 | 1.30E-06 |
| 1.70E-06 | -0.41413 | 8.90E-21 | -0.33399 | 1.24E-13 | -0.34566 | 1.49E-14 | -0.09426 | 0.04175  |
| 3.60E-05 | -0.44271 | 7.78E-24 | -0.45999 | 7.89E-26 | -0.38966 | 2.21E-18 | -0.36935 | 1.53E-16 |

|          |          |          |          |          |          |          |          |          |
|----------|----------|----------|----------|----------|----------|----------|----------|----------|
| 2.76E-15 | -0.32584 | 5.18E-13 | -0.4015  | 1.62E-19 | -0.45486 | 3.17E-25 | 0.197782 | 1.67E-05 |
| 4.14E-30 | -0.54167 | 5.81E-37 | -0.46085 | 6.22E-26 | -0.58936 | 5.12E-45 | -0.39382 | 8.92E-19 |
| 1.13E-35 | -0.54587 | 1.27E-37 | -0.55601 | 3.00E-39 | -0.64178 | 1.45E-55 | -0.44737 | 2.32E-24 |
| 6.24E-36 | -0.40462 | 8.00E-20 | -0.60447 | 7.38E-48 | -0.63774 | 1.11E-54 | -0.11869 | 0.01026  |
| 5.42E-15 | -0.5314  | 2.16E-35 | -0.461   | 5.97E-26 | -0.52423 | 2.51E-34 | -0.27954 | 7.86E-10 |
| 2.52E-30 | -0.51703 | 2.78E-33 | -0.61074 | 4.42E-49 | -0.66066 | 6.85E-60 | -0.09243 | 0.04589  |
| 7.66E-14 | 0.638482 | 7.66E-55 | 0.559332 | 8.56E-40 | 0.589039 | 5.87E-45 | 0.138186 | 0.00277  |
| 9.50E-24 | -0.32353 | 7.70E-13 | -0.44985 | 1.20E-24 | -0.51625 | 3.59E-33 | -0.08272 | 0.07411  |
| 4.05E-14 | 0.294819 | 8.08E-11 | 0.36708  | 2.42E-16 | 0.394264 | 8.10E-19 | 0.352641 | 4.03E-15 |
| 1.09E-06 | -0.25702 | 1.76E-08 | -0.31982 | 1.45E-12 | -0.29136 | 1.37E-10 | -0.11573 | 0.01232  |
| 8.32E-15 | -0.46663 | 1.26E-26 | -0.29035 | 1.59E-10 | -0.43221 | 1.12E-22 | -0.11937 | 0.00982  |
| 1.76E-26 | -0.51982 | 1.10E-33 | -0.4848  | 6.71E-29 | -0.59776 | 1.41E-46 | -0.19404 | 2.42E-05 |
| 3.85E-30 | -0.41031 | 2.17E-20 | -0.51638 | 3.45E-33 | -0.59604 | 2.97E-46 | -0.17519 | 0.00014  |
| 4.68E-22 | -0.28727 | 2.53E-10 | -0.29191 | 1.26E-10 | -0.37199 | 8.98E-17 | -0.40192 | 1.47E-19 |
| 3.98E-13 | -0.21049 | 4.47E-06 | -0.30385 | 1.97E-11 | -0.37547 | 4.40E-17 | -0.03469 | 0.45452  |
| 2.58E-28 | -0.52965 | 3.96E-35 | -0.64491 | 2.90E-56 | -0.67448 | 2.92E-63 | -0.15391 | 0.00085  |
| 1.29E-16 | -0.20539 | 7.66E-06 | -0.35909 | 1.17E-15 | -0.38567 | 5.20E-18 | 0.098978 | 0.03248  |
| 2.51E-17 | -0.242   | 1.19E-07 | -0.39721 | 4.23E-19 | -0.39457 | 7.57E-19 | -0.21595 | 2.48E-06 |
| 4.01E-09 | 0.577525 | 6.80E-43 | 0.222738 | 1.16E-06 | 0.371862 | 9.21E-17 | 0.358465 | 1.32E-15 |
| 1.08E-39 | 0.716658 | 8.67E-75 | 0.668661 | 8.05E-62 | 0.7796   | 1.49E-96 | 0.383969 | 7.46E-18 |
| 3.21E-28 | 0.541348 | 6.52E-37 | 0.318538 | 1.79E-12 | 0.538153 | 2.03E-36 | 0.454994 | 3.05E-25 |
| 1.19E-38 | -0.47921 | 3.47E-28 | -0.51613 | 3.75E-33 | -0.63518 | 3.99E-54 | -0.18481 | 5.88E-05 |
| 3.85E-14 | -0.23414 | 3.10E-07 | -0.31872 | 1.74E-12 | -0.38215 | 1.10E-17 | 0.087235 | 0.05961  |
| 4.70E-55 | -0.45801 | 1.35E-25 | -0.62769 | 1.57E-52 | -0.69429 | 1.99E-68 | -0.0551  | 0.23466  |
| 5.65E-11 | -0.49437 | 3.75E-30 | -0.31826 | 1.88E-12 | -0.40017 | 2.19E-19 | -0.20224 | 1.06E-05 |
| 2.60E-34 | 0.550855 | 2.05E-38 | 0.473555 | 1.77E-27 | 0.598123 | 1.20E-46 | 0.161251 | 0.00047  |
| 6.91E-27 | 0.469809 | 5.15E-27 | 0.496887 | 1.73E-30 | 0.568638 | 2.35E-41 | 0.253667 | 2.72E-08 |
| 0.0639   | -0.22287 | 1.15E-06 | -0.30614 | 1.37E-11 | -0.21055 | 4.45E-06 | -0.09381 | 0.04273  |
| 2.35E-33 | -0.58767 | 1.04E-44 | -0.42366 | 9.15E-22 | -0.61553 | 4.91E-50 | -0.3769  | 3.28E-17 |
| 2.83E-24 | -0.65087 | 1.30E-57 | -0.62536 | 4.80E-52 | -0.68688 | 1.90E-66 | -0.20026 | 1.30E-05 |
| 3.24E-12 | -0.23193 | 4.02E-07 | -0.38349 | 8.27E-18 | -0.36868 | 1.75E-16 | -0.06336 | 0.17164  |
| 4.89E-37 | -0.32529 | 5.69E-13 | -0.46902 | 6.43E-27 | -0.57658 | 9.95E-43 | -0.31552 | 2.97E-12 |
| 9.86E-12 | -0.51782 | 2.14E-33 | -0.49146 | 9.10E-30 | -0.51536 | 4.81E-33 | -0.07661 | 0.0982   |
| 2.85E-16 | 0.428528 | 2.79E-22 | 0.289376 | 1.85E-10 | 0.417095 | 4.42E-21 | 0.398104 | 3.47E-19 |
| 4.49E-06 | -0.11275 | 0.01477  | -0.2378  | 1.99E-07 | -0.25166 | 3.53E-08 | -0.11313 | 0.01445  |
| 1.82E-16 | -0.37993 | 1.75E-17 | -0.31219 | 5.14E-12 | -0.40705 | 4.60E-20 | -0.11082 | 0.01658  |
| 3.74E-16 | -0.28321 | 4.61E-10 | -0.36838 | 1.86E-16 | -0.44277 | 7.67E-24 | -0.16408 | 0.00037  |
| 2.17E-29 | -0.48969 | 1.55E-29 | -0.55779 | 1.53E-39 | -0.62264 | 1.76E-51 | -0.29343 | 1.00E-10 |
| 1.22E-34 | -0.51293 | 1.07E-32 | -0.47341 | 1.85E-27 | -0.58222 | 1.00E-43 | -0.21216 | 3.74E-06 |
| 3.51E-05 | -0.37456 | 5.32E-17 | -0.35252 | 4.13E-15 | -0.34864 | 8.59E-15 | -0.02436 | 0.59947  |
| 3.00E-24 | -0.50714 | 6.91E-32 | -0.52907 | 4.83E-35 | -0.56237 | 2.68E-40 | -0.24371 | 9.66E-08 |
| 4.82E-26 | -0.39765 | 3.83E-19 | -0.34492 | 1.71E-14 | -0.48592 | 4.81E-29 | -0.05745 | 0.21524  |
| 0.00017  | -0.28826 | 2.18E-10 | -0.21607 | 2.45E-06 | -0.2641  | 6.83E-09 | -0.10285 | 0.02625  |
| 1.76E-24 | -0.4855  | 5.44E-29 | -0.44705 | 2.52E-24 | -0.54978 | 3.06E-38 | -0.24626 | 7.01E-08 |
| 7.66E-20 | -0.64404 | 4.56E-56 | -0.65043 | 1.64E-57 | -0.63935 | 4.95E-55 | -0.03092 | 0.50512  |

|          |          |          |          |          |          |          |          |          |
|----------|----------|----------|----------|----------|----------|----------|----------|----------|
| 3.73E-21 | -0.53837 | 1.88E-36 | -0.39593 | 5.61E-19 | -0.53975 | 1.15E-36 | -0.25208 | 3.34E-08 |
| 1.36E-38 | 0.478741 | 3.98E-28 | 0.636876 | 1.71E-54 | 0.627319 | 1.87E-52 | 0.151501 | 0.00102  |
| 1.59E-24 | -0.48824 | 2.41E-29 | -0.35075 | 5.77E-15 | -0.51349 | 8.88E-33 | -0.38198 | 1.14E-17 |
| 1.32E-39 | 0.631434 | 2.53E-53 | 0.458003 | 1.35E-25 | 0.618592 | 1.18E-50 | 0.186611 | 4.96E-05 |
| 1.16E-25 | 0.573123 | 3.99E-42 | 0.488594 | 2.16E-29 | 0.566213 | 6.06E-41 | 0.511706 | 1.59E-32 |
| 1.44E-17 | 0.549935 | 2.88E-38 | 0.521572 | 6.15E-34 | 0.56856  | 2.42E-41 | 0.534753 | 6.73E-36 |
| 2.20E-12 | -0.14712 | 0.00143  | -0.26773 | 4.16E-09 | -0.29774 | 5.15E-11 | -0.10924 | 0.0182   |
| 1.21E-15 | -0.21616 | 2.42E-06 | -0.29776 | 5.14E-11 | -0.37158 | 9.76E-17 | 0.006802 | 0.88344  |
| 2.82E-19 | -0.33798 | 6.08E-14 | -0.31928 | 1.58E-12 | -0.42524 | 6.23E-22 | -0.12388 | 0.00736  |
| 2.76E-06 | -0.24217 | 1.17E-07 | -0.28718 | 2.57E-10 | -0.27077 | 2.73E-09 | -0.0691  | 0.13594  |
| 7.25E-13 | -0.48961 | 1.59E-29 | -0.39831 | 3.31E-19 | -0.46761 | 9.57E-27 | -0.09253 | 0.04567  |
| 2.02E-06 | -0.32022 | 1.35E-12 | -0.35469 | 2.73E-15 | -0.38281 | 9.54E-18 | -0.20174 | 1.12E-05 |
| 1.23E-23 | -0.61463 | 7.44E-50 | -0.58359 | 5.70E-44 | -0.64145 | 1.71E-55 | -0.16165 | 0.00045  |
| 4.98E-08 | -0.24982 | 4.47E-08 | -0.38264 | 9.88E-18 | -0.37362 | 6.43E-17 | -0.00149 | 0.97442  |
| 0.00135  | -0.20132 | 1.17E-05 | -0.15476 | 0.00079  | -0.21749 | 2.09E-06 | 0.104648 | 0.02372  |
| 6.33E-11 | -0.38552 | 5.37E-18 | -0.32173 | 1.05E-12 | -0.40907 | 2.89E-20 | -0.17496 | 0.00014  |
| 1.68E-26 | -0.33533 | 9.78E-14 | -0.38251 | 1.02E-17 | -0.47442 | 1.38E-27 | -0.1451  | 0.00167  |
| 6.90E-27 | -0.36039 | 9.06E-16 | -0.51906 | 1.42E-33 | -0.51256 | 1.20E-32 | -0.24174 | 1.23E-07 |
| 1.91E-25 | -0.38153 | 1.25E-17 | -0.38459 | 6.55E-18 | -0.50024 | 6.10E-31 | -0.25085 | 3.92E-08 |
| 1.20E-12 | 0.225464 | 8.53E-07 | 0.312872 | 4.60E-12 | 0.36067  | 8.58E-16 | -0.04797 | 0.30095  |
| 4.00E-16 | -0.40815 | 3.57E-20 | -0.39011 | 2.00E-18 | -0.46228 | 4.21E-26 | -0.20812 | 5.75E-06 |
| 5.30E-10 | -0.39476 | 7.26E-19 | -0.33207 | 1.75E-13 | -0.40984 | 2.42E-20 | 0.080957 | 0.08052  |
| 3.39E-27 | 0.489823 | 1.49E-29 | 0.515636 | 4.40E-33 | 0.526179 | 1.30E-34 | 0.326132 | 4.92E-13 |
| 8.08E-61 | 0.577679 | 6.39E-43 | 0.569897 | 1.43E-41 | 0.724356 | 4.02E-77 | 0.303895 | 1.96E-11 |
| 2.61E-52 | 0.533957 | 8.89E-36 | 0.664864 | 6.74E-61 | 0.741266 | 1.54E-82 | 0.307455 | 1.11E-11 |
| 1.01E-11 | -0.24797 | 5.66E-08 | -0.30802 | 1.01E-11 | -0.36426 | 4.24E-16 | 0.059579 | 0.19872  |
| 1.06E-23 | -0.4638  | 2.76E-26 | -0.50547 | 1.18E-31 | -0.57401 | 2.80E-42 | -0.13512 | 0.00344  |
| 1.78E-17 | 0.471489 | 3.20E-27 | 0.248527 | 5.27E-08 | 0.389171 | 2.45E-18 | 0.099242 | 0.03202  |
| 1.70E-15 | 0.59135  | 2.21E-45 | 0.517193 | 2.64E-33 | 0.572039 | 6.13E-42 | 0.299818 | 3.73E-11 |
| 2.77E-11 | -0.39675 | 4.68E-19 | -0.40787 | 3.81E-20 | -0.44109 | 1.18E-23 | -0.1711  | 0.0002   |
| 1.70E-58 | -0.40535 | 6.78E-20 | -0.58639 | 1.78E-44 | -0.68356 | 1.40E-65 | -0.33764 | 6.47E-14 |
| 3.24E-30 | -0.52657 | 1.14E-34 | -0.68329 | 1.66E-65 | -0.68299 | 1.97E-65 | -0.15428 | 0.00082  |
| 2.43E-08 | -0.45591 | 2.39E-25 | -0.36946 | 1.50E-16 | -0.39795 | 3.59E-19 | -0.44152 | 1.06E-23 |
| 2.02E-19 | -0.40343 | 1.05E-19 | -0.45528 | 2.83E-25 | -0.53314 | 1.18E-35 | -0.31702 | 2.31E-12 |
| 6.50E-17 | -0.20841 | 5.58E-06 | -0.28235 | 5.22E-10 | -0.35916 | 1.15E-15 | -0.22915 | 5.57E-07 |
| 1.76E-44 | 0.433279 | 8.56E-23 | 0.336226 | 8.34E-14 | 0.541417 | 6.36E-37 | 0.218411 | 1.89E-06 |
| 8.22E-28 | -0.24269 | 1.10E-07 | -0.40714 | 4.51E-20 | -0.49698 | 1.68E-30 | -0.30059 | 3.30E-11 |
| 3.38E-23 | 0.479121 | 3.56E-28 | 0.493127 | 5.48E-30 | 0.519918 | 1.07E-33 | 0.100584 | 0.02976  |
| 3.56E-19 | 0.348642 | 8.57E-15 | 0.264143 | 6.79E-09 | 0.39398  | 8.62E-19 | 0.221536 | 1.33E-06 |
| 2.53E-12 | 0.441367 | 1.10E-23 | 0.334699 | 1.10E-13 | 0.401365 | 1.67E-19 | -0.01133 | 0.80706  |
| 1.56E-08 | -0.25339 | 2.82E-08 | -0.28028 | 7.07E-10 | -0.30398 | 1.93E-11 | 0.05966  | 0.19811  |
| 1.04E-24 | -0.42287 | 1.11E-21 | -0.36468 | 3.89E-16 | -0.49609 | 2.21E-30 | -0.12756 | 0.00577  |
| 3.20E-27 | -0.53939 | 1.31E-36 | -0.53905 | 1.48E-36 | -0.59952 | 6.55E-47 | -0.00424 | 0.92721  |
| 6.74E-07 | -0.07736 | 0.09498  | -0.21549 | 2.61E-06 | -0.24725 | 6.19E-08 | -0.09312 | 0.04428  |
| 4.68E-38 | -0.54644 | 1.04E-37 | -0.65565 | 1.03E-58 | -0.70049 | 3.94E-70 | -0.16719 | 0.00028  |



|          |          |          |          |          |          |          |          |          |
|----------|----------|----------|----------|----------|----------|----------|----------|----------|
| 8.71E-55 | -0.54568 | 1.37E-37 | -0.56952 | 1.66E-41 | -0.71684 | 7.65E-75 | -0.24641 | 6.89E-08 |
| 7.55E-12 | 0.437556 | 2.91E-23 | 0.43484  | 5.79E-23 | 0.397633 | 3.85E-19 | 0.209088 | 5.19E-06 |
| 2.68E-43 | -0.51598 | 3.93E-33 | -0.5318  | 1.88E-35 | -0.65454 | 1.86E-58 | -0.42102 | 1.73E-21 |
| 1.28E-11 | -0.46048 | 6.89E-26 | -0.42812 | 3.08E-22 | -0.49103 | 1.04E-29 | -0.17674 | 0.00012  |
| 2.69E-15 | -0.62768 | 1.57E-52 | -0.62786 | 1.44E-52 | -0.63217 | 1.76E-53 | -0.19211 | 2.92E-05 |
| 2.73E-08 | -0.35084 | 5.67E-15 | -0.37374 | 6.28E-17 | -0.38491 | 6.11E-18 | 0.142953 | 0.00196  |
| 2.97E-25 | -0.52279 | 4.08E-34 | -0.54925 | 3.72E-38 | -0.58684 | 1.48E-44 | -0.19796 | 1.64E-05 |
| 3.53E-36 | -0.58426 | 4.32E-44 | -0.64583 | 1.81E-56 | -0.70619 | 9.77E-72 | -0.30543 | 1.53E-11 |
| 1.08E-07 | 0.564599 | 1.13E-40 | 0.458146 | 1.30E-25 | 0.483973 | 8.57E-29 | 0.168288 | 0.00026  |
| 1.20E-15 | 0.386663 | 4.21E-18 | 0.389044 | 2.52E-18 | 0.456343 | 2.12E-25 | 0.10006  | 0.03062  |
| 5.30E-17 | -0.36575 | 3.15E-16 | -0.44278 | 7.64E-24 | -0.46303 | 3.42E-26 | -0.32993 | 2.54E-13 |
| 1.34E-26 | -0.54035 | 9.31E-37 | -0.62397 | 9.35E-52 | -0.64458 | 3.46E-56 | -0.04683 | 0.31261  |
| 1.73E-14 | -0.2636  | 7.30E-09 | -0.2402  | 1.49E-07 | -0.36279 | 5.66E-16 | -0.19772 | 1.68E-05 |
| 2.83E-20 | 0.655757 | 9.73E-59 | 0.606568 | 2.90E-48 | 0.619313 | 8.44E-51 | 0.246018 | 7.24E-08 |
| 5.90E-10 | 0.504946 | 1.39E-31 | 0.444458 | 4.95E-24 | 0.412525 | 1.29E-20 | 0.133658 | 0.00381  |
| 5.96E-48 | -0.48062 | 2.30E-28 | -0.56876 | 2.24E-41 | -0.6704  | 3.01E-62 | -0.19283 | 2.73E-05 |
| 3.97E-17 | -0.27762 | 1.04E-09 | -0.46555 | 1.70E-26 | -0.45799 | 1.36E-25 | -0.26506 | 5.99E-09 |
| 2.93E-13 | -0.52578 | 1.49E-34 | -0.50594 | 1.01E-31 | -0.54554 | 1.44E-37 | -0.3149  | 3.29E-12 |
| 2.04E-48 | -0.21491 | 2.78E-06 | -0.29296 | 1.07E-10 | -0.49591 | 2.33E-30 | -0.39649 | 4.96E-19 |
| 7.41E-15 | -0.33439 | 1.16E-13 | -0.38807 | 3.11E-18 | -0.43158 | 1.31E-22 | 0.172889 | 0.00017  |
| 5.29E-09 | 0.458642 | 1.14E-25 | 0.305514 | 1.51E-11 | 0.396213 | 5.27E-19 | 0.429059 | 2.44E-22 |
| 1.15E-34 | 0.35895  | 1.20E-15 | 0.319356 | 1.56E-12 | 0.45547  | 2.69E-25 | 0.205525 | 7.56E-06 |
| 3.66E-14 | -0.49352 | 4.85E-30 | -0.61073 | 4.42E-49 | -0.55627 | 2.73E-39 | -0.06929 | 0.13487  |
| 7.03E-16 | 0.383689 | 7.92E-18 | 0.440598 | 1.34E-23 | 0.476631 | 7.33E-28 | -0.02549 | 0.58274  |
| 7.43E-06 | -0.23108 | 4.45E-07 | -0.20871 | 5.41E-06 | -0.27105 | 2.62E-09 | 0.000959 | 0.98351  |
| 4.01E-58 | -0.574   | 2.81E-42 | -0.61275 | 1.76E-49 | -0.72043 | 6.38E-76 | -0.28625 | 2.94E-10 |
| 9.17E-41 | 0.387547 | 3.48E-18 | 0.402836 | 1.20E-19 | 0.525055 | 1.90E-34 | 0.017831 | 0.70073  |
| 1.06E-24 | -0.46546 | 1.74E-26 | -0.58929 | 5.27E-45 | -0.61802 | 1.54E-50 | -0.0224  | 0.62919  |
| 2.68E-20 | -0.40221 | 1.38E-19 | -0.36739 | 2.27E-16 | -0.48402 | 8.44E-29 | -0.08851 | 0.05595  |
| 2.11E-12 | -0.55079 | 2.10E-38 | -0.51856 | 1.68E-33 | -0.57591 | 1.30E-42 | -0.03278 | 0.47983  |
| 1.47E-39 | -0.53751 | 2.55E-36 | -0.62456 | 7.03E-52 | -0.67768 | 4.53E-64 | -0.44239 | 8.45E-24 |
| 2.09E-36 | -0.26153 | 9.65E-09 | -0.33476 | 1.08E-13 | -0.46979 | 5.17E-27 | -0.39735 | 4.10E-19 |
| 9.21E-07 | -0.19027 | 3.49E-05 | -0.3801  | 1.69E-17 | -0.36038 | 9.08E-16 | -0.05751 | 0.21482  |
| 2.66E-33 | 0.507825 | 5.55E-32 | 0.616604 | 2.98E-50 | 0.647767 | 6.63E-57 | 0.128245 | 0.00551  |
| 7.59E-19 | 0.471252 | 3.42E-27 | 0.437979 | 2.62E-23 | 0.482757 | 1.23E-28 | 0.0039   | 0.93301  |
| 3.25E-20 | 0.326917 | 4.30E-13 | 0.561266 | 4.09E-40 | 0.561362 | 3.94E-40 | 0.001937 | 0.9667   |
| 7.01E-06 | -0.33678 | 7.55E-14 | -0.29814 | 4.84E-11 | -0.34267 | 2.60E-14 | -0.02868 | 0.53646  |
| 1.98E-14 | -0.52092 | 7.65E-34 | -0.43304 | 9.09E-23 | -0.52174 | 5.80E-34 | -0.20218 | 1.07E-05 |
| 9.50E-15 | -0.40175 | 1.53E-19 | -0.41583 | 5.96E-21 | -0.47697 | 6.64E-28 | -0.27629 | 1.25E-09 |
| 9.53E-19 | -0.4876  | 2.91E-29 | -0.44345 | 6.43E-24 | -0.50762 | 5.92E-32 | -0.09269 | 0.04528  |
| 3.93E-52 | 0.445045 | 4.25E-24 | 0.682431 | 2.76E-65 | 0.693501 | 3.26E-68 | 0.277742 | 1.02E-09 |
| 1.94E-25 | -0.46785 | 8.94E-27 | -0.58522 | 2.90E-44 | -0.62408 | 8.85E-52 | -0.18718 | 4.70E-05 |
| 7.01E-26 | -0.59913 | 7.78E-47 | -0.54616 | 1.15E-37 | -0.61371 | 1.14E-49 | -0.15648 | 0.00069  |
| 1.56E-29 | 0.442233 | 8.80E-24 | 0.577313 | 7.41E-43 | 0.61364  | 1.17E-49 | 0.078176 | 0.09152  |
| 2.16E-09 | -0.1702  | 0.00022  | -0.26882 | 3.58E-09 | -0.34237 | 2.74E-14 | -0.1469  | 0.00146  |

|          |          |          |          |          |          |          |          |          |
|----------|----------|----------|----------|----------|----------|----------|----------|----------|
| 1.13E-16 | 0.453919 | 4.08E-25 | 0.39839  | 3.25E-19 | 0.476322 | 8.02E-28 | 0.384571 | 6.57E-18 |
| 0.00098  | -0.43571 | 4.64E-23 | -0.30166 | 2.79E-11 | -0.31388 | 3.89E-12 | 0.130111 | 0.00486  |
| 0.00941  | -0.17679 | 0.00012  | -0.21635 | 2.37E-06 | -0.21328 | 3.31E-06 | 0.248949 | 5.00E-08 |
| 7.96E-28 | -0.21769 | 2.05E-06 | -0.42604 | 5.13E-22 | -0.48169 | 1.68E-28 | -0.29671 | 6.04E-11 |
| 6.62E-09 | -0.24192 | 1.20E-07 | -0.32987 | 2.57E-13 | -0.30726 | 1.14E-11 | -0.1455  | 0.00162  |
| 7.62E-05 | -0.47334 | 1.89E-27 | -0.37378 | 6.23E-17 | -0.38058 | 1.52E-17 | 0.002458 | 0.95775  |
| 1.43E-22 | -0.43246 | 1.05E-22 | -0.52866 | 5.56E-35 | -0.57778 | 6.14E-43 | -0.19284 | 2.72E-05 |
| 1.38E-07 | -0.48517 | 6.02E-29 | -0.37169 | 9.55E-17 | -0.39586 | 5.70E-19 | -0.22913 | 5.59E-07 |
| 6.84E-49 | 0.497466 | 1.45E-30 | 0.422148 | 1.32E-21 | 0.654366 | 2.05E-58 | 0.271738 | 2.38E-09 |
| 5.70E-37 | -0.61648 | 3.16E-50 | -0.57413 | 2.66E-42 | -0.69181 | 9.32E-68 | -0.2634  | 7.50E-09 |
| 7.58E-35 | -0.2516  | 3.56E-08 | -0.57196 | 6.34E-42 | -0.5512  | 1.80E-38 | -0.09645 | 0.0372   |
| 3.30E-40 | 0.469545 | 5.54E-27 | 0.439716 | 1.68E-23 | 0.587264 | 1.24E-44 | 0.094902 | 0.04037  |
| 5.76E-19 | -0.45192 | 6.95E-25 | -0.50397 | 1.89E-31 | -0.52114 | 7.10E-34 | -0.18976 | 3.67E-05 |
| 2.59E-14 | -0.42238 | 1.25E-21 | -0.47257 | 2.35E-27 | -0.51802 | 2.00E-33 | 0.051114 | 0.27031  |
| 2.07E-37 | -0.41275 | 1.23E-20 | -0.61618 | 3.63E-50 | -0.64664 | 1.19E-56 | -0.33004 | 2.50E-13 |
| 2.87E-42 | 0.436615 | 3.70E-23 | 0.423974 | 8.48E-22 | 0.556097 | 2.91E-39 | 0.338649 | 5.39E-14 |
| 1.11E-09 | -0.32995 | 2.53E-13 | -0.44681 | 2.68E-24 | -0.45608 | 2.28E-25 | -0.0028  | 0.95194  |
| 3.04E-29 | -0.23887 | 1.75E-07 | -0.50052 | 5.60E-31 | -0.5018  | 3.75E-31 | -0.07134 | 0.12366  |
| 1.75E-14 | -0.18999 | 3.59E-05 | -0.3869  | 4.00E-18 | -0.39221 | 1.27E-18 | -0.00907 | 0.84503  |
| 0.00221  | -0.29409 | 9.03E-11 | -0.36626 | 2.85E-16 | -0.34577 | 1.46E-14 | 0.247817 | 5.77E-08 |
| 2.29E-18 | -0.27072 | 2.75E-09 | -0.20675 | 6.65E-06 | -0.38421 | 7.09E-18 | -0.1253  | 0.00671  |
| 3.47E-20 | 0.629769 | 5.71E-53 | 0.722953 | 1.08E-76 | 0.664399 | 8.72E-61 | 0.075071 | 0.10518  |
| 2.16E-39 | -0.51577 | 4.21E-33 | -0.64706 | 9.58E-57 | -0.69222 | 7.20E-68 | -0.13735 | 0.00294  |
| 3.76E-19 | -0.42369 | 9.10E-22 | -0.31876 | 1.73E-12 | -0.48078 | 2.20E-28 | -0.00515 | 0.91169  |
| 3.59E-05 | -0.08193 | 0.07693  | -0.17357 | 0.00016  | -0.18404 | 6.32E-05 | 0.393703 | 9.16E-19 |
| 2.70E-19 | -0.33365 | 1.32E-13 | -0.28285 | 4.86E-10 | -0.38678 | 4.10E-18 | -0.32014 | 1.37E-12 |
| 1.17E-12 | -0.32945 | 2.77E-13 | -0.40402 | 9.18E-20 | -0.43201 | 1.18E-22 | -0.10138 | 0.02848  |
| 4.47E-15 | -0.33668 | 7.69E-14 | -0.48955 | 1.62E-29 | -0.48466 | 7.00E-29 | -0.017   | 0.71411  |
| 2.32E-06 | -0.36096 | 8.11E-16 | -0.27897 | 8.53E-10 | -0.34586 | 1.44E-14 | -0.12533 | 0.00669  |
| 2.71E-33 | -0.23329 | 3.43E-07 | -0.48492 | 6.47E-29 | -0.53149 | 2.10E-35 | -0.26167 | 9.48E-09 |
| 0.00015  | -0.4472  | 2.42E-24 | -0.26506 | 5.99E-09 | -0.32293 | 8.53E-13 | -0.07674 | 0.09766  |
| 5.77E-11 | -0.29544 | 7.35E-11 | -0.21491 | 2.78E-06 | -0.2969  | 5.87E-11 | -0.29049 | 1.56E-10 |
| 5.20E-32 | -0.44922 | 1.42E-24 | -0.48521 | 5.93E-29 | -0.57685 | 8.93E-43 | -0.39789 | 3.64E-19 |
| 1.05E-26 | -0.59778 | 1.39E-46 | -0.54178 | 5.58E-37 | -0.6088  | 1.06E-48 | -0.04888 | 0.29182  |
| 1.82E-15 | -0.16843 | 0.00026  | -0.30417 | 1.88E-11 | -0.37296 | 7.37E-17 | -0.05304 | 0.25269  |
| 9.08E-31 | -0.44268 | 7.84E-24 | -0.57857 | 4.46E-43 | -0.62685 | 2.35E-52 | -0.2619  | 9.18E-09 |
| 2.13E-37 | -0.41439 | 8.36E-21 | -0.49229 | 7.06E-30 | -0.58819 | 8.39E-45 | -0.24503 | 8.19E-08 |
| 7.12E-08 | -0.39049 | 1.85E-18 | -0.25656 | 1.87E-08 | -0.33615 | 8.46E-14 | -0.12939 | 0.0051   |
| 8.12E-08 | -0.24552 | 7.71E-08 | -0.34026 | 4.03E-14 | -0.34559 | 1.51E-14 | -0.26183 | 9.27E-09 |
| 6.31E-37 | -0.41963 | 2.42E-21 | -0.43762 | 2.86E-23 | -0.56941 | 1.74E-41 | -0.24531 | 7.91E-08 |
| 2.05E-35 | -0.42688 | 4.18E-22 | -0.52868 | 5.53E-35 | -0.61974 | 6.90E-51 | -0.48416 | 8.12E-29 |
| 2.07E-25 | -0.41228 | 1.37E-20 | -0.47492 | 1.20E-27 | -0.54704 | 8.34E-38 | -0.2958  | 6.95E-11 |
| 5.60E-08 | -0.40448 | 8.27E-20 | -0.25941 | 1.28E-08 | -0.33932 | 4.78E-14 | -0.35306 | 3.72E-15 |
| 1.02E-33 | -0.39375 | 9.06E-19 | -0.4043  | 8.60E-20 | -0.56011 | 6.36E-40 | -0.32632 | 4.77E-13 |
| 3.20E-14 | -0.294   | 9.16E-11 | -0.3117  | 5.57E-12 | -0.36812 | 1.96E-16 | -0.0823  | 0.0756   |

|          |          |          |          |          |          |          |          |          |
|----------|----------|----------|----------|----------|----------|----------|----------|----------|
| 5.92E-46 | 0.491558 | 8.83E-30 | 0.682999 | 1.97E-65 | 0.67697  | 6.88E-64 | 0.182156 | 7.52E-05 |
| 7.91E-16 | -0.54976 | 3.08E-38 | -0.52352 | 3.19E-34 | -0.58881 | 6.47E-45 | -0.16231 | 0.00043  |
| 2.55E-09 | -0.56524 | 8.85E-41 | -0.55604 | 2.97E-39 | -0.52482 | 2.06E-34 | -0.01804 | 0.69739  |
| 2.96E-32 | -0.23376 | 3.24E-07 | -0.41761 | 3.91E-21 | -0.49225 | 7.15E-30 | 0.032482 | 0.48378  |
| 2.59E-16 | -0.45617 | 2.23E-25 | -0.35222 | 4.36E-15 | -0.46519 | 1.88E-26 | -0.38586 | 4.99E-18 |
| 2.44E-30 | -0.24012 | 1.50E-07 | -0.28641 | 2.88E-10 | -0.45199 | 6.82E-25 | -0.14775 | 0.00137  |
| 1.01E-27 | 0.428865 | 2.56E-22 | 0.466554 | 1.28E-26 | 0.530541 | 2.91E-35 | 0.11176  | 0.01568  |
| 5.48E-46 | 0.461484 | 5.23E-26 | 0.650216 | 1.84E-57 | 0.692323 | 6.78E-68 | 0.160311 | 0.00051  |
| 1.69E-46 | -0.56884 | 2.17E-41 | -0.62374 | 1.04E-51 | -0.70493 | 2.24E-71 | -0.35377 | 3.25E-15 |
| 5.13E-27 | -0.6093  | 8.49E-49 | -0.51673 | 3.07E-33 | -0.62502 | 5.64E-52 | -0.18619 | 5.16E-05 |
| 1.01E-21 | -0.34259 | 2.63E-14 | -0.25524 | 2.22E-08 | -0.42394 | 8.55E-22 | -0.16525 | 0.00034  |
| 3.89E-39 | -0.48159 | 1.73E-28 | -0.52559 | 1.59E-34 | -0.63694 | 1.66E-54 | -0.32188 | 1.02E-12 |
| 3.86E-21 | -0.20892 | 5.29E-06 | -0.38711 | 3.82E-18 | -0.45158 | 7.62E-25 | -0.05153 | 0.26646  |
| 1.38E-33 | 0.340198 | 4.07E-14 | 0.497953 | 1.24E-30 | 0.585894 | 2.19E-44 | -0.01124 | 0.80852  |
| 1.79E-33 | 0.750571 | 1.05E-85 | 0.561117 | 4.33E-40 | 0.68147  | 4.88E-65 | 0.1782   | 0.00011  |
| 5.27E-35 | -0.42774 | 3.38E-22 | -0.48171 | 1.67E-28 | -0.61002 | 6.12E-49 | -0.17196 | 0.00019  |
| 1.78E-32 | -0.54821 | 5.44E-38 | -0.62962 | 6.15E-53 | -0.69297 | 4.53E-68 | -0.33325 | 1.42E-13 |
| 7.72E-19 | -0.44481 | 4.52E-24 | -0.49058 | 1.19E-29 | -0.53724 | 2.81E-36 | -0.02875 | 0.53539  |
| 1.69E-35 | -0.2489  | 5.03E-08 | -0.44055 | 1.36E-23 | -0.55082 | 2.08E-38 | -0.12906 | 0.00522  |
| 9.59E-34 | -0.44246 | 8.31E-24 | -0.49045 | 1.24E-29 | -0.60353 | 1.12E-47 | -0.22398 | 1.01E-06 |
| 5.86E-42 | -0.64037 | 2.96E-55 | -0.67627 | 1.04E-63 | -0.73394 | 3.85E-80 | -0.3965  | 4.95E-19 |
| 3.54E-30 | -0.45841 | 1.21E-25 | -0.60097 | 3.48E-47 | -0.61006 | 6.00E-49 | -0.05822 | 0.20916  |
| 0.43195  | -0.11047 | 0.01693  | -0.18196 | 7.66E-05 | -0.132   | 0.00427  | 0.057625 | 0.21387  |
| 1.01E-16 | 0.207055 | 6.44E-06 | 0.326602 | 4.54E-13 | 0.352907 | 3.83E-15 | 0.018089 | 0.69661  |
| 8.10E-06 | -0.32418 | 6.88E-13 | -0.12653 | 0.00618  | -0.26074 | 1.07E-08 | -0.14684 | 0.00146  |
| 8.00E-21 | -0.29978 | 3.75E-11 | -0.33663 | 7.76E-14 | -0.42577 | 5.48E-22 | -0.07453 | 0.10773  |
| 2.67E-06 | -0.25598 | 2.01E-08 | -0.28024 | 7.10E-10 | -0.35154 | 4.96E-15 | -0.01858 | 0.68884  |
| 3.48E-26 | 0.660701 | 6.68E-60 | 0.314086 | 3.76E-12 | 0.509927 | 2.82E-32 | 0.337522 | 6.61E-14 |
| 3.84E-49 | -0.45433 | 3.65E-25 | -0.54024 | 9.67E-37 | -0.65153 | 9.24E-58 | -0.09439 | 0.04146  |
| 5.76E-10 | -0.37585 | 4.08E-17 | -0.37114 | 1.07E-16 | -0.39473 | 7.31E-19 | -0.21938 | 1.70E-06 |
| 3.60E-33 | -0.5021  | 3.40E-31 | -0.61112 | 3.71E-49 | -0.66011 | 9.25E-60 | -0.36206 | 6.54E-16 |
| 4.53E-32 | -0.44537 | 3.90E-24 | -0.46429 | 2.41E-26 | -0.5576  | 1.65E-39 | -0.02791 | 0.54741  |
| 8.01E-33 | -0.53309 | 1.20E-35 | -0.63165 | 2.27E-53 | -0.66944 | 5.19E-62 | -0.28523 | 3.42E-10 |
| 1.60E-35 | -0.53241 | 1.52E-35 | -0.47065 | 4.06E-27 | -0.62163 | 2.83E-51 | -0.42566 | 5.63E-22 |
| 3.74E-06 | -0.35254 | 4.11E-15 | -0.33716 | 7.05E-14 | -0.37608 | 3.88E-17 | 0.137476 | 0.00291  |
| 1.32E-21 | -0.366   | 3.00E-16 | -0.49634 | 2.05E-30 | -0.49583 | 2.39E-30 | -0.03323 | 0.47375  |
| 5.68E-24 | 0.478682 | 4.05E-28 | 0.461154 | 5.73E-26 | 0.481663 | 1.69E-28 | 0.043878 | 0.34408  |
| 3.99E-24 | 0.351348 | 5.15E-15 | 0.352758 | 3.94E-15 | 0.516581 | 3.23E-33 | 0.207042 | 6.45E-06 |
| 1.52E-21 | -0.23965 | 1.59E-07 | -0.35934 | 1.11E-15 | -0.40585 | 6.05E-20 | -0.26463 | 6.35E-09 |
| 2.33E-30 | 0.56935  | 1.78E-41 | 0.488801 | 2.03E-29 | 0.62249  | 1.89E-51 | 0.155688 | 0.00074  |
| 9.66E-23 | -0.4199  | 2.26E-21 | -0.41381 | 9.58E-21 | -0.52233 | 4.77E-34 | 0.006737 | 0.88455  |
| 1.68E-21 | 0.235056 | 2.77E-07 | 0.390167 | 1.98E-18 | 0.417734 | 3.80E-21 | 0.171673 | 0.00019  |
| 3.04E-20 | 0.403362 | 1.07E-19 | 0.281381 | 6.02E-10 | 0.42091  | 1.78E-21 | 0.340356 | 3.96E-14 |
| 6.67E-09 | -0.42626 | 4.86E-22 | -0.40236 | 1.34E-19 | -0.42429 | 7.85E-22 | -0.05917 | 0.20185  |
| 1.13E-35 | -0.34944 | 7.39E-15 | -0.59307 | 1.06E-45 | -0.57628 | 1.12E-42 | -0.13245 | 0.00414  |

|          |          |          |          |          |          |          |          |          |
|----------|----------|----------|----------|----------|----------|----------|----------|----------|
| 4.52E-12 | -0.40785 | 3.83E-20 | -0.4611  | 5.82E-26 | -0.43789 | 2.67E-23 | 0.13502  | 0.00346  |
| 7.26E-32 | -0.53551 | 5.16E-36 | -0.60266 | 1.65E-47 | -0.66281 | 2.09E-60 | -0.16595 | 0.00032  |
| 1.68E-33 | -0.36225 | 6.30E-16 | -0.52672 | 1.08E-34 | -0.57018 | 1.28E-41 | -0.17574 | 0.00013  |
| 3.84E-25 | -0.64627 | 1.44E-56 | -0.52949 | 4.17E-35 | -0.60849 | 1.22E-48 | -0.19071 | 3.35E-05 |
| 3.66E-18 | -0.52868 | 5.53E-35 | -0.5598  | 7.17E-40 | -0.57181 | 6.73E-42 | -0.04875 | 0.29312  |
| 9.92E-27 | 0.590497 | 3.17E-45 | 0.482752 | 1.23E-28 | 0.571089 | 8.94E-42 | 0.311101 | 6.14E-12 |
| 1.66E-10 | -0.3738  | 6.20E-17 | -0.41917 | 2.70E-21 | -0.45123 | 8.35E-25 | 0.175427 | 0.00014  |
| 2.98E-26 | -0.553   | 9.27E-39 | -0.6317  | 2.22E-53 | -0.65638 | 6.97E-59 | -0.16047 | 0.0005   |
| 1.83E-19 | -0.32375 | 7.41E-13 | -0.42322 | 1.02E-21 | -0.46682 | 1.19E-26 | -0.01025 | 0.82509  |
| 2.03E-07 | -0.09694 | 0.03625  | -0.26923 | 3.38E-09 | -0.25494 | 2.31E-08 | -0.15823 | 0.0006   |
| 0.00398  | -0.3097  | 7.71E-12 | -0.38201 | 1.13E-17 | -0.36913 | 1.60E-16 | 0.287801 | 2.34E-10 |
| 3.75E-20 | 0.607956 | 1.55E-48 | 0.434073 | 7.02E-23 | 0.563648 | 1.64E-40 | 0.297275 | 5.54E-11 |
| 1.76E-39 | -0.47689 | 6.80E-28 | -0.66858 | 8.44E-62 | -0.69575 | 8.00E-69 | -0.34177 | 3.06E-14 |
| 7.78E-13 | -0.3018  | 2.73E-11 | -0.36519 | 3.52E-16 | -0.41123 | 1.75E-20 | -0.01568 | 0.73544  |
| 8.67E-06 | -0.20807 | 5.79E-06 | -0.31365 | 4.04E-12 | -0.32672 | 4.45E-13 | 0.013078 | 0.77804  |
| 8.01E-14 | -0.08516 | 0.06597  | -0.36385 | 4.59E-16 | -0.35657 | 1.90E-15 | -0.07591 | 0.10136  |
| 1.54E-14 | -0.29347 | 9.94E-11 | -0.46019 | 7.47E-26 | -0.47303 | 2.06E-27 | -0.01551 | 0.73812  |
| 0.00102  | -0.26084 | 1.06E-08 | -0.27642 | 1.23E-09 | -0.27927 | 8.17E-10 | 0.207599 | 6.08E-06 |
| 1.35E-20 | -0.2902  | 1.63E-10 | -0.254   | 2.61E-08 | -0.4117  | 1.57E-20 | -0.0349  | 0.45187  |
| 5.31E-38 | -0.59708 | 1.89E-46 | -0.61462 | 7.48E-50 | -0.70842 | 2.24E-72 | 0.038275 | 0.40925  |
| 0.00014  | -0.18545 | 5.54E-05 | -0.22163 | 1.32E-06 | -0.24442 | 8.83E-08 | -0.04567 | 0.32474  |
| 3.41E-05 | -0.3511  | 5.40E-15 | -0.27662 | 1.19E-09 | -0.31156 | 5.70E-12 | -0.35719 | 1.69E-15 |
| 2.63E-12 | -0.53385 | 9.23E-36 | -0.45913 | 9.98E-26 | -0.50319 | 2.42E-31 | 0.0525   | 0.25752  |
| 3.90E-07 | -0.34398 | 2.04E-14 | -0.26207 | 8.98E-09 | -0.34806 | 9.57E-15 | 0.148352 | 0.0013   |
| 0.0008   | -0.26537 | 5.74E-09 | -0.19775 | 1.67E-05 | -0.26243 | 8.56E-09 | -0.08745 | 0.05899  |
| 5.16E-14 | -0.54375 | 2.75E-37 | -0.42531 | 6.13E-22 | -0.49829 | 1.12E-30 | -0.28042 | 6.92E-10 |
| 3.61E-20 | -0.60203 | 2.18E-47 | -0.54621 | 1.13E-37 | -0.57626 | 1.13E-42 | -0.13749 | 0.00291  |
| 4.82E-13 | -0.31911 | 1.63E-12 | -0.33071 | 2.22E-13 | -0.36852 | 1.81E-16 | -0.19487 | 2.23E-05 |
| 9.98E-39 | -0.34111 | 3.45E-14 | -0.42174 | 1.46E-21 | -0.54294 | 3.68E-37 | -0.13477 | 0.00352  |
| 2.49E-30 | 0.389588 | 2.24E-18 | 0.309617 | 7.82E-12 | 0.468268 | 7.94E-27 | 0.08407  | 0.06951  |
| 4.86E-47 | -0.46222 | 4.27E-26 | -0.5926  | 1.30E-45 | -0.66339 | 1.53E-60 | -0.18974 | 3.68E-05 |
| 4.21E-29 | -0.41367 | 9.90E-21 | -0.44002 | 1.55E-23 | -0.56404 | 1.41E-40 | -0.32383 | 7.32E-13 |
| 1.95E-07 | -0.14988 | 0.00116  | -0.27806 | 9.72E-10 | -0.26001 | 1.18E-08 | 0.116653 | 0.01164  |
| 1.25E-10 | 0.055511 | 0.23118  | -0.23264 | 3.70E-07 | -0.26637 | 5.01E-09 | -0.02563 | 0.58067  |
| 2.15E-24 | -0.32782 | 3.68E-13 | -0.27016 | 2.97E-09 | -0.43786 | 2.70E-23 | -0.24488 | 8.34E-08 |
| 1.50E-09 | -0.19482 | 2.24E-05 | -0.29396 | 9.22E-11 | -0.34667 | 1.24E-14 | -0.09187 | 0.04724  |
| 3.87E-20 | -0.43955 | 1.75E-23 | -0.46333 | 3.15E-26 | -0.54182 | 5.50E-37 | 0.10047  | 0.02994  |
| 1.21E-05 | -0.21269 | 3.53E-06 | -0.25345 | 2.80E-08 | -0.2286  | 5.94E-07 | -0.11303 | 0.01453  |
| 1.68E-15 | -0.29147 | 1.35E-10 | -0.34078 | 3.66E-14 | -0.41489 | 7.44E-21 | 0.050641 | 0.27478  |
| 8.44E-24 | -0.32412 | 6.95E-13 | -0.30127 | 2.97E-11 | -0.44198 | 9.39E-24 | -0.21291 | 3.45E-06 |
| 5.93E-12 | -0.29253 | 1.15E-10 | -0.375   | 4.86E-17 | -0.36104 | 7.99E-16 | -0.23187 | 4.05E-07 |
| 1.32E-11 | -0.18227 | 7.45E-05 | -0.28068 | 6.66E-10 | -0.32107 | 1.17E-12 | -0.03211 | 0.4888   |
| 0.00053  | -0.19261 | 2.78E-05 | -0.19781 | 1.66E-05 | -0.21078 | 4.34E-06 | 0.09028  | 0.05121  |
| 0.00261  | -0.34432 | 1.91E-14 | -0.32231 | 9.48E-13 | -0.32254 | 9.12E-13 | -0.00651 | 0.88846  |
| 0.00032  | -0.32143 | 1.10E-12 | -0.26025 | 1.15E-08 | -0.31965 | 1.49E-12 | 0.032809 | 0.47938  |

|          |          |          |          |          |          |          |          |          |
|----------|----------|----------|----------|----------|----------|----------|----------|----------|
| 5.94E-24 | 0.486195 | 4.43E-29 | 0.551018 | 1.93E-38 | 0.574176 | 2.62E-42 | 0.321663 | 1.06E-12 |
| 1.38E-14 | -0.33111 | 2.07E-13 | -0.3133  | 4.29E-12 | -0.36058 | 8.73E-16 | -0.2355  | 2.63E-07 |
| 0.00263  | -0.25549 | 2.15E-08 | -0.28859 | 2.08E-10 | -0.26291 | 8.02E-09 | 0.229347 | 5.45E-07 |
| 1.42E-25 | 0.325798 | 5.21E-13 | 0.209708 | 4.86E-06 | 0.385067 | 5.91E-18 | 0.41248  | 1.31E-20 |
| 2.16E-38 | 0.456738 | 1.91E-25 | 0.480237 | 2.57E-28 | 0.523749 | 2.96E-34 | 0.305902 | 1.42E-11 |
| 1.71E-41 | 0.41164  | 1.59E-20 | 0.497228 | 1.56E-30 | 0.623169 | 1.37E-51 | 0.423448 | 9.64E-22 |
| 0.0009   | -0.43219 | 1.12E-22 | -0.31331 | 4.28E-12 | -0.36734 | 2.29E-16 | 0.005587 | 0.90415  |
| 6.56E-23 | 0.504713 | 1.49E-31 | 0.444629 | 4.73E-24 | 0.504106 | 1.81E-31 | 0.264697 | 6.29E-09 |
| 7.68E-31 | 0.583414 | 6.13E-44 | 0.363864 | 4.58E-16 | 0.55388  | 6.68E-39 | 0.092894 | 0.04481  |
| 3.48E-35 | 0.618108 | 1.48E-50 | 0.588192 | 8.38E-45 | 0.649352 | 2.90E-57 | 0.310053 | 7.29E-12 |
| 2.32E-34 | -0.25214 | 3.32E-08 | -0.4293  | 2.30E-22 | -0.49208 | 7.54E-30 | -0.28989 | 1.71E-10 |
| 0.07472  | -0.30058 | 3.31E-11 | -0.23854 | 1.82E-07 | -0.22162 | 1.32E-06 | -0.01621 | 0.72682  |
| 0.0033   | -0.30026 | 3.48E-11 | -0.28595 | 3.08E-10 | -0.27927 | 8.17E-10 | -0.13122 | 0.00451  |
| 0.00014  | -0.36189 | 6.75E-16 | -0.37448 | 5.40E-17 | -0.34231 | 2.77E-14 | -0.26227 | 8.74E-09 |
| 7.65E-21 | -0.55432 | 5.67E-39 | -0.54861 | 4.69E-38 | -0.59621 | 2.76E-46 | -0.26594 | 5.31E-09 |
| 1.06E-47 | -0.47761 | 5.53E-28 | -0.60902 | 9.63E-49 | -0.68035 | 9.49E-65 | -0.43777 | 2.76E-23 |
| 2.02E-17 | -0.31148 | 5.77E-12 | -0.38402 | 7.38E-18 | -0.44489 | 4.42E-24 | -0.00342 | 0.94123  |
| 9.01E-11 | -0.55467 | 4.98E-39 | -0.41371 | 9.82E-21 | -0.4566  | 1.98E-25 | -0.26313 | 7.79E-09 |
| 1.38E-13 | -0.34894 | 8.11E-15 | -0.4348  | 5.85E-23 | -0.46916 | 6.18E-27 | 0.050681 | 0.2744   |
| 1.04E-16 | -0.38338 | 8.46E-18 | -0.56598 | 6.65E-41 | -0.55401 | 6.35E-39 | 0.100335 | 0.03016  |
| 0.02434  | -0.32326 | 8.06E-13 | -0.27125 | 2.55E-09 | -0.25977 | 1.22E-08 | -0.08319 | 0.0725   |
| 1.41E-27 | -0.53002 | 3.48E-35 | -0.59645 | 2.49E-46 | -0.63222 | 1.72E-53 | -0.1791  | 9.96E-05 |
| 2.41E-33 | -0.53631 | 3.90E-36 | -0.54891 | 4.20E-38 | -0.63245 | 1.54E-53 | -0.36093 | 8.16E-16 |
| 1.98E-21 | -0.55263 | 1.06E-38 | -0.64316 | 7.14E-56 | -0.62482 | 6.21E-52 | -0.15587 | 0.00072  |
| 1.29E-23 | -0.34292 | 2.48E-14 | -0.53018 | 3.30E-35 | -0.54295 | 3.67E-37 | -0.15316 | 0.0009   |
| 3.68E-25 | -0.52588 | 1.44E-34 | -0.38965 | 2.21E-18 | -0.55912 | 9.27E-40 | -0.08541 | 0.06516  |
| 5.13E-19 | -0.45431 | 3.67E-25 | -0.51606 | 3.83E-33 | -0.57872 | 4.20E-43 | -0.20782 | 5.94E-06 |
| 2.72E-07 | -0.4623  | 4.18E-26 | -0.31994 | 1.42E-12 | -0.37929 | 2.00E-17 | -0.39604 | 5.47E-19 |
| 1.40E-07 | -0.1467  | 0.00148  | -0.25793 | 1.56E-08 | -0.31293 | 4.55E-12 | -0.13233 | 0.00417  |
| 5.12E-40 | -0.54642 | 1.04E-37 | -0.63935 | 4.95E-55 | -0.68938 | 4.16E-67 | -0.23168 | 4.14E-07 |
| 5.20E-25 | 0.300941 | 3.13E-11 | 0.463403 | 3.08E-26 | 0.508385 | 4.64E-32 | 0.299259 | 4.07E-11 |
| 2.37E-18 | -0.44262 | 7.96E-24 | -0.51195 | 1.47E-32 | -0.54282 | 3.84E-37 | -0.24798 | 5.65E-08 |
| 8.52E-16 | -0.48696 | 3.52E-29 | -0.41786 | 3.69E-21 | -0.49815 | 1.17E-30 | -0.2318  | 4.09E-07 |
| 5.94E-22 | -0.44068 | 1.31E-23 | -0.45352 | 4.54E-25 | -0.51762 | 2.29E-33 | -0.18031 | 8.92E-05 |
| 5.43E-06 | -0.19945 | 1.41E-05 | -0.28724 | 2.54E-10 | -0.29238 | 1.17E-10 | -0.16438 | 0.00036  |
| 4.18E-28 | 0.403976 | 9.27E-20 | 0.409366 | 2.70E-20 | 0.473318 | 1.90E-27 | 0.245172 | 8.04E-08 |
| 1.09E-08 | 0.45612  | 2.26E-25 | 0.390212 | 1.96E-18 | 0.42289  | 1.10E-21 | 0.178701 | 0.0001   |
| 1.50E-08 | 0.333228 | 1.42E-13 | 0.123943 | 0.00733  | 0.267046 | 4.57E-09 | 0.035749 | 0.44088  |
| 3.49E-30 | -0.39075 | 1.74E-18 | -0.36442 | 4.11E-16 | -0.50906 | 3.73E-32 | -0.08446 | 0.06821  |
| 9.07E-24 | -0.27851 | 9.13E-10 | -0.34539 | 1.57E-14 | -0.47418 | 1.48E-27 | -0.15637 | 0.0007   |
| 8.37E-17 | -0.33305 | 1.47E-13 | -0.45432 | 3.66E-25 | -0.48653 | 4.01E-29 | -0.02561 | 0.58096  |
| 4.25E-29 | -0.56107 | 4.42E-40 | -0.62175 | 2.68E-51 | -0.69347 | 3.33E-68 | -0.19261 | 2.78E-05 |
| 5.49E-13 | -0.32125 | 1.13E-12 | -0.28068 | 6.66E-10 | -0.39754 | 3.93E-19 | -0.0133  | 0.77435  |
| 2.40E-36 | -0.44395 | 5.64E-24 | -0.49354 | 4.83E-30 | -0.5995  | 6.61E-47 | -0.11436 | 0.01341  |
| 1.41E-15 | -0.4332  | 8.73E-23 | -0.4352  | 5.29E-23 | -0.49038 | 1.26E-29 | 0.267158 | 4.50E-09 |

|          |          |          |          |          |          |          |          |          |
|----------|----------|----------|----------|----------|----------|----------|----------|----------|
| 9.62E-06 | -0.35184 | 4.70E-15 | -0.41065 | 2.00E-20 | -0.38584 | 5.01E-18 | -0.10288 | 0.02621  |
| 1.39E-40 | -0.50359 | 2.13E-31 | -0.53405 | 8.59E-36 | -0.6542  | 2.23E-58 | -0.31046 | 6.82E-12 |
| 3.23E-19 | -0.2938  | 9.45E-11 | -0.43904 | 2.00E-23 | -0.44724 | 2.39E-24 | 0.141767 | 0.00213  |
| 1.48E-06 | -0.51097 | 2.01E-32 | -0.41048 | 2.08E-20 | -0.43645 | 3.85E-23 | 0.065767 | 0.15591  |
| 5.52E-68 | -0.47679 | 7.00E-28 | -0.67397 | 3.90E-63 | -0.73793 | 1.95E-81 | -0.27704 | 1.13E-09 |
| 2.65E-24 | 0.40816  | 3.56E-20 | 0.393129 | 1.04E-18 | 0.461236 | 5.60E-26 | 0.291942 | 1.25E-10 |
| 0.01173  | -0.28356 | 4.38E-10 | -0.30139 | 2.91E-11 | -0.2857  | 3.20E-10 | 0.460469 | 6.91E-26 |
| 3.95E-22 | -0.45944 | 9.16E-26 | -0.43599 | 4.33E-23 | -0.56227 | 2.79E-40 | -0.23136 | 4.30E-07 |
| 9.50E-38 | -0.59716 | 1.83E-46 | -0.6438  | 5.15E-56 | -0.70533 | 1.71E-71 | -0.07797 | 0.09237  |
| 1.85E-31 | -0.37946 | 1.93E-17 | -0.52199 | 5.34E-34 | -0.55551 | 3.63E-39 | -0.1078  | 0.0198   |
| 3.47E-28 | -0.35921 | 1.14E-15 | -0.54894 | 4.16E-38 | -0.57487 | 1.98E-42 | -0.36719 | 2.36E-16 |
| 1.03E-21 | -0.55641 | 2.59E-39 | -0.43758 | 2.90E-23 | -0.56445 | 1.20E-40 | -0.104   | 0.02461  |
| 8.83E-12 | -0.27144 | 2.49E-09 | -0.367   | 2.45E-16 | -0.39333 | 9.94E-19 | -0.09771 | 0.03478  |
| 9.27E-11 | -0.32387 | 7.27E-13 | -0.34087 | 3.60E-14 | -0.39734 | 4.11E-19 | -0.16449 | 0.00036  |
| 2.10E-12 | -0.07763 | 0.09382  | -0.18308 | 6.91E-05 | -0.2765  | 1.22E-09 | 0.107839 | 0.01975  |
| 3.59E-17 | -0.61623 | 3.55E-50 | -0.47125 | 3.42E-27 | -0.56773 | 3.35E-41 | -0.06454 | 0.16382  |
| 3.17E-32 | 0.612441 | 2.03E-49 | 0.578328 | 4.91E-43 | 0.703845 | 4.52E-71 | 0.345013 | 1.68E-14 |
| 2.06E-26 | -0.58057 | 1.97E-43 | -0.6235  | 1.17E-51 | -0.6663  | 3.03E-61 | -0.15551 | 0.00075  |
| 0.00058  | -0.48808 | 2.52E-29 | -0.39042 | 1.87E-18 | -0.41136 | 1.70E-20 | 0.33707  | 7.17E-14 |
| 4.08E-18 | -0.29953 | 3.90E-11 | -0.40149 | 1.63E-19 | -0.41785 | 3.70E-21 | -0.07509 | 0.1051   |
| 4.93E-12 | -0.48905 | 1.88E-29 | -0.54167 | 5.80E-37 | -0.51123 | 1.86E-32 | -0.38282 | 9.52E-18 |
| 1.16E-23 | -0.46962 | 5.43E-27 | -0.45547 | 2.69E-25 | -0.52779 | 7.49E-35 | 0.113971 | 0.01373  |
| 2.42E-59 | -0.43688 | 3.46E-23 | -0.53688 | 3.19E-36 | -0.64934 | 2.91E-57 | -0.37386 | 6.13E-17 |
| 8.22E-39 | -0.56811 | 2.89E-41 | -0.70827 | 2.47E-72 | -0.72207 | 2.02E-76 | -0.20239 | 1.05E-05 |
| 0.0397   | -0.08548 | 0.06494  | -0.27452 | 1.61E-09 | -0.22917 | 5.56E-07 | 0.096534 | 0.03703  |
| 2.09E-22 | 0.554479 | 5.34E-39 | 0.405885 | 6.00E-20 | 0.550769 | 2.12E-38 | 0.206791 | 6.62E-06 |
| 1.24E-25 | -0.58872 | 6.72E-45 | -0.59303 | 1.08E-45 | -0.64203 | 1.27E-55 | -0.20022 | 1.30E-05 |
| 2.19E-13 | 0.58169  | 1.25E-43 | 0.431453 | 1.35E-22 | 0.488425 | 2.27E-29 | -0.01161 | 0.8024   |
| 1.49E-19 | -0.44721 | 2.42E-24 | -0.46821 | 8.07E-27 | -0.53683 | 3.24E-36 | -0.027   | 0.56051  |
| 6.56E-34 | -0.64141 | 1.74E-55 | -0.63282 | 1.28E-53 | -0.70082 | 3.20E-70 | -0.17082 | 0.00021  |
| 0.06328  | -0.45248 | 5.99E-25 | -0.38314 | 8.89E-18 | -0.34357 | 2.20E-14 | -0.21334 | 3.29E-06 |
| 4.18E-20 | -0.31166 | 5.60E-12 | -0.34765 | 1.03E-14 | -0.46946 | 5.67E-27 | -0.25484 | 2.34E-08 |
| 2.23E-13 | -0.52021 | 9.70E-34 | -0.47539 | 1.05E-27 | -0.53358 | 1.02E-35 | -0.15357 | 0.00087  |
| 1.34E-27 | -0.26566 | 5.52E-09 | -0.24709 | 6.32E-08 | -0.44172 | 1.01E-23 | -0.20798 | 5.84E-06 |
| 3.96E-05 | -0.06749 | 0.14531  | -0.11    | 0.01741  | -0.18377 | 6.48E-05 | -0.25181 | 3.46E-08 |
| 1.11E-12 | -0.17542 | 0.00014  | -0.30131 | 2.95E-11 | -0.36895 | 1.66E-16 | -0.08207 | 0.07643  |
| 2.79E-17 | -0.42902 | 2.47E-22 | -0.42265 | 1.17E-21 | -0.49034 | 1.28E-29 | -0.4156  | 6.29E-21 |
| 2.39E-13 | -0.51114 | 1.91E-32 | -0.39182 | 1.38E-18 | -0.43363 | 7.84E-23 | -0.34079 | 3.65E-14 |
| 7.04E-08 | -0.30189 | 2.69E-11 | -0.16712 | 0.00029  | -0.30796 | 1.02E-11 | -0.08081 | 0.08107  |
| 4.87E-25 | -0.1612  | 0.00047  | -0.34883 | 8.28E-15 | -0.40255 | 1.28E-19 | -0.35121 | 5.28E-15 |
| 3.01E-05 | -0.44396 | 5.63E-24 | -0.42194 | 1.39E-21 | -0.41911 | 2.74E-21 | 0.027742 | 0.54983  |
| 5.61E-16 | -0.28355 | 4.38E-10 | -0.33095 | 2.13E-13 | -0.41839 | 3.25E-21 | 0.017424 | 0.70725  |
| 4.73E-18 | -0.20344 | 9.38E-06 | -0.38322 | 8.75E-18 | -0.42548 | 5.88E-22 | 0.185035 | 5.75E-05 |
| 1.32E-19 | -0.31851 | 1.80E-12 | -0.46626 | 1.39E-26 | -0.53806 | 2.10E-36 | -0.03294 | 0.47759  |
| 7.65E-07 | -0.14041 | 0.00236  | -0.18891 | 3.98E-05 | -0.24615 | 7.11E-08 | 0.061587 | 0.18398  |

|          |          |          |          |          |          |          |          |          |
|----------|----------|----------|----------|----------|----------|----------|----------|----------|
| 2.07E-24 | -0.38193 | 1.15E-17 | -0.6007  | 3.90E-47 | -0.59021 | 3.59E-45 | -0.24682 | 6.54E-08 |
| 3.13E-13 | -0.23235 | 3.83E-07 | -0.39617 | 5.32E-19 | -0.40393 | 9.36E-20 | -0.13331 | 0.0039   |
| 2.33E-08 | -0.22621 | 7.83E-07 | -0.28247 | 5.14E-10 | -0.33566 | 9.24E-14 | 0.041559 | 0.37021  |
| 9.43E-07 | -0.29124 | 1.40E-10 | -0.28757 | 2.42E-10 | -0.32962 | 2.69E-13 | 0.199042 | 1.47E-05 |
| 0.00123  | -0.26266 | 8.30E-09 | -0.19575 | 2.04E-05 | -0.19392 | 2.45E-05 | -0.06164 | 0.18363  |
| 2.23E-46 | -0.60028 | 4.70E-47 | -0.52894 | 5.06E-35 | -0.68094 | 6.67E-65 | -0.15413 | 0.00083  |
| 1.18E-33 | -0.5397  | 1.18E-36 | -0.74628 | 3.15E-84 | -0.73873 | 1.07E-81 | -0.19826 | 1.59E-05 |
| 0.03357  | -0.35705 | 1.73E-15 | -0.26443 | 6.53E-09 | -0.26577 | 5.44E-09 | -0.23286 | 3.60E-07 |
| 2.79E-15 | -0.43363 | 7.85E-23 | -0.43779 | 2.74E-23 | -0.50533 | 1.23E-31 | -0.36077 | 8.41E-16 |
| 1.38E-09 | -0.33154 | 1.92E-13 | -0.38    | 1.72E-17 | -0.42141 | 1.58E-21 | 0.214905 | 2.78E-06 |
| 2.04E-07 | -0.43839 | 2.36E-23 | -0.27937 | 8.05E-10 | -0.35989 | 9.98E-16 | 0.090376 | 0.05096  |
| 1.85E-43 | 0.526869 | 1.03E-34 | 0.466463 | 1.32E-26 | 0.613748 | 1.12E-49 | 0.378969 | 2.13E-17 |
| 6.08E-32 | -0.55788 | 1.48E-39 | -0.64932 | 2.94E-57 | -0.66356 | 1.39E-60 | -0.16859 | 0.00025  |
| 4.48E-22 | -0.41782 | 3.72E-21 | -0.60899 | 9.73E-49 | -0.58041 | 2.11E-43 | -0.05888 | 0.20406  |
| 2.90E-08 | -0.27349 | 1.86E-09 | -0.3112  | 6.04E-12 | -0.34931 | 7.56E-15 | 0.181258 | 8.18E-05 |
| 2.72E-18 | -0.35956 | 1.07E-15 | -0.3986  | 3.11E-19 | -0.4762  | 8.30E-28 | 0.036421 | 0.43232  |
| 2.78E-22 | -0.34857 | 8.69E-15 | -0.43349 | 8.12E-23 | -0.48155 | 1.75E-28 | -0.26664 | 4.83E-09 |
| 9.76E-11 | -0.51045 | 2.39E-32 | -0.4885  | 2.22E-29 | -0.48039 | 2.46E-28 | -0.26571 | 5.48E-09 |
| 9.63E-26 | -0.36234 | 6.18E-16 | -0.61748 | 1.98E-50 | -0.59536 | 3.97E-46 | -0.03957 | 0.39359  |
| 5.94E-32 | -0.43117 | 1.45E-22 | -0.5032  | 2.41E-31 | -0.56691 | 4.62E-41 | -0.25055 | 4.07E-08 |
| 1.10E-09 | -0.5069  | 7.45E-32 | -0.38312 | 8.94E-18 | -0.4322  | 1.12E-22 | -0.15976 | 0.00053  |
| 5.20E-11 | -0.30418 | 1.87E-11 | -0.38735 | 3.63E-18 | -0.40236 | 1.34E-19 | -0.07862 | 0.08967  |
| 1.07E-72 | 0.405829 | 6.08E-20 | 0.569505 | 1.67E-41 | 0.66754  | 1.51E-61 | 0.158702 | 0.00058  |
| 3.45E-15 | -0.51717 | 2.65E-33 | -0.46444 | 2.31E-26 | -0.54447 | 2.12E-37 | -0.21427 | 2.98E-06 |
| 1.26E-39 | -0.51585 | 4.11E-33 | -0.64624 | 1.47E-56 | -0.69406 | 2.30E-68 | -0.14396 | 0.00182  |
| 8.40E-16 | -0.34635 | 1.31E-14 | -0.44527 | 4.01E-24 | -0.4655  | 1.72E-26 | -0.4737  | 1.70E-27 |
| 6.06E-14 | -0.55429 | 5.72E-39 | -0.54763 | 6.71E-38 | -0.54177 | 5.61E-37 | -0.25153 | 3.59E-08 |
| 6.84E-27 | -0.47856 | 4.19E-28 | -0.56678 | 4.85E-41 | -0.59073 | 2.87E-45 | -0.16688 | 0.00029  |
| 1.25E-20 | -0.40782 | 3.85E-20 | -0.63751 | 1.25E-54 | -0.59868 | 9.44E-47 | 0.01953  | 0.67378  |
| 8.78E-47 | -0.51623 | 3.62E-33 | -0.41997 | 2.22E-21 | -0.61192 | 2.57E-49 | -0.41745 | 4.06E-21 |
| 3.40E-11 | -0.44812 | 1.90E-24 | -0.23076 | 4.62E-07 | -0.3791  | 2.08E-17 | -0.32259 | 9.03E-13 |
| 1.07E-20 | -0.59463 | 5.45E-46 | -0.54147 | 6.24E-37 | -0.62235 | 2.01E-51 | -0.15254 | 0.00094  |
| 2.79E-23 | -0.30333 | 2.15E-11 | -0.37817 | 2.52E-17 | -0.43856 | 2.26E-23 | -0.25971 | 1.23E-08 |
| 1.44E-06 | -0.33539 | 9.68E-14 | -0.29799 | 4.96E-11 | -0.33382 | 1.28E-13 | -0.02681 | 0.56336  |
| 3.14E-11 | -0.39096 | 1.67E-18 | -0.18527 | 5.63E-05 | -0.33396 | 1.25E-13 | 0.012028 | 0.79545  |
| 6.99E-15 | -0.31681 | 2.39E-12 | -0.42612 | 5.03E-22 | -0.43661 | 3.70E-23 | -0.18421 | 6.22E-05 |
| 8.45E-14 | -0.49009 | 1.38E-29 | -0.30814 | 9.93E-12 | -0.45859 | 1.15E-25 | -0.03087 | 0.50571  |
| 2.04E-31 | -0.53993 | 1.08E-36 | -0.67601 | 1.20E-63 | -0.67785 | 4.13E-64 | -0.1377  | 0.00286  |
| 7.80E-13 | 0.365209 | 3.51E-16 | 0.431597 | 1.30E-22 | 0.483901 | 8.76E-29 | 0.08797  | 0.05748  |
| 1.67E-14 | -0.54358 | 2.92E-37 | -0.48382 | 8.98E-29 | -0.54318 | 3.38E-37 | 0.081779 | 0.07748  |
| 0.00143  | -0.37999 | 1.72E-17 | -0.33763 | 6.48E-14 | -0.31464 | 3.43E-12 | -0.22053 | 1.49E-06 |
| 1.46E-21 | -0.46798 | 8.62E-27 | -0.49806 | 1.20E-30 | -0.57393 | 2.88E-42 | -0.17281 | 0.00017  |
| 5.67E-46 | -0.4787  | 4.03E-28 | -0.62785 | 1.45E-52 | -0.69365 | 2.97E-68 | -0.21595 | 2.48E-06 |
| 2.80E-24 | -0.29815 | 4.83E-11 | -0.47902 | 3.67E-28 | -0.49149 | 9.01E-30 | -0.34195 | 2.96E-14 |
| 9.58E-26 | -0.37154 | 9.83E-17 | -0.40284 | 1.20E-19 | -0.52635 | 1.23E-34 | -0.02299 | 0.62021  |

|          |          |          |          |          |          |          |          |          |
|----------|----------|----------|----------|----------|----------|----------|----------|----------|
| 4.19E-32 | -0.25392 | 2.64E-08 | -0.45044 | 1.03E-24 | -0.49799 | 1.23E-30 | 0.028828 | 0.53432  |
| 0.00051  | -0.3778  | 2.72E-17 | -0.37062 | 1.19E-16 | -0.38008 | 1.69E-17 | 0.052189 | 0.26035  |
| 2.67E-17 | -0.30052 | 3.34E-11 | -0.41358 | 1.01E-20 | -0.43332 | 8.47E-23 | -0.04929 | 0.28779  |
| 5.40E-12 | -0.27058 | 2.80E-09 | -0.24259 | 1.11E-07 | -0.32305 | 8.35E-13 | -0.07466 | 0.1071   |
| 2.94E-34 | 0.578538 | 4.51E-43 | 0.539825 | 1.12E-36 | 0.637027 | 1.59E-54 | 0.432606 | 1.01E-22 |
| 2.33E-16 | -0.41824 | 3.37E-21 | -0.40768 | 3.97E-20 | -0.49765 | 1.37E-30 | -0.01928 | 0.67777  |
| 3.76E-23 | -0.51121 | 1.87E-32 | -0.56289 | 2.19E-40 | -0.59642 | 2.52E-46 | -0.1082  | 0.01934  |
| 2.92E-12 | -0.13714 | 0.00298  | -0.43299 | 9.19E-23 | -0.38778 | 3.31E-18 | 0.121654 | 0.0085   |
| 2.97E-14 | -0.35334 | 3.53E-15 | -0.37255 | 8.02E-17 | -0.39805 | 3.50E-19 | -0.2923  | 1.19E-10 |
| 8.76E-41 | -0.43211 | 1.15E-22 | -0.70807 | 2.83E-72 | -0.69953 | 7.29E-70 | -0.35071 | 5.81E-15 |
| 9.30E-05 | -0.43828 | 2.42E-23 | -0.39524 | 6.53E-19 | -0.39358 | 9.41E-19 | -0.17272 | 0.00018  |
| 6.45E-11 | -0.53156 | 2.04E-35 | -0.52888 | 5.15E-35 | -0.50243 | 3.07E-31 | -0.22965 | 5.26E-07 |
| 5.89E-15 | -0.50883 | 4.02E-32 | -0.57993 | 2.56E-43 | -0.58459 | 3.77E-44 | -0.32213 | 9.78E-13 |
| 1.72E-12 | -0.5126  | 1.19E-32 | -0.56086 | 4.78E-40 | -0.53037 | 3.08E-35 | -0.1511  | 0.00105  |
| 4.49E-07 | -0.29573 | 7.03E-11 | -0.23541 | 2.66E-07 | -0.30381 | 1.99E-11 | -0.24392 | 9.40E-08 |
| 1.01E-29 | -0.33045 | 2.32E-13 | -0.44909 | 1.47E-24 | -0.52398 | 2.73E-34 | -0.00576 | 0.90121  |
| 6.98E-21 | -0.32657 | 4.56E-13 | -0.25391 | 2.64E-08 | -0.42337 | 9.82E-22 | -0.18288 | 7.04E-05 |
| 8.92E-21 | -0.31316 | 4.38E-12 | -0.38447 | 6.71E-18 | -0.43787 | 2.69E-23 | -0.44528 | 3.99E-24 |
| 2.38E-32 | -0.66616 | 3.27E-61 | -0.62693 | 2.26E-52 | -0.70896 | 1.57E-72 | -0.1794  | 9.70E-05 |
| 2.00E-27 | -0.28586 | 3.12E-10 | -0.2605  | 1.11E-08 | -0.41895 | 2.84E-21 | -0.35785 | 1.49E-15 |
| 5.39E-47 | -0.41992 | 2.26E-21 | -0.50843 | 4.57E-32 | -0.62262 | 1.77E-51 | -0.17411 | 0.00016  |
| 1.08E-38 | -0.41849 | 3.17E-21 | -0.57599 | 1.26E-42 | -0.65541 | 1.17E-58 | -0.18514 | 5.70E-05 |
| 1.86E-15 | 0.530531 | 2.92E-35 | 0.426842 | 4.22E-22 | 0.506308 | 9.00E-32 | 0.19598  | 2.00E-05 |
| 1.08E-27 | 0.46666  | 1.25E-26 | 0.473062 | 2.04E-27 | 0.539572 | 1.23E-36 | 0.077997 | 0.09226  |
| 2.94E-15 | -0.44827 | 1.83E-24 | -0.53168 | 1.96E-35 | -0.54793 | 6.02E-38 | 0.001542 | 0.97348  |
| 6.26E-06 | -0.3415  | 3.22E-14 | -0.36752 | 2.21E-16 | -0.35363 | 3.34E-15 | -0.09137 | 0.04845  |
| 6.98E-25 | -0.45786 | 1.41E-25 | -0.48321 | 1.07E-28 | -0.5651  | 9.35E-41 | -0.00671 | 0.88502  |
| 3.90E-19 | 0.563765 | 1.57E-40 | 0.536535 | 3.60E-36 | 0.520261 | 9.53E-34 | 0.282304 | 5.26E-10 |
| 3.57E-24 | -0.23026 | 4.89E-07 | -0.41189 | 1.50E-20 | -0.44816 | 1.88E-24 | -0.05165 | 0.26534  |
| 2.49E-29 | -0.52074 | 8.11E-34 | -0.53007 | 3.42E-35 | -0.60879 | 1.07E-48 | -0.17606 | 0.00013  |
| 1.87E-33 | 0.310498 | 6.78E-12 | 0.216772 | 2.26E-06 | 0.425792 | 5.45E-22 | 0.272854 | 2.04E-09 |
| 2.16E-18 | -0.18789 | 4.39E-05 | -0.39221 | 1.27E-18 | -0.41509 | 7.10E-21 | -0.05007 | 0.28025  |
| 1.93E-11 | -0.41165 | 1.59E-20 | -0.41129 | 1.73E-20 | -0.41826 | 3.35E-21 | 0.167621 | 0.00027  |
| 3.21E-36 | -0.64118 | 1.96E-55 | -0.63112 | 2.96E-53 | -0.71953 | 1.19E-75 | -0.06544 | 0.15797  |
| 7.25E-05 | -0.17202 | 0.00019  | -0.31977 | 1.46E-12 | -0.28316 | 4.65E-10 | -0.14763 | 0.00138  |
| 1.98E-18 | -0.28402 | 4.09E-10 | -0.46869 | 7.06E-27 | -0.46592 | 1.53E-26 | -0.01986 | 0.66855  |
| 1.16E-09 | -0.46583 | 1.57E-26 | -0.35111 | 5.39E-15 | -0.40927 | 2.76E-20 | -0.08067 | 0.08159  |
| 3.16E-25 | -0.62323 | 1.33E-51 | -0.54574 | 1.34E-37 | -0.62722 | 1.97E-52 | -0.09847 | 0.03339  |
| 2.09E-36 | -0.53158 | 2.03E-35 | -0.53167 | 1.97E-35 | -0.63336 | 9.80E-54 | -0.31325 | 4.32E-12 |
| 2.63E-24 | -0.43671 | 3.61E-23 | -0.36536 | 3.40E-16 | -0.50578 | 1.07E-31 | -0.02365 | 0.61013  |
| 1.22E-08 | -0.52434 | 2.42E-34 | -0.53869 | 1.68E-36 | -0.52545 | 1.66E-34 | -0.2172  | 2.16E-06 |
| 2.84E-12 | -0.3317  | 1.86E-13 | -0.36048 | 8.90E-16 | -0.41547 | 6.48E-21 | 0.032381 | 0.48513  |
| 7.53E-27 | -0.34506 | 1.67E-14 | -0.51529 | 4.94E-33 | -0.55952 | 7.96E-40 | -0.32546 | 5.53E-13 |
| 9.28E-56 | -0.54657 | 9.89E-38 | -0.58792 | 9.41E-45 | -0.69195 | 8.53E-68 | -0.37804 | 2.59E-17 |
| 1.62E-44 | -0.586   | 2.09E-44 | -0.65255 | 5.38E-58 | -0.71266 | 1.32E-73 | -0.37865 | 2.28E-17 |



|          |          |          |          |          |          |          |          |          |
|----------|----------|----------|----------|----------|----------|----------|----------|----------|
| 1.48E-16 | -0.45241 | 6.11E-25 | -0.42979 | 2.04E-22 | -0.4731  | 2.02E-27 | -0.01771 | 0.70264  |
| 7.28E-11 | -0.49895 | 9.12E-31 | -0.49656 | 1.91E-30 | -0.51729 | 2.55E-33 | -0.17993 | 9.23E-05 |
| 7.89E-16 | -0.19301 | 2.68E-05 | -0.4125  | 1.30E-20 | -0.40801 | 3.68E-20 | -0.28504 | 3.52E-10 |
| 7.25E-06 | -0.3698  | 1.40E-16 | -0.3976  | 3.88E-19 | -0.40971 | 2.49E-20 | 0.168788 | 0.00025  |
| 2.61E-20 | 0.319671 | 1.48E-12 | 0.374808 | 5.05E-17 | 0.439067 | 1.98E-23 | 0.248017 | 5.62E-08 |
| 3.12E-07 | -0.5198  | 1.11E-33 | -0.59563 | 3.53E-46 | -0.51967 | 1.16E-33 | -0.15006 | 0.00114  |
| 0.85666  | -0.22035 | 1.52E-06 | -0.12839 | 0.00546  | -0.11217 | 0.0153   | 0.399371 | 2.61E-19 |
| 1.90E-19 | -0.52891 | 5.11E-35 | -0.58791 | 9.44E-45 | -0.59175 | 1.87E-45 | -0.12017 | 0.00934  |
| 4.28E-29 | -0.55968 | 7.50E-40 | -0.75422 | 5.49E-87 | -0.70732 | 4.65E-72 | -0.28349 | 4.43E-10 |
| 2.38E-17 | -0.45938 | 9.31E-26 | -0.51806 | 1.98E-33 | -0.54406 | 2.45E-37 | 0.02862  | 0.53727  |
| 0.00201  | -0.33541 | 9.66E-14 | -0.29634 | 6.40E-11 | -0.32388 | 7.25E-13 | -0.14844 | 0.00129  |
| 0.02946  | -0.20152 | 1.14E-05 | -0.28004 | 7.31E-10 | -0.24667 | 6.66E-08 | 0.012087 | 0.79446  |
| 5.99E-26 | -0.28197 | 5.53E-10 | -0.26351 | 7.40E-09 | -0.42817 | 3.05E-22 | -0.10144 | 0.02838  |
| 1.39E-15 | -0.21504 | 2.74E-06 | -0.42398 | 8.47E-22 | -0.42687 | 4.19E-22 | -0.23273 | 3.66E-07 |
| 2.39E-19 | -0.33968 | 4.47E-14 | -0.25447 | 2.45E-08 | -0.43515 | 5.35E-23 | -0.08035 | 0.08283  |
| 4.45E-12 | -0.49079 | 1.12E-29 | -0.56761 | 3.52E-41 | -0.53016 | 3.32E-35 | -0.04289 | 0.35505  |
| 1.32E-37 | 0.55992  | 6.84E-40 | 0.43649  | 3.82E-23 | 0.565947 | 6.72E-41 | 0.417693 | 3.83E-21 |
| 4.10E-28 | 0.423515 | 9.48E-22 | 0.549039 | 4.01E-38 | 0.560487 | 5.51E-40 | 0.369431 | 1.51E-16 |
| 9.77E-19 | -0.44331 | 6.66E-24 | -0.30878 | 8.95E-12 | -0.48007 | 2.70E-28 | -0.1174  | 0.01112  |
| 8.73E-17 | -0.54956 | 3.31E-38 | -0.57604 | 1.24E-42 | -0.59342 | 9.16E-46 | -0.11352 | 0.0141   |
| 3.41E-14 | -0.33475 | 1.09E-13 | -0.22963 | 5.27E-07 | -0.39439 | 7.87E-19 | -0.13646 | 0.00313  |
| 6.92E-21 | -0.54157 | 6.02E-37 | -0.62207 | 2.30E-51 | -0.62592 | 3.67E-52 | -0.19752 | 1.71E-05 |
| 7.20E-10 | -0.30567 | 1.48E-11 | -0.41092 | 1.88E-20 | -0.37393 | 6.04E-17 | -0.06376 | 0.16896  |
| 2.32E-28 | -0.51364 | 8.47E-33 | -0.47017 | 4.65E-27 | -0.5801  | 2.39E-43 | -0.15968 | 0.00053  |
| 2.25E-28 | -0.49801 | 1.22E-30 | -0.50138 | 4.28E-31 | -0.59255 | 1.32E-45 | -0.13149 | 0.00442  |
| 1.59E-33 | 0.578936 | 3.84E-43 | 0.603739 | 1.02E-47 | 0.629552 | 6.35E-53 | 0.347071 | 1.15E-14 |
| 5.94E-20 | -0.59455 | 5.64E-46 | -0.55597 | 3.05E-39 | -0.61718 | 2.28E-50 | -0.1209  | 0.00891  |
| 2.00E-13 | -0.46682 | 1.19E-26 | -0.41654 | 5.04E-21 | -0.47245 | 2.43E-27 | -0.12486 | 0.0069   |
| 6.37E-11 | -0.49867 | 9.93E-31 | -0.57209 | 6.02E-42 | -0.54949 | 3.40E-38 | -0.21079 | 4.33E-06 |
| 2.00E-08 | -0.33006 | 2.49E-13 | -0.43156 | 1.31E-22 | -0.40238 | 1.33E-19 | 0.324265 | 6.79E-13 |
| 6.16E-19 | -0.46895 | 6.56E-27 | -0.36409 | 4.38E-16 | -0.49821 | 1.15E-30 | -0.1015  | 0.02829  |
| 1.86E-06 | 0.483259 | 1.06E-28 | 0.342268 | 2.79E-14 | 0.348743 | 8.41E-15 | -0.05138 | 0.26779  |
| 3.36E-08 | -0.39742 | 4.03E-19 | -0.42492 | 6.73E-22 | -0.39958 | 2.49E-19 | -0.25356 | 2.76E-08 |
| 5.16E-26 | 0.591165 | 2.39E-45 | 0.482027 | 1.52E-28 | 0.56095  | 4.62E-40 | 0.152325 | 0.00096  |
| 2.57E-37 | -0.57458 | 2.22E-42 | -0.57576 | 1.38E-42 | -0.67584 | 1.33E-63 | -0.21161 | 3.97E-06 |
| 8.84E-44 | -0.61864 | 1.16E-50 | -0.68405 | 1.05E-65 | -0.75644 | 8.93E-88 | -0.31495 | 3.26E-12 |
| 1.35E-24 | -0.35952 | 1.07E-15 | -0.26387 | 7.04E-09 | -0.4397  | 1.69E-23 | -0.25067 | 4.01E-08 |
| 1.69E-24 | -0.32779 | 3.69E-13 | -0.42705 | 4.00E-22 | -0.50687 | 7.54E-32 | -0.00966 | 0.83499  |
| 7.11E-38 | -0.43758 | 2.90E-23 | -0.65625 | 7.45E-59 | -0.66064 | 6.90E-60 | -0.40059 | 1.99E-19 |
| 4.75E-22 | -0.19564 | 2.06E-05 | -0.3198  | 1.45E-12 | -0.41306 | 1.14E-20 | -0.25182 | 3.46E-08 |
| 9.05E-10 | -0.29397 | 9.20E-11 | -0.3395  | 4.62E-14 | -0.38327 | 8.65E-18 | 0.114214 | 0.01352  |
| 1.16E-08 | 0.645517 | 2.13E-56 | 0.499562 | 7.54E-31 | 0.541378 | 6.45E-37 | 0.175511 | 0.00014  |
| 3.84E-72 | 0.384746 | 6.33E-18 | 0.699245 | 8.74E-70 | 0.731805 | 1.86E-79 | 0.161035 | 0.00048  |
| 5.59E-15 | 0.600649 | 3.99E-47 | 0.450919 | 9.07E-25 | 0.525043 | 1.91E-34 | 0.171938 | 0.00019  |
| 2.47E-46 | 0.64895  | 3.58E-57 | 0.667391 | 1.64E-61 | 0.74915  | 3.26E-85 | 0.287747 | 2.36E-10 |

|          |          |          |          |          |          |          |          |          |
|----------|----------|----------|----------|----------|----------|----------|----------|----------|
| 2.32E-40 | 0.628591 | 1.01E-52 | 0.501214 | 4.50E-31 | 0.624477 | 7.33E-52 | 0.18962  | 3.72E-05 |
| 4.78E-17 | -0.33034 | 2.37E-13 | -0.37584 | 4.08E-17 | -0.41843 | 3.22E-21 | -0.23155 | 4.21E-07 |
| 5.14E-16 | -0.42892 | 2.53E-22 | -0.41666 | 4.90E-21 | -0.48106 | 2.02E-28 | -0.21823 | 1.93E-06 |
| 5.11E-10 | -0.22986 | 5.13E-07 | -0.33435 | 1.16E-13 | -0.36472 | 3.86E-16 | 0.108164 | 0.01939  |
| 9.90E-12 | -0.53922 | 1.39E-36 | -0.43708 | 3.29E-23 | -0.51551 | 4.59E-33 | -0.21055 | 4.45E-06 |
| 1.11E-11 | 0.334636 | 1.11E-13 | 0.374479 | 5.40E-17 | 0.458119 | 1.31E-25 | 0.172041 | 0.00019  |
| 0.00019  | 0.193637 | 2.52E-05 | 0.368425 | 1.85E-16 | 0.270665 | 2.77E-09 | -0.02146 | 0.6437   |
| 7.73E-07 | 0.329451 | 2.77E-13 | 0.369231 | 1.57E-16 | 0.35723  | 1.67E-15 | -0.02227 | 0.63119  |
| 5.60E-05 | -0.27368 | 1.81E-09 | -0.07746 | 0.09455  | -0.23331 | 3.42E-07 | 0.053695 | 0.24683  |
| 2.62E-17 | -0.50031 | 5.98E-31 | -0.60306 | 1.38E-47 | -0.61924 | 8.74E-51 | -0.02274 | 0.62403  |
| 7.35E-19 | -0.29132 | 1.38E-10 | -0.29165 | 1.31E-10 | -0.39816 | 3.43E-19 | -0.24957 | 4.62E-08 |
| 5.16E-15 | -0.30922 | 8.35E-12 | -0.49597 | 2.29E-30 | -0.50539 | 1.21E-31 | -0.14014 | 0.0024   |
| 1.33E-45 | -0.33974 | 4.43E-14 | -0.52296 | 3.86E-34 | -0.60631 | 3.25E-48 | -0.20272 | 1.01E-05 |
| 6.52E-25 | -0.45791 | 1.39E-25 | -0.56211 | 2.96E-40 | -0.60291 | 1.48E-47 | -0.21938 | 1.70E-06 |
| 2.60E-18 | -0.57683 | 9.01E-43 | -0.49415 | 4.01E-30 | -0.57256 | 4.99E-42 | -0.19697 | 1.81E-05 |
| 1.00E-11 | -0.25522 | 2.23E-08 | -0.31816 | 1.91E-12 | -0.4047  | 7.85E-20 | -0.17198 | 0.00019  |
| 5.71E-27 | -0.17088 | 0.00021  | -0.44893 | 1.54E-24 | -0.45735 | 1.62E-25 | 0.011641 | 0.80188  |
| 1.08E-18 | -0.506   | 9.92E-32 | -0.43901 | 2.01E-23 | -0.53011 | 3.38E-35 | -0.21224 | 3.71E-06 |
| 1.03E-08 | -0.36028 | 9.26E-16 | -0.35754 | 1.58E-15 | -0.38288 | 9.40E-18 | 0.145867 | 0.00157  |
| 1.26E-15 | -0.36813 | 1.96E-16 | -0.42607 | 5.09E-22 | -0.48274 | 1.23E-28 | -0.25968 | 1.24E-08 |
| 1.23E-05 | -0.30845 | 9.45E-12 | -0.19791 | 1.65E-05 | -0.29394 | 9.25E-11 | 0.11202  | 0.01544  |
| 8.51E-13 | -0.30607 | 1.39E-11 | -0.51012 | 2.66E-32 | -0.46951 | 5.60E-27 | -0.04377 | 0.34528  |
| 0.00033  | -0.31082 | 6.43E-12 | -0.26141 | 9.82E-09 | -0.28487 | 3.61E-10 | 0.474264 | 1.45E-27 |
| 9.55E-38 | -0.58681 | 1.50E-44 | -0.66302 | 1.87E-60 | -0.70701 | 5.70E-72 | -0.35212 | 4.45E-15 |
| 6.63E-11 | -0.21479 | 2.81E-06 | -0.32445 | 6.57E-13 | -0.33672 | 7.63E-14 | -0.11522 | 0.01272  |
| 5.25E-16 | -0.43501 | 5.54E-23 | -0.46107 | 5.86E-26 | -0.50012 | 6.33E-31 | -0.10301 | 0.02601  |
| 3.26E-07 | -0.13327 | 0.00391  | -0.23521 | 2.72E-07 | -0.2795  | 7.91E-10 | -0.16765 | 0.00027  |
| 4.09E-16 | 0.642628 | 9.38E-56 | 0.502091 | 3.42E-31 | 0.595304 | 4.07E-46 | 0.202093 | 1.08E-05 |
| 1.12E-18 | -0.31212 | 5.20E-12 | -0.32671 | 4.45E-13 | -0.41653 | 5.05E-21 | 0.122658 | 0.00796  |
| 3.34E-09 | -0.54948 | 3.41E-38 | -0.40575 | 6.19E-20 | -0.48153 | 1.76E-28 | -0.1171  | 0.01133  |
| 5.15E-08 | 0.563945 | 1.46E-40 | 0.379194 | 2.04E-17 | 0.423071 | 1.06E-21 | 0.132653 | 0.00408  |
| 7.30E-23 | 0.464014 | 2.60E-26 | 0.413815 | 9.57E-21 | 0.519352 | 1.29E-33 | 0.156004 | 0.00072  |
| 1.07E-18 | -0.30601 | 1.40E-11 | -0.41008 | 2.29E-20 | -0.48922 | 1.79E-29 | 0.007273 | 0.87543  |
| 7.45E-21 | -0.46949 | 5.63E-27 | -0.34707 | 1.15E-14 | -0.49129 | 9.57E-30 | -0.05331 | 0.25024  |
| 9.15E-10 | -0.33017 | 2.44E-13 | -0.40537 | 6.75E-20 | -0.41003 | 2.31E-20 | -0.25385 | 2.66E-08 |
| 9.00E-11 | -0.35401 | 3.10E-15 | -0.51242 | 1.26E-32 | -0.49127 | 9.62E-30 | -0.14788 | 0.00135  |
| 7.14E-06 | -0.35128 | 5.22E-15 | -0.24423 | 9.05E-08 | -0.34211 | 2.87E-14 | -0.02691 | 0.56194  |
| 9.48E-12 | -0.49261 | 6.41E-30 | -0.46996 | 4.93E-27 | -0.53189 | 1.82E-35 | -0.16105 | 0.00048  |
| 0.13975  | -0.20494 | 8.03E-06 | -0.19371 | 2.50E-05 | -0.21334 | 3.29E-06 | -0.02593 | 0.57627  |
| 1.37E-08 | -0.1004  | 0.03006  | -0.33452 | 1.13E-13 | -0.31101 | 6.23E-12 | -0.03074 | 0.50759  |
| 1.05E-20 | -0.44493 | 4.38E-24 | -0.46525 | 1.85E-26 | -0.54724 | 7.75E-38 | -0.20102 | 1.20E-05 |
| 1.71E-09 | -0.3465  | 1.28E-14 | -0.26431 | 6.63E-09 | -0.34829 | 9.15E-15 | -0.22401 | 1.01E-06 |
| 2.10E-30 | -0.23343 | 3.37E-07 | -0.46089 | 6.16E-26 | -0.51826 | 1.85E-33 | -0.11759 | 0.01099  |
| 1.43E-14 | -0.55374 | 7.03E-39 | -0.57663 | 9.78E-43 | -0.58157 | 1.31E-43 | 0.071049 | 0.12522  |
| 0.00013  | -0.26484 | 6.18E-09 | -0.26655 | 4.89E-09 | -0.27415 | 1.70E-09 | -0.01446 | 0.75529  |

|          |          |          |          |          |          |          |          |          |
|----------|----------|----------|----------|----------|----------|----------|----------|----------|
| 1.02E-09 | -0.48826 | 2.39E-29 | -0.42125 | 1.64E-21 | -0.45066 | 9.71E-25 | 0.040538 | 0.3821   |
| 3.03E-08 | -0.45471 | 3.29E-25 | -0.40544 | 6.65E-20 | -0.41278 | 1.22E-20 | 0.162773 | 0.00041  |
| 3.59E-18 | 0.518217 | 1.88E-33 | 0.506753 | 7.81E-32 | 0.553953 | 6.50E-39 | 0.146537 | 0.0015   |
| 6.10E-37 | -0.37571 | 4.19E-17 | -0.53072 | 2.74E-35 | -0.62226 | 2.10E-51 | -0.24866 | 5.18E-08 |
| 7.36E-34 | -0.54489 | 1.82E-37 | -0.55784 | 1.51E-39 | -0.66063 | 6.96E-60 | -0.19455 | 2.30E-05 |
| 7.40E-17 | -0.25293 | 3.00E-08 | -0.39655 | 4.90E-19 | -0.40798 | 3.71E-20 | -0.3321  | 1.74E-13 |
| 4.20E-18 | -0.54673 | 9.34E-38 | -0.50263 | 2.88E-31 | -0.56949 | 1.68E-41 | -0.05963 | 0.19833  |
| 0.4334   | -0.2241  | 9.97E-07 | -0.14583 | 0.00158  | -0.10717 | 0.02054  | -0.03535 | 0.446    |
| 8.02E-24 | -0.5214  | 6.50E-34 | -0.61939 | 8.15E-51 | -0.61426 | 8.81E-50 | -0.03642 | 0.43231  |
| 3.71E-26 | -0.47302 | 2.07E-27 | -0.58166 | 1.26E-43 | -0.61088 | 4.14E-49 | -0.06804 | 0.14205  |
| 8.86E-08 | -0.05286 | 0.25424  | -0.16075 | 0.00049  | -0.19924 | 1.44E-05 | 0.000201 | 0.99654  |
| 3.55E-09 | 0.204188 | 8.68E-06 | 0.237143 | 2.16E-07 | 0.285757 | 3.17E-10 | 0.179598 | 9.52E-05 |
| 2.13E-31 | 0.545435 | 1.49E-37 | 0.623693 | 1.06E-51 | 0.682784 | 2.23E-65 | 0.228582 | 5.95E-07 |
| 0.00012  | -0.27877 | 8.79E-10 | -0.36976 | 1.41E-16 | -0.33525 | 9.92E-14 | 0.089449 | 0.0534   |
| 2.82E-31 | -0.44579 | 3.50E-24 | -0.54978 | 3.05E-38 | -0.60937 | 8.22E-49 | -0.17672 | 0.00012  |
| 1.35E-26 | -0.43478 | 5.87E-23 | -0.39144 | 1.50E-18 | -0.52103 | 7.38E-34 | 0.003105 | 0.94665  |
| 2.25E-13 | -0.18483 | 5.87E-05 | -0.32157 | 1.08E-12 | -0.32488 | 6.11E-13 | -0.0082  | 0.85979  |
| 2.80E-17 | -0.33829 | 5.76E-14 | -0.42626 | 4.86E-22 | -0.462   | 4.54E-26 | -0.20298 | 9.83E-06 |
| 0.00326  | -0.25034 | 4.18E-08 | -0.25931 | 1.30E-08 | -0.29489 | 8.00E-11 | 0.363939 | 4.51E-16 |
| 8.39E-15 | -0.62984 | 5.51E-53 | -0.56579 | 7.14E-41 | -0.5997  | 6.05E-47 | -0.10581 | 0.0222   |
| 7.01E-09 | 0.489886 | 1.46E-29 | 0.381596 | 1.23E-17 | 0.465293 | 1.83E-26 | 0.092723 | 0.04521  |
| 1.28E-20 | -0.55397 | 6.47E-39 | -0.6081  | 1.46E-48 | -0.62985 | 5.48E-53 | -0.15726 | 0.00065  |
| 7.07E-33 | 0.50702  | 7.18E-32 | 0.585104 | 3.04E-44 | 0.629758 | 5.74E-53 | 0.085592 | 0.06459  |
| 1.86E-24 | 0.534477 | 7.41E-36 | 0.25946  | 1.27E-08 | 0.522776 | 4.10E-34 | 0.271478 | 2.47E-09 |
| 2.09E-26 | -0.51883 | 1.54E-33 | -0.49913 | 8.62E-31 | -0.61022 | 5.60E-49 | -0.22775 | 6.56E-07 |
| 2.18E-12 | -0.54219 | 4.82E-37 | -0.64732 | 8.34E-57 | -0.60389 | 9.58E-48 | -0.11427 | 0.01348  |
| 0.00082  | -0.24242 | 1.13E-07 | -0.23654 | 2.32E-07 | -0.27032 | 2.91E-09 | -0.0064  | 0.89025  |
| 1.14E-21 | -0.39501 | 6.87E-19 | -0.56676 | 4.89E-41 | -0.5701  | 1.32E-41 | 0.063901 | 0.16801  |
| 1.05E-34 | 0.424057 | 8.31E-22 | 0.470106 | 4.73E-27 | 0.543191 | 3.36E-37 | 0.322807 | 8.71E-13 |
| 0.00326  | -0.32781 | 3.68E-13 | -0.41101 | 1.84E-20 | -0.39829 | 3.33E-19 | -0.13889 | 0.00263  |
| 5.39E-18 | 0.570755 | 1.02E-41 | 0.598845 | 8.79E-47 | 0.611917 | 2.58E-49 | 0.107244 | 0.02045  |
| 1.19E-23 | -0.49441 | 3.70E-30 | -0.47916 | 3.52E-28 | -0.5812  | 1.53E-43 | -0.02271 | 0.62454  |
| 1.68E-07 | -0.32685 | 4.35E-13 | -0.28361 | 4.34E-10 | -0.374   | 5.95E-17 | -0.16627 | 0.00031  |
| 1.22E-29 | 0.469059 | 6.36E-27 | 0.645964 | 1.69E-56 | 0.63739  | 1.33E-54 | 0.392566 | 1.17E-18 |
| 6.97E-39 | 0.646017 | 1.64E-56 | 0.549432 | 3.47E-38 | 0.647905 | 6.17E-57 | 0.419408 | 2.55E-21 |
| 3.48E-27 | 0.574524 | 2.28E-42 | 0.540351 | 9.31E-37 | 0.615877 | 4.18E-50 | 0.403824 | 9.59E-20 |
| 7.56E-18 | -0.52251 | 4.48E-34 | -0.39881 | 2.96E-19 | -0.5116  | 1.64E-32 | 0.053537 | 0.24823  |
| 1.24E-06 | -0.35392 | 3.16E-15 | -0.36711 | 2.40E-16 | -0.3892  | 2.44E-18 | -0.19059 | 3.39E-05 |
| 5.18E-18 | -0.46871 | 7.02E-27 | -0.53339 | 1.08E-35 | -0.55241 | 1.16E-38 | -0.21094 | 4.26E-06 |
| 1.22E-21 | 0.549408 | 3.50E-38 | 0.404538 | 8.16E-20 | 0.527965 | 7.05E-35 | 0.261244 | 1.00E-08 |
| 4.28E-28 | -0.45724 | 1.66E-25 | -0.39812 | 3.45E-19 | -0.55195 | 1.37E-38 | -0.26771 | 4.17E-09 |
| 4.26E-20 | -0.4452  | 4.09E-24 | -0.56208 | 3.00E-40 | -0.56704 | 4.40E-41 | -0.0957  | 0.0387   |
| 9.07E-06 | -0.30822 | 9.81E-12 | -0.29981 | 3.73E-11 | -0.35087 | 5.64E-15 | 0.162646 | 0.00042  |
| 2.58E-41 | -0.56936 | 1.77E-41 | -0.64968 | 2.44E-57 | -0.70457 | 2.81E-71 | -0.30566 | 1.48E-11 |
| 8.92E-18 | -0.54928 | 3.67E-38 | -0.49882 | 9.50E-31 | -0.55912 | 9.29E-40 | -0.14507 | 0.00167  |

|          |          |          |          |          |          |          |          |          |
|----------|----------|----------|----------|----------|----------|----------|----------|----------|
| 3.93E-22 | 0.395252 | 6.52E-19 | 0.549404 | 3.51E-38 | 0.544321 | 2.24E-37 | 0.238578 | 1.81E-07 |
| 1.93E-41 | -0.36726 | 2.33E-16 | -0.40054 | 2.01E-19 | -0.52698 | 9.87E-35 | -0.44089 | 1.24E-23 |
| 6.15E-12 | -0.49871 | 9.82E-31 | -0.43443 | 6.42E-23 | -0.48808 | 2.52E-29 | -0.26541 | 5.71E-09 |
| 3.38E-08 | -0.42209 | 1.34E-21 | -0.41293 | 1.18E-20 | -0.40729 | 4.35E-20 | -0.14749 | 0.00139  |
| 1.45E-21 | -0.58577 | 2.31E-44 | -0.59915 | 7.69E-47 | -0.64908 | 3.35E-57 | 0.01426  | 0.75858  |
| 1.80E-20 | -0.45225 | 6.37E-25 | -0.50589 | 1.03E-31 | -0.56416 | 1.34E-40 | -0.07871 | 0.08933  |
| 1.02E-14 | 0.448914 | 1.54E-24 | 0.465777 | 1.60E-26 | 0.515439 | 4.70E-33 | 0.472095 | 2.69E-27 |
| 2.17E-10 | -0.37591 | 4.03E-17 | -0.34578 | 1.46E-14 | -0.34207 | 2.90E-14 | -0.20326 | 9.56E-06 |
| 0.12003  | -0.37052 | 1.21E-16 | -0.23482 | 2.86E-07 | -0.28829 | 2.17E-10 | -0.11205 | 0.01541  |
| 1.73E-35 | -0.40971 | 2.49E-20 | -0.44951 | 1.32E-24 | -0.56979 | 1.49E-41 | -0.13958 | 0.0025   |
| 2.51E-21 | -0.63741 | 1.31E-54 | -0.55503 | 4.35E-39 | -0.63406 | 6.96E-54 | -0.2096  | 4.92E-06 |
| 1.33E-25 | -0.45875 | 1.11E-25 | -0.50287 | 2.67E-31 | -0.57447 | 2.32E-42 | -0.2109  | 4.28E-06 |
| 0.00774  | -0.14452 | 0.00174  | -0.29306 | 1.06E-10 | -0.24272 | 1.09E-07 | -0.28091 | 6.45E-10 |
| 1.91E-32 | 0.323979 | 7.13E-13 | 0.299616 | 3.85E-11 | 0.394596 | 7.53E-19 | 0.32221  | 9.64E-13 |
| 6.56E-20 | -0.44174 | 1.00E-23 | -0.41405 | 9.07E-21 | -0.4706  | 4.12E-27 | -0.32584 | 5.18E-13 |
| 8.57E-10 | -0.23731 | 2.12E-07 | -0.30855 | 9.30E-12 | -0.34047 | 3.87E-14 | 0.232557 | 3.74E-07 |
| 1.52E-36 | -0.55349 | 7.72E-39 | -0.53105 | 2.44E-35 | -0.64678 | 1.11E-56 | -0.22676 | 7.35E-07 |
| 1.62E-19 | -0.42408 | 8.26E-22 | -0.52542 | 1.68E-34 | -0.55274 | 1.02E-38 | -0.28472 | 3.69E-10 |
| 4.05E-05 | -0.20129 | 1.17E-05 | -0.11233 | 0.01516  | -0.21115 | 4.17E-06 | 0.013726 | 0.76734  |
| 2.66E-19 | 0.348261 | 9.21E-15 | 0.398492 | 3.18E-19 | 0.444363 | 5.07E-24 | 0.025427 | 0.58362  |
| 9.57E-22 | -0.3768  | 3.35E-17 | -0.41617 | 5.50E-21 | -0.48993 | 1.45E-29 | -0.15934 | 0.00055  |
| 3.30E-29 | -0.45315 | 5.01E-25 | -0.53687 | 3.20E-36 | -0.58528 | 2.82E-44 | -0.20543 | 7.63E-06 |
| 1.31E-12 | -0.49656 | 1.91E-30 | -0.52674 | 1.07E-34 | -0.53782 | 2.29E-36 | -0.12497 | 0.00685  |
| 9.48E-26 | -0.24447 | 8.78E-08 | -0.3256  | 5.39E-13 | -0.4604  | 7.04E-26 | -0.17146 | 0.0002   |
| 7.98E-20 | -0.36901 | 1.64E-16 | -0.4537  | 4.32E-25 | -0.52521 | 1.80E-34 | 0.020592 | 0.65715  |
| 1.93E-07 | -0.21799 | 1.98E-06 | -0.28357 | 4.37E-10 | -0.26778 | 4.13E-09 | -0.07637 | 0.09927  |
| 2.88E-26 | -0.24179 | 1.22E-07 | -0.405   | 7.34E-20 | -0.43999 | 1.57E-23 | -0.28746 | 2.46E-10 |
| 2.24E-13 | -0.26274 | 8.20E-09 | -0.33795 | 6.12E-14 | -0.35962 | 1.05E-15 | -0.03587 | 0.43927  |
| 2.54E-16 | -0.34712 | 1.14E-14 | -0.48631 | 4.28E-29 | -0.48968 | 1.56E-29 | -0.14759 | 0.00138  |
| 3.83E-36 | -0.1981  | 1.62E-05 | -0.49949 | 7.70E-31 | -0.50249 | 3.02E-31 | -0.105   | 0.02325  |
| 8.14E-08 | -0.29095 | 1.46E-10 | -0.37343 | 6.70E-17 | -0.39542 | 6.28E-19 | 0.228877 | 5.75E-07 |
| 9.61E-14 | -0.36529 | 3.45E-16 | -0.55203 | 1.33E-38 | -0.50131 | 4.36E-31 | -0.10013 | 0.0305   |
| 1.23E-08 | -0.20469 | 8.24E-06 | -0.35575 | 2.22E-15 | -0.3409  | 3.58E-14 | -0.23305 | 3.53E-07 |
| 2.11E-33 | -0.55095 | 1.99E-38 | -0.60552 | 4.64E-48 | -0.65976 | 1.12E-59 | -0.38729 | 3.68E-18 |
| 1.36E-21 | 0.219122 | 1.75E-06 | 0.246735 | 6.61E-08 | 0.357646 | 1.54E-15 | 0.343608 | 2.18E-14 |
| 4.33E-17 | -0.50562 | 1.12E-31 | -0.47746 | 5.77E-28 | -0.50449 | 1.61E-31 | 0.048302 | 0.29758  |
| 1.64E-05 | -0.5309  | 2.57E-35 | -0.38553 | 5.35E-18 | -0.40692 | 4.74E-20 | -0.20247 | 1.04E-05 |
| 1.68E-12 | -0.30627 | 1.34E-11 | -0.35287 | 3.86E-15 | -0.42894 | 2.51E-22 | 0.089165 | 0.05416  |
| 1.55E-16 | -0.16952 | 0.00023  | -0.34481 | 1.75E-14 | -0.40499 | 7.36E-20 | -0.24972 | 4.53E-08 |
| 1.12E-32 | 0.452196 | 6.46E-25 | 0.356984 | 1.76E-15 | 0.533392 | 1.08E-35 | 0.284522 | 3.80E-10 |
| 2.28E-36 | 0.691367 | 1.22E-67 | 0.660642 | 6.90E-60 | 0.723356 | 8.16E-77 | 0.30265  | 2.39E-11 |
| 1.75E-52 | 0.548082 | 5.70E-38 | 0.326368 | 4.73E-13 | 0.556845 | 2.19E-39 | 0.415905 | 5.86E-21 |
| 2.63E-34 | 0.701599 | 1.93E-70 | 0.625282 | 4.99E-52 | 0.710959 | 4.14E-73 | 0.236792 | 2.25E-07 |
| 3.41E-12 | -0.41883 | 2.93E-21 | -0.42164 | 1.49E-21 | -0.46226 | 4.22E-26 | -0.32301 | 8.41E-13 |
| 1.77E-07 | -0.09595 | 0.03819  | -0.15402 | 0.00084  | -0.2325  | 3.76E-07 | -0.05929 | 0.20089  |

|          |          |          |          |          |          |          |          |          |
|----------|----------|----------|----------|----------|----------|----------|----------|----------|
| 8.23E-10 | -0.24546 | 7.76E-08 | -0.32203 | 9.95E-13 | -0.33893 | 5.12E-14 | 0.153595 | 0.00087  |
| 3.00E-26 | -0.53288 | 1.29E-35 | -0.58354 | 5.82E-44 | -0.59609 | 2.90E-46 | -0.21386 | 3.11E-06 |
| 5.03E-07 | -0.56366 | 1.63E-40 | -0.41313 | 1.12E-20 | -0.51593 | 4.00E-33 | -0.09526 | 0.03961  |
| 2.62E-09 | -0.32863 | 3.19E-13 | -0.46751 | 9.84E-27 | -0.43902 | 2.01E-23 | -0.30039 | 3.41E-11 |
| 7.04E-30 | -0.66208 | 3.13E-60 | -0.61966 | 7.18E-51 | -0.69793 | 2.01E-69 | -0.21054 | 4.45E-06 |
| 2.64E-19 | -0.59827 | 1.13E-46 | -0.41404 | 9.09E-21 | -0.54188 | 5.39E-37 | -0.17111 | 0.0002   |
| 2.50E-22 | -0.03082 | 0.50641  | -0.32643 | 4.67E-13 | -0.38465 | 6.46E-18 | 0.073869 | 0.11089  |
| 6.04E-27 | -0.48389 | 8.79E-29 | -0.62609 | 3.38E-52 | -0.62148 | 3.05E-51 | -0.27056 | 2.81E-09 |
| 1.88E-35 | -0.5364  | 3.78E-36 | -0.58869 | 6.80E-45 | -0.64758 | 7.32E-57 | -0.18994 | 3.61E-05 |
| 6.90E-32 | 0.606817 | 2.59E-48 | 0.423126 | 1.04E-21 | 0.612987 | 1.58E-49 | 0.434698 | 6.00E-23 |
| 1.80E-34 | -0.56739 | 3.83E-41 | -0.63766 | 1.16E-54 | -0.68277 | 2.25E-65 | -0.08518 | 0.06589  |
| 2.64E-18 | -0.50056 | 5.52E-31 | -0.51478 | 5.84E-33 | -0.59587 | 3.19E-46 | -0.23438 | 3.01E-07 |
| 1.03E-24 | -0.57973 | 2.78E-43 | -0.61406 | 9.66E-50 | -0.64725 | 8.66E-57 | -0.13634 | 0.00315  |
| 1.01E-15 | 0.548558 | 4.78E-38 | 0.532174 | 1.65E-35 | 0.497123 | 1.61E-30 | -0.02762 | 0.55157  |
| 5.32E-56 | -0.46979 | 5.18E-27 | -0.6922  | 7.32E-68 | -0.73011 | 6.41E-79 | -0.33582 | 8.97E-14 |
| 3.08E-23 | -0.60074 | 3.83E-47 | -0.52316 | 3.60E-34 | -0.61374 | 1.12E-49 | -0.10692 | 0.02084  |
| 0.0492   | -0.06464 | 0.16311  | -0.09867 | 0.03303  | -0.14517 | 0.00166  | 0.010399 | 0.82266  |
| 5.86E-09 | -0.54552 | 1.45E-37 | -0.49468 | 3.41E-30 | -0.48353 | 9.76E-29 | -0.2566  | 1.86E-08 |
| 8.09E-12 | -0.25993 | 1.20E-08 | -0.30361 | 2.05E-11 | -0.32735 | 3.98E-13 | 0.111506 | 0.01592  |
| 4.85E-12 | -0.15654 | 0.00069  | -0.23663 | 2.30E-07 | -0.28317 | 4.64E-10 | 0.145243 | 0.00165  |
| 2.39E-09 | -0.04992 | 0.28171  | -0.29555 | 7.22E-11 | -0.27793 | 9.91E-10 | -0.09044 | 0.05081  |
| 3.15E-09 | -0.20748 | 6.16E-06 | -0.28269 | 4.97E-10 | -0.32431 | 6.74E-13 | -0.17141 | 0.0002   |
| 9.74E-16 | -0.38184 | 1.17E-17 | -0.40329 | 1.08E-19 | -0.44785 | 2.04E-24 | -0.25766 | 1.62E-08 |
| 2.31E-15 | -0.31354 | 4.12E-12 | -0.42148 | 1.55E-21 | -0.44134 | 1.11E-23 | 0.065037 | 0.16056  |
| 5.94E-36 | -0.6424  | 1.05E-55 | -0.60428 | 8.04E-48 | -0.70648 | 8.05E-72 | -0.16958 | 0.00023  |
| 9.78E-16 | -0.18107 | 8.32E-05 | -0.36611 | 2.93E-16 | -0.38606 | 4.78E-18 | -0.05243 | 0.25816  |
| 1.00E-09 | 0.128874 | 0.00528  | 0.222328 | 1.22E-06 | 0.290382 | 1.59E-10 | 0.084185 | 0.06912  |
| 5.93E-06 | -0.28725 | 2.54E-10 | -0.37146 | 1.00E-16 | -0.32834 | 3.36E-13 | 0.234239 | 3.06E-07 |
| 2.06E-16 | 0.308386 | 9.55E-12 | 0.126565 | 0.00617  | 0.286301 | 2.92E-10 | 0.064526 | 0.16388  |
| 1.24E-11 | -0.49591 | 2.33E-30 | -0.36097 | 8.09E-16 | -0.43303 | 9.10E-23 | -0.20169 | 1.12E-05 |
| 6.74E-33 | -0.57358 | 3.33E-42 | -0.5055  | 1.16E-31 | -0.63053 | 3.95E-53 | -0.25494 | 2.31E-08 |
| 9.11E-09 | -0.46558 | 1.68E-26 | -0.30686 | 1.22E-11 | -0.40194 | 1.47E-19 | -0.23108 | 4.44E-07 |
| 4.36E-54 | -0.4633  | 3.17E-26 | -0.53934 | 1.33E-36 | -0.66269 | 2.24E-60 | -0.15489 | 0.00078  |
| 1.16E-56 | -0.40743 | 4.21E-20 | -0.42626 | 4.86E-22 | -0.60422 | 8.27E-48 | -0.46553 | 1.71E-26 |
| 2.08E-06 | -0.48854 | 2.19E-29 | -0.35544 | 2.36E-15 | -0.41084 | 1.92E-20 | -0.0074  | 0.87327  |
| 3.92E-29 | 0.471066 | 3.61E-27 | 0.508886 | 3.95E-32 | 0.589826 | 4.21E-45 | 0.277226 | 1.10E-09 |
| 3.11E-10 | -0.56376 | 1.57E-40 | -0.50759 | 5.97E-32 | -0.50981 | 2.94E-32 | -0.09706 | 0.03601  |
| 2.59E-28 | -0.499   | 8.97E-31 | -0.4795  | 3.19E-28 | -0.57395 | 2.86E-42 | -0.11254 | 0.01497  |
| 2.54E-28 | -0.51887 | 1.51E-33 | -0.57268 | 4.75E-42 | -0.64058 | 2.66E-55 | -0.17331 | 0.00017  |
| 1.02E-13 | -0.32231 | 9.47E-13 | -0.43304 | 9.08E-23 | -0.44378 | 5.90E-24 | -0.21693 | 2.22E-06 |
| 5.01E-18 | -0.14499 | 0.00168  | -0.3413  | 3.33E-14 | -0.39287 | 1.10E-18 | -0.11072 | 0.01668  |
| 1.87E-46 | -0.57987 | 2.62E-43 | -0.65952 | 1.27E-59 | -0.72411 | 4.78E-77 | -0.41913 | 2.72E-21 |
| 2.52E-14 | -0.53589 | 4.51E-36 | -0.43149 | 1.34E-22 | -0.52599 | 1.38E-34 | -0.16169 | 0.00045  |
| 7.95E-17 | -0.1095  | 0.01793  | -0.33537 | 9.72E-14 | -0.3493  | 7.58E-15 | -0.06971 | 0.1325   |
| 3.31E-16 | -0.3304  | 2.34E-13 | -0.4873  | 3.19E-29 | -0.50229 | 3.21E-31 | -0.09487 | 0.04044  |

|          |          |          |          |          |          |          |          |          |
|----------|----------|----------|----------|----------|----------|----------|----------|----------|
| 2.03E-10 | -0.32556 | 5.43E-13 | -0.35994 | 9.90E-16 | -0.40031 | 2.12E-19 | 0.305138 | 1.61E-11 |
| 2.68E-41 | 0.60979  | 6.79E-49 | 0.417167 | 4.34E-21 | 0.638868 | 6.31E-55 | 0.320509 | 1.29E-12 |
| 5.61E-11 | -0.6371  | 1.53E-54 | -0.49792 | 1.25E-30 | -0.55027 | 2.55E-38 | -0.18022 | 8.99E-05 |
| 1.57E-33 | 0.46     | 7.86E-26 | 0.519512 | 1.22E-33 | 0.597797 | 1.39E-46 | 0.086623 | 0.06142  |
| 2.95E-22 | -0.37893 | 2.15E-17 | -0.42164 | 1.49E-21 | -0.50971 | 3.02E-32 | -0.13743 | 0.00292  |
| 9.87E-28 | -0.39691 | 4.52E-19 | -0.44088 | 1.25E-23 | -0.55227 | 1.21E-38 | -0.36191 | 6.73E-16 |
| 0.00242  | -0.30772 | 1.06E-11 | -0.34106 | 3.48E-14 | -0.3079  | 1.03E-11 | 0.074601 | 0.10738  |
| 2.12E-06 | -0.32964 | 2.68E-13 | -0.3608  | 8.36E-16 | -0.33589 | 8.86E-14 | -0.07519 | 0.10465  |
| 4.76E-07 | -0.23477 | 2.87E-07 | -0.32065 | 1.26E-12 | -0.3506  | 5.93E-15 | 0.067629 | 0.1445   |
| 8.13E-19 | -0.52579 | 1.48E-34 | -0.60129 | 3.02E-47 | -0.61509 | 6.00E-50 | -0.13097 | 0.00458  |
| 2.96E-22 | -0.5304  | 3.06E-35 | -0.48438 | 7.60E-29 | -0.57424 | 2.55E-42 | -0.07767 | 0.09362  |
| 2.71E-05 | -0.2415  | 1.27E-07 | -0.31948 | 1.53E-12 | -0.29674 | 6.02E-11 | 0.080188 | 0.08345  |
| 3.65E-38 | -0.56515 | 9.15E-41 | -0.53831 | 1.92E-36 | -0.6692  | 5.93E-62 | -0.102   | 0.02752  |
| 1.15E-16 | -0.52192 | 5.47E-34 | -0.46282 | 3.62E-26 | -0.52371 | 3.00E-34 | -0.02555 | 0.5818   |
| 2.67E-14 | -0.45535 | 2.78E-25 | -0.41756 | 3.95E-21 | -0.50911 | 3.67E-32 | -0.30778 | 1.05E-11 |
| 6.30E-32 | -0.40259 | 1.27E-19 | -0.5025  | 3.01E-31 | -0.56366 | 1.63E-40 | -0.42612 | 5.03E-22 |
| 1.58E-43 | -0.47042 | 4.33E-27 | -0.57589 | 1.31E-42 | -0.66456 | 7.97E-61 | -0.18879 | 4.03E-05 |
| 1.94E-40 | 0.332534 | 1.61E-13 | 0.422535 | 1.20E-21 | 0.554549 | 5.20E-39 | 0.204765 | 8.18E-06 |
| 2.95E-31 | 0.403284 | 1.08E-19 | 0.239182 | 1.69E-07 | 0.474082 | 1.53E-27 | 0.337686 | 6.42E-14 |
| 1.12E-18 | -0.54211 | 4.96E-37 | -0.56851 | 2.47E-41 | -0.58762 | 1.06E-44 | -0.28381 | 4.22E-10 |
| 4.85E-07 | -0.40621 | 5.58E-20 | -0.18778 | 4.44E-05 | -0.30088 | 3.15E-11 | -0.21469 | 2.84E-06 |
| 3.08E-49 | 0.498227 | 1.14E-30 | 0.364669 | 3.90E-16 | 0.631024 | 3.09E-53 | 0.172449 | 0.00018  |
| 6.27E-13 | -0.33641 | 8.07E-14 | -0.32244 | 9.27E-13 | -0.40655 | 5.15E-20 | -0.0838  | 0.0704   |
| 4.65E-12 | -0.53703 | 3.02E-36 | -0.4289  | 2.54E-22 | -0.50328 | 2.35E-31 | -0.11833 | 0.01049  |
| 1.44E-37 | 0.281664 | 5.78E-10 | 0.364455 | 4.07E-16 | 0.462502 | 3.95E-26 | 0.072573 | 0.11731  |
| 1.56E-13 | -0.59118 | 2.38E-45 | -0.43557 | 4.82E-23 | -0.51941 | 1.27E-33 | -0.17552 | 0.00014  |
| 9.84E-23 | -0.41321 | 1.10E-20 | -0.50659 | 8.22E-32 | -0.53651 | 3.62E-36 | -0.36608 | 2.95E-16 |
| 5.45E-16 | -0.3493  | 7.58E-15 | -0.47867 | 4.06E-28 | -0.47029 | 4.49E-27 | -0.17982 | 9.33E-05 |
| 9.03E-51 | -0.54125 | 6.76E-37 | -0.62611 | 3.35E-52 | -0.72293 | 1.10E-76 | -0.23141 | 4.28E-07 |
| 2.31E-38 | 0.483338 | 1.03E-28 | 0.605854 | 3.99E-48 | 0.622591 | 1.80E-51 | 0.168328 | 0.00026  |
| 1.41E-31 | 0.512329 | 1.30E-32 | 0.369072 | 1.62E-16 | 0.534875 | 6.45E-36 | 0.021537 | 0.64249  |
| 4.50E-30 | -0.38407 | 7.31E-18 | -0.42566 | 5.62E-22 | -0.54423 | 2.31E-37 | -0.23215 | 3.92E-07 |
| 1.58E-13 | -0.43937 | 1.83E-23 | -0.32909 | 2.95E-13 | -0.41894 | 2.85E-21 | -0.20031 | 1.29E-05 |
| 2.21E-22 | -0.45714 | 1.71E-25 | -0.43475 | 5.93E-23 | -0.52376 | 2.94E-34 | -0.01407 | 0.76174  |
| 1.91E-12 | -0.47473 | 1.27E-27 | -0.52827 | 6.35E-35 | -0.50235 | 3.15E-31 | -0.23148 | 4.24E-07 |
| 4.74E-27 | -0.49332 | 5.17E-30 | -0.50889 | 3.94E-32 | -0.58245 | 9.11E-44 | 0.028805 | 0.53464  |
| 1.91E-12 | -0.43179 | 1.24E-22 | -0.52618 | 1.30E-34 | -0.50665 | 8.07E-32 | -0.08418 | 0.06915  |
| 9.31E-20 | -0.56547 | 8.10E-41 | -0.56785 | 3.20E-41 | -0.61509 | 6.02E-50 | -0.10269 | 0.02649  |
| 2.37E-49 | -0.49434 | 3.79E-30 | -0.55983 | 7.09E-40 | -0.66145 | 4.43E-60 | -0.27072 | 2.75E-09 |
| 1.73E-64 | 0.513916 | 7.74E-33 | 0.622338 | 2.03E-51 | 0.727032 | 5.94E-78 | 0.301088 | 3.05E-11 |
| 1.38E-20 | -0.51985 | 1.09E-33 | -0.42568 | 5.60E-22 | -0.52037 | 9.18E-34 | -0.02987 | 0.51958  |
| 6.28E-44 | 0.518164 | 1.91E-33 | 0.63015  | 4.74E-53 | 0.680736 | 7.54E-65 | 0.209368 | 5.04E-06 |
| 3.89E-23 | 0.166979 | 0.00029  | 0.212918 | 3.45E-06 | 0.37347  | 6.64E-17 | 0.453095 | 5.08E-25 |
| 3.57E-26 | -0.46932 | 5.90E-27 | -0.38234 | 1.05E-17 | -0.53004 | 3.45E-35 | -0.09037 | 0.05098  |
| 1.25E-25 | 0.480427 | 2.43E-28 | 0.336378 | 8.12E-14 | 0.447146 | 2.45E-24 | 0.500064 | 6.45E-31 |

|          |          |          |          |          |          |          |          |          |
|----------|----------|----------|----------|----------|----------|----------|----------|----------|
| 2.77E-19 | -0.44944 | 1.34E-24 | -0.52813 | 6.67E-35 | -0.53069 | 2.76E-35 | -0.35189 | 4.65E-15 |
| 9.21E-21 | -0.41861 | 3.08E-21 | -0.46777 | 9.14E-27 | -0.49978 | 7.03E-31 | -0.47643 | 7.77E-28 |
| 2.72E-26 | 0.470364 | 4.40E-27 | 0.470261 | 4.53E-27 | 0.551199 | 1.81E-38 | 0.301683 | 2.78E-11 |
| 2.93E-37 | -0.6307  | 3.62E-53 | -0.66774 | 1.35E-61 | -0.70395 | 4.23E-71 | -0.49733 | 1.51E-30 |
| 1.30E-10 | -0.45902 | 1.03E-25 | -0.46033 | 7.18E-26 | -0.46046 | 6.93E-26 | -0.14377 | 0.00184  |
| 2.72E-29 | 0.423283 | 1.00E-21 | 0.543049 | 3.54E-37 | 0.594929 | 4.79E-46 | 0.131755 | 0.00434  |
| 2.99E-11 | -0.41861 | 3.08E-21 | -0.34839 | 8.99E-15 | -0.40956 | 2.58E-20 | -0.14308 | 0.00194  |
| 8.08E-27 | -0.4872  | 3.28E-29 | -0.55934 | 8.52E-40 | -0.61184 | 2.67E-49 | -0.24436 | 8.90E-08 |
| 1.98E-16 | -0.41856 | 3.12E-21 | -0.4623  | 4.18E-26 | -0.46764 | 9.47E-27 | -0.19768 | 1.68E-05 |
| 4.40E-36 | -0.38508 | 5.90E-18 | -0.51726 | 2.58E-33 | -0.5631  | 2.03E-40 | -0.49424 | 3.90E-30 |
| 4.09E-55 | -0.4625  | 3.96E-26 | -0.57295 | 4.27E-42 | -0.67943 | 1.63E-64 | -0.35968 | 1.04E-15 |
| 7.59E-26 | -0.57362 | 3.27E-42 | -0.60151 | 2.74E-47 | -0.64723 | 8.77E-57 | -0.1961  | 1.97E-05 |
| 1.68E-59 | -0.49724 | 1.55E-30 | -0.57276 | 4.61E-42 | -0.6854  | 4.67E-66 | -0.55275 | 1.02E-38 |
| 4.43E-19 | 0.416557 | 5.02E-21 | 0.39913  | 2.76E-19 | 0.496702 | 1.83E-30 | -0.01953 | 0.67371  |
| 1.25E-21 | -0.21046 | 4.49E-06 | -0.36044 | 8.97E-16 | -0.43193 | 1.20E-22 | -0.36594 | 3.03E-16 |
| 7.02E-16 | -0.31487 | 3.31E-12 | -0.47707 | 6.45E-28 | -0.48259 | 1.29E-28 | -0.11414 | 0.01358  |
| 5.91E-39 | 0.61831  | 1.35E-50 | 0.531775 | 1.90E-35 | 0.630166 | 4.71E-53 | 0.393773 | 9.02E-19 |
| 7.39E-15 | -0.38327 | 8.66E-18 | -0.40413 | 8.96E-20 | -0.47022 | 4.58E-27 | -0.04162 | 0.36949  |
| 1.23E-17 | -0.27968 | 7.71E-10 | -0.33351 | 1.35E-13 | -0.40827 | 3.48E-20 | -0.26465 | 6.33E-09 |
| 0.0003   | -0.39697 | 4.46E-19 | -0.23511 | 2.76E-07 | -0.29079 | 1.49E-10 | -0.17506 | 0.00014  |
| 1.03E-08 | -0.40228 | 1.36E-19 | -0.39162 | 1.44E-18 | -0.41587 | 5.90E-21 | -0.03026 | 0.51415  |
| 6.64E-17 | -0.44229 | 8.68E-24 | -0.43543 | 4.99E-23 | -0.44914 | 1.45E-24 | -0.22062 | 1.48E-06 |
| 8.00E-29 | -0.49385 | 4.39E-30 | -0.53257 | 1.44E-35 | -0.62554 | 4.41E-52 | -0.18474 | 5.92E-05 |
| 7.22E-12 | -0.34486 | 1.73E-14 | -0.27457 | 1.60E-09 | -0.37054 | 1.21E-16 | -0.12824 | 0.00551  |
| 8.32E-54 | 0.529426 | 4.27E-35 | 0.65949  | 1.29E-59 | 0.737203 | 3.36E-81 | 0.199228 | 1.44E-05 |
| 3.34E-19 | -0.44547 | 3.81E-24 | -0.44622 | 3.13E-24 | -0.53536 | 5.45E-36 | -0.02828 | 0.54216  |
| 3.83E-27 | -0.43437 | 6.51E-23 | -0.48117 | 1.96E-28 | -0.55052 | 2.32E-38 | -0.19067 | 3.36E-05 |
| 9.88E-37 | -0.48861 | 2.15E-29 | -0.44829 | 1.82E-24 | -0.60382 | 9.85E-48 | -0.29629 | 6.44E-11 |
| 1.14E-37 | -0.57975 | 2.76E-43 | -0.50123 | 4.47E-31 | -0.62307 | 1.43E-51 | -0.40217 | 1.39E-19 |
| 2.00E-31 | -0.45518 | 2.91E-25 | -0.70761 | 3.85E-72 | -0.68373 | 1.27E-65 | -0.11571 | 0.01234  |
| 3.46E-13 | -0.51076 | 2.16E-32 | -0.55003 | 2.78E-38 | -0.55782 | 1.52E-39 | -0.04146 | 0.37138  |
| 3.42E-26 | -0.48837 | 2.31E-29 | -0.2881  | 2.24E-10 | -0.46492 | 2.02E-26 | -0.15803 | 0.00061  |
| 2.36E-14 | -0.31906 | 1.64E-12 | -0.39362 | 9.33E-19 | -0.40823 | 3.51E-20 | -0.27295 | 2.01E-09 |
| 1.58E-21 | -0.30305 | 2.24E-11 | -0.36707 | 2.42E-16 | -0.43055 | 1.69E-22 | -0.37431 | 5.58E-17 |
| 4.97E-06 | -0.37006 | 1.33E-16 | -0.3146  | 3.45E-12 | -0.35157 | 4.94E-15 | -0.04873 | 0.29335  |
| 1.80E-07 | -0.18744 | 4.58E-05 | -0.20531 | 7.73E-06 | -0.2419  | 1.21E-07 | -0.12162 | 0.00852  |
| 2.66E-12 | -0.4566  | 1.98E-25 | -0.37175 | 9.42E-17 | -0.47059 | 4.13E-27 | -0.02135 | 0.64536  |
| 1.76E-24 | 0.323543 | 7.68E-13 | 0.37012  | 1.31E-16 | 0.470158 | 4.66E-27 | 0.151885 | 0.00099  |
| 4.03E-45 | 0.525232 | 1.79E-34 | 0.5526   | 1.08E-38 | 0.643568 | 5.80E-56 | 0.149219 | 0.00122  |
| 2.16E-09 | -0.61923 | 8.78E-51 | -0.42943 | 2.23E-22 | -0.51476 | 5.86E-33 | -0.08961 | 0.05297  |
| 3.08E-19 | -0.402   | 1.45E-19 | -0.32002 | 1.40E-12 | -0.43358 | 7.94E-23 | -0.20229 | 1.06E-05 |
| 1.36E-18 | -0.54993 | 2.89E-38 | -0.41582 | 5.97E-21 | -0.53592 | 4.46E-36 | -0.03065 | 0.50883  |
| 1.77E-36 | 0.424078 | 8.27E-22 | 0.649248 | 3.06E-57 | 0.674039 | 3.76E-63 | 0.086795 | 0.06091  |
| 1.85E-34 | -0.44129 | 1.12E-23 | -0.49469 | 3.40E-30 | -0.59995 | 5.43E-47 | -0.19746 | 1.72E-05 |
| 9.05E-16 | -0.49339 | 5.05E-30 | -0.32997 | 2.52E-13 | -0.50314 | 2.46E-31 | -0.18093 | 8.43E-05 |

|          |          |          |          |          |          |          |          |          |
|----------|----------|----------|----------|----------|----------|----------|----------|----------|
| 2.59E-28 | -0.64308 | 7.45E-56 | -0.55033 | 2.49E-38 | -0.61282 | 1.71E-49 | -0.37999 | 1.72E-17 |
| 1.20E-10 | -0.48497 | 6.38E-29 | -0.378   | 2.61E-17 | -0.44084 | 1.26E-23 | -0.13566 | 0.00331  |
| 3.18E-24 | -0.19021 | 3.52E-05 | -0.21252 | 3.60E-06 | -0.37786 | 2.69E-17 | -0.34114 | 3.43E-14 |
| 6.96E-11 | -0.24603 | 7.22E-08 | -0.44252 | 8.17E-24 | -0.42348 | 9.56E-22 | -0.08552 | 0.06483  |
| 2.16E-15 | -0.39713 | 4.30E-19 | -0.45514 | 2.94E-25 | -0.50617 | 9.42E-32 | -0.11833 | 0.01049  |
| 4.62E-25 | -0.52571 | 1.52E-34 | -0.59804 | 1.25E-46 | -0.62828 | 1.18E-52 | -0.13864 | 0.00268  |
| 5.66E-22 | -0.47803 | 4.89E-28 | -0.61985 | 6.55E-51 | -0.60032 | 4.62E-47 | -0.1793  | 9.79E-05 |
| 1.29E-17 | -0.34364 | 2.17E-14 | -0.52873 | 5.43E-35 | -0.50946 | 3.28E-32 | -0.13945 | 0.00253  |
| 4.02E-39 | 0.412247 | 1.38E-20 | 0.677884 | 4.03E-64 | 0.670159 | 3.45E-62 | 0.279269 | 8.17E-10 |
| 5.82E-28 | 0.460351 | 7.14E-26 | 0.342357 | 2.75E-14 | 0.470829 | 3.86E-27 | 0.437462 | 2.98E-23 |
| 5.73E-12 | -0.17176 | 0.00019  | -0.37717 | 3.10E-17 | -0.34895 | 8.10E-15 | -0.15599 | 0.00072  |
| 1.14E-12 | -0.39846 | 3.20E-19 | -0.39361 | 9.36E-19 | -0.40662 | 5.07E-20 | -0.30994 | 7.42E-12 |
| 1.64E-14 | 0.562223 | 2.84E-40 | 0.303784 | 2.00E-11 | 0.475129 | 1.13E-27 | 0.106186 | 0.02173  |
| 2.21E-24 | -0.61744 | 2.02E-50 | -0.43939 | 1.83E-23 | -0.57785 | 5.97E-43 | -0.32205 | 9.91E-13 |
| 2.96E-12 | -0.25612 | 1.98E-08 | -0.30263 | 2.40E-11 | -0.37413 | 5.80E-17 | -0.01342 | 0.77239  |
| 9.39E-28 | -0.59462 | 5.46E-46 | -0.69257 | 5.81E-68 | -0.67695 | 6.94E-64 | -0.29191 | 1.26E-10 |
| 2.03E-18 | -0.4198  | 2.32E-21 | -0.42953 | 2.18E-22 | -0.48977 | 1.52E-29 | -0.3244  | 6.63E-13 |
| 1.96E-31 | -0.71124 | 3.43E-73 | -0.6041  | 8.70E-48 | -0.7128  | 1.20E-73 | -0.26674 | 4.76E-09 |
| 1.81E-16 | -0.67764 | 4.65E-64 | -0.55442 | 5.46E-39 | -0.62233 | 2.04E-51 | -0.21066 | 4.39E-06 |
| 5.01E-09 | -0.30697 | 1.20E-11 | -0.16618 | 0.00031  | -0.32461 | 6.40E-13 | 0.044436 | 0.33798  |
| 9.99E-09 | -0.5676  | 3.52E-41 | -0.50728 | 6.61E-32 | -0.51564 | 4.39E-33 | -0.06473 | 0.16254  |
| 2.25E-18 | -0.57923 | 3.41E-43 | -0.52694 | 1.00E-34 | -0.57954 | 3.00E-43 | -0.02191 | 0.63669  |
| 3.48E-34 | -0.56949 | 1.68E-41 | -0.47801 | 4.91E-28 | -0.62273 | 1.69E-51 | -0.33012 | 2.46E-13 |
| 7.78E-06 | -0.45643 | 2.07E-25 | -0.43102 | 1.50E-22 | -0.4281  | 3.09E-22 | 0.053649 | 0.24723  |
| 6.67E-32 | -0.28626 | 2.94E-10 | -0.46732 | 1.04E-26 | -0.54985 | 2.98E-38 | -0.11414 | 0.01358  |
| 4.23E-13 | -0.45907 | 1.01E-25 | -0.40293 | 1.17E-19 | -0.44038 | 1.42E-23 | -0.14497 | 0.00168  |
| 8.10E-35 | -0.38041 | 1.58E-17 | -0.41597 | 5.77E-21 | -0.5687  | 2.30E-41 | -0.08182 | 0.07735  |
| 5.91E-35 | -0.53912 | 1.44E-36 | -0.55864 | 1.11E-39 | -0.66718 | 1.85E-61 | -0.24934 | 4.76E-08 |
| 3.31E-17 | -0.2552  | 2.23E-08 | -0.37399 | 5.96E-17 | -0.43074 | 1.61E-22 | -0.15532 | 0.00076  |
| 1.66E-30 | -0.49963 | 7.39E-31 | -0.50753 | 6.10E-32 | -0.60328 | 1.26E-47 | -0.14767 | 0.00137  |
| 2.66E-14 | -0.2564  | 1.91E-08 | -0.35343 | 3.47E-15 | -0.41827 | 3.35E-21 | 0.119873 | 0.00952  |
| 5.52E-22 | -0.52163 | 6.03E-34 | -0.53203 | 1.74E-35 | -0.59532 | 4.05E-46 | -0.26241 | 8.58E-09 |
| 2.14E-08 | -0.38607 | 4.78E-18 | -0.40467 | 7.92E-20 | -0.38582 | 5.03E-18 | -0.21138 | 4.07E-06 |
| 9.35E-06 | -0.37219 | 8.62E-17 | -0.30125 | 2.98E-11 | -0.39048 | 1.85E-18 | 0.002879 | 0.95053  |
| 1.08E-20 | -0.25183 | 3.46E-08 | -0.32832 | 3.37E-13 | -0.38965 | 2.21E-18 | -0.04396 | 0.34323  |
| 1.78E-34 | 0.403968 | 9.28E-20 | 0.42508  | 6.48E-22 | 0.500604 | 5.45E-31 | 0.275353 | 1.43E-09 |
| 1.53E-13 | -0.59466 | 5.37E-46 | -0.66325 | 1.65E-60 | -0.64854 | 4.42E-57 | -0.07827 | 0.09113  |
| 7.03E-33 | 0.575963 | 1.28E-42 | 0.438351 | 2.38E-23 | 0.581888 | 1.15E-43 | 0.424911 | 6.76E-22 |
| 7.07E-19 | -0.56587 | 6.92E-41 | -0.44119 | 1.15E-23 | -0.53004 | 3.46E-35 | -0.16883 | 0.00025  |
| 3.45E-25 | 0.611058 | 3.82E-49 | 0.371981 | 8.99E-17 | 0.544309 | 2.25E-37 | 0.423754 | 8.95E-22 |
| 1.96E-27 | -0.59392 | 7.38E-46 | -0.67932 | 1.74E-64 | -0.69931 | 8.39E-70 | -0.24586 | 7.38E-08 |
| 6.31E-39 | -0.61039 | 5.17E-49 | -0.67355 | 4.98E-63 | -0.72781 | 3.40E-78 | -0.30966 | 7.76E-12 |
| 3.05E-12 | -0.25341 | 2.82E-08 | -0.39887 | 2.92E-19 | -0.36464 | 3.93E-16 | -0.36721 | 2.36E-16 |
| 1.33E-35 | -0.37667 | 3.44E-17 | -0.50165 | 3.92E-31 | -0.58364 | 5.59E-44 | -0.3796  | 1.87E-17 |
| 0.00149  | -0.25156 | 3.57E-08 | -0.23853 | 1.83E-07 | -0.23372 | 3.25E-07 | -0.07169 | 0.12184  |



|          |          |          |          |          |          |          |          |          |
|----------|----------|----------|----------|----------|----------|----------|----------|----------|
| 7.58E-25 | -0.47067 | 4.03E-27 | -0.50268 | 2.84E-31 | -0.54892 | 4.20E-38 | -0.03251 | 0.48344  |
| 1.01E-08 | -0.48398 | 8.55E-29 | -0.32919 | 2.90E-13 | -0.41908 | 2.76E-21 | -0.01655 | 0.72128  |
| 4.43E-51 | 0.50184  | 3.70E-31 | 0.563324 | 1.86E-40 | 0.592968 | 1.11E-45 | 0.01519  | 0.74337  |
| 2.61E-05 | -0.36496 | 3.69E-16 | -0.2755  | 1.40E-09 | -0.35125 | 5.25E-15 | -0.26385 | 7.06E-09 |
| 0.0005   | -0.5166  | 3.21E-33 | -0.43487 | 5.74E-23 | -0.442   | 9.34E-24 | -0.20995 | 4.74E-06 |
| 2.39E-26 | 0.366434 | 2.75E-16 | 0.52569  | 1.53E-34 | 0.544534 | 2.07E-37 | -0.05156 | 0.26611  |
| 1.24E-24 | -0.50366 | 2.09E-31 | -0.62518 | 5.23E-52 | -0.6389  | 6.22E-55 | -0.23272 | 3.67E-07 |
| 1.20E-26 | 0.398279 | 3.33E-19 | 0.281867 | 5.61E-10 | 0.460518 | 6.82E-26 | 0.198408 | 1.57E-05 |
| 7.03E-15 | -0.21078 | 4.34E-06 | -0.33765 | 6.45E-14 | -0.38766 | 3.40E-18 | -0.08371 | 0.0707   |
| 4.18E-09 | -0.40281 | 1.21E-19 | -0.39205 | 1.32E-18 | -0.43224 | 1.11E-22 | -0.23406 | 3.12E-07 |
| 2.36E-50 | 0.514768 | 5.86E-33 | 0.641215 | 1.93E-55 | 0.68275  | 2.28E-65 | 0.140554 | 0.00233  |
| 2.07E-32 | -0.58157 | 1.31E-43 | -0.57129 | 8.25E-42 | -0.67183 | 1.33E-62 | -0.22411 | 9.96E-07 |
| 9.81E-13 | -0.40635 | 5.40E-20 | -0.43675 | 3.57E-23 | -0.48787 | 2.69E-29 | -0.0698  | 0.13204  |
| 1.77E-19 | -0.57312 | 3.99E-42 | -0.5159  | 4.04E-33 | -0.56466 | 1.11E-40 | -0.1996  | 1.39E-05 |
| 2.98E-17 | -0.14516 | 0.00166  | -0.37869 | 2.26E-17 | -0.40511 | 7.16E-20 | 0.03047  | 0.51128  |
| 5.49E-27 | -0.37779 | 2.73E-17 | -0.42625 | 4.87E-22 | -0.50057 | 5.50E-31 | -0.15032 | 0.00112  |
| 1.83E-05 | -0.28147 | 5.94E-10 | -0.31981 | 1.45E-12 | -0.32914 | 2.92E-13 | -0.08732 | 0.05935  |
| 2.37E-39 | -0.46651 | 1.30E-26 | -0.48713 | 3.35E-29 | -0.62718 | 2.00E-52 | -0.24064 | 1.41E-07 |
| 1.81E-18 | -0.55182 | 1.44E-38 | -0.45433 | 3.66E-25 | -0.55321 | 8.57E-39 | -0.28377 | 4.24E-10 |
| 1.18E-25 | -0.45379 | 4.22E-25 | -0.47167 | 3.04E-27 | -0.57339 | 3.58E-42 | -0.22816 | 6.25E-07 |
| 5.41E-16 | -0.598   | 1.27E-46 | -0.52119 | 6.99E-34 | -0.605   | 5.84E-48 | -0.24848 | 5.30E-08 |
| 9.84E-15 | -0.48503 | 6.26E-29 | -0.42461 | 7.27E-22 | -0.49031 | 1.29E-29 | -0.34756 | 1.05E-14 |
| 5.38E-28 | -0.4887  | 2.10E-29 | -0.46062 | 6.64E-26 | -0.59379 | 7.80E-46 | -0.16932 | 0.00024  |
| 6.28E-15 | -0.45397 | 4.02E-25 | -0.49081 | 1.11E-29 | -0.49745 | 1.45E-30 | -0.41424 | 8.66E-21 |
| 1.47E-27 | -0.54293 | 3.69E-37 | -0.53756 | 2.51E-36 | -0.62152 | 2.99E-51 | -0.33435 | 1.17E-13 |
| 7.83E-35 | 0.50081  | 5.11E-31 | 0.613439 | 1.29E-49 | 0.66112  | 5.32E-60 | -0.05432 | 0.2414   |
| 7.80E-17 | -0.55632 | 2.68E-39 | -0.59958 | 6.39E-47 | -0.57474 | 2.09E-42 | -0.07027 | 0.12944  |
| 2.10E-38 | -0.46022 | 7.40E-26 | -0.70241 | 1.14E-70 | -0.69925 | 8.70E-70 | -0.14926 | 0.00122  |
| 3.67E-22 | -0.60441 | 7.61E-48 | -0.53629 | 3.93E-36 | -0.62001 | 6.08E-51 | -0.09308 | 0.04438  |
| 4.13E-20 | -0.65064 | 1.47E-57 | -0.59942 | 6.83E-47 | -0.63325 | 1.04E-53 | -0.1373  | 0.00295  |
| 2.14E-18 | -0.51194 | 1.47E-32 | -0.44562 | 3.66E-24 | -0.545   | 1.75E-37 | -0.21726 | 2.15E-06 |
| 4.80E-31 | -0.40359 | 1.01E-19 | -0.3759  | 4.04E-17 | -0.52177 | 5.74E-34 | -0.08161 | 0.0781   |
| 2.69E-23 | -0.43372 | 7.67E-23 | -0.55034 | 2.49E-38 | -0.59158 | 2.00E-45 | -0.28638 | 2.89E-10 |
| 9.90E-26 | 0.627431 | 1.77E-52 | 0.601082 | 3.30E-47 | 0.658934 | 1.75E-59 | 0.31045  | 6.83E-12 |
| 3.58E-24 | -0.32868 | 3.16E-13 | -0.40109 | 1.78E-19 | -0.50876 | 4.11E-32 | -0.14304 | 0.00194  |
| 3.67E-08 | -0.25403 | 2.60E-08 | -0.32056 | 1.28E-12 | -0.3429  | 2.48E-14 | -0.27156 | 2.44E-09 |
| 3.57E-14 | 0.47647  | 7.68E-28 | 0.55401  | 6.36E-39 | 0.511563 | 1.66E-32 | 0.351124 | 5.37E-15 |
| 3.92E-27 | -0.41616 | 5.52E-21 | -0.54904 | 4.00E-38 | -0.54708 | 8.23E-38 | -0.46754 | 9.73E-27 |
| 2.55E-19 | -0.39558 | 6.06E-19 | -0.46661 | 1.26E-26 | -0.49563 | 2.55E-30 | 0.05572  | 0.22943  |
| 1.15E-18 | -0.37044 | 1.23E-16 | -0.53799 | 2.15E-36 | -0.50838 | 4.65E-32 | -0.07886 | 0.0887   |
| 7.63E-13 | -0.23593 | 2.50E-07 | -0.32405 | 7.04E-13 | -0.40825 | 3.49E-20 | -0.02392 | 0.60606  |
| 7.26E-51 | -0.4444  | 5.03E-24 | -0.61173 | 2.81E-49 | -0.69935 | 8.15E-70 | -0.08322 | 0.07239  |
| 2.75E-28 | -0.53768 | 2.40E-36 | -0.60141 | 2.86E-47 | -0.63016 | 4.72E-53 | -0.10332 | 0.02557  |
| 2.82E-16 | -0.21411 | 3.03E-06 | -0.39757 | 3.90E-19 | -0.40964 | 2.53E-20 | 0.001652 | 0.9716   |
| 1.07E-12 | -0.2785  | 9.14E-10 | -0.29287 | 1.09E-10 | -0.3825  | 1.02E-17 | 0.061355 | 0.18564  |

|          |          |          |          |          |          |          |          |          |
|----------|----------|----------|----------|----------|----------|----------|----------|----------|
| 5.89E-20 | -0.47779 | 5.24E-28 | -0.43472 | 5.97E-23 | -0.53315 | 1.18E-35 | -0.22353 | 1.06E-06 |
| 1.17E-30 | -0.45605 | 2.30E-25 | -0.58083 | 1.78E-43 | -0.62393 | 9.51E-52 | -0.31325 | 4.32E-12 |
| 2.31E-11 | -0.37525 | 4.60E-17 | -0.48877 | 2.05E-29 | -0.46471 | 2.15E-26 | -0.20522 | 7.80E-06 |
| 4.00E-22 | -0.42489 | 6.79E-22 | -0.52541 | 1.69E-34 | -0.55853 | 1.16E-39 | -0.10054 | 0.02983  |
| 4.04E-07 | -0.27139 | 2.50E-09 | -0.29054 | 1.55E-10 | -0.33282 | 1.53E-13 | 0.116477 | 0.01177  |
| 2.51E-32 | -0.51236 | 1.28E-32 | -0.67173 | 1.41E-62 | -0.68002 | 1.15E-64 | -0.3441  | 1.99E-14 |
| 1.06E-21 | -0.42846 | 2.83E-22 | -0.53508 | 6.01E-36 | -0.56933 | 1.79E-41 | -0.19338 | 2.58E-05 |
| 0.00103  | 0.249821 | 4.47E-08 | 0.27528  | 1.45E-09 | 0.2753   | 1.44E-09 | 0.093746 | 0.04288  |
| 5.28E-05 | -0.42292 | 1.10E-21 | -0.40224 | 1.37E-19 | -0.40194 | 1.47E-19 | -0.02047 | 0.65898  |
| 2.14E-37 | -0.16022 | 0.00051  | -0.34721 | 1.12E-14 | -0.46233 | 4.15E-26 | -0.2943  | 8.76E-11 |
| 1.92E-22 | -0.24209 | 1.18E-07 | -0.41726 | 4.25E-21 | -0.44637 | 3.00E-24 | -0.17239 | 0.00018  |
| 4.43E-12 | -0.32266 | 8.93E-13 | -0.45872 | 1.11E-25 | -0.43662 | 3.70E-23 | 0.106683 | 0.02112  |
| 3.29E-36 | -0.30794 | 1.03E-11 | -0.3185  | 1.80E-12 | -0.50842 | 4.58E-32 | -0.35895 | 1.20E-15 |
| 4.49E-11 | -0.06826 | 0.14081  | -0.09385 | 0.04266  | -0.22604 | 7.99E-07 | -0.26046 | 1.11E-08 |
| 1.18E-24 | -0.39518 | 6.62E-19 | -0.60802 | 1.51E-48 | -0.62559 | 4.30E-52 | -0.16934 | 0.00024  |
| 2.41E-11 | -0.5263  | 1.24E-34 | -0.50924 | 3.52E-32 | -0.51469 | 6.00E-33 | 0.005972 | 0.89759  |
| 4.82E-07 | -0.44928 | 1.40E-24 | -0.50293 | 2.62E-31 | -0.48401 | 8.48E-29 | 0.071169 | 0.12459  |
| 0.02623  | -0.34061 | 3.78E-14 | -0.21598 | 2.47E-06 | -0.21193 | 3.83E-06 | 0.003383 | 0.94188  |
| 1.59E-14 | -0.37629 | 3.72E-17 | -0.44432 | 5.13E-24 | -0.49016 | 1.35E-29 | 0.154096 | 0.00083  |
| 5.42E-32 | -0.36227 | 6.26E-16 | -0.50619 | 9.36E-32 | -0.55681 | 2.22E-39 | 0.014197 | 0.7596   |
| 1.99E-22 | -0.31365 | 4.05E-12 | -0.31023 | 7.08E-12 | -0.42468 | 7.15E-22 | -0.30055 | 3.32E-11 |
| 7.44E-29 | -0.48892 | 1.96E-29 | -0.50369 | 2.06E-31 | -0.56088 | 4.74E-40 | -0.56705 | 4.38E-41 |
| 1.55E-20 | 0.210321 | 4.56E-06 | 0.262141 | 8.89E-09 | 0.376731 | 3.40E-17 | 0.275965 | 1.31E-09 |
| 3.58E-13 | -0.30433 | 1.83E-11 | -0.36641 | 2.76E-16 | -0.41365 | 9.96E-21 | -0.07016 | 0.13005  |
| 5.70E-43 | -0.44641 | 2.98E-24 | -0.61726 | 2.20E-50 | -0.67871 | 2.48E-64 | -0.26282 | 8.11E-09 |
| 1.01E-05 | 0.372132 | 8.72E-17 | 0.333519 | 1.35E-13 | 0.35261  | 4.06E-15 | 0.308237 | 9.78E-12 |
| 1.12E-21 | 0.335429 | 9.62E-14 | 0.120204 | 0.00932  | 0.329665 | 2.66E-13 | 0.318408 | 1.83E-12 |
| 2.44E-34 | 0.248887 | 5.03E-08 | 0.331561 | 1.91E-13 | 0.505516 | 1.16E-31 | 0.308964 | 8.70E-12 |
| 1.64E-43 | -0.41348 | 1.03E-20 | -0.45198 | 6.85E-25 | -0.59143 | 2.13E-45 | -0.16592 | 0.00032  |
| 3.64E-19 | 0.568225 | 2.76E-41 | 0.531493 | 2.09E-35 | 0.550724 | 2.16E-38 | 0.471441 | 3.24E-27 |
| 0.16366  | -0.34439 | 1.89E-14 | -0.25185 | 3.44E-08 | -0.23463 | 2.92E-07 | -0.329   | 2.99E-13 |
| 7.84E-26 | 0.459958 | 7.95E-26 | 0.490934 | 1.07E-29 | 0.550165 | 2.65E-38 | 0.146348 | 0.00152  |
| 9.77E-29 | -0.51766 | 2.26E-33 | -0.56863 | 2.35E-41 | -0.63603 | 2.62E-54 | -0.26943 | 3.29E-09 |
| 1.91E-13 | -0.61608 | 3.80E-50 | -0.33603 | 8.63E-14 | -0.44874 | 1.61E-24 | 0.076709 | 0.09778  |
| 6.44E-30 | -0.31887 | 1.70E-12 | -0.51956 | 1.21E-33 | -0.55464 | 5.03E-39 | -0.07405 | 0.11001  |
| 5.48E-32 | -0.40043 | 2.06E-19 | -0.45778 | 1.44E-25 | -0.55585 | 3.19E-39 | 0.019307 | 0.6773   |
| 2.69E-15 | -0.24384 | 9.50E-08 | -0.45015 | 1.11E-24 | -0.42696 | 4.09E-22 | -0.18932 | 3.83E-05 |
| 3.77E-15 | -0.44504 | 4.26E-24 | -0.46824 | 8.02E-27 | -0.48938 | 1.70E-29 | -0.08323 | 0.07234  |
| 4.26E-13 | -0.45048 | 1.02E-24 | -0.39811 | 3.46E-19 | -0.46014 | 7.56E-26 | 0.036151 | 0.43575  |
| 8.93E-33 | 0.609596 | 7.41E-49 | 0.458153 | 1.30E-25 | 0.611425 | 3.23E-49 | 0.271805 | 2.36E-09 |
| 4.03E-39 | 0.692419 | 6.39E-68 | 0.603863 | 9.68E-48 | 0.672614 | 8.51E-63 | 0.136125 | 0.0032   |
| 2.05E-07 | -0.46382 | 2.75E-26 | -0.27274 | 2.07E-09 | -0.3577  | 1.53E-15 | -0.22876 | 5.83E-07 |
| 1.50E-07 | -0.24703 | 6.37E-08 | -0.17952 | 9.59E-05 | -0.26368 | 7.23E-09 | -0.00803 | 0.86255  |
| 3.20E-27 | -0.40717 | 4.47E-20 | -0.49263 | 6.37E-30 | -0.54718 | 7.92E-38 | -0.22499 | 9.01E-07 |
| 1.19E-27 | -0.44923 | 1.42E-24 | -0.46631 | 1.38E-26 | -0.55555 | 3.57E-39 | -0.11183 | 0.01562  |

|          |          |          |          |          |          |          |          |          |
|----------|----------|----------|----------|----------|----------|----------|----------|----------|
| 1.22E-18 | 0.502024 | 3.49E-31 | 0.255684 | 2.09E-08 | 0.435184 | 5.31E-23 | 0.155906 | 0.00072  |
| 8.81E-16 | 0.447662 | 2.14E-24 | 0.456291 | 2.15E-25 | 0.495416 | 2.72E-30 | 0.030778 | 0.50702  |
| 3.77E-29 | -0.47772 | 5.36E-28 | -0.48584 | 4.93E-29 | -0.55243 | 1.15E-38 | -0.3561  | 2.08E-15 |
| 9.82E-29 | 0.298203 | 4.79E-11 | 0.447404 | 2.29E-24 | 0.513179 | 9.84E-33 | 0.087479 | 0.05889  |
| 5.48E-37 | -0.48342 | 1.01E-28 | -0.58906 | 5.83E-45 | -0.62497 | 5.79E-52 | -0.31756 | 2.11E-12 |
| 3.51E-21 | -0.47087 | 3.82E-27 | -0.38409 | 7.28E-18 | -0.4882  | 2.43E-29 | 0.095924 | 0.03825  |
| 2.33E-07 | -0.32125 | 1.13E-12 | -0.38304 | 9.08E-18 | -0.36949 | 1.49E-16 | -0.44552 | 3.76E-24 |
| 6.33E-12 | -0.3869  | 4.00E-18 | -0.51876 | 1.57E-33 | -0.49355 | 4.82E-30 | -0.10047 | 0.02994  |
| 4.91E-06 | -0.53761 | 2.46E-36 | -0.33509 | 1.02E-13 | -0.39665 | 4.79E-19 | 0.08366  | 0.07088  |
| 1.39E-08 | -0.39896 | 2.86E-19 | -0.27029 | 2.92E-09 | -0.34322 | 2.35E-14 | -0.28766 | 2.39E-10 |
| 1.83E-14 | -0.2208  | 1.45E-06 | -0.42431 | 7.81E-22 | -0.43672 | 3.60E-23 | 0.024989 | 0.59013  |
| 1.81E-11 | -0.56152 | 3.71E-40 | -0.37184 | 9.26E-17 | -0.45767 | 1.48E-25 | -0.19269 | 2.76E-05 |
| 5.05E-07 | -0.55401 | 6.35E-39 | -0.29675 | 6.00E-11 | -0.38714 | 3.80E-18 | -0.02629 | 0.57085  |
| 4.45E-07 | -0.53063 | 2.82E-35 | -0.4718  | 2.93E-27 | -0.44869 | 1.63E-24 | -0.0581  | 0.21008  |
| 2.09E-15 | -0.4367  | 3.62E-23 | -0.40666 | 5.03E-20 | -0.47924 | 3.44E-28 | 0.044807 | 0.33396  |
| 5.29E-07 | -0.4991  | 8.71E-31 | -0.4334  | 8.30E-23 | -0.44923 | 1.42E-24 | -0.12855 | 0.0054   |
| 1.90E-09 | -0.46118 | 5.68E-26 | -0.37163 | 9.66E-17 | -0.40452 | 8.20E-20 | 0.023373 | 0.61439  |
| 4.42E-19 | -0.24294 | 1.06E-07 | -0.32692 | 4.29E-13 | -0.40974 | 2.47E-20 | -0.46617 | 1.43E-26 |
| 4.24E-10 | -0.34392 | 2.06E-14 | -0.31627 | 2.62E-12 | -0.36887 | 1.69E-16 | 0.093999 | 0.04232  |
| 2.11E-31 | -0.34247 | 2.69E-14 | -0.51909 | 1.41E-33 | -0.59363 | 8.35E-46 | -0.20125 | 1.17E-05 |
| 1.06E-43 | -0.50045 | 5.72E-31 | -0.67975 | 1.35E-64 | -0.73049 | 4.86E-79 | -0.33717 | 7.03E-14 |
| 4.77E-13 | -0.34126 | 3.35E-14 | -0.3063  | 1.34E-11 | -0.39285 | 1.10E-18 | 0.010434 | 0.82207  |
| 7.83E-19 | -0.47116 | 3.51E-27 | -0.51359 | 8.61E-33 | -0.55926 | 8.79E-40 | -0.06006 | 0.1951   |
| 5.56E-24 | -0.41476 | 7.67E-21 | -0.57362 | 3.27E-42 | -0.59762 | 1.50E-46 | -0.24399 | 9.33E-08 |
| 1.19E-38 | -0.44908 | 1.48E-24 | -0.57703 | 8.31E-43 | -0.63405 | 6.98E-54 | -0.30444 | 1.80E-11 |
| 2.07E-23 | -0.2498  | 4.48E-08 | -0.47704 | 6.51E-28 | -0.50292 | 2.63E-31 | -0.13141 | 0.00445  |
| 3.70E-23 | -0.44292 | 7.37E-24 | -0.50389 | 1.94E-31 | -0.56677 | 4.88E-41 | -0.07947 | 0.08626  |
| 1.11E-27 | -0.46765 | 9.45E-27 | -0.44559 | 3.69E-24 | -0.59195 | 1.71E-45 | -0.1279  | 0.00564  |
| 3.61E-20 | -0.62304 | 1.45E-51 | -0.5623  | 2.76E-40 | -0.62624 | 3.15E-52 | -0.2815  | 5.91E-10 |
| 2.55E-14 | -0.6129  | 1.65E-49 | -0.6219  | 2.50E-51 | -0.60072 | 3.87E-47 | -0.07795 | 0.09247  |
| 8.03E-07 | -0.39568 | 5.93E-19 | -0.34453 | 1.84E-14 | -0.35949 | 1.08E-15 | -0.16204 | 0.00044  |
| 5.24E-25 | -0.41739 | 4.12E-21 | -0.49178 | 8.25E-30 | -0.55651 | 2.49E-39 | -0.0255  | 0.5826   |
| 2.67E-44 | -0.4591  | 1.00E-25 | -0.61077 | 4.36E-49 | -0.6645  | 8.25E-61 | -0.39856 | 3.13E-19 |
| 2.26E-22 | -0.44379 | 5.89E-24 | -0.55953 | 7.93E-40 | -0.5623  | 2.75E-40 | -0.41428 | 8.59E-21 |
| 6.63E-32 | -0.54014 | 1.00E-36 | -0.53859 | 1.74E-36 | -0.65929 | 1.44E-59 | -0.1286  | 0.00538  |
| 1.85E-23 | -0.57175 | 6.89E-42 | -0.45782 | 1.42E-25 | -0.58872 | 6.72E-45 | -0.23848 | 1.84E-07 |
| 3.46E-28 | 0.402302 | 1.35E-19 | 0.325213 | 5.77E-13 | 0.441289 | 1.12E-23 | 0.043095 | 0.35277  |
| 2.26E-18 | -0.38752 | 3.50E-18 | -0.52341 | 3.32E-34 | -0.51186 | 1.51E-32 | -0.07738 | 0.09486  |
| 9.79E-31 | -0.65986 | 1.06E-59 | -0.69484 | 1.41E-68 | -0.72499 | 2.56E-77 | -0.3237  | 7.48E-13 |
| 1.04E-19 | -0.32347 | 7.77E-13 | -0.4916  | 8.71E-30 | -0.52323 | 3.52E-34 | 0.048981 | 0.29084  |
| 1.86E-13 | -0.66739 | 1.65E-61 | -0.61938 | 8.16E-51 | -0.61785 | 1.67E-50 | -0.14086 | 0.00228  |
| 1.46E-31 | -0.58136 | 1.43E-43 | -0.64123 | 1.91E-55 | -0.71111 | 3.73E-73 | -0.18065 | 8.65E-05 |
| 6.87E-09 | -0.45976 | 8.39E-26 | -0.45157 | 7.63E-25 | -0.45431 | 3.67E-25 | -0.17831 | 0.00011  |
| 2.99E-11 | -0.28677 | 2.72E-10 | -0.35132 | 5.18E-15 | -0.36694 | 2.48E-16 | -0.11817 | 0.01059  |
| 1.18E-21 | -0.4785  | 4.26E-28 | -0.62471 | 6.55E-52 | -0.60134 | 2.95E-47 | 0.029297 | 0.52768  |

|          |          |          |          |          |          |          |          |          |
|----------|----------|----------|----------|----------|----------|----------|----------|----------|
| 4.15E-19 | -0.65891 | 1.77E-59 | -0.61071 | 4.47E-49 | -0.64914 | 3.24E-57 | -0.1702  | 0.00022  |
| 3.78E-17 | -0.52267 | 4.25E-34 | -0.53095 | 2.53E-35 | -0.57092 | 9.55E-42 | -0.24738 | 6.09E-08 |
| 1.47E-31 | -0.38291 | 9.34E-18 | -0.60987 | 6.55E-49 | -0.60672 | 2.70E-48 | -0.30963 | 7.81E-12 |
| 1.02E-25 | -0.30988 | 7.49E-12 | -0.50407 | 1.83E-31 | -0.49812 | 1.18E-30 | 0.027843 | 0.54838  |
| 1.70E-08 | -0.39203 | 1.32E-18 | -0.39857 | 3.12E-19 | -0.40901 | 2.93E-20 | -0.18776 | 4.45E-05 |
| 3.96E-30 | -0.41835 | 3.28E-21 | -0.47586 | 9.16E-28 | -0.55543 | 3.73E-39 | -0.30298 | 2.27E-11 |
| 5.55E-08 | -0.51571 | 4.30E-33 | -0.37181 | 9.31E-17 | -0.42853 | 2.79E-22 | 0.074877 | 0.10609  |
| 6.18E-23 | -0.40972 | 2.49E-20 | -0.54915 | 3.85E-38 | -0.54117 | 6.94E-37 | -0.01986 | 0.66865  |
| 2.43E-05 | -0.40671 | 4.97E-20 | -0.38216 | 1.09E-17 | -0.40108 | 1.78E-19 | -0.06194 | 0.18151  |
| 1.49E-21 | -0.6334  | 9.65E-54 | -0.59311 | 1.04E-45 | -0.64868 | 4.11E-57 | -0.15367 | 0.00086  |
| 4.46E-47 | -0.39434 | 7.96E-19 | -0.57253 | 5.05E-42 | -0.64263 | 9.35E-56 | -0.27707 | 1.12E-09 |
| 1.47E-06 | -0.38693 | 3.97E-18 | -0.28983 | 1.72E-10 | -0.34157 | 3.17E-14 | 0.115516 | 0.01249  |
| 4.74E-19 | -0.55135 | 1.71E-38 | -0.41932 | 2.60E-21 | -0.54605 | 1.20E-37 | -0.39465 | 7.44E-19 |
| 9.26E-09 | -0.05254 | 0.25711  | -0.21267 | 3.54E-06 | -0.23531 | 2.69E-07 | -0.00073 | 0.98747  |
| 0.02116  | -0.27075 | 2.73E-09 | -0.25498 | 2.30E-08 | -0.27627 | 1.26E-09 | 0.129499 | 0.00507  |
| 0.03887  | -0.28786 | 2.32E-10 | -0.14405 | 0.0018   | -0.11335 | 0.01425  | 0.041713 | 0.36844  |
| 1.91E-11 | -0.22915 | 5.57E-07 | -0.38506 | 5.92E-18 | -0.38723 | 3.73E-18 | 0.040847 | 0.37847  |
| 0.00034  | -0.26899 | 3.49E-09 | -0.24867 | 5.17E-08 | -0.24426 | 9.02E-08 | 0.198404 | 1.57E-05 |
| 1.27E-24 | -0.52641 | 1.20E-34 | -0.54002 | 1.05E-36 | -0.60035 | 4.56E-47 | -0.15706 | 0.00066  |
| 6.84E-10 | 0.582555 | 8.73E-44 | 0.385207 | 5.74E-18 | 0.411094 | 1.81E-20 | 0.499404 | 7.92E-31 |
| 4.56E-19 | 0.587748 | 1.01E-44 | 0.493029 | 5.65E-30 | 0.566148 | 6.22E-41 | 0.383702 | 7.90E-18 |
| 1.92E-07 | -0.02264 | 0.62549  | -0.24174 | 1.23E-07 | -0.23629 | 2.39E-07 | -0.09918 | 0.03213  |
| 6.20E-16 | -0.41483 | 7.55E-21 | -0.35984 | 1.01E-15 | -0.44046 | 1.39E-23 | -0.28631 | 2.92E-10 |
| 1.60E-11 | -0.5643  | 1.27E-40 | -0.42024 | 2.09E-21 | -0.46498 | 1.99E-26 | -0.14552 | 0.00162  |
| 1.11E-09 | -0.47213 | 2.67E-27 | -0.44796 | 1.98E-24 | -0.47967 | 3.04E-28 | -0.09161 | 0.04788  |
| 1.55E-17 | -0.55389 | 6.66E-39 | -0.5563  | 2.70E-39 | -0.59136 | 2.20E-45 | -0.00429 | 0.92638  |
| 2.46E-20 | -0.49937 | 8.00E-31 | -0.50747 | 6.21E-32 | -0.55538 | 3.81E-39 | -0.12206 | 0.00828  |
| 3.05E-20 | -0.4318  | 1.24E-22 | -0.48967 | 1.56E-29 | -0.53991 | 1.09E-36 | 0.070185 | 0.12989  |
| 1.10E-14 | 0.298485 | 4.59E-11 | 0.42839  | 2.88E-22 | 0.456241 | 2.18E-25 | 0.083428 | 0.07167  |
| 2.50E-13 | 0.427768 | 3.36E-22 | 0.285027 | 3.53E-10 | 0.389627 | 2.22E-18 | 0.110229 | 0.01717  |
| 8.99E-40 | -0.55723 | 1.90E-39 | -0.51    | 2.76E-32 | -0.6327  | 1.36E-53 | -0.34308 | 2.41E-14 |
| 2.22E-24 | -0.40866 | 3.18E-20 | -0.44472 | 4.63E-24 | -0.50125 | 4.45E-31 | -0.12156 | 0.00854  |
| 4.36E-16 | -0.40193 | 1.47E-19 | -0.38257 | 1.00E-17 | -0.44886 | 1.56E-24 | 0.061509 | 0.18454  |
| 4.19E-41 | 0.402119 | 1.41E-19 | 0.565377 | 8.39E-41 | 0.605731 | 4.21E-48 | 0.202281 | 1.06E-05 |
| 2.61E-13 | -0.40543 | 6.66E-20 | -0.46828 | 7.92E-27 | -0.45356 | 4.49E-25 | -0.10248 | 0.0268   |
| 5.81E-08 | -0.30331 | 2.15E-11 | -0.46167 | 4.98E-26 | -0.4335  | 8.10E-23 | -0.00223 | 0.9616   |
| 7.10E-11 | -0.40109 | 1.78E-19 | -0.33235 | 1.66E-13 | -0.40354 | 1.02E-19 | -0.09307 | 0.0444   |
| 1.30E-32 | -0.2372  | 2.14E-07 | -0.50072 | 5.26E-31 | -0.51956 | 1.21E-33 | -0.00847 | 0.8552   |
| 5.85E-16 | 0.395216 | 6.57E-19 | 0.474435 | 1.38E-27 | 0.434651 | 6.07E-23 | -0.01769 | 0.70304  |
| 5.45E-32 | 0.47687  | 6.84E-28 | 0.453874 | 4.13E-25 | 0.585965 | 2.13E-44 | 0.205438 | 7.62E-06 |
| 1.88E-27 | -0.46908 | 6.32E-27 | -0.58709 | 1.33E-44 | -0.61499 | 6.29E-50 | -0.26843 | 3.77E-09 |
| 1.20E-30 | -0.39821 | 3.38E-19 | -0.42912 | 2.41E-22 | -0.51979 | 1.12E-33 | -0.10521 | 0.02298  |
| 1.15E-16 | -0.41049 | 2.08E-20 | -0.45189 | 7.02E-25 | -0.46621 | 1.41E-26 | -0.16507 | 0.00034  |
| 5.69E-16 | -0.63308 | 1.13E-53 | -0.61318 | 1.45E-49 | -0.60904 | 9.55E-49 | -0.15767 | 0.00063  |
| 5.00E-38 | -0.59336 | 9.40E-46 | -0.70072 | 3.39E-70 | -0.73743 | 2.84E-81 | -0.2329  | 3.59E-07 |

|          |          |          |          |          |          |          |          |          |
|----------|----------|----------|----------|----------|----------|----------|----------|----------|
| 0.05456  | -0.39299 | 1.07E-18 | -0.29791 | 5.02E-11 | -0.19401 | 2.43E-05 | 0.045827 | 0.32305  |
| 3.86E-15 | -0.33568 | 9.20E-14 | -0.34793 | 9.79E-15 | -0.4417  | 1.01E-23 | -0.28669 | 2.76E-10 |
| 2.92E-32 | -0.55666 | 2.36E-39 | -0.64927 | 3.02E-57 | -0.66916 | 6.06E-62 | -0.12353 | 0.00753  |
| 3.48E-18 | -0.39771 | 3.78E-19 | -0.47204 | 2.74E-27 | -0.4796  | 3.10E-28 | -0.20403 | 8.82E-06 |
| 6.55E-19 | -0.11684 | 0.01151  | -0.25007 | 4.33E-08 | -0.36776 | 2.11E-16 | -0.13915 | 0.00258  |
| 4.47E-15 | -0.27964 | 7.75E-10 | -0.2493  | 4.78E-08 | -0.36704 | 2.43E-16 | -0.29311 | 1.05E-10 |
| 2.76E-07 | -0.42811 | 3.09E-22 | -0.41364 | 9.97E-21 | -0.42813 | 3.07E-22 | -0.04223 | 0.36253  |
| 7.70E-13 | -0.49442 | 3.69E-30 | -0.48199 | 1.54E-28 | -0.51648 | 3.33E-33 | 0.044822 | 0.33379  |
| 2.64E-22 | -0.37633 | 3.69E-17 | -0.52313 | 3.64E-34 | -0.55557 | 3.55E-39 | -0.11865 | 0.01028  |
| 3.86E-26 | -0.56269 | 2.37E-40 | -0.4422  | 8.87E-24 | -0.58962 | 4.59E-45 | -0.2916  | 1.32E-10 |
| 3.06E-27 | -0.46615 | 1.44E-26 | -0.46798 | 8.62E-27 | -0.58709 | 1.33E-44 | -0.15098 | 0.00106  |
| 2.14E-22 | -0.60285 | 1.52E-47 | -0.46432 | 2.39E-26 | -0.59012 | 3.72E-45 | -0.13839 | 0.00273  |
| 9.20E-19 | -0.27977 | 7.60E-10 | -0.38236 | 1.05E-17 | -0.42615 | 4.99E-22 | -0.25346 | 2.80E-08 |
| 1.40E-25 | -0.41995 | 2.24E-21 | -0.45437 | 3.61E-25 | -0.53289 | 1.29E-35 | -0.14858 | 0.00128  |
| 1.41E-35 | 0.389344 | 2.36E-18 | 0.528369 | 6.14E-35 | 0.610866 | 4.17E-49 | 0.028852 | 0.53397  |
| 2.50E-29 | -0.58281 | 7.87E-44 | -0.54948 | 3.41E-38 | -0.63239 | 1.59E-53 | -0.20692 | 6.53E-06 |
| 2.29E-20 | -0.44444 | 4.98E-24 | -0.47548 | 1.02E-27 | -0.52367 | 3.03E-34 | -0.0286  | 0.53756  |
| 4.46E-30 | -0.33109 | 2.08E-13 | -0.46852 | 7.40E-27 | -0.5456  | 1.41E-37 | -0.30414 | 1.89E-11 |
| 1.65E-07 | -0.17149 | 0.0002   | -0.11778 | 0.01086  | -0.2348  | 2.86E-07 | -0.17391 | 0.00016  |
| 0.01591  | -0.11449 | 0.0133   | -0.18563 | 5.44E-05 | -0.18555 | 5.48E-05 | 0.025757 | 0.57875  |
| 7.68E-18 | -0.24905 | 4.93E-08 | -0.53954 | 1.24E-36 | -0.473   | 2.08E-27 | -0.16503 | 0.00034  |
| 5.65E-25 | -0.12601 | 0.0064   | -0.09803 | 0.03418  | -0.30146 | 2.88E-11 | -0.24808 | 5.58E-08 |
| 2.05E-07 | -0.21659 | 2.31E-06 | -0.24391 | 9.42E-08 | -0.30767 | 1.07E-11 | 0.128302 | 0.00549  |
| 5.55E-22 | -0.56028 | 5.97E-40 | -0.67017 | 3.42E-62 | -0.64196 | 1.32E-55 | -0.25253 | 3.16E-08 |
| 4.60E-29 | 0.450496 | 1.02E-24 | 0.549359 | 3.56E-38 | 0.608943 | 9.96E-49 | 0.341779 | 3.05E-14 |
| 1.35E-27 | -0.36688 | 2.52E-16 | -0.56611 | 6.31E-41 | -0.58808 | 8.77E-45 | -0.04113 | 0.37518  |
| 4.40E-36 | -0.52303 | 3.77E-34 | -0.59688 | 2.06E-46 | -0.65224 | 6.33E-58 | -0.31063 | 6.63E-12 |
| 2.50E-19 | -0.47716 | 6.29E-28 | -0.31793 | 1.99E-12 | -0.48927 | 1.76E-29 | -0.30385 | 1.98E-11 |
| 1.85E-33 | 0.465675 | 1.64E-26 | 0.439141 | 1.95E-23 | 0.54483  | 1.86E-37 | 0.177974 | 0.00011  |
| 4.54E-37 | -0.39525 | 6.52E-19 | -0.38662 | 4.24E-18 | -0.56817 | 2.83E-41 | -0.12962 | 0.00503  |
| 6.94E-12 | 0.087667 | 0.05835  | 0.275474 | 1.41E-09 | 0.324254 | 6.80E-13 | -0.07727 | 0.09535  |
| 4.33E-19 | -0.35069 | 5.83E-15 | -0.45769 | 1.47E-25 | -0.48937 | 1.71E-29 | -0.11598 | 0.01213  |
| 7.31E-32 | -0.36406 | 4.41E-16 | -0.35699 | 1.75E-15 | -0.48996 | 1.43E-29 | -0.09589 | 0.03831  |
| 1.01E-10 | -0.46409 | 2.55E-26 | -0.19831 | 1.58E-05 | -0.34034 | 3.97E-14 | -0.33428 | 1.18E-13 |
| 2.10E-52 | -0.52534 | 1.73E-34 | -0.59127 | 2.29E-45 | -0.69711 | 3.38E-69 | -0.36904 | 1.63E-16 |
| 5.07E-06 | -0.43531 | 5.14E-23 | -0.4247  | 7.11E-22 | -0.42151 | 1.54E-21 | 0.239559 | 1.61E-07 |
| 1.97E-07 | -0.49641 | 2.00E-30 | -0.43246 | 1.05E-22 | -0.41216 | 1.41E-20 | -0.04709 | 0.30987  |
| 1.82E-22 | -0.42738 | 3.69E-22 | -0.51537 | 4.81E-33 | -0.56506 | 9.51E-41 | -0.19015 | 3.53E-05 |
| 9.33E-26 | 0.445342 | 3.93E-24 | 0.564886 | 1.01E-40 | 0.586592 | 1.64E-44 | 0.340797 | 3.65E-14 |
| 1.52E-35 | -0.54256 | 4.22E-37 | -0.51699 | 2.82E-33 | -0.66754 | 1.51E-61 | -0.13991 | 0.00244  |
| 4.97E-09 | 0.405197 | 7.02E-20 | 0.299283 | 4.05E-11 | 0.353966 | 3.13E-15 | -0.04953 | 0.28541  |
| 1.45E-24 | -0.27712 | 1.11E-09 | -0.4789  | 3.79E-28 | -0.48547 | 5.50E-29 | -0.18873 | 4.05E-05 |
| 1.39E-39 | 0.526642 | 1.11E-34 | 0.467419 | 1.01E-26 | 0.602437 | 1.82E-47 | 0.2386   | 1.81E-07 |
| 2.19E-22 | -0.5109  | 2.06E-32 | -0.41793 | 3.62E-21 | -0.53324 | 1.14E-35 | -0.05898 | 0.20326  |
| 8.54E-29 | -0.40279 | 1.21E-19 | -0.40948 | 2.63E-20 | -0.55831 | 1.26E-39 | -0.14818 | 0.00132  |

|          |          |          |          |          |          |          |          |          |
|----------|----------|----------|----------|----------|----------|----------|----------|----------|
| 6.23E-11 | -0.58118 | 1.54E-43 | -0.45281 | 5.48E-25 | -0.48981 | 1.50E-29 | -0.39486 | 7.10E-19 |
| 2.07E-15 | -0.29862 | 4.49E-11 | -0.34867 | 8.52E-15 | -0.41054 | 2.06E-20 | 0.01804  | 0.69739  |
| 5.81E-15 | 0.415983 | 5.75E-21 | 0.240103 | 1.51E-07 | 0.356177 | 2.05E-15 | 0.3042   | 1.87E-11 |
| 6.28E-08 | -0.20063 | 1.25E-05 | -0.27957 | 7.83E-10 | -0.32108 | 1.17E-12 | -0.0554  | 0.2321   |
| 1.26E-24 | 0.484127 | 8.19E-29 | 0.549822 | 3.01E-38 | 0.551674 | 1.52E-38 | 0.393637 | 9.29E-19 |
| 7.05E-21 | 0.678671 | 2.54E-64 | 0.436345 | 3.96E-23 | 0.550674 | 2.20E-38 | 0.205287 | 7.74E-06 |
| 4.99E-30 | -0.54101 | 7.36E-37 | -0.61877 | 1.09E-50 | -0.67807 | 3.61E-64 | -0.30559 | 1.50E-11 |
| 1.51E-23 | -0.42186 | 1.41E-21 | -0.44084 | 1.26E-23 | -0.50492 | 1.40E-31 | 0.028254 | 0.54248  |
| 5.63E-08 | -0.49023 | 1.32E-29 | -0.47938 | 3.30E-28 | -0.46364 | 2.89E-26 | -0.04004 | 0.38793  |
| 1.13E-07 | -0.32886 | 3.07E-13 | -0.2916  | 1.32E-10 | -0.3277  | 3.75E-13 | -0.27826 | 9.46E-10 |
| 3.17E-11 | 0.434031 | 7.09E-23 | 0.24973  | 4.52E-08 | 0.346576 | 1.26E-14 | 0.416012 | 5.71E-21 |
| 6.99E-12 | 0.341474 | 3.23E-14 | 0.294901 | 7.98E-11 | 0.333273 | 1.41E-13 | 0.242558 | 1.11E-07 |
| 1.25E-18 | -0.20876 | 5.38E-06 | -0.25874 | 1.40E-08 | -0.37256 | 7.99E-17 | 0.008147 | 0.86061  |
| 2.78E-22 | -0.52662 | 1.12E-34 | -0.39023 | 1.95E-18 | -0.52767 | 7.79E-35 | -0.08472 | 0.06736  |
| 1.09E-12 | -0.42217 | 1.31E-21 | -0.48139 | 1.84E-28 | -0.52906 | 4.84E-35 | -0.41948 | 2.50E-21 |
| 2.58E-24 | 0.518895 | 1.50E-33 | 0.460981 | 6.01E-26 | 0.530867 | 2.60E-35 | 0.36471  | 3.87E-16 |
| 1.20E-27 | -0.43592 | 4.41E-23 | -0.4896  | 1.60E-29 | -0.60585 | 3.99E-48 | 0.03556  | 0.4433   |
| 7.08E-06 | -0.43586 | 4.48E-23 | -0.36287 | 5.57E-16 | -0.36269 | 5.77E-16 | -0.19394 | 2.44E-05 |
| 2.70E-09 | -0.21525 | 2.67E-06 | -0.36475 | 3.84E-16 | -0.36635 | 2.80E-16 | 0.133102 | 0.00396  |
| 1.78E-37 | -0.39946 | 2.56E-19 | -0.40184 | 1.50E-19 | -0.54719 | 7.89E-38 | -0.1951  | 2.18E-05 |
| 7.03E-18 | 0.466007 | 1.50E-26 | 0.363455 | 4.96E-16 | 0.444507 | 4.89E-24 | 0.362737 | 5.72E-16 |
| 8.78E-25 | -0.4668  | 1.20E-26 | -0.63716 | 1.48E-54 | -0.63277 | 1.31E-53 | -0.07477 | 0.10659  |
| 1.11E-15 | -0.39814 | 3.44E-19 | -0.47709 | 6.43E-28 | -0.45423 | 3.75E-25 | -0.22216 | 1.24E-06 |
| 1.41E-37 | 0.182519 | 7.28E-05 | 0.368743 | 1.73E-16 | 0.37127  | 1.04E-16 | 0.015356 | 0.74067  |
| 1.36E-19 | -0.48997 | 1.43E-29 | -0.44366 | 6.09E-24 | -0.51482 | 5.76E-33 | -0.22045 | 1.51E-06 |
| 5.52E-28 | 0.594118 | 6.78E-46 | 0.466061 | 1.47E-26 | 0.582144 | 1.03E-43 | 0.421876 | 1.41E-21 |
| 5.08E-10 | -0.30521 | 1.59E-11 | -0.30549 | 1.52E-11 | -0.4076  | 4.05E-20 | 0.011478 | 0.80461  |
| 2.26E-18 | -0.46896 | 6.54E-27 | -0.44025 | 1.46E-23 | -0.50165 | 3.92E-31 | -0.08674 | 0.06106  |
| 6.79E-50 | 0.359327 | 1.11E-15 | 0.478219 | 4.63E-28 | 0.560355 | 5.80E-40 | 0.13462  | 0.00356  |
| 0.00112  | -0.39911 | 2.77E-19 | -0.32496 | 6.03E-13 | -0.32302 | 8.40E-13 | -0.2877  | 2.37E-10 |
| 8.29E-40 | 0.709285 | 1.26E-72 | 0.481005 | 2.05E-28 | 0.65385  | 2.69E-58 | 0.441998 | 9.35E-24 |
| 9.21E-41 | 0.522799 | 4.07E-34 | 0.632587 | 1.44E-53 | 0.646669 | 1.17E-56 | 0.251506 | 3.60E-08 |
| 1.62E-22 | -0.46309 | 3.36E-26 | -0.65772 | 3.38E-59 | -0.6171  | 2.37E-50 | -0.12901 | 0.00523  |
| 1.81E-18 | -0.44352 | 6.31E-24 | -0.51674 | 3.06E-33 | -0.51796 | 2.04E-33 | -0.13112 | 0.00454  |
| 7.84E-21 | -0.41231 | 1.36E-20 | -0.50828 | 4.79E-32 | -0.57149 | 7.63E-42 | -0.08732 | 0.05935  |
| 1.79E-21 | -0.49642 | 2.00E-30 | -0.57846 | 4.67E-43 | -0.61205 | 2.43E-49 | -0.03798 | 0.4129   |
| 7.31E-07 | -0.24496 | 8.26E-08 | -0.27508 | 1.49E-09 | -0.32366 | 7.52E-13 | -0.08207 | 0.07643  |
| 6.07E-31 | -0.24889 | 5.03E-08 | -0.27795 | 9.89E-10 | -0.44347 | 6.39E-24 | -0.13286 | 0.00402  |
| 5.84E-42 | -0.50096 | 4.87E-31 | -0.58978 | 4.29E-45 | -0.66245 | 2.56E-60 | -0.44378 | 5.90E-24 |
| 2.52E-55 | 0.4521   | 6.63E-25 | 0.374539 | 5.33E-17 | 0.619771 | 6.80E-51 | 0.16161  | 0.00045  |
| 2.12E-17 | -0.53866 | 1.70E-36 | -0.43986 | 1.62E-23 | -0.54621 | 1.13E-37 | -0.08154 | 0.07836  |
| 8.70E-06 | -0.4533  | 4.82E-25 | -0.38549 | 5.40E-18 | -0.38926 | 2.41E-18 | -0.0173  | 0.70928  |
| 3.79E-15 | -0.23243 | 3.79E-07 | -0.35003 | 6.61E-15 | -0.34684 | 1.20E-14 | 0.052458 | 0.2579   |
| 1.06E-19 | -0.33641 | 8.07E-14 | -0.37764 | 2.81E-17 | -0.44278 | 7.65E-24 | -0.07562 | 0.10266  |
| 0.00013  | -0.14823 | 0.00132  | -0.30555 | 1.51E-11 | -0.29729 | 5.53E-11 | 0.064715 | 0.16265  |

|          |          |          |          |          |          |          |          |          |
|----------|----------|----------|----------|----------|----------|----------|----------|----------|
| 1.31E-23 | -0.49537 | 2.76E-30 | -0.55816 | 1.34E-39 | -0.60479 | 6.42E-48 | -0.04295 | 0.35437  |
| 4.19E-28 | -0.40802 | 3.68E-20 | -0.37212 | 8.74E-17 | -0.54499 | 1.75E-37 | -0.18308 | 6.91E-05 |
| 1.30E-25 | 0.202347 | 1.05E-05 | 0.455905 | 2.39E-25 | 0.47771  | 5.37E-28 | 0.053763 | 0.24623  |
| 4.47E-11 | -0.53671 | 3.38E-36 | -0.37493 | 4.93E-17 | -0.43638 | 3.92E-23 | -0.14826 | 0.00131  |
| 1.60E-38 | 0.4586   | 1.15E-25 | 0.464895 | 2.04E-26 | 0.580175 | 2.32E-43 | 0.017668 | 0.70334  |
| 1.49E-30 | -0.42169 | 1.47E-21 | -0.52976 | 3.80E-35 | -0.61321 | 1.43E-49 | -0.14834 | 0.00131  |
| 0.00013  | -0.20229 | 1.06E-05 | -0.30582 | 1.44E-11 | -0.32588 | 5.14E-13 | 0.088194 | 0.05684  |
| 1.05E-27 | 0.602359 | 1.88E-47 | 0.635676 | 3.12E-54 | 0.679969 | 1.19E-64 | 0.373814 | 6.19E-17 |
| 1.07E-12 | -0.26967 | 3.18E-09 | -0.39479 | 7.21E-19 | -0.43188 | 1.21E-22 | -0.23474 | 2.88E-07 |
| 7.79E-13 | -0.67178 | 1.37E-62 | -0.60939 | 8.15E-49 | -0.59402 | 7.06E-46 | -0.23119 | 4.39E-07 |
| 3.45E-16 | 0.628054 | 1.31E-52 | 0.479787 | 2.93E-28 | 0.535362 | 5.44E-36 | 0.370434 | 1.23E-16 |
| 1.46E-12 | -0.4673  | 1.04E-26 | -0.56337 | 1.82E-40 | -0.52071 | 8.19E-34 | -0.30122 | 2.99E-11 |
| 3.67E-35 | 0.621661 | 2.79E-51 | 0.604261 | 8.11E-48 | 0.661205 | 5.07E-60 | 0.039952 | 0.38902  |
| 5.24E-08 | 0.472188 | 2.62E-27 | 0.405518 | 6.53E-20 | 0.428058 | 3.13E-22 | 0.34734  | 1.09E-14 |
| 1.02E-57 | -0.44189 | 9.61E-24 | -0.59766 | 1.47E-46 | -0.68739 | 1.40E-66 | -0.45494 | 3.10E-25 |
| 7.46E-08 | -0.4799  | 2.84E-28 | -0.42145 | 1.56E-21 | -0.44719 | 2.43E-24 | -0.05213 | 0.26092  |
| 1.52E-15 | -0.43436 | 6.53E-23 | -0.41484 | 7.53E-21 | -0.4896  | 1.60E-29 | -0.15388 | 0.00085  |
| 4.15E-17 | -0.32432 | 6.72E-13 | -0.42454 | 7.40E-22 | -0.47163 | 3.07E-27 | -0.09758 | 0.03502  |
| 7.85E-38 | -0.52089 | 7.72E-34 | -0.49106 | 1.03E-29 | -0.63007 | 4.93E-53 | -0.28983 | 1.72E-10 |
| 6.22E-22 | -0.49038 | 1.26E-29 | -0.56818 | 2.81E-41 | -0.58419 | 4.44E-44 | -0.05699 | 0.21899  |
| 2.78E-14 | -0.27408 | 1.72E-09 | -0.26912 | 3.43E-09 | -0.34031 | 3.99E-14 | 0.002116 | 0.96362  |
| 5.21E-07 | -0.31358 | 4.09E-12 | -0.41002 | 2.32E-20 | -0.36571 | 3.17E-16 | -0.25137 | 3.67E-08 |
| 1.30E-25 | 0.508383 | 4.64E-32 | 0.51451  | 6.37E-33 | 0.527022 | 9.73E-35 | 0.22352  | 1.07E-06 |
| 3.44E-18 | -0.49271 | 6.23E-30 | -0.48157 | 1.74E-28 | -0.5193  | 1.31E-33 | -0.28686 | 2.69E-10 |
| 1.49E-26 | 0.538119 | 2.06E-36 | 0.563696 | 1.61E-40 | 0.57328  | 3.74E-42 | 0.249302 | 4.78E-08 |
| 9.88E-17 | -0.38572 | 5.14E-18 | -0.27483 | 1.54E-09 | -0.37633 | 3.69E-17 | 0.020066 | 0.66537  |
| 3.04E-15 | -0.4342  | 6.80E-23 | -0.34354 | 2.21E-14 | -0.45045 | 1.03E-24 | 0.003863 | 0.93364  |
| 2.72E-25 | 0.508976 | 3.83E-32 | 0.353198 | 3.63E-15 | 0.540179 | 9.90E-37 | 0.110138 | 0.01727  |
| 4.13E-33 | 0.392423 | 1.21E-18 | 0.528191 | 6.53E-35 | 0.580268 | 2.23E-43 | 0.434248 | 6.71E-23 |
| 0.00583  | -0.21838 | 1.90E-06 | -0.14774 | 0.00137  | -0.2041  | 8.76E-06 | 0.01267  | 0.78479  |
| 1.80E-26 | -0.40504 | 7.27E-20 | -0.38241 | 1.04E-17 | -0.54633 | 1.08E-37 | -0.18705 | 4.76E-05 |
| 1.92E-10 | -0.40909 | 2.88E-20 | -0.48521 | 5.94E-29 | -0.47372 | 1.69E-27 | -0.04537 | 0.32793  |
| 3.48E-56 | -0.46687 | 1.18E-26 | -0.60922 | 8.80E-49 | -0.70364 | 5.17E-71 | -0.20488 | 8.08E-06 |
| 1.42E-40 | -0.36738 | 2.27E-16 | -0.61493 | 6.47E-50 | -0.65173 | 8.31E-58 | -0.11698 | 0.01141  |
| 2.17E-12 | -0.6147  | 7.20E-50 | -0.53039 | 3.07E-35 | -0.57448 | 2.32E-42 | -0.07002 | 0.13078  |
| 3.64E-22 | -0.55035 | 2.48E-38 | -0.58865 | 6.92E-45 | -0.62219 | 2.17E-51 | -0.05016 | 0.27933  |
| 1.70E-20 | 0.342926 | 2.47E-14 | 0.260134 | 1.16E-08 | 0.387543 | 3.48E-18 | 0.281934 | 5.55E-10 |
| 1.10E-28 | -0.32404 | 7.05E-13 | -0.43713 | 3.24E-23 | -0.53497 | 6.24E-36 | 0.061116 | 0.18737  |
| 3.54E-30 | 0.361308 | 7.57E-16 | 0.49447  | 3.63E-30 | 0.497464 | 1.45E-30 | 0.123283 | 0.00765  |
| 1.04E-20 | -0.50449 | 1.60E-31 | -0.33999 | 4.23E-14 | -0.48998 | 1.43E-29 | -0.17057 | 0.00021  |
| 1.87E-15 | -0.32415 | 6.92E-13 | -0.41836 | 3.27E-21 | -0.45539 | 2.75E-25 | -0.14116 | 0.00223  |
| 5.62E-20 | -0.52212 | 5.11E-34 | -0.50876 | 4.11E-32 | -0.55839 | 1.22E-39 | -0.18745 | 4.58E-05 |
| 7.30E-09 | -0.15772 | 0.00062  | -0.34604 | 1.39E-14 | -0.35081 | 5.71E-15 | -0.20374 | 9.09E-06 |
| 5.43E-69 | 0.67203  | 1.19E-62 | 0.646217 | 1.48E-56 | 0.791292 | #####    | 0.318313 | 1.86E-12 |
| 1.55E-32 | 0.477104 | 6.40E-28 | 0.471305 | 3.37E-27 | 0.558423 | 1.21E-39 | -0.09083 | 0.04981  |

|          |          |          |          |          |          |          |          |          |
|----------|----------|----------|----------|----------|----------|----------|----------|----------|
| 1.71E-29 | 0.276768 | 1.17E-09 | 0.436961 | 3.39E-23 | 0.487802 | 2.74E-29 | 0.050709 | 0.27413  |
| 1.68E-32 | -0.56346 | 1.76E-40 | -0.5093  | 3.46E-32 | -0.6357  | 3.08E-54 | -0.24545 | 7.77E-08 |
| 0.07288  | -0.18444 | 6.08E-05 | -0.19312 | 2.65E-05 | -0.20153 | 1.14E-05 | -0.21398 | 3.07E-06 |
| 2.11E-22 | -0.4997  | 7.23E-31 | -0.37934 | 1.98E-17 | -0.52179 | 5.71E-34 | -0.18134 | 8.12E-05 |
| 4.24E-29 | -0.62468 | 6.63E-52 | -0.58524 | 2.88E-44 | -0.66491 | 6.55E-61 | -0.1917  | 3.04E-05 |
| 2.00E-13 | -0.20649 | 6.83E-06 | -0.32954 | 2.72E-13 | -0.36143 | 7.39E-16 | 0.083432 | 0.07166  |
| 5.69E-17 | -0.58297 | 7.35E-44 | -0.4094  | 2.67E-20 | -0.53093 | 2.54E-35 | -0.03927 | 0.39713  |
| 0.04981  | -0.30398 | 1.93E-11 | -0.28219 | 5.35E-10 | -0.26286 | 8.07E-09 | -0.03602 | 0.43743  |
| 5.98E-08 | -0.41687 | 4.66E-21 | -0.47266 | 2.29E-27 | -0.46332 | 3.15E-26 | -0.03419 | 0.46101  |
| 4.01E-32 | -0.38899 | 2.55E-18 | -0.41274 | 1.23E-20 | -0.52722 | 9.09E-35 | -0.21684 | 2.25E-06 |
| 0.03739  | -0.4     | 2.27E-19 | -0.31439 | 3.58E-12 | -0.30416 | 1.88E-11 | -0.15998 | 0.00052  |
| 1.40E-22 | -0.33605 | 8.61E-14 | -0.42966 | 2.11E-22 | -0.49947 | 7.77E-31 | -0.02017 | 0.66374  |
| 1.90E-36 | -0.40269 | 1.24E-19 | -0.46337 | 3.11E-26 | -0.59958 | 6.38E-47 | -0.12899 | 0.00524  |
| 1.08E-05 | -0.21086 | 4.30E-06 | -0.27054 | 2.82E-09 | -0.2715  | 2.46E-09 | -0.00342 | 0.9412   |
| 3.00E-36 | -0.45615 | 2.24E-25 | -0.6807  | 7.69E-65 | -0.65383 | 2.73E-58 | -0.22188 | 1.28E-06 |
| 0.00065  | -0.5409  | 7.65E-37 | -0.39232 | 1.24E-18 | -0.39334 | 9.92E-19 | -0.13682 | 0.00305  |
| 0.48371  | -0.04647 | 0.31636  | -0.15195 | 0.00099  | -0.13939 | 0.00254  | 0.148234 | 0.00132  |
| 8.54E-20 | -0.36152 | 7.26E-16 | -0.3677  | 2.13E-16 | -0.47755 | 5.62E-28 | -0.3513  | 5.20E-15 |
| 6.38E-22 | 0.276136 | 1.28E-09 | 0.426564 | 4.51E-22 | 0.478052 | 4.86E-28 | 0.178167 | 0.00011  |
| 8.71E-12 | -0.59235 | 1.44E-45 | -0.55272 | 1.03E-38 | -0.60997 | 6.27E-49 | -0.04172 | 0.3684   |
| 2.28E-14 | 0.334063 | 1.23E-13 | 0.319247 | 1.59E-12 | 0.395589 | 6.05E-19 | -0.07239 | 0.11822  |
| 6.77E-12 | -0.39612 | 5.38E-19 | -0.12613 | 0.00635  | -0.28898 | 1.96E-10 | 0.064293 | 0.16541  |
| 1.21E-35 | -0.4777  | 5.38E-28 | -0.51295 | 1.06E-32 | -0.59824 | 1.15E-46 | -0.05182 | 0.26374  |
| 3.29E-40 | -0.42472 | 7.07E-22 | -0.62672 | 2.50E-52 | -0.66338 | 1.53E-60 | 0.023126 | 0.61815  |
| 6.72E-16 | -0.43452 | 6.26E-23 | -0.57758 | 6.66E-43 | -0.55716 | 1.95E-39 | -0.0391  | 0.39921  |
| 3.64E-22 | 0.358139 | 1.40E-15 | 0.44738  | 2.31E-24 | 0.481506 | 1.77E-28 | 0.061174 | 0.18695  |
| 9.89E-31 | -0.39215 | 1.29E-18 | -0.46462 | 2.20E-26 | -0.55674 | 2.29E-39 | -0.08497 | 0.06656  |
| 6.84E-11 | -0.42351 | 9.50E-22 | -0.49243 | 6.78E-30 | -0.51843 | 1.75E-33 | -0.06626 | 0.15283  |
| 7.06E-17 | -0.43853 | 2.27E-23 | -0.35313 | 3.68E-15 | -0.49151 | 8.95E-30 | -0.04733 | 0.30739  |
| 1.07E-06 | -0.53013 | 3.35E-35 | -0.34287 | 2.50E-14 | -0.41209 | 1.43E-20 | -0.04498 | 0.33213  |
| 6.57E-21 | -0.20601 | 7.18E-06 | -0.41365 | 9.96E-21 | -0.42173 | 1.46E-21 | 0.035837 | 0.43975  |
| 0.01641  | -0.28056 | 6.78E-10 | -0.16378 | 0.00038  | -0.24018 | 1.49E-07 | 0.110659 | 0.01674  |
| 5.68E-14 | -0.34193 | 2.97E-14 | -0.40139 | 1.66E-19 | -0.44111 | 1.18E-23 | -0.3284  | 3.32E-13 |
| 3.38E-28 | -0.41209 | 1.43E-20 | -0.60147 | 2.79E-47 | -0.63124 | 2.78E-53 | -0.0749  | 0.10598  |
| 1.17E-22 | -0.4737  | 1.70E-27 | -0.60584 | 4.02E-48 | -0.61323 | 1.41E-49 | -0.11816 | 0.0106   |
| 3.99E-08 | -0.11744 | 0.01109  | -0.27046 | 2.85E-09 | -0.27101 | 2.64E-09 | -0.00443 | 0.92398  |
| 5.32E-16 | -0.42622 | 4.91E-22 | -0.61369 | 1.15E-49 | -0.57522 | 1.72E-42 | -0.01898 | 0.68241  |
| 3.61E-17 | -0.43862 | 2.22E-23 | -0.5607  | 5.09E-40 | -0.56739 | 3.84E-41 | 0.050339 | 0.27765  |
| 5.84E-08 | -0.37739 | 2.96E-17 | -0.4053  | 6.86E-20 | -0.41176 | 1.55E-20 | 0.065536 | 0.15737  |
| 4.82E-14 | -0.39562 | 6.01E-19 | -0.47235 | 2.50E-27 | -0.50237 | 3.13E-31 | -0.19046 | 3.43E-05 |
| 7.49E-25 | -0.4778  | 5.23E-28 | -0.44655 | 2.87E-24 | -0.56345 | 1.77E-40 | -0.16136 | 0.00046  |
| 1.21E-35 | -0.54078 | 7.98E-37 | -0.61594 | 4.05E-50 | -0.69279 | 5.07E-68 | -0.17939 | 9.71E-05 |
| 2.73E-16 | -0.40158 | 1.59E-19 | -0.55357 | 7.50E-39 | -0.5354  | 5.36E-36 | -0.16051 | 0.0005   |
| 7.66E-11 | -0.38517 | 5.78E-18 | -0.35478 | 2.68E-15 | -0.44251 | 8.20E-24 | -0.14663 | 0.00149  |
| 3.04E-05 | -0.28222 | 5.33E-10 | -0.28682 | 2.70E-10 | -0.32406 | 7.03E-13 | 0.063593 | 0.17007  |



|          |          |          |          |          |          |          |          |          |
|----------|----------|----------|----------|----------|----------|----------|----------|----------|
| 6.25E-26 | 0.464251 | 2.44E-26 | 0.587895 | 9.49E-45 | 0.563648 | 1.64E-40 | 0.11302  | 0.01454  |
| 0.00015  | -0.01    | 0.82933  | -0.1801  | 9.09E-05 | -0.16501 | 0.00034  | 0.071089 | 0.12501  |
| 1.07E-15 | -0.45576 | 2.49E-25 | -0.51714 | 2.69E-33 | -0.5416  | 5.95E-37 | -0.22133 | 1.36E-06 |
| 2.87E-13 | -0.54009 | 1.02E-36 | -0.52616 | 1.31E-34 | -0.524   | 2.72E-34 | -0.18223 | 7.48E-05 |
| 7.76E-15 | -0.47435 | 1.41E-27 | -0.51807 | 1.97E-33 | -0.58463 | 3.71E-44 | -0.07109 | 0.12501  |
| 4.55E-20 | -0.37583 | 4.09E-17 | -0.46838 | 7.70E-27 | -0.5078  | 5.59E-32 | 0.062042 | 0.18075  |
| 3.77E-15 | -0.4925  | 6.63E-30 | -0.52028 | 9.47E-34 | -0.54048 | 8.90E-37 | -0.14836 | 0.0013   |
| 5.10E-27 | -0.64027 | 3.11E-55 | -0.58067 | 1.89E-43 | -0.67494 | 2.23E-63 | -0.15367 | 0.00086  |
| 7.74E-20 | -0.52753 | 8.18E-35 | -0.65634 | 7.12E-59 | -0.62885 | 8.92E-53 | -0.14264 | 0.002    |
| 2.42E-25 | -0.51905 | 1.43E-33 | -0.53892 | 1.55E-36 | -0.58991 | 4.07E-45 | -0.12198 | 0.00832  |
| 6.59E-27 | -0.46699 | 1.14E-26 | -0.42532 | 6.12E-22 | -0.56003 | 6.55E-40 | -0.03679 | 0.42767  |
| 2.22E-17 | -0.46806 | 8.42E-27 | -0.50867 | 4.23E-32 | -0.55033 | 2.50E-38 | -0.17426 | 0.00015  |
| 3.04E-13 | -0.23991 | 1.54E-07 | -0.26283 | 8.10E-09 | -0.35875 | 1.25E-15 | 0.010378 | 0.82302  |
| 1.75E-11 | -0.5764  | 1.07E-42 | -0.55377 | 6.96E-39 | -0.62231 | 2.05E-51 | -0.16643 | 0.0003   |
| 0.0002   | -0.25739 | 1.68E-08 | -0.3029  | 2.29E-11 | -0.27094 | 2.66E-09 | -0.0862  | 0.06271  |
| 8.76E-21 | -0.49427 | 3.87E-30 | -0.56323 | 1.92E-40 | -0.5953  | 4.08E-46 | -0.04654 | 0.31558  |
| 7.98E-26 | -0.64687 | 1.06E-56 | -0.54828 | 5.30E-38 | -0.65036 | 1.71E-57 | -0.21165 | 3.95E-06 |
| 1.59E-10 | -0.38072 | 1.48E-17 | -0.41265 | 1.26E-20 | -0.45507 | 2.99E-25 | -0.14185 | 0.00212  |
| 7.72E-30 | 0.561815 | 3.32E-40 | 0.382564 | 1.00E-17 | 0.551333 | 1.72E-38 | 0.176917 | 0.00012  |
| 3.82E-25 | -0.47421 | 1.47E-27 | -0.55216 | 1.27E-38 | -0.60726 | 2.12E-48 | -0.14717 | 0.00143  |
| 1.27E-30 | -0.47462 | 1.31E-27 | -0.49569 | 2.50E-30 | -0.59353 | 8.72E-46 | -0.3012  | 3.00E-11 |
| 7.96E-11 | -0.4843  | 7.79E-29 | -0.51762 | 2.29E-33 | -0.52621 | 1.28E-34 | -0.10243 | 0.02687  |
| 7.13E-18 | -0.48191 | 1.57E-28 | -0.57319 | 3.88E-42 | -0.58443 | 4.02E-44 | -0.04494 | 0.33254  |
| 4.41E-14 | -0.59208 | 1.62E-45 | -0.49508 | 3.01E-30 | -0.56681 | 4.81E-41 | -0.08081 | 0.08106  |
| 4.21E-29 | 0.553141 | 8.80E-39 | 0.188973 | 3.96E-05 | 0.464268 | 2.43E-26 | 0.281785 | 5.68E-10 |
| 3.66E-25 | -0.25499 | 2.29E-08 | -0.32864 | 3.18E-13 | -0.41312 | 1.13E-20 | -0.34164 | 3.13E-14 |
| 2.72E-27 | -0.48764 | 2.88E-29 | -0.52382 | 2.89E-34 | -0.62661 | 2.63E-52 | -0.27751 | 1.05E-09 |
| 8.23E-26 | -0.54585 | 1.29E-37 | -0.5782  | 5.17E-43 | -0.64299 | 7.79E-56 | -0.27199 | 2.30E-09 |
| 7.06E-21 | -0.43807 | 2.56E-23 | -0.54001 | 1.05E-36 | -0.54295 | 3.66E-37 | -0.19229 | 2.87E-05 |
| 3.90E-37 | -0.49151 | 8.95E-30 | -0.58335 | 6.29E-44 | -0.67784 | 4.13E-64 | -0.22707 | 7.09E-07 |
| 3.27E-18 | -0.43006 | 1.91E-22 | -0.50961 | 3.13E-32 | -0.52463 | 2.19E-34 | -0.11148 | 0.01595  |
| 1.73E-09 | -0.34404 | 2.02E-14 | -0.40979 | 2.44E-20 | -0.42149 | 1.55E-21 | 0.065823 | 0.15556  |
| 3.78E-23 | -0.28673 | 2.74E-10 | -0.37861 | 2.30E-17 | -0.46629 | 1.38E-26 | -0.17242 | 0.00018  |
| 1.83E-30 | -0.34767 | 1.03E-14 | -0.40964 | 2.53E-20 | -0.51207 | 1.41E-32 | 0.128188 | 0.00553  |
| 2.33E-34 | -0.36829 | 1.90E-16 | -0.36481 | 3.80E-16 | -0.55679 | 2.24E-39 | -0.28028 | 7.06E-10 |
| 1.95E-41 | 0.69612  | 6.33E-69 | 0.6391   | 5.61E-55 | 0.716864 | 7.52E-75 | 0.557554 | 1.68E-39 |
| 1.17E-14 | -0.17558 | 0.00014  | -0.28404 | 4.08E-10 | -0.35183 | 4.70E-15 | -0.01934 | 0.67685  |
| 1.21E-26 | -0.57723 | 7.67E-43 | -0.43164 | 1.29E-22 | -0.57042 | 1.17E-41 | -0.04679 | 0.31293  |
| 2.67E-23 | 0.583305 | 6.41E-44 | 0.384971 | 6.03E-18 | 0.549982 | 2.83E-38 | 0.359586 | 1.06E-15 |
| 1.27E-22 | 0.507648 | 5.87E-32 | 0.61465  | 7.37E-50 | 0.577215 | 7.71E-43 | 0.160642 | 0.00049  |
| 4.36E-08 | -0.30496 | 1.65E-11 | -0.27252 | 2.13E-09 | -0.33997 | 4.24E-14 | 0.049891 | 0.28195  |
| 3.86E-40 | -0.42134 | 1.60E-21 | -0.42724 | 3.82E-22 | -0.56234 | 2.71E-40 | -0.12168 | 0.00848  |
| 6.00E-25 | -0.313   | 4.50E-12 | -0.32732 | 4.01E-13 | -0.46199 | 4.56E-26 | -0.33866 | 5.38E-14 |
| 1.46E-22 | -0.22842 | 6.07E-07 | -0.29584 | 6.91E-11 | -0.41504 | 7.18E-21 | -0.24771 | 5.85E-08 |
| 0.0005   | -0.38023 | 1.64E-17 | -0.30915 | 8.44E-12 | -0.32011 | 1.38E-12 | -0.14955 | 0.00119  |

|          |          |          |          |          |          |          |          |          |
|----------|----------|----------|----------|----------|----------|----------|----------|----------|
| 3.71E-15 | -0.3369  | 7.39E-14 | -0.40807 | 3.63E-20 | -0.41841 | 3.23E-21 | -0.04571 | 0.32431  |
| 3.15E-26 | -0.29265 | 1.13E-10 | -0.36546 | 3.34E-16 | -0.45477 | 3.25E-25 | -0.33022 | 2.42E-13 |
| 4.98E-12 | -0.07381 | 0.11115  | -0.31062 | 6.64E-12 | -0.3143  | 3.63E-12 | -0.29881 | 4.36E-11 |
| 1.14E-21 | -0.53865 | 1.71E-36 | -0.64388 | 4.94E-56 | -0.6397  | 4.14E-55 | -0.24058 | 1.42E-07 |
| 1.49E-47 | -0.48044 | 2.43E-28 | -0.5017  | 3.87E-31 | -0.64438 | 3.81E-56 | -0.19745 | 1.72E-05 |
| 2.01E-12 | -0.49753 | 1.42E-30 | -0.45203 | 6.75E-25 | -0.5387  | 1.68E-36 | -0.27694 | 1.14E-09 |
| 2.60E-18 | -0.37577 | 4.14E-17 | -0.34989 | 6.78E-15 | -0.47466 | 1.29E-27 | 0.034233 | 0.4605   |
| 0.0385   | -0.25944 | 1.28E-08 | -0.2596  | 1.25E-08 | -0.26021 | 1.15E-08 | -0.14    | 0.00243  |
| 2.70E-05 | -0.37333 | 6.83E-17 | -0.27407 | 1.72E-09 | -0.32012 | 1.37E-12 | -0.24053 | 1.43E-07 |
| 2.08E-15 | -0.61386 | 1.06E-49 | -0.58552 | 2.56E-44 | -0.5959  | 3.15E-46 | -0.25004 | 4.34E-08 |
| 9.25E-32 | -0.30388 | 1.96E-11 | -0.49382 | 4.43E-30 | -0.55366 | 7.25E-39 | -0.19188 | 2.99E-05 |
| 4.57E-09 | -0.55977 | 7.25E-40 | -0.43503 | 5.52E-23 | -0.48518 | 6.00E-29 | -0.1706  | 0.00021  |
| 2.52E-17 | -0.46719 | 1.08E-26 | -0.40019 | 2.18E-19 | -0.49655 | 1.92E-30 | 0.056873 | 0.21993  |
| 9.38E-09 | -0.53131 | 2.23E-35 | -0.41502 | 7.21E-21 | -0.46681 | 1.20E-26 | -0.02667 | 0.56533  |
| 4.00E-25 | -0.35836 | 1.35E-15 | -0.61101 | 3.91E-49 | -0.60295 | 1.45E-47 | -0.22754 | 6.71E-07 |
| 1.39E-09 | -0.47778 | 5.26E-28 | -0.28319 | 4.62E-10 | -0.38441 | 6.79E-18 | 0.04013  | 0.38691  |
| 1.88E-07 | -0.31261 | 4.80E-12 | -0.14616 | 0.00154  | -0.29261 | 1.13E-10 | 0.131957 | 0.00428  |
| 9.61E-17 | -0.56426 | 1.29E-40 | -0.54722 | 7.81E-38 | -0.6     | 5.32E-47 | -0.14299 | 0.00195  |
| 0.06004  | -0.15797 | 0.00061  | -0.06032 | 0.19318  | -0.11877 | 0.0102   | 0.103823 | 0.02485  |
| 1.74E-07 | -0.46096 | 6.05E-26 | -0.30714 | 1.17E-11 | -0.3915  | 1.48E-18 | -0.15546 | 0.00075  |
| 1.09E-12 | -0.48679 | 3.71E-29 | -0.40776 | 3.90E-20 | -0.4722  | 2.61E-27 | -0.13105 | 0.00456  |
| 2.43E-20 | -0.65325 | 3.71E-58 | -0.58559 | 2.48E-44 | -0.65242 | 5.76E-58 | -0.10844 | 0.01907  |
| 2.19E-11 | -0.34758 | 1.05E-14 | -0.36607 | 2.96E-16 | -0.37952 | 1.90E-17 | -0.05568 | 0.22975  |
| 0.00422  | -0.32131 | 1.12E-12 | -0.32301 | 8.41E-13 | -0.31481 | 3.34E-12 | 0.007267 | 0.87554  |
| 1.13E-16 | -0.32688 | 4.33E-13 | -0.42553 | 5.82E-22 | -0.43814 | 2.51E-23 | -0.29046 | 1.57E-10 |
| 5.77E-15 | -0.43892 | 2.06E-23 | -0.25005 | 4.34E-08 | -0.41103 | 1.83E-20 | -0.10976 | 0.01765  |
| 9.24E-35 | -0.37199 | 8.99E-17 | -0.40362 | 1.00E-19 | -0.54476 | 1.91E-37 | -0.17325 | 0.00017  |
| 4.03E-12 | -0.37583 | 4.09E-17 | -0.28287 | 4.85E-10 | -0.41158 | 1.61E-20 | -0.2033  | 9.51E-06 |
| 0.93585  | -0.21253 | 3.60E-06 | -0.17647 | 0.00013  | -0.16957 | 0.00023  | -0.09155 | 0.048    |
| 0.00904  | -0.24611 | 7.15E-08 | -0.16509 | 0.00034  | -0.19949 | 1.40E-05 | 0.120107 | 0.00938  |
| 4.09E-31 | 0.613259 | 1.40E-49 | 0.512079 | 1.41E-32 | 0.662233 | 2.88E-60 | 0.160562 | 0.0005   |
| 9.79E-12 | -0.32985 | 2.58E-13 | -0.32502 | 5.96E-13 | -0.38368 | 7.93E-18 | -0.20062 | 1.25E-05 |
| 0.00424  | -0.45392 | 4.08E-25 | -0.36165 | 7.08E-16 | -0.35014 | 6.47E-15 | 0.193913 | 2.45E-05 |
| 6.63E-11 | -0.30342 | 2.11E-11 | -0.45823 | 1.27E-25 | -0.44538 | 3.90E-24 | -0.04599 | 0.32137  |
| 1.74E-21 | -0.43292 | 9.37E-23 | -0.39471 | 7.34E-19 | -0.53031 | 3.15E-35 | -0.08101 | 0.08031  |
| 1.55E-08 | -0.50017 | 6.23E-31 | -0.32093 | 1.20E-12 | -0.40266 | 1.25E-19 | -0.27483 | 1.54E-09 |
| 1.40E-21 | -0.54367 | 2.83E-37 | -0.40596 | 5.90E-20 | -0.50166 | 3.91E-31 | -0.03445 | 0.45766  |
| 0.07798  | -0.33262 | 1.58E-13 | -0.24555 | 7.68E-08 | -0.24204 | 1.19E-07 | -0.03975 | 0.39148  |
| 1.52E-10 | -0.50905 | 3.75E-32 | -0.42074 | 1.85E-21 | -0.45003 | 1.15E-24 | -0.08029 | 0.08306  |
| 1.73E-55 | -0.41899 | 2.81E-21 | -0.50808 | 5.10E-32 | -0.64771 | 6.82E-57 | -0.36742 | 2.26E-16 |
| 5.14E-08 | -0.30303 | 2.25E-11 | -0.25097 | 3.86E-08 | -0.32639 | 4.71E-13 | -0.25861 | 1.43E-08 |
| 9.92E-09 | -0.31396 | 3.84E-12 | -0.24124 | 1.31E-07 | -0.33246 | 1.63E-13 | -0.3535  | 3.43E-15 |
| 4.71E-11 | -0.16414 | 0.00037  | -0.23484 | 2.85E-07 | -0.29829 | 4.73E-11 | -0.16794 | 0.00027  |
| 2.00E-23 | -0.59648 | 2.45E-46 | -0.55534 | 3.87E-39 | -0.61502 | 6.22E-50 | -0.10025 | 0.03031  |
| 0.27315  | -0.1819  | 7.70E-05 | -0.13035 | 0.00478  | -0.10131 | 0.02859  | 0.115899 | 0.0122   |

|          |          |          |          |          |          |          |          |          |
|----------|----------|----------|----------|----------|----------|----------|----------|----------|
| 3.21E-11 | -0.40535 | 6.78E-20 | -0.41216 | 1.41E-20 | -0.42581 | 5.43E-22 | -0.26562 | 5.55E-09 |
| 3.63E-05 | -0.39979 | 2.38E-19 | -0.41799 | 3.57E-21 | -0.4044  | 8.41E-20 | -0.09691 | 0.0363   |
| 3.81E-15 | -0.47633 | 8.01E-28 | -0.4026  | 1.26E-19 | -0.51393 | 7.71E-33 | 0.053033 | 0.25271  |
| 3.99E-22 | -0.31112 | 6.12E-12 | -0.37895 | 2.14E-17 | -0.48277 | 1.22E-28 | 0.039028 | 0.40009  |
| 3.40E-10 | -0.53156 | 2.05E-35 | -0.4136  | 1.01E-20 | -0.47675 | 7.08E-28 | -0.34148 | 3.23E-14 |
| 3.60E-14 | -0.51522 | 5.06E-33 | -0.5245  | 2.29E-34 | -0.54986 | 2.96E-38 | -0.26076 | 1.07E-08 |
| 5.56E-09 | -0.28728 | 2.53E-10 | -0.31192 | 5.38E-12 | -0.38194 | 1.15E-17 | -0.15392 | 0.00085  |
| 4.24E-42 | 0.504388 | 1.66E-31 | 0.481723 | 1.66E-28 | 0.616611 | 2.97E-50 | 0.148294 | 0.00131  |
| 2.44E-14 | -0.53997 | 1.07E-36 | -0.54204 | 5.09E-37 | -0.54654 | 1.00E-37 | -0.02108 | 0.6496   |
| 2.39E-10 | -0.23791 | 1.97E-07 | -0.33048 | 2.31E-13 | -0.37256 | 7.99E-17 | -0.148   | 0.00134  |
| 2.38E-09 | -0.28687 | 2.69E-10 | -0.43138 | 1.38E-22 | -0.39724 | 4.20E-19 | -0.13495 | 0.00348  |
| 9.08E-20 | -0.5164  | 3.43E-33 | -0.40977 | 2.45E-20 | -0.51761 | 2.30E-33 | -0.25966 | 1.24E-08 |
| 1.02E-11 | -0.30441 | 1.81E-11 | -0.27913 | 8.34E-10 | -0.36149 | 7.30E-16 | -0.2883  | 2.17E-10 |
| 0.00069  | -0.31306 | 4.46E-12 | -0.41707 | 4.45E-21 | -0.34766 | 1.03E-14 | -0.21718 | 2.16E-06 |
| 6.84E-24 | -0.61327 | 1.39E-49 | -0.47641 | 7.83E-28 | -0.60276 | 1.57E-47 | -0.19289 | 2.71E-05 |
| 6.40E-26 | -0.49365 | 4.67E-30 | -0.53258 | 1.44E-35 | -0.58202 | 1.09E-43 | -0.12641 | 0.00623  |
| 3.55E-09 | -0.1286  | 0.00538  | -0.26126 | 1.00E-08 | -0.29124 | 1.40E-10 | -0.27253 | 2.13E-09 |
| 1.43E-33 | -0.36532 | 3.43E-16 | -0.5312  | 2.32E-35 | -0.60486 | 6.20E-48 | -0.24992 | 4.41E-08 |
| 3.40E-25 | -0.43119 | 1.44E-22 | -0.43055 | 1.69E-22 | -0.52489 | 2.01E-34 | 0.012748 | 0.7835   |
| 1.69E-10 | -0.5086  | 4.33E-32 | -0.41226 | 1.38E-20 | -0.44651 | 2.90E-24 | -0.21201 | 3.80E-06 |
| 3.05E-12 | -0.57924 | 3.39E-43 | -0.42073 | 1.86E-21 | -0.4785  | 4.27E-28 | -0.38249 | 1.02E-17 |
| 0.73015  | -0.26254 | 8.43E-09 | -0.13099 | 0.00458  | -0.1318  | 0.00433  | 0.154807 | 0.00079  |
| 1.08E-17 | -0.20803 | 5.81E-06 | -0.47129 | 3.39E-27 | -0.47773 | 5.33E-28 | -0.29147 | 1.35E-10 |
| 9.75E-06 | -0.25731 | 1.69E-08 | -0.22996 | 5.07E-07 | -0.29243 | 1.16E-10 | -0.08465 | 0.06761  |
| 1.85E-12 | -0.16903 | 0.00024  | -0.33251 | 1.62E-13 | -0.35955 | 1.07E-15 | -0.04681 | 0.31274  |
| 0.00027  | -0.15206 | 0.00098  | -0.15784 | 0.00062  | -0.21928 | 1.71E-06 | 0.138794 | 0.00265  |
| 1.11E-29 | 0.369974 | 1.35E-16 | 0.529847 | 3.70E-35 | 0.608103 | 1.45E-48 | 0.13337  | 0.00389  |
| 1.29E-13 | 0.54708  | 8.21E-38 | 0.462233 | 4.26E-26 | 0.554498 | 5.30E-39 | -0.0407  | 0.38025  |
| 3.14E-10 | -0.34899 | 8.03E-15 | -0.3376  | 6.51E-14 | -0.38618 | 4.66E-18 | -0.15509 | 0.00077  |
| 4.01E-07 | -0.37976 | 1.81E-17 | -0.25178 | 3.48E-08 | -0.34915 | 7.80E-15 | -0.12863 | 0.00537  |
| 1.02E-06 | -0.13196 | 0.00428  | -0.23021 | 4.92E-07 | -0.24229 | 1.15E-07 | -0.01562 | 0.73641  |
| 2.26E-11 | -0.30383 | 1.98E-11 | -0.43114 | 1.46E-22 | -0.44216 | 8.97E-24 | -0.06251 | 0.17748  |
| 4.98E-32 | -0.33337 | 1.39E-13 | -0.42261 | 1.18E-21 | -0.51284 | 1.10E-32 | -0.31749 | 2.14E-12 |
| 2.27E-05 | -0.43403 | 7.09E-23 | -0.39082 | 1.72E-18 | -0.39617 | 5.32E-19 | 0.008934 | 0.84731  |
| 2.07E-57 | 0.475803 | 9.31E-28 | 0.30891  | 8.77E-12 | 0.584814 | 3.43E-44 | 0.29326  | 1.03E-10 |
| 7.38E-14 | -0.32048 | 1.29E-12 | -0.31454 | 3.49E-12 | -0.39892 | 2.89E-19 | -0.11154 | 0.01589  |
| 4.93E-26 | -0.41636 | 5.26E-21 | -0.52794 | 7.12E-35 | -0.58068 | 1.88E-43 | -0.16421 | 0.00037  |
| 2.09E-20 | -0.68144 | 4.97E-65 | -0.54172 | 5.71E-37 | -0.62354 | 1.14E-51 | -0.14754 | 0.00139  |
| 1.57E-10 | -0.11615 | 0.01201  | -0.28589 | 3.11E-10 | -0.29523 | 7.59E-11 | 0.16855  | 0.00025  |
| 2.57E-23 | 0.486163 | 4.47E-29 | 0.383445 | 8.34E-18 | 0.487779 | 2.76E-29 | 0.223433 | 1.08E-06 |
| 2.64E-26 | -0.46422 | 2.46E-26 | -0.47221 | 2.60E-27 | -0.59146 | 2.11E-45 | -0.14544 | 0.00163  |
| 2.37E-16 | -0.3938  | 8.97E-19 | -0.43072 | 1.62E-22 | -0.48071 | 2.24E-28 | -0.16644 | 0.0003   |
| 1.27E-16 | -0.23041 | 4.81E-07 | -0.29193 | 1.26E-10 | -0.40383 | 9.58E-20 | -0.31987 | 1.43E-12 |
| 1.31E-06 | -0.45951 | 8.99E-26 | -0.33565 | 9.24E-14 | -0.36135 | 7.51E-16 | -0.37331 | 6.85E-17 |
| 9.50E-15 | -0.53535 | 5.46E-36 | -0.37832 | 2.44E-17 | -0.47447 | 1.37E-27 | -0.17143 | 0.0002   |

|          |          |          |          |          |          |          |          |          |
|----------|----------|----------|----------|----------|----------|----------|----------|----------|
| 6.01E-10 | -0.38818 | 3.04E-18 | -0.45604 | 2.31E-25 | -0.43926 | 1.89E-23 | -0.19338 | 2.58E-05 |
| 0.0084   | -0.36206 | 6.53E-16 | -0.30461 | 1.75E-11 | -0.27276 | 2.07E-09 | 0.140627 | 0.00232  |
| 2.04E-07 | -0.17977 | 9.37E-05 | -0.35137 | 5.14E-15 | -0.34789 | 9.87E-15 | -0.13827 | 0.00275  |
| 2.92E-10 | -0.39297 | 1.08E-18 | -0.32302 | 8.39E-13 | -0.37282 | 7.58E-17 | -0.2235  | 1.07E-06 |
| 0.00017  | -0.20665 | 6.72E-06 | -0.26251 | 8.46E-09 | -0.28197 | 5.53E-10 | 0.038892 | 0.40173  |
| 5.86E-07 | -0.49901 | 8.96E-31 | -0.33859 | 5.45E-14 | -0.40513 | 7.12E-20 | -0.13788 | 0.00283  |
| 6.33E-08 | -0.4709  | 3.78E-27 | -0.40462 | 8.00E-20 | -0.44253 | 8.14E-24 | -0.18504 | 5.75E-05 |
| 2.54E-25 | -0.55012 | 2.69E-38 | -0.44196 | 9.45E-24 | -0.54729 | 7.60E-38 | -0.06254 | 0.17727  |
| 0.18034  | -0.34828 | 9.18E-15 | -0.19845 | 1.56E-05 | -0.19416 | 2.39E-05 | -0.01292 | 0.78059  |
| 3.88E-07 | -0.29803 | 4.92E-11 | -0.34336 | 2.28E-14 | -0.34889 | 8.18E-15 | 0.053462 | 0.24889  |
| 7.51E-10 | -0.33225 | 1.69E-13 | -0.30763 | 1.08E-11 | -0.38856 | 2.80E-18 | -0.03641 | 0.43242  |
| 0.08561  | -0.2367  | 2.28E-07 | -0.22728 | 6.92E-07 | -0.18386 | 6.42E-05 | 0.114611 | 0.0132   |
| 0.00193  | -0.41584 | 5.94E-21 | -0.28678 | 2.72E-10 | -0.31716 | 2.26E-12 | -0.08637 | 0.0622   |
| 0.00017  | -0.30536 | 1.55E-11 | -0.23223 | 3.88E-07 | -0.28256 | 5.07E-10 | 0.140084 | 0.00241  |
| 2.09E-11 | -0.42083 | 1.81E-21 | -0.3086  | 9.22E-12 | -0.39905 | 2.81E-19 | -0.2041  | 8.76E-06 |
| 4.10E-32 | -0.49689 | 1.73E-30 | -0.55788 | 1.48E-39 | -0.65604 | 8.33E-59 | -0.10286 | 0.02623  |
| 0.00292  | -0.01883 | 0.68481  | -0.08143 | 0.07874  | -0.0898  | 0.05245  | 0.222653 | 1.18E-06 |
| 0.30647  | -0.14486 | 0.0017   | -0.1023  | 0.02707  | -0.16427 | 0.00036  | 0.121183 | 0.00876  |
| 2.33E-07 | -0.25678 | 1.82E-08 | -0.33392 | 1.26E-13 | -0.28794 | 2.29E-10 | -0.01026 | 0.82491  |
| 0.00013  | -0.28403 | 4.09E-10 | -0.32483 | 6.16E-13 | -0.32653 | 4.60E-13 | -0.07161 | 0.12224  |
| 1.18E-12 | -0.3376  | 6.51E-14 | -0.24532 | 7.90E-08 | -0.37809 | 2.56E-17 | -0.23963 | 1.60E-07 |
| 2.69E-28 | 0.445304 | 3.97E-24 | 0.334911 | 1.05E-13 | 0.538805 | 1.61E-36 | 0.084655 | 0.06758  |
| 5.11E-22 | -0.53643 | 3.73E-36 | -0.47967 | 3.04E-28 | -0.54086 | 7.75E-37 | -0.08107 | 0.08009  |
| 6.42E-17 | 0.184986 | 5.78E-05 | 0.341251 | 3.36E-14 | 0.329625 | 2.68E-13 | 0.128014 | 0.0056   |
| 5.13E-12 | -0.58603 | 2.07E-44 | -0.42676 | 4.30E-22 | -0.49341 | 5.02E-30 | -0.30507 | 1.63E-11 |
| 1.34E-05 | -0.19921 | 1.45E-05 | -0.08832 | 0.05649  | -0.2176  | 2.07E-06 | -0.13853 | 0.0027   |
| 2.22E-10 | -0.43915 | 1.94E-23 | -0.30235 | 2.50E-11 | -0.39825 | 3.35E-19 | -0.39097 | 1.66E-18 |
| 2.02E-07 | -0.23062 | 4.69E-07 | -0.34045 | 3.89E-14 | -0.35138 | 5.13E-15 | 0.022861 | 0.62218  |
| 1.24E-11 | -0.34395 | 2.05E-14 | -0.37092 | 1.12E-16 | -0.43178 | 1.24E-22 | -0.05037 | 0.27736  |
| 1.61E-13 | -0.32607 | 4.98E-13 | -0.48962 | 1.59E-29 | -0.44561 | 3.67E-24 | 0.165528 | 0.00033  |
| 5.84E-19 | -0.51118 | 1.88E-32 | -0.61893 | 1.01E-50 | -0.6233  | 1.28E-51 | -0.2798  | 7.57E-10 |
| 5.04E-25 | -0.53706 | 2.99E-36 | -0.59624 | 2.72E-46 | -0.64418 | 4.23E-56 | -0.20445 | 8.44E-06 |
| 5.67E-25 | -0.64212 | 1.21E-55 | -0.61618 | 3.64E-50 | -0.66685 | 2.23E-61 | -0.37542 | 4.45E-17 |
| 2.92E-14 | -0.60558 | 4.50E-48 | -0.53097 | 2.51E-35 | -0.58846 | 7.47E-45 | -0.09649 | 0.03713  |
| 0.00035  | -0.08745 | 0.05899  | -0.19967 | 1.38E-05 | -0.18039 | 8.85E-05 | -0.05808 | 0.21025  |
| 7.29E-05 | -0.14658 | 0.00149  | -0.1812  | 8.22E-05 | -0.205   | 7.98E-06 | 0.080649 | 0.08168  |
| 0.00015  | -0.07044 | 0.12849  | -0.17862 | 0.0001   | -0.18303 | 6.94E-05 | 0.006604 | 0.88682  |
| 0.00338  | 0.018708 | 0.68677  | 0.042743 | 0.35672  | 0.076335 | 0.09944  | 0.190551 | 3.40E-05 |
| 8.63E-13 | 0.05634  | 0.22429  | 0.104901 | 0.02338  | 0.21569  | 2.55E-06 | 0.044687 | 0.33525  |
| 3.84E-09 | 0.048309 | 0.29751  | -0.18425 | 6.19E-05 | -0.21098 | 4.25E-06 | -0.21429 | 2.97E-06 |
| 0.01981  | 0.025698 | 0.57961  | 0.01812  | 0.69612  | 0.047731 | 0.30334  | 0.194672 | 2.27E-05 |
| 0.28032  | 0.128879 | 0.00528  | 0.15859  | 0.00058  | 0.076524 | 0.0986   | 0.067614 | 0.14459  |
| 0.43807  | 0.203908 | 8.94E-06 | 0.083018 | 0.07308  | 0.085991 | 0.06335  | 0.08655  | 0.06164  |
| 1.57E-07 | -0.1199  | 0.0095   | -0.14579 | 0.00158  | -0.21805 | 1.97E-06 | -0.0553  | 0.23293  |
| 0.00056  | -0.10479 | 0.02354  | -0.16192 | 0.00044  | -0.19384 | 2.47E-05 | 0.006584 | 0.88716  |

|          |          |          |          |          |          |          |          |          |
|----------|----------|----------|----------|----------|----------|----------|----------|----------|
| 0.00322  | -0.12124 | 0.00873  | -0.17534 | 0.00014  | -0.19481 | 2.24E-05 | -0.00815 | 0.86048  |
| 0.28368  | 0.344985 | 1.69E-14 | 0.165378 | 0.00033  | 0.160264 | 0.00051  | 0.176953 | 0.00012  |
| 0.08489  | 0.154323 | 0.00082  | 0.006506 | 0.88849  | 0.005345 | 0.90828  | 0.185856 | 5.33E-05 |
| 0.56907  | -0.06539 | 0.15828  | -0.11551 | 0.01249  | -0.09537 | 0.03939  | 0.105676 | 0.02237  |
| 1.14E-05 | 0.185703 | 5.40E-05 | 0.316415 | 2.56E-12 | 0.242611 | 1.11E-07 | 0.306653 | 1.26E-11 |
| 1.53E-05 | 0.229025 | 5.65E-07 | 0.183713 | 6.51E-05 | 0.172943 | 0.00017  | 0.296476 | 6.26E-11 |
| 0.00308  | -0.11702 | 0.01138  | -0.12757 | 0.00577  | -0.16611 | 0.00031  | 0.004462 | 0.92338  |
| 0.82292  | 0.03662  | 0.42981  | 0.048557 | 0.29504  | 0.008617 | 0.85266  | -0.0433  | 0.35049  |
| 3.82E-31 | 0.317292 | 2.21E-12 | 0.36732  | 2.30E-16 | 0.479418 | 3.27E-28 | 0.020178 | 0.66361  |
| 0.3892   | 0.034972 | 0.45088  | -0.03233 | 0.48579  | -0.02717 | 0.55803  | 0.047601 | 0.30466  |
| 3.24E-08 | -0.00725 | 0.8759   | -0.10826 | 0.01927  | -0.15473 | 0.00079  | 0.006023 | 0.89672  |
| 0.01788  | 0.069421 | 0.13413  | 0.093343 | 0.04378  | 0.083647 | 0.07093  | 0.207149 | 6.37E-06 |
| 5.29E-05 | -0.12152 | 0.00857  | 0.07489  | 0.10602  | -0.11185 | 0.0156   | -0.04077 | 0.37937  |
| 0.00668  | -0.00137 | 0.9764   | -0.07135 | 0.12363  | -0.06001 | 0.19546  | -0.02484 | 0.59229  |
| 0.02767  | 0.099108 | 0.03225  | -0.1268  | 0.00607  | -0.0776  | 0.09392  | 0.04045  | 0.38312  |
| 7.03E-05 | -0.01927 | 0.67795  | -0.21224 | 3.71E-06 | -0.17931 | 9.78E-05 | 0.080693 | 0.08152  |
| 1.81E-05 | -0.00471 | 0.91916  | -0.09538 | 0.03936  | -0.13915 | 0.00258  | 0.133069 | 0.00397  |
| 0.00128  | 0.012716 | 0.78403  | -0.06391 | 0.16798  | -0.06561 | 0.15692  | 0.178397 | 0.00011  |
| 2.12E-06 | 0.043275 | 0.35077  | -0.06527 | 0.15906  | -0.12042 | 0.00919  | 0.184767 | 5.90E-05 |
| 0.91518  | 0.080972 | 0.08047  | 0.028782 | 0.53496  | 0.034749 | 0.45376  | 0.064059 | 0.16696  |
| 0.00134  | 0.151036 | 0.00106  | 0.141542 | 0.00217  | 0.140725 | 0.0023   | 0.298107 | 4.87E-11 |
| 0.00089  | 0.01792  | 0.69932  | -0.06236 | 0.17856  | -0.09404 | 0.04223  | 0.141921 | 0.00211  |
| 9.84E-05 | -0.20472 | 8.22E-06 | -0.25041 | 4.15E-08 | -0.22642 | 7.64E-07 | -0.15482 | 0.00079  |
| 5.67E-10 | 0.03327  | 0.47323  | 0.092797 | 0.04504  | 0.11661  | 0.01168  | 0.000459 | 0.99211  |
| 0.12077  | 0.307545 | 1.09E-11 | 0.135261 | 0.0034   | 0.115814 | 0.01226  | 0.467034 | 1.12E-26 |
| 0.00232  | 0.061353 | 0.18565  | 0.048082 | 0.29979  | -0.04044 | 0.38321  | 0.330888 | 2.15E-13 |
| 0.01736  | 0.084165 | 0.06919  | -0.04674 | 0.31346  | -0.07582 | 0.10175  | 0.278653 | 8.93E-10 |
| 0.13796  | 0.219859 | 1.61E-06 | 0.02484  | 0.59235  | 0.012659 | 0.78498  | 0.194828 | 2.24E-05 |
| 4.36E-12 | -0.13902 | 0.0026   | -0.19123 | 3.19E-05 | -0.28379 | 4.23E-10 | 0.139868 | 0.00245  |
| 0.01872  | 0.105606 | 0.02246  | 0.02016  | 0.6639   | -0.02573 | 0.5791   | 0.190905 | 3.29E-05 |
| 7.68E-14 | 0.045127 | 0.33052  | -0.32762 | 3.80E-13 | -0.28671 | 2.75E-10 | -0.08348 | 0.07149  |
| 0.04574  | -0.00823 | 0.85927  | -0.04846 | 0.296    | -0.07481 | 0.1064   | 0.074881 | 0.10607  |
| 0.34312  | 0.007445 | 0.87252  | -0.02084 | 0.65322  | -0.02548 | 0.58284  | 0.127673 | 0.00573  |
| 0.00188  | 0.278683 | 8.90E-10 | 0.183062 | 6.92E-05 | 0.229697 | 5.23E-07 | 0.259311 | 1.30E-08 |
| 0.16178  | 0.001891 | 0.96748  | 0.002254 | 0.96126  | 0.032167 | 0.48802  | 0.279573 | 7.82E-10 |
| 0.01021  | 0.067639 | 0.14444  | 0.049045 | 0.29021  | 0.093188 | 0.04414  | -0.12926 | 0.00515  |
| 0.71524  | 0.145954 | 0.00156  | 0.203793 | 9.04E-06 | 0.117793 | 0.01085  | 0.20135  | 1.16E-05 |
| 2.85E-06 | 0.161836 | 0.00045  | 0.251357 | 3.67E-08 | 0.204011 | 8.84E-06 | 0.269043 | 3.47E-09 |
| 0.05641  | 0.128889 | 0.00528  | 0.019926 | 0.66757  | 0.063874 | 0.16819  | 0.231097 | 4.44E-07 |
| 1.58E-16 | -0.2351  | 2.76E-07 | -0.27049 | 2.84E-09 | -0.36006 | 9.66E-16 | 0.200152 | 1.31E-05 |
| 0.25658  | 0.137369 | 0.00293  | 0.100162 | 0.03045  | 0.126741 | 0.0061   | 0.314667 | 3.42E-12 |
| 1.84E-06 | -0.16156 | 0.00046  | -0.14838 | 0.0013   | -0.23125 | 4.36E-07 | 0.116516 | 0.01174  |
| 4.44E-09 | -0.13474 | 0.00353  | -0.27394 | 1.75E-09 | -0.28771 | 2.37E-10 | 0.26084  | 1.06E-08 |
| 0.12192  | 0.089001 | 0.05461  | -0.05854 | 0.20665  | -0.06279 | 0.17554  | 0.054743 | 0.23771  |
| 2.06E-10 | 0.007784 | 0.86677  | -0.0287  | 0.53612  | -0.1305  | 0.00473  | 0.001033 | 0.98224  |

|          |          |          |          |          |          |          |          |          |
|----------|----------|----------|----------|----------|----------|----------|----------|----------|
| 1.07E-08 | -0.07294 | 0.11545  | -0.14053 | 0.00233  | -0.19988 | 1.35E-05 | 0.136154 | 0.0032   |
| 1.16E-05 | 0.131805 | 0.00433  | -0.06986 | 0.13168  | -0.09872 | 0.03293  | 0.226634 | 7.46E-07 |
| 0.31508  | 0.173299 | 0.00017  | 0.03132  | 0.49956  | 0.049095 | 0.28971  | 0.139867 | 0.00245  |
| 0.69713  | 0.160396 | 0.0005   | -0.02146 | 0.64363  | 0.025829 | 0.57769  | 0.288346 | 2.15E-10 |
| 1.91E-11 | -0.37574 | 4.17E-17 | -0.31716 | 2.26E-12 | -0.40547 | 6.60E-20 | -0.01771 | 0.70269  |
| 0.02364  | 0.136274 | 0.00317  | -0.04478 | 0.33423  | -0.04243 | 0.36022  | 0.091113 | 0.04909  |
| 0.08826  | 0.201475 | 1.15E-05 | 0.054004 | 0.24412  | -0.00741 | 0.87319  | 0.188067 | 4.32E-05 |
| 4.91E-13 | -0.14635 | 0.00152  | -0.29033 | 1.60E-10 | -0.34041 | 3.92E-14 | 0.175318 | 0.00014  |
| 0.00025  | -0.21418 | 3.01E-06 | -0.16536 | 0.00033  | -0.22876 | 5.83E-07 | 0.149682 | 0.00118  |
| 0.59945  | -0.06447 | 0.16423  | -0.0761  | 0.10048  | -0.05532 | 0.2328   | -0.08834 | 0.05643  |
| 2.94E-08 | 0.514163 | 7.14E-33 | 0.397871 | 3.65E-19 | 0.411521 | 1.64E-20 | 0.226033 | 7.99E-07 |
| 0.11978  | 0.043297 | 0.35052  | 0.058572 | 0.20643  | 0.044707 | 0.33503  | 0.14882  | 0.00126  |
| 0.00552  | 0.088335 | 0.05645  | -0.03979 | 0.39098  | -0.06171 | 0.18312  | 0.188022 | 4.34E-05 |
| 0.90132  | 0.033977 | 0.46387  | 0.004145 | 0.92882  | 0.026942 | 0.5614   | 0.15716  | 0.00065  |
| 1.78E-05 | -0.02413 | 0.60295  | -0.14681 | 0.00147  | -0.17906 | 9.99E-05 | 0.122719 | 0.00793  |
| 0.00015  | -0.07385 | 0.11099  | -0.16282 | 0.00041  | -0.18739 | 4.60E-05 | -0.07279 | 0.11623  |
| 0.22332  | 0.054651 | 0.23851  | -0.05206 | 0.26153  | -0.02857 | 0.53793  | 0.173611 | 0.00016  |
| 0.07079  | -0.01031 | 0.82416  | -0.09272 | 0.04523  | -0.08195 | 0.07687  | 0.113109 | 0.01446  |
| 0.65798  | 0.008685 | 0.85152  | 0.05319  | 0.25131  | 0.029436 | 0.52572  | 0.016606 | 0.7204   |
| 0.00013  | 0.061978 | 0.18121  | -0.0674  | 0.14587  | -0.103   | 0.02603  | 0.186516 | 5.00E-05 |
| 0.03259  | 0.276772 | 1.17E-09 | 0.462827 | 3.62E-26 | 0.302195 | 2.57E-11 | 0.235548 | 2.62E-07 |
| 0.00104  | -0.04114 | 0.37509  | -0.1353  | 0.00339  | -0.14959 | 0.00119  | 0.042113 | 0.36387  |
| 0.85715  | 0.147693 | 0.00137  | 0.016634 | 0.71995  | 0.053489 | 0.24865  | 0.38292  | 9.32E-18 |
| 9.24E-06 | -0.03132 | 0.4995   | -0.1439  | 0.00182  | -0.14193 | 0.00211  | 0.009287 | 0.84135  |
| 1.82E-33 | -0.20683 | 6.59E-06 | -0.28307 | 4.70E-10 | -0.42179 | 1.44E-21 | 0.00099  | 0.98298  |
| 1.50E-06 | 0.025509 | 0.58241  | -0.16486 | 0.00035  | -0.16813 | 0.00026  | 0.332446 | 1.63E-13 |
| 0.01049  | -0.15219 | 0.00097  | -0.24326 | 1.02E-07 | -0.23048 | 4.77E-07 | -0.08949 | 0.05328  |
| 1.01E-06 | -0.26143 | 9.78E-09 | -0.14532 | 0.00164  | -0.25775 | 1.60E-08 | -0.18455 | 6.02E-05 |
| 1.07E-09 | -0.01631 | 0.72518  | -0.1407  | 0.00231  | -0.19656 | 1.89E-05 | 0.306081 | 1.38E-11 |
| 0.68195  | 0.209696 | 4.87E-06 | 0.133792 | 0.00377  | 0.068776 | 0.1378   | -0.10338 | 0.02548  |
| 2.47E-16 | -0.34126 | 3.35E-14 | -0.25473 | 2.37E-08 | -0.40955 | 2.59E-20 | -0.00964 | 0.83545  |
| 4.07E-06 | -0.12995 | 0.00491  | -0.126   | 0.0064   | -0.18844 | 4.16E-05 | 0.195908 | 2.01E-05 |
| 0.02067  | 0.087291 | 0.05944  | -0.03938 | 0.3959   | -0.06372 | 0.16922  | 0.312088 | 5.23E-12 |
| 3.87E-06 | 0.018006 | 0.69795  | -0.14487 | 0.0017   | -0.1665  | 0.0003   | 0.080058 | 0.08395  |
| 7.36E-07 | 0.00096  | 0.9835   | -0.05245 | 0.25795  | -0.12649 | 0.0062   | 0.093652 | 0.04309  |
| 0.48167  | 0.087507 | 0.05881  | -0.01073 | 0.8171   | 0.021357 | 0.64526  | 0.169217 | 0.00024  |
| 0.20182  | 0.229665 | 5.25E-07 | 0.168341 | 0.00026  | 0.16929  | 0.00024  | 0.42164  | 1.49E-21 |
| 0.39843  | 0.131778 | 0.00434  | -0.05595 | 0.22753  | -0.03912 | 0.39897  | -0.09328 | 0.04392  |
| 0.16717  | -0.17791 | 0.00011  | 0.015628 | 0.73624  | -0.04334 | 0.35003  | 0.102223 | 0.02718  |
| 0.00181  | 0.094089 | 0.04212  | 0.207376 | 6.22E-06 | 0.160637 | 0.00049  | 0.188215 | 4.26E-05 |
| 0.04949  | 0.013391 | 0.77287  | 0.035672 | 0.44186  | 0.047714 | 0.30351  | 0.032447 | 0.48425  |
| 0.004    | -0.01268 | 0.78458  | -0.11545 | 0.01254  | -0.1259  | 0.00644  | 0.117688 | 0.01092  |
| 6.47E-21 | -0.26208 | 8.96E-09 | -0.27201 | 2.29E-09 | -0.40332 | 1.07E-19 | -0.17536 | 0.00014  |
| 0.10414  | 0.031256 | 0.50044  | 0.07017  | 0.12998  | -0.05142 | 0.26741  | 0.022001 | 0.63533  |
| 4.63E-09 | -0.13473 | 0.00353  | -0.31398 | 3.83E-12 | -0.30876 | 8.99E-12 | 0.073243 | 0.11395  |

|          |          |          |          |          |          |          |          |          |
|----------|----------|----------|----------|----------|----------|----------|----------|----------|
| 0.35461  | 0.058222 | 0.20916  | 0.037231 | 0.42216  | 0.074333 | 0.10865  | -0.01382 | 0.76581  |
| 0.02398  | -0.04757 | 0.30494  | 0.037668 | 0.41673  | -0.03685 | 0.42694  | 0.13072  | 0.00466  |
| 0.70072  | 0.233982 | 3.15E-07 | 0.080471 | 0.08236  | 0.100167 | 0.03044  | 0.157005 | 0.00066  |
| 0.11036  | 0.053798 | 0.24592  | -0.04357 | 0.34745  | -0.03978 | 0.39101  | 0.202406 | 1.04E-05 |
| 0.00108  | 0.202042 | 1.08E-05 | 0.166805 | 0.00029  | 0.182135 | 7.54E-05 | 0.116095 | 0.01205  |
| 0.02709  | 0.373348 | 6.81E-17 | 0.271884 | 2.34E-09 | 0.291313 | 1.38E-10 | 0.19179  | 3.02E-05 |
| 6.00E-11 | 0.492301 | 7.05E-30 | 0.338551 | 5.49E-14 | 0.433277 | 8.56E-23 | 0.344403 | 1.89E-14 |
| 0.25309  | 0.197041 | 1.80E-05 | 0.027872 | 0.54796  | 0.08536  | 0.06532  | 0.323006 | 8.42E-13 |
| 4.40E-07 | 0.094964 | 0.04024  | 0.227592 | 6.68E-07 | 0.246927 | 6.45E-08 | -0.04329 | 0.35055  |
| 0.21558  | -0.09228 | 0.04626  | -0.08881 | 0.05512  | -0.13298 | 0.00399  | 0.262237 | 8.78E-09 |
| 4.27E-21 | -0.24934 | 4.76E-08 | -0.40381 | 9.63E-20 | -0.4596  | 8.76E-26 | -0.05096 | 0.2718   |
| 1.57E-09 | 0.016291 | 0.72549  | -0.1817  | 7.85E-05 | -0.24184 | 1.22E-07 | 0.030974 | 0.50431  |
| 0.07347  | 0.042954 | 0.35435  | -0.0781  | 0.09185  | -0.09049 | 0.05066  | 0.136921 | 0.00303  |
| 0.04147  | 0.024326 | 0.60003  | -0.06663 | 0.15054  | -0.06574 | 0.15609  | 0.182058 | 7.59E-05 |
| 0.08202  | -0.06855 | 0.13907  | -0.28538 | 3.35E-10 | -0.18944 | 3.78E-05 | 0.035844 | 0.43966  |
| 3.16E-13 | -0.21444 | 2.92E-06 | -0.22088 | 1.44E-06 | -0.31016 | 7.16E-12 | -0.01676 | 0.7179   |
| 0.05133  | 0.195534 | 2.09E-05 | 0.117209 | 0.01125  | 0.124272 | 0.00717  | 0.166994 | 0.00029  |
| 0.00258  | -0.14761 | 0.00138  | 0.062786 | 0.17557  | 0.044266 | 0.33984  | 0.01406  | 0.76187  |
| 0.00148  | -0.04649 | 0.31606  | -0.16053 | 0.0005   | -0.16731 | 0.00028  | 0.121542 | 0.00856  |
| 0.00014  | -0.04473 | 0.33474  | -0.18197 | 7.66E-05 | -0.16155 | 0.00046  | -0.08084 | 0.08096  |
| 0.00711  | 0.0445   | 0.33728  | -0.03939 | 0.39576  | -0.07576 | 0.10202  | 0.236163 | 2.43E-07 |
| 0.02544  | -0.20321 | 9.60E-06 | -0.41035 | 2.15E-20 | -0.30496 | 1.65E-11 | 0.140568 | 0.00233  |
| 0.00402  | 0.020491 | 0.65872  | -0.04578 | 0.32353  | -0.09616 | 0.03777  | 0.131593 | 0.00439  |
| 1.56E-09 | -0.01205 | 0.79516  | -0.08222 | 0.07589  | -0.16192 | 0.00044  | 0.062336 | 0.17869  |
| 0.31997  | -0.03787 | 0.41419  | -0.02723 | 0.55727  | -0.0488  | 0.29258  | 0.078396 | 0.0906   |
| 0.02056  | -0.07729 | 0.09528  | -0.08735 | 0.05927  | -0.1262  | 0.00632  | 0.042004 | 0.3651   |
| 0.04754  | 0.149558 | 0.00119  | 0.034619 | 0.45546  | 0.008478 | 0.85501  | 0.22946  | 5.38E-07 |
| 0.00031  | 0.313755 | 3.97E-12 | 0.210605 | 4.42E-06 | 0.256496 | 1.88E-08 | 0.298238 | 4.77E-11 |
| 0.26419  | 0.057683 | 0.21341  | -0.00302 | 0.94809  | -0.04587 | 0.32263  | 0.247876 | 5.72E-08 |
| 1.40E-09 | 0.01156  | 0.80325  | -0.14094 | 0.00227  | -0.20236 | 1.05E-05 | 0.111676 | 0.01576  |
| 3.53E-07 | -0.05986 | 0.1966   | -0.06544 | 0.158    | -0.16474 | 0.00035  | 0.073236 | 0.11399  |
| 0.00022  | 0.000559 | 0.99038  | 0.146956 | 0.00145  | -0.02418 | 0.60225  | -0.05385 | 0.24546  |
| 0.00574  | 0.054904 | 0.23633  | 0.001528 | 0.97372  | -0.06289 | 0.17487  | 0.075063 | 0.10522  |
| 0.54984  | 0.052061 | 0.26152  | 0.003297 | 0.94334  | 0.023176 | 0.61738  | 0.167947 | 0.00027  |
| 0.21767  | -0.07694 | 0.09677  | 0.149708 | 0.00118  | 0.002968 | 0.949    | 0.05442  | 0.24049  |
| 6.05E-09 | -0.13449 | 0.00359  | -0.26259 | 8.37E-09 | -0.27805 | 9.74E-10 | 0.244617 | 8.62E-08 |
| 0.02363  | -0.1499  | 0.00116  | -0.09672 | 0.03667  | -0.15319 | 0.0009   | -0.00058 | 0.99008  |
| 0.00012  | -0.18336 | 6.73E-05 | -0.14102 | 0.00225  | -0.18092 | 8.43E-05 | 0.046046 | 0.32074  |
| 0.15317  | 0.088942 | 0.05477  | 0.173972 | 0.00016  | 0.040412 | 0.38357  | 0.254381 | 2.48E-08 |
| 0.46594  | 0.155943 | 0.00072  | -0.07022 | 0.12972  | -0.00094 | 0.98387  | 0.116678 | 0.01163  |
| 3.51E-05 | 0.204199 | 8.67E-06 | 0.323299 | 8.01E-13 | 0.231584 | 4.19E-07 | 0.251987 | 3.39E-08 |
| 0.20344  | 0.152025 | 0.00098  | 0.101459 | 0.02836  | 0.087213 | 0.05967  | 0.038145 | 0.41084  |
| 0.00219  | 0.090216 | 0.05137  | -0.04402 | 0.34251  | -0.06256 | 0.17715  | 0.193018 | 2.67E-05 |
| 1.34E-07 | 0.178881 | 0.0001   | 0.127432 | 0.00582  | -0.0184  | 0.69167  | 0.24166  | 1.24E-07 |
| 1.96E-05 | 0.021273 | 0.64657  | -0.16523 | 0.00034  | -0.19539 | 2.12E-05 | 0.20449  | 8.41E-06 |

|          |          |          |          |          |          |          |          |          |
|----------|----------|----------|----------|----------|----------|----------|----------|----------|
| 0.16218  | 0.193495 | 2.55E-05 | 0.040116 | 0.38708  | 0.036137 | 0.43593  | 0.261045 | 1.03E-08 |
| 1.13E-05 | 0.321606 | 1.07E-12 | 0.233168 | 3.47E-07 | 0.276598 | 1.20E-09 | 0.27187  | 2.34E-09 |
| 0.6917   | 0.191152 | 3.21E-05 | 0.132997 | 0.00399  | 0.107201 | 0.0205   | 0.161901 | 0.00044  |
| 0.59575  | 0.238257 | 1.89E-07 | 0.169257 | 0.00024  | 0.115319 | 0.01264  | 0.245871 | 7.37E-08 |
| 3.82E-07 | 0.065656 | 0.15661  | -0.1279  | 0.00564  | -0.14828 | 0.00131  | -0.00661 | 0.88678  |
| 0.01031  | 0.217647 | 2.06E-06 | 0.234788 | 2.86E-07 | 0.118308 | 0.0105   | 0.004802 | 0.91756  |
| 1.73E-09 | 0.331305 | 2.00E-13 | 0.124952 | 0.00686  | 0.246812 | 6.55E-08 | 0.016661 | 0.71951  |
| 0.00063  | 0.065135 | 0.15993  | 0.117263 | 0.01121  | 0.117488 | 0.01106  | 0.025038 | 0.58939  |
| 3.12E-14 | -0.30397 | 1.94E-11 | -0.26291 | 8.02E-09 | -0.40431 | 8.59E-20 | 0.044027 | 0.34245  |
| 0.26853  | 0.040943 | 0.37736  | -0.01895 | 0.6829   | -0.02976 | 0.52117  | 0.113587 | 0.01405  |
| 0.82313  | 0.081474 | 0.0786   | 0.067016 | 0.14818  | 0.037666 | 0.41675  | 0.113122 | 0.01445  |
| 0.13972  | 0.151631 | 0.00101  | 0.042857 | 0.35544  | 0.024723 | 0.59409  | 0.194551 | 2.30E-05 |
| 1.22E-12 | -0.17411 | 0.00016  | -0.25844 | 1.46E-08 | -0.30977 | 7.63E-12 | 0.208662 | 5.43E-06 |
| 0.29411  | -0.03207 | 0.48934  | 0.099117 | 0.03224  | 0.060066 | 0.19507  | 0.310001 | 7.35E-12 |
| 0.00805  | 0.10312  | 0.02585  | -0.00435 | 0.92531  | -0.04878 | 0.29286  | 0.178324 | 0.00011  |
| 0.04937  | 0.174755 | 0.00015  | 0.091219 | 0.04883  | 0.039255 | 0.39736  | 0.203593 | 9.23E-06 |
| 0.19672  | 0.246111 | 7.15E-08 | 0.167048 | 0.00029  | 0.161589 | 0.00046  | 0.170199 | 0.00022  |
| 0.00118  | 0.015068 | 0.74536  | -0.08587 | 0.06372  | -0.11063 | 0.01677  | 0.140363 | 0.00236  |
| 4.85E-05 | 0.040311 | 0.38477  | 0.061623 | 0.18372  | 0.134769 | 0.00352  | -0.07131 | 0.12382  |
| 0.66809  | 0.159971 | 0.00052  | 0.069904 | 0.13144  | 0.064554 | 0.1637   | 0.083053 | 0.07296  |
| 0.00068  | -0.06378 | 0.16883  | -0.04974 | 0.28339  | 0.00125  | 0.97851  | 0.244447 | 8.81E-08 |
| 0.05987  | 0.161747 | 0.00045  | 0.030224 | 0.5147   | 0.024955 | 0.59064  | 0.168626 | 0.00025  |
| 0.00721  | 0.112534 | 0.01497  | 0.200217 | 1.30E-05 | 0.163015 | 0.0004   | 0.141753 | 0.00214  |
| 3.96E-06 | 0.248195 | 5.50E-08 | 0.239185 | 1.69E-07 | 0.258475 | 1.45E-08 | 0.284975 | 3.56E-10 |
| 0.73607  | 0.175663 | 0.00014  | 0.442332 | 8.58E-24 | 0.211383 | 4.07E-06 | 0.20358  | 9.24E-06 |
| 0.07437  | 0.16929  | 0.00024  | 0.024221 | 0.6016   | 0.025443 | 0.58339  | 0.157614 | 0.00063  |
| 2.18E-07 | -0.12036 | 0.00923  | -0.34552 | 1.53E-14 | -0.32679 | 4.40E-13 | -0.11462 | 0.01319  |
| 0.29879  | 0.006825 | 0.88306  | 0.022093 | 0.63392  | -0.00146 | 0.97482  | 0.052122 | 0.26096  |
| 3.67E-06 | 0.319437 | 1.54E-12 | 0.142278 | 0.00206  | 0.204434 | 8.46E-06 | 0.424363 | 7.72E-22 |
| 0.79066  | 0.100397 | 0.03006  | 0.03753  | 0.41844  | 0.016194 | 0.72706  | 0.283575 | 4.37E-10 |
| 0.00582  | 0.125922 | 0.00643  | 0.131814 | 0.00433  | 0.148128 | 0.00133  | 0.26378  | 7.13E-09 |
| 0.00021  | 0.02804  | 0.54555  | -0.03101 | 0.50383  | -0.10053 | 0.02984  | 0.107289 | 0.02039  |
| 0.02011  | 0.298586 | 4.52E-11 | 0.15835  | 0.00059  | 0.185685 | 5.41E-05 | 0.228612 | 5.93E-07 |
| 0.0003   | 0.025223 | 0.58664  | -0.06356 | 0.17032  | -0.08036 | 0.08279  | 0.237718 | 2.01E-07 |
| 0.00031  | 0.026858 | 0.56262  | -0.02531 | 0.58538  | -0.09768 | 0.03484  | 0.1244   | 0.00711  |
| 8.71E-08 | -0.07099 | 0.12553  | 0.01805  | 0.69723  | -0.14827 | 0.00131  | 0.269089 | 3.45E-09 |
| 0.00354  | 0.053821 | 0.24572  | 0.061583 | 0.18401  | -0.05788 | 0.21184  | 0.2182   | 1.93E-06 |
| 0.26769  | 0.127213 | 0.00591  | 0.048836 | 0.29227  | 0.024457 | 0.59807  | 0.21474  | 2.83E-06 |
| 0.00173  | -0.00089 | 0.98474  | -0.04412 | 0.34139  | -0.07096 | 0.12572  | 0.06666  | 0.15035  |
| 7.13E-06 | -0.01259 | 0.78618  | -0.14275 | 0.00199  | -0.16029 | 0.00051  | 0.093199 | 0.04411  |
| 0.00629  | 0.068747 | 0.13796  | -0.03783 | 0.4147   | -0.06043 | 0.19237  | 0.207983 | 5.84E-06 |
| 9.82E-08 | -0.16564 | 0.00032  | -0.12531 | 0.0067   | -0.22806 | 6.33E-07 | 0.128671 | 0.00536  |
| 2.38E-10 | -0.18144 | 8.04E-05 | -0.2643  | 6.65E-09 | -0.29882 | 4.36E-11 | -0.03597 | 0.43811  |
| 1.35E-05 | 0.078744 | 0.08918  | 0.118672 | 0.01027  | 0.166041 | 0.00031  | 0.258216 | 1.50E-08 |
| 0.00507  | -0.04627 | 0.31837  | -0.08639 | 0.06213  | -0.1228  | 0.00789  | 0.03523  | 0.44754  |



|          |          |          |          |          |          |          |          |          |
|----------|----------|----------|----------|----------|----------|----------|----------|----------|
| 0.01866  | 0.282334 | 5.24E-10 | 0.281955 | 5.54E-10 | 0.201928 | 1.10E-05 | 0.334397 | 1.16E-13 |
| 0.27699  | 0.120368 | 0.00922  | 0.282075 | 5.44E-10 | 0.122938 | 0.00782  | 0.140048 | 0.00242  |
| 0.01598  | 0.030312 | 0.51347  | -0.06449 | 0.1641   | -0.09809 | 0.03407  | 0.235946 | 2.49E-07 |
| 0.00016  | 0.018582 | 0.68878  | -0.08524 | 0.06571  | -0.09702 | 0.03609  | 0.038699 | 0.40408  |
| 7.30E-05 | -0.08643 | 0.062    | -0.17562 | 0.00014  | -0.2244  | 9.64E-07 | 0.185924 | 5.29E-05 |
| 2.03E-06 | -0.17589 | 0.00013  | -0.16585 | 0.00032  | -0.22446 | 9.57E-07 | -0.1626  | 0.00042  |
| 0.08091  | 0.388784 | 2.67E-18 | 0.286063 | 3.03E-10 | 0.247952 | 5.67E-08 | 0.375535 | 4.35E-17 |
| 0.65614  | 0.183926 | 6.38E-05 | 0.040684 | 0.38038  | 0.042615 | 0.35816  | 0.271905 | 2.33E-09 |
| 0.08635  | 0.011496 | 0.80432  | -0.00608 | 0.89572  | -0.05456 | 0.23932  | 0.0913   | 0.04863  |
| 0.20305  | 0.174422 | 0.00015  | 0.043595 | 0.34721  | 0.030539 | 0.51031  | 0.201731 | 1.12E-05 |
| 0.40135  | 0.195697 | 2.05E-05 | 0.044001 | 0.34273  | 0.054116 | 0.24314  | 0.240647 | 1.41E-07 |
| 0.52543  | 0.046071 | 0.32049  | 0.223877 | 1.02E-06 | 0.096591 | 0.03692  | 0.094737 | 0.04072  |
| 0.26553  | 0.076034 | 0.10078  | 0.13391  | 0.00374  | 0.075772 | 0.10196  | 0.187999 | 4.35E-05 |
| 0.01926  | 0.274823 | 1.54E-09 | 0.018178 | 0.69519  | 0.001598 | 0.97253  | 0.089223 | 0.054    |
| 0.00031  | 0.038186 | 0.41034  | 0.157924 | 0.00061  | 0.139032 | 0.0026   | 0.223514 | 1.07E-06 |
| 6.66E-05 | -0.20146 | 1.15E-05 | -0.05892 | 0.20375  | 0.000223 | 0.99617  | -0.09301 | 0.04453  |
| 0.90863  | -0.18714 | 4.72E-05 | -0.05625 | 0.22499  | -0.07734 | 0.09507  | 0.102366 | 0.02696  |
| 0.20936  | 0.085528 | 0.06479  | 0.0223   | 0.63075  | -0.00062 | 0.98935  | 0.143912 | 0.00182  |
| 0.11056  | 0.203846 | 8.99E-06 | 0.107564 | 0.02007  | 0.053223 | 0.25101  | 0.417172 | 4.34E-21 |
| 0.29513  | 0.059724 | 0.19763  | 0.00359  | 0.93832  | 0.000699 | 0.98798  | 0.09922  | 0.03206  |
| 0.00299  | 0.133916 | 0.00374  | 0.169786 | 0.00023  | 0.154362 | 0.00082  | 0.284335 | 3.91E-10 |
| 0.00625  | 0.438646 | 2.21E-23 | 0.258834 | 1.38E-08 | 0.271821 | 2.36E-09 | 0.463413 | 3.07E-26 |
| 1.91E-24 | -0.23032 | 4.86E-07 | -0.30575 | 1.46E-11 | -0.42894 | 2.52E-22 | -0.07432 | 0.10871  |
| 0.02984  | 0.109351 | 0.01809  | 0.041689 | 0.36872  | -0.00842 | 0.85601  | 0.2467   | 6.64E-08 |
| 0.04594  | 0.187904 | 4.38E-05 | -0.0169  | 0.7156   | 0.07232  | 0.11859  | 0.077045 | 0.09632  |
| 0.00063  | 0.02148  | 0.64336  | -0.03807 | 0.41172  | -0.10939 | 0.01805  | 0.239673 | 1.59E-07 |
| 0.48692  | -0.06756 | 0.14494  | -0.01225 | 0.79183  | -0.04108 | 0.3758   | 0.140126 | 0.00241  |
| 0.44454  | 0.190062 | 3.56E-05 | 0.073512 | 0.11263  | 0.05762  | 0.21392  | 0.239171 | 1.69E-07 |
| 0.01844  | 0.118561 | 0.01034  | -0.01935 | 0.67657  | -0.03781 | 0.41493  | 0.116937 | 0.01144  |
| 0.5469   | 0.362415 | 6.09E-16 | 0.404111 | 8.99E-20 | 0.237389 | 2.10E-07 | 0.105991 | 0.02197  |
| 6.48E-20 | -0.18434 | 6.14E-05 | -0.3336  | 1.33E-13 | -0.39861 | 3.10E-19 | -0.06051 | 0.19178  |
| 0.09265  | -0.05977 | 0.1973   | -0.03121 | 0.501    | -0.0722  | 0.11923  | 0.073009 | 0.11511  |
| 0.01187  | 0.127453 | 0.00581  | -0.04416 | 0.34103  | -0.04227 | 0.36213  | 0.187321 | 4.64E-05 |
| 0.01277  | 0.087545 | 0.0587   | -0.10608 | 0.02187  | -0.10118 | 0.02879  | 0.323217 | 8.12E-13 |
| 0.26702  | 0.198909 | 1.49E-05 | 0.102588 | 0.02663  | 0.114906 | 0.01297  | 0.301893 | 2.69E-11 |
| 0.0592   | 0.22662  | 7.47E-07 | 0.114797 | 0.01305  | 0.037597 | 0.4176   | 0.416605 | 4.96E-21 |
| 0.03372  | 0.100988 | 0.0291   | 0.001569 | 0.97302  | -0.03161 | 0.4956   | 0.153522 | 0.00087  |
| 0.05201  | -0.17026 | 0.00022  | -0.0725  | 0.11766  | -0.13367 | 0.0038   | 0.162497 | 0.00042  |
| 0.00129  | -0.00418 | 0.92823  | -0.04517 | 0.33005  | -0.0891  | 0.05434  | 0.15735  | 0.00064  |
| 6.10E-21 | -0.2704  | 2.87E-09 | -0.30468 | 1.73E-11 | -0.40183 | 1.50E-19 | 0.081204 | 0.0796   |
| 0.03072  | 0.135777 | 0.00328  | 0.137905 | 0.00282  | 0.131629 | 0.00438  | 0.181103 | 8.29E-05 |
| 0.35066  | 0.114884 | 0.01298  | 0.218943 | 1.78E-06 | 0.14348  | 0.00188  | 0.233449 | 3.36E-07 |
| 2.68E-07 | 0.230525 | 4.75E-07 | 0.251972 | 3.39E-08 | 0.253468 | 2.80E-08 | 0.333986 | 1.24E-13 |
| 0.00082  | 0.135597 | 0.00332  | 0.111192 | 0.01622  | -0.01202 | 0.79553  | 0.266536 | 4.90E-09 |
| 0.0116   | 0.089377 | 0.05359  | -0.01964 | 0.67213  | -0.03717 | 0.42297  | 0.149743 | 0.00117  |

|          |          |          |          |          |          |          |          |          |
|----------|----------|----------|----------|----------|----------|----------|----------|----------|
| 2.07E-07 | 0.065842 | 0.15544  | -0.10319 | 0.02576  | -0.14093 | 0.00227  | 0.097188 | 0.03577  |
| 0.00074  | -0.00971 | 0.8343   | -0.03799 | 0.41274  | -0.11671 | 0.0116   | 0.18089  | 8.46E-05 |
| 8.78E-13 | -0.0796  | 0.08575  | -0.17874 | 0.0001   | -0.27492 | 1.52E-09 | 0.129421 | 0.00509  |
| 1.24E-07 | -0.16244 | 0.00042  | -0.158   | 0.00061  | -0.22906 | 5.63E-07 | -0.02732 | 0.55595  |
| 3.46E-10 | 0.285871 | 3.11E-10 | 0.437988 | 2.61E-23 | 0.369956 | 1.36E-16 | 0.399316 | 2.65E-19 |
| 6.15E-06 | 0.024454 | 0.59811  | 0.066533 | 0.15114  | -0.09842 | 0.03347  | 0.107654 | 0.01997  |
| 1.04E-08 | -0.22894 | 5.71E-07 | -0.19663 | 1.87E-05 | -0.28314 | 4.66E-10 | 0.110698 | 0.0167   |
| 0.07578  | 0.090699 | 0.05014  | 0.020259 | 0.66235  | -0.02842 | 0.54018  | 0.268366 | 3.81E-09 |
| 0.28576  | 0.097639 | 0.03491  | 0.066968 | 0.14847  | 0.022669 | 0.6251   | 0.206599 | 6.75E-06 |
| 7.99E-13 | -0.23971 | 1.58E-07 | -0.25937 | 1.29E-08 | -0.34557 | 1.52E-14 | 0.01554  | 0.73767  |
| 0.68518  | 0.180565 | 8.71E-05 | 0.022085 | 0.63405  | 0.047766 | 0.30299  | 0.301958 | 2.66E-11 |
| 0.94722  | 0.251257 | 3.72E-08 | 0.108891 | 0.01858  | 0.105691 | 0.02236  | 0.271514 | 2.46E-09 |
| 0.17287  | 0.268577 | 3.70E-09 | 0.266442 | 4.96E-09 | 0.230234 | 4.91E-07 | 0.247329 | 6.13E-08 |
| 0.0015   | 0.09766  | 0.03487  | -0.04933 | 0.28744  | -0.05734 | 0.21611  | 0.162876 | 0.00041  |
| 0.00012  | -0.0333  | 0.47281  | -0.08483 | 0.06702  | -0.13034 | 0.00479  | 0.188781 | 4.03E-05 |
| 0.11936  | -0.16968 | 0.00023  | -0.05511 | 0.23457  | -0.12629 | 0.00628  | 0.031115 | 0.50238  |
| 0.53837  | 0.124978 | 0.00685  | 0.132546 | 0.00411  | 0.088592 | 0.05573  | 0.055158 | 0.23417  |
| 0.3531   | 0.074217 | 0.10921  | 0.001699 | 0.97079  | -0.00874 | 0.85053  | -0.03662 | 0.42988  |
| 0.63577  | 0.208146 | 5.74E-06 | 0.161583 | 0.00046  | 0.140177 | 0.0024   | 0.206507 | 6.82E-06 |
| 6.29E-08 | -0.1159  | 0.0122   | -0.18438 | 6.12E-05 | -0.22249 | 1.20E-06 | -0.08144 | 0.07871  |
| 0.137    | -0.00363 | 0.93765  | -0.02374 | 0.60888  | 0.010181 | 0.82631  | 0.168257 | 0.00026  |
| 0.00681  | 0.167853 | 0.00027  | -0.06001 | 0.19547  | 0.064014 | 0.16726  | 0.460176 | 7.49E-26 |
| 1.47E-05 | -0.18313 | 6.87E-05 | -0.25776 | 1.59E-08 | -0.25211 | 3.33E-08 | -0.12293 | 0.00783  |
| 0.37578  | 0.260655 | 1.09E-08 | 0.153923 | 0.00085  | 0.092986 | 0.0446   | 0.235847 | 2.52E-07 |
| 0.00102  | -0.00149 | 0.97443  | -0.03262 | 0.48187  | -0.07532 | 0.10402  | 0.08014  | 0.08363  |
| 0.01442  | 0.019876 | 0.66836  | -0.05011 | 0.27981  | -0.07048 | 0.12831  | 0.043171 | 0.35192  |
| 0.00255  | 0.007435 | 0.87269  | -0.03475 | 0.45372  | -0.05082 | 0.27306  | 0.356694 | 1.86E-15 |
| 0.72746  | 0.089005 | 0.0546   | 0.05112  | 0.27026  | 0.057967 | 0.21116  | 0.295478 | 7.31E-11 |
| 6.45E-07 | 0.417096 | 4.42E-21 | 0.28252  | 5.10E-10 | 0.335956 | 8.75E-14 | 0.482951 | 1.16E-28 |
| 0.00096  | 0.032895 | 0.47822  | 0.030667 | 0.50854  | -0.07516 | 0.10477  | 0.186402 | 5.06E-05 |
| 0.17737  | 0.214976 | 2.76E-06 | 0.17709  | 0.00012  | 0.146006 | 0.00156  | 0.246641 | 6.69E-08 |
| 0.42637  | 0.135592 | 0.00333  | 0.006242 | 0.89299  | 0.024626 | 0.59554  | 0.223967 | 1.01E-06 |
| 2.70E-15 | -0.01414 | 0.76053  | 0.230692 | 4.65E-07 | 0.278526 | 9.10E-10 | -0.03961 | 0.39308  |
| 0.65594  | 0.086589 | 0.06153  | -0.046   | 0.32128  | 0.033017 | 0.47659  | 0.187209 | 4.68E-05 |
| 0.00212  | 0.094608 | 0.04099  | -0.05401 | 0.24409  | -0.07646 | 0.09888  | 0.131189 | 0.00452  |
| 0.04534  | 0.164751 | 0.00035  | -0.01487 | 0.74866  | -0.00744 | 0.87266  | 0.217506 | 2.09E-06 |
| 0.50758  | 0.158634 | 0.00058  | -0.12672 | 0.0061   | -0.04546 | 0.32692  | 0.23399  | 3.15E-07 |
| 4.43E-17 | -0.24868 | 5.17E-08 | -0.42412 | 8.19E-22 | -0.43238 | 1.07E-22 | -0.17114 | 0.0002   |
| 0.0047   | 0.378052 | 2.58E-17 | -0.02437 | 0.59938  | 0.009598 | 0.83612  | 0.173497 | 0.00016  |
| 1.84E-07 | -0.0845  | 0.06808  | -0.15042 | 0.00111  | -0.24362 | 9.76E-08 | -0.03914 | 0.39876  |
| 0.7174   | 0.115881 | 0.01221  | 0.051516 | 0.26656  | 0.023172 | 0.61744  | 0.165336 | 0.00033  |
| 0.09566  | -0.01873 | 0.68645  | -0.06027 | 0.19356  | -0.10407 | 0.0245   | 0.598281 | 1.12E-46 |
| 0.00108  | 0.07279  | 0.11621  | -0.03395 | 0.46428  | -0.02873 | 0.53576  | 0.016558 | 0.72117  |
| 0.30536  | 0.175569 | 0.00014  | 0.108509 | 0.019    | 0.074408 | 0.1083   | 0.219116 | 1.75E-06 |
| 0.43751  | 0.099891 | 0.03091  | 0.087761 | 0.05808  | 0.100289 | 0.03024  | 0.000895 | 0.98461  |

|          |          |          |          |          |          |          |           |          |
|----------|----------|----------|----------|----------|----------|----------|-----------|----------|
| 0.17889  | -0.16724 | 0.00028  | -0.10906 | 0.0184   | -0.11367 | 0.01398  | -0.09854  | 0.03325  |
| 0.0423   | -0.24214 | 1.17E-07 | -0.13198 | 0.00428  | -0.19706 | 1.79E-05 | -0.09037  | 0.05098  |
| 0.00095  | -0.06015 | 0.19442  | -0.09405 | 0.04221  | -0.16287 | 0.00041  | 0.055325  | 0.23275  |
| 2.74E-12 | -0.22687 | 7.25E-07 | -0.11803 | 0.01069  | -0.27155 | 2.45E-09 | -8.90E-05 | 0.99847  |
| 5.82E-06 | 0.077122 | 0.09598  | 0.129862 | 0.00494  | 0.172243 | 0.00018  | 0.004037  | 0.93067  |
| 2.17E-12 | 0.005876 | 0.89922  | -0.10528 | 0.02289  | -0.18411 | 6.27E-05 | 0.180006  | 9.17E-05 |
| 0.15784  | -0.06851 | 0.13932  | -0.10016 | 0.03045  | -0.11333 | 0.01427  | 0.046484  | 0.31616  |
| 0.00048  | 0.007607 | 0.86976  | 0.125474 | 0.00663  | -0.04766 | 0.30402  | 0.107686  | 0.01993  |
| 9.82E-05 | -0.03075 | 0.50744  | -0.11152 | 0.01591  | -0.13889 | 0.00263  | 0.230263  | 4.89E-07 |
| 2.77E-08 | -0.02407 | 0.60394  | 0.146095 | 0.00155  | -0.09347 | 0.0435   | -0.0104   | 0.82271  |
| 3.44E-05 | 0.017317 | 0.70896  | -0.09188 | 0.04721  | -0.14984 | 0.00116  | 0.20416   | 8.71E-06 |
| 0.54161  | 0.181568 | 7.95E-05 | 0.131896 | 0.0043   | 0.072812 | 0.1161   | 0.312125  | 5.20E-12 |
| 0.07376  | 0.103469 | 0.02535  | -0.06259 | 0.17694  | -0.03738 | 0.42032  | 0.192872  | 2.71E-05 |
| 0.06043  | 0.080422 | 0.08255  | -0.04771 | 0.30356  | -0.05975 | 0.19743  | 0.16097   | 0.00048  |
| 0.01491  | 0.09975  | 0.03114  | 0.034416 | 0.45811  | -0.02988 | 0.51949  | 0.243189  | 1.03E-07 |
| 4.04E-10 | -0.25628 | 1.94E-08 | -0.24051 | 1.43E-07 | -0.31268 | 4.75E-12 | 0.0913    | 0.04863  |
| 0.01208  | 0.093212 | 0.04408  | -0.01327 | 0.77491  | -0.04812 | 0.29939  | 0.236881  | 2.23E-07 |
| 7.99E-12 | -0.05982 | 0.19688  | -0.209   | 5.25E-06 | -0.274   | 1.73E-09 | -0.01905  | 0.68143  |
| 0.00364  | 0.038217 | 0.40996  | -0.11713 | 0.01131  | -0.11219 | 0.01528  | 0.179149  | 9.92E-05 |
| 4.97E-15 | -0.1919  | 2.98E-05 | -0.23502 | 2.79E-07 | -0.33872 | 5.32E-14 | 0.090558  | 0.0505   |
| 3.38E-06 | -0.09294 | 0.0447   | -0.12215 | 0.00823  | -0.20626 | 7.00E-06 | 0.137966  | 0.00281  |
| 0.12641  | 0.153427 | 0.00088  | 0.01427  | 0.75842  | 0.011454 | 0.80501  | 0.180821  | 8.51E-05 |
| 0.46093  | 0.20011  | 1.32E-05 | 0.052355 | 0.25883  | 0.060168 | 0.19431  | 0.217007  | 2.21E-06 |
| 2.15E-05 | -0.21994 | 1.59E-06 | -0.26336 | 7.55E-09 | -0.26208 | 8.96E-09 | 0.20401   | 8.84E-06 |
| 0.46508  | 0.181863 | 7.73E-05 | 0.094586 | 0.04104  | 0.077677 | 0.09361  | -0.02229  | 0.63093  |
| 0.1281   | 0.111405 | 0.01602  | -0.01159 | 0.80278  | -0.00769 | 0.86831  | 0.161     | 0.00048  |
| 0.25676  | 0.231981 | 4.00E-07 | 0.192066 | 2.94E-05 | 0.18348  | 6.65E-05 | 0.187156  | 4.71E-05 |
| 0.80987  | 0.091887 | 0.04719  | 0.03678  | 0.4278   | 0.062145 | 0.18003  | 0.137843  | 0.00283  |
| 1.58E-10 | -0.12595 | 0.00642  | -0.26213 | 8.91E-09 | -0.28771 | 2.37E-10 | -0.18443  | 6.09E-05 |
| 0.01962  | 0.166685 | 0.0003   | -0.09965 | 0.03132  | 0.072481 | 0.11777  | 0.122196  | 0.00821  |
| 0.42938  | 0.034906 | 0.45173  | -0.08021 | 0.08338  | -0.05616 | 0.2258   | 0.324013  | 7.09E-13 |
| 0.7424   | 0.044382 | 0.33856  | 0.031338 | 0.49932  | 0.010816 | 0.81568  | 0.082094  | 0.07634  |
| 0.41414  | 0.313516 | 4.13E-12 | 0.046539 | 0.31559  | 0.114845 | 0.01301  | 0.425731  | 5.53E-22 |
| 0.58192  | -0.06743 | 0.14566  | -0.07672 | 0.09773  | -0.06348 | 0.17084  | 0.102098  | 0.02737  |
| 2.33E-06 | -0.17248 | 0.00018  | -0.19084 | 3.31E-05 | -0.22821 | 6.22E-07 | 0.037269  | 0.42168  |
| 0.88276  | -0.04828 | 0.29783  | 0.064635 | 0.16317  | -0.01034 | 0.82364  | 0.216643  | 2.30E-06 |
| 9.12E-12 | -0.23577 | 2.55E-07 | -0.21339 | 3.27E-06 | -0.32914 | 2.92E-13 | 0.080198  | 0.08341  |
| 0.57116  | 0.075086 | 0.10511  | -0.03496 | 0.45104  | -0.00204 | 0.96495  | 0.165421  | 0.00033  |
| 0.00077  | -0.23712 | 2.16E-07 | -0.29761 | 5.25E-11 | -0.29445 | 8.56E-11 | 0.379247  | 2.01E-17 |
| 6.24E-11 | -0.02939 | 0.52635  | -0.10253 | 0.02672  | -0.21422 | 2.99E-06 | -0.13628  | 0.00317  |
| 0.00985  | 0.129793 | 0.00497  | -0.07851 | 0.09013  | -0.05992 | 0.19616  | 0.185221  | 5.65E-05 |
| 3.09E-06 | 0.221138 | 1.39E-06 | 0.203814 | 9.02E-06 | 0.232751 | 3.65E-07 | 0.040174  | 0.38639  |
| 0.01876  | 0.04833  | 0.2973   | 0.04421  | 0.34045  | -0.015   | 0.74645  | 0.15065   | 0.00109  |
| 1.27E-08 | -0.22356 | 1.06E-06 | -0.28422 | 3.97E-10 | -0.31668 | 2.45E-12 | 0.080811  | 0.08107  |
| 0.00135  | -0.19883 | 1.50E-05 | -0.22558 | 8.42E-07 | -0.25725 | 1.71E-08 | 0.064413  | 0.16462  |

|          |           |          |          |          |          |          |          |          |
|----------|-----------|----------|----------|----------|----------|----------|----------|----------|
| 0.29271  | -0.14998  | 0.00115  | -0.14867 | 0.00127  | -0.17061 | 0.00021  | 0.089638 | 0.05289  |
| 0.0002   | -0.14269  | 0.00199  | -0.15714 | 0.00065  | -0.20041 | 1.28E-05 | -0.11602 | 0.01211  |
| 0.00972  | -0.01263  | 0.78551  | -0.01761 | 0.70426  | -0.06149 | 0.18468  | -0.08571 | 0.06422  |
| 0.97438  | 0.094573  | 0.04107  | -0.07757 | 0.09406  | -0.02335 | 0.61482  | 0.372996 | 7.31E-17 |
| 0.32374  | 0.27703   | 1.13E-09 | -0.01173 | 0.80042  | 0.113919 | 0.01377  | 0.387212 | 3.74E-18 |
| 5.82E-08 | -0.08478  | 0.06719  | -0.22329 | 1.09E-06 | -0.24204 | 1.19E-07 | -0.14505 | 0.00167  |
| 7.73E-07 | -0.07657  | 0.09841  | -0.16432 | 0.00036  | -0.23112 | 4.43E-07 | 0.088669 | 0.05552  |
| 0.00073  | 0.079405  | 0.08652  | -0.07438 | 0.10843  | -0.08195 | 0.07685  | 0.054848 | 0.23681  |
| 0.0262   | -0.11548  | 0.01252  | -0.08449 | 0.0681   | -0.12608 | 0.00637  | -0.05993 | 0.19612  |
| 0.59151  | 0.114286  | 0.01346  | 0.156705 | 0.00068  | 0.070519 | 0.12807  | -0.15158 | 0.00102  |
| 7.53E-10 | 0.606639  | 2.81E-48 | 0.460366 | 7.11E-26 | 0.47203  | 2.74E-27 | 0.33688  | 7.42E-14 |
| 0.01235  | 0.159486  | 0.00054  | 0.280483 | 6.86E-10 | 0.158089 | 0.00061  | 0.148675 | 0.00127  |
| 0.00196  | 0.036866  | 0.42673  | -0.01802 | 0.69772  | -0.03033 | 0.5132   | 0.114186 | 0.01355  |
| 0.01026  | 0.296968  | 5.81E-11 | 0.006374 | 0.89073  | 0.123592 | 0.0075   | 0.264745 | 6.25E-09 |
| 0.00178  | -0.01188  | 0.79793  | -0.07597 | 0.10108  | -0.1007  | 0.02957  | 0.128026 | 0.00559  |
| 0.33973  | -0.09554  | 0.03904  | 0.023137 | 0.61798  | -0.01969 | 0.67123  | 0.171905 | 0.00019  |
| 0.01613  | -0.1137   | 0.01395  | -0.14048 | 0.00234  | -0.15568 | 0.00074  | -0.00823 | 0.85918  |
| 3.31E-06 | -0.12187  | 0.00838  | -0.19769 | 1.68E-05 | -0.22922 | 5.53E-07 | 0.141569 | 0.00217  |
| 0.80663  | 0.064886  | 0.16154  | 0.022652 | 0.62536  | 0.060367 | 0.19284  | 0.026387 | 0.56949  |
| 0.361    | 0.195883  | 2.02E-05 | 0.087364 | 0.05923  | 0.105039 | 0.0232   | -0.02091 | 0.65227  |
| 4.68E-05 | -0.3261   | 4.95E-13 | -0.29162 | 1.32E-10 | -0.35285 | 3.87E-15 | 0.065221 | 0.15938  |
| 0.17605  | -0.07583  | 0.1017   | -0.01933 | 0.67699  | -0.06125 | 0.18638  | 0.050511 | 0.27601  |
| 0.0126   | -0.00351  | 0.93974  | -0.03438 | 0.45852  | -0.06325 | 0.17241  | 0.04189  | 0.36641  |
| 0.68805  | 0.103703  | 0.02502  | 0.009236 | 0.84222  | 0.031333 | 0.49937  | 0.074393 | 0.10837  |
| 8.73E-15 | 0.466657  | 1.25E-26 | 0.274663 | 1.58E-09 | 0.389912 | 2.09E-18 | 0.18591  | 5.30E-05 |
| 3.25E-11 | -0.0639   | 0.16799  | -0.25722 | 1.71E-08 | -0.27026 | 2.93E-09 | -0.02639 | 0.56948  |
| 0.00198  | 0.342141  | 2.86E-14 | 0.16416  | 0.00037  | 0.198398 | 1.57E-05 | 0.416236 | 5.41E-21 |
| 0.00105  | 0.076356  | 0.09934  | -0.01022 | 0.82559  | -0.06465 | 0.16309  | 0.226385 | 7.68E-07 |
| 0.74412  | -0.05304  | 0.25261  | -0.05676 | 0.22085  | -0.06299 | 0.17415  | 0.311032 | 6.21E-12 |
| 0.35008  | 0.145522  | 0.00162  | 0.149585 | 0.00119  | 0.113678 | 0.01397  | 0.367077 | 2.42E-16 |
| 5.86E-10 | -0.09006  | 0.05178  | -0.1969  | 1.82E-05 | -0.24208 | 1.18E-07 | 0.139222 | 0.00257  |
| 2.49E-05 | -9.29E-06 | 0.99984  | -0.11711 | 0.01132  | -0.1183  | 0.01051  | 0.268148 | 3.92E-09 |
| 0.00033  | -0.07722  | 0.09554  | -0.17596 | 0.00013  | -0.16726 | 0.00028  | 0.283505 | 4.41E-10 |
| 6.53E-05 | -0.06474  | 0.16246  | -0.19315 | 2.64E-05 | -0.18534 | 5.59E-05 | 0.168589 | 0.00025  |
| 6.35E-09 | -0.20276  | 1.01E-05 | -0.18756 | 4.53E-05 | -0.25712 | 1.73E-08 | 0.154717 | 0.00079  |
| 5.20E-08 | -0.17149  | 0.0002   | -0.18082 | 8.51E-05 | -0.27584 | 1.34E-09 | 0.12105  | 0.00883  |
| 1.54E-07 | -0.09402  | 0.04227  | -0.14264 | 0.002    | -0.22353 | 1.06E-06 | -0.02156 | 0.64217  |
| 0.00992  | -0.15514  | 0.00077  | -0.05943 | 0.19983  | -0.11425 | 0.01349  | 0.030106 | 0.51634  |
| 0.48702  | 0.009572  | 0.83655  | -0.02411 | 0.60323  | -0.03345 | 0.47081  | 0.173081 | 0.00017  |
| 0.1004   | 0.323427  | 7.83E-13 | 0.279241 | 8.21E-10 | 0.266566 | 4.88E-09 | 0.378642 | 2.28E-17 |
| 0.26151  | 0.063363  | 0.17163  | -0.07746 | 0.09454  | -0.07311 | 0.1146   | 0.203265 | 9.55E-06 |
| 0.06994  | -0.04838  | 0.2968   | -0.11402 | 0.01368  | -0.13002 | 0.00489  | 0.026077 | 0.57403  |
| 0.37506  | 0.361865  | 6.79E-16 | -0.02245 | 0.62842  | 0.102932 | 0.02613  | 0.128543 | 0.0054   |
| 7.16E-11 | -0.19183  | 3.00E-05 | -0.25318 | 2.90E-08 | -0.305   | 1.65E-11 | 0.124579 | 0.00703  |
| 0.6407   | -0.18614  | 5.18E-05 | -0.038   | 0.41266  | -0.06595 | 0.15477  | 0.299049 | 4.20E-11 |

|          |          |          |          |          |          |          |          |          |
|----------|----------|----------|----------|----------|----------|----------|----------|----------|
| 7.66E-07 | -0.09337 | 0.04373  | -0.21607 | 2.45E-06 | -0.23598 | 2.48E-07 | 0.108314 | 0.01922  |
| 7.32E-07 | -0.10948 | 0.01795  | -0.12391 | 0.00734  | -0.18011 | 9.08E-05 | 0.054437 | 0.24035  |
| 0.01368  | 0.417328 | 4.18E-21 | 0.253262 | 2.87E-08 | 0.26965  | 3.19E-09 | 0.263814 | 7.09E-09 |
| 0.00228  | 0.125951 | 0.00642  | -0.21453 | 2.90E-06 | -0.1505  | 0.00111  | 0.079413 | 0.08648  |
| 0.0111   | 0.246924 | 6.46E-08 | 0.195283 | 2.14E-05 | 0.211932 | 3.83E-06 | 0.322974 | 8.46E-13 |
| 0.00497  | 0.500846 | 5.05E-31 | 0.328358 | 3.35E-13 | 0.329328 | 2.83E-13 | 0.357414 | 1.62E-15 |
| 0.01408  | -0.1702  | 0.00022  | -0.10148 | 0.02832  | -0.15118 | 0.00105  | 0.072512 | 0.11762  |
| 0.00753  | 0.261828 | 9.28E-09 | 0.135702 | 0.0033   | 0.184882 | 5.84E-05 | 0.232068 | 3.96E-07 |
| 0.06869  | 0.101559 | 0.0282   | -0.02191 | 0.63666  | -0.03259 | 0.48235  | 0.164512 | 0.00036  |
| 0.11605  | 0.097411 | 0.03534  | -0.11611 | 0.01204  | -0.04399 | 0.34283  | 0.166556 | 0.0003   |
| 0.04046  | 0.173081 | 0.00017  | 0.018846 | 0.6846   | -0.00086 | 0.98519  | 0.206154 | 7.07E-06 |
| 0.11215  | 0.241636 | 1.25E-07 | 0.203619 | 9.21E-06 | 0.180587 | 8.70E-05 | 0.330234 | 2.41E-13 |
| 0.00027  | 0.015678 | 0.73543  | -0.11898 | 0.01007  | -0.13494 | 0.00348  | 0.160043 | 0.00052  |
| 1.25E-08 | -0.09624 | 0.03762  | -0.20975 | 4.84E-06 | -0.25295 | 2.99E-08 | 0.211836 | 3.87E-06 |
| 6.69E-05 | 0.020905 | 0.65228  | -0.05078 | 0.27343  | -0.11362 | 0.01402  | 0.137038 | 0.003    |
| 0.41577  | 0.031067 | 0.50303  | -0.03523 | 0.44756  | -0.03376 | 0.4667   | 0.16611  | 0.00031  |
| 0.0071   | 0.03858  | 0.40552  | -0.12137 | 0.00865  | -0.11025 | 0.01716  | 0.233758 | 3.24E-07 |
| 9.44E-07 | -0.10128 | 0.02864  | -0.2037  | 9.13E-06 | -0.23927 | 1.67E-07 | 0.235876 | 2.51E-07 |
| 3.51E-07 | -0.08746 | 0.05895  | -0.15101 | 0.00106  | -0.2103  | 4.57E-06 | 0.160799 | 0.00049  |
| 5.59E-12 | -0.23728 | 2.12E-07 | -0.29967 | 3.81E-11 | -0.3469  | 1.19E-14 | 0.136532 | 0.00311  |
| 0.0005   | 0.076448 | 0.09893  | -0.12002 | 0.00943  | -0.12056 | 0.00911  | 0.198457 | 1.56E-05 |
| 0.02547  | 0.110471 | 0.01693  | -0.0073  | 0.8749   | -0.02073 | 0.65497  | 0.200941 | 1.21E-05 |
| 0.03239  | 0.111932 | 0.01552  | -0.02568 | 0.57981  | -0.02252 | 0.62735  | 0.162902 | 0.00041  |
| 0.04483  | -0.01965 | 0.67187  | -0.11134 | 0.01608  | -0.119   | 0.01006  | 0.264784 | 6.22E-09 |
| 0.33068  | 0.139259 | 0.00256  | 0.076334 | 0.09944  | 0.037902 | 0.41383  | 0.356933 | 1.77E-15 |
| 3.98E-12 | -0.12741 | 0.00583  | -0.18883 | 4.01E-05 | -0.25227 | 3.26E-08 | 0.139984 | 0.00243  |
| 2.60E-13 | -0.17821 | 0.00011  | -0.29644 | 6.30E-11 | -0.35515 | 2.50E-15 | 0.071543 | 0.12262  |
| 1.14E-05 | 0.371485 | 9.95E-17 | 0.208919 | 5.29E-06 | 0.228971 | 5.69E-07 | 0.425284 | 6.17E-22 |
| 0.09392  | 0.129627 | 0.00502  | 0.152457 | 0.00095  | 0.12794  | 0.00563  | 0.252052 | 3.36E-08 |
| 0.14973  | 0.061047 | 0.18786  | 0.107456 | 0.0202   | 0.090317 | 0.05111  | 0.001849 | 0.96821  |
| 4.97E-09 | 0.508287 | 4.78E-32 | 0.48184  | 1.61E-28 | 0.442643 | 7.92E-24 | 0.314952 | 3.26E-12 |
| 0.58837  | -0.09329 | 0.04389  | -0.03259 | 0.48237  | -0.04756 | 0.30504  | 0.040315 | 0.38472  |
| 0.1092   | 0.116731 | 0.01159  | 0.032032 | 0.48986  | -0.00013 | 0.9977   | 0.226817 | 7.30E-07 |
| 0.50823  | 0.177283 | 0.00012  | 0.031735 | 0.49389  | 0.036951 | 0.42565  | 0.262895 | 8.03E-09 |
| 0.52739  | 0.127992 | 0.00561  | 0.073689 | 0.11176  | 0.07399  | 0.1103   | 0.07279  | 0.11621  |
| 1.75E-07 | -0.03389 | 0.46501  | -0.13647 | 0.00313  | -0.18821 | 4.26E-05 | 0.133322 | 0.0039   |
| 0.41134  | 0.035296 | 0.44668  | -0.1061  | 0.02184  | -0.06834 | 0.14034  | 0.248416 | 5.35E-08 |
| 0.68343  | -0.02299 | 0.62019  | -0.12008 | 0.0094   | -0.06411 | 0.16664  | 0.182931 | 7.00E-05 |
| 0.26793  | -0.01095 | 0.81347  | -0.10482 | 0.02349  | -0.0882  | 0.05683  | 0.164604 | 0.00035  |
| 0.39435  | 0.02603  | 0.57472  | -0.07868 | 0.08944  | 0.009888 | 0.83124  | 0.187961 | 4.36E-05 |
| 0.63651  | 0.187091 | 4.74E-05 | 0.035397 | 0.44539  | 0.094741 | 0.04071  | 0.302172 | 2.58E-11 |
| 0.11451  | -0.00775 | 0.86733  | -0.16533 | 0.00033  | -0.12376 | 0.00742  | 0.215707 | 2.55E-06 |
| 2.39E-21 | -0.25542 | 2.17E-08 | -0.37688 | 3.29E-17 | -0.44131 | 1.12E-23 | -0.1155  | 0.0125   |
| 7.04E-06 | -0.20098 | 1.21E-05 | -0.23968 | 1.59E-07 | -0.23219 | 3.90E-07 | -0.0202  | 0.66327  |
| 0.04947  | 0.081458 | 0.07866  | 0.048384 | 0.29677  | -0.01775 | 0.70206  | 0.167854 | 0.00027  |

|          |          |          |          |          |          |          |          |          |
|----------|----------|----------|----------|----------|----------|----------|----------|----------|
| 0.2226   | 0.01442  | 0.75595  | 0.070524 | 0.12805  | -0.01856 | 0.6892   | 0.225225 | 8.77E-07 |
| 3.62E-24 | -0.38891 | 2.60E-18 | -0.51915 | 1.38E-33 | -0.53914 | 1.43E-36 | -0.1709  | 0.00021  |
| 7.03E-20 | -0.26937 | 3.31E-09 | -0.18819 | 4.27E-05 | -0.39292 | 1.09E-18 | 0.000345 | 0.99407  |
| 7.74E-06 | 0.320783 | 1.23E-12 | 0.45703  | 1.76E-25 | 0.365332 | 3.42E-16 | 0.128037 | 0.00559  |
| 0.00028  | 0.120624 | 0.00907  | -0.00169 | 0.97093  | -0.06142 | 0.18519  | 0.154444 | 0.00081  |
| 0.00027  | 0.454056 | 3.93E-25 | 0.413313 | 1.08E-20 | 0.378895 | 2.17E-17 | 0.430886 | 1.55E-22 |
| 4.87E-08 | -0.3034  | 2.12E-11 | -0.28855 | 2.09E-10 | -0.35429 | 2.94E-15 | 0.022412 | 0.62903  |
| 0.00043  | 0.068712 | 0.13816  | 0.13311  | 0.00396  | -0.01832 | 0.69292  | 0.1781   | 0.00011  |
| 0.0073   | -0.21304 | 3.40E-06 | -0.23609 | 2.45E-07 | -0.25032 | 4.19E-08 | 0.147178 | 0.00143  |
| 1.11E-08 | -0.08809 | 0.05714  | -0.2095  | 4.97E-06 | -0.23437 | 3.01E-07 | -0.13291 | 0.00401  |
| 6.51E-15 | -0.15348 | 0.00088  | -0.24518 | 8.03E-08 | -0.33392 | 1.26E-13 | -0.00033 | 0.99425  |
| 0.02794  | 0.25184  | 3.45E-08 | 0.049343 | 0.28729  | 0.174174 | 0.00016  | 0.098876 | 0.03266  |
| 0.53001  | 0.029714 | 0.52181  | 0.103186 | 0.02576  | -0.00651 | 0.88842  | 0.106356 | 0.02152  |
| 0.25882  | 0.137294 | 0.00295  | 0.15448  | 0.00081  | 0.059623 | 0.19839  | -0.14318 | 0.00192  |
| 1.18E-07 | -0.12971 | 0.00499  | -0.20019 | 1.31E-05 | -0.25908 | 1.34E-08 | 0.065246 | 0.15922  |
| 0.00535  | 0.213883 | 3.11E-06 | 0.037368 | 0.42045  | 0.112598 | 0.01491  | 0.185357 | 5.58E-05 |
| 0.00013  | 0.021165 | 0.64824  | -0.10714 | 0.02057  | -0.13612 | 0.0032   | 0.045862 | 0.32269  |
| 1.83E-05 | -0.01787 | 0.70003  | -0.03613 | 0.43596  | -0.13519 | 0.00342  | 0.157024 | 0.00066  |
| 0.04352  | 0.085088 | 0.06618  | 0.121102 | 0.0088   | 0.016324 | 0.72495  | 0.262318 | 8.68E-09 |
| 0.45522  | 0.105555 | 0.02253  | 0.000726 | 0.98751  | 0.002228 | 0.9617   | 0.234391 | 3.00E-07 |
| 0.00027  | -0.09862 | 0.03312  | -0.07212 | 0.11961  | -0.1577  | 0.00063  | 0.144794 | 0.00171  |
| 2.55E-09 | -0.07274 | 0.11648  | -0.2224  | 1.21E-06 | -0.25359 | 2.75E-08 | 0.129881 | 0.00494  |
| 0.00277  | -0.01387 | 0.76499  | -0.07158 | 0.1224   | -0.12405 | 0.00727  | 0.160391 | 0.0005   |
| 3.63E-05 | -0.05826 | 0.20883  | -0.09353 | 0.04337  | -0.16392 | 0.00038  | 0.108084 | 0.01948  |
| 1.11E-07 | -0.22556 | 8.44E-07 | -0.22706 | 7.10E-07 | -0.27925 | 8.20E-10 | 0.131458 | 0.00443  |
| 0.63396  | 0.137001 | 0.00301  | 0.085562 | 0.06468  | 0.074088 | 0.10983  | 0.404181 | 8.85E-20 |
| 0.03589  | 0.028362 | 0.54095  | 0.203841 | 9.00E-06 | 0.104021 | 0.02458  | 0.088364 | 0.05637  |
| 0.04797  | 0.187388 | 4.61E-05 | 0.182312 | 7.42E-05 | 0.13703  | 0.003    | 0.220337 | 1.52E-06 |
| 2.33E-07 | -0.13815 | 0.00277  | -0.19729 | 1.75E-05 | -0.23759 | 2.05E-07 | -0.11375 | 0.01391  |
| 0.12351  | 0.162287 | 0.00043  | 0.048594 | 0.29467  | 0.025455 | 0.58321  | 0.175218 | 0.00014  |
| 0.18951  | 0.522139 | 5.08E-34 | 0.364957 | 3.69E-16 | 0.298669 | 4.46E-11 | 0.051773 | 0.26417  |
| 0.00178  | 0.078344 | 0.09082  | -0.01963 | 0.67216  | -0.0691  | 0.13594  | 0.205428 | 7.63E-06 |
| 0.00173  | 0.032987 | 0.477    | -0.15506 | 0.00077  | -0.13151 | 0.00442  | 0.201628 | 1.13E-05 |
| 0.02121  | -0.1557  | 0.00073  | -0.11404 | 0.01367  | -0.17951 | 9.60E-05 | 0.507239 | 6.69E-32 |
| 2.10E-05 | -0.04811 | 0.29947  | -0.13998 | 0.00243  | -0.16156 | 0.00046  | 0.112383 | 0.01511  |
| 0.0024   | -0.116   | 0.01212  | -0.22334 | 1.09E-06 | -0.22172 | 1.31E-06 | -0.01677 | 0.71774  |
| 0.00826  | 0.126199 | 0.00632  | 0.164169 | 0.00037  | 0.037116 | 0.42359  | 0.19417  | 2.39E-05 |
| 1.90E-07 | 0.069634 | 0.13294  | -0.15775 | 0.00062  | -0.16768 | 0.00027  | 0.19103  | 3.25E-05 |
| 0.00031  | -0.00902 | 0.84592  | 0.15799  | 0.00061  | 0.129585 | 0.00504  | 0.25448  | 2.45E-08 |
| 0.30177  | 0.164518 | 0.00036  | 0.154848 | 0.00079  | 0.134365 | 0.00363  | 0.072653 | 0.1169   |
| 0.97408  | -0.2729  | 2.03E-09 | -0.10174 | 0.02792  | -0.12158 | 0.00853  | 0.266618 | 4.84E-09 |
| 5.80E-06 | 0.15989  | 0.00052  | 0.174066 | 0.00016  | 0.174447 | 0.00015  | 0.137616 | 0.00288  |
| 0.18567  | -0.0527  | 0.25574  | -0.11526 | 0.01269  | -0.11193 | 0.01552  | -0.05163 | 0.26551  |
| 0.08467  | 0.199534 | 1.40E-05 | 0.134573 | 0.00357  | 0.147991 | 0.00134  | 0.408581 | 3.23E-20 |
| 0.19501  | 0.063096 | 0.17345  | -0.08586 | 0.06374  | 0.033767 | 0.46663  | -0.09531 | 0.03951  |

|          |          |          |          |          |          |          |          |          |
|----------|----------|----------|----------|----------|----------|----------|----------|----------|
| 0.16934  | -0.00236 | 0.95936  | 0.220481 | 1.50E-06 | 0.170763 | 0.00021  | 0.184611 | 5.99E-05 |
| 0.00013  | -0.19938 | 1.42E-05 | -0.03349 | 0.47026  | -0.1852  | 5.66E-05 | 0.171554 | 0.0002   |
| 0.76644  | 0.090715 | 0.05009  | -0.01864 | 0.68787  | 0.013447 | 0.77196  | -0.18422 | 6.21E-05 |
| 0.01349  | 0.083804 | 0.0704   | -0.25495 | 2.31E-08 | -0.16781 | 0.00027  | 0.133266 | 0.00391  |
| 3.26E-05 | 0.001985 | 0.96588  | 0.238974 | 1.73E-07 | -0.00378 | 0.93499  | -0.1085  | 0.019    |
| 0.00217  | -0.07559 | 0.1028   | -0.0367  | 0.42881  | -0.0933  | 0.04387  | 0.310956 | 6.29E-12 |
| 0.00371  | 0.220361 | 1.52E-06 | 0.042433 | 0.36022  | 0.03776  | 0.41559  | 0.150272 | 0.00113  |
| 1.99E-10 | -0.06707 | 0.14786  | -0.16694 | 0.00029  | -0.20576 | 7.37E-06 | -0.11136 | 0.01606  |
| 1.59E-05 | -0.03507 | 0.44958  | -0.0759  | 0.10138  | -0.16312 | 0.0004   | 0.132912 | 0.00401  |
| 0.01122  | -0.0663  | 0.15255  | -0.13266 | 0.00408  | -0.13642 | 0.00314  | 0.057171 | 0.21751  |
| 1.69E-05 | 0.027085 | 0.55932  | -0.09999 | 0.03075  | -0.14188 | 0.00212  | 0.166999 | 0.00029  |
| 0.1628   | 0.09924  | 0.03202  | -0.14228 | 0.00205  | -0.09471 | 0.04077  | 0.086024 | 0.06325  |
| 7.38E-11 | -0.19831 | 1.58E-05 | -0.37386 | 6.13E-17 | -0.38748 | 3.53E-18 | -0.16548 | 0.00033  |
| 0.83052  | 0.0175   | 0.70604  | -0.07328 | 0.11375  | -0.02999 | 0.51789  | 0.069116 | 0.13586  |
| 0.04307  | 0.16208  | 0.00044  | 0.039994 | 0.38852  | 0.013889 | 0.76467  | 0.228716 | 5.86E-07 |
| 0.64051  | 0.178347 | 0.00011  | 0.117621 | 0.01096  | 0.117269 | 0.01121  | 0.120888 | 0.00892  |
| 0.00217  | 0.207217 | 6.33E-06 | -0.02579 | 0.57833  | -0.04833 | 0.2973   | 0.288808 | 2.01E-10 |
| 0.01043  | 0.092487 | 0.04576  | -0.02926 | 0.5282   | -0.04578 | 0.32357  | 0.150943 | 0.00107  |
| 3.89E-23 | -0.56738 | 3.85E-41 | -0.55614 | 2.86E-39 | -0.6124  | 2.07E-49 | -0.17796 | 0.00011  |
| 3.57E-06 | 0.132906 | 0.00401  | 0.183982 | 6.35E-05 | 0.198953 | 1.48E-05 | 0.333379 | 1.39E-13 |
| 0.30993  | 0.155968 | 0.00072  | 0.033603 | 0.4688   | 0.036411 | 0.43245  | 0.038779 | 0.40311  |
| 0.03904  | -0.1417  | 0.00214  | -0.18346 | 6.67E-05 | -0.17909 | 9.97E-05 | -0.10899 | 0.01848  |
| 0.46189  | 0.171075 | 0.0002   | 0.105142 | 0.02306  | 0.067525 | 0.14512  | 0.203577 | 9.25E-06 |
| 0.20187  | 0.022599 | 0.62617  | 0.11565  | 0.01239  | -0.00161 | 0.97233  | 0.113157 | 0.01442  |
| 1.80E-12 | -0.18791 | 4.38E-05 | -0.15915 | 0.00056  | -0.30191 | 2.69E-11 | 0.143517 | 0.00188  |
| 3.58E-05 | 0.077823 | 0.09299  | -0.08069 | 0.08154  | -0.10954 | 0.01789  | 0.186481 | 5.02E-05 |
| 0.00789  | -0.22635 | 7.71E-07 | -0.15166 | 0.00101  | -0.19779 | 1.67E-05 | 0.215704 | 2.55E-06 |
| 3.42E-06 | 0.065947 | 0.15478  | 0.060798 | 0.18967  | 0.14177  | 0.00213  | -0.05705 | 0.21847  |
| 0.01071  | -0.14996 | 0.00115  | -0.14493 | 0.00169  | -0.17061 | 0.00021  | 0.230162 | 4.95E-07 |
| 1.44E-05 | 0.035322 | 0.44636  | 0.051755 | 0.26434  | -0.05384 | 0.24557  | -0.07297 | 0.11531  |
| 0.02019  | 0.148257 | 0.00131  | 0.263521 | 7.38E-09 | 0.170906 | 0.00021  | 0.073538 | 0.1125   |
| 2.02E-08 | -0.02627 | 0.57115  | -0.07779 | 0.09315  | -0.18676 | 4.89E-05 | 0.202999 | 9.82E-06 |
| 4.27E-06 | 0.111282 | 0.01613  | -0.00335 | 0.94246  | -0.06963 | 0.13296  | 0.229209 | 5.53E-07 |
| 0.00166  | 0.048324 | 0.29737  | 0.006188 | 0.89391  | -0.06686 | 0.14915  | 0.221922 | 1.28E-06 |
| 0.06689  | 0.030576 | 0.50981  | 0.028703 | 0.53608  | 0.073185 | 0.11424  | 0.095535 | 0.03904  |
| 0.08847  | 0.131284 | 0.00449  | 0.046463 | 0.31638  | 0.03526  | 0.44715  | 0.11667  | 0.01163  |
| 0.33745  | 0.002398 | 0.95879  | -0.15949 | 0.00054  | -0.08969 | 0.05275  | 0.06008  | 0.19497  |
| 0.03328  | 0.174417 | 0.00015  | 0.02197  | 0.63581  | 0.005998 | 0.89714  | 0.190551 | 3.40E-05 |
| 3.71E-06 | -0.08474 | 0.06729  | -0.04204 | 0.36471  | -0.15265 | 0.00094  | 0.135386 | 0.00337  |
| 0.00154  | 0.117152 | 0.01129  | 0.016802 | 0.71725  | -0.04898 | 0.29084  | 0.28075  | 6.60E-10 |
| 6.50E-16 | -0.3421  | 2.88E-14 | -0.38883 | 2.64E-18 | -0.45649 | 2.04E-25 | 0.019789 | 0.66971  |
| 2.54E-06 | -0.32155 | 1.08E-12 | -0.29879 | 4.37E-11 | -0.33935 | 4.75E-14 | -0.01048 | 0.82125  |
| 0.02583  | 0.034717 | 0.45418  | -0.04645 | 0.3165   | -0.0916  | 0.0479   | 0.107329 | 0.02035  |
| 0.27835  | 0.21435  | 2.95E-06 | 0.276502 | 1.22E-09 | 0.176446 | 0.00013  | 0.377398 | 2.96E-17 |
| 2.86E-05 | -0.00242 | 0.95848  | -0.19902 | 1.47E-05 | -0.18782 | 4.42E-05 | 0.21736  | 2.12E-06 |

|          |          |          |          |          |          |          |          |          |
|----------|----------|----------|----------|----------|----------|----------|----------|----------|
| 0.90397  | 0.036449 | 0.43198  | 0.060066 | 0.19507  | 0.030117 | 0.51618  | 0.063797 | 0.1687   |
| 2.40E-24 | 0.431823 | 1.23E-22 | 0.32427  | 6.78E-13 | 0.429696 | 2.09E-22 | 0.448571 | 1.69E-24 |
| 0.85806  | 0.145983 | 0.00156  | -0.03178 | 0.49328  | 0.048323 | 0.29737  | 0.335794 | 9.01E-14 |
| 0.02829  | -0.04845 | 0.29614  | -0.21058 | 4.43E-06 | -0.16017 | 0.00051  | 0.162173 | 0.00043  |
| 0.29297  | 0.08775  | 0.05811  | 0.024438 | 0.59834  | 0.033301 | 0.47281  | 0.129864 | 0.00494  |
| 0.0066   | 0.045407 | 0.32752  | -0.09035 | 0.05103  | -0.10443 | 0.02402  | 0.041067 | 0.37591  |
| 3.50E-07 | -0.26417 | 6.76E-09 | -0.00901 | 0.84607  | -0.18454 | 6.03E-05 | 0.011532 | 0.80371  |
| 0.00167  | 0.054547 | 0.2394   | -0.01722 | 0.71059  | -0.10444 | 0.024    | 0.136026 | 0.00323  |
| 0.00093  | -0.0084  | 0.85637  | -0.05873 | 0.20521  | -0.10957 | 0.01786  | 0.227433 | 6.80E-07 |
| 0.73545  | 0.036961 | 0.42553  | 0.151298 | 0.00104  | 0.021634 | 0.64099  | 0.117055 | 0.01136  |
| 2.65E-06 | -0.17565 | 0.00014  | -0.36836 | 1.87E-16 | -0.29006 | 1.67E-10 | -0.1102  | 0.01721  |
| 0.41272  | 0.022168 | 0.63277  | 0.014976 | 0.74686  | 0.012897 | 0.78104  | 0.091577 | 0.04795  |
| 1.80E-10 | -0.22998 | 5.06E-07 | -0.4023  | 1.36E-19 | -0.37983 | 1.78E-17 | 0.209309 | 5.07E-06 |
| 4.73E-09 | -0.17946 | 9.64E-05 | -0.30042 | 3.39E-11 | -0.33249 | 1.62E-13 | -0.13908 | 0.00259  |
| 9.66E-12 | -0.2499  | 4.42E-08 | -0.25394 | 2.63E-08 | -0.34255 | 2.65E-14 | 0.069205 | 0.13536  |
| 0.86043  | 0.043096 | 0.35276  | 0.001246 | 0.97858  | -0.0131  | 0.77764  | 0.094748 | 0.04069  |
| 0.10207  | 0.081734 | 0.07765  | 0.059969 | 0.19579  | 0.083263 | 0.07224  | 0.145066 | 0.00167  |
| 0.01574  | 0.164775 | 0.00035  | 0.099751 | 0.03114  | 0.11213  | 0.01534  | 0.259248 | 1.31E-08 |
| 0.45038  | 0.138229 | 0.00276  | 0.089711 | 0.0527   | 0.099754 | 0.03114  | 0.126995 | 0.00599  |
| 0.12623  | 0.09196  | 0.04702  | -0.04258 | 0.35851  | 0.050805 | 0.27322  | 0.141305 | 0.00221  |
| 0.08953  | -0.02978 | 0.52087  | -0.05538 | 0.23227  | -0.09965 | 0.03132  | 0.06068  | 0.19053  |
| 0.00159  | 0.259032 | 1.35E-08 | 0.208064 | 5.79E-06 | 0.213019 | 3.41E-06 | 0.508585 | 4.35E-32 |
| 0.02698  | 0.154659 | 0.0008   | 0.13308  | 0.00396  | 0.145898 | 0.00157  | 0.131765 | 0.00434  |
| 5.82E-06 | 0.224903 | 9.10E-07 | 0.194222 | 2.38E-05 | 0.183745 | 6.49E-05 | 0.159431 | 0.00054  |
| 0.00052  | 0.049531 | 0.28544  | -0.1248  | 0.00693  | -0.1265  | 0.00619  | 0.213347 | 3.29E-06 |
| 2.58E-17 | -0.20701 | 6.47E-06 | -0.24786 | 5.73E-08 | -0.35124 | 5.26E-15 | 0.063712 | 0.16928  |
| 5.22E-10 | -0.24451 | 8.73E-08 | -0.19725 | 1.76E-05 | -0.31626 | 2.63E-12 | -0.02534 | 0.58486  |
| 0.39199  | -0.04774 | 0.30329  | -0.0146  | 0.75306  | -0.05081 | 0.27319  | -0.20916 | 5.16E-06 |
| 0.00024  | 0.157574 | 0.00063  | 0.025734 | 0.57909  | -0.03073 | 0.50765  | 0.373005 | 7.30E-17 |
| 7.37E-08 | 0.085218 | 0.06577  | 0.13428  | 0.00365  | 0.200823 | 1.23E-05 | 0.076961 | 0.09668  |
| 0.00275  | 0.019003 | 0.68211  | -0.13011 | 0.00486  | -0.09468 | 0.04084  | 0.267521 | 4.28E-09 |
| 3.21E-15 | -0.38682 | 4.07E-18 | -0.40521 | 7.00E-20 | -0.44644 | 2.96E-24 | -0.02565 | 0.58036  |
| 3.05E-05 | 0.229741 | 5.20E-07 | 0.025212 | 0.58681  | 0.155362 | 0.00075  | 0.240285 | 1.47E-07 |
| 8.75E-05 | 0.193101 | 2.65E-05 | 0.186275 | 5.12E-05 | 0.231541 | 4.21E-07 | 0.184969 | 5.79E-05 |
| 0.08855  | 0.195377 | 2.12E-05 | 0.004754 | 0.91839  | 0.013181 | 0.77634  | 0.235519 | 2.62E-07 |
| 0.19465  | 0.380372 | 1.59E-17 | 0.142156 | 0.00207  | 0.153422 | 0.00088  | 0.276848 | 1.16E-09 |
| 0.01589  | -0.11982 | 0.00955  | -0.18476 | 5.90E-05 | -0.1806  | 8.69E-05 | -0.08678 | 0.06094  |
| 0.15923  | 0.289771 | 1.74E-10 | 0.128175 | 0.00554  | 0.058475 | 0.20719  | 0.002846 | 0.95109  |
| 0.04201  | 0.350284 | 6.30E-15 | -0.04167 | 0.36889  | 0.080305 | 0.083    | 0.125943 | 0.00643  |
| 0.17482  | 0.107183 | 0.02052  | 0.053936 | 0.24471  | 0.028801 | 0.5347   | 0.156092 | 0.00071  |
| 0.54608  | -0.09725 | 0.03564  | -0.04817 | 0.29891  | -0.08356 | 0.07122  | 0.13812  | 0.00278  |
| 2.09E-12 | -0.24481 | 8.42E-08 | -0.21733 | 2.13E-06 | -0.3242  | 6.86E-13 | 0.015902 | 0.73178  |
| 0.64619  | 0.07197  | 0.12039  | 0.002874 | 0.9506   | -0.01347 | 0.77162  | 0.177195 | 0.00012  |
| 0.00759  | 0.166709 | 0.0003   | 0.084948 | 0.06663  | 0.13772  | 0.00286  | 0.178642 | 0.0001   |
| 0.00346  | -0.1396  | 0.0025   | -0.11134 | 0.01608  | -0.13592 | 0.00325  | -0.00249 | 0.95715  |



|          |          |          |          |          |          |          |          |          |
|----------|----------|----------|----------|----------|----------|----------|----------|----------|
| 9.51E-08 | -0.00302 | 0.94802  | -0.1366  | 0.0031   | -0.17601 | 0.00013  | 0.140071 | 0.00241  |
| 0.01476  | 0.032815 | 0.4793   | 0.011495 | 0.80433  | -0.08271 | 0.07415  | -0.04084 | 0.37855  |
| 6.56E-05 | 0.039808 | 0.39074  | -0.02292 | 0.62132  | -0.05361 | 0.24758  | 0.231982 | 4.00E-07 |
| 0.00023  | 0.28078  | 6.57E-10 | 0.212956 | 3.43E-06 | 0.266076 | 5.22E-09 | 0.251375 | 3.66E-08 |
| 0.04278  | -0.05563 | 0.23022  | -0.0252  | 0.58703  | -0.07763 | 0.0938   | 0.086669 | 0.06128  |
| 0.05548  | 0.25077  | 3.96E-08 | 0.195465 | 2.10E-05 | 0.174439 | 0.00015  | 0.255582 | 2.12E-08 |
| 5.58E-10 | 0.128092 | 0.00557  | 0.300297 | 3.46E-11 | 0.26386  | 7.05E-09 | -0.25585 | 2.05E-08 |
| 0.0001   | 0.197783 | 1.67E-05 | 0.186756 | 4.89E-05 | 0.209774 | 4.83E-06 | 0.037789 | 0.41523  |
| 4.87E-07 | -0.10005 | 0.03063  | -0.17124 | 0.0002   | -0.22722 | 6.97E-07 | -0.01927 | 0.67795  |
| 0.00599  | -0.12188 | 0.00837  | -0.11984 | 0.00954  | -0.15053 | 0.0011   | 0.044344 | 0.33898  |
| 3.95E-05 | -0.16397 | 0.00037  | -0.18155 | 7.96E-05 | -0.22185 | 1.29E-06 | -0.04295 | 0.3544   |
| 0.10156  | -0.04936 | 0.2871   | -0.15428 | 0.00082  | -0.15356 | 0.00087  | 0.039253 | 0.39737  |
| 0.00022  | -0.18026 | 8.96E-05 | -0.10557 | 0.02251  | -0.18962 | 3.72E-05 | -0.03276 | 0.48002  |
| 0.06917  | 0.219929 | 1.60E-06 | 0.074368 | 0.10849  | 0.051008 | 0.27131  | 0.322931 | 8.53E-13 |
| 0.05385  | 0.172492 | 0.00018  | -0.05317 | 0.25149  | 0.017685 | 0.70306  | 0.29338  | 1.01E-10 |
| 0.06383  | 0.105484 | 0.02262  | -0.0321  | 0.48892  | -0.0209  | 0.6523   | 0.0733   | 0.11367  |
| 0.17705  | -0.09031 | 0.05112  | -0.04694 | 0.31147  | -0.04441 | 0.33822  | 0.090436 | 0.05081  |
| 1.32E-10 | 0.153992 | 0.00084  | 0.055912 | 0.22783  | 0.225612 | 8.39E-07 | 0.057807 | 0.21243  |
| 0.22818  | -0.04052 | 0.38228  | -0.06998 | 0.13105  | -0.06593 | 0.15487  | 0.010743 | 0.81689  |
| 1.09E-13 | -0.21898 | 1.77E-06 | -0.33527 | 9.89E-14 | -0.35881 | 1.23E-15 | -0.21931 | 1.71E-06 |
| 0.51602  | 0.005854 | 0.8996   | -0.02277 | 0.62357  | -0.04717 | 0.3091   | -0.16557 | 0.00033  |
| 0.00012  | 0.024801 | 0.59293  | 0.066211 | 0.15313  | 0.135518 | 0.00334  | -0.14113 | 0.00224  |
| 0.01478  | 0.06484  | 0.16183  | -0.07908 | 0.08782  | -0.0866  | 0.06151  | 0.106492 | 0.02135  |
| 5.22E-09 | -0.26776 | 4.14E-09 | -0.16133 | 0.00047  | -0.28231 | 5.26E-10 | 0.240202 | 1.49E-07 |
| 0.13497  | -0.04872 | 0.29341  | 0.010648 | 0.81848  | 0.03269  | 0.48098  | 0.287742 | 2.36E-10 |
| 0.00727  | -0.05051 | 0.27606  | -0.09212 | 0.04663  | -0.12174 | 0.00845  | 0.005321 | 0.9087   |
| 0.02485  | 0.013995 | 0.76293  | -0.00955 | 0.837    | 0.048514 | 0.29547  | 0.01345  | 0.77189  |
| 0.63928  | 0.141883 | 0.00212  | -0.04344 | 0.3489   | 0.003398 | 0.94161  | 0.177232 | 0.00012  |
| 0.14901  | -0.11914 | 0.00997  | -0.16564 | 0.00032  | -0.12213 | 0.00824  | -0.32998 | 2.52E-13 |
| 1.77E-15 | -0.11049 | 0.01691  | -0.19087 | 3.30E-05 | -0.30663 | 1.27E-11 | 0.051161 | 0.26987  |
| 0.29719  | -0.0276  | 0.55194  | 0.022176 | 0.63264  | -0.02713 | 0.55863  | 0.081757 | 0.07756  |
| 0.00057  | 0.065523 | 0.15745  | -0.04266 | 0.35765  | -0.08728 | 0.05947  | 0.127874 | 0.00565  |
| 5.95E-11 | -0.12383 | 0.00738  | -0.09136 | 0.04847  | -0.23844 | 1.84E-07 | -0.15865 | 0.00058  |
| 9.13E-10 | -0.20232 | 1.05E-05 | -0.25986 | 1.21E-08 | -0.29476 | 8.16E-11 | 0.022421 | 0.6289   |
| 0.479    | 0.069899 | 0.13147  | 0.055555 | 0.23081  | 0.054244 | 0.24203  | 0.073097 | 0.11467  |
| 0.07096  | 0.005081 | 0.9128   | -0.06192 | 0.18159  | -0.03195 | 0.49093  | 0.225973 | 8.05E-07 |
| 0.7795   | -0.09707 | 0.03599  | -0.09421 | 0.04186  | -0.06331 | 0.172    | 0.160228 | 0.00051  |
| 0.00439  | -0.11778 | 0.01086  | -0.07901 | 0.08811  | -0.10627 | 0.02163  | -0.00256 | 0.95596  |
| 0.00218  | 0.23767  | 2.03E-07 | 0.071999 | 0.12024  | 0.053812 | 0.2458   | 0.071427 | 0.12322  |
| 0.25837  | -0.00529 | 0.90922  | -0.10874 | 0.01874  | -0.04304 | 0.35337  | -0.02246 | 0.62826  |
| 1.52E-11 | -0.15414 | 0.00083  | -0.38044 | 1.57E-17 | -0.39346 | 9.66E-19 | 0.096325 | 0.03745  |
| 0.02286  | 0.042226 | 0.36257  | -0.04956 | 0.28521  | -0.06455 | 0.16375  | -0.00134 | 0.97697  |
| 0.01023  | -0.07974 | 0.0852   | -0.06507 | 0.16033  | -0.07809 | 0.09187  | 0.146902 | 0.00146  |
| 0.04637  | -0.10403 | 0.02456  | -0.25031 | 4.20E-08 | -0.20048 | 1.27E-05 | 0.000423 | 0.99273  |
| 0.35499  | 0.168672 | 0.00025  | 0.006466 | 0.88917  | 0.080096 | 0.0838   | 0.259041 | 1.35E-08 |

|          |          |          |          |          |          |          |          |          |
|----------|----------|----------|----------|----------|----------|----------|----------|----------|
| 0.09881  | 0.255755 | 2.08E-08 | 0.016176 | 0.72735  | 0.137678 | 0.00287  | 0.295165 | 7.67E-11 |
| 0.29843  | 0.111641 | 0.01579  | 0.02562  | 0.58078  | 0.047247 | 0.30828  | 0.407285 | 4.36E-20 |
| 0.39138  | 0.056291 | 0.22468  | 0.032189 | 0.48773  | 0.031747 | 0.49373  | 0.159755 | 0.00053  |
| 0.05581  | -0.0661  | 0.15381  | 0.031558 | 0.4963   | 0.021799 | 0.63844  | 0.251359 | 3.67E-08 |
| 0.40537  | -0.13302 | 0.00398  | -0.06115 | 0.18711  | -0.0782  | 0.09142  | 0.181478 | 8.01E-05 |
| 0.71426  | -0.07718 | 0.09573  | -0.01116 | 0.80988  | -0.01808 | 0.69672  | 0.198138 | 1.61E-05 |
| 0.00945  | 0.082677 | 0.07427  | 0.126512 | 0.00619  | 0.134151 | 0.00368  | 0.275422 | 1.42E-09 |
| 0.00887  | 0.07778  | 0.09317  | 0.103    | 0.02603  | 0.123985 | 0.00731  | 0.321661 | 1.06E-12 |
| 0.27413  | 0.012303 | 0.79088  | 0.083928 | 0.06998  | 0.064071 | 0.16688  | 0.305785 | 1.45E-11 |
| 0.00072  | 0.072853 | 0.1159   | 0.112713 | 0.01481  | 0.1396   | 0.0025   | 0.113828 | 0.01385  |
| 0.4093   | 0.425879 | 5.33E-22 | 0.30507  | 1.63E-11 | 0.188899 | 3.99E-05 | 0.076204 | 0.10002  |
| 0.89952  | 0.113021 | 0.01454  | 0.152778 | 0.00093  | 0.106551 | 0.02128  | 0.01318  | 0.77636  |
| 4.21E-06 | -0.0857  | 0.06425  | -0.26157 | 9.60E-09 | -0.27657 | 1.20E-09 | -0.17454 | 0.00015  |
| 0.00035  | -0.05317 | 0.2515   | -0.16384 | 0.00038  | -0.17032 | 0.00022  | 0.181924 | 7.69E-05 |
| 4.35E-14 | -0.20267 | 1.02E-05 | -0.2248  | 9.20E-07 | -0.31933 | 1.57E-12 | -0.16977 | 0.00023  |
| 0.00011  | 0.25398  | 2.62E-08 | 0.148176 | 0.00132  | 0.023374 | 0.61439  | 0.161626 | 0.00045  |
| 4.02E-06 | 0.160544 | 0.0005   | -0.03052 | 0.5106   | 0.118412 | 0.01043  | 0.236888 | 2.23E-07 |
| 0.98119  | 0.161987 | 0.00044  | -0.13357 | 0.00383  | 0.010454 | 0.82173  | 0.238518 | 1.83E-07 |
| 0.27487  | -0.03398 | 0.46382  | -0.03214 | 0.48839  | -0.01413 | 0.76065  | 0.322601 | 9.02E-13 |
| 0.02853  | 0.206039 | 7.16E-06 | 0.193289 | 2.60E-05 | 0.156496 | 0.00069  | 0.260421 | 1.12E-08 |
| 0.38698  | 0.191385 | 3.14E-05 | 0.258787 | 1.39E-08 | 0.12954  | 0.00505  | 0.018574 | 0.68889  |
| 0.00041  | 0.431308 | 1.40E-22 | 0.491459 | 9.10E-30 | 0.401284 | 1.70E-19 | 0.207842 | 5.93E-06 |
| 0.05085  | 0.067165 | 0.14728  | -0.02897 | 0.53234  | -0.04064 | 0.38093  | 0.017812 | 0.70103  |
| 0.01737  | -0.25518 | 2.24E-08 | -0.14614 | 0.00154  | -0.20227 | 1.06E-05 | 0.124305 | 0.00716  |
| 1.37E-14 | -0.25906 | 1.34E-08 | -0.10833 | 0.0192   | -0.28337 | 4.50E-10 | 0.030494 | 0.51095  |
| 2.69E-22 | -0.15756 | 0.00063  | -0.23213 | 3.93E-07 | -0.37969 | 1.84E-17 | -0.06261 | 0.17677  |
| 0.00035  | -0.00519 | 0.91098  | -0.09814 | 0.03398  | -0.13139 | 0.00446  | 0.010482 | 0.82127  |
| 0.48281  | 0.102918 | 0.02615  | 0.219598 | 1.66E-06 | 0.084014 | 0.06969  | 0.055305 | 0.23293  |
| 0.87106  | -0.14603 | 0.00155  | -0.02698 | 0.56079  | -0.08811 | 0.05709  | 0.098454 | 0.03341  |
| 1.71E-07 | -0.12416 | 0.00722  | -0.20297 | 9.84E-06 | -0.21904 | 1.76E-06 | 0.103747 | 0.02496  |
| 0.75477  | 0.184748 | 5.91E-05 | 0.116767 | 0.01156  | 0.121667 | 0.00849  | 0.359584 | 1.06E-15 |
| 0.04343  | 0.05033  | 0.27774  | 0.006461 | 0.88925  | -0.02    | 0.66633  | 0.008444 | 0.85559  |
| 0.00016  | -0.01478 | 0.74998  | 0.00473  | 0.9188   | -0.09664 | 0.03683  | 0.030412 | 0.51208  |
| 0.00033  | 0.044266 | 0.33983  | -0.08617 | 0.06278  | -0.10954 | 0.01788  | 0.17161  | 0.00019  |
| 5.93E-16 | -0.22283 | 1.15E-06 | -0.33483 | 1.07E-13 | -0.39427 | 8.09E-19 | 0.00317  | 0.94553  |
| 0.01169  | 0.206581 | 6.77E-06 | 0.016718 | 0.7186   | 0.085621 | 0.0645   | 0.002044 | 0.96486  |
| 0.75319  | 0.056532 | 0.2227   | 0.154935 | 0.00078  | 0.060754 | 0.18999  | 0.090574 | 0.05045  |
| 2.86E-18 | -0.32786 | 3.65E-13 | -0.39116 | 1.59E-18 | -0.47283 | 2.18E-27 | -0.01062 | 0.81898  |
| 1.59E-12 | -0.12302 | 0.00778  | -0.21503 | 2.74E-06 | -0.27025 | 2.93E-09 | -0.00615 | 0.89454  |
| 4.30E-08 | 0.088397 | 0.05628  | 0.328941 | 3.02E-13 | 0.228555 | 5.97E-07 | 0.134292 | 0.00364  |
| 0.19355  | 0.199321 | 1.43E-05 | 0.215484 | 2.61E-06 | 0.142259 | 0.00206  | 0.350153 | 6.46E-15 |
| 0.077    | 0.214454 | 2.92E-06 | -0.04847 | 0.29593  | 0.028954 | 0.53252  | 0.232345 | 3.83E-07 |
| 0.05987  | 0.002678 | 0.95397  | 0.018893 | 0.68385  | -0.07092 | 0.1259   | 0.175496 | 0.00014  |
| 1.27E-07 | -0.08165 | 0.07796  | -0.15823 | 0.0006   | -0.21931 | 1.71E-06 | 0.138416 | 0.00272  |
| 1.58E-05 | -0.14175 | 0.00214  | -0.25236 | 3.23E-08 | -0.24087 | 1.37E-07 | 0.262299 | 8.71E-09 |

|          |          |          |          |          |          |          |          |          |
|----------|----------|----------|----------|----------|----------|----------|----------|----------|
| 7.27E-06 | -0.1093  | 0.01814  | -0.21894 | 1.78E-06 | -0.20158 | 1.14E-05 | 0.141122 | 0.00224  |
| 1.19E-06 | -0.0178  | 0.70127  | -0.11601 | 0.01212  | -0.18124 | 8.19E-05 | 0.170925 | 0.00021  |
| 0.05971  | 0.133874 | 0.00375  | 0.053337 | 0.25     | 0.07506  | 0.10523  | 0.164199 | 0.00037  |
| 0.26467  | 0.07094  | 0.12581  | 0.029263 | 0.52816  | 0.001542 | 0.97348  | 0.019933 | 0.66745  |
| 0.05911  | -0.03185 | 0.49233  | 0.050842 | 0.27288  | -0.0489  | 0.29159  | -0.09593 | 0.03824  |
| 0.22753  | -0.15098 | 0.00107  | 0.010585 | 0.81955  | -0.05416 | 0.24275  | 0.19176  | 3.02E-05 |
| 8.43E-11 | 0.509515 | 3.22E-32 | 0.168318 | 0.00026  | 0.320968 | 1.19E-12 | 0.296886 | 5.88E-11 |
| 0.9438   | -0.02716 | 0.55827  | -0.05927 | 0.20104  | 0.02249  | 0.62783  | 0.190369 | 3.46E-05 |
| 0.00247  | 0.021403 | 0.64456  | -0.12453 | 0.00705  | -0.12299 | 0.00779  | 0.183538 | 6.62E-05 |
| 4.59E-06 | 0.230473 | 4.77E-07 | 0.159938 | 0.00052  | 0.225592 | 8.41E-07 | 0.351415 | 5.09E-15 |
| 0.72672  | 0.085025 | 0.06639  | 0.057667 | 0.21354  | 0.058422 | 0.2076   | 0.072212 | 0.11915  |
| 2.89E-13 | -0.31108 | 6.17E-12 | -0.31414 | 3.73E-12 | -0.40249 | 1.30E-19 | -0.17191 | 0.00019  |
| 2.73E-13 | -0.18943 | 3.79E-05 | -0.36823 | 1.92E-16 | -0.37895 | 2.14E-17 | -0.27852 | 9.10E-10 |
| 5.63E-05 | 0.09101  | 0.04935  | -0.04982 | 0.28264  | -0.08446 | 0.06821  | 0.176202 | 0.00013  |
| 0.00015  | -0.00153 | 0.97367  | 0.099825 | 0.03102  | 0.109063 | 0.01839  | -0.32127 | 1.13E-12 |
| 4.42E-10 | 0.018528 | 0.68963  | -0.1989  | 1.49E-05 | -0.2066  | 6.75E-06 | -0.03393 | 0.46449  |
| 0.79395  | -0.05791 | 0.21161  | -0.0103  | 0.82429  | -0.04385 | 0.34442  | 0.092727 | 0.0452   |
| 0.10762  | -0.01523 | 0.74272  | -0.30239 | 2.49E-11 | -0.16105 | 0.00048  | 0.317389 | 2.17E-12 |
| 3.05E-25 | -0.36321 | 5.21E-16 | -0.48384 | 8.92E-29 | -0.52658 | 1.13E-34 | -0.06413 | 0.16648  |
| 0.81986  | -0.02468 | 0.59468  | -0.00804 | 0.86239  | -0.03643 | 0.43222  | 0.431201 | 1.44E-22 |
| 0.05905  | 0.120891 | 0.00892  | 0.167072 | 0.00029  | 0.113385 | 0.01422  | 0.100643 | 0.02966  |
| 3.91E-20 | -0.19196 | 2.97E-05 | -0.31773 | 2.05E-12 | -0.40003 | 2.26E-19 | -0.1527  | 0.00093  |
| 2.22E-10 | -0.14154 | 0.00217  | -0.20028 | 1.30E-05 | -0.29089 | 1.47E-10 | 0.129866 | 0.00494  |
| 1.80E-12 | -0.16217 | 0.00043  | -0.24528 | 7.93E-08 | -0.31314 | 4.40E-12 | -0.07419 | 0.10936  |
| 0.02345  | -0.07893 | 0.08843  | -0.02209 | 0.63391  | -0.09559 | 0.03893  | 0.093809 | 0.04274  |
| 3.66E-09 | 0.103006 | 0.02602  | 0.17148  | 0.0002   | 0.200793 | 1.23E-05 | 0.171424 | 0.0002   |
| 0.00026  | -0.04351 | 0.34817  | -0.12603 | 0.00639  | -0.15129 | 0.00104  | 0.096285 | 0.03753  |
| 0.00327  | -0.07193 | 0.12058  | -0.14685 | 0.00146  | -0.13116 | 0.00452  | -0.16769 | 0.00027  |
| 0.21715  | 0.151557 | 0.00102  | 0.02676  | 0.56405  | 0.0295   | 0.52482  | 0.158269 | 0.0006   |
| 0.0128   | -0.01427 | 0.75846  | -0.0011  | 0.98111  | 0.060933 | 0.18869  | 0.330363 | 2.36E-13 |
| 4.89E-13 | -0.25971 | 1.23E-08 | -0.33635 | 8.15E-14 | -0.39773 | 3.77E-19 | 0.198151 | 1.61E-05 |
| 0.00064  | -0.06841 | 0.13991  | -0.12936 | 0.00511  | -0.16264 | 0.00042  | 0.219541 | 1.67E-06 |
| 0.15792  | 0.275386 | 1.43E-09 | 0.243357 | 1.01E-07 | 0.165822 | 0.00032  | 0.318337 | 1.85E-12 |
| 0.00131  | -0.11571 | 0.01234  | -0.1145  | 0.01329  | -0.16537 | 0.00033  | 0.035444 | 0.44478  |
| 0.00047  | 0.319498 | 1.53E-12 | 0.313104 | 4.42E-12 | 0.278895 | 8.63E-10 | 0.37335  | 6.80E-17 |
| 3.03E-08 | -0.17458 | 0.00015  | -0.31523 | 3.11E-12 | -0.29546 | 7.32E-11 | 0.000715 | 0.98771  |
| 0.02622  | -0.16741 | 0.00028  | -0.15037 | 0.00112  | -0.18571 | 5.40E-05 | 0.077649 | 0.09373  |
| 1.70E-06 | -0.12018 | 0.00933  | -0.09435 | 0.04155  | -0.19004 | 3.57E-05 | -0.06063 | 0.1909   |
| 4.45E-06 | -0.03194 | 0.49105  | -0.16005 | 0.00052  | -0.18392 | 6.39E-05 | 0.075221 | 0.10448  |
| 0.158    | 0.134957 | 0.00348  | 0.05391  | 0.24494  | 0.075994 | 0.10096  | 0.292848 | 1.09E-10 |
| 0.00311  | -0.02572 | 0.57923  | -0.21175 | 3.91E-06 | -0.19369 | 2.50E-05 | 0.166893 | 0.00029  |
| 0.32882  | 0.112193 | 0.01528  | 0.029885 | 0.51943  | 0.006188 | 0.8939   | 0.147801 | 0.00136  |
| 6.98E-08 | -0.04908 | 0.28991  | -0.21855 | 1.86E-06 | -0.23279 | 3.63E-07 | -0.1781  | 0.00011  |
| 0.32855  | 0.035729 | 0.44113  | -0.03051 | 0.51078  | -0.04932 | 0.28749  | 0.225703 | 8.30E-07 |
| 0.01974  | -0.05008 | 0.28012  | -0.0904  | 0.05091  | -0.08269 | 0.07424  | 0.140555 | 0.00233  |

|          |          |          |          |          |          |          |          |          |
|----------|----------|----------|----------|----------|----------|----------|----------|----------|
| 0.36469  | 0.029886 | 0.51941  | 0.206864 | 6.57E-06 | 0.063474 | 0.17088  | 0.135177 | 0.00342  |
| 2.03E-28 | -0.39631 | 5.16E-19 | -0.49098 | 1.05E-29 | -0.55273 | 1.02E-38 | -0.30434 | 1.83E-11 |
| 1.76E-10 | -0.14618 | 0.00154  | -0.12851 | 0.00541  | -0.26454 | 6.43E-09 | 0.156113 | 0.00071  |
| 0.17146  | 0.139856 | 0.00245  | 0.006677 | 0.88557  | -0.00414 | 0.92894  | 0.31912  | 1.63E-12 |
| 3.90E-07 | -0.30768 | 1.07E-11 | -0.18358 | 6.59E-05 | -0.30153 | 2.85E-11 | 0.075475 | 0.10332  |
| 1.82E-13 | 0.134209 | 0.00366  | 0.163439 | 0.00039  | 0.245263 | 7.95E-08 | 0.257421 | 1.67E-08 |
| 0.0037   | 0.132982 | 0.00399  | 0.188651 | 4.08E-05 | 0.187837 | 4.41E-05 | 0.114461 | 0.01332  |
| 0.1201   | -0.11857 | 0.01033  | -0.18596 | 5.27E-05 | -0.16058 | 0.00049  | 0.274928 | 1.52E-09 |
| 6.63E-06 | -0.03723 | 0.42213  | -0.17679 | 0.00012  | -0.19434 | 2.35E-05 | 0.16022  | 0.00051  |
| 0.24343  | 0.067551 | 0.14497  | 0.04826  | 0.29801  | 0.037239 | 0.42206  | 0.108484 | 0.01903  |
| 0.27088  | -0.03108 | 0.5029   | -0.0625  | 0.17752  | -0.06885 | 0.13735  | -0.00839 | 0.85642  |
| 0.04019  | -0.10048 | 0.02992  | -0.02743 | 0.5543   | -0.00625 | 0.89279  | 0.224323 | 9.72E-07 |
| 0.52828  | 0.265837 | 5.39E-09 | -0.00886 | 0.84858  | 0.078666 | 0.08949  | 0.122621 | 0.00798  |
| 0.00183  | 0.004573 | 0.92149  | -0.04318 | 0.35185  | -0.10113 | 0.02888  | 0.215752 | 2.53E-06 |
| 0.55089  | -0.03287 | 0.47853  | -0.09938 | 0.03178  | -0.052   | 0.26208  | 0.252946 | 2.99E-08 |
| 0.00027  | -0.04937 | 0.28701  | -0.12929 | 0.00514  | -0.14406 | 0.0018   | 0.171605 | 0.00019  |
| 1.11E-09 | -0.07208 | 0.11983  | -0.16884 | 0.00025  | -0.24744 | 6.05E-08 | 0.06903  | 0.13635  |
| 0.30197  | 0.15562  | 0.00074  | 0.037957 | 0.41315  | 0.034022 | 0.46327  | 0.168371 | 0.00026  |
| 0.00019  | 0.022683 | 0.62489  | -0.14372 | 0.00185  | -0.12661 | 0.00615  | -0.09258 | 0.04555  |
| 0.00098  | 0.105926 | 0.02206  | -0.02615 | 0.57298  | -0.05069 | 0.27431  | 0.151201 | 0.00105  |
| 0.62669  | 0.254751 | 2.37E-08 | 0.164228 | 0.00037  | 0.10896  | 0.01851  | 0.169969 | 0.00022  |
| 0.27957  | 0.179054 | 0.0001   | 0.143861 | 0.00183  | 0.049639 | 0.2844   | 0.116674 | 0.01163  |
| 1.00E-05 | -0.30233 | 2.51E-11 | -0.21732 | 2.13E-06 | -0.27036 | 2.89E-09 | -0.03046 | 0.51146  |
| 0.00341  | 0.122032 | 0.00829  | 0.023742 | 0.60881  | -0.02274 | 0.62403  | 0.127688 | 0.00572  |
| 0.06689  | 0.023973 | 0.60533  | -0.05943 | 0.19985  | -0.05065 | 0.27472  | -0.00837 | 0.8568   |
| 0.85482  | 0.156886 | 0.00067  | 0.046889 | 0.31195  | 0.044396 | 0.33841  | 0.289394 | 1.84E-10 |
| 0.13748  | 0.249411 | 4.71E-08 | 0.098775 | 0.03284  | 0.078989 | 0.08818  | 0.239244 | 1.67E-07 |
| 0.00171  | 0.154764 | 0.00079  | -0.07248 | 0.1178   | -0.06084 | 0.18933  | 0.152381 | 0.00095  |
| 3.08E-22 | -0.22292 | 1.14E-06 | -0.33366 | 1.32E-13 | -0.40038 | 2.09E-19 | -0.17876 | 0.0001   |
| 3.36E-05 | 0.300968 | 3.11E-11 | 0.195093 | 2.18E-05 | 0.21279  | 3.50E-06 | 0.42713  | 3.93E-22 |
| 0.0125   | -0.03105 | 0.50333  | -0.07271 | 0.1166   | -0.15569 | 0.00074  | 0.226022 | 8.00E-07 |
| 1.61E-07 | -0.09375 | 0.04287  | -0.14245 | 0.00203  | -0.20405 | 8.81E-06 | 0.087922 | 0.05762  |
| 0.24903  | 0.176224 | 0.00013  | 0.052099 | 0.26118  | 0.041045 | 0.37617  | 0.198174 | 1.60E-05 |
| 8.85E-07 | 0.29699  | 5.79E-11 | 0.268479 | 3.75E-09 | 0.279262 | 8.18E-10 | 0.21863  | 1.84E-06 |
| 0.02291  | 0.121322 | 0.00868  | 0.019869 | 0.66846  | -0.00863 | 0.85237  | 0.146891 | 0.00146  |
| 5.53E-08 | -0.2141  | 3.03E-06 | -0.20717 | 6.36E-06 | -0.27572 | 1.36E-09 | 0.123671 | 0.00746  |
| 1.73E-07 | -0.16403 | 0.00037  | -0.11917 | 0.00995  | -0.22563 | 8.37E-07 | 0.074141 | 0.10958  |
| 0.30979  | 0.193759 | 2.49E-05 | 0.03533  | 0.44625  | 0.022121 | 0.6335   | 0.260102 | 1.17E-08 |
| 2.27E-19 | 0.466291 | 1.38E-26 | 0.321675 | 1.06E-12 | 0.406898 | 4.76E-20 | 0.308397 | 9.53E-12 |
| 0.07325  | 0.030689 | 0.50825  | -0.03716 | 0.423    | -0.0404  | 0.3837   | 0.277432 | 1.06E-09 |
| 0.61488  | 0.411628 | 1.60E-20 | 0.278002 | 9.81E-10 | 0.239751 | 1.57E-07 | 0.158734 | 0.00058  |
| 0.0014   | -0.11405 | 0.01366  | -0.02574 | 0.57897  | -0.10493 | 0.02335  | 0.361423 | 7.40E-16 |
| 1.77E-19 | -0.34035 | 3.96E-14 | -0.30541 | 1.54E-11 | -0.46762 | 9.53E-27 | -0.00043 | 0.99254  |
| 6.06E-06 | -0.24266 | 1.10E-07 | -0.2012  | 1.18E-05 | -0.25648 | 1.89E-08 | 0.004078 | 0.92997  |
| 3.13E-06 | -0.00369 | 0.93664  | -0.22706 | 7.10E-07 | -0.22945 | 5.38E-07 | 0.127557 | 0.00577  |

|          |          |          |          |          |          |          |          |          |
|----------|----------|----------|----------|----------|----------|----------|----------|----------|
| 2.41E-07 | -0.20135 | 1.16E-05 | -0.23739 | 2.09E-07 | -0.28783 | 2.33E-10 | 0.204903 | 8.06E-06 |
| 6.29E-10 | -0.08709 | 0.06002  | -0.28875 | 2.03E-10 | -0.2591  | 1.34E-08 | -0.22802 | 6.36E-07 |
| 0.00023  | 0.043773 | 0.34524  | -0.10191 | 0.02766  | -0.12337 | 0.0076   | 0.208712 | 5.41E-06 |
| 5.07E-09 | -0.06739 | 0.14592  | -0.19949 | 1.40E-05 | -0.23877 | 1.77E-07 | -0.14966 | 0.00118  |
| 0.02271  | 0.180172 | 9.03E-05 | 0.113712 | 0.01394  | 0.14867  | 0.00127  | -0.27392 | 1.75E-09 |
| 1.94E-14 | 0.153215 | 0.00089  | 0.21585  | 2.51E-06 | 0.240008 | 1.52E-07 | 0.359402 | 1.10E-15 |
| 1.67E-11 | 0.176749 | 0.00012  | 0.174539 | 0.00015  | 0.24052  | 1.43E-07 | 0.139719 | 0.00248  |
| 0.00021  | 0.024709 | 0.59431  | -0.13218 | 0.00422  | -0.14756 | 0.00138  | 0.017312 | 0.70904  |
| 0.19558  | 0.072435 | 0.11801  | 0.028073 | 0.54507  | -0.0036  | 0.93821  | 0.136999 | 0.00301  |
| 0.59338  | 0.066494 | 0.15138  | 0.042119 | 0.3638   | 0.02436  | 0.59951  | -0.05591 | 0.22786  |
| 6.10E-10 | 0.028058 | 0.54529  | 0.086841 | 0.06077  | 0.204959 | 8.01E-06 | -0.02907 | 0.53083  |
| 1.62E-06 | 0.092002 | 0.04691  | 0.014034 | 0.76229  | 0.127371 | 0.00584  | -0.08399 | 0.06976  |
| 0.96854  | 0.208264 | 5.67E-06 | 0.082111 | 0.07628  | 0.071142 | 0.12473  | 0.32761  | 3.81E-13 |
| 0.11617  | 0.05945  | 0.1997   | 0.026079 | 0.574    | -0.02415 | 0.60271  | 0.047518 | 0.30551  |
| 0.05894  | -0.08061 | 0.08184  | -0.1681  | 0.00026  | -0.18923 | 3.86E-05 | -0.02562 | 0.58084  |
| 0.08929  | 0.173701 | 0.00016  | 0.097182 | 0.03578  | 0.126207 | 0.00631  | 0.320022 | 1.40E-12 |
| 0.00387  | -0.07463 | 0.10726  | -0.06548 | 0.15771  | -0.12932 | 0.00513  | 0.213297 | 3.31E-06 |
| 3.52E-17 | -0.25356 | 2.76E-08 | -0.23645 | 2.35E-07 | -0.37995 | 1.74E-17 | -0.08228 | 0.07569  |
| 1.03E-09 | 0.051169 | 0.2698   | -0.1179  | 0.01078  | -0.19575 | 2.04E-05 | 0.153895 | 0.00085  |
| 9.64E-19 | 0.254039 | 2.60E-08 | 0.235495 | 2.63E-07 | 0.401742 | 1.54E-19 | 0.298534 | 4.55E-11 |
| 0.83381  | 0.016181 | 0.72728  | 0.124824 | 0.00692  | 0.022267 | 0.63126  | 0.218089 | 1.96E-06 |
| 0.22161  | -0.19421 | 2.38E-05 | -0.13245 | 0.00414  | -0.13407 | 0.0037   | -0.02327 | 0.61598  |
| 4.53E-16 | -0.19383 | 2.47E-05 | -0.20838 | 5.60E-06 | -0.32975 | 2.63E-13 | -0.01001 | 0.82911  |
| 0.00307  | 0.024898 | 0.59148  | -0.0282  | 0.54324  | -0.07024 | 0.12957  | 0.189228 | 3.86E-05 |
| 0.18528  | 0.087217 | 0.05966  | -0.02303 | 0.61953  | -0.02324 | 0.6164   | 0.273178 | 1.95E-09 |
| 0.0277   | 0.214578 | 2.88E-06 | 0.365379 | 3.39E-16 | 0.141538 | 0.00217  | 0.306615 | 1.27E-11 |
| 1.02E-05 | 0.229934 | 5.09E-07 | -0.01445 | 0.75544  | 0.127444 | 0.00582  | 0.326665 | 4.49E-13 |
| 0.29331  | 0.164612 | 0.00035  | -0.00488 | 0.9162   | 0.040225 | 0.38579  | 0.335617 | 9.30E-14 |
| 0.01573  | 0.202255 | 1.06E-05 | 0.200565 | 1.26E-05 | 0.174499 | 0.00015  | 0.179742 | 9.40E-05 |
| 2.94E-05 | -0.11765 | 0.01094  | -0.14042 | 0.00235  | -0.16869 | 0.00025  | -0.02752 | 0.55299  |
| 0.8014   | -0.08814 | 0.05698  | -0.01817 | 0.69526  | -0.01653 | 0.72162  | 0.202327 | 1.05E-05 |
| 0.00136  | -0.13638 | 0.00315  | -0.01725 | 0.7101   | -0.13516 | 0.00343  | 0.146498 | 0.0015   |
| 0.1188   | -0.06957 | 0.13329  | -0.06713 | 0.14749  | -0.0811  | 0.08     | -0.02333 | 0.61506  |
| 0.72392  | 0.070575 | 0.12777  | 0.065283 | 0.15898  | 0.0208   | 0.65391  | 0.177939 | 0.00011  |
| 0.03126  | 0.121879 | 0.00837  | 0.041357 | 0.37255  | 0.07526  | 0.10431  | 0.139504 | 0.00252  |
| 0.19229  | 0.104029 | 0.02457  | 0.241947 | 1.20E-07 | 0.08753  | 0.05875  | 0.260709 | 1.08E-08 |
| 0.22522  | 0.236032 | 2.47E-07 | 0.188356 | 4.20E-05 | 0.167941 | 0.00027  | 0.251621 | 3.55E-08 |
| 0.24249  | 0.094771 | 0.04064  | 0.009318 | 0.84084  | -0.01804 | 0.69736  | -0.05179 | 0.26399  |
| 0.0042   | 0.119957 | 0.00947  | 0.01214  | 0.79358  | -0.02918 | 0.52929  | 0.088294 | 0.05656  |
| 0.00036  | 0.0142   | 0.75956  | -0.10987 | 0.01755  | -0.12089 | 0.00892  | 0.135611 | 0.00332  |
| 0.00149  | 0.205985 | 7.20E-06 | 0.050028 | 0.28064  | 0.023788 | 0.60812  | 0.146795 | 0.00147  |
| 8.06E-06 | -0.05872 | 0.20531  | -0.14916 | 0.00123  | -0.19167 | 3.05E-05 | 0.113406 | 0.0142   |
| 0.00145  | 0.055376 | 0.23232  | -0.09069 | 0.05016  | -0.08182 | 0.07733  | 0.168288 | 0.00026  |
| 0.44214  | -0.02204 | 0.6347   | 0.225956 | 8.06E-07 | 0.043871 | 0.34416  | -0.05613 | 0.22604  |
| 0.44734  | 0.171678 | 0.00019  | 0.084699 | 0.06744  | 0.085856 | 0.06377  | 0.166825 | 0.00029  |

|          |          |          |          |          |          |          |          |          |
|----------|----------|----------|----------|----------|----------|----------|----------|----------|
| 0.004    | 0.209971 | 4.73E-06 | 0.088777 | 0.05522  | 0.081512 | 0.07846  | 0.165621 | 0.00033  |
| 0.43084  | 0.258684 | 1.41E-08 | 0.105043 | 0.0232   | 0.040657 | 0.3807   | 0.036981 | 0.42528  |
| 1.90E-05 | -0.1198  | 0.00956  | -0.21673 | 2.27E-06 | -0.22136 | 1.36E-06 | 0.11969  | 0.00963  |
| 0.00209  | 0.135455 | 0.00336  | -0.01845 | 0.69095  | -0.01826 | 0.69393  | 0.316283 | 2.61E-12 |
| 0.0684   | -0.06966 | 0.13278  | -0.1281  | 0.00557  | -0.00814 | 0.8608   | 0.341494 | 3.22E-14 |
| 0.66258  | 0.118033 | 0.01069  | 0.097989 | 0.03426  | 0.068432 | 0.13978  | 0.36359  | 4.83E-16 |
| 0.67373  | 0.063136 | 0.17317  | 0.127792 | 0.00568  | 0.045853 | 0.32278  | 0.438195 | 2.48E-23 |
| 0.00461  | 0.080346 | 0.08284  | -0.03475 | 0.45377  | -0.06351 | 0.17063  | 0.09656  | 0.03698  |
| 0.0076   | -0.0412  | 0.37435  | -0.12864 | 0.00537  | -0.12505 | 0.00681  | 0.113907 | 0.01378  |
| 4.42E-13 | -0.03153 | 0.49674  | 0.207384 | 6.22E-06 | 0.209823 | 4.80E-06 | 0.204238 | 8.64E-06 |
| 0.00548  | 0.189642 | 3.71E-05 | 0.192725 | 2.75E-05 | 0.042027 | 0.36484  | -0.10861 | 0.01889  |
| 0.00901  | -0.03189 | 0.49183  | -0.09083 | 0.0498   | -0.11181 | 0.01563  | 0.044498 | 0.3373   |
| 0.01399  | 0.024217 | 0.60166  | -0.01046 | 0.82164  | 0.080025 | 0.08408  | 0.068061 | 0.14195  |
| 0.03436  | -0.15585 | 0.00073  | -0.15107 | 0.00106  | -0.11382 | 0.01385  | 0.170557 | 0.00021  |
| 0.02873  | 0.229309 | 5.47E-07 | 0.104639 | 0.02373  | 0.035215 | 0.44773  | 0.175118 | 0.00014  |
| 1.01E-07 | -0.06968 | 0.13266  | -0.15347 | 0.00088  | -0.21189 | 3.85E-06 | 0.139944 | 0.00244  |
| 0.00015  | -0.12982 | 0.00496  | -0.15877 | 0.00057  | -0.22545 | 8.55E-07 | 0.216033 | 2.46E-06 |
| 8.92E-08 | -0.04406 | 0.34211  | -0.08987 | 0.05228  | -0.1772  | 0.00012  | 0.220269 | 1.54E-06 |
| 0.02485  | -0.01163 | 0.80199  | 0.051069 | 0.27073  | 0.040042 | 0.38795  | 0.04143  | 0.3717   |
| 0.0719   | 0.189649 | 3.71E-05 | 0.013645 | 0.76869  | -0.00123 | 0.97879  | 0.160689 | 0.00049  |
| 3.27E-05 | 0.210114 | 4.66E-06 | 0.042328 | 0.36141  | 0.119877 | 0.00951  | 0.142104 | 0.00208  |
| 6.69E-07 | -0.22562 | 8.38E-07 | -0.29709 | 5.70E-11 | -0.3358  | 9.00E-14 | -0.0392  | 0.39798  |
| 3.44E-08 | 0.076865 | 0.0971   | -0.02927 | 0.52812  | -0.13765 | 0.00287  | 0.22644  | 7.63E-07 |
| 4.72E-09 | -0.24101 | 1.35E-07 | -0.21481 | 2.81E-06 | -0.33551 | 9.49E-14 | 0.017797 | 0.70128  |
| 0.00247  | 0.009363 | 0.84008  | -0.05698 | 0.21907  | -0.10281 | 0.02631  | 0.203521 | 9.30E-06 |
| 0.08946  | 0.02099  | 0.65096  | -0.08396 | 0.06989  | -0.05573 | 0.22932  | 0.106743 | 0.02105  |
| 1.91E-07 | -0.27234 | 2.19E-09 | -0.22574 | 8.26E-07 | -0.28422 | 3.98E-10 | 0.115448 | 0.01254  |
| 0.26325  | 0.036287 | 0.43402  | 0.00289  | 0.95034  | -0.00454 | 0.92201  | 0.091959 | 0.04702  |
| 3.00E-07 | -0.14859 | 0.00128  | -0.12892 | 0.00527  | -0.22633 | 7.73E-07 | 0.134311 | 0.00364  |
| 0.00433  | 0.040614 | 0.3812   | -0.24638 | 6.91E-08 | -0.05393 | 0.24473  | 0.220957 | 1.42E-06 |
| 0.47682  | 0.217617 | 2.06E-06 | 0.17825  | 0.00011  | 0.104692 | 0.02366  | 0.268241 | 3.87E-09 |
| 0.36195  | -0.10032 | 0.03019  | -0.02239 | 0.62942  | -0.03792 | 0.41363  | 0.111222 | 0.01619  |
| 0.02026  | 0.102227 | 0.02717  | -0.00076 | 0.98699  | 0.027195 | 0.55773  | -0.14159 | 0.00216  |
| 0.4826   | -0.26538 | 5.73E-09 | -0.01504 | 0.74582  | -0.11576 | 0.0123   | 0.136793 | 0.00306  |
| 1.14E-14 | 0.261833 | 9.27E-09 | 0.333163 | 1.44E-13 | 0.412257 | 1.38E-20 | -0.16987 | 0.00023  |
| 8.41E-09 | 0.362371 | 6.15E-16 | 0.243543 | 9.86E-08 | 0.327594 | 3.82E-13 | 0.338074 | 5.98E-14 |
| 0.72768  | -0.14783 | 0.00136  | -0.09243 | 0.04589  | -0.10657 | 0.02125  | 0.325445 | 5.54E-13 |
| 0.15334  | 0.049643 | 0.28436  | -0.23157 | 4.20E-07 | -0.11824 | 0.01055  | 0.212412 | 3.64E-06 |
| 6.23E-11 | 0.057023 | 0.21871  | 0.099287 | 0.03194  | -0.07954 | 0.086    | -0.01319 | 0.77611  |
| 0.00013  | -0.02636 | 0.56984  | -0.1015  | 0.02829  | -0.13857 | 0.00269  | 0.293463 | 9.95E-11 |
| 0.02887  | 0.130783 | 0.00464  | -0.07143 | 0.12323  | -0.05954 | 0.19899  | 0.297846 | 5.07E-11 |
| 0.01661  | 0.093655 | 0.04308  | -0.03559 | 0.44287  | -0.03796 | 0.41315  | 0.173874 | 0.00016  |
| 0.00653  | 0.038483 | 0.4067   | -0.05842 | 0.20758  | -0.06269 | 0.17621  | 0.192249 | 2.88E-05 |
| 0.08856  | 0.213099 | 3.38E-06 | 0.109603 | 0.01782  | 0.10008  | 0.03059  | 0.24824  | 5.47E-08 |
| 1.68E-14 | -0.26197 | 9.10E-09 | -0.15698 | 0.00066  | -0.31703 | 2.31E-12 | 0.172962 | 0.00017  |

|          |          |          |          |          |          |          |          |          |
|----------|----------|----------|----------|----------|----------|----------|----------|----------|
| 0.34088  | 0.300973 | 3.11E-11 | 0.223085 | 1.12E-06 | 0.20259  | 1.02E-05 | 0.314542 | 3.49E-12 |
| 0.03932  | -0.02978 | 0.52084  | -0.12815 | 0.00555  | -0.08513 | 0.06605  | 0.057006 | 0.21884  |
| 0.86411  | 0.15038  | 0.00112  | 0.017614 | 0.7042   | 0.033493 | 0.47026  | 0.180102 | 9.09E-05 |
| 2.70E-06 | 0.038827 | 0.40252  | -0.09991 | 0.03088  | -0.13056 | 0.00471  | 0.142148 | 0.00208  |
| 0.10789  | -0.03883 | 0.40254  | -0.20335 | 9.46E-06 | -0.13546 | 0.00336  | 0.063246 | 0.17242  |
| 0.31436  | -0.01201 | 0.79577  | -0.07208 | 0.11982  | -0.04396 | 0.34323  | -0.00067 | 0.98848  |
| 0.11704  | 0.191363 | 3.14E-05 | 0.079697 | 0.08536  | 0.024297 | 0.60046  | 0.261812 | 9.29E-09 |
| 0.52668  | 0.057583 | 0.21421  | -0.08889 | 0.0549   | -0.01708 | 0.71278  | 0.332769 | 1.54E-13 |
| 0.00185  | 0.09964  | 0.03133  | 0.010736 | 0.81702  | -0.03314 | 0.47498  | 0.09819  | 0.03389  |
| 0.00113  | -0.25506 | 2.27E-08 | -0.18218 | 7.51E-05 | -0.21225 | 3.70E-06 | -0.06393 | 0.16784  |
| 0.10842  | -0.05874 | 0.20512  | -0.01516 | 0.7438   | 0.009164 | 0.84344  | 0.024376 | 0.59929  |
| 3.86E-08 | 0.404604 | 8.03E-20 | 0.187011 | 4.77E-05 | 0.275431 | 1.42E-09 | 0.431979 | 1.18E-22 |
| 2.99E-06 | 0.00536  | 0.90804  | -0.11632 | 0.01189  | -0.14947 | 0.0012   | 0.043917 | 0.34365  |
| 0.11788  | -0.00291 | 0.94991  | -0.01233 | 0.79044  | -0.03751 | 0.41872  | 0.088775 | 0.05523  |
| 7.35E-24 | -0.08483 | 0.06701  | -0.22492 | 9.08E-07 | -0.31292 | 4.56E-12 | -0.15191 | 0.00099  |
| 2.88E-16 | -0.13233 | 0.00418  | -0.34863 | 8.59E-15 | -0.33749 | 6.65E-14 | 0.123039 | 0.00777  |
| 0.00062  | 0.020751 | 0.65468  | -0.22624 | 7.80E-07 | -0.15292 | 0.00092  | 0.119658 | 0.00965  |
| 2.24E-13 | -0.07198 | 0.12037  | -0.21324 | 3.33E-06 | -0.2677  | 4.17E-09 | 0.196398 | 1.92E-05 |
| 0.01095  | -0.31485 | 3.32E-12 | -0.12831 | 0.00549  | -0.178   | 0.00011  | 0.056708 | 0.22127  |
| 2.27E-09 | 0.454439 | 3.55E-25 | 0.257677 | 1.61E-08 | 0.332816 | 1.53E-13 | 0.187858 | 4.40E-05 |
| 0.43921  | 0.048583 | 0.29478  | 0.028219 | 0.54299  | 0.004221 | 0.92752  | -0.03783 | 0.41466  |
| 0.00017  | 0.000936 | 0.98391  | -0.15379 | 0.00085  | -0.14088 | 0.00228  | -0.05773 | 0.21305  |
| 0.95993  | 0.306408 | 1.31E-11 | 0.111368 | 0.01605  | 0.143256 | 0.00191  | 0.344784 | 1.76E-14 |
| 0.09804  | 0.001695 | 0.97086  | -0.01523 | 0.74274  | -0.07619 | 0.10008  | 0.138747 | 0.00266  |
| 1.01E-10 | 0.254287 | 2.51E-08 | 0.21746  | 2.10E-06 | 0.262955 | 7.97E-09 | 0.12668  | 0.00612  |
| 0.71735  | 0.020259 | 0.66234  | -0.03168 | 0.49464  | -0.0124  | 0.7892   | 0.182391 | 7.36E-05 |
| 0.89657  | -0.06834 | 0.14033  | 0.160897 | 0.00048  | 0.013947 | 0.76372  | 0.035493 | 0.44415  |
| 0.00048  | 0.109251 | 0.01819  | 0.04007  | 0.38762  | 0.102377 | 0.02695  | -0.33897 | 5.08E-14 |
| 0.34174  | 0.243023 | 1.05E-07 | 0.067612 | 0.1446   | 0.033243 | 0.47359  | 0.067103 | 0.14766  |
| 0.08863  | -0.17809 | 0.00011  | -0.0988  | 0.03279  | -0.15564 | 0.00074  | 0.199081 | 1.46E-05 |
| 0.08575  | 0.076579 | 0.09836  | -0.00814 | 0.8608   | 0.009464 | 0.83838  | 0.151704 | 0.00101  |
| 0.00354  | 0.073213 | 0.1141   | -0.00154 | 0.97357  | -0.05382 | 0.24576  | 0.218726 | 1.82E-06 |
| 0.00038  | 0.00585  | 0.89967  | 0.021818 | 0.63815  | -0.09333 | 0.04381  | 0.223964 | 1.01E-06 |
| 0.00036  | 0.07726  | 0.09539  | -0.00125 | 0.97854  | -0.06695 | 0.1486   | 0.159872 | 0.00052  |
| 3.58E-11 | -0.05816 | 0.20961  | -0.28302 | 4.74E-10 | -0.28257 | 5.06E-10 | 0.003876 | 0.93342  |
| 5.18E-08 | -0.04207 | 0.36431  | -0.17949 | 9.61E-05 | -0.20317 | 9.64E-06 | 0.003638 | 0.93751  |
| 9.35E-15 | 0.230351 | 4.84E-07 | 0.003847 | 0.93392  | 0.237753 | 2.01E-07 | 0.484994 | 6.33E-29 |
| 0.56152  | 0.020732 | 0.65497  | -0.06078 | 0.18981  | -0.06136 | 0.18558  | 0.133837 | 0.00376  |
| 0.00077  | -0.13154 | 0.00441  | -0.20438 | 8.51E-06 | -0.19153 | 3.09E-05 | 0.221059 | 1.41E-06 |
| 0.2253   | 0.331756 | 1.85E-13 | 0.204763 | 8.18E-06 | 0.223646 | 1.05E-06 | 0.333311 | 1.40E-13 |
| 0.01588  | 0.092633 | 0.04542  | 0.016966 | 0.7146   | -0.02025 | 0.66255  | 0.160093 | 0.00052  |
| 1.45E-21 | 0.303901 | 1.96E-11 | 0.229281 | 5.49E-07 | 0.375645 | 4.25E-17 | 0.088176 | 0.0569   |
| 0.12854  | -0.00113 | 0.98051  | -0.0815  | 0.07849  | -0.06169 | 0.18325  | 0.430408 | 1.75E-22 |
| 0.00056  | 0.144187 | 0.00178  | 0.143579 | 0.00187  | 0.150828 | 0.00108  | 0.351131 | 5.37E-15 |
| 5.54E-10 | -0.00546 | 0.9064   | -0.0571  | 0.21807  | -0.15017 | 0.00113  | 0.196747 | 1.85E-05 |

|          |          |          |          |          |          |          |          |          |
|----------|----------|----------|----------|----------|----------|----------|----------|----------|
| 0.99168  | -0.01336 | 0.77336  | -0.12795 | 0.00562  | -0.07149 | 0.1229   | 0.385005 | 5.99E-18 |
| 0.00883  | 0.152725 | 0.00093  | -0.04498 | 0.33208  | -0.04083 | 0.37862  | 0.409943 | 2.36E-20 |
| 0.05751  | 0.073716 | 0.11163  | -0.06046 | 0.19214  | -0.05623 | 0.22522  | 0.053372 | 0.24969  |
| 0.30445  | -0.244   | 9.32E-08 | -0.13738 | 0.00293  | -0.11897 | 0.01008  | -0.17322 | 0.00017  |
| 1.13E-11 | 0.112791 | 0.01474  | 0.099607 | 0.03139  | 0.2001   | 1.32E-05 | 0.443369 | 6.56E-24 |
| 0.52787  | -0.06615 | 0.15352  | -0.00332 | 0.94295  | -0.03191 | 0.49151  | 0.022623 | 0.62581  |
| 1.86E-05 | -0.08129 | 0.07928  | -0.33325 | 1.42E-13 | -0.26763 | 4.22E-09 | 0.217942 | 1.99E-06 |
| 0.09077  | -0.03921 | 0.3979   | -0.13401 | 0.00372  | -0.03912 | 0.39896  | -0.01209 | 0.79437  |
| 0.11595  | 0.187561 | 4.53E-05 | 0.077241 | 0.09547  | 0.040323 | 0.38462  | 0.25131  | 3.69E-08 |
| 0.00073  | 0.000605 | 0.9896   | -0.10199 | 0.02754  | -0.13504 | 0.00346  | 0.238314 | 1.87E-07 |
| 0.00058  | -0.09825 | 0.03378  | -0.16068 | 0.00049  | -0.19342 | 2.57E-05 | 0.008994 | 0.8463   |
| 0.00013  | 0.232365 | 3.82E-07 | 0.301547 | 2.84E-11 | 0.26103  | 1.03E-08 | 0.202626 | 1.02E-05 |
| 9.72E-05 | 0.005429 | 0.90685  | -0.08317 | 0.07257  | 0.051013 | 0.27126  | 0.354064 | 3.07E-15 |
| 0.01093  | -0.05403 | 0.24386  | 0.028297 | 0.54187  | 0.027082 | 0.55937  | 0.312991 | 4.51E-12 |
| 0.28848  | 0.224568 | 9.45E-07 | 0.064398 | 0.16472  | 0.061532 | 0.18437  | 0.178104 | 0.00011  |
| 0.00021  | 0.036989 | 0.42518  | -0.02632 | 0.57044  | -0.10473 | 0.0236   | 0.249271 | 4.79E-08 |
| 0.00093  | 0.010908 | 0.81414  | -0.00467 | 0.91989  | -0.10209 | 0.02739  | 0.142304 | 0.00205  |
| 0.00675  | -0.01191 | 0.79744  | -0.05132 | 0.26842  | -0.0698  | 0.13204  | 0.053635 | 0.24736  |
| 0.12408  | 0.030672 | 0.50848  | -0.03362 | 0.46856  | -0.0245  | 0.59745  | 0.036915 | 0.4261   |
| 0.01131  | 0.150108 | 0.00114  | 0.149462 | 0.0012   | 0.175936 | 0.00013  | 0.2119   | 3.85E-06 |
| 0.8442   | 0.011539 | 0.80359  | 0.015052 | 0.74562  | -0.00235 | 0.95953  | 0.139286 | 0.00256  |
| 0.17966  | 0.122145 | 0.00823  | 0.016628 | 0.72005  | -0.0005  | 0.99133  | 0.204292 | 8.59E-06 |
| 0.94817  | 0.029267 | 0.5281   | -0.01016 | 0.82668  | -0.01492 | 0.7477   | 0.070918 | 0.12592  |
| 0.00182  | 0.008828 | 0.84911  | 0.156502 | 0.00069  | 0.15129  | 0.00104  | 0.075153 | 0.1048   |
| 0.0852   | -0.10239 | 0.02694  | -0.10949 | 0.01794  | -0.10626 | 0.02163  | 0.181432 | 8.05E-05 |
| 0.07641  | 0.165356 | 0.00033  | 0.480678 | 2.26E-28 | 0.294118 | 9.00E-11 | 0.203489 | 9.33E-06 |
| 0.13502  | -0.0666  | 0.1507   | 0.122015 | 0.0083   | -0.03777 | 0.41545  | 0.119633 | 0.00966  |
| 7.32E-24 | -0.29213 | 1.22E-10 | -0.34774 | 1.01E-14 | -0.44428 | 5.19E-24 | -0.06086 | 0.18925  |
| 2.25E-05 | -0.21925 | 1.72E-06 | -0.22622 | 7.82E-07 | -0.27447 | 1.62E-09 | -0.05361 | 0.24762  |
| 0.79709  | -0.19387 | 2.46E-05 | -0.12414 | 0.00723  | -0.11508 | 0.01283  | 0.051746 | 0.26443  |
| 0.10424  | 0.158657 | 0.00058  | 0.159913 | 0.00052  | 0.17795  | 0.00011  | 0.19568  | 2.06E-05 |
| 0.0003   | 0.031053 | 0.50322  | -0.11686 | 0.01149  | -0.1164  | 0.01183  | 0.061293 | 0.18608  |
| 7.77E-06 | 0.283451 | 4.45E-10 | 0.131237 | 0.0045   | 0.228016 | 6.36E-07 | 0.12558  | 0.00658  |
| 0.99975  | 0.138508 | 0.0027   | -0.06324 | 0.17244  | -0.0016  | 0.97254  | 0.253939 | 2.63E-08 |
| 6.06E-07 | -0.0438  | 0.34492  | -0.18982 | 3.65E-05 | -0.21045 | 4.50E-06 | -0.04123 | 0.37396  |
| 0.03467  | -0.18093 | 8.43E-05 | -0.12923 | 0.00516  | -0.18854 | 4.13E-05 | 0.049177 | 0.28891  |
| 0.00881  | 0.103827 | 0.02485  | -0.08739 | 0.05916  | -0.08539 | 0.06524  | 0.215201 | 2.69E-06 |
| 3.31E-05 | -0.03467 | 0.45476  | -0.11896 | 0.01008  | -0.14621 | 0.00153  | 0.118734 | 0.01023  |
| 0.21174  | -0.10975 | 0.01767  | -0.22608 | 7.95E-07 | -0.20922 | 5.12E-06 | 0.327924 | 3.61E-13 |
| 2.68E-05 | -0.17698 | 0.00012  | 0.033614 | 0.46866  | 0.043403 | 0.34934  | 0.167526 | 0.00028  |
| 0.18671  | 0.034638 | 0.45521  | 0.01677  | 0.71776  | -0.05225 | 0.2598   | 0.251671 | 3.53E-08 |
| 0.00904  | -0.09379 | 0.04279  | -0.09094 | 0.04954  | -0.12834 | 0.00548  | 0.491088 | 1.02E-29 |
| 0.49564  | 0.0455   | 0.32653  | 0.108455 | 0.01906  | 0.103561 | 0.02522  | 0.249044 | 4.94E-08 |
| 1.93E-05 | 0.165811 | 0.00032  | 0.244669 | 8.57E-08 | 0.238015 | 1.94E-07 | 0.240356 | 1.46E-07 |
| 9.96E-05 | 0.090804 | 0.04987  | -0.17208 | 0.00019  | -0.14931 | 0.00121  | -0.08425 | 0.06891  |



|          |          |          |          |          |          |          |          |          |
|----------|----------|----------|----------|----------|----------|----------|----------|----------|
| 2.06E-11 | -0.24018 | 1.49E-07 | -0.34744 | 1.07E-14 | -0.35749 | 1.59E-15 | 0.195478 | 2.10E-05 |
| 0.08219  | 0.226273 | 7.78E-07 | -0.00216 | 0.96285  | 0.049959 | 0.2813   | 0.039403 | 0.39557  |
| 7.60E-11 | -0.19617 | 1.96E-05 | -0.23787 | 1.98E-07 | -0.31248 | 4.90E-12 | -0.14003 | 0.00242  |
| 0.00728  | -0.05801 | 0.2108   | -0.15853 | 0.00059  | -0.16859 | 0.00025  | 0.0549   | 0.23637  |
| 1.09E-11 | -0.19806 | 1.62E-05 | -0.37225 | 8.51E-17 | -0.35736 | 1.63E-15 | -0.05464 | 0.23862  |
| 5.68E-05 | 0.073419 | 0.11308  | 0.244866 | 8.36E-08 | 0.19986  | 1.35E-05 | -0.05503 | 0.23529  |
| 0.80635  | 0.246629 | 6.70E-08 | 0.127897 | 0.00564  | 0.114276 | 0.01347  | 0.264234 | 6.70E-09 |
| 0.00396  | 0.265463 | 5.67E-09 | 0.243697 | 9.67E-08 | 0.221712 | 1.31E-06 | 0.2677   | 4.17E-09 |
| 0.0062   | 0.124272 | 0.00717  | 0.086005 | 0.0633   | 0.01197  | 0.79641  | 0.136031 | 0.00322  |
| 3.98E-06 | 0.217177 | 2.17E-06 | 0.036032 | 0.43727  | -0.03262 | 0.48188  | -0.05633 | 0.22436  |
| 0.15076  | 0.179217 | 9.86E-05 | -0.03474 | 0.45395  | 0.077521 | 0.09428  | 0.120695 | 0.00903  |
| 0.32153  | 0.229813 | 5.16E-07 | 0.122963 | 0.00781  | 0.080278 | 0.0831   | 0.146861 | 0.00146  |
| 0.00238  | -0.31054 | 6.73E-12 | -0.13685 | 0.00304  | -0.25401 | 2.61E-08 | 0.049746 | 0.28336  |
| 0.01075  | 0.032469 | 0.48395  | -0.10302 | 0.026    | -0.08614 | 0.06288  | 0.09357  | 0.04327  |
| 0.86469  | 0.011369 | 0.80643  | -0.03405 | 0.46285  | -0.03683 | 0.42718  | 0.14829  | 0.00131  |
| 0.15033  | 0.171051 | 0.0002   | 0.049565 | 0.28512  | 0.02934  | 0.52708  | 0.225948 | 8.07E-07 |
| 1.49E-06 | -0.19685 | 1.83E-05 | -0.2336  | 3.30E-07 | -0.26314 | 7.78E-09 | 0.102797 | 0.02632  |
| 0.77513  | 0.028415 | 0.54018  | -0.04708 | 0.30994  | -0.02321 | 0.61681  | 0.245753 | 7.48E-08 |
| 0.01024  | -0.10875 | 0.01873  | -0.20893 | 5.28E-06 | -0.19349 | 2.55E-05 | 0.069315 | 0.13473  |
| 0.00571  | -0.21045 | 4.50E-06 | -0.16873 | 0.00025  | -0.20466 | 8.26E-06 | 0.026387 | 0.56949  |
| 0.00085  | 0.022082 | 0.63409  | -0.0587  | 0.20541  | -0.09513 | 0.03989  | 0.060784 | 0.18977  |
| 3.12E-07 | -0.04049 | 0.3827   | -0.16014 | 0.00051  | -0.1927  | 2.76E-05 | 0.099089 | 0.03229  |
| 0.00472  | -0.05728 | 0.21664  | 0.059953 | 0.19591  | -0.05605 | 0.22665  | -0.02772 | 0.5501   |
| 0.14623  | 0.005969 | 0.89764  | -0.08265 | 0.07437  | -0.08853 | 0.0559   | 0.116532 | 0.01173  |
| 0.79641  | 0.047369 | 0.30703  | 0.025476 | 0.58291  | -0.01434 | 0.75733  | 0.189372 | 3.81E-05 |
| 0.0016   | -0.14283 | 0.00197  | -0.03295 | 0.47751  | -0.1143  | 0.01345  | 0.009632 | 0.83554  |
| 0.00043  | -0.16319 | 0.0004   | -0.26932 | 3.34E-09 | -0.28677 | 2.73E-10 | -0.04141 | 0.37193  |
| 0.28248  | 0.032382 | 0.48512  | 0.022798 | 0.62314  | -0.02455 | 0.59668  | -0.00947 | 0.83821  |
| 1.48E-15 | -0.31369 | 4.02E-12 | -0.27134 | 2.52E-09 | -0.37998 | 1.73E-17 | 0.040662 | 0.38064  |
| 6.70E-12 | -0.18698 | 4.79E-05 | -0.29871 | 4.43E-11 | -0.33932 | 4.78E-14 | 0.007799 | 0.86651  |
| 0.00162  | 0.07445  | 0.1081   | -0.08456 | 0.06789  | -0.06993 | 0.13129  | 0.013258 | 0.77506  |
| 0.36267  | 0.214118 | 3.03E-06 | 0.074228 | 0.10916  | 0.050456 | 0.27653  | 0.346963 | 1.17E-14 |
| 0.0148   | 0.063848 | 0.16837  | -0.00592 | 0.89847  | -0.04592 | 0.32202  | 0.128793 | 0.00531  |
| 0.00281  | 0.006738 | 0.88454  | -0.05558 | 0.2306   | -0.09376 | 0.04284  | 0.114807 | 0.01304  |
| 0.7928   | 0.210228 | 4.60E-06 | 0.063499 | 0.17071  | 0.080234 | 0.08327  | 0.1735   | 0.00016  |
| 1.54E-11 | -0.22688 | 7.25E-07 | -0.32066 | 1.25E-12 | -0.35802 | 1.44E-15 | 0.238954 | 1.73E-07 |
| 9.26E-05 | 0.03131  | 0.49969  | -0.0822  | 0.07598  | -0.12333 | 0.00762  | 0.197669 | 1.69E-05 |
| 0.05566  | 0.013218 | 0.77573  | -0.03214 | 0.48839  | -0.06656 | 0.15097  | 0.045659 | 0.32484  |
| 0.0091   | -0.00787 | 0.86526  | -0.15265 | 0.00094  | -0.14195 | 0.00211  | 0.058668 | 0.20568  |
| 0.16685  | 0.16386  | 0.00038  | 0.104736 | 0.0236   | 0.115111 | 0.0128   | 0.168781 | 0.00025  |
| 0.01145  | 0.157719 | 0.00062  | -0.12628 | 0.00628  | -0.08212 | 0.07624  | 0.333768 | 1.29E-13 |
| 0.01233  | -0.10727 | 0.02042  | -0.15329 | 0.00089  | -0.15646 | 0.00069  | 0.242775 | 1.08E-07 |
| 0.07125  | 0.304655 | 1.74E-11 | 0.20916  | 5.15E-06 | 0.132546 | 0.00411  | 0.344119 | 1.99E-14 |
| 5.12E-05 | 0.595896 | 3.16E-46 | 0.112491 | 0.01501  | 0.259999 | 1.18E-08 | 0.409438 | 2.65E-20 |
| 0.01365  | 0.243352 | 1.01E-07 | 0.150391 | 0.00111  | 0.174921 | 0.00015  | 0.207213 | 6.33E-06 |

|          |          |          |          |          |          |          |          |          |
|----------|----------|----------|----------|----------|----------|----------|----------|----------|
| 0.8115   | 0.222834 | 1.15E-06 | 0.160883 | 0.00048  | 0.138903 | 0.00263  | 0.280802 | 6.55E-10 |
| 0.01421  | 0.106088 | 0.02185  | 0.010322 | 0.82395  | -0.02083 | 0.65342  | 0.042577 | 0.35859  |
| 0.59648  | 0.260262 | 1.14E-08 | 0.164218 | 0.00037  | 0.135365 | 0.00338  | 0.403575 | 1.01E-19 |
| 0.02924  | 0.212562 | 3.58E-06 | 0.105164 | 0.02304  | 0.064327 | 0.16519  | 0.152705 | 0.00093  |
| 0.00015  | -0.08368 | 0.07083  | -0.13641 | 0.00314  | -0.15876 | 0.00057  | 0.061247 | 0.18642  |
| 0.76468  | 0.179693 | 9.44E-05 | 0.009622 | 0.83571  | 0.05589  | 0.22801  | 0.314574 | 3.47E-12 |
| 0.1489   | 0.048318 | 0.29742  | -0.06048 | 0.19199  | -0.02987 | 0.51962  | 0.305866 | 1.43E-11 |
| 0.18235  | -0.16198 | 0.00044  | -0.06989 | 0.13153  | -0.03611 | 0.43628  | -0.19845 | 1.56E-05 |
| 0.50251  | 0.178428 | 0.00011  | 0.03604  | 0.43716  | 0.046992 | 0.3109   | 0.12195  | 0.00834  |
| 0.2773   | 0.033475 | 0.4705   | -0.03447 | 0.45743  | -0.03038 | 0.51258  | 0.13263  | 0.00409  |
| 0.52983  | 0.145765 | 0.00159  | 0.037569 | 0.41795  | 0.07756  | 0.09411  | 0.059212 | 0.2015   |
| 1.69E-07 | -0.08831 | 0.05652  | -0.19686 | 1.83E-05 | -0.20799 | 5.83E-06 | -0.08642 | 0.06205  |
| 0.14863  | -0.00908 | 0.84485  | -0.04498 | 0.33212  | -0.04312 | 0.3525   | 0.044944 | 0.33248  |
| 0.01542  | 0.066274 | 0.15274  | -0.05836 | 0.20809  | -0.06195 | 0.18142  | 0.058707 | 0.20538  |
| 0.2064   | 0.275825 | 1.34E-09 | 0.103484 | 0.02533  | 0.131452 | 0.00443  | 0.233433 | 3.37E-07 |
| 0.00991  | 0.174232 | 0.00015  | -0.00992 | 0.83066  | 0.000718 | 0.98765  | 0.13896  | 0.00262  |
| 0.01552  | 0.046743 | 0.31347  | -0.06216 | 0.1799   | -0.06722 | 0.14696  | -0.02849 | 0.53914  |
| 1.24E-07 | 0.051341 | 0.26818  | 0.077197 | 0.09566  | 0.20958  | 4.93E-06 | -0.07158 | 0.12243  |
| 0.00352  | -0.12664 | 0.00614  | 0.002452 | 0.95786  | -0.09839 | 0.03352  | 0.069225 | 0.13524  |
| 2.75E-06 | 0.280914 | 6.44E-10 | 0.211888 | 3.85E-06 | 0.236019 | 2.47E-07 | 0.257585 | 1.63E-08 |
| 1.08E-09 | -0.17313 | 0.00017  | -0.1283  | 0.00549  | -0.28434 | 3.91E-10 | -0.0104  | 0.82258  |
| 0.01587  | -0.04236 | 0.36106  | 0.026779 | 0.56377  | 0.054315 | 0.24141  | -0.05683 | 0.22028  |
| 0.00329  | 0.024157 | 0.60256  | 0.074125 | 0.10965  | -0.04212 | 0.36382  | -0.0537  | 0.24674  |
| 2.44E-23 | 0.199526 | 1.40E-05 | 0.247262 | 6.19E-08 | 0.348873 | 8.21E-15 | 0.111642 | 0.01579  |
| 0.52491  | -0.00492 | 0.91554  | 0.001897 | 0.96739  | -0.01282 | 0.78228  | -0.03296 | 0.4773   |
| 0.85999  | 0.228957 | 5.70E-07 | 0.081281 | 0.07931  | 0.096576 | 0.03695  | 0.40453  | 8.17E-20 |
| 1.88E-05 | -0.00085 | 0.98541  | -0.23426 | 3.05E-07 | -0.17335 | 0.00017  | -0.22909 | 5.61E-07 |
| 1.47E-08 | -0.13956 | 0.00251  | -0.1213  | 0.00869  | -0.2269  | 7.24E-07 | 0.343787 | 2.11E-14 |
| 0.16527  | -0.08722 | 0.05964  | -0.22462 | 9.39E-07 | -0.13861 | 0.00268  | 0.334201 | 1.20E-13 |
| 0.00062  | 0.394994 | 6.90E-19 | 0.269494 | 3.26E-09 | 0.285147 | 3.47E-10 | 0.133127 | 0.00395  |
| 0.05877  | -0.13977 | 0.00247  | -0.19892 | 1.49E-05 | -0.15431 | 0.00082  | 0.102606 | 0.02661  |
| 0.16436  | 0.140159 | 0.0024   | -0.05647 | 0.22318  | -0.04149 | 0.37102  | 0.29018  | 1.64E-10 |
| 0.95886  | 0.052624 | 0.2564   | -0.14909 | 0.00123  | -0.04019 | 0.38625  | 0.368726 | 1.74E-16 |
| 0.00269  | -0.10867 | 0.01882  | -0.17179 | 0.00019  | -0.1997  | 1.37E-05 | 0.147445 | 0.0014   |
| 0.0001   | 0.003448 | 0.94076  | -0.09369 | 0.04301  | -0.14234 | 0.00205  | 0.371875 | 9.19E-17 |
| 0.0853   | -0.00571 | 0.9021   | -0.06236 | 0.17855  | -0.06324 | 0.17248  | 0.039018 | 0.4002   |
| 0.13158  | 0.061266 | 0.18628  | -0.17241 | 0.00018  | -0.05633 | 0.22433  | 0.225106 | 8.89E-07 |
| 8.56E-09 | -0.08349 | 0.07145  | -0.21449 | 2.91E-06 | -0.2511  | 3.80E-08 | 0.173713 | 0.00016  |
| 0.03664  | 0.037227 | 0.4222   | -0.11061 | 0.01679  | -0.08121 | 0.07958  | 0.251735 | 3.50E-08 |
| 0.06457  | 0.102455 | 0.02683  | -0.07385 | 0.11096  | -0.04023 | 0.38578  | 0.241086 | 1.34E-07 |
| 0.02549  | -0.00809 | 0.8616   | 0.144555 | 0.00174  | -0.02206 | 0.63439  | 0.058033 | 0.21064  |
| 0.94593  | 0.254163 | 2.55E-08 | 0.114854 | 0.01301  | 0.116329 | 0.01188  | 0.317842 | 2.02E-12 |
| 1.80E-07 | -0.17214 | 0.00019  | -0.25697 | 1.77E-08 | -0.28997 | 1.69E-10 | 0.031503 | 0.49706  |
| 4.11E-05 | -0.09829 | 0.0337   | -0.15993 | 0.00052  | -0.19676 | 1.85E-05 | 0.312825 | 4.63E-12 |
| 0.64537  | 0.063562 | 0.17028  | 0.00981  | 0.83255  | 0.036114 | 0.43622  | -0.05111 | 0.27033  |

|          |          |          |          |          |          |          |          |          |
|----------|----------|----------|----------|----------|----------|----------|----------|----------|
| 0.70986  | -0.0087  | 0.8512   | -0.00041 | 0.99295  | -0.00713 | 0.87789  | 0.076751 | 0.0976   |
| 0.00148  | -0.12725 | 0.00589  | -0.04885 | 0.2921   | -0.00642 | 0.88992  | -0.02173 | 0.63944  |
| 1.78E-13 | 0.176528 | 0.00013  | 0.264338 | 6.61E-09 | 0.310811 | 6.44E-12 | 0.082314 | 0.07556  |
| 1.23E-10 | -0.05678 | 0.22064  | -0.28733 | 2.51E-10 | -0.29113 | 1.42E-10 | 0.135953 | 0.00324  |
| 0.78767  | 0.019228 | 0.67855  | -0.03572 | 0.44121  | -0.00594 | 0.89815  | 0.523626 | 3.08E-34 |
| 0.01334  | -0.09668 | 0.03674  | -0.134   | 0.00372  | -0.15533 | 0.00076  | -0.03659 | 0.43021  |
| 0.00015  | 0.025914 | 0.57643  | -0.15725 | 0.00065  | -0.14119 | 0.00223  | 0.065324 | 0.15872  |
| 0.04363  | 0.020114 | 0.66462  | -0.01731 | 0.70905  | -0.05666 | 0.22163  | 0.163269 | 0.0004   |
| 1.43E-05 | -0.07454 | 0.10765  | 0.018427 | 0.69124  | 0.06496  | 0.16106  | 0.040523 | 0.38227  |
| 0.0018   | -0.10451 | 0.02391  | -0.1891  | 3.91E-05 | -0.18643 | 5.04E-05 | 0.182352 | 7.39E-05 |
| 0.00626  | -0.10978 | 0.01764  | -0.15925 | 0.00055  | -0.15932 | 0.00055  | 0.031583 | 0.49597  |
| 0.00966  | 0.017225 | 0.71044  | 0.017806 | 0.70113  | 0.036588 | 0.43022  | 0.199902 | 1.35E-05 |
| 0.00347  | 0.212426 | 3.64E-06 | 0.151515 | 0.00102  | 0.177793 | 0.00011  | 0.226332 | 7.72E-07 |
| 0.00216  | -0.04267 | 0.35754  | -0.14685 | 0.00146  | -0.11446 | 0.01333  | -0.11189 | 0.01556  |
| 6.78E-10 | 0.300471 | 3.37E-11 | 0.231764 | 4.10E-07 | 0.299774 | 3.75E-11 | 0.538904 | 1.56E-36 |
| 4.62E-08 | -0.27246 | 2.16E-09 | -0.19698 | 1.81E-05 | -0.2792  | 8.25E-10 | -0.01543 | 0.73941  |
| 0.05864  | 0.016966 | 0.7146   | 0.012624 | 0.78556  | 0.053251 | 0.25076  | 0.06146  | 0.18489  |
| 0.00701  | -0.06599 | 0.1545   | -0.11483 | 0.01302  | -0.14659 | 0.00149  | -0.04934 | 0.28734  |
| 0.39204  | 0.035199 | 0.44794  | -0.0069  | 0.88176  | 0.031141 | 0.50201  | 0.369663 | 1.44E-16 |
| 0.03041  | 0.21991  | 1.60E-06 | 0.113873 | 0.01381  | 0.084792 | 0.06714  | 0.314447 | 3.55E-12 |
| 3.13E-08 | 0.042691 | 0.35731  | 0.301706 | 2.77E-11 | 0.208355 | 5.61E-06 | 0.233624 | 3.29E-07 |
| 0.00125  | 0.006343 | 0.89126  | -0.08748 | 0.0589   | -0.07239 | 0.11824  | -0.059   | 0.2031   |
| 3.43E-06 | 0.248923 | 5.01E-08 | 0.075765 | 0.102    | 0.189887 | 3.63E-05 | 0.191678 | 3.05E-05 |
| 4.00E-15 | 0.437949 | 2.64E-23 | 0.487882 | 2.68E-29 | 0.497635 | 1.37E-30 | 0.462465 | 3.99E-26 |
| 0.09311  | 0.279006 | 8.49E-10 | -0.02775 | 0.54968  | 0.025343 | 0.58488  | 0.26495  | 6.08E-09 |
| 2.55E-20 | 0.404362 | 8.49E-20 | 0.327799 | 3.69E-13 | 0.396088 | 5.42E-19 | 0.220799 | 1.45E-06 |
| 4.91E-05 | 0.052141 | 0.26079  | -0.05556 | 0.23079  | -0.11218 | 0.01529  | 0.144437 | 0.00175  |
| 0.0364   | -0.15333 | 0.00089  | -0.11867 | 0.01027  | -0.16795 | 0.00027  | 0.003954 | 0.93208  |
| 3.30E-17 | 0.030368 | 0.5127   | -0.26072 | 1.08E-08 | -0.27821 | 9.53E-10 | 0.117302 | 0.01118  |
| 0.00049  | -0.02543 | 0.58352  | 0.034049 | 0.46292  | 0.072813 | 0.1161   | 0.129238 | 0.00516  |
| 0.0082   | 0.18959  | 3.73E-05 | 0.217829 | 2.02E-06 | 0.19355  | 2.54E-05 | 0.372057 | 8.86E-17 |
| 0.0639   | -0.01134 | 0.80698  | -0.06055 | 0.19152  | -0.08648 | 0.06185  | -0.04666 | 0.31432  |
| 0.56743  | -0.17351 | 0.00016  | -0.11313 | 0.01444  | -0.10231 | 0.02705  | 0.051712 | 0.26474  |
| 0.00369  | 0.198495 | 1.55E-05 | 0.151701 | 0.00101  | 0.029247 | 0.52839  | 0.299683 | 3.81E-11 |
| 2.02E-05 | -0.2375  | 2.07E-07 | -0.19576 | 2.04E-05 | -0.28306 | 4.71E-10 | 0.306242 | 1.35E-11 |
| 5.19E-12 | -0.35529 | 2.43E-15 | -0.27032 | 2.91E-09 | -0.36874 | 1.73E-16 | -0.11323 | 0.01435  |
| 1.04E-05 | -0.21198 | 3.81E-06 | -0.17898 | 0.0001   | -0.23163 | 4.17E-07 | 0.146923 | 0.00145  |
| 0.17793  | -0.11854 | 0.01035  | -0.11003 | 0.01738  | -0.13314 | 0.00395  | -0.00162 | 0.97222  |
| 0.04755  | 0.112821 | 0.01471  | 0.02368  | 0.60975  | -0.00235 | 0.95961  | 0.149055 | 0.00124  |
| 0.00212  | 0.002675 | 0.95402  | 0.022115 | 0.63358  | -0.08904 | 0.0545   | 0.277109 | 1.11E-09 |
| 4.08E-08 | 0.142889 | 0.00196  | -0.12383 | 0.00738  | -0.15369 | 0.00086  | 0.241664 | 1.24E-07 |
| 0.95146  | 0.064171 | 0.16622  | 0.312472 | 4.91E-12 | 0.128881 | 0.00528  | 0.161261 | 0.00047  |
| 2.12E-05 | 0.471164 | 3.51E-27 | 0.361841 | 6.82E-16 | 0.35599  | 2.13E-15 | 0.24496  | 8.26E-08 |
| 0.00011  | -0.04721 | 0.30869  | -0.12352 | 0.00753  | -0.1742  | 0.00015  | 0.065342 | 0.1586   |
| 5.50E-21 | -0.17259 | 0.00018  | -0.31832 | 1.86E-12 | -0.41167 | 1.58E-20 | 0.025763 | 0.57866  |

|          |          |          |          |          |          |          |          |          |
|----------|----------|----------|----------|----------|----------|----------|----------|----------|
| 1.22E-10 | -0.22183 | 1.29E-06 | -0.14125 | 0.00222  | -0.24533 | 7.89E-08 | 0.168931 | 0.00025  |
| 1.42E-22 | -0.2644  | 6.55E-09 | -0.23873 | 1.78E-07 | -0.39764 | 3.84E-19 | -0.25159 | 3.57E-08 |
| 0.12359  | 0.107647 | 0.01998  | -0.02889 | 0.53344  | -0.03418 | 0.46114  | 0.162177 | 0.00043  |
| 0.00034  | 0.013041 | 0.77866  | -0.09402 | 0.04227  | -0.10266 | 0.02652  | 0.146588 | 0.00149  |
| 0.06808  | 0.233793 | 3.23E-07 | 0.15226  | 0.00096  | 0.150996 | 0.00106  | 0.284775 | 3.66E-10 |
| 6.72E-12 | -0.16085 | 0.00048  | -0.16359 | 0.00039  | -0.27053 | 2.82E-09 | 0.025432 | 0.58355  |
| 6.01E-10 | 0.23436  | 3.02E-07 | 0.253942 | 2.63E-08 | 0.280384 | 6.96E-10 | 0.128672 | 0.00536  |
| 0.35985  | 0.200374 | 1.28E-05 | 0.143327 | 0.0019   | 0.132646 | 0.00408  | 0.1539   | 0.00085  |
| 4.79E-13 | 0.678043 | 3.68E-64 | 0.401057 | 1.79E-19 | 0.487414 | 3.08E-29 | 0.325309 | 5.67E-13 |
| 1.96E-08 | -0.14302 | 0.00195  | -0.25106 | 3.81E-08 | -0.2836  | 4.36E-10 | 0.237071 | 2.18E-07 |
| 0.00166  | -0.05465 | 0.23855  | 0.029245 | 0.52841  | 0.034001 | 0.46355  | 0.215989 | 2.47E-06 |
| 5.91E-05 | 0.036833 | 0.42713  | -0.10648 | 0.02136  | -0.13893 | 0.00262  | 0.192084 | 2.93E-05 |
| 0.98277  | -0.11948 | 0.00976  | -0.14104 | 0.00225  | -0.11951 | 0.00974  | 0.327831 | 3.67E-13 |
| 0.01516  | -0.16963 | 0.00023  | -0.12514 | 0.00677  | -0.13719 | 0.00297  | -0.0417  | 0.36863  |
| 0.00023  | -0.201   | 1.20E-05 | -0.08556 | 0.06468  | -0.19087 | 3.30E-05 | 0.12503  | 0.00682  |
| 0.51287  | 0.094078 | 0.04214  | 0.025055 | 0.58915  | 0.04105  | 0.37611  | 0.385018 | 5.97E-18 |
| 0.00101  | -0.26527 | 5.82E-09 | -0.20116 | 1.19E-05 | -0.24271 | 1.09E-07 | -0.05237 | 0.25872  |
| 9.32E-14 | -0.20376 | 9.08E-06 | -0.201   | 1.21E-05 | -0.29735 | 5.48E-11 | -0.02863 | 0.53719  |
| 0.54376  | -0.11169 | 0.01575  | -0.10898 | 0.01849  | -0.06919 | 0.13543  | 0.321226 | 1.14E-12 |
| 0.00252  | 0.098984 | 0.03247  | -0.00071 | 0.98775  | -0.05552 | 0.23113  | 0.17741  | 0.00012  |
| 0.00531  | 0.133294 | 0.00391  | -0.03223 | 0.48721  | -0.03774 | 0.41581  | 0.186971 | 4.79E-05 |
| 0.82949  | -0.07304 | 0.11497  | -0.04507 | 0.33115  | -0.07932 | 0.08685  | 0.231392 | 4.29E-07 |
| 0.03119  | 0.171794 | 0.00019  | -0.00688 | 0.88212  | -0.02786 | 0.54807  | 0.293435 | 9.99E-11 |
| 0.01909  | 0.211485 | 4.02E-06 | 0.066224 | 0.15305  | 0.066399 | 0.15196  | 0.284959 | 3.56E-10 |
| 0.65693  | -0.2778  | 1.01E-09 | -0.04319 | 0.35176  | -0.07494 | 0.10578  | -0.11295 | 0.0146   |
| 0.01102  | 0.142087 | 0.00208  | 0.276292 | 1.25E-09 | 0.217155 | 2.17E-06 | 0.171509 | 0.0002   |
| 3.40E-05 | 0.219727 | 1.63E-06 | 0.124298 | 0.00716  | 0.206659 | 6.71E-06 | 0.275702 | 1.36E-09 |
| 0.55103  | -0.23852 | 1.83E-07 | -0.1058  | 0.02222  | -0.12892 | 0.00527  | 0.227168 | 7.01E-07 |
| 0.77859  | -0.09213 | 0.0466   | -0.07222 | 0.11909  | -0.08129 | 0.07929  | 0.12042  | 0.00919  |
| 0.82714  | -0.16742 | 0.00028  | -0.01879 | 0.68552  | -0.06421 | 0.16597  | 0.013589 | 0.7696   |
| 0.00116  | 0.105561 | 0.02252  | 0.193953 | 2.44E-05 | 0.201402 | 1.16E-05 | 0.126229 | 0.00631  |
| 0.0454   | 0.178522 | 0.0001   | 0.111065 | 0.01634  | 0.129711 | 0.00499  | 0.331914 | 1.79E-13 |
| 0.33896  | 0.086158 | 0.06283  | -0.00975 | 0.83358  | -0.02284 | 0.62247  | 0.423994 | 8.44E-22 |
| 0.00212  | -0.08013 | 0.08366  | -0.16831 | 0.00026  | -0.16568 | 0.00032  | 0.006531 | 0.88806  |
| 5.49E-12 | -0.21962 | 1.65E-06 | -0.35846 | 1.32E-15 | -0.36721 | 2.35E-16 | -0.18214 | 7.54E-05 |
| 0.00106  | -0.04422 | 0.34038  | -0.08419 | 0.06911  | -0.1226  | 0.00799  | 0.054031 | 0.24388  |
| 0.00038  | -0.04085 | 0.37844  | -0.27848 | 9.16E-10 | -0.23606 | 2.46E-07 | 0.385049 | 5.93E-18 |
| 0.17645  | 0.1107   | 0.0167   | -0.04625 | 0.31865  | -0.00485 | 0.91668  | 0.145947 | 0.00156  |
| 0.1855   | -0.11009 | 0.01732  | 0.154097 | 0.00083  | 0.041192 | 0.37446  | -0.01432 | 0.75757  |
| 0.12907  | 0.145678 | 0.0016   | -0.07482 | 0.10637  | -0.03773 | 0.41601  | 0.188798 | 4.03E-05 |
| 5.31E-08 | -0.16864 | 0.00025  | -0.20834 | 5.62E-06 | -0.26981 | 3.12E-09 | -0.09826 | 0.03377  |
| 0.07845  | 0.191588 | 3.08E-05 | 0.331104 | 2.07E-13 | 0.19897  | 1.48E-05 | 0.122555 | 0.00802  |
| 0.7121   | 0.244996 | 8.22E-08 | 0.057975 | 0.2111   | 0.070177 | 0.12994  | 0.184327 | 6.15E-05 |
| 4.62E-06 | -0.00665 | 0.88609  | -0.12281 | 0.00789  | -0.18047 | 8.79E-05 | 0.164347 | 0.00036  |
| 0.98311  | 0.055569 | 0.23069  | -0.13377 | 0.00378  | -0.07158 | 0.12242  | 0.159647 | 0.00053  |

|          |          |          |          |          |          |          |          |          |
|----------|----------|----------|----------|----------|----------|----------|----------|----------|
| 3.71E-06 | -0.3095  | 7.98E-12 | -0.24172 | 1.23E-07 | -0.31984 | 1.44E-12 | -0.08202 | 0.07663  |
| 0.02456  | 0.128398 | 0.00546  | -0.01664 | 0.71979  | -0.02743 | 0.55437  | 0.188338 | 4.21E-05 |
| 0.00224  | 0.255032 | 2.28E-08 | 0.164019 | 0.00037  | 0.190247 | 3.50E-05 | 0.327617 | 3.81E-13 |
| 0.0023   | 0.130259 | 0.00481  | -0.01718 | 0.71109  | -0.03876 | 0.40335  | 0.071542 | 0.12262  |
| 0.76552  | 0.248337 | 5.40E-08 | 0.070698 | 0.1271   | 0.092559 | 0.04559  | 0.202386 | 1.05E-05 |
| 0.39121  | -0.03772 | 0.41614  | -0.02212 | 0.63355  | -0.04813 | 0.29931  | 0.068277 | 0.14068  |
| 1.63E-17 | -0.21978 | 1.62E-06 | -0.26113 | 1.02E-08 | -0.37816 | 2.53E-17 | 0.129861 | 0.00494  |
| 0.60886  | 0.328976 | 3.00E-13 | 0.180214 | 9.00E-05 | 0.191349 | 3.15E-05 | 0.242636 | 1.10E-07 |
| 0.60282  | 0.221167 | 1.39E-06 | 0.075658 | 0.10248  | 0.09336  | 0.04375  | 0.294841 | 8.06E-11 |
| 0.17988  | -0.21053 | 4.46E-06 | -0.22077 | 1.45E-06 | -0.17062 | 0.00021  | 0.083731 | 0.07064  |
| 1.40E-10 | -0.19103 | 3.25E-05 | -0.22782 | 6.50E-07 | -0.32345 | 7.80E-13 | 0.163937 | 0.00037  |
| 0.07029  | 0.000676 | 0.98838  | -0.02383 | 0.60746  | -0.06748 | 0.1454   | 0.119749 | 0.00959  |
| 0.00028  | -0.10029 | 0.03024  | -0.1437  | 0.00185  | -0.17441 | 0.00015  | 0.040371 | 0.38406  |
| 0.00388  | -0.01827 | 0.6938   | -0.01838 | 0.69202  | -0.08662 | 0.06143  | 0.096101 | 0.03789  |
| 2.10E-05 | 0.151791 | 0.001    | 0.019575 | 0.67308  | -0.04129 | 0.37329  | 0.167306 | 0.00028  |
| 0.0112   | 0.157072 | 0.00066  | -0.00066 | 0.98858  | 0.011732 | 0.80038  | 0.077113 | 0.09602  |
| 0.50346  | 0.25356  | 2.76E-08 | 0.068121 | 0.1416   | 0.060582 | 0.19126  | 0.197465 | 1.72E-05 |
| 0.00024  | 0.233567 | 3.31E-07 | 0.275665 | 1.37E-09 | 0.219616 | 1.65E-06 | 0.066875 | 0.14904  |
| 0.00411  | -0.02717 | 0.55815  | -0.05167 | 0.26512  | -0.13251 | 0.00412  | -0.0281  | 0.54474  |
| 0.10614  | 0.230795 | 4.60E-07 | 0.127779 | 0.00569  | 0.164852 | 0.00035  | -0.01727 | 0.70965  |
| 0.00086  | 0.164259 | 0.00036  | 0.275509 | 1.40E-09 | 0.250378 | 4.16E-08 | 0.063978 | 0.1675   |
| 1.74E-13 | -0.13612 | 0.0032   | -0.267   | 4.60E-09 | -0.31083 | 6.42E-12 | 0.257583 | 1.63E-08 |
| 1.82E-09 | -0.20026 | 1.30E-05 | -0.20889 | 5.30E-06 | -0.30943 | 8.06E-12 | 0.049505 | 0.2857   |
| 0.00043  | -0.05257 | 0.25692  | 0.122351 | 0.00812  | 0.141226 | 0.00222  | 0.09499  | 0.04018  |
| 0.22808  | 0.06768  | 0.1442   | 0.074928 | 0.10585  | 0.08459  | 0.06779  | 0.018632 | 0.68798  |
| 0.47228  | 0.087946 | 0.05755  | 0.077049 | 0.0963   | 0.037676 | 0.41662  | 0.156172 | 0.00071  |
| 0.98147  | -0.11491 | 0.01296  | -0.13792 | 0.00282  | -0.12201 | 0.0083   | 0.061852 | 0.1821   |
| 8.03E-05 | 0.000732 | 0.98741  | -0.08426 | 0.06889  | -0.12665 | 0.00613  | 0.120969 | 0.00888  |
| 0.00559  | 0.134442 | 0.00361  | -0.08137 | 0.07897  | -0.08832 | 0.05648  | 0.163744 | 0.00038  |
| 5.41E-09 | -0.06266 | 0.17643  | -0.12014 | 0.00936  | -0.20532 | 7.72E-06 | 0.130792 | 0.00464  |
| 6.10E-09 | 0.142413 | 0.00204  | 0.343463 | 2.24E-14 | 0.311834 | 5.45E-12 | 0.234722 | 2.89E-07 |
| 0.12752  | 0.095109 | 0.03993  | 0.068502 | 0.13938  | -0.04984 | 0.28247  | 0.313809 | 3.94E-12 |
| 0.037    | -0.04053 | 0.38218  | -0.03503 | 0.45019  | -0.00304 | 0.9478   | -0.08199 | 0.07671  |
| 0.23184  | 0.009653 | 0.83519  | 0.051132 | 0.27014  | 0.042568 | 0.35869  | -0.02035 | 0.66088  |
| 0.57723  | 0.055436 | 0.23182  | -0.01742 | 0.70728  | -0.01472 | 0.7511   | 0.27655  | 1.21E-09 |
| 0.62018  | 0.116313 | 0.01189  | 0.006284 | 0.89227  | 0.028333 | 0.54135  | 0.442739 | 7.72E-24 |
| 1.15E-08 | -0.39064 | 1.78E-18 | -0.36274 | 5.72E-16 | -0.4375  | 2.95E-23 | 0.06181  | 0.18239  |
| 0.12596  | 0.213596 | 3.20E-06 | 0.070279 | 0.12938  | 0.113207 | 0.01438  | 0.476627 | 7.34E-28 |
| 0.00118  | 0.025087 | 0.58867  | 0.046125 | 0.31992  | 0.085569 | 0.06466  | 0.494901 | 3.18E-30 |
| 0.05684  | -0.07524 | 0.10442  | -0.08243 | 0.07515  | -0.0939  | 0.04254  | 0.057791 | 0.21255  |
| 0.08426  | 0.247204 | 6.23E-08 | 0.125273 | 0.00672  | 0.113002 | 0.01455  | 0.177364 | 0.00012  |
| 0.03637  | 0.126335 | 0.00626  | 0.189055 | 3.93E-05 | 0.159056 | 0.00056  | 0.008035 | 0.86252  |
| 0.00027  | 0.197701 | 1.68E-05 | 0.27149  | 2.47E-09 | 0.254748 | 2.37E-08 | 0.126775 | 0.00608  |
| 0.13878  | 0.127593 | 0.00576  | 0.114596 | 0.01321  | 0.063835 | 0.16845  | 0.180911 | 8.44E-05 |
| 0.16334  | 0.313103 | 4.43E-12 | 0.073064 | 0.11484  | 0.137827 | 0.00284  | 0.289398 | 1.84E-10 |

|          |          |          |          |          |          |          |          |          |
|----------|----------|----------|----------|----------|----------|----------|----------|----------|
| 1.04E-05 | -0.03634 | 0.43333  | -0.09045 | 0.05077  | 0.055662 | 0.22991  | -0.11678 | 0.01155  |
| 0.00196  | -0.08172 | 0.0777   | -0.21885 | 1.80E-06 | -0.20287 | 9.95E-06 | -0.07362 | 0.11207  |
| 0.02135  | 0.209019 | 5.23E-06 | 0.025885 | 0.57686  | 0.015154 | 0.74396  | 0.121946 | 0.00834  |
| 0.02991  | -0.03002 | 0.51752  | 0.041066 | 0.37592  | 0.044799 | 0.33404  | 0.25003  | 4.35E-08 |
| 5.61E-10 | -0.21696 | 2.22E-06 | -0.30457 | 1.76E-11 | -0.34212 | 2.87E-14 | 0.186096 | 5.21E-05 |
| 0.27355  | 0.174745 | 0.00015  | 0.06642  | 0.15183  | 0.076701 | 0.09782  | 0.274549 | 1.60E-09 |
| 3.44E-13 | 0.043387 | 0.34951  | 0.228978 | 5.69E-07 | 0.252128 | 3.32E-08 | 0.148954 | 0.00125  |
| 0.95197  | -0.07526 | 0.10429  | -0.02566 | 0.58024  | -0.01049 | 0.82114  | 0.249846 | 4.46E-08 |
| 0.3586   | 0.054679 | 0.23826  | 0.096814 | 0.03649  | 0.098859 | 0.03269  | 0.281435 | 5.97E-10 |
| 0.17247  | 0.108148 | 0.0194   | 0.051498 | 0.26673  | 0.049595 | 0.28482  | 0.29738  | 5.45E-11 |
| 3.95E-06 | 0.240492 | 1.44E-07 | 0.187462 | 4.57E-05 | 0.22809  | 6.30E-07 | 0.206367 | 6.92E-06 |
| 0.0001   | -0.00754 | 0.87095  | -0.10211 | 0.02736  | -0.13202 | 0.00426  | 0.17349  | 0.00016  |
| 0.57677  | 0.157882 | 0.00062  | 0.071521 | 0.12273  | 0.060036 | 0.19529  | 0.014633 | 0.75247  |
| 0.99751  | 0.125888 | 0.00645  | 0.187066 | 4.75E-05 | 0.075745 | 0.10209  | -0.07191 | 0.12071  |
| 1.57E-05 | -0.19158 | 3.08E-05 | -0.15132 | 0.00104  | -0.23532 | 2.69E-07 | 0.28315  | 4.65E-10 |
| 0.62565  | 0.237674 | 2.02E-07 | 0.14069  | 0.00231  | 0.10087  | 0.02929  | 0.199127 | 1.46E-05 |
| 0.07335  | 0.236593 | 2.31E-07 | 0.149113 | 0.00123  | 0.167468 | 0.00028  | 0.639697 | 4.15E-55 |
| 0.00038  | -0.13366 | 0.00381  | -0.11617 | 0.01199  | -0.16517 | 0.00034  | 0.020129 | 0.66439  |
| 0.01325  | -0.04162 | 0.36956  | -0.1004  | 0.03005  | -0.12765 | 0.00574  | 0.190915 | 3.28E-05 |
| 0.86974  | 0.173158 | 0.00017  | 0.004391 | 0.9246   | 0.002391 | 0.95891  | 0.278127 | 9.64E-10 |
| 0.21448  | 0.0896   | 0.05299  | -0.01512 | 0.74445  | -0.03709 | 0.42386  | 0.186478 | 5.02E-05 |
| 0.40154  | 0.133617 | 0.00382  | 0.077727 | 0.0934   | 0.024591 | 0.59606  | 0.193929 | 2.45E-05 |
| 3.73E-05 | -0.08514 | 0.06601  | -0.10307 | 0.02593  | -0.17128 | 0.0002   | 0.146544 | 0.0015   |
| 0.00043  | 0.114697 | 0.01313  | 0.029087 | 0.53064  | -0.04168 | 0.36881  | 0.138878 | 0.00263  |
| 3.50E-07 | -0.172   | 0.00019  | -0.20874 | 5.39E-06 | -0.28182 | 5.65E-10 | 0.155916 | 0.00072  |
| 7.45E-05 | 0.047089 | 0.3099   | -0.06303 | 0.17389  | -0.11094 | 0.01647  | 0.184757 | 5.91E-05 |
| 0.00161  | -0.38588 | 4.97E-18 | -0.29004 | 1.67E-10 | -0.32399 | 7.11E-13 | 0.046919 | 0.31165  |
| 0.00172  | -0.22802 | 6.35E-07 | -0.19322 | 2.62E-05 | -0.2424  | 1.14E-07 | 0.19164  | 3.06E-05 |
| 0.09624  | -0.1394  | 0.00254  | -0.12145 | 0.00861  | -0.14851 | 0.00129  | 0.067023 | 0.14814  |
| 0.15879  | -0.18932 | 3.83E-05 | -0.04817 | 0.29891  | -0.12249 | 0.00805  | 0.259105 | 1.33E-08 |
| 0.9073   | -0.00165 | 0.97161  | 0.047518 | 0.30551  | -0.00291 | 0.95006  | 0.085512 | 0.06484  |
| 3.90E-10 | -0.0785  | 0.09019  | -0.29187 | 1.27E-10 | -0.30039 | 3.41E-11 | -0.01763 | 0.70398  |
| 0.00546  | 0.41485  | 7.51E-21 | 0.073882 | 0.11082  | 0.177655 | 0.00011  | 0.181931 | 7.68E-05 |
| 0.46125  | 0.142231 | 0.00206  | -0.00774 | 0.86749  | 0.011743 | 0.80019  | 0.244127 | 9.17E-08 |
| 0.07365  | -0.16197 | 0.00044  | -0.28209 | 5.43E-10 | -0.1997  | 1.37E-05 | 0.14607  | 0.00155  |
| 0.00495  | -0.04266 | 0.35765  | -0.05135 | 0.26808  | -0.10009 | 0.03058  | 0.054969 | 0.23578  |
| 4.39E-18 | -0.22111 | 1.40E-06 | -0.32457 | 6.44E-13 | -0.39124 | 1.57E-18 | -0.17395 | 0.00016  |
| 0.04288  | -0.04128 | 0.37341  | -0.08498 | 0.06654  | -0.10313 | 0.02584  | 0.19537  | 2.12E-05 |
| 1.08E-07 | 0.178239 | 0.00011  | 0.157294 | 0.00065  | 0.226451 | 7.62E-07 | 0.324755 | 6.24E-13 |
| 8.49E-08 | -0.30344 | 2.11E-11 | -0.14413 | 0.00179  | -0.2475  | 6.00E-08 | -0.07604 | 0.10074  |
| 1.77E-05 | 0.095512 | 0.03909  | -0.10426 | 0.02425  | -0.13285 | 0.00403  | 0.349262 | 7.63E-15 |
| 2.20E-09 | 0.399901 | 2.32E-19 | 0.411753 | 1.55E-20 | 0.400876 | 1.87E-19 | 0.295329 | 7.48E-11 |
| 0.66289  | 0.087246 | 0.05957  | 0.030633 | 0.50902  | 0.024064 | 0.60396  | 0.024636 | 0.59538  |
| 0.51381  | 0.210666 | 4.39E-06 | 0.27415  | 1.70E-09 | 0.138087 | 0.00279  | 0.244357 | 8.91E-08 |
| 0.06555  | -0.07478 | 0.10654  | 0.034122 | 0.46196  | -0.02383 | 0.6075   | 0.188874 | 4.00E-05 |

|          |          |          |          |          |          |          |          |          |
|----------|----------|----------|----------|----------|----------|----------|----------|----------|
| 0.01579  | 0.102198 | 0.02722  | 0.068166 | 0.14133  | 0.107025 | 0.02071  | 0.171284 | 0.0002   |
| 3.48E-07 | -0.21802 | 1.97E-06 | -0.22318 | 1.11E-06 | -0.27981 | 7.56E-10 | -0.06731 | 0.14644  |
| 0.39843  | 0.032372 | 0.48526  | 0.036096 | 0.43645  | 0.015806 | 0.73335  | 0.225061 | 8.94E-07 |
| 0.18794  | -0.19123 | 3.18E-05 | -0.21048 | 4.48E-06 | -0.19436 | 2.34E-05 | 0.05667  | 0.22157  |
| 0.28588  | 0.186551 | 4.99E-05 | 0.062179 | 0.17979  | 0.115362 | 0.01261  | 0.332249 | 1.69E-13 |
| 0.11293  | -0.02762 | 0.55165  | 0.066674 | 0.15027  | 0.03752  | 0.41856  | 0.130265 | 0.00481  |
| 0.52408  | 0.042692 | 0.35729  | 0.075238 | 0.10441  | 0.077611 | 0.09389  | 0.244269 | 9.00E-08 |
| 0.05417  | 0.026415 | 0.56908  | -0.09975 | 0.03114  | -0.00305 | 0.94755  | -0.04889 | 0.29171  |
| 0.16711  | -0.05646 | 0.22327  | -0.10225 | 0.02714  | -0.10148 | 0.02832  | -0.02287 | 0.62201  |
| 0.30828  | 0.042683 | 0.3574   | -0.06427 | 0.16554  | -0.02822 | 0.54302  | 0.25168  | 3.52E-08 |
| 0.07261  | -0.19247 | 2.82E-05 | -0.0572  | 0.21725  | -0.11422 | 0.01352  | 0.23738  | 2.10E-07 |
| 0.31701  | 0.068247 | 0.14086  | 0.109    | 0.01846  | 0.090661 | 0.05023  | -0.17731 | 0.00012  |
| 0.00482  | -0.0769  | 0.09696  | -0.05351 | 0.24844  | -0.08866 | 0.05555  | 0.221872 | 1.28E-06 |
| 6.11E-06 | 0.218299 | 1.91E-06 | 0.196901 | 1.82E-05 | 0.235308 | 2.69E-07 | 0.264435 | 6.52E-09 |
| 0.42633  | -0.16593 | 0.00032  | -0.06425 | 0.16573  | -0.04487 | 0.33332  | -0.10362 | 0.02514  |
| 0.00406  | 0.118217 | 0.01056  | -0.00783 | 0.86604  | -0.02308 | 0.61883  | 0.151829 | 0.001    |
| 0.00391  | 0.096322 | 0.03745  | -0.06347 | 0.17092  | -0.07967 | 0.08547  | 0.224853 | 9.15E-07 |
| 0.97287  | -0.16315 | 0.0004   | -0.17007 | 0.00022  | -0.11968 | 0.00963  | 0.09423  | 0.04181  |
| 0.02546  | 0.218624 | 1.85E-06 | 0.102698 | 0.02647  | 0.133059 | 0.00397  | 0.133447 | 0.00386  |
| 0.0242   | -0.1481  | 0.00133  | -0.32008 | 1.38E-12 | -0.24287 | 1.07E-07 | 0.14494  | 0.00169  |
| 0.03123  | 0.266303 | 5.06E-09 | 0.212667 | 3.54E-06 | 0.204397 | 8.50E-06 | 0.159355 | 0.00055  |
| 6.08E-09 | 0.173843 | 0.00016  | 0.279703 | 7.68E-10 | 0.29137  | 1.37E-10 | 0.297001 | 5.78E-11 |
| 8.38E-12 | -0.27056 | 2.81E-09 | -0.4157  | 6.15E-21 | -0.43986 | 1.62E-23 | -0.10075 | 0.02948  |
| 5.54E-05 | 0.09516  | 0.03982  | -0.2183  | 1.91E-06 | -0.18751 | 4.55E-05 | 0.267093 | 4.54E-09 |
| 0.22554  | 0.182707 | 7.15E-05 | 0.020353 | 0.66088  | 0.029974 | 0.51817  | 0.228737 | 5.85E-07 |
| 1.87E-05 | -0.04744 | 0.30625  | -0.08642 | 0.06202  | -0.15529 | 0.00076  | 0.176249 | 0.00013  |
| 1.01E-11 | 0.374741 | 5.12E-17 | 0.317504 | 2.13E-12 | 0.377366 | 2.98E-17 | 0.200884 | 1.22E-05 |
| 0.00113  | -0.24824 | 5.46E-08 | -0.1845  | 6.05E-05 | -0.27224 | 2.22E-09 | 0.144686 | 0.00172  |
| 4.49E-12 | -0.23046 | 4.78E-07 | -0.3852  | 5.75E-18 | -0.39945 | 2.57E-19 | 0.025181 | 0.58727  |
| 6.78E-05 | -0.00298 | 0.94878  | -0.07385 | 0.11096  | -0.13057 | 0.00471  | 0.180819 | 8.51E-05 |
| 0.00399  | 0.080052 | 0.08398  | -0.02488 | 0.59171  | -0.06355 | 0.17035  | 0.215938 | 2.48E-06 |
| 1.09E-05 | 0.217328 | 2.13E-06 | 0.192151 | 2.91E-05 | 0.2418   | 1.22E-07 | 0.237674 | 2.02E-07 |
| 1.36E-08 | -0.06382 | 0.16855  | -0.14086 | 0.00228  | -0.22758 | 6.69E-07 | 0.215808 | 2.52E-06 |
| 1.90E-15 | 0.354633 | 2.76E-15 | 0.150674 | 0.00109  | 0.3518   | 4.73E-15 | 0.364578 | 3.98E-16 |
| 1.78E-06 | -0.21983 | 1.61E-06 | 0.126191 | 0.00632  | -0.12997 | 0.00491  | -0.09099 | 0.04941  |
| 0.0308   | 0.066935 | 0.14868  | 0.043673 | 0.34634  | -0.02416 | 0.60247  | 0.237065 | 2.18E-07 |
| 0.07017  | 0.146725 | 0.00148  | 0.236502 | 2.33E-07 | 0.139641 | 0.00249  | 0.193736 | 2.49E-05 |
| 0.00165  | 0.079646 | 0.08556  | -0.02427 | 0.6008   | -0.05878 | 0.20483  | 0.133707 | 0.0038   |
| 0.4848   | -0.06826 | 0.1408   | -0.31725 | 2.23E-12 | -0.17739 | 0.00012  | 0.071368 | 0.12353  |
| 6.31E-09 | -0.02913 | 0.53005  | -0.12223 | 0.00819  | -0.20631 | 6.96E-06 | -0.06968 | 0.13269  |
| 0.02184  | 0.159048 | 0.00056  | -0.00751 | 0.87141  | 0.005116 | 0.91221  | 0.254304 | 2.51E-08 |
| 0.01464  | -0.03143 | 0.49806  | -0.15708 | 0.00066  | -0.14172 | 0.00214  | 0.177691 | 0.00011  |
| 0.00018  | -0.03905 | 0.39982  | -0.04083 | 0.37873  | -0.12033 | 0.00924  | 0.164013 | 0.00037  |
| 1.43E-07 | 0.000305 | 0.99476  | -0.1885  | 4.14E-05 | -0.22882 | 5.79E-07 | 0.120342 | 0.00924  |
| 0.49117  | 0.071853 | 0.121    | 0.13417  | 0.00367  | 0.034286 | 0.45982  | 0.294113 | 9.01E-11 |

|          |          |          |          |          |          |          |          |          |
|----------|----------|----------|----------|----------|----------|----------|----------|----------|
| 2.86E-05 | -0.21274 | 3.51E-06 | -0.0482  | 0.29861  | -0.21166 | 3.95E-06 | -0.17595 | 0.00013  |
| 0.02746  | 0.357697 | 1.53E-15 | -0.03403 | 0.46314  | 0.010435 | 0.82205  | 0.160247 | 0.00051  |
| 0.14179  | -0.08316 | 0.07259  | 0.067552 | 0.14496  | 0.02785  | 0.54828  | 0.057577 | 0.21425  |
| 0.67404  | -0.17746 | 0.00012  | -0.0814  | 0.07886  | -0.10028 | 0.03025  | -0.11578 | 0.01229  |
| 9.63E-10 | 0.249405 | 4.71E-08 | 0.112129 | 0.01534  | 0.230407 | 4.81E-07 | 0.134444 | 0.00361  |
| 0.13902  | 0.070264 | 0.12946  | -0.04449 | 0.3374   | 0.022953 | 0.62077  | 0.248477 | 5.30E-08 |
| 0.02058  | 0.090594 | 0.0504   | 0.058387 | 0.20787  | 0.027255 | 0.55686  | 0.26378  | 7.13E-09 |
| 0.21463  | 0.064176 | 0.16618  | -0.13169 | 0.00436  | -0.08128 | 0.0793   | 0.048456 | 0.29604  |
| 0.08993  | 0.291526 | 1.34E-10 | 0.153562 | 0.00087  | 0.159498 | 0.00054  | 0.277494 | 1.06E-09 |
| 0.0003   | 0.009103 | 0.84445  | -0.02554 | 0.58196  | -0.1004  | 0.03005  | 0.234047 | 3.13E-07 |
| 1.08E-10 | -0.35942 | 1.09E-15 | -0.43578 | 4.57E-23 | -0.42099 | 1.74E-21 | -0.23698 | 2.20E-07 |
| 1.62E-15 | -0.03643 | 0.43225  | -0.1414  | 0.00219  | -0.27788 | 9.99E-10 | -0.0016  | 0.97255  |
| 0.01447  | -0.07797 | 0.09237  | 0.096216 | 0.03766  | -0.05135 | 0.26813  | 0.05115  | 0.26998  |
| 0.01134  | -0.06908 | 0.13604  | 0.063843 | 0.1684   | -0.08844 | 0.05617  | 0.052352 | 0.25886  |
| 1.00E-10 | -0.29315 | 1.04E-10 | -0.25355 | 2.77E-08 | -0.33987 | 4.32E-14 | 0.017056 | 0.71315  |
| 1.52E-05 | -0.12228 | 0.00816  | -0.13882 | 0.00264  | -0.22925 | 5.51E-07 | 0.260717 | 1.08E-08 |
| 0.00232  | -0.18385 | 6.43E-05 | -0.18214 | 7.54E-05 | -0.21321 | 3.34E-06 | 0.24382  | 9.52E-08 |
| 3.53E-05 | 0.445681 | 3.60E-24 | 0.348877 | 8.21E-15 | 0.338252 | 5.79E-14 | 0.083099 | 0.0728   |
| 0.00293  | -0.03861 | 0.40515  | 0.04902  | 0.29045  | 0.08639  | 0.06213  | 0.084565 | 0.06787  |
| 0.00026  | 0.061713 | 0.18308  | -0.07959 | 0.08578  | -0.10154 | 0.02823  | 0.226861 | 7.27E-07 |
| 1.27E-06 | -0.01642 | 0.72336  | -0.03759 | 0.41774  | -0.14329 | 0.00191  | 0.096462 | 0.03717  |
| 7.03E-08 | 0.356484 | 1.93E-15 | 0.086485 | 0.06184  | 0.245284 | 7.93E-08 | 0.310474 | 6.80E-12 |
| 0.0003   | 0.113525 | 0.0141   | -0.07103 | 0.12533  | 0.095694 | 0.03872  | -0.02612 | 0.57334  |
| 0.01237  | -0.22008 | 1.57E-06 | -0.12811 | 0.00556  | -0.18537 | 5.57E-05 | -0.11756 | 0.01101  |
| 0.00028  | 0.072524 | 0.11755  | -0.05297 | 0.25326  | -0.08353 | 0.07132  | -0.06936 | 0.1345   |
| 0.02728  | -0.00601 | 0.89698  | -0.05084 | 0.27286  | -0.06851 | 0.13932  | 0.216723 | 2.28E-06 |
| 0.00079  | 0.022012 | 0.63517  | -0.08776 | 0.05808  | -0.12778 | 0.00569  | 0.136583 | 0.0031   |
| 0.03063  | -0.05919 | 0.20167  | -0.07398 | 0.11034  | -0.082   | 0.07668  | -0.05697 | 0.21914  |
| 0.82084  | -0.10653 | 0.02131  | 0.067463 | 0.14549  | 0.040214 | 0.38591  | 0.087251 | 0.05956  |
| 0.00019  | -0.22629 | 7.76E-07 | -0.28196 | 5.53E-10 | -0.2888  | 2.01E-10 | -0.03054 | 0.51025  |
| 1.35E-06 | -0.15634 | 0.0007   | -0.302   | 2.65E-11 | -0.31256 | 4.84E-12 | 0.166053 | 0.00031  |
| 0.06802  | -0.09292 | 0.04474  | -0.14327 | 0.00191  | -0.1944  | 2.33E-05 | -0.13488 | 0.0035   |
| 0.09761  | 0.064571 | 0.16359  | -0.06248 | 0.17769  | -0.09298 | 0.04462  | 0.078739 | 0.0892   |
| 5.77E-09 | -0.4057  | 6.25E-20 | -0.38052 | 1.54E-17 | -0.42605 | 5.12E-22 | -0.06956 | 0.13333  |
| 0.67332  | 0.106983 | 0.02076  | -0.07623 | 0.09991  | -0.05078 | 0.27348  | 0.16093  | 0.00048  |
| 1.50E-22 | -0.17062 | 0.00021  | -0.30238 | 2.49E-11 | -0.39881 | 2.96E-19 | -0.19428 | 2.36E-05 |
| 0.00069  | 0.325126 | 5.85E-13 | 0.249237 | 4.82E-08 | 0.240925 | 1.36E-07 | 0.044339 | 0.33903  |
| 2.69E-05 | -0.00722 | 0.87637  | -0.04815 | 0.29914  | -0.1623  | 0.00043  | -0.01472 | 0.75098  |
| 0.53991  | 0.27703  | 1.13E-09 | 0.151738 | 0.001    | 0.078907 | 0.08852  | -0.11311 | 0.01446  |
| 0.00181  | 0.015704 | 0.73501  | -0.2624  | 8.59E-09 | -0.19737 | 1.74E-05 | -0.03053 | 0.51044  |
| 1.73E-09 | -0.28061 | 6.73E-10 | -0.25478 | 2.36E-08 | -0.35551 | 2.33E-15 | -0.0942  | 0.04188  |
| 4.37E-13 | -0.11995 | 0.00947  | -0.1217  | 0.00847  | -0.26741 | 4.35E-09 | -0.10265 | 0.02653  |
| 1.32E-12 | -0.32594 | 5.09E-13 | -0.40582 | 6.09E-20 | -0.44867 | 1.65E-24 | -0.16638 | 0.0003   |
| 1.58E-11 | -0.16049 | 0.0005   | -0.26804 | 3.98E-09 | -0.32343 | 7.83E-13 | 0.135029 | 0.00346  |
| 8.92E-05 | -0.15889 | 0.00057  | -0.25824 | 1.50E-08 | -0.26822 | 3.88E-09 | -0.14717 | 0.00143  |



|          |          |          |          |          |          |          |          |          |
|----------|----------|----------|----------|----------|----------|----------|----------|----------|
| 2.26E-06 | -0.09689 | 0.03634  | -0.29949 | 3.93E-11 | -0.28237 | 5.21E-10 | 0.092377 | 0.04602  |
| 5.31E-05 | 0.014214 | 0.75933  | -0.06858 | 0.1389   | -0.16743 | 0.00028  | -0.02048 | 0.65892  |
| 0.00808  | 0.312593 | 4.81E-12 | 0.145172 | 0.00166  | 0.161539 | 0.00046  | 0.23792  | 1.96E-07 |
| 0.00068  | -0.10527 | 0.0229   | -0.28807 | 2.25E-10 | -0.26638 | 5.01E-09 | -0.06058 | 0.19129  |
| 0.52551  | 0.200201 | 1.31E-05 | 0.315617 | 2.92E-12 | 0.177205 | 0.00012  | 0.026771 | 0.56388  |
| 4.44E-14 | -0.28127 | 6.12E-10 | -0.35448 | 2.84E-15 | -0.39184 | 1.38E-18 | -0.21905 | 1.76E-06 |
| 0.01883  | 0.16394  | 0.00037  | 0.105792 | 0.02223  | 0.000171 | 0.99706  | 0.093974 | 0.04237  |
| 0.02322  | 0.298359 | 4.68E-11 | 0.118549 | 0.01035  | 0.164987 | 0.00034  | 0.091537 | 0.04804  |
| 1.49E-23 | -0.30479 | 1.70E-11 | -0.35608 | 2.09E-15 | -0.47364 | 1.73E-27 | -0.21879 | 1.81E-06 |
| 6.49E-12 | -0.00216 | 0.96289  | -0.04752 | 0.30553  | -0.18943 | 3.79E-05 | -0.14721 | 0.00142  |
| 5.88E-18 | -0.38608 | 4.76E-18 | -0.42923 | 2.35E-22 | -0.49486 | 3.23E-30 | -0.21331 | 3.31E-06 |
| 0.17432  | 0.037967 | 0.41303  | 0.107795 | 0.01981  | 0.018712 | 0.68671  | 0.101508 | 0.02828  |
| 6.74E-05 | -0.24574 | 7.50E-08 | -0.14571 | 0.00159  | -0.24505 | 8.17E-08 | -0.14714 | 0.00143  |
| 1.92E-11 | -0.08421 | 0.06903  | -0.23341 | 3.38E-07 | -0.30035 | 3.43E-11 | -0.13446 | 0.0036   |
| 7.27E-24 | -0.4445  | 4.90E-24 | -0.49595 | 2.31E-30 | -0.55203 | 1.33E-38 | -0.43831 | 2.41E-23 |
| 0.0009   | 0.332316 | 1.67E-13 | 0.104643 | 0.02373  | 0.126805 | 0.00607  | 0.045518 | 0.32634  |
| 4.39E-18 | -0.22533 | 8.67E-07 | -0.35179 | 4.74E-15 | -0.42583 | 5.39E-22 | -0.07481 | 0.10638  |
| 4.05E-14 | -0.28286 | 4.85E-10 | -0.39924 | 2.69E-19 | -0.41036 | 2.14E-20 | -0.03947 | 0.3948   |
| 0.00015  | 0.137742 | 0.00286  | -0.04133 | 0.37289  | 0.073458 | 0.11289  | -0.01367 | 0.76829  |
| 2.23E-17 | -0.23035 | 4.84E-07 | -0.42878 | 2.62E-22 | -0.45831 | 1.25E-25 | -0.15342 | 0.00088  |
| 2.11E-10 | -0.23478 | 2.87E-07 | -0.32491 | 6.08E-13 | -0.37219 | 8.62E-17 | -0.06757 | 0.14488  |
| 9.78E-10 | -0.05851 | 0.20693  | -0.15509 | 0.00077  | -0.21195 | 3.83E-06 | -0.29226 | 1.19E-10 |
| 1.82E-05 | -0.14978 | 0.00117  | -0.1781  | 0.00011  | -0.23523 | 2.72E-07 | -0.11063 | 0.01677  |
| 5.92E-19 | -0.05738 | 0.21584  | -0.29091 | 1.47E-10 | -0.37154 | 9.83E-17 | -0.13723 | 0.00296  |
| 0.22406  | 0.023494 | 0.61257  | 0.000519 | 0.99108  | -0.07844 | 0.09044  | -0.00553 | 0.90505  |
| 0.1461   | 0.141366 | 0.0022   | -0.09085 | 0.04976  | -0.03901 | 0.40028  | 0.229215 | 5.53E-07 |
| 6.11E-15 | -0.31335 | 4.25E-12 | -0.47954 | 3.15E-28 | -0.4725  | 2.40E-27 | -0.06679 | 0.14957  |
| 0.48178  | 0.154053 | 0.00084  | -0.01089 | 0.81442  | 0.006089 | 0.89559  | 0.086501 | 0.06179  |
| 2.79E-06 | -0.13958 | 0.0025   | -0.08137 | 0.07899  | -0.21614 | 2.43E-06 | -0.11356 | 0.01407  |
| 1.71E-23 | -0.30419 | 1.87E-11 | -0.38527 | 5.66E-18 | -0.48764 | 2.88E-29 | -0.13637 | 0.00315  |
| 3.91E-12 | -0.41388 | 9.43E-21 | -0.42686 | 4.20E-22 | -0.48019 | 2.61E-28 | -0.02358 | 0.61125  |
| 0.10428  | -0.07522 | 0.10447  | -0.27734 | 1.08E-09 | -0.19352 | 2.55E-05 | 0.010451 | 0.82179  |
| 0.47006  | 0.030778 | 0.50702  | -0.14453 | 0.00174  | -0.10734 | 0.02034  | -0.06615 | 0.15351  |
| 2.96E-08 | -0.28935 | 1.86E-10 | -0.24587 | 7.37E-08 | -0.30816 | 9.90E-12 | -0.07625 | 0.09982  |
| 0.00139  | -0.19202 | 2.95E-05 | -0.11553 | 0.01248  | -0.15225 | 0.00096  | -0.04592 | 0.32209  |
| 0.00391  | -0.18228 | 7.44E-05 | -0.13294 | 0.004    | -0.18394 | 6.37E-05 | -0.02828 | 0.54217  |
| 0.42022  | -0.10089 | 0.02927  | 0.007836 | 0.86589  | -0.06076 | 0.18996  | -0.02472 | 0.5941   |
| 0.01447  | -0.24501 | 8.21E-08 | -0.15684 | 0.00067  | -0.18681 | 4.87E-05 | -0.00701 | 0.8799   |
| 0.00376  | -0.16037 | 0.0005   | -0.0985  | 0.03333  | -0.15809 | 0.00061  | 0.041909 | 0.36619  |
| 3.47E-15 | -0.30114 | 3.03E-11 | -0.3331  | 1.45E-13 | -0.38199 | 1.13E-17 | -0.2846  | 3.76E-10 |
| 0.00117  | -0.28049 | 6.85E-10 | -0.19736 | 1.74E-05 | -0.22245 | 1.20E-06 | -0.0298  | 0.52058  |
| 3.68E-05 | -0.22309 | 1.12E-06 | -0.19269 | 2.76E-05 | -0.24627 | 7.01E-08 | -0.05124 | 0.26909  |
| 3.42E-06 | -0.22591 | 8.10E-07 | -0.18743 | 4.59E-05 | -0.23765 | 2.03E-07 | -0.07025 | 0.12955  |
| 0.00145  | -0.0738  | 0.1112   | -0.09904 | 0.03236  | -0.13513 | 0.00344  | -0.01504 | 0.74577  |
| 3.55E-05 | -0.18212 | 7.55E-05 | -0.13915 | 0.00258  | -0.21226 | 3.70E-06 | -0.02995 | 0.51858  |

|          |          |          |          |          |          |          |          |          |
|----------|----------|----------|----------|----------|----------|----------|----------|----------|
| 1.91E-06 | -0.21775 | 2.03E-06 | -0.18755 | 4.53E-05 | -0.24201 | 1.19E-07 | -0.10862 | 0.01888  |
| 0.00365  | -0.13001 | 0.00489  | -0.10249 | 0.02678  | -0.14197 | 0.0021   | -0.06279 | 0.17554  |
| 6.89E-07 | -0.25172 | 3.50E-08 | -0.21038 | 4.53E-06 | -0.26756 | 4.26E-09 | -0.07063 | 0.12746  |
| 0.07862  | -0.2442  | 9.09E-08 | -0.13706 | 0.003    | -0.16784 | 0.00027  | -0.05177 | 0.26419  |
| 2.95E-08 | -0.2331  | 3.50E-07 | -0.21218 | 3.73E-06 | -0.29907 | 4.19E-11 | 0.00775  | 0.86735  |
| 6.42E-07 | -0.2759  | 1.33E-09 | -0.18748 | 4.56E-05 | -0.2503  | 4.21E-08 | -0.04242 | 0.36038  |
| 0.00935  | -0.16758 | 0.00028  | -0.10652 | 0.02132  | -0.14443 | 0.00175  | -0.12005 | 0.00941  |
| 0.01248  | -0.16537 | 0.00033  | -0.098   | 0.03424  | -0.12089 | 0.00892  | -0.01118 | 0.80966  |
| 0.00632  | -0.13348 | 0.00386  | -0.12282 | 0.00788  | -0.14299 | 0.00195  | -0.00256 | 0.95601  |
| 0.1201   | -0.18436 | 6.13E-05 | -0.16185 | 0.00045  | -0.17056 | 0.00021  | -0.00292 | 0.94979  |
| 0.34493  | -0.231   | 4.49E-07 | -0.06928 | 0.13495  | -0.10233 | 0.02702  | -0.02803 | 0.54567  |
| 0.0003   | -0.19437 | 2.34E-05 | -0.13977 | 0.00247  | -0.201   | 1.20E-05 | -0.0204  | 0.66011  |
| 0.1917   | -0.23376 | 3.24E-07 | -0.20576 | 7.38E-06 | -0.18719 | 4.69E-05 | -0.05387 | 0.24525  |
| 1.15E-05 | -0.32202 | 9.96E-13 | -0.22853 | 5.99E-07 | -0.30277 | 2.34E-11 | -0.06345 | 0.17103  |
| 2.87E-05 | -0.22054 | 1.49E-06 | -0.18642 | 5.05E-05 | -0.22672 | 7.39E-07 | -0.15872 | 0.00058  |
| 1.46E-19 | -0.40749 | 4.16E-20 | -0.26601 | 5.26E-09 | -0.41237 | 1.34E-20 | -0.45984 | 8.21E-26 |
| 4.85E-05 | -0.26006 | 1.17E-08 | -0.17731 | 0.00012  | -0.23602 | 2.47E-07 | -0.09287 | 0.04488  |
| 0.29212  | -0.08134 | 0.07909  | -0.03175 | 0.49363  | -0.07877 | 0.08907  | -0.03161 | 0.49558  |
| 0.20024  | -0.07073 | 0.12693  | -0.06071 | 0.1903   | -0.06127 | 0.18624  | -0.03691 | 0.42619  |
| 5.94E-08 | -0.28058 | 6.77E-10 | -0.20663 | 6.73E-06 | -0.2909  | 1.47E-10 | -0.13274 | 0.00406  |
| 0.46227  | -0.0566  | 0.22217  | -0.04597 | 0.32151  | -0.03752 | 0.41856  | -0.11059 | 0.01681  |
| 2.14E-07 | -0.25853 | 1.44E-08 | -0.19046 | 3.43E-05 | -0.26546 | 5.67E-09 | -0.1043  | 0.02419  |
| 1.50E-08 | -0.36039 | 9.06E-16 | -0.32564 | 5.36E-13 | -0.38197 | 1.14E-17 | -0.15877 | 0.00057  |
| 0.04371  | -0.10391 | 0.02474  | -0.10146 | 0.02836  | -0.12282 | 0.00788  | -0.00737 | 0.87372  |
| 5.06E-06 | -0.25599 | 2.01E-08 | -0.20149 | 1.15E-05 | -0.28092 | 6.44E-10 | -0.02038 | 0.6605   |
| 5.99E-06 | -0.2139  | 3.10E-06 | -0.12319 | 0.00769  | -0.22582 | 8.19E-07 | -0.04275 | 0.35665  |
| 1.37E-05 | -0.22827 | 6.17E-07 | -0.20889 | 5.31E-06 | -0.24497 | 8.26E-08 | -0.10366 | 0.02507  |
| 0.17093  | -0.286   | 3.06E-10 | -0.08241 | 0.07521  | -0.1716  | 0.00019  | 0.004166 | 0.92845  |
| 4.47E-07 | -0.28913 | 1.92E-10 | -0.23523 | 2.72E-07 | -0.28382 | 4.21E-10 | -0.07437 | 0.10849  |
| 1.87E-06 | -0.25428 | 2.52E-08 | -0.19911 | 1.46E-05 | -0.251   | 3.84E-08 | -0.07925 | 0.08714  |
| 0.00021  | -0.15955 | 0.00054  | -0.1424  | 0.00204  | -0.1521  | 0.00098  | -0.02563 | 0.58065  |
| 7.80E-06 | -0.24132 | 1.30E-07 | -0.18994 | 3.61E-05 | -0.25061 | 4.04E-08 | -0.06213 | 0.18011  |
| 0.03896  | -0.17122 | 0.0002   | -0.1453  | 0.00164  | -0.18423 | 6.21E-05 | -0.04427 | 0.33982  |
| 0.0863   | -0.13396 | 0.00373  | -0.08304 | 0.07302  | -0.12153 | 0.00856  | -0.01394 | 0.7639   |
| 0.00024  | -0.17808 | 0.00011  | -0.15764 | 0.00063  | -0.18717 | 4.70E-05 | -0.04363 | 0.34684  |
| 0.00044  | -0.27548 | 1.41E-09 | -0.18631 | 5.10E-05 | -0.21831 | 1.91E-06 | -0.0771  | 0.09606  |
| 0.02207  | -0.19791 | 1.65E-05 | -0.10806 | 0.0195   | -0.1532  | 0.0009   | -0.08067 | 0.08162  |
| 0.4496   | -0.08007 | 0.08392  | -0.0209  | 0.65242  | -0.03732 | 0.42107  | -0.12517 | 0.00676  |
| 0.07008  | -0.16632 | 0.00031  | -0.07052 | 0.12808  | -0.13681 | 0.00305  | -0.00254 | 0.95633  |
| 0.00104  | -0.22671 | 7.39E-07 | -0.10686 | 0.02091  | -0.18081 | 8.52E-05 | -0.05806 | 0.21046  |
| 6.66E-05 | -0.23099 | 4.49E-07 | -0.12264 | 0.00797  | -0.20977 | 4.83E-06 | -0.10874 | 0.01874  |
| 8.09E-09 | -0.38526 | 5.68E-18 | -0.29779 | 5.11E-11 | -0.36661 | 2.66E-16 | -0.12079 | 0.00898  |
| 0.08392  | -0.02902 | 0.53162  | -0.06339 | 0.17146  | -0.07097 | 0.12564  | 0.010362 | 0.82327  |
| 0.00047  | -0.18431 | 6.16E-05 | -0.14761 | 0.00138  | -0.17056 | 0.00021  | -0.03883 | 0.40249  |
| 0.12829  | -0.11298 | 0.01457  | -0.10252 | 0.02673  | -0.10793 | 0.01965  | -0.03678 | 0.42786  |

|          |          |          |          |          |          |          |          |          |
|----------|----------|----------|----------|----------|----------|----------|----------|----------|
| 2.87E-10 | -0.3406  | 3.79E-14 | -0.28788 | 2.31E-10 | -0.35054 | 6.00E-15 | -0.09053 | 0.05057  |
| 1.42E-07 | -0.27231 | 2.20E-09 | -0.22038 | 1.52E-06 | -0.26636 | 5.02E-09 | -0.09265 | 0.04538  |
| 0.00346  | -0.16723 | 0.00028  | -0.07139 | 0.1234   | -0.15658 | 0.00068  | -0.15145 | 0.00103  |
| 0.11382  | -0.09412 | 0.04205  | -0.04242 | 0.36036  | -0.0642  | 0.16605  | -0.05459 | 0.23902  |
| 0.05904  | 0.092853 | 0.04491  | -0.02795 | 0.54684  | 0.06395  | 0.16768  | 0.140118 | 0.00241  |
| 7.93E-05 | -0.22702 | 7.13E-07 | -0.16197 | 0.00044  | -0.2121  | 3.76E-06 | -0.05957 | 0.1988   |
| 1.12E-07 | -0.29532 | 7.49E-11 | -0.25482 | 2.35E-08 | -0.30952 | 7.94E-12 | -0.08387 | 0.07017  |
| 0.00027  | -0.28263 | 5.02E-10 | -0.17087 | 0.00021  | -0.22857 | 5.96E-07 | -0.16481 | 0.00035  |
| 0.1415   | -0.03772 | 0.41604  | 0.020324 | 0.66133  | 0.051783 | 0.26408  | -0.02625 | 0.57148  |
| 0.13198  | -0.19519 | 2.16E-05 | -0.109   | 0.01846  | -0.10109 | 0.02894  | -0.02005 | 0.66564  |
| 3.42E-05 | -0.30052 | 3.34E-11 | -0.18654 | 4.99E-05 | -0.253   | 2.97E-08 | -0.0431  | 0.35268  |
| 0.67757  | -0.13778 | 0.00285  | -0.09204 | 0.04681  | -0.04674 | 0.31346  | -0.04851 | 0.29555  |
| 0.00577  | -0.14704 | 0.00144  | -0.13667 | 0.00308  | -0.17528 | 0.00014  | 0.006849 | 0.88265  |
| 0.03574  | -0.13438 | 0.00362  | -0.05695 | 0.21926  | -0.10763 | 0.02     | 0.133034 | 0.00398  |
| 6.51E-06 | -0.28626 | 2.94E-10 | -0.22276 | 1.16E-06 | -0.26915 | 3.42E-09 | -0.06068 | 0.19054  |
| 0.16229  | -0.08071 | 0.08146  | -0.08179 | 0.07744  | -0.08827 | 0.05664  | -0.07402 | 0.11015  |
| 0.01675  | -0.0995  | 0.03157  | -0.08626 | 0.06252  | -0.10592 | 0.02206  | -0.06401 | 0.16727  |
| 3.16E-05 | -0.2173  | 2.14E-06 | -0.17501 | 0.00014  | -0.24484 | 8.38E-08 | -0.06136 | 0.18557  |
| 2.98E-08 | -0.28907 | 1.93E-10 | -0.25559 | 2.12E-08 | -0.31055 | 6.72E-12 | -0.06304 | 0.1738   |
| 1.45E-07 | -0.27789 | 9.97E-10 | -0.23548 | 2.64E-07 | -0.29618 | 6.56E-11 | -0.08102 | 0.0803   |
| 0.03619  | -0.12364 | 0.00747  | -0.11908 | 0.01     | -0.12553 | 0.0066   | 0.002194 | 0.96229  |
| 0.00041  | -0.18215 | 7.53E-05 | -0.14519 | 0.00166  | -0.17665 | 0.00012  | -0.04975 | 0.28334  |
| 0.00154  | -0.28532 | 3.38E-10 | -0.17532 | 0.00014  | -0.23275 | 3.65E-07 | -0.06834 | 0.14029  |
| 0.00168  | -0.18573 | 5.39E-05 | -0.15759 | 0.00063  | -0.16238 | 0.00043  | -0.08857 | 0.05578  |
| 0.01593  | -0.09125 | 0.04874  | -0.1052  | 0.02299  | -0.14745 | 0.0014   | 0.022178 | 0.63261  |
| 0.0104   | -0.17254 | 0.00018  | -0.113   | 0.01455  | -0.15275 | 0.00093  | -0.03304 | 0.47631  |
| 0.00235  | -0.16903 | 0.00024  | -0.14769 | 0.00137  | -0.18059 | 8.69E-05 | -0.0351  | 0.44919  |
| 0.00021  | -0.21989 | 1.60E-06 | -0.16682 | 0.00029  | -0.21515 | 2.70E-06 | -0.12271 | 0.00794  |
| 8.16E-06 | -0.28108 | 6.29E-10 | -0.19276 | 2.74E-05 | -0.26855 | 3.71E-09 | -0.19025 | 3.50E-05 |
| 0.0862   | -0.22029 | 1.53E-06 | -0.07415 | 0.10953  | -0.14682 | 0.00146  | -0.02567 | 0.57997  |
| 0.11208  | -0.15325 | 0.00089  | -0.10631 | 0.02158  | -0.12771 | 0.00571  | -0.03549 | 0.4442   |
| 0.31222  | -0.08598 | 0.06339  | -0.06293 | 0.1746   | -0.05494 | 0.23602  | 0.002598 | 0.95535  |
| 0.00262  | -0.08136 | 0.07903  | -0.11191 | 0.01554  | -0.12076 | 0.009    | -0.01737 | 0.7081   |
| 0.00074  | -0.2144  | 2.94E-06 | -0.1763  | 0.00013  | -0.18904 | 3.93E-05 | -0.05585 | 0.22837  |
| 9.40E-07 | -0.24519 | 8.02E-08 | -0.21926 | 1.72E-06 | -0.26782 | 4.10E-09 | -0.13944 | 0.00253  |
| 2.79E-05 | -0.21313 | 3.37E-06 | -0.18503 | 5.75E-05 | -0.21903 | 1.76E-06 | -0.09165 | 0.04777  |
| 0.09306  | -0.09065 | 0.05026  | -0.0658  | 0.15568  | -0.06939 | 0.13428  | 0.011392 | 0.80605  |
| 0.63339  | -0.0415  | 0.37084  | -0.06136 | 0.1856   | -0.01331 | 0.77419  | 0.064207 | 0.16598  |
| 3.71E-05 | -0.20745 | 6.17E-06 | -0.15869 | 0.00058  | -0.20332 | 9.50E-06 | -0.05155 | 0.26623  |
| 0.07554  | -0.09243 | 0.04589  | -0.1057  | 0.02234  | -0.12615 | 0.00634  | 0.00391  | 0.93284  |
| 0.00014  | -0.15111 | 0.00105  | -0.15453 | 0.00081  | -0.18508 | 5.73E-05 | -0.04041 | 0.38363  |
| 0.12391  | -0.11801 | 0.0107   | -0.06563 | 0.15677  | -0.08595 | 0.06348  | -0.02821 | 0.54305  |
| 0.00811  | -0.12274 | 0.00792  | -0.15445 | 0.00081  | -0.15    | 0.00115  | -0.08219 | 0.076    |
| 0.03435  | -0.07973 | 0.08523  | -0.00891 | 0.84774  | -0.06978 | 0.13211  | -0.05303 | 0.2527   |
| 0.00173  | -0.2229  | 1.14E-06 | -0.17271 | 0.00018  | -0.19595 | 2.00E-05 | -0.03592 | 0.43872  |

|          |          |          |          |          |          |          |          |          |
|----------|----------|----------|----------|----------|----------|----------|----------|----------|
| 0.00242  | -0.21515 | 2.71E-06 | -0.15747 | 0.00064  | -0.20915 | 5.16E-06 | -0.05197 | 0.26232  |
| 0.00701  | -0.13477 | 0.00352  | -0.10203 | 0.02747  | -0.14949 | 0.0012   | -0.04854 | 0.29521  |
| 2.57E-08 | -0.31637 | 2.58E-12 | -0.22822 | 6.21E-07 | -0.30392 | 1.95E-11 | -0.16206 | 0.00044  |
| 6.78E-05 | -0.19854 | 1.55E-05 | -0.13102 | 0.00457  | -0.18893 | 3.97E-05 | -0.05648 | 0.22311  |
| 0.00156  | -0.14648 | 0.0015   | -0.11423 | 0.01351  | -0.13981 | 0.00246  | -0.01833 | 0.6928   |
| 0.03009  | -0.18216 | 7.53E-05 | -0.0999  | 0.0309   | -0.14538 | 0.00163  | 0.021254 | 0.64686  |
| 1.69E-05 | -0.20382 | 9.01E-06 | -0.17646 | 0.00013  | -0.20517 | 7.84E-06 | -0.19494 | 2.21E-05 |
| 0.01842  | -0.12937 | 0.00511  | -0.13142 | 0.00445  | -0.15597 | 0.00072  | 0.026576 | 0.56673  |
| 0.09361  | -0.02682 | 0.56321  | 0.016154 | 0.72771  | -0.0333  | 0.47288  | -0.03111 | 0.5025   |
| 1.27E-05 | -0.24923 | 4.82E-08 | -0.20663 | 6.73E-06 | -0.24448 | 8.78E-08 | -0.0603  | 0.1933   |
| 0.00011  | -0.19465 | 2.28E-05 | -0.16319 | 0.0004   | -0.21363 | 3.19E-06 | -0.0307  | 0.50803  |
| 0.52644  | -0.12967 | 0.00501  | -0.10132 | 0.02857  | -0.12543 | 0.00665  | -0.03174 | 0.49379  |
| 8.30E-05 | -0.20649 | 6.83E-06 | -0.13377 | 0.00378  | -0.19953 | 1.40E-05 | -0.03599 | 0.43776  |
| 0.00013  | -0.20991 | 4.76E-06 | -0.16883 | 0.00025  | -0.2048  | 8.15E-06 | -0.08632 | 0.06234  |
| 4.00E-06 | -0.24058 | 1.42E-07 | -0.19749 | 1.72E-05 | -0.25661 | 1.86E-08 | -0.07611 | 0.10045  |
| 0.23694  | 0.027477 | 0.55365  | 0.011655 | 0.80167  | 0.054728 | 0.23784  | -0.00135 | 0.97681  |
| 1.53E-05 | -0.22649 | 7.58E-07 | -0.18212 | 7.55E-05 | -0.22958 | 5.30E-07 | -0.06077 | 0.18984  |
| 0.04471  | -0.13997 | 0.00243  | -0.11808 | 0.01065  | -0.13615 | 0.0032   | -0.0101  | 0.82762  |
| 1.95E-06 | -0.21913 | 1.74E-06 | -0.16584 | 0.00032  | -0.21949 | 1.68E-06 | -0.03693 | 0.42592  |
| 0.01342  | -0.14102 | 0.00225  | -0.08922 | 0.054    | -0.1309  | 0.0046   | -0.04013 | 0.38689  |
| 0.00201  | -0.12703 | 0.00598  | -0.09443 | 0.04138  | -0.14324 | 0.00191  | -0.04159 | 0.3698   |
| 0.00021  | -0.21354 | 3.22E-06 | -0.1433  | 0.00191  | -0.20999 | 4.72E-06 | -0.0527  | 0.25572  |
| 1.79E-07 | -0.30916 | 8.42E-12 | -0.2491  | 4.90E-08 | -0.30502 | 1.64E-11 | -0.07579 | 0.10189  |
| 0.04452  | -0.15611 | 0.00071  | -0.12883 | 0.0053   | -0.1683  | 0.00026  | 0.031203 | 0.50116  |
| 7.79E-10 | -0.29154 | 1.33E-10 | -0.24961 | 4.59E-08 | -0.30299 | 2.26E-11 | -0.11305 | 0.01452  |
| 1.26E-05 | -0.21427 | 2.98E-06 | -0.19193 | 2.98E-05 | -0.22253 | 1.19E-06 | -0.07455 | 0.10765  |
| 0.11341  | -0.13023 | 0.00482  | -0.04376 | 0.34536  | -0.10785 | 0.01974  | -0.033   | 0.47686  |
| 0.00111  | -0.26565 | 5.53E-09 | -0.20757 | 6.10E-06 | -0.2335  | 3.34E-07 | -0.02226 | 0.63135  |
| 0.01637  | -0.1984  | 1.57E-05 | -0.18617 | 5.17E-05 | -0.21283 | 3.48E-06 | -0.00395 | 0.93216  |
| 0.99317  | -0.14748 | 0.00139  | -0.15758 | 0.00063  | -0.13996 | 0.00243  | 0.11087  | 0.01653  |
| 0.18022  | -0.1184  | 0.01044  | -0.05804 | 0.21061  | -0.06465 | 0.16307  | -0.01857 | 0.68891  |
| 0.00217  | -0.21294 | 3.44E-06 | -0.15677 | 0.00067  | -0.17067 | 0.00021  | 0.005642 | 0.90321  |
| 0.03473  | -0.16161 | 0.00045  | -0.09218 | 0.04648  | -0.10618 | 0.02174  | -0.06194 | 0.18148  |
| 3.88E-09 | -0.28543 | 3.32E-10 | -0.28796 | 2.28E-10 | -0.32197 | 1.00E-12 | -0.10983 | 0.01758  |
| 0.00019  | -0.22184 | 1.29E-06 | -0.25362 | 2.74E-08 | -0.25142 | 3.64E-08 | -0.11956 | 0.00971  |
| 0.00083  | -0.11891 | 0.01012  | -0.12656 | 0.00617  | -0.16372 | 0.00038  | -0.00101 | 0.98263  |
| 2.81E-07 | -0.27971 | 7.67E-10 | -0.21828 | 1.92E-06 | -0.28604 | 3.04E-10 | -0.08322 | 0.07237  |
| 0.03363  | -0.15977 | 0.00053  | -0.16706 | 0.00029  | -0.1917  | 3.04E-05 | -0.08495 | 0.06662  |
| 0.01395  | -0.11335 | 0.01425  | -0.11075 | 0.01665  | -0.12118 | 0.00876  | -0.0684  | 0.13998  |
| 0.07803  | -0.19303 | 2.67E-05 | -0.10419 | 0.02434  | -0.15425 | 0.00082  | -0.03486 | 0.45227  |
| 0.05975  | -0.21841 | 1.89E-06 | -0.15677 | 0.00067  | -0.17467 | 0.00015  | -0.0543  | 0.2415   |
| 0.00967  | -0.15863 | 0.00058  | -0.17264 | 0.00018  | -0.19856 | 1.54E-05 | -0.03362 | 0.46863  |
| 0.0528   | -0.12705 | 0.00597  | -0.1288  | 0.00531  | -0.14614 | 0.00154  | -0.02142 | 0.64433  |
| 3.23E-08 | -0.29624 | 6.49E-11 | -0.26203 | 9.03E-09 | -0.30672 | 1.25E-11 | -0.07439 | 0.10836  |
| 0.00093  | -0.14345 | 0.00188  | -0.11096 | 0.01645  | -0.14408 | 0.0018   | -0.03789 | 0.41396  |

|          |          |          |          |          |          |          |          |         |
|----------|----------|----------|----------|----------|----------|----------|----------|---------|
| 0.0412   | -0.15289 | 0.00092  | -0.1093  | 0.01814  | -0.13245 | 0.00414  | -0.05209 | 0.2613  |
| 0.34117  | -0.06115 | 0.18714  | -0.06112 | 0.18736  | -0.05088 | 0.27248  | 0.005066 | 0.91305 |
| 0.00652  | -0.18802 | 4.34E-05 | -0.14107 | 0.00225  | -0.14897 | 0.00124  | -0.04876 | 0.29298 |
| 6.64E-06 | -0.20998 | 4.73E-06 | -0.17905 | 0.0001   | -0.21211 | 3.76E-06 | -0.07033 | 0.12909 |
| 0.00122  | -0.18371 | 6.52E-05 | -0.12989 | 0.00493  | -0.17398 | 0.00016  | -0.09506 | 0.04003 |
| 1.83E-06 | -0.24028 | 1.47E-07 | -0.17383 | 0.00016  | -0.2368  | 2.25E-07 | -0.04424 | 0.34007 |
| 2.22E-08 | -0.28299 | 4.76E-10 | -0.23472 | 2.89E-07 | -0.29759 | 5.27E-11 | -0.08338 | 0.07184 |
| 0.35345  | -0.11745 | 0.01108  | -0.10682 | 0.02095  | -0.09633 | 0.03744  | -0.0152  | 0.74325 |
| 6.55E-06 | -0.23505 | 2.78E-07 | -0.19412 | 2.40E-05 | -0.23766 | 2.03E-07 | -0.06335 | 0.17172 |
| 0.0052   | -0.16924 | 0.00024  | -0.1655  | 0.00033  | -0.18058 | 8.70E-05 | -0.04935 | 0.28718 |
| 0.41071  | -0.13655 | 0.00311  | -0.12115 | 0.00878  | -0.12449 | 0.00707  | 0.001417 | 0.97563 |
| 4.84E-07 | -0.24622 | 7.06E-08 | -0.20206 | 1.08E-05 | -0.25338 | 2.83E-08 | -0.07001 | 0.13083 |
| 0.00013  | -0.19654 | 1.89E-05 | -0.15284 | 0.00092  | -0.19502 | 2.20E-05 | -0.04155 | 0.37035 |
| 1.84E-06 | -0.22695 | 7.19E-07 | -0.18295 | 6.99E-05 | -0.24546 | 7.76E-08 | -0.07794 | 0.09252 |
| 0.37533  | -0.02956 | 0.52395  | -0.02713 | 0.55863  | -0.01153 | 0.80381  | -0.01384 | 0.76543 |
| 7.34E-10 | -0.30889 | 8.80E-12 | -0.2753  | 1.44E-09 | -0.32614 | 4.91E-13 | -0.14171 | 0.00214 |
| 0.27081  | -0.10099 | 0.02911  | -0.05818 | 0.2095   | -0.08891 | 0.05487  | -0.03584 | 0.43977 |
| 0.00033  | -0.24296 | 1.06E-07 | -0.2158  | 2.52E-06 | -0.24771 | 5.85E-08 | -0.05752 | 0.21469 |
| 1.32E-05 | -0.20145 | 1.15E-05 | -0.17403 | 0.00016  | -0.21675 | 2.27E-06 | -0.05214 | 0.26083 |
| 2.25E-06 | -0.24134 | 1.29E-07 | -0.20162 | 1.13E-05 | -0.25813 | 1.52E-08 | -0.06369 | 0.16941 |
| 0.00285  | -0.21133 | 4.09E-06 | -0.13692 | 0.00303  | -0.18924 | 3.86E-05 | -0.03735 | 0.42069 |
| 1.09E-08 | -0.34545 | 1.55E-14 | -0.27545 | 1.41E-09 | -0.33505 | 1.03E-13 | -0.11415 | 0.01358 |
| 0.00294  | -0.12152 | 0.00857  | -0.11419 | 0.01354  | -0.14837 | 0.0013   | -0.04068 | 0.38041 |
| 1.22E-06 | -0.25967 | 1.24E-08 | -0.23777 | 2.00E-07 | -0.27556 | 1.39E-09 | -0.04165 | 0.3692  |
| 6.39E-05 | -0.25833 | 1.48E-08 | -0.16493 | 0.00034  | -0.2314  | 4.28E-07 | -0.03082 | 0.50638 |
| 0.01069  | -0.12476 | 0.00695  | -0.09721 | 0.03573  | -0.12924 | 0.00516  | -0.00197 | 0.96608 |
| 1.39E-06 | -0.25343 | 2.81E-08 | -0.21295 | 3.44E-06 | -0.27012 | 2.99E-09 | -0.09591 | 0.03829 |
| 0.1117   | -0.22705 | 7.11E-07 | -0.18858 | 4.11E-05 | -0.19028 | 3.49E-05 | -0.01287 | 0.78155 |
| 2.16E-11 | -0.27898 | 8.53E-10 | -0.31219 | 5.14E-12 | -0.3612  | 7.74E-16 | -0.15048 | 0.00111 |
| 7.71E-06 | -0.31219 | 5.14E-12 | -0.20431 | 8.57E-06 | -0.25388 | 2.65E-08 | -0.03351 | 0.47001 |
| 7.08E-05 | -0.23333 | 3.41E-07 | -0.1675  | 0.00028  | -0.21798 | 1.98E-06 | -0.05863 | 0.20598 |
| 0.00304  | -0.14023 | 0.00239  | -0.09239 | 0.046    | -0.13813 | 0.00278  | 0.005184 | 0.91104 |
| 0.11637  | -0.14559 | 0.00161  | -0.10227 | 0.02711  | -0.1211  | 0.0088   | -0.02268 | 0.62492 |
| 3.46E-07 | -0.26059 | 1.10E-08 | -0.19759 | 1.70E-05 | -0.25687 | 1.79E-08 | -0.07574 | 0.1021  |
| 0.00072  | -0.20718 | 6.36E-06 | -0.16992 | 0.00023  | -0.20696 | 6.50E-06 | -0.08951 | 0.05322 |
| 1.94E-06 | -0.27201 | 2.29E-09 | -0.2133  | 3.31E-06 | -0.2636  | 7.31E-09 | -0.08812 | 0.05704 |
| 0.00024  | -0.20022 | 1.30E-05 | -0.17163 | 0.00019  | -0.21439 | 2.94E-06 | -0.05987 | 0.19655 |
| 6.15E-07 | -0.29015 | 1.64E-10 | -0.226   | 8.03E-07 | -0.27096 | 2.66E-09 | -0.06408 | 0.16684 |
| 0.00059  | -0.19342 | 2.57E-05 | -0.14249 | 0.00202  | -0.19214 | 2.92E-05 | -0.0541  | 0.24324 |
| 2.66E-10 | -0.31902 | 1.65E-12 | -0.27573 | 1.36E-09 | -0.3454  | 1.57E-14 | -0.08698 | 0.06037 |
| 0.00079  | -0.16222 | 0.00043  | -0.10712 | 0.0206   | -0.13815 | 0.00277  | -0.03226 | 0.48681 |
| 0.00015  | -0.19478 | 2.25E-05 | -0.1587  | 0.00058  | -0.20917 | 5.15E-06 | -0.03065 | 0.50873 |
| 0.00535  | -0.16254 | 0.00042  | -0.10556 | 0.02252  | -0.15024 | 0.00113  | -0.03302 | 0.47662 |
| 0.68553  | -0.01969 | 0.67131  | -0.06086 | 0.18923  | -0.05477 | 0.23748  | 0.025161 | 0.58758 |
| 0.00916  | -0.15053 | 0.0011   | -0.08427 | 0.06885  | -0.14033 | 0.00237  | -0.05332 | 0.25019 |

|          |          |          |          |          |          |          |          |          |
|----------|----------|----------|----------|----------|----------|----------|----------|----------|
| 7.12E-06 | -0.24356 | 9.83E-08 | -0.18701 | 4.77E-05 | -0.24467 | 8.56E-08 | -0.05805 | 0.21053  |
| 2.75E-06 | -0.26525 | 5.84E-09 | -0.25179 | 3.47E-08 | -0.28352 | 4.40E-10 | -0.06963 | 0.13299  |
| 0.01021  | -0.13662 | 0.00309  | -0.11397 | 0.01372  | -0.14802 | 0.00134  | -0.04001 | 0.38829  |
| 0.18564  | -0.13679 | 0.00306  | -0.08701 | 0.06026  | -0.12173 | 0.00845  | -0.02187 | 0.63728  |
| 0.00023  | -0.22361 | 1.05E-06 | -0.17816 | 0.00011  | -0.1983  | 1.58E-05 | -0.04968 | 0.28404  |
| 0.02149  | -0.08905 | 0.05446  | -0.04681 | 0.31278  | -0.09163 | 0.04782  | -0.00921 | 0.84263  |
| 0.00053  | -0.17884 | 0.0001   | -0.14668 | 0.00148  | -0.18199 | 7.64E-05 | -0.08561 | 0.06452  |
| 1.93E-05 | -0.20374 | 9.09E-06 | -0.16566 | 0.00032  | -0.22439 | 9.64E-07 | -0.04702 | 0.31059  |
| 4.29E-08 | -0.25903 | 1.35E-08 | -0.23336 | 3.39E-07 | -0.29914 | 4.14E-11 | -0.02214 | 0.63318  |
| 0.00069  | -0.10332 | 0.02557  | -0.09569 | 0.03873  | -0.14236 | 0.00204  | -0.02636 | 0.56994  |
| 7.39E-06 | -0.23235 | 3.83E-07 | -0.1927  | 2.76E-05 | -0.25412 | 2.57E-08 | -0.05905 | 0.20276  |
| 0.47725  | -0.16182 | 0.00045  | -0.05714 | 0.21774  | -0.09496 | 0.04025  | 0.000378 | 0.9935   |
| 4.51E-06 | -0.23675 | 2.26E-07 | -0.18062 | 8.67E-05 | -0.2391  | 1.70E-07 | -0.06422 | 0.1659   |
| 8.99E-06 | -0.2377  | 2.02E-07 | -0.1931  | 2.65E-05 | -0.24981 | 4.48E-08 | -0.06554 | 0.15732  |
| 3.48E-06 | -0.24398 | 9.33E-08 | -0.19643 | 1.91E-05 | -0.25453 | 2.43E-08 | -0.06738 | 0.14599  |
| 0.36137  | -0.17437 | 0.00015  | -0.06188 | 0.18189  | -0.10443 | 0.02401  | -0.0078  | 0.86645  |
| 1.88E-06 | -0.21641 | 2.36E-06 | -0.18272 | 7.14E-05 | -0.23481 | 2.86E-07 | -0.0713  | 0.12387  |
| 0.01625  | -0.17983 | 9.32E-05 | -0.0775  | 0.09434  | -0.13266 | 0.00408  | -0.0272  | 0.55761  |
| 2.17E-07 | -0.26984 | 3.10E-09 | -0.21919 | 1.73E-06 | -0.26783 | 4.10E-09 | -0.08744 | 0.05901  |
| 0.0001   | -0.22626 | 7.79E-07 | -0.17813 | 0.00011  | -0.22481 | 9.20E-07 | -0.05301 | 0.25294  |
| 0.00032  | -0.18537 | 5.58E-05 | -0.14001 | 0.00243  | -0.17325 | 0.00017  | -0.03656 | 0.43055  |
| 0.02547  | -0.14215 | 0.00208  | -0.10605 | 0.0219   | -0.12378 | 0.00741  | -0.03682 | 0.42731  |
| 0.00178  | -0.16878 | 0.00025  | -0.07332 | 0.11358  | -0.12246 | 0.00807  | -0.0306  | 0.50945  |
| 0.05073  | -0.15145 | 0.00103  | -0.1258  | 0.00649  | -0.15057 | 0.0011   | -0.01644 | 0.72307  |
| 0.00035  | -0.2426  | 1.11E-07 | -0.14762 | 0.00138  | -0.19356 | 2.54E-05 | -0.09907 | 0.03231  |
| 0.00453  | -0.12574 | 0.00651  | -0.07198 | 0.12033  | -0.12029 | 0.00927  | -0.03057 | 0.50985  |
| 2.37E-10 | -0.26579 | 5.43E-09 | -0.22752 | 6.73E-07 | -0.29492 | 7.96E-11 | -0.15535 | 0.00076  |
| 0.00207  | -0.14895 | 0.00125  | -0.14582 | 0.00158  | -0.17971 | 9.42E-05 | -0.1314  | 0.00445  |
| 3.81E-05 | -0.20688 | 6.56E-06 | -0.146   | 0.00156  | -0.21335 | 3.29E-06 | -0.09065 | 0.05026  |
| 0.042    | -0.11876 | 0.01021  | -0.11982 | 0.00955  | -0.13959 | 0.0025   | -0.05418 | 0.24256  |
| 0.02627  | -0.11102 | 0.01639  | -0.03531 | 0.44655  | -0.10137 | 0.02849  | -0.05744 | 0.21532  |
| 5.98E-06 | -0.22021 | 1.55E-06 | -0.18319 | 6.84E-05 | -0.22824 | 6.20E-07 | -0.08284 | 0.07368  |
| 0.00056  | -0.18365 | 6.55E-05 | -0.17265 | 0.00018  | -0.18865 | 4.08E-05 | -0.03959 | 0.39334  |
| 1.76E-06 | -0.28556 | 3.26E-10 | -0.23246 | 3.78E-07 | -0.28101 | 6.35E-10 | -0.04086 | 0.3783   |
| 0.00012  | -0.18156 | 7.95E-05 | -0.14545 | 0.00162  | -0.18341 | 6.70E-05 | -0.19512 | 2.17E-05 |
| 4.88E-05 | -0.21046 | 4.49E-06 | -0.1747  | 0.00015  | -0.2187  | 1.83E-06 | -0.05569 | 0.22972  |
| 0.55045  | -0.13051 | 0.00473  | -0.16064 | 0.00049  | -0.12602 | 0.00639  | -0.05836 | 0.2081   |
| 1.00E-07 | -0.25747 | 1.66E-08 | -0.17546 | 0.00014  | -0.25796 | 1.55E-08 | -0.04354 | 0.34786  |
| 0.08247  | -0.20806 | 5.79E-06 | -0.04736 | 0.30708  | -0.11032 | 0.01708  | -0.05854 | 0.20667  |
| 2.82E-05 | -0.19662 | 1.87E-05 | -0.14407 | 0.0018   | -0.21457 | 2.88E-06 | -0.1112  | 0.01622  |
| 0.28127  | -0.10267 | 0.0265   | -0.05852 | 0.20687  | -0.08144 | 0.07872  | 0.016959 | 0.71471  |
| 0.037    | -0.16119 | 0.00047  | -0.16105 | 0.00048  | -0.1292  | 0.00517  | 0.022292 | 0.63087  |
| 5.39E-07 | -0.28641 | 2.87E-10 | -0.23917 | 1.69E-07 | -0.28126 | 6.13E-10 | -0.07452 | 0.10775  |
| 0.96395  | -0.0358  | 0.44025  | -0.01837 | 0.69216  | -0.00532 | 0.90869  | 0.051193 | 0.26957  |
| 0.67208  | -0.06999 | 0.13095  | -0.03708 | 0.42406  | -0.05978 | 0.19724  | -0.00785 | 0.86568  |

|          |          |          |          |          |          |          |          |          |
|----------|----------|----------|----------|----------|----------|----------|----------|----------|
| 0.0647   | -0.16186 | 0.00045  | -0.12289 | 0.00785  | -0.15897 | 0.00056  | -0.03563 | 0.44243  |
| 0.0018   | -0.15356 | 0.00087  | -0.15082 | 0.00108  | -0.18553 | 5.49E-05 | -0.01329 | 0.77457  |
| 0.04957  | -0.16297 | 0.00041  | -0.14054 | 0.00233  | -0.14941 | 0.0012   | 0.002433 | 0.95818  |
| 0.00176  | -0.19243 | 2.83E-05 | -0.16764 | 0.00027  | -0.18918 | 3.88E-05 | -0.06009 | 0.1949   |
| 0.32181  | -0.10414 | 0.02441  | -0.09179 | 0.04743  | -0.11723 | 0.01123  | -0.01497 | 0.7469   |
| 0.00316  | -0.24372 | 9.64E-08 | -0.13574 | 0.00329  | -0.19384 | 2.47E-05 | -0.04727 | 0.30799  |
| 0.0025   | -0.16216 | 0.00043  | -0.15674 | 0.00068  | -0.20245 | 1.04E-05 | -0.04856 | 0.29503  |
| 1.80E-06 | -0.23864 | 1.80E-07 | -0.20302 | 9.80E-06 | -0.25093 | 3.88E-08 | -0.06905 | 0.13625  |
| 4.61E-05 | -0.17397 | 0.00016  | -0.14563 | 0.0016   | -0.20227 | 1.06E-05 | -0.09778 | 0.03464  |
| 0.00494  | -0.15076 | 0.00108  | -0.1224  | 0.0081   | -0.1414  | 0.00219  | -0.17153 | 0.0002   |
| 0.00024  | -0.17016 | 0.00022  | -0.16696 | 0.00029  | -0.19428 | 2.36E-05 | -0.0486  | 0.29464  |
| 0.59522  | -0.0861  | 0.06303  | -0.02973 | 0.52157  | -0.02633 | 0.57038  | -0.03608 | 0.43671  |
| 0.01514  | -0.14361 | 0.00186  | -0.13048 | 0.00474  | -0.16342 | 0.00039  | 0.030676 | 0.50842  |
| 0.01702  | -0.2226  | 1.18E-06 | -0.08973 | 0.05264  | -0.10391 | 0.02473  | -0.0766  | 0.09827  |
| 0.48804  | -0.06804 | 0.14207  | 0.019514 | 0.67404  | 0.015266 | 0.74213  | 0.002517 | 0.95673  |
| 0.37533  | -0.02956 | 0.52395  | -0.02713 | 0.55863  | -0.01153 | 0.80381  | -0.01384 | 0.76543  |
| 4.17E-05 | -0.22563 | 8.37E-07 | -0.15753 | 0.00063  | -0.21231 | 3.68E-06 | -0.06485 | 0.16174  |
| 0.26115  | -0.18683 | 4.86E-05 | -0.1076  | 0.02003  | -0.11753 | 0.01103  | -0.06022 | 0.19389  |
| 5.36E-07 | -0.19517 | 2.16E-05 | -0.16355 | 0.00039  | -0.23549 | 2.63E-07 | -0.05258 | 0.2568   |
| 3.99E-13 | -0.30634 | 1.33E-11 | -0.32077 | 1.23E-12 | -0.38191 | 1.15E-17 | -0.24776 | 5.81E-08 |
| 0.01677  | -0.16303 | 0.0004   | -0.04167 | 0.36892  | -0.13017 | 0.00484  | -0.12208 | 0.00826  |
| 0.0062   | -0.20465 | 8.27E-06 | -0.13993 | 0.00244  | -0.19656 | 1.88E-05 | -0.05805 | 0.21047  |
| 0.0022   | -0.26559 | 5.57E-09 | -0.16932 | 0.00024  | -0.20614 | 7.08E-06 | -0.04503 | 0.33155  |
| 0.09987  | -0.13327 | 0.00391  | -0.05969 | 0.19787  | -0.07413 | 0.10963  | -0.02765 | 0.55118  |
| 7.52E-06 | -0.16001 | 0.00052  | -0.1372  | 0.00297  | -0.20008 | 1.32E-05 | -0.01636 | 0.72443  |
| 0.00023  | -0.15732 | 0.00065  | -0.10191 | 0.02766  | -0.18456 | 6.02E-05 | -0.01591 | 0.73158  |
| 1.57E-05 | -0.25085 | 3.92E-08 | -0.18086 | 8.48E-05 | -0.24467 | 8.56E-08 | -0.06242 | 0.17811  |
| 1.54E-14 | -0.14352 | 0.00188  | -0.3486  | 8.64E-15 | -0.32455 | 6.46E-13 | -0.33532 | 9.81E-14 |
| 2.33E-21 | -0.22364 | 1.05E-06 | -0.41501 | 7.22E-21 | -0.40942 | 2.66E-20 | -0.36152 | 7.27E-16 |
| 7.08E-29 | -0.28662 | 2.79E-10 | -0.43875 | 2.15E-23 | -0.4717  | 3.01E-27 | -0.48694 | 3.55E-29 |
| 5.04E-06 | -0.24382 | 9.53E-08 | -0.29514 | 7.70E-11 | -0.31377 | 3.97E-12 | -0.2343  | 3.04E-07 |
| 5.12E-09 | 0.019857 | 0.66865  | -0.19597 | 2.00E-05 | -0.18235 | 7.39E-05 | -0.29134 | 1.37E-10 |
| 3.17E-06 | 0.041515 | 0.37072  | -0.16669 | 0.0003   | -0.12451 | 0.00706  | -0.33069 | 2.22E-13 |
| 7.98E-07 | -0.11064 | 0.01676  | -0.26671 | 4.78E-09 | -0.22196 | 1.27E-06 | -0.17371 | 0.00016  |
| 1.81E-08 | -0.07105 | 0.12522  | -0.2511  | 3.79E-08 | -0.22079 | 1.45E-06 | -0.2629  | 8.03E-09 |
| 1.51E-07 | -0.32421 | 6.85E-13 | -0.30807 | 1.01E-11 | -0.33404 | 1.23E-13 | -0.2784  | 9.27E-10 |
| 1.03E-08 | -0.10132 | 0.02857  | -0.27814 | 9.61E-10 | -0.26878 | 3.60E-09 | -0.16842 | 0.00026  |
| 0.00455  | 0.077493 | 0.09439  | -0.17747 | 0.00012  | -0.10306 | 0.02594  | -0.14517 | 0.00166  |
| 1.11E-15 | -0.08644 | 0.06197  | -0.30481 | 1.70E-11 | -0.30165 | 2.80E-11 | -0.34479 | 1.75E-14 |
| 8.34E-35 | -0.36362 | 4.80E-16 | -0.60543 | 4.82E-48 | -0.59826 | 1.13E-46 | -0.51761 | 2.30E-33 |
| 6.00E-16 | -0.08619 | 0.06275  | -0.3151  | 3.18E-12 | -0.31159 | 5.67E-12 | -0.34626 | 1.34E-14 |
| 3.95E-37 | -0.32064 | 1.26E-12 | -0.52911 | 4.76E-35 | -0.56082 | 4.85E-40 | -0.46258 | 3.87E-26 |
| 0.83676  | 0.020377 | 0.6605   | 0.031794 | 0.49309  | 0.031593 | 0.49583  | -0.23199 | 3.99E-07 |
| 9.78E-49 | -0.20653 | 6.80E-06 | -0.40163 | 1.57E-19 | -0.48806 | 2.54E-29 | -0.243   | 1.05E-07 |
| 8.28E-22 | -0.22364 | 1.05E-06 | -0.33243 | 1.64E-13 | -0.3863  | 4.54E-18 | -0.42531 | 6.13E-22 |

|          |          |          |          |          |          |          |          |          |
|----------|----------|----------|----------|----------|----------|----------|----------|----------|
| 0.00013  | -0.15818 | 0.00006  | -0.31635 | 2.58E-12 | -0.227   | 7.15E-07 | -0.0191  | 0.68059  |
| 0.85285  | 0.025196 | 0.58705  | -0.33587 | 8.89E-14 | -0.11212 | 0.01534  | -0.09215 | 0.04656  |
| 2.17E-08 | -0.15457 | 0.0008   | -0.24953 | 4.64E-08 | -0.27163 | 2.42E-09 | -0.13273 | 0.00406  |
| 2.71E-11 | -0.01975 | 0.67035  | -0.17989 | 9.27E-05 | -0.22593 | 8.08E-07 | -0.14398 | 0.00181  |
| 0.00088  | -0.02419 | 0.60209  | -0.24323 | 1.02E-07 | -0.16072 | 0.00049  | -0.25182 | 3.46E-08 |
| 2.60E-26 | -0.32067 | 1.25E-12 | -0.46155 | 5.14E-26 | -0.49311 | 5.51E-30 | -0.38659 | 4.28E-18 |
| 1.42E-07 | -0.08776 | 0.05809  | -0.1784  | 0.00011  | -0.19127 | 3.17E-05 | -0.37876 | 2.23E-17 |
| 0.00029  | -0.02088 | 0.65262  | -0.14836 | 0.0013   | -0.12957 | 0.00504  | -0.38099 | 1.40E-17 |
| 1.29E-17 | -0.06622 | 0.15307  | -0.2394  | 1.64E-07 | -0.28446 | 3.84E-10 | -0.35257 | 4.09E-15 |
| 0.00099  | -0.15774 | 0.00062  | -0.14522 | 0.00165  | -0.15589 | 0.00072  | -0.47213 | 2.66E-27 |
| 1.26E-15 | -0.13919 | 0.00257  | -0.3116  | 5.67E-12 | -0.31972 | 1.47E-12 | -0.38081 | 1.45E-17 |
| 8.84E-32 | -0.30922 | 8.34E-12 | -0.56338 | 1.82E-40 | -0.53729 | 2.75E-36 | -0.32801 | 3.55E-13 |
| 0.6454   | 0.031176 | 0.50154  | -0.16346 | 0.00039  | -0.07914 | 0.08756  | -0.05867 | 0.20567  |
| 5.32E-13 | -0.12919 | 0.00517  | -0.45655 | 2.01E-25 | -0.3523  | 4.30E-15 | -0.20787 | 5.91E-06 |
| 0.05922  | 0.029726 | 0.52166  | -0.07003 | 0.13075  | -0.0584  | 0.20775  | -0.22813 | 6.28E-07 |
| 0.00292  | 0.124173 | 0.00722  | -0.0277  | 0.55044  | -0.02526 | 0.58606  | -0.30125 | 2.98E-11 |
| 9.97E-14 | -0.08516 | 0.06594  | -0.24538 | 7.83E-08 | -0.26737 | 4.37E-09 | -0.33502 | 1.03E-13 |
| 1.08E-34 | -0.3108  | 6.45E-12 | -0.42937 | 2.26E-22 | -0.48383 | 8.94E-29 | -0.53449 | 7.38E-36 |
| 1.43E-24 | -0.1501  | 0.00114  | -0.15712 | 0.00066  | -0.30385 | 1.97E-11 | -0.47795 | 5.01E-28 |
| 3.30E-15 | -0.05507 | 0.23491  | -0.19279 | 2.73E-05 | -0.25422 | 2.53E-08 | -0.51153 | 1.68E-32 |
| 1.07E-21 | -0.22095 | 1.42E-06 | -0.3099  | 7.47E-12 | -0.37953 | 1.90E-17 | -0.42184 | 1.42E-21 |
| 1.53E-44 | -0.32791 | 3.62E-13 | -0.40378 | 9.70E-20 | -0.53464 | 7.01E-36 | -0.54108 | 7.18E-37 |
| 0.00018  | -0.10624 | 0.02167  | -0.2162  | 2.41E-06 | -0.19036 | 3.46E-05 | -0.29681 | 5.95E-11 |
| 0.00065  | -0.01787 | 0.70007  | -0.2543  | 2.51E-08 | -0.15391 | 0.00085  | -0.34115 | 3.42E-14 |
| 4.04E-25 | -0.20083 | 1.23E-05 | -0.38505 | 5.94E-18 | -0.40392 | 9.39E-20 | -0.48236 | 1.38E-28 |
| 1.02E-05 | 0.236338 | 2.38E-07 | -0.02123 | 0.64727  | -0.01611 | 0.72848  | -0.23403 | 3.13E-07 |
| 1.07E-21 | -0.34041 | 3.92E-14 | -0.39556 | 6.08E-19 | -0.44884 | 1.57E-24 | -0.38531 | 5.61E-18 |
| 2.31E-06 | 0.056273 | 0.22484  | -0.19762 | 1.70E-05 | -0.13757 | 0.00289  | -0.27766 | 1.03E-09 |
| 2.55E-06 | -0.04373 | 0.34573  | -0.33067 | 2.23E-13 | -0.22267 | 1.17E-06 | -0.23133 | 4.32E-07 |
| 0.01291  | -0.1179  | 0.01077  | -0.27834 | 9.34E-10 | -0.1959  | 2.01E-05 | -0.22071 | 1.46E-06 |
| 2.58E-13 | 0.015801 | 0.73343  | -0.01262 | 0.7856   | -0.14243 | 0.00203  | -0.48215 | 1.47E-28 |
| 1.30E-13 | -0.33435 | 1.16E-13 | -0.34156 | 3.18E-14 | -0.37003 | 1.34E-16 | -0.05496 | 0.23587  |
| 0.87887  | 0.095852 | 0.0384   | 0.067631 | 0.14449  | 0.040132 | 0.38688  | -0.25153 | 3.59E-08 |
| 0.16063  | 0.102925 | 0.02614  | -0.12257 | 0.00801  | -0.0302  | 0.515    | -0.29147 | 1.35E-10 |
| 2.58E-08 | -0.16506 | 0.00034  | -0.28511 | 3.49E-10 | -0.25899 | 1.35E-08 | -0.28118 | 6.20E-10 |
| 9.25E-44 | -0.34205 | 2.91E-14 | -0.43109 | 1.48E-22 | -0.53245 | 1.50E-35 | -0.44419 | 5.30E-24 |
| 5.57E-37 | -0.27796 | 9.87E-10 | -0.39866 | 3.06E-19 | -0.48286 | 1.19E-28 | -0.52007 | 1.02E-33 |
| 0.00016  | 0.073301 | 0.11366  | -0.16189 | 0.00044  | -0.09373 | 0.0429   | -0.27454 | 1.61E-09 |
| 5.11E-18 | -0.30763 | 1.08E-11 | -0.42401 | 8.42E-22 | -0.42537 | 6.04E-22 | -0.41683 | 4.70E-21 |
| 1.73E-32 | -0.25927 | 1.30E-08 | -0.40252 | 1.29E-19 | -0.47504 | 1.16E-27 | -0.45541 | 2.73E-25 |
| 3.05E-18 | -0.17718 | 0.00012  | -0.51578 | 4.20E-33 | -0.45382 | 4.19E-25 | -0.03906 | 0.39973  |
| 1.59E-22 | -0.19355 | 2.54E-05 | -0.39938 | 2.61E-19 | -0.4212  | 1.66E-21 | -0.37903 | 2.11E-17 |
| 4.15E-11 | -0.05759 | 0.21419  | -0.28496 | 3.56E-10 | -0.24781 | 5.77E-08 | -0.31917 | 1.61E-12 |
| 2.99E-30 | -0.36237 | 6.15E-16 | -0.55614 | 2.86E-39 | -0.56641 | 5.62E-41 | -0.25495 | 2.31E-08 |
| 0.19036  | 0.308951 | 8.71E-12 | 0.073508 | 0.11265  | 0.139554 | 0.00251  | -0.07145 | 0.1231   |



|          |          |          |          |          |          |          |          |          |
|----------|----------|----------|----------|----------|----------|----------|----------|----------|
| 0.00012  | 0.0226   | 0.62616  | -0.12048 | 0.00916  | -0.09629 | 0.03751  | -0.2758  | 1.34E-09 |
| 8.75E-13 | -0.04031 | 0.3848   | -0.20428 | 8.60E-06 | -0.23447 | 2.98E-07 | -0.46247 | 3.99E-26 |
| 1.22E-14 | -0.22733 | 6.88E-07 | -0.32238 | 9.37E-13 | -0.34895 | 8.10E-15 | -0.33516 | 1.01E-13 |
| 0.97878  | 0.292826 | 1.10E-10 | 0.234161 | 3.09E-07 | 0.192928 | 2.70E-05 | -0.25625 | 1.94E-08 |
| 0.15543  | 0.135428 | 0.00336  | 0.047775 | 0.30289  | 0.059999 | 0.19557  | -0.43165 | 1.29E-22 |
| 7.50E-11 | -0.23089 | 4.55E-07 | -0.37714 | 3.12E-17 | -0.35268 | 4.00E-15 | -0.27658 | 1.20E-09 |
| 4.42E-28 | -0.24972 | 4.53E-08 | -0.43234 | 1.08E-22 | -0.4511  | 8.65E-25 | -0.4677  | 9.33E-27 |
| 1.69E-31 | -0.43125 | 1.42E-22 | -0.50087 | 5.02E-31 | -0.54188 | 5.38E-37 | -0.26806 | 3.97E-09 |
| 3.40E-10 | -0.06992 | 0.13138  | -0.32005 | 1.39E-12 | -0.27003 | 3.02E-09 | -0.39015 | 1.99E-18 |
| 3.74E-18 | -0.07776 | 0.09324  | -0.23619 | 2.42E-07 | -0.26572 | 5.47E-09 | -0.25284 | 3.03E-08 |
| 0.6362   | 0.282036 | 5.47E-10 | 0.136995 | 0.00301  | 0.170467 | 0.00021  | -0.21556 | 2.59E-06 |
| 1.01E-14 | -0.03561 | 0.44261  | -0.19302 | 2.67E-05 | -0.24408 | 9.22E-08 | -0.48556 | 5.36E-29 |
| 3.83E-18 | -0.14112 | 0.00224  | -0.30703 | 1.19E-11 | -0.3502  | 6.40E-15 | -0.18685 | 4.85E-05 |
| 1.00E-20 | -0.12803 | 0.00559  | -0.1996  | 1.39E-05 | -0.29171 | 1.30E-10 | -0.39902 | 2.83E-19 |
| 3.27E-31 | -0.34785 | 9.95E-15 | -0.46168 | 4.96E-26 | -0.52175 | 5.80E-34 | -0.50528 | 1.25E-31 |
| 5.56E-26 | -0.19425 | 2.37E-05 | -0.42549 | 5.86E-22 | -0.43642 | 3.88E-23 | -0.45257 | 5.85E-25 |
| 9.05E-18 | -0.10186 | 0.02773  | -0.23936 | 1.65E-07 | -0.29458 | 8.39E-11 | -0.39847 | 3.19E-19 |
| 1.79E-27 | -0.20351 | 9.31E-06 | -0.38025 | 1.63E-17 | -0.42357 | 9.36E-22 | -0.51063 | 2.25E-32 |
| 7.88E-08 | -0.04507 | 0.33114  | -0.1513  | 0.00104  | -0.16151 | 0.00046  | -0.39693 | 4.50E-19 |
| 0.10802  | 0.117398 | 0.01112  | -0.06889 | 0.13715  | -0.019   | 0.6822   | -0.20928 | 5.09E-06 |
| 1.71E-09 | -0.12384 | 0.00737  | -0.24355 | 9.85E-08 | -0.26871 | 3.63E-09 | -0.19292 | 2.70E-05 |
| 0.06149  | 0.321633 | 1.06E-12 | -0.04104 | 0.37627  | 0.118326 | 0.01049  | -0.09397 | 0.04238  |
| 1.13E-38 | -0.42915 | 2.39E-22 | -0.59798 | 1.28E-46 | -0.62317 | 1.37E-51 | -0.38243 | 1.03E-17 |
| 0.00557  | 0.032815 | 0.4793   | -0.16107 | 0.00048  | -0.07453 | 0.10771  | -0.12031 | 0.00926  |
| 4.07E-14 | -0.24703 | 6.37E-08 | -0.28179 | 5.67E-10 | -0.33471 | 1.09E-13 | -0.26449 | 6.47E-09 |
| 3.20E-09 | -0.03605 | 0.43707  | -0.11698 | 0.01141  | -0.21144 | 4.04E-06 | -0.20803 | 5.81E-06 |
| 4.59E-25 | -0.21842 | 1.89E-06 | -0.47496 | 1.19E-27 | -0.47392 | 1.60E-27 | -0.14024 | 0.00239  |
| 3.50E-08 | 0.064335 | 0.16513  | -0.18442 | 6.09E-05 | -0.15473 | 0.00079  | -0.45796 | 1.37E-25 |
| 6.57E-26 | -0.42561 | 5.70E-22 | -0.65001 | 2.05E-57 | -0.59408 | 6.91E-46 | -0.39694 | 4.49E-19 |
| 1.84E-08 | -0.03351 | 0.47002  | -0.27774 | 1.02E-09 | -0.21929 | 1.71E-06 | -0.38619 | 4.66E-18 |
| 1.30E-06 | -0.2763  | 1.25E-09 | -0.19985 | 1.35E-05 | -0.27002 | 3.03E-09 | -0.39716 | 4.27E-19 |
| 1.22E-11 | -0.04724 | 0.30832  | -0.11277 | 0.01475  | -0.18652 | 5.00E-05 | -0.44018 | 1.49E-23 |
| 0.06159  | -0.14924 | 0.00122  | -0.05481 | 0.2371   | -0.06492 | 0.16129  | 0.107313 | 0.02037  |
| 8.62E-15 | -0.2097  | 4.87E-06 | -0.27685 | 1.16E-09 | -0.31393 | 3.86E-12 | -0.28763 | 2.40E-10 |
| 9.50E-08 | -0.09724 | 0.03567  | -0.15818 | 0.0006   | -0.19191 | 2.98E-05 | -0.28315 | 4.65E-10 |
| 4.75E-12 | -0.25487 | 2.33E-08 | -0.28108 | 6.29E-10 | -0.3459  | 1.43E-14 | -0.33456 | 1.12E-13 |
| 0.00115  | -0.17578 | 0.00013  | -0.15751 | 0.00064  | -0.21982 | 1.61E-06 | -0.20695 | 6.51E-06 |
| 8.90E-10 | -0.20185 | 1.10E-05 | -0.21046 | 4.49E-06 | -0.29244 | 1.16E-10 | -0.33297 | 1.49E-13 |
| 7.31E-05 | -0.02965 | 0.52265  | -0.06243 | 0.17805  | -0.10189 | 0.02769  | -0.28819 | 2.21E-10 |
| 0.20117  | 0.115725 | 0.01233  | -0.08055 | 0.08205  | 0.041894 | 0.36636  | -0.04724 | 0.30837  |
| 8.95E-12 | -0.13718 | 0.00297  | -0.22343 | 1.08E-06 | -0.25338 | 2.83E-08 | -0.53163 | 1.99E-35 |
| 0.00798  | -0.06481 | 0.16205  | -0.13208 | 0.00425  | -0.12497 | 0.00685  | -0.27689 | 1.15E-09 |
| 3.68E-05 | -0.13918 | 0.00257  | -0.11307 | 0.0145   | -0.15197 | 0.00099  | -0.24509 | 8.13E-08 |
| 7.96E-11 | 0.004091 | 0.92974  | -0.23637 | 2.37E-07 | -0.21564 | 2.56E-06 | -0.47986 | 2.87E-28 |
| 4.28E-20 | -0.09147 | 0.04821  | -0.28046 | 6.88E-10 | -0.29044 | 1.57E-10 | -0.2052  | 7.81E-06 |

|          |          |          |          |          |          |          |          |          |
|----------|----------|----------|----------|----------|----------|----------|----------|----------|
| 1.13E-42 | -0.24596 | 7.28E-08 | -0.44415 | 5.36E-24 | -0.51107 | 1.95E-32 | -0.234   | 3.15E-07 |
| 0.67235  | 0.015115 | 0.74459  | -0.05066 | 0.2746   | -0.01067 | 0.81815  | -0.12834 | 0.00548  |
| 1.85E-06 | 0.138871 | 0.00263  | 0.043285 | 0.35065  | -0.04912 | 0.2895   | -0.31577 | 2.85E-12 |
| 3.59E-12 | -0.2336  | 3.30E-07 | -0.48214 | 1.47E-28 | -0.42149 | 1.55E-21 | -0.23329 | 3.43E-07 |
| 4.00E-27 | -0.42487 | 6.82E-22 | -0.45466 | 3.35E-25 | -0.50793 | 5.37E-32 | -0.28988 | 1.71E-10 |
| 1.35E-31 | -0.28486 | 3.62E-10 | -0.44495 | 4.35E-24 | -0.47907 | 3.61E-28 | -0.30094 | 3.12E-11 |
| 2.46E-09 | -0.20396 | 8.89E-06 | -0.32369 | 7.49E-13 | -0.2999  | 3.68E-11 | -0.28866 | 2.06E-10 |
| 4.62E-06 | 0.078901 | 0.08854  | -0.21623 | 2.40E-06 | -0.16384 | 0.00038  | -0.40645 | 5.27E-20 |
| 3.48E-30 | -0.32282 | 8.69E-13 | -0.55625 | 2.75E-39 | -0.54083 | 7.84E-37 | -0.38658 | 4.28E-18 |
| 7.69E-24 | -0.34482 | 1.75E-14 | -0.46669 | 1.24E-26 | -0.48955 | 1.62E-29 | -0.41349 | 1.03E-20 |
| 0.00046  | -0.28769 | 2.38E-10 | -0.30776 | 1.06E-11 | -0.27123 | 2.56E-09 | -0.35945 | 1.09E-15 |
| 0.07504  | 0.148314 | 0.00131  | 0.070927 | 0.12588  | 0.059566 | 0.19882  | -0.40457 | 8.10E-20 |
| 0.44651  | 0.301153 | 3.02E-11 | 0.121544 | 0.00856  | 0.100119 | 0.03052  | -0.20444 | 8.46E-06 |
| 8.12E-06 | -0.27436 | 1.65E-09 | -0.37074 | 1.16E-16 | -0.30821 | 9.82E-12 | -0.39465 | 7.45E-19 |
| 0.0001   | 0.184214 | 6.21E-05 | 2.58E-05 | 0.99956  | -0.02806 | 0.54525  | -0.26009 | 1.17E-08 |
| 7.84E-36 | -0.347   | 1.17E-14 | -0.47332 | 1.90E-27 | -0.52604 | 1.36E-34 | -0.39631 | 5.16E-19 |
| 6.70E-15 | -0.19898 | 1.48E-05 | -0.41226 | 1.38E-20 | -0.37624 | 3.76E-17 | -0.4009  | 1.85E-19 |
| 7.30E-44 | -0.34187 | 3.00E-14 | -0.46254 | 3.91E-26 | -0.55064 | 2.22E-38 | -0.51931 | 1.31E-33 |
| 0.25963  | -0.00225 | 0.96136  | -0.15204 | 0.00098  | -0.10304 | 0.02597  | -0.0656  | 0.15695  |
| 7.68E-12 | -0.11467 | 0.01315  | -0.385   | 6.00E-18 | -0.31476 | 3.37E-12 | -0.31204 | 5.27E-12 |
| 2.43E-06 | -0.21156 | 3.99E-06 | -0.30786 | 1.04E-11 | -0.28238 | 5.20E-10 | -0.38836 | 2.92E-18 |
| 3.93E-24 | -0.23863 | 1.80E-07 | -0.41023 | 2.21E-20 | -0.41644 | 5.16E-21 | -0.2461  | 7.16E-08 |
| 3.87E-05 | 0.13534  | 0.00339  | -0.05912 | 0.20219  | -0.05294 | 0.25353  | -0.1103  | 0.0171   |
| 4.77E-11 | -0.03131 | 0.49964  | -0.24977 | 4.50E-08 | -0.22787 | 6.47E-07 | -0.28752 | 2.44E-10 |
| 8.85E-17 | -0.22486 | 9.15E-07 | -0.37132 | 1.03E-16 | -0.39759 | 3.88E-19 | -0.4424  | 8.42E-24 |
| 8.02E-10 | -0.1218  | 0.00842  | -0.28643 | 2.87E-10 | -0.27105 | 2.62E-09 | -0.34767 | 1.03E-14 |
| 2.00E-18 | -0.29904 | 4.21E-11 | -0.49266 | 6.32E-30 | -0.45492 | 3.12E-25 | -0.20651 | 6.81E-06 |
| 1.04E-17 | -0.14076 | 0.0023   | -0.30059 | 3.30E-11 | -0.32038 | 1.31E-12 | -0.34602 | 1.40E-14 |
| 5.98E-13 | -0.20766 | 6.04E-06 | -0.27123 | 2.56E-09 | -0.30161 | 2.81E-11 | -0.40346 | 1.04E-19 |
| 0.16413  | 0.227082 | 7.08E-07 | -0.07567 | 0.10243  | 0.09634  | 0.03742  | -0.06949 | 0.13373  |
| 0.76413  | -0.06047 | 0.19209  | -0.26515 | 5.91E-09 | -0.13595 | 0.00324  | -0.25384 | 2.67E-08 |
| 4.42E-18 | -0.10641 | 0.02146  | -0.35855 | 1.30E-15 | -0.33681 | 7.52E-14 | -0.33351 | 1.35E-13 |
| 0.26449  | 0.165869 | 0.00032  | 0.021855 | 0.63758  | 0.012655 | 0.78504  | -0.25389 | 2.65E-08 |
| 1.04E-09 | -0.13308 | 0.00396  | -0.37053 | 1.21E-16 | -0.33093 | 2.13E-13 | -0.33134 | 1.99E-13 |
| 4.15E-20 | -0.13587 | 0.00326  | -0.41279 | 1.22E-20 | -0.41452 | 8.11E-21 | -0.04482 | 0.33379  |
| 0.67593  | 0.064978 | 0.16094  | -0.0119  | 0.79752  | 0.023088 | 0.61872  | -0.22456 | 9.46E-07 |
| 3.65E-40 | -0.33228 | 1.68E-13 | -0.54924 | 3.72E-38 | -0.56231 | 2.74E-40 | -0.35206 | 4.50E-15 |
| 0.00078  | 0.049554 | 0.28522  | -0.02682 | 0.56319  | -0.02704 | 0.5599   | -0.35024 | 6.35E-15 |
| 0.06762  | 0.255382 | 2.18E-08 | 0.106375 | 0.0215   | 0.087501 | 0.05883  | -0.20793 | 5.87E-06 |
| 2.09E-06 | 0.024111 | 0.60325  | -0.14924 | 0.00122  | -0.14414 | 0.00179  | -0.4678  | 9.06E-27 |
| 0.28388  | 0.103382 | 0.02548  | 0.054156 | 0.24279  | 0.079119 | 0.08766  | -0.15881 | 0.00057  |
| 5.91E-05 | -0.09947 | 0.03163  | -0.12208 | 0.00827  | -0.14245 | 0.00203  | -0.28774 | 2.36E-10 |
| 1.49E-15 | -0.19408 | 2.41E-05 | -0.36101 | 8.03E-16 | -0.35274 | 3.96E-15 | -0.43583 | 4.51E-23 |
| 4.63E-15 | -0.2213  | 1.37E-06 | -0.10952 | 0.0179   | -0.25881 | 1.39E-08 | -0.13155 | 0.0044   |
| 3.50E-39 | -0.33486 | 1.06E-13 | -0.44931 | 1.39E-24 | -0.5215  | 6.29E-34 | -0.35118 | 5.32E-15 |

|          |          |          |          |          |          |          |          |          |
|----------|----------|----------|----------|----------|----------|----------|----------|----------|
| 2.45E-27 | -0.2454  | 7.82E-08 | -0.45269 | 5.66E-25 | -0.44462 | 4.74E-24 | -0.52401 | 2.71E-34 |
| 3.50E-17 | -0.09314 | 0.04424  | -0.34175 | 3.07E-14 | -0.32161 | 1.07E-12 | -0.41554 | 6.38E-21 |
| 1.49E-36 | -0.26196 | 9.11E-09 | -0.52024 | 9.59E-34 | -0.52459 | 2.23E-34 | -0.35577 | 2.22E-15 |
| 5.38E-12 | -0.12972 | 0.00499  | -0.38342 | 8.39E-18 | -0.35442 | 2.87E-15 | -0.28607 | 3.02E-10 |
| 4.24E-22 | -0.16387 | 0.00038  | -0.39476 | 7.26E-19 | -0.39764 | 3.84E-19 | -0.42123 | 1.64E-21 |
| 0.0014   | -0.02649 | 0.56801  | -0.12904 | 0.00523  | -0.13154 | 0.00441  | -0.219   | 1.77E-06 |
| 0.39738  | 0.103078 | 0.02591  | -0.09194 | 0.04706  | -0.02093 | 0.65185  | -0.26927 | 3.36E-09 |
| 3.68E-10 | -0.18698 | 4.79E-05 | -0.32167 | 1.06E-12 | -0.29965 | 3.83E-11 | -0.20549 | 7.58E-06 |
| 3.36E-27 | -0.26356 | 7.35E-09 | -0.46001 | 7.83E-26 | -0.49683 | 1.76E-30 | -0.46582 | 1.58E-26 |
| 9.46E-18 | -0.35073 | 5.79E-15 | -0.58321 | 6.67E-44 | -0.51032 | 2.49E-32 | -0.23242 | 3.80E-07 |
| 5.09E-06 | 0.058268 | 0.2088   | -0.22791 | 6.43E-07 | -0.13882 | 0.00264  | -0.30182 | 2.72E-11 |
| 7.82E-30 | -0.33702 | 7.24E-14 | -0.48853 | 2.21E-29 | -0.52118 | 7.01E-34 | -0.55063 | 2.23E-38 |
| 0.00096  | -0.25088 | 3.90E-08 | -0.27202 | 2.29E-09 | -0.23598 | 2.48E-07 | -0.20028 | 1.30E-05 |
| 1.28E-09 | -0.0123  | 0.79096  | -0.02741 | 0.55465  | 0.101125 | 0.02888  | 0.48516  | 6.03E-29 |
| 6.12E-24 | -0.27226 | 2.21E-09 | -0.43079 | 1.59E-22 | -0.46548 | 1.73E-26 | -0.52304 | 3.75E-34 |
| 0.97643  | 0.029528 | 0.52442  | -0.0191  | 0.68053  | -0.00065 | 0.9888   | -0.30146 | 2.88E-11 |
| 4.99E-16 | -0.27028 | 2.92E-09 | -0.50747 | 6.21E-32 | -0.43885 | 2.10E-23 | -0.47657 | 7.46E-28 |
| 3.17E-34 | -0.29896 | 4.26E-11 | -0.38527 | 5.66E-18 | -0.48404 | 8.40E-29 | -0.29409 | 9.04E-11 |
| 7.27E-25 | -0.31105 | 6.19E-12 | -0.36052 | 8.83E-16 | -0.43601 | 4.31E-23 | -0.25998 | 1.19E-08 |
| 2.45E-22 | -0.22964 | 5.26E-07 | -0.40946 | 2.64E-20 | -0.42559 | 5.72E-22 | -0.34759 | 1.04E-14 |
| 0.00081  | 0.069317 | 0.13472  | -0.16188 | 0.00044  | -0.1111  | 0.01631  | -0.4499  | 1.19E-24 |
| 2.09E-31 | -0.25917 | 1.32E-08 | -0.53601 | 4.33E-36 | -0.51302 | 1.04E-32 | -0.38445 | 6.74E-18 |
| 0.58817  | 0.089081 | 0.05439  | -0.15403 | 0.00084  | -0.02444 | 0.59828  | -0.1592  | 0.00055  |
| 3.25E-29 | -0.40974 | 2.47E-20 | -0.66826 | 1.01E-61 | -0.62747 | 1.74E-52 | -0.1921  | 2.93E-05 |
| 7.89E-24 | -0.23587 | 2.52E-07 | -0.46867 | 7.09E-27 | -0.44309 | 7.06E-24 | -0.38616 | 4.68E-18 |
| 5.93E-21 | -0.12162 | 0.00851  | -0.35521 | 2.47E-15 | -0.35799 | 1.45E-15 | -0.36964 | 1.44E-16 |
| 7.22E-09 | -0.15475 | 0.00079  | -0.34952 | 7.27E-15 | -0.28557 | 3.26E-10 | -0.32359 | 7.62E-13 |
| 8.09E-27 | -0.1732  | 0.00017  | -0.39894 | 2.88E-19 | -0.43328 | 8.55E-23 | -0.25908 | 1.34E-08 |
| 2.43E-34 | -0.30738 | 1.12E-11 | -0.41559 | 6.30E-21 | -0.48827 | 2.38E-29 | -0.47133 | 3.35E-27 |
| 4.50E-08 | 0.043935 | 0.34346  | -0.31487 | 3.30E-12 | -0.19809 | 1.62E-05 | -0.32863 | 3.19E-13 |
| 1.85E-08 | -0.0298  | 0.52067  | -0.15313 | 0.0009   | -0.16379 | 0.00038  | -0.39589 | 5.67E-19 |
| 1.06E-09 | -0.11823 | 0.01056  | -0.33992 | 4.28E-14 | -0.29639 | 6.35E-11 | -0.07282 | 0.11607  |
| 0.00505  | -0.00863 | 0.85239  | -0.04022 | 0.38586  | -0.04428 | 0.33971  | -0.22403 | 1.01E-06 |
| 2.79E-13 | -0.12526 | 0.00672  | -0.2066  | 6.75E-06 | -0.25951 | 1.26E-08 | -0.17807 | 0.00011  |
| 0.00115  | 0.009375 | 0.83988  | -0.34614 | 1.37E-14 | -0.19687 | 1.83E-05 | -0.16978 | 0.00023  |
| 9.93E-06 | 0.141928 | 0.00211  | 0.010534 | 0.8204   | 0.002788 | 0.95208  | -0.24486 | 8.36E-08 |
| 1.66E-19 | -0.24953 | 4.64E-08 | -0.56904 | 2.01E-41 | -0.48817 | 2.46E-29 | -0.40159 | 1.59E-19 |
| 0.01099  | -0.25725 | 1.70E-08 | -0.24458 | 8.66E-08 | -0.25774 | 1.60E-08 | -0.07963 | 0.08562  |
| 3.82E-12 | -0.19984 | 1.36E-05 | -0.37717 | 3.10E-17 | -0.38041 | 1.58E-17 | 0.031712 | 0.49421  |
| 0.00562  | -0.19449 | 2.31E-05 | -0.36387 | 4.58E-16 | -0.2809  | 6.46E-10 | 0.066347 | 0.15229  |
| 0.02082  | -0.51195 | 1.47E-32 | -0.35878 | 1.24E-15 | -0.37642 | 3.62E-17 | -0.03041 | 0.51207  |
| 0.0097   | -0.26241 | 8.57E-09 | -0.31534 | 3.06E-12 | -0.28045 | 6.90E-10 | -0.1081  | 0.01946  |
| 1.10E-07 | 0.148892 | 0.00125  | 0.013352 | 0.77351  | 0.128089 | 0.00557  | 0.239544 | 1.61E-07 |
| 0.00547  | -0.2776  | 1.04E-09 | -0.47717 | 6.27E-28 | -0.36347 | 4.95E-16 | 0.115758 | 0.01231  |
| 8.67E-07 | 0.004901 | 0.91587  | 0.033889 | 0.46503  | 0.085824 | 0.06387  | 0.155207 | 0.00076  |

|          |          |          |          |          |          |          |          |          |
|----------|----------|----------|----------|----------|----------|----------|----------|----------|
| 0.05596  | -0.20803 | 5.81E-06 | -0.10287 | 0.02621  | -0.07578 | 0.10193  | -0.02191 | 0.63675  |
| 0.56812  | -0.29975 | 3.77E-11 | -0.28746 | 2.46E-10 | -0.23579 | 2.54E-07 | -0.04439 | 0.33846  |
| 0.0041   | -0.15934 | 0.00055  | -0.43703 | 3.33E-23 | -0.32488 | 6.11E-13 | -0.00018 | 0.99692  |
| 3.76E-05 | -0.4414  | 1.09E-23 | -0.41186 | 1.51E-20 | -0.42025 | 2.08E-21 | -0.0085  | 0.85456  |
| 2.25E-06 | -0.33603 | 8.64E-14 | -0.38933 | 2.37E-18 | -0.3711  | 1.08E-16 | 0.074923 | 0.10587  |
| 7.93E-10 | 0.182187 | 7.50E-05 | 0.054625 | 0.23872  | 0.220762 | 1.45E-06 | 0.271909 | 2.33E-09 |
| 0.018    | -0.36589 | 3.06E-16 | -0.20894 | 5.27E-06 | -0.25462 | 2.41E-08 | 0.033451 | 0.47082  |
| 2.40E-09 | -0.48259 | 1.29E-28 | -0.45584 | 2.43E-25 | -0.46996 | 4.93E-27 | -0.05352 | 0.24837  |
| 0.53776  | -0.04279 | 0.35617  | -0.07964 | 0.08559  | -0.10628 | 0.02162  | -0.07799 | 0.09231  |
| 0.00017  | -0.26739 | 4.35E-09 | -0.37239 | 8.27E-17 | -0.3417  | 3.10E-14 | -0.02346 | 0.61305  |
| 2.05E-07 | -0.18442 | 6.09E-05 | -0.09052 | 0.05059  | -0.00757 | 0.87046  | 0.102781 | 0.02635  |
| 5.39E-13 | -0.08429 | 0.06876  | -0.07891 | 0.08852  | 0.07815  | 0.09163  | 0.169757 | 0.00023  |
| 1.17E-06 | -0.25757 | 1.63E-08 | -0.40619 | 5.60E-20 | -0.36965 | 1.44E-16 | 0.162157 | 0.00043  |
| 0.0229   | -0.42223 | 1.29E-21 | -0.34976 | 6.95E-15 | -0.33736 | 6.80E-14 | 0.045453 | 0.32703  |
| 0.00017  | 0.010555 | 0.82004  | -0.09362 | 0.04315  | 0.006711 | 0.885    | 0.133771 | 0.00378  |
| 2.44E-05 | -0.14879 | 0.00126  | -0.35354 | 3.40E-15 | -0.30445 | 1.80E-11 | -0.04585 | 0.32283  |
| 2.66E-08 | -0.43627 | 4.03E-23 | -0.46357 | 2.94E-26 | -0.47677 | 7.05E-28 | 0.030052 | 0.51709  |
| 0.72233  | -0.23799 | 1.95E-07 | -0.23622 | 2.41E-07 | -0.18356 | 6.60E-05 | 0.088422 | 0.05621  |
| 0.50098  | -0.18741 | 4.60E-05 | -0.30158 | 2.83E-11 | -0.1972  | 1.77E-05 | 0.13505  | 0.00346  |
| 0.0287   | -0.02292 | 0.62127  | 0.056801 | 0.22051  | 0.003554 | 0.93894  | 0.023029 | 0.61962  |
| 0.10034  | -0.29525 | 7.57E-11 | -0.34479 | 1.76E-14 | -0.30087 | 3.16E-11 | 0.123637 | 0.00747  |
| 0.03195  | -0.08705 | 0.06016  | -0.09475 | 0.04068  | -0.04154 | 0.37041  | -0.03078 | 0.50704  |
| 0.82401  | -0.26238 | 8.61E-09 | -0.33879 | 5.26E-14 | -0.25155 | 3.58E-08 | 0.082754 | 0.074    |
| 0.19994  | -0.25175 | 3.49E-08 | -0.20433 | 8.55E-06 | -0.22108 | 1.40E-06 | 0.030195 | 0.5151   |
| 0.01294  | -0.21146 | 4.03E-06 | -0.24449 | 8.76E-08 | -0.14502 | 0.00168  | 0.15942  | 0.00054  |
| 0.40475  | -0.26658 | 4.87E-09 | -0.39945 | 2.57E-19 | -0.30224 | 2.55E-11 | 0.118767 | 0.01021  |
| 0.00036  | -0.22996 | 5.07E-07 | -0.3177  | 2.06E-12 | -0.3147  | 3.40E-12 | -0.13746 | 0.00291  |
| 3.26E-08 | -0.30162 | 2.81E-11 | -0.51921 | 1.35E-33 | -0.44532 | 3.96E-24 | -0.0242  | 0.60187  |
| 0.0115   | -0.38692 | 3.98E-18 | -0.40107 | 1.79E-19 | -0.33835 | 5.69E-14 | 0.038668 | 0.40445  |
| 0.00559  | -0.1084  | 0.01911  | -0.07792 | 0.09257  | -0.01904 | 0.68151  | -0.00135 | 0.97686  |
| 0.00044  | -0.10422 | 0.0243   | -0.23394 | 3.17E-07 | -0.21153 | 4.00E-06 | 0.152427 | 0.00095  |
| 0.90474  | -0.26339 | 7.51E-09 | -0.25128 | 3.71E-08 | -0.21206 | 3.78E-06 | 0.037122 | 0.42351  |
| 7.34E-12 | -0.28974 | 1.75E-10 | -0.51494 | 5.54E-33 | -0.49299 | 5.71E-30 | -0.143   | 0.00195  |
| 0.06149  | -0.28964 | 1.77E-10 | -0.30714 | 1.17E-11 | -0.27508 | 1.49E-09 | 0.063006 | 0.17406  |
| 0.01537  | -0.29377 | 9.49E-11 | -0.24772 | 5.84E-08 | -0.28207 | 5.44E-10 | 0.047223 | 0.30852  |
| 0.05126  | -0.47122 | 3.46E-27 | -0.35916 | 1.15E-15 | -0.33147 | 1.94E-13 | 0.14207  | 0.00209  |
| 3.93E-12 | -0.37196 | 9.04E-17 | -0.50338 | 2.28E-31 | -0.49737 | 1.49E-30 | -0.10733 | 0.02035  |
| 8.29E-13 | 0.213428 | 3.26E-06 | 0.052198 | 0.26027  | 0.186825 | 4.86E-05 | 0.09377  | 0.04282  |
| 0.16333  | -0.3063  | 1.34E-11 | -0.25686 | 1.80E-08 | -0.24121 | 1.31E-07 | -0.14299 | 0.00195  |
| 0.75707  | 0.182144 | 7.53E-05 | 0.154731 | 0.00079  | 0.05998  | 0.19571  | 0.127539 | 0.00578  |
| 0.35319  | 0.126011 | 0.0064   | 0.079263 | 0.08708  | 0.040891 | 0.37796  | 0.087472 | 0.05891  |
| 0.00146  | -0.42515 | 6.37E-22 | -0.31424 | 3.67E-12 | -0.32797 | 3.58E-13 | 0.012302 | 0.7909   |
| 0.00638  | -0.19931 | 1.43E-05 | -0.39342 | 9.75E-19 | -0.33236 | 1.66E-13 | 0.069855 | 0.13172  |
| 0.19138  | -0.05605 | 0.22666  | -0.05598 | 0.22723  | -0.02446 | 0.59805  | 0.043696 | 0.3461   |
| 6.59E-05 | -0.29507 | 7.77E-11 | -0.32994 | 2.54E-13 | -0.3243  | 6.74E-13 | 0.147117 | 0.00143  |

|          |          |          |          |          |          |          |          |          |
|----------|----------|----------|----------|----------|----------|----------|----------|----------|
| 0.00035  | -0.16537 | 0.00033  | -0.22446 | 9.57E-07 | -0.23776 | 2.00E-07 | 0.078334 | 0.09086  |
| 0.00712  | -0.27992 | 7.44E-10 | -0.36271 | 5.75E-16 | -0.33759 | 6.52E-14 | -0.00339 | 0.94174  |
| 6.44E-07 | -0.39803 | 3.52E-19 | -0.44699 | 2.56E-24 | -0.44881 | 1.58E-24 | -0.14674 | 0.00147  |
| 6.07E-09 | -0.38731 | 3.66E-18 | -0.42849 | 2.81E-22 | -0.43448 | 6.33E-23 | -0.06975 | 0.1323   |
| 0.02053  | 0.008092 | 0.86154  | -0.06686 | 0.14911  | 0.011357 | 0.80663  | 0.057605 | 0.21404  |
| 0.179    | 0.125978 | 0.00641  | -0.08087 | 0.08086  | -0.00237 | 0.95927  | 0.304035 | 1.92E-11 |
| 4.21E-06 | -0.22231 | 1.22E-06 | -0.16248 | 0.00042  | -0.26102 | 1.03E-08 | 0.022212 | 0.63209  |
| 2.18E-05 | -0.08354 | 0.07128  | -0.10365 | 0.02509  | 0.054013 | 0.24404  | 0.040645 | 0.38084  |
| 0.01474  | -0.20328 | 9.54E-06 | -0.33054 | 2.29E-13 | -0.2809  | 6.45E-10 | 0.060717 | 0.19026  |
| 1.17E-05 | -0.23222 | 3.89E-07 | -0.44579 | 3.50E-24 | -0.37871 | 2.25E-17 | 0.020152 | 0.66402  |
| 1.07E-06 | -0.2079  | 5.89E-06 | -0.32731 | 4.02E-13 | -0.35162 | 4.90E-15 | -0.07958 | 0.08583  |
| 1.26E-10 | -0.21224 | 3.71E-06 | -0.31926 | 1.59E-12 | -0.35472 | 2.71E-15 | 0.078129 | 0.09171  |
| 9.15E-10 | -0.34181 | 3.03E-14 | -0.4322  | 1.12E-22 | -0.42656 | 4.52E-22 | -0.05485 | 0.23676  |
| 0.02741  | -0.36809 | 1.97E-16 | -0.34297 | 2.45E-14 | -0.33363 | 1.32E-13 | 0.153648 | 0.00086  |
| 2.19E-06 | -0.31208 | 5.23E-12 | -0.50876 | 4.11E-32 | -0.43137 | 1.38E-22 | 0.087877 | 0.05774  |
| 0.01106  | -0.17198 | 0.00019  | -0.09867 | 0.03303  | -0.04966 | 0.28419  | 0.03077  | 0.50713  |
| 0.0086   | 0.242173 | 1.17E-07 | -0.00941 | 0.83929  | 0.071457 | 0.12306  | 0.012005 | 0.79584  |
| 0.39199  | -0.42857 | 2.76E-22 | -0.45179 | 7.20E-25 | -0.4031  | 1.13E-19 | -0.02929 | 0.52777  |
| 4.93E-15 | -0.15543 | 0.00075  | -0.29429 | 8.76E-11 | -0.39427 | 8.08E-19 | -0.05716 | 0.21757  |
| 1.16E-05 | -0.22424 | 9.81E-07 | -0.35196 | 4.59E-15 | -0.32684 | 4.36E-13 | 0.195791 | 2.03E-05 |
| 0.00049  | -0.3704  | 1.24E-16 | -0.39363 | 9.31E-19 | -0.37894 | 2.15E-17 | 0.018677 | 0.68727  |
| 0.07821  | -0.14064 | 0.00232  | -0.25248 | 3.18E-08 | -0.1034  | 0.02545  | 0.209816 | 4.81E-06 |
| 9.26E-06 | -0.09461 | 0.04098  | -0.06352 | 0.17055  | 0.019568 | 0.67319  | 0.048265 | 0.29796  |
| 0.05548  | -0.25909 | 1.34E-08 | -0.43353 | 8.04E-23 | -0.31504 | 3.21E-12 | 0.037167 | 0.42296  |
| 0.06038  | -0.02205 | 0.63453  | -0.02558 | 0.58133  | -0.0249  | 0.59143  | 0.064424 | 0.16455  |
| 0.04407  | -0.23653 | 2.32E-07 | -0.27248 | 2.15E-09 | -0.16112 | 0.00047  | 0.272119 | 2.26E-09 |
| 0.79259  | -0.32409 | 6.99E-13 | -0.43039 | 1.76E-22 | -0.31616 | 2.67E-12 | 0.116518 | 0.01174  |
| 0.01045  | -0.24612 | 7.14E-08 | -0.32905 | 2.97E-13 | -0.28173 | 5.73E-10 | -0.12784 | 0.00566  |
| 0.01145  | -0.12767 | 0.00573  | -0.2369  | 2.22E-07 | -0.11095 | 0.01646  | 0.044169 | 0.34089  |
| 0.49405  | -0.16094 | 0.00048  | -0.20778 | 5.97E-06 | -0.1388  | 0.00265  | 0.04456  | 0.33663  |
| 1.09E-06 | -0.20914 | 5.17E-06 | -0.22293 | 1.14E-06 | -0.28718 | 2.56E-10 | 0.121353 | 0.00866  |
| 5.76E-05 | -0.19228 | 2.87E-05 | -0.24264 | 1.10E-07 | -0.27104 | 2.63E-09 | 0.045336 | 0.32827  |
| 0.36394  | 0.007498 | 0.87162  | -0.14366 | 0.00186  | -0.01955 | 0.67349  | 0.002834 | 0.95129  |
| 0.00024  | -0.28039 | 6.95E-10 | -0.36524 | 3.49E-16 | -0.33098 | 2.12E-13 | 0.090911 | 0.0496   |
| 2.07E-07 | -0.31014 | 7.18E-12 | -0.44296 | 7.30E-24 | -0.42614 | 5.01E-22 | 0.080768 | 0.08123  |
| 0.84192  | -0.34351 | 2.22E-14 | -0.31831 | 1.86E-12 | -0.24491 | 8.31E-08 | 0.103027 | 0.02599  |
| 0.13157  | -0.20372 | 9.11E-06 | -0.33078 | 2.19E-13 | -0.27696 | 1.14E-09 | 0.174331 | 0.00015  |
| 0.34038  | -0.18097 | 8.40E-05 | -0.27598 | 1.31E-09 | -0.23226 | 3.87E-07 | -0.03373 | 0.46707  |
| 0.02369  | -0.07466 | 0.10711  | -0.09241 | 0.04594  | -0.01565 | 0.7359   | 0.103256 | 0.02566  |
| 0.69473  | -0.28518 | 3.45E-10 | -0.28888 | 1.99E-10 | -0.25013 | 4.30E-08 | 0.022463 | 0.62825  |
| 0.06301  | -0.34573 | 1.48E-14 | -0.25495 | 2.31E-08 | -0.24009 | 1.51E-07 | 0.01389  | 0.76465  |
| 0.01018  | -0.25487 | 2.33E-08 | -0.28449 | 3.82E-10 | -0.28537 | 3.36E-10 | 0.076238 | 0.09987  |
| 0.56465  | -0.1306  | 0.0047   | -0.2779  | 9.95E-10 | -0.18173 | 7.83E-05 | 0.075394 | 0.10369  |
| 2.09E-15 | -0.19961 | 1.39E-05 | -0.24012 | 1.50E-07 | -0.34559 | 1.51E-14 | 0.00118  | 0.97972  |
| 0.49413  | -0.31802 | 1.96E-12 | -0.31936 | 1.56E-12 | -0.30438 | 1.82E-11 | 0.059612 | 0.19847  |

|          |          |          |          |          |          |          |          |          |
|----------|----------|----------|----------|----------|----------|----------|----------|----------|
| 0.3205   | -0.38938 | 2.35E-18 | -0.31986 | 1.44E-12 | -0.24477 | 8.46E-08 | 0.090066 | 0.05176  |
| 0.01487  | -0.32164 | 1.06E-12 | -0.4103  | 2.17E-20 | -0.36085 | 8.28E-16 | 0.056991 | 0.21897  |
| 0.45526  | -0.18807 | 4.31E-05 | -0.16562 | 0.00033  | -0.1198  | 0.00956  | -0.01724 | 0.71017  |
| 0.02587  | -0.17153 | 0.0002   | -0.14462 | 0.00173  | -0.17529 | 0.00014  | -0.06662 | 0.1506   |
| 1.18E-22 | -0.15369 | 0.00086  | -0.21829 | 1.92E-06 | -0.37512 | 4.73E-17 | -0.06533 | 0.15871  |
| 0.10809  | -0.40089 | 1.86E-19 | -0.37785 | 2.70E-17 | -0.28451 | 3.81E-10 | 0.014562 | 0.75362  |
| 0.95389  | -0.26027 | 1.14E-08 | -0.20214 | 1.07E-05 | -0.20309 | 9.73E-06 | -0.00101 | 0.98261  |
| 8.42E-14 | -0.22041 | 1.51E-06 | -0.26936 | 3.32E-09 | -0.36746 | 2.24E-16 | 0.048616 | 0.29446  |
| 4.90E-21 | -0.21947 | 1.68E-06 | -0.36543 | 3.35E-16 | -0.47611 | 8.52E-28 | -0.03405 | 0.46291  |
| 8.21E-09 | -0.22156 | 1.33E-06 | -0.25362 | 2.74E-08 | -0.3225  | 9.17E-13 | 0.077305 | 0.0952   |
| 0.84448  | -0.24677 | 6.58E-08 | -0.32391 | 7.22E-13 | -0.25363 | 2.74E-08 | 0.12961  | 0.00503  |
| 0.00987  | -0.31592 | 2.78E-12 | -0.25772 | 1.60E-08 | -0.27986 | 7.51E-10 | 0.003918 | 0.9327   |
| 7.49E-07 | -0.42707 | 3.98E-22 | -0.43602 | 4.30E-23 | -0.45167 | 7.42E-25 | -0.09114 | 0.04902  |
| 6.22E-27 | -0.25793 | 1.56E-08 | -0.39401 | 8.56E-19 | -0.49233 | 6.99E-30 | -0.14685 | 0.00146  |
| 4.31E-06 | -0.30395 | 1.94E-11 | -0.31596 | 2.76E-12 | -0.36978 | 1.41E-16 | -0.17157 | 0.0002   |
| 6.15E-12 | -0.19131 | 3.16E-05 | -0.33196 | 1.78E-13 | -0.37601 | 3.94E-17 | -0.12624 | 0.0063   |
| 0.31065  | -0.06161 | 0.18379  | -0.27496 | 1.51E-09 | -0.15869 | 0.00058  | 0.193452 | 2.56E-05 |
| 0.46946  | -0.24604 | 7.22E-08 | -0.30736 | 1.13E-11 | -0.2083  | 5.65E-06 | 0.078799 | 0.08895  |
| 0.05876  | 0.050634 | 0.27484  | -0.14449 | 0.00174  | -0.05586 | 0.22828  | -0.0164  | 0.72369  |
| 0.85638  | -0.20039 | 1.28E-05 | -0.28143 | 5.98E-10 | -0.20114 | 1.19E-05 | -0.01641 | 0.72352  |
| 2.31E-09 | -0.4152  | 6.92E-21 | -0.42548 | 5.88E-22 | -0.47913 | 3.56E-28 | -0.03349 | 0.47024  |
| 2.08E-05 | 0.02009  | 0.665    | 0.045393 | 0.32766  | 0.057545 | 0.21451  | 0.093056 | 0.04444  |
| 0.71911  | 0.034977 | 0.45081  | -0.07748 | 0.09446  | -0.05837 | 0.20799  | 0.287706 | 2.37E-10 |
| 0.75054  | -0.17275 | 0.00018  | -0.27063 | 2.78E-09 | -0.17273 | 0.00018  | 0.021513 | 0.64286  |
| 1.51E-08 | -0.39063 | 1.79E-18 | -0.38648 | 4.37E-18 | -0.4201  | 2.16E-21 | -0.17645 | 0.00013  |
| 0.00101  | -0.29418 | 8.92E-11 | -0.37057 | 1.20E-16 | -0.34453 | 1.84E-14 | -0.00895 | 0.84709  |
| 3.97E-13 | -0.39399 | 8.59E-19 | -0.53895 | 1.53E-36 | -0.5204  | 9.10E-34 | 0.003625 | 0.93773  |
| 0.09828  | -0.2553  | 2.20E-08 | -0.1924  | 2.84E-05 | -0.24582 | 7.42E-08 | 0.078657 | 0.08953  |
| 0.00012  | -0.33666 | 7.72E-14 | -0.48289 | 1.18E-28 | -0.40481 | 7.66E-20 | 0.118044 | 0.01068  |
| 0.01982  | -0.06601 | 0.15438  | -0.13478 | 0.00352  | -0.03651 | 0.43126  | 0.153734 | 0.00086  |
| 0.40206  | -0.43438 | 6.50E-23 | -0.31025 | 7.06E-12 | -0.29986 | 3.70E-11 | -0.06027 | 0.19359  |
| 0.00144  | -0.24925 | 4.81E-08 | -0.26731 | 4.40E-09 | -0.29553 | 7.25E-11 | 0.000619 | 0.98935  |
| 4.06E-06 | -0.13783 | 0.00284  | -0.08217 | 0.07606  | -0.01657 | 0.72102  | 0.350433 | 6.12E-15 |
| 0.00104  | -0.29664 | 6.11E-11 | -0.30485 | 1.68E-11 | -0.32195 | 1.01E-12 | -0.01547 | 0.73879  |
| 0.60961  | -0.17756 | 0.00011  | -0.21662 | 2.30E-06 | -0.1758  | 0.00013  | 0.076623 | 0.09816  |
| 0.8149   | 0.101578 | 0.02817  | 0.037032 | 0.42464  | 0.023586 | 0.61118  | 0.060181 | 0.19421  |
| 0.11888  | 0.007953 | 0.8639   | -0.12597 | 0.00642  | -0.11648 | 0.01177  | 0.031713 | 0.4942   |
| 2.08E-09 | -0.14566 | 0.0016   | -0.4869  | 3.59E-29 | -0.40667 | 5.01E-20 | 0.002362 | 0.95941  |
| 0.00034  | -0.21562 | 2.57E-06 | -0.28017 | 7.17E-10 | -0.28398 | 4.12E-10 | 0.086756 | 0.06102  |
| 0.00646  | -0.3826  | 9.96E-18 | -0.33001 | 2.51E-13 | -0.35109 | 5.41E-15 | -0.01896 | 0.68271  |
| 0.56178  | -0.04754 | 0.30525  | -0.14222 | 0.00206  | -0.11046 | 0.01694  | -0.00049 | 0.9916   |
| 0.00034  | -0.26366 | 7.24E-09 | -0.49822 | 1.14E-30 | -0.41141 | 1.68E-20 | 0.094244 | 0.04178  |
| 0.5179   | -0.2392  | 1.68E-07 | -0.24945 | 4.68E-08 | -0.18725 | 4.67E-05 | 0.122107 | 0.00825  |
| 1.58E-13 | -0.29558 | 7.19E-11 | -0.38102 | 1.39E-17 | -0.43926 | 1.89E-23 | -0.05306 | 0.25247  |
| 0.04595  | -0.46818 | 8.15E-27 | -0.38708 | 3.84E-18 | -0.41093 | 1.88E-20 | 0.030216 | 0.51481  |

|          |          |          |          |          |          |          |          |          |
|----------|----------|----------|----------|----------|----------|----------|----------|----------|
| 0.00243  | -0.45952 | 8.97E-26 | -0.3709  | 1.12E-16 | -0.3684  | 1.86E-16 | 0.043282 | 0.35068  |
| 0.04759  | -0.32583 | 5.19E-13 | -0.3818  | 1.18E-17 | -0.34465 | 1.80E-14 | 0.047813 | 0.30251  |
| 0.80108  | -0.28037 | 6.97E-10 | -0.23772 | 2.01E-07 | -0.18845 | 4.16E-05 | 0.012903 | 0.78094  |
| 2.28E-05 | -0.09632 | 0.03746  | -0.09237 | 0.04605  | 0.030598 | 0.50951  | 0.023166 | 0.61753  |
| 6.23E-05 | -0.43832 | 2.40E-23 | -0.46464 | 2.19E-26 | -0.43975 | 1.67E-23 | -0.04852 | 0.29545  |
| 0.00137  | -0.28544 | 3.32E-10 | -0.30614 | 1.37E-11 | -0.28302 | 4.74E-10 | 0.032473 | 0.48389  |
| 0.00426  | -0.31073 | 6.52E-12 | -0.31137 | 5.88E-12 | -0.30149 | 2.87E-11 | -0.04096 | 0.37714  |
| 0.98661  | -0.2234  | 1.08E-06 | -0.28408 | 4.06E-10 | -0.21667 | 2.29E-06 | 0.075864 | 0.10155  |
| 1.54E-29 | -0.41307 | 1.14E-20 | -0.42043 | 1.99E-21 | -0.55461 | 5.08E-39 | -0.18999 | 3.59E-05 |
| 0.00804  | 0.232236 | 3.88E-07 | 0.01532  | 0.74124  | 0.085597 | 0.06457  | 0.034342 | 0.45908  |
| 0.04358  | -0.26351 | 7.40E-09 | -0.34175 | 3.07E-14 | -0.24611 | 7.15E-08 | 0.137605 | 0.00288  |
| 0.49034  | 0.087102 | 0.06     | -0.06148 | 0.18473  | 0.000983 | 0.9831   | 0.270453 | 2.85E-09 |
| 0.80555  | 0.103306 | 0.02559  | -0.00321 | 0.94488  | 0.005033 | 0.91362  | 0.303284 | 2.16E-11 |
| 0.00034  | -0.16    | 0.00052  | -0.10103 | 0.02904  | -0.17809 | 0.00011  | 0.034664 | 0.45488  |
| 0.90461  | 0.030976 | 0.50428  | -0.00457 | 0.92153  | 0.008855 | 0.84864  | 0.00469  | 0.91949  |
| 0.85862  | 0.13185  | 0.00432  | 0.036413 | 0.43243  | 0.051075 | 0.27068  | 0.131275 | 0.00449  |
| 0.0019   | 0.12223  | 0.00819  | 0.104536 | 0.02387  | 0.112599 | 0.01491  | 0.153672 | 0.00086  |
| 0.49531  | 0.151227 | 0.00104  | -0.03279 | 0.47967  | 0.003026 | 0.948    | 0.197136 | 1.78E-05 |
| 0.01938  | -0.1352  | 0.00342  | -0.12816 | 0.00554  | -0.15087 | 0.00107  | 0.114618 | 0.0132   |
| 0.10939  | -0.04125 | 0.37379  | -0.08113 | 0.07987  | -0.06607 | 0.15402  | 0.061473 | 0.18479  |
| 0.60019  | 0.073152 | 0.1144   | -0.00878 | 0.84999  | 0.032802 | 0.47947  | 0.062698 | 0.17618  |
| 0.89575  | 0.108673 | 0.01882  | -0.06982 | 0.13189  | 0.000505 | 0.99132  | 0.01874  | 0.68627  |
| 0.87006  | 0.053297 | 0.25035  | -0.00577 | 0.90099  | 0.001105 | 0.981    | 0.018293 | 0.69337  |
| 0.73843  | 0.085786 | 0.06398  | -0.05429 | 0.24166  | -0.01078 | 0.81631  | 0.11467  | 0.01315  |
| 0.06503  | 0.002535 | 0.95643  | -0.07664 | 0.09807  | -0.06617 | 0.15336  | 0.046486 | 0.31614  |
| 0.01272  | -0.04323 | 0.35127  | -0.09224 | 0.04636  | -0.09247 | 0.0458   | 0.022694 | 0.62473  |
| 0.00013  | 0.026481 | 0.56812  | -0.14035 | 0.00237  | -0.13677 | 0.00306  | -0.08339 | 0.07179  |
| 0.00342  | -0.12749 | 0.0058   | -0.12626 | 0.00629  | -0.14551 | 0.00162  | -0.00781 | 0.86626  |
| 0.46378  | 0.099309 | 0.0319   | 0.099238 | 0.03203  | 0.050167 | 0.2793   | 0.128924 | 0.00527  |
| 0.18137  | 0.145419 | 0.00163  | 0.020646 | 0.65631  | 0.013009 | 0.77919  | 0.401518 | 1.62E-19 |
| 0.0045   | 0.074672 | 0.10705  | -0.11879 | 0.01019  | -0.07282 | 0.11605  | 0.312156 | 5.17E-12 |
| 0.64641  | 0.028045 | 0.54547  | -0.07252 | 0.11758  | -0.04112 | 0.37527  | 0.197377 | 1.74E-05 |
| 0.84617  | -0.01498 | 0.74673  | -0.1195  | 0.00974  | -0.07607 | 0.10064  | 0.236634 | 2.30E-07 |
| 0.00029  | -0.01789 | 0.69973  | -0.07234 | 0.1185   | 0.028267 | 0.5423   | 0.296255 | 6.48E-11 |
| 0.05343  | -0.01883 | 0.68477  | 0.021482 | 0.64334  | 0.054204 | 0.24237  | 0.339593 | 4.55E-14 |
| 0.54751  | -0.03344 | 0.47101  | -0.08474 | 0.06732  | -0.05669 | 0.2214   | 0.113281 | 0.01431  |
| 0.81617  | 0.101602 | 0.02813  | -0.04924 | 0.28827  | 0.003774 | 0.93517  | 0.155789 | 0.00073  |
| 0.04631  | -0.05209 | 0.26129  | -0.08081 | 0.08107  | -0.07963 | 0.08562  | 0.021298 | 0.64618  |
| 0.01667  | 4.06E-05 | 0.9993   | -0.10961 | 0.01782  | -0.08606 | 0.06313  | -0.05705 | 0.2185   |
| 0.76212  | 0.075377 | 0.10377  | -0.03464 | 0.45515  | 0.017624 | 0.70405  | 0.158963 | 0.00056  |
| 0.00308  | 0.101862 | 0.02773  | 0.050785 | 0.27341  | 0.119727 | 0.00961  | 0.141639 | 0.00215  |
| 0.02172  | 0.178145 | 0.00011  | 0.067417 | 0.14577  | 0.12768  | 0.00573  | 0.314278 | 3.65E-12 |
| 8.30E-07 | 0.12817  | 0.00554  | 0.139191 | 0.00257  | 0.23041  | 4.81E-07 | 0.33731  | 6.86E-14 |
| 0.91447  | 0.005334 | 0.90848  | -0.02288 | 0.62193  | -0.01758 | 0.70467  | 0.040197 | 0.38612  |
| 0.3185   | 0.047968 | 0.30095  | -0.03489 | 0.45199  | -0.01868 | 0.68724  | 0.074215 | 0.10922  |

|          |          |          |          |          |          |          |          |          |
|----------|----------|----------|----------|----------|----------|----------|----------|----------|
| 0.26198  | -0.00223 | 0.96175  | -0.04794 | 0.3012   | -0.02861 | 0.53734  | -0.06441 | 0.16466  |
| 0.00579  | 0.073416 | 0.1131   | 0.009284 | 0.84141  | 0.113243 | 0.01434  | 0.259125 | 1.33E-08 |
| 0.03501  | 0.151702 | 0.00101  | -0.02964 | 0.52285  | 0.069269 | 0.13499  | 0.299942 | 3.66E-11 |
| 0.01702  | 0.142997 | 0.00195  | 0.012371 | 0.78975  | 0.104903 | 0.02338  | 0.190591 | 3.39E-05 |
| 0.40568  | 0.085964 | 0.06343  | -0.01147 | 0.80472  | 0.051834 | 0.26361  | 0.150637 | 0.00109  |
| 0.63239  | 0.016714 | 0.71866  | 0.005719 | 0.9019   | 0.01202  | 0.79558  | -0.02233 | 0.63024  |
| 0.39895  | -0.01894 | 0.68314  | -0.10884 | 0.01864  | -0.05964 | 0.19824  | 0.037261 | 0.42178  |
| 0.13307  | 0.100246 | 0.03031  | 0.038498 | 0.40653  | 0.083358 | 0.07191  | 0.239062 | 1.71E-07 |
| 0.85583  | 0.047407 | 0.30664  | 0.003311 | 0.94311  | 0.000799 | 0.98626  | 0.053173 | 0.25146  |
| 0.46629  | 0.083755 | 0.07056  | 0.00261  | 0.95515  | 0.048857 | 0.29207  | 0.109057 | 0.0184   |
| 0.36287  | -0.00172 | 0.97047  | -0.03513 | 0.44879  | -0.01769 | 0.70305  | 0.00889  | 0.84806  |
| 0.03122  | -0.075   | 0.10551  | -0.07103 | 0.12531  | -0.08974 | 0.05261  | -0.04556 | 0.32585  |
| 0.76247  | 0.02401  | 0.60478  | -0.0193  | 0.67748  | 0.009101 | 0.8445   | 0.043991 | 0.34285  |
| 0.38294  | 0.019619 | 0.67239  | -0.01574 | 0.73435  | -0.01389 | 0.76459  | 0.056125 | 0.22606  |
| 0.07769  | -0.00809 | 0.86164  | -0.10294 | 0.02611  | -0.08589 | 0.06366  | 0.131831 | 0.00432  |
| 0.00819  | 0.086725 | 0.06112  | 0.034231 | 0.46053  | 0.092228 | 0.04637  | 0.255992 | 2.01E-08 |
| 0.01657  | 0.034368 | 0.45873  | -0.02421 | 0.60182  | 0.063067 | 0.17365  | 0.253951 | 2.63E-08 |
| 0.06393  | -0.08927 | 0.05388  | -0.06307 | 0.17363  | -0.08775 | 0.0581   | -0.16896 | 0.00024  |
| 0.12831  | 0.097305 | 0.03554  | 0.030724 | 0.50776  | 0.0091   | 0.84451  | 0.072906 | 0.11563  |
| 0.01535  | -0.10696 | 0.02078  | -0.00508 | 0.91288  | 0.034306 | 0.45955  | 0.275076 | 1.49E-09 |
| 0.91142  | 0.013988 | 0.76305  | -0.10651 | 0.02132  | -0.04467 | 0.33544  | 0.168001 | 0.00027  |
| 0.56226  | -0.07238 | 0.1183   | -0.06949 | 0.13374  | -0.0469  | 0.31186  | 0.184157 | 6.25E-05 |
| 0.00014  | 0.089355 | 0.05365  | 0.155677 | 0.00074  | 0.182549 | 7.26E-05 | 0.432044 | 1.17E-22 |
| 0.06923  | 0.033635 | 0.46838  | -0.03732 | 0.421    | 0.028199 | 0.54326  | 0.114124 | 0.0136   |
| 0.32058  | 0.039565 | 0.39363  | -0.06161 | 0.18383  | -0.03232 | 0.48598  | 0.14585  | 0.00158  |
| 0.00109  | 0.129559 | 0.00505  | 0.03132  | 0.49957  | 0.140356 | 0.00237  | 0.194443 | 2.33E-05 |
| 0.61088  | 0.040358 | 0.38421  | -0.0061  | 0.89536  | 0.002243 | 0.96145  | 0.142569 | 0.00201  |
| 0.72093  | 0.071342 | 0.12367  | -0.0591  | 0.20235  | 0.000826 | 0.9858   | 0.276953 | 1.14E-09 |
| 0.01615  | 0.017674 | 0.70325  | 0.054139 | 0.24294  | 0.093365 | 0.04373  | 0.180224 | 8.99E-05 |
| 0.26234  | 0.064546 | 0.16375  | -0.08102 | 0.08028  | -0.03218 | 0.48791  | 0.155055 | 0.00077  |
| 0.35684  | 0.049264 | 0.28806  | -0.07324 | 0.11394  | -0.03636 | 0.43306  | 0.121291 | 0.0087   |
| 0.01609  | -0.05233 | 0.25904  | -0.07066 | 0.1273   | -0.08938 | 0.05359  | 0.131972 | 0.00428  |
| 2.17E-08 | 0.196892 | 1.82E-05 | 0.280249 | 7.10E-10 | 0.303098 | 2.22E-11 | 0.460554 | 6.75E-26 |
| 0.53688  | 0.185462 | 5.53E-05 | 0.101808 | 0.02781  | 0.114069 | 0.01364  | 0.108848 | 0.01863  |
| 0.88915  | 0.037401 | 0.42004  | 0.011725 | 0.8005   | 0.025315 | 0.58528  | 0.21117  | 4.16E-06 |
| 0.71682  | -0.05233 | 0.25904  | -0.10587 | 0.02213  | -0.06036 | 0.19289  | 0.097501 | 0.03517  |
| 0.91227  | 0.056403 | 0.22377  | 0.09347  | 0.0435   | 0.055354 | 0.23251  | 0.282753 | 4.93E-10 |
| 0.00459  | 0.077898 | 0.09268  | 0.077318 | 0.09514  | 0.112361 | 0.01513  | 0.366864 | 2.52E-16 |
| 0.01364  | 0.25435  | 2.49E-08 | 0.149434 | 0.0012   | 0.174785 | 0.00015  | 0.341668 | 3.12E-14 |
| 0.08304  | 0.077646 | 0.09374  | 0.010665 | 0.8182   | 0.066269 | 0.15277  | 0.148357 | 0.0013   |
| 0.01177  | -0.08524 | 0.06568  | -0.12843 | 0.00545  | -0.1214  | 0.00863  | 0.007889 | 0.86499  |
| 0.418    | -0.02966 | 0.52252  | -0.10131 | 0.0286   | -0.08707 | 0.0601   | 0.061414 | 0.18522  |
| 0.19171  | 0.014045 | 0.76211  | -0.07264 | 0.11699  | -0.05195 | 0.26252  | 0.085764 | 0.06405  |
| 0.27822  | -0.03415 | 0.46153  | -0.15212 | 0.00097  | -0.0884  | 0.05626  | 0.114869 | 0.01299  |
| 0.63654  | -0.00901 | 0.84604  | -0.05864 | 0.20588  | -0.05601 | 0.22699  | 0.22423  | 9.82E-07 |



|          |          |          |          |          |          |          |          |          |
|----------|----------|----------|----------|----------|----------|----------|----------|----------|
| 9.17E-05 | 0.069273 | 0.13497  | -0.10663 | 0.02119  | -0.10224 | 0.02715  | 0.300204 | 3.51E-11 |
| 0.0209   | 0.062209 | 0.17958  | 0.054525 | 0.23959  | 0.066701 | 0.15011  | 0.232779 | 3.64E-07 |
| 0.00069  | 0.002857 | 0.9509   | -0.05338 | 0.24961  | -0.09482 | 0.04055  | 0.110332 | 0.01707  |
| 0.13647  | 0.052601 | 0.2566   | -0.00826 | 0.85872  | -0.02107 | 0.64978  | 0.199147 | 1.45E-05 |
| 0.13668  | 0.034765 | 0.45355  | -0.05621 | 0.22538  | -0.05194 | 0.26267  | 0.095938 | 0.03822  |
| 0.10563  | 0.047667 | 0.30399  | -0.07483 | 0.10631  | -0.05406 | 0.24367  | 0.102442 | 0.02685  |
| 0.00949  | -0.04411 | 0.34149  | -0.08361 | 0.07105  | -0.10577 | 0.02226  | 0.109101 | 0.01835  |
| 0.24031  | 0.150701 | 0.00109  | 0.034586 | 0.45589  | 0.08495  | 0.06663  | 0.191806 | 3.01E-05 |
| 0.43443  | 0.164608 | 0.00035  | 0.030483 | 0.5111   | 0.08085  | 0.08092  | 0.215152 | 2.70E-06 |
| 0.61649  | 0.079108 | 0.0877   | -0.01805 | 0.69724  | 0.01047  | 0.82147  | 0.200987 | 1.21E-05 |
| 0.16251  | -0.00717 | 0.87722  | -0.04361 | 0.34705  | -0.04792 | 0.30142  | 0.026536 | 0.56731  |
| 0.33271  | 0.117745 | 0.01088  | -0.01324 | 0.77534  | 0.010598 | 0.81931  | 0.181264 | 8.17E-05 |
| 0.59029  | 0.069735 | 0.13238  | -0.04165 | 0.36911  | -0.00448 | 0.92305  | 0.129039 | 0.00523  |
| 0.04003  | 0.023379 | 0.6143   | -0.10366 | 0.02508  | -0.08688 | 0.06067  | -0.0233  | 0.61554  |
| 0.85478  | 0.033614 | 0.46865  | -0.04287 | 0.35526  | 0.003181 | 0.94534  | 0.07103  | 0.12533  |
| 0.54325  | 0.097679 | 0.03484  | -0.03851 | 0.40642  | 0.005254 | 0.90985  | 0.174966 | 0.00014  |
| 0.00459  | 0.117912 | 0.01077  | -0.01024 | 0.82529  | -0.02913 | 0.53003  | 0.227722 | 6.58E-07 |
| 0.351    | 0.000261 | 0.99551  | -0.03396 | 0.4641   | 0.000616 | 0.98941  | 0.074215 | 0.10922  |
| 0.39815  | -0.00576 | 0.90117  | -0.07462 | 0.10727  | -0.04388 | 0.34407  | 0.079609 | 0.08571  |
| 0.77842  | 0.037326 | 0.42097  | -0.05642 | 0.22361  | -0.01757 | 0.70486  | 0.108503 | 0.01901  |
| 0.13947  | 0.005663 | 0.90287  | -0.09925 | 0.03201  | -0.06504 | 0.16053  | 0.13597  | 0.00324  |
| 0.8119   | 0.171166 | 0.0002   | -0.00588 | 0.89923  | 0.078304 | 0.09098  | 0.296774 | 5.98E-11 |
| 7.99E-05 | -0.02491 | 0.5913   | -0.04889 | 0.29173  | 0.04738  | 0.30691  | 0.370493 | 1.22E-16 |
| 0.35159  | 0.060982 | 0.18833  | -0.00892 | 0.84759  | -0.00962 | 0.83572  | 0.153559 | 0.00087  |
| 0.21459  | 0.075266 | 0.10428  | -0.03654 | 0.4308   | -0.02343 | 0.61346  | 0.241423 | 1.28E-07 |
| 0.73222  | 0.051634 | 0.26546  | -0.10804 | 0.01953  | -0.05927 | 0.20103  | 0.368651 | 1.76E-16 |
| 7.11E-10 | -0.27369 | 1.81E-09 | -0.31455 | 3.49E-12 | -0.39678 | 4.65E-19 | 0.012811 | 0.78247  |
| 5.37E-10 | -0.43341 | 8.28E-23 | -0.44891 | 1.54E-24 | -0.45485 | 3.18E-25 | -0.01745 | 0.70688  |
| 8.39E-17 | -0.43286 | 9.51E-23 | -0.43607 | 4.25E-23 | -0.52531 | 1.74E-34 | 0.08255  | 0.07472  |
| 0.1409   | -0.02319 | 0.61722  | -0.0712  | 0.12444  | -0.10308 | 0.02591  | 0.320412 | 1.31E-12 |
| 1.13E-08 | -0.05214 | 0.26081  | -0.16111 | 0.00047  | -0.25193 | 3.41E-08 | 0.073014 | 0.11509  |
| 1.51E-18 | -0.43943 | 1.81E-23 | -0.33594 | 8.78E-14 | -0.49578 | 2.43E-30 | -0.0962  | 0.0377   |
| 0.79042  | -0.17478 | 0.00015  | -0.40536 | 6.77E-20 | -0.2582  | 1.50E-08 | 0.152743 | 0.00093  |
| 0.13693  | -0.16983 | 0.00023  | -0.15523 | 0.00076  | -0.12737 | 0.00584  | 0.066264 | 0.1528   |
| 1.88E-27 | -0.49217 | 7.34E-30 | -0.44141 | 1.09E-23 | -0.58497 | 3.21E-44 | -0.03941 | 0.39544  |
| 9.01E-10 | -0.40154 | 1.61E-19 | -0.41783 | 3.71E-21 | -0.46335 | 3.13E-26 | 0.089967 | 0.05202  |
| 1.65E-05 | -0.25821 | 1.50E-08 | -0.20971 | 4.86E-06 | -0.24508 | 8.14E-08 | 0.167477 | 0.00028  |
| 1.25E-22 | -0.52347 | 3.25E-34 | -0.33345 | 1.37E-13 | -0.52522 | 1.80E-34 | -0.04798 | 0.30078  |
| 2.71E-14 | -0.34822 | 9.28E-15 | -0.27825 | 9.47E-10 | -0.4186  | 3.09E-21 | 0.153153 | 0.0009   |
| 0.14239  | -0.12947 | 0.00508  | -0.25516 | 2.24E-08 | -0.19826 | 1.59E-05 | -0.04269 | 0.35732  |
| 1.31E-15 | -0.38301 | 9.14E-18 | -0.18262 | 7.21E-05 | -0.38574 | 5.12E-18 | 0.124974 | 0.00685  |
| 1.18E-30 | -0.57913 | 3.54E-43 | -0.48126 | 1.91E-28 | -0.62843 | 1.09E-52 | -0.30483 | 1.69E-11 |
| 1.57E-19 | -0.36764 | 2.16E-16 | -0.42522 | 6.27E-22 | -0.50151 | 4.10E-31 | 0.258027 | 1.54E-08 |
| 3.65E-18 | -0.35888 | 1.22E-15 | -0.45454 | 3.46E-25 | -0.49528 | 2.83E-30 | -0.08461 | 0.06771  |
| 0.27517  | -0.33942 | 4.69E-14 | -0.23195 | 4.01E-07 | -0.26804 | 3.99E-09 | 0.260727 | 1.07E-08 |

|          |          |          |          |          |          |          |          |          |
|----------|----------|----------|----------|----------|----------|----------|----------|----------|
| 1.40E-12 | -0.41908 | 2.75E-21 | -0.39173 | 1.41E-18 | -0.47102 | 3.65E-27 | -0.005   | 0.91421  |
| 2.42E-24 | -0.48631 | 4.28E-29 | -0.4904  | 1.26E-29 | -0.57234 | 5.45E-42 | -0.25582 | 2.06E-08 |
| 2.12E-21 | -0.52598 | 1.39E-34 | -0.53357 | 1.02E-35 | -0.61002 | 6.11E-49 | -0.04455 | 0.33676  |
| 5.83E-12 | -0.42764 | 3.46E-22 | -0.48348 | 9.91E-29 | -0.5272  | 9.15E-35 | -0.05474 | 0.23775  |
| 0.00176  | -0.28874 | 2.03E-10 | -0.37263 | 7.88E-17 | -0.3056  | 1.49E-11 | 0.241307 | 1.30E-07 |
| 3.20E-12 | -0.33951 | 4.61E-14 | -0.26068 | 1.08E-08 | -0.40487 | 7.56E-20 | 0.104173 | 0.02437  |
| 2.86E-05 | -0.30716 | 1.16E-11 | -0.06447 | 0.16423  | -0.2501  | 4.32E-08 | 0.009425 | 0.83904  |
| 5.24E-17 | -0.33543 | 9.62E-14 | -0.32189 | 1.02E-12 | -0.46148 | 5.25E-26 | -0.04726 | 0.30813  |
| 1.82E-11 | -0.2847  | 3.70E-10 | -0.23307 | 3.52E-07 | -0.35773 | 1.52E-15 | 0.235254 | 2.71E-07 |
| 1.52E-07 | -0.32836 | 3.34E-13 | -0.31337 | 4.24E-12 | -0.37461 | 5.26E-17 | -0.0012  | 0.9794   |
| 0.0024   | -0.40813 | 3.59E-20 | -0.37959 | 1.87E-17 | -0.40816 | 3.56E-20 | 0.089231 | 0.05398  |
| 4.81E-05 | -0.1625  | 0.00042  | -0.31377 | 3.96E-12 | -0.28551 | 3.29E-10 | 0.013826 | 0.7657   |
| 0.00046  | -0.11331 | 0.01429  | -0.30073 | 3.23E-11 | -0.25623 | 1.95E-08 | -0.08993 | 0.05213  |
| 2.10E-22 | -0.47165 | 3.05E-27 | -0.44498 | 4.33E-24 | -0.54812 | 5.62E-38 | 0.069349 | 0.13454  |
| 5.36E-11 | -0.37333 | 6.84E-17 | -0.41638 | 5.23E-21 | -0.45447 | 3.51E-25 | -0.05372 | 0.24664  |
| 1.17E-12 | -0.34943 | 7.40E-15 | -0.38899 | 2.55E-18 | -0.42662 | 4.45E-22 | -0.05204 | 0.26167  |
| 0.00509  | -0.25391 | 2.64E-08 | -0.23202 | 3.98E-07 | -0.2618  | 9.31E-09 | 0.192943 | 2.69E-05 |
| 0.00286  | -0.14193 | 0.00211  | -0.14932 | 0.00121  | -0.16867 | 0.00025  | 0.394173 | 8.26E-19 |
| 4.75E-23 | -0.53048 | 2.97E-35 | -0.5135  | 8.88E-33 | -0.61736 | 2.10E-50 | -0.02719 | 0.55777  |
| 4.66E-09 | -0.37762 | 2.83E-17 | -0.37508 | 4.77E-17 | -0.43754 | 2.93E-23 | -0.17323 | 0.00017  |
| 2.78E-16 | -0.41741 | 4.10E-21 | -0.35597 | 2.13E-15 | -0.49108 | 1.02E-29 | 0.011455 | 0.80499  |
| 1.57E-08 | -0.08558 | 0.06463  | -0.17414 | 0.00016  | -0.25243 | 3.20E-08 | 0.066588 | 0.1508   |
| 4.80E-13 | -0.18986 | 3.63E-05 | -0.36481 | 3.79E-16 | -0.39009 | 2.01E-18 | 0.051621 | 0.26558  |
| 4.40E-10 | -0.34789 | 9.87E-15 | -0.18556 | 5.48E-05 | -0.33097 | 2.12E-13 | 0.249998 | 4.37E-08 |
| 0.01851  | -0.48391 | 8.73E-29 | -0.4056  | 6.40E-20 | -0.4013  | 1.69E-19 | 0.059713 | 0.19771  |
| 1.79E-15 | -0.35782 | 1.49E-15 | -0.31225 | 5.09E-12 | -0.4251  | 6.44E-22 | 0.050856 | 0.27274  |
| 9.44E-13 | -0.40657 | 5.13E-20 | -0.305   | 1.64E-11 | -0.42949 | 2.19E-22 | 0.075403 | 0.10365  |
| 0.26742  | -0.32722 | 4.08E-13 | -0.39836 | 3.27E-19 | -0.31147 | 5.79E-12 | 0.180474 | 8.79E-05 |
| 1.22E-14 | -0.30228 | 2.53E-11 | -0.35479 | 2.68E-15 | -0.42368 | 9.10E-22 | 0.14195  | 0.00211  |
| 0.00028  | -0.21456 | 2.89E-06 | -0.18978 | 3.66E-05 | -0.21813 | 1.95E-06 | 0.287915 | 2.30E-10 |
| 4.79E-12 | -0.32613 | 4.93E-13 | -0.39454 | 7.62E-19 | -0.44966 | 1.27E-24 | -0.03293 | 0.47777  |
| 0.00256  | -0.28404 | 4.08E-10 | -0.34165 | 3.13E-14 | -0.31286 | 4.61E-12 | 0.201389 | 1.16E-05 |
| 6.98E-12 | -0.20765 | 6.05E-06 | -0.28484 | 3.63E-10 | -0.36255 | 5.93E-16 | 0.010444 | 0.82191  |
| 0.57411  | -0.10703 | 0.02071  | -0.16783 | 0.00027  | -0.16281 | 0.00041  | 0.134636 | 0.00356  |
| 2.02E-16 | -0.21019 | 4.62E-06 | -0.2547  | 2.38E-08 | -0.37501 | 4.85E-17 | 0.013641 | 0.76875  |
| 1.97E-11 | -0.2649  | 6.12E-09 | -0.26373 | 7.18E-09 | -0.37033 | 1.26E-16 | 0.056559 | 0.22248  |
| 7.77E-11 | -0.19423 | 2.38E-05 | -0.27781 | 1.01E-09 | -0.31827 | 1.87E-12 | -0.04671 | 0.31377  |
| 3.13E-08 | -0.39569 | 5.92E-19 | -0.35583 | 2.19E-15 | -0.38834 | 2.94E-18 | -0.01453 | 0.75418  |
| 4.27E-15 | -0.31148 | 5.78E-12 | -0.35965 | 1.05E-15 | -0.44624 | 3.11E-24 | 0.019413 | 0.67563  |
| 9.75E-05 | -0.10488 | 0.02342  | -0.23255 | 3.74E-07 | -0.23364 | 3.28E-07 | 0.210149 | 4.64E-06 |
| 1.14E-21 | -0.2643  | 6.64E-09 | -0.44574 | 3.55E-24 | -0.48068 | 2.26E-28 | 0.06886  | 0.13732  |
| 0.0003   | -0.24268 | 1.10E-07 | -0.3022  | 2.56E-11 | -0.26522 | 5.86E-09 | 0.109618 | 0.0178   |
| 0.00041  | -0.2554  | 2.18E-08 | -0.32397 | 7.13E-13 | -0.30976 | 7.64E-12 | 0.016899 | 0.71567  |
| 0.94756  | -0.10186 | 0.02773  | -0.15319 | 0.0009   | -0.09661 | 0.03688  | 0.385495 | 5.40E-18 |
| 4.01E-07 | -0.38654 | 4.32E-18 | -0.16234 | 0.00043  | -0.29681 | 5.95E-11 | -0.18027 | 8.95E-05 |

|          |          |          |          |          |          |          |          |          |
|----------|----------|----------|----------|----------|----------|----------|----------|----------|
| 3.08E-08 | -0.26321 | 7.70E-09 | -0.32378 | 7.37E-13 | -0.35593 | 2.15E-15 | 0.02054  | 0.65796  |
| 0.0737   | -0.2278  | 6.52E-07 | -0.23003 | 5.03E-07 | -0.22514 | 8.86E-07 | 0.150778 | 0.00108  |
| 0.00353  | -0.19953 | 1.40E-05 | -0.07613 | 0.10033  | -0.18545 | 5.53E-05 | 0.188115 | 4.30E-05 |
| 4.82E-05 | -0.10968 | 0.01773  | -0.19038 | 3.46E-05 | -0.21323 | 3.33E-06 | 0.30807  | 1.00E-11 |
| 0.14847  | -0.1008  | 0.0294   | -0.23596 | 2.49E-07 | -0.18934 | 3.82E-05 | 0.198235 | 1.59E-05 |
| 0.00044  | -0.48213 | 1.47E-28 | -0.361   | 8.04E-16 | -0.37854 | 2.33E-17 | 0.083331 | 0.072    |
| 0.00855  | -0.37866 | 2.27E-17 | -0.29669 | 6.06E-11 | -0.31954 | 1.52E-12 | 0.04809  | 0.29971  |
| 0.00103  | -0.43106 | 1.49E-22 | -0.40454 | 8.15E-20 | -0.37093 | 1.11E-16 | 0.004637 | 0.92039  |
| 4.20E-14 | -0.53654 | 3.59E-36 | -0.49089 | 1.08E-29 | -0.55679 | 2.24E-39 | 0.006001 | 0.89709  |
| 6.96E-10 | -0.27676 | 1.17E-09 | -0.15571 | 0.00073  | -0.32236 | 9.40E-13 | 0.092932 | 0.04472  |
| 0.42006  | -0.35837 | 1.34E-15 | -0.20744 | 6.18E-06 | -0.26687 | 4.68E-09 | -0.01399 | 0.76303  |
| 2.95E-21 | -0.48633 | 4.26E-29 | -0.48245 | 1.34E-28 | -0.57304 | 4.13E-42 | -0.01096 | 0.81325  |
| 3.57E-26 | -0.18194 | 7.68E-05 | -0.29627 | 6.47E-11 | -0.41141 | 1.68E-20 | 0.030508 | 0.51075  |
| 6.38E-23 | -0.46874 | 6.97E-27 | -0.58712 | 1.32E-44 | -0.60021 | 4.85E-47 | 0.014647 | 0.75224  |
| 0.00027  | -0.36458 | 3.98E-16 | -0.2224  | 1.21E-06 | -0.30715 | 1.16E-11 | 0.013886 | 0.76472  |
| 2.20E-34 | -0.59487 | 4.92E-46 | -0.57823 | 5.11E-43 | -0.67729 | 5.69E-64 | -0.05221 | 0.2602   |
| 3.68E-16 | -0.45433 | 3.65E-25 | -0.42679 | 4.27E-22 | -0.51464 | 6.10E-33 | -0.09482 | 0.04054  |
| 0.00011  | -0.3698  | 1.40E-16 | -0.21459 | 2.88E-06 | -0.30476 | 1.71E-11 | 0.100743 | 0.0295   |
| 3.70E-10 | -0.43855 | 2.26E-23 | -0.26692 | 4.64E-09 | -0.36891 | 1.67E-16 | -0.06116 | 0.18702  |
| 4.94E-11 | -0.49625 | 2.10E-30 | -0.37656 | 3.52E-17 | -0.46274 | 3.70E-26 | -0.02135 | 0.64533  |
| 3.08E-15 | -0.45919 | 9.81E-26 | -0.40195 | 1.47E-19 | -0.50007 | 6.44E-31 | -0.1168  | 0.01153  |
| 1.59E-15 | -0.28964 | 1.78E-10 | -0.33848 | 5.56E-14 | -0.43538 | 5.05E-23 | 0.135438 | 0.00336  |
| 2.92E-09 | -0.21914 | 1.74E-06 | -0.18858 | 4.11E-05 | -0.33438 | 1.16E-13 | 0.129514 | 0.00506  |
| 8.89E-20 | -0.47895 | 3.74E-28 | -0.52269 | 4.22E-34 | -0.5765  | 1.03E-42 | -0.03516 | 0.4485   |
| 0.00256  | -0.25859 | 1.43E-08 | -0.33541 | 9.64E-14 | -0.29846 | 4.61E-11 | -0.13465 | 0.00355  |
| 2.29E-05 | -0.06125 | 0.18642  | -0.27199 | 2.30E-09 | -0.22638 | 7.68E-07 | 0.155744 | 0.00073  |
| 3.40E-18 | -0.31385 | 3.92E-12 | -0.46264 | 3.81E-26 | -0.49392 | 4.30E-30 | 0.207787 | 5.96E-06 |
| 0.584    | -0.2583  | 1.48E-08 | -0.12119 | 0.00875  | -0.17149 | 0.0002   | 0.231708 | 4.13E-07 |
| 1.16E-07 | -0.34124 | 3.37E-14 | -0.29249 | 1.15E-10 | -0.3633  | 5.12E-16 | 0.122683 | 0.00795  |
| 0.91802  | -0.20593 | 7.24E-06 | -0.22076 | 1.45E-06 | -0.17371 | 0.00016  | -0.12653 | 0.00618  |
| 1.71E-14 | -0.39294 | 1.08E-18 | -0.27533 | 1.44E-09 | -0.42153 | 1.53E-21 | 0.001597 | 0.97255  |
| 2.40E-21 | -0.45172 | 7.33E-25 | -0.42535 | 6.08E-22 | -0.54678 | 9.15E-38 | -0.10922 | 0.01822  |
| 3.67E-10 | -0.40138 | 1.66E-19 | -0.33348 | 1.36E-13 | -0.4192  | 2.67E-21 | -0.04614 | 0.31978  |
| 0.81182  | -0.17995 | 9.21E-05 | -0.2948  | 8.11E-11 | -0.23038 | 4.83E-07 | 0.260992 | 1.04E-08 |
| 2.21E-43 | -0.44096 | 1.22E-23 | -0.53819 | 2.01E-36 | -0.6558  | 9.49E-59 | -0.24323 | 1.02E-07 |
| 0.06598  | -0.28091 | 6.45E-10 | -0.16164 | 0.00045  | -0.20054 | 1.26E-05 | 0.135043 | 0.00346  |
| 0.00928  | -0.43312 | 8.90E-23 | -0.42764 | 3.47E-22 | -0.39721 | 4.23E-19 | 0.063393 | 0.17143  |
| 9.34E-11 | -0.1128  | 0.01473  | -0.19068 | 3.36E-05 | -0.26928 | 3.36E-09 | -0.06249 | 0.17764  |
| 2.49E-24 | -0.51164 | 1.62E-32 | -0.58889 | 6.25E-45 | -0.62326 | 1.31E-51 | -0.16137 | 0.00046  |
| 0.09847  | -0.21159 | 3.98E-06 | -0.059   | 0.20316  | -0.0768  | 0.09739  | 0.415608 | 6.28E-21 |
| 0.00015  | -0.10517 | 0.02303  | -0.095   | 0.04016  | -0.19538 | 2.12E-05 | 0.116901 | 0.01147  |
| 4.80E-06 | -0.13468 | 0.00355  | -0.17517 | 0.00014  | -0.01515 | 0.74398  | 0.289079 | 1.93E-10 |
| 1.88E-12 | -0.37097 | 1.10E-16 | -0.25524 | 2.22E-08 | -0.3977  | 3.79E-19 | 0.163336 | 0.00039  |
| 2.76E-38 | -0.45253 | 5.91E-25 | -0.38842 | 2.89E-18 | -0.59482 | 5.03E-46 | -0.16292 | 0.00041  |
| 1.85E-14 | -0.49783 | 1.29E-30 | -0.50357 | 2.14E-31 | -0.55775 | 1.56E-39 | 0.045389 | 0.32771  |

|          |          |          |          |          |          |          |          |          |
|----------|----------|----------|----------|----------|----------|----------|----------|----------|
| 0.0583   | -0.29006 | 1.67E-10 | -0.16902 | 0.00024  | -0.23086 | 4.56E-07 | 0.271281 | 2.54E-09 |
| 1.58E-16 | -0.43693 | 3.41E-23 | -0.35675 | 1.84E-15 | -0.47528 | 1.08E-27 | 0.041977 | 0.36541  |
| 0.41571  | -0.13862 | 0.00268  | -0.07397 | 0.11041  | -0.15946 | 0.00054  | 0.029416 | 0.52601  |
| 7.20E-20 | -0.4905  | 1.22E-29 | -0.47961 | 3.09E-28 | -0.56399 | 1.43E-40 | -0.06187 | 0.18196  |
| 2.93E-23 | -0.45917 | 9.85E-26 | -0.47465 | 1.30E-27 | -0.58159 | 1.30E-43 | 0.015201 | 0.74319  |
| 1.46E-24 | -0.49006 | 1.39E-29 | -0.51511 | 5.23E-33 | -0.61023 | 5.57E-49 | -0.05545 | 0.23173  |
| 3.36E-08 | -0.4158  | 6.00E-21 | -0.36131 | 7.57E-16 | -0.40097 | 1.83E-19 | 0.033181 | 0.47441  |
| 7.74E-12 | -0.52333 | 3.40E-34 | -0.43351 | 8.08E-23 | -0.49794 | 1.25E-30 | -0.01355 | 0.77025  |
| 0.41503  | -0.17267 | 0.00018  | -0.23163 | 4.17E-07 | -0.21433 | 2.96E-06 | 0.06316  | 0.17301  |
| 1.31E-18 | -0.48428 | 7.83E-29 | -0.35123 | 5.27E-15 | -0.47678 | 7.03E-28 | -0.14162 | 0.00216  |
| 2.46E-05 | 0.166105 | 0.00031  | 0.110794 | 0.01661  | 0.176423 | 0.00013  | 0.611959 | 2.53E-49 |
| 3.72E-22 | 0.332868 | 1.52E-13 | 0.431524 | 1.33E-22 | 0.45449  | 3.50E-25 | 0.84364  | #####    |
| 6.42E-05 | 0.22883  | 5.78E-07 | 0.077444 | 0.0946   | 0.164865 | 0.00035  | 0.578899 | 3.90E-43 |
| 4.55E-20 | 0.383664 | 7.96E-18 | 0.396428 | 5.03E-19 | 0.439891 | 1.61E-23 | 0.72784  | 3.32E-78 |
| 8.71E-18 | 0.306037 | 1.39E-11 | 0.085137 | 0.06603  | 0.285658 | 3.21E-10 | 0.502057 | 3.45E-31 |
| 3.16E-09 | 0.423191 | 1.03E-21 | 0.300236 | 3.49E-11 | 0.318711 | 1.74E-12 | 0.770088 | 7.99E-93 |
| 7.64E-09 | -0.07528 | 0.10421  | -0.00742 | 0.8729   | 0.071419 | 0.12327  | 0.485963 | 4.75E-29 |
| 2.24E-19 | 0.160073 | 0.00052  | 0.266598 | 4.86E-09 | 0.308601 | 9.22E-12 | 0.824702 | #####    |
| 3.76E-16 | -0.06704 | 0.14803  | 0.097778 | 0.03465  | 0.165531 | 0.00033  | 0.708451 | 2.20E-72 |
| 8.15E-28 | 0.504696 | 1.50E-31 | 0.409246 | 2.77E-20 | 0.485646 | 5.22E-29 | 0.785603 | 5.25E-99 |
| 2.86E-19 | 0.270173 | 2.96E-09 | 0.038317 | 0.40874  | 0.263462 | 7.44E-09 | 0.629975 | 5.17E-53 |
| 7.67E-19 | 0.249788 | 4.49E-08 | 0.407986 | 3.71E-20 | 0.442904 | 7.40E-24 | 0.683949 | 1.11E-65 |
| 4.17E-09 | 0.295132 | 7.70E-11 | 0.287015 | 2.63E-10 | 0.314853 | 3.31E-12 | 0.720122 | 7.90E-76 |
| 0.42855  | -0.0562  | 0.22546  | 0.120324 | 0.00925  | 0.069344 | 0.13457  | 0.612802 | 1.72E-49 |
| 1.54E-06 | 0.179981 | 9.19E-05 | 0.085093 | 0.06617  | 0.146057 | 0.00155  | 0.539982 | 1.06E-36 |
| 0.00692  | -0.08372 | 0.07067  | -0.04786 | 0.30201  | -0.00957 | 0.83651  | 0.525129 | 1.85E-34 |
| 4.19E-16 | 0.257955 | 1.55E-08 | 0.16559  | 0.00033  | 0.280805 | 6.55E-10 | 0.774741 | 1.26E-94 |
| 0.00116  | 0.098217 | 0.03384  | 0.001192 | 0.9795   | 0.08408  | 0.06947  | 0.710945 | 4.17E-73 |
| 6.65E-05 | 0.172704 | 0.00018  | 0.130375 | 0.00477  | 0.170658 | 0.00021  | 0.795776 | #####    |
| 2.25E-05 | 0.037268 | 0.4217   | -0.10114 | 0.02886  | 0.057251 | 0.21687  | 0.631415 | 2.56E-53 |
| 7.13E-12 | -0.03649 | 0.4314   | -0.12455 | 0.00704  | 0.068778 | 0.13779  | 0.610753 | 4.39E-49 |
| 1.50E-07 | -0.1075  | 0.02015  | 0.044396 | 0.33842  | 0.082117 | 0.07626  | 0.661763 | 3.74E-60 |
| 6.67E-06 | -0.0141  | 0.76124  | 0.146615 | 0.00149  | 0.078491 | 0.09021  | 0.626639 | 2.60E-52 |
| 2.00E-29 | 0.336023 | 8.65E-14 | 0.359013 | 1.19E-15 | 0.466653 | 1.25E-26 | 0.726419 | 9.22E-78 |
| 8.26E-19 | 0.15795  | 0.00061  | 0.182795 | 7.09E-05 | 0.2747   | 1.57E-09 | 0.84717  | #####    |
| 1.83E-22 | 0.274556 | 1.60E-09 | 0.357195 | 1.69E-15 | 0.392437 | 1.21E-18 | 0.860022 | #####    |
| 0.00025  | 0.285313 | 3.38E-10 | 0.084956 | 0.06661  | 0.16727  | 0.00028  | 0.574323 | 2.47E-42 |
| 4.66E-17 | 0.244732 | 8.50E-08 | 0.366053 | 2.97E-16 | 0.387187 | 3.76E-18 | 0.712308 | 1.67E-73 |
| 0.27334  | 0.030498 | 0.5109   | -0.04028 | 0.38507  | -0.01609 | 0.7287   | 0.584993 | 3.19E-44 |
| 1.26E-21 | 0.489918 | 1.45E-29 | 0.4697   | 5.31E-27 | 0.509241 | 3.52E-32 | 0.835999 | #####    |
| 1.33E-09 | 0.026522 | 0.56752  | -0.05423 | 0.24217  | 0.071675 | 0.12192  | 0.729847 | 7.76E-79 |
| 0.00172  | -0.0281  | 0.54465  | 0.050464 | 0.27646  | 0.071553 | 0.12256  | 0.473061 | 2.04E-27 |
| 7.72E-08 | 0.073319 | 0.11358  | 0.22299  | 1.13E-06 | 0.219844 | 1.61E-06 | 0.787191 | 1.14E-99 |
| 1.56E-12 | 0.27272  | 2.08E-09 | 0.299445 | 3.95E-11 | 0.326612 | 4.53E-13 | 0.533235 | 1.14E-35 |
| 9.52E-08 | 0.119255 | 0.0099   | 0.323381 | 7.90E-13 | 0.271679 | 2.40E-09 | 0.795716 | #####    |

|          |          |          |          |          |          |          |          |          |
|----------|----------|----------|----------|----------|----------|----------|----------|----------|
| 1.56E-18 | 0.233751 | 3.24E-07 | 0.146658 | 0.00148  | 0.269352 | 3.32E-09 | 0.745289 | 6.84E-84 |
| 4.58E-13 | 0.337723 | 6.37E-14 | 0.241998 | 1.19E-07 | 0.319999 | 1.40E-12 | 0.666599 | 2.56E-61 |
| 6.55E-14 | 0.154618 | 0.0008   | 0.325727 | 5.28E-13 | 0.343018 | 2.43E-14 | 0.633865 | 7.66E-54 |
| 2.67E-20 | 0.232664 | 3.69E-07 | 0.2646   | 6.38E-09 | 0.351299 | 5.20E-15 | 0.720418 | 6.42E-76 |
| 8.92E-08 | 0.030813 | 0.50653  | 0.223004 | 1.13E-06 | 0.215767 | 2.53E-06 | 0.724985 | 2.57E-77 |
| 4.42E-10 | -0.04074 | 0.37972  | 0.170202 | 0.00022  | 0.147024 | 0.00144  | 0.679237 | 1.83E-64 |
| 2.32E-17 | 0.250089 | 4.32E-08 | 0.233164 | 3.48E-07 | 0.336863 | 7.44E-14 | 0.731168 | 2.96E-79 |
| 2.52E-18 | 0.262414 | 8.57E-09 | 0.226856 | 7.27E-07 | 0.342336 | 2.76E-14 | 0.686538 | 2.34E-66 |
| 0.0018   | 0.102857 | 0.02624  | 0.215776 | 2.53E-06 | 0.151678 | 0.00101  | 0.722097 | 1.98E-76 |
| 0.13338  | 0.002411 | 0.95856  | -0.03762 | 0.4173   | 0.020064 | 0.6654   | 0.643757 | 5.26E-56 |
| 5.96E-08 | 0.322252 | 9.57E-13 | 0.02232  | 0.63044  | 0.159507 | 0.00054  | 0.566141 | 6.24E-41 |
| 0.1268   | 0.204175 | 8.69E-06 | 0.087931 | 0.05759  | 0.132835 | 0.00403  | 0.529852 | 3.69E-35 |
| 1.41E-62 | 0.289167 | 1.91E-10 | 0.390921 | 1.68E-18 | 0.484855 | 6.60E-29 | 0.769148 | 1.83E-92 |
| 0.06187  | 0.168625 | 0.00025  | 0.038441 | 0.40722  | 0.110641 | 0.01676  | 0.604645 | 6.84E-48 |
| 0.00445  | 0.243319 | 1.01E-07 | 0.243942 | 9.38E-08 | 0.22532  | 8.67E-07 | 0.591613 | 1.98E-45 |
| 5.17E-14 | 0.175202 | 0.00014  | 0.233279 | 3.43E-07 | 0.2744   | 1.64E-09 | 0.603393 | 1.19E-47 |
| 0.00019  | 0.175423 | 0.00014  | 0.126703 | 0.00611  | 0.189166 | 3.89E-05 | 0.534009 | 8.73E-36 |
| 1.57E-08 | 0.134292 | 0.00364  | 0.000488 | 0.99161  | 0.137854 | 0.00283  | 0.650698 | 1.43E-57 |
| 6.00E-07 | 0.098828 | 0.03275  | 0.037671 | 0.41669  | 0.102913 | 0.02615  | 0.722461 | 1.53E-76 |
| 4.05E-12 | 0.3018   | 2.73E-11 | 0.212346 | 3.67E-06 | 0.313445 | 4.18E-12 | 0.576496 | 1.03E-42 |
| 0.4345   | 0.125279 | 0.00671  | 0.139926 | 0.00244  | 0.042597 | 0.35837  | 0.472795 | 2.20E-27 |
| 0.00027  | 0.180818 | 8.51E-05 | 0.02005  | 0.66562  | 0.091238 | 0.04878  | 0.753401 | 1.07E-86 |
| 0.22492  | 0.028226 | 0.54289  | -0.03173 | 0.494    | -0.00933 | 0.8406   | 0.658302 | 2.47E-59 |
| 0.2046   | -0.06069 | 0.1905   | -0.12223 | 0.00819  | -0.0387  | 0.40404  | 0.315442 | 3.01E-12 |
| 4.11E-18 | 0.207554 | 6.11E-06 | 0.157444 | 0.00064  | 0.304269 | 1.85E-11 | 0.649379 | 2.86E-57 |
| 1.14E-27 | 0.326032 | 5.01E-13 | 0.348301 | 9.14E-15 | 0.439884 | 1.61E-23 | 0.870495 | #####    |
| 3.09E-21 | 0.100955 | 0.02916  | 0.158905 | 0.00057  | 0.264031 | 6.89E-09 | 0.67792  | 3.95E-64 |
| 0.81473  | -0.09929 | 0.03193  | -0.04952 | 0.28553  | -0.05159 | 0.26587  | 0.588982 | 6.01E-45 |
| 6.42E-22 | 0.467324 | 1.04E-26 | 0.604957 | 5.95E-48 | 0.590995 | 2.57E-45 | 0.653197 | 3.81E-58 |
| 3.23E-08 | 0.216492 | 2.34E-06 | 0.279388 | 8.04E-10 | 0.299649 | 3.83E-11 | 0.584425 | 4.03E-44 |
| 3.33E-26 | 0.41223  | 1.39E-20 | 0.545528 | 1.44E-37 | 0.565359 | 8.45E-41 | 0.736269 | 6.78E-81 |
| 0.0104   | -0.03105 | 0.50332  | -0.08566 | 0.06438  | 0.003951 | 0.93214  | 0.500755 | 5.20E-31 |
| 7.10E-25 | 0.360978 | 8.08E-16 | 0.46859  | 7.26E-27 | 0.49339  | 5.06E-30 | 0.630061 | 4.95E-53 |
| 3.29E-08 | 0.306436 | 1.31E-11 | 0.310492 | 6.78E-12 | 0.330344 | 2.37E-13 | 0.763872 | 1.76E-90 |
| 0.0003   | 0.039033 | 0.40003  | -0.01241 | 0.78915  | 0.079064 | 0.08788  | 0.596534 | 2.40E-46 |
| 0.62233  | 0.048651 | 0.29411  | -0.10216 | 0.02727  | -0.06792 | 0.1428   | 0.620294 | 5.32E-51 |
| 0.25961  | 0.105393 | 0.02274  | 0.107223 | 0.02047  | 0.108225 | 0.01932  | 0.578081 | 5.43E-43 |
| 1.49E-22 | 0.365378 | 3.39E-16 | 0.345389 | 1.57E-14 | 0.462914 | 3.53E-26 | 0.778644 | 3.59E-96 |
| 0.64011  | 0.139966 | 0.00243  | 0.111891 | 0.01556  | 0.091478 | 0.04819  | 0.518671 | 1.62E-33 |
| 5.46E-35 | 0.319324 | 1.57E-12 | 0.34364  | 2.17E-14 | 0.484014 | 8.47E-29 | 0.705163 | 1.92E-71 |
| 6.48E-06 | -0.04588 | 0.32253  | -0.01989 | 0.66809  | 0.055529 | 0.23103  | 0.535538 | 5.11E-36 |
| 9.53E-08 | -0.18342 | 6.69E-05 | 0.125497 | 0.00662  | 0.059084 | 0.20248  | 0.623826 | 1.00E-51 |
| 0.08813  | -0.14562 | 0.0016   | -0.00415 | 0.9287   | -0.02223 | 0.63186  | 0.674772 | 2.46E-63 |
| 1.87E-07 | 0.173679 | 0.00016  | 0.15818  | 0.0006   | 0.207392 | 6.21E-06 | 0.673118 | 6.38E-63 |
| 0.17057  | 0.152681 | 0.00093  | 0.062343 | 0.17865  | 0.066682 | 0.15022  | 0.690689 | 1.86E-67 |

|          |          |          |          |          |          |          |          |          |
|----------|----------|----------|----------|----------|----------|----------|----------|----------|
| 0.00043  | 0.23023  | 4.91E-07 | 0.250593 | 4.05E-08 | 0.212722 | 3.52E-06 | 0.676    | 1.21E-63 |
| 7.57E-12 | 0.26696  | 4.62E-09 | 0.327457 | 3.91E-13 | 0.34225  | 2.80E-14 | 0.648676 | 4.13E-57 |
| 0.00873  | -0.10934 | 0.01809  | -0.07546 | 0.10337  | -0.12678 | 0.00608  | 0.566379 | 5.68E-41 |
| 7.40E-07 | 0.09736  | 0.03544  | 0.183146 | 6.86E-05 | 0.202931 | 9.88E-06 | 0.695054 | 1.24E-68 |
| 0.00025  | -0.09601 | 0.03807  | 0.064131 | 0.16648  | 0.064905 | 0.16141  | 0.524344 | 2.42E-34 |
| 2.59E-18 | 0.139697 | 0.00248  | 0.151645 | 0.00101  | 0.276988 | 1.13E-09 | 0.70692  | 6.05E-72 |
| 0.07489  | -0.05203 | 0.26181  | -0.18321 | 6.82E-05 | -0.07671 | 0.0978   | 0.660741 | 6.54E-60 |
| 1.65E-11 | 0.323171 | 8.18E-13 | 0.351437 | 5.07E-15 | 0.376418 | 3.62E-17 | 0.685388 | 4.69E-66 |
| 0.03747  | 0.095822 | 0.03846  | 0.12958  | 0.00504  | 0.120409 | 0.0092   | 0.5206   | 8.51E-34 |
| 0.87588  | 0.095094 | 0.03996  | 0.016323 | 0.72497  | -0.00784 | 0.86576  | 0.583449 | 6.04E-44 |
| 6.75E-30 | 0.352451 | 4.18E-15 | 0.396276 | 5.20E-19 | 0.457143 | 1.71E-25 | 0.814818 | #####    |
| 0.10265  | -0.07453 | 0.10772  | -0.22235 | 1.22E-06 | -0.08354 | 0.07129  | 0.520791 | 7.98E-34 |
| 5.66E-12 | 0.287604 | 2.41E-10 | 0.105711 | 0.02233  | 0.274305 | 1.66E-09 | 0.55859  | 1.13E-39 |
| 8.00E-06 | 0.042218 | 0.36266  | 0.023873 | 0.60684  | 0.091845 | 0.04729  | 0.708618 | 1.97E-72 |
| 0.25232  | 0.196856 | 1.83E-05 | 0.138286 | 0.00275  | 0.125572 | 0.00659  | 0.47593  | 8.98E-28 |
| 0.00011  | 0.234934 | 2.82E-07 | 0.243821 | 9.52E-08 | 0.246372 | 6.92E-08 | 0.681505 | 4.78E-65 |
| 4.65E-22 | 0.44905  | 1.49E-24 | 0.452655 | 5.72E-25 | 0.498581 | 1.02E-30 | 0.739821 | 4.64E-82 |
| 0.01576  | 0.006271 | 0.89248  | -0.00203 | 0.96503  | 0.073744 | 0.11149  | 0.619109 | 9.28E-51 |
| 4.00E-18 | 0.272775 | 2.06E-09 | 0.360217 | 9.37E-16 | 0.402385 | 1.33E-19 | 0.808994 | #####    |
| 1.37E-17 | 0.169003 | 0.00024  | 0.167331 | 0.00028  | 0.256531 | 1.87E-08 | 0.678233 | 3.29E-64 |
| 0.3061   | 0.150996 | 0.00106  | -0.06349 | 0.1708   | -0.03937 | 0.39592  | 0.546597 | 9.80E-38 |
| 7.62E-17 | 0.039566 | 0.39362  | -0.13648 | 0.00312  | 0.084525 | 0.06801  | 0.571516 | 7.55E-42 |
| 1.87E-06 | 0.059938 | 0.19603  | 0.091951 | 0.04704  | 0.131104 | 0.00454  | 0.758781 | 1.29E-88 |
| 4.94E-10 | 0.269624 | 3.20E-09 | 0.273677 | 1.82E-09 | 0.303125 | 2.22E-11 | 0.772532 | 9.15E-94 |
| 1.84E-05 | 0.027541 | 0.55273  | -0.09059 | 0.05041  | 0.021099 | 0.64926  | 0.513554 | 8.71E-33 |
| 2.98E-05 | 0.191853 | 3.00E-05 | 0.18685  | 4.85E-05 | 0.218634 | 1.84E-06 | 0.548882 | 4.25E-38 |
| 2.28E-15 | 0.306349 | 1.33E-11 | 0.430603 | 1.67E-22 | 0.425586 | 5.73E-22 | 0.580817 | 1.78E-43 |
| 1.85E-13 | 0.109096 | 0.01836  | 0.009791 | 0.83286  | 0.175514 | 0.00014  | 0.737877 | 2.02E-81 |
| 2.08E-08 | 0.121751 | 0.00844  | 0.168125 | 0.00026  | 0.22377  | 1.04E-06 | 0.758499 | 1.63E-88 |
| 0.07998  | 0.107382 | 0.02028  | -0.02911 | 0.53036  | 0.040648 | 0.38081  | 0.614056 | 9.69E-50 |
| 1.16E-05 | 0.253513 | 2.78E-08 | -0.01299 | 0.77957  | 0.147034 | 0.00144  | 0.580066 | 2.42E-43 |
| 0.01016  | -0.08508 | 0.06621  | -0.23145 | 4.26E-07 | -0.0967  | 0.0367   | 0.633912 | 7.48E-54 |
| 3.73E-09 | 0.290182 | 1.64E-10 | 0.34714  | 1.14E-14 | 0.304865 | 1.68E-11 | 0.637546 | 1.23E-54 |
| 0.08499  | -0.0349  | 0.45185  | -0.06721 | 0.14703  | -0.00376 | 0.93545  | 0.579005 | 3.73E-43 |
| 0.00449  | 0.295348 | 7.45E-11 | 0.053209 | 0.25114  | 0.138377 | 0.00273  | 0.672723 | 8.00E-63 |
| 0.0522   | -0.03122 | 0.50089  | -0.06974 | 0.13233  | 0.007013 | 0.87985  | 0.536601 | 3.52E-36 |
| 0.00409  | 0.144408 | 0.00176  | 0.242011 | 1.19E-07 | 0.213152 | 3.36E-06 | 0.634788 | 4.85E-54 |
| 9.27E-20 | 0.281873 | 5.60E-10 | 0.292868 | 1.09E-10 | 0.387246 | 3.71E-18 | 0.77281  | 7.14E-94 |
| 0.87686  | 0.160986 | 0.00048  | 0.098296 | 0.0337   | 0.107415 | 0.02025  | 0.315918 | 2.78E-12 |
| 1.62E-17 | 0.354396 | 2.89E-15 | 0.306226 | 1.35E-11 | 0.377591 | 2.84E-17 | 0.850168 | #####    |
| 3.60E-20 | 0.215519 | 2.60E-06 | 0.403851 | 9.53E-20 | 0.413506 | 1.03E-20 | 0.750158 | 1.46E-85 |
| 8.37E-30 | 0.34276  | 2.55E-14 | 0.341583 | 3.16E-14 | 0.443015 | 7.19E-24 | 0.861873 | #####    |
| 2.54E-32 | 0.663766 | 1.24E-60 | 0.606249 | 3.34E-48 | 0.655098 | 1.38E-58 | 0.693641 | 2.99E-68 |
| 4.73E-20 | 0.306963 | 1.20E-11 | 0.530427 | 3.03E-35 | 0.489277 | 1.76E-29 | 0.570884 | 9.70E-42 |
| 6.20E-19 | 0.437127 | 3.25E-23 | 0.331642 | 1.88E-13 | 0.442301 | 8.65E-24 | 0.654075 | 2.39E-58 |

|          |          |          |          |          |          |          |          |          |
|----------|----------|----------|----------|----------|----------|----------|----------|----------|
| 1.95E-08 | 0.555783 | 3.27E-39 | 0.438255 | 2.44E-23 | 0.446875 | 2.63E-24 | 0.606633 | 2.82E-48 |
| 0.02894  | 0.026959 | 0.56115  | 0.045289 | 0.32878  | 0.075358 | 0.10386  | 0.673758 | 4.42E-63 |
| 1.31E-09 | 0.286652 | 2.77E-10 | 0.306994 | 1.19E-11 | 0.307569 | 1.09E-11 | 0.575146 | 1.77E-42 |
| 1.57E-11 | 0.489294 | 1.75E-29 | 0.311153 | 6.09E-12 | 0.376876 | 3.30E-17 | 0.787662 | #####    |
| 5.17E-07 | 0.27041  | 2.87E-09 | 0.261725 | 9.40E-09 | 0.284934 | 3.58E-10 | 0.774708 | 1.30E-94 |
| 1.18E-20 | 0.411797 | 1.53E-20 | 0.265045 | 6.00E-09 | 0.391384 | 1.52E-18 | 0.623867 | 9.80E-52 |
| 5.93E-22 | 0.254397 | 2.48E-08 | 0.308551 | 9.30E-12 | 0.367523 | 2.21E-16 | 0.825751 | #####    |
| 2.41E-05 | 0.100172 | 0.03043  | 0.24044  | 1.45E-07 | 0.179947 | 9.22E-05 | 0.627363 | 1.83E-52 |
| 1.59E-06 | 0.219264 | 1.72E-06 | 0.181173 | 8.24E-05 | 0.220703 | 1.46E-06 | 0.615652 | 4.64E-50 |
| 0.68276  | -0.07856 | 0.08991  | -0.13184 | 0.00432  | -0.07467 | 0.10706  | 0.536555 | 3.57E-36 |
| 2.03E-10 | 0.342126 | 2.87E-14 | 0.189931 | 3.61E-05 | 0.266866 | 4.68E-09 | 0.603033 | 1.40E-47 |
| 1.95E-05 | 0.15544  | 0.00075  | 0.066121 | 0.15369  | 0.152206 | 0.00097  | 0.582269 | 9.82E-44 |
| 1.88E-12 | 0.364902 | 3.73E-16 | 0.52306  | 3.73E-34 | 0.424996 | 6.62E-22 | 0.550351 | 2.47E-38 |
| 0.96705  | 0.152822 | 0.00092  | -0.0217  | 0.63991  | 0.025546 | 0.58187  | 0.493014 | 5.67E-30 |
| 1.12E-19 | 0.372549 | 8.01E-17 | 0.593841 | 7.64E-46 | 0.518179 | 1.90E-33 | 0.692899 | 4.74E-68 |
| 0.02055  | -0.13985 | 0.00245  | -0.01958 | 0.67308  | -0.01023 | 0.82546  | 0.560458 | 5.57E-40 |
| 8.60E-05 | 0.141739 | 0.00214  | 0.201248 | 1.17E-05 | 0.222034 | 1.26E-06 | 0.595286 | 4.11E-46 |
| 1.16E-09 | 0.118884 | 0.01013  | 0.161391 | 0.00046  | 0.221378 | 1.36E-06 | 0.780573 | 6.03E-97 |
| 3.53E-24 | 0.251356 | 3.67E-08 | 0.164031 | 0.00037  | 0.344739 | 1.77E-14 | 0.500087 | 6.40E-31 |
| 2.17E-27 | 0.213728 | 3.16E-06 | 0.198945 | 1.48E-05 | 0.311111 | 6.13E-12 | 0.521211 | 6.93E-34 |
| 4.61E-10 | 0.170424 | 0.00022  | 0.103799 | 0.02489  | 0.172481 | 0.00018  | 0.59074  | 2.86E-45 |
| 4.32E-19 | -0.4433  | 6.69E-24 | -0.41982 | 2.31E-21 | -0.49042 | 1.25E-29 | -0.37561 | 4.28E-17 |
| 2.27E-11 | -0.32189 | 1.02E-12 | -0.38259 | 9.99E-18 | -0.40398 | 9.26E-20 | -0.09424 | 0.0418   |
| 0.00026  | -0.32441 | 6.62E-13 | -0.3337  | 1.31E-13 | -0.31701 | 2.31E-12 | -0.08847 | 0.05607  |
| 9.06E-09 | -0.35014 | 6.47E-15 | -0.46188 | 4.70E-26 | -0.41807 | 3.50E-21 | -0.04379 | 0.34503  |
| 5.49E-13 | -0.52156 | 6.17E-34 | -0.42596 | 5.23E-22 | -0.46978 | 5.20E-27 | -0.24937 | 4.74E-08 |
| 1.61E-08 | -0.38587 | 4.98E-18 | -0.22491 | 9.09E-07 | -0.32246 | 9.24E-13 | -0.11182 | 0.01563  |
| 0.00012  | -0.19327 | 2.61E-05 | -0.21528 | 2.67E-06 | -0.21825 | 1.92E-06 | -0.05586 | 0.22823  |
| 4.09E-06 | -0.26495 | 6.08E-09 | -0.09243 | 0.04589  | -0.23352 | 3.33E-07 | -0.18982 | 3.65E-05 |
| 6.63E-05 | -0.29428 | 8.77E-11 | -0.28213 | 5.39E-10 | -0.29208 | 1.23E-10 | -0.02763 | 0.55147  |
| 1.77E-12 | -0.28241 | 5.18E-10 | -0.30346 | 2.10E-11 | -0.36905 | 1.63E-16 | -0.18707 | 4.75E-05 |
| 3.01E-08 | -0.14742 | 0.0014   | -0.05055 | 0.27563  | -0.19334 | 2.59E-05 | -0.08252 | 0.07484  |
| 6.30E-08 | -0.31269 | 4.74E-12 | -0.22113 | 1.40E-06 | -0.30429 | 1.84E-11 | -0.19716 | 1.77E-05 |
| 1.21E-10 | -0.24992 | 4.41E-08 | -0.22053 | 1.49E-06 | -0.29019 | 1.63E-10 | -0.14818 | 0.00132  |
| 5.65E-08 | -0.3562  | 2.04E-15 | -0.41894 | 2.85E-21 | -0.40197 | 1.46E-19 | -0.08647 | 0.06188  |
| 4.01E-13 | -0.44079 | 1.28E-23 | -0.41003 | 2.31E-20 | -0.46615 | 1.44E-26 | -0.24971 | 4.54E-08 |
| 0.21152  | -0.27013 | 2.98E-09 | -0.06247 | 0.17777  | -0.11434 | 0.01342  | -0.087   | 0.06028  |
| 1.86E-08 | -0.36749 | 2.22E-16 | -0.28867 | 2.05E-10 | -0.33826 | 5.79E-14 | -0.06267 | 0.17641  |
| 0.6835   | -0.0667  | 0.15012  | 0.024195 | 0.60199  | -0.01966 | 0.67175  | -0.06147 | 0.18479  |
| 0.00212  | -0.37797 | 2.63E-17 | -0.41683 | 4.70E-21 | -0.3591  | 1.16E-15 | -0.07163 | 0.12214  |
| 0.18991  | -0.08348 | 0.0715   | -0.16934 | 0.00024  | -0.15202 | 0.00098  | -0.1149  | 0.01297  |
| 3.42E-12 | -0.39848 | 3.19E-19 | -0.48902 | 1.90E-29 | -0.45851 | 1.18E-25 | -0.19422 | 2.38E-05 |
| 1.01E-06 | -0.31566 | 2.90E-12 | -0.15899 | 0.00056  | -0.27435 | 1.65E-09 | -0.09785 | 0.03451  |
| 2.75E-09 | -0.16436 | 0.00036  | -0.19852 | 1.55E-05 | -0.24529 | 7.92E-08 | -0.09459 | 0.04102  |
| 0.7885   | -0.15693 | 0.00067  | -0.11293 | 0.01462  | -0.11463 | 0.01319  | -0.07461 | 0.10732  |

|          |          |          |          |          |          |          |          |          |
|----------|----------|----------|----------|----------|----------|----------|----------|----------|
| 0.20677  | -0.18654 | 4.99E-05 | 0.047912 | 0.3015   | -0.06678 | 0.14961  | -0.01411 | 0.76102  |
| 2.12E-06 | -0.30737 | 1.12E-11 | -0.37038 | 1.24E-16 | -0.34485 | 1.74E-14 | -0.11778 | 0.01085  |
| 8.74E-10 | -0.25579 | 2.07E-08 | -0.30327 | 2.17E-11 | -0.33259 | 1.59E-13 | -0.18982 | 3.65E-05 |
| 7.73E-19 | -0.38505 | 5.93E-18 | -0.37882 | 2.20E-17 | -0.4574  | 1.60E-25 | -0.26289 | 8.04E-09 |
| 0.0005   | -0.1893  | 3.84E-05 | -0.22527 | 8.73E-07 | -0.21404 | 3.05E-06 | -0.01291 | 0.78075  |
| 0.10998  | 0.062363 | 0.1785   | 0.056921 | 0.21954  | -0.01109 | 0.81103  | 0.029121 | 0.53016  |
| 3.17E-16 | -0.46376 | 2.80E-26 | -0.43179 | 1.24E-22 | -0.4727  | 2.26E-27 | -0.23549 | 2.63E-07 |
| 0.01123  | -0.17813 | 0.00011  | -0.18213 | 7.54E-05 | -0.18859 | 4.11E-05 | -0.0195  | 0.67424  |
| 2.76E-06 | -0.44014 | 1.51E-23 | -0.44612 | 3.21E-24 | -0.43416 | 6.86E-23 | -0.1371  | 0.00299  |
| 1.72E-18 | -0.29853 | 4.55E-11 | -0.30251 | 2.44E-11 | -0.3687  | 1.75E-16 | -0.38168 | 1.21E-17 |
| 0.01234  | -0.27128 | 2.54E-09 | -0.0793  | 0.08693  | -0.14584 | 0.00158  | -0.01288 | 0.78125  |
| 0.0043   | -0.25058 | 4.06E-08 | -0.118   | 0.01071  | -0.18808 | 4.31E-05 | 0.012968 | 0.77986  |
| 0.01219  | -0.21234 | 3.67E-06 | -0.1412  | 0.00222  | -0.17639 | 0.00013  | 0.026325 | 0.57041  |
| 3.41E-15 | -0.47483 | 1.23E-27 | -0.4753  | 1.08E-27 | -0.48987 | 1.47E-29 | -0.17938 | 9.71E-05 |
| 1.81E-18 | -0.36031 | 9.20E-16 | -0.44226 | 8.73E-24 | -0.46881 | 6.82E-27 | -0.27686 | 1.16E-09 |
| 6.44E-05 | -0.22218 | 1.24E-06 | -0.30299 | 2.26E-11 | -0.27224 | 2.22E-09 | -0.12592 | 0.00644  |
| 0.00039  | -0.28843 | 2.13E-10 | -0.31698 | 2.33E-12 | -0.29725 | 5.56E-11 | -0.05831 | 0.20846  |
| 1.94E-05 | -0.23695 | 2.21E-07 | -0.29968 | 3.81E-11 | -0.28712 | 2.59E-10 | -0.27963 | 7.76E-10 |
| 0.18281  | -0.09543 | 0.03926  | -0.06815 | 0.14145  | -0.10293 | 0.02613  | -0.01126 | 0.80826  |
| 0.55063  | -0.15775 | 0.00062  | -0.00267 | 0.95412  | -0.07675 | 0.0976   | -0.05313 | 0.25184  |
| 1.81E-06 | -0.36995 | 1.36E-16 | -0.41374 | 9.75E-21 | -0.38693 | 3.97E-18 | 0.079143 | 0.08756  |
| 0.57973  | -0.01709 | 0.71263  | 0.158161 | 0.0006   | 0.07857  | 0.08989  | 0.066472 | 0.15151  |
| 0.00037  | -0.14773 | 0.00137  | -0.13999 | 0.00243  | -0.19574 | 2.05E-05 | -0.05137 | 0.26789  |
| 7.04E-05 | -0.10904 | 0.01842  | -0.13902 | 0.00261  | -0.18049 | 8.78E-05 | -0.00864 | 0.85233  |
| 0.01485  | -0.10978 | 0.01764  | -0.04017 | 0.38639  | -0.12235 | 0.00813  | -0.25871 | 1.41E-08 |
| 7.02E-09 | -0.10699 | 0.02075  | -0.08487 | 0.06687  | -0.16827 | 0.00026  | 0.104625 | 0.02375  |
| 1.34E-06 | 0.051348 | 0.26813  | -0.09233 | 0.04614  | -0.11762 | 0.01096  | 0.106909 | 0.02085  |
| 3.14E-08 | -0.08577 | 0.06402  | -0.21878 | 1.81E-06 | -0.22865 | 5.91E-07 | 0.001298 | 0.97768  |
| 8.98E-18 | -0.00937 | 0.83994  | -0.19112 | 3.22E-05 | -0.29088 | 1.47E-10 | 0.131568 | 0.0044   |
| 1.05E-23 | -0.20747 | 6.16E-06 | -0.37542 | 4.45E-17 | -0.44985 | 1.20E-24 | 0.025034 | 0.58946  |
| 7.06E-22 | -0.04635 | 0.31755  | -0.25408 | 2.58E-08 | -0.33371 | 1.31E-13 | -0.16397 | 0.00037  |
| 1.98E-13 | -0.15501 | 0.00078  | -0.33706 | 7.18E-14 | -0.38239 | 1.04E-17 | 0.172645 | 0.00018  |
| 7.45E-11 | 0.067358 | 0.14612  | -0.14814 | 0.00132  | -0.19215 | 2.91E-05 | 0.156914 | 0.00067  |
| 2.50E-32 | -0.26425 | 6.69E-09 | -0.30078 | 3.20E-11 | -0.46719 | 1.07E-26 | 0.104087 | 0.02449  |
| 1.22E-13 | -0.07148 | 0.12295  | -0.28685 | 2.69E-10 | -0.30066 | 3.27E-11 | -0.12362 | 0.00748  |
| 1.67E-22 | -0.18683 | 4.86E-05 | -0.21625 | 2.40E-06 | -0.36525 | 3.48E-16 | -0.01872 | 0.68663  |
| 7.29E-16 | 0.040886 | 0.37802  | -0.15877 | 0.00057  | -0.28372 | 4.28E-10 | 0.080639 | 0.08172  |
| 1.46E-21 | -0.02875 | 0.53539  | -0.25609 | 1.99E-08 | -0.33621 | 8.36E-14 | -0.04967 | 0.28409  |
| 6.22E-05 | 0.008003 | 0.86305  | 0.061694 | 0.18322  | -0.07448 | 0.10795  | 0.188661 | 4.08E-05 |
| 9.76E-06 | -0.0666  | 0.15071  | -0.31134 | 5.91E-12 | -0.27207 | 2.27E-09 | 0.399602 | 2.48E-19 |
| 3.36E-08 | -0.22412 | 9.95E-07 | -0.22094 | 1.42E-06 | -0.2897  | 1.76E-10 | 0.257252 | 1.70E-08 |
| 1.42E-08 | -0.16914 | 0.00024  | -0.33285 | 1.52E-13 | -0.31397 | 3.83E-12 | 0.256433 | 1.90E-08 |
| 4.07E-34 | -0.12557 | 0.00659  | -0.17453 | 0.00015  | -0.38624 | 4.60E-18 | -0.14756 | 0.00138  |
| 1.89E-17 | -0.09232 | 0.04615  | -0.27714 | 1.11E-09 | -0.36349 | 4.93E-16 | -0.01571 | 0.73488  |
| 2.54E-23 | 0.205924 | 7.25E-06 | 0.266007 | 5.26E-09 | 0.378256 | 2.48E-17 | -0.25589 | 2.04E-08 |



|          |          |          |          |          |          |          |          |          |
|----------|----------|----------|----------|----------|----------|----------|----------|----------|
| 0.00114  | 0.170082 | 0.00022  | 0.010319 | 0.82399  | -0.08652 | 0.06174  | 0.118123 | 0.01063  |
| 3.35E-19 | -0.13241 | 0.00415  | -0.33574 | 9.10E-14 | -0.37779 | 2.73E-17 | -0.03744 | 0.41958  |
| 9.55E-41 | -0.38668 | 4.19E-18 | -0.54216 | 4.88E-37 | -0.62644 | 2.86E-52 | -0.0928  | 0.04502  |
| 0.00098  | -0.06918 | 0.1355   | -0.19924 | 1.44E-05 | -0.18605 | 5.23E-05 | 0.1887   | 4.06E-05 |
| 1.44E-09 | -0.05994 | 0.19604  | -0.30493 | 1.66E-11 | -0.31147 | 5.78E-12 | 0.11248  | 0.01502  |
| 4.53E-14 | -0.1123  | 0.01518  | -0.288   | 2.27E-10 | -0.36702 | 2.45E-16 | -0.0007  | 0.98793  |
| 6.03E-53 | -0.28949 | 1.81E-10 | -0.32847 | 3.28E-13 | -0.51541 | 4.74E-33 | -0.05904 | 0.20284  |
| 2.69E-21 | -0.20259 | 1.02E-05 | -0.3193  | 1.58E-12 | -0.38721 | 3.74E-18 | 0.236742 | 2.27E-07 |
| 0.00019  | -0.00311 | 0.94658  | 0.137731 | 0.00286  | -0.03173 | 0.49394  | 0.22341  | 1.08E-06 |
| 8.23E-08 | -0.06496 | 0.16105  | -0.27786 | 1.00E-09 | -0.27148 | 2.47E-09 | 0.186648 | 4.94E-05 |
| 0.01013  | 0.16374  | 0.00038  | -0.07415 | 0.10955  | -0.04729 | 0.30787  | 0.347777 | 1.01E-14 |
| 5.46E-18 | -0.20418 | 8.69E-06 | -0.41771 | 3.81E-21 | -0.43846 | 2.32E-23 | 0.176588 | 0.00013  |
| 9.13E-23 | -0.28686 | 2.69E-10 | -0.20028 | 1.30E-05 | -0.38108 | 1.37E-17 | 0.068767 | 0.13785  |
| 3.12E-09 | -0.24855 | 5.26E-08 | -0.26968 | 3.18E-09 | -0.34197 | 2.95E-14 | 0.287081 | 2.60E-10 |
| 4.55E-22 | -0.2854  | 3.34E-10 | -0.46329 | 3.18E-26 | -0.49225 | 7.15E-30 | 0.044229 | 0.34023  |
| 1.56E-30 | -0.40116 | 1.75E-19 | -0.51885 | 1.52E-33 | -0.57964 | 2.88E-43 | -0.0089  | 0.84783  |
| 0.00804  | 0.122785 | 0.0079   | -0.01291 | 0.78084  | -0.0588  | 0.20468  | 0.209518 | 4.96E-06 |
| 4.82E-14 | -0.22038 | 1.52E-06 | -0.33154 | 1.92E-13 | -0.37112 | 1.07E-16 | 0.254365 | 2.49E-08 |
| 6.80E-22 | 0.052939 | 0.25355  | 0.223137 | 1.11E-06 | 0.329272 | 2.85E-13 | 0.027787 | 0.54917  |
| 9.78E-18 | -0.20794 | 5.86E-06 | -0.22703 | 7.12E-07 | -0.33806 | 6.00E-14 | 0.036198 | 0.43515  |
| 6.01E-08 | -0.09253 | 0.04566  | 0.002589 | 0.9555   | -0.15912 | 0.00056  | 0.133408 | 0.00387  |
| 9.38E-19 | -0.04709 | 0.30985  | -0.20027 | 1.30E-05 | -0.30614 | 1.37E-11 | 0.024416 | 0.59867  |
| 0.00054  | 0.059728 | 0.1976   | -0.06296 | 0.17441  | -0.07458 | 0.10748  | 0.365954 | 3.02E-16 |
| 7.70E-23 | -0.14196 | 0.0021   | -0.16776 | 0.00027  | -0.33037 | 2.35E-13 | 0.01954  | 0.67362  |
| 2.46E-41 | -0.27949 | 7.92E-10 | -0.44582 | 3.47E-24 | -0.55272 | 1.03E-38 | -0.11485 | 0.01301  |
| 1.09E-23 | -0.17626 | 0.00013  | -0.40833 | 3.43E-20 | -0.44042 | 1.40E-23 | 0.087881 | 0.05774  |
| 2.63E-11 | -0.15427 | 0.00082  | -0.02379 | 0.60802  | -0.21818 | 1.94E-06 | 0.111672 | 0.01576  |
| 1.35E-41 | -0.35713 | 1.71E-15 | -0.36409 | 4.38E-16 | -0.53061 | 2.84E-35 | -0.16221 | 0.00043  |
| 8.65E-57 | 0.263574 | 7.33E-09 | 0.289604 | 1.78E-10 | 0.484556 | 7.21E-29 | 0.143734 | 0.00185  |
| 1.87E-24 | -0.15056 | 0.0011   | -0.28122 | 6.16E-10 | -0.35425 | 2.97E-15 | -0.04879 | 0.29274  |
| 4.55E-09 | -0.06477 | 0.16228  | -0.25007 | 4.33E-08 | -0.26192 | 9.16E-09 | 0.010771 | 0.81642  |
| 4.30E-09 | -0.18673 | 4.90E-05 | -0.18899 | 3.95E-05 | -0.2817  | 5.75E-10 | 0.367627 | 2.17E-16 |
| 6.20E-30 | -0.39658 | 4.87E-19 | -0.48812 | 2.49E-29 | -0.54894 | 4.16E-38 | 0.046854 | 0.31232  |
| 7.51E-24 | -0.24034 | 1.46E-07 | -0.27344 | 1.88E-09 | -0.41783 | 3.71E-21 | 0.050456 | 0.27654  |
| 2.79E-05 | -0.08221 | 0.07592  | -0.04046 | 0.38302  | -0.11773 | 0.01089  | 0.413854 | 9.49E-21 |
| 8.02E-08 | -0.01297 | 0.77975  | -0.08407 | 0.06951  | -0.20633 | 6.94E-06 | 0.016899 | 0.71568  |
| 2.08E-21 | -0.1947  | 2.27E-05 | -0.31458 | 3.47E-12 | -0.37392 | 6.06E-17 | 0.085952 | 0.06347  |
| 2.76E-36 | -0.29105 | 1.43E-10 | -0.32407 | 7.02E-13 | -0.48944 | 1.68E-29 | -0.30073 | 3.23E-11 |
| 1.12E-08 | 0.060248 | 0.19372  | -0.21443 | 2.93E-06 | -0.21555 | 2.59E-06 | 0.247619 | 5.91E-08 |
| 1.50E-08 | -0.05443 | 0.24044  | -0.02346 | 0.61312  | -0.16048 | 0.0005   | 0.094504 | 0.04122  |
| 2.07E-20 | -0.31949 | 1.53E-12 | -0.21821 | 1.93E-06 | -0.3989  | 2.90E-19 | 0.035509 | 0.44395  |
| 4.47E-14 | -0.00262 | 0.95494  | -0.10929 | 0.01815  | -0.26187 | 9.22E-09 | -0.18734 | 4.63E-05 |
| 0.00632  | -0.28172 | 5.73E-10 | -0.19601 | 1.99E-05 | -0.23734 | 2.11E-07 | 0.577483 | 6.92E-43 |
| 2.92E-13 | -0.09436 | 0.04153  | -0.18356 | 6.61E-05 | -0.25986 | 1.21E-08 | 0.33133  | 1.99E-13 |
| 1.94E-10 | -0.28114 | 6.23E-10 | -0.28238 | 5.20E-10 | -0.34409 | 2.00E-14 | 0.308289 | 9.70E-12 |

|          |          |          |          |          |          |          |          |          |
|----------|----------|----------|----------|----------|----------|----------|----------|----------|
| 1.18E-24 | -0.17959 | 9.53E-05 | -0.29744 | 5.40E-11 | -0.40391 | 9.41E-20 | 0.171311 | 0.0002   |
| 1.89E-08 | 0.09424  | 0.04179  | -0.12396 | 0.00732  | -0.1649  | 0.00035  | 0.029943 | 0.51862  |
| 5.94E-11 | -0.05026 | 0.27844  | -0.24045 | 1.44E-07 | -0.23579 | 2.54E-07 | 0.08665  | 0.06134  |
| 6.07E-12 | -0.17233 | 0.00018  | -0.22579 | 8.22E-07 | -0.30284 | 2.32E-11 | 0.178879 | 0.0001   |
| 1.82E-16 | -0.35116 | 5.33E-15 | -0.43896 | 2.04E-23 | -0.45805 | 1.34E-25 | 0.234635 | 2.92E-07 |
| 0.00064  | -0.04843 | 0.29633  | -0.14504 | 0.00167  | -0.1721  | 0.00019  | 0.30412  | 1.89E-11 |
| 1.75E-12 | -0.08538 | 0.06524  | -0.24582 | 7.42E-08 | -0.29258 | 1.14E-10 | 0.17601  | 0.00013  |
| 5.80E-15 | 0.082893 | 0.07352  | -0.07755 | 0.09415  | -0.18674 | 4.90E-05 | -0.02906 | 0.53096  |
| 0.87013  | 0.068892 | 0.13714  | 0.053067 | 0.25241  | 0.030986 | 0.50415  | 0.361817 | 6.85E-16 |
| 2.68E-24 | 0.135328 | 0.00339  | 0.237692 | 2.02E-07 | 0.333588 | 1.33E-13 | 0.053421 | 0.24926  |
| 6.38E-13 | -0.05316 | 0.25159  | -0.27109 | 2.61E-09 | -0.28871 | 2.04E-10 | -0.09267 | 0.04534  |
| 3.67E-09 | 0.052924 | 0.25369  | -0.16546 | 0.00033  | -0.23877 | 1.77E-07 | -0.07945 | 0.08634  |
| 1.35E-27 | 0.218884 | 1.79E-06 | 0.263464 | 7.44E-09 | 0.40109  | 1.78E-19 | 0.078673 | 0.08947  |
| 3.39E-31 | -0.36516 | 3.54E-16 | -0.35587 | 2.18E-15 | -0.4771  | 6.41E-28 | -0.13701 | 0.00301  |
| 0.02805  | -0.06657 | 0.15093  | -0.01847 | 0.6905   | -0.09845 | 0.03342  | 0.082191 | 0.076    |
| 7.89E-07 | 0.035011 | 0.45037  | -0.19243 | 2.83E-05 | -0.15581 | 0.00073  | -0.00387 | 0.93357  |
| 0.00869  | 0.02386  | 0.60704  | -0.20262 | 1.02E-05 | -0.14831 | 0.00131  | 0.41418  | 8.79E-21 |
| 5.84E-13 | -0.14453 | 0.00174  | -0.33864 | 5.40E-14 | -0.3947  | 7.36E-19 | 0.121191 | 0.00875  |
| 4.86E-35 | -0.335   | 1.04E-13 | -0.39296 | 1.08E-18 | -0.51892 | 1.49E-33 | 0.025957 | 0.5758   |
| 3.70E-19 | -0.27088 | 2.68E-09 | -0.25019 | 4.26E-08 | -0.40462 | 8.00E-20 | -0.00219 | 0.96234  |
| 1.81E-21 | -0.32374 | 7.43E-13 | -0.27345 | 1.87E-09 | -0.40287 | 1.19E-19 | -0.01932 | 0.67714  |
| 6.66E-26 | -0.22942 | 5.40E-07 | -0.35376 | 3.26E-15 | -0.42718 | 3.88E-22 | -0.17398 | 0.00016  |
| 1.02E-19 | -0.3864  | 4.44E-18 | -0.42235 | 1.26E-21 | -0.4786  | 4.15E-28 | 0.07224  | 0.119    |
| 5.80E-26 | -0.44064 | 1.32E-23 | -0.44765 | 2.15E-24 | -0.57078 | 1.01E-41 | 0.009061 | 0.84517  |
| 0.00232  | 0.039398 | 0.39563  | -0.22278 | 1.16E-06 | -0.17357 | 0.00016  | 0.310833 | 6.42E-12 |
| 1.77E-32 | -0.09384 | 0.04266  | -0.3542  | 2.99E-15 | -0.42241 | 1.24E-21 | -0.12443 | 0.0071   |
| 7.23E-25 | -0.03734 | 0.42084  | -0.22515 | 8.85E-07 | -0.34025 | 4.03E-14 | -0.24755 | 5.96E-08 |
| 3.14E-18 | -0.22236 | 1.22E-06 | -0.3412  | 3.39E-14 | -0.40182 | 1.51E-19 | 0.107689 | 0.01993  |
| 0.99784  | 0.100923 | 0.02921  | -0.00073 | 0.98738  | 0.028511 | 0.53882  | 0.471005 | 3.67E-27 |
| 1.25E-11 | -0.112   | 0.01546  | -0.03424 | 0.46048  | -0.23617 | 2.43E-07 | 0.006019 | 0.89679  |
| 5.24E-17 | -0.11782 | 0.01083  | -0.39621 | 5.28E-19 | -0.40389 | 9.45E-20 | 0.058775 | 0.20486  |
| 0.00016  | -0.06474 | 0.16249  | -0.17902 | 0.0001   | -0.18872 | 4.06E-05 | 0.214118 | 3.03E-06 |
| 0.00052  | 0.001666 | 0.97135  | -0.22935 | 5.44E-07 | -0.22453 | 9.50E-07 | 0.35174  | 4.78E-15 |
| 0.04933  | -0.0043  | 0.9262   | -0.06202 | 0.1809   | -0.1277  | 0.00572  | 0.362373 | 6.14E-16 |
| 2.15E-09 | -0.19991 | 1.35E-05 | -0.13475 | 0.00353  | -0.28012 | 7.22E-10 | 0.19114  | 3.21E-05 |
| 1.09E-13 | -0.03013 | 0.51599  | -0.02526 | 0.58607  | -0.18434 | 6.14E-05 | -0.16521 | 0.00034  |
| 5.42E-09 | -0.06308 | 0.17353  | -0.17457 | 0.00015  | -0.20976 | 4.84E-06 | 0.492141 | 7.40E-30 |
| 0.01235  | 0.072791 | 0.1162   | 0.051909 | 0.26292  | -0.03329 | 0.47301  | 0.151778 | 0.001    |
| 4.77E-12 | -0.02892 | 0.53297  | 0.21364  | 3.19E-06 | 0.255052 | 2.28E-08 | 0.129739 | 0.00498  |
| 7.79E-06 | 0.04064  | 0.38089  | -0.23976 | 1.57E-07 | -0.21444 | 2.92E-06 | 0.461278 | 5.54E-26 |
| 1.18E-07 | 0.036468 | 0.43174  | 0.221208 | 1.38E-06 | 0.17612  | 0.00013  | -0.19292 | 2.70E-05 |
| 1.96E-09 | 0.0054   | 0.90735  | -0.09651 | 0.03709  | -0.20203 | 1.08E-05 | 0.140273 | 0.00238  |
| 4.54E-16 | -0.19581 | 2.03E-05 | -0.15537 | 0.00075  | -0.29574 | 7.02E-11 | -0.05154 | 0.26636  |
| 5.34E-05 | 0.059625 | 0.19837  | 0.056651 | 0.22173  | -0.05639 | 0.22389  | 0.019728 | 0.67067  |
| 1.37E-15 | -0.20772 | 6.01E-06 | -0.08863 | 0.05563  | -0.31319 | 4.36E-12 | 0.065651 | 0.15664  |

|          |          |          |          |          |          |          |          |          |
|----------|----------|----------|----------|----------|----------|----------|----------|----------|
| 1.15E-30 | 0.304658 | 1.74E-11 | 0.168313 | 0.00026  | 0.388008 | 3.15E-18 | 0.140618 | 0.00232  |
| 0.00044  | 0.085822 | 0.06387  | -0.07093 | 0.12588  | -0.12451 | 0.00706  | 0.288924 | 1.98E-10 |
| 1.02E-15 | 0.137089 | 0.00299  | 0.271913 | 2.33E-09 | 0.308525 | 9.33E-12 | -0.01032 | 0.82394  |
| 0.00311  | 0.046408 | 0.31696  | 0.028531 | 0.53854  | -0.06876 | 0.1379   | 0.333686 | 1.31E-13 |
| 1.75E-37 | -0.35487 | 2.64E-15 | -0.30636 | 1.32E-11 | -0.50649 | 8.51E-32 | -0.04214 | 0.36357  |
| 3.89E-35 | -0.43363 | 7.84E-23 | -0.37706 | 3.17E-17 | -0.54272 | 3.99E-37 | -0.08625 | 0.06255  |
| 1.01E-19 | -0.2341  | 3.11E-07 | -0.28114 | 6.24E-10 | -0.41001 | 2.32E-20 | 0.171443 | 0.0002   |
| 2.23E-05 | 0.046882 | 0.31203  | -0.16917 | 0.00024  | -0.18947 | 3.77E-05 | 0.062379 | 0.17839  |
| 1.99E-26 | 0.16295  | 0.00041  | 0.331072 | 2.08E-13 | 0.371778 | 9.37E-17 | -0.01023 | 0.82548  |
| 2.57E-36 | -0.46311 | 3.35E-26 | -0.51468 | 6.03E-33 | -0.62125 | 3.38E-51 | -0.0967  | 0.03671  |
| 3.19E-12 | -0.07816 | 0.0916   | -0.15498 | 0.00078  | -0.2579  | 1.56E-08 | 0.15354  | 0.00087  |
| 0.03835  | 0.07623  | 0.0999   | 0.019031 | 0.68167  | -0.04039 | 0.38378  | 0.30492  | 1.67E-11 |
| 0.00107  | -0.03578 | 0.44041  | -0.15515 | 0.00077  | -0.13787 | 0.00283  | 0.318106 | 1.93E-12 |
| 1.32E-06 | -0.20367 | 9.16E-06 | -0.20523 | 7.79E-06 | -0.29574 | 7.02E-11 | 0.070338 | 0.12906  |
| 2.40E-22 | -0.3338  | 1.28E-13 | -0.46027 | 7.31E-26 | -0.49903 | 8.90E-31 | 0.075423 | 0.10355  |
| 0.00735  | -0.0859  | 0.06361  | -0.09291 | 0.04478  | -0.12617 | 0.00633  | 0.474052 | 1.54E-27 |
| 4.43E-17 | -0.20896 | 5.27E-06 | -0.08063 | 0.08174  | -0.32209 | 9.84E-13 | 0.13261  | 0.0041   |
| 7.15E-17 | -0.05801 | 0.2108   | -0.11168 | 0.01575  | -0.25958 | 1.25E-08 | 0.094085 | 0.04213  |
| 0.00037  | -0.15971 | 0.00053  | -0.21932 | 1.71E-06 | -0.25185 | 3.45E-08 | 0.497899 | 1.26E-30 |
| 0.00115  | 0.191846 | 3.00E-05 | 0.010556 | 0.82003  | -0.02197 | 0.63579  | 0.324523 | 6.49E-13 |
| 1.73E-29 | -0.35686 | 1.80E-15 | -0.43681 | 3.52E-23 | -0.52034 | 9.29E-34 | 0.055698 | 0.22962  |
| 8.96E-09 | 0.107926 | 0.01966  | 0.092582 | 0.04554  | -0.10045 | 0.02997  | 0.060467 | 0.1921   |
| 4.05E-06 | -0.13314 | 0.00395  | -0.22798 | 6.38E-07 | -0.25446 | 2.46E-08 | 0.168098 | 0.00026  |
| 0.71392  | 0.212232 | 3.71E-06 | 0.071494 | 0.12287  | 0.01836  | 0.6923   | 0.260452 | 1.12E-08 |
| 7.90E-17 | -0.33362 | 1.33E-13 | -0.42303 | 1.07E-21 | -0.46144 | 5.30E-26 | 0.132329 | 0.00418  |
| 1.90E-13 | -0.08393 | 0.06998  | -0.18044 | 8.82E-05 | -0.2494  | 4.72E-08 | 0.140672 | 0.00231  |
| 1.38E-22 | -0.23756 | 2.05E-07 | -0.21822 | 1.93E-06 | -0.39126 | 1.56E-18 | 0.122332 | 0.00813  |
| 0.00396  | 0.040867 | 0.37824  | -0.22288 | 1.15E-06 | -0.16332 | 0.00039  | 0.313184 | 4.37E-12 |
| 3.60E-24 | -0.09227 | 0.04627  | -0.29873 | 4.41E-11 | -0.38429 | 6.97E-18 | -0.13912 | 0.00259  |
| 3.62E-45 | -0.40557 | 6.45E-20 | -0.53482 | 6.56E-36 | -0.62496 | 5.81E-52 | -0.13035 | 0.00478  |
| 0.00037  | 0.038522 | 0.40624  | -0.16478 | 0.00035  | -0.1857  | 5.40E-05 | 0.35675  | 1.84E-15 |
| 0.01661  | -0.06509 | 0.16024  | -0.25705 | 1.75E-08 | -0.19451 | 2.31E-05 | 0.371915 | 9.11E-17 |
| 6.76E-05 | -0.2357  | 2.57E-07 | -0.10854 | 0.01897  | -0.20574 | 7.39E-06 | 0.282803 | 4.89E-10 |
| 1.23E-07 | -0.04198 | 0.36539  | -0.19887 | 1.49E-05 | -0.22461 | 9.41E-07 | 0.227625 | 6.65E-07 |
| 2.20E-15 | -0.23254 | 3.74E-07 | -0.33507 | 1.03E-13 | -0.40036 | 2.10E-19 | -0.0054  | 0.90735  |
| 2.13E-15 | -0.3661  | 2.94E-16 | -0.34334 | 2.29E-14 | -0.43571 | 4.65E-23 | 0.242314 | 1.15E-07 |
| 6.77E-10 | -0.27145 | 2.48E-09 | -0.21423 | 2.99E-06 | -0.29317 | 1.04E-10 | 0.313984 | 3.83E-12 |
| 2.91E-19 | -0.21117 | 4.16E-06 | -0.26129 | 9.97E-09 | -0.36452 | 4.02E-16 | 0.142185 | 0.00207  |
| 1.84E-21 | -0.27243 | 2.16E-09 | -0.40588 | 6.01E-20 | -0.45826 | 1.26E-25 | 0.252831 | 3.04E-08 |
| 2.77E-20 | -0.08857 | 0.05579  | -0.30886 | 8.84E-12 | -0.39465 | 7.43E-19 | 0.2218   | 1.29E-06 |
| 5.88E-17 | -0.22303 | 1.13E-06 | -0.06872 | 0.13813  | -0.2768  | 1.17E-09 | 0.104328 | 0.02415  |
| 1.81E-40 | -0.32478 | 6.21E-13 | -0.46885 | 6.75E-27 | -0.58315 | 6.83E-44 | -0.09829 | 0.03372  |
| 5.27E-12 | -0.07946 | 0.08631  | -0.19731 | 1.75E-05 | -0.25596 | 2.02E-08 | 0.11274  | 0.01479  |
| 5.02E-35 | -0.29172 | 1.30E-10 | -0.32114 | 1.16E-12 | -0.45921 | 9.76E-26 | -0.06762 | 0.14455  |
| 1.87E-24 | -0.24159 | 1.25E-07 | -0.35897 | 1.19E-15 | -0.45631 | 2.14E-25 | 0.019023 | 0.68179  |

|          |          |          |          |          |          |          |          |          |
|----------|----------|----------|----------|----------|----------|----------|----------|----------|
| 2.47E-08 | -0.00809 | 0.86155  | 0.027043 | 0.55993  | -0.11913 | 0.00997  | -0.106   | 0.02196  |
| 1.53E-43 | -0.45097 | 8.95E-25 | -0.58232 | 9.61E-44 | -0.6568  | 5.55E-59 | -0.0253  | 0.58551  |
| 3.50E-19 | -0.16697 | 0.00029  | -0.32389 | 7.24E-13 | -0.38174 | 1.19E-17 | 0.063726 | 0.16918  |
| 4.68E-11 | -0.0943  | 0.04166  | -0.29042 | 1.58E-10 | -0.30072 | 3.23E-11 | 0.155301 | 0.00076  |
| 2.00E-54 | -0.32745 | 3.92E-13 | -0.42402 | 8.38E-22 | -0.58527 | 2.84E-44 | -0.25275 | 3.07E-08 |
| 5.63E-11 | -0.08833 | 0.05647  | -0.09856 | 0.03322  | -0.26447 | 6.49E-09 | 0.040915 | 0.37768  |
| 2.24E-10 | -0.07366 | 0.1119   | 0.006712 | 0.88497  | -0.19239 | 2.84E-05 | 0.139326 | 0.00255  |
| 0.07239  | 0.062993 | 0.17415  | 0.154065 | 0.00084  | 0.034646 | 0.45511  | 0.275831 | 1.34E-09 |
| 0.0805   | 0.125011 | 0.00683  | -0.13857 | 0.00269  | -0.12068 | 0.00904  | 0.127581 | 0.00576  |
| 1.71E-29 | -0.39618 | 5.31E-19 | -0.39778 | 3.72E-19 | -0.52419 | 2.55E-34 | 0.093878 | 0.04258  |
| 7.38E-17 | -0.2956  | 7.17E-11 | -0.33405 | 1.23E-13 | -0.42577 | 5.48E-22 | 0.312877 | 4.59E-12 |
| 6.86E-15 | 0.088634 | 0.05562  | 0.244268 | 9.01E-08 | 0.277794 | 1.01E-09 | -0.11206 | 0.0154   |
| 1.13E-19 | -0.00844 | 0.85565  | -0.12339 | 0.00759  | -0.28186 | 5.61E-10 | -0.31057 | 6.70E-12 |
| 3.81E-17 | -0.13089 | 0.00461  | -0.26788 | 4.07E-09 | -0.32366 | 7.53E-13 | 0.144333 | 0.00177  |
| 0.74635  | -0.00172 | 0.97041  | -0.01514 | 0.74425  | -0.05662 | 0.22201  | 0.380679 | 1.49E-17 |
| 4.71E-08 | -0.12339 | 0.0076   | -0.29094 | 1.46E-10 | -0.27834 | 9.34E-10 | 0.232833 | 3.62E-07 |
| 2.61E-39 | -0.43903 | 2.00E-23 | -0.40576 | 6.17E-20 | -0.55522 | 4.04E-39 | -0.01488 | 0.74841  |
| 9.01E-13 | -0.17641 | 0.00013  | -0.24898 | 4.98E-08 | -0.31924 | 1.59E-12 | 0.039337 | 0.39636  |
| 8.61E-14 | -0.06813 | 0.14154  | -0.19886 | 1.50E-05 | -0.28048 | 6.86E-10 | 0.293777 | 9.48E-11 |
| 8.99E-06 | -0.16072 | 0.00049  | -0.05173 | 0.26458  | -0.17043 | 0.00022  | 0.299133 | 4.15E-11 |
| 2.84E-31 | -0.34357 | 2.20E-14 | -0.26499 | 6.05E-09 | -0.47183 | 2.90E-27 | -0.12809 | 0.00557  |
| 2.84E-15 | -0.1568  | 0.00067  | -0.33545 | 9.58E-14 | -0.38677 | 4.11E-18 | -0.00399 | 0.93148  |
| 3.30E-10 | -0.05895 | 0.20352  | -0.24653 | 6.78E-08 | -0.22933 | 5.46E-07 | 0.136831 | 0.00305  |
| 5.94E-21 | 0.180789 | 8.54E-05 | 0.155784 | 0.00073  | 0.317365 | 2.18E-12 | -0.07319 | 0.11423  |
| 5.70E-05 | -0.04866 | 0.29401  | 0.049676 | 0.28403  | -0.0919  | 0.04717  | 0.232114 | 3.94E-07 |
| 1.42E-06 | -0.08962 | 0.05294  | 0.062746 | 0.17585  | -0.12105 | 0.00883  | 0.190769 | 3.33E-05 |
| 4.22E-10 | -0.17395 | 0.00016  | -0.18545 | 5.53E-05 | -0.31442 | 3.56E-12 | 0.207354 | 6.24E-06 |
| 5.67E-16 | -0.13551 | 0.00334  | -0.24709 | 6.32E-08 | -0.36633 | 2.81E-16 | 0.084081 | 0.06947  |
| 8.28E-20 | -0.37444 | 5.44E-17 | -0.36991 | 1.37E-16 | -0.47366 | 1.72E-27 | 0.180637 | 8.66E-05 |
| 3.10E-06 | 0.055749 | 0.22919  | 0.005598 | 0.90397  | -0.13201 | 0.00427  | 0.258247 | 1.50E-08 |
| 3.79E-25 | -0.25402 | 2.60E-08 | -0.42074 | 1.85E-21 | -0.48921 | 1.80E-29 | 0.083704 | 0.07073  |
| 3.18E-27 | -0.14393 | 0.00182  | -0.32994 | 2.54E-13 | -0.39804 | 3.52E-19 | -0.06582 | 0.1556   |
| 0.00012  | -0.19239 | 2.84E-05 | -0.27292 | 2.02E-09 | -0.27141 | 2.49E-09 | 0.300362 | 3.42E-11 |
| 2.37E-15 | -0.14826 | 0.00131  | -0.31638 | 2.57E-12 | -0.34417 | 1.97E-14 | 0.328019 | 3.55E-13 |
| 0.00522  | 0.082487 | 0.07494  | 0.065068 | 0.16036  | -0.02154 | 0.64244  | 0.416839 | 4.69E-21 |
| 1.61E-22 | -0.18877 | 4.04E-05 | -0.28042 | 6.93E-10 | -0.39825 | 3.35E-19 | 0.077021 | 0.09642  |
| 1.42E-21 | -0.32492 | 6.06E-13 | -0.24281 | 1.08E-07 | -0.41247 | 1.31E-20 | 0.180173 | 9.03E-05 |
| 5.42E-34 | -0.34036 | 3.96E-14 | -0.35317 | 3.65E-15 | -0.47527 | 1.09E-27 | -0.06876 | 0.13789  |
| 3.01E-24 | -0.4838  | 9.03E-29 | -0.43153 | 1.32E-22 | -0.54432 | 2.23E-37 | 0.087743 | 0.05813  |
| 1.52E-53 | 0.267371 | 4.37E-09 | 0.285742 | 3.17E-10 | 0.469514 | 5.59E-27 | 0.129048 | 0.00522  |
| 6.56E-37 | -0.48118 | 1.95E-28 | -0.45089 | 9.14E-25 | -0.59961 | 6.30E-47 | -0.02744 | 0.55415  |
| 3.19E-28 | -0.29864 | 4.48E-11 | -0.30955 | 7.91E-12 | -0.41978 | 2.33E-21 | 0.028227 | 0.54288  |
| 0.00078  | -0.06299 | 0.17416  | -0.16035 | 0.0005   | -0.1794  | 9.70E-05 | 0.221602 | 1.32E-06 |
| 1.46E-27 | -0.43851 | 2.28E-23 | -0.47293 | 2.12E-27 | -0.56701 | 4.44E-41 | -0.07364 | 0.112    |
| 5.10E-31 | 0.196413 | 1.91E-05 | 0.198227 | 1.60E-05 | 0.388096 | 3.09E-18 | 0.206763 | 6.64E-06 |

|          |          |          |          |          |          |          |          |          |
|----------|----------|----------|----------|----------|----------|----------|----------|----------|
| 1.33E-14 | -0.44485 | 4.47E-24 | -0.37026 | 1.28E-16 | -0.42852 | 2.79E-22 | -0.1948  | 2.25E-05 |
| 6.29E-05 | -0.1061  | 0.02184  | 0.020154 | 0.66399  | -0.079   | 0.08813  | -0.46128 | 5.54E-26 |
| 0.03811  | -0.18073 | 8.58E-05 | -0.11034 | 0.01706  | -0.12703 | 0.00598  | -0.02883 | 0.5343   |
| 5.70E-25 | -0.44835 | 1.79E-24 | -0.47233 | 2.52E-27 | -0.51169 | 1.60E-32 | -0.23368 | 3.27E-07 |
| 3.75E-11 | -0.40432 | 8.57E-20 | -0.38443 | 6.76E-18 | -0.4016  | 1.59E-19 | -0.12189 | 0.00837  |
| 0.00118  | -0.35162 | 4.89E-15 | -0.12272 | 0.00793  | -0.19401 | 2.43E-05 | -0.35425 | 2.97E-15 |
| 8.08E-22 | -0.55092 | 2.01E-38 | -0.43831 | 2.41E-23 | -0.54608 | 1.18E-37 | -0.41328 | 1.09E-20 |
| 1.06E-08 | -0.42647 | 4.62E-22 | -0.31977 | 1.46E-12 | -0.37182 | 9.30E-17 | 0.014244 | 0.75884  |
| 0.02798  | -0.10842 | 0.0191   | -0.03196 | 0.49084  | -0.09384 | 0.04266  | -0.09986 | 0.03096  |
| 5.48E-10 | -0.56869 | 2.30E-41 | -0.30704 | 1.19E-11 | -0.41168 | 1.58E-20 | -0.3446  | 1.82E-14 |
| 0.24864  | -0.45072 | 9.56E-25 | -0.20816 | 5.73E-06 | -0.21591 | 2.49E-06 | -0.13827 | 0.00275  |
| 1.64E-05 | -0.49555 | 2.61E-30 | -0.28352 | 4.40E-10 | -0.3173  | 2.21E-12 | -0.25948 | 1.27E-08 |
| 9.43E-10 | -0.45392 | 4.08E-25 | -0.35637 | 1.98E-15 | -0.38877 | 2.67E-18 | -0.18534 | 5.59E-05 |
| 1.26E-05 | -0.39803 | 3.52E-19 | -0.244   | 9.31E-08 | -0.28043 | 6.92E-10 | -0.25991 | 1.20E-08 |
| 2.65E-19 | -0.4245  | 7.46E-22 | -0.37402 | 5.94E-17 | -0.44497 | 4.34E-24 | -0.32858 | 3.22E-13 |
| 5.44E-07 | -0.33706 | 7.18E-14 | -0.10232 | 0.02703  | -0.22411 | 9.96E-07 | -0.2528  | 3.05E-08 |
| 6.32E-12 | -0.40092 | 1.85E-19 | -0.25712 | 1.73E-08 | -0.36432 | 4.19E-16 | -0.29116 | 1.41E-10 |
| 6.58E-12 | -0.51368 | 8.36E-33 | -0.35141 | 5.09E-15 | -0.43223 | 1.11E-22 | -0.14508 | 0.00167  |
| 1.40E-11 | -0.63224 | 1.70E-53 | -0.45616 | 2.23E-25 | -0.5059  | 1.03E-31 | -0.21838 | 1.90E-06 |
| 2.00E-12 | -0.42116 | 1.68E-21 | -0.26269 | 8.25E-09 | -0.35209 | 4.47E-15 | -0.32418 | 6.89E-13 |
| 3.17E-12 | -0.48853 | 2.20E-29 | -0.30774 | 1.06E-11 | -0.38311 | 8.95E-18 | -0.23611 | 2.45E-07 |
| 2.71E-13 | -0.4271  | 3.96E-22 | -0.2936  | 9.74E-11 | -0.38043 | 1.57E-17 | -0.21631 | 2.38E-06 |
| 0.02427  | -0.31649 | 2.53E-12 | -0.15771 | 0.00063  | -0.17203 | 0.00019  | -0.0336  | 0.46889  |
| 5.81E-18 | -0.54568 | 1.37E-37 | -0.38708 | 3.85E-18 | -0.47356 | 1.77E-27 | -0.32081 | 1.22E-12 |
| 1.91E-10 | -0.53965 | 1.20E-36 | -0.38339 | 8.43E-18 | -0.44089 | 1.24E-23 | -0.12679 | 0.00608  |
| 5.19E-07 | -0.45063 | 9.81E-25 | -0.3118  | 5.48E-12 | -0.35287 | 3.86E-15 | -0.3155  | 2.98E-12 |
| 9.43E-10 | -0.3413  | 3.33E-14 | -0.19257 | 2.79E-05 | -0.30428 | 1.84E-11 | -0.34283 | 2.52E-14 |
| 4.65E-15 | -0.36526 | 3.47E-16 | -0.34308 | 2.41E-14 | -0.39217 | 1.28E-18 | -0.19983 | 1.36E-05 |
| 1.83E-22 | -0.49552 | 2.63E-30 | -0.37592 | 4.01E-17 | -0.48684 | 3.65E-29 | -0.21793 | 1.99E-06 |
| 4.62E-14 | -0.5647  | 1.09E-40 | -0.47196 | 2.79E-27 | -0.51221 | 1.35E-32 | -0.21158 | 3.98E-06 |
| 1.83E-06 | -0.40281 | 1.21E-19 | -0.40132 | 1.69E-19 | -0.34289 | 2.49E-14 | -0.1366  | 0.0031   |
| 0.0082   | -0.1778  | 0.00011  | -0.11769 | 0.01092  | -0.03116 | 0.5018   | 0.018733 | 0.68637  |
| 0.1922   | -0.38071 | 1.48E-17 | -0.14018 | 0.0024   | -0.18344 | 6.68E-05 | -0.11379 | 0.01387  |
| 1.03E-13 | -0.39563 | 6.00E-19 | -0.32474 | 6.25E-13 | -0.38306 | 9.04E-18 | -0.11154 | 0.01589  |
| 4.64E-13 | -0.42369 | 9.08E-22 | -0.42803 | 3.15E-22 | -0.43656 | 3.75E-23 | -0.13662 | 0.00309  |
| 1.19E-11 | -0.40273 | 1.23E-19 | -0.30059 | 3.30E-11 | -0.38834 | 2.93E-18 | -0.04666 | 0.31434  |
| 5.76E-08 | -0.44929 | 1.40E-24 | -0.30417 | 1.88E-11 | -0.33325 | 1.42E-13 | -0.15567 | 0.00074  |
| 0.02873  | -0.47424 | 1.46E-27 | -0.24912 | 4.89E-08 | -0.28555 | 3.27E-10 | -0.24074 | 1.39E-07 |
| 0.11084  | -0.32426 | 6.80E-13 | -0.14334 | 0.0019   | -0.09316 | 0.04421  | -0.11659 | 0.01169  |
| 0.00732  | -0.41282 | 1.21E-20 | -0.12764 | 0.00574  | -0.2328  | 3.63E-07 | -0.20416 | 8.71E-06 |
| 4.94E-06 | -0.13053 | 0.00472  | -0.22117 | 1.39E-06 | -0.22619 | 7.85E-07 | -0.11502 | 0.01287  |
| 0.0107   | 0.0701   | 0.13036  | -0.01903 | 0.68165  | -0.01889 | 0.68387  | -0.00344 | 0.94093  |
| 0.08573  | -0.07045 | 0.12847  | -0.15979 | 0.00053  | -0.11927 | 0.00989  | -0.16607 | 0.00031  |
| 0.0063   | -0.00342 | 0.9412   | -0.11843 | 0.01042  | -0.11838 | 0.01045  | -0.02903 | 0.53142  |
| 1.76E-06 | 0.020746 | 0.65475  | -0.17035 | 0.00022  | -0.15459 | 0.0008   | -0.27104 | 2.63E-09 |

|          |          |          |          |          |          |          |          |          |
|----------|----------|----------|----------|----------|----------|----------|----------|----------|
| 0.78165  | 0.092492 | 0.04575  | -0.0341  | 0.46226  | 0.025675 | 0.57995  | -0.03263 | 0.48172  |
| 0.31328  | 0.035941 | 0.43842  | -0.01523 | 0.74274  | 0.002629 | 0.95482  | -0.07552 | 0.10312  |
| 1.12E-05 | -0.13571 | 0.0033   | -0.35998 | 9.81E-16 | -0.28383 | 4.21E-10 | 0.135566 | 0.00333  |
| 0.04854  | 0.005764 | 0.90114  | -0.05138 | 0.2678   | -0.05531 | 0.23284  | -0.06692 | 0.14876  |
| 0.00045  | 0.001375 | 0.97635  | -0.17404 | 0.00016  | -0.10263 | 0.02657  | -0.02741 | 0.55461  |
| 0.6548   | 0.109175 | 0.01827  | 0.064858 | 0.16172  | 0.074511 | 0.10781  | 0.027268 | 0.55666  |
| 3.33E-08 | -0.04767 | 0.304    | -0.28063 | 6.72E-10 | -0.23116 | 4.41E-07 | -0.14258 | 0.00201  |
| 0.00765  | 0.082362 | 0.07539  | -0.15244 | 0.00095  | -0.09496 | 0.04025  | -0.07303 | 0.11499  |
| 0.06542  | 0.028284 | 0.54205  | -0.01506 | 0.74553  | -0.01862 | 0.68824  | 0.016899 | 0.71569  |
| 0.00046  | 0.054761 | 0.23755  | -0.16469 | 0.00035  | -0.10386 | 0.0248   | -0.22535 | 8.64E-07 |
| 0.72686  | 0.040036 | 0.38802  | -0.01638 | 0.72408  | 0.00904  | 0.84552  | -0.11129 | 0.01613  |
| 0.0489   | -0.05571 | 0.22954  | -0.0604  | 0.19258  | -0.08243 | 0.07516  | -0.09856 | 0.03322  |
| 0.00026  | 0.023973 | 0.60533  | -0.12762 | 0.00575  | -0.11012 | 0.01728  | -0.0006  | 0.98971  |
| 0.06177  | 0.060728 | 0.19019  | 0.000897 | 0.98457  | -0.01224 | 0.79201  | 0.05904  | 0.20282  |
| 0.7939   | -0.00547 | 0.90613  | -0.0583  | 0.20853  | -0.03553 | 0.44368  | -0.01108 | 0.81121  |
| 0.30258  | 0.076662 | 0.09799  | -0.0118  | 0.79928  | 0.013212 | 0.77582  | 0.007065 | 0.87898  |
| 0.92168  | 0.175901 | 0.00013  | 0.062834 | 0.17524  | 0.09728  | 0.03559  | 0.005319 | 0.90873  |
| 7.89E-09 | -0.12953 | 0.00506  | -0.1864  | 5.06E-05 | -0.2454  | 7.82E-08 | -0.26012 | 1.17E-08 |
| 0.62435  | 0.146202 | 0.00153  | 0.073308 | 0.11363  | 0.081243 | 0.07945  | 0.028722 | 0.53582  |
| 0.00149  | -0.02174 | 0.63934  | -0.22406 | 1.00E-06 | -0.15225 | 0.00096  | 0.109294 | 0.01815  |
| 0.15868  | 0.089918 | 0.05215  | -0.03496 | 0.45103  | 0.00682  | 0.88315  | -0.18967 | 3.70E-05 |
| 4.36E-05 | -0.04304 | 0.35342  | -0.13757 | 0.00289  | -0.13465 | 0.00355  | -0.20978 | 4.83E-06 |
| 0.22334  | 0.054637 | 0.23863  | 0.100584 | 0.02975  | 0.095057 | 0.04004  | -0.01111 | 0.81081  |
| 0.67799  | 0.170763 | 0.00021  | 0.05712  | 0.21792  | 0.071745 | 0.12156  | 0.004904 | 0.91582  |
| 0.44032  | 0.151902 | 0.00099  | 0.021441 | 0.64397  | 0.04834  | 0.29721  | -0.01753 | 0.70554  |
| 0.79967  | 0.120635 | 0.00907  | 0.052634 | 0.2563   | 0.061709 | 0.18311  | 0.07809  | 0.09187  |
| 0.69615  | 0.122098 | 0.00826  | 0.034408 | 0.45821  | 0.069513 | 0.13362  | 0.048556 | 0.29505  |
| 0.4029   | 0.044023 | 0.34249  | 0.074036 | 0.11008  | 0.058459 | 0.20731  | 0.027113 | 0.55892  |
| 0.15306  | 0.022888 | 0.62177  | 0.045846 | 0.32285  | 0.064974 | 0.16097  | 0.067689 | 0.14415  |
| 0.13999  | 0.14917  | 0.00122  | -0.06447 | 0.16427  | 0.070232 | 0.12964  | 0.014854 | 0.74884  |
| 0.05531  | 0.231705 | 4.13E-07 | 0.062327 | 0.17876  | 0.069839 | 0.1318   | 0.026573 | 0.56677  |
| 0.21516  | 0.126339 | 0.00626  | 0.008815 | 0.84932  | 0.026469 | 0.56829  | -0.01219 | 0.79282  |
| 9.51E-09 | -0.12118 | 0.00876  | -0.24873 | 5.14E-08 | -0.26035 | 1.13E-08 | -0.09642 | 0.03726  |
| 0.40968  | 0.088368 | 0.05636  | 0.023051 | 0.61929  | 0.044359 | 0.33882  | -0.00493 | 0.91534  |
| 0.47957  | 0.069262 | 0.13503  | -0.00072 | 0.9877   | 0.022603 | 0.62611  | -0.02165 | 0.64072  |
| 0.14374  | -0.13504 | 0.00346  | -0.09248 | 0.04578  | -0.12395 | 0.00732  | -0.16928 | 0.00024  |
| 0.09197  | -0.04834 | 0.29719  | 0.03548  | 0.44432  | -0.03058 | 0.50981  | -0.12881 | 0.00531  |
| 0.00237  | 0.025687 | 0.57978  | -0.06766 | 0.1443   | -0.06536 | 0.15851  | 0.002461 | 0.9577   |
| 0.3629   | 0.132101 | 0.00424  | -0.01076 | 0.81661  | 0.031679 | 0.49466  | 0.061784 | 0.18258  |
| 6.21E-05 | -0.08354 | 0.07129  | 0.085709 | 0.06422  | 0.114532 | 0.01326  | 0.022891 | 0.62172  |
| 0.60229  | 0.146169 | 0.00154  | 0.03602  | 0.43742  | 0.076579 | 0.09836  | 0.063931 | 0.16781  |
| 0.33546  | 0.023059 | 0.61915  | -0.03948 | 0.39463  | 0.008799 | 0.84959  | 0.033596 | 0.46889  |
| 9.02E-06 | 0.028263 | 0.54236  | -0.11937 | 0.00983  | -0.152   | 0.00098  | -0.03185 | 0.49231  |
| 0.07288  | -0.01148 | 0.8046   | -0.18445 | 6.08E-05 | -0.1039  | 0.02474  | 0.107821 | 0.01978  |
| 0.00237  | 0.078223 | 0.09132  | -0.06797 | 0.14249  | -0.0617  | 0.18314  | -0.01552 | 0.73798  |

|          |          |          |          |          |          |          |          |          |
|----------|----------|----------|----------|----------|----------|----------|----------|----------|
| 0.00245  | -0.0203  | 0.66174  | -0.11298 | 0.01458  | -0.09383 | 0.04269  | -0.03401 | 0.46339  |
| 0.67754  | -0.07218 | 0.1193   | -0.05798 | 0.21105  | -0.02239 | 0.62936  | 0.064462 | 0.1643   |
| 0.3042   | 0.038234 | 0.40975  | -0.00378 | 0.9351   | 0.006639 | 0.88623  | -0.11185 | 0.0156   |
| 0.05161  | 0.166756 | 0.0003   | 0.079311 | 0.08689  | 0.12856  | 0.0054   | -0.00567 | 0.90278  |
| 0.66831  | 0.083956 | 0.06989  | 0.008809 | 0.84943  | 0.027493 | 0.55341  | -0.07419 | 0.10936  |
| 0.19463  | 0.015161 | 0.74384  | 0.050486 | 0.27625  | 0.063076 | 0.17358  | -0.01    | 0.82936  |
| 0.17188  | 0.027204 | 0.5576   | -0.08221 | 0.07592  | -0.04812 | 0.29937  | 0.076185 | 0.1001   |
| 0.13529  | 0.096206 | 0.03768  | -0.00131 | 0.9775   | 0.021616 | 0.64126  | 0.016543 | 0.72141  |
| 0.06279  | 0.134617 | 0.00356  | 0.027142 | 0.55849  | 0.025133 | 0.58799  | 0.004661 | 0.91998  |
| 0.7201   | 0.134767 | 0.00352  | 0.019668 | 0.67161  | 0.066049 | 0.15414  | -0.00285 | 0.95102  |
| 0.14458  | 0.07668  | 0.09791  | 0.017262 | 0.70985  | 0.018929 | 0.68327  | 0.02598  | 0.57546  |
| 0.41802  | 0.144449 | 0.00175  | 0.086486 | 0.06184  | 0.118892 | 0.01013  | -0.07337 | 0.11332  |
| 0.07592  | 0.1671   | 0.00029  | 0.063194 | 0.17278  | 0.039461 | 0.39488  | -0.05455 | 0.23939  |
| 0.79058  | -0.05173 | 0.26459  | -0.01845 | 0.69081  | -0.00609 | 0.89551  | -0.01036 | 0.82324  |
| 0.00972  | 0.068025 | 0.14216  | 0.084912 | 0.06675  | 0.138843 | 0.00264  | 0.083247 | 0.07229  |
| 0.53187  | 0.148331 | 0.00131  | -0.07602 | 0.10086  | -0.00643 | 0.88986  | 0.189582 | 3.73E-05 |
| 0.16644  | 0.197814 | 1.66E-05 | 0.038547 | 0.40593  | 0.048763 | 0.29299  | 0.094429 | 0.04138  |
| 0.00097  | 0.003447 | 0.94078  | -0.10286 | 0.02623  | -0.09458 | 0.04105  | -0.20297 | 9.85E-06 |
| 0.00163  | -0.06375 | 0.169    | -0.08231 | 0.07559  | -0.11757 | 0.011    | -0.27285 | 2.04E-09 |
| 0.60989  | 0.016088 | 0.72878  | -0.00231 | 0.96035  | 0.014061 | 0.76184  | -0.04041 | 0.38358  |
| 0.42709  | -0.00442 | 0.92402  | -0.04229 | 0.36187  | -0.03843 | 0.40741  | -0.02914 | 0.52989  |
| 6.56E-08 | -0.05302 | 0.25283  | -0.17575 | 0.00013  | -0.19908 | 1.46E-05 | 0.043048 | 0.35329  |
| 6.98E-09 | -0.21515 | 2.71E-06 | -0.19837 | 1.57E-05 | -0.25152 | 3.60E-08 | -0.24284 | 1.08E-07 |
| 0.23075  | 0.042846 | 0.35557  | -0.01422 | 0.75923  | 0.001721 | 0.97042  | 0.073857 | 0.11094  |
| 0.24211  | 0.147373 | 0.0014   | 0.03652  | 0.43107  | 0.047885 | 0.30178  | 0.13216  | 0.00422  |
| 1.42E-06 | -0.01044 | 0.82193  | -0.201   | 1.20E-05 | -0.18777 | 4.44E-05 | -0.26013 | 1.16E-08 |
| 0.02165  | -0.06486 | 0.16173  | -0.12323 | 0.00768  | -0.09531 | 0.0395   | -0.10011 | 0.03054  |
| 0.30501  | 0.034577 | 0.45601  | -0.06285 | 0.17511  | -0.02421 | 0.60184  | -0.00194 | 0.96664  |
| 0.02858  | -0.01835 | 0.69251  | -0.0347  | 0.45437  | -0.04028 | 0.38508  | -0.04056 | 0.38187  |
| 0.00124  | -0.06007 | 0.19501  | -0.11302 | 0.01454  | -0.12768 | 0.00573  | -0.04561 | 0.32539  |
| 0.00486  | 0.01651  | 0.72195  | -0.21042 | 4.51E-06 | -0.17796 | 0.00011  | -0.01358 | 0.76976  |
| 0.00017  | -0.18004 | 9.14E-05 | -0.22192 | 1.28E-06 | -0.23218 | 3.90E-07 | -0.22543 | 8.57E-07 |
| 0.68838  | -0.17562 | 0.00014  | -0.24117 | 1.32E-07 | -0.16828 | 0.00026  | -0.09532 | 0.03949  |
| 0.49292  | -0.02866 | 0.53663  | -0.04109 | 0.37564  | 0.007632 | 0.86934  | 0.034738 | 0.45391  |
| 0.21552  | -0.04576 | 0.32372  | -0.03074 | 0.50748  | -0.04202 | 0.36488  | -0.03811 | 0.41127  |
| 0.06355  | -0.14989 | 0.00116  | -0.14049 | 0.00234  | -0.13039 | 0.00477  | -0.00828 | 0.85829  |
| 1.11E-05 | -0.10929 | 0.01815  | -0.30739 | 1.12E-11 | -0.26091 | 1.05E-08 | -0.32834 | 3.36E-13 |
| 0.07917  | -0.05094 | 0.27192  | 0.029278 | 0.52795  | 0.035481 | 0.44431  | 0.212628 | 3.56E-06 |
| 0.01267  | -0.07695 | 0.09675  | -0.11216 | 0.01531  | -0.10446 | 0.02397  | -0.13331 | 0.0039   |
| 0.04069  | -0.06825 | 0.14085  | -0.07453 | 0.10774  | -0.06751 | 0.14522  | -0.10094 | 0.02918  |
| 0.27106  | -0.05817 | 0.20954  | -0.06911 | 0.13591  | -0.05642 | 0.2236   | 0.00515  | 0.91162  |
| 0.1544   | 0.047931 | 0.30131  | -0.20166 | 1.13E-05 | -0.10984 | 0.01757  | 0.151559 | 0.00102  |
| 0.00013  | 0.041469 | 0.37125  | 0.023544 | 0.61181  | -0.05194 | 0.26259  | -0.08423 | 0.06896  |
| 0.00123  | 0.087125 | 0.05993  | -0.05186 | 0.26341  | -0.0462  | 0.31916  | -0.07457 | 0.10754  |
| 0.39176  | 0.06293  | 0.17458  | -0.01593 | 0.73127  | 0.005604 | 0.90386  | 0.043814 | 0.34479  |

|          |          |         |          |          |          |          |          |          |
|----------|----------|---------|----------|----------|----------|----------|----------|----------|
| 0.43574  | 0.005671 | 0.90272 | -0.01072 | 0.81728  | -0.01743 | 0.70722  | -0.01029 | 0.82442  |
| 0.05839  | 0.123541 | 0.00752 | -0.05188 | 0.26316  | -0.01418 | 0.75982  | -0.07203 | 0.1201   |
| 0.03471  | 0.08243  | 0.07514 | -0.05734 | 0.21618  | -0.04098 | 0.37693  | -0.04155 | 0.3703   |
| 0.81111  | 0.096373 | 0.03735 | -0.0911  | 0.04913  | -0.00358 | 0.93844  | 0.034489 | 0.45715  |
| 8.35E-05 | -0.05632 | 0.22446 | -0.17981 | 9.34E-05 | -0.1589  | 0.00057  | -0.08674 | 0.06106  |
| 0.70286  | 0.047074 | 0.31005 | -0.01406 | 0.76186  | 0.021147 | 0.64852  | 0.112533 | 0.01497  |
| 0.34203  | 0.014573 | 0.75345 | 0.016355 | 0.72446  | -0.00213 | 0.96335  | -0.06925 | 0.13512  |
| 0.03929  | 0.118249 | 0.01054 | -0.02636 | 0.56985  | 6.70E-05 | 0.99885  | 0.033674 | 0.46786  |
| 0.51635  | 0.152452 | 0.00095 | 0.041456 | 0.3714   | 0.057691 | 0.21335  | 0.075485 | 0.10327  |
| 0.37475  | 0.069455 | 0.13394 | 0.006101 | 0.89539  | 0.024701 | 0.59443  | -0.04982 | 0.28262  |
| 0.22252  | -0.0055  | 0.9056  | 0.001327 | 0.97719  | -0.01899 | 0.68236  | -0.11665 | 0.01165  |
| 0.00104  | 0.026438 | 0.56875 | -0.14563 | 0.0016   | -0.09856 | 0.03323  | -0.15121 | 0.00105  |
| 1.57E-07 | 0.123343 | 0.00762 | 0.107247 | 0.02044  | 0.227311 | 6.90E-07 | 0.068791 | 0.13771  |
| 0.21075  | -0.0281  | 0.54476 | -0.07322 | 0.11406  | -0.04442 | 0.33818  | -0.06067 | 0.19061  |
| 0.31032  | 0.109784 | 0.01763 | 0.032306 | 0.48615  | 0.093337 | 0.0438   | 0.012036 | 0.79532  |
| 0.31083  | -0.04218 | 0.36315 | -0.02532 | 0.58525  | -0.0389  | 0.40168  | -0.15067 | 0.00109  |
| 0.01335  | -0.07436 | 0.10853 | -0.10803 | 0.01954  | -0.09686 | 0.0364   | -0.0687  | 0.13826  |
| 0.57866  | 0.082387 | 0.0753  | 0.035942 | 0.43841  | 0.054696 | 0.23811  | -0.19656 | 1.89E-05 |
| 0.32233  | -0.00877 | 0.85016 | -0.0386  | 0.40525  | -0.05352 | 0.2484   | -0.14481 | 0.0017   |
| 1.19E-06 | 0.096176 | 0.03774 | -0.17126 | 0.0002   | -0.13955 | 0.00251  | 0.01797  | 0.69852  |
| 0.27029  | 0.022064 | 0.63437 | -0.05    | 0.28088  | -0.02551 | 0.58233  | 0.040518 | 0.38233  |
| 0.30284  | 0.064798 | 0.16211 | 0.051781 | 0.2641   | 0.014043 | 0.76214  | -0.01177 | 0.79982  |
| 2.01E-11 | -0.09282 | 0.04497 | -0.25473 | 2.37E-08 | -0.26732 | 4.40E-09 | -0.19666 | 1.87E-05 |
| 0.05803  | 0.056335 | 0.22432 | -0.02664 | 0.56575  | -0.01833 | 0.69271  | 0.038213 | 0.41001  |
| 8.84E-07 | -0.16834 | 0.00026 | -0.3058  | 1.45E-11 | -0.27262 | 2.11E-09 | -0.09808 | 0.03409  |
| 0.00092  | 0.098886 | 0.03264 | -0.07749 | 0.09441  | -0.06186 | 0.18205  | -0.01777 | 0.70177  |
| 0.00629  | -0.08062 | 0.08178 | -0.1889  | 3.99E-05 | -0.14288 | 0.00197  | -0.19313 | 2.65E-05 |
| 0.09874  | 0.044571 | 0.33651 | -0.02747 | 0.55378  | 0.015876 | 0.73221  | 0.279533 | 7.87E-10 |
| 0.76241  | 0.066606 | 0.15069 | 0.00259  | 0.95549  | 0.052007 | 0.26202  | -0.00619 | 0.89393  |
| 3.37E-05 | -0.12874 | 0.00533 | -0.21796 | 1.99E-06 | -0.2037  | 9.13E-06 | -0.10009 | 0.03056  |
| 1.41E-09 | -0.17687 | 0.00012 | -0.18514 | 5.70E-05 | -0.24872 | 5.14E-08 | -0.23181 | 4.08E-07 |
| 0.39851  | 0.093254 | 0.04399 | -0.00304 | 0.94771  | 0.032542 | 0.48297  | -0.05344 | 0.24906  |
| 4.69E-07 | 0.020618 | 0.65675 | -0.15667 | 0.00068  | -0.14367 | 0.00185  | -0.12584 | 0.00647  |
| 0.00129  | -0.00876 | 0.8503  | -0.0751  | 0.10507  | -0.09147 | 0.04821  | -0.08194 | 0.0769   |
| 0.91437  | 0.025689 | 0.57974 | -0.00662 | 0.8866   | 0.018916 | 0.68347  | -0.13549 | 0.00335  |
| 0.00013  | 0.014847 | 0.74896 | -0.13604 | 0.00322  | -0.14175 | 0.00214  | -0.02814 | 0.54419  |
| 0.06259  | -0.06549 | 0.15765 | -0.06609 | 0.15387  | -0.06843 | 0.13978  | -0.16522 | 0.00034  |
| 1.21E-10 | -0.06828 | 0.14064 | -0.35446 | 2.85E-15 | -0.28306 | 4.71E-10 | -0.14228 | 0.00206  |
| 0.43642  | -0.00982 | 0.83243 | -0.06243 | 0.17802  | -0.06074 | 0.19008  | 0.025867 | 0.57713  |
| 1.06E-05 | -0.11924 | 0.0099  | -0.09929 | 0.03193  | -0.1732  | 0.00017  | -0.04694 | 0.3114   |
| 0.77138  | 0.115025 | 0.01287 | 0.028114 | 0.54448  | 0.028829 | 0.5343   | 0.068448 | 0.13969  |
| 0.11893  | 0.16173  | 0.00045 | -0.00627 | 0.8925   | 0.025737 | 0.57904  | -0.01916 | 0.67958  |
| 0.24385  | 0.024019 | 0.60463 | 0.027408 | 0.55465  | 0.048285 | 0.29775  | 0.074854 | 0.1062   |
| 0.19041  | -0.00325 | 0.94417 | -0.04833 | 0.2973   | -0.02939 | 0.52632  | -0.21528 | 2.67E-06 |
| 0.21993  | -0.04669 | 0.314   | -0.11851 | 0.01037  | -0.07329 | 0.11373  | -0.07722 | 0.09557  |



|          |          |          |          |          |          |          |           |          |
|----------|----------|----------|----------|----------|----------|----------|-----------|----------|
| 0.87116  | 0.067867 | 0.14309  | 0.019228 | 0.67855  | 0.041933 | 0.36592  | 0.01071   | 0.81745  |
| 0.03479  | 0.023631 | 0.61049  | -0.04801 | 0.30056  | -0.03705 | 0.42447  | -0.02783  | 0.54852  |
| 0.00338  | 0.086307 | 0.06238  | -0.07197 | 0.12039  | -0.06174 | 0.1829   | 0.068161  | 0.14136  |
| 0.73703  | -0.03389 | 0.46499  | -0.07566 | 0.10248  | -0.04339 | 0.34947  | 0.007888  | 0.865    |
| 0.06426  | 0.234581 | 2.94E-07 | 0.161149 | 0.00047  | 0.184307 | 6.16E-05 | -0.00175  | 0.96986  |
| 0.00121  | -0.09748 | 0.03521  | -0.23771 | 2.02E-07 | -0.17621 | 0.00013  | 0.021145  | 0.64855  |
| 0.01573  | 0.013538 | 0.77045  | -0.04121 | 0.37425  | -0.05154 | 0.26637  | -0.11161  | 0.01582  |
| 0.02407  | 0.155521 | 0.00075  | -0.16504 | 0.00034  | -0.0831  | 0.07279  | -4.27E-05 | 0.99927  |
| 5.37E-06 | 0.063754 | 0.16899  | -0.16763 | 0.00027  | -0.15005 | 0.00114  | 0.193536  | 2.54E-05 |
| 0.00029  | 0.139815 | 0.00246  | -0.17279 | 0.00018  | -0.07812 | 0.09176  | -0.03289  | 0.47835  |
| 0.64277  | 0.240549 | 1.43E-07 | -0.03958 | 0.39347  | 0.025219 | 0.5867   | 0.431605  | 1.30E-22 |
| 0.39998  | 0.13547  | 0.00335  | 0.024788 | 0.59313  | 0.020298 | 0.66174  | -0.11704  | 0.01136  |
| 0.67365  | 0.056048 | 0.2267   | -0.2316  | 4.18E-07 | -0.08287 | 0.07361  | 0.281228  | 6.16E-10 |
| 0.01948  | 0.111092 | 0.01632  | -0.08952 | 0.0532   | -0.04631 | 0.31795  | -0.0829   | 0.07348  |
| 0.14904  | -0.09919 | 0.03212  | -0.10821 | 0.01933  | -0.08203 | 0.07659  | -0.00937  | 0.84     |
| 0.08671  | 0.000618 | 0.98937  | -0.0301  | 0.5164   | 0.037059 | 0.4243   | 0.011078  | 0.81129  |
| 0.52432  | 0.048729 | 0.29333  | 0.060041 | 0.19526  | 0.035743 | 0.44095  | -0.06372  | 0.16921  |
| 0.05606  | -0.19405 | 2.42E-05 | -0.07189 | 0.1208   | -0.11692 | 0.01145  | -0.0383   | 0.40896  |
| 0.01908  | 0.029073 | 0.53085  | 0.36228  | 6.26E-16 | 0.200366 | 1.28E-05 | 0.215435  | 2.62E-06 |
| 0.00036  | -0.31519 | 3.13E-12 | -0.18659 | 4.97E-05 | -0.22948 | 5.36E-07 | -0.03975  | 0.39145  |
| 0.02242  | -0.1617  | 0.00045  | -0.0369  | 0.42628  | -0.0945  | 0.04123  | 0.016039  | 0.72958  |
| 0.11702  | -0.32135 | 1.12E-12 | -0.15849 | 0.00059  | -0.17164 | 0.00019  | 0.064971  | 0.16099  |
| 0.18931  | -0.20934 | 5.06E-06 | -0.10447 | 0.02396  | -0.12145 | 0.00861  | -0.00412  | 0.92932  |
| 0.3286   | -0.14296 | 0.00195  | -0.01144 | 0.80525  | -0.09829 | 0.03371  | 0.31384   | 3.92E-12 |
| 0.49529  | -0.14562 | 0.0016   | -0.0526  | 0.25657  | -0.06865 | 0.13855  | 0.215308  | 2.66E-06 |
| 0.04299  | 0.111898 | 0.01555  | 0.193435 | 2.57E-05 | 0.149688 | 0.00118  | 0.260922  | 1.05E-08 |
| 0.50674  | -0.10773 | 0.01989  | -0.08911 | 0.05431  | -0.09078 | 0.04994  | 0.100501  | 0.02989  |
| 0.6357   | -0.12549 | 0.00662  | -0.05956 | 0.19887  | -0.06108 | 0.18761  | 0.016975  | 0.71445  |
| 0.42552  | -0.2478  | 5.78E-08 | -0.13274 | 0.00406  | -0.14621 | 0.00153  | 0.108512  | 0.019    |
| 0.63002  | -0.05666 | 0.22162  | 0.021985 | 0.63558  | -0.01056 | 0.81998  | 0.001394  | 0.97604  |
| 0.66792  | -0.02201 | 0.63519  | -0.03882 | 0.40263  | 0.003683 | 0.93673  | 0.135724  | 0.0033   |
| 0.91789  | -0.05944 | 0.19981  | 0.115434 | 0.01255  | 0.038089 | 0.41153  | 0.144107  | 0.0018   |
| 0.99535  | -0.10871 | 0.01877  | 0.006517 | 0.8883   | -0.02958 | 0.52375  | 0.306595  | 1.27E-11 |
| 0.0392   | 0.001635 | 0.97189  | 0.155019 | 0.00078  | 0.118206 | 0.01057  | 0.368904  | 1.68E-16 |
| 0.23465  | 0.005308 | 0.90892  | -0.00137 | 0.97647  | -0.02113 | 0.64878  | 0.089307  | 0.05378  |
| 0.1836   | -0.25314 | 2.92E-08 | -0.20964 | 4.90E-06 | -0.17692 | 0.00012  | 0.110169  | 0.01724  |
| 0.56627  | -0.09779 | 0.03463  | -0.06728 | 0.14658  | -0.05905 | 0.20275  | 0.24191   | 1.21E-07 |
| 1.95E-06 | 0.038695 | 0.40412  | 0.112126 | 0.01534  | 0.179044 | 0.0001   | 0.224045  | 1.00E-06 |
| 0.02042  | -0.26969 | 3.17E-09 | -0.21453 | 2.90E-06 | -0.20618 | 7.06E-06 | -0.01622  | 0.72663  |
| 0.00081  | -0.05204 | 0.26175  | 0.103014 | 0.02601  | 0.088419 | 0.05621  | 0.225034  | 8.96E-07 |
| 0.04875  | -0.06311 | 0.17333  | -0.01602 | 0.72989  | 0.002642 | 0.95458  | 0.204872  | 8.09E-06 |
| 0.32323  | -0.13765 | 0.00287  | -0.0452  | 0.3297   | -0.0142  | 0.75952  | 0.055628  | 0.2302   |
| 0.05295  | -0.15855 | 0.00058  | -0.12489 | 0.00689  | -0.12973 | 0.00499  | -0.01023  | 0.82549  |
| 0.04801  | -0.26515 | 5.92E-09 | -0.11139 | 0.01603  | -0.16792 | 0.00027  | 0.069442  | 0.13402  |
| 0.08191  | -0.19677 | 1.85E-05 | -0.03724 | 0.42204  | -0.01069 | 0.81774  | 0.120938  | 0.00889  |

|          |          |          |          |          |          |          |          |          |
|----------|----------|----------|----------|----------|----------|----------|----------|----------|
| 0.07915  | -0.07746 | 0.09454  | -0.06759 | 0.14475  | -0.08199 | 0.07672  | 0.049048 | 0.29017  |
| 0.96977  | -0.22172 | 1.31E-06 | -0.05436 | 0.24098  | -0.06269 | 0.17621  | 0.028257 | 0.54244  |
| 0.92294  | -0.07334 | 0.11349  | -0.00944 | 0.83874  | -0.01992 | 0.66763  | 0.006059 | 0.89611  |
| 0.00992  | 0.059396 | 0.2001   | 0.141135 | 0.00224  | 0.158282 | 0.0006   | 0.262924 | 8.00E-09 |
| 0.13409  | -0.13885 | 0.00264  | -0.00038 | 0.99353  | 0.009949 | 0.83021  | 0.051164 | 0.26984  |
| 0.18072  | -0.1503  | 0.00112  | 0.027063 | 0.55964  | -0.00292 | 0.94983  | 0.085892 | 0.06365  |
| 0.00226  | 0.028014 | 0.54593  | 0.17271  | 0.00018  | 0.151626 | 0.00101  | 0.222704 | 1.17E-06 |
| 0.28975  | -0.13817 | 0.00277  | -0.0776  | 0.09392  | -0.0698  | 0.13202  | 0.002496 | 0.9571   |
| 0.37535  | -0.15933 | 0.00055  | -0.05162 | 0.26562  | -0.06604 | 0.15419  | 0.047854 | 0.3021   |
| 0.38428  | -0.12973 | 0.00499  | -0.12744 | 0.00582  | -0.07243 | 0.11801  | 0.02091  | 0.6522   |
| 0.14142  | -0.17185 | 0.00019  | -0.12916 | 0.00518  | -0.1119  | 0.01555  | 0.010538 | 0.82032  |
| 0.00836  | -0.3111  | 6.15E-12 | -0.15805 | 0.00061  | -0.19628 | 1.94E-05 | -0.05192 | 0.26285  |
| 0.07177  | -0.16958 | 0.00023  | -0.06516 | 0.15978  | -0.11046 | 0.01694  | 0.104656 | 0.02371  |
| 0.88823  | -0.1627  | 0.00042  | -0.0713  | 0.12387  | -0.07211 | 0.11968  | 0.15131  | 0.00104  |
| 0.00661  | -0.24321 | 1.03E-07 | -0.25206 | 3.35E-08 | -0.22892 | 5.73E-07 | -0.04494 | 0.33253  |
| 0.02472  | -0.18718 | 4.70E-05 | -0.09482 | 0.04055  | -0.05196 | 0.26242  | 0.275646 | 1.37E-09 |
| 0.71688  | -0.08633 | 0.06232  | 0.102843 | 0.02626  | 0.020883 | 0.65262  | 0.147674 | 0.00137  |
| 0.11977  | -0.16009 | 0.00052  | 0.023871 | 0.60687  | -0.09497 | 0.04022  | 0.051299 | 0.26858  |
| 0.00385  | -0.24283 | 1.08E-07 | -0.19019 | 3.52E-05 | -0.20434 | 8.55E-06 | -0.03985 | 0.39019  |
| 0.00496  | -0.26288 | 8.05E-09 | -0.17135 | 0.0002   | -0.19026 | 3.50E-05 | -0.02585 | 0.57737  |
| 4.57E-06 | 0.157794 | 0.00062  | 0.32876  | 3.12E-13 | 0.2945   | 8.49E-11 | 0.091752 | 0.04752  |
| 0.02934  | -0.07803 | 0.09212  | -0.0549  | 0.23635  | -0.12303 | 0.00778  | 0.279914 | 7.45E-10 |
| 3.36E-05 | -0.28579 | 3.15E-10 | -0.20596 | 7.22E-06 | -0.27259 | 2.12E-09 | 0.123889 | 0.00735  |
| 0.0638   | -0.22752 | 6.73E-07 | -0.13944 | 0.00253  | -0.16994 | 0.00022  | -0.00137 | 0.97641  |
| 0.265    | -0.16598 | 0.00032  | -0.03809 | 0.41155  | -0.05811 | 0.21002  | 0.1957   | 2.05E-05 |
| 0.00023  | -0.10848 | 0.01903  | 0.217011 | 2.21E-06 | 0.156483 | 0.00069  | 0.051009 | 0.2713   |
| 0.13072  | 0.118896 | 0.01012  | 0.142473 | 0.00203  | 0.094254 | 0.04176  | 0.332201 | 1.71E-13 |
| 1.24E-23 | -0.02871 | 0.53602  | 0.093187 | 0.04414  | 0.216864 | 2.24E-06 | 0.128835 | 0.0053   |
| 0.73031  | -0.07008 | 0.13048  | 0.019195 | 0.67906  | -0.02092 | 0.65204  | 0.213723 | 3.16E-06 |
| 0.00554  | 0.073589 | 0.11225  | 0.010774 | 0.81637  | 0.041721 | 0.36835  | -0.12309 | 0.00775  |
| 1.14E-05 | 0.177201 | 0.00012  | 0.336626 | 7.76E-14 | 0.270077 | 3.00E-09 | 0.127857 | 0.00566  |
| 2.37E-38 | 0.215939 | 2.48E-06 | 0.269647 | 3.19E-09 | 0.395901 | 5.65E-19 | 0.218759 | 1.82E-06 |
| 4.51E-07 | 0.130521 | 0.00473  | 0.258707 | 1.41E-08 | 0.244777 | 8.45E-08 | 0.003395 | 0.94167  |
| 0.00434  | -0.26218 | 8.85E-09 | 0.003875 | 0.93344  | -0.0132  | 0.77601  | 0.123032 | 0.00777  |
| 0.1816   | -0.13013 | 0.00485  | 0.15023  | 0.00113  | 0.04035  | 0.38431  | 0.233945 | 3.17E-07 |
| 0.03197  | -0.28912 | 1.92E-10 | -0.0317  | 0.49434  | -0.0648  | 0.16208  | 0.109917 | 0.01749  |
| 2.62E-10 | -0.06404 | 0.1671   | 0.207172 | 6.36E-06 | 0.21304  | 3.40E-06 | 0.030912 | 0.50517  |
| 1.50E-06 | -0.23416 | 3.09E-07 | -0.03718 | 0.42281  | 0.013142 | 0.77699  | -0.06069 | 0.19047  |
| 0.00598  | -0.00418 | 0.92822  | -0.09482 | 0.04054  | -0.13212 | 0.00424  | -0.14054 | 0.00233  |
| 1.84E-09 | -0.08186 | 0.07719  | 0.32224  | 9.59E-13 | 0.218371 | 1.90E-06 | 0.18965  | 3.71E-05 |
| 0.15751  | -0.13237 | 0.00416  | 0.191992 | 2.96E-05 | 0.094227 | 0.04182  | 0.102622 | 0.02658  |
| 2.82E-31 | 0.346478 | 1.28E-14 | 0.532842 | 1.31E-35 | 0.542357 | 4.54E-37 | 0.137496 | 0.00291  |
| 9.03E-06 | 0.181553 | 7.96E-05 | 0.21008  | 4.67E-06 | 0.223506 | 1.07E-06 | 0.141166 | 0.00223  |
| 2.20E-09 | -0.26972 | 3.16E-09 | 0.020251 | 0.66247  | 0.087281 | 0.05947  | 0.009814 | 0.83248  |
| 0.15246  | 0.2383   | 1.88E-07 | 0.10173  | 0.02793  | 0.049811 | 0.28273  | -0.16405 | 0.00037  |

|          |          |          |          |          |          |          |          |          |
|----------|----------|----------|----------|----------|----------|----------|----------|----------|
| 3.54E-23 | 0.298185 | 4.81E-11 | 0.280267 | 7.08E-10 | 0.392445 | 1.21E-18 | 0.143234 | 0.00192  |
| 0.00033  | -0.19745 | 1.72E-05 | 0.042611 | 0.35821  | 0.04459  | 0.3363   | 0.262606 | 8.35E-09 |
| 9.55E-20 | 0.168059 | 0.00026  | 0.033304 | 0.47278  | 0.227259 | 6.94E-07 | 0.325337 | 5.65E-13 |
| 3.58E-15 | -0.042   | 0.36516  | 0.090367 | 0.05098  | 0.143352 | 0.0019   | 0.346088 | 1.38E-14 |
| 2.40E-10 | -0.0689  | 0.13706  | 0.1892   | 3.87E-05 | 0.204079 | 8.78E-06 | -0.0545  | 0.23977  |
| 2.07E-16 | 0.078769 | 0.08908  | 0.24862  | 5.21E-08 | 0.280312 | 7.03E-10 | 0.361364 | 7.49E-16 |
| 0.00031  | -0.122   | 0.00831  | 0.150501 | 0.00111  | 0.112654 | 0.01486  | 0.190767 | 3.33E-05 |
| 6.34E-05 | -0.20979 | 4.82E-06 | 0.040758 | 0.37952  | 0.04395  | 0.34329  | 0.130267 | 0.00481  |
| 1.86E-08 | 0.042769 | 0.35642  | 0.181015 | 8.36E-05 | 0.231896 | 4.04E-07 | -0.1003  | 0.03022  |
| 0.00017  | -0.08027 | 0.08311  | -0.27757 | 1.04E-09 | -0.28098 | 6.38E-10 | 0.079505 | 0.08612  |
| 3.34E-24 | 0.187045 | 4.76E-05 | 0.469878 | 5.05E-27 | 0.477112 | 6.38E-28 | 0.206496 | 6.83E-06 |
| 0.00136  | 0.058427 | 0.20755  | -0.04471 | 0.33499  | 0.080732 | 0.08137  | 0.232279 | 3.86E-07 |
| 0.00039  | -0.14481 | 0.0017   | -0.03394 | 0.46442  | 0.005082 | 0.91278  | 0.240916 | 1.36E-07 |
| 0.62699  | -0.20944 | 5.01E-06 | 0.062282 | 0.17907  | -0.0138  | 0.76618  | 0.101103 | 0.02892  |
| 0.39179  | -0.17775 | 0.00011  | -0.09609 | 0.03792  | -0.06933 | 0.13467  | 0.171818 | 0.00019  |
| 4.06E-37 | 0.233359 | 3.40E-07 | 0.481069 | 2.02E-28 | 0.546056 | 1.19E-37 | 0.429904 | 1.98E-22 |
| 1.52E-42 | 0.475741 | 9.48E-28 | 0.458361 | 1.23E-25 | 0.57304  | 4.12E-42 | 0.318204 | 1.90E-12 |
| 8.54E-07 | 0.028949 | 0.5326   | 0.295658 | 7.11E-11 | 0.208162 | 5.73E-06 | 0.028636 | 0.53703  |
| 0.00447  | -0.287   | 2.63E-10 | -0.00145 | 0.97502  | -0.02502 | 0.58972  | 0.144689 | 0.00172  |
| 2.80E-07 | -0.30594 | 1.42E-11 | -0.02447 | 0.59785  | -0.01985 | 0.66873  | 0.059166 | 0.20186  |
| 0.10545  | -0.38198 | 1.14E-17 | -0.13148 | 0.00443  | -0.19033 | 3.47E-05 | 0.009903 | 0.83099  |
| 1.48E-11 | 0.089607 | 0.05297  | 0.185113 | 5.71E-05 | 0.22666  | 7.44E-07 | 0.134626 | 0.00356  |
| 1.26E-17 | 0.097951 | 0.03433  | 0.361143 | 7.82E-16 | 0.390879 | 1.70E-18 | 0.175962 | 0.00013  |
| 5.98E-37 | 0.324476 | 6.55E-13 | 0.305856 | 1.43E-11 | 0.460001 | 7.86E-26 | 0.381244 | 1.33E-17 |
| 0.0899   | 0.008309 | 0.85787  | 0.073878 | 0.11084  | 0.087255 | 0.05955  | 0.058613 | 0.20611  |
| 5.30E-06 | 0.153301 | 0.00089  | 0.536882 | 3.18E-36 | 0.35677  | 1.83E-15 | 0.1906   | 3.38E-05 |
| 0.00067  | -0.05156 | 0.26614  | 0.267755 | 4.14E-09 | 0.153876 | 0.00085  | 0.12946  | 0.00508  |
| 1.28E-17 | -0.01546 | 0.73896  | 0.344985 | 1.69E-14 | 0.335641 | 9.26E-14 | 0.225129 | 8.87E-07 |
| 1.34E-20 | -0.05232 | 0.25917  | 0.35758  | 1.56E-15 | 0.336204 | 8.37E-14 | 0.209952 | 4.74E-06 |
| 4.40E-48 | 0.368355 | 1.87E-16 | 0.601345 | 2.94E-47 | 0.662233 | 2.88E-60 | 0.326021 | 5.02E-13 |
| 8.51E-24 | 0.043973 | 0.34304  | 0.316166 | 2.67E-12 | 0.329874 | 2.57E-13 | 0.338549 | 5.49E-14 |
| 0.00944  | -0.34971 | 7.02E-15 | -0.26059 | 1.09E-08 | -0.27056 | 2.81E-09 | -0.02709 | 0.55928  |
| 5.38E-59 | 0.446347 | 3.03E-24 | 0.717623 | 4.46E-75 | 0.754766 | 3.53E-87 | 0.260995 | 1.04E-08 |
| 6.01E-05 | -0.36536 | 3.41E-16 | -0.41866 | 3.05E-21 | -0.40883 | 3.05E-20 | -0.03559 | 0.44294  |
| 3.09E-14 | -0.08778 | 0.05804  | -0.05448 | 0.23998  | 0.112893 | 0.01465  | 0.286351 | 2.90E-10 |
| 6.72E-38 | 0.213115 | 3.37E-06 | 0.555371 | 3.82E-39 | 0.559347 | 8.51E-40 | 0.282303 | 5.26E-10 |
| 1.17E-06 | -0.08658 | 0.06155  | 0.227935 | 6.42E-07 | 0.194527 | 2.31E-05 | 0.153588 | 0.00087  |
| 0.85942  | 0.025186 | 0.5872   | 0.187971 | 4.36E-05 | 0.066522 | 0.15121  | 0.088285 | 0.05659  |
| 1.79E-11 | 0.150502 | 0.00111  | 0.593801 | 7.77E-46 | 0.440029 | 1.55E-23 | 0.189532 | 3.75E-05 |
| 0.06619  | -0.25046 | 4.12E-08 | -0.06073 | 0.19014  | -0.06166 | 0.18347  | 0.156155 | 0.00071  |
| 0.21511  | -0.02931 | 0.52743  | 0.031232 | 0.50076  | 0.03838  | 0.40796  | 0.130265 | 0.00481  |
| 0.42455  | -0.32385 | 7.29E-13 | -0.1572  | 0.00065  | -0.16488 | 0.00035  | 0.085157 | 0.06596  |
| 1.01E-07 | 0.151282 | 0.00104  | 0.192813 | 2.73E-05 | 0.220297 | 1.53E-06 | 0.352398 | 4.22E-15 |
| 0.40508  | -0.16636 | 0.00031  | 0.016902 | 0.71563  | -0.00714 | 0.87766  | 0.082228 | 0.07586  |
| 1.59E-11 | -0.15418 | 0.00083  | 0.148664 | 0.00127  | 0.163957 | 0.00037  | 0.260476 | 1.11E-08 |

|          |          |          |          |          |          |          |          |          |
|----------|----------|----------|----------|----------|----------|----------|----------|----------|
| 4.95E-08 | -0.09844 | 0.03344  | 0.15939  | 0.00055  | 0.161882 | 0.00044  | 0.256571 | 1.86E-08 |
| 0.36524  | 0.027305 | 0.55613  | 0.047782 | 0.30283  | 0.062951 | 0.17444  | 0.03727  | 0.42167  |
| 4.50E-49 | 0.24034  | 1.46E-07 | 0.44178  | 9.89E-24 | 0.511509 | 1.69E-32 | 0.176635 | 0.00012  |
| 0.00221  | -0.15419 | 0.00083  | 0.122851 | 0.00787  | 0.038123 | 0.41111  | 0.230912 | 4.53E-07 |
| 2.31E-37 | 0.329668 | 2.66E-13 | 0.483229 | 1.07E-28 | 0.515472 | 4.65E-33 | 0.302229 | 2.55E-11 |
| 5.26E-30 | 0.211324 | 4.09E-06 | 0.307529 | 1.10E-11 | 0.43132  | 1.40E-22 | 0.130786 | 0.00464  |
| 5.98E-08 | 0.092737 | 0.04518  | 0.485635 | 5.23E-29 | 0.326624 | 4.52E-13 | -0.02509 | 0.58868  |
| 1.78E-58 | 0.419566 | 2.45E-21 | 0.670555 | 2.75E-62 | 0.738255 | 1.52E-81 | 0.289385 | 1.84E-10 |
| 0.30437  | 0.080368 | 0.08276  | 0.021669 | 0.64046  | 0.014921 | 0.74775  | 0.000933 | 0.98397  |
| 7.71E-30 | 0.129859 | 0.00494  | 0.439654 | 1.71E-23 | 0.475757 | 9.43E-28 | 0.254652 | 2.40E-08 |
| 5.22E-17 | 0.081716 | 0.07771  | 0.379226 | 2.02E-17 | 0.34753  | 1.06E-14 | -0.04573 | 0.32409  |
| 0.00297  | -0.34952 | 7.27E-15 | -0.18698 | 4.79E-05 | -0.22651 | 7.57E-07 | -0.20863 | 5.45E-06 |
| 3.80E-13 | -0.00911 | 0.84439  | 0.337158 | 7.05E-14 | 0.278204 | 9.53E-10 | 0.057639 | 0.21376  |
| 6.30E-18 | 0.185595 | 5.46E-05 | 0.412859 | 1.20E-20 | 0.41115  | 1.78E-20 | 0.220278 | 1.53E-06 |
| 4.20E-14 | -0.0577  | 0.21327  | 0.247599 | 5.93E-08 | 0.22268  | 1.17E-06 | 0.068422 | 0.13984  |
| 0.04168  | -0.3136  | 4.08E-12 | -0.10829 | 0.01924  | -0.09356 | 0.0433   | 0.14376  | 0.00184  |
| 4.83E-06 | 0.002293 | 0.96059  | -0.15263 | 0.00094  | -0.17953 | 9.57E-05 | -0.0128  | 0.7827   |
| 1.43E-10 | -0.03473 | 0.45401  | 0.314147 | 3.73E-12 | 0.209465 | 4.99E-06 | 0.117251 | 0.01122  |
| 5.65E-14 | -0.13893 | 0.00262  | 0.27084  | 2.70E-09 | 0.227574 | 6.69E-07 | 0.16736  | 0.00028  |
| 0.05495  | -0.23401 | 3.14E-07 | -0.09556 | 0.03899  | -0.14679 | 0.00147  | -0.06472 | 0.16261  |
| 0.23759  | -0.36467 | 3.90E-16 | 0.066213 | 0.15312  | -0.02682 | 0.56315  | 0.010389 | 0.82282  |
| 0.33106  | 0.052281 | 0.25951  | 0.195285 | 2.14E-05 | 0.090711 | 0.0501   | -0.14307 | 0.00194  |
| 1.47E-20 | -0.1306  | 0.0047   | 0.062616 | 0.17675  | 0.174032 | 0.00016  | 0.110818 | 0.01659  |
| 5.32E-13 | 0.180687 | 8.62E-05 | 0.182739 | 7.13E-05 | 0.291272 | 1.39E-10 | 0.206246 | 7.01E-06 |
| 3.12E-16 | -0.03257 | 0.4826   | -0.20646 | 6.85E-06 | -0.2634  | 7.51E-09 | 0.053434 | 0.24914  |
| 0.00023  | 0.118631 | 0.01029  | 0.271983 | 2.30E-09 | 0.195543 | 2.09E-05 | 0.199491 | 1.40E-05 |
| 0.03553  | -0.12036 | 0.00923  | 0.011844 | 0.79851  | 0.010479 | 0.82132  | 0.165136 | 0.00034  |
| 2.76E-11 | -0.09499 | 0.04017  | 0.027509 | 0.55318  | 0.086608 | 0.06147  | 0.039191 | 0.39813  |
| 3.59E-17 | 0.084003 | 0.06973  | 0.19317  | 2.64E-05 | 0.272977 | 2.00E-09 | 0.164052 | 0.00037  |
| 0.12512  | -0.30783 | 1.05E-11 | -0.27183 | 2.35E-09 | -0.22666 | 7.44E-07 | 0.010854 | 0.81503  |
| 2.28E-06 | -0.0951  | 0.03996  | -0.04528 | 0.32884  | 0.049446 | 0.28627  | 0.514962 | 5.49E-33 |
| 3.30E-09 | -0.17409 | 0.00016  | -0.04627 | 0.31841  | 0.016509 | 0.72196  | -0.02864 | 0.53701  |
| 0.01492  | -0.29322 | 1.03E-10 | 0.112541 | 0.01496  | 0.032446 | 0.48425  | 0.018423 | 0.6913   |
| 0.31428  | -0.35155 | 4.96E-15 | 0.005123 | 0.91208  | -0.12371 | 0.00744  | 0.027759 | 0.54958  |
| 0.10964  | 0.138995 | 0.00261  | 0.341307 | 3.33E-14 | 0.223479 | 1.07E-06 | 0.002395 | 0.95883  |
| 2.29E-06 | -0.13196 | 0.00428  | 0.267744 | 4.15E-09 | 0.147273 | 0.00142  | -0.03608 | 0.43663  |
| 1.16E-12 | 0.023847 | 0.60724  | 0.294921 | 7.96E-11 | 0.276332 | 1.25E-09 | 0.22828  | 6.17E-07 |
| 1.35E-27 | 0.179497 | 9.61E-05 | 0.453951 | 4.04E-25 | 0.471694 | 3.02E-27 | 0.354214 | 2.99E-15 |
| 1.30E-29 | 0.173775 | 0.00016  | 0.442357 | 8.53E-24 | 0.477355 | 5.95E-28 | 0.330901 | 2.14E-13 |
| 7.91E-23 | 0.000793 | 0.98637  | 0.368034 | 2.00E-16 | 0.366265 | 2.84E-16 | 0.282333 | 5.24E-10 |
| 0.04857  | -0.1623  | 0.00043  | -0.03417 | 0.46137  | -0.05476 | 0.23758  | -0.01576 | 0.73406  |
| 1.56E-42 | 0.21433  | 2.96E-06 | 0.381166 | 1.35E-17 | 0.512717 | 1.14E-32 | 0.227261 | 6.94E-07 |
| 3.40E-21 | 0.140874 | 0.00228  | 0.425502 | 5.85E-22 | 0.368996 | 1.65E-16 | 0.198416 | 1.57E-05 |
| 0.00388  | -0.09867 | 0.03302  | 0.082333 | 0.07549  | 0.012258 | 0.79163  | 0.115225 | 0.01271  |
| 2.61E-19 | 0.084473 | 0.06818  | 0.332011 | 1.76E-13 | 0.367874 | 2.06E-16 | 0.100647 | 0.02965  |

|          |          |          |          |          |          |          |          |          |
|----------|----------|----------|----------|----------|----------|----------|----------|----------|
| 4.95E-13 | -0.11533 | 0.01263  | -0.24499 | 8.23E-08 | -0.30831 | 9.66E-12 | 0.041363 | 0.37248  |
| 0.00104  | 0.203329 | 9.49E-06 | 0.003992 | 0.93144  | 0.117082 | 0.01134  | -0.08905 | 0.05447  |
| 7.30E-09 | 0.06787  | 0.14307  | 0.32478  | 6.21E-13 | 0.244341 | 8.92E-08 | 0.162478 | 0.00042  |
| 5.73E-58 | 0.273486 | 1.86E-09 | 0.574513 | 2.29E-42 | 0.638366 | 8.12E-55 | 0.397295 | 4.15E-19 |
| 3.45E-21 | 0.060081 | 0.19496  | 0.347204 | 1.12E-14 | 0.35606  | 2.10E-15 | 0.098194 | 0.03389  |
| 1.38E-24 | 0.092687 | 0.04529  | 0.511825 | 1.53E-32 | 0.4631   | 3.35E-26 | 0.220125 | 1.56E-06 |
| 3.09E-36 | 0.272389 | 2.18E-09 | 0.467016 | 1.13E-26 | 0.53442  | 7.56E-36 | 0.288696 | 2.05E-10 |
| 2.47E-15 | 0.196901 | 1.82E-05 | 0.404278 | 8.65E-20 | 0.405392 | 6.71E-20 | 0.257026 | 1.76E-08 |
| 2.73E-05 | -0.15774 | 0.00062  | 0.185264 | 5.63E-05 | 0.132512 | 0.00412  | 0.020778 | 0.65426  |
| 1.54E-09 | 0.029636 | 0.52292  | 0.27131  | 2.53E-09 | 0.250668 | 4.01E-08 | 0.159245 | 0.00055  |
| 3.67E-42 | 0.246657 | 6.68E-08 | 0.576956 | 8.56E-43 | 0.590276 | 3.48E-45 | 0.198576 | 1.54E-05 |
| 3.53E-32 | 0.190232 | 3.51E-05 | 0.343018 | 2.43E-14 | 0.448767 | 1.60E-24 | 0.153944 | 0.00084  |
| 2.46E-39 | 0.168821 | 0.00025  | 0.495785 | 2.43E-30 | 0.518027 | 2.00E-33 | 0.246941 | 6.44E-08 |
| 0.23331  | 0.09099  | 0.0494   | 0.094461 | 0.04131  | 0.104498 | 0.02392  | 0.134097 | 0.00369  |
| 1.66E-37 | 0.096543 | 0.03701  | 0.339004 | 5.06E-14 | 0.429164 | 2.38E-22 | 0.343174 | 2.36E-14 |
| 1.55E-11 | 0.192629 | 2.78E-05 | 0.142226 | 0.00206  | 0.267067 | 4.55E-09 | -0.04314 | 0.35228  |
| 1.46E-05 | -0.0312  | 0.50117  | 0.351129 | 5.37E-15 | 0.240177 | 1.49E-07 | 0.224363 | 9.68E-07 |
| 7.23E-36 | 0.192541 | 2.80E-05 | 0.28837  | 2.15E-10 | 0.448379 | 1.78E-24 | 0.389652 | 2.21E-18 |
| 0.05926  | -0.22191 | 1.28E-06 | -0.00782 | 0.86611  | -0.02654 | 0.56725  | 0.001738 | 0.97013  |
| 6.01E-23 | 0.070644 | 0.1274   | 0.474962 | 1.19E-27 | 0.406156 | 5.64E-20 | 0.066094 | 0.15386  |
| 5.93E-16 | -0.15749 | 0.00064  | 0.245108 | 8.11E-08 | 0.251106 | 3.79E-08 | 0.221984 | 1.27E-06 |
| 7.63E-19 | 0.103825 | 0.02485  | 0.451741 | 7.29E-25 | 0.411908 | 1.50E-20 | 0.148029 | 0.00134  |
| 1.68E-12 | -0.02535 | 0.5847   | 0.088809 | 0.05513  | 0.187282 | 4.65E-05 | 0.347952 | 9.76E-15 |
| 6.06E-61 | 0.568175 | 2.82E-41 | 0.603132 | 1.34E-47 | 0.72373  | 6.26E-77 | 0.333278 | 1.41E-13 |
| 1.02E-07 | 0.035236 | 0.44746  | 0.107643 | 0.01998  | 0.168551 | 0.00025  | -0.0712  | 0.12442  |
| 2.83E-21 | -0.01508 | 0.74523  | 0.412446 | 1.32E-20 | 0.369032 | 1.63E-16 | 0.209777 | 4.83E-06 |
| 0.03991  | -0.23797 | 1.95E-07 | 0.052159 | 0.26063  | -0.00029 | 0.99502  | 0.076368 | 0.09929  |
| 6.00E-07 | -0.15963 | 0.00054  | 0.124776 | 0.00694  | 0.113894 | 0.01379  | 0.25868  | 1.41E-08 |
| 3.15E-10 | 0.177364 | 0.00012  | 0.451268 | 8.27E-25 | 0.368761 | 1.72E-16 | 0.078349 | 0.0908   |
| 0.00054  | -0.24791 | 5.70E-08 | 0.003127 | 0.94626  | 0.013171 | 0.7765   | 0.114467 | 0.01332  |
| 0.95077  | -0.10682 | 0.02095  | 0.103867 | 0.02479  | 0.026888 | 0.56218  | 0.160021 | 0.00052  |
| 0.00062  | -0.23718 | 2.15E-07 | 0.080262 | 0.08316  | 0.029484 | 0.52505  | 0.114134 | 0.01359  |
| 2.70E-09 | 0.124667 | 0.00699  | 0.329454 | 2.76E-13 | 0.292373 | 1.17E-10 | 0.156704 | 0.00068  |
| 6.54E-26 | 0.06508  | 0.16029  | 0.260637 | 1.09E-08 | 0.340234 | 4.05E-14 | 0.152996 | 0.00091  |
| 0.56156  | -0.16459 | 0.00035  | -0.06155 | 0.18422  | -0.07709 | 0.09613  | -0.19624 | 1.95E-05 |
| 1.79E-06 | 0.085633 | 0.06446  | 0.350213 | 6.38E-15 | 0.265787 | 5.43E-09 | 0.220704 | 1.46E-06 |
| 3.32E-11 | 0.091012 | 0.04935  | 0.480516 | 2.37E-28 | 0.396007 | 5.52E-19 | 0.107908 | 0.01968  |
| 7.82E-10 | -0.0121  | 0.79432  | 0.302433 | 2.47E-11 | 0.263304 | 7.60E-09 | 0.291373 | 1.37E-10 |
| 1.27E-10 | -0.10733 | 0.02034  | 0.086476 | 0.06187  | 0.132984 | 0.00399  | 0.08015  | 0.0836   |
| 0.00011  | -0.12697 | 0.006    | -0.02461 | 0.59583  | 0.016853 | 0.71642  | 0.178289 | 0.00011  |
| 4.94E-05 | 0.011454 | 0.80501  | 0.159233 | 0.00055  | 0.151483 | 0.00102  | 0.056309 | 0.22454  |
| 3.04E-12 | 0.18413  | 6.26E-05 | 0.335874 | 8.88E-14 | 0.333364 | 1.39E-13 | -0.19354 | 2.54E-05 |
| 3.25E-07 | -0.01968 | 0.67141  | -0.21628 | 2.39E-06 | -0.20003 | 1.33E-05 | -0.08409 | 0.06943  |
| 0.60282  | -0.17795 | 0.00011  | 0.126609 | 0.00615  | 0.010073 | 0.82813  | 0.055658 | 0.22995  |
| 6.25E-32 | 0.466057 | 1.48E-26 | 0.426536 | 4.54E-22 | 0.531742 | 1.92E-35 | 0.27535  | 1.43E-09 |

|          |          |          |          |          |          |          |          |          |
|----------|----------|----------|----------|----------|----------|----------|----------|----------|
| 3.70E-23 | 0.281703 | 5.74E-10 | 0.438453 | 2.32E-23 | 0.441055 | 1.19E-23 | 0.168792 | 0.00025  |
| 1.87E-07 | -0.04828 | 0.29777  | 0.226833 | 7.29E-07 | 0.190347 | 3.47E-05 | 0.089691 | 0.05275  |
| 3.59E-08 | -0.02661 | 0.56625  | 0.37592  | 4.02E-17 | 0.260979 | 1.04E-08 | 0.118313 | 0.0105   |
| 1.33E-10 | -0.2293  | 5.47E-07 | 0.093222 | 0.04406  | 0.042198 | 0.3629   | -0.03269 | 0.48094  |
| 0.00087  | 0.048034 | 0.30028  | 0.181199 | 8.22E-05 | 0.147532 | 0.00139  | -0.06931 | 0.13477  |
| 1.22E-08 | -0.229   | 5.67E-07 | -0.04128 | 0.3734   | 0.015498 | 0.73836  | 0.085766 | 0.06405  |
| 1.25E-16 | -0.08714 | 0.05989  | 0.136701 | 0.00308  | 0.1925   | 2.81E-05 | 0.049953 | 0.28136  |
| 8.08E-05 | 0.313397 | 4.22E-12 | 0.07443  | 0.10819  | -0.02492 | 0.59117  | -0.19006 | 3.57E-05 |
| 6.40E-14 | -0.03959 | 0.39337  | 0.121304 | 0.00869  | 0.225076 | 8.92E-07 | 0.221936 | 1.27E-06 |
| 0.05107  | -0.21221 | 3.72E-06 | 0.030372 | 0.51264  | -0.01614 | 0.7279   | 0.099461 | 0.03164  |
| 2.87E-06 | -0.1638  | 0.00038  | 0.09438  | 0.04148  | 0.09381  | 0.04274  | 0.132553 | 0.00411  |
| 0.01499  | -0.19125 | 3.18E-05 | -0.16041 | 0.0005   | -0.06562 | 0.15681  | 0.048388 | 0.29672  |
| 7.90E-21 | 0.042107 | 0.36393  | 0.390891 | 1.69E-18 | 0.338593 | 5.45E-14 | 0.125254 | 0.00672  |
| 1.85E-19 | 0.219279 | 1.72E-06 | 0.561684 | 3.49E-40 | 0.494311 | 3.82E-30 | 0.301138 | 3.03E-11 |
| 4.54E-35 | -0.01447 | 0.75511  | 0.235928 | 2.50E-07 | 0.322533 | 9.13E-13 | 0.160078 | 0.00052  |
| 1.76E-10 | 0.248871 | 5.05E-08 | 0.43269  | 9.92E-23 | 0.370679 | 1.17E-16 | 0.179009 | 0.0001   |
| 1.35E-22 | 0.23356  | 3.32E-07 | 0.171599 | 0.00019  | 0.362442 | 6.06E-16 | 0.231373 | 4.30E-07 |
| 1.55E-31 | 0.192683 | 2.76E-05 | 0.280756 | 6.59E-10 | 0.396684 | 4.75E-19 | 0.32309  | 8.30E-13 |
| 9.66E-06 | -0.09493 | 0.0403   | -0.02835 | 0.54115  | 0.058288 | 0.20864  | 0.112005 | 0.01545  |
| 0.00252  | -0.09088 | 0.04968  | -0.13923 | 0.00257  | -0.16849 | 0.00025  | 0.08857  | 0.05579  |
| 0.1665   | 0.191742 | 3.03E-05 | 0.39561  | 6.02E-19 | 0.231325 | 4.32E-07 | 0.008348 | 0.85721  |
| 0.41295  | -0.06558 | 0.15706  | 0.175346 | 0.00014  | 0.048201 | 0.2986   | 0.077273 | 0.09533  |
| 1.03E-24 | 0.119543 | 0.00972  | 0.188018 | 4.34E-05 | 0.338523 | 5.52E-14 | 0.124125 | 0.00724  |
| 0.43007  | 0.2095   | 4.97E-06 | 0.272248 | 2.22E-09 | 0.171146 | 0.0002   | -0.02318 | 0.61733  |
| 8.91E-19 | 0.239659 | 1.59E-07 | 0.266057 | 5.23E-09 | 0.342856 | 2.51E-14 | 0.276621 | 1.20E-09 |
| 0.60064  | 0.110801 | 0.0166   | 0.189682 | 3.70E-05 | 0.082777 | 0.07392  | -0.01933 | 0.67698  |
| 0.00095  | 0.079495 | 0.08616  | 0.509857 | 2.89E-32 | 0.307813 | 1.05E-11 | -0.00682 | 0.88306  |
| 1.13E-11 | 0.071081 | 0.12505  | 0.396082 | 5.43E-19 | 0.320967 | 1.19E-12 | 0.216252 | 2.40E-06 |
| 4.95E-29 | 0.322021 | 9.96E-13 | 0.433216 | 8.70E-23 | 0.452418 | 6.09E-25 | 0.024531 | 0.59696  |
| 1.61E-06 | -0.0475  | 0.30566  | -0.42496 | 6.67E-22 | -0.32543 | 5.56E-13 | -0.1956  | 2.07E-05 |
| 0.00015  | -0.24893 | 5.01E-08 | 0.147841 | 0.00136  | 0.065898 | 0.15508  | -0.01558 | 0.73709  |
| 0.00011  | -0.07523 | 0.10444  | 0.028788 | 0.53488  | 0.067959 | 0.14255  | -0.03815 | 0.41081  |
| 6.86E-18 | 0.095085 | 0.03998  | 0.27531  | 1.44E-09 | 0.280151 | 7.20E-10 | 0.143755 | 0.00184  |
| 6.63E-09 | 0.052644 | 0.25621  | 0.192413 | 2.84E-05 | 0.19268  | 2.76E-05 | 0.304337 | 1.83E-11 |
| 0.00286  | -0.20214 | 1.07E-05 | -0.0495  | 0.28578  | -0.04581 | 0.32324  | -0.20378 | 9.06E-06 |
| 0.42938  | -0.21132 | 4.09E-06 | -0.16919 | 0.00024  | -0.20227 | 1.06E-05 | -0.10069 | 0.02958  |
| 0.00043  | -0.02391 | 0.60626  | 0.186924 | 4.81E-05 | 0.130402 | 0.00476  | 0.008235 | 0.85913  |
| 4.47E-10 | -0.18673 | 4.90E-05 | -0.39806 | 3.50E-19 | -0.385   | 6.00E-18 | -0.04676 | 0.3133   |
| 0.00151  | 0.265573 | 5.59E-09 | -0.00344 | 0.94084  | -0.02248 | 0.62794  | 0.07196  | 0.12044  |
| 0.00819  | 0.076742 | 0.09764  | -0.11127 | 0.01615  | -0.08001 | 0.08416  | -0.11798 | 0.01072  |
| 0.00982  | -0.17871 | 0.0001   | 0.048582 | 0.29479  | -0.01193 | 0.79716  | 0.264643 | 6.34E-09 |
| 3.15E-26 | 0.312581 | 4.82E-12 | 0.427721 | 3.40E-22 | 0.465271 | 1.84E-26 | 0.011681 | 0.80122  |
| 9.29E-24 | 0.47855  | 4.20E-28 | 0.580257 | 2.24E-43 | 0.556083 | 2.92E-39 | 0.235389 | 2.67E-07 |
| 0.30614  | -0.19035 | 3.47E-05 | 0.164724 | 0.00035  | 0.021453 | 0.64379  | -0.00938 | 0.83973  |
| 5.34E-11 | 0.036782 | 0.42777  | 0.162707 | 0.00042  | 0.235026 | 2.78E-07 | 0.061346 | 0.18571  |

|          |           |          |          |          |          |          |          |          |
|----------|-----------|----------|----------|----------|----------|----------|----------|----------|
| 2.56E-17 | 0.221677  | 1.31E-06 | 0.201528 | 1.14E-05 | 0.341657 | 3.12E-14 | 0.044006 | 0.34267  |
| 2.34E-34 | 0.183242  | 6.80E-05 | 0.242988 | 1.06E-07 | 0.431338 | 1.39E-22 | 0.214544 | 2.89E-06 |
| 0.00266  | -0.14344  | 0.00189  | -0.12239 | 0.0081   | -0.03834 | 0.4084   | 0.119643 | 0.00966  |
| 5.05E-06 | -0.04155  | 0.37033  | 0.27709  | 1.12E-09 | 0.184313 | 6.16E-05 | 0.058324 | 0.20836  |
| 0.02682  | -0.25581  | 2.06E-08 | 0.008591 | 0.8531   | -0.00673 | 0.88465  | 0.112529 | 0.01497  |
| 1.63E-19 | 0.207847  | 5.92E-06 | 0.399945 | 2.30E-19 | 0.410523 | 2.06E-20 | 0.177212 | 0.00012  |
| 8.97E-12 | -0.1764   | 0.00013  | 0.200635 | 1.25E-05 | 0.151603 | 0.00101  | 0.018199 | 0.69487  |
| 4.49E-05 | -0.21396  | 3.08E-06 | 0.104811 | 0.0235   | 0.069761 | 0.13224  | 0.14116  | 0.00223  |
| 4.58E-06 | -0.14814  | 0.00133  | 0.153643 | 0.00086  | 0.140718 | 0.0023   | 0.147915 | 0.00135  |
| 0.00034  | -0.01288  | 0.78129  | 0.038998 | 0.40045  | 0.083231 | 0.07235  | -0.05595 | 0.22751  |
| 2.04E-14 | -0.12648  | 0.0062   | 0.14115  | 0.00223  | 0.171727 | 0.00019  | 0.099539 | 0.03151  |
| 2.05E-16 | -0.00167  | 0.9713   | 0.125667 | 0.00654  | 0.196139 | 1.97E-05 | 0.390118 | 2.00E-18 |
| 8.49E-35 | 0.31407   | 3.77E-12 | 0.285674 | 3.21E-10 | 0.462835 | 3.61E-26 | 0.289272 | 1.88E-10 |
| 0.05899  | -0.05382  | 0.24575  | 0.065644 | 0.15669  | 0.03349  | 0.4703   | 0.136402 | 0.00314  |
| 0.0031   | 0.13346   | 0.00386  | 0.072962 | 0.11535  | -0.02488 | 0.59177  | -0.11268 | 0.01484  |
| 3.82E-41 | 0.34742   | 1.08E-14 | 0.255422 | 2.17E-08 | 0.456081 | 2.28E-25 | 0.272227 | 2.23E-09 |
| 0.03057  | -0.15217  | 0.00097  | 0.023204 | 0.61696  | 0.022782 | 0.62338  | 0.174896 | 0.00015  |
| 4.82E-12 | -0.06956  | 0.13337  | 0.269534 | 3.24E-09 | 0.243982 | 9.33E-08 | 0.225487 | 8.51E-07 |
| 0.08102  | -0.25152  | 3.60E-08 | -0.00429 | 0.92637  | -0.0354  | 0.44533  | 0.136179 | 0.00319  |
| 4.70E-06 | -0.07595  | 0.10115  | 0.402092 | 1.42E-19 | 0.224982 | 9.02E-07 | 0.151557 | 0.00102  |
| 0.1322   | -0.23627  | 2.40E-07 | 0.272728 | 2.07E-09 | 0.04726  | 0.30814  | -0.00594 | 0.89811  |
| 1.31E-05 | -0.01721  | 0.71066  | -0.02936 | 0.52684  | 0.033571 | 0.46923  | 0.068105 | 0.14169  |
| 5.80E-18 | 0.312129  | 5.19E-12 | 0.445112 | 4.18E-24 | 0.43298  | 9.23E-23 | 0.353554 | 3.39E-15 |
| 9.57E-14 | 0.0756    | 0.10275  | 0.005885 | 0.89907  | 0.17934  | 9.75E-05 | 0.26508  | 5.97E-09 |
| 5.84E-07 | -0.16944  | 0.00023  | -0.0181  | 0.6965   | 0.040977 | 0.37696  | 0.129673 | 0.00501  |
| 8.79E-09 | -0.12347  | 0.00756  | 0.113838 | 0.01384  | 0.139641 | 0.00249  | 0.243378 | 1.01E-07 |
| 0.0006   | -6.50E-05 | 0.99888  | 0.240668 | 1.41E-07 | 0.172945 | 0.00017  | 0.036342 | 0.43332  |
| 2.36E-08 | 0.071459  | 0.12305  | 0.235795 | 2.54E-07 | 0.259884 | 1.20E-08 | -0.11875 | 0.01022  |
| 6.57E-36 | 0.07362   | 0.1121   | 0.198743 | 1.51E-05 | 0.307897 | 1.03E-11 | 0.297797 | 5.11E-11 |
| 2.27E-11 | 0.249335  | 4.76E-08 | 0.485792 | 5.00E-29 | 0.394198 | 8.22E-19 | 0.060479 | 0.19201  |
| 0.05946  | -0.36467  | 3.90E-16 | -0.14969 | 0.00118  | -0.14727 | 0.00142  | -0.04037 | 0.3841   |
| 1.21E-11 | -0.10026  | 0.03028  | 0.234197 | 3.07E-07 | 0.172439 | 0.00018  | -0.00764 | 0.86922  |
| 1.35E-11 | -0.05877  | 0.20491  | 0.408427 | 3.35E-20 | 0.28535  | 3.36E-10 | 0.012493 | 0.78772  |
| 3.71E-08 | 0.138254  | 0.00275  | 0.311626 | 5.64E-12 | 0.254894 | 2.32E-08 | 0.059601 | 0.19855  |
| 3.38E-06 | 0.008374  | 0.85677  | 0.217626 | 2.06E-06 | 0.184734 | 5.92E-05 | 0.148695 | 0.00127  |
| 7.86E-34 | 0.473728  | 1.69E-27 | 0.699371 | 8.06E-70 | 0.642492 | 1.01E-55 | 0.230913 | 4.53E-07 |
| 1.08E-10 | -0.1881   | 4.30E-05 | 0.128524 | 0.00541  | 0.136726 | 0.00307  | -0.05808 | 0.21027  |
| 2.19E-52 | 0.222699  | 1.17E-06 | 0.534826 | 6.56E-36 | 0.572919 | 4.32E-42 | 0.199017 | 1.47E-05 |
| 1.08E-28 | 0.168586  | 0.00025  | 0.354134 | 3.03E-15 | 0.416277 | 5.36E-21 | 0.174502 | 0.00015  |
| 0.00991  | -0.34891  | 8.16E-15 | -0.06392 | 0.16789  | -0.07258 | 0.11729  | 0.209023 | 5.23E-06 |
| 0.13288  | 0.05265   | 0.25616  | 0.0137   | 0.76778  | 0.045841 | 0.32291  | 0.214923 | 2.77E-06 |
| 1.72E-08 | -0.07915  | 0.08752  | 0.044141 | 0.3412   | 0.114833 | 0.01302  | 0.353617 | 3.35E-15 |
| 3.72E-21 | 0.322536  | 9.12E-13 | 0.593016 | 1.09E-45 | 0.545198 | 1.63E-37 | 0.194562 | 2.30E-05 |
| 0.00386  | -0.28194  | 5.55E-10 | 0.033977 | 0.46387  | -0.00778 | 0.86681  | 0.288124 | 2.23E-10 |
| 1.60E-17 | 0.099489  | 0.03159  | 0.271619 | 2.42E-09 | 0.318293 | 1.87E-12 | 0.051089 | 0.27055  |

|          |          |          |          |          |          |          |          |          |
|----------|----------|----------|----------|----------|----------|----------|----------|----------|
| 6.39E-08 | 0.103856 | 0.02481  | 0.283752 | 4.26E-10 | 0.242973 | 1.06E-07 | 0.423291 | 1.00E-21 |
| 3.77E-06 | -0.01889 | 0.68385  | 0.368476 | 1.83E-16 | 0.197688 | 1.68E-05 | 0.028764 | 0.53522  |
| 0.0037   | 0.181705 | 7.85E-05 | 0.069376 | 0.13439  | 0.120162 | 0.00934  | 0.205474 | 7.60E-06 |
| 0.00872  | -0.00651 | 0.88838  | 0.098817 | 0.03277  | 0.072995 | 0.11518  | 0.058399 | 0.20777  |
| 6.46E-06 | -0.11854 | 0.01035  | -0.06132 | 0.1859   | 0.039987 | 0.3886   | 0.097383 | 0.03539  |
| 8.75E-18 | 0.049117 | 0.2895   | 0.390554 | 1.82E-18 | 0.36239  | 6.12E-16 | 0.174451 | 0.00015  |
| 0.00188  | 0.359269 | 1.13E-15 | 0.203398 | 9.42E-06 | 0.242228 | 1.16E-07 | 0.382641 | 9.88E-18 |
| 4.85E-05 | -0.12239 | 0.0081   | -0.18112 | 8.28E-05 | -0.21204 | 3.79E-06 | -0.08689 | 0.06062  |
| 0.17488  | -0.31153 | 5.73E-12 | -0.10914 | 0.01832  | -0.11952 | 0.00973  | 0.25793  | 1.56E-08 |
| 2.10E-29 | 0.369892 | 1.37E-16 | 0.503975 | 1.89E-31 | 0.542161 | 4.87E-37 | 0.258921 | 1.37E-08 |
| 4.21E-06 | -0.15797 | 0.00061  | 0.145494 | 0.00162  | 0.114896 | 0.01297  | 0.190066 | 3.56E-05 |
| 0.00108  | 0.117722 | 0.0109   | 0.409376 | 2.69E-20 | 0.289498 | 1.81E-10 | 0.136959 | 0.00302  |
| 0.08875  | -0.09564 | 0.03882  | 0.025002 | 0.58993  | 0.017828 | 0.70079  | 0.146255 | 0.00153  |
| 0.86938  | -0.20506 | 7.93E-06 | 0.040802 | 0.37899  | -0.0221  | 0.63382  | 0.121529 | 0.00856  |
| 2.00E-30 | -0.05013 | 0.27963  | 0.224524 | 9.50E-07 | 0.33367  | 1.32E-13 | 0.268569 | 3.70E-09 |
| 8.29E-08 | -0.14651 | 0.0015   | -0.18978 | 3.66E-05 | -0.26794 | 4.04E-09 | -0.18379 | 6.46E-05 |
| 0.00015  | 0.152048 | 0.00098  | 0.218642 | 1.84E-06 | 0.181059 | 8.33E-05 | 0.100723 | 0.02953  |
| 7.64E-12 | 0.002392 | 0.95889  | 0.279512 | 7.89E-10 | 0.252635 | 3.11E-08 | 0.160306 | 0.00051  |
| 0.01012  | -0.13049 | 0.00474  | 0.086434 | 0.06199  | 0.024411 | 0.59876  | -0.02997 | 0.51818  |
| 1.28E-07 | 0.138555 | 0.00269  | 0.25411  | 2.57E-08 | 0.225427 | 8.57E-07 | -0.16126 | 0.00047  |
| 0.07761  | -0.15074 | 0.00109  | 0.190376 | 3.46E-05 | 0.076385 | 0.09921  | 0.014225 | 0.75916  |
| 8.03E-18 | 0.077697 | 0.09353  | 0.349158 | 7.78E-15 | 0.33524  | 9.95E-14 | 0.225963 | 8.06E-07 |
| 0.0007   | 0.061438 | 0.18505  | 0.168129 | 0.00026  | 0.15099  | 0.00106  | 0.101001 | 0.02908  |
| 0.27574  | -0.02784 | 0.54845  | -0.02673 | 0.56448  | 0.02621  | 0.57209  | -0.18574 | 5.39E-05 |
| 2.95E-06 | 0.325162 | 5.82E-13 | 0.137909 | 0.00282  | 0.247558 | 5.96E-08 | 0.114963 | 0.01292  |
| 0.01501  | 0.00973  | 0.8339   | 0.223097 | 1.12E-06 | 0.12943  | 0.00509  | -0.06875 | 0.13793  |
| 5.49E-05 | -0.00942 | 0.83907  | 0.094957 | 0.04025  | 0.13372  | 0.00379  | 0.227114 | 7.06E-07 |
| 6.66E-05 | 0.014394 | 0.75638  | 0.110688 | 0.01671  | 0.153797 | 0.00085  | 0.336843 | 7.47E-14 |
| 7.64E-19 | 0.160608 | 0.00049  | 0.505863 | 1.04E-31 | 0.42615  | 4.99E-22 | 0.309677 | 7.75E-12 |
| 3.85E-09 | 0.059262 | 0.20112  | 0.409428 | 2.66E-20 | 0.29503  | 7.83E-11 | 0.140578 | 0.00233  |
| 0.00942  | -0.09694 | 0.03624  | -0.35188 | 4.66E-15 | -0.25459 | 2.42E-08 | -0.00186 | 0.96803  |
| 4.14E-25 | 0.176282 | 0.00013  | 0.404856 | 7.59E-20 | 0.43101  | 1.51E-22 | 0.140334 | 0.00237  |
| 0.16925  | -0.23385 | 3.20E-07 | 0.088644 | 0.05559  | 0.003874 | 0.93346  | -0.01318 | 0.77637  |
| 0.01223  | -0.24704 | 6.36E-08 | 0.07602  | 0.10084  | 0.014703 | 0.75132  | -0.00956 | 0.83668  |
| 0.00251  | -0.07822 | 0.09133  | 0.321973 | 1.00E-12 | 0.187945 | 4.37E-05 | -0.0369  | 0.42631  |
| 0.01904  | -0.14019 | 0.00239  | 0.324951 | 6.03E-13 | 0.156564 | 0.00069  | -0.04087 | 0.37818  |
| 1.17E-22 | -0.05295 | 0.25342  | 0.158119 | 0.0006   | 0.254601 | 2.41E-08 | 0.280556 | 6.79E-10 |
| 4.58E-20 | 0.206707 | 6.68E-06 | 0.234314 | 3.03E-07 | 0.349247 | 7.65E-15 | 0.199808 | 1.36E-05 |
| 0.91329  | -0.36653 | 2.70E-16 | -0.05574 | 0.22925  | -0.11541 | 0.01257  | 0.02888  | 0.53358  |
| 0.00643  | 0.106963 | 0.02078  | 0.048402 | 0.29659  | 0.089025 | 0.05454  | 0.082917 | 0.07343  |
| 1.42E-10 | -0.08487 | 0.06689  | 0.151273 | 0.00104  | 0.159753 | 0.00053  | 0.226605 | 7.48E-07 |
| 2.44E-13 | -0.04289 | 0.35509  | 0.082287 | 0.07565  | 0.156548 | 0.00069  | -0.08767 | 0.05833  |
| 2.87E-21 | 0.248002 | 5.63E-08 | 0.431634 | 1.29E-22 | 0.46209  | 4.43E-26 | 0.034011 | 0.46341  |
| 1.16E-08 | 0.048685 | 0.29377  | 0.265897 | 5.34E-09 | 0.248429 | 5.34E-08 | 0.223286 | 1.09E-06 |
| 7.66E-51 | 0.397888 | 3.64E-19 | 0.512075 | 1.41E-32 | 0.600807 | 3.73E-47 | 0.287923 | 2.30E-10 |



|          |          |          |          |          |          |          |          |          |
|----------|----------|----------|----------|----------|----------|----------|----------|----------|
| 0.00039  | 0.102327 | 0.02702  | 0.3782   | 2.50E-17 | 0.243882 | 9.45E-08 | -0.00063 | 0.98912  |
| 8.66E-31 | 0.214033 | 3.05E-06 | 0.073307 | 0.11364  | 0.331268 | 2.01E-13 | 0.342898 | 2.49E-14 |
| 0.70427  | -0.28988 | 1.71E-10 | 0.133287 | 0.00391  | -0.02529 | 0.58563  | 0.116905 | 0.01146  |
| 0.05199  | -0.05358 | 0.24782  | -0.11554 | 0.01247  | 0.005956 | 0.89786  | 0.018436 | 0.6911   |
| 8.50E-26 | 0.117262 | 0.01121  | 0.204003 | 8.85E-06 | 0.343616 | 2.18E-14 | 0.312405 | 4.96E-12 |
| 0.00067  | 0.255355 | 2.19E-08 | -0.19735 | 1.74E-05 | -0.12402 | 0.00729  | -0.28664 | 2.78E-10 |
| 1.79E-09 | -0.12228 | 0.00816  | -0.00703 | 0.87949  | 0.079459 | 0.0863   | 0.06877  | 0.13784  |
| 0.00058  | -0.05345 | 0.24897  | 0.203268 | 9.55E-06 | 0.113295 | 0.0143   | -0.14202 | 0.00209  |
| 0.02051  | -0.24657 | 6.75E-08 | 0.027193 | 0.55776  | -0.0379  | 0.41387  | 0.006739 | 0.88452  |
| 0.48351  | -0.27424 | 1.68E-09 | -0.03631 | 0.4337   | -0.09165 | 0.04776  | -0.0819  | 0.07705  |
| 1.07E-41 | 0.368138 | 1.95E-16 | 0.539437 | 1.29E-36 | 0.598829 | 8.85E-47 | 0.303901 | 1.96E-11 |
| 0.03569  | -0.39625 | 5.23E-19 | -0.20129 | 1.17E-05 | -0.2726  | 2.11E-09 | -0.08174 | 0.07763  |
| 6.92E-28 | 0.16755  | 0.00028  | 0.423591 | 9.31E-22 | 0.386409 | 4.44E-18 | 0.136384 | 0.00315  |
| 1.32E-20 | 0.110523 | 0.01688  | 0.128122 | 0.00556  | 0.29537  | 7.43E-11 | 0.202476 | 1.04E-05 |
| 4.24E-28 | 0.08975  | 0.05259  | 0.212746 | 3.51E-06 | 0.335079 | 1.02E-13 | 0.35189  | 4.65E-15 |
| 2.80E-10 | 0.099394 | 0.03176  | 0.053434 | 0.24914  | 0.196722 | 1.85E-05 | 0.075629 | 0.10261  |
| 1.80E-05 | 0.117427 | 0.0111   | 0.200217 | 1.30E-05 | 0.210684 | 4.38E-06 | 0.225337 | 8.66E-07 |
| 3.56E-10 | 0.000575 | 0.99011  | 0.093688 | 0.04301  | 0.177643 | 0.00011  | 0.000368 | 0.99367  |
| 0.00496  | 0.170138 | 0.00022  | -0.0423  | 0.3617   | -0.05087 | 0.27262  | 0.00235  | 0.95961  |
| 0.1211   | 0.364949 | 3.69E-16 | 0.156079 | 0.00071  | 0.143355 | 0.0019   | -0.15418 | 0.00083  |
| 1.27E-08 | 0.050598 | 0.27519  | 0.302904 | 2.29E-11 | 0.231494 | 4.23E-07 | 0.160162 | 0.00051  |
| 0.19805  | -0.25373 | 2.70E-08 | 0.051191 | 0.26959  | -0.01445 | 0.75542  | 0.022197 | 0.63232  |
| 3.23E-11 | 0.02189  | 0.63705  | -0.03727 | 0.42168  | 0.134379 | 0.00362  | 0.266363 | 5.01E-09 |
| 1.86E-08 | 0.135584 | 0.00333  | 0.278784 | 8.77E-10 | 0.245154 | 8.06E-08 | 0.089457 | 0.05337  |
| 0.0008   | -0.11281 | 0.01473  | 0.307195 | 1.16E-11 | 0.164501 | 0.00036  | 0.012497 | 0.78766  |
| 7.45E-33 | 0.243319 | 1.01E-07 | 0.452428 | 6.07E-25 | 0.491181 | 9.90E-30 | 0.134581 | 0.00357  |
| 0.00026  | -0.09957 | 0.03145  | 0.214333 | 2.96E-06 | 0.113284 | 0.01431  | -0.01233 | 0.79045  |
| 0.74566  | -0.33333 | 1.40E-13 | 0.0355   | 0.44407  | -0.06771 | 0.14399  | 0.152386 | 0.00095  |
| 5.97E-07 | 0.002376 | 0.95917  | 0.241452 | 1.28E-07 | 0.181728 | 7.83E-05 | 0.154665 | 0.0008   |
| 3.79E-16 | -0.12481 | 0.00692  | 0.055242 | 0.23345  | 0.121022 | 0.00885  | 0.093949 | 0.04243  |
| 5.61E-16 | -0.02753 | 0.55294  | 0.241398 | 1.28E-07 | 0.276051 | 1.30E-09 | 0.220774 | 1.45E-06 |
| 2.16E-20 | 0.44631  | 3.05E-24 | 0.582158 | 1.03E-43 | 0.549637 | 3.22E-38 | 0.126736 | 0.0061   |
| 0.01378  | 0.150852 | 0.00108  | 0.210726 | 4.36E-06 | 0.170101 | 0.00022  | 0.125693 | 0.00653  |
| 3.27E-12 | -0.16257 | 0.00042  | -0.02675 | 0.56424  | 0.080428 | 0.08253  | 0.174365 | 0.00015  |
| 0.00061  | 0.217916 | 2.00E-06 | 0.384966 | 6.04E-18 | 0.297132 | 5.66E-11 | 0.036317 | 0.43364  |
| 5.43E-10 | -0.22937 | 5.43E-07 | 0.045266 | 0.32903  | 0.08236  | 0.07539  | 0.176506 | 0.00013  |
| 6.54E-36 | 0.098318 | 0.03366  | 0.208393 | 5.59E-06 | 0.327485 | 3.89E-13 | 0.262775 | 8.16E-09 |
| 2.46E-10 | 0.067984 | 0.1424   | 0.391479 | 1.49E-18 | 0.299579 | 3.87E-11 | 0.059823 | 0.19689  |
| 0.90312  | -0.37306 | 7.21E-17 | -0.17989 | 9.27E-05 | -0.20342 | 9.40E-06 | -0.05321 | 0.25111  |
| 0.00031  | 0.118304 | 0.01051  | 0.186325 | 5.09E-05 | 0.184234 | 6.20E-05 | -0.0463  | 0.31805  |
| 4.77E-05 | -0.10058 | 0.02975  | 0.086013 | 0.06328  | 0.087269 | 0.05951  | -0.10775 | 0.01986  |
| 0.02741  | 0.105716 | 0.02232  | -0.16696 | 0.00029  | -0.07413 | 0.10961  | -0.14526 | 0.00165  |
| 4.50E-07 | -0.20315 | 9.66E-06 | 0.083422 | 0.07169  | 0.102076 | 0.0274   | 0.008012 | 0.8629   |
| 6.81E-07 | 0.125302 | 0.0067   | 0.170192 | 0.00022  | 0.187    | 4.78E-05 | 0.11244  | 0.01506  |
| 0.94788  | -0.2897  | 1.76E-10 | -0.10952 | 0.01791  | -0.11906 | 0.01002  | 0.068641 | 0.13858  |

|          |          |          |          |          |          |          |          |          |
|----------|----------|----------|----------|----------|----------|----------|----------|----------|
| 1.30E-46 | 0.422183 | 1.31E-21 | 0.430875 | 1.56E-22 | 0.585135 | 3.00E-44 | 0.20118  | 1.18E-05 |
| 1.36E-12 | 0.075857 | 0.10158  | 0.115676 | 0.01237  | 0.221031 | 1.41E-06 | 0.226995 | 7.15E-07 |
| 1.50E-14 | -0.0286  | 0.53759  | 0.052519 | 0.25735  | 0.166907 | 0.00029  | 0.335669 | 9.21E-14 |
| 7.55E-10 | -0.15678 | 0.00067  | -0.05185 | 0.26349  | 0.052606 | 0.25655  | 0.387338 | 3.64E-18 |
| 3.55E-14 | 0.0228   | 0.6231   | -0.00877 | 0.85001  | 0.164556 | 0.00036  | 0.332813 | 1.53E-13 |
| 3.34E-29 | 0.089171 | 0.05414  | 0.338856 | 5.19E-14 | 0.374493 | 5.38E-17 | 0.125276 | 0.00671  |
| 7.22E-05 | -0.17574 | 0.00013  | 0.061003 | 0.18818  | 0.032397 | 0.48492  | 0.09514  | 0.03986  |
| 3.53E-23 | 0.160474 | 0.0005   | 0.35022  | 6.38E-15 | 0.410031 | 2.31E-20 | 0.276187 | 1.27E-09 |
| 0.01635  | -0.01532 | 0.74117  | 0.106888 | 0.02087  | 0.055805 | 0.22872  | -0.13136 | 0.00446  |
| 1.10E-45 | 0.523251 | 3.50E-34 | 0.668087 | 1.11E-61 | 0.710697 | 4.93E-73 | 0.303457 | 2.10E-11 |
| 1.93E-07 | 0.095515 | 0.03909  | 0.222467 | 1.20E-06 | 0.219539 | 1.67E-06 | 0.423523 | 9.46E-22 |
| 5.40E-14 | 0.280221 | 7.12E-10 | 0.435861 | 4.47E-23 | 0.411839 | 1.52E-20 | 0.178951 | 0.0001   |
| 0.86424  | -0.11385 | 0.01383  | 0.022894 | 0.62168  | -0.02454 | 0.59677  | 0.21789  | 2.00E-06 |
| 1.08E-13 | 0.036995 | 0.4251   | 0.25909  | 1.34E-08 | 0.305401 | 1.54E-11 | -0.0339  | 0.46486  |
| 5.14E-24 | 0.1718   | 0.00019  | 0.548982 | 4.09E-38 | 0.500654 | 5.36E-31 | 0.154169 | 0.00083  |
| 2.59E-09 | 0.111845 | 0.0156   | 0.288763 | 2.02E-10 | 0.273999 | 1.73E-09 | 0.221958 | 1.27E-06 |
| 0.54852  | -0.01131 | 0.80749  | 0.243263 | 1.02E-07 | 0.087216 | 0.05966  | 0.114008 | 0.0137   |
| 1.40E-14 | -0.06507 | 0.16035  | 0.33564  | 9.26E-14 | 0.249901 | 4.42E-08 | 0.376558 | 3.52E-17 |
| 0.58783  | -0.16226 | 0.00043  | -0.01346 | 0.77172  | -0.0372  | 0.42259  | 0.077063 | 0.09624  |
| 2.29E-07 | -0.25861 | 1.42E-08 | 0.127585 | 0.00576  | 0.083264 | 0.07223  | -0.01405 | 0.76195  |
| 1.79E-08 | 0.046611 | 0.31484  | 0.090102 | 0.05167  | 0.145627 | 0.0016   | 0.118519 | 0.01037  |
| 3.22E-22 | 0.011941 | 0.7969   | 0.383506 | 8.23E-18 | 0.378952 | 2.14E-17 | 0.233472 | 3.35E-07 |
| 1.18E-20 | 0.229738 | 5.20E-07 | 0.46806  | 8.42E-27 | 0.409919 | 2.37E-20 | 0.100008 | 0.03071  |
| 6.01E-36 | 0.12989  | 0.00493  | 0.322349 | 9.42E-13 | 0.414521 | 8.11E-21 | 0.47245  | 2.43E-27 |
| 5.35E-07 | -0.00469 | 0.91943  | 0.3083   | 9.68E-12 | 0.242608 | 1.11E-07 | -0.05049 | 0.27622  |
| 8.46E-21 | 0.207934 | 5.87E-06 | 0.498228 | 1.14E-30 | 0.458146 | 1.30E-25 | 0.338879 | 5.17E-14 |
| 0.00646  | -0.12495 | 0.00686  | 0.141637 | 0.00215  | 0.07921  | 0.0873   | 0.189479 | 3.77E-05 |
| 2.20E-28 | 0.376592 | 3.50E-17 | 0.660574 | 7.17E-60 | 0.625742 | 4.00E-52 | 0.353968 | 3.13E-15 |
| 5.79E-14 | 0.243262 | 1.02E-07 | 0.420971 | 1.75E-21 | 0.416047 | 5.66E-21 | 0.285857 | 3.12E-10 |
| 6.55E-21 | -0.13121 | 0.00451  | 0.206962 | 6.50E-06 | 0.240232 | 1.48E-07 | 0.030804 | 0.50666  |
| 0.53693  | -0.13451 | 0.00359  | 0.189896 | 3.62E-05 | 0.019167 | 0.6795   | 0.041307 | 0.37312  |
| 5.33E-05 | -0.26053 | 1.10E-08 | -0.0225  | 0.62768  | -0.04576 | 0.32382  | 0.018843 | 0.68463  |
| 0.37865  | -0.24001 | 1.52E-07 | -0.07497 | 0.10563  | -0.12108 | 0.00881  | 0.083136 | 0.07267  |
| 0.01617  | -0.10239 | 0.02693  | 0.081036 | 0.08022  | 0.042055 | 0.36452  | 0.096481 | 0.03714  |
| 0.00059  | -0.13378 | 0.00378  | 0.168652 | 0.00025  | 0.086125 | 0.06293  | 0.052181 | 0.26043  |
| 1.10E-08 | 0.119293 | 0.00987  | -0.14276 | 0.00198  | 0.045466 | 0.32689  | 0.163103 | 0.0004   |
| 4.27E-37 | 0.319734 | 1.47E-12 | 0.260102 | 1.17E-08 | 0.409089 | 2.88E-20 | 0.28633  | 2.91E-10 |
| 1.72E-11 | 0.06805  | 0.14201  | -0.15333 | 0.00089  | -0.13349 | 0.00385  | -0.29853 | 4.55E-11 |
| 6.12E-14 | 0.025897 | 0.57669  | 0.239022 | 1.72E-07 | 0.222922 | 1.14E-06 | 0.286128 | 3.00E-10 |
| 1.49E-10 | -0.01731 | 0.70904  | 0.100856 | 0.02931  | 0.173162 | 0.00017  | 0.106659 | 0.02115  |
| 1.10E-16 | 0.24908  | 4.91E-08 | 0.472121 | 2.67E-27 | 0.411205 | 1.76E-20 | -0.05428 | 0.24168  |
| 1.16E-12 | 0.142492 | 0.00202  | 0.159017 | 0.00056  | 0.249047 | 4.93E-08 | 0.232167 | 3.91E-07 |
| 8.63E-05 | -0.0993  | 0.03193  | 0.070479 | 0.12829  | 0.084156 | 0.06922  | 0.095894 | 0.03831  |
| 4.67E-18 | -0.0206  | 0.65696  | -0.04094 | 0.37736  | 0.167021 | 0.00029  | 0.251618 | 3.55E-08 |
| 0.87045  | -0.27459 | 1.59E-09 | -0.0529  | 0.25394  | -0.15889 | 0.00057  | -0.06556 | 0.15724  |

|          |          |          |          |          |          |          |          |          |
|----------|----------|----------|----------|----------|----------|----------|----------|----------|
| 8.37E-20 | -0.01813 | 0.69596  | 0.18698  | 4.79E-05 | 0.282374 | 5.21E-10 | 0.348955 | 8.09E-15 |
| 1.02E-24 | 0.119253 | 0.0099   | 0.183729 | 6.50E-05 | 0.282263 | 5.29E-10 | 0.317789 | 2.03E-12 |
| 0.00292  | -0.18223 | 7.47E-05 | -0.30301 | 2.26E-11 | -0.23479 | 2.86E-07 | 0.007131 | 0.87785  |
| 2.64E-08 | 0.172408 | 0.00018  | -0.05325 | 0.25079  | -0.06831 | 0.14046  | -0.02787 | 0.54801  |
| 5.17E-05 | -0.16279 | 0.00041  | 0.064443 | 0.16443  | 0.038791 | 0.40296  | 0.371196 | 1.05E-16 |
| 7.62E-10 | 0.077166 | 0.0958   | 0.144168 | 0.00179  | 0.186988 | 4.78E-05 | 0.151925 | 0.00099  |
| 1.31E-10 | 0.24718  | 6.25E-08 | 0.514015 | 7.49E-33 | 0.449603 | 1.29E-24 | 0.278808 | 8.74E-10 |
| 0.04617  | -0.33553 | 9.45E-14 | -0.01742 | 0.70726  | -0.05203 | 0.2618   | 0.067525 | 0.14512  |
| 0.24904  | -0.09783 | 0.03456  | -0.13661 | 0.00309  | -0.07976 | 0.0851   | -0.03105 | 0.50329  |
| 1.26E-08 | -0.04098 | 0.37693  | 0.237998 | 1.95E-07 | 0.210362 | 4.54E-06 | 0.220385 | 1.52E-06 |
| 0.03336  | -0.26093 | 1.05E-08 | -0.03007 | 0.5168   | -0.03884 | 0.40241  | 0.171225 | 0.0002   |
| 2.80E-06 | -0.13651 | 0.00312  | 0.13178  | 0.00434  | 0.121139 | 0.00878  | 0.140403 | 0.00236  |
| 0.0006   | -0.20835 | 5.61E-06 | 0.085036 | 0.06635  | 0.060718 | 0.19026  | 0.145459 | 0.00162  |
| 4.23E-34 | 0.145741 | 0.00159  | 0.335707 | 9.15E-14 | 0.447909 | 2.01E-24 | 0.270374 | 2.88E-09 |
| 2.54E-13 | -0.17217 | 0.00019  | 0.075154 | 0.10479  | 0.125463 | 0.00663  | 0.118946 | 0.01009  |
| 8.82E-20 | 0.029658 | 0.5226   | 0.275752 | 1.35E-09 | 0.34457  | 1.83E-14 | 0.329346 | 2.82E-13 |
| 0.1342   | -0.34582 | 1.45E-14 | -0.11217 | 0.0153   | -0.17515 | 0.00014  | 0.053277 | 0.25053  |
| 3.80E-38 | 0.261738 | 9.39E-09 | 0.61871  | 1.12E-50 | 0.611164 | 3.64E-49 | 0.196161 | 1.96E-05 |
| 7.67E-11 | -0.11807 | 0.01066  | 0.145997 | 0.00156  | 0.180347 | 8.89E-05 | 0.176742 | 0.00012  |
| 6.28E-38 | 0.099869 | 0.03094  | 0.478363 | 4.44E-28 | 0.482359 | 1.38E-28 | 0.242641 | 1.10E-07 |
| 3.69E-21 | 0.044432 | 0.33802  | 0.330759 | 2.20E-13 | 0.352725 | 3.97E-15 | 0.301562 | 2.84E-11 |
| 0.33464  | -0.0539  | 0.24507  | -0.01814 | 0.69575  | 0.006244 | 0.89296  | 0.114395 | 0.01338  |
| 4.43E-49 | 0.18695  | 4.80E-05 | 0.451501 | 7.78E-25 | 0.545475 | 1.47E-37 | 0.335682 | 9.19E-14 |
| 2.19E-18 | -0.03791 | 0.41378  | 0.236583 | 2.31E-07 | 0.252474 | 3.18E-08 | 0.268788 | 3.59E-09 |
| 0.00186  | -0.1824  | 7.36E-05 | 0.003496 | 0.93995  | -0.00941 | 0.83923  | 0.305516 | 1.51E-11 |
| 3.08E-13 | -0.19612 | 1.97E-05 | 0.084752 | 0.06727  | 0.108242 | 0.0193   | 0.110292 | 0.01711  |
| 3.43E-09 | 0.013487 | 0.77129  | 0.281386 | 6.02E-10 | 0.229526 | 5.33E-07 | 0.121234 | 0.00873  |
| 1.43E-12 | 0.000557 | 0.99042  | 0.342126 | 2.87E-14 | 0.294102 | 9.02E-11 | 0.178451 | 0.00011  |
| 0.04144  | -0.22203 | 1.26E-06 | 0.040973 | 0.377    | 0.016212 | 0.72676  | 0.046875 | 0.3121   |
| 6.15E-13 | 0.043894 | 0.3439   | 0.287245 | 2.54E-10 | 0.289221 | 1.89E-10 | 0.356489 | 1.93E-15 |
| 3.65E-20 | 0.125009 | 0.00683  | 0.425619 | 5.68E-22 | 0.405907 | 5.97E-20 | 0.012845 | 0.7819   |
| 5.82E-12 | 0.415909 | 5.85E-21 | 0.502634 | 2.88E-31 | 0.455246 | 2.85E-25 | 0.066566 | 0.15094  |
| 0.32159  | -0.24972 | 4.53E-08 | -0.1215  | 0.00858  | -0.11417 | 0.01356  | 0.172081 | 0.00019  |
| 1.43E-08 | -0.02828 | 0.54211  | -0.03594 | 0.4384   | 0.056611 | 0.22206  | 0.320786 | 1.23E-12 |
| 0.01371  | 0.109882 | 0.01753  | 0.167169 | 0.00029  | 0.171634 | 0.00019  | 0.292299 | 1.19E-10 |
| 1.82E-27 | 0.071413 | 0.1233   | 0.367221 | 2.35E-16 | 0.356875 | 1.79E-15 | 0.151089 | 0.00106  |
| 1.48E-33 | 0.317259 | 2.22E-12 | 0.264458 | 6.50E-09 | 0.416805 | 4.73E-21 | 0.262964 | 7.96E-09 |
| 1.28E-37 | 0.317077 | 2.29E-12 | 0.418429 | 3.22E-21 | 0.541889 | 5.37E-37 | 0.262315 | 8.69E-09 |
| 3.09E-15 | 0.064411 | 0.16464  | -0.00372 | 0.93617  | 0.173325 | 0.00017  | 0.224503 | 9.52E-07 |
| 0.99287  | -0.15453 | 0.00081  | -0.12558 | 0.00658  | -0.09479 | 0.04061  | 0.205776 | 7.36E-06 |
| 5.70E-14 | 0.065268 | 0.15908  | 0.233733 | 3.25E-07 | 0.290736 | 1.50E-10 | 0.344004 | 2.03E-14 |
| 4.62E-36 | 0.432718 | 9.85E-23 | 0.314026 | 3.80E-12 | 0.465174 | 1.89E-26 | 0.226311 | 7.74E-07 |
| 1.60E-06 | 0.058256 | 0.20889  | 0.177679 | 0.00011  | 0.172011 | 0.00019  | 0.075957 | 0.10113  |
| 1.27E-05 | -0.26581 | 5.41E-09 | -0.08445 | 0.06826  | -0.01902 | 0.68184  | 0.182628 | 7.20E-05 |
| 0.00808  | 0.007875 | 0.86522  | 0.3428   | 2.53E-14 | 0.194854 | 2.23E-05 | -0.00407 | 0.93015  |

|          |          |          |          |          |          |          |          |          |
|----------|----------|----------|----------|----------|----------|----------|----------|----------|
| 0.00434  | -0.15578 | 0.00073  | 0.00258  | 0.95566  | -0.00193 | 0.96679  | 0.436481 | 3.82E-23 |
| 4.79E-06 | -0.12625 | 0.0063   | -0.01938 | 0.67612  | 0.055744 | 0.22923  | 0.103414 | 0.02543  |
| 2.19E-08 | 0.369859 | 1.38E-16 | 0.23791  | 1.97E-07 | 0.297435 | 5.40E-11 | 0.030855 | 0.50596  |
| 0.07985  | 0.364171 | 4.31E-16 | 0.152739 | 0.00093  | 0.183772 | 6.48E-05 | -0.03471 | 0.4543   |
| 0.0129   | -0.24867 | 5.18E-08 | 0.014753 | 0.7505   | -0.00066 | 0.98864  | 0.313259 | 4.31E-12 |
| 1.59E-09 | -0.23696 | 2.21E-07 | 0.001461 | 0.97488  | 0.035763 | 0.44069  | 0.105343 | 0.0228   |
| 8.24E-35 | 0.422489 | 1.22E-21 | 0.641248 | 1.89E-55 | 0.629312 | 7.13E-53 | 0.115067 | 0.01284  |
| 8.55E-38 | 0.406873 | 4.79E-20 | 0.733088 | 7.22E-80 | 0.670499 | 2.84E-62 | 0.29447  | 8.53E-11 |
| 0.06577  | -0.09291 | 0.04478  | 0.361151 | 7.81E-16 | 0.15812  | 0.0006   | 0.067746 | 0.14381  |
| 4.90E-13 | 0.192451 | 2.83E-05 | 0.043729 | 0.34573  | 0.211772 | 3.90E-06 | -0.04323 | 0.35123  |
| 0.62199  | 0.009999 | 0.82937  | -0.13717 | 0.00297  | -0.07618 | 0.10013  | 0.030087 | 0.51661  |
| 1.03E-06 | 0.097412 | 0.03534  | 0.036382 | 0.43282  | -0.0654  | 0.15825  | -0.09833 | 0.03364  |
| 9.60E-07 | -0.04823 | 0.29826  | 0.227937 | 6.42E-07 | 0.170008 | 0.00022  | 0.177532 | 0.00011  |
| 6.42E-33 | 0.377132 | 3.13E-17 | 0.460334 | 7.17E-26 | 0.539758 | 1.15E-36 | 0.075803 | 0.10182  |
| 5.26E-09 | -0.03426 | 0.46017  | 0.229062 | 5.63E-07 | 0.17622  | 0.00013  | 0.096687 | 0.03673  |
| 3.11E-09 | 0.048218 | 0.29843  | 0.50513  | 1.31E-31 | 0.359357 | 1.11E-15 | 0.070012 | 0.13085  |
| 2.56E-16 | 0.117821 | 0.01083  | 0.20695  | 6.51E-06 | 0.307297 | 1.14E-11 | 0.093964 | 0.04239  |
| 2.08E-23 | 0.137745 | 0.00285  | 0.412572 | 1.28E-20 | 0.396781 | 4.65E-19 | -0.11537 | 0.0126   |
| 0.00011  | -0.20004 | 1.33E-05 | 0.052939 | 0.25355  | 0.041998 | 0.36517  | -0.00155 | 0.97335  |
| 1.20E-27 | 0.141459 | 0.00218  | 0.265954 | 5.30E-09 | 0.355136 | 2.50E-15 | 0.293021 | 1.06E-10 |
| 5.15E-20 | -0.0314  | 0.49845  | 0.17963  | 9.49E-05 | 0.251616 | 3.55E-08 | -0.01323 | 0.7755   |
| 0.26594  | -0.28906 | 1.94E-10 | -0.02051 | 0.65838  | -0.06358 | 0.17018  | 0.106778 | 0.021    |
| 1.93E-12 | -0.07558 | 0.10285  | 0.1734   | 0.00017  | 0.20386  | 8.98E-06 | 0.129734 | 0.00499  |
| 1.00E-43 | 0.138566 | 0.00269  | 0.231885 | 4.04E-07 | 0.387681 | 3.38E-18 | 0.27886  | 8.67E-10 |
| 3.05E-23 | 0.078415 | 0.09053  | 0.218788 | 1.81E-06 | 0.309471 | 8.01E-12 | 0.078334 | 0.09086  |
| 3.40E-26 | 0.015475 | 0.73873  | 0.176106 | 0.00013  | 0.264873 | 6.15E-09 | 0.253941 | 2.63E-08 |
| 2.05E-41 | 0.393498 | 9.58E-19 | 0.322869 | 8.62E-13 | 0.522104 | 5.14E-34 | 0.197494 | 1.72E-05 |
| 6.97E-11 | -0.01604 | 0.72949  | 0.169458 | 0.00023  | 0.201494 | 1.15E-05 | 0.016195 | 0.72704  |
| 7.51E-45 | 0.297843 | 5.07E-11 | 0.421037 | 1.72E-21 | 0.508692 | 4.20E-32 | 0.113958 | 0.01374  |
| 0.01598  | -0.37447 | 5.41E-17 | -0.08807 | 0.0572   | -0.07936 | 0.0867   | -0.00589 | 0.89905  |
| 0.08087  | -0.3447  | 1.78E-14 | -0.00428 | 0.92647  | -0.08225 | 0.07578  | 0.022065 | 0.63435  |
| 3.12E-05 | -0.11289 | 0.01465  | -0.07875 | 0.08914  | -0.00496 | 0.9148   | -0.15632 | 0.0007   |
| 6.04E-09 | -0.14316 | 0.00193  | 0.030278 | 0.51394  | 0.095584 | 0.03894  | 0.194477 | 2.32E-05 |
| 1.46E-20 | 0.139914 | 0.00244  | 0.395578 | 6.07E-19 | 0.38453  | 6.63E-18 | 0.233707 | 3.26E-07 |
| 2.69E-13 | 0.006184 | 0.89397  | 0.293295 | 1.02E-10 | 0.298904 | 4.30E-11 | 0.293305 | 1.02E-10 |
| 0.00049  | -0.12954 | 0.00505  | 0.146437 | 0.00151  | 0.12991  | 0.00493  | 0.266434 | 4.97E-09 |
| 2.85E-13 | 0.069932 | 0.13129  | 0.364515 | 4.03E-16 | 0.322644 | 8.95E-13 | 0.089168 | 0.05415  |
| 0.03431  | 0.149052 | 0.00124  | 0.320623 | 1.26E-12 | 0.179886 | 9.27E-05 | 0.020663 | 0.65605  |
| 5.29E-10 | -0.0317  | 0.49435  | 0.093636 | 0.04312  | 0.155006 | 0.00078  | 0.217328 | 2.13E-06 |
| 0.00036  | 0.345732 | 1.47E-14 | -0.04987 | 0.28213  | 0.12513  | 0.00678  | 0.224817 | 9.19E-07 |
| 2.38E-06 | -0.05287 | 0.25418  | -0.26314 | 7.77E-09 | -0.23458 | 2.94E-07 | 0.044056 | 0.34213  |
| 5.99E-07 | -0.17348 | 0.00016  | 0.192538 | 2.80E-05 | 0.131493 | 0.00442  | 0.119742 | 0.0096   |
| 0.01235  | -0.08725 | 0.05955  | -0.00033 | 0.99427  | 0.024698 | 0.59447  | 0.132237 | 0.0042   |
| 8.78E-11 | -0.04951 | 0.2857   | 0.322022 | 9.95E-13 | 0.253747 | 2.70E-08 | 0.124497 | 0.00707  |
| 1.46E-18 | 0.0746   | 0.10739  | 0.239277 | 1.67E-07 | 0.313125 | 4.41E-12 | 0.290348 | 1.60E-10 |

|          |          |          |          |          |          |          |          |          |
|----------|----------|----------|----------|----------|----------|----------|----------|----------|
| 2.22E-10 | 0.027124 | 0.55875  | 0.175887 | 0.00013  | 0.217457 | 2.10E-06 | 0.28414  | 4.02E-10 |
| 0.00446  | -0.41244 | 1.32E-20 | -0.25058 | 4.05E-08 | -0.27106 | 2.62E-09 | -0.05976 | 0.19735  |
| 5.70E-08 | 0.134211 | 0.00366  | 0.489523 | 1.63E-29 | 0.355364 | 2.40E-15 | 0.153873 | 0.00085  |
| 0.00017  | -0.10336 | 0.02551  | -0.04443 | 0.33809  | 0.023589 | 0.61113  | 0.105331 | 0.02282  |
| 1.58E-25 | 0.018653 | 0.68765  | 0.387075 | 3.85E-18 | 0.374633 | 5.23E-17 | -0.02009 | 0.665    |
| 6.16E-26 | 0.242475 | 1.13E-07 | 0.56983  | 1.47E-41 | 0.519709 | 1.15E-33 | -0.03892 | 0.40143  |
| 5.39E-20 | -0.02864 | 0.53691  | 0.381516 | 1.25E-17 | 0.284269 | 3.95E-10 | 0.20838  | 5.60E-06 |
| 0.0557   | -0.32896 | 3.01E-13 | -0.01114 | 0.81025  | -0.0838  | 0.07041  | 0.179875 | 9.28E-05 |
| 2.77E-34 | 0.35381  | 3.23E-15 | 0.519718 | 1.14E-33 | 0.536298 | 3.91E-36 | 0.217104 | 2.18E-06 |
| 3.60E-06 | -0.06022 | 0.19391  | 0.542872 | 3.77E-37 | 0.309939 | 7.42E-12 | 0.070545 | 0.12793  |
| 5.76E-07 | 0.190144 | 3.54E-05 | 0.561369 | 3.93E-40 | 0.401018 | 1.81E-19 | 0.12812  | 0.00556  |
| 3.08E-14 | 0.14351  | 0.00188  | 0.363804 | 4.63E-16 | 0.316384 | 2.57E-12 | 0.165559 | 0.00033  |
| 8.11E-34 | 0.37865  | 2.28E-17 | 0.568456 | 2.52E-41 | 0.566259 | 5.96E-41 | 0.25395  | 2.63E-08 |
| 1.17E-31 | 0.358856 | 1.22E-15 | 0.652118 | 6.76E-58 | 0.604988 | 5.87E-48 | 0.052399 | 0.25844  |
| 0.03177  | -0.2842  | 3.98E-10 | -0.07797 | 0.0924   | -0.08618 | 0.06276  | 0.132188 | 0.00422  |
| 1.90E-11 | 0.129193 | 0.00517  | 0.154447 | 0.00081  | 0.24928  | 4.79E-08 | 0.124189 | 0.00721  |
| 2.65E-23 | 0.392921 | 1.09E-18 | 0.369322 | 1.54E-16 | 0.472849 | 2.17E-27 | 0.20871  | 5.41E-06 |
| 0.19884  | -0.51448 | 6.44E-33 | -0.15861 | 0.00058  | -0.22421 | 9.85E-07 | -0.01116 | 0.80992  |
| 3.62E-08 | 0.178479 | 0.00011  | 0.300305 | 3.45E-11 | 0.283852 | 4.19E-10 | 0.312324 | 5.03E-12 |
| 3.99E-12 | -0.05835 | 0.20819  | 0.363457 | 4.96E-16 | 0.301966 | 2.66E-11 | 0.225581 | 8.42E-07 |
| 3.15E-06 | 0.069427 | 0.1341   | 0.121779 | 0.00843  | 0.169333 | 0.00024  | 0.086345 | 0.06226  |
| 6.58E-12 | -0.02162 | 0.64125  | 0.126255 | 0.00629  | 0.192246 | 2.88E-05 | 0.209873 | 4.78E-06 |
| 1.34E-05 | -0.17436 | 0.00015  | 0.069198 | 0.13539  | 0.049658 | 0.28421  | 0.145756 | 0.00159  |
| 0.00132  | -0.16484 | 0.00035  | 0.266556 | 4.88E-09 | 0.082827 | 0.07375  | 0.18341  | 6.70E-05 |
| 0.14478  | -0.22002 | 1.58E-06 | -0.03091 | 0.50516  | -0.08117 | 0.07971  | -0.12397 | 0.00732  |
| 3.09E-53 | 0.261822 | 9.28E-09 | 0.534001 | 8.75E-36 | 0.615366 | 5.29E-50 | 0.360112 | 9.57E-16 |
| 2.96E-11 | -0.14792 | 0.00135  | 0.10113  | 0.02888  | 0.103875 | 0.02478  | 0.261196 | 1.01E-08 |
| 8.41E-09 | 0.134202 | 0.00367  | 0.13672  | 0.00307  | 0.222689 | 1.17E-06 | 0.266816 | 4.71E-09 |
| 3.91E-12 | 0.08495  | 0.06663  | 0.002593 | 0.95543  | 0.180447 | 8.81E-05 | 0.052566 | 0.25692  |
| 2.66E-08 | -0.01306 | 0.77829  | 0.096129 | 0.03784  | 0.17301  | 0.00017  | 0.36247  | 6.03E-16 |
| 0.27501  | -0.23322 | 3.45E-07 | -0.16276 | 0.00041  | -0.17092 | 0.00021  | -0.04849 | 0.29576  |
| 0.0009   | 0.281666 | 5.78E-10 | 0.325766 | 5.24E-13 | 0.262512 | 8.46E-09 | 0.107553 | 0.02008  |
| 7.93E-09 | 0.047758 | 0.30306  | 0.431083 | 1.48E-22 | 0.326957 | 4.27E-13 | -0.05462 | 0.23878  |
| 5.11E-15 | 0.058517 | 0.20686  | 0.168312 | 0.00026  | 0.240995 | 1.35E-07 | 0.053929 | 0.24477  |
| 7.88E-19 | -0.04246 | 0.35989  | 0.118255 | 0.01054  | 0.19968  | 1.38E-05 | 0.212194 | 3.73E-06 |
| 3.35E-07 | -0.01774 | 0.70224  | -0.07108 | 0.12508  | 0.058061 | 0.21042  | 0.170864 | 0.00021  |
| 1.57E-12 | 0.020264 | 0.66227  | 0.327674 | 3.77E-13 | 0.287293 | 2.52E-10 | 0.174146 | 0.00016  |
| 0.00069  | -0.18635 | 5.08E-05 | -0.05187 | 0.26329  | -0.01184 | 0.79857  | 0.097138 | 0.03586  |
| 1.79E-20 | 0.000734 | 0.98739  | 0.261864 | 9.23E-09 | 0.321528 | 1.08E-12 | 0.288952 | 1.97E-10 |
| 0.09645  | -0.31996 | 1.41E-12 | 0.100531 | 0.02984  | -0.0443  | 0.33949  | -0.03419 | 0.46108  |
| 0.00444  | -0.24598 | 7.27E-08 | 0.007639 | 0.86923  | -0.02413 | 0.60301  | 0.139387 | 0.00254  |
| 2.60E-09 | -0.15427 | 0.00082  | 0.310185 | 7.13E-12 | 0.218993 | 1.77E-06 | 0.05141  | 0.26755  |
| 5.38E-28 | 0.305201 | 1.59E-11 | 0.155479 | 0.00075  | 0.361649 | 7.08E-16 | 0.272984 | 2.00E-09 |
| 4.15E-05 | -0.02902 | 0.53153  | -0.25499 | 2.30E-08 | -0.19906 | 1.47E-05 | -0.11699 | 0.01141  |
| 0.81625  | -0.10962 | 0.01781  | 0.260945 | 1.04E-08 | 0.077125 | 0.09597  | -0.12708 | 0.00596  |

|          |          |          |          |          |          |          |          |          |
|----------|----------|----------|----------|----------|----------|----------|----------|----------|
| 0.13506  | -0.24441 | 8.85E-08 | 0.236007 | 2.48E-07 | -0.04031 | 0.3848   | -0.03345 | 0.47089  |
| 5.33E-07 | -0.14719 | 0.00142  | 0.147962 | 0.00134  | 0.135555 | 0.00333  | 0.084388 | 0.06845  |
| 2.59E-11 | 0.030326 | 0.51327  | 0.275997 | 1.31E-09 | 0.251906 | 3.42E-08 | 0.389295 | 2.39E-18 |
| 2.77E-27 | 0.067298 | 0.14648  | 0.23888  | 1.75E-07 | 0.320695 | 1.25E-12 | 0.245633 | 7.59E-08 |
| 0.00312  | -0.00999 | 0.82959  | 0.118408 | 0.01044  | 0.112915 | 0.01463  | 0.013233 | 0.77548  |
| 0.0004   | 0.236265 | 2.40E-07 | -0.15533 | 0.00076  | -0.0729  | 0.11566  | -0.06475 | 0.16239  |
| 0.02938  | 0.022291 | 0.63088  | -0.01963 | 0.67222  | 0.076623 | 0.09816  | 0.380035 | 1.71E-17 |
| 9.78E-06 | -0.22212 | 1.25E-06 | -0.00968 | 0.83472  | 0.007579 | 0.87024  | 0.161233 | 0.00047  |
| 3.88E-15 | 0.112363 | 0.01512  | 0.199191 | 1.45E-05 | 0.241982 | 1.20E-07 | 0.252985 | 2.98E-08 |
| 1.10E-08 | 0.371262 | 1.04E-16 | 0.305114 | 1.61E-11 | 0.371161 | 1.06E-16 | 0.206303 | 6.97E-06 |
| 1.43E-17 | -0.03414 | 0.46168  | 0.364363 | 4.15E-16 | 0.3246   | 6.41E-13 | 0.210274 | 4.58E-06 |
| 1.01E-12 | 0.080723 | 0.0814   | 0.233348 | 3.40E-07 | 0.293196 | 1.04E-10 | 0.177438 | 0.00012  |
| 3.42E-31 | 0.227402 | 6.83E-07 | 0.531001 | 2.48E-35 | 0.521454 | 6.39E-34 | 0.229024 | 5.66E-07 |
| 1.91E-19 | 0.046606 | 0.31489  | 0.374083 | 5.86E-17 | 0.326681 | 4.48E-13 | -0.08206 | 0.07647  |
| 0.08873  | 0.410797 | 1.94E-20 | 0.134558 | 0.00358  | 0.141817 | 0.00213  | 0.096301 | 0.03749  |
| 2.61E-14 | -0.01326 | 0.77503  | 0.036886 | 0.42647  | 0.181891 | 7.71E-05 | 0.19666  | 1.87E-05 |
| 0.00018  | 0.094207 | 0.04186  | -0.22085 | 1.44E-06 | -0.13343 | 0.00387  | -0.0706  | 0.12762  |
| 7.55E-16 | 0.32683  | 4.36E-13 | 0.586269 | 1.87E-44 | 0.478774 | 3.94E-28 | 0.03777  | 0.41546  |
| 0.00229  | -0.27188 | 2.34E-09 | -0.09006 | 0.05179  | -0.05477 | 0.23748  | 0.004048 | 0.93048  |
| 0.29124  | -0.25452 | 2.44E-08 | 0.03843  | 0.40735  | -0.03334 | 0.47226  | 0.046278 | 0.31831  |
| 0.11017  | -0.25798 | 1.55E-08 | -0.09463 | 0.04095  | -0.11596 | 0.01215  | 0.073691 | 0.11175  |
| 1.09E-05 | -0.12425 | 0.00718  | -0.00076 | 0.98695  | 0.018367 | 0.69219  | 0.319174 | 1.61E-12 |
| 1.94E-43 | 0.300904 | 3.14E-11 | 0.333194 | 1.43E-13 | 0.500974 | 4.85E-31 | 0.02278  | 0.6234   |
| 0.92192  | -0.10388 | 0.02477  | 0.12484  | 0.00691  | 0.037786 | 0.41527  | 0.253027 | 2.96E-08 |
| 0.02644  | -0.07871 | 0.08931  | 0.104552 | 0.02385  | 0.086477 | 0.06186  | 0.198692 | 1.52E-05 |
| 0.00794  | -0.14716 | 0.00143  | 0.19893  | 1.49E-05 | 0.089463 | 0.05336  | 0.077324 | 0.09511  |
| 1.44E-11 | 0.184229 | 6.20E-05 | 0.497889 | 1.27E-30 | 0.38659  | 4.27E-18 | 0.318566 | 1.78E-12 |
| 1.96E-08 | -0.11781 | 0.01084  | 0.320957 | 1.19E-12 | 0.213584 | 3.21E-06 | 0.172775 | 0.00018  |
| 0.24129  | -0.34352 | 2.22E-14 | -0.06225 | 0.1793   | -0.10434 | 0.02414  | 0.004149 | 0.92875  |
| 0.04247  | -0.32008 | 1.38E-12 | -0.20512 | 7.88E-06 | -0.15708 | 0.00066  | 0.010228 | 0.82553  |
| 7.80E-32 | 0.192144 | 2.91E-05 | 0.223466 | 1.07E-06 | 0.371649 | 9.62E-17 | 0.451403 | 7.98E-25 |
| 0.04054  | -0.09931 | 0.0319   | 0.115539 | 0.01247  | 0.080274 | 0.08312  | 0.074052 | 0.11     |
| 6.72E-27 | 0.192104 | 2.92E-05 | 0.122476 | 0.00806  | 0.353682 | 3.31E-15 | 0.236974 | 2.20E-07 |
| 3.14E-18 | 0.108861 | 0.01861  | 0.335984 | 8.71E-14 | 0.36198  | 6.64E-16 | 0.112848 | 0.01469  |
| 3.21E-06 | 0.149985 | 0.00115  | 0.170678 | 0.00021  | 0.179502 | 9.60E-05 | 0.258775 | 1.39E-08 |
| 2.46E-14 | 0.24235  | 1.14E-07 | 0.193246 | 2.62E-05 | 0.287712 | 2.37E-10 | 0.185092 | 5.72E-05 |
| 5.60E-11 | 0.02792  | 0.54726  | 0.316902 | 2.36E-12 | 0.282442 | 5.16E-10 | 0.246282 | 7.00E-08 |
| 4.45E-14 | -0.00277 | 0.95236  | 0.167728 | 0.00027  | 0.233339 | 3.40E-07 | 0.132967 | 0.004    |
| 5.58E-21 | 0.279324 | 8.11E-10 | 0.522102 | 5.14E-34 | 0.485156 | 6.04E-29 | 0.004171 | 0.92837  |
| 1.40E-05 | -0.13375 | 0.00378  | 0.036487 | 0.43149  | 0.05888  | 0.20405  | 0.033304 | 0.47277  |
| 9.58E-17 | 0.122393 | 0.0081   | 0.34178  | 3.05E-14 | 0.349608 | 7.15E-15 | 0.232824 | 3.62E-07 |
| 1.63E-25 | 0.147916 | 0.00135  | 0.298638 | 4.48E-11 | 0.392612 | 1.16E-18 | 0.212929 | 3.44E-06 |
| 6.29E-12 | 0.065043 | 0.16052  | 0.330539 | 2.29E-13 | 0.32223  | 9.61E-13 | 0.19127  | 3.17E-05 |
| 3.30E-18 | 0.212787 | 3.50E-06 | 0.244859 | 8.37E-08 | 0.332174 | 1.71E-13 | 0.344256 | 1.94E-14 |
| 0.36616  | -0.27336 | 1.90E-09 | 0.035059 | 0.44975  | -0.05652 | 0.22277  | 0.069183 | 0.13548  |

|          |          |          |          |          |          |          |          |          |
|----------|----------|----------|----------|----------|----------|----------|----------|----------|
| 1.76E-19 | 0.220789 | 1.45E-06 | 0.640332 | 3.01E-55 | 0.517034 | 2.78E-33 | 0.035786 | 0.4404   |
| 0.00111  | 0.038451 | 0.4071   | 0.151965 | 0.00099  | 0.13238  | 0.00416  | 0.107007 | 0.02073  |
| 3.02E-11 | -0.04862 | 0.29445  | 0.467833 | 8.98E-27 | 0.301871 | 2.70E-11 | -0.01869 | 0.68702  |
| 6.24E-06 | 0.000314 | 0.99461  | 0.202574 | 1.03E-05 | 0.16214  | 0.00044  | -0.06883 | 0.1375   |
| 0.15897  | -0.23881 | 1.76E-07 | 0.120153 | 0.00935  | 0.02543  | 0.58358  | 0.084752 | 0.06727  |
| 1.18E-09 | 0.121526 | 0.00857  | 0.102669 | 0.02651  | 0.192144 | 2.91E-05 | 0.305675 | 1.48E-11 |
| 9.43E-11 | 0.108614 | 0.01888  | 0.372107 | 8.77E-17 | 0.318202 | 1.90E-12 | 0.230759 | 4.62E-07 |
| 0.01057  | -0.01342 | 0.77232  | -0.09395 | 0.04243  | -0.15059 | 0.0011   | -0.08363 | 0.07099  |
| 7.08E-26 | 0.277019 | 1.13E-09 | 0.364597 | 3.96E-16 | 0.430004 | 1.93E-22 | 0.43017  | 1.86E-22 |
| 6.46E-30 | 0.341305 | 3.33E-14 | 0.380541 | 1.54E-17 | 0.467473 | 9.93E-27 | 0.310604 | 6.66E-12 |
| 1.87E-20 | 0.204204 | 8.67E-06 | 0.344676 | 1.79E-14 | 0.385307 | 5.62E-18 | 0.217969 | 1.98E-06 |
| 2.29E-09 | -0.09566 | 0.03878  | -0.09353 | 0.04335  | 0.025585 | 0.58129  | 0.028539 | 0.53842  |
| 5.19E-45 | 0.229947 | 5.08E-07 | 0.156902 | 0.00067  | 0.400744 | 1.92E-19 | 0.351826 | 4.71E-15 |
| 8.15E-17 | 0.195073 | 2.18E-05 | 0.522643 | 4.29E-34 | 0.455048 | 3.01E-25 | 0.160861 | 0.00048  |
| 1.44E-06 | -0.06023 | 0.19388  | 0.501083 | 4.69E-31 | 0.310519 | 6.75E-12 | -0.01683 | 0.71684  |
| 0.0315   | -0.15482 | 0.00079  | -0.06112 | 0.18733  | -0.07208 | 0.11984  | 0.154147 | 0.00083  |
| 1.46E-15 | 0.016906 | 0.71556  | 0.331716 | 1.86E-13 | 0.321119 | 1.16E-12 | 0.106679 | 0.02112  |
| 0.03362  | 0.095875 | 0.03835  | 0.132867 | 0.00402  | 0.135911 | 0.00325  | 0.155969 | 0.00072  |
| 0.62807  | 0.046483 | 0.31617  | -0.11692 | 0.01145  | -0.01559 | 0.73691  | -0.11366 | 0.01399  |
| 7.05E-34 | 0.213221 | 3.34E-06 | 0.566541 | 5.34E-41 | 0.501736 | 3.82E-31 | 0.095861 | 0.03838  |
| 3.50E-07 | -0.06327 | 0.17226  | 0.210379 | 4.53E-06 | 0.176282 | 0.00013  | 0.096384 | 0.03733  |
| 1.07E-32 | 0.312362 | 5.00E-12 | 0.297271 | 5.54E-11 | 0.443598 | 6.19E-24 | 0.322037 | 9.93E-13 |
| 0.00033  | 0.163187 | 0.0004   | 0.193166 | 2.64E-05 | 0.193873 | 2.46E-05 | 0.0899   | 0.0522   |
| 3.37E-20 | 0.12479  | 0.00693  | 0.253093 | 2.94E-08 | 0.334994 | 1.04E-13 | 0.190505 | 3.42E-05 |
| 6.23E-30 | 0.138153 | 0.00277  | 0.472838 | 2.18E-27 | 0.477136 | 6.34E-28 | 0.132451 | 0.00414  |
| 0.85409  | -0.24333 | 1.01E-07 | 0.138879 | 0.00263  | -0.02646 | 0.56836  | -0.08672 | 0.06113  |
| 5.27E-59 | 0.371367 | 1.02E-16 | 0.491039 | 1.03E-29 | 0.649328 | 2.94E-57 | 0.371524 | 9.87E-17 |
| 1.34E-13 | 0.410683 | 1.99E-20 | 0.369243 | 1.57E-16 | 0.417349 | 4.16E-21 | -0.0225  | 0.62767  |
| 0.00549  | 0.230882 | 4.55E-07 | 0.162443 | 0.00042  | 0.213757 | 3.15E-06 | 0.276567 | 1.20E-09 |
| 0.11557  | 0.101869 | 0.02772  | -0.12506 | 0.00681  | 0.001741 | 0.97006  | -0.11912 | 0.00998  |
| 2.66E-20 | 0.120218 | 0.00931  | 0.261601 | 9.56E-09 | 0.350046 | 6.59E-15 | 0.079181 | 0.08741  |
| 9.74E-52 | 0.256556 | 1.87E-08 | 0.377489 | 2.90E-17 | 0.544799 | 1.88E-37 | 0.365705 | 3.18E-16 |
| 0.00225  | -0.06786 | 0.14315  | 0.123525 | 0.00753  | 0.089006 | 0.05459  | 0.233157 | 3.48E-07 |
| 1.19E-09 | 0.1742   | 0.00015  | 0.251313 | 3.69E-08 | 0.259866 | 1.21E-08 | 0.415092 | 7.09E-21 |
| 0.01673  | 0.147959 | 0.00134  | -0.04892 | 0.29144  | -0.04432 | 0.3392   | -0.1061  | 0.02184  |
| 3.52E-47 | 0.343224 | 2.34E-14 | 0.577347 | 7.31E-43 | 0.605995 | 3.75E-48 | 0.389171 | 2.45E-18 |
| 0.0106   | -0.30081 | 3.19E-11 | -0.27303 | 1.99E-09 | -0.26423 | 6.70E-09 | -0.13052 | 0.00473  |
| 1.25E-34 | 0.340871 | 3.60E-14 | 0.48684  | 3.65E-29 | 0.560003 | 6.63E-40 | 0.115601 | 0.01242  |
| 1.11E-70 | 0.387861 | 3.25E-18 | 0.40995  | 2.36E-20 | 0.63818  | 8.92E-55 | 0.204737 | 8.20E-06 |
| 0.00668  | -0.19894 | 1.48E-05 | -0.13891 | 0.00263  | -0.1878  | 4.43E-05 | -0.07328 | 0.11378  |
| 1.56E-29 | 0.236739 | 2.27E-07 | 0.293826 | 9.41E-11 | 0.419633 | 2.41E-21 | 0.125727 | 0.00652  |
| 0.00457  | -0.04663 | 0.31465  | 0.235419 | 2.66E-07 | 0.161085 | 0.00047  | 0.000652 | 0.98879  |
| 0.00032  | -0.30007 | 3.58E-11 | 0.031705 | 0.49429  | 0.015976 | 0.73059  | 0.129038 | 0.00523  |
| 4.32E-06 | -0.05185 | 0.26347  | 0.131742 | 0.00435  | 0.105493 | 0.02261  | 0.063916 | 0.16791  |
| 1.57E-09 | 0.141895 | 0.00211  | 0.105577 | 0.0225   | 0.203552 | 9.27E-06 | 0.15068  | 0.00109  |

|          |          |          |          |          |          |          |          |          |
|----------|----------|----------|----------|----------|----------|----------|----------|----------|
| 3.80E-10 | -0.06282 | 0.17533  | 0.117251 | 0.01122  | 0.119107 | 0.00999  | 0.045259 | 0.3291   |
| 2.07E-08 | -0.03304 | 0.47632  | 0.347357 | 1.09E-14 | 0.264574 | 6.40E-09 | 0.118513 | 0.01037  |
| 4.97E-19 | 0.314544 | 3.49E-12 | 0.541765 | 5.61E-37 | 0.47343  | 1.84E-27 | 0.283437 | 4.46E-10 |
| 9.91E-38 | 0.233736 | 3.25E-07 | 0.36959  | 1.46E-16 | 0.462564 | 3.89E-26 | 0.363161 | 5.26E-16 |
| 2.99E-21 | 0.27569  | 1.36E-09 | 0.704185 | 3.62E-71 | 0.558829 | 1.04E-39 | 0.168919 | 0.00025  |
| 2.20E-50 | 0.488258 | 2.39E-29 | 0.573391 | 3.58E-42 | 0.654899 | 1.54E-58 | 0.3302   | 2.43E-13 |
| 1.99E-15 | 0.029834 | 0.52013  | 0.20295  | 9.86E-06 | 0.266979 | 4.61E-09 | 0.258145 | 1.52E-08 |
| 9.16E-25 | 0.497559 | 1.40E-30 | 0.457352 | 1.62E-25 | 0.520799 | 7.96E-34 | 0.230491 | 4.76E-07 |
| 2.29E-40 | 0.418902 | 2.87E-21 | 0.615329 | 5.39E-50 | 0.63054  | 3.92E-53 | 0.227472 | 6.77E-07 |
| 9.38E-18 | 0.029208 | 0.52893  | -0.00441 | 0.92435  | 0.204634 | 8.29E-06 | 0.377743 | 2.75E-17 |
| 0.00203  | -0.04431 | 0.33936  | 0.107938 | 0.01964  | 0.075526 | 0.10308  | -0.09617 | 0.03775  |
| 0.12229  | -0.33603 | 8.63E-14 | -0.04756 | 0.30509  | -0.08712 | 0.05994  | -0.00461 | 0.92087  |
| 0.00116  | 0.090336 | 0.05107  | 0.111631 | 0.0158   | 0.10078  | 0.02944  | 0.14663  | 0.00149  |
| 0.0054   | -0.01507 | 0.7453   | 0.098059 | 0.03413  | 0.074357 | 0.10854  | -0.02384 | 0.60736  |
| 3.42E-13 | -0.03572 | 0.4413   | 0.260198 | 1.15E-08 | 0.269993 | 3.04E-09 | 0.142609 | 0.00201  |
| 1.81E-22 | 0.213653 | 3.18E-06 | 0.407175 | 4.47E-20 | 0.427548 | 3.54E-22 | 0.291967 | 1.25E-10 |
| 1.96E-08 | -0.04436 | 0.33881  | 0.19577  | 2.04E-05 | 0.189044 | 3.93E-05 | 0.309388 | 8.12E-12 |
| 4.80E-12 | 0.204285 | 8.59E-06 | 0.476253 | 8.18E-28 | 0.386917 | 3.98E-18 | 0.288315 | 2.16E-10 |
| 8.43E-35 | 0.274702 | 1.57E-09 | 0.431654 | 1.28E-22 | 0.492575 | 6.48E-30 | 0.127414 | 0.00583  |
| 1.10E-25 | 0.223086 | 1.12E-06 | 0.465122 | 1.91E-26 | 0.462606 | 3.84E-26 | 0.268405 | 3.79E-09 |
| 0.01391  | -0.02808 | 0.54492  | 0.209621 | 4.91E-06 | 0.075734 | 0.10213  | 0.066809 | 0.14944  |
| 1.56E-05 | 0.14912  | 0.00123  | 0.158311 | 0.0006   | 0.180773 | 8.55E-05 | 0.007829 | 0.86601  |
| 0.03475  | -0.04427 | 0.33974  | 0.16383  | 0.00038  | 0.089833 | 0.05238  | 0.073022 | 0.11505  |
| 9.79E-05 | -0.08523 | 0.06572  | 0.167062 | 0.00029  | 0.126746 | 0.00609  | 0.278913 | 8.61E-10 |
| 4.02E-38 | 0.107493 | 0.02015  | 0.210621 | 4.41E-06 | 0.337579 | 6.54E-14 | 0.219357 | 1.70E-06 |
| 1.75E-33 | 0.135955 | 0.00324  | 0.452926 | 5.32E-25 | 0.466273 | 1.39E-26 | 0.144591 | 0.00173  |
| 3.14E-21 | 0.459394 | 9.28E-26 | 0.238167 | 1.91E-07 | 0.40557  | 6.45E-20 | 0.318044 | 1.95E-12 |
| 5.34E-19 | 0.004227 | 0.92741  | -0.00051 | 0.99126  | 0.112293 | 0.01519  | 0.048785 | 0.29278  |
| 1.65E-07 | 0.195017 | 2.20E-05 | 0.346818 | 1.21E-14 | 0.307678 | 1.07E-11 | 0.196768 | 1.85E-05 |
| 4.35E-27 | 0.246873 | 6.50E-08 | 0.670352 | 3.09E-62 | 0.586036 | 2.06E-44 | 0.25503  | 2.28E-08 |
| 0.48361  | -0.286   | 3.06E-10 | -0.11489 | 0.01298  | -0.17636 | 0.00013  | 0.028185 | 0.54347  |
| 9.82E-05 | 0.135888 | 0.00326  | 0.15858  | 0.00058  | 0.18721  | 4.68E-05 | 0.108841 | 0.01863  |
| 3.48E-13 | 0.232149 | 3.92E-07 | 0.121222 | 0.00873  | 0.287909 | 2.30E-10 | 0.326499 | 4.62E-13 |
| 2.45E-12 | 0.274207 | 1.68E-09 | 0.443621 | 6.15E-24 | 0.353352 | 3.52E-15 | 0.004001 | 0.93128  |
| 0.08028  | -0.17897 | 0.0001   | -0.16029 | 0.00051  | -0.07578 | 0.10192  | 0.118668 | 0.01027  |
| 1.85E-06 | 0.052283 | 0.2595   | 0.047679 | 0.30387  | 0.113655 | 0.01399  | 0.197724 | 1.68E-05 |
| 8.78E-07 | -0.00474 | 0.91856  | 0.114273 | 0.01348  | 0.138106 | 0.00278  | 0.287298 | 2.52E-10 |
| 1.51E-49 | 0.293525 | 9.85E-11 | 0.525635 | 1.56E-34 | 0.587749 | 1.01E-44 | 0.280621 | 6.72E-10 |
| 6.68E-16 | -0.04922 | 0.28852  | 0.176688 | 0.00012  | 0.225951 | 8.07E-07 | 0.230175 | 4.94E-07 |
| 0.92992  | -0.36017 | 9.46E-16 | -0.05503 | 0.2353   | -0.14154 | 0.00217  | -0.04294 | 0.35449  |
| 3.99E-09 | 0.070629 | 0.12748  | 0.186746 | 4.90E-05 | 0.197586 | 1.70E-05 | 0.133726 | 0.00379  |
| 3.17E-25 | 0.220051 | 1.57E-06 | 0.46103  | 5.93E-26 | 0.459317 | 9.47E-26 | 0.262305 | 8.70E-09 |
| 2.13E-05 | -0.23829 | 1.88E-07 | 0.115717 | 0.01234  | 0.067624 | 0.14453  | 0.181213 | 8.21E-05 |
| 0.46114  | -0.29776 | 5.14E-11 | 0.030356 | 0.51286  | -0.07499 | 0.10556  | 0.104863 | 0.02343  |
| 8.57E-26 | 0.002463 | 0.95766  | 0.269659 | 3.18E-09 | 0.324802 | 6.19E-13 | 0.24568  | 7.55E-08 |



|          |          |          |          |          |          |          |          |          |
|----------|----------|----------|----------|----------|----------|----------|----------|----------|
| 6.86E-12 | -0.1844  | 6.11E-05 | 0.212035 | 3.79E-06 | 0.149667 | 0.00118  | 0.010946 | 0.81349  |
| 4.34E-17 | 0.218666 | 1.84E-06 | 0.503268 | 2.36E-31 | 0.427452 | 3.63E-22 | 0.017969 | 0.69853  |
| 0.51482  | 0.206269 | 6.99E-06 | -0.10876 | 0.01873  | 0.009912 | 0.83083  | 0.166923 | 0.00029  |
| 4.60E-05 | 0.099723 | 0.03119  | -0.12044 | 0.00918  | -0.09668 | 0.03674  | 0.202965 | 9.85E-06 |
| 0.62107  | -0.25445 | 2.46E-08 | -0.01847 | 0.69055  | -0.10026 | 0.0303   | -0.18207 | 7.58E-05 |
| 0.05788  | -0.32018 | 1.36E-12 | -0.10775 | 0.01986  | -0.19042 | 3.44E-05 | 0.014891 | 0.74825  |
| 0.0479   | -0.26651 | 4.92E-09 | -0.06036 | 0.19289  | -0.09343 | 0.04359  | -0.04011 | 0.38715  |
| 5.15E-18 | -0.07781 | 0.09304  | -0.31586 | 2.80E-12 | -0.30614 | 1.37E-11 | -0.10766 | 0.01996  |
| 2.64E-25 | 0.20525  | 7.77E-06 | 0.35002  | 6.62E-15 | 0.420913 | 1.78E-21 | 0.373183 | 7.04E-17 |
| 7.77E-20 | 0.114953 | 0.01293  | 0.252516 | 3.16E-08 | 0.329281 | 2.85E-13 | 0.487526 | 2.98E-29 |
| 1.83E-10 | 0.266755 | 4.75E-09 | 0.391252 | 1.56E-18 | 0.38036  | 1.60E-17 | 0.118058 | 0.01067  |
| 3.05E-41 | 0.290307 | 1.61E-10 | 0.348933 | 8.12E-15 | 0.445388 | 3.89E-24 | 0.247275 | 6.18E-08 |
| 4.44E-12 | 0.073197 | 0.11418  | 0.195459 | 2.10E-05 | 0.256301 | 1.93E-08 | 0.100861 | 0.02931  |
| 9.44E-13 | 0.11573  | 0.01233  | 0.459031 | 1.02E-25 | 0.406455 | 5.27E-20 | 0.117871 | 0.01079  |
| #####    | 0.379899 | 1.76E-17 | 0.608674 | 1.12E-48 | 0.697548 | 2.57E-69 | 0.251104 | 3.79E-08 |
| 7.46E-55 | 0.461861 | 4.72E-26 | 0.57656  | 1.00E-42 | 0.666571 | 2.60E-61 | 0.320849 | 1.21E-12 |
| 7.79E-19 | 0.070938 | 0.12582  | 0.159154 | 0.00056  | 0.277888 | 9.97E-10 | 0.187099 | 4.73E-05 |
| 1.60E-35 | 0.38757  | 3.46E-18 | 0.569097 | 1.96E-41 | 0.580838 | 1.77E-43 | 0.177256 | 0.00012  |
| 0.82337  | -0.20683 | 6.59E-06 | -0.04422 | 0.34033  | -0.06571 | 0.15626  | 0.112353 | 0.01513  |
| 2.66E-15 | -0.09308 | 0.04437  | 0.392104 | 1.30E-18 | 0.293076 | 1.06E-10 | 0.021988 | 0.63554  |
| 0.00077  | -0.11287 | 0.01467  | 0.159248 | 0.00055  | 0.102357 | 0.02698  | -0.03448 | 0.45729  |
| 3.63E-14 | 0.076968 | 0.09665  | 0.28299  | 4.76E-10 | 0.248399 | 5.36E-08 | 0.055102 | 0.23464  |
| 0.02486  | 0.005286 | 0.9093   | -0.06681 | 0.14945  | -0.00806 | 0.86203  | 0.205706 | 7.41E-06 |
| 0.00017  | 0.014103 | 0.76115  | 0.277992 | 9.82E-10 | 0.19554  | 2.09E-05 | 0.151101 | 0.00106  |
| 5.72E-20 | 0.029159 | 0.52963  | 0.424875 | 6.81E-22 | 0.401739 | 1.54E-19 | 0.195437 | 2.11E-05 |
| 8.41E-06 | -0.15683 | 0.00067  | 0.087399 | 0.05913  | 0.081241 | 0.07946  | 0.094199 | 0.04188  |
| 5.33E-56 | 0.388803 | 2.66E-18 | 0.623313 | 1.28E-51 | 0.694214 | 2.09E-68 | 0.242246 | 1.16E-07 |
| 3.31E-05 | 0.100609 | 0.02972  | 0.01318  | 0.77636  | 0.125379 | 0.00667  | 0.223685 | 1.05E-06 |
| 0.00671  | -0.01353 | 0.77053  | 0.161855 | 0.00045  | 0.105949 | 0.02203  | 0.259282 | 1.30E-08 |
| 2.57E-23 | 0.221774 | 1.30E-06 | 0.331133 | 2.06E-13 | 0.439661 | 1.70E-23 | 0.178053 | 0.00011  |
| 1.11E-18 | 0.199339 | 1.43E-05 | 0.384655 | 6.45E-18 | 0.437102 | 3.27E-23 | 0.013121 | 0.77733  |
| 0.00268  | 0.113169 | 0.01441  | 0.245073 | 8.14E-08 | 0.188847 | 4.01E-05 | 0.06344  | 0.17111  |
| 0.00055  | 0.165325 | 0.00033  | 0.48694  | 3.55E-29 | 0.287269 | 2.53E-10 | 0.08258  | 0.07462  |
| 0.0354   | 0.213084 | 3.39E-06 | 0.17446  | 0.00015  | 0.125396 | 0.00666  | 0.054276 | 0.24175  |
| 1.37E-08 | 0.051116 | 0.27029  | 0.217948 | 1.99E-06 | 0.213209 | 3.34E-06 | 0.279193 | 8.26E-10 |
| 7.61E-14 | -0.00368 | 0.93678  | 0.330252 | 2.40E-13 | 0.274976 | 1.51E-09 | 0.119592 | 0.00969  |
| 4.17E-06 | 0.181138 | 8.27E-05 | 0.45323  | 4.90E-25 | 0.293293 | 1.02E-10 | 0.270188 | 2.96E-09 |
| 3.20E-09 | -0.08826 | 0.05666  | 0.373609 | 6.45E-17 | 0.24779  | 5.79E-08 | 0.052846 | 0.25439  |
| 0.01853  | -0.0089  | 0.84783  | 0.037432 | 0.41966  | 0.064737 | 0.16251  | 0.167424 | 0.00028  |
| 0.01998  | 0.061885 | 0.18186  | 0.06121  | 0.18668  | 0.070795 | 0.12658  | 0.034836 | 0.45264  |
| 4.64E-14 | 0.155504 | 0.00075  | 0.344699 | 1.79E-14 | 0.357238 | 1.67E-15 | 0.295027 | 7.83E-11 |
| 2.53E-22 | 0.204742 | 8.20E-06 | 0.538786 | 1.62E-36 | 0.448302 | 1.81E-24 | 0.163675 | 0.00038  |
| 2.95E-21 | 0.061612 | 0.1838   | 0.245923 | 7.32E-08 | 0.24508  | 8.14E-08 | -0.0029  | 0.95008  |
| 0.06035  | -0.18999 | 3.59E-05 | 0.060645 | 0.19079  | 0.027838 | 0.54845  | 0.137461 | 0.00291  |
| 1.36E-27 | 0.154326 | 0.00082  | 0.324007 | 7.09E-13 | 0.376898 | 3.28E-17 | 0.278537 | 9.08E-10 |

|          |          |          |          |          |          |          |          |          |
|----------|----------|----------|----------|----------|----------|----------|----------|----------|
| 4.59E-27 | 0.40983  | 2.42E-20 | 0.515926 | 4.00E-33 | 0.554366 | 5.57E-39 | 0.504406 | 1.65E-31 |
| 0.18371  | -0.41382 | 9.56E-21 | -0.04757 | 0.30493  | -0.16693 | 0.00029  | 0.080644 | 0.0817   |
| 0.00025  | 0.181855 | 7.74E-05 | 0.178301 | 0.00011  | 0.212396 | 3.65E-06 | 0.247653 | 5.89E-08 |
| 1.15E-16 | 0.428284 | 2.96E-22 | 0.456032 | 2.31E-25 | 0.440142 | 1.51E-23 | 0.074794 | 0.10648  |
| 0.30854  | -0.28549 | 3.29E-10 | -0.03542 | 0.44508  | -0.07264 | 0.11697  | -0.06353 | 0.17049  |
| 4.39E-05 | -0.02589 | 0.57684  | -0.06306 | 0.17369  | 0.051114 | 0.27032  | 0.331204 | 2.03E-13 |
| 3.22E-05 | -0.45279 | 5.51E-25 | -0.33149 | 1.93E-13 | -0.36353 | 4.90E-16 | -0.14694 | 0.00145  |
| 8.49E-11 | 0.113487 | 0.01413  | 0.226792 | 7.32E-07 | 0.244522 | 8.73E-08 | 0.115667 | 0.01237  |
| 2.33E-09 | -0.09775 | 0.03471  | 0.047445 | 0.30625  | 0.083333 | 0.07199  | 0.022729 | 0.62419  |
| 0.01346  | 0.133243 | 0.00392  | 0.085134 | 0.06604  | -0.00767 | 0.86877  | -0.08563 | 0.06447  |
| 0.00096  | 0.087315 | 0.05937  | 0.203172 | 9.64E-06 | 0.142506 | 0.00202  | -0.07529 | 0.10416  |
| 1.24E-05 | -0.24396 | 9.36E-08 | 0.04221  | 0.36275  | 0.001919 | 0.96701  | 0.172147 | 0.00019  |
| 0.17804  | 0.026824 | 0.56312  | 0.126189 | 0.00632  | 0.094808 | 0.04057  | 0.066546 | 0.15106  |
| 1.74E-05 | -0.00943 | 0.8389   | -0.28532 | 3.38E-10 | -0.21656 | 2.32E-06 | -0.09682 | 0.03647  |
| 1.85E-19 | 0.084503 | 0.06808  | 0.215402 | 2.63E-06 | 0.263574 | 7.33E-09 | 0.171618 | 0.00019  |
| 4.75E-06 | -0.16017 | 0.00051  | 0.238894 | 1.75E-07 | 0.161429 | 0.00046  | 0.158914 | 0.00057  |
| 0.27748  | -0.28136 | 6.04E-10 | 0.037824 | 0.41479  | -0.04462 | 0.336    | 0.063082 | 0.17354  |
| 7.22E-08 | 0.07786  | 0.09284  | 0.252107 | 3.33E-08 | 0.26341  | 7.49E-09 | 0.208685 | 5.42E-06 |
| 3.27E-36 | 0.297595 | 5.27E-11 | 0.407493 | 4.15E-20 | 0.490679 | 1.15E-29 | 0.268687 | 3.64E-09 |
| 9.93E-17 | 0.304497 | 1.78E-11 | 0.24826  | 5.45E-08 | 0.395402 | 6.30E-19 | 0.097471 | 0.03523  |
| 1.75E-17 | 0.126278 | 0.00629  | 0.415672 | 6.19E-21 | 0.40699  | 4.66E-20 | 0.200689 | 1.24E-05 |
| 5.64E-15 | 0.105205 | 0.02298  | 0.411868 | 1.51E-20 | 0.382194 | 1.09E-17 | 0.2506   | 4.05E-08 |
| 0.0865   | -0.13871 | 0.00266  | 0.049835 | 0.2825   | 0.011927 | 0.79713  | 0.052681 | 0.25588  |
| 0.00212  | -0.01964 | 0.67209  | 0.19372  | 2.50E-05 | 0.104424 | 0.02402  | 0.019327 | 0.67699  |
| 0.62943  | -0.31841 | 1.83E-12 | -0.06517 | 0.1597   | -0.08857 | 0.05581  | 0.020934 | 0.65183  |
| 0.48949  | -0.03552 | 0.44381  | -0.05605 | 0.22669  | -0.08495 | 0.06662  | -0.04943 | 0.28644  |
| 0.97507  | -0.03203 | 0.48985  | 0.008876 | 0.84829  | -0.03324 | 0.47358  | 0.107833 | 0.01976  |
| 2.39E-12 | -0.03005 | 0.51708  | 0.208385 | 5.60E-06 | 0.224499 | 9.53E-07 | 0.159833 | 0.00053  |
| 0.00367  | 0.04578  | 0.32355  | 0.361607 | 7.14E-16 | 0.21716  | 2.17E-06 | 0.170772 | 0.00021  |
| 0.19398  | 0.153014 | 0.00091  | -0.01634 | 0.72467  | 0.04455  | 0.33674  | 0.135979 | 0.00324  |
| 7.25E-39 | 0.124642 | 0.007    | 0.342723 | 2.57E-14 | 0.453007 | 5.20E-25 | 0.409188 | 2.81E-20 |
| 3.62E-12 | -0.00416 | 0.92854  | 0.010792 | 0.81608  | 0.123685 | 0.00745  | 0.527836 | 7.37E-35 |
| 9.31E-11 | -0.04027 | 0.38527  | 0.109229 | 0.01822  | 0.175434 | 0.00014  | 0.331917 | 1.79E-13 |
| 2.39E-21 | 0.107383 | 0.02028  | 0.171341 | 0.0002   | 0.317907 | 1.99E-12 | 0.24436  | 8.90E-08 |
| 5.33E-08 | -0.13742 | 0.00292  | 0.100798 | 0.02941  | 0.102535 | 0.02671  | -0.21378 | 3.14E-06 |
| 5.70E-07 | 0.230588 | 4.71E-07 | 0.005555 | 0.9047   | 0.213357 | 3.29E-06 | 0.147796 | 0.00136  |
| 2.41E-06 | -0.02917 | 0.52946  | 0.059115 | 0.20225  | 0.115328 | 0.01263  | 0.142063 | 0.00209  |
| 1.61E-06 | -0.17425 | 0.00015  | 0.118121 | 0.01063  | 0.084463 | 0.06821  | 0.024206 | 0.60183  |
| 0.60734  | -0.12388 | 0.00736  | -0.08251 | 0.07488  | -0.11343 | 0.01419  | 0.119283 | 0.00988  |
| 0.70666  | -0.44112 | 1.17E-23 | -0.19131 | 3.16E-05 | -0.22244 | 1.20E-06 | 0.066712 | 0.15004  |
| 1.60E-32 | 0.031474 | 0.49745  | 0.179963 | 9.21E-05 | 0.27123  | 2.56E-09 | 0.302113 | 2.60E-11 |
| 5.85E-19 | -0.05445 | 0.24025  | -0.02374 | 0.60886  | 0.142854 | 0.00197  | 0.201965 | 1.09E-05 |
| 1.06E-09 | 0.161087 | 0.00047  | 0.521968 | 5.38E-34 | 0.378727 | 2.24E-17 | 0.263845 | 7.07E-09 |
| 1.38E-37 | 0.401867 | 1.49E-19 | 0.700827 | 3.18E-70 | 0.663567 | 1.38E-60 | 0.136416 | 0.00314  |
| 6.55E-44 | 0.324893 | 6.09E-13 | 0.706175 | 9.87E-72 | 0.640477 | 2.80E-55 | 0.174935 | 0.00014  |

|          |          |          |          |          |          |          |          |          |
|----------|----------|----------|----------|----------|----------|----------|----------|----------|
| 8.93E-16 | 0.216198 | 2.41E-06 | 0.612889 | 1.65E-49 | 0.463393 | 3.09E-26 | 0.060506 | 0.19181  |
| 4.33E-18 | 0.35034  | 6.23E-15 | 0.648852 | 3.76E-57 | 0.529668 | 3.93E-35 | 0.157439 | 0.00064  |
| 0.00532  | 0.146427 | 0.00151  | -0.05903 | 0.20288  | -0.0613  | 0.18603  | -0.02195 | 0.63607  |
| 8.56E-28 | 0.079058 | 0.0879   | 0.264334 | 6.61E-09 | 0.35777  | 1.51E-15 | -0.00719 | 0.87681  |
| 4.00E-17 | 0.068968 | 0.1367   | 0.413517 | 1.03E-20 | 0.386668 | 4.20E-18 | 0.266246 | 5.10E-09 |
| 3.16E-33 | 0.234735 | 2.88E-07 | 0.590095 | 3.76E-45 | 0.582464 | 9.07E-44 | 0.268118 | 3.94E-09 |
| 4.39E-15 | 0.002132 | 0.96335  | 0.372433 | 8.20E-17 | 0.331926 | 1.79E-13 | 0.164541 | 0.00036  |
| 0.02318  | -0.24378 | 9.57E-08 | 0.121316 | 0.00868  | 0.034887 | 0.45197  | 0.0334   | 0.47149  |
| 0.47973  | 0.254003 | 2.61E-08 | -0.16009 | 0.00052  | -0.0538  | 0.24594  | 0.077072 | 0.0962   |
| 0.04464  | -0.19176 | 3.03E-05 | -0.07166 | 0.12202  | -0.0781  | 0.09182  | 0.066121 | 0.15369  |
| 6.69E-52 | 0.401314 | 1.69E-19 | 0.56104  | 4.46E-40 | 0.621926 | 2.46E-51 | 0.172062 | 0.00019  |
| 0.00011  | -0.19038 | 3.46E-05 | 0.017404 | 0.70757  | 0.04905  | 0.29016  | 0.335633 | 9.27E-14 |
| 2.47E-25 | 0.201493 | 1.15E-05 | 0.344351 | 1.90E-14 | 0.396484 | 4.97E-19 | 0.167603 | 0.00027  |
| 0.00267  | -0.03214 | 0.48842  | 0.335962 | 8.74E-14 | 0.202678 | 1.01E-05 | -0.00214 | 0.96317  |
| 1.67E-12 | -0.10502 | 0.02322  | 0.069687 | 0.13265  | 0.129578 | 0.00504  | 0.112421 | 0.01507  |
| 5.86E-35 | 0.248373 | 5.37E-08 | 0.43467  | 6.04E-23 | 0.500236 | 6.11E-31 | 0.167075 | 0.00029  |
| 0.02708  | -0.20124 | 1.18E-05 | 0.032452 | 0.48418  | -0.00393 | 0.93257  | 0.017924 | 0.69925  |
| 1.13E-10 | 0.070299 | 0.12927  | 0.388675 | 2.73E-18 | 0.311241 | 6.00E-12 | 0.002064 | 0.96452  |
| 9.14E-19 | 0.085337 | 0.06539  | 0.256836 | 1.80E-08 | 0.326817 | 4.37E-13 | 0.150577 | 0.0011   |
| 8.88E-05 | -0.33076 | 2.20E-13 | 0.000556 | 0.99043  | -0.00406 | 0.9302   | 0.076005 | 0.10091  |
| 7.27E-45 | 0.262728 | 8.22E-09 | 0.602503 | 1.77E-47 | 0.607034 | 2.35E-48 | 0.292251 | 1.20E-10 |
| 3.01E-05 | -0.10019 | 0.0304   | 0.311094 | 6.15E-12 | 0.156901 | 0.00067  | 0.007106 | 0.87828  |
| 0.86092  | -0.20866 | 5.44E-06 | 0.028422 | 0.54009  | -0.05873 | 0.20522  | -0.13228 | 0.00419  |
| 0.20945  | -0.21156 | 3.99E-06 | 0.01587  | 0.73231  | -0.04956 | 0.28518  | 0.12025  | 0.00929  |
| 6.59E-14 | 0.234011 | 3.14E-07 | 0.444026 | 5.54E-24 | 0.369479 | 1.49E-16 | -0.03661 | 0.42997  |
| 3.25E-05 | -0.26568 | 5.50E-09 | 0.056603 | 0.22212  | -0.02012 | 0.6645   | -0.00251 | 0.95689  |
| 6.98E-13 | 0.117948 | 0.01074  | 0.237089 | 2.17E-07 | 0.273381 | 1.89E-09 | 0.078693 | 0.08939  |
| 8.51E-16 | 0.467062 | 1.11E-26 | 0.195327 | 2.13E-05 | 0.363362 | 5.06E-16 | 0.233027 | 3.53E-07 |
| 2.40E-22 | 0.2062   | 7.04E-06 | 0.516905 | 2.90E-33 | 0.482438 | 1.35E-28 | -0.01823 | 0.69433  |
| 0.00056  | 0.026452 | 0.56853  | 0.129957 | 0.00491  | 0.1117   | 0.01574  | 0.300535 | 3.33E-11 |
| 0.00016  | -0.25527 | 2.21E-08 | 0.015194 | 0.74331  | 0.00167  | 0.97129  | 0.261481 | 9.72E-09 |
| 4.02E-07 | -0.04847 | 0.29591  | 0.054704 | 0.23805  | 0.117468 | 0.01107  | 0.137125 | 0.00298  |
| 7.29E-26 | 0.197089 | 1.79E-05 | 0.302373 | 2.49E-11 | 0.393655 | 9.26E-19 | 0.157798 | 0.00062  |
| 7.05E-14 | 0.241792 | 1.22E-07 | 0.295354 | 7.45E-11 | 0.365772 | 3.14E-16 | 0.021615 | 0.64128  |
| 6.74E-14 | -0.01496 | 0.74713  | 0.180752 | 8.57E-05 | 0.238023 | 1.94E-07 | -0.00945 | 0.83857  |
| 0.02309  | -0.21606 | 2.45E-06 | -0.05645 | 0.22341  | -0.0211  | 0.64929  | 0.303251 | 2.17E-11 |
| 0.01775  | -0.13777 | 0.00285  | -0.03042 | 0.51204  | -0.02384 | 0.60733  | 0.18195  | 7.67E-05 |
| 1.23E-14 | 0.080847 | 0.08093  | 0.383949 | 7.50E-18 | 0.32481  | 6.18E-13 | 0.2435   | 9.91E-08 |
| 1.33E-08 | 0.082819 | 0.07377  | 0.038264 | 0.40938  | 0.13955  | 0.00251  | -0.07633 | 0.09947  |
| 6.51E-19 | 0.01553  | 0.73783  | 0.23866  | 1.80E-07 | 0.308247 | 9.76E-12 | 0.111845 | 0.0156   |
| 5.42E-18 | 0.376914 | 3.27E-17 | 0.426358 | 4.74E-22 | 0.460101 | 7.65E-26 | 0.081341 | 0.07909  |
| 7.57E-19 | 0.029371 | 0.52663  | 0.227727 | 6.57E-07 | 0.269369 | 3.31E-09 | 0.235415 | 2.66E-07 |
| 1.91E-06 | 0.268315 | 3.84E-09 | 0.534333 | 7.79E-36 | 0.404427 | 8.36E-20 | 0.308917 | 8.76E-12 |
| 1.21E-07 | -0.08133 | 0.07913  | 0.351625 | 4.89E-15 | 0.204523 | 8.38E-06 | -0.02321 | 0.61693  |
| 0.00082  | 0.24586  | 7.38E-08 | 0.399257 | 2.68E-19 | 0.292808 | 1.10E-10 | 0.011981 | 0.79624  |

|          |          |          |          |          |          |          |          |          |
|----------|----------|----------|----------|----------|----------|----------|----------|----------|
| 7.69E-56 | 0.372067 | 8.84E-17 | 0.613244 | 1.41E-49 | 0.698065 | 1.85E-69 | 0.495338 | 2.78E-30 |
| 1.69E-27 | 0.299844 | 3.71E-11 | 0.135571 | 0.00333  | 0.359625 | 1.05E-15 | 0.282931 | 4.80E-10 |
| 1.59E-13 | 0.202144 | 1.07E-05 | 0.302279 | 2.53E-11 | 0.313419 | 4.20E-12 | 0.201085 | 1.19E-05 |
| 5.96E-05 | -0.06018 | 0.19422  | -0.18167 | 7.87E-05 | -0.16173 | 0.00045  | 0.144005 | 0.00181  |
| 2.98E-11 | 0.332504 | 1.62E-13 | 0.288449 | 2.12E-10 | 0.366873 | 2.52E-16 | 0.156138 | 0.00071  |
| 1.13E-07 | 0.132885 | 0.00402  | 0.387859 | 3.25E-18 | 0.344335 | 1.91E-14 | 0.167105 | 0.00029  |
| 0.43548  | -0.41513 | 7.02E-21 | -0.24445 | 8.81E-08 | -0.23928 | 1.66E-07 | -0.14034 | 0.00237  |
| 5.93E-36 | 0.233178 | 3.47E-07 | 0.209815 | 4.81E-06 | 0.42267  | 1.16E-21 | 0.105524 | 0.02257  |
| 0.00062  | -0.01209 | 0.79438  | 0.113684 | 0.01397  | 0.099449 | 0.03166  | 0.172146 | 0.00019  |
| 2.34E-21 | -0.00935 | 0.84028  | 0.20687  | 6.56E-06 | 0.249244 | 4.81E-08 | 0.178965 | 0.0001   |
| 6.25E-09 | -0.25279 | 3.05E-08 | 0.12068  | 0.00904  | 0.068034 | 0.14211  | 0.130707 | 0.00467  |
| 4.81E-07 | 0.107805 | 0.01979  | 0.212749 | 3.51E-06 | 0.250728 | 3.98E-08 | 0.153454 | 0.00088  |
| 0.67753  | -0.28077 | 6.57E-10 | -0.07309 | 0.11471  | -0.12079 | 0.00898  | -0.00328 | 0.94363  |
| 0.02721  | -0.09674 | 0.03664  | 0.073292 | 0.11371  | 0.057656 | 0.21363  | -0.2192  | 1.73E-06 |
| 2.94E-07 | 0.228736 | 5.85E-07 | 0.020179 | 0.6636   | -0.03751 | 0.41874  | -0.23571 | 2.57E-07 |
| 4.96E-06 | 0.035125 | 0.44889  | -0.08257 | 0.07466  | 0.056551 | 0.22255  | -0.01222 | 0.79228  |
| 5.38E-07 | 0.01888  | 0.68405  | -0.3451  | 1.66E-14 | -0.24568 | 7.55E-08 | -0.19558 | 2.08E-05 |
| 4.42E-20 | 0.105194 | 0.023    | 0.268197 | 3.90E-09 | 0.301272 | 2.97E-11 | 0.257207 | 1.72E-08 |
| 1.54E-59 | 0.409617 | 2.55E-20 | 0.661767 | 3.73E-60 | 0.731962 | 1.65E-79 | 0.198425 | 1.56E-05 |
| 6.62E-06 | 0.057246 | 0.21691  | 0.416498 | 5.09E-21 | 0.260214 | 1.15E-08 | 0.002504 | 0.95697  |
| 1.13E-93 | 0.259508 | 1.26E-08 | 0.414633 | 7.90E-21 | 0.539813 | 1.13E-36 | 0.255961 | 2.02E-08 |
| 4.44E-08 | -0.07658 | 0.09836  | 0.211278 | 4.11E-06 | 0.203268 | 9.55E-06 | 0.291431 | 1.35E-10 |
| 6.38E-05 | 0.268876 | 3.55E-09 | 0.135155 | 0.00343  | 0.20825  | 5.68E-06 | 0.049609 | 0.28469  |
| 0.51665  | -0.46885 | 6.74E-27 | -0.21632 | 2.38E-06 | -0.22392 | 1.02E-06 | 0.007029 | 0.87959  |
| 0.45446  | -0.07843 | 0.09046  | -0.25256 | 3.14E-08 | -0.19152 | 3.10E-05 | -0.01322 | 0.77569  |
| 0.00183  | 0.034514 | 0.45683  | 0.043846 | 0.34444  | 0.082289 | 0.07565  | 0.249124 | 4.89E-08 |
| 0.26767  | -0.1023  | 0.02706  | 0.121506 | 0.00858  | 0.028163 | 0.54378  | 0.277892 | 9.97E-10 |
| 0.28205  | 0.13206  | 0.00425  | -0.14667 | 0.00148  | -0.0987  | 0.03297  | -0.02169 | 0.64015  |
| 1.24E-25 | -0.00258 | 0.95559  | 0.385969 | 4.88E-18 | 0.389732 | 2.17E-18 | 0.290376 | 1.59E-10 |
| 0.07618  | -0.41361 | 1.00E-20 | -0.15395 | 0.00084  | -0.24021 | 1.49E-07 | -0.10641 | 0.02145  |
| 1.88E-47 | 0.162667 | 0.00042  | 0.522652 | 4.28E-34 | 0.545269 | 1.59E-37 | 0.200146 | 1.31E-05 |
| 0.26156  | -0.19033 | 3.47E-05 | 0.00348  | 0.94022  | -0.07263 | 0.117    | 0.066133 | 0.15361  |
| 1.91E-16 | -0.05712 | 0.2179   | 0.264973 | 6.06E-09 | 0.276599 | 1.20E-09 | 0.21298  | 3.42E-06 |
| 1.58E-37 | 0.15924  | 0.00055  | 0.547702 | 6.54E-38 | 0.556239 | 2.76E-39 | 0.263668 | 7.24E-09 |
| 1.12E-26 | 0.19886  | 1.50E-05 | 0.161306 | 0.00047  | 0.304275 | 1.85E-11 | 0.312521 | 4.87E-12 |
| 0.00089  | -0.09125 | 0.04876  | 0.029678 | 0.52233  | 0.049217 | 0.28852  | 0.133138 | 0.00395  |
| 0.00937  | -0.23462 | 2.92E-07 | -0.15909 | 0.00056  | -0.06749 | 0.14534  | 0.180431 | 8.82E-05 |
| 1.77E-08 | -0.23304 | 3.53E-07 | -0.10796 | 0.01961  | 0.015892 | 0.73195  | 0.061985 | 0.18116  |
| 1.03E-07 | -0.27111 | 2.60E-09 | 0.161121 | 0.00047  | 0.119034 | 0.01004  | 0.18865  | 4.08E-05 |
| 0.07739  | -0.13136 | 0.00446  | -0.12851 | 0.00542  | -0.06368 | 0.1695   | -0.26521 | 5.87E-09 |
| 3.83E-05 | -0.13126 | 0.00449  | -0.06764 | 0.14444  | 0.026242 | 0.57162  | 0.344768 | 1.76E-14 |
| 3.36E-16 | 0.173454 | 0.00017  | -0.01999 | 0.66655  | 0.208231 | 5.69E-06 | 0.318627 | 1.77E-12 |
| 1.27E-28 | 0.130317 | 0.00479  | 0.251168 | 3.76E-08 | 0.339289 | 4.80E-14 | 0.42033  | 2.04E-21 |
| 3.36E-29 | 0.208242 | 5.68E-06 | 0.364227 | 4.26E-16 | 0.468128 | 8.26E-27 | 0.047826 | 0.30237  |
| 0.00113  | 0.008241 | 0.85902  | -0.04563 | 0.32513  | 0.022852 | 0.62232  | 0.107713 | 0.0199   |

|          |          |          |          |          |          |          |          |          |
|----------|----------|----------|----------|----------|----------|----------|----------|----------|
| 2.35E-19 | 0.159783 | 0.00053  | 0.365262 | 3.47E-16 | 0.376272 | 3.73E-17 | 0.196918 | 1.82E-05 |
| 1.51E-25 | 0.259085 | 1.34E-08 | 0.226502 | 7.57E-07 | 0.40213  | 1.41E-19 | 0.191787 | 3.02E-05 |
| 1.99E-21 | 0.209494 | 4.98E-06 | 0.11767  | 0.01093  | 0.326076 | 4.97E-13 | 0.363909 | 4.54E-16 |
| 6.46E-31 | 0.112532 | 0.01497  | 0.549705 | 3.14E-38 | 0.521045 | 7.33E-34 | 0.297145 | 5.65E-11 |
| 1.85E-21 | 0.203446 | 9.37E-06 | 0.08147  | 0.07861  | 0.294313 | 8.74E-11 | 0.173231 | 0.00017  |
| 2.69E-36 | 0.336821 | 7.49E-14 | 0.665956 | 3.67E-61 | 0.6277   | 1.56E-52 | 0.051704 | 0.26482  |
| 4.05E-20 | 0.210066 | 4.68E-06 | 0.486199 | 4.42E-29 | 0.448103 | 1.91E-24 | 0.301932 | 2.67E-11 |
| 4.92E-37 | 0.325632 | 5.37E-13 | 0.403796 | 9.65E-20 | 0.460899 | 6.15E-26 | 0.15781  | 0.00062  |
| 2.76E-08 | -0.28326 | 4.57E-10 | 0.027181 | 0.55793  | 0.022847 | 0.62239  | -0.10275 | 0.02639  |
| 1.64E-07 | 0.05809  | 0.21019  | 0.174056 | 0.00016  | 0.191968 | 2.96E-05 | 0.125267 | 0.00672  |
| 4.30E-08 | 0.326089 | 4.96E-13 | 0.479557 | 3.14E-28 | 0.417074 | 4.44E-21 | 0.103501 | 0.02531  |
| 2.53E-16 | 0.32151  | 1.09E-12 | 0.202992 | 9.82E-06 | 0.352888 | 3.85E-15 | 0.310329 | 6.97E-12 |
| 0.05245  | -0.07903 | 0.08803  | 0.05039  | 0.27717  | 0.027347 | 0.55553  | 0.053056 | 0.25251  |
| 9.65E-11 | -0.15178 | 0.001    | 0.14036  | 0.00236  | 0.115025 | 0.01287  | 0.150982 | 0.00106  |
| 8.32E-12 | 0.080974 | 0.08046  | 0.250598 | 4.05E-08 | 0.28277  | 4.92E-10 | 0.143275 | 0.00191  |
| 5.02E-10 | -0.0278  | 0.54906  | 0.218117 | 1.95E-06 | 0.190654 | 3.37E-05 | 0.131922 | 0.00429  |
| 2.33E-11 | -0.07882 | 0.08888  | 0.125441 | 0.00664  | 0.157088 | 0.00066  | 0.104134 | 0.02442  |
| 0.00445  | 0.112005 | 0.01545  | 0.261744 | 9.38E-09 | 0.194945 | 2.21E-05 | 0.320148 | 1.37E-12 |
| 4.93E-08 | 0.105129 | 0.02308  | 0.26995  | 3.06E-09 | 0.227198 | 6.99E-07 | 0.109615 | 0.01781  |
| 0.04537  | -0.20762 | 6.07E-06 | 0.191174 | 3.20E-05 | 0.054991 | 0.23559  | 0.045639 | 0.32505  |
| 0.00657  | -0.10877 | 0.01871  | -0.09567 | 0.03877  | -0.13593 | 0.00325  | -0.0399  | 0.38964  |
| 0.00493  | 0.075472 | 0.10333  | -0.27616 | 1.28E-09 | -0.20423 | 8.64E-06 | -0.01582 | 0.7332   |
| 0.00559  | -0.17327 | 0.00017  | 0.039513 | 0.39426  | 0.023338 | 0.61493  | 0.032242 | 0.48702  |
| 7.97E-08 | -0.21382 | 3.13E-06 | 0.279752 | 7.62E-10 | 0.146435 | 0.00151  | -0.01193 | 0.79708  |
| 3.26E-36 | 0.267302 | 4.41E-09 | 0.372993 | 7.32E-17 | 0.519763 | 1.12E-33 | 0.150045 | 0.00115  |
| 0.05963  | -0.22042 | 1.51E-06 | 0.114437 | 0.01334  | -0.01016 | 0.8267   | -0.13075 | 0.00465  |
| 8.32E-05 | 0.089474 | 0.05333  | 0.167364 | 0.00028  | 0.162505 | 0.00042  | 0.005818 | 0.90022  |
| 0.63378  | 0.215504 | 2.60E-06 | -0.17228 | 0.00018  | -0.02326 | 0.61614  | -0.07057 | 0.12778  |
| 1.74E-09 | -0.0101  | 0.82772  | -0.00217 | 0.96273  | 0.120788 | 0.00898  | 0.216866 | 2.24E-06 |
| 2.47E-29 | 0.459232 | 9.69E-26 | 0.424704 | 7.10E-22 | 0.515721 | 4.28E-33 | 0.312507 | 4.88E-12 |
| 6.27E-14 | -0.03409 | 0.46241  | 0.073638 | 0.11201  | 0.157807 | 0.00062  | 0.245649 | 7.58E-08 |
| 4.45E-16 | -0.1628  | 0.00041  | 0.058494 | 0.20704  | 0.125676 | 0.00654  | 0.105453 | 0.02266  |
| 0.00541  | -0.21448 | 2.91E-06 | 0.043119 | 0.35251  | 0.022981 | 0.62034  | 0.141622 | 0.00216  |
| 5.91E-36 | 0.312457 | 4.92E-12 | 0.457096 | 1.73E-25 | 0.526879 | 1.02E-34 | 0.119823 | 0.00955  |
| 5.42E-10 | -0.07235 | 0.11844  | 0.148132 | 0.00133  | 0.190277 | 3.49E-05 | 0.080571 | 0.08198  |
| 9.01E-05 | -0.01054 | 0.82038  | 0.0502   | 0.27899  | 0.077462 | 0.09453  | -0.03696 | 0.42549  |
| 2.82E-14 | 0.164317 | 0.00036  | 0.36189  | 6.76E-16 | 0.336544 | 7.88E-14 | 0.246685 | 6.65E-08 |
| 0.00459  | 0.060578 | 0.19128  | 0.258247 | 1.50E-08 | 0.160527 | 0.0005   | 0.258801 | 1.39E-08 |
| 1.86E-10 | -0.01371 | 0.76763  | 0.178068 | 0.00011  | 0.203005 | 9.81E-06 | 0.029273 | 0.52801  |
| 6.89E-11 | -0.15318 | 0.0009   | 0.178596 | 0.0001   | 0.18957  | 3.74E-05 | 0.077464 | 0.09452  |
| 5.34E-24 | 0.190606 | 3.38E-05 | 0.352666 | 4.01E-15 | 0.362592 | 5.88E-16 | 0.249492 | 4.66E-08 |
| 6.97E-05 | -0.08029 | 0.08305  | 0.05941  | 0.2      | 0.042513 | 0.35932  | 0.113514 | 0.01411  |
| 3.13E-10 | -0.0984  | 0.0335   | 0.121809 | 0.00841  | 0.148933 | 0.00125  | 0.14957  | 0.00119  |
| 0.36333  | -0.44356 | 6.25E-24 | -0.1619  | 0.00044  | -0.20815 | 5.73E-06 | -0.03597 | 0.43808  |
| 0.01022  | 0.353869 | 3.19E-15 | -0.08856 | 0.05582  | -0.02936 | 0.52676  | 0.110882 | 0.01652  |

|          |          |          |          |          |          |          |          |          |
|----------|----------|----------|----------|----------|----------|----------|----------|----------|
| 3.60E-08 | 0.125278 | 0.00671  | 0.403181 | 1.11E-19 | 0.292629 | 1.13E-10 | -0.11665 | 0.01164  |
| 6.94E-14 | 0.181561 | 7.95E-05 | 0.413798 | 9.61E-21 | 0.362649 | 5.82E-16 | 0.138967 | 0.00262  |
| 0.24049  | 0.306088 | 1.38E-11 | 0.026285 | 0.57099  | 0.071372 | 0.12351  | 0.077013 | 0.09646  |
| 0.48815  | -0.2511  | 3.79E-08 | -0.14313 | 0.00193  | -0.16257 | 0.00042  | -0.05059 | 0.27531  |
| 0.03253  | -0.36283 | 5.61E-16 | -0.11229 | 0.01519  | -0.19317 | 2.64E-05 | -0.00996 | 0.83006  |
| 0.42581  | -0.09665 | 0.03681  | 0.050695 | 0.27426  | 0.006239 | 0.89304  | 0.050398 | 0.27709  |
| 6.00E-23 | 0.235348 | 2.68E-07 | 0.267446 | 4.32E-09 | 0.3876   | 3.44E-18 | 0.113974 | 0.01372  |
| 0.13788  | -0.33841 | 5.63E-14 | -0.0207  | 0.65548  | -0.04119 | 0.37445  | -0.03457 | 0.45613  |
| 1.43E-06 | -0.08391 | 0.07004  | 0.181946 | 7.67E-05 | 0.163729 | 0.00038  | 0.022051 | 0.63457  |
| 2.50E-05 | -0.15176 | 0.001    | -0.04676 | 0.3133   | 0.009623 | 0.8357   | 0.05943  | 0.19985  |
| 1.28E-06 | -0.02665 | 0.56559  | 0.088567 | 0.0558   | 0.143084 | 0.00194  | 0.069281 | 0.13493  |
| 0.00089  | -0.26426 | 6.68E-09 | 0.0772   | 0.09565  | 0.018907 | 0.68362  | 0.091644 | 0.04778  |
| 0.18547  | -0.22541 | 8.59E-07 | 0.053402 | 0.24942  | 0.007968 | 0.86364  | 0.049895 | 0.28192  |
| 0.00629  | -0.05827 | 0.20881  | -0.19919 | 1.45E-05 | -0.21151 | 4.01E-06 | -0.01628 | 0.72574  |
| 9.43E-09 | -0.02486 | 0.59207  | 0.17214  | 0.00019  | 0.173428 | 0.00017  | 0.020599 | 0.65704  |
| 0.00019  | 0.04761  | 0.30457  | 0.372621 | 7.89E-17 | 0.227773 | 6.54E-07 | 0.357405 | 1.62E-15 |
| 0.88223  | -0.12817 | 0.00554  | 0.114372 | 0.0134   | 0.023111 | 0.61837  | 0.075683 | 0.10237  |
| 4.40E-22 | 0.204927 | 8.04E-06 | 0.468397 | 7.66E-27 | 0.462821 | 3.62E-26 | 0.3761   | 3.87E-17 |
| 0.00036  | -0.24464 | 8.60E-08 | 0.079977 | 0.08427  | 0.033075 | 0.47583  | 0.056549 | 0.22256  |
| 0.47981  | -0.33999 | 4.23E-14 | -0.11596 | 0.01215  | -0.15198 | 0.00099  | -0.07719 | 0.09568  |
| 0.00135  | 0.048764 | 0.29299  | 0.096766 | 0.03658  | 0.106332 | 0.02155  | 0.035685 | 0.44169  |
| 7.17E-06 | 0.419033 | 2.79E-21 | 0.059039 | 0.20283  | 0.254844 | 2.34E-08 | 0.025716 | 0.57936  |
| 0.09229  | -0.23273 | 3.66E-07 | -0.00271 | 0.95341  | -0.10188 | 0.0277   | -0.04418 | 0.34074  |
| 0.58626  | 0.01384  | 0.76548  | 0.005041 | 0.91348  | 0.022374 | 0.62961  | 0.142791 | 0.00198  |
| 0.24832  | -0.17455 | 0.00015  | -0.07024 | 0.12958  | -0.12316 | 0.00771  | -0.03052 | 0.51053  |
| 0.78416  | -0.00623 | 0.89315  | 0.11204  | 0.01542  | 0.050115 | 0.2798   | 0.10671  | 0.02109  |
| 4.23E-27 | -0.38909 | 2.50E-18 | -0.36909 | 1.61E-16 | -0.48305 | 1.13E-28 | -0.15773 | 0.00062  |
| 0.01144  | -0.24789 | 5.71E-08 | -0.05666 | 0.22162  | -0.16615 | 0.00031  | -0.0431  | 0.35271  |
| 5.81E-22 | -0.25495 | 2.31E-08 | -0.22624 | 7.81E-07 | -0.36023 | 9.35E-16 | -0.10528 | 0.02288  |
| 2.62E-06 | -0.2196  | 1.66E-06 | -0.1813  | 8.14E-05 | -0.23653 | 2.32E-07 | -0.02244 | 0.62865  |
| 2.18E-19 | -0.46931 | 5.93E-27 | -0.37402 | 5.93E-17 | -0.49832 | 1.11E-30 | -0.15727 | 0.00065  |
| 7.72E-09 | -0.27646 | 1.22E-09 | -0.16646 | 0.0003   | -0.26457 | 6.40E-09 | -0.07235 | 0.11845  |
| 2.30E-08 | -0.32267 | 8.92E-13 | -0.14845 | 0.00129  | -0.30095 | 3.12E-11 | -0.13208 | 0.00425  |
| 1.99E-38 | 0.376241 | 3.76E-17 | 0.336689 | 7.68E-14 | 0.463748 | 2.80E-26 | 0.311342 | 5.91E-12 |
| 1.95E-16 | -0.53502 | 6.14E-36 | -0.39576 | 5.82E-19 | -0.51638 | 3.45E-33 | -0.17258 | 0.00018  |
| 0.46857  | 0.119718 | 0.00961  | 0.090114 | 0.05164  | 0.098375 | 0.03356  | -0.03683 | 0.42718  |
| 3.52E-32 | 0.335428 | 9.62E-14 | 0.099345 | 0.03184  | 0.363151 | 5.27E-16 | 0.29043  | 1.58E-10 |
| 4.91E-09 | 0.548705 | 4.53E-38 | 0.121794 | 0.00842  | 0.287477 | 2.45E-10 | 0.213657 | 3.18E-06 |
| 3.40E-21 | -0.51183 | 1.52E-32 | -0.37948 | 1.92E-17 | -0.50411 | 1.81E-31 | -0.24371 | 9.65E-08 |
| 3.75E-22 | -0.57898 | 3.77E-43 | -0.44822 | 1.85E-24 | -0.56294 | 2.15E-40 | -0.08687 | 0.06068  |
| 6.85E-18 | -0.41418 | 8.78E-21 | -0.19607 | 1.98E-05 | -0.40662 | 5.07E-20 | -0.22645 | 7.62E-07 |
| 9.06E-48 | -0.61649 | 3.14E-50 | -0.56453 | 1.16E-40 | -0.68344 | 1.51E-65 | -0.39246 | 1.20E-18 |
| 0.00018  | -0.36993 | 1.36E-16 | -0.03992 | 0.38937  | -0.22474 | 9.27E-07 | -0.20374 | 9.10E-06 |
| 7.15E-18 | -0.45711 | 1.72E-25 | -0.34998 | 6.67E-15 | -0.47935 | 3.33E-28 | -0.11765 | 0.01094  |
| 1.10E-11 | -0.43116 | 1.45E-22 | -0.18692 | 4.81E-05 | -0.3497  | 7.03E-15 | 0.075313 | 0.10406  |

|          |          |          |          |          |          |          |          |          |
|----------|----------|----------|----------|----------|----------|----------|----------|----------|
| 0.13685  | -0.14652 | 0.0015   | -0.13694 | 0.00302  | -0.14998 | 0.00115  | -0.02089 | 0.6525   |
| 0.00522  | -0.03411 | 0.46212  | 0.120399 | 0.0092   | -0.02625 | 0.57156  | 0.105456 | 0.02266  |
| 9.30E-14 | -0.32093 | 1.20E-12 | -0.13682 | 0.00305  | -0.35751 | 1.58E-15 | -0.18013 | 9.07E-05 |
| 0.97637  | -0.36065 | 8.61E-16 | 0.038    | 0.41262  | -0.1458  | 0.00158  | -0.08191 | 0.07702  |
| 6.69E-11 | -0.19192 | 2.98E-05 | -0.22785 | 6.48E-07 | -0.31748 | 2.14E-12 | -0.06754 | 0.14502  |
| 2.58E-06 | -0.3484  | 8.97E-15 | -0.20666 | 6.71E-06 | -0.29406 | 9.08E-11 | -0.19006 | 3.56E-05 |
| 2.94E-30 | -0.42826 | 2.97E-22 | -0.38308 | 9.01E-18 | -0.48021 | 2.59E-28 | -0.36557 | 3.26E-16 |
| 0.00065  | -0.19274 | 2.75E-05 | -0.03337 | 0.47196  | -0.1352  | 0.00342  | -0.02004 | 0.66578  |
| 0.06263  | -0.24458 | 8.66E-08 | 0.076967 | 0.09666  | -0.09354 | 0.04334  | 0.012947 | 0.78021  |
| 7.30E-05 | -0.30286 | 2.31E-11 | -0.07222 | 0.1191   | -0.21343 | 3.26E-06 | 0.066627 | 0.15056  |
| 2.19E-05 | -0.34968 | 7.05E-15 | -0.15409 | 0.00083  | -0.24936 | 4.74E-08 | 0.046212 | 0.319    |
| 8.63E-19 | -0.42083 | 1.81E-21 | -0.2671  | 4.53E-09 | -0.44636 | 3.02E-24 | -0.14913 | 0.00123  |
| 0.46815  | -0.10784 | 0.01975  | 0.11179  | 0.01565  | 0.000986 | 0.98305  | -0.06101 | 0.18813  |
| 2.51E-09 | -0.5513  | 1.74E-38 | -0.34215 | 2.85E-14 | -0.4374  | 3.03E-23 | -0.04923 | 0.28842  |
| 0.54926  | -0.03078 | 0.50701  | 0.096193 | 0.03771  | 0.039811 | 0.3907   | 0.076746 | 0.09762  |
| 4.54E-20 | -0.57401 | 2.79E-42 | -0.4944  | 3.71E-30 | -0.56118 | 4.22E-40 | -0.04074 | 0.37976  |
| 0.00577  | -0.06656 | 0.15098  | 0.021513 | 0.64285  | -0.07344 | 0.11297  | 0.019572 | 0.67312  |
| 3.86E-05 | -0.14128 | 0.00221  | 0.136067 | 0.00322  | -0.08341 | 0.07173  | -0.00925 | 0.84192  |
| 0.21383  | -0.18559 | 5.46E-05 | -0.05627 | 0.22485  | -0.09334 | 0.04378  | 0.006265 | 0.8926   |
| 3.14E-21 | -0.34809 | 9.50E-15 | -0.26041 | 1.12E-08 | -0.41642 | 5.18E-21 | -0.03902 | 0.40024  |
| 6.82E-36 | -0.49477 | 3.31E-30 | -0.40279 | 1.21E-19 | -0.57969 | 2.83E-43 | -0.2136  | 3.20E-06 |
| 4.47E-09 | -0.43287 | 9.48E-23 | -0.10069 | 0.02959  | -0.27125 | 2.55E-09 | -0.18781 | 4.43E-05 |
| 4.89E-09 | -0.36428 | 4.22E-16 | -0.12914 | 0.00519  | -0.3005  | 3.35E-11 | -0.06474 | 0.1625   |
| 2.25E-09 | -0.24378 | 9.57E-08 | -0.17688 | 0.00012  | -0.29444 | 8.57E-11 | 0.089875 | 0.05227  |
| 9.91E-25 | -0.40442 | 8.38E-20 | -0.34164 | 3.13E-14 | -0.47599 | 8.83E-28 | -0.22447 | 9.56E-07 |
| 9.71E-26 | -0.44104 | 1.20E-23 | -0.33677 | 7.56E-14 | -0.48657 | 3.96E-29 | -0.23366 | 3.28E-07 |
| 0.37859  | -0.10061 | 0.02972  | 0.027957 | 0.54674  | 0.00172  | 0.97042  | 0.126381 | 0.00624  |
| 3.80E-24 | -0.41792 | 3.63E-21 | -0.39993 | 2.31E-19 | -0.52603 | 1.36E-34 | -0.13233 | 0.00417  |
| 7.19E-18 | 0.430214 | 1.84E-22 | 0.233937 | 3.17E-07 | 0.351062 | 5.44E-15 | 0.156449 | 0.00069  |
| 1.28E-19 | -0.42919 | 2.36E-22 | -0.50827 | 4.81E-32 | -0.54432 | 2.24E-37 | -0.07943 | 0.08643  |
| 3.49E-05 | -0.40652 | 5.19E-20 | -0.18153 | 7.97E-05 | -0.29605 | 6.69E-11 | -0.10978 | 0.01764  |
| 8.53E-15 | -0.4437  | 6.03E-24 | -0.35068 | 5.85E-15 | -0.44764 | 2.16E-24 | -0.1876  | 4.51E-05 |
| 0.76165  | -0.342   | 2.93E-14 | -0.2143  | 2.97E-06 | -0.20795 | 5.86E-06 | 0.054478 | 0.23999  |
| 3.22E-11 | -0.52697 | 9.92E-35 | -0.34099 | 3.53E-14 | -0.435   | 5.56E-23 | -0.06267 | 0.17635  |
| 0.0001   | -0.0755  | 0.10319  | 0.01548  | 0.73865  | -0.11659 | 0.01169  | -0.1691  | 0.00024  |
| 4.40E-17 | -0.48107 | 2.02E-28 | -0.45886 | 1.07E-25 | -0.51791 | 2.08E-33 | -0.17464 | 0.00015  |
| 5.32E-15 | -0.44971 | 1.25E-24 | -0.46241 | 4.06E-26 | -0.50701 | 7.19E-32 | -0.12809 | 0.00557  |
| 1.00E-12 | -0.29465 | 8.30E-11 | -0.24445 | 8.81E-08 | -0.32577 | 5.24E-13 | -0.20839 | 5.59E-06 |
| 0.10177  | -0.15748 | 0.00064  | -0.04307 | 0.35301  | -0.13388 | 0.00375  | -0.21269 | 3.53E-06 |
| 4.95E-14 | 0.276989 | 1.13E-09 | 0.062311 | 0.17887  | 0.271457 | 2.48E-09 | 0.184788 | 5.89E-05 |
| 0.14572  | -0.00147 | 0.97468  | -0.00839 | 0.8565   | -0.03571 | 0.44143  | 0.243494 | 9.92E-08 |
| 0.59009  | 0.00731  | 0.87481  | 0.043157 | 0.35208  | 0.039522 | 0.39415  | -0.01977 | 0.66997  |
| 5.19E-13 | -0.54018 | 9.91E-37 | -0.28641 | 2.87E-10 | -0.44065 | 1.32E-23 | -0.21698 | 2.21E-06 |
| 2.51E-17 | 0.509334 | 3.42E-32 | 0.260806 | 1.06E-08 | 0.420658 | 1.89E-21 | 0.353049 | 3.73E-15 |
| 3.63E-21 | -0.45884 | 1.08E-25 | -0.39204 | 1.32E-18 | -0.50549 | 1.17E-31 | -0.00927 | 0.8416   |

|          |          |          |          |          |          |          |          |          |
|----------|----------|----------|----------|----------|----------|----------|----------|----------|
| 9.06E-07 | -0.22747 | 6.77E-07 | -0.08477 | 0.0672   | -0.19125 | 3.18E-05 | -0.22935 | 5.45E-07 |
| 0.01881  | -0.10889 | 0.01858  | 0.00954  | 0.83709  | -0.05866 | 0.20575  | 0.144677 | 0.00172  |
| 1.84E-25 | -0.5646  | 1.13E-40 | -0.46408 | 2.55E-26 | -0.58341 | 6.13E-44 | -0.10034 | 0.03016  |
| 2.65E-21 | -0.48392 | 8.72E-29 | -0.25443 | 2.47E-08 | -0.47719 | 6.23E-28 | -0.20362 | 9.20E-06 |
| 2.08E-18 | -0.50166 | 3.91E-31 | -0.38251 | 1.02E-17 | -0.49934 | 8.07E-31 | -0.13326 | 0.00392  |
| 5.80E-07 | -0.25984 | 1.21E-08 | -0.05794 | 0.21139  | -0.24534 | 7.88E-08 | -0.1569  | 0.00067  |
| 2.09E-09 | -0.34057 | 3.81E-14 | -0.10316 | 0.02579  | -0.3005  | 3.35E-11 | -0.22181 | 1.29E-06 |
| 2.46E-05 | -0.43189 | 1.21E-22 | -0.1436  | 0.00186  | -0.29514 | 7.70E-11 | -0.02167 | 0.64039  |
| 3.06E-23 | -0.37692 | 3.27E-17 | -0.35371 | 3.29E-15 | -0.47131 | 3.37E-27 | -0.1693  | 0.00024  |
| 8.10E-10 | -0.44225 | 8.76E-24 | -0.35894 | 1.20E-15 | -0.39919 | 2.72E-19 | -0.06517 | 0.15971  |
| 1.27E-13 | -0.48873 | 2.08E-29 | -0.1795  | 9.61E-05 | -0.41264 | 1.26E-20 | -0.21437 | 2.94E-06 |
| 2.92E-29 | -0.32532 | 5.66E-13 | -0.27942 | 7.99E-10 | -0.47831 | 4.51E-28 | -0.28395 | 4.13E-10 |
| 0.0004   | -0.30322 | 2.18E-11 | 0.090858 | 0.04973  | -0.12489 | 0.00689  | -0.12865 | 0.00536  |
| 1.30E-07 | -0.15798 | 0.00061  | -0.0257  | 0.57954  | -0.18391 | 6.39E-05 | -0.24341 | 1.00E-07 |
| 3.74E-07 | -0.22166 | 1.31E-06 | -0.07074 | 0.12687  | -0.20967 | 4.88E-06 | 0.021146 | 0.64854  |
| 0.00241  | -0.21757 | 2.07E-06 | -0.02249 | 0.6279   | -0.15603 | 0.00072  | -0.10006 | 0.03063  |
| 0.01006  | -0.0996  | 0.0314   | 0.049541 | 0.28535  | -0.0829  | 0.07347  | -0.08715 | 0.05986  |
| 7.45E-34 | -0.62868 | 9.69E-53 | -0.54384 | 2.67E-37 | -0.65633 | 7.15E-59 | -0.28082 | 6.53E-10 |
| 6.12E-15 | -0.37667 | 3.44E-17 | -0.05776 | 0.21277  | -0.29851 | 4.57E-11 | -0.23568 | 2.57E-07 |
| 2.15E-16 | -0.40699 | 4.66E-20 | -0.23877 | 1.77E-07 | -0.38052 | 1.55E-17 | -0.1663  | 0.00031  |
| 8.37E-08 | -0.41771 | 3.82E-21 | -0.19329 | 2.60E-05 | -0.35909 | 1.17E-15 | -0.16554 | 0.00033  |
| 0.00056  | -0.16286 | 0.00041  | 0.001703 | 0.97072  | -0.1391  | 0.00259  | -0.34839 | 8.99E-15 |
| 0.00021  | -0.33729 | 6.90E-14 | -0.30141 | 2.91E-11 | -0.31524 | 3.11E-12 | -0.09648 | 0.03714  |
| 0.15521  | -0.37462 | 5.24E-17 | -0.0029  | 0.9501   | -0.14665 | 0.00148  | -0.09762 | 0.03495  |
| 9.91E-16 | -0.43808 | 2.55E-23 | -0.2175  | 2.09E-06 | -0.4005  | 2.03E-19 | -0.04443 | 0.3381   |
| 1.80E-06 | -0.37098 | 1.10E-16 | -0.17749 | 0.00012  | -0.32609 | 4.96E-13 | -0.04962 | 0.28462  |
| 8.28E-23 | -0.32977 | 2.62E-13 | -0.16578 | 0.00032  | -0.38525 | 5.69E-18 | -0.09513 | 0.03988  |
| 0.11724  | -0.44956 | 1.30E-24 | -0.12366 | 0.00746  | -0.22553 | 8.47E-07 | 0.065558 | 0.15723  |
| 3.50E-18 | -0.50543 | 1.19E-31 | -0.44106 | 1.19E-23 | -0.54827 | 5.32E-38 | -0.0886  | 0.05571  |
| 5.63E-10 | -0.35988 | 1.00E-15 | -0.05392 | 0.24489  | -0.28681 | 2.71E-10 | -0.11378 | 0.01389  |
| 0.00027  | -0.18624 | 5.14E-05 | -0.15771 | 0.00063  | -0.20397 | 8.88E-06 | 0.039874 | 0.38994  |
| 1.85E-07 | -0.19782 | 1.66E-05 | -0.25369 | 2.72E-08 | -0.29558 | 7.19E-11 | -0.24235 | 1.14E-07 |
| 0.87387  | -0.37289 | 7.48E-17 | -0.1547  | 0.0008   | -0.17335 | 0.00017  | -0.07498 | 0.10559  |
| 1.03E-18 | -0.40605 | 5.78E-20 | -0.33106 | 2.09E-13 | -0.4516  | 7.57E-25 | -0.10974 | 0.01768  |
| 6.54E-12 | -0.40327 | 1.09E-19 | -0.12117 | 0.00877  | -0.34164 | 3.13E-14 | -0.18989 | 3.63E-05 |
| 0.01664  | -0.31264 | 4.77E-12 | 0.000831 | 0.98572  | -0.13571 | 0.0033   | -0.05457 | 0.2392   |
| 5.46E-12 | -0.34832 | 9.10E-15 | -0.01186 | 0.7983   | -0.25291 | 3.00E-08 | -0.18765 | 4.49E-05 |
| 7.16E-06 | -0.47304 | 2.05E-27 | -0.40374 | 9.77E-20 | -0.41826 | 3.35E-21 | 0.010655 | 0.81838  |
| 0.33673  | -0.17632 | 0.00013  | -0.0569  | 0.21972  | -0.04148 | 0.37115  | 0.040441 | 0.38323  |
| 0.02229  | -0.08785 | 0.05781  | -0.02012 | 0.66456  | -0.1214  | 0.00863  | -0.23483 | 2.85E-07 |
| 1.13E-21 | -0.47338 | 1.87E-27 | -0.38222 | 1.08E-17 | -0.5024  | 3.10E-31 | -0.2231  | 1.12E-06 |
| 2.82E-07 | -0.33922 | 4.86E-14 | 0.077108 | 0.09604  | -0.18086 | 8.48E-05 | -0.04301 | 0.35375  |
| 8.18E-13 | -0.40739 | 4.25E-20 | -0.26828 | 3.86E-09 | -0.38689 | 4.00E-18 | -0.24595 | 7.30E-08 |
| 0.14771  | -0.22404 | 1.00E-06 | -0.07946 | 0.08629  | -0.06033 | 0.19311  | 0.053679 | 0.24697  |
| 0.00275  | -0.18965 | 3.71E-05 | -0.07357 | 0.11236  | -0.16814 | 0.00026  | -0.12979 | 0.00497  |



|          |          |          |          |          |          |          |          |          |
|----------|----------|----------|----------|----------|----------|----------|----------|----------|
| 1.78E-09 | -0.44424 | 5.24E-24 | -0.16072 | 0.00049  | -0.32406 | 7.03E-13 | -0.11841 | 0.01044  |
| 1.38E-08 | -0.11253 | 0.01498  | 0.115932 | 0.01217  | -0.13041 | 0.00476  | -0.15354 | 0.00087  |
| 4.79E-08 | -0.53887 | 1.58E-36 | -0.22228 | 1.23E-06 | -0.36122 | 7.70E-16 | -0.07363 | 0.11204  |
| 2.33E-05 | -0.17639 | 0.00013  | -0.09976 | 0.03112  | -0.19372 | 2.50E-05 | 0.124971 | 0.00685  |
| 1.32E-24 | -0.60154 | 2.70E-47 | -0.55427 | 5.78E-39 | -0.62379 | 1.02E-51 | -0.05791 | 0.21161  |
| 1.25E-48 | -0.48724 | 3.25E-29 | -0.45988 | 8.12E-26 | -0.63385 | 7.71E-54 | -0.2725  | 2.14E-09 |
| 1.78E-19 | -0.39562 | 6.00E-19 | -0.38382 | 7.70E-18 | -0.48401 | 8.47E-29 | -0.23314 | 3.49E-07 |
| 7.65E-12 | -0.49513 | 2.97E-30 | -0.36396 | 4.49E-16 | -0.46465 | 2.18E-26 | -0.20921 | 5.13E-06 |
| 1.57E-05 | -0.23513 | 2.75E-07 | -0.10443 | 0.02401  | -0.2017  | 1.12E-05 | -0.21859 | 1.85E-06 |
| 0.5767   | -0.21074 | 4.36E-06 | -0.05045 | 0.27662  | -0.05627 | 0.22486  | 0.074867 | 0.10613  |
| 9.64E-21 | -0.23413 | 3.10E-07 | -0.21571 | 2.54E-06 | -0.37286 | 7.52E-17 | -0.32337 | 7.91E-13 |
| 3.41E-19 | -0.49098 | 1.05E-29 | -0.42399 | 8.45E-22 | -0.51555 | 4.52E-33 | -0.10765 | 0.01997  |
| 1.26E-22 | -0.42445 | 7.55E-22 | -0.2691  | 3.44E-09 | -0.44444 | 4.97E-24 | -0.32947 | 2.75E-13 |
| 2.32E-11 | -0.26258 | 8.38E-09 | -0.12212 | 0.00824  | -0.26047 | 1.11E-08 | -0.11611 | 0.01204  |
| 0.00019  | -0.23487 | 2.84E-07 | -0.01632 | 0.72505  | -0.19259 | 2.79E-05 | -0.06978 | 0.13216  |
| 0.00032  | -0.27582 | 1.34E-09 | -0.01382 | 0.76578  | -0.20499 | 7.99E-06 | 0.092114 | 0.04665  |
| 0.00095  | -0.26805 | 3.98E-09 | 0.08078  | 0.08119  | -0.11544 | 0.01254  | 0.101094 | 0.02893  |
| 2.07E-07 | -0.52632 | 1.24E-34 | -0.4012  | 1.73E-19 | -0.42398 | 8.47E-22 | -0.08789 | 0.05771  |
| 1.72E-30 | 0.550539 | 2.31E-38 | 0.358528 | 1.30E-15 | 0.546242 | 1.11E-37 | 0.25994  | 1.19E-08 |
| 7.14E-05 | -0.47319 | 1.97E-27 | -0.15894 | 0.00057  | -0.27858 | 9.03E-10 | -0.13367 | 0.00381  |
| 1.29E-07 | -0.32465 | 6.35E-13 | -0.01203 | 0.79542  | -0.22381 | 1.03E-06 | -0.03029 | 0.51372  |
| 0.00032  | -0.34998 | 6.67E-15 | -0.08911 | 0.05431  | -0.24746 | 6.03E-08 | -0.17189 | 0.00019  |
| 9.40E-26 | -0.51579 | 4.19E-33 | -0.46244 | 4.02E-26 | -0.55915 | 9.16E-40 | -0.05331 | 0.25022  |
| 4.63E-11 | -0.40156 | 1.60E-19 | -0.23647 | 2.34E-07 | -0.37454 | 5.33E-17 | -0.10006 | 0.03062  |
| 3.56E-21 | -0.49795 | 1.25E-30 | -0.48358 | 9.62E-29 | -0.57613 | 1.19E-42 | -0.23354 | 3.33E-07 |
| 1.90E-37 | -0.55324 | 8.49E-39 | -0.472   | 2.76E-27 | -0.65042 | 1.65E-57 | -0.17349 | 0.00016  |
| 2.09E-20 | -0.62671 | 2.51E-52 | -0.49169 | 8.48E-30 | -0.58938 | 5.07E-45 | -0.23585 | 2.52E-07 |
| 0.00297  | -0.18835 | 4.20E-05 | -0.18298 | 6.97E-05 | -0.17886 | 0.0001   | -0.01945 | 0.67511  |
| 1.71E-06 | -0.43593 | 4.40E-23 | -0.26043 | 1.12E-08 | -0.36007 | 9.64E-16 | -0.03423 | 0.4605   |
| 0.00029  | -0.06701 | 0.14823  | -0.08518 | 0.0659   | -0.13434 | 0.00363  | -0.08742 | 0.05906  |
| 9.15E-11 | -0.41441 | 8.32E-21 | -0.19312 | 2.65E-05 | -0.3634  | 5.02E-16 | -0.15061 | 0.0011   |
| 5.46E-18 | -0.53266 | 1.40E-35 | -0.31496 | 3.26E-12 | -0.4592  | 9.78E-26 | -0.17392 | 0.00016  |
| 1.25E-08 | -0.2219  | 1.28E-06 | -0.09048 | 0.05069  | -0.23302 | 3.54E-07 | -0.07018 | 0.12994  |
| 0.0489   | -0.27512 | 1.48E-09 | 0.045498 | 0.32655  | -0.12645 | 0.00621  | -0.02406 | 0.60408  |
| 8.54E-23 | -0.24725 | 6.20E-08 | -0.29444 | 8.57E-11 | -0.41633 | 5.30E-21 | -0.16488 | 0.00035  |
| 4.12E-16 | -0.30798 | 1.02E-11 | -0.29174 | 1.29E-10 | -0.39838 | 3.26E-19 | -0.22473 | 9.28E-07 |
| 2.30E-13 | -0.47772 | 5.36E-28 | -0.24957 | 4.61E-08 | -0.38962 | 2.23E-18 | -0.09781 | 0.0346   |
| 1.73E-11 | -0.36316 | 5.26E-16 | -0.14759 | 0.00138  | -0.33056 | 2.28E-13 | -0.16974 | 0.00023  |
| 2.42E-10 | -0.62078 | 4.24E-51 | -0.28885 | 2.00E-10 | -0.40525 | 6.93E-20 | -0.31713 | 2.27E-12 |
| 4.47E-24 | -0.56313 | 2.00E-40 | -0.39335 | 9.89E-19 | -0.55915 | 9.18E-40 | -0.02249 | 0.62784  |
| 0.26178  | -0.26773 | 4.16E-09 | -0.13657 | 0.0031   | -0.17867 | 0.0001   | -0.11541 | 0.01257  |
| 0.00018  | -0.06381 | 0.16863  | -0.07943 | 0.08642  | -0.10462 | 0.02376  | 0.146495 | 0.0015   |
| 1.54E-30 | -0.67539 | 1.72E-63 | -0.52368 | 3.02E-34 | -0.65389 | 2.63E-58 | -0.18817 | 4.28E-05 |
| 5.47E-15 | -0.50988 | 2.87E-32 | -0.33692 | 7.36E-14 | -0.46456 | 2.24E-26 | -0.18136 | 8.10E-05 |
| 1.07E-13 | -0.4151  | 7.08E-21 | -0.19222 | 2.89E-05 | -0.36654 | 2.69E-16 | -0.0646  | 0.16338  |

|          |          |          |          |          |          |          |          |          |
|----------|----------|----------|----------|----------|----------|----------|----------|----------|
| 1.49E-08 | -0.53943 | 1.29E-36 | -0.23078 | 4.61E-07 | -0.38821 | 3.02E-18 | -0.12943 | 0.00509  |
| 1.20E-05 | -0.08503 | 0.06637  | -0.18487 | 5.84E-05 | -0.2476  | 5.93E-08 | -0.06008 | 0.19495  |
| 0.00449  | -0.1232  | 0.00769  | 0.13686  | 0.00304  | -0.07098 | 0.12559  | -0.15054 | 0.0011   |
| 7.41E-08 | -0.31453 | 3.50E-12 | -0.21295 | 3.43E-06 | -0.2837  | 4.29E-10 | -0.08416 | 0.0692   |
| 1.87E-11 | -0.58574 | 2.34E-44 | -0.35514 | 2.50E-15 | -0.49553 | 2.62E-30 | -0.11465 | 0.01317  |
| 0.9246   | -0.21892 | 1.78E-06 | 0.032067 | 0.48938  | -0.02608 | 0.57393  | 0.105886 | 0.02211  |
| 1.43E-16 | -0.44685 | 2.65E-24 | -0.24375 | 9.61E-08 | -0.42968 | 2.10E-22 | -0.10552 | 0.02257  |
| 4.09E-05 | -0.21431 | 2.96E-06 | -0.07852 | 0.0901   | -0.18012 | 9.07E-05 | 0.152022 | 0.00098  |
| 3.58E-11 | -0.40857 | 3.24E-20 | -0.14953 | 0.00119  | -0.32442 | 6.61E-13 | -0.069   | 0.13651  |
| 4.07E-27 | -0.64262 | 9.43E-56 | -0.49989 | 6.80E-31 | -0.62756 | 1.67E-52 | -0.20763 | 6.06E-06 |
| 1.58E-31 | -0.50461 | 1.54E-31 | -0.50113 | 4.62E-31 | -0.61362 | 1.18E-49 | -0.25937 | 1.29E-08 |
| 8.32E-16 | -0.2139  | 3.10E-06 | -0.23624 | 2.41E-07 | -0.36633 | 2.80E-16 | 0.020451 | 0.65935  |
| 0.90468  | -0.14052 | 0.00234  | 0.077977 | 0.09235  | -0.04303 | 0.35352  | 0.038253 | 0.40952  |
| 2.10E-07 | -0.31408 | 3.77E-12 | -0.17842 | 0.00011  | -0.28398 | 4.12E-10 | -0.18678 | 4.88E-05 |
| 2.45E-18 | -0.47691 | 6.76E-28 | -0.3301  | 2.47E-13 | -0.46212 | 4.39E-26 | -0.07406 | 0.10995  |
| 1.88E-17 | -0.28485 | 3.62E-10 | -0.05619 | 0.22554  | -0.28938 | 1.85E-10 | -0.17482 | 0.00015  |
| 1.89E-06 | -0.34212 | 2.87E-14 | -0.21218 | 3.73E-06 | -0.29295 | 1.08E-10 | 0.175834 | 0.00013  |
| 9.04E-16 | -0.2892  | 1.90E-10 | -0.05629 | 0.22473  | -0.26048 | 1.11E-08 | -0.19725 | 1.76E-05 |
| 0.01089  | -0.37404 | 5.91E-17 | -0.22139 | 1.36E-06 | -0.26508 | 5.97E-09 | -0.0484  | 0.29661  |
| 4.75E-36 | -0.44529 | 3.98E-24 | -0.34826 | 9.22E-15 | -0.51787 | 2.11E-33 | -0.11351 | 0.01412  |
| 0.26326  | -0.18546 | 5.53E-05 | 0.006513 | 0.88836  | -0.01624 | 0.72626  | 0.140438 | 0.00235  |
| 1.60E-13 | -0.46302 | 3.43E-26 | -0.3451  | 1.66E-14 | -0.44347 | 6.39E-24 | -0.05315 | 0.25165  |
| 5.84E-14 | -0.52664 | 1.11E-34 | -0.27171 | 2.39E-09 | -0.42299 | 1.08E-21 | -0.07344 | 0.11299  |
| 8.30E-07 | -0.25569 | 2.09E-08 | -0.13318 | 0.00394  | -0.26234 | 8.66E-09 | -0.1891  | 3.91E-05 |
| 0.93171  | -0.29783 | 5.08E-11 | -0.05911 | 0.20228  | -0.13015 | 0.00485  | 0.09154  | 0.04804  |
| 0.00075  | -0.38093 | 1.42E-17 | -0.12349 | 0.00755  | -0.24426 | 9.02E-08 | -0.08625 | 0.06255  |
| 2.04E-09 | -0.31071 | 6.55E-12 | -0.35429 | 2.94E-15 | -0.35567 | 2.26E-15 | 0.066105 | 0.15379  |
| 0.53948  | -0.3002  | 3.51E-11 | -0.08951 | 0.05323  | -0.10673 | 0.02106  | 0.058514 | 0.20688  |
| 0.21413  | -0.22718 | 7.01E-07 | -0.06141 | 0.18524  | -0.13987 | 0.00245  | 0.260462 | 1.11E-08 |
| 4.55E-13 | -0.54543 | 1.50E-37 | -0.39171 | 1.41E-18 | -0.48477 | 6.77E-29 | -0.08983 | 0.05237  |
| 2.74E-08 | -0.25024 | 4.24E-08 | -0.13601 | 0.00323  | -0.2514  | 3.65E-08 | -0.07899 | 0.08819  |
| 2.30E-06 | -0.42203 | 1.36E-21 | -0.23946 | 1.63E-07 | -0.3091  | 8.51E-12 | 0.004393 | 0.92456  |
| 3.34E-05 | -0.39082 | 1.72E-18 | -0.03032 | 0.51341  | -0.21928 | 1.71E-06 | -0.15586 | 0.00073  |
| 4.50E-12 | -0.40053 | 2.01E-19 | -0.26506 | 5.99E-09 | -0.40846 | 3.33E-20 | -0.10401 | 0.0246   |
| 0.02566  | -0.25798 | 1.55E-08 | 0.105374 | 0.02276  | -0.09217 | 0.0465   | -0.11001 | 0.0174   |
| 2.13E-19 | -0.47713 | 6.34E-28 | -0.35969 | 1.04E-15 | -0.50356 | 2.15E-31 | -0.1387  | 0.00267  |
| 0.00011  | -0.31421 | 3.69E-12 | 0.015103 | 0.74478  | -0.18642 | 5.05E-05 | -0.13341 | 0.00387  |
| 1.40E-10 | -0.40591 | 5.97E-20 | -0.23393 | 3.18E-07 | -0.37315 | 7.08E-17 | -0.06326 | 0.17231  |
| 3.01E-10 | -0.46583 | 1.57E-26 | -0.31448 | 3.52E-12 | -0.40149 | 1.62E-19 | -0.21133 | 4.09E-06 |
| 0.47025  | -0.16013 | 0.00051  | 0.174393 | 0.00015  | 0.06125  | 0.18639  | -0.01982 | 0.6693   |
| 4.15E-12 | -0.24671 | 6.63E-08 | -0.12025 | 0.00929  | -0.28701 | 2.63E-10 | 0.137904 | 0.00282  |
| 5.90E-11 | -0.1453  | 0.00164  | -0.04668 | 0.31414  | -0.21385 | 3.12E-06 | -0.00767 | 0.86866  |
| 0.48303  | -0.10824 | 0.0193   | 0.013937 | 0.76389  | -0.01249 | 0.78785  | 0.042088 | 0.36414  |
| 1.98E-14 | -0.3238  | 7.35E-13 | -0.26181 | 9.30E-09 | -0.37275 | 7.68E-17 | -0.20365 | 9.18E-06 |
| 1.01E-10 | -0.15418 | 0.00083  | -0.17505 | 0.00014  | -0.26221 | 8.82E-09 | -0.18611 | 5.20E-05 |

|          |          |          |          |          |          |          |          |          |
|----------|----------|----------|----------|----------|----------|----------|----------|----------|
| 1.03E-16 | -0.46605 | 1.48E-26 | -0.24928 | 4.79E-08 | -0.42149 | 1.55E-21 | -0.13022 | 0.00482  |
| 0.26118  | -0.29553 | 7.25E-11 | -0.12175 | 0.00845  | -0.19529 | 2.14E-05 | -0.06813 | 0.14155  |
| 1.44E-14 | -0.5577  | 1.59E-39 | -0.31528 | 3.09E-12 | -0.46062 | 6.64E-26 | -0.23437 | 3.01E-07 |
| 0.00211  | -0.09685 | 0.03642  | -0.14622 | 0.00153  | -0.17105 | 0.0002   | -0.08446 | 0.06821  |
| 9.38E-34 | -0.52866 | 5.56E-35 | -0.4463  | 3.06E-24 | -0.58225 | 9.91E-44 | -0.28834 | 2.16E-10 |
| 5.20E-05 | -0.08861 | 0.05568  | -0.06899 | 0.13657  | -0.15699 | 0.00066  | 0.10982  | 0.01759  |
| 3.42E-13 | -0.55262 | 1.07E-38 | -0.34035 | 3.96E-14 | -0.47778 | 5.26E-28 | -0.0078  | 0.86656  |
| 2.78E-09 | -0.54529 | 1.58E-37 | -0.19949 | 1.40E-05 | -0.39377 | 9.02E-19 | -0.08238 | 0.07534  |
| 6.81E-21 | -0.46636 | 1.36E-26 | -0.4802  | 2.60E-28 | -0.55584 | 3.21E-39 | -0.00206 | 0.96465  |
| 0.01214  | -0.13124 | 0.0045   | 0.063547 | 0.17039  | -0.10083 | 0.02935  | -0.11798 | 0.01072  |
| 5.03E-19 | -0.57355 | 3.37E-42 | -0.37373 | 6.30E-17 | -0.51726 | 2.58E-33 | -0.13086 | 0.00462  |
| 2.54E-24 | -0.34671 | 1.23E-14 | -0.35746 | 1.60E-15 | -0.47988 | 2.86E-28 | -0.25584 | 2.05E-08 |
| 4.66E-08 | -0.30882 | 8.90E-12 | -0.01334 | 0.77378  | -0.23356 | 3.32E-07 | -0.08547 | 0.06498  |
| 6.72E-10 | 0.530394 | 3.06E-35 | 0.168612 | 0.00025  | 0.319097 | 1.63E-12 | 0.233465 | 3.35E-07 |
| 0.01824  | -0.27189 | 2.33E-09 | -0.18476 | 5.91E-05 | -0.19284 | 2.72E-05 | -0.07484 | 0.10624  |
| 0.00743  | -0.28029 | 7.05E-10 | 0.044138 | 0.34123  | -0.14299 | 0.00195  | -0.07296 | 0.11537  |
| 3.91E-15 | -0.42405 | 8.32E-22 | -0.35568 | 2.26E-15 | -0.43466 | 6.05E-23 | -0.10582 | 0.02219  |
| 3.02E-42 | -0.54323 | 3.32E-37 | -0.38922 | 2.43E-18 | -0.58093 | 1.70E-43 | -0.3296  | 2.69E-13 |
| 2.44E-17 | -0.38321 | 8.77E-18 | -0.2674  | 4.35E-09 | -0.41646 | 5.13E-21 | -0.28214 | 5.39E-10 |
| 5.66E-16 | -0.30132 | 2.94E-11 | -0.18322 | 6.82E-05 | -0.35369 | 3.30E-15 | -0.26683 | 4.70E-09 |
| 7.05E-16 | -0.34413 | 1.98E-14 | -0.33454 | 1.13E-13 | -0.40285 | 1.20E-19 | -0.12334 | 0.00762  |
| 8.70E-10 | -0.36793 | 2.04E-16 | -0.19422 | 2.38E-05 | -0.31836 | 1.85E-12 | -0.05198 | 0.2623   |
| 2.28E-42 | -0.60154 | 2.70E-47 | -0.58711 | 1.32E-44 | -0.68353 | 1.43E-65 | -0.38671 | 4.16E-18 |
| 2.07E-21 | -0.64695 | 1.01E-56 | -0.48325 | 1.06E-28 | -0.59435 | 6.14E-46 | -0.13096 | 0.00459  |
| 8.04E-06 | -0.33141 | 1.96E-13 | -0.16871 | 0.00025  | -0.26915 | 3.42E-09 | 0.08856  | 0.05582  |
| 2.96E-20 | -0.35868 | 1.26E-15 | -0.31954 | 1.51E-12 | -0.46352 | 2.99E-26 | -0.16098 | 0.00048  |
| 3.26E-25 | -0.46493 | 2.02E-26 | -0.43956 | 1.75E-23 | -0.54921 | 3.76E-38 | -0.09705 | 0.03603  |
| 1.19E-23 | -0.46842 | 7.60E-27 | -0.22699 | 7.16E-07 | -0.45155 | 7.68E-25 | -0.20767 | 6.03E-06 |
| 1.67E-17 | -0.29152 | 1.34E-10 | -0.22574 | 8.27E-07 | -0.35919 | 1.14E-15 | -0.13105 | 0.00456  |
| 1.04E-08 | -0.44624 | 3.11E-24 | -0.24103 | 1.35E-07 | -0.3353  | 9.83E-14 | -0.05549 | 0.23135  |
| 5.61E-06 | -0.35717 | 1.69E-15 | -0.0322  | 0.48752  | -0.21518 | 2.70E-06 | 0.054073 | 0.24351  |
| 2.10E-17 | -0.3798  | 1.80E-17 | -0.43666 | 3.66E-23 | -0.49272 | 6.20E-30 | -0.0461  | 0.32015  |
| 2.62E-08 | -0.38061 | 1.52E-17 | -0.25813 | 1.52E-08 | -0.35511 | 2.52E-15 | -0.13282 | 0.00404  |
| 2.40E-06 | 0.064061 | 0.16695  | 0.205178 | 7.83E-06 | -0.0207  | 0.65549  | -0.07161 | 0.12227  |
| 8.83E-05 | -0.3128  | 4.65E-12 | -0.0484  | 0.2966   | -0.18791 | 4.38E-05 | 0.064992 | 0.16085  |
| 0.00415  | -0.24631 | 6.98E-08 | -0.16875 | 0.00025  | -0.21828 | 1.92E-06 | -0.20691 | 6.54E-06 |
| 1.09E-11 | -0.18002 | 9.16E-05 | -0.03726 | 0.42177  | -0.19935 | 1.42E-05 | -0.07541 | 0.10362  |
| 0.02961  | -0.36087 | 8.25E-16 | -0.15837 | 0.00059  | -0.20197 | 1.09E-05 | -0.09994 | 0.03082  |
| 4.14E-23 | -0.47834 | 4.47E-28 | -0.40802 | 3.68E-20 | -0.51165 | 1.62E-32 | -0.03256 | 0.48267  |
| 4.95E-07 | -0.39905 | 2.81E-19 | -0.19314 | 2.64E-05 | -0.31206 | 5.26E-12 | -0.10058 | 0.02977  |
| 0.01554  | -0.01638 | 0.72402  | 0.049712 | 0.28369  | -0.06589 | 0.15511  | 0.002386 | 0.95899  |
| 9.56E-15 | -0.25999 | 1.19E-08 | -0.23761 | 2.04E-07 | -0.34481 | 1.75E-14 | -0.03451 | 0.45693  |
| 8.93E-06 | -0.42855 | 2.77E-22 | -0.1706  | 0.00021  | -0.27932 | 8.11E-10 | -0.03017 | 0.51538  |
| 2.37E-18 | -0.50963 | 3.11E-32 | -0.3515  | 5.01E-15 | -0.50244 | 3.06E-31 | -0.11479 | 0.01305  |
| 0.00076  | -0.3513  | 5.20E-15 | -0.23299 | 3.55E-07 | -0.22803 | 6.34E-07 | -0.20346 | 9.36E-06 |

|          |          |          |          |          |          |          |          |          |
|----------|----------|----------|----------|----------|----------|----------|----------|----------|
| 5.44E-05 | -0.37465 | 5.21E-17 | 0.028063 | 0.54521  | -0.18305 | 6.93E-05 | -0.15746 | 0.00064  |
| 1.19E-12 | -0.4725  | 2.40E-27 | -0.27207 | 2.28E-09 | -0.39139 | 1.52E-18 | -0.23866 | 1.80E-07 |
| 4.39E-11 | -0.24733 | 6.14E-08 | -0.21368 | 3.18E-06 | -0.30671 | 1.25E-11 | -0.01367 | 0.76823  |
| 0.00139  | -0.31962 | 1.49E-12 | -0.18196 | 7.66E-05 | -0.2177  | 2.04E-06 | -0.02084 | 0.65323  |
| 9.80E-19 | -0.53997 | 1.07E-36 | -0.44262 | 7.96E-24 | -0.51409 | 7.30E-33 | -0.17717 | 0.00012  |
| 4.59E-13 | -0.4622  | 4.29E-26 | -0.33159 | 1.90E-13 | -0.41387 | 9.46E-21 | -0.10896 | 0.01851  |
| 1.04E-05 | -0.10824 | 0.0193   | -0.1534  | 0.00088  | -0.15297 | 0.00091  | 0.064992 | 0.16085  |
| 0.01223  | -0.18267 | 7.18E-05 | 0.017323 | 0.70887  | -0.12044 | 0.00918  | 0.098829 | 0.03274  |
| 0.00271  | -0.43286 | 9.52E-23 | -0.17746 | 0.00012  | -0.27642 | 1.23E-09 | -0.0613  | 0.18603  |
| 3.22E-10 | -0.38182 | 1.17E-17 | -0.18621 | 5.15E-05 | -0.32096 | 1.19E-12 | -0.08905 | 0.05447  |
| 2.48E-06 | -0.2381  | 1.92E-07 | -0.13362 | 0.00382  | -0.25998 | 1.19E-08 | 0.087879 | 0.05774  |
| 2.24E-34 | -0.50636 | 8.86E-32 | -0.43605 | 4.27E-23 | -0.59091 | 2.66E-45 | -0.3569  | 1.78E-15 |
| 3.75E-20 | -0.47436 | 1.41E-27 | -0.3318  | 1.83E-13 | -0.46323 | 3.23E-26 | -0.15991 | 0.00052  |
| 1.28E-07 | -0.39661 | 4.83E-19 | -0.2429  | 1.07E-07 | -0.36243 | 6.07E-16 | -0.11945 | 0.00978  |
| 1.36E-07 | -0.23326 | 3.44E-07 | -0.13335 | 0.00389  | -0.22795 | 6.40E-07 | -0.19234 | 2.86E-05 |
| 6.26E-09 | -0.19682 | 1.84E-05 | -0.19267 | 2.77E-05 | -0.30684 | 1.23E-11 | -0.0987  | 0.03296  |
| 0.93772  | -0.17811 | 0.00011  | 0.039699 | 0.39203  | -0.01585 | 0.73265  | 0.142006 | 0.0021   |
| 3.52E-06 | -0.32455 | 6.47E-13 | -0.21322 | 3.34E-06 | -0.29552 | 7.26E-11 | -0.04879 | 0.29274  |
| 1.57E-20 | -0.58801 | 9.05E-45 | -0.30504 | 1.63E-11 | -0.51739 | 2.47E-33 | -0.14992 | 0.00116  |
| 2.43E-06 | -0.40726 | 4.38E-20 | -0.30585 | 1.43E-11 | -0.33258 | 1.60E-13 | 0.029936 | 0.51871  |
| 4.64E-05 | -0.47012 | 4.71E-27 | -0.25723 | 1.71E-08 | -0.34034 | 3.97E-14 | 0.096154 | 0.03779  |
| 1.78E-14 | -0.48751 | 2.99E-29 | -0.29095 | 1.46E-10 | -0.43974 | 1.67E-23 | 0.004529 | 0.92225  |
| 1.16E-05 | -0.35132 | 5.18E-15 | -0.18426 | 6.19E-05 | -0.27063 | 2.78E-09 | -0.04908 | 0.28984  |
| 0.37677  | -0.18804 | 4.33E-05 | 0.093854 | 0.04264  | -0.03897 | 0.40077  | 0.021806 | 0.63834  |
| 5.12E-05 | -0.45822 | 1.28E-25 | -0.16433 | 0.00036  | -0.28159 | 5.84E-10 | -0.17098 | 0.00021  |
| 1.22E-05 | -0.35078 | 5.74E-15 | -0.16392 | 0.00038  | -0.27466 | 1.58E-09 | -0.00893 | 0.8474   |
| 1.79E-12 | -0.41301 | 1.16E-20 | -0.40765 | 4.00E-20 | -0.42771 | 3.41E-22 | -0.08561 | 0.06454  |
| 0.14199  | -0.17771 | 0.00011  | 0.050875 | 0.27256  | -0.07199 | 0.1203   | -0.04113 | 0.37519  |
| 3.62E-10 | -0.33325 | 1.42E-13 | -0.23017 | 4.95E-07 | -0.36689 | 2.51E-16 | -0.00138 | 0.97619  |
| 4.16E-05 | -0.53095 | 2.52E-35 | -0.36422 | 4.27E-16 | -0.39921 | 2.71E-19 | -0.02551 | 0.58246  |
| 0.21477  | -0.3216  | 1.07E-12 | -0.0589  | 0.20386  | -0.10813 | 0.01942  | 0.021702 | 0.63994  |
| 0.00033  | -0.32595 | 5.08E-13 | -0.05573 | 0.22937  | -0.17829 | 0.00011  | -0.10399 | 0.02462  |
| 0.23712  | -0.13624 | 0.00318  | 0.078538 | 0.09002  | -0.0679  | 0.14287  | -0.05366 | 0.24718  |
| 3.02E-26 | -0.44768 | 2.13E-24 | -0.41112 | 1.80E-20 | -0.53658 | 3.55E-36 | -0.16331 | 0.00039  |
| 0.00727  | -0.25643 | 1.90E-08 | -0.02606 | 0.57423  | -0.16158 | 0.00046  | -0.0028  | 0.95186  |
| 7.31E-16 | -0.25994 | 1.19E-08 | -0.20173 | 1.12E-05 | -0.33716 | 7.06E-14 | 0.01055  | 0.82013  |
| 3.00E-05 | -0.37385 | 6.14E-17 | -0.18195 | 7.67E-05 | -0.26122 | 1.01E-08 | 0.0859   | 0.06363  |
| 1.92E-06 | -0.21329 | 3.31E-06 | -0.13468 | 0.00355  | -0.21529 | 2.66E-06 | -0.03686 | 0.42681  |
| 6.84E-14 | -0.30221 | 2.56E-11 | -0.21881 | 1.81E-06 | -0.345   | 1.69E-14 | -0.18247 | 7.31E-05 |
| 9.25E-05 | -0.29787 | 5.05E-11 | -0.04023 | 0.38569  | -0.16045 | 0.0005   | -0.06117 | 0.18694  |
| 6.54E-07 | -0.4303  | 1.80E-22 | -0.20763 | 6.06E-06 | -0.33124 | 2.02E-13 | 0.003065 | 0.94733  |
| 0.41555  | -0.13375 | 0.00379  | 0.048959 | 0.29106  | 0.025023 | 0.58962  | 0.058733 | 0.20519  |
| 2.11E-21 | -0.56988 | 1.44E-41 | -0.28216 | 5.37E-10 | -0.50196 | 3.56E-31 | -0.25247 | 3.18E-08 |
| 2.07E-10 | -0.445   | 4.30E-24 | -0.41416 | 8.84E-21 | -0.47958 | 3.11E-28 | -0.07712 | 0.09597  |
| 0.03676  | -0.20214 | 1.07E-05 | -0.01515 | 0.74398  | -0.11403 | 0.01367  | 0.002542 | 0.95631  |

|          |          |          |          |          |          |          |          |          |
|----------|----------|----------|----------|----------|----------|----------|----------|----------|
| 0.80547  | -0.08904 | 0.0545   | -0.00387 | 0.93354  | -0.00124 | 0.97866  | -0.1896  | 3.73E-05 |
| 0.89837  | 0.255063 | 2.27E-08 | 0.020162 | 0.66387  | 0.076408 | 0.09911  | 0.261785 | 9.33E-09 |
| 0.58656  | -0.09915 | 0.03217  | 0.010999 | 0.81261  | -0.04032 | 0.38467  | 0.092201 | 0.04644  |
| 0.47983  | -0.06195 | 0.1814   | -0.01452 | 0.75423  | -0.04036 | 0.38418  | 0.074428 | 0.1082   |
| 0.00762  | 0.049264 | 0.28806  | -0.01293 | 0.78043  | -0.05928 | 0.20095  | -0.04484 | 0.33364  |
| 0.00119  | -0.01229 | 0.7911   | 0.16333  | 0.00039  | 0.156936 | 0.00067  | 0.005873 | 0.89927  |
| 0.10599  | -0.32493 | 6.05E-13 | -0.05164 | 0.26545  | -0.08602 | 0.06327  | -0.01225 | 0.79177  |
| 5.56E-06 | 0.157508 | 0.00064  | 0.314587 | 3.46E-12 | 0.28293  | 4.80E-10 | 0.004509 | 0.92258  |
| 9.19E-06 | -0.092   | 0.04693  | 0.036944 | 0.42575  | 0.066624 | 0.15058  | 0.0184   | 0.69166  |
| 4.71E-10 | 0.171581 | 0.00019  | -0.04974 | 0.28338  | 0.133395 | 0.00388  | 0.249128 | 4.88E-08 |
| 0.00064  | -0.11925 | 0.0099   | 0.017161 | 0.71146  | 0.044977 | 0.33212  | -0.21463 | 2.86E-06 |
| 0.02721  | -0.1377  | 0.00286  | -0.07356 | 0.11241  | -0.02181 | 0.63828  | 0.091589 | 0.04792  |
| 0.00704  | -0.22704 | 7.11E-07 | -0.11503 | 0.01287  | -0.16749 | 0.00028  | -0.09446 | 0.04132  |
| 5.53E-15 | 0.154641 | 0.0008   | 0.240377 | 1.46E-07 | 0.286404 | 2.88E-10 | 0.074367 | 0.10849  |
| 1.09E-18 | 0.252775 | 3.06E-08 | 0.258911 | 1.37E-08 | 0.333451 | 1.37E-13 | 0.194251 | 2.37E-05 |
| 0.1433   | -0.03421 | 0.46074  | -0.02392 | 0.6062   | -0.03409 | 0.46234  | 0.006274 | 0.89244  |
| 0.00676  | -0.06475 | 0.16243  | -0.08884 | 0.05504  | -0.13014 | 0.00485  | -0.10141 | 0.02844  |
| 0.46606  | 0.183039 | 6.93E-05 | 0.024665 | 0.59495  | 0.089972 | 0.05201  | 0.38419  | 7.12E-18 |
| 0.01032  | -0.00228 | 0.96073  | -0.07513 | 0.10489  | -0.08846 | 0.0561   | -0.24539 | 7.83E-08 |
| 0.00028  | 0.071201 | 0.12442  | 0.079696 | 0.08536  | 0.110212 | 0.01719  | 0.086389 | 0.06213  |
| 8.71E-05 | 0.200271 | 1.30E-05 | 0.07032  | 0.12916  | 0.152343 | 0.00096  | 0.445466 | 3.81E-24 |
| 0.04171  | -0.26392 | 7.00E-09 | -0.10685 | 0.02092  | -0.07469 | 0.10696  | -0.06449 | 0.16415  |
| 0.0797   | -0.2552  | 2.23E-08 | 0.009986 | 0.82959  | -0.0362  | 0.43514  | -0.09503 | 0.04009  |
| 0.00093  | 0.092539 | 0.04564  | 0.278908 | 8.61E-10 | 0.05877  | 0.2049   | -0.071   | 0.1255   |
| 0.00024  | -0.04952 | 0.28553  | 0.038218 | 0.40994  | 0.021431 | 0.64412  | 0.10484  | 0.02346  |
| 0.43474  | 0.170236 | 0.00022  | 0.0886   | 0.05571  | 0.097668 | 0.03486  | 0.194855 | 2.23E-05 |
| 0.45166  | -0.06124 | 0.1865   | -0.18797 | 4.36E-05 | -0.09089 | 0.04964  | 0.016064 | 0.72917  |
| 3.36E-23 | 0.305565 | 1.50E-11 | 0.283409 | 4.48E-10 | 0.411676 | 1.58E-20 | 0.083047 | 0.07298  |
| 0.00075  | -0.21977 | 1.62E-06 | -0.36393 | 4.52E-16 | -0.33174 | 1.85E-13 | 0.026954 | 0.56123  |
| 0.8101   | -0.20262 | 1.02E-05 | -0.16842 | 0.00026  | -0.15484 | 0.00079  | 0.014222 | 0.75921  |
| 0.08073  | 0.271984 | 2.30E-09 | -0.21044 | 4.50E-06 | -0.10134 | 0.02854  | 0.015798 | 0.73348  |
| 0.81439  | -0.04996 | 0.28128  | -0.08215 | 0.07614  | -0.05614 | 0.22594  | 0.05006  | 0.28033  |
| 0.00114  | 0.109394 | 0.01804  | 0.199222 | 1.44E-05 | 0.165279 | 0.00033  | 0.021653 | 0.6407   |
| 0.31694  | -0.05904 | 0.20285  | -0.12667 | 0.00612  | -0.09476 | 0.04067  | -0.06401 | 0.16729  |
| 0.70748  | -0.23529 | 2.70E-07 | -0.23114 | 4.42E-07 | -0.16523 | 0.00034  | -0.0099  | 0.83112  |
| 0.03595  | -0.1985  | 1.55E-05 | -0.21436 | 2.95E-06 | -0.20626 | 7.00E-06 | -0.0519  | 0.263    |
| 0.7681   | -0.2446  | 8.64E-08 | -0.16741 | 0.00028  | -0.15812 | 0.0006   | -0.08002 | 0.0841   |
| 0.44121  | -0.14923 | 0.00122  | 0.014246 | 0.7588   | -0.09079 | 0.04989  | -0.07336 | 0.1134   |
| 0.00089  | 0.072447 | 0.11795  | 0.206715 | 6.67E-06 | 0.198749 | 1.51E-05 | 0.014606 | 0.75291  |
| 0.24826  | -0.0594  | 0.20008  | 0.019007 | 0.68204  | 0.013589 | 0.7696   | 0.037099 | 0.4238   |
| 0.54654  | -0.15241 | 0.00095  | -0.06443 | 0.16448  | -0.0815  | 0.07852  | 0.002072 | 0.96438  |
| 0.41165  | 0.06881  | 0.1376   | 0.176669 | 0.00012  | 0.091328 | 0.04856  | -0.09352 | 0.04339  |
| 0.69975  | -0.00743 | 0.87273  | 0.025388 | 0.5842   | 0.029687 | 0.5222   | 0.020996 | 0.65087  |
| 0.23371  | -0.02827 | 0.54229  | -0.06999 | 0.13099  | -0.07331 | 0.11362  | -0.03624 | 0.43466  |
| 0.00235  | -0.05836 | 0.20808  | 0.092772 | 0.0451   | 0.057973 | 0.21112  | 0.043591 | 0.34725  |

|          |          |          |          |          |          |          |           |          |
|----------|----------|----------|----------|----------|----------|----------|-----------|----------|
| 0.84799  | 0.044799 | 0.33404  | 0.068487 | 0.13947  | 0.025777 | 0.57846  | 0.029618  | 0.52316  |
| 0.02941  | -0.07471 | 0.10688  | 0.004726 | 0.91887  | 0.026168 | 0.5727   | 0.034916  | 0.4516   |
| 0.36293  | -0.11885 | 0.01015  | -0.15073 | 0.00109  | -0.12365 | 0.00747  | 0.067146  | 0.1474   |
| 0.13382  | 0.052927 | 0.25366  | 0.220961 | 1.42E-06 | 0.11299  | 0.01457  | -0.09321  | 0.04408  |
| 0.024    | -0.0012  | 0.97932  | 0.030194 | 0.51512  | 0.044281 | 0.33966  | 0.031189  | 0.50136  |
| 0.73322  | -0.11338 | 0.01423  | 0.072061 | 0.11992  | -0.00453 | 0.92229  | -0.06313  | 0.17323  |
| 0.33784  | 0.014599 | 0.75302  | 0.096957 | 0.03621  | 0.028165 | 0.54376  | 0.019229  | 0.67853  |
| 0.99155  | 0.033371 | 0.47189  | 0.003713 | 0.93621  | -0.00428 | 0.92656  | 0.041833  | 0.36707  |
| 0.13992  | -0.00322 | 0.94459  | 0.001308 | 0.97751  | -0.01441 | 0.75614  | -8.83E-05 | 0.99848  |
| 0.41767  | 0.026458 | 0.56846  | 0.018857 | 0.68442  | 0.031886 | 0.49184  | 0.02519   | 0.58714  |
| 0.24954  | 0.006268 | 0.89254  | 0.026577 | 0.56671  | 0.044109 | 0.34155  | 0.030584  | 0.50969  |
| 0.40062  | -0.10589 | 0.0221   | -0.01208 | 0.79459  | -0.03415 | 0.46157  | 0.031604  | 0.49568  |
| 0.25574  | 0.049867 | 0.28219  | -0.06568 | 0.15648  | 0.002139 | 0.96323  | 0.129477  | 0.00507  |
| 0.3562   | -0.05811 | 0.21004  | -0.13423 | 0.00366  | -0.07117 | 0.12456  | -0.18353  | 6.62E-05 |
| 0.06305  | -0.02186 | 0.63758  | 0.080316 | 0.08296  | 0.09094  | 0.04953  | 0.036125  | 0.43608  |
| 0.0085   | 0.042963 | 0.35426  | 0.171627 | 0.00019  | 0.120215 | 0.00931  | -0.03615  | 0.43577  |
| 0.04702  | -0.01388 | 0.76483  | 0.073992 | 0.11029  | 0.041259 | 0.37368  | 0.041639  | 0.36929  |
| 0.80785  | 0.008463 | 0.85527  | 0.096664 | 0.03678  | 0.045071 | 0.33112  | 0.010673  | 0.81807  |
| 0.02572  | -0.11826 | 0.01053  | -0.12374 | 0.00743  | -0.10367 | 0.02507  | -0.07261  | 0.11713  |
| 0.56559  | -0.1222  | 0.0082   | 0.029024 | 0.53153  | 0.005368 | 0.9079   | -0.00693  | 0.88135  |
| 0.37449  | -0.01818 | 0.69523  | -0.04698 | 0.31102  | 0.008401 | 0.85631  | 0.101102  | 0.02892  |
| 0.10547  | -0.01822 | 0.69449  | 0.027365 | 0.55526  | 0.039369 | 0.39598  | 0.037898  | 0.41389  |
| 0.43901  | -0.06381 | 0.1686   | 0.009673 | 0.83485  | -0.03027 | 0.51403  | 0.009248  | 0.84202  |
| 0.00068  | -0.09083 | 0.04979  | -0.17316 | 0.00017  | -0.17375 | 0.00016  | -0.27869  | 8.89E-10 |
| 0.37162  | -0.03408 | 0.46257  | 0.124779 | 0.00694  | 0.032701 | 0.48082  | -0.05175  | 0.26443  |
| 0.32941  | 0.059549 | 0.19894  | -0.04993 | 0.28157  | -0.02876 | 0.53529  | 0.108908  | 0.01856  |
| 0.48058  | -0.04712 | 0.30963  | -0.01793 | 0.6992   | -0.02843 | 0.53994  | 0.012274  | 0.79137  |
| 0.00021  | -0.24663 | 6.70E-08 | -0.20453 | 8.38E-06 | -0.24517 | 8.04E-08 | 0.028263  | 0.54236  |
| 0.11822  | 0.012468 | 0.78814  | 0.017701 | 0.70281  | 0.072891 | 0.11571  | 0.029345  | 0.527    |
| 0.70799  | 0.003466 | 0.94046  | 0.003881 | 0.93333  | -0.00867 | 0.85176  | 0.01553   | 0.73783  |
| 0.68697  | -0.03436 | 0.45881  | -0.02632 | 0.57048  | -0.0314  | 0.49852  | 0.036744  | 0.42825  |
| 0.0626   | 0.132771 | 0.00405  | 0.077752 | 0.09329  | 0.116915 | 0.01146  | 0.070075  | 0.1305   |
| 0.01566  | 0.129019 | 0.00523  | 0.048421 | 0.29639  | 0.108856 | 0.01862  | 0.096263  | 0.03757  |
| 0.01492  | -0.13718 | 0.00297  | 0.016605 | 0.72042  | -0.07701 | 0.09647  | -0.04137  | 0.37236  |
| 0.84023  | -0.05547 | 0.23152  | -0.05813 | 0.20989  | -0.04329 | 0.3506   | -0.06725  | 0.14675  |
| 0.51839  | -0.0031  | 0.94675  | 0.037295 | 0.42136  | 0.053425 | 0.24921  | -0.01354  | 0.77045  |
| 0.14304  | -0.0738  | 0.11122  | -0.01564 | 0.73597  | -0.04983 | 0.28254  | -0.02021  | 0.6631   |
| 0.6511   | 0.013722 | 0.76742  | 0.014608 | 0.75288  | 0.013508 | 0.77094  | 0.029612  | 0.52326  |
| 0.93525  | -0.00521 | 0.91053  | 0.016608 | 0.72037  | -0.00161 | 0.97225  | 7.08E-05  | 0.99878  |
| 0.93368  | 0.019207 | 0.67888  | 0.042919 | 0.35474  | 0.01905  | 0.68136  | 0.020376  | 0.66053  |
| 0.97713  | -0.04746 | 0.30605  | 0.029644 | 0.5228   | 0.018093 | 0.69655  | -0.01451  | 0.7544   |
| 0.00791  | 0.067218 | 0.14697  | 0.115642 | 0.01239  | 0.114399 | 0.01337  | 0.048395  | 0.29665  |
| 1.61E-06 | -0.19498 | 2.20E-05 | -0.0928  | 0.04502  | -0.17136 | 0.0002   | -0.27305  | 1.98E-09 |
| 0.05689  | -0.09142 | 0.04833  | 0.117064 | 0.01135  | 0.046855 | 0.31231  | 0.006     | 0.89711  |
| 0.24298  | -0.06651 | 0.15125  | 0.137552 | 0.00289  | 0.047028 | 0.31052  | -0.01555  | 0.73743  |

|          |          |          |          |          |          |          |          |          |
|----------|----------|----------|----------|----------|----------|----------|----------|----------|
| 0.17082  | -0.20744 | 6.18E-06 | 0.130655 | 0.00468  | 0.010777 | 0.81632  | -0.12112 | 0.00879  |
| 0.00046  | -0.23095 | 4.51E-07 | -0.08355 | 0.07126  | -0.1797  | 9.43E-05 | -0.01943 | 0.67536  |
| 0.46887  | -0.02069 | 0.65561  | -0.0783  | 0.09099  | 0.002356 | 0.95951  | -0.00774 | 0.86745  |
| 4.21E-07 | 0.064207 | 0.16598  | -0.10724 | 0.02045  | 0.069073 | 0.13611  | 0.461427 | 5.31E-26 |
| 0.04655  | -0.04324 | 0.35115  | -0.0388  | 0.40283  | 0.00113  | 0.98056  | 0.13351  | 0.00385  |
| 0.00839  | 0.118902 | 0.01012  | 0.106432 | 0.02143  | 0.117438 | 0.01109  | 0.13534  | 0.00339  |
| 4.27E-09 | 0.231408 | 4.28E-07 | 0.240452 | 1.44E-07 | 0.245211 | 8.00E-08 | 0.296111 | 6.63E-11 |
| 0.07708  | -0.02407 | 0.60387  | 0.06433  | 0.16517  | 0.028615 | 0.53734  | -0.00763 | 0.86931  |
| 0.85908  | 0.006639 | 0.88623  | -0.0013  | 0.97759  | 0.013462 | 0.77169  | 0.031081 | 0.50285  |
| 0.00433  | -0.00255 | 0.95621  | -0.08152 | 0.07843  | 0.045251 | 0.32919  | 0.095126 | 0.03989  |
| 2.28E-14 | 0.382777 | 9.60E-18 | 0.285027 | 3.53E-10 | 0.342045 | 2.91E-14 | 0.358089 | 1.42E-15 |
| 0.12807  | 0.052685 | 0.25584  | -0.02992 | 0.51895  | 0.006212 | 0.89349  | -0.12452 | 0.00706  |
| 0.00034  | 0.26651  | 4.92E-09 | 0.130753 | 0.00465  | 0.202673 | 1.02E-05 | -0.06607 | 0.15402  |
| 0.04649  | 0.299605 | 3.85E-11 | 0.295974 | 6.77E-11 | 0.232813 | 3.62E-07 | -0.06816 | 0.14139  |
| 0.39534  | 0.050774 | 0.27352  | -0.05274 | 0.25531  | 0.029951 | 0.5185   | 0.133538 | 0.00384  |
| 0.0013   | -0.04159 | 0.36986  | -0.07481 | 0.1064   | -0.12193 | 0.00835  | 0.265074 | 5.98E-09 |
| 0.29193  | -0.09726 | 0.03564  | -0.09394 | 0.04245  | -0.07412 | 0.10967  | -0.26322 | 7.68E-09 |
| 0.16827  | -0.23761 | 2.04E-07 | -0.24686 | 6.51E-08 | -0.11799 | 0.01071  | 0.021908 | 0.63677  |
| 0.26298  | 0.12204  | 0.00829  | 0.062136 | 0.18009  | 0.082073 | 0.07642  | -0.01548 | 0.73861  |
| 0.00126  | -0.09893 | 0.03256  | -0.13717 | 0.00297  | -0.03776 | 0.41553  | 0.31725  | 2.23E-12 |
| 0.1439   | 0.1815   | 8.00E-05 | 0.144099 | 0.0018   | 0.127192 | 0.00591  | 0.035388 | 0.4455   |
| 0.00075  | 0.134389 | 0.00362  | 0.30048  | 3.36E-11 | 0.242311 | 1.15E-07 | 0.339363 | 4.74E-14 |
| 7.63E-05 | -0.05736 | 0.21602  | 0.043184 | 0.35178  | -0.06015 | 0.19446  | -0.1613  | 0.00047  |
| 1.28E-05 | 0.307727 | 1.06E-11 | 0.103438 | 0.0254   | 0.170826 | 0.00021  | 0.150328 | 0.00112  |
| 0.43723  | 0.044329 | 0.33914  | 0.11135  | 0.01607  | 0.025752 | 0.57883  | 0.351281 | 5.22E-15 |
| 0.85311  | -0.14794 | 0.00135  | -0.11835 | 0.01048  | -0.1036  | 0.02517  | 0.277402 | 1.07E-09 |
| 0.46116  | -0.18172 | 7.83E-05 | -0.18891 | 3.98E-05 | -0.12404 | 0.00728  | -0.04469 | 0.33524  |
| 3.37E-08 | 0.096713 | 0.03668  | 0.184744 | 5.91E-05 | 0.188004 | 4.34E-05 | 0.145065 | 0.00167  |
| 0.03953  | -0.28027 | 7.07E-10 | -0.10518 | 0.02301  | -0.15217 | 0.00097  | -0.13037 | 0.00478  |
| 4.72E-09 | 0.017099 | 0.71246  | 0.213135 | 3.37E-06 | 0.219833 | 1.61E-06 | 0.197201 | 1.77E-05 |
| 2.61E-07 | -0.13615 | 0.0032   | -0.18872 | 4.06E-05 | -0.20622 | 7.02E-06 | 0.143917 | 0.00182  |
| 0.5765   | -0.12147 | 0.0086   | -0.05119 | 0.26962  | -0.07882 | 0.08889  | 0.001654 | 0.97157  |
| 0.0007   | 0.025234 | 0.58649  | 0.055576 | 0.23064  | 0.094027 | 0.04225  | 0.091278 | 0.04868  |
| 6.15E-05 | 0.145361 | 0.00163  | 0.051757 | 0.26432  | 0.173541 | 0.00016  | -0.02237 | 0.62975  |
| 0.40784  | -0.00092 | 0.98413  | -0.10588 | 0.02211  | -0.06378 | 0.16883  | 0.15966  | 0.00053  |
| 6.06E-08 | 0.312868 | 4.60E-12 | 0.050697 | 0.27425  | 0.249289 | 4.78E-08 | 0.247198 | 6.24E-08 |
| 3.39E-08 | -0.21386 | 3.11E-06 | 0.136492 | 0.00312  | 0.159405 | 0.00054  | 0.078744 | 0.08918  |
| 0.90546  | -0.12817 | 0.00554  | 0.007141 | 0.87768  | -0.03092 | 0.50504  | -0.15703 | 0.00066  |
| 0.06246  | -0.01344 | 0.77208  | -0.26946 | 3.27E-09 | -0.03055 | 0.51011  | 0.15504  | 0.00077  |
| 3.05E-05 | 0.493973 | 4.23E-30 | 0.290746 | 1.50E-10 | 0.351371 | 5.13E-15 | 0.050176 | 0.27922  |
| 1.66E-11 | 0.141077 | 0.00224  | 0.421202 | 1.66E-21 | 0.362668 | 5.80E-16 | -0.12983 | 0.00495  |
| 0.30694  | -0.09844 | 0.03344  | -0.01095 | 0.81339  | -0.00749 | 0.87169  | -0.00728 | 0.87537  |
| 0.05307  | -0.20683 | 6.59E-06 | -0.03015 | 0.51573  | -0.03974 | 0.39156  | 0.018512 | 0.68989  |
| 0.27818  | 0.06353  | 0.1705   | 0.27269  | 2.09E-09 | 0.159298 | 0.00055  | 0.042274 | 0.36203  |
| 0.27477  | -0.00464 | 0.92039  | 0.058521 | 0.20682  | 0.004592 | 0.92117  | 0.067083 | 0.14778  |

|          |          |          |          |          |          |          |          |          |
|----------|----------|----------|----------|----------|----------|----------|----------|----------|
| 0.42969  | 0.026264 | 0.57129  | 0.032216 | 0.48737  | 0.015196 | 0.74327  | -0.17422 | 0.00015  |
| 0.1224   | -0.16225 | 0.00043  | -0.01583 | 0.73292  | -0.10679 | 0.02099  | -0.04488 | 0.3332   |
| 1.08E-12 | 0.31094  | 6.31E-12 | 0.218072 | 1.96E-06 | 0.312244 | 5.10E-12 | 0.235334 | 2.68E-07 |
| 0.76305  | -0.34721 | 1.12E-14 | -0.12745 | 0.00581  | -0.1383  | 0.00274  | -0.03706 | 0.4243   |
| 0.00085  | 0.1133   | 0.0143   | 0.097685 | 0.03483  | 0.111496 | 0.01593  | 0.076409 | 0.09911  |
| 0.04621  | -0.01655 | 0.72126  | 0.005678 | 0.90261  | 0.049988 | 0.28102  | 0.090875 | 0.04969  |
| 2.32E-09 | -0.16654 | 0.0003   | 0.02677  | 0.5639   | 0.071783 | 0.12136  | 0.164752 | 0.00035  |
| 0.05029  | -0.28222 | 5.33E-10 | -0.19729 | 1.75E-05 | -0.16315 | 0.0004   | -0.15998 | 0.00052  |
| 0.26695  | -0.06767 | 0.14424  | -0.11396 | 0.01373  | -0.04679 | 0.31294  | 0.001071 | 0.98159  |
| 0.25286  | -0.2083  | 5.65E-06 | -0.10598 | 0.02199  | -0.12437 | 0.00713  | -0.22307 | 1.12E-06 |
| 0.03892  | 0.096694 | 0.03672  | -0.09918 | 0.03213  | 0.051276 | 0.26879  | -0.02553 | 0.58216  |
| 7.68E-05 | -0.2384  | 1.85E-07 | -0.29178 | 1.29E-10 | -0.25251 | 3.16E-08 | -0.14416 | 0.00179  |
| 0.42102  | -0.10284 | 0.02626  | -0.11523 | 0.01271  | -0.0928  | 0.04502  | -0.04236 | 0.36104  |
| 2.69E-16 | 0.318356 | 1.85E-12 | 0.174468 | 0.00015  | 0.247319 | 6.14E-08 | 0.177443 | 0.00012  |
| 0.01324  | 0.009407 | 0.83934  | 0.045564 | 0.32584  | 0.01416  | 0.76022  | -0.14247 | 0.00203  |
| 3.91E-21 | 0.29414  | 8.97E-11 | 0.330559 | 2.28E-13 | 0.407663 | 3.99E-20 | 0.239915 | 1.54E-07 |
| 0.36177  | 0.088779 | 0.05522  | 0.021614 | 0.6413   | 0.033864 | 0.46536  | -0.16598 | 0.00032  |
| 0.05339  | -0.10262 | 0.02658  | -0.15786 | 0.00062  | -0.15846 | 0.00059  | -0.06243 | 0.17807  |
| 0.00721  | 0.11156  | 0.01587  | 0.272228 | 2.23E-09 | 0.146816 | 0.00147  | 0.175665 | 0.00014  |
| 0.88931  | -0.11419 | 0.01354  | -0.00168 | 0.97103  | -0.03469 | 0.45447  | 0.019126 | 0.68016  |
| 0.21659  | -0.06331 | 0.17196  | -0.04328 | 0.35074  | -0.0627  | 0.17618  | -0.03874 | 0.40355  |
| 0.7004   | 0.01585  | 0.73263  | -0.00386 | 0.93376  | -0.0109  | 0.81433  | 0.000971 | 0.9833   |
| 0.33765  | 0.202533 | 1.03E-05 | 0.137292 | 0.00295  | 0.129681 | 0.005    | 0.236029 | 2.47E-07 |
| 5.38E-05 | 0.140576 | 0.00233  | 0.177421 | 0.00012  | 0.215057 | 2.73E-06 | -0.1209  | 0.00892  |
| 6.78E-06 | 0.002128 | 0.96341  | 0.092907 | 0.04478  | 0.121325 | 0.00868  | 0.123038 | 0.00777  |
| 0.20219  | 0.093101 | 0.04434  | -0.14487 | 0.0017   | -0.07925 | 0.08714  | 0.077095 | 0.0961   |
| 0.20589  | -0.30157 | 2.83E-11 | -0.17767 | 0.00011  | -0.14217 | 0.00207  | 0.014957 | 0.74716  |
| 7.47E-05 | -0.14114 | 0.00223  | 0.088353 | 0.0564   | 0.068025 | 0.14216  | -0.20002 | 1.33E-05 |
| 0.04887  | 0.014648 | 0.75222  | -0.07862 | 0.08968  | -0.00854 | 0.85392  | 0.079353 | 0.08672  |
| 5.87E-05 | 0.022079 | 0.63413  | 0.069287 | 0.13489  | 0.113564 | 0.01407  | 0.181397 | 8.07E-05 |
| 0.07464  | 0.439673 | 1.70E-23 | 0.129023 | 0.00523  | 0.223155 | 1.11E-06 | 0.138288 | 0.00275  |
| 0.76638  | -0.04681 | 0.31273  | 0.085873 | 0.06371  | 0.029725 | 0.52166  | -0.19287 | 2.71E-05 |
| 0.53521  | -0.03784 | 0.41459  | -0.00051 | 0.99115  | -0.02935 | 0.52698  | 0.083781 | 0.07047  |
| 0.00925  | -0.1168  | 0.01154  | -0.16363 | 0.00038  | -0.15961 | 0.00054  | 0.086544 | 0.06166  |
| 0.05814  | -0.08132 | 0.07918  | -0.07238 | 0.11827  | -0.10696 | 0.02079  | -0.0432  | 0.3516   |
| 0.00787  | 0.146414 | 0.00151  | 0.194332 | 2.35E-05 | 0.161351 | 0.00046  | 0.248377 | 5.37E-08 |
| 0.00194  | 0.068603 | 0.13879  | -0.00707 | 0.87885  | -0.08286 | 0.07362  | 0.143659 | 0.00186  |
| 0.1807   | -0.1452  | 0.00165  | -0.00527 | 0.90952  | -0.03646 | 0.43188  | -0.00375 | 0.93561  |
| 3.73E-11 | 0.149274 | 0.00122  | -0.03091 | 0.5052   | 0.139133 | 0.00258  | 0.431208 | 1.44E-22 |
| 3.75E-08 | -0.1732  | 0.00017  | -0.2381  | 1.92E-07 | -0.28338 | 4.50E-10 | -0.17713 | 0.00012  |
| 0.00431  | -0.11024 | 0.01716  | -0.13408 | 0.0037   | -0.13175 | 0.00434  | -0.17652 | 0.00013  |
| 0.00106  | -0.11197 | 0.01548  | -0.1349  | 0.00349  | -0.144   | 0.00181  | -0.04753 | 0.30543  |
| 0.02955  | -0.12863 | 0.00537  | -0.26263 | 8.33E-09 | -0.10376 | 0.02494  | -0.01856 | 0.68907  |
| 0.00178  | -0.3138  | 3.94E-12 | -0.3842  | 7.10E-18 | -0.33674 | 7.60E-14 | 0.007903 | 0.86475  |
| 0.929    | -0.08797 | 0.05749  | -0.13111 | 0.00454  | -0.07456 | 0.10756  | -0.08597 | 0.0634   |



|          |          |          |          |          |           |          |          |          |
|----------|----------|----------|----------|----------|-----------|----------|----------|----------|
| 3.78E-11 | -0.09654 | 0.03703  | 0.148718 | 0.00127  | 0.130488  | 0.00474  | 0.075795 | 0.10186  |
| 1.95E-10 | 0.311644 | 5.62E-12 | 0.292501 | 1.15E-10 | 0.310188  | 7.13E-12 | 0.284377 | 3.88E-10 |
| 0.18851  | -0.2026  | 1.02E-05 | 0.056558 | 0.22249  | -0.06799  | 0.14238  | 0.208436 | 5.57E-06 |
| 0.00019  | -0.15929 | 0.00055  | -0.20259 | 1.02E-05 | -0.19508  | 2.18E-05 | 0.207384 | 6.22E-06 |
| 2.06E-07 | 0.045186 | 0.32988  | 0.114408 | 0.01337  | 0.164101  | 0.00037  | 0.444753 | 4.58E-24 |
| 0.84026  | -0.09917 | 0.03215  | -0.03495 | 0.45116  | -0.05335  | 0.24986  | -0.07573 | 0.10216  |
| 0.11011  | -0.05893 | 0.20366  | -0.05298 | 0.25318  | -0.05438  | 0.24087  | -0.03264 | 0.48169  |
| 0.26796  | -0.21504 | 2.74E-06 | -0.11235 | 0.01514  | -0.1338   | 0.00377  | -0.26181 | 9.30E-09 |
| 0.17822  | -0.0597  | 0.19782  | -0.01791 | 0.69942  | -0.04745  | 0.30615  | -0.19588 | 2.02E-05 |
| 0.02509  | 0.206402 | 6.89E-06 | 0.074615 | 0.10732  | 0.121684  | 0.00848  | 0.070285 | 0.12935  |
| 0.45379  | -0.08278 | 0.07392  | -0.12885 | 0.00529  | -0.11868  | 0.01026  | 0.113795 | 0.01387  |
| 1.01E-08 | -0.28362 | 4.34E-10 | -0.31499 | 3.24E-12 | -0.34519  | 1.63E-14 | -0.21022 | 4.61E-06 |
| 0.00503  | -0.19465 | 2.28E-05 | -0.0103  | 0.82439  | -0.01798  | 0.69834  | 0.021128 | 0.64882  |
| 3.87E-13 | -0.03442 | 0.45808  | 0.359881 | 1.00E-15 | 0.287747  | 2.36E-10 | 0.052082 | 0.26133  |
| 0.01394  | 0.293673 | 9.63E-11 | 0.122288 | 0.00816  | 0.05146   | 0.26708  | -0.12279 | 0.0079   |
| 2.75E-08 | -0.09615 | 0.03779  | 0.103654 | 0.02509  | 0.127036  | 0.00598  | -0.12565 | 0.00655  |
| 0.8586   | -0.01531 | 0.74147  | 0.032458 | 0.48409  | 0.004948  | 0.91507  | 0.265767 | 5.44E-09 |
| 0.88424  | -0.07946 | 0.0863   | -0.00166 | 0.97142  | -0.05645  | 0.22339  | 0.213417 | 3.27E-06 |
| 0.9209   | -0.01768 | 0.7032   | -0.00072 | 0.98759  | -0.02405  | 0.6042   | 0.015388 | 0.74014  |
| 0.92236  | 0.027842 | 0.54839  | 0.013334 | 0.77382  | -7.01E-06 | 0.99988  | 0.032333 | 0.48579  |
| 0.23713  | -0.18265 | 7.19E-05 | -0.09387 | 0.04261  | -0.08613  | 0.06291  | -0.04968 | 0.28399  |
| 2.41E-10 | 0.452098 | 6.63E-25 | 0.282368 | 5.21E-10 | 0.353172  | 3.64E-15 | 0.045366 | 0.32795  |
| 2.03E-06 | 0.157524 | 0.00063  | 0.279479 | 7.93E-10 | 0.292052  | 1.23E-10 | 0.073044 | 0.11494  |
| 4.85E-13 | -0.03813 | 0.41102  | -0.08419 | 0.06912  | 0.145182  | 0.00166  | 0.14313  | 0.00193  |
| 0.27091  | -0.04952 | 0.2856   | 0.060014 | 0.19546  | 0.067049  | 0.14798  | 0.054731 | 0.23782  |
| 0.0053   | 0.070478 | 0.1283   | -0.0309  | 0.50532  | 0.07561   | 0.1027   | 0.004408 | 0.92431  |
| 0.38072  | -0.01971 | 0.67094  | 0.108987 | 0.01848  | 0.024253  | 0.60113  | -0.06883 | 0.1375   |
| 0.00028  | -0.21523 | 2.68E-06 | -0.1842  | 6.22E-05 | -0.20087  | 1.22E-05 | -0.06512 | 0.16004  |
| 0.05105  | -0.00025 | 0.99564  | 0.012935 | 0.78041  | -0.02817  | 0.54373  | -0.02448 | 0.5977   |
| 0.46233  | 0.220704 | 1.46E-06 | 0.169662 | 0.00023  | 0.060686  | 0.19049  | -0.08786 | 0.0578   |
| 2.09E-05 | -0.11504 | 0.01286  | 0.161483 | 0.00046  | 0.141032  | 0.00225  | 0.054019 | 0.24398  |
| 0.67689  | -0.03112 | 0.50234  | 0.057744 | 0.21293  | 0.015019  | 0.74615  | 0.034937 | 0.45133  |
| 0.70363  | -0.01    | 0.82942  | -0.03321 | 0.47402  | 0.004685  | 0.91957  | 0.014024 | 0.76245  |
| 0.56187  | -0.0353  | 0.44668  | -0.00481 | 0.91743  | 0.011371  | 0.8064   | 0.015691 | 0.73521  |
| 0.01237  | 0.156732 | 0.00068  | -0.19939 | 1.42E-05 | -0.12776  | 0.00569  | 0.182742 | 7.13E-05 |
| 0.05618  | -0.09212 | 0.04663  | -0.07876 | 0.08913  | -0.09058  | 0.05044  | -0.04249 | 0.35963  |
| 1.74E-06 | -0.03636 | 0.43307  | -0.11565 | 0.01239  | -0.17162  | 0.00019  | 0.021123 | 0.6489   |
| 0.48485  | 0.018586 | 0.6887   | -0.07798 | 0.09234  | -0.06089  | 0.18902  | 0.055303 | 0.23294  |
| 0.17149  | -0.27691 | 1.15E-09 | -0.20468 | 8.25E-06 | -0.19871  | 1.52E-05 | -0.05404 | 0.24376  |
| 0.04281  | 0.184353 | 6.13E-05 | 0.142153 | 0.00207  | 0.095205  | 0.03973  | 0.010654 | 0.81839  |
| 5.98E-10 | 0.318092 | 1.93E-12 | 0.286112 | 3.01E-10 | 0.359043  | 1.18E-15 | 0.134012 | 0.00372  |
| 0.00263  | 0.150195 | 0.00113  | 0.219053 | 1.76E-06 | 0.196182  | 1.96E-05 | 0.049659 | 0.2842   |
| 0.83128  | -0.04098 | 0.37695  | 0.04911  | 0.28957  | 0.048535  | 0.29526  | 0.036064 | 0.43686  |
| 0.73679  | -0.2104  | 4.52E-06 | 0.0481   | 0.29961  | -0.06758  | 0.14478  | 0.006125 | 0.89498  |
| 0.02882  | -0.29272 | 1.11E-10 | -0.12174 | 0.00845  | -0.08655  | 0.06164  | 0.081817 | 0.07734  |

|          |          |          |           |          |          |          |          |          |
|----------|----------|----------|-----------|----------|----------|----------|----------|----------|
| 0.82882  | -0.19692 | 1.82E-05 | 0.020034  | 0.66587  | -0.04908 | 0.28984  | -0.23713 | 2.16E-07 |
| 0.01434  | -0.04217 | 0.36319  | 0.355661  | 2.26E-15 | 0.201604 | 1.13E-05 | -0.01611 | 0.72846  |
| 0.02218  | -0.01623 | 0.72653  | 0.009467  | 0.83832  | -0.02931 | 0.52745  | -0.13864 | 0.00268  |
| 0.00254  | -0.243   | 1.05E-07 | -0.23666  | 2.29E-07 | -0.23815 | 1.91E-07 | -0.10767 | 0.01995  |
| 0.00265  | -0.08888 | 0.05495  | 0.026387  | 0.56949  | 0.028002 | 0.5461   | 0.071016 | 0.1254   |
| 0.46993  | 0.028925 | 0.53293  | 0.036034  | 0.43724  | 0.0578   | 0.21249  | 0.113345 | 0.01426  |
| 0.30453  | -0.15928 | 0.00055  | -0.10683  | 0.02095  | -0.1125  | 0.015    | -0.06021 | 0.19401  |
| 0.84878  | -0.00465 | 0.92026  | -0.07211  | 0.11966  | -0.00269 | 0.95382  | 0.141566 | 0.00217  |
| 5.99E-05 | 0.046919 | 0.31165  | 0.107505  | 0.02014  | 0.182702 | 7.15E-05 | 0.237734 | 2.01E-07 |
| 0.17928  | 0.119237 | 0.00991  | 0.109462  | 0.01797  | 0.138757 | 0.00266  | 0.347177 | 1.13E-14 |
| 0.04262  | -0.10506 | 0.02318  | -0.01284  | 0.7819   | -0.01043 | 0.82216  | 0.309417 | 8.08E-12 |
| 0.42197  | -0.38185 | 1.17E-17 | -0.1182   | 0.01057  | -0.15231 | 0.00096  | -0.03889 | 0.40171  |
| 0.11981  | -0.30502 | 1.64E-11 | -0.11197  | 0.01549  | -0.1689  | 0.00025  | -0.18296 | 6.98E-05 |
| 0.00194  | -0.08515 | 0.06597  | 0.030603  | 0.50943  | 0.072735 | 0.11649  | 0.010304 | 0.82425  |
| 0.32012  | 0.007772 | 0.86697  | -8.94E-05 | 0.99846  | 0.017823 | 0.70086  | -0.06201 | 0.181    |
| 0.01008  | -0.00495 | 0.91496  | -0.13566  | 0.00331  | -0.1508  | 0.00108  | 0.142279 | 0.00206  |
| 0.35968  | 0.218199 | 1.93E-06 | 0.186357  | 5.08E-05 | 0.163221 | 0.0004   | 0.169063 | 0.00024  |
| 0.85063  | -0.06685 | 0.14917  | -0.00025  | 0.99576  | -0.0342  | 0.46089  | -0.1279  | 0.00564  |
| 0.04857  | -0.1248  | 0.00693  | -0.07548  | 0.10328  | -0.09108 | 0.04917  | -0.05569 | 0.22969  |
| 0.13112  | -0.01225 | 0.7918   | -0.00117  | 0.97987  | -0.02061 | 0.65681  | 0.00229  | 0.96064  |
| 0.35735  | -0.05398 | 0.24436  | -0.07486  | 0.10615  | -0.10074 | 0.0295   | -0.06552 | 0.15745  |
| 0.41363  | 0.032242 | 0.48701  | 0.056928  | 0.21948  | 0.06167  | 0.18339  | -0.02266 | 0.62519  |
| 1.97E-05 | 0.369034 | 1.63E-16 | 0.19478   | 2.25E-05 | 0.245534 | 7.69E-08 | 0.228209 | 6.22E-07 |
| 0.38511  | 0.076865 | 0.0971   | 0.22191   | 1.28E-06 | 0.132056 | 0.00425  | -0.10921 | 0.01823  |
| 5.00E-10 | 0.038164 | 0.41061  | 0.156288  | 0.0007   | 0.224004 | 1.01E-06 | 0.267359 | 4.37E-09 |
| 1.10E-14 | -0.09242 | 0.04593  | -0.05722  | 0.21711  | 0.098969 | 0.0325   | -0.07284 | 0.11598  |
| 0.02985  | 0.012625 | 0.78554  | -0.03495  | 0.4512   | 0.015949 | 0.73103  | 0.036077 | 0.43669  |
| 0.32377  | -0.14493 | 0.00169  | -0.10371  | 0.02502  | -0.11777 | 0.01086  | 0.071491 | 0.12289  |
| 0.17672  | -0.15878 | 0.00057  | -0.13305  | 0.00397  | -0.14357 | 0.00187  | 0.072905 | 0.11563  |
| 0.30716  | -0.07617 | 0.10019  | 0.04013   | 0.3869   | -0.05046 | 0.27649  | -0.03014 | 0.5159   |
| 0.02614  | -0.15269 | 0.00093  | -0.01393  | 0.764    | -0.12095 | 0.00889  | -0.05026 | 0.27844  |
| 2.55E-10 | 0.114447 | 0.01333  | 0.413506  | 1.03E-20 | 0.347762 | 1.01E-14 | 0.166588 | 0.0003   |
| 7.60E-12 | -0.35954 | 1.07E-15 | -0.24885  | 5.06E-08 | -0.32531 | 5.67E-13 | -0.04022 | 0.38589  |
| 0.02022  | -0.1421  | 0.00208  | -0.14572  | 0.00159  | -0.15863 | 0.00058  | -0.19175 | 3.03E-05 |
| 0.60328  | 0.203093 | 9.72E-06 | 0.118875  | 0.01014  | 0.108674 | 0.01882  | 0.171455 | 0.0002   |
| 0.86221  | -0.04014 | 0.38675  | 0.037298  | 0.42131  | 0.000448 | 0.9923   | -0.00791 | 0.86469  |
| 0.02146  | 0.121044 | 0.00883  | 0.068735  | 0.13804  | 0.106845 | 0.02092  | 0.15785  | 0.00062  |
| 0.08098  | -0.15143 | 0.00103  | -0.33428  | 1.18E-13 | -0.24117 | 1.32E-07 | -0.09127 | 0.0487   |
| 0.04592  | -0.0678  | 0.14348  | -0.10624  | 0.02167  | -0.09315 | 0.04422  | -0.01729 | 0.70933  |
| 0.04823  | 0.158328 | 0.00059  | 0.033276  | 0.47315  | 0.1091   | 0.01835  | -0.25363 | 2.74E-08 |
| 2.28E-18 | 0.312994 | 4.50E-12 | 0.340347  | 3.96E-14 | 0.39478  | 7.23E-19 | 0.087516 | 0.05879  |
| 0.1156   | -0.15819 | 0.0006   | 0.000502  | 0.99136  | -0.09058 | 0.05045  | 0.015667 | 0.73561  |
| 0.00183  | -0.10807 | 0.01949  | 0.106637  | 0.02118  | 0.078195 | 0.09144  | 0.070136 | 0.13016  |
| 0.12461  | -0.04754 | 0.30526  | -0.08618  | 0.06276  | -0.05738 | 0.21585  | -0.05205 | 0.26159  |
| 0.01487  | -0.15998 | 0.00052  | -0.09055  | 0.0505   | -0.11067 | 0.01673  | -0.07975 | 0.08514  |

|          |          |          |          |          |          |          |          |          |
|----------|----------|----------|----------|----------|----------|----------|----------|----------|
| 0.00097  | -0.21254 | 3.59E-06 | -0.11518 | 0.01275  | -0.15593 | 0.00072  | -0.07462 | 0.10728  |
| 0.01509  | -0.23933 | 1.65E-07 | -0.0367  | 0.42877  | -0.03018 | 0.51526  | 0.005701 | 0.90221  |
| 0.47794  | -0.21058 | 4.43E-06 | -0.10922 | 0.01823  | -0.13096 | 0.00459  | 0.103982 | 0.02463  |
| 0.29414  | -0.08363 | 0.07099  | -0.08733 | 0.05934  | -0.10054 | 0.02983  | -0.17227 | 0.00018  |
| 0.96981  | -0.33116 | 2.05E-13 | -0.09165 | 0.04776  | -0.14213 | 0.00208  | -0.08049 | 0.08229  |
| 1.35E-05 | 0.045685 | 0.32456  | 0.046739 | 0.31351  | 0.093919 | 0.04249  | 0.220806 | 1.45E-06 |
| 0.43073  | 0.180067 | 9.12E-05 | 0.013604 | 0.76937  | 0.036965 | 0.42548  | 0.040817 | 0.37883  |
| 0.10883  | -0.35831 | 1.36E-15 | -0.2537  | 2.71E-08 | -0.26716 | 4.49E-09 | -0.20331 | 9.51E-06 |
| 2.55E-06 | -0.24687 | 6.50E-08 | -0.23235 | 3.83E-07 | -0.24772 | 5.84E-08 | -0.07643 | 0.099    |
| 8.37E-06 | 0.005071 | 0.91298  | 0.071083 | 0.12504  | 0.124088 | 0.00726  | 0.151934 | 0.00099  |
| 1.01E-06 | 0.099203 | 0.03209  | -0.01528 | 0.74184  | 0.113674 | 0.01397  | 0.345503 | 1.54E-14 |
| 0.04784  | -0.00226 | 0.96114  | -0.06231 | 0.17891  | 0.052525 | 0.25729  | 0.043831 | 0.3446   |
| 0.0002   | 0.136493 | 0.00312  | 0.150432 | 0.00111  | 0.19925  | 1.44E-05 | 0.250927 | 3.88E-08 |
| 0.00091  | -0.08757 | 0.05862  | 0.041378 | 0.37231  | 0.039917 | 0.38944  | 0.06953  | 0.13353  |
| 1.35E-05 | 0.106119 | 0.02181  | -0.08601 | 0.06328  | -0.10853 | 0.01898  | 0.274399 | 1.64E-09 |
| 0.00205  | 0.075147 | 0.10483  | 0.116198 | 0.01198  | 0.137144 | 0.00298  | 0.371208 | 1.05E-16 |
| 0.5916   | 0.330711 | 2.22E-13 | 0.177717 | 0.00011  | 0.169983 | 0.00022  | 0.413362 | 1.06E-20 |
| 0.66009  | 0.119808 | 0.00956  | 0.155552 | 0.00074  | 0.062721 | 0.17602  | -0.06256 | 0.17711  |
| 0.02222  | -0.12082 | 0.00896  | -0.06876 | 0.13787  | -0.12574 | 0.00651  | 0.429276 | 2.32E-22 |
| 0.00465  | -0.10959 | 0.01783  | -0.10888 | 0.0186   | -0.11007 | 0.01734  | 0.237312 | 2.12E-07 |
| 0.01801  | -0.15731 | 0.00065  | -0.22874 | 5.85E-07 | -0.20003 | 1.33E-05 | 0.059621 | 0.1984   |
| 3.19E-05 | -0.12728 | 0.00588  | 0.071715 | 0.12172  | 0.102978 | 0.02606  | 0.322103 | 9.82E-13 |
| 0.29958  | 0.085395 | 0.06521  | 0.004823 | 0.91721  | -0.00385 | 0.93384  | -0.03905 | 0.39985  |
| 0.23426  | -0.11802 | 0.01069  | 0.144453 | 0.00175  | 0.007195 | 0.87676  | -0.0045  | 0.92282  |
| 2.45E-05 | -0.21724 | 2.15E-06 | -0.21414 | 3.02E-06 | -0.27169 | 2.40E-09 | -0.13195 | 0.00429  |
| 0.00565  | 0.05647  | 0.22321  | 0.07774  | 0.09335  | 0.083448 | 0.0716   | 0.019443 | 0.67516  |
| 0.93103  | -0.00491 | 0.91565  | 0.011768 | 0.79978  | -0.00115 | 0.9803   | 0.022504 | 0.62763  |
| 1.03E-05 | 0.129453 | 0.00508  | 0.223936 | 1.02E-06 | 0.197705 | 1.68E-05 | 0.009304 | 0.84107  |
| 7.24E-06 | 0.186394 | 5.06E-05 | 0.072366 | 0.11836  | 0.195771 | 2.04E-05 | 0.106214 | 0.0217   |
| 0.12483  | -0.03042 | 0.51193  | 0.06232  | 0.17881  | 0.052727 | 0.25546  | 0.101973 | 0.02756  |
| 0.40175  | 0.102112 | 0.02735  | 0.182642 | 7.19E-05 | 0.110111 | 0.01729  | 0.152878 | 0.00092  |
| 3.20E-18 | 0.488234 | 2.41E-29 | 0.207874 | 5.91E-06 | 0.390816 | 1.72E-18 | 0.44009  | 1.53E-23 |
| 2.49E-07 | 0.155606 | 0.00074  | 0.12418  | 0.00721  | 0.204409 | 8.48E-06 | 0.424861 | 6.84E-22 |
| 1.56E-14 | 0.250877 | 3.90E-08 | 0.156316 | 0.0007   | 0.319297 | 1.58E-12 | -0.14149 | 0.00218  |
| 3.07E-07 | 0.425058 | 6.52E-22 | 0.085958 | 0.06345  | 0.270522 | 2.82E-09 | 0.162646 | 0.00042  |
| 0.02061  | -0.20172 | 1.12E-05 | -0.00779 | 0.86661  | -0.01745 | 0.70679  | -0.11722 | 0.01124  |
| 0.00608  | 0.145566 | 0.00161  | -0.07519 | 0.10463  | -0.09302 | 0.04453  | -0.01675 | 0.71813  |
| 0.42966  | 0.182043 | 7.60E-05 | 0.273465 | 1.87E-09 | 0.177777 | 0.00011  | 0.160651 | 0.00049  |
| 2.46E-15 | 0.114475 | 0.01331  | 0.099006 | 0.03243  | 0.244693 | 8.54E-08 | 0.259084 | 1.34E-08 |
| 7.15E-09 | 0.258231 | 1.50E-08 | 0.211735 | 3.92E-06 | 0.266965 | 4.62E-09 | 0.218752 | 1.82E-06 |
| 0.02735  | 0.103641 | 0.02511  | 0.065062 | 0.1604   | 0.119013 | 0.01005  | 0.086903 | 0.06059  |
| 0.61323  | 0.066372 | 0.15213  | -0.19264 | 2.77E-05 | -0.07557 | 0.10289  | -0.17809 | 0.00011  |
| 0.95711  | -0.1837  | 6.52E-05 | -0.17948 | 9.62E-05 | -0.12561 | 0.00657  | -0.0716  | 0.12232  |
| 0.62534  | -0.06102 | 0.18805  | 0.034018 | 0.46333  | 0.009453 | 0.83855  | -0.04415 | 0.3411   |
| 0.4457   | -0.09245 | 0.04584  | -0.00184 | 0.9684   | -0.01006 | 0.82833  | -0.03748 | 0.41902  |

|          |          |          |          |          |          |          |          |          |
|----------|----------|----------|----------|----------|----------|----------|----------|----------|
| 5.40E-06 | -0.10501 | 0.02324  | 0.149019 | 0.00124  | 0.114239 | 0.0135   | -0.10604 | 0.02192  |
| 0.64771  | 0.035881 | 0.43919  | 0.052706 | 0.25565  | 0.038772 | 0.40319  | -0.03945 | 0.39502  |
| 0.24915  | 0.101798 | 0.02783  | 0.080763 | 0.08125  | 0.096174 | 0.03775  | 0.099297 | 0.03192  |
| 0.53081  | 0.011945 | 0.79683  | -0.04752 | 0.3055   | -0.03387 | 0.46525  | 0.344326 | 1.91E-14 |
| 0.31687  | 0.035058 | 0.44976  | 0.249622 | 4.58E-08 | 0.159555 | 0.00054  | -0.10466 | 0.02371  |
| 0.02738  | 0.274703 | 1.57E-09 | 0.45833  | 1.24E-25 | 0.318226 | 1.89E-12 | 0.108544 | 0.01896  |
| 0.1806   | -0.22224 | 1.23E-06 | -0.14492 | 0.00169  | -0.10425 | 0.02427  | -0.08816 | 0.05695  |
| 0.81891  | -0.06822 | 0.141    | -0.02852 | 0.53865  | -0.03131 | 0.49976  | 0.096049 | 0.038    |
| 0.43471  | -0.00383 | 0.93423  | 0.022669 | 0.6251   | 0.022852 | 0.62231  | 0.11853  | 0.01036  |
| 0.23347  | 0.14082  | 0.00229  | 0.076824 | 0.09728  | 0.082921 | 0.07342  | 0.231698 | 4.13E-07 |
| 0.83793  | -0.04381 | 0.34485  | -0.04328 | 0.35072  | -0.04548 | 0.32669  | -0.00936 | 0.8401   |
| 0.03223  | 0.083319 | 0.07204  | 0.112032 | 0.01543  | 0.103045 | 0.02596  | 0.176935 | 0.00012  |
| 3.34E-08 | 0.174383 | 0.00015  | 0.038639 | 0.4048   | 0.154828 | 0.00079  | 0.12291  | 0.00784  |
| 0.00027  | 0.065867 | 0.15528  | -0.12031 | 0.00926  | 0.025971 | 0.5756   | -0.01349 | 0.77124  |
| 0.15358  | -0.18043 | 8.82E-05 | -0.20162 | 1.13E-05 | -0.16879 | 0.00025  | -0.04513 | 0.33045  |
| 0.29006  | -0.15456 | 0.0008   | -0.16606 | 0.00031  | -0.14011 | 0.00241  | -0.17759 | 0.00011  |
| 0.07285  | -0.0977  | 0.0348   | -0.14162 | 0.00216  | -0.13668 | 0.00308  | 0.154778 | 0.00079  |
| 0.01355  | -0.11787 | 0.01079  | -0.07915 | 0.08755  | -0.03169 | 0.49452  | 0.342005 | 2.93E-14 |
| 2.66E-20 | 0.373817 | 6.18E-17 | 0.386411 | 4.44E-18 | 0.407064 | 4.58E-20 | 0.076578 | 0.09836  |
| 0.07384  | -0.07508 | 0.10512  | -0.12315 | 0.00772  | -0.07104 | 0.12528  | 0.109917 | 0.01749  |
| 0.05042  | 0.156266 | 0.0007   | -0.31253 | 4.86E-12 | -0.12637 | 0.00625  | 0.059596 | 0.1986   |
| 1.51E-05 | 0.056053 | 0.22666  | 0.187964 | 4.36E-05 | 0.175355 | 0.00014  | -0.12617 | 0.00633  |
| 0.47444  | -0.10304 | 0.02597  | -0.03134 | 0.49929  | -0.01765 | 0.7036   | -0.04628 | 0.31827  |
| 0.03007  | -0.13351 | 0.00385  | 0.095443 | 0.03923  | 0.065297 | 0.15889  | 0.287063 | 2.61E-10 |
| 2.52E-07 | 0.154042 | 0.00084  | 0.267423 | 4.34E-09 | 0.26435  | 6.60E-09 | -0.05575 | 0.22917  |
| 0.03095  | 0.096819 | 0.03648  | -0.11075 | 0.01665  | 0.04391  | 0.34373  | 0.309727 | 7.68E-12 |
| 2.77E-08 | -0.24548 | 7.74E-08 | -0.31324 | 4.32E-12 | -0.33154 | 1.92E-13 | 0.114613 | 0.0132   |
| 0.59921  | -0.09898 | 0.03248  | 0.065241 | 0.15925  | -0.05185 | 0.26346  | 0.343364 | 2.28E-14 |
| 0.04208  | -0.12864 | 0.00537  | -0.12676 | 0.00609  | -0.05687 | 0.21995  | 0.038585 | 0.40546  |
| 0.02632  | 0.000868 | 0.98507  | 0.010625 | 0.81887  | 0.038463 | 0.40694  | 0.114921 | 0.01295  |
| 0.00318  | -0.06731 | 0.14643  | 0.083042 | 0.073    | 0.089902 | 0.05219  | -0.00149 | 0.97434  |
| 0.23797  | 0.263778 | 7.13E-09 | 0.303671 | 2.03E-11 | 0.192589 | 2.79E-05 | -0.11634 | 0.01187  |
| 0.02956  | -0.10819 | 0.01935  | -0.02009 | 0.66502  | -0.08077 | 0.08121  | 0.160881 | 0.00048  |
| 0.11523  | -0.2675  | 4.29E-09 | -0.07406 | 0.10996  | -0.11581 | 0.01226  | 0.112324 | 0.01516  |
| 0.0005   | -0.1381  | 0.00278  | -0.15094 | 0.00107  | -0.14557 | 0.00161  | -0.15692 | 0.00067  |
| 1.67E-14 | 0.013883 | 0.76477  | 0.005762 | 0.90118  | -0.17386 | 0.00016  | -0.20156 | 1.14E-05 |
| 0.14324  | 0.287083 | 2.60E-10 | 0.123233 | 0.00767  | 0.11915  | 0.00996  | 0.079719 | 0.08528  |
| 1.31E-06 | 0.138518 | 0.0027   | 0.107094 | 0.02062  | 0.147644 | 0.00138  | 0.23785  | 1.98E-07 |
| 0.17949  | 0.138799 | 0.00265  | 0.198719 | 1.52E-05 | 0.118422 | 0.01043  | 0.025918 | 0.57637  |
| 0.4588   | -0.04466 | 0.33555  | 0.041647 | 0.36919  | 0.013571 | 0.76991  | -0.26277 | 8.17E-09 |
| 1.30E-24 | 0.361035 | 7.99E-16 | 0.385775 | 5.08E-18 | 0.448094 | 1.91E-24 | 0.335429 | 9.62E-14 |
| 0.00011  | -0.37612 | 3.85E-17 | -0.21399 | 3.07E-06 | -0.28661 | 2.79E-10 | -0.09425 | 0.04177  |
| 0.57205  | 0.165806 | 0.00032  | 0.061899 | 0.18177  | 0.08943  | 0.05345  | -0.05756 | 0.21442  |
| 1.83E-15 | 0.22237  | 1.21E-06 | 0.289052 | 1.94E-10 | 0.313537 | 4.12E-12 | 0.197486 | 1.72E-05 |
| 0.14967  | 0.185267 | 5.63E-05 | -0.00484 | 0.91693  | 0.053668 | 0.24707  | 0.040067 | 0.38765  |

|          |          |          |          |          |          |          |          |          |
|----------|----------|----------|----------|----------|----------|----------|----------|----------|
| 0.6563   | 0.075118 | 0.10496  | -0.01362 | 0.76902  | -0.00083 | 0.98566  | 0.100711 | 0.02955  |
| 1.40E-10 | -0.28337 | 4.50E-10 | -0.33695 | 7.32E-14 | -0.35103 | 5.47E-15 | -0.0656  | 0.15699  |
| 0.42737  | 0.096977 | 0.03617  | -0.00769 | 0.86829  | 0.005115 | 0.91222  | 0.40918  | 2.82E-20 |
| 4.13E-07 | -0.12011 | 0.00938  | -0.32089 | 1.21E-12 | -0.27108 | 2.61E-09 | 0.092099 | 0.04668  |
| 0.39063  | -0.20109 | 1.19E-05 | -0.02584 | 0.57755  | -0.03695 | 0.42571  | -0.30101 | 3.09E-11 |
| 0.60922  | -0.01827 | 0.69379  | -0.07473 | 0.10678  | -0.08017 | 0.08352  | -0.09949 | 0.03158  |
| 0.00032  | 0.150068 | 0.00114  | -0.07538 | 0.10377  | 0.043801 | 0.34493  | 0.054366 | 0.24096  |
| 0.73303  | -0.35678 | 1.83E-15 | -0.32881 | 3.09E-13 | -0.26083 | 1.06E-08 | -0.17193 | 0.00019  |
| 0.04736  | -0.08562 | 0.06451  | 0.038939 | 0.40117  | 0.007804 | 0.86642  | -0.00886 | 0.84864  |
| 0.00249  | 0.227968 | 6.39E-07 | 0.03464  | 0.45519  | 0.101044 | 0.02901  | 0.00138  | 0.97627  |
| 0.85953  | -0.01023 | 0.82545  | -0.26964 | 3.19E-09 | -0.1347  | 0.00354  | -0.03138 | 0.49873  |
| 0.03697  | 0.018519 | 0.68978  | -0.03414 | 0.46171  | -0.04347 | 0.34864  | -0.18522 | 5.65E-05 |
| 3.77E-19 | 0.255777 | 2.07E-08 | 0.321013 | 1.18E-12 | 0.344684 | 1.79E-14 | 0.220889 | 1.43E-06 |
| 0.16054  | -0.13819 | 0.00277  | -0.04868 | 0.29381  | -0.07025 | 0.12956  | -0.02756 | 0.55241  |
| 0.74683  | 0.091072 | 0.0492   | 0.091999 | 0.04692  | 0.075206 | 0.10456  | -0.13115 | 0.00453  |
| 0.00014  | 0.311274 | 5.97E-12 | 0.378162 | 2.52E-17 | 0.35095  | 5.55E-15 | 0.222251 | 1.23E-06 |
| 0.13476  | -0.11391 | 0.01377  | -0.13218 | 0.00422  | -0.1135  | 0.01412  | 0.011758 | 0.79994  |
| 0.13593  | 0.027576 | 0.55222  | 0.002729 | 0.95311  | -0.00837 | 0.85685  | -0.0247  | 0.59443  |
| 0.00392  | 0.12109  | 0.00881  | 0.225725 | 8.28E-07 | 0.190906 | 3.29E-05 | -0.2014  | 1.16E-05 |
| 0.00257  | 0.149704 | 0.00118  | 0.066887 | 0.14897  | 0.127399 | 0.00583  | -0.05167 | 0.26513  |
| 0.00219  | 0.010941 | 0.81359  | -0.13578 | 0.00328  | -0.11532 | 0.01264  | 0.008254 | 0.85881  |
| 0.02986  | 0.122951 | 0.00781  | 0.148666 | 0.00127  | 0.130066 | 0.00487  | -0.08613 | 0.06291  |
| 2.18E-16 | 0.336809 | 7.51E-14 | 0.354676 | 2.74E-15 | 0.380623 | 1.51E-17 | 0.341284 | 3.34E-14 |
| 2.35E-05 | 0.343474 | 2.24E-14 | 0.128043 | 0.00559  | 0.213431 | 3.26E-06 | -0.12762 | 0.00575  |
| 0.99517  | -0.09345 | 0.04353  | -0.07349 | 0.11272  | -0.04872 | 0.29343  | 0.035614 | 0.4426   |
| 0.00032  | 0.046775 | 0.31314  | 0.216473 | 2.34E-06 | 0.177527 | 0.00011  | 0.020321 | 0.66138  |
| 0.08735  | 0.070501 | 0.12817  | -0.02578 | 0.57842  | 0.038649 | 0.40469  | 0.107025 | 0.02071  |
| 0.06616  | -0.11468 | 0.01315  | -0.07237 | 0.11835  | -0.10203 | 0.02748  | -0.20457 | 8.34E-06 |
| 0.00017  | -0.16582 | 0.00032  | 0.04402  | 0.34252  | 0.0343   | 0.45963  | 0.160847 | 0.00048  |
| 0.00483  | -0.20161 | 1.13E-05 | -0.04289 | 0.35505  | -0.00586 | 0.89946  | 0.126655 | 0.00613  |
| 0.0001   | -0.15164 | 0.00101  | -0.24646 | 6.85E-08 | -0.22277 | 1.16E-06 | -0.18769 | 4.47E-05 |
| 2.23E-05 | -0.26844 | 3.77E-09 | -0.26541 | 5.71E-09 | -0.25775 | 1.60E-08 | -0.34315 | 2.37E-14 |
| 0.12094  | -0.09465 | 0.04091  | 0.102598 | 0.02662  | 0.049953 | 0.28136  | 0.141623 | 0.00216  |
| 0.6766   | 0.085996 | 0.06333  | 0.054459 | 0.24016  | 0.070197 | 0.12983  | -0.13675 | 0.00307  |
| 8.62E-13 | -0.36169 | 7.02E-16 | -0.34102 | 3.51E-14 | -0.39783 | 3.68E-19 | -0.10059 | 0.02975  |
| 0.02886  | 0.238607 | 1.81E-07 | 0.388758 | 2.68E-18 | 0.237916 | 1.97E-07 | -0.03357 | 0.46924  |
| 0.00866  | 0.069    | 0.13652  | 0.160428 | 0.0005   | 0.019765 | 0.67009  | 0.094688 | 0.04082  |
| 1.24E-06 | 0.088925 | 0.05481  | 0.064873 | 0.16162  | 0.132835 | 0.00403  | 0.137556 | 0.00289  |
| 0.93442  | 0.130609 | 0.0047   | 0.040025 | 0.38815  | 0.002688 | 0.9538   | 0.198909 | 1.49E-05 |
| 7.19E-08 | 0.077823 | 0.09299  | 0.199315 | 1.43E-05 | 0.203459 | 9.36E-06 | 0.273901 | 1.76E-09 |
| 0.38336  | 0.033376 | 0.47181  | 0.047049 | 0.31031  | 0.046471 | 0.3163   | 0.004773 | 0.91806  |
| 0.00041  | 0.000359 | 0.99382  | 0.164643 | 0.00035  | 0.114441 | 0.01334  | -0.0023  | 0.96046  |
| 0.01799  | -0.02761 | 0.5518   | -0.03815 | 0.41082  | 0.018517 | 0.6898   | 0.035325 | 0.44632  |
| 0.4167   | -0.14823 | 0.00132  | -0.13913 | 0.00259  | -0.10855 | 0.01895  | 0.224173 | 9.89E-07 |
| 0.10141  | 0.001247 | 0.97855  | 0.012671 | 0.78477  | 0.052414 | 0.2583   | 0.043648 | 0.34663  |

|          |          |          |          |          |          |          |          |          |
|----------|----------|----------|----------|----------|----------|----------|----------|----------|
| 0.04746  | -0.13258 | 0.0041   | -0.16818 | 0.00026  | -0.16086 | 0.00048  | 0.213736 | 3.16E-06 |
| 0.93834  | -0.12063 | 0.00907  | -0.0771  | 0.09608  | -0.08614 | 0.06289  | 0.036731 | 0.42842  |
| 1.13E-05 | 0.051449 | 0.26718  | -0.03406 | 0.46277  | 0.068482 | 0.13949  | 0.404712 | 7.84E-20 |
| 0.00037  | -0.0412  | 0.37436  | -0.20368 | 9.15E-06 | -0.17365 | 0.00016  | -0.31016 | 7.16E-12 |
| 5.22E-05 | 0.019642 | 0.67203  | 0.156107 | 0.00071  | 0.177837 | 0.00011  | -0.06193 | 0.18157  |
| 0.20644  | 0.061993 | 0.1811   | -0.03838 | 0.40792  | 0.005571 | 0.90443  | 0.026394 | 0.5694   |
| 0.11621  | -0.23897 | 1.73E-07 | -0.15627 | 0.0007   | -0.16445 | 0.00036  | 0.116145 | 0.01202  |
| 0.00013  | 0.049478 | 0.28597  | 0.117632 | 0.01096  | 0.151189 | 0.00105  | -0.03118 | 0.50142  |
| 2.26E-05 | 0.287522 | 2.44E-10 | 0.276291 | 1.25E-09 | 0.333558 | 1.34E-13 | 0.13541  | 0.00337  |
| 5.23E-08 | 0.101227 | 0.02872  | 0.182991 | 6.96E-05 | 0.190321 | 3.48E-05 | -0.01976 | 0.67012  |
| 9.22E-17 | 0.328325 | 3.37E-13 | 0.133735 | 0.00379  | 0.371806 | 9.32E-17 | 0.196757 | 1.85E-05 |
| 0.95863  | 0.26094  | 1.04E-08 | -0.08208 | 0.0764   | 0.041905 | 0.36624  | -0.10872 | 0.01877  |
| 0.85643  | 0.094136 | 0.04202  | 0.004605 | 0.92094  | 0.038021 | 0.41237  | 0.22661  | 7.48E-07 |
| 0.54271  | 0.314599 | 3.46E-12 | 0.314835 | 3.32E-12 | 0.239268 | 1.67E-07 | 0.236037 | 2.47E-07 |
| 7.67E-13 | 0.368183 | 1.94E-16 | 0.363581 | 4.84E-16 | 0.359332 | 1.11E-15 | 0.218852 | 1.80E-06 |
| 5.79E-14 | -0.05502 | 0.23531  | 0.166062 | 0.00031  | 0.197359 | 1.74E-05 | 0.296032 | 6.71E-11 |
| 0.75819  | 0.130347 | 0.00478  | 0.097321 | 0.03551  | 0.063108 | 0.17336  | 0.299441 | 3.95E-11 |
| 0.07091  | 0.135208 | 0.00342  | 0.092688 | 0.04529  | 0.001566 | 0.97308  | -0.05772 | 0.2131   |
| 0.10254  | -0.17825 | 0.00011  | -0.04505 | 0.33133  | -0.09513 | 0.03988  | 0.066708 | 0.15006  |
| 0.00554  | -0.13146 | 0.00443  | -0.16097 | 0.00048  | -0.18151 | 7.99E-05 | -0.12409 | 0.00726  |
| 0.17724  | -0.02751 | 0.55323  | 0.011417 | 0.80563  | -0.04056 | 0.38181  | -0.00615 | 0.89463  |
| 0.00036  | -0.04463 | 0.33585  | -0.13119 | 0.00452  | 0.006825 | 0.88306  | 0.317595 | 2.10E-12 |
| 0.5566   | 0.23335  | 3.40E-07 | 0.044198 | 0.34058  | 0.080745 | 0.08132  | -0.08462 | 0.06771  |
| 5.34E-09 | -0.05869 | 0.20549  | 0.17593  | 0.00013  | 0.194133 | 2.40E-05 | -0.02689 | 0.56214  |
| 0.17014  | -0.10811 | 0.01945  | -0.22566 | 8.34E-07 | -0.11486 | 0.013    | 0.074381 | 0.10842  |
| 0.00025  | 0.145192 | 0.00166  | 0.220674 | 1.47E-06 | 0.035121 | 0.44894  | -0.18328 | 6.78E-05 |
| 0.09166  | 0.01751  | 0.70587  | 0.045747 | 0.32391  | 0.045256 | 0.32913  | 0.006334 | 0.89142  |
| 0.92095  | -0.05707 | 0.21833  | -0.09176 | 0.04751  | -0.05434 | 0.24122  | 0.194289 | 2.36E-05 |
| 0.45175  | -0.12711 | 0.00595  | -0.07799 | 0.09228  | -0.07042 | 0.12859  | 0.066082 | 0.15393  |
| 0.69806  | -0.11379 | 0.01388  | -0.01141 | 0.8058   | -0.04706 | 0.31025  | -0.00121 | 0.97926  |
| 0.52723  | -0.10238 | 0.02694  | -0.18274 | 7.13E-05 | -0.15537 | 0.00075  | -0.24302 | 1.05E-07 |
| 0.69777  | -0.05958 | 0.19874  | -0.03202 | 0.49006  | -0.01667 | 0.71935  | -0.10222 | 0.02719  |
| 0.00591  | 0.117528 | 0.01103  | 0.14107  | 0.00225  | 0.110442 | 0.01696  | 0.263395 | 7.51E-09 |
| 0.6822   | -0.08234 | 0.07547  | -0.07109 | 0.12502  | -0.04196 | 0.36563  | -0.00527 | 0.90965  |
| 4.39E-06 | -0.03426 | 0.46017  | 0.088033 | 0.0573   | 0.119309 | 0.00986  | 0.504066 | 1.83E-31 |
| 0.16159  | 0.015445 | 0.73921  | -0.0352  | 0.44791  | 0.020601 | 0.65702  | 0.100838 | 0.02934  |
| 0.02165  | -0.10707 | 0.02065  | -0.09506 | 0.04003  | -0.02122 | 0.64735  | 0.381637 | 1.22E-17 |
| 0.09409  | -0.12735 | 0.00585  | -0.02437 | 0.5994   | -0.01289 | 0.78112  | 0.101665 | 0.02803  |
| 0.52248  | -0.01911 | 0.68048  | -0.01076 | 0.81668  | -0.0015  | 0.97421  | -0.23787 | 1.98E-07 |
| 1.02E-08 | 0.083264 | 0.07223  | 0.125482 | 0.00662  | 0.188866 | 4.00E-05 | -0.04882 | 0.2924   |
| 0.16309  | 0.055191 | 0.23389  | -0.06956 | 0.13335  | -0.04327 | 0.35077  | 0.296773 | 5.98E-11 |
| 0.10342  | -0.18859 | 4.11E-05 | -0.22715 | 7.03E-07 | -0.21641 | 2.36E-06 | -0.1514  | 0.00103  |
| 0.39253  | -0.03682 | 0.42734  | -0.01275 | 0.78347  | -0.06286 | 0.17508  | -0.02091 | 0.65226  |
| 0.00018  | 0.347985 | 9.70E-15 | 0.409131 | 2.85E-20 | 0.311531 | 5.73E-12 | 0.176541 | 0.00013  |
| 0.00059  | -0.02163 | 0.64106  | -0.24615 | 7.12E-08 | -0.19618 | 1.96E-05 | -0.02953 | 0.52446  |

|          |          |          |          |          |          |          |          |          |
|----------|----------|----------|----------|----------|----------|----------|----------|----------|
| 0.02779  | 0.029216 | 0.52883  | -0.18718 | 4.70E-05 | -0.13843 | 0.00272  | -0.16085 | 0.00048  |
| 0.29318  | 0.002679 | 0.95396  | -0.0586  | 0.20622  | -0.01399 | 0.76297  | -0.29472 | 8.21E-11 |
| 5.06E-07 | 0.012773 | 0.78308  | 0.031313 | 0.49965  | 0.1275   | 0.00579  | -0.08247 | 0.07501  |
| 9.80E-07 | 0.027732 | 0.54997  | 0.033718 | 0.46728  | 0.121415 | 0.00863  | 0.238508 | 1.83E-07 |
| 0.31337  | 0.165864 | 0.00032  | 0.199004 | 1.47E-05 | 0.162861 | 0.00041  | 0.252913 | 3.00E-08 |
| 0.57234  | 0.031007 | 0.50385  | 0.004622 | 0.92065  | 0.010287 | 0.82454  | -0.05964 | 0.19824  |
| 0.1752   | -0.06946 | 0.13392  | 0.045204 | 0.32968  | 0.044299 | 0.33947  | -0.0392  | 0.39797  |
| 0.05284  | -0.17667 | 0.00012  | -0.04583 | 0.32299  | -0.03669 | 0.42894  | 0.159082 | 0.00056  |
| 0.00024  | -0.05852 | 0.2068   | -0.06532 | 0.15878  | -0.1243  | 0.00716  | -0.06843 | 0.13982  |
| 0.93903  | 0.052831 | 0.25453  | 0.142129 | 0.00208  | 0.058367 | 0.20802  | -0.10963 | 0.0178   |
| 0.00517  | 0.489393 | 1.70E-29 | 0.311041 | 6.20E-12 | 0.29566  | 7.10E-11 | 0.264499 | 6.47E-09 |
| 4.14E-10 | -0.18059 | 8.69E-05 | 0.012918 | 0.78069  | 0.080135 | 0.08365  | 0.18625  | 5.13E-05 |
| 0.90934  | -0.09474 | 0.04071  | -0.24784 | 5.75E-08 | -0.16244 | 0.00042  | 0.245211 | 8.01E-08 |
| 0.04017  | -0.1572  | 0.00065  | -0.11528 | 0.01267  | -0.14634 | 0.00152  | 0.109562 | 0.01786  |
| 0.00789  | -0.14592 | 0.00157  | 0.02519  | 0.58714  | 0.031168 | 0.50164  | 0.160366 | 0.0005   |
| 2.75E-12 | 0.157216 | 0.00065  | 0.254676 | 2.39E-08 | 0.305237 | 1.58E-11 | 0.36024  | 9.33E-16 |
| 0.14144  | 0.054913 | 0.23626  | 0.133009 | 0.00398  | 0.034418 | 0.45809  | -0.00511 | 0.91223  |
| 0.00097  | 0.098061 | 0.03413  | 0.011059 | 0.81161  | -0.00974 | 0.83376  | 0.368386 | 1.86E-16 |
| 0.77511  | 0.049311 | 0.28759  | 0.029179 | 0.52935  | 0.045925 | 0.32202  | 0.21853  | 1.86E-06 |
| 0.00666  | -0.13888 | 0.00263  | -0.11713 | 0.0113   | -0.11676 | 0.01157  | -0.15471 | 0.00079  |
| 0.1917   | 0.011045 | 0.81184  | -0.0339  | 0.46493  | -0.05961 | 0.19845  | 0.072082 | 0.11982  |
| 0.17361  | -0.05207 | 0.26148  | -0.22937 | 5.43E-07 | -0.15255 | 0.00094  | 0.020797 | 0.65396  |
| 0.2755   | -0.12023 | 0.0093   | -0.07099 | 0.12554  | -0.09297 | 0.04464  | -0.14237 | 0.00204  |
| 0.89351  | -0.0672  | 0.14707  | 0.025591 | 0.5812   | -0.01185 | 0.79837  | -0.2349  | 2.83E-07 |
| 0.30052  | 0.352834 | 3.89E-15 | -0.01238 | 0.78953  | 0.107173 | 0.02053  | 0.091063 | 0.04922  |
| 0.95899  | -0.05893 | 0.20369  | -0.03625 | 0.43455  | -0.01226 | 0.79167  | -0.24476 | 8.47E-08 |
| 0.09899  | -0.29127 | 1.39E-10 | -0.05525 | 0.23335  | -0.08348 | 0.07148  | -0.11273 | 0.01479  |
| 0.00146  | -0.34994 | 6.71E-15 | -0.13048 | 0.00474  | -0.21875 | 1.82E-06 | -0.19736 | 1.74E-05 |
| 0.94736  | 0.171801 | 0.00019  | 0.132571 | 0.00411  | 0.086301 | 0.0624   | 0.051339 | 0.26821  |
| 0.00567  | 0.120888 | 0.00892  | 0.080934 | 0.08061  | 0.001518 | 0.97391  | -0.10173 | 0.02794  |
| 0.02466  | 0.191901 | 2.98E-05 | -0.01744 | 0.70692  | 0.08003  | 0.08406  | 0.291135 | 1.42E-10 |
| 0.2765   | 0.051018 | 0.27122  | 0.01288  | 0.78132  | 0.013838 | 0.76551  | -0.09372 | 0.04294  |
| 0.00458  | 0.029713 | 0.52183  | -0.02694 | 0.56138  | -0.06506 | 0.16044  | -0.09596 | 0.03818  |
| 0.84511  | -0.01541 | 0.7398   | 0.011051 | 0.81174  | 0.006611 | 0.8867   | -0.13452 | 0.00359  |
| 0.00297  | -0.29678 | 5.98E-11 | -0.11333 | 0.01427  | -0.15393 | 0.00085  | -0.11076 | 0.01664  |
| 4.92E-09 | -0.31714 | 2.27E-12 | -0.36099 | 8.06E-16 | -0.34776 | 1.01E-14 | -0.18973 | 3.68E-05 |
| 3.51E-09 | 0.163555 | 0.00039  | 0.163764 | 0.00038  | 0.243089 | 1.04E-07 | 0.30348  | 2.09E-11 |
| 0.01435  | 0.044024 | 0.34248  | 0.089538 | 0.05316  | 0.115146 | 0.01278  | -0.00935 | 0.84028  |
| 0.00382  | -0.03288 | 0.47847  | 0.132569 | 0.00411  | 0.124279 | 0.00717  | -0.04903 | 0.29037  |
| 0.02911  | -0.10908 | 0.01837  | -0.11734 | 0.01116  | -0.14395 | 0.00182  | -0.03026 | 0.51413  |
| 0.91238  | 0.055894 | 0.22798  | 0.038216 | 0.40998  | 0.028486 | 0.53917  | 0.028175 | 0.54361  |
| 0.5377   | 0.046687 | 0.31405  | 0.073795 | 0.11125  | 0.047798 | 0.30266  | -0.20145 | 1.15E-05 |
| 0.01158  | 0.033558 | 0.4694   | 0.0481   | 0.29961  | -0.00834 | 0.85741  | 0.439316 | 1.86E-23 |
| 1.23E-19 | 0.196622 | 1.87E-05 | 0.316489 | 2.53E-12 | 0.416837 | 4.70E-21 | 0.150951 | 0.00107  |
| 3.76E-25 | 0.341467 | 3.23E-14 | 0.288492 | 2.11E-10 | 0.394564 | 7.58E-19 | 0.308146 | 9.92E-12 |

|          |          |          |          |          |          |          |          |          |
|----------|----------|----------|----------|----------|----------|----------|----------|----------|
| 0.00673  | -0.14409 | 0.0018   | 0.012616 | 0.78569  | -0.08806 | 0.05723  | -0.32667 | 4.49E-13 |
| 0.11819  | 0.132219 | 0.00421  | 0.281744 | 5.71E-10 | 0.14927  | 0.00122  | 0.026631 | 0.56593  |
| 0.77524  | -0.13433 | 0.00363  | -0.14827 | 0.00131  | -0.10799 | 0.01959  | 0.205644 | 7.46E-06 |
| 0.00921  | 0.084002 | 0.06973  | 0.00858  | 0.8533   | 0.092022 | 0.04687  | -0.11147 | 0.01596  |
| 0.59094  | -0.20806 | 5.79E-06 | -0.11283 | 0.01471  | -0.12703 | 0.00598  | 0.102698 | 0.02647  |
| 0.46102  | 0.050312 | 0.27791  | 0.022829 | 0.62266  | 0.022035 | 0.63481  | -0.03676 | 0.42809  |
| 5.99E-11 | -0.07729 | 0.09528  | 0.111989 | 0.01547  | 0.161534 | 0.00046  | -0.00796 | 0.86374  |
| 2.39E-07 | -0.10494 | 0.02334  | -0.05716 | 0.21759  | 0.035975 | 0.43799  | 0.141406 | 0.00219  |
| 2.22E-05 | -0.06013 | 0.19462  | -0.14261 | 0.00201  | -0.17351 | 0.00016  | -0.16785 | 0.00027  |
| 0.36352  | -0.20997 | 4.73E-06 | -0.10315 | 0.0258   | -0.12647 | 0.00621  | -0.20222 | 1.06E-05 |
| 0.02145  | -0.1002  | 0.03038  | 0.047796 | 0.30268  | -0.00106 | 0.98185  | 0.225546 | 8.45E-07 |
| 1.60E-05 | 0.227969 | 6.39E-07 | 0.323177 | 8.18E-13 | 0.262464 | 8.51E-09 | 0.177137 | 0.00012  |
| 0.53953  | 0.016443 | 0.72303  | -0.07732 | 0.09512  | -0.00591 | 0.89865  | 0.123181 | 0.0077   |
| 0.00496  | -0.09208 | 0.04672  | -0.02838 | 0.54075  | 0.030542 | 0.51028  | 0.069314 | 0.13474  |
| 0.10271  | 0.054837 | 0.2369   | -0.04757 | 0.30493  | 0.046053 | 0.32068  | 0.20823  | 5.69E-06 |
| 0.06171  | 0.139245 | 0.00256  | -0.0204  | 0.66014  | -0.00957 | 0.83661  | 0.166871 | 0.00029  |
| 0.20806  | -0.09068 | 0.05019  | -0.04254 | 0.359    | -0.02018 | 0.66358  | 0.018825 | 0.68492  |
| 0.97897  | -0.04563 | 0.32513  | -0.04386 | 0.34427  | -0.0129  | 0.781    | 0.019462 | 0.67486  |
| 0.76951  | 0.087214 | 0.05967  | 0.023587 | 0.61116  | 0.0385   | 0.4065   | 0.089242 | 0.05395  |
| 1.04E-13 | 0.014222 | 0.7592   | 0.081929 | 0.07694  | 0.192727 | 2.75E-05 | -0.01792 | 0.69925  |
| 0.1758   | -0.13406 | 0.0037   | -0.0877  | 0.05825  | -0.09062 | 0.05035  | -0.08696 | 0.06042  |
| 0.36629  | -0.22276 | 1.16E-06 | -0.10119 | 0.02878  | -0.11064 | 0.01677  | -0.0779  | 0.09266  |
| 0.10777  | -0.01735 | 0.70839  | -0.08675 | 0.06104  | -0.07553 | 0.10308  | -0.00325 | 0.94416  |
| 0.00489  | -0.08218 | 0.07603  | -0.12808 | 0.00558  | -0.14389 | 0.00182  | -0.24681 | 6.55E-08 |
| 0.00082  | -0.03578 | 0.44044  | 0.038285 | 0.40912  | 0.077685 | 0.09358  | -0.10386 | 0.0248   |
| 0.36584  | -0.03511 | 0.44908  | 0.004625 | 0.92059  | 0.02488  | 0.59174  | -0.08537 | 0.06529  |
| 1.10E-05 | 0.147557 | 0.00139  | 0.041275 | 0.37349  | 0.103807 | 0.02488  | 0.244244 | 9.03E-08 |
| 0.02742  | -0.1946  | 2.29E-05 | -0.14476 | 0.00171  | -0.04422 | 0.34035  | -0.10372 | 0.025    |
| 0.34266  | -0.11045 | 0.01696  | -0.08073 | 0.08139  | -0.08861 | 0.05568  | -0.03947 | 0.39481  |
| 0.61864  | 0.060225 | 0.19389  | 0.000676 | 0.98837  | 0.008944 | 0.84714  | 0.121943 | 0.00834  |
| 0.69314  | 0.087258 | 0.05954  | 0.059472 | 0.19953  | 0.030375 | 0.5126   | 0.113244 | 0.01434  |
| 0.02044  | -0.0935  | 0.04343  | 0.045032 | 0.33153  | 0.060519 | 0.19172  | -0.04489 | 0.33309  |
| 0.04814  | -0.09262 | 0.04544  | -0.02765 | 0.55119  | -0.05626 | 0.2249   | -0.00736 | 0.87392  |
| 0.74055  | -0.21423 | 2.99E-06 | -0.06046 | 0.19218  | -0.10065 | 0.02965  | -0.01372 | 0.76744  |
| 0.49957  | -0.10964 | 0.01778  | -0.13894 | 0.00262  | -0.12862 | 0.00537  | -0.07296 | 0.11538  |
| 0.47291  | 0.028378 | 0.54071  | 0.166655 | 0.0003   | 0.031745 | 0.49375  | 0.076839 | 0.09721  |
| 0.04564  | -0.08542 | 0.06512  | -0.05911 | 0.2023   | -0.08788 | 0.05775  | -0.13403 | 0.00371  |
| 0.00525  | -0.19832 | 1.58E-05 | -0.25377 | 2.69E-08 | -0.21708 | 2.19E-06 | 0.121062 | 0.00882  |
| 0.05769  | 0.044636 | 0.3358   | -0.00085 | 0.98538  | 0.045443 | 0.32713  | 0.090657 | 0.05024  |
| 0.01442  | -0.04835 | 0.29712  | 0.049393 | 0.2868   | 0.065969 | 0.15464  | 0.023109 | 0.6184   |
| 0.48007  | -0.02326 | 0.61613  | -0.01734 | 0.70866  | -0.02746 | 0.55385  | -0.00895 | 0.84697  |
| 0.1401   | 0.097929 | 0.03437  | 0.145594 | 0.00161  | 0.132326 | 0.00418  | 0.241333 | 1.30E-07 |
| 0.00183  | -0.2688  | 3.58E-09 | -0.07671 | 0.09777  | -0.07632 | 0.09948  | 0.143181 | 0.00192  |
| 0.00125  | 0.044439 | 0.33794  | 0.123246 | 0.00767  | -0.03818 | 0.41036  | -0.00667 | 0.88573  |
| 0.0001   | -0.00224 | 0.96154  | 0.157428 | 0.00064  | 0.107317 | 0.02036  | 0.289581 | 1.79E-10 |



|          |          |          |          |          |          |          |          |          |
|----------|----------|----------|----------|----------|----------|----------|----------|----------|
| 0.00895  | -0.19197 | 2.96E-05 | 0.082971 | 0.07324  | 0.038332 | 0.40855  | 0.068164 | 0.14135  |
| 0.0004   | 0.125114 | 0.00679  | 0.189291 | 3.84E-05 | 0.180217 | 9.00E-05 | 0.039085 | 0.3994   |
| 0.00298  | 0.145725 | 0.00159  | 0.219508 | 1.67E-06 | 0.187892 | 4.39E-05 | 0.081816 | 0.07735  |
| 1.52E-05 | 0.310619 | 6.64E-12 | 0.453415 | 4.67E-25 | 0.3592   | 1.14E-15 | -0.10772 | 0.0199   |
| 2.47E-06 | -0.11735 | 0.01115  | -0.10573 | 0.0223   | -0.17037 | 0.00022  | -0.28562 | 3.23E-10 |
| 0.01831  | -0.06064 | 0.19085  | 0.13127  | 0.00449  | 0.075157 | 0.10478  | 0.206658 | 6.71E-06 |
| 0.24115  | 0.197149 | 1.78E-05 | 0.288572 | 2.08E-10 | 0.213941 | 3.09E-06 | -0.07882 | 0.08886  |
| 0.1141   | -0.04065 | 0.38079  | 0.048322 | 0.29738  | -0.01133 | 0.80702  | 0.335211 | 1.00E-13 |
| 4.18E-08 | 0.142562 | 0.00201  | 0.341877 | 3.00E-14 | 0.294133 | 8.98E-11 | 0.104154 | 0.02439  |
| 0.0001   | -0.01334 | 0.77373  | 0.135189 | 0.00342  | 0.144864 | 0.0017   | 0.151655 | 0.00101  |
| 0.76391  | -0.0011  | 0.98114  | 0.061866 | 0.18199  | 0.01572  | 0.73474  | -0.14586 | 0.00157  |
| 5.75E-06 | -0.10795 | 0.01963  | -0.15786 | 0.00062  | -0.19719 | 1.77E-05 | -0.22692 | 7.22E-07 |
| 0.01771  | -0.11881 | 0.01018  | 0.0912   | 0.04888  | 0.053315 | 0.2502   | 0.013737 | 0.76718  |
| 0.0002   | -0.08237 | 0.07537  | -0.15773 | 0.00062  | -0.19519 | 2.16E-05 | -0.0899  | 0.05219  |
| 0.00055  | 0.020768 | 0.65442  | 0.093024 | 0.04451  | -0.05864 | 0.2059   | -0.10597 | 0.022    |
| 0.01177  | -0.05615 | 0.22583  | -0.15392 | 0.00085  | -0.12826 | 0.00551  | -0.24015 | 1.50E-07 |
| 6.88E-14 | 0.373463 | 6.65E-17 | 0.324524 | 6.49E-13 | 0.394064 | 8.46E-19 | 0.04601  | 0.32113  |
| 0.00026  | -0.07308 | 0.11476  | -0.19231 | 2.87E-05 | -0.14709 | 0.00144  | -0.06376 | 0.16898  |
| 9.56E-05 | 0.063713 | 0.16927  | 0.194715 | 2.26E-05 | 0.171556 | 0.0002   | 0.121781 | 0.00843  |
| 0.357    | 0.009971 | 0.82985  | 0.07873  | 0.08923  | 0.047691 | 0.30375  | -0.04144 | 0.3716   |
| 0.57045  | -0.0088  | 0.84952  | -0.04961 | 0.28466  | -0.08096 | 0.0805   | -0.15625 | 0.0007   |
| 0.7164   | 0.208468 | 5.55E-06 | 0.265452 | 5.68E-09 | 0.126514 | 0.00619  | -0.18436 | 6.13E-05 |
| 0.00106  | -0.03254 | 0.48294  | 0.027791 | 0.54912  | -0.07726 | 0.0954   | -0.10237 | 0.02697  |
| 0.0206   | -0.01446 | 0.75525  | 0.069704 | 0.13255  | 0.100189 | 0.03041  | -0.01449 | 0.75483  |
| 0.19892  | 0.057949 | 0.2113   | 0.070505 | 0.12815  | 0.063668 | 0.16957  | 0.009953 | 0.83015  |
| 0.42883  | -0.22913 | 5.58E-07 | 0.040632 | 0.381    | -0.01632 | 0.72505  | -0.10598 | 0.02199  |
| 9.50E-05 | -0.0233  | 0.61547  | 0.290122 | 1.65E-10 | 0.192327 | 2.86E-05 | 0.338582 | 5.46E-14 |
| 0.0053   | 0.310552 | 6.72E-12 | 0.296663 | 6.09E-11 | 0.249796 | 4.48E-08 | 0.168027 | 0.00026  |
| 3.88E-25 | 0.257349 | 1.68E-08 | 0.321348 | 1.12E-12 | 0.488217 | 2.42E-29 | 0.127999 | 0.0056   |
| 0.00062  | 0.14286  | 0.00197  | 0.161193 | 0.00047  | 0.181834 | 7.75E-05 | -0.23509 | 2.76E-07 |
| 2.16E-05 | 0.15648  | 0.00069  | 0.300196 | 3.51E-11 | 0.263836 | 7.07E-09 | -0.03307 | 0.47584  |
| 0.00678  | 0.1669   | 0.00029  | 0.271752 | 2.38E-09 | 0.217278 | 2.14E-06 | -0.01796 | 0.6986   |
| 0.00023  | -0.17215 | 0.00019  | 0.134153 | 0.00368  | 0.132881 | 0.00402  | 0.013749 | 0.76697  |
| 0.58238  | 0.021638 | 0.64093  | -0.06106 | 0.1878   | -0.02138 | 0.64493  | 0.537742 | 2.35E-36 |
| 0.30637  | 0.088244 | 0.05671  | 0.143026 | 0.00195  | 0.129474 | 0.00507  | -0.00199 | 0.96574  |
| 0.00651  | -0.28237 | 5.21E-10 | -0.00433 | 0.92568  | -0.05378 | 0.24612  | 0.123879 | 0.00736  |
| 0.00507  | 0.006965 | 0.88067  | -0.04432 | 0.33923  | 0.007055 | 0.87914  | -0.3383  | 5.74E-14 |
| 0.00041  | -0.02669 | 0.56504  | -0.06002 | 0.19542  | 0.027313 | 0.55602  | 0.389788 | 2.15E-18 |
| 0.87187  | -0.02637 | 0.56973  | 0.098657 | 0.03305  | 0.017183 | 0.71111  | -0.00882 | 0.84928  |
| 0.03414  | 0.057898 | 0.21171  | 0.148244 | 0.00131  | 0.071066 | 0.12513  | 0.092817 | 0.04499  |
| 0.90562  | -0.12648 | 0.0062   | 0.02963  | 0.523    | -0.01588 | 0.73211  | -0.04781 | 0.30256  |
| 0.69079  | -0.0967  | 0.03671  | -0.0142  | 0.75959  | -0.02448 | 0.59772  | -0.01474 | 0.75077  |
| 0.16187  | -0.22513 | 8.86E-07 | -0.16737 | 0.00028  | -0.14718 | 0.00143  | -0.10483 | 0.02348  |
| 0.12005  | -0.08723 | 0.05962  | -0.00108 | 0.98142  | 0.004239 | 0.92721  | 0.02446  | 0.59803  |
| 1.82E-06 | 0.002031 | 0.96509  | 0.194983 | 2.20E-05 | 0.187307 | 4.64E-05 | 0.125233 | 0.00673  |

|          |          |          |          |          |          |          |          |          |
|----------|----------|----------|----------|----------|----------|----------|----------|----------|
| 2.09E-10 | -0.35401 | 3.11E-15 | -0.2407  | 1.40E-07 | -0.35261 | 4.06E-15 | -0.15787 | 0.00062  |
| 0.82151  | 0.260593 | 1.09E-08 | 0.066469 | 0.15153  | 0.1145   | 0.01329  | 0.161852 | 0.00045  |
| 0.00013  | -0.2093  | 5.08E-06 | -0.09471 | 0.04078  | -0.1736  | 0.00016  | -0.22536 | 8.63E-07 |
| 0.30403  | -0.0153  | 0.74149  | 0.076602 | 0.09825  | 0.061807 | 0.18241  | -0.03809 | 0.4115   |
| 0.14152  | -0.09147 | 0.0482   | -0.23729 | 2.12E-07 | -0.1827  | 7.15E-05 | 0.27217  | 2.24E-09 |
| 0.56822  | -0.03999 | 0.38858  | -0.02395 | 0.60571  | -0.0372  | 0.42249  | -0.18439 | 6.11E-05 |
| 0.57494  | 0.140711 | 0.00231  | 0.251803 | 3.47E-08 | 0.177407 | 0.00012  | 0.131712 | 0.00436  |
| 0.08659  | -0.16986 | 0.00023  | -0.04246 | 0.35996  | -0.10721 | 0.02049  | -0.02512 | 0.58815  |
| 0.70136  | 0.053912 | 0.24493  | 0.034713 | 0.45423  | 0.029343 | 0.52703  | -0.00884 | 0.84894  |
| 7.99E-05 | 0.110059 | 0.01735  | 0.225367 | 8.63E-07 | 0.204474 | 8.43E-06 | 0.050325 | 0.27778  |
| 1.97E-06 | 0.03539  | 0.44548  | -0.13618 | 0.00319  | 0.038234 | 0.40975  | 0.163945 | 0.00037  |
| 0.33978  | 0.279414 | 8.01E-10 | -0.00345 | 0.94069  | 0.07246  | 0.11788  | -0.27683 | 1.16E-09 |
| 0.09633  | 0.216319 | 2.38E-06 | 0.035331 | 0.44624  | 0.005182 | 0.91107  | -0.1144  | 0.01337  |
| 0.02621  | -0.18019 | 9.02E-05 | -0.22784 | 6.49E-07 | -0.23367 | 3.27E-07 | 0.003462 | 0.94052  |
| 0.50514  | 0.00789  | 0.86497  | 0.003588 | 0.93837  | 0.002876 | 0.95057  | 0.328188 | 3.45E-13 |
| 0.57293  | 0.016794 | 0.71737  | 0.022443 | 0.62856  | 0.048142 | 0.29919  | 0.198514 | 1.55E-05 |
| 6.01E-07 | 0.103118 | 0.02586  | 0.196598 | 1.88E-05 | 0.200378 | 1.28E-05 | 0.359267 | 1.13E-15 |
| 0.17656  | -0.34081 | 3.64E-14 | -0.17849 | 0.00011  | -0.19061 | 3.38E-05 | -0.11894 | 0.0101   |
| 2.11E-07 | 0.006824 | 0.88307  | 0.102259 | 0.02713  | 0.170289 | 0.00022  | 0.470124 | 4.71E-27 |
| 0.22267  | -0.10397 | 0.02464  | -0.03409 | 0.46242  | -0.07154 | 0.12266  | 0.035304 | 0.44658  |
| 2.42E-06 | 0.024524 | 0.59706  | 0.130083 | 0.00487  | 0.156446 | 0.00069  | 0.101536 | 0.02824  |
| 0.90705  | -0.04423 | 0.3402   | 0.027613 | 0.55169  | -0.0201  | 0.66491  | -0.00287 | 0.95062  |
| 2.40E-09 | 0.184344 | 6.14E-05 | 0.341756 | 3.07E-14 | 0.320929 | 1.20E-12 | 0.133431 | 0.00387  |
| 0.00016  | -0.0673  | 0.14647  | -0.05145 | 0.26719  | -0.11849 | 0.01038  | -0.01478 | 0.74999  |
| 0.00678  | -0.22474 | 9.26E-07 | -0.06488 | 0.1616   | -0.15996 | 0.00052  | -0.2237  | 1.04E-06 |
| 0.02902  | -0.11085 | 0.01656  | -0.11318 | 0.0144   | -0.1127  | 0.01482  | 0.234788 | 2.86E-07 |
| 0.40846  | -0.12668 | 0.00612  | -0.06565 | 0.15666  | -0.06357 | 0.17025  | -0.09832 | 0.03365  |
| 0.4709   | -0.33797 | 6.10E-14 | -0.07125 | 0.12416  | -0.13053 | 0.00472  | 0.021406 | 0.6445   |
| 0.33037  | -0.09355 | 0.04332  | -0.25706 | 1.75E-08 | -0.17851 | 0.00011  | 0.064191 | 0.16609  |
| 0.68868  | -0.04583 | 0.32304  | -0.21702 | 2.20E-06 | -0.13451 | 0.00359  | 0.076963 | 0.09667  |
| 0.08147  | 0.131148 | 0.00453  | 0.001528 | 0.97373  | -0.00816 | 0.86043  | 0.121802 | 0.00842  |
| 1.33E-06 | -0.09533 | 0.03948  | -0.1497  | 0.00118  | -0.17507 | 0.00014  | 0.339842 | 4.34E-14 |
| 5.23E-08 | -0.24162 | 1.25E-07 | -0.21856 | 1.86E-06 | -0.29138 | 1.37E-10 | -0.04381 | 0.34487  |
| 3.63E-11 | -0.09636 | 0.03739  | -0.26232 | 8.68E-09 | -0.30144 | 2.89E-11 | -0.29165 | 1.31E-10 |
| 0.0759   | 0.014402 | 0.75626  | 0.101578 | 0.02817  | 0.099017 | 0.03241  | 7.38E-05 | 0.99873  |
| 0.57783  | 0.091146 | 0.04901  | 0.098042 | 0.03416  | 0.096645 | 0.03681  | 0.019643 | 0.67201  |
| 0.20968  | 0.135645 | 0.00331  | 0.079142 | 0.08757  | 0.030578 | 0.50978  | 0.013481 | 0.77139  |
| 0.71853  | -0.30037 | 3.42E-11 | -0.07948 | 0.08623  | -0.11426 | 0.01348  | -0.08924 | 0.05395  |
| 0.63992  | -0.12714 | 0.00593  | -0.0298  | 0.52068  | -0.02514 | 0.58785  | 0.060537 | 0.19159  |
| 0.02194  | -0.25852 | 1.44E-08 | -0.24221 | 1.16E-07 | -0.24524 | 7.98E-08 | -0.09769 | 0.03481  |
| 1.73E-06 | -0.16447 | 0.00036  | -0.1294  | 0.0051   | -0.19482 | 2.24E-05 | -0.08602 | 0.06325  |
| 2.93E-14 | 0.330992 | 2.11E-13 | 0.331379 | 1.97E-13 | 0.356772 | 1.83E-15 | 0.355965 | 2.14E-15 |
| 0.92785  | -0.05013 | 0.27965  | -0.03123 | 0.50082  | -0.0129  | 0.78092  | -0.01503 | 0.74591  |
| 5.67E-12 | -0.20304 | 9.78E-06 | -0.19854 | 1.55E-05 | -0.30149 | 2.87E-11 | 0.159866 | 0.00052  |
| 0.17483  | 0.14989  | 0.00116  | 0.152936 | 0.00091  | 0.075771 | 0.10197  | -0.23289 | 3.59E-07 |

|          |          |          |          |          |          |          |           |          |
|----------|----------|----------|----------|----------|----------|----------|-----------|----------|
| 0.94623  | -0.08479 | 0.06715  | -0.05646 | 0.22326  | -0.05737 | 0.21589  | 0.003204  | 0.94495  |
| 0.00067  | -0.16031 | 0.00051  | -0.09797 | 0.03431  | -0.17534 | 0.00014  | -0.34938  | 7.47E-15 |
| 0.13749  | -0.17096 | 0.00021  | -0.0438  | 0.345    | -0.07526 | 0.1043   | -0.07604  | 0.10076  |
| 0.99919  | 0.001273 | 0.97811  | -0.11239 | 0.0151   | -0.05326 | 0.25069  | -0.12751  | 0.00579  |
| 1.46E-05 | 0.399942 | 2.30E-19 | 0.234382 | 3.01E-07 | 0.266157 | 5.16E-09 | 0.131028  | 0.00457  |
| 2.58E-05 | 0.001599 | 0.97251  | 0.16422  | 0.00037  | 0.146812 | 0.00147  | 0.133232  | 0.00392  |
| 0.06789  | -0.18192 | 7.69E-05 | 0.044848 | 0.33351  | 0.01228  | 0.79125  | 0.160964  | 0.00048  |
| 0.30957  | 0.148811 | 0.00126  | 0.282097 | 5.42E-10 | 0.098482 | 0.03336  | -0.12642  | 0.00623  |
| 4.66E-09 | 0.058214 | 0.20922  | -0.13169 | 0.00436  | -0.179   | 0.0001   | 0.006948  | 0.88096  |
| 0.00164  | -0.26332 | 7.58E-09 | -0.16583 | 0.00032  | -0.22421 | 9.85E-07 | -0.25572  | 2.08E-08 |
| 0.36738  | 0.126991 | 0.00599  | 0.067576 | 0.14482  | 0.049191 | 0.28877  | 0.082583  | 0.0746   |
| 8.44E-09 | 0.009834 | 0.83215  | -0.16229 | 0.00043  | -0.14001 | 0.00243  | 0.170264  | 0.00022  |
| 0.44859  | -0.11914 | 0.00997  | -0.05184 | 0.26352  | -0.08422 | 0.069    | -2.91E-05 | 0.9995   |
| 0.0157   | 0.007872 | 0.86528  | -0.00153 | 0.97373  | 0.02993  | 0.51879  | 0.17441   | 0.00015  |
| 0.01461  | -0.04987 | 0.28215  | -0.06978 | 0.13211  | -0.08541 | 0.06515  | -0.20788  | 5.90E-06 |
| 0.00017  | 0.164621 | 0.00035  | 0.218045 | 1.97E-06 | 0.243493 | 9.92E-08 | 0.291831  | 1.28E-10 |
| 0.00207  | 0.236428 | 2.35E-07 | -0.13392 | 0.00374  | 0.06029  | 0.19341  | 0.346143  | 1.37E-14 |
| 0.00042  | 0.072966 | 0.11533  | 0.041905 | 0.36623  | 0.074417 | 0.10826  | 0.184639  | 5.97E-05 |
| 0.8344   | -0.01646 | 0.72278  | 0.054078 | 0.24347  | -0.01582 | 0.73307  | 0.227924  | 6.43E-07 |
| 0.00339  | 0.036704 | 0.42876  | 0.119031 | 0.01004  | 0.137556 | 0.00289  | 0.022296  | 0.63081  |
| 0.00707  | -0.16239 | 0.00043  | 0.152705 | 0.00093  | 0.077065 | 0.09623  | -0.07282  | 0.11606  |
| 0.00047  | -0.15171 | 0.00101  | 0.043046 | 0.35332  | 0.032343 | 0.48565  | 0.023377  | 0.61433  |
| 6.88E-06 | -0.12797 | 0.00561  | -0.31142 | 5.83E-12 | -0.27996 | 7.40E-10 | -0.05012  | 0.27976  |
| 0.04015  | -0.1085  | 0.01901  | 0.072512 | 0.11761  | 0.046069 | 0.32051  | 0.09079   | 0.04991  |
| 0.27261  | -0.04219 | 0.36302  | 0.01516  | 0.74385  | 0.043948 | 0.34332  | -0.04847  | 0.29588  |
| 0.00987  | -0.18163 | 7.90E-05 | -0.05204 | 0.2617   | -0.05572 | 0.22943  | -0.11141  | 0.01601  |
| 0.04296  | 0.019309 | 0.67727  | 0.012471 | 0.78808  | 0.063228 | 0.17254  | 0.112379  | 0.01511  |
| 0.66342  | 0.117375 | 0.01113  | -0.07057 | 0.12782  | -0.033   | 0.47678  | -0.00402  | 0.931    |
| 0.00303  | -0.03274 | 0.48031  | 0.000434 | 0.99254  | 0.027596 | 0.55193  | 0.0783    | 0.091    |
| 0.30438  | -0.04104 | 0.37621  | 0.016902 | 0.71564  | 0.04233  | 0.3614   | 0.016797  | 0.71733  |
| 2.31E-07 | -0.10292 | 0.02614  | 0.037959 | 0.41313  | 0.058625 | 0.20602  | 0.121474  | 0.00859  |
| 0.06652  | 0.05637  | 0.22403  | -0.00382 | 0.93442  | 0.047834 | 0.30229  | 0.001468  | 0.97475  |
| 0.0701   | 0.027088 | 0.55927  | 0.070405 | 0.12869  | 0.084341 | 0.06861  | -0.10978  | 0.01763  |
| 0.24161  | -0.19858 | 1.54E-05 | -0.08948 | 0.05331  | -0.04451 | 0.33715  | -0.03824  | 0.40972  |
| 0.15373  | 0.009364 | 0.84006  | -0.17198 | 0.00019  | -0.08541 | 0.06515  | 0.16352   | 0.00039  |
| 0.30345  | -0.01914 | 0.68001  | -0.02995 | 0.51845  | -0.05429 | 0.24166  | -0.08524  | 0.06571  |
| 0.01442  | -0.09786 | 0.03449  | -0.15457 | 0.0008   | -0.14055 | 0.00233  | -0.0648   | 0.16207  |
| 0.92045  | -0.16823 | 0.00026  | -0.03828 | 0.40922  | -0.10481 | 0.0235   | 0.090606  | 0.05037  |
| 0.14877  | -0.10368 | 0.02505  | -0.02131 | 0.64597  | 0.01039  | 0.82281  | -0.04186  | 0.3667   |
| 0.18462  | 0.0446   | 0.33619  | 0.07036  | 0.12894  | 0.076551 | 0.09848  | -0.12256  | 0.00802  |
| 0.09554  | -0.08556 | 0.0647   | 0.036712 | 0.42866  | 0.028822 | 0.5344   | 0.038321  | 0.40869  |
| 0.0906   | -0.16957 | 0.00023  | -0.03997 | 0.38877  | -0.03119 | 0.50141  | 0.022303  | 0.6307   |
| 2.08E-05 | -0.11432 | 0.01344  | 0.057442 | 0.21534  | 0.055567 | 0.23072  | 0.103397  | 0.02545  |
| 0.00307  | 0.204002 | 8.85E-06 | 0.292838 | 1.09E-10 | 0.248836 | 5.07E-08 | 0.004514  | 0.92249  |
| 0.00014  | 0.113024 | 0.01454  | 0.118796 | 0.01019  | 0.142052 | 0.00209  | 0.001938  | 0.96669  |

|          |          |          |          |          |          |          |          |          |
|----------|----------|----------|----------|----------|----------|----------|----------|----------|
| 0.47969  | -0.21791 | 2.00E-06 | -0.18099 | 8.38E-05 | -0.15769 | 0.00063  | -0.00603 | 0.89657  |
| 0.07241  | -0.16357 | 0.00039  | -0.20428 | 8.60E-06 | -0.18447 | 6.07E-05 | -0.21141 | 4.05E-06 |
| 5.93E-10 | 0.077871 | 0.09279  | 0.209707 | 4.86E-06 | 0.198433 | 1.56E-05 | 0.076639 | 0.09809  |
| 4.18E-13 | 0.198625 | 1.53E-05 | 0.282746 | 4.93E-10 | 0.30175  | 2.75E-11 | -0.00823 | 0.85927  |
| 4.20E-08 | -0.17255 | 0.00018  | -0.2048  | 8.15E-06 | -0.24667 | 6.66E-08 | -0.33471 | 1.09E-13 |
| 0.49395  | -0.0754  | 0.10364  | -0.09676 | 0.0366   | -0.10241 | 0.02689  | -0.06223 | 0.17945  |
| 3.33E-05 | -0.05974 | 0.19753  | 0.030545 | 0.51024  | 0.076006 | 0.10091  | -0.00618 | 0.89398  |
| 0.04695  | 0.164013 | 0.00037  | 0.180647 | 8.65E-05 | 0.168149 | 0.00026  | 0.150743 | 0.00108  |
| 0.00026  | 0.210285 | 4.57E-06 | 0.00778  | 0.86684  | 0.116867 | 0.01149  | 0.438128 | 2.52E-23 |
| 4.83E-16 | 0.343516 | 2.22E-14 | 0.381653 | 1.22E-17 | 0.39868  | 3.05E-19 | 0.234703 | 2.89E-07 |
| 0.1192   | -0.03338 | 0.47177  | 0.04828  | 0.29781  | 0.075367 | 0.10381  | 0.200809 | 1.23E-05 |
| 0.20711  | 0.069411 | 0.13419  | 0.053794 | 0.24596  | 0.067294 | 0.1465   | 0.469332 | 5.89E-27 |
| 0.44983  | -0.10099 | 0.0291   | -0.0882  | 0.05684  | -0.09614 | 0.03782  | 0.236676 | 2.28E-07 |
| 0.00025  | -0.14377 | 0.00184  | -0.1419  | 0.00211  | -0.0141  | 0.76125  | 0.045855 | 0.32277  |
| 0.93963  | 0.18808  | 4.31E-05 | 0.090544 | 0.05053  | 0.075685 | 0.10236  | 0.333758 | 1.29E-13 |
| 0.04402  | 0.074779 | 0.10655  | -0.02609 | 0.57382  | -0.02595 | 0.57586  | 0.035327 | 0.44629  |
| 0.46417  | 0.007741 | 0.86749  | 0.057216 | 0.21715  | 0.046261 | 0.31849  | -0.04926 | 0.28807  |
| 0.29608  | 0.326273 | 4.80E-13 | -0.02322 | 0.61677  | 0.106108 | 0.02183  | 0.301685 | 2.78E-11 |
| 1.01E-05 | -0.07363 | 0.11203  | 0.019507 | 0.67415  | 0.047438 | 0.30632  | 0.328634 | 3.19E-13 |
| 9.84E-18 | -0.25945 | 1.28E-08 | -0.31643 | 2.55E-12 | -0.38869 | 2.72E-18 | 0.059147 | 0.202    |
| 0.00084  | -0.15613 | 0.00071  | -0.02311 | 0.61832  | 0.020311 | 0.66154  | 0.059979 | 0.19572  |
| 0.00532  | 0.010043 | 0.82862  | 0.104501 | 0.02392  | 0.103218 | 0.02571  | 0.022065 | 0.63435  |
| 0.5984   | -0.18763 | 4.50E-05 | -0.06537 | 0.15845  | -0.0706  | 0.12761  | -0.30863 | 9.17E-12 |
| 1.09E-11 | 0.014835 | 0.74916  | -0.00071 | 0.98787  | 0.156    | 0.00072  | 0.078059 | 0.092    |
| 0.44578  | -0.04451 | 0.33713  | -0.10263 | 0.02658  | -0.07053 | 0.12799  | 0.153187 | 0.0009   |
| 0.51699  | -0.0252  | 0.587    | -0.06369 | 0.16945  | -0.01613 | 0.72802  | 0.108073 | 0.01949  |
| 0.76309  | -0.02307 | 0.61894  | -0.07867 | 0.08947  | -0.0518  | 0.26392  | -0.13705 | 0.003    |
| 0.14963  | -0.16678 | 0.00029  | -0.05727 | 0.21673  | -0.03578 | 0.44047  | 0.014075 | 0.76162  |
| 0.79121  | -0.02966 | 0.52252  | -0.23479 | 2.86E-07 | -0.11844 | 0.01042  | 0.348588 | 8.66E-15 |
| 0.09913  | 0.117518 | 0.01104  | 0.320915 | 1.20E-12 | 0.211143 | 4.17E-06 | 0.104631 | 0.02374  |
| 2.78E-05 | -0.06581 | 0.15566  | -0.05114 | 0.27004  | -0.11681 | 0.01153  | 0.172267 | 0.00018  |
| 0.10368  | -0.14693 | 0.00145  | -0.02609 | 0.57389  | -0.02897 | 0.53223  | 0.063096 | 0.17345  |
| 0.49442  | -0.0911  | 0.04912  | -0.01568 | 0.73542  | -0.03378 | 0.46644  | 0.001213 | 0.97914  |
| 0.11734  | -0.11944 | 0.00978  | -0.08358 | 0.07114  | -0.05506 | 0.23504  | -0.15728 | 0.00065  |
| 3.57E-05 | 0.00576  | 0.90121  | 0.158521 | 0.00059  | 0.137249 | 0.00296  | -0.01608 | 0.72893  |
| 0.25926  | 0.158873 | 0.00057  | 0.14613  | 0.00154  | 0.046512 | 0.31587  | -0.14294 | 0.00196  |
| 2.27E-06 | 0.213294 | 3.31E-06 | 0.121005 | 0.00886  | 0.20209  | 1.08E-05 | 0.333629 | 1.33E-13 |
| 0.0002   | -0.04771 | 0.3035   | -0.12388 | 0.00736  | 0.016374 | 0.72415  | 0.032821 | 0.47923  |
| 6.13E-14 | 0.235564 | 2.61E-07 | 0.332191 | 1.71E-13 | 0.343157 | 2.37E-14 | 0.313814 | 3.94E-12 |
| 0.469    | 0.247913 | 5.70E-08 | 0.081406 | 0.07885  | 0.101684 | 0.028    | -0.16484 | 0.00035  |
| 0.25198  | 0.112211 | 0.01526  | -0.03323 | 0.47382  | 0.014185 | 0.75981  | -0.11056 | 0.01684  |
| 0.25489  | -0.0203  | 0.66165  | 0.017078 | 0.71281  | -0.06602 | 0.15431  | -0.1764  | 0.00013  |
| 2.57E-08 | -0.33215 | 1.72E-13 | -0.24082 | 1.38E-07 | -0.36351 | 4.91E-16 | -0.11427 | 0.01348  |
| 0.68574  | 0.133259 | 0.00392  | 0.103068 | 0.02593  | 0.113413 | 0.0142   | -0.16222 | 0.00043  |
| 0.62679  | -0.1429  | 0.00196  | -0.02913 | 0.53006  | -0.1014  | 0.02844  | -0.29098 | 1.45E-10 |

|          |          |          |          |          |          |          |          |          |
|----------|----------|----------|----------|----------|----------|----------|----------|----------|
| 0.79401  | -0.08396 | 0.06988  | -0.01194 | 0.79694  | -0.03059 | 0.50968  | -0.16636 | 0.00031  |
| 0.00128  | 0.156036 | 0.00072  | 0.282455 | 5.15E-10 | 0.229405 | 5.41E-07 | 0.040061 | 0.38773  |
| 3.91E-05 | 0.05339  | 0.24952  | 0.16967  | 0.00023  | 0.156895 | 0.00067  | 0.085229 | 0.06573  |
| 0.00046  | 0.07176  | 0.12148  | 0.099521 | 0.03154  | 0.145174 | 0.00166  | 0.026257 | 0.57139  |
| 7.32E-06 | -0.02929 | 0.52778  | 0.061945 | 0.18144  | 0.072209 | 0.11916  | 0.004333 | 0.9256   |
| 1.35E-06 | -0.3177  | 2.06E-12 | -0.22251 | 1.19E-06 | -0.27863 | 8.96E-10 | -0.10696 | 0.02079  |
| 7.33E-06 | -0.10231 | 0.02705  | 0.035435 | 0.4449   | -0.13959 | 0.0025   | -0.18551 | 5.50E-05 |
| 0.00011  | -0.12464 | 0.007    | -0.15084 | 0.00108  | -0.17002 | 0.00022  | -0.27672 | 1.18E-09 |
| 0.00409  | 0.237534 | 2.06E-07 | 0.382205 | 1.08E-17 | 0.279752 | 7.62E-10 | 0.017627 | 0.704    |
| 0.01042  | -0.16021 | 0.00051  | -0.01297 | 0.77989  | -0.0131  | 0.77775  | 0.125958 | 0.00642  |
| 0.00875  | -0.0371  | 0.42376  | 0.121082 | 0.00881  | 0.104449 | 0.02399  | -0.01237 | 0.78974  |
| 6.33E-15 | -0.00732 | 0.87456  | 0.112134 | 0.01533  | -0.11629 | 0.01191  | -0.22509 | 8.90E-07 |
| 0.06984  | -0.13561 | 0.00332  | -0.02343 | 0.61354  | 0.007924 | 0.86439  | -0.09272 | 0.04522  |
| 0.96304  | 0.192772 | 2.74E-05 | -0.09773 | 0.03474  | 0.044003 | 0.34271  | 0.048544 | 0.29517  |
| 0.10701  | -0.028   | 0.54606  | 0.102372 | 0.02696  | 0.067414 | 0.14579  | -0.05312 | 0.25189  |
| 7.75E-05 | 0.008688 | 0.85146  | 0.023805 | 0.60786  | 0.097815 | 0.03458  | 0.070827 | 0.12641  |
| 0.00699  | -0.01361 | 0.7693   | -0.04345 | 0.34878  | -0.09105 | 0.04924  | -0.2377  | 2.02E-07 |
| 0.8684   | 0.234183 | 3.08E-07 | 0.044678 | 0.33536  | 0.073566 | 0.11236  | 0.193705 | 2.50E-05 |
| 6.41E-05 | -0.03288 | 0.47844  | -0.07356 | 0.11238  | -0.12645 | 0.00621  | -0.30008 | 3.58E-11 |
| 0.95378  | 0.02535  | 0.58476  | -0.01565 | 0.73595  | -0.00467 | 0.91988  | -0.08991 | 0.05218  |
| 0.51397  | -0.22618 | 7.86E-07 | -0.06588 | 0.15518  | -0.11796 | 0.01073  | 0.29213  | 1.22E-10 |
| 0.49108  | -0.2032  | 9.62E-06 | -0.10256 | 0.02667  | -0.1111  | 0.01631  | 0.107811 | 0.01979  |
| 0.49268  | 0.152763 | 0.00093  | -0.08449 | 0.06811  | -0.00369 | 0.93663  | 0.146457 | 0.00151  |
| 3.90E-07 | 0.076624 | 0.09816  | 0.104266 | 0.02424  | 0.146739 | 0.00147  | -0.06636 | 0.15219  |
| 0.00064  | -0.14201 | 0.0021   | 0.051831 | 0.26364  | 0.063036 | 0.17386  | 0.106958 | 0.02079  |
| 0.00171  | -0.06407 | 0.1669   | 0.010289 | 0.82451  | 0.05271  | 0.25562  | 0.149866 | 0.00116  |
| 0.10524  | 0.241813 | 1.22E-07 | 0.114412 | 0.01336  | 0.135052 | 0.00345  | -0.26277 | 8.18E-09 |
| 0.00127  | -0.03364 | 0.46829  | -0.17163 | 0.00019  | -0.15058 | 0.0011   | 0.077609 | 0.0939   |
| 0.27454  | 0.037725 | 0.41601  | 0.038936 | 0.4012   | 0.067013 | 0.1482   | 0.048216 | 0.29845  |
| 0.24316  | 0.056958 | 0.21923  | -0.04345 | 0.34884  | 0.007798 | 0.86654  | 0.261183 | 1.01E-08 |
| 0.52553  | 0.035512 | 0.44391  | -0.07982 | 0.08489  | -0.02483 | 0.59253  | 0.230895 | 4.54E-07 |
| 0.33558  | -0.23271 | 3.67E-07 | -0.18223 | 7.48E-05 | -0.16023 | 0.00051  | -0.1377  | 0.00286  |
| 3.55E-12 | 0.364126 | 4.35E-16 | 0.088711 | 0.0554   | 0.285946 | 3.08E-10 | 0.331139 | 2.06E-13 |
| 4.09E-05 | 0.303168 | 2.20E-11 | 0.432229 | 1.11E-22 | 0.346435 | 1.29E-14 | -0.01976 | 0.67012  |
| 2.98E-16 | 0.034113 | 0.46208  | -0.25751 | 1.65E-08 | -0.25564 | 2.11E-08 | -0.06578 | 0.15581  |
| 3.11E-09 | -0.28483 | 3.63E-10 | -0.275   | 1.51E-09 | -0.33731 | 6.86E-14 | 0.272048 | 2.28E-09 |
| 4.26E-09 | -0.1627  | 0.00042  | -0.06894 | 0.13687  | -0.2134  | 3.27E-06 | 0.177284 | 0.00012  |
| 0.48754  | -0.00572 | 0.90194  | 0.000407 | 0.993    | 0.017975 | 0.69844  | -0.11329 | 0.0143   |
| 0.11604  | -0.2493  | 4.78E-08 | -0.0757  | 0.10229  | -0.13562 | 0.00332  | -0.08837 | 0.05636  |
| 0.00019  | 0.235573 | 2.61E-07 | 0.03765  | 0.41695  | -0.00926 | 0.84175  | -0.17865 | 0.0001   |
| 0.37092  | 0.057276 | 0.21667  | 0.036476 | 0.43164  | 0.051099 | 0.27046  | 0.064607 | 0.16335  |
| 7.64E-05 | 0.17139  | 0.0002   | 0.176163 | 0.00013  | 0.191187 | 3.20E-05 | -0.11424 | 0.0135   |
| 0.09704  | 0.18322  | 6.82E-05 | -0.05175 | 0.26436  | 0.045401 | 0.32758  | 0.081334 | 0.07912  |
| 0.70145  | -0.14777 | 0.00136  | -0.22361 | 1.05E-06 | -0.14471 | 0.00172  | 0.078988 | 0.08819  |
| 0.04485  | -0.08511 | 0.06611  | -0.08238 | 0.07531  | -0.08135 | 0.07906  | -0.28685 | 2.69E-10 |

|          |          |          |          |          |          |          |          |          |
|----------|----------|----------|----------|----------|----------|----------|----------|----------|
| 0.03592  | -0.12396 | 0.00732  | -0.14201 | 0.0021   | -0.13692 | 0.00303  | -0.00686 | 0.88239  |
| 0.00421  | 0.102905 | 0.02617  | 0.196776 | 1.84E-05 | 0.172385 | 0.00018  | 0.016646 | 0.71975  |
| 0.03865  | -0.00073 | 0.98742  | 0.059434 | 0.19982  | 0.103847 | 0.02482  | 0.205485 | 7.59E-06 |
| 0.2201   | -0.08725 | 0.05956  | -0.04854 | 0.29523  | -0.06079 | 0.1897   | 0.002518 | 0.95672  |
| 0.04204  | -0.14912 | 0.00123  | 0.06073  | 0.19017  | 0.037543 | 0.41827  | 0.032122 | 0.48863  |
| 4.23E-06 | -0.3378  | 6.28E-14 | -0.22739 | 6.84E-07 | -0.25691 | 1.78E-08 | -0.21149 | 4.02E-06 |
| 0.23177  | -0.12765 | 0.00574  | -0.18245 | 7.33E-05 | -0.13261 | 0.0041   | -0.22079 | 1.45E-06 |
| 0.08534  | -0.04987 | 0.28214  | -0.05777 | 0.21269  | -0.04164 | 0.36925  | -0.06538 | 0.15837  |
| 0.76792  | -0.01846 | 0.69067  | -0.01815 | 0.69559  | 0.009046 | 0.84541  | -0.02969 | 0.52216  |
| 0.00026  | -0.06178 | 0.18259  | -0.12526 | 0.00672  | -0.15181 | 0.001    | 0.153976 | 0.00084  |
| 5.84E-05 | -0.00014 | 0.99763  | -0.07291 | 0.11561  | 0.032829 | 0.47911  | 0.247301 | 6.16E-08 |
| 0.05886  | -0.05576 | 0.2291   | -0.13066 | 0.00468  | -0.10983 | 0.01758  | -0.19676 | 1.85E-05 |
| 0.02061  | -0.32049 | 1.29E-12 | -0.12174 | 0.00845  | -0.0919  | 0.04715  | 0.05868  | 0.20559  |
| 0.47296  | 0.153216 | 0.00089  | 0.098736 | 0.03291  | 0.092741 | 0.04517  | 0.069075 | 0.13609  |
| 0.98393  | -0.02864 | 0.53696  | -0.03037 | 0.51269  | -0.00109 | 0.98119  | 0.072379 | 0.11829  |
| 2.19E-07 | 0.096286 | 0.03752  | 0.012319 | 0.79062  | 0.164952 | 0.00034  | -0.07072 | 0.12697  |
| 0.01012  | 0.056148 | 0.22586  | 0.203213 | 9.60E-06 | 0.153362 | 0.00088  | 0.012449 | 0.78846  |
| 5.56E-06 | 0.18883  | 4.01E-05 | 0.187624 | 4.50E-05 | 0.219944 | 1.59E-06 | 0.03877  | 0.40321  |
| 5.90E-10 | 0.040279 | 0.38515  | 0.012979 | 0.77967  | 0.128298 | 0.00549  | 0.395396 | 6.31E-19 |
| 0.39637  | -0.15161 | 0.00101  | 0.032445 | 0.48427  | -0.0394  | 0.39556  | 0.097668 | 0.03486  |
| 0.05386  | -0.0188  | 0.68525  | 0.078546 | 0.08999  | 0.102622 | 0.02658  | -0.11584 | 0.01224  |
| 0.37471  | -0.11968 | 0.00963  | -0.05718 | 0.21743  | -0.05366 | 0.24712  | -0.18229 | 7.43E-05 |
| 0.02465  | -0.40811 | 3.60E-20 | -0.23077 | 4.61E-07 | -0.23672 | 2.27E-07 | 0.213887 | 3.10E-06 |
| 0.00062  | 0.054499 | 0.23982  | 0.202756 | 1.01E-05 | 0.160044 | 0.00052  | -0.19898 | 1.48E-05 |
| 0.42961  | 0.045245 | 0.32925  | 0.054083 | 0.24343  | 0.053758 | 0.24628  | 0.092258 | 0.0463   |
| 0.8404   | -0.02055 | 0.65784  | 0.00439  | 0.92462  | 0.028924 | 0.53295  | -0.05927 | 0.20109  |
| 0.11808  | -0.03262 | 0.48187  | -0.04045 | 0.38317  | -0.06852 | 0.13927  | 0.024203 | 0.60188  |
| 0.65878  | -0.06788 | 0.14302  | -0.03454 | 0.45651  | -0.07221 | 0.11917  | -0.03522 | 0.44762  |
| 0.03651  | -0.06615 | 0.15353  | 0.058415 | 0.20765  | 0.070107 | 0.13033  | 0.022023 | 0.635    |
| 0.3456   | 0.076355 | 0.09935  | 0.014446 | 0.75552  | 0.05705  | 0.21849  | 0.119263 | 0.00989  |
| 0.64538  | 0.16605  | 0.00031  | -0.01678 | 0.71761  | 0.042318 | 0.36153  | 0.30821  | 9.82E-12 |
| 0.71075  | 0.084055 | 0.06956  | -0.0482  | 0.29857  | -0.0026  | 0.95538  | 0.349215 | 7.70E-15 |
| 0.95137  | 0.031329 | 0.49943  | -0.05105 | 0.2709   | -0.01262 | 0.78558  | 0.275687 | 1.37E-09 |
| 5.64E-05 | -0.06861 | 0.13878  | 0.065387 | 0.15832  | 0.058968 | 0.20338  | -0.05963 | 0.1983   |
| 0.05965  | -0.12004 | 0.00942  | 0.063586 | 0.17012  | 0.036739 | 0.42831  | 0.171921 | 0.00019  |
| 0.00661  | -0.06478 | 0.16224  | -0.08626 | 0.06253  | -0.11049 | 0.01691  | 0.006717 | 0.88489  |
| 0.43604  | 0.152041 | 0.00098  | 0.071303 | 0.12388  | 0.074735 | 0.10675  | -0.04939 | 0.28681  |
| 0.24261  | 0.204861 | 8.10E-06 | 0.154652 | 0.0008   | 0.14929  | 0.00121  | 0.15653  | 0.00069  |
| 0.20819  | 0.213457 | 3.25E-06 | 0.164198 | 0.00037  | 0.159962 | 0.00052  | 0.149824 | 0.00116  |
| 0.04967  | -0.25815 | 1.52E-08 | -0.00109 | 0.98124  | -0.02674 | 0.56435  | -0.00831 | 0.85782  |
| 0.01282  | -0.03734 | 0.4208   | 0.031618 | 0.49549  | 0.009124 | 0.8441   | -0.21406 | 3.05E-06 |
| 0.2358   | 0.039663 | 0.39246  | 0.102237 | 0.02716  | 0.102736 | 0.02641  | -0.20814 | 5.74E-06 |
| 0.00259  | 0.05478  | 0.2374   | 0.130151 | 0.00485  | 0.118438 | 0.01042  | -0.36422 | 4.27E-16 |
| 1.50E-11 | 0.28058  | 6.76E-10 | 0.200201 | 1.31E-05 | 0.286945 | 2.66E-10 | 0.178327 | 0.00011  |
| 0.34967  | -0.1764  | 0.00013  | -0.0974  | 0.03537  | -0.08568 | 0.06432  | -0.03774 | 0.41581  |

|          |          |          |          |          |          |          |          |          |
|----------|----------|----------|----------|----------|----------|----------|----------|----------|
| 5.93E-09 | 0.185627 | 5.44E-05 | 0.228865 | 5.76E-07 | 0.218747 | 1.82E-06 | 0.161788 | 0.00045  |
| 0.3355   | -0.15186 | 0.00099  | 0.096491 | 0.03712  | 0.008784 | 0.84984  | -0.31781 | 2.03E-12 |
| 0.6422   | 0.11128  | 0.01614  | 0.106755 | 0.02103  | 0.124024 | 0.00729  | -0.06694 | 0.14866  |
| 0.09563  | 0.047832 | 0.30232  | 0.021919 | 0.63659  | 0.003079 | 0.94709  | -0.04118 | 0.37456  |
| 0.00737  | -0.04509 | 0.33088  | -0.05199 | 0.26221  | -0.09242 | 0.04591  | -0.07923 | 0.08721  |
| 6.77E-10 | -0.11961 | 0.00968  | -0.26792 | 4.05E-09 | -0.27028 | 2.92E-09 | -0.04703 | 0.31054  |
| 5.16E-05 | -0.12377 | 0.00741  | -0.03998 | 0.38863  | -0.12087 | 0.00893  | -0.1239  | 0.00735  |
| 0.00027  | -0.05712 | 0.21795  | -0.06019 | 0.19415  | -0.11519 | 0.01274  | -0.02908 | 0.5308   |
| 4.00E-06 | -0.28065 | 6.70E-10 | -0.15263 | 0.00094  | -0.26378 | 7.13E-09 | 0.020577 | 0.65739  |
| 1.39E-05 | -0.14343 | 0.00189  | -0.11461 | 0.0132   | -0.1674  | 0.00028  | -0.03133 | 0.49944  |
| 0.08936  | -0.08382 | 0.07035  | -0.03822 | 0.40993  | -0.06006 | 0.19513  | 0.156956 | 0.00066  |
| 0.61897  | -0.01324 | 0.77538  | 0.01083  | 0.81543  | -0.00195 | 0.96656  | 0.01865  | 0.6877   |
| 0.09987  | 0.052456 | 0.25792  | 0.088656 | 0.05555  | 0.117703 | 0.01091  | 0.103792 | 0.0249   |
| 0.1762   | -0.03691 | 0.42615  | 0.081715 | 0.07771  | 0.083779 | 0.07048  | 0.003699 | 0.93645  |
| 0.00026  | -0.01979 | 0.66976  | 0.191402 | 3.13E-05 | 0.169134 | 0.00024  | -0.00508 | 0.91273  |
| 0.37407  | 0.083306 | 0.07209  | 0.032414 | 0.48469  | 0.06792  | 0.14278  | 0.132563 | 0.00411  |
| 0.72843  | 0.058527 | 0.20678  | 0.019938 | 0.66738  | 0.035042 | 0.44997  | 0.067181 | 0.14719  |
| 0.03411  | -0.10767 | 0.01995  | 0.046387 | 0.31718  | 0.026198 | 0.57226  | -0.19859 | 1.54E-05 |
| 0.03313  | -0.07032 | 0.12918  | -0.0955  | 0.03912  | -0.11065 | 0.01676  | -0.05379 | 0.24601  |
| 0.13514  | -0.0588  | 0.20469  | -0.09758 | 0.03501  | -0.12207 | 0.00827  | -0.12841 | 0.00545  |
| 0.95334  | -0.06599 | 0.1545   | 0.005735 | 0.90163  | -0.00298 | 0.94875  | -0.00843 | 0.85578  |
| 1.55E-12 | -0.25895 | 1.36E-08 | -0.30429 | 1.84E-11 | -0.3494  | 7.43E-15 | -0.15407 | 0.00084  |
| 0.96963  | -0.03272 | 0.48052  | 0.032946 | 0.47755  | 0.000249 | 0.99571  | -0.06355 | 0.17039  |
| 4.84E-10 | 0.31287  | 4.60E-12 | 0.117264 | 0.01121  | 0.249987 | 4.38E-08 | 0.069551 | 0.13341  |
| 0.52465  | -0.04435 | 0.33897  | 0.019171 | 0.67945  | 0.010698 | 0.81765  | -0.0527  | 0.25571  |
| 0.00229  | -0.00785 | 0.86561  | -0.00445 | 0.92364  | 0.018462 | 0.69068  | 0.017975 | 0.69844  |
| 0.00028  | -0.07353 | 0.11255  | 0.196393 | 1.92E-05 | -0.05511 | 0.23456  | -0.03511 | 0.4491   |
| 1.10E-11 | 0.177621 | 0.00011  | 0.240404 | 1.45E-07 | 0.279794 | 7.58E-10 | 0.354319 | 2.93E-15 |
| 0.69488  | -0.19712 | 1.78E-05 | -0.13446 | 0.0036   | -0.12027 | 0.00928  | 0.037059 | 0.4243   |
| 0.62731  | -0.06384 | 0.16841  | -0.06347 | 0.17093  | -0.06176 | 0.18272  | 0.055845 | 0.22839  |
| 1.86E-08 | 0.094439 | 0.04136  | 0.166816 | 0.00029  | 0.228338 | 6.12E-07 | 0.132929 | 0.00401  |
| 0.42986  | 0.168845 | 0.00025  | -0.12196 | 0.00833  | -0.01335 | 0.7736   | 0.116447 | 0.01179  |
| 0.95967  | -0.09326 | 0.04397  | -0.01373 | 0.76733  | -0.00559 | 0.90411  | -0.17676 | 0.00012  |
| 0.00012  | 0.163737 | 0.00038  | 0.019908 | 0.66785  | 0.144948 | 0.00169  | 0.277273 | 1.09E-09 |
| 0.03258  | -0.01354 | 0.77047  | -0.07762 | 0.09385  | -0.07851 | 0.09013  | -0.27055 | 2.81E-09 |
| 0.14326  | -0.03085 | 0.50605  | 0.004692 | 0.91945  | 0.01098  | 0.81293  | 0.279957 | 7.40E-10 |
| 0.0095   | -0.02204 | 0.63476  | -0.02403 | 0.60448  | -0.07247 | 0.11785  | 0.0891   | 0.05434  |
| 0.60529  | 0.021442 | 0.64395  | 0.026927 | 0.56162  | -0.01711 | 0.71225  | 0.256392 | 1.91E-08 |
| 0.20526  | -0.33077 | 2.20E-13 | -0.22655 | 7.53E-07 | -0.24689 | 6.48E-08 | -0.01648 | 0.72247  |
| 1.04E-13 | 0.471564 | 3.13E-27 | 0.38379  | 7.75E-18 | 0.408197 | 3.53E-20 | 0.088763 | 0.05526  |
| 0.00041  | -0.20347 | 9.35E-06 | 0.063539 | 0.17044  | 0.027944 | 0.54692  | 0.00396  | 0.93198  |
| 0.00187  | -0.0263  | 0.57071  | 0.040595 | 0.38143  | 0.086377 | 0.06217  | 0.11516  | 0.01277  |
| 0.98649  | -0.13251 | 0.00412  | -0.13143 | 0.00444  | -0.1198  | 0.00956  | -0.07207 | 0.11988  |
| 0.08374  | 0.003457 | 0.94061  | 0.0234   | 0.61398  | 0.03971  | 0.3919   | 0.078083 | 0.0919   |
| 0.00487  | -0.0179  | 0.69965  | -0.09723 | 0.03569  | -0.11289 | 0.01465  | -0.10404 | 0.02455  |

|          |          |          |          |          |          |          |          |          |
|----------|----------|----------|----------|----------|----------|----------|----------|----------|
| 0.00017  | -0.19717 | 1.77E-05 | -0.22831 | 6.15E-07 | -0.2415  | 1.27E-07 | -0.11648 | 0.01177  |
| 0.42879  | 0.02531  | 0.58536  | 0.000105 | 0.99819  | 0.046794 | 0.31294  | 0.073165 | 0.11434  |
| 0.02239  | 0.246384 | 6.91E-08 | 0.183331 | 6.75E-05 | 0.204935 | 8.03E-06 | 0.063652 | 0.16968  |
| 0.49772  | -0.00958 | 0.83649  | -0.01687 | 0.71615  | -0.00907 | 0.84506  | -0.04325 | 0.35106  |
| 0.75789  | -0.06673 | 0.14993  | -0.10126 | 0.02867  | -0.07344 | 0.11298  | 0.004359 | 0.92515  |
| 0.23462  | -0.12184 | 0.0084   | -0.18758 | 4.52E-05 | -0.15366 | 0.00086  | 0.055555 | 0.23082  |
| 0.66975  | -0.15091 | 0.00107  | -0.16089 | 0.00048  | -0.11729 | 0.01119  | -0.11705 | 0.01136  |
| 0.82636  | 4.57E-05 | 0.99921  | -0.01826 | 0.69393  | -0.02329 | 0.6157   | 0.066133 | 0.15361  |
| 0.00173  | -0.02587 | 0.57711  | 0.025254 | 0.58619  | 0.046757 | 0.31332  | 0.075403 | 0.10365  |
| 0.48226  | -0.0597  | 0.1978   | -0.07062 | 0.12754  | -0.06389 | 0.16811  | -0.08034 | 0.08286  |
| 0.03234  | -0.06497 | 0.16102  | -0.01696 | 0.71468  | 0.016389 | 0.72391  | -0.07794 | 0.0925   |
| 0.83231  | -0.01229 | 0.79102  | -0.00271 | 0.95343  | 0.028909 | 0.53317  | -0.06065 | 0.19072  |
| 0.35945  | 0.041206 | 0.37429  | 0.028808 | 0.5346   | 0.030975 | 0.5043   | -0.087   | 0.06028  |
| 0.70222  | 0.11517  | 0.01276  | -0.06565 | 0.15665  | 0.002425 | 0.95831  | 0.11333  | 0.01427  |
| 0.10396  | 0.021849 | 0.63767  | 0.064383 | 0.16482  | 0.067952 | 0.14259  | -0.1569  | 0.00067  |
| 9.70E-09 | -0.05556 | 0.23076  | 0.181188 | 8.23E-05 | 0.195235 | 2.15E-05 | -0.02088 | 0.65259  |
| 0.4708   | 0.148893 | 0.00125  | -0.00885 | 0.84879  | 0.046134 | 0.31983  | -0.17073 | 0.00021  |
| 0.00373  | -0.31493 | 3.27E-12 | -0.39154 | 1.47E-18 | -0.32089 | 1.21E-12 | -0.04905 | 0.2902   |
| 0.12576  | 0.07957  | 0.08586  | -0.05162 | 0.26557  | -0.03249 | 0.48363  | 0.111339 | 0.01608  |
| 0.00207  | 0.081691 | 0.07781  | -0.27326 | 1.93E-09 | -0.15815 | 0.0006   | -0.08466 | 0.06755  |
| 0.00078  | 0.096045 | 0.03801  | -0.10289 | 0.02619  | -0.09215 | 0.04655  | -0.27267 | 2.09E-09 |
| 0.52048  | -0.03121 | 0.50105  | 0.023832 | 0.60746  | 0.006166 | 0.89428  | -0.16122 | 0.00047  |
| 0.00025  | -0.23481 | 2.86E-07 | -0.25068 | 4.01E-08 | -0.29332 | 1.02E-10 | -0.1283  | 0.00549  |
| 0.00071  | -0.05278 | 0.25494  | 0.111486 | 0.01594  | 0.091707 | 0.04763  | 0.074728 | 0.10679  |
| 3.11E-07 | 0.093451 | 0.04354  | 0.113116 | 0.01445  | 0.175874 | 0.00013  | -0.06976 | 0.13225  |
| 0.7922   | -0.04933 | 0.28738  | -0.01724 | 0.71023  | -0.01969 | 0.67135  | -0.08158 | 0.07821  |
| 0.52389  | 0.100479 | 0.02993  | 0.094668 | 0.04086  | 0.068589 | 0.13888  | -0.06779 | 0.14355  |
| 0.451    | 0.197687 | 1.68E-05 | 0.166352 | 0.00031  | 0.151693 | 0.00101  | 0.134603 | 0.00357  |
| 0.00029  | 0.221217 | 1.38E-06 | 0.110579 | 0.01682  | 0.205994 | 7.19E-06 | 0.050021 | 0.2807   |
| 8.36E-07 | 0.194607 | 2.29E-05 | 0.268132 | 3.93E-09 | 0.2886   | 2.07E-10 | 0.076879 | 0.09704  |
| 1.09E-09 | 0.172893 | 0.00017  | 0.390833 | 1.71E-18 | 0.353346 | 3.53E-15 | 0.24401  | 9.30E-08 |
| 1.77E-08 | 0.100074 | 0.0306   | 0.387764 | 3.32E-18 | 0.320926 | 1.20E-12 | 0.273323 | 1.91E-09 |
| 4.77E-05 | -0.20271 | 1.01E-05 | -0.17428 | 0.00015  | -0.20164 | 1.13E-05 | -0.07809 | 0.09187  |
| 0.11762  | -0.13379 | 0.00377  | -0.03473 | 0.45405  | -0.04806 | 0.29998  | -0.04531 | 0.32857  |
| 0.00435  | 0.020757 | 0.65458  | -0.09314 | 0.04426  | -0.10243 | 0.02687  | 0.233401 | 3.38E-07 |
| 0.13414  | -0.19706 | 1.79E-05 | -0.18196 | 7.67E-05 | -0.10125 | 0.02869  | 0.172439 | 0.00018  |
| 0.31321  | -0.3791  | 2.08E-17 | -0.16202 | 0.00044  | -0.15493 | 0.00078  | 0.031296 | 0.49989  |
| 0.24789  | -0.18625 | 5.13E-05 | 0.015771 | 0.73392  | -0.01953 | 0.67375  | -0.0116  | 0.80263  |
| 8.19E-06 | -0.23852 | 1.83E-07 | 0.038664 | 0.4045   | 0.049091 | 0.28976  | 0.015591 | 0.73684  |
| 0.00056  | -0.3772  | 3.08E-17 | -0.35903 | 1.18E-15 | -0.33672 | 7.63E-14 | -0.00999 | 0.82961  |
| 0.52102  | -0.00105 | 0.98197  | -0.07687 | 0.09708  | -0.04916 | 0.28906  | 0.200198 | 1.31E-05 |
| 0.07945  | 0.105484 | 0.02262  | 0.075447 | 0.10345  | 0.11818  | 0.01059  | 0.155655 | 0.00074  |
| 0.19036  | -0.3097  | 7.72E-12 | -0.0857  | 0.06425  | -0.10418 | 0.02436  | 0.132278 | 0.00419  |
| 0.70416  | 0.038467 | 0.4069   | -0.02055 | 0.65779  | -0.00899 | 0.84644  | 0.114022 | 0.01368  |
| 0.0033   | -0.21482 | 2.80E-06 | -0.02181 | 0.63822  | -0.00654 | 0.88798  | -0.01852 | 0.68975  |



|          |          |          |          |          |          |          |          |          |
|----------|----------|----------|----------|----------|----------|----------|----------|----------|
| 0.96855  | 0.061209 | 0.18669  | -0.00393 | 0.93258  | 0.028269 | 0.54227  | 0.062543 | 0.17725  |
| 0.0924   | 0.014191 | 0.7597   | -0.04095 | 0.37728  | -0.02107 | 0.64973  | 0.247273 | 6.18E-08 |
| 0.88111  | -0.2346  | 2.93E-07 | -0.08492 | 0.06673  | -0.10955 | 0.01788  | -0.00609 | 0.89557  |
| 0.00191  | -0.11727 | 0.01121  | -0.11582 | 0.01226  | -0.16789 | 0.00027  | 0.138339 | 0.00274  |
| 2.29E-10 | -0.1439  | 0.00182  | 0.093935 | 0.04246  | 0.157979 | 0.00061  | 0.266889 | 4.67E-09 |
| 0.13925  | -0.00091 | 0.98438  | 0.110954 | 0.01645  | 0.078949 | 0.08835  | -0.05613 | 0.226    |
| 0.01599  | -0.03318 | 0.47445  | 0.089976 | 0.052    | 0.074249 | 0.10906  | 0.013066 | 0.77823  |
| 0.00722  | 0.022153 | 0.633    | 0.110019 | 0.01739  | 0.11768  | 0.01092  | -0.00099 | 0.983    |
| 0.35284  | 0.001701 | 0.97076  | -0.02048 | 0.65894  | -0.0169  | 0.71559  | 0.030008 | 0.51771  |
| 0.5916   | -0.13107 | 0.00455  | -0.02506 | 0.58906  | -0.02896 | 0.53244  | -0.11626 | 0.01193  |
| 0.21743  | -0.03873 | 0.40371  | -0.05432 | 0.24133  | -0.04373 | 0.34572  | -0.05231 | 0.25928  |
| 0.4448   | 0.017819 | 0.70092  | 0.013672 | 0.76825  | 0.024045 | 0.60425  | 0.078975 | 0.08824  |
| 1.15E-08 | 0.318978 | 1.67E-12 | 0.246122 | 7.14E-08 | 0.332384 | 1.65E-13 | 0.365392 | 3.38E-16 |
| 0.38285  | -0.087   | 0.06028  | -0.15163 | 0.00101  | -0.13694 | 0.00302  | 0.207891 | 5.90E-06 |
| 1.81E-05 | -0.04261 | 0.35819  | 0.075299 | 0.10413  | 0.097545 | 0.03509  | 0.186611 | 4.96E-05 |
| 0.05903  | 0.157053 | 0.00066  | 0.074624 | 0.10727  | 0.114775 | 0.01307  | 0.101914 | 0.02765  |
| 0.02394  | -0.08147 | 0.07862  | -0.04727 | 0.30801  | -0.10407 | 0.02452  | -0.00928 | 0.84147  |
| 0.17211  | -0.00803 | 0.8626   | 0.030383 | 0.51248  | 0.028018 | 0.54586  | 0.148312 | 0.00131  |
| 0.01949  | 0.098017 | 0.03421  | 0.175202 | 0.00014  | 0.114431 | 0.01335  | 0.238397 | 1.85E-07 |
| 0.0002   | 0.140869 | 0.00228  | 0.253224 | 2.89E-08 | 0.195117 | 2.18E-05 | 0.248451 | 5.32E-08 |
| 2.73E-31 | 0.322668 | 8.92E-13 | 0.142278 | 0.00206  | 0.414387 | 8.37E-21 | 0.288819 | 2.01E-10 |
| 0.34718  | 0.121483 | 0.00859  | 0.102321 | 0.02703  | 0.12343  | 0.00758  | 0.196283 | 1.94E-05 |
| 0.03692  | 0.012996 | 0.77939  | -0.23666 | 2.29E-07 | -0.06553 | 0.15742  | 0.130356 | 0.00478  |
| 2.45E-07 | -0.11686 | 0.01149  | -0.10767 | 0.01994  | 0.020406 | 0.66005  | 0.108006 | 0.01956  |
| 0.02     | -0.07698 | 0.09662  | -0.06673 | 0.14995  | 0.009744 | 0.83366  | -0.13701 | 0.00301  |
| 0.46004  | 0.004659 | 0.92002  | -0.00898 | 0.84653  | -0.02409 | 0.60353  | 0.226381 | 7.68E-07 |
| 0.37513  | 0.043374 | 0.34966  | 0.15786  | 0.00062  | 0.023116 | 0.6183   | -0.06352 | 0.17059  |
| 0.24585  | 0.102037 | 0.02746  | 0.063045 | 0.17379  | 0.034593 | 0.4558   | -0.01888 | 0.684    |
| 0.02879  | 0.098101 | 0.03406  | 0.033919 | 0.46463  | 0.10007  | 0.0306   | 0.052696 | 0.25574  |
| 0.57949  | 0.111011 | 0.0164   | 0.103888 | 0.02476  | 0.060844 | 0.18934  | 0.084615 | 0.06771  |
| 0.00011  | 0.142865 | 0.00197  | 0.265182 | 5.89E-09 | 0.23093  | 4.53E-07 | 0.351038 | 5.46E-15 |
| 0.09644  | 0.01402  | 0.76252  | -0.01674 | 0.71829  | 0.019945 | 0.66727  | 0.440219 | 1.48E-23 |
| 5.73E-05 | -0.10357 | 0.0252   | -0.11209 | 0.01538  | -0.21135 | 4.08E-06 | 0.214221 | 2.99E-06 |
| 0.17096  | -0.03597 | 0.43809  | -0.03757 | 0.41795  | 0.017988 | 0.69823  | 0.077196 | 0.09567  |
| 0.25171  | -0.16848 | 0.00025  | 0.008313 | 0.85781  | -0.03147 | 0.49747  | 0.11948  | 0.00976  |
| 0.00386  | -0.31195 | 5.35E-12 | -0.22341 | 1.08E-06 | -0.26904 | 3.47E-09 | -0.20007 | 1.32E-05 |
| 0.06577  | 0.169894 | 0.00023  | -0.12906 | 0.00522  | -0.05494 | 0.236    | 0.008109 | 0.86125  |
| 0.00139  | 0.05626  | 0.22494  | -0.29834 | 4.69E-11 | -0.18695 | 4.80E-05 | -0.10873 | 0.01876  |
| 0.87396  | -0.02244 | 0.62857  | -0.01496 | 0.7472   | -0.02112 | 0.64899  | -0.1164  | 0.01183  |
| 0.0046   | -0.29804 | 4.92E-11 | -0.20518 | 7.83E-06 | -0.23581 | 2.53E-07 | -0.16321 | 0.0004   |
| 0.0003   | 0.046838 | 0.31248  | 0.135343 | 0.00338  | 0.150283 | 0.00112  | 0.267456 | 4.32E-09 |
| 0.39611  | -0.27453 | 1.61E-09 | -0.13789 | 0.00283  | -0.08979 | 0.05249  | -0.29353 | 9.84E-11 |
| 0.00727  | -0.17695 | 0.00012  | -0.14495 | 0.00169  | -0.16161 | 0.00045  | -0.09785 | 0.03452  |
| 0.38602  | 0.001368 | 0.97649  | 0.0369   | 0.42629  | 0.017066 | 0.713    | -0.0787  | 0.08936  |
| 0.06139  | -0.18274 | 7.13E-05 | -0.09996 | 0.03079  | -0.12666 | 0.00613  | -0.2548  | 2.35E-08 |

|          |          |          |          |          |          |          |          |          |
|----------|----------|----------|----------|----------|----------|----------|----------|----------|
| 4.72E-05 | 0.355773 | 2.22E-15 | 0.257148 | 1.73E-08 | 0.25751  | 1.65E-08 | -0.20955 | 4.95E-06 |
| 0.01609  | 0.128891 | 0.00528  | 0.200581 | 1.26E-05 | 0.17679  | 0.00012  | 0.052356 | 0.25883  |
| 0.03711  | 0.057381 | 0.21582  | -0.10889 | 0.01858  | -0.07296 | 0.11535  | 0.19057  | 3.39E-05 |
| 0.07469  | -0.14938 | 0.00121  | -0.09975 | 0.03114  | -0.08282 | 0.07376  | -0.13918 | 0.00258  |
| 0.00027  | -0.2105  | 4.47E-06 | 0.039113 | 0.39906  | 0.036356 | 0.43315  | -0.02458 | 0.59622  |
| 0.55604  | -0.1156  | 0.01242  | -0.0369  | 0.42628  | -0.07716 | 0.09581  | -0.0018  | 0.96899  |
| 0.22238  | 0.186359 | 5.08E-05 | -0.05076 | 0.27366  | -0.00754 | 0.87082  | 0.302029 | 2.63E-11 |
| 1.10E-07 | 0.029876 | 0.51955  | -0.00665 | 0.8861   | 0.107415 | 0.02025  | 0.243925 | 9.40E-08 |
| 0.01484  | -0.17676 | 0.00012  | -0.15167 | 0.00101  | -0.16205 | 0.00044  | -0.12121 | 0.00874  |
| 0.50416  | -0.32079 | 1.23E-12 | -0.13315 | 0.00394  | -0.13744 | 0.00292  | -0.06176 | 0.18274  |
| 0.00022  | -0.17182 | 0.00019  | 0.092331 | 0.04613  | 0.072524 | 0.11756  | 0.072165 | 0.11939  |
| 0.11928  | -0.21159 | 3.98E-06 | -0.0935  | 0.04343  | -0.07917 | 0.08744  | 0.039074 | 0.39953  |
| 1.06E-08 | 0.009623 | 0.8357   | 0.155517 | 0.00075  | 0.215454 | 2.62E-06 | 0.018649 | 0.68771  |
| 4.27E-05 | -0.15304 | 0.00091  | -0.14796 | 0.00134  | -0.17811 | 0.00011  | -0.08919 | 0.05408  |
| 0.05024  | 0.10687  | 0.02089  | 0.098749 | 0.03288  | 0.140905 | 0.00227  | -0.07114 | 0.12473  |
| 0.00213  | -0.38737 | 3.62E-18 | -0.25545 | 2.16E-08 | -0.27831 | 9.39E-10 | -0.11439 | 0.01338  |
| 0.00045  | -0.39445 | 7.77E-19 | -0.2931  | 1.05E-10 | -0.30524 | 1.58E-11 | -0.17041 | 0.00022  |
| 0.2566   | -0.03642 | 0.43232  | -0.06334 | 0.1718   | -0.01014 | 0.82702  | -0.03235 | 0.48561  |
| 0.45979  | -0.31577 | 2.85E-12 | -0.21819 | 1.94E-06 | -0.19098 | 3.26E-05 | -0.20235 | 1.05E-05 |
| 0.73164  | -0.30911 | 8.49E-12 | -0.03667 | 0.42923  | -0.05904 | 0.20285  | 0.081723 | 0.07769  |
| 2.21E-06 | -0.04626 | 0.31847  | 0.151962 | 0.00099  | 0.18067  | 8.63E-05 | 0.295093 | 7.75E-11 |
| 0.02634  | -0.11439 | 0.01338  | 0.005503 | 0.90558  | 0.014339 | 0.75727  | -0.11772 | 0.0109   |
| 0.2341   | -0.19208 | 2.93E-05 | -0.10673 | 0.02106  | -0.13245 | 0.00414  | 0.083635 | 0.07097  |
| 0.03471  | 0.047217 | 0.30858  | -0.00131 | 0.97755  | -0.01108 | 0.81127  | -0.16753 | 0.00028  |
| 0.24092  | 0.026459 | 0.56844  | -0.05968 | 0.19799  | -0.0554  | 0.23212  | -0.09636 | 0.03738  |
| 0.68435  | -0.10056 | 0.0298   | -0.06116 | 0.18707  | -0.07269 | 0.11669  | -0.02483 | 0.59246  |
| 0.01288  | -0.05525 | 0.23342  | 0.035106 | 0.44914  | 0.077389 | 0.09484  | 0.029264 | 0.52814  |
| 0.03934  | 0.259343 | 1.29E-08 | 0.37677  | 3.37E-17 | 0.25218  | 3.30E-08 | 0.170927 | 0.00021  |
| 3.89E-07 | 0.20804  | 5.80E-06 | 0.359531 | 1.07E-15 | 0.313776 | 3.96E-12 | 0.193892 | 2.45E-05 |
| 0.51059  | -0.11461 | 0.0132   | 0.045706 | 0.32433  | 0.027469 | 0.55376  | -0.08819 | 0.05686  |
| 0.09774  | 0.204518 | 8.39E-06 | 0.203771 | 9.06E-06 | 0.176067 | 0.00013  | -0.04683 | 0.31256  |
| 1.11E-05 | 0.147782 | 0.00136  | 0.248297 | 5.43E-08 | 0.23371  | 3.26E-07 | -0.16153 | 0.00046  |
| 0.00027  | -0.12865 | 0.00536  | 0.078501 | 0.09017  | 0.091195 | 0.04889  | -0.03165 | 0.49507  |
| 0.14245  | -0.08689 | 0.06062  | -0.00632 | 0.89172  | 0.033147 | 0.47486  | 0.173991 | 0.00016  |
| 0.26939  | -0.12893 | 0.00526  | 0.0441   | 0.34165  | 0.024753 | 0.59364  | 0.029922 | 0.5189   |
| 0.27109  | -0.09149 | 0.04815  | 0.00678  | 0.88383  | 0.017586 | 0.70465  | 0.021885 | 0.63713  |
| 0.26024  | -0.21734 | 2.13E-06 | -0.11551 | 0.0125   | -0.12053 | 0.00913  | 0.417816 | 3.72E-21 |
| 0.67515  | -0.01819 | 0.69504  | -0.02206 | 0.6344   | -0.0016  | 0.97241  | -0.15565 | 0.00074  |
| 0.99003  | -0.04944 | 0.28632  | 0.056952 | 0.21928  | 0.027153 | 0.55834  | -0.14055 | 0.00233  |
| 0.27212  | -0.05262 | 0.25642  | -0.06913 | 0.13581  | -0.0038  | 0.93473  | 0.099862 | 0.03096  |
| 0.17084  | 0.167515 | 0.00028  | 0.11768  | 0.01092  | 0.144377 | 0.00176  | -0.04101 | 0.37656  |
| 0.77869  | -0.04928 | 0.28792  | -0.03163 | 0.49539  | -0.05279 | 0.25493  | 0.015067 | 0.74537  |
| 0.0676   | -0.17332 | 0.00017  | -0.09205 | 0.0468   | -0.02883 | 0.53431  | 0.138778 | 0.00265  |
| 0.00297  | -0.12675 | 0.00609  | -0.02539 | 0.58416  | -0.11478 | 0.01306  | 0.072598 | 0.11718  |
| 0.37818  | 0.194039 | 2.42E-05 | 0.060314 | 0.19323  | 0.096373 | 0.03735  | -0.00249 | 0.95715  |

|          |          |          |          |          |          |          |          |          |
|----------|----------|----------|----------|----------|----------|----------|----------|----------|
| 0.03255  | 0.039072 | 0.39956  | 0.065055 | 0.16045  | 0.103079 | 0.02591  | 0.003681 | 0.93677  |
| 0.58891  | 0.035835 | 0.43978  | 0.068795 | 0.13769  | 0.036647 | 0.42948  | 0.010709 | 0.81745  |
| 0.85324  | 0.026704 | 0.56486  | -0.01164 | 0.80183  | 0.024103 | 0.60337  | 0.076485 | 0.09877  |
| 0.93102  | -0.12989 | 0.00493  | -0.06563 | 0.15678  | -0.10322 | 0.02571  | -0.00847 | 0.85519  |
| 0.00126  | 0.246443 | 6.86E-08 | 0.280255 | 7.09E-10 | 0.237483 | 2.07E-07 | 0.112984 | 0.01457  |
| 0.02652  | -0.12961 | 0.00503  | -0.09535 | 0.03942  | -0.14447 | 0.00175  | -0.02958 | 0.52375  |
| 0.03189  | -0.15841 | 0.00059  | -0.15773 | 0.00062  | -0.14628 | 0.00153  | 0.035209 | 0.44781  |
| 0.04916  | -0.15124 | 0.00104  | -0.12152 | 0.00857  | -0.11411 | 0.01361  | -0.15721 | 0.00065  |
| 0.3648   | -0.09897 | 0.03249  | -0.02672 | 0.56467  | -0.06617 | 0.15341  | 0.119005 | 0.01005  |
| 0.86523  | -0.09343 | 0.04358  | -0.24866 | 5.18E-08 | -0.12702 | 0.00598  | 0.026762 | 0.56402  |
| 0.01425  | 0.201821 | 1.11E-05 | 0.28169  | 5.76E-10 | 0.225352 | 8.64E-07 | 0.240947 | 1.36E-07 |
| 0.04705  | -0.11134 | 0.01608  | 0.060509 | 0.19179  | 0.051498 | 0.26672  | -0.29453 | 8.46E-11 |
| 0.04156  | -0.29001 | 1.68E-10 | -0.2551  | 2.26E-08 | -0.22859 | 5.95E-07 | -0.14156 | 0.00217  |
| 0.39969  | -0.24038 | 1.46E-07 | -0.10243 | 0.02687  | -0.08518 | 0.06588  | 0.097934 | 0.03436  |
| 1.10E-09 | -0.06848 | 0.13951  | 0.158773 | 0.00057  | 0.191914 | 2.98E-05 | 0.01883  | 0.68484  |
| 6.25E-07 | -0.11069 | 0.01671  | 0.091265 | 0.04871  | 0.121545 | 0.00856  | 0.107941 | 0.01964  |
| 0.10085  | -0.05737 | 0.21594  | -0.12148 | 0.00859  | -0.08543 | 0.0651   | -0.11261 | 0.0149   |
| 0.58172  | 0.391218 | 1.57E-18 | -0.01276 | 0.78333  | 0.077297 | 0.09523  | 0.094203 | 0.04187  |
| 0.19023  | -0.21875 | 1.82E-06 | -0.15296 | 0.00091  | -0.10095 | 0.02916  | -0.12335 | 0.00762  |
| 0.05454  | -0.10314 | 0.02582  | -0.11301 | 0.01455  | -0.14253 | 0.00202  | 0.148579 | 0.00128  |
| 5.38E-06 | 0.235457 | 2.64E-07 | 0.178737 | 0.0001   | 0.189508 | 3.76E-05 | 0.103105 | 0.02587  |
| 0.90082  | 0.00572  | 0.90189  | -0.02354 | 0.61187  | -0.0035  | 0.93987  | -0.05221 | 0.26014  |
| 0.37587  | -0.15973 | 0.00053  | -0.21269 | 3.53E-06 | -0.15886 | 0.00057  | -0.17803 | 0.00011  |
| 2.36E-10 | -0.06201 | 0.181    | 0.185531 | 5.49E-05 | 0.194124 | 2.40E-05 | -0.04491 | 0.33284  |
| 0.61436  | -0.06928 | 0.13493  | -0.05831 | 0.20849  | -0.03959 | 0.39338  | 0.031047 | 0.5033   |
| 0.03882  | -0.05944 | 0.1998   | -0.03343 | 0.47112  | 0.01447  | 0.75513  | 0.017947 | 0.69888  |
| 0.35497  | -0.05909 | 0.20246  | 0.002394 | 0.95886  | -0.02147 | 0.64346  | -0.05574 | 0.22927  |
| 0.02381  | -0.2554  | 2.17E-08 | -0.13419 | 0.00367  | -0.09909 | 0.03228  | -0.0233  | 0.61552  |
| 8.52E-11 | 0.123666 | 0.00746  | 0.035658 | 0.44204  | 0.200036 | 1.33E-05 | 0.138389 | 0.00273  |
| 7.85E-16 | 0.088143 | 0.05699  | 0.14152  | 0.00217  | 0.221601 | 1.32E-06 | 0.194876 | 2.23E-05 |
| 0.02289  | -0.2327  | 3.67E-07 | -0.16405 | 0.00037  | -0.17743 | 0.00012  | -0.16975 | 0.00023  |
| 0.50826  | 0.092265 | 0.04629  | 0.107896 | 0.01969  | 0.09757  | 0.03504  | -0.05692 | 0.21952  |
| 0.01939  | 0.161823 | 0.00045  | 0.17696  | 0.00012  | 0.206748 | 6.65E-06 | 0.061006 | 0.18816  |
| 0.03024  | -0.06394 | 0.16775  | 0.056197 | 0.22547  | 0.071482 | 0.12294  | 0.008131 | 0.8609   |
| 0.05359  | -0.03925 | 0.39743  | 0.086687 | 0.06123  | 0.084577 | 0.06783  | 0.011707 | 0.80079  |
| 0.16057  | -0.13005 | 0.00488  | -0.06979 | 0.13208  | -0.09278 | 0.04507  | -0.1523  | 0.00096  |
| 0.20383  | 0.103192 | 0.02575  | 0.208864 | 5.32E-06 | 0.084073 | 0.0695   | -0.05756 | 0.21442  |
| 0.07692  | 0.058342 | 0.20822  | 0.056491 | 0.22304  | 0.100033 | 0.03067  | 0.104059 | 0.02452  |
| 0.0558   | -0.04531 | 0.32856  | 0.074609 | 0.10734  | 0.041715 | 0.36841  | -0.05289 | 0.25398  |
| 0.65266  | 0.061337 | 0.18577  | -0.01394 | 0.76384  | -0.01341 | 0.77263  | 0.005817 | 0.90022  |
| 5.99E-06 | 0.054634 | 0.23865  | -0.08349 | 0.07146  | -0.08189 | 0.07709  | 0.102672 | 0.02651  |
| 0.71426  | -0.06967 | 0.13276  | 0.003439 | 0.94092  | 0.008034 | 0.86252  | -0.00036 | 0.99376  |
| 0.21213  | -0.05668 | 0.22146  | 0.03597  | 0.43805  | 0.044348 | 0.33893  | 0.015973 | 0.73063  |
| 0.13104  | -0.00566 | 0.90285  | 0.036926 | 0.42596  | 0.066675 | 0.15027  | 0.029674 | 0.52238  |
| 0.04533  | 0.021348 | 0.6454   | 0.004905 | 0.91581  | -0.02323 | 0.61653  | 0.024767 | 0.59344  |

|          |          |          |          |          |          |          |          |          |
|----------|----------|----------|----------|----------|----------|----------|----------|----------|
| 0.5434   | -0.07115 | 0.12466  | -0.0596  | 0.19854  | -0.04616 | 0.31958  | -0.03135 | 0.49914  |
| 0.86797  | 0.009858 | 0.83175  | 0.002319 | 0.96014  | -0.02835 | 0.54116  | -0.05481 | 0.23714  |
| 0.2579   | -0.06855 | 0.1391   | 0.019322 | 0.67706  | -0.00475 | 0.91844  | 0.018455 | 0.6908   |
| 0.15942  | -0.16854 | 0.00025  | -0.02904 | 0.53137  | -0.09042 | 0.05084  | -0.00267 | 0.95411  |
| 7.23E-05 | 0.119411 | 0.0098   | 0.099241 | 0.03202  | 0.17462  | 0.00015  | 0.376951 | 3.24E-17 |
| 0.46422  | -0.09719 | 0.03575  | -0.01092 | 0.81392  | -0.02286 | 0.62222  | 0.081168 | 0.07973  |
| 0.74482  | -0.11356 | 0.01407  | -0.05578 | 0.2289   | -0.04699 | 0.31092  | 0.019688 | 0.6713   |
| 0.00185  | -0.10361 | 0.02515  | 0.109058 | 0.0184   | 0.096278 | 0.03754  | -0.00434 | 0.92542  |
| 0.29458  | -0.0938  | 0.04276  | 0.082241 | 0.07582  | 0.045599 | 0.32548  | 0.043997 | 0.34277  |
| 0.13174  | -0.10866 | 0.01883  | 0.078033 | 0.09211  | 0.034894 | 0.45189  | 0.004646 | 0.92023  |
| 0.03726  | -0.10506 | 0.02317  | 0.014839 | 0.74909  | 0.048121 | 0.2994   | 0.023281 | 0.61579  |
| 0.3227   | 0.121158 | 0.00877  | 0.13825  | 0.00275  | 0.114193 | 0.01354  | -0.02646 | 0.56847  |
| 0.12038  | -0.04043 | 0.38341  | -0.00379 | 0.93494  | -0.01627 | 0.72581  | 0.017011 | 0.71388  |
| 0.05138  | -0.10887 | 0.01861  | 0.00758  | 0.87022  | 0.006003 | 0.89706  | -0.06573 | 0.15612  |
| 0.18143  | 0.066301 | 0.15257  | 0.047941 | 0.30121  | 0.091389 | 0.04841  | 0.01095  | 0.81342  |
| 0.06533  | -0.08779 | 0.058    | 0.021329 | 0.6457   | -0.00133 | 0.97717  | -0.00217 | 0.96275  |
| 0.03965  | -0.07049 | 0.12825  | 0.066676 | 0.15026  | 0.033888 | 0.46504  | 0.021568 | 0.64201  |
| 0.16358  | 0.003527 | 0.93941  | 0.060843 | 0.18934  | 0.038014 | 0.41245  | -0.03394 | 0.46438  |
| 0.10737  | -0.05515 | 0.23421  | 0.033486 | 0.47036  | -0.02927 | 0.5281   | 0.151583 | 0.00102  |
| 0.82995  | 0.083253 | 0.07227  | 0.096939 | 0.03624  | 0.068277 | 0.14068  | 0.186643 | 4.94E-05 |
| 0.32246  | -0.10547 | 0.02264  | 0.112589 | 0.01492  | 0.001701 | 0.97076  | -0.0013  | 0.97773  |
| 0.00925  | -0.16603 | 0.00031  | -0.20856 | 5.49E-06 | -0.21466 | 2.85E-06 | 0.092407 | 0.04595  |
| 0.2753   | 0.16709  | 0.00029  | 0.049174 | 0.28894  | 0.052659 | 0.25608  | 0.123623 | 0.00748  |
| 0.25399  | -0.04561 | 0.32535  | 0.071884 | 0.12083  | 0.020787 | 0.65411  | -0.00868 | 0.85164  |
| 0.30392  | 0.119891 | 0.00951  | 0.110383 | 0.01702  | 0.107972 | 0.0196   | -0.13059 | 0.0047   |
| 3.96E-13 | 0.13025  | 0.00481  | 0.424022 | 8.38E-22 | 0.331263 | 2.01E-13 | 0.021788 | 0.63862  |
| 0.42412  | -0.01439 | 0.75647  | 0.002935 | 0.94956  | 0.021784 | 0.63867  | 0.058311 | 0.20846  |
| 0.95689  | 0.034203 | 0.4609   | 0.020856 | 0.65305  | 0.019078 | 0.68092  | 0.015768 | 0.73396  |
| 0.0275   | -0.08638 | 0.06216  | -0.02648 | 0.56807  | 0.029239 | 0.52849  | -0.02411 | 0.6033   |
| 0.6398   | -0.03636 | 0.4331   | 0.025036 | 0.58943  | -0.00364 | 0.93742  | -0.00459 | 0.9212   |
| 0.26314  | 0.005196 | 0.91083  | 0.031598 | 0.49576  | 0.05221  | 0.26016  | 0.069579 | 0.13325  |
| 7.39E-06 | -0.14833 | 0.00131  | -0.17348 | 0.00016  | -0.20904 | 5.22E-06 | -0.19626 | 1.94E-05 |
| 0.75212  | 0.051608 | 0.26571  | 0.005294 | 0.90916  | 0.029341 | 0.52706  | 0.039659 | 0.39251  |
| 0.97497  | -0.0226  | 0.62617  | -0.03181 | 0.49294  | -0.0576  | 0.21407  | -0.00165 | 0.97161  |
| 0.03608  | 0.196766 | 1.85E-05 | -0.10901 | 0.01845  | -0.05453 | 0.23958  | 0.016128 | 0.72812  |
| 8.51E-05 | -0.27612 | 1.28E-09 | 0.026655 | 0.56557  | 0.041081 | 0.37574  | -0.01359 | 0.76961  |
| 0.02443  | 0.107936 | 0.01964  | 0.234696 | 2.90E-07 | 0.163865 | 0.00038  | -0.05667 | 0.22155  |
| 0.00011  | -0.20846 | 5.55E-06 | -0.22308 | 1.12E-06 | -0.26479 | 6.21E-09 | -0.04628 | 0.3183   |
| 0.22755  | -0.07269 | 0.11671  | 0.05046  | 0.27649  | 0.056048 | 0.22669  | 0.081076 | 0.08007  |
| 0.65858  | 0.059447 | 0.19972  | -0.06401 | 0.16729  | -0.00333 | 0.94281  | 0.022097 | 0.63387  |
| 0.00098  | -0.14689 | 0.00146  | -0.14706 | 0.00144  | -0.18441 | 6.10E-05 | -0.13164 | 0.00438  |
| 0.9945   | 0.043371 | 0.34969  | -0.04753 | 0.30538  | 0.001431 | 0.97539  | -0.03356 | 0.46943  |
| 0.00198  | 0.182708 | 7.15E-05 | -0.03214 | 0.4884   | 0.146354 | 0.00152  | 0.117019 | 0.01138  |
| 0.0031   | 0.072827 | 0.11602  | -0.00471 | 0.91914  | 0.096538 | 0.03703  | 0.110883 | 0.01652  |
| 0.78689  | 0.018835 | 0.68476  | 0.031011 | 0.5038   | 0.042745 | 0.3567   | -0.05652 | 0.22277  |

|          |          |          |          |          |          |          |          |          |
|----------|----------|----------|----------|----------|----------|----------|----------|----------|
| 0.22949  | -0.0512  | 0.26949  | -0.04543 | 0.32729  | -0.06503 | 0.16058  | -0.0808  | 0.08112  |
| 0.91517  | -0.11238 | 0.01511  | -0.02326 | 0.61614  | -0.04404 | 0.34226  | -0.00581 | 0.90028  |
| 0.33145  | 0.004442 | 0.92374  | -0.08195 | 0.07688  | -0.05196 | 0.26249  | -0.08199 | 0.07671  |
| 0.07771  | 0.073052 | 0.1149   | 0.193518 | 2.55E-05 | 0.097098 | 0.03594  | 0.08373  | 0.07065  |
| 9.33E-05 | 0.091055 | 0.04924  | 0.267931 | 4.04E-09 | 0.245748 | 7.48E-08 | 0.014694 | 0.75147  |
| 0.9064   | -0.03041 | 0.51211  | 0.029215 | 0.52883  | -0.02144 | 0.64396  | -0.03346 | 0.47074  |
| 0.99027  | 0.023804 | 0.60788  | -0.00655 | 0.88776  | 0.006506 | 0.88849  | 0.040665 | 0.3806   |
| 0.12377  | 0.061874 | 0.18194  | -0.00593 | 0.89836  | 0.048189 | 0.29872  | 0.113908 | 0.01378  |
| 0.68845  | -0.00213 | 0.96341  | -0.00482 | 0.91728  | 0.010645 | 0.81853  | 0.033166 | 0.47461  |
| 0.07546  | -0.15872 | 0.00058  | -0.14446 | 0.00175  | -0.15049 | 0.00111  | -0.03116 | 0.50169  |
| 0.04112  | 0.118129 | 0.01062  | 0.164566 | 0.00036  | 0.125055 | 0.00681  | -0.02885 | 0.53403  |
| 0.00714  | 0.168493 | 0.00025  | 0.204317 | 8.57E-06 | 0.162324 | 0.00043  | 0.00681  | 0.88331  |
| 0.15162  | 0.213958 | 3.08E-06 | 0.226177 | 7.86E-07 | 0.159842 | 0.00053  | -0.19021 | 3.51E-05 |
| 0.45284  | -0.04908 | 0.28988  | -0.02615 | 0.57295  | -0.07676 | 0.09755  | 0.005907 | 0.8987   |
| 0.01743  | 0.033784 | 0.46641  | -0.00231 | 0.96026  | 0.042881 | 0.35517  | 0.092444 | 0.04586  |
| 0.69977  | 0.04771  | 0.30355  | 0.022454 | 0.62839  | 0.012665 | 0.78487  | 0.038938 | 0.40118  |
| 0.15294  | -0.02599 | 0.57529  | -0.02163 | 0.64101  | -0.04667 | 0.31423  | 0.043924 | 0.34358  |
| 6.70E-17 | 0.398002 | 3.55E-19 | 0.160645 | 0.00049  | 0.322697 | 8.87E-13 | 0.356363 | 1.98E-15 |
| 0.06515  | 0.096585 | 0.03693  | -0.07875 | 0.08914  | -0.08729 | 0.05943  | -0.10741 | 0.02025  |
| 0.14647  | -0.04144 | 0.37157  | -0.03523 | 0.44756  | -0.06167 | 0.18337  | 0.171173 | 0.0002   |
| 0.34024  | -0.24452 | 8.73E-08 | -0.09777 | 0.03466  | -0.08977 | 0.05255  | 0.027686 | 0.55063  |
| 0.1198   | -0.00235 | 0.9596   | -0.06362 | 0.16988  | 0.00158  | 0.97283  | 0.076292 | 0.09963  |
| 0.00098  | 0.155802 | 0.00073  | -0.0253  | 0.58543  | 0.079237 | 0.08719  | 0.036368 | 0.433    |
| 0.49606  | 0.048281 | 0.29779  | 0.07099  | 0.12554  | 0.040617 | 0.38117  | 0.020802 | 0.65388  |
| 0.11361  | 0.057458 | 0.21521  | 0.06696  | 0.14853  | 0.068286 | 0.14063  | 0.057024 | 0.2187   |
| 2.29E-16 | 0.146847 | 0.00146  | 0.266106 | 5.19E-09 | 0.319471 | 1.53E-12 | 0.244433 | 8.82E-08 |
| 0.7308   | 0.070257 | 0.1295   | -0.03819 | 0.41032  | 0.00395  | 0.93216  | 0.25408  | 2.58E-08 |
| 0.12015  | 0.183133 | 6.87E-05 | 0.074034 | 0.11009  | 0.063887 | 0.1681   | 0.130362 | 0.00478  |
| 0.00037  | 0.279219 | 8.23E-10 | 0.283325 | 4.53E-10 | 0.277462 | 1.06E-09 | 0.339769 | 4.40E-14 |
| 0.0001   | 0.15663  | 0.00068  | -0.00655 | 0.8877   | 0.11908  | 0.01001  | 0.326626 | 4.52E-13 |
| 0.00133  | -0.30246 | 2.46E-11 | -0.28588 | 3.11E-10 | -0.26903 | 3.48E-09 | -0.03546 | 0.44453  |
| 0.13697  | -0.05374 | 0.24643  | -0.07002 | 0.13082  | -0.09225 | 0.04633  | 0.06959  | 0.13319  |
| 8.06E-12 | 0.186951 | 4.80E-05 | 0.092898 | 0.0448   | 0.180102 | 9.09E-05 | 0.233317 | 3.41E-07 |
| 0.5652   | -0.06871 | 0.13819  | -0.03804 | 0.41213  | -0.01693 | 0.71521  | -0.07659 | 0.09831  |
| 0.23278  | -0.30897 | 8.69E-12 | -0.06716 | 0.1473   | -0.09254 | 0.04563  | -0.14413 | 0.00179  |
| 6.48E-05 | -0.15896 | 0.00057  | -0.0356  | 0.44281  | -0.15611 | 0.00071  | -0.13868 | 0.00267  |
| 0.27141  | 0.050658 | 0.27461  | -0.13985 | 0.00245  | -0.08047 | 0.08237  | 0.290428 | 1.58E-10 |
| 0.00015  | -0.24208 | 1.18E-07 | -0.18797 | 4.36E-05 | -0.24155 | 1.26E-07 | 0.141632 | 0.00216  |
| 1.46E-06 | -0.1703  | 0.00022  | -0.18585 | 5.33E-05 | -0.24219 | 1.17E-07 | 0.276368 | 1.24E-09 |
| 0.00403  | 0.000451 | 0.99224  | -0.13066 | 0.00468  | -0.11676 | 0.01157  | 0.14681  | 0.00147  |
| 0.35873  | 0.027648 | 0.55118  | -0.00138 | 0.97619  | 0.041798 | 0.36747  | 0.133175 | 0.00394  |
| 0.46379  | -0.16975 | 0.00023  | 0.017617 | 0.70415  | -0.02033 | 0.66122  | 0.220055 | 1.57E-06 |
| 0.94746  | -0.01944 | 0.67516  | 0.053908 | 0.24496  | 0.040479 | 0.38279  | -0.02156 | 0.64217  |
| 0.02776  | 0.0608   | 0.18965  | 0.114215 | 0.01352  | 0.092936 | 0.04471  | -0.01192 | 0.79723  |
| 0.00069  | -0.07234 | 0.11851  | 0.074037 | 0.11007  | 0.104308 | 0.02418  | 0.003739 | 0.93577  |

|          |          |          |          |          |          |          |          |          |
|----------|----------|----------|----------|----------|----------|----------|----------|----------|
| 2.78E-06 | -0.12321 | 0.00768  | 0.102812 | 0.0263   | 0.11663  | 0.01166  | 0.335212 | 1.00E-13 |
| 0.10741  | -0.09605 | 0.038    | -0.197   | 1.80E-05 | -0.10607 | 0.02188  | -0.01696 | 0.71478  |
| 0.68593  | 0.075259 | 0.10431  | -0.02381 | 0.60779  | -0.03997 | 0.38876  | 0.269493 | 3.26E-09 |
| 9.96E-05 | 0.085338 | 0.06539  | 0.028425 | 0.54004  | -0.04277 | 0.35646  | 0.09576  | 0.03858  |
| 0.18755  | 0.188993 | 3.95E-05 | 0.128178 | 0.00554  | 0.119597 | 0.00968  | 0.041416 | 0.37186  |
| 0.25634  | 0.220946 | 1.42E-06 | -0.20683 | 6.59E-06 | -0.01149 | 0.80443  | -0.01822 | 0.6946   |
| 0.00095  | -0.15119 | 0.00105  | -0.14418 | 0.00179  | -0.04228 | 0.36193  | -0.0813  | 0.07926  |
| 0.4898   | 0.020743 | 0.65479  | -0.03858 | 0.40553  | -0.02274 | 0.62406  | -0.02942 | 0.52601  |
| 0.19676  | -0.00577 | 0.90095  | 0.040659 | 0.38067  | -0.00326 | 0.94398  | 0.029564 | 0.52393  |
| 0.04597  | -0.1217  | 0.00847  | -0.01039 | 0.82273  | 0.014785 | 0.74998  | 0.039069 | 0.3996   |
| 0.39006  | -0.00947 | 0.83821  | 0.035257 | 0.4472   | 0.019597 | 0.67273  | -0.00055 | 0.99046  |
| 1.27E-06 | -0.09986 | 0.03096  | -0.2667  | 4.79E-09 | -0.24092 | 1.36E-07 | 0.089105 | 0.05432  |
| 5.67E-05 | 0.025178 | 0.58731  | 0.045552 | 0.32597  | 0.098108 | 0.03404  | 0.053714 | 0.24666  |
| 0.01076  | -0.13727 | 0.00295  | -0.25116 | 3.76E-08 | -0.1929  | 2.71E-05 | -0.18287 | 7.04E-05 |
| 0.00878  | -0.1718  | 0.00019  | -0.06421 | 0.16597  | 0.012012 | 0.79572  | 0.044725 | 0.33484  |
| 0.01495  | 0.124783 | 0.00694  | 0.106203 | 0.02171  | 0.118124 | 0.01063  | 0.078125 | 0.09173  |
| 0.03956  | -0.12441 | 0.00711  | -0.16132 | 0.00047  | -0.16615 | 0.00031  | -0.12243 | 0.00808  |
| 0.83503  | -0.10827 | 0.01926  | -0.10906 | 0.01839  | -0.08688 | 0.06067  | -0.14611 | 0.00155  |
| 0.10788  | 0.008447 | 0.85554  | 0.051695 | 0.26489  | 0.093426 | 0.0436   | 0.087638 | 0.05843  |
| 0.91544  | -0.01753 | 0.70556  | 0.05598  | 0.22726  | 0.038364 | 0.40816  | 0.183534 | 6.62E-05 |
| 0.44748  | -0.00888 | 0.84816  | 0.071767 | 0.12144  | 0.056776 | 0.22071  | 0.115815 | 0.01226  |
| 3.78E-10 | 0.287102 | 2.59E-10 | 0.190927 | 3.28E-05 | 0.284121 | 4.03E-10 | 0.334392 | 1.16E-13 |
| 0.83227  | -0.00649 | 0.88867  | 0.018454 | 0.6908   | -0.00623 | 0.89321  | 0.03413  | 0.46186  |
| 0.03361  | -0.25496 | 2.30E-08 | 0.028264 | 0.54234  | -0.12368 | 0.00745  | -0.10931 | 0.01813  |
| 1.36E-07 | -0.09732 | 0.03551  | 0.071032 | 0.12532  | 0.12522  | 0.00674  | 0.161894 | 0.00044  |
| 0.01284  | -0.06333 | 0.17187  | 0.048038 | 0.30024  | 0.079412 | 0.08649  | 0.072091 | 0.11977  |
| 3.54E-09 | -0.11482 | 0.01303  | -0.18079 | 8.53E-05 | -0.22717 | 7.01E-07 | -0.02897 | 0.53234  |
| 5.11E-05 | -0.17619 | 0.00013  | -0.18563 | 5.44E-05 | -0.21017 | 4.63E-06 | -0.10222 | 0.02719  |
| 0.16856  | 0.014488 | 0.75483  | -0.00109 | 0.98131  | -0.00409 | 0.92976  | 0.043788 | 0.34508  |
| 0.00151  | 0.017191 | 0.71098  | 0.101819 | 0.0278   | 0.115767 | 0.0123   | 0.349284 | 7.60E-15 |
| 0.10648  | -0.08645 | 0.06194  | -0.13047 | 0.00474  | -0.11169 | 0.01575  | -0.03059 | 0.50968  |
| 0.08758  | -0.01354 | 0.77043  | 0.012134 | 0.79368  | 0.030077 | 0.51674  | 0.275269 | 1.45E-09 |
| 0.0746   | -0.10516 | 0.02305  | 0.004611 | 0.92084  | -0.01413 | 0.76077  | 0.065202 | 0.1595   |
| 0.46877  | -0.08936 | 0.05363  | -0.05976 | 0.19735  | -0.09831 | 0.03368  | 0.130757 | 0.00465  |
| 1.40E-07 | -0.09738 | 0.03539  | -0.24225 | 1.16E-07 | -0.25371 | 2.71E-08 | -0.11718 | 0.01127  |
| 2.07E-12 | 0.403996 | 9.23E-20 | 0.375961 | 3.98E-17 | 0.394859 | 7.11E-19 | 0.350289 | 6.29E-15 |
| 0.00019  | 0.288773 | 2.02E-10 | 0.327373 | 3.97E-13 | 0.302102 | 2.60E-11 | 0.313604 | 4.07E-12 |
| 0.28302  | -0.06474 | 0.16247  | -0.11728 | 0.0112   | -0.07067 | 0.12726  | -0.10098 | 0.02911  |
| 0.18822  | -0.27957 | 7.83E-10 | -0.16397 | 0.00037  | -0.15857 | 0.00058  | -0.11769 | 0.01092  |
| 0.4126   | 0.063277 | 0.17221  | -0.2732  | 1.94E-09 | -0.13105 | 0.00456  | 0.014642 | 0.75231  |
| 0.01136  | -0.11396 | 0.01373  | -0.09659 | 0.03692  | -0.12345 | 0.00757  | -0.11547 | 0.01253  |
| 0.65326  | 0.174984 | 0.00014  | -0.12156 | 0.00855  | -0.02098 | 0.65114  | 0.226652 | 7.44E-07 |
| 0.00525  | -0.04953 | 0.28542  | -0.29467 | 8.27E-11 | -0.19205 | 2.94E-05 | 0.089177 | 0.05413  |
| 0.63534  | 0.12975  | 0.00498  | 0.083973 | 0.06983  | 0.048563 | 0.29498  | 0.208605 | 5.47E-06 |
| 0.00359  | 0.003781 | 0.93506  | 0.1707   | 0.00021  | 0.131506 | 0.00442  | 0.127588 | 0.00576  |

|          |          |          |          |          |          |          |          |          |
|----------|----------|----------|----------|----------|----------|----------|----------|----------|
| 0.4927   | -0.09565 | 0.03882  | 0.006419 | 0.88997  | -0.04635 | 0.31758  | 0.010362 | 0.82328  |
| 0.39342  | -0.10485 | 0.02345  | 0.003556 | 0.93892  | -0.05076 | 0.27365  | 0.007112 | 0.87818  |
| 3.85E-10 | 0.130349 | 0.00478  | 0.313763 | 3.97E-12 | 0.314517 | 3.50E-12 | -0.05156 | 0.26612  |
| 0.41497  | 6.68E-05 | 0.99885  | -0.02436 | 0.59945  | 0.011529 | 0.80376  | -0.01926 | 0.67804  |
| 0.0524   | -0.0711  | 0.12493  | -0.07477 | 0.1066   | -0.10337 | 0.02549  | -0.02595 | 0.57584  |
| 0.69467  | -0.27171 | 2.39E-09 | -0.12279 | 0.0079   | -0.11205 | 0.01541  | 0.029215 | 0.52883  |
| 0.00017  | -0.19061 | 3.38E-05 | -0.03652 | 0.43106  | -0.02363 | 0.61054  | -0.00036 | 0.99377  |
| 0.13625  | -0.10184 | 0.02777  | 0.05456  | 0.23929  | 0.064086 | 0.16678  | -0.00698 | 0.88034  |
| 0.19945  | -0.15713 | 0.00066  | -0.04524 | 0.32926  | -0.06517 | 0.15969  | -0.03905 | 0.39978  |
| 0.23109  | -0.00794 | 0.86418  | -0.0398  | 0.39088  | -0.0357  | 0.44156  | -0.03838 | 0.40792  |
| 0.00235  | -0.0074  | 0.87326  | -0.10994 | 0.01747  | -0.09731 | 0.03554  | 0.291919 | 1.26E-10 |
| 0.26939  | -0.15302 | 0.00091  | -0.09414 | 0.042    | -0.11043 | 0.01697  | -0.11508 | 0.01283  |
| 0.28414  | 0.047655 | 0.30412  | 0.062268 | 0.17917  | 0.045465 | 0.3269   | 0.014448 | 0.75549  |
| 0.8004   | -0.11377 | 0.01389  | -0.05229 | 0.25944  | -0.05937 | 0.20034  | -0.08915 | 0.0542   |
| 5.96E-13 | 0.402357 | 1.34E-19 | 0.357037 | 1.74E-15 | 0.455436 | 2.71E-25 | 0.204561 | 8.35E-06 |
| 5.86E-07 | -0.12157 | 0.00854  | -0.16659 | 0.0003   | -0.22242 | 1.21E-06 | -0.23621 | 2.41E-07 |
| 0.19497  | 0.148176 | 0.00132  | -0.12491 | 0.00688  | -0.07568 | 0.10236  | 0.131148 | 0.00453  |
| 0.02006  | -0.21298 | 3.42E-06 | 0.005812 | 0.90031  | -0.01172 | 0.80051  | -0.14766 | 0.00137  |
| 6.08E-05 | -0.04908 | 0.28982  | -0.1852  | 5.67E-05 | -0.16762 | 0.00027  | -0.222   | 1.26E-06 |
| 1.25E-21 | 0.155395 | 0.00075  | 0.313311 | 4.28E-12 | 0.378185 | 2.51E-17 | 0.266226 | 5.11E-09 |
| 0.10785  | 0.499699 | 7.22E-31 | 0.213199 | 3.34E-06 | 0.248311 | 5.42E-08 | -0.00282 | 0.95146  |
| 0.28104  | -0.06453 | 0.16385  | 0.026649 | 0.56566  | 0.022699 | 0.62464  | 0.03662  | 0.42981  |
| 0.02544  | 0.064587 | 0.16348  | 0.398183 | 3.41E-19 | 0.216536 | 2.32E-06 | -0.0303  | 0.51363  |
| 0.34757  | 0.208319 | 5.63E-06 | 0.038163 | 0.41062  | 0.098733 | 0.03291  | 0.19426  | 2.37E-05 |
| 0.0002   | -0.04036 | 0.38415  | -0.20621 | 7.03E-06 | -0.18767 | 4.48E-05 | 0.12656  | 0.00617  |
| 5.37E-05 | 0.08554  | 0.06475  | 0.190099 | 3.55E-05 | 0.182098 | 7.57E-05 | -0.03284 | 0.47894  |
| 0.01944  | 0.00083  | 0.98573  | 0.249641 | 4.57E-08 | 0.154941 | 0.00078  | -0.05902 | 0.20299  |
| 0.88702  | 0.358609 | 1.28E-15 | 0.323889 | 7.24E-13 | 0.220286 | 1.53E-06 | -0.05167 | 0.26514  |
| 0.57489  | -0.27165 | 2.41E-09 | -0.10322 | 0.02571  | -0.14282 | 0.00198  | -0.15869 | 0.00058  |
| 0.03767  | -0.19892 | 1.49E-05 | -0.06971 | 0.13249  | -0.14031 | 0.00237  | -0.08631 | 0.06238  |
| 2.98E-07 | -0.0662  | 0.15319  | -0.09814 | 0.03398  | -0.17279 | 0.00018  | -0.23722 | 2.14E-07 |
| 8.63E-18 | 0.37836  | 2.42E-17 | 0.335179 | 1.01E-13 | 0.426908 | 4.15E-22 | 0.186174 | 5.17E-05 |
| 0.00071  | 0.30073  | 3.23E-11 | 0.135239 | 0.00341  | 0.178776 | 0.0001   | -0.15969 | 0.00053  |
| 0.50879  | 0.032458 | 0.48409  | 0.022651 | 0.62538  | 0.014281 | 0.75822  | 0.016866 | 0.71621  |
| 0.92046  | 0.033319 | 0.47258  | -0.00543 | 0.90686  | 0.01878  | 0.68564  | 0.024289 | 0.60058  |
| 0.34618  | 0.099194 | 0.0321   | 0.098965 | 0.0325   | 0.070674 | 0.12724  | 0.406917 | 4.74E-20 |
| 0.20031  | -0.04378 | 0.34511  | -0.00836 | 0.85696  | -0.04499 | 0.33198  | -0.00534 | 0.90829  |
| 0.20794  | -0.01843 | 0.69114  | -0.00171 | 0.97068  | -0.02858 | 0.53784  | -0.03247 | 0.48399  |
| 0.334    | 0.019244 | 0.67829  | 0.050819 | 0.27309  | 0.007751 | 0.86733  | 0.049104 | 0.28963  |
| 0.02047  | -0.0538  | 0.24589  | -0.07458 | 0.10747  | -0.10107 | 0.02897  | -0.06261 | 0.17682  |
| 0.19164  | -0.06828 | 0.14067  | -0.0457  | 0.32436  | -0.06218 | 0.17977  | 0.019922 | 0.66763  |
| 0.40956  | -0.02406 | 0.60406  | -0.0098  | 0.83271  | 0.009277 | 0.84153  | 0.017535 | 0.70547  |
| 0.27356  | -0.03581 | 0.44013  | -0.04368 | 0.34627  | -0.05151 | 0.26664  | -0.0109  | 0.81428  |
| 0.1084   | 0.000956 | 0.98356  | 0.087629 | 0.05846  | 0.054548 | 0.23939  | 0.032655 | 0.48145  |
| 1.29E-05 | 0.019022 | 0.68181  | 0.247469 | 6.03E-08 | 0.201677 | 1.12E-05 | 0.05482  | 0.23705  |

|          |          |          |          |          |          |          |          |          |
|----------|----------|----------|----------|----------|----------|----------|----------|----------|
| 0.05839  | -0.09856 | 0.03323  | -0.08307 | 0.07291  | -0.11508 | 0.01283  | 0.007197 | 0.87674  |
| 0.54119  | -0.04265 | 0.35777  | -0.03258 | 0.48246  | -0.00727 | 0.87549  | 0.010657 | 0.81834  |
| 0.01424  | 0.112012 | 0.01545  | 0.039726 | 0.39171  | 0.010068 | 0.82821  | 0.286667 | 2.77E-10 |
| 0.04495  | -0.00067 | 0.98844  | -0.0081  | 0.86146  | -0.04121 | 0.37423  | 0.100711 | 0.02955  |
| 3.28E-09 | 0.347106 | 1.14E-14 | 0.232757 | 3.65E-07 | 0.315282 | 3.09E-12 | 0.376408 | 3.63E-17 |
| 0.01045  | 0.119455 | 0.00977  | -0.08813 | 0.05702  | -0.00683 | 0.88294  | -0.0625  | 0.17753  |
| 2.40E-07 | -0.07828 | 0.09108  | -0.09196 | 0.047    | 0.053917 | 0.24488  | 0.082943 | 0.07334  |
| 0.4203   | 0.092359 | 0.04606  | 0.048814 | 0.29248  | 0.033632 | 0.46841  | 0.137337 | 0.00294  |
| 2.62E-07 | 0.073377 | 0.11329  | 0.215689 | 2.55E-06 | 0.187538 | 4.54E-05 | 0.136377 | 0.00315  |
| 8.02E-09 | 0.158591 | 0.00058  | -0.02876 | 0.53527  | 0.127564 | 0.00577  | 0.048464 | 0.29596  |
| 0.04781  | 0.080615 | 0.08181  | -0.04311 | 0.35257  | -0.03815 | 0.41075  | 0.132994 | 0.00399  |
| 0.07421  | -0.20785 | 5.92E-06 | -0.1381  | 0.00278  | -0.16295 | 0.00041  | -0.13799 | 0.00281  |
| 0.27343  | -0.15393 | 0.00085  | -0.0901  | 0.05167  | -0.05743 | 0.21543  | 0.011625 | 0.80216  |
| 4.23E-15 | 0.350003 | 6.64E-15 | 0.102296 | 0.02707  | 0.27113  | 2.59E-09 | 0.270138 | 2.98E-09 |
| 0.00022  | 0.142232 | 0.00206  | 0.019414 | 0.67561  | 0.090568 | 0.05047  | 0.19341  | 2.57E-05 |
| 3.20E-13 | 0.128921 | 0.00527  | 0.349202 | 7.72E-15 | 0.336705 | 7.65E-14 | 0.149863 | 0.00116  |
| 0.00141  | 0.451551 | 7.67E-25 | 0.326136 | 4.92E-13 | 0.273862 | 1.77E-09 | -0.04254 | 0.35897  |
| 9.42E-14 | 0.316639 | 2.46E-12 | 0.289503 | 1.81E-10 | 0.361371 | 7.48E-16 | 0.193856 | 2.46E-05 |
| 0.00037  | 0.168462 | 0.00026  | 0.168619 | 0.00025  | 0.20715  | 6.37E-06 | -0.06242 | 0.17813  |
| 0.03593  | 0.212253 | 3.70E-06 | -0.02445 | 0.59814  | -0.03024 | 0.51453  | -0.01712 | 0.7122   |
| 0.13781  | -0.00026 | 0.9956   | -0.07827 | 0.09112  | -0.06993 | 0.13129  | 0.110676 | 0.01673  |
| 0.00532  | 0.410868 | 1.90E-20 | 0.145533 | 0.00161  | 0.19743  | 1.73E-05 | 0.231337 | 4.31E-07 |
| 0.0178   | -0.16353 | 0.00039  | -0.19678 | 1.84E-05 | -0.19269 | 2.76E-05 | 0.107549 | 0.02009  |
| 0.00578  | -0.07081 | 0.12652  | -0.14196 | 0.0021   | -0.13132 | 0.00448  | -0.06962 | 0.13302  |
| 0.00012  | -0.41021 | 2.22E-20 | -0.27968 | 7.71E-10 | -0.32355 | 7.67E-13 | -0.31281 | 4.65E-12 |
| 0.00097  | 0.076327 | 0.09947  | 0.077236 | 0.09549  | 0.140961 | 0.00226  | -0.15545 | 0.00075  |
| 0.02606  | -0.1989  | 1.49E-05 | -0.15362 | 0.00087  | -0.16384 | 0.00038  | 0.029171 | 0.52946  |
| 0.00106  | -0.12474 | 0.00695  | -0.16296 | 0.00041  | -0.15069 | 0.00109  | -0.23428 | 3.04E-07 |
| 6.03E-05 | 0.17295  | 0.00017  | 0.241908 | 1.21E-07 | 0.2359   | 2.51E-07 | -0.00721 | 0.87659  |
| 0.00041  | 0.315698 | 2.88E-12 | 0.243543 | 9.86E-08 | 0.251437 | 3.63E-08 | 0.423848 | 8.75E-22 |
| 0.02131  | -0.14977 | 0.00117  | -0.14474 | 0.00171  | -0.16013 | 0.00051  | -0.031   | 0.50401  |
| 0.01775  | -0.07107 | 0.1251   | -0.0843  | 0.06874  | -0.09761 | 0.03496  | -0.14909 | 0.00123  |
| 7.21E-07 | -0.20552 | 7.56E-06 | 0.073491 | 0.11273  | 0.099374 | 0.03179  | 0.029554 | 0.52407  |
| 0.07744  | -0.03101 | 0.50378  | -0.00779 | 0.86674  | 0.030489 | 0.51102  | 0.038323 | 0.40867  |
| 0.92522  | -0.06688 | 0.14903  | -0.03439 | 0.45849  | -0.03159 | 0.49581  | -0.20113 | 1.19E-05 |
| 3.33E-09 | -0.00042 | 0.99278  | 0.124568 | 0.00703  | 0.19766  | 1.69E-05 | -0.16334 | 0.00039  |
| 5.33E-06 | -0.00923 | 0.8423   | 0.250751 | 3.97E-08 | 0.231712 | 4.13E-07 | -0.14399 | 0.00181  |
| 0.56286  | 0.037185 | 0.42273  | 0.022984 | 0.6203   | 0.055914 | 0.22781  | -0.26442 | 6.53E-09 |
| 0.55553  | 0.041785 | 0.36761  | 0.020958 | 0.65146  | 0.064851 | 0.16177  | -0.25662 | 1.85E-08 |
| 3.26E-05 | -0.11652 | 0.01174  | 0.114062 | 0.01365  | 0.114959 | 0.01292  | 0.017339 | 0.70861  |
| 0.47528  | 0.216845 | 2.25E-06 | 0.060623 | 0.19095  | 0.096445 | 0.03721  | 0.249251 | 4.81E-08 |
| 0.88682  | 0.114281 | 0.01347  | 0.019427 | 0.67541  | 0.053059 | 0.25248  | 0.24847  | 5.31E-08 |
| 3.40E-06 | -0.02742 | 0.55449  | 0.086585 | 0.06154  | 0.11745  | 0.01108  | 0.245305 | 7.91E-08 |
| 0.69726  | 0.005617 | 0.90365  | 0.071089 | 0.12501  | 0.046694 | 0.31398  | -0.12907 | 0.00521  |
| 1.27E-10 | -0.42925 | 2.33E-22 | -0.31811 | 1.93E-12 | -0.39237 | 1.22E-18 | -0.26206 | 8.99E-09 |



|          |          |          |          |          |          |          |          |          |
|----------|----------|----------|----------|----------|----------|----------|----------|----------|
| 0.0001   | 0.014521 | 0.75429  | 0.227428 | 6.81E-07 | 0.214417 | 2.93E-06 | 0.281784 | 5.68E-10 |
| 0.00046  | -0.18389 | 6.41E-05 | 0.0289   | 0.5333   | 0.040429 | 0.38338  | 0.10235  | 0.02699  |
| 0.00021  | 0.027672 | 0.55083  | 0.102396 | 0.02692  | 0.124382 | 0.00712  | 0.062053 | 0.18067  |
| 1.22E-06 | -0.05413 | 0.24306  | 0.080874 | 0.08083  | 0.108945 | 0.01852  | 0.090924 | 0.04957  |
| 0.12391  | -0.07614 | 0.10032  | -0.01922 | 0.6787   | -0.07865 | 0.08955  | 0.125    | 0.00684  |
| 0.00074  | 0.294203 | 8.88E-11 | 0.293352 | 1.01E-10 | 0.27546  | 1.41E-09 | 0.081543 | 0.07834  |
| 0.3673   | -0.04609 | 0.32023  | -0.00389 | 0.93311  | 0.009594 | 0.83618  | 0.031795 | 0.49307  |
| 0.81973  | -0.06507 | 0.16037  | -0.03893 | 0.40133  | 0.004489 | 0.92293  | -0.06819 | 0.14117  |
| 0.00256  | -0.11067 | 0.01673  | -0.12598 | 0.00641  | -0.14356 | 0.00187  | -0.14731 | 0.00141  |
| 0.00417  | 0.24375  | 9.61E-08 | 0.041997 | 0.36518  | 0.114301 | 0.01345  | 0.348834 | 8.27E-15 |
| 5.25E-07 | -0.01329 | 0.77459  | -0.05007 | 0.28019  | 0.112154 | 0.01532  | -0.17511 | 0.00014  |
| 0.17044  | -0.02291 | 0.62145  | -0.17604 | 0.00013  | -0.11646 | 0.01179  | 0.124011 | 0.00729  |
| 0.8818   | -0.19604 | 1.98E-05 | -0.20864 | 5.45E-06 | -0.15814 | 0.0006   | 0.086421 | 0.06203  |
| 0.02882  | 0.01744  | 0.70699  | 0.083891 | 0.0701   | 0.063565 | 0.17027  | 0.133024 | 0.00398  |
| 1.08E-07 | 0.27861  | 8.99E-10 | 0.251857 | 3.44E-08 | 0.229451 | 5.38E-07 | 0.184918 | 5.82E-05 |
| 0.00175  | 0.154067 | 0.00084  | 0.196708 | 1.86E-05 | 0.031779 | 0.49329  | -0.03179 | 0.49315  |
| 6.04E-11 | -0.17072 | 0.00021  | -0.15654 | 0.00069  | -0.24129 | 1.30E-07 | -0.18258 | 7.23E-05 |
| 9.48E-05 | 0.074184 | 0.10937  | 0.125472 | 0.00663  | 0.018838 | 0.68471  | 0.06835  | 0.14026  |
| 0.52042  | -0.06311 | 0.17335  | 0.043129 | 0.35239  | -0.00675 | 0.88438  | -0.00961 | 0.83599  |
| 0.00023  | 0.290148 | 1.64E-10 | 0.438958 | 2.04E-23 | 0.307891 | 1.03E-11 | 0.084859 | 0.06692  |
| 0.00091  | 0.101324 | 0.02857  | 0.110945 | 0.01646  | 0.166178 | 0.00031  | 0.039138 | 0.39876  |
| 0.18255  | -0.13918 | 0.00258  | -0.10859 | 0.01891  | -0.11569 | 0.01236  | -0.04486 | 0.33334  |
| 0.00022  | 0.070821 | 0.12645  | 0.20577  | 7.36E-06 | 0.178201 | 0.00011  | -0.10393 | 0.0247   |
| 0.04091  | -0.14472 | 0.00172  | -0.15342 | 0.00088  | -0.06049 | 0.19195  | -0.20271 | 1.01E-05 |
| 1.31E-11 | 0.049529 | 0.28547  | -0.23405 | 3.13E-07 | -0.21692 | 2.23E-06 | 0.149034 | 0.00124  |
| 0.51323  | -0.19424 | 2.37E-05 | -0.20963 | 4.90E-06 | -0.16237 | 0.00043  | 0.012588 | 0.78615  |
| 0.00736  | -0.29947 | 3.94E-11 | -0.08081 | 0.08108  | -0.07263 | 0.11702  | -0.02571 | 0.57945  |
| 0.32418  | -0.0093  | 0.84114  | -0.26528 | 5.81E-09 | -0.08535 | 0.06534  | 0.023237 | 0.61646  |
| 0.04562  | 0.057939 | 0.21138  | -0.07216 | 0.1194   | -0.00205 | 0.9647   | 0.108813 | 0.01866  |
| 0.87339  | -0.35126 | 5.24E-15 | -0.14122 | 0.00222  | -0.17146 | 0.0002   | -0.12796 | 0.00562  |
| 5.04E-05 | 0.045995 | 0.32128  | 0.112062 | 0.0154   | 0.13645  | 0.00313  | 0.320793 | 1.23E-12 |
| 0.01011  | -0.15086 | 0.00108  | -0.0686  | 0.13881  | -0.15088 | 0.00107  | 0.05497  | 0.23577  |
| 0.15514  | -0.06081 | 0.18958  | 0.028013 | 0.54594  | 0.007962 | 0.86376  | -0.03305 | 0.47619  |
| 0.00246  | -0.12161 | 0.00852  | -0.18946 | 3.78E-05 | -0.18653 | 5.00E-05 | 0.051039 | 0.27101  |
| 0.52357  | -0.03436 | 0.45879  | 0.092187 | 0.04647  | 0.050167 | 0.2793   | 0.05709  | 0.21817  |
| 0.44332  | 0.093999 | 0.04232  | 0.126482 | 0.0062   | 0.115213 | 0.01272  | -0.14325 | 0.00191  |
| 0.6188   | -0.04486 | 0.33336  | -0.01821 | 0.69476  | -0.03793 | 0.4135   | 0.023149 | 0.61779  |
| 0.33661  | -0.13415 | 0.00368  | 0.047984 | 0.30078  | 0.006114 | 0.89516  | 0.009091 | 0.84467  |
| 0.45537  | 0.014457 | 0.75535  | 0.029613 | 0.52323  | 0.039683 | 0.39223  | 0.002515 | 0.95677  |
| 0.13198  | -0.14608 | 0.00155  | -0.06989 | 0.13151  | -0.0993  | 0.03191  | -0.15413 | 0.00083  |
| 0.04464  | -0.11308 | 0.01449  | 0.031057 | 0.50317  | 0.038439 | 0.40724  | -0.16664 | 0.0003   |
| 0.00134  | 0.010952 | 0.81339  | 0.150342 | 0.00112  | 0.119384 | 0.00982  | 0.175565 | 0.00014  |
| 0.00065  | -0.11163 | 0.01581  | -0.13748 | 0.00291  | -0.16706 | 0.00029  | -0.16748 | 0.00028  |
| 0.63261  | -0.08292 | 0.07342  | -0.12661 | 0.00615  | -0.06944 | 0.13403  | -0.17038 | 0.00022  |
| 0.10672  | -0.07215 | 0.11946  | -0.013   | 0.77926  | 0.021565 | 0.64205  | 0.006753 | 0.88428  |

|          |          |          |          |          |          |          |          |          |
|----------|----------|----------|----------|----------|----------|----------|----------|----------|
| 0.61602  | 0.013835 | 0.76556  | 0.005409 | 0.90719  | -0.00727 | 0.87544  | -0.10195 | 0.02759  |
| 0.30541  | -0.05043 | 0.27675  | -0.05373 | 0.24652  | -0.05595 | 0.22752  | -0.03326 | 0.47341  |
| 0.29471  | -0.08591 | 0.06361  | -0.02549 | 0.58268  | -0.00659 | 0.88707  | 0.031516 | 0.49687  |
| 0.98618  | -0.28084 | 6.51E-10 | -0.08959 | 0.05301  | -0.09707 | 0.03599  | -0.01017 | 0.82655  |
| 0.00451  | -0.1961  | 1.97E-05 | 0.049638 | 0.28441  | 0.042041 | 0.36469  | 0.062151 | 0.17999  |
| 2.82E-11 | 0.200153 | 1.31E-05 | 0.370437 | 1.23E-16 | 0.311901 | 5.39E-12 | -0.04414 | 0.34125  |
| 0.62659  | 0.037533 | 0.4184   | -0.03279 | 0.47969  | 0.034708 | 0.4543   | 0.040853 | 0.37841  |
| 0.26701  | -0.01135 | 0.80683  | -0.04962 | 0.28462  | -0.03128 | 0.50009  | -0.21891 | 1.79E-06 |
| 0.19604  | -0.19014 | 3.54E-05 | -0.2065  | 6.82E-06 | -0.12879 | 0.00531  | 0.189521 | 3.76E-05 |
| 0.27626  | 0.113503 | 0.01412  | 0.11879  | 0.01019  | 0.099569 | 0.03145  | -0.04912 | 0.28949  |
| 0.01133  | -0.04132 | 0.37296  | -0.16611 | 0.00031  | -0.1733  | 0.00017  | 0.332761 | 1.55E-13 |
| 0.02454  | -0.00695 | 0.88098  | 0.075166 | 0.10474  | 0.064136 | 0.16645  | 0.013881 | 0.76481  |
| 1.56E-06 | -0.10797 | 0.0196   | 0.123593 | 0.0075   | 0.159191 | 0.00055  | -0.1482  | 0.00132  |
| 0.23214  | -0.08223 | 0.07587  | 0.028304 | 0.54177  | 0.02236  | 0.62982  | -0.01068 | 0.81799  |
| 8.55E-06 | -0.19147 | 3.11E-05 | -0.18113 | 8.27E-05 | -0.26008 | 1.17E-08 | -0.19661 | 1.87E-05 |
| 0.65499  | -0.00757 | 0.87037  | 0.020377 | 0.6605   | 0.020257 | 0.66238  | 0.06457  | 0.1636   |
| 0.00682  | 0.014421 | 0.75594  | 0.250494 | 4.10E-08 | 0.140596 | 0.00232  | 0.140825 | 0.00229  |
| 0.03462  | 0.178649 | 0.0001   | -0.10952 | 0.01791  | -0.05585 | 0.22838  | 0.22986  | 5.13E-07 |
| 4.33E-08 | 0.034475 | 0.45734  | -0.09002 | 0.05187  | -0.16091 | 0.00048  | 0.098375 | 0.03356  |
| 0.30099  | 0.153415 | 0.00088  | -0.12018 | 0.00933  | -0.01234 | 0.79032  | 0.170293 | 0.00022  |
| 0.00175  | -0.16209 | 0.00044  | -0.16448 | 0.00036  | -0.17565 | 0.00014  | 0.11679  | 0.01155  |
| 0.01119  | 0.07595  | 0.10116  | 0.060381 | 0.19273  | 0.07682  | 0.0973   | 0.063506 | 0.17066  |
| 6.77E-15 | 0.18135  | 8.11E-05 | 0.231549 | 4.21E-07 | 0.338321 | 5.72E-14 | 0.312893 | 4.58E-12 |
| 1.05E-09 | 0.307574 | 1.09E-11 | 0.130853 | 0.00462  | 0.248382 | 5.37E-08 | 0.032378 | 0.48518  |
| 0.39075  | 0.138193 | 0.00276  | -0.13616 | 0.0032   | 0.001056 | 0.98185  | 0.262414 | 8.57E-09 |
| 2.63E-05 | -0.02924 | 0.52844  | 0.015001 | 0.74645  | 0.073955 | 0.11047  | 0.008163 | 0.86035  |
| 0.82127  | -0.21035 | 4.54E-06 | -0.14237 | 0.00204  | -0.11237 | 0.01512  | 0.074994 | 0.10554  |
| 1.56E-06 | 0.073822 | 0.11111  | 0.142816 | 0.00198  | 0.147703 | 0.00137  | -0.01793 | 0.69919  |
| 5.49E-08 | 0.143619 | 0.00186  | 0.160912 | 0.00048  | 0.202406 | 1.04E-05 | 0.148837 | 0.00126  |
| 0.35838  | -0.20707 | 6.43E-06 | -0.09493 | 0.04031  | -0.11511 | 0.0128   | 0.000234 | 0.99597  |
| 7.73E-05 | 0.043809 | 0.34484  | 0.074382 | 0.10842  | 0.159116 | 0.00056  | 0.285306 | 3.39E-10 |
| 0.001    | -0.04595 | 0.3218   | 0.092168 | 0.04652  | 0.093897 | 0.04254  | -0.03242 | 0.48466  |
| 0.00545  | -0.10733 | 0.02035  | -0.13824 | 0.00275  | -0.14923 | 0.00122  | -0.2097  | 4.87E-06 |
| 0.00016  | 0.002951 | 0.94928  | 0.051558 | 0.26617  | 0.088037 | 0.05729  | -0.02778 | 0.54926  |
| 0.15073  | -0.03732 | 0.42101  | 0.009488 | 0.83797  | 0.004821 | 0.91725  | 0.146333 | 0.00152  |
| 4.01E-05 | -0.18071 | 8.60E-05 | -0.0727  | 0.11668  | 0.039084 | 0.39941  | -0.03473 | 0.45404  |
| 0.14516  | -0.31668 | 2.45E-12 | -0.28317 | 4.64E-10 | -0.24776 | 5.81E-08 | -0.16213 | 0.00044  |
| 0.05444  | -0.13763 | 0.00288  | -0.12112 | 0.00879  | -0.07247 | 0.11783  | -0.20224 | 1.06E-05 |
| 0.00302  | -0.00293 | 0.94972  | -0.11498 | 0.01291  | 0.016557 | 0.7212   | -0.08565 | 0.06442  |
| 0.62287  | -0.17109 | 0.0002   | -0.14902 | 0.00124  | -0.1535  | 0.00087  | 0.049253 | 0.28816  |
| 0.01209  | -0.26797 | 4.02E-09 | -0.0295  | 0.52488  | -0.02949 | 0.52493  | 0.175173 | 0.00014  |
| 0.00016  | -0.33194 | 1.79E-13 | -0.28514 | 3.47E-10 | -0.2654  | 5.72E-09 | -0.31552 | 2.97E-12 |
| 9.74E-11 | -0.16654 | 0.0003   | -0.33907 | 5.00E-14 | -0.31817 | 1.91E-12 | -0.1361  | 0.00321  |
| 0.80846  | -0.05057 | 0.27549  | 0.000796 | 0.98632  | -0.02686 | 0.5626   | -0.0165  | 0.72219  |
| 0.11757  | -0.25729 | 1.70E-08 | -0.3773  | 3.02E-17 | -0.25337 | 2.83E-08 | -0.07759 | 0.09398  |

|          |          |          |          |          |          |          |          |          |
|----------|----------|----------|----------|----------|----------|----------|----------|----------|
| 0.00017  | 0.058249 | 0.20895  | -0.23201 | 3.98E-07 | -0.15186 | 0.00099  | 0.100366 | 0.03011  |
| 0.09485  | -0.01498 | 0.74676  | -0.01797 | 0.69854  | -0.0382  | 0.41015  | -0.00651 | 0.8884   |
| 4.22E-06 | 0.065404 | 0.15821  | -0.05683 | 0.22029  | -0.1291  | 0.0052   | -0.01034 | 0.82363  |
| 0.74037  | 0.016523 | 0.72173  | 0.125467 | 0.00663  | 0.049858 | 0.28227  | -0.04865 | 0.29414  |
| 6.86E-12 | -0.32939 | 2.79E-13 | -0.2685  | 3.74E-09 | -0.33079 | 2.19E-13 | -0.40113 | 1.76E-19 |
| 0.06427  | 0.26384  | 7.07E-09 | 0.298338 | 4.70E-11 | 0.237371 | 2.10E-07 | 0.085275 | 0.06559  |
| 4.45E-13 | 0.496169 | 2.16E-30 | 0.277887 | 9.97E-10 | 0.40317  | 1.11E-19 | 0.254005 | 2.61E-08 |
| 0.56586  | 0.085563 | 0.06468  | -0.02552 | 0.58223  | 0.038792 | 0.40294  | -0.16487 | 0.00035  |
| 0.00013  | -0.10019 | 0.03041  | -0.13261 | 0.0041   | -0.17562 | 0.00014  | -0.16854 | 0.00025  |
| 0.20193  | -0.02994 | 0.5186   | 0.023689 | 0.60961  | 0.041848 | 0.36689  | -0.10611 | 0.02182  |
| 0.42741  | -0.04101 | 0.37655  | 0.001369 | 0.97647  | -0.01779 | 0.70135  | -0.10045 | 0.02998  |
| 0.00783  | -0.2702  | 2.95E-09 | -0.2576  | 1.63E-08 | -0.13254 | 0.00411  | 0.157017 | 0.00066  |
| 0.51373  | 0.150286 | 0.00112  | 0.05631  | 0.22453  | 0.05545  | 0.2317   | 0.270432 | 2.86E-09 |
| 0.00909  | -0.13074 | 0.00466  | -0.02264 | 0.62551  | -0.00252 | 0.95676  | 0.072479 | 0.11779  |
| 0.71524  | 0.015833 | 0.73291  | 0.110378 | 0.01702  | 0.006751 | 0.88431  | 0.041513 | 0.37075  |
| 0.8197   | -0.32401 | 7.09E-13 | -0.10351 | 0.0253   | -0.12279 | 0.00789  | -0.2004  | 1.28E-05 |
| 2.71E-06 | -0.14465 | 0.00172  | 0.139821 | 0.00246  | 0.141025 | 0.00225  | 0.019312 | 0.67722  |
| 0.01662  | -0.31746 | 2.15E-12 | -0.13838 | 0.00273  | -0.19774 | 1.67E-05 | -0.40416 | 8.90E-20 |
| 0.78655  | -0.11149 | 0.01594  | -0.06534 | 0.15859  | -0.07371 | 0.11165  | -0.03883 | 0.40247  |
| 0.30188  | 0.163325 | 0.00039  | 0.227178 | 7.01E-07 | 0.135781 | 0.00328  | 0.035189 | 0.44806  |
| 0.03308  | 0.268463 | 3.76E-09 | 0.323265 | 8.05E-13 | 0.139676 | 0.00248  | -0.00787 | 0.86527  |
| 0.00036  | 0.22201  | 1.26E-06 | 0.256426 | 1.90E-08 | 0.286558 | 2.81E-10 | 0.117785 | 0.01085  |
| 5.25E-06 | 0.054394 | 0.24072  | 0.132623 | 0.00409  | 0.151972 | 0.00099  | 0.11603  | 0.0121   |
| 0.17009  | 0.000714 | 0.98773  | -0.02059 | 0.65714  | -0.02299 | 0.62023  | -0.20024 | 1.30E-05 |
| 5.92E-06 | 0.261553 | 9.62E-09 | 0.171476 | 0.0002   | 0.239441 | 1.63E-07 | 0.450808 | 9.35E-25 |
| 3.28E-06 | 0.303144 | 2.21E-11 | 0.115647 | 0.01239  | 0.220291 | 1.53E-06 | -0.02598 | 0.57545  |
| 0.95079  | 0.038971 | 0.40078  | -0.04011 | 0.38713  | 0.012189 | 0.79277  | 0.216174 | 2.42E-06 |
| 0.00784  | 0.008001 | 0.86309  | 0.041058 | 0.37602  | 0.070442 | 0.12849  | -0.01669 | 0.71911  |
| 0.01022  | -0.12652 | 0.00619  | -0.17271 | 0.00018  | -0.16386 | 0.00038  | 0.048734 | 0.29328  |
| 0.00241  | -0.00306 | 0.94741  | 0.099659 | 0.0313   | 0.098741 | 0.0329   | -0.20251 | 1.03E-05 |
| 0.34382  | 0.144135 | 0.00179  | 0.006541 | 0.88788  | 0.028124 | 0.54434  | 0.000601 | 0.98967  |
| 0.95038  | -0.0152  | 0.74316  | -0.10194 | 0.0276   | -0.05891 | 0.20385  | 0.238285 | 1.88E-07 |
| 0.07811  | 0.126217 | 0.00631  | 0.148777 | 0.00126  | 0.12394  | 0.00733  | -0.09125 | 0.04874  |
| 0.11853  | 0.085243 | 0.06569  | 0.08766  | 0.05837  | 0.073778 | 0.11133  | 0.052947 | 0.25348  |
| 6.04E-10 | -0.04657 | 0.31524  | 0.193843 | 2.47E-05 | 0.171839 | 0.00019  | -0.11949 | 0.00975  |
| 1.82E-05 | 0.193818 | 2.47E-05 | 0.147793 | 0.00136  | 0.192389 | 2.84E-05 | 0.068121 | 0.1416   |
| 4.04E-06 | 0.020834 | 0.65339  | -0.13827 | 0.00275  | -0.14975 | 0.00117  | 0.053103 | 0.25209  |
| 0.75088  | -0.07341 | 0.11311  | -0.06024 | 0.19381  | -0.04063 | 0.38098  | 0.021463 | 0.64362  |
| 0.16634  | -0.07729 | 0.09527  | 0.028202 | 0.54323  | -0.01671 | 0.71872  | -0.07831 | 0.09095  |
| 0.00174  | 0.303428 | 2.11E-11 | 0.188287 | 4.23E-05 | 0.226222 | 7.82E-07 | 0.32447  | 6.55E-13 |
| 0.93043  | -0.32545 | 5.54E-13 | -0.20124 | 1.18E-05 | -0.16766 | 0.00027  | 0.050208 | 0.2789   |
| 0.00063  | -0.01592 | 0.73149  | 0.042117 | 0.36381  | 0.024877 | 0.59179  | 0.088043 | 0.05727  |
| 0.23935  | -0.09476 | 0.04066  | -0.25142 | 3.64E-08 | -0.09231 | 0.04618  | 0.162551 | 0.00042  |
| 0.00332  | 0.059394 | 0.20012  | 0.118122 | 0.01063  | 0.096365 | 0.03737  | 0.077129 | 0.09596  |
| 0.35678  | -0.27202 | 2.29E-09 | -0.18051 | 8.76E-05 | -0.18597 | 5.27E-05 | -0.16519 | 0.00034  |

|          |          |          |          |          |          |          |          |          |
|----------|----------|----------|----------|----------|----------|----------|----------|----------|
| 0.027    | 0.127075 | 0.00596  | 0.048253 | 0.29807  | 0.093085 | 0.04437  | 0.114502 | 0.01329  |
| 0.31602  | 0.097111 | 0.03591  | -0.16662 | 0.0003   | -0.0607  | 0.1904   | -0.14474 | 0.00171  |
| 0.00387  | -0.08034 | 0.08285  | -0.01822 | 0.69446  | 0.057964 | 0.21119  | 0.15219  | 0.00097  |
| 0.11504  | -0.27273 | 2.08E-09 | -0.0462  | 0.3191   | -0.10149 | 0.02831  | 0.086489 | 0.06183  |
| 0.00029  | -0.01188 | 0.79789  | 0.110988 | 0.01642  | 0.11403  | 0.01368  | 0.150265 | 0.00113  |
| 3.65E-14 | -0.19514 | 2.17E-05 | -0.13484 | 0.00351  | -0.01165 | 0.80176  | 0.327552 | 3.85E-13 |
| 0.45491  | 0.119709 | 0.00962  | 0.047694 | 0.30372  | 0.07018  | 0.12992  | 0.278809 | 8.73E-10 |
| 0.11667  | -0.12944 | 0.00508  | -0.08211 | 0.0763   | -0.10883 | 0.01864  | 0.005436 | 0.90674  |
| 0.00043  | -0.08758 | 0.05861  | -0.03041 | 0.51209  | -0.07564 | 0.10255  | -0.05488 | 0.23651  |
| 0.0046   | 0.006529 | 0.8881   | 0.088136 | 0.05701  | 0.081673 | 0.07787  | -0.00627 | 0.89246  |
| 2.71E-07 | -0.04937 | 0.28697  | 0.047784 | 0.3028   | 0.118178 | 0.01059  | 0.398193 | 3.40E-19 |
| 0.36525  | -0.13807 | 0.00279  | -0.12354 | 0.00752  | -0.12192 | 0.00835  | 0.077956 | 0.09243  |
| 0.12302  | -0.14054 | 0.00233  | -0.12051 | 0.00914  | -0.10835 | 0.01918  | -0.07406 | 0.10998  |
| 0.09371  | 0.220445 | 1.51E-06 | 0.135089 | 0.00345  | 0.174591 | 0.00015  | 0.279793 | 7.58E-10 |
| 7.44E-08 | -0.23294 | 3.57E-07 | -0.22128 | 1.37E-06 | -0.31024 | 7.07E-12 | -0.284   | 4.10E-10 |
| 0.66261  | -0.12567 | 0.00654  | -0.02007 | 0.66536  | -0.03317 | 0.47462  | 0.028836 | 0.5342   |
| 0.48373  | -0.20091 | 1.22E-05 | -0.01681 | 0.71719  | -0.04083 | 0.37866  | -0.16107 | 0.00048  |
| 0.00065  | -0.06291 | 0.17475  | 0.031429 | 0.49806  | 0.068689 | 0.1383   | 0.076467 | 0.09885  |
| 0.9286   | -0.09618 | 0.03774  | -0.00549 | 0.90587  | -0.02515 | 0.58766  | -0.11514 | 0.01278  |
| 0.00899  | -0.15825 | 0.0006   | -0.05729 | 0.21659  | -0.06557 | 0.15715  | -0.05069 | 0.2743   |
| 0.32315  | 0.049344 | 0.28727  | 0.034924 | 0.4515   | 0.014741 | 0.7507   | 0.01188  | 0.79792  |
| 2.02E-09 | -0.04638 | 0.31728  | -0.27669 | 1.18E-09 | -0.24093 | 1.36E-07 | -0.04895 | 0.29119  |
| 0.02224  | -0.10366 | 0.02508  | -0.08041 | 0.08261  | -0.12048 | 0.00916  | 0.260029 | 1.18E-08 |
| 1.27E-05 | 0.387134 | 3.80E-18 | 0.084242 | 0.06894  | 0.21517  | 2.70E-06 | 0.091771 | 0.04747  |
| 0.86768  | 0.075658 | 0.10248  | -0.02455 | 0.59674  | 0.001806 | 0.96896  | -0.14707 | 0.00144  |
| 0.0012   | -0.15425 | 0.00082  | 0.086993 | 0.06032  | 0.061077 | 0.18764  | 0.13611  | 0.00321  |
| 3.69E-15 | 0.209544 | 4.95E-06 | 0.059555 | 0.1989   | 0.235235 | 2.72E-07 | 0.074707 | 0.10688  |
| 7.08E-05 | -0.0096  | 0.83616  | 0.161866 | 0.00045  | 0.149149 | 0.00123  | 0.166216 | 0.00031  |
| 0.0025   | 0.033055 | 0.4761   | 0.063725 | 0.16919  | -0.04471 | 0.33501  | -0.22948 | 5.36E-07 |
| 0.93718  | 0.285169 | 3.46E-10 | -0.07738 | 0.09486  | 0.033049 | 0.47618  | -0.02684 | 0.56294  |
| 0.54058  | 0.019858 | 0.66863  | -0.04092 | 0.37757  | -0.02891 | 0.53309  | 0.055802 | 0.22874  |
| 0.13195  | -0.28644 | 2.86E-10 | -0.09413 | 0.04203  | -0.07276 | 0.11635  | -0.06349 | 0.17076  |
| 4.45E-06 | -0.10871 | 0.01877  | -0.20776 | 5.98E-06 | -0.18893 | 3.97E-05 | -0.21125 | 4.13E-06 |
| 0.20531  | 0.107995 | 0.01958  | 0.195939 | 2.01E-05 | 0.17924  | 9.84E-05 | 0.139642 | 0.00249  |
| 4.70E-10 | -0.10679 | 0.02099  | -0.2395  | 1.62E-07 | -0.24478 | 8.45E-08 | 0.136567 | 0.0031   |
| 0.00137  | 0.018458 | 0.69075  | -0.07589 | 0.10144  | -0.11152 | 0.01591  | 0.091954 | 0.04703  |
| 0.19264  | 0.11415  | 0.01358  | 0.171337 | 0.0002   | 0.138289 | 0.00275  | 0.116506 | 0.01175  |
| 0.19558  | 0.043904 | 0.34379  | 0.000513 | 0.99117  | 0.052686 | 0.25584  | 0.093094 | 0.04435  |
| 0.14601  | -0.03864 | 0.40478  | -0.00668 | 0.88546  | -0.05774 | 0.21299  | 0.057818 | 0.21234  |
| 6.46E-06 | 0.389488 | 2.29E-18 | 0.251296 | 3.70E-08 | 0.302407 | 2.48E-11 | 0.421253 | 1.64E-21 |
| 0.90293  | -0.02478 | 0.59318  | 0.038231 | 0.40979  | 0.017592 | 0.70456  | -0.11759 | 0.01098  |
| 0.01981  | -0.10371 | 0.02502  | -0.11189 | 0.01556  | -0.12719 | 0.00592  | 0.055168 | 0.23408  |
| 0.71546  | -0.27821 | 9.52E-10 | -0.07097 | 0.12563  | -0.06687 | 0.14909  | -0.21228 | 3.69E-06 |
| 0.38155  | 0.055376 | 0.23233  | 0.075939 | 0.10121  | 0.068964 | 0.13673  | -0.06741 | 0.14583  |
| 4.41E-20 | 0.020878 | 0.6527   | 0.217487 | 2.09E-06 | 0.292406 | 1.17E-10 | 0.082002 | 0.07667  |

|          |           |          |          |          |          |          |          |          |
|----------|-----------|----------|----------|----------|----------|----------|----------|----------|
| 0.00046  | -7.57E-05 | 0.9987   | 0.053845 | 0.24551  | 0.070311 | 0.1292   | 0.094632 | 0.04094  |
| 2.86E-09 | 0.241412  | 1.28E-07 | 0.250401 | 4.15E-08 | 0.267656 | 4.20E-09 | 0.108408 | 0.01911  |
| 2.76E-05 | 0.208036  | 5.81E-06 | 0.254016 | 2.60E-08 | 0.29177  | 1.29E-10 | 0.13781  | 0.00284  |
| 4.12E-08 | 0.15985   | 0.00053  | 0.276306 | 1.25E-09 | 0.247288 | 6.17E-08 | -0.05807 | 0.21038  |
| 0.14786  | 0.003227  | 0.94456  | 0.122053 | 0.00828  | 0.066144 | 0.15354  | -0.34409 | 2.00E-14 |
| 0.01585  | 0.120232  | 0.0093   | -0.01725 | 0.71003  | -0.03558 | 0.44306  | 0.025052 | 0.58919  |
| 0.64717  | -0.26873  | 3.62E-09 | -0.21181 | 3.88E-06 | -0.20899 | 5.25E-06 | -0.00111 | 0.98084  |
| 3.34E-09 | 0.381367  | 1.29E-17 | 0.313855 | 3.91E-12 | 0.327739 | 3.73E-13 | 0.108046 | 0.01952  |
| 0.85172  | 0.094257  | 0.04175  | 0.034033 | 0.46312  | 0.028928 | 0.53289  | -0.12402 | 0.00729  |
| 0.00098  | -0.06274  | 0.17588  | -0.04836 | 0.29705  | -0.11965 | 0.00965  | -0.20933 | 5.06E-06 |
| 0.59613  | -0.17036  | 0.00022  | -0.07824 | 0.09126  | -0.08005 | 0.08396  | 0.006205 | 0.89362  |
| 0.63608  | -0.04666  | 0.31432  | -0.04336 | 0.34983  | -0.0051  | 0.91255  | -0.06645 | 0.15166  |
| 4.90E-14 | -0.08308  | 0.07285  | 0.186745 | 4.90E-05 | 0.211385 | 4.07E-06 | 0.097409 | 0.03535  |
| 8.95E-14 | 0.023961  | 0.60552  | 0.277002 | 1.13E-09 | 0.250178 | 4.27E-08 | 0.090176 | 0.05148  |
| 0.54306  | -0.30584  | 1.44E-11 | -0.08501 | 0.06644  | -0.10422 | 0.0243   | -0.08329 | 0.07215  |
| 2.22E-15 | 0.147301  | 0.00141  | 0.000106 | 0.99818  | 0.139393 | 0.00254  | 0.197576 | 1.70E-05 |
| 1.57E-06 | -0.31084  | 6.41E-12 | -0.20835 | 5.61E-06 | -0.29997 | 3.64E-11 | 0.019661 | 0.67173  |
| 0.33504  | 0.443257  | 6.76E-24 | 0.292642 | 1.13E-10 | 0.223552 | 1.06E-06 | 0.087984 | 0.05744  |
| 0.53067  | -0.15207  | 0.00098  | -0.11946 | 0.00977  | -0.11625 | 0.01194  | -0.06265 | 0.17648  |
| 0.01738  | -0.11598  | 0.01214  | -0.06704 | 0.14803  | -0.0878  | 0.05796  | -0.08198 | 0.07676  |
| 0.00212  | -0.18733  | 4.63E-05 | -0.13435 | 0.00363  | -0.18615 | 5.18E-05 | -0.1852  | 5.66E-05 |
| 6.72E-05 | -0.03745  | 0.4194   | -0.12168 | 0.00848  | -0.15553 | 0.00074  | -0.04578 | 0.3235   |
| 0.00075  | 0.020466  | 0.65912  | 0.078343 | 0.09082  | 0.101449 | 0.02837  | 0.120225 | 0.00931  |
| 0.76113  | -0.03203  | 0.4899   | 0.036732 | 0.42841  | 0.024684 | 0.59467  | 0.038181 | 0.4104   |
| 0.00061  | 0.394979  | 6.92E-19 | 0.123437 | 0.00757  | 0.196505 | 1.90E-05 | 0.149009 | 0.00124  |
| 0.01418  | 0.178392  | 0.00011  | 0.18933  | 3.83E-05 | 0.180436 | 8.82E-05 | 0.131326 | 0.00447  |
| 0.02047  | -0.1467   | 0.00148  | -0.12872 | 0.00534  | -0.04367 | 0.34634  | 0.257602 | 1.63E-08 |
| 0.00039  | -0.00498  | 0.9146   | 0.007296 | 0.87505  | -0.07799 | 0.0923   | -0.10119 | 0.02878  |
| 0.09095  | -0.17358  | 0.00016  | -0.18714 | 4.71E-05 | -0.09529 | 0.03955  | 0.037005 | 0.42498  |
| 1.59E-18 | 0.196706  | 1.86E-05 | 0.133093 | 0.00396  | 0.300197 | 3.51E-11 | 0.270029 | 3.02E-09 |
| 0.10166  | 0.033236  | 0.47368  | 0.170688 | 0.00021  | 0.023121 | 0.61822  | -0.00326 | 0.94395  |
| 0.45245  | 0.014103  | 0.76115  | 0.094842 | 0.04049  | 0.036576 | 0.43037  | 0.084297 | 0.06875  |
| 0.75176  | 0.193121  | 2.65E-05 | 0.042445 | 0.36008  | 0.067079 | 0.1478   | 0.045191 | 0.32983  |
| 0.36018  | 0.247411  | 6.07E-08 | 0.249351 | 4.75E-08 | 0.131399 | 0.00445  | 0.086053 | 0.06316  |
| 0.00134  | -0.12968  | 0.005    | -0.11078 | 0.01663  | -0.16543 | 0.00033  | -0.23864 | 1.80E-07 |
| 0.00076  | -0.09146  | 0.04824  | 0.038516 | 0.40631  | 0.067843 | 0.14323  | -0.12501 | 0.00683  |
| 0.0621   | -0.07666  | 0.09798  | 0.030737 | 0.50758  | 0.027852 | 0.54824  | -0.10093 | 0.02919  |
| 0.15284  | -0.04215  | 0.36341  | 0.121298 | 0.00869  | 0.078524 | 0.09008  | -0.03785 | 0.41445  |
| 0.43621  | 0.02775   | 0.54971  | 0.267007 | 4.59E-09 | 0.170209 | 0.00022  | -0.06543 | 0.15802  |
| 0.26177  | -0.23693  | 2.22E-07 | -0.15207 | 0.00098  | -0.14062 | 0.00232  | 0.074775 | 0.10656  |
| 1.30E-05 | -0.03903  | 0.40008  | 0.002006 | 0.96551  | 0.095426 | 0.03927  | 0.006741 | 0.88449  |
| 6.39E-07 | 0.059421  | 0.19992  | -0.05002 | 0.28071  | -0.14412 | 0.00179  | -0.09939 | 0.03177  |
| 0.89239  | -0.14728  | 0.00142  | 0.09165  | 0.04777  | -0.03397 | 0.46389  | 0.041398 | 0.37206  |
| 5.15E-12 | 0.126441  | 0.00622  | 0.239909 | 1.54E-07 | 0.270212 | 2.95E-09 | 0.367009 | 2.45E-16 |
| 0.2623   | 0.155266  | 0.00076  | 0.062637 | 0.1766   | 0.098773 | 0.03284  | 0.063811 | 0.16861  |

|          |          |          |          |          |          |          |          |          |
|----------|----------|----------|----------|----------|----------|----------|----------|----------|
| 0.10136  | -0.0595  | 0.1993   | 0.041272 | 0.37353  | 0.054873 | 0.2366   | 0.09978  | 0.03109  |
| 0.00633  | -0.48593 | 4.80E-29 | -0.1919  | 2.98E-05 | -0.25112 | 3.78E-08 | -0.17479 | 0.00015  |
| 1.94E-12 | -0.21278 | 3.50E-06 | -0.23315 | 3.48E-07 | -0.29739 | 5.44E-11 | -0.28412 | 4.03E-10 |
| 0.41799  | -0.00823 | 0.85926  | 0.019241 | 0.67834  | -0.01617 | 0.72747  | -0.05429 | 0.24163  |
| 0.16678  | -0.0743  | 0.10883  | -0.01451 | 0.75448  | -0.06796 | 0.14256  | -0.01687 | 0.71623  |
| 0.15216  | -0.05339 | 0.24949  | -0.02478 | 0.59319  | -0.06079 | 0.18971  | 0.037688 | 0.41648  |
| 0.13067  | -0.30915 | 8.44E-12 | 0.038772 | 0.40319  | -0.00524 | 0.91002  | -0.08598 | 0.06338  |
| 0.20344  | 0.006688 | 0.88539  | 0.011587 | 0.8028   | 0.00958  | 0.83642  | -0.04548 | 0.32675  |
| 0.00249  | -0.05208 | 0.26134  | 0.115664 | 0.01238  | 0.1024   | 0.02691  | 0.198513 | 1.55E-05 |
| 0.88908  | 0.127644 | 0.00574  | 0.030813 | 0.50653  | 0.045412 | 0.32746  | 0.316998 | 2.32E-12 |
| 0.79173  | 0.031109 | 0.50245  | 0.034949 | 0.45117  | 0.034602 | 0.45569  | -0.24546 | 7.76E-08 |
| 2.43E-18 | -0.35934 | 1.11E-15 | -0.38298 | 9.20E-18 | -0.43396 | 7.22E-23 | -0.23091 | 4.54E-07 |
| 0.46904  | -0.00413 | 0.92902  | -0.0722  | 0.1192   | 0.010851 | 0.81509  | 0.107742 | 0.01987  |
| 0.01412  | 0.031509 | 0.49697  | -0.09244 | 0.04588  | -0.12718 | 0.00592  | -0.13029 | 0.0048   |
| 0.11151  | -0.11122 | 0.01619  | -0.10811 | 0.01944  | -0.0675  | 0.14527  | -0.14457 | 0.00173  |
| 1.75E-12 | 0.0345   | 0.45701  | 0.135884 | 0.00326  | 0.16054  | 0.0005   | 0.044263 | 0.33986  |
| 0.20404  | 0.143657 | 0.00186  | -0.07534 | 0.10394  | 0.007762 | 0.86714  | -0.27116 | 2.58E-09 |
| 1.75E-07 | 0.447698 | 2.12E-24 | 0.149949 | 0.00115  | 0.293168 | 1.04E-10 | 0.359426 | 1.09E-15 |
| 0.00019  | 0.105881 | 0.02211  | 0.075679 | 0.10238  | 0.149276 | 0.00121  | -0.03939 | 0.39572  |
| 3.40E-09 | 0.087172 | 0.05979  | 0.131927 | 0.00429  | 0.20947  | 4.99E-06 | 0.059346 | 0.20049  |
| 0.04188  | 0.119062 | 0.01002  | -0.05565 | 0.23003  | 0.063355 | 0.17169  | -0.00053 | 0.99082  |
| 0.85903  | -0.14468 | 0.00172  | -0.10198 | 0.02756  | -0.03546 | 0.44453  | 0.030707 | 0.508    |
| 0.40357  | -0.00893 | 0.84734  | 0.079347 | 0.08675  | 0.045843 | 0.32289  | 0.082859 | 0.07364  |
| 0.27822  | -0.12011 | 0.00937  | -0.05434 | 0.24116  | -0.0961  | 0.03789  | 0.081721 | 0.07769  |
| 1.12E-06 | 0.042743 | 0.35673  | 0.044714 | 0.33496  | 0.089846 | 0.05234  | 0.295322 | 7.48E-11 |
| 3.09E-06 | 0.10701  | 0.02073  | 0.114183 | 0.01355  | 0.159152 | 0.00056  | 0.33026  | 2.40E-13 |
| 1.31E-20 | 0.360531 | 8.82E-16 | 0.357579 | 1.56E-15 | 0.419374 | 2.57E-21 | 0.245237 | 7.98E-08 |
| 5.82E-08 | -0.19556 | 2.08E-05 | 0.143419 | 0.00189  | 0.109707 | 0.01771  | 0.141416 | 0.00219  |
| 0.00783  | -0.20259 | 1.02E-05 | -0.04876 | 0.293    | -0.14288 | 0.00197  | -0.05406 | 0.24364  |
| 3.71E-08 | 0.371437 | 1.00E-16 | 0.42973  | 2.07E-22 | 0.405836 | 6.07E-20 | 0.12789  | 0.00565  |
| 0.23056  | 0.058497 | 0.20701  | 0.106681 | 0.02112  | 0.104006 | 0.0246   | -0.07152 | 0.12272  |
| 0.3865   | -0.08093 | 0.08064  | -0.16405 | 0.00037  | -0.08019 | 0.08345  | 0.22957  | 5.31E-07 |
| 0.16965  | 0.036784 | 0.42775  | 0.144434 | 0.00175  | 0.141143 | 0.00223  | -0.089   | 0.0546   |
| 0.1007   | -0.07382 | 0.11111  | -0.04393 | 0.34352  | -0.10696 | 0.02079  | -0.20495 | 8.02E-06 |
| 0.01376  | 0.022397 | 0.62927  | -0.21968 | 1.64E-06 | -0.10149 | 0.0283   | 0.021393 | 0.64472  |
| 0.001    | 0.20314  | 9.67E-06 | 0.157656 | 0.00063  | 0.192772 | 2.74E-05 | -0.09238 | 0.04601  |
| 0.04723  | -0.17526 | 0.00014  | -0.2166  | 2.31E-06 | -0.07094 | 0.12581  | -0.15876 | 0.00057  |
| 0.03415  | 0.121914 | 0.00836  | -0.10625 | 0.02166  | -0.06439 | 0.16481  | -0.22334 | 1.09E-06 |
| 1.63E-08 | -0.11849 | 0.01038  | 0.009511 | 0.83759  | 0.075084 | 0.10512  | 0.120381 | 0.00922  |
| 0.87375  | -0.00825 | 0.85888  | -0.02533 | 0.58511  | -0.01192 | 0.79719  | 0.033281 | 0.47308  |
| 0.08248  | -0.06703 | 0.14813  | -0.00904 | 0.84557  | 0.027983 | 0.54636  | 0.157941 | 0.00061  |
| 6.80E-06 | -0.09705 | 0.03603  | 0.033185 | 0.47436  | 0.083292 | 0.07214  | 0.186368 | 5.07E-05 |
| 0.00244  | 0.136162 | 0.00319  | 0.131362 | 0.00446  | 0.181802 | 7.78E-05 | -0.09136 | 0.04847  |
| 8.94E-12 | -0.05532 | 0.23276  | 0.238918 | 1.74E-07 | 0.24453  | 8.72E-08 | 0.118941 | 0.01009  |
| 0.50975  | 0.102323 | 0.02703  | 0.148899 | 0.00125  | 0.056433 | 0.22352  | -0.12115 | 0.00878  |

|          |          |          |          |          |          |          |          |          |
|----------|----------|----------|----------|----------|----------|----------|----------|----------|
| 3.37E-05 | -0.2234  | 1.08E-06 | 0.04428  | 0.33968  | 0.05171  | 0.26476  | -0.01557 | 0.73722  |
| 3.35E-22 | 0.15348  | 0.00088  | 0.203468 | 9.35E-06 | 0.35629  | 2.01E-15 | 0.139837 | 0.00246  |
| 1.28E-05 | -0.12145 | 0.00861  | -0.18299 | 6.96E-05 | -0.21089 | 4.29E-06 | 0.107014 | 0.02072  |
| 0.00456  | 0.275737 | 1.36E-09 | 0.142992 | 0.00195  | 0.227713 | 6.59E-07 | -0.06715 | 0.14735  |
| 0.07462  | -0.06163 | 0.18368  | 0.046841 | 0.31246  | 0.029763 | 0.52113  | 0.017122 | 0.7121   |
| 0.17646  | -0.0528  | 0.25478  | -0.0309  | 0.50535  | -0.02212 | 0.63351  | -0.0039  | 0.93307  |
| 0.03056  | 0.255136 | 2.25E-08 | 0.23797  | 1.95E-07 | 0.228233 | 6.20E-07 | 0.03652  | 0.43108  |
| 0.01485  | 0.077248 | 0.09544  | 0.006069 | 0.89592  | -0.02362 | 0.61062  | 0.155754 | 0.00073  |
| 0.2643   | -0.12334 | 0.00762  | -0.13067 | 0.00468  | -0.1311  | 0.00454  | -0.08238 | 0.07534  |
| 0.01732  | -0.07608 | 0.10058  | -0.08979 | 0.0525   | -0.0996  | 0.0314   | -0.06044 | 0.1923   |
| 0.25867  | 0.145624 | 0.0016   | 0.21526  | 2.67E-06 | 0.136422 | 0.00314  | 0.001933 | 0.96677  |
| 0.00068  | 0.26311  | 7.80E-09 | -0.0361  | 0.43641  | 0.113959 | 0.01374  | -0.07123 | 0.12425  |
| 0.46471  | -0.26984 | 3.11E-09 | -0.08817 | 0.05691  | -0.09659 | 0.03693  | 0.049152 | 0.28915  |
| 0.28283  | 0.035899 | 0.43895  | 0.094549 | 0.04112  | 0.072401 | 0.11818  | -0.02651 | 0.56769  |
| 0.0016   | -0.07178 | 0.12135  | -0.1856  | 5.46E-05 | -0.1675  | 0.00028  | 0.072375 | 0.11831  |
| 0.01707  | -0.02382 | 0.60767  | -0.02242 | 0.62896  | -0.07599 | 0.10098  | 0.083204 | 0.07244  |
| 0.36673  | 0.033963 | 0.46405  | 0.004993 | 0.9143   | 0.005502 | 0.9056   | -0.22338 | 1.08E-06 |
| 0.63346  | 0.092514 | 0.0457   | 0.074831 | 0.1063   | 0.07804  | 0.09208  | 0.062451 | 0.17789  |
| 0.71175  | -0.04863 | 0.29431  | -0.05031 | 0.2779   | -0.04649 | 0.31608  | -0.0486  | 0.29461  |
| 0.57722  | -0.21879 | 1.81E-06 | -0.13067 | 0.00468  | -0.1335  | 0.00385  | -0.11202 | 0.01544  |
| 0.00227  | -0.05529 | 0.23308  | -0.12372 | 0.00743  | 0.006121 | 0.89505  | -0.0906  | 0.05039  |
| 0.96077  | -0.20317 | 9.65E-06 | -0.07044 | 0.1285   | -0.09062 | 0.05033  | -0.08227 | 0.07572  |
| 0.60064  | -0.34892 | 8.14E-15 | -0.10401 | 0.0246   | -0.13415 | 0.00368  | -0.03885 | 0.40228  |
| 0.01367  | -0.14499 | 0.00168  | -0.11659 | 0.01169  | -0.12644 | 0.00622  | -0.18419 | 6.23E-05 |
| 0.06169  | 0.060759 | 0.18996  | 0.07818  | 0.0915   | 0.073744 | 0.11149  | -0.08305 | 0.07297  |
| 4.55E-06 | 0.007438 | 0.87264  | 0.172218 | 0.00018  | 0.17851  | 0.00011  | 0.306095 | 1.38E-11 |
| 0.00886  | -0.00309 | 0.94699  | 0.168846 | 0.00025  | 0.15411  | 0.00083  | 0.008506 | 0.85453  |
| 0.49986  | 0.096913 | 0.03629  | -0.03849 | 0.40665  | -0.0286  | 0.5376   | -0.04768 | 0.30387  |
| 0.60899  | -0.00961 | 0.83587  | -0.02426 | 0.60106  | 0.005024 | 0.91377  | -0.08142 | 0.07881  |
| 0.14279  | -0.11631 | 0.0119   | -0.14196 | 0.0021   | -0.13918 | 0.00258  | -0.12358 | 0.0075   |
| 0.0078   | -0.17358 | 0.00016  | -0.13682 | 0.00305  | -0.14849 | 0.00129  | 0.008773 | 0.85003  |
| 0.01164  | 0.008606 | 0.85285  | -0.00692 | 0.88145  | -0.04477 | 0.33435  | -0.16539 | 0.00033  |
| 0.48838  | 0.097741 | 0.03472  | 0.197793 | 1.67E-05 | 0.140105 | 0.00241  | -0.21962 | 1.65E-06 |
| 0.97664  | -0.02442 | 0.59867  | -0.25321 | 2.89E-08 | -0.13822 | 0.00276  | -0.08007 | 0.08389  |
| 0.01063  | -0.2587  | 1.41E-08 | -0.25772 | 1.60E-08 | -0.20493 | 8.04E-06 | 0.094159 | 0.04197  |
| 0.00038  | -0.03814 | 0.41096  | 0.040829 | 0.37868  | 0.095815 | 0.03847  | 0.138517 | 0.0027   |
| 4.55E-10 | 0.06909  | 0.136    | 0.207336 | 6.25E-06 | 0.269574 | 3.22E-09 | 0.094693 | 0.04081  |
| 4.74E-12 | 0.120534 | 0.00913  | -0.09689 | 0.03633  | 0.133695 | 0.0038   | 0.307106 | 1.17E-11 |
| 1.12E-05 | 0.07152  | 0.12273  | -0.00161 | 0.97226  | -0.06111 | 0.18741  | 0.006786 | 0.88372  |
| 0.01006  | -0.07831 | 0.09096  | -0.08434 | 0.06862  | -0.0391  | 0.3992   | 0.413398 | 1.06E-20 |
| 2.08E-08 | -0.05537 | 0.23239  | -0.30191 | 2.68E-11 | -0.23359 | 3.30E-07 | -0.0261  | 0.57367  |
| 2.11E-05 | 0.357553 | 1.57E-15 | 0.207908 | 5.88E-06 | 0.276608 | 1.20E-09 | -0.06855 | 0.13909  |
| 0.05073  | 0.143042 | 0.00194  | 0.079552 | 0.08593  | 0.097802 | 0.03461  | 0.10099  | 0.0291   |
| 8.27E-06 | 0.10911  | 0.01834  | -0.21667 | 2.29E-06 | -0.16113 | 0.00047  | 0.118527 | 0.01036  |
| 0.49783  | 0.056926 | 0.21949  | 0.105965 | 0.02201  | 0.081984 | 0.07674  | 0.029222 | 0.52874  |

|          |          |          |          |          |          |          |          |          |
|----------|----------|----------|----------|----------|----------|----------|----------|----------|
| 0.05921  | -0.14241 | 0.00204  | -0.03322 | 0.47392  | 0.007571 | 0.87039  | 0.040321 | 0.38465  |
| 0.0021   | 0.017454 | 0.70676  | 0.023155 | 0.6177   | 0.10964  | 0.01778  | -0.16611 | 0.00031  |
| 0.73903  | 0.207714 | 6.01E-06 | 0.257234 | 1.71E-08 | 0.191678 | 3.05E-05 | 0.006951 | 0.88092  |
| 1.34E-05 | -0.0053  | 0.90913  | 0.142018 | 0.0021   | 0.160926 | 0.00048  | -0.07148 | 0.12293  |
| 0.48171  | -0.21068 | 4.39E-06 | -0.0697  | 0.13257  | -0.09438 | 0.04148  | -0.06725 | 0.14678  |
| 2.48E-06 | -0.21652 | 2.33E-06 | -0.26313 | 7.79E-09 | -0.29652 | 6.22E-11 | -0.30165 | 2.79E-11 |
| 0.08296  | -0.01512 | 0.74454  | -0.1407  | 0.00231  | 0.016334 | 0.72479  | 0.013469 | 0.77159  |
| 0.00028  | -0.05882 | 0.20452  | 0.148038 | 0.00134  | 0.073728 | 0.11157  | 0.071354 | 0.12361  |
| 0.87992  | -0.17734 | 0.00012  | -0.0099  | 0.8311   | -0.08822 | 0.05678  | -0.01051 | 0.82083  |
| 0.12392  | -0.07864 | 0.08961  | 0.176228 | 0.00013  | 0.048953 | 0.29111  | -0.10165 | 0.02806  |
| 0.39373  | -0.04263 | 0.35796  | 0.024849 | 0.59221  | -0.03957 | 0.39361  | 0.003023 | 0.94805  |
| 0.0839   | -0.11262 | 0.01489  | -0.05287 | 0.25415  | -0.1034  | 0.02545  | -0.03063 | 0.50901  |
| 0.32787  | -0.07914 | 0.08756  | 0.02395  | 0.60568  | 0.019011 | 0.68197  | -0.02927 | 0.52807  |
| 0.75069  | -0.06414 | 0.16642  | 0.145376 | 0.00163  | 0.004486 | 0.92297  | -0.05681 | 0.22043  |
| 0.92744  | -0.18744 | 4.58E-05 | 0.000394 | 0.99323  | -0.08356 | 0.07121  | -0.05913 | 0.2021   |
| 0.85488  | -0.21028 | 4.58E-06 | -0.1807  | 8.61E-05 | -0.14557 | 0.00161  | -0.00323 | 0.94456  |
| 0.57294  | -0.10594 | 0.02204  | -0.2195  | 1.67E-06 | -0.14023 | 0.00239  | -0.11174 | 0.0157   |
| 0.00027  | -0.33202 | 1.76E-13 | -0.28204 | 5.47E-10 | -0.29911 | 4.16E-11 | -0.10759 | 0.02004  |
| 0.13936  | 0.262902 | 8.03E-09 | -0.03334 | 0.47226  | 0.114377 | 0.01339  | -0.22995 | 5.08E-07 |
| 0.01967  | -0.05845 | 0.20738  | -0.09331 | 0.04386  | -0.12414 | 0.00723  | -0.23209 | 3.95E-07 |
| 0.83806  | -0.01182 | 0.79887  | 0.020479 | 0.65892  | 0.008123 | 0.86102  | -0.06336 | 0.17168  |
| 0.65294  | -0.12608 | 0.00637  | -0.02653 | 0.56742  | -0.0531  | 0.25211  | 0.023954 | 0.60561  |
| 5.83E-08 | 0.452388 | 6.14E-25 | 0.261406 | 9.82E-09 | 0.352201 | 4.38E-15 | 0.272644 | 2.10E-09 |
| 0.22413  | -0.14815 | 0.00132  | -0.14185 | 0.00212  | -0.14007 | 0.00242  | -0.34933 | 7.53E-15 |
| 0.35164  | -0.12006 | 0.0094   | -0.16614 | 0.00031  | -0.12866 | 0.00536  | -0.05892 | 0.20377  |
| 4.98E-09 | 0.30624  | 1.35E-11 | 0.31924  | 1.59E-12 | 0.337079 | 7.16E-14 | 0.160833 | 0.00048  |
| 0.5694   | -0.05779 | 0.21257  | -0.01275 | 0.78341  | -0.02295 | 0.62084  | -0.03369 | 0.4676   |
| 0.16284  | -0.04547 | 0.32688  | -0.02217 | 0.63268  | 0.019433 | 0.67532  | 0.022921 | 0.62126  |
| 9.82E-07 | -0.02001 | 0.66626  | 0.149646 | 0.00118  | 0.165045 | 0.00034  | 0.453455 | 4.62E-25 |
| 3.32E-06 | -0.15757 | 0.00063  | 0.165498 | 0.00033  | 0.122819 | 0.00788  | 0.051843 | 0.26353  |
| 0.00063  | 0.036663 | 0.42928  | 0.133303 | 0.0039   | 0.160143 | 0.00051  | 0.18247  | 7.31E-05 |
| 0.84382  | -0.00296 | 0.94912  | -0.06768 | 0.14419  | -0.04991 | 0.28175  | 0.093445 | 0.04355  |
| 0.03208  | 0.075391 | 0.1037   | -0.06648 | 0.15144  | -0.04576 | 0.32376  | -0.12625 | 0.0063   |
| 0.06933  | 0.001311 | 0.97746  | 0.011341 | 0.80689  | 0.052108 | 0.2611   | -0.02747 | 0.5537   |
| 0.04389  | 0.118335 | 0.01049  | 0.092024 | 0.04686  | 0.100402 | 0.03005  | -0.18312 | 6.88E-05 |
| 5.06E-09 | -0.0081  | 0.86139  | 0.165948 | 0.00032  | 0.18031  | 8.92E-05 | -0.10052 | 0.02986  |
| 0.00532  | 0.151973 | 0.00099  | 0.227677 | 6.61E-07 | 0.184416 | 6.10E-05 | 0.142212 | 0.00207  |
| 0.00882  | 0.077711 | 0.09347  | 0.11301  | 0.01455  | 0.098272 | 0.03374  | 0.139119 | 0.00259  |
| 0.27584  | 0.049381 | 0.28691  | 0.041789 | 0.36756  | 0.038276 | 0.40923  | 0.010349 | 0.8235   |
| 0.31047  | 0.11673  | 0.01159  | 0.144324 | 0.00177  | 0.098879 | 0.03266  | 0.063693 | 0.1694   |
| 0.45782  | -0.14121 | 0.00222  | -0.04545 | 0.32703  | -0.03035 | 0.51295  | 0.001843 | 0.96831  |
| 0.01765  | 0.124344 | 0.00714  | 0.095407 | 0.03931  | 0.128955 | 0.00526  | -0.04778 | 0.30281  |
| 5.43E-06 | 0.028337 | 0.5413   | 0.11305  | 0.01451  | 0.145564 | 0.00161  | 0.102693 | 0.02648  |
| 6.94E-14 | 0.040095 | 0.38732  | 0.153808 | 0.00085  | 0.177636 | 0.00011  | 0.07199  | 0.12029  |
| 0.30772  | 0.081416 | 0.07881  | 0.047706 | 0.30359  | 0.074438 | 0.10816  | 0.136099 | 0.00321  |



|          |          |          |          |          |          |          |          |          |
|----------|----------|----------|----------|----------|----------|----------|----------|----------|
| 3.51E-05 | -0.1574  | 0.00064  | 0.02112  | 0.64894  | 0.053697 | 0.24682  | 0.059766 | 0.19732  |
| 0.02006  | -0.12658 | 0.00616  | 0.003758 | 0.93544  | 0.012595 | 0.78604  | 0.151592 | 0.00102  |
| 6.69E-11 | -0.19422 | 2.38E-05 | -0.0483  | 0.29758  | 0.060171 | 0.19429  | 0.026437 | 0.56876  |
| 0.06043  | 0.010796 | 0.816    | -0.08809 | 0.05714  | -0.0104  | 0.82257  | 0.362038 | 6.56E-16 |
| 0.27761  | -0.05244 | 0.25805  | 0.055064 | 0.23497  | 0.027959 | 0.54671  | -0.009   | 0.84616  |
| 0.91914  | -0.21964 | 1.65E-06 | -0.09479 | 0.04061  | -0.11071 | 0.01669  | 0.024282 | 0.60069  |
| 0.67374  | -0.00606 | 0.89605  | -0.04996 | 0.2813   | -0.04173 | 0.36823  | 0.02296  | 0.62067  |
| 0.68707  | -0.01977 | 0.66999  | -0.05334 | 0.24999  | -0.0469  | 0.31182  | 0.026898 | 0.56204  |
| 0.80116  | -0.13455 | 0.00358  | -0.02981 | 0.52049  | -0.03173 | 0.49399  | -0.08615 | 0.06287  |
| 0.02326  | -0.18787 | 4.40E-05 | -0.28795 | 2.29E-10 | -0.23106 | 4.46E-07 | 0.016422 | 0.72337  |
| 0.33996  | -0.0874  | 0.05914  | -0.06121 | 0.18671  | -0.05307 | 0.2524   | 0.031729 | 0.49398  |
| 0.72075  | -0.07    | 0.13093  | -0.05673 | 0.22106  | -0.05968 | 0.19794  | -0.06525 | 0.15919  |
| 9.89E-12 | -0.17225 | 0.00018  | -0.25948 | 1.27E-08 | -0.29983 | 3.72E-11 | -0.25533 | 2.19E-08 |
| 3.32E-13 | 0.124937 | 0.00687  | 0.197172 | 1.77E-05 | 0.242006 | 1.19E-07 | -0.04737 | 0.30703  |
| 0.00159  | -0.15463 | 0.0008   | -0.17518 | 0.00014  | -0.15607 | 0.00071  | -0.19528 | 2.14E-05 |
| 2.46E-08 | 0.1272   | 0.00591  | 0.022489 | 0.62786  | 0.172818 | 0.00017  | -0.20382 | 9.02E-06 |
| 9.88E-05 | 0.135285 | 0.0034   | 0.059937 | 0.19603  | 0.137681 | 0.00287  | 0.256646 | 1.85E-08 |
| 0.16144  | -0.08681 | 0.06086  | -0.13639 | 0.00314  | -0.11038 | 0.01702  | -0.10587 | 0.02212  |
| 1.26E-07 | -0.04335 | 0.34992  | 0.219324 | 1.71E-06 | 0.204971 | 8.00E-06 | -0.14481 | 0.0017   |
| 0.01806  | -0.15629 | 0.0007   | -0.07966 | 0.08551  | -0.12491 | 0.00688  | -0.06635 | 0.15224  |
| 0.00034  | -0.03422 | 0.46067  | 0.114989 | 0.0129   | 0.124459 | 0.00708  | -0.13108 | 0.00455  |
| 0.46033  | -0.25685 | 1.80E-08 | 0.009228 | 0.84235  | -0.10974 | 0.01768  | 0.204054 | 8.80E-06 |
| 0.02652  | -0.00656 | 0.88751  | 0.071075 | 0.12509  | 0.068185 | 0.14122  | 0.025452 | 0.58326  |
| 0.38765  | 0.06284  | 0.1752   | 0.049796 | 0.28288  | 0.060591 | 0.19119  | 0.059264 | 0.20111  |
| 0.00051  | 0.172199 | 0.00018  | -0.06594 | 0.15484  | 0.095372 | 0.03938  | 0.43721  | 3.18E-23 |
| 2.18E-12 | -0.0293  | 0.52761  | 0.088882 | 0.05493  | 0.15422  | 0.00083  | 0.233592 | 3.30E-07 |
| 0.63592  | 0.201938 | 1.09E-05 | 0.074779 | 0.10655  | 0.08184  | 0.07726  | 0.519579 | 1.20E-33 |
| 6.67E-05 | -0.19289 | 2.71E-05 | -0.21731 | 2.13E-06 | -0.21296 | 3.43E-06 | -0.06484 | 0.16185  |
| 3.22E-08 | 0.154851 | 0.00079  | 0.111037 | 0.01637  | 0.19259  | 2.79E-05 | 0.052094 | 0.26123  |
| 0.38376  | 0.189875 | 3.63E-05 | 0.033211 | 0.47401  | 0.050496 | 0.27615  | 0.320133 | 1.37E-12 |
| 0.33543  | -0.0498  | 0.28285  | 0.04119  | 0.37448  | 0.011609 | 0.80242  | -0.04083 | 0.37863  |
| 0.00012  | 0.011302 | 0.80755  | 0.247056 | 6.35E-08 | 0.198417 | 1.56E-05 | 0.104589 | 0.0238   |
| 0.00933  | -0.18221 | 7.49E-05 | 0.069145 | 0.13569  | 0.047629 | 0.30438  | -0.1198  | 0.00956  |
| 1.51E-14 | 0.286543 | 2.82E-10 | 0.214286 | 2.97E-06 | 0.368672 | 1.76E-16 | 0.112059 | 0.0154   |
| 0.1474   | 0.155307 | 0.00076  | -0.0891  | 0.05434  | 0.015694 | 0.73516  | 0.185158 | 5.69E-05 |
| 5.72E-16 | 0.127327 | 0.00586  | 0.217659 | 2.05E-06 | 0.279912 | 7.45E-10 | -0.04956 | 0.28517  |
| 0.00018  | 0.096205 | 0.03768  | -0.04708 | 0.31004  | -0.0467  | 0.31387  | 0.161539 | 0.00046  |
| 1.44E-19 | 0.290637 | 1.53E-10 | 0.252643 | 3.11E-08 | 0.38555  | 5.33E-18 | 0.181791 | 7.78E-05 |
| 6.09E-07 | 0.14753  | 0.00139  | 0.091932 | 0.04708  | 0.157188 | 0.00065  | 0.211935 | 3.83E-06 |
| 0.00142  | -0.02083 | 0.65338  | 0.009377 | 0.83984  | 0.060423 | 0.19242  | 0.004625 | 0.9206   |
| 0.19077  | -0.15754 | 0.00063  | -0.09281 | 0.04501  | -0.09908 | 0.0323   | -0.09265 | 0.04537  |
| 0.68839  | -0.1922  | 2.90E-05 | -0.04346 | 0.34873  | -0.05036 | 0.27746  | -0.02346 | 0.61313  |
| 0.18789  | -0.10875 | 0.01873  | 0.003312 | 0.9431   | 0.015043 | 0.74577  | -0.04219 | 0.363    |
| 1.53E-05 | 0.313798 | 3.95E-12 | 0.201772 | 1.11E-05 | 0.281919 | 5.57E-10 | 0.014727 | 0.75093  |
| 0.12568  | -0.41952 | 2.48E-21 | -0.24015 | 1.50E-07 | -0.24449 | 8.76E-08 | -0.03334 | 0.47225  |

|          |          |          |          |          |          |          |          |          |
|----------|----------|----------|----------|----------|----------|----------|----------|----------|
| 0.07305  | -0.09532 | 0.0395   | -0.09074 | 0.05003  | -0.12085 | 0.00894  | -0.16275 | 0.00041  |
| 0.39558  | -0.16458 | 0.00036  | -0.03549 | 0.44413  | -0.05573 | 0.22933  | -0.05978 | 0.19718  |
| 0.0453   | -0.10804 | 0.01953  | -0.03971 | 0.39192  | -0.02424 | 0.60135  | -0.05487 | 0.23664  |
| 0.08167  | -0.33548 | 9.53E-14 | -0.21581 | 2.52E-06 | -0.19587 | 2.02E-05 | -0.20165 | 1.13E-05 |
| 0.53831  | -0.19928 | 1.43E-05 | -0.07207 | 0.11987  | -0.03525 | 0.4473   | 0.006798 | 0.88352  |
| 0.93664  | 0.032392 | 0.48499  | 0.025454 | 0.58322  | 0.012318 | 0.79063  | -0.08148 | 0.07859  |
| 1.51E-05 | -0.02091 | 0.65226  | -0.17413 | 0.00016  | -0.14968 | 0.00118  | 0.01131  | 0.80742  |
| 0.70058  | -0.07156 | 0.12253  | -0.04795 | 0.30117  | -0.05664 | 0.22178  | -0.08436 | 0.06855  |
| 0.19984  | -0.18439 | 6.11E-05 | -0.08544 | 0.06506  | -0.10017 | 0.03043  | -0.06848 | 0.13948  |
| 0.23404  | -0.06578 | 0.15583  | 0.009505 | 0.83768  | 0.023986 | 0.60514  | 0.033692 | 0.46762  |
| 0.05466  | -0.01274 | 0.78359  | 0.046666 | 0.31427  | 0.088634 | 0.05562  | 0.037675 | 0.41663  |
| 0.05902  | -0.14173 | 0.00214  | 0.036342 | 0.43332  | 0.042288 | 0.36186  | -0.05804 | 0.21062  |
| 2.17E-15 | 0.453624 | 4.41E-25 | 0.176575 | 0.00013  | 0.322585 | 9.04E-13 | 0.411714 | 1.56E-20 |
| 7.39E-10 | -0.01129 | 0.80767  | 0.231617 | 4.17E-07 | 0.222092 | 1.25E-06 | -0.05425 | 0.24194  |
| 0.00022  | 0.082352 | 0.07542  | 0.104323 | 0.02416  | 0.182602 | 7.22E-05 | 0.219305 | 1.71E-06 |
| 7.52E-06 | -0.00074 | 0.9872   | -0.07856 | 0.08995  | 0.032817 | 0.47928  | 0.301642 | 2.80E-11 |
| 0.28326  | -0.32609 | 4.96E-13 | -0.13714 | 0.00298  | -0.10154 | 0.02823  | -0.1623  | 0.00043  |
| 2.86E-05 | -0.28654 | 2.82E-10 | -0.20961 | 4.92E-06 | -0.26832 | 3.83E-09 | -0.30062 | 3.29E-11 |
| 4.33E-05 | -0.03654 | 0.4308   | 0.106524 | 0.02131  | 0.119593 | 0.00969  | 0.272124 | 2.26E-09 |
| 0.17584  | 0.078396 | 0.09061  | -0.11671 | 0.0116   | -0.06202 | 0.18088  | 0.016534 | 0.72156  |
| 0.00023  | -0.0484  | 0.29663  | -0.18423 | 6.21E-05 | -0.17756 | 0.00011  | 0.245765 | 7.47E-08 |
| 0.53024  | -0.18182 | 7.76E-05 | -0.05374 | 0.24643  | -0.05632 | 0.22448  | -0.18534 | 5.59E-05 |
| 0.48467  | -0.03234 | 0.48571  | -0.0682  | 0.14112  | 0.004726 | 0.91887  | -0.03359 | 0.46902  |
| 0.01057  | -0.01277 | 0.78322  | 0.097789 | 0.03463  | 0.081696 | 0.07779  | 0.043572 | 0.34746  |
| 0.89112  | -0.16144 | 0.00046  | -0.10803 | 0.01954  | -0.11678 | 0.01155  | 0.037357 | 0.42058  |
| 3.73E-09 | 0.266985 | 4.60E-09 | 0.210137 | 4.65E-06 | 0.299734 | 3.78E-11 | 0.086249 | 0.06256  |
| 1.39E-11 | 0.129575 | 0.00504  | 0.307039 | 1.19E-11 | 0.326013 | 5.02E-13 | -0.05226 | 0.25967  |
| 0.00077  | 0.352199 | 4.39E-15 | 0.232979 | 3.55E-07 | 0.230714 | 4.64E-07 | -0.24005 | 1.52E-07 |
| 0.12423  | -0.10173 | 0.02794  | -0.02791 | 0.54743  | -0.05507 | 0.23493  | -0.20885 | 5.33E-06 |
| 5.50E-07 | -0.08254 | 0.07474  | 0.053496 | 0.24858  | 0.116621 | 0.01167  | -0.08548 | 0.06494  |
| 5.71E-10 | -0.19919 | 1.45E-05 | -0.19205 | 2.94E-05 | -0.27475 | 1.56E-09 | -0.15359 | 0.00087  |
| 5.79E-11 | 0.446484 | 2.92E-24 | 0.251222 | 3.74E-08 | 0.34478  | 1.76E-14 | 0.182693 | 7.16E-05 |
| 0.34096  | 0.081262 | 0.07938  | 0.135134 | 0.00343  | 0.101487 | 0.02831  | 0.045079 | 0.33103  |
| 0.14749  | -0.08624 | 0.06259  | -0.20402 | 8.83E-06 | -0.13144 | 0.00444  | -0.02907 | 0.53083  |
| 0.86677  | -0.00669 | 0.88543  | -0.05396 | 0.24453  | -0.02227 | 0.63118  | -0.03689 | 0.4264   |
| 0.48345  | -0.03893 | 0.40125  | -0.05717 | 0.21749  | -0.03882 | 0.40259  | -0.22987 | 5.12E-07 |
| 3.27E-07 | -0.15076 | 0.00108  | -0.2374  | 2.09E-07 | -0.24337 | 1.01E-07 | -0.05169 | 0.26497  |
| 0.00878  | 0.024708 | 0.59432  | 0.158951 | 0.00057  | 0.104927 | 0.02335  | 0.025512 | 0.58237  |
| 0.30098  | -0.16164 | 0.00045  | -0.10222 | 0.02719  | -0.13021 | 0.00483  | -0.21928 | 1.72E-06 |
| 0.0013   | -0.13647 | 0.00313  | -0.18591 | 5.30E-05 | -0.18218 | 7.51E-05 | -0.03037 | 0.51264  |
| 6.14E-05 | -0.0409  | 0.37781  | 0.102429 | 0.02687  | 0.104392 | 0.02407  | 0.046233 | 0.31878  |
| 0.22185  | 0.023328 | 0.61508  | 0.01287  | 0.78148  | -0.00231 | 0.96024  | -0.11659 | 0.01169  |
| 0.00242  | -0.12431 | 0.00716  | 0.064305 | 0.16533  | 0.052312 | 0.25923  | 0.062874 | 0.17497  |
| 0.38713  | -0.2126  | 3.57E-06 | -0.08042 | 0.08255  | -0.07583 | 0.10171  | -0.12053 | 0.00913  |
| 0.12763  | -0.05924 | 0.20131  | 0.041726 | 0.36829  | 0.055784 | 0.2289   | 0.052364 | 0.25876  |

|          |          |          |          |          |          |          |          |          |
|----------|----------|----------|----------|----------|----------|----------|----------|----------|
| 5.13E-10 | -0.32567 | 5.33E-13 | -0.3243  | 6.74E-13 | -0.34611 | 1.37E-14 | -0.11932 | 0.00985  |
| 0.01015  | -0.0131  | 0.77767  | -0.02576 | 0.57868  | -0.0649  | 0.16144  | 0.414218 | 8.71E-21 |
| 0.09914  | -0.11976 | 0.00958  | -0.01418 | 0.75987  | 0.006019 | 0.89678  | -0.01218 | 0.79296  |
| 0.39751  | 0.099603 | 0.03139  | 0.083196 | 0.07247  | 0.043622 | 0.34691  | 0.012368 | 0.78981  |
| 0.11577  | 0.082796 | 0.07385  | 0.112415 | 0.01508  | 0.099776 | 0.0311   | 0.092354 | 0.04607  |
| 0.00347  | -0.24361 | 9.78E-08 | -0.19477 | 2.25E-05 | -0.19923 | 1.44E-05 | -0.38634 | 4.50E-18 |
| 0.18041  | -0.03509 | 0.44932  | 0.071831 | 0.12111  | -0.00899 | 0.84641  | 0.122455 | 0.00807  |
| 0.00026  | -0.10224 | 0.02715  | 0.093156 | 0.04421  | 0.080544 | 0.08208  | -0.02729 | 0.55637  |
| 0.35728  | 0.025561 | 0.58164  | 0.096308 | 0.03748  | 0.062981 | 0.17423  | 0.064952 | 0.16111  |
| 4.96E-05 | -0.12599 | 0.0064   | -0.02418 | 0.60222  | 0.057573 | 0.21429  | -0.16139 | 0.00046  |
| 3.48E-05 | 0.33609  | 8.55E-14 | 0.20742  | 6.20E-06 | 0.295284 | 7.53E-11 | 0.422239 | 1.29E-21 |
| 0.31883  | -0.01332 | 0.77406  | 0.04168  | 0.36882  | 0.054777 | 0.23742  | -0.05587 | 0.22819  |
| 0.01344  | -0.36062 | 8.66E-16 | -0.18262 | 7.21E-05 | -0.13379 | 0.00377  | -0.06783 | 0.14334  |
| 0.20809  | -0.13042 | 0.00476  | -0.11503 | 0.01286  | -0.1042  | 0.02432  | -0.21999 | 1.58E-06 |
| 3.01E-05 | 0.170467 | 0.00021  | 0.164884 | 0.00035  | 0.218112 | 1.95E-06 | 0.043282 | 0.35068  |
| 0.51931  | -0.02825 | 0.54259  | 0.022638 | 0.62558  | 0.011293 | 0.80769  | 0.060641 | 0.19082  |
| 0.00102  | 0.150108 | 0.00114  | 0.177942 | 0.00011  | 0.203472 | 9.35E-06 | 0.035752 | 0.44083  |
| 0.00868  | 0.047695 | 0.30371  | -0.03578 | 0.4405   | 0.073083 | 0.11475  | 0.071293 | 0.12393  |
| 3.96E-09 | -0.1275  | 0.00579  | -0.13962 | 0.0025   | 0.026181 | 0.57252  | 0.117671 | 0.01093  |
| 0.69981  | 0.209793 | 4.82E-06 | 0.116474 | 0.01177  | 0.095284 | 0.03956  | 0.248305 | 5.42E-08 |
| 8.13E-05 | -0.04063 | 0.38096  | 0.001418 | 0.97561  | 0.084406 | 0.06839  | 0.089145 | 0.05422  |
| 0.02133  | 0.237111 | 2.17E-07 | 0.180652 | 8.64E-05 | 0.178485 | 0.00011  | 0.402958 | 1.17E-19 |
| 0.79544  | -0.06133 | 0.1858   | 0.007688 | 0.86839  | -0.00838 | 0.85673  | 0.105391 | 0.02274  |
| 7.70E-07 | -0.13548 | 0.00335  | -0.04656 | 0.31535  | 0.007452 | 0.8724   | 0.043015 | 0.35367  |
| 0.77707  | 0.054615 | 0.23882  | 0.095791 | 0.03852  | 0.046716 | 0.31375  | 0.091278 | 0.04868  |
| 0.21085  | -0.15306 | 0.00091  | -0.03936 | 0.39614  | -0.0539  | 0.24502  | -0.25031 | 4.20E-08 |
| 0.34267  | -0.11524 | 0.0127   | 0.006647 | 0.88609  | -0.01786 | 0.70026  | 0.003906 | 0.93291  |
| 0.0788   | 0.04047  | 0.38289  | 0.089296 | 0.05381  | 0.077336 | 0.09507  | -0.03569 | 0.44163  |
| 0.10095  | -0.1229  | 0.00784  | -0.09972 | 0.0312   | -0.10689 | 0.02087  | 0.058563 | 0.2065   |
| 0.25122  | -0.0605  | 0.19184  | 0.000116 | 0.99801  | -0.03544 | 0.44482  | -0.19933 | 1.43E-05 |
| 0.65679  | -0.00345 | 0.94072  | -0.04902 | 0.29041  | -0.03514 | 0.44869  | -0.04565 | 0.32496  |
| 2.03E-13 | -0.20888 | 5.31E-06 | -0.23367 | 3.27E-07 | -0.3088  | 8.93E-12 | -0.1579  | 0.00062  |
| 2.28E-19 | 0.293723 | 9.56E-11 | 0.229022 | 5.66E-07 | 0.371915 | 9.12E-17 | 0.068668 | 0.13842  |
| 0.32379  | -0.03829 | 0.40901  | -0.06435 | 0.16503  | -0.0488  | 0.29267  | -0.15692 | 0.00067  |
| 0.06447  | 0.253566 | 2.76E-08 | 0.121555 | 0.00855  | 0.171953 | 0.00019  | 0.486691 | 3.82E-29 |
| 7.89E-10 | 0.005734 | 0.90164  | 0.093572 | 0.04327  | 0.178843 | 0.0001   | 0.44994  | 1.18E-24 |
| 0.01982  | 0.104526 | 0.02389  | -0.00892 | 0.84759  | 0.077335 | 0.09507  | 0.299725 | 3.78E-11 |
| 0.03605  | 0.097923 | 0.03438  | 0.073729 | 0.11157  | 0.097599 | 0.03499  | 0.347752 | 1.01E-14 |
| 0.02366  | -0.05204 | 0.26175  | -0.0851  | 0.06614  | -0.08909 | 0.05437  | -0.22732 | 6.89E-07 |
| 0.00032  | 0.122483 | 0.00805  | -0.00595 | 0.89794  | 0.09273  | 0.04519  | 0.46649  | 1.31E-26 |
| 0.08603  | -0.25151 | 3.60E-08 | -0.08207 | 0.07644  | -0.10364 | 0.0251   | 0.034325 | 0.4593   |
| 0.00044  | -0.01293 | 0.78042  | 0.20651  | 6.82E-06 | 0.132603 | 0.0041   | 0.228782 | 5.82E-07 |
| 0.11032  | -0.1677  | 0.00027  | -0.01543 | 0.73945  | -0.03483 | 0.45269  | 0.016513 | 0.72191  |
| 0.04925  | -0.06056 | 0.19138  | 0.037753 | 0.41568  | -0.00931 | 0.84105  | 0.104714 | 0.02363  |
| 0.07404  | -0.07802 | 0.09219  | -0.16253 | 0.00042  | -0.11022 | 0.01718  | 0.071722 | 0.12168  |

|          |          |          |          |          |          |          |          |          |
|----------|----------|----------|----------|----------|----------|----------|----------|----------|
| 0.52004  | 0.187391 | 4.60E-05 | 0.187855 | 4.41E-05 | 0.140215 | 0.00239  | 0.420515 | 1.95E-21 |
| 0.13184  | 0.147031 | 0.00144  | 0.006359 | 0.89099  | 0.037348 | 0.4207   | -0.08676 | 0.06103  |
| 0.27468  | 0.193106 | 2.65E-05 | 0.066609 | 0.15067  | 0.094642 | 0.04092  | 0.199994 | 1.33E-05 |
| 0.45117  | -0.0856  | 0.06456  | -0.092   | 0.04692  | -0.07309 | 0.1147   | -0.05224 | 0.25991  |
| 1.35E-05 | 0.14227  | 0.00206  | 0.141837 | 0.00212  | 0.221762 | 1.30E-06 | 0.057567 | 0.21433  |
| 0.95419  | 0.077557 | 0.09412  | 0.055132 | 0.23439  | 0.030273 | 0.51401  | -0.0571  | 0.21812  |
| 0.52446  | -0.08044 | 0.08247  | -0.07022 | 0.1297   | -0.05179 | 0.26406  | -0.41328 | 1.09E-20 |
| 0.00244  | -0.05169 | 0.26498  | 0.07527  | 0.10426  | 0.064635 | 0.16317  | -0.00167 | 0.97123  |
| 0.02895  | -0.0509  | 0.27229  | -0.16261 | 0.00042  | -0.14044 | 0.00235  | -0.30494 | 1.66E-11 |
| 0.50346  | 0.115473 | 0.01252  | 0.174119 | 0.00016  | 0.144114 | 0.00179  | -0.30589 | 1.43E-11 |
| 0.00685  | -0.22722 | 6.97E-07 | 0.013452 | 0.77187  | -0.01348 | 0.77137  | 0.083313 | 0.07206  |
| 0.03024  | 0.151904 | 0.00099  | 0.13798  | 0.00281  | 0.150451 | 0.00111  | 0.03893  | 0.40127  |
| 0.23545  | 0.012995 | 0.77942  | 0.019043 | 0.68146  | 0.036909 | 0.42618  | 0.01155  | 0.80342  |
| 0.07689  | 0.000269 | 0.99537  | 0.061854 | 0.18208  | 0.090732 | 0.05005  | 0.034287 | 0.4598   |
| 0.09293  | -0.08792 | 0.05764  | -0.144   | 0.00181  | -0.12157 | 0.00854  | 0.026369 | 0.56975  |
| 0.34252  | -0.01189 | 0.79772  | 0.071022 | 0.12537  | 0.077832 | 0.09296  | 0.028288 | 0.542    |
| 0.3309   | 0.004688 | 0.91951  | -0.10799 | 0.01958  | -0.06634 | 0.15234  | -0.11247 | 0.01503  |
| 0.01907  | -0.12613 | 0.00635  | -0.14178 | 0.00213  | -0.20321 | 9.60E-06 | -0.11044 | 0.01696  |
| 0.00541  | -0.10633 | 0.02156  | -0.10942 | 0.01801  | -0.12274 | 0.00792  | -0.04981 | 0.28278  |
| 0.02527  | 0.439757 | 1.66E-23 | 0.212801 | 3.49E-06 | 0.265716 | 5.48E-09 | 0.19199  | 2.96E-05 |
| 6.14E-05 | -0.15499 | 0.00078  | -0.24697 | 6.42E-08 | -0.23856 | 1.82E-07 | -0.16278 | 0.00041  |
| 0.91635  | 0.118608 | 0.01031  | 0.111978 | 0.01548  | 0.093827 | 0.0427   | 0.011858 | 0.79829  |
| 0.33665  | 0.126772 | 0.00608  | 0.011829 | 0.79876  | 0.065925 | 0.15492  | 0.199368 | 1.42E-05 |
| 0.2589   | 0.020392 | 0.66027  | 0.028264 | 0.54234  | 0.042992 | 0.35393  | -0.10498 | 0.02328  |
| 0.01502  | 0.011703 | 0.80085  | 0.113963 | 0.01373  | 0.131077 | 0.00455  | -0.14125 | 0.00222  |
| 0.19218  | -0.15605 | 0.00071  | -0.12256 | 0.00802  | -0.11373 | 0.01393  | -0.32556 | 5.44E-13 |
| 0.4039   | 0.117436 | 0.01109  | -0.06237 | 0.17848  | -0.02092 | 0.65205  | 0.095025 | 0.04011  |
| 0.04951  | -0.03409 | 0.46236  | 0.052551 | 0.25706  | 0.040095 | 0.38732  | 0.220434 | 1.51E-06 |
| 6.41E-05 | -0.08472 | 0.06736  | 0.116038 | 0.01209  | 0.139362 | 0.00254  | -0.01071 | 0.81747  |
| 0.46264  | 0.020986 | 0.65102  | -0.02415 | 0.60263  | 0.014694 | 0.75146  | 0.060086 | 0.19492  |
| 1.09E-15 | 0.375939 | 4.00E-17 | 0.211086 | 4.20E-06 | 0.353584 | 3.37E-15 | 0.159812 | 0.00053  |
| 0.10714  | -0.19401 | 2.43E-05 | -0.15915 | 0.00056  | -0.17763 | 0.00011  | 0.292644 | 1.13E-10 |
| 0.69176  | -0.11409 | 0.01363  | -0.07643 | 0.09901  | -0.05054 | 0.27577  | 0.138927 | 0.00262  |
| 0.92471  | -0.10156 | 0.0282   | -0.06382 | 0.16855  | -0.0597  | 0.19778  | 0.185602 | 5.45E-05 |
| 0.1204   | 0.101756 | 0.02789  | -0.06259 | 0.17691  | 0.061018 | 0.18807  | 0.32243  | 9.29E-13 |
| 3.47E-05 | -0.15397 | 0.00084  | -0.1901  | 3.55E-05 | -0.20904 | 5.22E-06 | -0.23992 | 1.54E-07 |
| 0.66311  | -0.19305 | 2.67E-05 | -0.03603 | 0.43723  | -0.02676 | 0.56411  | -0.05636 | 0.2241   |
| 0.00145  | -0.08744 | 0.05901  | 0.001185 | 0.97962  | 0.051063 | 0.27079  | 0.189687 | 3.70E-05 |
| 0.00549  | -0.10181 | 0.02781  | -0.19858 | 1.54E-05 | -0.16464 | 0.00035  | 0.031975 | 0.49063  |
| 0.85186  | -0.07473 | 0.10676  | -0.14531 | 0.00164  | -0.07421 | 0.10924  | 0.015408 | 0.73981  |
| 0.01272  | -0.28322 | 4.60E-10 | -0.07762 | 0.09385  | -0.06664 | 0.15047  | 0.009062 | 0.84515  |
| 0.09479  | 0.110801 | 0.0166   | 0.018263 | 0.69385  | 0.033387 | 0.47167  | 0.346511 | 1.28E-14 |
| 0.15712  | -0.41014 | 2.25E-20 | -0.07154 | 0.12264  | -0.09683 | 0.03646  | 0.022356 | 0.6299   |
| 0.53121  | -0.27398 | 1.74E-09 | -0.03228 | 0.48648  | -0.09397 | 0.04237  | 0.354926 | 2.61E-15 |
| 0.84207  | -0.27354 | 1.85E-09 | -0.15458 | 0.0008   | -0.16064 | 0.00049  | -0.0996  | 0.03141  |

|          |          |          |          |          |          |          |          |          |
|----------|----------|----------|----------|----------|----------|----------|----------|----------|
| 0.72518  | -0.11536 | 0.01261  | -0.09793 | 0.03437  | -0.06166 | 0.18347  | 0.08802  | 0.05734  |
| 0.00548  | 0.250099 | 4.31E-08 | 0.176052 | 0.00013  | 0.220412 | 1.51E-06 | 0.356043 | 2.10E-15 |
| 0.24909  | 0.024764 | 0.59348  | -0.14879 | 0.00126  | -0.088   | 0.0574   | 0.170063 | 0.00022  |
| 0.00176  | -0.0541  | 0.24331  | 0.075135 | 0.10489  | 0.084489 | 0.06812  | 0.161006 | 0.00048  |
| 0.39868  | -0.12082 | 0.00896  | -0.07148 | 0.12292  | -0.03743 | 0.41971  | 0.11839  | 0.01045  |
| 0.18351  | 0.027537 | 0.55279  | -0.02282 | 0.62274  | 0.044016 | 0.34257  | -0.07306 | 0.11486  |
| 0.21002  | 0.097138 | 0.03586  | -0.01193 | 0.79714  | 0.03733  | 0.42092  | 0.109737 | 0.01768  |
| 0.37107  | 0.082582 | 0.07461  | 0.094634 | 0.04094  | 0.092429 | 0.0459   | -0.04163 | 0.36943  |
| 0.0914   | -0.07298 | 0.11527  | 0.039075 | 0.39953  | 0.02246  | 0.62829  | -0.13974 | 0.00247  |
| 0.57115  | -0.12873 | 0.00534  | -0.02597 | 0.57561  | -0.03633 | 0.43349  | -0.10551 | 0.02259  |
| 0.06884  | -0.2451  | 8.11E-08 | -0.24388 | 9.45E-08 | -0.20304 | 9.77E-06 | 0.007542 | 0.87087  |
| 0.0705   | -0.07494 | 0.10577  | 0.277538 | 1.05E-09 | 0.130154 | 0.00485  | 0.130038 | 0.00488  |
| 0.98347  | -0.21096 | 4.25E-06 | 0.153334 | 0.00089  | -0.00589 | 0.89905  | 0.067971 | 0.14248  |
| 0.28346  | 0.01156  | 0.80324  | -0.02517 | 0.58749  | -0.04177 | 0.36781  | 0.09066  | 0.05023  |
| 0.7084   | -0.04751 | 0.30556  | -0.14537 | 0.00163  | -0.08936 | 0.05363  | 0.433657 | 7.79E-23 |
| 0.01691  | -0.25094 | 3.87E-08 | -0.14727 | 0.00142  | -0.09381 | 0.04273  | -0.1235  | 0.00754  |
| 0.00016  | -0.01058 | 0.81954  | 0.088897 | 0.05489  | 0.139701 | 0.00248  | 0.452256 | 6.36E-25 |
| 4.67E-13 | -0.20678 | 6.63E-06 | 0.103613 | 0.02515  | 0.119938 | 0.00948  | 0.105989 | 0.02198  |
| 0.05853  | 0.140635 | 0.00232  | 0.180039 | 9.14E-05 | 0.179192 | 9.88E-05 | -0.10188 | 0.02771  |
| 0.00731  | 0.022075 | 0.6342   | -0.02517 | 0.58736  | 0.024465 | 0.59795  | -0.26374 | 7.16E-09 |
| 0.17329  | -0.12407 | 0.00727  | -0.05808 | 0.21028  | -0.04469 | 0.33523  | 0.072361 | 0.11838  |
| 0.00022  | 0.044208 | 0.34046  | 0.082646 | 0.07438  | 0.153207 | 0.0009   | 0.003318 | 0.94299  |
| 8.58E-06 | 0.088418 | 0.05622  | 0.022434 | 0.62869  | 0.1659   | 0.00032  | 0.21391  | 3.10E-06 |
| 0.28478  | -0.20909 | 5.20E-06 | -0.15287 | 0.00092  | -0.13745 | 0.00292  | -0.03178 | 0.49333  |
| 0.24661  | 0.123612 | 0.00749  | -0.03957 | 0.39354  | 0.012866 | 0.78155  | 0.415521 | 6.41E-21 |
| 1.47E-07 | -0.07642 | 0.09905  | -0.13511 | 0.00344  | -0.21978 | 1.62E-06 | -0.17868 | 0.0001   |
| 0.16655  | 0.057839 | 0.21217  | 0.149619 | 0.00118  | 0.092865 | 0.04488  | 0.060335 | 0.19307  |
| 1.00E-12 | -0.09444 | 0.04136  | 0.117917 | 0.01076  | 0.164318 | 0.00036  | 0.482216 | 1.44E-28 |
| 0.37902  | -0.12693 | 0.00602  | -0.11258 | 0.01493  | -0.09022 | 0.05136  | 0.503919 | 1.92E-31 |
| 4.48E-05 | -0.09611 | 0.03787  | -0.14519 | 0.00166  | -0.15865 | 0.00058  | -0.39645 | 5.00E-19 |
| 0.00748  | -0.29826 | 4.76E-11 | -0.12466 | 0.00699  | -0.18483 | 5.86E-05 | -0.15732 | 0.00064  |
| 4.35E-09 | -0.13603 | 0.00322  | 0.004184 | 0.92815  | 0.050484 | 0.27627  | 0.197924 | 1.64E-05 |
| 0.73162  | -0.01274 | 0.78363  | 0.068498 | 0.1394   | 0.041539 | 0.37045  | -0.00068 | 0.98838  |
| 0.00095  | -0.00237 | 0.9592   | -0.07712 | 0.09599  | 0.01165  | 0.80174  | 0.075994 | 0.10096  |
| 0.09939  | -0.33918 | 4.90E-14 | -0.14059 | 0.00232  | -0.10891 | 0.01856  | -0.189   | 3.95E-05 |
| 0.00012  | -0.19722 | 1.76E-05 | -0.25252 | 3.16E-08 | -0.25    | 4.37E-08 | -0.12951 | 0.00506  |
| 0.00507  | -0.02377 | 0.60834  | 0.075406 | 0.10363  | 0.08648  | 0.06185  | 0.029276 | 0.52797  |
| 1.13E-06 | 0.23885  | 1.76E-07 | 0.255547 | 2.13E-08 | 0.293228 | 1.03E-10 | 0.309312 | 8.22E-12 |
| 0.00011  | -0.10826 | 0.01928  | -0.1168  | 0.01154  | -0.16925 | 0.00024  | -0.19765 | 1.69E-05 |
| 0.01125  | -0.06631 | 0.15252  | 0.01875  | 0.6861   | 3.92E-05 | 0.99933  | 0.168243 | 0.00026  |
| 0.01213  | -0.14159 | 0.00216  | -0.0492  | 0.28869  | -0.009   | 0.84611  | -0.02447 | 0.59794  |
| 0.38599  | -0.04094 | 0.37737  | -0.00489 | 0.9161   | -0.08036 | 0.08279  | -0.20189 | 1.10E-05 |
| 0.8114   | -0.09592 | 0.03825  | -0.10032 | 0.03018  | -0.1127  | 0.01482  | -0.03134 | 0.49929  |
| 0.03516  | 0.165092 | 0.00034  | 0.027354 | 0.55542  | 0.116949 | 0.01143  | 0.047235 | 0.3084   |
| 1.63E-05 | -0.1003  | 0.03023  | -0.02963 | 0.52306  | 0.046435 | 0.31668  | 0.038387 | 0.40788  |

|          |          |          |          |          |          |          |          |          |
|----------|----------|----------|----------|----------|----------|----------|----------|----------|
| 0.99449  | -0.0879  | 0.05769  | -0.01437 | 0.75677  | -0.04907 | 0.28991  | -0.05227 | 0.25959  |
| 0.66341  | 0.041782 | 0.36765  | 0.0967   | 0.03671  | 0.076635 | 0.09811  | 0.087982 | 0.05745  |
| 0.17884  | -0.07393 | 0.1106   | -0.24292 | 1.07E-07 | -0.14573 | 0.00159  | 0.098097 | 0.03406  |
| 0.00026  | 0.068992 | 0.13656  | 0.156857 | 0.00067  | 0.127951 | 0.00562  | 0.381486 | 1.26E-17 |
| 0.00022  | 0.142863 | 0.00197  | 0.232894 | 3.59E-07 | 0.224322 | 9.72E-07 | 0.132461 | 0.00414  |
| 0.958    | -0.14378 | 0.00184  | 0.117612 | 0.01097  | 0.016912 | 0.71548  | 0.145567 | 0.00161  |
| 0.14763  | -0.09915 | 0.03217  | -0.05359 | 0.24773  | -0.04079 | 0.37916  | 0.279529 | 7.87E-10 |
| 0.47139  | -0.03963 | 0.39287  | 0.008686 | 0.8515   | 0.036545 | 0.43076  | -0.18106 | 8.32E-05 |
| 0.23113  | 0.254269 | 2.52E-08 | 0.080955 | 0.08053  | 0.102216 | 0.02719  | 0.419867 | 2.28E-21 |
| 0.44622  | -0.01641 | 0.72359  | -0.00152 | 0.97385  | -0.04846 | 0.29603  | 0.071798 | 0.12128  |
| 0.10859  | -0.03532 | 0.44644  | -0.03375 | 0.46686  | -0.05318 | 0.25141  | -0.10562 | 0.02244  |
| 0.28942  | -0.0472  | 0.30876  | 0.077848 | 0.09289  | 0.063166 | 0.17296  | -0.15252 | 0.00094  |
| 0.00021  | -0.08705 | 0.06015  | 0.101143 | 0.02885  | 0.136569 | 0.0031   | -0.04626 | 0.31852  |
| 0.09341  | 0.067712 | 0.14401  | 0.127424 | 0.00582  | 0.099078 | 0.0323   | 0.252468 | 3.18E-08 |
| 0.01417  | 0.045734 | 0.32404  | 0.145951 | 0.00156  | 0.142347 | 0.00205  | -0.05149 | 0.26683  |
| 0.89391  | 0.022326 | 0.63035  | 0.006554 | 0.88766  | 0.027555 | 0.55252  | -0.02538 | 0.58428  |
| 0.03132  | 0.071311 | 0.12383  | 0.056394 | 0.22384  | 0.091127 | 0.04906  | -0.1305  | 0.00473  |
| 4.33E-06 | -0.22962 | 5.28E-07 | -0.11666 | 0.01164  | -0.20178 | 1.11E-05 | -0.25024 | 4.24E-08 |
| 0.01266  | -0.0414  | 0.37204  | 0.052567 | 0.25691  | -0.03679 | 0.42764  | 0.015017 | 0.7462   |
| 0.32317  | -0.10969 | 0.01773  | 0.036937 | 0.42583  | 0.030405 | 0.51219  | -0.05662 | 0.22198  |
| 0.14392  | -0.0701  | 0.13036  | 0.166972 | 0.00029  | 0.104756 | 0.02358  | 0.003492 | 0.94     |
| 0.44073  | -0.01438 | 0.75668  | -0.12432 | 0.00715  | -0.07278 | 0.11627  | -0.11307 | 0.0145   |
| 0.71563  | -0.07834 | 0.09085  | -0.0029  | 0.95013  | -0.00467 | 0.91989  | -0.02542 | 0.5838   |
| 0.37598  | -0.00907 | 0.84499  | 0.074081 | 0.10986  | 0.066845 | 0.14922  | -0.05855 | 0.20658  |
| 0.01454  | 0.054878 | 0.23656  | 0.131402 | 0.00445  | 0.140741 | 0.0023   | 0.049163 | 0.28905  |
| 6.55E-16 | 0.234234 | 3.06E-07 | 0.057627 | 0.21386  | 0.238499 | 1.83E-07 | 0.261762 | 9.36E-09 |
| 1.07E-05 | -0.03554 | 0.44354  | 0.206017 | 7.18E-06 | 0.133402 | 0.00388  | -0.01736 | 0.70829  |
| 2.58E-17 | 0.331601 | 1.90E-13 | 0.32789  | 3.63E-13 | 0.390091 | 2.01E-18 | 0.134124 | 0.00369  |
| 0.13145  | 0.032441 | 0.48432  | 0.011403 | 0.80585  | 0.041592 | 0.36983  | 0.153627 | 0.00087  |
| 1.87E-05 | -0.16307 | 0.0004   | -0.17506 | 0.00014  | -0.21812 | 1.95E-06 | -0.12233 | 0.00814  |
| 0.74577  | 0.020664 | 0.65603  | 0.029802 | 0.52059  | -0.02096 | 0.65148  | 0.066902 | 0.14888  |
| 0.48269  | 0.022623 | 0.6258   | 0.043724 | 0.34578  | 0.021166 | 0.64823  | 0.016354 | 0.72448  |
| 0.2799   | 0.055311 | 0.23287  | 0.02062  | 0.65672  | 0.068964 | 0.13672  | -0.01427 | 0.75843  |
| 0.24281  | 0.057823 | 0.2123   | 0.100753 | 0.02948  | 0.074112 | 0.10971  | 0.016535 | 0.72155  |
| 0.11889  | 0.19595  | 2.00E-05 | 0.23531  | 2.69E-07 | 0.194679 | 2.27E-05 | -0.07901 | 0.0881   |
| 0.00801  | 0.126019 | 0.00639  | 0.134031 | 0.00371  | 0.133056 | 0.00397  | 0.081109 | 0.07995  |
| 0.03061  | -0.16362 | 0.00038  | 0.055482 | 0.23143  | 0.04631  | 0.31798  | -0.07727 | 0.09534  |
| 0.79065  | 0.007071 | 0.87887  | 0.062139 | 0.18007  | 0.007404 | 0.87321  | 0.085515 | 0.06483  |
| 0.00031  | -0.13544 | 0.00336  | 0.126259 | 0.00629  | 0.122727 | 0.00793  | -0.00888 | 0.8482   |
| 0.33438  | 0.037718 | 0.41611  | -0.08843 | 0.05619  | 0.019635 | 0.67214  | 0.057493 | 0.21492  |
| 0.25388  | 0.200236 | 1.30E-05 | 0.113097 | 0.01447  | 0.095946 | 0.03821  | -0.03968 | 0.39229  |
| 0.11202  | -0.18911 | 3.91E-05 | -0.05992 | 0.19617  | -0.09116 | 0.04897  | 0.114609 | 0.0132   |
| 0.01815  | 0.019979 | 0.66673  | 0.035123 | 0.44892  | 0.068538 | 0.13917  | -0.01082 | 0.81559  |
| 0.03026  | -0.02025 | 0.66245  | 0.003389 | 0.94178  | -0.05318 | 0.25136  | 0.035927 | 0.4386   |
| 0.70203  | -0.01703 | 0.71358  | -0.02178 | 0.63868  | -0.01723 | 0.71034  | -0.15362 | 0.00087  |

|          |          |          |          |          |          |          |          |          |
|----------|----------|----------|----------|----------|----------|----------|----------|----------|
| 1.28E-08 | 0.198917 | 1.49E-05 | 0.222571 | 1.19E-06 | 0.30208  | 2.61E-11 | 0.323849 | 7.29E-13 |
| 0.62897  | -0.11417 | 0.01356  | -0.09137 | 0.04845  | -0.06354 | 0.17042  | -0.15162 | 0.00101  |
| 0.00164  | 0.348451 | 8.89E-15 | 0.330892 | 2.15E-13 | 0.317075 | 2.29E-12 | 0.051661 | 0.26521  |
| 8.87E-08 | -0.14774 | 0.00137  | -0.26897 | 3.50E-09 | -0.26631 | 5.05E-09 | -0.20183 | 1.11E-05 |
| 0.35247  | 0.162675 | 0.00042  | -0.03829 | 0.40903  | 0.026012 | 0.575    | 0.09102  | 0.04933  |
| 0.90883  | -0.04874 | 0.29326  | -0.06512 | 0.16     | -0.015   | 0.74648  | 0.075564 | 0.10291  |
| 0.73238  | 0.051127 | 0.2702   | -0.07227 | 0.11885  | 0.033974 | 0.46391  | 0.016906 | 0.71556  |
| 0.0669   | 0.064669 | 0.16295  | 0.060117 | 0.19469  | 0.03025  | 0.51433  | -0.10925 | 0.0182   |
| 0.00042  | -0.09117 | 0.04896  | -0.13959 | 0.0025   | -0.1423  | 0.00205  | -0.12786 | 0.00566  |
| 0.03929  | -0.02994 | 0.51864  | -0.07107 | 0.12511  | -0.08623 | 0.06262  | -0.07086 | 0.12625  |
| 0.84249  | -0.07486 | 0.10616  | 0.030033 | 0.51736  | 0.011064 | 0.81153  | -0.04659 | 0.31507  |
| 0.07686  | 0.027361 | 0.55532  | 0.08052  | 0.08217  | 0.05738  | 0.21583  | -0.06579 | 0.15579  |
| 1.32E-10 | 0.246214 | 7.06E-08 | 0.353609 | 3.35E-15 | 0.359745 | 1.03E-15 | -0.10447 | 0.02396  |
| 0.04145  | -0.01907 | 0.68105  | 0.010848 | 0.81514  | 0.024805 | 0.59286  | -0.05083 | 0.27299  |
| 0.04705  | -0.22084 | 1.44E-06 | -0.15444 | 0.00081  | -0.11905 | 0.01003  | 0.094272 | 0.04172  |
| 0.59077  | -0.05122 | 0.2693   | -0.11269 | 0.01483  | -0.05768 | 0.21347  | 0.251835 | 3.45E-08 |
| 0.39111  | -0.04234 | 0.36127  | -0.19397 | 2.44E-05 | -0.12578 | 0.00649  | 0.139563 | 0.00251  |
| 0.03506  | -0.08437 | 0.0685   | 0.039452 | 0.39499  | -0.06397 | 0.16757  | -0.04256 | 0.3588   |
| 3.50E-05 | -0.01139 | 0.8061   | -0.13533 | 0.00339  | -0.12845 | 0.00544  | -0.14418 | 0.00179  |
| 2.22E-06 | 0.192026 | 2.95E-05 | 0.096675 | 0.03676  | 0.19102  | 3.25E-05 | 0.042479 | 0.35971  |
| 6.09E-05 | 0.145639 | 0.0016   | 0.105333 | 0.02282  | 0.16819  | 0.00026  | 0.076251 | 0.09981  |
| 0.52858  | -0.04823 | 0.29834  | -0.04601 | 0.32111  | -0.06015 | 0.19445  | -0.05488 | 0.2365   |
| 1.22E-09 | 0.05634  | 0.22428  | 0.187516 | 4.55E-05 | 0.18394  | 6.37E-05 | 0.219242 | 1.72E-06 |
| 3.08E-05 | -0.07685 | 0.09715  | -0.05735 | 0.21606  | 0.03358  | 0.46911  | 0.093669 | 0.04305  |
| 0.00016  | -0.17876 | 0.0001   | -0.00869 | 0.85141  | 0.002978 | 0.94882  | 0.063349 | 0.17172  |
| 5.52E-06 | -0.12228 | 0.00816  | -0.18655 | 4.99E-05 | -0.21092 | 4.28E-06 | -0.09863 | 0.03309  |
| 2.88E-10 | 0.379286 | 2.00E-17 | 0.495147 | 2.95E-30 | 0.418093 | 3.49E-21 | 0.101388 | 0.02847  |
| 0.43616  | 0.084566 | 0.06787  | 0.007723 | 0.86779  | 0.04634  | 0.31766  | -0.15337 | 0.00088  |
| 0.00497  | 0.100703 | 0.02956  | 0.109163 | 0.01829  | 0.127198 | 0.00591  | 0.271297 | 2.54E-09 |
| 0.00209  | 0.234978 | 2.80E-07 | -0.08799 | 0.05741  | 0.081256 | 0.07941  | 0.312867 | 4.60E-12 |
| 0.70004  | -0.10254 | 0.02671  | -0.06844 | 0.13974  | -0.08441 | 0.06839  | -0.31633 | 2.59E-12 |
| 5.23E-17 | 0.372448 | 8.18E-17 | 0.066302 | 0.15257  | 0.28516  | 3.46E-10 | 0.213943 | 3.09E-06 |
| 0.27313  | -0.14719 | 0.00142  | -0.18435 | 6.14E-05 | -0.15632 | 0.0007   | 0.054518 | 0.23965  |
| 0.14261  | -0.077   | 0.09652  | 0.047495 | 0.30574  | 0.049197 | 0.28871  | -0.02247 | 0.62817  |
| 0.5723   | 0.152719 | 0.00093  | 0.182815 | 7.08E-05 | 0.07469  | 0.10697  | -0.05956 | 0.19888  |
| 0.91077  | 0.058495 | 0.20703  | 0.002734 | 0.95302  | 0.013394 | 0.77282  | 0.259041 | 1.35E-08 |
| 0.00593  | 0.23007  | 5.01E-07 | 0.106234 | 0.02167  | 0.148675 | 0.00127  | 0.459293 | 9.53E-26 |
| 0.85319  | 0.03653  | 0.43095  | 0.111246 | 0.01617  | 0.079432 | 0.08641  | -0.23738 | 2.10E-07 |
| 0.93367  | 0.262269 | 8.74E-09 | 0.277497 | 1.05E-09 | 0.185559 | 5.48E-05 | 0.169126 | 0.00024  |
| 0.62007  | 0.135086 | 0.00345  | 0.157003 | 0.00066  | 0.095531 | 0.03905  | 0.283014 | 4.74E-10 |
| 0.03931  | 0.339368 | 4.73E-14 | 0.332524 | 1.61E-13 | 0.233108 | 3.50E-07 | 0.111078 | 0.01633  |
| 0.71222  | 0.195093 | 2.18E-05 | 0.043377 | 0.34963  | 0.072044 | 0.12001  | -0.00388 | 0.93337  |
| 1.64E-06 | 0.165706 | 0.00032  | 0.199516 | 1.40E-05 | 0.23649  | 2.34E-07 | 0.201001 | 1.20E-05 |
| 2.58E-05 | 0.042608 | 0.35824  | -0.07039 | 0.12876  | -0.0776  | 0.09394  | -0.16441 | 0.00036  |
| 4.01E-06 | 0.265778 | 5.43E-09 | 0.371923 | 9.10E-17 | 0.321939 | 1.01E-12 | -0.20016 | 1.31E-05 |

|          |          |          |          |          |          |          |          |          |
|----------|----------|----------|----------|----------|----------|----------|----------|----------|
| 0.43505  | -0.06446 | 0.16432  | -0.15421 | 0.00083  | -0.10422 | 0.0243   | 0.215666 | 2.56E-06 |
| 0.90917  | 0.116917 | 0.01146  | 0.169382 | 0.00024  | 0.101715 | 0.02796  | 0.077321 | 0.09513  |
| 0.59873  | -0.05343 | 0.24917  | 0.020657 | 0.65614  | -0.03737 | 0.42047  | 0.041159 | 0.37484  |
| 0.81927  | -0.03003 | 0.51743  | 0.091071 | 0.0492   | 0.027333 | 0.55574  | -0.08323 | 0.07236  |
| 0.63148  | 0.051973 | 0.26233  | 0.021619 | 0.64122  | -0.00282 | 0.95146  | -0.00165 | 0.97165  |
| 0.09272  | -0.07004 | 0.1307   | 0.105265 | 0.0229   | 0.026034 | 0.57468  | 0.1593   | 0.00055  |
| 0.33434  | -0.11465 | 0.01317  | -0.04169 | 0.36867  | -0.0793  | 0.08695  | -0.04764 | 0.30424  |
| 2.58E-05 | 0.166434 | 0.0003   | 0.215072 | 2.73E-06 | 0.205352 | 7.69E-06 | 0.222113 | 1.25E-06 |
| 5.05E-06 | 0.214468 | 2.91E-06 | -0.04917 | 0.28902  | 0.116716 | 0.0116   | 0.22019  | 1.55E-06 |
| 0.85438  | 0.023    | 0.62006  | -0.0144  | 0.75623  | 0.025786 | 0.57832  | 0.430571 | 1.68E-22 |
| 0.05753  | 0.05769  | 0.21335  | 0.018567 | 0.68901  | 0.027852 | 0.54825  | 0.25019  | 4.26E-08 |
| 1.74E-05 | -0.26361 | 7.29E-09 | -0.24009 | 1.51E-07 | -0.29434 | 8.70E-11 | -0.20204 | 1.08E-05 |
| 0.10289  | 0.055972 | 0.22733  | 0.078824 | 0.08885  | 0.074307 | 0.10878  | 0.06005  | 0.19519  |
| 3.46E-07 | 0.002472 | 0.95751  | 0.057615 | 0.21395  | -0.10286 | 0.02624  | -0.09817 | 0.03392  |
| 0.86614  | 0.005364 | 0.90797  | 0.097193 | 0.03575  | 0.042664 | 0.35761  | -0.08199 | 0.07671  |
| 0.97506  | 0.022432 | 0.62872  | 0.04241  | 0.36048  | 0.041415 | 0.37187  | -0.04373 | 0.34576  |
| 0.03487  | 0.035184 | 0.44813  | 0.184694 | 5.94E-05 | 0.15412  | 0.00083  | -0.07556 | 0.10293  |
| 0.01261  | 0.023759 | 0.60855  | 0.086427 | 0.06202  | 0.09927  | 0.03197  | -0.16493 | 0.00034  |
| 0.00228  | 0.229332 | 5.46E-07 | 0.164414 | 0.00036  | 0.212429 | 3.63E-06 | -0.03353 | 0.46979  |
| 0.06124  | 0.12626  | 0.00629  | 0.064988 | 0.16088  | 0.108457 | 0.01906  | -0.02526 | 0.58613  |
| 0.69478  | 0.044875 | 0.33322  | 0.002393 | 0.95887  | 0.03056  | 0.51002  | 0.254186 | 2.55E-08 |
| 0.31751  | 0.036867 | 0.42671  | 0.027732 | 0.54998  | 0.067652 | 0.14437  | 0.152519 | 0.00094  |
| 0.62137  | -0.05114 | 0.27005  | 0.054255 | 0.24193  | 0.008359 | 0.85703  | -0.04464 | 0.3358   |
| 0.88855  | 0.036202 | 0.4351   | 0.043778 | 0.34519  | 0.011533 | 0.8037   | -0.01616 | 0.7276   |
| 0.64255  | -0.14162 | 0.00216  | -0.00582 | 0.9002   | -0.02268 | 0.62501  | 0.105858 | 0.02214  |
| 3.65E-11 | 0.253729 | 2.70E-08 | 0.307486 | 1.10E-11 | 0.328775 | 3.11E-13 | 0.083204 | 0.07244  |
| 0.00035  | 0.087905 | 0.05767  | 0.068558 | 0.13905  | 0.110578 | 0.01682  | 0.32366  | 7.53E-13 |
| 0.73068  | -0.24313 | 1.04E-07 | -0.05301 | 0.25288  | -0.1041  | 0.02447  | 0.048755 | 0.29307  |
| 0.77957  | -0.13161 | 0.00439  | -0.00387 | 0.93358  | -0.03513 | 0.44885  | -0.02836 | 0.54094  |
| 0.01139  | -0.00443 | 0.92386  | -0.07847 | 0.09032  | -0.11527 | 0.01268  | 0.005573 | 0.9044   |
| 0.80821  | -0.1941  | 2.40E-05 | 0.010336 | 0.82371  | -0.05614 | 0.22596  | -0.10138 | 0.02847  |
| 0.63869  | -0.1418  | 0.00213  | -0.03783 | 0.41478  | -0.06564 | 0.15672  | -0.06278 | 0.17562  |
| 0.25153  | -0.13019 | 0.00483  | -0.04737 | 0.30706  | -0.08386 | 0.07021  | -0.11213 | 0.01533  |
| 0.22862  | -0.13935 | 0.00254  | -0.24878 | 5.10E-08 | -0.18534 | 5.59E-05 | -0.11153 | 0.01589  |
| 0.63705  | -0.03232 | 0.48594  | -0.06518 | 0.15967  | -0.05324 | 0.25086  | -0.06479 | 0.16216  |
| 0.26564  | 0.026197 | 0.57228  | 0.006077 | 0.8958   | -0.02193 | 0.63642  | -0.01882 | 0.68505  |
| 0.12307  | 0.138252 | 0.00275  | 0.193722 | 2.50E-05 | 0.154373 | 0.00082  | 0.190527 | 3.41E-05 |
| 0.00292  | 0.053345 | 0.24993  | 0.264078 | 6.85E-09 | 0.176839 | 0.00012  | 0.19962  | 1.39E-05 |
| 0.00221  | 0.013212 | 0.77583  | 0.108594 | 0.0189   | 0.125576 | 0.00658  | 0.269421 | 3.29E-09 |
| 5.42E-06 | -0.04559 | 0.32553  | 0.107581 | 0.02005  | 0.137034 | 0.003    | 0.19902  | 1.47E-05 |
| 0.04992  | 0.103889 | 0.02476  | 0.117663 | 0.01094  | 0.115185 | 0.01275  | 0.040564 | 0.38178  |
| 0.0386   | 0.178436 | 0.00011  | 0.181789 | 7.78E-05 | 0.160974 | 0.00048  | 0.053888 | 0.24513  |
| 0.72496  | 0.004479 | 0.9231   | 0.045299 | 0.32867  | 0.043629 | 0.34684  | -0.04689 | 0.31199  |
| 0.02935  | 0.071757 | 0.1215   | 0.140898 | 0.00227  | 0.129135 | 0.00519  | -0.07821 | 0.09138  |
| 0.05432  | -0.05374 | 0.2464   | 0.111544 | 0.01588  | 0.053762 | 0.24624  | 0.055944 | 0.22756  |



|          |          |          |          |          |          |          |          |          |
|----------|----------|----------|----------|----------|----------|----------|----------|----------|
| 0.85892  | 0.020183 | 0.66353  | 0.018516 | 0.68982  | -0.01057 | 0.81981  | -0.12892 | 0.00527  |
| 0.53555  | 0.01389  | 0.76466  | 0.033524 | 0.46985  | -0.02037 | 0.66062  | -0.14182 | 0.00213  |
| 0.09926  | 0.108437 | 0.01908  | 0.156227 | 0.0007   | 0.114362 | 0.0134   | -0.03627 | 0.43424  |
| 0.53728  | -0.01862 | 0.68816  | -0.01966 | 0.67181  | -0.02598 | 0.57549  | -0.01022 | 0.82572  |
| 0.25423  | -0.00051 | 0.9912   | 0.066459 | 0.15159  | 0.052131 | 0.26089  | -0.15546 | 0.00075  |
| 0.05335  | 0.085725 | 0.06417  | 0.008729 | 0.85078  | -0.0172  | 0.7109   | 0.167405 | 0.00028  |
| 0.52367  | -0.11351 | 0.01412  | -0.00794 | 0.86417  | -0.0322  | 0.48752  | -0.14537 | 0.00163  |
| 0.01931  | -0.01386 | 0.76508  | -0.05148 | 0.26687  | -0.07916 | 0.0875   | -0.1187  | 0.01025  |
| 0.02247  | -0.1016  | 0.02814  | 0.047825 | 0.30239  | 0.043294 | 0.35055  | 0.332892 | 1.51E-13 |
| 0.00029  | -0.0627  | 0.17616  | -0.09782 | 0.03457  | -0.14049 | 0.00234  | -0.06444 | 0.16442  |
| 0.00384  | 0.423782 | 8.89E-22 | 0.096383 | 0.03733  | 0.211863 | 3.86E-06 | 0.146436 | 0.00151  |
| 1.15E-17 | 0.44452  | 4.87E-24 | 0.241985 | 1.20E-07 | 0.361541 | 7.23E-16 | 0.275279 | 1.45E-09 |
| 0.18339  | -0.24574 | 7.50E-08 | -0.16281 | 0.00041  | -0.17187 | 0.00019  | -0.12408 | 0.00726  |
| 0.00086  | 0.010372 | 0.82312  | -0.04087 | 0.37821  | 0.04231  | 0.36162  | 0.128203 | 0.00553  |
| 1.68E-05 | -0.23034 | 4.85E-07 | 0.096888 | 0.03634  | 0.048398 | 0.29662  | 0.182119 | 7.55E-05 |
| 5.19E-06 | -0.10516 | 0.02304  | -0.14058 | 0.00233  | -0.19686 | 1.83E-05 | -0.1666  | 0.0003   |
| 8.20E-07 | -0.24069 | 1.40E-07 | -0.31509 | 3.19E-12 | -0.29847 | 4.60E-11 | 0.103711 | 0.02501  |
| 0.31842  | 0.04671  | 0.31381  | 0.044823 | 0.33378  | 0.05442  | 0.2405   | -0.05114 | 0.27003  |
| 0.0407   | -0.12404 | 0.00728  | -0.014   | 0.76288  | -0.0116  | 0.80255  | 0.076725 | 0.09771  |
| 0.48677  | 0.200214 | 1.30E-05 | 0.117503 | 0.01104  | 0.096012 | 0.03807  | 0.031369 | 0.49889  |
| 0.01553  | 0.10815  | 0.0194   | -0.16113 | 0.00047  | -0.08308 | 0.07285  | 0.042376 | 0.36087  |
| 0.4239   | 0.055606 | 0.23038  | -0.04579 | 0.32348  | -0.02101 | 0.65065  | 0.007307 | 0.87486  |
| 0.00588  | -0.02536 | 0.58467  | -0.18694 | 4.81E-05 | -0.15628 | 0.0007   | -0.17672 | 0.00012  |
| 0.93503  | -0.00812 | 0.86107  | -0.01503 | 0.74592  | 4.37E-05 | 0.99925  | -0.08155 | 0.07832  |
| 0.76709  | -0.1236  | 0.00749  | 0.006377 | 0.89069  | -0.04014 | 0.38675  | -0.09744 | 0.03529  |
| 0.19414  | 0.113332 | 0.01427  | 0.35713  | 1.71E-15 | 0.169585 | 0.00023  | 0.251323 | 3.69E-08 |
| 0.00084  | 0.28186  | 5.61E-10 | 0.17094  | 0.00021  | 0.223713 | 1.04E-06 | 0.272185 | 2.24E-09 |
| 2.03E-06 | 0.371886 | 9.17E-17 | 0.36481  | 3.80E-16 | 0.31278  | 4.67E-12 | -0.0117  | 0.80096  |
| 0.45646  | -0.07464 | 0.10718  | 0.090164 | 0.05151  | 0.044957 | 0.33234  | -0.3583  | 1.36E-15 |
| 0.7672   | 0.150095 | 0.00114  | 0.102885 | 0.02619  | 0.101681 | 0.02801  | 0.014265 | 0.75849  |
| 0.00216  | -0.10291 | 0.02616  | -0.12512 | 0.00678  | -0.14783 | 0.00136  | -0.19659 | 1.88E-05 |
| 0.00107  | 0.173676 | 0.00016  | 0.003026 | 0.94801  | -0.05196 | 0.26247  | -0.18311 | 6.89E-05 |
| 0.04064  | 0.273238 | 1.93E-09 | 0.309139 | 8.45E-12 | 0.217053 | 2.20E-06 | 0.070384 | 0.12881  |
| 0.17596  | -0.12947 | 0.00508  | -0.23422 | 3.07E-07 | -0.1796  | 9.52E-05 | -0.02439 | 0.59902  |
| 0.19282  | -0.00283 | 0.95139  | -0.07848 | 0.09026  | -0.05965 | 0.19815  | -0.1018  | 0.02783  |
| 0.11906  | -0.1008  | 0.0294   | -0.02259 | 0.62633  | -0.06923 | 0.1352   | 0.03019  | 0.51516  |
| 0.73078  | -0.05636 | 0.22412  | -0.02566 | 0.58023  | -0.00936 | 0.84014  | 0.002386 | 0.95899  |
| 0.09713  | -0.1444  | 0.00176  | -0.0608  | 0.18969  | -0.09161 | 0.04787  | -0.18284 | 7.06E-05 |
| 0.00917  | -0.00544 | 0.9066   | 0.134838 | 0.00351  | 0.087745 | 0.05813  | 0.118774 | 0.0102   |
| 0.00044  | -0.06308 | 0.17358  | -0.2209  | 1.43E-06 | -0.16338 | 0.00039  | -0.02035 | 0.66088  |
| 0.40945  | 0.016573 | 0.72093  | 0.09355  | 0.04332  | 0.054411 | 0.24058  | 0.073438 | 0.11299  |
| 6.60E-11 | 0.108788 | 0.01869  | 0.270846 | 2.70E-09 | 0.288849 | 2.00E-10 | -0.0711  | 0.12498  |
| 0.10628  | -0.01712 | 0.71207  | 0.178802 | 0.0001   | 0.073744 | 0.1115   | 0.254574 | 2.42E-08 |
| 0.10202  | -0.11317 | 0.01441  | -0.09408 | 0.04214  | -0.09327 | 0.04394  | 0.000213 | 0.99633  |
| 0.01038  | -0.10041 | 0.03004  | -0.11203 | 0.01543  | -0.12759 | 0.00576  | -0.01558 | 0.73706  |

|          |          |          |          |          |           |          |          |          |
|----------|----------|----------|----------|----------|-----------|----------|----------|----------|
| 0.2121   | 0.162895 | 0.00041  | 0.032995 | 0.47689  | 0.082168  | 0.07608  | 0.030965 | 0.50443  |
| 0.6653   | -0.30164 | 2.80E-11 | -0.10078 | 0.02944  | -0.11157  | 0.01586  | 0.008066 | 0.86199  |
| 0.00223  | -0.14341 | 0.00189  | 0.063958 | 0.16763  | 0.039892  | 0.38973  | 0.196496 | 1.90E-05 |
| 0.25915  | -0.10314 | 0.02582  | 0.00031  | 0.99466  | -0.01012  | 0.82729  | 0.090577 | 0.05045  |
| 0.54892  | -0.03578 | 0.44042  | -0.03038 | 0.51253  | -0.01607  | 0.729    | -0.02113 | 0.64875  |
| 0.02506  | -0.09798 | 0.03427  | -0.06346 | 0.17095  | 0.022945  | 0.62089  | 0.079317 | 0.08687  |
| 0.00156  | -0.08122 | 0.07954  | -0.21069 | 4.38E-06 | -0.19617  | 1.96E-05 | -0.09091 | 0.04959  |
| 0.00118  | 0.056082 | 0.22642  | 0.109055 | 0.0184   | 0.129006  | 0.00524  | -0.01848 | 0.69038  |
| 2.11E-17 | 0.213118 | 3.37E-06 | 0.304816 | 1.69E-11 | 0.342322  | 2.76E-14 | 0.158768 | 0.00057  |
| 0.179    | -0.04601 | 0.32113  | -0.05228 | 0.25954  | -0.05608  | 0.22646  | 0.049332 | 0.28739  |
| 0.09516  | 0.101595 | 0.02814  | 0.16223  | 0.00043  | 0.102603  | 0.02661  | -0.16667 | 0.0003   |
| 0.00536  | 0.023841 | 0.60732  | 0.091511 | 0.04811  | -0.00819  | 0.85987  | -0.18188 | 7.72E-05 |
| 0.00259  | 0.003884 | 0.93329  | 0.107094 | 0.02063  | -0.04506  | 0.33123  | -0.04212 | 0.36374  |
| 0.88139  | 0.037231 | 0.42215  | 0.110505 | 0.0169   | 0.052082  | 0.26133  | -0.09871 | 0.03295  |
| 0.18805  | 0.108337 | 0.01919  | 0.113341 | 0.01426  | 0.027104  | 0.55905  | 0.046624 | 0.31471  |
| 0.06575  | -0.06924 | 0.13514  | -0.07881 | 0.08891  | -0.04874  | 0.29325  | -0.0754  | 0.10364  |
| 0.98361  | -0.05756 | 0.21439  | 0.008931 | 0.84735  | -0.01203  | 0.79543  | 0.099403 | 0.03174  |
| 0.00026  | -0.06203 | 0.18083  | 0.047928 | 0.30134  | 0.07865   | 0.08956  | -0.01414 | 0.76057  |
| 6.65E-08 | -0.0781  | 0.09184  | 0.103343 | 0.02553  | 0.099712  | 0.03121  | 0.183688 | 6.53E-05 |
| 0.13284  | 0.279317 | 8.12E-10 | 0.051248 | 0.26906  | 0.101609  | 0.02812  | 0.077185 | 0.09571  |
| 5.47E-14 | -0.04039 | 0.38387  | -0.19802 | 1.63E-05 | -0.24023  | 1.48E-07 | -0.08864 | 0.05561  |
| 2.22E-05 | 0.229059 | 5.63E-07 | -0.09583 | 0.03843  | -0.0382   | 0.41021  | -0.18234 | 7.40E-05 |
| 8.74E-09 | -0.15177 | 0.001    | -0.13102 | 0.00457  | -0.23174  | 4.12E-07 | -0.03338 | 0.47175  |
| 0.32287  | -0.18125 | 8.18E-05 | -0.03407 | 0.46269  | -0.06769  | 0.14414  | 0.03998  | 0.38869  |
| 0.502    | 0.057826 | 0.21228  | 0.185124 | 5.71E-05 | 0.082689  | 0.07423  | 0.081662 | 0.07791  |
| 0.25995  | 0.077706 | 0.09349  | 0.006641 | 0.88619  | -7.12E-05 | 0.99878  | 0.352105 | 4.46E-15 |
| 0.01478  | 0.125001 | 0.00684  | -0.04521 | 0.32963  | -0.07922  | 0.08724  | 0.077751 | 0.0933   |
| 3.19E-06 | 0.312162 | 5.16E-12 | 0.288042 | 2.25E-10 | 0.323791  | 7.36E-13 | 0.352094 | 4.47E-15 |
| 7.92E-05 | -0.06499 | 0.16084  | -0.23269 | 3.68E-07 | -0.19725  | 1.76E-05 | 0.0437   | 0.34604  |
| 7.42E-06 | 0.106923 | 0.02083  | 0.198184 | 1.60E-05 | 0.213469  | 3.25E-06 | 0.161109 | 0.00047  |
| 0.54563  | -0.10351 | 0.02529  | -0.05979 | 0.19715  | -0.06416  | 0.16632  | -0.06482 | 0.16194  |
| 0.29481  | -0.15753 | 0.00063  | -0.09968 | 0.03127  | -0.10091  | 0.02922  | 0.067221 | 0.14695  |
| 0.37229  | -0.25411 | 2.57E-08 | -0.08506 | 0.06628  | -0.10912  | 0.01833  | 0.076089 | 0.10053  |
| 0.10745  | 0.017996 | 0.69809  | 0.088152 | 0.05697  | -0.01602  | 0.72988  | 0.213916 | 3.09E-06 |
| 0.08025  | -0.07408 | 0.10986  | -0.12035 | 0.00923  | -0.02824  | 0.54274  | 0.304091 | 1.90E-11 |
| 0.41205  | -0.18994 | 3.61E-05 | -0.10113 | 0.02888  | -0.06608  | 0.15394  | -0.14946 | 0.0012   |
| 0.04697  | 0.023304 | 0.61545  | 0.036877 | 0.42658  | -0.00127  | 0.97817  | -0.22756 | 6.70E-07 |
| 0.01487  | -0.18455 | 6.02E-05 | -0.0012  | 0.97942  | -0.00645  | 0.88943  | -0.11549 | 0.01251  |
| 6.42E-07 | -0.02326 | 0.61606  | 0.132426 | 0.00415  | 0.165988  | 0.00032  | 0.187704 | 4.47E-05 |
| 0.01088  | -0.09929 | 0.03193  | -0.08446 | 0.06822  | -0.11495  | 0.01293  | -0.12776 | 0.00569  |
| 2.16E-09 | 0.012286 | 0.79116  | 0.143095 | 0.00194  | 0.181782  | 7.79E-05 | 0.125006 | 0.00684  |
| 3.07E-07 | -0.09543 | 0.03926  | -0.14569 | 0.0016   | -0.1682   | 0.00026  | -0.02235 | 0.62996  |
| 0.09008  | 0.034354 | 0.45892  | 0.000697 | 0.98802  | 0.043672  | 0.34635  | 0.13013  | 0.00485  |
| 0.44022  | 0.093623 | 0.04315  | 0.040533 | 0.38215  | 0.065902  | 0.15506  | 0.067147 | 0.14739  |
| 0.34919  | 0.059942 | 0.19599  | 0.021829 | 0.63799  | 0.026833  | 0.56299  | -0.00117 | 0.97996  |

|          |          |          |          |          |          |          |          |          |
|----------|----------|----------|----------|----------|----------|----------|----------|----------|
| 1.65E-07 | 0.175003 | 0.00014  | 0.069007 | 0.13648  | 0.183016 | 6.95E-05 | -0.0169  | 0.71565  |
| 0.01739  | -0.19376 | 2.49E-05 | -0.01704 | 0.71333  | 0.006532 | 0.88805  | -0.0988  | 0.0328   |
| 0.52521  | -0.24044 | 1.45E-07 | -0.18487 | 5.84E-05 | -0.17219 | 0.00018  | -0.12838 | 0.00546  |
| 2.62E-05 | -0.3029  | 2.30E-11 | -0.35009 | 6.53E-15 | -0.35002 | 6.62E-15 | -0.16391 | 0.00038  |
| 0.0375   | -0.19893 | 1.49E-05 | -0.17245 | 0.00018  | -0.17518 | 0.00014  | -0.06352 | 0.17059  |
| 0.66988  | 0.013177 | 0.7764   | 0.011981 | 0.79624  | 0.013797 | 0.76619  | 0.045887 | 0.32242  |
| 3.62E-05 | -0.0467  | 0.31391  | 0.179388 | 9.70E-05 | 0.16809  | 0.00026  | 0.124274 | 0.00717  |
| 0.48969  | -0.28935 | 1.85E-10 | -0.24142 | 1.28E-07 | -0.2263  | 7.75E-07 | 0.018462 | 0.69068  |
| 0.59302  | 0.010623 | 0.81891  | 0.148668 | 0.00127  | 0.061947 | 0.18143  | 0.070413 | 0.12865  |
| 0.84756  | -0.15672 | 0.00068  | -0.09065 | 0.05026  | -0.06824 | 0.1409   | 0.048329 | 0.29732  |
| 0.02996  | -0.12219 | 0.00821  | -0.01235 | 0.7901   | 0.005548 | 0.90483  | 0.024814 | 0.59274  |
| 0.34967  | -0.13383 | 0.00376  | 0.037352 | 0.42064  | -0.00783 | 0.86607  | -0.06619 | 0.15323  |
| 0.07539  | 0.011203 | 0.8092   | 0.021667 | 0.64048  | -0.02786 | 0.5481   | 0.00289  | 0.95034  |
| 0.07614  | 0.068121 | 0.14159  | -0.03336 | 0.47205  | -0.01434 | 0.75734  | -0.28912 | 1.92E-10 |
| 0.372    | 0.077085 | 0.09615  | -0.02786 | 0.5481   | -0.00483 | 0.91704  | 0.199858 | 1.35E-05 |
| 0.74495  | 0.096671 | 0.03677  | -0.21799 | 1.98E-06 | -0.07835 | 0.09078  | 0.041571 | 0.37007  |
| 0.4342   | 0.069685 | 0.13266  | 0.036835 | 0.4271   | 0.021423 | 0.64424  | 0.032193 | 0.48767  |
| 8.14E-08 | 0.377363 | 2.98E-17 | 0.183604 | 6.58E-05 | 0.268088 | 3.96E-09 | 0.195604 | 2.07E-05 |
| 1.54E-14 | 0.284126 | 4.03E-10 | 0.322472 | 9.22E-13 | 0.326694 | 4.47E-13 | 0.423418 | 9.71E-22 |
| 0.26342  | -0.10502 | 0.02323  | -0.16942 | 0.00024  | -0.11457 | 0.01323  | 0.028159 | 0.54384  |
| 0.08862  | 0.122091 | 0.00826  | 0.052934 | 0.2536   | 0.039944 | 0.38911  | 0.248837 | 5.07E-08 |
| 3.32E-06 | -0.08344 | 0.07162  | -0.1374  | 0.00293  | -0.18856 | 4.12E-05 | 0.176617 | 0.00012  |
| 0.02552  | -0.16616 | 0.00031  | 0.000756 | 0.987    | 0.014188 | 0.75976  | 0.187483 | 4.56E-05 |
| 1.19E-05 | -0.12017 | 0.00934  | -0.1575  | 0.00064  | -0.21259 | 3.57E-06 | -0.02315 | 0.61776  |
| 0.01842  | -0.07404 | 0.11004  | 0.086101 | 0.06301  | 0.088838 | 0.05505  | 0.17528  | 0.00014  |
| 2.11E-05 | -0.0613  | 0.18602  | 0.048236 | 0.29824  | 0.09995  | 0.03081  | 0.169745 | 0.00023  |
| 0.16818  | -0.096   | 0.03811  | -0.09389 | 0.04256  | -0.1198  | 0.00956  | 0.082416 | 0.0752   |
| 7.86E-05 | 0.035462 | 0.44455  | 0.189612 | 3.72E-05 | 0.178573 | 0.0001   | 0.065289 | 0.15895  |
| 0.55007  | -0.03122 | 0.50089  | -0.07323 | 0.11402  | -0.05614 | 0.22592  | 0.122886 | 0.00785  |
| 0.57269  | -0.07757 | 0.09405  | -0.00185 | 0.96812  | -0.03279 | 0.47961  | 0.005372 | 0.90782  |
| 1.51E-06 | -0.26372 | 7.18E-09 | -0.23846 | 1.84E-07 | -0.26537 | 5.74E-09 | -0.03725 | 0.42195  |
| 2.12E-07 | -0.29185 | 1.27E-10 | -0.33809 | 5.97E-14 | -0.36262 | 5.85E-16 | -0.06684 | 0.14923  |
| 0.00221  | -0.18007 | 9.11E-05 | -0.16304 | 0.0004   | -0.18134 | 8.12E-05 | -0.16184 | 0.00045  |
| 0.37109  | -0.20924 | 5.11E-06 | -0.15427 | 0.00082  | -0.18242 | 7.34E-05 | 0.01061  | 0.81913  |
| 0.15348  | -0.2218  | 1.29E-06 | -0.23589 | 2.51E-07 | -0.2562  | 1.96E-08 | -0.18482 | 5.87E-05 |
| 3.17E-18 | 0.13971  | 0.00248  | 0.189503 | 3.76E-05 | 0.278864 | 8.67E-10 | 0.226146 | 7.89E-07 |
| 0.50371  | 0.031884 | 0.49186  | -0.08513 | 0.06605  | -0.00657 | 0.88733  | -0.00539 | 0.9075   |
| 9.13E-07 | 0.024715 | 0.5942   | 0.135329 | 0.00339  | 0.095779 | 0.03854  | -0.01229 | 0.79103  |
| 1.57E-06 | 0.016638 | 0.71989  | 0.057592 | 0.21413  | 0.100687 | 0.02959  | -0.18766 | 4.49E-05 |
| 0.58983  | -0.06892 | 0.13696  | -0.11225 | 0.01523  | -0.04526 | 0.32904  | 0.151533 | 0.00102  |
| 0.10775  | -0.02656 | 0.567    | 0.055286 | 0.23308  | 0.071236 | 0.12423  | -0.1083  | 0.01924  |
| 0.10124  | 0.1273   | 0.00587  | 0.146314 | 0.00152  | 0.100671 | 0.02961  | 0.03342  | 0.47123  |
| 4.77E-09 | 0.399575 | 2.50E-19 | 0.348064 | 9.55E-15 | 0.400535 | 2.01E-19 | 0.057207 | 0.21722  |
| 1.04E-08 | -0.16885 | 0.00025  | -0.1441  | 0.0018   | -0.21803 | 1.97E-06 | -0.16705 | 0.00029  |
| 2.52E-10 | 0.103933 | 0.0247   | 0.099099 | 0.03227  | 0.19696  | 1.81E-05 | 0.361921 | 6.71E-16 |

|          |          |          |          |          |          |          |          |          |
|----------|----------|----------|----------|----------|----------|----------|----------|----------|
| 0.00051  | 0.461761 | 4.85E-26 | 0.193256 | 2.61E-05 | 0.263595 | 7.31E-09 | 0.114951 | 0.01293  |
| 4.93E-18 | 0.047808 | 0.30256  | 0.072478 | 0.11779  | 0.225272 | 8.72E-07 | 0.17547  | 0.00014  |
| 0.72434  | 0.001217 | 0.97908  | 0.023797 | 0.60799  | 0.021025 | 0.65042  | -0.04344 | 0.34888  |
| 0.64767  | -0.08924 | 0.05395  | -0.03424 | 0.46043  | -0.00181 | 0.96884  | 0.033427 | 0.47114  |
| 0.82683  | 0.002198 | 0.96221  | -0.02947 | 0.52529  | -0.01073 | 0.81704  | 0.074052 | 0.11     |
| 0.73952  | 0.062821 | 0.17533  | 0.006211 | 0.89352  | 0.031242 | 0.50063  | 0.116772 | 0.01156  |
| 0.32476  | 0.072397 | 0.1182   | 0.054336 | 0.24122  | 0.0703   | 0.12927  | -0.06809 | 0.14176  |
| 0.54277  | 0.002956 | 0.94921  | 0.044519 | 0.33708  | 0.014495 | 0.75472  | -0.12787 | 0.00565  |
| 0.85523  | -0.15289 | 0.00092  | -0.09653 | 0.03704  | -0.05524 | 0.23347  | -0.02534 | 0.58498  |
| 1.77E-29 | 0.46239  | 4.08E-26 | 0.221754 | 1.30E-06 | 0.416913 | 4.61E-21 | 0.337743 | 6.35E-14 |
| 1.08E-08 | 0.243551 | 9.85E-08 | 0.223425 | 1.08E-06 | 0.254366 | 2.49E-08 | 0.074219 | 0.1092   |
| 0.14626  | -0.19593 | 2.01E-05 | -0.17174 | 0.00019  | -0.14855 | 0.00128  | -0.05427 | 0.24176  |
| 0.76364  | -0.29825 | 4.76E-11 | -0.14129 | 0.00221  | -0.15005 | 0.00114  | -0.01877 | 0.68584  |
| 0.28285  | -0.00883 | 0.84907  | 0.019629 | 0.67223  | 0.024922 | 0.59113  | 0.062001 | 0.18104  |
| 0.20612  | 0.045019 | 0.33167  | -0.04282 | 0.35591  | 0.015222 | 0.74284  | 0.187886 | 4.39E-05 |
| 0.93112  | -0.27738 | 1.07E-09 | -0.2438  | 9.54E-08 | -0.21957 | 1.66E-06 | 0.07311  | 0.11461  |
| 0.00131  | 0.064908 | 0.16139  | -0.094   | 0.04231  | 0.057707 | 0.21322  | -0.00627 | 0.89248  |
| 0.29939  | -0.03263 | 0.4818   | 0.032157 | 0.48817  | 0.048242 | 0.29819  | 0.00077  | 0.98676  |
| 0.00051  | 0.073472 | 0.11282  | 0.183112 | 6.89E-05 | 0.137892 | 0.00283  | -0.04436 | 0.33876  |
| 0.01788  | 0.150963 | 0.00107  | 0.107396 | 0.02027  | 0.106893 | 0.02087  | 0.063671 | 0.16955  |
| 0.04871  | 0.050451 | 0.27658  | 0.140887 | 0.00228  | 0.150771 | 0.00108  | 0.036691 | 0.42892  |
| 0.55465  | 0.003084 | 0.947    | -0.02046 | 0.65917  | -0.00864 | 0.85227  | -0.14865 | 0.00127  |
| 2.78E-05 | 0.097439 | 0.03529  | 0.117486 | 0.01106  | 0.139413 | 0.00253  | -0.01024 | 0.82535  |
| 0.27961  | 0.041006 | 0.37661  | -0.15455 | 0.0008   | -0.07616 | 0.10021  | 0.014127 | 0.76075  |
| 0.12031  | -0.11276 | 0.01477  | -0.20129 | 1.17E-05 | -0.11939 | 0.00981  | 0.035199 | 0.44794  |
| 0.68084  | -0.14059 | 0.00233  | -0.13729 | 0.00295  | -0.10045 | 0.02997  | -0.18231 | 7.42E-05 |
| 0.62532  | -0.07215 | 0.11947  | -0.08886 | 0.055    | -0.08982 | 0.05241  | -0.05945 | 0.1997   |
| 0.05982  | -0.09396 | 0.04239  | -0.10087 | 0.02929  | -0.03678 | 0.42786  | -0.08685 | 0.06075  |
| 1.19E-07 | -0.06641 | 0.15189  | -0.19998 | 1.34E-05 | -0.20832 | 5.63E-06 | -0.12166 | 0.00849  |
| 1.73E-10 | 0.158472 | 0.00059  | 0.277553 | 1.05E-09 | 0.286718 | 2.75E-10 | 0.182318 | 7.41E-05 |
| 0.06216  | -0.07082 | 0.12643  | -0.08606 | 0.06313  | -0.11406 | 0.01365  | -0.12069 | 0.00904  |
| 3.31E-08 | -0.27465 | 1.58E-09 | -0.40359 | 1.01E-19 | -0.35728 | 1.66E-15 | -0.07883 | 0.08882  |
| 0.05222  | 0.150602 | 0.0011   | -0.10908 | 0.01837  | 0.032265 | 0.4867   | 0.481809 | 1.62E-28 |
| 0.01291  | -0.04103 | 0.37636  | -0.15357 | 0.00087  | -0.0609  | 0.18892  | 0.142233 | 0.00206  |
| 0.19627  | -0.14011 | 0.00241  | -0.2043  | 8.58E-06 | -0.18932 | 3.83E-05 | 0.461879 | 4.69E-26 |
| 2.43E-08 | -0.11996 | 0.00946  | -0.29767 | 5.20E-11 | -0.28381 | 4.22E-10 | -0.13361 | 0.00382  |
| 0.28502  | -0.03619 | 0.43528  | 8.21E-05 | 0.99859  | -0.03217 | 0.48793  | -0.1307  | 0.00467  |
| 0.95961  | 0.050686 | 0.27435  | 0.04285  | 0.35551  | 0.037724 | 0.41603  | 0.002919 | 0.94984  |
| 1.85E-10 | 0.222722 | 1.17E-06 | 0.272043 | 2.28E-09 | 0.32026  | 1.34E-12 | -0.10952 | 0.0179   |
| 0.00061  | 0.007073 | 0.87884  | 0.083282 | 0.07217  | 0.119437 | 0.00978  | 0.20242  | 1.04E-05 |
| 0.00317  | -0.05521 | 0.23375  | 0.043068 | 0.35307  | 0.085855 | 0.06377  | -0.19949 | 1.40E-05 |
| 4.98E-07 | 0.360219 | 9.37E-16 | 0.216643 | 2.30E-06 | 0.263491 | 7.41E-09 | 0.167326 | 0.00028  |
| 0.36171  | 0.030384 | 0.51247  | -0.01893 | 0.6833   | -0.01968 | 0.67141  | 0.246568 | 6.75E-08 |
| 0.03169  | -0.04767 | 0.30394  | 0.086623 | 0.06142  | 0.089025 | 0.05454  | 0.021674 | 0.64038  |
| 0.0165   | -0.20872 | 5.40E-06 | -0.16261 | 0.00042  | -0.18571 | 5.40E-05 | -0.07393 | 0.1106   |

|          |          |          |          |          |           |          |          |          |
|----------|----------|----------|----------|----------|-----------|----------|----------|----------|
| 3.50E-15 | 0.129358 | 0.00511  | 0.054664 | 0.23839  | 0.244532  | 8.71E-08 | 0.292364 | 1.18E-10 |
| 0.00027  | -0.23777 | 2.00E-07 | -0.14414 | 0.00179  | -0.19633  | 1.93E-05 | -0.34628 | 1.33E-14 |
| 0.00406  | -0.15827 | 0.0006   | -0.17083 | 0.00021  | -0.19879  | 1.51E-05 | -0.21389 | 3.10E-06 |
| 0.54188  | -0.13995 | 0.00244  | -0.12101 | 0.00885  | -0.07915  | 0.08754  | 0.104986 | 0.02327  |
| 1.04E-06 | 0.31888  | 1.69E-12 | 0.346997 | 1.17E-14 | 0.338428  | 5.61E-14 | -0.13324 | 0.00392  |
| 0.71289  | -0.2818  | 5.67E-10 | -0.21007 | 4.68E-06 | -0.20527  | 7.76E-06 | -0.11016 | 0.01724  |
| 0.132    | -0.21132 | 4.09E-06 | -0.05292 | 0.25373  | -0.06396  | 0.1676   | -0.07128 | 0.12401  |
| 0.00177  | -0.14833 | 0.00131  | -0.32709 | 4.17E-13 | -0.2528   | 3.05E-08 | -0.08632 | 0.06235  |
| 0.03282  | -0.03047 | 0.51125  | -0.16621 | 0.00031  | -0.13626  | 0.00317  | 0.117162 | 0.01128  |
| 0.00532  | -0.03675 | 0.42822  | 0.206126 | 7.10E-06 | 0.170831  | 0.00021  | 0.122218 | 0.00819  |
| 0.36173  | -0.18333 | 6.75E-05 | -0.13557 | 0.00333  | -0.14472  | 0.00171  | 0.018956 | 0.68284  |
| 0.00631  | 0.017895 | 0.69972  | -0.0567  | 0.2213   | 0.011229  | 0.80876  | 0.183642 | 6.55E-05 |
| 0.00075  | 0.383113 | 8.95E-18 | 0.404368 | 8.48E-20 | 0.32314   | 8.23E-13 | 0.132114 | 0.00424  |
| 0.06116  | -0.0151  | 0.74491  | 0.118882 | 0.01013  | 0.133946  | 0.00373  | -0.05183 | 0.26369  |
| 0.00061  | 0.311043 | 6.20E-12 | 0.345084 | 1.66E-14 | 0.341508  | 3.21E-14 | 0.179706 | 9.43E-05 |
| 0.08955  | -0.22692 | 7.21E-07 | -0.14985 | 0.00116  | -0.09159  | 0.04792  | 0.315627 | 2.92E-12 |
| 0.00027  | -0.10439 | 0.02407  | -0.20381 | 9.02E-06 | -0.20972  | 4.86E-06 | -0.22778 | 6.53E-07 |
| 0.03566  | -0.0493  | 0.28774  | 0.037914 | 0.41368  | 0.033976  | 0.46388  | 0.073648 | 0.11196  |
| 0.96671  | -0.02093 | 0.65195  | 0.001448 | 0.9751   | 0.011277  | 0.80796  | -0.34793 | 9.80E-15 |
| 0.03162  | -0.10169 | 0.028    | -0.05507 | 0.23494  | -0.09016  | 0.05151  | -0.03566 | 0.44208  |
| 0.10163  | -0.29062 | 1.53E-10 | -0.20495 | 8.02E-06 | -0.19431  | 2.36E-05 | -0.22669 | 7.41E-07 |
| 9.42E-05 | -0.11221 | 0.01526  | 0.248431 | 5.33E-08 | 0.155644  | 0.00074  | -0.09588 | 0.03834  |
| 0.78199  | -0.04419 | 0.34067  | 0.027587 | 0.55206  | -0.01428  | 0.75825  | 0.067776 | 0.14363  |
| 0.66518  | -0.06054 | 0.19158  | -0.01618 | 0.72734  | -3.79E-05 | 0.99935  | -0.02023 | 0.66279  |
| 0.01184  | 0.040389 | 0.38385  | 0.022564 | 0.6267   | 0.063613  | 0.16994  | -0.0459  | 0.32226  |
| 0.09091  | -0.09925 | 0.03201  | -0.08863 | 0.05562  | -0.0058   | 0.90045  | -0.19269 | 2.76E-05 |
| 0.07905  | -0.02051 | 0.65845  | -0.06785 | 0.14318  | 0.001193  | 0.97948  | -0.07747 | 0.09449  |
| 0.32839  | -0.1935  | 2.55E-05 | -0.14538 | 0.00163  | -0.11225  | 0.01523  | -0.1622  | 0.00043  |
| 0.01108  | -0.26961 | 3.20E-09 | -0.11611 | 0.01204  | -0.18401  | 6.33E-05 | -0.25798 | 1.55E-08 |
| 0.00259  | -0.21291 | 3.45E-06 | -0.03263 | 0.48185  | -0.02378  | 0.60828  | -0.1794  | 9.69E-05 |
| 0.97491  | -0.07874 | 0.08919  | -0.01905 | 0.68131  | -0.03286  | 0.47865  | 0.097957 | 0.03432  |
| 8.09E-20 | 0.263896 | 7.02E-09 | 0.278247 | 9.47E-10 | 0.369372  | 1.53E-16 | 0.249488 | 4.66E-08 |
| 7.12E-05 | -0.14195 | 0.00211  | -0.01627 | 0.72586  | 0.019135  | 0.68002  | -0.041   | 0.37663  |
| 3.74E-05 | 0.100999 | 0.02908  | 0.19434  | 2.35E-05 | 0.206044  | 7.16E-06 | 0.084111 | 0.06937  |
| 0.25195  | -0.01996 | 0.66704  | -0.11494 | 0.01294  | -0.08703  | 0.0602   | 0.145867 | 0.00157  |
| 0.27039  | -0.23794 | 1.96E-07 | -0.1249  | 0.00688  | -0.15734  | 0.00064  | 0.093865 | 0.04261  |
| 0.05934  | 0.08861  | 0.05568  | 0.035505 | 0.44399  | 0.090275  | 0.05122  | 0.073467 | 0.11285  |
| 7.43E-13 | -0.22627 | 7.77E-07 | -0.32609 | 4.95E-13 | -0.34928  | 7.61E-15 | -0.01242 | 0.78898  |
| 0.93998  | -0.0666  | 0.15075  | -0.04656 | 0.31539  | -0.06242  | 0.17814  | -0.0931  | 0.04434  |
| 0.00242  | -0.12995 | 0.00491  | -0.00336 | 0.94224  | 0.018477  | 0.69044  | -0.07055 | 0.12791  |
| 0.92529  | -0.03948 | 0.39469  | -0.07779 | 0.09313  | -0.04709  | 0.30987  | -0.06355 | 0.17035  |
| 0.32957  | 0.026167 | 0.57272  | -0.13654 | 0.00311  | -0.08758  | 0.05861  | 0.469564 | 5.52E-27 |
| 0.87771  | -0.0918  | 0.0474   | -0.09834 | 0.03363  | -0.04635  | 0.31757  | 0.002166 | 0.96277  |
| 2.80E-05 | -0.03465 | 0.45502  | -0.00221 | 0.96208  | 0.055258  | 0.23332  | 0.28988  | 1.71E-10 |
| 0.22192  | -0.01982 | 0.66919  | 0.003557 | 0.93889  | -0.02773  | 0.55     | 0.078972 | 0.08825  |

|          |          |          |          |          |          |          |          |          |
|----------|----------|----------|----------|----------|----------|----------|----------|----------|
| 0.9754   | -0.02549 | 0.58273  | 0.02204  | 0.63474  | 0.013874 | 0.76492  | -0.12262 | 0.00798  |
| 0.05974  | -0.1536  | 0.00087  | -0.12489 | 0.00689  | -0.16716 | 0.00029  | -0.0346  | 0.4557   |
| 0.31587  | -0.20111 | 1.19E-05 | -0.09157 | 0.04797  | -0.07987 | 0.08469  | -0.02438 | 0.59922  |
| 3.34E-07 | -0.02427 | 0.60086  | 0.052402 | 0.25841  | 0.107468 | 0.02018  | 0.471708 | 3.01E-27 |
| 1.68E-10 | 0.101909 | 0.02766  | 0.246576 | 6.74E-08 | 0.271573 | 2.44E-09 | 0.039407 | 0.39553  |
| 1.41E-07 | -0.21556 | 2.59E-06 | 0.057751 | 0.21288  | 0.081371 | 0.07898  | 0.061632 | 0.18366  |
| 0.57881  | -0.09564 | 0.03883  | -0.06549 | 0.15766  | -0.06581 | 0.15564  | -0.15531 | 0.00076  |
| 0.0003   | 0.122139 | 0.00824  | 0.108111 | 0.01945  | 0.161947 | 0.00044  | -0.02491 | 0.59136  |
| 0.61683  | 0.261735 | 9.39E-09 | 0.126417 | 0.00623  | 0.135683 | 0.0033   | 0.314772 | 3.36E-12 |
| 0.39906  | 0.051598 | 0.26579  | -0.06731 | 0.14642  | -0.00738 | 0.87364  | 0.280441 | 6.90E-10 |
| 0.01702  | -0.01534 | 0.74094  | 0.086171 | 0.06279  | 0.090948 | 0.04951  | -0.02893 | 0.53291  |
| 0.71538  | -0.34836 | 9.03E-15 | -0.26509 | 5.96E-09 | -0.22552 | 8.48E-07 | 0.101408 | 0.02844  |
| 0.02017  | -0.10282 | 0.02629  | -0.13666 | 0.00308  | -0.06517 | 0.15971  | -0.15006 | 0.00114  |
| 4.76E-07 | -0.17363 | 0.00016  | 0.044959 | 0.33232  | 0.080491 | 0.08229  | 0.160301 | 0.00051  |
| 0.70969  | -0.1365  | 0.00312  | -0.11449 | 0.0133   | -0.12041 | 0.0092   | 0.027522 | 0.553    |
| 5.38E-05 | -0.20821 | 5.70E-06 | 0.065969 | 0.15464  | 0.03499  | 0.45064  | -0.09518 | 0.03979  |
| 0.90746  | -0.09191 | 0.04713  | -0.02099 | 0.65095  | -0.03974 | 0.39156  | 0.024086 | 0.60364  |
| 0.92801  | -0.19796 | 1.64E-05 | -0.09205 | 0.04681  | -0.12063 | 0.00907  | 0.011399 | 0.80593  |
| 1.73E-05 | -0.08254 | 0.07476  | 0.049636 | 0.28443  | 0.108273 | 0.01926  | 0.267456 | 4.32E-09 |
| 0.98329  | 0.150464 | 0.00111  | -0.06684 | 0.14928  | -0.03835 | 0.40834  | 0.152726 | 0.00093  |
| 0.00116  | 0.227873 | 6.46E-07 | 0.085707 | 0.06423  | 0.18866  | 4.08E-05 | 0.248668 | 5.18E-08 |
| 0.45712  | 0.243464 | 9.95E-08 | 0.102536 | 0.02671  | 0.122978 | 0.0078   | 0.31342  | 4.20E-12 |
| 1.21E-08 | -0.20769 | 6.02E-06 | -0.23731 | 2.12E-07 | -0.25682 | 1.80E-08 | -0.25819 | 1.51E-08 |
| 0.05721  | -0.02234 | 0.63014  | -0.0318  | 0.49306  | -0.00849 | 0.85485  | -0.25956 | 1.26E-08 |
| 0.11659  | -0.10476 | 0.02357  | -0.15462 | 0.0008   | -0.16205 | 0.00044  | -0.0182  | 0.6949   |
| 0.01614  | -0.03945 | 0.39506  | -0.00765 | 0.86904  | -0.06445 | 0.16441  | 0.24145  | 1.28E-07 |
| 0.07278  | -0.05429 | 0.24161  | -0.02254 | 0.62714  | -0.04423 | 0.34017  | -0.08458 | 0.06783  |
| 0.05689  | 0.122518 | 0.00804  | 0.087111 | 0.05997  | 0.13568  | 0.00331  | -0.17501 | 0.00014  |
| 9.86E-27 | 0.306124 | 1.37E-11 | 0.256426 | 1.90E-08 | 0.403185 | 1.11E-19 | 0.172196 | 0.00018  |
| 0.00026  | -0.01539 | 0.74005  | 0.057277 | 0.21666  | 0.067975 | 0.14245  | -0.10597 | 0.022    |
| 0.01755  | -0.09092 | 0.04957  | -0.15274 | 0.00093  | -0.14314 | 0.00193  | -0.08026 | 0.08317  |
| 0.00137  | -0.23402 | 3.14E-07 | 0.053254 | 0.25074  | 0.052416 | 0.25829  | -0.13127 | 0.00449  |
| 0.00017  | -0.2152  | 2.69E-06 | -0.16889 | 0.00025  | -0.19326 | 2.61E-05 | -0.14444 | 0.00175  |
| 0.11285  | -0.09777 | 0.03466  | -0.04329 | 0.35059  | -0.05871 | 0.20539  | -0.10614 | 0.02179  |
| 0.00012  | -0.1295  | 0.00507  | -0.21171 | 3.93E-06 | -0.22093 | 1.43E-06 | 0.115881 | 0.01221  |
| 0.00421  | 0.106185 | 0.02173  | -0.03867 | 0.40442  | 0.015878 | 0.73218  | 0.448367 | 1.78E-24 |
| 0.00189  | 0.316851 | 2.38E-12 | 0.162111 | 0.00044  | 0.211551 | 3.99E-06 | 0.098724 | 0.03293  |
| 3.55E-05 | 0.379259 | 2.01E-17 | 0.163163 | 0.0004   | 0.252491 | 3.17E-08 | 0.041561 | 0.37019  |
| 0.70152  | -0.03225 | 0.48689  | -0.03121 | 0.50113  | -0.0276  | 0.55181  | -0.06801 | 0.14222  |
| 0.00942  | -0.07053 | 0.12804  | -0.12657 | 0.00616  | -0.03268 | 0.48107  | 0.145254 | 0.00165  |
| 0.0031   | -0.17705 | 0.00012  | -0.07952 | 0.08607  | -0.01343 | 0.77217  | -0.00109 | 0.9812   |
| 0.00044  | -0.14644 | 0.00151  | -0.21935 | 1.70E-06 | -0.23897 | 1.73E-07 | -0.07172 | 0.12169  |
| 0.29865  | 0.125649 | 0.00655  | 0.142531 | 0.00202  | 0.138402 | 0.00272  | 0.350781 | 5.73E-15 |
| 0.013    | 0.196957 | 1.81E-05 | -0.10596 | 0.02201  | 0.015052 | 0.74562  | 0.085401 | 0.06519  |
| 0.0745   | -0.08196 | 0.07681  | 0.100418 | 0.03003  | 0.076889 | 0.097    | -0.11885 | 0.01015  |

|          |          |          |          |          |          |          |          |          |
|----------|----------|----------|----------|----------|----------|----------|----------|----------|
| 0.08473  | -0.32632 | 4.77E-13 | -0.18883 | 4.01E-05 | -0.20211 | 1.08E-05 | -0.25454 | 2.43E-08 |
| 0.58697  | -0.22426 | 9.79E-07 | -0.12545 | 0.00664  | -0.13112 | 0.00454  | -0.09957 | 0.03146  |
| 0.01649  | -0.15892 | 0.00057  | -0.07378 | 0.11131  | -0.01164 | 0.80185  | -0.3797  | 1.83E-17 |
| 0.97374  | -0.01843 | 0.69122  | -0.16759 | 0.00028  | -0.07463 | 0.10723  | -0.0045  | 0.92282  |
| 0.29644  | -0.04672 | 0.31368  | -0.06404 | 0.16707  | -0.06096 | 0.18846  | -0.08454 | 0.06797  |
| 0.26679  | -0.04092 | 0.37767  | -0.05661 | 0.22203  | -0.05885 | 0.20425  | -0.09112 | 0.04908  |
| 0.67209  | -0.03341 | 0.47143  | -0.03545 | 0.44471  | -0.02642 | 0.56899  | -0.05504 | 0.23516  |
| 0.75569  | 0.046855 | 0.31231  | 0.020277 | 0.66206  | 0.021925 | 0.63651  | -0.00336 | 0.94231  |
| 0.00176  | -0.0792  | 0.08732  | 0.104734 | 0.02361  | 0.103949 | 0.02468  | -0.16544 | 0.00033  |
| 0.10344  | 0.028775 | 0.53506  | -0.02261 | 0.62602  | 0.022475 | 0.62807  | -0.07411 | 0.10971  |
| 0.01873  | 0.181276 | 8.16E-05 | 0.283897 | 4.17E-10 | 0.203801 | 9.04E-06 | 0.248663 | 5.18E-08 |
| 2.50E-06 | 0.303731 | 2.01E-11 | 0.167483 | 0.00028  | 0.249825 | 4.47E-08 | 0.207849 | 5.92E-06 |
| 5.03E-14 | 0.343494 | 2.23E-14 | 0.072572 | 0.11731  | 0.271521 | 2.46E-09 | 0.194706 | 2.27E-05 |
| 3.07E-13 | 0.064733 | 0.16253  | 0.14043  | 0.00235  | 0.190377 | 3.46E-05 | 0.188754 | 4.04E-05 |
| 5.40E-14 | 0.124366 | 0.00713  | 0.324026 | 7.07E-13 | 0.328281 | 3.39E-13 | 0.086169 | 0.0628   |
| 0.38538  | -0.05471 | 0.23798  | -0.0339  | 0.46493  | -0.02417 | 0.60238  | -0.31676 | 2.41E-12 |
| 0.00144  | -0.23911 | 1.70E-07 | -0.22984 | 5.14E-07 | -0.22034 | 1.52E-06 | -0.29546 | 7.33E-11 |
| 0.20093  | 0.195394 | 2.12E-05 | 0.079219 | 0.08726  | 0.119464 | 0.00977  | 0.492888 | 5.89E-30 |
| 0.53285  | -0.04322 | 0.35141  | -0.10411 | 0.02446  | -0.10173 | 0.02793  | -0.11764 | 0.01095  |
| 0.02872  | -0.07528 | 0.1042   | -0.02557 | 0.5815   | -0.02913 | 0.53008  | -0.21776 | 2.03E-06 |
| 0.42091  | -0.18068 | 8.62E-05 | -0.02448 | 0.59765  | -0.03426 | 0.46019  | 0.013926 | 0.76406  |
| 6.04E-18 | 0.34336  | 2.29E-14 | 0.307023 | 1.19E-11 | 0.401122 | 1.77E-19 | 0.194472 | 2.32E-05 |
| 5.26E-11 | 0.463766 | 2.79E-26 | 0.082987 | 0.07319  | 0.286512 | 2.83E-10 | 0.034999 | 0.45052  |
| 5.38E-10 | 0.392493 | 1.19E-18 | 0.160892 | 0.00048  | 0.299545 | 3.89E-11 | 0.119923 | 0.00949  |
| 0.01428  | -0.33315 | 1.44E-13 | -0.37891 | 2.16E-17 | -0.27721 | 1.10E-09 | -0.27398 | 1.74E-09 |
| 0.09644  | -0.17111 | 0.0002   | -0.09666 | 0.03678  | -0.07232 | 0.1186   | 0.169907 | 0.00023  |
| 0.0927   | -0.02324 | 0.61645  | -0.07749 | 0.09439  | 0.010412 | 0.82245  | 0.072417 | 0.1181   |
| 1.22E-15 | 0.028253 | 0.54249  | 0.246545 | 6.77E-08 | 0.277582 | 1.04E-09 | 0.171375 | 0.0002   |
| 0.8411   | -0.05578 | 0.22889  | -0.01151 | 0.80402  | -0.02551 | 0.58244  | -0.12639 | 0.00624  |
| 0.22994  | -0.03776 | 0.41562  | -0.03279 | 0.47964  | -0.04204 | 0.36468  | -0.10186 | 0.02773  |
| 0.0216   | 0.00695  | 0.88093  | 0.059787 | 0.19715  | 0.073676 | 0.11182  | 0.310796 | 6.46E-12 |
| 0.8534   | 0.190741 | 3.34E-05 | 0.061247 | 0.18642  | 0.078896 | 0.08856  | 0.127719 | 0.00571  |
| 0.01483  | -0.04531 | 0.32851  | 0.056119 | 0.22611  | 0.092116 | 0.04664  | 0.252424 | 3.20E-08 |
| 0.07647  | 0.149735 | 0.00117  | 0.091887 | 0.04719  | 0.123827 | 0.00738  | 0.222378 | 1.21E-06 |
| 0.93125  | 0.091099 | 0.04913  | 0.098343 | 0.03361  | 0.071681 | 0.12189  | -0.01576 | 0.73404  |
| 0.02795  | 0.013776 | 0.76653  | -0.04008 | 0.38751  | -0.06274 | 0.1759   | -0.07331 | 0.1136   |
| 0.87659  | -0.02473 | 0.594    | 2.54E-05 | 0.99956  | 0.008037 | 0.86249  | -0.06451 | 0.16398  |
| 0.00027  | -0.22444 | 9.59E-07 | 0.01753  | 0.70555  | 0.035986 | 0.43785  | 0.080667 | 0.08162  |
| 0.00169  | -0.24529 | 7.93E-08 | -0.04671 | 0.31377  | -0.01791 | 0.69948  | 0.137845 | 0.00283  |
| 0.00038  | -0.29651 | 6.23E-11 | -0.02275 | 0.62392  | -0.01251 | 0.78748  | 0.158211 | 0.0006   |
| 3.40E-06 | -0.25356 | 2.76E-08 | 0.08663  | 0.0614   | 0.065821 | 0.15557  | 0.150244 | 0.00113  |
| 0.29436  | -0.00495 | 0.91505  | 0.02537  | 0.58447  | 0.052078 | 0.26137  | 0.070275 | 0.1294   |
| 0.01637  | 0.11535  | 0.01262  | 0.109044 | 0.01841  | 0.016421 | 0.72339  | -0.00242 | 0.95838  |
| 2.46E-07 | -0.26274 | 8.21E-09 | -0.16302 | 0.0004   | -0.26325 | 7.65E-09 | -0.06022 | 0.19392  |
| 1.83E-06 | -0.06884 | 0.13741  | -0.1079  | 0.01968  | -0.16758 | 0.00028  | -0.03126 | 0.50045  |

|          |          |          |           |          |          |          |           |          |
|----------|----------|----------|-----------|----------|----------|----------|-----------|----------|
| 2.83E-10 | 0.055495 | 0.23132  | 0.094558  | 0.0411   | 0.126952 | 0.00601  | -0.10092  | 0.0292   |
| 1.04E-18 | 0.113422 | 0.01419  | 0.26755   | 4.26E-09 | 0.327814 | 3.68E-13 | 0.018284  | 0.69351  |
| 0.04509  | 0.090185 | 0.05146  | 0.31408   | 3.77E-12 | 0.141583 | 0.00216  | 0.017107  | 0.71234  |
| 0.0005   | 0.095048 | 0.04006  | 0.079496  | 0.08616  | 0.108252 | 0.01929  | 0.263313  | 7.59E-09 |
| 0.71193  | -0.01703 | 0.71362  | 0.024665  | 0.59495  | 0.02076  | 0.65453  | -9.57E-05 | 0.99835  |
| 0.99118  | 0.12464  | 0.007    | 0.005963  | 0.89774  | 0.038455 | 0.40705  | 0.44882   | 1.58E-24 |
| 0.06687  | 0.014411 | 0.7561   | -0.02497  | 0.59037  | -0.03882 | 0.40264  | 0.11179   | 0.01565  |
| 0.40559  | -0.04972 | 0.28359  | -0.02464  | 0.5953   | -0.03297 | 0.47728  | -0.01001  | 0.82911  |
| 0.03977  | 0.047288 | 0.30785  | 0.108776  | 0.01871  | 0.101342 | 0.02854  | 0.003684  | 0.93671  |
| 0.00576  | 0.022441 | 0.62859  | 0.024648  | 0.59521  | 0.07186  | 0.12096  | 0.216101  | 2.44E-06 |
| 0.98084  | 0.121861 | 0.00838  | 0.021082  | 0.64954  | 0.063909 | 0.16796  | 0.103489  | 0.02532  |
| 0.44124  | -0.02458 | 0.59621  | -9.27E-05 | 0.99841  | 0.007555 | 0.87065  | -0.01331  | 0.77417  |
| 0.68507  | -0.0485  | 0.2956   | -0.02372  | 0.60919  | -0.02853 | 0.53853  | -0.02342  | 0.61372  |
| 0.0046   | 0.072097 | 0.11974  | -0.01323  | 0.77556  | 0.084706 | 0.06742  | 0.11047   | 0.01693  |
| 0.4957   | -0.11584 | 0.01224  | -0.02816  | 0.54383  | -0.02364 | 0.61031  | 0.039183  | 0.39822  |
| 0.03259  | 0.18585  | 5.33E-05 | 0.176544  | 0.00013  | 0.164406 | 0.00036  | 0.016621  | 0.72015  |
| 0.00738  | 0.044425 | 0.3381   | 0.12514   | 0.00678  | 0.127327 | 0.00586  | 0.139516  | 0.00251  |
| 4.56E-06 | 0.10342  | 0.02542  | 0.185511  | 5.50E-05 | 0.184068 | 6.30E-05 | 0.291415  | 1.36E-10 |
| 0.22722  | -0.0002  | 0.99648  | -0.03115  | 0.50195  | 0.041299 | 0.37321  | 0.032768  | 0.47993  |
| 0.05095  | -0.1681  | 0.00026  | 0.006792  | 0.88362  | 0.027171 | 0.55807  | 0.058147  | 0.20974  |
| 0.1309   | 0.070099 | 0.13037  | 0.013049  | 0.77852  | 0.041816 | 0.36726  | 0.027345  | 0.55556  |
| 0.88532  | 0.005197 | 0.91082  | 0.025975  | 0.57554  | 0.037491 | 0.41892  | 0.007925  | 0.86439  |
| 0.10732  | -0.09193 | 0.04708  | -0.05516  | 0.23417  | -0.07835 | 0.09081  | -0.15972  | 0.00053  |
| 0.97816  | -0.04068 | 0.38047  | 0.035321  | 0.44637  | 0.011478 | 0.80461  | -0.10056  | 0.0298   |
| 0.21957  | 0.125508 | 0.00661  | 0.043655  | 0.34654  | 0.097991 | 0.03426  | 0.23932   | 1.66E-07 |
| 2.94E-06 | 0.058805 | 0.20463  | 0.210866  | 4.30E-06 | 0.221017 | 1.41E-06 | 0.126204  | 0.00632  |
| 0.00263  | -0.09748 | 0.0352   | 0.03596   | 0.43818  | 0.081559 | 0.07829  | 0.088113  | 0.05708  |
| 0.0023   | 0.038434 | 0.4073   | 0.179829  | 9.32E-05 | 0.166721 | 0.0003   | 0.158483  | 0.00059  |
| 0.01641  | 0.020364 | 0.6607   | 0.108071  | 0.01949  | 0.143775 | 0.00184  | 0.047346  | 0.30726  |
| 0.05068  | -0.21335 | 3.29E-06 | -0.15676  | 0.00068  | -0.10869 | 0.0188   | 0.109649  | 0.01777  |
| 0.29664  | -0.02024 | 0.66271  | -0.05014  | 0.27958  | -0.05363 | 0.24736  | -0.05419  | 0.2425   |
| 0.65478  | -0.08645 | 0.06194  | -0.04146  | 0.37134  | -0.05508 | 0.23485  | -0.0134   | 0.77268  |
| 4.19E-06 | 0.513085 | 1.01E-32 | 0.216043  | 2.45E-06 | 0.286335 | 2.91E-10 | 0.219191  | 1.73E-06 |
| 0.00122  | -0.06919 | 0.13544  | -0.10692  | 0.02083  | -0.17519 | 0.00014  | -0.17007  | 0.00022  |
| 0.09024  | -0.11909 | 0.01     | -0.0597   | 0.1978   | -0.00456 | 0.92168  | 0.149183  | 0.00122  |
| 0.00013  | -0.15973 | 0.00053  | -0.2981   | 4.87E-11 | -0.2474  | 6.08E-08 | 0.263342  | 7.56E-09 |
| 1.88E-12 | -0.09435 | 0.04155  | -0.13876  | 0.00265  | 0.057816 | 0.21236  | 0.416537  | 5.04E-21 |
| 0.02495  | -0.02197 | 0.63576  | -0.20373  | 9.10E-06 | -0.06338 | 0.17154  | -0.07797  | 0.09237  |
| 0.0157   | -0.01219 | 0.79275  | -0.0185   | 0.6901   | 0.063463 | 0.17095  | 0.05814   | 0.2098   |
| 4.96E-09 | 0.135588 | 0.00333  | -0.01637  | 0.72416  | 0.114471 | 0.01331  | 0.242737  | 1.09E-07 |
| 0.76249  | -0.19457 | 2.30E-05 | -0.16543  | 0.00033  | -0.17036 | 0.00022  | -0.16734  | 0.00028  |
| 0.1894   | -0.03716 | 0.42306  | -0.12222  | 0.00819  | -0.08877 | 0.05525  | -0.12917  | 0.00518  |
| 0.40192  | -0.12233 | 0.00813  | -0.00995  | 0.83025  | 0.000278 | 0.99522  | 0.078323  | 0.0909   |
| 0.01189  | 0.06552  | 0.15747  | 0.109291  | 0.01815  | 0.097891 | 0.03444  | 0.022298  | 0.63077  |
| 3.33E-07 | 0.34321  | 2.35E-14 | 0.27058   | 2.80E-09 | 0.283778 | 4.24E-10 | 0.176643  | 0.00012  |



|          |          |          |          |          |          |          |          |          |
|----------|----------|----------|----------|----------|----------|----------|----------|----------|
| 0.24841  | -0.05796 | 0.21123  | -0.06271 | 0.17611  | -0.04739 | 0.30682  | -0.07533 | 0.10398  |
| 0.05533  | -0.04253 | 0.35917  | -0.03572 | 0.44122  | -0.05349 | 0.24861  | -0.03693 | 0.42591  |
| 0.61782  | 0.020286 | 0.66193  | -0.0342  | 0.46098  | -0.03461 | 0.45558  | 0.071102 | 0.12494  |
| 0.24102  | 0.005697 | 0.90228  | -0.03241 | 0.48474  | -0.01989 | 0.66808  | 0.010578 | 0.81965  |
| 0.02375  | -0.09713 | 0.03587  | -0.0889  | 0.0549   | -0.10552 | 0.02257  | -0.08117 | 0.07973  |
| 0.37622  | -0.0578  | 0.21246  | -0.05782 | 0.2123   | -0.05322 | 0.25108  | 0.01672  | 0.71857  |
| 0.82967  | -0.0056  | 0.90395  | 0.013978 | 0.76321  | 0.012416 | 0.789    | 0.027247 | 0.55697  |
| 0.07066  | -0.21045 | 4.49E-06 | -0.00763 | 0.86945  | -0.02739 | 0.55494  | 0.011894 | 0.79767  |
| 0.55775  | -0.05505 | 0.23507  | -0.0794  | 0.08654  | -0.06091 | 0.18885  | 0.050798 | 0.27329  |
| 0.72432  | -0.08083 | 0.08098  | 0.000581 | 0.99002  | -0.03204 | 0.48977  | -0.0283  | 0.54179  |
| 0.00045  | 0.090908 | 0.04961  | 0.145969 | 0.00156  | 0.175205 | 0.00014  | 0.279513 | 7.89E-10 |
| 0.48684  | 0.204332 | 8.55E-06 | 0.149253 | 0.00122  | 0.140371 | 0.00236  | 0.040052 | 0.38784  |
| 0.51186  | 0.070436 | 0.12853  | 0.078209 | 0.09138  | 0.084368 | 0.06852  | 0.023537 | 0.61191  |
| 0.92637  | 0.019837 | 0.66896  | 0.029108 | 0.53034  | 0.004081 | 0.92991  | 0.086671 | 0.06128  |
| 0.03527  | -0.12953 | 0.00506  | -0.05282 | 0.25465  | -0.02028 | 0.66206  | -0.0784  | 0.0906   |
| 0.04037  | -0.13038 | 0.00477  | 0.096894 | 0.03633  | 0.051621 | 0.26558  | 0.070392 | 0.12876  |
| 0.14463  | 0.320228 | 1.35E-12 | 0.165708 | 0.00032  | 0.153222 | 0.00089  | 0.229052 | 5.64E-07 |
| 4.97E-11 | 0.234648 | 2.91E-07 | 0.217767 | 2.03E-06 | 0.26756  | 4.26E-09 | 0.2528   | 3.05E-08 |
| 0.5124   | -0.16376 | 0.00038  | -0.12885 | 0.00529  | -0.11636 | 0.01186  | -0.14011 | 0.00241  |
| 0.40131  | 0.029554 | 0.52406  | 0.078146 | 0.09164  | 0.015484 | 0.73859  | 0.000389 | 0.9933   |
| 0.73173  | -0.0927  | 0.04527  | -0.02794 | 0.54697  | -0.04639 | 0.31711  | -0.11789 | 0.01078  |
| 0.35758  | 0.201174 | 1.18E-05 | 0.171257 | 0.0002   | 0.17288  | 0.00017  | 0.310987 | 6.26E-12 |
| 0.09506  | -0.04066 | 0.3807   | -0.01685 | 0.71651  | -0.01665 | 0.71967  | 0.262003 | 9.06E-09 |
| 0.00846  | -0.12462 | 0.00701  | -0.10926 | 0.01818  | -0.17561 | 0.00014  | 0.072029 | 0.12009  |
| 0.00012  | -0.11219 | 0.01528  | -0.1393  | 0.00255  | -0.18216 | 7.52E-05 | -0.16689 | 0.00029  |
| 0.00012  | 0.324337 | 6.70E-13 | 0.214389 | 2.94E-06 | 0.254432 | 2.47E-08 | 0.134792 | 0.00352  |
| 0.65551  | 0.062168 | 0.17987  | 0.004607 | 0.9209   | 0.007321 | 0.87463  | 0.170217 | 0.00022  |
| 0.65375  | -0.11473 | 0.01311  | -0.01925 | 0.6782   | -0.01374 | 0.76717  | 0.036747 | 0.42822  |
| 6.79E-07 | 0.008223 | 0.85934  | -0.00808 | 0.86169  | -0.10249 | 0.02677  | 0.161507 | 0.00046  |
| 0.62928  | -0.02031 | 0.66155  | 0.047221 | 0.30854  | 0.041178 | 0.37462  | 0.053367 | 0.24973  |
| 0.01762  | -0.0209  | 0.65233  | 0.07987  | 0.08468  | 0.109319 | 0.01812  | 0.129637 | 0.00502  |
| 6.11E-11 | 0.071228 | 0.12427  | 0.265288 | 5.81E-09 | 0.284366 | 3.89E-10 | 0.214388 | 2.94E-06 |
| 0.12285  | 0.074092 | 0.10981  | 0.073386 | 0.11324  | 0.10961  | 0.01781  | 0.12848  | 0.00543  |
| 0.57022  | 0.039223 | 0.39774  | 0.128921 | 0.00527  | 0.095546 | 0.03902  | 0.070335 | 0.12907  |
| 0.10356  | -0.05375 | 0.24635  | -0.04609 | 0.32032  | -0.05972 | 0.19762  | -0.16248 | 0.00042  |
| 0.78495  | -0.0959  | 0.03829  | -0.04861 | 0.29452  | -0.026   | 0.57511  | 0.327734 | 3.73E-13 |
| 0.00745  | -0.09595 | 0.0382   | -0.02106 | 0.64988  | 0.006913 | 0.88156  | 0.126082 | 0.00637  |
| 0.63569  | -0.00531 | 0.90887  | -0.04804 | 0.30017  | 0.033095 | 0.47556  | 0.129919 | 0.00492  |
| 0.08309  | -0.2179  | 2.00E-06 | -0.09092 | 0.04957  | -0.12176 | 0.00844  | -0.08339 | 0.07179  |
| 0.12915  | -0.02245 | 0.62842  | 0.048284 | 0.29776  | 0.00453  | 0.92223  | -0.00598 | 0.89741  |
| 0.00615  | -0.13807 | 0.00279  | -0.03923 | 0.3976   | 0.003802 | 0.9347   | 0.030833 | 0.50626  |
| 1.98E-06 | 0.155248 | 0.00076  | 0.182614 | 7.21E-05 | 0.206269 | 6.99E-06 | -0.06581 | 0.15565  |
| 0.80535  | -0.04485 | 0.33351  | 0.00407  | 0.9301   | 0.006372 | 0.89076  | 0.010523 | 0.82058  |
| 0.00347  | 0.127343 | 0.00586  | 0.205026 | 7.96E-06 | 0.152448 | 0.00095  | -0.01929 | 0.67759  |
| 0.97427  | -0.06399 | 0.16742  | -0.04559 | 0.32553  | -0.0658  | 0.15573  | -0.09845 | 0.03342  |

|          |          |          |          |          |          |          |          |          |
|----------|----------|----------|----------|----------|----------|----------|----------|----------|
| 0.36111  | -0.0175  | 0.70599  | -0.0082  | 0.85969  | -0.02418 | 0.60225  | -0.01046 | 0.8216   |
| 0.13046  | -0.12464 | 0.007    | -0.20397 | 8.88E-06 | -0.15033 | 0.00112  | 0.268521 | 3.73E-09 |
| 0.23696  | -0.06093 | 0.18874  | -0.01873 | 0.68635  | 0.019486 | 0.67449  | -0.04593 | 0.32192  |
| 7.60E-13 | 0.202322 | 1.05E-05 | 0.368589 | 1.79E-16 | 0.354221 | 2.98E-15 | 0.126355 | 0.00625  |
| 0.00037  | -0.06189 | 0.18182  | -0.09147 | 0.0482   | -0.03246 | 0.48407  | 0.408442 | 3.34E-20 |
| 0.05777  | 0.008589 | 0.85314  | 0.085655 | 0.06439  | 0.013443 | 0.77201  | -0.0773  | 0.09521  |
| 0.47614  | 0.029142 | 0.52987  | 0.069468 | 0.13387  | 0.024039 | 0.60434  | -0.03794 | 0.41341  |
| 0.73838  | -0.02353 | 0.61198  | -0.00507 | 0.91293  | -0.00725 | 0.87576  | -0.18221 | 7.49E-05 |
| 0.10136  | -0.0432  | 0.35163  | 0.301665 | 2.79E-11 | 0.148587 | 0.00128  | -0.20499 | 7.99E-06 |
| 0.68196  | 0.098718 | 0.03294  | 0.129486 | 0.00507  | 0.108564 | 0.01894  | 0.090817 | 0.04984  |
| 1.18E-05 | 0.030331 | 0.5132   | 0.019372 | 0.67627  | 0.137415 | 0.00292  | -0.04288 | 0.35513  |
| 2.69E-11 | 0.185144 | 5.69E-05 | 0.142453 | 0.00203  | 0.21751  | 2.09E-06 | 0.010805 | 0.81586  |
| 0.34219  | 0.085742 | 0.06412  | -0.01215 | 0.79344  | -0.00428 | 0.92657  | 0.26305  | 7.87E-09 |
| 0.73389  | -0.09997 | 0.03078  | -0.0455  | 0.32652  | -0.02972 | 0.52178  | -0.06238 | 0.1784   |
| 0.00038  | 0.066261 | 0.15282  | -0.0542  | 0.24239  | 0.086364 | 0.06221  | -0.11539 | 0.01259  |
| 0.82418  | -0.07257 | 0.11734  | -0.03082 | 0.50645  | -0.03845 | 0.40705  | -0.04496 | 0.3323   |
| 0.02337  | -0.04866 | 0.29401  | 0.006089 | 0.89559  | 0.001799 | 0.96907  | 0.319061 | 1.64E-12 |
| 0.15373  | 0.227327 | 6.89E-07 | 0.097401 | 0.03536  | 0.089753 | 0.05259  | 0.29889  | 4.31E-11 |
| 0.43648  | -0.24531 | 7.91E-08 | -0.10425 | 0.02427  | -0.07981 | 0.0849   | -0.02715 | 0.55841  |
| 0.13033  | 0.04119  | 0.37448  | 0.005754 | 0.90131  | 0.049588 | 0.28489  | 0.061027 | 0.18801  |
| 0.80172  | 0.064423 | 0.16456  | 0.012881 | 0.7813   | -0.00776 | 0.86715  | 0.127543 | 0.00578  |
| 0.02211  | -0.14584 | 0.00158  | -0.0166  | 0.72056  | -0.01703 | 0.7135   | -0.02437 | 0.59944  |
| 0.1201   | 0.142857 | 0.00197  | -0.02652 | 0.56748  | 0.05113  | 0.27016  | -0.0666  | 0.15071  |
| 0.03296  | 0.199413 | 1.42E-05 | 0.102957 | 0.02609  | 0.126132 | 0.00635  | -0.01804 | 0.69732  |
| 2.96E-09 | 0.401669 | 1.56E-19 | 0.381068 | 1.38E-17 | 0.356805 | 1.82E-15 | 0.337538 | 6.59E-14 |
| 8.04E-08 | -0.07106 | 0.12519  | 0.112085 | 0.01538  | 0.124518 | 0.00706  | 0.094569 | 0.04108  |
| 8.76E-05 | -0.03634 | 0.43341  | -0.09906 | 0.03234  | -0.13172 | 0.00435  | -0.14957 | 0.00119  |
| 0.35781  | -0.28866 | 2.06E-10 | -0.1606  | 0.00049  | -0.19859 | 1.54E-05 | -0.1818  | 7.78E-05 |
| 0.01867  | -0.00419 | 0.92804  | 0.087905 | 0.05767  | 0.067015 | 0.14819  | 0.073211 | 0.11411  |
| 0.2856   | -0.11987 | 0.00952  | -0.03798 | 0.41282  | -0.04781 | 0.30258  | -0.11026 | 0.01714  |
| 1.40E-09 | 0.263447 | 7.46E-09 | 0.340738 | 3.69E-14 | 0.34772  | 1.02E-14 | 0.434112 | 6.95E-23 |
| 0.00019  | 0.010259 | 0.825    | 0.059883 | 0.19644  | 0.073177 | 0.11428  | -0.02642 | 0.569    |
| 0.00435  | 0.078767 | 0.08908  | 0.091341 | 0.04853  | 0.097051 | 0.03603  | 0.060423 | 0.19243  |
| 2.02E-10 | -0.21517 | 2.70E-06 | -0.30207 | 2.62E-11 | -0.28612 | 3.00E-10 | -0.04086 | 0.37832  |
| 3.76E-07 | 0.054341 | 0.24118  | 0.021457 | 0.64372  | 0.187918 | 4.38E-05 | 0.098916 | 0.03259  |
| 0.00396  | -0.18173 | 7.82E-05 | -0.12811 | 0.00556  | -0.05437 | 0.2409   | -0.30523 | 1.58E-11 |
| 0.00829  | 0.092848 | 0.04492  | 0.057152 | 0.21766  | 0.086023 | 0.06325  | 0.058613 | 0.20611  |
| 3.50E-08 | -0.0246  | 0.59587  | 0.074721 | 0.10682  | 0.130148 | 0.00485  | -0.12451 | 0.00706  |
| 6.10E-05 | -0.21528 | 2.67E-06 | -0.29577 | 6.99E-11 | -0.27768 | 1.03E-09 | -0.24586 | 7.38E-08 |
| 0.00041  | -0.1902  | 3.52E-05 | -0.08825 | 0.05669  | -0.02765 | 0.55108  | 0.18266  | 7.18E-05 |
| 4.85E-08 | -0.20388 | 8.97E-06 | -0.19947 | 1.41E-05 | -0.2434  | 1.00E-07 | -0.24255 | 1.11E-07 |
| 0.87687  | -0.13126 | 0.00449  | -0.00889 | 0.84806  | -0.05152 | 0.26652  | 0.111769 | 0.01567  |
| 0.03996  | 0.261533 | 9.65E-09 | 0.090332 | 0.05107  | 0.135775 | 0.00328  | -0.02177 | 0.63883  |
| 5.55E-10 | -0.18619 | 5.16E-05 | -0.2659  | 5.35E-09 | -0.25167 | 3.53E-08 | -0.02845 | 0.53971  |
| 0.03716  | -0.05741 | 0.21559  | -0.05087 | 0.27261  | -0.05313 | 0.25186  | -0.21306 | 3.40E-06 |

|          |          |          |          |          |          |          |          |          |
|----------|----------|----------|----------|----------|----------|----------|----------|----------|
| 0.59844  | -0.05471 | 0.23798  | -0.03551 | 0.444    | -0.09371 | 0.04295  | 0.084711 | 0.0674   |
| 0.12185  | 0.073468 | 0.11284  | 0.059216 | 0.20147  | 0.090066 | 0.05176  | -0.05685 | 0.22013  |
| 9.54E-10 | -0.14257 | 0.00201  | 0.15985  | 0.00053  | 0.17575  | 0.00013  | -0.15861 | 0.00058  |
| 0.17821  | 0.06749  | 0.14533  | -0.0064  | 0.89025  | 0.052681 | 0.25588  | -0.17213 | 0.00019  |
| 0.32183  | 0.056027 | 0.22687  | 0.048726 | 0.29336  | 0.006515 | 0.88833  | -0.0039  | 0.933    |
| 0.00398  | -0.13573 | 0.00329  | -0.0777  | 0.09352  | -0.03307 | 0.4759   | 0.110372 | 0.01703  |
| 6.96E-11 | 0.259795 | 1.22E-08 | 0.165814 | 0.00032  | 0.242283 | 1.15E-07 | 0.173139 | 0.00017  |
| 0.01442  | -0.08758 | 0.0586   | 0.073923 | 0.11062  | 0.085629 | 0.06447  | -0.09628 | 0.03753  |
| 0.00369  | 0.070749 | 0.12683  | 0.025308 | 0.58539  | 0.052171 | 0.26052  | -0.05286 | 0.25427  |
| 1.74E-06 | -0.02487 | 0.59189  | -0.09612 | 0.03785  | -0.13299 | 0.00399  | -0.1958  | 2.03E-05 |
| 0.44052  | -0.04306 | 0.3532   | -0.01585 | 0.73263  | -0.02515 | 0.58775  | 0.234154 | 3.09E-07 |
| 0.46575  | -0.18636 | 5.08E-05 | -0.01458 | 0.75331  | -0.10943 | 0.018    | 0.088176 | 0.0569   |
| 0.12977  | -0.05495 | 0.23598  | 0.062305 | 0.17891  | 0.031313 | 0.49966  | -0.18489 | 5.83E-05 |
| 0.21113  | 0.048164 | 0.29897  | -0.21993 | 1.60E-06 | -0.11272 | 0.0148   | 0.074709 | 0.10688  |
| 0.769    | -0.11883 | 0.01016  | -0.18557 | 5.47E-05 | -0.13391 | 0.00374  | 0.082489 | 0.07493  |
| 0.4798   | -0.04605 | 0.32072  | -0.10804 | 0.01953  | -0.06548 | 0.15773  | -0.02034 | 0.6611   |
| 0.00865  | -0.10151 | 0.02828  | 0.038702 | 0.40404  | 0.034569 | 0.45611  | 0.08641  | 0.06207  |
| 0.50784  | -0.02521 | 0.5869   | -0.05376 | 0.24629  | -0.06583 | 0.15548  | 0.066616 | 0.15063  |
| 0.08821  | -0.08478 | 0.06717  | -0.1561  | 0.00071  | -0.13739 | 0.00293  | -0.02357 | 0.61143  |
| 8.69E-10 | 0.38604  | 4.80E-18 | 0.195762 | 2.04E-05 | 0.305997 | 1.40E-11 | 0.311935 | 5.36E-12 |
| 0.02537  | 0.084842 | 0.06698  | 0.054509 | 0.23973  | -0.00932 | 0.84076  | 0.088365 | 0.05637  |
| 0.56442  | -0.19701 | 1.80E-05 | 0.004522 | 0.92237  | -0.04972 | 0.28357  | 0.101202 | 0.02876  |
| 0.00689  | -0.20376 | 9.07E-06 | -0.30781 | 1.05E-11 | -0.23948 | 1.62E-07 | -0.04008 | 0.3875   |
| 0.09716  | -0.3702  | 1.29E-16 | -0.26329 | 7.62E-09 | -0.2492  | 4.84E-08 | -0.11692 | 0.01145  |
| 1.15E-08 | -0.21641 | 2.36E-06 | -0.02007 | 0.66535  | 0.030589 | 0.50962  | 0.145559 | 0.00161  |
| 0.00129  | -0.06479 | 0.16219  | -0.03941 | 0.39555  | 0.029996 | 0.51787  | 0.090663 | 0.05023  |
| 0.00014  | -0.05401 | 0.24406  | -0.00248 | 0.95744  | 0.072269 | 0.11885  | 0.151178 | 0.00105  |
| 0.18382  | -0.0782  | 0.09142  | -0.07881 | 0.08892  | -0.08334 | 0.07197  | -0.09185 | 0.04729  |
| 0.76174  | 0.03783  | 0.41472  | -0.01394 | 0.76389  | -0.00027 | 0.99542  | 0.138234 | 0.00276  |
| 0.0005   | 0.172019 | 0.00019  | 0.159941 | 0.00052  | 0.180515 | 8.75E-05 | 0.115646 | 0.01239  |
| 8.86E-05 | -0.09476 | 0.04066  | -0.28584 | 3.13E-10 | -0.08    | 0.08417  | -0.05407 | 0.2435   |
| 4.36E-05 | 0.159187 | 0.00055  | 0.193028 | 2.67E-05 | 0.206523 | 6.81E-06 | 0.410195 | 2.23E-20 |
| 0.00072  | 0.157397 | 0.00064  | 0.190453 | 3.43E-05 | 0.203989 | 8.86E-06 | 0.071585 | 0.1224   |
| 0.87274  | -0.0093  | 0.84117  | -0.06867 | 0.13844  | -0.04699 | 0.31092  | 0.040208 | 0.38598  |
| 0.00081  | 0.019584 | 0.67293  | -0.1485  | 0.00129  | -0.11119 | 0.01622  | 0.174651 | 0.00015  |
| 0.49631  | -0.02978 | 0.52095  | -0.05823 | 0.20908  | -0.06133 | 0.18579  | -0.0694  | 0.13428  |
| 1.81E-19 | -0.28192 | 5.57E-10 | -0.26329 | 7.62E-09 | -0.36043 | 8.99E-16 | 0.03337  | 0.47189  |
| 0.50504  | -0.00944 | 0.83876  | 0.035652 | 0.44212  | 0.017207 | 0.71072  | -0.10583 | 0.02217  |
| 7.74E-16 | -0.02526 | 0.58604  | 0.193593 | 2.53E-05 | 0.20122  | 1.18E-05 | 0.139032 | 0.0026   |
| 0.13604  | -0.07114 | 0.12474  | -0.04294 | 0.35451  | -0.07103 | 0.1253   | 0.161142 | 0.00047  |
| 0.00757  | 0.087722 | 0.05819  | 0.305869 | 1.43E-11 | 0.230683 | 4.66E-07 | 0.081527 | 0.0784   |
| 0.01038  | -0.06223 | 0.17945  | 0.055287 | 0.23307  | 0.027788 | 0.54916  | 0.153863 | 0.00085  |
| 6.83E-07 | -0.05973 | 0.19758  | 0.025837 | 0.57756  | 0.114102 | 0.01362  | 0.161936 | 0.00044  |
| 0.25885  | 0.131295 | 0.00448  | 0.054044 | 0.24377  | 0.086128 | 0.06293  | 0.10778  | 0.01982  |
| 3.77E-06 | -0.12218 | 0.00821  | 0.090896 | 0.04964  | 0.091089 | 0.04915  | 0.288308 | 2.17E-10 |

|          |          |          |          |          |          |          |          |          |
|----------|----------|----------|----------|----------|----------|----------|----------|----------|
| 0.01848  | -0.20262 | 1.02E-05 | 0.054344 | 0.24115  | 0.011776 | 0.79964  | -0.00738 | 0.87367  |
| 7.98E-22 | -0.10042 | 0.03003  | -0.09672 | 0.03667  | -0.28793 | 2.29E-10 | -0.2274  | 6.83E-07 |
| 0.00745  | 0.064907 | 0.1614   | 0.099351 | 0.03183  | 0.109606 | 0.01782  | 0.014643 | 0.7523   |
| 3.85E-06 | 0.246414 | 6.88E-08 | 0.0493   | 0.28771  | 0.181068 | 8.32E-05 | -0.04541 | 0.32748  |
| 0.59188  | -0.02956 | 0.524    | -0.10286 | 0.02623  | -0.01171 | 0.80066  | -0.05961 | 0.1985   |
| 0.00032  | 0.073536 | 0.11251  | 0.105469 | 0.02264  | 0.131198 | 0.00451  | 0.275745 | 1.35E-09 |
| 0.01312  | -0.41332 | 1.08E-20 | -0.19425 | 2.37E-05 | -0.23798 | 1.95E-07 | -0.03694 | 0.42576  |
| 0.10551  | 0.185372 | 5.57E-05 | 0.152854 | 0.00092  | 0.141221 | 0.00222  | -0.0381  | 0.41136  |
| 0.77459  | 0.23513  | 2.75E-07 | -0.1421  | 0.00208  | 0.001734 | 0.97019  | 0.008409 | 0.85619  |
| 0.28541  | 0.072804 | 0.11614  | 0.051423 | 0.26742  | 0.045408 | 0.3275   | 0.008513 | 0.85442  |
| 8.99E-09 | 0.020354 | 0.66086  | 0.141084 | 0.00224  | 0.173614 | 0.00016  | -0.0078  | 0.86649  |
| 7.42E-10 | -0.12446 | 0.00708  | -0.23734 | 2.11E-07 | -0.27177 | 2.37E-09 | 0.083723 | 0.07067  |
| 0.44284  | -0.20513 | 7.87E-06 | -0.13941 | 0.00253  | -0.1148  | 0.01305  | -0.06212 | 0.18021  |
| 0.05547  | -0.10913 | 0.01832  | 0.035259 | 0.44716  | 0.006189 | 0.89389  | -0.01504 | 0.74585  |
| 0.23043  | -0.25086 | 3.91E-08 | -0.02953 | 0.52443  | -0.03616 | 0.43565  | -0.01643 | 0.72329  |
| 0.10058  | -0.27123 | 2.56E-09 | 0.016547 | 0.72135  | -0.001   | 0.98277  | 0.018775 | 0.68571  |
| 0.15995  | -0.0368  | 0.42758  | 0.0232   | 0.61702  | 0.007746 | 0.86741  | -0.05267 | 0.25593  |
| 0.58924  | -0.03319 | 0.47432  | 0.018433 | 0.69115  | -0.00946 | 0.83849  | -0.03148 | 0.49739  |
| 0.00361  | -0.2022  | 1.07E-05 | 0.013526 | 0.77064  | 0.022978 | 0.62039  | -0.0126  | 0.78589  |
| 0.72011  | -0.05856 | 0.20656  | 0.012201 | 0.79258  | -0.01065 | 0.81838  | -0.02331 | 0.61534  |
| 0.45743  | -0.05194 | 0.26265  | 0.045992 | 0.32131  | 0.005604 | 0.90386  | 0.020303 | 0.66167  |
| 0.51567  | -0.20484 | 8.12E-06 | -0.01263 | 0.78543  | -0.06464 | 0.16311  | 0.008788 | 0.84978  |
| 0.06593  | -0.07953 | 0.086    | 9.72E-05 | 0.99833  | 0.021845 | 0.63773  | 0.054676 | 0.23829  |
| 0.64012  | -0.16089 | 0.00048  | -0.04942 | 0.28656  | -0.07373 | 0.11154  | -0.05871 | 0.20534  |
| 0.23061  | -0.08263 | 0.07443  | -0.10112 | 0.0289   | -0.09237 | 0.04603  | -0.08942 | 0.05349  |
| 0.55897  | -0.11403 | 0.01367  | -0.01976 | 0.6701   | -0.03311 | 0.47542  | 0.045013 | 0.33173  |
| 0.95354  | -0.1296  | 0.00503  | 0.018146 | 0.69571  | -0.05515 | 0.23421  | 0.010659 | 0.8183   |
| 0.10813  | -0.02687 | 0.56248  | 0.021331 | 0.64567  | 0.013536 | 0.77048  | -0.07261 | 0.1171   |
| 0.70066  | -0.01181 | 0.799    | 0.015124 | 0.74444  | -0.01228 | 0.7912   | 0.038382 | 0.40794  |
| 0.77003  | -0.11216 | 0.01531  | -0.00127 | 0.97809  | -0.02347 | 0.61294  | 0.021335 | 0.64561  |
| 0.0257   | -0.08584 | 0.06381  | 0.031691 | 0.49448  | 0.012005 | 0.79582  | -0.00646 | 0.88927  |
| 0.00499  | -0.14437 | 0.00176  | -0.02138 | 0.64485  | 0.006759 | 0.88418  | -0.0002  | 0.99651  |
| 0.06352  | -0.15028 | 0.00112  | -0.07903 | 0.08803  | -0.08522 | 0.06576  | -0.00789 | 0.86497  |
| 0.01778  | -0.043   | 0.3538   | 0.042637 | 0.35791  | 0.050106 | 0.27988  | 0.033792 | 0.46631  |
| 0.72206  | -0.19537 | 2.12E-05 | -0.03846 | 0.40704  | -0.05978 | 0.1972   | -0.1693  | 0.00024  |
| 0.05036  | -0.04568 | 0.3246   | -0.05244 | 0.25806  | 0.00148  | 0.97456  | -0.07141 | 0.12333  |
| 0.21752  | -0.07392 | 0.11066  | 0.025909 | 0.57651  | 0.012376 | 0.78966  | -0.10732 | 0.02035  |
| 1.04E-09 | 0.366019 | 2.99E-16 | 0.416016 | 5.70E-21 | 0.377036 | 3.19E-17 | 0.219288 | 1.71E-06 |
| 3.35E-06 | 0.363388 | 5.03E-16 | 0.227397 | 6.83E-07 | 0.273893 | 1.76E-09 | 0.190384 | 3.46E-05 |
| 0.00542  | -0.07615 | 0.10026  | 0.095485 | 0.03915  | 0.090694 | 0.05015  | -0.35581 | 2.20E-15 |
| 3.65E-11 | 0.118381 | 0.01046  | 0.033483 | 0.47039  | 0.182152 | 7.53E-05 | 0.319917 | 1.42E-12 |
| 0.99278  | 0.134928 | 0.00348  | -0.21664 | 2.30E-06 | -0.08115 | 0.07979  | 0.256543 | 1.87E-08 |
| 0.57774  | 0.009329 | 0.84066  | -0.20183 | 1.11E-05 | -0.0848  | 0.06712  | 0.019246 | 0.67827  |
| 2.70E-07 | 0.262448 | 8.53E-09 | 0.227857 | 6.48E-07 | 0.245463 | 7.76E-08 | -0.14635 | 0.00152  |
| 0.00249  | 0.158342 | 0.00059  | 0.121447 | 0.00861  | 0.132391 | 0.00416  | 0.067629 | 0.1445   |

|          |          |          |          |          |          |          |          |          |
|----------|----------|----------|----------|----------|----------|----------|----------|----------|
| 1.94E-11 | -0.16272 | 0.00041  | -0.26643 | 4.97E-09 | -0.31129 | 5.95E-12 | -0.13451 | 0.00359  |
| 4.88E-06 | -0.09814 | 0.03399  | 0.065549 | 0.15729  | -0.14877 | 0.00126  | -0.23147 | 4.25E-07 |
| 0.38356  | -0.22012 | 1.56E-06 | -0.09957 | 0.03145  | -0.09901 | 0.03242  | 0.001583 | 0.97279  |
| 0.05792  | 0.288036 | 2.26E-10 | 0.189161 | 3.89E-05 | 0.163709 | 0.00038  | -0.08554 | 0.06474  |
| 1.04E-06 | 0.098787 | 0.03282  | 0.092185 | 0.04648  | 0.192398 | 2.84E-05 | 0.070695 | 0.12712  |
| 0.47195  | 0.075988 | 0.10099  | -0.18079 | 8.53E-05 | -0.06152 | 0.18445  | -0.02893 | 0.53292  |
| 0.1716   | -0.26514 | 5.93E-09 | -0.08425 | 0.06892  | -0.06214 | 0.18009  | -0.16232 | 0.00043  |
| 0.00273  | 0.192743 | 2.75E-05 | 0.089163 | 0.05417  | 0.149634 | 0.00118  | 0.082306 | 0.07559  |
| 8.65E-14 | -0.38715 | 3.79E-18 | -0.38211 | 1.10E-17 | -0.40118 | 1.74E-19 | 0.072968 | 0.11532  |
| 0.96895  | -0.12856 | 0.0054   | -0.19292 | 2.70E-05 | -0.14016 | 0.0024   | -0.24023 | 1.48E-07 |
| 0.02061  | 0.126742 | 0.00609  | 0.045526 | 0.32625  | 0.082571 | 0.07464  | -0.14718 | 0.00143  |
| 0.00665  | 0.123189 | 0.0077   | 0.035718 | 0.44127  | 0.167535 | 0.00028  | 0.088332 | 0.05646  |
| 9.13E-07 | 0.103585 | 0.02519  | 0.024828 | 0.59253  | 0.122747 | 0.00792  | 0.252844 | 3.03E-08 |
| 0.03229  | -0.11813 | 0.01062  | -0.12999 | 0.0049   | -0.12279 | 0.0079   | -0.26966 | 3.19E-09 |
| 1.12E-05 | 0.029625 | 0.52306  | -0.07626 | 0.09979  | -0.12363 | 0.00748  | 0.080517 | 0.08219  |
| 0.00514  | -0.15064 | 0.00109  | 0.025207 | 0.58688  | 0.013296 | 0.77443  | -0.00652 | 0.88821  |
| 0.45863  | 0.118671 | 0.01027  | -0.08897 | 0.05469  | -0.05191 | 0.26291  | -0.08944 | 0.05342  |
| 0.0134   | -0.03238 | 0.48521  | -0.18942 | 3.79E-05 | -0.04648 | 0.31615  | -0.0181  | 0.69647  |
| 0.02985  | -0.03733 | 0.42088  | 0.080681 | 0.08156  | 0.075292 | 0.10416  | 0.13122  | 0.00451  |
| 0.67015  | 0.10592  | 0.02206  | 0.036425 | 0.43228  | 0.07782  | 0.09301  | -0.00791 | 0.86471  |
| 0.13913  | -0.14956 | 0.00119  | -0.11429 | 0.01347  | -0.07839 | 0.09063  | -0.20252 | 1.03E-05 |
| 6.71E-06 | -0.03769 | 0.41643  | 0.135086 | 0.00345  | 0.173536 | 0.00016  | 0.069912 | 0.1314   |
| 0.31398  | -0.19319 | 2.63E-05 | -0.22854 | 5.98E-07 | -0.12332 | 0.00763  | -0.02486 | 0.5921   |
| 0.007    | 0.115888 | 0.01221  | 0.049183 | 0.28885  | 0.103093 | 0.02589  | 0.273502 | 1.86E-09 |
| 0.29738  | -0.02788 | 0.54785  | -0.02937 | 0.52665  | -0.01071 | 0.81745  | -0.01119 | 0.80941  |
| 0.71562  | -0.113   | 0.01456  | -0.08538 | 0.06525  | -0.05261 | 0.25656  | -0.08467 | 0.06755  |
| 0.0973   | -0.15872 | 0.00058  | 0.040633 | 0.38097  | 0.035881 | 0.43919  | 0.061891 | 0.18182  |
| 0.06125  | -0.33905 | 5.02E-14 | -0.23945 | 1.63E-07 | -0.2345  | 2.97E-07 | -0.19607 | 1.98E-05 |
| 4.21E-11 | -0.18654 | 4.99E-05 | -0.24256 | 1.11E-07 | -0.28866 | 2.06E-10 | 0.096351 | 0.03739  |
| 0.00106  | 0.033546 | 0.46956  | 0.054401 | 0.24066  | 0.122931 | 0.00782  | 0.031203 | 0.50117  |
| 0.0004   | 0.187556 | 4.53E-05 | 0.242834 | 1.08E-07 | 0.188828 | 4.01E-05 | -0.11511 | 0.0128   |
| 0.00542  | -0.32638 | 4.72E-13 | -0.18793 | 4.37E-05 | -0.25501 | 2.29E-08 | -0.2116  | 3.97E-06 |
| 0.04808  | -0.03429 | 0.45973  | -0.07393 | 0.1106   | -0.05563 | 0.23018  | -0.15676 | 0.00067  |
| 6.32E-13 | 0.289474 | 1.82E-10 | 0.371316 | 1.03E-16 | 0.370036 | 1.33E-16 | 0.1663   | 0.00031  |
| 0.00715  | 0.003152 | 0.94583  | 0.154171 | 0.00083  | 0.121408 | 0.00863  | -0.09103 | 0.04931  |
| 0.00405  | -0.14027 | 0.00238  | -0.07335 | 0.11344  | -0.03691 | 0.42618  | -0.02023 | 0.66284  |
| 8.92E-06 | 0.450051 | 1.14E-24 | 0.433577 | 7.95E-23 | 0.373389 | 6.75E-17 | 0.265268 | 5.82E-09 |
| 6.00E-08 | 0.12441  | 0.00711  | 0.20345  | 9.37E-06 | 0.27778  | 1.01E-09 | 0.079685 | 0.08541  |
| 0.64656  | 0.247413 | 6.07E-08 | 0.208434 | 5.57E-06 | 0.147037 | 0.00144  | -0.02719 | 0.55781  |
| 0.00614  | 0.198256 | 1.59E-05 | 0.277482 | 1.06E-09 | 0.242308 | 1.15E-07 | -0.05066 | 0.27462  |
| 0.02303  | -0.1214  | 0.00863  | 0.014467 | 0.75518  | -0.11369 | 0.01396  | -0.14534 | 0.00164  |
| 0.0004   | -0.15997 | 0.00052  | -0.23557 | 2.61E-07 | -0.23468 | 2.90E-07 | -0.28425 | 3.96E-10 |
| 0.02208  | -0.09604 | 0.03801  | -0.14677 | 0.00147  | -0.13473 | 0.00353  | 0.112706 | 0.01482  |
| 2.94E-06 | -0.12032 | 0.00925  | -0.0755  | 0.10319  | -0.00319 | 0.94522  | 0.089962 | 0.05204  |
| 7.58E-06 | 0.026364 | 0.56982  | -0.15389 | 0.00085  | 0.038894 | 0.40171  | 0.005817 | 0.90023  |

|          |          |          |          |          |          |          |          |          |
|----------|----------|----------|----------|----------|----------|----------|----------|----------|
| 0.29419  | -0.29161 | 1.32E-10 | -0.1054  | 0.02273  | -0.13665 | 0.00309  | -0.00818 | 0.86     |
| 1.61E-16 | 0.13528  | 0.0034   | 0.242224 | 1.16E-07 | 0.257346 | 1.68E-08 | -0.0247  | 0.59451  |
| 0.81678  | 0.147259 | 0.00142  | -0.07052 | 0.12809  | 0.042872 | 0.35527  | 0.075521 | 0.1031   |
| 4.50E-08 | 0.184281 | 6.17E-05 | 0.32827  | 3.40E-13 | 0.286568 | 2.81E-10 | 0.178474 | 0.00011  |
| 0.0102   | -0.21856 | 1.86E-06 | -0.19389 | 2.46E-05 | -0.20037 | 1.28E-05 | 0.259133 | 1.33E-08 |
| 1.57E-07 | 0.26778  | 4.13E-09 | 0.261633 | 9.52E-09 | 0.291956 | 1.25E-10 | 0.138104 | 0.00278  |
| 1.19E-08 | -0.02628 | 0.5711   | 0.020423 | 0.65979  | 0.140726 | 0.0023   | 0.054326 | 0.24131  |
| 0.02203  | 0.112682 | 0.01484  | -0.05664 | 0.22184  | -0.07392 | 0.11066  | -0.29558 | 7.20E-11 |
| 0.00023  | 0.067486 | 0.14535  | 0.166101 | 0.00031  | 0.24003  | 1.52E-07 | -0.14766 | 0.00137  |
| 3.69E-10 | 0.040046 | 0.3879   | 0.266219 | 5.11E-09 | 0.264224 | 6.71E-09 | 0.243103 | 1.04E-07 |
| 3.75E-08 | -0.02149 | 0.64324  | 0.018201 | 0.69483  | 0.128815 | 0.00531  | 0.044169 | 0.3409   |
| 0.77237  | -0.01275 | 0.7834   | -0.21265 | 3.55E-06 | -0.09311 | 0.04433  | -0.03585 | 0.43954  |
| 1.59E-13 | 0.026482 | 0.5681   | 0.162345 | 0.00043  | 0.214056 | 3.05E-06 | 0.11335  | 0.01425  |
| 0.40711  | 0.051196 | 0.26954  | 0.062001 | 0.18104  | 0.00644  | 0.88962  | -0.05212 | 0.26096  |
| 0.45142  | 0.000786 | 0.98648  | -0.01328 | 0.77478  | 0.050825 | 0.27303  | 0.177546 | 0.00011  |
| 0.00676  | -0.04159 | 0.36983  | -0.1752  | 0.00014  | -0.16242 | 0.00043  | 0.247617 | 5.91E-08 |
| 4.02E-11 | -0.0699  | 0.13148  | 0.185765 | 5.37E-05 | 0.194079 | 2.41E-05 | 0.437816 | 2.73E-23 |
| 9.60E-06 | 0.220364 | 1.52E-06 | 0.200811 | 1.23E-05 | 0.247381 | 6.09E-08 | 0.119019 | 0.01004  |
| 1.34E-08 | 0.26296  | 7.96E-09 | 0.194889 | 2.22E-05 | 0.284404 | 3.87E-10 | 0.087343 | 0.05929  |
| 0.01363  | -0.16663 | 0.0003   | -0.18186 | 7.73E-05 | -0.08288 | 0.07358  | 0.113782 | 0.01388  |
| 0.58563  | -0.02484 | 0.59239  | -0.04315 | 0.35219  | -0.02176 | 0.63906  | -0.127   | 0.00599  |
| 0.8578   | 0.015402 | 0.73991  | 0.098504 | 0.03332  | 0.043462 | 0.34869  | 0.250527 | 4.08E-08 |
| 0.56855  | 0.108117 | 0.01944  | 0.214854 | 2.79E-06 | 0.09834  | 0.03362  | 0.173463 | 0.00017  |
| 0.37315  | 0.13518  | 0.00342  | 0.142945 | 0.00196  | 0.129725 | 0.00499  | 0.145367 | 0.00163  |
| 0.3526   | 0.100698 | 0.02957  | 0.092203 | 0.04643  | 0.088726 | 0.05536  | 0.019954 | 0.66712  |
| 0.58337  | 0.117878 | 0.01079  | 0.075771 | 0.10197  | 0.056741 | 0.221    | -0.18232 | 7.41E-05 |
| 0.00048  | 0.20844  | 5.56E-06 | -0.08086 | 0.08088  | 0.096361 | 0.03737  | 0.091087 | 0.04916  |
| 0.25749  | 0.215332 | 2.65E-06 | 0.043032 | 0.35347  | 0.065309 | 0.15882  | 0.354246 | 2.97E-15 |
| 3.43E-05 | 0.236944 | 2.21E-07 | 0.04411  | 0.34154  | 0.146253 | 0.00153  | 0.205705 | 7.41E-06 |
| 9.44E-08 | 0.339569 | 4.57E-14 | 0.125163 | 0.00676  | 0.237362 | 2.10E-07 | 0.134619 | 0.00356  |
| 0.3229   | -0.01362 | 0.76908  | -0.02006 | 0.66543  | -0.04448 | 0.33751  | -0.08535 | 0.06535  |
| 0.00016  | 0.100566 | 0.02978  | 0.155711 | 0.00073  | 0.184359 | 6.13E-05 | 0.154431 | 0.00081  |
| 0.03859  | -0.04529 | 0.32877  | 0.108938 | 0.01853  | 0.118211 | 0.01057  | -0.05541 | 0.232    |
| 5.48E-05 | -0.08982 | 0.05241  | -0.03085 | 0.50605  | 0.023142 | 0.6179   | 0.198722 | 1.52E-05 |
| 0.03653  | 0.450443 | 1.03E-24 | 0.096513 | 0.03707  | 0.165549 | 0.00033  | 0.388419 | 2.89E-18 |
| 0.16773  | 0.203969 | 8.88E-06 | 0.117903 | 0.01077  | 0.108995 | 0.01847  | 0.41099  | 1.85E-20 |
| 0.01007  | -0.29336 | 1.01E-10 | -0.07653 | 0.09855  | -0.06229 | 0.17901  | -0.05147 | 0.26697  |
| 0.22132  | -0.00607 | 0.89596  | 0.008303 | 0.85797  | -0.00829 | 0.85814  | -0.0329  | 0.47812  |
| 0.10026  | 0.199907 | 1.35E-05 | 0.093252 | 0.04399  | 0.1165   | 0.01175  | 0.15945  | 0.00054  |
| 0.15937  | -0.34737 | 1.09E-14 | -0.00568 | 0.90258  | -0.10196 | 0.02757  | 0.019061 | 0.68118  |
| 0.133    | -0.26329 | 7.61E-09 | -0.18469 | 5.94E-05 | -0.20863 | 5.46E-06 | -0.16271 | 0.00041  |
| 0.02894  | 0.29467  | 8.27E-11 | -0.0521  | 0.26115  | 0.049155 | 0.28913  | -0.07011 | 0.13032  |
| 4.86E-09 | -0.07886 | 0.08872  | -0.16403 | 0.00037  | -0.22565 | 8.35E-07 | -0.08824 | 0.0567   |
| 0.90025  | -0.05474 | 0.23773  | -0.22504 | 8.96E-07 | -0.15121 | 0.00105  | -0.05109 | 0.27054  |
| 0.00188  | 0.062082 | 0.18047  | -0.05931 | 0.20078  | 0.051726 | 0.26461  | 0.15445  | 0.00081  |

|          |          |          |          |          |          |          |          |          |
|----------|----------|----------|----------|----------|----------|----------|----------|----------|
| 0.47328  | -0.00791 | 0.8646   | -0.24335 | 1.01E-07 | -0.15212 | 0.00097  | -0.05505 | 0.23511  |
| 1.28E-10 | 0.007999 | 0.86312  | 0.240442 | 1.45E-07 | 0.24604  | 7.22E-08 | 0.15755  | 0.00063  |
| 3.28E-06 | 0.132648 | 0.00408  | 0.159724 | 0.00053  | 0.19839  | 1.57E-05 | 0.496621 | 1.88E-30 |
| 0.95819  | -0.04853 | 0.29529  | -0.08611 | 0.06298  | -0.04803 | 0.30028  | 0.223991 | 1.01E-06 |
| 0.00107  | -0.1659  | 0.00032  | -0.19126 | 3.18E-05 | -0.18183 | 7.75E-05 | 0.033234 | 0.47371  |
| 0.26894  | 0.203727 | 9.11E-06 | 0.049026 | 0.2904   | 0.125397 | 0.00666  | -0.18919 | 3.88E-05 |
| 0.3473   | -0.22783 | 6.50E-07 | -0.14187 | 0.00212  | -0.13097 | 0.00458  | 0.027393 | 0.55486  |
| 0.18665  | 0.019169 | 0.67949  | -0.01557 | 0.73723  | 0.007598 | 0.86993  | -0.23732 | 2.11E-07 |
| 0.71321  | -0.11912 | 0.00998  | -0.08194 | 0.07691  | -0.06243 | 0.17805  | -0.00966 | 0.83514  |
| 0.31268  | -0.06501 | 0.16071  | -0.11255 | 0.01496  | -0.09124 | 0.04878  | 0.135139 | 0.00343  |
| 0.16622  | -0.15175 | 0.001    | -0.14391 | 0.00182  | -0.10868 | 0.01881  | 0.255816 | 2.06E-08 |
| 0.11733  | -0.16862 | 0.00025  | -0.1132  | 0.01438  | -0.12442 | 0.0071   | -0.0031  | 0.94668  |
| 0.08297  | 0.382717 | 9.73E-18 | 0.275678 | 1.37E-09 | 0.26003  | 1.18E-08 | 0.240573 | 1.42E-07 |
| 0.0788   | 0.1796   | 9.52E-05 | -0.00378 | 0.93504  | 0.064595 | 0.16343  | 0.353613 | 3.35E-15 |
| 0.23037  | -0.11405 | 0.01366  | -0.08658 | 0.06154  | -0.03    | 0.51787  | 0.003109 | 0.94657  |
| 0.00511  | -0.14018 | 0.0024   | -0.09281 | 0.04501  | -0.12779 | 0.00568  | 0.161702 | 0.00045  |
| 0.22702  | 0.003084 | 0.94701  | -0.03212 | 0.48869  | 0.019476 | 0.67463  | 0.220302 | 1.53E-06 |
| 0.13528  | 0.343077 | 2.41E-14 | -0.08872 | 0.05537  | -0.01184 | 0.79864  | 0.170711 | 0.00021  |
| 0.00057  | -0.0897  | 0.05273  | -0.20386 | 8.98E-06 | -0.20856 | 5.50E-06 | -0.15593 | 0.00072  |
| 0.00314  | 0.037086 | 0.42397  | 0.127861 | 0.00566  | 0.089493 | 0.05328  | -0.03108 | 0.50282  |
| 0.02353  | -0.01707 | 0.71295  | -0.06656 | 0.15097  | -0.06613 | 0.15364  | -0.1512  | 0.00105  |
| 2.29E-06 | -0.1162  | 0.01197  | 0.069561 | 0.13335  | -0.06757 | 0.14485  | -0.09957 | 0.03145  |
| 3.39E-06 | 0.395592 | 6.05E-19 | 0.255299 | 2.20E-08 | 0.312284 | 5.06E-12 | 0.196053 | 1.98E-05 |
| 0.09554  | -0.02298 | 0.62038  | 0.005852 | 0.89963  | 0.038472 | 0.40685  | 0.055157 | 0.23417  |
| 0.15778  | -0.16435 | 0.00036  | -0.13108 | 0.00455  | -0.05162 | 0.26561  | -0.28901 | 1.95E-10 |
| 0.80169  | -0.28687 | 2.68E-10 | -0.10545 | 0.02266  | -0.14099 | 0.00226  | -0.2289  | 5.74E-07 |
| 0.00057  | -0.10691 | 0.02084  | -0.1402  | 0.00239  | -0.14271 | 0.00199  | -0.21767 | 2.05E-06 |
| 0.01049  | 0.107661 | 0.01996  | 0.003991 | 0.93146  | 0.089653 | 0.05285  | 0.091792 | 0.04742  |
| 0.08554  | -0.26945 | 3.28E-09 | -0.13577 | 0.00328  | -0.13404 | 0.00371  | -0.22614 | 7.89E-07 |
| 0.15124  | -0.15539 | 0.00075  | -0.0647  | 0.16278  | -0.09653 | 0.03704  | -0.27567 | 1.37E-09 |
| 0.00451  | -0.11523 | 0.01271  | -0.06103 | 0.18795  | -0.14641 | 0.00151  | -0.09165 | 0.04777  |
| 0.39436  | 0.050833 | 0.27296  | -0.01046 | 0.82157  | 0.013244 | 0.77529  | 0.072407 | 0.11815  |
| 1.69E-05 | -0.04654 | 0.31553  | -0.02508 | 0.58877  | 0.054642 | 0.23858  | 0.167445 | 0.00028  |
| 2.42E-09 | 0.381004 | 1.39E-17 | 0.413943 | 9.29E-21 | 0.381755 | 1.19E-17 | 0.095991 | 0.03811  |
| 0.00597  | -0.17469 | 0.00015  | -0.1539  | 0.00085  | -0.17125 | 0.0002   | -0.23724 | 2.13E-07 |
| 0.38109  | -0.13407 | 0.0037   | 0.030806 | 0.50663  | 0.013552 | 0.77022  | 0.130221 | 0.00482  |
| 1.26E-30 | 0.05842  | 0.20761  | 0.248189 | 5.50E-08 | 0.309939 | 7.42E-12 | 0.312095 | 5.22E-12 |
| 0.00098  | -0.28818 | 2.21E-10 | -0.16059 | 0.00049  | -0.24971 | 4.53E-08 | -0.06549 | 0.15766  |
| 0.00446  | -0.11462 | 0.0132   | -0.12176 | 0.00844  | -0.16155 | 0.00046  | -0.29334 | 1.01E-10 |
| 1.76E-16 | 0.221267 | 1.37E-06 | 0.418863 | 2.90E-21 | 0.376847 | 3.32E-17 | 0.086173 | 0.06279  |
| 1.84E-05 | -0.23843 | 1.85E-07 | 0.087655 | 0.05838  | 0.093157 | 0.04421  | 0.061142 | 0.18718  |
| 0.0054   | -0.18204 | 7.61E-05 | -0.11813 | 0.01062  | -0.139   | 0.00261  | -0.06341 | 0.1713   |
| 0.29697  | 0.010725 | 0.81719  | 0.006939 | 0.88112  | -0.01168 | 0.80127  | 0.03069  | 0.50823  |
| 0.64657  | -0.03728 | 0.42157  | -0.04689 | 0.31191  | -0.07159 | 0.12235  | -0.05638 | 0.22399  |
| 9.12E-05 | -0.05225 | 0.25983  | 0.063709 | 0.16929  | 0.105191 | 0.023    | 0.359676 | 1.04E-15 |

|          |          |          |          |          |          |          |          |          |
|----------|----------|----------|----------|----------|----------|----------|----------|----------|
| 2.99E-07 | -0.10957 | 0.01785  | 0.113067 | 0.0145   | 0.133212 | 0.00393  | 0.198614 | 1.53E-05 |
| 0.00021  | 0.205627 | 7.48E-06 | 0.054298 | 0.24155  | -0.0273  | 0.5562   | -0.07181 | 0.1212   |
| 5.45E-09 | 0.164144 | 0.00037  | 0.330329 | 2.37E-13 | 0.283723 | 4.28E-10 | 0.11275  | 0.01478  |
| 0.00034  | 0.291353 | 1.37E-10 | 0.177175 | 0.00012  | 0.217783 | 2.03E-06 | 0.498826 | 9.48E-31 |
| 1.20E-06 | -0.08604 | 0.06319  | -0.15497 | 0.00078  | -0.17967 | 9.46E-05 | -0.22187 | 1.28E-06 |
| 0.00712  | 0.018939 | 0.68311  | 0.190397 | 3.45E-05 | 0.154776 | 0.00079  | -0.05681 | 0.22041  |
| 0.17473  | 0.112134 | 0.01533  | 0.186417 | 5.05E-05 | 0.154177 | 0.00083  | 0.134416 | 0.00361  |
| 0.03462  | 0.096854 | 0.03641  | 0.159415 | 0.00054  | 0.170321 | 0.00022  | -0.09442 | 0.04141  |
| 4.87E-12 | 0.155579 | 0.00074  | 0.32051  | 1.29E-12 | 0.328178 | 3.45E-13 | 0.170887 | 0.00021  |
| 6.15E-08 | 0.03295  | 0.47749  | 0.23082  | 4.58E-07 | 0.228347 | 6.12E-07 | 0.099328 | 0.03187  |
| 0.03537  | 0.043752 | 0.34547  | -0.02426 | 0.60097  | 0.043626 | 0.34687  | 0.022574 | 0.62656  |
| 0.00052  | 0.057447 | 0.2153   | 0.1191   | 0.00999  | 0.152511 | 0.00095  | -0.07211 | 0.11967  |
| 0.00063  | 0.233595 | 3.30E-07 | 0.253765 | 2.69E-08 | 0.264744 | 6.25E-09 | 0.071061 | 0.12516  |
| 5.88E-17 | 0.22499  | 9.01E-07 | 0.116784 | 0.01155  | 0.287465 | 2.46E-10 | 0.154128 | 0.00083  |
| 0.08139  | -0.05351 | 0.24844  | -0.13809 | 0.00279  | -0.10062 | 0.0297   | -0.10184 | 0.02776  |
| 0.00664  | 0.124146 | 0.00723  | 0.102098 | 0.02737  | -0.00752 | 0.87117  | -0.26174 | 9.39E-09 |
| 0.86407  | -0.08541 | 0.06517  | -0.13965 | 0.00249  | -0.11163 | 0.0158   | -0.05242 | 0.25824  |
| 0.04625  | -0.13221 | 0.00421  | 0.030768 | 0.50716  | -0.05564 | 0.2301   | -0.08643 | 0.062    |
| 0.00138  | -0.09367 | 0.04305  | 0.08406  | 0.06954  | -0.0426  | 0.35838  | -0.13142 | 0.00445  |
| 0.01199  | -0.08766 | 0.05837  | 0.013421 | 0.77237  | -0.04728 | 0.30789  | -0.04324 | 0.35113  |
| 0.00033  | -0.14036 | 0.00236  | 0.02724  | 0.55707  | -0.08838 | 0.05632  | -0.0791  | 0.08774  |
| 0.00155  | -0.05985 | 0.19666  | 0.011194 | 0.80935  | -0.05427 | 0.24176  | -0.08046 | 0.08239  |
| 0.00344  | -0.08503 | 0.06637  | 0.036305 | 0.43379  | -0.05657 | 0.2224   | -0.02794 | 0.54704  |
| 0.06205  | -0.0489  | 0.29166  | -0.03426 | 0.46013  | -0.07069 | 0.12716  | -0.02471 | 0.59429  |
| 2.55E-05 | -0.18391 | 6.40E-05 | 0.001638 | 0.97183  | -0.13292 | 0.00401  | -0.16049 | 0.0005   |
| 0.03376  | -0.27305 | 1.98E-09 | -0.29391 | 9.30E-11 | -0.27855 | 9.07E-10 | -0.14225 | 0.00206  |
| 0.01728  | 0.165897 | 0.00032  | -0.21592 | 2.49E-06 | -0.10119 | 0.02879  | -0.10698 | 0.02076  |
| 0.30867  | 0.003284 | 0.94357  | 0.074728 | 0.10678  | 0.028227 | 0.54286  | -0.10756 | 0.02007  |
| 0.00247  | -0.26115 | 1.02E-08 | -0.17659 | 0.00012  | -0.19968 | 1.38E-05 | 0.105655 | 0.0224   |
| 0.5295   | -0.0679  | 0.14292  | -0.11968 | 0.00964  | -0.06137 | 0.18552  | 0.415128 | 7.03E-21 |
| 0.13589  | -0.03072 | 0.50783  | -0.03437 | 0.45865  | 0.021175 | 0.64809  | 0.197359 | 1.74E-05 |
| 0.20781  | -0.0975  | 0.03517  | -0.00257 | 0.95577  | 0.014652 | 0.75215  | 0.039747 | 0.39146  |
| 0.20949  | 0.156275 | 0.0007   | 0.010466 | 0.82154  | 0.022596 | 0.62621  | 0.140431 | 0.00235  |
| 0.5495   | 0.079018 | 0.08807  | -0.04423 | 0.34025  | -0.02031 | 0.66155  | 0.046185 | 0.31928  |
| 6.14E-11 | 0.238128 | 1.92E-07 | 0.244629 | 8.61E-08 | 0.297164 | 5.63E-11 | -0.12313 | 0.00773  |
| 4.44E-06 | 0.44099  | 1.21E-23 | 0.093211 | 0.04408  | 0.217184 | 2.16E-06 | 0.003056 | 0.94748  |
| 0.03996  | -0.27918 | 8.28E-10 | -0.35067 | 5.85E-15 | -0.25209 | 3.34E-08 | 0.052464 | 0.25784  |
| 0.00506  | 0.09772  | 0.03476  | 0.124319 | 0.00715  | 0.142779 | 0.00198  | 0.076733 | 0.09768  |
| 0.34907  | 0.001444 | 0.97518  | 0.007256 | 0.87573  | -0.01645 | 0.72297  | -0.1351  | 0.00344  |
| 0.50678  | 0.03555  | 0.44342  | -0.01365 | 0.76865  | 0.036766 | 0.42798  | 0.157026 | 0.00066  |
| 0.07642  | 0.132474 | 0.00413  | 0.129027 | 0.00523  | 0.129626 | 0.00502  | 0.064556 | 0.16369  |
| 0.85118  | -0.07328 | 0.11376  | 0.014904 | 0.74804  | -0.01893 | 0.68329  | -0.01992 | 0.66772  |
| 0.03117  | -0.19341 | 2.57E-05 | 0.00716  | 0.87735  | -0.0198  | 0.66956  | 0.074276 | 0.10893  |
| 0.42017  | 0.097451 | 0.03526  | 0.027791 | 0.54913  | 0.084595 | 0.06778  | 0.124784 | 0.00694  |
| 0.10113  | 0.172238 | 0.00018  | 0.090358 | 0.05101  | 0.116655 | 0.01164  | 0.273179 | 1.95E-09 |



|          |          |          |          |          |          |          |          |          |
|----------|----------|----------|----------|----------|----------|----------|----------|----------|
| 0.8833   | 0.018919 | 0.68344  | 0.037178 | 0.42282  | 0.031516 | 0.49688  | -0.09754 | 0.0351   |
| 0.13759  | -0.06169 | 0.18326  | 0.044543 | 0.33681  | -0.00232 | 0.96013  | 0.070545 | 0.12793  |
| 0.00037  | -0.06592 | 0.15496  | -0.01271 | 0.78406  | -0.09003 | 0.05185  | -0.29045 | 1.57E-10 |
| 0.03244  | -0.06624 | 0.15292  | 0.089068 | 0.05442  | 0.083533 | 0.07131  | 0.007869 | 0.86533  |
| 0.09377  | -0.06997 | 0.1311   | 0.077339 | 0.09505  | 0.056859 | 0.22003  | 0.046919 | 0.31165  |
| 0.01359  | -0.20213 | 1.07E-05 | -0.11171 | 0.01573  | -0.15204 | 0.00098  | -0.17202 | 0.00019  |
| 0.75936  | -0.07667 | 0.09796  | -0.00571 | 0.90214  | -0.02174 | 0.6394   | -0.1587  | 0.00058  |
| 0.6314   | 0.059263 | 0.20112  | 0.005875 | 0.89924  | 0.027693 | 0.55053  | -0.18824 | 4.25E-05 |
| 0.22048  | -0.00249 | 0.95717  | 0.036309 | 0.43374  | -0.01872 | 0.68659  | 0.207364 | 6.23E-06 |
| 0.00827  | 0.083233 | 0.07234  | 0.331268 | 2.01E-13 | 0.218241 | 1.93E-06 | 0.272836 | 2.04E-09 |
| 0.56331  | 0.106928 | 0.02082  | 0.107993 | 0.01958  | 0.097406 | 0.03535  | 0.002968 | 0.949    |
| 0.25043  | 0.102413 | 0.02689  | 0.208644 | 5.44E-06 | 0.172193 | 0.00018  | -0.19533 | 2.13E-05 |
| 4.97E-05 | -0.00525 | 0.90996  | 0.225693 | 8.31E-07 | 0.219813 | 1.62E-06 | -0.01427 | 0.75843  |
| 0.08776  | -0.29843 | 4.63E-11 | -0.20582 | 7.33E-06 | -0.21278 | 3.50E-06 | 0.05735  | 0.21607  |
| 0.5675   | -0.14899 | 0.00124  | -0.05435 | 0.24111  | -0.04644 | 0.31658  | -0.05003 | 0.28057  |
| 0.37753  | 0.003323 | 0.94291  | 0.060408 | 0.19254  | 0.08266  | 0.07433  | -0.03706 | 0.42426  |
| 0.12329  | 0.04722  | 0.30855  | 0.046728 | 0.31362  | 0.06577  | 0.15589  | 0.065634 | 0.15675  |
| 0.39094  | 0.218019 | 1.97E-06 | -0.13426 | 0.00365  | -0.0352  | 0.44791  | 0.076683 | 0.0979   |
| 0.39272  | -0.11783 | 0.01082  | -0.03802 | 0.41235  | -0.03983 | 0.39043  | -0.09395 | 0.04243  |
| 0.00734  | -0.19212 | 2.92E-05 | -0.19418 | 2.39E-05 | -0.21139 | 4.07E-06 | 0.276903 | 1.15E-09 |
| 0.00385  | -0.12591 | 0.00644  | -0.01854 | 0.68948  | 0.019    | 0.68215  | 0.096345 | 0.03741  |
| 5.26E-05 | -0.17614 | 0.00013  | -0.24079 | 1.38E-07 | -0.2079  | 5.89E-06 | -0.17216 | 0.00019  |
| 0.00105  | -0.18743 | 4.59E-05 | 0.042911 | 0.35484  | 0.052013 | 0.26196  | 0.000334 | 0.99426  |
| 0.77182  | -0.10692 | 0.02083  | -0.00275 | 0.9527   | -0.02069 | 0.6556   | -0.12266 | 0.00796  |
| 0.54617  | -0.17821 | 0.00011  | -0.10109 | 0.02893  | -0.06961 | 0.13306  | 0.043247 | 0.35108  |
| 1.38E-09 | -0.2983  | 4.72E-11 | -0.23038 | 4.83E-07 | -0.28258 | 5.05E-10 | -0.28389 | 4.17E-10 |
| 0.20755  | -0.17402 | 0.00016  | 0.043873 | 0.34414  | -0.00054 | 0.99072  | -0.06768 | 0.14419  |
| 3.12E-17 | 0.326391 | 4.71E-13 | 0.3479   | 9.85E-15 | 0.444974 | 4.33E-24 | 0.050232 | 0.27867  |
| 0.04737  | -0.09404 | 0.04222  | -0.03779 | 0.41526  | 0.017733 | 0.70231  | 0.163397 | 0.00039  |
| 0.11538  | -0.05839 | 0.20782  | 0.037554 | 0.41814  | -0.01627 | 0.72575  | 0.053054 | 0.25252  |
| 0.00049  | -0.23297 | 3.56E-07 | -0.0015  | 0.97429  | 0.029933 | 0.51876  | 0.012655 | 0.78504  |
| 0.14172  | -0.02565 | 0.58036  | -0.01321 | 0.77592  | -0.03241 | 0.4847   | -0.19502 | 2.20E-05 |
| 0.22672  | -0.17492 | 0.00015  | -0.10803 | 0.01954  | -0.06509 | 0.16021  | -0.21873 | 1.82E-06 |
| 0.23472  | 0.117501 | 0.01105  | 0.007392 | 0.87342  | 0.10847  | 0.01904  | 0.050916 | 0.27217  |
| 0.00215  | 0.295607 | 7.16E-11 | 0.001518 | 0.97389  | 0.153135 | 0.0009   | 0.160376 | 0.0005   |
| 0.47038  | 0.070425 | 0.12858  | -0.00249 | 0.95727  | 0.045841 | 0.32291  | 0.148687 | 0.00127  |
| 3.07E-10 | 0.404366 | 8.48E-20 | 0.171974 | 0.00019  | 0.282578 | 5.06E-10 | 0.150424 | 0.00111  |
| 0.00032  | -0.03674 | 0.42832  | -0.13776 | 0.00285  | -0.18613 | 5.19E-05 | -0.17185 | 0.00019  |
| 0.14409  | -0.17306 | 0.00017  | -0.11702 | 0.01138  | -0.13842 | 0.00272  | -0.06274 | 0.17588  |
| 2.84E-07 | 0.278984 | 8.52E-10 | 0.376378 | 3.65E-17 | 0.350183 | 6.42E-15 | 0.154247 | 0.00082  |
| 0.17265  | -0.25943 | 1.28E-08 | -0.08321 | 0.07241  | -0.0959  | 0.0383   | -0.15268 | 0.00093  |
| 0.90038  | -0.13885 | 0.00264  | -0.02543 | 0.58355  | -0.03085 | 0.50607  | 0.065301 | 0.15887  |
| 3.15E-05 | -0.00752 | 0.87132  | -0.02756 | 0.55239  | -0.09362 | 0.04316  | 0.259457 | 1.27E-08 |
| 0.00012  | 0.196537 | 1.89E-05 | 0.148752 | 0.00126  | 0.183589 | 6.59E-05 | -0.08542 | 0.06514  |
| 0.00182  | -0.13246 | 0.00414  | 0.04572  | 0.32419  | 0.073161 | 0.11436  | -0.01422 | 0.75926  |

|          |          |          |          |          |          |          |          |          |
|----------|----------|----------|----------|----------|----------|----------|----------|----------|
| 0.00368  | -0.17588 | 0.00013  | 0.052019 | 0.26191  | 0.060773 | 0.18985  | -0.0042  | 0.92781  |
| 0.94287  | -0.02218 | 0.63253  | -0.08572 | 0.06419  | -0.0986  | 0.03315  | 0.209383 | 5.03E-06 |
| 1.11E-07 | -0.20604 | 7.16E-06 | -0.18993 | 3.61E-05 | -0.25255 | 3.15E-08 | -0.21274 | 3.51E-06 |
| 0.09873  | -0.00027 | 0.99528  | 0.064647 | 0.16309  | 0.039394 | 0.39568  | -0.05971 | 0.1977   |
| 1.34E-08 | 0.132217 | 0.00421  | -0.01993 | 0.66754  | 0.113304 | 0.01429  | 0.111986 | 0.01547  |
| 0.58861  | -0.25019 | 4.26E-08 | -0.14585 | 0.00158  | -0.13392 | 0.00374  | 0.311176 | 6.07E-12 |
| 1.55E-27 | 0.420637 | 1.90E-21 | 0.237682 | 2.02E-07 | 0.422954 | 1.09E-21 | 0.13236  | 0.00417  |
| 0.49894  | -0.05356 | 0.24799  | -0.00285 | 0.95109  | -0.00343 | 0.94109  | 0.090725 | 0.05007  |
| 0.52305  | -0.17632 | 0.00013  | -0.03511 | 0.44914  | -0.07891 | 0.0885   | -0.24048 | 1.44E-07 |
| 0.00035  | -0.10091 | 0.02923  | -0.16196 | 0.00044  | -0.17143 | 0.0002   | -0.31694 | 2.35E-12 |
| 4.52E-13 | 0.197394 | 1.73E-05 | 0.276512 | 1.21E-09 | 0.288471 | 2.12E-10 | 0.164696 | 0.00035  |
| 3.41E-05 | 0.175255 | 0.00014  | 0.198224 | 1.60E-05 | 0.247924 | 5.69E-08 | -0.00156 | 0.97311  |
| 0.0259   | -0.22379 | 1.03E-06 | -0.20467 | 8.26E-06 | -0.228   | 6.37E-07 | 0.011903 | 0.79753  |
| 0.00274  | 0.05824  | 0.20902  | 0.112046 | 0.01541  | 0.102965 | 0.02608  | -0.18893 | 3.97E-05 |
| 0.76029  | -0.06013 | 0.19462  | -0.0913  | 0.04864  | -0.07256 | 0.11735  | 0.270562 | 2.81E-09 |
| 0.14313  | 0.258058 | 1.53E-08 | 0.229656 | 5.25E-07 | 0.15908  | 0.00056  | 0.115885 | 0.01221  |
| 0.05746  | -0.22654 | 7.54E-07 | -0.00795 | 0.86397  | -0.00629 | 0.89209  | -0.08877 | 0.05524  |
| 0.27445  | -0.06128 | 0.18615  | -0.01784 | 0.70065  | 0.015202 | 0.74318  | -0.1076  | 0.02003  |
| 5.99E-08 | 0.288258 | 2.18E-10 | 0.329564 | 2.71E-13 | 0.346863 | 1.20E-14 | 0.382098 | 1.11E-17 |
| 0.34349  | -0.0971  | 0.03594  | -0.0315  | 0.49716  | 0.003996 | 0.93137  | -0.045   | 0.33183  |
| 0.00731  | -0.0838  | 0.0704   | -0.13678 | 0.00306  | -0.15026 | 0.00113  | -0.06858 | 0.1389   |
| 0.03827  | -0.09943 | 0.03169  | -0.09912 | 0.03223  | -0.10806 | 0.01951  | -0.02975 | 0.52135  |
| 1.60E-05 | 0.018562 | 0.68909  | 0.04604  | 0.32081  | 0.097933 | 0.03436  | 0.079158 | 0.0875   |
| 0.18227  | -0.00451 | 0.92251  | 0.022734 | 0.62411  | 0.038459 | 0.407    | 0.003525 | 0.93944  |
| 0.90063  | -0.02149 | 0.64314  | 0.029111 | 0.5303   | 0.014979 | 0.74681  | -0.04689 | 0.31191  |
| 0.21319  | 0.0289   | 0.5333   | 0.048092 | 0.29969  | 0.069024 | 0.13638  | 0.020984 | 0.65106  |
| 0.8077   | 0.110505 | 0.0169   | 0.02709  | 0.55925  | 0.040629 | 0.38102  | 0.058    | 0.2109   |
| 0.82767  | 0.024225 | 0.60154  | 0.060573 | 0.19132  | 0.035091 | 0.44933  | -0.00507 | 0.91302  |
| 3.87E-05 | 0.197466 | 1.72E-05 | 0.054346 | 0.24114  | 0.163183 | 0.0004   | 0.125825 | 0.00648  |
| 0.39835  | -0.01044 | 0.82196  | -0.14972 | 0.00117  | -0.09272 | 0.0452   | -0.16704 | 0.00029  |
| 0.00386  | 0.010913 | 0.81405  | 0.144879 | 0.00169  | 0.149485 | 0.0012   | 0.271265 | 2.55E-09 |
| 0.74323  | -0.19763 | 1.69E-05 | -0.10826 | 0.01928  | -0.12989 | 0.00493  | 0.20159  | 1.13E-05 |
| 0.01213  | -0.11634 | 0.01187  | -0.14645 | 0.00151  | -0.16531 | 0.00033  | -0.0831  | 0.07281  |
| 0.01612  | -0.13354 | 0.00384  | -0.27458 | 1.60E-09 | -0.19855 | 1.54E-05 | -0.08686 | 0.06072  |
| 0.0633   | -0.23215 | 3.92E-07 | -0.20156 | 1.14E-05 | -0.20643 | 6.87E-06 | 0.073037 | 0.11497  |
| 0.02125  | -0.17115 | 0.0002   | 0.083404 | 0.07175  | 0.074968 | 0.10566  | 0.040781 | 0.37924  |
| 3.05E-14 | -0.27479 | 1.55E-09 | -0.34177 | 3.06E-14 | -0.38589 | 4.96E-18 | 0.145795 | 0.00158  |
| 1.61E-09 | 0.012203 | 0.79253  | 0.279569 | 7.83E-10 | 0.227928 | 6.42E-07 | 0.119354 | 0.00983  |
| 0.01352  | 0.051184 | 0.26965  | 0.077026 | 0.0964   | 0.065854 | 0.15536  | 0.146496 | 0.0015   |
| 0.01048  | -0.11131 | 0.0161   | 0.081902 | 0.07704  | 0.063058 | 0.17371  | -0.13688 | 0.00304  |
| 0.02755  | -0.01872 | 0.68665  | 0.071401 | 0.12336  | 0.08694  | 0.06048  | 0.053397 | 0.24947  |
| 0.88162  | 0.023508 | 0.61234  | -0.01606 | 0.72923  | 0.012478 | 0.78797  | -0.07403 | 0.1101   |
| 4.24E-09 | -0.20211 | 1.08E-05 | -0.00443 | 0.92402  | 0.066763 | 0.14972  | 0.160631 | 0.00049  |
| 0.47701  | 0.025621 | 0.58075  | 0.022846 | 0.6224   | 0.009067 | 0.84507  | -0.01068 | 0.81789  |
| 0.00178  | 0.141372 | 0.0022   | 0.03255  | 0.48286  | 0.121386 | 0.00864  | 0.142819 | 0.00198  |

|          |          |          |          |          |          |          |          |          |
|----------|----------|----------|----------|----------|----------|----------|----------|----------|
| 0.01795  | 0.174792 | 0.00015  | -0.10181 | 0.02782  | -0.05953 | 0.19909  | 0.092561 | 0.04559  |
| 0.00076  | -0.22587 | 8.14E-07 | -0.22529 | 8.70E-07 | -0.19485 | 2.23E-05 | -0.15487 | 0.00078  |
| 2.89E-10 | 0.241276 | 1.30E-07 | 0.269712 | 3.16E-09 | 0.309004 | 8.64E-12 | 0.228406 | 6.08E-07 |
| 3.36E-06 | -0.01296 | 0.78002  | 0.106772 | 0.02101  | 0.136687 | 0.00308  | -0.12868 | 0.00535  |
| 0.93219  | -0.12978 | 0.00497  | -0.02646 | 0.5685   | -0.04884 | 0.29222  | -0.12146 | 0.0086   |
| 0.25564  | 0.004463 | 0.92338  | 0.007632 | 0.86935  | 0.024916 | 0.59121  | -0.00763 | 0.86941  |
| 0.01861  | -0.19211 | 2.92E-05 | 0.033064 | 0.47597  | 0.028845 | 0.53406  | 0.042748 | 0.35666  |
| 3.96E-08 | 0.009258 | 0.84185  | 0.078795 | 0.08897  | 0.162829 | 0.00041  | 0.138236 | 0.00276  |
| 0.06321  | 0.093926 | 0.04248  | 0.119308 | 0.00986  | 0.096587 | 0.03693  | -0.00432 | 0.92579  |
| 0.11948  | 0.036805 | 0.42749  | 0.01425  | 0.75874  | 0.00678  | 0.88382  | 0.029339 | 0.52709  |
| 0.83225  | -0.0019  | 0.96734  | 0.025898 | 0.57668  | -0.01125 | 0.80838  | 0.033599 | 0.46886  |
| 0.93147  | 0.125462 | 0.00663  | 0.089347 | 0.05367  | 0.074853 | 0.1062   | 0.013105 | 0.7776   |
| 0.03159  | 0.044128 | 0.34134  | 0.13167  | 0.00437  | 0.091383 | 0.04842  | -0.0227  | 0.62455  |
| 0.40486  | -0.06728 | 0.14658  | 0.016426 | 0.72331  | 0.031257 | 0.50043  | -0.07127 | 0.12405  |
| 5.47E-06 | 0.083358 | 0.07191  | 0.178821 | 0.0001   | 0.214148 | 3.02E-06 | -0.07193 | 0.1206   |
| 1.34E-05 | 0.051733 | 0.26454  | 0.180195 | 9.01E-05 | 0.161699 | 0.00045  | 0.062053 | 0.18067  |
| 0.00015  | -0.06748 | 0.1454   | -0.12346 | 0.00756  | -0.17156 | 0.0002   | -0.04858 | 0.29484  |
| 0.28235  | -0.012   | 0.79596  | -0.06263 | 0.17668  | -0.02785 | 0.54834  | -0.13643 | 0.00314  |
| 8.37E-05 | 0.028575 | 0.53791  | 0.150308 | 0.00112  | 0.125223 | 0.00674  | -0.03875 | 0.40345  |
| 0.4463   | -0.01723 | 0.71031  | -0.03384 | 0.46564  | -0.03488 | 0.45212  | -0.02449 | 0.59756  |
| 0.03135  | 0.093762 | 0.04284  | 0.113035 | 0.01453  | 0.108411 | 0.01911  | 0.075866 | 0.10154  |
| 3.06E-11 | 0.432022 | 1.17E-22 | 0.286979 | 2.64E-10 | 0.377445 | 2.93E-17 | -0.02879 | 0.53484  |
| 0.00039  | -0.21158 | 3.98E-06 | -0.24782 | 5.76E-08 | -0.23268 | 3.68E-07 | 0.08505  | 0.06631  |
| 0.50568  | -0.07821 | 0.09138  | -0.07399 | 0.11031  | -0.055   | 0.2355   | 0.060083 | 0.19494  |
| 0.86536  | -0.06744 | 0.14562  | 0.028295 | 0.5419   | 0.016233 | 0.72642  | -0.08295 | 0.07333  |
| 0.00555  | 0.028327 | 0.54145  | 0.134375 | 0.00362  | 0.123532 | 0.00753  | 0.155138 | 0.00077  |
| 0.26986  | -0.06812 | 0.14159  | 0.059362 | 0.20036  | 0.038994 | 0.4005   | -0.0091  | 0.84456  |
| 5.13E-05 | -0.11017 | 0.01724  | 0.049621 | 0.28458  | 0.099486 | 0.0316   | 0.062676 | 0.17633  |
| 4.60E-05 | 0.43818  | 2.49E-23 | -0.00753 | 0.8711   | 0.167107 | 0.00029  | 0.320796 | 1.23E-12 |
| 1.54E-14 | 0.275013 | 1.50E-09 | 0.42823  | 3.00E-22 | 0.412209 | 1.39E-20 | 0.224064 | 1.00E-06 |
| 8.60E-08 | 0.285069 | 3.51E-10 | 0.346915 | 1.18E-14 | 0.295542 | 7.23E-11 | 0.019611 | 0.67251  |
| 0.00039  | -0.04973 | 0.28348  | 0.013286 | 0.7746   | 0.016094 | 0.72868  | 0.049888 | 0.28199  |
| 0.10868  | -0.07293 | 0.11549  | -0.17759 | 0.00011  | -0.18277 | 7.11E-05 | 0.042788 | 0.35622  |
| 0.90369  | -0.16768 | 0.00027  | -0.15735 | 0.00064  | -0.14548 | 0.00162  | -0.22678 | 7.33E-07 |
| 2.16E-09 | 0.163531 | 0.00039  | 0.092    | 0.04692  | -0.06878 | 0.13775  | 0.100226 | 0.03035  |
| 0.23744  | 0.086166 | 0.06281  | -0.01851 | 0.68989  | 0.005815 | 0.90027  | 0.099075 | 0.03231  |
| 0.00178  | 0.014579 | 0.75334  | -0.00457 | 0.92162  | -0.04099 | 0.37677  | -0.0934  | 0.04365  |
| 0.68361  | 0.140153 | 0.0024   | 0.064497 | 0.16407  | 0.075402 | 0.10365  | 0.076797 | 0.0974   |
| 0.03907  | 0.337805 | 6.28E-14 | 0.310736 | 6.52E-12 | 0.219649 | 1.65E-06 | 0.182182 | 7.51E-05 |
| 0.92453  | -0.14208 | 0.00209  | -0.03516 | 0.44843  | -0.05485 | 0.23678  | 0.006499 | 0.88861  |
| 0.03617  | -0.4049  | 7.51E-20 | -0.26189 | 9.19E-09 | -0.15782 | 0.00062  | 0.100563 | 0.02979  |
| 0.45117  | -0.14493 | 0.00169  | -0.05251 | 0.25741  | -0.03745 | 0.41948  | -0.07629 | 0.09962  |
| 0.42937  | 0.052409 | 0.25835  | -0.05138 | 0.26782  | -0.01906 | 0.68122  | 0.04018  | 0.38632  |
| 0.13346  | -0.15998 | 0.00052  | -0.15524 | 0.00076  | -0.15452 | 0.00081  | 0.071837 | 0.12108  |
| 1.96E-06 | -0.29987 | 3.70E-11 | -0.19788 | 1.65E-05 | -0.23688 | 2.23E-07 | -0.09229 | 0.04622  |

|          |          |          |          |          |          |          |          |          |
|----------|----------|----------|----------|----------|----------|----------|----------|----------|
| 0.00026  | 0.116405 | 0.01182  | 0.032089 | 0.48909  | 0.106465 | 0.02139  | 0.154958 | 0.00078  |
| 5.76E-09 | 0.258195 | 1.51E-08 | 0.299429 | 3.96E-11 | 0.327102 | 4.16E-13 | 0.075419 | 0.10357  |
| 0.27883  | -0.0346  | 0.45565  | 0.078798 | 0.08896  | -0.00632 | 0.89167  | -0.13682 | 0.00305  |
| 0.02571  | 0.040675 | 0.38049  | 0.059153 | 0.20196  | 0.063239 | 0.17247  | -0.02873 | 0.53565  |
| 0.39966  | -0.00068 | 0.98831  | 0.010391 | 0.82279  | 0.036512 | 0.43118  | 0.064982 | 0.16092  |
| 0.00423  | -0.17978 | 9.36E-05 | -0.04322 | 0.3514   | -0.02984 | 0.51999  | 0.074235 | 0.10912  |
| 0.34394  | 0.016372 | 0.72418  | 0.166637 | 0.0003   | 0.097027 | 0.03607  | -0.1715  | 0.0002   |
| 0.85113  | 0.016654 | 0.71963  | 0.027269 | 0.55666  | 0.02102  | 0.65049  | 0.021501 | 0.64304  |
| 0.43486  | 0.070038 | 0.13071  | 0.08689  | 0.06062  | 0.114197 | 0.01354  | -0.08084 | 0.08098  |
| 0.3444   | 0.018526 | 0.68966  | -0.00665 | 0.88603  | 0.017511 | 0.70586  | -0.12239 | 0.0081   |
| 0.82192  | 0.022845 | 0.62242  | 0.042981 | 0.35405  | 0.017628 | 0.70398  | -0.01422 | 0.75921  |
| 0.00777  | 0.020877 | 0.65271  | 0.017027 | 0.71362  | 0.060397 | 0.19262  | 0.029451 | 0.52551  |
| 0.08244  | 0.051    | 0.27138  | 0.092347 | 0.04609  | 0.123984 | 0.00731  | 0.044933 | 0.33259  |
| 0.78397  | 0.067345 | 0.1462   | 0.166709 | 0.0003   | 0.088597 | 0.05572  | 0.024215 | 0.6017   |
| 0.17834  | 0.064991 | 0.16086  | 0.184509 | 6.04E-05 | 0.131737 | 0.00435  | -0.0392  | 0.39799  |
| 0.4451   | 0.048595 | 0.29466  | 0.02513  | 0.58803  | 0.043568 | 0.34751  | 0.023036 | 0.61952  |
| 0.92546  | -0.12672 | 0.0061   | 0.027144 | 0.55846  | -0.04115 | 0.37492  | -0.02358 | 0.6112   |
| 0.02226  | 0.275512 | 1.40E-09 | 0.185031 | 5.76E-05 | 0.174897 | 0.00015  | -0.00125 | 0.9785   |
| 4.18E-05 | -0.10793 | 0.01965  | -0.26401 | 6.91E-09 | -0.25026 | 4.23E-08 | -0.11797 | 0.01073  |
| 0.92851  | 0.000122 | 0.9979   | 0.022051 | 0.63457  | 0.009366 | 0.84002  | -0.03573 | 0.44115  |
| 0.085    | 0.010364 | 0.82324  | 0.03502  | 0.45026  | 0.086423 | 0.06203  | 0.010602 | 0.81925  |
| 0.04208  | 0.05914  | 0.20205  | 0.076394 | 0.09917  | 0.10917  | 0.01828  | 0.000428 | 0.99265  |
| 0.07722  | -0.05269 | 0.25579  | -0.05472 | 0.23792  | -0.07772 | 0.09344  | -0.0316  | 0.49574  |
| 0.30612  | 0.07779  | 0.09313  | 0.043183 | 0.35179  | 0.052551 | 0.25706  | 0.021038 | 0.65021  |
| 0.06745  | 0.092049 | 0.0468   | -0.05352 | 0.24839  | -0.01867 | 0.68743  | -0.21211 | 3.76E-06 |
| 0.05014  | -0.16582 | 0.00032  | -0.00673 | 0.88464  | -0.00948 | 0.83811  | 0.021602 | 0.64148  |
| 0.25805  | -0.25585 | 2.05E-08 | -0.18365 | 6.55E-05 | -0.14202 | 0.0021   | -0.07618 | 0.10011  |
| 0.317    | -0.14581 | 0.00158  | -0.06417 | 0.16624  | -0.04327 | 0.35082  | 0.008408 | 0.8562   |
| 8.58E-16 | 0.087619 | 0.05849  | 0.28854  | 2.09E-10 | 0.343433 | 2.25E-14 | 0.032915 | 0.47796  |
| 0.20878  | -0.21343 | 3.26E-06 | -0.03907 | 0.39957  | -0.02231 | 0.63053  | -0.09625 | 0.0376   |
| 0.00477  | 0.211456 | 4.03E-06 | 0.295738 | 7.02E-11 | 0.248299 | 5.43E-08 | -0.11444 | 0.01334  |
| 0.08444  | -0.11635 | 0.01186  | -0.04807 | 0.2999   | -0.01728 | 0.70952  | -0.05184 | 0.26359  |
| 0.06811  | 0.095378 | 0.03937  | 0.144276 | 0.00177  | 0.133362 | 0.00389  | -0.05659 | 0.2222   |
| 0.27446  | -0.14212 | 0.00208  | -0.08953 | 0.05317  | -0.0876  | 0.05854  | -0.13289 | 0.00402  |
| 0.18156  | 0.022975 | 0.62045  | 0.064832 | 0.16189  | 0.062289 | 0.17902  | -0.03641 | 0.43242  |
| 1.74E-05 | -0.09814 | 0.03399  | -0.22078 | 1.45E-06 | -0.21987 | 1.61E-06 | -0.15295 | 0.00091  |
| 0.8421   | -0.0542  | 0.24241  | -0.03196 | 0.49088  | -0.02847 | 0.5394   | 0.119942 | 0.00948  |
| 0.0029   | -0.02758 | 0.55213  | -0.12993 | 0.00492  | 0.024727 | 0.59404  | 0.117064 | 0.01135  |
| 6.38E-07 | 0.129072 | 0.00521  | 0.041061 | 0.37598  | 0.140193 | 0.00239  | 0.033788 | 0.46635  |
| 7.57E-08 | -0.23806 | 1.93E-07 | -0.15726 | 0.00065  | -0.0921  | 0.04668  | -0.01727 | 0.70975  |
| 0.32506  | -0.16137 | 0.00046  | -0.09667 | 0.03676  | -0.08728 | 0.05949  | 0.117654 | 0.01094  |
| 9.46E-05 | -0.26385 | 7.06E-09 | -0.27896 | 8.54E-10 | -0.29738 | 5.45E-11 | -0.13012 | 0.00486  |
| 0.00265  | -0.08032 | 0.08295  | -0.13205 | 0.00426  | -0.13939 | 0.00254  | -0.21734 | 2.13E-06 |
| 0.93815  | -0.1677  | 0.00027  | -0.10098 | 0.02912  | -0.12165 | 0.0085   | 0.015794 | 0.73353  |
| 0.13455  | 0.219129 | 1.74E-06 | 0.136969 | 0.00302  | 0.189743 | 3.68E-05 | -0.16845 | 0.00026  |

|          |          |          |          |          |          |          |          |          |
|----------|----------|----------|----------|----------|----------|----------|----------|----------|
| 0.14536  | -0.39212 | 1.29E-18 | -0.22739 | 6.83E-07 | -0.25657 | 1.86E-08 | -0.19307 | 2.66E-05 |
| 2.05E-05 | 0.11514  | 0.01278  | 0.288357 | 2.15E-10 | 0.249638 | 4.58E-08 | 0.066955 | 0.14856  |
| 0.02466  | 0.025589 | 0.58123  | -0.04623 | 0.31886  | -0.08308 | 0.07287  | -0.12226 | 0.00817  |
| 8.01E-13 | 0.136293 | 0.00317  | 0.171582 | 0.00019  | 0.258755 | 1.40E-08 | -0.07317 | 0.1143   |
| 0.04043  | -0.03219 | 0.48766  | -0.05568 | 0.22976  | -0.06963 | 0.13298  | -0.30289 | 2.30E-11 |
| 0.00296  | -0.16716 | 0.00029  | -0.12696 | 0.00601  | -0.14911 | 0.00123  | -0.13961 | 0.0025   |
| 2.02E-10 | 0.155068 | 0.00077  | 0.320943 | 1.20E-12 | 0.289083 | 1.93E-10 | 0.11497  | 0.01291  |
| 5.57E-10 | 0.142882 | 0.00197  | 0.083078 | 0.07287  | 0.202452 | 1.04E-05 | -0.00168 | 0.97119  |
| 0.25389  | 0.027283 | 0.55645  | -0.02911 | 0.53038  | 0.023738 | 0.60887  | 0.020499 | 0.6586   |
| 4.81E-09 | 0.36552  | 3.30E-16 | 0.439136 | 1.95E-23 | 0.414181 | 8.79E-21 | -0.1025  | 0.02677  |
| 4.78E-08 | 0.117407 | 0.01111  | 0.241006 | 1.35E-07 | 0.2065   | 6.82E-06 | -0.20314 | 9.67E-06 |
| 0.60333  | -0.27909 | 8.39E-10 | -0.11024 | 0.01717  | -0.11022 | 0.01718  | -0.21996 | 1.59E-06 |
| 0.0004   | -0.22512 | 8.88E-07 | 0.002008 | 0.96549  | 0.016563 | 0.7211   | 0.05505  | 0.23509  |
| 0.00116  | -0.19237 | 2.85E-05 | -0.16861 | 0.00025  | -0.03387 | 0.46527  | -0.07609 | 0.10052  |
| 0.3418   | 0.056519 | 0.22281  | 0.057546 | 0.2145   | 0.084336 | 0.06863  | -0.1233  | 0.00764  |
| 0.27059  | -0.22613 | 7.90E-07 | -0.16844 | 0.00026  | -0.15952 | 0.00054  | -0.11548 | 0.01252  |
| 0.85542  | -0.11716 | 0.01128  | -0.06766 | 0.14431  | -0.04376 | 0.34534  | -0.112   | 0.01546  |
| 4.31E-05 | -0.12781 | 0.00568  | -0.24414 | 9.15E-08 | -0.24156 | 1.26E-07 | -0.05196 | 0.26241  |
| 0.48644  | 0.029497 | 0.52486  | 0.072486 | 0.11775  | 0.063064 | 0.17366  | -0.1     | 0.03072  |
| 0.04118  | -0.0995  | 0.03158  | 1.67E-06 | 0.99997  | 0.002021 | 0.96527  | -0.00654 | 0.88795  |
| 0.73469  | 0.213213 | 3.34E-06 | 0.072117 | 0.11963  | 0.109322 | 0.01812  | 0.219048 | 1.76E-06 |
| 0.02052  | 0.137472 | 0.00291  | -0.12679 | 0.00608  | -0.04236 | 0.36106  | -0.08517 | 0.06591  |
| 0.02491  | -0.02795 | 0.54684  | -0.01385 | 0.76537  | -0.00533 | 0.90856  | -0.09809 | 0.03407  |
| 0.16969  | -0.19791 | 1.65E-05 | -0.02195 | 0.63616  | -0.05778 | 0.21262  | 0.106472 | 0.02138  |
| 0.097    | -0.07142 | 0.12325  | -0.12665 | 0.00613  | -0.15362 | 0.00087  | -0.05471 | 0.23801  |
| 8.72E-06 | -0.20403 | 8.83E-06 | 0.078924 | 0.08845  | 0.08578  | 0.064    | 0.135238 | 0.00341  |
| 0.98303  | -0.07032 | 0.12914  | 0.063804 | 0.16866  | -0.03717 | 0.42295  | 0.015977 | 0.73058  |
| 0.0998   | -0.18009 | 9.10E-05 | -0.22932 | 5.47E-07 | -0.25022 | 4.25E-08 | -0.02703 | 0.56014  |
| 0.30148  | 0.067712 | 0.14401  | 0.077125 | 0.09597  | 0.05278  | 0.25498  | 0.021125 | 0.64887  |
| 0.2292   | -0.00611 | 0.8952   | -0.05908 | 0.20248  | -0.03972 | 0.39179  | -0.05085 | 0.27276  |
| 0.08634  | -0.05651 | 0.2229   | -0.10415 | 0.0244   | -0.11366 | 0.01399  | 0.03027  | 0.51405  |
| 0.01709  | 0.223462 | 1.07E-06 | -0.03519 | 0.44801  | 0.042577 | 0.3586   | 0.058262 | 0.20884  |
| 0.77792  | -0.12232 | 0.00814  | -0.03753 | 0.41845  | -0.0655  | 0.1576   | 0.031494 | 0.49718  |
| 0.54973  | 0.033684 | 0.46773  | -0.11895 | 0.01009  | -0.0688  | 0.13767  | -0.16564 | 0.00032  |
| 0.00033  | -0.02562 | 0.58076  | -0.13616 | 0.0032   | -0.14014 | 0.0024   | 0.073761 | 0.11141  |
| 0.50139  | -0.05458 | 0.23912  | -0.02577 | 0.57862  | -0.02905 | 0.53119  | 0.010647 | 0.8185   |
| 0.00489  | -0.13693 | 0.00303  | -0.18152 | 7.98E-05 | -0.1549  | 0.00078  | 0.121415 | 0.00863  |
| 0.90472  | -0.22906 | 5.63E-07 | -0.29434 | 8.70E-11 | -0.17755 | 0.00011  | -0.03137 | 0.4989   |
| 0.00239  | -0.00029 | 0.99501  | 0.076815 | 0.09732  | 0.097049 | 0.03603  | 0.085531 | 0.06478  |
| 0.00898  | 0.041305 | 0.37315  | -0.02273 | 0.62421  | -0.08476 | 0.06724  | -0.18667 | 4.93E-05 |
| 0.02062  | 0.326951 | 4.27E-13 | 0.325205 | 5.77E-13 | 0.272987 | 2.00E-09 | 0.278586 | 9.02E-10 |
| 0.01737  | 0.252784 | 3.05E-08 | 0.103513 | 0.02529  | 0.02303  | 0.6196   | 0.049401 | 0.28671  |
| 0.65139  | -0.01926 | 0.67797  | 0.028674 | 0.5365   | -0.01907 | 0.68099  | 0.092643 | 0.0454   |
| 0.09407  | 0.057992 | 0.21097  | 0.025537 | 0.58199  | -0.02222 | 0.63203  | 0.09472  | 0.04075  |
| 3.04E-05 | -0.24212 | 1.18E-07 | -0.08728 | 0.05948  | -0.03037 | 0.51263  | 0.058001 | 0.2109   |

|          |           |          |          |          |          |          |          |          |
|----------|-----------|----------|----------|----------|----------|----------|----------|----------|
| 6.75E-07 | 0.029984  | 0.51804  | -0.04985 | 0.28235  | 0.076525 | 0.09859  | 0.117359 | 0.01114  |
| 0.15805  | -0.0728   | 0.11617  | -0.09242 | 0.04593  | -0.0564  | 0.2238   | 0.016684 | 0.71914  |
| 0.0008   | -0.15549  | 0.00075  | -0.07199 | 0.1203   | -0.00657 | 0.88748  | 0.068831 | 0.13748  |
| 0.60124  | 0.018918  | 0.68345  | -0.04069 | 0.38036  | -0.01143 | 0.80536  | 0.094264 | 0.04174  |
| 0.00988  | 0.204955  | 8.02E-06 | 0.194291 | 2.36E-05 | 0.173464 | 0.00017  | -0.00963 | 0.83549  |
| 9.06E-06 | 0.055044  | 0.23514  | 0.130023 | 0.00489  | 0.183815 | 6.45E-05 | 0.13711  | 0.00299  |
| 0.94554  | -0.18884  | 4.01E-05 | -0.16262 | 0.00042  | -0.11957 | 0.0097   | -0.1903  | 3.49E-05 |
| 0.11463  | -0.05802  | 0.21072  | -0.07049 | 0.12825  | -0.05525 | 0.23337  | -0.18537 | 5.57E-05 |
| 0.14937  | 0.054924  | 0.23617  | 0.120104 | 0.00938  | 0.117951 | 0.01074  | -0.03368 | 0.46779  |
| 0.0883   | -6.74E-05 | 0.99884  | 0.04945  | 0.28624  | 0.071141 | 0.12473  | 0.025291 | 0.58564  |
| 3.09E-07 | -0.07986  | 0.08473  | -0.02124 | 0.64714  | 0.071058 | 0.12518  | 0.111226 | 0.01619  |
| 0.54585  | 0.075331  | 0.10398  | 0.022895 | 0.62165  | 0.010027 | 0.8289   | 0.011396 | 0.80598  |
| 0.31047  | -0.15157  | 0.00102  | -0.0628  | 0.17547  | -0.05758 | 0.21419  | -0.02599 | 0.57534  |
| 0.75055  | 0.261917  | 9.17E-09 | 0.152907 | 0.00092  | 0.141724 | 0.00214  | 0.170671 | 0.00021  |
| 0.42028  | -0.07195  | 0.12052  | 0.06687  | 0.14907  | 0.014372 | 0.75674  | 0.034223 | 0.46064  |
| 2.31E-11 | 0.184267  | 6.18E-05 | 0.176415 | 0.00013  | 0.28722  | 2.55E-10 | 0.103804 | 0.02488  |
| 0.76051  | 0.013862  | 0.76511  | -0.01374 | 0.76705  | -0.00581 | 0.90043  | 0.041415 | 0.37187  |
| 0.45152  | -0.1671   | 0.00029  | -0.04306 | 0.35311  | -0.02402 | 0.60463  | 0.028823 | 0.53438  |
| 0.04348  | -0.06372  | 0.16922  | -0.04208 | 0.36419  | -0.01623 | 0.7264   | 0.130532 | 0.00472  |
| 9.05E-06 | -0.08615  | 0.06287  | -0.01992 | 0.66768  | 0.041212 | 0.37422  | -0.01909 | 0.68068  |
| 0.09924  | -0.06114  | 0.18722  | -0.10014 | 0.03049  | -0.10557 | 0.02251  | -0.03338 | 0.47176  |
| 0.10222  | -0.13542  | 0.00337  | -0.06848 | 0.13951  | -0.08886 | 0.055    | -0.0548  | 0.23725  |
| 0.93628  | 0.007136  | 0.87776  | -0.08077 | 0.08122  | -0.03534 | 0.44614  | -0.10739 | 0.02027  |
| 0.7861   | -0.05598  | 0.22726  | -0.01275 | 0.78348  | -0.03585 | 0.43955  | -0.12683 | 0.00606  |
| 0.03391  | -0.01663  | 0.72003  | -0.02762 | 0.55156  | 0.01597  | 0.7307   | 0.167883 | 0.00027  |
| 0.52326  | 0.060607  | 0.19107  | -0.01021 | 0.82591  | 0.037862 | 0.41433  | 0.083805 | 0.07039  |
| 0.3387   | -0.10997  | 0.01744  | -0.0959  | 0.0383   | -0.07252 | 0.11757  | -0.01462 | 0.7527   |
| 0.14844  | -0.15423  | 0.00083  | -0.041   | 0.3767   | -0.05043 | 0.27679  | 0.047289 | 0.30785  |
| 0.00215  | -0.16179  | 0.00045  | -0.15076 | 0.00108  | -0.18275 | 7.12E-05 | -0.02825 | 0.54249  |
| 0.02631  | -0.12676  | 0.00609  | -0.09472 | 0.04076  | -0.1308  | 0.00464  | -0.05298 | 0.2532   |
| 0.89841  | -0.06665  | 0.15044  | -0.06947 | 0.13385  | -0.07368 | 0.11183  | 0.056571 | 0.22238  |
| 0.06129  | -0.1537   | 0.00086  | -0.10456 | 0.02384  | -0.11816 | 0.0106   | -0.07205 | 0.12     |
| 0.19727  | 0.080297  | 0.08303  | -0.04805 | 0.30009  | 0.027853 | 0.54823  | 0.242786 | 1.08E-07 |
| 0.82353  | -0.01547  | 0.73877  | 0.004273 | 0.92662  | 0.008531 | 0.85412  | 0.036458 | 0.43185  |
| 0.63653  | -0.0405   | 0.38259  | -0.04933 | 0.28739  | -0.04157 | 0.37006  | 0.036773 | 0.42789  |
| 0.00333  | -0.12295  | 0.00782  | -0.2203  | 1.53E-06 | -0.1878  | 4.43E-05 | -0.00908 | 0.84479  |
| 0.00145  | -0.15737  | 0.00064  | -0.17449 | 0.00015  | -0.21101 | 4.23E-06 | -0.10342 | 0.02542  |
| 0.29022  | -0.08466  | 0.06758  | -0.0464  | 0.31709  | -0.02501 | 0.58984  | 0.010026 | 0.82893  |
| 0.79093  | -0.00171  | 0.97054  | 0.004944 | 0.91514  | 0.015589 | 0.73687  | -0.04565 | 0.32493  |
| 0.77512  | -0.12629  | 0.00628  | -0.11119 | 0.01623  | -0.09705 | 0.03604  | 0.002892 | 0.9503   |
| 0.50526  | -0.06731  | 0.14639  | 0.012887 | 0.78121  | -0.03952 | 0.39417  | 0.021336 | 0.64559  |
| 0.26455  | -0.09862  | 0.03311  | -0.06703 | 0.14808  | -0.05625 | 0.22503  | 0.048217 | 0.29844  |
| 0.40361  | -0.15396  | 0.00084  | -0.07525 | 0.10433  | -0.07558 | 0.10283  | 0.037589 | 0.41771  |
| 0.53007  | -0.09783  | 0.03455  | -0.0754  | 0.10367  | -0.07453 | 0.10771  | -0.03551 | 0.44389  |
| 0.83324  | -0.0708   | 0.12653  | -0.07438 | 0.10844  | -0.03956 | 0.3937   | -0.00984 | 0.83196  |

|          |          |          |          |          |          |          |          |          |
|----------|----------|----------|----------|----------|----------|----------|----------|----------|
| 0.88435  | 0.037288 | 0.42145  | 0.038007 | 0.41254  | 0.032129 | 0.48854  | 0.016936 | 0.71509  |
| 0.36461  | -0.02903 | 0.53147  | -0.01493 | 0.74759  | -0.01311 | 0.77754  | 0.024045 | 0.60425  |
| 0.17794  | 0.022914 | 0.62136  | 0.086551 | 0.06164  | 0.082274 | 0.0757   | -0.12161 | 0.00852  |
| 0.96229  | -0.02447 | 0.59785  | 0.001293 | 0.97777  | 0.00455  | 0.92189  | 0.020204 | 0.6632   |
| 0.74363  | -0.10355 | 0.02523  | -0.07511 | 0.10502  | -0.05273 | 0.25544  | -0.01365 | 0.76861  |
| 0.66273  | -0.07304 | 0.11496  | -0.03216 | 0.48807  | -0.03221 | 0.48745  | 0.013571 | 0.76991  |
| 0.59261  | -0.03141 | 0.49831  | -0.04247 | 0.35982  | -0.02287 | 0.62197  | 0.012919 | 0.78067  |
| 0.2912   | -0.05917 | 0.20182  | -0.06271 | 0.17611  | -0.05997 | 0.19575  | 0.002833 | 0.95131  |
| 0.64366  | -0.26262 | 8.34E-09 | -0.09663 | 0.03685  | -0.08221 | 0.07592  | 0.020708 | 0.65534  |
| 0.03921  | -0.15089 | 0.00107  | -0.13976 | 0.00247  | -0.12165 | 0.0085   | -0.05122 | 0.26934  |
| 0.11503  | 0.105464 | 0.02265  | 0.072619 | 0.11708  | 0.064288 | 0.16544  | 0.11017  | 0.01723  |
| 0.69935  | -0.08419 | 0.0691   | -0.07141 | 0.1233   | -0.04588 | 0.3225   | -0.04406 | 0.34208  |
| 0.10622  | -0.08502 | 0.06639  | 0.02416  | 0.60252  | 0.027384 | 0.555    | 0.070793 | 0.1266   |
| 0.64857  | -0.13437 | 0.00362  | -0.05446 | 0.24011  | -0.0853  | 0.06552  | 0.038078 | 0.41166  |
| 0.79196  | 0.009031 | 0.84568  | -0.01657 | 0.72104  | -0.02531 | 0.5854   | 0.017946 | 0.69889  |
| 0.92447  | 0.011686 | 0.80114  | 0.01166  | 0.80158  | 0.004575 | 0.92145  | 0.02024  | 0.66265  |
| 0.86607  | 0.003114 | 0.9465   | 0.017419 | 0.70733  | 0.022358 | 0.62986  | 0.023738 | 0.60888  |
| 0.40906  | -0.04641 | 0.31697  | 0.002689 | 0.95378  | -0.00027 | 0.99538  | 0.045409 | 0.3275   |
| 0.20893  | -0.02924 | 0.52849  | -0.02792 | 0.54728  | -0.03038 | 0.51247  | 0.003903 | 0.93296  |
| 5.79E-05 | 0.015257 | 0.74228  | 0.010053 | 0.82847  | 0.052694 | 0.25576  | 0.169459 | 0.00023  |
| 0.00025  | -0.05229 | 0.25942  | 0.113296 | 0.0143   | 0.112656 | 0.01486  | -0.02589 | 0.57685  |
| 0.05681  | 0.08124  | 0.07947  | 0.05503  | 0.23525  | 0.001362 | 0.97658  | 0.162855 | 0.00041  |
| 0.0055   | 0.127225 | 0.0059   | 0.083422 | 0.07169  | 0.003082 | 0.94704  | 0.166553 | 0.0003   |
| 0.07097  | 0.077726 | 0.0934   | 0.081843 | 0.07725  | 0.079838 | 0.08481  | 0.114378 | 0.01339  |
| 8.11E-08 | -0.04652 | 0.31579  | -0.06566 | 0.15659  | 0.03842  | 0.40748  | 0.301702 | 2.77E-11 |
| 3.76E-05 | -0.24019 | 1.49E-07 | -0.1272  | 0.00591  | -0.06275 | 0.1758   | 0.22137  | 1.36E-06 |
| 0.94922  | 0.129836 | 0.00495  | 0.021311 | 0.64598  | 0.082223 | 0.07588  | 0.052836 | 0.25448  |
| 1.18E-08 | 0.370122 | 1.31E-16 | 0.400265 | 2.14E-19 | 0.394081 | 8.43E-19 | 0.055477 | 0.23147  |
| 0.00357  | 0.394145 | 8.31E-19 | 0.250643 | 4.02E-08 | 0.253847 | 2.66E-08 | 0.158404 | 0.00059  |
| 0.01932  | 0.220288 | 1.53E-06 | 0.147712 | 0.00137  | 0.064296 | 0.16539  | 0.228492 | 6.02E-07 |
| 0.01723  | -0.20585 | 7.31E-06 | -0.10893 | 0.01854  | -0.17143 | 0.0002   | -0.12531 | 0.0067   |
| 0.2143   | 0.088803 | 0.05515  | 0.01969  | 0.67127  | 0.066177 | 0.15334  | 0.049002 | 0.29063  |
| 0.00572  | -0.05548 | 0.23143  | 0.03925  | 0.39742  | 0.07471  | 0.10687  | -0.01174 | 0.8003   |
| 0.15348  | -0.04027 | 0.38529  | -0.01963 | 0.67214  | 0.022564 | 0.62671  | 0.05659  | 0.22223  |
| 0.35121  | 0.02179  | 0.63858  | -0.00491 | 0.9158   | 0.029444 | 0.52561  | 0.005267 | 0.90962  |
| 0.66578  | -0.03205 | 0.48955  | 0.004871 | 0.91639  | -0.02489 | 0.59161  | -0.16547 | 0.00033  |
| 0.35622  | 0.068632 | 0.13863  | 0.079671 | 0.08546  | 0.05577  | 0.22901  | 0.096218 | 0.03766  |
| 0.1087   | 0.009311 | 0.84094  | 0.072419 | 0.11809  | 0.064209 | 0.16597  | -0.02077 | 0.65433  |
| 3.59E-11 | 0.166717 | 0.0003   | 0.127775 | 0.00569  | 0.218943 | 1.78E-06 | 0.021811 | 0.63825  |
| 0.01856  | 0.017075 | 0.71284  | 0.091221 | 0.04882  | 0.106823 | 0.02095  | -0.05746 | 0.21521  |
| 0.02828  | -0.21246 | 3.62E-06 | -0.10782 | 0.01977  | -0.12566 | 0.00655  | 0.032223 | 0.48727  |
| 2.88E-07 | 0.033736 | 0.46704  | 0.15278  | 0.00093  | 0.226986 | 7.16E-07 | 0.000186 | 0.9968   |
| 2.20E-05 | 0.250344 | 4.18E-08 | 0.305895 | 1.43E-11 | 0.314901 | 3.29E-12 | -0.04447 | 0.33765  |
| 0.02009  | -0.0936  | 0.0432   | 0.129899 | 0.00493  | 0.079519 | 0.08607  | -0.25411 | 2.57E-08 |
| 0.10652  | -0.21753 | 2.08E-06 | -0.12974 | 0.00498  | -0.10405 | 0.02454  | 0.140105 | 0.00241  |

|          |          |          |          |          |          |          |          |          |
|----------|----------|----------|----------|----------|----------|----------|----------|----------|
| 0.81506  | -0.04852 | 0.29543  | 0.022666 | 0.62516  | 0.021546 | 0.64235  | -0.17053 | 0.00021  |
| 0.17066  | -0.02575 | 0.57883  | -0.03182 | 0.49279  | -0.03731 | 0.42118  | -0.0666  | 0.15075  |
| 1.02E-09 | -0.00324 | 0.94429  | 0.011347 | 0.8068   | 0.140875 | 0.00228  | 0.475569 | 9.96E-28 |
| 4.54E-08 | 0.244473 | 8.78E-08 | 0.250178 | 4.27E-08 | 0.318467 | 1.81E-12 | -0.13682 | 0.00305  |
| 4.79E-16 | 0.378253 | 2.48E-17 | 0.405694 | 6.27E-20 | 0.467633 | 9.49E-27 | 0.077248 | 0.09544  |
| 0.99167  | 0.144949 | 0.00169  | -0.05746 | 0.21521  | 0.020017 | 0.66613  | 0.229614 | 5.28E-07 |
| 0.00035  | 0.161628 | 0.00045  | 0.205179 | 7.83E-06 | 0.204544 | 8.37E-06 | 0.101217 | 0.02874  |
| 5.44E-10 | -0.09888 | 0.03265  | 0.185607 | 5.45E-05 | 0.189537 | 3.75E-05 | 0.197049 | 1.79E-05 |
| 0.21701  | -0.18125 | 8.18E-05 | -0.05469 | 0.2382   | -0.07615 | 0.10028  | -0.0693  | 0.13482  |
| 0.20255  | -0.14136 | 0.0022   | -0.02075 | 0.65469  | -0.04264 | 0.35787  | -0.08121 | 0.07957  |
| 0.23785  | -0.06689 | 0.14894  | -0.18445 | 6.08E-05 | -0.07259 | 0.1172   | 0.081967 | 0.0768   |
| 0.02496  | -0.21561 | 2.57E-06 | -0.10055 | 0.0298   | -0.07099 | 0.12552  | 0.035374 | 0.44568  |
| 0.8222   | -0.03311 | 0.47532  | 0.0378   | 0.41509  | 0.0008   | 0.98625  | -0.09786 | 0.03451  |
| 0.00177  | 0.070336 | 0.12907  | -0.12889 | 0.00528  | 0.05359  | 0.24775  | 0.200239 | 1.30E-05 |
| 0.78932  | 0.172203 | 0.00018  | -0.12467 | 0.00699  | -0.05703 | 0.21861  | 0.209703 | 4.87E-06 |
| 9.88E-17 | 0.394289 | 8.05E-19 | 0.399604 | 2.48E-19 | 0.41478  | 7.63E-21 | 0.096832 | 0.03645  |
| 0.94715  | 0.035936 | 0.43849  | -0.02075 | 0.65464  | 0.013531 | 0.77057  | 0.251796 | 3.47E-08 |
| 0.12557  | -0.00367 | 0.93694  | -0.00151 | 0.97412  | 0.026569 | 0.56683  | 0.354536 | 2.81E-15 |
| 0.07117  | -0.0984  | 0.03352  | 0.050675 | 0.27445  | 0.055235 | 0.23352  | 0.154027 | 0.00084  |
| 0.10651  | -0.11922 | 0.00992  | -0.09211 | 0.04665  | -0.10449 | 0.02393  | -0.01681 | 0.71705  |
| 2.69E-21 | 0.388422 | 2.88E-18 | 0.457667 | 1.48E-25 | 0.523697 | 3.01E-34 | 0.116865 | 0.01149  |
| 0.01155  | -0.07791 | 0.09262  | 0.123521 | 0.00753  | 0.091014 | 0.04934  | -0.00139 | 0.97609  |
| 0.00721  | -0.15325 | 0.00089  | 0.100202 | 0.03039  | 0.072338 | 0.1185   | -0.01241 | 0.78919  |
| 0.04018  | -0.21467 | 2.85E-06 | 0.000407 | 0.99299  | -0.00317 | 0.94559  | -0.04015 | 0.38667  |
| 0.26684  | -0.14868 | 0.00127  | -0.03767 | 0.41668  | -0.07699 | 0.09656  | -0.0967  | 0.03671  |
| 0.01938  | -0.04273 | 0.35683  | 0.104468 | 0.02396  | 0.087817 | 0.05792  | 0.001303 | 0.97759  |
| 0.0046   | 0.148349 | 0.0013   | 0.296354 | 6.38E-11 | 0.206681 | 6.70E-06 | -0.0635  | 0.17072  |
| 0.79445  | 0.083924 | 0.06999  | 0.018701 | 0.68689  | 0.032353 | 0.48551  | 0.338453 | 5.59E-14 |
| 1.21E-22 | 0.251043 | 3.82E-08 | 0.189764 | 3.67E-05 | 0.387571 | 3.46E-18 | 0.435556 | 4.83E-23 |
| 0.18259  | -0.0131  | 0.77773  | -0.13619 | 0.00319  | -0.03528 | 0.44695  | -0.09543 | 0.03925  |
| 7.71E-08 | 0.010654 | 0.81839  | 0.234224 | 3.06E-07 | 0.216054 | 2.45E-06 | 0.190542 | 3.40E-05 |
| 0.43762  | -0.15756 | 0.00063  | -0.1326  | 0.0041   | -0.12242 | 0.00808  | 0.002268 | 0.96101  |
| 1.72E-12 | 0.15035  | 0.00112  | 0.036071 | 0.43676  | 0.192455 | 2.83E-05 | 0.040043 | 0.38793  |
| 3.05E-11 | 0.086493 | 0.06181  | 0.085136 | 0.06603  | 0.153206 | 0.0009   | 0.167538 | 0.00028  |
| 2.88E-09 | 0.386988 | 3.92E-18 | 0.203883 | 8.96E-06 | 0.304548 | 1.77E-11 | 0.056778 | 0.2207   |
| 0.00254  | -0.03832 | 0.40868  | 0.020174 | 0.66367  | 0.035882 | 0.43918  | 0.098603 | 0.03315  |
| 0.07001  | -0.09691 | 0.0363   | -0.09892 | 0.03258  | -0.11397 | 0.01372  | -0.08215 | 0.07615  |
| 2.06E-10 | -0.17922 | 9.85E-05 | -0.33339 | 1.38E-13 | -0.34293 | 2.47E-14 | -0.13149 | 0.00442  |
| 0.95385  | -0.27484 | 1.54E-09 | -0.1702  | 0.00022  | -0.16382 | 0.00038  | 0.061873 | 0.18195  |
| 8.15E-08 | 0.280934 | 6.42E-10 | 0.335389 | 9.69E-14 | 0.305444 | 1.53E-11 | 0.332261 | 1.69E-13 |
| 0.35332  | 0.119784 | 0.00957  | 0.088081 | 0.05716  | 0.092144 | 0.04657  | 0.037488 | 0.41896  |
| 1.59E-05 | -0.23661 | 2.30E-07 | -0.28476 | 3.67E-10 | -0.28007 | 7.29E-10 | -0.26295 | 7.98E-09 |
| 0.00099  | 0.067216 | 0.14698  | 0.045127 | 0.33052  | 0.143104 | 0.00193  | 0.149137 | 0.00123  |
| 0.17036  | 0.076746 | 0.09762  | -0.06464 | 0.16316  | -0.00842 | 0.85602  | 0.194013 | 2.43E-05 |
| 0.00166  | -0.03551 | 0.44387  | 0.074489 | 0.10791  | 0.11177  | 0.01567  | 0.021053 | 0.64998  |



|          |           |          |          |          |          |          |          |          |
|----------|-----------|----------|----------|----------|----------|----------|----------|----------|
| 0.15698  | 0.124796  | 0.00693  | 0.094382 | 0.04148  | 0.082267 | 0.07573  | -0.29561 | 7.16E-11 |
| 0.15632  | -0.05483  | 0.237    | -0.00147 | 0.97481  | 0.004889 | 0.91608  | -0.00409 | 0.92977  |
| 5.72E-08 | 0.174447  | 0.00015  | 0.094611 | 0.04099  | 0.174598 | 0.00015  | 0.340886 | 3.59E-14 |
| 0.77727  | -0.12737  | 0.00584  | -0.124   | 0.0073   | -0.11744 | 0.01109  | 0.044729 | 0.33479  |
| 0.60443  | -0.09804  | 0.03416  | -0.01866 | 0.68755  | -0.02815 | 0.54398  | -0.18735 | 4.62E-05 |
| 0.9322   | -0.00057  | 0.99028  | 0.002016 | 0.96534  | -0.01032 | 0.82396  | 0.008411 | 0.85615  |
| 0.31479  | 0.064697  | 0.16277  | 0.050958 | 0.27178  | 0.075082 | 0.10513  | -0.18251 | 7.28E-05 |
| 0.48157  | 0.032099  | 0.48894  | 0.05698  | 0.21906  | 0.013382 | 0.77303  | 0.076646 | 0.09806  |
| 0.33286  | 0.002842  | 0.95116  | 0.009803 | 0.83267  | 0.001391 | 0.97609  | -0.00723 | 0.87614  |
| 0.03848  | 0.283037  | 4.73E-10 | 0.093017 | 0.04453  | 0.141168 | 0.00223  | 0.16752  | 0.00028  |
| 3.06E-15 | 0.089772  | 0.05254  | 0.310369 | 6.92E-12 | 0.337    | 7.26E-14 | 0.069363 | 0.13446  |
| 3.50E-24 | 0.257651  | 1.62E-08 | 0.196884 | 1.82E-05 | 0.359722 | 1.03E-15 | 0.180931 | 8.43E-05 |
| 1.60E-06 | -7.91E-05 | 0.99864  | -0.15996 | 0.00052  | -0.1596  | 0.00054  | 0.130251 | 0.00481  |
| 0.00143  | -0.04467  | 0.3354   | -0.16432 | 0.00036  | -0.02167 | 0.64037  | 0.446959 | 2.58E-24 |
| 0.18864  | -0.28265  | 5.01E-10 | -0.14683 | 0.00146  | -0.13216 | 0.00422  | -0.10568 | 0.02237  |
| 0.04495  | -0.21019  | 4.62E-06 | -0.20857 | 5.49E-06 | -0.20674 | 6.65E-06 | -0.13281 | 0.00404  |
| 0.08057  | -0.18199  | 7.64E-05 | -0.14388 | 0.00183  | -0.14356 | 0.00187  | -0.04494 | 0.33252  |
| 0.78199  | -0.02467  | 0.59494  | 0.002956 | 0.94921  | 0.001474 | 0.97466  | -0.12853 | 0.00541  |
| 0.92568  | 0.007596  | 0.86995  | -0.12161 | 0.00852  | -0.05028 | 0.27823  | 0.043015 | 0.35367  |
| 0.0864   | 0.005207  | 0.91064  | -0.03349 | 0.47032  | 0.021275 | 0.64654  | -0.14024 | 0.00239  |
| 0.05327  | 0.024154  | 0.6026   | -0.04498 | 0.33208  | 0.025531 | 0.58209  | 0.099916 | 0.03086  |
| 0.97077  | -0.21126  | 4.12E-06 | -0.22598 | 8.04E-07 | -0.15925 | 0.00055  | 0.009131 | 0.84398  |
| 0.05063  | -0.1279   | 0.00564  | -0.15454 | 0.00081  | -0.07227 | 0.11886  | 0.04517  | 0.33005  |
| 0.42574  | -0.12655  | 0.00617  | -0.22085 | 1.44E-06 | -0.14599 | 0.00156  | -0.04061 | 0.3812   |
| 0.89943  | -0.04256  | 0.35876  | -0.18787 | 4.40E-05 | -0.08437 | 0.06852  | -0.03611 | 0.43632  |
| 6.55E-05 | -0.15082  | 0.00108  | -0.26315 | 7.76E-09 | -0.23631 | 2.39E-07 | -0.17947 | 9.63E-05 |
| 0.46384  | -0.04806  | 0.30003  | -0.22521 | 8.78E-07 | -0.12187 | 0.00838  | 0.194934 | 2.21E-05 |
| 0.38137  | -0.11782  | 0.01083  | -0.2127  | 3.53E-06 | -0.13893 | 0.00262  | 0.057641 | 0.21374  |
| 0.30956  | 0.000821  | 0.98589  | -0.11889 | 0.01013  | -0.02611 | 0.57356  | -0.0342  | 0.46095  |
| 1.73E-06 | -0.14977  | 0.00117  | -0.28867 | 2.05E-10 | -0.24873 | 5.13E-08 | -0.03106 | 0.50312  |
| 6.95E-08 | -0.13728  | 0.00295  | -0.18638 | 5.07E-05 | -0.20773 | 6.00E-06 | -0.18914 | 3.90E-05 |
| 0.36531  | -0.09258  | 0.04553  | -0.10911 | 0.01835  | -0.08203 | 0.07656  | 0.038267 | 0.40935  |
| 0.00593  | -0.25753  | 1.64E-08 | -0.23457 | 2.94E-07 | -0.22283 | 1.15E-06 | -0.04225 | 0.36233  |
| 0.00486  | -0.31165  | 5.61E-12 | -0.18848 | 4.15E-05 | -0.21115 | 4.17E-06 | -0.19652 | 1.89E-05 |
| 0.12449  | -0.00805  | 0.86227  | -0.10806 | 0.01951  | -0.00394 | 0.93225  | 0.00057  | 0.9902   |
| 0.3535   | -0.22033  | 1.53E-06 | -0.16785 | 0.00027  | -0.13279 | 0.00404  | -0.13811 | 0.00278  |
| 0.00091  | -0.12196  | 0.00833  | -0.23794 | 1.96E-07 | -0.20991 | 4.76E-06 | 0.015499 | 0.73833  |
| 0.64244  | -0.15523  | 0.00076  | -0.24759 | 5.93E-08 | -0.15193 | 0.00099  | 0.067238 | 0.14684  |
| 0.00092  | -0.18655  | 4.99E-05 | -0.29637 | 6.37E-11 | -0.25094 | 3.87E-08 | -0.10415 | 0.0244   |
| 0.037    | -0.12389  | 0.00735  | -0.32365 | 7.54E-13 | -0.24466 | 8.57E-08 | -0.01036 | 0.82331  |
| 3.02E-10 | 0.232634  | 3.70E-07 | 0.148942 | 0.00125  | 0.287997 | 2.27E-10 | 0.12933  | 0.00512  |
| 0.01253  | -0.14954  | 0.00119  | -0.04295 | 0.35439  | -0.0166  | 0.72051  | 0.081504 | 0.07849  |
| 0.01017  | -0.29072  | 1.51E-10 | -0.16284 | 0.00041  | -0.19964 | 1.38E-05 | -0.41903 | 2.79E-21 |
| 0.01518  | -0.07785  | 0.09288  | -0.08838 | 0.05631  | -0.12662 | 0.00614  | -0.22123 | 1.38E-06 |
| 0.00562  | -0.08095  | 0.08055  | -0.16522 | 0.00034  | -0.17314 | 0.00017  | 0.038682 | 0.40428  |

|          |          |          |          |          |          |          |          |          |
|----------|----------|----------|----------|----------|----------|----------|----------|----------|
| 0.13073  | -0.11389 | 0.01379  | -0.03968 | 0.39223  | -0.08404 | 0.06961  | -0.03661 | 0.42994  |
| 6.75E-08 | -0.02457 | 0.59642  | 0.157448 | 0.00064  | 0.188369 | 4.19E-05 | -0.03358 | 0.46914  |
| 8.00E-09 | -0.26389 | 7.03E-09 | -0.33031 | 2.38E-13 | -0.32992 | 2.55E-13 | -0.22458 | 9.44E-07 |
| 0.8968   | -0.0673  | 0.14644  | -0.21902 | 1.77E-06 | -0.14336 | 0.0019   | 0.057815 | 0.21237  |
| 0.04977  | 0.323015 | 8.41E-13 | 0.166744 | 0.0003   | 0.257087 | 1.74E-08 | 0.300173 | 3.53E-11 |
| 0.61753  | -0.01116 | 0.80999  | -0.01124 | 0.80852  | -0.0527  | 0.25571  | 0.277959 | 9.87E-10 |
| 0.00242  | -0.23445 | 2.98E-07 | 0.142457 | 0.00203  | 0.087298 | 0.05942  | 0.007022 | 0.87971  |
| 0.13236  | -0.1342  | 0.00367  | -0.01598 | 0.73056  | -0.08162 | 0.07805  | -0.12443 | 0.0071   |
| 0.01533  | -0.24839 | 5.36E-08 | -0.16389 | 0.00038  | -0.19269 | 2.76E-05 | -0.2301  | 4.99E-07 |
| 0.50408  | -0.09743 | 0.03531  | -0.1226  | 0.00799  | -0.09821 | 0.03385  | -0.04852 | 0.29544  |
| 0.66771  | -0.06918 | 0.13549  | 0.006869 | 0.88231  | -0.0288  | 0.53471  | 0.170436 | 0.00022  |
| 0.09697  | 0.035819 | 0.43997  | 0.037176 | 0.42284  | 0.022031 | 0.63488  | 0.125159 | 0.00677  |
| 3.81E-08 | -0.19649 | 1.90E-05 | 0.048274 | 0.29786  | 0.053266 | 0.25063  | 0.005129 | 0.91199  |
| 0.65235  | -0.05813 | 0.20987  | 0.06008  | 0.19497  | 0.031259 | 0.50039  | 0.009666 | 0.83497  |
| 0.00126  | -0.08604 | 0.0632   | 0.12642  | 0.00623  | 0.131882 | 0.00431  | 0.007525 | 0.87116  |
| 0.00037  | 0.002622 | 0.95494  | 0.11859  | 0.01032  | 0.100725 | 0.02953  | 0.230357 | 4.84E-07 |
| 0.02916  | -0.10217 | 0.02726  | -0.17873 | 0.0001   | -0.12376 | 0.00741  | -0.00239 | 0.95885  |
| 0.00325  | 0.147685 | 0.00137  | 0.176338 | 0.00013  | 0.199092 | 1.46E-05 | 0.108956 | 0.01851  |
| 0.01948  | 0.131785 | 0.00433  | 0.075375 | 0.10378  | 0.089255 | 0.05392  | 0.276691 | 1.18E-09 |
| 0.26156  | -0.06616 | 0.15346  | -0.02034 | 0.66104  | -0.03944 | 0.39517  | 0.000498 | 0.99144  |
| 0.02155  | 0.176215 | 0.00013  | 0.170545 | 0.00021  | 0.18028  | 8.94E-05 | 0.000652 | 0.98879  |
| 0.00362  | -0.11792 | 0.01076  | 0.000802 | 0.98622  | 0.008731 | 0.85074  | -0.01418 | 0.75988  |
| 0.00915  | 0.019326 | 0.677    | 0.069802 | 0.13201  | 0.075726 | 0.10217  | -0.16757 | 0.00028  |
| 0.01535  | -0.10903 | 0.01843  | -0.03192 | 0.49136  | -0.09521 | 0.03971  | 0.024173 | 0.60232  |
| 0.94052  | -0.1295  | 0.00507  | -0.07301 | 0.1151   | -0.11793 | 0.01076  | -0.04304 | 0.35343  |
| 0.00452  | -0.04946 | 0.28615  | -0.04775 | 0.30312  | -0.1049  | 0.02339  | -0.12553 | 0.0066   |
| 0.50903  | -0.16509 | 0.00034  | -0.03394 | 0.46436  | -0.08462 | 0.06771  | 0.217183 | 2.16E-06 |
| 7.52E-12 | -0.00066 | 0.98858  | -0.06764 | 0.14444  | 0.113679 | 0.01397  | 0.048898 | 0.29166  |
| 0.85167  | 0.017534 | 0.70548  | 0.047279 | 0.30795  | 0.027182 | 0.55791  | 0.041041 | 0.37622  |
| 0.00345  | -0.11402 | 0.01368  | -0.31174 | 5.53E-12 | -0.23416 | 3.09E-07 | 0.136275 | 0.00317  |
| 0.01793  | 0.16711  | 0.00029  | -0.03868 | 0.40427  | 0.066354 | 0.15224  | 0.295878 | 6.87E-11 |
| 0.01035  | -0.05738 | 0.21584  | 0.05063  | 0.27488  | 0.062507 | 0.1775   | 0.012758 | 0.78334  |
| 0.74027  | -0.07346 | 0.11287  | -0.06575 | 0.15605  | -0.04314 | 0.35229  | 0.024094 | 0.60351  |
| 0.09576  | -0.1561  | 0.00071  | -0.05696 | 0.21924  | -0.03741 | 0.41997  | 0.016877 | 0.71604  |
| 1.49E-05 | 0.13721  | 0.00297  | 0.128164 | 0.00554  | 0.180086 | 9.10E-05 | 0.226967 | 7.18E-07 |
| 0.34254  | -0.09452 | 0.04118  | -0.09478 | 0.04063  | -0.09028 | 0.05122  | -0.13473 | 0.00353  |
| 0.49338  | 0.03099  | 0.50409  | 0.083402 | 0.07176  | 0.067064 | 0.14789  | -0.3087  | 9.07E-12 |
| 0.92598  | 0.016806 | 0.71717  | 0.036583 | 0.43028  | 0.011553 | 0.80337  | 0.089651 | 0.05286  |
| 0.5403   | 0.048077 | 0.29985  | -0.02794 | 0.54694  | -0.00996 | 0.83003  | 0.13401  | 0.00372  |
| 0.53692  | -0.04404 | 0.34234  | -0.03172 | 0.49406  | -0.00499 | 0.91431  | -0.06759 | 0.14476  |
| 0.99046  | -0.24426 | 9.02E-08 | -0.22602 | 8.01E-07 | -0.15997 | 0.00052  | 0.050313 | 0.2779   |
| 0.00509  | -0.27792 | 9.92E-10 | -0.19238 | 2.85E-05 | -0.2222  | 1.24E-06 | -0.22345 | 1.07E-06 |
| 0.001    | 0.216529 | 2.33E-06 | 0.111872 | 0.01558  | 0.155309 | 0.00076  | -0.00171 | 0.97053  |
| 1.83E-08 | -0.21423 | 2.99E-06 | -0.23432 | 3.03E-07 | -0.28322 | 4.60E-10 | -0.13672 | 0.00307  |
| 1.03E-12 | -0.07848 | 0.09028  | 0.009981 | 0.82967  | -0.16152 | 0.00046  | 0.079355 | 0.08672  |

|          |          |          |          |          |          |          |          |          |
|----------|----------|----------|----------|----------|----------|----------|----------|----------|
| 0.90615  | -0.00106 | 0.98186  | 0.026022 | 0.57485  | 0.016122 | 0.72822  | -0.02773 | 0.55003  |
| 0.00025  | -0.05956 | 0.19886  | -0.0347  | 0.45437  | 0.001379 | 0.9763   | -0.04917 | 0.28895  |
| 0.03427  | 0.345681 | 1.49E-14 | 0.149332 | 0.00121  | 0.17007  | 0.00022  | 0.243172 | 1.03E-07 |
| 6.53E-05 | 0.311728 | 5.54E-12 | 0.238561 | 1.82E-07 | 0.267943 | 4.04E-09 | 0.128282 | 0.0055   |
| 0.92945  | 0.115388 | 0.01259  | -0.19861 | 1.53E-05 | -0.05845 | 0.2074   | 0.019206 | 0.67889  |
| 0.00063  | -0.1761  | 0.00013  | 0.039697 | 0.39206  | 0.035776 | 0.44053  | -0.01211 | 0.79401  |
| 0.00022  | -0.08978 | 0.0525   | 0.09195  | 0.04704  | 0.073086 | 0.11473  | -0.00086 | 0.98527  |
| 0.01919  | -0.04658 | 0.31516  | -0.00614 | 0.8948   | 0.034238 | 0.46044  | 0.023656 | 0.61011  |
| 0.99184  | -0.10586 | 0.02214  | 0.080869 | 0.08085  | -0.03035 | 0.51292  | -0.05983 | 0.19683  |
| 0.06002  | 0.242157 | 1.17E-07 | 0.118772 | 0.0102   | 0.093241 | 0.04402  | 0.126627 | 0.00614  |
| 0.00108  | 0.232355 | 3.83E-07 | 0.133789 | 0.00377  | 0.169484 | 0.00023  | -0.03507 | 0.44957  |
| 0.00163  | -0.00155 | 0.97338  | -0.18002 | 9.16E-05 | -0.02202 | 0.63501  | -0.056   | 0.2271   |
| 0.22333  | 0.23046  | 4.78E-07 | 0.339457 | 4.66E-14 | 0.155813 | 0.00073  | 0.01218  | 0.79293  |
| 0.00025  | 0.110474 | 0.01693  | -0.00439 | 0.92458  | -0.07514 | 0.10486  | -0.10215 | 0.02729  |
| 0.00027  | 0.076686 | 0.09789  | 0.150332 | 0.00112  | 0.141399 | 0.00219  | 0.019239 | 0.67838  |
| 0.25614  | -0.05014 | 0.27952  | -0.06182 | 0.18229  | -0.07851 | 0.09014  | 0.000486 | 0.99165  |
| 0.82272  | -0.23468 | 2.90E-07 | -0.05484 | 0.23684  | -0.09096 | 0.04947  | 0.098501 | 0.03333  |
| 0.04901  | -0.20784 | 5.92E-06 | -0.14879 | 0.00126  | -0.1611  | 0.00047  | -0.29494 | 7.94E-11 |
| 0.09304  | 0.203841 | 9.00E-06 | 0.048195 | 0.29865  | 0.1216   | 0.00853  | 0.284995 | 3.54E-10 |
| 0.00053  | 0.036596 | 0.43012  | -0.07187 | 0.12092  | -0.10406 | 0.02452  | 0.151756 | 0.001    |
| 0.00037  | -0.08539 | 0.06523  | -0.20184 | 1.11E-05 | -0.19562 | 2.07E-05 | -0.31638 | 2.57E-12 |
| 2.14E-09 | -0.10384 | 0.02483  | 0.163204 | 0.0004   | 0.127562 | 0.00577  | 0.084211 | 0.06904  |
| 0.50258  | -0.18361 | 6.57E-05 | -0.10529 | 0.02288  | -0.1436  | 0.00186  | -0.15943 | 0.00054  |
| 0.84926  | 0.144999 | 0.00168  | 0.199277 | 1.43E-05 | 0.09317  | 0.04418  | 0.054943 | 0.236    |
| 6.28E-10 | -0.07952 | 0.08607  | -0.0015  | 0.97417  | 0.075319 | 0.10403  | 0.239875 | 1.55E-07 |
| 0.00026  | 0.181857 | 7.74E-05 | 0.018013 | 0.69783  | -0.02831 | 0.54164  | 0.072929 | 0.11552  |
| 0.58258  | 0.002796 | 0.95194  | -0.26543 | 5.70E-09 | -0.12482 | 0.00692  | -0.15852 | 0.00059  |
| 0.00037  | 0.142478 | 0.00203  | 0.157698 | 0.00063  | 0.151927 | 0.00099  | 0.215647 | 2.56E-06 |
| 0.00084  | -0.06625 | 0.15291  | 0.073244 | 0.11395  | 0.100274 | 0.03027  | 0.051921 | 0.26282  |
| 0.00152  | 0.0713   | 0.1239   | 0.178599 | 0.0001   | 0.180962 | 8.40E-05 | -0.1605  | 0.0005   |
| 0.46834  | 0.034502 | 0.45699  | 0.030409 | 0.51212  | 0.033569 | 0.46925  | 0.107647 | 0.01998  |
| 1.61E-05 | -0.34132 | 3.32E-14 | -0.2731  | 1.97E-09 | -0.2861  | 3.01E-10 | -0.1861  | 5.21E-05 |
| 0.20445  | 0.033859 | 0.46543  | 0.015277 | 0.74195  | 0.019942 | 0.66731  | 0.12575  | 0.00651  |
| 0.00082  | 0.141343 | 0.0022   | -0.07348 | 0.11277  | -0.02939 | 0.52639  | -0.11932 | 0.00985  |
| 0.00353  | -0.11328 | 0.01432  | -0.2294  | 5.41E-07 | -0.22404 | 1.00E-06 | -0.02467 | 0.59481  |
| 0.04993  | -0.35021 | 6.39E-15 | -0.23516 | 2.74E-07 | -0.26638 | 5.00E-09 | -0.21392 | 3.09E-06 |
| 0.01457  | -0.16578 | 0.00032  | -0.03437 | 0.45877  | -0.12488 | 0.00689  | 0.059382 | 0.20021  |
| 0.33313  | -0.23485 | 2.84E-07 | -0.21392 | 3.09E-06 | -0.15051 | 0.0011   | -0.06668 | 0.15022  |
| 2.81E-05 | -0.02437 | 0.59935  | -0.10178 | 0.02785  | -0.09415 | 0.04198  | -0.08909 | 0.05436  |
| 1.12E-13 | 0.259628 | 1.24E-08 | 0.264272 | 6.67E-09 | 0.308082 | 1.00E-11 | 0.172948 | 0.00017  |
| 0.06275  | 0.049175 | 0.28893  | 0.135365 | 0.00338  | 0.101783 | 0.02785  | 0.036726 | 0.42848  |
| 0.00373  | -0.07962 | 0.08566  | -0.12019 | 0.00933  | -0.14785 | 0.00135  | -0.20381 | 9.03E-06 |
| 3.10E-05 | 0.0616   | 0.18389  | -0.01762 | 0.70416  | -0.08709 | 0.06002  | 0.048825 | 0.29238  |
| 2.91E-09 | 0.028024 | 0.54578  | -0.2066  | 6.75E-06 | -0.217   | 2.21E-06 | 0.073045 | 0.11493  |
| 0.0388   | -0.02183 | 0.63803  | 0.041885 | 0.36646  | 0.053007 | 0.25294  | 0.244068 | 9.23E-08 |

|          |          |          |          |          |          |          |          |          |
|----------|----------|----------|----------|----------|----------|----------|----------|----------|
| 0.03985  | 0.222782 | 1.16E-06 | 0.13943  | 0.00253  | 0.131722 | 0.00435  | 0.143191 | 0.00192  |
| 0.12732  | -0.15774 | 0.00062  | 0.085061 | 0.06627  | 0.032382 | 0.48512  | -0.03268 | 0.48111  |
| 0.01327  | 0.138467 | 0.00271  | 0.319145 | 1.62E-12 | 0.232383 | 3.81E-07 | -0.00463 | 0.92047  |
| 0.17278  | 0.014754 | 0.75049  | -0.10367 | 0.02506  | -0.05266 | 0.25611  | 0.175972 | 0.00013  |
| 0.88864  | 0.142841 | 0.00197  | -0.00789 | 0.86501  | 0.066132 | 0.15362  | 0.384057 | 7.33E-18 |
| 0.00343  | -0.10495 | 0.02332  | -0.13597 | 0.00324  | -0.14465 | 0.00172  | 0.044732 | 0.33477  |
| 0.25277  | -0.18776 | 4.44E-05 | -0.06231 | 0.17889  | -0.05589 | 0.22803  | -0.06079 | 0.18973  |
| 0.00024  | -0.02522 | 0.58662  | -0.00964 | 0.83535  | 0.076016 | 0.10086  | -0.0377  | 0.4163   |
| 0.00914  | -0.24521 | 8.01E-08 | -0.18288 | 7.04E-05 | -0.1969  | 1.82E-05 | -0.17827 | 0.00011  |
| 6.28E-05 | -0.18099 | 8.38E-05 | -0.29544 | 7.35E-11 | -0.24511 | 8.11E-08 | -0.12211 | 0.00825  |
| 0.00225  | -0.04992 | 0.28164  | 0.020122 | 0.66449  | 0.054532 | 0.23953  | 0.183897 | 6.40E-05 |
| 0.425    | -0.06394 | 0.16778  | -0.04772 | 0.30347  | -0.05218 | 0.26042  | 0.030952 | 0.50461  |
| 9.50E-12 | 0.059656 | 0.19814  | 0.105881 | 0.02211  | 0.237921 | 1.96E-07 | 0.128071 | 0.00558  |
| 0.0001   | -0.0618  | 0.18249  | -0.16252 | 0.00042  | -0.1835  | 6.64E-05 | -0.19708 | 1.79E-05 |
| 0.09013  | 0.122943 | 0.00782  | 0.09764  | 0.03491  | 0.080692 | 0.08152  | -0.03515 | 0.44858  |
| 2.97E-05 | 0.066459 | 0.15159  | 0.222622 | 1.18E-06 | 0.197814 | 1.66E-05 | 0.452269 | 6.34E-25 |
| 0.01876  | -0.06001 | 0.1955   | 0.023399 | 0.614    | 0.075127 | 0.10492  | -0.09573 | 0.03865  |
| 0.44652  | -0.01669 | 0.71908  | -0.12201 | 0.00831  | -0.0835  | 0.07143  | 0.397224 | 4.21E-19 |
| 0.00375  | 0.025914 | 0.57643  | 0.062811 | 0.1754   | 0.088966 | 0.0547   | 0.265944 | 5.31E-09 |
| 0.02692  | -0.1003  | 0.03023  | -0.0876  | 0.05854  | 0.03892  | 0.4014   | -0.02509 | 0.58868  |
| 0.58643  | -0.11    | 0.01741  | -0.26824 | 3.88E-09 | -0.14991 | 0.00116  | 0.160301 | 0.00051  |
| 5.03E-07 | -0.12715 | 0.00593  | 0.053598 | 0.24768  | 0.110263 | 0.01714  | 0.03843  | 0.40735  |
| 0.00012  | 0.024023 | 0.60458  | 0.132557 | 0.00411  | 0.160547 | 0.0005   | 0.155438 | 0.00075  |
| 1.69E-06 | 0.12336  | 0.00761  | -0.06722 | 0.14693  | 0.101657 | 0.02805  | 0.353658 | 3.32E-15 |
| 3.89E-05 | 0.409993 | 2.33E-20 | 0.149481 | 0.0012   | 0.226927 | 7.21E-07 | 0.093727 | 0.04292  |
| 0.27931  | 0.327975 | 3.58E-13 | -0.08188 | 0.07712  | 0.046376 | 0.31728  | 0.332541 | 1.61E-13 |
| 2.69E-09 | -0.02466 | 0.59505  | 0.065061 | 0.16041  | 0.136107 | 0.00321  | 0.389426 | 2.32E-18 |
| 0.00168  | -0.19698 | 1.81E-05 | -0.06918 | 0.13548  | -0.19051 | 3.41E-05 | -0.09178 | 0.04745  |
| 0.00538  | -0.1926  | 2.79E-05 | -0.08827 | 0.05664  | -0.18229 | 7.43E-05 | 0.024636 | 0.59539  |
| 0.33837  | -0.00073 | 0.98741  | -0.03725 | 0.42192  | -0.05812 | 0.21     | -0.00558 | 0.90431  |
| 0.05903  | 0.441753 | 9.96E-24 | 0.027296 | 0.55627  | 0.134419 | 0.00361  | 0.285947 | 3.08E-10 |
| 0.61019  | 0.031908 | 0.49154  | 0.108117 | 0.01944  | 0.033783 | 0.46642  | 0.091691 | 0.04767  |
| 0.182    | 0.003749 | 0.93561  | -0.19453 | 2.31E-05 | -0.13213 | 0.00423  | -0.02398 | 0.6052   |
| 8.10E-05 | 0.148871 | 0.00125  | 0.274491 | 1.62E-09 | 0.242868 | 1.07E-07 | 0.044916 | 0.33278  |
| 2.76E-05 | -0.08844 | 0.05615  | 0.016278 | 0.72569  | 0.079209 | 0.0873   | -0.04033 | 0.38452  |
| 0.58569  | 0.026995 | 0.56062  | -0.19734 | 1.74E-05 | -0.1171  | 0.01132  | 0.122836 | 0.00787  |
| 0.35329  | -0.24547 | 7.75E-08 | -0.16298 | 0.00041  | -0.10497 | 0.02329  | -0.02078 | 0.6543   |
| 0.48818  | -0.06141 | 0.18522  | -0.23302 | 3.53E-07 | -0.15414 | 0.00083  | 0.033082 | 0.47573  |
| 0.00022  | -0.15879 | 0.00057  | -0.12823 | 0.00552  | -0.16583 | 0.00032  | 0.136379 | 0.00315  |
| 0.88627  | -0.02266 | 0.62519  | -0.03974 | 0.39159  | -0.01899 | 0.68227  | -0.16949 | 0.00023  |
| 0.75361  | 0.010792 | 0.81608  | 0.043867 | 0.34421  | 0.022047 | 0.63463  | 0.042968 | 0.35419  |
| 1.43E-05 | -0.0064  | 0.89024  | 0.144216 | 0.00178  | 0.148964 | 0.00124  | -0.11601 | 0.01211  |
| 0.04339  | -0.22827 | 6.17E-07 | -0.16999 | 0.00022  | -0.1891  | 3.91E-05 | -0.21073 | 4.36E-06 |
| 4.32E-06 | -0.3313  | 2.00E-13 | 0.05249  | 0.25761  | 0.030239 | 0.51448  | -0.03708 | 0.42403  |
| 0.00015  | -0.09315 | 0.04423  | 0.193053 | 2.67E-05 | 0.12863  | 0.00537  | -0.05    | 0.28088  |

|          |          |          |          |          |          |          |          |          |
|----------|----------|----------|----------|----------|----------|----------|----------|----------|
| 0.8196   | -0.29659 | 6.16E-11 | -0.20801 | 5.82E-06 | -0.16735 | 0.00028  | -0.16702 | 0.00029  |
| 0.05292  | -0.0205  | 0.65858  | 0.058147 | 0.20975  | 0.072481 | 0.11778  | 0.035591 | 0.44289  |
| 0.00814  | -0.25073 | 3.98E-08 | -0.02018 | 0.66362  | -0.01366 | 0.76842  | 0.004392 | 0.92458  |
| 0.00199  | -0.00959 | 0.83626  | -0.03506 | 0.44978  | 0.050027 | 0.28065  | 0.192124 | 2.92E-05 |
| 0.34499  | 0.133069 | 0.00397  | 0.011162 | 0.80988  | 0.000377 | 0.99353  | 0.075274 | 0.10424  |
| 0.00083  | -0.12576 | 0.0065   | 0.102438 | 0.02686  | 0.114877 | 0.01299  | 0.062283 | 0.17906  |
| 0.00082  | 0.102557 | 0.02668  | 0.09289  | 0.04482  | 0.139454 | 0.00253  | 0.039731 | 0.39165  |
| 0.00363  | -0.14872 | 0.00127  | -0.11917 | 0.00995  | -0.14665 | 0.00148  | 0.205478 | 7.59E-06 |
| 4.25E-10 | 0.063002 | 0.17409  | 0.11208  | 0.01538  | 0.16496  | 0.00034  | 0.180203 | 9.01E-05 |
| 0.81807  | 0.126712 | 0.00611  | 0.048942 | 0.29122  | 0.053879 | 0.24521  | 0.064737 | 0.1625   |
| 0.05697  | -0.06371 | 0.16929  | -0.06527 | 0.15904  | -0.09166 | 0.04774  | -0.17351 | 0.00016  |
| 0.16021  | -0.04445 | 0.33785  | -0.01008 | 0.82797  | -0.04889 | 0.29172  | -0.03415 | 0.46165  |
| 0.20936  | -0.08119 | 0.07963  | 0.079899 | 0.08457  | 0.049125 | 0.28942  | 0.006238 | 0.89305  |
| 0.40834  | 0.046979 | 0.31102  | 0.018717 | 0.68663  | 0.015653 | 0.73582  | -0.00632 | 0.89172  |
| 0.33819  | -0.1141  | 0.01362  | -0.06118 | 0.18693  | -0.03865 | 0.4047   | 0.12288  | 0.00785  |
| 0.46314  | -0.03093 | 0.50486  | -0.0535  | 0.24853  | -0.08374 | 0.07061  | 0.065683 | 0.15644  |
| 0.17445  | 0.182563 | 7.25E-05 | 0.120141 | 0.00936  | 0.157282 | 0.00065  | -0.07461 | 0.10733  |
| 1.08E-17 | 0.265229 | 5.86E-09 | 0.350669 | 5.86E-15 | 0.352372 | 4.24E-15 | 0.232631 | 3.70E-07 |
| 7.90E-22 | 0.505749 | 1.08E-31 | 0.342871 | 2.50E-14 | 0.428986 | 2.49E-22 | 0.14906  | 0.00124  |
| 0.47845  | 0.188556 | 4.12E-05 | 0.202066 | 1.08E-05 | 0.130371 | 0.00477  | -0.10912 | 0.01833  |
| 0.01428  | -0.07957 | 0.08588  | -0.06079 | 0.18974  | -0.08071 | 0.08147  | -0.06337 | 0.17157  |
| 0.07883  | -0.13258 | 0.0041   | -0.03682 | 0.42725  | -0.07496 | 0.1057   | -0.10785 | 0.01974  |
| 0.80936  | -0.03828 | 0.40913  | -0.00858 | 0.85322  | -0.03064 | 0.50892  | 0.029729 | 0.52161  |
| 0.51636  | 0.000732 | 0.98742  | -0.00103 | 0.98222  | 0.028385 | 0.54061  | -0.12948 | 0.00507  |
| 0.03164  | -0.03411 | 0.46215  | 0.017092 | 0.71258  | 0.019525 | 0.67386  | 0.024706 | 0.59435  |
| 0.01508  | -0.14353 | 0.00187  | -0.1198  | 0.00956  | -0.14865 | 0.00127  | -0.16755 | 0.00028  |
| 0.4112   | -0.02386 | 0.60699  | 0.017295 | 0.70932  | -0.01369 | 0.768    | 0.017485 | 0.70627  |
| 0.03521  | 0.026227 | 0.57184  | -0.04301 | 0.3537   | 0.037866 | 0.41428  | 0.029031 | 0.53144  |
| 0.90516  | -0.06759 | 0.14474  | 0.129815 | 0.00496  | 0.048065 | 0.29997  | 0.185047 | 5.75E-05 |
| 0.04442  | -0.01293 | 0.78047  | -0.02417 | 0.60244  | -0.07198 | 0.12032  | 0.083852 | 0.07023  |
| 0.74484  | 0.105584 | 0.02249  | 0.054229 | 0.24215  | 0.004017 | 0.93101  | 0.079239 | 0.08718  |
| 2.90E-08 | -0.0158  | 0.73344  | 0.147534 | 0.00139  | 0.148969 | 0.00124  | 0.026056 | 0.57435  |
| 0.51147  | -0.05451 | 0.23974  | -0.05005 | 0.28044  | -0.07865 | 0.08958  | -0.08338 | 0.07185  |
| 0.01415  | -0.42169 | 1.47E-21 | -0.21362 | 3.20E-06 | -0.22216 | 1.24E-06 | -0.14291 | 0.00196  |
| 0.07915  | -0.28959 | 1.79E-10 | -0.25996 | 1.19E-08 | -0.24461 | 8.63E-08 | -0.08471 | 0.0674   |
| 0.25561  | 0.004883 | 0.91619  | -0.04427 | 0.33975  | -0.02838 | 0.54074  | 0.110988 | 0.01642  |
| 0.1052   | -0.16238 | 0.00043  | -0.14989 | 0.00116  | -0.1489  | 0.00125  | -0.14422 | 0.00178  |
| 0.0017   | 0.092356 | 0.04607  | -0.03359 | 0.46901  | 0.049795 | 0.28288  | 0.40087  | 1.87E-19 |
| 0.7726   | 0.016714 | 0.71867  | 0.094703 | 0.04079  | 0.056511 | 0.22288  | 0.069283 | 0.13492  |
| 0.58748  | 0.070658 | 0.12732  | 0.125165 | 0.00676  | 0.036084 | 0.43661  | -0.0383  | 0.40898  |
| 0.31936  | -0.08061 | 0.08185  | 0.065879 | 0.1552   | -0.03192 | 0.49135  | -0.02729 | 0.55642  |
| 0.63182  | 0.025993 | 0.57527  | 0.135694 | 0.0033   | 0.066884 | 0.14898  | 0.098766 | 0.03285  |
| 0.94313  | 0.126028 | 0.00639  | 0.06636  | 0.15221  | 0.106093 | 0.02185  | 0.308111 | 9.98E-12 |
| 2.13E-06 | -0.04217 | 0.36317  | -0.05089 | 0.27239  | -0.14414 | 0.00179  | -0.08675 | 0.06105  |
| 0.0119   | 0.094207 | 0.04186  | 0.188667 | 4.08E-05 | 0.131298 | 0.00448  | 0.1379   | 0.00282  |

|          |          |          |          |          |          |          |          |          |
|----------|----------|----------|----------|----------|----------|----------|----------|----------|
| 0.00047  | 0.020008 | 0.66627  | 0.220983 | 1.42E-06 | 0.164436 | 0.00036  | 0.112584 | 0.01493  |
| 0.00047  | 0.284187 | 3.99E-10 | 0.053095 | 0.25216  | 0.197341 | 1.74E-05 | 0.303436 | 2.11E-11 |
| 0.00844  | 0.260811 | 1.06E-08 | 0.053668 | 0.24707  | 0.11561  | 0.01242  | 0.105388 | 0.02274  |
| 0.05952  | -0.18171 | 7.84E-05 | -0.02956 | 0.52391  | -0.10293 | 0.02613  | 0.139114 | 0.00259  |
| 0.01515  | 0.089919 | 0.05215  | 0.276653 | 1.19E-09 | 0.194484 | 2.32E-05 | 0.157605 | 0.00063  |
| 1.99E-05 | -0.04112 | 0.37527  | -0.16801 | 0.00027  | -0.16785 | 0.00027  | -0.09196 | 0.04701  |
| 0.03554  | -0.10933 | 0.0181   | -0.13434 | 0.00363  | -0.1328  | 0.00404  | -0.11859 | 0.01032  |
| 0.01156  | -0.02884 | 0.53409  | 0.10629  | 0.0216   | 0.084487 | 0.06813  | -0.03117 | 0.50166  |
| 0.74514  | 0.182853 | 7.05E-05 | 0.127673 | 0.00573  | 0.088645 | 0.05559  | 0.319085 | 1.64E-12 |
| 0.90441  | -0.12745 | 0.00581  | 0.012883 | 0.78126  | -0.04049 | 0.3826   | 0.030191 | 0.51516  |
| 4.35E-06 | 0.16943  | 0.00023  | -0.0214  | 0.64465  | 0.086865 | 0.0607   | 0.356172 | 2.05E-15 |
| 8.90E-39 | 0.494357 | 3.76E-30 | 0.407205 | 4.44E-20 | 0.564929 | 9.98E-41 | 0.370756 | 1.15E-16 |
| 0.00925  | -0.11869 | 0.01025  | -0.01714 | 0.71181  | -0.12403 | 0.00728  | -0.30326 | 2.17E-11 |
| 0.30723  | -0.08061 | 0.08182  | -0.05221 | 0.26017  | -0.10769 | 0.01992  | -0.20237 | 1.05E-05 |
| 0.32389  | -0.06181 | 0.18241  | -0.04908 | 0.28989  | -0.04323 | 0.3513   | -0.06818 | 0.14123  |
| 0.00858  | 0.252394 | 3.21E-08 | -0.01307 | 0.77814  | 0.11874  | 0.01022  | 0.002544 | 0.95627  |
| 0.79003  | -0.20559 | 7.50E-06 | -0.09796 | 0.03432  | -0.10987 | 0.01754  | -0.01949 | 0.6745   |
| 0.00011  | 0.005389 | 0.90754  | -0.1985  | 1.55E-05 | -0.17544 | 0.00014  | -0.14783 | 0.00136  |
| 1.94E-06 | 0.12514  | 0.00678  | 0.150899 | 0.00107  | 0.200412 | 1.28E-05 | -0.05207 | 0.26144  |
| 0.37486  | 0.119641 | 0.00966  | -0.07385 | 0.11097  | -0.00242 | 0.95835  | 0.07841  | 0.09055  |
| 3.76E-05 | -0.22988 | 5.12E-07 | -0.2717  | 2.40E-09 | -0.31474 | 3.38E-12 | -0.23003 | 5.03E-07 |
| 1.91E-11 | 0.504077 | 1.83E-31 | 0.223859 | 1.02E-06 | 0.336525 | 7.90E-14 | 0.144549 | 0.00174  |
| 0.91999  | -0.23594 | 2.49E-07 | -0.15393 | 0.00085  | -0.18956 | 3.74E-05 | -0.17855 | 0.0001   |
| 0.02378  | -0.00405 | 0.93041  | 0.102869 | 0.02622  | 0.081365 | 0.079    | -0.08381 | 0.07037  |
| 0.05246  | -0.21506 | 2.73E-06 | 0.038677 | 0.40434  | -0.01639 | 0.72396  | 0.067437 | 0.14565  |
| 0.93494  | -0.02514 | 0.58787  | 0.027661 | 0.55099  | 0.027205 | 0.55758  | -0.08099 | 0.08038  |
| 0.12173  | 0.091499 | 0.04814  | 0.177306 | 0.00012  | 0.126764 | 0.00609  | 0.145297 | 0.00164  |
| 0.88482  | -0.09277 | 0.04509  | 0.012991 | 0.77948  | 0.009083 | 0.8448   | -0.03221 | 0.48744  |
| 8.59E-09 | -0.11014 | 0.01726  | 0.171421 | 0.0002   | 0.166922 | 0.00029  | 0.109843 | 0.01757  |
| 0.0094   | -0.00244 | 0.9581   | -0.04571 | 0.3243   | -0.07549 | 0.10325  | -0.12622 | 0.00631  |
| 0.0004   | 0.121991 | 0.00831  | 0.20979  | 4.82E-06 | 0.172498 | 0.00018  | -0.05369 | 0.24687  |
| 0.28488  | 0.065816 | 0.1556   | 0.062943 | 0.17449  | 0.061172 | 0.18696  | -0.00336 | 0.94232  |
| 4.70E-14 | -0.10108 | 0.02896  | -0.01635 | 0.7245   | 0.098688 | 0.03299  | 0.21124  | 4.13E-06 |
| 0.1199   | -0.04441 | 0.33829  | -0.12751 | 0.00579  | -0.1214  | 0.00863  | -0.08948 | 0.05331  |
| 0.00072  | -0.19169 | 3.05E-05 | -0.16236 | 0.00043  | -0.19699 | 1.81E-05 | -0.21309 | 3.38E-06 |
| 0.60226  | -0.17107 | 0.0002   | -0.04816 | 0.29903  | -0.08367 | 0.07083  | -0.06604 | 0.15422  |
| 1.38E-06 | -0.1761  | 0.00013  | -0.13583 | 0.00327  | -0.20795 | 5.86E-06 | -0.204   | 8.85E-06 |
| 0.03275  | -0.13808 | 0.00279  | -0.00592 | 0.89843  | -0.12087 | 0.00893  | -0.21226 | 3.70E-06 |
| 0.99069  | -0.16751 | 0.00028  | -0.06286 | 0.17504  | -0.10741 | 0.02025  | -0.06324 | 0.17248  |
| 0.31816  | 0.142716 | 0.00199  | -0.00599 | 0.89723  | 0.027346 | 0.55554  | 0.338343 | 5.70E-14 |
| 0.13993  | -0.05423 | 0.24217  | -0.01557 | 0.73723  | 0.032766 | 0.47995  | -0.11395 | 0.01374  |
| 4.07E-07 | 0.155027 | 0.00078  | 0.126881 | 0.00604  | 0.212927 | 3.44E-06 | -0.18871 | 4.06E-05 |
| 0.02492  | -0.11751 | 0.01104  | 0.049003 | 0.29062  | 0.05454  | 0.23946  | 0.078027 | 0.09214  |
| 0.93994  | -0.13568 | 0.00331  | -0.08323 | 0.07234  | -0.04614 | 0.31981  | -0.07325 | 0.11393  |
| 0.00012  | -0.2416  | 1.25E-07 | -0.17678 | 0.00012  | -0.23961 | 1.60E-07 | 0.10387  | 0.02479  |

|          |          |          |          |          |          |          |          |          |
|----------|----------|----------|----------|----------|----------|----------|----------|----------|
| 0.00014  | 0.026604 | 0.56632  | 0.000259 | 0.99554  | 0.04008  | 0.3875   | 0.386039 | 4.81E-18 |
| 0.04461  | -0.10234 | 0.027    | -0.04831 | 0.29755  | -0.07335 | 0.1134   | -0.26567 | 5.52E-09 |
| 0.0011   | 0.304978 | 1.65E-11 | 0.307042 | 1.19E-11 | 0.281727 | 5.72E-10 | 0.092344 | 0.0461   |
| 0.01221  | -0.07853 | 0.09005  | -0.06779 | 0.14356  | -0.08443 | 0.06831  | -0.12878 | 0.00532  |
| 0.0003   | 0.154508 | 0.00081  | -0.13056 | 0.00471  | 0.054064 | 0.24359  | 0.042429 | 0.36026  |
| 0.00065  | 0.009685 | 0.83464  | 0.179784 | 9.36E-05 | 0.133816 | 0.00377  | -0.09699 | 0.03614  |
| 0.00926  | 0.156566 | 0.00069  | 0.113782 | 0.01388  | 0.143611 | 0.00186  | 0.221659 | 1.31E-06 |
| 0.5776   | -0.17702 | 0.00012  | -0.03059 | 0.50957  | -0.0396  | 0.39317  | -0.01277 | 0.78321  |
| 0.36476  | -0.0823  | 0.07559  | -0.0283  | 0.54178  | -0.03292 | 0.47794  | 0.022766 | 0.62362  |
| 0.00152  | -0.11523 | 0.01271  | -0.0082  | 0.85978  | 0.040496 | 0.38259  | 0.029972 | 0.51821  |
| 0.08789  | 0.021873 | 0.63731  | 0.017647 | 0.70368  | 0.005763 | 0.90115  | 0.065776 | 0.15585  |
| 0.10336  | -0.06259 | 0.1769   | -0.12434 | 0.00714  | -0.09004 | 0.05184  | 0.317587 | 2.10E-12 |
| 0.27499  | 0.014101 | 0.76118  | 0.025098 | 0.58851  | 0.043034 | 0.35346  | -0.02215 | 0.63312  |
| 0.63403  | 0.093252 | 0.04399  | 0.092449 | 0.04585  | 0.069063 | 0.13616  | 0.065167 | 0.15972  |
| 0.36663  | -0.01389 | 0.76459  | 0.086171 | 0.06279  | 0.040243 | 0.38557  | -0.00645 | 0.8895   |
| 0.04022  | 0.075433 | 0.10351  | 0.044416 | 0.3382   | 0.075858 | 0.10157  | -0.00821 | 0.85947  |
| 4.25E-06 | 0.246077 | 7.18E-08 | 0.290462 | 1.57E-10 | 0.316928 | 2.35E-12 | -0.05893 | 0.20367  |
| 0.64521  | -0.02723 | 0.55716  | 0.012888 | 0.78118  | 0.005857 | 0.89955  | -0.02274 | 0.62395  |
| 0.77312  | 0.042575 | 0.35862  | 0.025133 | 0.58798  | 0.014101 | 0.76119  | -0.01486 | 0.7487   |
| 0.34906  | 0.05135  | 0.26811  | -0.024   | 0.60492  | 0.023565 | 0.61149  | 0.007235 | 0.87609  |
| 0.00414  | 0.037552 | 0.41817  | 0.065505 | 0.15757  | 0.080682 | 0.08156  | 0.081667 | 0.07789  |
| 0.6402   | 0.134204 | 0.00367  | -0.03207 | 0.48935  | 0.021926 | 0.63649  | 0.157746 | 0.00062  |
| 3.62E-13 | 0.163589 | 0.00039  | 0.196286 | 1.94E-05 | 0.230427 | 4.80E-07 | 0.167204 | 0.00028  |
| 0.48446  | -0.07982 | 0.08489  | -0.02391 | 0.60624  | -0.0198  | 0.66949  | -0.2012  | 1.18E-05 |
| 1.82E-06 | -0.1329  | 0.00401  | 0.130324 | 0.00479  | 0.125525 | 0.00661  | 0.120607 | 0.00908  |
| 0.61574  | -0.01537 | 0.74037  | 0.027095 | 0.55917  | -0.00766 | 0.86889  | 0.39028  | 1.93E-18 |
| 7.68E-06 | -0.19989 | 1.35E-05 | 0.079151 | 0.08753  | 0.101134 | 0.02887  | 0.079077 | 0.08783  |
| 0.10272  | -0.01961 | 0.67247  | 0.060197 | 0.1941   | 0.084004 | 0.06973  | 0.056242 | 0.22509  |
| 0.60131  | 0.061767 | 0.1827   | 0.00342  | 0.94124  | 0.015125 | 0.74443  | 0.135931 | 0.00325  |
| 1.51E-13 | 0.243339 | 1.01E-07 | 0.402283 | 1.36E-19 | 0.39001  | 2.05E-18 | 0.249033 | 4.94E-08 |
| 0.00259  | -0.1504  | 0.00111  | 0.080979 | 0.08044  | 0.041255 | 0.37372  | 0.06448  | 0.16418  |
| 1.04E-08 | -0.20236 | 1.05E-05 | 0.1301   | 0.00486  | 0.121896 | 0.00836  | 0.064524 | 0.1639   |
| 0.30737  | -0.11437 | 0.01339  | -0.10766 | 0.01996  | -0.11037 | 0.01704  | -0.0796  | 0.08575  |
| 0.3582   | 0.151826 | 0.001    | 0.052198 | 0.26027  | 0.090963 | 0.04947  | 0.019932 | 0.66747  |
| 0.59117  | -0.05949 | 0.19938  | -0.00299 | 0.94854  | -0.02391 | 0.60626  | -0.14546 | 0.00162  |
| 0.00969  | 0.112252 | 0.01523  | 0.076992 | 0.09655  | 0.124991 | 0.00684  | -0.04203 | 0.36475  |
| 0.26236  | -0.04121 | 0.37428  | -0.05085 | 0.27278  | -0.05022 | 0.27882  | -0.00491 | 0.91565  |
| 0.0033   | 0.121931 | 0.00835  | -0.09318 | 0.04414  | 0.002959 | 0.94915  | 0.062205 | 0.17961  |
| 0.1526   | -0.13053 | 0.00472  | -0.02626 | 0.57129  | -0.01254 | 0.787    | -0.03027 | 0.51403  |
| 0.0005   | 0.162955 | 0.00041  | 0.08163  | 0.07803  | 0.117864 | 0.0108   | 0.342014 | 2.92E-14 |
| 0.89347  | -0.08625 | 0.06255  | -0.06451 | 0.16398  | -0.04334 | 0.35006  | -0.00402 | 0.931    |
| 0.01277  | 0.166193 | 0.00031  | 0.027435 | 0.55426  | 0.097521 | 0.03513  | 0.050917 | 0.27216  |
| 0.49876  | -0.14671 | 0.00148  | -0.03472 | 0.4541   | -0.044   | 0.34272  | 0.024544 | 0.59676  |
| 8.29E-08 | 0.080308 | 0.08299  | 0.164308 | 0.00036  | 0.225389 | 8.61E-07 | 0.029925 | 0.51886  |
| 0.68499  | -0.04423 | 0.3402   | 0.077041 | 0.09634  | -0.00435 | 0.92538  | 0.081165 | 0.07974  |

|          |          |          |          |          |          |          |          |          |
|----------|----------|----------|----------|----------|----------|----------|----------|----------|
| 0.76602  | 0.424121 | 8.19E-22 | 0.15168  | 0.00101  | 0.155897 | 0.00072  | -0.08574 | 0.06413  |
| 0.84064  | -0.32622 | 4.85E-13 | 0.040414 | 0.38356  | -0.07929 | 0.08697  | -0.06502 | 0.1607   |
| 0.00334  | -0.11703 | 0.01138  | -0.10961 | 0.01781  | -0.15406 | 0.00084  | 0.052646 | 0.2562   |
| 0.03894  | 0.186627 | 4.95E-05 | 0.049734 | 0.28348  | 0.153934 | 0.00085  | 0.029224 | 0.5287   |
| 2.69E-07 | 0.017782 | 0.70151  | -0.15683 | 0.00067  | -0.18325 | 6.80E-05 | -0.03695 | 0.42573  |
| 0.17125  | -0.01351 | 0.77097  | -0.05078 | 0.2735   | -0.05777 | 0.21269  | 0.026176 | 0.57258  |
| 4.67E-08 | 0.021007 | 0.65069  | 0.170647 | 0.00021  | 0.187229 | 4.68E-05 | 0.057727 | 0.21306  |
| 0.71999  | -0.13273 | 0.00406  | -0.11038 | 0.01702  | -0.08579 | 0.06397  | 0.06517  | 0.15971  |
| 0.00035  | -0.06126 | 0.18634  | -0.05794 | 0.21141  | -0.13505 | 0.00346  | -0.27103 | 2.63E-09 |
| 0.26958  | 0.089858 | 0.05231  | 0.079281 | 0.08701  | 0.016639 | 0.71987  | 0.201514 | 1.14E-05 |
| 5.54E-06 | -0.19601 | 1.99E-05 | 0.024409 | 0.59878  | 0.020618 | 0.65675  | 0.174727 | 0.00015  |
| 2.21E-11 | -0.06073 | 0.19015  | -0.21958 | 1.66E-06 | -0.24095 | 1.36E-07 | 0.076161 | 0.10021  |
| 0.08358  | -0.13327 | 0.00391  | -0.01761 | 0.70428  | -0.07305 | 0.11489  | 0.003654 | 0.93723  |
| 0.00258  | 0.195671 | 2.06E-05 | 0.245458 | 7.76E-08 | 0.214664 | 2.85E-06 | -0.06717 | 0.14724  |
| 0.43359  | -0.11252 | 0.01499  | -0.02116 | 0.64828  | -0.03031 | 0.51353  | 0.043787 | 0.34509  |
| 2.99E-06 | -0.02902 | 0.53165  | -0.13581 | 0.00328  | -0.13587 | 0.00326  | -0.13357 | 0.00383  |
| 0.01522  | 0.079762 | 0.0851   | 0.113721 | 0.01394  | 0.094112 | 0.04207  | 0.374075 | 5.87E-17 |
| 0.00207  | 0.033149 | 0.47484  | -0.20062 | 1.25E-05 | -0.00309 | 0.94688  | 0.075452 | 0.10342  |
| 2.83E-10 | -0.12486 | 0.0069   | 0.042833 | 0.35571  | 0.09703  | 0.03607  | 0.021126 | 0.64884  |
| 0.0011   | -0.07661 | 0.09822  | -0.08577 | 0.06404  | -0.13073 | 0.00466  | -0.28397 | 4.12E-10 |
| 0.01205  | 0.346339 | 1.32E-14 | 0.297293 | 5.52E-11 | 0.265968 | 5.29E-09 | 0.253733 | 2.70E-08 |
| 0.05907  | -0.31589 | 2.79E-12 | -0.18937 | 3.81E-05 | -0.21991 | 1.60E-06 | -0.12399 | 0.0073   |
| 0.26321  | -0.11824 | 0.01055  | -0.09916 | 0.03217  | -0.09275 | 0.04515  | -0.1503  | 0.00112  |
| 0.96601  | 0.137275 | 0.00295  | 0.041983 | 0.36534  | 0.060186 | 0.19418  | 0.239716 | 1.58E-07 |
| 9.11E-08 | -0.27902 | 8.48E-10 | -0.34351 | 2.22E-14 | -0.30979 | 7.60E-12 | -0.1116  | 0.01583  |
| 0.63264  | -0.02413 | 0.60298  | -0.07877 | 0.08906  | -0.02123 | 0.64727  | 0.059764 | 0.19733  |
| 3.06E-07 | 0.155513 | 0.00075  | -0.06419 | 0.16607  | 0.106165 | 0.02176  | 0.103755 | 0.02495  |
| 0.00118  | -0.15345 | 0.00088  | -0.23323 | 3.45E-07 | -0.07148 | 0.12294  | 0.289238 | 1.89E-10 |
| 0.67499  | 0.009535 | 0.83718  | 0.004184 | 0.92816  | 0.017091 | 0.71259  | -0.12079 | 0.00898  |
| 0.08246  | -0.08843 | 0.05619  | -0.06695 | 0.14857  | -0.0264  | 0.56927  | -0.00286 | 0.95088  |
| 0.00045  | -0.13729 | 0.00295  | -0.09162 | 0.04785  | -0.18234 | 7.40E-05 | 0.10894  | 0.01853  |
| 0.27843  | -0.36531 | 3.44E-16 | -0.11401 | 0.01369  | -0.14413 | 0.00179  | -0.22351 | 1.07E-06 |
| 0.06806  | -0.17102 | 0.0002   | 0.052181 | 0.26043  | 0.03904  | 0.39995  | -0.06352 | 0.17054  |
| 0.00197  | -0.03793 | 0.41347  | 0.112419 | 0.01507  | 0.094288 | 0.04168  | 0.05593  | 0.22768  |
| 0.9121   | -0.33562 | 9.30E-14 | -0.1618  | 0.00045  | -0.16421 | 0.00037  | -0.25826 | 1.49E-08 |
| 0.47189  | -0.22734 | 6.88E-07 | -0.18763 | 4.50E-05 | -0.15835 | 0.00059  | 0.051412 | 0.26752  |
| 0.50306  | 0.089005 | 0.0546   | 0.09285  | 0.04491  | 0.063327 | 0.17187  | -0.01597 | 0.73064  |
| 0.6503   | -0.10307 | 0.02593  | -0.12561 | 0.00657  | -0.14227 | 0.00206  | 0.05347  | 0.24882  |
| 3.67E-07 | 0.267955 | 4.03E-09 | 0.374783 | 5.07E-17 | 0.294251 | 8.82E-11 | 0.232014 | 3.98E-07 |
| 0.00834  | -0.04587 | 0.32263  | 0.094742 | 0.04071  | 0.102715 | 0.02645  | 0.041949 | 0.36573  |
| 1.09E-10 | 0.315998 | 2.74E-12 | 0.153974 | 0.00084  | 0.268173 | 3.91E-09 | 0.211771 | 3.90E-06 |
| 0.47002  | 0.01231  | 0.79076  | 0.038377 | 0.40801  | -0.00014 | 0.99764  | 0.018563 | 0.68908  |
| 0.40936  | 0.092022 | 0.04687  | -0.02991 | 0.5191   | -0.0171  | 0.71249  | 0.07415  | 0.10953  |
| 3.97E-05 | 0.192406 | 2.84E-05 | 0.218527 | 1.87E-06 | 0.225952 | 8.07E-07 | -0.01902 | 0.68176  |
| 1.70E-05 | -0.17762 | 0.00011  | -0.20845 | 5.56E-06 | -0.21897 | 1.78E-06 | -0.03029 | 0.51385  |



|          |          |          |          |          |          |          |          |          |
|----------|----------|----------|----------|----------|----------|----------|----------|----------|
| 0.8609   | -0.03626 | 0.43437  | 0.095928 | 0.03824  | 0.072692 | 0.1167   | 0.142522 | 0.00202  |
| 0.00257  | -0.05677 | 0.22079  | 0.023053 | 0.61925  | 0.018326 | 0.69284  | -0.03132 | 0.49955  |
| 7.13E-05 | 0.133103 | 0.00396  | 0.029257 | 0.52824  | 0.090058 | 0.05179  | 0.443385 | 6.54E-24 |
| 0.0309   | -0.03037 | 0.51273  | -0.02353 | 0.61206  | 0.010074 | 0.82811  | 0.002762 | 0.95253  |
| 2.35E-05 | 0.326473 | 4.64E-13 | 0.024163 | 0.60247  | 0.192709 | 2.76E-05 | 0.03569  | 0.44163  |
| 7.44E-07 | 0.290646 | 1.53E-10 | 0.27638  | 1.24E-09 | 0.318613 | 1.77E-12 | 0.15322  | 0.00089  |
| 0.37711  | -0.14873 | 0.00127  | -0.1295  | 0.00506  | -0.0893  | 0.05379  | 0.168259 | 0.00026  |
| 8.53E-08 | 0.129419 | 0.00509  | 0.047081 | 0.30998  | 0.179387 | 9.70E-05 | -0.02251 | 0.62754  |
| 0.78933  | -0.01406 | 0.76186  | -0.03126 | 0.50043  | -0.00302 | 0.94814  | -0.00215 | 0.96303  |
| 0.44199  | 0.03416  | 0.46146  | -0.00028 | 0.99524  | 0.01095  | 0.81342  | 0.136403 | 0.00314  |
| 0.61385  | 0.100513 | 0.02987  | 0.066472 | 0.15151  | 0.062629 | 0.17666  | 0.097451 | 0.03527  |
| 0.00351  | -0.18481 | 5.88E-05 | -0.11334 | 0.01426  | -0.08314 | 0.07266  | -0.04794 | 0.3012   |
| 0.00276  | -0.11075 | 0.01665  | -0.11495 | 0.01293  | -0.11807 | 0.01066  | -0.15121 | 0.00105  |
| 0.00311  | 0.061845 | 0.18214  | 0.165321 | 0.00033  | 0.066623 | 0.15059  | 0.010284 | 0.82459  |
| 0.27789  | 0.140977 | 0.00226  | 0.218168 | 1.94E-06 | 0.080222 | 0.08332  | 0.029797 | 0.52066  |
| 0.02679  | 0.045179 | 0.32995  | 0.00904  | 0.84552  | -0.0495  | 0.28572  | -0.04285 | 0.35547  |
| 0.96351  | 0.25586  | 2.05E-08 | 0.050536 | 0.27577  | 0.097633 | 0.03492  | -0.04897 | 0.29099  |
| 0.01076  | 0.034346 | 0.45903  | -0.02154 | 0.64242  | 0.006095 | 0.8955   | 0.005151 | 0.9116   |
| 0.00335  | 0.146533 | 0.0015   | 0.027076 | 0.55946  | 0.130849 | 0.00462  | 0.115015 | 0.01288  |
| 0.76965  | -0.10487 | 0.02343  | -0.05645 | 0.22335  | -0.08548 | 0.06495  | 0.032205 | 0.48751  |
| 5.95E-05 | -0.25124 | 3.73E-08 | -0.28747 | 2.46E-10 | -0.27909 | 8.39E-10 | -0.00452 | 0.92241  |
| 0.25018  | 0.15862  | 0.00058  | -0.16399 | 0.00037  | -0.04195 | 0.36568  | 0.163111 | 0.0004   |
| 0.72387  | -0.11914 | 0.00997  | -0.05929 | 0.20088  | -0.07157 | 0.12248  | -0.02706 | 0.55972  |
| 0.01574  | 0.065465 | 0.15782  | -0.04194 | 0.36583  | 0.039905 | 0.38958  | 0.185403 | 5.56E-05 |
| 0.60571  | -0.13441 | 0.00361  | -0.05522 | 0.23365  | -0.08355 | 0.07126  | 0.045009 | 0.33178  |
| 0.0002   | 0.24903  | 4.94E-08 | 0.180177 | 9.03E-05 | 0.231991 | 3.99E-07 | 0.381132 | 1.36E-17 |
| 1.75E-05 | 0.008458 | 0.85535  | 0.177283 | 0.00012  | 0.17838  | 0.00011  | 0.029165 | 0.52955  |
| 0.00035  | -0.19672 | 1.86E-05 | -0.12524 | 0.00673  | -0.04215 | 0.3635   | 0.112549 | 0.01496  |
| 0.02315  | -0.31284 | 4.62E-12 | -0.22194 | 1.27E-06 | -0.22704 | 7.11E-07 | 0.093264 | 0.04396  |
| 1.67E-12 | -0.02882 | 0.53437  | 0.152492 | 0.00095  | 0.200956 | 1.21E-05 | 0.471169 | 3.50E-27 |
| 2.45E-06 | -0.24444 | 8.82E-08 | -0.15415 | 0.00083  | -0.26148 | 9.72E-09 | 0.165678 | 0.00032  |
| 2.39E-06 | 0.013345 | 0.77363  | 0.117696 | 0.01091  | 0.133605 | 0.00382  | 0.07961  | 0.08571  |
| 0.00028  | 0.201252 | 1.17E-05 | 0.30752  | 1.10E-11 | 0.265809 | 5.41E-09 | -0.02024 | 0.66263  |
| 0.00187  | -0.16313 | 0.0004   | -0.01271 | 0.7841   | 0.027126 | 0.55873  | -0.25186 | 3.44E-08 |
| 3.63E-08 | 0.318937 | 1.68E-12 | 0.281183 | 6.20E-10 | 0.291582 | 1.32E-10 | -0.13923 | 0.00257  |
| 5.81E-05 | -0.0912  | 0.04889  | -0.00292 | 0.94983  | 0.04895  | 0.29114  | 0.185866 | 5.32E-05 |
| 0.00035  | -0.05349 | 0.24861  | 0.039744 | 0.39149  | 0.060385 | 0.1927   | 0.005455 | 0.90642  |
| 0.55331  | 0.026077 | 0.57404  | 0.042278 | 0.36199  | 0.002779 | 0.95223  | -0.1368  | 0.00305  |
| 0.00082  | -0.08484 | 0.06697  | -0.09563 | 0.03886  | -0.16966 | 0.00023  | -0.20636 | 6.92E-06 |
| 4.32E-08 | 0.393472 | 9.63E-19 | 0.377303 | 3.02E-17 | 0.35483  | 2.66E-15 | 0.002447 | 0.95793  |
| 4.33E-05 | -0.50229 | 3.21E-31 | -0.28255 | 5.08E-10 | -0.36798 | 2.02E-16 | -0.26974 | 3.15E-09 |
| 2.48E-06 | 0.145494 | 0.00162  | 0.144548 | 0.00174  | 0.186306 | 5.10E-05 | -0.00486 | 0.91653  |
| 0.0001   | 0.071141 | 0.12474  | 0.053645 | 0.24727  | -0.03788 | 0.4141   | -0.03155 | 0.49642  |
| 0.0892   | 0.011367 | 0.80647  | -0.08478 | 0.06717  | -0.07173 | 0.12164  | -0.09798 | 0.03427  |
| 0.00288  | 0.171971 | 0.00019  | 0.125228 | 0.00674  | 0.168163 | 0.00026  | -0.04285 | 0.35553  |

|          |          |          |          |          |          |          |          |          |
|----------|----------|----------|----------|----------|----------|----------|----------|----------|
| 0.54263  | -0.1743  | 0.00015  | -0.02839 | 0.54057  | -0.06717 | 0.14723  | -0.02752 | 0.55305  |
| 0.09136  | -0.01275 | 0.78341  | 0.061838 | 0.1822   | 0.07352  | 0.11259  | -0.04373 | 0.34568  |
| 3.40E-10 | -0.09347 | 0.04349  | -0.26921 | 3.39E-09 | -0.26265 | 8.30E-09 | 0.001285 | 0.97791  |
| 0.00685  | -0.06658 | 0.15084  | -0.10499 | 0.02327  | -0.10791 | 0.01967  | -0.21508 | 2.73E-06 |
| 0.07359  | -0.13668 | 0.00308  | 0.003923 | 0.93261  | 0.028694 | 0.53621  | 0.082527 | 0.0748   |
| 0.4351   | -0.08739 | 0.05914  | -0.10595 | 0.02202  | -0.08625 | 0.06256  | 0.383832 | 7.68E-18 |
| 0.00015  | 0.026635 | 0.56587  | 0.046339 | 0.31768  | -0.05214 | 0.26077  | 0.063373 | 0.17156  |
| 3.68E-11 | 0.09244  | 0.04587  | 0.207091 | 6.41E-06 | 0.282634 | 5.01E-10 | 0.234392 | 3.00E-07 |
| 0.39721  | -0.15162 | 0.00101  | 0.006619 | 0.88656  | -0.0169  | 0.71574  | -0.13622 | 0.00318  |
| 0.78424  | 0.001149 | 0.98024  | -0.05402 | 0.24401  | -0.06407 | 0.16691  | 0.096241 | 0.03761  |
| 0.00013  | 0.129839 | 0.00495  | 0.21536  | 2.64E-06 | 0.234767 | 2.87E-07 | 0.251837 | 3.45E-08 |
| 7.19E-16 | 0.089939 | 0.0521   | 0.344721 | 1.78E-14 | 0.334739 | 1.09E-13 | 0.231249 | 4.36E-07 |
| 1.36E-07 | 5.02E-05 | 0.99914  | 0.168354 | 0.00026  | 0.168717 | 0.00025  | -0.26727 | 4.43E-09 |
| 0.93278  | -0.10647 | 0.02137  | -0.0216  | 0.64147  | -0.01668 | 0.71913  | 0.135588 | 0.00333  |
| 0.58222  | -0.03589 | 0.43913  | -0.03666 | 0.42933  | -0.0286  | 0.53752  | 0.032175 | 0.48791  |
| 0.15914  | -0.03631 | 0.43375  | -0.02473 | 0.59392  | -0.04208 | 0.36419  | -0.06094 | 0.18866  |
| 0.26261  | -0.0691  | 0.13593  | 0.008834 | 0.84901  | -0.00708 | 0.87864  | 0.038333 | 0.40853  |
| 0.32118  | -0.01857 | 0.689    | 0.016756 | 0.71798  | -0.03146 | 0.49762  | 0.032348 | 0.48558  |
| 5.10E-06 | 0.121778 | 0.00843  | 0.029112 | 0.53029  | 0.134335 | 0.00363  | 0.178242 | 0.00011  |
| 2.64E-05 | 0.112006 | 0.01545  | 0.091729 | 0.04757  | 0.14611  | 0.00155  | 0.024994 | 0.59005  |
| 0.12592  | -0.18777 | 4.44E-05 | -0.23489 | 2.83E-07 | -0.20584 | 7.31E-06 | -0.11392 | 0.01377  |
| 0.67313  | 0.091728 | 0.04758  | 0.089012 | 0.05458  | 0.072203 | 0.11919  | -0.03436 | 0.45884  |
| 0.0739   | -0.29542 | 7.37E-11 | 0.025472 | 0.58296  | -0.10674 | 0.02104  | -0.12679 | 0.00607  |
| 1.20E-17 | 0.406349 | 5.40E-20 | 0.140513 | 0.00234  | 0.314332 | 3.61E-12 | 0.449789 | 1.22E-24 |
| 0.03579  | -0.0086  | 0.85287  | 0.009267 | 0.84168  | 0.043658 | 0.34651  | 0.071145 | 0.12471  |
| 1.03E-10 | 0.433602 | 7.90E-23 | -0.05003 | 0.28061  | 0.216556 | 2.32E-06 | 0.201642 | 1.13E-05 |
| 0.56987  | -0.07722 | 0.09554  | 0.077603 | 0.09393  | 0.022256 | 0.63142  | 0.03009  | 0.51657  |
| 0.48077  | -0.09778 | 0.03465  | -0.01823 | 0.69441  | -0.0321  | 0.4889   | -0.0377  | 0.41628  |
| 0.38406  | -0.05775 | 0.2129   | 0.147777 | 0.00136  | 0.045435 | 0.32722  | -0.02702 | 0.56022  |
| 0.68761  | -0.09171 | 0.04762  | 0.013296 | 0.77443  | 0.017728 | 0.70238  | -0.18597 | 5.27E-05 |
| 2.67E-05 | -0.22968 | 5.24E-07 | -0.16251 | 0.00042  | -0.24144 | 1.28E-07 | -0.20795 | 5.86E-06 |
| 1.79E-07 | 0.145577 | 0.00161  | 0.182172 | 7.51E-05 | 0.178444 | 0.00011  | 0.361136 | 7.83E-16 |
| 1.61E-06 | 0.012407 | 0.78916  | 0.202999 | 9.82E-06 | 0.178848 | 0.0001   | 0.431408 | 1.37E-22 |
| 0.22686  | -0.11649 | 0.01176  | -0.0721  | 0.11975  | -0.11495 | 0.01293  | 0.015184 | 0.74346  |
| 0.075    | -0.02997 | 0.51822  | -0.04544 | 0.32718  | -0.06013 | 0.19461  | -0.00248 | 0.95744  |
| 0.07367  | -0.09977 | 0.03111  | -0.06079 | 0.1897   | -0.08377 | 0.0705   | -0.02207 | 0.63435  |
| 0.39622  | 0.142599 | 0.00201  | 0.119055 | 0.01002  | 0.088801 | 0.05515  | 0.071749 | 0.12154  |
| 0.4789   | 0.131545 | 0.00441  | 0.34123  | 3.37E-14 | 0.182653 | 7.19E-05 | 0.165523 | 0.00033  |
| 0.09339  | -0.02335 | 0.61478  | 0.084258 | 0.06888  | 0.049338 | 0.28733  | -0.03913 | 0.39891  |
| 4.12E-11 | 0.180432 | 8.82E-05 | 0.276036 | 1.30E-09 | 0.302483 | 2.45E-11 | 0.38083  | 1.45E-17 |
| 0.01905  | -0.14678 | 0.00147  | -0.11302 | 0.01454  | -0.14061 | 0.00232  | 0.055346 | 0.23258  |
| 0.59504  | -0.04109 | 0.3757   | -0.01355 | 0.7702   | -0.05521 | 0.23371  | -0.00577 | 0.90109  |
| 0.45276  | 0.263807 | 7.10E-09 | 0.049537 | 0.28539  | 0.088611 | 0.05568  | 0.242053 | 1.19E-07 |
| 0.32766  | 0.001394 | 0.97604  | -0.01711 | 0.71236  | -0.04343 | 0.349    | -0.01009 | 0.82792  |
| 0.56309  | 0.021384 | 0.64485  | 0.090267 | 0.05124  | 0.076808 | 0.09735  | -0.11568 | 0.01237  |

|          |          |          |          |          |          |          |          |          |
|----------|----------|----------|----------|----------|----------|----------|----------|----------|
| 0.00038  | -0.07883 | 0.08883  | 0.079836 | 0.08482  | 0.080059 | 0.08395  | 0.039549 | 0.39383  |
| 0.02522  | 0.191097 | 3.23E-05 | -0.12477 | 0.00694  | 0.076758 | 0.09757  | 0.212125 | 3.76E-06 |
| 9.60E-15 | 0.024758 | 0.59357  | 0.010949 | 0.81345  | 0.192797 | 2.73E-05 | 0.414263 | 8.62E-21 |
| 0.61383  | -0.15926 | 0.00055  | -0.06304 | 0.17384  | -0.09949 | 0.03159  | 0.485712 | 5.12E-29 |
| 0.89292  | 0.055249 | 0.2334   | -0.06924 | 0.13513  | -0.03514 | 0.44872  | -0.21331 | 3.30E-06 |
| 0.50741  | -0.1514  | 0.00103  | -0.02358 | 0.61131  | -0.02684 | 0.56286  | -0.0945  | 0.04123  |
| 0.00019  | -0.18429 | 6.17E-05 | 0.00972  | 0.83407  | 0.014095 | 0.76128  | 0.128197 | 0.00553  |
| 0.07557  | -0.12475 | 0.00695  | -0.03185 | 0.4923   | 0.013594 | 0.76952  | -0.00139 | 0.97603  |
| 1.25E-14 | 0.337589 | 6.53E-14 | 0.333803 | 1.28E-13 | 0.407185 | 4.46E-20 | 0.320214 | 1.35E-12 |
| 4.86E-07 | 0.039426 | 0.3953   | 0.01731  | 0.70908  | 0.125007 | 0.00683  | 0.1528   | 0.00092  |
| 0.32493  | -0.13197 | 0.00428  | 0.012021 | 0.79556  | -0.00115 | 0.98025  | 6.20E-05 | 0.99893  |
| 0.02215  | -0.04466 | 0.33556  | 0.039244 | 0.39749  | 0.030663 | 0.5086   | 0.021445 | 0.64391  |
| 0.02939  | -0.03357 | 0.46929  | -0.01338 | 0.77309  | 0.01227  | 0.79142  | 0.010361 | 0.82329  |
| 1.62E-08 | 0.292664 | 1.12E-10 | 0.036862 | 0.42677  | 0.20286  | 9.96E-06 | 0.083527 | 0.07134  |
| 0.00019  | 0.02223  | 0.63183  | -0.15868 | 0.00058  | -0.14505 | 0.00167  | 0.058377 | 0.20795  |
| 0.83209  | 0.014437 | 0.75568  | -0.12521 | 0.00674  | -0.04166 | 0.369    | -0.09691 | 0.0363   |
| 0.00793  | -0.04674 | 0.31351  | -0.0872  | 0.05972  | -0.10586 | 0.02214  | -0.18385 | 6.43E-05 |
| 0.97614  | 0.137053 | 0.003    | 0.140246 | 0.00238  | 0.094889 | 0.04039  | -0.06277 | 0.17571  |
| 0.03042  | 0.17233  | 0.00018  | 0.125831 | 0.00647  | 0.136823 | 0.00305  | 0.152088 | 0.00098  |
| 0.00393  | -0.20119 | 1.18E-05 | -0.15302 | 0.00091  | -0.16081 | 0.00049  | -0.19536 | 2.12E-05 |
| 0.24344  | -0.00685 | 0.88255  | -0.07888 | 0.08864  | -0.10312 | 0.02586  | -0.0041  | 0.92956  |
| 0.13195  | -0.17545 | 0.00014  | -0.11523 | 0.01271  | -0.06704 | 0.14806  | -0.00378 | 0.93514  |
| 0.00415  | -0.0789  | 0.08853  | 0.191378 | 3.14E-05 | 0.121397 | 0.00864  | 0.141859 | 0.00212  |
| 0.65899  | 0.002    | 0.96562  | 0.014868 | 0.74863  | 0.004971 | 0.91468  | 0.245421 | 7.80E-08 |
| 0.04194  | 0.030848 | 0.50605  | 0.108023 | 0.01954  | 0.108656 | 0.01884  | 0.324928 | 6.06E-13 |
| 0.79439  | -0.00924 | 0.8421   | 0.043221 | 0.35136  | 0.037539 | 0.41832  | -0.04673 | 0.3136   |
| 0.45679  | -0.01412 | 0.76089  | 0.035331 | 0.44624  | -0.02174 | 0.63938  | -0.42769 | 3.42E-22 |
| 0.0012   | 0.205251 | 7.77E-06 | 0.300192 | 3.52E-11 | 0.264513 | 6.45E-09 | 0.088051 | 0.05725  |
| 0.64793  | -0.03725 | 0.42192  | -0.00194 | 0.96667  | -0.00634 | 0.89126  | 0.049117 | 0.2895   |
| 0.75846  | -0.13519 | 0.00342  | 0.05106  | 0.27082  | 0.00028  | 0.99518  | -0.00607 | 0.89586  |
| 0.83862  | -0.14243 | 0.00203  | 0.033501 | 0.47016  | -0.00227 | 0.96101  | -0.01153 | 0.80371  |
| 1.60E-20 | 0.322103 | 9.82E-13 | 0.220932 | 1.43E-06 | 0.369229 | 1.57E-16 | 0.202228 | 1.06E-05 |
| 0.44825  | 0.023573 | 0.61136  | 0.055381 | 0.23228  | 0.022419 | 0.62893  | -0.11745 | 0.01108  |
| 0.00082  | 0.031514 | 0.49691  | 0.11735  | 0.01115  | 0.091828 | 0.04733  | 0.063687 | 0.16944  |
| 0.13043  | -0.20981 | 4.81E-06 | -0.1186  | 0.01031  | -0.11916 | 0.00996  | -0.13154 | 0.00441  |
| 0.00701  | 0.405493 | 6.56E-20 | 0.33856  | 5.48E-14 | 0.261159 | 1.01E-08 | 0.15628  | 0.0007   |
| 0.16503  | 0.472966 | 2.10E-27 | 0.289658 | 1.77E-10 | 0.291368 | 1.37E-10 | 0.009258 | 0.84185  |
| 0.22404  | -0.01542 | 0.73962  | 0.021215 | 0.64747  | -0.01743 | 0.70719  | 0.144702 | 0.00172  |
| 0.00172  | -0.04391 | 0.34373  | 0.080822 | 0.08103  | 0.087241 | 0.05959  | -0.17696 | 0.00012  |
| 0.03803  | 0.113292 | 0.0143   | 0.126056 | 0.00638  | 0.134121 | 0.00369  | 0.240604 | 1.42E-07 |
| 0.17671  | -0.06193 | 0.18158  | 0.070393 | 0.12876  | -0.0183  | 0.69333  | 0.013425 | 0.77231  |
| 0.05319  | -0.07685 | 0.09716  | -0.04125 | 0.37374  | -0.083   | 0.07313  | 0.018528 | 0.68963  |
| 0.01131  | -0.04019 | 0.38615  | -0.03885 | 0.40219  | -0.09326 | 0.04398  | -0.1778  | 0.00011  |
| 0.00711  | -0.30196 | 2.66E-11 | -0.23937 | 1.65E-07 | -0.2501  | 4.31E-08 | 0.328714 | 3.14E-13 |
| 0.44434  | 0.004678 | 0.91969  | 0.105348 | 0.0228   | 0.092626 | 0.04543  | -0.05634 | 0.22427  |

|          |          |          |          |          |           |          |          |          |
|----------|----------|----------|----------|----------|-----------|----------|----------|----------|
| 0.00296  | -0.11994 | 0.00948  | -0.02583 | 0.57769  | 0.003377  | 0.94198  | -0.07503 | 0.10538  |
| 0.35829  | -0.28675 | 2.73E-10 | -0.16496 | 0.00034  | -0.13476  | 0.00353  | -0.06197 | 0.18128  |
| 0.05243  | -0.10195 | 0.0276   | -0.1128  | 0.01473  | -0.13339  | 0.00388  | -0.0293  | 0.52759  |
| 0.42718  | 0.047333 | 0.30739  | 0.140779 | 0.00229  | 0.069029  | 0.13635  | -0.0714  | 0.12336  |
| 0.2653   | -0.281   | 6.36E-10 | -0.09141 | 0.04836  | -0.09469  | 0.04081  | -0.00284 | 0.95124  |
| 0.2192   | 0.060218 | 0.19394  | 0.03218  | 0.48786  | 0.092456  | 0.04583  | 0.184725 | 5.92E-05 |
| 0.1723   | -0.18625 | 5.13E-05 | -0.06541 | 0.15815  | -0.04521  | 0.32963  | 0.19664  | 1.87E-05 |
| 9.13E-05 | -0.23421 | 3.07E-07 | 0.035117 | 0.449    | 0.045647  | 0.32496  | -0.02638 | 0.56963  |
| 1.29E-06 | 0.081275 | 0.07933  | 0.19459  | 2.29E-05 | 0.185445  | 5.54E-05 | 0.029589 | 0.52357  |
| 0.00963  | 0.281328 | 6.07E-10 | 0.207001 | 6.47E-06 | 0.230932  | 4.52E-07 | 0.447574 | 2.19E-24 |
| 2.09E-07 | 0.132267 | 0.00419  | 0.161555 | 0.00046  | 0.191303  | 3.16E-05 | 0.314034 | 3.80E-12 |
| 0.00073  | -0.005   | 0.91422  | -0.06097 | 0.18843  | -0.00312  | 0.94639  | 0.187713 | 4.47E-05 |
| 0.11728  | -0.16749 | 0.00028  | -0.23592 | 2.50E-07 | -0.18916  | 3.89E-05 | 0.089812 | 0.05243  |
| 0.00074  | -0.03538 | 0.44557  | -0.13479 | 0.00352  | -0.14507  | 0.00167  | 0.290013 | 1.68E-10 |
| 0.0008   | -0.44462 | 4.75E-24 | -0.30484 | 1.69E-11 | -0.32238  | 9.36E-13 | -0.07309 | 0.11473  |
| 0.599    | -0.17651 | 0.00013  | -0.00764 | 0.86922  | -0.04127  | 0.37359  | -0.30357 | 2.07E-11 |
| 0.09096  | 0.087419 | 0.05907  | 0.208457 | 5.55E-06 | 0.11166   | 0.01578  | -0.21526 | 2.67E-06 |
| 0.84971  | -0.00287 | 0.95063  | 0.019955 | 0.6671   | -0.00609  | 0.89556  | 0.080882 | 0.0808   |
| 6.84E-08 | -0.06172 | 0.18301  | -0.32268 | 8.90E-13 | -0.2455   | 7.73E-08 | -0.1346  | 0.00357  |
| 0.52462  | -0.00313 | 0.9462   | -0.0034  | 0.94157  | -0.03294  | 0.4776   | 0.43494  | 5.64E-23 |
| 0.21592  | -0.13194 | 0.00429  | -0.09192 | 0.0471   | -0.11481  | 0.01304  | 0.105699 | 0.02235  |
| 0.78884  | -0.13269 | 0.00407  | -0.02099 | 0.65096  | -0.08032  | 0.08292  | -0.03672 | 0.42856  |
| 0.54595  | -0.14151 | 0.00217  | -0.11393 | 0.01376  | -0.108    | 0.01957  | 0.012413 | 0.78906  |
| 0.23389  | 0.012178 | 0.79296  | 0.0091   | 0.84451  | -5.78E-05 | 0.99901  | -0.01497 | 0.74701  |
| 0.21115  | 0.043754 | 0.34545  | -0.09878 | 0.03283  | -0.00155  | 0.97328  | 0.04445  | 0.33782  |
| 0.38614  | 0.018944 | 0.68303  | -0.06151 | 0.1845   | -0.00252  | 0.95663  | 0.033948 | 0.46425  |
| 0.21495  | -0.01113 | 0.81044  | -0.08294 | 0.07336  | -0.05442  | 0.2405   | -0.00827 | 0.85858  |
| 0.67422  | -0.02473 | 0.59399  | -0.03817 | 0.41057  | -0.04106  | 0.376    | -0.00911 | 0.84429  |
| 0.54511  | 0.067889 | 0.14296  | -0.16422 | 0.00037  | -0.04916  | 0.2891   | 0.044074 | 0.34194  |
| 9.17E-05 | 0.170217 | 0.00022  | 0.137848 | 0.00283  | 0.177238  | 0.00012  | 0.111427 | 0.016    |
| 0.86398  | -0.049   | 0.29061  | -0.05951 | 0.19921  | -0.03569  | 0.44157  | 0.022679 | 0.62496  |
| 0.21749  | 0.024776 | 0.5933   | 0.010901 | 0.81425  | 0.049525  | 0.28551  | 0.033875 | 0.46522  |
| 0.54922  | 0.003194 | 0.94511  | 0.015583 | 0.73696  | 0.033738  | 0.46702  | -0.12115 | 0.00877  |
| 0.46449  | -0.10131 | 0.0286   | -0.15074 | 0.00108  | -0.11274  | 0.01479  | 0.104911 | 0.02337  |
| 0.77786  | 0.110419 | 0.01698  | 0.05162  | 0.26559  | 0.036594  | 0.43014  | 0.187777 | 4.44E-05 |
| 0.02809  | -0.05613 | 0.22602  | -0.05241 | 0.25833  | -0.08419  | 0.06909  | 0.003675 | 0.93686  |
| 0.87182  | 0.014109 | 0.76106  | -0.01052 | 0.8206   | -0.0019   | 0.96738  | 0.057927 | 0.21148  |
| 0.33574  | -0.00777 | 0.86696  | 0.018615 | 0.68825  | 0.013118  | 0.77737  | -0.01274 | 0.78369  |
| 0.40773  | 0.044789 | 0.33415  | -0.00352 | 0.93953  | 0.026651  | 0.56564  | 0.053467 | 0.24885  |
| 0.50961  | -0.09483 | 0.04051  | -0.051   | 0.27143  | -0.04203  | 0.36482  | 0.009566 | 0.83666  |
| 0.25825  | 0.08626  | 0.06252  | 0.143276 | 0.00191  | 0.070173  | 0.12996  | -0.06078 | 0.1898   |
| 0.81331  | -0.0112  | 0.80927  | -0.09831 | 0.03368  | -0.08521  | 0.0658   | 0.054988 | 0.23561  |
| 0.61138  | -0.00563 | 0.90334  | 0.083901 | 0.07007  | 0.030814  | 0.50652  | 0.047257 | 0.30817  |
| 0.42797  | -0.07719 | 0.09568  | 0.033105 | 0.47542  | -0.06361  | 0.16997  | -0.1393  | 0.00255  |
| 0.95948  | 0.053354 | 0.24985  | 0.089184 | 0.05411  | 0.040799  | 0.37904  | 0.071189 | 0.12448  |

|          |          |          |          |          |          |          |          |          |
|----------|----------|----------|----------|----------|----------|----------|----------|----------|
| 0.01768  | 0.226461 | 7.61E-07 | 0.147111 | 0.00143  | 0.130767 | 0.00465  | 0.088195 | 0.05684  |
| 0.00882  | 0.094041 | 0.04223  | 0.251995 | 3.38E-08 | 0.185716 | 5.40E-05 | 0.070109 | 0.13031  |
| 1.29E-05 | -0.11302 | 0.01454  | -0.16467 | 0.00035  | -0.19567 | 2.06E-05 | -0.24149 | 1.27E-07 |
| 0.00469  | 0.215002 | 2.75E-06 | 0.353267 | 3.58E-15 | 0.259323 | 1.30E-08 | -0.25205 | 3.36E-08 |
| 0.97487  | 0.013788 | 0.76634  | -0.13026 | 0.00481  | -0.09348 | 0.04348  | 0.011562 | 0.80322  |
| 0.01211  | -0.01731 | 0.709    | 0.084188 | 0.06912  | 0.080925 | 0.08064  | 0.124897 | 0.00688  |
| 0.47585  | 0.056694 | 0.22138  | 0.127097 | 0.00595  | 0.088023 | 0.05733  | 0.093474 | 0.04349  |
| 0.01486  | 0.055687 | 0.22971  | 0.063659 | 0.16963  | 0.0811   | 0.07999  | 0.018849 | 0.68454  |
| 0.22339  | -0.23237 | 3.82E-07 | -0.08378 | 0.07046  | -0.13485 | 0.00351  | -0.02805 | 0.54534  |
| 0.00541  | 0.083074 | 0.07289  | 0.305479 | 1.52E-11 | 0.200957 | 1.21E-05 | -0.0173  | 0.70925  |
| 0.2471   | -0.03885 | 0.40221  | -0.04941 | 0.28659  | -0.05028 | 0.27825  | -0.03009 | 0.51654  |
| 0.21488  | 0.09624  | 0.03762  | 0.091849 | 0.04728  | 0.018289 | 0.69343  | -0.1035  | 0.02531  |
| 0.95103  | 0.057725 | 0.21308  | -0.00151 | 0.97401  | 0.020958 | 0.65145  | 0.047536 | 0.30532  |
| 0.00946  | 0.090637 | 0.05029  | 0.190234 | 3.51E-05 | 0.115965 | 0.01215  | -0.01659 | 0.72059  |
| 0.83767  | -0.04208 | 0.36418  | -0.02951 | 0.52472  | -0.00228 | 0.96087  | 0.005179 | 0.91112  |
| 0.04962  | 0.050597 | 0.27519  | 0.124031 | 0.00729  | 0.109046 | 0.01841  | 0.103361 | 0.02551  |
| 0.0195   | 0.045992 | 0.32132  | 0.141495 | 0.00218  | 0.120857 | 0.00894  | 0.044761 | 0.33445  |
| 0.16553  | -0.09721 | 0.03572  | 0.009479 | 0.83812  | -0.08977 | 0.05254  | 0.082614 | 0.07449  |
| 0.18945  | -0.01567 | 0.73561  | -0.01159 | 0.80269  | -0.04279 | 0.3562   | 0.044518 | 0.33709  |
| 0.03814  | -0.04451 | 0.33712  | 0.012583 | 0.78624  | 0.006952 | 0.88089  | 0.133203 | 0.00393  |
| 0.09264  | -0.04189 | 0.36636  | -0.02759 | 0.55199  | -0.06224 | 0.17937  | 0.005753 | 0.90133  |
| 0.34657  | -0.12798 | 0.00561  | 0.047292 | 0.30781  | 0.010816 | 0.81567  | -0.0432  | 0.3516   |
| 0.59125  | -0.08159 | 0.07816  | -0.02899 | 0.53207  | -0.05186 | 0.26334  | 0.00308  | 0.94707  |
| 0.0488   | 0.100399 | 0.03006  | 0.177846 | 0.00011  | 0.139779 | 0.00247  | -0.13793 | 0.00282  |
| 0.49867  | 0.012271 | 0.79141  | 0.047261 | 0.30814  | 0.033067 | 0.47593  | 0.032991 | 0.47694  |
| 0.01392  | 0.208351 | 5.62E-06 | 0.362311 | 6.22E-16 | 0.239018 | 1.72E-07 | 0.011946 | 0.79681  |
| 0.59366  | -0.15366 | 0.00086  | -0.18462 | 5.98E-05 | -0.13904 | 0.0026   | 0.005851 | 0.89964  |
| 0.30195  | -0.0274  | 0.55476  | -0.08239 | 0.07529  | -0.07155 | 0.12259  | -0.13972 | 0.00248  |
| 0.75814  | 0.084331 | 0.06864  | 0.00986  | 0.83171  | 0.004619 | 0.9207   | 0.06658  | 0.15085  |
| 0.1448   | -0.03792 | 0.41361  | -0.03835 | 0.40829  | -0.01998 | 0.66677  | 0.06689  | 0.14895  |
| 0.02449  | 0.003377 | 0.94198  | 0.010451 | 0.82178  | 0.038056 | 0.41194  | 0.222683 | 1.17E-06 |
| 0.52485  | 0.020622 | 0.65668  | 0.022655 | 0.62531  | 6.52E-05 | 0.99888  | 0.031167 | 0.50165  |
| 0.02982  | 0.00203  | 0.96511  | -0.0669  | 0.14891  | -0.08461 | 0.06774  | 0.015044 | 0.74575  |
| 0.00611  | -0.08452 | 0.06802  | 0.113217 | 0.01437  | -0.04079 | 0.37913  | -0.11773 | 0.01089  |
| 0.76828  | 0.163345 | 0.00039  | 0.163038 | 0.0004   | 0.11366  | 0.01399  | -0.00506 | 0.91321  |
| 0.01177  | -0.1487  | 0.00127  | -0.19193 | 2.97E-05 | -0.21272 | 3.52E-06 | 0.037847 | 0.41451  |
| 0.51568  | -0.05486 | 0.23669  | -0.04461 | 0.33609  | -0.03035 | 0.51288  | 0.025647 | 0.58037  |
| 7.15E-06 | -0.13463 | 0.00356  | -0.19464 | 2.28E-05 | -0.23471 | 2.89E-07 | 0.086757 | 0.06102  |
| 0.03408  | -0.06667 | 0.15028  | -0.01012 | 0.82727  | -0.09965 | 0.03131  | -0.05981 | 0.19695  |
| 0.48429  | -0.04391 | 0.34368  | 0.053714 | 0.24666  | 0.003692 | 0.93659  | 0.111505 | 0.01592  |
| 0.73388  | -0.00752 | 0.87122  | 0.121933 | 0.00834  | 0.036578 | 0.43035  | 0.007976 | 0.86352  |
| 0.6823   | -0.0092  | 0.84289  | -0.04179 | 0.3676   | -0.02781 | 0.54889  | 0.018762 | 0.68591  |
| 0.27519  | -0.01308 | 0.77809  | -0.00812 | 0.86105  | -0.03865 | 0.40467  | -0.03542 | 0.44508  |
| 0.0004   | -0.10475 | 0.02358  | -0.15331 | 0.00089  | -0.15    | 0.00115  | -0.15261 | 0.00094  |
| 0.48863  | -0.02838 | 0.54064  | -0.05831 | 0.20848  | -0.03871 | 0.40395  | -0.02964 | 0.52285  |

|          |          |          |          |          |          |          |          |         |
|----------|----------|----------|----------|----------|----------|----------|----------|---------|
| 0.8074   | 0.068715 | 0.13815  | 0.055891 | 0.228    | 0.048947 | 0.29117  | -0.04516 | 0.33016 |
| 0.00355  | -0.18158 | 7.94E-05 | -0.11673 | 0.01159  | -0.19557 | 2.08E-05 | -0.03139 | 0.49855 |
| 0.44804  | 0.102803 | 0.02632  | 0.024378 | 0.59926  | 0.055172 | 0.23405  | 0.040973 | 0.37701 |
| 0.08668  | 0.085539 | 0.06475  | -0.12074 | 0.00901  | -0.00061 | 0.98951  | 0.06059  | 0.19119 |
| 0.25984  | -0.01819 | 0.69507  | -0.00699 | 0.88031  | -0.03384 | 0.46561  | -0.00277 | 0.95247 |
| 0.15715  | -0.01852 | 0.68969  | 0.070381 | 0.12882  | 0.062507 | 0.1775   | 0.008587 | 0.85318 |
| 0.15383  | -0.1397  | 0.00248  | -0.12217 | 0.00822  | -0.1443  | 0.00177  | -0.12274 | 0.00792 |
| 0.00264  | 0.103491 | 0.02532  | -0.05654 | 0.22264  | 0.079184 | 0.0874   | -0.00863 | 0.85249 |
| 0.85666  | 0.01106  | 0.81159  | -0.00426 | 0.9268   | -0.00611 | 0.89522  | 0.029161 | 0.5296  |
| 0.49051  | 0.010482 | 0.82126  | -0.03882 | 0.40259  | -0.04973 | 0.28351  | 0.026662 | 0.56548 |
| 0.56455  | 0.007081 | 0.87871  | -0.02557 | 0.58147  | -0.03661 | 0.42999  | 0.136828 | 0.00305 |
| 0.06237  | 0.171663 | 0.00019  | 0.221399 | 1.35E-06 | 0.159603 | 0.00054  | 0.062333 | 0.17871 |
| 0.50349  | -0.00837 | 0.85678  | -0.00857 | 0.85346  | -0.02228 | 0.631    | 0.022413 | 0.62901 |
| 0.12466  | 0.030316 | 0.51342  | 0.1813   | 8.14E-05 | 0.019942 | 0.66731  | -0.01043 | 0.8222  |
| 0.27765  | 0.104965 | 0.0233   | 0.154143 | 0.00083  | 0.071537 | 0.12265  | -0.00392 | 0.93272 |
| 0.92898  | -0.09677 | 0.03657  | -0.03418 | 0.4612   | -0.09461 | 0.04099  | 0.095681 | 0.03875 |
| 1.33E-05 | -0.2225  | 1.20E-06 | -0.14842 | 0.0013   | -0.2388  | 1.77E-07 | -0.02888 | 0.53356 |
| 0.96788  | -0.03301 | 0.47676  | -0.0377  | 0.41632  | -0.01584 | 0.73283  | 0.087533 | 0.05874 |
| 0.96658  | 0.062349 | 0.1786   | 0.057711 | 0.21319  | 0.01686  | 0.7163   | 0.029692 | 0.52213 |
| 0.71222  | 0.006442 | 0.88958  | 0.025658 | 0.58021  | -0.00272 | 0.95318  | 0.050761 | 0.27364 |
| 0.4319   | -0.16937 | 0.00024  | -0.15772 | 0.00062  | -0.13895 | 0.00262  | -0.02455 | 0.59665 |
| 0.99867  | -0.03434 | 0.45913  | -0.0204  | 0.6602   | -0.00718 | 0.87702  | -0.05381 | 0.24581 |
| 0.01875  | -0.02515 | 0.58769  | 0.090819 | 0.04983  | 0.017934 | 0.69909  | 0.000462 | 0.99206 |
| 0.14658  | -0.01202 | 0.7955   | 0.038135 | 0.41096  | 0.005056 | 0.91323  | -0.09497 | 0.04022 |
| 0.00051  | 0.013869 | 0.76499  | 0.155115 | 0.00077  | 0.137226 | 0.00296  | 0.149023 | 0.00124 |
| 0.59841  | 0.046865 | 0.3122   | 0.050658 | 0.27462  | 0.040748 | 0.37963  | 0.067404 | 0.14585 |
| 0.09977  | -0.03655 | 0.4307   | -0.0673  | 0.14648  | -0.08058 | 0.08196  | 0.04541  | 0.32749 |
| 0.59408  | -0.02032 | 0.66139  | 0.055312 | 0.23286  | -0.02697 | 0.56096  | -0.04399 | 0.34285 |
| 0.02698  | 0.060981 | 0.18834  | 0.21942  | 1.69E-06 | 0.124277 | 0.00717  | -0.00916 | 0.84342 |
| 0.68864  | 0.084859 | 0.06692  | 0.139263 | 0.00256  | 0.099711 | 0.03121  | 0.02803  | 0.5457  |
| 0.03861  | 0.270277 | 2.92E-09 | 0.206154 | 7.07E-06 | 0.110258 | 0.01715  | -0.09227 | 0.04627 |
| 0.60354  | -0.08894 | 0.05478  | -0.01741 | 0.70747  | -0.05971 | 0.19775  | -0.15969 | 0.00053 |
| 0.7625   | -0.04063 | 0.381    | 0.028747 | 0.53546  | -0.02106 | 0.64982  | 0.004582 | 0.92133 |
| 0.017    | 0.093531 | 0.04336  | 0.141472 | 0.00218  | 0.091257 | 0.04873  | -0.0029  | 0.95018 |
| 0.00021  | 0.336317 | 8.20E-14 | 0.361685 | 7.03E-16 | 0.29168  | 1.30E-10 | -0.04437 | 0.3387  |
| 0.10526  | -0.25437 | 2.49E-08 | -0.159   | 0.00056  | -0.15326 | 0.00089  | 0.021456 | 0.64374 |
| 0.62458  | 0.055525 | 0.23107  | 0.25373  | 2.70E-08 | 0.136589 | 0.0031   | -0.03937 | 0.39602 |
| 0.4257   | -0.0266  | 0.56632  | -0.01728 | 0.70949  | -0.01597 | 0.73072  | 0.144821 | 0.0017  |
| 0.68619  | 0.000265 | 0.99545  | 0.019159 | 0.67964  | -0.00633 | 0.89156  | 0.071497 | 0.12286 |
| 0.14602  | -0.02288 | 0.62191  | -0.06242 | 0.1781   | -0.06937 | 0.13441  | -0.08765 | 0.0584  |
| 0.57574  | -0.00723 | 0.87614  | -0.02891 | 0.53311  | -0.03275 | 0.48022  | 0.042194 | 0.36294 |
| 0.02876  | 0.043446 | 0.34886  | -0.0359  | 0.43892  | 0.015134 | 0.74427  | 0.159048 | 0.00056 |
| 0.98597  | 0.048301 | 0.29759  | 0.00098  | 0.98315  | 0.024564 | 0.59647  | -0.07836 | 0.09075 |
| 2.94E-06 | 0.224999 | 9.00E-07 | 0.350506 | 6.04E-15 | 0.26577  | 5.44E-09 | -0.07366 | 0.11192 |
| 0.00377  | -0.0704  | 0.12873  | 0.028224 | 0.54291  | -0.06927 | 0.13499  | -0.06767 | 0.14427 |

|          |          |          |          |          |          |          |          |          |
|----------|----------|----------|----------|----------|----------|----------|----------|----------|
| 0.45226  | -0.00074 | 0.98734  | -0.01846 | 0.69065  | -0.01559 | 0.7369   | -0.0085  | 0.85464  |
| 0.7876   | -0.07113 | 0.12479  | -0.04938 | 0.28695  | -0.06443 | 0.16453  | -0.06572 | 0.15624  |
| 0.58798  | -0.07307 | 0.11482  | -0.13819 | 0.00277  | -0.089   | 0.05462  | -0.02292 | 0.62126  |
| 0.11064  | 0.07751  | 0.09432  | 0.066956 | 0.14855  | 0.078966 | 0.08828  | -0.01285 | 0.78178  |
| 7.39E-06 | 0.014349 | 0.75712  | 0.201322 | 1.17E-05 | 0.12804  | 0.00559  | 0.045789 | 0.32346  |
| 0.04604  | -0.0645  | 0.16408  | 0.00831  | 0.85786  | -0.06835 | 0.14025  | 0.013197 | 0.77608  |
| 0.06399  | -0.14638 | 0.00151  | 0.053526 | 0.24832  | -0.07306 | 0.11488  | -0.17392 | 0.00016  |
| 0.27559  | 0.108161 | 0.01939  | 0.131203 | 0.00451  | 0.040839 | 0.37856  | 0.042263 | 0.36215  |
| 0.55305  | -0.10444 | 0.024    | 0.053674 | 0.24701  | -0.01567 | 0.7355   | -0.06549 | 0.15767  |
| 0.06979  | -0.1047  | 0.02365  | -0.19022 | 3.51E-05 | -0.19396 | 2.44E-05 | -0.03553 | 0.44369  |
| 0.71967  | -0.03832 | 0.40871  | 0.035899 | 0.43896  | 0.023592 | 0.61107  | -0.01444 | 0.75565  |
| 0.06464  | -0.18247 | 7.31E-05 | -0.03854 | 0.40606  | -0.11884 | 0.01016  | -0.02167 | 0.64037  |
| 0.57682  | 0.21597  | 2.47E-06 | 0.038995 | 0.40049  | 0.046997 | 0.31084  | 0.190292 | 3.49E-05 |
| 0.92087  | 0.087252 | 0.05956  | 0.094303 | 0.04165  | 0.058788 | 0.20476  | 0.017627 | 0.704    |
| 0.11425  | 0.015627 | 0.73625  | -0.01584 | 0.73286  | -0.06534 | 0.15863  | -0.11472 | 0.01311  |
| 0.00146  | 0.135337 | 0.00339  | 0.091258 | 0.04873  | 0.130796 | 0.00464  | 0.039129 | 0.39887  |
| 1.29E-07 | 0.132197 | 0.00421  | 0.290544 | 1.55E-10 | 0.249599 | 4.60E-08 | -0.14531 | 0.00164  |
| 0.18322  | 0.102978 | 0.02606  | 0.100669 | 0.02962  | 0.099576 | 0.03144  | 0.018639 | 0.68788  |
| 0.69548  | 0.027654 | 0.5511   | 0.013703 | 0.76773  | 0.033288 | 0.47298  | 0.058805 | 0.20462  |
| 3.91E-06 | 0.121348 | 0.00866  | 0.232141 | 3.92E-07 | 0.251089 | 3.80E-08 | 0.002136 | 0.96328  |
| 0.00357  | -0.13864 | 0.00268  | -0.20763 | 6.06E-06 | -0.17804 | 0.00011  | -0.10597 | 0.022    |
| 0.3024   | -0.18784 | 4.41E-05 | -0.04947 | 0.28607  | -0.12617 | 0.00633  | 0.096751 | 0.03661  |
| 0.0003   | 0.213565 | 3.21E-06 | 0.147347 | 0.00141  | 0.223095 | 1.12E-06 | 0.365897 | 3.06E-16 |
| 6.17E-07 | 0.292385 | 1.17E-10 | 0.299559 | 3.88E-11 | 0.256313 | 1.93E-08 | 0.237314 | 2.11E-07 |
| 0.05525  | 0.161783 | 0.00045  | 0.244661 | 8.57E-08 | 0.081899 | 0.07705  | -0.19158 | 3.08E-05 |
| 0.94272  | -0.00069 | 0.98818  | 0.044452 | 0.3378   | 0.005771 | 0.90102  | 0.008028 | 0.86264  |
| 3.47E-07 | 0.25986  | 1.21E-08 | -0.08377 | 0.0705   | 0.102226 | 0.02718  | 0.129037 | 0.00523  |
| 0.91349  | 0.002469 | 0.95756  | -0.01513 | 0.74439  | -0.00869 | 0.85143  | -0.0434  | 0.34942  |
| 9.35E-06 | 0.006087 | 0.89562  | 0.126589 | 0.00616  | 0.150818 | 0.00108  | 0.018984 | 0.68241  |
| 0.02476  | -0.16813 | 0.00026  | -0.14232 | 0.00205  | -0.06102 | 0.18804  | 0.067922 | 0.14277  |
| 0.94509  | -0.00333 | 0.94281  | -0.07145 | 0.12308  | -0.02326 | 0.61607  | -0.1125  | 0.015    |
| 0.00047  | 0.012281 | 0.79124  | 0.09228  | 0.04625  | 0.116483 | 0.01177  | -0.05914 | 0.20209  |
| 9.77E-19 | 0.168213 | 0.00026  | 0.043676 | 0.34631  | 0.24625  | 7.03E-08 | 0.122008 | 0.0083   |
| 0.17664  | 0.113462 | 0.01416  | -0.01997 | 0.66681  | 0.028236 | 0.54275  | -0.00569 | 0.90235  |
| 0.04432  | 0.084634 | 0.06765  | 0.02918  | 0.52933  | 0.088872 | 0.05496  | 0.14036  | 0.00236  |
| 0.65927  | -0.00101 | 0.98268  | 0.007531 | 0.87106  | -0.00853 | 0.85406  | 0.070985 | 0.12557  |
| 0.13862  | -0.02369 | 0.60961  | 0.052845 | 0.2544   | 0.029103 | 0.53042  | 0.047504 | 0.30564  |
| 0.08577  | -0.06746 | 0.1455   | 0.061142 | 0.18717  | 0.042988 | 0.35397  | -0.07811 | 0.09178  |
| 0.14036  | -0.01897 | 0.68256  | -0.20393 | 8.92E-06 | -0.13968 | 0.00248  | 0.315998 | 2.74E-12 |
| 0.0015   | -0.01129 | 0.80767  | 0.035434 | 0.44491  | 0.1066   | 0.02122  | 0.192696 | 2.76E-05 |
| 1.05E-11 | 0.196138 | 1.97E-05 | 0.239269 | 1.67E-07 | 0.277832 | 1.01E-09 | 0.256239 | 1.95E-08 |
| 0.15658  | 0.005821 | 0.90016  | 0.14323  | 0.00192  | 0.022628 | 0.62572  | 0.030613 | 0.50929  |
| 3.10E-09 | -0.21701 | 2.21E-06 | -0.20248 | 1.04E-05 | -0.24204 | 1.19E-07 | 0.003577 | 0.93855  |
| 0.86001  | -0.02027 | 0.66225  | -0.04444 | 0.3379   | -0.00708 | 0.87871  | 0.004026 | 0.93086  |
| 0.00042  | 0.163325 | 0.00039  | 0.167297 | 0.00028  | 0.159755 | 0.00053  | 0.153422 | 0.00088  |

|          |          |          |          |          |          |          |          |          |
|----------|----------|----------|----------|----------|----------|----------|----------|----------|
| 0.22609  | 0.079049 | 0.08794  | -0.13487 | 0.0035   | -0.03813 | 0.41105  | -0.10591 | 0.02207  |
| 3.43E-10 | 0.045351 | 0.32811  | 0.048324 | 0.29736  | 0.098797 | 0.0328   | -0.07334 | 0.11346  |
| 0.36502  | -0.01066 | 0.81826  | -0.05221 | 0.26016  | -0.05409 | 0.24335  | 0.0262   | 0.57223  |
| 1.75E-08 | -0.21553 | 2.59E-06 | 0.12895  | 0.00526  | 0.130951 | 0.00459  | 0.040076 | 0.38755  |
| 0.23922  | 0.10137  | 0.02849  | 0.155942 | 0.00072  | 0.057936 | 0.21141  | 0.164405 | 0.00036  |
| 9.11E-07 | 0.010982 | 0.8129   | 0.234052 | 3.13E-07 | 0.183681 | 6.53E-05 | 0.489084 | 1.86E-29 |
| 0.09161  | 0.082358 | 0.0754   | 0.124017 | 0.00729  | 0.103195 | 0.02574  | 0.327991 | 3.57E-13 |
| 0.06126  | 0.134966 | 0.00348  | 0.265731 | 5.47E-09 | 0.192246 | 2.88E-05 | 0.135035 | 0.00346  |
| 1.28E-07 | -0.10207 | 0.02741  | 0.206772 | 6.63E-06 | 0.156034 | 0.00072  | 0.053157 | 0.2516   |
| 0.05266  | 0.182403 | 7.35E-05 | 0.278121 | 9.64E-10 | 0.204316 | 8.57E-06 | 0.255655 | 2.10E-08 |
| 1.16E-05 | 0.0869   | 0.06059  | 0.029651 | 0.52271  | 0.141557 | 0.00217  | 0.14025  | 0.00238  |
| 0.00471  | 0.043718 | 0.34585  | 0.15467  | 0.0008   | 0.163069 | 0.0004   | -0.13971 | 0.00248  |
| 0.93778  | 0.078736 | 0.08921  | 0.142882 | 0.00197  | 0.101697 | 0.02798  | 0.386016 | 4.83E-18 |
| 0.08417  | 0.060347 | 0.19298  | 0.068292 | 0.1406   | 0.029709 | 0.52189  | 0.360671 | 8.58E-16 |
| 0.13647  | 0.058258 | 0.20887  | 0.093353 | 0.04376  | 0.039719 | 0.3918   | 0.273786 | 1.79E-09 |
| 0.01651  | 0.032112 | 0.48877  | 0.090856 | 0.04974  | 0.01121  | 0.80908  | 0.214936 | 2.77E-06 |
| 1.93E-10 | 0.423919 | 8.60E-22 | 0.376558 | 3.52E-17 | 0.353236 | 3.60E-15 | -0.00424 | 0.92722  |
| 0.01942  | 0.391559 | 1.46E-18 | 0.287369 | 2.49E-10 | 0.251351 | 3.67E-08 | -0.11274 | 0.01479  |
| 0.97737  | -0.11809 | 0.01065  | 0.001461 | 0.97488  | -0.03512 | 0.44897  | 0.039689 | 0.39215  |
| 0.78394  | -0.0005  | 0.99132  | -0.00261 | 0.95513  | -0.01722 | 0.71046  | -0.00533 | 0.90847  |
| 8.63E-05 | -0.1675  | 0.00028  | -0.02658 | 0.56664  | 0.045986 | 0.32138  | 0.001836 | 0.96844  |
| 0.40935  | -0.08323 | 0.07236  | -0.00162 | 0.97209  | -0.00679 | 0.88357  | 0.001519 | 0.97389  |
| 1.11E-06 | -0.13931 | 0.00255  | -0.07896 | 0.0883   | -0.21247 | 3.62E-06 | -0.00248 | 0.95737  |
| 0.06425  | 0.012454 | 0.78837  | -0.09326 | 0.04396  | -0.07929 | 0.08696  | -0.24676 | 6.59E-08 |
| 1.93E-05 | -0.17948 | 9.62E-05 | -0.19109 | 3.23E-05 | -0.00718 | 0.87695  | 0.044052 | 0.34217  |
| 4.01E-05 | 0.397584 | 3.89E-19 | 0.291116 | 1.42E-10 | 0.295167 | 7.66E-11 | 0.271118 | 2.60E-09 |
| 4.09E-12 | 0.185978 | 5.26E-05 | 0.421556 | 1.52E-21 | 0.383897 | 7.58E-18 | 0.009039 | 0.84554  |
| 5.95E-07 | 0.179993 | 9.18E-05 | 0.352486 | 4.15E-15 | 0.294457 | 8.55E-11 | 0.05592  | 0.22776  |
| 0.54143  | 0.028102 | 0.54466  | -0.01406 | 0.76181  | 0.014992 | 0.7466   | -0.19111 | 3.22E-05 |
| 0.14124  | 0.001556 | 0.97325  | -0.05812 | 0.20996  | -0.08922 | 0.054    | -0.05911 | 0.20231  |
| 0.00344  | -0.04123 | 0.37404  | 0.248102 | 5.56E-08 | 0.122204 | 0.0082   | 0.207944 | 5.86E-06 |
| 0.51294  | -0.04119 | 0.37448  | -0.01055 | 0.8202   | 0.010993 | 0.8127   | -0.11797 | 0.01073  |
| 1.19E-05 | 0.264608 | 6.37E-09 | -0.09785 | 0.03452  | 0.083438 | 0.07164  | 0.469745 | 5.24E-27 |
| 0.19185  | -0.11487 | 0.013    | -0.14709 | 0.00144  | -0.15543 | 0.00075  | 0.125105 | 0.00679  |
| 9.34E-09 | 0.396719 | 4.71E-19 | 0.152206 | 0.00097  | 0.278955 | 8.55E-10 | 0.502478 | 3.03E-31 |
| 1.02E-06 | -0.04011 | 0.3871   | 0.123739 | 0.00743  | 0.140394 | 0.00236  | -0.02374 | 0.60881  |
| 3.88E-08 | 0.229196 | 5.54E-07 | 0.113719 | 0.01394  | 0.24314  | 1.04E-07 | -0.02089 | 0.65249  |
| 0.00065  | 0.036647 | 0.42947  | -0.15284 | 0.00092  | -0.14056 | 0.00233  | 0.009122 | 0.84414  |
| 0.48992  | -0.22556 | 8.44E-07 | -0.12357 | 0.00751  | -0.13695 | 0.00302  | 0.276987 | 1.13E-09 |
| 0.02282  | -0.03573 | 0.44105  | -0.03969 | 0.39209  | -0.05982 | 0.19694  | -0.29234 | 1.18E-10 |
| 0.7886   | -0.02839 | 0.54056  | 0.008979 | 0.84655  | -0.01979 | 0.6697   | -0.09525 | 0.03964  |
| 0.25245  | -0.21798 | 1.98E-06 | -0.03249 | 0.48365  | -0.08947 | 0.05334  | -0.10942 | 0.01801  |
| 0.01762  | 0.015879 | 0.73216  | 0.112407 | 0.01508  | 0.090674 | 0.0502   | 0.062903 | 0.17477  |
| 0.01614  | 0.015907 | 0.73171  | 0.130893 | 0.00461  | 0.103742 | 0.02497  | 0.050596 | 0.2752   |
| 0.63747  | 0.080642 | 0.08171  | 0.133865 | 0.00375  | 0.090006 | 0.05192  | 0.107987 | 0.01959  |



|          |          |          |          |          |          |          |          |          |
|----------|----------|----------|----------|----------|----------|----------|----------|----------|
| 0.88541  | -0.05935 | 0.20046  | 0.004217 | 0.92758  | 4.73E-05 | 0.99919  | 0.026512 | 0.56766  |
| 0.33671  | 0.018493 | 0.69018  | 0.032361 | 0.48541  | -0.01616 | 0.72763  | -0.02906 | 0.53097  |
| 0.00029  | -0.21881 | 1.81E-06 | -0.15309 | 0.0009   | -0.188   | 4.35E-05 | 0.093483 | 0.04347  |
| 0.03163  | 0.020216 | 0.66302  | -0.1846  | 5.99E-05 | -0.16017 | 0.00051  | -0.05176 | 0.26428  |
| 0.16211  | -0.20833 | 5.63E-06 | -0.02058 | 0.65733  | -0.0159  | 0.73175  | -0.08302 | 0.07308  |
| 0.50119  | -0.15187 | 0.00099  | -0.10018 | 0.03042  | -0.04245 | 0.36004  | -0.21549 | 2.61E-06 |
| 0.02694  | -0.33938 | 4.72E-14 | -0.09107 | 0.04919  | -0.08521 | 0.06579  | -0.09803 | 0.03419  |
| 0.05461  | -0.23603 | 2.47E-07 | -0.16028 | 0.00051  | -0.20508 | 7.91E-06 | -0.03984 | 0.39031  |
| 1.83E-11 | 0.018703 | 0.68686  | 0.193374 | 2.58E-05 | 0.199138 | 1.46E-05 | 0.015802 | 0.73341  |
| 0.00068  | -0.22899 | 5.68E-07 | -0.16703 | 0.00029  | -0.20749 | 6.15E-06 | 0.050444 | 0.27665  |
| 0.00101  | -0.02417 | 0.60235  | 0.080178 | 0.08349  | 0.073566 | 0.11236  | -0.09392 | 0.0425   |
| 0.27357  | -0.04508 | 0.33101  | -0.04636 | 0.31746  | -0.06034 | 0.19306  | -0.04071 | 0.38008  |
| 0.80867  | -0.08366 | 0.07087  | -0.04274 | 0.35681  | -0.03041 | 0.51207  | 0.08498  | 0.06653  |
| 0.1005   | 0.032621 | 0.4819   | -0.14851 | 0.00129  | -0.10863 | 0.01886  | -0.04129 | 0.37334  |
| 0.35079  | -0.22968 | 5.24E-07 | -0.17336 | 0.00017  | -0.11423 | 0.01351  | 0.045592 | 0.32555  |
| 6.39E-23 | 0.038149 | 0.41079  | 0.292436 | 1.16E-10 | 0.30387  | 1.97E-11 | 0.208524 | 5.51E-06 |
| 0.00017  | -0.04352 | 0.34805  | 0.131521 | 0.00441  | 0.106693 | 0.02111  | 0.456808 | 1.87E-25 |
| 0.47488  | 0.209755 | 4.84E-06 | 0.064421 | 0.16457  | 0.081553 | 0.07831  | 0.394839 | 7.14E-19 |
| 1.28E-07 | 0.175449 | 0.00014  | 0.182506 | 7.28E-05 | 0.244014 | 9.30E-08 | 0.212018 | 3.80E-06 |
| 0.4433   | -0.09854 | 0.03326  | -0.19876 | 1.51E-05 | -0.10596 | 0.02201  | 0.022415 | 0.62898  |
| 0.54358  | -0.13903 | 0.0026   | -0.12364 | 0.00747  | -0.04385 | 0.34442  | -0.08066 | 0.08162  |
| 0.02921  | -0.09971 | 0.03122  | 0.022667 | 0.62513  | 0.008751 | 0.8504   | 0.025091 | 0.58862  |
| 0.12926  | -0.25541 | 2.17E-08 | -0.20366 | 9.17E-06 | -0.20083 | 1.23E-05 | 0.057937 | 0.2114   |
| 0.06002  | 0.201609 | 1.13E-05 | 0.27352  | 1.86E-09 | 0.099837 | 0.031    | 0.116285 | 0.01191  |
| 0.32162  | 0.0679   | 0.1429   | 0.076053 | 0.10069  | 0.064502 | 0.16404  | 0.342657 | 2.60E-14 |
| 0.00205  | -0.17924 | 9.84E-05 | -0.04628 | 0.31832  | -0.0194  | 0.67585  | 0.172019 | 0.00019  |
| 0.02659  | -0.22352 | 1.06E-06 | -0.22991 | 5.10E-07 | -0.22073 | 1.46E-06 | -0.08998 | 0.05198  |
| 0.0024   | 0.091079 | 0.04918  | -0.01648 | 0.7225   | -0.03577 | 0.44066  | -0.14358 | 0.00187  |
| 0.0733   | -0.15565 | 0.00074  | 0.090338 | 0.05106  | 0.057355 | 0.21604  | -0.03365 | 0.46823  |
| 0.01027  | -0.02257 | 0.62664  | -0.07713 | 0.09596  | -0.08528 | 0.06556  | -0.01839 | 0.6919   |
| 0.09499  | 0.03947  | 0.39477  | -0.04432 | 0.33926  | 0.044263 | 0.33986  | 0.083007 | 0.07312  |
| 3.74E-10 | 0.099678 | 0.03127  | 0.023974 | 0.60532  | 0.16984  | 0.00023  | 0.362635 | 5.84E-16 |
| 6.11E-07 | -0.03776 | 0.41561  | 0.030648 | 0.50882  | 0.077535 | 0.09422  | 0.039265 | 0.39723  |
| 0.00023  | -0.01131 | 0.80749  | -0.05641 | 0.22373  | 0.058166 | 0.2096   | 0.137895 | 0.00282  |
| 0.02529  | -0.04814 | 0.29924  | -0.06423 | 0.16582  | 0.00064  | 0.98899  | 0.004708 | 0.91917  |
| 0.00013  | -0.2288  | 5.81E-07 | -0.2782  | 9.53E-10 | -0.23907 | 1.71E-07 | -0.16422 | 0.00037  |
| 0.01258  | -0.14785 | 0.00135  | -0.06112 | 0.1873   | -0.03874 | 0.40355  | -0.26198 | 9.09E-09 |
| 0.02019  | -0.35763 | 1.55E-15 | -0.25826 | 1.49E-08 | -0.25931 | 1.30E-08 | -0.2251  | 8.89E-07 |
| 0.48788  | -0.02421 | 0.60183  | -0.11584 | 0.01224  | -0.02344 | 0.61341  | 0.075133 | 0.10489  |
| 0.44263  | -0.01953 | 0.67373  | -0.0243  | 0.60048  | -0.03503 | 0.45014  | 0.040657 | 0.38069  |
| 0.84035  | 0.001816 | 0.96878  | 0.00416  | 0.92856  | 0.019424 | 0.67545  | 0.123191 | 0.00769  |
| 0.83235  | 0.020494 | 0.65868  | 0.010871 | 0.81474  | -0.02975 | 0.52129  | 0.026492 | 0.56795  |
| 0.10415  | 0.285622 | 3.23E-10 | -0.0876  | 0.05855  | 0.076792 | 0.09742  | 0.044671 | 0.33542  |
| 0.99494  | -0.11167 | 0.01576  | -0.03355 | 0.46956  | -0.06583 | 0.15554  | -0.01448 | 0.755    |
| 0.12309  | 0.040121 | 0.38701  | -0.14741 | 0.0014   | -0.03652 | 0.43113  | -0.22811 | 6.29E-07 |

|          |          |          |          |          |          |          |          |          |
|----------|----------|----------|----------|----------|----------|----------|----------|----------|
| 0.12315  | -0.08313 | 0.0727   | -0.04819 | 0.29868  | -0.0221  | 0.63387  | -0.05488 | 0.23654  |
| 0.5637   | -0.01286 | 0.78171  | 0.045006 | 0.33181  | 0.00153  | 0.97369  | -0.02781 | 0.54881  |
| 0.0339   | -0.0018  | 0.96909  | 0.064768 | 0.16231  | 0.003204 | 0.94494  | -0.02615 | 0.57292  |
| 0.17874  | -0.00022 | 0.99619  | 0.044479 | 0.33751  | -0.00959 | 0.83633  | 0.003981 | 0.93163  |
| 0.0553   | 0.181084 | 8.31E-05 | -0.00114 | 0.98037  | 0.010175 | 0.82642  | 0.323559 | 7.66E-13 |
| 0.01809  | -0.01581 | 0.73326  | -0.0897  | 0.05272  | -0.09406 | 0.04217  | 0.012558 | 0.78666  |
| 6.51E-07 | 0.016893 | 0.71577  | -0.08843 | 0.05619  | -0.13063 | 0.00469  | 0.138958 | 0.00262  |
| 9.91E-06 | 0.044262 | 0.33988  | -0.14566 | 0.0016   | -0.13471 | 0.00354  | 0.1829   | 7.02E-05 |
| 0.13911  | 0.029875 | 0.51957  | -0.09637 | 0.03736  | -0.04222 | 0.36268  | 0.008646 | 0.85217  |
| 0.00049  | 0.105559 | 0.02252  | 0.025233 | 0.5865   | -0.0451  | 0.33081  | 0.424053 | 8.32E-22 |
| 0.00872  | -0.08209 | 0.07635  | -0.10115 | 0.02884  | -0.12875 | 0.00533  | 0.015452 | 0.7391   |
| 0.34795  | 0.013804 | 0.76606  | -0.0735  | 0.11269  | -0.04543 | 0.32723  | 0.224721 | 9.29E-07 |
| 0.86952  | -0.01744 | 0.70692  | -0.01056 | 0.81998  | -0.01252 | 0.78732  | 0.158427 | 0.00059  |
| 0.49439  | -0.05368 | 0.24697  | -0.08379 | 0.07044  | -0.04825 | 0.2981   | 0.178353 | 0.00011  |
| 1.01E-07 | -0.18137 | 8.10E-05 | -0.26682 | 4.71E-09 | -0.30007 | 3.58E-11 | 0.137775 | 0.00285  |
| 0.26692  | 0.148764 | 0.00126  | 0.086017 | 0.06327  | 0.114392 | 0.01338  | 0.04526  | 0.32909  |
| 4.30E-09 | -0.3063  | 1.34E-11 | -0.17733 | 0.00012  | -0.26566 | 5.52E-09 | -0.30389 | 1.96E-11 |
| 0.90768  | 0.003432 | 0.94104  | 0.246215 | 7.06E-08 | 0.145683 | 0.0016   | 0.019945 | 0.66726  |
| 0.00426  | 0.264304 | 6.64E-09 | 0.143042 | 0.00194  | 0.152722 | 0.00093  | 0.179339 | 9.75E-05 |
| 0.00284  | 0.042582 | 0.35854  | 0.100727 | 0.02952  | 0.070691 | 0.12715  | 0.180412 | 8.84E-05 |
| 0.91577  | -0.02132 | 0.6458   | -0.0223  | 0.63071  | -0.00963 | 0.83563  | -0.11848 | 0.01039  |
| 0.00083  | 0.05865  | 0.20582  | 0.062146 | 0.18003  | 0.130439 | 0.00475  | 0.227109 | 7.06E-07 |
| 8.05E-12 | 0.089703 | 0.05272  | 0.182018 | 7.62E-05 | 0.266657 | 4.82E-09 | 0.254958 | 2.30E-08 |
| 0.74055  | 0.01242  | 0.78893  | -0.08525 | 0.06567  | -0.04113 | 0.37521  | -0.05721 | 0.21722  |
| 0.07582  | -0.0803  | 0.08303  | -0.11708 | 0.01134  | -0.06615 | 0.15348  | -0.25576 | 2.07E-08 |
| 0.00358  | 0.047468 | 0.30601  | 0.141856 | 0.00212  | 0.141037 | 0.00225  | -0.08559 | 0.06458  |
| 0.30197  | 0.177801 | 0.00011  | 0.186615 | 4.96E-05 | 0.177707 | 0.00011  | 0.347811 | 1.00E-14 |
| 0.96012  | -0.01079 | 0.81613  | -0.00679 | 0.8836   | -0.03192 | 0.49136  | 0.035044 | 0.44994  |
| 0.09423  | -0.10301 | 0.02601  | -0.06053 | 0.19167  | -0.08586 | 0.06376  | 0.015477 | 0.7387   |
| 0.11534  | -0.02147 | 0.64345  | -0.04715 | 0.30929  | -0.06328 | 0.1722   | 0.132443 | 0.00414  |
| 0.72994  | -0.07842 | 0.09049  | -0.03867 | 0.40442  | -0.03356 | 0.46939  | 0.086211 | 0.06267  |
| 0.70327  | -0.01215 | 0.7934   | -0.0409  | 0.37789  | -0.02501 | 0.58985  | -0.03255 | 0.48284  |
| 0.03629  | -0.05021 | 0.27891  | 0.067183 | 0.14718  | 0.00106  | 0.98177  | 0.139564 | 0.00251  |
| 0.14226  | 0.043299 | 0.3505   | -0.00476 | 0.91835  | 0.010735 | 0.81702  | 0.169126 | 0.00024  |
| 1.93E-10 | -0.14055 | 0.00233  | -0.28007 | 7.28E-10 | -0.30148 | 2.87E-11 | -0.08928 | 0.05386  |
| 0.28595  | -0.22158 | 1.33E-06 | -0.06134 | 0.18571  | -0.06244 | 0.17798  | -0.11506 | 0.01284  |
| 1.44E-16 | -0.28964 | 1.77E-10 | -0.38548 | 5.42E-18 | -0.41431 | 8.53E-21 | -0.13808 | 0.00279  |
| 0.02716  | 0.044332 | 0.33911  | 0.121628 | 0.00851  | 0.137897 | 0.00282  | 0.223357 | 1.08E-06 |
| 0.01941  | 0.174275 | 0.00015  | -0.12494 | 0.00686  | 0.036712 | 0.42866  | 0.300901 | 3.15E-11 |
| 7.17E-09 | 0.313379 | 4.23E-12 | 0.118605 | 0.01031  | 0.275262 | 1.45E-09 | 0.223711 | 1.04E-06 |
| 0.02484  | -0.31659 | 2.49E-12 | -0.23812 | 1.92E-07 | -0.25883 | 1.38E-08 | -0.0952  | 0.03975  |
| 2.42E-06 | 0.395505 | 6.16E-19 | 0.088198 | 0.05684  | 0.22629  | 7.76E-07 | 0.085763 | 0.06405  |
| 0.00231  | 0.157375 | 0.00064  | 0.126385 | 0.00624  | 0.170123 | 0.00022  | -0.00844 | 0.85566  |
| 8.85E-10 | -0.01805 | 0.69723  | 0.049349 | 0.28723  | 0.136462 | 0.00313  | 0.280797 | 6.55E-10 |
| 3.85E-06 | -0.03079 | 0.50681  | 0.128413 | 0.00545  | 0.119836 | 0.00954  | 0.100736 | 0.02951  |

|          |          |          |          |          |          |          |          |          |
|----------|----------|----------|----------|----------|----------|----------|----------|----------|
| 0.12084  | -0.03965 | 0.3926   | -0.05118 | 0.26971  | -0.09119 | 0.04891  | -0.22313 | 1.11E-06 |
| 0.99094  | -0.25    | 4.37E-08 | -0.08535 | 0.06535  | -0.10379 | 0.0249   | -0.03964 | 0.39279  |
| 7.21E-05 | 0.158663 | 0.00058  | 0.064063 | 0.16693  | 0.160118 | 0.00051  | 0.314361 | 3.60E-12 |
| 0.00018  | -0.17355 | 0.00016  | -0.25598 | 2.01E-08 | -0.22938 | 5.42E-07 | 0.050668 | 0.27452  |
| 0.67198  | -0.04668 | 0.31408  | -0.14027 | 0.00238  | -0.06094 | 0.18862  | -0.0079  | 0.86485  |
| 0.59973  | 0.102477 | 0.0268   | 0.122498 | 0.00805  | 0.097636 | 0.03492  | -0.16176 | 0.00045  |
| 0.0002   | -0.06729 | 0.14651  | -0.15983 | 0.00053  | -0.17887 | 0.0001   | -0.21604 | 2.45E-06 |
| 0.00363  | -0.16531 | 0.00033  | -0.18098 | 8.39E-05 | -0.20016 | 1.31E-05 | -0.06358 | 0.17016  |
| 0.02061  | 0.084794 | 0.06713  | 0.183203 | 6.83E-05 | 0.145852 | 0.00158  | -0.2035  | 9.32E-06 |
| 0.11584  | 0.194108 | 2.40E-05 | 0.05164  | 0.26541  | 0.042253 | 0.36227  | 0.182857 | 7.05E-05 |
| 0.0284   | -0.0463  | 0.31809  | -0.1026  | 0.02662  | -0.09773 | 0.03473  | -0.05305 | 0.25252  |
| 0.6376   | -0.05181 | 0.2638   | -0.08753 | 0.05873  | -0.08526 | 0.06564  | -0.18346 | 6.67E-05 |
| 7.45E-05 | -0.02655 | 0.56717  | 0.00224  | 0.9615   | 0.054405 | 0.24062  | -0.07738 | 0.09487  |
| 0.07702  | -0.13931 | 0.00255  | -0.03077 | 0.50714  | -0.00572 | 0.90186  | 0.024905 | 0.59137  |
| 0.5931   | -0.13259 | 0.0041   | -0.05244 | 0.25811  | -0.09486 | 0.04045  | -0.12628 | 0.00628  |
| 0.01526  | 0.390319 | 1.91E-18 | 0.409389 | 2.68E-20 | 0.321435 | 1.10E-12 | -0.03028 | 0.51396  |
| 0.29874  | 0.09057  | 0.05046  | 0.047437 | 0.30633  | 0.072345 | 0.11847  | -0.02025 | 0.66255  |
| 0.96368  | -0.11765 | 0.01095  | -0.29046 | 1.57E-10 | -0.15266 | 0.00093  | 0.155496 | 0.00075  |
| 0.37646  | -0.00974 | 0.83375  | -0.07791 | 0.09263  | -0.02015 | 0.6641   | 0.006907 | 0.88167  |
| 0.55998  | 0.075748 | 0.10207  | -0.04287 | 0.3553   | 0.002382 | 0.95906  | 0.227251 | 6.95E-07 |
| 0.00082  | -0.16915 | 0.00024  | -0.18443 | 6.09E-05 | -0.21004 | 4.69E-06 | -0.17695 | 0.00012  |
| 0.67866  | 0.000375 | 0.99355  | -0.01301 | 0.7791   | 0.022289 | 0.63092  | 0.032255 | 0.48683  |
| 4.34E-06 | -0.00727 | 0.87547  | 0.052732 | 0.25542  | 0.100532 | 0.02984  | 0.05758  | 0.21423  |
| 0.65387  | 0.097623 | 0.03494  | 0.129776 | 0.00497  | 0.108391 | 0.01913  | -0.1532  | 0.0009   |
| 0.03667  | 0.333252 | 1.42E-13 | 0.175359 | 0.00014  | 0.1814   | 8.07E-05 | 0.043394 | 0.34944  |
| 0.92211  | -0.03146 | 0.49759  | 0.164093 | 0.00037  | 0.041909 | 0.36619  | -0.12452 | 0.00706  |
| 0.00154  | -0.05726 | 0.21676  | 0.058059 | 0.21044  | 0.08145  | 0.07869  | 0.234373 | 3.01E-07 |
| 6.56E-05 | 0.066083 | 0.15393  | 0.109891 | 0.01752  | 0.163274 | 0.0004   | 0.01234  | 0.79027  |
| 0.0001   | -0.05703 | 0.21868  | 0.062697 | 0.17618  | 0.097712 | 0.03477  | 0.076938 | 0.09678  |
| 0.27084  | 0.022595 | 0.62624  | 0.090566 | 0.05048  | 0.017077 | 0.71282  | 0.122377 | 0.00811  |
| 0.21811  | -0.15537 | 0.00075  | -0.1216  | 0.00852  | -0.1186  | 0.01032  | -0.33602 | 8.66E-14 |
| 0.98686  | 0.099813 | 0.03104  | -0.06705 | 0.14799  | -0.02305 | 0.61932  | -0.12502 | 0.00683  |
| 0.01787  | 0.073409 | 0.11313  | 0.17778  | 0.00011  | 0.14364  | 0.00186  | 0.096988 | 0.03615  |
| 0.96412  | -0.07923 | 0.0872   | -0.02574 | 0.57894  | -0.01612 | 0.7283   | 0.018167 | 0.69538  |
| 0.00042  | 0.034276 | 0.45994  | 0.089485 | 0.0533   | 0.13311  | 0.00396  | 0.085421 | 0.06513  |
| 0.67733  | -0.06216 | 0.17992  | -0.03415 | 0.46166  | -0.06061 | 0.19104  | 0.046624 | 0.3147   |
| 0.34827  | -0.08153 | 0.07838  | 0.007738 | 0.86754  | 0.009984 | 0.82963  | 0.064391 | 0.16477  |
| 9.99E-11 | -0.04008 | 0.38753  | 0.279194 | 8.26E-10 | 0.291434 | 1.35E-10 | -0.05383 | 0.24567  |
| 4.75E-26 | 0.368169 | 1.94E-16 | 0.325284 | 5.70E-13 | 0.410984 | 1.85E-20 | 0.219655 | 1.65E-06 |
| 0.01924  | 0.037099 | 0.4238   | 0.010136 | 0.82708  | 0.073876 | 0.11085  | 0.151926 | 0.00099  |
| 0.12285  | -0.1405  | 0.00234  | -0.13849 | 0.00271  | -0.12032 | 0.00925  | -0.04172 | 0.3684   |
| 0.83191  | -0.11756 | 0.01101  | -0.11634 | 0.01187  | -0.08314 | 0.07266  | -0.01558 | 0.73709  |
| 0.85812  | -0.04386 | 0.34431  | -0.08153 | 0.0784   | -0.06955 | 0.13342  | 0.023375 | 0.61437  |
| 0.66102  | -0.18252 | 7.28E-05 | -0.1118  | 0.01565  | -0.08783 | 0.05788  | 0.028184 | 0.54349  |
| 0.23652  | -0.06256 | 0.1771   | 0.028473 | 0.53936  | 0.023356 | 0.61465  | 0.209511 | 4.97E-06 |

|          |          |          |          |          |          |          |          |          |
|----------|----------|----------|----------|----------|----------|----------|----------|----------|
| 0.0001   | 8.40E-05 | 0.99856  | -0.1897  | 3.69E-05 | -0.17948 | 9.62E-05 | 0.098165 | 0.03394  |
| 0.00126  | 0.076154 | 0.10024  | -0.05062 | 0.27496  | 0.050525 | 0.27588  | 0.221542 | 1.33E-06 |
| 0.00104  | -0.09133 | 0.04855  | -0.08217 | 0.07607  | 0.015329 | 0.7411   | 0.236409 | 2.36E-07 |
| 2.84E-07 | -0.32314 | 8.22E-13 | -0.20461 | 8.31E-06 | -0.24299 | 1.06E-07 | 0.032296 | 0.48628  |
| 0.10595  | 0.02234  | 0.63013  | 0.004152 | 0.9287   | 0.019107 | 0.68046  | 0.222182 | 1.24E-06 |
| 1.02E-06 | -0.22389 | 1.02E-06 | -0.23118 | 4.39E-07 | -0.24041 | 1.45E-07 | -0.14135 | 0.0022   |
| 0.37681  | -0.14886 | 0.00125  | -0.03649 | 0.4314   | -0.10087 | 0.02929  | -0.10713 | 0.02058  |
| 0.19941  | -0.12365 | 0.00747  | -0.06688 | 0.14902  | -0.09765 | 0.03489  | 0.026525 | 0.56748  |
| 0.05841  | -0.02376 | 0.60853  | 0.082822 | 0.07376  | 0.061806 | 0.18242  | -0.08112 | 0.07991  |
| 0.00097  | -0.08849 | 0.05601  | 0.122044 | 0.00829  | 0.142304 | 0.00205  | -0.00133 | 0.97715  |
| 0.45326  | 0.044649 | 0.33567  | 0.034466 | 0.45745  | 0.051379 | 0.26783  | 0.017554 | 0.70517  |
| 0.10282  | -0.06522 | 0.15939  | -0.19867 | 1.52E-05 | -0.13811 | 0.00278  | -0.0943  | 0.04166  |
| 0.14034  | -0.04001 | 0.38833  | -0.03298 | 0.47715  | -0.01282 | 0.78233  | 0.053687 | 0.2469   |
| 0.89731  | -0.18603 | 5.24E-05 | -0.0585  | 0.20696  | -0.07238 | 0.11828  | -0.07289 | 0.11571  |
| 3.36E-11 | -0.05629 | 0.22466  | -0.26567 | 5.51E-09 | -0.27501 | 1.50E-09 | 0.073359 | 0.11338  |
| 0.20334  | -0.19212 | 2.92E-05 | -0.14782 | 0.00136  | -0.1693  | 0.00024  | 0.037169 | 0.42293  |
| 0.03877  | 0.146808 | 0.00147  | -0.06575 | 0.15602  | -0.02648 | 0.56813  | -0.13645 | 0.00313  |
| 6.15E-06 | 0.182913 | 7.01E-05 | 0.184272 | 6.18E-05 | 0.265009 | 6.03E-09 | 0.073213 | 0.1141   |
| 0.04166  | -0.08307 | 0.07289  | -0.01784 | 0.70055  | 0.008167 | 0.86027  | 0.035265 | 0.44708  |
| 0.00432  | -0.13267 | 0.00408  | -0.28022 | 7.12E-10 | -0.10781 | 0.01979  | 0.15371  | 0.00086  |
| 0.74418  | 0.021798 | 0.63845  | 0.10255  | 0.02669  | 0.049444 | 0.28629  | -0.00457 | 0.92158  |
| 0.07549  | 0.056147 | 0.22588  | 0.115168 | 0.01276  | 0.116111 | 0.01204  | 0.055614 | 0.23032  |
| 0.00262  | -0.14612 | 0.00154  | 0.06288  | 0.17493  | 0.06207  | 0.18056  | -0.0104  | 0.82271  |
| 7.00E-05 | 0.332071 | 1.75E-13 | 0.204228 | 8.65E-06 | 0.251216 | 3.74E-08 | 0.482529 | 1.31E-28 |
| 6.35E-07 | 0.049583 | 0.28494  | 0.183643 | 6.55E-05 | 0.181479 | 8.01E-05 | 0.051343 | 0.26817  |
| 0.11104  | -0.10322 | 0.02571  | -0.04905 | 0.29018  | -0.05152 | 0.26652  | -0.01155 | 0.80349  |
| 0.54424  | -0.04248 | 0.35964  | 0.081827 | 0.07731  | -0.00672 | 0.88492  | -0.00742 | 0.87289  |
| 0.06199  | -0.14175 | 0.00214  | -0.14019 | 0.00239  | -0.1246  | 0.00702  | -0.23596 | 2.49E-07 |
| 0.84588  | -0.00124 | 0.97872  | 0.088403 | 0.05626  | 0.021626 | 0.64112  | -0.18857 | 4.12E-05 |
| 0.25833  | 0.151116 | 0.00105  | 0.012414 | 0.78903  | -0.01134 | 0.80695  | 0.046917 | 0.31167  |
| 0.00253  | -0.10694 | 0.02081  | -0.09778 | 0.03465  | -0.16203 | 0.00044  | -0.33444 | 1.15E-13 |
| 0.07861  | -0.02957 | 0.52381  | -0.14012 | 0.00241  | -0.0583  | 0.20857  | -0.02931 | 0.52747  |
| 0.2605   | 0.088116 | 0.05707  | 0.1529   | 0.00092  | 0.034196 | 0.46099  | -0.10047 | 0.02994  |
| 6.37E-05 | 0.059787 | 0.19716  | 0.133424 | 0.00387  | 0.180153 | 9.05E-05 | 0.276904 | 1.15E-09 |
| 0.20001  | -0.01848 | 0.69037  | 0.044818 | 0.33384  | -0.0103  | 0.82428  | -0.10241 | 0.0269   |
| 0.00273  | -0.04717 | 0.30908  | -0.12982 | 0.00496  | -0.15055 | 0.0011   | 0.049629 | 0.28449  |
| 0.00032  | 0.154031 | 0.00084  | 0.309108 | 8.49E-12 | 0.201137 | 1.19E-05 | 0.128539 | 0.0054   |
| 2.36E-05 | 0.055788 | 0.22886  | 0.201438 | 1.15E-05 | 0.186401 | 5.06E-05 | -0.06203 | 0.18082  |
| 0.007    | 0.314055 | 3.78E-12 | 0.244965 | 8.26E-08 | 0.275884 | 1.33E-09 | 0.213029 | 3.41E-06 |
| 0.00066  | 0.134229 | 0.00366  | 0.211748 | 3.91E-06 | 0.219293 | 1.71E-06 | 0.044258 | 0.33992  |
| 0.02481  | 0.204431 | 8.47E-06 | 0.104864 | 0.02343  | 0.119305 | 0.00987  | 0.060383 | 0.19272  |
| 2.43E-07 | 0.090495 | 0.05066  | -0.07794 | 0.09248  | 0.074847 | 0.10622  | 0.211798 | 3.89E-06 |
| 1.13E-06 | -0.06744 | 0.14561  | -0.03296 | 0.47735  | 0.040171 | 0.38642  | 0.090662 | 0.05023  |
| 0.99981  | -0.01622 | 0.72665  | -0.02764 | 0.55133  | -0.0312  | 0.50124  | -0.00776 | 0.86714  |
| 3.52E-10 | -0.10887 | 0.0186   | -0.22868 | 5.88E-07 | -0.25203 | 3.37E-08 | -0.04762 | 0.30447  |

|          |          |          |          |          |          |          |          |          |
|----------|----------|----------|----------|----------|----------|----------|----------|----------|
| 0.07827  | -0.19904 | 1.47E-05 | -0.10879 | 0.01869  | -0.13753 | 0.0029   | 0.049937 | 0.28151  |
| 0.70534  | 0.003423 | 0.94118  | -0.06117 | 0.18698  | -0.03673 | 0.42846  | 0.288782 | 2.02E-10 |
| 1.22E-15 | 0.165311 | 0.00033  | 0.319179 | 1.61E-12 | 0.325896 | 5.13E-13 | -0.02346 | 0.61302  |
| 0.08609  | -0.09447 | 0.04129  | -0.0591  | 0.20233  | -0.07499 | 0.10557  | 0.115684 | 0.01236  |
| 1.11E-05 | -0.03093 | 0.50493  | -0.03463 | 0.45526  | 0.046857 | 0.31229  | -0.1097  | 0.01772  |
| 1.46E-13 | 0.259189 | 1.32E-08 | 0.19994  | 1.34E-05 | 0.321584 | 1.07E-12 | 0.094071 | 0.04216  |
| 0.00101  | -0.32271 | 8.85E-13 | -0.40355 | 1.02E-19 | -0.31295 | 4.54E-12 | -0.00183 | 0.96849  |
| 0.20533  | -0.01551 | 0.73816  | 0.040918 | 0.37765  | 0.010183 | 0.82627  | -0.05297 | 0.25326  |
| 0.86131  | -0.07628 | 0.09966  | -0.06276 | 0.17577  | -0.06455 | 0.16369  | -0.02139 | 0.64483  |
| 0.17038  | -0.11577 | 0.01229  | -0.18802 | 4.34E-05 | -0.15562 | 0.00074  | 0.146805 | 0.00147  |
| 3.09E-08 | 0.015287 | 0.74178  | 0.160642 | 0.00049  | 0.183756 | 6.49E-05 | 0.221463 | 1.34E-06 |
| 0.0409   | -0.02913 | 0.5301   | -0.00184 | 0.96834  | 0.036615 | 0.42987  | -0.12354 | 0.00752  |
| 0.00511  | -0.16837 | 0.00026  | -0.17043 | 0.00022  | -0.205   | 7.98E-06 | -0.1976  | 1.70E-05 |
| 1.43E-05 | 0.030296 | 0.51369  | 0.090894 | 0.04964  | 0.100773 | 0.02945  | 0.166385 | 0.0003   |
| 1.67E-08 | 0.322936 | 8.52E-13 | 0.047836 | 0.30228  | 0.225459 | 8.54E-07 | 0.474704 | 1.28E-27 |
| 0.00051  | 0.115436 | 0.01255  | 0.048638 | 0.29423  | -0.06392 | 0.16792  | 0.04973  | 0.28352  |
| 0.2474   | 0.111915 | 0.01554  | 0.072642 | 0.11696  | 0.06242  | 0.17811  | 0.062468 | 0.17777  |
| 7.75E-11 | 0.012092 | 0.79439  | 0.029187 | 0.52923  | 0.159255 | 0.00055  | 0.070445 | 0.12848  |
| 0.19886  | -0.13679 | 0.00306  | -0.12012 | 0.00937  | -0.11068 | 0.01672  | 0.296934 | 5.84E-11 |
| 1.23E-07 | 0.227843 | 6.49E-07 | 0.019646 | 0.67197  | 0.204289 | 8.59E-06 | 0.308961 | 8.70E-12 |
| 0.21663  | 0.010075 | 0.8281   | 0.094978 | 0.04021  | 0.066677 | 0.15025  | -0.0427  | 0.35716  |
| 0.17462  | -0.17299 | 0.00017  | -0.06416 | 0.16628  | -0.03912 | 0.39901  | -0.0307  | 0.50816  |
| 7.08E-08 | 0.481581 | 1.73E-28 | 0.260585 | 1.10E-08 | 0.357756 | 1.51E-15 | 0.324947 | 6.04E-13 |
| 0.00011  | -0.1021  | 0.02737  | -0.15438 | 0.00082  | -0.14514 | 0.00166  | -0.1202  | 0.00932  |
| 0.97686  | 0.067319 | 0.14636  | -0.00113 | 0.98064  | 0.024616 | 0.59569  | -0.12006 | 0.0094   |
| 2.04E-05 | 0.082927 | 0.0734   | 0.119935 | 0.00948  | 0.156    | 0.00072  | 0.140517 | 0.00234  |
| 2.24E-07 | 0.165315 | 0.00033  | 0.081314 | 0.07919  | 0.200634 | 1.25E-05 | -0.12378 | 0.0074   |
| 0.07735  | -0.04    | 0.38843  | -0.01596 | 0.73092  | 0.058686 | 0.20554  | 0.251874 | 3.44E-08 |
| 0.00142  | -0.09415 | 0.04198  | 0.083208 | 0.07242  | 0.085715 | 0.0642   | 0.057174 | 0.21749  |
| 0.0005   | -0.11558 | 0.01244  | -0.12604 | 0.00638  | -0.16279 | 0.00041  | 0.026609 | 0.56625  |
| 0.39447  | -0.0673  | 0.14647  | -0.00389 | 0.93323  | 0.016279 | 0.72569  | 0.206144 | 7.08E-06 |
| 0.14897  | 0.037661 | 0.41681  | -0.19416 | 2.39E-05 | -0.08045 | 0.08244  | 0.021064 | 0.6498   |
| 1.47E-10 | 0.412513 | 1.30E-20 | 0.15894  | 0.00057  | 0.324816 | 6.17E-13 | 0.398691 | 3.04E-19 |
| 0.12819  | -0.26081 | 1.06E-08 | 0.01703  | 0.71357  | 0.000716 | 0.98769  | -0.10824 | 0.0193   |
| 0.97827  | -0.2283  | 6.16E-07 | -0.06605 | 0.15412  | -0.11928 | 0.00988  | 0.065984 | 0.15454  |
| 0.05314  | -0.03508 | 0.44942  | -0.02501 | 0.58983  | -0.0398  | 0.39079  | -0.03687 | 0.42672  |
| 0.64825  | -0.05557 | 0.23069  | -0.10898 | 0.01848  | -0.05753 | 0.2146   | 0.171859 | 0.00019  |
| 6.74E-13 | 0.118695 | 0.01025  | 0.152538 | 0.00094  | 0.247161 | 6.27E-08 | 0.476049 | 8.67E-28 |
| 0.0059   | -0.13343 | 0.00387  | -0.09031 | 0.05114  | -0.05706 | 0.21837  | -0.21554 | 2.59E-06 |
| 8.20E-10 | 0.064387 | 0.16479  | 0.138873 | 0.00263  | 0.211674 | 3.94E-06 | 0.148517 | 0.00129  |
| 0.53191  | -0.01045 | 0.82179  | -0.00051 | 0.99129  | 0.017322 | 0.70888  | 0.160325 | 0.00051  |
| 0.06082  | -0.07673 | 0.09769  | -0.09258 | 0.04553  | -0.11281 | 0.01472  | -0.10556 | 0.02252  |
| 0.32333  | 0.049152 | 0.28915  | 0.094602 | 0.04101  | 0.065368 | 0.15844  | -0.00859 | 0.85308  |
| 0.00069  | -0.29205 | 1.23E-10 | 0.014974 | 0.74689  | 0.028399 | 0.54042  | -0.02377 | 0.60841  |
| 0.00049  | -0.15159 | 0.00102  | 0.019581 | 0.67299  | 0.017589 | 0.70461  | 0.062387 | 0.17834  |

|          |          |          |          |          |          |          |          |          |
|----------|----------|----------|----------|----------|----------|----------|----------|----------|
| 0.77957  | -0.35299 | 3.77E-15 | -0.10078 | 0.02944  | -0.12252 | 0.00803  | -0.08299 | 0.07319  |
| 0.2201   | -0.04953 | 0.28546  | -0.04492 | 0.33271  | -0.0641  | 0.1667   | 0.015335 | 0.741    |
| 0.26217  | 0.039428 | 0.39528  | -0.09496 | 0.04024  | -0.03011 | 0.51628  | 0.357684 | 1.53E-15 |
| 0.77946  | -0.08458 | 0.06784  | -0.00975 | 0.83363  | -0.02636 | 0.56994  | -0.08914 | 0.05422  |
| 0.22751  | -0.09382 | 0.04271  | -0.15125 | 0.00104  | -0.14374 | 0.00185  | 0.036673 | 0.42915  |
| 3.02E-21 | 0.17362  | 0.00016  | 0.188693 | 4.07E-05 | 0.325362 | 5.62E-13 | 0.120387 | 0.00921  |
| 2.28E-10 | -0.02953 | 0.52438  | -0.0267  | 0.56487  | 0.103535 | 0.02526  | 0.192926 | 2.70E-05 |
| 0.02139  | -0.27117 | 2.58E-09 | -0.01308 | 0.77808  | -0.02814 | 0.54412  | -0.04219 | 0.36293  |
| 0.03674  | -0.00183 | 0.96846  | -0.10081 | 0.02938  | -0.11975 | 0.00959  | 0.144661 | 0.00172  |
| 0.98852  | -0.08692 | 0.06055  | -0.03354 | 0.46963  | -0.02135 | 0.64544  | -0.0042  | 0.92781  |
| 3.76E-09 | -0.29923 | 4.08E-11 | -0.29649 | 6.25E-11 | -0.32065 | 1.26E-12 | -0.10661 | 0.02121  |
| 0.00448  | -0.0982  | 0.03387  | -0.0536  | 0.2477   | -0.01408 | 0.76161  | 0.180012 | 9.17E-05 |
| 0.01393  | -0.21665 | 2.29E-06 | -0.21877 | 1.81E-06 | -0.22109 | 1.40E-06 | -0.07419 | 0.10934  |
| 0.00724  | -0.24162 | 1.25E-07 | -0.26257 | 8.40E-09 | -0.21065 | 4.40E-06 | -0.16852 | 0.00025  |
| 0.30868  | -0.25346 | 2.80E-08 | -0.06811 | 0.14164  | -0.09063 | 0.0503   | 0.00125  | 0.97851  |
| 4.13E-06 | 0.104831 | 0.02348  | 0.098767 | 0.03285  | 0.142671 | 0.002    | 0.210978 | 4.25E-06 |
| 0.54698  | -0.10633 | 0.02156  | -0.0319  | 0.49168  | -0.03276 | 0.48001  | 0.211483 | 4.02E-06 |
| 0.90608  | -0.13075 | 0.00465  | -0.10594 | 0.02203  | -0.08909 | 0.05437  | -0.00329 | 0.94348  |
| 0.66519  | -0.12377 | 0.00741  | -0.09391 | 0.0425   | -0.05532 | 0.23281  | 0.227907 | 6.44E-07 |
| 0.00775  | 0.045408 | 0.32751  | 0.095267 | 0.0396   | 0.105586 | 0.02249  | -0.06817 | 0.14128  |
| 0.04931  | -0.08453 | 0.06799  | -0.23546 | 2.64E-07 | -0.13377 | 0.00378  | 0.316238 | 2.63E-12 |
| 0.73915  | 0.07483  | 0.10631  | 0.038034 | 0.41221  | 0.017884 | 0.69989  | 0.010534 | 0.82039  |
| 0.12961  | -0.0422  | 0.36283  | -0.04521 | 0.32964  | -0.04732 | 0.30752  | -0.03681 | 0.42742  |
| 0.90814  | -0.28918 | 1.90E-10 | -0.0909  | 0.04962  | -0.09954 | 0.03151  | 0.04689  | 0.31195  |
| 6.10E-10 | -0.26026 | 1.14E-08 | -0.25071 | 3.99E-08 | -0.29939 | 3.99E-11 | -0.13986 | 0.00245  |
| 0.81072  | -0.21612 | 2.43E-06 | -0.04616 | 0.31954  | -0.06526 | 0.15912  | 0.109221 | 0.01822  |
| 0.00012  | 0.00097  | 0.98331  | 0.041124 | 0.37525  | 0.093452 | 0.04354  | 0.03462  | 0.45544  |
| 0.74753  | -0.2457  | 7.53E-08 | -0.14376 | 0.00184  | -0.1509  | 0.00107  | 0.025158 | 0.58761  |
| 0.00786  | -0.23092 | 4.53E-07 | -0.13079 | 0.00464  | -0.14619 | 0.00154  | -0.08714 | 0.05988  |
| 0.01688  | 0.097973 | 0.03429  | -0.03192 | 0.49133  | -0.04835 | 0.29707  | 0.080877 | 0.08082  |
| 0.23822  | -0.06567 | 0.15652  | 0.064455 | 0.16435  | 0.036916 | 0.42609  | -0.03894 | 0.4011   |
| 0.00316  | 0.056704 | 0.2213   | 0.184629 | 5.98E-05 | 0.172343 | 0.00018  | 0.025067 | 0.58897  |
| 0.2537   | -0.31177 | 5.50E-12 | -0.08113 | 0.07989  | -0.16745 | 0.00028  | -0.02104 | 0.65012  |
| 0.01178  | -0.14111 | 0.00224  | -0.21682 | 2.25E-06 | -0.06589 | 0.15514  | 0.034803 | 0.45307  |
| 0.0002   | 0.073729 | 0.11156  | 0.081736 | 0.07764  | 0.116659 | 0.01164  | 0.239654 | 1.59E-07 |
| 0.28711  | -0.15582 | 0.00073  | 0.017003 | 0.71401  | -0.04744 | 0.30631  | -0.22001 | 1.58E-06 |
| 0.13854  | 0.001611 | 0.97229  | 0.085553 | 0.06471  | 0.075574 | 0.10286  | 0.074168 | 0.10944  |
| 0.55266  | -0.0515  | 0.2667   | 0.134748 | 0.00353  | 0.04248  | 0.3597   | -0.14158 | 0.00216  |
| 0.85791  | 0.054497 | 0.23983  | 0.199749 | 1.37E-05 | 0.037555 | 0.41813  | 0.069088 | 0.13602  |
| 0.70867  | -0.1986  | 1.54E-05 | -0.10925 | 0.0182   | -0.10729 | 0.0204   | 0.00188  | 0.96769  |
| 0.08488  | 0.087647 | 0.05841  | 0.143544 | 0.00187  | 0.125922 | 0.00643  | 0.103746 | 0.02496  |
| 6.39E-08 | 0.061175 | 0.18693  | 0.213537 | 3.22E-06 | 0.246358 | 6.93E-08 | 0.273451 | 1.87E-09 |
| 1.34E-05 | -0.1317  | 0.00436  | -0.24578 | 7.45E-08 | -0.2209  | 1.43E-06 | -0.15681 | 0.00067  |
| 0.00075  | -0.13817 | 0.00277  | 0.094152 | 0.04198  | -0.0839  | 0.07008  | -0.06887 | 0.13727  |
| 0.00035  | 0.0059   | 0.89882  | -0.10342 | 0.02542  | 0.032204 | 0.48753  | -0.11052 | 0.01689  |

|          |          |          |          |          |          |          |          |          |
|----------|----------|----------|----------|----------|----------|----------|----------|----------|
| 0.21975  | 0.334775 | 1.08E-13 | 0.104995 | 0.02326  | 0.147974 | 0.00134  | 0.003572 | 0.93863  |
| 0.1206   | 0.032598 | 0.48222  | -0.02478 | 0.59321  | -0.03815 | 0.41083  | 0.032849 | 0.47884  |
| 0.709    | -0.03685 | 0.42694  | -0.00706 | 0.87913  | -0.01963 | 0.67215  | -0.09017 | 0.05148  |
| 0.08048  | 0.07426  | 0.109    | 0.096858 | 0.0364   | 0.11673  | 0.01159  | -0.00113 | 0.98052  |
| 0.20009  | -0.05592 | 0.22777  | -0.02781 | 0.54889  | -0.04925 | 0.28816  | -0.06082 | 0.1895   |
| 0.34694  | 0.005812 | 0.90032  | 0.253478 | 2.79E-08 | 0.109284 | 0.01816  | 0.06141  | 0.18524  |
| 0.01781  | -0.1694  | 0.00024  | -0.20672 | 6.67E-06 | -0.12919 | 0.00517  | -0.19851 | 1.55E-05 |
| 0.04709  | 0.03983  | 0.39047  | 0.013646 | 0.76866  | -0.07787 | 0.09279  | -0.06833 | 0.1404   |
| 0.0012   | -0.12865 | 0.00536  | -0.1192  | 0.00993  | -0.15896 | 0.00057  | -0.27484 | 1.54E-09 |
| 0.88186  | 0.052572 | 0.25687  | 0.316979 | 2.33E-12 | 0.127264 | 0.00589  | -0.03727 | 0.42166  |
| 0.00033  | 0.014012 | 0.76265  | 0.153123 | 0.0009   | 0.169675 | 0.00023  | -0.04544 | 0.32716  |
| 0.02794  | -0.09942 | 0.03171  | 0.045945 | 0.32182  | 0.014165 | 0.76014  | -0.1859  | 5.31E-05 |
| 0.00452  | 0.242336 | 1.14E-07 | -0.05928 | 0.20099  | 0.09669  | 0.03673  | 0.209904 | 4.76E-06 |
| 0.78314  | 0.153393 | 0.00088  | 0.132313 | 0.00418  | 0.055182 | 0.23397  | -0.11801 | 0.0107   |
| 2.53E-14 | 0.139489 | 0.00252  | 0.272064 | 2.28E-09 | 0.307355 | 1.13E-11 | -0.25934 | 1.29E-08 |
| 0.58879  | -0.21102 | 4.23E-06 | -0.23455 | 2.95E-07 | -0.19804 | 1.62E-05 | 0.186686 | 4.92E-05 |
| 0.23209  | -0.07177 | 0.12144  | -0.0583  | 0.20854  | -0.03729 | 0.4214   | -0.00254 | 0.95638  |
| 1.31E-05 | 0.377607 | 2.83E-17 | 0.371329 | 1.03E-16 | 0.310294 | 7.01E-12 | 0.22337  | 1.08E-06 |
| 0.7966   | -0.33025 | 2.41E-13 | -0.08963 | 0.05291  | -0.12011 | 0.00937  | -0.17331 | 0.00017  |
| 0.00576  | -0.31154 | 5.72E-12 | -0.26767 | 4.19E-09 | -0.24835 | 5.39E-08 | 0.120437 | 0.00918  |
| 0.03497  | -0.08875 | 0.05529  | 0.080597 | 0.08188  | 0.053811 | 0.2458   | 0.018385 | 0.6919   |
| 0.00607  | -0.17352 | 0.00016  | -0.04378 | 0.34521  | -0.09702 | 0.03608  | -0.06735 | 0.1462   |
| 0.3681   | -0.249   | 4.96E-08 | -0.284   | 4.11E-10 | -0.20289 | 9.93E-06 | -0.12419 | 0.00721  |
| 0.00065  | -0.25802 | 1.54E-08 | -0.28052 | 6.82E-10 | -0.27115 | 2.59E-09 | -0.30538 | 1.55E-11 |
| 0.07933  | 0.143202 | 0.00192  | 0.033143 | 0.47491  | 0.063511 | 0.17063  | 0.364235 | 4.26E-16 |
| 0.41504  | -0.13382 | 0.00376  | -0.03196 | 0.49079  | -0.05184 | 0.26358  | -0.12621 | 0.00631  |
| 0.72749  | -0.19715 | 1.78E-05 | -0.10057 | 0.02978  | -0.08085 | 0.08092  | 0.061118 | 0.18735  |
| 0.10462  | -0.02201 | 0.63518  | 0.074973 | 0.10564  | 0.04248  | 0.3597   | -0.10526 | 0.02291  |
| 0.10821  | -0.22792 | 6.43E-07 | 0.018415 | 0.69143  | 0.030427 | 0.51188  | -0.04642 | 0.31678  |
| 0.16278  | 0.02145  | 0.64384  | -0.1978  | 1.67E-05 | -0.09209 | 0.04669  | 0.217898 | 2.00E-06 |
| 0.00814  | 0.134141 | 0.00368  | 0.084558 | 0.0679   | 0.101241 | 0.0287   | 0.050172 | 0.27925  |
| 0.01187  | 0.098724 | 0.03293  | 0.131089 | 0.00455  | 0.108083 | 0.01948  | -0.01341 | 0.77256  |
| 0.26856  | 0.005049 | 0.91334  | 0.02392  | 0.60613  | 0.006447 | 0.8895   | -0.25382 | 2.67E-08 |
| 0.43854  | -0.01065 | 0.81841  | -0.13232 | 0.00418  | -0.07753 | 0.09424  | 0.349068 | 7.92E-15 |
| 0.06137  | -0.0059  | 0.89883  | 0.038847 | 0.40228  | 0.020235 | 0.66273  | 0.053619 | 0.2475   |
| 0.10275  | 0.045632 | 0.32512  | 0.011766 | 0.79981  | 0.023064 | 0.61908  | -0.02911 | 0.53033  |
| 0.44824  | 0.008627 | 0.8525   | -0.05654 | 0.22266  | -0.04173 | 0.36829  | 0.020645 | 0.65632  |
| 0.57312  | 0.03346  | 0.4707   | -0.00903 | 0.84569  | 0.018176 | 0.69523  | 0.020999 | 0.65082  |
| 0.5133   | 0.024778 | 0.59328  | -0.02667 | 0.56534  | 0.008654 | 0.85204  | 0.02751  | 0.55316  |
| 0.94111  | -0.05732 | 0.21629  | -0.00571 | 0.90213  | -0.0112  | 0.80929  | 0.003143 | 0.94599  |
| 0.88451  | -0.06737 | 0.14603  | -0.00644 | 0.88968  | -0.00123 | 0.97887  | 0.016873 | 0.7161   |
| 0.52808  | -0.0045  | 0.92281  | 0.003274 | 0.94374  | -0.00272 | 0.95319  | -0.11612 | 0.01203  |
| 0.54683  | -0.05513 | 0.23438  | -0.07629 | 0.09964  | -0.05693 | 0.21946  | -0.17733 | 0.00012  |
| 0.98137  | -0.03064 | 0.50891  | -0.02991 | 0.51906  | -0.01719 | 0.71106  | -0.18584 | 5.33E-05 |
| 0.43513  | -0.04829 | 0.29774  | -0.03359 | 0.46896  | -0.04337 | 0.34971  | -0.02717 | 0.55809  |

|          |          |          |          |          |          |          |          |          |
|----------|----------|----------|----------|----------|----------|----------|----------|----------|
| 0.01629  | -0.12195 | 0.00833  | -0.0571  | 0.21808  | -0.11131 | 0.01611  | -0.0188  | 0.68533  |
| 6.25E-05 | 0.344134 | 1.98E-14 | 0.189045 | 3.93E-05 | 0.258825 | 1.38E-08 | 0.133475 | 0.00386  |
| 0.49349  | -0.08463 | 0.06767  | -0.05875 | 0.20503  | -0.05972 | 0.19765  | -0.02447 | 0.59792  |
| 0.83158  | -0.33922 | 4.86E-14 | -0.25582 | 2.06E-08 | -0.23884 | 1.76E-07 | -0.21822 | 1.93E-06 |
| 0.40491  | -0.13777 | 0.00285  | -0.02272 | 0.6243   | -0.07786 | 0.09282  | -0.00334 | 0.94261  |
| 0.28582  | -0.06165 | 0.18352  | -0.02818 | 0.5436   | -0.0478  | 0.30267  | 0.000152 | 0.99738  |
| 0.23762  | -0.07706 | 0.09625  | 0.0396   | 0.39321  | 0.024199 | 0.60194  | 0.034301 | 0.45962  |
| 0.44923  | -0.06009 | 0.1949   | -0.00093 | 0.98404  | -0.03912 | 0.39897  | 0.048028 | 0.30034  |
| 0.31871  | 0.008841 | 0.84887  | 0.071397 | 0.12338  | 0.029146 | 0.52981  | -0.01102 | 0.81221  |
| 0.15003  | 0.017616 | 0.70417  | 0.00394  | 0.93234  | -0.00668 | 0.88558  | -0.11448 | 0.01331  |
| 2.73E-15 | 0.206886 | 6.55E-06 | 0.248328 | 5.41E-08 | 0.325314 | 5.67E-13 | -0.00276 | 0.95257  |
| 5.14E-06 | -0.24828 | 5.44E-08 | -0.2219  | 1.28E-06 | -0.25899 | 1.36E-08 | 0.075244 | 0.10438  |
| 2.82E-05 | 0.192304 | 2.87E-05 | 0.274753 | 1.56E-09 | 0.257344 | 1.68E-08 | 0.14501  | 0.00168  |
| 0.04169  | -0.20706 | 6.43E-06 | 0.060342 | 0.19302  | -0.04987 | 0.28214  | 0.013462 | 0.77171  |
| 0.48963  | -0.04245 | 0.36     | -0.07589 | 0.10145  | -0.06641 | 0.15193  | 0.050174 | 0.27923  |
| 0.36156  | 0.149178 | 0.00122  | -0.11731 | 0.01118  | -0.06379 | 0.16872  | -0.149   | 0.00124  |
| 0.01576  | -0.03172 | 0.49411  | 0.070502 | 0.12817  | 0.094704 | 0.04079  | 0.006571 | 0.88738  |
| 0.00018  | -0.04153 | 0.37054  | 0.072193 | 0.11925  | 0.083166 | 0.07257  | 0.134773 | 0.00352  |
| 0.03811  | -0.07347 | 0.11285  | -0.05112 | 0.27025  | -0.09562 | 0.03888  | -0.08363 | 0.07098  |
| 5.79E-25 | 0.267516 | 4.28E-09 | 0.05854  | 0.20668  | 0.326942 | 4.28E-13 | 0.325794 | 5.22E-13 |
| 0.0045   | 0.117396 | 0.01112  | -0.03384 | 0.46565  | 0.070164 | 0.13001  | -0.02104 | 0.65022  |
| 0.67162  | 0.032241 | 0.48702  | 0.081687 | 0.07782  | 0.078129 | 0.09171  | 0.179893 | 9.27E-05 |
| 0.10758  | 0.011112 | 0.81073  | 0.157902 | 0.00062  | 0.095665 | 0.03878  | -0.03605 | 0.43707  |
| 0.10485  | -0.05756 | 0.21439  | 0.036261 | 0.43435  | -0.03278 | 0.47976  | 0.079172 | 0.08745  |
| 0.26444  | 0.044459 | 0.33773  | -0.11608 | 0.01206  | -0.05196 | 0.26244  | 0.150832 | 0.00108  |
| 0.4624   | -0.00677 | 0.88407  | 0.003039 | 0.94778  | -0.00207 | 0.96449  | 0.026435 | 0.56879  |
| 0.00047  | -0.28274 | 4.94E-10 | -0.21896 | 1.78E-06 | -0.22784 | 6.49E-07 | -0.24209 | 1.18E-07 |
| 0.72687  | -0.32132 | 1.12E-12 | -0.23533 | 2.69E-07 | -0.20115 | 1.19E-05 | -0.00525 | 0.90989  |
| 0.58837  | -0.12148 | 0.00859  | -0.00864 | 0.85236  | -0.053   | 0.25298  | 0.026622 | 0.56606  |
| 1.79E-07 | 0.197332 | 1.74E-05 | 0.332518 | 1.61E-13 | 0.270186 | 2.96E-09 | 0.192596 | 2.79E-05 |
| 0.48927  | -0.20276 | 1.01E-05 | -0.20501 | 7.97E-06 | -0.17571 | 0.00014  | 0.046252 | 0.31858  |
| 0.03056  | -0.03579 | 0.44033  | -0.24639 | 6.91E-08 | -0.1594  | 0.00055  | 0.018319 | 0.69295  |
| 0.00295  | -0.17851 | 0.00011  | 0.084531 | 0.06799  | 0.014713 | 0.75115  | 0.139889 | 0.00245  |
| 0.0015   | -0.13924 | 0.00257  | 0.002117 | 0.9636   | 0.055743 | 0.22924  | -0.19833 | 1.58E-05 |
| 0.00236  | 0.145089 | 0.00167  | 0.171238 | 0.0002   | 0.179285 | 9.80E-05 | 0.203345 | 9.47E-06 |
| 0.00303  | -0.15486 | 0.00079  | -0.11677 | 0.01156  | -0.17779 | 0.00011  | 0.092013 | 0.04689  |
| 0.76503  | -0.06919 | 0.13543  | -0.0747  | 0.10691  | -0.08104 | 0.08019  | 0.124391 | 0.00712  |
| 0.00119  | 0.023291 | 0.61563  | -0.08989 | 0.05223  | 0.048179 | 0.29882  | 0.089577 | 0.05306  |
| 1.81E-06 | 0.186548 | 4.99E-05 | 0.065903 | 0.15505  | 0.140545 | 0.00233  | 0.390461 | 1.86E-18 |
| 0.11117  | 0.035463 | 0.44454  | 0.089789 | 0.05249  | 0.026641 | 0.56577  | 0.098954 | 0.03252  |
| 0.00085  | 0.206293 | 6.97E-06 | -0.01946 | 0.67485  | -0.07401 | 0.1102   | -0.12244 | 0.00808  |
| 0.30125  | 0.083642 | 0.07094  | -0.00532 | 0.90866  | 0.007364 | 0.8739   | -0.32566 | 5.34E-13 |
| 0.01049  | -0.11828 | 0.01052  | -0.0443  | 0.33942  | -0.07249 | 0.11772  | -0.11506 | 0.01284  |
| 0.01076  | 0.013652 | 0.76856  | -0.08904 | 0.0545   | -0.03516 | 0.44844  | 0.047701 | 0.30365  |
| 0.66902  | -0.02287 | 0.62198  | 0.009902 | 0.831    | 0.02202  | 0.63505  | -0.01986 | 0.66855  |



|          |          |          |          |          |          |          |          |          |
|----------|----------|----------|----------|----------|----------|----------|----------|----------|
| 0.0028   | -0.18897 | 3.96E-05 | -0.04246 | 0.35987  | 0.007744 | 0.86744  | -0.0551  | 0.23467  |
| 1.85E-06 | -0.2078  | 5.95E-06 | 0.072182 | 0.1193   | 0.114624 | 0.01319  | 0.141285 | 0.00221  |
| 2.38E-09 | 0.19604  | 1.98E-05 | -0.01963 | 0.67224  | 0.166527 | 0.0003   | 0.422876 | 1.11E-21 |
| 0.02484  | -0.08995 | 0.05207  | -0.02261 | 0.62594  | -0.01156 | 0.80331  | 0.009009 | 0.84605  |
| 2.17E-05 | -0.17155 | 0.0002   | 0.120885 | 0.00892  | 0.119545 | 0.00972  | 0.069512 | 0.13363  |
| 0.28096  | -0.01726 | 0.7099   | -0.05714 | 0.21777  | -0.03801 | 0.41252  | -0.08533 | 0.06543  |
| 0.07648  | 0.093946 | 0.04243  | 0.063794 | 0.16873  | 0.085657 | 0.06438  | 0.081182 | 0.07968  |
| 0.39393  | -0.00967 | 0.83494  | 0.022114 | 0.63361  | 0.01396  | 0.7635   | 0.031156 | 0.50181  |
| 0.09259  | -0.15454 | 0.00081  | -0.09146 | 0.04824  | -0.11863 | 0.01029  | -0.00654 | 0.88785  |
| 0.84458  | -0.07864 | 0.0896   | 0.004759 | 0.91831  | -0.02552 | 0.58218  | 0.016877 | 0.71604  |
| 0.91872  | -0.07885 | 0.08875  | 0.006173 | 0.89416  | -0.00655 | 0.88782  | 0.003969 | 0.93183  |
| 0.66312  | 0.039772 | 0.39115  | 0.142146 | 0.00208  | 0.05621  | 0.22535  | -0.10293 | 0.02613  |
| 0.10734  | -0.31067 | 6.59E-12 | -0.28562 | 3.23E-10 | -0.25671 | 1.83E-08 | 0.011165 | 0.80983  |
| 0.14251  | -0.00323 | 0.94456  | 0.025244 | 0.58634  | 0.039292 | 0.3969   | -0.22821 | 6.21E-07 |
| 0.2499   | -0.25249 | 3.17E-08 | -0.2842  | 3.99E-10 | -0.24086 | 1.37E-07 | 0.234814 | 2.86E-07 |
| 5.13E-09 | 0.244279 | 8.99E-08 | 0.136143 | 0.0032   | 0.246144 | 7.12E-08 | 0.075912 | 0.10133  |
| 0.65057  | -0.17252 | 0.00018  | -0.07866 | 0.08953  | -0.10033 | 0.03018  | -0.07403 | 0.1101   |
| 0.38328  | -0.0344  | 0.45838  | 0.052727 | 0.25546  | -0.02205 | 0.63462  | 0.115688 | 0.01236  |
| 0.02321  | -0.08338 | 0.07185  | -0.02074 | 0.65488  | 0.052859 | 0.25427  | -0.01677 | 0.71782  |
| 5.98E-05 | -0.15216 | 0.00097  | 0.029007 | 0.53177  | 0.036026 | 0.43734  | 0.029942 | 0.51863  |
| 0.06856  | -0.02612 | 0.57339  | -0.16525 | 0.00034  | -0.14846 | 0.00129  | 0.057    | 0.21889  |
| 0.17668  | -0.26129 | 9.97E-09 | -0.15553 | 0.00074  | -0.17605 | 0.00013  | -0.24084 | 1.38E-07 |
| 0.96324  | -0.07601 | 0.10088  | -0.08587 | 0.06372  | -0.06791 | 0.14286  | 0.033716 | 0.46731  |
| 0.57193  | -0.09028 | 0.05122  | 0.200287 | 1.30E-05 | 0.029434 | 0.52575  | 0.007007 | 0.87995  |
| 7.09E-07 | 0.207986 | 5.84E-06 | 0.165835 | 0.00032  | 0.243061 | 1.05E-07 | 0.077167 | 0.09579  |
| 0.74411  | -0.0943  | 0.04165  | -0.00897 | 0.84676  | -0.03566 | 0.44196  | -0.11538 | 0.0126   |
| 0.03301  | -0.06626 | 0.15283  | -0.26565 | 5.53E-09 | -0.17576 | 0.00013  | 0.164657 | 0.00035  |
| 0.11833  | -0.14199 | 0.0021   | -0.10845 | 0.01907  | -0.10754 | 0.02009  | 0.02525  | 0.58625  |
| 0.00194  | -0.04775 | 0.30318  | -0.15585 | 0.00073  | -0.13465 | 0.00355  | 0.189129 | 3.90E-05 |
| 0.07541  | -0.17732 | 0.00012  | 0.035753 | 0.44082  | -0.00019 | 0.99668  | -0.04236 | 0.36104  |
| 0.01528  | 0.178967 | 0.0001   | -0.01495 | 0.74725  | 0.076244 | 0.09984  | 0.399923 | 2.31E-19 |
| 1.02E-14 | 0.30618  | 1.36E-11 | 0.191387 | 3.14E-05 | 0.281554 | 5.87E-10 | 0.293766 | 9.50E-11 |
| 1.75E-14 | 0.468906 | 6.64E-27 | 0.25113  | 3.78E-08 | 0.353809 | 3.23E-15 | 0.366319 | 2.81E-16 |
| 4.53E-38 | 0.430609 | 1.67E-22 | 0.306202 | 1.36E-11 | 0.484568 | 7.19E-29 | 0.173135 | 0.00017  |
| 0.0001   | -0.12316 | 0.00771  | -0.15344 | 0.00088  | -0.18218 | 7.51E-05 | 0.03027  | 0.51405  |
| 0.15468  | -0.03458 | 0.45595  | -0.11733 | 0.01117  | -0.1151  | 0.01281  | -0.08659 | 0.06152  |
| 1.96E-18 | 0.154116 | 0.00083  | 0.338834 | 5.21E-14 | 0.323224 | 8.11E-13 | 0.04219  | 0.36298  |
| 6.13E-05 | -0.0383  | 0.40892  | -0.06345 | 0.17106  | -0.12101 | 0.00885  | 0.070037 | 0.13071  |
| 0.29255  | -0.03278 | 0.47976  | 0.082065 | 0.07645  | -0.04678 | 0.31304  | -0.1164  | 0.01183  |
| 0.01016  | -0.00707 | 0.87895  | -0.05719 | 0.21732  | -0.06708 | 0.14779  | -0.07515 | 0.1048   |
| 0.91299  | -0.03672 | 0.42861  | -0.01127 | 0.80814  | 0.003319 | 0.94297  | -0.18632 | 5.09E-05 |
| 0.0069   | 0.452845 | 5.43E-25 | 0.288273 | 2.18E-10 | 0.285832 | 3.13E-10 | 0.14347  | 0.00188  |
| 0.02045  | -0.22736 | 6.86E-07 | -0.03395 | 0.46421  | -0.02079 | 0.65407  | 0.32299  | 8.44E-13 |
| 0.5438   | 0.08474  | 0.0673   | -0.03229 | 0.48641  | 0.05966  | 0.19811  | 0.259009 | 1.35E-08 |
| 0.17941  | 0.002908 | 0.95003  | 0.091479 | 0.04819  | 0.070029 | 0.13075  | 0.05491  | 0.23628  |

|          |          |          |          |          |          |          |          |          |
|----------|----------|----------|----------|----------|----------|----------|----------|----------|
| 0.03793  | 0.009074 | 0.84494  | 0.13574  | 0.00329  | 0.104593 | 0.0238   | 0.07424  | 0.1091   |
| 0.37486  | -0.1842  | 6.22E-05 | -0.16808 | 0.00026  | -0.12622 | 0.00631  | 0.075044 | 0.10531  |
| 4.92E-19 | 0.085285 | 0.06556  | 0.172388 | 0.00018  | 0.269826 | 3.11E-09 | 0.147384 | 0.0014   |
| 0.05578  | -0.06904 | 0.13632  | -0.03036 | 0.51278  | -0.09625 | 0.03759  | 0.343329 | 2.30E-14 |
| 0.00028  | 0.02567  | 0.58003  | 0.194151 | 2.39E-05 | 0.183533 | 6.62E-05 | 0.256928 | 1.78E-08 |
| 0.54759  | -0.13211 | 0.00424  | 0.058381 | 0.20792  | -0.00091 | 0.98434  | 0.01099  | 0.81277  |
| 0.43255  | 0.011288 | 0.80777  | 0.132123 | 0.00424  | 0.078334 | 0.09086  | 0.042525 | 0.35918  |
| 0.01026  | -0.32024 | 1.35E-12 | -0.10718 | 0.02052  | -0.15492 | 0.00078  | 0.112704 | 0.01482  |
| 0.87625  | -0.11347 | 0.01415  | -0.03562 | 0.44253  | -0.02892 | 0.53294  | -0.02193 | 0.63639  |
| 0.00077  | 0.357764 | 1.51E-15 | 0.24122  | 1.31E-07 | 0.282704 | 4.96E-10 | 0.467485 | 9.90E-27 |
| 0.09844  | -0.10771 | 0.0199   | 0.071929 | 0.1206   | 0.035512 | 0.44392  | -0.00073 | 0.98739  |
| 0.51831  | -0.05727 | 0.2167   | -0.01709 | 0.71257  | -0.05522 | 0.23367  | 0.348478 | 8.84E-15 |
| 0.17921  | -0.16525 | 0.00034  | -0.02249 | 0.6279   | -0.07664 | 0.09808  | -0.17963 | 9.49E-05 |
| 2.55E-23 | 0.224954 | 9.05E-07 | 0.260517 | 1.11E-08 | 0.420559 | 1.93E-21 | 0.188018 | 4.34E-05 |
| 0.01825  | 0.03009  | 0.51656  | -0.014   | 0.76281  | 0.010761 | 0.8166   | 0.25698  | 1.77E-08 |
| 0.15091  | -0.19493 | 2.22E-05 | -0.12328 | 0.00765  | -0.09296 | 0.04466  | -0.16097 | 0.00048  |
| 1.57E-06 | -0.14773 | 0.00137  | 0.010212 | 0.8258   | 0.035511 | 0.44392  | 0.262386 | 8.60E-09 |
| 0.60229  | -0.21446 | 2.92E-06 | -0.18879 | 4.03E-05 | -0.12482 | 0.00692  | -0.31273 | 4.71E-12 |
| 0.01258  | -0.13358 | 0.00383  | -0.13235 | 0.00417  | -0.17464 | 0.00015  | -0.20884 | 5.33E-06 |
| 0.0902   | -0.21789 | 2.00E-06 | -0.12271 | 0.00794  | -0.11384 | 0.01384  | 0.010598 | 0.81933  |
| 0.37891  | 0.00586  | 0.89949  | 0.10639  | 0.02148  | 0.065627 | 0.15679  | -0.00925 | 0.84198  |
| 0.37908  | -0.04212 | 0.36381  | -0.00868 | 0.85166  | -0.04471 | 0.33495  | -0.03103 | 0.50348  |
| 7.91E-05 | 0.261665 | 9.48E-09 | 0.269216 | 3.39E-09 | 0.233251 | 3.44E-07 | 0.299209 | 4.10E-11 |
| 0.79226  | -0.10468 | 0.02368  | -0.00229 | 0.96058  | -0.00479 | 0.91782  | -0.21448 | 2.91E-06 |
| 0.04459  | -0.05756 | 0.2144   | -0.08733 | 0.05932  | -0.11759 | 0.01099  | -0.15649 | 0.00069  |
| 0.97445  | -0.16059 | 0.00049  | -0.04488 | 0.3332   | -0.05486 | 0.23668  | -0.16463 | 0.00035  |
| 0.34267  | -0.02218 | 0.63252  | 0.017644 | 0.70373  | 0.023653 | 0.61015  | 0.057925 | 0.2115   |
| 0.52614  | -0.04656 | 0.31541  | -0.16448 | 0.00036  | -0.08582 | 0.06387  | -0.16049 | 0.0005   |
| 1.72E-05 | 0.136628 | 0.00309  | 0.252695 | 3.09E-08 | 0.234514 | 2.96E-07 | 0.072368 | 0.11835  |
| 0.06007  | 0.046866 | 0.3122   | 0.120168 | 0.00934  | 0.002903 | 0.95011  | -0.18666 | 4.93E-05 |
| 0.1415   | 0.067866 | 0.1431   | 0.154969 | 0.00078  | 0.123325 | 0.00763  | -0.26879 | 3.59E-09 |
| 0.05618  | -0.15821 | 0.0006   | -0.10196 | 0.02758  | -0.18347 | 6.66E-05 | -0.05546 | 0.2316   |
| 7.39E-09 | 0.006794 | 0.88358  | 0.087016 | 0.06025  | 0.136834 | 0.00305  | 0.214783 | 2.82E-06 |
| 0.37018  | -0.30869 | 9.09E-12 | -0.16497 | 0.00034  | -0.16635 | 0.00031  | -0.0061  | 0.89536  |
| 7.57E-05 | 0.036769 | 0.42794  | 0.073673 | 0.11184  | 0.132039 | 0.00426  | 0.368733 | 1.73E-16 |
| 0.62798  | -0.08502 | 0.06641  | -0.07902 | 0.08806  | -0.05243 | 0.25815  | -0.00601 | 0.89691  |
| 0.01529  | -0.0305  | 0.51089  | 0.070727 | 0.12695  | 0.083808 | 0.07038  | -0.02276 | 0.62369  |
| 0.51791  | 0.021043 | 0.65014  | 0.0214   | 0.6446   | 0.016386 | 0.72396  | -0.15628 | 0.0007   |
| 0.03644  | -0.08964 | 0.05288  | -0.08914 | 0.05422  | -0.01909 | 0.68076  | 0.190699 | 3.35E-05 |
| 8.81E-05 | 0.218537 | 1.86E-06 | 0.02347  | 0.61292  | 0.182046 | 7.60E-05 | 0.245496 | 7.72E-08 |
| 0.46033  | 0.059386 | 0.20018  | 0.070202 | 0.1298   | 0.067311 | 0.14641  | -0.0605  | 0.19188  |
| 0.49898  | -0.12546 | 0.00663  | -0.0141  | 0.76116  | -0.03663 | 0.42969  | 0.001399 | 0.97594  |
| 0.0034   | -0.05906 | 0.20266  | -0.09316 | 0.0442   | -0.10007 | 0.03061  | -0.00839 | 0.85646  |
| 0.51217  | 0.12375  | 0.00742  | 0.127769 | 0.00569  | 0.135289 | 0.0034   | -0.03555 | 0.44342  |
| 0.99717  | 0.060937 | 0.18866  | 0.154226 | 0.00083  | 0.083335 | 0.07199  | -0.01718 | 0.71119  |

|          |          |          |          |          |          |          |          |          |
|----------|----------|----------|----------|----------|----------|----------|----------|----------|
| 0.64919  | 0.288088 | 2.24E-10 | 0.183514 | 6.63E-05 | 0.15652  | 0.00069  | 0.046145 | 0.3197   |
| 0.00109  | 0.313214 | 4.35E-12 | 0.154645 | 0.0008   | 0.201206 | 1.18E-05 | -0.05261 | 0.25654  |
| 9.17E-21 | 0.380163 | 1.66E-17 | 0.337714 | 6.38E-14 | 0.434518 | 6.27E-23 | 0.124616 | 0.00701  |
| 0.26657  | -0.09588 | 0.03835  | 0.033924 | 0.46457  | 0.01629  | 0.7255   | -0.09284 | 0.04495  |
| 0.18184  | 0.018776 | 0.68569  | 0.070538 | 0.12797  | 0.085737 | 0.06413  | -0.05615 | 0.22583  |
| 0.37824  | -0.03786 | 0.4144   | 0.010231 | 0.82547  | -0.02246 | 0.62827  | -0.14475 | 0.00171  |
| 0.41146  | -0.03869 | 0.4042   | 0.101896 | 0.02768  | -0.00642 | 0.88987  | -0.06492 | 0.16132  |
| 0.00098  | 0.089334 | 0.05371  | 0.171024 | 0.0002   | 0.160807 | 0.00049  | 0.166063 | 0.00031  |
| 0.00408  | 0.015929 | 0.73135  | 0.057121 | 0.21792  | 0.090218 | 0.05137  | 0.079093 | 0.08776  |
| 0.2404   | 0.060015 | 0.19545  | 0.05016  | 0.27937  | 0.055693 | 0.22965  | 0.055988 | 0.2272   |
| 0.14936  | -0.06044 | 0.19231  | -0.11889 | 0.01013  | -0.09635 | 0.03739  | 0.094975 | 0.04021  |
| 2.04E-22 | 0.370813 | 1.14E-16 | 0.300502 | 3.35E-11 | 0.46877  | 6.90E-27 | 0.221123 | 1.40E-06 |
| 0.00664  | 0.17765  | 0.00011  | 0.067247 | 0.14679  | 0.099658 | 0.0313   | -0.134   | 0.00372  |
| 9.12E-05 | 0.07361  | 0.11215  | -0.1292  | 0.00517  | 0.053215 | 0.25108  | 0.164841 | 0.00035  |
| 0.07995  | 0.249226 | 4.82E-08 | -0.05124 | 0.26914  | 0.077979 | 0.09234  | 0.440456 | 1.39E-23 |
| 0.01742  | -0.0721  | 0.1197   | -0.287   | 2.63E-10 | -0.20861 | 5.46E-06 | -0.13687 | 0.00304  |
| 0.00027  | 0.443454 | 6.42E-24 | 0.117301 | 0.01118  | 0.21445  | 2.92E-06 | 0.196973 | 1.81E-05 |
| 3.56E-10 | 0.0386   | 0.40528  | 0.136386 | 0.00314  | 0.229417 | 5.40E-07 | 0.233827 | 3.21E-07 |
| 0.0004   | 0.006841 | 0.88278  | -0.15377 | 0.00086  | -0.00907 | 0.84506  | -0.04449 | 0.3374   |
| 0.04681  | -0.1143  | 0.01346  | -0.02381 | 0.60773  | 0.018595 | 0.68857  | -0.02513 | 0.58797  |
| 0.74526  | -0.11666 | 0.01164  | -0.02428 | 0.60073  | -0.03811 | 0.4113   | -0.05871 | 0.20535  |
| 0.25874  | -0.01566 | 0.73568  | 0.066026 | 0.15428  | 0.026839 | 0.5629   | 0.051408 | 0.26757  |
| 0.30778  | -0.05514 | 0.23428  | 0.009153 | 0.84361  | 0.024475 | 0.5978   | 0.027146 | 0.55843  |
| 0.39702  | 0.031358 | 0.49904  | 0.134092 | 0.00369  | 0.086553 | 0.06163  | -0.06427 | 0.16555  |
| 0.24041  | 0.004385 | 0.92471  | 0.163282 | 0.0004   | 0.07922  | 0.08725  | -0.00423 | 0.92741  |
| 0.16411  | -0.05377 | 0.24615  | 0.076008 | 0.1009   | 0.052347 | 0.25891  | 0.054616 | 0.23881  |
| 0.04974  | -0.12415 | 0.00723  | -0.01834 | 0.69266  | -0.07487 | 0.10613  | 0.010835 | 0.81536  |
| 0.85703  | 0.015311 | 0.74139  | 0.061871 | 0.18196  | 0.006728 | 0.88471  | 0.004842 | 0.91689  |
| 0.51275  | -0.01198 | 0.79632  | 0.017673 | 0.70326  | -0.00143 | 0.97542  | 0.004184 | 0.92815  |
| 0.01739  | 0.009174 | 0.84327  | 0.031423 | 0.49815  | 0.07334  | 0.11347  | 0.004685 | 0.91957  |
| 0.65822  | -0.05782 | 0.21233  | -0.0134  | 0.77265  | -0.04698 | 0.31101  | 0.02193  | 0.63643  |
| 0.40352  | -0.03231 | 0.4861   | 0.147829 | 0.00136  | -0.01367 | 0.76831  | -0.0763  | 0.0996   |
| 9.35E-11 | 0.097042 | 0.03604  | 0.297614 | 5.25E-11 | 0.258648 | 1.42E-08 | 0.2406   | 1.42E-07 |
| 0.03305  | -0.06296 | 0.1744   | 0.053215 | 0.25109  | 0.051006 | 0.27133  | -0.29527 | 7.54E-11 |
| 0.0397   | -0.01094 | 0.8136   | 0.032055 | 0.48954  | 0.045225 | 0.32946  | -0.01226 | 0.79165  |
| 0.05182  | 0.024304 | 0.60035  | -0.05387 | 0.24529  | 0.018259 | 0.69391  | -0.27936 | 8.07E-10 |
| 0.35377  | 0.098795 | 0.0328   | 0.106356 | 0.02152  | 0.087519 | 0.05878  | 0.067012 | 0.14821  |
| 0.87641  | -0.03745 | 0.41949  | -0.002   | 0.96563  | 0.029047 | 0.5312   | 0.017009 | 0.7139   |
| 0.71191  | 0.036315 | 0.43367  | -0.04587 | 0.32264  | -0.04763 | 0.30433  | 0.128717 | 0.00534  |
| 0.45932  | -0.24821 | 5.49E-08 | -0.15243 | 0.00095  | -0.15256 | 0.00094  | 0.010761 | 0.81658  |
| 0.87072  | -0.18924 | 3.86E-05 | -0.20883 | 5.34E-06 | -0.14009 | 0.00241  | 0.131963 | 0.00428  |
| 0.50323  | -0.1378  | 0.00284  | -0.00871 | 0.85101  | -0.01735 | 0.70851  | 0.008605 | 0.85286  |
| 0.2246   | -0.0981  | 0.03405  | -0.0076  | 0.8699   | -0.02036 | 0.66077  | -0.0225  | 0.62771  |
| 0.01022  | 0.040475 | 0.38283  | 0.009342 | 0.84042  | 0.092068 | 0.04676  | 0.019096 | 0.68063  |
| 0.00032  | 0.152808 | 0.00092  | 0.150557 | 0.0011   | 0.189621 | 3.72E-05 | 0.174003 | 0.00016  |

|          |          |          |          |          |          |          |          |          |
|----------|----------|----------|----------|----------|----------|----------|----------|----------|
| 0.632    | -0.03195 | 0.49099  | 0.105313 | 0.02284  | 0.042161 | 0.36331  | -0.11176 | 0.01568  |
| 0.81299  | -0.05004 | 0.28052  | 0.029241 | 0.52847  | -0.0239  | 0.60644  | -0.01762 | 0.70411  |
| 0.98719  | -0.02477 | 0.59334  | -0.01087 | 0.81481  | -0.01976 | 0.67012  | 0.004272 | 0.92664  |
| 0.11769  | -0.07844 | 0.09042  | -0.09773 | 0.03475  | -0.11398 | 0.01372  | -0.10544 | 0.02268  |
| 0.39495  | -0.0997  | 0.03122  | 0.018541 | 0.68943  | -0.03248 | 0.48378  | 0.078464 | 0.09032  |
| 0.00917  | -0.0694  | 0.13423  | -0.13374 | 0.00379  | -0.00278 | 0.95218  | -0.05999 | 0.19563  |
| 0.76725  | -0.03845 | 0.40714  | 0.078182 | 0.09149  | 0.055038 | 0.23519  | 0.061493 | 0.18465  |
| 5.92E-05 | 0.1075   | 0.02015  | -0.0504  | 0.27706  | -0.07981 | 0.0849   | 0.274379 | 1.64E-09 |
| 0.35687  | 0.068021 | 0.14218  | -0.00512 | 0.91211  | 0.018791 | 0.68546  | -0.01596 | 0.73084  |
| 0.10019  | -0.22966 | 5.25E-07 | -0.14017 | 0.0024   | -0.16414 | 0.00037  | 0.003886 | 0.93325  |
| 0.04493  | -0.01343 | 0.77217  | -0.02092 | 0.65204  | 0.029992 | 0.51793  | 0.025186 | 0.5872   |
| 0.23412  | -0.17935 | 9.73E-05 | -0.10251 | 0.02674  | -0.11072 | 0.01668  | 0.010762 | 0.81658  |
| 0.0013   | 0.254405 | 2.48E-08 | 0.068358 | 0.14021  | 0.124286 | 0.00716  | 0.241577 | 1.26E-07 |
| 0.13498  | -0.13385 | 0.00376  | -0.04623 | 0.31878  | -0.08231 | 0.07558  | 0.052748 | 0.25527  |
| 0.13295  | -0.24183 | 1.22E-07 | -0.10889 | 0.01858  | -0.10381 | 0.02487  | -0.03879 | 0.40301  |
| 0.13528  | -0.30802 | 1.01E-11 | -0.0102  | 0.82607  | -0.08618 | 0.06276  | 0.192036 | 2.94E-05 |
| 0.66177  | -0.04374 | 0.34559  | 0.01583  | 0.73296  | 0.005636 | 0.90331  | 0.0146   | 0.75301  |
| 0.82633  | -0.0288  | 0.53476  | 0.019122 | 0.68022  | -0.01539 | 0.74014  | 0.240227 | 1.48E-07 |
| 3.13E-05 | 0.441297 | 1.12E-23 | 0.229849 | 5.14E-07 | 0.278595 | 9.01E-10 | 0.169802 | 0.00023  |
| 0.02812  | -0.3428  | 2.53E-14 | -0.24182 | 1.22E-07 | -0.23021 | 4.93E-07 | -0.07229 | 0.11875  |
| 0.1194   | -0.05077 | 0.27351  | -0.05381 | 0.24585  | -0.06385 | 0.16837  | -0.00595 | 0.89796  |
| 3.38E-05 | 0.235358 | 2.68E-07 | 0.272008 | 2.30E-09 | 0.289408 | 1.84E-10 | 0.245448 | 7.77E-08 |
| 0.857    | -0.15138 | 0.00103  | -0.01276 | 0.78334  | -0.09418 | 0.04193  | 0.023959 | 0.60555  |
| 0.01687  | -0.13938 | 0.00254  | 0.058399 | 0.20777  | 0.015023 | 0.7461   | 0.102847 | 0.02625  |
| 0.12752  | -0.26678 | 4.74E-09 | -0.16814 | 0.00026  | -0.19067 | 3.36E-05 | -0.04425 | 0.33998  |
| 0.87525  | -0.07854 | 0.09002  | -0.09393 | 0.04248  | -0.07028 | 0.12937  | -0.09844 | 0.03345  |
| 0.19192  | -0.16797 | 0.00027  | -0.21168 | 3.94E-06 | -0.17805 | 0.00011  | -0.20766 | 6.04E-06 |
| 0.53551  | -0.28389 | 4.17E-10 | -0.26367 | 7.23E-09 | -0.17441 | 0.00015  | -0.07239 | 0.11826  |
| 0.88104  | -0.22075 | 1.45E-06 | -0.09218 | 0.04648  | -0.11929 | 0.00987  | -0.17995 | 9.22E-05 |
| 0.05676  | 0.29469  | 8.25E-11 | 0.102875 | 0.02621  | 0.097596 | 0.03499  | 0.040011 | 0.38831  |
| 1.77E-06 | 0.242979 | 1.06E-07 | 0.008244 | 0.85897  | 0.193239 | 2.62E-05 | 0.176355 | 0.00013  |
| 0.58358  | -0.23761 | 2.04E-07 | -0.20905 | 5.22E-06 | -0.17603 | 0.00013  | -0.1024  | 0.02691  |
| 0.23717  | -0.09561 | 0.03889  | -0.09942 | 0.03171  | -0.09503 | 0.0401   | -0.00242 | 0.95832  |
| 0.00045  | 0.058842 | 0.20434  | 0.141812 | 0.00213  | 0.153465 | 0.00088  | 0.020794 | 0.65401  |
| 2.31E-05 | 0.159768 | 0.00053  | 0.201491 | 1.15E-05 | 0.179215 | 9.86E-05 | 0.075015 | 0.10544  |
| 0.07541  | 0.152161 | 0.00097  | 0.250812 | 3.94E-08 | 0.183779 | 6.47E-05 | -0.02924 | 0.52849  |
| 0.444    | -0.1097  | 0.01772  | -0.03699 | 0.42514  | -0.04807 | 0.29991  | 0.007861 | 0.86546  |
| 0.29682  | 0.004135 | 0.92899  | -0.09723 | 0.03568  | -0.07473 | 0.10676  | 0.062867 | 0.17502  |
| 0.02898  | -0.10039 | 0.03008  | -0.01538 | 0.74019  | -0.07273 | 0.11651  | -0.06364 | 0.16977  |
| 0.89235  | -0.13894 | 0.00262  | -0.0367  | 0.42881  | -0.09323 | 0.04405  | 0.255151 | 2.25E-08 |
| 1.41E-06 | 0.004281 | 0.92649  | 0.200847 | 1.22E-05 | 0.15206  | 0.00098  | 0.002001 | 0.96561  |
| 0.06268  | 0.157967 | 0.00061  | 0.263686 | 7.22E-09 | 0.118403 | 0.01044  | 0.076243 | 0.09984  |
| 0.01953  | -0.07721 | 0.09562  | -0.03267 | 0.4812   | 0.021137 | 0.64867  | 0.346427 | 1.30E-14 |
| 0.09296  | 0.069187 | 0.13546  | 0.077641 | 0.09376  | 0.098967 | 0.0325   | 0.168073 | 0.00026  |
| 0.0019   | 0.025446 | 0.58335  | -0.00793 | 0.86422  | -0.07092 | 0.12589  | 0.168462 | 0.00026  |

|          |          |          |          |          |          |          |          |          |
|----------|----------|----------|----------|----------|----------|----------|----------|----------|
| 0.00803  | -0.09291 | 0.04478  | -0.10319 | 0.02575  | -0.13555 | 0.00333  | 0.031909 | 0.49153  |
| 0.01839  | -0.04725 | 0.30828  | -0.17787 | 0.00011  | -0.14361 | 0.00186  | 0.355552 | 2.31E-15 |
| 0.01004  | 0.252528 | 3.16E-08 | 0.242566 | 1.11E-07 | 0.191344 | 3.15E-05 | -0.12383 | 0.00738  |
| 0.00279  | -0.11817 | 0.01059  | -0.08335 | 0.07193  | -0.12777 | 0.00569  | 0.178426 | 0.00011  |
| 1.18E-06 | -0.16455 | 0.00036  | 0.018521 | 0.68974  | 0.039933 | 0.38924  | -0.07308 | 0.11477  |
| 0.09519  | -0.12485 | 0.0069   | -0.02859 | 0.53776  | -0.02839 | 0.54052  | -0.09667 | 0.03676  |
| 0.40183  | -0.03987 | 0.38998  | 0.022697 | 0.62468  | 0.010338 | 0.82368  | 0.009824 | 0.83231  |
| 6.26E-05 | -0.1252  | 0.00675  | -0.00206 | 0.96458  | 0.026803 | 0.56342  | 0.133981 | 0.00372  |
| 0.80365  | -0.02432 | 0.60016  | -0.02162 | 0.64115  | -0.01967 | 0.67164  | 0.233401 | 3.38E-07 |
| 0.00061  | 0.086898 | 0.0606   | 0.177149 | 0.00012  | 0.16851  | 0.00025  | 0.139918 | 0.00244  |
| 0.00825  | -0.02651 | 0.56774  | 0.072196 | 0.11923  | 0.061947 | 0.18142  | -0.05151 | 0.26658  |
| 0.05346  | -0.27106 | 2.62E-09 | -0.1463  | 0.00152  | -0.18853 | 4.13E-05 | -0.04826 | 0.29805  |
| 0.00665  | -0.20158 | 1.14E-05 | -0.09461 | 0.04098  | -0.04687 | 0.31215  | -0.04422 | 0.34038  |
| 0.0032   | -0.09114 | 0.04904  | -0.20278 | 1.00E-05 | -0.1885  | 4.14E-05 | -0.21036 | 4.53E-06 |
| 0.07722  | -0.24061 | 1.42E-07 | 0.020005 | 0.66633  | -0.12081 | 0.00897  | 0.038652 | 0.40465  |
| 0.57333  | -0.10997 | 0.01744  | -0.00785 | 0.86571  | -0.04696 | 0.31126  | 0.211614 | 3.97E-06 |
| 0.5712   | -0.06106 | 0.18779  | -0.04429 | 0.33957  | -0.0376  | 0.41756  | -0.01166 | 0.80151  |
| 0.0009   | 0.019222 | 0.67864  | 0.111343 | 0.01608  | 0.092749 | 0.04515  | 0.10362  | 0.02514  |
| 0.02865  | -0.2636  | 7.31E-09 | -0.24881 | 5.08E-08 | -0.22062 | 1.48E-06 | 0.078444 | 0.09041  |
| 1.40E-05 | 0.35538  | 2.39E-15 | -0.02362 | 0.61068  | 0.146933 | 0.00145  | 0.358709 | 1.26E-15 |
| 0.50492  | 0.08565  | 0.06441  | -0.02199 | 0.63558  | -0.03158 | 0.49604  | 0.19356  | 2.54E-05 |
| 0.0046   | -0.15596 | 0.00072  | -0.19077 | 3.33E-05 | -0.19236 | 2.85E-05 | -0.23614 | 2.44E-07 |
| 0.83577  | -0.07148 | 0.12294  | -0.0132  | 0.77605  | -0.04729 | 0.30779  | 0.028105 | 0.54462  |
| 0.08064  | 0.074827 | 0.10632  | -0.11043 | 0.01697  | -0.05211 | 0.26106  | 0.21052  | 4.46E-06 |
| 1.64E-08 | -0.10354 | 0.02525  | -0.00939 | 0.83963  | 0.07895  | 0.08834  | -0.079   | 0.08816  |
| 0.00013  | -0.07281 | 0.11613  | 0.096266 | 0.03756  | 0.093982 | 0.04235  | 0.01136  | 0.80659  |
| 0.57697  | -0.07245 | 0.11792  | -0.11958 | 0.0097   | -0.07961 | 0.0857   | 0.160796 | 0.00049  |
| 0.03021  | -0.01523 | 0.74267  | -0.19931 | 1.43E-05 | -0.16808 | 0.00026  | 0.022446 | 0.6285   |
| 0.94178  | -0.32113 | 1.16E-12 | -0.02926 | 0.52824  | -0.1099  | 0.01751  | 0.083386 | 0.07182  |
| 0.13746  | 0.076136 | 0.10032  | -0.07692 | 0.09688  | 0.01398  | 0.76317  | 0.268842 | 3.57E-09 |
| 9.32E-08 | 0.241105 | 1.33E-07 | 0.044799 | 0.33404  | 0.195943 | 2.00E-05 | 0.184498 | 6.05E-05 |
| 0.00107  | 0.45075  | 9.49E-25 | 0.319438 | 1.54E-12 | 0.287127 | 2.58E-10 | 0.220797 | 1.45E-06 |
| 0.15709  | -0.03438 | 0.45853  | 0.05614  | 0.22594  | 0.036788 | 0.4277   | -0.01377 | 0.7667   |
| 0.45112  | -0.07737 | 0.0949   | -0.24684 | 6.52E-08 | -0.10862 | 0.01888  | 0.075741 | 0.1021   |
| 1.98E-06 | -0.11763 | 0.01095  | -0.24692 | 6.46E-08 | -0.28938 | 1.84E-10 | 0.24462  | 8.62E-08 |
| 0.06642  | 0.121785 | 0.00842  | 0.089443 | 0.05341  | 0.117865 | 0.0108   | -0.05076 | 0.27366  |
| 0.36272  | 0.036798 | 0.42758  | 0.049189 | 0.28879  | 0.054851 | 0.23679  | -0.0037  | 0.93645  |
| 2.11E-07 | 0.068997 | 0.13653  | 0.210258 | 4.59E-06 | 0.191074 | 3.23E-05 | 0.044917 | 0.33277  |
| 4.19E-05 | 0.107272 | 0.02041  | 0.148797 | 0.00126  | 0.172931 | 0.00017  | 0.118464 | 0.0104   |
| 3.43E-06 | -0.03668 | 0.42907  | -0.12792 | 0.00563  | -0.17279 | 0.00018  | 0.009024 | 0.84578  |
| 0.06943  | 0.016403 | 0.72369  | 0.121915 | 0.00835  | 0.064554 | 0.1637   | -0.05309 | 0.25223  |
| 0.42708  | -0.11721 | 0.01125  | -0.0337  | 0.46749  | -0.03872 | 0.40381  | -0.00031 | 0.99471  |
| 0.13566  | -0.00748 | 0.87187  | -0.00031 | 0.99475  | -0.03216 | 0.48816  | 0.072623 | 0.11705  |
| 0.00319  | -0.00235 | 0.95961  | 0.162789 | 0.00041  | 0.159139 | 0.00056  | -0.24392 | 9.41E-08 |
| 0.48211  | -0.12349 | 0.00755  | -0.23044 | 4.79E-07 | -0.16335 | 0.00039  | 0.141513 | 0.00217  |

|          |          |          |          |          |          |          |          |          |
|----------|----------|----------|----------|----------|----------|----------|----------|----------|
| 0.0982   | -0.24502 | 8.20E-08 | -0.13377 | 0.00378  | -0.12099 | 0.00886  | 0.008726 | 0.85083  |
| 0.0751   | -0.17126 | 0.0002   | -0.19552 | 2.09E-05 | -0.09481 | 0.04057  | -0.24097 | 1.35E-07 |
| 0.00021  | -0.27838 | 9.29E-10 | -0.11349 | 0.01413  | -0.1949  | 2.22E-05 | -0.061   | 0.18819  |
| 0.00702  | 0.157924 | 0.00061  | -0.00255 | 0.95614  | 0.072377 | 0.1183   | 0.443017 | 7.19E-24 |
| 1.01E-09 | 0.067319 | 0.14635  | 0.203185 | 9.63E-06 | 0.236217 | 2.41E-07 | 0.083394 | 0.07179  |
| 7.59E-05 | -0.21676 | 2.27E-06 | -0.2193  | 1.71E-06 | -0.22855 | 5.98E-07 | -0.26484 | 6.17E-09 |
| 0.09561  | 0.119048 | 0.01003  | 0.159085 | 0.00056  | 0.10555  | 0.02254  | 0.167304 | 0.00028  |
| 0.14505  | -0.25458 | 2.42E-08 | -0.09668 | 0.03675  | -0.0738  | 0.1112   | -0.16174 | 0.00045  |
| 0.49825  | 0.296938 | 5.83E-11 | 0.11414  | 0.01359  | 0.173361 | 0.00017  | 0.137808 | 0.00284  |
| 0.52204  | -0.02859 | 0.53769  | 0.028676 | 0.53647  | -0.06224 | 0.17934  | 0.072206 | 0.11918  |
| 5.05E-13 | 0.121204 | 0.00874  | 0.054881 | 0.23653  | 0.177643 | 0.00011  | -0.15649 | 0.00069  |
| 3.96E-19 | 0.460293 | 7.25E-26 | 0.281502 | 5.92E-10 | 0.367788 | 2.10E-16 | 0.163229 | 0.0004   |
| 0.49393  | -0.20452 | 8.39E-06 | -0.09577 | 0.03856  | -0.08589 | 0.06367  | -0.16356 | 0.00039  |
| 0.10898  | -0.1823  | 7.43E-05 | -0.09925 | 0.032    | -0.14188 | 0.00212  | -0.07961 | 0.08571  |
| 0.2087   | -0.04772 | 0.30349  | -0.03836 | 0.40826  | -0.05858 | 0.20639  | -0.25129 | 3.70E-08 |
| 0.8087   | 0.044347 | 0.33894  | -0.0526  | 0.25665  | -0.00598 | 0.89747  | 0.03613  | 0.43602  |
| 0.00076  | 0.221235 | 1.38E-06 | 0.130275 | 0.00481  | 0.219945 | 1.59E-06 | 0.087687 | 0.05829  |
| 4.84E-05 | 0.153067 | 0.0009   | 0.230861 | 4.56E-07 | 0.244585 | 8.66E-08 | -0.09874 | 0.03291  |
| 7.33E-13 | 0.070674 | 0.12724  | 0.034152 | 0.46157  | 0.162777 | 0.00041  | 0.050802 | 0.27325  |
| 6.17E-10 | 0.020202 | 0.66325  | -0.1804  | 8.84E-05 | -0.21902 | 1.77E-06 | -0.10715 | 0.02056  |
| 0.01525  | 0.038222 | 0.4099   | 0.13532  | 0.00339  | 0.125013 | 0.00683  | -0.08743 | 0.05903  |
| 0.6754   | -0.09755 | 0.03508  | -0.0316  | 0.49571  | -0.00526 | 0.90967  | -0.15646 | 0.00069  |
| 0.20358  | -0.06528 | 0.15898  | 0.089834 | 0.05237  | 0.047261 | 0.30813  | -0.03945 | 0.39505  |
| 4.00E-11 | -0.05532 | 0.23276  | -0.20464 | 8.28E-06 | -0.23742 | 2.09E-07 | -0.10583 | 0.02218  |
| 0.89639  | -0.29873 | 4.42E-11 | -0.17229 | 0.00018  | -0.1685  | 0.00025  | 0.05086  | 0.27271  |
| 0.13106  | -0.08791 | 0.05764  | 0.042173 | 0.36317  | 0.032793 | 0.47959  | -0.01587 | 0.73232  |
| 0.00049  | -0.19205 | 2.94E-05 | -0.1853  | 5.61E-05 | -0.19859 | 1.54E-05 | -0.28726 | 2.53E-10 |
| 0.56552  | -0.07632 | 0.09951  | -0.04979 | 0.2829   | -0.05902 | 0.20295  | 0.040768 | 0.37939  |
| 2.22E-07 | 0.223653 | 1.05E-06 | 0.228747 | 5.84E-07 | 0.256352 | 1.92E-08 | 0.156736 | 0.00068  |
| 0.01361  | 0.070313 | 0.12919  | 0.081899 | 0.07705  | 0.099972 | 0.03077  | -0.20449 | 8.41E-06 |
| 1.12E-07 | 0.269122 | 3.43E-09 | 0.432662 | 9.99E-23 | 0.313909 | 3.87E-12 | -0.07084 | 0.12634  |
| 0.81519  | -0.05112 | 0.27021  | -0.00955 | 0.83692  | -0.01904 | 0.68145  | -0.01295 | 0.78021  |
| 0.9168   | 0.141412 | 0.00219  | 0.026131 | 0.57324  | 0.043942 | 0.34339  | 0.232021 | 3.98E-07 |
| 3.30E-06 | 0.027715 | 0.55022  | 0.100947 | 0.02917  | 0.170903 | 0.00021  | 0.037345 | 0.42073  |
| 0.33289  | -0.0716  | 0.12229  | -0.02213 | 0.63336  | -0.03082 | 0.50646  | 0.234918 | 2.82E-07 |
| 0.46865  | -0.17456 | 0.00015  | -0.02109 | 0.64937  | -0.05281 | 0.25475  | -0.18215 | 7.53E-05 |
| 0.00058  | -0.12232 | 0.00814  | -0.17595 | 0.00013  | -0.18975 | 3.67E-05 | -0.21545 | 2.62E-06 |
| 0.64371  | 0.189225 | 3.86E-05 | -0.0169  | 0.71566  | 0.031537 | 0.49659  | 0.183291 | 6.77E-05 |
| 6.77E-05 | -0.04018 | 0.38631  | -0.12023 | 0.00931  | -0.14064 | 0.00232  | -0.00103 | 0.98225  |
| 3.75E-06 | -0.1209  | 0.00891  | -0.19369 | 2.50E-05 | -0.20479 | 8.16E-06 | -0.19599 | 1.99E-05 |
| 0.00278  | -0.00297 | 0.94895  | -0.07263 | 0.117    | -0.00626 | 0.89265  | -0.0453  | 0.32861  |
| 1.17E-08 | -0.17501 | 0.00014  | -0.26136 | 9.88E-09 | -0.27511 | 1.48E-09 | -0.11099 | 0.01642  |
| 0.06041  | -0.09554 | 0.03903  | -0.13412 | 0.00369  | -0.16091 | 0.00048  | -0.06488 | 0.1616   |
| 5.24E-07 | -0.11843 | 0.01042  | -0.19857 | 1.54E-05 | -0.21153 | 4.00E-06 | -0.16987 | 0.00023  |
| 3.39E-10 | 0.263451 | 7.45E-09 | 0.250663 | 4.01E-08 | 0.323543 | 7.68E-13 | 0.087418 | 0.05907  |

|          |          |          |          |          |          |          |          |          |
|----------|----------|----------|----------|----------|----------|----------|----------|----------|
| 0.00394  | -0.03088 | 0.5056   | 0.084483 | 0.06814  | 0.093369 | 0.04372  | 0.11417  | 0.01356  |
| 0.00066  | -0.03631 | 0.43368  | 0.020813 | 0.6537   | -0.09595 | 0.0382   | 0.098734 | 0.03291  |
| 0.60944  | 0.105476 | 0.02263  | 0.119787 | 0.00957  | 0.088771 | 0.05524  | 0.194746 | 2.26E-05 |
| 0.01038  | 0.106531 | 0.02131  | 0.270377 | 2.88E-09 | 0.163685 | 0.00038  | -0.04402 | 0.34258  |
| 0.00044  | 0.02934  | 0.52707  | 0.180089 | 9.10E-05 | 0.18033  | 8.90E-05 | -0.05466 | 0.23839  |
| 0.03684  | 0.058455 | 0.20734  | 0.140955 | 0.00226  | 0.143177 | 0.00192  | 0.293775 | 9.49E-11 |
| 0.68083  | -0.07837 | 0.0907   | -0.00285 | 0.95099  | 0.019411 | 0.67566  | -0.16968 | 0.00023  |
| 1.25E-06 | 0.092135 | 0.0466   | 0.09644  | 0.03722  | 0.111967 | 0.01549  | 0.284065 | 4.07E-10 |
| 9.11E-08 | -0.20337 | 9.44E-06 | 0.03082  | 0.50644  | 0.071648 | 0.12207  | 0.106561 | 0.02127  |
| 0.14907  | 0.003835 | 0.93412  | 0.033909 | 0.46476  | 0.049485 | 0.28589  | 0.287379 | 2.49E-10 |
| 0.67691  | -0.03078 | 0.50705  | -0.00118 | 0.97966  | -0.01789 | 0.69972  | -0.22076 | 1.45E-06 |
| 0.00017  | -0.03268 | 0.48109  | 0.163796 | 0.00038  | 0.125951 | 0.00642  | 0.074166 | 0.10945  |
| 2.99E-16 | 0.084056 | 0.06955  | 0.133792 | 0.00377  | 0.190826 | 3.31E-05 | 0.369681 | 1.43E-16 |
| 0.31561  | 0.074229 | 0.10915  | -0.01151 | 0.80415  | -0.0175  | 0.70596  | 0.082441 | 0.07511  |
| 0.00071  | 0.02922  | 0.52876  | 0.245501 | 7.72E-08 | 0.165985 | 0.00032  | -0.01919 | 0.67921  |
| 0.00754  | 0.020186 | 0.66349  | 0.092295 | 0.04622  | 0.117957 | 0.01074  | 0.06994  | 0.13125  |
| 3.99E-05 | -0.11565 | 0.01239  | -0.01223 | 0.79215  | 0.01979  | 0.66969  | 0.05272  | 0.25553  |
| 0.45592  | -0.03845 | 0.40706  | 0.038619 | 0.40505  | 0.028022 | 0.5458   | -0.05065 | 0.27469  |
| 0.49128  | -0.03795 | 0.41326  | 0.107041 | 0.02069  | 0.067079 | 0.1478   | 0.412544 | 1.29E-20 |
| 0.00167  | -0.01139 | 0.80615  | -0.20105 | 1.20E-05 | -0.16113 | 0.00047  | -0.17994 | 9.22E-05 |
| 0.53101  | 0.029684 | 0.52224  | 0.111256 | 0.01616  | 0.039    | 0.40043  | 0.08968  | 0.05278  |
| 1.60E-05 | -0.13136 | 0.00446  | 0.103067 | 0.02593  | 0.050649 | 0.2747   | -0.02387 | 0.60695  |
| 0.09171  | -0.11314 | 0.01443  | -0.03084 | 0.50618  | -0.0305  | 0.51089  | -0.04944 | 0.2863   |
| 0.6972   | 0.002671 | 0.95409  | 0.012691 | 0.78444  | -0.02138 | 0.64492  | -0.067   | 0.14831  |
| 0.03646  | -0.02845 | 0.53964  | -0.08662 | 0.06143  | -0.08946 | 0.05338  | 0.022639 | 0.62556  |
| 0.0543   | 0.037771 | 0.41545  | 0.113757 | 0.01391  | 0.090346 | 0.05104  | 0.015547 | 0.73755  |
| 0.01466  | -0.15243 | 0.00095  | 0.038929 | 0.40129  | 0.013905 | 0.7644   | 0.009199 | 0.84285  |
| 0.26433  | 0.314407 | 3.57E-12 | 0.309491 | 7.98E-12 | 0.24329  | 1.02E-07 | 0.039953 | 0.38901  |
| 0.6804   | 0.065867 | 0.15528  | 0.114521 | 0.01327  | 0.0513   | 0.26857  | -0.02557 | 0.58151  |
| 0.11109  | 0.309649 | 7.78E-12 | 0.069032 | 0.13634  | 0.156674 | 0.00068  | 0.154122 | 0.00083  |
| 3.59E-05 | -0.1374  | 0.00293  | -0.19453 | 2.30E-05 | -0.21523 | 2.68E-06 | -0.25453 | 2.44E-08 |
| 0.02804  | -0.1581  | 0.00061  | -0.02023 | 0.66275  | -0.00807 | 0.86189  | 0.233668 | 3.27E-07 |
| 0.00023  | -0.10849 | 0.01902  | 0.017974 | 0.69846  | 0.044255 | 0.33995  | 0.469759 | 5.22E-27 |
| 3.80E-09 | -0.33757 | 6.55E-14 | -0.4592  | 9.79E-26 | -0.41516 | 6.98E-21 | -0.00137 | 0.97637  |
| 0.003    | -0.35307 | 3.72E-15 | -0.22428 | 9.77E-07 | -0.25372 | 2.71E-08 | -0.00416 | 0.9286   |
| 0.65883  | 0.228273 | 6.17E-07 | 0.054169 | 0.24268  | 0.067563 | 0.1449   | 0.210784 | 4.34E-06 |
| 1.54E-05 | -0.14498 | 0.00168  | -0.28367 | 4.31E-10 | -0.26969 | 3.17E-09 | -0.14405 | 0.0018   |
| 0.01941  | -0.176   | 0.00013  | -0.19602 | 1.99E-05 | -0.16361 | 0.00038  | 0.190453 | 3.43E-05 |
| 0.00022  | -0.19704 | 1.80E-05 | -0.27846 | 9.18E-10 | -0.26073 | 1.07E-08 | -0.02135 | 0.64534  |
| 0.00035  | 0.019153 | 0.67972  | 0.182063 | 7.59E-05 | 0.178198 | 0.00011  | 0.341975 | 2.95E-14 |
| 9.92E-09 | -0.01537 | 0.7404   | 0.118765 | 0.01021  | 0.165296 | 0.00033  | 0.124736 | 0.00696  |
| 2.50E-12 | 0.352781 | 3.93E-15 | 0.361814 | 6.86E-16 | 0.355029 | 2.56E-15 | 0.324975 | 6.01E-13 |
| 0.53713  | 0.114725 | 0.01311  | -0.08028 | 0.08308  | 0.001584 | 0.97276  | 0.128417 | 0.00545  |
| 0.88542  | -0.02511 | 0.58834  | -0.17409 | 0.00016  | -0.05708 | 0.21821  | 0.385754 | 5.11E-18 |
| 9.09E-10 | 0.155498 | 0.00075  | 0.26125  | 1.00E-08 | 0.277123 | 1.11E-09 | 0.299304 | 4.04E-11 |

|          |          |          |          |          |          |          |          |          |
|----------|----------|----------|----------|----------|----------|----------|----------|----------|
| 0.3482   | 0.032131 | 0.48852  | 0.025715 | 0.57937  | 0.010944 | 0.81353  | 0.135425 | 0.00337  |
| 0.98255  | 0.015429 | 0.73948  | 0.026681 | 0.5652   | -0.01461 | 0.75281  | -0.09002 | 0.05189  |
| 1.96E-05 | -0.12385 | 0.00737  | -0.18415 | 6.25E-05 | -0.20572 | 7.40E-06 | 0.333726 | 1.30E-13 |
| 0.01191  | -0.11685 | 0.0115   | -0.10595 | 0.02203  | -0.13557 | 0.00333  | 0.00938  | 0.83978  |
| 0.00207  | -0.228   | 6.37E-07 | -0.15912 | 0.00056  | -0.19889 | 1.49E-05 | -0.09374 | 0.04289  |
| 0.178    | 0.204793 | 8.15E-06 | 0.193075 | 2.66E-05 | 0.149429 | 0.0012   | 0.142001 | 0.0021   |
| 0.00045  | -0.28233 | 5.24E-10 | -0.24088 | 1.37E-07 | -0.25883 | 1.38E-08 | -0.16421 | 0.00037  |
| 0.00601  | 0.36019  | 9.42E-16 | 0.204663 | 8.26E-06 | 0.264831 | 6.18E-09 | 0.406478 | 5.24E-20 |
| 1.41E-11 | -0.0159  | 0.73179  | 0.140316 | 0.00237  | 0.180959 | 8.40E-05 | -0.06631 | 0.15254  |
| 0.0391   | 0.077591 | 0.09398  | -0.14147 | 0.00218  | -0.02554 | 0.58195  | 0.380795 | 1.46E-17 |
| 0.09087  | -0.21833 | 1.91E-06 | -0.10662 | 0.02119  | -0.10353 | 0.02527  | -0.20978 | 4.83E-06 |
| 0.35137  | -0.0457  | 0.32442  | -0.09106 | 0.04922  | -0.05059 | 0.27523  | -0.13558 | 0.00333  |
| 8.33E-09 | 0.172783 | 0.00018  | 0.28955  | 1.80E-10 | 0.30992  | 7.45E-12 | 0.287709 | 2.37E-10 |
| 0.04481  | -0.03804 | 0.41219  | 0.038652 | 0.40464  | 0.049812 | 0.28272  | 0.243804 | 9.54E-08 |
| 1.00E-09 | -0.13189 | 0.0043   | -0.14894 | 0.00125  | -0.24873 | 5.14E-08 | -0.13758 | 0.00289  |
| 0.10012  | 0.048971 | 0.29093  | 0.167002 | 0.00029  | 0.100312 | 0.0302   | 0.117661 | 0.01094  |
| 0.06944  | -0.16985 | 0.00023  | -0.13899 | 0.00261  | -0.1456  | 0.00161  | -0.18341 | 6.70E-05 |
| 0.01465  | -0.12634 | 0.00626  | 0.049633 | 0.28446  | -0.0068  | 0.88351  | -0.00175 | 0.96988  |
| 0.51058  | 0.048785 | 0.29277  | -0.03285 | 0.47877  | 0.020223 | 0.66291  | 0.220218 | 1.55E-06 |
| 0.9475   | -0.0845  | 0.06808  | -0.1138  | 0.01387  | -0.09417 | 0.04194  | -0.04222 | 0.36261  |
| 0.06192  | -0.1119  | 0.01555  | -0.00123 | 0.9788   | 0.00939  | 0.83962  | -0.14068 | 0.00231  |
| 0.11531  | 0.082281 | 0.07567  | -0.12918 | 0.00518  | -0.06477 | 0.16232  | 0.20938  | 5.04E-06 |
| 0.02348  | 0.264326 | 6.62E-09 | 0.040682 | 0.38041  | 0.138506 | 0.0027   | 0.197099 | 1.79E-05 |
| 8.73E-07 | 0.383187 | 8.81E-18 | 0.412208 | 1.39E-20 | 0.399219 | 2.70E-19 | 0.302059 | 2.62E-11 |
| 0.00944  | -0.25572 | 2.08E-08 | -0.17085 | 0.00021  | -0.196   | 1.99E-05 | -0.12379 | 0.0074   |
| 0.7716   | -0.0422  | 0.36284  | 0.001571 | 0.97299  | 0.009051 | 0.84533  | 0.02199  | 0.6355   |
| 0.33473  | -0.33853 | 5.51E-14 | -0.13072 | 0.00466  | -0.15186 | 0.00099  | -0.14834 | 0.0013   |
| 0.30456  | -0.00056 | 0.99044  | -0.12791 | 0.00564  | -0.08094 | 0.08059  | 0.021247 | 0.64698  |
| 1.28E-05 | -0.06014 | 0.1945   | -0.28815 | 2.22E-10 | -0.24612 | 7.15E-08 | 0.203453 | 9.37E-06 |
| 0.00037  | -0.0569  | 0.21973  | 0.049963 | 0.28126  | 0.100616 | 0.0297   | 0.107191 | 0.02051  |
| 0.13523  | -0.1154  | 0.01258  | 0.051547 | 0.26627  | 0.011074 | 0.81136  | 0.233749 | 3.24E-07 |
| 3.80E-16 | -0.02209 | 0.63391  | 0.218586 | 1.85E-06 | 0.223138 | 1.11E-06 | -0.04013 | 0.38685  |
| 0.42411  | -0.14315 | 0.00193  | -0.00171 | 0.97052  | -0.04609 | 0.32028  | 0.039591 | 0.39332  |
| 0.40195  | -0.10213 | 0.02731  | -0.16854 | 0.00025  | -0.15756 | 0.00063  | -0.09394 | 0.04245  |
| 0.00148  | -0.13919 | 0.00257  | -0.07758 | 0.09402  | -0.19229 | 2.87E-05 | -0.01884 | 0.68473  |
| 0.43292  | -0.1718  | 0.00019  | -0.04039 | 0.38387  | -0.0749  | 0.10596  | -0.03615 | 0.43576  |
| 0.02044  | -0.07426 | 0.109    | 0.051486 | 0.26684  | -0.04243 | 0.36022  | -0.02599 | 0.57527  |
| 0.23887  | -0.04253 | 0.35912  | -0.01845 | 0.69092  | -0.03352 | 0.46986  | -0.14994 | 0.00115  |
| 0.2904   | -0.13147 | 0.00443  | -0.14209 | 0.00208  | -0.09973 | 0.03117  | -0.16226 | 0.00043  |
| 0.35375  | -0.03914 | 0.39871  | -0.03196 | 0.49085  | -0.05435 | 0.24106  | -0.02755 | 0.55253  |
| 0.01254  | 0.384639 | 6.47E-18 | 0.236661 | 2.29E-07 | 0.255557 | 2.13E-08 | -0.07267 | 0.1168   |
| 0.21947  | -0.03959 | 0.39329  | 0.000428 | 0.99265  | -0.04043 | 0.38341  | 0.151717 | 0.00101  |
| 0.26394  | -0.20667 | 6.70E-06 | -0.02855 | 0.53826  | -0.046   | 0.32125  | 0.091978 | 0.04697  |
| 0.49565  | 0.001658 | 0.9715   | 0.071666 | 0.12197  | -0.01067 | 0.81805  | 0.002734 | 0.95302  |
| 1.53E-08 | 0.139256 | 0.00256  | 0.28949  | 1.82E-10 | 0.251263 | 3.72E-08 | 0.077987 | 0.09231  |



|          |          |          |          |          |          |          |          |          |
|----------|----------|----------|----------|----------|----------|----------|----------|----------|
| 0.07975  | -0.3369  | 7.38E-14 | -0.17362 | 0.00016  | -0.21615 | 2.43E-06 | -0.14237 | 0.00204  |
| 0.0517   | -0.3132  | 4.36E-12 | -0.27755 | 1.05E-09 | -0.26577 | 5.44E-09 | 0.103921 | 0.02472  |
| 0.00012  | -0.23503 | 2.78E-07 | -0.27548 | 1.41E-09 | -0.26797 | 4.02E-09 | -0.18567 | 5.42E-05 |
| 0.86545  | -0.13725 | 0.00296  | -0.20423 | 8.64E-06 | -0.1295  | 0.00507  | -0.20067 | 1.25E-05 |
| 1.42E-09 | 0.192734 | 2.75E-05 | 0.37781  | 2.72E-17 | 0.299379 | 3.99E-11 | 0.355374 | 2.39E-15 |
| 0.69304  | 0.146659 | 0.00148  | 0.036139 | 0.4359   | 0.024368 | 0.59939  | 0.252692 | 3.09E-08 |
| 0.13505  | 0.132023 | 0.00426  | 0.104828 | 0.02348  | 0.076032 | 0.10079  | 0.088631 | 0.05562  |
| 0.0008   | -0.14871 | 0.00127  | 0.012922 | 0.78063  | 0.029013 | 0.53169  | 0.23961  | 1.60E-07 |
| 0.70343  | -0.11269 | 0.01483  | -0.12887 | 0.00529  | -0.10678 | 0.021    | 0.06916  | 0.13561  |
| 1.80E-05 | 0.205725 | 7.40E-06 | 0.070965 | 0.12567  | 0.169316 | 0.00024  | 0.443241 | 6.78E-24 |
| 2.48E-09 | 0.128126 | 0.00556  | 0.079069 | 0.08786  | 0.153535 | 0.00087  | 0.228932 | 5.72E-07 |
| 0.95265  | 0.092681 | 0.04531  | 0.062959 | 0.17438  | 0.04895  | 0.29114  | 0.167528 | 0.00028  |
| 0.52409  | -0.22999 | 5.05E-07 | -0.01171 | 0.80076  | -0.13031 | 0.00479  | -0.17851 | 0.00011  |
| 0.11379  | 0.185509 | 5.50E-05 | 0.268294 | 3.85E-09 | 0.183423 | 6.69E-05 | -0.0099  | 0.83098  |
| 0.0002   | -0.16345 | 0.00039  | -0.01137 | 0.80639  | 0.010664 | 0.81821  | 0.034374 | 0.45866  |
| 0.01416  | 0.080244 | 0.08323  | 0.100217 | 0.03036  | 0.108733 | 0.01875  | 0.166713 | 0.0003   |
| 0.97785  | -0.08127 | 0.07936  | -0.02776 | 0.54954  | 0.004779 | 0.91797  | -0.00728 | 0.8754   |
| 0.03015  | -0.12574 | 0.00651  | 0.079264 | 0.08708  | 0.058918 | 0.20376  | 0.014388 | 0.75648  |
| 0.00046  | 0.099368 | 0.0318   | 0.175766 | 0.00013  | 0.155677 | 0.00074  | 0.03009  | 0.51656  |
| 0.61544  | -0.25418 | 2.55E-08 | -0.15717 | 0.00065  | -0.16715 | 0.00029  | 0.055897 | 0.22796  |
| 0.00396  | -0.13838 | 0.00273  | -0.18557 | 5.47E-05 | -0.1804  | 8.85E-05 | -0.15619 | 0.00071  |
| 1.02E-06 | -0.10479 | 0.02353  | -0.1548  | 0.00079  | 0.005082 | 0.91278  | 0.129215 | 0.00516  |
| 0.67781  | 0.034695 | 0.45447  | 0.020246 | 0.66255  | 0.016596 | 0.72057  | -0.01621 | 0.72674  |
| 5.00E-06 | 0.194606 | 2.29E-05 | 0.271146 | 2.59E-09 | 0.252955 | 2.99E-08 | -0.00585 | 0.89974  |
| 0.80726  | 0.034346 | 0.45902  | 0.037119 | 0.42355  | 0.014408 | 0.75615  | -0.01442 | 0.75594  |
| 0.63013  | -0.00976 | 0.83343  | -0.16591 | 0.00032  | -0.07789 | 0.09271  | 0.180667 | 8.63E-05 |
| 0.97145  | 0.29024  | 1.62E-10 | 0.156464 | 0.00069  | 0.132056 | 0.00425  | 0.07975  | 0.08515  |
| 0.00108  | 0.06067  | 0.19061  | 0.035883 | 0.43917  | 0.099971 | 0.03077  | -0.00251 | 0.95689  |
| 0.72028  | 0.031965 | 0.49076  | -0.06125 | 0.18641  | -0.05729 | 0.21654  | -0.05841 | 0.20772  |
| 0.06208  | -0.05509 | 0.23475  | 0.083643 | 0.07094  | 0.063601 | 0.17002  | 0.13317  | 0.00394  |
| 0.00302  | -0.10432 | 0.02416  | -0.16367 | 0.00038  | -0.15482 | 0.00079  | -0.30978 | 7.62E-12 |
| 4.92E-14 | -0.18874 | 4.05E-05 | -0.26304 | 7.88E-09 | -0.32428 | 6.77E-13 | -0.19462 | 2.28E-05 |
| 0.09819  | -0.05108 | 0.2706   | 0.013374 | 0.77316  | 0.016762 | 0.71788  | 0.08788  | 0.05774  |
| 0.92199  | -0.08741 | 0.0591   | -0.005   | 0.91419  | -0.0256  | 0.58105  | -0.20293 | 9.89E-06 |
| 0.00774  | -0.09169 | 0.04768  | -0.13309 | 0.00396  | -0.13498 | 0.00347  | 0.005163 | 0.9114   |
| 0.23581  | -0.01205 | 0.79516  | -0.04106 | 0.37601  | -0.07803 | 0.09213  | 0.164455 | 0.00036  |
| 0.81096  | -0.25085 | 3.92E-08 | -0.12143 | 0.00862  | -0.10914 | 0.01831  | 0.020367 | 0.66066  |
| 1.03E-06 | 0.274374 | 1.64E-09 | 0.060667 | 0.19063  | 0.210284 | 4.57E-06 | 0.39824  | 3.36E-19 |
| 3.78E-05 | -0.00928 | 0.84154  | 0.046075 | 0.32044  | 0.069668 | 0.13276  | 0.238946 | 1.73E-07 |
| 2.11E-09 | 0.19197  | 2.96E-05 | 0.185058 | 5.74E-05 | 0.223024 | 1.13E-06 | 0.194212 | 2.38E-05 |
| 0.08819  | -0.32474 | 6.26E-13 | -0.19227 | 2.88E-05 | -0.19026 | 3.50E-05 | -0.07223 | 0.11908  |
| 0.70397  | 0.03181  | 0.49287  | 0.138571 | 0.00269  | 0.104471 | 0.02396  | -0.21736 | 2.12E-06 |
| 0.00107  | 0.0055   | 0.90564  | 0.185576 | 5.47E-05 | 0.203687 | 9.14E-06 | 0.109161 | 0.01829  |
| 0.00412  | -0.32662 | 4.52E-13 | -0.22736 | 6.86E-07 | -0.26008 | 1.17E-08 | 0.102623 | 0.02658  |
| 0.00014  | 0.082946 | 0.07333  | -0.07774 | 0.09334  | 0.051285 | 0.26871  | 0.414582 | 8.00E-21 |

|          |          |          |          |          |          |          |          |          |
|----------|----------|----------|----------|----------|----------|----------|----------|----------|
| 0.40224  | -0.20505 | 7.94E-06 | -0.02726 | 0.55672  | -0.02399 | 0.60506  | -0.09757 | 0.03504  |
| 0.22728  | 0.066661 | 0.15035  | 0.058623 | 0.20604  | 0.068033 | 0.14211  | 0.052858 | 0.25428  |
| 0.22684  | 0.065074 | 0.16032  | -0.01535 | 0.74076  | 0.040921 | 0.3776   | 0.04689  | 0.31195  |
| 8.56E-10 | 0.093914 | 0.04251  | 0.420648 | 1.89E-21 | 0.297252 | 5.56E-11 | -0.0454  | 0.32756  |
| 1.53E-05 | -0.05859 | 0.20626  | 0.077139 | 0.09591  | 0.103822 | 0.02485  | -0.01535 | 0.74081  |
| 1.22E-05 | -0.13586 | 0.00326  | 0.000282 | 0.99515  | 0.049299 | 0.28772  | 0.405186 | 7.04E-20 |
| 1.54E-06 | 0.06764  | 0.14444  | -0.18242 | 7.34E-05 | -0.13175 | 0.00434  | -0.14868 | 0.00127  |
| 0.05185  | -0.03678 | 0.42775  | -0.03494 | 0.45125  | -0.02173 | 0.63954  | 0.076477 | 0.09881  |
| 0.00068  | 0.51188  | 1.50E-32 | 0.170774 | 0.00021  | 0.267916 | 4.05E-09 | 0.192799 | 2.73E-05 |
| 0.00277  | 0.064892 | 0.1615   | 0.078777 | 0.08904  | 0.096082 | 0.03793  | 0.481869 | 1.59E-28 |
| 9.82E-08 | 0.210687 | 4.38E-06 | 0.080988 | 0.0804   | 0.199137 | 1.46E-05 | 0.388174 | 3.04E-18 |
| 0.00206  | 0.216313 | 2.38E-06 | 0.290979 | 1.45E-10 | 0.277077 | 1.12E-09 | 0.073073 | 0.1148   |
| 4.66E-08 | 0.014653 | 0.75213  | -0.28305 | 4.72E-10 | -0.26664 | 4.83E-09 | -0.12863 | 0.00537  |
| 0.01912  | -0.14802 | 0.00134  | -0.14322 | 0.00192  | -0.11314 | 0.01443  | 0.021622 | 0.64118  |
| 0.51612  | -0.05598 | 0.22722  | -0.02929 | 0.52783  | -0.0357  | 0.44154  | -0.03553 | 0.44362  |
| 0.57532  | -0.04568 | 0.32463  | -0.08885 | 0.05502  | -0.04737 | 0.30696  | -0.04723 | 0.30848  |
| 0.01489  | 0.121482 | 0.00859  | -0.09551 | 0.03909  | -0.05418 | 0.24262  | -0.20739 | 6.21E-06 |
| 0.1486   | 0.043803 | 0.34491  | 0.062763 | 0.17573  | 0.052788 | 0.25491  | 0.013422 | 0.77237  |
| 0.60039  | 0.138847 | 0.00264  | 0.005667 | 0.90279  | 0.043593 | 0.34723  | -0.05676 | 0.2208   |
| 0.81505  | -0.05958 | 0.19875  | -0.07007 | 0.13051  | -0.034   | 0.46359  | -0.30037 | 3.42E-11 |
| 0.14165  | -0.13704 | 0.003    | -0.02032 | 0.66139  | 0.00316  | 0.9457   | -0.16133 | 0.00047  |
| 0.0853   | -0.00411 | 0.92933  | 0.102185 | 0.02724  | 0.10152  | 0.02826  | 0.099451 | 0.03166  |
| 0.04217  | 0.308453 | 9.44E-12 | -0.04726 | 0.30819  | 0.106617 | 0.0212   | 0.069964 | 0.13111  |
| 0.00896  | -0.23882 | 1.76E-07 | -0.10132 | 0.02858  | -0.06316 | 0.17298  | -0.03822 | 0.40988  |
| 0.00015  | -0.15453 | 0.00081  | -0.23889 | 1.75E-07 | -0.23816 | 1.91E-07 | 0.022976 | 0.62042  |
| 0.06591  | 0.288464 | 2.12E-10 | 0.225619 | 8.38E-07 | 0.237682 | 2.02E-07 | 0.295169 | 7.66E-11 |
| 0.89263  | 0.246394 | 6.90E-08 | 0.158798 | 0.00057  | 0.07924  | 0.08717  | 0.024271 | 0.60086  |
| 0.01749  | -0.1628  | 0.00041  | 0.002881 | 0.95049  | -0.05391 | 0.2449   | -0.01457 | 0.75349  |
| 0.44395  | -0.0281  | 0.54463  | -0.16979 | 0.00023  | -0.10107 | 0.02897  | -0.26181 | 9.30E-09 |
| 0.97668  | -0.11758 | 0.01099  | -0.01628 | 0.72565  | -0.02587 | 0.5771   | 0.036513 | 0.43116  |
| 0.05225  | -0.06197 | 0.18127  | -0.04218 | 0.36315  | -0.09394 | 0.04245  | -0.0287  | 0.53611  |
| 0.00134  | 0.295061 | 7.79E-11 | 0.18327  | 6.79E-05 | 0.227998 | 6.37E-07 | 0.190278 | 3.49E-05 |
| 2.16E-09 | 0.359683 | 1.04E-15 | 0.406923 | 4.73E-20 | 0.346877 | 1.19E-14 | 0.079029 | 0.08802  |
| 5.17E-12 | 0.30323  | 2.18E-11 | 0.315668 | 2.90E-12 | 0.361736 | 6.96E-16 | 0.310192 | 7.12E-12 |
| 0.21476  | -0.03184 | 0.49248  | -0.11557 | 0.01245  | -0.09978 | 0.03109  | 0.052618 | 0.25645  |
| 0.10209  | 0.196444 | 1.91E-05 | 0.032267 | 0.48667  | 0.002992 | 0.94858  | -0.0405  | 0.38249  |
| 0.07813  | 0.288271 | 2.18E-10 | 0.050574 | 0.27541  | 0.149254 | 0.00122  | 0.115666 | 0.01238  |
| 1.77E-07 | 0.253259 | 2.87E-08 | 0.002748 | 0.95276  | 0.20505  | 7.94E-06 | 0.231636 | 4.16E-07 |
| 0.02418  | 0.041714 | 0.36843  | 0.106756 | 0.02103  | 0.013611 | 0.76925  | 0.222813 | 1.15E-06 |
| 0.98816  | 0.065348 | 0.15857  | 0.248176 | 5.51E-08 | 0.096113 | 0.03787  | 0.048953 | 0.29111  |
| 0.00105  | -0.41404 | 9.08E-21 | -0.16698 | 0.00029  | -0.25516 | 2.24E-08 | -0.1767  | 0.00012  |
| 0.20434  | 0.218058 | 1.96E-06 | 0.210708 | 4.37E-06 | 0.228693 | 5.88E-07 | -0.16569 | 0.00032  |
| 0.01696  | 0.352561 | 4.09E-15 | 0.434441 | 6.40E-23 | 0.314616 | 3.45E-12 | 0.109118 | 0.01833  |
| 0.01014  | -0.11295 | 0.0146   | 0.04498  | 0.33209  | -0.07272 | 0.11659  | -0.11571 | 0.01234  |
| 0.1301   | -0.19698 | 1.81E-05 | 0.041628 | 0.36942  | -0.01713 | 0.71194  | -0.01865 | 0.68765  |

|          |          |          |           |          |           |          |          |          |
|----------|----------|----------|-----------|----------|-----------|----------|----------|----------|
| 1.20E-05 | 0.060155 | 0.19441  | -0.07296  | 0.11534  | 0.062957  | 0.1744   | 0.0176   | 0.70444  |
| 2.33E-08 | 0.124252 | 0.00718  | 0.132353  | 0.00417  | 0.175034  | 0.00014  | -0.05081 | 0.27322  |
| 0.00021  | -0.0786  | 0.08975  | -0.04394  | 0.34335  | -0.09056  | 0.05048  | 0.034964 | 0.45097  |
| 0.36011  | -0.08462 | 0.06769  | 0.011071  | 0.8114   | 0.021623  | 0.64115  | 0.050951 | 0.27184  |
| 0.08387  | -0.02411 | 0.6033   | -0.07714  | 0.0959   | 0.007601  | 0.86986  | -0.02419 | 0.60207  |
| 0.9372   | -0.11275 | 0.01478  | -0.06301  | 0.174    | -0.05585  | 0.22837  | 0.023957 | 0.60557  |
| 0.12067  | -0.01729 | 0.7094   | 0.053925  | 0.24481  | 0.064879  | 0.16159  | 0.051715 | 0.26471  |
| 0.60436  | -0.06752 | 0.14517  | -0.02947  | 0.52523  | -0.06352  | 0.17053  | 0.027724 | 0.55008  |
| 0.8571   | -0.07373 | 0.11158  | -0.04229  | 0.36188  | -0.02533  | 0.58513  | 0.089812 | 0.05243  |
| 0.39136  | -0.06112 | 0.18736  | -0.03889  | 0.40178  | -0.07558  | 0.10285  | 0.01568  | 0.7354   |
| 0.81998  | -0.09507 | 0.04002  | 0.015591  | 0.73683  | -0.03617  | 0.43556  | 0.007134 | 0.8778   |
| 0.01236  | 0.053122 | 0.25192  | 0.09507   | 0.04001  | 0.10847   | 0.01904  | 0.027131 | 0.55866  |
| 0.60662  | -0.08623 | 0.06261  | -0.00643  | 0.88977  | -0.0166   | 0.72056  | 0.026491 | 0.56798  |
| 0.17081  | -0.14116 | 0.00223  | -0.12706  | 0.00597  | -0.16969  | 0.00023  | 0.002509 | 0.95687  |
| 0.25563  | -0.0873  | 0.05941  | -0.06152  | 0.18448  | -0.06881  | 0.13761  | 0.122306 | 0.00815  |
| 0.82778  | -0.13573 | 0.00329  | -0.04409  | 0.34173  | -0.03232  | 0.48596  | 0.130677 | 0.00468  |
| 0.02914  | -0.07762 | 0.09385  | -0.03978  | 0.39106  | -0.08715  | 0.05985  | -0.0276  | 0.5519   |
| 0.31818  | -0.20628 | 6.98E-06 | -0.08605  | 0.06316  | -0.05954  | 0.19901  | 0.022103 | 0.63377  |
| 0.00965  | -0.09679 | 0.03654  | 0.012075  | 0.79467  | 0.031147  | 0.50193  | 0.053404 | 0.2494   |
| 0.13963  | -0.0675  | 0.14525  | -0.07032  | 0.12917  | -0.09115  | 0.04899  | 0.332423 | 1.64E-13 |
| 4.72E-09 | 0.356683 | 1.86E-15 | 0.342912  | 2.48E-14 | 0.346833  | 1.20E-14 | 0.331572 | 1.91E-13 |
| 0.01202  | 0.057577 | 0.21426  | 0.112462  | 0.01504  | 0.097739  | 0.03472  | -0.10778 | 0.01982  |
| 0.71352  | 0.067378 | 0.146    | 0.075585  | 0.10281  | 0.069238  | 0.13517  | -0.13196 | 0.00428  |
| 0.01144  | 0.007663 | 0.86883  | -1.22E-05 | 0.99979  | 0.042434  | 0.36022  | 0.147762 | 0.00136  |
| 6.26E-05 | -0.1005  | 0.02989  | -0.20617  | 7.06E-06 | -0.21732  | 2.13E-06 | -0.17403 | 0.00016  |
| 0.36014  | -0.10479 | 0.02353  | -0.03692  | 0.4261   | -0.07071  | 0.12705  | 0.127696 | 0.00572  |
| 7.22E-08 | -0.22691 | 7.22E-07 | -0.25542  | 2.17E-08 | -0.28298  | 4.77E-10 | -0.30575 | 1.46E-11 |
| 0.54293  | 0.050159 | 0.27938  | -0.13433  | 0.00363  | -0.0563   | 0.22457  | 0.205291 | 7.74E-06 |
| 0.28406  | 0.00072  | 0.98763  | -0.01203  | 0.79547  | 0.022559  | 0.62679  | 0.022509 | 0.62754  |
| 0.02024  | -0.03557 | 0.44314  | -0.14394  | 0.00182  | -7.03E-05 | 0.99879  | 0.024294 | 0.60051  |
| 5.43E-07 | -0.02956 | 0.52393  | 0.039433  | 0.39521  | 0.092863  | 0.04488  | 0.130277 | 0.00481  |
| 2.05E-05 | -0.15041 | 0.00111  | 0.036826  | 0.42723  | 0.090988  | 0.0494   | 0.17717  | 0.00012  |
| 8.12E-05 | 0.142241 | 0.00206  | 0.200889  | 1.22E-05 | 0.198963  | 1.48E-05 | 0.062772 | 0.17566  |
| 1.52E-08 | -0.12922 | 0.00516  | 0.101275  | 0.02865  | 0.125977  | 0.00641  | 0.219387 | 1.70E-06 |
| 0.12544  | 0.062057 | 0.18065  | 0.236794  | 2.25E-07 | 0.180787  | 8.54E-05 | -0.03677 | 0.42789  |
| 0.01207  | 0.144672 | 0.00172  | 0.205125  | 7.88E-06 | 0.161593  | 0.00046  | 0.199885 | 1.35E-05 |
| 0.09519  | -0.21419 | 3.00E-06 | 0.101422  | 0.02841  | 0.018158  | 0.69552  | 0.043083 | 0.3529   |
| 0.71088  | 0.262278 | 8.73E-09 | 0.271446  | 2.48E-09 | 0.146452  | 0.00151  | -0.01569 | 0.73521  |
| 0.00025  | 0.276908 | 1.15E-09 | 0.256657  | 1.84E-08 | 0.255613  | 2.11E-08 | 0.044322 | 0.33922  |
| 0.58839  | -0.04866 | 0.29398  | -0.00891  | 0.84773  | -0.01157  | 0.803    | -0.05429 | 0.24162  |
| 0.29507  | 0.072909 | 0.11561  | -0.04194  | 0.36588  | -0.04369  | 0.34618  | 0.028985 | 0.53209  |
| 0.00479  | 0.211219 | 4.14E-06 | 0.233326  | 3.41E-07 | 0.186784  | 4.88E-05 | 0.025165 | 0.58751  |
| 0.00023  | 0.305403 | 1.54E-11 | 0.06391   | 0.16795  | 0.171592  | 0.00019  | 0.234853 | 2.84E-07 |
| 0.27547  | -0.05221 | 0.26019  | -0.05609  | 0.22634  | -0.07021  | 0.12975  | 0.03011  | 0.51628  |
| 0.02452  | -0.17117 | 0.0002   | -0.21797  | 1.98E-06 | -0.05219  | 0.26031  | -0.1316  | 0.00439  |

|          |          |          |          |          |          |          |          |          |
|----------|----------|----------|----------|----------|----------|----------|----------|----------|
| 0.50257  | -0.02306 | 0.61917  | -0.0304  | 0.51221  | -0.02807 | 0.54514  | 0.010208 | 0.82586  |
| 0.88277  | -0.01766 | 0.70348  | 0.026866 | 0.56251  | 0.01837  | 0.69215  | 0.009109 | 0.84435  |
| 0.53899  | -0.06687 | 0.14905  | -0.06651 | 0.15125  | -0.04358 | 0.34742  | 0.006061 | 0.89607  |
| 0.04355  | -0.17441 | 0.00015  | -0.14185 | 0.00212  | -0.12532 | 0.0067   | -0.03931 | 0.39665  |
| 0.00021  | 0.422782 | 1.13E-21 | 0.116543 | 0.01172  | 0.189883 | 3.63E-05 | -0.04284 | 0.35561  |
| 0.103    | -0.13687 | 0.00304  | -0.10948 | 0.01795  | -0.04629 | 0.31815  | -0.06258 | 0.17701  |
| 0.00014  | -0.34274 | 2.56E-14 | -0.22344 | 1.07E-06 | -0.24657 | 6.75E-08 | -0.11898 | 0.01007  |
| 0.07275  | -0.26076 | 1.07E-08 | -0.10252 | 0.02674  | -0.16902 | 0.00024  | -0.06203 | 0.18083  |
| 0.03059  | 0.084367 | 0.06852  | 0.100388 | 0.03008  | 0.065916 | 0.15497  | -0.06551 | 0.15754  |
| 0.52089  | 0.040728 | 0.37987  | 0.115143 | 0.01278  | 0.068872 | 0.13725  | -0.0917  | 0.04764  |
| 0.04446  | 0.007892 | 0.86494  | -0.0232  | 0.61705  | 0.069044 | 0.13627  | 0.024248 | 0.6012   |
| 0.58941  | -0.17948 | 9.62E-05 | -0.07861 | 0.08974  | -0.10811 | 0.01945  | -0.15771 | 0.00063  |
| 0.00884  | -0.14536 | 0.00163  | -0.13761 | 0.00288  | -0.05875 | 0.20507  | 0.266878 | 4.67E-09 |
| 1.01E-06 | -0.1133  | 0.0143   | -0.0745  | 0.10787  | 0.085202 | 0.06582  | 0.079169 | 0.08746  |
| 0.04018  | 0.107433 | 0.02023  | 0.1936   | 2.53E-05 | 0.187164 | 4.70E-05 | 0.14228  | 0.00206  |
| 0.14623  | 0.135282 | 0.0034   | -0.1281  | 0.00557  | -0.00572 | 0.90197  | -0.21612 | 2.43E-06 |
| 0.00041  | 0.182084 | 7.58E-05 | 0.005716 | 0.90195  | 0.104406 | 0.02405  | 0.320377 | 1.32E-12 |
| 0.00562  | 0.129528 | 0.00506  | 0.125841 | 0.00647  | 0.112277 | 0.0152   | -0.02183 | 0.63799  |
| 0.27     | -0.02405 | 0.60416  | 0.037008 | 0.42493  | 0.009636 | 0.83548  | 0.002083 | 0.9642   |
| 0.20779  | 0.043758 | 0.34541  | 0.068074 | 0.14187  | 0.047414 | 0.30656  | -0.02117 | 0.64821  |
| 0.07092  | 0.128127 | 0.00556  | 0.013274 | 0.77481  | 0.065413 | 0.15816  | 0.490243 | 1.31E-29 |
| 0.48256  | -0.24461 | 8.63E-08 | -0.15928 | 0.00055  | -0.12247 | 0.00806  | 0.149557 | 0.00119  |
| 2.58E-05 | -0.22207 | 1.25E-06 | -0.00402 | 0.93099  | 0.034119 | 0.46201  | 0.326041 | 5.00E-13 |
| 0.23156  | -0.10596 | 0.02202  | 0.014307 | 0.7578   | -0.00865 | 0.85209  | -0.10931 | 0.01813  |
| 0.17741  | 0.043424 | 0.34911  | 0.042556 | 0.35883  | 0.071967 | 0.12041  | 0.229384 | 5.42E-07 |
| 0.17676  | 0.068751 | 0.13794  | -0.01097 | 0.81313  | 0.036996 | 0.4251   | 0.051305 | 0.26852  |
| 0.77173  | 0.297833 | 5.08E-11 | 0.246316 | 6.97E-08 | 0.159219 | 0.00055  | 0.11207  | 0.01539  |
| 0.1183   | 0.145109 | 0.00167  | 0.083331 | 0.072    | 0.097144 | 0.03585  | 0.278539 | 9.08E-10 |
| 3.68E-10 | -0.04817 | 0.29889  | -0.31897 | 1.67E-12 | -0.27371 | 1.81E-09 | 0.099195 | 0.0321   |
| 0.00426  | -0.08168 | 0.07785  | -0.05909 | 0.20243  | -0.08241 | 0.07522  | 0.177958 | 0.00011  |
| 0.81737  | 0.051551 | 0.26623  | 0.242897 | 1.07E-07 | 0.066093 | 0.15386  | 0.110685 | 0.01672  |
| 0.82036  | 0.054547 | 0.2394   | -0.02709 | 0.5592   | 0.017996 | 0.69811  | 0.032224 | 0.48725  |
| 0.01419  | 0.383648 | 7.99E-18 | 0.02032  | 0.66139  | 0.136934 | 0.00302  | 0.080441 | 0.08248  |
| 1.49E-05 | 0.227209 | 6.98E-07 | 0.201465 | 1.15E-05 | 0.23544  | 2.65E-07 | 0.201267 | 1.17E-05 |
| 1.34E-15 | 0.247591 | 5.93E-08 | 0.275472 | 1.41E-09 | 0.327735 | 3.73E-13 | 0.292335 | 1.18E-10 |
| 0.41409  | 0.151725 | 0.00101  | -0.24083 | 1.38E-07 | -0.10639 | 0.02148  | 0.083319 | 0.07204  |
| 0.10425  | 0.255338 | 2.19E-08 | -0.07668 | 0.09791  | 0.072231 | 0.11905  | 0.214046 | 3.05E-06 |
| 0.08274  | -0.08832 | 0.05649  | -0.01615 | 0.7278   | -0.03604 | 0.43711  | 0.13677  | 0.00306  |
| 0.44286  | -0.03227 | 0.4866   | 0.024056 | 0.60409  | -0.05982 | 0.19691  | 0.068578 | 0.13894  |
| 0.53298  | -0.02028 | 0.66199  | 0.01897  | 0.68263  | -0.01668 | 0.71919  | -0.01786 | 0.70026  |
| 0.51501  | 0.022458 | 0.62833  | 0.016503 | 0.72206  | 0.01758  | 0.70474  | -0.02422 | 0.60164  |
| 0.30364  | -0.16269 | 0.00042  | 0.001655 | 0.97155  | 0.024587 | 0.59613  | -0.02293 | 0.6211   |
| 0.25553  | -0.03548 | 0.44437  | -0.0436  | 0.3471   | -0.01671 | 0.71877  | -0.10765 | 0.01997  |
| 0.09269  | -0.25284 | 3.03E-08 | -0.12084 | 0.00895  | -0.09787 | 0.03449  | -0.05301 | 0.25291  |
| 2.36E-06 | -0.19751 | 1.71E-05 | -0.18859 | 4.11E-05 | -0.23993 | 1.54E-07 | -0.20114 | 1.19E-05 |

|          |          |          |          |          |          |          |          |          |
|----------|----------|----------|----------|----------|----------|----------|----------|----------|
| 0.91132  | -0.0298  | 0.52058  | 0.068752 | 0.13794  | 0.037886 | 0.41403  | -0.03324 | 0.47365  |
| 3.54E-12 | -0.1398  | 0.00246  | -0.31847 | 1.81E-12 | -0.31059 | 6.68E-12 | 0.118836 | 0.01016  |
| 0.00143  | -0.05317 | 0.25146  | -0.00156 | 0.97318  | 0.060762 | 0.18994  | -0.1444  | 0.00176  |
| 0.00933  | 0.126856 | 0.00605  | 0.08551  | 0.06485  | 0.044278 | 0.3397   | 0.155309 | 0.00076  |
| 5.22E-08 | 0.340119 | 4.13E-14 | 0.265558 | 5.60E-09 | 0.312746 | 4.69E-12 | 0.158679 | 0.00058  |
| 0.40675  | 0.157863 | 0.00062  | -0.06493 | 0.16127  | -0.03308 | 0.47576  | -0.00055 | 0.99053  |
| 0.4334   | -0.0847  | 0.06743  | -0.05386 | 0.24535  | -0.07284 | 0.11595  | 0.075903 | 0.10137  |
| 0.46467  | 0.032066 | 0.48939  | -0.11693 | 0.01145  | -0.03283 | 0.4791   | -0.03296 | 0.47742  |
| 0.03125  | -0.08193 | 0.07694  | -0.02983 | 0.52024  | -0.01812 | 0.69615  | 0.278185 | 9.56E-10 |
| 0.72827  | 0.048432 | 0.29629  | 0.095664 | 0.03878  | 0.062785 | 0.17558  | 0.130833 | 0.00463  |
| 0.00045  | 0.231658 | 4.15E-07 | 0.092013 | 0.04689  | 0.198852 | 1.50E-05 | 0.065929 | 0.15489  |
| 0.00054  | -0.02653 | 0.56737  | -0.23244 | 3.79E-07 | -0.17994 | 9.22E-05 | 0.322257 | 9.56E-13 |
| 9.43E-13 | 0.056783 | 0.22066  | 0.112296 | 0.01519  | 0.131281 | 0.00449  | 0.149753 | 0.00117  |
| 0.44096  | -0.21604 | 2.45E-06 | 0.007615 | 0.86964  | -0.03152 | 0.49683  | 0.008831 | 0.84905  |
| 0.01007  | 0.186785 | 4.88E-05 | -0.01768 | 0.70319  | 0.105311 | 0.02284  | 0.299733 | 3.78E-11 |
| 0.89456  | 0.086912 | 0.06056  | 0.051433 | 0.26733  | 0.050878 | 0.27253  | 0.016032 | 0.72968  |
| 0.90157  | 0.014113 | 0.76099  | -0.00994 | 0.83034  | 0.002313 | 0.96024  | 0.050294 | 0.27808  |
| 4.67E-05 | -0.16064 | 0.00049  | 0.005222 | 0.91039  | 0.055267 | 0.23324  | 0.164714 | 0.00035  |
| 0.26088  | 0.0633   | 0.17206  | 0.115106 | 0.01281  | 0.100335 | 0.03017  | -0.05205 | 0.26158  |
| 0.00042  | -0.0513  | 0.26855  | 0.027758 | 0.5496   | 0.100073 | 0.0306   | 0.001967 | 0.96618  |
| 0.00384  | -0.07097 | 0.12567  | -0.00894 | 0.84729  | 0.028349 | 0.54112  | -0.08602 | 0.06325  |
| 0.0195   | 0.079515 | 0.08608  | 0.167156 | 0.00029  | 0.128737 | 0.00533  | 0.089558 | 0.0531   |
| 0.13256  | -0.03401 | 0.46338  | -0.01655 | 0.72138  | 0.005555 | 0.90471  | -0.16691 | 0.00029  |
| 8.13E-05 | -0.20797 | 5.85E-06 | -0.01228 | 0.79126  | 0.04506  | 0.33123  | 0.247513 | 5.99E-08 |
| 0.00027  | 0.084553 | 0.06791  | 0.038593 | 0.40536  | 0.114622 | 0.01319  | 0.389054 | 2.52E-18 |
| 0.01146  | -0.1628  | 0.00041  | -0.12008 | 0.00939  | -0.0438  | 0.34497  | 0.132691 | 0.00407  |
| 0.70891  | -0.00298 | 0.94873  | -0.03723 | 0.42222  | -0.04311 | 0.35261  | -0.29671 | 6.05E-11 |
| 0.00726  | -0.14621 | 0.00153  | -0.10227 | 0.0271   | -0.02739 | 0.55489  | -0.23175 | 4.11E-07 |
| 0.00015  | 0.007453 | 0.87238  | -0.21075 | 4.35E-06 | -0.16503 | 0.00034  | -0.15866 | 0.00058  |
| 0.79623  | -0.07947 | 0.08626  | -0.01775 | 0.70198  | -0.0231  | 0.61861  | 0.012424 | 0.78886  |
| 0.51912  | -0.07221 | 0.11916  | 0.027948 | 0.54686  | 0.022469 | 0.62816  | 0.020442 | 0.65948  |
| 0.00376  | -0.29714 | 5.65E-11 | 0.012242 | 0.7919   | -0.01455 | 0.75385  | 0.029082 | 0.53072  |
| 0.1497   | -0.05782 | 0.2123   | 0.060242 | 0.19376  | 0.058799 | 0.20467  | 0.007365 | 0.87389  |
| 0.26286  | -0.10379 | 0.0249   | 0.046363 | 0.31743  | 0.025392 | 0.58415  | -0.03424 | 0.46041  |
| 0.70883  | -0.07863 | 0.08963  | 0.045071 | 0.33111  | 0.036248 | 0.43452  | 0.024265 | 0.60095  |
| 0.36412  | -0.06676 | 0.14975  | -0.088   | 0.0574   | -0.07777 | 0.09322  | 0.345526 | 1.53E-14 |
| 0.03133  | -0.00348 | 0.94017  | -0.07829 | 0.09106  | -0.05433 | 0.24128  | -0.08678 | 0.06096  |
| 0.21947  | -0.2587  | 1.41E-08 | -0.12347 | 0.00756  | -0.16325 | 0.0004   | 0.099203 | 0.03209  |
| 0.043    | -0.14568 | 0.0016   | -0.15463 | 0.0008   | -0.14759 | 0.00138  | 0.091706 | 0.04763  |
| 0.80604  | -0.19187 | 2.99E-05 | -0.07212 | 0.1196   | -0.04201 | 0.36498  | -0.09413 | 0.04203  |
| 1.46E-05 | 0.278233 | 9.49E-10 | 0.213881 | 3.11E-06 | 0.277812 | 1.01E-09 | 0.074088 | 0.10983  |
| 0.26974  | -0.29959 | 3.86E-11 | -0.03151 | 0.49698  | -0.1057  | 0.02234  | 0.036342 | 0.43333  |
| 0.26208  | 0.101479 | 0.02832  | 0.265574 | 5.59E-09 | 0.152785 | 0.00093  | 0.120567 | 0.00911  |
| 0.87187  | -0.05364 | 0.24734  | -0.07554 | 0.10301  | -0.04722 | 0.30851  | 0.065393 | 0.15828  |
| 0.33366  | 0.09638  | 0.03734  | -0.14389 | 0.00183  | -0.02393 | 0.60592  | 0.262581 | 8.38E-09 |

|          |          |          |          |          |          |          |          |          |
|----------|----------|----------|----------|----------|----------|----------|----------|----------|
| 0.11322  | -0.05007 | 0.28026  | 0.023113 | 0.61835  | -0.01057 | 0.81972  | -0.0071  | 0.87843  |
| 0.60682  | 0.095385 | 0.03935  | 0.075937 | 0.10122  | 0.03017  | 0.51545  | 0.000116 | 0.99801  |
| 2.34E-12 | 0.348741 | 8.42E-15 | 0.242917 | 1.07E-07 | 0.322871 | 8.61E-13 | 0.260241 | 1.15E-08 |
| 9.16E-05 | -0.20119 | 1.18E-05 | -0.18188 | 7.72E-05 | -0.22591 | 8.11E-07 | -0.01894 | 0.68313  |
| 0.00219  | -0.07058 | 0.12772  | -0.10161 | 0.02811  | -0.15349 | 0.00088  | -0.23411 | 3.11E-07 |
| 0.00013  | 0.083425 | 0.07168  | 0.263183 | 7.73E-09 | 0.207905 | 5.89E-06 | 0.057023 | 0.21871  |
| 0.00422  | -0.09166 | 0.04773  | -0.09492 | 0.04033  | -0.02639 | 0.5694   | 0.009218 | 0.84252  |
| 0.31351  | 0.056881 | 0.21985  | -0.02046 | 0.65924  | -0.00477 | 0.91809  | 0.217469 | 2.10E-06 |
| 0.48213  | 0.001129 | 0.98059  | 0.06718  | 0.14719  | 0.063152 | 0.17306  | -0.00439 | 0.92467  |
| 0.39283  | 0.250849 | 3.92E-08 | -0.09001 | 0.05192  | 0.022037 | 0.63479  | 0.271846 | 2.35E-09 |
| 0.11712  | -0.03183 | 0.49254  | -0.11284 | 0.0147   | -0.05217 | 0.26054  | 0.088776 | 0.05522  |
| 2.00E-10 | -0.01133 | 0.80704  | -0.0751  | 0.10504  | 0.107822 | 0.01977  | 0.092883 | 0.04484  |
| 6.34E-05 | 0.005546 | 0.90486  | -0.0647  | 0.16277  | 0.003306 | 0.94319  | -0.02382 | 0.60761  |
| 1.56E-07 | 0.20241  | 1.04E-05 | 0.009934 | 0.83047  | 0.178089 | 0.00011  | 0.169646 | 0.00023  |
| 0.12967  | -0.03077 | 0.50711  | -0.06003 | 0.19535  | -0.0277  | 0.5505   | 0.265876 | 5.36E-09 |
| 0.06505  | -0.1443  | 0.00177  | -0.03617 | 0.43546  | -0.02878 | 0.535    | -0.1057  | 0.02235  |
| 0.00823  | 0.000597 | 0.98973  | -0.01497 | 0.74689  | -0.00365 | 0.93728  | -0.1386  | 0.00269  |
| 0.15457  | 0.039647 | 0.39265  | -0.1134  | 0.01421  | -0.05399 | 0.24425  | 0.442442 | 8.34E-24 |
| 0.00038  | -0.21692 | 2.23E-06 | -0.20366 | 9.17E-06 | -0.22223 | 1.23E-06 | -0.2658  | 5.42E-09 |
| 2.91E-10 | -0.06302 | 0.17398  | 0.180782 | 8.54E-05 | 0.187387 | 4.61E-05 | -0.09281 | 0.045    |
| 0.34765  | -0.0546  | 0.23892  | -0.09547 | 0.03918  | -0.10368 | 0.02505  | 0.312354 | 5.00E-12 |
| 0.0023   | 0.263568 | 7.34E-09 | 0.333742 | 1.30E-13 | 0.246008 | 7.24E-08 | -0.03038 | 0.51251  |
| 0.02002  | -0.3121  | 5.22E-12 | -0.21441 | 2.93E-06 | -0.23063 | 4.69E-07 | -0.22101 | 1.41E-06 |
| 2.42E-17 | -0.22466 | 9.36E-07 | -0.41621 | 5.44E-21 | -0.38372 | 7.87E-18 | -0.03197 | 0.49075  |
| 0.37127  | -0.04668 | 0.31412  | -0.01777 | 0.7017   | -0.00554 | 0.90493  | 0.042445 | 0.36009  |
| 0.33054  | -0.36429 | 4.21E-16 | -0.21293 | 3.44E-06 | -0.19046 | 3.43E-05 | 0.001717 | 0.97047  |
| 2.42E-06 | 0.053528 | 0.24831  | 0.138629 | 0.00268  | 0.176131 | 0.00013  | 0.012183 | 0.79287  |
| 0.06208  | -0.12202 | 0.0083   | -0.08627 | 0.06248  | -0.08229 | 0.07564  | -0.04066 | 0.38069  |
| 5.99E-17 | -0.02187 | 0.63728  | 0.140195 | 0.00239  | 0.196874 | 1.83E-05 | 0.108049 | 0.01952  |
| 0.01549  | 0.069844 | 0.13178  | 0.081558 | 0.07829  | 0.091097 | 0.04913  | 0.074145 | 0.10956  |
| 0.00419  | 0.10607  | 0.02188  | 0.081054 | 0.08016  | 0.120779 | 0.00898  | 0.01937  | 0.67631  |
| 0.74606  | -0.09071 | 0.0501   | -0.02768 | 0.55079  | -0.05556 | 0.23076  | -0.04716 | 0.3092   |
| 0.34684  | -0.02415 | 0.60265  | 0.01334  | 0.77371  | -0.00893 | 0.84741  | 0.03194  | 0.4911   |
| 0.09293  | 0.036269 | 0.43425  | 0.019755 | 0.67026  | 0.034295 | 0.45969  | -0.0088  | 0.84957  |
| 0.0276   | -0.35361 | 3.36E-15 | -0.26138 | 9.85E-09 | -0.25944 | 1.28E-08 | -0.21532 | 2.66E-06 |
| 0.43577  | -0.06118 | 0.18689  | -0.14271 | 0.00199  | -0.07954 | 0.08597  | -0.28681 | 2.71E-10 |
| 3.45E-21 | 0.261739 | 9.39E-09 | 0.035898 | 0.43897  | 0.242603 | 1.11E-07 | 0.446338 | 3.03E-24 |
| 0.28642  | -0.03492 | 0.45153  | 0.007418 | 0.87297  | 0.019951 | 0.66717  | 0.30041  | 3.40E-11 |
| 5.88E-05 | -0.04204 | 0.36468  | 0.121501 | 0.00858  | 0.121477 | 0.00859  | -0.08294 | 0.07335  |
| 0.01643  | -0.13122 | 0.00451  | 0.100278 | 0.03026  | 0.0591   | 0.20236  | 0.000958 | 0.98353  |
| 0.43021  | -0.30827 | 9.73E-12 | -0.17204 | 0.00019  | -0.16188 | 0.00044  | -0.24833 | 5.40E-08 |
| 0.07731  | -0.30142 | 2.90E-11 | -0.32796 | 3.59E-13 | -0.27512 | 1.48E-09 | 0.1527   | 0.00093  |
| 1.32E-05 | 0.097847 | 0.03452  | 0.133517 | 0.00385  | 0.11339  | 0.01422  | 0.116163 | 0.012    |
| 9.95E-07 | -0.25389 | 2.65E-08 | -0.20618 | 7.06E-06 | -0.25576 | 2.07E-08 | -0.11334 | 0.01426  |
| 0.00046  | 0.142433 | 0.00203  | -0.02427 | 0.60086  | 0.098402 | 0.03351  | -0.11666 | 0.01164  |

|          |          |          |          |          |          |          |          |          |
|----------|----------|----------|----------|----------|----------|----------|----------|----------|
| 0.04093  | 0.140785 | 0.00229  | 0.226086 | 7.94E-07 | 0.146485 | 0.0015   | 0.013182 | 0.77633  |
| 0.00653  | -0.19274 | 2.75E-05 | -0.09064 | 0.05029  | -0.17036 | 0.00022  | -0.03567 | 0.44187  |
| 0.26101  | 0.062691 | 0.17623  | 0.091435 | 0.04829  | 0.012276 | 0.79133  | -0.19827 | 1.59E-05 |
| 0.01178  | 0.269583 | 3.22E-09 | 0.103824 | 0.02485  | 0.137944 | 0.00281  | -0.01178 | 0.79962  |
| 0.20075  | -0.05992 | 0.19614  | 0.022012 | 0.63516  | 0.023761 | 0.60853  | 0.087009 | 0.06027  |
| 1.47E-09 | 0.438074 | 2.55E-23 | 0.186456 | 5.03E-05 | 0.29466  | 8.28E-11 | 0.270503 | 2.83E-09 |
| 0.13178  | -0.33304 | 1.47E-13 | -0.12511 | 0.00679  | -0.16691 | 0.00029  | -0.18576 | 5.38E-05 |
| 0.00132  | -0.40627 | 5.50E-20 | -0.19281 | 2.73E-05 | -0.24163 | 1.25E-07 | -0.13554 | 0.00334  |
| 0.08158  | -0.04542 | 0.3274   | -0.07053 | 0.12799  | -0.09637 | 0.03736  | -0.07247 | 0.11782  |
| 3.19E-11 | 0.159493 | 0.00054  | 0.042012 | 0.36502  | 0.217031 | 2.20E-06 | 0.089847 | 0.05234  |
| 6.87E-10 | 0.196601 | 1.88E-05 | -0.04646 | 0.31645  | 0.168265 | 0.00026  | 0.070521 | 0.12806  |
| 1.25E-17 | 0.164042 | 0.00037  | 0.072483 | 0.11776  | 0.266506 | 4.92E-09 | 0.125862 | 0.00646  |
| 0.00011  | 0.089584 | 0.05304  | 0.140066 | 0.00242  | 0.194102 | 2.40E-05 | -0.10416 | 0.02439  |
| 0.00356  | -0.09364 | 0.04312  | -0.10281 | 0.02631  | -0.00227 | 0.96104  | -0.07172 | 0.12168  |
| 3.67E-05 | -0.26637 | 5.01E-09 | -0.23648 | 2.34E-07 | -0.23651 | 2.33E-07 | -0.01816 | 0.69543  |
| 0.00018  | 0.153591 | 0.00087  | 0.21258  | 3.58E-06 | 0.242502 | 1.12E-07 | 0.134691 | 0.00354  |
| 0.01169  | 0.015525 | 0.7379   | -0.10307 | 0.02593  | -0.09842 | 0.03348  | -0.07492 | 0.1059   |
| 0.22111  | -0.09448 | 0.04127  | 0.023308 | 0.61537  | 0.010417 | 0.82236  | -0.08991 | 0.05216  |
| 0.20527  | -0.11941 | 0.0098   | 0.251356 | 3.67E-08 | 0.002018 | 0.96531  | -0.14113 | 0.00224  |
| 0.01664  | -0.32722 | 4.08E-13 | -0.17777 | 0.00011  | -0.21665 | 2.29E-06 | -0.15654 | 0.00069  |
| 0.70069  | -0.0523  | 0.25933  | -0.27186 | 2.34E-09 | -0.12305 | 0.00777  | -0.16932 | 0.00024  |
| 4.95E-07 | 0.066841 | 0.14925  | 0.18459  | 6.00E-05 | 0.179255 | 9.82E-05 | 0.311299 | 5.95E-12 |
| 0.01081  | -0.15451 | 0.00081  | -0.12954 | 0.00505  | -0.17265 | 0.00018  | -0.1865  | 5.01E-05 |
| 0.16028  | -0.05002 | 0.2807   | -0.02518 | 0.58731  | 0.009092 | 0.84465  | -0.20152 | 1.14E-05 |
| 0.19353  | -0.14427 | 0.00177  | -0.11632 | 0.01189  | -0.06616 | 0.15346  | -0.02463 | 0.59541  |
| 3.05E-11 | 0.224847 | 9.16E-07 | 0.22625  | 7.80E-07 | 0.292696 | 1.12E-10 | 0.289164 | 1.91E-10 |
| 7.94E-23 | 0.224795 | 9.21E-07 | 0.153648 | 0.00086  | 0.370505 | 1.21E-16 | 0.109151 | 0.0183   |
| 0.57592  | -0.14812 | 0.00133  | -0.07334 | 0.11347  | -0.05393 | 0.24477  | -0.20016 | 1.31E-05 |
| 0.00649  | -0.02742 | 0.5545   | 0.094025 | 0.04226  | 0.097115 | 0.0359   | 0.06983  | 0.13185  |
| 0.00756  | -0.16128 | 0.00047  | 0.07749  | 0.09441  | 0.057274 | 0.21669  | 0.060258 | 0.19365  |
| 0.36839  | -0.04216 | 0.36331  | -0.06839 | 0.14003  | -0.05649 | 0.22301  | 0.405572 | 6.45E-20 |
| 0.95641  | 0.09371  | 0.04296  | 0.044247 | 0.34004  | -0.03125 | 0.50048  | -0.05763 | 0.21382  |
| 0.19339  | 0.086783 | 0.06094  | 0.06683  | 0.14931  | 0.046584 | 0.31512  | -0.00332 | 0.94295  |
| 0.00334  | -0.21842 | 1.89E-06 | -0.07874 | 0.0892   | -0.19145 | 3.12E-05 | -0.07678 | 0.09746  |
| 2.69E-37 | 0.336449 | 8.01E-14 | 0.17521  | 0.00014  | 0.453394 | 4.69E-25 | 0.179282 | 9.80E-05 |
| 9.50E-18 | 0.26363  | 7.27E-09 | 0.293441 | 9.98E-11 | 0.380036 | 1.71E-17 | 0.001652 | 0.97159  |
| 9.57E-06 | -0.03519 | 0.44801  | -0.11786 | 0.0108   | -0.15286 | 0.00092  | 0.006248 | 0.89288  |
| 0.09118  | 0.019145 | 0.67986  | 0.060864 | 0.18919  | 0.045539 | 0.32611  | 0.001836 | 0.96843  |
| 0.73964  | -0.15217 | 0.00097  | 0.001421 | 0.97557  | -0.04716 | 0.30916  | -0.00102 | 0.98242  |
| 0.00027  | -0.22736 | 6.86E-07 | -0.12265 | 0.00797  | -0.20812 | 5.75E-06 | -0.18332 | 6.75E-05 |
| 0.95583  | -0.21592 | 2.49E-06 | -0.06409 | 0.16675  | -0.07536 | 0.10386  | 0.031306 | 0.49975  |
| 0.55208  | -0.34054 | 3.83E-14 | -0.15405 | 0.00084  | -0.15747 | 0.00064  | -0.00857 | 0.85342  |
| 0.47981  | 0.135215 | 0.00342  | -0.0127  | 0.78433  | 0.045591 | 0.32556  | -0.03898 | 0.40061  |
| 2.24E-09 | 0.150072 | 0.00114  | 0.043636 | 0.34676  | 0.187371 | 4.61E-05 | -0.05559 | 0.23052  |
| 0.9165   | 0.050149 | 0.27947  | 0.112819 | 0.01472  | 0.08072  | 0.08141  | -0.02503 | 0.58954  |

|          |          |          |          |          |          |          |          |          |
|----------|----------|----------|----------|----------|----------|----------|----------|----------|
| 1.85E-20 | 0.218728 | 1.82E-06 | 0.196692 | 1.86E-05 | 0.315688 | 2.89E-12 | 0.314881 | 3.30E-12 |
| 0.14697  | 0.038013 | 0.41247  | -0.02795 | 0.54683  | 0.04521  | 0.32962  | -0.09442 | 0.04139  |
| 8.61E-20 | 0.263451 | 7.45E-09 | 0.335834 | 8.95E-14 | 0.421251 | 1.64E-21 | 0.14613  | 0.00154  |
| 0.01257  | 0.165693 | 0.00032  | -0.01442 | 0.75599  | 0.024463 | 0.59798  | 0.139842 | 0.00246  |
| 2.22E-08 | 0.207104 | 6.40E-06 | 0.226101 | 7.93E-07 | 0.287011 | 2.63E-10 | -0.23756 | 2.05E-07 |
| 0.00012  | -0.07749 | 0.09441  | 0.115169 | 0.01276  | 0.074117 | 0.10969  | -0.07117 | 0.12461  |
| 0.001    | -0.20562 | 7.48E-06 | -0.15494 | 0.00078  | -0.18979 | 3.66E-05 | -0.05444 | 0.24033  |
| 0.02575  | -0.10396 | 0.02466  | -0.0757  | 0.10227  | -0.11668 | 0.01163  | -0.33098 | 2.11E-13 |
| 0.29534  | -0.15007 | 0.00114  | -0.08321 | 0.0724   | -0.09652 | 0.03707  | -0.2286  | 5.94E-07 |
| 0.00737  | -0.013   | 0.77932  | -0.14953 | 0.00119  | -0.03852 | 0.40621  | -0.21535 | 2.65E-06 |
| 0.21921  | -0.15388 | 0.00085  | 0.066764 | 0.14972  | 0.011171 | 0.80974  | -0.06992 | 0.13135  |
| 1.88E-10 | 0.484334 | 7.70E-29 | 0.385091 | 5.88E-18 | 0.404813 | 7.66E-20 | 0.288322 | 2.16E-10 |
| 0.00054  | -0.12307 | 0.00775  | -0.11391 | 0.01377  | -0.15232 | 0.00096  | -0.23344 | 3.36E-07 |
| 0.69889  | -0.08818 | 0.05688  | -0.05073 | 0.27397  | -0.03433 | 0.45922  | 0.030955 | 0.50457  |
| 1.59E-05 | 0.112384 | 0.01511  | 0.266062 | 5.23E-09 | 0.246628 | 6.70E-08 | 0.037847 | 0.41451  |
| 0.00175  | 0.031359 | 0.49903  | 0.094676 | 0.04085  | 0.144588 | 0.00173  | -0.015   | 0.74654  |
| 0.00213  | 0.146879 | 0.00146  | 0.061242 | 0.18646  | 0.105874 | 0.02212  | -0.03327 | 0.47329  |
| 0.0006   | -0.25727 | 1.70E-08 | -0.19398 | 2.43E-05 | -0.24124 | 1.31E-07 | 0.038539 | 0.40603  |
| 0.308    | 0.039243 | 0.3975   | 0.070229 | 0.12965  | 0.078286 | 0.09106  | 0.008778 | 0.84995  |
| 1.35E-06 | -0.11148 | 0.01595  | 0.009871 | 0.83153  | 0.059521 | 0.19916  | 0.035954 | 0.43826  |
| 6.17E-07 | -0.18755 | 4.53E-05 | -0.10563 | 0.02243  | 0.009586 | 0.83632  | 0.391785 | 1.39E-18 |
| 0.00073  | 0.044257 | 0.33992  | -0.29629 | 6.44E-11 | -0.20459 | 8.33E-06 | -0.12473 | 0.00696  |
| 0.82065  | 0.28686  | 2.69E-10 | 0.221231 | 1.38E-06 | 0.170014 | 0.00022  | -0.10524 | 0.02294  |
| 0.82122  | 0.244744 | 8.49E-08 | 0.125145 | 0.00677  | 0.129434 | 0.00509  | -0.1283  | 0.00549  |
| 6.46E-09 | -0.06728 | 0.14662  | -0.22506 | 8.94E-07 | -0.21923 | 1.73E-06 | -0.03437 | 0.45875  |
| 0.01007  | -0.03506 | 0.44973  | -0.04768 | 0.30383  | -0.06447 | 0.16424  | -0.08545 | 0.06504  |
| 0.12346  | 0.291693 | 1.30E-10 | 0.211055 | 4.21E-06 | 0.148917 | 0.00125  | 0.318947 | 1.67E-12 |
| 7.18E-06 | -0.05655 | 0.22256  | -0.1352  | 0.00342  | -0.15304 | 0.00091  | -0.19653 | 1.89E-05 |
| 0.02952  | 0.036296 | 0.43391  | 0.052755 | 0.25521  | 0.005119 | 0.91215  | -0.05556 | 0.23076  |
| 0.02039  | -0.0445  | 0.33728  | -0.01304 | 0.77859  | -0.04675 | 0.31341  | -0.1275  | 0.0058   |
| 0.67597  | 0.165918 | 0.00032  | 0.178797 | 0.0001   | 0.110344 | 0.01706  | 0.060928 | 0.18873  |
| 4.27E-09 | -0.06539 | 0.15832  | -0.06277 | 0.17567  | -0.16735 | 0.00028  | -0.23146 | 4.25E-07 |
| 0.90422  | 0.214311 | 2.96E-06 | 0.113072 | 0.01449  | 0.110818 | 0.01659  | 0.040569 | 0.38173  |
| 0.01028  | 0.033079 | 0.47577  | -0.01289 | 0.7811   | -0.0083  | 0.85802  | -0.07434 | 0.10863  |
| 1.39E-07 | 0.319143 | 1.62E-12 | 0.280642 | 6.70E-10 | 0.326887 | 4.32E-13 | 0.084124 | 0.06933  |
| 0.43858  | 0.21391  | 3.10E-06 | 0.068031 | 0.14213  | 0.122929 | 0.00783  | 0.130608 | 0.0047   |
| 0.14152  | 0.30644  | 1.31E-11 | 0.075786 | 0.1019   | 0.152744 | 0.00093  | 0.118118 | 0.01063  |
| 0.00718  | 0.296567 | 6.18E-11 | 0.337608 | 6.51E-14 | 0.307295 | 1.14E-11 | 0.069423 | 0.13412  |
| 0.00587  | -0.10837 | 0.01916  | -0.14827 | 0.00131  | -0.14217 | 0.00207  | -0.09196 | 0.04702  |
| 0.38851  | 0.017007 | 0.71395  | 0.175905 | 0.00013  | 0.129926 | 0.00492  | -0.00539 | 0.9075   |
| 0.00133  | -0.00204 | 0.96494  | -0.0051  | 0.91253  | -0.04923 | 0.28841  | -0.04085 | 0.37844  |
| 0.28249  | 0.068508 | 0.13934  | 0.061691 | 0.18324  | 0.08974  | 0.05262  | 2.08E-05 | 0.99964  |
| 0.10152  | -0.00644 | 0.88955  | 0.043738 | 0.34562  | -0.00635 | 0.8911   | -0.17822 | 0.00011  |
| 0.03907  | 0.09403  | 0.04225  | -0.03259 | 0.48233  | -0.00669 | 0.88543  | -0.04972 | 0.28361  |
| 0.5738   | 0.192412 | 2.84E-05 | 0.191906 | 2.98E-05 | 0.109171 | 0.01828  | 0.071797 | 0.12129  |



|          |          |          |          |          |          |          |          |          |
|----------|----------|----------|----------|----------|----------|----------|----------|----------|
| 0.08406  | 0.124302 | 0.00716  | 0.035402 | 0.44532  | 0.043787 | 0.34508  | -0.24554 | 7.68E-08 |
| 0.88269  | 0.252611 | 3.12E-08 | 0.237922 | 1.96E-07 | 0.188204 | 4.26E-05 | -0.04688 | 0.312    |
| 9.41E-05 | 0.01662  | 0.72018  | -0.07023 | 0.12964  | -0.09982 | 0.03102  | -0.19574 | 2.05E-05 |
| 0.05998  | 0.094313 | 0.04163  | 0.020276 | 0.66209  | 0.003097 | 0.94679  | -0.03815 | 0.41074  |
| 0.56569  | 0.188607 | 4.10E-05 | 0.023285 | 0.61572  | 0.111154 | 0.01626  | 0.065267 | 0.15909  |
| 0.01295  | 0.191943 | 2.97E-05 | 0.125169 | 0.00676  | 0.136301 | 0.00316  | 0.135757 | 0.00329  |
| 0.0041   | 0.156149 | 0.00071  | 0.256015 | 2.01E-08 | 0.235196 | 2.73E-07 | 0.011717 | 0.80063  |
| 0.11923  | 0.206356 | 6.93E-06 | 0.174555 | 0.00015  | 0.11218  | 0.01529  | -0.00765 | 0.86904  |
| 0.00515  | 0.10798  | 0.01959  | 0.019305 | 0.67734  | -0.02861 | 0.53737  | -0.15214 | 0.00097  |
| 0.68497  | 0.212839 | 3.48E-06 | 0.109196 | 0.01825  | 0.100428 | 0.03001  | -0.03971 | 0.39193  |
| 0.15858  | 0.303468 | 2.10E-11 | 0.195312 | 2.13E-05 | 0.211879 | 3.86E-06 | 0.045104 | 0.33076  |
| 1.39E-06 | -0.10102 | 0.02906  | -0.09879 | 0.03281  | -0.14155 | 0.00217  | -0.14307 | 0.00194  |
| 0.81584  | 0.148635 | 0.00128  | -0.02003 | 0.66597  | 0.059049 | 0.20275  | -0.02028 | 0.66208  |
| 0.11836  | 0.020625 | 0.65663  | 0.028671 | 0.53654  | -0.00515 | 0.91162  | 0.033207 | 0.47406  |
| 0.44245  | 0.342067 | 2.90E-14 | 0.251782 | 3.48E-08 | 0.241392 | 1.29E-07 | 0.044964 | 0.33226  |
| 0.31045  | 0.246037 | 7.22E-08 | 0.100104 | 0.03055  | 0.114607 | 0.0132   | 0.01432  | 0.75759  |
| 0.0244   | 0.078726 | 0.08925  | -0.01745 | 0.70677  | -0.02444 | 0.59839  | 0.018418 | 0.69138  |
| 3.11E-06 | -0.01798 | 0.69835  | -0.11684 | 0.01151  | -0.12535 | 0.00668  | -0.12282 | 0.00788  |
| 0.03819  | 0.082584 | 0.0746   | 0.072837 | 0.11597  | 0.027783 | 0.54924  | -0.08368 | 0.07082  |
| 0.00772  | 0.129279 | 0.00514  | -0.004   | 0.93134  | 0.004496 | 0.9228   | 0.023422 | 0.61366  |
| 0.91879  | 0.279282 | 8.16E-10 | 0.212019 | 3.80E-06 | 0.186983 | 4.79E-05 | -0.00116 | 0.98013  |
| 0.15849  | 0.229343 | 5.45E-07 | 0.209068 | 5.21E-06 | 0.185519 | 5.50E-05 | 0.009053 | 0.8453   |
| 0.00094  | 0.331446 | 1.95E-13 | 0.226232 | 7.81E-07 | 0.281005 | 6.36E-10 | 0.100575 | 0.02977  |
| 0.01439  | 0.171976 | 0.00019  | 0.18444  | 6.08E-05 | 0.200493 | 1.27E-05 | 0.04963  | 0.28449  |
| 0.62087  | 0.184813 | 5.87E-05 | 0.136955 | 0.00302  | 0.152609 | 0.00094  | 0.012089 | 0.79444  |
| 0.27065  | 0.076746 | 0.09762  | 0.102964 | 0.02608  | 0.064808 | 0.16205  | -0.30686 | 1.22E-11 |
| 0.06054  | 0.160913 | 0.00048  | 0.056612 | 0.22205  | 0.044163 | 0.34095  | -0.03568 | 0.44178  |
| 0.6167   | 0.218288 | 1.92E-06 | 0.131835 | 0.00432  | 0.14997  | 0.00115  | 0.036876 | 0.42659  |
| 1.66E-05 | 0.044187 | 0.34069  | -0.00505 | 0.91336  | -0.06718 | 0.14719  | -0.02161 | 0.64132  |
| 1.26E-11 | -0.20053 | 1.26E-05 | -0.14364 | 0.00186  | -0.26169 | 9.45E-09 | -0.19888 | 1.49E-05 |
| 0.68645  | 0.081316 | 0.07918  | -0.01032 | 0.82393  | 0.024456 | 0.59808  | -0.0111  | 0.81094  |
| 0.00019  | 0.351962 | 4.59E-15 | 0.234825 | 2.85E-07 | 0.288552 | 2.09E-10 | 0.031193 | 0.5013   |
| 0.04218  | 0.02956  | 0.52397  | -0.16051 | 0.0005   | -0.1018  | 0.02783  | -0.20828 | 5.66E-06 |
| 0.01325  | 0.02964  | 0.52285  | 0.013675 | 0.7682   | -0.03751 | 0.41862  | -0.16546 | 0.00033  |
| 0.38521  | 0.233043 | 3.53E-07 | 0.106562 | 0.02127  | 0.115254 | 0.01269  | -0.00482 | 0.9172   |
| 0.30902  | 0.189038 | 3.93E-05 | 0.136036 | 0.00322  | 0.117643 | 0.01095  | 0.009819 | 0.83239  |
| 0.61311  | 0.213471 | 3.25E-06 | 0.159359 | 0.00055  | 0.132616 | 0.00409  | -0.00982 | 0.83244  |
| 0.37347  | 0.116697 | 0.01161  | 0.160338 | 0.0005   | 0.098756 | 0.03287  | 0.010066 | 0.82825  |
| 0.59565  | 0.116415 | 0.01182  | 0.092265 | 0.04629  | 0.076391 | 0.09919  | -0.00226 | 0.96112  |
| 0.05991  | 0.318233 | 1.89E-12 | 0.176361 | 0.00013  | 0.224792 | 9.21E-07 | 0.02104  | 0.65018  |
| 0.34018  | 0.059901 | 0.1963   | -0.01401 | 0.76264  | 0.020022 | 0.66606  | 9.99E-05 | 0.99828  |
| 0.00415  | 0.099854 | 0.03097  | -0.0241  | 0.60342  | -0.03009 | 0.51655  | -0.02801 | 0.54601  |
| 0.5995   | 0.115412 | 0.01257  | 0.217618 | 2.06E-06 | 0.150827 | 0.00108  | -0.03239 | 0.48505  |
| 4.57E-08 | -0.09831 | 0.03368  | -0.106   | 0.02196  | -0.1561  | 0.00071  | -0.01605 | 0.72939  |
| 1.24E-13 | 0.419772 | 2.33E-21 | 0.486997 | 3.49E-29 | 0.479301 | 3.38E-28 | 0.229909 | 5.10E-07 |

|          |          |          |          |          |          |          |          |          |
|----------|----------|----------|----------|----------|----------|----------|----------|----------|
| 0.00303  | 0.179931 | 9.23E-05 | 0.140883 | 0.00228  | 0.115226 | 0.01271  | 0.498322 | 1.11E-30 |
| 0.00824  | 0.316464 | 2.54E-12 | 0.290992 | 1.45E-10 | 0.28045  | 6.89E-10 | 0.135365 | 0.00338  |
| 0.00179  | 0.461967 | 4.58E-26 | 0.205388 | 7.66E-06 | 0.25923  | 1.31E-08 | 0.117269 | 0.01121  |
| 0.45799  | 0.141529 | 0.00217  | 0.280684 | 6.66E-10 | 0.158445 | 0.00059  | 0.08597  | 0.06341  |
| 0.05278  | 0.04178  | 0.36767  | 0.02926  | 0.5282   | -0.00104 | 0.98216  | -0.19805 | 1.62E-05 |
| 0.19173  | 0.11813  | 0.01062  | -0.0841  | 0.06941  | -0.0379  | 0.41386  | 0.047083 | 0.30996  |
| 0.11995  | 0.212693 | 3.53E-06 | 0.213136 | 3.37E-06 | 0.19051  | 3.41E-05 | -0.08127 | 0.07934  |
| 0.73796  | 0.145489 | 0.00162  | 0.053454 | 0.24896  | 0.063962 | 0.1676   | -0.15949 | 0.00054  |
| 0.12632  | 0.1511   | 0.00106  | 0.073939 | 0.11055  | 0.037246 | 0.42196  | -0.01409 | 0.76143  |
| 3.33E-07 | 0.345506 | 1.54E-14 | 0.339959 | 4.25E-14 | 0.3402   | 4.07E-14 | 0.345798 | 1.46E-14 |
| 0.37024  | 0.120923 | 0.0089   | 0.035868 | 0.43935  | 0.052652 | 0.25615  | -0.10996 | 0.01745  |
| 0.02511  | 0.012397 | 0.78931  | -0.05504 | 0.23517  | -0.04488 | 0.33316  | -0.0299  | 0.51915  |
| 0.06642  | 0.05993  | 0.19609  | 0.023608 | 0.61084  | 0.003641 | 0.93745  | -0.06216 | 0.17992  |
| 0.05943  | 0.025746 | 0.57891  | 0.024471 | 0.59786  | -0.00549 | 0.90587  | -0.03021 | 0.5149   |
| 0.21962  | 0.049216 | 0.28853  | 0.036602 | 0.43004  | 0.030088 | 0.51659  | -0.04132 | 0.37297  |
| 4.22E-05 | -0.06876 | 0.13791  | -0.12766 | 0.00573  | -0.16476 | 0.00035  | -0.09132 | 0.04857  |
| 0.49613  | 0.108959 | 0.01851  | 0.074612 | 0.10733  | 0.066185 | 0.15329  | -0.06592 | 0.15497  |
| 2.92E-06 | 0.182091 | 7.57E-05 | 0.134216 | 0.00366  | 0.218773 | 1.82E-06 | 0.160497 | 0.0005   |
| 0.00027  | 0.222942 | 1.14E-06 | 0.159699 | 0.00053  | 0.235535 | 2.62E-07 | 0.157245 | 0.00065  |
| 0.37869  | 0.01636  | 0.72438  | 0.020829 | 0.65346  | -0.01547 | 0.73876  | 0.055038 | 0.23519  |
| 0.3419   | 0.124781 | 0.00694  | -0.012   | 0.79586  | 0.035012 | 0.45036  | -0.0274  | 0.55478  |
| 0.0324   | 0.188688 | 4.07E-05 | 0.257517 | 1.65E-08 | 0.133242 | 0.00392  | -0.23792 | 1.96E-07 |
| 0.60906  | 0.141865 | 0.00212  | 0.218032 | 1.97E-06 | 0.140605 | 0.00232  | -0.19802 | 1.63E-05 |
| 0.96735  | 0.184417 | 6.10E-05 | 0.192246 | 2.88E-05 | 0.131092 | 0.00455  | -0.06053 | 0.19166  |
| 0.00782  | 0.280646 | 6.70E-10 | 0.148505 | 0.00129  | 0.213072 | 3.39E-06 | 0.183057 | 6.92E-05 |
| 8.29E-08 | -0.10801 | 0.01956  | -0.10564 | 0.02242  | -0.17085 | 0.00021  | -0.09646 | 0.03717  |
| 2.37E-06 | -0.15302 | 0.00091  | -0.27221 | 2.23E-09 | -0.26101 | 1.04E-08 | -0.04276 | 0.35649  |
| 9.33E-05 | 0.300164 | 3.53E-11 | 0.121102 | 0.0088   | 0.223688 | 1.04E-06 | 0.224779 | 9.23E-07 |
| 0.49268  | 0.330708 | 2.22E-13 | -0.01423 | 0.75908  | 0.097375 | 0.03541  | 0.018284 | 0.69351  |
| 0.09294  | 0.177842 | 0.00011  | 0.194572 | 2.30E-05 | 0.179794 | 9.35E-05 | 0.087239 | 0.05959  |
| 0.00104  | 0.0763   | 0.09959  | -0.06147 | 0.18481  | -0.06184 | 0.18218  | -0.1275  | 0.00579  |
| 0.01456  | 0.177126 | 0.00012  | 0.153766 | 0.00086  | 0.06879  | 0.13772  | -0.07324 | 0.11398  |
| 0.26745  | 0.250991 | 3.85E-08 | 0.262676 | 8.27E-09 | 0.221638 | 1.32E-06 | -0.0244  | 0.59897  |
| 0.29889  | 0.232462 | 3.78E-07 | 0.235071 | 2.77E-07 | 0.145289 | 0.00164  | -0.14521 | 0.00165  |
| 8.03E-06 | 0.030546 | 0.51022  | -0.00029 | 0.99493  | -0.07205 | 0.11998  | -0.19504 | 2.19E-05 |
| 0.87452  | 0.288239 | 2.19E-10 | 0.200762 | 1.23E-05 | 0.188393 | 4.18E-05 | -0.13373 | 0.00379  |
| 7.98E-05 | 0.345359 | 1.58E-14 | 0.370057 | 1.33E-16 | 0.366606 | 2.66E-16 | -0.07959 | 0.08577  |
| 0.0395   | -0.06468 | 0.16289  | 0.025667 | 0.58007  | -0.03497 | 0.45096  | 0.154234 | 0.00083  |
| 0.98818  | 0.132459 | 0.00414  | 0.032894 | 0.47825  | 0.048278 | 0.29782  | -0.00237 | 0.95923  |
| 0.01504  | 0.028757 | 0.53532  | 0.011389 | 0.8061   | -0.0214  | 0.64468  | -0.03181 | 0.49284  |
| 0.71     | 0.179181 | 9.89E-05 | 0.195839 | 2.02E-05 | 0.147833 | 0.00136  | -0.05067 | 0.27448  |
| 4.87E-06 | 0.016756 | 0.71798  | -0.02672 | 0.56469  | -0.08635 | 0.06226  | -0.00649 | 0.8888   |
| 0.76773  | 0.110603 | 0.0168   | 0.097436 | 0.03529  | 0.115054 | 0.01285  | -0.00765 | 0.86899  |
| 0.52421  | 0.216723 | 2.28E-06 | 0.143222 | 0.00192  | 0.160278 | 0.00051  | 0.054672 | 0.23832  |
| 0.36703  | -0.00055 | 0.99054  | -0.03502 | 0.45027  | -0.03489 | 0.45194  | 0.065545 | 0.15732  |

|          |          |          |          |          |          |          |          |          |
|----------|----------|----------|----------|----------|----------|----------|----------|----------|
| 0.28867  | 0.218586 | 1.85E-06 | 0.120334 | 0.00924  | 0.149702 | 0.00118  | 0.021713 | 0.63977  |
| 3.39E-06 | 0.050683 | 0.27438  | -0.13083 | 0.00463  | -0.12268 | 0.00795  | -0.23187 | 4.05E-07 |
| 0.77761  | 0.099608 | 0.03139  | -0.06468 | 0.16287  | 0.013658 | 0.76848  | -0.14633 | 0.00152  |
| 0.00141  | 0.023637 | 0.6104   | 0.025361 | 0.5846   | -0.04155 | 0.37027  | -0.07653 | 0.09859  |
| 0.34957  | 0.173335 | 0.00017  | 0.12048  | 0.00916  | 0.12402  | 0.00729  | -0.01103 | 0.81216  |
| 0.10568  | 0.140768 | 0.0023   | -0.0937  | 0.04298  | -0.0293  | 0.5277   | 0.07961  | 0.0857   |
| 0.74665  | 0.186768 | 4.89E-05 | 0.202104 | 1.08E-05 | 0.16185  | 0.00045  | 0.053888 | 0.24513  |
| 0.70859  | 0.123375 | 0.0076   | -0.00431 | 0.92591  | 0.038936 | 0.40121  | 0.144473 | 0.00175  |
| 0.00668  | 0.039631 | 0.39284  | -0.02805 | 0.54545  | -0.03758 | 0.41788  | -0.11963 | 0.00967  |
| 2.41E-05 | 0.332283 | 1.68E-13 | 0.390445 | 1.86E-18 | 0.381349 | 1.30E-17 | 0.343157 | 2.37E-14 |
| 0.00013  | 0.410099 | 2.28E-20 | 0.4658   | 1.58E-26 | 0.362534 | 5.95E-16 | 0.112046 | 0.01542  |
| 0.19858  | 0.169215 | 0.00024  | 0.040102 | 0.38724  | 0.055277 | 0.23316  | -0.00318 | 0.94543  |
| 1.23E-10 | -0.11877 | 0.0102   | -0.19592 | 2.01E-05 | -0.22753 | 6.72E-07 | -0.108   | 0.01957  |
| 0.10099  | 0.181105 | 8.29E-05 | 0.197926 | 1.64E-05 | 0.155394 | 0.00075  | -0.08591 | 0.06359  |
| 0.41849  | -0.04334 | 0.35003  | -0.14811 | 0.00133  | -0.08606 | 0.06313  | 0.00729  | 0.87515  |
| 0.74656  | 0.072859 | 0.11587  | 0.024663 | 0.59499  | 0.022864 | 0.62214  | 0.050646 | 0.27473  |
| 1.34E-08 | 0.067627 | 0.14452  | 0.036406 | 0.43252  | -0.08137 | 0.07899  | -0.17829 | 0.00011  |
| 0.00043  | -0.04019 | 0.38621  | -0.07586 | 0.10155  | -0.14293 | 0.00196  | -0.07054 | 0.12795  |
| 0.00036  | -0.00182 | 0.96864  | -0.013   | 0.77935  | -0.08678 | 0.06094  | -0.03413 | 0.46185  |
| 1.72E-06 | -0.0638  | 0.16872  | -0.10752 | 0.02012  | -0.17321 | 0.00017  | -0.12522 | 0.00674  |
| 0.01423  | -0.13568 | 0.00331  | -0.13027 | 0.00481  | -0.17824 | 0.00011  | -0.00482 | 0.91728  |
| 0.32578  | 0.224717 | 9.29E-07 | 0.228889 | 5.74E-07 | 0.194249 | 2.37E-05 | -0.24344 | 9.98E-08 |
| 0.77003  | 0.126552 | 0.00617  | 0.134007 | 0.00372  | 0.117362 | 0.01114  | 0.066112 | 0.15374  |
| 0.07485  | -0.04392 | 0.34367  | 0.08634  | 0.06228  | 0.068789 | 0.13773  | -0.01034 | 0.82368  |
| 0.0145   | 0.008397 | 0.85639  | -0.06727 | 0.14665  | -0.05598 | 0.2273   | -0.04688 | 0.31203  |
| 0.12217  | 0.279437 | 7.98E-10 | 0.122918 | 0.00783  | 0.175049 | 0.00014  | 0.071878 | 0.12087  |
| 6.05E-06 | -0.00656 | 0.88765  | -0.07257 | 0.11732  | -0.12631 | 0.00627  | -0.05598 | 0.22728  |
| 0.0045   | 0.273047 | 1.98E-09 | 0.231799 | 4.09E-07 | 0.240821 | 1.38E-07 | 0.000331 | 0.99431  |
| 0.339    | 0.116733 | 0.01159  | 0.034061 | 0.46276  | 0.043748 | 0.34552  | -0.06336 | 0.17167  |
| 1.09E-07 | 0.019189 | 0.67917  | 0.294922 | 7.96E-11 | 0.269917 | 3.07E-09 | 0.043968 | 0.3431   |
| 0.00796  | 0.234955 | 2.81E-07 | 0.223374 | 1.08E-06 | 0.197084 | 1.79E-05 | -0.15114 | 0.00105  |
| 0.44237  | 0.174287 | 0.00015  | 0.148684 | 0.00127  | 0.148978 | 0.00124  | -0.02858 | 0.5378   |
| 0.14732  | 0.075074 | 0.10517  | 0.004604 | 0.92095  | -0.00306 | 0.94745  | -0.34457 | 1.83E-14 |
| 1.18E-07 | 0.051399 | 0.26764  | 0.029402 | 0.5262   | -0.07248 | 0.11778  | -0.05842 | 0.20762  |
| 0.01588  | 0.028614 | 0.53735  | -0.00128 | 0.97806  | -0.02731 | 0.55609  | -0.08589 | 0.06365  |
| 0.00652  | 0.201971 | 1.09E-05 | 0.074332 | 0.10866  | 0.150349 | 0.00112  | 0.075567 | 0.1029   |
| 0.04798  | -0.00038 | 0.99353  | 0.042379 | 0.36084  | 0.084778 | 0.06718  | 0.007822 | 0.86613  |
| 0.46927  | 0.25314  | 2.92E-08 | 0.239858 | 1.55E-07 | 0.209194 | 5.14E-06 | 0.036045 | 0.4371   |
| 0.34473  | 0.06208  | 0.18048  | -0.01812 | 0.69619  | -0.00851 | 0.85443  | -0.01524 | 0.7426   |
| 0.03523  | 0.275964 | 1.31E-09 | 0.164557 | 0.00036  | 0.191772 | 3.02E-05 | 0.023363 | 0.61454  |
| 0.28716  | 0.263027 | 7.89E-09 | 0.208024 | 5.81E-06 | 0.199157 | 1.45E-05 | -0.06311 | 0.17335  |
| 1.66E-11 | -0.01968 | 0.67141  | -0.22194 | 1.27E-06 | -0.23284 | 3.61E-07 | -0.10593 | 0.02205  |
| 0.12833  | 0.101258 | 0.02867  | 0.00494  | 0.91521  | 0.065152 | 0.15982  | 0.125624 | 0.00656  |
| 0.1097   | 0.052067 | 0.26147  | -0.00366 | 0.93706  | -0.00373 | 0.93599  | -0.03071 | 0.50792  |
| 6.31E-06 | -0.00017 | 0.99701  | -0.11641 | 0.01182  | -0.10627 | 0.02162  | -0.37115 | 1.06E-16 |

|          |          |          |          |          |          |          |          |          |
|----------|----------|----------|----------|----------|----------|----------|----------|----------|
| 0.00083  | 0.073862 | 0.11092  | 0.184774 | 5.90E-05 | 0.165271 | 0.00033  | -0.0293  | 0.52759  |
| 9.42E-05 | -0.05158 | 0.26601  | -0.16358 | 0.00039  | -0.15394 | 0.00084  | -0.0174  | 0.70767  |
| 0.21712  | 0.112551 | 0.01496  | 0.017128 | 0.712    | 0.036015 | 0.43748  | -0.18719 | 4.69E-05 |
| 8.89E-08 | -0.13586 | 0.00326  | -0.1873  | 4.64E-05 | -0.22479 | 9.22E-07 | -0.10506 | 0.02317  |
| 0.00297  | 0.23542  | 2.66E-07 | 0.02693  | 0.56157  | 0.029921 | 0.51892  | 0.089179 | 0.05412  |
| 0.03162  | 0.285975 | 3.07E-10 | 0.236834 | 2.24E-07 | 0.248779 | 5.10E-08 | 0.045199 | 0.32974  |
| 0.05504  | 0.128027 | 0.00559  | 0.174342 | 0.00015  | 0.158793 | 0.00057  | 0.117176 | 0.01127  |
| 0.02765  | 0.200887 | 1.22E-05 | 0.163064 | 0.0004   | 0.178286 | 0.00011  | -0.04362 | 0.34696  |
| 0.49788  | 0.143964 | 0.00181  | 0.060489 | 0.19194  | 0.07869  | 0.0894   | 0.016282 | 0.72564  |
| 0.49839  | 0.18094  | 8.42E-05 | 0.040081 | 0.38749  | 0.058627 | 0.206    | -0.06173 | 0.18296  |
| 0.04026  | 0.275919 | 1.32E-09 | 0.26166  | 9.49E-09 | 0.237588 | 2.05E-07 | -0.06069 | 0.19046  |
| 0.35219  | 0.22065  | 1.47E-06 | 0.190195 | 3.52E-05 | 0.17178  | 0.00019  | -0.00568 | 0.90258  |
| 0.00012  | 0.011172 | 0.80972  | -0.0063  | 0.89207  | -0.06948 | 0.13381  | -0.12335 | 0.00762  |
| 0.20886  | 0.082696 | 0.0742   | 0.062012 | 0.18097  | 0.079246 | 0.08715  | -0.22417 | 9.89E-07 |
| 0.05105  | 0.096509 | 0.03708  | -0.00211 | 0.96374  | -0.01691 | 0.71558  | -0.10279 | 0.02633  |
| 0.16489  | 0.144395 | 0.00176  | 0.107619 | 0.02001  | 0.133617 | 0.00382  | 0.045272 | 0.32896  |
| 0.46107  | 0.290218 | 1.63E-10 | 0.165672 | 0.00032  | 0.178672 | 0.0001   | -0.01156 | 0.80323  |
| 0.00143  | 0.077209 | 0.09561  | -0.02599 | 0.57527  | -0.03918 | 0.39827  | -0.05134 | 0.26817  |
| 3.22E-07 | 0.139478 | 0.00252  | 0.252499 | 3.17E-08 | 0.257967 | 1.55E-08 | 0.005574 | 0.90438  |
| 0.94345  | 0.070821 | 0.12644  | 0.023658 | 0.61009  | 0.036652 | 0.42941  | 0.027559 | 0.55247  |
| 0.90328  | 0.113742 | 0.01392  | 0.094902 | 0.04037  | 0.097592 | 0.035    | -0.10436 | 0.02411  |
| 0.0845   | 0.384489 | 6.68E-18 | 0.238332 | 1.87E-07 | 0.261684 | 9.46E-09 | -0.01695 | 0.71486  |
| 0.94501  | 0.213051 | 3.40E-06 | 0.085858 | 0.06376  | 0.10376  | 0.02494  | 0.010048 | 0.82854  |
| 0.01256  | 0.001846 | 0.96827  | 0.015058 | 0.74552  | -0.04924 | 0.28827  | -0.10305 | 0.02596  |
| 5.21E-06 | -0.07626 | 0.09978  | -0.04534 | 0.32825  | -0.11642 | 0.01181  | -0.03592 | 0.43873  |
| 0.32694  | 0.281394 | 6.01E-10 | 0.115727 | 0.01233  | 0.161339 | 0.00046  | 0.12301  | 0.00778  |
| 0.70221  | 0.318394 | 1.84E-12 | 0.199785 | 1.36E-05 | 0.190463 | 3.43E-05 | -0.18662 | 4.95E-05 |
| 0.0003   | 0.035294 | 0.44672  | 0.031571 | 0.49613  | -0.03356 | 0.46938  | -0.11704 | 0.01137  |
| 8.98E-07 | -0.15335 | 0.00088  | -0.23689 | 2.22E-07 | -0.26074 | 1.07E-08 | -0.02184 | 0.63779  |
| 2.90E-08 | 0.000943 | 0.98378  | 0.328489 | 3.27E-13 | 0.28645  | 2.86E-10 | 0.094029 | 0.04225  |
| 0.40486  | 0.246926 | 6.45E-08 | 0.185151 | 5.69E-05 | 0.184278 | 6.18E-05 | 0.027099 | 0.55912  |
| 0.55161  | 0.290693 | 1.51E-10 | 0.213043 | 3.40E-06 | 0.194625 | 2.28E-05 | 0.001713 | 0.97055  |
| 0.14208  | 0.127935 | 0.00563  | 0.053544 | 0.24816  | 0.041087 | 0.37567  | -0.01565 | 0.7358   |
| 0.03079  | 0.09235  | 0.04609  | 0.052171 | 0.26052  | 0.018564 | 0.68907  | -0.08445 | 0.06824  |
| 0.00983  | 0.065823 | 0.15555  | 0.039817 | 0.39062  | -0.00148 | 0.97463  | -0.08545 | 0.06504  |
| 0.98556  | 0.119099 | 0.00999  | 0.117871 | 0.01079  | 0.100607 | 0.02972  | -0.05748 | 0.21505  |
| 0.00246  | 0.263605 | 7.30E-09 | 0.145459 | 0.00162  | 0.1894   | 3.80E-05 | -0.01846 | 0.69074  |
| 0.97161  | 0.158833 | 0.00057  | 0.134572 | 0.00357  | 0.104902 | 0.02338  | 0.019295 | 0.67748  |
| 0.11923  | 0.192673 | 2.77E-05 | 0.125666 | 0.00654  | 0.20824  | 5.68E-06 | -0.03444 | 0.45776  |
| 0.23949  | 0.026567 | 0.56686  | 0.090299 | 0.05116  | 0.043722 | 0.3458   | -0.02776 | 0.54958  |
| 0.29307  | 0.119585 | 0.00969  | -0.04243 | 0.36022  | -0.00193 | 0.96675  | -0.02759 | 0.55196  |
| 7.30E-08 | 0.007841 | 0.8658   | 0.13729  | 0.00295  | 0.180414 | 8.84E-05 | 0.139122 | 0.00259  |
| 2.88E-11 | -0.10047 | 0.02994  | -0.09194 | 0.04707  | -0.20527 | 7.76E-06 | -0.14803 | 0.00134  |
| 0.00056  | 0.201339 | 1.16E-05 | 0.235234 | 2.72E-07 | 0.231038 | 4.47E-07 | 0.105305 | 0.02285  |
| 0.89512  | 0.197306 | 1.75E-05 | 0.164681 | 0.00035  | 0.128683 | 0.00535  | -0.13069 | 0.00467  |

|          |          |          |          |          |          |          |          |          |
|----------|----------|----------|----------|----------|----------|----------|----------|----------|
| 0.20141  | 0.102258 | 0.02713  | 0.09606  | 0.03798  | 0.110192 | 0.01721  | -0.0715  | 0.12283  |
| 7.90E-10 | -0.04057 | 0.38176  | -0.16426 | 0.00036  | -0.20314 | 9.67E-06 | -0.34382 | 2.10E-14 |
| 1.20E-10 | -0.10453 | 0.02388  | -0.17663 | 0.00012  | -0.23389 | 3.19E-07 | -0.13081 | 0.00463  |
| 0.19452  | 0.117761 | 0.01087  | 0.106014 | 0.02195  | 0.065712 | 0.15626  | 0.017968 | 0.69855  |
| 0.15351  | 0.192358 | 2.85E-05 | 0.176219 | 0.00013  | 0.172073 | 0.00019  | 0.103048 | 0.02596  |
| 0.00019  | -0.01497 | 0.74693  | 0.017573 | 0.70486  | -0.06224 | 0.17936  | -0.04875 | 0.29314  |
| 0.66685  | 0.188917 | 3.98E-05 | 0.162546 | 0.00042  | 0.102885 | 0.0262   | -0.02283 | 0.6227   |
| 0.86748  | 0.148682 | 0.00127  | 0.106429 | 0.02143  | 0.117687 | 0.01092  | -0.04786 | 0.30198  |
| 0.54125  | 0.131723 | 0.00435  | 0.145643 | 0.0016   | 0.112973 | 0.01458  | -0.02702 | 0.56031  |
| 0.15343  | 0.036703 | 0.42877  | -0.02668 | 0.56525  | -0.02846 | 0.53951  | -0.25598 | 2.02E-08 |
| 0.2477   | -0.05882 | 0.20448  | -0.06535 | 0.15856  | -0.05477 | 0.23744  | 0.094393 | 0.04146  |
| 0.02942  | 0.099183 | 0.03212  | -0.08256 | 0.07467  | -0.07513 | 0.10491  | -0.0555  | 0.23129  |
| 4.51E-05 | -0.0134  | 0.7728   | -0.03901 | 0.40027  | -0.11094 | 0.01647  | -0.07167 | 0.12193  |
| 1.85E-07 | -0.1001  | 0.03055  | -0.08941 | 0.05351  | -0.16132 | 0.00047  | -0.1089  | 0.01857  |
| 0.114    | -0.04043 | 0.38332  | -0.03437 | 0.45876  | -0.05136 | 0.26798  | -0.26803 | 3.99E-09 |
| 0.42938  | 0.073954 | 0.11048  | 0.050752 | 0.27373  | 0.028455 | 0.53961  | 0.03637  | 0.43297  |
| 0.61882  | 0.19171  | 3.04E-05 | 0.077174 | 0.09576  | 0.083934 | 0.06996  | -0.01432 | 0.75757  |
| 5.10E-07 | 0.242815 | 1.08E-07 | 0.249536 | 4.64E-08 | 0.319669 | 1.48E-12 | 0.08834  | 0.05644  |
| 0.03059  | 0.270815 | 2.71E-09 | 0.215861 | 2.50E-06 | 0.225656 | 8.35E-07 | 0.0494   | 0.28672  |
| 0.00185  | -0.01578 | 0.73373  | -0.03881 | 0.40277  | -0.08092 | 0.08066  | -0.14239 | 0.00204  |
| 0.15688  | 0.290424 | 1.58E-10 | 0.125601 | 0.00657  | 0.189537 | 3.75E-05 | -0.04157 | 0.3701   |
| 0.03013  | 0.006068 | 0.89596  | 0.046031 | 0.32091  | 0.054201 | 0.24239  | 0.240526 | 1.43E-07 |
| 0.01778  | 0.038596 | 0.40533  | 0.190232 | 3.51E-05 | 0.153919 | 0.00085  | 0.019291 | 0.67756  |
| 0.52117  | -0.00893 | 0.84742  | 0.060738 | 0.19011  | 0.036493 | 0.43141  | -0.07391 | 0.11071  |
| 0.01588  | -0.01167 | 0.80145  | -0.09614 | 0.03781  | -0.06331 | 0.17202  | -0.06449 | 0.16414  |
| 0.19119  | 0.290114 | 1.65E-10 | 0.175108 | 0.00014  | 0.169167 | 0.00024  | 0.100532 | 0.02984  |
| 3.68E-06 | -0.00979 | 0.83294  | -0.14102 | 0.00225  | -0.14584 | 0.00158  | -0.12047 | 0.00917  |
| 0.29805  | -0.12169 | 0.00847  | 0.030073 | 0.51679  | 0.018488 | 0.69026  | -0.02898 | 0.53221  |
| 0.0432   | -0.11002 | 0.01739  | -0.11671 | 0.0116   | -0.12771 | 0.00571  | -0.25937 | 1.29E-08 |
| 1.23E-11 | -0.23846 | 1.84E-07 | -0.32603 | 5.01E-13 | -0.32973 | 2.63E-13 | -0.47203 | 2.74E-27 |
| 0.45979  | -0.07942 | 0.08647  | -0.0656  | 0.15697  | -0.06458 | 0.16354  | -0.19151 | 3.10E-05 |
| 1.04E-05 | -0.12497 | 0.00685  | -0.20283 | 9.99E-06 | -0.20122 | 1.18E-05 | -0.22736 | 6.86E-07 |
| 0.63069  | -0.12424 | 0.00719  | -0.03537 | 0.4457   | -0.02883 | 0.53426  | -0.14944 | 0.0012   |
| 0.03282  | -0.16896 | 0.00024  | -0.094   | 0.04232  | -0.10749 | 0.02015  | -0.10675 | 0.02104  |
| 3.42E-07 | -0.27893 | 8.59E-10 | -0.26412 | 6.81E-09 | -0.28868 | 2.05E-10 | -0.3243  | 6.75E-13 |
| 0.92211  | -0.03328 | 0.47313  | -0.00146 | 0.97497  | 0.003961 | 0.93196  | -0.14543 | 0.00163  |
| 7.92E-10 | -0.31491 | 3.28E-12 | -0.32598 | 5.05E-13 | -0.34826 | 9.22E-15 | -0.28015 | 7.19E-10 |
| 0.01791  | -0.20999 | 4.72E-06 | -0.16752 | 0.00028  | -0.16853 | 0.00025  | -0.10976 | 0.01766  |
| 0.1071   | -0.02634 | 0.57012  | 0.054831 | 0.23696  | 0.062689 | 0.17624  | -0.04123 | 0.37404  |
| 0.24602  | 0.078165 | 0.09156  | 0.116602 | 0.01168  | 0.089133 | 0.05425  | -0.27235 | 2.19E-09 |
| 0.00014  | -0.20747 | 6.16E-06 | -0.13271 | 0.00407  | -0.17694 | 0.00012  | -0.14415 | 0.00179  |
| 0.0207   | -0.15614 | 0.00071  | -0.13406 | 0.0037   | -0.11535 | 0.01262  | -0.18659 | 4.97E-05 |
| 0.4146   | -0.0279  | 0.54762  | 0.119211 | 0.00992  | 0.073914 | 0.11067  | -0.05538 | 0.2323   |
| 0.69018  | -0.10108 | 0.02896  | -0.04586 | 0.32269  | -0.00737 | 0.87383  | -0.09917 | 0.03215  |
| 0.85392  | -0.03818 | 0.41043  | -0.04117 | 0.37471  | -0.02473 | 0.59399  | -0.12749 | 0.0058   |

|          |          |          |          |          |          |          |          |          |
|----------|----------|----------|----------|----------|----------|----------|----------|----------|
| 0.96187  | -0.02864 | 0.53694  | 0.031808 | 0.4929   | 0.041792 | 0.36754  | -0.09559 | 0.03892  |
| 0.86591  | -0.00592 | 0.89847  | 0.053501 | 0.24854  | 0.039135 | 0.3988   | -0.10394 | 0.02469  |
| 0.55742  | -0.03579 | 0.44036  | 0.033315 | 0.47262  | 0.01246  | 0.78828  | -0.11036 | 0.01705  |
| 0.12941  | -0.08383 | 0.07031  | -0.03447 | 0.45738  | -0.05946 | 0.19963  | -0.06348 | 0.17081  |
| 0.61597  | 0.060312 | 0.19324  | -0.04933 | 0.28744  | 0.027693 | 0.55053  | -0.03206 | 0.48943  |
| 0.52067  | -0.03022 | 0.51471  | -0.00941 | 0.83935  | -0.01148 | 0.80451  | -0.15754 | 0.00063  |
| 0.14132  | -0.28723 | 2.54E-10 | -0.1003  | 0.03022  | -0.15877 | 0.00057  | -0.04447 | 0.33756  |
| 0.50602  | 0.009606 | 0.83597  | 0.049657 | 0.28422  | 0.04444  | 0.33793  | -0.14437 | 0.00176  |
| 0.00022  | -0.18148 | 8.01E-05 | -0.14198 | 0.0021   | -0.17474 | 0.00015  | -0.26978 | 3.13E-09 |
| 0.92282  | -0.07147 | 0.123    | -0.02536 | 0.5846   | -0.00374 | 0.93568  | -0.08775 | 0.05811  |
| 0.20441  | 0.019707 | 0.67101  | 0.073541 | 0.11248  | 0.085323 | 0.06544  | -0.01983 | 0.66906  |
| 0.08212  | -0.1456  | 0.00161  | -0.05079 | 0.27332  | -0.08318 | 0.07254  | -0.05259 | 0.25667  |
| 0.39912  | 0.02204  | 0.63474  | 0.03019  | 0.51517  | 0.057422 | 0.2155   | -0.05528 | 0.23314  |
| 0.88753  | -0.05009 | 0.28004  | 0.016974 | 0.71448  | 0.011567 | 0.80312  | -0.07004 | 0.13071  |
| 0.9761   | -0.06764 | 0.14443  | -0.01952 | 0.67387  | -0.0024  | 0.95882  | -0.07945 | 0.08634  |
| 0.04714  | -0.02436 | 0.59954  | 0.139823 | 0.00246  | 0.09877  | 0.03285  | -0.0181  | 0.69643  |
| 0.93612  | -0.04945 | 0.28625  | 0.034381 | 0.45857  | 0.029012 | 0.53171  | -0.03717 | 0.42293  |
| 0.46382  | 0.002635 | 0.95471  | 0.114652 | 0.01317  | 0.078169 | 0.09155  | -0.00864 | 0.85225  |
| 0.72668  | -0.02657 | 0.56683  | 0.037161 | 0.42303  | 0.037077 | 0.42408  | -0.05882 | 0.2045   |
| 0.90835  | -0.04138 | 0.3723   | -0.01233 | 0.79049  | -0.00362 | 0.93788  | -0.10015 | 0.03047  |
| 0.81895  | -0.02561 | 0.58094  | 0.025801 | 0.5781   | 0.021807 | 0.63832  | -0.0493  | 0.28766  |
| 0.0928   | -0.11677 | 0.01156  | -0.05168 | 0.26504  | -0.06856 | 0.13902  | -0.11914 | 0.00997  |
| 0.23455  | -0.0868  | 0.06089  | -0.04009 | 0.38739  | -0.04456 | 0.33664  | -0.21253 | 3.59E-06 |
| 0.74405  | -0.05863 | 0.20598  | -0.04658 | 0.31518  | -0.0197  | 0.67104  | -0.15862 | 0.00058  |
| 0.91222  | -0.11811 | 0.01063  | -0.07037 | 0.12889  | -0.05615 | 0.22586  | -0.16052 | 0.0005   |
| 0.00973  | -0.18612 | 5.20E-05 | -0.15462 | 0.0008   | -0.15889 | 0.00057  | -0.1282  | 0.00553  |
| 0.60518  | -0.11087 | 0.01653  | 0.020275 | 0.66211  | -0.00187 | 0.96788  | 0.041903 | 0.36626  |
| 0.59985  | 0.043351 | 0.34992  | 0.029589 | 0.52358  | 0.049841 | 0.28244  | -0.15287 | 0.00092  |
| 0.90519  | 0.000209 | 0.99641  | 0.034799 | 0.45313  | 0.036683 | 0.42901  | -0.07644 | 0.09898  |
| 0.87665  | 0.004568 | 0.92158  | 0.014146 | 0.76045  | 0.035072 | 0.44958  | -0.13019 | 0.00484  |
| 0.57749  | -0.02527 | 0.58591  | 0.01547  | 0.7388   | 0.018613 | 0.68828  | -0.10592 | 0.02207  |
| 0.17852  | -0.08149 | 0.07855  | -0.07012 | 0.13026  | -0.05981 | 0.197    | -0.20055 | 1.26E-05 |
| 0.37374  | -0.07641 | 0.09908  | -0.02994 | 0.51864  | -0.03105 | 0.50323  | -0.18281 | 7.08E-05 |
| 0.08234  | -0.03157 | 0.49608  | -0.03121 | 0.50108  | 0.030799 | 0.50672  | -0.04518 | 0.32991  |
| 0.97549  | -0.10694 | 0.02081  | 0.027995 | 0.54619  | -0.00096 | 0.98344  | -0.05244 | 0.25808  |
| 0.39434  | 0.018446 | 0.69094  | 0.020418 | 0.65986  | 0.048364 | 0.29697  | -0.16743 | 0.00028  |
| 0.00248  | -0.15698 | 0.00066  | -0.08187 | 0.07714  | -0.12613 | 0.00635  | -0.10733 | 0.02035  |
| 0.17195  | -0.13343 | 0.00387  | -0.08135 | 0.07905  | -0.10108 | 0.02895  | -0.16    | 0.00052  |
| 7.32E-06 | -0.21276 | 3.50E-06 | -0.19011 | 3.55E-05 | -0.2209  | 1.43E-06 | -0.33498 | 1.04E-13 |
| 1.92E-07 | -0.08802 | 0.05734  | -0.35485 | 2.64E-15 | -0.26301 | 7.91E-09 | -0.1429  | 0.00196  |
| 0.6702   | -0.13118 | 0.00452  | -0.03311 | 0.4754   | -0.05923 | 0.20134  | 0.04622  | 0.31893  |
| 2.10E-06 | -0.26472 | 6.28E-09 | -0.21154 | 4.00E-06 | -0.26608 | 5.21E-09 | -0.14325 | 0.00191  |
| 0.48336  | -0.02429 | 0.60061  | 0.06296  | 0.17438  | 0.014153 | 0.76034  | -0.00918 | 0.8432   |
| 8.31E-27 | -0.33672 | 7.63E-14 | -0.46452 | 2.26E-26 | -0.51591 | 4.03E-33 | -0.40513 | 7.13E-20 |
| 0.0427   | -0.04438 | 0.33859  | -0.02369 | 0.60954  | -0.06653 | 0.15114  | -0.15183 | 0.001    |

|          |          |          |          |          |          |          |          |          |
|----------|----------|----------|----------|----------|----------|----------|----------|----------|
| 0.00103  | -0.00148 | 0.9746   | -0.06568 | 0.15643  | -0.08552 | 0.0648   | -0.03703 | 0.42464  |
| 1.40E-07 | -0.0416  | 0.36974  | -0.14463 | 0.00173  | -0.1793  | 9.78E-05 | -0.2891  | 1.93E-10 |
| 0.00018  | -0.10858 | 0.01892  | -0.15666 | 0.00068  | -0.18927 | 3.85E-05 | 0.117828 | 0.01082  |
| 1.88E-10 | -0.15438 | 0.00082  | -0.20286 | 9.96E-06 | -0.24167 | 1.24E-07 | -0.36532 | 3.43E-16 |
| 0.52085  | 0.074532 | 0.10771  | -0.02659 | 0.56647  | -0.01067 | 0.81813  | 0.075604 | 0.10273  |
| 0.94486  | -0.14512 | 0.00167  | 0.049346 | 0.28725  | -0.01772 | 0.70246  | 0.036854 | 0.42686  |
| 0.13757  | -0.01924 | 0.67831  | -0.00125 | 0.97848  | -0.02548 | 0.58286  | 0.314923 | 3.28E-12 |
| 8.30E-13 | -0.2801  | 7.25E-10 | -0.24921 | 4.83E-08 | -0.32456 | 6.45E-13 | 0.089986 | 0.05197  |
| 0.00086  | -0.07051 | 0.1281   | -0.02261 | 0.62604  | -0.09436 | 0.04154  | -0.13962 | 0.0025   |
| 0.00014  | -0.15419 | 0.00083  | -0.12196 | 0.00833  | -0.16177 | 0.00045  | -0.19201 | 2.95E-05 |
| 0.00106  | -0.06022 | 0.19389  | -0.10466 | 0.02371  | -0.13367 | 0.00381  | -0.11317 | 0.01441  |
| 5.29E-12 | -0.26402 | 6.90E-09 | -0.17874 | 0.0001   | -0.29723 | 5.57E-11 | -0.13367 | 0.0038   |
| 0.01887  | -0.17917 | 9.90E-05 | -0.06145 | 0.18495  | -0.12697 | 0.006    | 0.04291  | 0.35484  |
| 4.95E-05 | -0.37817 | 2.52E-17 | -0.25717 | 1.72E-08 | -0.26677 | 4.74E-09 | -0.02597 | 0.57554  |
| 9.72E-07 | -0.08644 | 0.06199  | -0.12525 | 0.00673  | -0.16617 | 0.00031  | 0.202084 | 1.08E-05 |
| 0.0275   | -0.03083 | 0.50625  | 0.011508 | 0.80411  | -0.03985 | 0.39025  | -0.05226 | 0.25974  |
| 2.64E-05 | -0.23958 | 1.61E-07 | -0.2856  | 3.24E-10 | -0.25737 | 1.68E-08 | -0.23358 | 3.31E-07 |
| 0.70795  | 0.110474 | 0.01693  | 0.117112 | 0.01132  | 0.069563 | 0.13334  | -0.13973 | 0.00248  |
| 0.00144  | -0.21923 | 1.73E-06 | -0.18946 | 3.78E-05 | -0.19056 | 3.40E-05 | 0.007959 | 0.86381  |
| 0.00052  | -0.05943 | 0.19984  | -0.19247 | 2.82E-05 | -0.15546 | 0.00075  | 0.047589 | 0.30478  |
| 0.85095  | -0.10836 | 0.01916  | -0.16421 | 0.00037  | -0.11362 | 0.01402  | 0.108101 | 0.01946  |
| 1.16E-07 | -0.05673 | 0.22108  | -0.09736 | 0.03544  | -0.16007 | 0.00052  | -0.23335 | 3.40E-07 |
| 0.11013  | -0.17968 | 9.45E-05 | -0.11514 | 0.01278  | -0.12704 | 0.00598  | -0.1086  | 0.01889  |
| 0.37417  | -0.13651 | 0.00312  | -0.04371 | 0.3459   | -0.07181 | 0.12121  | -0.13978 | 0.00247  |
| 0.00807  | 0.022237 | 0.63172  | -0.02218 | 0.63255  | -0.05295 | 0.2535   | 0.019147 | 0.67983  |
| 0.00598  | 0.048902 | 0.29162  | 0.002454 | 0.95783  | 0.007194 | 0.87679  | -0.06745 | 0.14559  |
| 5.81E-13 | -0.37698 | 3.22E-17 | -0.3299  | 2.56E-13 | -0.40773 | 3.94E-20 | -0.16047 | 0.0005   |
| 0.01289  | -0.00387 | 0.9335   | -0.04597 | 0.32158  | -0.06131 | 0.18596  | -0.27963 | 7.76E-10 |
| 5.09E-21 | -0.25802 | 1.54E-08 | -0.3084  | 9.52E-12 | -0.38984 | 2.12E-18 | -0.1649  | 0.00035  |
| 4.23E-07 | -0.18207 | 7.58E-05 | -0.20745 | 6.17E-06 | -0.24344 | 9.98E-08 | -0.14547 | 0.00162  |
| 0.03743  | 0.046766 | 0.31323  | -0.02457 | 0.59639  | -0.02629 | 0.57094  | 0.020044 | 0.66571  |
| 0.0001   | -0.02075 | 0.65476  | -0.12837 | 0.00547  | -0.11892 | 0.0101   | -0.01792 | 0.69932  |
| 5.24E-08 | -0.17268 | 0.00018  | -0.18676 | 4.89E-05 | -0.24848 | 5.31E-08 | 0.045472 | 0.32683  |
| 0.00072  | -0.23279 | 3.63E-07 | -0.15338 | 0.00088  | -0.1844  | 6.11E-05 | -0.12275 | 0.00792  |
| 1.64E-05 | -0.17743 | 0.00012  | -0.17515 | 0.00014  | -0.20991 | 4.76E-06 | -0.09051 | 0.05062  |
| 0.00292  | -0.06287 | 0.17498  | 0.036719 | 0.42856  | -0.04809 | 0.29975  | -0.04156 | 0.37016  |
| 0.0001   | -0.01756 | 0.705    | -0.1165  | 0.01175  | -0.1324  | 0.00416  | 0.068806 | 0.13763  |
| 0.00741  | -0.04721 | 0.30862  | -0.00235 | 0.95952  | -0.08213 | 0.0762   | -0.26513 | 5.93E-09 |
| 1.23E-07 | -0.23513 | 2.75E-07 | -0.18274 | 7.13E-05 | -0.24673 | 6.61E-08 | -0.19376 | 2.49E-05 |
| 2.72E-06 | -0.1247  | 0.00697  | -0.07978 | 0.08502  | -0.17606 | 0.00013  | -0.16002 | 0.00052  |
| 0.0193   | -0.09974 | 0.03117  | -0.02131 | 0.64595  | -0.07981 | 0.08493  | 0.005518 | 0.90533  |
| 0.02074  | -0.17609 | 0.00013  | -0.09847 | 0.03339  | -0.15384 | 0.00085  | 0.174089 | 0.00016  |
| 4.36E-05 | -0.15866 | 0.00058  | -0.18916 | 3.89E-05 | -0.22368 | 1.05E-06 | -0.06922 | 0.13527  |
| 4.59E-07 | -0.23578 | 2.54E-07 | -0.18416 | 6.24E-05 | -0.25998 | 1.19E-08 | 0.017764 | 0.7018   |
| 0.00271  | -0.01525 | 0.74243  | 0.076742 | 0.09764  | -0.02588 | 0.57699  | -0.06506 | 0.16039  |

|          |          |          |          |          |          |          |          |          |
|----------|----------|----------|----------|----------|----------|----------|----------|----------|
| 9.22E-06 | -0.04269 | 0.35736  | -0.12999 | 0.0049   | -0.14825 | 0.00131  | -0.42094 | 1.76E-21 |
| 2.87E-07 | -0.22687 | 7.26E-07 | -0.31135 | 5.90E-12 | -0.29882 | 4.35E-11 | -0.07403 | 0.11013  |
| 0.0162   | -0.03793 | 0.41344  | -0.07923 | 0.08721  | -0.09915 | 0.03218  | 0.003009 | 0.9483   |
| 1.38E-09 | -0.13083 | 0.00463  | -0.27445 | 1.63E-09 | -0.27381 | 1.78E-09 | -0.15846 | 0.00059  |
| 0.40621  | 0.007677 | 0.86858  | 0.060233 | 0.19383  | 0.036944 | 0.42574  | 0.151139 | 0.00105  |
| 0.07731  | -0.11127 | 0.01615  | -0.04449 | 0.33738  | -0.08587 | 0.06373  | -0.26316 | 7.75E-09 |
| 4.08E-07 | -0.04855 | 0.2951   | -0.0965  | 0.03709  | -0.15093 | 0.00107  | 0.237565 | 2.05E-07 |
| 0.3676   | -0.04871 | 0.29351  | 0.08931  | 0.05377  | 0.052349 | 0.25889  | 0.127371 | 0.00584  |
| 0.91514  | -0.04801 | 0.30047  | 0.07499  | 0.10556  | 0.020347 | 0.66097  | 0.097017 | 0.03609  |
| 2.30E-05 | -0.19612 | 1.97E-05 | -0.12156 | 0.00854  | -0.19488 | 2.23E-05 | -0.11043 | 0.01697  |
| 2.40E-06 | -0.16058 | 0.0005   | -0.1784  | 0.00011  | -0.23139 | 4.29E-07 | -0.05758 | 0.21426  |
| 2.68E-31 | -0.27379 | 1.79E-09 | -0.47935 | 3.34E-28 | -0.53486 | 6.47E-36 | -0.19443 | 2.33E-05 |
| 9.61E-13 | -0.23115 | 4.41E-07 | -0.28552 | 3.28E-10 | -0.33566 | 9.22E-14 | -0.15196 | 0.00099  |
| 5.20E-10 | -0.20811 | 5.76E-06 | -0.29157 | 1.33E-10 | -0.33489 | 1.06E-13 | 0.087628 | 0.05846  |
| 0.06254  | -0.24151 | 1.27E-07 | -0.30889 | 8.80E-12 | -0.26806 | 3.97E-09 | -0.04165 | 0.36912  |
| 0.70165  | 0.066133 | 0.15361  | 0.075824 | 0.10173  | 0.055072 | 0.2349   | -0.20264 | 1.02E-05 |
| 5.11E-20 | -0.33136 | 1.98E-13 | -0.46763 | 9.49E-27 | -0.47789 | 5.09E-28 | -0.24728 | 6.17E-08 |
| 0.0002   | -0.10432 | 0.02417  | -0.24776 | 5.81E-08 | -0.21155 | 4.00E-06 | -0.05796 | 0.21119  |
| 0.00086  | -0.2521  | 3.34E-08 | -0.28257 | 5.06E-10 | -0.25827 | 1.49E-08 | 0.073465 | 0.11286  |
| 0.00018  | 0.070113 | 0.13029  | -0.09563 | 0.03884  | -0.08642 | 0.06204  | -0.00324 | 0.94427  |
| 1.88E-08 | -0.19922 | 1.44E-05 | -0.17207 | 0.00019  | -0.24954 | 4.63E-08 | -0.07775 | 0.09332  |
| 0.00084  | -0.21435 | 2.95E-06 | -0.28909 | 1.93E-10 | -0.24061 | 1.42E-07 | -0.00151 | 0.97399  |
| 0.00165  | -0.12812 | 0.00556  | -0.23869 | 1.79E-07 | -0.21044 | 4.50E-06 | 0.095173 | 0.0398   |
| 7.75E-21 | -0.26695 | 4.63E-09 | -0.20005 | 1.33E-05 | -0.33712 | 7.10E-14 | -0.17532 | 0.00014  |
| 3.00E-12 | -0.14865 | 0.00127  | -0.15836 | 0.00059  | -0.23842 | 1.85E-07 | -0.12245 | 0.00807  |
| 1.36E-05 | -0.21977 | 1.62E-06 | -0.21265 | 3.55E-06 | -0.26747 | 4.31E-09 | -0.18631 | 5.10E-05 |
| 0.00149  | -0.23197 | 4.01E-07 | -0.28414 | 4.02E-10 | -0.2518  | 3.47E-08 | 0.010551 | 0.8201   |
| 1.74E-06 | -0.12185 | 0.00839  | -0.10764 | 0.01999  | -0.17583 | 0.00013  | -0.07641 | 0.0991   |
| 0.31253  | -0.01636 | 0.72434  | 0.113896 | 0.01379  | 0.028523 | 0.53865  | -0.03899 | 0.40055  |
| 0.72161  | -0.07577 | 0.10199  | -0.06845 | 0.13968  | -0.04879 | 0.29269  | -0.00021 | 0.99633  |
| 4.39E-26 | -0.24111 | 1.33E-07 | -0.35828 | 1.36E-15 | -0.4302  | 1.84E-22 | -0.35849 | 1.31E-15 |
| 6.17E-07 | -0.03076 | 0.50723  | -0.20132 | 1.17E-05 | -0.18846 | 4.16E-05 | -0.20154 | 1.14E-05 |
| 0.06256  | -0.11921 | 0.00993  | -0.09412 | 0.04204  | -0.12089 | 0.00892  | -0.13473 | 0.00353  |
| 0.27338  | -0.13295 | 0.004    | -0.10254 | 0.0267   | -0.11386 | 0.01382  | -0.09744 | 0.03529  |
| 9.39E-06 | -0.21407 | 3.04E-06 | -0.25103 | 3.83E-08 | -0.2584  | 1.47E-08 | -0.00929 | 0.84125  |
| 0.02004  | -0.19782 | 1.66E-05 | -0.12135 | 0.00866  | -0.14875 | 0.00127  | -0.06044 | 0.19228  |
| 5.89E-12 | -0.23114 | 4.42E-07 | -0.20655 | 6.79E-06 | -0.2835  | 4.42E-10 | -0.09001 | 0.05192  |
| 1.66E-17 | -0.2087  | 5.41E-06 | -0.26919 | 3.40E-09 | -0.33866 | 5.38E-14 | -0.29349 | 9.91E-11 |
| 9.83E-13 | -0.20086 | 1.22E-05 | -0.21477 | 2.82E-06 | -0.29757 | 5.29E-11 | -0.03578 | 0.44045  |
| 0.00068  | -0.24351 | 9.89E-08 | -0.12497 | 0.00685  | -0.17732 | 0.00012  | -0.08211 | 0.07629  |
| 9.81E-11 | -0.05657 | 0.22243  | -0.10183 | 0.02778  | -0.19097 | 3.26E-05 | -0.21372 | 3.16E-06 |
| 9.41E-08 | -0.1134  | 0.01421  | -0.17364 | 0.00016  | -0.20659 | 6.76E-06 | -0.10915 | 0.0183   |
| 1.17E-17 | -0.38889 | 2.61E-18 | -0.33586 | 8.91E-14 | -0.40616 | 5.63E-20 | -0.33119 | 2.04E-13 |
| 4.29E-06 | -0.31837 | 1.84E-12 | -0.33051 | 2.30E-13 | -0.32534 | 5.65E-13 | -0.22709 | 7.08E-07 |
| 9.99E-24 | -0.3788  | 2.21E-17 | -0.34808 | 9.53E-15 | -0.42596 | 5.24E-22 | -0.12334 | 0.00762  |



|          |          |          |          |          |          |          |          |          |
|----------|----------|----------|----------|----------|----------|----------|----------|----------|
| 3.54E-31 | -0.40123 | 1.72E-19 | -0.45974 | 8.45E-26 | -0.53998 | 1.06E-36 | -0.24642 | 6.88E-08 |
| 2.76E-07 | -0.1474  | 0.0014   | -0.1183  | 0.01051  | -0.19128 | 3.17E-05 | -0.10042 | 0.03002  |
| 5.09E-14 | -0.21756 | 2.08E-06 | -0.3179  | 2.00E-12 | -0.33994 | 4.27E-14 | 0.012474 | 0.78804  |
| 0.81529  | -0.03423 | 0.46049  | 0.077863 | 0.09283  | 0.044811 | 0.33392  | 0.058864 | 0.20418  |
| 0.00059  | -0.23473 | 2.89E-07 | -0.38062 | 1.51E-17 | -0.26911 | 3.43E-09 | -0.21039 | 4.52E-06 |
| 9.43E-08 | -0.07308 | 0.11476  | -0.17658 | 0.00013  | -0.2046  | 8.32E-06 | -0.41813 | 3.45E-21 |
| 0.12513  | 0.018483 | 0.69035  | 0.02098  | 0.65111  | -0.01292 | 0.78067  | -0.1107  | 0.0167   |
| 0.49622  | -0.18645 | 5.03E-05 | -0.27788 | 9.98E-10 | -0.18358 | 6.59E-05 | 0.119429 | 0.00979  |
| 2.38E-05 | -0.05525 | 0.23337  | -0.17882 | 0.0001   | -0.18413 | 6.26E-05 | -0.05908 | 0.20253  |
| 0.01493  | 0.01338  | 0.77305  | -0.07263 | 0.11703  | -0.07344 | 0.113    | -0.06754 | 0.14506  |
| 2.74E-05 | -0.15661 | 0.00068  | -0.10375 | 0.02495  | -0.16564 | 0.00032  | -0.01052 | 0.82066  |
| 1.64E-09 | -0.316   | 2.74E-12 | -0.23408 | 3.12E-07 | -0.33717 | 7.04E-14 | -0.05421 | 0.24233  |
| 0.00233  | -0.01403 | 0.76237  | -0.04167 | 0.36888  | -0.07995 | 0.08437  | -0.08742 | 0.05905  |
| 8.77E-06 | -0.12975 | 0.00498  | -0.18514 | 5.69E-05 | -0.22433 | 9.71E-07 | 0.183545 | 6.61E-05 |
| 0.00058  | -0.09231 | 0.04618  | -0.12744 | 0.00582  | -0.15901 | 0.00056  | -0.01205 | 0.79516  |
| 0.0028   | -0.12844 | 0.00544  | -0.11436 | 0.0134   | -0.13819 | 0.00276  | -0.02061 | 0.65693  |
| 0.09554  | 0.006899 | 0.8818   | 0.006449 | 0.88946  | -0.02375 | 0.60875  | -0.0428  | 0.35605  |
| 0.00043  | 0.002406 | 0.95865  | -0.22274 | 1.16E-06 | -0.14488 | 0.00169  | 0.018013 | 0.69783  |
| 7.55E-12 | -0.22179 | 1.29E-06 | -0.30603 | 1.39E-11 | -0.32695 | 4.27E-13 | -0.01937 | 0.67628  |
| 6.54E-05 | 0.049728 | 0.28353  | -0.1296  | 0.00503  | -0.11392 | 0.01377  | -0.10268 | 0.02649  |
| 0.00276  | -0.01566 | 0.73564  | -0.11795 | 0.01074  | -0.11086 | 0.01655  | -0.07896 | 0.08832  |
| 0.06351  | -0.12815 | 0.00555  | -0.05149 | 0.26684  | -0.09692 | 0.03629  | -0.0672  | 0.1471   |
| 0.03556  | 0.142104 | 0.00208  | -0.10439 | 0.02407  | 0.034993 | 0.4506   | 0.335977 | 8.72E-14 |
| 0.00048  | -0.25786 | 1.57E-08 | -0.16031 | 0.00051  | -0.22136 | 1.36E-06 | -0.117   | 0.0114   |
| 0.00013  | -0.09279 | 0.04506  | -0.25854 | 1.44E-08 | -0.19392 | 2.45E-05 | -0.13088 | 0.00461  |
| 0.59527  | -0.04427 | 0.33983  | 0.047731 | 0.30334  | 0.017386 | 0.70785  | -0.12293 | 0.00782  |
| 0.00285  | 0.064477 | 0.1642   | -0.1986  | 1.54E-05 | -0.14001 | 0.00243  | -0.00703 | 0.87958  |
| 0.00011  | -0.10388 | 0.02477  | -0.16246 | 0.00042  | -0.19019 | 3.52E-05 | -0.01403 | 0.76238  |
| 9.36E-13 | -0.28032 | 7.02E-10 | -0.28987 | 1.71E-10 | -0.35631 | 2.00E-15 | -0.06818 | 0.14127  |
| 4.35E-12 | -0.23251 | 3.75E-07 | -0.25851 | 1.44E-08 | -0.34606 | 1.39E-14 | -0.10027 | 0.03028  |
| 2.55E-08 | -0.28403 | 4.09E-10 | -0.15426 | 0.00082  | -0.2521  | 3.34E-08 | -0.27624 | 1.26E-09 |
| 4.26E-09 | -0.11663 | 0.01166  | -0.16662 | 0.0003   | -0.23148 | 4.24E-07 | -0.08961 | 0.05297  |
| 7.96E-08 | -0.09362 | 0.04316  | -0.13393 | 0.00374  | -0.19046 | 3.43E-05 | 0.106386 | 0.02148  |
| 1.63E-05 | -0.07128 | 0.124    | 0.002969 | 0.94897  | -0.12714 | 0.00593  | 0.006337 | 0.89137  |
| 0.00079  | -0.04978 | 0.28299  | -0.09106 | 0.04922  | -0.1028  | 0.02632  | 0.03874  | 0.40358  |
| 9.01E-09 | -0.09357 | 0.04327  | -0.15462 | 0.0008   | -0.2     | 1.33E-05 | -0.07053 | 0.128    |
| 0.3431   | 0.059753 | 0.19741  | 0.069476 | 0.13383  | 0.03488  | 0.45207  | -0.32145 | 1.10E-12 |
| 1.14E-12 | -0.24386 | 9.48E-08 | -0.35485 | 2.65E-15 | -0.34976 | 6.96E-15 | 0.025221 | 0.58668  |
| 9.81E-16 | -0.17156 | 0.0002   | -0.01676 | 0.71792  | -0.21581 | 2.52E-06 | -0.40756 | 4.09E-20 |
| 0.0858   | -0.11837 | 0.01046  | -0.10677 | 0.02101  | -0.15964 | 0.00053  | 0.367805 | 2.09E-16 |
| 1.76E-12 | -0.2064  | 6.89E-06 | -0.13867 | 0.00267  | -0.28087 | 6.49E-10 | -0.28275 | 4.93E-10 |
| 0.00388  | -0.0233  | 0.61557  | -0.1111  | 0.01631  | -0.12709 | 0.00596  | 0.009878 | 0.8314   |
| 0.0451   | -0.22483 | 9.17E-07 | -0.20205 | 1.08E-05 | -0.19928 | 1.44E-05 | -0.06265 | 0.1765   |
| 1.60E-15 | -0.48049 | 2.39E-28 | -0.34609 | 1.38E-14 | -0.45769 | 1.47E-25 | -0.15089 | 0.00107  |
| 0.5976   | -0.16443 | 0.00036  | 0.032319 | 0.48598  | -0.02768 | 0.55067  | 0.025919 | 0.57636  |

|          |          |          |          |          |          |          |          |          |
|----------|----------|----------|----------|----------|----------|----------|----------|----------|
| 0.15502  | -0.07839 | 0.09064  | -0.12041 | 0.0092   | -0.096   | 0.0381   | 0.015507 | 0.73821  |
| 0.97877  | -0.03608 | 0.43659  | -0.00126 | 0.9783   | -0.01361 | 0.7692   | 0.103848 | 0.02482  |
| 3.28E-05 | -0.13821 | 0.00276  | -0.10832 | 0.01921  | -0.18271 | 7.15E-05 | -0.06552 | 0.15749  |
| 1.85E-05 | -0.08455 | 0.06791  | -0.15255 | 0.00094  | -0.16913 | 0.00024  | -0.18656 | 4.98E-05 |
| 2.85E-07 | -0.14862 | 0.00128  | -0.17126 | 0.0002   | -0.1993  | 1.43E-05 | -0.34015 | 4.11E-14 |
| 3.63E-18 | -0.24842 | 5.35E-08 | -0.33346 | 1.37E-13 | -0.39758 | 3.89E-19 | -0.51571 | 4.30E-33 |
| 5.84E-09 | -0.2253  | 8.70E-07 | -0.14463 | 0.00173  | -0.22496 | 9.04E-07 | -0.07326 | 0.11387  |
| 5.98E-05 | -0.10799 | 0.01958  | -0.06894 | 0.13687  | -0.12987 | 0.00494  | -0.21567 | 2.56E-06 |
| 5.21E-06 | -0.05806 | 0.21046  | -0.07006 | 0.1306   | -0.12996 | 0.00491  | -0.12367 | 0.00746  |
| 8.78E-12 | -0.2528  | 3.05E-08 | -0.18837 | 4.19E-05 | -0.28194 | 5.55E-10 | -0.21409 | 3.04E-06 |
| 3.37E-05 | -0.25703 | 1.76E-08 | -0.12463 | 0.00701  | -0.20224 | 1.06E-05 | -0.10965 | 0.01777  |
| 0.02295  | 0.020045 | 0.6657   | -0.02976 | 0.52115  | -0.06905 | 0.13624  | 0.105834 | 0.02217  |
| 0.04174  | -0.00445 | 0.92367  | -0.08613 | 0.06293  | -0.07086 | 0.12622  | -0.02767 | 0.55079  |
| 0.70999  | 0.10802  | 0.01955  | 0.088445 | 0.05614  | 0.024159 | 0.60254  | -0.01849 | 0.69026  |
| 7.41E-05 | -0.27705 | 1.12E-09 | -0.10882 | 0.01866  | -0.21409 | 3.04E-06 | -0.15383 | 0.00085  |
| 7.53E-11 | -0.25989 | 1.20E-08 | -0.37639 | 3.64E-17 | -0.37114 | 1.07E-16 | -0.12202 | 0.0083   |
| 0.45876  | 0.055731 | 0.22933  | -0.0739  | 0.11076  | -0.05177 | 0.26423  | 0.264203 | 6.73E-09 |
| 0.00562  | -0.17597 | 0.00013  | 0.008841 | 0.84889  | -0.10144 | 0.02838  | -0.05551 | 0.23119  |
| 0.19667  | -0.08473 | 0.06734  | -0.14202 | 0.00209  | -0.05494 | 0.23605  | -0.24957 | 4.62E-08 |
| 0.05195  | -0.02486 | 0.59203  | 0.036867 | 0.4267   | -0.10802 | 0.01955  | -0.07865 | 0.08958  |
| 1.89E-05 | -0.27496 | 1.51E-09 | -0.13542 | 0.00337  | -0.22612 | 7.92E-07 | 0.104054 | 0.02453  |
| 8.11E-18 | -0.25465 | 2.40E-08 | -0.37472 | 5.14E-17 | -0.42779 | 3.34E-22 | -0.29224 | 1.20E-10 |
| 1.09E-11 | -0.09873 | 0.03292  | -0.2239  | 1.02E-06 | -0.27519 | 1.47E-09 | -0.16351 | 0.00039  |
| 2.10E-16 | -0.28264 | 5.01E-10 | -0.3899  | 2.09E-18 | -0.40325 | 1.09E-19 | -0.12271 | 0.00794  |
| 0.55289  | -0.10111 | 0.02891  | -0.01078 | 0.81634  | -0.05751 | 0.21476  | 0.049623 | 0.28455  |
| 6.72E-11 | -0.23372 | 3.25E-07 | -0.24083 | 1.38E-07 | -0.30643 | 1.31E-11 | -0.34621 | 1.35E-14 |
| 1.24E-12 | -0.25463 | 2.41E-08 | -0.42253 | 1.20E-21 | -0.37107 | 1.08E-16 | -0.17533 | 0.00014  |
| 0.1116   | -0.2177  | 2.04E-06 | -0.16654 | 0.0003   | -0.16275 | 0.00041  | 0.017523 | 0.70566  |
| 0.42287  | -0.10241 | 0.0269   | -0.14703 | 0.00144  | -0.10968 | 0.01774  | -0.17169 | 0.00019  |
| 0.40924  | -0.01593 | 0.73136  | -0.03943 | 0.39525  | -0.03588 | 0.4392   | -0.05403 | 0.24392  |
| 0.09218  | -0.07492 | 0.10588  | -0.027   | 0.56053  | -0.0852  | 0.06583  | -0.155   | 0.00078  |
| 0.00024  | -0.11512 | 0.0128   | -0.10033 | 0.03018  | -0.14513 | 0.00166  | -0.07891 | 0.08851  |
| 3.22E-24 | -0.36047 | 8.92E-16 | -0.49677 | 1.79E-30 | -0.52295 | 3.87E-34 | -0.32024 | 1.35E-12 |
| 0.02971  | -0.1367  | 0.00308  | -0.17888 | 0.0001   | -0.05206 | 0.26155  | -0.00843 | 0.85585  |
| 9.24E-10 | -0.16258 | 0.00042  | -0.2816  | 5.83E-10 | -0.2699  | 3.08E-09 | -0.35364 | 3.33E-15 |
| 2.30E-06 | -0.06986 | 0.13169  | -0.19762 | 1.70E-05 | -0.2152  | 2.69E-06 | -0.25272 | 3.08E-08 |
| 0.0004   | -0.20978 | 4.83E-06 | -0.34183 | 3.03E-14 | -0.28749 | 2.45E-10 | -0.17566 | 0.00014  |
| 9.97E-14 | -0.14415 | 0.00179  | -0.18238 | 7.37E-05 | -0.26235 | 8.64E-09 | 0.060718 | 0.19026  |
| 9.20E-14 | -0.2072  | 6.34E-06 | -0.30316 | 2.20E-11 | -0.3358  | 9.01E-14 | -0.06686 | 0.14911  |
| 6.22E-23 | -0.24411 | 9.19E-08 | -0.28176 | 5.70E-10 | -0.41082 | 1.93E-20 | -0.16497 | 0.00034  |
| 2.03E-10 | -0.29575 | 7.00E-11 | -0.29667 | 6.08E-11 | -0.33771 | 6.38E-14 | 0.062574 | 0.17704  |
| 3.51E-16 | -0.35843 | 1.33E-15 | -0.34392 | 2.06E-14 | -0.39798 | 3.56E-19 | -0.24392 | 9.41E-08 |
| 1.05E-05 | -0.05523 | 0.23355  | -0.1703  | 0.00022  | -0.20701 | 6.47E-06 | 0.028183 | 0.5435   |
| 2.34E-16 | -0.09977 | 0.03111  | -0.28123 | 6.16E-10 | -0.29091 | 1.47E-10 | -0.22424 | 9.81E-07 |
| 3.48E-15 | -0.2867  | 2.75E-10 | -0.16823 | 0.00026  | -0.28125 | 6.14E-10 | -0.00272 | 0.9533   |

|          |          |          |          |          |          |          |          |          |
|----------|----------|----------|----------|----------|----------|----------|----------|----------|
| 6.84E-26 | -0.36857 | 1.79E-16 | -0.34855 | 8.73E-15 | -0.45544 | 2.71E-25 | -0.20747 | 6.16E-06 |
| 1.36E-22 | -0.27018 | 2.96E-09 | -0.31222 | 5.12E-12 | -0.40099 | 1.82E-19 | -0.36895 | 1.66E-16 |
| 7.14E-15 | -0.25771 | 1.60E-08 | -0.21058 | 4.43E-06 | -0.3067  | 1.25E-11 | -0.1052  | 0.02299  |
| 0.00783  | 0.007976 | 0.86352  | -0.05586 | 0.22825  | -0.07153 | 0.12266  | -0.13343 | 0.00387  |
| 1.75E-07 | -0.34861 | 8.62E-15 | -0.33749 | 6.65E-14 | -0.3124  | 4.97E-12 | 0.026976 | 0.56091  |
| 0.26231  | -0.0135  | 0.77107  | -0.02202 | 0.63497  | -0.03341 | 0.47134  | -0.0198  | 0.66952  |
| 0.01793  | -0.14919 | 0.00122  | -0.20364 | 9.19E-06 | -0.17667 | 0.00012  | -0.03135 | 0.4991   |
| 0.00154  | -0.16105 | 0.00048  | -0.148   | 0.00134  | -0.18363 | 6.56E-05 | -0.14488 | 0.00169  |
| 1.41E-06 | -0.08391 | 0.07004  | -0.17264 | 0.00018  | -0.18536 | 5.58E-05 | -0.08425 | 0.06891  |
| 8.38E-19 | -0.21223 | 3.71E-06 | -0.29388 | 9.34E-11 | -0.33966 | 4.49E-14 | -0.35243 | 4.20E-15 |
| 0.08679  | -0.04702 | 0.31063  | -0.2799  | 7.47E-10 | -0.19763 | 1.69E-05 | 0.049493 | 0.28582  |
| 1.09E-16 | -0.2882  | 2.20E-10 | -0.34564 | 1.50E-14 | -0.39494 | 6.99E-19 | -0.01408 | 0.7616   |
| 3.02E-08 | -0.14018 | 0.0024   | -0.34175 | 3.07E-14 | -0.30527 | 1.57E-11 | -0.24361 | 9.77E-08 |
| 3.21E-09 | -0.23528 | 2.70E-07 | -0.19695 | 1.81E-05 | -0.26482 | 6.19E-09 | -0.13405 | 0.00371  |
| 0.49154  | 0.164528 | 0.00036  | -0.03225 | 0.48696  | 0.018395 | 0.69175  | 0.191343 | 3.15E-05 |
| 0.00029  | -0.28967 | 1.77E-10 | -0.11089 | 0.01651  | -0.19823 | 1.59E-05 | -0.19029 | 3.49E-05 |
| 4.04E-07 | -0.21876 | 1.82E-06 | -0.25511 | 2.26E-08 | -0.28707 | 2.61E-10 | 0.156352 | 0.0007   |
| 1.65E-19 | -0.25474 | 2.37E-08 | -0.22844 | 6.06E-07 | -0.32797 | 3.58E-13 | -0.24821 | 5.49E-08 |
| 1.00E-10 | -0.33307 | 1.46E-13 | -0.25768 | 1.61E-08 | -0.3313  | 2.00E-13 | -0.0608  | 0.18965  |
| 3.53E-13 | -0.14011 | 0.00241  | -0.28316 | 4.65E-10 | -0.31878 | 1.72E-12 | -0.24367 | 9.71E-08 |
| 0.00012  | -0.06153 | 0.18439  | 0.025706 | 0.57951  | -0.0628  | 0.17544  | -0.1939  | 2.45E-05 |
| 0.34228  | 0.124258 | 0.00718  | -0.07181 | 0.1212   | 0.02475  | 0.59368  | 0.013605 | 0.76934  |
| 1.87E-14 | -0.4205  | 1.96E-21 | -0.33572 | 9.14E-14 | -0.40662 | 5.08E-20 | 0.038406 | 0.40764  |
| 0.00791  | -0.1129  | 0.01464  | -0.25429 | 2.51E-08 | -0.17793 | 0.00011  | -0.09194 | 0.04707  |
| 0.00118  | -0.18095 | 8.41E-05 | -0.11769 | 0.01092  | -0.1882  | 4.26E-05 | -0.10808 | 0.01949  |
| 4.81E-07 | -0.30629 | 1.34E-11 | -0.20964 | 4.90E-06 | -0.28407 | 4.06E-10 | -0.09041 | 0.05086  |
| 4.42E-27 | -0.36529 | 3.45E-16 | -0.44413 | 5.39E-24 | -0.50371 | 2.05E-31 | -0.1251  | 0.00679  |
| 9.03E-08 | -0.075   | 0.10553  | -0.12402 | 0.00729  | -0.17755 | 0.00011  | -0.01275 | 0.78342  |
| 7.89E-07 | -0.18216 | 7.52E-05 | -0.15996 | 0.00052  | -0.23052 | 4.75E-07 | 0.144194 | 0.00178  |
| 2.56E-10 | -0.25803 | 1.54E-08 | -0.27049 | 2.84E-09 | -0.32671 | 4.45E-13 | -0.08554 | 0.06474  |
| 1.54E-09 | -0.2715  | 2.47E-09 | -0.23641 | 2.36E-07 | -0.31898 | 1.67E-12 | -0.08478 | 0.06719  |
| 9.10E-05 | -0.16878 | 0.00025  | -0.17501 | 0.00014  | -0.20912 | 5.18E-06 | -0.16576 | 0.00032  |
| 1.69E-27 | -0.43683 | 3.50E-23 | -0.56007 | 6.45E-40 | -0.59213 | 1.59E-45 | -0.29938 | 3.99E-11 |
| 9.24E-09 | -0.12034 | 0.00924  | -0.19864 | 1.53E-05 | -0.23757 | 2.05E-07 | -0.23565 | 2.58E-07 |
| 2.21E-06 | -0.23771 | 2.02E-07 | -0.39985 | 2.35E-19 | -0.35129 | 5.21E-15 | -0.19804 | 1.62E-05 |
| 2.15E-16 | -0.22895 | 5.71E-07 | -0.32516 | 5.82E-13 | -0.38964 | 2.22E-18 | -0.00098 | 0.98311  |
| 1.21E-13 | -0.22676 | 7.35E-07 | -0.2102  | 4.62E-06 | -0.31335 | 4.25E-12 | -0.14555 | 0.00161  |
| 3.13E-06 | -0.14519 | 0.00166  | 0.031423 | 0.49816  | -0.11819 | 0.01058  | -0.11896 | 0.01008  |
| 0.00294  | -0.03633 | 0.43349  | -0.13359 | 0.00383  | -0.13098 | 0.00458  | -0.06317 | 0.17296  |
| 0.07729  | 0.016806 | 0.71717  | -0.03433 | 0.45924  | -0.06938 | 0.13434  | 0.112196 | 0.01528  |
| 1.20E-13 | -0.19985 | 1.35E-05 | -0.29886 | 4.33E-11 | -0.33836 | 5.68E-14 | -0.31256 | 4.84E-12 |
| 0.00254  | -0.07677 | 0.09753  | -0.09555 | 0.03901  | -0.12389 | 0.00735  | 0.172545 | 0.00018  |
| 0.05532  | -0.05191 | 0.26294  | -0.0734  | 0.11316  | -0.07243 | 0.11802  | -0.12708 | 0.00596  |
| 0.08916  | 0.02666  | 0.5655   | -0.09725 | 0.03565  | -0.08232 | 0.07554  | 0.027227 | 0.55726  |
| 1.03E-26 | -0.26499 | 6.05E-09 | -0.36553 | 3.29E-16 | -0.41747 | 4.04E-21 | -0.4305  | 1.71E-22 |

|          |          |          |          |          |          |          |          |          |
|----------|----------|----------|----------|----------|----------|----------|----------|----------|
| 0.00116  | -0.10043 | 0.03001  | -0.24879 | 5.10E-08 | -0.18765 | 4.49E-05 | -0.13654 | 0.00311  |
| 0.00186  | -0.1335  | 0.00385  | -0.14136 | 0.0022   | -0.14082 | 0.00229  | -0.09159 | 0.0479   |
| 0.02413  | -0.15391 | 0.00085  | -0.14157 | 0.00216  | -0.15315 | 0.0009   | -0.12355 | 0.00752  |
| 0.0029   | -0.18722 | 4.68E-05 | -0.18249 | 7.30E-05 | -0.20005 | 1.33E-05 | -0.19083 | 3.31E-05 |
| 0.1508   | 0.028609 | 0.53742  | 0.034765 | 0.45356  | 0.063935 | 0.16779  | -0.06984 | 0.13178  |
| 0.37498  | -0.06047 | 0.19204  | -0.03384 | 0.46566  | -0.05325 | 0.25077  | -0.15756 | 0.00063  |
| 0.00999  | -0.08204 | 0.07654  | -0.01546 | 0.73893  | -0.09872 | 0.03293  | -0.08126 | 0.07938  |
| 0.35431  | -0.03212 | 0.48866  | -0.01483 | 0.74919  | -0.03678 | 0.4278   | -0.1519  | 0.00099  |
| 0.6168   | 0.029325 | 0.52728  | 0.037194 | 0.42262  | 0.021239 | 0.64709  | -0.12132 | 0.00868  |
| 0.04619  | -0.09083 | 0.04981  | -0.10877 | 0.01871  | -0.11672 | 0.01159  | -0.20909 | 5.19E-06 |
| 0.48867  | -0.02449 | 0.59755  | 0.009164 | 0.84344  | -0.02498 | 0.59025  | -0.1607  | 0.00049  |
| 0.00609  | -0.01321 | 0.77578  | -0.03548 | 0.44437  | -0.08804 | 0.05728  | -0.10227 | 0.02711  |
| 0.23123  | -0.06649 | 0.15143  | -0.07793 | 0.09255  | -0.09033 | 0.05108  | -0.07294 | 0.11548  |
| 0.01515  | -0.05209 | 0.26123  | -0.02267 | 0.62509  | -0.06152 | 0.18449  | -0.05206 | 0.26157  |
| 0.09048  | -0.05796 | 0.21119  | -0.07199 | 0.12027  | -0.07911 | 0.08771  | -0.19147 | 3.11E-05 |
| 0.47125  | -0.03235 | 0.48556  | 0.004647 | 0.92023  | -0.00068 | 0.98835  | -0.12029 | 0.00927  |
| 0.00691  | -0.12899 | 0.00524  | -0.06794 | 0.14265  | -0.12813 | 0.00555  | -0.04882 | 0.29243  |
| 0.00632  | -0.08304 | 0.073    | -0.09305 | 0.04444  | -0.12598 | 0.00641  | -0.10816 | 0.01939  |
| 0.01421  | -0.08591 | 0.06359  | -0.07775 | 0.09332  | -0.10894 | 0.01853  | -0.15495 | 0.00078  |
| 0.00086  | -0.11388 | 0.0138   | -0.11463 | 0.01318  | -0.14683 | 0.00146  | -0.14365 | 0.00186  |
| 0.58598  | 0.037711 | 0.41619  | 0.028362 | 0.54094  | 0.045468 | 0.32687  | -0.04105 | 0.37608  |
| 0.97885  | -0.01786 | 0.70029  | -0.10771 | 0.01991  | -0.04815 | 0.29907  | -0.05308 | 0.2523   |
| 2.73E-05 | -0.20588 | 7.28E-06 | -0.19626 | 1.94E-05 | -0.24666 | 6.68E-08 | -0.28079 | 6.56E-10 |
| 0.01475  | -0.04874 | 0.29323  | -0.06862 | 0.13869  | -0.08356 | 0.0712   | 0.007066 | 0.87896  |
| 0.04541  | -0.02803 | 0.54573  | -0.04425 | 0.34004  | -0.05209 | 0.26128  | 0.087688 | 0.05829  |
| 0.07502  | -0.08528 | 0.06557  | -0.09585 | 0.03839  | -0.0942  | 0.04187  | -0.1213  | 0.00869  |
| 0.16973  | -0.1402  | 0.00239  | -0.10884 | 0.01863  | -0.11952 | 0.00973  | -0.15999 | 0.00052  |
| 0.22138  | -0.00609 | 0.89557  | -0.19388 | 2.46E-05 | -0.1251  | 0.00679  | -0.15902 | 0.00056  |
| 0.42311  | -0.02645 | 0.56864  | -0.01913 | 0.68002  | -0.01599 | 0.73035  | -0.1256  | 0.00657  |
| 0.68665  | -0.00113 | 0.9805   | 0.053109 | 0.25203  | 0.017151 | 0.71163  | -0.16751 | 0.00028  |
| 0.03837  | -0.12682 | 0.00606  | -0.0812  | 0.07961  | -0.11669 | 0.01162  | -0.25325 | 2.87E-08 |
| 0.14392  | -0.15931 | 0.00055  | -0.05    | 0.28093  | -0.08826 | 0.05667  | -0.12661 | 0.00615  |
| 0.11575  | -0.10044 | 0.03     | -0.09892 | 0.03258  | -0.10802 | 0.01955  | -0.14171 | 0.00214  |
| 0.25903  | -0.02198 | 0.63568  | -0.0419  | 0.36632  | -0.04904 | 0.29025  | -0.14277 | 0.00198  |
| 3.17E-07 | -0.04361 | 0.34708  | -0.14744 | 0.0014   | -0.17438 | 0.00015  | -0.43093 | 1.54E-22 |
| 0.39608  | -0.1235  | 0.00754  | -0.04169 | 0.36869  | -0.06407 | 0.1669   | -0.10074 | 0.0295   |
| 0.23395  | -0.17092 | 0.00021  | -0.04493 | 0.3326   | -0.09916 | 0.03217  | -0.09496 | 0.04025  |
| 0.01608  | -0.10995 | 0.01746  | -0.1097  | 0.01772  | -0.14664 | 0.00149  | -0.18599 | 5.26E-05 |
| 0.00372  | -0.14754 | 0.00139  | -0.14224 | 0.00206  | -0.14618 | 0.00154  | -0.096   | 0.03811  |
| 0.78912  | -0.00401 | 0.93108  | 0.020581 | 0.65732  | 0.006729 | 0.88469  | -0.10407 | 0.0245   |
| 0.00219  | -0.12832 | 0.00549  | -0.12667 | 0.00612  | -0.15654 | 0.00069  | -0.14004 | 0.00242  |
| 0.57346  | -0.0336  | 0.46882  | -0.071   | 0.12547  | -0.05006 | 0.2803   | -0.13747 | 0.00291  |
| 0.75052  | -0.12714 | 0.00593  | -0.01801 | 0.69785  | -0.02298 | 0.62044  | -0.04859 | 0.29469  |
| 0.18861  | -0.10038 | 0.0301   | -0.06145 | 0.18492  | -0.08569 | 0.06428  | -0.12232 | 0.00814  |
| 0.02443  | -0.15014 | 0.00114  | -0.11464 | 0.01318  | -0.13925 | 0.00256  | -0.13458 | 0.00357  |

|          |          |          |          |          |          |          |          |          |
|----------|----------|----------|----------|----------|----------|----------|----------|----------|
| 0.00045  | -0.1824  | 7.36E-05 | -0.14903 | 0.00124  | -0.1974  | 1.73E-05 | -0.10143 | 0.02841  |
| 2.80E-07 | -0.25021 | 4.25E-08 | -0.25047 | 4.11E-08 | -0.30199 | 2.65E-11 | -0.2059  | 7.26E-06 |
| 0.01366  | -0.14139 | 0.00219  | -0.10521 | 0.02297  | -0.14525 | 0.00165  | -0.15182 | 0.001    |
| 0.07306  | -0.05919 | 0.20167  | 0.009969 | 0.82987  | -0.05243 | 0.25816  | -0.06445 | 0.16439  |
| 1.79E-11 | -0.15111 | 0.00105  | -0.29231 | 1.19E-10 | -0.30484 | 1.69E-11 | -0.28862 | 2.07E-10 |
| 0.12016  | -0.12119 | 0.00875  | -0.03454 | 0.45655  | -0.05007 | 0.28022  | -0.05418 | 0.24261  |
| 0.00015  | -0.21757 | 2.07E-06 | -0.20355 | 9.27E-06 | -0.22339 | 1.08E-06 | -0.18675 | 4.89E-05 |
| 0.60268  | -0.04217 | 0.36318  | -0.04342 | 0.34913  | -0.03167 | 0.49478  | -0.08537 | 0.06528  |
| 1.45E-08 | -0.25957 | 1.25E-08 | -0.2291  | 5.61E-07 | -0.29059 | 1.54E-10 | -0.20778 | 5.97E-06 |
| 0.27274  | -0.02454 | 0.59676  | -0.00642 | 0.88989  | -0.03183 | 0.49257  | -0.11371 | 0.01394  |
| 0.67263  | -0.01176 | 0.79991  | -0.05098 | 0.2716   | -0.02163 | 0.64105  | -0.07847 | 0.09028  |
| 5.48E-07 | 0.069269 | 0.135    | 0.161333 | 0.00047  | 0.166267 | 0.00031  | 0.039081 | 0.39945  |
| 0.17197  | -0.02427 | 0.60087  | 0.055693 | 0.22965  | 0.058418 | 0.20763  | -0.08153 | 0.07838  |
| 0.02665  | -0.05426 | 0.24188  | -0.04012 | 0.38708  | -0.06882 | 0.13757  | -0.09622 | 0.03765  |
| 0.37323  | -0.09076 | 0.04997  | -0.0225  | 0.62763  | -0.03049 | 0.51105  | -0.05812 | 0.20997  |
| 0.25791  | -0.01987 | 0.66844  | 0.008246 | 0.85894  | -0.03101 | 0.50385  | -0.00969 | 0.83453  |
| 0.00047  | -0.08786 | 0.05778  | 0.097493 | 0.03519  | 0.087412 | 0.05909  | -0.03444 | 0.45782  |
| 0.01291  | -0.0559  | 0.22791  | 0.086555 | 0.06163  | 0.074961 | 0.10569  | -0.05569 | 0.2297   |
| 0.07985  | -0.04577 | 0.32369  | 0.067802 | 0.14348  | 0.06038  | 0.19274  | -0.10731 | 0.02037  |
| 2.16E-06 | -0.17367 | 0.00016  | -0.16322 | 0.0004   | -0.20941 | 5.02E-06 | -0.44014 | 1.51E-23 |
| 6.47E-31 | 0.18951  | 3.76E-05 | 0.187429 | 4.59E-05 | 0.327117 | 4.15E-13 | 0.224978 | 9.02E-07 |
| 3.82E-05 | -0.05459 | 0.239    | 0.098515 | 0.0333   | 0.084667 | 0.06754  | -0.01932 | 0.67708  |
| 3.45E-08 | 0.197543 | 1.71E-05 | 0.113062 | 0.0145   | 0.186211 | 5.15E-05 | 0.136859 | 0.00304  |
| 3.90E-29 | 0.073364 | 0.11335  | 0.210975 | 4.25E-06 | 0.302663 | 2.38E-11 | 0.115752 | 0.01231  |
| 1.84E-18 | 0.189422 | 3.79E-05 | 0.115272 | 0.01268  | 0.234142 | 3.09E-07 | 0.1934   | 2.58E-05 |
| 1.20E-20 | 0.134581 | 0.00357  | 0.272165 | 2.25E-09 | 0.309995 | 7.36E-12 | 0.12622  | 0.00631  |
| 2.52E-10 | 0.24237  | 1.14E-07 | 0.193233 | 2.62E-05 | 0.270001 | 3.04E-09 | 0.034773 | 0.45345  |
| 5.66E-14 | 0.05728  | 0.21663  | 0.106008 | 0.02195  | 0.169918 | 0.00023  | 0.208761 | 5.38E-06 |
| 2.41E-08 | 0.114521 | 0.01327  | -0.04557 | 0.32575  | 0.077765 | 0.09324  | -0.12032 | 0.00925  |
| 6.97E-21 | 0.337076 | 7.16E-14 | 0.400525 | 2.02E-19 | 0.438696 | 2.18E-23 | 0.144683 | 0.00172  |
| 1.13E-15 | 0.156437 | 0.00069  | 0.192463 | 2.82E-05 | 0.2537   | 2.71E-08 | 0.319892 | 1.43E-12 |
| 1.99E-08 | 0.135292 | 0.0034   | 0.082782 | 0.0739   | 0.160982 | 0.00048  | 0.378284 | 2.46E-17 |
| 2.02E-11 | 0.368441 | 1.84E-16 | 0.181189 | 8.23E-05 | 0.298053 | 4.91E-11 | 0.322374 | 9.38E-13 |
| 0.26825  | 0.096521 | 0.03706  | 0.153142 | 0.0009   | 0.081417 | 0.07881  | -0.07821 | 0.09137  |
| 0.00078  | 0.234491 | 2.97E-07 | 0.348537 | 8.74E-15 | 0.260366 | 1.13E-08 | -0.11872 | 0.01024  |
| 1.11E-11 | 0.257291 | 1.70E-08 | 0.232081 | 3.95E-07 | 0.289876 | 1.71E-10 | 0.104166 | 0.02438  |
| 1.18E-07 | -0.01144 | 0.80528  | 0.098229 | 0.03382  | 0.110997 | 0.01641  | 0.196317 | 1.93E-05 |
| 0.40594  | -0.11802 | 0.0107   | -0.10469 | 0.02366  | -0.08981 | 0.05243  | 0.078486 | 0.09023  |
| 1.39E-10 | 0.27385  | 1.77E-09 | 0.160989 | 0.00048  | 0.240723 | 1.40E-07 | 0.171636 | 0.00019  |
| 6.95E-20 | 0.156346 | 0.0007   | 0.231957 | 4.01E-07 | 0.29927  | 4.06E-11 | 0.177562 | 0.00011  |
| 0.0093   | 0.049653 | 0.28426  | 0.19131  | 3.16E-05 | 0.12111  | 0.0088   | 0.166964 | 0.00029  |
| 4.46E-11 | 0.095605 | 0.0389   | 0.328764 | 3.12E-13 | 0.311433 | 5.82E-12 | 0.159357 | 0.00055  |
| 5.28E-07 | 0.177919 | 0.00011  | 0.112215 | 0.01526  | 0.180678 | 8.62E-05 | 0.192375 | 2.85E-05 |
| 9.87E-16 | 0.072161 | 0.11941  | 0.151314 | 0.00104  | 0.215967 | 2.47E-06 | 0.114285 | 0.01347  |
| 1.80E-24 | 0.384579 | 6.56E-18 | 0.458742 | 1.11E-25 | 0.533672 | 9.82E-36 | 0.104925 | 0.02335  |

|          |          |          |          |          |          |          |          |          |
|----------|----------|----------|----------|----------|----------|----------|----------|----------|
| 2.19E-12 | 0.321431 | 1.10E-12 | 0.381807 | 1.18E-17 | 0.362857 | 5.59E-16 | 0.158367 | 0.00059  |
| 0.00067  | -0.22533 | 8.67E-07 | 0.039661 | 0.39248  | 0.005689 | 0.90242  | 0.174694 | 0.00015  |
| 1.30E-10 | -0.11429 | 0.01346  | -0.05886 | 0.20419  | 0.044136 | 0.34126  | 0.127645 | 0.00574  |
| 1.27E-05 | 0.073389 | 0.11323  | 0.147761 | 0.00136  | 0.137902 | 0.00282  | 0.06195  | 0.1814   |
| 8.46E-19 | 0.041203 | 0.37433  | 0.12434  | 0.00714  | 0.129925 | 0.00492  | 0.05758  | 0.21423  |
| 5.43E-17 | 0.410075 | 2.29E-20 | 0.214429 | 2.93E-06 | 0.382273 | 1.07E-17 | -0.0195  | 0.67425  |
| 1.45E-21 | 0.3571   | 1.72E-15 | 0.364419 | 4.10E-16 | 0.419626 | 2.42E-21 | 0.267759 | 4.14E-09 |
| 9.17E-25 | 0.182198 | 7.50E-05 | 0.34834  | 9.07E-15 | 0.353878 | 3.19E-15 | 0.29104  | 1.44E-10 |
| 3.51E-14 | 0.126329 | 0.00626  | 0.254633 | 2.40E-08 | 0.286716 | 2.75E-10 | 0.016831 | 0.71677  |
| 5.91E-08 | 0.02249  | 0.62784  | 0.107928 | 0.01965  | 0.138407 | 0.00272  | 0.148822 | 0.00126  |
| 2.08E-14 | 0.063935 | 0.16779  | 0.142427 | 0.00203  | 0.200617 | 1.25E-05 | 0.227343 | 6.87E-07 |
| 9.30E-34 | 0.429618 | 2.13E-22 | 0.469865 | 5.07E-27 | 0.525278 | 1.76E-34 | 0.108759 | 0.01872  |
| 7.96E-07 | 0.05606  | 0.2266   | -0.00642 | 0.88987  | 0.091601 | 0.04789  | -0.02004 | 0.66576  |
| 7.62E-19 | 0.416831 | 4.70E-21 | 0.282312 | 5.26E-10 | 0.400552 | 2.01E-19 | 0.141252 | 0.00222  |
| 1.07E-17 | 0.383648 | 7.99E-18 | 0.520108 | 1.00E-33 | 0.44156  | 1.05E-23 | 0.183956 | 6.37E-05 |
| 0.23174  | -0.15325 | 0.00089  | 0.030674 | 0.50845  | -0.04518 | 0.32991  | -0.00748 | 0.87195  |
| 5.64E-13 | 0.367574 | 2.19E-16 | 0.281858 | 5.62E-10 | 0.341446 | 3.24E-14 | 0.285841 | 3.13E-10 |
| 3.85E-08 | -0.07702 | 0.09641  | 0.017285 | 0.70948  | 0.09035  | 0.05103  | 0.143357 | 0.0019   |
| 2.23E-12 | 0.365085 | 3.60E-16 | 0.284031 | 4.09E-10 | 0.360904 | 8.20E-16 | 0.246017 | 7.24E-08 |
| 3.61E-10 | 0.195941 | 2.00E-05 | 0.231475 | 4.24E-07 | 0.213546 | 3.22E-06 | 0.374371 | 5.52E-17 |
| 1.20E-11 | -0.14911 | 0.00123  | 0.025347 | 0.58481  | 0.104854 | 0.02345  | 0.116341 | 0.01187  |
| 0.06845  | 0.081364 | 0.07901  | 0.140531 | 0.00234  | 0.025464 | 0.58307  | -0.13709 | 0.00299  |
| 8.65E-05 | 0.212168 | 3.74E-06 | 0.169834 | 0.00023  | 0.157466 | 0.00064  | 0.273335 | 1.90E-09 |
| 2.69E-06 | 0.094092 | 0.04211  | 0.089681 | 0.05278  | 0.105055 | 0.02318  | 0.2013   | 1.17E-05 |
| 1.99E-22 | 0.228598 | 5.94E-07 | 0.143665 | 0.00186  | 0.281171 | 6.21E-10 | 0.39866  | 3.06E-19 |
| 0.00016  | 0.215959 | 2.48E-06 | 0.201658 | 1.13E-05 | 0.213409 | 3.27E-06 | -0.12668 | 0.00612  |
| 7.93E-12 | 0.362522 | 5.97E-16 | 0.312337 | 5.02E-12 | 0.377827 | 2.71E-17 | -0.04337 | 0.34967  |
| 9.23E-17 | 0.2482   | 5.49E-08 | 0.380793 | 1.46E-17 | 0.370669 | 1.17E-16 | 0.182819 | 7.08E-05 |
| 4.93E-15 | 0.199892 | 1.35E-05 | 0.157286 | 0.00065  | 0.2964   | 6.34E-11 | 0.361173 | 7.78E-16 |
| 1.49E-11 | 0.200128 | 1.32E-05 | 0.080132 | 0.08366  | 0.191531 | 3.09E-05 | 0.159978 | 0.00052  |
| 3.34E-14 | 0.26053  | 1.10E-08 | 0.103367 | 0.0255   | 0.264873 | 6.15E-09 | 0.396374 | 5.09E-19 |
| 2.40E-24 | 0.133528 | 0.00384  | 0.08052  | 0.08218  | 0.239074 | 1.71E-07 | 0.156399 | 0.00069  |
| 8.04E-08 | -0.12772 | 0.00571  | 0.106735 | 0.02106  | 0.106093 | 0.02185  | 0.139299 | 0.00255  |
| 7.02E-17 | 0.50193  | 3.59E-31 | 0.312009 | 5.30E-12 | 0.421316 | 1.61E-21 | 0.297007 | 5.77E-11 |
| 4.62E-09 | 0.465217 | 1.86E-26 | 0.329863 | 2.57E-13 | 0.366251 | 2.85E-16 | 0.378279 | 2.46E-17 |
| 7.00E-16 | 0.503902 | 1.93E-31 | 0.319519 | 1.52E-12 | 0.442965 | 7.29E-24 | 0.04501  | 0.33176  |
| 1.04E-12 | 0.161978 | 0.00044  | 0.216443 | 2.35E-06 | 0.275115 | 1.48E-09 | 0.068943 | 0.13684  |
| 2.20E-14 | 0.250283 | 4.21E-08 | 0.242457 | 1.13E-07 | 0.335451 | 9.58E-14 | 0.187493 | 4.56E-05 |
| 2.36E-10 | 0.17619  | 0.00013  | 0.411393 | 1.69E-20 | 0.322868 | 8.62E-13 | -0.09725 | 0.03564  |
| 2.63E-18 | 0.055061 | 0.235    | 0.096736 | 0.03664  | 0.216627 | 2.30E-06 | 0.194562 | 2.30E-05 |
| 1.44E-23 | -0.02793 | 0.5471   | 0.013616 | 0.76916  | 0.153707 | 0.00086  | 0.341622 | 3.14E-14 |
| 3.21E-17 | 0.371437 | 1.00E-16 | 0.286436 | 2.86E-10 | 0.348459 | 8.87E-15 | 0.238764 | 1.77E-07 |
| 9.00E-19 | 0.499965 | 6.65E-31 | 0.345052 | 1.67E-14 | 0.449556 | 1.30E-24 | 0.176781 | 0.00012  |
| 2.95E-05 | -0.01111 | 0.81073  | -0.16599 | 0.00032  | -0.01992 | 0.66766  | -0.03637 | 0.43295  |
| 0.41038  | 0.138182 | 0.00277  | 0.145107 | 0.00167  | 0.091694 | 0.04766  | 0.103905 | 0.02474  |

|          |          |          |          |          |          |          |          |          |
|----------|----------|----------|----------|----------|----------|----------|----------|----------|
| 4.36E-11 | 0.183782 | 6.47E-05 | 0.119344 | 0.00984  | 0.197339 | 1.74E-05 | 0.232522 | 3.75E-07 |
| 3.12E-12 | 0.236626 | 2.30E-07 | 0.196281 | 1.94E-05 | 0.250673 | 4.01E-08 | 0.092191 | 0.04646  |
| 2.78E-12 | 0.107018 | 0.02072  | 0.240159 | 1.50E-07 | 0.205746 | 7.38E-06 | 0.293852 | 9.37E-11 |
| 0.0067   | 0.114209 | 0.01353  | 0.118121 | 0.01063  | 0.121794 | 0.00842  | -0.05171 | 0.26471  |
| 0.00031  | 0.121306 | 0.00869  | 0.176021 | 0.00013  | 0.125349 | 0.00668  | 0.217903 | 2.00E-06 |
| 4.73E-09 | 0.146077 | 0.00155  | 0.194404 | 2.33E-05 | 0.210187 | 4.62E-06 | 0.048509 | 0.29551  |
| 0.0381   | 0.243912 | 9.41E-08 | 0.088852 | 0.05501  | 0.087739 | 0.05814  | -0.05351 | 0.24845  |
| 7.16E-06 | -0.03866 | 0.40449  | -0.1255  | 0.00662  | 0.037624 | 0.41727  | 0.161306 | 0.00047  |
| 4.47E-16 | 0.02691  | 0.56186  | 0.125013 | 0.00683  | 0.158284 | 0.0006   | 0.178406 | 0.00011  |
| 0.32162  | -0.07093 | 0.12587  | -0.06008 | 0.195    | -0.08618 | 0.06278  | -0.13022 | 0.00482  |
| 1.15E-08 | 0.155912 | 0.00072  | 0.267902 | 4.06E-09 | 0.227509 | 6.74E-07 | 0.127015 | 0.00599  |
| 1.85E-15 | 0.221272 | 1.37E-06 | 0.287712 | 2.37E-10 | 0.319299 | 1.58E-12 | 0.108234 | 0.01931  |
| 2.35E-05 | -0.20218 | 1.07E-05 | 0.110225 | 0.01718  | 0.034934 | 0.45137  | 0.122491 | 0.00805  |
| 5.99E-13 | 0.487242 | 3.24E-29 | 0.293036 | 1.06E-10 | 0.407375 | 4.27E-20 | 0.089805 | 0.05245  |
| 0.00034  | -0.00666 | 0.88578  | 0.168174 | 0.00026  | 0.107202 | 0.0205   | 0.186847 | 4.85E-05 |
| 6.79E-08 | 0.145149 | 0.00166  | 0.134309 | 0.00364  | 0.173993 | 0.00016  | 0.006905 | 0.88169  |
| 0.00857  | 0.369497 | 1.49E-16 | 0.300698 | 3.25E-11 | 0.261632 | 9.52E-09 | 0.182587 | 7.23E-05 |
| 8.65E-18 | 0.240197 | 1.49E-07 | 0.124867 | 0.0069   | 0.285311 | 3.38E-10 | 0.092916 | 0.04476  |
| 0.0088   | 0.040398 | 0.38374  | 0.179387 | 9.71E-05 | 0.105219 | 0.02296  | 0.009398 | 0.83949  |
| 1.76E-11 | 0.259071 | 1.34E-08 | 0.083574 | 0.07117  | 0.212141 | 3.75E-06 | 0.068413 | 0.13989  |
| 6.67E-07 | -0.08297 | 0.07324  | -0.00562 | 0.90352  | 0.031052 | 0.50324  | 0.00398  | 0.93164  |
| 0.00048  | 0.093066 | 0.04442  | 0.159516 | 0.00054  | 0.125657 | 0.00655  | 0.302215 | 2.56E-11 |
| 0.04076  | -0.00705 | 0.87923  | -0.12595 | 0.00642  | -0.06572 | 0.15623  | 0.048166 | 0.29895  |
| 3.73E-17 | 0.147827 | 0.00136  | 0.160172 | 0.00051  | 0.222156 | 1.24E-06 | -0.05732 | 0.21631  |
| 0.00425  | -0.10117 | 0.0288   | 0.104897 | 0.02339  | 0.036956 | 0.42559  | 0.062809 | 0.17541  |
| 6.71E-05 | 0.037241 | 0.42203  | 0.210408 | 4.51E-06 | 0.16673  | 0.0003   | -0.08339 | 0.07181  |
| 0.00661  | 0.023393 | 0.61409  | 0.172265 | 0.00018  | 0.115195 | 0.01274  | -0.04506 | 0.33124  |
| 3.99E-06 | -0.01796 | 0.69861  | 0.02483  | 0.5925   | 0.102312 | 0.02704  | 0.211536 | 4.00E-06 |
| 2.17E-05 | -0.08979 | 0.0525   | 0.068314 | 0.14047  | 0.061896 | 0.18178  | 0.118612 | 0.01031  |
| 1.87E-14 | 0.152178 | 0.00097  | 0.174196 | 0.00015  | 0.250185 | 4.27E-08 | 0.026516 | 0.56761  |
| 9.94E-24 | 0.229309 | 5.47E-07 | 0.372179 | 8.64E-17 | 0.389507 | 2.28E-18 | 0.291643 | 1.31E-10 |
| 1.59E-07 | 0.10331  | 0.02558  | 0.037957 | 0.41316  | 0.145174 | 0.00166  | -0.10362 | 0.02514  |
| 0.04992  | -0.07363 | 0.11205  | 0.14437  | 0.00176  | 0.056706 | 0.22128  | 0.109783 | 0.01763  |
| 2.74E-29 | 0.371461 | 1.00E-16 | 0.338844 | 5.21E-14 | 0.432478 | 1.05E-22 | 0.310662 | 6.60E-12 |
| 1.31E-07 | 0.245578 | 7.65E-08 | 0.020668 | 0.65597  | 0.117705 | 0.01091  | -0.06278 | 0.17563  |
| 5.20E-07 | 0.201756 | 1.12E-05 | 0.050517 | 0.27596  | 0.216791 | 2.26E-06 | 0.281171 | 6.21E-10 |
| 4.62E-10 | -0.17056 | 0.00021  | -0.09061 | 0.05037  | 0.026128 | 0.57329  | 0.18865  | 4.08E-05 |
| 8.49E-44 | 0.399893 | 2.33E-19 | 0.455588 | 2.60E-25 | 0.543489 | 3.02E-37 | 0.180213 | 9.00E-05 |
| 0.11008  | 0.031444 | 0.49786  | 0.149249 | 0.00122  | 0.063781 | 0.16881  | 0.127937 | 0.00563  |
| 0.50453  | 0.067488 | 0.14534  | 0.088399 | 0.05627  | 0.04427  | 0.33979  | 0.001296 | 0.97772  |
| 5.34E-05 | 0.059697 | 0.19783  | -0.04186 | 0.36678  | 0.044961 | 0.33229  | 0.121489 | 0.00859  |
| 1.51E-21 | 0.148954 | 0.00125  | 0.225427 | 8.57E-07 | 0.292905 | 1.08E-10 | 0.262315 | 8.69E-09 |
| 5.23E-15 | 0.210742 | 4.36E-06 | 0.403237 | 1.10E-19 | 0.341891 | 2.99E-14 | 0.089172 | 0.05414  |
| 7.56E-24 | 0.42101  | 1.74E-21 | 0.318714 | 1.74E-12 | 0.40007  | 2.23E-19 | 0.165133 | 0.00034  |
| 0.02789  | -0.04795 | 0.30114  | -0.06067 | 0.19058  | -0.02789 | 0.54771  | -0.02701 | 0.56046  |

|          |          |          |          |          |          |          |          |          |
|----------|----------|----------|----------|----------|----------|----------|----------|----------|
| 4.82E-09 | -0.26262 | 8.33E-09 | -0.27532 | 1.44E-09 | -0.26663 | 4.83E-09 | -0.02484 | 0.59233  |
| 2.31E-08 | -0.16728 | 0.00028  | -0.16943 | 0.00023  | -0.1835  | 6.64E-05 | -0.03769 | 0.41639  |
| 0.86169  | 0.028056 | 0.54531  | 0.154726 | 0.00079  | 0.117686 | 0.01092  | 0.010426 | 0.8222   |
| 9.77E-05 | -0.11885 | 0.01015  | 0.014527 | 0.7542   | -0.05679 | 0.22064  | -0.04448 | 0.33754  |
| 2.32E-05 | -0.14331 | 0.00191  | -0.16723 | 0.00028  | -0.14475 | 0.00171  | -0.07684 | 0.09721  |
| 0.01092  | -0.10942 | 0.01801  | -0.09999 | 0.03074  | -0.07956 | 0.08591  | 0.005052 | 0.91329  |
| 0.01278  | -0.16435 | 0.00036  | -0.03431 | 0.45944  | -0.07602 | 0.10086  | -0.05643 | 0.22357  |
| 0.00029  | -0.08535 | 0.06534  | 0.078854 | 0.08873  | -0.03258 | 0.48251  | -0.11772 | 0.0109   |
| 0.00084  | -0.11372 | 0.01393  | -0.13596 | 0.00324  | -0.09959 | 0.03142  | -0.01584 | 0.73279  |
| 0.00515  | -0.13855 | 0.00269  | -0.31575 | 2.86E-12 | -0.16946 | 0.00023  | 0.061943 | 0.18145  |
| 5.77E-07 | -0.22299 | 1.13E-06 | -0.31797 | 1.97E-12 | -0.25377 | 2.69E-08 | -0.05511 | 0.2346   |
| 1.22E-06 | -0.16281 | 0.00041  | -0.14863 | 0.00128  | -0.17661 | 0.00012  | -0.14788 | 0.00135  |
| 3.16E-25 | 0.013876 | 0.76489  | 0.023251 | 0.61625  | 0.184111 | 6.27E-05 | 0.168129 | 0.00026  |
| 2.74E-05 | 0.140344 | 0.00237  | 0.216787 | 2.26E-06 | 0.177386 | 0.00012  | 0.18804  | 4.33E-05 |
| 2.23E-11 | 0.147344 | 0.00141  | 0.042991 | 0.35394  | 0.169023 | 0.00024  | 0.228927 | 5.72E-07 |
| 2.14E-05 | -0.08151 | 0.07845  | 0.079166 | 0.08747  | 0.072262 | 0.11889  | -0.00101 | 0.98256  |
| 5.82E-20 | 0.248701 | 5.16E-08 | 0.493493 | 4.90E-30 | 0.418816 | 2.93E-21 | 0.094853 | 0.04047  |
| 0.00046  | 0.348173 | 9.36E-15 | 0.053554 | 0.24808  | 0.17086  | 0.00021  | 0.087545 | 0.0587   |
| 1.18E-39 | 0.258208 | 1.50E-08 | 0.34876  | 8.39E-15 | 0.458323 | 1.24E-25 | 0.145124 | 0.00166  |
| 0.01836  | -0.10138 | 0.02849  | -0.04255 | 0.35885  | -0.02774 | 0.54988  | 0.092578 | 0.04555  |
| 4.81E-07 | 0.150522 | 0.0011   | 0.08221  | 0.07593  | 0.120823 | 0.00896  | 0.129884 | 0.00494  |
| 6.25E-13 | 0.427841 | 3.30E-22 | 0.444831 | 4.49E-24 | 0.407977 | 3.72E-20 | 0.133474 | 0.00386  |
| 0.00675  | 0.036707 | 0.42872  | 0.279026 | 8.47E-10 | 0.16918  | 0.00024  | 0.108772 | 0.01871  |
| 1.07E-13 | 0.215068 | 2.73E-06 | 0.125929 | 0.00643  | 0.216139 | 2.43E-06 | 0.20299  | 9.82E-06 |
| 0.07931  | 0.124745 | 0.00695  | -0.00415 | 0.92865  | 0.028081 | 0.54495  | 0.115534 | 0.01248  |
| 8.43E-22 | -0.02928 | 0.52786  | 0.030605 | 0.5094   | 0.159351 | 0.00055  | 0.304643 | 1.74E-11 |
| 1.65E-11 | 0.035576 | 0.4431   | 0.036009 | 0.43755  | 0.123676 | 0.00746  | 0.053198 | 0.25123  |
| 9.96E-26 | 0.319241 | 1.59E-12 | 0.216082 | 2.44E-06 | 0.353284 | 3.57E-15 | 0.283022 | 4.74E-10 |
| 0.00761  | -0.13322 | 0.00393  | -0.14508 | 0.00167  | -0.07383 | 0.11106  | 0.258808 | 1.39E-08 |
| 6.56E-15 | 0.208724 | 5.40E-06 | -0.01152 | 0.80385  | 0.178604 | 0.0001   | 0.068707 | 0.1382   |
| 2.64E-30 | 0.383993 | 7.43E-18 | 0.388003 | 3.16E-18 | 0.463018 | 3.43E-26 | 0.120467 | 0.00917  |
| 7.73E-15 | 0.11113  | 0.01628  | -0.07262 | 0.11706  | 0.137499 | 0.00291  | 0.269965 | 3.05E-09 |
| 0.39148  | 0.036389 | 0.43273  | -0.10542 | 0.0227   | -0.05185 | 0.26343  | 0.032404 | 0.48483  |
| 0.04009  | -0.0551  | 0.2347   | -0.0427  | 0.35722  | -0.02283 | 0.62267  | 0.244313 | 8.96E-08 |
| 0.00611  | 0.08714  | 0.05988  | 0.003074 | 0.94717  | 0.057768 | 0.21274  | 0.146267 | 0.00153  |
| 2.40E-38 | 0.414115 | 8.92E-21 | 0.432914 | 9.38E-23 | 0.524584 | 2.23E-34 | 0.206016 | 7.18E-06 |
| 1.73E-08 | 0.414495 | 8.16E-21 | 0.347035 | 1.16E-14 | 0.352178 | 4.40E-15 | 0.217104 | 2.18E-06 |
| 1.49E-05 | 0.13244  | 0.00414  | -0.08352 | 0.07134  | 0.056474 | 0.22318  | 0.303681 | 2.03E-11 |
| 2.33E-18 | 0.117916 | 0.01076  | 0.146765 | 0.00147  | 0.273121 | 1.96E-09 | 0.288992 | 1.96E-10 |
| 0.00927  | -0.25514 | 2.25E-08 | 0.012201 | 0.79258  | -0.04515 | 0.33029  | 0.110004 | 0.0174   |
| 0.00038  | -0.09385 | 0.04264  | -0.08338 | 0.07185  | -0.00169 | 0.97088  | 0.04014  | 0.38679  |
| 6.10E-06 | -0.03187 | 0.49209  | 0.149843 | 0.00116  | 0.10223  | 0.02717  | 0.117398 | 0.01112  |
| 1.47E-16 | 0.168689 | 0.00025  | 0.084855 | 0.06693  | 0.222065 | 1.26E-06 | -0.02434 | 0.59976  |
| 1.29E-22 | 0.166958 | 0.00029  | 0.067357 | 0.14613  | 0.29363  | 9.70E-11 | 0.183555 | 6.61E-05 |
| 6.70E-08 | 0.294847 | 8.05E-11 | 0.367487 | 2.23E-16 | 0.315146 | 3.16E-12 | 0.169564 | 0.00023  |



|          |          |          |          |          |          |          |          |          |
|----------|----------|----------|----------|----------|----------|----------|----------|----------|
| 0.17824  | 0.05718  | 0.21744  | 0.090914 | 0.04959  | 0.050004 | 0.28087  | 0.155255 | 0.00076  |
| 6.45E-34 | 0.473349 | 1.88E-27 | 0.51942  | 1.26E-33 | 0.567228 | 4.08E-41 | 0.277906 | 9.95E-10 |
| 0.00013  | -0.09734 | 0.03548  | 0.029604 | 0.52336  | 0.037524 | 0.41851  | 0.044906 | 0.33289  |
| 1.38E-14 | 0.140694 | 0.00231  | 0.181375 | 8.09E-05 | 0.281416 | 5.99E-10 | 0.145984 | 0.00156  |
| 0.13041  | 0.182236 | 7.47E-05 | 0.168402 | 0.00026  | 0.101012 | 0.02906  | 0.077951 | 0.09246  |
| 5.91E-09 | 0.339017 | 5.04E-14 | 0.424033 | 8.36E-22 | 0.342242 | 2.81E-14 | 0.025847 | 0.57742  |
| 6.93E-15 | 0.436787 | 3.54E-23 | 0.401959 | 1.46E-19 | 0.418112 | 3.47E-21 | 0.084804 | 0.0671   |
| 5.61E-13 | 0.122833 | 0.00787  | 0.22348  | 1.07E-06 | 0.261788 | 9.32E-09 | 0.12577  | 0.0065   |
| 1.37E-07 | 0.122589 | 0.008    | -0.03141 | 0.49831  | 0.093331 | 0.04381  | 0.145396 | 0.00163  |
| 2.27E-18 | 0.126453 | 0.00621  | 0.028816 | 0.53448  | 0.223265 | 1.10E-06 | 0.129449 | 0.00508  |
| 2.87E-19 | 0.088188 | 0.05686  | 0.008611 | 0.85277  | 0.183276 | 6.78E-05 | 0.062004 | 0.18102  |
| 0.01505  | -0.1717  | 0.00019  | -0.00704 | 0.87941  | -0.03227 | 0.48668  | 0.11817  | 0.01059  |
| 1.05E-15 | 0.110262 | 0.01714  | 0.181292 | 8.15E-05 | 0.256636 | 1.85E-08 | 0.297163 | 5.63E-11 |
| 0.31187  | 0.099697 | 0.03123  | -0.02647 | 0.56832  | 0.020111 | 0.66466  | -0.07789 | 0.0927   |
| 7.13E-33 | 0.386181 | 4.66E-18 | 0.3699   | 1.37E-16 | 0.464119 | 2.53E-26 | 0.310912 | 6.33E-12 |
| 2.03E-09 | 0.233082 | 3.51E-07 | 0.0391   | 0.39922  | 0.158169 | 0.0006   | 0.15085  | 0.00108  |
| 9.56E-11 | 0.182262 | 7.45E-05 | 0.168973 | 0.00024  | 0.276915 | 1.15E-09 | -0.00712 | 0.878    |
| 0.90389  | 0.156994 | 0.00066  | 0.16675  | 0.0003   | 0.095088 | 0.03997  | -0.05961 | 0.19846  |
| 1.01E-08 | 0.28157  | 5.86E-10 | 0.224764 | 9.24E-07 | 0.270415 | 2.87E-09 | -0.00721 | 0.87655  |
| 2.97E-20 | 0.26725  | 4.44E-09 | 0.161699 | 0.00045  | 0.307901 | 1.03E-11 | 0.227049 | 7.11E-07 |
| 4.13E-06 | 0.094845 | 0.04049  | 0.343406 | 2.27E-14 | 0.256779 | 1.81E-08 | 0.126079 | 0.00637  |
| 4.77E-07 | 0.160402 | 0.0005   | 0.345144 | 1.64E-14 | 0.2343   | 3.04E-07 | -0.06917 | 0.13554  |
| 3.39E-08 | -0.02686 | 0.56262  | 0.201463 | 1.15E-05 | 0.157924 | 0.00061  | -0.1826  | 7.22E-05 |
| 4.84E-09 | 0.159959 | 0.00052  | 0.199153 | 1.45E-05 | 0.212817 | 3.48E-06 | -0.02235 | 0.6299   |
| 0.00483  | 0.053112 | 0.252    | 0.162887 | 0.00041  | 0.12819  | 0.00553  | -0.07328 | 0.11377  |
| 0.01023  | 0.291712 | 1.30E-10 | 0.138404 | 0.00272  | 0.145722 | 0.00159  | 0.112267 | 0.01521  |
| 7.04E-17 | 0.162457 | 0.00042  | 0.163394 | 0.00039  | 0.276058 | 1.30E-09 | 0.230594 | 4.71E-07 |
| 0.0004   | -0.06811 | 0.14168  | -0.15466 | 0.0008   | -0.02058 | 0.65741  | -0.04803 | 0.3003   |
| 3.30E-14 | 0.225203 | 8.79E-07 | 0.27296  | 2.01E-09 | 0.281141 | 6.23E-10 | 0.268143 | 3.93E-09 |
| 2.93E-20 | 0.311477 | 5.78E-12 | 0.318603 | 1.77E-12 | 0.375371 | 4.50E-17 | 0.299041 | 4.21E-11 |
| 1.29E-10 | 0.067932 | 0.14271  | -0.08027 | 0.08314  | 0.067121 | 0.14755  | 0.085672 | 0.06434  |
| 0.00407  | -0.05214 | 0.26079  | -0.08056 | 0.082    | -0.03076 | 0.50725  | 0.019921 | 0.66764  |
| 1.71E-19 | 0.379628 | 1.86E-17 | 0.270911 | 2.68E-09 | 0.386277 | 4.57E-18 | 0.233152 | 3.48E-07 |
| 1.05E-15 | 0.213905 | 3.10E-06 | 0.284088 | 4.05E-10 | 0.305602 | 1.49E-11 | 0.411167 | 1.78E-20 |
| 1.11E-25 | 0.217237 | 2.15E-06 | 0.390123 | 2.00E-18 | 0.400286 | 2.13E-19 | 0.108222 | 0.01932  |
| 1.14E-05 | 0.018837 | 0.68473  | 0.06631  | 0.15252  | 0.084628 | 0.06767  | 0.019527 | 0.67383  |
| 4.74E-09 | -0.17693 | 0.00012  | -0.15691 | 0.00067  | 0.000314 | 0.9946   | 0.149351 | 0.00121  |
| 0.00058  | 0.06768  | 0.1442   | 0.04639  | 0.31715  | 0.074677 | 0.10702  | 0.071949 | 0.1205   |
| 0.25271  | 0.08979  | 0.05249  | 0.083118 | 0.07273  | 0.089152 | 0.0542   | 0.102995 | 0.02603  |
| 3.44E-13 | 0.190024 | 3.58E-05 | 0.120164 | 0.00934  | 0.222311 | 1.22E-06 | 0.26073  | 1.07E-08 |
| 1.68E-12 | 0.138607 | 0.00268  | 0.093542 | 0.04333  | 0.202173 | 1.07E-05 | 0.060705 | 0.19035  |
| 4.20E-07 | -0.2152  | 2.69E-06 | 0.002173 | 0.96265  | 0.005139 | 0.91181  | 0.028769 | 0.53515  |
| 4.60E-10 | 0.13743  | 0.00292  | 0.17016  | 0.00022  | 0.169904 | 0.00023  | 0.143788 | 0.00184  |
| 1.09E-31 | 0.404134 | 8.94E-20 | 0.55912  | 9.28E-40 | 0.586576 | 1.65E-44 | 0.178418 | 0.00011  |
| 0.01603  | 0.264589 | 6.39E-09 | -0.08478 | 0.06717  | 0.062652 | 0.1765   | 0.204297 | 8.58E-06 |

|          |          |          |          |          |          |          |          |          |
|----------|----------|----------|----------|----------|----------|----------|----------|----------|
| 5.56E-06 | 0.215175 | 2.70E-06 | 0.122697 | 0.00794  | 0.148361 | 0.0013   | 0.220374 | 1.52E-06 |
| 4.19E-08 | 0.425872 | 5.34E-22 | 0.108361 | 0.01916  | 0.247901 | 5.71E-08 | -0.04622 | 0.31891  |
| 2.94E-12 | 0.160777 | 0.00049  | 0.116306 | 0.0119   | 0.219968 | 1.59E-06 | 0.194274 | 2.36E-05 |
| 6.29E-12 | 0.176097 | 0.00013  | 0.398136 | 3.44E-19 | 0.340925 | 3.57E-14 | 0.047682 | 0.30384  |
| 0.02474  | -0.01912 | 0.68029  | 0.1598   | 0.00053  | 0.06061  | 0.19105  | -0.0283  | 0.54188  |
| 1.31E-22 | 0.325555 | 5.44E-13 | 0.254631 | 2.40E-08 | 0.370902 | 1.12E-16 | -0.02661 | 0.56618  |
| 0.00079  | 0.012866 | 0.78155  | 0.013623 | 0.76904  | 0.039731 | 0.39165  | 0.005788 | 0.90072  |
| 4.23E-08 | 0.036002 | 0.43765  | -0.08819 | 0.05686  | 0.069238 | 0.13517  | 0.135805 | 0.00328  |
| 0.04476  | -0.0202  | 0.66329  | 0.002642 | 0.95459  | 0.001822 | 0.96868  | 0.19669  | 1.86E-05 |
| 2.89E-16 | 0.394006 | 8.57E-19 | 0.330495 | 2.30E-13 | 0.389363 | 2.35E-18 | 0.030235 | 0.51454  |
| 8.03E-07 | -0.04525 | 0.32917  | 0.252345 | 3.23E-08 | 0.192848 | 2.72E-05 | 0.079411 | 0.08649  |
| 5.99E-42 | 0.387324 | 3.65E-18 | 0.361152 | 7.81E-16 | 0.487219 | 3.26E-29 | 0.165001 | 0.00034  |
| 5.54E-12 | 0.336398 | 8.09E-14 | 0.137151 | 0.00298  | 0.289012 | 1.95E-10 | 0.243206 | 1.03E-07 |
| 6.65E-19 | 0.25256  | 3.14E-08 | 0.297452 | 5.39E-11 | 0.312364 | 5.00E-12 | -0.00464 | 0.92035  |
| 0.07472  | 0.167569 | 0.00028  | 0.068384 | 0.14006  | 0.090742 | 0.05003  | 0.129265 | 0.00515  |
| 0.00014  | 0.277274 | 1.09E-09 | 0.31389  | 3.89E-12 | 0.235493 | 2.63E-07 | -0.01704 | 0.71335  |
| 3.14E-07 | 0.17652  | 0.00013  | 0.015382 | 0.74024  | 0.097511 | 0.03515  | 0.149609 | 0.00118  |
| 2.44E-19 | 0.203733 | 9.10E-06 | 0.050219 | 0.2788   | 0.246376 | 6.92E-08 | 0.267511 | 4.28E-09 |
| 0.42524  | -0.01276 | 0.78333  | 0.167448 | 0.00028  | 0.040509 | 0.38244  | -0.04486 | 0.33342  |
| 4.16E-11 | 0.219089 | 1.75E-06 | 0.362699 | 5.76E-16 | 0.308165 | 9.89E-12 | 0.088504 | 0.05598  |
| 0.12595  | -0.15481 | 0.00079  | 0.064731 | 0.16254  | 0.040568 | 0.38174  | 0.080228 | 0.08329  |
| 7.05E-08 | -0.00207 | 0.96444  | 0.226673 | 7.43E-07 | 0.200197 | 1.31E-05 | 0.125858 | 0.00646  |
| 0.97224  | -0.05234 | 0.25896  | 0.051176 | 0.26973  | 0.03443  | 0.45793  | -0.1042  | 0.02433  |
| 0.92608  | -0.27037 | 2.88E-09 | -0.10497 | 0.02329  | -0.11821 | 0.01057  | 0.082737 | 0.07406  |
| 0.41495  | -0.33055 | 2.28E-13 | -0.13847 | 0.00271  | -0.17194 | 0.00019  | 0.090894 | 0.04964  |
| 6.85E-08 | -0.42554 | 5.80E-22 | -0.38038 | 1.59E-17 | -0.40467 | 7.91E-20 | 0.049379 | 0.28693  |
| 6.17E-11 | -0.35366 | 3.32E-15 | -0.26192 | 9.16E-09 | -0.34407 | 2.01E-14 | -0.0422  | 0.36289  |
| 0.13438  | -0.3434  | 2.27E-14 | -0.12945 | 0.00508  | -0.19217 | 2.90E-05 | 0.178133 | 0.00011  |
| 7.00E-05 | -0.57278 | 4.58E-42 | -0.37496 | 4.89E-17 | -0.40598 | 5.88E-20 | -0.01975 | 0.6704   |
| 0.40762  | -0.16825 | 0.00026  | -0.01529 | 0.74176  | -0.05664 | 0.22178  | -0.00271 | 0.95335  |
| 0.38148  | -0.14461 | 0.00173  | -0.03656 | 0.43052  | -0.07843 | 0.09045  | -0.02142 | 0.64423  |
| 8.13E-14 | -0.10922 | 0.01823  | -0.07441 | 0.1083   | 0.086846 | 0.06076  | 0.216604 | 2.31E-06 |
| 0.14494  | -0.38753 | 3.49E-18 | -0.12475 | 0.00695  | -0.1908  | 3.32E-05 | -0.25417 | 2.55E-08 |
| 0.70427  | -0.23835 | 1.86E-07 | -0.0711  | 0.12496  | -0.09299 | 0.04458  | 0.147948 | 0.00134  |
| 0.00042  | 0.059203 | 0.20157  | 0.320459 | 1.30E-12 | 0.250211 | 4.25E-08 | 0.387434 | 3.57E-18 |
| 1.35E-14 | -0.40302 | 1.15E-19 | -0.29247 | 1.16E-10 | -0.37951 | 1.91E-17 | -0.13658 | 0.0031   |
| 8.78E-07 | 0.054322 | 0.24135  | 0.226977 | 7.17E-07 | 0.238232 | 1.89E-07 | 0.1932   | 2.63E-05 |
| 0.72496  | -0.27316 | 1.95E-09 | 0.016064 | 0.72916  | -0.05131 | 0.26847  | 0.071747 | 0.12155  |
| 0.42716  | -0.32583 | 5.19E-13 | -0.05542 | 0.23192  | -0.11901 | 0.01005  | 0.041068 | 0.3759   |
| 1.01E-06 | -0.01518 | 0.74357  | 0.259638 | 1.24E-08 | 0.23183  | 4.07E-07 | 0.16024  | 0.00051  |
| 0.01704  | -0.33133 | 1.99E-13 | -0.19095 | 3.27E-05 | -0.22956 | 5.31E-07 | 0.139636 | 0.00249  |
| 0.42026  | -0.28753 | 2.43E-10 | -0.01124 | 0.80852  | -0.05887 | 0.2041   | 0.007906 | 0.86469  |
| 0.00655  | -0.37579 | 4.12E-17 | -0.19781 | 1.66E-05 | -0.24614 | 7.13E-08 | -0.00345 | 0.94076  |
| 0.37962  | -0.26187 | 9.22E-09 | -0.08253 | 0.0748   | -0.1167  | 0.01161  | 0.039615 | 0.39304  |
| 1.06E-10 | -0.44222 | 8.84E-24 | -0.25221 | 3.29E-08 | -0.35662 | 1.88E-15 | -0.12835 | 0.00548  |

|          |          |          |          |          |          |          |          |          |
|----------|----------|----------|----------|----------|----------|----------|----------|----------|
| 0.7094   | -0.18003 | 9.15E-05 | 0.038494 | 0.40657  | -0.02469 | 0.59464  | 0.014051 | 0.762    |
| 9.66E-17 | 0.220397 | 1.51E-06 | 0.403842 | 9.55E-20 | 0.417139 | 4.37E-21 | 0.25722  | 1.71E-08 |
| 0.01692  | -0.23674 | 2.27E-07 | -0.02402 | 0.60458  | -0.01704 | 0.71337  | 0.182427 | 7.34E-05 |
| 3.38E-20 | 0.23837  | 1.86E-07 | 0.51019  | 2.59E-32 | 0.509633 | 3.10E-32 | 0.243168 | 1.03E-07 |
| 0.00039  | -0.20334 | 9.47E-06 | 0.053102 | 0.25209  | 0.043815 | 0.34478  | 0.198872 | 1.49E-05 |
| 0.18416  | -0.05863 | 0.20597  | -0.06029 | 0.1934   | -0.04247 | 0.35978  | 0.122823 | 0.00788  |
| 8.51E-18 | 0.044793 | 0.3341   | 0.154381 | 0.00082  | 0.243487 | 9.92E-08 | 0.198292 | 1.58E-05 |
| 3.17E-05 | -0.12309 | 0.00774  | 0.0775   | 0.09436  | 0.098652 | 0.03306  | 0.140482 | 0.00234  |
| 0.01859  | -0.39259 | 1.17E-18 | -0.04305 | 0.35322  | -0.04007 | 0.38767  | 0.021655 | 0.64067  |
| 0.0932   | -0.22284 | 1.15E-06 | 0.050524 | 0.27589  | -0.08774 | 0.05814  | 0.260661 | 1.08E-08 |
| 0.00022  | -0.13381 | 0.00377  | 0.08853  | 0.0559   | 0.097503 | 0.03517  | 0.191564 | 3.08E-05 |
| 0.65769  | -0.13087 | 0.00461  | 0.042324 | 0.36146  | 0.018101 | 0.69642  | 0.167556 | 0.00028  |
| 0.0029   | -0.169   | 0.00024  | -0.08219 | 0.076    | 0.009759 | 0.8334   | 0.235539 | 2.62E-07 |
| 6.07E-08 | -0.00651 | 0.88846  | 0.257807 | 1.58E-08 | 0.239106 | 1.70E-07 | 0.15686  | 0.00067  |
| 0.33169  | -0.26468 | 6.31E-09 | -0.04502 | 0.3317   | -0.14639 | 0.00151  | -0.10059 | 0.02975  |
| 1.77E-08 | -0.01953 | 0.67385  | 0.168919 | 0.00025  | 0.182302 | 7.42E-05 | 0.246728 | 6.62E-08 |
| 0.27429  | -0.39279 | 1.12E-18 | -0.21037 | 4.53E-06 | -0.21638 | 2.37E-06 | 0.217159 | 2.17E-06 |
| 0.11868  | -0.30685 | 1.22E-11 | -0.19501 | 2.20E-05 | -0.20024 | 1.30E-05 | 0.214863 | 2.79E-06 |
| 0.00467  | -0.43037 | 1.77E-22 | -0.19667 | 1.86E-05 | -0.26229 | 8.71E-09 | 0.140965 | 0.00226  |
| 0.31715  | -0.30264 | 2.39E-11 | -0.20016 | 1.31E-05 | -0.13081 | 0.00463  | 0.204189 | 8.68E-06 |
| 0.39362  | -0.26562 | 5.55E-09 | -0.05669 | 0.2214   | -0.07798 | 0.09234  | 0.034458 | 0.45756  |
| 0.39883  | -0.14524 | 0.00165  | 0.082167 | 0.07608  | 0.020223 | 0.66292  | 0.087135 | 0.0599   |
| 0.0137   | -0.07365 | 0.11196  | 0.150043 | 0.00115  | 0.10273  | 0.02642  | 0.102908 | 0.02616  |
| 2.04E-06 | -0.4775  | 5.71E-28 | -0.30498 | 1.65E-11 | -0.34916 | 7.79E-15 | 0.004612 | 0.92082  |
| 1.74E-09 | -0.38729 | 3.68E-18 | -0.27714 | 1.11E-09 | -0.34208 | 2.89E-14 | -0.05205 | 0.26167  |
| 0.03484  | -0.26436 | 6.59E-09 | -0.05015 | 0.27948  | -0.04856 | 0.29503  | 0.075039 | 0.10533  |
| 1.67E-14 | -0.42949 | 2.20E-22 | -0.26572 | 5.48E-09 | -0.39503 | 6.84E-19 | 0.016399 | 0.72375  |
| 0.19281  | -0.22184 | 1.29E-06 | 0.115733 | 0.01232  | -0.02695 | 0.5613   | -0.12016 | 0.00935  |
| 0.08799  | -0.26701 | 4.59E-09 | -0.06154 | 0.18433  | -0.11043 | 0.01697  | 0.02226  | 0.63136  |
| 0.6185   | -0.3194  | 1.55E-12 | -0.12528 | 0.00671  | -0.12152 | 0.00857  | 0.084309 | 0.06871  |
| 0.09653  | -0.2332  | 3.46E-07 | -0.11167 | 0.01576  | -0.08755 | 0.05869  | 0.066366 | 0.15217  |
| 4.52E-09 | -0.16374 | 0.00038  | 0.07182  | 0.12117  | 0.107899 | 0.01969  | 0.29184  | 1.27E-10 |
| 0.94333  | -0.25708 | 1.74E-08 | -0.05266 | 0.25609  | -0.09807 | 0.03411  | 0.19261  | 2.78E-05 |
| 0.21206  | -0.05961 | 0.19851  | -0.06039 | 0.19268  | -0.03394 | 0.46431  | 0.283992 | 4.11E-10 |
| 0.31855  | 0.051654 | 0.26528  | 0.001    | 0.98281  | -0.00666 | 0.88584  | 0.05624  | 0.22511  |
| 3.98E-07 | -0.40146 | 1.63E-19 | -0.1942  | 2.38E-05 | -0.31319 | 4.36E-12 | 0.224599 | 9.42E-07 |
| 0.00012  | -0.15535 | 0.00076  | -0.09208 | 0.04672  | -0.15145 | 0.00103  | -0.1791  | 9.96E-05 |
| 0.00349  | -0.0862  | 0.0627   | 0.00628  | 0.89233  | 0.060059 | 0.19512  | 0.059264 | 0.20111  |
| 2.14E-08 | -0.02445 | 0.59814  | 0.008806 | 0.84946  | 0.097027 | 0.03607  | 0.369628 | 1.45E-16 |
| 0.00355  | -0.36786 | 2.07E-16 | -0.30765 | 1.07E-11 | -0.28172 | 5.73E-10 | 0.029383 | 0.52647  |
| 0.29427  | -0.31345 | 4.18E-12 | -0.36505 | 3.62E-16 | -0.27691 | 1.15E-09 | 0.080574 | 0.08197  |
| 2.80E-19 | -0.4267  | 4.37E-22 | -0.33916 | 4.91E-14 | -0.46829 | 7.91E-27 | -0.18539 | 5.56E-05 |
| 1.12E-07 | 0.475909 | 9.03E-28 | 0.273571 | 1.84E-09 | 0.338671 | 5.37E-14 | 0.416389 | 5.22E-21 |
| 2.98E-08 | -0.2555  | 2.15E-08 | -0.2833  | 4.55E-10 | -0.32516 | 5.82E-13 | 0.279548 | 7.85E-10 |
| 4.20E-10 | -0.43117 | 1.45E-22 | -0.22185 | 1.29E-06 | -0.38738 | 3.61E-18 | -0.12622 | 0.00631  |

|          |          |          |          |          |          |          |          |          |
|----------|----------|----------|----------|----------|----------|----------|----------|----------|
| 9.25E-35 | -0.53165 | 1.98E-35 | -0.48721 | 3.28E-29 | -0.61777 | 1.73E-50 | -0.13853 | 0.0027   |
| 4.91E-12 | 0.51858  | 1.67E-33 | 0.459947 | 7.97E-26 | 0.506367 | 8.84E-32 | 0.150821 | 0.00108  |
| 0.04654  | -0.00842 | 0.85595  | -0.16353 | 0.00039  | -0.14152 | 0.00217  | 0.316908 | 2.36E-12 |
| 2.45E-16 | -0.38495 | 6.05E-18 | -0.46206 | 4.46E-26 | -0.50254 | 2.96E-31 | 0.12288  | 0.00785  |
| 7.75E-12 | -0.39889 | 2.91E-19 | -0.28928 | 1.87E-10 | -0.42063 | 1.90E-21 | -0.12703 | 0.00598  |
| 0.00215  | 0.026182 | 0.57249  | -0.04576 | 0.32381  | -0.11806 | 0.01067  | -0.28141 | 6.00E-10 |
| 1.81E-09 | -0.15375 | 0.00086  | -0.29037 | 1.59E-10 | -0.33903 | 5.04E-14 | 0.170766 | 0.00021  |
| 0.43251  | -0.02889 | 0.53341  | 0.10725  | 0.02044  | 0.016423 | 0.72336  | 0.206927 | 6.52E-06 |
| 2.42E-08 | -0.2505  | 4.10E-08 | -0.26308 | 7.83E-09 | -0.32613 | 4.93E-13 | 0.112378 | 0.01511  |
| 7.22E-12 | -0.48194 | 1.56E-28 | -0.31384 | 3.92E-12 | -0.43614 | 4.17E-23 | 0.048751 | 0.29311  |
| 0.00176  | -0.40659 | 5.10E-20 | -0.27151 | 2.46E-09 | -0.30736 | 1.13E-11 | 0.070887 | 0.12609  |
| 5.98E-07 | -0.19317 | 2.64E-05 | -0.02919 | 0.52918  | -0.21435 | 2.95E-06 | 0.006457 | 0.88932  |
| 1.43E-16 | -0.36256 | 5.92E-16 | -0.42871 | 2.66E-22 | -0.45723 | 1.67E-25 | 0.083979 | 0.06981  |
| 3.58E-09 | 0.042902 | 0.35494  | -0.21339 | 3.28E-06 | -0.22029 | 1.53E-06 | -0.08861 | 0.05568  |
| 0.5754   | -0.26862 | 3.67E-09 | -0.24363 | 9.76E-08 | -0.19747 | 1.72E-05 | -0.09665 | 0.03681  |
| 0.67771  | 0.053043 | 0.25263  | 0.17128  | 0.0002   | 0.062222 | 0.17949  | 0.176873 | 0.00012  |
| 1.19E-05 | -0.23717 | 2.15E-07 | -0.22005 | 1.58E-06 | -0.27023 | 2.94E-09 | -0.24965 | 4.57E-08 |
| 0.01346  | -0.09218 | 0.0465   | 0.065055 | 0.16045  | -0.04292 | 0.35472  | 0.178107 | 0.00011  |
| 3.49E-30 | -0.5811  | 1.59E-43 | -0.55403 | 6.30E-39 | -0.63108 | 3.01E-53 | -0.26411 | 6.82E-09 |
| 0.00021  | -0.22798 | 6.38E-07 | -0.06582 | 0.15555  | -0.0726  | 0.11717  | 0.073501 | 0.11268  |
| 2.95E-20 | -0.43316 | 8.83E-23 | -0.16763 | 0.00027  | -0.43237 | 1.08E-22 | 0.098943 | 0.03254  |
| 9.81E-11 | -0.25889 | 1.37E-08 | -0.25101 | 3.84E-08 | -0.3553  | 2.43E-15 | 0.021275 | 0.64654  |
| 5.29E-10 | -0.39764 | 3.84E-19 | -0.33413 | 1.21E-13 | -0.40615 | 5.65E-20 | 0.036118 | 0.43617  |
| 1.52E-15 | -0.31872 | 1.74E-12 | -0.32181 | 1.03E-12 | -0.39626 | 5.22E-19 | -0.03412 | 0.46202  |
| 1.51E-16 | -0.48885 | 2.00E-29 | -0.43496 | 5.62E-23 | -0.53278 | 1.34E-35 | -0.12835 | 0.00547  |
| 0.08157  | -0.22105 | 1.41E-06 | -0.142   | 0.0021   | -0.18249 | 7.30E-05 | 0.158644 | 0.00058  |
| 0.01542  | -0.4384  | 2.35E-23 | -0.32619 | 4.87E-13 | -0.3494  | 7.44E-15 | 0.049305 | 0.28766  |
| 0.35454  | -0.32574 | 5.26E-13 | -0.20559 | 7.50E-06 | -0.20097 | 1.21E-05 | -0.03193 | 0.4912   |
| 5.16E-19 | -0.24156 | 1.26E-07 | -0.31993 | 1.42E-12 | -0.43659 | 3.72E-23 | -0.22422 | 9.84E-07 |
| 0.18991  | -0.17564 | 0.00014  | -0.0496  | 0.28481  | -0.07723 | 0.09551  | 0.113615 | 0.01402  |
| 0.30954  | -0.20457 | 8.34E-06 | 0.156273 | 0.0007   | -0.03244 | 0.48428  | 0.182213 | 7.49E-05 |
| 0.46795  | -0.25744 | 1.66E-08 | -0.13934 | 0.00255  | -0.1629  | 0.00041  | -0.01329 | 0.77448  |
| 1.29E-05 | -0.2625  | 8.48E-09 | -0.13529 | 0.0034   | -0.23653 | 2.33E-07 | 0.008686 | 0.85149  |
| 0.00274  | -0.30378 | 2.00E-11 | -0.16416 | 0.00037  | -0.22612 | 7.91E-07 | 0.260068 | 1.17E-08 |
| 0.00036  | -0.12174 | 0.00845  | 0.16025  | 0.00051  | -0.0567  | 0.22135  | -0.10053 | 0.02984  |
| 0.09822  | -0.24224 | 1.16E-07 | -0.17527 | 0.00014  | -0.21571 | 2.55E-06 | 0.439584 | 1.74E-23 |
| 7.29E-26 | 0.44575  | 3.54E-24 | 0.40419  | 8.83E-20 | 0.511977 | 1.45E-32 | 0.242439 | 1.13E-07 |
| 2.97E-07 | -0.19065 | 3.37E-05 | -0.1141  | 0.01362  | -0.2039  | 8.95E-06 | -0.10261 | 0.0266   |
| 1.62E-07 | -0.21153 | 4.00E-06 | -0.34379 | 2.11E-14 | -0.36066 | 8.60E-16 | 0.069932 | 0.13129  |
| 1.75E-17 | -0.38817 | 3.05E-18 | -0.38707 | 3.85E-18 | -0.49074 | 1.13E-29 | -0.01717 | 0.71139  |
| 6.20E-11 | -0.22716 | 7.02E-07 | -0.1455  | 0.00162  | -0.24496 | 8.26E-08 | -0.10111 | 0.02891  |
| 0.34805  | -0.01122 | 0.80887  | -0.05334 | 0.25001  | -0.06467 | 0.16294  | 0.334818 | 1.07E-13 |
| 5.01E-14 | -0.25012 | 4.30E-08 | -0.34019 | 4.08E-14 | -0.39069 | 1.77E-18 | 0.097056 | 0.03602  |
| 6.31E-08 | -0.30319 | 2.19E-11 | -0.38777 | 3.32E-18 | -0.40895 | 2.97E-20 | -0.03001 | 0.51773  |
| 1.75E-18 | -0.43713 | 3.24E-23 | -0.33624 | 8.32E-14 | -0.45468 | 3.32E-25 | 0.034295 | 0.4597   |

|          |          |          |          |          |          |          |          |          |
|----------|----------|----------|----------|----------|----------|----------|----------|----------|
| 5.82E-10 | -0.29327 | 1.03E-10 | -0.18506 | 5.74E-05 | -0.34396 | 2.05E-14 | -0.09245 | 0.04584  |
| 7.32E-05 | -0.14998 | 0.00115  | -0.0576  | 0.21406  | -0.1738  | 0.00016  | -0.01939 | 0.67596  |
| 2.38E-12 | -0.25844 | 1.46E-08 | -0.42427 | 7.89E-22 | -0.41779 | 3.75E-21 | 0.02898  | 0.53216  |
| 1.94E-09 | -0.23066 | 4.67E-07 | -0.18682 | 4.86E-05 | -0.31072 | 6.54E-12 | 0.087264 | 0.05952  |
| 0.09182  | -0.16178 | 0.00045  | -0.10356 | 0.02522  | -0.16858 | 0.00025  | 0.204041 | 8.81E-06 |
| 0.03133  | -0.07432 | 0.10871  | -0.16124 | 0.00047  | -0.17547 | 0.00014  | -0.28268 | 4.98E-10 |
| 1.14E-26 | -0.61064 | 4.62E-49 | -0.50783 | 5.55E-32 | -0.61508 | 6.05E-50 | -0.141   | 0.00226  |
| 2.68E-14 | -0.48946 | 1.66E-29 | -0.41375 | 9.73E-21 | -0.4742  | 1.48E-27 | -0.03935 | 0.39626  |
| 3.83E-05 | -0.16673 | 0.0003   | 0.054695 | 0.23812  | -0.16998 | 0.00022  | 0.034159 | 0.46147  |
| 1.39E-10 | -0.31804 | 1.95E-12 | -0.30673 | 1.25E-11 | -0.37015 | 1.30E-16 | -0.00401 | 0.9311   |
| 0.0586   | -0.20421 | 8.66E-06 | -0.13328 | 0.00391  | -0.20064 | 1.25E-05 | -0.03254 | 0.483    |
| 2.47E-13 | -0.29775 | 5.14E-11 | -0.25749 | 1.65E-08 | -0.33323 | 1.42E-13 | -0.08509 | 0.06616  |
| 1.42E-06 | -0.05273 | 0.25543  | 0.066799 | 0.1495   | -0.12784 | 0.00566  | 0.020956 | 0.65148  |
| 0.86025  | -0.22299 | 1.13E-06 | -0.16435 | 0.00036  | -0.17242 | 0.00018  | 0.046054 | 0.32067  |
| 8.13E-09 | -0.33139 | 1.97E-13 | -0.19002 | 3.58E-05 | -0.35773 | 1.52E-15 | -0.24305 | 1.05E-07 |
| 1.01E-09 | -0.32466 | 6.34E-13 | -0.39577 | 5.81E-19 | -0.42108 | 1.71E-21 | 0.009297 | 0.84119  |
| 0.21996  | -0.24367 | 9.70E-08 | 0.045688 | 0.32453  | -0.09399 | 0.04233  | 0.015121 | 0.7445   |
| 2.84E-16 | -0.37138 | 1.02E-16 | -0.3114  | 5.85E-12 | -0.44411 | 5.42E-24 | -0.13339 | 0.00388  |
| 2.78E-15 | -0.55408 | 6.19E-39 | -0.43478 | 5.88E-23 | -0.51605 | 3.85E-33 | -0.11185 | 0.0156   |
| 0.9566   | -0.04395 | 0.34326  | 0.044011 | 0.34262  | -0.02012 | 0.66447  | 0.089644 | 0.05287  |
| 3.54E-10 | -0.40053 | 2.02E-19 | -0.25607 | 1.99E-08 | -0.37446 | 5.43E-17 | 0.051681 | 0.26502  |
| 3.65E-11 | -0.12045 | 0.00918  | -0.26422 | 6.71E-09 | -0.32532 | 5.67E-13 | -0.0998  | 0.03106  |
| 1.87E-05 | -0.27346 | 1.87E-09 | -0.28019 | 7.16E-10 | -0.3109  | 6.35E-12 | 0.267017 | 4.58E-09 |
| 6.70E-07 | -0.40152 | 1.61E-19 | -0.19174 | 3.03E-05 | -0.30715 | 1.17E-11 | 0.031568 | 0.49616  |
| 3.88E-05 | -0.31316 | 4.38E-12 | -0.3025  | 2.44E-11 | -0.34513 | 1.65E-14 | 0.209532 | 4.96E-06 |
| 2.72E-05 | 0.032884 | 0.47838  | 0.083139 | 0.07266  | -0.09223 | 0.04637  | 0.141407 | 0.00219  |
| 3.63E-10 | -0.2363  | 2.39E-07 | -0.22353 | 1.06E-06 | -0.3331  | 1.45E-13 | 0.138568 | 0.00269  |
| 0.00095  | -0.31977 | 1.46E-12 | -0.32602 | 5.02E-13 | -0.34897 | 8.07E-15 | 0.277338 | 1.08E-09 |
| 6.57E-11 | -0.38251 | 1.02E-17 | -0.3557  | 2.25E-15 | -0.45013 | 1.12E-24 | -0.12847 | 0.00543  |
| 1.07E-05 | -0.28793 | 2.29E-10 | -0.15616 | 0.00071  | -0.25969 | 1.23E-08 | 0.114709 | 0.01312  |
| 3.33E-16 | -0.44774 | 2.10E-24 | -0.41799 | 3.57E-21 | -0.4698  | 5.16E-27 | 0.139546 | 0.00251  |
| 4.65E-05 | -0.12661 | 0.00615  | -0.08907 | 0.05441  | -0.18184 | 7.75E-05 | 0.175517 | 0.00014  |
| 5.71E-20 | -0.27214 | 2.25E-09 | -0.24639 | 6.91E-08 | -0.41448 | 8.19E-21 | -0.30683 | 1.23E-11 |
| 0.02788  | -0.25119 | 3.75E-08 | 0.035051 | 0.44986  | -0.14051 | 0.00234  | 0.017428 | 0.70718  |
| 2.13E-11 | -0.37021 | 1.29E-16 | -0.3639  | 4.55E-16 | -0.42374 | 8.97E-22 | -0.01899 | 0.6823   |
| 1.27E-14 | -0.36773 | 2.12E-16 | -0.36681 | 2.55E-16 | -0.43179 | 1.24E-22 | 0.221107 | 1.40E-06 |
| 6.93E-05 | -0.12467 | 0.00699  | -0.282   | 5.50E-10 | -0.28557 | 3.26E-10 | 0.124895 | 0.00688  |
| 0.04313  | -0.17683 | 0.00012  | -0.02978 | 0.52095  | -0.12449 | 0.00707  | -0.03068 | 0.50843  |
| 4.02E-05 | 0.202985 | 9.83E-06 | 0.070991 | 0.12554  | 0.192931 | 2.70E-05 | 0.467187 | 1.08E-26 |
| 1.14E-31 | -0.4752  | 1.11E-27 | -0.36484 | 3.77E-16 | -0.54959 | 3.27E-38 | -0.14232 | 0.00205  |
| 0.02252  | -0.04373 | 0.34574  | 0.045458 | 0.32698  | 0.004337 | 0.92553  | 0.042934 | 0.35458  |
| 2.17E-22 | -0.47956 | 3.13E-28 | -0.43571 | 4.65E-23 | -0.54944 | 3.46E-38 | -0.06687 | 0.14904  |
| 2.04E-05 | -0.4456  | 3.67E-24 | -0.23992 | 1.54E-07 | -0.33015 | 2.45E-13 | -0.19877 | 1.51E-05 |
| 1.29E-10 | -0.38836 | 2.92E-18 | -0.26224 | 8.77E-09 | -0.38797 | 3.18E-18 | -0.144   | 0.00181  |
| 0.06052  | -0.06033 | 0.19311  | 0.113886 | 0.0138   | 0.012913 | 0.78077  | 0.025902 | 0.57661  |

|          |          |          |          |          |          |          |          |          |
|----------|----------|----------|----------|----------|----------|----------|----------|----------|
| 0.66583  | -0.0925  | 0.04574  | 0.051822 | 0.26372  | 0.000676 | 0.98837  | -0.19417 | 2.39E-05 |
| 0.09996  | -0.12011 | 0.00938  | 0.022794 | 0.6232   | -0.08346 | 0.07158  | 0.274299 | 1.66E-09 |
| 0.03034  | -0.22134 | 1.36E-06 | -0.17491 | 0.00015  | -0.20112 | 1.19E-05 | 0.349836 | 6.85E-15 |
| 0.00011  | -0.00422 | 0.92756  | 0.054893 | 0.23643  | -0.09209 | 0.0467   | -0.09814 | 0.03399  |
| 1.66E-09 | -0.51643 | 3.40E-33 | -0.3469  | 1.19E-14 | -0.43662 | 3.70E-23 | -0.34525 | 1.61E-14 |
| 0.03953  | -0.18765 | 4.49E-05 | -0.23602 | 2.47E-07 | -0.26151 | 9.67E-09 | 0.052075 | 0.26139  |
| 6.24E-14 | -0.27199 | 2.30E-09 | -0.25567 | 2.10E-08 | -0.39065 | 1.78E-18 | -0.11375 | 0.01391  |
| 4.12E-08 | -0.23807 | 1.93E-07 | -0.3593  | 1.12E-15 | -0.35586 | 2.18E-15 | -0.02903 | 0.53145  |
| 1.52E-05 | -0.16719 | 0.00028  | -0.03173 | 0.49397  | -0.17974 | 9.40E-05 | -0.05692 | 0.21953  |
| 0.02671  | 0.086239 | 0.06259  | 0.158788 | 0.00057  | 0.086304 | 0.06239  | -0.13082 | 0.00463  |
| 2.98E-09 | -0.43365 | 7.80E-23 | -0.27264 | 2.10E-09 | -0.39965 | 2.46E-19 | -0.05851 | 0.2069   |
| 9.18E-05 | 0.022568 | 0.62665  | -0.19796 | 1.64E-05 | -0.2084  | 5.59E-06 | 0.001726 | 0.97033  |
| 2.93E-11 | -0.33374 | 1.30E-13 | -0.10342 | 0.02543  | -0.28732 | 2.51E-10 | -0.18608 | 5.21E-05 |
| 1.53E-10 | -0.35885 | 1.22E-15 | -0.23728 | 2.12E-07 | -0.37494 | 4.91E-17 | -0.17045 | 0.00022  |
| 5.91E-19 | -0.39032 | 1.91E-18 | -0.38297 | 9.23E-18 | -0.49105 | 1.03E-29 | -0.14736 | 0.00141  |
| 2.69E-08 | -0.27491 | 1.53E-09 | -0.09533 | 0.03946  | -0.27455 | 1.61E-09 | -0.14887 | 0.00125  |
| 0.03064  | -0.09862 | 0.03311  | -0.02108 | 0.64951  | -0.0989  | 0.03261  | 0.101477 | 0.02833  |
| 1.76E-05 | -0.34417 | 1.97E-14 | -0.27441 | 1.64E-09 | -0.34731 | 1.10E-14 | 0.105412 | 0.02271  |
| 2.84E-17 | -0.40612 | 5.69E-20 | -0.46167 | 4.97E-26 | -0.47479 | 1.24E-27 | -0.04992 | 0.28172  |
| 1.03E-06 | -0.20864 | 5.45E-06 | -0.18279 | 7.09E-05 | -0.25549 | 2.15E-08 | -0.09045 | 0.05078  |
| 0.01819  | -0.06375 | 0.16904  | 0.078217 | 0.09135  | -0.05741 | 0.21556  | -0.08983 | 0.05238  |
| 3.74E-12 | -0.01355 | 0.77024  | -0.1629  | 0.00041  | -0.29368 | 9.62E-11 | -0.15954 | 0.00054  |
| 3.81E-08 | -0.37924 | 2.02E-17 | -0.11044 | 0.01696  | -0.31729 | 2.21E-12 | -0.07635 | 0.09935  |
| 1.43E-08 | -0.37952 | 1.90E-17 | -0.20845 | 5.56E-06 | -0.34677 | 1.22E-14 | 0.213942 | 3.09E-06 |
| 0.00073  | -0.07019 | 0.12987  | -0.00508 | 0.91278  | -0.14198 | 0.0021   | 0.190541 | 3.40E-05 |
| 0.00019  | -0.00406 | 0.93025  | 0.075425 | 0.10355  | 0.089993 | 0.05196  | 0.162383 | 0.00043  |
| 3.35E-07 | 0.412581 | 1.28E-20 | 0.295206 | 7.62E-11 | 0.303514 | 2.08E-11 | 0.002072 | 0.96437  |
| 5.08E-23 | -0.64632 | 1.41E-56 | -0.50042 | 5.77E-31 | -0.61849 | 1.24E-50 | -0.201   | 1.20E-05 |
| 2.02E-15 | -0.52111 | 7.16E-34 | -0.35694 | 1.77E-15 | -0.48297 | 1.15E-28 | -0.0947  | 0.04079  |
| 0.08197  | -0.1696  | 0.00023  | 0.082911 | 0.07345  | -0.08311 | 0.07276  | -0.09743 | 0.0353   |
| 1.33E-11 | -0.36099 | 8.06E-16 | -0.2556  | 2.12E-08 | -0.40713 | 4.51E-20 | -0.04545 | 0.32711  |
| 6.82E-10 | -0.02307 | 0.61897  | -0.09685 | 0.03642  | -0.24647 | 6.83E-08 | -0.15575 | 0.00073  |
| 4.54E-11 | -0.23547 | 2.64E-07 | -0.16287 | 0.00041  | -0.28955 | 1.80E-10 | 0.162524 | 0.00042  |
| 0.00609  | -0.38837 | 2.91E-18 | -0.20685 | 6.57E-06 | -0.29666 | 6.09E-11 | 0.078609 | 0.08973  |
| 4.44E-19 | -0.57039 | 1.18E-41 | -0.44477 | 4.57E-24 | -0.53207 | 1.72E-35 | -0.11145 | 0.01597  |
| 3.03E-07 | -0.22644 | 7.63E-07 | -0.17125 | 0.0002   | -0.26613 | 5.18E-09 | 0.078747 | 0.08917  |
| 0.11263  | -0.10566 | 0.02239  | -0.02671 | 0.56481  | -0.08178 | 0.07748  | 0.132611 | 0.00409  |
| 2.38E-22 | -0.34479 | 1.76E-14 | -0.25351 | 2.78E-08 | -0.41505 | 7.17E-21 | 0.005257 | 0.90979  |
| 2.11E-18 | -0.19902 | 1.47E-05 | -0.24958 | 4.61E-08 | -0.34758 | 1.05E-14 | -0.2399  | 1.54E-07 |
| 1.47E-14 | -0.46352 | 2.99E-26 | -0.54221 | 4.78E-37 | -0.54015 | 1.00E-36 | -0.05615 | 0.22583  |
| 4.07E-06 | -0.43279 | 9.69E-23 | -0.40325 | 1.09E-19 | -0.42491 | 6.76E-22 | 0.098085 | 0.03408  |
| 1.82E-12 | -0.43608 | 4.23E-23 | -0.44358 | 6.22E-24 | -0.47843 | 4.36E-28 | -0.2257  | 8.30E-07 |
| 3.78E-16 | -0.35993 | 9.92E-16 | -0.35692 | 1.78E-15 | -0.41861 | 3.08E-21 | 0.023388 | 0.61417  |
| 0.00017  | -0.26013 | 1.16E-08 | -0.27878 | 8.78E-10 | -0.29381 | 9.43E-11 | -0.03765 | 0.41692  |
| 2.07E-08 | -0.35868 | 1.26E-15 | -0.15672 | 0.00068  | -0.27743 | 1.07E-09 | 0.157407 | 0.00064  |

|          |          |          |          |          |          |          |          |          |
|----------|----------|----------|----------|----------|----------|----------|----------|----------|
| 1.42E-18 | -0.40572 | 6.23E-20 | -0.34056 | 3.81E-14 | -0.47814 | 4.73E-28 | -0.07563 | 0.1026   |
| 0.00397  | -0.05271 | 0.25565  | -0.25209 | 3.34E-08 | -0.19358 | 2.53E-05 | -0.11626 | 0.01193  |
| 0.06826  | -0.05567 | 0.22986  | -0.02344 | 0.61341  | -0.09911 | 0.03225  | 0.263627 | 7.28E-09 |
| 4.22E-05 | -0.3857  | 5.17E-18 | -0.23029 | 4.88E-07 | -0.2823  | 5.27E-10 | 0.358141 | 1.40E-15 |
| 3.28E-36 | -0.3438  | 2.11E-14 | -0.36708 | 2.42E-16 | -0.53047 | 2.98E-35 | -0.0424  | 0.36062  |
| 1.29E-12 | -0.12858 | 0.00539  | -0.16391 | 0.00038  | -0.27503 | 1.50E-09 | 0.053982 | 0.24431  |
| 0.00293  | -0.4396  | 1.73E-23 | -0.14758 | 0.00138  | -0.2954  | 7.39E-11 | 0.019432 | 0.67532  |
| 0.00286  | -0.28973 | 1.75E-10 | -0.0335  | 0.47014  | -0.19713 | 1.78E-05 | 0.021587 | 0.64171  |
| 0.10848  | -0.20404 | 8.82E-06 | -0.06069 | 0.19048  | -0.14287 | 0.00197  | -0.14897 | 0.00124  |
| 1.35E-11 | -0.06628 | 0.15268  | -0.05817 | 0.2096   | -0.21602 | 2.46E-06 | 0.001245 | 0.97859  |
| 0.05503  | -0.22466 | 9.36E-07 | -0.20162 | 1.13E-05 | -0.22868 | 5.89E-07 | -0.04311 | 0.35265  |
| 1.14E-18 | -0.37338 | 6.77E-17 | -0.40562 | 6.37E-20 | -0.50502 | 1.35E-31 | -0.00024 | 0.99579  |
| 0.08003  | -0.24788 | 5.72E-08 | -0.08636 | 0.06222  | -0.16415 | 0.00037  | -0.04724 | 0.30838  |
| 0.00033  | -0.27417 | 1.69E-09 | -0.25121 | 3.74E-08 | -0.29658 | 6.16E-11 | 0.139343 | 0.00255  |
| 2.30E-07 | -0.35176 | 4.77E-15 | -0.13306 | 0.00397  | -0.28034 | 7.01E-10 | 0.12619  | 0.00632  |
| 9.18E-20 | -0.23822 | 1.89E-07 | -0.32444 | 6.59E-13 | -0.40396 | 9.30E-20 | -0.14282 | 0.00197  |
| 0.00438  | -0.18333 | 6.75E-05 | -0.24922 | 4.83E-08 | -0.21751 | 2.09E-06 | 0.11084  | 0.01656  |
| 0.00976  | -0.39644 | 5.01E-19 | -0.25883 | 1.38E-08 | -0.31363 | 4.05E-12 | -0.06864 | 0.13856  |
| 1.77E-05 | -0.49177 | 8.29E-30 | -0.37098 | 1.10E-16 | -0.39017 | 1.98E-18 | 0.04757  | 0.30498  |
| 0.10217  | -0.0964  | 0.0373   | 0.052572 | 0.25687  | -0.02729 | 0.55642  | -0.09292 | 0.04475  |
| 0.25775  | -0.23641 | 2.36E-07 | -0.02632 | 0.57045  | -0.16261 | 0.00042  | 0.040573 | 0.38169  |
| 0.00252  | -0.29679 | 5.97E-11 | -0.11496 | 0.01292  | -0.23813 | 1.92E-07 | 0.054799 | 0.23724  |
| 2.98E-12 | -0.44522 | 4.06E-24 | -0.34335 | 2.29E-14 | -0.40864 | 3.19E-20 | 0.132352 | 0.00417  |
| 1.16E-06 | -0.36564 | 3.22E-16 | -0.18875 | 4.05E-05 | -0.30609 | 1.38E-11 | 0.288862 | 1.99E-10 |
| 6.70E-12 | -0.09774 | 0.03473  | -0.0149  | 0.74806  | -0.20912 | 5.18E-06 | -0.2738  | 1.78E-09 |
| 4.43E-21 | -0.3997  | 2.43E-19 | -0.29285 | 1.09E-10 | -0.43792 | 2.65E-23 | -0.19098 | 3.26E-05 |
| 0.05898  | 0.176032 | 0.00013  | 0.067818 | 0.14338  | 0.146412 | 0.00151  | -0.12119 | 0.00875  |
| 5.11E-06 | -0.42248 | 1.22E-21 | -0.25365 | 2.73E-08 | -0.36124 | 7.67E-16 | -0.09636 | 0.03738  |
| 0.18352  | -0.25132 | 3.69E-08 | -0.14049 | 0.00234  | -0.13892 | 0.00262  | -0.00693 | 0.88127  |
| 0.31706  | -0.00356 | 0.93889  | -0.14042 | 0.00235  | -0.08682 | 0.06083  | 0.114386 | 0.01338  |
| 0.01383  | -0.27361 | 1.83E-09 | -0.24834 | 5.40E-08 | -0.22476 | 9.25E-07 | -0.00897 | 0.84663  |
| 6.75E-14 | 0.440583 | 1.35E-23 | 0.295164 | 7.67E-11 | 0.400184 | 2.18E-19 | 0.135778 | 0.00328  |
| 7.51E-06 | -0.29511 | 7.73E-11 | -0.21279 | 3.50E-06 | -0.28674 | 2.74E-10 | -0.2908  | 1.49E-10 |
| 2.02E-11 | -0.4082  | 3.53E-20 | -0.36432 | 4.18E-16 | -0.44056 | 1.35E-23 | -0.0734  | 0.11319  |
| 4.19E-08 | -0.23608 | 2.45E-07 | -0.2642  | 6.73E-09 | -0.25817 | 1.51E-08 | -0.19951 | 1.40E-05 |
| 1.20E-05 | -0.4623  | 4.19E-26 | -0.28217 | 5.37E-10 | -0.37018 | 1.30E-16 | -0.09572 | 0.03866  |
| 0.06077  | -0.48771 | 2.81E-29 | -0.38676 | 4.12E-18 | -0.37938 | 1.96E-17 | -0.12771 | 0.00571  |
| 8.09E-06 | -0.45862 | 1.15E-25 | -0.20854 | 5.51E-06 | -0.35725 | 1.67E-15 | -0.17422 | 0.00015  |
| 3.84E-05 | -0.43168 | 1.28E-22 | -0.29908 | 4.18E-11 | -0.36162 | 7.13E-16 | -0.01686 | 0.71624  |
| 0.59331  | -0.09506 | 0.04003  | -0.16485 | 0.00035  | -0.12399 | 0.0073   | 0.204798 | 8.15E-06 |
| 4.03E-19 | -0.45711 | 1.73E-25 | -0.37785 | 2.69E-17 | -0.48231 | 1.40E-28 | -0.20436 | 8.52E-06 |
| 6.66E-14 | -0.41506 | 7.14E-21 | -0.23036 | 4.84E-07 | -0.42802 | 3.16E-22 | -0.20439 | 8.50E-06 |
| 0.00054  | -0.30816 | 9.90E-12 | -0.0233  | 0.6155   | -0.19741 | 1.73E-05 | 0.140943 | 0.00227  |
| 0.42312  | -0.29092 | 1.46E-10 | -0.13567 | 0.00331  | -0.13214 | 0.00423  | 0.061121 | 0.18733  |
| 9.93E-05 | -0.12513 | 0.00678  | -0.08092 | 0.08066  | -0.16378 | 0.00038  | -0.0918  | 0.04741  |

|          |          |          |          |          |          |          |           |          |
|----------|----------|----------|----------|----------|----------|----------|-----------|----------|
| 7.39E-08 | -0.39845 | 3.21E-19 | -0.37422 | 5.69E-17 | -0.40136 | 1.67E-19 | -0.10285  | 0.02625  |
| 0.56041  | 0.146186 | 0.00154  | -0.01823 | 0.69444  | 0.004606 | 0.92092  | 0.000539  | 0.99074  |
| 2.13E-08 | -0.20976 | 4.84E-06 | -0.13217 | 0.00422  | -0.27381 | 1.78E-09 | 0.033974  | 0.4639   |
| 2.41E-10 | -0.44819 | 1.86E-24 | -0.32043 | 1.30E-12 | -0.41176 | 1.55E-20 | -0.07737  | 0.09493  |
| 1.07E-22 | -0.44341 | 6.49E-24 | -0.36254 | 5.95E-16 | -0.53722 | 2.82E-36 | -0.0816   | 0.07812  |
| 1.13E-16 | -0.30954 | 7.92E-12 | -0.42896 | 2.51E-22 | -0.50265 | 2.87E-31 | -0.0842   | 0.06907  |
| 0.00012  | -0.26418 | 6.75E-09 | -0.13008 | 0.00487  | -0.23202 | 3.98E-07 | 0.018332  | 0.69275  |
| 4.94E-07 | 0.205673 | 7.44E-06 | -0.0015  | 0.97413  | 0.164671 | 0.00035  | -0.10801  | 0.01956  |
| 5.56E-12 | -0.33387 | 1.27E-13 | -0.36991 | 1.37E-16 | -0.42288 | 1.11E-21 | 0.011872  | 0.79804  |
| 0.00787  | -0.14632 | 0.00152  | -0.18705 | 4.76E-05 | -0.21078 | 4.34E-06 | 0.057848  | 0.21211  |
| 0.02309  | 0.360858 | 8.27E-16 | 0.192789 | 2.74E-05 | 0.25447  | 2.45E-08 | -0.21828  | 1.92E-06 |
| 1.08E-05 | -0.37742 | 2.95E-17 | -0.40014 | 2.20E-19 | -0.37637 | 3.66E-17 | 0.273333  | 1.91E-09 |
| 5.87E-07 | -0.12293 | 0.00782  | -0.15306 | 0.00091  | -0.26352 | 7.38E-09 | -0.01437  | 0.75685  |
| 0.0646   | -0.15368 | 0.00086  | 0.077744 | 0.09333  | 0.014228 | 0.75911  | 0.017862  | 0.70025  |
| 3.99E-08 | -0.26296 | 7.96E-09 | -0.3229  | 8.57E-13 | -0.35935 | 1.11E-15 | 0.012557  | 0.78666  |
| 2.08E-05 | -0.25157 | 3.57E-08 | -0.07806 | 0.09199  | -0.22508 | 8.92E-07 | 0.008651  | 0.8521   |
| 0.14154  | -0.36806 | 1.98E-16 | -0.16764 | 0.00027  | -0.23989 | 1.55E-07 | -0.28943  | 1.83E-10 |
| 4.96E-21 | -0.17434 | 0.00015  | -0.25159 | 3.57E-08 | -0.34699 | 1.17E-14 | -0.08517  | 0.06592  |
| 1.09E-18 | -0.28873 | 2.04E-10 | -0.26587 | 5.36E-09 | -0.39612 | 5.38E-19 | -0.24389  | 9.44E-08 |
| 0.09179  | -0.04347 | 0.34859  | 0.100748 | 0.02949  | -0.03514 | 0.44869  | 0.419529  | 2.47E-21 |
| 1.29E-05 | -0.28477 | 3.66E-10 | -0.25428 | 2.52E-08 | -0.28134 | 6.06E-10 | 0.144216  | 0.00178  |
| 6.80E-08 | -0.2533  | 2.86E-08 | -0.24113 | 1.33E-07 | -0.3089  | 8.79E-12 | 0.145609  | 0.0016   |
| 0.82299  | -0.24564 | 7.59E-08 | 0.008192 | 0.85986  | -0.12666 | 0.00613  | 0.083438  | 0.07164  |
| 7.81E-06 | -0.25257 | 3.14E-08 | 0.025917 | 0.57639  | 0.018763 | 0.6859   | 0.076501  | 0.0987   |
| 0.22488  | 0.183106 | 6.89E-05 | -0.1138  | 0.01387  | -0.02809 | 0.54477  | -0.02102  | 0.65054  |
| 7.82E-05 | -0.25534 | 2.19E-08 | -0.03213 | 0.4885   | -0.19254 | 2.80E-05 | 0.045552  | 0.32597  |
| 4.88E-09 | -0.17147 | 0.0002   | 0.048412 | 0.29649  | -0.18805 | 4.32E-05 | -4.14E-05 | 0.99929  |
| 4.38E-10 | -0.32555 | 5.44E-13 | -0.37619 | 3.80E-17 | -0.38808 | 3.10E-18 | 0.111378  | 0.01604  |
| 0.24115  | -0.27127 | 2.54E-09 | -0.22676 | 7.35E-07 | -0.2193  | 1.71E-06 | 0.327513  | 3.88E-13 |
| 0.04715  | -0.06972 | 0.13247  | -0.16666 | 0.0003   | -0.17445 | 0.00015  | 0.041056  | 0.37603  |
| 3.03E-06 | -0.05969 | 0.19787  | -0.15186 | 0.00099  | -0.2315  | 4.23E-07 | -0.19304  | 2.67E-05 |
| 2.58E-10 | -0.34785 | 9.95E-15 | -0.17748 | 0.00012  | -0.33786 | 6.21E-14 | -0.27149  | 2.47E-09 |
| 1.31E-20 | -0.36879 | 1.71E-16 | -0.26966 | 3.18E-09 | -0.41637 | 5.24E-21 | 0.030125  | 0.51607  |
| 0.83925  | 0.134263 | 0.00365  | 0.029163 | 0.52957  | 0.030254 | 0.51427  | 0.199423  | 1.41E-05 |
| 7.31E-11 | -0.2331  | 3.50E-07 | -0.16093 | 0.00048  | -0.28241 | 5.18E-10 | -0.1013   | 0.0286   |
| 0.03195  | 0.059132 | 0.20211  | -0.03749 | 0.41898  | -0.08899 | 0.05463  | 0.031157  | 0.5018   |
| 0.00015  | -0.22538 | 8.62E-07 | -0.11253 | 0.01497  | -0.20632 | 6.96E-06 | -0.0207   | 0.65544  |
| 2.65E-05 | -0.21998 | 1.59E-06 | -0.20975 | 4.84E-06 | -0.25887 | 1.38E-08 | 0.020447  | 0.65941  |
| 0.81995  | -0.19158 | 3.08E-05 | -0.06386 | 0.16827  | -0.11582 | 0.01226  | 0.165639  | 0.00032  |
| 2.21E-17 | -0.41998 | 2.22E-21 | -0.28041 | 6.94E-10 | -0.40651 | 5.20E-20 | -0.25663  | 1.85E-08 |
| 0.0005   | -0.28615 | 2.99E-10 | -0.02807 | 0.54511  | -0.21877 | 1.82E-06 | -0.10086  | 0.0293   |
| 1.20E-15 | -0.45221 | 6.44E-25 | -0.40892 | 2.99E-20 | -0.48369 | 9.31E-29 | -0.17933  | 9.75E-05 |
| 0.38427  | -0.38627 | 4.57E-18 | -0.24282 | 1.08E-07 | -0.25536 | 2.19E-08 | -0.03083  | 0.50632  |
| 4.77E-06 | -0.08604 | 0.0632   | -0.2156  | 2.58E-06 | -0.22554 | 8.46E-07 | -0.16142  | 0.00046  |
| 6.07E-09 | 0.390273 | 1.93E-18 | 0.28816  | 2.22E-10 | 0.378205 | 2.50E-17 | 0.182312  | 7.42E-05 |



|          |          |          |          |          |          |          |          |          |
|----------|----------|----------|----------|----------|----------|----------|----------|----------|
| 4.70E-07 | -0.19497 | 2.21E-05 | -0.29953 | 3.90E-11 | -0.31799 | 1.96E-12 | -0.00665 | 0.88606  |
| 6.98E-05 | -0.20298 | 9.83E-06 | 0.020895 | 0.65243  | -0.14166 | 0.00215  | -0.02976 | 0.52116  |
| 1.76E-14 | -0.17803 | 0.00011  | -0.23298 | 3.55E-07 | -0.3559  | 2.16E-15 | -0.24437 | 8.89E-08 |
| 0.69553  | -0.20386 | 8.98E-06 | -0.02368 | 0.6098   | -0.0708  | 0.12656  | 0.189019 | 3.94E-05 |
| 8.86E-17 | -0.26268 | 8.26E-09 | -0.38966 | 2.21E-18 | -0.44702 | 2.53E-24 | -0.13004 | 0.00488  |
| 0.00301  | -0.34647 | 1.29E-14 | -0.26737 | 4.37E-09 | -0.29354 | 9.83E-11 | 0.025796 | 0.57818  |
| 0.00968  | -0.27414 | 1.70E-09 | -0.24276 | 1.09E-07 | -0.2627  | 8.25E-09 | 0.120818 | 0.00896  |
| 2.20E-21 | -0.43855 | 2.26E-23 | -0.45594 | 2.37E-25 | -0.56818 | 2.82E-41 | -0.19075 | 3.34E-05 |
| 1.41E-17 | -0.51931 | 1.31E-33 | -0.27349 | 1.86E-09 | -0.46291 | 3.54E-26 | -0.17248 | 0.00018  |
| 0.0003   | -0.14356 | 0.00187  | 0.075389 | 0.10371  | -0.10113 | 0.02887  | -0.16661 | 0.0003   |
| 0.24795  | -0.05929 | 0.20091  | 0.048512 | 0.29549  | -0.04132 | 0.37292  | 0.417871 | 3.67E-21 |
| 0.54003  | -0.3423  | 2.78E-14 | -0.16922 | 0.00024  | -0.20613 | 7.09E-06 | -0.06454 | 0.1638   |
| 1.56E-21 | -0.22542 | 8.57E-07 | -0.25636 | 1.92E-08 | -0.38109 | 1.37E-17 | 0.029323 | 0.52732  |
| 1.55E-22 | 0.497189 | 1.57E-30 | 0.345477 | 1.55E-14 | 0.440914 | 1.24E-23 | 0.271263 | 2.55E-09 |
| 1.60E-09 | -0.38236 | 1.05E-17 | -0.29697 | 5.80E-11 | -0.3853  | 5.62E-18 | 0.059362 | 0.20036  |
| 0.7955   | -0.2101  | 4.66E-06 | -0.23049 | 4.77E-07 | -0.17176 | 0.00019  | 0.293419 | 1.00E-10 |
| 2.00E-08 | -0.35639 | 1.97E-15 | -0.28063 | 6.71E-10 | -0.36578 | 3.13E-16 | -0.05622 | 0.2253   |
| 0.02795  | -0.23295 | 3.57E-07 | -0.20867 | 5.43E-06 | -0.23368 | 3.27E-07 | 0.087778 | 0.05803  |
| 0.08486  | -0.24059 | 1.42E-07 | -0.04342 | 0.34914  | -0.13722 | 0.00296  | -0.0283  | 0.54178  |
| 0.00062  | -0.26486 | 6.16E-09 | -0.11232 | 0.01516  | -0.21799 | 1.98E-06 | -0.18677 | 4.89E-05 |
| 4.99E-10 | -0.54008 | 1.03E-36 | -0.34717 | 1.13E-14 | -0.45009 | 1.13E-24 | -0.13013 | 0.00485  |
| 0.53306  | 0.020302 | 0.66168  | -0.05197 | 0.26237  | -0.06159 | 0.18394  | -0.13672 | 0.00307  |
| 4.17E-06 | -0.38927 | 2.40E-18 | -0.3453  | 1.60E-14 | -0.38238 | 1.05E-17 | -0.0063  | 0.89198  |
| 2.15E-22 | -0.4663  | 1.38E-26 | -0.54674 | 9.28E-38 | -0.58565 | 2.43E-44 | -0.09532 | 0.0395   |
| 3.08E-06 | -0.37737 | 2.97E-17 | -0.26586 | 5.37E-09 | -0.33884 | 5.21E-14 | -0.07297 | 0.11531  |
| 0.00028  | -0.19875 | 1.51E-05 | -0.16815 | 0.00026  | -0.24553 | 7.69E-08 | -0.28892 | 1.98E-10 |
| 0.01887  | -0.19508 | 2.18E-05 | -0.03005 | 0.5171   | -0.12834 | 0.00548  | 0.081212 | 0.07957  |
| 0.00321  | -0.44886 | 1.56E-24 | -0.1779  | 0.00011  | -0.29314 | 1.04E-10 | -0.16116 | 0.00047  |
| 0.00036  | -0.13482 | 0.00351  | 0.035128 | 0.44886  | -0.11832 | 0.0105   | 0.130139 | 0.00485  |
| 0.0257   | 0.123728 | 0.00743  | 0.075979 | 0.10103  | 0.11117  | 0.01624  | 0.123065 | 0.00776  |
| 0.04581  | -0.08909 | 0.05438  | -0.10193 | 0.02763  | -0.05002 | 0.28068  | 0.293937 | 9.25E-11 |
| 1.95E-16 | -0.27206 | 2.28E-09 | -0.34455 | 1.84E-14 | -0.42209 | 1.34E-21 | -0.03885 | 0.40225  |
| 0.00245  | -0.02544 | 0.58344  | -0.19156 | 3.08E-05 | -0.20675 | 6.65E-06 | 0.278259 | 9.45E-10 |
| 1.68E-22 | -0.42951 | 2.18E-22 | -0.37077 | 1.15E-16 | -0.49198 | 7.77E-30 | -0.17216 | 0.00019  |
| 0.01205  | -0.20498 | 8.00E-06 | -0.18499 | 5.78E-05 | -0.22462 | 9.39E-07 | 0.054888 | 0.23647  |
| 0.00074  | -0.25402 | 2.60E-08 | -0.17148 | 0.0002   | -0.2611  | 1.02E-08 | 0.048508 | 0.29553  |
| 0.27745  | -0.09997 | 0.03077  | -0.08119 | 0.07966  | -0.1257  | 0.00653  | 0.212075 | 3.78E-06 |
| 0.0479   | -0.14015 | 0.0024   | 0.044587 | 0.33634  | 0.001135 | 0.98048  | 0.030008 | 0.51771  |
| 7.63E-12 | -0.09241 | 0.04594  | -0.1018  | 0.02782  | -0.24459 | 8.65E-08 | -0.08965 | 0.05286  |
| 1.84E-10 | -0.4388  | 2.12E-23 | -0.26488 | 6.14E-09 | -0.40969 | 2.50E-20 | -0.1615  | 0.00046  |
| 0.3212   | -0.11837 | 0.01046  | 0.097846 | 0.03453  | -0.05922 | 0.20141  | 0.074544 | 0.10765  |
| 6.98E-07 | -0.40455 | 8.13E-20 | -0.15856 | 0.00058  | -0.3032  | 2.19E-11 | -0.11716 | 0.01128  |
| 3.95E-12 | -0.4062  | 5.59E-20 | -0.22598 | 8.04E-07 | -0.39172 | 1.41E-18 | -0.26361 | 7.29E-09 |
| 0.01127  | -0.39949 | 2.55E-19 | -0.05678 | 0.22069  | -0.22406 | 1.00E-06 | -0.08163 | 0.07802  |
| 2.58E-20 | -0.14422 | 0.00178  | -0.31059 | 6.68E-12 | -0.36498 | 3.67E-16 | -0.22058 | 1.48E-06 |

|          |          |          |          |          |          |          |          |          |
|----------|----------|----------|----------|----------|----------|----------|----------|----------|
| 3.03E-20 | -0.58277 | 7.99E-44 | -0.45062 | 9.83E-25 | -0.56495 | 9.90E-41 | -0.24761 | 5.92E-08 |
| 2.75E-05 | 0.186039 | 5.23E-05 | 0.106075 | 0.02187  | 0.193868 | 2.46E-05 | -0.05593 | 0.2277   |
| 0.51105  | -0.04675 | 0.31344  | -0.07767 | 0.09365  | -0.06651 | 0.15128  | 0.365576 | 3.26E-16 |
| 0.63789  | -0.13153 | 0.00441  | -0.15601 | 0.00072  | -0.11983 | 0.00954  | 0.462255 | 4.23E-26 |
| 3.76E-09 | -0.18983 | 3.65E-05 | -0.11832 | 0.0105   | -0.26715 | 4.50E-09 | -0.05358 | 0.24782  |
| 3.56E-07 | -0.35003 | 6.60E-15 | -0.1192  | 0.00993  | -0.30272 | 2.36E-11 | -0.06595 | 0.15479  |
| 2.00E-06 | 0.316691 | 2.44E-12 | 0.281227 | 6.16E-10 | 0.308497 | 9.38E-12 | 0.305471 | 1.52E-11 |
| 8.13E-06 | -0.06573 | 0.15616  | 0.079512 | 0.08609  | -0.13016 | 0.00485  | -0.03533 | 0.44627  |
| 2.24E-39 | 0.550977 | 1.96E-38 | 0.429011 | 2.47E-22 | 0.646289 | 1.43E-56 | 0.155869 | 0.00072  |
| 7.73E-05 | -0.26246 | 8.51E-09 | -0.23497 | 2.80E-07 | -0.30485 | 1.68E-11 | 0.131055 | 0.00456  |
| 1.06E-05 | -0.29959 | 3.86E-11 | -0.21186 | 3.86E-06 | -0.29748 | 5.37E-11 | 0.005993 | 0.89724  |
| 3.46E-08 | -0.26691 | 4.66E-09 | -0.05131 | 0.26844  | -0.20167 | 1.13E-05 | -0.0526  | 0.25662  |
| 0.05192  | 0.03993  | 0.38927  | -0.08971 | 0.05269  | -0.105   | 0.02325  | 0.151235 | 0.00104  |
| 0.26248  | 0.142082 | 0.00209  | 0.175684 | 0.00014  | 0.093871 | 0.0426   | 0.142291 | 0.00205  |
| 3.74E-11 | -0.44507 | 4.22E-24 | -0.44731 | 2.35E-24 | -0.4667  | 1.23E-26 | 0.131092 | 0.00455  |
| 0.00417  | -0.17495 | 0.00014  | -0.05542 | 0.23198  | -0.16097 | 0.00048  | -0.13297 | 0.00399  |
| 3.66E-07 | -0.30775 | 1.06E-11 | -0.23367 | 3.28E-07 | -0.30504 | 1.63E-11 | -0.06061 | 0.19103  |
| 1.78E-08 | -0.25075 | 3.97E-08 | -0.03926 | 0.39724  | -0.22969 | 5.23E-07 | -0.06759 | 0.14472  |
| 1.02E-15 | -0.19795 | 1.64E-05 | -0.13197 | 0.00428  | -0.31865 | 1.76E-12 | -0.07628 | 0.09969  |
| 0.00055  | -0.2925  | 1.15E-10 | -0.32362 | 7.58E-13 | -0.34203 | 2.92E-14 | -0.12419 | 0.00721  |
| 8.07E-16 | -0.32718 | 4.11E-13 | -0.47819 | 4.67E-28 | -0.47893 | 3.77E-28 | -0.04607 | 0.32049  |
| 0.00079  | -0.35744 | 1.61E-15 | -0.27773 | 1.02E-09 | -0.34585 | 1.44E-14 | -0.00787 | 0.86524  |
| 0.44422  | 0.09623  | 0.03763  | 0.148574 | 0.00128  | 0.016426 | 0.72331  | 0.033445 | 0.47089  |
| 0.55893  | 0.067483 | 0.14537  | -0.02869 | 0.5362   | -0.01949 | 0.67446  | 0.185353 | 5.58E-05 |
| 0.48342  | -0.01689 | 0.71577  | -0.01803 | 0.69763  | -0.05611 | 0.22616  | 0.474964 | 1.19E-27 |
| 2.71E-13 | -0.28142 | 5.98E-10 | -0.20269 | 1.01E-05 | -0.31563 | 2.91E-12 | -0.0964  | 0.0373   |
| 1.12E-15 | -0.3519  | 4.64E-15 | -0.08132 | 0.07918  | -0.32693 | 4.29E-13 | -0.03337 | 0.47193  |
| 7.01E-05 | -0.09988 | 0.03093  | -0.12386 | 0.00737  | -0.18261 | 7.22E-05 | 0.059638 | 0.19828  |
| 6.55E-05 | -0.20082 | 1.23E-05 | -0.10583 | 0.02218  | -0.21449 | 2.91E-06 | 0.105212 | 0.02297  |
| 5.64E-06 | -0.0361  | 0.43644  | -0.25412 | 2.57E-08 | -0.24109 | 1.33E-07 | 0.1024   | 0.02691  |
| 0.0007   | -0.30768 | 1.07E-11 | -0.20921 | 5.13E-06 | -0.28539 | 3.34E-10 | 0.025814 | 0.57791  |
| 8.00E-06 | 0.270218 | 2.95E-09 | 0.259895 | 1.20E-08 | 0.292845 | 1.09E-10 | -0.22001 | 1.58E-06 |
| 2.82E-07 | -0.24831 | 5.42E-08 | -0.36101 | 8.03E-16 | -0.36269 | 5.78E-16 | 0.071399 | 0.12337  |
| 9.96E-05 | 0.443079 | 7.08E-24 | 0.279255 | 8.19E-10 | 0.301922 | 2.68E-11 | 0.22221  | 1.24E-06 |
| 2.25E-22 | -0.42792 | 3.24E-22 | -0.383   | 9.16E-18 | -0.50822 | 4.88E-32 | -0.15725 | 0.00065  |
| 7.05E-13 | -0.20054 | 1.26E-05 | -0.23027 | 4.89E-07 | -0.33597 | 8.73E-14 | 0.026533 | 0.56736  |
| 0.18304  | -0.26915 | 3.42E-09 | -0.23848 | 1.84E-07 | -0.19967 | 1.38E-05 | -0.18082 | 8.51E-05 |
| 5.87E-05 | -0.30602 | 1.40E-11 | -0.25393 | 2.63E-08 | -0.28135 | 6.04E-10 | 0.016711 | 0.71872  |
| 0.04493  | -0.31116 | 6.08E-12 | -0.22551 | 8.49E-07 | -0.24866 | 5.18E-08 | 0.177612 | 0.00011  |
| 0.00339  | -0.10252 | 0.02673  | -0.10114 | 0.02886  | -0.15744 | 0.00064  | 0.001288 | 0.97785  |
| 1.19E-05 | -0.06729 | 0.14654  | -0.11693 | 0.01145  | -0.18874 | 4.05E-05 | 0.03589  | 0.43907  |
| 1.88E-06 | 0.18768  | 4.48E-05 | 0.162974 | 0.00041  | 0.255521 | 2.14E-08 | -0.2165  | 2.33E-06 |
| 1.51E-08 | -0.29753 | 5.32E-11 | -0.21892 | 1.79E-06 | -0.33165 | 1.88E-13 | -0.08253 | 0.07479  |
| 0.00219  | -0.19817 | 1.60E-05 | -0.07405 | 0.10999  | -0.19915 | 1.45E-05 | 0.029243 | 0.52844  |
| 4.04E-11 | -0.40379 | 9.67E-20 | -0.31759 | 2.10E-12 | -0.40949 | 2.62E-20 | -0.08938 | 0.05358  |

|          |          |          |          |          |          |          |          |          |
|----------|----------|----------|----------|----------|----------|----------|----------|----------|
| 4.67E-07 | -0.08903 | 0.05453  | -0.01093 | 0.81378  | -0.15496 | 0.00078  | 0.001951 | 0.96647  |
| 1.28E-05 | -0.21235 | 3.67E-06 | -0.09557 | 0.03897  | -0.24475 | 8.48E-08 | 0.044093 | 0.34172  |
| 2.00E-17 | -0.47691 | 6.77E-28 | -0.37298 | 7.34E-17 | -0.49443 | 3.68E-30 | 0.059188 | 0.20169  |
| 0.00046  | -0.20671 | 6.68E-06 | -0.00989 | 0.83115  | -0.17723 | 0.00012  | -0.06576 | 0.15593  |
| 8.93E-09 | -0.10493 | 0.02335  | 0.002788 | 0.95208  | -0.2016  | 1.13E-05 | -0.05164 | 0.26541  |
| 5.01E-11 | -0.21078 | 4.34E-06 | -0.07693 | 0.0968   | -0.26865 | 3.66E-09 | -0.15006 | 0.00114  |
| 0.28782  | -0.38024 | 1.64E-17 | -0.1594  | 0.00055  | -0.20544 | 7.62E-06 | -0.06687 | 0.14905  |
| 2.91E-05 | -0.17995 | 9.22E-05 | -0.0458  | 0.32338  | -0.21931 | 1.71E-06 | -0.20719 | 6.35E-06 |
| 1.47E-07 | -0.30129 | 2.96E-11 | -0.09371 | 0.04295  | -0.27091 | 2.68E-09 | -0.21605 | 2.45E-06 |
| 0.0038   | -0.27428 | 1.67E-09 | -0.21666 | 2.29E-06 | -0.29085 | 1.48E-10 | -0.0956  | 0.03891  |
| 1.67E-06 | -0.20369 | 9.14E-06 | -0.07028 | 0.12937  | -0.23617 | 2.43E-07 | -0.04695 | 0.31131  |
| 2.31E-22 | -0.2874  | 2.48E-10 | -0.24594 | 7.31E-08 | -0.4242  | 8.03E-22 | 0.027314 | 0.556    |
| 0.00128  | -0.14245 | 0.00203  | 0.043999 | 0.34275  | -0.1381  | 0.00278  | -0.08987 | 0.05227  |
| 0.02447  | -0.3467  | 1.23E-14 | -0.06791 | 0.14285  | -0.13444 | 0.00361  | 0.063617 | 0.16991  |
| 0.2512   | -0.11365 | 0.01399  | 0.161265 | 0.00047  | -0.01801 | 0.69784  | 0.219634 | 1.65E-06 |
| 0.00058  | -0.06648 | 0.15149  | -0.0292  | 0.529    | -0.12822 | 0.00552  | -0.03474 | 0.45383  |
| 2.39E-14 | -0.26208 | 8.96E-09 | -0.23535 | 2.68E-07 | -0.35836 | 1.35E-15 | -0.15092 | 0.00107  |
| 2.69E-19 | -0.42416 | 8.11E-22 | -0.32058 | 1.27E-12 | -0.44486 | 4.46E-24 | -0.1537  | 0.00086  |
| 0.23413  | -0.25002 | 4.36E-08 | -0.14099 | 0.00226  | -0.12105 | 0.00883  | 0.188065 | 4.32E-05 |
| 0.0509   | -0.02574 | 0.57903  | -0.02639 | 0.5694   | -0.07112 | 0.12486  | 0.128619 | 0.00538  |
| 0.00045  | -0.31226 | 5.08E-12 | -0.19453 | 2.31E-05 | -0.27968 | 7.71E-10 | -0.05407 | 0.24351  |
| 3.19E-05 | -0.3301  | 2.47E-13 | -0.36227 | 6.27E-16 | -0.34625 | 1.34E-14 | 0.332809 | 1.53E-13 |
| 0.07733  | -0.04973 | 0.28352  | 0.12133  | 0.00867  | -0.01204 | 0.79532  | 0.069726 | 0.13243  |
| 0.4758   | -0.02605 | 0.57447  | -0.16789 | 0.00027  | -0.14395 | 0.00182  | 0.064663 | 0.16298  |
| 4.26E-41 | -0.51228 | 1.32E-32 | -0.37432 | 5.58E-17 | -0.58217 | 1.02E-43 | -0.42633 | 4.78E-22 |
| 0.03266  | -0.15317 | 0.0009   | -0.02857 | 0.53795  | -0.10646 | 0.02139  | 0.130096 | 0.00486  |
| 3.44E-09 | 0.327522 | 3.87E-13 | 0.274338 | 1.65E-09 | 0.346656 | 1.24E-14 | 0.048911 | 0.29153  |
| 2.17E-05 | -0.29948 | 3.93E-11 | -0.36147 | 7.34E-16 | -0.34627 | 1.33E-14 | 0.297689 | 5.19E-11 |
| 0.00109  | -0.11231 | 0.01517  | -0.22506 | 8.93E-07 | -0.18472 | 5.93E-05 | 0.062234 | 0.1794   |
| 0.00412  | -0.1636  | 0.00039  | -0.16915 | 0.00024  | -0.20443 | 8.46E-06 | 0.150307 | 0.00112  |
| 9.35E-10 | -0.43489 | 5.71E-23 | -0.35088 | 5.62E-15 | -0.40603 | 5.80E-20 | 0.064821 | 0.16196  |
| 9.81E-12 | -0.3406  | 3.79E-14 | -0.45734 | 1.62E-25 | -0.47541 | 1.04E-27 | 0.011135 | 0.81034  |
| 1.64E-34 | -0.57072 | 1.03E-41 | -0.46294 | 3.50E-26 | -0.63214 | 1.79E-53 | -0.33652 | 7.91E-14 |
| 1.41E-13 | -0.36818 | 1.94E-16 | -0.25098 | 3.85E-08 | -0.40039 | 2.08E-19 | -0.28729 | 2.52E-10 |
| 4.57E-11 | -0.15459 | 0.0008   | -0.20934 | 5.06E-06 | -0.27444 | 1.63E-09 | 0.145824 | 0.00158  |
| 0.01023  | -0.21966 | 1.64E-06 | -0.01981 | 0.66943  | -0.05579 | 0.22888  | 0.079421 | 0.08645  |
| 1.45E-06 | -0.21591 | 2.49E-06 | -0.10527 | 0.02289  | -0.25731 | 1.69E-08 | 0.051836 | 0.26359  |
| 1.57E-12 | -0.11509 | 0.01282  | -0.28329 | 4.55E-10 | -0.33957 | 4.56E-14 | 0.004747 | 0.91851  |
| 1.54E-06 | -0.22946 | 5.38E-07 | -0.10076 | 0.02947  | -0.22095 | 1.42E-06 | 0.267297 | 4.41E-09 |
| 0.16838  | -0.0764  | 0.09916  | 0.003491 | 0.94003  | -0.06755 | 0.145    | 0.157879 | 0.00062  |
| 7.07E-06 | -0.31114 | 6.11E-12 | -0.23097 | 4.50E-07 | -0.3124  | 4.97E-12 | 0.155977 | 0.00072  |
| 0.7342   | 0.026993 | 0.56065  | 0.029798 | 0.52064  | 0.031376 | 0.49879  | 0.267418 | 4.34E-09 |
| 0.00633  | -0.09251 | 0.0457   | 0.003277 | 0.9437   | -0.11607 | 0.01207  | -0.00635 | 0.89113  |
| 0.00861  | -0.13713 | 0.00298  | -0.02739 | 0.55496  | -0.14926 | 0.00122  | 0.10745  | 0.0202   |
| 5.60E-05 | -0.08558 | 0.06463  | -0.1551  | 0.00077  | -0.21545 | 2.62E-06 | 0.156022 | 0.00072  |

|          |          |          |          |          |          |          |          |          |
|----------|----------|----------|----------|----------|----------|----------|----------|----------|
| 6.31E-12 | -0.33506 | 1.03E-13 | -0.33451 | 1.13E-13 | -0.38892 | 2.59E-18 | -0.03731 | 0.42121  |
| 0.02855  | -0.09862 | 0.03312  | -0.09149 | 0.04816  | -0.14481 | 0.0017   | 0.015761 | 0.73408  |
| 1.78E-23 | -0.43508 | 5.45E-23 | -0.27062 | 2.79E-09 | -0.45381 | 4.20E-25 | -0.24204 | 1.19E-07 |
| 2.64E-10 | -0.2049  | 8.07E-06 | -0.17506 | 0.00014  | -0.29467 | 8.27E-11 | -0.23577 | 2.55E-07 |
| 6.70E-07 | -0.42008 | 2.17E-21 | -0.30415 | 1.88E-11 | -0.38805 | 3.12E-18 | 0.075679 | 0.10239  |
| 3.57E-13 | -0.47101 | 3.67E-27 | -0.29465 | 8.29E-11 | -0.43307 | 9.02E-23 | -0.04077 | 0.37932  |
| 8.76E-09 | -0.25423 | 2.53E-08 | -0.20087 | 1.22E-05 | -0.34203 | 2.92E-14 | -0.18613 | 5.19E-05 |
| 0.0021   | -0.04914 | 0.28931  | -0.07399 | 0.11031  | -0.13494 | 0.00348  | 0.280005 | 7.35E-10 |
| 1.63E-20 | -0.52386 | 2.84E-34 | -0.47008 | 4.77E-27 | -0.58897 | 6.05E-45 | -0.06041 | 0.19253  |
| 1.42E-11 | -0.38353 | 8.19E-18 | -0.24243 | 1.13E-07 | -0.38059 | 1.52E-17 | 0.076967 | 0.09666  |
| 0.00084  | -0.43386 | 7.41E-23 | -0.21326 | 3.32E-06 | -0.32264 | 8.96E-13 | -0.18738 | 4.61E-05 |
| 4.37E-09 | -0.37635 | 3.67E-17 | -0.39731 | 4.13E-19 | -0.4266  | 4.48E-22 | 0.138223 | 0.00276  |
| 2.06E-16 | -0.45065 | 9.75E-25 | -0.19388 | 2.46E-05 | -0.40264 | 1.25E-19 | -0.09572 | 0.03867  |
| 4.19E-23 | -0.48886 | 1.99E-29 | -0.40137 | 1.67E-19 | -0.53699 | 3.06E-36 | -0.22965 | 5.26E-07 |
| 0.00012  | -0.28203 | 5.48E-10 | -0.25205 | 3.36E-08 | -0.30743 | 1.11E-11 | -0.166   | 0.00031  |
| 4.49E-06 | -0.35708 | 1.72E-15 | -0.32518 | 5.80E-13 | -0.3649  | 3.73E-16 | 0.215767 | 2.53E-06 |
| 0.11537  | -0.2118  | 3.89E-06 | -0.01964 | 0.67206  | -0.14353 | 0.00187  | -0.15662 | 0.00068  |
| 1.03E-09 | -0.37411 | 5.82E-17 | -0.27706 | 1.12E-09 | -0.36389 | 4.55E-16 | 0.035591 | 0.44289  |
| 1.03E-05 | -0.34339 | 2.27E-14 | -0.08905 | 0.05446  | -0.22933 | 5.46E-07 | -0.11273 | 0.0148   |
| 0.31124  | -0.14676 | 0.00147  | 0.006732 | 0.88463  | -0.12651 | 0.00619  | 0.153036 | 0.00091  |
| 0.00031  | -0.10066 | 0.02963  | -0.03868 | 0.40426  | -0.12896 | 0.00525  | 0.254722 | 2.38E-08 |
| 1.92E-05 | -0.20718 | 6.35E-06 | -0.14633 | 0.00152  | -0.22376 | 1.04E-06 | 0.078529 | 0.09006  |
| 2.71E-07 | -0.06908 | 0.13604  | -0.05092 | 0.27218  | -0.17478 | 0.00015  | -0.16768 | 0.00027  |
| 8.92E-16 | -0.46029 | 7.26E-26 | -0.47019 | 4.62E-27 | -0.51986 | 1.09E-33 | -0.15481 | 0.00079  |
| 0.13135  | -0.35022 | 6.38E-15 | -0.22245 | 1.20E-06 | -0.24012 | 1.50E-07 | 0.076878 | 0.09705  |
| 1.19E-13 | -0.34003 | 4.20E-14 | -0.28577 | 3.16E-10 | -0.41075 | 1.96E-20 | -0.19144 | 3.12E-05 |
| 0.00984  | -0.28433 | 3.91E-10 | -0.23748 | 2.07E-07 | -0.26517 | 5.90E-09 | 0.0292   | 0.52905  |
| 1.48E-20 | -0.47975 | 2.96E-28 | -0.32723 | 4.07E-13 | -0.51094 | 2.04E-32 | -0.11972 | 0.00961  |
| 0.00113  | -0.34044 | 3.90E-14 | -0.02823 | 0.54284  | -0.21009 | 4.67E-06 | -0.03961 | 0.39315  |
| 0.00102  | -0.01915 | 0.67983  | 0.048431 | 0.29629  | -0.10132 | 0.02857  | 0.017728 | 0.70239  |
| 2.73E-06 | -0.1141  | 0.01362  | -0.13554 | 0.00334  | -0.2064  | 6.89E-06 | -0.17851 | 0.00011  |
| 0.97155  | 0.072093 | 0.11976  | 0.021663 | 0.64054  | -0.05756 | 0.21438  | 0.017388 | 0.70782  |
| 0.00142  | -0.10055 | 0.02981  | -0.15987 | 0.00052  | -0.18455 | 6.02E-05 | 0.096374 | 0.03735  |
| 0.44729  | -0.26515 | 5.91E-09 | -0.10928 | 0.01816  | -0.1738  | 0.00016  | 0.011759 | 0.79993  |
| 2.06E-07 | -0.19352 | 2.55E-05 | -0.30831 | 9.67E-12 | -0.32162 | 1.07E-12 | -0.1114  | 0.01602  |
| 0.06087  | 0.043535 | 0.34787  | -0.00493 | 0.91531  | -0.10346 | 0.02536  | -0.11754 | 0.01102  |
| 0.00033  | -0.46648 | 1.31E-26 | -0.20708 | 6.42E-06 | -0.29608 | 6.66E-11 | -0.14263 | 0.002    |
| 1.86E-09 | -0.46125 | 5.59E-26 | -0.24896 | 4.99E-08 | -0.38279 | 9.58E-18 | -0.10197 | 0.02757  |
| 0.55298  | -0.26439 | 6.56E-09 | -0.0295  | 0.52477  | -0.11652 | 0.01174  | 0.018163 | 0.69544  |
| 1.49E-09 | -0.27032 | 2.90E-09 | -0.23104 | 4.47E-07 | -0.31342 | 4.20E-12 | -0.39208 | 1.31E-18 |
| 0.35637  | 0.152903 | 0.00092  | 0.117048 | 0.01136  | 0.091242 | 0.04877  | 0.278471 | 9.17E-10 |
| 5.32E-20 | -0.30514 | 1.61E-11 | -0.25027 | 4.22E-08 | -0.4419  | 9.58E-24 | -0.31092 | 6.33E-12 |
| 0.00101  | 0.109785 | 0.01763  | 0.036093 | 0.43648  | -0.04359 | 0.34731  | 0.066823 | 0.14936  |
| 8.68E-12 | 0.475662 | 9.70E-28 | 0.437026 | 3.33E-23 | 0.459356 | 9.37E-26 | 0.153014 | 0.00091  |
| 1.27E-16 | -0.48785 | 2.71E-29 | -0.56607 | 6.41E-41 | -0.58247 | 9.06E-44 | -0.08985 | 0.05233  |

|          |          |          |          |          |          |          |          |          |
|----------|----------|----------|----------|----------|----------|----------|----------|----------|
| 1.24E-05 | -0.21755 | 2.08E-06 | -0.27459 | 1.60E-09 | -0.30913 | 8.46E-12 | 0.015191 | 0.74335  |
| 4.57E-07 | -0.21793 | 1.99E-06 | 0.002903 | 0.95011  | -0.20226 | 1.06E-05 | 0.035682 | 0.44173  |
| 1.76E-06 | -0.25087 | 3.91E-08 | 0.016856 | 0.71638  | -0.18937 | 3.81E-05 | 0.0826   | 0.07454  |
| 4.42E-12 | -0.27758 | 1.04E-09 | -0.27463 | 1.59E-09 | -0.38253 | 1.01E-17 | 0.132955 | 0.004    |
| 0.05638  | 0.253264 | 2.87E-08 | 0.188458 | 4.16E-05 | 0.204517 | 8.39E-06 | -0.12284 | 0.00787  |
| 0.39008  | 0.036922 | 0.42602  | -0.03462 | 0.45541  | -0.01913 | 0.68006  | 0.30011  | 3.56E-11 |
| 0.01266  | -0.28752 | 2.44E-10 | -0.24567 | 7.56E-08 | -0.25859 | 1.43E-08 | 0.074479 | 0.10796  |
| 1.31E-05 | -0.27718 | 1.10E-09 | -0.09032 | 0.05111  | -0.22172 | 1.31E-06 | -0.14758 | 0.00138  |
| 1.64E-11 | -0.18512 | 5.71E-05 | -0.14884 | 0.00126  | -0.29113 | 1.42E-10 | -0.20262 | 1.02E-05 |
| 2.51E-08 | -0.32917 | 2.90E-13 | -0.2636  | 7.31E-09 | -0.35513 | 2.51E-15 | -0.01098 | 0.81293  |
| 0.0148   | -0.27069 | 2.76E-09 | -0.24264 | 1.10E-07 | -0.23826 | 1.89E-07 | -0.26073 | 1.07E-08 |
| 1.50E-12 | -0.43787 | 2.69E-23 | -0.40776 | 3.91E-20 | -0.4687  | 7.03E-27 | -0.13651 | 0.00312  |
| 3.15E-07 | -0.35747 | 1.60E-15 | -0.28174 | 5.71E-10 | -0.3625  | 5.99E-16 | -0.13826 | 0.00275  |
| 0.00508  | -0.2876  | 2.41E-10 | -0.11016 | 0.01724  | -0.23408 | 3.12E-07 | 0.016086 | 0.72881  |
| 9.64E-09 | -0.40772 | 3.94E-20 | -0.37575 | 4.16E-17 | -0.41256 | 1.29E-20 | -0.07037 | 0.12886  |
| 0.99898  | -0.27107 | 2.62E-09 | -0.047   | 0.31081  | -0.11048 | 0.01692  | 0.469367 | 5.83E-27 |
| 3.35E-14 | -0.39107 | 1.63E-18 | -0.33552 | 9.46E-14 | -0.40715 | 4.49E-20 | -0.12901 | 0.00524  |
| 1.36E-23 | -0.32516 | 5.82E-13 | -0.30829 | 9.69E-12 | -0.44464 | 4.72E-24 | -0.04574 | 0.324    |
| 7.37E-12 | -0.32773 | 3.73E-13 | -0.19749 | 1.72E-05 | -0.32635 | 4.74E-13 | -0.33278 | 1.54E-13 |
| 0.18094  | -0.00452 | 0.92241  | 0.114649 | 0.01317  | 0.037097 | 0.42383  | 0.173647 | 0.00016  |
| 3.09E-23 | -0.52734 | 8.75E-35 | -0.48245 | 1.34E-28 | -0.5343  | 7.89E-36 | -0.29798 | 4.96E-11 |
| 0.15462  | -0.04741 | 0.3066   | -0.12392 | 0.00734  | -0.15255 | 0.00094  | -0.01949 | 0.67449  |
| 0.00875  | -0.24993 | 4.41E-08 | -0.11351 | 0.01411  | -0.22657 | 7.51E-07 | 0.045523 | 0.32628  |
| 0.01866  | -0.22453 | 9.49E-07 | -0.10605 | 0.0219   | -0.19356 | 2.54E-05 | -0.13511 | 0.00344  |
| 0.91406  | -0.25538 | 2.18E-08 | -0.12288 | 0.00785  | -0.17078 | 0.00021  | 0.16462  | 0.00035  |
| 1.41E-06 | -0.07163 | 0.12214  | -0.17018 | 0.00022  | -0.22081 | 1.45E-06 | 0.183552 | 6.61E-05 |
| 1.55E-29 | 0.577135 | 7.97E-43 | 0.377496 | 2.90E-17 | 0.586798 | 1.50E-44 | 0.26089  | 1.05E-08 |
| 0.0478   | -0.07945 | 0.08633  | 0.014609 | 0.75286  | -0.0979  | 0.03442  | -0.02019 | 0.66338  |
| 0.00014  | 0.302993 | 2.26E-11 | 0.153457 | 0.00088  | 0.231646 | 4.16E-07 | 0.201755 | 1.12E-05 |
| 3.25E-06 | -0.34011 | 4.14E-14 | -0.11491 | 0.01296  | -0.28818 | 2.21E-10 | -0.08324 | 0.07233  |
| 0.01288  | -0.07215 | 0.11945  | 0.065728 | 0.15615  | -0.05989 | 0.19635  | 0.11946  | 0.00977  |
| 0.2551   | -0.2832  | 4.62E-10 | -0.17153 | 0.0002   | -0.18482 | 5.87E-05 | -0.12689 | 0.00604  |
| 5.99E-13 | -0.34681 | 1.21E-14 | -0.31679 | 2.40E-12 | -0.40556 | 6.46E-20 | -0.00836 | 0.85696  |
| 2.36E-13 | -0.29201 | 1.24E-10 | -0.08962 | 0.05294  | -0.24769 | 5.86E-08 | -0.40498 | 7.37E-20 |
| 2.91E-14 | -0.36155 | 7.22E-16 | -0.34108 | 3.47E-14 | -0.44979 | 1.22E-24 | -0.01925 | 0.67821  |
| 2.17E-12 | -0.3484  | 8.97E-15 | -0.18081 | 8.52E-05 | -0.39273 | 1.13E-18 | -0.23056 | 4.72E-07 |
| 1.50E-14 | -0.39093 | 1.68E-18 | -0.39474 | 7.30E-19 | -0.47999 | 2.77E-28 | -0.05714 | 0.21778  |
| 0.07507  | 0.02224  | 0.63167  | 0.163205 | 0.0004   | 0.07835  | 0.09079  | 0.053403 | 0.24941  |
| 0.00024  | 0.014905 | 0.74802  | -0.09792 | 0.03439  | -0.13112 | 0.00454  | -0.01902 | 0.68181  |
| 5.73E-13 | -0.40358 | 1.01E-19 | -0.35862 | 1.28E-15 | -0.41927 | 2.63E-21 | -0.08771 | 0.05824  |
| 7.49E-06 | -0.12153 | 0.00856  | -0.12462 | 0.00701  | -0.23624 | 2.41E-07 | 0.005804 | 0.90045  |
| 0.34309  | -0.09595 | 0.0382   | -0.03484 | 0.45259  | -0.02145 | 0.64378  | 0.058272 | 0.20876  |
| 5.62E-16 | -0.39479 | 7.22E-19 | -0.32484 | 6.15E-13 | -0.42257 | 1.19E-21 | 0.166831 | 0.00029  |
| 3.40E-13 | -0.25117 | 3.76E-08 | -0.31138 | 5.87E-12 | -0.39299 | 1.07E-18 | -0.09367 | 0.04305  |
| 1.15E-06 | -0.19279 | 2.73E-05 | -0.31682 | 2.39E-12 | -0.29788 | 5.04E-11 | -0.18773 | 4.46E-05 |

|          |          |          |          |          |          |          |          |          |
|----------|----------|----------|----------|----------|----------|----------|----------|----------|
| 9.38E-22 | -0.35662 | 1.88E-15 | -0.47506 | 1.15E-27 | -0.50563 | 1.12E-31 | -0.06333 | 0.17187  |
| 3.14E-15 | -0.37223 | 8.56E-17 | -0.39047 | 1.85E-18 | -0.46065 | 6.58E-26 | -0.12657 | 0.00617  |
| 4.21E-15 | -0.39699 | 4.44E-19 | -0.46574 | 1.61E-26 | -0.48574 | 5.08E-29 | -0.05539 | 0.23216  |
| 3.01E-19 | -0.32252 | 9.14E-13 | -0.44556 | 3.71E-24 | -0.50091 | 4.95E-31 | -0.03074 | 0.50747  |
| 0.02341  | -0.28457 | 3.77E-10 | -0.07536 | 0.10385  | -0.17954 | 9.57E-05 | 0.090412 | 0.05087  |
| 4.34E-17 | -0.17896 | 0.0001   | -0.3318  | 1.83E-13 | -0.40579 | 6.14E-20 | 0.028148 | 0.54401  |
| 0.35786  | -0.28819 | 2.21E-10 | -0.17875 | 0.0001   | -0.21007 | 4.68E-06 | -0.07225 | 0.11895  |
| 0.4104   | -0.22641 | 7.65E-07 | -0.03537 | 0.44573  | -0.13368 | 0.0038   | -0.24263 | 1.10E-07 |
| 0.71925  | -0.28213 | 5.40E-10 | -0.13675 | 0.00306  | -0.14809 | 0.00133  | 0.19024  | 3.50E-05 |
| 3.32E-06 | -0.20318 | 9.63E-06 | -0.16606 | 0.00031  | -0.21541 | 2.63E-06 | -0.40537 | 6.74E-20 |
| 1.30E-20 | -0.35478 | 2.68E-15 | -0.40392 | 9.38E-20 | -0.50559 | 1.13E-31 | -0.29072 | 1.51E-10 |
| 6.89E-05 | -0.23449 | 2.97E-07 | -0.03712 | 0.4235   | -0.18606 | 5.22E-05 | -0.1699  | 0.00023  |
| 0.92398  | -0.15652 | 0.00069  | 0.056317 | 0.22447  | -0.03977 | 0.39123  | 0.025057 | 0.58912  |
| 1.11E-26 | -0.38221 | 1.08E-17 | -0.37861 | 2.30E-17 | -0.53307 | 1.21E-35 | -0.26627 | 5.08E-09 |
| 3.22E-07 | -0.20047 | 1.27E-05 | -0.30265 | 2.39E-11 | -0.35031 | 6.27E-15 | -0.01424 | 0.75897  |
| 9.30E-06 | -0.1597  | 0.00053  | -0.22739 | 6.84E-07 | -0.28868 | 2.05E-10 | -0.02244 | 0.62862  |
| 1.40E-15 | -0.40094 | 1.84E-19 | -0.28334 | 4.52E-10 | -0.42586 | 5.36E-22 | -0.38003 | 1.71E-17 |
| 0.03157  | -0.13946 | 0.00252  | -0.05535 | 0.23252  | -0.14366 | 0.00186  | 0.401233 | 1.72E-19 |
| 6.18E-18 | -0.30257 | 2.42E-11 | -0.38194 | 1.15E-17 | -0.45008 | 1.13E-24 | -0.12067 | 0.00905  |
| 1.16E-25 | -0.34547 | 1.55E-14 | -0.38652 | 4.34E-18 | -0.50181 | 3.73E-31 | -0.1252  | 0.00675  |
| 1.25E-07 | -0.38278 | 9.60E-18 | -0.35446 | 2.85E-15 | -0.37698 | 3.22E-17 | -0.31656 | 2.50E-12 |
| 2.02E-11 | -0.3365  | 7.94E-14 | -0.35888 | 1.22E-15 | -0.41203 | 1.45E-20 | -0.04817 | 0.29891  |
| 1.42E-10 | -0.31257 | 4.83E-12 | -0.32087 | 1.21E-12 | -0.37714 | 3.12E-17 | -0.02183 | 0.63804  |
| 2.01E-18 | -0.40529 | 6.87E-20 | -0.42533 | 6.09E-22 | -0.48116 | 1.96E-28 | -0.07809 | 0.09187  |
| 0.23984  | -0.12078 | 0.00898  | -0.06591 | 0.15501  | -0.09815 | 0.03396  | 0.021861 | 0.6375   |
| 2.58E-08 | -0.44265 | 7.91E-24 | -0.31578 | 2.84E-12 | -0.38871 | 2.71E-18 | 0.015181 | 0.74351  |
| 2.92E-18 | -0.43376 | 7.59E-23 | -0.27657 | 1.20E-09 | -0.45408 | 3.90E-25 | -0.05284 | 0.25445  |
| 3.17E-23 | -0.50715 | 6.88E-32 | -0.30785 | 1.04E-11 | -0.5073  | 6.57E-32 | -0.25198 | 3.39E-08 |
| 9.17E-17 | -0.50598 | 9.99E-32 | -0.36423 | 4.26E-16 | -0.49904 | 8.86E-31 | -0.07267 | 0.11682  |
| 1.04E-08 | -0.31678 | 2.41E-12 | -0.30395 | 1.94E-11 | -0.36226 | 6.28E-16 | 0.130388 | 0.00477  |
| 2.09E-11 | -0.31675 | 2.42E-12 | -0.18388 | 6.41E-05 | -0.34265 | 2.61E-14 | 0.052998 | 0.25303  |
| 8.30E-06 | -0.16458 | 0.00035  | -0.10917 | 0.01828  | -0.21322 | 3.34E-06 | -0.01584 | 0.73278  |
| 4.93E-12 | -0.44417 | 5.33E-24 | -0.28094 | 6.42E-10 | -0.39366 | 9.24E-19 | -0.27946 | 7.96E-10 |
| 0.46449  | 0.205435 | 7.63E-06 | 0.022624 | 0.62578  | 0.066006 | 0.15441  | -0.25594 | 2.03E-08 |
| 0.08533  | 0.064482 | 0.16417  | 0.044006 | 0.34268  | -0.04006 | 0.3877   | 0.107075 | 0.02065  |
| 1.26E-08 | -0.19278 | 2.74E-05 | -0.18413 | 6.26E-05 | -0.24518 | 8.04E-08 | -0.08966 | 0.05282  |
| 1.56E-05 | -0.29841 | 4.64E-11 | -0.3237  | 7.47E-13 | -0.32342 | 7.84E-13 | 0.218493 | 1.87E-06 |
| 2.23E-13 | 0.32879  | 3.10E-13 | 0.335944 | 8.77E-14 | 0.383233 | 8.72E-18 | 0.155173 | 0.00077  |
| 9.13E-08 | 0.291788 | 1.28E-10 | 0.19618  | 1.96E-05 | 0.271573 | 2.44E-09 | 0.181438 | 8.04E-05 |
| 4.83E-07 | -0.32289 | 8.59E-13 | -0.17399 | 0.00016  | -0.26231 | 8.69E-09 | -0.26365 | 7.26E-09 |
| 0.00046  | -0.3227  | 8.86E-13 | -0.24049 | 1.44E-07 | -0.28356 | 4.38E-10 | 0.038993 | 0.40051  |
| 4.60E-13 | -0.39206 | 1.31E-18 | -0.46824 | 8.00E-27 | -0.49745 | 1.45E-30 | -0.05136 | 0.26805  |
| 0.7262   | 0.435099 | 5.42E-23 | 0.111656 | 0.01578  | 0.206104 | 7.11E-06 | 0.007338 | 0.87433  |
| 2.50E-09 | -0.43839 | 2.36E-23 | -0.19086 | 3.30E-05 | -0.3252  | 5.78E-13 | -0.09636 | 0.03737  |
| 0.13535  | -0.37402 | 5.93E-17 | -0.22005 | 1.57E-06 | -0.26007 | 1.17E-08 | -0.01335 | 0.77362  |

|          |          |          |          |          |          |          |          |          |
|----------|----------|----------|----------|----------|----------|----------|----------|----------|
| 4.84E-17 | -0.50409 | 1.82E-31 | -0.35451 | 2.82E-15 | -0.46432 | 2.39E-26 | -0.1365  | 0.00312  |
| 1.74E-10 | -0.14631 | 0.00152  | -0.30721 | 1.15E-11 | -0.34108 | 3.47E-14 | -0.0023  | 0.96048  |
| 0.00028  | 0.298852 | 4.33E-11 | 0.203694 | 9.14E-06 | 0.235441 | 2.65E-07 | 0.167476 | 0.00028  |
| 0.00976  | -0.32338 | 7.90E-13 | -0.24686 | 6.51E-08 | -0.26611 | 5.19E-09 | 0.344071 | 2.00E-14 |
| 1.57E-06 | -0.31162 | 5.65E-12 | -0.2745  | 1.61E-09 | -0.37818 | 2.52E-17 | -0.17049 | 0.00021  |
| 3.66E-09 | 0.436983 | 3.37E-23 | 0.271489 | 2.47E-09 | 0.315973 | 2.75E-12 | 0.049696 | 0.28384  |
| 0.0027   | -0.19573 | 2.05E-05 | -0.0722  | 0.11922  | -0.17011 | 0.00022  | -0.144   | 0.00181  |
| 1.48E-07 | -0.273   | 2.00E-09 | -0.04923 | 0.28834  | -0.24879 | 5.10E-08 | -0.01939 | 0.67597  |
| 8.67E-06 | -0.30269 | 2.37E-11 | -0.1231  | 0.00774  | -0.26377 | 7.14E-09 | -0.17975 | 9.39E-05 |
| 1.74E-08 | -0.40499 | 7.36E-20 | -0.38203 | 1.12E-17 | -0.41161 | 1.60E-20 | 0.118001 | 0.01071  |
| 0.0196   | -0.10982 | 0.01759  | -0.15549 | 0.00075  | -0.20693 | 6.52E-06 | 0.05055  | 0.27564  |
| 6.78E-05 | -0.18393 | 6.38E-05 | -0.21907 | 1.76E-06 | -0.25682 | 1.80E-08 | -0.04882 | 0.29239  |
| 3.41E-09 | -0.30748 | 1.10E-11 | -0.31399 | 3.82E-12 | -0.32551 | 5.48E-13 | 0.058231 | 0.20909  |
| 2.02E-08 | -0.18976 | 3.67E-05 | -0.30131 | 2.95E-11 | -0.29719 | 5.61E-11 | 0.030339 | 0.51309  |
| 0.06817  | -0.37501 | 4.84E-17 | -0.11172 | 0.01572  | -0.1981  | 1.61E-05 | -0.16839 | 0.00026  |
| 0.00014  | -0.17861 | 0.0001   | -0.16369 | 0.00038  | -0.23459 | 2.93E-07 | 0.161896 | 0.00044  |
| 8.09E-29 | -0.62443 | 7.50E-52 | -0.45391 | 4.09E-25 | -0.61566 | 4.62E-50 | -0.16195 | 0.00044  |
| 3.13E-17 | -0.27928 | 8.17E-10 | -0.16009 | 0.00052  | -0.30848 | 9.40E-12 | -0.22421 | 9.85E-07 |
| 6.55E-17 | -0.32354 | 7.68E-13 | -0.4021  | 1.42E-19 | -0.45783 | 1.42E-25 | -0.0181  | 0.69647  |
| 8.24E-08 | -0.17917 | 9.90E-05 | -0.19094 | 3.27E-05 | -0.26216 | 8.87E-09 | -0.24391 | 9.41E-08 |
| 0.00013  | -0.35654 | 1.91E-15 | -0.02822 | 0.54295  | -0.23511 | 2.76E-07 | 0.041063 | 0.37596  |
| 2.58E-10 | -0.36586 | 3.08E-16 | -0.21159 | 3.98E-06 | -0.36734 | 2.29E-16 | -0.10479 | 0.02353  |
| 7.18E-08 | 0.235414 | 2.66E-07 | 0.079155 | 0.08752  | 0.200588 | 1.26E-05 | 0.100555 | 0.0298   |
| 3.65E-15 | -0.49936 | 8.04E-31 | -0.50386 | 1.96E-31 | -0.53375 | 9.55E-36 | -0.25323 | 2.88E-08 |
| 6.91E-17 | -0.50524 | 1.26E-31 | -0.39407 | 8.44E-19 | -0.50681 | 7.68E-32 | -0.02876 | 0.53528  |
| 8.79E-22 | 0.536919 | 3.14E-36 | 0.270209 | 2.95E-09 | 0.437286 | 3.12E-23 | 0.057889 | 0.21178  |
| 0.03803  | -0.18145 | 8.03E-05 | -0.12512 | 0.00678  | -0.12986 | 0.00494  | 0.178325 | 0.00011  |
| 1.49E-09 | -0.20427 | 8.61E-06 | -0.23831 | 1.88E-07 | -0.30117 | 3.02E-11 | -0.00565 | 0.90307  |
| 4.52E-09 | -0.36573 | 3.17E-16 | -0.44299 | 7.25E-24 | -0.45243 | 6.07E-25 | -0.04911 | 0.28952  |
| 5.70E-19 | -0.39171 | 1.41E-18 | -0.25227 | 3.26E-08 | -0.41061 | 2.02E-20 | -0.20397 | 8.88E-06 |
| 0.01258  | 0.133247 | 0.00392  | 0.16795  | 0.00027  | 0.067746 | 0.14381  | 0.125062 | 0.00681  |
| 6.70E-05 | -0.25481 | 2.35E-08 | -0.09884 | 0.03272  | -0.22084 | 1.44E-06 | -0.0976  | 0.03499  |
| 2.79E-08 | -0.30236 | 2.50E-11 | -0.06399 | 0.16743  | -0.25013 | 4.30E-08 | -0.22368 | 1.05E-06 |
| 1.31E-26 | -0.37892 | 2.15E-17 | -0.40865 | 3.18E-20 | -0.54497 | 1.77E-37 | -0.21006 | 4.69E-06 |
| 0.15795  | -0.2347  | 2.90E-07 | 0.024809 | 0.59281  | -0.10939 | 0.01804  | 0.039831 | 0.39046  |
| 0.00328  | 0.055138 | 0.23434  | 0.248658 | 5.18E-08 | 0.146436 | 0.00151  | 0.161408 | 0.00046  |
| 0.86208  | -0.29092 | 1.46E-10 | 0.012379 | 0.78962  | -0.11591 | 0.01219  | -0.10607 | 0.02188  |
| 0.00567  | -0.40063 | 1.97E-19 | -0.21182 | 3.88E-06 | -0.27192 | 2.32E-09 | -0.21412 | 3.03E-06 |
| 9.77E-16 | -0.2672  | 4.47E-09 | -0.22447 | 9.56E-07 | -0.32204 | 9.92E-13 | -0.05257 | 0.25691  |
| 0.71977  | 0.054298 | 0.24155  | 0.02804  | 0.54555  | -0.04714 | 0.30933  | -0.01552 | 0.73792  |
| 0.89222  | -0.15504 | 0.00077  | -0.18255 | 7.25E-05 | -0.15507 | 0.00077  | 0.170744 | 0.00021  |
| 3.86E-13 | -0.34195 | 2.96E-14 | -0.30603 | 1.40E-11 | -0.42772 | 3.40E-22 | -0.04181 | 0.36738  |
| 2.29E-05 | -0.1523  | 0.00096  | -0.13874 | 0.00266  | -0.20898 | 5.25E-06 | 0.045451 | 0.32705  |
| 4.15E-19 | 0.323123 | 8.25E-13 | 0.091576 | 0.04795  | 0.307761 | 1.06E-11 | 0.054497 | 0.23983  |
| 7.02E-09 | 0.351045 | 5.46E-15 | 0.296356 | 6.38E-11 | 0.306926 | 1.21E-11 | 0.42299  | 1.08E-21 |

|          |          |          |          |          |          |          |          |          |
|----------|----------|----------|----------|----------|----------|----------|----------|----------|
| 0.03054  | -0.04839 | 0.29669  | -0.09546 | 0.0392   | -0.12485 | 0.0069   | -0.11396 | 0.01373  |
| 0.00073  | -0.36377 | 4.67E-16 | -0.22656 | 7.52E-07 | -0.31061 | 6.66E-12 | -0.0122  | 0.7926   |
| 0.00567  | -0.15503 | 0.00078  | -0.15945 | 0.00054  | -0.19751 | 1.71E-05 | 0.037677 | 0.41662  |
| 0.00025  | -0.22193 | 1.28E-06 | -0.25741 | 1.67E-08 | -0.30723 | 1.15E-11 | 0.153737 | 0.00086  |
| 4.34E-06 | -0.23799 | 1.95E-07 | -0.10877 | 0.01871  | -0.248   | 5.64E-08 | -0.16485 | 0.00035  |
| 4.24E-06 | -0.36315 | 5.28E-16 | -0.3631  | 5.32E-16 | -0.40207 | 1.42E-19 | -0.19361 | 2.52E-05 |
| 0.00328  | -0.27685 | 1.16E-09 | -0.21273 | 3.52E-06 | -0.25158 | 3.57E-08 | -0.30946 | 8.02E-12 |
| 1.68E-07 | -0.3449  | 1.72E-14 | -0.22308 | 1.12E-06 | -0.34396 | 2.05E-14 | 0.004299 | 0.92618  |
| 7.58E-05 | -0.40175 | 1.53E-19 | -0.24197 | 1.20E-07 | -0.30189 | 2.69E-11 | -0.089   | 0.05462  |
| 3.70E-15 | -0.52003 | 1.03E-33 | -0.4523  | 6.28E-25 | -0.52126 | 6.83E-34 | 0.013983 | 0.76313  |
| 1.24E-11 | -0.03861 | 0.4052   | 0.048463 | 0.29598  | -0.14842 | 0.0013   | -0.17723 | 0.00012  |
| 0.00084  | -0.30514 | 1.61E-11 | -0.27349 | 1.86E-09 | -0.28695 | 2.66E-10 | 0.018789 | 0.6855   |
| 9.42E-10 | -0.37466 | 5.20E-17 | -0.4221  | 1.33E-21 | -0.45608 | 2.28E-25 | 0.108444 | 0.01907  |
| 0.37001  | 0.117517 | 0.01104  | 0.081296 | 0.07926  | -0.0088  | 0.84959  | -0.06225 | 0.17931  |
| 0.00702  | -0.27637 | 1.24E-09 | 0.017891 | 0.69977  | -0.15036 | 0.00112  | 0.175135 | 0.00014  |
| 0.26206  | -0.09671 | 0.03668  | 0.019082 | 0.68086  | -0.06726 | 0.14673  | 0.074175 | 0.10941  |
| 2.67E-12 | -0.33306 | 1.46E-13 | -0.16104 | 0.00048  | -0.31649 | 2.53E-12 | -0.02859 | 0.53767  |
| 0.00011  | 0.04504  | 0.33145  | 0.301673 | 2.79E-11 | 0.188042 | 4.33E-05 | 0.050324 | 0.27779  |
| 0.00281  | 0.16276  | 0.00041  | -0.02136 | 0.64524  | -0.05261 | 0.25654  | -0.03117 | 0.50157  |
| 8.93E-06 | -0.30115 | 3.02E-11 | -0.10861 | 0.01889  | -0.24065 | 1.41E-07 | -0.05401 | 0.24411  |
| 0.77951  | -0.09357 | 0.04327  | 0.171798 | 0.00019  | 0.014562 | 0.75363  | 0.168324 | 0.00026  |
| 0.07943  | -0.29175 | 1.29E-10 | 0.034617 | 0.45549  | -0.06375 | 0.16902  | 0.171018 | 0.0002   |
| 3.38E-16 | -0.29495 | 7.92E-11 | -0.31754 | 2.12E-12 | -0.41587 | 5.91E-21 | 0.052647 | 0.25619  |
| 0.93733  | -0.38393 | 7.53E-18 | -0.20234 | 1.05E-05 | -0.21528 | 2.67E-06 | -0.27116 | 2.58E-09 |
| 4.10E-06 | -0.20695 | 6.51E-06 | -0.19956 | 1.39E-05 | -0.26    | 1.18E-08 | -0.06541 | 0.15817  |
| 0.53197  | -0.15721 | 0.00065  | -0.00126 | 0.97828  | -0.09493 | 0.0403   | 0.193879 | 2.46E-05 |
| 5.16E-07 | -0.10152 | 0.02825  | -0.03102 | 0.50361  | -0.18791 | 4.38E-05 | 0.05457  | 0.2392   |
| 1.88E-07 | -0.44367 | 6.07E-24 | -0.26218 | 8.85E-09 | -0.34602 | 1.40E-14 | -0.0857  | 0.06427  |
| 0.01915  | 0.012818 | 0.78234  | 0.067986 | 0.14239  | -0.05566 | 0.22997  | -0.18837 | 4.19E-05 |
| 1.05E-05 | -0.19054 | 3.40E-05 | 0.011239 | 0.80861  | -0.17504 | 0.00014  | 0.109955 | 0.01745  |
| 2.59E-11 | -0.32761 | 3.81E-13 | -0.34727 | 1.11E-14 | -0.39728 | 4.16E-19 | -0.08226 | 0.07573  |
| 1.35E-05 | -0.30062 | 3.29E-11 | -0.2428  | 1.08E-07 | -0.31201 | 5.30E-12 | -0.15626 | 0.0007   |
| 3.75E-18 | -0.46101 | 5.96E-26 | -0.50441 | 1.64E-31 | -0.56826 | 2.73E-41 | -0.1734  | 0.00017  |
| 2.92E-10 | -0.37107 | 1.08E-16 | -0.01728 | 0.7096   | -0.27017 | 2.96E-09 | -0.2518  | 3.47E-08 |
| 0.33184  | -0.22034 | 1.52E-06 | 0.039012 | 0.40028  | -0.09344 | 0.04357  | 0.185203 | 5.66E-05 |
| 1.34E-07 | -0.23649 | 2.33E-07 | -0.29224 | 1.20E-10 | -0.3449  | 1.72E-14 | -0.03028 | 0.51391  |
| 2.82E-08 | -0.36619 | 2.89E-16 | -0.3365  | 7.93E-14 | -0.35724 | 1.67E-15 | -0.07412 | 0.10969  |
| 0.00011  | 0.28589  | 3.11E-10 | 0.028123 | 0.54437  | 0.201326 | 1.17E-05 | 0.207963 | 5.85E-06 |
| 1.48E-07 | -0.3981  | 3.47E-19 | -0.21746 | 2.10E-06 | -0.34623 | 1.34E-14 | -0.04155 | 0.37034  |
| 5.11E-15 | -0.49444 | 3.67E-30 | -0.44938 | 1.36E-24 | -0.51986 | 1.09E-33 | -0.20322 | 9.60E-06 |
| 0.19458  | -0.38718 | 3.76E-18 | -0.13246 | 0.00414  | -0.23103 | 4.47E-07 | 0.073428 | 0.11304  |
| 6.04E-06 | -0.41894 | 2.85E-21 | -0.20547 | 7.59E-06 | -0.33973 | 4.44E-14 | -0.20916 | 5.15E-06 |
| 1.44E-08 | 0.440242 | 1.47E-23 | 0.311416 | 5.83E-12 | 0.385198 | 5.75E-18 | 0.40553  | 6.51E-20 |
| 0.00109  | -0.08621 | 0.06269  | -0.01112 | 0.81062  | -0.13882 | 0.00264  | -0.09912 | 0.03223  |
| 7.88E-13 | -0.42004 | 2.19E-21 | -0.43549 | 4.91E-23 | -0.48669 | 3.83E-29 | -0.12342 | 0.00758  |



|          |          |          |          |          |          |          |          |          |
|----------|----------|----------|----------|----------|----------|----------|----------|----------|
| 1.26E-22 | -0.50978 | 2.96E-32 | -0.43449 | 6.32E-23 | -0.54997 | 2.85E-38 | -0.01934 | 0.67675  |
| 0.03804  | -0.19134 | 3.15E-05 | -0.18309 | 6.90E-05 | -0.19716 | 1.78E-05 | 0.238791 | 1.77E-07 |
| 0.24499  | -0.28851 | 2.10E-10 | -0.14442 | 0.00175  | -0.18374 | 6.49E-05 | 0.047747 | 0.30317  |
| 1.05E-15 | -0.51432 | 6.78E-33 | -0.49904 | 8.87E-31 | -0.54792 | 6.03E-38 | 0.042927 | 0.35466  |
| 0.00139  | -0.10425 | 0.02426  | 0.012854 | 0.78175  | -0.00939 | 0.8397   | 0.017268 | 0.70975  |
| 8.66E-12 | -0.35386 | 3.20E-15 | -0.33879 | 5.26E-14 | -0.40546 | 6.62E-20 | 0.209083 | 5.20E-06 |
| 0.87988  | -0.14739 | 0.0014   | -0.08323 | 0.07235  | -0.1363  | 0.00316  | -0.09794 | 0.03435  |
| 1.56E-13 | -0.25021 | 4.25E-08 | -0.35147 | 5.04E-15 | -0.41585 | 5.94E-21 | -0.06024 | 0.19376  |
| 1.41E-18 | -0.48513 | 6.07E-29 | -0.40939 | 2.69E-20 | -0.50109 | 4.68E-31 | -0.22823 | 6.20E-07 |
| 1.01E-12 | -0.10116 | 0.02882  | -0.26741 | 4.34E-09 | -0.30437 | 1.82E-11 | 0.127965 | 0.00562  |
| 5.75E-16 | -0.46083 | 6.26E-26 | -0.3973  | 4.14E-19 | -0.45434 | 3.65E-25 | -0.15646 | 0.00069  |
| 0.00209  | -0.1559  | 0.00072  | -0.01019 | 0.82611  | -0.15622 | 0.00071  | 0.081548 | 0.07833  |
| 2.51E-08 | -0.19655 | 1.89E-05 | -0.34087 | 3.60E-14 | -0.34996 | 6.69E-15 | -0.14505 | 0.00167  |
| 6.89E-08 | 0.429146 | 2.39E-22 | 0.159    | 0.00056  | 0.312715 | 4.72E-12 | 0.113266 | 0.01432  |
| 0.8782   | -0.04413 | 0.34135  | 0.07574  | 0.10211  | -0.02249 | 0.62789  | 0.021553 | 0.64223  |
| 1.75E-17 | -0.3943  | 8.03E-19 | -0.24988 | 4.43E-08 | -0.43582 | 4.52E-23 | -0.3197  | 1.48E-12 |
| 0.0002   | -0.3369  | 7.39E-14 | -0.00371 | 0.93634  | -0.18746 | 4.58E-05 | -0.01564 | 0.73604  |
| 6.15E-08 | -0.302   | 2.65E-11 | -0.18089 | 8.46E-05 | -0.2546  | 2.41E-08 | 0.123175 | 0.0077   |
| 0.50034  | -0.08399 | 0.06977  | -0.06494 | 0.16122  | -0.08246 | 0.07505  | 0.167558 | 0.00028  |
| 9.24E-17 | -0.44378 | 5.90E-24 | -0.2687  | 3.64E-09 | -0.44396 | 5.63E-24 | -0.02198 | 0.63572  |
| 0.02449  | 0.044002 | 0.34272  | -0.05014 | 0.27961  | -0.1043  | 0.0242   | 0.089559 | 0.0531   |
| 0.00097  | -0.27946 | 7.96E-10 | -0.28412 | 4.03E-10 | -0.26609 | 5.20E-09 | 0.078261 | 0.09116  |
| 1.60E-07 | -0.38466 | 6.44E-18 | -0.23828 | 1.88E-07 | -0.35946 | 1.09E-15 | -0.17218 | 0.00018  |
| 0.29674  | -0.2971  | 5.69E-11 | 0.00426  | 0.92684  | -0.13117 | 0.00452  | -0.02426 | 0.60105  |
| 1.45E-11 | -0.3438  | 2.11E-14 | -0.33583 | 8.95E-14 | -0.42448 | 7.51E-22 | -0.02577 | 0.57851  |
| 0.11776  | 0.025054 | 0.58916  | -0.06758 | 0.14482  | 0.040659 | 0.38067  | 0.156568 | 0.00069  |
| 0.01687  | 0.13896  | 0.00262  | 0.060263 | 0.1936   | 0.168896 | 0.00025  | 0.146354 | 0.00152  |
| 7.10E-06 | 0.472928 | 2.12E-27 | 0.25982  | 1.21E-08 | 0.378731 | 2.24E-17 | 0.123213 | 0.00768  |
| 0.07513  | -0.44528 | 3.99E-24 | -0.18876 | 4.04E-05 | -0.2595  | 1.27E-08 | 0.145854 | 0.00158  |
| 3.42E-10 | -0.35271 | 3.98E-15 | -0.16309 | 0.0004   | -0.3212  | 1.14E-12 | -0.07695 | 0.09674  |
| 1.52E-29 | -0.38431 | 6.94E-18 | -0.27897 | 8.54E-10 | -0.4749  | 1.21E-27 | -0.25171 | 3.51E-08 |
| 5.17E-13 | -0.20862 | 5.46E-06 | -0.1523  | 0.00096  | -0.3162  | 2.65E-12 | 0.063586 | 0.17013  |
| 1.29E-14 | -0.31784 | 2.02E-12 | -0.37065 | 1.18E-16 | -0.43072 | 1.62E-22 | -0.17491 | 0.00015  |
| 6.25E-16 | -0.24697 | 6.42E-08 | -0.28513 | 3.48E-10 | -0.36512 | 3.57E-16 | -0.1656  | 0.00033  |
| 0.00326  | -0.28444 | 3.85E-10 | -0.10061 | 0.02971  | -0.19682 | 1.84E-05 | -0.10636 | 0.02152  |
| 0.00046  | -0.19491 | 2.22E-05 | -0.11611 | 0.01204  | -0.20205 | 1.08E-05 | 0.014849 | 0.74894  |
| 4.23E-12 | -0.42206 | 1.35E-21 | -0.29159 | 1.32E-10 | -0.43569 | 4.67E-23 | -0.15941 | 0.00054  |
| 1.23E-16 | -0.42677 | 4.29E-22 | -0.41926 | 2.64E-21 | -0.49603 | 2.25E-30 | -0.07197 | 0.1204   |
| 4.61E-19 | -0.47206 | 2.72E-27 | -0.31589 | 2.79E-12 | -0.48184 | 1.61E-28 | -0.11674 | 0.01158  |
| 8.77E-05 | -0.33752 | 6.61E-14 | -0.13932 | 0.00255  | -0.25683 | 1.80E-08 | 0.18387  | 6.42E-05 |
| 3.84E-05 | 0.0736   | 0.1122   | -0.06225 | 0.17931  | -0.10424 | 0.02427  | -0.09859 | 0.03318  |
| 0.61276  | -0.20896 | 5.26E-06 | 0.102787 | 0.02634  | -0.04403 | 0.34246  | 0.056645 | 0.22178  |
| 0.04838  | -0.12343 | 0.00758  | 0.065513 | 0.15752  | -0.10673 | 0.02106  | -0.0255  | 0.58261  |
| 1.74E-09 | -0.21943 | 1.69E-06 | -0.3749  | 4.95E-17 | -0.38087 | 1.44E-17 | 0.110057 | 0.01735  |
| 0.24059  | -0.22185 | 1.29E-06 | -0.12911 | 0.0052   | -0.14849 | 0.00129  | 0.315679 | 2.89E-12 |

|          |          |          |          |          |          |          |          |          |
|----------|----------|----------|----------|----------|----------|----------|----------|----------|
| 0.00058  | -0.14939 | 0.0012   | -0.19079 | 3.32E-05 | -0.21891 | 1.79E-06 | -0.14739 | 0.0014   |
| 0.00037  | -0.41611 | 5.58E-21 | -0.36505 | 3.62E-16 | -0.38002 | 1.71E-17 | 0.0238   | 0.60793  |
| 5.60E-06 | 0.448229 | 1.85E-24 | 0.261355 | 9.88E-09 | 0.336191 | 8.39E-14 | 0.386804 | 4.08E-18 |
| 0.00133  | -0.17467 | 0.00015  | -0.07923 | 0.08721  | -0.194   | 2.43E-05 | 0.011317 | 0.8073   |
| 2.27E-10 | -0.30706 | 1.18E-11 | -0.2635  | 7.40E-09 | -0.3814  | 1.28E-17 | -0.03854 | 0.40603  |
| 3.76E-07 | -0.22778 | 6.53E-07 | -0.15767 | 0.00063  | -0.26101 | 1.04E-08 | -0.0283  | 0.54178  |
| 4.07E-09 | -0.41009 | 2.28E-20 | -0.18292 | 7.01E-05 | -0.35005 | 6.58E-15 | -0.00511 | 0.91226  |
| 3.31E-11 | -0.26386 | 7.06E-09 | -0.29875 | 4.40E-11 | -0.37947 | 1.92E-17 | -0.16424 | 0.00037  |
| 0.33044  | -0.05818 | 0.20948  | -0.02373 | 0.60893  | -0.03653 | 0.43101  | 0.131812 | 0.00433  |
| 6.78E-17 | -0.53908 | 1.47E-36 | -0.48337 | 1.02E-28 | -0.53358 | 1.01E-35 | -0.06818 | 0.14122  |
| 0.11406  | -0.36935 | 1.53E-16 | -0.30289 | 2.30E-11 | -0.28169 | 5.76E-10 | 0.063985 | 0.16745  |
| 4.39E-22 | -0.26802 | 3.99E-09 | -0.28518 | 3.45E-10 | -0.41428 | 8.58E-21 | -0.10371 | 0.02501  |
| 1.31E-09 | -0.47483 | 1.23E-27 | -0.30709 | 1.18E-11 | -0.3998  | 2.37E-19 | 0.013978 | 0.76321  |
| 0.00018  | 0.079178 | 0.08742  | -0.07275 | 0.11641  | -0.13325 | 0.00392  | -0.20973 | 4.85E-06 |
| 1.96E-17 | -0.41052 | 2.06E-20 | -0.51377 | 8.11E-33 | -0.55269 | 1.04E-38 | -0.14969 | 0.00118  |
| 4.03E-07 | -0.22729 | 6.92E-07 | -0.12881 | 0.00531  | -0.24144 | 1.28E-07 | -0.20734 | 6.24E-06 |
| 0.44179  | -0.26967 | 3.18E-09 | -0.21172 | 3.92E-06 | -0.19609 | 1.98E-05 | -0.11599 | 0.01213  |
| 0.63355  | -0.16444 | 0.00036  | 0.002483 | 0.95733  | -0.05671 | 0.22123  | -0.03221 | 0.4875   |
| 0.00035  | -0.46579 | 1.59E-26 | -0.16505 | 0.00034  | -0.316   | 2.74E-12 | 0.031103 | 0.50254  |
| 4.04E-06 | -0.21938 | 1.70E-06 | -0.16704 | 0.00029  | -0.24814 | 5.54E-08 | -0.2863  | 2.92E-10 |
| 0.00044  | -0.2221  | 1.25E-06 | -0.30711 | 1.17E-11 | -0.31854 | 1.79E-12 | 0.019262 | 0.67801  |
| 0.21145  | -0.07035 | 0.12902  | -0.0483  | 0.29761  | -0.07152 | 0.12276  | 0.201985 | 1.09E-05 |
| 2.52E-11 | -0.2947  | 8.24E-11 | -0.21309 | 3.38E-06 | -0.35883 | 1.23E-15 | -0.03761 | 0.41748  |
| 0.07566  | -0.27743 | 1.07E-09 | -0.1536  | 0.00087  | -0.19766 | 1.69E-05 | 0.058689 | 0.20552  |
| 1.20E-11 | -0.30437 | 1.82E-11 | -0.32726 | 4.05E-13 | -0.40409 | 9.02E-20 | -0.0038  | 0.9347   |
| 0.23951  | -0.0431  | 0.35275  | -0.10223 | 0.02716  | -0.09525 | 0.03963  | 0.234449 | 2.98E-07 |
| 0.81457  | -0.10388 | 0.02478  | -0.11007 | 0.01733  | -0.07666 | 0.09798  | 0.437755 | 2.77E-23 |
| 2.33E-14 | -0.17339 | 0.00017  | -0.39285 | 1.10E-18 | -0.38616 | 4.68E-18 | 0.168155 | 0.00026  |
| 7.37E-08 | -0.3471  | 1.14E-14 | -0.21522 | 2.68E-06 | -0.33082 | 2.18E-13 | 0.222447 | 1.20E-06 |
| 3.62E-09 | -0.47091 | 3.77E-27 | -0.32337 | 7.91E-13 | -0.41908 | 2.75E-21 | -0.05953 | 0.1991   |
| 0.75654  | -0.2189  | 1.79E-06 | -0.13128 | 0.00449  | -0.14814 | 0.00132  | -0.02377 | 0.60844  |
| 1.23E-11 | -0.27029 | 2.92E-09 | -0.39163 | 1.44E-18 | -0.4323  | 1.09E-22 | -0.0492  | 0.28871  |
| 1.48E-07 | -0.19897 | 1.48E-05 | -0.17917 | 9.90E-05 | -0.25049 | 4.10E-08 | 0.136423 | 0.00314  |
| 1.11E-09 | -0.27923 | 8.22E-10 | -0.23034 | 4.85E-07 | -0.31945 | 1.54E-12 | -0.0095  | 0.83783  |
| 1.01E-09 | -0.13659 | 0.0031   | -0.02734 | 0.55563  | -0.2351  | 2.76E-07 | -0.1369  | 0.00303  |
| 4.35E-09 | -0.19914 | 1.45E-05 | -0.17734 | 0.00012  | -0.27693 | 1.14E-09 | -0.14844 | 0.00129  |
| 4.87E-12 | -0.44036 | 1.43E-23 | -0.31352 | 4.13E-12 | -0.42821 | 3.01E-22 | -0.28315 | 4.65E-10 |
| 0.37988  | -0.18016 | 9.04E-05 | -0.19233 | 2.86E-05 | -0.17021 | 0.00022  | -0.21417 | 3.01E-06 |
| 2.07E-05 | -0.22154 | 1.33E-06 | -0.00309 | 0.94694  | -0.18574 | 5.38E-05 | -0.07615 | 0.10028  |
| 6.16E-07 | -0.53568 | 4.87E-36 | -0.35003 | 6.61E-15 | -0.42582 | 5.41E-22 | -0.20753 | 6.13E-06 |
| 6.34E-06 | -0.32943 | 2.78E-13 | -0.10994 | 0.01747  | -0.29194 | 1.25E-10 | -0.07156 | 0.12255  |
| 3.22E-09 | -0.36588 | 3.07E-16 | -0.21196 | 3.82E-06 | -0.33681 | 7.52E-14 | -0.30119 | 3.01E-11 |
| 1.76E-11 | -0.16009 | 0.00052  | -0.07006 | 0.13059  | -0.24428 | 8.99E-08 | 0.121813 | 0.00841  |
| 1.69E-08 | -0.3057  | 1.47E-11 | -0.18971 | 3.69E-05 | -0.31224 | 5.10E-12 | 0.101124 | 0.02888  |
| 0.8728   | -0.15665 | 0.00068  | -0.07992 | 0.08449  | -0.13691 | 0.00303  | 0.237507 | 2.07E-07 |

|          |          |          |          |          |          |          |          |          |
|----------|----------|----------|----------|----------|----------|----------|----------|----------|
| 7.83E-19 | -0.50244 | 3.06E-31 | -0.37952 | 1.90E-17 | -0.50045 | 5.71E-31 | -0.15684 | 0.00067  |
| 2.62E-10 | -0.20219 | 1.07E-05 | -0.33241 | 1.65E-13 | -0.36039 | 9.06E-16 | 0.16733  | 0.00028  |
| 0.56683  | -0.16058 | 0.00049  | 0.001672 | 0.97125  | -0.07748 | 0.09445  | 0.028312 | 0.54166  |
| 6.72E-06 | -0.38929 | 2.39E-18 | -0.32137 | 1.11E-12 | -0.38415 | 7.18E-18 | 0.17368  | 0.00016  |
| 0.00016  | -0.21918 | 1.74E-06 | -0.27255 | 2.13E-09 | -0.28134 | 6.06E-10 | -0.07269 | 0.1167   |
| 0.0017   | -0.12533 | 0.00669  | -0.12943 | 0.00509  | -0.19809 | 1.62E-05 | 0.085722 | 0.06418  |
| 0.0007   | -0.30934 | 8.18E-12 | -0.13979 | 0.00246  | -0.22266 | 1.17E-06 | 0.035047 | 0.4499   |
| 4.08E-06 | -0.35653 | 1.91E-15 | -0.29384 | 9.40E-11 | -0.33884 | 5.21E-14 | 5.72E-05 | 0.99902  |
| 3.72E-07 | -0.25422 | 2.54E-08 | -0.14515 | 0.00166  | -0.25622 | 1.95E-08 | 0.058065 | 0.21039  |
| 2.20E-08 | -0.24031 | 1.47E-07 | -0.16227 | 0.00043  | -0.29896 | 4.26E-11 | -0.08683 | 0.0608   |
| 0.48559  | -0.07892 | 0.08845  | -0.08997 | 0.05201  | -0.09687 | 0.03638  | 0.575705 | 1.42E-42 |
| 3.43E-24 | -0.20613 | 7.09E-06 | -0.26139 | 9.83E-09 | -0.34696 | 1.17E-14 | -0.22986 | 5.13E-07 |
| 0.00208  | -0.29517 | 7.66E-11 | -0.29769 | 5.19E-11 | -0.27616 | 1.28E-09 | 0.236873 | 2.23E-07 |
| 0.00827  | -0.06623 | 0.15302  | -0.05024 | 0.27857  | -0.15298 | 0.00091  | 0.044584 | 0.33636  |
| 0.02084  | -0.27406 | 1.72E-09 | -0.09798 | 0.03428  | -0.19284 | 2.72E-05 | -0.06632 | 0.15244  |
| 3.05E-20 | 0.243869 | 9.46E-08 | 0.136914 | 0.00303  | 0.32257  | 9.07E-13 | 0.289326 | 1.86E-10 |
| 3.18E-18 | 0.597862 | 1.35E-46 | 0.226451 | 7.62E-07 | 0.428877 | 2.56E-22 | 0.165975 | 0.00032  |
| 0.90278  | -0.35729 | 1.66E-15 | -0.02856 | 0.53814  | -0.13863 | 0.00268  | 0.064343 | 0.16508  |
| 2.32E-18 | -0.35321 | 3.62E-15 | -0.20236 | 1.05E-05 | -0.37199 | 8.97E-17 | -0.24539 | 7.83E-08 |
| 0.25626  | 0.054737 | 0.23776  | 0.141709 | 0.00214  | 0.063937 | 0.16777  | 0.104971 | 0.02329  |
| 0.65895  | 0.015731 | 0.73457  | -0.10306 | 0.02594  | -0.08419 | 0.06909  | -0.05498 | 0.2357   |
| 1.43E-06 | -0.38749 | 3.53E-18 | -0.02581 | 0.57797  | -0.24425 | 9.02E-08 | -0.23827 | 1.88E-07 |
| 0.25636  | -0.09893 | 0.03257  | 0.081811 | 0.07737  | -0.03202 | 0.49002  | -0.09111 | 0.04909  |
| 3.69E-06 | -0.18998 | 3.59E-05 | -0.13634 | 0.00315  | -0.24749 | 6.01E-08 | 0.187183 | 4.70E-05 |
| 1.35E-12 | -0.45737 | 1.61E-25 | -0.38454 | 6.61E-18 | -0.48559 | 5.30E-29 | -0.24301 | 1.05E-07 |
| 0.22492  | 0.005622 | 0.90355  | 0.145796 | 0.00158  | 0.060041 | 0.19525  | 0.313068 | 4.45E-12 |
| 0.00411  | -0.12381 | 0.00739  | -0.11967 | 0.00964  | -0.14932 | 0.00121  | 0.119732 | 0.0096   |
| 0.30678  | -0.32525 | 5.73E-13 | -0.14412 | 0.00179  | -0.20575 | 7.38E-06 | -0.00364 | 0.93743  |
| 3.63E-07 | -0.17738 | 0.00012  | -0.10823 | 0.01931  | -0.25652 | 1.88E-08 | 0.031601 | 0.49572  |
| 4.27E-14 | -0.51687 | 2.93E-33 | -0.2251  | 8.90E-07 | -0.4218  | 1.43E-21 | -0.16018 | 0.00051  |
| 4.12E-22 | -0.5279  | 7.20E-35 | -0.34113 | 3.44E-14 | -0.49787 | 1.27E-30 | -0.13678 | 0.00306  |
| 2.61E-09 | -0.40174 | 1.54E-19 | -0.34381 | 2.10E-14 | -0.38383 | 7.69E-18 | 0.081462 | 0.07864  |
| 6.90E-24 | -0.52819 | 6.52E-35 | -0.37603 | 3.92E-17 | -0.53126 | 2.27E-35 | 0.027173 | 0.55805  |
| 3.84E-18 | -0.39134 | 1.53E-18 | -0.27043 | 2.86E-09 | -0.44464 | 4.72E-24 | -0.05459 | 0.23906  |
| 6.82E-05 | -0.01067 | 0.81814  | -0.10784 | 0.01976  | -0.15564 | 0.00074  | 0.196165 | 1.96E-05 |
| 3.63E-18 | -0.34047 | 3.87E-14 | -0.25336 | 2.83E-08 | -0.39595 | 5.58E-19 | -0.19697 | 1.81E-05 |
| 1.75E-18 | -0.41561 | 6.28E-21 | -0.31995 | 1.41E-12 | -0.4596  | 8.77E-26 | -0.14407 | 0.0018   |
| 5.41E-13 | -0.44039 | 1.41E-23 | -0.23101 | 4.48E-07 | -0.40774 | 3.93E-20 | -0.12803 | 0.00559  |
| 5.62E-15 | -0.51238 | 1.28E-32 | -0.48206 | 1.51E-28 | -0.53428 | 7.94E-36 | -0.18651 | 5.00E-05 |
| 3.42E-06 | -0.25428 | 2.52E-08 | -0.28089 | 6.47E-10 | -0.2909  | 1.47E-10 | -0.25422 | 2.54E-08 |
| 0.00071  | -0.11261 | 0.0149   | -0.158   | 0.00061  | -0.18704 | 4.76E-05 | 0.161824 | 0.00045  |
| 0.00045  | -0.26813 | 3.94E-09 | -0.28314 | 4.66E-10 | -0.30362 | 2.05E-11 | 0.037816 | 0.41489  |
| 8.17E-07 | -0.35886 | 1.22E-15 | -0.27427 | 1.67E-09 | -0.32911 | 2.94E-13 | -0.05186 | 0.26341  |
| 0.11892  | -0.18302 | 6.95E-05 | -0.14219 | 0.00207  | -0.08352 | 0.07135  | 0.064786 | 0.16219  |
| 9.07E-07 | -0.29909 | 4.18E-11 | 0.005101 | 0.91245  | -0.24216 | 1.17E-07 | -0.06545 | 0.15793  |

|          |          |          |          |          |          |          |          |          |
|----------|----------|----------|----------|----------|----------|----------|----------|----------|
| 0.04028  | -0.31009 | 7.25E-12 | -0.02863 | 0.53709  | -0.16966 | 0.00023  | -0.17112 | 0.0002   |
| 2.30E-07 | -0.49597 | 2.29E-30 | -0.29068 | 1.52E-10 | -0.40005 | 2.25E-19 | -0.02427 | 0.60082  |
| 0.02181  | -0.05295 | 0.25346  | -0.16834 | 0.00026  | -0.15924 | 0.00055  | -0.06779 | 0.14358  |
| 0.0853   | 0.005739 | 0.90157  | 0.064544 | 0.16376  | -0.04359 | 0.34722  | -0.07799 | 0.0923   |
| 0.00021  | -0.272   | 2.30E-09 | -0.29003 | 1.67E-10 | -0.30706 | 1.18E-11 | 0.214092 | 3.04E-06 |
| 0.30624  | -0.23975 | 1.57E-07 | -0.00485 | 0.91667  | -0.15314 | 0.0009   | 0.062709 | 0.17611  |
| 0.00473  | -0.22318 | 1.11E-06 | -0.17219 | 0.00018  | -0.22024 | 1.54E-06 | 0.06674  | 0.14987  |
| 9.61E-05 | -0.34515 | 1.64E-14 | -0.05506 | 0.23497  | -0.20713 | 6.38E-06 | 0.094211 | 0.04185  |
| 0.0172   | -0.38519 | 5.75E-18 | -0.18255 | 7.25E-05 | -0.24447 | 8.79E-08 | 0.098849 | 0.03271  |
| 4.07E-14 | 0.321768 | 1.04E-12 | 0.347437 | 1.07E-14 | 0.407356 | 4.29E-20 | -0.01884 | 0.68472  |
| 0.70713  | -0.0066  | 0.8869   | 0.016353 | 0.72449  | -0.04936 | 0.28711  | 0.079732 | 0.08522  |
| 0.00707  | 0.092409 | 0.04594  | 0.108569 | 0.01893  | 0.059037 | 0.20284  | 0.154752 | 0.00079  |
| 1.62E-16 | -0.2958  | 6.95E-11 | -0.28838 | 2.14E-10 | -0.40195 | 1.47E-19 | 0.157734 | 0.00062  |
| 4.53E-06 | -0.26268 | 8.27E-09 | -0.2738  | 1.78E-09 | -0.32736 | 3.98E-13 | -0.14326 | 0.00191  |
| 1.01E-08 | -0.27811 | 9.66E-10 | -0.26701 | 4.59E-09 | -0.34072 | 3.70E-14 | 0.180911 | 8.44E-05 |
| 0.00016  | -0.22444 | 9.60E-07 | -0.00674 | 0.88443  | -0.19422 | 2.38E-05 | -0.07439 | 0.10838  |
| 1.82E-18 | -0.37136 | 1.02E-16 | -0.34957 | 7.20E-15 | -0.42637 | 4.74E-22 | 0.034228 | 0.46058  |
| 0.00071  | -0.35788 | 1.48E-15 | -0.08124 | 0.07945  | -0.22192 | 1.28E-06 | 0.048869 | 0.29195  |
| 0.00015  | -0.36679 | 2.56E-16 | -0.31382 | 3.93E-12 | -0.34999 | 6.65E-15 | 0.092226 | 0.04638  |
| 6.55E-18 | -0.50081 | 5.10E-31 | -0.57253 | 5.04E-42 | -0.57353 | 3.39E-42 | -0.15543 | 0.00075  |
| 0.4644   | -0.08653 | 0.06171  | 0.064965 | 0.16102  | -0.00523 | 0.91023  | -0.1582  | 0.0006   |
| 0.09321  | -0.20715 | 6.37E-06 | -0.15705 | 0.00066  | -0.16101 | 0.00048  | -0.07492 | 0.10588  |
| 6.45E-05 | 0.360995 | 8.05E-16 | 0.379986 | 1.73E-17 | 0.382964 | 9.23E-18 | 0.167199 | 0.00028  |
| 0.06145  | -0.14708 | 0.00144  | 0.029669 | 0.52245  | -0.05806 | 0.21045  | 0.137223 | 0.00296  |
| 0.00399  | -0.24371 | 9.66E-08 | -0.25537 | 2.18E-08 | -0.30658 | 1.28E-11 | -0.02308 | 0.61877  |
| 1.01E-07 | -0.4269  | 4.16E-22 | -0.30466 | 1.73E-11 | -0.38319 | 8.81E-18 | 0.154557 | 0.0008   |
| 2.56E-20 | -0.54916 | 3.84E-38 | -0.36013 | 9.54E-16 | -0.52395 | 2.77E-34 | -0.37986 | 1.77E-17 |
| 2.18E-34 | -0.45394 | 4.06E-25 | -0.46906 | 6.36E-27 | -0.60161 | 2.62E-47 | -0.14557 | 0.00161  |
| 9.33E-08 | -0.32487 | 6.12E-13 | -0.26782 | 4.10E-09 | -0.34623 | 1.34E-14 | 0.142472 | 0.00203  |
| 4.10E-32 | -0.55042 | 2.41E-38 | -0.41047 | 2.09E-20 | -0.57658 | 9.96E-43 | -0.20286 | 9.95E-06 |
| 2.87E-07 | -0.09451 | 0.04121  | -0.2038  | 9.03E-06 | -0.22113 | 1.39E-06 | 0.230773 | 4.61E-07 |
| 1.71E-15 | -0.32891 | 3.04E-13 | -0.27314 | 1.96E-09 | -0.42747 | 3.61E-22 | -0.20934 | 5.06E-06 |
| 0.90291  | -0.14358 | 0.00187  | 0.047764 | 0.30301  | -0.038   | 0.41258  | -0.23755 | 2.05E-07 |
| 0.48649  | -0.24587 | 7.37E-08 | -0.05897 | 0.20338  | -0.13335 | 0.00389  | 0.351672 | 4.85E-15 |
| 2.82E-06 | -0.38144 | 1.27E-17 | -0.29456 | 8.41E-11 | -0.35968 | 1.04E-15 | -0.02733 | 0.55573  |
| 2.43E-15 | -0.43503 | 5.52E-23 | -0.36032 | 9.19E-16 | -0.45547 | 2.68E-25 | -0.04887 | 0.29196  |
| 0.20182  | -0.27925 | 8.20E-10 | -0.21243 | 3.63E-06 | -0.23443 | 2.99E-07 | 0.037596 | 0.41761  |
| 0.00064  | -0.17394 | 0.00016  | -0.11519 | 0.01274  | -0.17871 | 0.0001   | 0.095979 | 0.03814  |
| 3.18E-08 | -0.39952 | 2.53E-19 | -0.05921 | 0.20156  | -0.27226 | 2.22E-09 | -0.06864 | 0.13856  |
| 7.68E-15 | -0.35393 | 3.15E-15 | -0.29797 | 4.97E-11 | -0.44704 | 2.52E-24 | -0.01853 | 0.68963  |
| 0.06129  | -0.27838 | 9.29E-10 | -0.09759 | 0.03501  | -0.19095 | 3.27E-05 | -0.11228 | 0.0152   |
| 0.49219  | -0.00464 | 0.92032  | 0.238804 | 1.77E-07 | 0.10175  | 0.0279   | -0.14461 | 0.00173  |
| 0.92987  | -0.24623 | 7.05E-08 | 0.0359   | 0.43895  | -0.10591 | 0.02207  | 0.0283   | 0.54183  |
| 4.03E-19 | -0.37638 | 3.65E-17 | -0.36882 | 1.70E-16 | -0.46636 | 1.35E-26 | -0.09946 | 0.03165  |
| 9.37E-08 | -0.42267 | 1.16E-21 | -0.41516 | 6.98E-21 | -0.43795 | 2.64E-23 | -0.01815 | 0.69557  |

|          |          |          |          |          |          |          |          |          |
|----------|----------|----------|----------|----------|----------|----------|----------|----------|
| 1.68E-40 | -0.51234 | 1.29E-32 | -0.39857 | 3.12E-19 | -0.58404 | 4.73E-44 | -0.33404 | 1.23E-13 |
| 0.00841  | -0.0212  | 0.64768  | -0.10082 | 0.02937  | -0.15422 | 0.00083  | 0.014906 | 0.748    |
| 5.63E-17 | -0.49826 | 1.13E-30 | -0.549   | 4.06E-38 | -0.55562 | 3.48E-39 | -0.22674 | 7.37E-07 |
| 1.60E-05 | -0.29491 | 7.98E-11 | -0.06261 | 0.1768   | -0.22901 | 5.66E-07 | -0.04364 | 0.34672  |
| 0.00016  | -0.22689 | 7.24E-07 | -0.17021 | 0.00022  | -0.24791 | 5.70E-08 | 0.120125 | 0.00937  |
| 1.96E-05 | -0.26258 | 8.38E-09 | -0.32924 | 2.87E-13 | -0.32565 | 5.35E-13 | 0.085269 | 0.06561  |
| 0.03684  | -0.14372 | 0.00185  | 0.061915 | 0.18165  | -0.08524 | 0.06571  | -0.13101 | 0.00457  |
| 9.16E-27 | -0.57117 | 8.67E-42 | -0.33533 | 9.79E-14 | -0.51756 | 2.34E-33 | -0.19347 | 2.56E-05 |
| 0.05455  | -0.23293 | 3.57E-07 | -0.03996 | 0.38889  | -0.17021 | 0.00022  | -0.02784 | 0.54839  |
| 0.00362  | -0.2495  | 4.65E-08 | -0.04627 | 0.31841  | -0.17797 | 0.00011  | -0.02247 | 0.62808  |
| 5.21E-21 | -0.33565 | 9.24E-14 | -0.3542  | 2.99E-15 | -0.46855 | 7.34E-27 | -0.10775 | 0.01985  |
| 1.84E-05 | -0.31671 | 2.43E-12 | -0.17929 | 9.79E-05 | -0.26635 | 5.02E-09 | -0.2706  | 2.80E-09 |
| 0.7611   | -0.2294  | 5.41E-07 | -0.11949 | 0.00975  | -0.13101 | 0.00457  | -0.09116 | 0.04898  |
| 0.00013  | -0.26861 | 3.68E-09 | -0.14078 | 0.00229  | -0.25156 | 3.58E-08 | 0.047078 | 0.31001  |
| 2.79E-19 | -0.38835 | 2.93E-18 | -0.46558 | 1.69E-26 | -0.50681 | 7.68E-32 | -0.17519 | 0.00014  |
| 1.02E-26 | -0.35694 | 1.77E-15 | -0.34864 | 8.58E-15 | -0.4674  | 1.01E-26 | -0.08468 | 0.06751  |
| 4.05E-09 | -0.11515 | 0.01277  | -0.18835 | 4.20E-05 | -0.26407 | 6.86E-09 | -0.10007 | 0.0306   |
| 1.92E-16 | -0.19319 | 2.63E-05 | -0.18404 | 6.32E-05 | -0.3133  | 4.28E-12 | 0.043029 | 0.35351  |
| 0.49     | -0.28833 | 2.16E-10 | -0.19263 | 2.78E-05 | -0.18907 | 3.92E-05 | 0.1793   | 9.78E-05 |
| 1.73E-15 | -0.30891 | 8.77E-12 | -0.31031 | 6.98E-12 | -0.39188 | 1.36E-18 | -0.2329  | 3.59E-07 |
| 1.31E-05 | -0.0551  | 0.23466  | -0.08735 | 0.05927  | -0.1977  | 1.68E-05 | -0.03822 | 0.40997  |
| 1.33E-06 | -0.28403 | 4.09E-10 | -0.06489 | 0.16154  | -0.25434 | 2.50E-08 | -0.13386 | 0.00376  |
| 5.84E-06 | -0.03437 | 0.45871  | -0.07668 | 0.09793  | -0.17141 | 0.0002   | -0.11965 | 0.00965  |
| 1.43E-27 | -0.35342 | 3.48E-15 | -0.38448 | 6.69E-18 | -0.48003 | 2.74E-28 | -0.16511 | 0.00034  |
| 0.92876  | -0.3237  | 7.48E-13 | -0.0377  | 0.41637  | -0.14537 | 0.00163  | -0.16737 | 0.00028  |
| 4.62E-11 | -0.45101 | 8.85E-25 | -0.29905 | 4.20E-11 | -0.45116 | 8.50E-25 | 0.093333 | 0.04381  |
| 0.0268   | -0.12858 | 0.00539  | -0.08974 | 0.05263  | -0.14259 | 0.00201  | 0.189245 | 3.86E-05 |
| 3.75E-12 | -0.39858 | 3.12E-19 | -0.30009 | 3.57E-11 | -0.41575 | 6.07E-21 | -0.07644 | 0.09895  |
| 1.85E-05 | -0.13326 | 0.00391  | -0.21888 | 1.79E-06 | -0.24286 | 1.07E-07 | 0.13056  | 0.00471  |
| 4.07E-08 | -0.31742 | 2.16E-12 | -0.06116 | 0.18707  | -0.25529 | 2.21E-08 | 0.137657 | 0.00287  |
| 0.00068  | -0.13784 | 0.00284  | -0.21285 | 3.47E-06 | -0.27006 | 3.01E-09 | -0.06635 | 0.15229  |
| 4.78E-10 | -0.42635 | 4.75E-22 | -0.24013 | 1.50E-07 | -0.3683  | 1.89E-16 | -0.20739 | 6.22E-06 |
| 5.67E-10 | -0.19177 | 3.02E-05 | -0.13679 | 0.00306  | -0.26055 | 1.10E-08 | 0.101618 | 0.02811  |
| 5.11E-11 | -0.43126 | 1.42E-22 | -0.29017 | 1.64E-10 | -0.3927  | 1.14E-18 | -0.24489 | 8.33E-08 |
| 1.03E-18 | 0.500284 | 6.02E-31 | 0.364355 | 4.15E-16 | 0.507024 | 7.17E-32 | 0.338843 | 5.21E-14 |
| 0.00138  | 0.144691 | 0.00172  | 0.028564 | 0.53806  | 0.157713 | 0.00063  | 0.149958 | 0.00115  |
| 0.29113  | -0.00767 | 0.86862  | 0.014902 | 0.74807  | -0.02906 | 0.53108  | -0.05579 | 0.22882  |
| 3.91E-06 | -0.42417 | 8.08E-22 | -0.07416 | 0.10949  | -0.27675 | 1.17E-09 | -0.07687 | 0.09708  |
| 1.51E-09 | -0.52061 | 8.47E-34 | -0.26135 | 9.89E-09 | -0.39874 | 3.01E-19 | -0.03009 | 0.51654  |
| 0.04211  | -0.17831 | 0.00011  | -0.04686 | 0.31225  | -0.07053 | 0.12801  | 0.056622 | 0.22197  |
| 5.26E-07 | -0.38844 | 2.87E-18 | -0.35581 | 2.20E-15 | -0.40349 | 1.03E-19 | 0.013024 | 0.77893  |
| 3.27E-18 | -0.42684 | 4.22E-22 | -0.26993 | 3.07E-09 | -0.43255 | 1.03E-22 | -0.19229 | 2.87E-05 |
| 0.00264  | -0.35475 | 2.70E-15 | -0.13572 | 0.0033   | -0.25113 | 3.78E-08 | -0.19319 | 2.63E-05 |
| 0.2228   | 0.086755 | 0.06103  | 0.097279 | 0.03559  | 0.111265 | 0.01615  | -0.19069 | 3.36E-05 |
| 1.50E-07 | -0.34404 | 2.02E-14 | -0.16455 | 0.00036  | -0.28879 | 2.02E-10 | -0.11263 | 0.01488  |

|          |          |          |          |          |          |          |          |          |
|----------|----------|----------|----------|----------|----------|----------|----------|----------|
| 1.04E-08 | -0.33678 | 7.55E-14 | -0.32783 | 3.67E-13 | -0.43727 | 3.14E-23 | 0.005635 | 0.90334  |
| 3.33E-07 | -0.31456 | 3.48E-12 | -0.18417 | 6.24E-05 | -0.27683 | 1.16E-09 | -0.07697 | 0.09664  |
| 0.09337  | -0.23254 | 3.74E-07 | -0.11245 | 0.01504  | -0.10904 | 0.01842  | -0.09418 | 0.04191  |
| 1.05E-16 | -0.1625  | 0.00042  | -0.29278 | 1.10E-10 | -0.33809 | 5.96E-14 | -0.18623 | 5.14E-05 |
| 0.30647  | -0.15829 | 0.0006   | 0.106124 | 0.02181  | -0.03861 | 0.40521  | 0.234274 | 3.05E-07 |
| 0.00035  | -0.00266 | 0.95425  | -0.0602  | 0.19407  | -0.14902 | 0.00124  | -0.1411  | 0.00224  |
| 0.50562  | -0.17105 | 0.0002   | 0.104824 | 0.02349  | -0.01242 | 0.78902  | 0.138139 | 0.00278  |
| 7.36E-06 | -0.1496  | 0.00119  | -0.09662 | 0.03687  | -0.20764 | 6.05E-06 | -0.06577 | 0.1559   |
| 9.19E-10 | -0.32967 | 2.66E-13 | -0.0714  | 0.12337  | -0.29736 | 5.47E-11 | -0.08317 | 0.07255  |
| 2.90E-07 | -0.24904 | 4.94E-08 | -0.05896 | 0.20346  | -0.24295 | 1.06E-07 | -0.22194 | 1.27E-06 |
| 4.14E-24 | -0.43156 | 1.32E-22 | -0.40558 | 6.44E-20 | -0.52894 | 5.05E-35 | -0.17625 | 0.00013  |
| 5.51E-21 | -0.41671 | 4.84E-21 | -0.30223 | 2.55E-11 | -0.4659  | 1.54E-26 | -0.36955 | 1.47E-16 |
| 2.60E-05 | -0.42049 | 1.97E-21 | -0.24251 | 1.12E-07 | -0.32803 | 3.54E-13 | 0.049213 | 0.28855  |
| 7.80E-28 | -0.33812 | 5.93E-14 | -0.4578  | 1.43E-25 | -0.53125 | 2.28E-35 | -0.16076 | 0.00049  |
| 9.79E-15 | -0.32384 | 7.29E-13 | -0.15159 | 0.00102  | -0.34827 | 9.20E-15 | -0.06456 | 0.16364  |
| 0.23668  | 0.026612 | 0.56621  | -0.02501 | 0.58976  | -0.07107 | 0.12513  | 0.016743 | 0.71819  |
| 2.40E-20 | -0.45453 | 3.46E-25 | -0.42071 | 1.86E-21 | -0.50881 | 4.05E-32 | 0.080149 | 0.0836   |
| 4.59E-17 | -0.45355 | 4.50E-25 | -0.35734 | 1.64E-15 | -0.51202 | 1.43E-32 | -0.09487 | 0.04043  |
| 1.79E-14 | -0.45372 | 4.30E-25 | -0.37465 | 5.22E-17 | -0.46221 | 4.28E-26 | 0.081068 | 0.08011  |
| 1.51E-09 | -0.21749 | 2.09E-06 | -0.39834 | 3.29E-19 | -0.40439 | 8.44E-20 | -0.24471 | 8.53E-08 |
| 1.80E-12 | -0.37891 | 2.16E-17 | -0.41527 | 6.80E-21 | -0.45227 | 6.34E-25 | 0.023445 | 0.6133   |
| 5.94E-21 | -0.44822 | 1.85E-24 | -0.19554 | 2.09E-05 | -0.41227 | 1.38E-20 | -0.24279 | 1.08E-07 |
| 1.65E-27 | -0.48687 | 3.63E-29 | -0.38879 | 2.66E-18 | -0.53215 | 1.67E-35 | -0.18121 | 8.21E-05 |
| 0.76508  | -0.32163 | 1.06E-12 | -0.07217 | 0.11936  | -0.15757 | 0.00063  | -0.02591 | 0.57654  |
| 4.98E-26 | 0.689096 | 4.94E-67 | 0.475083 | 1.15E-27 | 0.592329 | 1.46E-45 | 0.203654 | 9.17E-06 |
| 2.22E-07 | -0.31566 | 2.90E-12 | -0.21748 | 2.09E-06 | -0.33534 | 9.78E-14 | 0.023536 | 0.61193  |
| 1.69E-34 | -0.51302 | 1.04E-32 | -0.47956 | 3.14E-28 | -0.61601 | 3.93E-50 | -0.36543 | 3.36E-16 |
| 0.08931  | -0.23671 | 2.27E-07 | -0.04849 | 0.29568  | -0.1525  | 0.00095  | 0.022503 | 0.62764  |
| 6.66E-05 | -0.25674 | 1.82E-08 | -0.18504 | 5.75E-05 | -0.27329 | 1.92E-09 | -0.11086 | 0.01654  |
| 0.02746  | -0.13326 | 0.00391  | 0.073918 | 0.11065  | -0.07498 | 0.10561  | 0.218354 | 1.90E-06 |
| 0.06772  | -0.13779 | 0.00285  | 0.009953 | 0.83015  | -0.1127  | 0.01482  | -0.01271 | 0.78414  |
| 3.07E-11 | -0.26207 | 8.97E-09 | -0.16624 | 0.00031  | -0.31256 | 4.84E-12 | -0.07945 | 0.08634  |
| 0.00022  | -0.05523 | 0.2336   | -0.0735  | 0.11271  | -0.13643 | 0.00313  | 0.133082 | 0.00396  |
| 6.82E-10 | 0.498334 | 1.10E-30 | 0.298268 | 4.75E-11 | 0.367353 | 2.29E-16 | 0.266226 | 5.11E-09 |
| 0.00011  | -0.20442 | 8.48E-06 | -0.21214 | 3.75E-06 | -0.25603 | 2.00E-08 | 0.08045  | 0.08244  |
| 0.16765  | -0.14329 | 0.00191  | -0.06106 | 0.18777  | -0.05644 | 0.22343  | 0.414291 | 8.56E-21 |
| 1.69E-05 | -0.26318 | 7.73E-09 | -0.2021  | 1.08E-05 | -0.2607  | 1.08E-08 | -0.01871 | 0.68681  |
| 3.99E-20 | -0.38175 | 1.19E-17 | -0.36628 | 2.83E-16 | -0.48522 | 5.93E-29 | -0.13497 | 0.00347  |
| 0.00109  | -0.2143  | 2.97E-06 | -0.30098 | 3.11E-11 | -0.29155 | 1.33E-10 | 0.155724 | 0.00073  |
| 0.76006  | -0.21706 | 2.19E-06 | -0.09459 | 0.04104  | -0.12614 | 0.00634  | 0.318432 | 1.83E-12 |
| 0.00077  | -0.05773 | 0.21307  | -0.03838 | 0.40801  | -0.13595 | 0.00324  | -0.09153 | 0.04805  |
| 1.13E-14 | -0.45819 | 1.29E-25 | -0.43841 | 2.34E-23 | -0.50136 | 4.30E-31 | 0.103305 | 0.02559  |
| 3.88E-17 | -0.33177 | 1.84E-13 | -0.31514 | 3.16E-12 | -0.44197 | 9.42E-24 | -0.08601 | 0.06328  |
| 8.47E-08 | -0.26352 | 7.39E-09 | -0.25327 | 2.87E-08 | -0.35353 | 3.41E-15 | 0.017002 | 0.71403  |
| 7.94E-14 | -0.37597 | 3.98E-17 | -0.29107 | 1.43E-10 | -0.4042  | 8.81E-20 | 0.06812  | 0.1416   |

|          |          |          |          |          |          |          |          |          |
|----------|----------|----------|----------|----------|----------|----------|----------|----------|
| 4.06E-32 | -0.39273 | 1.13E-18 | -0.42936 | 2.27E-22 | -0.55422 | 5.88E-39 | -0.168   | 0.00027  |
| 7.86E-07 | -0.38571 | 5.15E-18 | -0.25505 | 2.27E-08 | -0.34362 | 2.18E-14 | 0.167284 | 0.00028  |
| 0.00085  | -0.12967 | 0.00501  | -0.20831 | 5.64E-06 | -0.21853 | 1.86E-06 | -0.13456 | 0.00358  |
| 3.09E-06 | -0.12042 | 0.00919  | -0.28335 | 4.52E-10 | -0.27867 | 8.91E-10 | 0.176707 | 0.00012  |
| 0.13275  | -0.3367  | 7.66E-14 | -0.03512 | 0.44896  | -0.19074 | 3.34E-05 | -0.03707 | 0.42414  |
| 6.97E-07 | 0.45968  | 8.58E-26 | 0.325718 | 5.29E-13 | 0.389008 | 2.54E-18 | 0.23707  | 2.18E-07 |
| 0.07581  | -0.37878 | 2.22E-17 | -0.09515 | 0.03983  | -0.20785 | 5.92E-06 | 0.126012 | 0.0064   |
| 0.00808  | -0.27633 | 1.25E-09 | -0.13065 | 0.00469  | -0.18895 | 3.97E-05 | -0.08526 | 0.06562  |
| 8.20E-18 | -0.3512  | 5.29E-15 | -0.35675 | 1.84E-15 | -0.42725 | 3.81E-22 | -0.20247 | 1.04E-05 |
| 1.15E-11 | -0.38399 | 7.44E-18 | -0.34537 | 1.58E-14 | -0.45229 | 6.30E-25 | -0.05686 | 0.22007  |
| 6.70E-23 | -0.13463 | 0.00356  | -0.12692 | 0.00602  | -0.29447 | 8.53E-11 | -0.23734 | 2.11E-07 |
| 1.66E-15 | -0.44661 | 2.82E-24 | -0.2866  | 2.80E-10 | -0.44244 | 8.34E-24 | -0.03502 | 0.45029  |
| 1.27E-16 | -0.53963 | 1.20E-36 | -0.41627 | 5.37E-21 | -0.54247 | 4.36E-37 | 0.034998 | 0.45054  |
| 3.28E-12 | 0.208892 | 5.30E-06 | 0.29998  | 3.63E-11 | 0.32897  | 3.01E-13 | 0.133152 | 0.00394  |
| 1.33E-14 | -0.45233 | 6.24E-25 | -0.28405 | 4.07E-10 | -0.41991 | 2.26E-21 | -0.17018 | 0.00022  |
| 0.11641  | -0.16702 | 0.00029  | -0.07196 | 0.12044  | -0.10606 | 0.02189  | -0.13335 | 0.00389  |
| 1.43E-19 | -0.30241 | 2.48E-11 | -0.30025 | 3.48E-11 | -0.39938 | 2.61E-19 | -0.03179 | 0.49312  |
| 2.02E-07 | -0.39779 | 3.72E-19 | -0.30706 | 1.18E-11 | -0.37167 | 9.58E-17 | -0.20999 | 4.72E-06 |
| 1.72E-12 | -0.24584 | 7.39E-08 | -0.1307  | 0.00467  | -0.32233 | 9.45E-13 | 0.127145 | 0.00593  |
| 1.59E-05 | -0.38212 | 1.10E-17 | -0.2414  | 1.29E-07 | -0.32295 | 8.50E-13 | 0.001425 | 0.97551  |
| 0.00113  | -0.26899 | 3.49E-09 | -0.00146 | 0.97491  | -0.15055 | 0.0011   | 0.186718 | 4.91E-05 |
| 3.71E-16 | -0.21015 | 4.64E-06 | -0.3108  | 6.45E-12 | -0.4009  | 1.86E-19 | -0.07682 | 0.0973   |
| 5.83E-18 | -0.30275 | 2.35E-11 | -0.21531 | 2.66E-06 | -0.36288 | 5.56E-16 | -0.22949 | 5.35E-07 |
| 1.22E-06 | -0.43533 | 5.12E-23 | -0.23839 | 1.86E-07 | -0.35379 | 3.24E-15 | 0.086731 | 0.0611   |
| 0.00929  | -0.33839 | 5.65E-14 | -0.0686  | 0.13883  | -0.18384 | 6.44E-05 | -0.05092 | 0.27209  |
| 1.92E-12 | -0.43921 | 1.91E-23 | -0.3427  | 2.58E-14 | -0.44622 | 3.13E-24 | -0.03048 | 0.51109  |
| 3.15E-10 | -0.14826 | 0.00131  | -0.18833 | 4.21E-05 | -0.26359 | 7.31E-09 | -0.04748 | 0.30591  |
| 3.08E-22 | -0.49503 | 3.06E-30 | -0.40685 | 4.81E-20 | -0.51279 | 1.12E-32 | -0.05296 | 0.25337  |
| 0.09759  | -0.09667 | 0.03676  | -0.07948 | 0.08622  | -0.04305 | 0.35333  | 0.491762 | 8.30E-30 |
| 0.09433  | -0.03868 | 0.40436  | -0.02116 | 0.64832  | -0.07473 | 0.10676  | 0.158345 | 0.00059  |
| 0.40514  | 0.079701 | 0.08535  | 0.049442 | 0.28631  | -0.01831 | 0.69311  | 0.108909 | 0.01856  |
| 0.06644  | 0.026548 | 0.56714  | 0.044551 | 0.33673  | -0.00392 | 0.93259  | 0.16719  | 0.00028  |
| 0.28852  | -0.13287 | 0.00402  | -0.02218 | 0.63256  | -0.09349 | 0.04344  | 0.088456 | 0.05611  |
| 6.28E-05 | -0.27272 | 2.08E-09 | -0.34297 | 2.45E-14 | -0.31495 | 3.26E-12 | 0.02078  | 0.65422  |
| 5.27E-28 | -0.23805 | 1.93E-07 | -0.17072 | 0.00021  | -0.38765 | 3.40E-18 | -0.32926 | 2.86E-13 |
| 0.87992  | -0.13842 | 0.00272  | 0.017029 | 0.71358  | -0.06435 | 0.16501  | -0.10719 | 0.02051  |
| 0.00093  | -0.21288 | 3.46E-06 | -0.2758  | 1.34E-09 | -0.24811 | 5.55E-08 | 0.225029 | 8.97E-07 |
| 1.53E-05 | -0.23452 | 2.96E-07 | -0.12409 | 0.00726  | -0.21287 | 3.47E-06 | 0.020131 | 0.66436  |
| 3.27E-12 | -0.3882  | 3.02E-18 | -0.42261 | 1.18E-21 | -0.47198 | 2.78E-27 | 0.020518 | 0.6583   |
| 4.61E-17 | -0.32415 | 6.92E-13 | -0.37315 | 7.08E-17 | -0.42773 | 3.39E-22 | -0.02091 | 0.65219  |
| 5.96E-18 | -0.42286 | 1.11E-21 | -0.40233 | 1.34E-19 | -0.48864 | 2.13E-29 | 0.07641  | 0.0991   |
| 0.23682  | 0.001489 | 0.97439  | 0.096504 | 0.03709  | -0.03286 | 0.47863  | 0.004518 | 0.92243  |
| 0.00263  | -0.20242 | 1.04E-05 | -0.13151 | 0.00442  | -0.21387 | 3.11E-06 | 0.11729  | 0.01119  |
| 1.23E-10 | -0.29636 | 6.38E-11 | -0.24951 | 4.65E-08 | -0.36687 | 2.52E-16 | -0.10126 | 0.02867  |
| 0.61278  | -0.3389  | 5.15E-14 | -0.12669 | 0.00612  | -0.18728 | 4.65E-05 | 0.121751 | 0.00844  |

|          |          |          |          |          |          |          |          |          |
|----------|----------|----------|----------|----------|----------|----------|----------|----------|
| 3.99E-07 | -0.29452 | 8.46E-11 | -0.33753 | 6.60E-14 | -0.38658 | 4.28E-18 | 0.022484 | 0.62793  |
| 9.03E-09 | -0.3893  | 2.38E-18 | -0.35796 | 1.45E-15 | -0.40903 | 2.91E-20 | -0.03925 | 0.39739  |
| 1.49E-05 | -0.09541 | 0.0393   | -0.12256 | 0.00802  | -0.17274 | 0.00018  | -0.15823 | 0.0006   |
| 1.09E-09 | -0.29571 | 7.05E-11 | -0.21034 | 4.55E-06 | -0.3006  | 3.30E-11 | 0.016146 | 0.72784  |
| 2.24E-14 | -0.19171 | 3.04E-05 | -0.09852 | 0.0333   | -0.26788 | 4.07E-09 | -0.18506 | 5.74E-05 |
| 2.65E-07 | -0.3574  | 1.62E-15 | -0.10174 | 0.02792  | -0.29094 | 1.46E-10 | -0.26545 | 5.68E-09 |
| 5.22E-11 | -0.38909 | 2.49E-18 | -0.44887 | 1.56E-24 | -0.46529 | 1.82E-26 | -0.07195 | 0.12051  |
| 5.07E-13 | -0.39979 | 2.38E-19 | -0.30088 | 3.16E-11 | -0.43255 | 1.03E-22 | -0.03858 | 0.40553  |
| 3.13E-13 | -0.29701 | 5.77E-11 | -0.24513 | 8.08E-08 | -0.34323 | 2.34E-14 | -0.09783 | 0.03456  |
| 0.07457  | -0.36209 | 6.49E-16 | -0.29511 | 7.73E-11 | -0.28787 | 2.31E-10 | 0.118222 | 0.01056  |
| 1.03E-06 | -0.25604 | 2.00E-08 | -0.13179 | 0.00433  | -0.2691  | 3.44E-09 | 0.057983 | 0.21103  |
| 7.17E-21 | -0.47437 | 1.41E-27 | -0.43013 | 1.88E-22 | -0.5193  | 1.31E-33 | -0.18084 | 8.50E-05 |
| 0.00085  | -0.27098 | 2.65E-09 | -0.04573 | 0.32404  | -0.17401 | 0.00016  | -0.08404 | 0.06959  |
| 0.37155  | -0.2326  | 3.72E-07 | -0.06266 | 0.17643  | -0.13576 | 0.00329  | 0.017596 | 0.7045   |
| 0.90657  | -0.05365 | 0.24725  | 0.052885 | 0.25404  | -0.03332 | 0.47261  | 0.438564 | 2.25E-23 |
| 3.18E-13 | -0.3196  | 1.50E-12 | -0.28597 | 3.07E-10 | -0.39678 | 4.65E-19 | -0.11597 | 0.01214  |
| 0.21703  | -0.21883 | 1.80E-06 | -0.09483 | 0.04051  | -0.1453  | 0.00164  | 0.388809 | 2.65E-18 |
| 1.04E-26 | -0.59513 | 4.39E-46 | -0.40719 | 4.45E-20 | -0.57844 | 4.70E-43 | -0.09939 | 0.03176  |
| 1.09E-12 | -0.36757 | 2.19E-16 | -0.25114 | 3.78E-08 | -0.36386 | 4.58E-16 | -0.15544 | 0.00075  |
| 9.04E-11 | -0.24832 | 5.41E-08 | -0.32371 | 7.46E-13 | -0.36231 | 6.22E-16 | 0.031827 | 0.49264  |
| 1.03E-08 | -0.29967 | 3.82E-11 | -0.23229 | 3.85E-07 | -0.34542 | 1.56E-14 | 0.141698 | 0.00214  |
| 0.61879  | -0.17405 | 0.00016  | -0.13546 | 0.00336  | -0.11379 | 0.01388  | 0.04211  | 0.36389  |
| 1.93E-18 | -0.24105 | 1.34E-07 | -0.12705 | 0.00597  | -0.32542 | 5.57E-13 | -0.26442 | 6.54E-09 |
| 0.12645  | 0.052614 | 0.25648  | 0.150285 | 0.00112  | 0.115946 | 0.01216  | 0.042699 | 0.35721  |
| 1.81E-13 | -0.39295 | 1.08E-18 | -0.22395 | 1.01E-06 | -0.3739  | 6.08E-17 | -0.05233 | 0.25907  |
| 4.08E-07 | -0.44048 | 1.38E-23 | -0.2009  | 1.22E-05 | -0.33493 | 1.05E-13 | -0.05875 | 0.20503  |
| 7.88E-22 | -0.34357 | 2.20E-14 | -0.42933 | 2.29E-22 | -0.52412 | 2.61E-34 | -0.05687 | 0.21994  |
| 0.00523  | -0.13972 | 0.00248  | 0.068212 | 0.14107  | -0.09102 | 0.04932  | 0.191984 | 2.96E-05 |
| 1.86E-07 | -0.50223 | 3.27E-31 | -0.36013 | 9.53E-16 | -0.4312  | 1.44E-22 | -0.14103 | 0.00225  |
| 1.40E-10 | -0.3957  | 5.91E-19 | -0.02957 | 0.52381  | -0.2682  | 3.90E-09 | -0.13417 | 0.00367  |
| 5.51E-10 | -0.21685 | 2.24E-06 | -0.15488 | 0.00078  | -0.26564 | 5.54E-09 | -0.38516 | 5.79E-18 |
| 4.14E-14 | -0.14638 | 0.00151  | -0.18485 | 5.85E-05 | -0.31041 | 6.88E-12 | -0.13075 | 0.00465  |
| 1.53E-14 | 0.296359 | 6.38E-11 | 0.127527 | 0.00578  | 0.275565 | 1.39E-09 | 0.134776 | 0.00352  |
| 7.74E-14 | -0.37491 | 4.94E-17 | -0.31938 | 1.56E-12 | -0.44422 | 5.26E-24 | 0.087392 | 0.05914  |
| 4.01E-06 | 0.224251 | 9.80E-07 | 0.097754 | 0.0347   | 0.230845 | 4.57E-07 | -0.01251 | 0.7875   |
| 4.61E-22 | -0.47832 | 4.50E-28 | -0.31155 | 5.71E-12 | -0.49463 | 3.46E-30 | -0.11072 | 0.01668  |
| 0.51666  | -0.28526 | 3.41E-10 | -0.19124 | 3.18E-05 | -0.17867 | 0.0001   | -0.05145 | 0.26717  |
| 2.70E-08 | -0.38806 | 3.11E-18 | -0.12145 | 0.00861  | -0.29913 | 4.15E-11 | -0.14979 | 0.00117  |
| 8.31E-23 | -0.34113 | 3.44E-14 | -0.14155 | 0.00217  | -0.35633 | 1.99E-15 | -0.23501 | 2.79E-07 |
| 0.0627   | -0.21844 | 1.88E-06 | -0.04971 | 0.28368  | -0.14399 | 0.00181  | -0.00218 | 0.96261  |
| 8.13E-10 | 0.434802 | 5.84E-23 | 0.307983 | 1.02E-11 | 0.404151 | 8.91E-20 | 0.251134 | 3.78E-08 |
| 0.90813  | -0.13651 | 0.00312  | 0.024813 | 0.59275  | -0.0584  | 0.20778  | -0.0423  | 0.36177  |
| 0.00239  | 0.072591 | 0.11721  | -0.0949  | 0.04038  | -0.12063 | 0.00907  | 0.103359 | 0.02551  |
| 0.00297  | -0.20775 | 5.98E-06 | -0.06262 | 0.17675  | -0.15471 | 0.0008   | 0.169352 | 0.00024  |
| 8.46E-06 | -0.27155 | 2.45E-09 | 0.000563 | 0.99032  | -0.18946 | 3.78E-05 | -0.0378  | 0.4151   |



|          |          |          |          |          |          |          |          |          |
|----------|----------|----------|----------|----------|----------|----------|----------|----------|
| 0.00715  | -0.38957 | 2.25E-18 | -0.19917 | 1.45E-05 | -0.32902 | 2.98E-13 | -0.16506 | 0.00034  |
| 0.00241  | 0.045781 | 0.32354  | -0.13258 | 0.0041   | -0.14303 | 0.00194  | -0.06945 | 0.13398  |
| 3.53E-09 | -0.23299 | 3.55E-07 | -0.30477 | 1.70E-11 | -0.32616 | 4.90E-13 | 0.212619 | 3.56E-06 |
| 0.01535  | -0.27747 | 1.06E-09 | -0.15724 | 0.00065  | -0.21607 | 2.45E-06 | -0.11518 | 0.01275  |
| 0.00102  | -0.39756 | 3.91E-19 | -0.21267 | 3.54E-06 | -0.30858 | 9.24E-12 | 0.004118 | 0.92929  |
| 0.00039  | -0.24596 | 7.29E-08 | -0.19641 | 1.91E-05 | -0.21804 | 1.97E-06 | 0.030866 | 0.5058   |
| 5.43E-13 | -0.38792 | 3.21E-18 | -0.27708 | 1.12E-09 | -0.40579 | 6.13E-20 | -0.04224 | 0.36239  |
| 5.52E-10 | -0.42077 | 1.84E-21 | -0.2868  | 2.71E-10 | -0.42765 | 3.45E-22 | -0.15679 | 0.00067  |
| 3.75E-08 | -0.31008 | 7.26E-12 | -0.26179 | 9.33E-09 | -0.33082 | 2.17E-13 | -0.03001 | 0.5177   |
| 2.13E-34 | -0.38118 | 1.34E-17 | -0.3623  | 6.23E-16 | -0.54148 | 6.22E-37 | -0.31162 | 5.65E-12 |
| 0.03576  | -0.30652 | 1.29E-11 | -0.12873 | 0.00534  | -0.22821 | 6.22E-07 | -0.00545 | 0.90652  |
| 0.42609  | -0.1494  | 0.0012   | 0.000341 | 0.99414  | -0.10551 | 0.02259  | 0.133827 | 0.00376  |
| 2.60E-07 | -0.31587 | 2.80E-12 | -0.15062 | 0.0011   | -0.28144 | 5.97E-10 | -0.09139 | 0.04842  |
| 2.47E-06 | -0.07562 | 0.10267  | -0.13796 | 0.00281  | -0.19783 | 1.66E-05 | 0.222744 | 1.16E-06 |
| 0.0413   | -0.08255 | 0.07473  | -0.05843 | 0.20751  | -0.13062 | 0.0047   | 0.2376   | 2.04E-07 |
| 6.30E-17 | -0.16005 | 0.00052  | -0.18083 | 8.50E-05 | -0.32828 | 3.39E-13 | -0.25732 | 1.69E-08 |
| 0.35193  | -0.12462 | 0.00701  | 0.012278 | 0.79129  | -0.0785  | 0.09018  | -0.09408 | 0.04215  |
| 7.36E-26 | -0.57363 | 3.26E-42 | -0.46294 | 3.50E-26 | -0.59358 | 8.53E-46 | -0.09195 | 0.04704  |
| 2.94E-08 | -0.34578 | 1.46E-14 | -0.10935 | 0.01809  | -0.29292 | 1.08E-10 | -0.19735 | 1.74E-05 |
| 2.51E-19 | -0.51024 | 2.55E-32 | -0.37116 | 1.06E-16 | -0.52901 | 4.92E-35 | -0.1218  | 0.00841  |
| 1.93E-07 | -0.04189 | 0.36637  | -0.1579  | 0.00062  | -0.19466 | 2.28E-05 | -0.08897 | 0.0547   |
| 0.6703   | -0.04216 | 0.36336  | -0.12476 | 0.00694  | -0.10401 | 0.02459  | 0.194225 | 2.38E-05 |
| 4.81E-09 | -0.33949 | 4.63E-14 | -0.30601 | 1.40E-11 | -0.38819 | 3.03E-18 | 0.119255 | 0.0099   |
| 8.64E-24 | -0.35409 | 3.06E-15 | -0.33964 | 4.50E-14 | -0.48561 | 5.27E-29 | -0.02541 | 0.58393  |
| 1.96E-06 | -0.1791  | 9.96E-05 | -0.06842 | 0.13983  | -0.2238  | 1.03E-06 | 0.137174 | 0.00297  |
| 2.34E-14 | -0.36792 | 2.04E-16 | -0.26757 | 4.25E-09 | -0.39253 | 1.18E-18 | 0.03916  | 0.39849  |
| 2.24E-08 | -0.18849 | 4.15E-05 | -0.15749 | 0.00064  | -0.26143 | 9.79E-09 | 5.58E-05 | 0.99904  |
| 2.55E-26 | -0.45449 | 3.50E-25 | -0.46973 | 5.26E-27 | -0.54598 | 1.22E-37 | -0.04735 | 0.30725  |
| 4.98E-12 | -0.26827 | 3.86E-09 | 0.021619 | 0.64122  | -0.2201  | 1.57E-06 | -0.1046  | 0.02379  |
| 0.00048  | -0.1825  | 7.29E-05 | -0.18918 | 3.88E-05 | -0.25812 | 1.52E-08 | 0.006519 | 0.88826  |
| 2.58E-21 | -0.36868 | 1.75E-16 | -0.28216 | 5.38E-10 | -0.42219 | 1.30E-21 | -0.08904 | 0.05449  |
| 0.13067  | -0.24445 | 8.81E-08 | -0.02929 | 0.52778  | -0.14427 | 0.00177  | -0.01488 | 0.74845  |
| 2.38E-15 | -0.35645 | 1.95E-15 | -0.20155 | 1.14E-05 | -0.35755 | 1.57E-15 | 0.037829 | 0.41473  |
| 1.01E-13 | 0.516514 | 3.30E-33 | 0.202301 | 1.05E-05 | 0.393342 | 9.91E-19 | 0.264852 | 6.16E-09 |
| 4.95E-06 | -0.42155 | 1.52E-21 | -0.26293 | 7.99E-09 | -0.36412 | 4.35E-16 | 0.178372 | 0.00011  |
| 1.35E-12 | -0.44579 | 3.50E-24 | -0.54937 | 3.55E-38 | -0.54163 | 5.89E-37 | 0.034073 | 0.46261  |
| 0.00043  | -0.29094 | 1.46E-10 | -0.12833 | 0.00548  | -0.19341 | 2.57E-05 | 0.022513 | 0.62748  |
| 1.75E-07 | 0.011021 | 0.81224  | -0.07933 | 0.08683  | -0.18747 | 4.57E-05 | -0.098   | 0.03424  |
| 2.19E-12 | -0.26317 | 7.74E-09 | -0.17237 | 0.00018  | -0.31809 | 1.93E-12 | -0.05717 | 0.21756  |
| 0.26061  | -0.01623 | 0.72645  | 0.226849 | 7.28E-07 | 0.029736 | 0.52151  | 0.110647 | 0.01675  |
| 8.84E-27 | -0.41141 | 1.68E-20 | -0.28717 | 2.57E-10 | -0.46062 | 6.63E-26 | -0.20403 | 8.83E-06 |
| 7.94E-05 | -0.27661 | 1.20E-09 | -0.2301  | 4.99E-07 | -0.28843 | 2.13E-10 | 0.187515 | 4.55E-05 |
| 2.66E-08 | -0.23377 | 3.24E-07 | -0.18481 | 5.87E-05 | -0.28371 | 4.28E-10 | -0.38892 | 2.59E-18 |
| 0.0003   | -0.18155 | 7.96E-05 | -0.03073 | 0.5077   | -0.18595 | 5.28E-05 | 0.014305 | 0.75783  |
| 3.36E-08 | -0.21384 | 3.12E-06 | -0.15061 | 0.0011   | -0.30208 | 2.61E-11 | -0.13121 | 0.00451  |

|          |          |          |          |          |          |          |          |          |
|----------|----------|----------|----------|----------|----------|----------|----------|----------|
| 1.41E-08 | -0.18194 | 7.67E-05 | -0.07123 | 0.12425  | -0.22525 | 8.75E-07 | -0.01406 | 0.76189  |
| 0.44881  | -0.27906 | 8.43E-10 | 0.068458 | 0.13963  | -0.07572 | 0.10219  | 0.054744 | 0.2377   |
| 0.00058  | -0.09025 | 0.05128  | -0.22817 | 6.24E-07 | -0.21012 | 4.66E-06 | 0.223856 | 1.03E-06 |
| 1.23E-32 | -0.4498  | 1.22E-24 | -0.41961 | 2.43E-21 | -0.5396  | 1.22E-36 | -0.07026 | 0.12949  |
| 0.65868  | -0.18588 | 5.31E-05 | -0.21891 | 1.79E-06 | -0.18345 | 6.67E-05 | 0.264066 | 6.86E-09 |
| 5.95E-09 | -0.27511 | 1.48E-09 | -0.20681 | 6.60E-06 | -0.31357 | 4.09E-12 | -0.04403 | 0.34245  |
| 1.17E-18 | -0.42987 | 2.00E-22 | -0.47672 | 7.15E-28 | -0.51698 | 2.83E-33 | -0.08882 | 0.05511  |
| 3.02E-05 | -0.38847 | 2.86E-18 | -0.12277 | 0.0079   | -0.28429 | 3.93E-10 | -0.23988 | 1.55E-07 |
| 0.0002   | -0.34947 | 7.34E-15 | -0.25263 | 3.12E-08 | -0.30241 | 2.48E-11 | 0.160557 | 0.0005   |
| 1.55E-09 | -0.38748 | 3.53E-18 | -0.31349 | 4.15E-12 | -0.41315 | 1.12E-20 | -0.0592  | 0.20159  |
| 1.36E-10 | -0.39876 | 2.99E-19 | -0.32876 | 3.12E-13 | -0.38184 | 1.17E-17 | -0.1465  | 0.0015   |
| 1.05E-12 | -0.47023 | 4.57E-27 | -0.28299 | 4.76E-10 | -0.46133 | 5.46E-26 | -0.06642 | 0.15181  |
| 0.00014  | 0.338034 | 6.03E-14 | 0.188692 | 4.07E-05 | 0.25211  | 3.33E-08 | 0.162598 | 0.00042  |
| 1.77E-16 | -0.28589 | 3.10E-10 | -0.22838 | 6.10E-07 | -0.37941 | 1.95E-17 | 0.003193 | 0.94513  |
| 6.20E-07 | -0.1442  | 0.00178  | -0.08633 | 0.0623   | -0.19991 | 1.35E-05 | -0.01816 | 0.69553  |
| 5.91E-09 | -0.2972  | 5.60E-11 | -0.12815 | 0.00555  | -0.28039 | 6.96E-10 | -0.16045 | 0.0005   |
| 0.0005   | -0.19426 | 2.37E-05 | -0.16458 | 0.00035  | -0.2285  | 6.01E-07 | -0.04023 | 0.38568  |
| 2.95E-07 | -0.02349 | 0.61262  | 0.066446 | 0.15167  | -0.1294  | 0.0051   | 0.120553 | 0.00911  |
| 2.25E-05 | -0.13224 | 0.0042   | -0.06802 | 0.14218  | -0.21472 | 2.84E-06 | 0.22135  | 1.36E-06 |
| 3.45E-17 | -0.37709 | 3.15E-17 | -0.29805 | 4.91E-11 | -0.45524 | 2.86E-25 | -0.04197 | 0.36554  |
| 0.68176  | -0.09261 | 0.04548  | -0.03088 | 0.50564  | -0.09253 | 0.04567  | 0.214495 | 2.91E-06 |
| 0.70599  | -0.26547 | 5.66E-09 | 0.04894  | 0.29124  | -0.0612  | 0.18675  | 0.007984 | 0.86338  |
| 5.03E-15 | -0.45345 | 4.62E-25 | -0.41342 | 1.05E-20 | -0.49145 | 9.14E-30 | 0.010531 | 0.82045  |
| 0.45064  | -0.07082 | 0.12644  | -0.07051 | 0.1281   | -0.10507 | 0.02317  | 0.116786 | 0.01155  |
| 0.00311  | -0.37285 | 7.54E-17 | -0.0921  | 0.04668  | -0.23148 | 4.24E-07 | -0.08574 | 0.06411  |
| 1.46E-13 | -0.29242 | 1.17E-10 | -0.27462 | 1.59E-09 | -0.37592 | 4.02E-17 | -0.17023 | 0.00022  |
| 0.9469   | -0.16463 | 0.00035  | -0.039   | 0.40038  | -0.07659 | 0.09832  | 0.254448 | 2.46E-08 |
| 6.43E-05 | 0.111793 | 0.01565  | -0.05362 | 0.24748  | -0.12245 | 0.00807  | 0.141608 | 0.00216  |
| 0.94467  | -0.18297 | 6.98E-05 | 0.057372 | 0.2159   | -0.08751 | 0.05881  | -0.02568 | 0.57995  |
| 0.00059  | -0.36418 | 4.30E-16 | -0.11049 | 0.01691  | -0.26111 | 1.02E-08 | -0.08954 | 0.05316  |
| 5.30E-05 | -0.24184 | 1.22E-07 | -0.06402 | 0.1672   | -0.23075 | 4.62E-07 | -0.14569 | 0.00159  |
| 4.21E-06 | -0.27846 | 9.19E-10 | -0.06446 | 0.1643   | -0.20725 | 6.31E-06 | -0.08097 | 0.08048  |
| 0.07268  | -0.08414 | 0.06926  | -0.14382 | 0.00183  | -0.14821 | 0.00132  | 0.036624 | 0.42976  |
| 2.87E-09 | -0.1882  | 4.26E-05 | -0.22378 | 1.03E-06 | -0.31179 | 5.49E-12 | -0.02823 | 0.54288  |
| 9.13E-21 | -0.41959 | 2.44E-21 | -0.3483  | 9.15E-15 | -0.48989 | 1.46E-29 | -0.21207 | 3.78E-06 |
| 6.01E-05 | -0.33802 | 6.05E-14 | -0.22144 | 1.35E-06 | -0.30831 | 9.67E-12 | -0.08664 | 0.06137  |
| 1.96E-09 | -0.39327 | 1.01E-18 | -0.33866 | 5.38E-14 | -0.37909 | 2.08E-17 | -0.01091 | 0.81417  |
| 0.08647  | -0.20307 | 9.75E-06 | -0.21871 | 1.83E-06 | -0.20783 | 5.93E-06 | 0.042127 | 0.3637   |
| 0.00012  | -0.28994 | 1.70E-10 | -0.27406 | 1.72E-09 | -0.327   | 4.24E-13 | -0.10778 | 0.01982  |
| 2.68E-11 | -0.26571 | 5.48E-09 | -0.26152 | 9.67E-09 | -0.36275 | 5.70E-16 | -0.24353 | 9.87E-08 |
| 3.10E-11 | -0.32606 | 4.98E-13 | -0.08831 | 0.05651  | -0.3134  | 4.21E-12 | -0.08011 | 0.08373  |
| 0.03187  | -0.16567 | 0.00032  | -0.19111 | 3.22E-05 | -0.18541 | 5.56E-05 | 0.145364 | 0.00163  |
| 3.42E-10 | -0.20844 | 5.56E-06 | -0.05535 | 0.23258  | -0.22713 | 7.04E-07 | 0.055025 | 0.2353   |
| 1.22E-14 | -0.36312 | 5.30E-16 | -0.27223 | 2.22E-09 | -0.3941  | 8.40E-19 | -0.07658 | 0.09834  |
| 1.31E-19 | -0.33667 | 7.70E-14 | -0.26761 | 4.23E-09 | -0.45702 | 1.77E-25 | -0.14718 | 0.00143  |

|          |          |          |          |          |          |          |          |          |
|----------|----------|----------|----------|----------|----------|----------|----------|----------|
| 1.29E-05 | -0.38628 | 4.57E-18 | -0.09511 | 0.03992  | -0.27194 | 2.32E-09 | -0.01541 | 0.7398   |
| 0.33699  | -0.08366 | 0.07089  | 0.033685 | 0.46772  | -0.05139 | 0.26775  | 0.194596 | 2.29E-05 |
| 1.37E-07 | -0.22478 | 9.23E-07 | -0.32115 | 1.15E-12 | -0.35375 | 3.27E-15 | -0.02252 | 0.62734  |
| 0.22345  | -0.23278 | 3.64E-07 | -0.21034 | 4.55E-06 | -0.23121 | 4.38E-07 | 0.322202 | 9.65E-13 |
| 0.00219  | -0.18793 | 4.38E-05 | -0.13141 | 0.00445  | -0.20904 | 5.22E-06 | 0.119048 | 0.01003  |
| 0.00014  | -0.15586 | 0.00073  | 0.069905 | 0.13144  | -0.09951 | 0.03156  | 0.013397 | 0.77277  |
| 8.10E-24 | -0.36518 | 3.53E-16 | -0.38648 | 4.37E-18 | -0.50468 | 1.51E-31 | -0.14282 | 0.00198  |
| 0.40915  | -0.05909 | 0.20242  | 0.035371 | 0.44573  | 0.008567 | 0.8535   | -0.10377 | 0.02493  |
| 9.29E-05 | -0.44126 | 1.13E-23 | -0.36693 | 2.49E-16 | -0.41594 | 5.81E-21 | -0.11011 | 0.01729  |
| 0.0276   | -0.04921 | 0.28861  | -0.12296 | 0.00781  | -0.12853 | 0.00541  | -0.07318 | 0.11428  |
| 5.96E-12 | -0.39598 | 5.55E-19 | -0.31382 | 3.94E-12 | -0.38537 | 5.54E-18 | -0.18683 | 4.85E-05 |
| 0.00121  | -0.32311 | 8.27E-13 | -0.25776 | 1.60E-08 | -0.29822 | 4.78E-11 | -0.13389 | 0.00375  |
| 1.72E-11 | -0.06098 | 0.18835  | -0.16772 | 0.00027  | -0.28885 | 2.00E-10 | -0.30253 | 2.43E-11 |
| 0.00665  | -0.32832 | 3.37E-13 | -0.19286 | 2.72E-05 | -0.29073 | 1.51E-10 | 0.08079  | 0.08115  |
| 1.37E-07 | -0.42887 | 2.56E-22 | -0.32735 | 3.98E-13 | -0.41594 | 5.80E-21 | -0.1229  | 0.00784  |
| 5.30E-17 | -0.30314 | 2.21E-11 | -0.25436 | 2.49E-08 | -0.38464 | 6.48E-18 | 0.01452  | 0.75432  |
| 0.02092  | -0.3813  | 1.31E-17 | -0.23634 | 2.38E-07 | -0.29422 | 8.86E-11 | -0.11225 | 0.01523  |
| 0.08662  | -0.32595 | 5.08E-13 | -0.15184 | 0.001    | -0.21442 | 2.93E-06 | 0.014989 | 0.74664  |
| 4.15E-23 | -0.46839 | 7.67E-27 | -0.37021 | 1.29E-16 | -0.51278 | 1.12E-32 | -0.14345 | 0.00188  |
| 0.2156   | -0.38515 | 5.81E-18 | -0.26927 | 3.36E-09 | -0.28235 | 5.23E-10 | 0.039895 | 0.3897   |
| 6.61E-16 | -0.4702  | 4.61E-27 | -0.52164 | 6.01E-34 | -0.56278 | 2.29E-40 | 0.008486 | 0.85488  |
| 3.99E-06 | -0.3273  | 4.02E-13 | -0.18963 | 3.72E-05 | -0.27951 | 7.90E-10 | -0.08585 | 0.06378  |
| 0.00192  | -0.06369 | 0.16939  | -0.17215 | 0.00019  | -0.13979 | 0.00246  | 0.026877 | 0.56234  |
| 2.29E-07 | -0.23908 | 1.71E-07 | -0.083   | 0.07316  | -0.22979 | 5.17E-07 | -0.0106  | 0.81924  |
| 0.31072  | -0.13913 | 0.00258  | 0.06716  | 0.14731  | -0.07943 | 0.08642  | -0.02967 | 0.5225   |
| 0.98992  | -0.03973 | 0.39164  | 0.016651 | 0.71967  | -0.06204 | 0.18074  | -0.00411 | 0.92948  |
| 0.31688  | -0.09745 | 0.03526  | 0.171842 | 0.00019  | -0.00258 | 0.95565  | -0.00189 | 0.96757  |
| 0.27567  | -0.2253  | 8.70E-07 | -0.16497 | 0.00034  | -0.15575 | 0.00073  | 0.233764 | 3.24E-07 |
| 4.28E-31 | -0.46785 | 8.93E-27 | -0.45761 | 1.51E-25 | -0.56702 | 4.43E-41 | -0.08758 | 0.05859  |
| 0.01892  | -0.33173 | 1.85E-13 | -0.3039  | 1.96E-11 | -0.31196 | 5.34E-12 | -0.10837 | 0.01915  |
| 0.00485  | -0.27233 | 2.19E-09 | -0.21036 | 4.54E-06 | -0.22653 | 7.55E-07 | -0.15506 | 0.00077  |
| 0.02261  | -0.05562 | 0.23031  | 0.098112 | 0.03404  | 0.022673 | 0.62504  | -0.03567 | 0.44192  |
| 5.87E-23 | -0.38661 | 4.26E-18 | -0.4206  | 1.92E-21 | -0.51309 | 1.01E-32 | -0.05411 | 0.24316  |
| 0.42014  | -0.15783 | 0.00062  | -0.21246 | 3.62E-06 | -0.15789 | 0.00062  | -0.05911 | 0.20228  |
| 0.19879  | -0.3069  | 1.21E-11 | -0.19467 | 2.27E-05 | -0.2398  | 1.56E-07 | -0.11221 | 0.01526  |
| 5.51E-07 | -0.39824 | 3.36E-19 | -0.29662 | 6.13E-11 | -0.34499 | 1.69E-14 | -0.04697 | 0.31108  |
| 1.46E-08 | -0.32003 | 1.39E-12 | -0.14523 | 0.00165  | -0.31857 | 1.78E-12 | -0.08755 | 0.05869  |
| 2.26E-18 | -0.22581 | 8.20E-07 | -0.23628 | 2.40E-07 | -0.3704  | 1.24E-16 | 0.016915 | 0.71542  |
| 7.81E-12 | -0.33678 | 7.55E-14 | -0.43451 | 6.29E-23 | -0.47754 | 5.63E-28 | 0.046872 | 0.31213  |
| 5.66E-09 | 0.474518 | 1.35E-27 | 0.351746 | 4.78E-15 | 0.382161 | 1.09E-17 | 0.172635 | 0.00018  |
| 1.71E-10 | -0.45084 | 9.28E-25 | -0.32387 | 7.26E-13 | -0.44271 | 7.79E-24 | -0.00619 | 0.89386  |
| 2.23E-05 | -0.42739 | 3.68E-22 | -0.19419 | 2.38E-05 | -0.29892 | 4.29E-11 | 0.053056 | 0.2525   |
| 0.00162  | -0.26354 | 7.37E-09 | -0.13012 | 0.00486  | -0.20738 | 6.22E-06 | 0.068357 | 0.14022  |
| 0.01131  | -0.08212 | 0.07626  | 0.071938 | 0.12056  | -0.09522 | 0.0397   | -0.04377 | 0.3453   |
| 4.92E-06 | 0.149336 | 0.00121  | 0.127889 | 0.00565  | 0.201741 | 1.12E-05 | 0.403902 | 9.42E-20 |

|          |          |          |          |          |          |          |          |          |
|----------|----------|----------|----------|----------|----------|----------|----------|----------|
| 0.58896  | 0.064792 | 0.16215  | 0.011251 | 0.8084   | -0.00577 | 0.90097  | 0.232713 | 3.67E-07 |
| 4.09E-14 | -0.4774  | 5.87E-28 | -0.53491 | 6.36E-36 | -0.55608 | 2.93E-39 | -0.12032 | 0.00925  |
| 6.46E-08 | -0.37681 | 3.34E-17 | -0.38168 | 1.21E-17 | -0.41226 | 1.38E-20 | -0.04011 | 0.38715  |
| 0.0125   | -0.14189 | 0.00211  | -0.06618 | 0.15335  | -0.12065 | 0.00906  | 0.255198 | 2.23E-08 |
| 4.71E-25 | -0.2638  | 7.11E-09 | -0.20088 | 1.22E-05 | -0.38777 | 3.32E-18 | -0.35289 | 3.84E-15 |
| 4.96E-11 | -0.41478 | 7.63E-21 | -0.10899 | 0.01847  | -0.30243 | 2.47E-11 | -0.27727 | 1.09E-09 |
| 0.03772  | -0.21633 | 2.38E-06 | -0.04897 | 0.29092  | -0.06037 | 0.19283  | 0.114053 | 0.01366  |
| 7.31E-14 | 0.42377  | 8.91E-22 | 0.320617 | 1.26E-12 | 0.423157 | 1.03E-21 | 0.120135 | 0.00936  |
| 1.26E-36 | 0.582974 | 7.35E-44 | 0.334427 | 1.15E-13 | 0.594233 | 6.46E-46 | 0.29771  | 5.18E-11 |
| 0.46239  | -0.39491 | 7.02E-19 | -0.23968 | 1.59E-07 | -0.26502 | 6.03E-09 | 0.025925 | 0.57627  |
| 4.99E-14 | -0.09826 | 0.03376  | -0.15525 | 0.00076  | -0.25043 | 4.13E-08 | -0.10547 | 0.02264  |
| 0.01461  | -0.52188 | 5.54E-34 | -0.24814 | 5.54E-08 | -0.32842 | 3.31E-13 | -0.0961  | 0.0379   |
| 1.17E-05 | -0.37196 | 9.03E-17 | -0.29208 | 1.23E-10 | -0.36836 | 1.87E-16 | 0.101764 | 0.02788  |
| 6.60E-06 | -0.12214 | 0.00824  | 0.068803 | 0.13764  | 0.021419 | 0.64432  | -0.1015  | 0.02829  |
| 1.48E-10 | -0.24111 | 1.33E-07 | -0.34204 | 2.91E-14 | -0.38568 | 5.19E-18 | -0.00292 | 0.94977  |
| 0.52863  | 0.108276 | 0.01926  | 0.036788 | 0.4277   | 0.043793 | 0.34502  | 0.210007 | 4.71E-06 |
| 1.64E-10 | -0.43822 | 2.46E-23 | -0.18843 | 4.17E-05 | -0.36694 | 2.49E-16 | -0.15977 | 0.00053  |
| 7.86E-24 | 0.689357 | 4.21E-67 | 0.414385 | 8.38E-21 | 0.560088 | 6.42E-40 | 0.07312  | 0.11456  |
| 0.37353  | 0.188717 | 4.06E-05 | 0.008402 | 0.8563   | 0.041432 | 0.37167  | 0.151912 | 0.00099  |
| 0.03609  | -0.37509 | 4.76E-17 | -0.17587 | 0.00013  | -0.26021 | 1.15E-08 | 0.052973 | 0.25325  |
| 0.00132  | -0.21483 | 2.80E-06 | 0.030467 | 0.51132  | -0.13086 | 0.00462  | 0.089994 | 0.05195  |
| 0.08949  | -0.23474 | 2.88E-07 | -0.11272 | 0.0148   | -0.17859 | 0.0001   | 0.078492 | 0.09021  |
| 0.04403  | -0.13332 | 0.0039   | 0.018921 | 0.6834   | -0.11589 | 0.01221  | 0.053342 | 0.24996  |
| 7.63E-10 | -0.48308 | 1.12E-28 | -0.33757 | 6.55E-14 | -0.42935 | 2.27E-22 | 0.031145 | 0.50195  |
| 2.52E-17 | -0.58318 | 6.75E-44 | -0.26402 | 6.90E-09 | -0.49094 | 1.07E-29 | -0.21646 | 2.34E-06 |
| 3.71E-20 | -0.40906 | 2.90E-20 | -0.39346 | 9.67E-19 | -0.49544 | 2.70E-30 | -0.09443 | 0.04138  |
| 4.53E-24 | -0.46208 | 4.44E-26 | -0.3923  | 1.24E-18 | -0.52583 | 1.46E-34 | 0.013513 | 0.77086  |
| 1.33E-08 | -0.36797 | 2.02E-16 | -0.33699 | 7.27E-14 | -0.40757 | 4.08E-20 | -0.01219 | 0.79272  |
| 0.0061   | 0.096229 | 0.03764  | 0.1068   | 0.02098  | 0.147224 | 0.00142  | 0.010044 | 0.82862  |
| 0.32197  | -0.15936 | 0.00055  | 0.030454 | 0.5115   | -0.08627 | 0.06248  | 0.153028 | 0.00091  |
| 0.03824  | -0.37956 | 1.89E-17 | -0.10107 | 0.02897  | -0.21619 | 2.42E-06 | 0.003137 | 0.9461   |
| 0.00055  | -0.03987 | 0.38994  | -0.10797 | 0.0196   | -0.16044 | 0.0005   | 0.056036 | 0.2268   |
| 0.01207  | -0.44048 | 1.38E-23 | -0.27731 | 1.08E-09 | -0.28601 | 3.05E-10 | -0.07915 | 0.08752  |
| 0.00014  | -0.4439  | 5.72E-24 | -0.18517 | 5.68E-05 | -0.30132 | 2.95E-11 | 0.038429 | 0.40736  |
| 1.78E-15 | -0.37425 | 5.66E-17 | -0.42786 | 3.28E-22 | -0.46933 | 5.88E-27 | 0.089912 | 0.05217  |
| 5.31E-05 | -0.11608 | 0.01206  | -0.0571  | 0.2181   | -0.14553 | 0.00161  | 0.07679  | 0.09743  |
| 4.72E-19 | -0.40833 | 3.43E-20 | -0.44318 | 6.90E-24 | -0.51115 | 1.90E-32 | -0.11066 | 0.01674  |
| 2.11E-07 | 0.458919 | 1.06E-25 | 0.211903 | 3.85E-06 | 0.334101 | 1.22E-13 | -0.06096 | 0.18848  |
| 1.37E-12 | -0.47438 | 1.40E-27 | -0.24822 | 5.48E-08 | -0.41003 | 2.31E-20 | -0.0509  | 0.27228  |
| 0.00474  | -0.18799 | 4.35E-05 | -0.15596 | 0.00072  | -0.23789 | 1.97E-07 | -0.16939 | 0.00024  |
| 6.40E-25 | -0.46322 | 3.24E-26 | -0.61114 | 3.68E-49 | -0.62763 | 1.61E-52 | -0.17068 | 0.00021  |
| 0.9443   | -0.0507  | 0.27419  | 0.016013 | 0.72999  | -0.01385 | 0.76534  | 0.112456 | 0.01504  |
| 1.91E-07 | -0.34575 | 1.47E-14 | -0.21135 | 4.08E-06 | -0.32049 | 1.29E-12 | -0.16929 | 0.00024  |
| 0.24473  | 0.057022 | 0.21872  | -0.0403  | 0.38487  | -0.04608 | 0.32038  | -0.17836 | 0.00011  |
| 9.51E-06 | -0.34448 | 1.86E-14 | -0.28919 | 1.90E-10 | -0.35238 | 4.23E-15 | -0.01199 | 0.7961   |

|          |          |          |          |          |          |          |          |          |
|----------|----------|----------|----------|----------|----------|----------|----------|----------|
| 2.39E-24 | -0.28007 | 7.28E-10 | -0.26319 | 7.72E-09 | -0.42911 | 2.41E-22 | -0.16554 | 0.00033  |
| 6.40E-06 | -0.32828 | 3.39E-13 | -0.29121 | 1.40E-10 | -0.3065  | 1.29E-11 | 0.048888 | 0.29175  |
| 5.20E-14 | -0.55223 | 1.24E-38 | -0.45595 | 2.36E-25 | -0.53801 | 2.14E-36 | -0.14785 | 0.00135  |
| 4.50E-07 | -0.19862 | 1.53E-05 | -0.28738 | 2.49E-10 | -0.31604 | 2.72E-12 | -0.1008  | 0.02941  |
| 3.29E-23 | 0.327311 | 4.01E-13 | 0.288824 | 2.01E-10 | 0.424697 | 7.12E-22 | 0.29081  | 1.49E-10 |
| 0.06156  | -0.20928 | 5.09E-06 | 0.002738 | 0.95295  | -0.11118 | 0.01623  | 0.045399 | 0.3276   |
| 0.00609  | -0.13517 | 0.00343  | 0.06417  | 0.16622  | -0.0637  | 0.16936  | 0.030965 | 0.50443  |
| 0.11703  | 0.176701 | 0.00012  | 0.06555  | 0.15728  | -0.02184 | 0.63775  | 0.104715 | 0.02363  |
| 0.00327  | -0.29975 | 3.77E-11 | -0.1927  | 2.76E-05 | -0.25839 | 1.47E-08 | 0.235031 | 2.78E-07 |
| 0.00025  | -0.39212 | 1.29E-18 | -0.2084  | 5.59E-06 | -0.30016 | 3.53E-11 | -0.07061 | 0.12758  |
| 1.39E-06 | -0.09549 | 0.03913  | -0.08014 | 0.08365  | -0.19034 | 3.47E-05 | -0.15932 | 0.00055  |
| 1.69E-14 | 0.472504 | 2.40E-27 | 0.304506 | 1.78E-11 | 0.422115 | 1.33E-21 | 0.260824 | 1.06E-08 |
| 0.70617  | 0.054768 | 0.2375   | 0.172129 | 0.00019  | 0.083251 | 0.07228  | 0.013748 | 0.76699  |
| 1.10E-16 | -0.58938 | 5.08E-45 | -0.49308 | 5.56E-30 | -0.56062 | 5.24E-40 | -0.23168 | 4.14E-07 |
| 3.79E-07 | -0.37753 | 2.88E-17 | -0.15504 | 0.00077  | -0.30594 | 1.42E-11 | 0.204093 | 8.77E-06 |
| 7.07E-06 | -0.4216  | 1.51E-21 | -0.29601 | 6.73E-11 | -0.3433  | 2.31E-14 | -0.02258 | 0.62646  |
| 8.91E-06 | -0.34576 | 1.47E-14 | -0.09538 | 0.03937  | -0.23379 | 3.23E-07 | 0.051259 | 0.26895  |
| 0.39152  | -0.23463 | 2.92E-07 | -0.12535 | 0.00668  | -0.17549 | 0.00014  | 0.013345 | 0.77363  |
| 5.06E-14 | 0.193104 | 2.65E-05 | -0.00431 | 0.92604  | 0.186243 | 5.13E-05 | 0.34212  | 2.87E-14 |
| 0.12851  | 0.011935 | 0.79699  | -0.15291 | 0.00092  | -0.03229 | 0.48633  | 0.232504 | 3.76E-07 |
| 0.47303  | 0.149928 | 0.00116  | -0.1533  | 0.00089  | -0.05062 | 0.27498  | 0.239151 | 1.69E-07 |
| 6.32E-05 | 0.132568 | 0.00411  | -0.19837 | 1.57E-05 | 0.004833 | 0.91704  | 0.258446 | 1.46E-08 |
| 5.91E-17 | 0.297963 | 4.98E-11 | 0.074529 | 0.10773  | 0.245462 | 7.76E-08 | 0.263486 | 7.42E-09 |
| 3.34E-06 | -0.2195  | 1.67E-06 | -0.18229 | 7.43E-05 | -0.03847 | 0.40681  | 0.340131 | 4.12E-14 |
| 0.023    | 0.007928 | 0.86433  | -0.31517 | 3.14E-12 | -0.09733 | 0.03549  | 0.181022 | 8.35E-05 |
| 1.31E-05 | -0.06158 | 0.184    | -0.47282 | 2.19E-27 | -0.35571 | 2.24E-15 | -0.18685 | 4.85E-05 |
| 0.79912  | -0.31014 | 7.19E-12 | -0.49066 | 1.16E-29 | -0.32065 | 1.26E-12 | 0.05472  | 0.23791  |
| 0.05098  | 0.146116 | 0.00154  | -0.12466 | 0.00699  | -0.00645 | 0.8894   | 0.244093 | 9.20E-08 |
| 1.22E-18 | 0.301463 | 2.88E-11 | 0.0562   | 0.22544  | 0.271887 | 2.33E-09 | 0.312011 | 5.29E-12 |
| 0.17036  | -0.11745 | 0.01108  | -0.36417 | 4.31E-16 | -0.16399 | 0.00037  | 0.109647 | 0.01777  |
| 0.00308  | 0.06754  | 0.14503  | -0.37924 | 2.02E-17 | -0.21947 | 1.68E-06 | -0.10551 | 0.02259  |
| 0.00121  | -0.15601 | 0.00072  | -0.55701 | 2.06E-39 | -0.37012 | 1.31E-16 | 0.043299 | 0.3505   |
| 0.70388  | 0.075676 | 0.1024   | -0.40078 | 1.91E-19 | -0.18078 | 8.54E-05 | 0.050396 | 0.27711  |
| 1.90E-06 | -0.02695 | 0.56127  | -0.22127 | 1.37E-06 | -0.03776 | 0.41555  | 0.193779 | 2.48E-05 |
| 7.88E-12 | 0.274271 | 1.67E-09 | -0.11672 | 0.01159  | 0.177516 | 0.00011  | 0.050068 | 0.28025  |
| 0.01361  | 0.124375 | 0.00712  | -0.18505 | 5.74E-05 | -0.10305 | 0.02595  | 0.100593 | 0.02974  |
| 0.04023  | -0.09008 | 0.05174  | -0.4033  | 1.08E-19 | -0.26051 | 1.11E-08 | 0.165636 | 0.00032  |
| 0.46656  | -0.21328 | 3.31E-06 | -0.41263 | 1.26E-20 | -0.21577 | 2.53E-06 | -0.01704 | 0.71346  |
| 0.79132  | 0.107452 | 0.0202   | -0.24137 | 1.29E-07 | -0.15164 | 0.00101  | 0.159659 | 0.00053  |
| 0.1649   | -0.15906 | 0.00056  | -0.39106 | 1.63E-18 | -0.21081 | 4.32E-06 | 0.168985 | 0.00024  |
| 8.96E-10 | 0.38193  | 1.15E-17 | 0.654694 | 1.72E-58 | 0.507686 | 5.80E-32 | -0.06945 | 0.13396  |
| 8.10E-07 | -0.09162 | 0.04785  | -0.09761 | 0.03496  | 0.003813 | 0.9345   | 0.253191 | 2.90E-08 |
| 6.23E-24 | 0.181742 | 7.82E-05 | -0.08632 | 0.06233  | 0.212039 | 3.79E-06 | 0.222736 | 1.16E-06 |
| 9.72E-07 | 0.113668 | 0.01398  | -0.1218  | 0.00842  | 0.078358 | 0.09076  | 0.0584   | 0.20777  |
| 0.70503  | -0.11746 | 0.01108  | -0.42963 | 2.12E-22 | -0.21817 | 1.94E-06 | 0.26224  | 8.77E-09 |

|          |          |          |          |          |          |          |          |          |
|----------|----------|----------|----------|----------|----------|----------|----------|----------|
| 0.09162  | -0.20401 | 8.84E-06 | -0.45647 | 2.05E-25 | -0.28865 | 2.06E-10 | 0.298216 | 4.78E-11 |
| 0.11852  | -0.19202 | 2.95E-05 | -0.39772 | 3.77E-19 | -0.27812 | 9.64E-10 | 0.152166 | 0.00097  |
| 0.01191  | 0.002771 | 0.95238  | -0.16452 | 0.00036  | -0.16719 | 0.00028  | -0.0017  | 0.97075  |
| 4.65E-11 | -0.34927 | 7.62E-15 | -0.69122 | 1.34E-67 | -0.54976 | 3.07E-38 | -0.04844 | 0.29625  |
| 0.16827  | -0.19496 | 2.21E-05 | -0.41984 | 2.30E-21 | -0.24108 | 1.34E-07 | 0.044792 | 0.33412  |
| 4.38E-11 | 0.027523 | 0.55298  | -0.18371 | 6.51E-05 | 0.091563 | 0.04798  | 0.290523 | 1.55E-10 |
| 2.72E-05 | 0.038357 | 0.40824  | -0.05504 | 0.23519  | 0.089716 | 0.05269  | 0.291657 | 1.31E-10 |
| 9.97E-15 | 0.225024 | 8.97E-07 | -0.13032 | 0.00479  | 0.134581 | 0.00357  | 0.218292 | 1.91E-06 |
| 2.35E-31 | 0.324025 | 7.07E-13 | 0.28834  | 2.16E-10 | 0.398465 | 3.20E-19 | 0.037544 | 0.41826  |
| 0.76849  | -0.35447 | 2.84E-15 | -0.45279 | 5.51E-25 | -0.31638 | 2.57E-12 | 0.089862 | 0.0523   |
| 1.15E-14 | -0.12816 | 0.00554  | -0.37258 | 7.96E-17 | -0.38605 | 4.79E-18 | -0.09929 | 0.03193  |
| 0.00989  | -0.07133 | 0.12375  | -0.15064 | 0.00109  | -0.08173 | 0.07768  | 0.166519 | 0.0003   |
| 4.21E-10 | 0.330175 | 2.44E-13 | 0.6107   | 4.49E-49 | 0.496764 | 1.80E-30 | -0.09879 | 0.03281  |
| 0.67472  | -0.20335 | 9.47E-06 | -0.54837 | 5.12E-38 | -0.30061 | 3.29E-11 | 0.111187 | 0.01623  |
| 0.01518  | -0.05783 | 0.21227  | -0.32783 | 3.67E-13 | -0.24738 | 6.09E-08 | 0.191601 | 3.07E-05 |
| 0.13795  | -0.12019 | 0.00932  | -0.23621 | 2.42E-07 | -0.16181 | 0.00045  | 0.080963 | 0.0805   |
| 0.18037  | -0.12618 | 0.00632  | -0.45417 | 3.82E-25 | -0.28884 | 2.00E-10 | 0.013392 | 0.77286  |
| 0.0013   | -0.01104 | 0.81198  | -0.25815 | 1.51E-08 | -0.09478 | 0.04063  | 0.005816 | 0.90024  |
| 3.74E-07 | -0.02277 | 0.62362  | -0.20471 | 8.22E-06 | -0.03868 | 0.40431  | -0.00357 | 0.93874  |
| 0.20716  | -0.41763 | 3.89E-21 | -0.56027 | 6.00E-40 | -0.4116  | 1.61E-20 | 0.040263 | 0.38533  |
| 0.05912  | -0.24789 | 5.71E-08 | -0.36643 | 2.75E-16 | -0.29054 | 1.55E-10 | -0.03145 | 0.49777  |
| 1.91E-15 | 0.077168 | 0.09579  | -0.01755 | 0.70518  | 0.186848 | 4.85E-05 | 0.276931 | 1.14E-09 |
| 0.96922  | -0.10833 | 0.0192   | -0.41507 | 7.14E-21 | -0.22718 | 7.00E-07 | 0.145106 | 0.00167  |
| 0.36172  | -0.01081 | 0.81573  | -0.31686 | 2.37E-12 | -0.15812 | 0.0006   | 0.127256 | 0.00589  |
| 0.00084  | -0.00812 | 0.8611   | -0.2384  | 1.85E-07 | -0.19898 | 1.48E-05 | 0.073932 | 0.11058  |
| 3.17E-23 | 0.003182 | 0.94533  | -0.08996 | 0.05205  | 0.165753 | 0.00032  | 0.052657 | 0.2561   |
| 0.02601  | -0.06692 | 0.14874  | -0.16543 | 0.00033  | -0.16052 | 0.0005   | -0.42114 | 1.68E-21 |
| 0.7082   | 0.190995 | 3.26E-05 | -0.15127 | 0.00104  | -0.03953 | 0.394    | -0.03745 | 0.41943  |
| 2.77E-08 | 0.062829 | 0.17527  | -0.19563 | 2.07E-05 | 0.068373 | 0.14013  | 0.274168 | 1.69E-09 |
| 1.37E-22 | 0.34128  | 3.34E-14 | 0.183372 | 6.72E-05 | 0.350141 | 6.47E-15 | 0.225779 | 8.23E-07 |
| 0.00196  | -0.2219  | 1.28E-06 | -0.24155 | 1.26E-07 | -0.12178 | 0.00842  | 0.056221 | 0.22527  |
| 0.18156  | -0.12858 | 0.00539  | -0.46545 | 1.75E-26 | -0.22058 | 1.48E-06 | 0.110768 | 0.01663  |
| 0.23724  | -0.16038 | 0.0005   | -0.31271 | 4.72E-12 | -0.2471  | 6.32E-08 | -0.04467 | 0.33545  |
| 5.39E-20 | 0.169606 | 0.00023  | -0.02507 | 0.58888  | 0.195355 | 2.12E-05 | 0.478573 | 4.18E-28 |
| 0.40501  | 0.219215 | 1.73E-06 | -0.1799  | 9.26E-05 | -0.08362 | 0.07103  | -0.00187 | 0.96792  |
| 0.16674  | -0.20648 | 6.84E-06 | -0.37586 | 4.06E-17 | -0.20783 | 5.93E-06 | 0.036046 | 0.43709  |
| 0.18498  | 0.236455 | 2.35E-07 | 0.43118  | 1.45E-22 | 0.279813 | 7.56E-10 | -0.07657 | 0.09839  |
| 0.09209  | 0.044663 | 0.33551  | -0.17389 | 0.00016  | -0.16895 | 0.00024  | 0.076511 | 0.09865  |
| 3.92E-07 | -0.07149 | 0.12288  | -0.26909 | 3.44E-09 | -0.01533 | 0.74106  | 0.031939 | 0.49111  |
| 3.18E-05 | 0.192853 | 2.72E-05 | -0.05832 | 0.20843  | 0.110369 | 0.01703  | -0.03403 | 0.46314  |
| 0.61611  | -0.08676 | 0.061    | -0.21066 | 4.39E-06 | -0.1473  | 0.00141  | -0.12193 | 0.00835  |
| 3.07E-19 | 0.244818 | 8.41E-08 | -0.06503 | 0.16061  | 0.235106 | 2.76E-07 | 0.314008 | 3.81E-12 |
| 0.01914  | 0.26656  | 4.88E-09 | 0.411502 | 1.64E-20 | 0.2861   | 3.01E-10 | -0.24498 | 8.24E-08 |
| 1.73E-08 | -0.06272 | 0.17602  | -0.48246 | 1.34E-28 | -0.37366 | 6.39E-17 | 0.024384 | 0.59916  |
| 0.617    | -0.18026 | 8.96E-05 | -0.46383 | 2.74E-26 | -0.26196 | 9.11E-09 | -0.06932 | 0.13469  |

|          |          |          |          |          |          |          |          |          |
|----------|----------|----------|----------|----------|----------|----------|----------|----------|
| 3.48E-09 | 0.182102 | 7.56E-05 | -0.12823 | 0.00552  | 0.092823 | 0.04498  | 0.190375 | 3.46E-05 |
| 3.61E-27 | 0.240036 | 1.52E-07 | 0.026398 | 0.56934  | 0.335047 | 1.03E-13 | 0.260841 | 1.06E-08 |
| 0.08352  | -0.24593 | 7.31E-08 | -0.61452 | 7.83E-50 | -0.34944 | 7.39E-15 | -0.06815 | 0.14142  |
| 0.00502  | -0.366   | 3.00E-16 | -0.51157 | 1.66E-32 | -0.40139 | 1.66E-19 | -0.12119 | 0.00875  |
| 1.49E-14 | 0.140773 | 0.00229  | -0.00628 | 0.89232  | 0.202823 | 9.99E-06 | 0.305275 | 1.57E-11 |
| 0.25695  | 0.195348 | 2.13E-05 | -0.10042 | 0.03002  | 0.02838  | 0.54069  | 0.139765 | 0.00247  |
| 2.26E-22 | 0.431027 | 1.50E-22 | 0.268517 | 3.73E-09 | 0.417686 | 3.84E-21 | 0.213235 | 3.33E-06 |
| 0.03468  | -0.13846 | 0.00271  | -0.31157 | 5.69E-12 | -0.14336 | 0.0019   | 0.186145 | 5.18E-05 |
| 0.01599  | -0.44784 | 2.05E-24 | -0.56292 | 2.16E-40 | -0.43043 | 1.74E-22 | -0.14499 | 0.00168  |
| 0.36387  | 0.032164 | 0.48807  | -0.2224  | 1.21E-06 | -0.11373 | 0.01393  | 0.375005 | 4.85E-17 |
| 1.42E-16 | 0.046085 | 0.32034  | -0.01945 | 0.67498  | 0.136017 | 0.00323  | 0.091236 | 0.04879  |
| 0.01743  | 0.184618 | 5.98E-05 | -0.21145 | 4.04E-06 | -0.02568 | 0.57985  | 0.092461 | 0.04582  |
| 0.04127  | -0.03581 | 0.44015  | -0.27694 | 1.14E-09 | -0.23555 | 2.61E-07 | 0.082486 | 0.07495  |
| 0.83814  | 0.168213 | 0.00026  | -0.29792 | 5.01E-11 | -0.11384 | 0.01384  | 0.195808 | 2.03E-05 |
| 0.02144  | 0.01287  | 0.78148  | -0.30603 | 1.39E-11 | -0.1043  | 0.0242   | 0.1202   | 0.00932  |
| 7.17E-06 | -0.07538 | 0.10376  | -0.22566 | 8.34E-07 | -0.03202 | 0.49004  | 0.273128 | 1.96E-09 |
| 3.73E-15 | 0.274524 | 1.61E-09 | 0.081505 | 0.07849  | 0.225312 | 8.68E-07 | 0.284028 | 4.09E-10 |
| 0.15694  | -0.00953 | 0.83734  | -0.05961 | 0.19849  | 0.015431 | 0.73944  | 0.084599 | 0.06776  |
| 1.54E-07 | -0.02989 | 0.51934  | -0.18059 | 8.69E-05 | 0.011312 | 0.80739  | 0.08467  | 0.06753  |
| 0.02472  | -0.07243 | 0.11805  | -0.19663 | 1.87E-05 | -0.199   | 1.48E-05 | -0.17672 | 0.00012  |
| 9.57E-13 | 0.338283 | 5.76E-14 | -0.00761 | 0.86968  | 0.227974 | 6.39E-07 | 0.246993 | 6.40E-08 |
| 6.20E-38 | 0.420669 | 1.88E-21 | 0.192961 | 2.69E-05 | 0.415746 | 6.08E-21 | 0.169731 | 0.00023  |
| 0.00775  | 0.243668 | 9.70E-08 | -0.2028  | 1.00E-05 | 0.002847 | 0.95107  | -0.02225 | 0.63149  |
| 0.12577  | 0.097728 | 0.03475  | -0.17054 | 0.00021  | -0.02935 | 0.52688  | 0.146147 | 0.00154  |
| 0.58241  | -0.10105 | 0.02901  | -0.39417 | 8.27E-19 | -0.20825 | 5.68E-06 | 0.062968 | 0.17432  |
| 0.28998  | -0.13818 | 0.00277  | -0.49756 | 1.40E-30 | -0.29437 | 8.66E-11 | 0.125267 | 0.00672  |
| 0.01272  | -0.02706 | 0.55962  | -0.23681 | 2.25E-07 | -0.08961 | 0.05297  | 0.046926 | 0.31157  |
| 4.88E-10 | 0.155272 | 0.00076  | -0.09289 | 0.04482  | 0.08968  | 0.05278  | 0.340622 | 3.77E-14 |
| 2.06E-08 | 0.075087 | 0.10511  | 0.00249  | 0.95721  | 0.159791 | 0.00053  | 0.182565 | 7.24E-05 |
| 0.17829  | -0.01053 | 0.82052  | -0.27646 | 1.22E-09 | -0.10567 | 0.02238  | 0.157109 | 0.00066  |
| 9.88E-12 | 0.071818 | 0.12118  | -0.03036 | 0.51283  | 0.167616 | 0.00027  | 0.366267 | 2.84E-16 |
| 6.71E-06 | -0.00834 | 0.8573   | -0.13219 | 0.00422  | 0.048412 | 0.29648  | -0.12847 | 0.00543  |
| 3.20E-06 | 0.214655 | 2.86E-06 | -0.14758 | 0.00138  | 0.032306 | 0.48615  | 0.150516 | 0.0011   |
| 0.00754  | 0.33004  | 2.49E-13 | 0.021064 | 0.6498   | 0.160917 | 0.00048  | 0.118321 | 0.0105   |
| 0.00452  | 0.083405 | 0.07175  | -0.32629 | 4.79E-13 | -0.06383 | 0.16851  | 0.067462 | 0.1455   |
| 8.43E-06 | 0.141364 | 0.0022   | 0.059867 | 0.19655  | 0.157237 | 0.00065  | 0.198145 | 1.61E-05 |
| 0.00483  | 0.097089 | 0.03595  | -0.3384  | 5.64E-14 | -0.08537 | 0.06528  | 0.155925 | 0.00072  |
| 0.0002   | -0.03766 | 0.41683  | -0.33898 | 5.08E-14 | -0.26659 | 4.86E-09 | -0.07368 | 0.11181  |
| 0.65989  | 0.157315 | 0.00065  | 0.41956  | 2.46E-21 | 0.209534 | 4.95E-06 | -0.17527 | 0.00014  |
| 2.03E-19 | 0.275838 | 1.34E-09 | 0.233178 | 3.47E-07 | 0.350405 | 6.16E-15 | 0.283141 | 4.66E-10 |
| 5.03E-09 | 0.218299 | 1.91E-06 | 0.53225  | 1.61E-35 | 0.407444 | 4.20E-20 | -0.13814 | 0.00277  |
| 0.67117  | -0.14453 | 0.00174  | -0.29301 | 1.07E-10 | -0.15159 | 0.00102  | 0.120307 | 0.00926  |
| 4.63E-05 | -0.14281 | 0.00198  | -0.52973 | 3.85E-35 | -0.37249 | 8.10E-17 | -0.06614 | 0.15356  |
| 4.31E-22 | -0.28944 | 1.83E-10 | -0.40561 | 6.40E-20 | -0.4804  | 2.45E-28 | -0.27834 | 9.35E-10 |
| 0.53887  | -0.19142 | 3.13E-05 | -0.36127 | 7.63E-16 | -0.24955 | 4.63E-08 | -0.1362  | 0.00319  |

|          |          |          |          |          |          |          |          |          |
|----------|----------|----------|----------|----------|----------|----------|----------|----------|
| 0.16109  | -0.1517  | 0.00101  | -0.25285 | 3.03E-08 | -0.22623 | 7.81E-07 | -0.00119 | 0.97951  |
| 0.00062  | -0.01386 | 0.76516  | -0.11003 | 0.01738  | 0.013917 | 0.76421  | 0.06946  | 0.13392  |
| 2.62E-05 | -0.42958 | 2.15E-22 | -0.67318 | 6.14E-63 | -0.49661 | 1.88E-30 | -0.04785 | 0.30218  |
| 2.91E-05 | -0.28266 | 4.99E-10 | -0.64929 | 3.00E-57 | -0.46088 | 6.18E-26 | 0.091863 | 0.04725  |
| 0.4505   | -0.12427 | 0.00717  | -0.46992 | 4.99E-27 | -0.26804 | 3.98E-09 | -0.02682 | 0.56312  |
| 1.10E-06 | -0.05035 | 0.27751  | -0.11415 | 0.01357  | 0.078132 | 0.0917   | 0.072602 | 0.11716  |
| 0.33316  | -0.14482 | 0.0017   | -0.44528 | 3.99E-24 | -0.23507 | 2.77E-07 | 0.038216 | 0.40997  |
| 0.03974  | -0.33735 | 6.81E-14 | -0.50283 | 2.71E-31 | -0.37988 | 1.76E-17 | -0.16483 | 0.00035  |
| 0.00023  | -0.10574 | 0.02229  | -0.40195 | 1.47E-19 | -0.32459 | 6.41E-13 | -0.01787 | 0.70012  |
| 0.09854  | -0.04252 | 0.35926  | -0.19791 | 1.65E-05 | -0.06644 | 0.1517   | -0.05719 | 0.21738  |
| 0.00011  | -0.04431 | 0.33932  | -0.38689 | 4.01E-18 | -0.12498 | 0.00685  | 0.267351 | 4.38E-09 |
| 3.70E-07 | -0.08374 | 0.07062  | -0.25383 | 2.67E-08 | -0.04327 | 0.35085  | 0.138763 | 0.00265  |
| 0.00396  | -0.27758 | 1.04E-09 | -0.50055 | 5.54E-31 | -0.37409 | 5.85E-17 | -0.09801 | 0.03421  |
| 0.33776  | -0.27252 | 2.14E-09 | -0.45199 | 6.83E-25 | -0.29762 | 5.25E-11 | 0.008409 | 0.85619  |
| 0.92872  | -0.14781 | 0.00136  | -0.30808 | 1.00E-11 | -0.21233 | 3.67E-06 | -0.10205 | 0.02744  |
| 3.47E-07 | 0.278296 | 9.40E-10 | -0.10143 | 0.02841  | 0.1436   | 0.00186  | 0.283207 | 4.61E-10 |
| 2.23E-07 | 0.182344 | 7.39E-05 | 0.438071 | 2.56E-23 | 0.303775 | 2.00E-11 | -0.15541 | 0.00075  |
| 0.36911  | -0.2492  | 4.84E-08 | -0.45466 | 3.34E-25 | -0.30739 | 1.12E-11 | -0.26673 | 4.77E-09 |
| 1.82E-13 | -0.03868 | 0.4043   | -0.03215 | 0.48824  | 0.131111 | 0.00454  | 0.18632  | 5.10E-05 |
| 2.60E-12 | 0.137352 | 0.00294  | -0.05001 | 0.28078  | 0.178284 | 0.00011  | 0.348514 | 8.78E-15 |
| 9.98E-19 | -0.1336  | 0.00382  | -0.55979 | 7.19E-40 | -0.4514  | 7.99E-25 | -0.25194 | 3.40E-08 |
| 0.17707  | -0.15962 | 0.00054  | -0.4832  | 1.08E-28 | -0.20285 | 9.96E-06 | -0.01096 | 0.81325  |
| 2.53E-09 | 0.152692 | 0.00093  | 0.045886 | 0.32243  | 0.17604  | 0.00013  | 0.107551 | 0.02009  |
| 0.9493   | 0.104213 | 0.02431  | -0.35387 | 3.19E-15 | -0.12676 | 0.00609  | 0.200387 | 1.28E-05 |
| 0.87358  | -0.05937 | 0.20029  | -0.24126 | 1.31E-07 | -0.19408 | 2.41E-05 | 0.140453 | 0.00235  |
| 5.54E-13 | 0.015035 | 0.74589  | -0.08415 | 0.06926  | 0.090578 | 0.05044  | 0.079126 | 0.08763  |
| 0.02743  | 0.085624 | 0.06449  | -0.30563 | 1.49E-11 | -0.17799 | 0.00011  | -0.09743 | 0.03531  |
| 5.13E-10 | 0.261999 | 9.06E-09 | 0.096849 | 0.03642  | 0.28032  | 7.02E-10 | 0.11779  | 0.01085  |
| 0.22479  | -0.12978 | 0.00497  | -0.32743 | 3.93E-13 | -0.21075 | 4.35E-06 | 0.210834 | 4.31E-06 |
| 0.79288  | 0.004072 | 0.93006  | -0.07817 | 0.09153  | -0.08058 | 0.08196  | 0.113716 | 0.01394  |
| 0.36004  | 0.379545 | 1.89E-17 | -0.15189 | 0.00099  | -0.0152  | 0.74324  | -0.03801 | 0.41246  |
| 0.04497  | -0.11568 | 0.01236  | -0.4762  | 8.30E-28 | -0.31239 | 4.97E-12 | -0.18707 | 4.75E-05 |
| 0.18537  | -0.18264 | 7.19E-05 | -0.40688 | 4.78E-20 | -0.19487 | 2.23E-05 | 0.158404 | 0.00059  |
| 0.00445  | -0.06554 | 0.15735  | -0.25868 | 1.41E-08 | -0.06346 | 0.17097  | 0.323152 | 8.21E-13 |
| 0.21658  | -0.1044  | 0.02405  | -0.29638 | 6.36E-11 | -0.19775 | 1.67E-05 | 0.09029  | 0.05118  |
| 8.87E-07 | 0.142553 | 0.00201  | -0.07024 | 0.12959  | 0.152123 | 0.00097  | 0.100843 | 0.02934  |
| 0.00071  | 0.094129 | 0.04203  | 0.042452 | 0.36001  | 0.100488 | 0.02991  | 0.312371 | 4.99E-12 |
| 1.29E-09 | 0.297012 | 5.77E-11 | 0.629352 | 7.00E-53 | 0.480378 | 2.47E-28 | -0.14643 | 0.00151  |
| 7.44E-14 | 0.088643 | 0.05559  | -0.24672 | 6.63E-08 | 0.067042 | 0.14803  | 0.155015 | 0.00078  |
| 7.44E-05 | -0.2736  | 1.84E-09 | -0.57049 | 1.13E-41 | -0.4246  | 7.29E-22 | 0.051094 | 0.2705   |
| 0.60942  | -0.10037 | 0.03011  | -0.45083 | 9.28E-25 | -0.23204 | 3.97E-07 | 0.009913 | 0.83082  |
| 2.37E-11 | 0.047259 | 0.30815  | -0.11356 | 0.01407  | 0.11476  | 0.01308  | 0.303584 | 2.06E-11 |
| 0.00539  | -0.25513 | 2.25E-08 | -0.24837 | 5.37E-08 | -0.12579 | 0.00649  | -0.08236 | 0.07539  |
| 0.00216  | -0.06681 | 0.14946  | -0.14577 | 0.00158  | -0.04773 | 0.30332  | 0.097523 | 0.03513  |
| 0.68236  | -0.31387 | 3.90E-12 | -0.50682 | 7.64E-32 | -0.32597 | 5.06E-13 | 0.064199 | 0.16604  |



|          |          |          |          |          |          |          |          |          |
|----------|----------|----------|----------|----------|----------|----------|----------|----------|
| 0.01879  | -0.27612 | 1.28E-09 | -0.52723 | 9.08E-35 | -0.35327 | 3.58E-15 | 0.103795 | 0.02489  |
| 0.48326  | -0.14321 | 0.00192  | -0.21192 | 3.84E-06 | -0.20814 | 5.75E-06 | -0.03281 | 0.47934  |
| 1.35E-07 | -0.12783 | 0.00567  | -0.43107 | 1.48E-22 | -0.36314 | 5.28E-16 | -0.30596 | 1.41E-11 |
| 0.00398  | -0.15008 | 0.00114  | -0.48358 | 9.63E-29 | -0.35521 | 2.47E-15 | 0.020764 | 0.65448  |
| 0.00593  | 0.017502 | 0.70599  | -0.27237 | 2.18E-09 | -0.08989 | 0.05224  | -0.11354 | 0.01409  |
| 0.7169   | -0.18844 | 4.17E-05 | -0.42757 | 3.52E-22 | -0.27817 | 9.58E-10 | 0.214592 | 2.87E-06 |
| 3.83E-12 | -0.17034 | 0.00022  | -0.43484 | 5.79E-23 | -0.39131 | 1.55E-18 | 0.121138 | 0.00878  |
| 0.00037  | -0.26632 | 5.04E-09 | -0.32498 | 6.01E-13 | -0.15274 | 0.00093  | -0.00324 | 0.94441  |
| 0.01748  | -0.00405 | 0.93041  | -0.30212 | 2.60E-11 | -0.09208 | 0.04674  | 0.078674 | 0.08947  |
| 0.18826  | -0.10041 | 0.03005  | -0.47341 | 1.85E-27 | -0.2768  | 1.17E-09 | 0.120188 | 0.00933  |
| 0.00063  | 0.042789 | 0.35621  | 0.01085  | 0.8151   | 0.120777 | 0.00899  | 0.205072 | 7.92E-06 |
| 0.00045  | 0.046506 | 0.31593  | -0.20278 | 1.00E-05 | 7.10E-05 | 0.99878  | 0.248606 | 5.22E-08 |
| 0.86188  | -0.28562 | 3.23E-10 | -0.42625 | 4.88E-22 | -0.29789 | 5.03E-11 | 0.038574 | 0.40559  |
| 3.08E-10 | 0.275532 | 1.40E-09 | -0.05741 | 0.21563  | 0.17689  | 0.00012  | 0.243269 | 1.02E-07 |
| 0.5586   | -0.26862 | 3.67E-09 | -0.47061 | 4.10E-27 | -0.32352 | 7.71E-13 | 0.046392 | 0.31712  |
| 3.29E-06 | -0.2946  | 8.36E-11 | -0.47945 | 3.23E-28 | -0.422   | 1.37E-21 | -0.02888 | 0.53357  |
| 1.14E-06 | 0.050164 | 0.27933  | -0.11391 | 0.01378  | 0.072968 | 0.11532  | 0.169133 | 0.00024  |
| 0.0429   | -0.00146 | 0.97495  | -0.43683 | 3.50E-23 | -0.2605  | 1.11E-08 | -0.02242 | 0.62884  |
| 6.81E-08 | -0.05807 | 0.21034  | -0.20511 | 7.89E-06 | 0.035901 | 0.43893  | 0.102536 | 0.02671  |
| 0.29573  | -0.28147 | 5.94E-10 | -0.5576  | 1.65E-39 | -0.35095 | 5.55E-15 | 0.020425 | 0.65975  |
| 0.00353  | 0.030318 | 0.51339  | -0.14506 | 0.00167  | -0.01266 | 0.78498  | 0.15737  | 0.00064  |
| 0.13318  | -0.12155 | 0.00855  | -0.40066 | 1.96E-19 | -0.19312 | 2.65E-05 | 0.036669 | 0.42919  |
| 0.16087  | -0.11627 | 0.01192  | -0.46552 | 1.71E-26 | -0.2901  | 1.66E-10 | -0.04731 | 0.30759  |
| 0.56729  | -0.01142 | 0.80552  | -0.15027 | 0.00113  | -0.06305 | 0.17373  | 0.089124 | 0.05427  |
| 3.09E-06 | 0.021483 | 0.64332  | -0.28098 | 6.38E-10 | -0.02687 | 0.56239  | -0.03002 | 0.51751  |
| 0.61053  | -0.21453 | 2.90E-06 | -0.41281 | 1.21E-20 | -0.26145 | 9.76E-09 | 0.284753 | 3.67E-10 |
| 0.01363  | -0.13497 | 0.00348  | -0.37102 | 1.09E-16 | -0.17802 | 0.00011  | 0.19592  | 2.01E-05 |
| 5.26E-08 | 0.248875 | 5.04E-08 | -0.04758 | 0.30483  | 0.18105  | 8.33E-05 | 0.076186 | 0.1001   |
| 2.45E-10 | 0.229041 | 5.64E-07 | -0.02347 | 0.61291  | 0.189065 | 3.92E-05 | -0.03221 | 0.48746  |
| 1.75E-08 | 0.226728 | 7.38E-07 | -0.19995 | 1.34E-05 | 0.116001 | 0.01212  | 0.228616 | 5.93E-07 |
| 4.90E-05 | 0.258619 | 1.42E-08 | 0.146346 | 0.00152  | 0.223388 | 1.08E-06 | 0.468301 | 7.87E-27 |
| 0.11874  | -0.25821 | 1.50E-08 | -0.45917 | 9.86E-26 | -0.32411 | 6.97E-13 | 0.097064 | 0.036    |
| 1.14E-18 | 0.261357 | 9.88E-09 | -0.0288  | 0.53473  | 0.213601 | 3.20E-06 | 0.281179 | 6.20E-10 |
| 0.27971  | -0.20794 | 5.87E-06 | -0.36136 | 7.50E-16 | -0.23701 | 2.19E-07 | -0.18503 | 5.75E-05 |
| 0.06122  | -0.13948 | 0.00252  | -0.35876 | 1.24E-15 | -0.16207 | 0.00044  | 0.143565 | 0.00187  |
| 0.08269  | 0.173101 | 0.00017  | -0.18054 | 8.73E-05 | 0.030285 | 0.51385  | -0.08459 | 0.06778  |
| 4.88E-14 | 0.147994 | 0.00134  | -0.11008 | 0.01733  | 0.147293 | 0.00141  | 0.224699 | 9.31E-07 |
| 0.36144  | -0.0664  | 0.15195  | -0.28879 | 2.02E-10 | -0.15305 | 0.00091  | 0.027481 | 0.55359  |
| 0.00016  | 0.070838 | 0.12635  | -0.34588 | 1.43E-14 | -0.25321 | 2.89E-08 | 0.039094 | 0.3993   |
| 0.8064   | -0.11748 | 0.01106  | -0.36918 | 1.59E-16 | -0.24053 | 1.43E-07 | 0.025507 | 0.58244  |
| 0.02306  | -0.17725 | 0.00012  | -0.45224 | 6.39E-25 | -0.17112 | 0.0002   | 0.067152 | 0.14736  |
| 0.95964  | -0.03267 | 0.48125  | -0.26298 | 7.94E-09 | -0.16249 | 0.00042  | 0.061673 | 0.18337  |
| 0.75641  | -0.16587 | 0.00032  | -0.32668 | 4.48E-13 | -0.20171 | 1.12E-05 | 0.068244 | 0.14088  |
| 0.22171  | 0.121689 | 0.00848  | -0.29733 | 5.49E-11 | -0.12362 | 0.00748  | 0.142889 | 0.00196  |
| 0.51448  | 0.303257 | 2.17E-11 | 0.103206 | 0.02573  | 0.112864 | 0.01468  | 0.153922 | 0.00085  |

|          |          |          |          |          |          |          |          |          |
|----------|----------|----------|----------|----------|----------|----------|----------|----------|
| 0.03123  | 0.129149 | 0.00519  | -0.24335 | 1.01E-07 | -0.16448 | 0.00036  | 0.058995 | 0.20317  |
| 9.69E-11 | -0.36101 | 8.03E-16 | -0.43825 | 2.44E-23 | -0.46662 | 1.26E-26 | -0.16107 | 0.00048  |
| 0.00458  | 0.016238 | 0.72635  | -0.4018  | 1.51E-19 | -0.12413 | 0.00724  | 0.058004 | 0.21087  |
| 0.38745  | -0.03182 | 0.4927   | -0.21546 | 2.62E-06 | -0.16034 | 0.0005   | 0.27077  | 2.73E-09 |
| 0.11023  | 0.086617 | 0.06144  | -0.07686 | 0.09714  | -0.00983 | 0.83229  | 0.002525 | 0.95659  |
| 0.16427  | 0.010899 | 0.81428  | -0.22389 | 1.02E-06 | -0.08682 | 0.06084  | 0.336709 | 7.65E-14 |
| 0.19783  | -0.19214 | 2.91E-05 | -0.40582 | 6.09E-20 | -0.27454 | 1.61E-09 | 0.002869 | 0.9507   |
| 0.05441  | -0.04946 | 0.28618  | -0.31716 | 2.26E-12 | -0.2237  | 1.04E-06 | 0.274365 | 1.65E-09 |
| 2.40E-12 | -0.08479 | 0.06716  | -0.50168 | 3.89E-31 | -0.38598 | 4.86E-18 | -0.07701 | 0.09649  |
| 0.0063   | 0.219743 | 1.63E-06 | -0.06753 | 0.14512  | 0.10025  | 0.0303   | 0.201739 | 1.12E-05 |
| 0.61955  | -0.07457 | 0.10755  | -0.34082 | 3.64E-14 | -0.14239 | 0.00204  | 0.132007 | 0.00427  |
| 0.56837  | -0.19387 | 2.46E-05 | -0.43507 | 5.46E-23 | -0.23928 | 1.67E-07 | -0.01187 | 0.79802  |
| 4.08E-22 | 0.279276 | 8.17E-10 | 0.127508 | 0.00579  | 0.297128 | 5.66E-11 | 0.299537 | 3.89E-11 |
| 5.62E-10 | 0.323709 | 7.46E-13 | 0.02021  | 0.66311  | 0.217802 | 2.02E-06 | 0.026621 | 0.56607  |
| 0.00048  | -0.03528 | 0.44691  | -0.34973 | 6.99E-15 | -0.25038 | 4.16E-08 | -0.10346 | 0.02536  |
| 2.26E-11 | 0.02563  | 0.58063  | 0.031663 | 0.49487  | 0.179925 | 9.24E-05 | 0.144972 | 0.00168  |
| 0.00017  | 0.227452 | 6.79E-07 | -0.12606 | 0.00638  | 0.046262 | 0.31848  | -0.06521 | 0.15945  |
| 0.00385  | 0.142794 | 0.00198  | 0.057731 | 0.21303  | 0.098652 | 0.03306  | 0.138044 | 0.00279  |
| 0.72196  | 0.11217  | 0.0153   | -0.0851  | 0.06615  | -0.0491  | 0.28971  | 0.196842 | 1.83E-05 |
| 0.51174  | -0.27506 | 1.49E-09 | -0.42255 | 1.20E-21 | -0.2897  | 1.76E-10 | 0.111685 | 0.01575  |
| 0.49852  | -0.28273 | 4.95E-10 | -0.40293 | 1.17E-19 | -0.27097 | 2.65E-09 | 0.08147  | 0.07862  |
| 8.43E-05 | -0.04812 | 0.29937  | -0.11208 | 0.01539  | -0.01434 | 0.75722  | -0.01705 | 0.71331  |
| 0.00091  | 0.09385  | 0.04265  | -0.27197 | 2.31E-09 | -0.0081  | 0.86136  | 0.134218 | 0.00366  |
| 0.1532   | 0.073947 | 0.11051  | -0.09053 | 0.05058  | -0.05733 | 0.21623  | 0.265657 | 5.52E-09 |
| 0.30667  | -0.10047 | 0.02994  | -0.42492 | 6.74E-22 | -0.23969 | 1.58E-07 | 0.034279 | 0.45991  |
| 0.00123  | 0.10597  | 0.022    | -0.23166 | 4.15E-07 | -0.00341 | 0.94142  | 0.243126 | 1.04E-07 |
| 0.0045   | 0.018755 | 0.68603  | -0.03808 | 0.41168  | 0.023529 | 0.61204  | -0.32081 | 1.22E-12 |
| 0.49349  | -0.25725 | 1.71E-08 | -0.42482 | 6.90E-22 | -0.29511 | 7.73E-11 | 0.155386 | 0.00075  |
| 1.02E-08 | -0.17512 | 0.00014  | -0.44945 | 1.34E-24 | -0.42773 | 3.39E-22 | -0.16787 | 0.00027  |
| 0.00212  | 0.005542 | 0.90492  | -0.27209 | 2.27E-09 | -0.06144 | 0.18502  | 0.208953 | 5.27E-06 |
| 4.66E-09 | 0.092429 | 0.0459   | -0.02081 | 0.6538   | 0.125071 | 0.00681  | -0.07175 | 0.12152  |
| 0.00857  | -0.10581 | 0.02221  | -0.34462 | 1.81E-14 | -0.25851 | 1.44E-08 | -0.1069  | 0.02086  |
| 0.58158  | -0.06383 | 0.16852  | -0.45355 | 4.50E-25 | -0.23476 | 2.88E-07 | 0.024215 | 0.6017   |
| 0.33774  | -0.01322 | 0.77566  | -0.379   | 2.12E-17 | -0.21038 | 4.53E-06 | 0.017169 | 0.71135  |
| 0.13205  | -0.16579 | 0.00032  | -0.25326 | 2.87E-08 | -0.14256 | 0.00201  | -0.02105 | 0.65003  |
| 0.43333  | 0.202864 | 9.95E-06 | -0.2017  | 1.12E-05 | -0.04193 | 0.36591  | 0.075791 | 0.10188  |
| 1.98E-20 | 0.225576 | 8.42E-07 | 0.042853 | 0.35548  | 0.259871 | 1.20E-08 | 0.013997 | 0.7629   |
| 2.45E-17 | -0.03279 | 0.4796   | -0.08591 | 0.06361  | 0.120813 | 0.00897  | 0.215016 | 2.74E-06 |
| 0.15162  | -0.01339 | 0.77295  | -0.12123 | 0.00873  | -0.05938 | 0.20019  | 0.390889 | 1.69E-18 |
| 0.59719  | 0.163923 | 0.00038  | -0.1956  | 2.07E-05 | -0.08913 | 0.05425  | -0.04481 | 0.33398  |
| 0.00799  | 0.0883   | 0.05655  | -0.22628 | 7.77E-07 | -0.05264 | 0.25628  | 0.054894 | 0.23642  |
| 1.60E-06 | -0.07037 | 0.12888  | -0.23053 | 4.74E-07 | -0.03649 | 0.43144  | 0.063516 | 0.17059  |
| 0.04376  | 0.022282 | 0.63103  | -0.3536  | 3.36E-15 | -0.1053  | 0.02287  | 0.125317 | 0.0067   |
| 1.56E-07 | -0.01273 | 0.78385  | -0.16834 | 0.00026  | 0.048146 | 0.29915  | 0.200347 | 1.29E-05 |
| 0.2506   | -0.22547 | 8.53E-07 | -0.4239  | 8.63E-22 | -0.26382 | 7.09E-09 | 0.050416 | 0.27692  |

|          |          |          |          |          |          |          |          |          |
|----------|----------|----------|----------|----------|----------|----------|----------|----------|
| 3.66E-06 | 0.006731 | 0.88465  | -0.1214  | 0.00864  | 0.002469 | 0.95757  | 0.065886 | 0.15516  |
| 1.88E-08 | 0.230384 | 4.82E-07 | 0.040857 | 0.37836  | 0.193935 | 2.44E-05 | 0.343707 | 2.14E-14 |
| 1.28E-11 | 0.160516 | 0.0005   | -0.05781 | 0.21237  | 0.181167 | 8.24E-05 | 0.383949 | 7.49E-18 |
| 0.00749  | -0.25285 | 3.03E-08 | -0.41278 | 1.22E-20 | -0.32953 | 2.73E-13 | -0.00182 | 0.96872  |
| 2.40E-05 | -0.05171 | 0.26474  | -0.16698 | 0.00029  | -0.0439  | 0.3438   | 0.069254 | 0.13508  |
| 0.00259  | 0.155329 | 0.00076  | -0.28362 | 4.34E-10 | -0.03646 | 0.43183  | 0.056449 | 0.22339  |
| 0.41769  | -0.1085  | 0.01901  | -0.1106  | 0.0168   | -0.08066 | 0.08164  | -0.20787 | 5.91E-06 |
| 6.47E-07 | 0.092197 | 0.04645  | -0.21319 | 3.35E-06 | 0.056086 | 0.22638  | 0.13226  | 0.0042   |
| 0.29704  | -0.20548 | 7.59E-06 | -0.53613 | 4.15E-36 | -0.34123 | 3.38E-14 | 0.066845 | 0.14922  |
| 0.00215  | 0.176677 | 0.00012  | -0.23017 | 4.95E-07 | -0.03166 | 0.49488  | -0.02035 | 0.6609   |
| 0.06124  | 0.1087   | 0.01879  | -0.01386 | 0.76516  | 0.049452 | 0.28622  | 0.294101 | 9.02E-11 |
| 0.00015  | -0.07848 | 0.09028  | -0.36094 | 8.14E-16 | -0.27087 | 2.69E-09 | 0.100585 | 0.02975  |
| 2.34E-15 | 0.190112 | 3.55E-05 | -0.12631 | 0.00627  | 0.156865 | 0.00067  | 0.283569 | 4.37E-10 |
| 0.00517  | -0.05666 | 0.2217   | -0.40587 | 6.02E-20 | -0.2647  | 6.29E-09 | -0.02416 | 0.60259  |
| 0.70713  | -0.18679 | 4.88E-05 | -0.33074 | 2.21E-13 | -0.23382 | 3.22E-07 | 0.031324 | 0.49951  |
| 0.01722  | 0.171651 | 0.00019  | -0.15048 | 0.00111  | 0.033384 | 0.47171  | 0.512963 | 1.06E-32 |
| 4.44E-06 | 0.209247 | 5.11E-06 | -0.05119 | 0.26956  | 0.104218 | 0.0243   | 0.041282 | 0.37341  |
| 0.00051  | -0.10807 | 0.01949  | -0.27798 | 9.84E-10 | -0.13561 | 0.00332  | 0.20341  | 9.41E-06 |
| 0.07656  | 0.140494 | 0.00234  | -0.0459  | 0.32232  | 0.036899 | 0.4263   | 0.051677 | 0.26506  |
| 0.08381  | 0.029779 | 0.5209   | -0.32676 | 4.42E-13 | -0.11267 | 0.01485  | 0.19833  | 1.58E-05 |
| 0.26975  | 0.157468 | 0.00064  | -0.27098 | 2.65E-09 | -0.13858 | 0.00269  | 0.071712 | 0.12173  |
| 0.20896  | -0.05311 | 0.25206  | -0.41166 | 1.59E-20 | -0.22392 | 1.02E-06 | -0.08727 | 0.05949  |
| 8.94E-06 | 0.007403 | 0.87323  | -0.31215 | 5.17E-12 | -0.05321 | 0.25109  | 0.210173 | 4.63E-06 |
| 5.68E-14 | 0.174885 | 0.00015  | 0.045883 | 0.32247  | 0.204013 | 8.84E-06 | 0.167872 | 0.00027  |
| 0.00544  | 0.000634 | 0.9891   | -0.22935 | 5.44E-07 | -0.10639 | 0.02148  | 0.022661 | 0.62522  |
| 8.63E-10 | -0.43922 | 1.90E-23 | -0.56088 | 4.74E-40 | -0.50629 | 9.06E-32 | -0.15363 | 0.00087  |
| 0.92024  | 0.167369 | 0.00028  | -0.20297 | 9.84E-06 | -0.08939 | 0.05356  | 0.280501 | 6.84E-10 |
| 1.90E-07 | -0.15934 | 0.00055  | -0.43041 | 1.75E-22 | -0.35205 | 4.51E-15 | 0.187593 | 4.52E-05 |
| 3.37E-11 | 0.142144 | 0.00208  | -0.14577 | 0.00159  | 0.122838 | 0.00787  | 0.24763  | 5.91E-08 |
| 0.76283  | -0.22052 | 1.49E-06 | -0.33841 | 5.63E-14 | -0.2416  | 1.25E-07 | -0.1051  | 0.02312  |
| 0.00095  | 0.006769 | 0.88401  | -0.34151 | 3.21E-14 | -0.10562 | 0.02245  | 0.278212 | 9.52E-10 |
| 0.12276  | -0.05223 | 0.26001  | -0.28245 | 5.15E-10 | -0.14592 | 0.00157  | 0.133491 | 0.00385  |
| 0.93759  | -0.14929 | 0.00121  | -0.29003 | 1.67E-10 | -0.21019 | 4.62E-06 | -0.21046 | 4.49E-06 |
| 0.00022  | -0.17751 | 0.00012  | -0.38164 | 1.22E-17 | -0.15531 | 0.00076  | 0.165651 | 0.00032  |
| 0.05154  | -0.11414 | 0.01359  | -0.33968 | 4.48E-14 | -0.13464 | 0.00355  | 0.128464 | 0.00543  |
| 4.62E-05 | -0.19651 | 1.89E-05 | -0.31061 | 6.66E-12 | -0.11089 | 0.01652  | 0.283045 | 4.72E-10 |
| 2.60E-07 | 0.273864 | 1.77E-09 | -0.06505 | 0.16049  | 0.142206 | 0.00207  | 0.170479 | 0.00021  |
| 5.26E-06 | 0.042017 | 0.36496  | -0.25911 | 1.33E-08 | 0.00321  | 0.94485  | 0.009102 | 0.84447  |
| 4.21E-06 | -0.09873 | 0.03292  | -0.30331 | 2.15E-11 | -0.05732 | 0.21634  | 0.087348 | 0.05927  |
| 0.00015  | 0.179945 | 9.22E-05 | -0.20392 | 8.93E-06 | 0.04582  | 0.32314  | 0.004759 | 0.91831  |
| 2.19E-40 | 0.406742 | 4.93E-20 | 0.141985 | 0.0021   | 0.398345 | 3.28E-19 | 0.208424 | 5.57E-06 |
| 0.73616  | -0.35163 | 4.88E-15 | -0.33817 | 5.88E-14 | -0.2661  | 5.20E-09 | -0.05246 | 0.25788  |
| 0.00611  | 0.01274  | 0.78363  | -0.35112 | 5.38E-15 | -0.19186 | 3.00E-05 | 0.124417 | 0.0071   |
| 0.1561   | -0.23235 | 3.83E-07 | -0.58359 | 5.69E-44 | -0.3751  | 4.76E-17 | 0.131816 | 0.00433  |
| 0.18249  | -0.14409 | 0.0018   | -0.38386 | 7.63E-18 | -0.19615 | 1.96E-05 | 0.016568 | 0.72101  |

|          |          |          |          |          |          |          |          |          |
|----------|----------|----------|----------|----------|----------|----------|----------|----------|
| 0.12197  | -0.09991 | 0.03087  | -0.29663 | 6.12E-11 | -0.12707 | 0.00596  | 0.090778 | 0.04994  |
| 6.22E-12 | 0.318319 | 1.86E-12 | -0.00837 | 0.85678  | 0.231927 | 4.02E-07 | 0.297833 | 5.08E-11 |
| 2.62E-24 | 0.177854 | 0.00011  | 0.045407 | 0.32752  | 0.301291 | 2.96E-11 | 0.076368 | 0.09929  |
| 0.05225  | -0.05114 | 0.27007  | -0.35585 | 2.18E-15 | -0.13168 | 0.00437  | 0.061172 | 0.18696  |
| 0.00049  | 0.051567 | 0.26609  | -0.21421 | 3.00E-06 | -0.0337  | 0.46757  | -0.00918 | 0.84313  |
| 0.33868  | -0.14899 | 0.00124  | -0.39948 | 2.55E-19 | -0.21672 | 2.28E-06 | 0.005968 | 0.89765  |
| 4.14E-05 | 0.128894 | 0.00528  | -0.21249 | 3.61E-06 | 0.013462 | 0.77169  | 0.00875  | 0.85043  |
| 4.28E-09 | -0.15149 | 0.00102  | -0.52627 | 1.26E-34 | -0.41867 | 3.04E-21 | -0.20934 | 5.06E-06 |
| 3.28E-09 | 0.401132 | 1.76E-19 | 0.446678 | 2.77E-24 | 0.4094   | 2.68E-20 | 0.358789 | 1.24E-15 |
| 0.08754  | 0.025272 | 0.58592  | -0.24442 | 8.84E-08 | -0.12744 | 0.00582  | 0.265246 | 5.84E-09 |
| 0.60414  | -0.24885 | 5.06E-08 | -0.53542 | 5.32E-36 | -0.31962 | 1.49E-12 | 0.04721  | 0.30866  |
| 4.87E-06 | -0.17489 | 0.00015  | -0.63502 | 4.33E-54 | -0.45247 | 6.00E-25 | -0.15466 | 0.0008   |
| 0.01356  | -0.01794 | 0.69891  | -0.30973 | 7.68E-12 | -0.23928 | 1.66E-07 | -0.17267 | 0.00018  |
| 2.72E-08 | -0.15418 | 0.00083  | -0.33605 | 8.60E-14 | -0.06967 | 0.13272  | 0.129864 | 0.00494  |
| 0.03498  | -0.24278 | 1.08E-07 | -0.23238 | 3.81E-07 | -0.25349 | 2.79E-08 | -0.12672 | 0.0061   |
| 0.25589  | -0.29294 | 1.08E-10 | -0.3939  | 8.77E-19 | -0.29607 | 6.67E-11 | -0.14483 | 0.0017   |
| 0.00528  | -0.32946 | 2.76E-13 | -0.35792 | 1.47E-15 | -0.18724 | 4.67E-05 | -0.06182 | 0.18233  |
| 0.35788  | -0.013   | 0.77931  | -0.38253 | 1.01E-17 | -0.16771 | 0.00027  | 0.13491  | 0.00349  |
| 0.05426  | -0.30951 | 7.95E-12 | -0.60415 | 8.51E-48 | -0.40675 | 4.92E-20 | -0.01496 | 0.74715  |
| 3.94E-09 | -0.06336 | 0.17162  | -0.16789 | 0.00027  | 0.039863 | 0.39007  | 0.15318  | 0.0009   |
| 0.31924  | -0.04741 | 0.30657  | -0.35913 | 1.16E-15 | -0.21805 | 1.97E-06 | -0.13347 | 0.00386  |
| 0.01013  | -0.09523 | 0.03968  | -0.32223 | 9.61E-13 | -0.25589 | 2.04E-08 | -0.09554 | 0.03903  |
| 0.53254  | -0.13951 | 0.00251  | -0.4456  | 3.68E-24 | -0.21285 | 3.47E-06 | 0.044209 | 0.34045  |
| 0.1439   | -0.21951 | 1.67E-06 | -0.36679 | 2.56E-16 | -0.19612 | 1.97E-05 | -0.04781 | 0.30251  |
| 4.52E-22 | 0.388662 | 2.74E-18 | 0.157935 | 0.00061  | 0.409358 | 2.70E-20 | 0.272074 | 2.27E-09 |
| 0.19828  | 0.014814 | 0.74951  | -0.35567 | 2.26E-15 | -0.22506 | 8.94E-07 | -0.08095 | 0.08053  |
| 0.08609  | -0.19506 | 2.19E-05 | -0.09005 | 0.05181  | -0.08512 | 0.06607  | -0.15868 | 0.00058  |
| 2.53E-05 | -0.11599 | 0.01213  | -0.48732 | 3.17E-29 | -0.35148 | 5.02E-15 | 0.307409 | 1.12E-11 |
| 2.92E-09 | 0.213305 | 3.31E-06 | 0.07279  | 0.11621  | 0.226288 | 7.76E-07 | 0.045977 | 0.32148  |
| 0.12843  | -0.0364  | 0.43255  | -0.29957 | 3.88E-11 | -0.12843 | 0.00545  | 0.090586 | 0.05042  |
| 0.00503  | 0.292123 | 1.22E-10 | -0.09352 | 0.04338  | 0.115815 | 0.01226  | 0.027818 | 0.54874  |
| 0.0002   | 0.160469 | 0.0005   | -0.19623 | 1.95E-05 | 0.038249 | 0.40957  | 0.205373 | 7.68E-06 |
| 0.86509  | -0.12457 | 0.00703  | -0.32256 | 9.09E-13 | -0.21336 | 3.29E-06 | 0.105518 | 0.02258  |
| 0.07626  | -0.00302 | 0.94811  | -0.16934 | 0.00024  | -0.08912 | 0.05428  | 0.025787 | 0.5783   |
| 0.0102   | -0.33308 | 1.46E-13 | -0.27564 | 1.37E-09 | -0.267   | 4.59E-09 | -0.07217 | 0.11937  |
| 0.95216  | 0.017506 | 0.70593  | -0.10739 | 0.02028  | -0.07786 | 0.09284  | -0.08147 | 0.0786   |
| 0.00033  | 0.102923 | 0.02614  | -0.02804 | 0.54557  | 0.049016 | 0.29049  | 0.228593 | 5.95E-07 |
| 0.60925  | 0.144005 | 0.00181  | -0.18003 | 9.15E-05 | -0.0728  | 0.11618  | -0.1366  | 0.0031   |
| 0.03695  | -0.07251 | 0.1176   | -0.3002  | 3.51E-11 | -0.13155 | 0.00441  | 0.262338 | 8.66E-09 |
| 4.06E-10 | 0.158429 | 0.00059  | 0.063406 | 0.17134  | 0.148269 | 0.00131  | 0.138534 | 0.0027   |
| 0.94365  | 0.17178  | 0.00019  | -0.10403 | 0.02456  | -0.04455 | 0.33675  | 0.451167 | 8.50E-25 |
| 6.29E-05 | 0.037292 | 0.4214   | -0.26042 | 1.12E-08 | -0.04639 | 0.31718  | 0.095474 | 0.03917  |
| 0.00011  | -0.15258 | 0.00094  | -0.47595 | 8.94E-28 | -0.34643 | 1.29E-14 | 0.061422 | 0.18516  |
| 0.001    | -0.05121 | 0.26938  | -0.15363 | 0.00087  | -0.17075 | 0.00021  | 0.441853 | 9.71E-24 |
| 0.61197  | -0.1297  | 0.005    | -0.19531 | 2.13E-05 | -0.15258 | 0.00094  | -0.04071 | 0.38003  |

|          |          |          |          |          |          |          |          |          |
|----------|----------|----------|----------|----------|----------|----------|----------|----------|
| 2.19E-12 | 0.140484 | 0.00234  | -0.00556 | 0.90467  | 0.1752   | 0.00014  | 0.231842 | 4.06E-07 |
| 0.00316  | -0.18123 | 8.20E-05 | -0.3324  | 1.65E-13 | -0.15501 | 0.00078  | 0.069753 | 0.13228  |
| 4.21E-19 | 0.265561 | 5.60E-09 | -0.01426 | 0.75854  | 0.288804 | 2.01E-10 | 0.40366  | 9.96E-20 |
| 0.00065  | -0.44983 | 1.21E-24 | -0.49229 | 7.07E-30 | -0.40485 | 7.60E-20 | -0.25902 | 1.35E-08 |
| 2.48E-11 | 0.227499 | 6.75E-07 | -0.00095 | 0.98362  | 0.197374 | 1.74E-05 | 0.234562 | 2.94E-07 |
| 4.56E-20 | 0.310851 | 6.40E-12 | 0.119729 | 0.0096   | 0.287092 | 2.60E-10 | 0.325432 | 5.55E-13 |
| 0.72754  | -0.06826 | 0.14079  | -0.39692 | 4.50E-19 | -0.20542 | 7.64E-06 | 0.091318 | 0.04858  |
| 1.85E-15 | 0.30231  | 2.52E-11 | 0.150215 | 0.00113  | 0.310142 | 7.18E-12 | 0.300872 | 3.16E-11 |
| 0.10865  | -0.17618 | 0.00013  | -0.39107 | 1.63E-18 | -0.28376 | 4.25E-10 | 0.190842 | 3.31E-05 |
| 0.01139  | -0.09666 | 0.03679  | -0.22083 | 1.44E-06 | -0.07584 | 0.10164  | 0.197195 | 1.77E-05 |
| 5.11E-09 | 0.102211 | 0.0272   | -0.10299 | 0.02604  | 0.059909 | 0.19624  | 0.045798 | 0.32337  |
| 0.00448  | -0.17136 | 0.0002   | -0.3495  | 7.30E-15 | -0.30878 | 8.96E-12 | -0.19365 | 2.51E-05 |
| 0.133    | -0.02786 | 0.54811  | -0.15374 | 0.00086  | -0.09736 | 0.03543  | 0.06164  | 0.1836   |
| 2.21E-05 | -0.15861 | 0.00058  | -0.51731 | 2.54E-33 | -0.38153 | 1.25E-17 | -0.02315 | 0.61772  |
| 3.19E-11 | 0.101975 | 0.02756  | -0.15413 | 0.00083  | 0.048801 | 0.29261  | 0.115895 | 0.0122   |
| 0.48137  | -0.06873 | 0.13806  | -0.37902 | 2.11E-17 | -0.21754 | 2.08E-06 | -0.08634 | 0.06228  |
| 0.02055  | 0.377326 | 3.00E-17 | 0.52074  | 8.12E-34 | 0.38286  | 9.44E-18 | -0.17828 | 0.00011  |
| 0.64147  | -0.20427 | 8.60E-06 | -0.3969  | 4.53E-19 | -0.25769 | 1.61E-08 | 0.074079 | 0.10987  |
| 5.47E-06 | 0.181339 | 8.11E-05 | -0.00193 | 0.96684  | 0.130577 | 0.00471  | 0.300759 | 3.22E-11 |
| 3.03E-10 | 0.300174 | 3.53E-11 | -0.07086 | 0.12621  | 0.180872 | 8.47E-05 | -0.0259  | 0.57667  |
| 2.29E-05 | -0.0998  | 0.03106  | -0.19611 | 1.97E-05 | -0.05836 | 0.20808  | 0.228787 | 5.81E-07 |
| 2.29E-05 | -0.24047 | 1.44E-07 | -0.50369 | 2.07E-31 | -0.37554 | 4.34E-17 | -0.19493 | 2.22E-05 |
| 1.27E-07 | 0.259701 | 1.23E-08 | 0.498595 | 1.02E-30 | 0.359739 | 1.03E-15 | -0.0722  | 0.1192   |
| 0.00264  | 0.261698 | 9.44E-09 | -0.14569 | 0.0016   | 0.055002 | 0.2355   | 0.071872 | 0.1209   |
| 7.85E-06 | 0.157469 | 0.00064  | -0.21014 | 4.64E-06 | 0.019439 | 0.67522  | 0.139252 | 0.00256  |
| 0.00034  | 0.252692 | 3.09E-08 | -0.19039 | 3.45E-05 | 0.018889 | 0.6839   | -0.06209 | 0.18042  |
| 0.66057  | -0.0494  | 0.28675  | -0.33354 | 1.35E-13 | -0.14801 | 0.00134  | 0.110961 | 0.01645  |
| 0.59615  | 0.286665 | 2.77E-10 | -0.18404 | 6.31E-05 | -0.05521 | 0.23375  | 0.163532 | 0.00039  |
| 0.00033  | -0.10143 | 0.02841  | -0.39475 | 7.28E-19 | -0.34247 | 2.69E-14 | -0.15044 | 0.00111  |
| 2.06E-25 | 0.283079 | 4.70E-10 | 0.094111 | 0.04207  | 0.36486  | 3.76E-16 | 0.215893 | 2.49E-06 |
| 0.06707  | -0.42214 | 1.32E-21 | -0.44718 | 2.43E-24 | -0.35993 | 9.91E-16 | -0.09997 | 0.03077  |
| 0.01312  | 0.04941  | 0.28663  | -0.26702 | 4.58E-09 | -0.0325  | 0.48358  | 0.162724 | 0.00041  |
| 0.97016  | 0.020993 | 0.65091  | -0.42127 | 1.63E-21 | -0.20142 | 1.15E-05 | 0.007757 | 0.86723  |
| 1.56E-08 | -0.18753 | 4.54E-05 | -0.57577 | 1.38E-42 | -0.42142 | 1.57E-21 | -0.20515 | 7.85E-06 |
| 5.59E-08 | 0.175312 | 0.00014  | -0.1007  | 0.02956  | 0.126756 | 0.00609  | -0.02024 | 0.6627   |
| 0.13196  | -0.16132 | 0.00047  | -0.36296 | 5.47E-16 | -0.1796  | 9.52E-05 | 0.189048 | 3.93E-05 |
| 3.74E-12 | -0.09223 | 0.04638  | -0.20448 | 8.42E-06 | 0.004574 | 0.92146  | 0.143357 | 0.0019   |
| 0.99101  | 0.076874 | 0.09706  | -0.38594 | 4.91E-18 | -0.17656 | 0.00013  | 0.020575 | 0.65742  |
| 0.13703  | -0.23912 | 1.70E-07 | -0.45928 | 9.56E-26 | -0.25719 | 1.72E-08 | 0.061378 | 0.18548  |
| 0.04731  | -0.04796 | 0.30098  | -0.19964 | 1.38E-05 | -0.07752 | 0.09429  | -0.06064 | 0.19085  |
| 4.06E-05 | 0.222184 | 1.24E-06 | 0.003585 | 0.9384   | 0.152843 | 0.00092  | -0.00029 | 0.99506  |
| 0.15432  | 0.03153  | 0.49668  | -0.29879 | 4.38E-11 | -0.0964  | 0.0373   | 0.129895 | 0.00493  |
| 0.00045  | -0.06949 | 0.13376  | -0.23624 | 2.41E-07 | -0.0476  | 0.30466  | 0.129931 | 0.00492  |
| 2.64E-15 | 0.248464 | 5.31E-08 | -0.11517 | 0.01276  | 0.185506 | 5.50E-05 | 0.259384 | 1.29E-08 |
| 0.00227  | 0.081166 | 0.07974  | -0.27442 | 1.63E-09 | -0.045   | 0.33186  | 0.421523 | 1.53E-21 |

|          |          |          |          |          |          |          |          |          |
|----------|----------|----------|----------|----------|----------|----------|----------|----------|
| 1.12E-12 | 0.203565 | 9.26E-06 | -0.01545 | 0.7391   | 0.185573 | 5.47E-05 | 0.1526   | 0.00094  |
| 0.10473  | -0.28976 | 1.74E-10 | -0.24325 | 1.02E-07 | -0.19166 | 3.05E-05 | -0.00857 | 0.8535   |
| 1.86E-23 | 0.33949  | 4.63E-14 | 0.079282 | 0.08701  | 0.312046 | 5.26E-12 | 0.163612 | 0.00039  |
| 0.28601  | 0.064005 | 0.16732  | -0.3278  | 3.69E-13 | -0.1238  | 0.0074   | 0.095494 | 0.03913  |
| 0.00346  | -0.0214  | 0.64463  | -0.45094 | 9.02E-25 | -0.28071 | 6.64E-10 | -0.00303 | 0.94796  |
| 7.56E-08 | -0.12263 | 0.00798  | -0.25647 | 1.89E-08 | -0.23822 | 1.89E-07 | -0.07237 | 0.11832  |
| 2.77E-10 | -0.3441  | 1.99E-14 | -0.39273 | 1.13E-18 | -0.36681 | 2.55E-16 | -0.26433 | 6.62E-09 |
| 9.76E-05 | -0.03883 | 0.40247  | -0.32487 | 6.11E-13 | -0.20741 | 6.20E-06 | -0.23782 | 1.99E-07 |
| 0.00241  | -0.05056 | 0.27557  | -0.23113 | 4.42E-07 | -0.15215 | 0.00097  | -0.38729 | 3.68E-18 |
| 5.24E-09 | -0.22936 | 5.44E-07 | -0.39309 | 1.05E-18 | -0.32351 | 7.73E-13 | -0.39301 | 1.07E-18 |
| 8.17E-24 | -0.32306 | 8.34E-13 | -0.56651 | 5.40E-41 | -0.52967 | 3.93E-35 | -0.33119 | 2.04E-13 |
| 0.55304  | 0.121079 | 0.00881  | -0.03866 | 0.4046   | 0.047859 | 0.30204  | -0.22423 | 9.82E-07 |
| 0.00068  | -0.16984 | 0.00023  | -0.18558 | 5.46E-05 | -0.19421 | 2.38E-05 | -0.21985 | 1.61E-06 |
| 0.00096  | 0.037247 | 0.42196  | -0.16707 | 0.00029  | -0.08473 | 0.06735  | -0.30939 | 8.11E-12 |
| 1.59E-23 | -0.18308 | 6.91E-05 | -0.49054 | 1.20E-29 | -0.4409  | 1.24E-23 | -0.36865 | 1.77E-16 |
| 4.73E-05 | -0.18853 | 4.13E-05 | -0.31102 | 6.23E-12 | -0.25807 | 1.53E-08 | -0.2659  | 5.34E-09 |
| 1.03E-05 | -0.1733  | 0.00017  | -0.21001 | 4.71E-06 | -0.23018 | 4.94E-07 | -0.00877 | 0.85009  |
| 1.28E-22 | -0.11909 | 0.01     | -0.4588  | 1.09E-25 | -0.40298 | 1.16E-19 | -0.38306 | 9.05E-18 |
| 0.08738  | 0.075164 | 0.10475  | -0.23213 | 3.93E-07 | -0.08192 | 0.07697  | -0.12236 | 0.00812  |
| 2.18E-07 | -0.03233 | 0.48588  | -0.34393 | 2.06E-14 | -0.25082 | 3.93E-08 | -0.26667 | 4.81E-09 |
| 2.35E-12 | -0.12223 | 0.00819  | -0.41412 | 8.90E-21 | -0.3302  | 2.43E-13 | -0.25387 | 2.65E-08 |
| 3.99E-05 | -0.31181 | 5.47E-12 | -0.39298 | 1.07E-18 | -0.30865 | 9.15E-12 | -0.08419 | 0.0691   |
| 0.32392  | -0.15565 | 0.00074  | -0.31652 | 2.51E-12 | -0.16641 | 0.0003   | -0.10776 | 0.01985  |
| 6.76E-11 | -0.15081 | 0.00108  | -0.36713 | 2.39E-16 | -0.29844 | 4.62E-11 | -0.3435  | 2.23E-14 |
| 6.64E-12 | -0.17189 | 0.00019  | -0.34471 | 1.78E-14 | -0.33486 | 1.06E-13 | -0.21171 | 3.93E-06 |
| 0.02296  | 0.00116  | 0.98005  | -0.22938 | 5.43E-07 | -0.11753 | 0.01103  | -0.31217 | 5.16E-12 |
| 0.244    | 0.08389  | 0.07011  | -0.21365 | 3.18E-06 | -0.06846 | 0.13961  | -0.33233 | 1.67E-13 |
| 3.21E-17 | -0.24089 | 1.37E-07 | -0.49898 | 9.05E-31 | -0.43283 | 9.59E-23 | -0.42279 | 1.13E-21 |
| 1.79E-07 | -0.17857 | 0.0001   | -0.25376 | 2.69E-08 | -0.2631  | 7.81E-09 | -0.1345  | 0.00359  |
| 1.46E-08 | -0.03144 | 0.49787  | -0.22743 | 6.80E-07 | -0.19231 | 2.87E-05 | 0.022823 | 0.62275  |
| 9.34E-11 | -0.17527 | 0.00014  | -0.3334  | 1.38E-13 | -0.29281 | 1.10E-10 | -0.37007 | 1.32E-16 |
| 2.14E-09 | 0.056413 | 0.22369  | -0.19942 | 1.41E-05 | -0.15468 | 0.0008   | -0.12445 | 0.00709  |
| 1.38E-14 | -0.18234 | 7.40E-05 | -0.30218 | 2.57E-11 | -0.32357 | 7.64E-13 | -0.2471  | 6.32E-08 |
| 6.17E-13 | -0.23721 | 2.14E-07 | -0.40247 | 1.30E-19 | -0.36927 | 1.56E-16 | -0.27719 | 1.10E-09 |
| 1.96E-26 | -0.33432 | 1.17E-13 | -0.48057 | 2.33E-28 | -0.50896 | 3.85E-32 | -0.39832 | 3.31E-19 |
| 6.80E-26 | -0.25638 | 1.91E-08 | -0.5488  | 4.37E-38 | -0.48534 | 5.72E-29 | -0.5731  | 4.02E-42 |
| 4.16E-07 | -0.27356 | 1.85E-09 | -0.46593 | 1.53E-26 | -0.37292 | 7.43E-17 | -0.23415 | 3.09E-07 |
| 0.00069  | -0.04877 | 0.29292  | -0.34819 | 9.33E-15 | -0.20575 | 7.38E-06 | 0.0532   | 0.25122  |
| 1.04E-07 | -0.1039  | 0.02475  | -0.23594 | 2.50E-07 | -0.21956 | 1.66E-06 | -0.19735 | 1.74E-05 |
| 3.64E-19 | -0.2437  | 9.66E-08 | -0.37212 | 8.74E-17 | -0.39095 | 1.67E-18 | -0.213   | 3.42E-06 |
| 0.00047  | 0.106943 | 0.02081  | -0.18186 | 7.73E-05 | -0.09508 | 0.03998  | -0.22128 | 1.37E-06 |
| 4.09E-08 | -0.04754 | 0.30526  | -0.29114 | 1.42E-10 | -0.2361  | 2.45E-07 | -0.08229 | 0.07565  |
| 0.78466  | 0.091998 | 0.04692  | -0.1515  | 0.00102  | -0.02639 | 0.56951  | -0.02416 | 0.60258  |
| 7.05E-24 | -0.18475 | 5.91E-05 | -0.38136 | 1.29E-17 | -0.40199 | 1.45E-19 | -0.25262 | 3.12E-08 |
| 0.00278  | 0.198983 | 1.48E-05 | 0.065022 | 0.16066  | 0.172133 | 0.00019  | 0.228544 | 5.98E-07 |

|          |          |          |          |          |          |          |          |          |
|----------|----------|----------|----------|----------|----------|----------|----------|----------|
| 0.7758   | 0.06755  | 0.14497  | -0.24287 | 1.07E-07 | -0.09659 | 0.03692  | -0.06772 | 0.14396  |
| 5.29E-10 | -0.01682 | 0.71697  | -0.29428 | 8.78E-11 | -0.23902 | 1.72E-07 | -0.20075 | 1.24E-05 |
| 5.33E-08 | 0.00398  | 0.93164  | -0.1807  | 8.60E-05 | -0.18509 | 5.72E-05 | -0.23893 | 1.74E-07 |
| 0.01326  | -0.09122 | 0.04883  | -0.22047 | 1.50E-06 | -0.15449 | 0.00081  | -0.29195 | 1.25E-10 |
| 2.11E-17 | -0.19393 | 2.45E-05 | -0.55144 | 1.66E-38 | -0.44232 | 8.61E-24 | -0.33882 | 5.23E-14 |
| 3.76E-05 | -0.19502 | 2.20E-05 | -0.47062 | 4.09E-27 | -0.3286  | 3.21E-13 | -0.21091 | 4.28E-06 |
| 0.26724  | -0.05253 | 0.25721  | -0.07405 | 0.11     | -0.07312 | 0.11455  | -0.00153 | 0.97367  |
| 3.23E-05 | 0.053217 | 0.25107  | -0.23386 | 3.20E-07 | -0.14137 | 0.0022   | -0.22343 | 1.08E-06 |
| 0.00161  | -0.09994 | 0.03082  | -0.12994 | 0.00492  | -0.14909 | 0.00123  | -0.15223 | 0.00097  |
| 6.52E-12 | -0.06042 | 0.19244  | -0.3247  | 6.30E-13 | -0.26247 | 8.51E-09 | -0.15304 | 0.00091  |
| 0.62136  | 0.060325 | 0.19315  | 0.018562 | 0.68909  | 0.051721 | 0.26465  | -0.33568 | 9.20E-14 |
| 0.02397  | -0.13187 | 0.00431  | -0.28271 | 4.96E-10 | -0.19299 | 2.68E-05 | -0.02089 | 0.65246  |
| 3.15E-16 | -0.11546 | 0.01253  | -0.48669 | 3.82E-29 | -0.37003 | 1.34E-16 | -0.33237 | 1.66E-13 |
| 1.63E-09 | -0.07427 | 0.10896  | -0.3136  | 4.07E-12 | -0.25474 | 2.37E-08 | -0.09094 | 0.04952  |
| 4.29E-26 | -0.20954 | 4.95E-06 | -0.44957 | 1.30E-24 | -0.43194 | 1.20E-22 | -0.17655 | 0.00013  |
| 0.1655   | -0.32259 | 9.03E-13 | -0.35173 | 4.79E-15 | -0.25538 | 2.18E-08 | -0.16744 | 0.00028  |
| 4.17E-13 | -0.18453 | 6.03E-05 | -0.37131 | 1.03E-16 | -0.31526 | 3.10E-12 | -0.33472 | 1.09E-13 |
| 1.62E-09 | -0.11051 | 0.01689  | -0.24505 | 8.17E-08 | -0.22312 | 1.12E-06 | -0.23862 | 1.80E-07 |
| 0.00021  | 0.148099 | 0.00133  | -0.21001 | 4.71E-06 | -0.10195 | 0.02759  | -0.11756 | 0.01101  |
| 9.30E-06 | -0.03163 | 0.49532  | -0.2316  | 4.18E-07 | -0.17917 | 9.90E-05 | -0.07087 | 0.1262   |
| 2.63E-06 | -0.14836 | 0.0013   | -0.33162 | 1.89E-13 | -0.28566 | 3.21E-10 | -0.12244 | 0.00808  |
| 1.21E-07 | -0.09971 | 0.03122  | -0.33037 | 2.36E-13 | -0.26248 | 8.50E-09 | -0.57434 | 2.45E-42 |
| 0.00044  | 0.058694 | 0.20548  | -0.16173 | 0.00045  | -0.11979 | 0.00957  | -0.01337 | 0.77329  |
| 3.24E-20 | -0.25756 | 1.64E-08 | -0.56679 | 4.83E-41 | -0.48632 | 4.27E-29 | -0.33056 | 2.28E-13 |
| 1.18E-11 | -0.15869 | 0.00058  | -0.40112 | 1.76E-19 | -0.34873 | 8.43E-15 | -0.38003 | 1.71E-17 |
| 0.58335  | -0.06887 | 0.13724  | 0.015572 | 0.73715  | 0.030562 | 0.51     | -0.25566 | 2.10E-08 |
| 2.59E-06 | -0.01631 | 0.7252   | -0.33089 | 2.15E-13 | -0.2284  | 6.08E-07 | 0.004706 | 0.91921  |
| 2.87E-09 | -0.19248 | 2.82E-05 | -0.33478 | 1.08E-13 | -0.28248 | 5.13E-10 | -0.11843 | 0.01042  |
| 1.31E-20 | -0.30087 | 3.16E-11 | -0.54088 | 7.70E-37 | -0.50471 | 1.50E-31 | -0.37688 | 3.30E-17 |
| 1.51E-07 | -0.00946 | 0.83852  | -0.23225 | 3.87E-07 | -0.18786 | 4.40E-05 | -0.06654 | 0.15107  |
| 2.39E-15 | -0.28073 | 6.62E-10 | -0.43494 | 5.65E-23 | -0.42006 | 2.18E-21 | -0.13413 | 0.00368  |
| 6.64E-07 | -0.08044 | 0.08248  | -0.36417 | 4.31E-16 | -0.26706 | 4.56E-09 | -0.24524 | 7.97E-08 |
| 0.18302  | 0.240247 | 1.48E-07 | 0.037522 | 0.41853  | 0.071158 | 0.12465  | -0.15505 | 0.00077  |
| 2.96E-05 | 0.173514 | 0.00016  | 0.22201  | 1.26E-06 | 0.213985 | 3.07E-06 | -0.01335 | 0.77359  |
| 1.06E-09 | 0.125632 | 0.00656  | 0.090271 | 0.05123  | 0.199822 | 1.36E-05 | 0.375147 | 4.71E-17 |
| 0.22637  | -0.00062 | 0.98931  | 0.081166 | 0.07974  | 0.004013 | 0.93107  | -0.0146  | 0.753    |
| 0.69117  | 0.013863 | 0.76509  | 0.074624 | 0.10728  | 0.032129 | 0.48854  | -0.012   | 0.79587  |
| 0.00608  | 0.07186  | 0.12096  | 0.188816 | 4.02E-05 | 0.04497  | 0.3322   | -0.15588 | 0.00072  |
| 0.03301  | -0.09366 | 0.04308  | 0.049189 | 0.28879  | 0.039416 | 0.39542  | -0.03704 | 0.42449  |
| 0.11872  | -0.08384 | 0.07028  | -0.1472  | 0.00142  | -0.07786 | 0.09285  | 0.208546 | 5.50E-06 |
| 0.01407  | 0.036471 | 0.4317   | -0.15554 | 0.00074  | -0.12192 | 0.00835  | 0.139216 | 0.00257  |
| 0.00186  | 0.140003 | 0.00243  | 0.072964 | 0.11534  | -0.00504 | 0.91349  | -0.10787 | 0.01972  |
| 0.01974  | 0.326572 | 4.56E-13 | 0.256786 | 1.81E-08 | 0.240372 | 1.46E-07 | 0.190814 | 3.31E-05 |
| 0.00015  | 0.198374 | 1.57E-05 | 0.476191 | 8.33E-28 | 0.336627 | 7.76E-14 | 0.010818 | 0.81565  |
| 0.73113  | 0.08208  | 0.07639  | 0.154652 | 0.0008   | 0.095345 | 0.03944  | -0.04092 | 0.37758  |

|          |          |          |          |          |          |          |          |          |
|----------|----------|----------|----------|----------|----------|----------|----------|----------|
| 0.64361  | -0.03279 | 0.47962  | 0.068844 | 0.13741  | 0.007206 | 0.87659  | -0.08244 | 0.07512  |
| 2.18E-10 | 0.173933 | 0.00016  | 0.335505 | 9.49E-14 | 0.348365 | 9.03E-15 | -0.02281 | 0.62295  |
| 1.05E-09 | 0.136555 | 0.00311  | 0.351676 | 4.84E-15 | 0.323148 | 8.22E-13 | 0.072019 | 0.12014  |
| 2.25E-16 | 0.297649 | 5.23E-11 | 0.313672 | 4.03E-12 | 0.359152 | 1.15E-15 | -0.05387 | 0.24526  |
| 0.14608  | -0.02094 | 0.65166  | 0.079848 | 0.08477  | -0.00362 | 0.93774  | -0.04778 | 0.30289  |
| 0.00594  | 0.080212 | 0.08335  | 0.246881 | 6.49E-08 | 0.19911  | 1.46E-05 | -0.08228 | 0.07569  |
| 0.01231  | 0.044493 | 0.33736  | 0.081829 | 0.0773   | 0.000459 | 0.99211  | 0.07472  | 0.10682  |
| 0.86876  | -0.02838 | 0.54065  | 0.160682 | 0.00049  | 0.053749 | 0.24636  | 0.254237 | 2.53E-08 |
| 0.33994  | 0.118962 | 0.01008  | -0.0785  | 0.09019  | 0.010813 | 0.81573  | -0.05064 | 0.27482  |
| 0.10665  | 0.069832 | 0.13184  | 0.27058  | 2.80E-09 | 0.164383 | 0.00036  | -0.07049 | 0.12823  |
| 0.00184  | 0.037575 | 0.41787  | 0.125608 | 0.00657  | 0.011968 | 0.79645  | -0.18122 | 8.21E-05 |
| 0.00033  | 0.016684 | 0.71914  | 0.093263 | 0.04396  | -0.01013 | 0.82715  | -0.30859 | 9.23E-12 |
| 0.1505   | 0.17796  | 0.00011  | 0.263212 | 7.70E-09 | 0.210309 | 4.56E-06 | -0.08923 | 0.05399  |
| 0.01556  | 0.199395 | 1.42E-05 | 0.182119 | 7.55E-05 | 0.207877 | 5.90E-06 | 0.00216  | 0.96288  |
| 0.00335  | 0.177738 | 0.00011  | 0.099981 | 0.03075  | 0.18092  | 8.43E-05 | 0.050939 | 0.27196  |
| 4.94E-05 | 0.003489 | 0.94006  | 0.263549 | 7.35E-09 | 0.222971 | 1.13E-06 | 0.037204 | 0.42249  |
| 0.02444  | -0.03856 | 0.40573  | -0.12464 | 0.007    | -0.09363 | 0.04313  | 0.315445 | 3.00E-12 |
| 0.03576  | -0.0162  | 0.72694  | -0.12573 | 0.00652  | -0.06019 | 0.19417  | 0.11742  | 0.0111   |
| 0.11338  | -0.10021 | 0.03037  | -0.1179  | 0.01078  | -0.10295 | 0.0261   | -0.03865 | 0.40472  |
| 4.60E-18 | 0.159154 | 0.00056  | 0.366161 | 2.90E-16 | 0.387654 | 3.40E-18 | 0.375416 | 4.45E-17 |
| 0.00025  | -0.08855 | 0.05585  | 0.035786 | 0.4404   | 0.065644 | 0.15669  | 0.105651 | 0.02241  |
| 0.00638  | 0.080086 | 0.08384  | 0.192803 | 2.73E-05 | 0.083657 | 0.07089  | -0.04241 | 0.36048  |
| 1.44E-10 | 0.173913 | 0.00016  | 0.243833 | 9.51E-08 | 0.263802 | 7.11E-09 | 0.211667 | 3.94E-06 |
| 1.17E-05 | -0.05173 | 0.26459  | -0.05302 | 0.2528   | -0.11117 | 0.01625  | 0.059883 | 0.19644  |
| 0.0001   | 0.357636 | 1.55E-15 | 0.508168 | 4.97E-32 | 0.394096 | 8.40E-19 | 0.159576 | 0.00054  |
| 0.49273  | 0.106696 | 0.0211   | 0.122964 | 0.00781  | 0.08138  | 0.07894  | -0.18928 | 3.84E-05 |
| 0.03899  | 0.080209 | 0.08337  | 0.137331 | 0.00294  | 0.108833 | 0.01864  | 0.056275 | 0.22482  |
| 2.60E-05 | -0.1026  | 0.02662  | -0.06597 | 0.15465  | -0.1316  | 0.00439  | -0.11677 | 0.01156  |
| 2.99E-06 | 0.127309 | 0.00587  | 0.281048 | 6.32E-10 | 0.250328 | 4.19E-08 | 0.060037 | 0.19529  |
| 0.01693  | 0.2033   | 9.52E-06 | 0.286212 | 2.96E-10 | 0.21086  | 4.30E-06 | -0.03334 | 0.47232  |
| 0.19978  | 0.161367 | 0.00046  | 0.237602 | 2.04E-07 | 0.16652  | 0.0003   | -0.0573  | 0.21645  |
| 0.16984  | 0.101416 | 0.02842  | 0.073357 | 0.11339  | 0.030295 | 0.5137   | -0.05399 | 0.24427  |
| 0.90041  | 0.106586 | 0.02124  | 0.145993 | 0.00156  | 0.092676 | 0.04532  | -0.02248 | 0.62804  |
| 0.42457  | -0.03272 | 0.48055  | 0.094949 | 0.04027  | 0.050807 | 0.27321  | 0.006506 | 0.88848  |
| 0.16186  | -0.04344 | 0.34892  | 0.149075 | 0.00123  | 0.089283 | 0.05384  | -0.05634 | 0.22432  |
| 0.03792  | 0.211997 | 3.81E-06 | 0.149414 | 0.0012   | 0.1875   | 4.56E-05 | 0.034995 | 0.45057  |
| 0.22775  | 0.029394 | 0.52632  | -0.04251 | 0.35932  | -0.03978 | 0.39111  | 0.007022 | 0.87971  |
| 9.94E-05 | 0.049105 | 0.28961  | -0.14434 | 0.00176  | -0.13078 | 0.00464  | -0.01424 | 0.75887  |
| 0.00102  | -0.0693  | 0.13483  | -0.18    | 9.17E-05 | -0.17606 | 0.00013  | 0.08305  | 0.07297  |
| 0.70205  | 0.143738 | 0.00185  | 0.105057 | 0.02318  | 0.098862 | 0.03268  | 0.034072 | 0.46262  |
| 0.02526  | 0.088648 | 0.05558  | 0.032397 | 0.48492  | 0.081161 | 0.07976  | 0.021097 | 0.6493   |
| 0.57636  | -0.15608 | 0.00071  | -0.02051 | 0.65845  | -0.0414  | 0.37206  | -0.0662  | 0.15321  |
| 0.14841  | -0.03241 | 0.48475  | -0.02731 | 0.55608  | -0.02316 | 0.61756  | -0.04749 | 0.30583  |
| 0.14782  | 0.17967  | 9.46E-05 | 0.186469 | 5.03E-05 | 0.158868 | 0.00057  | -0.02765 | 0.55116  |
| 0.02715  | -0.04944 | 0.28631  | -0.0477  | 0.30364  | -0.06924 | 0.13516  | -0.17483 | 0.00015  |



|          |          |          |          |          |          |          |          |          |
|----------|----------|----------|----------|----------|----------|----------|----------|----------|
| 0.69829  | -0.1875  | 4.56E-05 | -0.05972 | 0.19766  | -0.05494 | 0.236    | -0.2357  | 2.57E-07 |
| 0.2697   | 0.131765 | 0.00434  | 0.281981 | 5.52E-10 | 0.156314 | 0.0007   | -0.04952 | 0.28559  |
| 0.00024  | 0.189376 | 3.81E-05 | 0.309069 | 8.55E-12 | 0.282672 | 4.99E-10 | -0.06245 | 0.1779   |
| 0.3493   | 0.178656 | 0.0001   | 0.070696 | 0.12712  | 0.087442 | 0.059    | 0.210205 | 4.61E-06 |
| 0.64474  | 0.098399 | 0.03351  | -0.00408 | 0.93001  | 0.00784  | 0.86582  | 0.190762 | 3.33E-05 |
| 0.75691  | 0.155304 | 0.00076  | 0.12416  | 0.00722  | 0.094885 | 0.0404   | -0.00578 | 0.90086  |
| 0.05045  | 0.33922  | 4.86E-14 | 0.185475 | 5.52E-05 | 0.21895  | 1.78E-06 | -0.12171 | 0.00847  |
| 0.93617  | 0.064465 | 0.16428  | 0.091385 | 0.04842  | 0.047339 | 0.30733  | -0.07822 | 0.09135  |
| 0.2295   | -0.08039 | 0.08266  | -0.14958 | 0.00119  | -0.10788 | 0.01971  | 0.200171 | 1.31E-05 |
| 0.00026  | 0.095174 | 0.03979  | -0.07626 | 0.09977  | -0.08427 | 0.06884  | -0.18037 | 8.87E-05 |
| 0.12103  | -0.07135 | 0.12364  | 0.014633 | 0.75247  | -0.05285 | 0.25433  | -0.06703 | 0.14807  |
| 0.42953  | 0.111287 | 0.01613  | 0.193005 | 2.68E-05 | 0.110455 | 0.01695  | 0.020315 | 0.66147  |
| 0.02585  | 0.223525 | 1.06E-06 | 0.188576 | 4.11E-05 | 0.207485 | 6.15E-06 | 0.016021 | 0.72986  |
| 0.13203  | -0.11275 | 0.01478  | -0.19231 | 2.87E-05 | -0.1283  | 0.00549  | 0.048447 | 0.29614  |
| 0.08226  | 0.02533  | 0.58506  | -0.16636 | 0.00031  | -0.09296 | 0.04465  | -0.03897 | 0.40078  |
| 0.15572  | -0.05863 | 0.20595  | -0.04915 | 0.28921  | -0.07243 | 0.11803  | 0.108012 | 0.01956  |
| 0.78268  | -0.02781 | 0.54879  | 0.116587 | 0.01169  | 0.055222 | 0.23363  | 0.028425 | 0.54004  |
| 0.0922   | 0.203941 | 8.91E-06 | 0.333235 | 1.42E-13 | 0.23431  | 3.03E-07 | -0.06011 | 0.19474  |
| 0.12383  | 0.174682 | 0.00015  | 0.04135  | 0.37262  | 0.085761 | 0.06406  | 0.316761 | 2.41E-12 |
| 1.81E-17 | 0.342057 | 2.90E-14 | 0.349989 | 6.66E-15 | 0.400725 | 1.93E-19 | 0.282319 | 5.25E-10 |
| 3.30E-12 | 0.333473 | 1.36E-13 | 0.279987 | 7.37E-10 | 0.338899 | 5.15E-14 | 0.238349 | 1.87E-07 |
| 3.47E-07 | 0.022724 | 0.62427  | 0.044024 | 0.34248  | 0.096377 | 0.03734  | 0.443691 | 6.04E-24 |
| 0.8775   | 0.164991 | 0.00034  | 0.085425 | 0.06511  | 0.088489 | 0.05602  | -0.05216 | 0.26058  |
| 0.07716  | 0.276703 | 1.18E-09 | 0.222319 | 1.22E-06 | 0.209679 | 4.88E-06 | -0.11947 | 0.00976  |
| 0.00109  | 0.261783 | 9.33E-09 | 0.208002 | 5.83E-06 | 0.272644 | 2.10E-09 | 0.115352 | 0.01262  |
| 0.0057   | 0.104695 | 0.02366  | -0.0083  | 0.85811  | -0.01724 | 0.71023  | -0.20711 | 6.40E-06 |
| 0.05514  | 0.151213 | 0.00105  | 0.105563 | 0.02252  | 0.151761 | 0.001    | 0.1063   | 0.02159  |
| 5.39E-12 | 0.374724 | 5.13E-17 | 0.402507 | 1.29E-19 | 0.434878 | 5.73E-23 | 0.2202   | 1.55E-06 |
| 0.96271  | -0.08249 | 0.07492  | 0.03982  | 0.39059  | 0.002685 | 0.95386  | -0.05779 | 0.21254  |
| 0.08572  | 0.104756 | 0.02358  | 0.233399 | 3.38E-07 | 0.178865 | 0.0001   | -0.0468  | 0.3129   |
| 0.11183  | 0.351062 | 5.44E-15 | 0.171421 | 0.0002   | 0.193683 | 2.51E-05 | 0.280706 | 6.64E-10 |
| 3.05E-12 | -0.13842 | 0.00272  | -0.30069 | 3.25E-11 | -0.31859 | 1.78E-12 | -0.13871 | 0.00266  |
| 0.65935  | 0.09823  | 0.03382  | 0.160094 | 0.00052  | 0.115831 | 0.01225  | 0.018451 | 0.69086  |
| 0.27598  | 0.142757 | 0.00198  | 0.270826 | 2.71E-09 | 0.188592 | 4.11E-05 | -0.03312 | 0.47526  |
| 0.79087  | 0.094923 | 0.04032  | 0.207946 | 5.86E-06 | 0.121985 | 0.00832  | -0.07578 | 0.10192  |
| 0.05359  | -0.05278 | 0.25501  | -0.01738 | 0.7079   | -0.04602 | 0.32098  | 0.007965 | 0.86369  |
| 0.76002  | 0.040501 | 0.38252  | 0.044856 | 0.33343  | 0.025075 | 0.58885  | -0.13571 | 0.0033   |
| 0.003    | 0.282969 | 4.77E-10 | 0.184586 | 6.00E-05 | 0.233659 | 3.28E-07 | 0.014453 | 0.75541  |
| 0.41433  | 0.079952 | 0.08436  | 0.039539 | 0.39394  | 0.017384 | 0.7079   | 0.177987 | 0.00011  |
| 3.17E-08 | 0.336012 | 8.66E-14 | 0.268541 | 3.72E-09 | 0.322099 | 9.82E-13 | 0.217637 | 2.06E-06 |
| 0.293    | 0.089748 | 0.0526   | 0.200671 | 1.25E-05 | 0.080112 | 0.08374  | -0.35504 | 2.55E-15 |
| 0.1426   | 0.039283 | 0.39701  | 0.00211  | 0.96372  | 0.000172 | 0.99703  | -0.38567 | 5.20E-18 |
| 0.23222  | -0.00385 | 0.93381  | -0.13279 | 0.00404  | -0.0789  | 0.08853  | 0.091841 | 0.0473   |
| 0.00013  | 0.116133 | 0.01202  | 0.374212 | 5.70E-17 | 0.284859 | 3.62E-10 | -0.06482 | 0.16197  |
| 0.00028  | 0.290504 | 1.56E-10 | 0.344181 | 1.96E-14 | 0.295684 | 7.08E-11 | 0.049293 | 0.28778  |

|          |          |          |          |          |          |          |          |          |
|----------|----------|----------|----------|----------|----------|----------|----------|----------|
| 0.78406  | 0.058753 | 0.20503  | 0.079573 | 0.08585  | 0.059087 | 0.20246  | -0.11166 | 0.01578  |
| 0.1741   | -0.02402 | 0.60468  | -0.16193 | 0.00044  | -0.12664 | 0.00614  | -0.32044 | 1.30E-12 |
| 0.00552  | 0.043843 | 0.34447  | 0.224817 | 9.19E-07 | 0.173813 | 0.00016  | 0.167881 | 0.00027  |
| 0.60264  | 0.141386 | 0.00219  | 0.124215 | 0.0072   | 0.114468 | 0.01332  | 0.010583 | 0.81957  |
| 0.00547  | 0.272678 | 2.09E-09 | 0.141638 | 0.00215  | 0.186403 | 5.06E-05 | 0.392472 | 1.20E-18 |
| 0.01835  | 0.105224 | 0.02296  | 0.028881 | 0.53356  | 0.092663 | 0.04535  | 0.22669  | 7.41E-07 |
| 0.31681  | 0.232012 | 3.98E-07 | 0.120237 | 0.0093   | 0.16449  | 0.00036  | 0.099634 | 0.03134  |
| 0.31369  | 0.042561 | 0.35878  | 0.076941 | 0.09677  | 0.029001 | 0.53186  | 0.028388 | 0.54057  |
| 0.04497  | 0.057426 | 0.21546  | 0.05197  | 0.26236  | 0.081619 | 0.07807  | 0.037752 | 0.41568  |
| 7.35E-07 | 0.208936 | 5.28E-06 | 0.225195 | 8.80E-07 | 0.262335 | 8.66E-09 | 0.031613 | 0.49556  |
| 0.09388  | 0.159026 | 0.00056  | 0.128256 | 0.00551  | 0.086653 | 0.06133  | 0.224881 | 9.12E-07 |
| 0.17571  | 0.100097 | 0.03056  | 0.032565 | 0.48265  | -0.00385 | 0.93381  | 0.340524 | 3.84E-14 |
| 0.01148  | -0.13606 | 0.00322  | -0.16656 | 0.0003   | -0.1508  | 0.00108  | 0.012134 | 0.79368  |
| 8.81E-06 | -0.00578 | 0.90095  | -0.12404 | 0.00728  | -0.12758 | 0.00576  | 0.018092 | 0.69656  |
| 0.03546  | 0.128132 | 0.00555  | 0.02994  | 0.51865  | 0.023753 | 0.60865  | 0.024885 | 0.59168  |
| 0.02377  | 0.074421 | 0.10824  | -0.00222 | 0.96186  | -0.01656 | 0.72112  | 0.017253 | 0.70999  |
| 0.02716  | -0.01093 | 0.81381  | -0.07218 | 0.11929  | -0.08472 | 0.06738  | 0.060089 | 0.1949   |
| 0.98261  | 0.181607 | 7.92E-05 | 0.127532 | 0.00578  | 0.114446 | 0.01333  | 0.154278 | 0.00082  |
| 0.18616  | 0.055796 | 0.22879  | -0.04562 | 0.32528  | -0.03167 | 0.49484  | 0.179977 | 9.20E-05 |
| 0.00025  | -0.00103 | 0.98227  | -0.10274 | 0.02641  | -0.10497 | 0.02329  | 0.140642 | 0.00232  |
| 0.12349  | 0.126798 | 0.00607  | 0.083668 | 0.07086  | 0.052582 | 0.25678  | 0.116323 | 0.01188  |
| 0.03956  | 0.083506 | 0.07141  | -0.01702 | 0.71381  | -0.01643 | 0.7233   | 0.099579 | 0.03144  |
| 1.50E-10 | 0.493653 | 4.67E-30 | 0.313075 | 4.45E-12 | 0.375137 | 4.72E-17 | 0.23615  | 2.43E-07 |
| 0.94497  | 0.010093 | 0.8278   | 0.028225 | 0.5429   | 0.026881 | 0.56229  | -0.0314  | 0.49844  |
| 0.92988  | 0.030337 | 0.51312  | 0.052377 | 0.25864  | 0.020579 | 0.65736  | -0.15088 | 0.00107  |
| 8.70E-06 | 0.094585 | 0.04104  | 0.317337 | 2.19E-12 | 0.276919 | 1.15E-09 | 0.134878 | 0.0035   |
| 1.22E-05 | 0.257061 | 1.75E-08 | 0.438527 | 2.28E-23 | 0.365112 | 3.58E-16 | 0.091592 | 0.04791  |
| 0.00115  | 0.038679 | 0.40432  | 0.042206 | 0.36281  | -0.03376 | 0.46668  | -0.07175 | 0.12154  |
| 0.02745  | 0.032299 | 0.48625  | 0.131128 | 0.00453  | 0.028992 | 0.53199  | 0.261663 | 9.48E-09 |
| 0.00093  | 0.220391 | 1.52E-06 | 0.271947 | 2.31E-09 | 0.248126 | 5.55E-08 | 0.011756 | 0.79997  |
| 0.00092  | 0.230145 | 4.96E-07 | 0.239434 | 1.63E-07 | 0.265178 | 5.90E-09 | 0.21606  | 2.45E-06 |
| 4.69E-10 | 0.063517 | 0.17059  | 0.186783 | 4.88E-05 | 0.255592 | 2.12E-08 | 0.391931 | 1.35E-18 |
| 0.00127  | -0.06225 | 0.17927  | 0.060247 | 0.19373  | 0.087311 | 0.05938  | 0.030987 | 0.50413  |
| 0.63249  | 0.055774 | 0.22898  | 0.02186  | 0.63751  | 0.043277 | 0.35074  | 0.19827  | 1.59E-05 |
| 2.89E-07 | -0.01068 | 0.81802  | 0.132215 | 0.00421  | 0.135744 | 0.00329  | 0.309271 | 8.27E-12 |
| 0.48734  | 0.050391 | 0.27716  | -0.15366 | 0.00086  | -0.02771 | 0.55024  | 0.008399 | 0.85636  |
| 0.48535  | 0.020277 | 0.66206  | -0.01587 | 0.73235  | 0.007183 | 0.87698  | 0.080564 | 0.08201  |
| 0.14123  | 0.163517 | 0.00039  | 0.023835 | 0.60741  | 0.097266 | 0.03562  | 0.076142 | 0.1003   |
| 0.21096  | -0.07899 | 0.08818  | 0.034924 | 0.45149  | 0.033488 | 0.47033  | -0.06802 | 0.14221  |
| 0.31454  | 0.06432  | 0.16524  | 0.057875 | 0.21189  | 0.063861 | 0.16828  | -0.19137 | 3.14E-05 |
| 0.05257  | 0.005925 | 0.8984   | -0.00899 | 0.84634  | 0.014216 | 0.7593   | 0.117586 | 0.01099  |
| 4.88E-06 | 0.129366 | 0.00511  | 0.104912 | 0.02337  | 0.207546 | 6.11E-06 | 0.251678 | 3.52E-08 |
| 0.3455   | 0.0574   | 0.21567  | 0.036349 | 0.43324  | 0.028586 | 0.53775  | -0.05628 | 0.22481  |
| 0.80168  | 0.138434 | 0.00272  | 0.109161 | 0.01829  | 0.106897 | 0.02086  | 0.034773 | 0.45346  |
| 0.40869  | 0.14647  | 0.0015   | 0.107329 | 0.02035  | 0.072995 | 0.11519  | 0.002365 | 0.95934  |

|          |          |          |          |          |          |          |          |          |
|----------|----------|----------|----------|----------|----------|----------|----------|----------|
| 0.52717  | 0.174802 | 0.00015  | 0.141484 | 0.00218  | 0.131801 | 0.00433  | -0.16301 | 0.0004   |
| 0.00239  | -0.01485 | 0.74891  | -0.17963 | 9.49E-05 | -0.12606 | 0.00638  | -0.09257 | 0.04556  |
| 0.3075   | 0.063656 | 0.16965  | -0.08334 | 0.07198  | -0.04591 | 0.32215  | -0.02383 | 0.60755  |
| 0.06284  | 0.138804 | 0.00265  | 0.157237 | 0.00065  | 0.153239 | 0.00089  | -0.07431 | 0.10877  |
| 0.94032  | 0.127622 | 0.00575  | 0.152289 | 0.00096  | 0.114997 | 0.01289  | -0.08359 | 0.07111  |
| 0.85468  | -0.00581 | 0.90038  | 0.083729 | 0.07065  | 0.052475 | 0.25775  | -0.10288 | 0.0262   |
| 0.96237  | 0.071641 | 0.1221   | 0.052976 | 0.25322  | 0.061153 | 0.18709  | -0.02314 | 0.618    |
| 0.84469  | 0.085102 | 0.06614  | 0.078171 | 0.09154  | 0.08704  | 0.06018  | -0.06224 | 0.17935  |
| 0.27343  | 0.060782 | 0.18979  | 0.131846 | 0.00432  | 0.055355 | 0.2325   | -0.08311 | 0.07276  |
| 0.0264   | 0.123404 | 0.00759  | 0.155322 | 0.00076  | 0.151211 | 0.00105  | 0.026848 | 0.56276  |
| 1.35E-10 | 0.27223  | 2.22E-09 | 0.334612 | 1.11E-13 | 0.388403 | 2.90E-18 | 0.028938 | 0.53275  |
| 0.06199  | 0.022012 | 0.63517  | -0.06294 | 0.17453  | 0.028145 | 0.54405  | 0.206229 | 7.02E-06 |
| 0.36883  | 0.106335 | 0.02155  | 0.041683 | 0.36878  | 0.089521 | 0.0532   | -0.00496 | 0.9149   |
| 0.23608  | 0.20752  | 6.13E-06 | 0.095986 | 0.03812  | 0.093089 | 0.04436  | -0.10087 | 0.02929  |
| 0.76666  | 0.230081 | 5.00E-07 | 0.278134 | 9.63E-10 | 0.199537 | 1.40E-05 | -0.05436 | 0.24105  |
| 5.28E-08 | 0.20975  | 4.84E-06 | 0.353761 | 3.26E-15 | 0.336886 | 7.41E-14 | 0.156907 | 0.00067  |
| 0.00827  | 0.023813 | 0.60774  | 0.139785 | 0.00247  | 0.017546 | 0.7053   | -0.11558 | 0.01244  |
| 0.01609  | 0.102735 | 0.02642  | 0.123308 | 0.00764  | 0.127319 | 0.00586  | -0.06439 | 0.16474  |
| 0.02333  | 0.146952 | 0.00145  | 0.011945 | 0.79684  | 0.101763 | 0.02788  | 0.179885 | 9.27E-05 |
| 0.00065  | -0.03065 | 0.50875  | -0.02355 | 0.61172  | -0.07567 | 0.10242  | 0.12145  | 0.00861  |
| 0.17488  | 0.087861 | 0.05779  | 0.042606 | 0.35827  | 0.084109 | 0.06938  | 0.072351 | 0.11843  |
| 3.11E-08 | 0.243738 | 9.62E-08 | 0.249872 | 4.44E-08 | 0.282733 | 4.94E-10 | 0.186047 | 5.23E-05 |
| 0.78654  | 0.230944 | 4.52E-07 | 0.084959 | 0.0666   | 0.116378 | 0.01184  | 0.058395 | 0.2078   |
| 0.00018  | 0.120977 | 0.00887  | 0.222139 | 1.25E-06 | 0.159345 | 0.00055  | 0.064175 | 0.16619  |
| 0.00199  | 0.213331 | 3.30E-06 | 0.162575 | 0.00042  | 0.197559 | 1.71E-05 | 0.03586  | 0.43945  |
| 0.23325  | 0.2287   | 5.87E-07 | 0.219143 | 1.74E-06 | 0.208143 | 5.74E-06 | 0.039494 | 0.39448  |
| 5.39E-05 | 0.089036 | 0.05451  | 0.124272 | 0.00717  | 0.177051 | 0.00012  | 0.261213 | 1.01E-08 |
| 0.03961  | 0.217504 | 2.09E-06 | 0.094915 | 0.04034  | 0.127695 | 0.00572  | 0.10981  | 0.0176   |
| 1.59E-18 | 0.210874 | 4.29E-06 | 0.433583 | 7.93E-23 | 0.424704 | 7.10E-22 | 0.271691 | 2.40E-09 |
| 0.00068  | 0.289133 | 1.92E-10 | 0.294257 | 8.81E-11 | 0.293584 | 9.77E-11 | -0.08393 | 0.06997  |
| 0.00536  | 0.19016  | 3.53E-05 | 0.239189 | 1.68E-07 | 0.208738 | 5.39E-06 | -0.0228  | 0.62313  |
| 0.34593  | -0.03045 | 0.51161  | -0.02824 | 0.54274  | -0.0364  | 0.4326   | 0.13806  | 0.00279  |
| 3.07E-06 | 0.03927  | 0.39717  | 0.025872 | 0.57706  | 0.132155 | 0.00423  | 0.249639 | 4.58E-08 |
| 0.01343  | 0.330001 | 2.51E-13 | 0.259697 | 1.23E-08 | 0.261106 | 1.02E-08 | 0.243592 | 9.80E-08 |
| 0.48195  | 0.097824 | 0.03457  | -0.02517 | 0.58743  | 0.017709 | 0.70268  | -0.10651 | 0.02133  |
| 0.00017  | 0.015668 | 0.73559  | 0.187947 | 4.37E-05 | 0.170454 | 0.00021  | 0.036763 | 0.42801  |
| 0.01211  | 0.087956 | 0.05752  | 0.241086 | 1.34E-07 | 0.191026 | 3.25E-05 | -0.02851 | 0.53884  |
| 0.81193  | 0.080438 | 0.08249  | 0.065914 | 0.15499  | 0.051147 | 0.27     | 0.064501 | 0.16405  |
| 0.9913   | 0.087201 | 0.0597   | -0.07831 | 0.09094  | -0.01946 | 0.67492  | 0.027684 | 0.55067  |
| 0.21831  | 0.233993 | 3.15E-07 | 0.291765 | 1.29E-10 | 0.226272 | 7.78E-07 | -0.35002 | 6.61E-15 |
| 0.4814   | 0.06075  | 0.19002  | -0.06395 | 0.16768  | -0.01913 | 0.68012  | -0.30737 | 1.12E-11 |
| 0.86109  | 0.031887 | 0.49183  | 0.123071 | 0.00775  | 0.084474 | 0.06817  | -0.10737 | 0.0203   |
| 0.61508  | 0.263817 | 7.09E-09 | 0.208202 | 5.71E-06 | 0.17039  | 0.00022  | 0.015058 | 0.74551  |
| 5.38E-05 | 0.460419 | 7.01E-26 | 0.25923  | 1.31E-08 | 0.326968 | 4.26E-13 | 0.317841 | 2.02E-12 |
| 3.58E-10 | 0.27874  | 8.82E-10 | 0.522903 | 3.93E-34 | 0.425476 | 5.89E-22 | 0.137883 | 0.00283  |

|          |          |          |          |          |          |          |          |          |
|----------|----------|----------|----------|----------|----------|----------|----------|----------|
| 1.13E-12 | 0.373    | 7.31E-17 | 0.700874 | 3.08E-70 | 0.563652 | 1.64E-40 | 0.190077 | 3.56E-05 |
| 0.25081  | 0.044164 | 0.34095  | 0.001466 | 0.97479  | 0.023194 | 0.6171   | 0.244973 | 8.25E-08 |
| 0.0018   | 0.216121 | 2.43E-06 | 0.229329 | 5.46E-07 | 0.229689 | 5.23E-07 | -0.08086 | 0.08089  |
| 0.01568  | 0.094177 | 0.04193  | -0.14695 | 0.00145  | -0.10094 | 0.02917  | 0.121146 | 0.00878  |
| 0.01971  | -0.13327 | 0.00391  | 0.059479 | 0.19947  | 0.058184 | 0.20945  | -0.01622 | 0.7267   |
| 0.60156  | 0.159162 | 0.00056  | 0.188904 | 3.98E-05 | 0.157121 | 0.00066  | 0.20808  | 5.78E-06 |
| 3.09E-05 | -0.14157 | 0.00216  | -0.29071 | 1.51E-10 | -0.24004 | 1.52E-07 | -0.19641 | 1.91E-05 |
| 0.11613  | 0.069544 | 0.13345  | 0.155877 | 0.00072  | 0.103649 | 0.0251   | 0.095534 | 0.03905  |
| 3.56E-13 | 0.066672 | 0.15028  | 0.089043 | 0.05449  | 0.208121 | 5.75E-06 | 0.216756 | 2.27E-06 |
| 1.04E-12 | 0.124633 | 0.007    | 0.319798 | 1.45E-12 | 0.309598 | 7.85E-12 | 0.042508 | 0.35937  |
| 0.00176  | 0.162022 | 0.00044  | 0.162686 | 0.00042  | 0.180685 | 8.62E-05 | 0.020216 | 0.66302  |
| 6.86E-21 | 0.09679  | 0.03653  | 0.166345 | 0.00031  | 0.302153 | 2.58E-11 | 0.238199 | 1.90E-07 |
| 0.52799  | 0.1264   | 0.00623  | -0.10739 | 0.02028  | 0.027899 | 0.54757  | -0.06182 | 0.18229  |
| 0.02085  | -0.05598 | 0.22724  | -0.05361 | 0.24757  | -0.05937 | 0.20032  | 0.162408 | 0.00043  |
| 1.95E-05 | 0.114648 | 0.01317  | 0.067769 | 0.14367  | -0.02595 | 0.57592  | -0.06106 | 0.18779  |
| 3.28E-09 | 0.50567  | 1.10E-31 | 0.314149 | 3.72E-12 | 0.366175 | 2.89E-16 | -0.1787  | 0.0001   |
| 0.28719  | 0.039893 | 0.38971  | 0.04303  | 0.3535   | 0.022619 | 0.62586  | 0.038284 | 0.40914  |
| 0.31069  | 0.105553 | 0.02253  | 0.117323 | 0.01117  | 0.114923 | 0.01295  | 0.139867 | 0.00245  |
| 0.00045  | 0.044261 | 0.33989  | 0.178937 | 0.0001   | 0.20326  | 9.55E-06 | 0.180357 | 8.88E-05 |
| 7.99E-05 | -0.01772 | 0.70245  | 0.14203  | 0.00209  | 0.160276 | 0.00051  | -0.01839 | 0.69182  |
| 0.79896  | 0.062697 | 0.17618  | 0.036551 | 0.43069  | 0.036905 | 0.42623  | 0.021551 | 0.64227  |
| 0.06907  | 0.197147 | 1.78E-05 | 0.084818 | 0.06705  | 0.137521 | 0.0029   | -0.01668 | 0.71916  |
| 0.43647  | -0.01241 | 0.78912  | -0.05592 | 0.22779  | 0.007163 | 0.87731  | 0.042893 | 0.35503  |
| 0.00364  | -0.04829 | 0.29772  | -0.0831  | 0.0728   | -0.08276 | 0.07399  | -0.05102 | 0.27116  |
| 0.08673  | 0.047792 | 0.30272  | 0.027251 | 0.55692  | 0.05505  | 0.23509  | -0.0238  | 0.60798  |
| 0.71105  | 0.079165 | 0.08747  | 0.079323 | 0.08685  | 0.043368 | 0.34973  | -0.1205  | 0.00915  |
| 0.7216   | 0.058282 | 0.20869  | 0.048896 | 0.29168  | 0.047318 | 0.30755  | -0.03564 | 0.44223  |
| 0.08486  | -0.11294 | 0.01461  | -0.17202 | 0.00019  | -0.14643 | 0.00151  | -0.15812 | 0.0006   |
| 0.12871  | 0.171819 | 0.00019  | 0.150294 | 0.00112  | 0.152092 | 0.00098  | 0.046059 | 0.32061  |
| 5.32E-06 | 0.087836 | 0.05786  | 0.152578 | 0.00094  | 0.200873 | 1.22E-05 | 0.247303 | 6.15E-08 |
| 0.01083  | 0.056567 | 0.22242  | 0.088616 | 0.05567  | 0.138284 | 0.00275  | -0.07313 | 0.11453  |
| 0.03842  | -0.00396 | 0.93202  | 0.049492 | 0.28583  | 0.083756 | 0.07056  | 0.044178 | 0.34079  |
| 0.05044  | 0.078687 | 0.08941  | 0.024579 | 0.59624  | 0.062609 | 0.17679  | 0.043563 | 0.34757  |
| 0.88957  | -0.04026 | 0.38535  | 0.010071 | 0.82817  | -0.00118 | 0.97971  | -0.08022 | 0.08332  |
| 0.00069  | 0.148609 | 0.00128  | 0.200244 | 1.30E-05 | 0.173054 | 0.00017  | -0.14321 | 0.00192  |
| 1.02E-12 | 0.369887 | 1.37E-16 | 0.35827  | 1.37E-15 | 0.390421 | 1.87E-18 | 0.062098 | 0.18036  |
| 7.00E-05 | 0.138666 | 0.00267  | 0.048316 | 0.29744  | 0.136356 | 0.00315  | 0.139125 | 0.00259  |
| 0.00012  | 0.103527 | 0.02527  | 0.04587  | 0.3226   | 0.125963 | 0.00642  | -0.12962 | 0.00502  |
| 0.00464  | 0.247031 | 6.37E-08 | 0.154641 | 0.0008   | 0.221131 | 1.39E-06 | 0.104115 | 0.02445  |
| 0.1141   | 0.073929 | 0.1106   | 0.124343 | 0.00714  | 0.104998 | 0.02326  | 0.039023 | 0.40015  |
| 0.46977  | 0.372877 | 7.49E-17 | 0.253077 | 2.94E-08 | 0.174532 | 0.00015  | 0.293527 | 9.85E-11 |
| 0.4734   | 0.060331 | 0.1931   | -0.09383 | 0.04269  | -0.00414 | 0.92896  | -0.07975 | 0.08517  |
| 0.00038  | 0.367086 | 2.41E-16 | 0.515065 | 5.31E-33 | 0.381436 | 1.27E-17 | 0.140118 | 0.00241  |
| 0.12579  | 0.018156 | 0.69555  | -0.05747 | 0.21513  | -0.06077 | 0.1899   | -0.11118 | 0.01623  |
| 0.79125  | 0.056958 | 0.21924  | 0.058044 | 0.21056  | 0.029431 | 0.5258   | 0.06787  | 0.14308  |

|          |          |          |          |          |          |          |          |          |
|----------|----------|----------|----------|----------|----------|----------|----------|----------|
| 0.01439  | 0.13433  | 0.00363  | 0.113786 | 0.01388  | 0.131537 | 0.00441  | 0.06339  | 0.17145  |
| 0.06675  | 0.129901 | 0.00493  | 0.083669 | 0.07085  | 0.110787 | 0.01662  | -0.10245 | 0.02683  |
| 0.41819  | -0.03251 | 0.48345  | 0.090752 | 0.05     | 0.073937 | 0.11056  | -0.04789 | 0.30169  |
| 9.41E-05 | 0.162529 | 0.00042  | 0.179035 | 0.0001   | 0.211148 | 4.17E-06 | -0.03551 | 0.44391  |
| 0.12347  | -0.06199 | 0.1811   | 0.011116 | 0.81066  | 0.023417 | 0.61372  | -0.0454  | 0.3276   |
| 0.53772  | -0.05596 | 0.22741  | -0.0146  | 0.75302  | -0.01187 | 0.798    | 0.004292 | 0.9263   |
| 0.19336  | 0.226194 | 7.85E-07 | 0.227441 | 6.80E-07 | 0.194054 | 2.42E-05 | -0.0267  | 0.56488  |
| 0.54954  | 0.251481 | 3.61E-08 | 0.175055 | 0.00014  | 0.135546 | 0.00334  | 0.134654 | 0.00355  |
| 0.00964  | 0.08009  | 0.08383  | -0.04161 | 0.36961  | -0.03069 | 0.50819  | -0.22118 | 1.39E-06 |
| 2.92E-07 | 0.360711 | 8.51E-16 | 0.350989 | 5.51E-15 | 0.375201 | 4.66E-17 | -0.01312 | 0.77738  |
| 0.00687  | 0.069129 | 0.13578  | -0.09477 | 0.04065  | -0.05503 | 0.23524  | 0.161369 | 0.00046  |
| 0.01688  | 0.199641 | 1.38E-05 | 0.273393 | 1.89E-09 | 0.227232 | 6.96E-07 | 0.103695 | 0.02503  |
| 0.08989  | -0.02943 | 0.52574  | -0.05402 | 0.24399  | -0.05932 | 0.20068  | 0.032348 | 0.48558  |
| 0.64726  | 0.206678 | 6.70E-06 | 0.076905 | 0.09693  | 0.100918 | 0.02921  | -0.25887 | 1.38E-08 |
| 5.89E-07 | 0.293767 | 9.50E-11 | 0.287909 | 2.30E-10 | 0.326335 | 4.75E-13 | 0.343704 | 2.14E-14 |
| 0.00019  | 0.283205 | 4.61E-10 | 0.282732 | 4.94E-10 | 0.31051  | 6.76E-12 | 0.021928 | 0.63645  |
| 0.60133  | 0.010033 | 0.8288   | 0.11688  | 0.01148  | 0.051516 | 0.26656  | 0.128749 | 0.00533  |
| 0.00027  | -0.04254 | 0.35903  | 0.130075 | 0.00487  | 0.131699 | 0.00436  | 0.14537  | 0.00163  |
| 0.7648   | 0.314485 | 3.52E-12 | 0.161241 | 0.00047  | 0.162125 | 0.00044  | -0.31069 | 6.57E-12 |
| 0.00129  | 0.087153 | 0.05985  | 0.188232 | 4.25E-05 | 0.152174 | 0.00097  | 0.102874 | 0.02621  |
| 0.00919  | 0.040836 | 0.3786   | -0.02404 | 0.60432  | -0.06704 | 0.14806  | -0.19719 | 1.77E-05 |
| 0.00013  | 0.259889 | 1.20E-08 | 0.3178   | 2.03E-12 | 0.308497 | 9.38E-12 | 0.021127 | 0.64882  |
| 0.50544  | 0.011657 | 0.80163  | 0.042233 | 0.3625   | 0.017907 | 0.69952  | -0.23422 | 3.07E-07 |
| 1.79E-07 | 0.009931 | 0.83052  | 0.122661 | 0.00796  | 0.12192  | 0.00835  | 0.176347 | 0.00013  |
| 2.28E-14 | -0.33666 | 7.71E-14 | -0.17063 | 0.00021  | -0.37455 | 5.32E-17 | -0.22087 | 1.44E-06 |
| 7.25E-08 | -0.14557 | 0.00161  | 0.181517 | 7.98E-05 | -0.13085 | 0.00462  | -0.13417 | 0.00367  |
| 3.94E-26 | -0.38987 | 2.11E-18 | -0.31665 | 2.46E-12 | -0.47396 | 1.58E-27 | -0.15677 | 0.00067  |
| 0.00062  | 0.142272 | 0.00206  | 0.226199 | 7.84E-07 | 0.028392 | 0.54052  | 0.039203 | 0.39798  |
| 4.02E-20 | -0.39367 | 9.23E-19 | -0.212   | 3.80E-06 | -0.43044 | 1.74E-22 | -0.1843  | 6.17E-05 |
| 1.71E-08 | -0.1502  | 0.00113  | 0.009924 | 0.83063  | -0.18594 | 5.28E-05 | -0.09233 | 0.04613  |
| 4.84E-12 | -0.06797 | 0.14248  | 0.087027 | 0.06022  | -0.18983 | 3.65E-05 | -0.07758 | 0.09402  |
| 3.01E-21 | -0.29171 | 1.30E-10 | -0.11776 | 0.01087  | -0.32656 | 4.57E-13 | -0.18637 | 5.07E-05 |
| 2.48E-22 | -0.34129 | 3.34E-14 | -0.20605 | 7.16E-06 | -0.4023  | 1.35E-19 | -0.28156 | 5.86E-10 |
| 2.39E-12 | -0.34569 | 1.49E-14 | -0.0895  | 0.05327  | -0.27194 | 2.32E-09 | -0.16338 | 0.00039  |
| 1.71E-32 | -0.28794 | 2.29E-10 | -0.13378 | 0.00378  | -0.37926 | 2.01E-17 | -0.22584 | 8.17E-07 |
| 2.36E-21 | -0.43009 | 1.89E-22 | -0.21687 | 2.24E-06 | -0.43005 | 1.91E-22 | -0.26987 | 3.09E-09 |
| 1.80E-13 | -0.10596 | 0.02201  | 0.057953 | 0.21127  | -0.21192 | 3.84E-06 | 0.0096   | 0.83608  |
| 0.03129  | -0.00695 | 0.88099  | 0.161968 | 0.00044  | -0.03075 | 0.50735  | 0.043059 | 0.35318  |
| 1.68E-06 | -0.0539  | 0.24505  | -0.00331 | 0.94314  | -0.16662 | 0.0003   | 0.01177  | 0.79974  |
| 4.50E-19 | -0.26782 | 4.10E-09 | -0.02848 | 0.53932  | -0.30103 | 3.08E-11 | -0.0435  | 0.34827  |
| 0.00067  | 0.059238 | 0.20131  | 0.166503 | 0.0003   | -0.01192 | 0.79717  | -0.16979 | 0.00023  |
| 2.26E-06 | -0.21097 | 4.25E-06 | 0.086603 | 0.06148  | -0.15913 | 0.00056  | -0.07795 | 0.09247  |
| 1.44E-14 | -0.34971 | 7.02E-15 | -0.13135 | 0.00447  | -0.3225  | 9.18E-13 | 0.068042 | 0.14206  |
| 4.32E-09 | -0.32808 | 3.51E-13 | -0.08716 | 0.05983  | -0.28289 | 4.83E-10 | -0.15167 | 0.00101  |
| 3.56E-15 | -0.21755 | 2.08E-06 | -0.06161 | 0.1838   | -0.25443 | 2.47E-08 | -0.35227 | 4.32E-15 |

|          |          |          |          |          |          |          |          |          |
|----------|----------|----------|----------|----------|----------|----------|----------|----------|
| 6.80E-16 | -0.1359  | 0.00325  | -0.17542 | 0.00014  | -0.33281 | 1.53E-13 | 0.006966 | 0.88065  |
| 3.20E-10 | -0.3457  | 1.48E-14 | -0.07191 | 0.1207   | -0.26836 | 3.81E-09 | -0.04913 | 0.28935  |
| 6.59E-18 | -0.27072 | 2.75E-09 | -0.13693 | 0.00303  | -0.33337 | 1.39E-13 | -0.16249 | 0.00042  |
| 1.12E-20 | -0.15074 | 0.00109  | -0.0795  | 0.08614  | -0.28662 | 2.79E-10 | -0.0484  | 0.2966   |
| 8.58E-29 | -0.37607 | 3.89E-17 | -0.2327  | 3.67E-07 | -0.44294 | 7.34E-24 | -0.08532 | 0.06546  |
| 3.58E-14 | -0.30312 | 2.22E-11 | -0.05733 | 0.21622  | -0.28475 | 3.68E-10 | -0.04276 | 0.35655  |
| 1.90E-10 | -0.08451 | 0.06805  | 0.091932 | 0.04708  | -0.16824 | 0.00026  | -0.13707 | 0.003    |
| 2.28E-16 | -0.30519 | 1.59E-11 | -0.18824 | 4.25E-05 | -0.3797  | 1.83E-17 | -0.32587 | 5.15E-13 |
| 2.42E-15 | -0.33504 | 1.03E-13 | 0.035721 | 0.44123  | -0.26585 | 5.38E-09 | -0.19874 | 1.52E-05 |
| 4.76E-20 | -0.33545 | 9.58E-14 | -0.1942  | 2.38E-05 | -0.37283 | 7.57E-17 | -0.00957 | 0.83652  |
| 7.98E-40 | -0.37461 | 5.25E-17 | -0.29953 | 3.90E-11 | -0.50202 | 3.49E-31 | -0.2683  | 3.84E-09 |
| 4.94E-05 | -0.13177 | 0.00434  | 0.002223 | 0.96178  | -0.13129 | 0.00449  | -0.12384 | 0.00737  |
| 9.72E-14 | -0.22046 | 1.50E-06 | -0.08202 | 0.07662  | -0.30022 | 3.50E-11 | -0.24319 | 1.03E-07 |
| 9.44E-13 | -0.38481 | 6.24E-18 | -0.17554 | 0.00014  | -0.33688 | 7.42E-14 | -0.07533 | 0.10399  |
| 0.00022  | 0.049853 | 0.28232  | 0.260166 | 1.16E-08 | 0.026071 | 0.57413  | 0.007893 | 0.86491  |
| 3.13E-13 | -0.14372 | 0.00185  | -0.01834 | 0.69265  | -0.22807 | 6.32E-07 | -0.10769 | 0.01993  |
| 0.00055  | -0.01911 | 0.68042  | 0.108927 | 0.01854  | -0.04617 | 0.31942  | -0.19761 | 1.70E-05 |
| 6.87E-13 | -0.46887 | 6.70E-27 | -0.25889 | 1.37E-08 | -0.42407 | 8.28E-22 | -0.08277 | 0.07396  |
| 0.24664  | 0.096904 | 0.03631  | 0.302941 | 2.28E-11 | 0.092359 | 0.04606  | -0.1816  | 7.92E-05 |
| 0.19815  | -0.10823 | 0.01932  | 0.037169 | 0.42293  | -0.09212 | 0.04662  | -0.05926 | 0.20111  |
| 1.15E-12 | -0.23556 | 2.61E-07 | -0.12004 | 0.00942  | -0.30188 | 2.70E-11 | -0.24503 | 8.19E-08 |
| 3.57E-05 | -0.39557 | 6.08E-19 | -0.13415 | 0.00368  | -0.3016  | 2.82E-11 | -0.32532 | 5.66E-13 |
| 4.41E-22 | -0.42065 | 1.89E-21 | -0.23823 | 1.89E-07 | -0.43876 | 2.14E-23 | -0.21331 | 3.30E-06 |
| 1.26E-11 | -0.33588 | 8.88E-14 | -0.13519 | 0.00342  | -0.35347 | 3.44E-15 | -0.26674 | 4.76E-09 |
| 5.79E-16 | -0.18059 | 8.69E-05 | -0.07224 | 0.11902  | -0.30065 | 3.27E-11 | -0.0482  | 0.29856  |
| 4.24E-08 | -0.10666 | 0.02115  | -0.0484  | 0.29656  | -0.18022 | 8.99E-05 | -0.14343 | 0.00189  |
| 1.22E-08 | -0.07335 | 0.11343  | 0.112394 | 0.0151   | -0.11917 | 0.00995  | 0.134386 | 0.00362  |
| 8.03E-21 | -0.20616 | 7.07E-06 | -0.09689 | 0.03634  | -0.29267 | 1.12E-10 | -0.36153 | 7.25E-16 |
| 2.67E-09 | -0.29411 | 9.01E-11 | -0.08443 | 0.06831  | -0.25927 | 1.31E-08 | -0.12372 | 0.00744  |
| 5.90E-13 | -0.13854 | 0.0027   | 0.067209 | 0.14702  | -0.20503 | 7.96E-06 | -0.26297 | 7.96E-09 |
| 0.34796  | 0.216701 | 2.28E-06 | 0.249232 | 4.82E-08 | 0.130023 | 0.00489  | -0.05551 | 0.23119  |
| 9.83E-11 | -0.20073 | 1.24E-05 | 0.045387 | 0.32773  | -0.18844 | 4.17E-05 | -0.29757 | 5.29E-11 |
| 2.81E-17 | -0.37915 | 2.05E-17 | -0.22264 | 1.18E-06 | -0.40857 | 3.24E-20 | -0.12937 | 0.00511  |
| 3.00E-06 | -0.16167 | 0.00045  | 0.04242  | 0.36037  | -0.17014 | 0.00022  | 0.002234 | 0.9616   |
| 1.50E-06 | -0.12128 | 0.0087   | 0.186081 | 5.21E-05 | -0.09753 | 0.03512  | -0.03344 | 0.47092  |
| 2.99E-22 | -0.33389 | 1.26E-13 | -0.24004 | 1.52E-07 | -0.44096 | 1.22E-23 | -0.20918 | 5.15E-06 |
| 8.77E-16 | -0.28013 | 7.22E-10 | -0.02132 | 0.64585  | -0.2964  | 6.34E-11 | -0.10611 | 0.02183  |
| 0.00583  | -0.00829 | 0.85815  | 0.084968 | 0.06657  | -0.08914 | 0.05424  | -0.21894 | 1.78E-06 |
| 2.08E-17 | -0.28238 | 5.20E-10 | -0.09367 | 0.04304  | -0.32634 | 4.75E-13 | -0.00031 | 0.99468  |
| 1.34E-08 | -0.19898 | 1.48E-05 | -0.04215 | 0.36342  | -0.19661 | 1.88E-05 | 0.123162 | 0.00771  |
| 2.22E-06 | -0.30926 | 8.29E-12 | -0.03587 | 0.43934  | -0.24269 | 1.10E-07 | -0.01578 | 0.73377  |
| 0.00121  | 0.123961 | 0.00732  | 0.237401 | 2.09E-07 | 0.018242 | 0.69418  | 0.035628 | 0.44242  |
| 4.60E-16 | -0.14918 | 0.00122  | 0.106367 | 0.02151  | -0.1665  | 0.0003   | -0.15594 | 0.00072  |
| 1.69E-09 | -0.3895  | 2.28E-18 | -0.09441 | 0.04142  | -0.26512 | 5.94E-09 | -0.17491 | 0.00015  |
| 1.28E-20 | -0.30333 | 2.14E-11 | -0.19367 | 2.51E-05 | -0.38187 | 1.16E-17 | 0.00889  | 0.84806  |

|          |          |          |          |          |          |          |          |          |
|----------|----------|----------|----------|----------|----------|----------|----------|----------|
| 4.41E-28 | -0.45528 | 2.83E-25 | -0.30002 | 3.61E-11 | -0.51711 | 2.71E-33 | -0.24015 | 1.50E-07 |
| 1.52E-22 | -0.32514 | 5.84E-13 | -0.27468 | 1.57E-09 | -0.44044 | 1.40E-23 | -0.25959 | 1.25E-08 |
| 3.89E-21 | -0.4375  | 2.96E-23 | -0.24614 | 7.13E-08 | -0.42843 | 2.85E-22 | -0.16795 | 0.00027  |
| 9.99E-17 | -0.11568 | 0.01237  | 0.004435 | 0.92385  | -0.23646 | 2.34E-07 | -0.09698 | 0.03616  |
| 0.00024  | 0.163202 | 0.0004   | 0.375977 | 3.97E-17 | 0.126256 | 0.00629  | 0.008096 | 0.86148  |
| 4.40E-08 | 0.000447 | 0.99232  | 0.070567 | 0.12781  | -0.11602 | 0.01211  | -0.07386 | 0.11092  |
| 7.18E-18 | -0.27224 | 2.22E-09 | -0.07659 | 0.09831  | -0.29431 | 8.73E-11 | -0.4504  | 1.04E-24 |
| 1.14E-20 | -0.21246 | 3.62E-06 | -0.10909 | 0.01836  | -0.3258  | 5.21E-13 | -0.07566 | 0.10249  |
| 4.74E-08 | -0.0814  | 0.07888  | -0.06244 | 0.17796  | -0.17356 | 0.00016  | -0.19962 | 1.39E-05 |
| 5.43E-19 | -0.2876  | 2.41E-10 | 0.04212  | 0.36378  | -0.28954 | 1.80E-10 | -0.12206 | 0.00828  |
| 0.06354  | 0.302277 | 2.53E-11 | 0.32575  | 5.26E-13 | 0.152785 | 0.00093  | 0.086939 | 0.06048  |
| 0.18334  | 0.127307 | 0.00587  | 0.162566 | 0.00042  | 0.038511 | 0.40637  | -0.14389 | 0.00182  |
| 3.54E-09 | -0.32366 | 7.52E-13 | -0.13901 | 0.00261  | -0.31089 | 6.36E-12 | -0.25812 | 1.52E-08 |
| 5.09E-05 | -0.15515 | 0.00077  | 0.099692 | 0.03124  | -0.13069 | 0.00467  | -0.31534 | 3.06E-12 |
| 4.43E-18 | -0.36212 | 6.46E-16 | -0.20767 | 6.03E-06 | -0.39902 | 2.82E-19 | -0.16256 | 0.00042  |
| 7.85E-06 | -0.15284 | 0.00092  | 0.08402  | 0.06967  | -0.12243 | 0.00808  | -0.24217 | 1.17E-07 |
| 1.38E-12 | 0.010654 | 0.81838  | 0.047613 | 0.30454  | -0.13621 | 0.00318  | -0.23066 | 4.67E-07 |
| 7.05E-10 | -0.25552 | 2.14E-08 | 0.004783 | 0.9179   | -0.23126 | 4.35E-07 | 0.007351 | 0.87411  |
| 0.00044  | -0.13273 | 0.00406  | 0.105044 | 0.02319  | -0.10167 | 0.02803  | -0.08136 | 0.07901  |
| 7.08E-11 | -0.22496 | 9.04E-07 | -0.01714 | 0.71179  | -0.24326 | 1.02E-07 | -0.01764 | 0.70385  |
| 1.90E-08 | -0.03088 | 0.50567  | 0.15106  | 0.00106  | -0.07583 | 0.10169  | 0.038652 | 0.40465  |
| 1.55E-23 | -0.55073 | 2.15E-38 | -0.28835 | 2.15E-10 | -0.51625 | 3.60E-33 | -0.27558 | 1.39E-09 |
| 0.88818  | 0.122042 | 0.00829  | 0.304538 | 1.77E-11 | 0.169185 | 0.00024  | 0.004933 | 0.91532  |
| 3.94E-06 | -0.11223 | 0.01524  | 0.02536  | 0.58461  | -0.16347 | 0.00039  | -0.01308 | 0.77806  |
| 5.56E-11 | 0.098413 | 0.03349  | 0.119777 | 0.00958  | -0.09476 | 0.04067  | -0.20773 | 6.00E-06 |
| 1.10E-11 | -0.40956 | 2.58E-20 | -0.128   | 0.0056   | -0.33518 | 1.01E-13 | -0.08199 | 0.07671  |
| 1.01E-07 | -0.31904 | 1.65E-12 | -0.07287 | 0.11581  | -0.24896 | 4.99E-08 | -0.24075 | 1.39E-07 |
| 7.24E-10 | -0.22776 | 6.55E-07 | -0.06529 | 0.15894  | -0.19465 | 2.28E-05 | -0.02089 | 0.65245  |
| 8.78E-11 | -0.20332 | 9.50E-06 | -0.05516 | 0.23412  | -0.26832 | 3.83E-09 | -0.31542 | 3.02E-12 |
| 5.91E-18 | -0.42334 | 9.90E-22 | -0.21669 | 2.28E-06 | -0.43415 | 6.89E-23 | -0.05984 | 0.19673  |
| 3.50E-08 | -0.16561 | 0.00033  | -0.0542  | 0.24238  | -0.24766 | 5.88E-08 | -0.23603 | 2.47E-07 |
| 2.68E-09 | -0.37609 | 3.87E-17 | -0.14009 | 0.00241  | -0.30023 | 3.50E-11 | -0.39901 | 2.84E-19 |
| 0.00017  | -0.01375 | 0.76693  | 0.151438 | 0.00103  | -0.03346 | 0.47071  | -0.08152 | 0.07845  |
| 9.01E-22 | -0.44493 | 4.38E-24 | -0.26633 | 5.04E-09 | -0.45361 | 4.43E-25 | 0.011405 | 0.80583  |
| 6.91E-12 | -0.25608 | 1.99E-08 | -0.18061 | 8.67E-05 | -0.33844 | 5.60E-14 | -0.11121 | 0.0162   |
| 2.77E-13 | -0.18862 | 4.09E-05 | -0.02827 | 0.54226  | -0.24197 | 1.20E-07 | -0.19913 | 1.46E-05 |
| 4.05E-16 | -0.2419  | 1.21E-07 | -0.06802 | 0.14218  | -0.28119 | 6.19E-10 | -0.23043 | 4.80E-07 |
| 9.07E-23 | -0.20184 | 1.11E-05 | -0.19898 | 1.48E-05 | -0.38449 | 6.69E-18 | -0.05519 | 0.23387  |
| 1.01E-11 | 0.278587 | 9.02E-10 | 0.19241  | 2.84E-05 | -0.00637 | 0.89074  | -0.076   | 0.10092  |
| 0.00154  | -0.07738 | 0.09489  | 0.136407 | 0.00314  | -0.03519 | 0.44804  | -0.19382 | 2.47E-05 |
| 9.81E-23 | -0.1858  | 5.36E-05 | -0.01405 | 0.76206  | -0.28024 | 7.11E-10 | -0.36328 | 5.14E-16 |
| 2.15E-13 | -0.28371 | 4.28E-10 | -0.06065 | 0.19076  | -0.30701 | 1.19E-11 | -0.14104 | 0.00225  |
| 7.74E-22 | -0.34468 | 1.79E-14 | -0.19189 | 2.99E-05 | -0.40918 | 2.81E-20 | 0.029763 | 0.52113  |
| 2.28E-13 | -0.4198  | 2.32E-21 | -0.14383 | 0.00183  | -0.363   | 5.43E-16 | -0.2121  | 3.77E-06 |
| 0.01649  | 0.195298 | 2.14E-05 | 0.208711 | 5.41E-06 | 0.073836 | 0.11105  | 0.027949 | 0.54686  |

|          |          |          |          |          |          |          |          |          |
|----------|----------|----------|----------|----------|----------|----------|----------|----------|
| 7.67E-13 | -0.30347 | 2.10E-11 | -0.1355  | 0.00335  | -0.33227 | 1.69E-13 | 0.015028 | 0.74601  |
| 5.33E-11 | -0.17624 | 0.00013  | 0.020143 | 0.66417  | -0.20614 | 7.08E-06 | -0.17621 | 0.00013  |
| 3.19E-25 | -0.38395 | 7.49E-18 | -0.23117 | 4.40E-07 | -0.42442 | 7.61E-22 | -0.22097 | 1.42E-06 |
| 3.83E-09 | -0.19141 | 3.13E-05 | -0.04223 | 0.36256  | -0.24704 | 6.36E-08 | -0.194   | 2.43E-05 |
| 5.61E-17 | -0.35988 | 1.00E-15 | -0.1536  | 0.00087  | -0.38431 | 6.94E-18 | -0.16346 | 0.00039  |
| 0.06463  | 0.117829 | 0.01082  | 0.251359 | 3.67E-08 | 0.032753 | 0.48013  | 0.010638 | 0.81865  |
| 4.66E-09 | -0.22106 | 1.41E-06 | -0.03001 | 0.51764  | -0.2307  | 4.65E-07 | -0.06853 | 0.13919  |
| 0.00019  | -0.1949  | 2.22E-05 | -0.02003 | 0.66591  | -0.18625 | 5.13E-05 | -0.11939 | 0.00981  |
| 9.02E-07 | -0.07839 | 0.09062  | 0.141417 | 0.00219  | -0.0781  | 0.09184  | 0.002319 | 0.96014  |
| 1.25E-15 | -0.07923 | 0.08722  | 0.094594 | 0.04102  | -0.13779 | 0.00285  | -0.22314 | 1.11E-06 |
| 0.05928  | 0.228687 | 5.88E-07 | 0.274929 | 1.52E-09 | 0.124424 | 0.0071   | 0.031776 | 0.49334  |
| 2.52E-22 | -0.24331 | 1.01E-07 | -0.25135 | 3.68E-08 | -0.42909 | 2.42E-22 | -0.34504 | 1.68E-14 |
| 6.25E-12 | -0.1581  | 0.00061  | 0.138373 | 0.00273  | -0.17159 | 0.00019  | -0.18846 | 4.16E-05 |
| 0.00057  | -0.0647  | 0.16277  | 0.142731 | 0.00199  | -0.02778 | 0.54922  | -0.07167 | 0.12193  |
| 0.00478  | 0.08306  | 0.07294  | 0.219105 | 1.75E-06 | 0.061274 | 0.18622  | 0.006983 | 0.88037  |
| 6.77E-13 | -0.23006 | 5.01E-07 | -0.13456 | 0.00358  | -0.30995 | 7.41E-12 | -0.01562 | 0.73634  |
| 8.06E-12 | -0.25658 | 1.86E-08 | -0.00815 | 0.86061  | -0.24935 | 4.75E-08 | -0.25577 | 2.07E-08 |
| 1.29E-25 | -0.17619 | 0.00013  | 0.029752 | 0.52129  | -0.28391 | 4.16E-10 | -0.11957 | 0.0097   |
| 9.03E-12 | -0.35656 | 1.90E-15 | -0.12704 | 0.00597  | -0.30348 | 2.09E-11 | -0.12697 | 0.006    |
| 0.00014  | -0.28934 | 1.86E-10 | -0.05595 | 0.22748  | -0.21522 | 2.68E-06 | -0.18793 | 4.37E-05 |
| 2.21E-11 | -0.44862 | 1.66E-24 | -0.21001 | 4.71E-06 | -0.38595 | 4.89E-18 | -0.06315 | 0.17305  |
| 7.74E-08 | 0.014896 | 0.74817  | 0.140979 | 0.00226  | -0.05439 | 0.24073  | -0.07274 | 0.11644  |
| 5.83E-12 | -0.27653 | 1.21E-09 | -0.17478 | 0.00015  | -0.36365 | 4.78E-16 | 0.002787 | 0.9521   |
| 1.30E-24 | -0.42791 | 3.24E-22 | -0.16587 | 0.00032  | -0.41971 | 2.37E-21 | -0.27023 | 2.94E-09 |
| 1.22E-28 | -0.36159 | 7.17E-16 | -0.30217 | 2.58E-11 | -0.48471 | 6.90E-29 | -0.19588 | 2.02E-05 |
| 2.68E-30 | -0.31936 | 1.56E-12 | -0.22431 | 9.73E-07 | -0.44745 | 2.26E-24 | -0.07795 | 0.09246  |
| 4.87E-20 | -0.3747  | 5.16E-17 | -0.18529 | 5.62E-05 | -0.4187  | 3.02E-21 | -0.16013 | 0.00051  |
| 3.18E-13 | -0.24937 | 4.73E-08 | -0.18495 | 5.80E-05 | -0.31496 | 3.26E-12 | -0.2702  | 2.95E-09 |
| 1.76E-20 | -0.39297 | 1.07E-18 | -0.23917 | 1.69E-07 | -0.43911 | 1.96E-23 | -0.09984 | 0.03099  |
| 4.71E-10 | -0.21792 | 1.99E-06 | 0.008155 | 0.86049  | -0.22021 | 1.55E-06 | -0.14145 | 0.00218  |
| 5.48E-12 | -0.04201 | 0.36503  | 0.057367 | 0.21594  | -0.18288 | 7.04E-05 | -0.34575 | 1.47E-14 |
| 1.66E-22 | -0.18699 | 4.78E-05 | 0.014448 | 0.75549  | -0.24551 | 7.71E-08 | -0.10768 | 0.01994  |
| 3.09E-19 | -0.42019 | 2.11E-21 | -0.16815 | 0.00026  | -0.36937 | 1.53E-16 | -0.25606 | 1.99E-08 |
| 1.29E-16 | -0.34069 | 3.72E-14 | -0.10227 | 0.02711  | -0.32529 | 5.69E-13 | -0.2008  | 1.23E-05 |
| 6.22E-05 | -0.1026  | 0.02662  | 0.224079 | 9.99E-07 | -0.06451 | 0.16396  | -0.06197 | 0.18126  |
| 8.68E-21 | -0.35868 | 1.26E-15 | -0.25343 | 2.81E-08 | -0.42192 | 1.40E-21 | -0.02938 | 0.52646  |
| 6.47E-07 | -0.28061 | 6.74E-10 | -0.02466 | 0.59496  | -0.1832  | 6.83E-05 | -0.20782 | 5.94E-06 |
| 0.3124   | -0.08461 | 0.06772  | -0.08867 | 0.05551  | -0.08996 | 0.05206  | 0.013596 | 0.76949  |
| 0.42579  | 0.047979 | 0.30083  | -0.07181 | 0.12121  | -0.04016 | 0.3866   | 0.092329 | 0.04614  |
| 0.50247  | -0.0339  | 0.46487  | -0.04717 | 0.30902  | -0.05183 | 0.26368  | -0.01389 | 0.76472  |
| 0.30789  | 0.011829 | 0.79876  | 0.003459 | 0.94057  | 0.027095 | 0.55918  | 0.189973 | 3.60E-05 |
| 0.30251  | -0.03406 | 0.46274  | -0.03775 | 0.41574  | -0.04101 | 0.37658  | 0.028037 | 0.54559  |
| 0.47968  | -0.06044 | 0.19233  | -0.0763  | 0.09959  | -0.04708 | 0.31002  | 0.093441 | 0.04356  |
| 0.5705   | 0.034186 | 0.46112  | 0.008547 | 0.85384  | 0.005351 | 0.90819  | 0.102717 | 0.02644  |
| 0.16679  | 0.00133  | 0.97713  | -0.04403 | 0.34245  | -0.03956 | 0.39374  | 0.040619 | 0.38114  |



|         |          |         |          |         |          |         |          |         |
|---------|----------|---------|----------|---------|----------|---------|----------|---------|
| 0.03779 | -0.09638 | 0.03734 | -0.12609 | 0.00636 | -0.11979 | 0.00957 | -0.01679 | 0.71736 |
| 0.17525 | 0.019144 | 0.67988 | -0.04953 | 0.28549 | -0.03414 | 0.46173 | 0.027206 | 0.55757 |
| 0.00912 | -0.03477 | 0.45343 | -0.09373 | 0.04291 | -0.08573 | 0.06415 | -0.1037  | 0.02503 |
| 0.58846 | -0.00249 | 0.95729 | -0.041   | 0.37664 | -0.0201  | 0.6648  | 0.097596 | 0.03499 |
| 0.23744 | -0.03771 | 0.41625 | -0.05144 | 0.26728 | -0.0368  | 0.42754 | 0.052964 | 0.25333 |
| 0.25766 | -0.0315  | 0.49706 | -0.05469 | 0.23815 | -0.03971 | 0.39195 | 0.053139 | 0.25177 |
| 0.62755 | -0.00022 | 0.99614 | 0.044868 | 0.3333  | 0.038894 | 0.40171 | 0.097742 | 0.03472 |
| 0.29337 | -0.06038 | 0.19271 | -0.07153 | 0.1227  | -0.05941 | 0.19999 | 0.048863 | 0.29201 |
| 0.21672 | 0.003638 | 0.93751 | -0.0508  | 0.27327 | -0.03835 | 0.40838 | 0.04274  | 0.35676 |
| 0.39548 | 0.01161  | 0.80241 | -0.04256 | 0.35873 | 0.009608 | 0.83595 | 0.061932 | 0.18153 |
| 0.89762 | 0.084141 | 0.06927 | -0.00961 | 0.83598 | 0.031617 | 0.4955  | 0.07652  | 0.09862 |
| 0.18387 | -0.04221 | 0.3628  | -0.12745 | 0.00581 | -0.08052 | 0.08217 | 0.040964 | 0.37711 |
| 0.63541 | -0.00411 | 0.92939 | -0.01692 | 0.7154  | 0.006533 | 0.88802 | -0.00415 | 0.92867 |
| 0.84506 | -0.09031 | 0.05114 | -0.03078 | 0.50705 | -0.0195  | 0.67431 | -0.08208 | 0.07639 |
| 0.68585 | -0.032   | 0.49033 | -0.01925 | 0.67815 | -0.00581 | 0.90042 | -0.03994 | 0.38922 |
| 0.199   | -0.06505 | 0.16047 | -0.0587  | 0.20546 | -0.06459 | 0.16345 | 0.008285 | 0.85828 |
| 0.08938 | -0.06688 | 0.149   | -0.09886 | 0.03268 | -0.0786  | 0.08975 | -0.01268 | 0.78466 |
| 0.24872 | 0.0309   | 0.50533 | -0.03186 | 0.49224 | -0.02111 | 0.64908 | 0.043368 | 0.34973 |
| 0.77601 | 0.025713 | 0.5794  | -0.02174 | 0.63934 | -0.00776 | 0.86722 | 0.045323 | 0.32842 |
| 0.09386 | -0.03287 | 0.47857 | -0.06182 | 0.18234 | -0.06553 | 0.1574  | 0.035833 | 0.4398  |
| 0.55236 | 0.023209 | 0.61688 | -0.02269 | 0.62479 | 0.011927 | 0.79714 | 0.054229 | 0.24216 |
| 0.00213 | -0.05294 | 0.25354 | -0.1013  | 0.02861 | -0.10648 | 0.02137 | -0.13132 | 0.00447 |
| 0.19116 | -0.03064 | 0.50891 | -0.05834 | 0.20826 | -0.06177 | 0.18265 | 0.00245  | 0.95789 |
| 0.10905 | -0.02845 | 0.53974 | -0.0495  | 0.28571 | -0.05928 | 0.20101 | 0.017121 | 0.7121  |
| 0.92858 | 0.037191 | 0.42265 | -0.0015  | 0.97415 | 0.018379 | 0.692   | -0.06535 | 0.15857 |
| 0.13539 | -0.04078 | 0.37923 | -0.06238 | 0.17838 | -0.06451 | 0.16396 | 0.024193 | 0.60203 |
| 0.74846 | 0.016271 | 0.72582 | -0.0194  | 0.67587 | -0.00203 | 0.96517 | 0.021521 | 0.64274 |
| 0.41633 | -0.0482  | 0.29856 | -0.05946 | 0.19962 | -0.04424 | 0.34007 | 0.022648 | 0.62543 |
| 0.20161 | -0.02754 | 0.5527  | -0.05    | 0.28092 | -0.04583 | 0.32307 | 0.033334 | 0.47237 |
| 0.17894 | -0.03762 | 0.41735 | -0.0553  | 0.23294 | -0.0557  | 0.22959 | 0.039534 | 0.394   |
| 0.31551 | -0.03403 | 0.46323 | -0.03299 | 0.47701 | -0.03264 | 0.48158 | -0.04711 | 0.30972 |
| 0.43673 | 0.09953  | 0.03152 | 0.019532 | 0.67375 | 0.0501   | 0.27994 | 0.069912 | 0.1314  |
| 0.43904 | 0.015506 | 0.73822 | -0.05076 | 0.27369 | -0.02118 | 0.64802 | 0.052376 | 0.25864 |
| 0.41202 | 0.067087 | 0.14776 | -0.00543 | 0.90677 | 0.007753 | 0.86729 | 0.071077 | 0.12508 |
| 0.00517 | -0.02648 | 0.5682  | 0.027841 | 0.5484  | 0.077823 | 0.09299 | 0.110799 | 0.0166  |
| 0.91444 | -0.01174 | 0.80026 | -0.00144 | 0.97531 | 0.008819 | 0.84925 | 0.010153 | 0.82678 |
| 0.85834 | 0.011571 | 0.80305 | -0.03778 | 0.41532 | -0.0063  | 0.89195 | 0.040197 | 0.38612 |
| 0.62235 | 0.008808 | 0.84943 | -0.02885 | 0.53394 | -0.01313 | 0.77714 | 0.039188 | 0.39816 |
| 0.51342 | -0.00471 | 0.91918 | -0.03032 | 0.51343 | -0.02426 | 0.601   | 0.021252 | 0.64689 |
| 0.73777 | 0.009658 | 0.83511 | -0.03536 | 0.4458  | -0.01644 | 0.72305 | 0.031662 | 0.49489 |
| 0.42293 | -0.00329 | 0.94349 | -0.02922 | 0.52874 | -0.02273 | 0.62418 | 0.022194 | 0.63237 |
| 0.82945 | 0.040651 | 0.38076 | -0.03048 | 0.51108 | 0.008603 | 0.8529  | 0.041893 | 0.36638 |
| 0.83815 | 0.055606 | 0.23039 | -0.02972 | 0.52174 | 0.012977 | 0.77971 | 0.029432 | 0.52578 |
| 0.89501 | 0.035509 | 0.44396 | -0.02863 | 0.53716 | 0.009738 | 0.83376 | 0.0452   | 0.32973 |
| 0.67259 | 0.063879 | 0.16816 | -0.0329  | 0.47815 | 0.010376 | 0.82305 | 0.025527 | 0.58215 |

|          |          |          |          |          |          |          |          |          |
|----------|----------|----------|----------|----------|----------|----------|----------|----------|
| 0.015    | -0.06073 | 0.19013  | -0.04987 | 0.28218  | -0.10126 | 0.02867  | 0.044883 | 0.33313  |
| 0.50809  | 0.019955 | 0.66711  | -0.02641 | 0.56913  | 0.013109 | 0.77752  | 0.050526 | 0.27587  |
| 0.04479  | -0.21393 | 3.09E-06 | -0.18891 | 3.98E-05 | -0.17575 | 0.00013  | 0.024778 | 0.59327  |
| 0.27339  | -0.00831 | 0.85781  | -0.04407 | 0.34197  | -0.0385  | 0.40646  | 0.044966 | 0.33224  |
| 0.22913  | -0.02144 | 0.64399  | -0.05838 | 0.20789  | -0.04598 | 0.32143  | 0.048335 | 0.29725  |
| 0.25264  | 0.001021 | 0.98244  | -0.03992 | 0.38941  | -0.03578 | 0.4405   | 0.033219 | 0.47391  |
| 0.9587   | 0.018007 | 0.69792  | -0.01612 | 0.72819  | 0.004631 | 0.9205   | 0.022383 | 0.62948  |
| 0.80431  | 0.010778 | 0.81631  | -0.03787 | 0.41419  | -0.01536 | 0.74053  | 0.045808 | 0.32326  |
| 0.78919  | 0.007149 | 0.87755  | -0.05074 | 0.27382  | -0.01972 | 0.67086  | 0.04445  | 0.33782  |
| 0.63334  | 0.017531 | 0.70554  | 0.037076 | 0.42409  | 0.006119 | 0.89508  | 0.040175 | 0.38637  |
| 0.49668  | -0.0031  | 0.94668  | -0.03288 | 0.47843  | -0.02657 | 0.56686  | 0.031944 | 0.49105  |
| 0.35721  | 0.048239 | 0.29822  | -0.02828 | 0.54212  | 0.023936 | 0.60589  | 0.057205 | 0.21724  |
| 0.89791  | 0.016347 | 0.72458  | -0.02615 | 0.573    | -0.00304 | 0.9478   | 0.046975 | 0.31107  |
| 0.84964  | 0.014751 | 0.75054  | -0.00966 | 0.83506  | 0.011723 | 0.80053  | -0.06742 | 0.14574  |
| 0.53976  | -0.01485 | 0.74899  | -0.06443 | 0.16454  | -0.03588 | 0.43926  | 0.039834 | 0.39042  |
| 0.71237  | 0.022076 | 0.63418  | -0.02143 | 0.64412  | -0.00334 | 0.94268  | 0.031065 | 0.50305  |
| 0.76569  | -0.05566 | 0.2299   | -0.0329  | 0.47817  | -0.04302 | 0.35362  | -0.06879 | 0.13771  |
| 0.96487  | 0.038987 | 0.40059  | -0.0223  | 0.63072  | 0.019242 | 0.67833  | 0.021158 | 0.64835  |
| 0.02909  | -0.10227 | 0.0271   | -0.05603 | 0.22687  | -0.09307 | 0.0444   | 0.00544  | 0.90667  |
| 3.91E-21 | 0.57444  | 2.36E-42 | 0.412986 | 1.16E-20 | 0.514443 | 6.51E-33 | 0.179065 | 9.99E-05 |
| 4.23E-13 | 0.719835 | 9.64E-76 | 0.290324 | 1.60E-10 | 0.451375 | 8.04E-25 | 0.082098 | 0.07633  |
| 4.95E-14 | 0.633373 | 9.76E-54 | 0.50974  | 3.00E-32 | 0.523907 | 2.80E-34 | 0.256841 | 1.80E-08 |
| 7.22E-08 | 0.576387 | 1.08E-42 | 0.320445 | 1.30E-12 | 0.393304 | 9.99E-19 | -0.19713 | 1.78E-05 |
| 3.74E-07 | 0.504728 | 1.49E-31 | 0.30862  | 9.19E-12 | 0.3426   | 2.63E-14 | 0.087403 | 0.05911  |
| 6.18E-20 | 0.587699 | 1.03E-44 | 0.201022 | 1.20E-05 | 0.420272 | 2.07E-21 | 0.389826 | 2.13E-18 |
| 9.17E-38 | 0.485591 | 5.30E-29 | 0.191789 | 3.02E-05 | 0.468628 | 7.18E-27 | 0.264989 | 6.05E-09 |
| 4.24E-23 | 0.626997 | 2.19E-52 | 0.514382 | 6.64E-33 | 0.604072 | 8.82E-48 | 0.462957 | 3.49E-26 |
| 1.77E-10 | 0.711657 | 2.59E-73 | 0.607396 | 2.00E-48 | 0.559094 | 9.37E-40 | 0.072755 | 0.11639  |
| 2.97E-20 | 0.563641 | 1.64E-40 | 0.29751  | 5.34E-11 | 0.442445 | 8.33E-24 | 0.220989 | 1.42E-06 |
| 2.97E-07 | 0.511587 | 1.65E-32 | -0.03208 | 0.48915  | 0.19411  | 2.40E-05 | 0.3138   | 3.94E-12 |
| 1.20E-18 | 0.637946 | 1.00E-54 | 0.160022 | 0.00052  | 0.400641 | 1.97E-19 | 0.166763 | 0.0003   |
| 3.92E-28 | 0.708974 | 1.55E-72 | 0.742155 | 7.77E-83 | 0.705511 | 1.53E-71 | 0.231319 | 4.32E-07 |
| 8.76E-26 | 0.807767 | #####    | 0.700863 | 3.10E-70 | 0.742936 | 4.26E-83 | 0.115888 | 0.01221  |
| 3.69E-08 | 0.572053 | 6.10E-42 | 0.424886 | 6.80E-22 | 0.473548 | 1.78E-27 | 0.312687 | 4.74E-12 |
| 1.52E-13 | 0.674101 | 3.62E-63 | 0.529826 | 3.72E-35 | 0.561342 | 3.98E-40 | 0.223763 | 1.04E-06 |
| 4.37E-26 | 0.665623 | 4.42E-61 | 0.236298 | 2.39E-07 | 0.47779  | 5.24E-28 | 0.2354   | 2.66E-07 |
| 1.49E-05 | 0.663532 | 1.41E-60 | 0.493867 | 4.37E-30 | 0.455891 | 2.40E-25 | 0.05841  | 0.20769  |
| 2.34E-27 | 0.830216 | #####    | 0.731219 | 2.85E-79 | 0.742481 | 6.05E-83 | 0.262032 | 9.02E-09 |
| 5.68E-10 | 0.744075 | 1.76E-83 | 0.521058 | 7.30E-34 | 0.508616 | 4.30E-32 | 0.077964 | 0.0924   |
| 4.66E-12 | 0.74055  | 2.66E-82 | 0.714699 | 3.31E-74 | 0.636318 | 2.26E-54 | 0.097201 | 0.03574  |
| 5.08E-22 | 0.633875 | 7.62E-54 | 0.525396 | 1.69E-34 | 0.541037 | 7.28E-37 | 0.098095 | 0.03407  |
| 9.59E-21 | 0.555136 | 4.17E-39 | 0.423072 | 1.06E-21 | 0.47466  | 1.29E-27 | 0.307606 | 1.08E-11 |
| 1.86E-15 | 0.718396 | 2.62E-75 | 0.331253 | 2.02E-13 | 0.446369 | 3.01E-24 | 0.010681 | 0.81793  |
| 9.36E-14 | 0.751531 | 4.86E-86 | 0.592875 | 1.15E-45 | 0.603486 | 1.14E-47 | 0.102492 | 0.02678  |
| 8.84E-27 | 0.602383 | 1.86E-47 | 0.586229 | 1.90E-44 | 0.617552 | 1.92E-50 | 0.010637 | 0.81867  |

|          |          |          |          |          |          |          |          |          |
|----------|----------|----------|----------|----------|----------|----------|----------|----------|
| 2.12E-30 | 0.693829 | 2.66E-68 | 0.592801 | 1.19E-45 | 0.646428 | 1.33E-56 | 0.101097 | 0.02893  |
| 7.80E-29 | 0.768928 | 2.21E-92 | 0.43908  | 1.98E-23 | 0.596926 | 2.02E-46 | 0.318757 | 1.73E-12 |
| 1.79E-33 | 0.824559 | #####    | 0.560313 | 5.89E-40 | 0.680104 | 1.10E-64 | 0.200393 | 1.28E-05 |
| 2.25E-12 | 0.535759 | 4.73E-36 | 0.35254  | 4.11E-15 | 0.406581 | 5.12E-20 | 0.186907 | 4.82E-05 |
| 1.30E-14 | 0.74039  | 3.00E-82 | 0.719541 | 1.18E-75 | 0.669462 | 5.12E-62 | 0.114892 | 0.01298  |
| 1.09E-09 | 0.633349 | 9.87E-54 | 0.416506 | 5.08E-21 | 0.483735 | 9.20E-29 | 0.301732 | 2.76E-11 |
| 1.89E-32 | 0.594972 | 4.70E-46 | 0.410324 | 2.16E-20 | 0.574587 | 2.22E-42 | 0.382848 | 9.46E-18 |
| 3.88E-21 | 0.651546 | 9.14E-58 | 0.25173  | 3.50E-08 | 0.420825 | 1.81E-21 | 0.297501 | 5.35E-11 |
| 5.03E-10 | 0.641655 | 1.54E-55 | 0.373695 | 6.34E-17 | 0.467325 | 1.04E-26 | 0.019569 | 0.67318  |
| 2.46E-25 | 0.772265 | 1.16E-93 | 0.607303 | 2.08E-48 | 0.654967 | 1.48E-58 | 0.085843 | 0.06381  |
| 9.95E-22 | 0.66794  | 1.21E-61 | 0.477493 | 5.71E-28 | 0.556043 | 2.97E-39 | 0.417843 | 3.70E-21 |
| 6.38E-09 | 0.648228 | 5.21E-57 | 0.239457 | 1.63E-07 | 0.383537 | 8.18E-18 | -0.09695 | 0.03622  |
| 2.29E-20 | 0.388925 | 2.59E-18 | 0.379349 | 1.97E-17 | 0.418491 | 3.17E-21 | 0.173408 | 0.00017  |
| 2.67E-30 | 0.851827 | #####    | 0.639251 | 5.20E-55 | 0.700478 | 3.97E-70 | 0.230012 | 5.04E-07 |
| 1.99E-13 | 0.530605 | 2.85E-35 | 0.401012 | 1.81E-19 | 0.420929 | 1.77E-21 | 0.192369 | 2.85E-05 |
| 1.39E-15 | 0.506188 | 9.35E-32 | 0.078494 | 0.0902   | 0.312726 | 4.71E-12 | 0.272243 | 2.22E-09 |
| 9.11E-16 | 0.599118 | 7.80E-47 | 0.507701 | 5.77E-32 | 0.508235 | 4.86E-32 | 0.126505 | 0.00619  |
| 6.13E-16 | 0.658026 | 2.86E-59 | 0.361802 | 6.87E-16 | 0.464464 | 2.30E-26 | 0.117331 | 0.01116  |
| 1.96E-07 | 0.453369 | 4.72E-25 | 0.458452 | 1.20E-25 | 0.427009 | 4.05E-22 | -0.04428 | 0.33973  |
| 1.40E-30 | 0.741627 | 1.17E-82 | 0.583349 | 6.29E-44 | 0.676791 | 7.63E-64 | 0.187347 | 4.62E-05 |
| 6.02E-35 | 0.658061 | 2.81E-59 | 0.660105 | 9.25E-60 | 0.688739 | 6.15E-67 | 0.283342 | 4.52E-10 |
| 3.92E-11 | 0.61425  | 8.86E-50 | 0.454608 | 3.39E-25 | 0.491229 | 9.76E-30 | 0.169607 | 0.00023  |
| 2.49E-12 | 0.561637 | 3.55E-40 | 0.276655 | 1.19E-09 | 0.372296 | 8.44E-17 | 0.391799 | 1.39E-18 |
| 1.26E-29 | 0.756551 | 8.16E-88 | 0.317344 | 2.19E-12 | 0.546258 | 1.11E-37 | 0.172688 | 0.00018  |
| 1.43E-06 | 0.50999  | 2.77E-32 | 0.479382 | 3.30E-28 | 0.402155 | 1.40E-19 | 0.281777 | 5.68E-10 |
| 9.31E-23 | 0.631657 | 2.27E-53 | 0.574942 | 1.93E-42 | 0.630936 | 3.23E-53 | 0.311433 | 5.82E-12 |
| 8.46E-15 | 0.528266 | 6.36E-35 | 0.268816 | 3.58E-09 | 0.408189 | 3.54E-20 | 0.41465  | 7.87E-21 |
| 3.64E-29 | 0.753136 | 1.33E-86 | 0.600071 | 5.15E-47 | 0.676563 | 8.72E-64 | 0.268778 | 3.60E-09 |
| 1.64E-07 | 0.681607 | 4.50E-65 | 0.270484 | 2.84E-09 | 0.390904 | 1.69E-18 | 0.082387 | 0.0753   |
| 6.77E-10 | 0.753547 | 9.53E-87 | 0.536249 | 3.98E-36 | 0.530267 | 3.20E-35 | 0.201945 | 1.09E-05 |
| 7.58E-07 | 0.538127 | 2.05E-36 | 0.35605  | 2.10E-15 | 0.358681 | 1.26E-15 | 0.378256 | 2.48E-17 |
| 1.68E-17 | 0.570532 | 1.11E-41 | 0.474178 | 1.49E-27 | 0.490328 | 1.28E-29 | 0.206755 | 6.64E-06 |
| 8.13E-13 | 0.548797 | 4.38E-38 | 0.536247 | 3.98E-36 | 0.500326 | 5.94E-31 | 0.063855 | 0.16832  |
| 1.44E-40 | 0.717619 | 4.48E-75 | 0.46257  | 3.88E-26 | 0.62563  | 4.22E-52 | 0.301683 | 2.78E-11 |
| 3.91E-35 | 0.887256 | #####    | 0.684349 | 8.77E-66 | 0.766404 | 1.99E-91 | 0.275883 | 1.33E-09 |
| 2.23E-27 | 0.856989 | #####    | 0.614415 | 8.21E-50 | 0.702521 | 1.07E-70 | 0.16434  | 0.00036  |
| 9.71E-23 | 0.810901 | #####    | 0.618973 | 9.89E-51 | 0.655237 | 1.28E-58 | 0.037547 | 0.41822  |
| 3.01E-19 | 0.623994 | 9.23E-52 | 0.590906 | 2.67E-45 | 0.570644 | 1.07E-41 | 0.331557 | 1.91E-13 |
| 2.34E-27 | 0.765483 | 4.41E-91 | 0.308783 | 8.95E-12 | 0.534399 | 7.62E-36 | 0.229693 | 5.23E-07 |
| 7.70E-23 | 0.672897 | 7.24E-63 | 0.355733 | 2.23E-15 | 0.523722 | 2.98E-34 | 0.392992 | 1.07E-18 |
| 0.01528  | 0.592264 | 1.50E-45 | 0.169332 | 0.00024  | 0.266228 | 5.11E-09 | -0.02662 | 0.56606  |
| 0.69812  | 0.559169 | 9.11E-40 | 0.075137 | 0.10487  | 0.160883 | 0.00048  | -0.05252 | 0.25731  |
| 7.40E-20 | 0.83647  | #####    | 0.602813 | 1.54E-47 | 0.630471 | 4.05E-53 | 0.179082 | 9.98E-05 |
| 0.00132  | 0.688327 | 7.91E-67 | 0.664765 | 7.12E-61 | 0.501389 | 4.26E-31 | 0.051564 | 0.26611  |
| 3.59E-25 | 0.77982  | 1.21E-96 | 0.583524 | 5.86E-44 | 0.648859 | 3.75E-57 | 0.1847   | 5.94E-05 |

|          |          |          |          |          |          |          |          |          |
|----------|----------|----------|----------|----------|----------|----------|----------|----------|
| 4.84E-08 | 0.684727 | 6.99E-66 | 0.536882 | 3.18E-36 | 0.500289 | 6.01E-31 | 0.250008 | 4.36E-08 |
| 1.56E-43 | 0.827558 | #####    | 0.565766 | 7.21E-41 | 0.711985 | 2.08E-73 | 0.304825 | 1.69E-11 |
| 5.45E-14 | 0.73973  | 4.97E-82 | 0.742784 | 4.78E-83 | 0.660469 | 7.58E-60 | 0.1456   | 0.00161  |
| 1.77E-31 | 0.818775 | #####    | 0.604863 | 6.21E-48 | 0.68641  | 2.53E-66 | 0.167659 | 0.00027  |
| 1.07E-36 | 0.586554 | 1.66E-44 | 0.361072 | 7.93E-16 | 0.536763 | 3.32E-36 | 0.167124 | 0.00029  |
| 3.57E-11 | 0.583023 | 7.20E-44 | 0.57795  | 5.73E-43 | 0.540994 | 7.40E-37 | 0.103888 | 0.02476  |
| 4.59E-07 | 0.652301 | 6.14E-58 | 0.463692 | 2.85E-26 | 0.457264 | 1.66E-25 | 0.333037 | 1.47E-13 |
| 2.43E-23 | 0.664339 | 9.02E-61 | 0.597585 | 1.52E-46 | 0.655728 | 9.87E-59 | 0.195416 | 2.11E-05 |
| 2.67E-13 | 0.703085 | 7.41E-71 | 0.634789 | 4.84E-54 | 0.550689 | 2.18E-38 | 0.111909 | 0.01554  |
| 7.52E-10 | 0.598576 | 9.88E-47 | 0.419301 | 2.61E-21 | 0.452041 | 6.73E-25 | 0.115192 | 0.01274  |
| 1.72E-10 | 0.505328 | 1.23E-31 | 0.318188 | 1.90E-12 | 0.382544 | 1.01E-17 | 0.088598 | 0.05572  |
| 2.05E-05 | 0.687772 | 1.11E-66 | 0.391332 | 1.54E-18 | 0.408319 | 3.43E-20 | 0.332363 | 1.66E-13 |
| 3.96E-12 | 0.678686 | 2.52E-64 | 0.375246 | 4.61E-17 | 0.435287 | 5.17E-23 | 0.208072 | 5.78E-06 |
| 1.37E-34 | 0.778911 | 2.81E-96 | 0.63631  | 2.27E-54 | 0.684379 | 8.61E-66 | 0.248923 | 5.01E-08 |
| 2.91E-39 | 0.818645 | #####    | 0.549213 | 3.76E-38 | 0.670626 | 2.65E-62 | 0.193004 | 2.68E-05 |
| 1.37E-12 | 0.530975 | 2.50E-35 | 0.266845 | 4.69E-09 | 0.371028 | 1.09E-16 | 0.072566 | 0.11734  |
| 1.92E-39 | 0.756465 | 8.76E-88 | 0.474312 | 1.43E-27 | 0.654335 | 2.08E-58 | 0.151169 | 0.00105  |
| 3.09E-06 | 0.640491 | 2.78E-55 | 0.455843 | 2.43E-25 | 0.428455 | 2.84E-22 | 0.307295 | 1.14E-11 |
| 4.21E-26 | 0.586702 | 1.56E-44 | 0.333954 | 1.25E-13 | 0.485199 | 5.96E-29 | 0.127759 | 0.0057   |
| 1.60E-13 | 0.638124 | 9.17E-55 | 0.425722 | 5.54E-22 | 0.496544 | 1.92E-30 | 0.155029 | 0.00077  |
| 0.00047  | 0.51519  | 5.10E-33 | 0.386893 | 4.00E-18 | 0.345477 | 1.55E-14 | -0.14689 | 0.00146  |
| 4.80E-07 | 0.642081 | 1.24E-55 | 0.448057 | 1.93E-24 | 0.448462 | 1.74E-24 | 0.375297 | 4.56E-17 |
| 6.89E-17 | 0.586598 | 1.63E-44 | 0.176935 | 0.00012  | 0.399494 | 2.54E-19 | 0.254726 | 2.37E-08 |
| 0.00013  | 0.668587 | 8.39E-62 | 0.22627  | 7.78E-07 | 0.317891 | 2.00E-12 | -0.00177 | 0.96964  |
| 4.50E-34 | 0.764486 | 1.04E-90 | 0.450473 | 1.02E-24 | 0.637052 | 1.57E-54 | 0.228828 | 5.79E-07 |
| 9.15E-14 | 0.770127 | 7.72E-93 | 0.589272 | 5.32E-45 | 0.619042 | 9.57E-51 | 0.054505 | 0.23976  |
| 2.77E-17 | 0.567642 | 3.47E-41 | 0.610788 | 4.32E-49 | 0.580562 | 1.98E-43 | 0.092317 | 0.04616  |
| 5.13E-31 | 0.703253 | 6.64E-71 | 0.565246 | 8.83E-41 | 0.699087 | 9.66E-70 | 0.38753  | 3.49E-18 |
| 1.59E-08 | 0.602653 | 1.65E-47 | 0.410746 | 1.96E-20 | 0.48024  | 2.57E-28 | -0.02034 | 0.66116  |
| 2.05E-13 | 0.658318 | 2.45E-59 | 0.360891 | 8.22E-16 | 0.454711 | 3.30E-25 | 0.430319 | 1.79E-22 |
| 4.26E-22 | 0.858249 | #####    | 0.558677 | 1.10E-39 | 0.633085 | 1.13E-53 | 0.132729 | 0.00406  |
| 3.48E-21 | 0.778221 | 5.30E-96 | 0.41918  | 2.69E-21 | 0.560609 | 5.26E-40 | 0.202508 | 1.03E-05 |
| 8.41E-11 | 0.615699 | 4.54E-50 | 0.550454 | 2.38E-38 | 0.548437 | 5.00E-38 | 0.318869 | 1.70E-12 |
| 1.75E-19 | 0.847011 | #####    | 0.650268 | 1.79E-57 | 0.684891 | 6.33E-66 | 0.260151 | 1.16E-08 |
| 3.50E-17 | 0.539889 | 1.10E-36 | 0.452575 | 5.84E-25 | 0.495781 | 2.43E-30 | 0.045001 | 0.33187  |
| 4.42E-25 | 0.832219 | #####    | 0.543385 | 3.14E-37 | 0.64191  | 1.35E-55 | 0.220309 | 1.53E-06 |
| 9.20E-27 | 0.730118 | 6.37E-79 | 0.537449 | 2.61E-36 | 0.638929 | 6.12E-55 | 0.276935 | 1.14E-09 |
| 2.12E-08 | 0.568634 | 2.35E-41 | 0.564998 | 9.72E-41 | 0.546559 | 9.93E-38 | 0.300793 | 3.20E-11 |
| 1.34E-22 | 0.729132 | 1.31E-78 | 0.297948 | 4.99E-11 | 0.467058 | 1.12E-26 | 0.185789 | 5.36E-05 |
| 9.77E-27 | 0.494871 | 3.21E-30 | 0.217896 | 2.00E-06 | 0.431507 | 1.33E-22 | 0.308696 | 9.08E-12 |
| 2.19E-05 | 0.582814 | 7.85E-44 | 0.242665 | 1.10E-07 | 0.304516 | 1.78E-11 | 0.061698 | 0.18319  |
| 1.63E-20 | 0.716421 | 1.02E-74 | 0.603274 | 1.26E-47 | 0.598371 | 1.08E-46 | 0.2742   | 1.69E-09 |
| 9.42E-44 | 0.825331 | #####    | 0.560236 | 6.07E-40 | 0.707477 | 4.19E-72 | 0.250948 | 3.87E-08 |
| 5.57E-45 | 0.856805 | #####    | 0.760021 | 4.57E-89 | 0.78649  | 2.25E-99 | 0.237219 | 2.14E-07 |
| 6.91E-07 | 0.465187 | 1.88E-26 | 0.384499 | 6.67E-18 | 0.373465 | 6.65E-17 | 0.396318 | 5.15E-19 |

|          |          |          |          |          |          |          |          |          |
|----------|----------|----------|----------|----------|----------|----------|----------|----------|
| 1.82E-18 | 0.664456 | 8.45E-61 | 0.711357 | 3.17E-73 | 0.645327 | 2.35E-56 | 0.236309 | 2.39E-07 |
| 1.67E-30 | 0.694567 | 1.68E-68 | 0.287838 | 2.32E-10 | 0.493721 | 4.57E-30 | 0.224558 | 9.46E-07 |
| 2.60E-37 | 0.728116 | 2.72E-78 | 0.671263 | 1.84E-62 | 0.720771 | 5.02E-76 | 0.359899 | 9.97E-16 |
| 3.91E-16 | 0.63827  | 8.53E-55 | 0.461841 | 4.74E-26 | 0.553453 | 7.83E-39 | 0.15076  | 0.00108  |
| 2.53E-06 | 0.489783 | 1.51E-29 | 0.261291 | 9.97E-09 | 0.340073 | 4.17E-14 | 0.014903 | 0.74805  |
| 2.33E-18 | 0.740603 | 2.55E-82 | 0.6291   | 7.90E-53 | 0.636991 | 1.62E-54 | 0.02608  | 0.57399  |
| 7.81E-14 | 0.511599 | 1.64E-32 | 0.389843 | 2.12E-18 | 0.420295 | 2.06E-21 | 0.170433 | 0.00022  |
| 6.48E-25 | 0.633429 | 9.50E-54 | 0.442278 | 8.70E-24 | 0.59045  | 3.24E-45 | 0.332695 | 1.56E-13 |
| 9.22E-21 | 0.540087 | 1.02E-36 | 0.271301 | 2.53E-09 | 0.438585 | 2.24E-23 | 0.202627 | 1.02E-05 |
| 7.69E-21 | 0.697299 | 3.01E-69 | 0.6246   | 6.91E-52 | 0.629609 | 6.17E-53 | 0.149657 | 0.00118  |
| 3.94E-09 | 0.737476 | 2.74E-81 | 0.326291 | 4.79E-13 | 0.412249 | 1.38E-20 | 0.197992 | 1.63E-05 |
| 1.64E-10 | 0.759344 | 8.05E-89 | 0.744941 | 8.97E-84 | 0.617323 | 2.14E-50 | 0.112242 | 0.01524  |
| 6.25E-22 | 0.525009 | 1.93E-34 | 0.292294 | 1.19E-10 | 0.459729 | 8.46E-26 | 0.211459 | 4.03E-06 |
| 1.00E-05 | 0.528338 | 6.21E-35 | 0.454002 | 3.99E-25 | 0.395916 | 5.63E-19 | -0.11944 | 0.00978  |
| 4.70E-54 | 0.806098 | #####    | 0.58295  | 7.42E-44 | 0.740942 | 1.97E-82 | 0.324018 | 7.08E-13 |
| 3.35E-10 | 0.61495  | 6.42E-50 | 0.485446 | 5.54E-29 | 0.514642 | 6.10E-33 | 0.005194 | 0.91087  |
| 9.03E-20 | 0.650003 | 2.06E-57 | 0.374342 | 5.55E-17 | 0.529162 | 4.68E-35 | 0.159455 | 0.00054  |
| 3.39E-09 | 0.689684 | 3.45E-67 | 0.565759 | 7.23E-41 | 0.558014 | 1.41E-39 | 0.165517 | 0.00033  |
| 0.60378  | 0.550424 | 2.41E-38 | 0.379957 | 1.74E-17 | 0.30568  | 1.47E-11 | 0.042879 | 0.35519  |
| 0.95074  | -0.05938 | 0.20024  | 0.024591 | 0.59606  | -0.01106 | 0.81159  | 0.026357 | 0.56993  |
| 0.97302  | -0.1856  | 5.46E-05 | 0.013158 | 0.77672  | -0.04707 | 0.31013  | -0.05128 | 0.26873  |
| 0.09972  | -0.10138 | 0.02847  | -0.16626 | 0.00031  | -0.14119 | 0.00223  | 0.016037 | 0.72961  |
| 0.23576  | -0.04526 | 0.32909  | -0.0066  | 0.88688  | 0.0254   | 0.58402  | 0.028525 | 0.53862  |
| 0.67987  | -0.02255 | 0.62692  | -0.07182 | 0.12119  | -0.01416 | 0.76024  | 0.03882  | 0.40261  |
| 0.23991  | 0.006373 | 0.89074  | 0.041414 | 0.37188  | 0.075442 | 0.10347  | 0.004615 | 0.92077  |
| 0.0072   | -0.01191 | 0.79746  | 0.012647 | 0.78517  | 0.075616 | 0.10267  | 0.097023 | 0.03608  |
| 0.20535  | -0.04661 | 0.31482  | -0.05739 | 0.21579  | -0.04009 | 0.3874   | -0.00905 | 0.84533  |
| 0.97827  | -0.07977 | 0.08508  | -0.06654 | 0.15109  | -0.05121 | 0.26941  | 0.07899  | 0.08818  |
| 0.03748  | -0.10934 | 0.0181   | -0.11824 | 0.01055  | -0.13156 | 0.0044   | -0.08907 | 0.05442  |
| 0.258    | 0.065042 | 0.16053  | -0.08127 | 0.07935  | -0.03576 | 0.44073  | -0.10727 | 0.02042  |
| 0.00549  | -0.22522 | 8.78E-07 | -0.19995 | 1.34E-05 | -0.21717 | 2.17E-06 | -0.05141 | 0.26755  |
| 0.2083   | 0.03936  | 0.39609  | 0.060889 | 0.18901  | 0.077004 | 0.0965   | -0.08199 | 0.0767   |
| 0.45833  | -0.11751 | 0.01104  | -0.13208 | 0.00425  | -0.11587 | 0.01222  | -0.01465 | 0.75225  |
| 0.77622  | -0.02357 | 0.61136  | 0.014745 | 0.75063  | -0.00482 | 0.91726  | -0.02104 | 0.65015  |
| 0.21503  | -0.06166 | 0.18345  | -0.06535 | 0.15852  | -0.07316 | 0.11437  | -0.02685 | 0.56273  |
| 0.21359  | -0.05493 | 0.23614  | -0.01119 | 0.80946  | 0.043292 | 0.35058  | -0.11405 | 0.01366  |
| 0.97742  | -0.03349 | 0.47028  | -0.02642 | 0.56907  | -0.0175  | 0.70603  | 0.014601 | 0.75299  |
| 0.75026  | 0.046822 | 0.31265  | -0.00233 | 0.95994  | 0.023448 | 0.61326  | -0.04592 | 0.32205  |
| 0.04563  | 0.049175 | 0.28893  | 0.054308 | 0.24147  | 0.091442 | 0.04828  | 0.007177 | 0.87707  |
| 0.01308  | -0.09603 | 0.03803  | -0.08793 | 0.05759  | -0.11461 | 0.0132   | -0.0838  | 0.07042  |
| 0.96305  | -0.05042 | 0.27684  | -0.05098 | 0.27155  | -0.03776 | 0.4156   | 0.010352 | 0.82345  |
| 0.05511  | 0.008911 | 0.8477   | 0.008636 | 0.85234  | 0.052915 | 0.25377  | 0.022016 | 0.63511  |
| 0.40771  | 0.016985 | 0.71429  | -0.0067  | 0.88518  | 0.019498 | 0.67428  | -0.00019 | 0.99676  |
| 0.37854  | -0.02539 | 0.58418  | 0.007211 | 0.87649  | 0.002735 | 0.953    | -0.02526 | 0.58615  |
| 0.00013  | 0.061156 | 0.18707  | 0.111938 | 0.01551  | 0.150829 | 0.00108  | 0.054942 | 0.23601  |

|          |          |          |          |          |          |          |          |          |
|----------|----------|----------|----------|----------|----------|----------|----------|----------|
| 0.01547  | -0.20777 | 5.97E-06 | -0.16207 | 0.00044  | -0.18681 | 4.86E-05 | -0.15626 | 0.0007   |
| 0.54925  | 0.001588 | 0.9727   | 0.021909 | 0.63676  | 0.031295 | 0.4999   | 0.033301 | 0.47282  |
| 0.18262  | 0.151202 | 0.00105  | 0.112403 | 0.01509  | 0.118381 | 0.01046  | 0.090331 | 0.05108  |
| 0.43035  | -0.04982 | 0.28268  | 0.039146 | 0.39866  | 0.041536 | 0.37047  | -0.00345 | 0.94076  |
| 0.14812  | -0.09529 | 0.03956  | -0.06813 | 0.14152  | -0.07851 | 0.09015  | -0.02183 | 0.63793  |
| 0.40027  | 0.009637 | 0.83546  | -0.01589 | 0.73191  | 0.014731 | 0.75086  | -0.02181 | 0.63833  |
| 0.00027  | -0.26961 | 3.21E-09 | -0.24888 | 5.04E-08 | -0.2652  | 5.88E-09 | -0.0795  | 0.08616  |
| 0.95398  | -0.03957 | 0.39355  | -0.06654 | 0.15112  | -0.05143 | 0.2674   | -0.02788 | 0.54783  |
| 0.17678  | 0.12467  | 0.00699  | 0.021845 | 0.63774  | 0.075634 | 0.10259  | -0.03826 | 0.40944  |
| 0.26145  | -0.12027 | 0.00928  | 0.011918 | 0.79728  | -0.02698 | 0.56085  | -0.11275 | 0.01477  |
| 0.05703  | 0.06257  | 0.17706  | 0.072826 | 0.11603  | 0.069652 | 0.13284  | 0.018179 | 0.69518  |
| 0.44158  | -0.00867 | 0.85169  | 0.027322 | 0.55589  | 0.019486 | 0.67448  | -0.00689 | 0.88187  |
| 0.14895  | -0.03646 | 0.43179  | 0.041577 | 0.37001  | 0.029539 | 0.52427  | -0.03871 | 0.4039   |
| 0.02428  | 0.00546  | 0.90632  | 0.102722 | 0.02643  | 0.108058 | 0.0195   | 0.043149 | 0.35216  |
| 0.82045  | 0.013389 | 0.77291  | 0.010357 | 0.82336  | 0.030647 | 0.50882  | 0.039666 | 0.39242  |
| 0.53452  | -0.03368 | 0.46777  | -0.0237  | 0.60945  | 0.004065 | 0.93019  | -0.00545 | 0.90642  |
| 0.09351  | -0.12634 | 0.00626  | -0.10718 | 0.02053  | -0.09683 | 0.03645  | -0.2303  | 4.87E-07 |
| 7.52E-05 | -0.30077 | 3.21E-11 | -0.27111 | 2.60E-09 | -0.28291 | 4.82E-10 | -0.33549 | 9.51E-14 |
| 0.26322  | -0.04041 | 0.3836   | -0.01864 | 0.68791  | -0.04488 | 0.33317  | 0.013552 | 0.77021  |
| 0.9868   | -0.1473  | 0.00141  | 0.004292 | 0.9263   | -0.01797 | 0.69854  | -0.00497 | 0.91471  |
| 0.13346  | -0.05151 | 0.26663  | -0.01356 | 0.77007  | -0.05181 | 0.26381  | 0.000493 | 0.99152  |
| 0.96388  | -0.04272 | 0.35693  | -0.06928 | 0.13494  | -0.05112 | 0.27028  | -0.00393 | 0.93255  |
| 0.17041  | -0.04538 | 0.32778  | -0.07549 | 0.10324  | -0.07113 | 0.1248   | 0.029317 | 0.5274   |
| 0.1041   | -0.02944 | 0.52564  | -0.0285  | 0.539    | -0.06442 | 0.16458  | -0.00261 | 0.95519  |
| 0.50021  | -0.04387 | 0.34422  | -0.08646 | 0.06192  | -0.05807 | 0.21037  | -0.0014  | 0.97601  |
| 0.35784  | -0.12679 | 0.00607  | -0.15633 | 0.0007   | -0.1143  | 0.01345  | -0.14602 | 0.00156  |
| 0.03246  | -0.07977 | 0.08507  | -0.06777 | 0.14369  | -0.08757 | 0.05864  | -0.03484 | 0.45254  |
| 0.02403  | -0.07955 | 0.08592  | 0.082844 | 0.07369  | 0.088643 | 0.05559  | 0.031121 | 0.50229  |
| 0.01135  | 0.127472 | 0.00581  | 0.085385 | 0.06524  | 0.132486 | 0.00413  | 0.072198 | 0.11922  |
| 0.15853  | -0.01776 | 0.70185  | -0.00746 | 0.87229  | 0.019105 | 0.68049  | 0.149986 | 0.00115  |
| 0.04667  | -0.14152 | 0.00217  | -0.1061  | 0.02184  | -0.11815 | 0.0106   | -0.20079 | 1.23E-05 |
| 0.90168  | -0.1209  | 0.00892  | -0.07214 | 0.11949  | -0.08445 | 0.06826  | 0.137663 | 0.00287  |
| 0.15777  | -0.05125 | 0.26903  | -0.04107 | 0.37584  | 0.000562 | 0.99033  | 0.015156 | 0.74393  |
| 0.04002  | -0.14921 | 0.00122  | -0.08443 | 0.06833  | -0.11747 | 0.01107  | -0.03929 | 0.39691  |
| 0.25027  | 0.000234 | 0.99597  | -0.02469 | 0.59457  | 2.76E-05 | 0.99953  | 0.050644 | 0.27474  |
| 0.28626  | -0.15972 | 0.00053  | -0.10034 | 0.03015  | -0.10092 | 0.02921  | 0.00897  | 0.84671  |
| 0.64352  | -0.03339 | 0.47158  | -0.03902 | 0.40019  | -0.03066 | 0.50871  | 0.03402  | 0.4633   |
| 0.33225  | -0.09234 | 0.0461   | -0.05869 | 0.20555  | -0.06099 | 0.18829  | -0.03124 | 0.50062  |
| 0.12111  | -0.13452 | 0.00359  | -0.21289 | 3.46E-06 | -0.16864 | 0.00025  | -0.00122 | 0.97907  |
| 0.05776  | -0.19158 | 3.08E-05 | 0.027914 | 0.54735  | -0.01277 | 0.78321  | -0.02377 | 0.60837  |
| 0.04498  | -0.13199 | 0.00427  | -0.10092 | 0.02922  | -0.11385 | 0.01383  | -0.03743 | 0.41968  |
| 0.89961  | -0.00297 | 0.94902  | 0.037432 | 0.41965  | 0.015939 | 0.73119  | -0.03702 | 0.42481  |
| 0.02104  | 0.066245 | 0.15292  | 0.151966 | 0.00099  | 0.147684 | 0.00137  | 0.049725 | 0.28356  |
| 0.12955  | -0.05765 | 0.21365  | -0.08599 | 0.06337  | -0.10656 | 0.02126  | 0.121684 | 0.00848  |
| 0.68344  | 0.046232 | 0.3188   | 0.060548 | 0.1915   | 0.042441 | 0.36014  | 0.035714 | 0.44132  |

|          |          |          |          |          |          |          |          |          |
|----------|----------|----------|----------|----------|----------|----------|----------|----------|
| 0.61231  | -0.05704 | 0.21857  | -0.01279 | 0.7828   | -0.01606 | 0.72925  | -0.02732 | 0.55599  |
| 0.65165  | 0.008982 | 0.8465   | -0.00563 | 0.90334  | 0.026511 | 0.56768  | 0.010877 | 0.81464  |
| 0.18538  | -0.03725 | 0.42192  | -0.05311 | 0.252    | -0.03998 | 0.3887   | -0.03004 | 0.5172   |
| 0.87796  | -0.0174  | 0.70765  | 0.01732  | 0.70891  | 0.016839 | 0.71664  | -0.18186 | 7.73E-05 |
| 0.31674  | -0.04766 | 0.30401  | 0.012352 | 0.79006  | 0.015496 | 0.73838  | 0.065028 | 0.16062  |
| 0.00047  | 0.10867  | 0.01882  | 0.209136 | 5.17E-06 | 0.185567 | 5.47E-05 | 0.017431 | 0.70714  |
| 0.13059  | 0.032589 | 0.48233  | 0.057331 | 0.21622  | 0.070108 | 0.13032  | 0.048295 | 0.29766  |
| 0.23043  | -0.08491 | 0.06676  | 0.002116 | 0.96363  | 0.030161 | 0.51557  | 0.005665 | 0.90282  |
| 0.31759  | 0.001768 | 0.9696   | -0.03154 | 0.49661  | 0.007923 | 0.86441  | 0.043031 | 0.35349  |
| 0.15353  | -0.26959 | 3.21E-09 | -0.19926 | 1.44E-05 | -0.18663 | 4.95E-05 | -0.18106 | 8.33E-05 |
| 0.00396  | 0.054884 | 0.2365   | 0.102054 | 0.02744  | 0.126978 | 0.006    | -0.0485  | 0.29559  |
| 5.43E-05 | -0.22423 | 9.82E-07 | -0.19409 | 2.41E-05 | -0.21178 | 3.90E-06 | -0.04151 | 0.37072  |
| 0.7734   | -0.03913 | 0.39889  | -0.07497 | 0.10565  | -0.0319  | 0.49168  | -0.07865 | 0.08956  |
| 0.57361  | -0.03687 | 0.42669  | -0.02786 | 0.54806  | -0.01387 | 0.76497  | 0.016716 | 0.71862  |
| 0.41654  | 0.046727 | 0.31363  | -0.04537 | 0.32794  | -0.00252 | 0.95664  | 0.039181 | 0.39825  |
| 0.33481  | -0.00776 | 0.86718  | -0.05686 | 0.22007  | -0.05411 | 0.24323  | -0.04175 | 0.36799  |
| 0.26503  | 0.058655 | 0.20579  | 0.063955 | 0.16765  | 0.076952 | 0.09672  | 0.042704 | 0.35716  |
| 0.68582  | -0.05334 | 0.24998  | -0.06269 | 0.17623  | -0.03686 | 0.42682  | -0.01759 | 0.7046   |
| 0.00914  | 0.130695 | 0.00467  | 0.129047 | 0.00522  | 0.149447 | 0.0012   | -0.1141  | 0.01362  |
| 0.95049  | -0.06344 | 0.17109  | 0.016212 | 0.72676  | 0.004331 | 0.92563  | -0.01546 | 0.73898  |
| 0.86969  | -0.12204 | 0.00829  | -0.04038 | 0.38395  | -0.05291 | 0.25386  | -0.00661 | 0.88674  |
| 0.27683  | 0.085713 | 0.06421  | 0.064746 | 0.16245  | 0.078153 | 0.09161  | 0.091863 | 0.04725  |
| 0.0003   | 0.069247 | 0.13512  | 0.157274 | 0.00065  | 0.162283 | 0.00043  | 0.060239 | 0.19378  |
| 0.9778   | -0.16523 | 0.00034  | -0.05423 | 0.24217  | -0.07057 | 0.12778  | -0.0237  | 0.6095   |
| 0.40874  | -0.03353 | 0.46982  | -0.07734 | 0.09506  | -0.05713 | 0.21781  | -0.12306 | 0.00776  |
| 0.33386  | -0.09837 | 0.03357  | -0.0393  | 0.39679  | -0.04317 | 0.35192  | -0.08929 | 0.05383  |
| 0.60587  | 0.008776 | 0.84998  | -0.019   | 0.68207  | 0.001736 | 0.97016  | -0.01575 | 0.73426  |
| 0.90718  | -0.07599 | 0.10096  | -0.07367 | 0.11183  | -0.06006 | 0.19512  | -0.02943 | 0.52581  |
| 0.0236   | -0.16952 | 0.00023  | -0.04984 | 0.2825   | -0.05974 | 0.19751  | -0.00853 | 0.85407  |
| 0.00092  | -0.03953 | 0.39406  | 0.123675 | 0.00746  | 0.108803 | 0.01868  | -0.02545 | 0.5833   |
| 0.51492  | -0.14014 | 0.0024   | -0.06611 | 0.15376  | -0.05755 | 0.21447  | 0.021206 | 0.64761  |
| 0.67305  | -0.24599 | 7.26E-08 | -0.15334 | 0.00089  | -0.12819 | 0.00553  | -0.00101 | 0.98258  |
| 0.27705  | -0.04686 | 0.31226  | -0.04559 | 0.32552  | -0.02576 | 0.57871  | -0.01008 | 0.82799  |
| 0.01427  | -0.13447 | 0.0036   | -0.16927 | 0.00024  | -0.16683 | 0.00029  | -0.0535  | 0.24855  |
| 0.92058  | 0.005232 | 0.91021  | 0.018255 | 0.69398  | 0.03569  | 0.44163  | 0.012632 | 0.78542  |
| 0.32497  | 0.003365 | 0.94218  | -0.00791 | 0.86471  | 0.023347 | 0.61479  | -0.00882 | 0.84924  |
| 0.20076  | -0.04972 | 0.28363  | 0.044277 | 0.33971  | 0.017133 | 0.71192  | -0.08148 | 0.07857  |
| 0.00782  | 0.069664 | 0.13278  | 0.046487 | 0.31613  | 0.090248 | 0.05129  | 0.057361 | 0.21598  |
| 2.57E-05 | -0.00065 | 0.98887  | 0.136413 | 0.00314  | 0.153504 | 0.00087  | 0.018458 | 0.69074  |
| 0.09994  | -0.02882 | 0.53447  | 0.0243   | 0.60041  | 0.034324 | 0.45931  | 0.004588 | 0.92124  |
| 0.99693  | 0.019839 | 0.66893  | 0.014304 | 0.75785  | 0.044315 | 0.3393   | 0.101054 | 0.029    |
| 0.0316   | -0.18856 | 4.12E-05 | -0.19102 | 3.25E-05 | -0.15408 | 0.00084  | -0.00775 | 0.8673   |
| 0.03315  | 0.037473 | 0.41914  | 0.116472 | 0.01178  | 0.113936 | 0.01375  | 0.027556 | 0.55251  |
| 0.16456  | -0.05822 | 0.20918  | -0.01799 | 0.69815  | -0.0318  | 0.49306  | -0.00695 | 0.88091  |
| 0.31643  | -0.06893 | 0.13692  | -0.10802 | 0.01955  | -0.09889 | 0.03264  | -0.01179 | 0.79939  |

|          |          |          |          |          |          |          |           |          |
|----------|----------|----------|----------|----------|----------|----------|-----------|----------|
| 0.85454  | -0.09703 | 0.03606  | -0.10965 | 0.01777  | -0.09232 | 0.04617  | -0.0141   | 0.76124  |
| 2.41E-06 | 0.027827 | 0.5486   | 0.08694  | 0.06048  | 0.146803 | 0.00147  | 0.014031  | 0.76234  |
| 0.00087  | -0.02658 | 0.56665  | -0.00501 | 0.91409  | 0.083408 | 0.07174  | 0.079494  | 0.08616  |
| 0.11178  | -0.22309 | 1.12E-06 | -0.18757 | 4.53E-05 | -0.16704 | 0.00029  | -0.35409  | 3.06E-15 |
| 0.19624  | -0.09321 | 0.04409  | -0.00764 | 0.86916  | 0.025103 | 0.58843  | -0.03976  | 0.39129  |
| 5.85E-05 | 0.042553 | 0.35887  | 0.176233 | 0.00013  | 0.18555  | 5.48E-05 | 0.028263  | 0.54236  |
| 0.43107  | -0.02351 | 0.61226  | 0.002314 | 0.96023  | 0.001091 | 0.98124  | 0.00014   | 0.99759  |
| 0.03157  | 0.025368 | 0.5845   | -0.00661 | 0.88672  | 0.025772 | 0.57853  | 0.212933  | 3.44E-06 |
| 0.04964  | 0.213515 | 3.23E-06 | 0.172639 | 0.00018  | 0.152602 | 0.00094  | 0.188193  | 4.27E-05 |
| 0.14672  | -0.14626 | 0.00153  | -0.05453 | 0.23958  | -0.0946  | 0.041    | -0.12254  | 0.00803  |
| 0.34442  | -0.02369 | 0.60954  | -0.03322 | 0.47382  | -0.04672 | 0.31372  | 0.008999  | 0.84621  |
| 0.90173  | -0.06261 | 0.17679  | -0.0226  | 0.62616  | -0.0446  | 0.33621  | -0.07168  | 0.1219   |
| 0.60661  | -0.04442 | 0.33816  | -0.04262 | 0.35806  | -0.062   | 0.18105  | -0.03151  | 0.49697  |
| 0.1262   | -0.10541 | 0.02271  | -0.09486 | 0.04046  | -0.10566 | 0.02239  | -0.0382   | 0.41023  |
| 0.00428  | 0.050833 | 0.27296  | 0.071898 | 0.12076  | 0.079009 | 0.0881   | 0.00896   | 0.84687  |
| 0.11287  | -0.06713 | 0.14747  | -0.05672 | 0.22117  | -0.08292 | 0.07341  | -0.00113  | 0.98057  |
| 0.01894  | 0.02813  | 0.54425  | 0.071686 | 0.12187  | 0.113123 | 0.01445  | 0.042389  | 0.36072  |
| 0.0058   | -0.27869 | 8.88E-10 | -0.06971 | 0.13253  | -0.05903 | 0.20286  | 0.093571  | 0.04327  |
| 0.04289  | -0.15275 | 0.00093  | -0.11345 | 0.01416  | -0.1194  | 0.00981  | -0.17733  | 0.00012  |
| 0.02047  | -0.02612 | 0.57342  | 0.068385 | 0.14006  | 0.064726 | 0.16258  | 0.026675  | 0.56528  |
| 0.30256  | -0.01157 | 0.80305  | -0.07418 | 0.10939  | -0.03479 | 0.45328  | 0.009395  | 0.83954  |
| 0.03026  | 0.025505 | 0.58247  | -0.02203 | 0.63485  | 0.040296 | 0.38494  | 0.053787  | 0.24602  |
| 0.25     | 0.128963 | 0.00525  | 0.109296 | 0.01814  | 0.090381 | 0.05095  | 0.019413  | 0.67563  |
| 0.13941  | -0.13399 | 0.00372  | -0.0353  | 0.44667  | -0.00522 | 0.91034  | 0.019532  | 0.67375  |
| 0.00064  | -0.2443  | 8.97E-08 | -0.20318 | 9.64E-06 | -0.23518 | 2.73E-07 | -0.04659  | 0.31501  |
| 0.00128  | 0.012176 | 0.79299  | -0.0031  | 0.94675  | 0.072457 | 0.1179   | 0.112663  | 0.01485  |
| 0.2751   | 0.010169 | 0.82651  | 0.00598  | 0.89745  | 0.029467 | 0.52528  | 0.029757  | 0.52122  |
| 0.5299   | -0.01428 | 0.75825  | 0.068946 | 0.13682  | 0.064836 | 0.16186  | -0.0546   | 0.23896  |
| 0.52267  | -0.10713 | 0.02058  | -0.12815 | 0.00555  | -0.08082 | 0.08104  | 0.084984  | 0.06652  |
| 0.87675  | -0.03306 | 0.47604  | -0.01557 | 0.73711  | -0.02178 | 0.6388   | -0.05793  | 0.21149  |
| 0.0003   | -0.25179 | 3.47E-08 | -0.24259 | 1.11E-07 | -0.25776 | 1.59E-08 | -0.07282  | 0.11609  |
| 0.34098  | 0.082483 | 0.07496  | 0.058914 | 0.20379  | 0.020968 | 0.65129  | 0.149895  | 0.00116  |
| 0.10447  | -0.07787 | 0.09281  | -0.05584 | 0.22843  | -0.08614 | 0.0629   | 0.009591  | 0.83623  |
| 0.52477  | -0.05158 | 0.26599  | -0.05423 | 0.24215  | -0.05748 | 0.21501  | -2.93E-05 | 0.9995   |
| 0.4096   | -0.11636 | 0.01186  | -0.12917 | 0.00518  | -0.10334 | 0.02554  | -0.01305  | 0.77853  |
| 0.6683   | -0.16722 | 0.00028  | -0.07072 | 0.127    | -0.08629 | 0.06244  | 0.123395  | 0.00759  |
| 0.89824  | -0.02092 | 0.65207  | -0.00155 | 0.97333  | 0.017099 | 0.71246  | 0.101324  | 0.02857  |
| 0.93966  | 0.038624 | 0.40499  | -0.05551 | 0.23123  | -0.00607 | 0.89598  | 0.036512  | 0.43118  |
| 0.25291  | -0.08024 | 0.08324  | -0.08868 | 0.05548  | -0.08073 | 0.08136  | -0.0268   | 0.5635   |
| 0.9837   | -0.13323 | 0.00392  | -0.04208 | 0.36421  | -0.03576 | 0.4408   | -0.01565  | 0.73587  |
| 0.69897  | 0.032692 | 0.48095  | -0.01295 | 0.7801   | 0.008721 | 0.8509   | -0.06231  | 0.17888  |
| 0.10536  | -0.10373 | 0.02498  | -0.09794 | 0.03436  | -0.09527 | 0.0396   | -0.01222  | 0.79229  |
| 7.28E-05 | -0.23116 | 4.40E-07 | -0.21292 | 3.45E-06 | -0.2303  | 4.87E-07 | -0.08162  | 0.07806  |
| 0.11185  | -0.0535  | 0.24852  | -0.09254 | 0.04564  | -0.08753 | 0.05874  | -0.13491  | 0.00349  |
| 0.19889  | -0.1169  | 0.01146  | -0.11359 | 0.01405  | -0.11133 | 0.01609  | -0.08075  | 0.08129  |



|          |          |          |          |          |          |          |          |          |
|----------|----------|----------|----------|----------|----------|----------|----------|----------|
| 0.14876  | -0.11582 | 0.01225  | -0.04384 | 0.34448  | -0.10367 | 0.02507  | -0.11835 | 0.01047  |
| 0.01194  | -0.16319 | 0.0004   | -0.13955 | 0.00251  | -0.16455 | 0.00036  | -0.12534 | 0.00669  |
| 0.93207  | 0.008881 | 0.84821  | 0.031976 | 0.49062  | 0.018479 | 0.6904   | 0.028949 | 0.5326   |
| 0.17708  | 0.062658 | 0.17645  | 0.059588 | 0.19865  | 0.066717 | 0.15001  | 0.124927 | 0.00687  |
| 0.10073  | 0.139871 | 0.00245  | 0.10074  | 0.0295   | 0.111139 | 0.01627  | 0.087727 | 0.05818  |
| 0.41669  | -0.0118  | 0.79928  | 0.072391 | 0.11823  | 0.052136 | 0.26084  | 0.002602 | 0.95527  |
| 0.64856  | 0.019413 | 0.67563  | 0.021421 | 0.64429  | 0.045233 | 0.32937  | 0.003194 | 0.94512  |
| 0.00147  | -0.14211 | 0.00208  | -0.05541 | 0.23202  | -0.01917 | 0.67953  | 0.001155 | 0.98015  |
| 0.58302  | -0.05115 | 0.26996  | -0.0636  | 0.17004  | -0.04608 | 0.32034  | 0.00255  | 0.95617  |
| 0.58737  | 0.007634 | 0.86932  | 0.007263 | 0.87561  | 0.018627 | 0.68806  | 0.015545 | 0.73759  |
| 0.00405  | -0.04039 | 0.38385  | 0.043261 | 0.35092  | 0.083731 | 0.07064  | 0.035193 | 0.44802  |
| 0.66166  | -0.04255 | 0.35886  | -0.00961 | 0.83586  | -0.00672 | 0.88491  | 0.021274 | 0.64656  |
| 0.9225   | -0.05446 | 0.24011  | -0.04555 | 0.32598  | -0.02023 | 0.66274  | -0.00242 | 0.95841  |
| 0.01185  | 0.062214 | 0.17954  | 0.023815 | 0.60772  | 0.082689 | 0.07423  | 0.044187 | 0.3407   |
| 0.11166  | -0.03469 | 0.45449  | 0.023382 | 0.61426  | 0.02901  | 0.53174  | 0.012465 | 0.7882   |
| 0.64337  | -0.06722 | 0.14697  | -0.08545 | 0.06503  | -0.06166 | 0.18342  | -0.07089 | 0.12606  |
| 0.44569  | -0.12184 | 0.0084   | -0.13473 | 0.00353  | -0.12539 | 0.00666  | -0.0262  | 0.57223  |
| 0.47516  | 0.022862 | 0.62216  | -0.00544 | 0.90668  | 0.021309 | 0.64601  | 0.025616 | 0.58083  |
| 0.06124  | -0.05201 | 0.26201  | 0.102986 | 0.02605  | 0.067862 | 0.14312  | -0.01535 | 0.7408   |
| 0.01317  | 0.027311 | 0.55604  | -0.03109 | 0.50278  | 0.048592 | 0.29469  | 0.015979 | 0.73054  |
| 0.10425  | -0.0084  | 0.85635  | -0.028   | 0.54615  | 0.025886 | 0.57685  | 0.046638 | 0.31456  |
| 0.03568  | 0.066596 | 0.15075  | 0.029936 | 0.5187   | 0.094181 | 0.04192  | 0.049867 | 0.28219  |
| 0.65936  | -0.05445 | 0.24022  | -0.07377 | 0.11139  | -0.07174 | 0.12158  | 0.009412 | 0.83926  |
| 0.52591  | -0.05122 | 0.26936  | -0.04256 | 0.35877  | -0.04763 | 0.30433  | -0.00173 | 0.97026  |
| 0.71216  | 0.004584 | 0.92129  | -0.06263 | 0.17663  | -0.01474 | 0.75067  | -0.02459 | 0.59604  |
| 0.35295  | -0.12417 | 0.00722  | -0.06358 | 0.17015  | -0.07972 | 0.08527  | -0.06121 | 0.1867   |
| 0.91446  | -0.03123 | 0.50075  | -0.02882 | 0.53436  | -0.04202 | 0.36495  | 0.010827 | 0.81549  |
| 0.00869  | -0.19339 | 2.58E-05 | -0.16831 | 0.00026  | -0.18449 | 6.06E-05 | -0.06528 | 0.15898  |
| 6.34E-05 | -0.18916 | 3.89E-05 | -0.25864 | 1.42E-08 | -0.2525  | 3.17E-08 | -0.1222  | 0.0082   |
| 0.75119  | -0.29196 | 1.25E-10 | -0.14727 | 0.00142  | -0.16807 | 0.00026  | -0.01177 | 0.79971  |
| 0.71404  | 0.129234 | 0.00516  | 0.13429  | 0.00364  | 0.076544 | 0.09851  | 0.087762 | 0.05808  |
| 0.09223  | -0.06224 | 0.17935  | -0.16623 | 0.00031  | -0.09591 | 0.03828  | -0.28287 | 4.84E-10 |
| 0.01257  | -0.1201  | 0.00938  | -0.11512 | 0.01279  | -0.12696 | 0.00601  | -0.06452 | 0.16393  |
| 0.16066  | 0.005102 | 0.91243  | -0.04532 | 0.32849  | 0.008949 | 0.84705  | -0.01531 | 0.74135  |
| 0.38318  | -0.00865 | 0.85217  | -0.02199 | 0.63549  | -0.02571 | 0.57948  | 0.049916 | 0.28172  |
| 0.90569  | -0.13138 | 0.00446  | -0.11889 | 0.01013  | -0.11143 | 0.01599  | 0.001922 | 0.96696  |
| 0.89308  | -0.13038 | 0.00477  | -0.14655 | 0.00149  | -0.10515 | 0.02305  | -0.01798 | 0.69833  |
| 0.00597  | -0.02901 | 0.53172  | 0.125125 | 0.00678  | 0.139348 | 0.00254  | -0.00914 | 0.84379  |
| 0.00408  | 0.00462  | 0.92069  | 0.121981 | 0.00832  | 0.13537  | 0.00338  | 0.032357 | 0.48546  |
| 0.0942   | -0.04527 | 0.32901  | 0.097304 | 0.03554  | 0.091989 | 0.04695  | -0.02639 | 0.56951  |
| 0.00155  | -0.2369  | 2.22E-07 | -0.20961 | 4.91E-06 | -0.19939 | 1.42E-05 | -0.167   | 0.00029  |
| 0.12382  | -0.0401  | 0.38732  | -0.01291 | 0.78087  | -0.04668 | 0.31414  | -0.04065 | 0.38074  |
| 0.72877  | 0.00108  | 0.98144  | -0.03298 | 0.4771   | -0.01015 | 0.82687  | -0.03582 | 0.44001  |
| 0.27787  | -0.21585 | 2.51E-06 | -0.11979 | 0.00957  | -0.07198 | 0.12036  | 0.000432 | 0.99257  |
| 0.0693   | 0.060542 | 0.19155  | 0.071227 | 0.12428  | 0.092222 | 0.04639  | 0.104583 | 0.02381  |

|          |          |          |          |          |          |          |          |          |
|----------|----------|----------|----------|----------|----------|----------|----------|----------|
| 0.14852  | 0.012136 | 0.79366  | 0.010278 | 0.8247   | 0.024416 | 0.59868  | 0.007118 | 0.87808  |
| 0.10548  | 0.099076 | 0.03231  | 0.004507 | 0.92261  | 0.06237  | 0.17846  | 0.162083 | 0.00044  |
| 0.05286  | -0.01231 | 0.79083  | 0.011889 | 0.79777  | 0.071452 | 0.12309  | 0.035053 | 0.44983  |
| 0.02971  | -0.13377 | 0.00378  | -0.00219 | 0.96237  | -0.00107 | 0.9816   | 0.032953 | 0.47746  |
| 0.93926  | -0.01779 | 0.70134  | -0.08726 | 0.05954  | -0.05604 | 0.22678  | -0.04283 | 0.35578  |
| 0.98175  | -0.00193 | 0.9668   | -0.01703 | 0.71357  | -0.00806 | 0.86217  | 0.015193 | 0.74332  |
| 0.92639  | 0.028743 | 0.53552  | -0.04484 | 0.33358  | 0.005204 | 0.9107   | -0.04776 | 0.30307  |
| 0.59318  | -0.02517 | 0.5874   | -0.03932 | 0.3966   | -0.02469 | 0.59454  | -0.01086 | 0.81494  |
| 0.1013   | -0.17316 | 0.00017  | -0.13187 | 0.00431  | -0.11803 | 0.01069  | -0.05612 | 0.22612  |
| 0.20691  | 0.023921 | 0.60611  | 0.002671 | 0.95409  | 0.028564 | 0.53807  | -0.1683  | 0.00026  |
| 0.67155  | -0.15854 | 0.00058  | -0.1098  | 0.01761  | -0.10162 | 0.02811  | -0.18366 | 6.54E-05 |
| 0.12969  | -0.11152 | 0.0159   | 0.02556  | 0.58166  | 0.010754 | 0.8167   | -0.0217  | 0.63991  |
| 0.20147  | 0.051955 | 0.26249  | 0.013059 | 0.77835  | 0.051337 | 0.26822  | 0.058742 | 0.20511  |
| 0.90239  | -0.01063 | 0.81883  | -0.02126 | 0.64682  | -0.01211 | 0.79417  | 0.039728 | 0.39169  |
| 0.33579  | -0.0049  | 0.91583  | -0.01123 | 0.8088   | -0.02218 | 0.63253  | -0.10059 | 0.02974  |
| 1.03E-07 | -0.21516 | 2.70E-06 | -0.26719 | 4.48E-09 | -0.26816 | 3.92E-09 | -0.34626 | 1.34E-14 |
| 0.98007  | 0.05797  | 0.21114  | -0.03235 | 0.48553  | 0.007012 | 0.87988  | 0.000999 | 0.98281  |
| 0.54626  | 0.055697 | 0.22962  | -0.01891 | 0.68357  | 0.035485 | 0.44426  | 0.008212 | 0.85952  |
| 0.01565  | 0.092233 | 0.04636  | 0.023896 | 0.60649  | 0.079329 | 0.08682  | 0.038175 | 0.41047  |
| 0.02367  | 0.038493 | 0.40658  | 0.01808  | 0.69675  | 0.070762 | 0.12676  | 0.03787  | 0.41423  |
| 0.02216  | 0.022323 | 0.63039  | -0.01907 | 0.68097  | 0.046034 | 0.32087  | 0.021633 | 0.64101  |
| 0.15807  | -0.018   | 0.69805  | -0.00913 | 0.84407  | 0.033924 | 0.46456  | 0.021543 | 0.64239  |
| 0.00451  | 0.056208 | 0.22537  | 0.030133 | 0.51596  | 0.076326 | 0.09947  | 0.021988 | 0.63554  |
| 0.76495  | -0.0059  | 0.89882  | -0.02853 | 0.5385   | -0.00319 | 0.94523  | -0.01111 | 0.81078  |
| 0.02632  | 0.027267 | 0.55668  | -0.02829 | 0.54196  | 0.030144 | 0.51582  | 0.023296 | 0.61556  |
| 0.00472  | 0.049062 | 0.29004  | -0.00818 | 0.86014  | 0.052653 | 0.25613  | 0.023631 | 0.61049  |
| 0.3952   | -0.04487 | 0.33329  | -0.06309 | 0.17348  | -0.02124 | 0.64701  | -0.02542 | 0.58373  |
| 0.64601  | -0.0489  | 0.29168  | -0.05586 | 0.22828  | -0.02501 | 0.58989  | -0.01271 | 0.78411  |
| 0.20393  | 0.050814 | 0.27314  | -0.03155 | 0.49635  | 0.019221 | 0.67866  | -0.04666 | 0.31433  |
| 0.52993  | -0.01986 | 0.66861  | -0.04353 | 0.34797  | -0.02968 | 0.52225  | 0.036876 | 0.42659  |
| 0.42645  | -0.05097 | 0.27163  | -0.0514  | 0.2676   | -0.05609 | 0.22636  | 0.032288 | 0.48639  |
| 0.36855  | -0.15487 | 0.00078  | -0.09684 | 0.03643  | -0.09149 | 0.04816  | -0.00997 | 0.82984  |
| 0.05545  | -0.0379  | 0.41384  | -0.00619 | 0.89382  | 0.038972 | 0.40076  | 0.121378 | 0.00865  |
| 0.29943  | -0.03909 | 0.3994   | 0.032319 | 0.48597  | 0.037433 | 0.41964  | 0.074307 | 0.10878  |
| 0.41823  | 0.024075 | 0.60379  | -0.01667 | 0.71933  | 0.012843 | 0.78193  | 0.011117 | 0.81063  |
| 0.26078  | 0.022791 | 0.62324  | 0.001137 | 0.98045  | 0.027136 | 0.55858  | 0.038012 | 0.41247  |
| 0.00104  | 0.080749 | 0.0813   | 0.048108 | 0.29953  | 0.108285 | 0.01925  | 0.070454 | 0.12843  |
| 0.53994  | -0.033   | 0.47683  | -0.06856 | 0.13906  | -0.0462  | 0.31915  | 0.038577 | 0.40556  |
| 0.23766  | -0.0188  | 0.68533  | 0.015917 | 0.73155  | 0.014425 | 0.75587  | 0.029095 | 0.53053  |
| 0.68839  | 0.007233 | 0.87611  | 0.029353 | 0.52689  | 0.029862 | 0.51975  | -0.00467 | 0.91989  |
| 0.29841  | 0.001761 | 0.96973  | 0.000184 | 0.99684  | -0.02154 | 0.64249  | 0.017587 | 0.70463  |
| 0.61929  | -0.01993 | 0.66755  | -0.00383 | 0.93423  | 0.006891 | 0.88193  | 0.010142 | 0.82697  |
| 0.24246  | 0.022046 | 0.63465  | -0.01943 | 0.67543  | 0.032517 | 0.4833   | 0.031608 | 0.49562  |
| 0.87552  | -0.09545 | 0.03923  | -0.04885 | 0.29217  | -0.04632 | 0.31784  | -0.04156 | 0.3702   |
| 0.16716  | 0.035572 | 0.44314  | 0.011526 | 0.8038   | 0.036464 | 0.43179  | 0.049653 | 0.28426  |

|         |          |          |          |          |          |          |          |          |
|---------|----------|----------|----------|----------|----------|----------|----------|----------|
| 0.31811 | -0.02558 | 0.58142  | -0.01893 | 0.68319  | 0.003288 | 0.94351  | 0.132365 | 0.00417  |
| 0.34223 | -0.058   | 0.21092  | -0.05358 | 0.24783  | -0.05768 | 0.21346  | 0.008397 | 0.85638  |
| 0.00013 | -0.09434 | 0.04158  | -0.05775 | 0.21285  | -0.13328 | 0.00391  | -0.02331 | 0.61534  |
| 0.19253 | -0.16218 | 0.00043  | -0.14301 | 0.00195  | -0.14749 | 0.00139  | -0.03255 | 0.48287  |
| 0.44831 | 0.022289 | 0.63092  | 0.014889 | 0.74828  | -0.01105 | 0.8117   | -0.03902 | 0.40015  |
| 0.39712 | 0.024014 | 0.60471  | 0.026807 | 0.56337  | 0.027758 | 0.5496   | 0.020301 | 0.66169  |
| 0.54275 | -0.0778  | 0.09307  | -0.11251 | 0.01499  | -0.02884 | 0.5341   | 0.018824 | 0.68494  |
| 0.64167 | -0.02791 | 0.54745  | -0.0359  | 0.43898  | -0.01096 | 0.8133   | -0.02844 | 0.53982  |
| 0.71588 | -0.00148 | 0.9746   | 0.007882 | 0.86511  | 0.002385 | 0.959    | -0.07399 | 0.1103   |
| 0.11258 | 0.052615 | 0.25648  | 0.043768 | 0.3453   | 0.089361 | 0.05363  | 0.044008 | 0.34266  |
| 0.4814  | 0.013203 | 0.77597  | 0.018693 | 0.68701  | -0.02867 | 0.53649  | 0.085807 | 0.06392  |
| 0.02907 | -0.14034 | 0.00237  | -0.13915 | 0.00258  | -0.13619 | 0.00319  | -0.04535 | 0.32809  |
| 0.73677 | -0.08403 | 0.06963  | -0.05424 | 0.24208  | -0.05611 | 0.2262   | 0.015953 | 0.73096  |
| 0.86294 | -0.056   | 0.22713  | -0.0181  | 0.6964   | -0.04052 | 0.3823   | -0.01673 | 0.71842  |
| 0.82383 | -0.10778 | 0.01982  | -0.05201 | 0.26199  | -0.04909 | 0.28972  | -0.02902 | 0.53153  |
| 0.87287 | 0.050034 | 0.28057  | 0.041898 | 0.36632  | 0.037109 | 0.42368  | -0.00644 | 0.8896   |
| 0.89327 | 0.022735 | 0.6241   | -0.02128 | 0.64652  | 0.024483 | 0.59768  | 0.048778 | 0.29284  |
| 0.60088 | -0.05317 | 0.25147  | -0.0338  | 0.46623  | -0.01953 | 0.67373  | -0.20636 | 6.92E-06 |
| 0.93285 | -0.03518 | 0.44814  | 0.018204 | 0.69479  | -0.01301 | 0.77912  | -0.07168 | 0.12191  |
| 0.68733 | -0.02289 | 0.62175  | -0.02612 | 0.57339  | -0.01476 | 0.7504   | -0.08544 | 0.06508  |
| 0.91188 | -0.04504 | 0.3314   | 0.00059  | 0.98985  | 0.008657 | 0.85199  | -0.05191 | 0.26294  |
| 0.06319 | -0.19397 | 2.44E-05 | -0.37698 | 3.22E-17 | -0.26794 | 4.04E-09 | -0.17318 | 0.00017  |
| 0.04252 | -0.16614 | 0.00031  | -0.10256 | 0.02668  | -0.12129 | 0.0087   | -0.10623 | 0.02168  |
| 0.34889 | -0.0274  | 0.55471  | -0.08675 | 0.06105  | -0.01105 | 0.81175  | -0.05268 | 0.25585  |
| 0.64649 | -0.06604 | 0.15421  | -0.05721 | 0.21719  | -0.07194 | 0.12052  | -0.01374 | 0.76719  |
| 0.45819 | -0.04508 | 0.33103  | -0.04869 | 0.2937   | -0.05459 | 0.23905  | -0.06081 | 0.18955  |
| 0.46562 | 0.022306 | 0.63065  | 0.002031 | 0.96509  | 0.014104 | 0.76113  | 0.027702 | 0.5504   |
| 0.0148  | -0.26934 | 3.33E-09 | -0.13713 | 0.00298  | -0.20842 | 5.58E-06 | -0.08685 | 0.06074  |
| 0.24215 | -0.09027 | 0.05122  | -0.06869 | 0.13832  | -0.05166 | 0.26525  | -0.02052 | 0.65831  |
| 0.88293 | -0.10471 | 0.02364  | -0.10445 | 0.02398  | -0.06396 | 0.16765  | -0.0182  | 0.69488  |
| 0.89705 | -0.02391 | 0.60634  | -0.03714 | 0.42334  | -0.0108  | 0.81602  | 0.007461 | 0.87225  |
| 0.13671 | -0.01448 | 0.75505  | 0.056989 | 0.21898  | 0.056737 | 0.22103  | -0.13207 | 0.00425  |
| 0.11792 | -0.22801 | 6.36E-07 | -0.15664 | 0.00068  | -0.17177 | 0.00019  | -0.13344 | 0.00387  |
| 0.01511 | -0.03977 | 0.39119  | -0.07637 | 0.09928  | -0.08075 | 0.08131  | 0.008331 | 0.8575   |
| 0.87203 | -0.00591 | 0.89862  | 0.008744 | 0.85052  | 0.017682 | 0.70312  | -0.04558 | 0.32569  |
| 0.86814 | -0.01535 | 0.74069  | 0.009108 | 0.84437  | -0.00959 | 0.83631  | 0.00215  | 0.96304  |
| 0.00153 | 0.00017  | 0.99707  | 0.048134 | 0.29927  | 0.09027  | 0.05124  | 0.033529 | 0.46978  |
| 0.11966 | 0.053748 | 0.24636  | 0.066836 | 0.14928  | 0.063278 | 0.1722   | 0.031172 | 0.50159  |
| 0.44779 | -0.08087 | 0.08085  | -0.07468 | 0.107    | -0.06587 | 0.15523  | 0.023904 | 0.60637  |
| 0.90182 | -0.00876 | 0.85021  | -0.01964 | 0.67204  | 0.003596 | 0.93822  | 0.035755 | 0.44079  |
| 0.84903 | 0.018257 | 0.69394  | 0.040919 | 0.37763  | 0.032063 | 0.48943  | 0.001855 | 0.96811  |
| 0.38252 | -0.05111 | 0.27034  | 0.009524 | 0.83736  | 0.031407 | 0.49837  | 0.054501 | 0.2398   |
| 0.82494 | -0.01351 | 0.7709   | 0.006552 | 0.88771  | 0.001694 | 0.97088  | 0.024461 | 0.59801  |
| 0.02511 | -0.08975 | 0.05259  | -0.10546 | 0.02265  | -0.09759 | 0.035    | -0.04768 | 0.3039   |
| 0.7851  | 0.022608 | 0.62604  | 0.031495 | 0.49716  | 0.024614 | 0.59572  | -0.25074 | 3.97E-08 |

|         |          |          |          |          |          |          |          |         |
|---------|----------|----------|----------|----------|----------|----------|----------|---------|
| 0.71504 | -0.07139 | 0.12342  | -0.03099 | 0.50411  | -0.01394 | 0.76382  | -0.0129  | 0.78091 |
| 0.01499 | -0.01762 | 0.70404  | 0.060768 | 0.18989  | 0.073113 | 0.1146   | -0.0693  | 0.13481 |
| 0.56436 | 0.016061 | 0.72921  | 0.012619 | 0.78564  | 0.033759 | 0.46675  | -0.00398 | 0.93166 |
| 0.11725 | -0.29631 | 6.42E-11 | -0.01794 | 0.69897  | -0.02654 | 0.56728  | 0.01425  | 0.75873 |
| 0.34182 | -0.21725 | 2.15E-06 | -0.13631 | 0.00316  | -0.17257 | 0.00018  | -0.15098 | 0.00107 |
| 0.76995 | -0.05248 | 0.25771  | 0.021319 | 0.64586  | 0.004658 | 0.92004  | 0.019687 | 0.67131 |
| 0.57723 | -0.08476 | 0.06726  | -0.01625 | 0.7262   | -0.00436 | 0.92509  | 0.012601 | 0.78594 |
| 0.59315 | 0.037319 | 0.42105  | 0.107838 | 0.01976  | 0.028942 | 0.5327   | -0.03296 | 0.47733 |
| 0.45866 | -0.04735 | 0.30726  | -0.02375 | 0.60875  | 0.027521 | 0.55302  | 0.00603  | 0.89659 |
| 0.94066 | -0.01554 | 0.73764  | -0.02805 | 0.54538  | -0.03138 | 0.49878  | -0.01698 | 0.71446 |
| 0.8198  | 0.019529 | 0.6738   | 0.013244 | 0.77529  | 0.04292  | 0.35473  | -0.01558 | 0.73699 |
| 0.67856 | -0.16052 | 0.0005   | 0.015839 | 0.73281  | -0.02761 | 0.5517   | -0.08814 | 0.05699 |
| 0.03626 | -0.10863 | 0.01887  | 0.011109 | 0.81077  | 0.00184  | 0.96837  | 0.014005 | 0.76277 |
| 0.66652 | -0.05977 | 0.19728  | -0.04868 | 0.29386  | -0.03674 | 0.4283   | -0.00435 | 0.92523 |
| 0.12091 | 0.014492 | 0.75477  | 0.072057 | 0.11994  | 0.090568 | 0.05047  | -0.04111 | 0.3754  |
| 0.02196 | -0.21399 | 3.07E-06 | -0.20281 | 1.00E-05 | -0.19196 | 2.96E-05 | -0.03388 | 0.46516 |
| 0.00021 | -0.25872 | 1.40E-08 | -0.2406  | 1.42E-07 | -0.25259 | 3.13E-08 | -0.06558 | 0.15706 |
| 0.01136 | 0.038167 | 0.41057  | 0.008669 | 0.85178  | 0.054055 | 0.24367  | 0.0387   | 0.40407 |
| 0.15547 | 0.021313 | 0.64595  | -0.02938 | 0.52655  | 0.014224 | 0.75916  | 0.004557 | 0.92177 |
| 0.01992 | 0.001579 | 0.97284  | -0.02828 | 0.54205  | 0.002843 | 0.95113  | 0.016304 | 0.72528 |
| 0.05928 | 0.01968  | 0.67143  | -0.01715 | 0.71158  | 0.021462 | 0.64365  | 0.018894 | 0.68383 |
| 0.80026 | -0.14496 | 0.00168  | -0.06874 | 0.13802  | -0.08551 | 0.06484  | -0.02934 | 0.52708 |
| 0.2318  | 0.007452 | 0.8724   | -0.02139 | 0.64474  | 0.014658 | 0.75205  | 0.018854 | 0.68447 |
| 0.77988 | 0.021731 | 0.6395   | 0.027893 | 0.54765  | 0.015272 | 0.74203  | 0.035042 | 0.44997 |
| 0.3111  | -0.06227 | 0.17917  | -0.05816 | 0.20961  | -0.06989 | 0.13153  | 0.012852 | 0.78178 |
| 0.51613 | -0.0206  | 0.65701  | -0.0299  | 0.51921  | -0.01879 | 0.68547  | 0.016315 | 0.72511 |
| 0.07794 | 0.038011 | 0.41249  | 0.002774 | 0.95232  | 0.049333 | 0.28738  | 0.001822 | 0.96868 |
| 0.05541 | -0.11098 | 0.01642  | -0.06341 | 0.1713   | -0.09358 | 0.04324  | 0.00654  | 0.8879  |
| 0.15616 | 0.035645 | 0.44221  | 0.018399 | 0.69169  | 0.042426 | 0.3603   | 0.01525  | 0.74238 |
| 0.58263 | -0.05256 | 0.257    | -0.06054 | 0.19157  | -0.03287 | 0.47856  | -0.00132 | 0.97739 |
| 0.79479 | -0.01932 | 0.67703  | -0.02897 | 0.53233  | -0.01119 | 0.80941  | 0.005277 | 0.90944 |
| 0.5333  | -0.00229 | 0.96063  | -0.02235 | 0.63     | -0.00426 | 0.92686  | 0.011101 | 0.8109  |
| 0.76939 | -0.00215 | 0.96297  | -0.03509 | 0.44937  | -0.01589 | 0.73206  | 0.008242 | 0.85901 |
| 0.0038  | -0.17273 | 0.00018  | -0.10764 | 0.01999  | -0.1613  | 0.00047  | -0.02829 | 0.54203 |
| 0.28164 | -0.07488 | 0.10608  | -0.06008 | 0.195    | -0.08147 | 0.07861  | 0.001359 | 0.97664 |
| 0.30244 | -0.03026 | 0.51414  | -0.05146 | 0.2671   | -0.04935 | 0.28723  | 0.011906 | 0.79749 |
| 0.15442 | -0.00162 | 0.97222  | 0.027288 | 0.55638  | 0.006345 | 0.89123  | 0.034586 | 0.45589 |
| 0.98476 | -0.07251 | 0.11764  | -0.06664 | 0.15046  | -0.03756 | 0.41812  | 0.005514 | 0.9054  |
| 0.22699 | -0.03893 | 0.40133  | -0.04395 | 0.34325  | -0.04358 | 0.34737  | -0.01502 | 0.74615 |
| 0.09475 | 0.035659 | 0.44202  | 0.01236  | 0.78993  | 0.036086 | 0.43658  | 0.019397 | 0.67588 |
| 0.45991 | 0.031699 | 0.49439  | 0.013212 | 0.77583  | 0.034051 | 0.46289  | 0.038155 | 0.41072 |
| 0.65815 | -0.01704 | 0.71345  | -0.04613 | 0.31986  | -0.02463 | 0.59553  | -0.00145 | 0.97511 |
| 0.09005 | 0.015486 | 0.73855  | -0.01363 | 0.76889  | 0.012156 | 0.79332  | -0.00689 | 0.88192 |
| 0.17966 | -0.04008 | 0.38755  | -0.06289 | 0.17486  | -0.03353 | 0.4698   | 0.014063 | 0.7618  |
| 0.0364  | 0.046932 | 0.31151  | -0.02539 | 0.58423  | 0.040281 | 0.38512  | 0.04509  | 0.33091 |

|         |          |          |           |         |          |         |          |         |
|---------|----------|----------|-----------|---------|----------|---------|----------|---------|
| 0.2991  | 0.029231 | 0.5286   | 0.003182  | 0.94533 | 0.028789 | 0.53487 | 0.055171 | 0.23406 |
| 0.35249 | -0.09035 | 0.05103  | -0.09384  | 0.04266 | -0.05742 | 0.21554 | 0.017509 | 0.70589 |
| 0.08431 | -0.00297 | 0.94893  | -0.05265  | 0.25613 | -0.0043  | 0.9261  | 0.005998 | 0.89714 |
| 0.03216 | 0.056221 | 0.22527  | 0.003025  | 0.94802 | 0.05527  | 0.23322 | 0.022285 | 0.63098 |
| 0.56844 | 0.001843 | 0.96832  | -0.02149  | 0.64319 | -0.00534 | 0.90839 | 0.01045  | 0.8218  |
| 0.35763 | 0.022108 | 0.63369  | -0.0212   | 0.64766 | 0.005468 | 0.90619 | 0.041568 | 0.37011 |
| 0.18882 | -0.02961 | 0.52327  | -0.04561  | 0.3254  | -0.01071 | 0.81748 | -0.00813 | 0.86092 |
| 0.89268 | -0.23747 | 2.07E-07 | -0.06883  | 0.13748 | -0.08579 | 0.06396 | -0.0688  | 0.13764 |
| 0.00085 | -0.00538 | 0.90772  | 0.051502  | 0.26669 | 0.08295  | 0.07332 | 0.013249 | 0.77522 |
| 0.11286 | -0.10353 | 0.02527  | -0.10527  | 0.02289 | -0.11705 | 0.01136 | -0.02413 | 0.60291 |
| 0.84174 | -0.05106 | 0.27086  | -0.07022  | 0.12971 | -0.07248 | 0.11778 | -0.01193 | 0.79703 |
| 0.10621 | -0.01542 | 0.73954  | -0.01854  | 0.68942 | 0.023015 | 0.61984 | 0.030872 | 0.50572 |
| 0.53196 | 0.005051 | 0.91332  | -0.01013  | 0.82724 | 0.003096 | 0.9468  | -0.00656 | 0.88764 |
| 0.05131 | 0.012817 | 0.78236  | -0.02346  | 0.61314 | 0.013695 | 0.76786 | 0.012914 | 0.78076 |
| 0.0146  | 0.054947 | 0.23596  | 0.008943  | 0.84717 | 0.050297 | 0.27806 | 0.046751 | 0.31339 |
| 0.05881 | -0.01019 | 0.8262   | -0.0422   | 0.36286 | 0.011402 | 0.80587 | 0.027187 | 0.55784 |
| 0.00329 | 0.077538 | 0.0942   | 0.026154  | 0.5729  | 0.085034 | 0.06636 | 0.044678 | 0.33535 |
| 0.18924 | 0.001977 | 0.96602  | -0.02882  | 0.53439 | -0.01016 | 0.82672 | 0.022722 | 0.6243  |
| 0.35945 | 0.002314 | 0.96023  | -3.89E-05 | 0.99933 | 0.028979 | 0.53217 | 0.008038 | 0.86246 |
| 0.04836 | 0.040412 | 0.38357  | -0.00396  | 0.93192 | 0.051802 | 0.26391 | 0.025317 | 0.58525 |
| 0.33786 | -0.05192 | 0.26284  | -0.04215  | 0.36345 | -0.01686 | 0.71638 | 0.005297 | 0.90911 |
| 0.32361 | 0.024205 | 0.60185  | 0.018615  | 0.68825 | 0.043287 | 0.35063 | 0.03698  | 0.42529 |
| 0.99056 | -0.00549 | 0.90573  | -0.00972  | 0.83399 | -0.0038  | 0.93471 | -0.01075 | 0.81685 |
| 0.67487 | -0.05223 | 0.25996  | -0.04647  | 0.31631 | -0.04419 | 0.34069 | -0.00918 | 0.84323 |
| 0.81652 | -0.01804 | 0.69747  | -0.04573  | 0.32413 | -0.02269 | 0.62477 | 0.022004 | 0.63529 |
| 0.5604  | -0.02058 | 0.6573   | -0.03163  | 0.49537 | -0.01839 | 0.69177 | 0.027383 | 0.555   |
| 0.11521 | -0.15589 | 0.00072  | -0.12363  | 0.00748 | -0.10624 | 0.02166 | -0.02324 | 0.61635 |
| 0.05402 | 0.057895 | 0.21173  | 0.009054  | 0.84529 | 0.057236 | 0.21699 | 0.012819 | 0.78232 |
| 0.17013 | 0.011879 | 0.79793  | 0.008371  | 0.85683 | 0.036965 | 0.42548 | 0.001105 | 0.981   |
| 0.66873 | -0.02271 | 0.62444  | -0.04952  | 0.28553 | -0.04658 | 0.31515 | 0.014701 | 0.75135 |
| 0.23034 | 0.046384 | 0.3172   | -0.00853  | 0.85419 | 0.028884 | 0.53352 | 0.023221 | 0.6167  |
| 0.08916 | -0.14336 | 0.0019   | -0.09994  | 0.03082 | -0.10958 | 0.01784 | -0.03401 | 0.4634  |
| 0.68743 | -0.01862 | 0.68825  | -0.01011  | 0.82745 | -0.00322 | 0.94469 | 0.024266 | 0.60093 |
| 0.73892 | -0.02686 | 0.56265  | -0.04126  | 0.37367 | -0.02257 | 0.62663 | 0.010894 | 0.81436 |
| 0.58823 | -0.04571 | 0.32434  | -0.03799  | 0.41269 | -0.02302 | 0.61979 | -0.00188 | 0.96766 |
| 0.23811 | -0.09098 | 0.04944  | -0.0536   | 0.24769 | -0.08174 | 0.07764 | -0.02565 | 0.58027 |
| 0.58107 | 0.021402 | 0.64457  | -0.01017  | 0.82646 | -0.00911 | 0.84433 | 0.023273 | 0.61591 |
| 0.30829 | -0.06075 | 0.19003  | -0.11182  | 0.01563 | -0.0744  | 0.10834 | 0.002374 | 0.95919 |
| 0.05228 | 0.046823 | 0.31265  | 0.008593  | 0.85306 | 0.047725 | 0.3034  | 0.016409 | 0.72358 |
| 0.13053 | 0.034405 | 0.45826  | 0.010517  | 0.82068 | 0.036828 | 0.4272  | 0.025108 | 0.58835 |
| 0.74972 | -0.02422 | 0.60156  | -0.01109  | 0.81111 | -0.0213  | 0.64609 | 0.038878 | 0.40191 |
| 0.59242 | 0.004309 | 0.926    | -0.02376  | 0.60861 | -0.00613 | 0.89497 | -0.0158  | 0.73347 |
| 0.90336 | 0.031313 | 0.49965  | 0.001468  | 0.97475 | 0.007428 | 0.87281 | -0.00868 | 0.85152 |
| 0.36724 | 0.021146 | 0.64854  | -0.02919  | 0.52917 | 0.000412 | 0.99291 | 0.002327 | 0.96    |
| 0.79712 | -0.06136 | 0.18561  | -0.06655  | 0.15103 | -0.05017 | 0.27931 | 0.013574 | 0.76985 |

|         |          |          |          |          |          |          |          |         |
|---------|----------|----------|----------|----------|----------|----------|----------|---------|
| 0.17724 | -0.12869 | 0.00535  | -0.14539 | 0.00163  | -0.14038 | 0.00236  | -0.06766 | 0.14431 |
| 0.71237 | 0.038388 | 0.40787  | 0.016566 | 0.72104  | 0.020443 | 0.65947  | 0.039195 | 0.39808 |
| 0.01566 | -0.22399 | 1.01E-06 | -0.22299 | 1.13E-06 | -0.20799 | 5.83E-06 | 0.021519 | 0.64276 |
| 0.48925 | -0.21502 | 2.74E-06 | -0.19969 | 1.38E-05 | -0.16838 | 0.00026  | 0.029082 | 0.53071 |
| 0.81296 | -0.06492 | 0.16132  | -0.04764 | 0.30422  | -0.02195 | 0.63611  | 0.008978 | 0.84657 |
| 0.10222 | -0.06788 | 0.14303  | -0.07301 | 0.11512  | -0.07449 | 0.10791  | -0.04486 | 0.33335 |
| 0.3028  | -0.03446 | 0.45754  | -0.01181 | 0.79913  | -0.03908 | 0.39941  | -0.01201 | 0.79576 |
| 0.03005 | 0.075366 | 0.10382  | -0.00169 | 0.97092  | 0.066324 | 0.15243  | 0.058342 | 0.20822 |
| 0.40034 | -0.05967 | 0.19802  | -0.08076 | 0.08128  | -0.03847 | 0.4069   | 0.028552 | 0.53824 |
| 0.01869 | -0.16916 | 0.00024  | -0.1499  | 0.00116  | -0.15492 | 0.00078  | -0.01905 | 0.68132 |
| 0.65914 | -0.05308 | 0.25232  | -0.07003 | 0.13073  | -0.05985 | 0.19667  | -0.01669 | 0.71904 |
| 0.6688  | -0.04922 | 0.2885   | -0.03779 | 0.41521  | -0.00649 | 0.88884  | -0.00798 | 0.86338 |
| 0.22154 | -0.05546 | 0.2316   | -0.03299 | 0.47691  | -0.04763 | 0.3044   | 0.020932 | 0.65186 |
| 0.70938 | -0.03853 | 0.40607  | -0.03376 | 0.46676  | -0.02614 | 0.57316  | -0.05096 | 0.27178 |
| 0.22904 | 0.047963 | 0.301    | 0.000555 | 0.99046  | 0.047671 | 0.30395  | -0.06464 | 0.16316 |
| 0.19868 | 0.038722 | 0.4038   | -0.00601 | 0.89691  | 0.04623  | 0.31882  | 0.038837 | 0.40239 |
| 0.40248 | -0.03504 | 0.45005  | -0.02913 | 0.53009  | -0.00939 | 0.83958  | 0.02879  | 0.53485 |
| 0.03179 | 0.020125 | 0.66445  | 0.0103   | 0.82432  | 0.051737 | 0.26451  | 0.021766 | 0.63895 |
| 0.23451 | -0.01063 | 0.81871  | -0.01824 | 0.69425  | 0.001421 | 0.97556  | 0.025382 | 0.58429 |
| 0.57774 | -0.05913 | 0.20211  | -0.05818 | 0.20948  | -0.02786 | 0.54817  | -0.02159 | 0.64172 |
| 0.44703 | -0.01833 | 0.69279  | -0.03113 | 0.50219  | -0.01503 | 0.74599  | 0.002176 | 0.96259 |
| 0.12028 | 0.013775 | 0.76655  | -0.02938 | 0.52646  | 0.019909 | 0.66783  | 0.025251 | 0.58623 |
| 0.91642 | -0.06659 | 0.15076  | -0.0414  | 0.37206  | -0.03647 | 0.43166  | 0.004232 | 0.92733 |
| 0.87195 | -0.0612  | 0.18678  | -0.04634 | 0.31763  | -0.0296  | 0.52342  | 0.021933 | 0.63639 |
| 0.39941 | -0.02781 | 0.54889  | -0.0148  | 0.74967  | -0.02243 | 0.62877  | -0.00166 | 0.97149 |
| 0.047   | -0.00488 | 0.91631  | -0.00662 | 0.88655  | 0.028507 | 0.53888  | 0.025553 | 0.58176 |
| 0.07142 | -0.0702  | 0.12979  | -0.03022 | 0.51481  | -0.05163 | 0.26547  | -0.02232 | 0.63038 |
| 0.82022 | -0.00268 | 0.95393  | 0.011037 | 0.81198  | 0.009227 | 0.84237  | 0.028586 | 0.53774 |
| 0.66029 | -0.02673 | 0.56451  | 0.010678 | 0.81799  | 0.000295 | 0.99493  | 0.011561 | 0.80322 |
| 0.09423 | -0.08459 | 0.0678   | -0.11524 | 0.01271  | -0.09377 | 0.04284  | -0.15845 | 0.00059 |
| 0.0577  | -0.21842 | 1.89E-06 | -0.16816 | 0.00026  | -0.19145 | 3.12E-05 | -0.02082 | 0.65367 |
| 0.35033 | -0.00679 | 0.88357  | -0.05127 | 0.26886  | 0.000144 | 0.99752  | 0.001553 | 0.9733  |
| 0.024   | 0.057562 | 0.21437  | 0.029226 | 0.52867  | 0.082249 | 0.07579  | 0.03834  | 0.40846 |
| 0.82645 | -0.1732  | 0.00017  | -0.16653 | 0.0003   | -0.11455 | 0.01325  | -0.06711 | 0.1476  |
| 0.02283 | -0.11898 | 0.01007  | -0.16436 | 0.00036  | -0.17898 | 0.0001   | -0.16123 | 0.00047 |
| 0.57038 | -0.04024 | 0.38557  | -0.03953 | 0.39411  | 0.006685 | 0.88545  | 0.031791 | 0.49313 |
| 0.65318 | -0.02819 | 0.54343  | 0.015104 | 0.74477  | 0.016449 | 0.72294  | 0.016122 | 0.72822 |
| 0.95462 | -0.08689 | 0.06062  | -0.02542 | 0.5838   | -0.03749 | 0.41889  | 0.002045 | 0.96485 |
| 0.44237 | -0.05245 | 0.258    | -0.02437 | 0.59938  | -0.01998 | 0.66678  | 0.094763 | 0.04066 |
| 0.00861 | -0.16092 | 0.00048  | -0.12823 | 0.00552  | -0.15259 | 0.00094  | -0.13441 | 0.00361 |
| 0.31262 | 0.011407 | 0.8058   | -0.04049 | 0.38263  | -0.02037 | 0.66062  | 0.025903 | 0.5766  |
| 0.92016 | -0.09976 | 0.03113  | -0.10281 | 0.02631  | -0.04502 | 0.3317   | 0.015792 | 0.73357 |
| 0.11355 | -0.00145 | 0.97504  | 0.013599 | 0.76944  | 0.068188 | 0.14121  | -0.01512 | 0.74444 |
| 0.25009 | -0.00792 | 0.86448  | 0.022985 | 0.62028  | 0.035562 | 0.44326  | 0.007782 | 0.8668  |
| 0.29737 | -0.00911 | 0.8443   | -0.00916 | 0.84342  | 0.016879 | 0.71601  | -0.02204 | 0.63467 |

|         |          |          |          |          |          |         |          |         |
|---------|----------|----------|----------|----------|----------|---------|----------|---------|
| 0.02811 | 0.045724 | 0.32414  | 0.054094 | 0.24333  | 0.088276 | 0.05662 | 0.15964  | 0.00053 |
| 0.92568 | -0.0659  | 0.1551   | -0.01576 | 0.73414  | -0.01638 | 0.72411 | 0.007937 | 0.86417 |
| 0.85785 | -0.13871 | 0.00266  | -0.04865 | 0.29407  | -0.08716 | 0.05984 | -0.00324 | 0.9443  |
| 0.14185 | -0.08338 | 0.07185  | -0.08543 | 0.0651   | -0.09041 | 0.05087 | -0.02513 | 0.58802 |
| 0.41181 | -0.07278 | 0.11626  | -0.00114 | 0.98036  | -0.0446  | 0.33614 | -0.03492 | 0.45149 |
| 0.01768 | -0.11781 | 0.01083  | -0.09375 | 0.04286  | -0.12991 | 0.00493 | -0.04801 | 0.30056 |
| 0.38946 | -0.04559 | 0.32561  | -0.02514 | 0.58784  | -0.0065  | 0.88858 | -0.01343 | 0.77228 |
| 0.69585 | 0.046451 | 0.3165   | 0.03943  | 0.39524  | 0.048523 | 0.29538 | 0.014801 | 0.74971 |
| 0.17092 | 0.001697 | 0.97082  | 0.045282 | 0.32885  | 0.040901 | 0.37785 | 0.026291 | 0.57089 |
| 0.42723 | -0.00497 | 0.91475  | 0.032064 | 0.48942  | 0.048954 | 0.29111 | -0.01859 | 0.68861 |
| 0.08975 | 0.025358 | 0.58465  | 0.013381 | 0.77303  | 0.048633 | 0.29428 | 0.012017 | 0.79564 |
| 0.29769 | 0.041655 | 0.3691   | -0.00453 | 0.92221  | 0.047475 | 0.30594 | -0.00668 | 0.88557 |
| 0.24806 | -0.05174 | 0.26445  | -0.00517 | 0.91126  | 0.007924 | 0.86439 | 0.047998 | 0.30064 |
| 0.02284 | -0.15615 | 0.00071  | -0.08058 | 0.08196  | -0.10704 | 0.02069 | -0.03774 | 0.4158  |
| 0.17247 | 0.006617 | 0.8866   | 0.000332 | 0.99429  | 0.024531 | 0.59695 | 0.019313 | 0.6772  |
| 0.82894 | -0.04839 | 0.29666  | 0.01898  | 0.68247  | 0.027029 | 0.56014 | -0.02504 | 0.58935 |
| 0.47795 | -0.02251 | 0.62758  | -0.01422 | 0.75919  | 0.023264 | 0.61605 | 0.028229 | 0.54285 |
| 0.0047  | 0.055962 | 0.22741  | 0.011335 | 0.80699  | 0.083422 | 0.07169 | 0.052003 | 0.26206 |
| 0.65859 | 0.01923  | 0.67852  | -0.00018 | 0.99695  | 0.024168 | 0.6024  | -0.01931 | 0.67725 |
| 0.21444 | -0.0084  | 0.85636  | 0.033649 | 0.4682   | 0.064906 | 0.16141 | 0.029116 | 0.53024 |
| 0.94462 | -0.05197 | 0.26237  | 0.008735 | 0.85067  | 0.002861 | 0.95084 | -0.00116 | 0.98004 |
| 0.41564 | 0.022377 | 0.62956  | 0.007537 | 0.87096  | 0.0493   | 0.2877  | 0.027465 | 0.55383 |
| 0.71881 | -0.09458 | 0.04106  | -0.04958 | 0.28499  | -0.05659 | 0.22227 | 0.030988 | 0.50412 |
| 0.17092 | -0.02131 | 0.64602  | -0.02809 | 0.54476  | -0.05142 | 0.26741 | 0.036398 | 0.43262 |
| 0.02153 | -0.15509 | 0.00077  | -0.13439 | 0.00362  | -0.1667  | 0.0003  | 0.002065 | 0.9645  |
| 0.16537 | -0.13952 | 0.00251  | -0.12913 | 0.00519  | -0.11974 | 0.0096  | -0.02781 | 0.54891 |
| 0.01435 | 0.064487 | 0.16414  | 0.029592 | 0.52353  | 0.0784   | 0.09059 | 0.034419 | 0.45806 |
| 0.10154 | -0.11568 | 0.01237  | -0.10372 | 0.025    | -0.08382 | 0.07036 | -0.06359 | 0.17007 |
| 0.17455 | 0.102015 | 0.0275   | 0.022604 | 0.62609  | 0.07603  | 0.1008  | -0.08145 | 0.07868 |
| 0.31699 | -0.00621 | 0.89357  | -0.04141 | 0.37191  | -0.01454 | 0.75391 | -0.02451 | 0.59732 |
| 0.0363  | -0.1353  | 0.00339  | 0.044781 | 0.33423  | 0.065278 | 0.15902 | 0.031245 | 0.50059 |
| 0.03488 | -0.10335 | 0.02552  | -0.11331 | 0.01428  | -0.1181  | 0.01064 | -0.0497  | 0.28384 |
| 0.28071 | 0.028696 | 0.53618  | 0.0126   | 0.78595  | 0.043022 | 0.35359 | 0.027114 | 0.55891 |
| 0.323   | -0.03427 | 0.46006  | 0.039941 | 0.38914  | 0.037555 | 0.41812 | -0.02227 | 0.63113 |
| 0.87428 | -0.04273 | 0.35683  | -0.00082 | 0.98593  | 0.01966  | 0.67175 | -0.02677 | 0.56392 |
| 0.33521 | -0.0829  | 0.07349  | -0.03318 | 0.47439  | -0.01558 | 0.73706 | -0.08311 | 0.07276 |
| 0.02372 | -0.08703 | 0.06021  | -0.09102 | 0.04933  | -0.10731 | 0.02037 | -0.0532  | 0.25123 |
| 0.31035 | -0.09341 | 0.04364  | -0.15385 | 0.00085  | -0.10821 | 0.01933 | 0.098471 | 0.03338 |
| 0.11714 | -0.03318 | 0.47444  | 0.019478 | 0.67461  | 0.03072  | 0.50782 | -0.02925 | 0.52831 |
| 0.09038 | -0.20519 | 7.82E-06 | -0.18197 | 7.66E-05 | -0.16128 | 0.00047 | -0.00347 | 0.94035 |
| 0.92153 | -0.02288 | 0.62191  | -0.0279  | 0.54759  | -0.01968 | 0.67138 | -0.03668 | 0.42904 |
| 0.16961 | 0.039967 | 0.38883  | -0.00509 | 0.91263  | 0.029907 | 0.51912 | 0.023435 | 0.61345 |
| 0.14457 | 0.05631  | 0.22453  | -0.02414 | 0.6028   | 0.021817 | 0.63817 | 0.065314 | 0.15878 |
| 0.00087 | 0.058731 | 0.2052   | 0.013052 | 0.77847  | 0.076134 | 0.10033 | 0.037768 | 0.41549 |
| 0.83098 | -0.03618 | 0.43539  | -0.08853 | 0.0559   | -0.05705 | 0.21845 | 0.063154 | 0.17305 |

|          |          |          |          |          |          |          |          |          |
|----------|----------|----------|----------|----------|----------|----------|----------|----------|
| 0.07512  | 0.035043 | 0.44996  | 0.015581 | 0.737    | 0.032786 | 0.47969  | 0.060896 | 0.18896  |
| 0.16617  | -0.06131 | 0.18596  | -0.04449 | 0.33737  | -0.00761 | 0.86966  | -0.04729 | 0.30779  |
| 1.07E-05 | 0.076125 | 0.10037  | 0.245803 | 7.43E-08 | 0.236239 | 2.41E-07 | -0.04228 | 0.36195  |
| 0.00081  | 0.13277  | 0.00405  | 0.162026 | 0.00044  | 0.188215 | 4.26E-05 | 0.071682 | 0.12189  |
| 0.5494   | -0.07047 | 0.12834  | -0.06116 | 0.18701  | -0.03756 | 0.41804  | -0.00286 | 0.95091  |
| 0.75449  | -0.07099 | 0.12556  | -0.07086 | 0.12625  | -0.04106 | 0.37598  | -0.00187 | 0.96785  |
| 0.07776  | -0.04291 | 0.35481  | -0.06627 | 0.15279  | -0.05922 | 0.20144  | -0.19963 | 1.39E-05 |
| 0.03033  | -0.03735 | 0.42065  | -0.00256 | 0.95593  | 0.024595 | 0.59601  | -0.02994 | 0.51862  |
| 0.78679  | -0.10186 | 0.02774  | -0.10135 | 0.02853  | -0.08574 | 0.06412  | 0.063251 | 0.17239  |
| 0.78051  | -0.01907 | 0.6811   | -0.0085  | 0.85459  | -0.01979 | 0.66969  | -0.01083 | 0.8154   |
| 0.01504  | 0.102232 | 0.02717  | 0.191494 | 3.10E-05 | 0.161839 | 0.00045  | 0.111971 | 0.01548  |
| 0.23809  | -0.25097 | 3.86E-08 | -0.23767 | 2.03E-07 | -0.20347 | 9.35E-06 | -0.03779 | 0.41527  |
| 0.63422  | -0.08579 | 0.06398  | -0.04797 | 0.30094  | -0.01569 | 0.73518  | -0.02765 | 0.55111  |
| 0.53045  | -0.1355  | 0.00335  | -0.12958 | 0.00504  | -0.12064 | 0.00907  | -0.04392 | 0.34359  |
| 0.04141  | -0.15534 | 0.00076  | -0.13117 | 0.00452  | -0.13969 | 0.00248  | -0.02889 | 0.53339  |
| 5.40E-06 | -0.14941 | 0.0012   | -0.14656 | 0.00149  | -0.19072 | 3.35E-05 | -0.07634 | 0.09943  |
| 0.11051  | -0.01364 | 0.76869  | -0.05615 | 0.22587  | -0.01953 | 0.67379  | -0.01725 | 0.71009  |
| 0.53246  | -0.09647 | 0.03716  | 0.007628 | 0.86942  | 0.034344 | 0.45906  | -0.03994 | 0.38919  |
| 0.45676  | -0.09298 | 0.04461  | -0.10818 | 0.01937  | -0.05752 | 0.21468  | 0.044483 | 0.33746  |
| 0.19608  | 0.016196 | 0.72703  | -0.01041 | 0.8225   | 0.033872 | 0.46525  | 0.046747 | 0.31343  |
| 0.60051  | -0.08904 | 0.05449  | -0.06091 | 0.18883  | -0.04255 | 0.35886  | -0.04003 | 0.38814  |
| 0.49003  | -0.09806 | 0.03412  | -0.08135 | 0.07906  | -0.06134 | 0.18576  | -0.08904 | 0.05449  |
| 0.00413  | -0.1774  | 0.00012  | -0.14031 | 0.00237  | -0.17502 | 0.00014  | 0.117788 | 0.01085  |
| 0.99877  | 0.023955 | 0.60561  | -0.07427 | 0.10893  | -0.03675 | 0.4282   | 0.168496 | 0.00025  |
| 0.85817  | -0.08523 | 0.06574  | -0.02598 | 0.57553  | -0.02072 | 0.65508  | -0.02908 | 0.5308   |
| 0.39043  | 0.053428 | 0.24919  | 0.05263  | 0.25634  | 0.071827 | 0.12113  | 0.021908 | 0.63677  |
| 0.44788  | -0.06936 | 0.13446  | 0.00286  | 0.95084  | 0.039012 | 0.40028  | 0.009961 | 0.83002  |
| 0.9198   | -0.04162 | 0.36946  | -0.02709 | 0.5593   | -0.02645 | 0.56853  | -0.02749 | 0.55344  |
| 0.5052   | -0.01913 | 0.68017  | -0.00916 | 0.84351  | 0.03115  | 0.5019   | -0.00541 | 0.90717  |
| 0.82102  | -0.09494 | 0.04029  | -0.01457 | 0.75354  | -0.01555 | 0.73746  | 0.031782 | 0.49325  |
| 0.11589  | -0.02934 | 0.52711  | 0.063783 | 0.1688   | 0.067033 | 0.14808  | 0.022018 | 0.63508  |
| 0.001    | -0.15111 | 0.00105  | -0.14625 | 0.00153  | -0.1894  | 3.80E-05 | -0.05931 | 0.20075  |
| 0.14574  | -0.14946 | 0.0012   | -0.0137  | 0.76775  | -0.07927 | 0.08705  | -0.04572 | 0.32418  |
| 0.5451   | 0.03244  | 0.48434  | 0.056523 | 0.22278  | 0.050855 | 0.27275  | -0.04941 | 0.28662  |
| 0.10961  | -0.0934  | 0.04367  | -0.06823 | 0.14094  | -0.09174 | 0.04754  | -0.03322 | 0.47393  |
| 0.37209  | -0.05487 | 0.23659  | -0.05397 | 0.2444   | -0.04085 | 0.37848  | -0.22115 | 1.39E-06 |
| 0.13661  | 0.036429 | 0.43222  | 0.067165 | 0.14728  | 0.061809 | 0.1824   | -0.106   | 0.02197  |
| 0.99061  | 0.082622 | 0.07446  | 0.0908   | 0.04988  | 0.053651 | 0.24722  | -0.04868 | 0.29384  |
| 0.72583  | -0.02037 | 0.66069  | -0.02238 | 0.62952  | -0.01554 | 0.73775  | -0.00777 | 0.86692  |
| 0.08805  | -0.09357 | 0.04326  | -0.05159 | 0.26588  | -0.06761 | 0.14459  | -0.08844 | 0.05614  |
| 0.85173  | 0.009786 | 0.83296  | 0.019631 | 0.67219  | 0.032848 | 0.47886  | 0.0097   | 0.8344   |
| 0.00012  | -0.16954 | 0.00023  | -0.18325 | 6.80E-05 | -0.20322 | 9.59E-06 | -0.15264 | 0.00094  |
| 0.61993  | -0.07994 | 0.08443  | -0.03744 | 0.41953  | -0.0422  | 0.36284  | -0.01148 | 0.80463  |
| 0.08495  | -0.0361  | 0.43639  | 0.064351 | 0.16503  | 0.048762 | 0.29301  | 0.004735 | 0.91872  |
| 0.14592  | 0.02998  | 0.51809  | 0.033108 | 0.47538  | 0.051947 | 0.26258  | 0.013518 | 0.77077  |



|         |          |          |          |         |          |          |           |          |
|---------|----------|----------|----------|---------|----------|----------|-----------|----------|
| 0.26446 | -0.01833 | 0.6927   | -0.0111  | 0.81085 | 0.049988 | 0.28102  | 0.012728  | 0.78382  |
| 0.11543 | -0.17466 | 0.00015  | -0.10576 | 0.02226 | -0.11953 | 0.00973  | -0.05021  | 0.27893  |
| 0.31952 | -0.01007 | 0.82822  | -0.02842 | 0.54008 | 0.018395 | 0.69174  | -0.00108  | 0.98147  |
| 0.38733 | -0.00941 | 0.83924  | -0.02773 | 0.55001 | 0.007797 | 0.86655  | 0.019785  | 0.66978  |
| 0.6989  | -0.00153 | 0.97377  | 0.020749 | 0.65471 | 0.023434 | 0.61347  | -0.03773  | 0.41597  |
| 0.72563 | -0.06672 | 0.14997  | -0.03441 | 0.45819 | -0.03726 | 0.42178  | -5.95E-05 | 0.99898  |
| 0.2     | -0.19561 | 2.07E-05 | -0.10278 | 0.02634 | -0.08614 | 0.06289  | 0.048714  | 0.29348  |
| 0.12416 | -0.02532 | 0.58518  | -0.0168  | 0.71721 | 0.014121 | 0.76087  | 0.014659  | 0.75204  |
| 0.97906 | -0.04704 | 0.31038  | -0.03283 | 0.47911 | -0.04116 | 0.37479  | 0.042945  | 0.35445  |
| 0.46948 | 0.028603 | 0.53751  | -0.01815 | 0.69564 | 0.00672  | 0.88484  | 0.007207  | 0.87656  |
| 0.08244 | 0.074585 | 0.10746  | 0.081338 | 0.0791  | 0.086373 | 0.06218  | 0.000541  | 0.99069  |
| 0.00072 | 0.025969 | 0.57563  | 0.048791 | 0.29271 | 0.067622 | 0.14454  | 0.067285  | 0.14656  |
| 0.69284 | -0.06027 | 0.19358  | -0.01386 | 0.76509 | -0.01768 | 0.70317  | 0.075124  | 0.10493  |
| 0.02293 | -0.1784  | 0.00011  | -0.13887 | 0.00263 | -0.15712 | 0.00066  | -0.09439  | 0.04146  |
| 0.60979 | -0.0403  | 0.38493  | -0.01509 | 0.745   | -0.03687 | 0.42662  | -0.02886  | 0.53385  |
| 0.25314 | -0.21921 | 1.73E-06 | -0.17827 | 0.00011 | -0.16399 | 0.00037  | -0.09787  | 0.03449  |
| 0.36054 | -0.26211 | 8.93E-09 | -0.16738 | 0.00028 | -0.19299 | 2.68E-05 | -0.08769  | 0.05829  |
| 0.14678 | -0.02455 | 0.59661  | 0.120675 | 0.00904 | 0.070594 | 0.12767  | 0.0073    | 0.87498  |
| 0.85434 | -0.08248 | 0.07497  | -0.08181 | 0.07739 | -0.08011 | 0.08375  | 0.005909  | 0.89865  |
| 0.11965 | -0.07008 | 0.13048  | -0.06884 | 0.13743 | -0.06239 | 0.17831  | -0.11576  | 0.01231  |
| 0.0555  | 0.024996 | 0.59002  | 0.079166 | 0.08747 | 0.086754 | 0.06103  | -0.00665  | 0.88603  |
| 0.36115 | -0.0009  | 0.98445  | -0.00727 | 0.87555 | -0.01586 | 0.73245  | -0.02892  | 0.53297  |
| 0.57953 | -0.1413  | 0.00221  | -0.1192  | 0.00993 | -0.12164 | 0.00851  | -0.12115  | 0.00877  |
| 0.84698 | -0.06783 | 0.14334  | 0.029505 | 0.52475 | 0.007825 | 0.86608  | -0.01807  | 0.69696  |
| 0.48917 | 0.038765 | 0.40328  | 0.002596 | 0.95539 | 0.029297 | 0.52768  | 0.094773  | 0.04064  |
| 0.12701 | -0.03221 | 0.48744  | -0.03889 | 0.4018  | -0.01153 | 0.80382  | 0.006044  | 0.89636  |
| 0.08095 | -0.11241 | 0.01508  | -0.0954  | 0.03931 | -0.11766 | 0.01094  | -0.03162  | 0.49542  |
| 0.68248 | -0.0919  | 0.04717  | -0.04284 | 0.35564 | -0.03964 | 0.39276  | -0.0168   | 0.71734  |
| 0.14426 | 0.02803  | 0.54569  | -0.02014 | 0.66414 | 0.023871 | 0.60687  | 0.032813  | 0.47932  |
| 0.11495 | 0.038439 | 0.40724  | 0.066817 | 0.14939 | 0.062869 | 0.175    | -0.07887  | 0.08868  |
| 0.30357 | -0.07756 | 0.09409  | -0.09943 | 0.03168 | -0.05702 | 0.21871  | 0.014296  | 0.75799  |
| 0.00408 | 0.154706 | 0.0008   | 0.172385 | 0.00018 | 0.177805 | 0.00011  | 0.021276  | 0.64653  |
| 0.28173 | -0.04009 | 0.38737  | -0.00866 | 0.85191 | -0.05037 | 0.27736  | -0.0215   | 0.6431   |
| 0.06476 | -0.1994  | 1.42E-05 | -0.15692 | 0.00067 | -0.16488 | 0.00035  | 0.023966  | 0.60544  |
| 0.43053 | 0.125921 | 0.00644  | 0.029353 | 0.5269  | 0.044683 | 0.3353   | 0.167723  | 0.00027  |
| 0.50097 | -0.08888 | 0.05493  | -0.08265 | 0.07436 | -0.05385 | 0.24547  | -0.20324  | 9.57E-06 |
| 0.21174 | -0.05139 | 0.26771  | -0.04572 | 0.32424 | -0.06081 | 0.18961  | -0.11071  | 0.01669  |
| 0.12526 | -0.06902 | 0.13641  | -0.12414 | 0.00723 | -0.08905 | 0.05448  | -0.11596  | 0.01215  |
| 0.39751 | -0.00273 | 0.95305  | 0.004538 | 0.92209 | 0.028415 | 0.54019  | -0.13729  | 0.00295  |
| 0.93561 | -0.0111  | 0.81091  | -0.01958 | 0.67308 | -0.01911 | 0.68048  | -0.01225  | 0.79169  |
| 0.28345 | 0.013221 | 0.77569  | 0.00811  | 0.86124 | 0.043211 | 0.35147  | 0.011993  | 0.79603  |
| 0.94195 | -0.06314 | 0.17312  | -0.03123 | 0.50078 | -0.01798 | 0.6983   | -0.00704  | 0.87941  |
| 0.42139 | -0.05245 | 0.258    | -0.05355 | 0.2481  | -0.07163 | 0.12218  | -0.04314  | 0.35223  |
| 0.06108 | -0.04337 | 0.34969  | -0.02203 | 0.63496 | 0.023564 | 0.6115   | -0.00431  | 0.92603  |
| 0.02938 | -0.01367 | 0.76825  | -0.01786 | 0.70025 | 0.043254 | 0.351    | 0.029982  | 0.51806  |

|          |          |          |          |          |          |          |          |          |
|----------|----------|----------|----------|----------|----------|----------|----------|----------|
| 0.22522  | 0.046314 | 0.31794  | 0.065675 | 0.15649  | 0.065071 | 0.16034  | 0.055891 | 0.228    |
| 0.11661  | -0.09249 | 0.04575  | 0.044602 | 0.33617  | 0.059059 | 0.20267  | 0.110278 | 0.01713  |
| 0.48074  | -0.04471 | 0.33504  | -0.01683 | 0.71673  | 0.014211 | 0.75938  | 0.097376 | 0.03541  |
| 0.10536  | -0.2125  | 3.61E-06 | -0.13055 | 0.00472  | -0.15168 | 0.00101  | -0.0368  | 0.42758  |
| 0.44703  | -0.07052 | 0.12807  | -0.01412 | 0.76088  | -0.01758 | 0.7048   | 0.007544 | 0.87084  |
| 0.35296  | -0.07677 | 0.09751  | -0.02228 | 0.63104  | -0.04708 | 0.31     | 0.029446 | 0.52558  |
| 0.01455  | 0.019362 | 0.67644  | -0.00054 | 0.99072  | 0.051056 | 0.27085  | 0.005353 | 0.90815  |
| 0.51194  | -0.01435 | 0.75712  | -0.03133 | 0.49937  | -0.01383 | 0.76569  | -0.01558 | 0.73695  |
| 0.1926   | -0.01144 | 0.80518  | -0.01582 | 0.73314  | 0.024744 | 0.59378  | 0.044392 | 0.33845  |
| 0.4996   | 0.000454 | 0.99219  | -0.03238 | 0.48513  | -0.00222 | 0.9619   | 0.044067 | 0.34201  |
| 0.02534  | 0.010359 | 0.82332  | 0.09637  | 0.03736  | 0.092653 | 0.04537  | 0.02531  | 0.58535  |
| 0.00181  | -0.25662 | 1.85E-08 | -0.23147 | 4.25E-07 | -0.23686 | 2.23E-07 | -0.19558 | 2.08E-05 |
| 0.37537  | -0.06695 | 0.14856  | -0.04624 | 0.31874  | -0.06674 | 0.14987  | -0.00998 | 0.82976  |
| 2.21E-12 | -0.31817 | 1.91E-12 | -0.40609 | 5.73E-20 | -0.40972 | 2.49E-20 | -0.34915 | 7.79E-15 |
| 0.72039  | -0.23689 | 2.23E-07 | -0.10979 | 0.01763  | -0.12754 | 0.00578  | -0.06149 | 0.18464  |
| 0.07525  | 0.070643 | 0.1274   | -0.00127 | 0.97809  | 0.050676 | 0.27444  | 0.059547 | 0.19897  |
| 0.01919  | -0.06416 | 0.16627  | 0.034552 | 0.45633  | 0.057347 | 0.21609  | -0.01941 | 0.67566  |
| 0.23126  | -0.09657 | 0.03697  | -0.08008 | 0.08385  | -0.08626 | 0.06254  | -0.00103 | 0.98226  |
| 0.61785  | -0.01489 | 0.74833  | 0.033003 | 0.47679  | 0.03855  | 0.40589  | 0.020345 | 0.661    |
| 8.44E-07 | -0.5153  | 4.92E-33 | -0.36897 | 1.65E-16 | -0.46809 | 8.35E-27 | -0.2844  | 3.87E-10 |
| 0.00612  | -0.43812 | 2.52E-23 | -0.41049 | 2.08E-20 | -0.44044 | 1.39E-23 | 0.18818  | 4.27E-05 |
| 4.42E-06 | -0.50201 | 3.51E-31 | -0.24395 | 9.37E-08 | -0.41081 | 1.93E-20 | -0.19411 | 2.40E-05 |
| 0.23707  | -0.46032 | 7.20E-26 | -0.33826 | 5.78E-14 | -0.40231 | 1.35E-19 | -0.0561  | 0.22629  |
| 8.02E-05 | -0.0527  | 0.2557   | -0.02245 | 0.62848  | -0.0455  | 0.32654  | 0.200697 | 1.24E-05 |
| 0.00064  | -0.35695 | 1.77E-15 | -0.33186 | 1.81E-13 | -0.3959  | 5.65E-19 | 0.07995  | 0.08437  |
| 1.79E-09 | -0.03248 | 0.48381  | 0.407551 | 4.10E-20 | 0.206055 | 7.15E-06 | 0.034641 | 0.45518  |
| 0.02114  | -0.3421  | 2.88E-14 | -0.18077 | 8.55E-05 | -0.15958 | 0.00054  | 0.181849 | 7.74E-05 |
| 0.00014  | -0.16005 | 0.00052  | 0.165935 | 0.00032  | 0.009216 | 0.84256  | 0.108937 | 0.01853  |
| 4.07E-08 | -0.4747  | 1.28E-27 | -0.51444 | 6.52E-33 | -0.53844 | 1.84E-36 | -0.10086 | 0.0293   |
| 4.09E-06 | -0.28504 | 3.52E-10 | 0.079479 | 0.08622  | -0.02289 | 0.6217   | 0.077009 | 0.09648  |
| 0.21024  | -0.38758 | 3.45E-18 | -0.11523 | 0.01271  | -0.20427 | 8.61E-06 | -0.01597 | 0.73063  |
| 9.00E-10 | -0.58544 | 2.64E-44 | -0.48639 | 4.18E-29 | -0.56083 | 4.84E-40 | -0.13812 | 0.00278  |
| 0.80318  | -0.40015 | 2.20E-19 | -0.20879 | 5.36E-06 | -0.2792  | 8.26E-10 | 0.116866 | 0.01149  |
| 0.08153  | -0.21655 | 2.32E-06 | -0.03443 | 0.45797  | -0.20556 | 7.53E-06 | 0.010742 | 0.8169   |
| 0.08461  | -0.0801  | 0.08377  | -0.0396  | 0.39317  | -0.08228 | 0.07567  | -0.09949 | 0.0316   |
| 7.70E-08 | -0.35946 | 1.09E-15 | -0.20305 | 9.77E-06 | -0.39036 | 1.90E-18 | -0.04039 | 0.38387  |
| 0.00152  | -0.0933  | 0.04387  | 0.259309 | 1.30E-08 | 0.078352 | 0.09079  | -0.07222 | 0.11908  |
| 0.02129  | -0.35483 | 2.66E-15 | -0.25538 | 2.18E-08 | -0.20149 | 1.15E-05 | -0.03227 | 0.48658  |
| 0.0696   | -0.33346 | 1.37E-13 | -0.25329 | 2.86E-08 | -0.22207 | 1.25E-06 | 0.239256 | 1.67E-07 |
| 2.37E-05 | -0.57088 | 9.70E-42 | -0.41016 | 2.25E-20 | -0.48639 | 4.18E-29 | 0.013191 | 0.77617  |
| 0.85512  | -0.35901 | 1.19E-15 | -0.05205 | 0.26167  | -0.16675 | 0.0003   | 0.01158  | 0.80291  |
| 2.97E-15 | -0.48601 | 4.68E-29 | -0.35447 | 2.84E-15 | -0.51493 | 5.55E-33 | -0.18183 | 7.75E-05 |
| 0.0015   | -0.46715 | 1.09E-26 | -0.36422 | 4.27E-16 | -0.411   | 1.85E-20 | -0.05133 | 0.26829  |
| 0.04465  | -0.49848 | 1.05E-30 | -0.41296 | 1.17E-20 | -0.43761 | 2.88E-23 | -0.19243 | 2.83E-05 |
| 0.75454  | -0.29397 | 9.21E-11 | 0.043853 | 0.34436  | -0.1278  | 0.00568  | 0.115077 | 0.01283  |

|          |          |          |          |          |          |          |          |          |
|----------|----------|----------|----------|----------|----------|----------|----------|----------|
| 0.00132  | -0.33568 | 9.20E-14 | -0.13458 | 0.00357  | -0.28346 | 4.45E-10 | 0.163162 | 0.0004   |
| 0.03787  | -0.2853  | 3.39E-10 | -0.03855 | 0.40591  | -0.13878 | 0.00265  | -0.11851 | 0.01037  |
| 1.53E-13 | -0.00961 | 0.83588  | 0.319363 | 1.56E-12 | 0.206211 | 7.03E-06 | 0.175545 | 0.00014  |
| 0.00152  | 0.007289 | 0.87516  | 0.305678 | 1.48E-11 | 0.100804 | 0.0294   | 0.018913 | 0.68353  |
| 9.43E-05 | -0.36854 | 1.80E-16 | -0.35375 | 3.26E-15 | -0.40899 | 2.94E-20 | -0.10521 | 0.02297  |
| 0.06893  | -0.23896 | 1.73E-07 | 0.178208 | 0.00011  | -0.01758 | 0.7047   | -0.06686 | 0.14911  |
| 0.03586  | -0.24293 | 1.06E-07 | -0.15444 | 0.00081  | -0.24215 | 1.17E-07 | 0.029417 | 0.52598  |
| 4.84E-12 | -0.4634  | 3.09E-26 | -0.38411 | 7.25E-18 | -0.47511 | 1.14E-27 | -0.09067 | 0.05022  |
| 1.36E-05 | -0.53883 | 1.60E-36 | -0.61686 | 2.65E-50 | -0.56363 | 1.65E-40 | 0.066003 | 0.15443  |
| 4.92E-05 | -0.21107 | 4.21E-06 | 0.133338 | 0.00389  | 0.007063 | 0.879    | -0.00557 | 0.90441  |
| 2.56E-05 | -0.23607 | 2.46E-07 | 0.13601  | 0.00323  | 0.014623 | 0.75262  | -0.10388 | 0.02478  |
| 0.1      | -0.30298 | 2.26E-11 | -0.09448 | 0.04128  | -0.166   | 0.00031  | -0.05026 | 0.27845  |
| 1.25E-10 | -0.43842 | 2.34E-23 | -0.34741 | 1.08E-14 | -0.43728 | 3.13E-23 | -0.19575 | 2.04E-05 |
| 3.59E-05 | -0.51098 | 2.01E-32 | -0.31091 | 6.34E-12 | -0.42329 | 1.00E-21 | -0.1618  | 0.00045  |
| 0.00024  | -0.1093  | 0.01814  | -0.17576 | 0.00013  | -0.09844 | 0.03344  | 0.152359 | 0.00096  |
| 0.00051  | -0.24742 | 6.06E-08 | -0.2246  | 9.41E-07 | -0.35416 | 3.02E-15 | 0.016731 | 0.71838  |
| 2.98E-06 | -0.38771 | 3.36E-18 | -0.29397 | 9.21E-11 | -0.40797 | 3.72E-20 | 0.137019 | 0.00301  |
| 0.57548  | -0.29625 | 6.48E-11 | 0.126349 | 0.00626  | -0.11577 | 0.01229  | -0.04656 | 0.3154   |
| 0.76231  | -0.45436 | 3.63E-25 | -0.4553  | 2.82E-25 | -0.44236 | 8.52E-24 | -0.02036 | 0.66075  |
| 0.00357  | -0.39571 | 5.89E-19 | -0.16666 | 0.0003   | -0.3336  | 1.33E-13 | 0.040564 | 0.38178  |
| 0.95595  | -0.43658 | 3.73E-23 | -0.24079 | 1.38E-07 | -0.281   | 6.36E-10 | -0.03643 | 0.43222  |
| 1.74E-10 | -0.66877 | 7.55E-62 | -0.45784 | 1.42E-25 | -0.57419 | 2.60E-42 | -0.17596 | 0.00013  |
| 0.15845  | -0.13293 | 0.00401  | 0.019378 | 0.67619  | -0.15002 | 0.00115  | -0.09878 | 0.03283  |
| 0.12529  | -0.4537  | 4.33E-25 | -0.39379 | 8.98E-19 | -0.39966 | 2.45E-19 | -0.13234 | 0.00417  |
| 2.12E-07 | -0.54508 | 1.70E-37 | -0.38351 | 8.22E-18 | -0.49142 | 9.20E-30 | -0.23534 | 2.68E-07 |
| 0.00182  | -0.20851 | 5.52E-06 | -0.03148 | 0.49731  | -0.0535  | 0.24859  | 0.118849 | 0.01015  |
| 0.01678  | -0.45963 | 8.70E-26 | -0.25943 | 1.28E-08 | -0.36823 | 1.92E-16 | 0.051741 | 0.26447  |
| 5.51E-13 | -0.55951 | 8.01E-40 | -0.43224 | 1.11E-22 | -0.56633 | 5.78E-41 | -0.26097 | 1.04E-08 |
| 0.00148  | -0.55527 | 3.98E-39 | -0.50459 | 1.56E-31 | -0.48816 | 2.46E-29 | -0.03561 | 0.44261  |
| 0.46925  | -0.43538 | 5.05E-23 | -0.10145 | 0.02838  | -0.25812 | 1.52E-08 | -0.13167 | 0.00437  |
| 3.16E-07 | -0.43138 | 1.38E-22 | -0.18619 | 5.16E-05 | -0.38677 | 4.11E-18 | -0.12598 | 0.00641  |
| 9.38E-19 | 0.040095 | 0.38732  | 0.455783 | 2.47E-25 | 0.320576 | 1.27E-12 | 0.072991 | 0.1152   |
| 0.03261  | -0.49832 | 1.11E-30 | -0.32053 | 1.28E-12 | -0.37313 | 7.12E-17 | -0.00479 | 0.91777  |
| 0.00054  | -0.28006 | 7.30E-10 | -0.13653 | 0.00311  | -0.2938  | 9.44E-11 | 0.086631 | 0.0614   |
| 0.0077   | -0.07045 | 0.12847  | 0.056824 | 0.22032  | -0.02611 | 0.57362  | -0.04773 | 0.3034   |
| 0.08076  | -0.18652 | 5.00E-05 | 0.080803 | 0.0811   | -0.04517 | 0.33008  | 0.34977  | 6.94E-15 |
| 1.70E-06 | -0.17024 | 0.00022  | -0.0341  | 0.46221  | -0.02275 | 0.62387  | 0.098323 | 0.03365  |
| 0.02946  | -0.3268  | 4.39E-13 | -0.01207 | 0.79475  | -0.20931 | 5.08E-06 | -0.13912 | 0.00259  |
| 2.20E-11 | -0.59683 | 2.10E-46 | -0.44869 | 1.64E-24 | -0.57683 | 9.02E-43 | -0.09941 | 0.03173  |
| 0.04834  | -0.53728 | 2.77E-36 | -0.56816 | 2.84E-41 | -0.50757 | 6.02E-32 | -0.02615 | 0.57292  |
| 1.10E-05 | -0.52189 | 5.52E-34 | -0.36889 | 1.68E-16 | -0.46543 | 1.76E-26 | -0.27975 | 7.62E-10 |
| 0.38262  | -0.39702 | 4.41E-19 | -0.10386 | 0.0248   | -0.2527  | 3.09E-08 | 0.053878 | 0.24522  |
| 6.15E-08 | -0.52609 | 1.34E-34 | -0.39714 | 4.30E-19 | -0.48684 | 3.65E-29 | -0.13136 | 0.00446  |
| 1.43E-12 | -0.48562 | 5.26E-29 | -0.35396 | 3.14E-15 | -0.52681 | 1.05E-34 | -0.22676 | 7.35E-07 |
| 2.16E-14 | -0.11495 | 0.01293  | -0.0072  | 0.87667  | 0.013419 | 0.7724   | -0.01958 | 0.67295  |

|          |          |          |          |          |          |          |          |          |
|----------|----------|----------|----------|----------|----------|----------|----------|----------|
| 8.41E-06 | -0.31564 | 2.91E-12 | -0.26638 | 5.00E-09 | -0.21463 | 2.86E-06 | -0.05473 | 0.23783  |
| 0.22944  | -0.41323 | 1.10E-20 | -0.15585 | 0.00073  | -0.19461 | 2.29E-05 | -0.09283 | 0.04496  |
| 0.00076  | -0.42597 | 5.21E-22 | -0.40145 | 1.64E-19 | -0.32178 | 1.04E-12 | -0.05187 | 0.26332  |
| 2.43E-07 | -0.26011 | 1.17E-08 | 0.031958 | 0.49086  | -0.08525 | 0.06566  | -0.12498 | 0.00685  |
| 0.4427   | -0.24206 | 1.18E-07 | 0.018899 | 0.68375  | -0.12096 | 0.00888  | -0.06372 | 0.16924  |
| 0.47724  | 0.023135 | 0.618    | 0.071213 | 0.12435  | 0.074819 | 0.10636  | 0.257368 | 1.68E-08 |
| 0.47973  | 0.094363 | 0.04152  | 0.136255 | 0.00317  | 0.120596 | 0.00909  | 0.132474 | 0.00413  |
| 1.12E-08 | -0.23571 | 2.57E-07 | -0.2597  | 1.23E-08 | -0.28745 | 2.46E-10 | 0.081115 | 0.07993  |
| 2.37E-09 | -0.11526 | 0.01269  | -0.12764 | 0.00574  | -0.21419 | 3.00E-06 | 0.028147 | 0.54402  |
| 0.02297  | 0.120112 | 0.00937  | 0.165926 | 0.00032  | 0.165248 | 0.00034  | 0.149372 | 0.00121  |
| 0.10955  | -0.04298 | 0.35403  | -0.20099 | 1.21E-05 | -0.14896 | 0.00124  | 0.031938 | 0.49113  |
| 1.90E-09 | -0.19417 | 2.39E-05 | -0.28275 | 4.93E-10 | -0.29998 | 3.63E-11 | -0.00475 | 0.91839  |
| 0.00031  | -0.05311 | 0.25198  | -0.03275 | 0.48024  | -0.10167 | 0.02803  | -0.02905 | 0.53115  |
| 4.78E-08 | -0.21942 | 1.69E-06 | -0.28187 | 5.61E-10 | -0.29487 | 8.02E-11 | -0.0077  | 0.86812  |
| 0.00094  | -0.12455 | 0.00704  | 0.110245 | 0.01716  | 0.083508 | 0.0714   | 0.309362 | 8.15E-12 |
| 0.02848  | 0.217549 | 2.08E-06 | 0.150872 | 0.00107  | 0.166287 | 0.00031  | 0.215743 | 2.54E-06 |
| 9.77E-06 | 0.184345 | 6.14E-05 | 0.252079 | 3.35E-08 | 0.230324 | 4.86E-07 | 0.16083  | 0.00048  |
| 4.39E-08 | -0.11602 | 0.01211  | -0.15524 | 0.00076  | -0.21274 | 3.51E-06 | 0.247481 | 6.02E-08 |
| 0.00124  | 0.19302  | 2.67E-05 | 0.180531 | 8.74E-05 | 0.216392 | 2.36E-06 | 0.146637 | 0.00149  |
| 0.05719  | 0.123551 | 0.00752  | 0.13509  | 0.00345  | 0.132302 | 0.00418  | 0.134411 | 0.00361  |
| 0.00033  | 0.182866 | 7.05E-05 | 0.115468 | 0.01253  | 0.167901 | 0.00027  | 0.213871 | 3.11E-06 |
| 0.01458  | 0.076753 | 0.09759  | -0.00034 | 0.99413  | -0.01896 | 0.68271  | -0.09725 | 0.03565  |
| 0.14296  | 0.076793 | 0.09741  | 0.16512  | 0.00034  | 0.146205 | 0.00153  | -0.02621 | 0.57208  |
| 0.00209  | 0.129227 | 0.00516  | -0.02556 | 0.58159  | 0.116838 | 0.01151  | 0.171538 | 0.0002   |
| 0.78166  | -0.01219 | 0.79274  | 0.058732 | 0.20519  | 0.048258 | 0.29803  | 0.314354 | 3.60E-12 |
| 4.77E-05 | 0.207853 | 5.92E-06 | 0.336112 | 8.51E-14 | 0.307247 | 1.15E-11 | 0.056488 | 0.22307  |
| 0.01035  | 0.023627 | 0.61055  | 0.026256 | 0.57141  | 0.098163 | 0.03394  | 0.190622 | 3.38E-05 |
| 0.58807  | 0.139997 | 0.00243  | -0.0719  | 0.12075  | 0.045714 | 0.32425  | 0.021801 | 0.63842  |
| 1.35E-05 | 0.106457 | 0.0214   | 0.132571 | 0.00411  | 0.207142 | 6.38E-06 | 0.084055 | 0.06956  |
| 9.68E-08 | 0.111387 | 0.01603  | 0.205155 | 7.85E-06 | 0.257023 | 1.76E-08 | 0.346869 | 1.19E-14 |
| 0.00013  | 0.277706 | 1.02E-09 | 0.261996 | 9.07E-09 | 0.311095 | 6.15E-12 | 0.379809 | 1.79E-17 |
| 0.02052  | 0.150933 | 0.00107  | 0.061796 | 0.18249  | 0.135339 | 0.00339  | 0.319266 | 1.59E-12 |
| 0.1176   | 0.016751 | 0.71806  | -0.0112  | 0.80923  | 0.048151 | 0.2991   | 0.048747 | 0.29315  |
| 0.01161  | 0.057894 | 0.21174  | -0.05672 | 0.22115  | 0.071253 | 0.12414  | 0.222237 | 1.23E-06 |
| 4.84E-05 | 0.208263 | 5.67E-06 | 0.286708 | 2.75E-10 | 0.279066 | 8.42E-10 | 0.215652 | 2.56E-06 |
| 0.00192  | 0.200093 | 1.32E-05 | 0.255246 | 2.22E-08 | 0.252832 | 3.04E-08 | 0.067522 | 0.14514  |
| 0.00416  | 0.155712 | 0.00073  | 0.204784 | 8.16E-06 | 0.204464 | 8.44E-06 | 0.143191 | 0.00192  |
| 0.0002   | 0.076596 | 0.09828  | 0.075971 | 0.10107  | 0.131406 | 0.00445  | 0.172286 | 0.00018  |
| 0.05169  | -0.06958 | 0.13327  | 0.143852 | 0.00183  | 0.088156 | 0.05695  | 0.015258 | 0.74225  |
| 3.59E-15 | 0.250522 | 4.09E-08 | 0.23164  | 4.16E-07 | 0.345517 | 1.53E-14 | 0.458294 | 1.25E-25 |
| 0.00087  | 0.032476 | 0.48386  | -0.02768 | 0.55068  | 0.067717 | 0.14398  | 0.226713 | 7.39E-07 |
| 2.38E-16 | -0.23826 | 1.89E-07 | -0.34589 | 1.43E-14 | -0.38009 | 1.69E-17 | -0.02092 | 0.65206  |
| 0.08828  | 0.035568 | 0.44319  | 0.05399  | 0.24424  | 0.086971 | 0.06038  | 0.145712 | 0.00159  |
| 0.00803  | 0.081537 | 0.07837  | 0.083029 | 0.07304  | 0.124973 | 0.00685  | 0.150495 | 0.00111  |
| 3.01E-35 | 0.454399 | 3.59E-25 | 0.601498 | 2.75E-47 | 0.614438 | 8.13E-50 | 0.36464  | 3.93E-16 |

|          |          |          |          |          |          |          |          |          |
|----------|----------|----------|----------|----------|----------|----------|----------|----------|
| 5.81E-09 | 0.461709 | 4.92E-26 | 0.47163  | 3.07E-27 | 0.438716 | 2.17E-23 | 0.261678 | 9.46E-09 |
| 3.14E-13 | 0.447792 | 2.07E-24 | 0.45668  | 1.94E-25 | 0.457173 | 1.70E-25 | 0.473154 | 1.99E-27 |
| 9.38E-40 | 0.330374 | 2.35E-13 | 0.578619 | 4.37E-43 | 0.562941 | 2.15E-40 | 0.285773 | 3.16E-10 |
| 0.001    | -0.44926 | 1.41E-24 | -0.50227 | 3.23E-31 | -0.4056  | 6.40E-20 | -0.11146 | 0.01596  |
| 3.44E-16 | 0.418039 | 3.53E-21 | 0.571459 | 7.72E-42 | 0.506357 | 8.86E-32 | 0.012746 | 0.78354  |
| 2.57E-18 | 0.410502 | 2.07E-20 | 0.461253 | 5.58E-26 | 0.456556 | 2.01E-25 | 0.198023 | 1.63E-05 |
| 8.49E-40 | 0.329433 | 2.77E-13 | 0.593229 | 9.92E-46 | 0.582699 | 8.23E-44 | 0.249035 | 4.94E-08 |
| 6.23E-11 | 0.218786 | 1.81E-06 | 0.52915  | 4.70E-35 | 0.436492 | 3.81E-23 | 0.001133 | 0.98051  |
| 1.76E-24 | 0.443727 | 5.98E-24 | 0.648978 | 3.53E-57 | 0.568244 | 2.74E-41 | 0.377403 | 2.95E-17 |
| 1.52E-22 | 0.219456 | 1.68E-06 | 0.538804 | 1.61E-36 | 0.496288 | 2.08E-30 | 0.042475 | 0.35974  |
| 1.01E-22 | 0.52674  | 1.07E-34 | 0.707581 | 3.91E-72 | 0.666619 | 2.53E-61 | 0.116327 | 0.01188  |
| 2.91E-15 | 0.321255 | 1.13E-12 | 0.745097 | 7.95E-84 | 0.558325 | 1.25E-39 | 0.071399 | 0.12337  |
| 5.33E-24 | 0.516034 | 3.86E-33 | 0.781429 | 2.71E-97 | 0.6875   | 1.31E-66 | 0.163808 | 0.00038  |
| 0.00077  | 0.249816 | 4.47E-08 | 0.688031 | 9.46E-67 | 0.436224 | 4.08E-23 | 0.088868 | 0.05497  |
| 3.69E-19 | 0.419634 | 2.41E-21 | 0.786198 | 2.97E-99 | 0.608972 | 9.83E-49 | 0.062868 | 0.17501  |
| 1.07E-27 | 0.430119 | 1.88E-22 | 0.788354 | #####    | 0.66735  | 1.68E-61 | 0.286811 | 2.71E-10 |
| 5.17E-10 | 0.354692 | 2.73E-15 | 0.707409 | 4.38E-72 | 0.519221 | 1.35E-33 | 0.038527 | 0.40617  |
| 1.01E-05 | 0.250041 | 4.35E-08 | 0.689573 | 3.69E-67 | 0.45238  | 6.15E-25 | -0.08212 | 0.07625  |
| 2.18E-05 | 0.508861 | 3.98E-32 | 0.661585 | 4.12E-60 | 0.510548 | 2.31E-32 | 0.313093 | 4.43E-12 |
| 1.04E-38 | 0.596026 | 2.99E-46 | 0.878112 | #####    | 0.791459 | #####    | 0.226846 | 7.28E-07 |
| 2.10E-28 | 0.285611 | 3.24E-10 | 0.640043 | 3.49E-55 | 0.57218  | 5.80E-42 | 0.16551  | 0.00033  |
| 1.07E-10 | 0.523109 | 3.67E-34 | 0.650632 | 1.48E-57 | 0.544424 | 2.16E-37 | 0.069055 | 0.13621  |
| 4.09E-26 | 0.630664 | 3.69E-53 | 0.637879 | 1.04E-54 | 0.650393 | 1.68E-57 | 0.221297 | 1.37E-06 |
| 1.40E-25 | 0.41697  | 4.55E-21 | 0.580446 | 2.07E-43 | 0.606173 | 3.46E-48 | 0.228259 | 6.18E-07 |
| 4.49E-30 | 0.316247 | 2.63E-12 | 0.489834 | 1.49E-29 | 0.518854 | 1.52E-33 | 0.089759 | 0.05257  |
| 0.00035  | 0.432434 | 1.06E-22 | 0.629367 | 6.94E-53 | 0.490198 | 1.33E-29 | 0.125131 | 0.00678  |
| 6.58E-38 | 0.649754 | 2.35E-57 | 0.565746 | 7.27E-41 | 0.633882 | 7.59E-54 | 0.130173 | 0.00484  |
| 1.13E-22 | 0.438098 | 2.54E-23 | 0.387053 | 3.87E-18 | 0.459191 | 9.80E-26 | 0.159549 | 0.00054  |
| 1.40E-11 | 0.382783 | 9.59E-18 | 0.496855 | 1.75E-30 | 0.469091 | 6.30E-27 | 0.075362 | 0.10384  |
| 2.45E-48 | 0.588744 | 6.64E-45 | 0.832871 | #####    | 0.806835 | #####    | 0.271026 | 2.63E-09 |
| 1.41E-16 | 0.467257 | 1.05E-26 | 0.494461 | 3.65E-30 | 0.507669 | 5.83E-32 | 0.18993  | 3.61E-05 |
| 1.75E-30 | 0.459679 | 8.58E-26 | 0.726501 | 8.70E-78 | 0.63072  | 3.59E-53 | 0.221704 | 1.31E-06 |
| 0.13918  | 0.277578 | 1.04E-09 | 0.581477 | 1.36E-43 | 0.367751 | 2.11E-16 | 0.205287 | 7.74E-06 |
| 7.80E-18 | 0.41122  | 1.76E-20 | 0.738433 | 1.33E-81 | 0.615401 | 5.21E-50 | 0.176943 | 0.00012  |
| 2.23E-26 | 0.590364 | 3.35E-45 | 0.718418 | 2.58E-75 | 0.738153 | 1.64E-81 | 0.138056 | 0.00279  |
| 3.96E-08 | 0.457174 | 1.70E-25 | 0.49762  | 1.38E-30 | 0.416327 | 5.30E-21 | -0.06227 | 0.17912  |
| 1.54E-28 | 0.52627  | 1.26E-34 | 0.754972 | 2.98E-87 | 0.712876 | 1.14E-73 | 0.149288 | 0.00121  |
| 1.39E-14 | 0.566308 | 5.84E-41 | 0.591217 | 2.34E-45 | 0.585463 | 2.62E-44 | 0.230587 | 4.71E-07 |
| 8.22E-31 | 0.403951 | 9.32E-20 | 0.632088 | 1.84E-53 | 0.572858 | 4.43E-42 | 0.171384 | 0.0002   |
| 7.64E-32 | 0.385678 | 5.19E-18 | 0.64528  | 2.40E-56 | 0.57373  | 3.13E-42 | 0.130642 | 0.00469  |
| 3.13E-14 | 0.46637  | 1.35E-26 | 0.592885 | 1.15E-45 | 0.516623 | 3.18E-33 | 0.09819  | 0.03389  |
| 3.86E-42 | 0.314503 | 3.51E-12 | 0.633319 | 1.00E-53 | 0.610175 | 5.71E-49 | 0.312691 | 4.73E-12 |
| 3.16E-18 | 0.439497 | 1.78E-23 | 0.363122 | 5.30E-16 | 0.38938  | 2.35E-18 | 0.000233 | 0.996    |
| 1.92E-23 | 0.557915 | 1.47E-39 | 0.698271 | 1.62E-69 | 0.627252 | 1.93E-52 | 0.108213 | 0.01933  |
| 5.82E-15 | 0.606985 | 2.41E-48 | 0.746817 | 2.07E-84 | 0.640913 | 2.24E-55 | 0.151636 | 0.00101  |

|          |          |          |          |          |          |          |          |          |
|----------|----------|----------|----------|----------|----------|----------|----------|----------|
| 5.95E-16 | 0.469971 | 4.92E-27 | 0.498343 | 1.10E-30 | 0.518117 | 1.94E-33 | 0.116939 | 0.01144  |
| 5.31E-11 | 0.47954  | 3.15E-28 | 0.439296 | 1.87E-23 | 0.472404 | 2.47E-27 | 0.278416 | 9.24E-10 |
| 1.96E-27 | 0.330476 | 2.31E-13 | 0.443979 | 5.60E-24 | 0.487251 | 3.23E-29 | 0.398229 | 3.37E-19 |
| 1.78E-39 | 0.447689 | 2.13E-24 | 0.707888 | 3.19E-72 | 0.687334 | 1.45E-66 | 0.221416 | 1.35E-06 |
| 1.07E-42 | 0.475703 | 9.58E-28 | 0.780027 | 1.00E-96 | 0.721742 | 2.54E-76 | 0.314091 | 3.76E-12 |
| 2.28E-28 | 0.330078 | 2.48E-13 | 0.563863 | 1.51E-40 | 0.526379 | 1.21E-34 | 0.156924 | 0.00067  |
| 5.53E-29 | 0.54699  | 8.49E-38 | 0.676906 | 7.14E-64 | 0.626232 | 3.16E-52 | 0.277955 | 9.88E-10 |
| 1.02E-06 | 0.259629 | 1.24E-08 | 0.602815 | 1.54E-47 | 0.413085 | 1.14E-20 | -0.02966 | 0.5226   |
| 2.57E-20 | 0.281793 | 5.67E-10 | 0.456441 | 2.07E-25 | 0.436802 | 3.53E-23 | 0.072643 | 0.11695  |
| 9.66E-12 | 0.42196  | 1.38E-21 | 0.436072 | 4.24E-23 | 0.428329 | 2.93E-22 | -0.05653 | 0.22269  |
| 3.36E-11 | 0.445807 | 3.48E-24 | 0.719315 | 1.38E-75 | 0.540982 | 7.43E-37 | 0.24969  | 4.55E-08 |
| 3.73E-28 | 0.380508 | 1.55E-17 | 0.504904 | 1.41E-31 | 0.498551 | 1.03E-30 | 0.05797  | 0.21114  |
| 3.08E-16 | 0.65344  | 3.35E-58 | 0.724525 | 3.56E-77 | 0.669516 | 4.96E-62 | 0.27881  | 8.73E-10 |
| 2.08E-18 | 0.554928 | 4.51E-39 | 0.676027 | 1.19E-63 | 0.63274  | 1.33E-53 | 0.062141 | 0.18006  |
| 1.33E-14 | 0.399987 | 2.28E-19 | 0.529138 | 4.72E-35 | 0.460034 | 7.79E-26 | 0.076727 | 0.09771  |
| 1.10E-06 | 0.520661 | 8.34E-34 | 0.463955 | 2.65E-26 | 0.438094 | 2.54E-23 | 0.3866   | 4.26E-18 |
| 1.19E-18 | 0.439117 | 1.96E-23 | 0.584044 | 4.72E-44 | 0.524539 | 2.26E-34 | 0.316179 | 2.66E-12 |
| 1.16E-32 | 0.612216 | 2.25E-49 | 0.627584 | 1.65E-52 | 0.687665 | 1.18E-66 | 0.313086 | 4.44E-12 |
| 1.39E-12 | 0.439077 | 1.98E-23 | 0.631698 | 2.22E-53 | 0.547723 | 6.49E-38 | 0.267784 | 4.13E-09 |
| 5.12E-06 | 0.495762 | 2.44E-30 | 0.509903 | 2.84E-32 | 0.482514 | 1.32E-28 | 0.310137 | 7.19E-12 |
| 2.18E-24 | 0.422915 | 1.10E-21 | 0.665186 | 5.63E-61 | 0.613778 | 1.10E-49 | 0.266688 | 4.80E-09 |
| 9.32E-24 | 0.682512 | 2.63E-65 | 0.550769 | 2.12E-38 | 0.598148 | 1.19E-46 | 0.399372 | 2.61E-19 |
| 3.72E-06 | 0.2851   | 3.49E-10 | 0.667866 | 1.26E-61 | 0.454596 | 3.40E-25 | 0.050879 | 0.27252  |
| 5.97E-33 | 0.707607 | 3.84E-72 | 0.832581 | #####    | 0.775007 | 9.91E-95 | 0.202676 | 1.01E-05 |
| 2.31E-10 | 0.106082 | 0.02186  | 0.504102 | 1.81E-31 | 0.322944 | 8.51E-13 | 0.102786 | 0.02634  |
| 9.51E-12 | 0.445269 | 4.01E-24 | 0.507198 | 6.78E-32 | 0.486383 | 4.19E-29 | 0.253659 | 2.73E-08 |
| 3.20E-05 | 0.440966 | 1.22E-23 | 0.569397 | 1.74E-41 | 0.436434 | 3.87E-23 | 0.029876 | 0.51955  |
| 1.46E-18 | 0.448319 | 1.80E-24 | 0.636848 | 1.74E-54 | 0.550498 | 2.34E-38 | 0.168486 | 0.00025  |
| 6.74E-30 | 0.439895 | 1.60E-23 | 0.768762 | 2.56E-92 | 0.701576 | 1.96E-70 | 0.261525 | 9.66E-09 |
| 1.14E-27 | 0.574417 | 2.38E-42 | 0.798197 | #####    | 0.711426 | 3.02E-73 | 0.271671 | 2.41E-09 |
| 5.06E-27 | 0.438023 | 2.59E-23 | 0.785089 | 8.58E-99 | 0.722927 | 1.10E-76 | 0.189288 | 3.84E-05 |
| 3.17E-06 | 0.300663 | 3.27E-11 | 0.703445 | 5.86E-71 | 0.482399 | 1.36E-28 | 0.171272 | 0.0002   |
| 1.24E-19 | 0.325184 | 5.80E-13 | 0.657949 | 2.99E-59 | 0.575715 | 1.41E-42 | 0.227682 | 6.61E-07 |
| 0.05604  | 0.321634 | 1.06E-12 | 0.59354  | 8.69E-46 | 0.372105 | 8.77E-17 | 0.110773 | 0.01663  |
| 8.19E-13 | 0.46762  | 9.53E-27 | 0.47344  | 1.83E-27 | 0.464312 | 2.40E-26 | 0.472589 | 2.34E-27 |
| 3.32E-08 | 0.392913 | 1.09E-18 | 0.398409 | 3.24E-19 | 0.377914 | 2.66E-17 | 0.34267  | 2.59E-14 |
| 9.81E-22 | 0.30095  | 3.12E-11 | 0.775862 | 4.57E-95 | 0.618615 | 1.17E-50 | 0.006348 | 0.89118  |
| 4.65E-10 | 0.384257 | 7.02E-18 | 0.468361 | 7.74E-27 | 0.422071 | 1.34E-21 | 0.364076 | 4.39E-16 |
| 9.64E-27 | 0.365196 | 3.52E-16 | 0.454329 | 3.65E-25 | 0.48047  | 2.40E-28 | -0.08075 | 0.08129  |
| 8.78E-22 | 0.356952 | 1.77E-15 | 0.631522 | 2.43E-53 | 0.508163 | 4.98E-32 | 0.163956 | 0.00037  |
| 8.34E-30 | 0.268291 | 3.85E-09 | 0.504858 | 1.43E-31 | 0.512947 | 1.06E-32 | 0.147016 | 0.00144  |
| 1.74E-15 | 0.400998 | 1.82E-19 | 0.495116 | 2.98E-30 | 0.444689 | 4.66E-24 | 0.033584 | 0.46906  |
| 2.30E-25 | 0.67548  | 1.63E-63 | 0.649975 | 2.09E-57 | 0.666217 | 3.17E-61 | 0.263544 | 7.36E-09 |
| 4.46E-29 | 0.250424 | 4.14E-08 | 0.516998 | 2.81E-33 | 0.492775 | 6.10E-30 | 0.157152 | 0.00065  |
| 1.56E-22 | 0.541422 | 6.35E-37 | 0.637275 | 1.40E-54 | 0.595007 | 4.63E-46 | 0.326208 | 4.86E-13 |

|          |          |          |          |          |          |          |          |          |
|----------|----------|----------|----------|----------|----------|----------|----------|----------|
| 8.96E-24 | 0.630859 | 3.35E-53 | 0.657698 | 3.42E-59 | 0.705527 | 1.51E-71 | 0.251514 | 3.60E-08 |
| 5.53E-16 | 0.669991 | 3.79E-62 | 0.800712 | #####    | 0.682372 | 2.86E-65 | 0.087741 | 0.05814  |
| 2.56E-28 | 0.51075  | 2.16E-32 | 0.664645 | 7.61E-61 | 0.658755 | 1.93E-59 | 0.212018 | 3.80E-06 |
| 1.95E-10 | 0.417518 | 4.00E-21 | 0.667416 | 1.62E-61 | 0.521672 | 5.94E-34 | 0.201831 | 1.11E-05 |
| 2.92E-24 | 0.567813 | 3.25E-41 | 0.692991 | 4.48E-68 | 0.669389 | 5.33E-62 | 0.237138 | 2.16E-07 |
| 5.84E-24 | 0.576471 | 1.04E-42 | 0.606909 | 2.49E-48 | 0.588328 | 7.91E-45 | 0.113133 | 0.01444  |
| 1.06E-28 | 0.654002 | 2.49E-58 | 0.520612 | 8.47E-34 | 0.600064 | 5.16E-47 | 0.344545 | 1.84E-14 |
| 1.64E-16 | 0.343171 | 2.37E-14 | 0.507047 | 7.11E-32 | 0.45731  | 1.63E-25 | 0.014258 | 0.75861  |
| 9.52E-13 | 0.244093 | 9.20E-08 | 0.419019 | 2.80E-21 | 0.409988 | 2.34E-20 | 0.119282 | 0.00988  |
| 4.18E-14 | -0.62311 | 1.41E-51 | -0.71547 | 1.96E-74 | -0.64582 | 1.82E-56 | -0.19    | 3.59E-05 |
| 2.90E-44 | 0.355693 | 2.25E-15 | 0.612714 | 1.79E-49 | 0.637055 | 1.57E-54 | 0.205415 | 7.64E-06 |
| 3.78E-31 | 0.457645 | 1.49E-25 | 0.565647 | 7.56E-41 | 0.561535 | 3.69E-40 | 0.123991 | 0.0073   |
| 7.02E-15 | 0.507082 | 7.03E-32 | 0.48474  | 6.83E-29 | 0.490291 | 1.30E-29 | 0.547612 | 6.76E-38 |
| 6.91E-05 | 0.156126 | 0.00071  | 0.502247 | 3.25E-31 | 0.340638 | 3.76E-14 | 0.077165 | 0.0958   |
| 5.41E-32 | 0.636744 | 1.83E-54 | 0.682921 | 2.06E-65 | 0.742479 | 6.05E-83 | 0.287207 | 2.55E-10 |
| 1.88E-31 | 0.546603 | 9.77E-38 | 0.723018 | 1.04E-76 | 0.726781 | 7.12E-78 | 0.322546 | 9.10E-13 |
| 4.48E-28 | 0.6088   | 1.06E-48 | 0.6956   | 8.78E-69 | 0.697331 | 2.95E-69 | 0.147727 | 0.00137  |
| 8.97E-18 | 0.366541 | 2.69E-16 | 0.450179 | 1.10E-24 | 0.434605 | 6.14E-23 | 0.082422 | 0.07517  |
| 9.88E-15 | 0.311231 | 6.01E-12 | 0.721385 | 3.27E-76 | 0.538858 | 1.58E-36 | 0.032974 | 0.47718  |
| 6.72E-31 | 0.259277 | 1.30E-08 | 0.682822 | 2.19E-65 | 0.559831 | 7.08E-40 | 0.198111 | 1.61E-05 |
| 7.63E-25 | 0.211952 | 3.83E-06 | 0.510082 | 2.69E-32 | 0.475169 | 1.12E-27 | 0.090221 | 0.05136  |
| 5.22E-21 | 0.514608 | 6.17E-33 | 0.825988 | #####    | 0.702108 | 1.39E-70 | 0.072513 | 0.11761  |
| 3.06E-21 | 0.476814 | 6.95E-28 | 0.602237 | 1.99E-47 | 0.58828  | 8.07E-45 | 0.146447 | 0.00151  |
| 2.99E-22 | 0.260084 | 1.17E-08 | 0.687838 | 1.06E-66 | 0.570528 | 1.12E-41 | 0.172623 | 0.00018  |
| 3.11E-14 | 0.478162 | 4.71E-28 | 0.327714 | 3.74E-13 | 0.391597 | 1.45E-18 | 0.253651 | 2.73E-08 |
| 3.38E-15 | 0.340697 | 3.72E-14 | 0.512031 | 1.43E-32 | 0.430557 | 1.69E-22 | -0.04846 | 0.29596  |
| 6.24E-08 | 0.559131 | 9.24E-40 | 0.492104 | 7.48E-30 | 0.484118 | 8.21E-29 | 0.300517 | 3.34E-11 |
| 4.77E-06 | 0.251623 | 3.55E-08 | 0.596655 | 2.27E-46 | 0.435836 | 4.50E-23 | 0.07993  | 0.08445  |
| 1.37E-18 | 0.655314 | 1.23E-58 | 0.631712 | 2.21E-53 | 0.578795 | 4.07E-43 | -0.05253 | 0.25726  |
| 6.59E-10 | 0.527417 | 8.51E-35 | 0.470379 | 4.38E-27 | 0.457981 | 1.36E-25 | 0.520137 | 9.93E-34 |
| 0.7877   | 0.164787 | 0.00035  | 0.40771  | 3.95E-20 | 0.218668 | 1.84E-06 | 0.285105 | 3.49E-10 |
| 5.01E-10 | 0.47495  | 1.19E-27 | 0.330162 | 2.44E-13 | 0.418106 | 3.47E-21 | 0.221701 | 1.31E-06 |
| 0.02224  | -0.31221 | 5.12E-12 | -0.43762 | 2.87E-23 | -0.33219 | 1.71E-13 | 0.00098  | 0.98315  |
| 1.55E-08 | 0.411691 | 1.57E-20 | 0.692303 | 6.86E-68 | 0.542513 | 4.29E-37 | 0.131582 | 0.0044   |
| 2.49E-16 | 0.535457 | 5.26E-36 | 0.791674 | #####    | 0.647802 | 6.51E-57 | 0.161575 | 0.00046  |
| 8.16E-56 | 0.546647 | 9.62E-38 | 0.747203 | 1.53E-84 | 0.767839 | 5.73E-92 | 0.181246 | 8.18E-05 |
| 1.19E-15 | 0.415697 | 6.15E-21 | 0.676585 | 8.60E-64 | 0.575574 | 1.49E-42 | 0.269355 | 3.32E-09 |
| 6.57E-05 | -0.32191 | 1.01E-12 | -0.47309 | 2.03E-27 | -0.35673 | 1.84E-15 | -0.01243 | 0.78882  |
| 2.56E-09 | 0.491517 | 8.94E-30 | 0.654024 | 2.46E-58 | 0.525038 | 1.91E-34 | 0.146065 | 0.00155  |
| 5.04E-21 | 0.241535 | 1.26E-07 | 0.633102 | 1.12E-53 | 0.512708 | 1.15E-32 | 0.188238 | 4.25E-05 |
| 3.08E-21 | 0.389489 | 2.29E-18 | 0.556974 | 2.09E-39 | 0.479105 | 3.58E-28 | 0.06977  | 0.13219  |
| 9.32E-08 | 0.399767 | 2.39E-19 | 0.427201 | 3.86E-22 | 0.40784  | 3.83E-20 | 0.273176 | 1.95E-09 |
| 2.93E-15 | 0.333145 | 1.44E-13 | 0.47183  | 2.90E-27 | 0.448627 | 1.66E-24 | 0.037967 | 0.41303  |
| 0.00123  | -0.49448 | 3.62E-30 | -0.48024 | 2.57E-28 | -0.38448 | 6.69E-18 | -0.32519 | 5.79E-13 |
| 2.74E-36 | 0.397384 | 4.07E-19 | 0.691993 | 8.32E-68 | 0.64229  | 1.11E-55 | 0.153422 | 0.00088  |

|          |          |          |          |          |          |          |          |          |
|----------|----------|----------|----------|----------|----------|----------|----------|----------|
| 8.84E-27 | 0.555101 | 4.23E-39 | 0.760658 | 2.68E-89 | 0.690721 | 1.82E-67 | 0.369343 | 1.53E-16 |
| 1.96E-34 | 0.393487 | 9.60E-19 | 0.571533 | 7.50E-42 | 0.579364 | 3.23E-43 | 0.100368 | 0.03011  |
| 1.02E-16 | 0.501223 | 4.49E-31 | 0.504485 | 1.61E-31 | 0.530136 | 3.35E-35 | 0.406581 | 5.12E-20 |
| 4.10E-15 | -0.61516 | 5.83E-50 | -0.68369 | 1.30E-65 | -0.63382 | 7.83E-54 | -0.12741 | 0.00583  |
| 2.93E-59 | 0.548587 | 4.73E-38 | 0.631626 | 2.31E-53 | 0.719709 | 1.05E-75 | 0.290651 | 1.52E-10 |
| 8.64E-37 | 0.417759 | 3.77E-21 | 0.682904 | 2.08E-65 | 0.649856 | 2.23E-57 | 0.126282 | 0.00628  |
| 1.24E-06 | 0.630008 | 5.08E-53 | 0.517371 | 2.49E-33 | 0.483032 | 1.13E-28 | 0.290392 | 1.58E-10 |
| 3.39E-06 | 0.273648 | 1.82E-09 | 0.45005  | 1.14E-24 | 0.358861 | 1.22E-15 | 0.080663 | 0.08163  |
| 5.53E-16 | 0.47818  | 4.68E-28 | 0.484839 | 6.63E-29 | 0.466996 | 1.13E-26 | 0.000587 | 0.9899   |
| 1.90E-33 | -0.51388 | 7.83E-33 | -0.76171 | 1.10E-89 | -0.70796 | 3.04E-72 | -0.22359 | 1.06E-06 |
| 7.74E-20 | 0.253453 | 2.80E-08 | 0.558946 | 9.91E-40 | 0.487592 | 2.92E-29 | 0.22041  | 1.51E-06 |
| 1.84E-09 | 0.363534 | 4.89E-16 | 0.390603 | 1.80E-18 | 0.388818 | 2.65E-18 | 0.284792 | 3.65E-10 |
| 7.50E-28 | 0.314882 | 3.30E-12 | 0.648536 | 4.44E-57 | 0.587093 | 1.33E-44 | 0.090536 | 0.05055  |
| 2.04E-18 | 0.454629 | 3.37E-25 | 0.584084 | 4.65E-44 | 0.519873 | 1.08E-33 | 0.082147 | 0.07616  |
| 2.68E-14 | 0.655372 | 1.20E-58 | 0.626539 | 2.73E-52 | 0.607109 | 2.27E-48 | 0.38084  | 1.44E-17 |
| 1.90E-34 | 0.430249 | 1.82E-22 | 0.520694 | 8.25E-34 | 0.610695 | 4.50E-49 | 0.246012 | 7.24E-08 |
| 6.96E-45 | 0.513583 | 8.63E-33 | 0.832612 | #####    | 0.777164 | 1.40E-95 | 0.203932 | 8.91E-06 |
| 1.21E-41 | 0.45369  | 4.33E-25 | 0.814843 | #####    | 0.713403 | 7.97E-74 | 0.311814 | 5.47E-12 |
| 2.21E-10 | 0.351065 | 5.44E-15 | 0.568921 | 2.10E-41 | 0.492101 | 7.49E-30 | 0.077146 | 0.09588  |
| 3.21E-13 | 0.38143  | 1.28E-17 | 0.717697 | 4.24E-75 | 0.544944 | 1.79E-37 | 0.124941 | 0.00686  |
| 1.69E-20 | 0.322094 | 9.83E-13 | 0.646679 | 1.17E-56 | 0.577123 | 8.01E-43 | 0.048495 | 0.29566  |
| 3.10E-08 | 0.334179 | 1.20E-13 | 0.650328 | 1.74E-57 | 0.524157 | 2.58E-34 | 0.178392 | 0.00011  |
| 2.96E-26 | 0.723496 | 7.39E-77 | 0.757971 | 2.52E-88 | 0.736552 | 5.48E-81 | 0.235813 | 2.53E-07 |
| 4.08E-18 | 0.459727 | 8.47E-26 | 0.695656 | 8.47E-69 | 0.572869 | 4.41E-42 | 0.170107 | 0.00022  |
| 2.38E-22 | 0.604067 | 8.84E-48 | 0.815187 | #####    | 0.721424 | 3.18E-76 | 0.169318 | 0.00024  |
| 3.05E-07 | 0.23579  | 2.54E-07 | 0.525376 | 1.70E-34 | 0.390634 | 1.79E-18 | 0.081643 | 0.07798  |
| 4.25E-26 | 0.34264  | 2.61E-14 | 0.573239 | 3.81E-42 | 0.544788 | 1.89E-37 | 0.102966 | 0.02608  |
| 8.43E-15 | 0.714623 | 3.48E-74 | 0.704704 | 2.58E-71 | 0.665811 | 3.98E-61 | 0.14674  | 0.00147  |
| 1.16E-17 | 0.466723 | 1.23E-26 | 0.828714 | #####    | 0.649897 | 2.18E-57 | 0.078107 | 0.0918   |
| 2.65E-18 | 0.254019 | 2.60E-08 | 0.527835 | 7.37E-35 | 0.449959 | 1.17E-24 | 0.05748  | 0.21503  |
| 2.72E-14 | 0.628015 | 1.34E-52 | 0.627042 | 2.14E-52 | 0.614348 | 8.47E-50 | 0.245343 | 7.87E-08 |
| 2.52E-08 | 0.314146 | 3.73E-12 | 0.757248 | 4.59E-88 | 0.538449 | 1.83E-36 | 0.153638 | 0.00087  |
| 1.37E-11 | 0.21293  | 3.44E-06 | 0.535572 | 5.05E-36 | 0.388636 | 2.75E-18 | 0.06112  | 0.18733  |
| 7.90E-16 | 0.132213 | 0.00421  | 0.533715 | 9.67E-36 | 0.396315 | 5.15E-19 | 0.039609 | 0.39311  |
| 3.04E-07 | -0.3545  | 2.83E-15 | -0.45125 | 8.30E-25 | -0.38776 | 3.33E-18 | -0.17294 | 0.00017  |
| 3.96E-36 | 0.215128 | 2.71E-06 | 0.465761 | 1.60E-26 | 0.479932 | 2.81E-28 | 0.122175 | 0.00822  |
| 1.54E-17 | 0.304546 | 1.77E-11 | 0.464026 | 2.59E-26 | 0.441745 | 9.98E-24 | 0.188319 | 4.21E-05 |
| 4.22E-24 | 0.340329 | 3.98E-14 | 0.430112 | 1.88E-22 | 0.466127 | 1.45E-26 | 0.04627  | 0.3184   |
| 9.19E-28 | 0.448463 | 1.74E-24 | 0.523304 | 3.43E-34 | 0.565904 | 6.84E-41 | 0.273148 | 1.96E-09 |
| 1.56E-12 | 0.468598 | 7.24E-27 | 0.771014 | 3.53E-93 | 0.580546 | 1.99E-43 | 0.077081 | 0.09616  |
| 4.86E-25 | 0.421206 | 1.66E-21 | 0.711661 | 2.58E-73 | 0.614763 | 7.00E-50 | 0.030654 | 0.50873  |
| 1.97E-34 | 0.555471 | 3.68E-39 | 0.775756 | 5.03E-95 | 0.74474  | 1.05E-83 | 0.131439 | 0.00444  |
| 1.35E-43 | 0.721141 | 3.88E-76 | 0.804199 | #####    | 0.798433 | #####    | 0.244625 | 8.61E-08 |
| 3.30E-32 | 0.406224 | 5.55E-20 | 0.638692 | 6.90E-55 | 0.624685 | 6.63E-52 | 0.083016 | 0.07309  |
| 0.00433  | 0.556816 | 2.22E-39 | 0.47781  | 5.21E-28 | 0.417069 | 4.45E-21 | 0.314187 | 3.70E-12 |



|          |          |          |          |          |          |          |          |          |
|----------|----------|----------|----------|----------|----------|----------|----------|----------|
| 3.86E-16 | 0.354007 | 3.11E-15 | 0.501351 | 4.31E-31 | 0.48052  | 2.37E-28 | 0.164419 | 0.00036  |
| 7.63E-07 | 0.285018 | 3.53E-10 | 0.730817 | 3.83E-79 | 0.489151 | 1.83E-29 | 0.086673 | 0.06127  |
| 3.59E-11 | 0.354052 | 3.08E-15 | 0.595594 | 3.60E-46 | 0.514469 | 6.46E-33 | 0.131499 | 0.00442  |
| 1.60E-27 | 0.599946 | 5.44E-47 | 0.823593 | #####    | 0.743363 | 3.06E-83 | 0.158101 | 0.00061  |
| 5.93E-22 | 0.621293 | 3.32E-51 | 0.848325 | #####    | 0.747344 | 1.36E-84 | 0.258235 | 1.50E-08 |
| 5.79E-28 | 0.60729  | 2.10E-48 | 0.765719 | 3.60E-91 | 0.753048 | 1.43E-86 | 0.218941 | 1.78E-06 |
| 3.74E-10 | 0.583935 | 4.94E-44 | 0.62824  | 1.20E-52 | 0.547491 | 7.07E-38 | 0.136253 | 0.00317  |
| 7.46E-13 | 0.535382 | 5.40E-36 | 0.761173 | 1.74E-89 | 0.616098 | 3.77E-50 | 0.191987 | 2.96E-05 |
| 3.89E-24 | 0.397276 | 4.17E-19 | 0.660114 | 9.21E-60 | 0.5906   | 3.04E-45 | 0.146987 | 0.00145  |
| 3.75E-34 | 0.517463 | 2.41E-33 | 0.755118 | 2.65E-87 | 0.710068 | 7.50E-73 | 0.225046 | 8.95E-07 |
| 5.23E-13 | 0.368055 | 1.99E-16 | 0.675395 | 1.72E-63 | 0.495886 | 2.35E-30 | 0.104769 | 0.02356  |
| 0.0045   | 0.194886 | 2.23E-05 | 0.477808 | 5.22E-28 | 0.303381 | 2.13E-11 | 0.278686 | 8.89E-10 |
| 3.28E-45 | 0.561585 | 3.62E-40 | 0.779862 | 1.17E-96 | 0.760675 | 2.64E-89 | 0.168552 | 0.00025  |
| 6.97E-37 | 0.19981  | 1.36E-05 | 0.651424 | 9.75E-58 | 0.517434 | 2.44E-33 | 0.100906 | 0.02923  |
| 0.84447  | 0.311631 | 5.63E-12 | 0.532447 | 1.50E-35 | 0.290676 | 1.52E-10 | 0.100869 | 0.02929  |
| 3.74E-21 | 0.582944 | 7.44E-44 | 0.745815 | 4.53E-84 | 0.6881   | 9.08E-67 | 0.185175 | 5.68E-05 |
| 2.16E-45 | 0.513121 | 1.00E-32 | 0.795157 | #####    | 0.754022 | 6.48E-87 | 0.192199 | 2.90E-05 |
| 9.77E-55 | 0.653432 | 3.37E-58 | 0.761334 | 1.51E-89 | 0.843522 | #####    | 0.283508 | 4.41E-10 |
| 3.51E-20 | 0.481279 | 1.90E-28 | 0.593782 | 7.83E-46 | 0.57779  | 6.11E-43 | 0.159371 | 0.00055  |
| 5.93E-35 | 0.394732 | 7.31E-19 | 0.72031  | 6.93E-76 | 0.635129 | 4.09E-54 | 0.043287 | 0.35062  |
| 9.03E-29 | 0.477486 | 5.73E-28 | 0.800094 | #####    | 0.707207 | 5.00E-72 | 0.251921 | 3.41E-08 |
| 9.67E-08 | 0.303189 | 2.19E-11 | 0.500845 | 5.05E-31 | 0.380038 | 1.71E-17 | 0.019013 | 0.68195  |
| 2.44E-10 | 0.59464  | 5.42E-46 | 0.679304 | 1.75E-64 | 0.571026 | 9.17E-42 | 0.239733 | 1.58E-07 |
| 3.11E-25 | 0.332867 | 1.52E-13 | 0.712251 | 1.74E-73 | 0.598772 | 9.08E-47 | 0.17007  | 0.00022  |
| 3.66E-37 | 0.514086 | 7.32E-33 | 0.61711  | 2.36E-50 | 0.644805 | 3.07E-56 | 0.157906 | 0.00062  |
| 8.97E-55 | 0.486501 | 4.04E-29 | 0.717708 | 4.21E-75 | 0.710363 | 6.16E-73 | 0.243843 | 9.50E-08 |
| 7.81E-10 | -0.34536 | 1.58E-14 | -0.45888 | 1.07E-25 | -0.41865 | 3.05E-21 | 0.019623 | 0.67232  |
| 1.94E-17 | 0.56104  | 4.46E-40 | 0.667054 | 1.99E-61 | 0.592311 | 1.47E-45 | 0.13498  | 0.00347  |
| 4.55E-37 | 0.495275 | 2.84E-30 | 0.766218 | 2.34E-91 | 0.711111 | 3.73E-73 | 0.071535 | 0.12265  |
| 7.43E-10 | -0.34178 | 3.05E-14 | -0.50554 | 1.15E-31 | -0.44905 | 1.49E-24 | 0.038043 | 0.4121   |
| 1.33E-11 | 0.241789 | 1.22E-07 | 0.527036 | 9.69E-35 | 0.425442 | 5.93E-22 | 0.064182 | 0.16615  |
| 0.00057  | 0.411926 | 1.49E-20 | 0.410096 | 2.28E-20 | 0.370379 | 1.24E-16 | 0.053696 | 0.24682  |
| 7.34E-08 | 0.471428 | 3.25E-27 | 0.685482 | 4.43E-66 | 0.52268  | 4.24E-34 | 0.068199 | 0.14114  |
| 7.32E-23 | 0.395453 | 6.23E-19 | 0.59401  | 7.10E-46 | 0.515083 | 5.28E-33 | 0.115023 | 0.01287  |
| 0.00151  | 0.222151 | 1.24E-06 | 0.521423 | 6.46E-34 | 0.382106 | 1.11E-17 | 0.142799 | 0.00198  |
| 4.70E-28 | 0.535277 | 5.60E-36 | 0.649512 | 2.67E-57 | 0.628638 | 9.89E-53 | 0.058176 | 0.20952  |
| 4.85E-14 | 0.228711 | 5.86E-07 | 0.745671 | 5.08E-84 | 0.537996 | 2.15E-36 | 0.092796 | 0.04504  |
| 7.67E-23 | 0.726877 | 6.64E-78 | 0.697455 | 2.72E-69 | 0.699071 | 9.76E-70 | 0.232856 | 3.61E-07 |
| 1.74E-22 | 0.500479 | 5.66E-31 | 0.426697 | 4.37E-22 | 0.488822 | 2.02E-29 | 0.373497 | 6.60E-17 |
| 2.61E-25 | 0.612829 | 1.70E-49 | 0.505021 | 1.36E-31 | 0.578832 | 4.01E-43 | 0.161672 | 0.00045  |
| 3.63E-35 | 0.369359 | 1.53E-16 | 0.562787 | 2.28E-40 | 0.583684 | 5.48E-44 | 0.106814 | 0.02096  |
| 0.00147  | 0.156706 | 0.00068  | 0.588831 | 6.41E-45 | 0.357878 | 1.48E-15 | -0.01368 | 0.76812  |
| 1.30E-14 | 0.340988 | 3.53E-14 | 0.591435 | 2.13E-45 | 0.506148 | 9.47E-32 | 0.18107  | 8.32E-05 |
| 1.25E-32 | 0.588963 | 6.06E-45 | 0.597362 | 1.67E-46 | 0.631748 | 2.17E-53 | 0.158675 | 0.00058  |
| 3.94E-17 | 0.509594 | 3.14E-32 | 0.55933  | 8.57E-40 | 0.487789 | 2.75E-29 | 0.195362 | 2.12E-05 |

|          |          |          |          |          |          |          |          |          |
|----------|----------|----------|----------|----------|----------|----------|----------|----------|
| 3.39E-06 | 0.188584 | 4.11E-05 | 0.464409 | 2.33E-26 | 0.320516 | 1.29E-12 | -0.03701 | 0.42493  |
| 6.92E-38 | 0.233387 | 3.39E-07 | 0.643457 | 6.14E-56 | 0.549362 | 3.56E-38 | 0.234522 | 2.96E-07 |
| 1.18E-26 | 0.548572 | 4.76E-38 | 0.823615 | #####    | 0.698331 | 1.56E-69 | 0.164369 | 0.00036  |
| 2.07E-31 | 0.517413 | 2.45E-33 | 0.763069 | 3.48E-90 | 0.700998 | 2.85E-70 | 0.212867 | 3.47E-06 |
| 6.24E-47 | 0.523431 | 3.29E-34 | 0.810932 | #####    | 0.740983 | 1.91E-82 | 0.192929 | 2.70E-05 |
| 1.28E-14 | 0.285019 | 3.53E-10 | 0.636244 | 2.35E-54 | 0.479286 | 3.39E-28 | -0.02437 | 0.59933  |
| 1.36E-06 | 0.480941 | 2.09E-28 | 0.634383 | 5.93E-54 | 0.481551 | 1.75E-28 | 0.140992 | 0.00226  |
| 5.52E-16 | 0.451055 | 8.75E-25 | 0.444638 | 4.72E-24 | 0.493673 | 4.64E-30 | 0.177329 | 0.00012  |
| 3.29E-23 | 0.309188 | 8.38E-12 | 0.510999 | 2.00E-32 | 0.468251 | 7.98E-27 | 0.109932 | 0.01748  |
| 3.58E-23 | 0.331168 | 2.05E-13 | 0.694401 | 1.86E-68 | 0.592417 | 1.40E-45 | 0.266782 | 4.74E-09 |
| 5.88E-25 | 0.513168 | 9.88E-33 | 0.734585 | 2.38E-80 | 0.634429 | 5.79E-54 | 0.178391 | 0.00011  |
| 2.74E-08 | 0.584173 | 4.48E-44 | 0.651491 | 9.41E-58 | 0.546054 | 1.19E-37 | 0.265336 | 5.77E-09 |
| 4.69E-14 | 0.468939 | 6.58E-27 | 0.648997 | 3.49E-57 | 0.56226  | 2.80E-40 | 0.086093 | 0.06303  |
| 9.20E-08 | 0.209907 | 4.76E-06 | 0.534761 | 6.71E-36 | 0.336745 | 7.60E-14 | 0.022116 | 0.63357  |
| 2.99E-16 | 0.387107 | 3.82E-18 | 0.72157  | 2.87E-76 | 0.579654 | 2.87E-43 | 0.060706 | 0.19034  |
| 5.80E-33 | 0.567622 | 3.50E-41 | 0.771312 | 2.71E-93 | 0.747636 | 1.08E-84 | 0.237911 | 1.97E-07 |
| 1.55E-33 | 0.709493 | 1.10E-72 | 0.750809 | 8.68E-86 | 0.738726 | 1.06E-81 | 0.144641 | 0.00173  |
| 3.14E-26 | 0.589659 | 4.52E-45 | 0.736734 | 4.78E-81 | 0.674208 | 3.41E-63 | 0.165317 | 0.00033  |
| 5.80E-27 | 0.258803 | 1.39E-08 | 0.497217 | 1.56E-30 | 0.550267 | 2.55E-38 | 0.289092 | 1.93E-10 |
| 3.53E-19 | 0.523958 | 2.75E-34 | 0.702595 | 1.02E-70 | 0.616036 | 3.88E-50 | 0.125834 | 0.00647  |
| 2.02E-10 | 0.422006 | 1.37E-21 | 0.680874 | 6.95E-65 | 0.520064 | 1.02E-33 | 0.089739 | 0.05262  |
| 5.88E-37 | 0.635448 | 3.49E-54 | 0.807648 | #####    | 0.739309 | 6.85E-82 | 0.347344 | 1.09E-14 |
| 5.94E-08 | 0.46299  | 3.46E-26 | 0.572793 | 4.55E-42 | 0.459695 | 8.54E-26 | 0.210698 | 4.38E-06 |
| 4.17E-05 | 0.194267 | 2.37E-05 | 0.539653 | 1.19E-36 | 0.376166 | 3.82E-17 | 0.135465 | 0.00336  |
| 2.92E-31 | 0.437744 | 2.78E-23 | 0.591368 | 2.19E-45 | 0.644181 | 4.23E-56 | 0.238644 | 1.80E-07 |
| 9.34E-13 | 0.273622 | 1.83E-09 | 0.364833 | 3.78E-16 | 0.407668 | 3.99E-20 | 0.24385  | 9.49E-08 |
| 2.45E-16 | 0.465065 | 1.94E-26 | 0.531482 | 2.10E-35 | 0.566075 | 6.40E-41 | 0.377207 | 3.08E-17 |
| 6.36E-34 | 0.708525 | 2.09E-72 | 0.64924  | 3.07E-57 | 0.686523 | 2.36E-66 | 0.271174 | 2.58E-09 |
| 1.66E-24 | 0.248603 | 5.22E-08 | 0.494816 | 3.27E-30 | 0.487798 | 2.74E-29 | 0.172625 | 0.00018  |
| 2.43E-27 | 0.515084 | 5.28E-33 | 0.594143 | 6.71E-46 | 0.606826 | 2.58E-48 | 0.606503 | 2.98E-48 |
| 1.81E-15 | -0.45036 | 1.05E-24 | -0.57405 | 2.75E-42 | -0.52364 | 3.07E-34 | -0.08172 | 0.07768  |
| 0.00052  | 0.378084 | 2.57E-17 | 0.637053 | 1.57E-54 | 0.452519 | 5.93E-25 | 0.134014 | 0.00372  |
| 1.62E-26 | 0.499689 | 7.25E-31 | 0.500034 | 6.51E-31 | 0.515071 | 5.30E-33 | 0.051055 | 0.27087  |
| 1.22E-14 | 0.329496 | 2.74E-13 | 0.344609 | 1.82E-14 | 0.415648 | 6.22E-21 | 0.267336 | 4.39E-09 |
| 4.56E-49 | 0.613239 | 1.41E-49 | 0.553408 | 7.96E-39 | 0.720278 | 7.08E-76 | 0.257257 | 1.70E-08 |
| 9.61E-38 | 0.519067 | 1.42E-33 | 0.788546 | #####    | 0.739287 | 6.96E-82 | 0.249477 | 4.67E-08 |
| 1.35E-21 | 0.592329 | 1.46E-45 | 0.582353 | 9.49E-44 | 0.580865 | 1.75E-43 | 0.17897  | 0.0001   |
| 2.86E-54 | 0.598076 | 1.23E-46 | 0.856563 | #####    | 0.843556 | #####    | 0.262224 | 8.79E-09 |
| 0.00762  | 0.181914 | 7.70E-05 | 0.436204 | 4.10E-23 | 0.252647 | 3.11E-08 | -0.09672 | 0.03667  |
| 5.06E-06 | 0.185571 | 5.47E-05 | 0.462835 | 3.61E-26 | 0.317725 | 2.06E-12 | -0.13571 | 0.0033   |
| 2.41E-27 | 0.48816  | 2.46E-29 | 0.612188 | 2.28E-49 | 0.612016 | 2.47E-49 | 0.21277  | 3.50E-06 |
| 3.76E-22 | 0.356759 | 1.83E-15 | 0.700269 | 4.54E-70 | 0.573684 | 3.19E-42 | 0.050264 | 0.27837  |
| 1.77E-14 | 0.258266 | 1.49E-08 | 0.504947 | 1.39E-31 | 0.419005 | 2.80E-21 | 0.180634 | 8.66E-05 |
| 2.97E-18 | 0.595318 | 4.05E-46 | 0.751106 | 6.84E-86 | 0.646836 | 1.08E-56 | 0.133606 | 0.00382  |
| 2.41E-34 | 0.620785 | 4.22E-51 | 0.549322 | 3.61E-38 | 0.61594  | 4.06E-50 | 0.212297 | 3.69E-06 |

|          |          |          |          |          |          |          |          |          |
|----------|----------|----------|----------|----------|----------|----------|----------|----------|
| 1.49E-33 | 0.462561 | 3.89E-26 | 0.592872 | 1.16E-45 | 0.592686 | 1.25E-45 | 0.143868 | 0.00183  |
| 6.52E-46 | 0.353833 | 3.21E-15 | 0.689337 | 4.26E-67 | 0.626849 | 2.35E-52 | 0.14836  | 0.0013   |
| 0.1216   | 0.214035 | 3.05E-06 | 0.27954  | 7.86E-10 | 0.141757 | 0.00214  | 0.078661 | 0.08952  |
| 8.44E-13 | 0.395553 | 6.10E-19 | 0.626916 | 2.27E-52 | 0.512868 | 1.09E-32 | -0.06872 | 0.13813  |
| 1.46E-34 | 0.531375 | 2.18E-35 | 0.694721 | 1.52E-68 | 0.701869 | 1.62E-70 | 0.196517 | 1.89E-05 |
| 0.93736  | 0.472722 | 2.25E-27 | 0.574411 | 2.38E-42 | 0.376013 | 3.94E-17 | 0.168216 | 0.00026  |
| 2.35E-16 | 0.620159 | 5.67E-51 | 0.725976 | 1.27E-77 | 0.672199 | 1.08E-62 | 0.227483 | 6.76E-07 |
| 4.64E-08 | 0.342263 | 2.79E-14 | 0.72719  | 5.30E-78 | 0.508904 | 3.92E-32 | 0.147322 | 0.00141  |
| 1.14E-09 | 0.331983 | 1.77E-13 | 0.766992 | 1.20E-91 | 0.561231 | 4.15E-40 | 0.086712 | 0.06116  |
| 3.23E-08 | -0.36403 | 4.43E-16 | -0.52314 | 3.63E-34 | -0.42901 | 2.47E-22 | -0.18657 | 4.98E-05 |
| 2.79E-12 | 0.536159 | 4.11E-36 | 0.547349 | 7.45E-38 | 0.548863 | 4.28E-38 | 0.224815 | 9.19E-07 |
| 2.60E-08 | 0.356441 | 1.95E-15 | 0.648154 | 5.42E-57 | 0.465448 | 1.75E-26 | 0.043434 | 0.34899  |
| 4.34E-16 | 0.17805  | 0.00011  | 0.618969 | 9.91E-51 | 0.480829 | 2.16E-28 | 0.270541 | 2.82E-09 |
| 7.21E-17 | 0.466398 | 1.34E-26 | 0.640164 | 3.28E-55 | 0.559128 | 9.25E-40 | 0.11783  | 0.01082  |
| 1.75E-31 | 0.45625  | 2.18E-25 | 0.756922 | 6.01E-88 | 0.704102 | 3.83E-71 | 0.019566 | 0.67321  |
| 9.40E-25 | 0.390829 | 1.71E-18 | 0.759668 | 6.14E-89 | 0.679286 | 1.77E-64 | 0.175822 | 0.00013  |
| 1.10E-16 | 0.311973 | 5.33E-12 | 0.617244 | 2.22E-50 | 0.493225 | 5.32E-30 | 0.028513 | 0.53879  |
| 4.39E-16 | 0.607927 | 1.58E-48 | 0.740066 | 3.85E-82 | 0.652315 | 6.09E-58 | 0.258203 | 1.50E-08 |
| 5.94E-11 | 0.223268 | 1.10E-06 | 0.668253 | 1.01E-61 | 0.473796 | 1.66E-27 | 0.152347 | 0.00096  |
| 2.96E-37 | 0.742713 | 5.05E-83 | 0.79277  | #####    | 0.781546 | 2.43E-97 | 0.295266 | 7.55E-11 |
| 1.27E-05 | 0.360455 | 8.95E-16 | 0.427458 | 3.62E-22 | 0.378696 | 2.26E-17 | 0.178602 | 0.0001   |
| 6.78E-46 | 0.537442 | 2.61E-36 | 0.713031 | 1.03E-73 | 0.754444 | 4.59E-87 | 0.194197 | 2.38E-05 |
| 4.86E-12 | 0.313399 | 4.21E-12 | 0.633471 | 9.30E-54 | 0.484702 | 6.91E-29 | 0.20426  | 8.62E-06 |
| 3.95E-32 | 0.464537 | 2.25E-26 | 0.631989 | 1.93E-53 | 0.647299 | 8.46E-57 | 0.223731 | 1.04E-06 |
| 2.12E-13 | 0.292972 | 1.07E-10 | 0.540181 | 9.89E-37 | 0.438931 | 2.05E-23 | 0.381216 | 1.33E-17 |
| 2.07E-12 | 0.607208 | 2.18E-48 | 0.637671 | 1.15E-54 | 0.537711 | 2.38E-36 | 0.188163 | 4.28E-05 |
| 4.75E-27 | 0.598132 | 1.20E-46 | 0.833065 | #####    | 0.723457 | 7.60E-77 | 0.153315 | 0.00089  |
| 4.27E-08 | 0.3594   | 1.10E-15 | 0.378945 | 2.14E-17 | 0.291376 | 1.37E-10 | -0.00642 | 0.89001  |
| 4.90E-27 | 0.386682 | 4.19E-18 | 0.58968  | 4.48E-45 | 0.553791 | 6.90E-39 | 0.175003 | 0.00014  |
| 3.64E-17 | 0.555425 | 3.74E-39 | 0.634355 | 6.01E-54 | 0.638925 | 6.13E-55 | 0.233846 | 3.21E-07 |
| 1.76E-34 | 0.64669  | 1.16E-56 | 0.764397 | 1.12E-90 | 0.791364 | #####    | 0.161836 | 0.00045  |
| 3.15E-26 | 0.577787 | 6.12E-43 | 0.794978 | #####    | 0.720317 | 6.90E-76 | 0.230725 | 4.64E-07 |
| 3.32E-32 | 0.467396 | 1.01E-26 | 0.646969 | 1.00E-56 | 0.624788 | 6.31E-52 | 0.21785  | 2.01E-06 |
| 6.68E-17 | 0.452608 | 5.79E-25 | 0.426184 | 4.95E-22 | 0.456801 | 1.88E-25 | 0.053877 | 0.24523  |
| 7.54E-26 | 0.552758 | 1.01E-38 | 0.542683 | 4.04E-37 | 0.589703 | 4.44E-45 | 0.06952  | 0.13358  |
| 2.15E-26 | 0.250265 | 4.22E-08 | 0.599235 | 7.42E-47 | 0.593245 | 9.86E-46 | 0.100645 | 0.02966  |
| 8.60E-34 | 0.563712 | 1.60E-40 | 0.76485  | 7.60E-91 | 0.711652 | 2.60E-73 | 0.262361 | 8.63E-09 |
| 4.90E-24 | 0.498015 | 1.22E-30 | 0.569632 | 1.59E-41 | 0.560411 | 5.67E-40 | 0.455477 | 2.68E-25 |
| 2.59E-18 | 0.19618  | 1.96E-05 | 0.603751 | 1.02E-47 | 0.520217 | 9.67E-34 | 0.144956 | 0.00169  |
| 3.56E-17 | 0.560879 | 4.75E-40 | 0.638137 | 9.12E-55 | 0.614266 | 8.79E-50 | 0.266192 | 5.13E-09 |
| 4.93E-20 | 0.263387 | 7.52E-09 | 0.403612 | 1.01E-19 | 0.442305 | 8.64E-24 | 0.108775 | 0.01871  |
| 1.64E-12 | 0.247489 | 6.01E-08 | 0.528288 | 6.31E-35 | 0.41169  | 1.57E-20 | 0.230781 | 4.61E-07 |
| 6.32E-35 | 0.558186 | 1.32E-39 | 0.581131 | 1.57E-43 | 0.629399 | 6.83E-53 | 0.233998 | 3.15E-07 |
| 1.03E-10 | 0.378939 | 2.15E-17 | 0.485851 | 4.91E-29 | 0.418931 | 2.85E-21 | 0.1329   | 0.00401  |
| 1.90E-38 | 0.359416 | 1.10E-15 | 0.628088 | 1.29E-52 | 0.620718 | 4.36E-51 | 0.337277 | 6.91E-14 |

|          |          |          |          |          |          |          |          |          |
|----------|----------|----------|----------|----------|----------|----------|----------|----------|
| 4.27E-33 | 0.569423 | 1.73E-41 | 0.650431 | 1.65E-57 | 0.683095 | 1.86E-65 | 0.093894 | 0.04255  |
| 6.02E-28 | 0.602197 | 2.02E-47 | 0.538434 | 1.84E-36 | 0.60692  | 2.48E-48 | 0.477535 | 5.65E-28 |
| 5.67E-25 | 0.403804 | 9.63E-20 | 0.581733 | 1.22E-43 | 0.523801 | 2.90E-34 | 0.204597 | 8.32E-06 |
| 2.89E-25 | 0.446233 | 3.12E-24 | 0.693814 | 2.68E-68 | 0.631574 | 2.36E-53 | 0.123147 | 0.00772  |
| 0.42407  | 0.388665 | 2.74E-18 | 0.534407 | 7.59E-36 | 0.338862 | 5.19E-14 | 0.194294 | 2.36E-05 |
| 1.57E-16 | 0.543331 | 3.20E-37 | 0.727968 | 3.03E-78 | 0.63543  | 3.52E-54 | 0.345449 | 1.55E-14 |
| 0.00034  | 0.172154 | 0.00019  | 0.49678  | 1.79E-30 | 0.300356 | 3.43E-11 | 0.042653 | 0.35773  |
| 1.41E-28 | 0.28233  | 5.24E-10 | 0.565665 | 7.50E-41 | 0.517113 | 2.71E-33 | 0.133184 | 0.00394  |
| 2.11E-12 | 0.398542 | 3.14E-19 | 0.717478 | 4.93E-75 | 0.545426 | 1.50E-37 | 0.129173 | 0.00518  |
| 1.52E-29 | 0.563502 | 1.73E-40 | 0.549123 | 3.89E-38 | 0.599953 | 5.42E-47 | 0.176605 | 0.00012  |
| 0.08354  | 0.191086 | 3.23E-05 | 0.531403 | 2.16E-35 | 0.307481 | 1.10E-11 | 0.229764 | 5.19E-07 |
| 7.31E-14 | 0.611673 | 2.89E-49 | 0.512163 | 1.37E-32 | 0.513768 | 8.12E-33 | 0.015727 | 0.73463  |
| 1.04E-17 | 0.325942 | 5.09E-13 | 0.734188 | 3.20E-80 | 0.591945 | 1.72E-45 | 0.018334 | 0.69272  |
| 1.70E-47 | 0.550342 | 2.48E-38 | 0.832838 | #####    | 0.792646 | #####    | 0.202381 | 1.05E-05 |
| 2.91E-20 | 0.659001 | 1.69E-59 | 0.856566 | #####    | 0.745718 | 4.89E-84 | 0.308233 | 9.79E-12 |
| 8.98E-12 | 0.610489 | 4.95E-49 | 0.54083  | 7.84E-37 | 0.514484 | 6.43E-33 | 0.141759 | 0.00214  |
| 2.00E-13 | 0.348154 | 9.39E-15 | 0.566509 | 5.40E-41 | 0.486135 | 4.51E-29 | 0.222894 | 1.14E-06 |
| 1.35E-30 | 0.447407 | 2.29E-24 | 0.510077 | 2.69E-32 | 0.536228 | 4.01E-36 | 0.207003 | 6.47E-06 |
| 2.21E-17 | 0.547431 | 7.23E-38 | 0.460108 | 7.63E-26 | 0.51146  | 1.72E-32 | 0.357741 | 1.52E-15 |
| 1.34E-15 | 0.312243 | 5.10E-12 | 0.690242 | 2.45E-67 | 0.513503 | 8.85E-33 | 0.255219 | 2.23E-08 |
| 2.96E-29 | 0.76398  | 1.60E-90 | 0.662482 | 2.52E-60 | 0.698855 | 1.12E-69 | 0.395015 | 6.87E-19 |
| 7.03E-45 | 0.355897 | 2.16E-15 | 0.569145 | 1.92E-41 | 0.574911 | 1.95E-42 | 0.093645 | 0.0431   |
| 9.26E-35 | 0.246317 | 6.97E-08 | 0.536463 | 3.69E-36 | 0.521288 | 6.76E-34 | 0.051899 | 0.26301  |
| 4.28E-08 | 0.328363 | 3.34E-13 | 0.697498 | 2.65E-69 | 0.476166 | 8.39E-28 | 0.266627 | 4.84E-09 |
| 2.41E-19 | 0.593938 | 7.33E-46 | 0.600345 | 4.57E-47 | 0.604879 | 6.16E-48 | 0.197131 | 1.78E-05 |
| 1.06E-48 | -0.53594 | 4.44E-36 | -0.76546 | 4.50E-91 | -0.77053 | 5.42E-93 | -0.28747 | 2.46E-10 |
| 0.01496  | 0.205123 | 7.88E-06 | 0.584763 | 3.51E-44 | 0.325933 | 5.09E-13 | 0.04924  | 0.28829  |
| 1.24E-09 | 0.602062 | 2.15E-47 | 0.502447 | 3.06E-31 | 0.455713 | 2.52E-25 | 0.277358 | 1.08E-09 |
| 1.82E-32 | 0.482492 | 1.33E-28 | 0.710359 | 6.18E-73 | 0.638012 | 9.70E-55 | 0.152922 | 0.00092  |
| 4.40E-38 | 0.365677 | 3.20E-16 | 0.590093 | 3.76E-45 | 0.626118 | 3.34E-52 | 0.27996  | 7.40E-10 |
| 1.75E-20 | 0.3017   | 2.77E-11 | 0.229786 | 5.17E-07 | 0.293913 | 9.29E-11 | 0.150738 | 0.00109  |
| 1.61E-19 | 0.530599 | 2.85E-35 | 0.782232 | 1.28E-97 | 0.650777 | 1.37E-57 | 0.116538 | 0.01173  |
| 9.06E-09 | 0.476116 | 8.51E-28 | 0.742248 | 7.23E-83 | 0.558115 | 1.36E-39 | 0.106443 | 0.02141  |
| 6.25E-09 | -0.30549 | 1.52E-11 | -0.25446 | 2.46E-08 | -0.30379 | 1.99E-11 | -0.13556 | 0.00333  |
| 3.49E-12 | -0.37522 | 4.64E-17 | -0.33397 | 1.25E-13 | -0.39804 | 3.52E-19 | -0.10875 | 0.01874  |
| 0.01025  | -0.12    | 0.00944  | -0.17594 | 0.00013  | -0.1612  | 0.00047  | 0.228585 | 5.95E-07 |
| 1.75E-05 | -0.35292 | 3.82E-15 | -0.31523 | 3.11E-12 | -0.34659 | 1.26E-14 | 0.167649 | 0.00027  |
| 2.41E-15 | -0.34283 | 2.52E-14 | -0.39632 | 5.15E-19 | -0.42379 | 8.86E-22 | -0.3555  | 2.34E-15 |
| 3.15E-11 | -0.39557 | 6.07E-19 | -0.347   | 1.17E-14 | -0.38852 | 2.82E-18 | -0.10067 | 0.02962  |
| 2.66E-15 | -0.4113  | 1.72E-20 | -0.34628 | 1.33E-14 | -0.42192 | 1.39E-21 | -0.05883 | 0.20446  |
| 0.02564  | -0.11762 | 0.01096  | -0.08158 | 0.07821  | -0.11467 | 0.01315  | -0.06306 | 0.17372  |
| 0.00123  | -0.21295 | 3.44E-06 | -0.12957 | 0.00504  | -0.1585  | 0.00059  | -0.13423 | 0.00366  |
| 0.88435  | -0.15581 | 0.00073  | -0.0663  | 0.15258  | -0.06698 | 0.1484   | -0.05636 | 0.22411  |
| 8.55E-12 | -0.38495 | 6.06E-18 | -0.31662 | 2.47E-12 | -0.379   | 2.12E-17 | -0.09407 | 0.04216  |
| 2.64E-15 | -0.43148 | 1.34E-22 | -0.37806 | 2.58E-17 | -0.44202 | 9.29E-24 | -0.10953 | 0.0179   |

|          |          |          |          |          |          |          |          |          |
|----------|----------|----------|----------|----------|----------|----------|----------|----------|
| 3.29E-08 | -0.31286 | 4.60E-12 | -0.22068 | 1.47E-06 | -0.28894 | 1.97E-10 | -0.00465 | 0.92016  |
| 0.00023  | -0.26786 | 4.08E-09 | -0.26663 | 4.84E-09 | -0.27672 | 1.18E-09 | -0.06001 | 0.19546  |
| 3.82E-05 | -0.19443 | 2.33E-05 | -0.17565 | 0.00014  | -0.21078 | 4.34E-06 | -0.04461 | 0.33606  |
| 6.22E-10 | -0.38575 | 5.12E-18 | -0.35436 | 2.91E-15 | -0.38194 | 1.15E-17 | -0.05118 | 0.26971  |
| 0.00122  | -0.38971 | 2.19E-18 | -0.32428 | 6.77E-13 | -0.29783 | 5.08E-11 | -0.06144 | 0.18502  |
| 4.50E-07 | -0.30438 | 1.82E-11 | -0.26961 | 3.21E-09 | -0.30296 | 2.27E-11 | -0.04342 | 0.34918  |
| 8.44E-10 | -0.3724  | 8.26E-17 | -0.32781 | 3.68E-13 | -0.38342 | 8.38E-18 | -0.04957 | 0.28504  |
| 1.67E-13 | -0.42069 | 1.87E-21 | -0.37092 | 1.11E-16 | -0.42452 | 7.42E-22 | -0.09308 | 0.04437  |
| 4.53E-14 | -0.46037 | 7.10E-26 | -0.40243 | 1.31E-19 | -0.4569  | 1.83E-25 | -0.10926 | 0.01818  |
| 1.62E-08 | -0.32049 | 1.29E-12 | -0.27506 | 1.49E-09 | -0.33204 | 1.76E-13 | -0.05638 | 0.22399  |
| 5.55E-06 | -0.25578 | 2.07E-08 | -0.18702 | 4.77E-05 | -0.21795 | 1.99E-06 | -0.04905 | 0.29012  |
| 5.32E-05 | -0.25186 | 3.44E-08 | -0.25992 | 1.20E-08 | -0.24901 | 4.96E-08 | -0.07715 | 0.09585  |
| 2.82E-09 | -0.30944 | 8.05E-12 | -0.3894  | 2.34E-18 | -0.38376 | 7.80E-18 | -0.03036 | 0.51281  |
| 1.46E-14 | -0.3897  | 2.19E-18 | -0.37566 | 4.23E-17 | -0.43001 | 1.93E-22 | -0.09262 | 0.04545  |
| 2.07E-11 | -0.41394 | 9.29E-21 | -0.35452 | 2.82E-15 | -0.40561 | 6.39E-20 | -0.08527 | 0.06562  |
| 1.18E-14 | -0.39827 | 3.34E-19 | -0.35952 | 1.07E-15 | -0.41081 | 1.93E-20 | -0.09953 | 0.03151  |
| 0.02576  | -0.16911 | 0.00024  | -0.16604 | 0.00031  | -0.14637 | 0.00152  | -0.03895 | 0.40108  |
| 4.93E-11 | -0.39374 | 9.09E-19 | -0.31433 | 3.61E-12 | -0.38129 | 1.31E-17 | -0.10513 | 0.02308  |
| 2.44E-15 | -0.4567  | 1.93E-25 | -0.40088 | 1.87E-19 | -0.46005 | 7.76E-26 | -0.11211 | 0.01536  |
| 0.00226  | -0.36945 | 1.50E-16 | -0.37089 | 1.12E-16 | -0.33035 | 2.36E-13 | -0.12664 | 0.00614  |
| 5.03E-09 | -0.44279 | 7.62E-24 | -0.30992 | 7.44E-12 | -0.38194 | 1.14E-17 | -0.08674 | 0.06106  |
| 2.08E-13 | -0.37388 | 6.10E-17 | -0.37611 | 3.86E-17 | -0.42931 | 2.29E-22 | -0.01403 | 0.76229  |
| 0.00017  | -0.26577 | 5.44E-09 | -0.21557 | 2.58E-06 | -0.2194  | 1.69E-06 | -0.03774 | 0.41578  |
| 2.79E-13 | -0.42422 | 7.98E-22 | -0.36643 | 2.75E-16 | -0.42106 | 1.72E-21 | -0.21848 | 1.88E-06 |
| 1.01E-06 | -0.52006 | 1.02E-33 | -0.49454 | 3.56E-30 | -0.45497 | 3.08E-25 | -0.11122 | 0.01619  |
| 2.79E-16 | -0.47167 | 3.03E-27 | -0.42664 | 4.43E-22 | -0.4824  | 1.36E-28 | -0.10325 | 0.02566  |
| 3.47E-11 | -0.38674 | 4.14E-18 | -0.33782 | 6.26E-14 | -0.38645 | 4.40E-18 | -0.09143 | 0.04831  |
| 0.00301  | -0.265   | 6.04E-09 | -0.26177 | 9.35E-09 | -0.2549  | 2.32E-08 | 0.093725 | 0.04292  |
| 5.13E-08 | -0.50076 | 5.18E-31 | -0.38562 | 5.26E-18 | -0.42796 | 3.20E-22 | -0.05319 | 0.25133  |
| 7.81E-08 | -0.28324 | 4.59E-10 | -0.23872 | 1.78E-07 | -0.29712 | 5.67E-11 | -0.0476  | 0.3047   |
| 1.32E-08 | -0.36143 | 7.40E-16 | -0.35373 | 3.27E-15 | -0.36479 | 3.81E-16 | -0.0856  | 0.06456  |
| 8.09E-12 | -0.43076 | 1.60E-22 | -0.40283 | 1.20E-19 | -0.42408 | 8.26E-22 | -0.09316 | 0.0442   |
| 2.10E-06 | -0.27072 | 2.75E-09 | -0.22604 | 7.99E-07 | -0.28136 | 6.04E-10 | -0.10029 | 0.03024  |
| 8.22E-10 | -0.49231 | 7.02E-30 | -0.37035 | 1.25E-16 | -0.41924 | 2.65E-21 | -0.04527 | 0.32894  |
| 4.04E-19 | -0.4759  | 9.05E-28 | -0.41798 | 3.58E-21 | -0.52854 | 5.79E-35 | -0.14036 | 0.00236  |
| 0.27052  | -0.11775 | 0.01088  | -0.09688 | 0.03635  | -0.06269 | 0.17627  | 0.353842 | 3.21E-15 |
| 3.75E-05 | -0.30166 | 2.79E-11 | -0.22928 | 5.49E-07 | -0.2781  | 9.68E-10 | -0.03497 | 0.45088  |
| 0.99252  | -0.10651 | 0.02133  | -0.01666 | 0.71959  | -0.03023 | 0.51457  | -0.08826 | 0.05666  |
| 0.0654   | -0.1862  | 5.15E-05 | 0.149047 | 0.00124  | 0.071645 | 0.12208  | -0.10113 | 0.02887  |
| 2.08E-10 | -0.40828 | 3.46E-20 | -0.34443 | 1.88E-14 | -0.38465 | 6.45E-18 | -0.08047 | 0.08238  |
| 0.00469  | -0.22045 | 1.51E-06 | -0.14023 | 0.00239  | -0.20902 | 5.23E-06 | 0.201076 | 1.20E-05 |
| 1.56E-11 | -0.38968 | 2.20E-18 | -0.34911 | 7.85E-15 | -0.39107 | 1.63E-18 | -0.11281 | 0.01473  |
| 5.06E-06 | -0.33371 | 1.31E-13 | -0.18686 | 4.84E-05 | -0.26587 | 5.36E-09 | 0.031492 | 0.49721  |
| 7.32E-05 | -0.2063  | 6.97E-06 | -0.12619 | 0.00632  | -0.18723 | 4.68E-05 | -0.02307 | 0.61896  |
| 1.00E-20 | -0.35113 | 5.37E-15 | -0.40087 | 1.87E-19 | -0.46324 | 3.22E-26 | -0.24412 | 9.17E-08 |

|          |          |          |          |          |          |          |          |          |
|----------|----------|----------|----------|----------|----------|----------|----------|----------|
| 1.91E-14 | -0.17471 | 0.00015  | -0.21783 | 2.01E-06 | -0.29633 | 6.41E-11 | 0.041843 | 0.36695  |
| 0.00112  | -0.14892 | 0.00125  | -0.21986 | 1.61E-06 | -0.2082  | 5.70E-06 | -0.11993 | 0.00948  |
| 0.01491  | -0.2034  | 9.42E-06 | -0.21459 | 2.88E-06 | -0.22105 | 1.41E-06 | 0.077152 | 0.09585  |
| 3.55E-20 | -0.40075 | 1.92E-19 | -0.32475 | 6.24E-13 | -0.45793 | 1.38E-25 | -0.15558 | 0.00074  |
| 0.00019  | -0.42473 | 7.06E-22 | -0.27782 | 1.01E-09 | -0.3008  | 3.20E-11 | -0.00119 | 0.97956  |
| 1.16E-08 | -0.48354 | 9.75E-29 | -0.31828 | 1.87E-12 | -0.37533 | 4.54E-17 | -0.15693 | 0.00067  |
| 8.76E-09 | -0.367   | 2.45E-16 | -0.32383 | 7.31E-13 | -0.36023 | 9.36E-16 | -0.08733 | 0.05933  |
| 6.53E-12 | -0.39452 | 7.65E-19 | -0.34439 | 1.89E-14 | -0.40047 | 2.04E-19 | -0.08653 | 0.06169  |
| 7.13E-12 | -0.35067 | 5.85E-15 | -0.24898 | 4.98E-08 | -0.35389 | 3.18E-15 | -0.06353 | 0.17052  |
| 1.94E-11 | -0.36351 | 4.91E-16 | -0.3035  | 2.09E-11 | -0.36956 | 1.47E-16 | -0.08823 | 0.05674  |
| 5.22E-12 | -0.40959 | 2.56E-20 | -0.40091 | 1.85E-19 | -0.44486 | 4.45E-24 | 0.008319 | 0.85771  |
| 4.76E-11 | -0.33767 | 6.44E-14 | -0.31564 | 2.91E-12 | -0.36234 | 6.18E-16 | -0.03428 | 0.45993  |
| 1.12E-10 | -0.37857 | 2.32E-17 | -0.32131 | 1.12E-12 | -0.37242 | 8.22E-17 | -0.10173 | 0.02793  |
| 1.09E-06 | -0.23813 | 1.92E-07 | -0.21174 | 3.91E-06 | -0.25152 | 3.59E-08 | -0.16173 | 0.00045  |
| 2.83E-07 | -0.27815 | 9.60E-10 | -0.21692 | 2.23E-06 | -0.27265 | 2.10E-09 | -0.15328 | 0.00089  |
| 6.14E-12 | -0.40892 | 2.99E-20 | -0.37752 | 2.88E-17 | -0.40933 | 2.72E-20 | -0.10484 | 0.02346  |
| 1.41E-11 | -0.2956  | 7.17E-11 | -0.30253 | 2.44E-11 | -0.35022 | 6.38E-15 | -0.09427 | 0.04173  |
| 9.23E-12 | -0.4176  | 3.92E-21 | -0.37171 | 9.51E-17 | -0.42371 | 9.05E-22 | -0.06069 | 0.1905   |
| 6.98E-10 | -0.29807 | 4.90E-11 | -0.34555 | 1.53E-14 | -0.36184 | 6.83E-16 | -0.35411 | 3.05E-15 |
| 9.78E-17 | -0.47502 | 1.17E-27 | -0.39506 | 6.79E-19 | -0.46837 | 7.72E-27 | -0.11988 | 0.00951  |
| 2.03E-07 | -0.28256 | 5.07E-10 | -0.33529 | 9.85E-14 | -0.34163 | 3.14E-14 | -0.19824 | 1.59E-05 |
| 3.13E-29 | -0.53206 | 1.72E-35 | -0.44172 | 1.00E-23 | -0.57003 | 1.36E-41 | -0.24114 | 1.33E-07 |
| 1.17E-09 | -0.26235 | 8.65E-09 | -0.0395  | 0.39442  | -0.21665 | 2.29E-06 | -0.09906 | 0.03233  |
| 5.73E-13 | 0.110792 | 0.01661  | 0.106967 | 0.02078  | -0.0924  | 0.04597  | -0.05746 | 0.21523  |
| 1.25E-13 | -0.37935 | 1.97E-17 | -0.29457 | 8.40E-11 | -0.38658 | 4.28E-18 | -0.1058  | 0.02222  |
| 8.06E-06 | -0.27555 | 1.39E-09 | -0.20524 | 7.79E-06 | -0.25594 | 2.03E-08 | -0.1343  | 0.00364  |
| 6.25E-20 | -0.53367 | 9.83E-36 | -0.44981 | 1.22E-24 | -0.52497 | 1.95E-34 | -0.1561  | 0.00071  |
| 2.65E-15 | -0.51195 | 1.47E-32 | -0.44404 | 5.52E-24 | -0.49674 | 1.81E-30 | -0.11604 | 0.0121   |
| 9.56E-18 | -0.4749  | 1.21E-27 | -0.40171 | 1.55E-19 | -0.48133 | 1.87E-28 | -0.12389 | 0.00735  |
| 2.61E-07 | -0.2379  | 1.97E-07 | -0.2102  | 4.61E-06 | -0.26723 | 4.45E-09 | -0.20546 | 7.61E-06 |
| 5.50E-06 | -0.41969 | 2.38E-21 | -0.42229 | 1.27E-21 | -0.39741 | 4.04E-19 | -0.02418 | 0.60225  |
| 5.89E-06 | -0.42776 | 3.36E-22 | -0.29389 | 9.32E-11 | -0.32108 | 1.17E-12 | -0.05832 | 0.20838  |
| 4.61E-05 | -0.21408 | 3.04E-06 | -0.16315 | 0.0004   | -0.2114  | 4.06E-06 | 0.049987 | 0.28103  |
| 1.11E-13 | -0.46704 | 1.12E-26 | -0.24885 | 5.06E-08 | -0.38673 | 4.14E-18 | -0.17547 | 0.00014  |
| 1.26E-10 | -0.58974 | 4.36E-45 | -0.34856 | 8.70E-15 | -0.47934 | 3.34E-28 | -0.13906 | 0.0026   |
| 2.26E-05 | -0.25731 | 1.69E-08 | -0.20598 | 7.20E-06 | -0.24665 | 6.68E-08 | -0.22881 | 5.80E-07 |
| 3.11E-17 | -0.41334 | 1.07E-20 | -0.35318 | 3.64E-15 | -0.43809 | 2.54E-23 | -0.13701 | 0.00301  |
| 0.3427   | -0.12085 | 0.00895  | 0.000693 | 0.98808  | -0.02198 | 0.63572  | -0.0504  | 0.27706  |
| 0.58136  | -0.06255 | 0.17723  | -0.10054 | 0.02983  | -0.07396 | 0.11043  | 0.355907 | 2.16E-15 |
| 2.21E-19 | 0.557391 | 1.79E-39 | 0.389985 | 2.06E-18 | 0.532804 | 1.33E-35 | 0.160823 | 0.00049  |
| 6.72E-22 | -0.49665 | 1.86E-30 | -0.47932 | 3.36E-28 | -0.54813 | 5.60E-38 | -0.13771 | 0.00286  |
| 9.82E-15 | -0.38041 | 1.58E-17 | -0.27746 | 1.06E-09 | -0.40981 | 2.43E-20 | -0.15523 | 0.00076  |
| 3.81E-10 | -0.20659 | 6.76E-06 | -0.17931 | 9.78E-05 | -0.24718 | 6.25E-08 | -0.30541 | 1.54E-11 |
| 3.92E-14 | -0.2831  | 4.68E-10 | -0.17998 | 9.19E-05 | -0.33275 | 1.55E-13 | -0.19393 | 2.45E-05 |
| 0.00036  | -0.27467 | 1.58E-09 | -0.21178 | 3.90E-06 | -0.23006 | 5.01E-07 | -0.16829 | 0.00026  |

|          |          |          |          |          |          |          |          |          |
|----------|----------|----------|----------|----------|----------|----------|----------|----------|
| 8.44E-05 | -0.25892 | 1.37E-08 | -0.20959 | 4.92E-06 | -0.2505  | 4.10E-08 | -0.04596 | 0.32165  |
| 5.16E-06 | 0.027136 | 0.55858  | 0.126119 | 0.00635  | 0.170092 | 0.00022  | 0.042135 | 0.36361  |
| 0.0005   | -0.2612  | 1.01E-08 | -0.19662 | 1.87E-05 | -0.20175 | 1.12E-05 | -0.01717 | 0.71125  |
| 0.00768  | -0.35814 | 1.40E-15 | -0.38339 | 8.43E-18 | -0.3423  | 2.78E-14 | -0.07202 | 0.12013  |
| 2.96E-14 | -0.32891 | 3.04E-13 | -0.34281 | 2.53E-14 | -0.38762 | 3.43E-18 | -0.30495 | 1.66E-11 |
| 8.74E-09 | -0.46195 | 4.60E-26 | -0.30649 | 1.30E-11 | -0.36979 | 1.40E-16 | -0.1977  | 1.68E-05 |
| 0.00096  | -0.32772 | 3.74E-13 | -0.29569 | 7.07E-11 | -0.31533 | 3.06E-12 | -0.09211 | 0.04665  |
| 4.73E-10 | 0.345946 | 1.42E-14 | 0.33994  | 4.27E-14 | 0.345863 | 1.44E-14 | 0.151137 | 0.00105  |
| 2.34E-09 | -0.39777 | 3.73E-19 | -0.33463 | 1.11E-13 | -0.37476 | 5.09E-17 | -0.11071 | 0.01669  |
| 6.78E-09 | -0.2742  | 1.69E-09 | -0.24628 | 7.00E-08 | -0.28773 | 2.36E-10 | -0.06666 | 0.15036  |
| 9.80E-11 | -0.42604 | 5.13E-22 | -0.3336  | 1.33E-13 | -0.40134 | 1.68E-19 | -0.09473 | 0.04073  |
| 1.14E-13 | -0.45366 | 4.37E-25 | -0.40624 | 5.54E-20 | -0.45324 | 4.88E-25 | -0.11813 | 0.01062  |
| 6.42E-14 | -0.43199 | 1.18E-22 | -0.4362  | 4.11E-23 | -0.48497 | 6.38E-29 | -0.11847 | 0.0104   |
| 4.16E-09 | -0.38481 | 6.25E-18 | -0.31714 | 2.27E-12 | -0.36295 | 5.49E-16 | -0.0855  | 0.06487  |
| 8.82E-09 | -0.33887 | 5.18E-14 | -0.3062  | 1.36E-11 | -0.37023 | 1.28E-16 | -0.22143 | 1.35E-06 |
| 0.00041  | -0.23571 | 2.57E-07 | -0.38507 | 5.91E-18 | -0.3163  | 2.61E-12 | -0.05401 | 0.24409  |
| 4.34E-09 | -0.33343 | 1.37E-13 | -0.19584 | 2.03E-05 | -0.33175 | 1.85E-13 | 0.026416 | 0.56907  |
| 1.41E-05 | 0.365486 | 3.32E-16 | 0.122121 | 0.00824  | 0.242594 | 1.11E-07 | -0.20679 | 6.62E-06 |
| 1.52E-12 | -0.40403 | 9.15E-20 | -0.35049 | 6.06E-15 | -0.41325 | 1.09E-20 | -0.12634 | 0.00626  |
| 1.36E-09 | -0.39203 | 1.32E-18 | -0.34123 | 3.38E-14 | -0.38772 | 3.35E-18 | -0.0912  | 0.04888  |
| 3.63E-08 | -0.1924  | 2.84E-05 | -0.1504  | 0.00111  | -0.24039 | 1.45E-07 | -0.24234 | 1.14E-07 |
| 2.14E-08 | -0.36217 | 6.40E-16 | -0.28614 | 2.99E-10 | -0.34394 | 2.05E-14 | -0.01683 | 0.71684  |
| 0.01032  | -0.29573 | 7.03E-11 | -0.16104 | 0.00048  | -0.19245 | 2.83E-05 | -0.09207 | 0.04675  |
| 5.95E-12 | -0.40634 | 5.41E-20 | -0.34898 | 8.05E-15 | -0.40325 | 1.09E-19 | -0.0969  | 0.03632  |
| 2.30E-06 | -0.33815 | 5.90E-14 | -0.26296 | 7.97E-09 | -0.30109 | 3.05E-11 | -0.09206 | 0.04677  |
| 0.99747  | 0.006228 | 0.89322  | 0.106826 | 0.02095  | 0.036553 | 0.43067  | 0.049783 | 0.283    |
| 1.65E-06 | -0.19908 | 1.46E-05 | -0.0981  | 0.03406  | -0.22694 | 7.20E-07 | 0.013085 | 0.77792  |
| 2.10E-06 | -0.29604 | 6.70E-11 | -0.1959  | 2.01E-05 | -0.27534 | 1.43E-09 | -0.1183  | 0.01051  |
| 6.66E-13 | -0.46047 | 6.92E-26 | -0.45855 | 1.17E-25 | -0.47623 | 8.23E-28 | -0.0197  | 0.67107  |
| 1.73E-10 | -0.27661 | 1.20E-09 | -0.13488 | 0.0035   | -0.26207 | 8.98E-09 | -0.18455 | 6.02E-05 |
| 6.90E-13 | -0.45952 | 8.96E-26 | -0.38142 | 1.28E-17 | -0.43227 | 1.10E-22 | -0.10436 | 0.02412  |
| 4.54E-06 | -0.35456 | 2.79E-15 | -0.30721 | 1.15E-11 | -0.35139 | 5.11E-15 | -0.00809 | 0.86163  |
| 0.2113   | -0.14058 | 0.00233  | -0.02219 | 0.63238  | -0.03705 | 0.42443  | 0.007153 | 0.87748  |
| 0.00511  | -0.3179  | 2.00E-12 | -0.23329 | 3.42E-07 | -0.22672 | 7.38E-07 | 0.085658 | 0.06438  |
| 7.64E-21 | -0.48537 | 5.67E-29 | -0.49909 | 8.73E-31 | -0.54388 | 2.62E-37 | -0.24556 | 7.66E-08 |
| 1.34E-16 | -0.46427 | 2.42E-26 | -0.39899 | 2.84E-19 | -0.47135 | 3.33E-27 | -0.1697  | 0.00023  |
| 0.05055  | -0.26263 | 8.33E-09 | -0.09109 | 0.04914  | -0.1705  | 0.00021  | 0.033814 | 0.46601  |
| 7.03E-06 | -0.35065 | 5.88E-15 | -0.27766 | 1.03E-09 | -0.30302 | 2.25E-11 | -0.04568 | 0.32465  |
| 1.38E-11 | -0.18335 | 6.73E-05 | -0.09913 | 0.03221  | -0.22825 | 6.18E-07 | -0.05379 | 0.24601  |
| 8.61E-10 | -0.3905  | 1.84E-18 | -0.16911 | 0.00024  | -0.35271 | 3.98E-15 | -0.17089 | 0.00021  |
| 1.65E-11 | -0.39403 | 8.53E-19 | -0.3366  | 7.79E-14 | -0.42046 | 1.98E-21 | -0.13059 | 0.00471  |
| 8.84E-11 | -0.38606 | 4.78E-18 | -0.35701 | 1.75E-15 | -0.39411 | 8.38E-19 | -0.07709 | 0.0961   |
| 3.71E-09 | -0.41332 | 1.07E-20 | -0.27092 | 2.67E-09 | -0.34138 | 3.29E-14 | -0.11196 | 0.01549  |
| 3.57E-20 | -0.44496 | 4.35E-24 | -0.44168 | 1.01E-23 | -0.48983 | 1.49E-29 | -0.21124 | 4.13E-06 |
| 1.48E-17 | -0.39793 | 3.60E-19 | -0.35028 | 6.30E-15 | -0.4344  | 6.47E-23 | -0.09318 | 0.04416  |

|          |          |          |          |          |          |          |          |          |
|----------|----------|----------|----------|----------|----------|----------|----------|----------|
| 8.25E-14 | -0.46948 | 5.65E-27 | -0.39673 | 4.71E-19 | -0.44806 | 1.93E-24 | -0.10005 | 0.03064  |
| 9.01E-10 | -0.34896 | 8.07E-15 | -0.32687 | 4.33E-13 | -0.37553 | 4.35E-17 | -0.11746 | 0.01107  |
| 0.00013  | -0.25044 | 4.13E-08 | -0.20478 | 8.17E-06 | -0.21887 | 1.80E-06 | -0.06589 | 0.15512  |
| 0.42175  | 0.309558 | 7.90E-12 | 0.299131 | 4.15E-11 | 0.253583 | 2.75E-08 | -0.04931 | 0.2876   |
| 0.49591  | -0.23234 | 3.83E-07 | -0.06861 | 0.13878  | -0.09232 | 0.04616  | -0.02561 | 0.58087  |
| 5.65E-11 | -0.42279 | 1.13E-21 | -0.35981 | 1.02E-15 | -0.40785 | 3.82E-20 | -0.20947 | 4.99E-06 |
| 1.36E-07 | -0.41466 | 7.85E-21 | -0.18531 | 5.61E-05 | -0.3304  | 2.34E-13 | -0.07581 | 0.10181  |
| 2.72E-29 | -0.51371 | 8.28E-33 | -0.4965  | 1.95E-30 | -0.57981 | 2.69E-43 | -0.26272 | 8.23E-09 |
| 8.84E-11 | -0.30973 | 7.67E-12 | -0.31652 | 2.51E-12 | -0.3571  | 1.72E-15 | -0.08841 | 0.05623  |
| 2.95E-13 | -0.43084 | 1.57E-22 | -0.32152 | 1.08E-12 | -0.39738 | 4.07E-19 | -0.12173 | 0.00845  |
| 3.60E-09 | -0.31824 | 1.89E-12 | -0.2389  | 1.74E-07 | -0.31313 | 4.40E-12 | -0.00082 | 0.98591  |
| 1.26E-15 | -0.42797 | 3.19E-22 | -0.37296 | 7.36E-17 | -0.44353 | 6.30E-24 | -0.10911 | 0.01834  |
| 2.39E-15 | -0.50834 | 4.70E-32 | -0.39077 | 1.73E-18 | -0.46281 | 3.63E-26 | -0.21597 | 2.47E-06 |
| 1.69E-08 | -0.42527 | 6.19E-22 | -0.29992 | 3.67E-11 | -0.36289 | 5.55E-16 | -0.18803 | 4.33E-05 |
| 3.47E-08 | -0.30645 | 1.30E-11 | -0.25622 | 1.95E-08 | -0.30469 | 1.73E-11 | -0.02068 | 0.65573  |
| 1.26E-14 | -0.25686 | 1.80E-08 | -0.17646 | 0.00013  | -0.33321 | 1.43E-13 | -0.01546 | 0.73892  |
| 2.47E-06 | -0.31942 | 1.55E-12 | -0.28563 | 3.23E-10 | -0.32057 | 1.27E-12 | -0.0651  | 0.16015  |
| 1.04E-05 | -0.33605 | 8.61E-14 | -0.11098 | 0.01643  | -0.22472 | 9.29E-07 | -0.1292  | 0.00517  |
| 5.01E-11 | 0.325432 | 5.55E-13 | 0.364618 | 3.94E-16 | 0.375769 | 4.14E-17 | -0.02105 | 0.65004  |
| 2.70E-13 | -0.35315 | 3.66E-15 | -0.34892 | 8.14E-15 | -0.38207 | 1.12E-17 | -0.07076 | 0.12675  |
| 1.33E-14 | -0.48635 | 4.23E-29 | -0.44492 | 4.39E-24 | -0.4893  | 1.75E-29 | 0.012069 | 0.79477  |
| 6.04E-18 | -0.47558 | 9.93E-28 | -0.46343 | 3.06E-26 | -0.50776 | 5.66E-32 | -0.13897 | 0.00261  |
| 4.22E-10 | -0.40193 | 1.47E-19 | -0.32453 | 6.49E-13 | -0.39418 | 8.25E-19 | -0.10028 | 0.03026  |
| 2.39E-21 | 0.416989 | 4.53E-21 | 0.40339  | 1.06E-19 | 0.488252 | 2.39E-29 | 0.11372  | 0.01394  |
| 0.00053  | -0.2722  | 2.23E-09 | -0.22966 | 5.25E-07 | -0.24303 | 1.05E-07 | -0.04849 | 0.29569  |
| 6.14E-07 | -0.23887 | 1.75E-07 | 0.01967  | 0.67158  | -0.1897  | 3.69E-05 | -0.16085 | 0.00048  |
| 0.00287  | -0.20114 | 1.19E-05 | -0.08869 | 0.05545  | -0.1606  | 0.00049  | 0.012477 | 0.788    |
| 2.11E-08 | -0.33583 | 8.95E-14 | -0.30304 | 2.24E-11 | -0.32236 | 9.40E-13 | -0.15294 | 0.00091  |
| 0.00276  | -0.25119 | 3.75E-08 | -0.20523 | 7.79E-06 | -0.20957 | 4.94E-06 | -0.0427  | 0.3572   |
| 7.31E-14 | -0.25357 | 2.76E-08 | -0.28353 | 4.40E-10 | -0.34069 | 3.73E-14 | -0.00798 | 0.86345  |
| 0.00132  | -0.18119 | 8.23E-05 | -0.16641 | 0.0003   | -0.19033 | 3.48E-05 | -0.02209 | 0.63395  |
| 0.00067  | -0.31733 | 2.20E-12 | -0.30429 | 1.84E-11 | -0.28703 | 2.62E-10 | -0.25297 | 2.98E-08 |
| 0.0001   | -0.36829 | 1.90E-16 | -0.26544 | 5.69E-09 | -0.28949 | 1.82E-10 | -0.06801 | 0.14225  |
| 0.00018  | -0.13125 | 0.0045   | -0.15218 | 0.00097  | -0.19495 | 2.21E-05 | -0.03159 | 0.49592  |
| 1.42E-08 | -0.42516 | 6.36E-22 | -0.32749 | 3.89E-13 | -0.37698 | 3.22E-17 | -0.09296 | 0.04467  |
| 0.00031  | -0.24669 | 6.65E-08 | -0.22041 | 1.51E-06 | -0.22197 | 1.27E-06 | -0.04439 | 0.33853  |
| 0.73596  | -0.11341 | 0.0142   | -0.12263 | 0.00798  | -0.07227 | 0.11884  | 0.000712 | 0.98776  |
| 0.04064  | -0.13934 | 0.00255  | -0.07331 | 0.11364  | -0.11238 | 0.01511  | -0.05699 | 0.21901  |
| 0.00059  | -0.14208 | 0.00208  | -0.14315 | 0.00193  | -0.1639  | 0.00038  | -0.20607 | 7.14E-06 |
| 7.11E-17 | -0.44238 | 8.48E-24 | -0.50403 | 1.86E-31 | -0.50046 | 5.70E-31 | -0.17672 | 0.00012  |
| 1.48E-22 | 0.367905 | 2.05E-16 | 0.285349 | 3.36E-10 | 0.395762 | 5.82E-19 | 0.255138 | 2.25E-08 |
| 5.05E-11 | -0.41964 | 2.41E-21 | -0.29742 | 5.41E-11 | -0.36424 | 4.25E-16 | -0.1461  | 0.00155  |
| 1.44E-17 | -0.45186 | 7.07E-25 | -0.42501 | 6.60E-22 | -0.47973 | 2.99E-28 | -0.37091 | 1.12E-16 |
| 1.05E-09 | 0.344095 | 2.00E-14 | 0.168471 | 0.00026  | 0.246004 | 7.25E-08 | 0.223646 | 1.05E-06 |
| 0.34157  | -0.25251 | 3.17E-08 | -0.10396 | 0.02467  | -0.1077  | 0.01991  | -0.04003 | 0.38807  |



|          |          |          |          |          |          |          |          |          |
|----------|----------|----------|----------|----------|----------|----------|----------|----------|
| 5.71E-07 | 0.425567 | 5.76E-22 | 0.390079 | 2.02E-18 | 0.388587 | 2.78E-18 | 0.107301 | 0.02038  |
| 4.42E-08 | -0.38853 | 2.82E-18 | -0.25312 | 2.92E-08 | -0.31877 | 1.73E-12 | -0.06219 | 0.17974  |
| 0.04202  | -0.14374 | 0.00185  | -0.18056 | 8.72E-05 | -0.15374 | 0.00086  | 0.039137 | 0.39877  |
| 2.08E-06 | -0.28435 | 3.90E-10 | -0.2769  | 1.15E-09 | -0.30166 | 2.79E-11 | -0.09582 | 0.03846  |
| 0.0014   | -0.15161 | 0.00101  | -0.21954 | 1.67E-06 | -0.19283 | 2.72E-05 | -0.01034 | 0.82363  |
| 1.80E-06 | -0.3262  | 4.86E-13 | -0.20761 | 6.07E-06 | -0.26528 | 5.82E-09 | -0.11029 | 0.01711  |
| 8.27E-14 | -0.4443  | 5.16E-24 | -0.44242 | 8.39E-24 | -0.46718 | 1.08E-26 | -0.10256 | 0.02668  |
| 1.15E-07 | -0.33636 | 8.14E-14 | -0.29486 | 8.03E-11 | -0.32862 | 3.20E-13 | -0.05441 | 0.24062  |
| 7.85E-16 | -0.52739 | 8.57E-35 | -0.43889 | 2.07E-23 | -0.49057 | 1.19E-29 | -0.13353 | 0.00384  |
| 2.00E-16 | -0.47431 | 1.43E-27 | -0.41888 | 2.89E-21 | -0.47594 | 8.95E-28 | -0.11642 | 0.01181  |
| 0.00311  | -0.12152 | 0.00857  | -0.08825 | 0.0567   | -0.12959 | 0.00504  | -0.09396 | 0.0424   |
| 5.79E-14 | -0.43667 | 3.64E-23 | -0.37535 | 4.51E-17 | -0.438   | 2.60E-23 | -0.11014 | 0.01726  |
| 0.00083  | 0.245943 | 7.30E-08 | 0.070237 | 0.12961  | 0.135088 | 0.00345  | 0.000126 | 0.99784  |
| 0.64074  | -0.09125 | 0.04874  | -0.01785 | 0.70047  | -0.06368 | 0.16948  | -0.11084 | 0.01657  |
| 8.19E-09 | -0.38218 | 1.09E-17 | -0.32189 | 1.02E-12 | -0.367   | 2.45E-16 | -0.13025 | 0.00481  |
| 2.06E-05 | -0.26439 | 6.57E-09 | -0.27105 | 2.62E-09 | -0.26148 | 9.72E-09 | -0.21683 | 2.25E-06 |
| 5.66E-08 | -0.28231 | 5.25E-10 | -0.23247 | 3.77E-07 | -0.29462 | 8.33E-11 | -0.02001 | 0.66626  |
| 0.00257  | -0.30862 | 9.19E-12 | -0.2073  | 6.28E-06 | -0.2687  | 3.64E-09 | -0.0149  | 0.74804  |
| 6.63E-19 | -0.46173 | 4.89E-26 | -0.4674  | 1.01E-26 | -0.50647 | 8.56E-32 | -0.27227 | 2.21E-09 |
| 0.02035  | -0.31688 | 2.37E-12 | -0.20071 | 1.24E-05 | -0.22863 | 5.92E-07 | 0.110115 | 0.01729  |
| 0.21557  | -0.25903 | 1.35E-08 | -0.11052 | 0.01688  | -0.16143 | 0.00046  | 0.066733 | 0.14991  |
| 3.41E-07 | -0.28173 | 5.72E-10 | -0.25559 | 2.12E-08 | -0.2877  | 2.37E-10 | -0.19922 | 1.44E-05 |
| 0.25085  | -0.19441 | 2.33E-05 | 0.088639 | 0.0556   | -0.07084 | 0.12637  | -0.0277  | 0.55039  |
| 3.44E-12 | -0.37838 | 2.41E-17 | -0.3369  | 7.39E-14 | -0.38224 | 1.08E-17 | -0.08198 | 0.07675  |
| 2.40E-11 | -0.35557 | 2.30E-15 | -0.28799 | 2.27E-10 | -0.34561 | 1.51E-14 | -0.11735 | 0.01115  |
| 0.00622  | -0.11936 | 0.00983  | -0.11991 | 0.00949  | -0.12961 | 0.00503  | -0.01149 | 0.80439  |
| 6.29E-06 | -0.24277 | 1.08E-07 | -0.15827 | 0.0006   | -0.23872 | 1.78E-07 | -0.10011 | 0.03054  |
| 0.5316   | -0.1855  | 5.50E-05 | -0.09781 | 0.03459  | -0.12058 | 0.0091   | -0.03151 | 0.497    |
| 3.01E-37 | -0.46311 | 3.34E-26 | -0.54978 | 3.05E-38 | -0.60368 | 1.05E-47 | -0.20079 | 1.23E-05 |
| 3.14E-10 | -0.31471 | 3.40E-12 | -0.297   | 5.77E-11 | -0.33695 | 7.32E-14 | -0.12354 | 0.00752  |
| 8.33E-05 | -0.19893 | 1.49E-05 | -0.17871 | 0.0001   | -0.19233 | 2.86E-05 | -0.01963 | 0.67225  |
| 5.09E-13 | -0.37461 | 5.26E-17 | -0.18837 | 4.19E-05 | -0.34177 | 3.06E-14 | -0.09992 | 0.03085  |
| 4.27E-10 | -0.45009 | 1.13E-24 | -0.36637 | 2.79E-16 | -0.41285 | 1.20E-20 | -0.05686 | 0.22004  |
| 1.30E-07 | -0.36023 | 9.35E-16 | -0.30079 | 3.20E-11 | -0.34041 | 3.92E-14 | -0.06528 | 0.15901  |
| 7.88E-07 | -0.37975 | 1.81E-17 | -0.13095 | 0.00459  | -0.26726 | 4.43E-09 | 0.017347 | 0.70848  |
| 8.13E-16 | -0.47874 | 3.98E-28 | -0.36877 | 1.72E-16 | -0.46021 | 7.42E-26 | -0.17144 | 0.0002   |
| 0.61966  | -0.19275 | 2.74E-05 | -0.17283 | 0.00017  | -0.11644 | 0.0118   | -0.01616 | 0.72761  |
| 1.58E-17 | -0.45464 | 3.36E-25 | -0.45287 | 5.40E-25 | -0.49539 | 2.74E-30 | -0.17181 | 0.00019  |
| 0.00186  | -0.24533 | 7.89E-08 | -0.21372 | 3.16E-06 | -0.22533 | 8.66E-07 | -0.04791 | 0.30148  |
| 0.00025  | -0.27782 | 1.01E-09 | -0.2966  | 6.15E-11 | -0.28778 | 2.34E-10 | -0.04124 | 0.37394  |
| 4.74E-13 | -0.51454 | 6.32E-33 | -0.49291 | 5.86E-30 | -0.51848 | 1.72E-33 | -0.04954 | 0.28536  |
| 0.00283  | -0.21695 | 2.22E-06 | -0.14779 | 0.00136  | -0.17188 | 0.00019  | -0.00056 | 0.99034  |
| 2.62E-15 | -0.47078 | 3.92E-27 | -0.36469 | 3.89E-16 | -0.47056 | 4.17E-27 | -0.06052 | 0.19169  |
| 7.92E-06 | -0.20737 | 6.23E-06 | -0.14944 | 0.0012   | -0.21299 | 3.42E-06 | 0.140557 | 0.00233  |
| 2.15E-10 | 0.30438  | 1.81E-11 | 0.347751 | 1.01E-14 | 0.370616 | 1.19E-16 | -0.09864 | 0.03308  |

|          |          |          |          |          |          |          |          |          |
|----------|----------|----------|----------|----------|----------|----------|----------|----------|
| 0.00136  | -0.23356 | 3.32E-07 | -0.22354 | 1.06E-06 | -0.23652 | 2.33E-07 | -0.03207 | 0.48938  |
| 1.70E-10 | -0.37532 | 4.54E-17 | -0.32488 | 6.10E-13 | -0.36298 | 5.45E-16 | -0.20101 | 1.20E-05 |
| 6.64E-08 | -0.24271 | 1.09E-07 | -0.21021 | 4.61E-06 | -0.2753  | 1.44E-09 | -0.06286 | 0.17509  |
| 2.19E-07 | -0.31566 | 2.90E-12 | -0.31827 | 1.88E-12 | -0.33909 | 4.98E-14 | -0.05911 | 0.2023   |
| 4.46E-10 | -0.22885 | 5.77E-07 | -0.24056 | 1.42E-07 | -0.30422 | 1.86E-11 | 0.024095 | 0.6035   |
| 9.18E-05 | -0.29419 | 8.90E-11 | -0.09526 | 0.03962  | -0.18098 | 8.39E-05 | -0.13039 | 0.00477  |
| 0.00023  | -0.42762 | 3.48E-22 | -0.27515 | 1.47E-09 | -0.31306 | 4.45E-12 | -0.06433 | 0.16515  |
| 2.03E-12 | -0.33843 | 5.61E-14 | -0.33026 | 2.40E-13 | -0.39593 | 5.61E-19 | -0.00561 | 0.90374  |
| 2.24E-12 | -0.42982 | 2.02E-22 | -0.3897  | 2.19E-18 | -0.42087 | 1.79E-21 | -0.24694 | 6.45E-08 |
| 0.03247  | -0.21814 | 1.95E-06 | -0.15652 | 0.00069  | -0.19126 | 3.17E-05 | 0.003857 | 0.93376  |
| 0.00683  | -0.20909 | 5.19E-06 | -0.18004 | 9.15E-05 | -0.21358 | 3.21E-06 | -0.02471 | 0.59431  |
| 3.78E-05 | -0.23316 | 3.48E-07 | -0.32352 | 7.71E-13 | -0.28881 | 2.01E-10 | -0.02074 | 0.65488  |
| 0.16543  | -0.4308  | 1.59E-22 | -0.24766 | 5.88E-08 | -0.25741 | 1.67E-08 | -0.1407  | 0.00231  |
| 6.01E-17 | -0.47988 | 2.86E-28 | -0.40964 | 2.53E-20 | -0.49266 | 6.31E-30 | -0.13736 | 0.00293  |
| 0.00206  | -0.20887 | 5.31E-06 | -0.18147 | 8.02E-05 | -0.21157 | 3.99E-06 | -0.00806 | 0.86215  |
| 1.19E-15 | -0.40695 | 4.70E-20 | -0.40478 | 7.71E-20 | -0.44483 | 4.49E-24 | -0.12231 | 0.00815  |
| 2.26E-16 | 0.338264 | 5.78E-14 | 0.290085 | 1.66E-10 | 0.41352  | 1.03E-20 | 0.081968 | 0.0768   |
| 1.94E-06 | -0.3474  | 1.08E-14 | -0.27135 | 2.52E-09 | -0.33747 | 6.67E-14 | -0.24002 | 1.52E-07 |
| 0.04383  | -0.27633 | 1.25E-09 | -0.22572 | 8.29E-07 | -0.22264 | 1.18E-06 | -0.03192 | 0.49138  |
| 3.97E-08 | -0.33562 | 9.29E-14 | -0.31454 | 3.49E-12 | -0.35693 | 1.77E-15 | -0.10957 | 0.01785  |
| 6.48E-13 | -0.30859 | 9.24E-12 | -0.29423 | 8.85E-11 | -0.35761 | 1.55E-15 | -0.07686 | 0.09712  |
| 5.75E-11 | -0.34573 | 1.47E-14 | -0.30948 | 8.00E-12 | -0.36689 | 2.51E-16 | -0.07357 | 0.11234  |
| 0.00124  | -0.37955 | 1.89E-17 | -0.25884 | 1.38E-08 | -0.29811 | 4.86E-11 | 0.046732 | 0.31358  |
| 0.00143  | -0.2319  | 4.04E-07 | -0.12353 | 0.00753  | -0.19064 | 3.37E-05 | -0.00515 | 0.91154  |
| 6.36E-06 | -0.38346 | 8.31E-18 | -0.31718 | 2.25E-12 | -0.3199  | 1.43E-12 | -0.21227 | 3.70E-06 |
| 2.96E-11 | -0.35454 | 2.81E-15 | -0.37046 | 1.22E-16 | -0.4023  | 1.35E-19 | -0.28785 | 2.32E-10 |
| 0.16664  | -0.2057  | 7.42E-06 | -0.04118 | 0.37463  | -0.12006 | 0.00941  | -0.06742 | 0.14573  |
| 2.23E-12 | -0.37435 | 5.54E-17 | -0.30145 | 2.89E-11 | -0.3824  | 1.04E-17 | -0.10062 | 0.0297   |
| 0.30699  | -0.17559 | 0.00014  | -0.01623 | 0.72641  | -0.09427 | 0.04172  | -0.06991 | 0.13141  |
| 6.36E-05 | -0.27751 | 1.05E-09 | -0.25019 | 4.26E-08 | -0.25743 | 1.67E-08 | -0.02988 | 0.51949  |
| 1.53E-12 | -0.38194 | 1.15E-17 | -0.32778 | 3.70E-13 | -0.38876 | 2.68E-18 | -0.11836 | 0.01047  |
| 0.00807  | -0.13434 | 0.00363  | -0.12992 | 0.00492  | -0.15742 | 0.00064  | -0.03405 | 0.46297  |
| 0.00351  | -0.14028 | 0.00238  | -0.13081 | 0.00463  | -0.14913 | 0.00123  | -0.00896 | 0.84679  |
| 1.76E-06 | -0.29842 | 4.64E-11 | -0.29898 | 4.25E-11 | -0.31282 | 4.64E-12 | -0.02078 | 0.65426  |
| 4.12E-24 | -0.41516 | 6.97E-21 | -0.40672 | 4.96E-20 | -0.5281  | 6.74E-35 | -0.21881 | 1.81E-06 |
| 4.34E-13 | -0.41791 | 3.64E-21 | -0.37074 | 1.16E-16 | -0.42802 | 3.16E-22 | -0.07455 | 0.10761  |
| 1.32E-15 | -0.48301 | 1.14E-28 | -0.41198 | 1.47E-20 | -0.4752  | 1.11E-27 | -0.10532 | 0.02283  |
| 5.87E-06 | -0.26066 | 1.08E-08 | -0.28178 | 5.68E-10 | -0.27171 | 2.39E-09 | -0.13034 | 0.00478  |
| 0.09209  | -0.26089 | 1.05E-08 | -0.2052  | 7.81E-06 | -0.2144  | 2.94E-06 | -0.17997 | 9.20E-05 |
| 0.00054  | -0.43077 | 1.60E-22 | -0.33829 | 5.76E-14 | -0.31452 | 3.50E-12 | -0.06656 | 0.15095  |
| 0.00257  | -0.28822 | 2.20E-10 | -0.24036 | 1.46E-07 | -0.24546 | 7.76E-08 | -0.05025 | 0.27847  |
| 7.56E-06 | -0.34875 | 8.41E-15 | -0.28724 | 2.54E-10 | -0.31264 | 4.78E-12 | -0.08037 | 0.08275  |
| 6.50E-08 | -0.38298 | 9.20E-18 | -0.29749 | 5.36E-11 | -0.36692 | 2.49E-16 | 0.069145 | 0.13569  |
| 6.61E-11 | -0.40918 | 2.81E-20 | -0.36243 | 6.07E-16 | -0.40366 | 9.96E-20 | -0.10971 | 0.01771  |
| 1.29E-13 | -0.49431 | 3.82E-30 | -0.4328  | 9.66E-23 | -0.47274 | 2.24E-27 | -0.09195 | 0.04704  |

|          |          |          |          |          |          |          |          |          |
|----------|----------|----------|----------|----------|----------|----------|----------|----------|
| 4.48E-15 | -0.33357 | 1.34E-13 | -0.36394 | 4.51E-16 | -0.40437 | 8.47E-20 | -0.04954 | 0.28531  |
| 4.80E-10 | 0.335445 | 9.59E-14 | 0.204344 | 8.54E-06 | 0.296222 | 6.52E-11 | -0.11322 | 0.01437  |
| 0.0072   | -0.24352 | 9.88E-08 | -0.18609 | 5.21E-05 | -0.19361 | 2.52E-05 | -0.07577 | 0.10198  |
| 0.41174  | -0.06317 | 0.17295  | 0.024448 | 0.5982   | -0.02789 | 0.54769  | 0.04469  | 0.33522  |
| 0.15465  | -0.18952 | 3.76E-05 | -0.12221 | 0.0082   | -0.10254 | 0.02671  | 0.011029 | 0.8121   |
| 2.86E-06 | -0.29355 | 9.81E-11 | -0.24734 | 6.12E-08 | -0.2799  | 7.46E-10 | -0.05014 | 0.27958  |
| 1.05E-11 | -0.38932 | 2.38E-18 | -0.3499  | 6.78E-15 | -0.40259 | 1.27E-19 | -0.06154 | 0.18431  |
| 3.25E-10 | -0.32671 | 4.46E-13 | -0.26976 | 3.14E-09 | -0.32552 | 5.47E-13 | -0.08425 | 0.0689   |
| 1.26E-25 | -0.44072 | 1.30E-23 | -0.45387 | 4.13E-25 | -0.54155 | 6.06E-37 | -0.26802 | 3.99E-09 |
| 3.61E-31 | 0.57072  | 1.03E-41 | 0.334652 | 1.10E-13 | 0.510426 | 2.40E-32 | 0.287238 | 2.54E-10 |
| 1.82E-15 | -0.45448 | 3.50E-25 | -0.3853  | 5.62E-18 | -0.45742 | 1.59E-25 | -0.10841 | 0.01911  |
| 4.23E-07 | -0.21989 | 1.60E-06 | -0.20984 | 4.80E-06 | -0.27693 | 1.14E-09 | -0.02865 | 0.53691  |
| 5.56E-05 | -0.38711 | 3.82E-18 | -0.29725 | 5.56E-11 | -0.32336 | 7.92E-13 | -0.09544 | 0.03923  |
| 0.16383  | -0.20212 | 1.07E-05 | -0.10951 | 0.01792  | -0.07724 | 0.09549  | 0.174512 | 0.00015  |
| 3.63E-12 | -0.26009 | 1.17E-08 | -0.26482 | 6.19E-09 | -0.33069 | 2.23E-13 | -0.12779 | 0.00568  |
| 2.33E-18 | -0.39284 | 1.11E-18 | -0.3903  | 1.92E-18 | -0.45091 | 9.09E-25 | -0.19199 | 2.96E-05 |
| 1.44E-28 | -0.3988  | 2.97E-19 | -0.46477 | 2.11E-26 | -0.52417 | 2.56E-34 | -0.34003 | 4.20E-14 |
| 3.33E-13 | -0.43959 | 1.73E-23 | -0.39597 | 5.56E-19 | -0.44268 | 7.84E-24 | -0.09961 | 0.03139  |
| 0.60812  | -0.24689 | 6.48E-08 | -0.00088 | 0.98486  | -0.07686 | 0.09711  | -0.09766 | 0.03487  |
| 8.89E-15 | -0.41713 | 4.38E-21 | -0.34739 | 1.08E-14 | -0.42107 | 1.71E-21 | -0.06908 | 0.13607  |
| 0.00271  | -0.16358 | 0.00039  | -0.1987  | 1.52E-05 | -0.21938 | 1.70E-06 | -0.16067 | 0.00049  |
| 7.81E-07 | -0.29823 | 4.78E-11 | -0.23497 | 2.80E-07 | -0.28416 | 4.01E-10 | -0.19419 | 2.38E-05 |
| 0.03015  | -0.22481 | 9.19E-07 | -0.11723 | 0.01123  | -0.18059 | 8.69E-05 | -0.15612 | 0.00071  |
| 0.51319  | -0.29467 | 8.27E-11 | -0.21167 | 3.94E-06 | -0.18326 | 6.80E-05 | -0.05376 | 0.24625  |
| 5.70E-05 | -0.1527  | 0.00093  | -0.22458 | 9.44E-07 | -0.2132  | 3.34E-06 | 0.055331 | 0.23271  |
| 3.63E-11 | -0.37618 | 3.80E-17 | -0.29635 | 6.39E-11 | -0.38151 | 1.25E-17 | 0.014285 | 0.75816  |
| 1.99E-18 | 0.242948 | 1.06E-07 | 0.394117 | 8.36E-19 | 0.444035 | 5.52E-24 | 0.120909 | 0.00891  |
| 1.16E-09 | -0.35553 | 2.32E-15 | -0.2991  | 4.17E-11 | -0.33335 | 1.39E-13 | -0.03694 | 0.42583  |
| 0.00043  | -0.28019 | 7.15E-10 | -0.17494 | 0.00014  | -0.22467 | 9.35E-07 | -0.08118 | 0.07967  |
| 6.91E-07 | -0.3574  | 1.62E-15 | -0.25821 | 1.50E-08 | -0.31331 | 4.27E-12 | -0.06268 | 0.17632  |
| 1.29E-06 | -0.34435 | 1.90E-14 | -0.26073 | 1.07E-08 | -0.30692 | 1.21E-11 | -0.12779 | 0.00568  |
| 2.62E-24 | 0.399637 | 2.46E-19 | 0.402988 | 1.16E-19 | 0.494772 | 3.31E-30 | 0.031728 | 0.49399  |
| 0.00063  | -0.3052  | 1.59E-11 | -0.25507 | 2.27E-08 | -0.286   | 3.06E-10 | -0.13027 | 0.00481  |
| 0.00708  | -0.36605 | 2.96E-16 | -0.24233 | 1.15E-07 | -0.23789 | 1.97E-07 | 0.035924 | 0.43864  |
| 2.87E-17 | -0.43346 | 8.18E-23 | -0.3856  | 5.28E-18 | -0.461   | 5.98E-26 | -0.16887 | 0.00025  |
| 0.024    | -0.14243 | 0.00203  | -0.12098 | 0.00887  | -0.13538 | 0.00337  | -0.0014  | 0.97589  |
| 1.89E-06 | -0.28834 | 2.16E-10 | -0.22356 | 1.06E-06 | -0.27586 | 1.33E-09 | -0.03368 | 0.46785  |
| 0.0153   | -0.20664 | 6.72E-06 | -0.22671 | 7.39E-07 | -0.20929 | 5.08E-06 | 0.064834 | 0.16188  |
| 7.59E-08 | -0.42295 | 1.09E-21 | -0.38042 | 1.57E-17 | -0.39234 | 1.23E-18 | 0.022466 | 0.62821  |
| 8.22E-14 | -0.41224 | 1.38E-20 | -0.35441 | 2.88E-15 | -0.41484 | 7.53E-21 | -0.12555 | 0.00659  |
| 7.58E-09 | -0.39035 | 1.90E-18 | -0.30646 | 1.30E-11 | -0.35453 | 2.81E-15 | -0.13658 | 0.0031   |
| 0.03281  | -0.32612 | 4.93E-13 | -0.26029 | 1.14E-08 | -0.23317 | 3.47E-07 | -0.0522  | 0.26028  |
| 0.00053  | -0.32644 | 4.66E-13 | -0.2895  | 1.81E-10 | -0.2828  | 4.90E-10 | -0.28142 | 5.99E-10 |
| 6.17E-06 | -0.33685 | 7.46E-14 | -0.26217 | 8.86E-09 | -0.30139 | 2.91E-11 | -0.06787 | 0.14305  |
| 3.75E-07 | -0.37717 | 3.10E-17 | -0.24141 | 1.28E-07 | -0.3181  | 1.93E-12 | -0.08902 | 0.05455  |

|          |          |          |          |          |          |          |          |          |
|----------|----------|----------|----------|----------|----------|----------|----------|----------|
| 9.33E-12 | -0.43887 | 2.08E-23 | -0.35431 | 2.93E-15 | -0.40508 | 7.21E-20 | -0.10738 | 0.02028  |
| 1.49E-06 | -0.2832  | 4.61E-10 | -0.23777 | 2.00E-07 | -0.26285 | 8.09E-09 | -0.0245  | 0.5975   |
| 7.94E-15 | -0.43295 | 9.29E-23 | -0.37734 | 2.99E-17 | -0.43914 | 1.95E-23 | -0.10161 | 0.02813  |
| 9.25E-09 | -0.31945 | 1.54E-12 | -0.22838 | 6.09E-07 | -0.28523 | 3.42E-10 | -0.13385 | 0.00376  |
| 4.35E-07 | -0.36661 | 2.66E-16 | -0.33747 | 6.68E-14 | -0.33909 | 4.98E-14 | -0.00073 | 0.9874   |
| 2.67E-10 | -0.27027 | 2.92E-09 | -0.29786 | 5.06E-11 | -0.33781 | 6.28E-14 | -0.08789 | 0.05771  |
| 1.93E-16 | -0.42549 | 5.87E-22 | -0.36969 | 1.43E-16 | -0.44401 | 5.57E-24 | -0.12772 | 0.00571  |
| 1.08E-14 | -0.4829  | 1.18E-28 | -0.45009 | 1.13E-24 | -0.49475 | 3.33E-30 | -0.05393 | 0.24477  |
| 0.01584  | -0.22119 | 1.39E-06 | -0.12436 | 0.00713  | -0.17777 | 0.00011  | -0.06216 | 0.17992  |
| 4.41E-23 | 0.324975 | 6.01E-13 | 0.319614 | 1.50E-12 | 0.442051 | 9.23E-24 | 0.055359 | 0.23246  |
| 0.00012  | -0.28238 | 5.21E-10 | -0.21792 | 2.00E-06 | -0.21965 | 1.65E-06 | -0.10951 | 0.01792  |
| 5.30E-11 | -0.47077 | 3.93E-27 | -0.38804 | 3.13E-18 | -0.43934 | 1.85E-23 | -0.07035 | 0.12901  |
| 0.00044  | -0.18795 | 4.37E-05 | -0.27438 | 1.64E-09 | -0.25683 | 1.80E-08 | 0.049763 | 0.2832   |
| 0.85837  | -0.23603 | 2.47E-07 | -0.09842 | 0.03348  | -0.0713  | 0.12388  | -0.02182 | 0.63811  |
| 0.13696  | -0.29273 | 1.11E-10 | -0.12361 | 0.00749  | -0.13713 | 0.00298  | 0.03858  | 0.40552  |
| 0.00407  | -0.25595 | 2.02E-08 | -0.22138 | 1.36E-06 | -0.24178 | 1.23E-07 | -0.13569 | 0.0033   |
| 2.59E-06 | -0.35853 | 1.30E-15 | -0.26934 | 3.33E-09 | -0.32573 | 5.28E-13 | -0.00977 | 0.83316  |
| 0.65762  | -0.38936 | 2.35E-18 | -0.12141 | 0.00863  | -0.17553 | 0.00014  | -0.03119 | 0.5013   |
| 1.16E-21 | -0.41921 | 2.67E-21 | -0.47029 | 4.49E-27 | -0.50697 | 7.30E-32 | -0.37938 | 1.96E-17 |
| 0.00043  | -0.35466 | 2.74E-15 | -0.35496 | 2.59E-15 | -0.31267 | 4.75E-12 | -0.06881 | 0.1376   |
| 1.34E-14 | -0.44782 | 2.06E-24 | -0.38881 | 2.65E-18 | -0.44717 | 2.44E-24 | -0.11565 | 0.01239  |
| 1.38E-11 | 0.349242 | 7.66E-15 | 0.317477 | 2.14E-12 | 0.416835 | 4.70E-21 | 0.214599 | 2.87E-06 |
| 9.39E-23 | -0.47485 | 1.23E-27 | -0.46315 | 3.30E-26 | -0.53004 | 3.46E-35 | -0.28397 | 4.12E-10 |
| 1.81E-09 | -0.46875 | 6.94E-27 | -0.3944  | 7.87E-19 | -0.40189 | 1.49E-19 | -0.13579 | 0.00328  |
| 2.39E-05 | -0.37078 | 1.15E-16 | -0.29487 | 8.02E-11 | -0.29489 | 7.99E-11 | 0.105255 | 0.02292  |
| 0.80798  | 0.053084 | 0.25226  | 0.122226 | 0.00819  | 0.069449 | 0.13398  | -0.21285 | 3.47E-06 |
| 0.02082  | -0.1754  | 0.00014  | -0.11353 | 0.0141   | -0.14456 | 0.00174  | -0.12263 | 0.00798  |
| 3.78E-08 | -0.22351 | 1.07E-06 | -0.10261 | 0.0266   | -0.20681 | 6.61E-06 | -0.10816 | 0.01938  |
| 0.00569  | -0.39064 | 1.79E-18 | -0.19099 | 3.26E-05 | -0.23416 | 3.09E-07 | -0.05974 | 0.19754  |
| 1.26E-09 | -0.41408 | 9.00E-21 | -0.32989 | 2.56E-13 | -0.37347 | 6.64E-17 | -0.17424 | 0.00015  |
| 1.29E-09 | -0.41885 | 2.91E-21 | -0.39318 | 1.03E-18 | -0.41059 | 2.03E-20 | -0.08294 | 0.07335  |
| 0.07056  | -0.277   | 1.13E-09 | -0.23363 | 3.29E-07 | -0.22434 | 9.70E-07 | 0.069327 | 0.13467  |
| 0.03314  | -0.26615 | 5.17E-09 | -0.10733 | 0.02034  | -0.15375 | 0.00086  | 0.030286 | 0.51383  |
| 1.55E-10 | -0.34579 | 1.46E-14 | -0.33046 | 2.32E-13 | -0.368   | 2.01E-16 | -0.28151 | 5.91E-10 |
| 4.00E-05 | -0.37827 | 2.47E-17 | -0.30181 | 2.73E-11 | -0.35261 | 4.06E-15 | 0.027542 | 0.55271  |
| 2.54E-27 | -0.57454 | 2.27E-42 | -0.51939 | 1.27E-33 | -0.59261 | 1.29E-45 | -0.31079 | 6.46E-12 |
| 1.51E-09 | -0.3396  | 4.54E-14 | -0.3199  | 1.43E-12 | -0.35263 | 4.04E-15 | -0.05559 | 0.23054  |
| 0.00019  | -0.18033 | 8.90E-05 | -0.16091 | 0.00048  | -0.22179 | 1.30E-06 | 0.000294 | 0.99495  |
| 1.13E-05 | -0.38534 | 5.57E-18 | -0.33879 | 5.26E-14 | -0.36762 | 2.17E-16 | -0.0908  | 0.04988  |
| 1.99E-05 | -0.28872 | 2.04E-10 | -0.17256 | 0.00018  | -0.2232  | 1.10E-06 | -0.0164  | 0.7237   |
| 9.99E-12 | -0.32137 | 1.11E-12 | -0.21614 | 2.43E-06 | -0.32657 | 4.57E-13 | -0.18667 | 4.93E-05 |
| 4.17E-11 | -0.32411 | 6.97E-13 | -0.29344 | 9.99E-11 | -0.38745 | 3.55E-18 | -0.11101 | 0.0164   |
| 0.00305  | -0.2853  | 3.39E-10 | -0.10563 | 0.02243  | -0.20689 | 6.55E-06 | 0.008988 | 0.84639  |
| 6.05E-05 | -0.33651 | 7.93E-14 | -0.23139 | 4.29E-07 | -0.27631 | 1.25E-09 | -0.16698 | 0.00029  |
| 0.14944  | -0.32468 | 6.32E-13 | -0.25932 | 1.30E-08 | -0.22871 | 5.86E-07 | -0.25488 | 2.33E-08 |

|          |          |          |          |          |          |          |          |          |
|----------|----------|----------|----------|----------|----------|----------|----------|----------|
| 7.15E-07 | -0.34825 | 9.23E-15 | -0.24343 | 9.99E-08 | -0.29373 | 9.55E-11 | -0.03041 | 0.51206  |
| 7.19E-07 | -0.2816  | 5.83E-10 | -0.10664 | 0.02117  | -0.21686 | 2.24E-06 | -0.09103 | 0.0493   |
| 1.80E-06 | -0.25766 | 1.61E-08 | -0.20252 | 1.03E-05 | -0.26116 | 1.01E-08 | -0.23794 | 1.96E-07 |
| 1.08E-16 | -0.47101 | 3.66E-27 | -0.42396 | 8.52E-22 | -0.47435 | 1.41E-27 | -0.18655 | 4.98E-05 |
| 0.00489  | -0.29081 | 1.49E-10 | -0.19708 | 1.79E-05 | -0.23078 | 4.60E-07 | -0.16246 | 0.00042  |
| 3.69E-05 | -0.27573 | 1.36E-09 | -0.02868 | 0.53647  | -0.18549 | 5.51E-05 | -0.00858 | 0.85325  |
| 0.54526  | -0.22968 | 5.24E-07 | -0.00165 | 0.97169  | -0.06801 | 0.14224  | 0.05321  | 0.25113  |
| 6.41E-12 | 0.28492  | 3.58E-10 | 0.217738 | 2.04E-06 | 0.296596 | 6.15E-11 | 0.015076 | 0.74522  |
| 6.45E-10 | -0.36469 | 3.89E-16 | -0.35198 | 4.57E-15 | -0.37432 | 5.57E-17 | -0.36238 | 6.13E-16 |
| 4.89E-14 | -0.42952 | 2.18E-22 | -0.38458 | 6.55E-18 | -0.43295 | 9.29E-23 | -0.13076 | 0.00465  |
| 0.00048  | -0.28288 | 4.83E-10 | -0.30088 | 3.16E-11 | -0.2819  | 5.58E-10 | 0.203497 | 9.32E-06 |
| 3.21E-06 | -0.35171 | 4.81E-15 | -0.23638 | 2.37E-07 | -0.25203 | 3.37E-08 | -0.19371 | 2.50E-05 |
| 1.27E-07 | -0.3821  | 1.11E-17 | -0.4879  | 2.66E-29 | -0.4456  | 3.67E-24 | -0.16742 | 0.00028  |
| 1.55E-24 | -0.60301 | 1.42E-47 | -0.51446 | 6.48E-33 | -0.59753 | 1.56E-46 | -0.1121  | 0.01537  |
| 0.00342  | -0.28154 | 5.89E-10 | -0.21774 | 2.03E-06 | -0.24167 | 1.24E-07 | -0.13838 | 0.00273  |
| 4.24E-06 | -0.38844 | 2.87E-18 | -0.24058 | 1.42E-07 | -0.36832 | 1.89E-16 | -0.17761 | 0.00011  |
| 4.95E-17 | -0.31895 | 1.67E-12 | -0.36708 | 2.42E-16 | -0.42979 | 2.04E-22 | -0.15862 | 0.00058  |
| 3.91E-07 | -0.30934 | 8.18E-12 | -0.26357 | 7.33E-09 | -0.29727 | 5.54E-11 | -0.17652 | 0.00013  |
| 1.48E-19 | -0.53292 | 1.28E-35 | -0.30138 | 2.92E-11 | -0.47344 | 1.83E-27 | -0.23325 | 3.44E-07 |
| 2.64E-06 | -0.24577 | 7.46E-08 | -0.23234 | 3.83E-07 | -0.25582 | 2.06E-08 | -0.07524 | 0.10439  |
| 1.45E-21 | -0.38871 | 2.71E-18 | -0.43662 | 3.69E-23 | -0.47689 | 6.80E-28 | -0.40669 | 5.00E-20 |
| 0.0162   | -0.29143 | 1.36E-10 | -0.2526  | 3.13E-08 | -0.23853 | 1.82E-07 | -0.04932 | 0.2875   |
| 5.17E-11 | -0.24982 | 4.47E-08 | -0.29283 | 1.10E-10 | -0.34175 | 3.07E-14 | 0.061994 | 0.18109  |
| 1.06E-10 | -0.38928 | 2.40E-18 | -0.35959 | 1.06E-15 | -0.39833 | 3.29E-19 | -0.172   | 0.00019  |
| 1.02E-46 | 0.406488 | 5.23E-20 | 0.59016  | 3.66E-45 | 0.627153 | 2.03E-52 | 0.226975 | 7.17E-07 |
| 0.05431  | -0.2794  | 8.03E-10 | -0.17746 | 0.00012  | -0.1717  | 0.00019  | -0.14865 | 0.00127  |
| 8.29E-13 | -0.32907 | 2.96E-13 | -0.31793 | 1.99E-12 | -0.37864 | 2.28E-17 | -0.26334 | 7.56E-09 |
| 1.37E-28 | 0.417515 | 4.00E-21 | 0.382665 | 9.83E-18 | 0.482901 | 1.18E-28 | 0.192675 | 2.77E-05 |
| 4.24E-11 | 0.672629 | 8.44E-63 | 0.446298 | 3.06E-24 | 0.507947 | 5.33E-32 | 0.179873 | 9.28E-05 |
| 3.05E-12 | -0.46903 | 6.41E-27 | -0.37836 | 2.42E-17 | -0.43973 | 1.67E-23 | -0.13249 | 0.00413  |
| 0.0788   | -0.25276 | 3.06E-08 | -0.17734 | 0.00012  | -0.19678 | 1.84E-05 | -0.08342 | 0.07168  |
| 0.00152  | 0.246256 | 7.02E-08 | 0.118111 | 0.01063  | 0.19532  | 2.13E-05 | -0.0103  | 0.82439  |
| 0.00063  | -0.19776 | 1.67E-05 | -0.14142 | 0.00219  | -0.16968 | 0.00023  | -0.05536 | 0.23243  |
| 1.90E-05 | -0.30961 | 7.83E-12 | -0.22057 | 1.48E-06 | -0.26283 | 8.10E-09 | -0.09443 | 0.04137  |
| 2.92E-15 | -0.27341 | 1.89E-09 | -0.29566 | 7.11E-11 | -0.374   | 5.96E-17 | -0.14698 | 0.00145  |
| 7.82E-06 | -0.21065 | 4.40E-06 | -0.19753 | 1.71E-05 | -0.22852 | 5.99E-07 | -0.05193 | 0.26277  |
| 0.18961  | -0.16058 | 0.00049  | -0.03312 | 0.47528  | -0.03776 | 0.41553  | 0.074914 | 0.10591  |
| 2.20E-14 | -0.49004 | 1.40E-29 | -0.37717 | 3.10E-17 | -0.471   | 3.67E-27 | -0.21572 | 2.54E-06 |
| 0.46299  | -0.18725 | 4.67E-05 | -0.21335 | 3.29E-06 | -0.14533 | 0.00164  | 0.021932 | 0.63639  |
| 7.09E-09 | -0.23103 | 4.47E-07 | -0.15962 | 0.00054  | -0.21372 | 3.16E-06 | -0.05033 | 0.27774  |
| 5.52E-08 | -0.32324 | 8.09E-13 | -0.29312 | 1.05E-10 | -0.32275 | 8.79E-13 | -0.08478 | 0.06719  |
| 4.09E-06 | -0.27868 | 8.90E-10 | -0.22145 | 1.35E-06 | -0.27919 | 8.27E-10 | -0.07927 | 0.08705  |
| 2.15E-06 | -0.24425 | 9.02E-08 | -0.18506 | 5.74E-05 | -0.23429 | 3.04E-07 | -0.1471  | 0.00143  |
| 5.80E-05 | -0.27469 | 1.57E-09 | -0.2312  | 4.38E-07 | -0.25045 | 4.12E-08 | -0.10886 | 0.01862  |
| 5.29E-05 | -0.23548 | 2.64E-07 | -0.21891 | 1.79E-06 | -0.22517 | 8.82E-07 | -0.24728 | 6.17E-08 |

|          |          |          |          |          |          |          |          |          |
|----------|----------|----------|----------|----------|----------|----------|----------|----------|
| 3.97E-09 | -0.36582 | 3.11E-16 | -0.27179 | 2.36E-09 | -0.33196 | 1.78E-13 | -0.14129 | 0.00221  |
| 0.01565  | -0.10604 | 0.02191  | -0.06697 | 0.14846  | -0.12116 | 0.00877  | 0.015585 | 0.73694  |
| 0.26764  | -0.28794 | 2.29E-10 | -0.10845 | 0.01907  | -0.13929 | 0.00256  | -0.08863 | 0.05563  |
| 5.04E-08 | -0.43386 | 7.39E-23 | -0.23795 | 1.96E-07 | -0.32368 | 7.50E-13 | 0.064149 | 0.16636  |
| 9.69E-10 | -0.27871 | 8.86E-10 | -0.30099 | 3.10E-11 | -0.33188 | 1.81E-13 | -0.20158 | 1.14E-05 |
| 7.77E-18 | -0.50447 | 1.61E-31 | -0.4982  | 1.15E-30 | -0.53649 | 3.65E-36 | 0.01127  | 0.80808  |
| 1.04E-06 | -0.38898 | 2.56E-18 | -0.45336 | 4.73E-25 | -0.42359 | 9.31E-22 | -0.17787 | 0.00011  |
| 0.00172  | -0.34415 | 1.98E-14 | -0.22893 | 5.72E-07 | -0.25922 | 1.31E-08 | -0.02951 | 0.52474  |
| 2.15E-10 | 0.320805 | 1.22E-12 | 0.450314 | 1.07E-24 | 0.377341 | 2.99E-17 | 0.17196  | 0.00019  |
| 1.25E-18 | -0.49107 | 1.02E-29 | -0.44887 | 1.56E-24 | -0.5192  | 1.36E-33 | -0.13961 | 0.0025   |
| 3.96E-07 | -0.34061 | 3.78E-14 | -0.24019 | 1.49E-07 | -0.30096 | 3.12E-11 | -0.14883 | 0.00126  |
| 0.0393   | -0.29402 | 9.14E-11 | -0.20238 | 1.05E-05 | -0.19894 | 1.48E-05 | -0.06051 | 0.19182  |
| 0.00772  | -0.33285 | 1.52E-13 | -0.19856 | 1.54E-05 | -0.23819 | 1.90E-07 | -0.10347 | 0.02534  |
| 4.94E-10 | -0.41528 | 6.79E-21 | -0.36217 | 6.39E-16 | -0.40951 | 2.61E-20 | -0.10845 | 0.01906  |
| 9.79E-11 | -0.38515 | 5.80E-18 | -0.32315 | 8.22E-13 | -0.36087 | 8.26E-16 | -0.03065 | 0.50877  |
| 3.85E-12 | -0.40774 | 3.92E-20 | -0.35773 | 1.52E-15 | -0.40835 | 3.41E-20 | -0.08461 | 0.06771  |
| 1.02E-06 | -0.3994  | 2.59E-19 | -0.34382 | 2.10E-14 | -0.35705 | 1.73E-15 | 0.026194 | 0.57232  |
| 4.19E-15 | 0.438399 | 2.35E-23 | 0.334313 | 1.17E-13 | 0.457574 | 1.52E-25 | 0.136311 | 0.00316  |
| 4.96E-15 | -0.16733 | 0.00028  | -0.20756 | 6.10E-06 | -0.33545 | 9.58E-14 | -0.07566 | 0.10248  |
| 4.92E-06 | -0.32363 | 7.57E-13 | -0.22674 | 7.37E-07 | -0.27407 | 1.72E-09 | -0.0688  | 0.13764  |
| 0.00063  | -0.25875 | 1.40E-08 | -0.19549 | 2.10E-05 | -0.25528 | 2.21E-08 | -0.02823 | 0.54278  |
| 3.63E-09 | -0.24455 | 8.69E-08 | -0.24346 | 9.96E-08 | -0.30532 | 1.56E-11 | -0.09025 | 0.05129  |
| 0.2072   | -0.2857  | 3.19E-10 | -0.1205  | 0.00915  | -0.14145 | 0.00218  | -0.05663 | 0.22193  |
| 0.0449   | -0.21949 | 1.68E-06 | -0.13949 | 0.00252  | -0.16944 | 0.00023  | -0.14122 | 0.00222  |
| 1.64E-13 | -0.38041 | 1.58E-17 | -0.34851 | 8.79E-15 | -0.41215 | 1.41E-20 | -0.11106 | 0.01635  |
| 5.57E-11 | -0.21104 | 4.22E-06 | -0.24642 | 6.88E-08 | -0.30121 | 3.00E-11 | -0.04551 | 0.32637  |
| 2.77E-12 | -0.45454 | 3.45E-25 | -0.4346  | 6.15E-23 | -0.46093 | 6.10E-26 | -0.02281 | 0.62293  |
| 1.47E-09 | -0.40231 | 1.35E-19 | -0.3611  | 7.89E-16 | -0.39246 | 1.20E-18 | -0.09412 | 0.04204  |
| 0.59311  | -0.23527 | 2.70E-07 | -0.10932 | 0.01812  | -0.14157 | 0.00217  | -0.02443 | 0.59849  |
| 0.27593  | -0.1656  | 0.00033  | -0.12257 | 0.00801  | -0.10233 | 0.02702  | -0.01107 | 0.81148  |
| 2.17E-07 | -0.31567 | 2.90E-12 | -0.28784 | 2.32E-10 | -0.31589 | 2.79E-12 | -0.07777 | 0.09322  |
| 0.00552  | -0.26816 | 3.92E-09 | -0.26862 | 3.67E-09 | -0.26251 | 8.46E-09 | 0.010628 | 0.81882  |
| 2.18E-09 | -0.34963 | 7.12E-15 | -0.29196 | 1.25E-10 | -0.35077 | 5.74E-15 | -0.06437 | 0.16493  |
| 7.29E-09 | -0.34658 | 1.26E-14 | -0.29678 | 5.98E-11 | -0.34335 | 2.29E-14 | -0.07382 | 0.11111  |
| 3.96E-07 | -0.27386 | 1.77E-09 | -0.2287  | 5.87E-07 | -0.27852 | 9.11E-10 | -0.04621 | 0.319    |
| 5.51E-12 | -0.43805 | 2.57E-23 | -0.36632 | 2.81E-16 | -0.42148 | 1.55E-21 | -0.10547 | 0.02264  |
| 1.26E-08 | -0.28571 | 3.19E-10 | -0.24984 | 4.46E-08 | -0.29398 | 9.20E-11 | -0.05099 | 0.27144  |
| 3.06E-09 | -0.30684 | 1.23E-11 | -0.25397 | 2.62E-08 | -0.31292 | 4.56E-12 | -0.07246 | 0.1179   |
| 9.67E-13 | -0.40184 | 1.50E-19 | -0.35193 | 4.61E-15 | -0.42037 | 2.02E-21 | -0.09777 | 0.03467  |
| 0.86823  | -0.16928 | 0.00024  | -0.14931 | 0.00121  | -0.1338  | 0.00377  | -0.00921 | 0.84269  |
| 4.23E-07 | -0.24612 | 7.15E-08 | -0.21915 | 1.74E-06 | -0.2623  | 8.71E-09 | -0.01314 | 0.77699  |
| 6.83E-05 | -0.28053 | 6.81E-10 | -0.3376  | 6.51E-14 | -0.29779 | 5.11E-11 | -0.07264 | 0.11695  |
| 1.32E-06 | -0.31103 | 6.22E-12 | -0.31258 | 4.82E-12 | -0.31601 | 2.74E-12 | -0.03956 | 0.39366  |
| 0.01147  | -0.26751 | 4.29E-09 | -0.16456 | 0.00036  | -0.18539 | 5.57E-05 | -0.0566  | 0.22215  |
| 1.75E-11 | -0.37838 | 2.41E-17 | -0.33317 | 1.44E-13 | -0.37968 | 1.84E-17 | -0.11544 | 0.01255  |

|          |          |          |          |          |          |          |          |          |
|----------|----------|----------|----------|----------|----------|----------|----------|----------|
| 2.69E-09 | -0.35356 | 3.38E-15 | -0.31041 | 6.88E-12 | -0.34319 | 2.36E-14 | -0.09726 | 0.03563  |
| 7.92E-06 | -0.2066  | 6.75E-06 | -0.21983 | 1.61E-06 | -0.24037 | 1.46E-07 | -0.03033 | 0.51328  |
| 5.40E-05 | -0.20963 | 4.90E-06 | -0.18449 | 6.06E-05 | -0.21623 | 2.40E-06 | -0.04739 | 0.30683  |
| 3.92E-06 | -0.20723 | 6.32E-06 | -0.18284 | 7.06E-05 | -0.23654 | 2.32E-07 | -0.04664 | 0.31451  |
| 0.00576  | -0.20767 | 6.03E-06 | -0.17109 | 0.0002   | -0.19847 | 1.56E-05 | -0.01344 | 0.77203  |
| 0.14444  | -0.18695 | 4.80E-05 | -0.17417 | 0.00016  | -0.16751 | 0.00028  | -0.04319 | 0.35171  |
| 0.00902  | -0.25819 | 1.51E-08 | -0.14938 | 0.00121  | -0.18825 | 4.24E-05 | -0.06739 | 0.14594  |
| 1.13E-09 | -0.36737 | 2.28E-16 | -0.32016 | 1.37E-12 | -0.36601 | 2.99E-16 | -0.09724 | 0.03567  |
| 1.66E-05 | -0.28651 | 2.83E-10 | -0.22437 | 9.67E-07 | -0.25019 | 4.27E-08 | -0.1183  | 0.01051  |
| 0.00014  | -0.29106 | 1.43E-10 | -0.26825 | 3.87E-09 | -0.28234 | 5.24E-10 | -0.04917 | 0.28902  |
| 8.33E-08 | -0.34463 | 1.81E-14 | -0.29245 | 1.16E-10 | -0.32709 | 4.17E-13 | -0.09163 | 0.04781  |
| 2.27E-08 | -0.36285 | 5.60E-16 | -0.30029 | 3.46E-11 | -0.33849 | 5.55E-14 | -0.0909  | 0.04963  |
| 0.00031  | -0.27567 | 1.37E-09 | -0.1965  | 1.90E-05 | -0.22528 | 8.72E-07 | -0.07466 | 0.10713  |
| 5.43E-06 | -0.29531 | 7.49E-11 | -0.30284 | 2.32E-11 | -0.31021 | 7.10E-12 | -0.05647 | 0.22323  |
| 3.80E-11 | -0.40305 | 1.14E-19 | -0.33228 | 1.68E-13 | -0.376   | 3.95E-17 | -0.10046 | 0.02996  |
| 5.19E-06 | -0.31051 | 6.77E-12 | -0.24778 | 5.80E-08 | -0.27598 | 1.31E-09 | -0.05651 | 0.22287  |
| 6.58E-08 | -0.33796 | 6.11E-14 | -0.28195 | 5.54E-10 | -0.33112 | 2.06E-13 | -0.08075 | 0.08129  |
| 1.88E-07 | -0.36159 | 7.16E-16 | -0.28095 | 6.41E-10 | -0.33489 | 1.06E-13 | -0.08025 | 0.08319  |
| 1.21E-05 | -0.23903 | 1.72E-07 | -0.15527 | 0.00076  | -0.21658 | 2.31E-06 | -0.05991 | 0.19624  |
| 1.46E-10 | -0.3701  | 1.32E-16 | -0.33027 | 2.40E-13 | -0.37038 | 1.24E-16 | -0.09426 | 0.04176  |
| 8.29E-09 | -0.31546 | 3.00E-12 | -0.30387 | 1.97E-11 | -0.34291 | 2.48E-14 | -0.03052 | 0.51052  |
| 1.07E-10 | -0.37732 | 3.00E-17 | -0.33601 | 8.67E-14 | -0.38307 | 9.04E-18 | -0.10835 | 0.01918  |
| 0.00413  | -0.18558 | 5.46E-05 | -0.1691  | 0.00024  | -0.20777 | 5.97E-06 | 0.004027 | 0.93083  |
| 4.69E-11 | -0.36461 | 3.95E-16 | -0.32883 | 3.08E-13 | -0.38399 | 7.43E-18 | -0.1254  | 0.00666  |
| 0.02858  | -0.25661 | 1.86E-08 | -0.19949 | 1.40E-05 | -0.19554 | 2.09E-05 | -0.03193 | 0.49123  |
| 6.78E-10 | -0.35259 | 4.07E-15 | -0.28641 | 2.88E-10 | -0.34984 | 6.84E-15 | -0.08482 | 0.06704  |
| 6.93E-07 | -0.34578 | 1.46E-14 | -0.31979 | 1.45E-12 | -0.33748 | 6.66E-14 | -0.08827 | 0.05664  |
| 0.00347  | -0.15477 | 0.00079  | -0.14502 | 0.00168  | -0.17491 | 0.00015  | -0.00793 | 0.86421  |
| 0.03777  | -0.23613 | 2.44E-07 | -0.19138 | 3.14E-05 | -0.19531 | 2.14E-05 | -0.05555 | 0.23085  |
| 5.75E-11 | -0.40992 | 2.38E-20 | -0.35653 | 1.92E-15 | -0.40053 | 2.01E-19 | -0.09171 | 0.04761  |
| 2.58E-06 | -0.27688 | 1.15E-09 | -0.18882 | 4.02E-05 | -0.26872 | 3.62E-09 | -0.07399 | 0.11031  |
| 2.96E-05 | -0.18439 | 6.11E-05 | -0.12124 | 0.00873  | -0.18396 | 6.36E-05 | -0.00704 | 0.87932  |
| 1.95E-05 | -0.33375 | 1.30E-13 | -0.24452 | 8.73E-08 | -0.28592 | 3.09E-10 | -0.0558  | 0.22875  |
| 0.24024  | -0.21379 | 3.14E-06 | -0.35567 | 2.26E-15 | -0.25408 | 2.58E-08 | 0.003949 | 0.93218  |
| 0.401    | -0.16091 | 0.00048  | -0.07087 | 0.12616  | -0.10516 | 0.02304  | 0.248708 | 5.15E-08 |
| 1.64E-10 | -0.39058 | 1.81E-18 | -0.33317 | 1.44E-13 | -0.38876 | 2.68E-18 | -0.11794 | 0.01075  |
| 4.09E-14 | -0.38854 | 2.81E-18 | -0.36796 | 2.03E-16 | -0.40848 | 3.31E-20 | -0.14782 | 0.00136  |
| 4.53E-08 | -0.36229 | 6.24E-16 | -0.30758 | 1.09E-11 | -0.34138 | 3.28E-14 | -0.089   | 0.05461  |
| 7.46E-06 | -0.38742 | 3.58E-18 | -0.28108 | 6.29E-10 | -0.32084 | 1.22E-12 | -0.09427 | 0.04171  |
| 3.26E-06 | -0.32707 | 4.19E-13 | -0.26547 | 5.67E-09 | -0.29868 | 4.45E-11 | -0.07947 | 0.08626  |
| 4.90E-08 | -0.371   | 1.10E-16 | -0.31542 | 3.02E-12 | -0.34901 | 8.00E-15 | -0.09276 | 0.04512  |
| 3.20E-16 | -0.42487 | 6.82E-22 | -0.37056 | 1.20E-16 | -0.44207 | 9.19E-24 | -0.09323 | 0.04404  |
| 0.00091  | -0.25064 | 4.02E-08 | -0.23724 | 2.13E-07 | -0.23771 | 2.02E-07 | -0.24072 | 1.40E-07 |
| 1.25E-10 | -0.35701 | 1.75E-15 | -0.36428 | 4.22E-16 | -0.3935  | 9.58E-19 | -0.14982 | 0.00116  |
| 0.08228  | -0.15526 | 0.00076  | -0.14568 | 0.0016   | -0.14015 | 0.0024   | 0.015698 | 0.7351   |

|          |          |          |          |          |          |          |          |          |
|----------|----------|----------|----------|----------|----------|----------|----------|----------|
| 0.16123  | -0.19085 | 3.30E-05 | -0.23707 | 2.18E-07 | -0.16486 | 0.00035  | -0.03913 | 0.39885  |
| 8.29E-12 | -0.42151 | 1.54E-21 | -0.36587 | 3.08E-16 | -0.41482 | 7.57E-21 | -0.106   | 0.02196  |
| 2.25E-24 | -0.43353 | 8.04E-23 | -0.52333 | 3.40E-34 | -0.54179 | 5.56E-37 | -0.30412 | 1.89E-11 |
| 5.16E-10 | -0.38005 | 1.70E-17 | -0.34667 | 1.24E-14 | -0.38935 | 2.36E-18 | -0.12828 | 0.0055   |
| 1.57E-13 | -0.3509  | 5.61E-15 | -0.47841 | 4.38E-28 | -0.4381  | 2.54E-23 | -0.24304 | 1.05E-07 |
| 2.22E-11 | -0.41809 | 3.49E-21 | -0.3494  | 7.43E-15 | -0.41097 | 1.86E-20 | -0.07045 | 0.12844  |
| 1.14E-08 | -0.32964 | 2.68E-13 | -0.14154 | 0.00217  | -0.27975 | 7.63E-10 | -0.1525  | 0.00095  |
| 1.65E-16 | -0.39395 | 8.68E-19 | -0.35191 | 4.64E-15 | -0.42428 | 7.88E-22 | -0.20582 | 7.32E-06 |
| 8.46E-12 | 0.312481 | 4.90E-12 | 0.331306 | 2.00E-13 | 0.365182 | 3.53E-16 | 0.038439 | 0.40725  |
| 0.95493  | 0.094667 | 0.04087  | 0.084045 | 0.06959  | 0.023038 | 0.61948  | 0.143242 | 0.00191  |
| 4.85E-12 | -0.32784 | 3.66E-13 | -0.21498 | 2.76E-06 | -0.34279 | 2.54E-14 | -0.13167 | 0.00437  |
| 0.5517   | -0.03585 | 0.43956  | -0.06585 | 0.15536  | -0.07885 | 0.08875  | -0.07545 | 0.10342  |
| 1.32E-15 | -0.44809 | 1.91E-24 | -0.35993 | 9.92E-16 | -0.44096 | 1.22E-23 | -0.1204  | 0.0092   |
| 0.00352  | -0.31071 | 6.54E-12 | -0.25837 | 1.47E-08 | -0.24905 | 4.93E-08 | 0.111442 | 0.01598  |
| 2.60E-13 | -0.43356 | 7.98E-23 | -0.38219 | 1.09E-17 | -0.43483 | 5.81E-23 | -0.12587 | 0.00646  |
| 0.06639  | -0.35476 | 2.69E-15 | -0.19578 | 2.04E-05 | -0.24498 | 8.24E-08 | 0.126607 | 0.00615  |
| 2.77E-06 | -0.39929 | 2.66E-19 | -0.35135 | 5.15E-15 | -0.34618 | 1.36E-14 | -0.06091 | 0.18888  |
| 2.23E-06 | -0.37912 | 2.07E-17 | -0.40048 | 2.04E-19 | -0.35663 | 1.88E-15 | -0.02615 | 0.57298  |
| 0.00095  | -0.15355 | 0.00087  | -0.20066 | 1.25E-05 | -0.1983  | 1.58E-05 | 0.005744 | 0.90147  |
| 6.41E-07 | -0.24491 | 8.31E-08 | -0.19436 | 2.34E-05 | -0.25656 | 1.87E-08 | -0.08709 | 0.06003  |
| 4.47E-14 | -0.39728 | 4.16E-19 | -0.34353 | 2.21E-14 | -0.40771 | 3.95E-20 | -0.09073 | 0.05007  |
| 0.79844  | -0.30221 | 2.56E-11 | -0.14455 | 0.00174  | -0.1556  | 0.00074  | -0.06044 | 0.19228  |
| 2.79E-18 | -0.50286 | 2.68E-31 | -0.42043 | 1.99E-21 | -0.5093  | 3.46E-32 | -0.10195 | 0.0276   |
| 4.17E-08 | -0.31829 | 1.87E-12 | -0.29308 | 1.06E-10 | -0.32078 | 1.23E-12 | -0.08699 | 0.06033  |
| 0.07224  | -0.14361 | 0.00186  | -0.15451 | 0.00081  | -0.13659 | 0.0031   | -0.05636 | 0.22409  |
| 0.54314  | -0.20982 | 4.80E-06 | -0.05516 | 0.23414  | -0.07449 | 0.10793  | 0.073037 | 0.11497  |
| 0.00761  | -0.16003 | 0.00052  | -0.15257 | 0.00094  | -0.16245 | 0.00042  | -0.12015 | 0.00935  |
| 3.80E-07 | -0.37563 | 4.27E-17 | -0.2967  | 6.05E-11 | -0.36177 | 6.92E-16 | -0.07892 | 0.08848  |
| 5.96E-20 | 0.307958 | 1.02E-11 | 0.385162 | 5.79E-18 | 0.437105 | 3.27E-23 | 0.040123 | 0.38699  |
| 5.23E-08 | -0.39083 | 1.71E-18 | -0.19976 | 1.37E-05 | -0.32527 | 5.71E-13 | -0.17965 | 9.47E-05 |
| 7.01E-08 | -0.31412 | 3.74E-12 | -0.25413 | 2.57E-08 | -0.3204  | 1.31E-12 | -0.08031 | 0.08298  |
| 5.68E-12 | -0.40419 | 8.84E-20 | -0.4621  | 4.41E-26 | -0.46404 | 2.59E-26 | -0.09826 | 0.03376  |
| 3.73E-10 | -0.23601 | 2.47E-07 | -0.36349 | 4.93E-16 | -0.31298 | 4.51E-12 | -0.0843  | 0.06874  |
| 1.03E-07 | -0.18146 | 8.02E-05 | -0.30306 | 2.24E-11 | -0.31057 | 6.69E-12 | -0.3069  | 1.21E-11 |
| 2.46E-17 | -0.49718 | 1.58E-30 | -0.37689 | 3.29E-17 | -0.47975 | 2.96E-28 | -0.13467 | 0.00355  |
| 0.2846   | -0.27609 | 1.29E-09 | -0.14539 | 0.00163  | -0.1398  | 0.00246  | 0.144738 | 0.00171  |
| 1.04E-12 | -0.40879 | 3.08E-20 | -0.36967 | 1.43E-16 | -0.42103 | 1.72E-21 | -0.10229 | 0.02707  |
| 0.00168  | -0.36293 | 5.51E-16 | -0.20877 | 5.37E-06 | -0.24678 | 6.57E-08 | -0.12782 | 0.00567  |
| 0.57081  | -0.32354 | 7.68E-13 | -0.13467 | 0.00355  | -0.16055 | 0.0005   | -0.00239 | 0.95885  |
| 1.44E-12 | -0.42846 | 2.83E-22 | -0.37807 | 2.57E-17 | -0.42498 | 6.65E-22 | -0.08952 | 0.05321  |
| 0.00325  | -0.20361 | 9.21E-06 | -0.19775 | 1.67E-05 | -0.1904  | 3.45E-05 | -0.07949 | 0.08618  |
| 0.00227  | -0.22219 | 1.24E-06 | -0.19028 | 3.49E-05 | -0.20102 | 1.20E-05 | -0.03994 | 0.38915  |
| 0.11384  | -0.18878 | 4.03E-05 | -0.08615 | 0.06287  | -0.10384 | 0.02483  | -0.03137 | 0.4989   |
| 1.50E-07 | -0.33445 | 1.15E-13 | -0.24633 | 6.95E-08 | -0.29295 | 1.08E-10 | -0.11653 | 0.01173  |
| 0.00089  | -0.23674 | 2.27E-07 | -0.20091 | 1.22E-05 | -0.21259 | 3.57E-06 | -0.07094 | 0.12581  |



|          |          |          |          |          |          |          |          |          |
|----------|----------|----------|----------|----------|----------|----------|----------|----------|
| 7.06E-05 | -0.26525 | 5.84E-09 | -0.23365 | 3.28E-07 | -0.25481 | 2.35E-08 | -0.06974 | 0.13234  |
| 7.30E-13 | 0.332628 | 1.58E-13 | 0.432799 | 9.65E-23 | 0.426393 | 4.70E-22 | -0.20881 | 5.35E-06 |
| 1.72E-14 | -0.10476 | 0.02358  | -0.14087 | 0.00228  | -0.23256 | 3.73E-07 | -0.23162 | 4.17E-07 |
| 6.92E-15 | -0.48315 | 1.09E-28 | -0.43571 | 4.65E-23 | -0.48458 | 7.16E-29 | -0.11155 | 0.01588  |
| 0.00837  | -0.26697 | 4.61E-09 | -0.19187 | 2.99E-05 | -0.18707 | 4.75E-05 | -0.0383  | 0.40894  |
| 1.93E-18 | 0.557259 | 1.88E-39 | 0.311481 | 5.77E-12 | 0.44035  | 1.43E-23 | 0.301785 | 2.74E-11 |
| 0.00029  | -0.385   | 5.99E-18 | -0.31463 | 3.44E-12 | -0.32476 | 6.24E-13 | -0.12137 | 0.00865  |
| 7.37E-08 | -0.43818 | 2.49E-23 | -0.23746 | 2.08E-07 | -0.33584 | 8.94E-14 | -0.24275 | 1.09E-07 |
| 4.74E-11 | -0.48616 | 4.48E-29 | -0.35811 | 1.41E-15 | -0.42408 | 8.26E-22 | -0.12112 | 0.00879  |
| 2.48E-07 | -0.39749 | 3.97E-19 | -0.27741 | 1.07E-09 | -0.34194 | 2.97E-14 | -0.06591 | 0.15504  |
| 6.54E-14 | -0.39136 | 1.53E-18 | -0.42137 | 1.59E-21 | -0.47496 | 1.19E-27 | -0.31421 | 3.69E-12 |
| 1.06E-10 | -0.35243 | 4.20E-15 | -0.47645 | 7.72E-28 | -0.42689 | 4.17E-22 | 0.093282 | 0.04392  |
| 0.04055  | -0.36461 | 3.95E-16 | -0.27625 | 1.26E-09 | -0.28683 | 2.70E-10 | -0.02221 | 0.63214  |
| 1.22E-16 | -0.46521 | 1.87E-26 | -0.38029 | 1.62E-17 | -0.45208 | 6.67E-25 | -0.14196 | 0.0021   |
| 6.61E-06 | -0.31546 | 3.00E-12 | -0.27434 | 1.65E-09 | -0.29608 | 6.66E-11 | -0.08446 | 0.06821  |
| 1.24E-10 | -0.37916 | 2.05E-17 | -0.29946 | 3.94E-11 | -0.36908 | 1.62E-16 | -0.08074 | 0.08134  |
| 0.17235  | -0.25731 | 1.69E-08 | -0.15704 | 0.00066  | -0.15121 | 0.00105  | -0.04961 | 0.28468  |
| 0.01562  | -0.19689 | 1.82E-05 | -0.13719 | 0.00297  | -0.14662 | 0.00149  | -0.01101 | 0.8125   |
| 2.30E-07 | -0.15712 | 0.00066  | -0.21388 | 3.11E-06 | -0.24526 | 7.95E-08 | -0.09719 | 0.03575  |
| 0.00027  | -0.27779 | 1.01E-09 | -0.19837 | 1.57E-05 | -0.25499 | 2.29E-08 | -0.01382 | 0.76574  |
| 1.78E-07 | -0.29183 | 1.27E-10 | -0.22726 | 6.94E-07 | -0.29773 | 5.16E-11 | -0.08363 | 0.07098  |
| 0.04901  | -0.19958 | 1.39E-05 | -0.11996 | 0.00946  | -0.15309 | 0.0009   | -0.04902 | 0.29042  |
| 1.99E-17 | -0.61077 | 4.35E-49 | -0.48687 | 3.63E-29 | -0.56521 | 8.96E-41 | -0.28677 | 2.73E-10 |
| 4.04E-11 | -0.29778 | 5.12E-11 | -0.23876 | 1.78E-07 | -0.33481 | 1.07E-13 | -0.23291 | 3.58E-07 |
| 3.54E-06 | -0.25675 | 1.82E-08 | -0.2132  | 3.34E-06 | -0.29867 | 4.46E-11 | -0.1232  | 0.00769  |
| 0.00047  | -0.10582 | 0.02219  | -0.11429 | 0.01346  | -0.13119 | 0.00451  | 0.033462 | 0.47067  |
| 3.37E-12 | -0.42635 | 4.75E-22 | -0.38212 | 1.10E-17 | -0.42142 | 1.57E-21 | -0.08821 | 0.0568   |
| 2.17E-16 | -0.39509 | 6.75E-19 | -0.35228 | 4.32E-15 | -0.42903 | 2.46E-22 | -0.09797 | 0.0343   |
| 2.31E-08 | -0.25626 | 1.94E-08 | -0.2285  | 6.01E-07 | -0.27834 | 9.34E-10 | -0.0705  | 0.12819  |
| 2.05E-08 | 0.353015 | 3.76E-15 | 0.3015   | 2.86E-11 | 0.2901   | 1.66E-10 | 0.128902 | 0.00527  |
| 1.33E-07 | -0.38184 | 1.17E-17 | -0.24262 | 1.11E-07 | -0.34261 | 2.62E-14 | -0.03019 | 0.51513  |
| 8.80E-08 | 0.459972 | 7.92E-26 | 0.10856  | 0.01894  | 0.265766 | 5.44E-09 | 0.064125 | 0.16652  |
| 3.41E-18 | -0.59104 | 2.52E-45 | -0.47906 | 3.62E-28 | -0.59103 | 2.53E-45 | -0.1186  | 0.01031  |
| 2.14E-09 | -0.39158 | 1.46E-18 | -0.34558 | 1.52E-14 | -0.39404 | 8.51E-19 | -0.07434 | 0.1086   |
| 2.61E-09 | -0.27052 | 2.82E-09 | -0.29142 | 1.36E-10 | -0.33177 | 1.84E-13 | -0.07912 | 0.08767  |
| 0.00025  | -0.19703 | 1.80E-05 | -0.25381 | 2.67E-08 | -0.22349 | 1.07E-06 | -0.0012  | 0.97934  |
| 7.26E-22 | -0.48332 | 1.04E-28 | -0.4533  | 4.82E-25 | -0.51773 | 2.21E-33 | -0.21543 | 2.62E-06 |
| 2.41E-19 | -0.37307 | 7.20E-17 | -0.43885 | 2.10E-23 | -0.48217 | 1.46E-28 | -0.2831  | 4.68E-10 |
| 1.77E-11 | -0.45502 | 3.03E-25 | -0.33866 | 5.39E-14 | -0.39691 | 4.52E-19 | -0.08515 | 0.06599  |
| 7.43E-06 | -0.42398 | 8.47E-22 | -0.27727 | 1.09E-09 | -0.33504 | 1.03E-13 | -0.11621 | 0.01197  |
| 4.11E-05 | -0.21322 | 3.34E-06 | -0.19939 | 1.42E-05 | -0.22431 | 9.73E-07 | -0.10582 | 0.02219  |
| 2.12E-19 | -0.43713 | 3.25E-23 | -0.43257 | 1.02E-22 | -0.51685 | 2.95E-33 | -0.17414 | 0.00016  |
| 4.83E-13 | -0.40712 | 4.52E-20 | -0.45127 | 8.26E-25 | -0.46706 | 1.11E-26 | -0.05938 | 0.20025  |
| 1.44E-09 | -0.36441 | 4.11E-16 | -0.33069 | 2.23E-13 | -0.37075 | 1.16E-16 | 0.003267 | 0.94387  |
| 8.32E-06 | -0.31068 | 6.58E-12 | -0.31333 | 4.26E-12 | -0.34899 | 8.03E-15 | -0.00768 | 0.86845  |

|          |          |          |          |          |          |          |          |          |
|----------|----------|----------|----------|----------|----------|----------|----------|----------|
| 8.45E-12 | -0.39762 | 3.86E-19 | -0.37352 | 6.57E-17 | -0.44225 | 8.77E-24 | -0.06881 | 0.13761  |
| 0.00017  | -0.21589 | 2.49E-06 | -0.18163 | 7.90E-05 | -0.22051 | 1.50E-06 | -0.00832 | 0.85762  |
| 1.96E-09 | -0.42392 | 8.60E-22 | -0.35952 | 1.07E-15 | -0.40693 | 4.72E-20 | -0.14494 | 0.00169  |
| 6.24E-15 | -0.46312 | 3.33E-26 | -0.39438 | 7.89E-19 | -0.45511 | 2.96E-25 | -0.0765  | 0.09872  |
| 1.60E-10 | -0.37131 | 1.03E-16 | -0.32776 | 3.71E-13 | -0.39498 | 6.91E-19 | -0.09023 | 0.05134  |
| 0.02472  | -0.23548 | 2.64E-07 | -0.26599 | 5.28E-09 | -0.23256 | 3.73E-07 | 0.027303 | 0.55617  |
| 0.00974  | -0.09818 | 0.03391  | -0.11962 | 0.00967  | -0.12132 | 0.00868  | 0.005863 | 0.89945  |
| 5.87E-15 | -0.37555 | 4.33E-17 | -0.35279 | 3.92E-15 | -0.43841 | 2.35E-23 | -0.2188  | 1.81E-06 |
| 9.33E-05 | -0.28688 | 2.68E-10 | -0.30971 | 7.71E-12 | -0.28329 | 4.56E-10 | -0.16322 | 0.0004   |
| 1.52E-08 | -0.41937 | 2.57E-21 | -0.30117 | 3.02E-11 | -0.39913 | 2.76E-19 | -0.13172 | 0.00435  |
| 0.01491  | -0.19653 | 1.89E-05 | -0.16822 | 0.00026  | -0.1735  | 0.00016  | -0.05535 | 0.23258  |
| 0.00086  | -0.20837 | 5.61E-06 | -0.16555 | 0.00033  | -0.20152 | 1.14E-05 | -0.04893 | 0.29138  |
| 3.70E-12 | -0.40055 | 2.01E-19 | -0.35447 | 2.85E-15 | -0.39105 | 1.64E-18 | -0.1388  | 0.00265  |
| 1.27E-19 | -0.42648 | 4.61E-22 | -0.40666 | 5.03E-20 | -0.4883  | 2.36E-29 | -0.04853 | 0.29531  |
| 4.79E-28 | -0.50818 | 4.94E-32 | -0.49173 | 8.38E-30 | -0.56351 | 1.73E-40 | -0.23599 | 2.48E-07 |
| 2.03E-14 | -0.50326 | 2.37E-31 | -0.46137 | 5.40E-26 | -0.50233 | 3.17E-31 | 0.003855 | 0.93378  |
| 0.04649  | -0.28372 | 4.28E-10 | -0.19982 | 1.36E-05 | -0.20327 | 9.54E-06 | 0.095126 | 0.03989  |
| 0.25004  | -0.35325 | 3.59E-15 | -0.1522  | 0.00097  | -0.17182 | 0.00019  | -0.05383 | 0.24562  |
| 0.00076  | -0.2246  | 9.41E-07 | -0.19203 | 2.95E-05 | -0.26133 | 9.91E-09 | -0.24762 | 5.91E-08 |
| 0.14304  | -0.28885 | 2.00E-10 | -0.19176 | 3.02E-05 | -0.21891 | 1.79E-06 | 0.030601 | 0.50946  |
| 1.91E-05 | -0.32878 | 3.11E-13 | -0.23888 | 1.75E-07 | -0.28183 | 5.64E-10 | -0.11432 | 0.01343  |
| 2.66E-11 | -0.425   | 6.60E-22 | -0.33872 | 5.32E-14 | -0.4056  | 6.41E-20 | -0.07791 | 0.09261  |
| 1.11E-08 | -0.26851 | 3.73E-09 | -0.18145 | 8.04E-05 | -0.30251 | 2.44E-11 | -0.08308 | 0.07285  |
| 6.92E-15 | -0.40825 | 3.49E-20 | -0.35437 | 2.90E-15 | -0.43057 | 1.68E-22 | -0.14453 | 0.00174  |
| 5.17E-12 | -0.41622 | 5.44E-21 | -0.28111 | 6.26E-10 | -0.39033 | 1.91E-18 | -0.01051 | 0.82085  |
| 7.86E-06 | -0.41415 | 8.84E-21 | -0.2312  | 4.38E-07 | -0.27935 | 8.08E-10 | -0.07526 | 0.10431  |
| 4.24E-08 | -0.28352 | 4.41E-10 | -0.28856 | 2.09E-10 | -0.30905 | 8.58E-12 | -0.26809 | 3.95E-09 |
| 0.00038  | -0.30254 | 2.43E-11 | -0.27391 | 1.76E-09 | -0.26731 | 4.40E-09 | -0.00426 | 0.9269   |
| 6.52E-06 | -0.29221 | 1.20E-10 | -0.26176 | 9.36E-09 | -0.29464 | 8.31E-11 | -0.02959 | 0.52352  |
| 0.00047  | -0.10243 | 0.02686  | -0.06348 | 0.17082  | -0.12547 | 0.00663  | 0.053652 | 0.24721  |
| 1.55E-05 | -0.35241 | 4.21E-15 | -0.18615 | 5.18E-05 | -0.24646 | 6.84E-08 | -0.00988 | 0.8314   |
| 1.49E-05 | -0.16328 | 0.0004   | 0.188462 | 4.16E-05 | -0.08996 | 0.05204  | -0.25116 | 3.76E-08 |
| 2.31E-49 | 0.485189 | 5.98E-29 | 0.403522 | 1.03E-19 | 0.621546 | 2.95E-51 | 0.221229 | 1.38E-06 |
| 0.14839  | -0.32922 | 2.88E-13 | -0.24469 | 8.55E-08 | -0.22986 | 5.13E-07 | -0.01733 | 0.7088   |
| 2.44E-08 | -0.47132 | 3.36E-27 | -0.39882 | 2.96E-19 | -0.41733 | 4.18E-21 | -0.24232 | 1.15E-07 |
| 0.00195  | 0.035193 | 0.44802  | 0.134104 | 0.00369  | 0.131228 | 0.0045   | -0.09385 | 0.04265  |
| 0.07361  | -0.3832  | 8.79E-18 | -0.18884 | 4.01E-05 | -0.22712 | 7.05E-07 | -0.08607 | 0.06309  |
| 2.81E-07 | -0.36764 | 2.16E-16 | -0.23212 | 3.93E-07 | -0.2939  | 9.30E-11 | -0.19626 | 1.94E-05 |
| 5.53E-08 | -0.28895 | 1.97E-10 | -0.27187 | 2.34E-09 | -0.32235 | 9.41E-13 | -0.10928 | 0.01816  |
| 6.86E-22 | 0.45232  | 6.25E-25 | 0.310907 | 6.34E-12 | 0.451248 | 8.32E-25 | 0.344411 | 1.88E-14 |
| 3.26E-06 | -0.30936 | 8.16E-12 | -0.26589 | 5.35E-09 | -0.28659 | 2.80E-10 | -0.06804 | 0.14205  |
| 1.81E-09 | -0.19124 | 3.18E-05 | -0.14081 | 0.00229  | -0.23787 | 1.98E-07 | -0.02067 | 0.65588  |
| 0.31457  | -0.23708 | 2.17E-07 | -0.08923 | 0.05399  | -0.11805 | 0.01067  | -0.04869 | 0.29371  |
| 0.00706  | -0.26729 | 4.41E-09 | -0.20456 | 8.35E-06 | -0.23083 | 4.58E-07 | -0.06976 | 0.13224  |
| 3.35E-08 | -0.38299 | 9.19E-18 | -0.31431 | 3.63E-12 | -0.35569 | 2.25E-15 | -0.06317 | 0.17291  |

|          |          |          |          |          |          |          |          |          |
|----------|----------|----------|----------|----------|----------|----------|----------|----------|
| 4.98E-15 | 0.151358 | 0.00103  | 0.11558  | 0.01244  | 0.253451 | 2.80E-08 | 0.159311 | 0.00055  |
| 0.00057  | -0.3213  | 1.13E-12 | -0.19404 | 2.42E-05 | -0.29846 | 4.60E-11 | -0.08721 | 0.05967  |
| 5.98E-09 | -0.32837 | 3.34E-13 | -0.26627 | 5.08E-09 | -0.32662 | 4.52E-13 | -0.1093  | 0.01813  |
| 0.13521  | -0.22657 | 7.51E-07 | -0.14926 | 0.00122  | -0.16584 | 0.00032  | -0.04403 | 0.34243  |
| 1.79E-08 | -0.14395 | 0.00182  | -0.22696 | 7.18E-07 | -0.25114 | 3.78E-08 | -0.02211 | 0.63369  |
| 1.76E-07 | -0.47129 | 3.38E-27 | -0.29557 | 7.21E-11 | -0.36016 | 9.48E-16 | -0.01405 | 0.76208  |
| 2.56E-10 | -0.43052 | 1.70E-22 | -0.27658 | 1.20E-09 | -0.34811 | 9.47E-15 | -0.06602 | 0.15434  |
| 4.00E-07 | -0.17521 | 0.00014  | -0.12656 | 0.00617  | -0.20169 | 1.12E-05 | 0.01556  | 0.73734  |
| 0.18424  | -0.28054 | 6.80E-10 | -0.16307 | 0.0004   | -0.1812  | 8.22E-05 | 0.049515 | 0.28561  |
| 2.73E-06 | -0.21071 | 4.37E-06 | -0.17068 | 0.00021  | -0.23991 | 1.54E-07 | 0.074252 | 0.10904  |
| 0.87145  | -0.1552  | 0.00076  | -0.09254 | 0.04563  | -0.07557 | 0.10286  | -0.00221 | 0.96198  |
| 1.58E-20 | 0.577252 | 7.60E-43 | 0.330323 | 2.37E-13 | 0.500203 | 6.17E-31 | 0.381761 | 1.19E-17 |
| 7.75E-16 | -0.45435 | 3.63E-25 | -0.40685 | 4.81E-20 | -0.44414 | 5.38E-24 | -0.34063 | 3.77E-14 |
| 0.00014  | -0.29385 | 9.37E-11 | -0.22411 | 9.95E-07 | -0.22749 | 6.76E-07 | -0.27576 | 1.35E-09 |
| 6.22E-07 | -0.25361 | 2.74E-08 | -0.02409 | 0.6036   | -0.18142 | 8.05E-05 | -0.09275 | 0.04516  |
| 0.01604  | -0.26336 | 7.54E-09 | -0.04043 | 0.3834   | -0.17217 | 0.00019  | -0.02467 | 0.59486  |
| 0.45461  | -0.1933  | 2.60E-05 | -0.13801 | 0.0028   | -0.11677 | 0.01156  | -0.05463 | 0.23872  |
| 1.04E-09 | -0.30894 | 8.73E-12 | -0.36972 | 1.42E-16 | -0.34942 | 7.42E-15 | -0.20301 | 9.81E-06 |
| 4.78E-06 | -0.16681 | 0.00029  | -0.19338 | 2.58E-05 | -0.2173  | 2.14E-06 | 0.001908 | 0.96719  |
| 0.20034  | -0.10321 | 0.02572  | -0.08933 | 0.05371  | -0.09027 | 0.05124  | -0.08199 | 0.07672  |
| 2.80E-11 | -0.37807 | 2.57E-17 | -0.29873 | 4.42E-11 | -0.37372 | 6.31E-17 | -0.08159 | 0.07816  |
| 0.27083  | -0.30977 | 7.63E-12 | -0.17549 | 0.00014  | -0.18072 | 8.59E-05 | -0.00816 | 0.86041  |
| 0.00029  | -0.16028 | 0.00051  | -0.12994 | 0.00492  | -0.18249 | 7.30E-05 | -0.03267 | 0.48124  |
| 0.00688  | -0.32502 | 5.97E-13 | -0.13545 | 0.00336  | -0.1946  | 2.29E-05 | 0.010568 | 0.81982  |
| 3.24E-07 | -0.4756  | 9.86E-28 | -0.47313 | 2.00E-27 | -0.45572 | 2.51E-25 | -0.13943 | 0.00253  |
| 0.31476  | -0.18035 | 8.89E-05 | -0.04976 | 0.28321  | -0.06619 | 0.15327  | -0.08376 | 0.07055  |
| 2.07E-16 | -0.34766 | 1.03E-14 | -0.22688 | 7.25E-07 | -0.34207 | 2.90E-14 | -0.35243 | 4.19E-15 |
| 9.81E-15 | -0.42635 | 4.75E-22 | -0.38438 | 6.84E-18 | -0.44584 | 3.45E-24 | -0.09334 | 0.0438   |
| 0.9773   | 0.476863 | 6.86E-28 | 0.187267 | 4.66E-05 | 0.179327 | 9.76E-05 | -0.16011 | 0.00051  |
| 2.47E-07 | -0.41432 | 8.51E-21 | -0.15973 | 0.00053  | -0.29102 | 1.44E-10 | -0.07604 | 0.10077  |
| 2.53E-12 | 0.337993 | 6.07E-14 | 0.237479 | 2.07E-07 | 0.305541 | 1.51E-11 | 0.022276 | 0.63111  |
| 3.07E-19 | -0.48303 | 1.13E-28 | -0.44807 | 1.93E-24 | -0.51531 | 4.90E-33 | -0.30371 | 2.02E-11 |
| 2.71E-06 | -0.28868 | 2.05E-10 | -0.23432 | 3.03E-07 | -0.26948 | 3.27E-09 | -0.06251 | 0.17747  |
| 0.01882  | -0.13332 | 0.0039   | -0.12872 | 0.00534  | -0.16431 | 0.00036  | 0.140755 | 0.0023   |
| 0.3844   | -0.1763  | 0.00013  | -0.19876 | 1.51E-05 | -0.15194 | 0.00099  | 0.233739 | 3.25E-07 |
| 8.96E-13 | -0.42848 | 2.82E-22 | -0.22908 | 5.62E-07 | -0.35602 | 2.11E-15 | -0.01339 | 0.7729   |
| 8.51E-11 | -0.45158 | 7.61E-25 | -0.37378 | 6.24E-17 | -0.42345 | 9.64E-22 | -0.06933 | 0.13464  |
| 4.04E-09 | -0.4462  | 3.14E-24 | -0.39031 | 1.92E-18 | -0.42354 | 9.43E-22 | -0.03864 | 0.4048   |
| 0.0075   | -0.23666 | 2.29E-07 | -0.20579 | 7.35E-06 | -0.21126 | 4.12E-06 | 0.008122 | 0.86104  |
| 1.21E-09 | -0.41754 | 3.97E-21 | -0.33856 | 5.48E-14 | -0.38484 | 6.20E-18 | -0.07147 | 0.123    |
| 0.02306  | -0.16582 | 0.00032  | -0.0356  | 0.44276  | -0.02096 | 0.65143  | 0.118906 | 0.01012  |
| 0.00121  | -0.25372 | 2.71E-08 | -0.25501 | 2.29E-08 | -0.26492 | 6.11E-09 | -0.12245 | 0.00807  |
| 1.01E-11 | -0.46175 | 4.87E-26 | -0.39843 | 3.22E-19 | -0.44432 | 5.13E-24 | -0.17739 | 0.00012  |
| 6.12E-08 | -0.11816 | 0.0106   | -0.15662 | 0.00068  | -0.22396 | 1.01E-06 | 0.057711 | 0.21319  |
| 1.08E-10 | -0.3567  | 1.85E-15 | -0.30652 | 1.29E-11 | -0.36098 | 8.07E-16 | -0.09106 | 0.04923  |

|          |          |          |          |          |          |          |          |          |
|----------|----------|----------|----------|----------|----------|----------|----------|----------|
| 4.14E-09 | -0.33682 | 7.49E-14 | -0.26994 | 3.06E-09 | -0.32359 | 7.61E-13 | -0.08786 | 0.05778  |
| 1.15E-05 | -0.31683 | 2.39E-12 | -0.2891  | 1.93E-10 | -0.30001 | 3.62E-11 | -0.03892 | 0.40136  |
| 0.61651  | -0.28199 | 5.51E-10 | -0.0296  | 0.5234   | -0.11464 | 0.01318  | 0.082061 | 0.07646  |
| 6.74E-17 | -0.49796 | 1.24E-30 | -0.40427 | 8.68E-20 | -0.47799 | 4.96E-28 | -0.0439  | 0.34382  |
| 1.35E-24 | 0.520609 | 8.48E-34 | 0.312789 | 4.66E-12 | 0.474621 | 1.31E-27 | 0.114736 | 0.0131   |
| 2.06E-13 | -0.41531 | 6.74E-21 | -0.3576  | 1.56E-15 | -0.42477 | 7.00E-22 | -0.10493 | 0.02334  |
| 3.25E-11 | -0.48615 | 4.50E-29 | -0.34686 | 1.20E-14 | -0.40525 | 6.94E-20 | -0.08651 | 0.06176  |
| 0.53255  | -0.35021 | 6.38E-15 | -0.14759 | 0.00138  | -0.19    | 3.59E-05 | -0.08328 | 0.07218  |
| 0.16479  | -0.32518 | 5.80E-13 | -0.11501 | 0.01288  | -0.14762 | 0.00138  | -0.10848 | 0.01903  |
| 1.18E-13 | -0.39227 | 1.25E-18 | -0.35312 | 3.68E-15 | -0.40893 | 2.98E-20 | -0.13442 | 0.00361  |
| 0.43909  | -0.19584 | 2.03E-05 | -0.1918  | 3.01E-05 | -0.12076 | 0.009    | -0.19588 | 2.02E-05 |
| 0.01687  | -0.2187  | 1.83E-06 | -0.14817 | 0.00132  | -0.16683 | 0.00029  | -0.07423 | 0.10915  |
| 4.71E-09 | -0.41069 | 1.99E-20 | -0.40611 | 5.70E-20 | -0.41786 | 3.69E-21 | -0.12034 | 0.00924  |
| 0.00064  | -0.2589  | 1.37E-08 | -0.15127 | 0.00104  | -0.19433 | 2.35E-05 | -0.03393 | 0.46453  |
| 0.00049  | -0.31532 | 3.07E-12 | -0.1775  | 0.00012  | -0.23253 | 3.75E-07 | -0.05277 | 0.25505  |
| 1.69E-09 | 0.42491  | 6.76E-22 | 0.115903 | 0.0122   | 0.270376 | 2.88E-09 | 0.06515  | 0.15984  |
| 0.00024  | -0.21076 | 4.34E-06 | -0.24081 | 1.38E-07 | -0.24005 | 1.52E-07 | 0.01582  | 0.73312  |
| 0.01046  | -0.27806 | 9.73E-10 | -0.17162 | 0.00019  | -0.17916 | 9.90E-05 | -0.02865 | 0.53681  |
| 9.31E-10 | -0.40524 | 6.96E-20 | -0.32003 | 1.40E-12 | -0.37767 | 2.79E-17 | -0.0997  | 0.03124  |
| 1.72E-14 | -0.45356 | 4.49E-25 | -0.39356 | 9.45E-19 | -0.45208 | 6.67E-25 | -0.10148 | 0.02833  |
| 7.27E-21 | -0.53663 | 3.48E-36 | -0.39193 | 1.35E-18 | -0.52082 | 7.90E-34 | -0.25664 | 1.85E-08 |
| 4.23E-13 | -0.48679 | 3.71E-29 | -0.38043 | 1.57E-17 | -0.4484  | 1.76E-24 | -0.22604 | 7.99E-07 |
| 2.29E-18 | -0.57851 | 4.57E-43 | -0.46026 | 7.31E-26 | -0.55122 | 1.79E-38 | -0.19361 | 2.52E-05 |
| 6.28E-15 | -0.45958 | 8.81E-26 | -0.43556 | 4.83E-23 | -0.47326 | 1.93E-27 | -0.11316 | 0.01442  |
| 1.29E-14 | -0.46128 | 5.54E-26 | -0.40042 | 2.07E-19 | -0.45605 | 2.30E-25 | -0.11771 | 0.0109   |
| 7.74E-14 | -0.51913 | 1.39E-33 | -0.42999 | 1.94E-22 | -0.47986 | 2.87E-28 | -0.1793  | 9.78E-05 |
| 3.08E-19 | -0.48236 | 1.38E-28 | -0.41152 | 1.64E-20 | -0.50142 | 4.22E-31 | -0.16265 | 0.00042  |
| 8.90E-12 | -0.38299 | 9.17E-18 | -0.33029 | 2.39E-13 | -0.3997  | 2.43E-19 | -0.09227 | 0.04628  |
| 4.21E-08 | -0.37633 | 3.69E-17 | -0.32735 | 3.99E-13 | -0.35657 | 1.90E-15 | -0.0756  | 0.10274  |
| 1.07E-10 | -0.34837 | 9.02E-15 | -0.29679 | 5.97E-11 | -0.36509 | 3.59E-16 | -0.11884 | 0.01016  |
| 2.04E-10 | -0.42993 | 1.97E-22 | -0.36766 | 2.15E-16 | -0.40481 | 7.67E-20 | -0.12211 | 0.00825  |
| 3.83E-15 | -0.45879 | 1.09E-25 | -0.39738 | 4.07E-19 | -0.45958 | 8.82E-26 | -0.11563 | 0.0124   |
| 2.21E-15 | -0.47872 | 4.00E-28 | -0.41597 | 5.77E-21 | -0.47417 | 1.49E-27 | -0.11959 | 0.00969  |
| 1.06E-07 | -0.32671 | 4.45E-13 | -0.25322 | 2.89E-08 | -0.31157 | 5.69E-12 | -0.05686 | 0.22005  |
| 4.32E-06 | -0.32861 | 3.20E-13 | -0.27466 | 1.58E-09 | -0.32045 | 1.30E-12 | -0.06007 | 0.19502  |
| 1.07E-12 | -0.35595 | 2.14E-15 | -0.36342 | 5.00E-16 | -0.39961 | 2.48E-19 | -0.11652 | 0.01174  |
| 0.00013  | -0.32675 | 4.42E-13 | -0.27146 | 2.48E-09 | -0.29146 | 1.35E-10 | -0.04706 | 0.31015  |
| 0.00625  | -0.17851 | 0.00011  | -0.12667 | 0.00613  | -0.15267 | 0.00093  | -0.01599 | 0.73036  |
| 0.00017  | -0.26456 | 6.41E-09 | -0.23397 | 3.16E-07 | -0.26822 | 3.88E-09 | -0.04465 | 0.3356   |
| 5.84E-15 | -0.38093 | 1.42E-17 | -0.35187 | 4.66E-15 | -0.43833 | 2.39E-23 | -0.2136  | 3.20E-06 |
| 3.13E-09 | -0.38549 | 5.40E-18 | -0.31793 | 1.99E-12 | -0.37451 | 5.37E-17 | -0.10032 | 0.03019  |
| 1.28E-09 | -0.36339 | 5.03E-16 | -0.20892 | 5.29E-06 | -0.32134 | 1.12E-12 | -0.15519 | 0.00076  |
| 0.00402  | -0.02501 | 0.58984  | 0.061418 | 0.18519  | 0.050625 | 0.27493  | 0.019601 | 0.67268  |
| 2.91E-18 | -0.38112 | 1.36E-17 | -0.40724 | 4.40E-20 | -0.46986 | 5.07E-27 | -0.18391 | 6.39E-05 |
| 0.77989  | -0.10254 | 0.02671  | 0.084965 | 0.06658  | 0.004452 | 0.92356  | -0.00064 | 0.98896  |

|          |          |          |          |          |          |          |          |          |
|----------|----------|----------|----------|----------|----------|----------|----------|----------|
| 0.01051  | -0.27268 | 2.09E-09 | -0.17382 | 0.00016  | -0.17116 | 0.0002   | -0.31175 | 5.52E-12 |
| 2.38E-24 | 0.392188 | 1.28E-18 | 0.409655 | 2.52E-20 | 0.447398 | 2.30E-24 | 0.106566 | 0.02126  |
| 1.97E-13 | -0.44784 | 2.05E-24 | -0.39541 | 6.30E-19 | -0.44815 | 1.89E-24 | -0.11058 | 0.01682  |
| 1.20E-13 | 0.311775 | 5.50E-12 | 0.311725 | 5.55E-12 | 0.354306 | 2.94E-15 | 0.327071 | 4.18E-13 |
| 1.40E-05 | 0.425424 | 5.96E-22 | 0.118627 | 0.0103   | 0.274596 | 1.59E-09 | 0.333127 | 1.45E-13 |
| 8.00E-08 | -0.37742 | 2.94E-17 | -0.30881 | 8.92E-12 | -0.35451 | 2.82E-15 | -0.09493 | 0.0403   |
| 0.04158  | -0.28605 | 3.04E-10 | -0.18766 | 4.49E-05 | -0.20522 | 7.80E-06 | -0.04342 | 0.34918  |
| 0.0003   | -0.29038 | 1.59E-10 | -0.19608 | 1.98E-05 | -0.22068 | 1.47E-06 | -0.02688 | 0.56233  |
| 0.22074  | -0.23194 | 4.02E-07 | -0.15532 | 0.00076  | -0.16344 | 0.00039  | 0.065846 | 0.15541  |
| 4.64E-11 | -0.37587 | 4.06E-17 | -0.34831 | 9.12E-15 | -0.38201 | 1.13E-17 | -0.0538  | 0.24595  |
| 2.73E-08 | -0.25299 | 2.97E-08 | -0.31621 | 2.65E-12 | -0.31776 | 2.04E-12 | 0.026482 | 0.56811  |
| 1.01E-06 | -0.30288 | 2.30E-11 | -0.2836  | 4.36E-10 | -0.29596 | 6.79E-11 | -0.08445 | 0.06826  |
| 0.00014  | -0.3397  | 4.46E-14 | -0.23663 | 2.30E-07 | -0.27578 | 1.35E-09 | -0.05933 | 0.2006   |
| 0.00181  | -0.22919 | 5.54E-07 | -0.17129 | 0.0002   | -0.17864 | 0.0001   | -0.13092 | 0.0046   |
| 0.00018  | -0.2388  | 1.77E-07 | -0.1816  | 7.92E-05 | -0.21479 | 2.81E-06 | -0.07508 | 0.10512  |
| 1.43E-10 | 0.472006 | 2.76E-27 | 0.087891 | 0.05771  | 0.274002 | 1.73E-09 | 0.106756 | 0.02103  |
| 1.69E-07 | -0.14115 | 0.00223  | -0.15846 | 0.00059  | -0.2393  | 1.66E-07 | -0.09957 | 0.03145  |
| 6.74E-07 | -0.45891 | 1.06E-25 | -0.4155  | 6.44E-21 | -0.44426 | 5.20E-24 | -0.04871 | 0.29347  |
| 0.00013  | -0.42861 | 2.73E-22 | -0.47327 | 1.93E-27 | -0.42141 | 1.58E-21 | -0.08289 | 0.07354  |
| 1.66E-09 | -0.33498 | 1.04E-13 | -0.2837  | 4.29E-10 | -0.33868 | 5.36E-14 | -0.075   | 0.1055   |
| 9.44E-09 | -0.3888  | 2.66E-18 | -0.3285  | 3.27E-13 | -0.37596 | 3.98E-17 | -0.1124  | 0.01509  |
| 1.41E-17 | -0.2839  | 4.17E-10 | -0.23869 | 1.79E-07 | -0.3552  | 2.48E-15 | -0.16254 | 0.00042  |
| 4.97E-10 | -0.25665 | 1.84E-08 | -0.26703 | 4.58E-09 | -0.32076 | 1.23E-12 | -0.26441 | 6.55E-09 |
| 0.56591  | -0.27307 | 1.98E-09 | -0.18964 | 3.71E-05 | -0.13965 | 0.00249  | -0.18338 | 6.71E-05 |
| 1.66E-05 | -0.27818 | 9.57E-10 | -0.25298 | 2.98E-08 | -0.26608 | 5.21E-09 | -0.07735 | 0.09502  |
| 2.18E-08 | -0.27766 | 1.03E-09 | -0.2281  | 6.29E-07 | -0.28448 | 3.83E-10 | -0.10214 | 0.02731  |
| 3.91E-09 | -0.35047 | 6.08E-15 | -0.31688 | 2.37E-12 | -0.34506 | 1.67E-14 | -0.12665 | 0.00613  |
| 0.00462  | -0.2822  | 5.35E-10 | -0.30277 | 2.34E-11 | -0.27216 | 2.25E-09 | 0.015568 | 0.73721  |
| 3.11E-26 | 0.384054 | 7.33E-18 | 0.377806 | 2.72E-17 | 0.496206 | 2.13E-30 | 0.155056 | 0.00077  |
| 0.00192  | -0.18941 | 3.80E-05 | -0.15187 | 0.00099  | -0.19903 | 1.47E-05 | 0.00528  | 0.90941  |
| 0.00084  | -0.29724 | 5.57E-11 | -0.26787 | 4.08E-09 | -0.27558 | 1.39E-09 | -0.08094 | 0.08057  |
| 9.23E-11 | -0.41807 | 3.51E-21 | -0.36961 | 1.45E-16 | -0.40923 | 2.78E-20 | -0.09563 | 0.03885  |
| 0.00077  | -0.09816 | 0.03395  | -0.07811 | 0.09179  | -0.11907 | 0.01001  | -0.01427 | 0.75848  |
| 4.40E-07 | -0.38913 | 2.47E-18 | -0.46996 | 4.93E-27 | -0.44777 | 2.08E-24 | -0.10892 | 0.01855  |
| 7.56E-13 | -0.3981  | 3.47E-19 | -0.55716 | 1.95E-39 | -0.52056 | 8.62E-34 | -0.11039 | 0.01702  |
| 4.71E-15 | -0.47584 | 9.20E-28 | -0.40976 | 2.46E-20 | -0.46968 | 5.34E-27 | -0.12311 | 0.00773  |
| 0.11366  | -0.16286 | 0.00041  | 0.00036  | 0.99381  | -0.03069 | 0.50826  | -0.01592 | 0.73147  |
| 1.30E-05 | -0.32975 | 2.62E-13 | -0.35028 | 6.31E-15 | -0.32929 | 2.85E-13 | -0.04135 | 0.37258  |
| 5.87E-12 | -0.17848 | 0.00011  | -0.0795  | 0.08612  | -0.22659 | 7.49E-07 | -0.12703 | 0.00598  |
| 3.69E-11 | -0.3269  | 4.31E-13 | -0.2895  | 1.81E-10 | -0.35555 | 2.31E-15 | -0.07021 | 0.12977  |
| 1.35E-07 | -0.20588 | 7.28E-06 | -0.18874 | 4.05E-05 | -0.23803 | 1.94E-07 | -0.09514 | 0.03986  |
| 6.48E-08 | -0.48725 | 3.24E-29 | -0.35384 | 3.21E-15 | -0.41314 | 1.12E-20 | -0.08944 | 0.05341  |
| 2.68E-13 | -0.43838 | 2.36E-23 | -0.42024 | 2.09E-21 | -0.44872 | 1.62E-24 | -0.09765 | 0.0349   |
| 2.97E-09 | -0.13185 | 0.00432  | -0.29869 | 4.45E-11 | -0.31215 | 5.17E-12 | -0.23063 | 4.69E-07 |
| 1.45E-09 | -0.37965 | 1.85E-17 | -0.32991 | 2.55E-13 | -0.36715 | 2.38E-16 | -0.09052 | 0.05058  |

|          |          |          |          |          |          |          |          |          |
|----------|----------|----------|----------|----------|----------|----------|----------|----------|
| 3.04E-05 | -0.30167 | 2.79E-11 | -0.25142 | 3.64E-08 | -0.26876 | 3.60E-09 | -0.10472 | 0.02362  |
| 1.07E-16 | 0.450024 | 1.15E-24 | 0.136914 | 0.00303  | 0.33328  | 1.41E-13 | 0.012055 | 0.795    |
| 6.09E-11 | -0.28797 | 2.28E-10 | -0.27152 | 2.46E-09 | -0.34774 | 1.01E-14 | -0.06125 | 0.18641  |
| 0.12929  | -0.20224 | 1.06E-05 | -0.18342 | 6.69E-05 | -0.16764 | 0.00027  | -0.03574 | 0.44095  |
| 0.0001   | -0.29448 | 8.51E-11 | -0.30512 | 1.61E-11 | -0.31488 | 3.30E-12 | -0.04851 | 0.29548  |
| 0.00131  | -0.24333 | 1.01E-07 | -0.28155 | 5.88E-10 | -0.24204 | 1.19E-07 | -0.02758 | 0.5522   |
| 7.91E-08 | -0.27786 | 1.00E-09 | -0.20752 | 6.13E-06 | -0.26217 | 8.86E-09 | -0.09942 | 0.03172  |
| 1.53E-14 | -0.37223 | 8.54E-17 | -0.35426 | 2.96E-15 | -0.41573 | 6.10E-21 | -0.32873 | 3.14E-13 |
| 0.0056   | -0.22062 | 1.48E-06 | -0.18081 | 8.52E-05 | -0.19786 | 1.65E-05 | -0.03177 | 0.49336  |
| 0.00032  | -0.41839 | 3.25E-21 | -0.22032 | 1.53E-06 | -0.28335 | 4.52E-10 | -0.11999 | 0.00945  |
| 5.68E-11 | -0.38133 | 1.30E-17 | -0.33134 | 1.99E-13 | -0.38337 | 8.48E-18 | -0.07376 | 0.11144  |
| 1.52E-06 | 0.240169 | 1.49E-07 | 0.136514 | 0.00312  | 0.211751 | 3.91E-06 | 0.171088 | 0.0002   |
| 0.00051  | -0.28573 | 3.18E-10 | -0.10206 | 0.02743  | -0.21442 | 2.93E-06 | -0.03386 | 0.46542  |
| 5.91E-16 | -0.49903 | 8.90E-31 | -0.4168  | 4.74E-21 | -0.50738 | 6.40E-32 | -0.03601 | 0.43761  |
| 1.62E-08 | -0.26745 | 4.32E-09 | -0.25901 | 1.35E-08 | -0.32054 | 1.28E-12 | -0.08988 | 0.05225  |
| 0.48487  | -0.24432 | 8.95E-08 | -0.11421 | 0.01352  | -0.12407 | 0.00726  | 0.004626 | 0.92059  |
| 1.52E-10 | -0.37615 | 3.83E-17 | -0.34344 | 2.25E-14 | -0.40971 | 2.49E-20 | -0.04759 | 0.30477  |
| 3.59E-06 | -0.32685 | 4.34E-13 | -0.26877 | 3.60E-09 | -0.31272 | 4.71E-12 | -0.02214 | 0.63324  |
| 0.00281  | -0.53453 | 7.27E-36 | -0.31774 | 2.05E-12 | -0.333   | 1.48E-13 | -0.18949 | 3.77E-05 |
| 0.0055   | -0.43531 | 5.14E-23 | -0.24254 | 1.12E-07 | -0.26317 | 7.74E-09 | -0.0908  | 0.04987  |
| 3.35E-18 | 0.303331 | 2.14E-11 | 0.352926 | 3.82E-15 | 0.450697 | 9.62E-25 | 0.103317 | 0.02557  |
| 0.32662  | -0.07512 | 0.10496  | -0.14078 | 0.00229  | -0.10577 | 0.02226  | 0.070767 | 0.12673  |
| 2.05E-24 | 0.433564 | 7.97E-23 | 0.251857 | 3.44E-08 | 0.3971   | 4.33E-19 | 0.368167 | 1.94E-16 |
| 0.24225  | -0.07146 | 0.12307  | 0.22006  | 1.57E-06 | 0.049039 | 0.29027  | -0.12081 | 0.00897  |
| 4.85E-12 | -0.36925 | 1.56E-16 | -0.4039  | 9.43E-20 | -0.40359 | 1.01E-19 | -0.10664 | 0.02117  |
| 5.09E-07 | -0.28312 | 4.67E-10 | -0.20891 | 5.30E-06 | -0.26084 | 1.06E-08 | -0.09859 | 0.03317  |
| 0.00036  | -0.29303 | 1.06E-10 | -0.21779 | 2.02E-06 | -0.23808 | 1.93E-07 | -0.11476 | 0.01308  |
| 1.61E-17 | -0.43053 | 1.70E-22 | -0.45242 | 6.09E-25 | -0.4959  | 2.35E-30 | -0.21407 | 3.04E-06 |
| 0.00758  | -0.16208 | 0.00044  | -0.2605  | 1.11E-08 | -0.22766 | 6.63E-07 | 0.009143 | 0.84379  |
| 0.57252  | -0.16225 | 0.00043  | -0.03998 | 0.38873  | -0.08973 | 0.05266  | 0.025723 | 0.57924  |
| 0.00523  | -0.50174 | 3.82E-31 | -0.21807 | 1.96E-06 | -0.28966 | 1.77E-10 | -0.10095 | 0.02916  |
| 8.63E-18 | -0.55327 | 8.38E-39 | -0.50282 | 2.72E-31 | -0.56923 | 1.86E-41 | -0.09363 | 0.04314  |
| 6.47E-30 | -0.45743 | 1.58E-25 | -0.53538 | 5.39E-36 | -0.58763 | 1.06E-44 | -0.41417 | 8.80E-21 |
| 6.78E-07 | -0.35235 | 4.26E-15 | -0.25971 | 1.23E-08 | -0.32677 | 4.41E-13 | -0.18582 | 5.34E-05 |
| 2.57E-19 | -0.48138 | 1.84E-28 | -0.39489 | 7.06E-19 | -0.50984 | 2.91E-32 | -0.21208 | 3.77E-06 |
| 6.54E-10 | -0.41396 | 9.26E-21 | -0.24875 | 5.12E-08 | -0.35763 | 1.55E-15 | -0.05417 | 0.24265  |
| 8.80E-09 | -0.42316 | 1.03E-21 | -0.40282 | 1.21E-19 | -0.40303 | 1.15E-19 | -0.14041 | 0.00236  |
| 0.23665  | -0.37666 | 3.45E-17 | -0.2237  | 1.04E-06 | -0.21121 | 4.14E-06 | -0.14386 | 0.00183  |
| 0.27403  | -0.10729 | 0.02039  | -0.10938 | 0.01806  | -0.09902 | 0.03241  | 0.266855 | 4.69E-09 |
| 0.03672  | -0.37851 | 2.35E-17 | -0.1984  | 1.57E-05 | -0.21326 | 3.32E-06 | -0.06603 | 0.15427  |
| 0.0001   | -0.33145 | 1.95E-13 | -0.18848 | 4.15E-05 | -0.25853 | 1.44E-08 | -0.15616 | 0.00071  |
| 4.04E-13 | -0.5054  | 1.20E-31 | -0.52564 | 1.56E-34 | -0.51595 | 3.97E-33 | -0.06006 | 0.19509  |
| 1.27E-10 | -0.41534 | 6.69E-21 | -0.44145 | 1.08E-23 | -0.44971 | 1.25E-24 | -0.04262 | 0.35808  |
| 0.06267  | -0.34155 | 3.18E-14 | -0.16615 | 0.00031  | -0.2244  | 9.64E-07 | -0.00413 | 0.92915  |
| 1.30E-17 | -0.49245 | 6.74E-30 | -0.44915 | 1.45E-24 | -0.51949 | 1.23E-33 | -0.22014 | 1.56E-06 |

|          |          |          |          |          |          |          |          |          |
|----------|----------|----------|----------|----------|----------|----------|----------|----------|
| 0.00832  | -0.45122 | 8.38E-25 | -0.26948 | 3.26E-09 | -0.28902 | 1.95E-10 | -0.14649 | 0.0015   |
| 0.00017  | -0.40047 | 2.04E-19 | -0.23637 | 2.37E-07 | -0.27457 | 1.60E-09 | -0.15115 | 0.00105  |
| 6.05E-08 | -0.3557  | 2.25E-15 | -0.29705 | 5.73E-11 | -0.33922 | 4.86E-14 | -0.15199 | 0.00098  |
| 9.04E-12 | -0.27627 | 1.26E-09 | -0.25878 | 1.39E-08 | -0.32038 | 1.31E-12 | -0.09576 | 0.03857  |
| 1.56E-14 | -0.55875 | 1.07E-39 | -0.50916 | 3.62E-32 | -0.52786 | 7.32E-35 | -0.22023 | 1.54E-06 |
| 0.03008  | -0.13064 | 0.00469  | -0.05264 | 0.25622  | -0.08472 | 0.06738  | 0.027224 | 0.55731  |
| 0.52232  | 0.42088  | 1.79E-21 | 0.281633 | 5.80E-10 | 0.227824 | 6.50E-07 | 0.042343 | 0.36125  |
| 0.02453  | 0.346817 | 1.21E-14 | 0.232972 | 3.56E-07 | 0.256579 | 1.86E-08 | 0.390741 | 1.75E-18 |
| 4.64E-05 | 0.653253 | 3.70E-58 | 0.364537 | 4.01E-16 | 0.394101 | 8.39E-19 | 0.03065  | 0.50879  |
| 2.71E-05 | -0.44644 | 2.95E-24 | -0.22489 | 9.11E-07 | -0.32487 | 6.11E-13 | -0.01332 | 0.77398  |
| 0.1499   | -0.21583 | 2.51E-06 | -0.12229 | 0.00816  | -0.10501 | 0.02324  | -0.02097 | 0.65131  |
| 0.09927  | -0.36867 | 1.76E-16 | -0.27286 | 2.04E-09 | -0.17397 | 0.00016  | 0.017669 | 0.70333  |
| 0.52306  | -0.23927 | 1.67E-07 | -0.16243 | 0.00042  | -0.17488 | 0.00015  | -0.08307 | 0.0729   |
| 0.00011  | -0.59481 | 5.04E-46 | -0.43365 | 7.80E-23 | -0.42665 | 4.42E-22 | -0.11179 | 0.01566  |
| 0.0011   | -0.44431 | 5.14E-24 | -0.31152 | 5.74E-12 | -0.34562 | 1.51E-14 | -0.11932 | 0.00985  |
| 1.58E-05 | -0.58183 | 1.18E-43 | -0.37448 | 5.40E-17 | -0.44621 | 3.14E-24 | -0.1091  | 0.01836  |
| 4.29E-05 | 0.513181 | 9.83E-33 | 0.270016 | 3.03E-09 | 0.349966 | 6.69E-15 | 0.289239 | 1.89E-10 |
| 0.09758  | -0.38649 | 4.36E-18 | -0.22927 | 5.50E-07 | -0.28883 | 2.00E-10 | -0.19385 | 2.47E-05 |
| 2.66E-09 | -0.62856 | 1.03E-52 | -0.43269 | 9.93E-23 | -0.50688 | 7.51E-32 | -0.10609 | 0.02185  |
| 5.46E-08 | -0.58201 | 1.09E-43 | -0.40907 | 2.89E-20 | -0.46344 | 3.05E-26 | 0.058141 | 0.20979  |
| 0.41349  | -0.34136 | 3.30E-14 | -0.25504 | 2.28E-08 | -0.25083 | 3.93E-08 | -0.11962 | 0.00967  |
| 7.58E-05 | 0.370064 | 1.33E-16 | 0.062425 | 0.17807  | 0.17743  | 0.00012  | 0.143077 | 0.00194  |
| 0.2885   | -0.17128 | 0.0002   | 0.066281 | 0.1527   | -0.02372 | 0.60911  | -0.02269 | 0.62472  |
| 0.2449   | -0.29671 | 6.04E-11 | -0.1088  | 0.01868  | -0.15827 | 0.0006   | -0.04259 | 0.3584   |
| 0.04764  | -0.18811 | 4.30E-05 | -0.00563 | 0.90337  | -0.04431 | 0.33939  | -0.16205 | 0.00044  |
| 2.06E-08 | -0.56114 | 4.29E-40 | -0.3071  | 1.17E-11 | -0.43729 | 3.11E-23 | -0.12895 | 0.00526  |
| 0.80504  | -0.29987 | 3.70E-11 | -0.07459 | 0.10745  | -0.1248  | 0.00693  | 0.112001 | 0.01546  |
| 0.00081  | -0.42636 | 4.74E-22 | -0.16185 | 0.00045  | -0.31467 | 3.42E-12 | -0.04809 | 0.29969  |
| 2.67E-06 | -0.1931  | 2.65E-05 | -0.11612 | 0.01204  | -0.01875 | 0.68618  | 0.016852 | 0.71643  |
| 0.1239   | -0.25941 | 1.28E-08 | -0.15178 | 0.001    | -0.11815 | 0.01061  | 0.307287 | 1.14E-11 |
| 0.8371   | -0.42991 | 1.98E-22 | -0.13135 | 0.00447  | -0.19709 | 1.79E-05 | 0.184343 | 6.14E-05 |
| 0.14773  | -0.37535 | 4.52E-17 | -0.16004 | 0.00052  | -0.22378 | 1.03E-06 | -0.06943 | 0.13407  |
| 0.78969  | -0.32942 | 2.78E-13 | 0.017706 | 0.70274  | -0.09103 | 0.04931  | 0.044972 | 0.33218  |
| 0.00393  | -0.31752 | 2.13E-12 | -0.2405  | 1.44E-07 | -0.22996 | 5.07E-07 | -0.22893 | 5.72E-07 |
| 2.74E-06 | -0.27737 | 1.07E-09 | -0.11664 | 0.01165  | -0.06639 | 0.15203  | -0.00688 | 0.88206  |
| 6.36E-08 | -0.4842  | 8.01E-29 | -0.26742 | 4.34E-09 | -0.38143 | 1.27E-17 | -0.14051 | 0.00234  |
| 3.64E-08 | -0.6262  | 3.21E-52 | -0.31159 | 5.67E-12 | -0.45391 | 4.08E-25 | -0.05264 | 0.25628  |
| 0.19268  | -0.19451 | 2.31E-05 | 0.070828 | 0.1264   | -0.01875 | 0.68612  | -0.04268 | 0.35742  |
| 0.00464  | -0.4305  | 1.71E-22 | -0.19722 | 1.76E-05 | -0.27498 | 1.51E-09 | -0.12766 | 0.00573  |
| 0.00897  | -0.24201 | 1.19E-07 | 0.017314 | 0.709    | -0.10816 | 0.01939  | 0.021974 | 0.63575  |
| 1.45E-13 | -0.62257 | 1.82E-51 | -0.50627 | 9.11E-32 | -0.56297 | 2.12E-40 | -0.1521  | 0.00098  |
| 0.06905  | -0.35152 | 4.99E-15 | -0.1613  | 0.00047  | -0.22708 | 7.08E-07 | -0.02676 | 0.56406  |
| 0.46907  | -0.29885 | 4.34E-11 | -0.14929 | 0.00121  | -0.17902 | 0.0001   | 0.311786 | 5.49E-12 |
| 6.24E-10 | -0.57526 | 1.70E-42 | -0.39066 | 1.78E-18 | -0.48046 | 2.41E-28 | 0.037982 | 0.41285  |
| 0.20728  | -0.40258 | 1.27E-19 | -0.24393 | 9.40E-08 | -0.25966 | 1.24E-08 | -0.08379 | 0.07044  |

|          |          |          |          |          |          |          |          |          |
|----------|----------|----------|----------|----------|----------|----------|----------|----------|
| 1.58E-14 | -0.08408 | 0.06946  | -0.13788 | 0.00283  | 0.06623  | 0.15301  | 0.133055 | 0.00397  |
| 0.01823  | -0.55725 | 1.88E-39 | -0.39294 | 1.08E-18 | -0.38813 | 3.07E-18 | 0.098998 | 0.03245  |
| 0.0045   | -0.42444 | 7.58E-22 | -0.18513 | 5.70E-05 | -0.30572 | 1.47E-11 | -0.13497 | 0.00347  |
| 0.25614  | -0.25762 | 1.62E-08 | -0.04764 | 0.3043   | -0.11721 | 0.01125  | 0.032419 | 0.48463  |
| 0.03762  | -0.40865 | 3.18E-20 | -0.18    | 9.18E-05 | -0.24743 | 6.05E-08 | 0.088157 | 0.05695  |
| 0.08913  | -0.39023 | 1.95E-18 | -0.18654 | 4.99E-05 | -0.23352 | 3.33E-07 | 0.020452 | 0.65934  |
| 0.84212  | -0.32174 | 1.04E-12 | -0.15318 | 0.0009   | -0.16597 | 0.00032  | 0.247591 | 5.93E-08 |
| 1.86E-11 | -0.48406 | 8.36E-29 | -0.26807 | 3.97E-09 | -0.43451 | 6.29E-23 | -0.0172  | 0.71077  |
| 0.02309  | -0.19101 | 3.25E-05 | -0.04092 | 0.37766  | -0.03617 | 0.43555  | -0.0839  | 0.07007  |
| 0.00382  | -0.27953 | 7.88E-10 | -0.114   | 0.0137   | -0.0963  | 0.03749  | -0.0692  | 0.13539  |
| 0.41048  | -0.30344 | 2.11E-11 | -0.09629 | 0.03752  | -0.15386 | 0.00085  | -0.45706 | 1.75E-25 |
| 7.03E-10 | -0.54788 | 6.14E-38 | -0.39208 | 1.30E-18 | -0.47827 | 4.56E-28 | 0.02444  | 0.59832  |
| 4.81E-08 | -0.49993 | 6.73E-31 | -0.32892 | 3.04E-13 | -0.39919 | 2.72E-19 | -0.11718 | 0.01127  |
| 0.00071  | -0.34139 | 3.28E-14 | -0.17948 | 9.63E-05 | -0.23604 | 2.47E-07 | -0.0396  | 0.39327  |
| 0.00085  | -0.47348 | 1.81E-27 | -0.26674 | 4.76E-09 | -0.34145 | 3.24E-14 | -0.01331 | 0.77426  |
| 0.00095  | 0.548883 | 4.25E-38 | 0.305939 | 1.42E-11 | 0.313067 | 4.45E-12 | 0.229957 | 5.07E-07 |
| 1.80E-07 | 0.535762 | 4.72E-36 | 0.319479 | 1.53E-12 | 0.379433 | 1.94E-17 | 0.240814 | 1.38E-07 |
| 0.00933  | -0.43109 | 1.48E-22 | -0.26767 | 4.19E-09 | -0.30417 | 1.88E-11 | -0.05565 | 0.22999  |
| 1.68E-11 | -0.60908 | 9.35E-49 | -0.39894 | 2.87E-19 | -0.48702 | 3.46E-29 | -0.04591 | 0.32223  |
| 0.32708  | -0.33961 | 4.53E-14 | -0.16809 | 0.00026  | -0.19356 | 2.54E-05 | -0.12604 | 0.00638  |
| 0.02423  | -0.45879 | 1.09E-25 | -0.16713 | 0.00029  | -0.27439 | 1.64E-09 | -0.13175 | 0.00435  |
| 1.46E-06 | -0.55646 | 2.54E-39 | -0.3685  | 1.82E-16 | -0.4404  | 1.41E-23 | -0.16864 | 0.00025  |
| 4.70E-09 | -0.54878 | 4.40E-38 | -0.34283 | 2.52E-14 | -0.44042 | 1.40E-23 | -0.12529 | 0.00671  |
| 0.01076  | -0.47428 | 1.44E-27 | -0.31039 | 6.90E-12 | -0.36118 | 7.76E-16 | 0.024762 | 0.59351  |
| 0.05525  | 0.455109 | 2.96E-25 | 0.143882 | 0.00183  | 0.235719 | 2.56E-07 | 0.185655 | 5.43E-05 |
| 0.58278  | -0.32795 | 3.59E-13 | 0.020759 | 0.65455  | -0.0631  | 0.17345  | -0.08564 | 0.06444  |
| 0.00067  | -0.50628 | 9.07E-32 | -0.34494 | 1.71E-14 | -0.41673 | 4.82E-21 | 0.089814 | 0.05243  |
| 0.00064  | 0.523739 | 2.97E-34 | 0.114531 | 0.01327  | 0.216638 | 2.30E-06 | 0.275552 | 1.39E-09 |
| 0.43241  | -0.32979 | 2.61E-13 | -0.08498 | 0.06653  | -0.14207 | 0.00209  | 0.034928 | 0.45144  |
| 3.83E-06 | -0.44165 | 1.02E-23 | -0.40266 | 1.25E-19 | -0.42683 | 4.23E-22 | 0.038359 | 0.40822  |
| 1.01E-08 | -0.42254 | 1.20E-21 | -0.29212 | 1.22E-10 | -0.37281 | 7.60E-17 | -0.18961 | 3.72E-05 |
| 0.00237  | -0.42987 | 2.00E-22 | -0.24835 | 5.39E-08 | -0.31878 | 1.72E-12 | -0.08525 | 0.06568  |
| 0.00027  | -0.4662  | 1.42E-26 | -0.36685 | 2.53E-16 | -0.39284 | 1.11E-18 | 0.086643 | 0.06136  |
| 0.65315  | -0.14214 | 0.00208  | 0.108709 | 0.01878  | -0.00024 | 0.99581  | 0.013622 | 0.76906  |
| 1.28E-07 | -0.5825  | 8.93E-44 | -0.53889 | 1.57E-36 | -0.52995 | 3.57E-35 | -0.22681 | 7.31E-07 |
| 4.55E-05 | 0.407634 | 4.02E-20 | 0.221411 | 1.35E-06 | 0.331002 | 2.11E-13 | 0.157523 | 0.00063  |
| 0.00638  | 0.477748 | 5.31E-28 | 0.329061 | 2.96E-13 | 0.320238 | 1.35E-12 | 0.060473 | 0.19205  |
| 1.55E-06 | -0.50884 | 4.00E-32 | -0.44565 | 3.63E-24 | -0.449   | 1.51E-24 | -0.09362 | 0.04317  |
| 1.01E-07 | -0.20884 | 5.33E-06 | -0.15136 | 0.00103  | -0.02331 | 0.61538  | -0.00779 | 0.86661  |
| 6.26E-07 | -0.65104 | 1.20E-57 | -0.43261 | 1.01E-22 | -0.50283 | 2.70E-31 | 0.029007 | 0.53177  |
| 4.38E-13 | -0.5752  | 1.74E-42 | -0.39916 | 2.74E-19 | -0.50389 | 1.94E-31 | -0.08228 | 0.07569  |
| 2.53E-09 | -0.59099 | 2.57E-45 | -0.37406 | 5.89E-17 | -0.48761 | 2.90E-29 | -0.13157 | 0.0044   |
| 0.00445  | -0.45864 | 1.14E-25 | -0.28864 | 2.06E-10 | -0.30935 | 8.17E-12 | 0.054378 | 0.24086  |
| 0.01651  | 0.441203 | 1.15E-23 | 0.2668   | 4.72E-09 | 0.283875 | 4.18E-10 | 0.354206 | 2.99E-15 |
| 0.13969  | 0.398151 | 3.43E-19 | 0.165391 | 0.00033  | 0.232352 | 3.83E-07 | -0.20664 | 6.73E-06 |



|          |          |          |          |          |          |          |          |          |
|----------|----------|----------|----------|----------|----------|----------|----------|----------|
| 0.0748   | -0.3206  | 1.27E-12 | -0.17046 | 0.00021  | -0.18983 | 3.64E-05 | -0.06706 | 0.14792  |
| 2.92E-14 | 0.613126 | 1.48E-49 | 0.279336 | 8.10E-10 | 0.459932 | 8.01E-26 | 0.079053 | 0.08793  |
| 0.84403  | -0.40435 | 8.51E-20 | -0.29893 | 4.28E-11 | -0.24636 | 6.93E-08 | -0.0507  | 0.27418  |
| 5.97E-14 | -0.51153 | 1.68E-32 | -0.40461 | 8.02E-20 | -0.48649 | 4.06E-29 | -0.17694 | 0.00012  |
| 1.22E-07 | -0.49885 | 9.39E-31 | -0.37    | 1.34E-16 | -0.38513 | 5.83E-18 | -0.17857 | 0.0001   |
| 0.14184  | -0.14677 | 0.00147  | -0.06145 | 0.18495  | -0.03092 | 0.505    | 0.121632 | 0.00851  |
| 0.0143   | -0.43601 | 4.31E-23 | -0.13648 | 0.00312  | -0.22899 | 5.68E-07 | 0.093186 | 0.04414  |
| 0.61868  | -0.27312 | 1.96E-09 | -0.10193 | 0.02762  | -0.15678 | 0.00067  | 0.066577 | 0.15087  |
| 0.00174  | 0.521735 | 5.82E-34 | 0.265897 | 5.34E-09 | 0.310889 | 6.36E-12 | 0.118894 | 0.01012  |
| 0.06274  | -0.26012 | 1.17E-08 | -0.09963 | 0.03135  | -0.15781 | 0.00062  | 0.047035 | 0.31046  |
| 0.00282  | -0.45482 | 3.21E-25 | -0.2886  | 2.07E-10 | -0.30442 | 1.80E-11 | -0.23483 | 2.85E-07 |
| 0.2519   | -0.44085 | 1.26E-23 | -0.25087 | 3.91E-08 | -0.28297 | 4.77E-10 | -0.15728 | 0.00065  |
| 3.05E-13 | -0.53268 | 1.39E-35 | -0.39541 | 6.30E-19 | -0.49101 | 1.04E-29 | -0.03    | 0.51781  |
| 1.09E-05 | -0.25601 | 2.01E-08 | -0.01363 | 0.76889  | -0.0397  | 0.39204  | 0.21091  | 4.28E-06 |
| 0.01563  | -0.29449 | 8.51E-11 | -0.11365 | 0.014    | -0.10602 | 0.02194  | 0.153932 | 0.00085  |
| 7.78E-09 | -0.50689 | 7.49E-32 | -0.30574 | 1.46E-11 | -0.42445 | 7.56E-22 | -0.1277  | 0.00572  |
| 0.01971  | -0.51746 | 2.41E-33 | -0.2765  | 1.22E-09 | -0.35625 | 2.02E-15 | 0.052362 | 0.25877  |
| 0.00502  | -0.47061 | 4.11E-27 | -0.24997 | 4.38E-08 | -0.30025 | 3.48E-11 | 0.094027 | 0.04226  |
| 1.35E-09 | -0.5857  | 2.38E-44 | -0.36545 | 3.34E-16 | -0.46652 | 1.30E-26 | -0.14869 | 0.00127  |
| 0.17378  | -0.3259  | 5.12E-13 | -0.2145  | 2.90E-06 | -0.18245 | 7.32E-05 | 0.318195 | 1.90E-12 |
| 0.03817  | -0.41901 | 2.80E-21 | -0.20379 | 9.04E-06 | -0.2642  | 6.73E-09 | -0.17469 | 0.00015  |
| 2.88E-09 | -0.51458 | 6.22E-33 | -0.33037 | 2.35E-13 | -0.41713 | 4.38E-21 | -0.21096 | 4.26E-06 |
| 0.43274  | -0.21894 | 1.78E-06 | -0.02174 | 0.63933  | -0.10523 | 0.02295  | 0.167519 | 0.00028  |
| 0.00323  | -0.42198 | 1.37E-21 | -0.19252 | 2.81E-05 | -0.28231 | 5.26E-10 | -0.0146  | 0.753    |
| 0.39805  | -0.27588 | 1.33E-09 | -0.1027  | 0.02647  | -0.09631 | 0.03748  | -0.19247 | 2.82E-05 |
| 4.54E-07 | -0.55416 | 6.02E-39 | -0.20936 | 5.05E-06 | -0.35829 | 1.36E-15 | -0.17153 | 0.0002   |
| 5.84E-08 | -0.54563 | 1.39E-37 | -0.3425  | 2.67E-14 | -0.43813 | 2.52E-23 | -0.08852 | 0.05593  |
| 0.01828  | -0.38065 | 1.50E-17 | 0.036517 | 0.43112  | -0.13248 | 0.00413  | -0.11261 | 0.0149   |
| 0.00011  | -0.1632  | 0.0004   | -0.08252 | 0.07483  | -0.0118  | 0.79918  | -0.05225 | 0.25978  |
| 0.02189  | -0.30544 | 1.53E-11 | -0.14265 | 0.002    | -0.18803 | 4.33E-05 | -0.16613 | 0.00031  |
| 0.00572  | -0.3786  | 2.31E-17 | -0.07483 | 0.10632  | -0.20269 | 1.01E-05 | -0.0856  | 0.06456  |
| 4.56E-06 | -0.56578 | 7.18E-41 | -0.3205  | 1.29E-12 | -0.42431 | 7.82E-22 | -0.04018 | 0.38637  |
| 8.28E-06 | -0.41821 | 3.39E-21 | -0.227   | 7.15E-07 | -0.33083 | 2.17E-13 | 0.022675 | 0.62501  |
| 9.05E-08 | -0.55067 | 2.20E-38 | -0.28341 | 4.47E-10 | -0.40779 | 3.88E-20 | 0.012866 | 0.78155  |
| 8.32E-05 | -0.55042 | 2.41E-38 | -0.37405 | 5.90E-17 | -0.3844  | 6.81E-18 | 0.005269 | 0.90959  |
| 0.63713  | -0.36021 | 9.39E-16 | -0.07733 | 0.09509  | -0.14035 | 0.00237  | -0.1217  | 0.00847  |
| 9.38E-05 | -0.4909  | 1.08E-29 | -0.27575 | 1.35E-09 | -0.35997 | 9.84E-16 | -0.05183 | 0.26368  |
| 0.46912  | -0.3171  | 2.28E-12 | -0.119   | 0.01006  | -0.19274 | 2.75E-05 | -0.0512  | 0.26949  |
| 0.43884  | -0.31156 | 5.70E-12 | -0.24914 | 4.87E-08 | -0.18882 | 4.02E-05 | -0.27058 | 2.80E-09 |
| 0.40259  | -0.46214 | 4.37E-26 | -0.2415  | 1.27E-07 | -0.24207 | 1.18E-07 | 0.240817 | 1.38E-07 |
| 0.23275  | -0.37303 | 7.26E-17 | -0.1129  | 0.01464  | -0.1636  | 0.00039  | -0.10057 | 0.02977  |
| 0.02653  | -0.37661 | 3.48E-17 | -0.24245 | 1.13E-07 | -0.29146 | 1.35E-10 | -0.09737 | 0.03542  |
| 6.87E-09 | 0.569344 | 1.78E-41 | 0.348698 | 8.48E-15 | 0.446948 | 2.58E-24 | 0.236752 | 2.26E-07 |
| 0.43067  | -0.21371 | 3.16E-06 | 0.000315 | 0.99458  | -0.06999 | 0.13094  | -0.2761  | 1.29E-09 |
| 7.98E-10 | -0.49481 | 3.27E-30 | -0.33929 | 4.80E-14 | -0.42237 | 1.25E-21 | -0.06292 | 0.17463  |

|          |          |          |          |          |          |          |          |          |
|----------|----------|----------|----------|----------|----------|----------|----------|----------|
| 3.07E-10 | -0.68836 | 7.72E-67 | -0.48624 | 4.37E-29 | -0.54741 | 7.29E-38 | -0.17121 | 0.0002   |
| 0.05181  | -0.52333 | 3.41E-34 | -0.29819 | 4.81E-11 | -0.32697 | 4.26E-13 | -0.1132  | 0.01438  |
| 0.41815  | 0.490232 | 1.32E-29 | 0.23666  | 2.29E-07 | 0.249205 | 4.84E-08 | 0.074455 | 0.10808  |
| 0.0289   | -0.41459 | 7.99E-21 | -0.09298 | 0.04462  | -0.22819 | 6.23E-07 | -0.25102 | 3.83E-08 |
| 0.00289  | -0.27244 | 2.16E-09 | -0.07695 | 0.09673  | -0.15595 | 0.00072  | -0.06638 | 0.15208  |
| 0.81192  | -0.55568 | 3.40E-39 | -0.18363 | 6.56E-05 | -0.26383 | 7.08E-09 | 0.101665 | 0.02803  |
| 6.57E-08 | -0.33903 | 5.03E-14 | -0.12835 | 0.00547  | -0.28432 | 3.92E-10 | -0.08616 | 0.06283  |
| 0.38089  | -0.29076 | 1.50E-10 | -0.1164  | 0.01183  | -0.16063 | 0.00049  | -0.30865 | 9.15E-12 |
| 0.82195  | -0.24023 | 1.48E-07 | -0.09617 | 0.03776  | -0.11092 | 0.01648  | 0.074599 | 0.10739  |
| 0.01952  | -0.42494 | 6.71E-22 | -0.06458 | 0.16353  | -0.2109  | 4.28E-06 | 0.034719 | 0.45416  |
| 1.02E-10 | -0.54377 | 2.73E-37 | -0.33676 | 7.58E-14 | -0.47596 | 8.91E-28 | -0.12723 | 0.0059   |
| 0.08949  | -0.3839  | 7.57E-18 | -0.18701 | 4.77E-05 | -0.21938 | 1.70E-06 | 0.094431 | 0.04137  |
| 0.00108  | -0.50083 | 5.08E-31 | -0.35872 | 1.25E-15 | -0.39706 | 4.37E-19 | 0.085057 | 0.06628  |
| 1.17E-09 | -0.5843  | 4.25E-44 | -0.40757 | 4.08E-20 | -0.48615 | 4.49E-29 | -0.08265 | 0.07436  |
| 0.54418  | -0.36184 | 6.83E-16 | -0.09654 | 0.03703  | -0.13472 | 0.00354  | -0.09268 | 0.04531  |
| 1.34E-08 | -0.65305 | 4.13E-58 | -0.51125 | 1.84E-32 | -0.53561 | 4.98E-36 | -0.04545 | 0.32711  |
| 0.07297  | 0.375365 | 4.50E-17 | 0.213939 | 3.09E-06 | 0.207315 | 6.26E-06 | 0.088259 | 0.05666  |
| 1.69E-11 | -0.56695 | 4.55E-41 | -0.50567 | 1.10E-31 | -0.55162 | 1.55E-38 | 0.035625 | 0.44246  |
| 0.22182  | 0.312547 | 4.85E-12 | 0.174985 | 0.00014  | 0.184761 | 5.90E-05 | 0.05122  | 0.26932  |
| 0.03675  | -0.27481 | 1.55E-09 | 0.003921 | 0.93265  | -0.0571  | 0.21806  | 0.134463 | 0.0036   |
| 0.0215   | -0.24937 | 4.74E-08 | -0.26035 | 1.13E-08 | -0.12978 | 0.00497  | -0.00967 | 0.83493  |
| 0.20668  | -0.34885 | 8.25E-15 | -0.08726 | 0.05953  | -0.17355 | 0.00016  | -0.10879 | 0.01869  |
| 0.59781  | -0.31706 | 2.30E-12 | -0.10904 | 0.01842  | -0.14335 | 0.0019   | -0.38981 | 2.14E-18 |
| 5.94E-05 | -0.33807 | 5.99E-14 | 0.017375 | 0.70804  | -0.212   | 3.81E-06 | -0.23725 | 2.13E-07 |
| 0.05627  | -0.53276 | 1.35E-35 | -0.2776  | 1.04E-09 | -0.35018 | 6.43E-15 | -0.13002 | 0.00489  |
| 0.54168  | -0.49122 | 9.77E-30 | -0.23973 | 1.58E-07 | -0.25707 | 1.75E-08 | -0.09139 | 0.0484   |
| 1.26E-06 | -0.5448  | 1.88E-37 | -0.33357 | 1.34E-13 | -0.39824 | 3.36E-19 | -0.06553 | 0.15744  |
| 0.01895  | -0.33788 | 6.19E-14 | -0.02473 | 0.59401  | -0.10437 | 0.0241   | 0.04404  | 0.34231  |
| 0.31633  | -0.32633 | 4.75E-13 | -0.10845 | 0.01907  | -0.15205 | 0.00098  | -0.36853 | 1.81E-16 |
| 0.00229  | -0.42529 | 6.16E-22 | -0.27044 | 2.86E-09 | -0.30204 | 2.63E-11 | -0.04917 | 0.28895  |
| 0.33418  | -0.17    | 0.00022  | -0.09351 | 0.0434   | -0.10681 | 0.02096  | -0.1584  | 0.00059  |
| 0.00034  | -0.57328 | 3.75E-42 | -0.36291 | 5.53E-16 | -0.41457 | 8.03E-21 | 0.001484 | 0.97449  |
| 0.68355  | -0.46019 | 7.46E-26 | -0.20053 | 1.26E-05 | -0.23185 | 4.06E-07 | 0.143091 | 0.00194  |
| 0.20758  | -0.33995 | 4.26E-14 | -0.23312 | 3.49E-07 | -0.25862 | 1.42E-08 | 0.097049 | 0.03603  |
| 1.35E-05 | -0.4531  | 5.08E-25 | -0.24529 | 7.92E-08 | -0.3487  | 8.49E-15 | -0.09214 | 0.0466   |
| 0.0197   | -0.51043 | 2.40E-32 | -0.2678  | 4.12E-09 | -0.30606 | 1.39E-11 | -0.23161 | 4.18E-07 |
| 0.06415  | -0.36664 | 2.64E-16 | -0.28237 | 5.22E-10 | -0.31894 | 1.68E-12 | -0.1195  | 0.00974  |
| 3.35E-09 | -0.44892 | 1.54E-24 | -0.25114 | 3.78E-08 | -0.38561 | 5.27E-18 | -0.09681 | 0.03649  |
| 0.73167  | -0.35391 | 3.16E-15 | -0.07366 | 0.11191  | -0.10462 | 0.02377  | -0.15791 | 0.00062  |
| 5.34E-05 | -0.40257 | 1.27E-19 | -0.22817 | 6.25E-07 | -0.29895 | 4.27E-11 | 0.032308 | 0.48612  |
| 0.12525  | -0.25626 | 1.94E-08 | 0.087346 | 0.05928  | -0.00753 | 0.87102  | 0.095802 | 0.0385   |
| 0.24065  | 0.417361 | 4.15E-21 | 0.26877  | 3.60E-09 | 0.245048 | 8.17E-08 | 0.013981 | 0.76316  |
| 2.40E-09 | -0.59248 | 1.36E-45 | -0.37987 | 1.77E-17 | -0.45856 | 1.17E-25 | -0.04818 | 0.29884  |
| 0.05177  | -0.50231 | 3.19E-31 | -0.3245  | 6.52E-13 | -0.33444 | 1.15E-13 | -0.07537 | 0.10381  |
| 0.00394  | -0.2167  | 2.28E-06 | -0.08046 | 0.08239  | -0.06181 | 0.18236  | 0.262267 | 8.74E-09 |

|          |          |          |          |          |          |          |          |          |
|----------|----------|----------|----------|----------|----------|----------|----------|----------|
| 0.99074  | -0.28812 | 2.23E-10 | -0.23464 | 2.92E-07 | -0.21816 | 1.94E-06 | 0.054709 | 0.23801  |
| 0.00019  | -0.62808 | 1.30E-52 | -0.33006 | 2.48E-13 | -0.41408 | 9.01E-21 | 0.062505 | 0.17752  |
| 0.79179  | -0.35664 | 1.88E-15 | -0.1037  | 0.02502  | -0.16854 | 0.00025  | -0.28894 | 1.97E-10 |
| 0.03137  | -0.36216 | 6.41E-16 | -0.28089 | 6.47E-10 | -0.29211 | 1.22E-10 | -0.13294 | 0.004    |
| 0.0238   | 0.343587 | 2.19E-14 | 0.017255 | 0.70996  | 0.111631 | 0.0158   | 0.007705 | 0.86812  |
| 0.03226  | -0.43748 | 2.97E-23 | -0.29118 | 1.41E-10 | -0.28374 | 4.27E-10 | -0.34351 | 2.22E-14 |
| 0.11214  | -0.36549 | 3.32E-16 | -0.25329 | 2.86E-08 | -0.27663 | 1.19E-09 | -0.09128 | 0.04867  |
| 0.0033   | -0.45315 | 5.01E-25 | -0.20461 | 8.31E-06 | -0.28759 | 2.41E-10 | -0.2089  | 5.30E-06 |
| 0.00194  | -0.27558 | 1.39E-09 | -0.20712 | 6.40E-06 | -0.22531 | 8.68E-07 | -0.32811 | 3.49E-13 |
| 0.00296  | 0.553378 | 8.05E-39 | 0.235717 | 2.56E-07 | 0.29668  | 6.07E-11 | 0.315678 | 2.89E-12 |
| 0.02428  | 0.583691 | 5.46E-44 | 0.335713 | 9.14E-14 | 0.298042 | 4.92E-11 | 0.243779 | 9.57E-08 |
| 0.04486  | -0.37958 | 1.88E-17 | -0.18414 | 6.25E-05 | -0.2646  | 6.38E-09 | -0.0579  | 0.21166  |
| 0.94614  | -0.23841 | 1.85E-07 | 0.057829 | 0.21226  | -0.00994 | 0.83031  | 0.002292 | 0.9606   |
| 0.24269  | -0.33874 | 5.31E-14 | -0.15044 | 0.00111  | -0.15278 | 0.00093  | 0.05885  | 0.20428  |
| 0.00338  | -0.44618 | 3.16E-24 | -0.21283 | 3.48E-06 | -0.27532 | 1.44E-09 | -0.17619 | 0.00013  |
| 0.40188  | -0.21646 | 2.34E-06 | -0.0228  | 0.62314  | -0.13116 | 0.00453  | -0.27457 | 1.60E-09 |
| 6.15E-08 | -0.57353 | 3.38E-42 | -0.29735 | 5.47E-11 | -0.43068 | 1.64E-22 | -0.07694 | 0.09676  |
| 3.15E-09 | -0.62072 | 4.35E-51 | -0.52988 | 3.65E-35 | -0.5625  | 2.55E-40 | -0.163   | 0.00041  |
| 0.88047  | -0.39948 | 2.55E-19 | -0.09259 | 0.04552  | -0.16822 | 0.00026  | -0.05461 | 0.23886  |
| 0.02385  | -0.28629 | 2.93E-10 | -0.15713 | 0.00066  | -0.08235 | 0.07542  | -0.05898 | 0.20329  |
| 0.01529  | -0.36125 | 7.66E-16 | -0.10484 | 0.02346  | -0.24427 | 9.00E-08 | -0.0731  | 0.11466  |
| 0.8115   | -0.34933 | 7.53E-15 | -0.14544 | 0.00163  | -0.18573 | 5.39E-05 | 0.034456 | 0.45759  |
| 0.00115  | -0.51857 | 1.67E-33 | -0.14863 | 0.00128  | -0.30583 | 1.44E-11 | -0.09078 | 0.04993  |
| 0.00234  | -0.37631 | 3.71E-17 | -0.23335 | 3.40E-07 | -0.17302 | 0.00017  | 0.05867  | 0.20567  |
| 0.02417  | -0.49125 | 9.69E-30 | -0.31963 | 1.49E-12 | -0.3125  | 4.88E-12 | -0.04534 | 0.32823  |
| 0.01281  | -0.49998 | 6.63E-31 | -0.28492 | 3.59E-10 | -0.33508 | 1.02E-13 | -0.05168 | 0.26502  |
| 5.48E-07 | -0.4982  | 1.15E-30 | -0.34211 | 2.87E-14 | -0.41954 | 2.47E-21 | 0.078251 | 0.0912   |
| 0.00018  | -0.41603 | 5.69E-21 | -0.15968 | 0.00053  | -0.30535 | 1.56E-11 | -0.16533 | 0.00033  |
| 0.05582  | -0.13331 | 0.0039   | -0.00988 | 0.83135  | 0.000618 | 0.98937  | -0.15801 | 0.00061  |
| 0.37096  | -0.37671 | 3.41E-17 | -0.14465 | 0.00172  | -0.20629 | 6.97E-06 | 0.317152 | 2.26E-12 |
| 0.69328  | -0.33336 | 1.39E-13 | -0.11472 | 0.01311  | -0.15205 | 0.00098  | 0.307454 | 1.11E-11 |
| 0.0054   | -0.37513 | 4.72E-17 | -0.15502 | 0.00078  | -0.25425 | 2.53E-08 | -0.24664 | 6.69E-08 |
| 0.35589  | -0.34299 | 2.45E-14 | -0.17978 | 9.36E-05 | -0.23361 | 3.30E-07 | -0.08057 | 0.08199  |
| 0.84854  | -0.14963 | 0.00118  | -0.06217 | 0.17986  | -0.11314 | 0.01443  | -0.20876 | 5.38E-06 |
| 1.75E-06 | -0.53077 | 2.69E-35 | -0.29484 | 8.05E-11 | -0.38292 | 9.32E-18 | -0.07279 | 0.1162   |
| 0.01874  | -0.30641 | 1.31E-11 | -0.04927 | 0.28802  | -0.07156 | 0.12252  | -0.05166 | 0.26519  |
| 0.07293  | -0.31439 | 3.58E-12 | -0.13357 | 0.00383  | -0.12529 | 0.00671  | -0.14005 | 0.00242  |
| 0.8674   | -0.22797 | 6.39E-07 | -0.00425 | 0.92705  | -0.10375 | 0.02495  | 0.050006 | 0.28085  |
| 0.00151  | -0.38779 | 3.30E-18 | -0.18818 | 4.27E-05 | -0.25356 | 2.76E-08 | -0.26523 | 5.85E-09 |
| 0.04314  | -0.43185 | 1.22E-22 | -0.20911 | 5.18E-06 | -0.27803 | 9.78E-10 | -0.16962 | 0.00023  |
| 0.11497  | -0.28966 | 1.77E-10 | -0.1334  | 0.00388  | -0.14673 | 0.00147  | 0.012826 | 0.78221  |
| 2.42E-07 | 0.292049 | 1.23E-10 | 0.053435 | 0.24913  | 0.193053 | 2.67E-05 | 0.385304 | 5.62E-18 |
| 0.68668  | 0.094771 | 0.04064  | -0.1382  | 0.00276  | -0.03629 | 0.43393  | 0.324642 | 6.36E-13 |
| 0.73153  | -0.15328 | 0.00089  | -0.0545  | 0.23978  | -0.05034 | 0.27764  | -0.18449 | 6.05E-05 |
| 7.30E-07 | 0.07124  | 0.12421  | -0.0773  | 0.09523  | -0.10963 | 0.01779  | 0.124502 | 0.00706  |

|          |          |          |          |          |          |          |          |          |
|----------|----------|----------|----------|----------|----------|----------|----------|----------|
| 7.01E-07 | 0.084979 | 0.06653  | -0.15159 | 0.00102  | -0.14847 | 0.00129  | 0.294504 | 8.48E-11 |
| 5.73E-07 | 0.076629 | 0.09814  | -0.20691 | 6.54E-06 | -0.15337 | 0.00088  | 0.142279 | 0.00206  |
| 4.76E-06 | 0.296471 | 6.27E-11 | 0.253622 | 2.74E-08 | 0.288097 | 2.24E-10 | 0.456055 | 2.30E-25 |
| 2.80E-09 | 0.377087 | 3.15E-17 | 0.106584 | 0.02124  | 0.265737 | 5.46E-09 | 0.415301 | 6.75E-21 |
| 9.26E-05 | 0.50311  | 2.48E-31 | 0.310892 | 6.36E-12 | 0.336038 | 8.62E-14 | 0.366824 | 2.54E-16 |
| 0.18593  | 0.251362 | 3.67E-08 | -0.0018  | 0.96898  | 0.008436 | 0.85572  | 0.468848 | 6.75E-27 |
| 0.0393   | 0.421609 | 1.50E-21 | 0.19718  | 1.77E-05 | 0.216023 | 2.46E-06 | 0.400565 | 2.00E-19 |
| 0.00063  | 0.432292 | 1.10E-22 | 0.258022 | 1.54E-08 | 0.274483 | 1.62E-09 | 0.425967 | 5.22E-22 |
| 0.5254   | 0.138122 | 0.00278  | 0.023744 | 0.60878  | 0.05985  | 0.19668  | 0.42173  | 1.46E-21 |
| 0.01442  | 0.042972 | 0.35415  | -0.08653 | 0.06169  | -0.08307 | 0.07289  | 0.297802 | 5.10E-11 |
| 2.09E-06 | -0.05509 | 0.23471  | 0.133794 | 0.00377  | 0.13731  | 0.00294  | -0.09251 | 0.04571  |
| 0.11403  | 0.205657 | 7.45E-06 | 0.049837 | 0.28248  | 0.051058 | 0.27083  | 0.092309 | 0.04618  |
| 5.31E-06 | 0.080996 | 0.08037  | -0.101   | 0.02909  | -0.1175  | 0.01104  | 0.291446 | 1.35E-10 |
| 0.00973  | 0.206276 | 6.98E-06 | 0.021507 | 0.64296  | 0.021905 | 0.63681  | 0.132388 | 0.00416  |
| 0.00139  | 0.278811 | 8.73E-10 | 0.008862 | 0.84852  | 0.003249 | 0.94417  | 0.434911 | 5.68E-23 |
| 0.0256   | 0.030352 | 0.51292  | -0.07632 | 0.0995   | -0.12523 | 0.00673  | 0.303631 | 2.04E-11 |
| 2.75E-05 | 0.107886 | 0.0197   | -0.10814 | 0.01941  | -0.06694 | 0.14865  | 0.089105 | 0.05432  |
| 0.09153  | 0.021615 | 0.64129  | -0.08638 | 0.06215  | -0.09174 | 0.04756  | 0.125343 | 0.00669  |
| 0.00064  | 0.141787 | 0.00213  | -0.05454 | 0.23944  | -0.04848 | 0.29584  | 0.299658 | 3.82E-11 |
| 0.40903  | 0.237637 | 2.03E-07 | 0.176528 | 0.00013  | 0.167415 | 0.00028  | 0.306192 | 1.36E-11 |
| 0.05095  | 0.261697 | 9.44E-09 | 0.027726 | 0.55006  | 0.089941 | 0.05209  | 0.23158  | 4.19E-07 |
| 0.64466  | 0.206935 | 6.52E-06 | -0.00166 | 0.97145  | 0.070739 | 0.12688  | 0.298909 | 4.30E-11 |
| 1.37E-05 | -0.2937  | 9.59E-11 | 0.009961 | 0.83002  | 0.040189 | 0.38621  | 0.082953 | 0.07331  |
| 0.90937  | -0.31804 | 1.95E-12 | -0.0857  | 0.06424  | -0.14271 | 0.00199  | -0.2381  | 1.92E-07 |
| 6.82E-07 | 0.205815 | 7.33E-06 | -0.04524 | 0.32927  | -0.04269 | 0.35729  | 0.123531 | 0.00753  |
| 0.03153  | 0.301317 | 2.95E-11 | 0.219778 | 1.62E-06 | 0.202161 | 1.07E-05 | 0.423169 | 1.03E-21 |
| 0.00303  | 0.306282 | 1.34E-11 | -0.06197 | 0.18124  | -0.01153 | 0.80371  | 0.132934 | 0.004    |
| 2.73E-06 | 0.444618 | 4.75E-24 | 0.245304 | 7.91E-08 | 0.298269 | 4.75E-11 | 0.400418 | 2.07E-19 |
| 2.91E-05 | 0.384952 | 6.06E-18 | 0.25801  | 1.54E-08 | 0.268791 | 3.59E-09 | 0.691675 | 1.01E-67 |
| 0.17405  | 0.193395 | 2.58E-05 | 0.003681 | 0.93677  | -0.00797 | 0.86364  | 0.123408 | 0.00759  |
| 0.42321  | 0.077789 | 0.09314  | 0.089961 | 0.05204  | 0.054869 | 0.23664  | 0.358253 | 1.37E-15 |
| 0.18188  | 0.021834 | 0.6379   | -0.091   | 0.04936  | -0.06915 | 0.13564  | 0.320593 | 1.27E-12 |
| 0.42283  | 0.178074 | 0.00011  | 0.042173 | 0.36317  | 0.114683 | 0.01314  | 0.331027 | 2.10E-13 |
| 0.20629  | 0.108399 | 0.01912  | 0.030816 | 0.50649  | 0.051645 | 0.26536  | 0.369905 | 1.37E-16 |
| 0.82133  | 0.160606 | 0.00049  | 0.073447 | 0.11294  | 0.048618 | 0.29444  | 0.440751 | 1.29E-23 |
| 1.58E-09 | 0.073522 | 0.11258  | -0.15526 | 0.00076  | -0.14758 | 0.00138  | 0.024906 | 0.59135  |
| 0.01832  | 0.154495 | 0.00081  | -0.0488  | 0.29258  | -0.05599 | 0.22715  | 0.315982 | 2.75E-12 |
| 2.22E-12 | -0.23529 | 2.70E-07 | -0.00635 | 0.89113  | 0.094248 | 0.04177  | 0.103411 | 0.02543  |
| 0.06021  | 0.333383 | 1.38E-13 | 0.196397 | 1.92E-05 | 0.17241  | 0.00018  | 0.297971 | 4.97E-11 |
| 0.3046   | 0.192482 | 2.82E-05 | -0.085   | 0.06645  | 0.03188  | 0.49191  | 0.456885 | 1.83E-25 |
| 0.47979  | 0.167748 | 0.00027  | 0.055162 | 0.23413  | 0.040809 | 0.37891  | 0.175702 | 0.00014  |
| 1.65E-09 | -0.00262 | 0.95499  | -0.17856 | 0.0001   | -0.20321 | 9.61E-06 | 0.126242 | 0.0063   |
| 0.02316  | 0.331939 | 1.79E-13 | 0.248769 | 5.11E-08 | 0.243974 | 9.34E-08 | 0.447666 | 2.14E-24 |
| 1.64E-07 | 0.080846 | 0.08094  | -0.16167 | 0.00045  | -0.16542 | 0.00033  | 0.003546 | 0.93908  |
| 0.00012  | 0.174641 | 0.00015  | -0.10391 | 0.02473  | -0.10247 | 0.02682  | 0.137623 | 0.00288  |

|          |          |          |          |          |          |          |          |          |
|----------|----------|----------|----------|----------|----------|----------|----------|----------|
| 0.47201  | 0.233143 | 3.48E-07 | 0.029854 | 0.51985  | 0.110809 | 0.01659  | -0.07073 | 0.12691  |
| 7.00E-16 | -0.08092 | 0.08066  | 0.185589 | 5.46E-05 | 0.221382 | 1.36E-06 | 0.165208 | 0.00034  |
| 0.06662  | 0.130295 | 0.0048   | 0.098986 | 0.03246  | 0.040152 | 0.38664  | 0.290041 | 1.67E-10 |
| 0.60775  | 0.35775  | 1.51E-15 | 0.162549 | 0.00042  | 0.166876 | 0.00029  | 0.195421 | 2.11E-05 |
| 0.06176  | 0.303844 | 1.98E-11 | 0.017441 | 0.70697  | 0.0395   | 0.39441  | 0.190709 | 3.35E-05 |
| 0.49811  | 0.143624 | 0.00186  | 0.084222 | 0.069    | 0.051416 | 0.26749  | 0.471985 | 2.78E-27 |
| 0.00096  | 0.064936 | 0.16121  | -0.08416 | 0.06921  | -0.07647 | 0.09884  | 0.246465 | 6.84E-08 |
| 0.75964  | 0.122108 | 0.00825  | 0.105302 | 0.02286  | 0.057013 | 0.21878  | 0.357708 | 1.53E-15 |
| 0.00315  | 0.160448 | 0.0005   | -0.05193 | 0.26277  | -0.04487 | 0.33332  | 0.414836 | 7.53E-21 |
| 0.01032  | 0.19455  | 2.30E-05 | 0.209629 | 4.90E-06 | 0.198508 | 1.55E-05 | 0.195387 | 2.12E-05 |
| 0.32204  | -0.29559 | 7.18E-11 | -0.2458  | 7.44E-08 | -0.12873 | 0.00534  | -0.14763 | 0.00138  |
| 0.17739  | 0.218141 | 1.95E-06 | 0.088473 | 0.05606  | 0.065846 | 0.15541  | 0.294848 | 8.05E-11 |
| 1.22E-07 | 0.124419 | 0.0071   | -0.19584 | 2.02E-05 | -0.16573 | 0.00032  | -0.10392 | 0.02472  |
| 3.76E-10 | -0.05114 | 0.27008  | -0.35387 | 3.19E-15 | -0.31307 | 4.45E-12 | -0.11187 | 0.01558  |
| 0.00298  | 0.357513 | 1.58E-15 | 0.179355 | 9.73E-05 | 0.208022 | 5.81E-06 | 0.254429 | 2.47E-08 |
| 0.36671  | 0.277773 | 1.01E-09 | 0.063336 | 0.17181  | 0.060956 | 0.18852  | 0.037548 | 0.41821  |
| 0.5629   | 0.29305  | 1.06E-10 | 0.114704 | 0.01313  | 0.107483 | 0.02017  | 0.467864 | 8.90E-27 |
| 2.84E-09 | 0.339809 | 4.37E-14 | 0.232216 | 3.89E-07 | 0.300067 | 3.58E-11 | 0.643312 | 6.61E-56 |
| 0.26938  | -0.40044 | 2.06E-19 | -0.15829 | 0.0006   | -0.14073 | 0.0023   | -0.1546  | 0.0008   |
| 0.38372  | -0.28172 | 5.73E-10 | -0.07176 | 0.12151  | -0.0784  | 0.09061  | -0.01886 | 0.68437  |
| 0.23278  | -0.21874 | 1.82E-06 | 0.002527 | 0.95656  | -0.03967 | 0.39238  | -0.08748 | 0.05889  |
| 0.43643  | 0.178225 | 0.00011  | 0.104958 | 0.02331  | 0.075184 | 0.10466  | 0.05639  | 0.22387  |
| 0.18091  | -0.28175 | 5.70E-10 | -0.07223 | 0.11908  | -0.07445 | 0.10811  | 0.01138  | 0.80624  |
| 0.0005   | 0.231191 | 4.39E-07 | -0.00304 | 0.94781  | 0.021535 | 0.64252  | 0.083496 | 0.07144  |
| 5.51E-07 | 0.231446 | 4.26E-07 | -0.05484 | 0.23687  | -0.07684 | 0.09721  | 0.163175 | 0.0004   |
| 0.41615  | -0.3108  | 6.45E-12 | -0.27596 | 1.31E-09 | -0.2104  | 4.52E-06 | -0.21436 | 2.95E-06 |
| 6.69E-05 | -0.13285 | 0.00403  | -0.01289 | 0.78123  | 0.049752 | 0.2833   | -0.00669 | 0.88528  |
| 0.93421  | 0.467984 | 8.60E-27 | 0.019719 | 0.67081  | 0.10651  | 0.02133  | 0.220631 | 1.48E-06 |
| 0.15245  | 0.328443 | 3.30E-13 | 0.062212 | 0.17956  | 0.087546 | 0.0587   | 0.293581 | 9.77E-11 |
| 8.55E-05 | -0.35491 | 2.61E-15 | -0.05142 | 0.26745  | -0.0282  | 0.54331  | 0.059208 | 0.20153  |
| 0.63139  | 0.207236 | 6.32E-06 | 0.021228 | 0.64726  | 0.103392 | 0.02546  | 0.206667 | 6.71E-06 |
| 0.032    | 0.399268 | 2.67E-19 | 0.214678 | 2.85E-06 | 0.238515 | 1.83E-07 | 0.286767 | 2.73E-10 |
| 0.00457  | -0.2011  | 1.19E-05 | -0.07355 | 0.11245  | -0.02868 | 0.53636  | -0.35715 | 1.70E-15 |
| 3.70E-09 | -0.06753 | 0.14507  | 0.171802 | 0.00019  | 0.163983 | 0.00037  | 0.239656 | 1.59E-07 |
| 0.00333  | 0.159917 | 0.00052  | -0.07162 | 0.12222  | -0.08104 | 0.0802   | 0.409189 | 2.81E-20 |
| 0.23294  | 0.138387 | 0.00273  | 0.050216 | 0.27883  | 0.027677 | 0.55076  | 0.3477   | 1.02E-14 |
| 0.94836  | 0.182297 | 7.43E-05 | -0.12248 | 0.00805  | -0.0151  | 0.74481  | 0.269957 | 3.06E-09 |
| 0.29647  | 0.311564 | 5.69E-12 | 0.131947 | 0.00429  | 0.118397 | 0.01045  | 0.322794 | 8.73E-13 |
| 7.03E-05 | 0.004874 | 0.91633  | -0.08354 | 0.0713   | -0.10455 | 0.02385  | -0.04392 | 0.34363  |
| 0.96189  | 0.145562 | 0.00161  | -0.03563 | 0.44235  | 0.038    | 0.41263  | 0.29783  | 5.08E-11 |
| 0.3579   | 0.242485 | 1.12E-07 | -0.03427 | 0.46007  | 0.042193 | 0.36294  | 0.393819 | 8.93E-19 |
| 0.02487  | 0.082584 | 0.0746   | -0.03811 | 0.41122  | -0.07355 | 0.11242  | 0.007397 | 0.87334  |
| 0.85879  | 0.201915 | 1.10E-05 | 0.042343 | 0.36125  | 0.082967 | 0.07326  | 0.450823 | 9.31E-25 |
| 1.81E-17 | -0.01395 | 0.7637   | -0.28974 | 1.75E-10 | -0.29954 | 3.89E-11 | -0.07529 | 0.10417  |
| 0.01441  | 0.194184 | 2.39E-05 | 0.028347 | 0.54116  | 0.023865 | 0.60695  | 0.378431 | 2.39E-17 |

|          |          |          |          |          |          |          |          |          |
|----------|----------|----------|----------|----------|----------|----------|----------|----------|
| 0.97844  | 0.246453 | 6.85E-08 | 0.107026 | 0.02071  | 0.088424 | 0.0562   | 0.243015 | 1.05E-07 |
| 0.00019  | 0.318942 | 1.68E-12 | 0.253813 | 2.67E-08 | 0.261526 | 9.66E-09 | 0.446878 | 2.63E-24 |
| 0.05621  | 0.064115 | 0.16659  | -0.10574 | 0.02229  | -0.07747 | 0.09448  | 0.120782 | 0.00898  |
| 0.05852  | 0.105312 | 0.02284  | 0.039701 | 0.39201  | 0.114398 | 0.01337  | 0.27265  | 2.10E-09 |
| 0.00193  | 0.524967 | 1.96E-34 | 0.216618 | 2.30E-06 | 0.271132 | 2.59E-09 | 0.53795  | 2.18E-36 |
| 0.5948   | 0.192542 | 2.80E-05 | 0.157249 | 0.00065  | 0.136271 | 0.00317  | 0.178715 | 0.0001   |
| 0.16803  | 0.270621 | 2.79E-09 | 0.178903 | 0.0001   | 0.156918 | 0.00067  | 0.417837 | 3.70E-21 |
| 1.82E-06 | -0.32978 | 2.61E-13 | 0.053377 | 0.24964  | 0.047217 | 0.30859  | -0.01775 | 0.70199  |
| 0.1554   | 0.19522  | 2.15E-05 | 0.072456 | 0.1179   | 0.0425   | 0.35947  | 0.257762 | 1.59E-08 |
| 0.04754  | 0.143838 | 0.00183  | 0.115795 | 0.01228  | 0.114947 | 0.01293  | 0.334322 | 1.17E-13 |
| 2.00E-09 | 0.440084 | 1.53E-23 | 0.263368 | 7.54E-09 | 0.36493  | 3.71E-16 | 0.66218  | 2.97E-60 |
| 0.87236  | 0.180543 | 8.73E-05 | 0.104744 | 0.02359  | 0.063556 | 0.17033  | 0.486871 | 3.62E-29 |
| 0.75637  | 0.333281 | 1.41E-13 | 0.144664 | 0.00172  | 0.173193 | 0.00017  | 0.165697 | 0.00032  |
| 0.41361  | 0.284478 | 3.83E-10 | 0.09129  | 0.04865  | 0.102244 | 0.02715  | -0.01885 | 0.68453  |
| 0.051    | 0.08421  | 0.06904  | -0.00137 | 0.97639  | -0.01114 | 0.81019  | 0.437463 | 2.98E-23 |
| 0.0002   | 0.187555 | 4.53E-05 | -0.03739 | 0.42021  | -0.01271 | 0.78415  | -0.01494 | 0.74738  |
| 0.01513  | 0.200049 | 1.33E-05 | -0.04465 | 0.33565  | -0.03737 | 0.42046  | 0.346166 | 1.36E-14 |
| 0.00028  | -0.26476 | 6.24E-09 | -0.05372 | 0.24662  | -0.03267 | 0.48118  | 0.130549 | 0.00472  |
| 0.06828  | -0.31284 | 4.62E-12 | -0.15304 | 0.00091  | -0.10074 | 0.0295   | -0.01123 | 0.80867  |
| 0.98241  | 0.412104 | 1.43E-20 | 0.188476 | 4.15E-05 | 0.191475 | 3.11E-05 | 0.411247 | 1.74E-20 |
| 0.59849  | 0.187982 | 4.35E-05 | 0.178325 | 0.00011  | 0.132557 | 0.00411  | 0.128145 | 0.00555  |
| 0.80754  | 0.279952 | 7.41E-10 | 0.168965 | 0.00024  | 0.138366 | 0.00273  | 0.408362 | 3.40E-20 |
| 0.67365  | 0.147068 | 0.00144  | 0.041176 | 0.37464  | 0.048912 | 0.29152  | 0.508243 | 4.85E-32 |
| 0.00069  | 0.111716 | 0.01572  | 0.008752 | 0.85039  | -0.04059 | 0.38145  | 0.204307 | 8.57E-06 |
| 3.67E-06 | 0.034593 | 0.4558   | 0.076481 | 0.09879  | -0.05592 | 0.22775  | 0.341276 | 3.35E-14 |
| 0.107    | 0.130607 | 0.0047   | 0.13841  | 0.00272  | 0.104374 | 0.02409  | 0.359439 | 1.09E-15 |
| 0.00019  | 0.086721 | 0.06113  | -0.03304 | 0.47623  | -0.07655 | 0.09847  | 0.289416 | 1.84E-10 |
| 0.82391  | 0.451634 | 7.50E-25 | 0.201292 | 1.17E-05 | 0.2074   | 6.21E-06 | 0.296614 | 6.13E-11 |
| 0.00114  | 0.144559 | 0.00174  | -0.04943 | 0.28641  | -0.05056 | 0.27558  | 0.494867 | 3.22E-30 |
| 0.06954  | 0.321848 | 1.03E-12 | 0.191006 | 3.25E-05 | 0.185205 | 5.66E-05 | 0.222062 | 1.26E-06 |
| 0.38093  | 0.26453  | 6.44E-09 | 0.120856 | 0.00894  | 0.111918 | 0.01553  | 0.294132 | 8.98E-11 |
| 0.19076  | 0.30497  | 1.65E-11 | 0.211944 | 3.83E-06 | 0.115703 | 0.01235  | 0.393697 | 9.17E-19 |
| 0.02502  | 0.211184 | 4.15E-06 | 0.026434 | 0.56881  | 0.097759 | 0.03469  | 0.510902 | 2.06E-32 |
| 0.00088  | 0.224618 | 9.40E-07 | 0.167854 | 0.00027  | 0.18458  | 6.00E-05 | 0.431262 | 1.42E-22 |
| 1.24E-15 | -0.08854 | 0.05588  | 0.261942 | 9.13E-09 | 0.218442 | 1.88E-06 | 0.15401  | 0.00084  |
| 0.2389   | 0.268194 | 3.90E-09 | -0.07809 | 0.09189  | 0.036941 | 0.42578  | 0.031856 | 0.49224  |
| 0.00744  | 0.449469 | 1.33E-24 | 0.213726 | 3.16E-06 | 0.281883 | 5.60E-10 | 0.515676 | 4.35E-33 |
| 0.27321  | 0.263364 | 7.54E-09 | -0.05765 | 0.21364  | 0.05355  | 0.24811  | 0.188191 | 4.27E-05 |
| 1.17E-07 | 0.120045 | 0.00941  | -0.02141 | 0.64451  | -0.07573 | 0.10214  | 0.080995 | 0.08038  |
| 0.14928  | 0.094057 | 0.04219  | -0.02189 | 0.63699  | -0.00329 | 0.94353  | -0.09488 | 0.0404   |
| 5.75E-05 | -0.2362  | 2.42E-07 | 0.034528 | 0.45665  | 0.032164 | 0.48806  | -0.08377 | 0.07052  |
| 1.11E-06 | 0.19213  | 2.92E-05 | -0.05685 | 0.22015  | -0.07512 | 0.10495  | -0.22461 | 9.40E-07 |
| 0.40322  | 0.387279 | 3.69E-18 | 0.127229 | 0.0059   | 0.1234   | 0.00759  | 0.295116 | 7.72E-11 |
| 0.13537  | 0.214944 | 2.77E-06 | 0.035832 | 0.43982  | 0.041849 | 0.36687  | 0.291185 | 1.41E-10 |
| 2.04E-09 | -0.02574 | 0.579    | -0.31386 | 3.90E-12 | -0.2745  | 1.62E-09 | -0.12321 | 0.00769  |

|          |          |          |          |          |          |          |          |          |
|----------|----------|----------|----------|----------|----------|----------|----------|----------|
| 1.75E-26 | 0.357198 | 1.68E-15 | 0.509362 | 3.39E-32 | 0.562464 | 2.58E-40 | 0.126079 | 0.00637  |
| 2.43E-09 | -0.52948 | 4.19E-35 | -0.52941 | 4.30E-35 | -0.50337 | 2.29E-31 | -0.16709 | 0.00029  |
| 4.53E-09 | -0.40189 | 1.49E-19 | -0.44016 | 1.50E-23 | -0.43162 | 1.30E-22 | 0.026642 | 0.56576  |
| 4.74E-07 | -0.25533 | 2.19E-08 | -0.41841 | 3.23E-21 | -0.37168 | 9.55E-17 | -0.04717 | 0.30911  |
| 0.01581  | -0.11734 | 0.01115  | -0.2084  | 5.59E-06 | -0.17737 | 0.00012  | -0.04711 | 0.30969  |
| 1.05E-06 | -0.57436 | 2.43E-42 | -0.4844  | 7.56E-29 | -0.49564 | 2.54E-30 | -0.0552  | 0.23379  |
| 0.12765  | -0.24868 | 5.17E-08 | -0.23932 | 1.66E-07 | -0.22307 | 1.12E-06 | 0.009056 | 0.84524  |
| 0.82658  | -0.34359 | 2.19E-14 | -0.41062 | 2.02E-20 | -0.28066 | 6.68E-10 | -0.07825 | 0.09119  |
| 0.17933  | -0.44365 | 6.11E-24 | -0.48626 | 4.35E-29 | -0.36216 | 6.41E-16 | -0.04546 | 0.32697  |
| 2.89E-17 | -0.63437 | 5.96E-54 | -0.57632 | 1.11E-42 | -0.59443 | 5.94E-46 | -0.25532 | 2.20E-08 |
| 0.08653  | 0.337063 | 7.18E-14 | 0.371455 | 1.00E-16 | 0.266679 | 4.80E-09 | 0.081126 | 0.07989  |
| 4.96E-31 | -0.29406 | 9.08E-11 | -0.696   | 6.83E-69 | -0.60742 | 1.97E-48 | -0.27958 | 7.82E-10 |
| 1.05E-41 | 0.502868 | 2.68E-31 | 0.577224 | 7.69E-43 | 0.590509 | 3.16E-45 | 0.091043 | 0.04927  |
| 0.00246  | -0.36649 | 2.72E-16 | -0.34785 | 9.94E-15 | -0.34243 | 2.71E-14 | -0.07286 | 0.11589  |
| 1.55E-41 | 0.646674 | 1.17E-56 | 0.642394 | 1.06E-55 | 0.693085 | 4.23E-68 | 0.288124 | 2.23E-10 |
| 2.44E-07 | -0.56428 | 1.28E-40 | -0.6015  | 2.75E-47 | -0.54387 | 2.63E-37 | 0.091891 | 0.04718  |
| 7.03E-10 | -0.19503 | 2.19E-05 | -0.45705 | 1.75E-25 | -0.39213 | 1.29E-18 | 0.16535  | 0.00033  |
| 6.27E-14 | 0.505986 | 9.98E-32 | 0.732456 | 1.15E-79 | 0.577088 | 8.12E-43 | 0.082012 | 0.07664  |
| 0.03301  | -0.39037 | 1.89E-18 | -0.2563  | 1.93E-08 | -0.1902  | 3.52E-05 | -0.14425 | 0.00178  |
| 1.16E-16 | -0.59794 | 1.30E-46 | -0.66747 | 1.57E-61 | -0.65134 | 1.02E-57 | 0.004748 | 0.9185   |
| 1.44E-12 | 0.531257 | 2.27E-35 | 0.632819 | 1.28E-53 | 0.579684 | 2.83E-43 | 0.208122 | 5.75E-06 |
| 8.52E-24 | 0.478176 | 4.69E-28 | 0.689872 | 3.07E-67 | 0.623936 | 9.48E-52 | 0.211426 | 4.05E-06 |
| 5.10E-05 | -0.0298  | 0.52068  | -0.50341 | 2.25E-31 | -0.31389 | 3.89E-12 | 0.006012 | 0.89691  |
| 6.51E-09 | 0.222516 | 1.19E-06 | 0.378884 | 2.17E-17 | 0.330117 | 2.46E-13 | 0.100803 | 0.0294   |
| 0.00026  | -0.36059 | 8.72E-16 | -0.55235 | 1.18E-38 | -0.44489 | 4.42E-24 | 0.027241 | 0.55706  |
| 6.69E-28 | 0.334895 | 1.06E-13 | 0.503413 | 2.25E-31 | 0.510873 | 2.08E-32 | 0.092269 | 0.04628  |
| 2.35E-18 | 0.360981 | 8.07E-16 | 0.738795 | 1.01E-81 | 0.589915 | 4.06E-45 | 0.009786 | 0.83296  |
| 1.68E-10 | -0.55353 | 7.62E-39 | -0.676   | 1.21E-63 | -0.59016 | 3.66E-45 | 0.043117 | 0.35253  |
| 9.10E-09 | -0.35617 | 2.05E-15 | -0.5104  | 2.42E-32 | -0.45597 | 2.35E-25 | -0.00799 | 0.86319  |
| 1.68E-20 | -0.53358 | 1.01E-35 | -0.68708 | 1.68E-66 | -0.66466 | 7.55E-61 | -0.16155 | 0.00046  |
| 2.06E-05 | -0.39825 | 3.36E-19 | -0.42957 | 2.15E-22 | -0.38459 | 6.54E-18 | 0.037499 | 0.41882  |
| 9.35E-17 | 0.485201 | 5.96E-29 | 0.5892   | 5.48E-45 | 0.587307 | 1.21E-44 | 0.051415 | 0.2675   |
| 7.32E-05 | 0.25677  | 1.82E-08 | 0.43301  | 9.16E-23 | 0.351764 | 4.76E-15 | 0.248523 | 5.27E-08 |
| 2.85E-22 | 0.395942 | 5.60E-19 | 0.724261 | 4.30E-77 | 0.652285 | 6.19E-58 | 0.178414 | 0.00011  |
| 7.16E-11 | -0.34516 | 1.64E-14 | -0.41112 | 1.80E-20 | -0.4308  | 1.59E-22 | -0.00778 | 0.86683  |
| 0.02111  | -0.44739 | 2.30E-24 | -0.30671 | 1.25E-11 | -0.32659 | 4.55E-13 | -0.03487 | 0.45215  |
| 4.96E-15 | -0.59087 | 2.71E-45 | -0.54301 | 3.59E-37 | -0.58547 | 2.62E-44 | -0.05849 | 0.20707  |
| 5.52E-08 | 0.457169 | 1.70E-25 | 0.652037 | 7.05E-58 | 0.468262 | 7.96E-27 | -0.01931 | 0.67722  |
| 3.54E-09 | -0.51966 | 1.17E-33 | -0.64597 | 1.68E-56 | -0.53922 | 1.39E-36 | -0.22665 | 7.45E-07 |
| 0.00011  | 0.421286 | 1.62E-21 | 0.387191 | 3.76E-18 | 0.340451 | 3.89E-14 | -0.05906 | 0.2027   |
| 0.9549   | -0.02793 | 0.54714  | -0.1951  | 2.18E-05 | -0.09857 | 0.03321  | 0.19435  | 2.35E-05 |
| 0.00015  | 0.435048 | 5.49E-23 | 0.506299 | 9.03E-32 | 0.396327 | 5.14E-19 | 0.106369 | 0.0215   |
| 7.67E-08 | 0.338639 | 5.40E-14 | 0.529603 | 4.02E-35 | 0.408854 | 3.04E-20 | 0.159133 | 0.00056  |
| 3.60E-07 | -0.40228 | 1.36E-19 | -0.39392 | 8.73E-19 | -0.3853  | 5.62E-18 | -0.22235 | 1.22E-06 |
| 0.04976  | -0.38314 | 8.90E-18 | -0.28228 | 5.28E-10 | -0.29461 | 8.35E-11 | -0.0008  | 0.98618  |

|          |          |          |          |          |          |          |          |          |
|----------|----------|----------|----------|----------|----------|----------|----------|----------|
| 1.09E-14 | -0.51172 | 1.58E-32 | -0.53709 | 2.96E-36 | -0.53344 | 1.06E-35 | -0.31832 | 1.86E-12 |
| 0.00029  | 0.580468 | 2.06E-43 | 0.460585 | 6.70E-26 | 0.406853 | 4.81E-20 | -0.07086 | 0.12624  |
| 5.05E-11 | -0.2796  | 7.79E-10 | -0.36782 | 2.09E-16 | -0.37823 | 2.49E-17 | -0.15252 | 0.00094  |
| 8.41E-06 | -0.41866 | 3.04E-21 | -0.63505 | 4.26E-54 | -0.47253 | 2.38E-27 | -0.08678 | 0.06096  |
| 3.75E-25 | 0.410759 | 1.95E-20 | 0.641255 | 1.89E-55 | 0.601568 | 2.67E-47 | 0.222635 | 1.18E-06 |
| 4.81E-09 | -0.31527 | 3.09E-12 | -0.34709 | 1.14E-14 | -0.37126 | 1.04E-16 | -0.07575 | 0.10206  |
| 6.87E-26 | 0.461818 | 4.77E-26 | 0.649479 | 2.71E-57 | 0.621447 | 3.09E-51 | -0.00321 | 0.94487  |
| 1.98E-30 | -0.51369 | 8.32E-33 | -0.68544 | 4.54E-66 | -0.69028 | 2.40E-67 | -0.24156 | 1.26E-07 |
| 0.03328  | -0.24533 | 7.89E-08 | -0.27214 | 2.25E-09 | -0.24522 | 7.99E-08 | 0.014475 | 0.75505  |
| 0.14424  | -0.24292 | 1.06E-07 | -0.31888 | 1.69E-12 | -0.2729  | 2.02E-09 | -0.06011 | 0.19475  |
| 1.12E-08 | 0.399861 | 2.34E-19 | 0.457051 | 1.75E-25 | 0.439315 | 1.86E-23 | 0.035301 | 0.44663  |
| 1.75E-23 | 0.632343 | 1.62E-53 | 0.68568  | 3.94E-66 | 0.642084 | 1.24E-55 | 0.086917 | 0.06055  |
| 5.28E-10 | 0.467207 | 1.07E-26 | 0.582711 | 8.19E-44 | 0.498277 | 1.12E-30 | -0.07347 | 0.11281  |
| 0.00106  | 0.54814  | 5.58E-38 | 0.609675 | 7.15E-49 | 0.462053 | 4.47E-26 | 0.080195 | 0.08342  |
| 4.19E-38 | -0.54244 | 4.40E-37 | -0.65335 | 3.51E-58 | -0.69095 | 1.58E-67 | -0.41819 | 3.40E-21 |
| 9.33E-26 | 0.4444   | 5.02E-24 | 0.748069 | 7.70E-85 | 0.659649 | 1.19E-59 | -0.04115 | 0.37492  |
| 3.07E-20 | -0.51508 | 5.28E-33 | -0.58304 | 7.14E-44 | -0.56735 | 3.89E-41 | -0.3378  | 6.28E-14 |
| 2.81E-17 | 0.485298 | 5.79E-29 | 0.669149 | 6.11E-62 | 0.603814 | 9.89E-48 | 0.100115 | 0.03053  |
| 6.96E-17 | 0.428843 | 2.58E-22 | 0.555789 | 3.27E-39 | 0.560072 | 6.46E-40 | 0.124407 | 0.00711  |
| 5.56E-09 | -0.43623 | 4.08E-23 | -0.4829  | 1.18E-28 | -0.46724 | 1.06E-26 | 0.212312 | 3.68E-06 |
| 3.22E-10 | -0.44189 | 9.61E-24 | -0.63743 | 1.30E-54 | -0.56651 | 5.40E-41 | -0.00797 | 0.86367  |
| 1.75E-05 | -0.36275 | 5.71E-16 | -0.27303 | 1.99E-09 | -0.30385 | 1.97E-11 | -0.2455  | 7.72E-08 |
| 4.65E-06 | 0.322799 | 8.72E-13 | 0.445888 | 3.41E-24 | 0.392874 | 1.10E-18 | 0.011341 | 0.80689  |
| 3.25E-09 | 0.419349 | 2.58E-21 | 0.544377 | 2.19E-37 | 0.439683 | 1.69E-23 | 0.246728 | 6.62E-08 |
| 0.0012   | -0.30774 | 1.06E-11 | -0.43969 | 1.69E-23 | -0.34531 | 1.59E-14 | 0.254332 | 2.50E-08 |
| 1.04E-08 | -0.29977 | 3.76E-11 | -0.40217 | 1.39E-19 | -0.37308 | 7.19E-17 | -0.08273 | 0.07407  |
| 0.02375  | -0.25042 | 4.14E-08 | -0.26242 | 8.56E-09 | -0.23222 | 3.89E-07 | 0.246438 | 6.86E-08 |
| 1.18E-09 | 0.381546 | 1.24E-17 | 0.564035 | 1.41E-40 | 0.472933 | 2.12E-27 | -0.06053 | 0.19163  |
| 4.09E-17 | 0.548504 | 4.88E-38 | 0.67294  | 7.06E-63 | 0.64304  | 7.60E-56 | -0.05961 | 0.19849  |
| 0.00412  | -0.36615 | 2.91E-16 | -0.28298 | 4.77E-10 | -0.28787 | 2.31E-10 | 0.404383 | 8.45E-20 |
| 1.26E-09 | -0.25023 | 4.24E-08 | -0.47206 | 2.72E-27 | -0.43524 | 5.24E-23 | -0.12201 | 0.0083   |
| 7.60E-11 | -0.31854 | 1.79E-12 | -0.44857 | 1.69E-24 | -0.43038 | 1.76E-22 | -0.10035 | 0.03014  |
| 1.36E-20 | -0.49509 | 3.00E-30 | -0.65679 | 5.58E-59 | -0.62865 | 9.82E-53 | -0.28912 | 1.92E-10 |
| 9.56E-07 | -0.18235 | 7.39E-05 | -0.32545 | 5.54E-13 | -0.26691 | 4.65E-09 | 0.259049 | 1.34E-08 |
| 2.59E-06 | 0.410122 | 2.26E-20 | 0.353391 | 3.50E-15 | 0.385875 | 4.98E-18 | 0.173928 | 0.00016  |
| 0.2206   | 0.0712   | 0.12442  | -0.25174 | 3.50E-08 | -0.06791 | 0.14283  | 0.024706 | 0.59434  |
| 2.29E-21 | -0.60633 | 3.23E-48 | -0.67731 | 5.65E-64 | -0.65637 | 6.99E-59 | -0.29595 | 6.79E-11 |
| 0.30407  | -0.36712 | 2.40E-16 | -0.39376 | 9.05E-19 | -0.2998  | 3.74E-11 | -0.23972 | 1.58E-07 |
| 0.00012  | -0.43766 | 2.84E-23 | -0.50103 | 4.76E-31 | -0.42365 | 9.17E-22 | -0.07804 | 0.0921   |
| 0.21205  | 0.377903 | 2.66E-17 | 0.345213 | 1.62E-14 | 0.254372 | 2.49E-08 | 0.365233 | 3.49E-16 |
| 4.42E-12 | -0.39563 | 6.00E-19 | -0.44848 | 1.73E-24 | -0.43709 | 3.28E-23 | -0.25193 | 3.41E-08 |
| 1.67E-05 | -0.47921 | 3.47E-28 | -0.42052 | 1.95E-21 | -0.39036 | 1.90E-18 | 0.063162 | 0.17299  |
| 4.12E-24 | -0.37279 | 7.63E-17 | -0.72787 | 3.25E-78 | -0.61875 | 1.10E-50 | -0.30541 | 1.54E-11 |
| 0.16784  | 0.270465 | 2.85E-09 | 0.334959 | 1.05E-13 | 0.27012  | 2.99E-09 | 0.120675 | 0.00904  |
| 0.01732  | -0.36838 | 1.86E-16 | -0.45442 | 3.57E-25 | -0.35533 | 2.41E-15 | 0.122449 | 0.00807  |



|          |          |          |          |          |          |          |          |          |
|----------|----------|----------|----------|----------|----------|----------|----------|----------|
| 4.38E-07 | -0.46256 | 3.89E-26 | -0.68028 | 9.86E-65 | -0.54589 | 1.27E-37 | 0.080936 | 0.0806   |
| 4.55E-08 | -0.50017 | 6.23E-31 | -0.50074 | 5.23E-31 | -0.44664 | 2.80E-24 | 0.128865 | 0.00529  |
| 1.51E-05 | -0.22984 | 5.14E-07 | -0.36873 | 1.74E-16 | -0.2812  | 6.18E-10 | -0.06954 | 0.13344  |
| 8.35E-08 | 0.405466 | 6.60E-20 | 0.509116 | 3.67E-32 | 0.414389 | 8.37E-21 | 0.073609 | 0.11215  |
| 0.82779  | 0.093969 | 0.04238  | 0.291424 | 1.36E-10 | 0.128608 | 0.00538  | -0.28605 | 3.03E-10 |
| 0.0004   | -0.40111 | 1.77E-19 | -0.3674  | 2.27E-16 | -0.36319 | 5.23E-16 | -0.06691 | 0.14881  |
| 0.11559  | -0.33033 | 2.37E-13 | -0.18539 | 5.56E-05 | -0.13917 | 0.00258  | 0.076625 | 0.09815  |
| 0.01061  | -0.52569 | 1.53E-34 | -0.50592 | 1.02E-31 | -0.41512 | 7.04E-21 | -0.14629 | 0.00152  |
| 5.23E-15 | -0.24862 | 5.21E-08 | -0.43053 | 1.70E-22 | -0.39899 | 2.84E-19 | -0.00155 | 0.97342  |
| 2.66E-24 | 0.342281 | 2.79E-14 | 0.480134 | 2.65E-28 | 0.469404 | 5.77E-27 | 0.189243 | 3.86E-05 |
| 0.00213  | -0.23262 | 3.71E-07 | -0.33003 | 2.50E-13 | -0.21898 | 1.77E-06 | -0.25122 | 3.74E-08 |
| 2.78E-10 | -0.5241  | 2.62E-34 | -0.55109 | 1.88E-38 | -0.51091 | 2.05E-32 | -0.24928 | 4.79E-08 |
| 0.03872  | -0.42704 | 4.02E-22 | -0.59817 | 1.18E-46 | -0.4499  | 1.19E-24 | -0.05774 | 0.21292  |
| 2.47E-05 | -0.46216 | 4.35E-26 | -0.47    | 4.87E-27 | -0.45334 | 4.76E-25 | -0.07168 | 0.1219   |
| 9.95E-11 | -0.42211 | 1.33E-21 | -0.67798 | 3.82E-64 | -0.5168  | 3.00E-33 | -0.20771 | 6.01E-06 |
| 2.30E-14 | -0.42908 | 2.43E-22 | -0.64196 | 1.32E-55 | -0.58697 | 1.40E-44 | 0.046181 | 0.31933  |
| 0.25122  | -0.09753 | 0.03511  | -0.1774  | 0.00012  | -0.13844 | 0.00272  | 0.252806 | 3.05E-08 |
| 0.00101  | -0.27437 | 1.64E-09 | -0.59005 | 3.82E-45 | -0.40914 | 2.84E-20 | -0.01887 | 0.68426  |
| 4.78E-22 | -0.49245 | 6.74E-30 | -0.68626 | 2.77E-66 | -0.64016 | 3.29E-55 | -0.3413  | 3.33E-14 |
| 0.00035  | -0.15962 | 0.00054  | -0.5079  | 5.41E-32 | -0.35811 | 1.41E-15 | -0.08747 | 0.05891  |
| 3.78E-32 | 0.58581  | 2.27E-44 | 0.762335 | 6.50E-90 | 0.702518 | 1.07E-70 | 0.086409 | 0.06207  |
| 0.13982  | -0.10768 | 0.01994  | -0.16283 | 0.00041  | -0.08348 | 0.07148  | 0.388353 | 2.93E-18 |
| 0.00076  | 0.364327 | 4.18E-16 | 0.598076 | 1.23E-46 | 0.441162 | 1.16E-23 | -0.15772 | 0.00062  |
| 0.00058  | -0.24871 | 5.15E-08 | -0.26901 | 3.48E-09 | -0.2723  | 2.20E-09 | 0.089936 | 0.05211  |
| 0.11631  | -0.16909 | 0.00024  | -0.19881 | 1.50E-05 | -0.19865 | 1.53E-05 | 0.101459 | 0.02836  |
| 0.85913  | -0.32336 | 7.93E-13 | -0.334   | 1.24E-13 | -0.25058 | 4.06E-08 | -0.09469 | 0.04082  |
| 0.00468  | -0.40645 | 5.28E-20 | -0.27941 | 8.01E-10 | -0.29013 | 1.65E-10 | 0.305448 | 1.53E-11 |
| 4.07E-24 | -0.45691 | 1.82E-25 | -0.74451 | 1.26E-83 | -0.68231 | 2.96E-65 | -0.28738 | 2.49E-10 |
| 0.1981   | -0.11054 | 0.01686  | -0.17279 | 0.00018  | -0.07996 | 0.08433  | 0.333261 | 1.41E-13 |
| 5.98E-09 | -0.41814 | 3.45E-21 | -0.67884 | 2.30E-64 | -0.54438 | 2.19E-37 | -0.1517  | 0.00101  |
| 0.31854  | -0.0363  | 0.43384  | -0.20304 | 9.77E-06 | -0.12631 | 0.00627  | 0.248747 | 5.13E-08 |
| 2.48E-11 | -0.37958 | 1.88E-17 | -0.52409 | 2.64E-34 | -0.48209 | 1.49E-28 | -0.21515 | 2.71E-06 |
| 1.17E-06 | 0.22164  | 1.32E-06 | 0.493809 | 4.45E-30 | 0.384655 | 6.45E-18 | 0.271795 | 2.36E-09 |
| 1.38E-19 | -0.43448 | 6.33E-23 | -0.69489 | 1.37E-68 | -0.58644 | 1.74E-44 | -0.16558 | 0.00033  |
| 0.00047  | 0.490372 | 1.26E-29 | 0.646637 | 1.19E-56 | 0.486764 | 3.74E-29 | 0.019919 | 0.66767  |
| 1.86E-14 | 0.314755 | 3.37E-12 | 0.495547 | 2.61E-30 | 0.477758 | 5.29E-28 | 0.130915 | 0.0046   |
| 1.61E-19 | -0.52681 | 1.05E-34 | -0.71885 | 1.91E-75 | -0.65164 | 8.71E-58 | -0.18962 | 3.72E-05 |
| 4.20E-11 | 0.370703 | 1.17E-16 | 0.535329 | 5.50E-36 | 0.450729 | 9.54E-25 | -0.09341 | 0.04363  |
| 2.27E-16 | -0.38759 | 3.45E-18 | -0.5022  | 3.30E-31 | -0.49226 | 7.13E-30 | -0.34681 | 1.21E-14 |
| 2.17E-15 | 0.457446 | 1.58E-25 | 0.576536 | 1.01E-42 | 0.548365 | 5.13E-38 | -0.03923 | 0.3977   |
| 1.48E-22 | 0.596411 | 2.53E-46 | 0.755765 | 1.56E-87 | 0.691133 | 1.41E-67 | 0.019332 | 0.67691  |
| 7.72E-09 | -0.42503 | 6.56E-22 | -0.47313 | 2.00E-27 | -0.47439 | 1.40E-27 | -0.20814 | 5.74E-06 |
| 9.15E-24 | 0.410483 | 2.08E-20 | 0.672641 | 8.38E-63 | 0.590093 | 3.76E-45 | 0.025971 | 0.5756   |
| 2.26E-23 | -0.49174 | 8.36E-30 | -0.74114 | 1.69E-82 | -0.6664  | 2.87E-61 | -0.04152 | 0.37063  |
| 5.90E-19 | 0.341605 | 3.15E-14 | 0.580361 | 2.15E-43 | 0.467438 | 1.00E-26 | -0.04876 | 0.29307  |

|          |          |          |          |          |          |          |          |          |
|----------|----------|----------|----------|----------|----------|----------|----------|----------|
| 1.38E-10 | -0.36215 | 6.42E-16 | -0.55937 | 8.44E-40 | -0.46606 | 1.47E-26 | -0.19541 | 2.11E-05 |
| 8.37E-10 | -0.26716 | 4.50E-09 | -0.43656 | 3.75E-23 | -0.4262  | 4.93E-22 | -0.13176 | 0.00434  |
| 0.92932  | -0.21935 | 1.70E-06 | -0.33246 | 1.63E-13 | -0.21408 | 3.04E-06 | 0.182612 | 7.21E-05 |
| 8.07E-10 | 0.396694 | 4.74E-19 | 0.452709 | 5.64E-25 | 0.39546  | 6.22E-19 | 0.483833 | 8.94E-29 |
| 3.04E-06 | 0.157941 | 0.00061  | 0.277308 | 1.08E-09 | 0.247168 | 6.26E-08 | 0.240427 | 1.45E-07 |
| 1.11E-15 | 0.542701 | 4.01E-37 | 0.682058 | 3.44E-65 | 0.607677 | 1.76E-48 | 0.059801 | 0.19705  |
| 0.78548  | -0.24506 | 8.15E-08 | -0.18114 | 8.27E-05 | -0.17419 | 0.00015  | -0.10872 | 0.01877  |
| 0.01389  | -0.25878 | 1.39E-08 | -0.27656 | 1.21E-09 | -0.26391 | 7.00E-09 | 0.088759 | 0.05527  |
| 8.79E-13 | -0.42387 | 8.70E-22 | -0.55737 | 1.80E-39 | -0.5     | 6.58E-31 | -0.27397 | 1.74E-09 |
| 3.11E-08 | -0.29117 | 1.41E-10 | -0.5305  | 2.95E-35 | -0.42296 | 1.08E-21 | -0.22744 | 6.80E-07 |
| 0.01715  | -0.12788 | 0.00565  | -0.26106 | 1.03E-08 | -0.17858 | 0.0001   | -0.12547 | 0.00663  |
| 0.00595  | -0.21942 | 1.69E-06 | -0.23299 | 3.55E-07 | -0.23464 | 2.92E-07 | 0.071069 | 0.12512  |
| 2.70E-23 | -0.50038 | 5.84E-31 | -0.69655 | 4.83E-69 | -0.64958 | 2.57E-57 | -0.31412 | 3.74E-12 |
| 0.00162  | -0.12559 | 0.00658  | -0.53752 | 2.54E-36 | -0.33903 | 5.03E-14 | -0.15729 | 0.00065  |
| 0.7371   | 0.109148 | 0.0183   | 0.304202 | 1.87E-11 | 0.152013 | 0.00098  | 0.296275 | 6.46E-11 |
| 3.11E-07 | -0.41197 | 1.47E-20 | -0.4852  | 5.95E-29 | -0.46186 | 4.71E-26 | -0.22519 | 8.80E-07 |
| 2.97E-26 | -0.42691 | 4.14E-22 | -0.66961 | 4.72E-62 | -0.60296 | 1.45E-47 | -0.29518 | 7.65E-11 |
| 5.60E-06 | 0.422551 | 1.20E-21 | 0.49912  | 8.65E-31 | 0.42251  | 1.21E-21 | 0.137131 | 0.00298  |
| 4.18E-13 | -0.20684 | 6.58E-06 | -0.52548 | 1.64E-34 | -0.42608 | 5.08E-22 | 0.006153 | 0.8945   |
| 8.66E-23 | 0.431835 | 1.23E-22 | 0.696403 | 5.29E-69 | 0.618137 | 1.46E-50 | 0.211253 | 4.12E-06 |
| 6.56E-22 | 0.478201 | 4.65E-28 | 0.605509 | 4.65E-48 | 0.617939 | 1.60E-50 | 0.302077 | 2.61E-11 |
| 2.40E-13 | -0.63372 | 8.24E-54 | -0.62338 | 1.24E-51 | -0.59554 | 3.68E-46 | -0.09684 | 0.03644  |
| 1.62E-12 | -0.39633 | 5.13E-19 | -0.52954 | 4.11E-35 | -0.5124  | 1.27E-32 | -0.40615 | 5.65E-20 |
| 8.40E-10 | -0.54637 | 1.07E-37 | -0.65007 | 1.99E-57 | -0.56881 | 2.20E-41 | -0.11599 | 0.01213  |
| 4.24E-08 | 0.180193 | 9.02E-05 | 0.459457 | 9.12E-26 | 0.322731 | 8.82E-13 | -0.03855 | 0.40585  |
| 0.26622  | -0.20119 | 1.18E-05 | -0.44728 | 2.37E-24 | -0.23009 | 5.00E-07 | 0.122085 | 0.00826  |
| 4.37E-07 | -0.30818 | 9.86E-12 | -0.51976 | 1.13E-33 | -0.4309  | 1.55E-22 | -0.01082 | 0.81564  |
| 0.00219  | 0.460072 | 7.71E-26 | 0.486987 | 3.50E-29 | 0.387405 | 3.59E-18 | 0.210273 | 4.58E-06 |
| 3.55E-23 | 0.514678 | 6.03E-33 | 0.689773 | 3.26E-67 | 0.647531 | 7.49E-57 | 0.257443 | 1.66E-08 |
| 2.44E-07 | -0.51644 | 3.39E-33 | -0.48057 | 2.33E-28 | -0.47175 | 2.97E-27 | -0.12955 | 0.00505  |
| 2.20E-15 | 0.250037 | 4.35E-08 | 0.499324 | 8.12E-31 | 0.449629 | 1.28E-24 | 0.378483 | 2.36E-17 |
| 3.67E-07 | -0.42874 | 2.64E-22 | -0.47235 | 2.50E-27 | -0.44677 | 2.71E-24 | 0.085098 | 0.06615  |
| 6.93E-29 | 0.322781 | 8.75E-13 | 0.637013 | 1.60E-54 | 0.573653 | 3.23E-42 | 0.241423 | 1.28E-07 |
| 8.66E-32 | 0.336433 | 8.04E-14 | 0.614386 | 8.32E-50 | 0.576425 | 1.06E-42 | 0.216087 | 2.44E-06 |
| 1.88E-15 | -0.52995 | 3.57E-35 | -0.61089 | 4.12E-49 | -0.57864 | 4.33E-43 | -0.22732 | 6.89E-07 |
| 2.71E-15 | 0.344108 | 1.99E-14 | 0.623927 | 9.52E-52 | 0.530511 | 2.94E-35 | 0.252698 | 3.09E-08 |
| 0.006    | 0.191557 | 3.08E-05 | 0.448534 | 1.70E-24 | 0.273606 | 1.83E-09 | 0.059999 | 0.19557  |
| 8.75E-10 | 0.349775 | 6.93E-15 | 0.436742 | 3.58E-23 | 0.387402 | 3.59E-18 | -0.02994 | 0.51863  |
| 0.30366  | -0.24642 | 6.88E-08 | -0.39065 | 1.78E-18 | -0.27584 | 1.34E-09 | -0.10527 | 0.0229   |
| 6.49E-05 | -0.16917 | 0.00024  | -0.44299 | 7.24E-24 | -0.33735 | 6.82E-14 | 0.356233 | 2.03E-15 |
| 0.00056  | -0.43898 | 2.03E-23 | -0.56613 | 6.25E-41 | -0.43347 | 8.16E-23 | -0.02666 | 0.56557  |
| 1.97E-16 | -0.50499 | 1.37E-31 | -0.63322 | 1.05E-53 | -0.59229 | 1.48E-45 | 0.063071 | 0.17362  |
| 6.59E-06 | -0.19092 | 3.28E-05 | -0.59155 | 2.03E-45 | -0.41394 | 9.30E-21 | -0.02678 | 0.56374  |
| 0.02454  | 0.475674 | 9.66E-28 | 0.40387  | 9.49E-20 | 0.351952 | 4.60E-15 | 0.097607 | 0.03497  |
| 9.37E-10 | 0.21056  | 4.44E-06 | 0.373307 | 6.86E-17 | 0.317751 | 2.05E-12 | -0.10373 | 0.02498  |

|          |          |          |          |          |          |          |          |          |
|----------|----------|----------|----------|----------|----------|----------|----------|----------|
| 4.30E-06 | -0.34001 | 4.21E-14 | -0.42766 | 3.44E-22 | -0.38652 | 4.34E-18 | 0.019859 | 0.66861  |
| 4.05E-18 | -0.52971 | 3.88E-35 | -0.73068 | 4.24E-79 | -0.6479  | 6.19E-57 | -0.13589 | 0.00326  |
| 5.69E-24 | 0.414691 | 7.79E-21 | 0.638894 | 6.23E-55 | 0.592638 | 1.28E-45 | 0.02994  | 0.51865  |
| 0.00366  | -0.17799 | 0.00011  | -0.25174 | 3.49E-08 | -0.22858 | 5.95E-07 | -0.01682 | 0.71702  |
| 0.00035  | -0.23919 | 1.68E-07 | -0.27282 | 2.05E-09 | -0.29699 | 5.79E-11 | -0.02039 | 0.66036  |
| 0.07583  | -0.27398 | 1.74E-09 | -0.37703 | 3.19E-17 | -0.28213 | 5.40E-10 | -0.07513 | 0.10489  |
| 4.13E-26 | 0.541112 | 7.09E-37 | 0.618121 | 1.47E-50 | 0.619803 | 6.70E-51 | 0.127703 | 0.00572  |
| 1.02E-13 | 0.386299 | 4.55E-18 | 0.470676 | 4.03E-27 | 0.502273 | 3.23E-31 | -0.01258 | 0.7863   |
| 0.76621  | -0.33942 | 4.69E-14 | -0.39534 | 6.39E-19 | -0.29088 | 1.47E-10 | -0.03227 | 0.48664  |
| 0.00318  | -0.5155  | 4.61E-33 | -0.41495 | 7.33E-21 | -0.43026 | 1.82E-22 | 0.296462 | 6.28E-11 |
| 0.9116   | 0.52034  | 9.28E-34 | 0.440609 | 1.34E-23 | 0.292756 | 1.11E-10 | -0.11983 | 0.00954  |
| 1.90E-13 | 0.125563 | 0.00659  | 0.615135 | 5.89E-50 | 0.449044 | 1.49E-24 | 0.089585 | 0.05303  |
| 4.22E-07 | 0.519339 | 1.29E-33 | 0.468782 | 6.87E-27 | 0.446178 | 3.16E-24 | 0.117094 | 0.01133  |
| 0.46543  | 0.354016 | 3.10E-15 | 0.34578  | 1.46E-14 | 0.243427 | 1.00E-07 | -0.06899 | 0.13659  |
| 1.10E-12 | 0.484471 | 7.40E-29 | 0.556537 | 2.47E-39 | 0.562066 | 3.01E-40 | 0.20386  | 8.98E-06 |
| 1.85E-22 | -0.61025 | 5.51E-49 | -0.69843 | 1.47E-69 | -0.67869 | 2.52E-64 | -0.18267 | 7.18E-05 |
| 5.46E-15 | -0.51672 | 3.08E-33 | -0.5909  | 2.67E-45 | -0.53358 | 1.01E-35 | -0.20468 | 8.25E-06 |
| 4.76E-11 | -0.31646 | 2.54E-12 | -0.60856 | 1.19E-48 | -0.50301 | 2.56E-31 | -0.11786 | 0.0108   |
| 1.09E-05 | -0.2764  | 1.23E-09 | -0.52823 | 6.43E-35 | -0.3867  | 4.18E-18 | -0.05358 | 0.24784  |
| 0.3125   | -0.14035 | 0.00237  | -0.39628 | 5.19E-19 | -0.23807 | 1.93E-07 | 0.056326 | 0.2244   |
| 1.67E-06 | -0.25513 | 2.25E-08 | -0.35211 | 4.46E-15 | -0.30855 | 9.30E-12 | -0.1787  | 0.0001   |
| 3.38E-06 | -0.26967 | 3.18E-09 | -0.26661 | 4.84E-09 | -0.29118 | 1.41E-10 | 0.182544 | 7.26E-05 |
| 0.00341  | 0.473989 | 1.57E-27 | 0.459388 | 9.29E-26 | 0.36101  | 8.03E-16 | -0.02563 | 0.58068  |
| 0.01649  | -0.40134 | 1.68E-19 | -0.36049 | 8.89E-16 | -0.33311 | 1.45E-13 | -0.14201 | 0.0021   |
| 0.92497  | -0.29397 | 9.21E-11 | -0.29085 | 1.48E-10 | -0.20809 | 5.77E-06 | 0.107677 | 0.01994  |
| 1.07E-11 | -0.49845 | 1.07E-30 | -0.51294 | 1.07E-32 | -0.5218  | 5.70E-34 | -0.23306 | 3.52E-07 |
| 2.66E-13 | 0.343359 | 2.29E-14 | 0.33207  | 1.75E-13 | 0.399783 | 2.38E-19 | 0.019677 | 0.67148  |
| 0.3409   | 0.428972 | 2.50E-22 | 0.439908 | 1.60E-23 | 0.26573  | 5.47E-09 | -0.13861 | 0.00268  |
| 4.47E-11 | 0.187208 | 4.68E-05 | 0.478037 | 4.88E-28 | 0.38884  | 2.64E-18 | 0.268223 | 3.88E-09 |
| 2.60E-09 | -0.56883 | 2.18E-41 | -0.49066 | 1.16E-29 | -0.50143 | 4.21E-31 | -0.18024 | 8.97E-05 |
| 1.91E-08 | -0.30087 | 3.16E-11 | -0.54407 | 2.45E-37 | -0.44337 | 6.56E-24 | 0.110061 | 0.01735  |
| 0.01232  | -0.34642 | 1.30E-14 | -0.41982 | 2.31E-21 | -0.33305 | 1.47E-13 | -0.22879 | 5.81E-07 |
| 9.69E-09 | -0.31911 | 1.63E-12 | -0.46812 | 8.29E-27 | -0.42538 | 6.02E-22 | 0.055497 | 0.23131  |
| 0.81971  | -0.23907 | 1.71E-07 | -0.39524 | 6.54E-19 | -0.24796 | 5.66E-08 | -0.0389  | 0.40164  |
| 1.93E-11 | 0.518904 | 1.50E-33 | 0.564586 | 1.14E-40 | 0.475378 | 1.05E-27 | 0.066154 | 0.15348  |
| 1.31E-19 | -0.46048 | 6.88E-26 | -0.69384 | 2.65E-68 | -0.61299 | 1.58E-49 | -0.07711 | 0.09603  |
| 0.0183   | -0.48188 | 1.59E-28 | -0.3747  | 5.16E-17 | -0.35399 | 3.12E-15 | -0.09678 | 0.03655  |
| 1.01E-06 | -0.30985 | 7.53E-12 | -0.52852 | 5.83E-35 | -0.42654 | 4.54E-22 | 0.072491 | 0.11772  |
| 5.01E-09 | -0.24458 | 8.67E-08 | -0.37736 | 2.98E-17 | -0.34755 | 1.05E-14 | -0.3636  | 4.83E-16 |
| 1.30E-13 | -0.43961 | 1.73E-23 | -0.64252 | 9.89E-56 | -0.56474 | 1.08E-40 | 0.055753 | 0.22916  |
| 8.46E-09 | -0.09381 | 0.04274  | -0.37325 | 6.95E-17 | -0.3377  | 6.40E-14 | 0.135286 | 0.0034   |
| 0.00313  | -0.3639  | 4.55E-16 | -0.32809 | 3.50E-13 | -0.29676 | 6.00E-11 | -0.16719 | 0.00028  |
| 1.14E-06 | 0.429769 | 2.05E-22 | 0.610181 | 5.69E-49 | 0.452609 | 5.79E-25 | -0.19129 | 3.16E-05 |
| 1.57E-16 | 0.58604  | 2.06E-44 | 0.537887 | 2.23E-36 | 0.538803 | 1.61E-36 | -0.06334 | 0.17176  |
| 1.39E-17 | 0.55922  | 8.93E-40 | 0.632474 | 1.52E-53 | 0.586011 | 2.09E-44 | 0.253715 | 2.71E-08 |

|          |          |          |          |          |          |          |          |          |
|----------|----------|----------|----------|----------|----------|----------|----------|----------|
| 0.01023  | 0.420594 | 1.92E-21 | 0.625784 | 3.92E-52 | 0.435892 | 4.44E-23 | -0.04707 | 0.31011  |
| 0.18052  | -0.32494 | 6.05E-13 | -0.4378  | 2.73E-23 | -0.31651 | 2.52E-12 | 0.158807 | 0.00057  |
| 2.28E-13 | -0.46606 | 1.47E-26 | -0.64555 | 2.09E-56 | -0.56945 | 1.70E-41 | -0.06746 | 0.14552  |
| 9.57E-21 | 0.699319 | 8.34E-70 | 0.670603 | 2.68E-62 | 0.68739  | 1.40E-66 | 0.185181 | 5.67E-05 |
| 1.49E-21 | 0.494289 | 3.84E-30 | 0.53848  | 1.81E-36 | 0.559298 | 8.67E-40 | 0.305445 | 1.53E-11 |
| 0.00012  | -0.49252 | 6.60E-30 | -0.63548 | 3.45E-54 | -0.49994 | 6.70E-31 | -0.15151 | 0.00102  |
| 5.44E-13 | 0.329272 | 2.85E-13 | 0.681091 | 6.11E-65 | 0.53611  | 4.18E-36 | -0.06791 | 0.14284  |
| 2.25E-11 | -0.12115 | 0.00877  | -0.42771 | 3.41E-22 | -0.35309 | 3.70E-15 | -0.24211 | 1.18E-07 |
| 2.18E-06 | -0.33965 | 4.50E-14 | -0.50914 | 3.64E-32 | -0.43089 | 1.55E-22 | 0.098008 | 0.03423  |
| 8.96E-15 | 0.495197 | 2.91E-30 | 0.614521 | 7.82E-50 | 0.564486 | 1.19E-40 | -0.04392 | 0.34357  |
| 5.04E-15 | 0.222468 | 1.20E-06 | 0.579751 | 2.75E-43 | 0.487624 | 2.89E-29 | 0.001848 | 0.96823  |
| 0.01363  | -0.44071 | 1.30E-23 | -0.40697 | 4.68E-20 | -0.38529 | 5.63E-18 | 0.021634 | 0.64099  |
| 2.38E-10 | -0.50677 | 7.78E-32 | -0.59873 | 9.24E-47 | -0.51158 | 1.65E-32 | -0.25677 | 1.82E-08 |
| 4.52E-15 | -0.57568 | 1.43E-42 | -0.77094 | 3.78E-93 | -0.66414 | 1.01E-60 | -0.0485  | 0.29565  |
| 4.73E-10 | -0.47495 | 1.19E-27 | -0.58009 | 2.40E-43 | -0.53214 | 1.67E-35 | -0.03173 | 0.49395  |
| 1.77E-15 | -0.5492  | 3.77E-38 | -0.74116 | 1.66E-82 | -0.67864 | 2.59E-64 | -0.2516  | 3.56E-08 |
| 2.23E-21 | -0.32915 | 2.91E-13 | -0.5904  | 3.30E-45 | -0.54096 | 7.48E-37 | -0.11792 | 0.01076  |
| 1.79E-15 | -0.47617 | 8.38E-28 | -0.67983 | 1.29E-64 | -0.60065 | 3.99E-47 | -0.0121  | 0.79421  |
| 0.01093  | -0.29664 | 6.11E-11 | -0.47832 | 4.50E-28 | -0.34375 | 2.13E-14 | 0.04233  | 0.36139  |
| 8.16E-08 | -0.50796 | 5.32E-32 | -0.63518 | 3.99E-54 | -0.53426 | 8.00E-36 | -0.11626 | 0.01193  |
| 0.00013  | -0.11887 | 0.01014  | -0.37948 | 1.92E-17 | -0.30917 | 8.41E-12 | 0.121672 | 0.00849  |
| 0.29743  | -0.19703 | 1.80E-05 | -0.37818 | 2.52E-17 | -0.26775 | 4.14E-09 | 0.004734 | 0.91873  |
| 0.0017   | -0.27332 | 1.91E-09 | -0.36618 | 2.89E-16 | -0.30175 | 2.75E-11 | -0.23833 | 1.87E-07 |
| 3.23E-05 | 0.38809  | 3.10E-18 | 0.465058 | 1.95E-26 | 0.36289  | 5.55E-16 | 0.071999 | 0.12024  |
| 1.11E-07 | -0.25852 | 1.44E-08 | -0.41164 | 1.59E-20 | -0.37235 | 8.34E-17 | -0.10134 | 0.02854  |
| 9.35E-06 | -0.32872 | 3.14E-13 | -0.5496  | 3.26E-38 | -0.43516 | 5.33E-23 | 0.019547 | 0.67352  |
| 4.82E-13 | -0.26359 | 7.31E-09 | -0.50884 | 4.00E-32 | -0.43057 | 1.68E-22 | 0.033199 | 0.47418  |
| 5.24E-05 | -0.32732 | 4.01E-13 | -0.44467 | 4.68E-24 | -0.35691 | 1.78E-15 | -0.19002 | 3.58E-05 |
| 6.35E-12 | -0.41171 | 1.57E-20 | -0.68716 | 1.61E-66 | -0.57186 | 6.60E-42 | -0.16539 | 0.00033  |
| 3.60E-08 | -0.30642 | 1.31E-11 | -0.31748 | 2.14E-12 | -0.32856 | 3.23E-13 | -0.13513 | 0.00344  |
| 1.30E-06 | -0.45695 | 1.80E-25 | -0.55733 | 1.83E-39 | -0.45414 | 3.84E-25 | -0.01493 | 0.74766  |
| 4.22E-07 | -0.38941 | 2.33E-18 | -0.53522 | 5.71E-36 | -0.46626 | 1.39E-26 | -0.1287  | 0.00535  |
| 0.0002   | -0.38513 | 5.83E-18 | -0.51607 | 3.82E-33 | -0.42384 | 8.76E-22 | 0.064959 | 0.16107  |
| 0.00122  | -0.32535 | 5.64E-13 | -0.4856  | 5.29E-29 | -0.3692  | 1.58E-16 | -0.00933 | 0.84059  |
| 0.01406  | -0.40536 | 6.76E-20 | -0.41484 | 7.53E-21 | -0.36508 | 3.60E-16 | -0.01102 | 0.81229  |
| 0.00167  | -0.03492 | 0.45158  | -0.26046 | 1.11E-08 | -0.22111 | 1.40E-06 | -0.00013 | 0.99771  |
| 0.43432  | -0.27615 | 1.28E-09 | -0.3276  | 3.82E-13 | -0.20734 | 6.25E-06 | 0.231676 | 4.14E-07 |
| 4.60E-06 | -0.42346 | 9.61E-22 | -0.48404 | 8.40E-29 | -0.40213 | 1.41E-19 | 0.06249  | 0.17762  |
| 0.1216   | -0.307   | 1.19E-11 | -0.30683 | 1.23E-11 | -0.26204 | 9.02E-09 | 0.030831 | 0.50629  |
| 3.06E-22 | -0.42841 | 2.87E-22 | -0.68778 | 1.10E-66 | -0.62942 | 6.77E-53 | -0.2897  | 1.76E-10 |
| 0.01488  | -0.16134 | 0.00046  | -0.41852 | 3.15E-21 | -0.25984 | 1.21E-08 | -0.12443 | 0.0071   |
| 0.27839  | -0.3458  | 1.46E-14 | -0.32985 | 2.58E-13 | -0.23865 | 1.80E-07 | 0.079174 | 0.08744  |
| 9.94E-09 | -0.50791 | 5.40E-32 | -0.43367 | 7.76E-23 | -0.45069 | 9.63E-25 | -0.28192 | 5.57E-10 |
| 0.11386  | -0.07418 | 0.1094   | -0.23087 | 4.56E-07 | -0.10713 | 0.02058  | 0.18052  | 8.75E-05 |
| 0.08772  | -0.35081 | 5.70E-15 | -0.33605 | 8.60E-14 | -0.26078 | 1.07E-08 | 0.053691 | 0.24686  |

|          |          |          |          |          |          |          |          |          |
|----------|----------|----------|----------|----------|----------|----------|----------|----------|
| 0.07895  | -0.07018 | 0.12991  | -0.21333 | 3.30E-06 | -0.11206 | 0.0154   | -0.0686  | 0.13879  |
| 0.8679   | -0.25839 | 1.47E-08 | -0.34834 | 9.08E-15 | -0.20155 | 1.14E-05 | 0.019499 | 0.67428  |
| 2.58E-06 | -0.44716 | 2.45E-24 | -0.60711 | 2.27E-48 | -0.48477 | 6.77E-29 | 0.024654 | 0.59513  |
| 1.17E-05 | -0.35722 | 1.68E-15 | -0.36742 | 2.26E-16 | -0.34428 | 1.93E-14 | -0.02069 | 0.65558  |
| 0.02213  | -0.14512 | 0.00166  | -0.07612 | 0.10039  | -0.0308  | 0.50677  | 0.092133 | 0.0466   |
| 1.33E-14 | -0.39734 | 4.11E-19 | -0.59578 | 3.33E-46 | -0.55069 | 2.18E-38 | -0.03319 | 0.4743   |
| 7.23E-05 | -0.39135 | 1.53E-18 | -0.43587 | 4.46E-23 | -0.37777 | 2.74E-17 | -0.00465 | 0.92015  |
| 4.33E-28 | 0.378033 | 2.59E-17 | 0.608527 | 1.20E-48 | 0.590805 | 2.78E-45 | 0.031648 | 0.49507  |
| 0.03793  | -0.18616 | 5.17E-05 | -0.37923 | 2.02E-17 | -0.25451 | 2.44E-08 | 0.049165 | 0.28903  |
| 1.17E-06 | -0.52108 | 7.26E-34 | -0.47112 | 3.56E-27 | -0.4663  | 1.38E-26 | -0.19176 | 3.03E-05 |
| 0.00041  | -0.13244 | 0.00414  | -0.09529 | 0.03956  | -0.15633 | 0.0007   | -0.11094 | 0.01647  |
| 0.02919  | -0.15837 | 0.00059  | 0.059393 | 0.20013  | 0.043996 | 0.34278  | 0.055937 | 0.22762  |
| 1.05E-09 | -0.24577 | 7.46E-08 | -0.26361 | 7.29E-09 | -0.32025 | 1.34E-12 | -0.39148 | 1.49E-18 |
| 0.9194   | -0.05794 | 0.21138  | -0.01156 | 0.80317  | -0.03127 | 0.50025  | -0.09953 | 0.03151  |
| 7.39E-05 | -0.04026 | 0.38542  | 0.082267 | 0.07572  | 0.10627  | 0.02163  | 0.038553 | 0.40585  |
| 0.38996  | -0.11678 | 0.01155  | 0.008604 | 0.85289  | -0.05641 | 0.22367  | -0.1334  | 0.00388  |
| 0.48253  | 0.014501 | 0.75463  | 0.057086 | 0.21819  | 0.025307 | 0.58541  | 0.091415 | 0.04834  |
| 0.98373  | -0.07857 | 0.08989  | 0.014681 | 0.75167  | -0.02333 | 0.61502  | -0.12018 | 0.00933  |
| 0.26048  | -0.01974 | 0.67052  | 0.03209  | 0.48906  | -0.00103 | 0.98229  | -0.13352 | 0.00384  |
| 0.00876  | -0.23984 | 1.56E-07 | -0.13652 | 0.00311  | -0.18229 | 7.43E-05 | -0.2022  | 1.07E-05 |
| 0.09535  | -0.26372 | 7.19E-09 | -0.15998 | 0.00052  | -0.18594 | 5.28E-05 | 0.023369 | 0.61446  |
| 0.20135  | 0.015119 | 0.74453  | 0.024859 | 0.59206  | 0.037878 | 0.41413  | 0.04523  | 0.3294   |
| 0.00016  | -0.06043 | 0.19236  | 0.132787 | 0.00405  | 0.085392 | 0.06522  | -0.01095 | 0.81346  |
| 0.18619  | 0.015139 | 0.7442   | -0.03703 | 0.42465  | -0.0337  | 0.46748  | -0.01643 | 0.72326  |
| 0.40052  | -0.04663 | 0.31461  | -0.03219 | 0.48776  | -0.06641 | 0.15187  | -0.03143 | 0.49799  |
| 0.19569  | -0.08069 | 0.08153  | 0.072515 | 0.1176   | 0.072817 | 0.11608  | -0.03729 | 0.42139  |
| 0.00075  | -0.30242 | 2.48E-11 | -0.18673 | 4.90E-05 | -0.24294 | 1.06E-07 | -0.08473 | 0.06733  |
| 0.68635  | -0.00848 | 0.8549   | 0.032591 | 0.48231  | 0.018369 | 0.69216  | -0.06329 | 0.17211  |
| 0.00045  | -0.04606 | 0.32056  | 0.078473 | 0.09029  | 0.111005 | 0.0164   | -0.07985 | 0.08476  |
| 0.73934  | -0.06627 | 0.15276  | -0.07351 | 0.11264  | -0.07928 | 0.08701  | 0.001003 | 0.98276  |
| 0.75139  | -0.05452 | 0.23962  | -0.03252 | 0.48321  | -0.04221 | 0.3628   | -0.00153 | 0.97378  |
| 0.94915  | -0.14179 | 0.00213  | -0.02776 | 0.54964  | -0.07055 | 0.12792  | 0.007502 | 0.87155  |
| 0.00086  | -0.09551 | 0.03909  | -0.14618 | 0.00154  | -0.16267 | 0.00042  | -0.15678 | 0.00067  |
| 0.12833  | -0.00569 | 0.90247  | -0.07876 | 0.08911  | -0.0855  | 0.06487  | -0.05498 | 0.23573  |
| 0.93597  | -0.05591 | 0.2278   | 0.000573 | 0.99015  | -0.02616 | 0.57286  | -0.02898 | 0.53212  |
| 0.20221  | -0.23348 | 3.35E-07 | -0.13573 | 0.00329  | -0.16577 | 0.00032  | -0.12079 | 0.00898  |
| 0.00016  | -0.161   | 0.00048  | -0.13085 | 0.00462  | -0.17981 | 9.34E-05 | -0.21598 | 2.47E-06 |
| 0.03975  | 0.06183  | 0.18225  | 0.124557 | 0.00704  | 0.097932 | 0.03437  | -0.07586 | 0.10156  |
| 2.70E-11 | -0.27294 | 2.01E-09 | -0.29323 | 1.03E-10 | -0.34537 | 1.58E-14 | -0.25411 | 2.57E-08 |
| 8.62E-13 | -0.18946 | 3.78E-05 | -0.3029  | 2.29E-11 | -0.35537 | 2.40E-15 | -0.2769  | 1.15E-09 |
| 0.69044  | -0.07244 | 0.11798  | -0.0228  | 0.62318  | -0.05289 | 0.25401  | -0.11817 | 0.01059  |
| 0.90377  | -0.04945 | 0.28623  | -0.00445 | 0.92358  | -0.03799 | 0.41275  | -0.00225 | 0.96137  |
| 0.24617  | -0.07377 | 0.11137  | 0.138485 | 0.00271  | 0.037156 | 0.42309  | 0.030537 | 0.51035  |
| 4.99E-06 | 0.069877 | 0.13159  | 0.211715 | 3.92E-06 | 0.183938 | 6.38E-05 | -0.0151  | 0.74488  |
| 0.39733  | -0.00755 | 0.8708   | 0.000479 | 0.99176  | 0.015659 | 0.73573  | -0.00424 | 0.92725  |

|          |          |          |          |          |          |          |           |          |
|----------|----------|----------|----------|----------|----------|----------|-----------|----------|
| 0.00027  | -0.27673 | 1.18E-09 | -0.1844  | 6.11E-05 | -0.23194 | 4.02E-07 | -0.25479  | 2.35E-08 |
| 0.00042  | 0.009081 | 0.84482  | 0.13501  | 0.00346  | 0.135739 | 0.00329  | -0.02112  | 0.64892  |
| 0.79647  | -0.09811 | 0.03404  | -0.03877 | 0.40327  | -0.07275 | 0.11642  | -0.01628  | 0.72561  |
| 0.82626  | -0.1968  | 1.84E-05 | -0.09049 | 0.05068  | -0.09226 | 0.04631  | -0.0172   | 0.71084  |
| 0.84827  | -0.00462 | 0.92064  | 0.04249  | 0.35958  | 0.013835 | 0.76556  | -0.04762  | 0.30451  |
| 0.45779  | -0.05343 | 0.24917  | 0.048661 | 0.294    | 0.006328 | 0.89151  | -0.06371  | 0.16932  |
| 0.18901  | -0.07901 | 0.08811  | 0.005911 | 0.89863  | -0.01061 | 0.8191   | -0.11207  | 0.0154   |
| 0.20493  | -0.10562 | 0.02245  | -0.025   | 0.58991  | -0.01535 | 0.74078  | -0.2263   | 7.75E-07 |
| 0.24296  | -0.00416 | 0.92849  | 0.038819 | 0.40262  | 0.042835 | 0.35568  | -0.04341  | 0.34925  |
| 0.09101  | -0.01042 | 0.82225  | 0.025732 | 0.57912  | 0.046345 | 0.31761  | -0.01728  | 0.70952  |
| 0.94113  | -0.04077 | 0.37943  | -0.03905 | 0.39985  | -0.03123 | 0.50084  | -0.12897  | 0.00525  |
| 0.00264  | -0.19126 | 3.18E-05 | -0.12083 | 0.00896  | -0.16808 | 0.00026  | -0.05214  | 0.26081  |
| 0.77844  | -0.05341 | 0.24936  | 0.019722 | 0.67076  | -0.01868 | 0.68727  | -0.0779   | 0.09265  |
| 0.59508  | -0.07205 | 0.11998  | 0.064109 | 0.16663  | -0.00017 | 0.99706  | 0.00938   | 0.83979  |
| 0.0628   | -0.04878 | 0.29285  | 0.03047  | 0.51128  | 0.038389 | 0.40785  | -0.02979  | 0.5207   |
| 0.12878  | -0.06907 | 0.13615  | 0.018466 | 0.69061  | 0.00092  | 0.98418  | -0.08195  | 0.07688  |
| 0.35703  | -0.14908 | 0.00123  | -0.13233 | 0.00418  | -0.14087 | 0.00228  | -0.08533  | 0.06542  |
| 0.82168  | -0.18844 | 4.16E-05 | -0.05496 | 0.23589  | -0.0507  | 0.27426  | -0.14135  | 0.0022   |
| 0.63566  | -0.00291 | 0.94991  | 0.001301 | 0.97764  | 0.001452 | 0.97503  | 0.049348  | 0.28724  |
| 5.42E-06 | -0.18643 | 5.05E-05 | -0.13642 | 0.00314  | -0.19849 | 1.55E-05 | -0.06345  | 0.17105  |
| 0.00331  | -0.26718 | 4.48E-09 | -0.12646 | 0.00621  | -0.21787 | 2.01E-06 | -0.07597  | 0.10106  |
| 2.15E-07 | -0.1326  | 0.0041   | -0.1453  | 0.00164  | -0.21165 | 3.95E-06 | -0.1346   | 0.00357  |
| 0.27479  | -0.01557 | 0.73725  | 0.016485 | 0.72236  | 0.002618 | 0.955    | -0.00261  | 0.95507  |
| 0.15001  | -0.00881 | 0.84938  | 0.045677 | 0.32464  | 0.018102 | 0.69641  | -0.01545  | 0.73907  |
| 0.20905  | -0.12732 | 0.00586  | 0.08403  | 0.06964  | 0.027249 | 0.55694  | -0.06795  | 0.14261  |
| 0.91847  | -0.04753 | 0.30538  | 0.002336 | 0.95984  | -0.01051 | 0.82086  | -0.06579  | 0.15579  |
| 0.06837  | -0.06086 | 0.18923  | 0.06914  | 0.13572  | 0.04016  | 0.38656  | -0.04881  | 0.2925   |
| 0.12044  | -0.23293 | 3.58E-07 | -0.1422  | 0.00207  | -0.20939 | 5.03E-06 | 0.004478  | 0.92311  |
| 0.2246   | 0.005154 | 0.91155  | 0.108407 | 0.01911  | 0.075021 | 0.10542  | -0.00884  | 0.84885  |
| 6.71E-09 | -0.27202 | 2.29E-09 | -0.36683 | 2.54E-16 | -0.36164 | 7.09E-16 | -0.15088  | 0.00107  |
| 0.81065  | 0.019472 | 0.67469  | 0.02797  | 0.54655  | 0.012655 | 0.78503  | -0.01973  | 0.67069  |
| 0.02011  | -0.02174 | 0.63937  | 0.049646 | 0.28433  | 0.045658 | 0.32484  | 0.025258  | 0.58613  |
| 0.14881  | -0.0835  | 0.07143  | -0.04449 | 0.33737  | -0.0026  | 0.95529  | -9.64E-05 | 0.99834  |
| 0.01468  | -0.21883 | 1.80E-06 | 0.00055  | 0.99054  | -0.00847 | 0.85511  | 0.11948   | 0.00976  |
| 0.50367  | 0.061987 | 0.18114  | 0.026216 | 0.572    | 0.034506 | 0.45694  | -0.26092  | 1.05E-08 |
| 0.03488  | 0.063625 | 0.16986  | 0.098856 | 0.0327   | 0.095498 | 0.03912  | -0.08345  | 0.0716   |
| 0.33797  | -0.0307  | 0.50804  | 0.025095 | 0.58854  | -0.02038 | 0.66052  | -0.1336   | 0.00382  |
| 0.20256  | -0.20754 | 6.12E-06 | -0.08676 | 0.061    | -0.12449 | 0.00707  | -0.03007  | 0.51683  |
| 0.80112  | -0.05466 | 0.23847  | 0.021064 | 0.64981  | -0.00928 | 0.8414   | -0.05092  | 0.27215  |
| 0.06823  | -0.10551 | 0.02259  | -0.12245 | 0.00807  | -0.12678 | 0.00608  | -0.13255  | 0.00411  |
| 0.00039  | -0.20728 | 6.29E-06 | -0.1458  | 0.00158  | -0.20488 | 8.08E-06 | -0.16438  | 0.00036  |
| 0.28276  | -0.11234 | 0.01514  | -0.04182 | 0.36718  | -0.08277 | 0.07395  | -0.0604   | 0.1926   |
| 0.14353  | -0.11259 | 0.01492  | 0.012706 | 0.7842   | 0.001543 | 0.97347  | 0.031681  | 0.49463  |
| 0.00851  | 0.04828  | 0.29781  | 0.1547   | 0.0008   | 0.120309 | 0.00926  | 0.047911  | 0.30152  |
| 0.82764  | -0.11108 | 0.01633  | -0.06216 | 0.17993  | -0.06298 | 0.17426  | -0.09649  | 0.03713  |

|          |          |          |          |          |          |          |          |          |
|----------|----------|----------|----------|----------|----------|----------|----------|----------|
| 0.1676   | -0.02182 | 0.63814  | -0.01699 | 0.71429  | 0.019329 | 0.67695  | 0.043147 | 0.35219  |
| 0.29026  | -0.10333 | 0.02555  | 0.008532 | 0.85411  | -0.00215 | 0.96296  | -0.05775 | 0.21285  |
| 0.29339  | -0.06016 | 0.19434  | -0.03797 | 0.41294  | -0.06451 | 0.16401  | -0.09164 | 0.0478   |
| 0.42971  | -0.0201  | 0.66478  | 0.033686 | 0.4677   | 0.020445 | 0.65944  | -0.06642 | 0.15186  |
| 0.89443  | 0.029787 | 0.5208   | 0.018404 | 0.6916   | 0.023784 | 0.60818  | -0.09944 | 0.03167  |
| 0.98188  | 0.014787 | 0.74995  | -0.00244 | 0.95801  | 0.013258 | 0.77507  | -0.09837 | 0.03357  |
| 0.09274  | -0.12085 | 0.00895  | -0.06706 | 0.14792  | -0.01896 | 0.68279  | -0.038   | 0.41265  |
| 0.07431  | -0.04033 | 0.38457  | 0.080028 | 0.08407  | 0.052393 | 0.25849  | -0.01334 | 0.77372  |
| 0.11733  | -0.18783 | 4.42E-05 | -0.10864 | 0.01885  | -0.13506 | 0.00345  | -0.08575 | 0.06411  |
| 0.97723  | -0.00809 | 0.86163  | 0.031894 | 0.49173  | 0.013777 | 0.7665   | -0.07038 | 0.12882  |
| 0.55389  | -0.0974  | 0.03537  | 0.041796 | 0.36748  | -0.01041 | 0.82242  | 0.008474 | 0.85508  |
| 0.0687   | 0.071746 | 0.12155  | 0.097057 | 0.03602  | 0.073802 | 0.11121  | 0.108052 | 0.01951  |
| 1.08E-05 | 0.125053 | 0.00681  | 0.152446 | 0.00095  | 0.17063  | 0.00021  | -0.18506 | 5.74E-05 |
| 0.56606  | -0.02233 | 0.63024  | 0.026516 | 0.5676   | -0.0093  | 0.84107  | -0.04979 | 0.28292  |
| 4.47E-06 | -0.05164 | 0.26544  | 0.112863 | 0.01468  | 0.12032  | 0.00925  | 0.085028 | 0.06638  |
| 0.04567  | 0.015479 | 0.73866  | 0.093101 | 0.04433  | 0.081679 | 0.07785  | 0.044203 | 0.34052  |
| 0.26277  | -0.02134 | 0.64555  | 0.030689 | 0.50825  | 0.003755 | 0.9355   | -0.01549 | 0.73854  |
| 0.15407  | -0.16803 | 0.00027  | 0.034751 | 0.45375  | 0.009666 | 0.83497  | -0.02584 | 0.57749  |
| 0.76873  | -0.13308 | 0.00396  | -0.05578 | 0.22894  | -0.05967 | 0.19805  | -0.21547 | 2.61E-06 |
| 0.6097   | -0.06416 | 0.1663   | -0.00387 | 0.93353  | -0.04289 | 0.35507  | -0.04442 | 0.33811  |
| 0.45542  | -0.08415 | 0.06923  | -0.05759 | 0.21412  | -0.06677 | 0.14966  | -0.09538 | 0.03936  |
| 0.03113  | 0.235086 | 2.76E-07 | 0.429663 | 2.11E-22 | 0.297618 | 5.25E-11 | -0.16551 | 0.00033  |
| 0.15698  | 0.054874 | 0.23659  | -0.12327 | 0.00766  | 0.037605 | 0.4175   | 0.206778 | 6.63E-06 |
| 7.93E-20 | 0.057086 | 0.2182   | -0.03679 | 0.42772  | -0.19452 | 2.31E-05 | -0.30246 | 2.46E-11 |
| 9.39E-10 | 0.246198 | 7.07E-08 | 0.549826 | 3.00E-38 | 0.442502 | 8.21E-24 | -0.11887 | 0.01014  |
| 0.06796  | 0.138485 | 0.00271  | 0.150322 | 0.00112  | 0.052925 | 0.25368  | 0.003146 | 0.94594  |
| 0.9962   | -0.08321 | 0.07243  | -0.0278  | 0.54897  | -0.06227 | 0.17915  | 0.088358 | 0.05638  |
| 0.61679  | -0.0137  | 0.76775  | 0.022373 | 0.62963  | 0.021264 | 0.64671  | -0.19798 | 1.64E-05 |
| 0.32617  | -0.0191  | 0.68054  | 0.100487 | 0.02991  | 0.0032   | 0.94501  | -0.19174 | 3.03E-05 |
| 3.22E-05 | -0.05564 | 0.23014  | -0.13825 | 0.00275  | 0.034175 | 0.46127  | 0.327505 | 3.88E-13 |
| 0.01057  | 0.097046 | 0.03604  | 0.286846 | 2.69E-10 | 0.07861  | 0.08972  | -0.25409 | 2.58E-08 |
| 3.28E-08 | 0.451922 | 6.95E-25 | 0.54602  | 1.21E-37 | 0.435667 | 4.70E-23 | -0.06868 | 0.13838  |
| 0.6239   | 0.002849 | 0.95104  | 0.131728 | 0.00435  | 0.017901 | 0.69962  | -0.19671 | 1.86E-05 |
| 6.53E-18 | 0.083436 | 0.07164  | 0.003979 | 0.93165  | 0.170062 | 0.00022  | 0.252353 | 3.23E-08 |
| 0.15821  | 0.181479 | 8.01E-05 | 0.338635 | 5.41E-14 | 0.157189 | 0.00065  | -0.10534 | 0.02281  |
| 0.492    | 0.200112 | 1.32E-05 | 0.19976  | 1.37E-05 | 0.107941 | 0.01964  | -0.1566  | 0.00068  |
| 1.08E-14 | 0.066715 | 0.15002  | 0.210449 | 4.49E-06 | 0.152146 | 0.00097  | -0.17588 | 0.00013  |
| 0.05931  | 0.240196 | 1.49E-07 | 0.210937 | 4.27E-06 | 0.111097 | 0.01631  | -0.15317 | 0.0009   |
| 1.61E-06 | 0.30065  | 3.27E-11 | 0.113804 | 0.01387  | 0.199885 | 1.35E-05 | 0.043157 | 0.35207  |
| 0.11401  | 0.373698 | 6.34E-17 | 0.14773  | 0.00137  | 0.193361 | 2.59E-05 | -0.17049 | 0.00021  |
| 0.46089  | 0.386342 | 4.50E-18 | 0.296679 | 6.07E-11 | 0.245323 | 7.89E-08 | -0.15726 | 0.00065  |
| 1.33E-07 | 0.483295 | 1.05E-28 | 0.351301 | 5.20E-15 | 0.434498 | 6.31E-23 | 0.019627 | 0.67226  |
| 0.19072  | 0.112676 | 0.01484  | 0.078799 | 0.08895  | 0.054141 | 0.24292  | -0.13219 | 0.00422  |
| 0.9345   | 0.273777 | 1.79E-09 | 0.443996 | 5.58E-24 | 0.248641 | 5.19E-08 | 0.010238 | 0.82535  |
| 6.25E-09 | 0.066442 | 0.1517   | -0.01337 | 0.77324  | -0.1007  | 0.02957  | -0.13836 | 0.00273  |

|          |          |          |          |          |          |          |          |          |
|----------|----------|----------|----------|----------|----------|----------|----------|----------|
| 4.18E-08 | 0.287956 | 2.28E-10 | 0.319969 | 1.41E-12 | 0.302413 | 2.48E-11 | -0.12122 | 0.00874  |
| 2.39E-06 | 0.12251  | 0.00804  | 0.334948 | 1.05E-13 | 0.263816 | 7.09E-09 | -0.22165 | 1.32E-06 |
| 0.82843  | 0.081544 | 0.07834  | -0.21884 | 1.80E-06 | -0.07006 | 0.13057  | 0.288817 | 2.01E-10 |
| 8.05E-10 | 0.227605 | 6.67E-07 | 0.3976   | 3.88E-19 | 0.353504 | 3.42E-15 | -0.03028 | 0.51387  |
| 5.75E-06 | 0.192353 | 2.85E-05 | 0.412101 | 1.43E-20 | 0.093946 | 0.04243  | -0.03159 | 0.49586  |
| 0.01096  | 0.105364 | 0.02278  | 0.319988 | 1.40E-12 | 0.103779 | 0.02491  | -0.15653 | 0.00069  |
| 0.33406  | 0.18686  | 4.84E-05 | 0.460812 | 6.29E-26 | 0.200385 | 1.28E-05 | -0.22554 | 8.46E-07 |
| 0.20649  | -0.1079  | 0.01969  | -0.15706 | 0.00066  | -0.08262 | 0.07447  | 0.242656 | 1.10E-07 |
| 0.05202  | -0.27336 | 1.90E-09 | -0.41422 | 8.70E-21 | -0.30235 | 2.50E-11 | 0.042751 | 0.35663  |
| 0.4608   | 0.376724 | 3.40E-17 | 0.314    | 3.82E-12 | 0.191748 | 3.03E-05 | -0.16829 | 0.00026  |
| 0.04695  | 0.350689 | 5.84E-15 | 0.561906 | 3.20E-40 | 0.396324 | 5.14E-19 | -0.15828 | 0.0006   |
| 2.72E-18 | 0.323131 | 8.24E-13 | 0.482442 | 1.35E-28 | 0.45763  | 1.50E-25 | -0.02143 | 0.64407  |
| 0.92244  | 0.035088 | 0.44937  | -0.23626 | 2.40E-07 | -0.06552 | 0.1575   | -0.03035 | 0.51288  |
| 3.70E-19 | 0.00437  | 0.92496  | -0.12229 | 0.00815  | 0.129398 | 0.0051   | 0.125326 | 0.00669  |
| 1.82E-07 | 0.389336 | 2.37E-18 | 0.329081 | 2.95E-13 | 0.329261 | 2.86E-13 | 0.057573 | 0.21429  |
| 0.05525  | 0.180534 | 8.74E-05 | 0.318478 | 1.81E-12 | 0.128148 | 0.00555  | -0.01225 | 0.79176  |
| 0.71025  | 0.044965 | 0.33225  | 0.098672 | 0.03302  | 0.050496 | 0.27615  | -0.42265 | 1.17E-21 |
| 1.15E-05 | 0.174319 | 0.00015  | -0.0838  | 0.0704   | 0.131204 | 0.00451  | 0.254901 | 2.32E-08 |
| 3.00E-22 | 0.335526 | 9.45E-14 | 0.597697 | 1.45E-46 | 0.565555 | 7.83E-41 | -0.02231 | 0.63062  |
| 1.05E-09 | 0.143885 | 0.00183  | 0.347391 | 1.08E-14 | 0.350878 | 5.63E-15 | -0.11489 | 0.01298  |
| 0.00023  | -0.06362 | 0.1699   | 0.24733  | 6.13E-08 | 0.173219 | 0.00017  | -0.3018  | 2.73E-11 |
| 0.00478  | -0.00035 | 0.99391  | 0.148001 | 0.00134  | 0.007752 | 0.8673   | -0.06787 | 0.14305  |
| 4.00E-05 | 0.35842  | 1.33E-15 | 0.519797 | 1.11E-33 | 0.406886 | 4.77E-20 | 0.028316 | 0.54159  |
| 0.40325  | 0.265117 | 5.94E-09 | 0.228077 | 6.31E-07 | 0.169029 | 0.00024  | -0.15657 | 0.00069  |
| 0.11115  | 0.214394 | 2.94E-06 | 0.163438 | 0.00039  | 0.117551 | 0.01101  | -0.09298 | 0.04462  |
| 0.29661  | 0.228443 | 6.05E-07 | 0.395874 | 5.68E-19 | 0.219319 | 1.71E-06 | -0.20576 | 7.38E-06 |
| 0.15537  | 0.325546 | 5.45E-13 | 0.406362 | 5.38E-20 | 0.301145 | 3.03E-11 | -0.01487 | 0.74859  |
| 0.00049  | 0.603072 | 1.37E-47 | 0.49467  | 3.42E-30 | 0.455162 | 2.92E-25 | -0.05408 | 0.24344  |
| 6.02E-05 | 0.399454 | 2.57E-19 | 0.466433 | 1.33E-26 | 0.404064 | 9.08E-20 | -0.0806  | 0.08187  |
| 0.47596  | 0.234488 | 2.97E-07 | 0.483911 | 8.73E-29 | 0.26407  | 6.85E-09 | -0.18547 | 5.52E-05 |
| 7.34E-05 | 0.115902 | 0.0122   | 0.09699  | 0.03615  | -0.02303 | 0.61953  | -0.25027 | 4.22E-08 |
| 0.01552  | -0.05172 | 0.26466  | 0.023603 | 0.61091  | -0.09991 | 0.03088  | -0.177   | 0.00012  |
| 1.32E-09 | 0.550333 | 2.49E-38 | 0.578799 | 4.06E-43 | 0.572942 | 4.28E-42 | 0.011124 | 0.81052  |
| 2.15E-13 | 0.321012 | 1.18E-12 | 0.467555 | 9.71E-27 | 0.461455 | 5.27E-26 | -0.00832 | 0.85771  |
| 0.00256  | 0.385719 | 5.15E-18 | 0.502127 | 3.38E-31 | 0.398973 | 2.86E-19 | -0.03821 | 0.41006  |
| 0.00013  | -0.0218  | 0.63849  | 0.14574  | 0.00159  | -0.05308 | 0.25227  | -0.32166 | 1.06E-12 |
| 3.30E-08 | -0.14132 | 0.00221  | 0.121354 | 0.00866  | -0.1529  | 0.00092  | -0.29827 | 4.74E-11 |
| 0.71557  | 0.240848 | 1.37E-07 | 0.458748 | 1.11E-25 | 0.264114 | 6.81E-09 | 0.030919 | 0.50507  |
| 0.21444  | 0.205068 | 7.92E-06 | 0.334926 | 1.05E-13 | 0.179516 | 9.59E-05 | -0.17574 | 0.00013  |
| 0.02637  | 0.292843 | 1.09E-10 | 0.395146 | 6.67E-19 | 0.296911 | 5.86E-11 | -0.06278 | 0.17562  |
| 0.27973  | 0.122366 | 0.00812  | 0.512627 | 1.18E-32 | 0.207297 | 6.28E-06 | -0.20234 | 1.05E-05 |
| 0.01192  | 0.183504 | 6.64E-05 | 0.306589 | 1.28E-11 | 0.078391 | 0.09062  | -0.20999 | 4.72E-06 |
| 0.0941   | 0.44123  | 1.14E-23 | 0.500113 | 6.35E-31 | 0.371262 | 1.04E-16 | -0.1664  | 0.0003   |
| 0.06016  | 0.345691 | 1.49E-14 | 0.586917 | 1.43E-44 | 0.376578 | 3.51E-17 | -0.122   | 0.00831  |
| 9.37E-29 | 0.58652  | 1.69E-44 | 0.632311 | 1.65E-53 | 0.717282 | 5.65E-75 | 0.15893  | 0.00057  |



|          |          |          |          |          |          |          |          |          |
|----------|----------|----------|----------|----------|----------|----------|----------|----------|
| 1.61E-06 | 0.499665 | 7.30E-31 | 0.546481 | 1.02E-37 | 0.469785 | 5.18E-27 | -0.01689 | 0.71578  |
| 0.01852  | 0.438061 | 2.56E-23 | 0.269412 | 3.29E-09 | 0.273852 | 1.77E-09 | -0.00871 | 0.85117  |
| 1.25E-06 | 0.092507 | 0.04571  | 0.337068 | 7.17E-14 | 0.182485 | 7.30E-05 | -0.18893 | 3.97E-05 |
| 0.29633  | 0.130021 | 0.00489  | 0.348212 | 9.29E-15 | 0.159614 | 0.00054  | -0.17329 | 0.00017  |
| 0.01906  | 0.316817 | 2.39E-12 | 0.540514 | 8.78E-37 | 0.354563 | 2.80E-15 | -0.19402 | 2.42E-05 |
| 0.0913   | 0.276319 | 1.25E-09 | 0.39635  | 5.11E-19 | 0.206508 | 6.82E-06 | -0.17446 | 0.00015  |
| 1.83E-05 | 0.460527 | 6.80E-26 | 0.700815 | 3.20E-70 | 0.501982 | 3.54E-31 | -0.0913  | 0.04862  |
| 0.06102  | 0.015945 | 0.7311   | 0.419132 | 2.72E-21 | 0.201096 | 1.19E-05 | -0.1495  | 0.00119  |
| 1.80E-09 | 0.658817 | 1.87E-59 | 0.65393  | 2.58E-58 | 0.568088 | 2.91E-41 | -0.006   | 0.89711  |
| 0.83928  | 0.107554 | 0.02008  | 0.515981 | 3.93E-33 | 0.234898 | 2.83E-07 | -0.20028 | 1.30E-05 |
| 0.92792  | 0.074329 | 0.10868  | 0.246442 | 6.86E-08 | 0.085861 | 0.06375  | -0.20901 | 5.24E-06 |
| 0.75856  | 0.419569 | 2.45E-21 | 0.510191 | 2.59E-32 | 0.330465 | 2.32E-13 | -0.13679 | 0.00306  |
| 1.68E-06 | 0.249396 | 4.72E-08 | 0.492644 | 6.35E-30 | 0.397708 | 3.79E-19 | -0.07549 | 0.10324  |
| 0.00027  | 0.284878 | 3.61E-10 | 0.48806  | 2.54E-29 | 0.332317 | 1.67E-13 | -0.12334 | 0.00762  |
| 0.0006   | 0.313861 | 3.91E-12 | 0.61858  | 1.19E-50 | 0.433477 | 8.15E-23 | -0.13186 | 0.00431  |
| 0.00281  | -0.06614 | 0.15358  | 0.338891 | 5.16E-14 | 0.017383 | 0.7079   | -0.22368 | 1.05E-06 |
| 0.01909  | 0.224015 | 1.01E-06 | 0.333105 | 1.45E-13 | 0.142075 | 0.00209  | -0.22963 | 5.27E-07 |
| 0.05804  | 0.10608  | 0.02186  | 0.308009 | 1.01E-11 | 0.139557 | 0.00251  | -0.10978 | 0.01764  |
| 0.00709  | 0.031132 | 0.50214  | 0.193261 | 2.61E-05 | 0.017448 | 0.70686  | -0.31061 | 6.66E-12 |
| 0.00375  | 0.05764  | 0.21375  | 0.351145 | 5.35E-15 | 0.076193 | 0.10007  | -0.19645 | 1.91E-05 |
| 0.50435  | -0.07723 | 0.09551  | 0.130913 | 0.0046   | -0.02625 | 0.57143  | -0.13585 | 0.00327  |
| 0.00137  | 0.514507 | 6.38E-33 | 0.35831  | 1.36E-15 | 0.343238 | 2.34E-14 | -0.01407 | 0.76167  |
| 5.44E-07 | 0.037418 | 0.41982  | 0.285542 | 3.27E-10 | -0.00099 | 0.98299  | -0.27504 | 1.50E-09 |
| 1.12E-11 | 0.499165 | 8.53E-31 | 0.366963 | 2.47E-16 | 0.436966 | 3.38E-23 | 0.116946 | 0.01143  |
| 2.04E-10 | 0.56323  | 1.92E-40 | 0.535484 | 5.21E-36 | 0.540577 | 8.59E-37 | -0.01628 | 0.72568  |
| 3.58E-16 | 0.55188  | 1.41E-38 | 0.624166 | 8.50E-52 | 0.612708 | 1.80E-49 | 0.005414 | 0.9071   |
| 1.55E-05 | 0.212749 | 3.51E-06 | 0.581211 | 1.52E-43 | 0.360225 | 9.36E-16 | -0.10742 | 0.02024  |
| 5.27E-09 | 0.497832 | 1.29E-30 | 0.545802 | 1.31E-37 | 0.542986 | 3.62E-37 | -0.06162 | 0.18371  |
| 0.01029  | 0.131606 | 0.00439  | 0.212973 | 3.43E-06 | 0.163506 | 0.00039  | -0.13156 | 0.0044   |
| 0.12818  | 0.211249 | 4.13E-06 | 0.295985 | 6.76E-11 | 0.156318 | 0.0007   | -0.23591 | 2.50E-07 |
| 4.07E-07 | 0.498852 | 9.40E-31 | 0.450728 | 9.55E-25 | 0.452732 | 5.60E-25 | -0.00615 | 0.89448  |
| 0.47391  | 0.098034 | 0.03418  | 0.325929 | 5.10E-13 | 0.125743 | 0.00651  | -0.24825 | 5.46E-08 |
| 0.81377  | 0.228315 | 6.14E-07 | 0.459199 | 9.78E-26 | 0.240251 | 1.48E-07 | -0.18415 | 6.25E-05 |
| 1.75E-08 | 0.278267 | 9.44E-10 | 0.409065 | 2.89E-20 | 0.379806 | 1.79E-17 | -0.04131 | 0.37307  |
| 1.22E-13 | 0.398539 | 3.15E-19 | 0.703714 | 4.92E-71 | 0.570014 | 1.37E-41 | 0.002984 | 0.94872  |
| 3.07E-20 | 0.601181 | 3.16E-47 | 0.475923 | 9.00E-28 | 0.617774 | 1.73E-50 | 0.131088 | 0.00455  |
| 0.31845  | 0.044647 | 0.33569  | 0.458934 | 1.05E-25 | 0.175511 | 0.00014  | -0.21453 | 2.89E-06 |
| 0.00082  | 0.063883 | 0.16813  | 0.221989 | 1.27E-06 | 0.01945  | 0.67505  | -0.27638 | 1.24E-09 |
| 0.51574  | 0.100275 | 0.03026  | 0.419628 | 2.42E-21 | 0.17687  | 0.00012  | -0.17685 | 0.00012  |
| 1.26E-06 | -0.02912 | 0.53023  | 0.275332 | 1.44E-09 | -0.0218  | 0.63836  | -0.23872 | 1.78E-07 |
| 3.41E-11 | 0.368321 | 1.88E-16 | 0.562909 | 2.18E-40 | 0.500754 | 5.20E-31 | 0.092681 | 0.04531  |
| 0.20893  | -0.00231 | 0.96033  | 0.288488 | 2.11E-10 | 0.058622 | 0.20604  | -0.21988 | 1.61E-06 |
| 0.07731  | 0.056338 | 0.2243   | 0.291447 | 1.35E-10 | 0.157083 | 0.00066  | -0.15345 | 0.00088  |
| 7.94E-16 | 0.687334 | 1.45E-66 | 0.482369 | 1.38E-28 | 0.56892  | 2.10E-41 | 0.103972 | 0.02465  |
| 9.63E-05 | 0.262556 | 8.41E-09 | 0.42303  | 1.07E-21 | 0.313061 | 4.46E-12 | -0.10173 | 0.02794  |

|          |          |          |          |          |          |          |          |          |
|----------|----------|----------|----------|----------|----------|----------|----------|----------|
| 2.37E-09 | 0.402608 | 1.26E-19 | 0.427059 | 4.00E-22 | 0.426058 | 5.11E-22 | -0.0843  | 0.06873  |
| 9.71E-08 | -0.03605 | 0.43699  | 0.137509 | 0.0029   | -0.11363 | 0.01401  | -0.31288 | 4.59E-12 |
| 0.75282  | 0.345661 | 1.49E-14 | 0.314548 | 3.49E-12 | 0.217578 | 2.07E-06 | -0.13591 | 0.00325  |
| 8.68E-15 | 0.472174 | 2.63E-27 | 0.367169 | 2.37E-16 | 0.487013 | 3.47E-29 | -0.03577 | 0.4406   |
| 0.43019  | 0.236146 | 2.43E-07 | 0.321298 | 1.13E-12 | 0.193135 | 2.64E-05 | -0.12238 | 0.00811  |
| 0.06295  | 0.002501 | 0.95701  | 0.381255 | 1.32E-17 | 0.099895 | 0.0309   | -0.1306  | 0.0047   |
| 0.08709  | 0.278028 | 9.77E-10 | 0.400759 | 1.92E-19 | 0.269047 | 3.47E-09 | -0.18198 | 7.65E-05 |
| 2.28E-07 | 0.52994  | 3.58E-35 | 0.583914 | 4.98E-44 | 0.520667 | 8.32E-34 | -0.03927 | 0.39718  |
| 1.24E-14 | 0.491894 | 7.97E-30 | 0.599362 | 7.02E-47 | 0.538902 | 1.56E-36 | 0.025919 | 0.57636  |
| 0.01183  | 0.311423 | 5.83E-12 | 0.372748 | 7.69E-17 | 0.291293 | 1.38E-10 | -0.01267 | 0.78476  |
| 9.13E-13 | 0.120409 | 0.0092   | -0.02102 | 0.65041  | 0.179087 | 9.97E-05 | 0.354161 | 3.02E-15 |
| 2.38E-08 | 0.360586 | 8.72E-16 | 0.081183 | 0.07967  | 0.260233 | 1.15E-08 | 0.368681 | 1.75E-16 |
| 0.00422  | 0.181202 | 8.22E-05 | 0.081803 | 0.0774   | 0.063815 | 0.16859  | -0.13262 | 0.00409  |
| 0.37426  | 0.290706 | 1.51E-10 | 0.432477 | 1.05E-22 | 0.255184 | 2.24E-08 | -0.17213 | 0.00019  |
| 0.0519   | 0.151601 | 0.00101  | 0.000181 | 0.99688  | -0.01644 | 0.72315  | -0.14963 | 0.00118  |
| 6.78E-10 | 0.185469 | 5.52E-05 | -0.06998 | 0.13103  | 0.149051 | 0.00124  | 0.424571 | 7.34E-22 |
| 0.97835  | 0.246053 | 7.20E-08 | 0.305323 | 1.56E-11 | 0.139036 | 0.0026   | -0.23169 | 4.14E-07 |
| 6.60E-20 | 0.033744 | 0.46694  | 0.023799 | 0.60796  | -0.15452 | 0.00081  | -0.12029 | 0.00927  |
| 4.10E-28 | 0.503531 | 2.17E-31 | 0.601445 | 2.82E-47 | 0.647215 | 8.83E-57 | 0.051163 | 0.26986  |
| 0.05377  | 0.333157 | 1.44E-13 | 0.574462 | 2.34E-42 | 0.378092 | 2.56E-17 | -0.03626 | 0.43437  |
| 8.00E-07 | 0.101869 | 0.02772  | 0.351144 | 5.36E-15 | 0.263318 | 7.59E-09 | 0.054327 | 0.24131  |
| 0.03041  | 0.446492 | 2.91E-24 | 0.481071 | 2.01E-28 | 0.35862  | 1.28E-15 | -0.00522 | 0.91034  |
| 0.62613  | 0.195272 | 2.14E-05 | 0.359452 | 1.09E-15 | 0.16594  | 0.00032  | -0.16639 | 0.0003   |
| 1.46E-27 | 0.447029 | 2.53E-24 | 0.491044 | 1.03E-29 | 0.573182 | 3.89E-42 | 0.120223 | 0.00931  |
| 3.67E-06 | 0.077008 | 0.09648  | 0.340357 | 3.96E-14 | 0.220918 | 1.43E-06 | -0.08883 | 0.05507  |
| 1.27E-45 | 0.121422 | 0.00862  | 0.346596 | 1.26E-14 | 0.398103 | 3.47E-19 | 0.309849 | 7.53E-12 |
| 6.83E-75 | 0.493221 | 5.32E-30 | 0.586409 | 1.77E-44 | 0.64244  | 1.03E-55 | 0.262787 | 8.15E-09 |
| 6.85E-66 | 0.308528 | 9.33E-12 | 0.531532 | 2.07E-35 | 0.630388 | 4.22E-53 | 0.361591 | 7.16E-16 |
| 1.84E-44 | 0.24226  | 1.16E-07 | 0.353914 | 3.16E-15 | 0.455024 | 3.03E-25 | 0.076051 | 0.1007   |
| 9.69E-40 | 0.190192 | 3.52E-05 | 0.129447 | 0.00508  | 0.276055 | 1.30E-09 | 0.430513 | 1.71E-22 |
| 2.89E-62 | 0.612621 | 1.87E-49 | 0.65818  | 2.64E-59 | 0.76004  | 4.50E-89 | 0.316509 | 2.52E-12 |
| #####    | 0.500363 | 5.87E-31 | 0.585653 | 2.42E-44 | 0.723126 | 9.60E-77 | 0.234239 | 3.06E-07 |
| 1.07E-67 | 0.410423 | 2.11E-20 | 0.533124 | 1.19E-35 | 0.55226  | 1.22E-38 | 0.079604 | 0.08573  |
| 1.62E-27 | -0.16241 | 0.00043  | -0.41004 | 2.31E-20 | -0.44559 | 3.69E-24 | -0.19538 | 2.12E-05 |
| 3.69E-67 | 0.495273 | 2.84E-30 | 0.370702 | 1.17E-16 | 0.569585 | 1.62E-41 | 0.412546 | 1.29E-20 |
| 3.57E-76 | 0.49427  | 3.86E-30 | 0.635638 | 3.18E-54 | 0.62336  | 1.25E-51 | 0.285954 | 3.08E-10 |
| 3.00E-92 | 0.395772 | 5.81E-19 | 0.299956 | 3.65E-11 | 0.503647 | 2.09E-31 | 0.224967 | 9.03E-07 |
| #####    | 0.433866 | 7.39E-23 | 0.480927 | 2.10E-28 | 0.625894 | 3.72E-52 | 0.25926  | 1.31E-08 |
| #####    | 0.434092 | 6.98E-23 | 0.529362 | 4.37E-35 | 0.612702 | 1.80E-49 | 0.138675 | 0.00267  |
| 1.94E-80 | 0.421832 | 1.42E-21 | 0.477413 | 5.85E-28 | 0.587593 | 1.08E-44 | 0.322067 | 9.88E-13 |
| 9.61E-32 | 0.316075 | 2.71E-12 | 0.319089 | 1.63E-12 | 0.451365 | 8.06E-25 | 0.237948 | 1.96E-07 |
| 3.44E-63 | 0.272165 | 2.24E-09 | 0.535718 | 4.80E-36 | 0.609598 | 7.41E-49 | 0.360491 | 8.88E-16 |
| 1.52E-35 | 0.234223 | 3.06E-07 | 0.467956 | 8.67E-27 | 0.452063 | 6.69E-25 | 0.244628 | 8.61E-08 |
| 2.20E-41 | 0.399269 | 2.67E-19 | 0.491949 | 7.84E-30 | 0.533271 | 1.13E-35 | 0.108691 | 0.0188   |
| 3.19E-30 | 0.324883 | 6.10E-13 | 0.20408  | 8.78E-06 | 0.375389 | 4.48E-17 | 0.469093 | 6.30E-27 |

|          |          |          |          |          |          |          |          |          |
|----------|----------|----------|----------|----------|----------|----------|----------|----------|
| #####    | 0.660882 | 6.05E-60 | 0.763511 | 2.39E-90 | 0.836827 | #####    | 0.310009 | 7.34E-12 |
| 0.00405  | 0.231816 | 4.08E-07 | 0.232565 | 3.73E-07 | 0.184377 | 6.12E-05 | -0.09086 | 0.04972  |
| 2.91E-29 | 0.265485 | 5.65E-09 | 0.25425  | 2.53E-08 | 0.387769 | 3.32E-18 | 0.138353 | 0.00273  |
| 8.26E-96 | 0.526381 | 1.21E-34 | 0.678348 | 3.07E-64 | 0.726239 | 1.05E-77 | 0.361211 | 7.72E-16 |
| 1.80E-34 | 0.303257 | 2.17E-11 | 0.402406 | 1.32E-19 | 0.424864 | 6.83E-22 | 0.079507 | 0.08611  |
| #####    | 0.466905 | 1.16E-26 | 0.408032 | 3.67E-20 | 0.594444 | 5.90E-46 | 0.267752 | 4.14E-09 |
| 3.11E-39 | 0.524554 | 2.25E-34 | 0.412162 | 1.41E-20 | 0.589652 | 4.53E-45 | 0.27301  | 1.99E-09 |
| 1.34E-21 | 0.174267 | 0.00015  | 0.274519 | 1.61E-09 | 0.312036 | 5.27E-12 | 0.292582 | 1.14E-10 |
| 2.41E-59 | 0.354139 | 3.03E-15 | 0.171729 | 0.00019  | 0.408855 | 3.04E-20 | 0.332459 | 1.63E-13 |
| 1.35E-37 | 0.405985 | 5.87E-20 | 0.418736 | 2.99E-21 | 0.551106 | 1.87E-38 | 0.190155 | 3.53E-05 |
| #####    | 0.512729 | 1.14E-32 | 0.614196 | 9.08E-50 | 0.702947 | 8.10E-71 | 0.3041   | 1.90E-11 |
| 2.87E-89 | 0.301437 | 2.89E-11 | 0.278639 | 8.95E-10 | 0.457385 | 1.60E-25 | 0.197801 | 1.66E-05 |
| 6.86E-38 | 0.219862 | 1.61E-06 | 0.380534 | 1.54E-17 | 0.469822 | 5.13E-27 | 0.079309 | 0.0869   |
| 3.84E-66 | 0.503517 | 2.18E-31 | 0.565089 | 9.38E-41 | 0.697462 | 2.71E-69 | 0.273921 | 1.75E-09 |
| 6.74E-44 | 0.460856 | 6.22E-26 | 0.20694  | 6.52E-06 | 0.444415 | 5.01E-24 | 0.223407 | 1.08E-06 |
| 9.05E-29 | 0.29192  | 1.26E-10 | 0.143335 | 0.0019   | 0.324064 | 7.03E-13 | 0.268637 | 3.67E-09 |
| 5.49E-33 | 0.166465 | 0.0003   | 0.251859 | 3.44E-08 | 0.312782 | 4.66E-12 | 0.286351 | 2.90E-10 |
| 1.13E-50 | 0.359712 | 1.03E-15 | 0.418938 | 2.85E-21 | 0.570131 | 1.31E-41 | 0.266966 | 4.62E-09 |
| 2.41E-65 | 0.284995 | 3.55E-10 | 0.267842 | 4.09E-09 | 0.383963 | 7.47E-18 | 0.080967 | 0.08048  |
| 1.89E-71 | 0.342717 | 2.57E-14 | 0.39117  | 1.59E-18 | 0.484644 | 7.03E-29 | 0.058845 | 0.20432  |
| 2.39E-41 | 0.409286 | 2.75E-20 | 0.37023  | 1.28E-16 | 0.541145 | 7.01E-37 | 0.263263 | 7.64E-09 |
| 1.39E-46 | 0.344556 | 1.83E-14 | 0.415181 | 6.94E-21 | 0.553554 | 7.54E-39 | 0.238507 | 1.83E-07 |
| #####    | 0.563878 | 1.50E-40 | 0.617269 | 2.19E-50 | 0.725966 | 1.28E-77 | 0.445611 | 3.67E-24 |
| 6.13E-54 | 0.283181 | 4.63E-10 | 0.169835 | 0.00023  | 0.338392 | 5.65E-14 | 0.499492 | 7.71E-31 |
| 4.56E-35 | 0.326539 | 4.59E-13 | 0.199503 | 1.40E-05 | 0.372911 | 7.44E-17 | 0.238859 | 1.75E-07 |
| 2.29E-30 | 0.390123 | 2.00E-18 | 0.46012  | 7.61E-26 | 0.500654 | 5.36E-31 | 0.163916 | 0.00038  |
| 6.73E-33 | 0.070227 | 0.12967  | 0.160586 | 0.00049  | 0.293051 | 1.06E-10 | 0.163616 | 0.00038  |
| 1.72E-72 | 0.512192 | 1.36E-32 | 0.575057 | 1.84E-42 | 0.703428 | 5.93E-71 | 0.180461 | 8.80E-05 |
| 1.10E-45 | 0.282232 | 5.32E-10 | 0.194964 | 2.21E-05 | 0.364036 | 4.43E-16 | 0.330446 | 2.32E-13 |
| 2.67E-65 | 0.497142 | 1.60E-30 | 0.485984 | 4.72E-29 | 0.685317 | 4.90E-66 | 0.420505 | 1.96E-21 |
| 3.48E-59 | 0.491529 | 8.91E-30 | 0.556609 | 2.40E-39 | 0.635166 | 4.02E-54 | 0.232139 | 3.92E-07 |
| 9.15E-52 | 0.35253  | 4.12E-15 | 0.706245 | 9.42E-72 | 0.670049 | 3.67E-62 | 0.317803 | 2.03E-12 |
| 5.35E-96 | 0.510906 | 2.06E-32 | 0.547577 | 6.85E-38 | 0.645518 | 2.13E-56 | 0.41086  | 1.91E-20 |
| 9.63E-47 | 0.417114 | 4.40E-21 | 0.528144 | 6.63E-35 | 0.628616 | 1.00E-52 | 0.131355 | 0.00446  |
| #####    | 0.360829 | 8.32E-16 | 0.40218  | 1.39E-19 | 0.557053 | 2.03E-39 | 0.269024 | 3.48E-09 |
| #####    | 0.543343 | 3.18E-37 | 0.581393 | 1.41E-43 | 0.706379 | 8.63E-72 | 0.38231  | 1.06E-17 |
| 1.24E-69 | 0.507966 | 5.30E-32 | 0.547861 | 6.18E-38 | 0.665221 | 5.53E-61 | 0.36639  | 2.77E-16 |
| 1.08E-28 | 0.01931  | 0.67725  | 0.190671 | 3.36E-05 | 0.285596 | 3.24E-10 | 0.202796 | 1.00E-05 |
| 1.91E-51 | 0.412847 | 1.20E-20 | 0.472022 | 2.75E-27 | 0.540111 | 1.01E-36 | 0.593957 | 7.27E-46 |
| 1.43E-33 | 0.288501 | 2.11E-10 | 0.345312 | 1.59E-14 | 0.416349 | 5.27E-21 | 0.112342 | 0.01514  |
| 3.30E-97 | 0.256585 | 1.86E-08 | 0.225377 | 8.62E-07 | 0.429373 | 2.26E-22 | 0.337036 | 7.21E-14 |
| 8.84E-49 | 0.459631 | 8.69E-26 | 0.425312 | 6.13E-22 | 0.583868 | 5.08E-44 | 0.158766 | 0.00057  |
| #####    | 0.54895  | 4.14E-38 | 0.590808 | 2.78E-45 | 0.70733  | 4.62E-72 | 0.251302 | 3.70E-08 |
| 5.02E-47 | 0.207838 | 5.93E-06 | 0.31085  | 6.40E-12 | 0.44318  | 6.89E-24 | 0.304167 | 1.88E-11 |
| 4.30E-50 | 0.417546 | 3.97E-21 | 0.377099 | 3.15E-17 | 0.551058 | 1.90E-38 | 0.333601 | 1.33E-13 |

|          |          |          |          |          |          |          |          |          |
|----------|----------|----------|----------|----------|----------|----------|----------|----------|
| 1.22E-66 | 0.392288 | 1.25E-18 | 0.503307 | 2.33E-31 | 0.593163 | 1.02E-45 | 0.428706 | 2.67E-22 |
| 2.58E-18 | -0.08285 | 0.07367  | -0.05497 | 0.23577  | 0.069052 | 0.13623  | 0.324651 | 6.35E-13 |
| #####    | 0.518845 | 1.53E-33 | 0.554886 | 4.58E-39 | 0.712106 | 1.91E-73 | 0.469694 | 5.32E-27 |
| 1.85E-23 | 0.170315 | 0.00022  | 0.326255 | 4.82E-13 | 0.347266 | 1.11E-14 | 0.062231 | 0.17942  |
| 9.18E-61 | 0.297702 | 5.18E-11 | 0.55795  | 1.45E-39 | 0.610712 | 4.47E-49 | 0.234651 | 2.91E-07 |
| 9.57E-42 | 0.386132 | 4.71E-18 | 0.273931 | 1.75E-09 | 0.407337 | 4.30E-20 | 0.487789 | 2.75E-29 |
| 3.26E-63 | 0.267363 | 4.37E-09 | 0.286176 | 2.98E-10 | 0.404709 | 7.85E-20 | 0.029891 | 0.51934  |
| 6.93E-19 | 0.145162 | 0.00166  | 0.324966 | 6.02E-13 | 0.284563 | 3.78E-10 | -0.07821 | 0.09137  |
| 1.15E-32 | 0.190404 | 3.45E-05 | 0.00565  | 0.90309  | 0.207457 | 6.17E-06 | 0.220781 | 1.45E-06 |
| 1.19E-25 | 0.037651 | 0.41694  | 0.112679 | 0.01484  | 0.158263 | 0.0006   | 0.110358 | 0.01704  |
| #####    | 0.505012 | 1.36E-31 | 0.578725 | 4.18E-43 | 0.692137 | 7.60E-68 | 0.505095 | 1.32E-31 |
| 3.40E-21 | 0.390574 | 1.81E-18 | 0.170035 | 0.00022  | 0.327332 | 4.00E-13 | 0.227006 | 7.15E-07 |
| 5.86E-56 | 0.492626 | 6.38E-30 | 0.42414  | 8.15E-22 | 0.60214  | 2.07E-47 | 0.299576 | 3.87E-11 |
| 1.43E-65 | 0.627223 | 1.96E-52 | 0.587211 | 1.26E-44 | 0.64584  | 1.80E-56 | 0.163223 | 0.0004   |
| 2.38E-34 | 0.359481 | 1.08E-15 | 0.335499 | 9.50E-14 | 0.463467 | 3.03E-26 | 0.27124  | 2.56E-09 |
| 4.35E-52 | 0.196594 | 1.88E-05 | 0.158058 | 0.00061  | 0.373653 | 6.40E-17 | 0.278331 | 9.36E-10 |
| 7.79E-49 | 0.210496 | 4.47E-06 | 0.17506  | 0.00014  | 0.303826 | 1.98E-11 | 0.034335 | 0.45917  |
| 1.05E-28 | 0.131263 | 0.00449  | 0.067396 | 0.14589  | 0.165247 | 0.00034  | -0.05928 | 0.201    |
| 1.93E-31 | -0.01993 | 0.66749  | 0.083877 | 0.07015  | 0.130425 | 0.00476  | -0.03709 | 0.42397  |
| 2.09E-53 | -0.03386 | 0.46545  | 0.15349  | 0.00088  | 0.221222 | 1.38E-06 | 0.20518  | 7.83E-06 |
| 1.13E-21 | 0.5225   | 4.50E-34 | 0.573632 | 3.25E-42 | 0.624339 | 7.83E-52 | 0.110714 | 0.01669  |
| 7.10E-33 | 0.53264  | 1.41E-35 | 0.51711  | 2.71E-33 | 0.613475 | 1.27E-49 | 0.302117 | 2.60E-11 |
| 1.91E-65 | 0.718895 | 1.85E-75 | 0.672246 | 1.05E-62 | 0.837847 | #####    | 0.355586 | 2.30E-15 |
| 1.45E-19 | 0.422194 | 1.30E-21 | 0.493564 | 4.80E-30 | 0.523867 | 2.84E-34 | 0.208494 | 5.53E-06 |
| 1.00E-50 | 0.670683 | 2.56E-62 | 0.719275 | 1.42E-75 | 0.816649 | #####    | 0.319031 | 1.65E-12 |
| 3.28E-51 | 0.449767 | 1.23E-24 | 0.438266 | 2.43E-23 | 0.620466 | 4.91E-51 | 0.262394 | 8.60E-09 |
| 6.85E-17 | 0.453857 | 4.15E-25 | 0.383716 | 7.87E-18 | 0.472906 | 2.14E-27 | 0.28989  | 1.71E-10 |
| 8.07E-13 | 0.38264  | 9.89E-18 | 0.539852 | 1.11E-36 | 0.525171 | 1.83E-34 | 0.126072 | 0.00637  |
| 1.56E-39 | 0.485558 | 5.36E-29 | 0.730573 | 4.57E-79 | 0.687745 | 1.13E-66 | 0.282194 | 5.35E-10 |
| 3.33E-41 | 0.625274 | 5.00E-52 | 0.668453 | 9.05E-62 | 0.713601 | 6.97E-74 | 0.212703 | 3.53E-06 |
| 2.85E-47 | 0.518347 | 1.80E-33 | 0.546127 | 1.16E-37 | 0.621286 | 3.33E-51 | 0.091929 | 0.04709  |
| 2.05E-27 | 0.41395  | 9.28E-21 | 0.268885 | 3.54E-09 | 0.480209 | 2.59E-28 | 0.238508 | 1.83E-07 |
| 1.64E-56 | 0.589786 | 4.28E-45 | 0.760101 | 4.27E-89 | 0.790836 | #####    | 0.302533 | 2.43E-11 |
| 8.03E-30 | 0.54197  | 5.22E-37 | 0.43428  | 6.66E-23 | 0.575021 | 1.87E-42 | 0.342498 | 2.68E-14 |
| 8.60E-45 | 0.508634 | 4.28E-32 | 0.393461 | 9.66E-19 | 0.612593 | 1.90E-49 | 0.296365 | 6.37E-11 |
| 3.92E-50 | 0.534563 | 7.19E-36 | 0.605015 | 5.80E-48 | 0.730548 | 4.66E-79 | 0.199675 | 1.38E-05 |
| 6.24E-36 | 0.590042 | 3.84E-45 | 0.663306 | 1.60E-60 | 0.701294 | 2.35E-70 | 0.131589 | 0.00439  |
| 1.04E-18 | 0.641474 | 1.69E-55 | 0.587468 | 1.14E-44 | 0.595963 | 3.07E-46 | 0.176474 | 0.00013  |
| 2.15E-18 | 0.492958 | 5.77E-30 | 0.56543  | 8.22E-41 | 0.569222 | 1.87E-41 | 0.134235 | 0.00366  |
| 2.01E-45 | 0.619002 | 9.76E-51 | 0.669142 | 6.13E-62 | 0.740361 | 3.07E-82 | 0.426759 | 4.30E-22 |
| 4.08E-56 | 0.518792 | 1.55E-33 | 0.637074 | 1.55E-54 | 0.720438 | 6.34E-76 | 0.159366 | 0.00055  |
| 4.83E-38 | 0.511232 | 1.85E-32 | 0.576726 | 9.40E-43 | 0.663411 | 1.51E-60 | 0.243829 | 9.51E-08 |
| 1.13E-21 | 0.37874  | 2.24E-17 | 0.600343 | 4.57E-47 | 0.576005 | 1.26E-42 | 0.200327 | 1.29E-05 |
| 2.65E-62 | 0.363546 | 4.88E-16 | 0.567943 | 3.09E-41 | 0.706446 | 8.26E-72 | 0.233766 | 3.24E-07 |
| 1.55E-40 | 0.569242 | 1.85E-41 | 0.691057 | 1.48E-67 | 0.719802 | 9.87E-76 | 0.311276 | 5.97E-12 |

|          |          |          |          |          |          |          |          |          |
|----------|----------|----------|----------|----------|----------|----------|----------|----------|
| 6.52E-55 | 0.62676  | 2.45E-52 | 0.711593 | 2.70E-73 | 0.778079 | 6.04E-96 | 0.277484 | 1.06E-09 |
| 1.59E-32 | 0.40632  | 5.43E-20 | 0.477158 | 6.30E-28 | 0.584626 | 3.71E-44 | 0.058769 | 0.2049   |
| 2.03E-37 | 0.551597 | 1.56E-38 | 0.690562 | 2.01E-67 | 0.735933 | 8.72E-81 | 0.186578 | 4.97E-05 |
| 4.49E-52 | 0.347296 | 1.10E-14 | 0.624768 | 6.38E-52 | 0.689196 | 4.65E-67 | 0.270658 | 2.77E-09 |
| 1.84E-38 | 0.295912 | 6.83E-11 | 0.387907 | 3.22E-18 | 0.540272 | 9.57E-37 | 0.237009 | 2.19E-07 |
| 1.47E-40 | 0.550612 | 2.25E-38 | 0.626488 | 2.79E-52 | 0.676088 | 1.15E-63 | 0.300274 | 3.47E-11 |
| 7.25E-42 | 0.544806 | 1.88E-37 | 0.712643 | 1.33E-73 | 0.731088 | 3.14E-79 | 0.433073 | 9.01E-23 |
| 4.43E-30 | 0.441237 | 1.14E-23 | 0.59918  | 7.60E-47 | 0.630974 | 3.17E-53 | 0.17753  | 0.00011  |
| 4.17E-49 | 0.667495 | 1.55E-61 | 0.752243 | 2.74E-86 | 0.806321 | #####    | 0.219667 | 1.64E-06 |
| 1.76E-57 | 0.335268 | 9.90E-14 | 0.509495 | 3.24E-32 | 0.588837 | 6.39E-45 | 0.237617 | 2.04E-07 |
| 4.83E-18 | 0.457794 | 1.43E-25 | 0.580052 | 2.44E-43 | 0.583453 | 6.03E-44 | -0.01433 | 0.75745  |
| 1.59E-58 | 0.588431 | 7.58E-45 | 0.69956  | 7.14E-70 | 0.793788 | #####    | 0.315134 | 3.16E-12 |
| 3.97E-14 | 0.436064 | 4.25E-23 | 0.528262 | 6.37E-35 | 0.568424 | 2.56E-41 | 0.15848  | 0.00059  |
| 5.10E-34 | 0.360154 | 9.49E-16 | 0.478007 | 4.92E-28 | 0.554062 | 6.24E-39 | 0.237506 | 2.07E-07 |
| 1.15E-52 | 0.535187 | 5.78E-36 | 0.581737 | 1.22E-43 | 0.702319 | 1.22E-70 | 0.260733 | 1.07E-08 |
| 2.15E-33 | 0.687504 | 1.30E-66 | 0.734485 | 2.57E-80 | 0.765363 | 4.89E-91 | 0.202938 | 9.88E-06 |
| 8.41E-65 | 0.518585 | 1.66E-33 | 0.628698 | 9.61E-53 | 0.770726 | 4.55E-93 | 0.272646 | 2.10E-09 |
| 1.12E-23 | 0.598121 | 1.20E-46 | 0.510502 | 2.34E-32 | 0.613875 | 1.05E-49 | 0.293615 | 9.72E-11 |
| 3.80E-44 | 0.577857 | 5.95E-43 | 0.67603  | 1.19E-63 | 0.725901 | 1.34E-77 | 0.342798 | 2.53E-14 |
| 2.16E-14 | 0.656229 | 7.55E-59 | 0.555962 | 3.06E-39 | 0.619147 | 9.12E-51 | 0.281888 | 5.59E-10 |
| 1.15E-39 | 0.707276 | 4.78E-72 | 0.724335 | 4.08E-77 | 0.760738 | 2.50E-89 | 0.149073 | 0.00123  |
| 7.53E-37 | 0.592008 | 1.67E-45 | 0.628754 | 9.35E-53 | 0.721159 | 3.83E-76 | 0.292487 | 1.15E-10 |
| 8.51E-30 | 0.357537 | 1.58E-15 | 0.653579 | 3.11E-58 | 0.622857 | 1.58E-51 | 0.116233 | 0.01195  |
| 1.00E-42 | 0.510121 | 2.65E-32 | 0.665247 | 5.45E-61 | 0.718435 | 2.55E-75 | 0.282425 | 5.17E-10 |
| 6.95E-22 | 0.328688 | 3.16E-13 | 0.657532 | 3.74E-59 | 0.55428  | 5.75E-39 | 0.275061 | 1.49E-09 |
| 4.54E-22 | 0.407393 | 4.25E-20 | 0.587362 | 1.19E-44 | 0.599522 | 6.54E-47 | 0.143961 | 0.00181  |
| 7.92E-28 | 0.6225   | 1.88E-51 | 0.539141 | 1.43E-36 | 0.625805 | 3.88E-52 | 0.20523  | 7.79E-06 |
| 2.25E-38 | 0.65167  | 8.57E-58 | 0.681245 | 5.58E-65 | 0.739159 | 7.67E-82 | 0.387663 | 3.39E-18 |
| 2.53E-46 | 0.634934 | 4.51E-54 | 0.700083 | 5.12E-70 | 0.750179 | 1.44E-85 | 0.146191 | 0.00154  |
| 4.13E-61 | 0.646724 | 1.14E-56 | 0.52359  | 3.12E-34 | 0.743872 | 2.06E-83 | 0.267215 | 4.46E-09 |
| 6.31E-27 | 0.595521 | 3.71E-46 | 0.732708 | 9.56E-80 | 0.699018 | 1.01E-69 | 0.248521 | 5.27E-08 |
| 4.56E-47 | 0.678204 | 3.35E-64 | 0.806672 | #####    | 0.844075 | #####    | 0.173738 | 0.00016  |
| 9.77E-22 | 0.511009 | 1.99E-32 | 0.575488 | 1.55E-42 | 0.571862 | 6.58E-42 | 0.228971 | 5.69E-07 |
| 3.60E-63 | 0.471629 | 3.07E-27 | 0.700667 | 3.52E-70 | 0.775189 | 8.41E-95 | 0.305909 | 1.42E-11 |
| 1.08E-48 | 0.594337 | 6.18E-46 | 0.756998 | 5.65E-88 | 0.780488 | 6.52E-97 | 0.279689 | 7.69E-10 |
| 9.08E-56 | 0.754037 | 6.40E-87 | 0.748556 | 5.23E-85 | 0.854928 | #####    | 0.299863 | 3.70E-11 |
| 6.27E-30 | 0.477348 | 5.96E-28 | 0.718344 | 2.71E-75 | 0.677755 | 4.35E-64 | 0.150524 | 0.0011   |
| 3.06E-27 | 0.537151 | 2.90E-36 | 0.610372 | 5.22E-49 | 0.63727  | 1.41E-54 | 0.285477 | 3.30E-10 |
| 9.18E-22 | 0.540614 | 8.47E-37 | 0.666188 | 3.22E-61 | 0.637633 | 1.17E-54 | 0.264307 | 6.64E-09 |
| 1.94E-16 | 0.394199 | 8.22E-19 | 0.543334 | 3.19E-37 | 0.524647 | 2.18E-34 | 0.050675 | 0.27446  |
| 1.31E-27 | 0.565266 | 8.76E-41 | 0.530659 | 2.79E-35 | 0.613158 | 1.46E-49 | -0.02612 | 0.57336  |
| 1.96E-32 | 0.6789   | 2.22E-64 | 0.756389 | 9.33E-88 | 0.795943 | #####    | 0.111907 | 0.01554  |
| 3.20E-35 | 0.540644 | 8.38E-37 | 0.788783 | #####    | 0.736356 | 6.35E-81 | 0.163139 | 0.0004   |
| 5.36E-23 | 0.679574 | 1.50E-64 | 0.664429 | 8.58E-61 | 0.719204 | 1.50E-75 | 0.24918  | 4.85E-08 |
| 1.56E-55 | 0.656743 | 5.72E-59 | 0.710971 | 4.10E-73 | 0.792446 | #####    | 0.244983 | 8.24E-08 |

|          |          |          |          |          |          |          |          |          |
|----------|----------|----------|----------|----------|----------|----------|----------|----------|
| 2.72E-46 | 0.600252 | 4.75E-47 | 0.612612 | 1.88E-49 | 0.740798 | 2.20E-82 | 0.149512 | 0.00119  |
| 9.51E-42 | 0.611326 | 3.38E-49 | 0.706583 | 7.55E-72 | 0.750954 | 7.73E-86 | 0.142791 | 0.00198  |
| 2.62E-50 | 0.76941  | 1.45E-92 | 0.700548 | 3.80E-70 | 0.838745 | #####    | 0.248273 | 5.44E-08 |
| 3.95E-49 | 0.543881 | 2.62E-37 | 0.538809 | 1.61E-36 | 0.663414 | 1.51E-60 | 0.272334 | 2.19E-09 |
| 2.50E-41 | 0.557236 | 1.89E-39 | 0.700814 | 3.20E-70 | 0.732983 | 7.80E-80 | 0.302502 | 2.44E-11 |
| 1.38E-57 | 0.622703 | 1.70E-51 | 0.751532 | 4.86E-86 | 0.829455 | #####    | 0.397974 | 3.57E-19 |
| 1.56E-25 | -0.55722 | 1.91E-39 | -0.65534 | 1.21E-58 | -0.67022 | 3.34E-62 | -0.2252  | 8.79E-07 |
| 9.32E-27 | 0.463665 | 2.87E-26 | 0.569252 | 1.85E-41 | 0.559205 | 8.98E-40 | 0.296194 | 6.54E-11 |
| 4.83E-31 | 0.485291 | 5.80E-29 | 0.611007 | 3.91E-49 | 0.662287 | 2.80E-60 | 0.23437  | 3.01E-07 |
| 1.78E-46 | 0.577959 | 5.71E-43 | 0.728376 | 2.26E-78 | 0.795254 | #####    | 0.232987 | 3.55E-07 |
| 8.04E-40 | 0.570237 | 1.25E-41 | 0.739417 | 6.31E-82 | 0.721704 | 2.61E-76 | 0.264443 | 6.51E-09 |
| 5.43E-32 | 0.524625 | 2.20E-34 | 0.628763 | 9.31E-53 | 0.690524 | 2.06E-67 | 0.295866 | 6.88E-11 |
| 1.32E-36 | 0.551794 | 1.45E-38 | 0.550927 | 2.00E-38 | 0.659604 | 1.22E-59 | 0.2051   | 7.90E-06 |
| 2.00E-47 | 0.620702 | 4.39E-51 | 0.650019 | 2.04E-57 | 0.760218 | 3.87E-89 | 0.24678  | 6.57E-08 |
| 1.15E-60 | 0.664349 | 8.97E-61 | 0.703807 | 4.63E-71 | 0.794177 | #####    | 0.278175 | 9.57E-10 |
| 2.55E-30 | 0.520245 | 9.58E-34 | 0.508873 | 3.96E-32 | 0.607808 | 1.66E-48 | 0.244155 | 9.13E-08 |
| 1.64E-68 | 0.550261 | 2.56E-38 | 0.662407 | 2.62E-60 | 0.757432 | 3.94E-88 | 0.496907 | 1.72E-30 |
| 9.25E-55 | 0.603197 | 1.30E-47 | 0.622846 | 1.59E-51 | 0.76228  | 6.81E-90 | 0.446881 | 2.63E-24 |
| 3.72E-44 | 0.581054 | 1.62E-43 | 0.551614 | 1.55E-38 | 0.680067 | 1.12E-64 | 0.269924 | 3.07E-09 |
| 3.24E-48 | 0.614785 | 6.93E-50 | 0.795525 | #####    | 0.81308  | #####    | 0.147874 | 0.00135  |
| 5.65E-47 | 0.619288 | 8.53E-51 | 0.704605 | 2.76E-71 | 0.761724 | 1.09E-89 | 0.11675  | 0.01157  |
| 6.10E-32 | 0.329912 | 2.55E-13 | 0.439419 | 1.81E-23 | 0.536057 | 4.26E-36 | 0.215884 | 2.50E-06 |
| 8.90E-53 | 0.640374 | 2.95E-55 | 0.605399 | 4.89E-48 | 0.717163 | 6.13E-75 | 0.307312 | 1.14E-11 |
| 3.52E-37 | 0.637084 | 1.55E-54 | 0.678454 | 2.89E-64 | 0.74958  | 2.32E-85 | 0.133575 | 0.00383  |
| 9.82E-31 | 0.536832 | 3.24E-36 | 0.353647 | 3.33E-15 | 0.573593 | 3.30E-42 | 0.45022  | 1.09E-24 |
| 1.02E-29 | 0.474    | 1.56E-27 | 0.602451 | 1.81E-47 | 0.630655 | 3.71E-53 | 0.076009 | 0.10089  |
| 2.97E-39 | 0.707291 | 4.73E-72 | 0.552447 | 1.14E-38 | 0.675385 | 1.73E-63 | 0.388353 | 2.93E-18 |
| 3.62E-56 | 0.514032 | 7.45E-33 | 0.518325 | 1.81E-33 | 0.653575 | 3.12E-58 | 0.351555 | 4.95E-15 |
| 8.36E-73 | 0.553239 | 8.48E-39 | 0.603413 | 1.18E-47 | 0.780451 | 6.75E-97 | 0.29081  | 1.49E-10 |
| 2.86E-50 | 0.644507 | 3.58E-56 | 0.626622 | 2.62E-52 | 0.77188  | 1.64E-93 | 0.353827 | 3.22E-15 |
| 1.43E-81 | 0.620566 | 4.68E-51 | 0.766573 | 1.72E-91 | 0.851376 | #####    | 0.186127 | 5.19E-05 |
| 2.01E-27 | 0.306069 | 1.39E-11 | 0.542646 | 4.09E-37 | 0.558085 | 1.37E-39 | 0.222135 | 1.25E-06 |
| 4.75E-41 | 0.695843 | 7.53E-69 | 0.738086 | 1.73E-81 | 0.781865 | 1.80E-97 | 0.228328 | 6.13E-07 |
| 2.63E-26 | 0.455792 | 2.46E-25 | 0.400054 | 2.24E-19 | 0.505866 | 1.04E-31 | 0.303892 | 1.96E-11 |
| 3.26E-46 | 0.723124 | 9.61E-77 | 0.693479 | 3.31E-68 | 0.773944 | 2.58E-94 | 0.231106 | 4.43E-07 |
| 1.92E-28 | 0.37642  | 3.62E-17 | 0.519429 | 1.26E-33 | 0.573376 | 3.60E-42 | 0.404549 | 8.14E-20 |
| 5.24E-59 | 0.606095 | 3.58E-48 | 0.52746  | 8.38E-35 | 0.712158 | 1.85E-73 | 0.152925 | 0.00092  |
| 2.74E-43 | 0.56812  | 2.88E-41 | 0.747515 | 1.19E-84 | 0.773171 | 5.17E-94 | 0.499872 | 6.85E-31 |
| 9.63E-64 | 0.620002 | 6.11E-51 | 0.696945 | 3.76E-69 | 0.798187 | #####    | 0.497922 | 1.25E-30 |
| 1.22E-36 | 0.624068 | 8.91E-52 | 0.461098 | 5.82E-26 | 0.616877 | 2.63E-50 | 0.305068 | 1.63E-11 |
| 8.66E-29 | 0.415833 | 5.96E-21 | 0.424076 | 8.28E-22 | 0.507187 | 6.80E-32 | 0.407832 | 3.84E-20 |
| 1.04E-33 | 0.665818 | 3.96E-61 | 0.737302 | 3.12E-81 | 0.778191 | 5.45E-96 | 0.208155 | 5.73E-06 |
| 1.97E-25 | 0.51394  | 7.68E-33 | 0.597024 | 1.94E-46 | 0.606561 | 2.91E-48 | 0.113736 | 0.01392  |
| 3.07E-30 | 0.579804 | 2.70E-43 | 0.747552 | 1.16E-84 | 0.746009 | 3.89E-84 | 0.068178 | 0.14126  |
| 1.32E-43 | 0.51839  | 1.77E-33 | 0.568032 | 2.98E-41 | 0.688326 | 7.91E-67 | 0.030562 | 0.51     |

|          |          |          |          |          |          |          |          |          |
|----------|----------|----------|----------|----------|----------|----------|----------|----------|
| 1.09E-35 | 0.660528 | 7.35E-60 | 0.711856 | 2.27E-73 | 0.764259 | 1.26E-90 | 0.21762  | 2.06E-06 |
| 6.06E-41 | 0.297395 | 5.44E-11 | 0.445129 | 4.16E-24 | 0.544616 | 2.01E-37 | 0.19686  | 1.83E-05 |
| 2.94E-69 | 0.587538 | 1.10E-44 | 0.494802 | 3.28E-30 | 0.742997 | 4.06E-83 | 0.232229 | 3.88E-07 |
| 2.72E-47 | 0.62791  | 1.41E-52 | 0.563094 | 2.03E-40 | 0.721454 | 3.11E-76 | 0.247768 | 5.80E-08 |
| 3.16E-35 | 0.476834 | 6.91E-28 | 0.664088 | 1.04E-60 | 0.715832 | 1.53E-74 | 0.209803 | 4.81E-06 |
| 5.02E-47 | 0.5649   | 1.01E-40 | 0.764112 | 1.43E-90 | 0.76537  | 4.86E-91 | 0.205961 | 7.22E-06 |
| 4.65E-23 | 0.646024 | 1.64E-56 | 0.590834 | 2.75E-45 | 0.638025 | 9.64E-55 | 0.229922 | 5.09E-07 |
| 7.20E-56 | 0.439015 | 2.01E-23 | 0.520761 | 8.06E-34 | 0.684855 | 6.47E-66 | 0.253465 | 2.80E-08 |
| 1.26E-49 | 0.649869 | 2.21E-57 | 0.680514 | 8.60E-65 | 0.790874 | #####    | 0.193431 | 2.57E-05 |
| 2.39E-25 | 0.475163 | 1.12E-27 | 0.603443 | 1.17E-47 | 0.593764 | 7.89E-46 | 0.111382 | 0.01604  |
| 1.29E-52 | 0.569017 | 2.02E-41 | 0.576375 | 1.08E-42 | 0.7233   | 8.49E-77 | 0.325357 | 5.63E-13 |
| 1.78E-42 | 0.573562 | 3.35E-42 | 0.689971 | 2.89E-67 | 0.747936 | 8.55E-85 | 0.14949  | 0.0012   |
| 1.35E-29 | 0.622249 | 2.11E-51 | 0.720077 | 8.15E-76 | 0.713706 | 6.50E-74 | 0.319929 | 1.42E-12 |
| 2.59E-28 | 0.49243  | 6.77E-30 | 0.479712 | 3.00E-28 | 0.543153 | 3.41E-37 | 0.212102 | 3.76E-06 |
| 3.98E-45 | 0.452906 | 5.35E-25 | 0.616511 | 3.12E-50 | 0.676753 | 7.81E-64 | 0.403468 | 1.04E-19 |
| 2.37E-52 | 0.683361 | 1.58E-65 | 0.559543 | 7.90E-40 | 0.741662 | 1.13E-82 | 0.254629 | 2.40E-08 |
| 1.97E-52 | 0.58675  | 1.53E-44 | 0.553576 | 7.48E-39 | 0.719547 | 1.18E-75 | 0.343966 | 2.04E-14 |
| 2.49E-23 | 0.593568 | 8.58E-46 | 0.67519  | 1.93E-63 | 0.678752 | 2.43E-64 | 0.104285 | 0.02421  |
| 9.94E-16 | 0.446656 | 2.79E-24 | 0.564001 | 1.43E-40 | 0.546483 | 1.02E-37 | 0.161566 | 0.00046  |
| 1.92E-39 | 0.339528 | 4.60E-14 | 0.184576 | 6.01E-05 | 0.459201 | 9.78E-26 | 0.139709 | 0.00248  |
| 2.11E-23 | 0.402609 | 1.26E-19 | 0.44846  | 1.74E-24 | 0.511615 | 1.64E-32 | 0.164952 | 0.00034  |
| 3.23E-27 | 0.390931 | 1.68E-18 | 0.573914 | 2.91E-42 | 0.610597 | 4.71E-49 | 0.253832 | 2.67E-08 |
| 2.35E-35 | 0.611537 | 3.07E-49 | 0.686803 | 2.00E-66 | 0.713114 | 9.70E-74 | 0.351144 | 5.36E-15 |
| 0.45263  | 0.06327  | 0.17226  | 0.280077 | 7.27E-10 | 0.088363 | 0.05637  | -0.09602 | 0.03805  |
| 0.45711  | 0.084399 | 0.06842  | 0.358885 | 1.21E-15 | 0.169156 | 0.00024  | 0.101126 | 0.02888  |
| 0.07808  | -0.09363 | 0.04314  | 0.150942 | 0.00107  | -0.0516  | 0.2658   | -0.06329 | 0.17213  |
| 1.32E-06 | 0.285989 | 3.06E-10 | -0.23319 | 3.47E-07 | 0.077597 | 0.09395  | 0.247467 | 6.03E-08 |
| 0.00069  | 0.135467 | 0.00336  | 0.418831 | 2.92E-21 | 0.262756 | 8.19E-09 | 0.059264 | 0.20111  |
| 0.70127  | 0.073017 | 0.11507  | 0.487692 | 2.83E-29 | 0.201582 | 1.14E-05 | 0.028471 | 0.53939  |
| 0.00034  | 0.139281 | 0.00256  | 0.427694 | 3.42E-22 | 0.243579 | 9.81E-08 | 0.023125 | 0.61815  |
| 0.49174  | 0.117348 | 0.01115  | 0.532959 | 1.26E-35 | 0.227765 | 6.55E-07 | 0.187722 | 4.46E-05 |
| 0.05206  | 0.06592  | 0.15495  | 0.515839 | 4.12E-33 | 0.242752 | 1.09E-07 | -0.08926 | 0.0539   |
| 3.16E-07 | 0.479166 | 3.52E-28 | -0.00265 | 0.95441  | 0.237794 | 2.00E-07 | 0.152684 | 0.00093  |
| 0.95456  | -0.0501  | 0.27996  | 0.300311 | 3.45E-11 | 0.085116 | 0.06609  | -0.00559 | 0.90403  |
| 0.24162  | -0.04534 | 0.3282   | 0.225614 | 8.39E-07 | 0.019832 | 0.66903  | 0.049542 | 0.28534  |
| 0.06551  | -0.1036  | 0.02516  | 0.097538 | 0.0351   | -0.07991 | 0.08454  | -0.0596  | 0.19854  |
| 0.28397  | -0.27071 | 2.75E-09 | 0.177706 | 0.00011  | -0.05431 | 0.24147  | -0.07085 | 0.12631  |
| 0.00071  | 0.205587 | 7.51E-06 | 0.334572 | 1.12E-13 | 0.217264 | 2.15E-06 | 0.034872 | 0.45218  |
| 1.85E-05 | -0.38964 | 2.22E-18 | 0.01749  | 0.70619  | -0.23461 | 2.93E-07 | -0.05062 | 0.27502  |
| 0.22566  | 0.048893 | 0.29171  | 0.478346 | 4.46E-28 | 0.189061 | 3.93E-05 | 0.010196 | 0.82606  |
| 0.76818  | -0.0816  | 0.07813  | 0.295998 | 6.74E-11 | 0.090547 | 0.05052  | -0.17756 | 0.00011  |
| 0.00011  | 0.20548  | 7.59E-06 | 0.561916 | 3.19E-40 | 0.339111 | 4.96E-14 | -0.00837 | 0.85685  |
| 0.47365  | 0.180739 | 8.58E-05 | 0.492836 | 5.99E-30 | 0.234766 | 2.87E-07 | -0.02845 | 0.53965  |
| 0.12569  | -0.03579 | 0.44035  | 0.375209 | 4.65E-17 | 0.087526 | 0.05876  | -0.17124 | 0.0002   |
| 0.00227  | 0.057564 | 0.21436  | 0.299091 | 4.18E-11 | 0.042783 | 0.35627  | -0.27464 | 1.58E-09 |

|          |          |          |          |          |          |          |          |          |
|----------|----------|----------|----------|----------|----------|----------|----------|----------|
| 0.55255  | -0.00808 | 0.86183  | 0.453458 | 4.61E-25 | 0.160713 | 0.00049  | -0.04611 | 0.32004  |
| 0.75102  | -0.04226 | 0.36222  | 0.299467 | 3.94E-11 | 0.077386 | 0.09485  | 0.167032 | 0.00029  |
| 0.57008  | -0.12186 | 0.00839  | 0.357862 | 1.48E-15 | 0.030095 | 0.51649  | -0.19263 | 2.78E-05 |
| 0.19796  | -0.19266 | 2.77E-05 | 0.267616 | 4.22E-09 | 0.089707 | 0.05271  | -0.1069  | 0.02086  |
| 0.30901  | -0.23408 | 3.12E-07 | 0.133202 | 0.00393  | -0.04728 | 0.30794  | -0.05082 | 0.27311  |
| 0.3519   | -0.29183 | 1.28E-10 | 0.125932 | 0.00643  | -0.09207 | 0.04675  | -0.01165 | 0.80182  |
| 0.58424  | -0.12383 | 0.00738  | 0.283416 | 4.47E-10 | 0.057065 | 0.21837  | -0.1602  | 0.00051  |
| 0.00301  | -0.06482 | 0.16197  | 0.162064 | 0.00044  | -0.03217 | 0.48795  | 0.057851 | 0.21208  |
| 0.06824  | -0.11852 | 0.01037  | 0.457685 | 1.48E-25 | 0.173089 | 0.00017  | 0.059767 | 0.1973   |
| 0.00196  | -0.28047 | 6.87E-10 | 0.165169 | 0.00034  | -0.08999 | 0.05197  | -0.16527 | 0.00034  |
| 0.0579   | -0.0356  | 0.44279  | 0.244535 | 8.71E-08 | 0.106092 | 0.02185  | 0.028363 | 0.54092  |
| 0.48411  | 0.036903 | 0.42625  | 0.201917 | 1.10E-05 | 0.022859 | 0.6222   | -0.02856 | 0.53808  |
| 0.00021  | -0.39165 | 1.43E-18 | -0.04942 | 0.28654  | -0.2212  | 1.38E-06 | -0.14847 | 0.00129  |
| 0.00013  | 0.149538 | 0.00119  | 0.292205 | 1.20E-10 | 0.054293 | 0.2416   | -0.25688 | 1.79E-08 |
| 7.23E-06 | 0.12194  | 0.00834  | 0.376961 | 3.24E-17 | 0.249207 | 4.83E-08 | 0.008761 | 0.85022  |
| 1.01E-06 | -0.23827 | 1.88E-07 | 0.191365 | 3.14E-05 | 0.05885  | 0.20428  | -0.01854 | 0.68942  |
| 0.20026  | 0.045494 | 0.32659  | 0.345194 | 1.63E-14 | 0.16347  | 0.00039  | 0.076238 | 0.09987  |
| 0.6021   | 0.050801 | 0.27326  | 0.300823 | 3.18E-11 | 0.079018 | 0.08807  | 0.073467 | 0.11285  |
| 0.37278  | 0.225183 | 8.81E-07 | 0.40304  | 1.15E-19 | 0.187447 | 4.58E-05 | -0.05811 | 0.21007  |
| 0.20009  | -0.04899 | 0.29077  | 0.274001 | 1.73E-09 | 0.023988 | 0.60511  | 0.042739 | 0.35677  |
| 0.00293  | -0.22268 | 1.17E-06 | 0.228582 | 5.95E-07 | 0.066067 | 0.15402  | -0.13766 | 0.00287  |
| 0.0198   | -0.32512 | 5.86E-13 | 0.107783 | 0.01982  | -0.12955 | 0.00505  | -0.01828 | 0.6936   |
| 0.13551  | 0.079274 | 0.08704  | 0.537793 | 2.31E-36 | 0.259485 | 1.27E-08 | 0.176214 | 0.00013  |
| 0.63891  | 0.074555 | 0.1076   | 0.407242 | 4.40E-20 | 0.126915 | 0.00602  | -0.02855 | 0.5382   |
| 0.68701  | 0.187515 | 4.55E-05 | 0.440958 | 1.22E-23 | 0.179488 | 9.62E-05 | 0.090656 | 0.05024  |
| 0.0859   | 0.101551 | 0.02821  | 0.562825 | 2.25E-40 | 0.274086 | 1.71E-09 | 0.05205  | 0.26163  |
| 1.23E-11 | 0.173059 | 0.00017  | 0.618159 | 1.45E-50 | 0.397702 | 3.79E-19 | -0.06221 | 0.17959  |
| 0.00045  | -0.20315 | 9.67E-06 | 0.062877 | 0.17494  | -0.14253 | 0.00202  | -0.09468 | 0.04083  |
| 3.94E-06 | 0.29391  | 9.29E-11 | -0.11026 | 0.01714  | 0.132958 | 0.004    | 0.173205 | 0.00017  |
| 4.13E-05 | -0.37746 | 2.92E-17 | 0.10675  | 0.02104  | -0.1725  | 0.00018  | -0.07015 | 0.13009  |
| 0.20496  | -0.15388 | 0.00085  | 0.139989 | 0.00243  | 0.002072 | 0.96439  | 0.040601 | 0.38135  |
| 0.23145  | -0.10142 | 0.02841  | 0.205442 | 7.62E-06 | 0.009285 | 0.84138  | -0.0258  | 0.57818  |
| 5.15E-08 | 0.034518 | 0.45678  | 0.389295 | 2.39E-18 | 0.288383 | 2.14E-10 | -0.25377 | 2.69E-08 |
| 0.13256  | 0.047718 | 0.30347  | 0.181495 | 8.00E-05 | 0.028974 | 0.53224  | -0.23418 | 3.08E-07 |
| 0.28716  | -0.0181  | 0.69637  | 0.449309 | 1.39E-24 | 0.154788 | 0.00079  | -0.1135  | 0.01413  |
| 0.71892  | -0.19434 | 2.35E-05 | 0.293201 | 1.04E-10 | 0.040514 | 0.38238  | -0.01015 | 0.82677  |
| 0.06434  | 0.247209 | 6.23E-08 | 0.454212 | 3.77E-25 | 0.269976 | 3.05E-09 | 0.022078 | 0.63415  |
| 8.61E-06 | 0.208627 | 5.45E-06 | 0.537064 | 2.99E-36 | 0.332247 | 1.69E-13 | 0.033382 | 0.47173  |
| 0.27333  | 0.156759 | 0.00067  | 0.350896 | 5.61E-15 | 0.15186  | 0.00099  | 0.058356 | 0.20811  |
| 0.09099  | -0.23467 | 2.90E-07 | 0.115022 | 0.01287  | -0.08572 | 0.06418  | -0.0263  | 0.57077  |
| 4.46E-06 | 0.226634 | 7.46E-07 | 0.591192 | 2.36E-45 | 0.385104 | 5.87E-18 | 0.057189 | 0.21737  |
| 9.07E-05 | -0.38124 | 1.33E-17 | 0.041664 | 0.369    | -0.21011 | 4.66E-06 | -0.05947 | 0.19957  |
| 0.8411   | 0.134783 | 0.00352  | 0.328767 | 3.12E-13 | 0.149895 | 0.00116  | 0.1169   | 0.01147  |
| 0.96401  | 0.134559 | 0.00358  | 0.289549 | 1.80E-10 | 0.145844 | 0.00158  | -0.26447 | 6.49E-09 |
| 0.01564  | -0.25829 | 1.49E-08 | 0.154136 | 0.00083  | -0.10099 | 0.0291   | -0.06175 | 0.18283  |



|          |          |          |          |          |          |          |          |          |
|----------|----------|----------|----------|----------|----------|----------|----------|----------|
| 0.02823  | -0.04384 | 0.34453  | 0.413996 | 9.18E-21 | 0.193374 | 2.58E-05 | 0.244584 | 8.66E-08 |
| 7.92E-18 | 0.164777 | 0.00035  | 0.499732 | 7.15E-31 | 0.368631 | 1.77E-16 | 0.126554 | 0.00617  |
| 0.22614  | 0.126646 | 0.00613  | 0.381646 | 1.22E-17 | 0.202763 | 1.01E-05 | 0.067145 | 0.1474   |
| 0.11377  | -0.12957 | 0.00504  | 0.324275 | 6.78E-13 | 0.122699 | 0.00794  | 0.084089 | 0.06944  |
| 0.4111   | 0.459461 | 9.11E-26 | -0.12829 | 0.0055   | 0.077738 | 0.09335  | 0.070784 | 0.12664  |
| 0.58092  | -0.08857 | 0.05578  | 0.1941   | 2.40E-05 | 0.090377 | 0.05096  | -0.04312 | 0.3525   |
| 0.01263  | -0.14133 | 0.0022   | 0.204748 | 8.19E-06 | -0.02062 | 0.65664  | -0.22318 | 1.11E-06 |
| 0.1735   | -0.18536 | 5.58E-05 | 0.268143 | 3.93E-09 | 0.024758 | 0.59356  | -0.05989 | 0.19636  |
| 2.62E-06 | 0.29374  | 9.54E-11 | 0.471203 | 3.47E-27 | 0.314523 | 3.50E-12 | 0.140044 | 0.00242  |
| 0.23404  | 0.036064 | 0.43685  | 0.301056 | 3.07E-11 | 0.106301 | 0.02159  | -0.0937  | 0.04297  |
| 0.84032  | 0.000657 | 0.98871  | 0.334654 | 1.10E-13 | 0.114912 | 0.01296  | -0.15397 | 0.00084  |
| 0.33115  | -0.03678 | 0.42785  | 0.176035 | 0.00013  | 0.003868 | 0.93355  | 0.191505 | 3.10E-05 |
| 0.75654  | -0.17985 | 9.30E-05 | 0.230449 | 4.79E-07 | 0.04584  | 0.32292  | -0.11561 | 0.01242  |
| 0.6522   | 0.016762 | 0.71789  | 0.381492 | 1.26E-17 | 0.152849 | 0.00092  | -0.01263 | 0.78551  |
| 0.00392  | 0.027722 | 0.55011  | 0.337071 | 7.17E-14 | 0.03428  | 0.45988  | -0.23584 | 2.53E-07 |
| 5.30E-06 | 0.093253 | 0.04399  | 0.296296 | 6.44E-11 | 0.186524 | 5.00E-05 | -0.02432 | 0.60009  |
| 0.9356   | -0.04737 | 0.30705  | 0.235704 | 2.57E-07 | 0.100005 | 0.03071  | 0.172662 | 0.00018  |
| 0.64033  | -0.13773 | 0.00286  | 0.229263 | 5.50E-07 | 0.031619 | 0.49547  | 0.084036 | 0.06962  |
| 0.15791  | -0.14041 | 0.00236  | 0.087708 | 0.05823  | -0.08343 | 0.07165  | -0.24039 | 1.46E-07 |
| 0.00081  | 0.078753 | 0.08914  | 0.277526 | 1.05E-09 | 0.003791 | 0.93489  | -0.15547 | 0.00075  |
| 5.17E-09 | 0.228646 | 5.91E-07 | 0.529026 | 4.90E-35 | 0.373624 | 6.43E-17 | 0.117357 | 0.01115  |
| 0.34761  | 0.020927 | 0.65193  | 0.261777 | 9.34E-09 | 0.08441  | 0.06838  | -0.11655 | 0.01172  |
| 0.00045  | 0.040496 | 0.38258  | 0.514137 | 7.20E-33 | 0.290011 | 1.68E-10 | -0.07928 | 0.08703  |
| 0.0015   | 0.177775 | 0.00011  | 0.493436 | 4.99E-30 | 0.284565 | 3.78E-10 | 0.308961 | 8.70E-12 |
| 0.08912  | -0.2745  | 1.62E-09 | 0.085358 | 0.06533  | -0.09926 | 0.03198  | -0.13342 | 0.00387  |
| 0.71962  | -0.07439 | 0.10841  | 0.183435 | 6.68E-05 | 0.027179 | 0.55795  | -0.00939 | 0.83966  |
| 6.17E-09 | 0.072845 | 0.11594  | 0.422454 | 1.23E-21 | 0.306448 | 1.30E-11 | 0.030855 | 0.50595  |
| 0.15097  | 0.00071  | 0.9878   | 0.401689 | 1.55E-19 | 0.205109 | 7.89E-06 | 0.182137 | 7.54E-05 |
| 0.00268  | -0.09015 | 0.05154  | 0.427405 | 3.67E-22 | 0.197846 | 1.66E-05 | 0.024473 | 0.59782  |
| 0.01336  | -0.10222 | 0.02719  | 0.177661 | 0.00011  | 0.048537 | 0.29524  | 0.076443 | 0.09896  |
| 7.96E-10 | 0.168669 | 0.00025  | 0.41846  | 3.19E-21 | 0.302907 | 2.29E-11 | -0.13871 | 0.00266  |
| 2.82E-07 | 0.240066 | 1.51E-07 | 0.411303 | 1.72E-20 | 0.303297 | 2.16E-11 | 0.091609 | 0.04787  |
| 1.01E-06 | 0.055945 | 0.22755  | 0.314804 | 3.34E-12 | 0.018424 | 0.69128  | -0.05883 | 0.20446  |
| 8.04E-06 | -0.09321 | 0.04409  | 0.159136 | 0.00056  | -0.06871 | 0.1382   | -0.13888 | 0.00263  |
| 0.28269  | -0.17339 | 0.00017  | 0.218693 | 1.83E-06 | 0.029852 | 0.51988  | -0.06398 | 0.1675   |
| 0.76982  | 0.122185 | 0.00821  | 0.478713 | 4.01E-28 | 0.215061 | 2.73E-06 | -0.0006  | 0.98976  |
| 0.01414  | 0.211853 | 3.87E-06 | 0.581472 | 1.36E-43 | 0.359674 | 1.04E-15 | 0.235125 | 2.75E-07 |
| 9.33E-07 | -0.30559 | 1.50E-11 | 0.03493  | 0.45142  | -0.22868 | 5.89E-07 | 0.030214 | 0.51484  |
| 0.01335  | -0.06663 | 0.15053  | 0.040514 | 0.38237  | -0.0649  | 0.16143  | -0.07551 | 0.10316  |
| 0.11828  | 0.038336 | 0.4085   | 0.205253 | 7.77E-06 | 0.11083  | 0.01657  | 0.092397 | 0.04597  |
| 0.19929  | 0.0493   | 0.2877   | 0.240176 | 1.49E-07 | 0.069383 | 0.13435  | -0.16768 | 0.00027  |
| 0.16621  | 0.094258 | 0.04175  | 0.395447 | 6.24E-19 | 0.214054 | 3.05E-06 | -0.00951 | 0.83753  |
| 0.19529  | -0.20162 | 1.13E-05 | 0.091259 | 0.04873  | -0.086   | 0.06331  | -0.03983 | 0.39053  |
| 1.11E-06 | -0.23204 | 3.97E-07 | 0.098502 | 0.03333  | -0.15201 | 0.00098  | -0.18978 | 3.66E-05 |
| 0.02779  | -0.06763 | 0.14447  | 0.327021 | 4.22E-13 | 0.125828 | 0.00648  | 0.165564 | 0.00033  |

|          |          |          |          |          |          |          |          |          |
|----------|----------|----------|----------|----------|----------|----------|----------|----------|
| 0.12169  | -0.09421 | 0.04186  | 0.305671 | 1.48E-11 | 0.046406 | 0.31698  | -0.00868 | 0.85161  |
| 0.33127  | -0.17041 | 0.00022  | 0.082082 | 0.07639  | -0.0452  | 0.32972  | 0.032661 | 0.48137  |
| 0.00389  | -0.19915 | 1.45E-05 | 0.051572 | 0.26604  | -0.13186 | 0.00431  | -0.066   | 0.15445  |
| 0.30136  | -0.01707 | 0.71295  | 0.164665 | 0.00035  | 0.069882 | 0.13156  | -0.0488  | 0.29264  |
| 0.1303   | -0.14006 | 0.00242  | 0.198823 | 1.50E-05 | 0.056554 | 0.22252  | 0.044086 | 0.34179  |
| 0.19601  | -0.05076 | 0.27363  | 0.30205  | 2.63E-11 | 0.152123 | 0.00097  | -0.18322 | 6.82E-05 |
| 0.11602  | -0.06695 | 0.14858  | 0.284734 | 3.68E-10 | 0.088179 | 0.05689  | 0.076021 | 0.10084  |
| 0.44466  | -0.07862 | 0.08968  | 0.222279 | 1.23E-06 | 0.058061 | 0.21043  | 0.104886 | 0.0234   |
| 0.06451  | -0.0077  | 0.86827  | 0.285119 | 3.48E-10 | 0.148677 | 0.00127  | 0.11876  | 0.01021  |
| 0.08774  | -0.10431 | 0.02418  | 0.326168 | 4.89E-13 | 0.050267 | 0.27834  | -0.05581 | 0.22868  |
| 2.11E-10 | 0.117301 | 0.01119  | 0.593556 | 8.63E-46 | 0.390934 | 1.68E-18 | 0.159117 | 0.00056  |
| 0.4066   | -0.09066 | 0.05023  | 0.141415 | 0.00219  | 0.010196 | 0.82606  | -0.00287 | 0.95075  |
| 0.03135  | -0.08057 | 0.08198  | 0.303561 | 2.07E-11 | 0.047854 | 0.3021   | -0.03969 | 0.39218  |
| 0.00039  | 0.041009 | 0.37659  | 0.363216 | 5.20E-16 | 0.205454 | 7.61E-06 | 0.037601 | 0.41756  |
| 0.00136  | 0.110219 | 0.01719  | 0.348841 | 8.26E-15 | 0.219344 | 1.70E-06 | 0.133146 | 0.00395  |
| 0.77649  | -0.12417 | 0.00722  | 0.161881 | 0.00044  | 0.001812 | 0.96885  | -0.31478 | 3.35E-12 |
| 0.00149  | -0.12659 | 0.00616  | 0.218336 | 1.91E-06 | -0.01891 | 0.68363  | -0.04316 | 0.35203  |
| 0.46592  | 0.11194  | 0.01551  | 0.520888 | 7.73E-34 | 0.249812 | 4.48E-08 | -0.05494 | 0.23601  |
| 0.58799  | -0.0659  | 0.15507  | 0.272591 | 2.11E-09 | 0.05712  | 0.21792  | -0.0848  | 0.06712  |
| 0.00069  | -0.15698 | 0.00066  | 0.059505 | 0.19928  | -0.12056 | 0.00911  | 0.095921 | 0.03826  |
| 0.01543  | 0.061221 | 0.18661  | 0.476715 | 7.16E-28 | 0.232241 | 3.88E-07 | -0.00796 | 0.86385  |
| 0.09972  | -0.0806  | 0.08188  | 0.407898 | 3.78E-20 | 0.165811 | 0.00032  | -0.04328 | 0.3507   |
| 0.0414   | -0.21879 | 1.81E-06 | 0.121811 | 0.00841  | -0.09619 | 0.03772  | -0.17116 | 0.0002   |
| 0.01043  | -0.26745 | 4.32E-09 | 0.109449 | 0.01798  | -0.09918 | 0.03213  | -0.13102 | 0.00457  |
| 0.00091  | -0.09085 | 0.04976  | 0.305338 | 1.56E-11 | 0.138876 | 0.00263  | -0.10065 | 0.02965  |
| 0.57877  | -0.12509 | 0.0068   | 0.315543 | 2.96E-12 | 0.086731 | 0.0611   | -0.0526  | 0.25659  |
| 0.20234  | 0.100047 | 0.03064  | 0.482894 | 1.18E-28 | 0.237372 | 2.10E-07 | 0.130438 | 0.00475  |
| 2.05E-06 | 0.298796 | 4.37E-11 | -0.05432 | 0.24136  | 0.163792 | 0.00038  | 0.308838 | 8.87E-12 |
| 3.33E-13 | -0.25449 | 2.45E-08 | 0.00125  | 0.9785   | -0.24365 | 9.72E-08 | -0.14241 | 0.00204  |
| 0.00054  | -0.28766 | 2.39E-10 | 0.076227 | 0.09992  | -0.13656 | 0.00311  | -0.1545  | 0.00081  |
| 0.37416  | 0.078909 | 0.08851  | 0.377973 | 2.63E-17 | 0.204569 | 8.35E-06 | 0.042981 | 0.35405  |
| 0.01555  | 0.009113 | 0.8443   | 0.411924 | 1.49E-20 | 0.222443 | 1.20E-06 | 0.104841 | 0.02346  |
| 1.99E-09 | 0.321283 | 1.13E-12 | -0.16769 | 0.00027  | 0.18749  | 4.56E-05 | 0.270525 | 2.82E-09 |
| 0.85789  | -0.08165 | 0.07797  | 0.237238 | 2.13E-07 | 0.056193 | 0.2255   | -0.12436 | 0.00713  |
| 0.00135  | 0.283613 | 4.34E-10 | -0.15561 | 0.00074  | 0.097201 | 0.03574  | 0.054164 | 0.24272  |
| 0.0305   | -0.10526 | 0.02291  | 0.162222 | 0.00043  | -0.04164 | 0.3693   | 0.11942  | 0.00979  |
| 1.07E-05 | -0.30437 | 1.82E-11 | 0.093471 | 0.04349  | -0.18154 | 7.97E-05 | -0.10626 | 0.02164  |
| 0.78448  | -0.15484 | 0.00079  | 0.179176 | 9.89E-05 | -0.01501 | 0.74633  | 0.04747  | 0.306    |
| 0.11539  | 0.007052 | 0.8792   | 0.350826 | 5.69E-15 | 0.087111 | 0.05997  | -0.09405 | 0.04221  |
| 0.14881  | 0.167804 | 0.00027  | 0.462912 | 3.53E-26 | 0.279687 | 7.70E-10 | 0.060944 | 0.18861  |
| 0.05647  | -0.14922 | 0.00122  | 0.207352 | 6.24E-06 | -0.04484 | 0.33358  | 0.004003 | 0.93125  |
| 0.29006  | -0.15485 | 0.00079  | 0.240261 | 1.48E-07 | -0.02342 | 0.61361  | -0.09993 | 0.03083  |
| 0.08273  | -0.1575  | 0.00064  | 0.147533 | 0.00139  | -0.06896 | 0.13676  | 0.017834 | 0.70068  |
| 0.21316  | -0.00093 | 0.98397  | 0.290445 | 1.57E-10 | 0.128876 | 0.00528  | 0.100723 | 0.02953  |
| 0.03764  | 0.106795 | 0.02098  | 0.373569 | 6.51E-17 | 0.197192 | 1.77E-05 | -0.07536 | 0.10385  |

|          |          |          |          |          |          |          |          |          |
|----------|----------|----------|----------|----------|----------|----------|----------|----------|
| 2.04E-11 | 0.233956 | 3.16E-07 | 0.664857 | 6.77E-61 | 0.446379 | 3.00E-24 | 0.036661 | 0.4293   |
| 0.19166  | -0.1854  | 5.56E-05 | 0.126081 | 0.00637  | -0.07409 | 0.1098   | 0.0547   | 0.23808  |
| 1.41E-08 | 0.129339 | 0.00512  | 0.472054 | 2.72E-27 | 0.282632 | 5.02E-10 | 0.004164 | 0.92848  |
| 0.6903   | -0.03276 | 0.48007  | 0.284097 | 4.05E-10 | 0.069513 | 0.13362  | -0.05215 | 0.26073  |
| 0.672    | -0.29945 | 3.95E-11 | 0.175985 | 0.00013  | -0.03907 | 0.39963  | -0.06014 | 0.19452  |
| 4.14E-07 | -0.17357 | 0.00016  | 0.117287 | 0.0112   | -0.11238 | 0.01511  | -0.1633  | 0.0004   |
| 0.32308  | 0.121986 | 0.00832  | 0.346375 | 1.31E-14 | 0.158832 | 0.00057  | 0.029522 | 0.52451  |
| 0.79706  | -0.16877 | 0.00025  | 0.203228 | 9.59E-06 | 0.005901 | 0.8988   | -0.20226 | 1.06E-05 |
| 0.02334  | 0.059873 | 0.19651  | 0.412157 | 1.41E-20 | 0.208633 | 5.45E-06 | 0.012902 | 0.78096  |
| 9.78E-05 | -0.2254  | 8.59E-07 | 0.083452 | 0.07159  | -0.11664 | 0.01165  | -0.06519 | 0.15955  |
| 0.01682  | -0.16649 | 0.0003   | 0.13004  | 0.00488  | -0.06729 | 0.14655  | 0.039351 | 0.3962   |
| 2.96E-05 | 0.149311 | 0.00121  | -0.27768 | 1.03E-09 | 0.030907 | 0.50524  | 0.088279 | 0.05661  |
| 0.43115  | 0.123699 | 0.00744  | 0.421105 | 1.70E-21 | 0.182214 | 7.48E-05 | -0.02897 | 0.53237  |
| 9.77E-13 | 0.304857 | 1.68E-11 | 0.596445 | 2.49E-46 | 0.479211 | 3.47E-28 | 0.115081 | 0.01283  |
| 0.20572  | -0.07709 | 0.09613  | 0.359849 | 1.01E-15 | 0.138057 | 0.00279  | -0.19282 | 2.73E-05 |
| 0.00981  | 0.048406 | 0.29655  | 0.464397 | 2.34E-26 | 0.226715 | 7.39E-07 | 0.180286 | 8.94E-05 |
| 0.04556  | 0.172102 | 0.00019  | 0.504046 | 1.85E-31 | 0.300302 | 3.46E-11 | -0.05736 | 0.21598  |
| 0.08904  | 0.136463 | 0.00313  | 0.494876 | 3.21E-30 | 0.252211 | 3.29E-08 | 0.007388 | 0.87349  |
| 0.00663  | 0.111451 | 0.01597  | 0.226831 | 7.29E-07 | 0.041825 | 0.36716  | -0.00131 | 0.97744  |
| 6.07E-05 | -0.11568 | 0.01237  | 0.237968 | 1.95E-07 | 0.122175 | 0.00822  | -0.11079 | 0.01661  |
| 0.01162  | -0.28506 | 3.51E-10 | 0.101846 | 0.02775  | -0.10975 | 0.01767  | -0.08295 | 0.0733   |
| 0.00751  | -0.08211 | 0.07629  | 0.443155 | 6.94E-24 | 0.199989 | 1.34E-05 | 0.061035 | 0.18795  |
| 0.06181  | -0.21242 | 3.64E-06 | 0.241279 | 1.30E-07 | 0.044525 | 0.33701  | 0.060323 | 0.19316  |
| 0.14996  | -0.02387 | 0.60696  | 0.451649 | 7.47E-25 | 0.175506 | 0.00014  | -0.09882 | 0.03275  |
| 0.14924  | -0.21898 | 1.77E-06 | 0.271436 | 2.49E-09 | 0.055685 | 0.22972  | 0.014912 | 0.74791  |
| 0.00234  | 0.063957 | 0.16764  | 0.355752 | 2.23E-15 | 0.083476 | 0.07151  | -0.06925 | 0.13511  |
| 0.17223  | 0.002606 | 0.95522  | 0.192782 | 2.74E-05 | 0.040117 | 0.38706  | -0.13712 | 0.00298  |
| 0.11811  | -0.12799 | 0.00561  | 0.084811 | 0.06707  | -0.1042  | 0.02433  | -0.06259 | 0.17696  |
| 0.98803  | 0.158874 | 0.00057  | 0.468637 | 7.16E-27 | 0.204396 | 8.50E-06 | 0.014927 | 0.74765  |
| 0.02637  | -0.2966  | 6.14E-11 | 0.007411 | 0.87309  | -0.12989 | 0.00493  | -0.14999 | 0.00115  |
| 0.17032  | -0.16986 | 0.00023  | 0.186327 | 5.09E-05 | -0.00915 | 0.84361  | 0.021221 | 0.64737  |
| 0.00891  | 0.092445 | 0.04586  | 0.391215 | 1.58E-18 | 0.21487  | 2.79E-06 | 0.097267 | 0.03561  |
| 0.02275  | 0.093907 | 0.04252  | 0.261634 | 9.52E-09 | 0.158633 | 0.00058  | 0.151452 | 0.00103  |
| 0.58273  | 0.006405 | 0.8902   | 0.396978 | 4.45E-19 | 0.16208  | 0.00044  | -0.03656 | 0.43051  |
| 0.029    | -0.30183 | 2.72E-11 | 0.239072 | 1.71E-07 | -0.04179 | 0.3675   | -0.27327 | 1.92E-09 |
| 0.00429  | 0.319543 | 1.51E-12 | 0.506763 | 7.79E-32 | 0.325836 | 5.18E-13 | -0.10935 | 0.01809  |
| 0.41217  | 0.43401  | 7.13E-23 | -0.13122 | 0.00451  | 0.053818 | 0.24574  | -0.08533 | 0.06542  |
| 0.00299  | 0.035686 | 0.44168  | 0.2514   | 3.65E-08 | 0.155672 | 0.00074  | -0.1114  | 0.01602  |
| 2.64E-10 | 0.039445 | 0.39507  | -0.23411 | 3.11E-07 | 0.006922 | 0.88141  | 0.112    | 0.01546  |
| 0.14796  | -0.01651 | 0.72198  | 0.238608 | 1.81E-07 | 0.038408 | 0.40762  | 0.080129 | 0.08368  |
| 4.65E-10 | 0.389323 | 2.37E-18 | -0.02595 | 0.57592  | 0.215446 | 2.62E-06 | 0.486893 | 3.60E-29 |
| 0.01108  | -0.18169 | 7.86E-05 | 0.191146 | 3.21E-05 | 0.032461 | 0.48406  | -0.00799 | 0.86324  |
| 0.51173  | 0.140297 | 0.00238  | 0.524343 | 2.42E-34 | 0.264822 | 6.19E-09 | 0.078944 | 0.08837  |
| 0.18497  | 0.119288 | 0.00988  | 0.261274 | 9.99E-09 | 0.076503 | 0.09869  | 0.186531 | 5.00E-05 |
| 0.65577  | -0.05072 | 0.27406  | 0.21512  | 2.71E-06 | 0.030177 | 0.51535  | 0.251207 | 3.74E-08 |

|          |          |          |          |          |          |          |          |          |
|----------|----------|----------|----------|----------|----------|----------|----------|----------|
| 0.98147  | -0.25054 | 4.08E-08 | 0.026848 | 0.56276  | -0.06379 | 0.16878  | -0.34207 | 2.89E-14 |
| 7.93E-08 | 0.188604 | 4.10E-05 | 0.403076 | 1.14E-19 | 0.292401 | 1.17E-10 | 0.214024 | 3.06E-06 |
| 0.01673  | -0.09009 | 0.0517   | 0.327498 | 3.89E-13 | 0.11885  | 0.01015  | -0.04753 | 0.30541  |
| 0.24464  | -0.0591  | 0.20239  | 0.291358 | 1.37E-10 | 0.061048 | 0.18785  | -0.0676  | 0.14468  |
| 0.1007   | -0.08082 | 0.08105  | 0.375423 | 4.45E-17 | 0.056261 | 0.22493  | -0.12246 | 0.00807  |
| 0.0668   | 0.068144 | 0.14146  | 0.405308 | 6.85E-20 | 0.215313 | 2.66E-06 | 0.141297 | 0.00221  |
| 0.00844  | 0.182647 | 7.19E-05 | 0.549542 | 3.33E-38 | 0.32617  | 4.89E-13 | 0.058661 | 0.20574  |
| 0.00015  | -0.2683  | 3.84E-09 | 0.031132 | 0.50214  | -0.18145 | 8.03E-05 | -0.01473 | 0.75092  |
| 0.42353  | -0.04028 | 0.38508  | 0.184355 | 6.13E-05 | 0.025568 | 0.58154  | 0.044569 | 0.33654  |
| 0.00045  | 0.105738 | 0.0223   | 0.469326 | 5.90E-27 | 0.284226 | 3.97E-10 | 0.044072 | 0.34195  |
| 0.00763  | -0.08828 | 0.05662  | 0.250145 | 4.29E-08 | 0.02018  | 0.66358  | -0.02359 | 0.61118  |
| 0.43052  | 0.045621 | 0.32524  | 0.266293 | 5.06E-09 | 0.064309 | 0.16531  | 0.143912 | 0.00182  |
| 1.42E-06 | -0.11017 | 0.01724  | 0.271256 | 2.55E-09 | -0.04333 | 0.35011  | -0.22783 | 6.49E-07 |
| 0.37237  | -0.06355 | 0.17038  | 0.263304 | 7.60E-09 | 0.083498 | 0.07143  | 0.123678 | 0.00745  |
| 0.00993  | -0.15123 | 0.00104  | 0.248555 | 5.25E-08 | 0.090875 | 0.04969  | -0.1136  | 0.01404  |
| 5.99E-07 | 0.028362 | 0.54094  | 0.328833 | 3.08E-13 | 0.195169 | 2.16E-05 | 0.157497 | 0.00064  |
| 0.00252  | -0.01706 | 0.71315  | 0.338005 | 6.06E-14 | 0.04741  | 0.3066   | -0.27614 | 1.28E-09 |
| 0.02198  | -0.20595 | 7.23E-06 | 0.118878 | 0.01013  | -0.09483 | 0.04051  | 0.016168 | 0.72748  |
| 0.85926  | -0.03292 | 0.47789  | 0.191153 | 3.21E-05 | 0.055091 | 0.23474  | -0.09172 | 0.0476   |
| 8.85E-11 | -0.19798 | 1.64E-05 | 0.031992 | 0.4904   | -0.185   | 5.77E-05 | -0.33894 | 5.12E-14 |
| 3.50E-08 | 0.074374 | 0.10846  | 0.365655 | 3.21E-16 | 0.274128 | 1.70E-09 | 0.015725 | 0.73467  |
| 0.01337  | 0.062008 | 0.18099  | 0.381573 | 1.24E-17 | 0.218815 | 1.81E-06 | 0.126349 | 0.00626  |
| 0.22449  | 0.045817 | 0.32316  | 0.240547 | 1.43E-07 | 0.108678 | 0.01881  | -0.16424 | 0.00037  |
| 0.01368  | -0.18879 | 4.03E-05 | 0.163867 | 0.00038  | -0.0604  | 0.1926   | -0.08528 | 0.06556  |
| 0.19204  | -0.16563 | 0.00032  | 0.297755 | 5.14E-11 | 0.058557 | 0.20654  | -0.13701 | 0.00301  |
| 0.13699  | -0.09014 | 0.05157  | 0.315064 | 3.20E-12 | 0.064538 | 0.1638   | -0.14956 | 0.00119  |
| 0.00064  | -0.17767 | 0.00011  | 0.096398 | 0.0373   | -0.13571 | 0.0033   | -0.20544 | 7.63E-06 |
| 0.09321  | -0.21577 | 2.53E-06 | 0.094082 | 0.04213  | -0.0103  | 0.82434  | -0.19983 | 1.36E-05 |
| 8.34E-07 | -0.01633 | 0.72487  | 0.26062  | 1.09E-08 | -0.00945 | 0.83863  | -0.39948 | 2.55E-19 |
| 0.49325  | 0.152605 | 0.00094  | 0.333537 | 1.35E-13 | 0.198158 | 1.61E-05 | -0.0836  | 0.07107  |
| 0.02061  | 0.210487 | 4.48E-06 | 0.549011 | 4.05E-38 | 0.301441 | 2.89E-11 | 0.113184 | 0.0144   |
| 0.00061  | -0.09518 | 0.03977  | 0.395155 | 6.66E-19 | 0.18362  | 6.57E-05 | 0.0738   | 0.11122  |
| 0.0452   | -0.18    | 9.17E-05 | 0.0343   | 0.45963  | -0.01488 | 0.7485   | 0.066718 | 0.15     |
| 0.51926  | -0.08211 | 0.07629  | 0.233347 | 3.40E-07 | 0.068727 | 0.13808  | 0.265297 | 5.80E-09 |
| 0.04178  | -0.16239 | 0.00043  | 0.176496 | 0.00013  | -0.0142  | 0.75962  | -0.12436 | 0.00713  |
| 0.71351  | 0.006755 | 0.88425  | 0.359195 | 1.14E-15 | 0.113233 | 0.01435  | -0.04764 | 0.30424  |
| 0.00139  | -0.13625 | 0.00317  | 0.209153 | 5.16E-06 | -0.02331 | 0.61536  | -0.04741 | 0.30661  |
| 0.09694  | 0.10622  | 0.02169  | 0.319697 | 1.48E-12 | 0.17427  | 0.00015  | 0.019447 | 0.67509  |
| 9.23E-11 | -0.40146 | 1.64E-19 | -0.06135 | 0.18571  | -0.31833 | 1.86E-12 | -0.16742 | 0.00028  |
| 0.3515   | -0.22093 | 1.43E-06 | 0.288134 | 2.22E-10 | 0.035428 | 0.44499  | -0.19468 | 2.27E-05 |
| 0.00077  | 0.040064 | 0.38769  | 0.454864 | 3.16E-25 | 0.221193 | 1.39E-06 | 0.000994 | 0.9829   |
| 6.52E-06 | 0.117326 | 0.01117  | 0.574551 | 2.25E-42 | 0.334672 | 1.10E-13 | 0.093742 | 0.04289  |
| 0.11857  | 0.147591 | 0.00138  | 0.269265 | 3.36E-09 | 0.136602 | 0.0031   | 0.003806 | 0.93462  |
| 0.08742  | 0.14914  | 0.00123  | 0.269908 | 3.08E-09 | 0.11912  | 0.00998  | 0.177539 | 0.00011  |
| 0.00063  | 0.005171 | 0.91126  | 0.397037 | 4.39E-19 | 0.074162 | 0.10948  | 0.014861 | 0.74873  |

|          |          |          |          |          |          |          |          |          |
|----------|----------|----------|----------|----------|----------|----------|----------|----------|
| 0.05009  | -0.24199 | 1.19E-07 | 0.070013 | 0.13084  | -0.0883  | 0.05655  | 0.008368 | 0.85688  |
| 0.48112  | -0.19046 | 3.43E-05 | 0.179042 | 0.0001   | 0.029558 | 0.52401  | 0.044011 | 0.34262  |
| 0.14524  | -0.19394 | 2.44E-05 | 0.15208  | 0.00098  | -0.05591 | 0.22782  | -0.14508 | 0.00167  |
| 0.00074  | -0.06609 | 0.15389  | 0.053151 | 0.25166  | 0.064741 | 0.16248  | 0.054667 | 0.23837  |
| 0.01392  | -0.30538 | 1.55E-11 | 0.097531 | 0.03511  | -0.13962 | 0.0025   | -0.05727 | 0.21674  |
| 0.00497  | 0.1365   | 0.00312  | 0.548976 | 4.10E-38 | 0.305222 | 1.59E-11 | 0.097831 | 0.03455  |
| 2.75E-06 | -0.22039 | 1.52E-06 | 0.162699 | 0.00042  | -0.11645 | 0.01179  | -0.13016 | 0.00484  |
| 2.00E-07 | 0.129458 | 0.00508  | 0.444754 | 4.58E-24 | 0.306516 | 1.29E-11 | 0.119034 | 0.01004  |
| 0.05984  | -0.28065 | 6.69E-10 | 0.191946 | 2.97E-05 | -0.075   | 0.10553  | -0.02842 | 0.54006  |
| 0.006    | -0.22987 | 5.12E-07 | 0.162203 | 0.00043  | -0.07877 | 0.08907  | -0.14267 | 0.002    |
| 8.88E-05 | -0.03323 | 0.47377  | 0.304337 | 1.83E-11 | 0.150806 | 0.00108  | -0.06472 | 0.16264  |
| 0.31112  | -0.13144 | 0.00444  | 0.250283 | 4.21E-08 | 0.073353 | 0.11341  | -0.11285 | 0.01469  |
| 0.00625  | -0.0064  | 0.8903   | 0.330111 | 2.46E-13 | 0.03647  | 0.4317   | -0.10757 | 0.02007  |
| 2.60E-05 | -0.23318 | 3.47E-07 | 0.07882  | 0.08887  | -0.18315 | 6.86E-05 | -0.09443 | 0.04138  |
| 0.00565  | 0.064571 | 0.16359  | -0.38086 | 1.44E-17 | -0.06957 | 0.13328  | 0.027868 | 0.54802  |
| 0.46016  | -0.10929 | 0.01815  | 0.207073 | 6.43E-06 | 0.039637 | 0.39277  | -0.19327 | 2.61E-05 |
| 0.0139   | -0.0043  | 0.92609  | 0.355717 | 2.24E-15 | 0.053475 | 0.24877  | -0.01875 | 0.68606  |
| 0.00012  | -0.06049 | 0.19193  | 0.313169 | 4.38E-12 | 0.022458 | 0.62832  | -0.23477 | 2.87E-07 |
| 0.0017   | -0.09786 | 0.0345   | 0.196458 | 1.90E-05 | 0.062136 | 0.18009  | 0.17869  | 0.0001   |
| 0.57208  | 0.125215 | 0.00674  | 0.563509 | 1.73E-40 | 0.240982 | 1.35E-07 | -0.07973 | 0.08523  |
| 0.82868  | 0.152111 | 0.00098  | 0.394495 | 7.70E-19 | 0.219053 | 1.76E-06 | 0.013593 | 0.76955  |
| 0.00505  | -0.18323 | 6.81E-05 | 0.267761 | 4.14E-09 | 0.07636  | 0.09932  | 0.110847 | 0.01656  |
| 0.03887  | -0.05465 | 0.23847  | 0.228419 | 6.07E-07 | 0.090099 | 0.05168  | -0.02413 | 0.60292  |
| 0.34507  | -0.02563 | 0.58066  | 0.255026 | 2.28E-08 | 0.097614 | 0.03496  | 0.075434 | 0.10351  |
| 7.43E-07 | -0.14918 | 0.00122  | 0.101451 | 0.02837  | -0.12865 | 0.00536  | -0.22685 | 7.27E-07 |
| 0.4166   | 0.004779 | 0.91796  | 0.310882 | 6.37E-12 | 0.095346 | 0.03943  | -0.03094 | 0.50484  |
| 1.40E-08 | 0.236462 | 2.34E-07 | 0.507868 | 5.47E-32 | 0.373356 | 6.80E-17 | 0.056317 | 0.22447  |
| 0.29234  | -0.1373  | 0.00295  | 0.258303 | 1.48E-08 | 0.078285 | 0.09106  | -0.08721 | 0.05969  |
| 0.01398  | -0.17889 | 0.0001   | 0.280271 | 7.07E-10 | -0.00286 | 0.9508   | -0.12759 | 0.00576  |
| 0.00052  | 0.150928 | 0.00107  | 0.504291 | 1.71E-31 | 0.312549 | 4.85E-12 | 0.130316 | 0.00479  |
| 0.34369  | -0.37751 | 2.89E-17 | 0.037452 | 0.4194   | -0.1497  | 0.00118  | -0.01067 | 0.81818  |
| 0.81253  | -0.29434 | 8.70E-11 | 0.161893 | 0.00044  | -0.05831 | 0.20849  | -0.01509 | 0.74497  |
| 2.49E-16 | 0.254483 | 2.45E-08 | 0.035843 | 0.43968  | 0.294433 | 8.58E-11 | 0.307562 | 1.09E-11 |
| 1.71E-17 | 0.192931 | 2.70E-05 | 0.624152 | 8.56E-52 | 0.456466 | 2.05E-25 | 0.190038 | 3.57E-05 |
| 0.30441  | 0.142898 | 0.00196  | 0.474348 | 1.41E-27 | 0.239708 | 1.58E-07 | -0.00649 | 0.88875  |
| 0.34572  | -0.19183 | 3.00E-05 | 0.078939 | 0.08839  | -0.05164 | 0.26541  | -0.15624 | 0.0007   |
| 0.18929  | -0.01353 | 0.77057  | 0.295754 | 7.00E-11 | 0.158594 | 0.00058  | 0.172987 | 0.00017  |
| 6.24E-08 | -0.38942 | 2.32E-18 | -0.01777 | 0.70166  | -0.27447 | 1.62E-09 | 0.000429 | 0.99262  |
| 0.14356  | -0.30073 | 3.23E-11 | 0.10579  | 0.02223  | -0.07442 | 0.10826  | -0.05671 | 0.22123  |
| 0.63052  | 0.01537  | 0.74043  | 0.404473 | 8.28E-20 | 0.109012 | 0.01845  | -0.24411 | 9.18E-08 |
| 0.00781  | -0.17544 | 0.00014  | 0.249    | 4.96E-08 | -0.01595 | 0.73099  | -0.16832 | 0.00026  |
| 0.71559  | -0.16224 | 0.00043  | 0.181039 | 8.34E-05 | -0.01539 | 0.74017  | -0.08376 | 0.07056  |
| 0.00028  | -0.23953 | 1.62E-07 | 0.030645 | 0.50886  | -0.16651 | 0.0003   | -0.09054 | 0.05055  |
| 0.00098  | -0.14905 | 0.00124  | 0.250564 | 4.07E-08 | -0.02718 | 0.55794  | -0.08577 | 0.06404  |
| 0.38157  | -0.0059  | 0.89875  | 0.263748 | 7.16E-09 | 0.044188 | 0.34068  | -0.11744 | 0.01109  |

|          |          |          |          |          |          |          |          |          |
|----------|----------|----------|----------|----------|----------|----------|----------|----------|
| 0.00099  | -0.17191 | 0.00019  | 0.143956 | 0.00182  | -0.07349 | 0.11275  | -0.10513 | 0.02308  |
| 1.37E-13 | 0.405133 | 7.12E-20 | 0.0298   | 0.52061  | 0.328994 | 3.00E-13 | 0.277173 | 1.10E-09 |
| 2.12E-30 | -0.33055 | 2.28E-13 | -0.54122 | 6.83E-37 | -0.56294 | 2.16E-40 | -0.47121 | 3.46E-27 |
| 1.59E-24 | -0.21294 | 3.44E-06 | -0.33256 | 1.60E-13 | -0.42524 | 6.23E-22 | -0.3536  | 3.36E-15 |
| 6.73E-35 | -0.3233  | 8.01E-13 | -0.50216 | 3.34E-31 | -0.55091 | 2.01E-38 | -0.54519 | 1.64E-37 |
| 4.13E-32 | -0.28353 | 4.40E-10 | -0.50584 | 1.04E-31 | -0.52861 | 5.66E-35 | -0.53808 | 2.08E-36 |
| 1.15E-32 | -0.25203 | 3.37E-08 | -0.47143 | 3.25E-27 | -0.51322 | 9.70E-33 | -0.51946 | 1.24E-33 |
| 0.00139  | -0.01997 | 0.66694  | -0.10102 | 0.02905  | 0.051326 | 0.26833  | 0.32544  | 5.55E-13 |
| 2.00E-40 | -0.36285 | 5.60E-16 | -0.58179 | 1.19E-43 | -0.60982 | 6.70E-49 | -0.59568 | 3.47E-46 |
| 1.98E-24 | -0.24829 | 5.43E-08 | -0.39231 | 1.24E-18 | -0.43883 | 2.10E-23 | -0.43758 | 2.89E-23 |
| 1.07E-31 | 0.326646 | 4.50E-13 | 0.5419   | 5.35E-37 | 0.542616 | 4.14E-37 | 0.614335 | 8.52E-50 |
| 0.12063  | 0.162445 | 0.00042  | 0.073273 | 0.1138   | 0.093146 | 0.04423  | 0.543952 | 2.56E-37 |
| 4.59E-28 | -0.3208  | 1.22E-12 | -0.47239 | 2.47E-27 | -0.49874 | 9.73E-31 | -0.47021 | 4.59E-27 |
| 6.56E-14 | -0.26573 | 5.47E-09 | -0.41393 | 9.33E-21 | -0.40614 | 5.65E-20 | -0.44042 | 1.40E-23 |
| 0.04733  | 0.089461 | 0.05336  | 0.294347 | 8.69E-11 | 0.177654 | 0.00011  | 0.444836 | 4.49E-24 |
| 0.00025  | -0.30093 | 3.13E-11 | -0.34913 | 7.82E-15 | -0.31166 | 5.60E-12 | -0.51214 | 1.38E-32 |
| 1.27E-22 | -0.34087 | 3.61E-14 | -0.40244 | 1.31E-19 | -0.46113 | 5.77E-26 | -0.31327 | 4.30E-12 |
| 4.66E-08 | -0.01767 | 0.70326  | -0.2289  | 5.74E-07 | -0.21634 | 2.38E-06 | -0.24981 | 4.48E-08 |
| 2.33E-13 | -0.36018 | 9.45E-16 | -0.36703 | 2.44E-16 | -0.39612 | 5.38E-19 | -0.24109 | 1.33E-07 |
| 1.71E-13 | 0.013415 | 0.77248  | -0.2811  | 6.27E-10 | -0.24974 | 4.52E-08 | -0.47624 | 8.21E-28 |
| 0.00624  | -0.08593 | 0.06354  | -0.12235 | 0.00813  | -0.11635 | 0.01187  | -0.37078 | 1.15E-16 |
| 1.12E-11 | -0.01932 | 0.67711  | -0.24535 | 7.87E-08 | -0.23153 | 4.22E-07 | -0.44024 | 1.47E-23 |
| 0.00056  | -0.12393 | 0.00733  | -0.47852 | 4.24E-28 | -0.30624 | 1.35E-11 | -0.2165  | 2.33E-06 |
| 8.77E-12 | 0.114954 | 0.01293  | 0.169891 | 0.00023  | 0.191627 | 3.06E-05 | 0.176776 | 0.00012  |
| 4.26E-16 | 0.254032 | 2.60E-08 | 0.350715 | 5.81E-15 | 0.333069 | 1.46E-13 | 0.29436  | 8.67E-11 |
| 0.57148  | -0.03863 | 0.40493  | -0.02166 | 0.64055  | 0.0042   | 0.92788  | -0.52767 | 7.80E-35 |
| 4.21E-18 | -0.26479 | 6.22E-09 | -0.41852 | 3.15E-21 | -0.4285  | 2.81E-22 | -0.54496 | 1.78E-37 |
| 0.00037  | -0.25831 | 1.48E-08 | -0.24818 | 5.51E-08 | -0.23604 | 2.46E-07 | -0.37507 | 4.78E-17 |
| 1.09E-10 | -0.42517 | 6.35E-22 | -0.47008 | 4.77E-27 | -0.4554  | 2.74E-25 | -0.20363 | 9.20E-06 |
| 0.00011  | -0.05316 | 0.25159  | -0.29746 | 5.38E-11 | -0.19754 | 1.71E-05 | -0.34507 | 1.67E-14 |
| 2.12E-23 | -0.37315 | 7.09E-17 | -0.49169 | 8.48E-30 | -0.51633 | 3.51E-33 | -0.48874 | 2.07E-29 |
| 5.49E-12 | -0.11987 | 0.00952  | -0.3416  | 3.16E-14 | -0.30908 | 8.53E-12 | -0.3363  | 8.23E-14 |
| 2.40E-08 | -0.16349 | 0.00039  | -0.35609 | 2.09E-15 | -0.31587 | 2.80E-12 | -0.23526 | 2.71E-07 |
| 4.43E-08 | -0.33982 | 4.36E-14 | -0.40332 | 1.08E-19 | -0.38102 | 1.39E-17 | -0.43847 | 2.31E-23 |
| 1.02E-06 | -0.06154 | 0.1843   | -0.2373  | 2.12E-07 | -0.20687 | 6.57E-06 | -0.41064 | 2.01E-20 |
| 3.68E-05 | -0.35654 | 1.91E-15 | -0.37814 | 2.53E-17 | -0.33996 | 4.25E-14 | -0.50995 | 2.81E-32 |
| 1.65E-07 | -0.14552 | 0.00162  | -0.30926 | 8.29E-12 | -0.27069 | 2.76E-09 | -0.40399 | 9.24E-20 |
| 0.38906  | -0.2614  | 9.83E-09 | -0.4684  | 7.66E-27 | -0.28194 | 5.55E-10 | -0.33347 | 1.36E-13 |
| 0.76652  | -0.17642 | 0.00013  | -0.18938 | 3.81E-05 | -0.13897 | 0.00261  | -0.16725 | 0.00028  |
| 0.17574  | -0.29527 | 7.54E-11 | -0.27629 | 1.25E-09 | -0.20909 | 5.20E-06 | -0.27894 | 8.57E-10 |
| 0.00017  | -0.1295  | 0.00507  | -0.17601 | 0.00013  | -0.20362 | 9.21E-06 | -0.21271 | 3.52E-06 |
| 4.59E-23 | -0.21909 | 1.75E-06 | -0.41753 | 3.98E-21 | -0.4463  | 3.06E-24 | -0.5469  | 8.79E-38 |
| 0.00019  | -0.28144 | 5.97E-10 | -0.23034 | 4.85E-07 | -0.27809 | 9.68E-10 | -0.32023 | 1.35E-12 |
| 9.70E-09 | 0.162276 | 0.00043  | 0.201332 | 1.16E-05 | 0.234467 | 2.98E-07 | 0.398794 | 2.97E-19 |
| 2.94E-08 | -0.27119 | 2.57E-09 | -0.30394 | 1.95E-11 | -0.31245 | 4.92E-12 | -0.47134 | 3.34E-27 |

|          |          |          |          |          |          |          |          |          |
|----------|----------|----------|----------|----------|----------|----------|----------|----------|
| 2.43E-05 | 0.091702 | 0.04764  | -0.20051 | 1.27E-05 | -0.13922 | 0.00257  | -0.09945 | 0.03166  |
| 0.62755  | 0.019953 | 0.66714  | -0.05648 | 0.2231   | 0.019344 | 0.67672  | -0.02992 | 0.51895  |
| 2.71E-17 | -0.27189 | 2.33E-09 | -0.43929 | 1.87E-23 | -0.43996 | 1.58E-23 | -0.37596 | 3.98E-17 |
| 1.73E-07 | -0.23283 | 3.62E-07 | -0.39791 | 3.62E-19 | -0.34357 | 2.20E-14 | -0.21604 | 2.45E-06 |
| 3.15E-12 | -0.11127 | 0.01615  | -0.37678 | 3.36E-17 | -0.32775 | 3.72E-13 | -0.40793 | 3.75E-20 |
| 3.97E-05 | 0.128333 | 0.00548  | 0.253356 | 2.84E-08 | 0.254001 | 2.61E-08 | 0.362468 | 6.03E-16 |
| 9.95E-24 | 0.085757 | 0.06407  | 0.036229 | 0.43475  | 0.242853 | 1.07E-07 | 0.577953 | 5.72E-43 |
| 2.81E-41 | 0.317825 | 2.02E-12 | 0.381976 | 1.14E-17 | 0.505983 | 9.98E-32 | 0.327542 | 3.86E-13 |
| 7.81E-19 | -0.4558  | 2.46E-25 | -0.63021 | 4.60E-53 | -0.58243 | 9.20E-44 | -0.20506 | 7.93E-06 |
| 4.87E-10 | 0.176376 | 0.00013  | 0.376896 | 3.28E-17 | 0.323753 | 7.41E-13 | 0.436228 | 4.08E-23 |
| 2.53E-29 | -0.48218 | 1.45E-28 | -0.57929 | 3.32E-43 | -0.6025  | 1.77E-47 | -0.42851 | 2.80E-22 |
| 1.97E-10 | -0.283   | 4.75E-10 | -0.23386 | 3.20E-07 | -0.29513 | 7.70E-11 | -0.35586 | 2.18E-15 |
| 3.18E-41 | -0.37091 | 1.12E-16 | -0.57366 | 3.22E-42 | -0.61435 | 8.47E-50 | -0.59674 | 2.20E-46 |
| 0.24534  | 0.177478 | 0.00012  | 0.071005 | 0.12546  | 0.089186 | 0.05411  | 0.428746 | 2.64E-22 |
| 2.73E-11 | -0.16068 | 0.00049  | -0.27752 | 1.05E-09 | -0.27609 | 1.29E-09 | -0.21806 | 1.96E-06 |
| 3.00E-17 | -0.27654 | 1.21E-09 | -0.41229 | 1.37E-20 | -0.40055 | 2.01E-19 | -0.38215 | 1.10E-17 |
| 1.35E-19 | -0.09685 | 0.03642  | -0.32363 | 7.57E-13 | -0.33054 | 2.29E-13 | -0.20935 | 5.05E-06 |
| 0.13525  | -0.07141 | 0.12333  | -0.19112 | 3.22E-05 | -0.11577 | 0.01229  | -0.32558 | 5.41E-13 |
| 3.02E-33 | 0.406502 | 5.21E-20 | 0.417887 | 3.66E-21 | 0.545537 | 1.44E-37 | 0.353251 | 3.59E-15 |
| 0.19237  | -0.16785 | 0.00027  | -0.25831 | 1.48E-08 | -0.22456 | 9.46E-07 | -0.291   | 1.45E-10 |
| 1.51E-08 | -0.10339 | 0.02546  | -0.26383 | 7.08E-09 | -0.28673 | 2.74E-10 | -0.27584 | 1.34E-09 |
| 0.00434  | 0.243061 | 1.05E-07 | 0.066897 | 0.14891  | 0.010219 | 0.82568  | -0.13203 | 0.00426  |
| 1.27E-15 | -0.35545 | 2.36E-15 | -0.43587 | 4.47E-23 | -0.46258 | 3.87E-26 | -0.40855 | 3.26E-20 |
| 2.93E-26 | -0.31118 | 6.07E-12 | -0.47602 | 8.75E-28 | -0.50962 | 3.12E-32 | -0.47729 | 6.07E-28 |
| 1.05E-15 | -0.26797 | 4.02E-09 | -0.42842 | 2.86E-22 | -0.43518 | 5.31E-23 | -0.33046 | 2.32E-13 |
| 7.66E-05 | -0.35805 | 1.43E-15 | -0.3516  | 4.92E-15 | -0.33234 | 1.67E-13 | -0.42592 | 5.29E-22 |
| 5.60E-25 | -0.2917  | 1.30E-10 | -0.40016 | 2.19E-19 | -0.44673 | 2.73E-24 | -0.49877 | 9.64E-31 |
| 0.05999  | -0.39778 | 3.73E-19 | -0.31206 | 5.25E-12 | -0.26827 | 3.86E-09 | -0.29862 | 4.50E-11 |
| 1.02E-08 | -0.08915 | 0.05419  | -0.23701 | 2.19E-07 | -0.24848 | 5.30E-08 | -0.28553 | 3.28E-10 |
| 9.81E-09 | 0.197821 | 1.66E-05 | 0.367818 | 2.08E-16 | 0.292711 | 1.12E-10 | 0.353318 | 3.54E-15 |
| 4.51E-14 | -0.17742 | 0.00012  | -0.33384 | 1.28E-13 | -0.31546 | 3.00E-12 | -0.30693 | 1.21E-11 |
| 7.36E-15 | -0.48431 | 7.77E-29 | -0.37705 | 3.18E-17 | -0.44636 | 3.01E-24 | -0.37577 | 4.14E-17 |
| 7.49E-22 | 0.175681 | 0.00014  | 0.323078 | 8.32E-13 | 0.366447 | 2.74E-16 | 0.586355 | 1.81E-44 |
| 1.09E-40 | -0.19659 | 1.88E-05 | -0.51443 | 6.55E-33 | -0.54744 | 7.19E-38 | -0.50769 | 5.79E-32 |
| 0.00052  | -0.02447 | 0.59784  | -0.11556 | 0.01246  | -0.11517 | 0.01276  | -0.43977 | 1.66E-23 |
| 2.00E-17 | -0.12426 | 0.00718  | -0.3525  | 4.14E-15 | -0.34614 | 1.37E-14 | -0.51    | 2.76E-32 |
| 5.84E-19 | -0.30296 | 2.27E-11 | -0.43436 | 6.53E-23 | -0.46094 | 6.07E-26 | -0.4814  | 1.83E-28 |
| 9.03E-23 | 0.476303 | 8.06E-28 | 0.483665 | 9.39E-29 | 0.488351 | 2.32E-29 | 0.409235 | 2.78E-20 |
| 7.76E-11 | -0.29672 | 6.03E-11 | -0.25978 | 1.22E-08 | -0.31863 | 1.77E-12 | -0.3694  | 1.52E-16 |
| 2.00E-11 | -0.24256 | 1.11E-07 | -0.42117 | 1.67E-21 | -0.3905  | 1.84E-18 | -0.27587 | 1.33E-09 |
| 0.03412  | -0.16364 | 0.00038  | -0.25335 | 2.84E-08 | -0.20137 | 1.16E-05 | -0.51117 | 1.89E-32 |
| 1.98E-43 | 0.480721 | 2.23E-28 | 0.389925 | 2.08E-18 | 0.533431 | 1.07E-35 | 0.347667 | 1.03E-14 |
| 1.57E-21 | 0.376936 | 3.26E-17 | 0.369329 | 1.54E-16 | 0.437208 | 3.18E-23 | 0.3736   | 6.46E-17 |
| 1.39E-11 | -0.01817 | 0.69531  | -0.19555 | 2.08E-05 | -0.20724 | 6.31E-06 | -0.34025 | 4.04E-14 |
| 3.46E-22 | -0.38203 | 1.12E-17 | -0.41576 | 6.05E-21 | -0.47527 | 1.09E-27 | -0.46949 | 5.63E-27 |

|          |          |          |          |          |          |          |          |          |
|----------|----------|----------|----------|----------|----------|----------|----------|----------|
| 0.02519  | -0.04086 | 0.37835  | -0.07369 | 0.11177  | -0.06695 | 0.1486   | -0.26194 | 9.14E-09 |
| 1.57E-08 | -0.19342 | 2.57E-05 | -0.3208  | 1.22E-12 | -0.31548 | 2.99E-12 | -0.12116 | 0.00877  |
| 1.44E-10 | -0.08463 | 0.06766  | -0.26623 | 5.11E-09 | -0.27311 | 1.97E-09 | -0.30657 | 1.28E-11 |
| 1.34E-27 | -0.29803 | 4.92E-11 | -0.47215 | 2.65E-27 | -0.50382 | 1.98E-31 | -0.53051 | 2.94E-35 |
| 0.0262   | -0.34289 | 2.49E-14 | -0.36041 | 9.02E-16 | -0.28339 | 4.49E-10 | -0.27435 | 1.65E-09 |
| 1.06E-16 | -0.34969 | 7.05E-15 | -0.40285 | 1.20E-19 | -0.44842 | 1.76E-24 | -0.35158 | 4.93E-15 |
| 1.94E-23 | -0.34722 | 1.12E-14 | -0.4896  | 1.60E-29 | -0.49736 | 1.49E-30 | -0.61115 | 3.66E-49 |
| 3.75E-08 | -0.18538 | 5.57E-05 | -0.45102 | 8.83E-25 | -0.37055 | 1.20E-16 | -0.3775  | 2.89E-17 |
| 0.12461  | -0.29084 | 1.48E-10 | -0.49939 | 7.95E-31 | -0.31958 | 1.50E-12 | -0.21068 | 4.39E-06 |
| 6.55E-19 | 0.283165 | 4.64E-10 | 0.283661 | 4.31E-10 | 0.356858 | 1.80E-15 | 0.483847 | 8.90E-29 |
| 4.49E-06 | -0.17813 | 0.00011  | -0.23399 | 3.15E-07 | -0.25649 | 1.89E-08 | -0.63211 | 1.81E-53 |
| 4.50E-10 | -0.21428 | 2.97E-06 | -0.3081  | 1.00E-11 | -0.33863 | 5.41E-14 | -0.42805 | 3.13E-22 |
| 0.00147  | -0.16374 | 0.00038  | -0.36979 | 1.40E-16 | -0.26958 | 3.22E-09 | -0.27847 | 9.17E-10 |
| 2.27E-07 | 0.109451 | 0.01798  | 0.191396 | 3.13E-05 | 0.159942 | 0.00052  | 0.56755  | 3.60E-41 |
| 7.62E-05 | -0.4168  | 4.74E-21 | -0.3785  | 2.35E-17 | -0.36518 | 3.53E-16 | -0.43484 | 5.79E-23 |
| 9.22E-08 | -0.10618 | 0.02174  | -0.29776 | 5.13E-11 | -0.2924  | 1.17E-10 | -0.2121  | 3.77E-06 |
| 1.13E-12 | -0.52166 | 5.97E-34 | -0.41444 | 8.27E-21 | -0.45474 | 3.27E-25 | -0.41956 | 2.46E-21 |
| 1.26E-11 | -0.40103 | 1.80E-19 | -0.41528 | 6.78E-21 | -0.40605 | 5.78E-20 | -0.50679 | 7.73E-32 |
| 0.21332  | -0.11124 | 0.01617  | -0.2228  | 1.16E-06 | -0.17164 | 0.00019  | -0.30263 | 2.40E-11 |
| 0.02632  | -0.11913 | 0.00997  | -0.19267 | 2.77E-05 | -0.1397  | 0.00248  | -0.39444 | 7.80E-19 |
| 2.06E-31 | -0.41709 | 4.42E-21 | -0.46891 | 6.63E-27 | -0.54246 | 4.38E-37 | -0.48488 | 6.54E-29 |
| 3.43E-11 | 0.25654  | 1.87E-08 | 0.340315 | 3.99E-14 | 0.346494 | 1.28E-14 | 0.370034 | 1.33E-16 |
| 2.11E-22 | 0.389991 | 2.06E-18 | 0.23167  | 4.15E-07 | 0.380288 | 1.62E-17 | 0.368809 | 1.71E-16 |
| 0.62438  | -0.16222 | 0.00043  | -0.25222 | 3.28E-08 | -0.18061 | 8.68E-05 | -0.39164 | 1.44E-18 |
| 7.77E-07 | 0.043605 | 0.3471   | -0.21834 | 1.91E-06 | -0.17232 | 0.00018  | -0.36108 | 7.91E-16 |
| 2.16E-11 | -0.18379 | 6.47E-05 | -0.26273 | 8.21E-09 | -0.2944  | 8.62E-11 | -0.35146 | 5.04E-15 |
| 4.08E-24 | -0.26102 | 1.03E-08 | -0.426   | 5.18E-22 | -0.46274 | 3.70E-26 | -0.58413 | 4.55E-44 |
| 5.03E-35 | -0.1875  | 4.56E-05 | -0.38819 | 3.03E-18 | -0.44731 | 2.35E-24 | -0.49075 | 1.13E-29 |
| 3.32E-14 | 0.278897 | 8.62E-10 | 0.389684 | 2.20E-18 | 0.392492 | 1.19E-18 | 0.199798 | 1.36E-05 |
| 2.07E-17 | -0.21461 | 2.87E-06 | -0.4808  | 2.18E-28 | -0.4574  | 1.59E-25 | -0.28551 | 3.29E-10 |
| 1.30E-09 | -0.20048 | 1.27E-05 | -0.29349 | 9.91E-11 | -0.29692 | 5.85E-11 | -0.44649 | 2.92E-24 |
| 8.79E-38 | 0.479245 | 3.43E-28 | 0.365904 | 3.05E-16 | 0.556177 | 2.82E-39 | 0.387239 | 3.72E-18 |
| 1.16E-35 | 0.512707 | 1.15E-32 | 0.250355 | 4.18E-08 | 0.493096 | 5.53E-30 | 0.421065 | 1.71E-21 |
| 3.24E-11 | -0.2465  | 6.81E-08 | -0.33382 | 1.28E-13 | -0.33638 | 8.12E-14 | -0.43387 | 7.37E-23 |
| 4.16E-21 | 0.314164 | 3.71E-12 | 0.227537 | 6.72E-07 | 0.345844 | 1.44E-14 | 0.395618 | 6.01E-19 |
| 1.22E-51 | 0.533628 | 9.97E-36 | 0.640083 | 3.42E-55 | 0.68093  | 6.72E-65 | 0.38962  | 2.23E-18 |
| 0.00015  | -0.30631 | 1.33E-11 | -0.24892 | 5.02E-08 | -0.2619  | 9.19E-09 | -0.48764 | 2.88E-29 |
| 5.91E-07 | -0.38027 | 1.63E-17 | -0.53007 | 3.42E-35 | -0.42788 | 3.27E-22 | -0.41886 | 2.90E-21 |
| 9.76E-48 | -0.42701 | 4.05E-22 | -0.56982 | 1.47E-41 | -0.64295 | 7.94E-56 | -0.51727 | 2.57E-33 |
| 1.09E-12 | -0.34023 | 4.05E-14 | -0.39515 | 6.67E-19 | -0.39398 | 8.62E-19 | -0.38936 | 2.36E-18 |
| 1.25E-25 | -0.36546 | 3.34E-16 | -0.49973 | 7.16E-31 | -0.50704 | 7.12E-32 | -0.44121 | 1.15E-23 |
| 0.09708  | -0.20773 | 6.00E-06 | -0.13947 | 0.00252  | -0.15597 | 0.00072  | -0.24171 | 1.24E-07 |
| 2.39E-27 | 0.409608 | 2.55E-20 | 0.197634 | 1.69E-05 | 0.448067 | 1.93E-24 | 0.399275 | 2.67E-19 |
| 2.54E-12 | -0.24523 | 7.98E-08 | -0.43676 | 3.57E-23 | -0.36503 | 3.63E-16 | -0.441   | 1.21E-23 |
| 9.69E-18 | -0.23553 | 2.62E-07 | -0.33006 | 2.49E-13 | -0.37631 | 3.71E-17 | -0.38225 | 1.07E-17 |



|          |          |          |          |          |          |          |          |          |
|----------|----------|----------|----------|----------|----------|----------|----------|----------|
| 5.49E-10 | 0.2544   | 2.48E-08 | 0.299068 | 4.19E-11 | 0.307186 | 1.16E-11 | 0.249485 | 4.67E-08 |
| 0.88038  | 0.02146  | 0.64368  | -0.0836  | 0.07108  | -0.01314 | 0.77697  | -0.46558 | 1.68E-26 |
| 5.97E-10 | -0.42113 | 1.69E-21 | -0.45425 | 3.73E-25 | -0.4346  | 6.14E-23 | -0.40669 | 5.00E-20 |
| 5.69E-16 | -0.25179 | 3.47E-08 | -0.3093  | 8.23E-12 | -0.38584 | 5.02E-18 | -0.44839 | 1.77E-24 |
| 1.42E-15 | -0.31493 | 3.27E-12 | -0.36042 | 9.02E-16 | -0.40514 | 7.11E-20 | -0.57228 | 5.58E-42 |
| 7.00E-15 | 0.289073 | 1.93E-10 | 0.378694 | 2.26E-17 | 0.366311 | 2.82E-16 | 0.678052 | 3.66E-64 |
| 0.00735  | -0.06881 | 0.13758  | -0.12849 | 0.00542  | -0.13593 | 0.00325  | -0.25957 | 1.25E-08 |
| 6.23E-24 | -0.30142 | 2.90E-11 | -0.42126 | 1.63E-21 | -0.4656  | 1.68E-26 | -0.53864 | 1.71E-36 |
| 9.37E-19 | -0.23793 | 1.96E-07 | -0.43912 | 1.95E-23 | -0.44768 | 2.13E-24 | -0.29607 | 6.67E-11 |
| 6.44E-17 | 0.218587 | 1.85E-06 | 0.309618 | 7.82E-12 | 0.345667 | 1.49E-14 | 0.433858 | 7.40E-23 |
| 0.19494  | -0.06095 | 0.18856  | -0.13722 | 0.00296  | -0.09419 | 0.0419   | -0.37121 | 1.05E-16 |
| 7.61E-09 | -0.44008 | 1.53E-23 | -0.36183 | 6.83E-16 | -0.40607 | 5.75E-20 | -0.42908 | 2.43E-22 |
| 1.36E-05 | -0.19842 | 1.56E-05 | -0.27052 | 2.83E-09 | -0.26127 | 1.00E-08 | -0.37125 | 1.04E-16 |
| 0.00412  | -0.26121 | 1.01E-08 | -0.20345 | 9.36E-06 | -0.22893 | 5.71E-07 | 0.07614  | 0.10031  |
| 1.97E-06 | -0.43021 | 1.84E-22 | -0.28527 | 3.40E-10 | -0.33754 | 6.59E-14 | -0.31937 | 1.56E-12 |
| 1.53E-06 | 0.234713 | 2.89E-07 | 0.36306  | 5.37E-16 | 0.286972 | 2.65E-10 | 0.553736 | 7.04E-39 |
| 7.81E-05 | -0.21529 | 2.66E-06 | -0.28363 | 4.33E-10 | -0.22722 | 6.97E-07 | -0.30536 | 1.55E-11 |
| 3.88E-26 | -0.33    | 2.51E-13 | -0.51477 | 5.86E-33 | -0.51734 | 2.52E-33 | -0.61762 | 1.86E-50 |
| 0.00037  | -0.29569 | 7.07E-11 | -0.42818 | 3.03E-22 | -0.34987 | 6.81E-15 | -0.20165 | 1.13E-05 |
| 0.00011  | -0.07939 | 0.0866   | -0.17428 | 0.00015  | -0.17335 | 0.00017  | -0.37135 | 1.02E-16 |
| 1.77E-10 | -0.23461 | 2.93E-07 | -0.20917 | 5.15E-06 | -0.29127 | 1.39E-10 | -0.33653 | 7.90E-14 |
| 8.97E-08 | -0.32014 | 1.37E-12 | -0.41752 | 4.00E-21 | -0.39831 | 3.31E-19 | -0.24519 | 8.03E-08 |
| 2.11E-42 | -0.27568 | 1.37E-09 | -0.39883 | 2.95E-19 | -0.5161  | 3.78E-33 | -0.29973 | 3.78E-11 |
| 6.40E-10 | -0.29003 | 1.67E-10 | -0.35505 | 2.55E-15 | -0.34811 | 9.47E-15 | -0.32699 | 4.24E-13 |
| 2.28E-08 | -0.37056 | 1.20E-16 | -0.39602 | 5.50E-19 | -0.38682 | 4.07E-18 | -0.39265 | 1.15E-18 |
| 3.90E-14 | 0.011733 | 0.80036  | -0.24932 | 4.76E-08 | -0.23796 | 1.96E-07 | -0.46729 | 1.04E-26 |
| 6.05E-39 | -0.19403 | 2.42E-05 | -0.26658 | 4.87E-09 | -0.44962 | 1.28E-24 | -0.47838 | 4.42E-28 |
| 0.00033  | -0.26554 | 5.61E-09 | -0.31489 | 3.30E-12 | -0.31922 | 1.60E-12 | -0.05792 | 0.21156  |
| 1.39E-17 | -0.19198 | 2.96E-05 | -0.4092  | 2.80E-20 | -0.38001 | 1.72E-17 | -0.47002 | 4.84E-27 |
| 0.54901  | 0.209209 | 5.13E-06 | 0.079619 | 0.08567  | 0.031004 | 0.5039   | -0.34334 | 2.29E-14 |
| 3.06E-05 | -0.29469 | 8.25E-11 | -0.32616 | 4.89E-13 | -0.31584 | 2.81E-12 | -0.50941 | 3.34E-32 |
| 9.19E-05 | -0.01077 | 0.81639  | -0.20268 | 1.01E-05 | -0.1937  | 2.50E-05 | -0.30524 | 1.58E-11 |
| 2.02E-23 | 0.447948 | 1.99E-24 | 0.393128 | 1.04E-18 | 0.525779 | 1.49E-34 | 0.360805 | 8.36E-16 |
| 6.55E-30 | 0.408274 | 3.47E-20 | 0.514884 | 5.64E-33 | 0.560914 | 4.68E-40 | 0.332777 | 1.54E-13 |
| 4.31E-17 | -0.15952 | 0.00054  | -0.23788 | 1.98E-07 | -0.32362 | 7.58E-13 | -0.40142 | 1.65E-19 |
| 8.97E-08 | 0.113164 | 0.01441  | 0.299446 | 3.95E-11 | 0.288927 | 1.98E-10 | 0.388256 | 2.99E-18 |
| 4.67E-11 | -0.07444 | 0.10816  | -0.26484 | 6.17E-09 | -0.25903 | 1.35E-08 | -0.41475 | 7.69E-21 |
| 2.42E-12 | -0.12497 | 0.00685  | -0.23993 | 1.54E-07 | -0.25718 | 1.72E-08 | -0.59417 | 6.62E-46 |
| 0.16881  | 0.092651 | 0.04538  | -0.15533 | 0.00076  | -0.05164 | 0.26543  | -0.36184 | 6.82E-16 |
| 6.67E-38 | -0.33614 | 8.46E-14 | -0.51447 | 6.45E-33 | -0.55491 | 4.54E-39 | -0.54125 | 6.75E-37 |
| 0.1139   | -0.0841  | 0.06941  | -0.13464 | 0.00356  | -0.10738 | 0.02028  | -0.27749 | 1.06E-09 |
| 5.22E-11 | -0.2631  | 7.81E-09 | -0.30204 | 2.63E-11 | -0.32044 | 1.30E-12 | -0.30997 | 7.39E-12 |
| 0.24544  | 0.026723 | 0.56459  | -0.04129 | 0.3733   | -0.05658 | 0.22234  | -0.22413 | 9.94E-07 |
| 0.09702  | -0.15484 | 0.00079  | 0.177713 | 0.00011  | 0.043809 | 0.34485  | 0.456812 | 1.87E-25 |
| 7.91E-05 | -0.24188 | 1.21E-07 | -0.19961 | 1.39E-05 | -0.22489 | 9.11E-07 | -0.20128 | 1.17E-05 |

|          |          |          |          |          |          |          |          |          |
|----------|----------|----------|----------|----------|----------|----------|----------|----------|
| 3.61E-09 | -0.26331 | 7.60E-09 | -0.20696 | 6.50E-06 | -0.29865 | 4.48E-11 | -0.30626 | 1.34E-11 |
| 0.28917  | -0.13978 | 0.00247  | -0.12947 | 0.00508  | -0.15866 | 0.00058  | -0.42421 | 8.01E-22 |
| 1.72E-21 | -0.27514 | 1.48E-09 | -0.43422 | 6.76E-23 | -0.45024 | 1.09E-24 | -0.58651 | 1.69E-44 |
| 1.48E-31 | -0.20973 | 4.85E-06 | -0.32745 | 3.92E-13 | -0.43835 | 2.38E-23 | -0.37646 | 3.59E-17 |
| 1.25E-20 | -0.23276 | 3.65E-07 | -0.41936 | 2.58E-21 | -0.43622 | 4.09E-23 | -0.58318 | 6.74E-44 |
| 7.10E-06 | -0.38116 | 1.35E-17 | -0.23756 | 2.05E-07 | -0.30958 | 7.87E-12 | -0.357   | 1.75E-15 |
| 3.49E-08 | -0.27606 | 1.30E-09 | -0.25494 | 2.31E-08 | -0.31717 | 2.25E-12 | -0.39665 | 4.79E-19 |
| 4.35E-16 | -0.41469 | 7.79E-21 | -0.43992 | 1.59E-23 | -0.48647 | 4.08E-29 | -0.60529 | 5.12E-48 |
| 5.17E-17 | -0.25114 | 3.78E-08 | -0.29234 | 1.18E-10 | -0.37583 | 4.09E-17 | -0.49348 | 4.93E-30 |
| 0.06824  | 0.012361 | 0.78992  | -0.0397  | 0.392    | -0.07422 | 0.10922  | -0.35377 | 3.25E-15 |
| 3.35E-11 | -0.3298  | 2.60E-13 | -0.34862 | 8.61E-15 | -0.40532 | 6.82E-20 | -0.39305 | 1.06E-18 |
| 1.84E-15 | -0.14301 | 0.00195  | -0.33932 | 4.77E-14 | -0.40295 | 1.17E-19 | -0.31956 | 1.51E-12 |
| 2.37E-05 | -0.09223 | 0.04637  | -0.16467 | 0.00035  | -0.15341 | 0.00088  | -0.41626 | 5.38E-21 |
| 6.20E-21 | -0.21907 | 1.76E-06 | -0.45867 | 1.13E-25 | -0.4394  | 1.82E-23 | -0.46855 | 7.33E-27 |
| 1.23E-06 | -0.11486 | 0.013    | -0.25044 | 4.13E-08 | -0.22535 | 8.65E-07 | -0.39886 | 2.93E-19 |
| 4.73E-13 | -0.11293 | 0.01462  | -0.42324 | 1.01E-21 | -0.34846 | 8.87E-15 | -0.4711  | 3.58E-27 |
| 1.54E-16 | -0.32797 | 3.58E-13 | -0.41474 | 7.71E-21 | -0.46833 | 7.80E-27 | -0.53987 | 1.10E-36 |
| 2.28E-28 | -0.3722  | 8.60E-17 | -0.50101 | 4.80E-31 | -0.54553 | 1.44E-37 | -0.64366 | 5.54E-56 |
| 2.99E-06 | -0.24255 | 1.11E-07 | -0.24656 | 6.76E-08 | -0.27376 | 1.79E-09 | -0.27061 | 2.79E-09 |
| 6.67E-12 | -0.31092 | 6.33E-12 | -0.54414 | 2.39E-37 | -0.48375 | 9.17E-29 | -0.20356 | 9.26E-06 |
| 6.14E-44 | -0.36252 | 5.97E-16 | -0.55574 | 3.32E-39 | -0.59768 | 1.46E-46 | -0.53647 | 3.68E-36 |
| 0.0021   | -0.1334  | 0.00388  | -0.37805 | 2.59E-17 | -0.28791 | 2.30E-10 | -0.42943 | 2.23E-22 |
| 1.38E-34 | 0.292403 | 1.17E-10 | 0.502906 | 2.64E-31 | 0.539877 | 1.10E-36 | 0.370965 | 1.11E-16 |
| 2.39E-20 | -0.22733 | 6.88E-07 | -0.42307 | 1.06E-21 | -0.42593 | 5.27E-22 | -0.59471 | 5.26E-46 |
| 0.00015  | -0.28911 | 1.92E-10 | -0.36407 | 4.39E-16 | -0.35475 | 2.70E-15 | -0.32386 | 7.28E-13 |
| 0.80849  | -0.05718 | 0.21743  | 0.219757 | 1.63E-06 | 0.094121 | 0.04205  | 0.282508 | 5.11E-10 |
| 0.38247  | -0.24616 | 7.11E-08 | -0.23486 | 2.84E-07 | -0.16519 | 0.00034  | -0.33682 | 7.50E-14 |
| 9.03E-26 | 0.330105 | 2.47E-13 | 0.185094 | 5.72E-05 | 0.447907 | 2.01E-24 | 0.358327 | 1.35E-15 |
| 0.00494  | 0.0035   | 0.93986  | -0.17048 | 0.00021  | 0.000972 | 0.98329  | -0.05482 | 0.23703  |
| 0.0008   | 0.251485 | 3.61E-08 | 0.295164 | 7.67E-11 | 0.232905 | 3.58E-07 | 0.409909 | 2.38E-20 |
| 1.04E-17 | -0.24196 | 1.20E-07 | -0.39012 | 2.00E-18 | -0.40923 | 2.78E-20 | -0.49895 | 9.13E-31 |
| 3.93E-32 | -0.31247 | 4.91E-12 | -0.4903  | 1.29E-29 | -0.51334 | 9.33E-33 | -0.50775 | 5.67E-32 |
| 1.07E-31 | -0.3712  | 1.05E-16 | -0.45705 | 1.75E-25 | -0.52448 | 2.31E-34 | -0.37328 | 6.91E-17 |
| 2.62E-05 | -0.0401  | 0.38728  | -0.1157  | 0.01235  | -0.12897 | 0.00525  | -0.39029 | 1.92E-18 |
| 2.19E-14 | -0.18164 | 7.89E-05 | -0.28668 | 2.76E-10 | -0.32813 | 3.48E-13 | -0.39669 | 4.74E-19 |
| 0.01492  | -0.19783 | 1.66E-05 | -0.24939 | 4.72E-08 | -0.22066 | 1.47E-06 | -0.39349 | 9.60E-19 |
| 3.00E-15 | -0.18648 | 5.02E-05 | -0.38729 | 3.68E-18 | -0.41044 | 2.10E-20 | -0.44403 | 5.53E-24 |
| 7.19E-15 | 0.31207  | 5.24E-12 | 0.457113 | 1.72E-25 | 0.424306 | 7.83E-22 | 0.263742 | 7.16E-09 |
| 5.02E-16 | -0.1596  | 0.00054  | -0.31915 | 1.62E-12 | -0.34378 | 2.11E-14 | -0.44775 | 2.09E-24 |
| 6.56E-13 | 0.303353 | 2.14E-11 | 0.35032  | 6.26E-15 | 0.354445 | 2.86E-15 | 0.257327 | 1.69E-08 |
| 6.98E-09 | -0.23723 | 2.14E-07 | -0.26817 | 3.91E-09 | -0.29203 | 1.24E-10 | -0.5519  | 1.39E-38 |
| 1.11E-14 | -0.2622  | 8.83E-09 | -0.37027 | 1.27E-16 | -0.40556 | 6.47E-20 | -0.31619 | 2.65E-12 |
| 6.54E-10 | -0.1067  | 0.02109  | -0.22789 | 6.45E-07 | -0.31613 | 2.68E-12 | -0.04798 | 0.30079  |
| 8.63E-15 | -0.38089 | 1.43E-17 | -0.22719 | 7.00E-07 | -0.35796 | 1.45E-15 | -0.36357 | 4.85E-16 |
| 1.22E-09 | -0.32476 | 6.23E-13 | -0.24983 | 4.46E-08 | -0.32635 | 4.74E-13 | -0.26906 | 3.46E-09 |

|          |          |          |          |          |          |          |          |          |
|----------|----------|----------|----------|----------|----------|----------|----------|----------|
| 9.14E-11 | -0.10634 | 0.02154  | -0.19359 | 2.53E-05 | -0.23697 | 2.20E-07 | -0.42145 | 1.56E-21 |
| 0.0068   | -0.22473 | 9.28E-07 | -0.19087 | 3.30E-05 | -0.1819  | 7.70E-05 | -0.27895 | 8.56E-10 |
| 1.51E-17 | -0.43152 | 1.33E-22 | -0.41727 | 4.24E-21 | -0.46476 | 2.11E-26 | -0.46513 | 1.91E-26 |
| 6.30E-08 | 0.208681 | 5.42E-06 | 0.239528 | 1.62E-07 | 0.284934 | 3.58E-10 | 0.43905  | 1.99E-23 |
| 6.53E-18 | -0.23101 | 4.48E-07 | -0.41412 | 8.92E-21 | -0.39778 | 3.72E-19 | -0.50219 | 3.32E-31 |
| 1.07E-09 | -0.22976 | 5.19E-07 | -0.39061 | 1.80E-18 | -0.37735 | 2.99E-17 | -0.32583 | 5.19E-13 |
| 0.01238  | -0.24923 | 4.82E-08 | -0.23055 | 4.73E-07 | -0.19471 | 2.27E-05 | -0.37062 | 1.19E-16 |
| 7.98E-24 | -0.23959 | 1.60E-07 | -0.3734  | 6.74E-17 | -0.43077 | 1.60E-22 | -0.56202 | 3.07E-40 |
| 1.74E-16 | -0.19942 | 1.41E-05 | -0.30932 | 8.21E-12 | -0.35347 | 3.44E-15 | -0.47839 | 4.40E-28 |
| 1.33E-10 | 0.055898 | 0.22795  | -0.16385 | 0.00038  | -0.16465 | 0.00035  | -0.31425 | 3.67E-12 |
| 3.86E-15 | -0.15094 | 0.00107  | -0.27596 | 1.31E-09 | -0.32872 | 3.14E-13 | -0.52165 | 5.98E-34 |
| 4.87E-23 | -0.21223 | 3.71E-06 | -0.40369 | 9.90E-20 | -0.39315 | 1.03E-18 | -0.38458 | 6.55E-18 |
| 1.91E-11 | -0.18403 | 6.32E-05 | -0.26463 | 6.35E-09 | -0.2625  | 8.48E-09 | -0.18612 | 5.19E-05 |
| 1.49E-15 | -0.20513 | 7.87E-06 | -0.3345  | 1.13E-13 | -0.3687  | 1.75E-16 | -0.48164 | 1.71E-28 |
| 2.51E-48 | -0.50889 | 3.94E-32 | -0.57381 | 3.03E-42 | -0.68042 | 9.11E-65 | -0.55325 | 8.45E-39 |
| 0.00221  | -0.12587 | 0.00646  | -0.19205 | 2.94E-05 | -0.17729 | 0.00012  | -0.53023 | 3.24E-35 |
| 1.19E-34 | -0.4025  | 1.29E-19 | -0.54105 | 7.24E-37 | -0.57713 | 7.99E-43 | -0.47732 | 6.00E-28 |
| 0.03313  | 0.098568 | 0.03321  | 0.035134 | 0.44878  | 0.010123 | 0.82729  | -0.18334 | 6.74E-05 |
| 2.40E-26 | -0.19218 | 2.90E-05 | -0.44663 | 2.81E-24 | -0.44366 | 6.09E-24 | -0.52302 | 3.77E-34 |
| 0.85479  | -0.13287 | 0.00402  | -0.17827 | 0.00011  | -0.1327  | 0.00407  | -0.33952 | 4.61E-14 |
| 0.79139  | -0.08382 | 0.07036  | -0.15453 | 0.00081  | -0.07637 | 0.0993   | -0.41168 | 1.58E-20 |
| 9.74E-10 | -0.17731 | 0.00012  | -0.27074 | 2.74E-09 | -0.30333 | 2.15E-11 | -0.4328  | 9.64E-23 |
| 1.09E-10 | -0.44954 | 1.31E-24 | -0.51469 | 6.01E-33 | -0.48314 | 1.10E-28 | -0.50511 | 1.32E-31 |
| 2.15E-24 | -0.17333 | 0.00017  | -0.40858 | 3.24E-20 | -0.44162 | 1.03E-23 | -0.35675 | 1.84E-15 |
| 1.81E-34 | -0.44047 | 1.39E-23 | -0.45749 | 1.56E-25 | -0.55394 | 6.54E-39 | -0.41116 | 1.78E-20 |
| 1.42E-05 | -0.11751 | 0.01104  | -0.17928 | 9.80E-05 | -0.20983 | 4.80E-06 | -0.26775 | 4.15E-09 |
| 2.85E-22 | -0.37516 | 4.70E-17 | -0.36264 | 5.83E-16 | -0.45513 | 2.95E-25 | -0.67532 | 1.79E-63 |
| 8.69E-22 | -0.05721 | 0.21716  | -0.36671 | 2.60E-16 | -0.35724 | 1.67E-15 | -0.16566 | 0.00032  |
| 0.00015  | 0.057692 | 0.21334  | 0.257235 | 1.71E-08 | 0.245499 | 7.72E-08 | 0.152316 | 0.00096  |
| 5.46E-13 | 0.279228 | 8.22E-10 | 0.155304 | 0.00076  | 0.27464  | 1.58E-09 | 0.3403   | 4.00E-14 |
| 2.59E-07 | -0.21401 | 3.06E-06 | -0.19628 | 1.94E-05 | -0.28148 | 5.93E-10 | -0.406   | 5.84E-20 |
| 4.66E-06 | -0.13236 | 0.00417  | -0.23873 | 1.78E-07 | -0.20779 | 5.96E-06 | -0.2941  | 9.03E-11 |
| 4.05E-14 | -0.27371 | 1.81E-09 | -0.36058 | 8.73E-16 | -0.38174 | 1.20E-17 | -0.53148 | 2.10E-35 |
| 2.20E-12 | -0.11423 | 0.01351  | -0.3009  | 3.15E-11 | -0.28952 | 1.81E-10 | -0.49046 | 1.23E-29 |
| 6.91E-13 | -0.29301 | 1.07E-10 | -0.36264 | 5.82E-16 | -0.36875 | 1.73E-16 | -0.43065 | 1.65E-22 |
| 1.76E-05 | -0.15243 | 0.00095  | -0.1703  | 0.00022  | -0.24249 | 1.12E-07 | -0.25836 | 1.47E-08 |
| 0.00357  | -0.09436 | 0.04152  | -0.21732 | 2.13E-06 | -0.17867 | 0.0001   | -0.20738 | 6.22E-06 |
| 0.00011  | -0.26699 | 4.60E-09 | -0.24296 | 1.06E-07 | -0.2297  | 5.23E-07 | -0.42493 | 6.72E-22 |
| 0.00109  | -0.02684 | 0.56288  | -0.1415  | 0.00218  | -0.13428 | 0.00365  | -0.26663 | 4.83E-09 |
| 5.01E-07 | -0.12376 | 0.00742  | -0.27931 | 8.12E-10 | -0.27849 | 9.14E-10 | -0.36881 | 1.71E-16 |
| 0.26197  | -0.06235 | 0.17859  | -0.23063 | 4.69E-07 | -0.08763 | 0.05845  | -0.2598  | 1.22E-08 |
| 2.32E-10 | -0.25292 | 3.00E-08 | -0.35554 | 2.32E-15 | -0.32213 | 9.78E-13 | -0.51477 | 5.86E-33 |
| 1.37E-31 | -0.28048 | 6.87E-10 | -0.48393 | 8.68E-29 | -0.50348 | 2.20E-31 | -0.56655 | 5.31E-41 |
| 4.31E-09 | -0.35983 | 1.01E-15 | -0.40489 | 7.53E-20 | -0.37923 | 2.02E-17 | -0.41478 | 7.64E-21 |
| 9.85E-08 | -0.16399 | 0.00037  | -0.21158 | 3.98E-06 | -0.25771 | 1.60E-08 | -0.32271 | 8.86E-13 |

|          |          |          |          |          |          |          |          |          |
|----------|----------|----------|----------|----------|----------|----------|----------|----------|
| 5.65E-13 | -0.23197 | 4.01E-07 | -0.30601 | 1.40E-11 | -0.34554 | 1.53E-14 | -0.38986 | 2.11E-18 |
| 0.00523  | 0.006493 | 0.8887   | -0.0712  | 0.12442  | -0.07969 | 0.08541  | -0.3039  | 1.96E-11 |
| 1.47E-05 | -0.19968 | 1.38E-05 | -0.16709 | 0.00029  | -0.18988 | 3.63E-05 | -0.39814 | 3.44E-19 |
| 8.98E-20 | -0.43225 | 1.11E-22 | -0.51137 | 1.77E-32 | -0.55246 | 1.13E-38 | -0.41265 | 1.26E-20 |
| 1.88E-13 | -0.07802 | 0.09216  | -0.27314 | 1.96E-09 | -0.27206 | 2.28E-09 | -0.46239 | 4.08E-26 |
| 5.67E-06 | -0.26423 | 6.71E-09 | -0.2492  | 4.84E-08 | -0.26786 | 4.08E-09 | -0.36284 | 5.61E-16 |
| 0.00087  | 0.015216 | 0.74294  | -0.00667 | 0.88565  | -0.05561 | 0.23037  | -0.35242 | 4.20E-15 |
| 2.62E-32 | -0.20573 | 7.40E-06 | -0.42518 | 6.32E-22 | -0.45396 | 4.03E-25 | -0.61137 | 3.31E-49 |
| 8.84E-15 | -0.18047 | 8.79E-05 | -0.34157 | 3.17E-14 | -0.33401 | 1.24E-13 | -0.20761 | 6.08E-06 |
| 4.00E-25 | -0.24451 | 8.74E-08 | -0.41642 | 5.18E-21 | -0.43993 | 1.59E-23 | -0.38297 | 9.22E-18 |
| 6.28E-07 | -0.12579 | 0.00649  | -0.33187 | 1.81E-13 | -0.25416 | 2.56E-08 | -0.49911 | 8.69E-31 |
| 4.23E-11 | -0.18909 | 3.91E-05 | -0.41193 | 1.49E-20 | -0.36486 | 3.76E-16 | -0.13212 | 0.00423  |
| 1.74E-09 | -0.13837 | 0.00273  | -0.33522 | 9.99E-14 | -0.31494 | 3.27E-12 | -0.41905 | 2.78E-21 |
| 6.28E-08 | -0.18757 | 4.53E-05 | -0.23357 | 3.31E-07 | -0.2586  | 1.43E-08 | -0.4294  | 2.25E-22 |
| 8.62E-22 | -0.25472 | 2.38E-08 | -0.43208 | 1.15E-22 | -0.43102 | 1.51E-22 | -0.6171  | 2.37E-50 |
| 4.21E-13 | -0.28815 | 2.22E-10 | -0.40955 | 2.59E-20 | -0.4208  | 1.83E-21 | -0.53566 | 4.90E-36 |
| 2.82E-14 | 0.212445 | 3.63E-06 | 0.110851 | 0.01655  | 0.260904 | 1.05E-08 | 0.501521 | 4.09E-31 |
| 0.00039  | 0.324993 | 5.99E-13 | 0.467006 | 1.13E-26 | 0.340455 | 3.89E-14 | 0.233426 | 3.37E-07 |
| 3.50E-05 | -0.08777 | 0.05805  | -0.09156 | 0.04798  | -0.14859 | 0.00128  | -0.49457 | 3.53E-30 |
| 9.64E-13 | 0.497807 | 1.30E-30 | 0.363155 | 5.27E-16 | 0.42343  | 9.68E-22 | 0.405968 | 5.89E-20 |
| 1.11E-08 | -0.20748 | 6.16E-06 | -0.2977  | 5.19E-11 | -0.31716 | 2.26E-12 | -0.35132 | 5.18E-15 |
| 0.14727  | -0.10674 | 0.02106  | 0.033179 | 0.47443  | -0.02404 | 0.60438  | -0.35014 | 6.47E-15 |
| 1.12E-16 | 0.421414 | 1.57E-21 | 0.669599 | 4.74E-62 | 0.579251 | 3.38E-43 | 0.367716 | 2.13E-16 |
| 1.82E-10 | 0.042896 | 0.355    | -0.07842 | 0.09049  | -0.13417 | 0.00367  | -0.50522 | 1.27E-31 |
| 3.93E-18 | -0.22739 | 6.84E-07 | -0.36155 | 7.22E-16 | -0.39866 | 3.06E-19 | -0.35008 | 6.55E-15 |
| 3.52E-10 | -0.35873 | 1.25E-15 | -0.37006 | 1.33E-16 | -0.40245 | 1.31E-19 | -0.37458 | 5.29E-17 |
| 4.26E-11 | -0.27784 | 1.00E-09 | -0.32219 | 9.67E-13 | -0.3776  | 2.84E-17 | -0.47624 | 8.21E-28 |
| 2.85E-47 | -0.3324  | 1.65E-13 | -0.60422 | 8.25E-48 | -0.61169 | 2.86E-49 | -0.59052 | 3.13E-45 |
| 5.05E-19 | -0.34513 | 1.65E-14 | -0.44897 | 1.52E-24 | -0.48648 | 4.08E-29 | -0.39445 | 7.78E-19 |
| 0.86976  | -0.03146 | 0.49764  | -0.089   | 0.05462  | -0.01239 | 0.78936  | -0.19154 | 3.09E-05 |
| 0.00208  | -0.0202  | 0.66331  | -0.3268  | 4.38E-13 | -0.2037  | 9.13E-06 | -0.19857 | 1.54E-05 |
| 2.43E-52 | -0.60654 | 2.94E-48 | -0.63432 | 6.12E-54 | -0.73802 | 1.81E-81 | -0.42899 | 2.49E-22 |
| 1.48E-22 | -0.3375  | 6.63E-14 | -0.40569 | 6.27E-20 | -0.45378 | 4.23E-25 | -0.56105 | 4.45E-40 |
| 4.29E-22 | -0.52061 | 8.47E-34 | -0.67658 | 8.65E-64 | -0.64377 | 5.22E-56 | -0.26902 | 3.48E-09 |
| 1.54E-24 | -0.23022 | 4.92E-07 | -0.43476 | 5.91E-23 | -0.4462  | 3.15E-24 | -0.4376  | 2.88E-23 |
| 0.00286  | -0.17896 | 0.0001   | -0.25183 | 3.46E-08 | -0.20545 | 7.62E-06 | -0.47382 | 1.64E-27 |
| 3.65E-14 | -0.17895 | 0.0001   | -0.33217 | 1.71E-13 | -0.34371 | 2.14E-14 | -0.43126 | 1.42E-22 |
| 3.04E-13 | -0.17543 | 0.00014  | -0.37801 | 2.61E-17 | -0.34446 | 1.86E-14 | -0.50912 | 3.66E-32 |
| 2.99E-26 | -0.23628 | 2.39E-07 | -0.46851 | 7.41E-27 | -0.48892 | 1.96E-29 | -0.28932 | 1.86E-10 |
| 3.04E-06 | -0.13367 | 0.00381  | -0.31656 | 2.50E-12 | -0.27674 | 1.18E-09 | -0.00094 | 0.98392  |
| 5.70E-16 | -0.10397 | 0.02465  | -0.31503 | 3.22E-12 | -0.33452 | 1.13E-13 | -0.38777 | 3.32E-18 |
| 1.46E-17 | 0.363317 | 5.10E-16 | 0.45129  | 8.22E-25 | 0.461531 | 5.17E-26 | 0.504222 | 1.75E-31 |
| 1.92E-20 | -0.24732 | 6.14E-08 | -0.46979 | 5.17E-27 | -0.4589  | 1.06E-25 | -0.4664  | 1.34E-26 |
| 6.92E-12 | -0.14597 | 0.00156  | -0.2889  | 1.98E-10 | -0.30922 | 8.34E-12 | -0.48141 | 1.83E-28 |
| 0.05442  | 0.102913 | 0.02615  | -0.13237 | 0.00416  | -0.05995 | 0.19595  | 0.001179 | 0.97972  |

|          |          |          |          |          |          |          |          |          |
|----------|----------|----------|----------|----------|----------|----------|----------|----------|
| 5.11E-19 | -0.22846 | 6.04E-07 | -0.50806 | 5.14E-32 | -0.43007 | 1.90E-22 | -0.25132 | 3.69E-08 |
| 0.00035  | 0.038428 | 0.40738  | -0.29739 | 5.44E-11 | -0.21225 | 3.71E-06 | -0.37474 | 5.11E-17 |
| 2.14E-25 | -0.33506 | 1.03E-13 | -0.46764 | 9.47E-27 | -0.50749 | 6.17E-32 | -0.6141  | 9.49E-50 |
| 0.49275  | -0.19343 | 2.57E-05 | -0.09982 | 0.03103  | -0.11544 | 0.01254  | -0.34763 | 1.04E-14 |
| 1.34E-07 | -0.14531 | 0.00164  | -0.24955 | 4.63E-08 | -0.27293 | 2.02E-09 | -0.4215  | 1.54E-21 |
| 1.63E-20 | -0.16192 | 0.00044  | -0.36186 | 6.79E-16 | -0.393   | 1.07E-18 | -0.4226  | 1.18E-21 |
| 1.69E-35 | -0.33228 | 1.68E-13 | -0.51763 | 2.28E-33 | -0.57342 | 3.54E-42 | -0.17175 | 0.00019  |
| 4.87E-09 | -0.21606 | 2.45E-06 | -0.48261 | 1.28E-28 | -0.40066 | 1.96E-19 | -0.22062 | 1.48E-06 |
| 5.07E-23 | -0.24561 | 7.62E-08 | -0.41636 | 5.26E-21 | -0.42172 | 1.46E-21 | -0.53232 | 1.57E-35 |
| 1.30E-10 | -0.19739 | 1.74E-05 | -0.29015 | 1.64E-10 | -0.32758 | 3.83E-13 | -0.44377 | 5.92E-24 |
| 1.34E-31 | -0.49732 | 1.51E-30 | -0.57141 | 7.89E-42 | -0.61087 | 4.15E-49 | -0.46156 | 5.13E-26 |
| 1.33E-22 | -0.33325 | 1.42E-13 | -0.47172 | 2.99E-27 | -0.48131 | 1.88E-28 | -0.43542 | 5.00E-23 |
| 5.82E-24 | -0.30293 | 2.29E-11 | -0.45112 | 8.60E-25 | -0.49393 | 4.29E-30 | -0.47866 | 4.08E-28 |
| 1.91E-17 | -0.24095 | 1.36E-07 | -0.43506 | 5.48E-23 | -0.40641 | 5.32E-20 | -0.34277 | 2.54E-14 |
| 5.88E-05 | -0.22307 | 1.12E-06 | -0.2187  | 1.83E-06 | -0.22532 | 8.67E-07 | -0.20995 | 4.74E-06 |
| 0.00128  | -0.23817 | 1.91E-07 | -0.23674 | 2.27E-07 | -0.20459 | 8.33E-06 | -0.37453 | 5.35E-17 |
| 9.31E-08 | -0.29976 | 3.76E-11 | -0.47859 | 4.15E-28 | -0.39883 | 2.95E-19 | -0.27316 | 1.95E-09 |
| 2.33E-39 | -0.33375 | 1.30E-13 | -0.49355 | 4.81E-30 | -0.5397  | 1.17E-36 | -0.4147  | 7.78E-21 |
| 6.48E-21 | -0.15274 | 0.00093  | -0.36541 | 3.37E-16 | -0.3493  | 7.58E-15 | -0.39757 | 3.90E-19 |
| 4.12E-18 | -0.19054 | 3.40E-05 | -0.34029 | 4.00E-14 | -0.35784 | 1.49E-15 | -0.63096 | 3.20E-53 |
| 2.62E-26 | 0.356516 | 1.92E-15 | 0.405361 | 6.76E-20 | 0.423637 | 9.20E-22 | 0.317563 | 2.11E-12 |
| 8.23E-08 | 0.234397 | 3.00E-07 | 0.471559 | 3.14E-27 | 0.37468  | 5.18E-17 | 0.291021 | 1.44E-10 |
| 6.77E-22 | 0.42998  | 1.95E-22 | 0.386999 | 3.91E-18 | 0.465983 | 1.51E-26 | 0.499489 | 7.71E-31 |
| 0.03397  | -0.2104  | 4.52E-06 | -0.24832 | 5.41E-08 | -0.25862 | 1.42E-08 | -0.16679 | 0.00029  |
| 0.0001   | -0.2343  | 3.04E-07 | -0.30752 | 1.10E-11 | -0.29346 | 9.95E-11 | -0.28758 | 2.41E-10 |
| 9.72E-09 | -0.22935 | 5.44E-07 | -0.54116 | 6.96E-37 | -0.38915 | 2.47E-18 | -0.47045 | 4.30E-27 |
| 5.82E-07 | -0.23172 | 4.12E-07 | -0.34049 | 3.86E-14 | -0.33572 | 9.13E-14 | -0.30795 | 1.02E-11 |
| 3.46E-08 | -0.33751 | 6.62E-14 | -0.3334  | 1.38E-13 | -0.36054 | 8.80E-16 | -0.42905 | 2.45E-22 |
| 2.38E-30 | -0.21431 | 2.96E-06 | -0.46949 | 5.62E-27 | -0.48169 | 1.68E-28 | -0.46401 | 2.61E-26 |
| 0.00024  | -0.12321 | 0.00768  | -0.22169 | 1.31E-06 | -0.239   | 1.72E-07 | -0.17592 | 0.00013  |
| 8.33E-35 | -0.41801 | 3.55E-21 | -0.57733 | 7.36E-43 | -0.57813 | 5.33E-43 | -0.58228 | 9.78E-44 |
| 5.24E-41 | 0.555333 | 3.88E-39 | 0.440465 | 1.39E-23 | 0.56038  | 5.74E-40 | 0.260755 | 1.07E-08 |
| 0.00782  | -0.08281 | 0.07381  | -0.05918 | 0.20179  | -0.10938 | 0.01805  | -0.17423 | 0.00015  |
| 2.29E-08 | -0.14135 | 0.0022   | -0.33772 | 6.38E-14 | -0.2905  | 1.56E-10 | -0.45428 | 3.70E-25 |
| 0.00038  | 0.024808 | 0.59282  | 0.214448 | 2.92E-06 | 0.152797 | 0.00092  | 0.613957 | 1.01E-49 |
| 1.21E-08 | -0.07881 | 0.08891  | -0.21098 | 4.25E-06 | -0.22135 | 1.36E-06 | -0.42818 | 3.03E-22 |
| 1.09E-13 | -0.2113  | 4.10E-06 | -0.431   | 1.51E-22 | -0.40028 | 2.13E-19 | -0.26642 | 4.98E-09 |
| 7.02E-13 | -0.32008 | 1.38E-12 | -0.4401  | 1.52E-23 | -0.43704 | 3.32E-23 | -0.50103 | 4.77E-31 |
| 1.35E-22 | -0.26702 | 4.58E-09 | -0.40375 | 9.76E-20 | -0.44408 | 5.46E-24 | -0.53684 | 3.23E-36 |
| 8.20E-10 | -0.07224 | 0.11901  | -0.33884 | 5.21E-14 | -0.29413 | 8.98E-11 | -0.42718 | 3.88E-22 |
| 7.65E-08 | -0.31908 | 1.64E-12 | -0.5102  | 2.59E-32 | -0.42982 | 2.02E-22 | -0.30403 | 1.92E-11 |
| 2.85E-06 | -0.0768  | 0.09741  | -0.26491 | 6.11E-09 | -0.25005 | 4.34E-08 | -0.53235 | 1.55E-35 |
| 5.10E-42 | -0.39781 | 3.70E-19 | -0.62769 | 1.57E-52 | -0.65361 | 3.07E-58 | -0.52716 | 9.28E-35 |
| 9.73E-43 | -0.30025 | 3.48E-11 | -0.55713 | 1.97E-39 | -0.57199 | 6.25E-42 | -0.39392 | 8.73E-19 |
| 5.65E-05 | -0.11077 | 0.01664  | -0.29105 | 1.44E-10 | -0.23228 | 3.86E-07 | -0.26767 | 4.19E-09 |

|          |          |          |          |          |          |          |          |          |
|----------|----------|----------|----------|----------|----------|----------|----------|----------|
| 4.12E-05 | -0.08764 | 0.05843  | -0.31785 | 2.01E-12 | -0.23746 | 2.08E-07 | -0.1509  | 0.00107  |
| 1.84E-35 | -0.44017 | 1.49E-23 | -0.5896  | 4.63E-45 | -0.62423 | 8.26E-52 | -0.4376  | 2.88E-23 |
| 0.30031  | 0.098844 | 0.03272  | -0.02514 | 0.58794  | -0.00013 | 0.99773  | -0.35059 | 5.95E-15 |
| 0.00517  | -0.21733 | 2.13E-06 | -0.22371 | 1.04E-06 | -0.20667 | 6.70E-06 | -0.40604 | 5.80E-20 |
| 4.63E-14 | -0.36929 | 1.55E-16 | -0.39699 | 4.44E-19 | -0.41997 | 2.22E-21 | -0.53685 | 3.22E-36 |
| 5.68E-11 | -0.07199 | 0.12027  | -0.21662 | 2.30E-06 | -0.23165 | 4.16E-07 | -0.46137 | 5.40E-26 |
| 1.58E-16 | -0.30472 | 1.72E-11 | -0.36525 | 3.48E-16 | -0.41285 | 1.20E-20 | -0.35226 | 4.33E-15 |
| 1.12E-33 | 0.303792 | 1.99E-11 | 0.339139 | 4.93E-14 | 0.460006 | 7.85E-26 | 0.591857 | 1.78E-45 |
| 5.92E-14 | -0.12112 | 0.00879  | -0.33869 | 5.35E-14 | -0.32029 | 1.34E-12 | -0.43263 | 1.01E-22 |
| 1.82E-19 | -0.15064 | 0.00109  | -0.36645 | 2.74E-16 | -0.38422 | 7.08E-18 | -0.54828 | 5.29E-38 |
| 2.44E-31 | -0.31887 | 1.70E-12 | -0.53549 | 5.20E-36 | -0.54687 | 8.86E-38 | -0.42816 | 3.05E-22 |
| 1.47E-13 | -0.25348 | 2.79E-08 | -0.44739 | 2.30E-24 | -0.41278 | 1.22E-20 | -0.48629 | 4.31E-29 |
| 2.48E-07 | -0.10192 | 0.02764  | -0.29175 | 1.29E-10 | -0.28414 | 4.02E-10 | -0.30993 | 7.43E-12 |
| 0.9517   | -0.00888 | 0.84828  | -0.09286 | 0.04489  | -0.03442 | 0.45803  | -0.28862 | 2.07E-10 |
| 3.21E-12 | -0.38408 | 7.30E-18 | -0.35682 | 1.81E-15 | -0.38256 | 1.01E-17 | -0.43878 | 2.13E-23 |
| 0.18003  | -0.22776 | 6.55E-07 | -0.24011 | 1.50E-07 | -0.20908 | 5.20E-06 | -0.24643 | 6.87E-08 |
| 2.59E-06 | -0.35116 | 5.34E-15 | -0.31529 | 3.08E-12 | -0.35106 | 5.44E-15 | -0.38903 | 2.53E-18 |
| 0.00081  | -0.09946 | 0.03164  | -0.10239 | 0.02692  | -0.03428 | 0.45994  | 0.620295 | 5.32E-51 |
| 1.09E-35 | -0.24075 | 1.39E-07 | -0.31196 | 5.34E-12 | -0.44685 | 2.66E-24 | -0.37776 | 2.74E-17 |
| 1.37E-05 | -0.42703 | 4.02E-22 | -0.34523 | 1.62E-14 | -0.35837 | 1.34E-15 | -0.32929 | 2.85E-13 |
| 1.82E-16 | 0.436925 | 3.42E-23 | 0.370289 | 1.27E-16 | 0.440415 | 1.40E-23 | 0.486943 | 3.54E-29 |
| 6.68E-24 | -0.25279 | 3.05E-08 | -0.47572 | 9.53E-28 | -0.46015 | 7.55E-26 | -0.24451 | 8.74E-08 |
| 5.92E-12 | -0.18721 | 4.69E-05 | -0.33636 | 8.14E-14 | -0.34818 | 9.35E-15 | -0.20042 | 1.28E-05 |
| 5.49E-10 | -0.3742  | 5.72E-17 | -0.35974 | 1.03E-15 | -0.37341 | 6.72E-17 | -0.50218 | 3.33E-31 |
| 1.88E-22 | -0.25656 | 1.87E-08 | -0.39363 | 9.30E-19 | -0.4205  | 1.96E-21 | -0.4519  | 6.99E-25 |
| 4.05E-07 | -0.15089 | 0.00107  | -0.20559 | 7.51E-06 | -0.23511 | 2.76E-07 | -0.44096 | 1.22E-23 |
| 1.77E-06 | -0.27603 | 1.30E-09 | -0.26453 | 6.44E-09 | -0.29179 | 1.28E-10 | -0.36079 | 8.38E-16 |
| 0.60851  | -0.20977 | 4.83E-06 | -0.1839  | 6.40E-05 | -0.14144 | 0.00219  | -0.32541 | 5.57E-13 |
| 3.84E-47 | -0.32645 | 4.66E-13 | -0.55618 | 2.82E-39 | -0.59343 | 9.12E-46 | -0.58252 | 8.86E-44 |
| 3.81E-16 | -0.12956 | 0.00505  | -0.4359  | 4.43E-23 | -0.41658 | 4.99E-21 | -0.29221 | 1.20E-10 |
| 6.92E-19 | 0.279598 | 7.80E-10 | 0.421334 | 1.61E-21 | 0.426426 | 4.67E-22 | 0.429795 | 2.04E-22 |
| 9.20E-41 | -0.32179 | 1.03E-12 | -0.45262 | 5.77E-25 | -0.51445 | 6.50E-33 | -0.46391 | 2.68E-26 |
| 3.14E-36 | -0.30307 | 2.23E-11 | -0.51785 | 2.12E-33 | -0.53103 | 2.46E-35 | -0.54768 | 6.60E-38 |
| 5.57E-32 | -0.3538  | 3.23E-15 | -0.44108 | 1.18E-23 | -0.51367 | 8.37E-33 | -0.50846 | 4.53E-32 |
| 3.68E-06 | 0.011807 | 0.79912  | -0.12071 | 0.00903  | -0.14238 | 0.00204  | -0.28284 | 4.87E-10 |
| 6.64E-17 | -0.29698 | 5.80E-11 | -0.39035 | 1.90E-18 | -0.41478 | 7.63E-21 | -0.45402 | 3.97E-25 |
| 0.20187  | -0.042   | 0.36515  | -0.11096 | 0.01645  | 0.005908 | 0.89868  | -0.29738 | 5.44E-11 |
| 0.00566  | -0.12989 | 0.00493  | -0.28562 | 3.23E-10 | -0.22439 | 9.65E-07 | -0.23252 | 3.75E-07 |
| 2.50E-08 | 0.087087 | 0.06004  | 0.357255 | 1.67E-15 | 0.285363 | 3.36E-10 | 0.236483 | 2.34E-07 |
| 1.01E-08 | 0.202555 | 1.03E-05 | 0.39292  | 1.09E-18 | 0.326762 | 4.41E-13 | 0.340616 | 3.77E-14 |
| 0.53717  | -0.20262 | 1.02E-05 | -0.23994 | 1.54E-07 | -0.18049 | 8.77E-05 | -0.27605 | 1.30E-09 |
| 1.59E-11 | -0.21145 | 4.04E-06 | -0.46224 | 4.25E-26 | -0.40138 | 1.67E-19 | -0.13484 | 0.00351  |
| 8.00E-13 | -0.2161  | 2.44E-06 | -0.4385  | 2.29E-23 | -0.37422 | 5.69E-17 | -0.29076 | 1.50E-10 |
| 0.18584  | -0.00409 | 0.92976  | -0.17423 | 0.00015  | -0.06303 | 0.17388  | -0.21891 | 1.79E-06 |
| 3.39E-09 | -0.03787 | 0.41424  | -0.32171 | 1.05E-12 | -0.24425 | 9.03E-08 | -0.43098 | 1.52E-22 |

|          |          |          |          |          |          |          |          |          |
|----------|----------|----------|----------|----------|----------|----------|----------|----------|
| 5.62E-10 | -0.40016 | 2.19E-19 | -0.27125 | 2.55E-09 | -0.3541  | 3.05E-15 | -0.41812 | 3.46E-21 |
| 6.07E-37 | -0.43678 | 3.54E-23 | -0.60111 | 3.26E-47 | -0.6218  | 2.62E-51 | -0.32042 | 1.31E-12 |
| 0.34898  | -0.04726 | 0.3081   | -0.16348 | 0.00039  | -0.09442 | 0.04141  | -0.15515 | 0.00077  |
| 1.63E-09 | 0.018745 | 0.68619  | -0.27705 | 1.13E-09 | -0.22017 | 1.55E-06 | -0.50938 | 3.36E-32 |
| 0.00094  | -0.08945 | 0.0534   | -0.25393 | 2.63E-08 | -0.17917 | 9.90E-05 | -0.41707 | 4.44E-21 |
| 6.52E-07 | -0.35361 | 3.35E-15 | -0.42759 | 3.51E-22 | -0.36006 | 9.66E-16 | -0.22246 | 1.20E-06 |
| 0.03139  | 0.153863 | 0.00085  | 0.028265 | 0.54232  | 0.048326 | 0.29734  | -0.50795 | 5.33E-32 |
| 1.97E-27 | 0.289318 | 1.86E-10 | 0.423714 | 9.03E-22 | 0.480227 | 2.58E-28 | 0.388597 | 2.78E-18 |
| 1.62E-11 | -0.24571 | 7.52E-08 | -0.31698 | 2.33E-12 | -0.33251 | 1.61E-13 | -0.59011 | 3.73E-45 |
| 1.42E-26 | -0.3724  | 8.27E-17 | -0.46318 | 3.28E-26 | -0.51495 | 5.52E-33 | -0.48397 | 8.57E-29 |
| 6.39E-23 | -0.30888 | 8.81E-12 | -0.41607 | 5.63E-21 | -0.44208 | 9.15E-24 | -0.44116 | 1.16E-23 |
| 3.31E-39 | 0.432954 | 9.29E-23 | 0.431109 | 1.47E-22 | 0.537982 | 2.16E-36 | 0.499332 | 8.10E-31 |
| 4.98E-24 | -0.32807 | 3.52E-13 | -0.45231 | 6.26E-25 | -0.4924  | 6.84E-30 | -0.43934 | 1.85E-23 |
| 8.19E-14 | -0.19699 | 1.81E-05 | -0.33078 | 2.19E-13 | -0.33698 | 7.29E-14 | -0.30124 | 2.98E-11 |
| 2.34E-15 | -0.123   | 0.00779  | -0.3458  | 1.46E-14 | -0.33754 | 6.58E-14 | -0.35143 | 5.08E-15 |
| 2.74E-07 | -0.15125 | 0.00104  | -0.1846  | 5.99E-05 | -0.22338 | 1.08E-06 | -0.4198  | 2.32E-21 |
| 0.49023  | -0.11142 | 0.016    | -0.09034 | 0.05107  | -0.07015 | 0.13006  | -0.18059 | 8.70E-05 |
| 1.39E-19 | -0.48796 | 2.62E-29 | -0.50254 | 2.96E-31 | -0.54868 | 4.57E-38 | -0.49965 | 7.33E-31 |
| 0.01395  | 0.002843 | 0.95115  | -0.04807 | 0.29989  | -0.10436 | 0.02411  | -0.29297 | 1.07E-10 |
| 3.26E-17 | 0.306057 | 1.39E-11 | 0.344817 | 1.75E-14 | 0.415411 | 6.58E-21 | 0.575752 | 1.39E-42 |
| 1.26E-21 | 0.284538 | 3.79E-10 | 0.414432 | 8.28E-21 | 0.444676 | 4.68E-24 | 0.412278 | 1.37E-20 |
| 8.73E-05 | -0.34275 | 2.56E-14 | -0.34085 | 3.61E-14 | -0.32678 | 4.40E-13 | -0.38865 | 2.75E-18 |
| 8.05E-06 | -0.22511 | 8.89E-07 | -0.23913 | 1.70E-07 | -0.22975 | 5.20E-07 | -0.52902 | 4.91E-35 |
| 1.77E-14 | -0.17987 | 9.28E-05 | -0.39666 | 4.78E-19 | -0.39976 | 2.39E-19 | -0.37282 | 7.58E-17 |
| 8.71E-05 | 0.119619 | 0.00967  | 0.186517 | 5.00E-05 | 0.203584 | 9.24E-06 | 0.582013 | 1.09E-43 |
| 3.12E-07 | -0.12165 | 0.0085   | -0.24839 | 5.36E-08 | -0.23252 | 3.75E-07 | -0.47415 | 1.50E-27 |
| 2.51E-13 | 0.310843 | 6.41E-12 | 0.360249 | 9.31E-16 | 0.384693 | 6.40E-18 | 0.257841 | 1.58E-08 |
| 9.76E-15 | -0.23697 | 2.20E-07 | -0.38599 | 4.85E-18 | -0.36667 | 2.62E-16 | -0.16556 | 0.00033  |
| 5.20E-36 | -0.4607  | 6.49E-26 | -0.58815 | 8.53E-45 | -0.64339 | 6.36E-56 | -0.51165 | 1.62E-32 |
| 0.00344  | -0.06361 | 0.16997  | 0.123505 | 0.00754  | 0.06096  | 0.18849  | 0.550075 | 2.74E-38 |
| 0.02348  | -0.02283 | 0.62269  | -0.20274 | 1.01E-05 | -0.12857 | 0.0054   | -0.41602 | 5.70E-21 |
| 3.75E-23 | 0.461028 | 5.93E-26 | 0.498655 | 1.00E-30 | 0.535044 | 6.08E-36 | 0.540001 | 1.05E-36 |
| 0.7511   | -0.41028 | 2.18E-20 | -0.29548 | 7.30E-11 | -0.28399 | 4.11E-10 | -0.28879 | 2.02E-10 |
| 1.44E-13 | -0.14209 | 0.00208  | -0.38597 | 4.88E-18 | -0.36599 | 3.00E-16 | -0.23662 | 2.30E-07 |
| 0.00058  | -0.27255 | 2.13E-09 | -0.28307 | 4.70E-10 | -0.29173 | 1.29E-10 | -0.26677 | 4.75E-09 |
| 9.05E-13 | -0.15188 | 0.00099  | -0.35302 | 3.75E-15 | -0.37292 | 7.43E-17 | -0.26151 | 9.68E-09 |
| 2.12E-15 | -0.20934 | 5.06E-06 | -0.40157 | 1.60E-19 | -0.38295 | 9.26E-18 | -0.42789 | 3.26E-22 |
| 5.21E-23 | -0.14325 | 0.00191  | -0.42491 | 6.75E-22 | -0.42161 | 1.50E-21 | -0.34808 | 9.53E-15 |
| 1.89E-10 | -0.28927 | 1.88E-10 | -0.26786 | 4.08E-09 | -0.31506 | 3.21E-12 | -0.38972 | 2.18E-18 |
| 6.83E-17 | -0.21125 | 4.13E-06 | -0.42428 | 7.87E-22 | -0.42362 | 9.25E-22 | -0.48713 | 3.35E-29 |
| 1.29E-05 | -0.17634 | 0.00013  | -0.2011  | 1.19E-05 | -0.21854 | 1.86E-06 | -0.36058 | 8.74E-16 |
| 3.26E-05 | -0.18519 | 5.67E-05 | -0.24905 | 4.93E-08 | -0.25847 | 1.45E-08 | -0.24625 | 7.03E-08 |
| 1.87E-40 | -0.21968 | 1.64E-06 | -0.44514 | 4.15E-24 | -0.49956 | 7.54E-31 | -0.34726 | 1.11E-14 |
| 0.02348  | -0.04448 | 0.33752  | -0.11114 | 0.01627  | -0.08522 | 0.06576  | -0.22321 | 1.10E-06 |
| 1.86E-07 | -0.03269 | 0.48103  | -0.2524  | 3.21E-08 | -0.2552  | 2.23E-08 | -0.3575  | 1.59E-15 |

|          |          |          |          |          |          |          |          |          |
|----------|----------|----------|----------|----------|----------|----------|----------|----------|
| 0.76812  | -0.25853 | 1.44E-08 | -0.29672 | 6.03E-11 | -0.20137 | 1.16E-05 | -0.34297 | 2.46E-14 |
| 4.50E-12 | -0.20052 | 1.26E-05 | -0.08061 | 0.08184  | -0.28435 | 3.90E-10 | -0.35303 | 3.75E-15 |
| 3.01E-25 | -0.28667 | 2.76E-10 | -0.40855 | 3.26E-20 | -0.45166 | 7.44E-25 | -0.55414 | 6.05E-39 |
| 0.49385  | -0.10754 | 0.0201   | -0.21552 | 2.60E-06 | -0.13572 | 0.0033   | -0.18789 | 4.39E-05 |
| 1.46E-23 | -0.42658 | 4.49E-22 | -0.41998 | 2.22E-21 | -0.51109 | 1.94E-32 | -0.45387 | 4.13E-25 |
| 0.13478  | 0.076185 | 0.1001   | -0.26394 | 6.97E-09 | -0.13453 | 0.00358  | -0.29686 | 5.91E-11 |
| 4.57E-26 | -0.2542  | 2.54E-08 | -0.41322 | 1.10E-20 | -0.46902 | 6.44E-27 | -0.41803 | 3.54E-21 |
| 5.49E-12 | -0.31621 | 2.65E-12 | -0.41523 | 6.87E-21 | -0.39927 | 2.67E-19 | -0.38311 | 8.95E-18 |
| 2.54E-22 | -0.39695 | 4.48E-19 | -0.38786 | 3.25E-18 | -0.45929 | 9.54E-26 | -0.55837 | 1.23E-39 |
| 1.67E-15 | 0.167601 | 0.00027  | 0.440161 | 1.50E-23 | 0.423392 | 9.77E-22 | 0.216628 | 2.30E-06 |
| 2.06E-12 | -0.0469  | 0.3118   | -0.23777 | 2.00E-07 | -0.26996 | 3.05E-09 | -0.39588 | 5.67E-19 |
| 2.94E-06 | 0.19667  | 1.86E-05 | 0.158935 | 0.00057  | 0.200341 | 1.29E-05 | 0.364047 | 4.42E-16 |
| 2.43E-07 | -0.27918 | 8.28E-10 | -0.23761 | 2.04E-07 | -0.28024 | 7.11E-10 | -0.44445 | 4.96E-24 |
| 1.31E-21 | -0.30256 | 2.42E-11 | -0.52053 | 8.71E-34 | -0.49522 | 2.89E-30 | -0.54483 | 1.86E-37 |
| 3.27E-16 | -0.32523 | 5.75E-13 | -0.44244 | 8.33E-24 | -0.42444 | 7.57E-22 | -0.40091 | 1.85E-19 |
| 2.49E-10 | -0.22796 | 6.40E-07 | -0.37756 | 2.86E-17 | -0.32238 | 9.36E-13 | -0.32856 | 3.23E-13 |
| 1.11E-15 | -0.11737 | 0.01114  | -0.30652 | 1.29E-11 | -0.33574 | 9.10E-14 | -0.53761 | 2.46E-36 |
| 3.20E-20 | -0.19667 | 1.86E-05 | -0.43748 | 2.97E-23 | -0.41558 | 6.32E-21 | -0.47951 | 3.18E-28 |
| 0.3044   | -0.3284  | 3.32E-13 | -0.15609 | 0.00071  | -0.14498 | 0.00168  | -0.40922 | 2.79E-20 |
| 2.36E-18 | -0.3221  | 9.83E-13 | -0.48399 | 8.52E-29 | -0.51018 | 2.60E-32 | -0.32661 | 4.54E-13 |
| 3.24E-28 | -0.42001 | 2.21E-21 | -0.54688 | 8.82E-38 | -0.55882 | 1.04E-39 | -0.58657 | 1.65E-44 |
| 0.36238  | 0.013436 | 0.77213  | -0.02412 | 0.60315  | 0.013935 | 0.76391  | -0.19201 | 2.95E-05 |
| 9.21E-11 | -0.12188 | 0.00837  | -0.20439 | 8.50E-06 | -0.2393  | 1.66E-07 | -0.58845 | 7.52E-45 |
| 1.26E-09 | -0.19413 | 2.40E-05 | -0.26879 | 3.59E-09 | -0.26137 | 9.87E-09 | -0.06678 | 0.14965  |
| 1.63E-21 | -0.23136 | 4.30E-07 | -0.39816 | 3.42E-19 | -0.43338 | 8.34E-23 | -0.50398 | 1.89E-31 |
| 1.21E-16 | -0.29852 | 4.56E-11 | -0.37871 | 2.25E-17 | -0.42044 | 1.99E-21 | -0.45156 | 7.66E-25 |
| 9.25E-32 | -0.32278 | 8.75E-13 | -0.4978  | 1.30E-30 | -0.54055 | 8.66E-37 | -0.5604  | 5.69E-40 |
| 9.32E-35 | -0.27534 | 1.44E-09 | -0.48272 | 1.24E-28 | -0.51915 | 1.38E-33 | -0.57047 | 1.14E-41 |
| 2.18E-21 | -0.3027  | 2.37E-11 | -0.43729 | 3.12E-23 | -0.43934 | 1.85E-23 | -0.58886 | 6.32E-45 |
| 0.71832  | 0.074144 | 0.10956  | -0.01205 | 0.79509  | 0.050225 | 0.27875  | -0.38855 | 2.80E-18 |
| 6.48E-35 | -0.28337 | 4.50E-10 | -0.48638 | 4.19E-29 | -0.52041 | 9.06E-34 | -0.60742 | 1.98E-48 |
| 6.48E-15 | -0.17993 | 9.24E-05 | -0.35152 | 4.99E-15 | -0.35043 | 6.13E-15 | -0.39507 | 6.79E-19 |
| 2.48E-14 | -0.17065 | 0.00021  | -0.26189 | 9.20E-09 | -0.33062 | 2.25E-13 | -0.53462 | 7.05E-36 |
| 1.78E-15 | -0.2762  | 1.27E-09 | -0.34026 | 4.03E-14 | -0.36869 | 1.75E-16 | -0.33096 | 2.12E-13 |
| 2.37E-33 | -0.34342 | 2.26E-14 | -0.54927 | 3.68E-38 | -0.54362 | 2.88E-37 | -0.49806 | 1.20E-30 |
| 1.28E-30 | -0.33431 | 1.17E-13 | -0.40412 | 8.96E-20 | -0.49012 | 1.37E-29 | -0.56239 | 2.66E-40 |
| 4.91E-44 | 0.382032 | 1.12E-17 | 0.550391 | 2.44E-38 | 0.592987 | 1.10E-45 | 0.504239 | 1.74E-31 |
| 0.08186  | -0.13283 | 0.00403  | -0.45381 | 4.20E-25 | -0.26096 | 1.04E-08 | -0.35001 | 6.63E-15 |
| 9.11E-11 | -0.22792 | 6.43E-07 | -0.41705 | 4.47E-21 | -0.36777 | 2.10E-16 | -0.52128 | 6.77E-34 |
| 2.64E-22 | -0.22374 | 1.04E-06 | -0.43296 | 9.28E-23 | -0.43379 | 7.52E-23 | -0.5873  | 1.22E-44 |
| 0.07282  | -0.32139 | 1.11E-12 | -0.35987 | 1.00E-15 | -0.26535 | 5.76E-09 | -0.42366 | 9.15E-22 |
| 1.33E-08 | -0.10916 | 0.01829  | -0.18426 | 6.19E-05 | -0.20402 | 8.83E-06 | -0.36953 | 1.48E-16 |
| 6.84E-13 | -0.1292  | 0.00517  | -0.3126  | 4.80E-12 | -0.28791 | 2.30E-10 | -0.04415 | 0.34105  |
| 2.71E-05 | -0.3336  | 1.33E-13 | -0.3507  | 5.83E-15 | -0.34391 | 2.06E-14 | -0.21456 | 2.89E-06 |
| 0.00503  | -0.18589 | 5.31E-05 | -0.14603 | 0.00155  | -0.1582  | 0.0006   | -0.49888 | 9.32E-31 |



|          |          |          |          |          |          |          |          |          |
|----------|----------|----------|----------|----------|----------|----------|----------|----------|
| 7.98E-14 | -0.20326 | 9.55E-06 | -0.41072 | 1.97E-20 | -0.38707 | 3.85E-18 | -0.04496 | 0.33226  |
| 6.34E-15 | -0.24846 | 5.32E-08 | -0.3423  | 2.78E-14 | -0.36649 | 2.72E-16 | -0.22813 | 6.28E-07 |
| 1.01E-07 | -0.38749 | 3.52E-18 | -0.4485  | 1.72E-24 | -0.39047 | 1.85E-18 | -0.09514 | 0.03986  |
| 0.42434  | -0.04771 | 0.30352  | -0.20264 | 1.02E-05 | -0.10709 | 0.02063  | -0.18629 | 5.11E-05 |
| 6.02E-06 | -0.14911 | 0.00123  | -0.43511 | 5.41E-23 | -0.3619  | 6.75E-16 | -0.3852  | 5.75E-18 |
| 7.12E-10 | -0.03219 | 0.48768  | -0.24156 | 1.26E-07 | -0.23244 | 3.79E-07 | -0.39842 | 3.23E-19 |
| 2.42E-20 | -0.22163 | 1.32E-06 | -0.4943  | 3.83E-30 | -0.45102 | 8.84E-25 | -0.40756 | 4.09E-20 |
| 1.55E-27 | -0.36441 | 4.11E-16 | -0.57702 | 8.35E-43 | -0.58143 | 1.39E-43 | -0.49466 | 3.43E-30 |
| 3.46E-23 | -0.33502 | 1.03E-13 | -0.56664 | 5.13E-41 | -0.52734 | 8.73E-35 | -0.21405 | 3.05E-06 |
| 1.11E-06 | -0.3021  | 2.61E-11 | -0.39558 | 6.07E-19 | -0.38931 | 2.38E-18 | -0.23452 | 2.96E-07 |
| 5.77E-26 | -0.10156 | 0.0282   | -0.31009 | 7.24E-12 | -0.38227 | 1.07E-17 | -0.38025 | 1.63E-17 |
| 1.62E-20 | -0.21631 | 2.38E-06 | -0.37994 | 1.74E-17 | -0.42874 | 2.64E-22 | -0.56551 | 7.97E-41 |
| 1.76E-15 | 0.160833 | 0.00048  | 0.374891 | 4.96E-17 | 0.324285 | 6.76E-13 | 0.427092 | 3.96E-22 |
| 8.98E-15 | -0.30409 | 1.90E-11 | -0.40621 | 5.57E-20 | -0.39823 | 3.37E-19 | -0.34949 | 7.32E-15 |
| 2.85E-21 | -0.38541 | 5.50E-18 | -0.45372 | 4.30E-25 | -0.50852 | 4.44E-32 | -0.24814 | 5.54E-08 |
| 1.56E-36 | -0.34582 | 1.45E-14 | -0.56439 | 1.23E-40 | -0.58221 | 1.01E-43 | -0.54639 | 1.06E-37 |
| 1.11E-20 | -0.27772 | 1.02E-09 | -0.412   | 1.46E-20 | -0.44363 | 6.13E-24 | -0.53335 | 1.10E-35 |
| 1.01E-33 | -0.39559 | 6.05E-19 | -0.58624 | 1.90E-44 | -0.5909  | 2.68E-45 | -0.33856 | 5.48E-14 |
| 2.48E-15 | -0.31294 | 4.54E-12 | -0.47591 | 9.03E-28 | -0.42044 | 1.99E-21 | -0.29201 | 1.24E-10 |
| 0.10876  | 0.043136 | 0.35231  | 0.003785 | 0.93498  | 0.047742 | 0.30323  | -0.24059 | 1.42E-07 |
| 3.49E-08 | -0.19684 | 1.83E-05 | -0.22197 | 1.27E-06 | -0.26698 | 4.61E-09 | -0.52048 | 8.85E-34 |
| 0.16913  | -0.24894 | 5.00E-08 | -0.23774 | 2.01E-07 | -0.20885 | 5.33E-06 | -0.53296 | 1.26E-35 |
| 8.92E-28 | -0.28991 | 1.70E-10 | -0.66055 | 7.26E-60 | -0.605   | 5.83E-48 | -0.2635  | 7.40E-09 |
| 3.36E-10 | -0.30104 | 3.08E-11 | -0.3503  | 6.28E-15 | -0.35882 | 1.23E-15 | -0.39248 | 1.20E-18 |
| 8.42E-15 | -0.36669 | 2.61E-16 | -0.41333 | 1.07E-20 | -0.4376  | 2.88E-23 | -0.44797 | 1.98E-24 |
| 0.06612  | -0.30645 | 1.30E-11 | -0.33498 | 1.04E-13 | -0.28423 | 3.97E-10 | -0.3235  | 7.74E-13 |
| 0.00115  | -0.27015 | 2.97E-09 | -0.44407 | 5.48E-24 | -0.35351 | 3.41E-15 | -0.25799 | 1.55E-08 |
| 7.77E-13 | -0.29904 | 4.21E-11 | -0.35658 | 1.90E-15 | -0.42498 | 6.64E-22 | -0.16566 | 0.00032  |
| 0.00101  | -0.3664  | 2.77E-16 | -0.27044 | 2.86E-09 | -0.29147 | 1.35E-10 | -0.34458 | 1.83E-14 |
| 1.13E-06 | -0.23206 | 3.96E-07 | -0.26565 | 5.53E-09 | -0.29481 | 8.09E-11 | -0.29199 | 1.24E-10 |
| 4.15E-16 | 0.366432 | 2.75E-16 | 0.440127 | 1.51E-23 | 0.477078 | 6.44E-28 | 0.575502 | 1.54E-42 |
| 1.34E-17 | -0.20848 | 5.54E-06 | -0.37477 | 5.08E-17 | -0.40604 | 5.79E-20 | -0.43298 | 9.22E-23 |
| 0.95546  | -0.13222 | 0.00421  | -0.17957 | 9.54E-05 | -0.12328 | 0.00765  | -0.11396 | 0.01374  |
| 0.00057  | 0.149446 | 0.0012   | 0.224912 | 9.09E-07 | 0.200872 | 1.22E-05 | 0.469754 | 5.23E-27 |
| 5.86E-36 | 0.481745 | 1.65E-28 | 0.500538 | 5.56E-31 | 0.603877 | 9.62E-48 | 0.381936 | 1.15E-17 |
| 2.88E-16 | -0.37283 | 7.57E-17 | -0.4613  | 5.51E-26 | -0.49871 | 9.82E-31 | -0.47936 | 3.32E-28 |
| 3.35E-12 | -0.28146 | 5.95E-10 | -0.40798 | 3.72E-20 | -0.39832 | 3.30E-19 | -0.47893 | 3.76E-28 |
| 0.00301  | -0.12401 | 0.0073   | -0.21079 | 4.33E-06 | -0.18547 | 5.52E-05 | -0.28906 | 1.94E-10 |
| 8.01E-09 | -0.25027 | 4.22E-08 | -0.40132 | 1.69E-19 | -0.34433 | 1.91E-14 | -0.24847 | 5.31E-08 |
| 3.52E-15 | -0.24118 | 1.32E-07 | -0.356   | 2.12E-15 | -0.40776 | 3.90E-20 | -0.46753 | 9.77E-27 |
| 7.10E-17 | -0.30147 | 2.88E-11 | -0.4132  | 1.11E-20 | -0.4335  | 8.10E-23 | -0.30623 | 1.35E-11 |
| 2.15E-24 | -0.39734 | 4.11E-19 | -0.45833 | 1.24E-25 | -0.51787 | 2.11E-33 | -0.44776 | 2.09E-24 |
| 0.00023  | -0.16357 | 0.00039  | -0.19684 | 1.83E-05 | -0.18574 | 5.39E-05 | -0.33732 | 6.86E-14 |
| 2.85E-06 | -0.12265 | 0.00797  | -0.19156 | 3.08E-05 | -0.2106  | 4.42E-06 | -0.2624  | 8.58E-09 |
| 0.00146  | 0.3294   | 2.79E-13 | 0.235101 | 2.76E-07 | 0.287637 | 2.40E-10 | 0.44221  | 8.85E-24 |

|          |          |          |          |          |          |          |          |          |
|----------|----------|----------|----------|----------|----------|----------|----------|----------|
| 2.93E-13 | -0.18824 | 4.25E-05 | -0.37543 | 4.44E-17 | -0.3379  | 6.17E-14 | -0.35384 | 3.21E-15 |
| 3.81E-31 | -0.2739  | 1.76E-09 | -0.51893 | 1.49E-33 | -0.50443 | 1.64E-31 | -0.40498 | 7.37E-20 |
| 1.99E-08 | -0.18998 | 3.59E-05 | -0.28257 | 5.06E-10 | -0.29062 | 1.53E-10 | -0.34723 | 1.12E-14 |
| 5.88E-06 | -0.24996 | 4.39E-08 | -0.275   | 1.51E-09 | -0.29058 | 1.54E-10 | -0.29515 | 7.69E-11 |
| 0.00059  | 0.184202 | 6.22E-05 | -0.02298 | 0.62038  | -0.02452 | 0.59715  | -0.27545 | 1.41E-09 |
| 3.36E-22 | -0.35021 | 6.39E-15 | -0.49446 | 3.64E-30 | -0.5173  | 2.54E-33 | -0.53853 | 1.78E-36 |
| 7.81E-38 | 0.374176 | 5.75E-17 | 0.50557  | 1.14E-31 | 0.571422 | 7.84E-42 | 0.585594 | 2.48E-44 |
| 3.55E-16 | -0.26529 | 5.81E-09 | -0.39143 | 1.50E-18 | -0.38936 | 2.36E-18 | -0.56992 | 1.42E-41 |
| 0.98138  | -0.01578 | 0.73373  | -0.07267 | 0.11683  | -0.03744 | 0.4196   | -0.18237 | 7.38E-05 |
| 3.07E-09 | 0.048366 | 0.29694  | -0.21148 | 4.02E-06 | -0.15785 | 0.00062  | -0.39994 | 2.30E-19 |
| 1.24E-06 | -0.18307 | 6.91E-05 | -0.37391 | 6.07E-17 | -0.27789 | 9.97E-10 | -0.55411 | 6.13E-39 |
| 1.56E-07 | -0.35343 | 3.47E-15 | -0.43481 | 5.84E-23 | -0.38091 | 1.42E-17 | -0.54614 | 1.16E-37 |
| 5.96E-42 | -0.39396 | 8.67E-19 | -0.48486 | 6.60E-29 | -0.56836 | 2.62E-41 | -0.42177 | 1.45E-21 |
| 2.31E-16 | -0.17748 | 0.00012  | -0.26693 | 4.64E-09 | -0.35663 | 1.88E-15 | -0.33746 | 6.68E-14 |
| 0.23891  | -0.02328 | 0.61582  | -0.02326 | 0.61611  | -0.04022 | 0.3858   | -0.32302 | 8.39E-13 |
| 0.016    | -0.12512 | 0.00678  | -0.19106 | 3.24E-05 | -0.14952 | 0.00119  | -0.28713 | 2.58E-10 |
| 6.39E-10 | -0.20673 | 6.66E-06 | -0.28944 | 1.83E-10 | -0.30354 | 2.07E-11 | -0.43989 | 1.61E-23 |
| 2.99E-13 | -0.21945 | 1.68E-06 | -0.33053 | 2.29E-13 | -0.3445  | 1.85E-14 | -0.5264  | 1.20E-34 |
| 1.47E-07 | -0.16414 | 0.00037  | -0.22384 | 1.03E-06 | -0.25184 | 3.45E-08 | -0.3822  | 1.08E-17 |
| 5.69E-32 | -0.34293 | 2.47E-14 | -0.49216 | 7.35E-30 | -0.52184 | 5.61E-34 | -0.53254 | 1.46E-35 |
| 7.46E-08 | 0.439899 | 1.60E-23 | 0.419578 | 2.45E-21 | 0.395141 | 6.68E-19 | 0.39262  | 1.16E-18 |
| 5.20E-18 | 0.370374 | 1.25E-16 | 0.314124 | 3.74E-12 | 0.421779 | 1.44E-21 | 0.476824 | 6.93E-28 |
| 1.74E-28 | -0.10398 | 0.02463  | -0.40785 | 3.82E-20 | -0.42348 | 9.57E-22 | -0.35371 | 3.29E-15 |
| 2.87E-09 | -0.24846 | 5.32E-08 | -0.31496 | 3.26E-12 | -0.32047 | 1.29E-12 | -0.51593 | 4.00E-33 |
| 2.14E-09 | -0.16412 | 0.00037  | -0.32927 | 2.86E-13 | -0.30927 | 8.27E-12 | -0.40999 | 2.33E-20 |
| 0.84177  | -0.20017 | 1.31E-05 | -0.21942 | 1.69E-06 | -0.16633 | 0.00031  | -0.40541 | 6.69E-20 |
| 1.38E-25 | -0.11596 | 0.01216  | -0.17087 | 0.00021  | -0.31624 | 2.63E-12 | -0.46359 | 2.92E-26 |
| 3.19E-28 | -0.26651 | 4.91E-09 | -0.32409 | 7.00E-13 | -0.4106  | 2.03E-20 | -0.52334 | 3.39E-34 |
| 1.21E-06 | -0.10808 | 0.01948  | -0.21197 | 3.82E-06 | -0.25484 | 2.34E-08 | -0.47422 | 1.47E-27 |
| 0.00658  | 0.190004 | 3.58E-05 | 0.290621 | 1.53E-10 | 0.216282 | 2.39E-06 | 0.426924 | 4.13E-22 |
| 1.51E-11 | 0.294856 | 8.04E-11 | 0.398652 | 3.07E-19 | 0.381727 | 1.20E-17 | 0.300786 | 3.20E-11 |
| 6.33E-28 | 0.269783 | 3.13E-09 | 0.394897 | 7.05E-19 | 0.499576 | 7.51E-31 | 0.337444 | 6.70E-14 |
| 5.61E-14 | -0.17271 | 0.00018  | -0.32278 | 8.75E-13 | -0.35151 | 4.99E-15 | -0.53009 | 3.40E-35 |
| 1.34E-17 | -0.29633 | 6.41E-11 | -0.34415 | 1.98E-14 | -0.38384 | 7.66E-18 | -0.5623  | 2.75E-40 |
| 3.96E-26 | -0.38305 | 9.06E-18 | -0.47001 | 4.86E-27 | -0.50407 | 1.83E-31 | -0.51906 | 1.42E-33 |
| 1.39E-15 | -0.15634 | 0.0007   | -0.53271 | 1.37E-35 | -0.41049 | 2.08E-20 | -0.43165 | 1.29E-22 |
| 2.17E-15 | -0.22581 | 8.20E-07 | -0.41276 | 1.23E-20 | -0.38559 | 5.28E-18 | -0.48114 | 1.97E-28 |
| 2.24E-11 | -0.31083 | 6.42E-12 | -0.39211 | 1.30E-18 | -0.40065 | 1.96E-19 | -0.25154 | 3.58E-08 |
| 0.00038  | -0.13783 | 0.00284  | -0.51028 | 2.52E-32 | -0.33809 | 5.96E-14 | -0.20779 | 5.96E-06 |
| 0.58238  | -0.17311 | 0.00017  | -0.27256 | 2.12E-09 | -0.14844 | 0.0013   | -0.22415 | 9.91E-07 |
| 1.05E-06 | -0.2992  | 4.11E-11 | -0.42691 | 4.14E-22 | -0.38021 | 1.65E-17 | -0.44041 | 1.41E-23 |
| 2.07E-05 | -0.33489 | 1.06E-13 | -0.32273 | 8.83E-13 | -0.31934 | 1.57E-12 | -0.24884 | 5.06E-08 |
| 0.07935  | -0.39001 | 2.05E-18 | -0.15855 | 0.00058  | -0.12723 | 0.0059   | -0.13683 | 0.00305  |
| 1.67E-05 | -0.24027 | 1.47E-07 | -0.32624 | 4.83E-13 | -0.29558 | 7.19E-11 | -0.31112 | 6.12E-12 |
| 4.92E-23 | -0.29839 | 4.66E-11 | -0.4444  | 5.02E-24 | -0.46839 | 7.67E-27 | -0.52375 | 2.96E-34 |

|          |          |          |          |          |          |          |          |          |
|----------|----------|----------|----------|----------|----------|----------|----------|----------|
| 0.12653  | -0.2968  | 5.96E-11 | -0.39761 | 3.87E-19 | -0.26111 | 1.02E-08 | -0.21683 | 2.25E-06 |
| 1.99E-05 | -0.18104 | 8.34E-05 | -0.2361  | 2.45E-07 | -0.24227 | 1.15E-07 | -0.22543 | 8.56E-07 |
| 1.11E-38 | -0.36882 | 1.70E-16 | -0.53529 | 5.58E-36 | -0.58832 | 7.95E-45 | -0.59397 | 7.24E-46 |
| 2.43E-25 | -0.3906  | 1.80E-18 | -0.5174  | 2.47E-33 | -0.55899 | 9.73E-40 | -0.56677 | 4.87E-41 |
| 6.57E-22 | 0.454947 | 3.09E-25 | 0.430454 | 1.73E-22 | 0.495838 | 2.39E-30 | 0.420039 | 2.19E-21 |
| 0.00213  | -0.18932 | 3.83E-05 | -0.11703 | 0.01138  | -0.15183 | 0.001    | -0.48712 | 3.36E-29 |
| 1.97E-18 | -0.2534  | 2.82E-08 | -0.38956 | 2.26E-18 | -0.39941 | 2.59E-19 | -0.38396 | 7.48E-18 |
| 4.28E-19 | -0.39689 | 4.54E-19 | -0.44867 | 1.65E-24 | -0.48362 | 9.52E-29 | -0.45308 | 5.10E-25 |
| 4.44E-14 | -0.17791 | 0.00011  | -0.38177 | 1.19E-17 | -0.34354 | 2.21E-14 | -0.48893 | 1.95E-29 |
| 7.57E-17 | -0.16344 | 0.00039  | -0.34376 | 2.12E-14 | -0.37164 | 9.64E-17 | -0.59398 | 7.20E-46 |
| 1.16E-13 | -0.25824 | 1.50E-08 | -0.3079  | 1.03E-11 | -0.33139 | 1.97E-13 | -0.41382 | 9.57E-21 |
| 6.58E-06 | -0.11921 | 0.00992  | -0.20317 | 9.64E-06 | -0.24717 | 6.26E-08 | -0.21093 | 4.27E-06 |
| 0.00049  | 0.137203 | 0.00297  | -0.23892 | 1.74E-07 | -0.16995 | 0.00022  | -0.19463 | 2.28E-05 |
| 3.23E-09 | -0.38399 | 7.42E-18 | -0.32352 | 7.72E-13 | -0.36549 | 3.32E-16 | -0.35845 | 1.32E-15 |
| 6.27E-29 | 0.573844 | 2.99E-42 | 0.564291 | 1.28E-40 | 0.603561 | 1.11E-47 | 0.369886 | 1.38E-16 |
| 0.03576  | -0.36326 | 5.16E-16 | -0.1421  | 0.00208  | -0.18543 | 5.54E-05 | -0.29337 | 1.01E-10 |
| 2.48E-22 | -0.19949 | 1.40E-05 | -0.3744  | 5.49E-17 | -0.40991 | 2.38E-20 | -0.58639 | 1.78E-44 |
| 3.03E-14 | -0.1849  | 5.83E-05 | -0.12818 | 0.00554  | -0.30453 | 1.77E-11 | -0.18946 | 3.78E-05 |
| 1.14E-44 | -0.40415 | 8.91E-20 | -0.54743 | 7.23E-38 | -0.59486 | 4.93E-46 | -0.5183  | 1.83E-33 |
| 1.10E-13 | -0.28987 | 1.71E-10 | -0.35299 | 3.77E-15 | -0.37589 | 4.04E-17 | -0.13653 | 0.00311  |
| 6.53E-19 | 0.328143 | 3.47E-13 | 0.287274 | 2.53E-10 | 0.444424 | 4.99E-24 | 0.262489 | 8.49E-09 |
| 2.73E-05 | -0.16868 | 0.00025  | -0.45393 | 4.07E-25 | -0.35427 | 2.96E-15 | -0.08318 | 0.07251  |
| 8.19E-05 | -0.06979 | 0.13209  | -0.2298  | 5.17E-07 | -0.17464 | 0.00015  | -0.46615 | 1.44E-26 |
| 1.55E-08 | -0.07071 | 0.12702  | -0.1318  | 0.00433  | -0.21527 | 2.67E-06 | -0.45363 | 4.41E-25 |
| 8.02E-21 | -0.18076 | 8.56E-05 | -0.36048 | 8.90E-16 | -0.39261 | 1.16E-18 | -0.52302 | 3.79E-34 |
| 0.02158  | -0.03385 | 0.46554  | -0.09101 | 0.04935  | -0.11373 | 0.01393  | -0.4051  | 7.18E-20 |
| 1.81E-07 | -0.16501 | 0.00034  | -0.27562 | 1.38E-09 | -0.25552 | 2.14E-08 | -0.31876 | 1.73E-12 |
| 1.14E-13 | -0.19366 | 2.51E-05 | -0.30722 | 1.15E-11 | -0.32829 | 3.39E-13 | -0.2833  | 4.55E-10 |
| 0.23757  | 0.000116 | 0.998    | -0.19001 | 3.58E-05 | -0.07211 | 0.11969  | -0.1837  | 6.52E-05 |
| 7.45E-18 | -0.21134 | 4.09E-06 | -0.40688 | 4.78E-20 | -0.38517 | 5.78E-18 | -0.33631 | 8.21E-14 |
| 1.92E-08 | 0.485594 | 5.30E-29 | 0.479413 | 3.27E-28 | 0.455427 | 2.72E-25 | 0.308375 | 9.56E-12 |
| 2.66E-28 | -0.38324 | 8.70E-18 | -0.46161 | 5.06E-26 | -0.50658 | 8.25E-32 | -0.43289 | 9.44E-23 |
| 0.42419  | -0.15326 | 0.00089  | -0.10366 | 0.02508  | -0.05385 | 0.24549  | -0.29398 | 9.20E-11 |
| 3.80E-11 | 0.04103  | 0.37634  | -0.31111 | 6.14E-12 | -0.22739 | 6.84E-07 | -0.45269 | 5.67E-25 |
| 0.00294  | 0.141549 | 0.00217  | 0.19255  | 2.80E-05 | 0.17319  | 0.00017  | 0.293188 | 1.04E-10 |
| 2.46E-15 | 0.373715 | 6.31E-17 | 0.275251 | 1.45E-09 | 0.378866 | 2.18E-17 | 0.48713  | 3.35E-29 |
| 0.00049  | 0.047737 | 0.30328  | 0.045118 | 0.33061  | 0.099681 | 0.03126  | 0.429852 | 2.01E-22 |
| 1.29E-23 | -0.2987  | 4.44E-11 | -0.48293 | 1.17E-28 | -0.48755 | 2.95E-29 | -0.51276 | 1.13E-32 |
| 2.28E-06 | -0.16854 | 0.00025  | -0.32299 | 8.44E-13 | -0.26566 | 5.52E-09 | -0.39023 | 1.95E-18 |
| 0.0179   | 0.212175 | 3.73E-06 | 0.246719 | 6.62E-08 | 0.221121 | 1.40E-06 | 0.479373 | 3.31E-28 |
| 3.94E-34 | -0.23152 | 4.22E-07 | -0.30716 | 1.16E-11 | -0.4096  | 2.56E-20 | -0.2161  | 2.44E-06 |
| 4.20E-17 | 0.164164 | 0.00037  | 0.288765 | 2.02E-10 | 0.298933 | 4.28E-11 | 0.465177 | 1.89E-26 |
| 1.98E-12 | -0.15052 | 0.0011   | -0.21053 | 4.46E-06 | -0.25995 | 1.19E-08 | -0.23424 | 3.06E-07 |
| 7.35E-09 | 0.007845 | 0.86573  | -0.08244 | 0.07511  | -0.14845 | 0.00129  | -0.16332 | 0.00039  |
| 8.21E-08 | 0.112207 | 0.01527  | -0.09774 | 0.03471  | -0.10946 | 0.01797  | -0.1844  | 6.11E-05 |

|          |          |          |          |          |          |          |          |          |
|----------|----------|----------|----------|----------|----------|----------|----------|----------|
| 4.35E-06 | -0.15323 | 0.00089  | -0.18118 | 8.23E-05 | -0.19784 | 1.66E-05 | -0.29396 | 9.22E-11 |
| 4.69E-19 | -0.24194 | 1.20E-07 | -0.27425 | 1.67E-09 | -0.37781 | 2.72E-17 | -0.30955 | 7.91E-12 |
| 2.06E-12 | -0.21753 | 2.08E-06 | -0.31403 | 3.80E-12 | -0.33245 | 1.63E-13 | -0.37355 | 6.53E-17 |
| 0.00127  | -0.00442 | 0.9241   | -0.07402 | 0.11015  | -0.06952 | 0.13359  | -0.33678 | 7.55E-14 |
| 0.64507  | 0.062021 | 0.1809   | 0.01695  | 0.71486  | 0.010342 | 0.82361  | -0.2388  | 1.77E-07 |
| 9.20E-12 | 0.013206 | 0.77592  | 0.057129 | 0.21785  | 0.166801 | 0.00029  | 0.378776 | 2.22E-17 |
| 3.21E-10 | -0.22398 | 1.01E-06 | -0.3169  | 2.36E-12 | -0.34355 | 2.21E-14 | -0.25917 | 1.32E-08 |
| 1.13E-16 | -0.34407 | 2.00E-14 | -0.28957 | 1.80E-10 | -0.38558 | 5.30E-18 | -0.37321 | 7.00E-17 |
| 7.14E-19 | -0.28029 | 7.05E-10 | -0.33406 | 1.23E-13 | -0.39368 | 9.20E-19 | -0.54215 | 4.88E-37 |
| 2.96E-16 | -0.2472  | 6.24E-08 | -0.34862 | 8.61E-15 | -0.3881  | 3.09E-18 | -0.55389 | 6.65E-39 |
| 1.03E-07 | -0.09841 | 0.0335   | -0.25163 | 3.54E-08 | -0.22274 | 1.16E-06 | -0.5483  | 5.25E-38 |
| 4.49E-08 | -0.21292 | 3.45E-06 | -0.19144 | 3.12E-05 | -0.2588  | 1.39E-08 | -0.52221 | 4.96E-34 |
| 8.74E-11 | -0.15141 | 0.00103  | -0.2402  | 1.49E-07 | -0.29383 | 9.41E-11 | -0.38438 | 6.84E-18 |
| 9.03E-14 | -0.19804 | 1.63E-05 | -0.29089 | 1.47E-10 | -0.32136 | 1.11E-12 | -0.49765 | 1.37E-30 |
| 0.00023  | -0.1924  | 2.84E-05 | -0.19628 | 1.94E-05 | -0.20533 | 7.71E-06 | -0.47542 | 1.04E-27 |
| 8.52E-20 | -0.19578 | 2.04E-05 | -0.40205 | 1.43E-19 | -0.40368 | 9.90E-20 | -0.54112 | 7.08E-37 |
| 9.54E-22 | -0.2271  | 7.07E-07 | -0.36923 | 1.57E-16 | -0.38733 | 3.64E-18 | -0.2535  | 2.79E-08 |
| 0.01128  | -0.08823 | 0.05674  | -0.25384 | 2.66E-08 | -0.16956 | 0.00023  | -0.20313 | 9.69E-06 |
| 1.01E-14 | -0.20644 | 6.87E-06 | -0.33511 | 1.02E-13 | -0.35235 | 4.26E-15 | -0.48999 | 1.42E-29 |
| 3.23E-23 | -0.2533  | 2.86E-08 | -0.46232 | 4.16E-26 | -0.46336 | 3.12E-26 | -0.34098 | 3.53E-14 |
| 1.56E-09 | 0.040789 | 0.37915  | -0.19381 | 2.47E-05 | -0.18464 | 5.97E-05 | -0.27669 | 1.18E-09 |
| 0.05139  | 0.176247 | 0.00013  | -0.0443  | 0.33946  | 0.003306 | 0.94319  | -0.33714 | 7.07E-14 |
| 2.94E-16 | 0.464344 | 2.38E-26 | 0.420613 | 1.91E-21 | 0.501909 | 3.62E-31 | 0.499846 | 6.90E-31 |
| 2.08E-08 | -0.3378  | 6.29E-14 | -0.44279 | 7.62E-24 | -0.37089 | 1.12E-16 | -0.40165 | 1.57E-19 |
| 0.43583  | -0.1772  | 0.00012  | -0.26242 | 8.56E-09 | -0.10745 | 0.0202   | -0.13441 | 0.00361  |
| 1.22E-09 | -0.16858 | 0.00025  | -0.35585 | 2.19E-15 | -0.32463 | 6.37E-13 | -0.31399 | 3.82E-12 |
| 0.00541  | -0.12321 | 0.00769  | -0.09793 | 0.03437  | -0.1045  | 0.02393  | -0.38044 | 1.57E-17 |
| 1.54E-05 | -0.142   | 0.0021   | -0.16705 | 0.00029  | -0.17032 | 0.00022  | -0.34467 | 1.80E-14 |
| 1.32E-44 | -0.29988 | 3.69E-11 | -0.47492 | 1.20E-27 | -0.57554 | 1.51E-42 | -0.38876 | 2.68E-18 |
| 2.17E-18 | 0.328546 | 3.24E-13 | 0.235779 | 2.54E-07 | 0.3495   | 7.30E-15 | 0.380322 | 1.61E-17 |
| 7.88E-15 | 0.049879 | 0.28207  | 0.135227 | 0.00341  | 0.204558 | 8.35E-06 | 0.447469 | 2.26E-24 |
| 4.33E-07 | -0.26272 | 8.22E-09 | -0.34629 | 1.33E-14 | -0.33492 | 1.05E-13 | -0.37589 | 4.04E-17 |
| 4.82E-18 | 0.203368 | 9.45E-06 | 0.284947 | 3.57E-10 | 0.335627 | 9.28E-14 | 0.592325 | 1.46E-45 |
| 0.09661  | -0.21739 | 2.12E-06 | -0.11149 | 0.01593  | -0.13566 | 0.00331  | -0.44076 | 1.29E-23 |
| 0.01496  | -0.15435 | 0.00082  | -0.15827 | 0.0006   | -0.16612 | 0.00031  | -0.3926  | 1.16E-18 |
| 3.72E-12 | -0.04296 | 0.35431  | -0.26075 | 1.07E-08 | -0.25378 | 2.68E-08 | -0.48956 | 1.62E-29 |
| 3.44E-16 | -0.26842 | 3.78E-09 | -0.35264 | 4.04E-15 | -0.40206 | 1.43E-19 | -0.43278 | 9.71E-23 |
| 2.72E-06 | -0.34263 | 2.61E-14 | -0.49069 | 1.15E-29 | -0.42952 | 2.18E-22 | -0.35292 | 3.82E-15 |
| 0.00351  | -0.09082 | 0.04983  | -0.34216 | 2.85E-14 | -0.24453 | 8.72E-08 | -0.24341 | 1.00E-07 |
| 0.02097  | -0.29728 | 5.53E-11 | -0.25105 | 3.82E-08 | -0.2303  | 4.87E-07 | -0.2869  | 2.67E-10 |
| 5.60E-14 | -0.29397 | 9.21E-11 | -0.58787 | 9.61E-45 | -0.45995 | 7.97E-26 | -0.26468 | 6.31E-09 |
| 0.00024  | -0.4147  | 7.77E-21 | -0.31365 | 4.04E-12 | -0.33093 | 2.13E-13 | -0.32228 | 9.52E-13 |
| 3.04E-12 | -0.17124 | 0.0002   | -0.35624 | 2.03E-15 | -0.3509  | 5.61E-15 | -0.46846 | 7.54E-27 |
| 1.50E-10 | -0.16269 | 0.00042  | -0.10816 | 0.01939  | -0.24594 | 7.31E-08 | -0.31236 | 5.00E-12 |
| 2.17E-12 | -0.04728 | 0.30791  | -0.36419 | 4.29E-16 | -0.29591 | 6.84E-11 | -0.41819 | 3.41E-21 |

|          |          |          |          |          |          |          |          |          |
|----------|----------|----------|----------|----------|----------|----------|----------|----------|
| 0.14913  | -0.29023 | 1.62E-10 | -0.26219 | 8.84E-09 | -0.2367  | 2.28E-07 | -0.36799 | 2.01E-16 |
| 5.59E-38 | -0.28579 | 3.15E-10 | -0.4874  | 3.09E-29 | -0.52154 | 6.21E-34 | -0.55836 | 1.24E-39 |
| 3.11E-08 | -0.14632 | 0.00152  | -0.33357 | 1.34E-13 | -0.3112  | 6.05E-12 | -0.27412 | 1.70E-09 |
| 1.16E-11 | -0.17951 | 9.60E-05 | -0.23827 | 1.88E-07 | -0.2882  | 2.20E-10 | -0.55685 | 2.19E-39 |
| 6.01E-05 | -0.02163 | 0.64098  | -0.21303 | 3.40E-06 | -0.18608 | 5.21E-05 | -0.23598 | 2.48E-07 |
| 3.37E-23 | -0.2388  | 1.77E-07 | -0.36833 | 1.88E-16 | -0.42005 | 2.18E-21 | -0.4992  | 8.43E-31 |
| 3.56E-07 | -0.02073 | 0.65504  | -0.33662 | 7.77E-14 | -0.3122  | 5.13E-12 | -0.2149  | 2.78E-06 |
| 4.08E-41 | -0.37755 | 2.86E-17 | -0.6289  | 8.70E-53 | -0.64798 | 5.92E-57 | -0.5236  | 3.10E-34 |
| 7.85E-19 | -0.20062 | 1.25E-05 | -0.45186 | 7.07E-25 | -0.41262 | 1.27E-20 | -0.30474 | 1.71E-11 |
| 0.03521  | -0.13282 | 0.00404  | -0.28797 | 2.28E-10 | -0.2196  | 1.66E-06 | -0.14418 | 0.00179  |
| 1.17E-25 | -0.24833 | 5.41E-08 | -0.41446 | 8.24E-21 | -0.46165 | 5.00E-26 | -0.56153 | 3.70E-40 |
| 5.91E-23 | -0.22281 | 1.15E-06 | -0.36454 | 4.00E-16 | -0.39376 | 9.05E-19 | -0.67986 | 1.26E-64 |
| 6.75E-37 | -0.33691 | 7.38E-14 | -0.44273 | 7.75E-24 | -0.54519 | 1.64E-37 | -0.42369 | 9.08E-22 |
| 2.16E-12 | -0.20609 | 7.12E-06 | -0.35394 | 3.15E-15 | -0.347   | 1.17E-14 | -0.49813 | 1.18E-30 |
| 1.22E-20 | -0.215   | 2.75E-06 | -0.38953 | 2.27E-18 | -0.40305 | 1.14E-19 | -0.5975  | 1.58E-46 |
| 1.47E-11 | -0.16268 | 0.00042  | -0.479   | 3.68E-28 | -0.37377 | 6.25E-17 | -0.4327  | 9.88E-23 |
| 1.84E-34 | -0.4063  | 5.46E-20 | -0.58228 | 9.78E-44 | -0.61304 | 1.55E-49 | -0.55492 | 4.52E-39 |
| 0.00012  | -0.08224 | 0.07583  | -0.22413 | 9.94E-07 | -0.19672 | 1.85E-05 | -0.26307 | 7.85E-09 |
| 2.33E-15 | -0.34146 | 3.24E-14 | -0.36057 | 8.76E-16 | -0.39751 | 3.95E-19 | -0.3883  | 2.96E-18 |
| 3.71E-08 | -0.16878 | 0.00025  | -0.26904 | 3.47E-09 | -0.26972 | 3.16E-09 | -0.36368 | 4.75E-16 |
| 3.69E-06 | -0.23691 | 2.22E-07 | -0.22994 | 5.08E-07 | -0.24527 | 7.95E-08 | -0.36072 | 8.49E-16 |
| 1.17E-43 | -0.40548 | 6.58E-20 | -0.515   | 5.42E-33 | -0.61775 | 1.75E-50 | -0.50478 | 1.46E-31 |
| 1.11E-07 | -0.10316 | 0.0258   | -0.18382 | 6.45E-05 | -0.21079 | 4.33E-06 | -0.41074 | 1.96E-20 |
| 8.43E-20 | -0.18817 | 4.28E-05 | -0.39163 | 1.44E-18 | -0.41237 | 1.34E-20 | -0.49819 | 1.16E-30 |
| 1.64E-15 | -0.36682 | 2.55E-16 | -0.45651 | 2.03E-25 | -0.48936 | 1.72E-29 | -0.31603 | 2.73E-12 |
| 1.83E-22 | -0.12386 | 0.00737  | -0.36899 | 1.65E-16 | -0.38342 | 8.38E-18 | -0.33574 | 9.10E-14 |
| 2.03E-26 | -0.14766 | 0.00137  | -0.38953 | 2.27E-18 | -0.39871 | 3.03E-19 | -0.54562 | 1.40E-37 |
| 0.03619  | -0.21837 | 1.90E-06 | -0.1154  | 0.01258  | -0.08167 | 0.0779   | -0.23964 | 1.59E-07 |
| 2.04E-21 | -0.20336 | 9.45E-06 | -0.36671 | 2.60E-16 | -0.3947  | 7.37E-19 | -0.61259 | 1.90E-49 |
| 0.00105  | -0.12572 | 0.00652  | -0.19661 | 1.88E-05 | -0.17169 | 0.00019  | -0.21547 | 2.61E-06 |
| 6.03E-20 | -0.13206 | 0.00425  | -0.34651 | 1.28E-14 | -0.35746 | 1.60E-15 | -0.44482 | 4.50E-24 |
| 1.18E-16 | -0.11014 | 0.01727  | -0.33087 | 2.16E-13 | -0.32726 | 4.05E-13 | -0.50551 | 1.16E-31 |
| 7.20E-05 | 0.023173 | 0.61743  | -0.17068 | 0.00021  | -0.16778 | 0.00027  | -0.27493 | 1.52E-09 |
| 5.50E-12 | -0.34122 | 3.38E-14 | -0.53899 | 1.51E-36 | -0.47309 | 2.03E-27 | -0.3338  | 1.28E-13 |
| 4.14E-17 | -0.44739 | 2.30E-24 | -0.46129 | 5.51E-26 | -0.50819 | 4.93E-32 | -0.36742 | 2.26E-16 |
| 0.01029  | -0.17081 | 0.00021  | -0.19645 | 1.91E-05 | -0.18819 | 4.27E-05 | -0.40161 | 1.58E-19 |
| 0.0018   | 0.006066 | 0.89598  | -0.00656 | 0.88764  | 0.054945 | 0.23598  | -0.36267 | 5.80E-16 |
| 7.70E-16 | -0.36782 | 2.08E-16 | -0.5448  | 1.88E-37 | -0.53841 | 1.85E-36 | -0.51678 | 3.02E-33 |
| 2.76E-16 | -0.25469 | 2.38E-08 | -0.37227 | 8.49E-17 | -0.39376 | 9.05E-19 | -0.48173 | 1.66E-28 |
| 4.75E-09 | -0.2084  | 5.59E-06 | -0.26678 | 4.73E-09 | -0.28521 | 3.43E-10 | -0.23848 | 1.84E-07 |
| 2.44E-32 | -0.25877 | 1.39E-08 | -0.5097  | 3.04E-32 | -0.51674 | 3.07E-33 | -0.5689  | 2.12E-41 |
| 1.04E-08 | -0.11935 | 0.00984  | -0.33136 | 1.98E-13 | -0.32188 | 1.02E-12 | -0.31475 | 3.37E-12 |
| 2.57E-17 | -0.18269 | 7.16E-05 | -0.42826 | 2.98E-22 | -0.40189 | 1.48E-19 | -0.47988 | 2.86E-28 |
| 8.27E-16 | -0.03534 | 0.44607  | -0.2728  | 2.05E-09 | -0.27    | 3.04E-09 | -0.46858 | 7.27E-27 |
| 0.0006   | -0.11116 | 0.01625  | -0.2817  | 5.75E-10 | -0.2246  | 9.42E-07 | -0.43492 | 5.67E-23 |

|          |          |          |          |          |          |          |          |          |
|----------|----------|----------|----------|----------|----------|----------|----------|----------|
| 7.95E-12 | -0.26142 | 9.79E-09 | -0.39653 | 4.92E-19 | -0.3804  | 1.58E-17 | -0.31366 | 4.03E-12 |
| 2.57E-14 | -0.19967 | 1.38E-05 | -0.35068 | 5.85E-15 | -0.35614 | 2.07E-15 | -0.4847  | 6.92E-29 |
| 6.84E-14 | 0.037901 | 0.41384  | -0.28192 | 5.57E-10 | -0.24932 | 4.76E-08 | -0.44827 | 1.83E-24 |
| 2.32E-20 | -0.15891 | 0.00057  | -0.49619 | 2.14E-30 | -0.4648  | 2.09E-26 | -0.16785 | 0.00027  |
| 7.17E-34 | -0.50673 | 7.87E-32 | -0.64638 | 1.36E-56 | -0.65307 | 4.09E-58 | -0.44478 | 4.55E-24 |
| 2.28E-48 | -0.38228 | 1.07E-17 | -0.54364 | 2.86E-37 | -0.61239 | 2.08E-49 | -0.43776 | 2.76E-23 |
| 1.65E-45 | -0.42572 | 5.55E-22 | -0.55652 | 2.48E-39 | -0.64731 | 8.40E-57 | -0.46555 | 1.70E-26 |
| 5.77E-16 | -0.22282 | 1.15E-06 | -0.36054 | 8.79E-16 | -0.35476 | 2.69E-15 | -0.28439 | 3.88E-10 |
| 0.01901  | -0.15688 | 0.00067  | -0.39735 | 4.09E-19 | -0.29148 | 1.34E-10 | -0.17802 | 0.00011  |
| 1.38E-11 | -0.14391 | 0.00182  | -0.36591 | 3.05E-16 | -0.34955 | 7.23E-15 | -0.46523 | 1.86E-26 |
| 7.03E-16 | -0.21655 | 2.32E-06 | -0.40299 | 1.16E-19 | -0.40149 | 1.63E-19 | -0.49908 | 8.77E-31 |
| 5.72E-27 | -0.28251 | 5.11E-10 | -0.45975 | 8.41E-26 | -0.49217 | 7.34E-30 | -0.6851  | 5.58E-66 |
| 1.34E-13 | -0.15776 | 0.00062  | -0.24788 | 5.72E-08 | -0.31473 | 3.38E-12 | -0.29571 | 7.05E-11 |
| 3.38E-17 | 0.062364 | 0.17849  | 0.306519 | 1.29E-11 | 0.307419 | 1.12E-11 | 0.541818 | 5.51E-37 |
| 7.55E-10 | -0.35852 | 1.30E-15 | -0.46454 | 2.25E-26 | -0.38623 | 4.61E-18 | -0.15587 | 0.00072  |
| 4.11E-09 | -0.20612 | 7.10E-06 | -0.33667 | 7.70E-14 | -0.3272  | 4.09E-13 | -0.24539 | 7.83E-08 |
| 3.36E-17 | -0.33053 | 2.29E-13 | -0.53683 | 3.25E-36 | -0.49114 | 1.00E-29 | -0.41548 | 6.48E-21 |
| 3.34E-30 | -0.24923 | 4.82E-08 | -0.50206 | 3.45E-31 | -0.49753 | 1.42E-30 | -0.45031 | 1.07E-24 |
| 1.89E-14 | 0.270695 | 2.76E-09 | 0.612014 | 2.47E-49 | 0.481698 | 1.68E-28 | 0.29064  | 1.53E-10 |
| 2.17E-21 | -0.4807  | 2.24E-28 | -0.66125 | 4.94E-60 | -0.59154 | 2.04E-45 | -0.36059 | 8.72E-16 |
| 2.26E-13 | -0.29632 | 6.42E-11 | -0.33078 | 2.19E-13 | -0.36189 | 6.76E-16 | -0.50649 | 8.48E-32 |
| 0.01149  | -0.14563 | 0.0016   | -0.33444 | 1.15E-13 | -0.21035 | 4.54E-06 | -0.14543 | 0.00163  |
| 6.51E-11 | -0.24618 | 7.09E-08 | -0.33109 | 2.08E-13 | -0.35406 | 3.08E-15 | -0.38043 | 1.57E-17 |
| 4.67E-15 | -0.21812 | 1.95E-06 | -0.32891 | 3.04E-13 | -0.35836 | 1.35E-15 | -0.45298 | 5.24E-25 |
| 1.86E-42 | -0.31578 | 2.84E-12 | -0.52153 | 6.23E-34 | -0.54735 | 7.44E-38 | -0.51076 | 2.16E-32 |
| 7.17E-09 | -0.11871 | 0.01024  | -0.23522 | 2.72E-07 | -0.24275 | 1.09E-07 | -0.36428 | 4.22E-16 |
| 5.41E-09 | -0.20111 | 1.19E-05 | -0.33077 | 2.19E-13 | -0.28516 | 3.46E-10 | -0.31896 | 1.67E-12 |
| 1.36E-31 | -0.28166 | 5.78E-10 | -0.53469 | 6.87E-36 | -0.5309  | 2.57E-35 | -0.16199 | 0.00044  |
| 7.77E-09 | -0.0697  | 0.13258  | -0.19665 | 1.87E-05 | -0.20015 | 1.31E-05 | -0.33908 | 4.99E-14 |
| 4.50E-38 | -0.424   | 8.42E-22 | -0.56262 | 2.43E-40 | -0.60419 | 8.35E-48 | -0.49409 | 4.08E-30 |
| 1.15E-07 | -0.30236 | 2.50E-11 | -0.31627 | 2.62E-12 | -0.33047 | 2.32E-13 | -0.41069 | 1.99E-20 |
| 0.01064  | -0.08087 | 0.08086  | -0.16332 | 0.00039  | -0.15748 | 0.00064  | -0.29979 | 3.74E-11 |
| 6.51E-17 | -0.13526 | 0.0034   | -0.31694 | 2.34E-12 | -0.32986 | 2.58E-13 | -0.53461 | 7.08E-36 |
| 1.05E-23 | -0.23251 | 3.76E-07 | -0.47753 | 5.65E-28 | -0.44817 | 1.88E-24 | -0.52549 | 1.64E-34 |
| 1.52E-37 | -0.54095 | 7.52E-37 | -0.62788 | 1.43E-52 | -0.67531 | 1.80E-63 | -0.4406  | 1.34E-23 |
| 0.01171  | -0.00383 | 0.93423  | -0.16979 | 0.00023  | -0.12025 | 0.00929  | -0.42116 | 1.67E-21 |
| 2.76E-24 | -0.21923 | 1.73E-06 | -0.38238 | 1.04E-17 | -0.41287 | 1.20E-20 | -0.48354 | 9.73E-29 |
| 1.58E-06 | -0.24004 | 1.52E-07 | -0.27487 | 1.53E-09 | -0.29166 | 1.31E-10 | -0.49625 | 2.10E-30 |
| 6.52E-32 | -0.2285  | 6.01E-07 | -0.40678 | 4.89E-20 | -0.46751 | 9.84E-27 | -0.58209 | 1.06E-43 |
| 6.33E-11 | -0.21895 | 1.78E-06 | -0.27694 | 1.14E-09 | -0.32283 | 8.67E-13 | -0.40209 | 1.42E-19 |
| 1.24E-19 | -0.13357 | 0.00383  | -0.37485 | 5.00E-17 | -0.36822 | 1.92E-16 | -0.49912 | 8.66E-31 |
| 0.02645  | -0.28901 | 1.95E-10 | -0.15632 | 0.0007   | -0.24491 | 8.31E-08 | -0.31344 | 4.19E-12 |
| 1.36E-23 | -0.39082 | 1.72E-18 | -0.54946 | 3.44E-38 | -0.55487 | 4.62E-39 | -0.36592 | 3.04E-16 |
| 0.00043  | -0.20788 | 5.90E-06 | -0.3112  | 6.04E-12 | -0.28724 | 2.54E-10 | -0.17341 | 0.00017  |
| 2.36E-17 | -0.03191 | 0.4915   | -0.32635 | 4.74E-13 | -0.32913 | 2.92E-13 | -0.16184 | 0.00045  |

|          |          |          |          |          |          |          |          |          |
|----------|----------|----------|----------|----------|----------|----------|----------|----------|
| 4.64E-45 | 0.482726 | 1.24E-28 | 0.478161 | 4.71E-28 | 0.607467 | 1.94E-48 | 0.515193 | 5.09E-33 |
| 2.48E-15 | -0.35041 | 6.15E-15 | -0.38459 | 6.54E-18 | -0.40068 | 1.95E-19 | -0.49919 | 8.46E-31 |
| 3.84E-43 | -0.26824 | 3.87E-09 | -0.40377 | 9.70E-20 | -0.51805 | 1.99E-33 | -0.29123 | 1.40E-10 |
| 4.02E-44 | -0.49009 | 1.38E-29 | -0.69932 | 8.34E-70 | -0.70315 | 7.12E-71 | -0.39702 | 4.41E-19 |
| 4.49E-21 | -0.54847 | 4.94E-38 | -0.46538 | 1.78E-26 | -0.52231 | 4.80E-34 | -0.45574 | 2.50E-25 |
| 2.11E-05 | -0.26606 | 5.23E-09 | -0.25298 | 2.98E-08 | -0.26547 | 5.66E-09 | -0.19499 | 2.20E-05 |
| 3.81E-06 | -0.22527 | 8.73E-07 | -0.59567 | 3.49E-46 | -0.40608 | 5.73E-20 | -0.37861 | 2.30E-17 |
| 8.77E-23 | -0.13401 | 0.00372  | -0.34755 | 1.05E-14 | -0.40105 | 1.79E-19 | -0.40558 | 6.44E-20 |
| 3.76E-09 | -0.16464 | 0.00035  | -0.36248 | 6.02E-16 | -0.28736 | 2.50E-10 | -0.3698  | 1.40E-16 |
| 0.00032  | -0.0285  | 0.53902  | -0.23946 | 1.63E-07 | -0.15353 | 0.00087  | -0.37311 | 7.15E-17 |
| 7.18E-54 | -0.50898 | 3.83E-32 | -0.58099 | 1.66E-43 | -0.67773 | 4.40E-64 | -0.51244 | 1.25E-32 |
| 2.89E-36 | -0.42729 | 3.78E-22 | -0.50424 | 1.73E-31 | -0.56941 | 1.73E-41 | -0.54814 | 5.57E-38 |
| 2.00E-33 | -0.45923 | 9.71E-26 | -0.55689 | 2.16E-39 | -0.61236 | 2.11E-49 | -0.42798 | 3.19E-22 |
| 7.23E-21 | -0.13958 | 0.0025   | -0.36094 | 8.14E-16 | -0.36824 | 1.92E-16 | -0.43716 | 3.22E-23 |
| 1.31E-09 | -0.20711 | 6.40E-06 | -0.27259 | 2.11E-09 | -0.28414 | 4.02E-10 | -0.42142 | 1.57E-21 |
| 1.47E-06 | -0.1791  | 9.96E-05 | -0.27974 | 7.64E-10 | -0.28721 | 2.55E-10 | -0.24244 | 1.13E-07 |
| 0.00026  | -0.23132 | 4.32E-07 | -0.44664 | 2.80E-24 | -0.33236 | 1.66E-13 | -0.15149 | 0.00102  |
| 0.00026  | -0.04038 | 0.38392  | -0.3061  | 1.38E-11 | -0.18378 | 6.47E-05 | -0.35893 | 1.20E-15 |
| 5.86E-05 | -0.01735 | 0.70851  | -0.12482 | 0.00692  | -0.16938 | 0.00024  | -0.27088 | 2.69E-09 |
| 0.00589  | -0.21743 | 2.11E-06 | -0.19221 | 2.90E-05 | -0.20821 | 5.70E-06 | -0.32836 | 3.35E-13 |
| 1.11E-35 | 0.447227 | 2.40E-24 | 0.556906 | 2.15E-39 | 0.597153 | 1.83E-46 | 0.542521 | 4.28E-37 |
| 2.46E-13 | -0.23459 | 2.93E-07 | -0.20074 | 1.24E-05 | -0.32281 | 8.71E-13 | -0.41172 | 1.56E-20 |
| 0.15717  | -0.05155 | 0.26624  | -0.07721 | 0.09562  | -0.09427 | 0.04172  | -0.34822 | 9.28E-15 |
| 3.61E-33 | -0.36094 | 8.15E-16 | -0.50344 | 2.24E-31 | -0.55289 | 9.66E-39 | -0.53823 | 1.98E-36 |
| 4.28E-34 | -0.22938 | 5.42E-07 | -0.44131 | 1.12E-23 | -0.49999 | 6.59E-31 | -0.57203 | 6.16E-42 |
| 0.00424  | -0.25948 | 1.27E-08 | -0.31335 | 4.25E-12 | -0.28991 | 1.70E-10 | -0.36842 | 1.85E-16 |
| 6.79E-09 | -0.41085 | 1.91E-20 | -0.34464 | 1.81E-14 | -0.37845 | 2.38E-17 | -0.31182 | 5.46E-12 |
| 3.03E-07 | -0.42398 | 8.46E-22 | -0.30664 | 1.26E-11 | -0.34591 | 1.43E-14 | -0.37561 | 4.28E-17 |
| 0.00038  | -0.25106 | 3.81E-08 | -0.27315 | 1.95E-09 | -0.23925 | 1.67E-07 | -0.38418 | 7.13E-18 |
| 7.63E-16 | -0.42631 | 4.80E-22 | -0.4103  | 2.17E-20 | -0.49613 | 2.18E-30 | -0.46123 | 5.62E-26 |
| 1.58E-30 | -0.34334 | 2.29E-14 | -0.51036 | 2.45E-32 | -0.54561 | 1.40E-37 | -0.58935 | 5.14E-45 |
| 0.00208  | -0.28382 | 4.21E-10 | -0.38181 | 1.18E-17 | -0.31977 | 1.46E-12 | -0.25479 | 2.35E-08 |
| 1.45E-26 | -0.3095  | 7.97E-12 | -0.4416  | 1.04E-23 | -0.49224 | 7.19E-30 | -0.24339 | 1.00E-07 |
| 1.76E-19 | -0.11643 | 0.01181  | -0.31595 | 2.76E-12 | -0.34837 | 9.02E-15 | -0.45798 | 1.36E-25 |
| 2.28E-07 | 0.316414 | 2.56E-12 | 0.508996 | 3.81E-32 | 0.393051 | 1.06E-18 | 0.196333 | 1.93E-05 |
| 9.55E-21 | -0.16077 | 0.00049  | -0.37832 | 2.44E-17 | -0.38234 | 1.05E-17 | -0.3604  | 9.04E-16 |
| 6.34E-08 | -0.33888 | 5.18E-14 | -0.30972 | 7.70E-12 | -0.32428 | 6.77E-13 | -0.30286 | 2.31E-11 |
| 2.19E-17 | -0.18547 | 5.52E-05 | -0.39319 | 1.03E-18 | -0.39103 | 1.64E-18 | -0.35062 | 5.91E-15 |
| 1.07E-07 | 0.381654 | 1.22E-17 | 0.291855 | 1.27E-10 | 0.315437 | 3.01E-12 | 0.47638  | 7.88E-28 |
| 0.0001   | -0.37878 | 2.22E-17 | -0.38324 | 8.70E-18 | -0.34935 | 7.50E-15 | -0.32241 | 9.32E-13 |
| 4.31E-10 | -0.3047  | 1.72E-11 | -0.54571 | 1.35E-37 | -0.45575 | 2.49E-25 | -0.37959 | 1.88E-17 |
| 2.45E-20 | -0.20126 | 1.17E-05 | -0.28556 | 3.26E-10 | -0.35611 | 2.08E-15 | -0.44234 | 8.57E-24 |
| 3.56E-09 | -0.48392 | 8.71E-29 | -0.34223 | 2.81E-14 | -0.41162 | 1.60E-20 | -0.51597 | 3.94E-33 |
| 2.55E-17 | -0.3468  | 1.21E-14 | -0.41914 | 2.71E-21 | -0.4459  | 3.40E-24 | -0.36765 | 2.16E-16 |
| 0.00011  | 0.124962 | 0.00685  | -0.02419 | 0.60206  | 0.113092 | 0.01448  | -0.09332 | 0.04385  |

|          |          |          |          |          |          |          |          |          |
|----------|----------|----------|----------|----------|----------|----------|----------|----------|
| 1.65E-27 | 0.247614 | 5.92E-08 | 0.272323 | 2.20E-09 | 0.388477 | 2.85E-18 | 0.353858 | 3.20E-15 |
| 6.62E-06 | -0.02606 | 0.57423  | -0.42764 | 3.46E-22 | -0.32306 | 8.34E-13 | -0.27169 | 2.40E-09 |
| 1.17E-14 | -0.16184 | 0.00045  | -0.35375 | 3.26E-15 | -0.3413  | 3.33E-14 | -0.32648 | 4.64E-13 |
| 2.01E-18 | 0.363163 | 5.26E-16 | 0.358276 | 1.37E-15 | 0.424811 | 6.92E-22 | 0.275201 | 1.46E-09 |
| 0.16792  | -0.01941 | 0.67567  | -0.23042 | 4.80E-07 | -0.13132 | 0.00447  | -0.40066 | 1.96E-19 |
| 2.25E-15 | -0.23586 | 2.52E-07 | -0.37637 | 3.66E-17 | -0.38919 | 2.44E-18 | -0.48601 | 4.69E-29 |
| 2.65E-17 | -0.28339 | 4.49E-10 | -0.38049 | 1.55E-17 | -0.41429 | 8.56E-21 | -0.46412 | 2.53E-26 |
| 8.45E-23 | -0.20274 | 1.01E-05 | -0.42429 | 7.86E-22 | -0.43516 | 5.34E-23 | -0.5031  | 2.49E-31 |
| 1.61E-23 | -0.13799 | 0.00281  | -0.40737 | 4.27E-20 | -0.43338 | 8.35E-23 | -0.12891 | 0.00527  |
| 0.00048  | -0.1273  | 0.00587  | -0.26713 | 4.52E-09 | -0.23576 | 2.55E-07 | -0.27624 | 1.26E-09 |
| 3.53E-32 | 0.384924 | 6.09E-18 | 0.376006 | 3.94E-17 | 0.520523 | 8.73E-34 | 0.416712 | 4.84E-21 |
| 5.26E-08 | -0.14356 | 0.00187  | -0.26345 | 7.45E-09 | -0.25568 | 2.10E-08 | -0.43994 | 1.59E-23 |
| 4.20E-31 | -0.25496 | 2.30E-08 | -0.4185  | 3.16E-21 | -0.49713 | 1.60E-30 | -0.45602 | 2.32E-25 |
| 0.00936  | -0.20147 | 1.15E-05 | -0.30581 | 1.45E-11 | -0.22041 | 1.51E-06 | -0.41991 | 2.26E-21 |
| 3.73E-11 | -0.38406 | 7.31E-18 | -0.48755 | 2.95E-29 | -0.47926 | 3.42E-28 | -0.386   | 4.85E-18 |
| 4.19E-26 | -0.26447 | 6.49E-09 | -0.42722 | 3.84E-22 | -0.46349 | 3.01E-26 | -0.51369 | 8.33E-33 |
| 1.94E-48 | -0.36351 | 4.91E-16 | -0.5432  | 3.35E-37 | -0.59779 | 1.39E-46 | -0.57052 | 1.12E-41 |
| 2.10E-06 | -0.19205 | 2.94E-05 | -0.50946 | 3.28E-32 | -0.38862 | 2.76E-18 | -0.18812 | 4.30E-05 |
| 2.96E-15 | -0.11715 | 0.01129  | -0.26712 | 4.52E-09 | -0.32151 | 1.09E-12 | -0.31166 | 5.61E-12 |
| 1.20E-12 | -0.05183 | 0.26368  | -0.29181 | 1.28E-10 | -0.26687 | 4.68E-09 | -0.53126 | 2.27E-35 |
| 0.30145  | -0.24703 | 6.37E-08 | -0.14611 | 0.00154  | -0.1354  | 0.00337  | -0.2425  | 1.12E-07 |
| 3.18E-08 | -0.19099 | 3.26E-05 | -0.23052 | 4.75E-07 | -0.284   | 4.10E-10 | -0.45923 | 9.71E-26 |
| 2.34E-10 | -0.03302 | 0.47652  | -0.19435 | 2.35E-05 | -0.24432 | 8.95E-08 | -0.15001 | 0.00115  |
| 1.21E-05 | -0.06697 | 0.14848  | -0.34627 | 1.33E-14 | -0.25796 | 1.55E-08 | -0.32524 | 5.74E-13 |
| 1.99E-10 | -0.2158  | 2.52E-06 | -0.37713 | 3.13E-17 | -0.32228 | 9.53E-13 | -0.39377 | 9.03E-19 |
| 3.28E-08 | -0.26977 | 3.14E-09 | -0.23347 | 3.35E-07 | -0.25233 | 3.24E-08 | -0.26518 | 5.89E-09 |
| 7.93E-20 | -0.16698 | 0.00029  | -0.31512 | 3.17E-12 | -0.36002 | 9.74E-16 | -0.54194 | 5.27E-37 |
| 3.50E-30 | 0.213745 | 3.15E-06 | 0.19156  | 3.08E-05 | 0.349272 | 7.62E-15 | 0.515443 | 4.69E-33 |
| 3.34E-16 | -0.06844 | 0.13972  | -0.22447 | 9.56E-07 | -0.26562 | 5.55E-09 | -0.3515  | 5.00E-15 |
| 1.30E-08 | -0.12455 | 0.00704  | -0.4472  | 2.42E-24 | -0.32882 | 3.09E-13 | -0.16722 | 0.00028  |
| 6.26E-36 | -0.40041 | 2.07E-19 | -0.48938 | 1.70E-29 | -0.5708  | 1.00E-41 | -0.39754 | 3.93E-19 |
| 1.59E-39 | -0.35272 | 3.97E-15 | -0.56328 | 1.89E-40 | -0.5836  | 5.68E-44 | -0.39585 | 5.71E-19 |
| 5.76E-11 | -0.22797 | 6.39E-07 | -0.29846 | 4.60E-11 | -0.29298 | 1.07E-10 | -0.1722  | 0.00018  |
| 3.68E-17 | 0.394483 | 7.72E-19 | 0.369417 | 1.51E-16 | 0.434679 | 6.03E-23 | 0.542552 | 4.23E-37 |
| 9.66E-19 | -0.32592 | 5.10E-13 | -0.37758 | 2.85E-17 | -0.41152 | 1.64E-20 | -0.51459 | 6.21E-33 |
| 3.33E-16 | -0.28617 | 2.98E-10 | -0.34732 | 1.10E-14 | -0.3672  | 2.36E-16 | -0.41308 | 1.14E-20 |
| 0.00117  | -0.21621 | 2.41E-06 | -0.31872 | 1.74E-12 | -0.26446 | 6.50E-09 | -0.14144 | 0.00219  |
| 7.71E-13 | -0.08879 | 0.05518  | -0.29438 | 8.65E-11 | -0.30218 | 2.57E-11 | -0.38813 | 3.07E-18 |
| 1.13E-06 | -0.21606 | 2.45E-06 | -0.3195  | 1.53E-12 | -0.29865 | 4.47E-11 | -0.31974 | 1.47E-12 |
| 0.12076  | -0.23364 | 3.29E-07 | -0.21061 | 4.42E-06 | -0.2207  | 1.46E-06 | -0.16039 | 0.0005   |
| 1.05E-44 | 0.425772 | 5.48E-22 | 0.45784  | 1.42E-25 | 0.562809 | 2.26E-40 | 0.469161 | 6.18E-27 |
| 2.70E-22 | 0.231776 | 4.10E-07 | 0.390667 | 1.78E-18 | 0.450661 | 9.72E-25 | 0.284939 | 3.57E-10 |
| 7.52E-14 | -0.17406 | 0.00016  | -0.47778 | 5.26E-28 | -0.39543 | 6.27E-19 | -0.46641 | 1.34E-26 |
| 0.00052  | -0.3316  | 1.90E-13 | -0.38891 | 2.59E-18 | -0.31774 | 2.05E-12 | -0.35227 | 4.33E-15 |
| 0.01412  | -0.0581  | 0.21011  | -0.19032 | 3.48E-05 | -0.13513 | 0.00344  | -0.39767 | 3.82E-19 |



|          |          |          |          |          |          |          |          |          |
|----------|----------|----------|----------|----------|----------|----------|----------|----------|
| 0.43453  | -0.07622 | 0.09995  | 0.034745 | 0.45383  | -0.00044 | 0.99238  | 0.538205 | 2.00E-36 |
| 2.17E-05 | -0.11703 | 0.01137  | -0.29836 | 4.68E-11 | -0.27156 | 2.45E-09 | -0.23438 | 3.01E-07 |
| 4.84E-12 | -0.10093 | 0.02919  | -0.34035 | 3.96E-14 | -0.30233 | 2.51E-11 | -0.45919 | 9.82E-26 |
| 4.35E-27 | -0.19166 | 3.06E-05 | -0.46364 | 2.88E-26 | -0.44776 | 2.09E-24 | -0.48518 | 5.99E-29 |
| 9.28E-30 | -0.3389  | 5.16E-14 | -0.46009 | 7.67E-26 | -0.51071 | 2.19E-32 | -0.50392 | 1.92E-31 |
| 3.02E-05 | 0.11648  | 0.01177  | -0.05624 | 0.22508  | -0.05311 | 0.25206  | -0.33312 | 1.45E-13 |
| 2.79E-29 | -0.2552  | 2.23E-08 | -0.47654 | 7.54E-28 | -0.48204 | 1.52E-28 | -0.63599 | 2.67E-54 |
| 5.87E-20 | 0.28597  | 3.07E-10 | 0.453149 | 5.01E-25 | 0.437378 | 3.05E-23 | 0.258445 | 1.46E-08 |
| 1.18E-16 | 0.316005 | 2.74E-12 | 0.402134 | 1.41E-19 | 0.45146  | 7.86E-25 | 0.316811 | 2.39E-12 |
| 4.24E-28 | 0.504548 | 1.57E-31 | 0.656921 | 5.20E-59 | 0.627951 | 1.38E-52 | 0.312584 | 4.82E-12 |
| 3.94E-14 | -0.08158 | 0.07822  | 0.165705 | 0.00032  | 0.195381 | 2.12E-05 | 0.377843 | 2.70E-17 |
| 2.79E-14 | -0.33269 | 1.57E-13 | -0.44778 | 2.08E-24 | -0.45575 | 2.49E-25 | -0.25542 | 2.17E-08 |
| 3.52E-08 | -0.13908 | 0.00259  | -0.24144 | 1.28E-07 | -0.23979 | 1.56E-07 | -0.34485 | 1.74E-14 |
| 1.05E-15 | 0.21172  | 3.92E-06 | 0.361273 | 7.62E-16 | 0.352133 | 4.44E-15 | 0.410883 | 1.90E-20 |
| 0.40527  | 0.260684 | 1.08E-08 | -0.07021 | 0.12978  | -0.04807 | 0.29992  | -0.30128 | 2.97E-11 |
| 8.23E-26 | -0.36457 | 3.98E-16 | -0.47137 | 3.31E-27 | -0.51269 | 1.16E-32 | -0.41008 | 2.29E-20 |
| 4.84E-05 | -0.08498 | 0.06652  | -0.0895  | 0.05326  | -0.18265 | 7.19E-05 | -0.2857  | 3.19E-10 |
| 0.0221   | -0.05921 | 0.20156  | -0.28776 | 2.35E-10 | -0.22164 | 1.32E-06 | -0.26535 | 5.76E-09 |
| 7.62E-10 | -0.21582 | 2.51E-06 | -0.31985 | 1.44E-12 | -0.32808 | 3.51E-13 | -0.36172 | 6.98E-16 |
| 5.58E-13 | -0.19269 | 2.76E-05 | -0.47729 | 6.06E-28 | -0.36251 | 5.98E-16 | -0.25277 | 3.06E-08 |
| 2.98E-18 | -0.09762 | 0.03495  | -0.3552  | 2.47E-15 | -0.34834 | 9.08E-15 | -0.45554 | 2.64E-25 |
| 0.05444  | -0.05586 | 0.22824  | -0.04642 | 0.31687  | -0.07279 | 0.11619  | -0.2443  | 8.96E-08 |
| 4.77E-06 | -0.05971 | 0.19774  | -0.1252  | 0.00675  | -0.14888 | 0.00125  | -0.5165  | 3.31E-33 |
| 1.36E-29 | -0.29263 | 1.13E-10 | -0.53694 | 3.11E-36 | -0.5217  | 5.88E-34 | -0.52304 | 3.76E-34 |
| 0.04124  | -0.08991 | 0.05217  | -0.12133 | 0.00867  | -0.03821 | 0.41001  | 0.441523 | 1.06E-23 |
| 2.22E-24 | -0.21879 | 1.81E-06 | -0.42882 | 2.59E-22 | -0.44728 | 2.37E-24 | -0.59803 | 1.25E-46 |
| 1.95E-09 | -0.27559 | 1.39E-09 | -0.32644 | 4.67E-13 | -0.359   | 1.19E-15 | -0.4589  | 1.06E-25 |
| 0.00258  | 0.095149 | 0.03985  | -0.0722  | 0.11919  | -0.07457 | 0.10755  | -0.25299 | 2.97E-08 |
| 3.26E-17 | -0.21378 | 3.14E-06 | -0.31875 | 1.73E-12 | -0.36342 | 5.00E-16 | -0.51936 | 1.29E-33 |
| 0.00135  | -0.27894 | 8.57E-10 | -0.1875  | 4.56E-05 | -0.19473 | 2.26E-05 | -0.4567  | 1.93E-25 |
| 8.83E-25 | -0.2135  | 3.24E-06 | -0.33114 | 2.06E-13 | -0.40649 | 5.22E-20 | -0.44792 | 2.00E-24 |
| 1.83E-17 | -0.32997 | 2.53E-13 | -0.3193  | 1.58E-12 | -0.42276 | 1.14E-21 | -0.45392 | 4.07E-25 |
| 2.69E-24 | -0.47818 | 4.68E-28 | -0.44918 | 1.44E-24 | -0.52344 | 3.28E-34 | -0.50074 | 5.21E-31 |
| 0.01835  | -0.10992 | 0.01749  | -0.16091 | 0.00048  | -0.1507  | 0.00109  | -0.40698 | 4.67E-20 |
| 0.46875  | -0.19315 | 2.64E-05 | -0.1929  | 2.71E-05 | -0.14062 | 0.00232  | -0.42864 | 2.71E-22 |
| 3.42E-42 | 0.224506 | 9.52E-07 | 0.347676 | 1.03E-14 | 0.490055 | 1.39E-29 | 0.508017 | 5.22E-32 |
| 0.00044  | 0.035976 | 0.43797  | -0.39213 | 1.29E-18 | -0.23987 | 1.55E-07 | -0.106   | 0.02197  |
| 9.01E-14 | -0.32168 | 1.06E-12 | -0.32714 | 4.13E-13 | -0.39669 | 4.74E-19 | -0.40382 | 9.60E-20 |
| 1.99E-20 | -0.39155 | 1.47E-18 | -0.42574 | 5.52E-22 | -0.4578  | 1.43E-25 | -0.57753 | 6.78E-43 |
| 1.24E-26 | -0.27257 | 2.12E-09 | -0.33547 | 9.55E-14 | -0.42812 | 3.08E-22 | -0.3971  | 4.33E-19 |
| 7.89E-10 | -0.28628 | 2.93E-10 | -0.23257 | 3.73E-07 | -0.28735 | 2.50E-10 | -0.34914 | 7.81E-15 |
| 4.06E-20 | -0.34268 | 2.59E-14 | -0.44342 | 6.48E-24 | -0.47044 | 4.31E-27 | -0.48449 | 7.34E-29 |
| 1.44E-21 | -0.41848 | 3.18E-21 | -0.5549  | 4.56E-39 | -0.56412 | 1.36E-40 | -0.42817 | 3.04E-22 |
| 5.78E-15 | 0.281423 | 5.98E-10 | 0.095977 | 0.03814  | 0.26521  | 5.87E-09 | 0.5241   | 2.63E-34 |
| 0.06642  | 0.130737 | 0.00466  | 0.012795 | 0.78272  | 0.025642 | 0.58045  | -0.2537  | 2.71E-08 |

|          |          |          |          |          |          |          |          |          |
|----------|----------|----------|----------|----------|----------|----------|----------|----------|
| 4.30E-11 | -0.27576 | 1.35E-09 | -0.3528  | 3.91E-15 | -0.36725 | 2.34E-16 | -0.49858 | 1.02E-30 |
| 0.94156  | -0.06854 | 0.13916  | -0.11934 | 0.00985  | -0.08568 | 0.06431  | -0.26876 | 3.61E-09 |
| 2.03E-18 | -0.07656 | 0.09844  | -0.31709 | 2.29E-12 | -0.32359 | 7.62E-13 | -0.43641 | 3.89E-23 |
| 2.04E-13 | -0.23411 | 3.11E-07 | -0.38785 | 3.26E-18 | -0.382   | 1.13E-17 | -0.22981 | 5.16E-07 |
| 1.22E-06 | -0.01277 | 0.78306  | -0.20139 | 1.16E-05 | -0.21624 | 2.40E-06 | -0.11047 | 0.01693  |
| 0.03558  | -0.3162  | 2.65E-12 | -0.27399 | 1.74E-09 | -0.24579 | 7.44E-08 | -0.2998  | 3.74E-11 |
| 5.96E-20 | -0.3626  | 5.88E-16 | -0.37617 | 3.82E-17 | -0.45882 | 1.09E-25 | -0.6799  | 1.24E-64 |
| 1.91E-24 | 0.177261 | 0.00012  | 0.418085 | 3.49E-21 | 0.404826 | 7.64E-20 | 0.074047 | 0.11002  |
| 4.63E-45 | -0.41401 | 9.14E-21 | -0.58635 | 1.81E-44 | -0.63087 | 3.34E-53 | -0.55675 | 2.27E-39 |
| 2.38E-16 | -0.23483 | 2.85E-07 | -0.33332 | 1.40E-13 | -0.36583 | 3.10E-16 | -0.41295 | 1.17E-20 |
| 6.97E-23 | -0.19755 | 1.71E-05 | -0.34052 | 3.84E-14 | -0.39581 | 5.77E-19 | -0.58365 | 5.55E-44 |
| 2.18E-05 | 0.284413 | 3.86E-10 | 0.069731 | 0.13241  | 0.179339 | 9.75E-05 | 0.48953  | 1.63E-29 |
| 0.0058   | -0.08163 | 0.07801  | -0.13657 | 0.0031   | -0.13136 | 0.00446  | -0.44224 | 8.80E-24 |
| 6.09E-18 | 0.265661 | 5.52E-09 | 0.349256 | 7.64E-15 | 0.378938 | 2.15E-17 | 0.415317 | 6.73E-21 |
| 0.22389  | -0.15778 | 0.00062  | -0.13784 | 0.00284  | -0.11548 | 0.01252  | -0.38608 | 4.76E-18 |
| 0.00015  | -0.1479  | 0.00135  | -0.29615 | 6.59E-11 | -0.25106 | 3.82E-08 | -0.2778  | 1.01E-09 |
| 2.99E-30 | -0.35066 | 5.87E-15 | -0.41485 | 7.50E-21 | -0.48669 | 3.82E-29 | -0.64599 | 1.67E-56 |
| 1.25E-14 | -0.11466 | 0.01316  | -0.34167 | 3.12E-14 | -0.33851 | 5.53E-14 | -0.41518 | 6.94E-21 |
| 4.30E-18 | -0.34869 | 8.50E-15 | -0.44017 | 1.50E-23 | -0.45104 | 8.79E-25 | -0.21281 | 3.49E-06 |
| 0.20661  | -0.04449 | 0.33741  | -0.06751 | 0.14522  | -0.07673 | 0.0977   | -0.29727 | 5.54E-11 |
| 1.51E-09 | -0.15955 | 0.00054  | -0.29919 | 4.11E-11 | -0.2762  | 1.27E-09 | -0.52177 | 5.74E-34 |
| 0.02393  | -0.05896 | 0.2034   | -0.15227 | 0.00096  | -0.1131  | 0.01447  | -0.40813 | 3.58E-20 |
| 2.34E-11 | -0.33314 | 1.45E-13 | -0.39455 | 7.60E-19 | -0.46359 | 2.93E-26 | -0.08613 | 0.06293  |
| 9.39E-28 | -0.25523 | 2.22E-08 | -0.38593 | 4.91E-18 | -0.45594 | 2.37E-25 | -0.63622 | 2.37E-54 |
| 0.00029  | -0.3585  | 1.31E-15 | -0.27662 | 1.20E-09 | -0.29486 | 8.04E-11 | -0.34271 | 2.57E-14 |
| 0.60584  | -0.12125 | 0.00872  | -0.21267 | 3.54E-06 | -0.12958 | 0.00504  | -0.37075 | 1.15E-16 |
| 1.86E-08 | -0.16142 | 0.00046  | -0.30088 | 3.16E-11 | -0.28739 | 2.49E-10 | -0.51043 | 2.40E-32 |
| 5.13E-07 | -0.23475 | 2.88E-07 | -0.2405  | 1.44E-07 | -0.29067 | 1.52E-10 | -0.43075 | 1.61E-22 |
| 1.18E-07 | -0.46588 | 1.55E-26 | -0.29297 | 1.07E-10 | -0.37112 | 1.07E-16 | -0.53506 | 6.04E-36 |
| 2.06E-05 | -0.06289 | 0.17483  | -0.15146 | 0.00103  | -0.14885 | 0.00126  | -0.29381 | 9.44E-11 |
| 3.03E-12 | -0.30805 | 1.01E-11 | -0.44697 | 2.57E-24 | -0.39691 | 4.52E-19 | -0.27145 | 2.48E-09 |
| 2.70E-46 | -0.30198 | 2.65E-11 | -0.37253 | 8.04E-17 | -0.51033 | 2.48E-32 | -0.4222  | 1.30E-21 |
| 2.71E-08 | -0.35514 | 2.50E-15 | -0.28485 | 3.62E-10 | -0.34502 | 1.68E-14 | -0.52696 | 9.95E-35 |
| 8.35E-13 | -0.16634 | 0.00031  | -0.31105 | 6.20E-12 | -0.31678 | 2.41E-12 | -0.53942 | 1.29E-36 |
| 0.38857  | -0.31425 | 3.67E-12 | -0.1789  | 0.0001   | -0.15869 | 0.00058  | -0.13316 | 0.00394  |
| 3.97E-12 | -0.27433 | 1.66E-09 | -0.36735 | 2.29E-16 | -0.35834 | 1.35E-15 | -0.47807 | 4.84E-28 |
| 3.91E-13 | -0.26984 | 3.11E-09 | -0.37228 | 8.47E-17 | -0.37158 | 9.76E-17 | -0.23494 | 2.81E-07 |
| 2.58E-10 | -0.28094 | 6.42E-10 | -0.28309 | 4.69E-10 | -0.30614 | 1.37E-11 | -0.38133 | 1.30E-17 |
| 1.16E-08 | -0.26126 | 1.00E-08 | -0.24531 | 7.91E-08 | -0.25877 | 1.39E-08 | -0.34864 | 8.58E-15 |
| 1.03E-07 | -0.07223 | 0.11908  | -0.27478 | 1.55E-09 | -0.22323 | 1.10E-06 | -0.38467 | 6.44E-18 |
| 2.47E-16 | -0.13587 | 0.00326  | -0.42507 | 6.50E-22 | -0.36722 | 2.35E-16 | -0.35767 | 1.54E-15 |
| 1.50E-37 | 0.165653 | 0.00032  | 0.435795 | 4.55E-23 | 0.50041  | 5.79E-31 | 0.48643  | 4.13E-29 |
| 3.29E-19 | -0.51915 | 1.38E-33 | -0.4619  | 4.67E-26 | -0.52604 | 1.36E-34 | -0.49597 | 2.30E-30 |
| 4.57E-24 | -0.38183 | 1.17E-17 | -0.5189  | 1.50E-33 | -0.55262 | 1.07E-38 | -0.24394 | 9.38E-08 |
| 2.36E-11 | -0.19834 | 1.58E-05 | -0.41525 | 6.83E-21 | -0.3587  | 1.26E-15 | -0.1477  | 0.00137  |

|          |          |          |           |          |          |          |          |          |
|----------|----------|----------|-----------|----------|----------|----------|----------|----------|
| 4.65E-14 | -0.10078 | 0.02943  | -0.30311  | 2.22E-11 | -0.32975 | 2.63E-13 | -0.04188 | 0.36655  |
| 4.91E-21 | -0.34319 | 2.36E-14 | -0.44799  | 1.97E-24 | -0.47084 | 3.84E-27 | -0.27475 | 1.56E-09 |
| 2.74E-19 | -0.13204 | 0.00426  | -0.36198  | 6.64E-16 | -0.3653  | 3.45E-16 | -0.45893 | 1.05E-25 |
| 1.28E-11 | -0.15982 | 0.00053  | -0.41346  | 1.04E-20 | -0.36641 | 2.76E-16 | -0.27606 | 1.29E-09 |
| 9.50E-05 | -0.08861 | 0.05568  | -0.20929  | 5.09E-06 | -0.16173 | 0.00045  | -0.43089 | 1.55E-22 |
| 4.34E-10 | -0.28986 | 1.72E-10 | -0.45685  | 1.85E-25 | -0.40899 | 2.94E-20 | -0.24531 | 7.91E-08 |
| 5.31E-17 | 0.018919 | 0.68343  | -0.2985   | 4.58E-11 | -0.29791 | 5.02E-11 | -0.05862 | 0.20604  |
| 0.00019  | -0.0288  | 0.5347   | -0.13772  | 0.00286  | -0.14433 | 0.00177  | -0.41479 | 7.61E-21 |
| 6.10E-14 | -0.32255 | 9.09E-13 | -0.41669  | 4.86E-21 | -0.41581 | 5.99E-21 | -0.52974 | 3.83E-35 |
| 1.19E-07 | -0.36743 | 2.25E-16 | -0.43457  | 6.19E-23 | -0.37464 | 5.22E-17 | -0.36655 | 2.69E-16 |
| 1.02E-07 | -0.15643 | 0.00069  | 0.034061  | 0.46276  | 0.089925 | 0.05213  | 0.488455 | 2.25E-29 |
| 2.76E-16 | -0.33217 | 1.71E-13 | -0.32352  | 7.71E-13 | -0.3596  | 1.06E-15 | -0.5416  | 5.95E-37 |
| 4.51E-09 | -0.37406 | 5.89E-17 | -0.30898  | 8.67E-12 | -0.342   | 2.93E-14 | -0.52679 | 1.05E-34 |
| 3.07E-14 | -0.03735 | 0.42066  | -0.10784  | 0.01976  | -0.24402 | 9.29E-08 | -0.19368 | 2.51E-05 |
| 0.50416  | -0.0773  | 0.09523  | -0.19597  | 2.00E-05 | -0.07285 | 0.1159   | -0.3001  | 3.57E-11 |
| 1.43E-13 | -0.40199 | 1.45E-19 | -0.41248  | 1.31E-20 | -0.43785 | 2.70E-23 | -0.54895 | 4.15E-38 |
| 2.84E-15 | -0.10614 | 0.02179  | -0.3384   | 5.64E-14 | -0.33151 | 1.93E-13 | -0.5192  | 1.36E-33 |
| 0.14323  | -0.34888 | 8.20E-15 | -0.21016  | 4.63E-06 | -0.23805 | 1.93E-07 | -0.32874 | 3.13E-13 |
| 0.09835  | -0.0702  | 0.12981  | -0.10737  | 0.02029  | -0.05766 | 0.21361  | -0.26383 | 7.08E-09 |
| 1.75E-05 | 0.380322 | 1.61E-17 | 0.498693  | 9.88E-31 | 0.40769  | 3.97E-20 | 0.494357 | 3.76E-30 |
| 2.48E-34 | -0.26171 | 9.42E-09 | -0.46481  | 2.09E-26 | -0.5044  | 1.65E-31 | -0.5882  | 8.34E-45 |
| 3.13E-07 | -0.11992 | 0.00949  | -0.26493  | 6.10E-09 | -0.24379 | 9.56E-08 | -0.4429  | 7.42E-24 |
| 2.31E-26 | -0.2707  | 2.75E-09 | -0.42572  | 5.54E-22 | -0.43013 | 1.87E-22 | -0.53985 | 1.11E-36 |
| 1.13E-14 | -0.17982 | 9.33E-05 | -0.45017  | 1.11E-24 | -0.38722 | 3.74E-18 | -0.4262  | 4.93E-22 |
| 2.12E-15 | -0.03678 | 0.42781  | -0.25289  | 3.01E-08 | -0.24762 | 5.91E-08 | -0.3561  | 2.08E-15 |
| 1.89E-41 | -0.34744 | 1.07E-14 | -0.52963  | 3.98E-35 | -0.58889 | 6.26E-45 | -0.61756 | 1.92E-50 |
| 2.81E-17 | -0.18452 | 6.04E-05 | -0.31504  | 3.21E-12 | -0.35078 | 5.74E-15 | -0.47649 | 7.65E-28 |
| 2.56E-12 | -0.29128 | 1.39E-10 | -0.31687  | 2.37E-12 | -0.38886 | 2.62E-18 | -0.44483 | 4.49E-24 |
| 3.34E-23 | -0.33134 | 1.98E-13 | -0.36432  | 4.18E-16 | -0.45621 | 2.20E-25 | -0.39975 | 2.40E-19 |
| 2.66E-28 | 0.4365   | 3.81E-23 | 0.553202  | 8.60E-39 | 0.587978 | 9.17E-45 | 0.480017 | 2.74E-28 |
| 1.17E-21 | -0.46387 | 2.71E-26 | -0.5068   | 7.69E-32 | -0.56543 | 8.23E-41 | -0.45253 | 5.92E-25 |
| 0.00023  | 0.045869 | 0.32262  | -0.32162  | 1.07E-12 | -0.20348 | 9.34E-06 | -0.18567 | 5.42E-05 |
| 8.61E-06 | -0.02894 | 0.53277  | -0.20575  | 7.38E-06 | -0.18961 | 3.72E-05 | -0.39405 | 8.48E-19 |
| 1.80E-07 | -0.13636 | 0.00315  | -0.31969  | 1.48E-12 | -0.28589 | 3.11E-10 | -0.4801  | 2.67E-28 |
| 2.78E-06 | -0.20239 | 1.04E-05 | -0.24518  | 8.04E-08 | -0.25497 | 2.30E-08 | -0.38154 | 1.25E-17 |
| 0.00057  | -0.08905 | 0.05447  | -0.22436  | 9.68E-07 | -0.17944 | 9.66E-05 | -0.29541 | 7.38E-11 |
| 2.58E-06 | -0.22867 | 5.90E-07 | -0.32759  | 3.83E-13 | -0.29757 | 5.29E-11 | -0.43225 | 1.11E-22 |
| 4.52E-11 | -0.04347 | 0.34855  | -7.59E-05 | 0.99869  | 0.105176 | 0.02302  | 0.496968 | 1.69E-30 |
| 0.16533  | -0.0862  | 0.06271  | -0.15398  | 0.00084  | -0.07827 | 0.09114  | -0.28342 | 4.47E-10 |
| 0.00073  | 0.217207 | 2.16E-06 | 0.398892  | 2.91E-19 | 0.260586 | 1.10E-08 | 0.312466 | 4.91E-12 |
| 4.15E-30 | -0.26382 | 7.09E-09 | -0.46159  | 5.09E-26 | -0.48976 | 1.52E-29 | -0.40449 | 8.25E-20 |
| 2.20E-20 | -0.13165 | 0.00438  | -0.26932  | 3.34E-09 | -0.31866 | 1.76E-12 | -0.31198 | 5.32E-12 |
| 3.74E-07 | -0.358   | 1.44E-15 | -0.33845  | 5.59E-14 | -0.33333 | 1.40E-13 | -0.31138 | 5.87E-12 |
| 0.64135  | 0.037208 | 0.42244  | -0.00274  | 0.9529   | 0.013115 | 0.77743  | -0.40425 | 8.70E-20 |
| 1.64E-36 | -0.34713 | 1.14E-14 | -0.485    | 6.33E-29 | -0.5474  | 7.31E-38 | -0.64335 | 6.48E-56 |

|          |          |          |          |          |          |          |          |          |
|----------|----------|----------|----------|----------|----------|----------|----------|----------|
| 1.14E-07 | 0.081165 | 0.07974  | 0.135861 | 0.00326  | 0.165064 | 0.00034  | 0.408748 | 3.11E-20 |
| 1.35E-08 | -0.16749 | 0.00028  | -0.16022 | 0.00051  | -0.20868 | 5.42E-06 | -0.40703 | 4.61E-20 |
| 5.39E-11 | -0.31017 | 7.15E-12 | -0.38002 | 1.72E-17 | -0.40117 | 1.75E-19 | -0.39725 | 4.19E-19 |
| 1.21E-30 | -0.18819 | 4.27E-05 | -0.53117 | 2.34E-35 | -0.50226 | 3.24E-31 | -0.26919 | 3.40E-09 |
| 0.34711  | -0.09039 | 0.05094  | -0.05897 | 0.20333  | -0.04085 | 0.37839  | -0.26037 | 1.13E-08 |
| 4.32E-20 | -0.366   | 2.99E-16 | -0.53603 | 4.29E-36 | -0.51563 | 4.41E-33 | -0.44682 | 2.67E-24 |
| 0.00762  | -0.3469  | 1.19E-14 | -0.31433 | 3.62E-12 | -0.26168 | 9.46E-09 | -0.1804  | 8.85E-05 |
| 3.21E-27 | -0.33262 | 1.59E-13 | -0.52871 | 5.47E-35 | -0.53217 | 1.66E-35 | -0.45884 | 1.08E-25 |
| 6.06E-16 | 0.428967 | 2.50E-22 | 0.257905 | 1.56E-08 | 0.398311 | 3.31E-19 | 0.408128 | 3.59E-20 |
| 9.01E-11 | -0.1349  | 0.00349  | -0.30894 | 8.73E-12 | -0.3299  | 2.56E-13 | -0.24264 | 1.10E-07 |
| 1.50E-18 | -0.15635 | 0.0007   | -0.40807 | 3.63E-20 | -0.37358 | 6.50E-17 | -0.32936 | 2.81E-13 |
| 2.70E-26 | -0.21745 | 2.10E-06 | -0.46636 | 1.36E-26 | -0.44219 | 8.90E-24 | -0.28541 | 3.33E-10 |
| 1.36E-08 | 0.021588 | 0.64169  | 0.188479 | 4.15E-05 | 0.208488 | 5.53E-06 | 0.541358 | 6.49E-37 |
| 5.74E-12 | -0.2767  | 1.18E-09 | -0.30316 | 2.20E-11 | -0.37124 | 1.04E-16 | -0.48445 | 7.44E-29 |
| 1.46E-11 | 0.340475 | 3.87E-14 | 0.379016 | 2.11E-17 | 0.366101 | 2.94E-16 | 0.3054   | 1.54E-11 |
| 1.89E-06 | -0.11706 | 0.01135  | -0.17129 | 0.0002   | -0.19164 | 3.06E-05 | -0.44437 | 5.07E-24 |
| 3.49E-26 | -0.21894 | 1.78E-06 | -0.49941 | 7.91E-31 | -0.45831 | 1.25E-25 | -0.4814  | 1.83E-28 |
| 9.29E-11 | -0.2132  | 3.34E-06 | -0.20205 | 1.08E-05 | -0.2693  | 3.35E-09 | -0.3467  | 1.23E-14 |
| 3.69E-13 | -0.24332 | 1.01E-07 | -0.38506 | 5.92E-18 | -0.35282 | 3.90E-15 | -0.2757  | 1.36E-09 |
| 0.04404  | -0.11147 | 0.01595  | -0.26168 | 9.47E-09 | -0.17709 | 0.00012  | 0.011248 | 0.80845  |
| 2.64E-18 | -0.35142 | 5.08E-15 | -0.4807  | 2.24E-28 | -0.45304 | 5.17E-25 | -0.36104 | 7.97E-16 |
| 2.43E-11 | -0.15785 | 0.00062  | -0.34486 | 1.73E-14 | -0.31623 | 2.64E-12 | -0.18346 | 6.67E-05 |
| 7.53E-19 | -0.32803 | 3.55E-13 | -0.39883 | 2.95E-19 | -0.42182 | 1.43E-21 | -0.4565  | 2.03E-25 |
| 3.58E-26 | -0.34049 | 3.86E-14 | -0.46122 | 5.63E-26 | -0.4778  | 5.24E-28 | -0.41536 | 6.65E-21 |
| 4.81E-07 | -0.27246 | 2.16E-09 | -0.32156 | 1.08E-12 | -0.30896 | 8.70E-12 | -0.24339 | 1.00E-07 |
| 4.80E-05 | -0.16543 | 0.00033  | -0.32236 | 9.40E-13 | -0.25632 | 1.93E-08 | -0.3346  | 1.12E-13 |
| 0.00485  | -0.06788 | 0.14304  | -0.1648  | 0.00035  | -0.12218 | 0.00821  | -0.13864 | 0.00268  |
| 1.53E-18 | -0.2714  | 2.50E-09 | -0.55787 | 1.49E-39 | -0.4904  | 1.25E-29 | -0.47807 | 4.84E-28 |
| 1.78E-23 | -0.3577  | 1.53E-15 | -0.54717 | 7.94E-38 | -0.52037 | 9.20E-34 | -0.55354 | 7.57E-39 |
| 2.23E-16 | -0.31118 | 6.07E-12 | -0.53174 | 1.92E-35 | -0.4744  | 1.39E-27 | -0.48123 | 1.92E-28 |
| 5.62E-22 | -0.34226 | 2.80E-14 | -0.56784 | 3.22E-41 | -0.51161 | 1.64E-32 | -0.42053 | 1.95E-21 |
| 3.30E-17 | -0.3345  | 1.14E-13 | -0.47033 | 4.45E-27 | -0.45262 | 5.77E-25 | -0.37694 | 3.25E-17 |
| 4.67E-10 | -0.30916 | 8.42E-12 | -0.41803 | 3.54E-21 | -0.37364 | 6.42E-17 | -0.21539 | 2.64E-06 |
| 1.24E-09 | -0.27864 | 8.95E-10 | -0.49791 | 1.26E-30 | -0.43232 | 1.09E-22 | -0.25085 | 3.92E-08 |
| 1.15E-08 | -0.19143 | 3.12E-05 | -0.35573 | 2.23E-15 | -0.32802 | 3.55E-13 | -0.20553 | 7.55E-06 |
| 6.96E-09 | -0.20067 | 1.25E-05 | -0.49615 | 2.17E-30 | -0.36844 | 1.84E-16 | -0.2594  | 1.28E-08 |
| 5.71E-14 | 0.093316 | 0.04384  | 0.17481  | 0.00015  | 0.246572 | 6.75E-08 | 0.379218 | 2.03E-17 |
| 1.12E-20 | -0.30998 | 7.38E-12 | -0.44181 | 9.83E-24 | -0.47699 | 6.61E-28 | -0.43765 | 2.85E-23 |
| 2.72E-23 | -0.2872  | 2.56E-10 | -0.37113 | 1.07E-16 | -0.43072 | 1.62E-22 | -0.40463 | 7.98E-20 |
| 2.17E-07 | -0.20787 | 5.91E-06 | -0.22506 | 8.93E-07 | -0.24381 | 9.53E-08 | -0.45129 | 8.22E-25 |
| 1.00E-12 | -0.21684 | 2.25E-06 | -0.32011 | 1.38E-12 | -0.35748 | 1.60E-15 | -0.44018 | 1.49E-23 |
| 2.25E-20 | -0.20809 | 5.78E-06 | -0.41701 | 4.51E-21 | -0.41826 | 3.35E-21 | -0.54842 | 5.03E-38 |
| 5.26E-38 | -0.35085 | 5.66E-15 | -0.53614 | 4.14E-36 | -0.56669 | 5.03E-41 | -0.44074 | 1.29E-23 |
| 4.48E-28 | -0.3936  | 9.36E-19 | -0.53804 | 2.11E-36 | -0.53518 | 5.80E-36 | -0.51072 | 2.19E-32 |
| 9.72E-31 | -0.26205 | 9.00E-09 | -0.49673 | 1.82E-30 | -0.51648 | 3.33E-33 | -0.448   | 1.96E-24 |

|          |          |          |          |          |          |          |          |          |
|----------|----------|----------|----------|----------|----------|----------|----------|----------|
| 4.73E-26 | -0.29277 | 1.11E-10 | -0.4378  | 2.74E-23 | -0.46517 | 1.89E-26 | -0.26049 | 1.11E-08 |
| 2.32E-26 | -0.2169  | 2.23E-06 | -0.47106 | 3.61E-27 | -0.46718 | 1.08E-26 | -0.42339 | 9.78E-22 |
| 3.96E-07 | -0.20054 | 1.26E-05 | -0.23124 | 4.36E-07 | -0.24984 | 4.46E-08 | -0.25599 | 2.01E-08 |
| 4.86E-08 | 0.18834  | 4.21E-05 | 0.225783 | 8.23E-07 | 0.242879 | 1.07E-07 | 0.448782 | 1.60E-24 |
| 1.52E-40 | -0.39006 | 2.02E-18 | -0.51626 | 3.58E-33 | -0.59816 | 1.18E-46 | -0.30964 | 7.79E-12 |
| 0.97699  | 0.109304 | 0.01814  | -0.07643 | 0.09901  | 0.0065   | 0.88858  | -0.41792 | 3.63E-21 |
| 8.02E-21 | -0.2006  | 1.25E-05 | -0.39344 | 9.71E-19 | -0.4116  | 1.61E-20 | -0.53787 | 2.25E-36 |
| 0.02188  | 0.052253 | 0.25977  | 0.015465 | 0.73888  | 0.120196 | 0.00932  | -0.40373 | 9.80E-20 |
| 0.00085  | -0.25814 | 1.52E-08 | -0.24168 | 1.24E-07 | -0.2282  | 6.22E-07 | -0.28092 | 6.44E-10 |
| 0.00034  | -0.0484  | 0.2966   | -0.1354  | 0.00337  | -0.14782 | 0.00136  | -0.49767 | 1.36E-30 |
| 4.35E-10 | -0.10549 | 0.02262  | -0.32933 | 2.82E-13 | -0.29894 | 4.28E-11 | -0.26826 | 3.86E-09 |
| 2.65E-17 | -0.23263 | 3.70E-07 | -0.3774  | 2.96E-17 | -0.39784 | 3.68E-19 | -0.54873 | 4.48E-38 |
| 4.23E-20 | -0.22875 | 5.84E-07 | -0.50679 | 7.72E-32 | -0.44473 | 4.61E-24 | -0.43935 | 1.85E-23 |
| 0.50932  | -0.13935 | 0.00254  | -0.04362 | 0.34695  | -0.03079 | 0.50688  | -0.08322 | 0.07239  |
| 1.24E-20 | -0.30753 | 1.10E-11 | -0.47394 | 1.59E-27 | -0.48183 | 1.61E-28 | -0.57415 | 2.65E-42 |
| 9.52E-07 | 0.129322 | 0.00513  | 0.027998 | 0.54616  | 0.113036 | 0.01452  | -0.31914 | 1.62E-12 |
| 0.00101  | -0.13372 | 0.00379  | -0.15362 | 0.00087  | -0.19731 | 1.75E-05 | -0.31835 | 1.85E-12 |
| 1.94E-08 | -0.13258 | 0.0041   | -0.34149 | 3.22E-14 | -0.29814 | 4.84E-11 | -0.3812  | 1.34E-17 |
| 1.77E-09 | -0.36518 | 3.53E-16 | -0.41806 | 3.51E-21 | -0.41044 | 2.10E-20 | -0.29115 | 1.41E-10 |
| 2.84E-10 | 0.157952 | 0.00061  | 0.15807  | 0.00061  | 0.221414 | 1.35E-06 | 0.230869 | 4.56E-07 |
| 4.91E-18 | 0.431588 | 1.31E-22 | 0.256756 | 1.82E-08 | 0.382617 | 9.93E-18 | 0.445069 | 4.22E-24 |
| 4.91E-21 | 0.334389 | 1.16E-13 | 0.325829 | 5.19E-13 | 0.426648 | 4.42E-22 | 0.417624 | 3.90E-21 |
| 7.02E-17 | -0.16975 | 0.00023  | -0.37838 | 2.41E-17 | -0.38077 | 1.47E-17 | -0.46701 | 1.13E-26 |
| 0.03941  | -0.06521 | 0.15946  | -0.03162 | 0.49551  | -0.11082 | 0.01658  | -0.37769 | 2.78E-17 |
| 1.34E-05 | -0.03423 | 0.46059  | -0.1588  | 0.00057  | -0.15076 | 0.00108  | -0.41877 | 2.96E-21 |
| 5.12E-07 | 0.311727 | 5.54E-12 | 0.26451  | 6.46E-09 | 0.296496 | 6.25E-11 | 0.473768 | 1.67E-27 |
| 4.10E-29 | -0.34388 | 2.08E-14 | -0.50633 | 8.93E-32 | -0.52307 | 3.72E-34 | -0.35331 | 3.55E-15 |
| 1.01E-14 | -0.10164 | 0.02808  | -0.29916 | 4.13E-11 | -0.30827 | 9.72E-12 | -0.49302 | 5.66E-30 |
| 1.41E-26 | -0.39546 | 6.22E-19 | -0.48639 | 4.18E-29 | -0.52618 | 1.30E-34 | -0.54054 | 8.71E-37 |
| 3.65E-13 | -0.19778 | 1.67E-05 | -0.30909 | 8.51E-12 | -0.32485 | 6.14E-13 | -0.52093 | 7.63E-34 |
| 8.00E-05 | -0.09287 | 0.04487  | -0.23789 | 1.97E-07 | -0.19769 | 1.68E-05 | -0.44529 | 3.99E-24 |
| 9.59E-21 | -0.24812 | 5.55E-08 | -0.43556 | 4.83E-23 | -0.45406 | 3.93E-25 | -0.52718 | 9.22E-35 |
| 6.14E-20 | -0.34048 | 3.87E-14 | -0.45853 | 1.17E-25 | -0.45568 | 2.54E-25 | -0.35437 | 2.90E-15 |
| 9.53E-06 | -0.13542 | 0.00337  | -0.30239 | 2.49E-11 | -0.29418 | 8.92E-11 | -0.0814  | 0.07887  |
| 1.37E-06 | -0.09714 | 0.03586  | -0.16877 | 0.00025  | -0.17812 | 0.00011  | -0.35815 | 1.40E-15 |
| 3.57E-17 | 0.265214 | 5.87E-09 | 0.24949  | 4.66E-08 | 0.353676 | 3.31E-15 | 0.309323 | 8.20E-12 |
| 6.35E-10 | -0.18476 | 5.91E-05 | -0.26738 | 4.36E-09 | -0.28721 | 2.55E-10 | -0.28095 | 6.41E-10 |
| 6.50E-38 | -0.3387  | 5.34E-14 | -0.55336 | 8.11E-39 | -0.58443 | 4.02E-44 | -0.46712 | 1.10E-26 |
| 0.90528  | 0.008305 | 0.85794  | -0.24613 | 7.13E-08 | -0.06592 | 0.15492  | -0.3474  | 1.08E-14 |
| 3.32E-47 | -0.47959 | 3.11E-28 | -0.70173 | 1.78E-70 | -0.7014  | 2.20E-70 | -0.46938 | 5.80E-27 |
| 1.28E-08 | 0.034459 | 0.45755  | -0.11229 | 0.01519  | -0.16826 | 0.00026  | -0.23432 | 3.03E-07 |
| 6.17E-27 | 0.360985 | 8.07E-16 | 0.339529 | 4.60E-14 | 0.469986 | 4.90E-27 | 0.545958 | 1.24E-37 |
| 3.23E-05 | -0.20335 | 9.46E-06 | -0.28881 | 2.01E-10 | -0.26796 | 4.03E-09 | -0.36742 | 2.26E-16 |
| 7.26E-27 | -0.31019 | 7.13E-12 | -0.47676 | 7.07E-28 | -0.52544 | 1.67E-34 | -0.21438 | 2.94E-06 |
| 1.44E-17 | -0.1751  | 0.00014  | -0.27375 | 1.80E-09 | -0.33178 | 1.84E-13 | -0.55627 | 2.73E-39 |

|          |          |          |          |          |          |          |          |          |
|----------|----------|----------|----------|----------|----------|----------|----------|----------|
| 3.42E-09 | -0.17721 | 0.00012  | -0.39077 | 1.74E-18 | -0.32604 | 5.00E-13 | -0.20759 | 6.09E-06 |
| 1.87E-23 | -0.34119 | 3.40E-14 | -0.44541 | 3.86E-24 | -0.47834 | 4.47E-28 | -0.59598 | 3.04E-46 |
| 6.79E-17 | -0.0233  | 0.61544  | 0.139809 | 0.00246  | 0.178023 | 0.00011  | 0.539648 | 1.20E-36 |
| 2.24E-19 | -0.37127 | 1.04E-16 | -0.4447  | 4.65E-24 | -0.49011 | 1.37E-29 | -0.29445 | 8.55E-11 |
| 1.90E-07 | -0.14205 | 0.00209  | -0.26744 | 4.32E-09 | -0.27111 | 2.60E-09 | -0.34525 | 1.61E-14 |
| 3.66E-07 | -0.05444 | 0.2403   | -0.19119 | 3.20E-05 | -0.19429 | 2.36E-05 | -0.43858 | 2.25E-23 |
| 1.94E-31 | -0.24261 | 1.11E-07 | -0.4226  | 1.18E-21 | -0.47252 | 2.38E-27 | -0.54435 | 2.21E-37 |
| 5.75E-14 | 0.346934 | 1.18E-14 | 0.311722 | 5.55E-12 | 0.408147 | 3.57E-20 | 0.185923 | 5.29E-05 |
| 2.67E-14 | -0.24097 | 1.35E-07 | -0.34219 | 2.83E-14 | -0.38    | 1.72E-17 | -0.5564  | 2.60E-39 |
| 3.57E-35 | -0.43807 | 2.55E-23 | -0.5724  | 5.32E-42 | -0.6189  | 1.03E-50 | -0.45557 | 2.62E-25 |
| 1.12E-19 | -0.15118 | 0.00105  | -0.41285 | 1.20E-20 | -0.38951 | 2.28E-18 | -0.50355 | 2.16E-31 |
| 2.42E-23 | -0.34579 | 1.46E-14 | -0.46105 | 5.89E-26 | -0.48348 | 9.93E-29 | -0.26441 | 6.54E-09 |
| 5.05E-21 | -0.136   | 0.00323  | -0.39371 | 9.15E-19 | -0.39126 | 1.56E-18 | -0.55322 | 8.54E-39 |
| 2.42E-20 | 0.197964 | 1.64E-05 | 0.337416 | 6.73E-14 | 0.395056 | 6.80E-19 | 0.520759 | 8.07E-34 |
| 0.60741  | -0.19465 | 2.28E-05 | -0.11278 | 0.01475  | -0.10456 | 0.02384  | -0.32408 | 7.00E-13 |
| 2.05E-09 | -0.17476 | 0.00015  | -0.42294 | 1.09E-21 | -0.35432 | 2.93E-15 | -0.46744 | 1.00E-26 |
| 1.27E-20 | 0.212478 | 3.61E-06 | 0.297064 | 5.72E-11 | 0.364126 | 4.35E-16 | 0.339513 | 4.61E-14 |
| 1.62E-28 | 0.377209 | 3.08E-17 | 0.463755 | 2.80E-26 | 0.532786 | 1.34E-35 | 0.359024 | 1.18E-15 |
| 0.00019  | 0.039028 | 0.40009  | -0.1319  | 0.0043   | 0.010645 | 0.81854  | -0.1703  | 0.00022  |
| 1.53E-11 | -0.09887 | 0.03267  | -0.21169 | 3.94E-06 | -0.26269 | 8.26E-09 | -0.4855  | 5.45E-29 |
| 1.55E-30 | 0.366665 | 2.63E-16 | 0.216153 | 2.42E-06 | 0.415342 | 6.69E-21 | 0.520094 | 1.01E-33 |
| 2.11E-14 | -0.22969 | 5.23E-07 | -0.35901 | 1.19E-15 | -0.39186 | 1.37E-18 | -0.33577 | 9.05E-14 |
| 1.03E-05 | -0.11289 | 0.01465  | -0.32359 | 7.61E-13 | -0.28259 | 5.05E-10 | -0.44043 | 1.40E-23 |
| 5.80E-11 | -0.13143 | 0.00444  | -0.30089 | 3.15E-11 | -0.28896 | 1.97E-10 | -0.6395  | 4.59E-55 |
| 0.01966  | -0.06831 | 0.14048  | 0.017693 | 0.70294  | 0.0245   | 0.59743  | 0.105776 | 0.02225  |
| 9.54E-07 | -0.09094 | 0.04952  | -0.29365 | 9.66E-11 | -0.25784 | 1.58E-08 | -0.57968 | 2.84E-43 |
| 9.02E-23 | -0.29105 | 1.44E-10 | -0.39382 | 8.93E-19 | -0.44985 | 1.20E-24 | -0.49202 | 7.68E-30 |
| 3.70E-32 | -0.31329 | 4.29E-12 | -0.53849 | 1.80E-36 | -0.54934 | 3.59E-38 | -0.55217 | 1.26E-38 |
| 0.92084  | 0.012795 | 0.78272  | -0.00096 | 0.98355  | 0.01135  | 0.80674  | -0.41367 | 9.90E-21 |
| 0.31197  | 0.05133  | 0.26829  | 0.159737 | 0.00053  | 0.090642 | 0.05028  | -0.365   | 3.66E-16 |
| 0.00176  | -0.07567 | 0.10242  | -0.20951 | 4.97E-06 | -0.15733 | 0.00064  | -0.37239 | 8.27E-17 |
| 4.93E-25 | -0.34174 | 3.08E-14 | -0.4712  | 3.47E-27 | -0.49881 | 9.52E-31 | -0.47578 | 9.39E-28 |
| 8.36E-08 | 0.09917  | 0.03214  | 0.227684 | 6.61E-07 | 0.240857 | 1.37E-07 | 0.372968 | 7.36E-17 |
| 0.04284  | -0.32687 | 4.33E-13 | -0.39065 | 1.78E-18 | -0.29804 | 4.92E-11 | -0.25703 | 1.76E-08 |
| 3.15E-20 | -0.38267 | 9.82E-18 | -0.46024 | 7.36E-26 | -0.49111 | 1.01E-29 | -0.46576 | 1.60E-26 |
| 7.04E-18 | -0.13144 | 0.00444  | -0.36983 | 1.39E-16 | -0.38272 | 9.71E-18 | -0.62938 | 6.89E-53 |
| 4.27E-16 | -0.16831 | 0.00026  | -0.36133 | 7.55E-16 | -0.36248 | 6.01E-16 | -0.48291 | 1.17E-28 |
| 3.05E-15 | -0.24535 | 7.87E-08 | -0.32356 | 7.65E-13 | -0.35243 | 4.20E-15 | -0.47741 | 5.86E-28 |
| 1.09E-27 | -0.34645 | 1.29E-14 | -0.49096 | 1.06E-29 | -0.53201 | 1.75E-35 | -0.42984 | 2.01E-22 |
| 0.78863  | -0.30053 | 3.33E-11 | -0.22741 | 6.82E-07 | -0.20805 | 5.80E-06 | -0.16509 | 0.00034  |
| 4.84E-13 | -0.3653  | 3.44E-16 | -0.4202  | 2.11E-21 | -0.46226 | 4.23E-26 | -0.39497 | 6.93E-19 |
| 5.99E-18 | -0.18175 | 7.81E-05 | -0.38063 | 1.51E-17 | -0.3871  | 3.83E-18 | -0.32831 | 3.37E-13 |
| 1.47E-17 | 0.161772 | 0.00045  | 0.167653 | 0.00027  | 0.269392 | 3.30E-09 | 0.584785 | 3.47E-44 |
| 0.09117  | 0.036846 | 0.42697  | 0.001782 | 0.96937  | -0.00407 | 0.93016  | -0.33257 | 1.60E-13 |
| 1.70E-17 | 0.265953 | 5.30E-09 | 0.139342 | 0.00255  | 0.275945 | 1.32E-09 | 0.528242 | 6.41E-35 |

|          |          |          |          |          |          |          |          |          |
|----------|----------|----------|----------|----------|----------|----------|----------|----------|
| 4.45E-10 | -0.36311 | 5.31E-16 | -0.44805 | 1.93E-24 | -0.4219  | 1.40E-21 | -0.42565 | 5.64E-22 |
| 2.10E-37 | -0.33496 | 1.05E-13 | -0.50227 | 3.23E-31 | -0.55113 | 1.85E-38 | -0.61451 | 7.86E-50 |
| 2.88E-12 | -0.13799 | 0.0028   | -0.33067 | 2.23E-13 | -0.31421 | 3.69E-12 | -0.44939 | 1.36E-24 |
| 1.20E-20 | -0.22838 | 6.09E-07 | -0.39391 | 8.75E-19 | -0.4291  | 2.42E-22 | -0.23254 | 3.74E-07 |
| 8.98E-09 | -0.14952 | 0.00119  | -0.29146 | 1.35E-10 | -0.26189 | 9.20E-09 | -0.49282 | 6.01E-30 |
| 2.53E-09 | -0.46206 | 4.46E-26 | -0.42062 | 1.91E-21 | -0.43699 | 3.37E-23 | -0.50708 | 7.05E-32 |
| 0.02431  | -0.08303 | 0.07305  | -0.20545 | 7.61E-06 | -0.16567 | 0.00032  | -0.08853 | 0.05591  |
| 7.10E-13 | -0.14893 | 0.00125  | -0.17728 | 0.00012  | -0.24163 | 1.25E-07 | -0.44915 | 1.45E-24 |
| 2.45E-32 | -0.43218 | 1.13E-22 | -0.49726 | 1.54E-30 | -0.57251 | 5.08E-42 | -0.48307 | 1.12E-28 |
| 7.26E-09 | 0.240933 | 1.36E-07 | 0.275304 | 1.44E-09 | 0.288339 | 2.16E-10 | 0.443689 | 6.04E-24 |
| 8.24E-06 | -0.21734 | 2.13E-06 | -0.29333 | 1.02E-10 | -0.25984 | 1.21E-08 | -0.35842 | 1.33E-15 |
| 1.80E-10 | -0.09788 | 0.03447  | -0.28536 | 3.36E-10 | -0.28009 | 7.26E-10 | -0.26308 | 7.83E-09 |
| 2.33E-18 | 0.431077 | 1.48E-22 | 0.306974 | 1.20E-11 | 0.410329 | 2.16E-20 | 0.460272 | 7.30E-26 |
| 8.31E-34 | 0.425633 | 5.67E-22 | 0.43431  | 6.61E-23 | 0.551091 | 1.88E-38 | 0.328066 | 3.52E-13 |
| 2.73E-08 | -0.35693 | 1.77E-15 | -0.34627 | 1.33E-14 | -0.32833 | 3.37E-13 | -0.34541 | 1.56E-14 |
| 0.05818  | 0.084384 | 0.06847  | 0.036041 | 0.43715  | -0.01559 | 0.73685  | -0.30021 | 3.51E-11 |
| 7.88E-06 | -0.11383 | 0.01384  | -0.19677 | 1.84E-05 | -0.22245 | 1.20E-06 | -0.53332 | 1.11E-35 |
| 1.69E-24 | -0.15907 | 0.00056  | -0.3963  | 5.17E-19 | -0.41355 | 1.02E-20 | -0.32869 | 3.16E-13 |
| 3.73E-15 | -0.21587 | 2.50E-06 | -0.33536 | 9.73E-14 | -0.33438 | 1.16E-13 | -0.27463 | 1.59E-09 |
| 6.95E-07 | -0.21368 | 3.17E-06 | -0.24993 | 4.41E-08 | -0.27855 | 9.06E-10 | -0.44139 | 1.09E-23 |
| 5.35E-27 | -0.34725 | 1.11E-14 | -0.4656  | 1.68E-26 | -0.5088  | 4.06E-32 | -0.35846 | 1.32E-15 |
| 0.00331  | -0.10249 | 0.02677  | -0.18331 | 6.76E-05 | -0.17531 | 0.00014  | -0.4834  | 1.02E-28 |
| 3.07E-06 | -0.09513 | 0.03989  | -0.19534 | 2.13E-05 | -0.19842 | 1.56E-05 | -0.48063 | 2.29E-28 |
| 1.51E-08 | -0.02886 | 0.53391  | -0.36277 | 5.68E-16 | -0.27117 | 2.58E-09 | -0.1932  | 2.63E-05 |
| 0.02015  | 0.139618 | 0.0025   | -0.14182 | 0.00213  | -0.07613 | 0.10034  | -0.18582 | 5.34E-05 |
| 2.21E-13 | -0.25335 | 2.84E-08 | -0.37763 | 2.82E-17 | -0.38624 | 4.61E-18 | -0.38585 | 5.01E-18 |
| 1.91E-23 | -0.22242 | 1.21E-06 | -0.38912 | 2.48E-18 | -0.42907 | 2.44E-22 | -0.45082 | 9.30E-25 |
| 0.00011  | -0.09726 | 0.03562  | -0.16859 | 0.00025  | -0.14561 | 0.0016   | -0.369   | 1.64E-16 |
| 0.30557  | 0.032434 | 0.48442  | 0.002832 | 0.95133  | -0.00437 | 0.92501  | -0.21321 | 3.34E-06 |
| 2.58E-19 | -0.16908 | 0.00024  | -0.485   | 6.33E-29 | -0.43253 | 1.03E-22 | -0.18114 | 8.27E-05 |
| 6.93E-21 | -0.24348 | 9.93E-08 | -0.39652 | 4.92E-19 | -0.42497 | 6.66E-22 | -0.55731 | 1.84E-39 |
| 6.30E-06 | -0.07258 | 0.11729  | -0.06124 | 0.1865   | -0.1222  | 0.0082   | -0.30213 | 2.59E-11 |
| 3.97E-27 | -0.25577 | 2.07E-08 | -0.45363 | 4.41E-25 | -0.48155 | 1.75E-28 | -0.60252 | 1.76E-47 |
| 4.56E-15 | -0.20797 | 5.84E-06 | -0.41949 | 2.50E-21 | -0.39591 | 5.64E-19 | -0.57166 | 7.14E-42 |
| 0.00016  | -0.0527  | 0.25567  | -0.16301 | 0.0004   | -0.14204 | 0.00209  | -0.36358 | 4.85E-16 |
| 8.00E-09 | -0.143   | 0.00195  | -0.20052 | 1.26E-05 | -0.25307 | 2.94E-08 | -0.21739 | 2.12E-06 |
| 8.57E-15 | -0.37372 | 6.31E-17 | -0.58271 | 8.18E-44 | -0.52791 | 7.19E-35 | -0.31166 | 5.61E-12 |
| 3.69E-26 | 0.456516 | 2.03E-25 | 0.50558  | 1.13E-31 | 0.542913 | 3.72E-37 | 0.558546 | 1.15E-39 |
| 2.91E-07 | -0.19681 | 1.84E-05 | -0.30637 | 1.32E-11 | -0.29223 | 1.20E-10 | -0.33831 | 5.74E-14 |
| 1.21E-15 | -0.11373 | 0.01393  | -0.30445 | 1.79E-11 | -0.33193 | 1.79E-13 | -0.41758 | 3.94E-21 |
| 6.80E-12 | -0.2853  | 3.39E-10 | -0.30656 | 1.28E-11 | -0.32094 | 1.20E-12 | -0.38078 | 1.46E-17 |
| 1.85E-13 | -0.12007 | 0.0094   | -0.2599  | 1.20E-08 | -0.2729  | 2.02E-09 | -0.13796 | 0.00281  |
| 2.38E-11 | -0.06716 | 0.14731  | -0.25977 | 1.22E-08 | -0.25457 | 2.42E-08 | -0.52636 | 1.22E-34 |
| 6.97E-17 | -0.33447 | 1.14E-13 | -0.3711  | 1.08E-16 | -0.40181 | 1.51E-19 | -0.65439 | 2.02E-58 |
| 5.09E-24 | 0.394516 | 7.66E-19 | 0.332524 | 1.61E-13 | 0.466894 | 1.17E-26 | 0.367618 | 2.17E-16 |

|          |          |          |          |          |          |          |          |          |
|----------|----------|----------|----------|----------|----------|----------|----------|----------|
| 2.70E-05 | -0.16083 | 0.00049  | -0.21004 | 4.69E-06 | -0.2206  | 1.48E-06 | -0.38584 | 5.02E-18 |
| 2.42E-16 | 0.035038 | 0.45002  | 0.202646 | 1.02E-05 | 0.248029 | 5.61E-08 | 0.544205 | 2.33E-37 |
| 0.00047  | -0.29186 | 1.27E-10 | -0.45029 | 1.07E-24 | -0.36405 | 4.41E-16 | -0.24944 | 4.69E-08 |
| 1.70E-10 | 0.283265 | 4.57E-10 | 0.408979 | 2.95E-20 | 0.350155 | 6.45E-15 | 0.591028 | 2.53E-45 |
| 9.79E-06 | 0.320612 | 1.26E-12 | 0.306372 | 1.32E-11 | 0.314872 | 3.30E-12 | 0.517469 | 2.41E-33 |
| 3.30E-32 | -0.47023 | 4.57E-27 | -0.66601 | 3.56E-61 | -0.65457 | 1.84E-58 | -0.41545 | 6.51E-21 |
| 2.60E-28 | -0.35338 | 3.50E-15 | -0.49092 | 1.07E-29 | -0.5275  | 8.26E-35 | -0.41657 | 5.01E-21 |
| 3.96E-10 | -0.14143 | 0.00219  | -0.21724 | 2.15E-06 | -0.24025 | 1.48E-07 | -0.38901 | 2.54E-18 |
| 0.16871  | -0.05702 | 0.21871  | -0.13387 | 0.00375  | -0.07268 | 0.11675  | -0.36764 | 2.16E-16 |
| 1.92E-11 | -0.30335 | 2.14E-11 | -0.20104 | 1.20E-05 | -0.33895 | 5.10E-14 | -0.41722 | 4.29E-21 |
| 2.12E-09 | -0.2031  | 9.71E-06 | -0.24212 | 1.18E-07 | -0.28157 | 5.86E-10 | -0.28937 | 1.85E-10 |
| 6.36E-24 | -0.43994 | 1.58E-23 | -0.4837  | 9.29E-29 | -0.53591 | 4.48E-36 | -0.62276 | 1.66E-51 |
| 0.27813  | -0.07193 | 0.12058  | -0.16776 | 0.00027  | -0.13775 | 0.00285  | -0.33714 | 7.07E-14 |
| 4.60E-05 | 0.088866 | 0.05498  | -0.12443 | 0.0071   | -0.09265 | 0.04538  | -0.27545 | 1.41E-09 |
| 3.72E-38 | -0.42272 | 1.15E-21 | -0.56391 | 1.48E-40 | -0.60256 | 1.72E-47 | -0.47376 | 1.68E-27 |
| 0.26468  | 0.047995 | 0.30067  | 0.008226 | 0.85927  | 0.012695 | 0.78439  | -0.25193 | 3.41E-08 |
| 5.40E-10 | -0.1772  | 0.00012  | -0.41726 | 4.25E-21 | -0.3587  | 1.26E-15 | -0.35206 | 4.51E-15 |
| 2.80E-16 | -0.32159 | 1.07E-12 | -0.41151 | 1.64E-20 | -0.42653 | 4.55E-22 | -0.49172 | 8.41E-30 |
| 7.52E-10 | -0.19156 | 3.08E-05 | -0.26549 | 5.65E-09 | -0.29144 | 1.35E-10 | -0.39773 | 3.76E-19 |
| 7.51E-05 | -0.02876 | 0.53532  | -0.31062 | 6.65E-12 | -0.21629 | 2.39E-06 | -0.18818 | 4.27E-05 |
| 4.90E-33 | -0.27009 | 3.00E-09 | -0.41885 | 2.91E-21 | -0.46823 | 8.04E-27 | -0.44107 | 1.19E-23 |
| 1.09E-05 | -0.07263 | 0.117    | -0.13288 | 0.00402  | -0.16232 | 0.00043  | -0.19885 | 1.50E-05 |
| 9.81E-15 | -0.12309 | 0.00774  | -0.32473 | 6.26E-13 | -0.31727 | 2.22E-12 | -0.48639 | 4.18E-29 |
| 1.60E-18 | -0.23236 | 3.82E-07 | -0.41977 | 2.33E-21 | -0.43712 | 3.25E-23 | -0.41876 | 2.97E-21 |
| 9.70E-39 | -0.48648 | 4.07E-29 | -0.60324 | 1.28E-47 | -0.65202 | 7.12E-58 | -0.52703 | 9.72E-35 |
| 1.51E-23 | -0.34602 | 1.40E-14 | -0.66007 | 9.44E-60 | -0.57654 | 1.01E-42 | -0.42557 | 5.75E-22 |
| 2.14E-06 | -0.21398 | 3.07E-06 | -0.30436 | 1.82E-11 | -0.29513 | 7.71E-11 | -0.428   | 3.17E-22 |
| 2.02E-13 | -0.13676 | 0.00306  | -0.23693 | 2.22E-07 | -0.28439 | 3.88E-10 | -0.27172 | 2.39E-09 |
| 4.03E-22 | -0.16998 | 0.00022  | -0.35381 | 3.23E-15 | -0.39925 | 2.68E-19 | -0.25868 | 1.41E-08 |
| 0.00533  | 0.114047 | 0.01366  | 0.103455 | 0.02537  | 0.119446 | 0.00978  | 0.706909 | 6.09E-72 |
| 6.40E-32 | -0.41891 | 2.87E-21 | -0.52504 | 1.91E-34 | -0.56427 | 1.29E-40 | -0.54664 | 9.65E-38 |
| 0.06574  | -0.06967 | 0.13273  | 0.046204 | 0.31908  | -0.05754 | 0.21459  | -0.40109 | 1.78E-19 |
| 0.32777  | 0.075704 | 0.10227  | -0.11824 | 0.01055  | -0.05468 | 0.23829  | -0.37958 | 1.88E-17 |
| 2.25E-17 | -0.3034  | 2.12E-11 | -0.40421 | 8.79E-20 | -0.42482 | 6.90E-22 | -0.39342 | 9.75E-19 |
| 2.23E-14 | -0.42231 | 1.27E-21 | -0.51273 | 1.14E-32 | -0.48557 | 5.34E-29 | -0.35481 | 2.66E-15 |
| 2.60E-25 | -0.41892 | 2.86E-21 | -0.49269 | 6.27E-30 | -0.5179  | 2.09E-33 | -0.74281 | 4.68E-83 |
| 2.54E-11 | -0.15304 | 0.00091  | -0.2883  | 2.17E-10 | -0.32775 | 3.72E-13 | -0.32513 | 5.85E-13 |
| 3.17E-07 | -0.07489 | 0.10605  | -0.20241 | 1.04E-05 | -0.20379 | 9.05E-06 | -0.41847 | 3.19E-21 |
| 1.56E-17 | 0.308098 | 1.00E-11 | 0.411715 | 1.56E-20 | 0.423431 | 9.68E-22 | 0.304528 | 1.77E-11 |
| 1.97E-27 | -0.33027 | 2.40E-13 | -0.4634  | 3.09E-26 | -0.50113 | 4.62E-31 | -0.5585  | 1.17E-39 |
| 1.25E-18 | -0.20774 | 5.99E-06 | -0.34585 | 1.44E-14 | -0.39504 | 6.83E-19 | -0.5298  | 3.76E-35 |
| 7.39E-39 | -0.43559 | 4.79E-23 | -0.50665 | 8.08E-32 | -0.57969 | 2.82E-43 | -0.58471 | 3.59E-44 |
| 1.97E-09 | -0.28475 | 3.67E-10 | -0.41279 | 1.22E-20 | -0.379   | 2.12E-17 | -0.37548 | 4.40E-17 |
| 3.85E-32 | -0.28057 | 6.77E-10 | -0.5116  | 1.64E-32 | -0.54657 | 9.90E-38 | -0.27362 | 1.83E-09 |
| 0.26985  | -0.09866 | 0.03304  | -0.24133 | 1.30E-07 | -0.14802 | 0.00134  | -0.28623 | 2.95E-10 |



|          |          |          |          |          |          |          |          |          |
|----------|----------|----------|----------|----------|----------|----------|----------|----------|
| 4.70E-09 | -0.38216 | 1.09E-17 | -0.30074 | 3.23E-11 | -0.35492 | 2.61E-15 | -0.32806 | 3.52E-13 |
| 1.82E-23 | -0.21212 | 3.76E-06 | -0.32657 | 4.56E-13 | -0.38407 | 7.31E-18 | -0.59102 | 2.54E-45 |
| 9.12E-12 | -0.27149 | 2.47E-09 | -0.3398  | 4.38E-14 | -0.34048 | 3.87E-14 | -0.20205 | 1.08E-05 |
| 0.08196  | -0.24616 | 7.10E-08 | -0.14071 | 0.0023   | -0.18179 | 7.79E-05 | -0.29304 | 1.06E-10 |
| 9.09E-14 | -0.11356 | 0.01407  | -0.40941 | 2.67E-20 | -0.33241 | 1.64E-13 | -0.13457 | 0.00357  |
| 0.58663  | 0.078729 | 0.08924  | -0.12701 | 0.00599  | -0.0622  | 0.17967  | -0.29615 | 6.59E-11 |
| 8.13E-05 | 0.290626 | 1.53E-10 | 0.302731 | 2.36E-11 | 0.27664  | 1.19E-09 | 0.55063  | 2.23E-38 |
| 0.02738  | -0.14703 | 0.00144  | -0.06255 | 0.17719  | -0.01961 | 0.67258  | 0.616861 | 2.65E-50 |
| 2.47E-11 | -0.36623 | 2.86E-16 | -0.38863 | 2.76E-18 | -0.41847 | 3.19E-21 | -0.41945 | 2.52E-21 |
| 0.19739  | 0.049601 | 0.28476  | -0.15521 | 0.00076  | -0.04519 | 0.3298   | -0.34872 | 8.45E-15 |
| 0.00961  | -0.33839 | 5.65E-14 | -0.35703 | 1.74E-15 | -0.31243 | 4.94E-12 | -0.40738 | 4.27E-20 |
| 6.99E-30 | 0.388629 | 2.76E-18 | 0.447919 | 2.00E-24 | 0.475086 | 1.14E-27 | 0.373383 | 6.76E-17 |
| 4.31E-14 | -0.00588 | 0.89909  | -0.09274 | 0.04517  | -0.22842 | 6.07E-07 | -0.40226 | 1.37E-19 |
| 0.00495  | -0.23705 | 2.18E-07 | -0.15079 | 0.00108  | -0.17593 | 0.00013  | -0.3871  | 3.83E-18 |
| 5.58E-08 | -0.41677 | 4.77E-21 | -0.52513 | 1.85E-34 | -0.47159 | 3.11E-27 | -0.3343  | 1.18E-13 |
| 3.52E-14 | -0.23936 | 1.65E-07 | -0.32649 | 4.63E-13 | -0.3516  | 4.92E-15 | -0.23932 | 1.66E-07 |
| 6.14E-07 | -0.28198 | 5.52E-10 | -0.28775 | 2.36E-10 | -0.34239 | 2.73E-14 | -0.24189 | 1.21E-07 |
| 2.42E-09 | -0.28989 | 1.71E-10 | -0.29426 | 8.81E-11 | -0.3126  | 4.81E-12 | -0.3699  | 1.37E-16 |
| 1.63E-07 | -0.14272 | 0.00199  | -0.24156 | 1.26E-07 | -0.25505 | 2.28E-08 | -0.32524 | 5.74E-13 |
| 6.30E-14 | -0.24536 | 7.85E-08 | -0.16958 | 0.00023  | -0.32597 | 5.06E-13 | -0.28121 | 6.17E-10 |
| 1.72E-12 | -0.13067 | 0.00468  | -0.19813 | 1.61E-05 | -0.30137 | 2.92E-11 | -0.39296 | 1.08E-18 |
| 1.33E-09 | -0.14879 | 0.00126  | -0.26906 | 3.46E-09 | -0.30072 | 3.24E-11 | -0.43093 | 1.54E-22 |
| 3.90E-28 | 0.212861 | 3.47E-06 | 0.375993 | 3.96E-17 | 0.429483 | 2.20E-22 | 0.438265 | 2.43E-23 |
| 1.29E-07 | -0.15455 | 0.00081  | -0.27855 | 9.07E-10 | -0.29433 | 8.72E-11 | -0.41652 | 5.06E-21 |
| 3.29E-09 | 0.419362 | 2.58E-21 | 0.33102  | 2.10E-13 | 0.383151 | 8.87E-18 | 0.681338 | 5.28E-65 |
| 7.52E-13 | -0.26583 | 5.39E-09 | -0.54253 | 4.26E-37 | -0.46543 | 1.76E-26 | -0.09448 | 0.04127  |
| 6.85E-08 | -0.40079 | 1.90E-19 | -0.27979 | 7.58E-10 | -0.34094 | 3.56E-14 | -0.25885 | 1.38E-08 |
| 1.69E-11 | -0.14103 | 0.00225  | -0.34764 | 1.03E-14 | -0.33832 | 5.72E-14 | -0.45104 | 8.78E-25 |
| 2.47E-07 | -0.3383  | 5.74E-14 | -0.29239 | 1.17E-10 | -0.32131 | 1.12E-12 | -0.42346 | 9.61E-22 |
| 2.31E-38 | 0.311512 | 5.74E-12 | 0.435522 | 4.87E-23 | 0.502414 | 3.09E-31 | 0.607803 | 1.67E-48 |
| 7.06E-07 | 0.331492 | 1.93E-13 | 0.506021 | 9.87E-32 | 0.400725 | 1.93E-19 | 0.275087 | 1.49E-09 |
| 9.61E-19 | -0.21787 | 2.01E-06 | -0.31622 | 2.64E-12 | -0.38746 | 3.54E-18 | -0.38983 | 2.13E-18 |
| 1.53E-27 | -0.26992 | 3.07E-09 | -0.44759 | 2.19E-24 | -0.46997 | 4.91E-27 | -0.5907  | 2.91E-45 |
| 1.38E-07 | -0.22025 | 1.54E-06 | -0.37665 | 3.45E-17 | -0.30424 | 1.86E-11 | -0.43145 | 1.35E-22 |
| 1.38E-10 | -0.3168  | 2.40E-12 | -0.31924 | 1.59E-12 | -0.36874 | 1.73E-16 | -0.29713 | 5.66E-11 |
| 1.03E-21 | -0.30617 | 1.36E-11 | -0.44438 | 5.06E-24 | -0.48569 | 5.14E-29 | -0.45809 | 1.32E-25 |
| 5.55E-06 | 0.320715 | 1.24E-12 | 0.386496 | 4.36E-18 | 0.369155 | 1.59E-16 | 0.600162 | 4.95E-47 |
| 8.37E-15 | -0.27869 | 8.89E-10 | -0.48276 | 1.23E-28 | -0.41544 | 6.53E-21 | -0.34506 | 1.67E-14 |
| 6.16E-46 | 0.363912 | 4.54E-16 | 0.48765  | 2.87E-29 | 0.563878 | 1.50E-40 | 0.531806 | 1.88E-35 |
| 1.15E-18 | -0.4746  | 1.32E-27 | -0.51511 | 5.24E-33 | -0.51694 | 2.87E-33 | -0.47969 | 3.02E-28 |
| 9.49E-18 | -0.43507 | 5.46E-23 | -0.39586 | 5.70E-19 | -0.43607 | 4.25E-23 | -0.37152 | 9.88E-17 |
| 6.91E-15 | -0.28664 | 2.78E-10 | -0.41656 | 5.02E-21 | -0.44139 | 1.09E-23 | -0.40891 | 3.00E-20 |
| 8.06E-17 | -0.20141 | 1.15E-05 | -0.38986 | 2.11E-18 | -0.39904 | 2.81E-19 | -0.18182 | 7.76E-05 |
| 1.27E-16 | 0.233272 | 3.43E-07 | 0.218042 | 1.97E-06 | 0.343157 | 2.37E-14 | 0.388709 | 2.71E-18 |
| 0.11013  | -0.0839  | 0.07006  | -0.30999 | 7.37E-12 | -0.20248 | 1.04E-05 | -0.01028 | 0.82462  |

|          |          |          |          |          |          |          |          |          |
|----------|----------|----------|----------|----------|----------|----------|----------|----------|
| 1.31E-08 | -0.13355 | 0.00384  | -0.26452 | 6.45E-09 | -0.27493 | 1.52E-09 | -0.42246 | 1.22E-21 |
| 0.08142  | 0.045974 | 0.3215   | -0.16444 | 0.00036  | 0.003449 | 0.94075  | -0.33216 | 1.72E-13 |
| 7.11E-05 | -0.091   | 0.04937  | -0.16052 | 0.0005   | -0.16758 | 0.00028  | -0.29984 | 3.71E-11 |
| 6.01E-09 | -0.31949 | 1.53E-12 | -0.33671 | 7.65E-14 | -0.33734 | 6.83E-14 | -0.45892 | 1.05E-25 |
| 4.41E-08 | -0.22783 | 6.50E-07 | -0.27161 | 2.43E-09 | -0.26274 | 8.20E-09 | -0.37574 | 4.17E-17 |
| 8.62E-15 | -0.18709 | 4.74E-05 | -0.33447 | 1.14E-13 | -0.36979 | 1.40E-16 | -0.423   | 1.07E-21 |
| 4.77E-22 | -0.25891 | 1.37E-08 | -0.39498 | 6.92E-19 | -0.43731 | 3.10E-23 | -0.54873 | 4.50E-38 |
| 4.25E-24 | -0.3346  | 1.12E-13 | -0.41146 | 1.66E-20 | -0.46609 | 1.46E-26 | -0.48373 | 9.21E-29 |
| 1.58E-10 | 0.324776 | 6.22E-13 | 0.251931 | 3.41E-08 | 0.342375 | 2.74E-14 | 0.54569  | 1.36E-37 |
| 1.68E-28 | -0.32684 | 4.35E-13 | -0.45539 | 2.74E-25 | -0.49161 | 8.69E-30 | -0.56885 | 2.16E-41 |
| 6.17E-22 | 0.42327  | 1.01E-21 | 0.294336 | 8.71E-11 | 0.41982  | 2.31E-21 | 0.432391 | 1.07E-22 |
| 1.96E-18 | -0.23312 | 3.49E-07 | -0.36346 | 4.96E-16 | -0.39169 | 1.42E-18 | -0.56695 | 4.55E-41 |
| 1.25E-16 | -0.23466 | 2.91E-07 | -0.36838 | 1.86E-16 | -0.397   | 4.43E-19 | -0.23322 | 3.45E-07 |
| 0.08848  | 0.107427 | 0.02023  | 0.086772 | 0.06098  | 0.000812 | 0.98604  | -0.2844  | 3.87E-10 |
| 1.22E-08 | 0.125599 | 0.00657  | 0.212595 | 3.57E-06 | 0.223162 | 1.11E-06 | 0.502538 | 2.97E-31 |
| 1.16E-08 | -0.18835 | 4.20E-05 | -0.40485 | 7.59E-20 | -0.32841 | 3.32E-13 | -0.17883 | 0.0001   |
| 5.44E-05 | 0.133168 | 0.00394  | 0.258638 | 1.42E-08 | 0.237845 | 1.98E-07 | 0.357095 | 1.72E-15 |
| 1.23E-05 | -0.00592 | 0.8984   | -0.04226 | 0.36222  | -0.08366 | 0.07089  | -0.43966 | 1.71E-23 |
| 2.75E-07 | -0.21091 | 4.28E-06 | -0.22726 | 6.94E-07 | -0.28318 | 4.63E-10 | -0.42973 | 2.07E-22 |
| 2.12E-11 | -0.01662 | 0.72023  | -0.20468 | 8.25E-06 | -0.19885 | 1.50E-05 | -0.46549 | 1.73E-26 |
| 3.90E-05 | -0.16979 | 0.00023  | -0.23121 | 4.38E-07 | -0.21096 | 4.25E-06 | -0.17761 | 0.00011  |
| 1.62E-14 | -0.24142 | 1.28E-07 | -0.36841 | 1.85E-16 | -0.41911 | 2.74E-21 | -0.1262  | 0.00632  |
| 3.00E-16 | -0.12616 | 0.00633  | -0.32065 | 1.26E-12 | -0.34266 | 2.60E-14 | -0.30472 | 1.72E-11 |
| 6.25E-24 | -0.43587 | 4.46E-23 | -0.58774 | 1.01E-44 | -0.55797 | 1.44E-39 | -0.42289 | 1.10E-21 |
| 2.43E-33 | -0.33177 | 1.84E-13 | -0.59934 | 7.09E-47 | -0.60663 | 2.82E-48 | -0.37685 | 3.31E-17 |
| 4.88E-11 | 0.494036 | 4.15E-30 | 0.417222 | 4.29E-21 | 0.463547 | 2.96E-26 | 0.506327 | 8.95E-32 |
| 1.26E-11 | -0.27379 | 1.79E-09 | -0.38672 | 4.16E-18 | -0.36213 | 6.45E-16 | -0.37319 | 7.04E-17 |
| 1.59E-11 | -0.00731 | 0.8748   | -0.26893 | 3.52E-09 | -0.22897 | 5.69E-07 | -0.2245  | 9.53E-07 |
| 1.32E-14 | -0.09031 | 0.05114  | -0.27844 | 9.21E-10 | -0.28154 | 5.88E-10 | -0.52927 | 4.50E-35 |
| 1.23E-08 | -0.36534 | 3.42E-16 | -0.36014 | 9.51E-16 | -0.3777  | 2.78E-17 | -0.38934 | 2.37E-18 |
| 3.25E-18 | -0.34895 | 8.09E-15 | -0.37065 | 1.18E-16 | -0.42293 | 1.09E-21 | -0.25658 | 1.86E-08 |
| 1.03E-52 | -0.35654 | 1.91E-15 | -0.43662 | 3.69E-23 | -0.5883  | 8.00E-45 | -0.36784 | 2.08E-16 |
| 1.53E-09 | -0.31504 | 3.21E-12 | -0.56526 | 8.78E-41 | -0.48211 | 1.48E-28 | -0.30482 | 1.69E-11 |
| 6.78E-15 | -0.27425 | 1.67E-09 | -0.45684 | 1.85E-25 | -0.40905 | 2.90E-20 | -0.44088 | 1.25E-23 |
| 0.00302  | 0.081266 | 0.07937  | -0.10838 | 0.01914  | -0.09294 | 0.04471  | -0.26962 | 3.20E-09 |
| 0.02873  | -0.04356 | 0.34756  | -0.11005 | 0.01735  | -0.12315 | 0.00772  | -0.35447 | 2.85E-15 |
| 1.69E-08 | 0.214583 | 2.88E-06 | 0.299596 | 3.86E-11 | 0.283228 | 4.60E-10 | 0.37212  | 8.74E-17 |
| 0.60675  | 0.000725 | 0.98754  | -0.28844 | 2.12E-10 | -0.12687 | 0.00604  | -0.18121 | 8.21E-05 |
| 7.86E-10 | -0.2603  | 1.14E-08 | -0.35471 | 2.72E-15 | -0.3454  | 1.57E-14 | -0.31711 | 2.28E-12 |
| 2.57E-15 | -0.28209 | 5.43E-10 | -0.48568 | 5.17E-29 | -0.45287 | 5.40E-25 | -0.23346 | 3.36E-07 |
| 0.11195  | 0.080205 | 0.08338  | -0.34829 | 9.17E-15 | -0.16995 | 0.00022  | -0.28388 | 4.18E-10 |
| 0.00021  | -0.00067 | 0.98849  | 0.054895 | 0.23641  | 0.081841 | 0.07726  | 0.511462 | 1.72E-32 |
| 9.31E-10 | -0.24744 | 6.05E-08 | -0.41397 | 9.23E-21 | -0.38131 | 1.31E-17 | -0.44385 | 5.80E-24 |
| 1.18E-12 | 0.226375 | 7.69E-07 | 0.272708 | 2.08E-09 | 0.340083 | 4.16E-14 | 0.434741 | 5.93E-23 |
| 1.14E-35 | -0.42431 | 7.81E-22 | -0.5287  | 5.49E-35 | -0.58262 | 8.51E-44 | -0.56467 | 1.10E-40 |

|          |          |          |          |          |          |          |          |          |
|----------|----------|----------|----------|----------|----------|----------|----------|----------|
| 2.58E-18 | -0.27918 | 8.28E-10 | -0.38682 | 4.06E-18 | -0.40719 | 4.45E-20 | -0.58301 | 7.24E-44 |
| 0.53088  | -0.15631 | 0.0007   | -0.14149 | 0.00218  | -0.08607 | 0.06311  | -0.32148 | 1.09E-12 |
| 8.31E-21 | -0.24576 | 7.47E-08 | -0.39623 | 5.25E-19 | -0.42783 | 3.31E-22 | -0.56917 | 1.91E-41 |
| 7.29E-09 | -0.36731 | 2.31E-16 | -0.5172  | 2.63E-33 | -0.43766 | 2.83E-23 | -0.42322 | 1.02E-21 |
| 5.53E-14 | -0.19048 | 3.42E-05 | -0.42877 | 2.63E-22 | -0.39073 | 1.75E-18 | -0.4235  | 9.52E-22 |
| 1.72E-40 | 0.472854 | 2.17E-27 | 0.407052 | 4.59E-20 | 0.56159  | 3.61E-40 | 0.412583 | 1.28E-20 |
| 0.77908  | -0.08123 | 0.0795   | -0.12869 | 0.00535  | -0.08907 | 0.05442  | -0.24479 | 8.44E-08 |
| 0.33566  | -0.09807 | 0.03412  | -0.18585 | 5.33E-05 | -0.13607 | 0.00322  | -0.43499 | 5.58E-23 |
| 4.51E-20 | 0.363609 | 4.82E-16 | 0.34877  | 8.37E-15 | 0.434642 | 6.08E-23 | 0.157776 | 0.00062  |
| 9.87E-09 | -0.29297 | 1.07E-10 | -0.37955 | 1.89E-17 | -0.35186 | 4.67E-15 | -0.52465 | 2.18E-34 |
| 1.41E-17 | 0.225247 | 8.75E-07 | 0.262976 | 7.95E-09 | 0.32856  | 3.23E-13 | 0.220481 | 1.50E-06 |
| 7.37E-10 | -0.31209 | 5.22E-12 | -0.34964 | 7.11E-15 | -0.37594 | 4.00E-17 | -0.49006 | 1.39E-29 |
| 1.17E-16 | -0.39615 | 5.34E-19 | -0.38235 | 1.05E-17 | -0.42859 | 2.75E-22 | -0.38629 | 4.56E-18 |
| 1.21E-10 | 0.422543 | 1.20E-21 | 0.197056 | 1.79E-05 | 0.324837 | 6.15E-13 | 0.381486 | 1.26E-17 |
| 0.01343  | 0.111596 | 0.01584  | 0.130259 | 0.00481  | 0.129719 | 0.00499  | 0.565336 | 8.52E-41 |
| 0.00045  | -0.05812 | 0.20993  | -0.22587 | 8.15E-07 | -0.18977 | 3.67E-05 | -0.48193 | 1.57E-28 |
| 1.35E-19 | 0.226999 | 7.15E-07 | 0.499463 | 7.78E-31 | 0.442512 | 8.19E-24 | 0.506948 | 7.34E-32 |
| 2.26E-08 | -0.04821 | 0.2985   | -0.12239 | 0.0081   | -0.17798 | 0.00011  | -0.22189 | 1.28E-06 |
| 1.35E-15 | -0.2127  | 3.53E-06 | -0.35774 | 1.52E-15 | -0.37904 | 2.10E-17 | -0.36509 | 3.59E-16 |
| 3.76E-06 | -0.13787 | 0.00283  | -0.2503  | 4.20E-08 | -0.21262 | 3.56E-06 | -0.36966 | 1.44E-16 |
| 9.64E-08 | 0.332535 | 1.61E-13 | 0.179305 | 9.78E-05 | 0.285775 | 3.16E-10 | 0.408499 | 3.29E-20 |
| 8.21E-10 | -0.4973  | 1.52E-30 | -0.42482 | 6.90E-22 | -0.4227  | 1.15E-21 | -0.38941 | 2.33E-18 |
| 3.44E-08 | -0.16171 | 0.00045  | -0.27291 | 2.02E-09 | -0.26521 | 5.87E-09 | -0.46578 | 1.59E-26 |
| 5.77E-23 | -0.25729 | 1.70E-08 | -0.4197  | 2.38E-21 | -0.46874 | 6.95E-27 | -0.5449  | 1.81E-37 |
| 3.21E-09 | -0.24062 | 1.41E-07 | -0.39506 | 6.80E-19 | -0.31762 | 2.09E-12 | -0.30579 | 1.45E-11 |
| 4.56E-13 | -0.19196 | 2.97E-05 | -0.34526 | 1.61E-14 | -0.36341 | 5.01E-16 | -0.44025 | 1.46E-23 |
| 9.69E-21 | -0.09697 | 0.03617  | -0.3406  | 3.78E-14 | -0.35356 | 3.38E-15 | -0.22695 | 7.19E-07 |
| 6.82E-19 | 0.230745 | 4.62E-07 | 0.150604 | 0.0011   | 0.336605 | 7.79E-14 | 0.437689 | 2.82E-23 |
| 2.87E-12 | -0.33227 | 1.69E-13 | -0.25014 | 4.29E-08 | -0.34218 | 2.83E-14 | -0.56592 | 6.80E-41 |
| 1.05E-14 | -0.13571 | 0.0033   | -0.36922 | 1.57E-16 | -0.34868 | 8.52E-15 | -0.29383 | 9.40E-11 |
| 8.08E-25 | -0.22138 | 1.36E-06 | -0.28867 | 2.05E-10 | -0.39013 | 1.99E-18 | -0.3463  | 1.33E-14 |
| 0.00089  | 0.033324 | 0.47251  | -0.2218  | 1.29E-06 | -0.13226 | 0.00419  | -0.46983 | 5.12E-27 |
| 6.12E-27 | -0.21892 | 1.79E-06 | -0.43538 | 5.05E-23 | -0.44857 | 1.69E-24 | -0.54085 | 7.80E-37 |
| 1.08E-08 | -0.41793 | 3.63E-21 | -0.35801 | 1.44E-15 | -0.37478 | 5.08E-17 | -0.50747 | 6.21E-32 |
| 2.34E-17 | -0.38139 | 1.29E-17 | -0.42483 | 6.89E-22 | -0.46676 | 1.21E-26 | -0.53107 | 2.42E-35 |
| 6.77E-23 | -0.19076 | 3.33E-05 | -0.44576 | 3.53E-24 | -0.43425 | 6.71E-23 | -0.36608 | 2.95E-16 |
| 5.47E-14 | -0.25097 | 3.86E-08 | -0.50455 | 1.57E-31 | -0.438   | 2.61E-23 | -0.3145  | 3.52E-12 |
| 8.06E-05 | -0.18872 | 4.06E-05 | -0.24326 | 1.02E-07 | -0.22187 | 1.28E-06 | -0.21745 | 2.10E-06 |
| 1.25E-09 | -0.19474 | 2.26E-05 | -0.29813 | 4.85E-11 | -0.3133  | 4.28E-12 | -0.38188 | 1.16E-17 |
| 0.39664  | 0.06574  | 0.15608  | 0.022038 | 0.63477  | -0.04634 | 0.3177   | -0.40413 | 8.95E-20 |
| 1.74E-06 | 0.012936 | 0.78039  | -0.46372 | 2.82E-26 | -0.29199 | 1.24E-10 | -0.09077 | 0.04997  |
| 0.00062  | -0.17296 | 0.00017  | -0.26424 | 6.70E-09 | -0.22    | 1.58E-06 | -0.39807 | 3.49E-19 |
| 1.30E-32 | -0.24709 | 6.32E-08 | -0.42487 | 6.83E-22 | -0.46174 | 4.88E-26 | -0.52557 | 1.60E-34 |
| 1.85E-28 | -0.3194  | 1.55E-12 | -0.54112 | 7.06E-37 | -0.54421 | 2.33E-37 | -0.50871 | 4.18E-32 |
| 0.50904  | 0.180774 | 8.55E-05 | 0.028042 | 0.54551  | 0.108074 | 0.01949  | -0.29404 | 9.11E-11 |

|          |          |          |          |          |          |          |          |          |
|----------|----------|----------|----------|----------|----------|----------|----------|----------|
| 2.91E-06 | -0.12817 | 0.00554  | -0.2687  | 3.64E-09 | -0.26211 | 8.93E-09 | -0.15165 | 0.00101  |
| 2.85E-07 | -0.14253 | 0.00202  | -0.2727  | 2.08E-09 | -0.26812 | 3.94E-09 | -0.36723 | 2.35E-16 |
| 1.14E-20 | -0.24471 | 8.52E-08 | -0.40137 | 1.67E-19 | -0.42963 | 2.12E-22 | -0.34221 | 2.82E-14 |
| 9.95E-05 | 0.301125 | 3.04E-11 | 0.415439 | 6.54E-21 | 0.344553 | 1.83E-14 | 0.333561 | 1.34E-13 |
| 1.32E-29 | -0.27922 | 8.23E-10 | -0.44917 | 1.44E-24 | -0.48479 | 6.74E-29 | -0.46132 | 5.48E-26 |
| 2.80E-05 | -0.35475 | 2.70E-15 | -0.32133 | 1.12E-12 | -0.32044 | 1.30E-12 | -0.42046 | 1.98E-21 |
| 0.0868   | -0.09757 | 0.03503  | -0.01505 | 0.74564  | 0.010839 | 0.81529  | 0.326376 | 4.72E-13 |
| 0.00047  | -0.18747 | 4.57E-05 | -0.26385 | 7.06E-09 | -0.22545 | 8.55E-07 | -0.04054 | 0.38212  |
| 1.08E-22 | 0.095077 | 0.04     | 0.039086 | 0.39939  | 0.227974 | 6.39E-07 | 0.557608 | 1.65E-39 |
| 0.85065  | -0.10548 | 0.02263  | -0.03373 | 0.46707  | -0.02356 | 0.61153  | -0.37561 | 4.28E-17 |
| 1.10E-07 | 0.502686 | 2.83E-31 | 0.253829 | 2.67E-08 | 0.358879 | 1.22E-15 | 0.459717 | 8.49E-26 |
| 0.05311  | -0.017   | 0.71405  | -0.23971 | 1.58E-07 | -0.07062 | 0.12755  | -0.3503  | 6.28E-15 |
| 6.42E-13 | -0.24814 | 5.53E-08 | -0.33583 | 8.94E-14 | -0.35037 | 6.19E-15 | -0.42447 | 7.52E-22 |
| 5.22E-05 | 0.319976 | 1.41E-12 | 0.483306 | 1.04E-28 | 0.34715  | 1.13E-14 | 0.251897 | 3.43E-08 |
| 9.88E-09 | -0.26904 | 3.47E-09 | -0.33619 | 8.40E-14 | -0.33136 | 1.98E-13 | -0.48696 | 3.52E-29 |
| 1.71E-18 | -0.2409  | 1.37E-07 | -0.35496 | 2.59E-15 | -0.38694 | 3.96E-18 | -0.28931 | 1.87E-10 |
| 4.21E-10 | -0.11892 | 0.01011  | -0.38224 | 1.08E-17 | -0.3064  | 1.31E-11 | -0.33764 | 6.46E-14 |
| 2.47E-24 | -0.42034 | 2.04E-21 | -0.47751 | 5.69E-28 | -0.53148 | 2.11E-35 | -0.41055 | 2.05E-20 |
| 0.00051  | -0.28863 | 2.07E-10 | -0.31031 | 6.99E-12 | -0.27544 | 1.41E-09 | -0.21113 | 4.18E-06 |
| 3.18E-05 | -0.21221 | 3.72E-06 | -0.23533 | 2.69E-07 | -0.24299 | 1.06E-07 | -0.47655 | 7.50E-28 |
| 0.7579   | -0.08457 | 0.06786  | -0.22259 | 1.18E-06 | -0.14877 | 0.00126  | -0.43776 | 2.76E-23 |
| 0.21139  | 0.019952 | 0.66716  | -0.03149 | 0.49728  | 0.007654 | 0.86897  | -0.52878 | 5.33E-35 |
| 7.65E-13 | -0.16833 | 0.00026  | -0.24905 | 4.93E-08 | -0.29825 | 4.76E-11 | -0.38332 | 8.56E-18 |
| 3.25E-21 | -0.31044 | 6.84E-12 | -0.63906 | 5.72E-55 | -0.5696  | 1.61E-41 | -0.24253 | 1.12E-07 |
| 2.00E-06 | -0.20214 | 1.07E-05 | -0.29113 | 1.42E-10 | -0.27451 | 1.61E-09 | -0.27466 | 1.58E-09 |
| 7.47E-15 | -0.31894 | 1.68E-12 | -0.33345 | 1.37E-13 | -0.37817 | 2.52E-17 | -0.52615 | 1.31E-34 |
| 0.03059  | 0.014816 | 0.74948  | -0.07767 | 0.09364  | -0.10338 | 0.02548  | -0.33955 | 4.58E-14 |
| 5.06E-19 | -0.31493 | 3.28E-12 | -0.35073 | 5.79E-15 | -0.41486 | 7.48E-21 | -0.46413 | 2.52E-26 |
| 3.95E-11 | -0.2149  | 2.78E-06 | -0.33981 | 4.37E-14 | -0.34778 | 1.01E-14 | -0.39336 | 9.87E-19 |
| 4.03E-34 | -0.31506 | 3.20E-12 | -0.57303 | 4.14E-42 | -0.56254 | 2.51E-40 | -0.34746 | 1.07E-14 |
| 2.80E-14 | -0.10103 | 0.02904  | -0.38907 | 2.51E-18 | -0.34519 | 1.63E-14 | -0.35285 | 3.87E-15 |
| 6.86E-27 | -0.32477 | 6.23E-13 | -0.52008 | 1.01E-33 | -0.52974 | 3.84E-35 | -0.66972 | 4.41E-62 |
| 1.19E-20 | -0.20284 | 9.98E-06 | -0.50664 | 8.10E-32 | -0.45909 | 1.01E-25 | -0.43217 | 1.13E-22 |
| 0.00049  | 0.066944 | 0.14862  | 0.142249 | 0.00206  | 0.175548 | 0.00014  | 0.312741 | 4.70E-12 |
| 7.10E-24 | -0.33138 | 1.97E-13 | -0.43694 | 3.40E-23 | -0.47822 | 4.62E-28 | -0.30537 | 1.55E-11 |
| 0.93568  | 0.010172 | 0.82646  | -0.01832 | 0.69294  | -0.02563 | 0.58057  | -0.36034 | 9.15E-16 |
| 1.73E-14 | -0.43923 | 1.90E-23 | -0.45024 | 1.09E-24 | -0.48199 | 1.54E-28 | -0.50329 | 2.35E-31 |
| 8.06E-09 | -0.21097 | 4.25E-06 | -0.22492 | 9.08E-07 | -0.28473 | 3.69E-10 | -0.39949 | 2.54E-19 |
| 0.49586  | -0.19639 | 1.92E-05 | -0.19168 | 3.05E-05 | -0.1377  | 0.00286  | -0.29646 | 6.28E-11 |
| 4.64E-19 | -0.21575 | 2.53E-06 | -0.37712 | 3.13E-17 | -0.38466 | 6.45E-18 | -0.42885 | 2.58E-22 |
| 0.00064  | -0.25514 | 2.25E-08 | -0.32501 | 5.98E-13 | -0.30515 | 1.60E-11 | -0.346   | 1.40E-14 |
| 5.94E-09 | -0.09165 | 0.04776  | -0.33118 | 2.04E-13 | -0.2651  | 5.96E-09 | -0.20581 | 7.33E-06 |
| 2.84E-08 | -0.39244 | 1.21E-18 | -0.34914 | 7.81E-15 | -0.37288 | 7.49E-17 | -0.39248 | 1.20E-18 |
| 3.87E-22 | -0.20823 | 5.69E-06 | -0.4816  | 1.73E-28 | -0.44332 | 6.65E-24 | -0.41933 | 2.59E-21 |
| 6.08E-18 | -0.35625 | 2.02E-15 | -0.5912  | 2.35E-45 | -0.55321 | 8.57E-39 | -0.31606 | 2.71E-12 |

|          |          |          |          |          |          |          |          |          |
|----------|----------|----------|----------|----------|----------|----------|----------|----------|
| 0.00267  | 0.191036 | 3.24E-05 | 0.138129 | 0.00278  | 0.137638 | 0.00288  | 0.429141 | 2.39E-22 |
| 2.34E-13 | -0.27257 | 2.12E-09 | -0.4579  | 1.39E-25 | -0.43046 | 1.73E-22 | -0.43712 | 3.25E-23 |
| 2.02E-39 | -0.4153  | 6.75E-21 | -0.61135 | 3.34E-49 | -0.6343  | 6.17E-54 | -0.48956 | 1.62E-29 |
| 2.77E-17 | -0.24234 | 1.14E-07 | -0.47298 | 2.09E-27 | -0.46861 | 7.21E-27 | -0.51544 | 4.70E-33 |
| 4.01E-15 | -0.25967 | 1.24E-08 | -0.4212  | 1.66E-21 | -0.42507 | 6.50E-22 | -0.54912 | 3.89E-38 |
| 1.55E-08 | -0.1993  | 1.43E-05 | -0.38676 | 4.12E-18 | -0.30648 | 1.30E-11 | -0.38791 | 3.22E-18 |
| 2.16E-34 | -0.27267 | 2.09E-09 | -0.5179  | 2.09E-33 | -0.52456 | 2.25E-34 | -0.53769 | 2.39E-36 |
| 1.52E-08 | -0.12082 | 0.00896  | -0.2483  | 5.43E-08 | -0.24558 | 7.64E-08 | -0.51014 | 2.63E-32 |
| 4.63E-10 | -0.21855 | 1.86E-06 | -0.32112 | 1.16E-12 | -0.31029 | 7.01E-12 | -0.43177 | 1.25E-22 |
| 1.21E-22 | -0.29972 | 3.78E-11 | -0.4205  | 1.96E-21 | -0.46056 | 6.75E-26 | -0.58902 | 5.91E-45 |
| 1.83E-06 | -0.25243 | 3.20E-08 | -0.29767 | 5.21E-11 | -0.3028  | 2.33E-11 | -0.34963 | 7.12E-15 |
| 1.36E-28 | -0.23145 | 4.26E-07 | -0.45263 | 5.76E-25 | -0.49231 | 7.02E-30 | -0.47368 | 1.71E-27 |
| 5.24E-14 | -0.20307 | 9.75E-06 | -0.30704 | 1.19E-11 | -0.34431 | 1.92E-14 | -0.23762 | 2.04E-07 |
| 4.33E-39 | -0.36626 | 2.85E-16 | -0.60417 | 8.44E-48 | -0.62926 | 7.30E-53 | -0.51153 | 1.68E-32 |
| 8.40E-10 | -0.18337 | 6.73E-05 | -0.31603 | 2.73E-12 | -0.30572 | 1.46E-11 | -0.4014  | 1.66E-19 |
| 1.55E-11 | -0.04306 | 0.35312  | -0.24116 | 1.32E-07 | -0.23824 | 1.89E-07 | -0.47052 | 4.21E-27 |
| 5.80E-26 | -0.26763 | 4.21E-09 | -0.41296 | 1.17E-20 | -0.45507 | 2.99E-25 | -0.55499 | 4.41E-39 |
| 1.82E-19 | 0.48772  | 2.81E-29 | 0.586317 | 1.84E-44 | 0.545558 | 1.43E-37 | 0.375161 | 4.69E-17 |
| 4.17E-54 | 0.370695 | 1.17E-16 | 0.592178 | 1.55E-45 | 0.662824 | 2.08E-60 | 0.319393 | 1.55E-12 |
| 2.93E-09 | -0.06313 | 0.17321  | -0.28445 | 3.84E-10 | -0.27702 | 1.13E-09 | -0.31281 | 4.64E-12 |
| 9.56E-18 | -0.26144 | 9.77E-09 | -0.56634 | 5.76E-41 | -0.50495 | 1.39E-31 | -0.46703 | 1.12E-26 |
| 1.63E-19 | 0.263022 | 7.90E-09 | 0.473616 | 1.74E-27 | 0.446607 | 2.83E-24 | 0.354857 | 2.64E-15 |
| 2.85E-07 | -0.19719 | 1.77E-05 | -0.4031  | 1.13E-19 | -0.33092 | 2.14E-13 | -0.35587 | 2.17E-15 |
| 0.01458  | 0.00635  | 0.89114  | -0.1331  | 0.00396  | -0.0766  | 0.09827  | -0.3199  | 1.42E-12 |
| 2.18E-16 | -0.20034 | 1.29E-05 | -0.40464 | 7.97E-20 | -0.39502 | 6.85E-19 | -0.43337 | 8.36E-23 |
| 5.35E-20 | -0.22722 | 6.97E-07 | -0.43793 | 2.65E-23 | -0.4744  | 1.39E-27 | -0.28699 | 2.64E-10 |
| 2.96E-36 | -0.31823 | 1.89E-12 | -0.37045 | 1.23E-16 | -0.51263 | 1.18E-32 | -0.50667 | 8.03E-32 |
| 3.72E-05 | -0.16791 | 0.00027  | -0.16752 | 0.00028  | -0.20741 | 6.20E-06 | -0.42386 | 8.72E-22 |
| 5.14E-11 | -0.06876 | 0.1379   | -0.07069 | 0.12714  | -0.20475 | 8.19E-06 | -0.46271 | 3.74E-26 |
| 7.48E-13 | -0.12039 | 0.00921  | -0.02596 | 0.57569  | -0.20901 | 5.24E-06 | -0.50887 | 3.96E-32 |
| 0.00235  | -0.36133 | 7.53E-16 | -0.17388 | 0.00016  | -0.20507 | 7.92E-06 | -0.37135 | 1.02E-16 |
| 1.58E-17 | -0.20545 | 7.61E-06 | -0.37469 | 5.17E-17 | -0.40645 | 5.27E-20 | -0.53365 | 9.90E-36 |
| 3.18E-35 | -0.27949 | 7.92E-10 | -0.3968  | 4.62E-19 | -0.473   | 2.08E-27 | -0.54729 | 7.60E-38 |
| 1.03E-15 | -0.15006 | 0.00114  | -0.3361  | 8.54E-14 | -0.34864 | 8.58E-15 | -0.59521 | 4.24E-46 |
| 1.35E-16 | -0.18632 | 5.10E-05 | -0.37142 | 1.01E-16 | -0.38579 | 5.07E-18 | -0.58272 | 8.15E-44 |
| 4.85E-36 | -0.34385 | 2.09E-14 | -0.50527 | 1.25E-31 | -0.53443 | 7.54E-36 | -0.49376 | 4.52E-30 |
| 1.24E-08 | -0.26238 | 8.61E-09 | -0.40751 | 4.13E-20 | -0.35565 | 2.27E-15 | -0.21578 | 2.52E-06 |
| 8.27E-08 | -0.24179 | 1.22E-07 | -0.2208  | 1.45E-06 | -0.2765  | 1.22E-09 | -0.40406 | 9.10E-20 |
| 0.79278  | -0.23263 | 3.70E-07 | -0.28223 | 5.32E-10 | -0.19494 | 2.21E-05 | 0.020134 | 0.6643   |
| 3.11E-07 | -0.0731  | 0.11466  | -0.27759 | 1.04E-09 | -0.28077 | 6.58E-10 | -0.38007 | 1.70E-17 |
| 9.73E-15 | -0.39488 | 7.08E-19 | -0.41365 | 9.96E-21 | -0.4485  | 1.72E-24 | -0.48695 | 3.54E-29 |
| 0.00013  | 0.108115 | 0.01944  | 0.091978 | 0.04697  | 0.117346 | 0.01115  | 0.379099 | 2.08E-17 |
| 4.99E-22 | -0.18296 | 6.98E-05 | -0.28255 | 5.08E-10 | -0.34837 | 9.02E-15 | -0.32706 | 4.20E-13 |
| 3.91E-10 | -0.01346 | 0.77182  | -0.29094 | 1.46E-10 | -0.23042 | 4.80E-07 | -0.53236 | 1.55E-35 |
| 2.72E-11 | -0.05346 | 0.24893  | -0.35265 | 4.03E-15 | -0.27334 | 1.90E-09 | -0.33819 | 5.86E-14 |

|          |          |          |          |          |          |          |          |          |
|----------|----------|----------|----------|----------|----------|----------|----------|----------|
| 2.99E-19 | -0.42713 | 3.93E-22 | -0.47933 | 3.35E-28 | -0.51532 | 4.88E-33 | -0.53274 | 1.36E-35 |
| 5.92E-09 | -0.12058 | 0.0091   | -0.38362 | 8.03E-18 | -0.30185 | 2.71E-11 | -0.11999 | 0.00945  |
| 0.08464  | -0.05543 | 0.23187  | -0.18335 | 6.73E-05 | -0.13834 | 0.00274  | -0.25946 | 1.27E-08 |
| 0.39242  | -0.16996 | 0.00022  | -0.07519 | 0.10461  | -0.07617 | 0.10018  | -0.14639 | 0.00151  |
| 0.00362  | -0.07812 | 0.09176  | -0.32237 | 9.38E-13 | -0.20218 | 1.07E-05 | -0.20251 | 1.03E-05 |
| 0.00132  | -0.44032 | 1.44E-23 | -0.33912 | 4.95E-14 | -0.34275 | 2.56E-14 | -0.20696 | 6.50E-06 |
| 7.48E-11 | -0.36307 | 5.36E-16 | -0.41287 | 1.20E-20 | -0.40925 | 2.77E-20 | -0.27514 | 1.48E-09 |
| 1.82E-11 | -0.29878 | 4.38E-11 | -0.39866 | 3.06E-19 | -0.37583 | 4.09E-17 | -0.49504 | 3.05E-30 |
| 7.75E-12 | -0.26492 | 6.10E-09 | -0.50747 | 6.21E-32 | -0.41484 | 7.52E-21 | -0.48048 | 2.39E-28 |
| 9.04E-08 | 0.079572 | 0.08585  | -0.20983 | 4.80E-06 | -0.23708 | 2.17E-07 | -0.08332 | 0.07204  |
| 1.20E-20 | 0.383973 | 7.46E-18 | 0.3634   | 5.02E-16 | 0.444266 | 5.20E-24 | 0.310581 | 6.69E-12 |
| 5.45E-24 | 0.354506 | 2.83E-15 | 0.542665 | 4.06E-37 | 0.550718 | 2.16E-38 | 0.548273 | 5.31E-38 |
| 1.43E-13 | -0.32397 | 7.14E-13 | -0.43591 | 4.42E-23 | -0.41967 | 2.39E-21 | -0.38996 | 2.07E-18 |
| 1.14E-11 | -0.31312 | 4.41E-12 | -0.36563 | 3.23E-16 | -0.39081 | 1.72E-18 | -0.37299 | 7.33E-17 |
| 6.50E-05 | -0.18426 | 6.18E-05 | -0.53896 | 1.53E-36 | -0.34153 | 3.20E-14 | -0.26417 | 6.76E-09 |
| 6.85E-44 | 0.409143 | 2.84E-20 | 0.554564 | 5.17E-39 | 0.620726 | 4.34E-51 | 0.372612 | 7.91E-17 |
| 2.17E-25 | 0.167658 | 0.00027  | 0.241296 | 1.30E-07 | 0.363155 | 5.27E-16 | 0.531522 | 2.07E-35 |
| 1.47E-09 | -0.0697  | 0.13258  | -0.20239 | 1.04E-05 | -0.19735 | 1.74E-05 | -0.38531 | 5.62E-18 |
| 4.77E-16 | 0.440879 | 1.25E-23 | 0.337161 | 7.05E-14 | 0.442844 | 7.52E-24 | 0.439812 | 1.64E-23 |
| 1.99E-11 | -0.21587 | 2.50E-06 | -0.33703 | 7.22E-14 | -0.35532 | 2.42E-15 | -0.39248 | 1.20E-18 |
| 6.90E-05 | 0.042019 | 0.36493  | -0.07166 | 0.12198  | -0.07651 | 0.09866  | -0.34572 | 1.48E-14 |
| 2.45E-22 | 0.238373 | 1.86E-07 | 0.382447 | 1.03E-17 | 0.426862 | 4.19E-22 | 0.384924 | 6.09E-18 |
| 2.66E-06 | -0.15456 | 0.0008   | -0.1859  | 5.30E-05 | -0.22292 | 1.14E-06 | -0.27409 | 1.71E-09 |
| 7.36E-33 | -0.32763 | 3.80E-13 | -0.51862 | 1.64E-33 | -0.52471 | 2.13E-34 | -0.3916  | 1.45E-18 |
| 1.78E-16 | -0.18025 | 8.97E-05 | -0.40035 | 2.10E-19 | -0.3926  | 1.17E-18 | -0.56999 | 1.38E-41 |
| 1.21E-07 | -0.18753 | 4.54E-05 | -0.27608 | 1.29E-09 | -0.27399 | 1.74E-09 | -0.15771 | 0.00063  |
| 9.98E-10 | 0.050739 | 0.27385  | -0.19051 | 3.41E-05 | -0.21903 | 1.76E-06 | -0.15345 | 0.00088  |
| 1.18E-37 | 0.558095 | 1.37E-39 | 0.458834 | 1.08E-25 | 0.602323 | 1.91E-47 | 0.582779 | 7.96E-44 |
| 0.00291  | 0.008448 | 0.85552  | -0.15041 | 0.00111  | -0.14485 | 0.0017   | -0.51591 | 4.03E-33 |
| 9.40E-05 | -0.26999 | 3.04E-09 | -0.28089 | 6.47E-10 | -0.27512 | 1.48E-09 | -0.26068 | 1.08E-08 |
| 1.16E-13 | -0.24671 | 6.63E-08 | -0.39116 | 1.60E-18 | -0.40522 | 6.99E-20 | -0.47093 | 3.75E-27 |
| 1.94E-09 | -0.15577 | 0.00073  | -0.31512 | 3.17E-12 | -0.30504 | 1.63E-11 | -0.3193  | 1.58E-12 |
| 1.48E-15 | -0.36435 | 4.16E-16 | -0.55075 | 2.13E-38 | -0.51804 | 1.99E-33 | -0.39375 | 9.07E-19 |
| 1.14E-24 | -0.30229 | 2.53E-11 | -0.40496 | 7.41E-20 | -0.44531 | 3.96E-24 | -0.21794 | 1.99E-06 |
| 6.99E-21 | -0.42283 | 1.12E-21 | -0.41268 | 1.25E-20 | -0.49503 | 3.06E-30 | -0.54592 | 1.25E-37 |
| 3.24E-38 | 0.412335 | 1.35E-20 | 0.231064 | 4.45E-07 | 0.440915 | 1.24E-23 | 0.538143 | 2.04E-36 |
| 2.99E-05 | 0.112339 | 0.01515  | 0.0162   | 0.72696  | -0.01895 | 0.68289  | -0.42902 | 2.47E-22 |
| 4.00E-33 | 0.461536 | 5.16E-26 | 0.252776 | 3.06E-08 | 0.515063 | 5.32E-33 | 0.597964 | 1.29E-46 |
| 0.13835  | 0.09761  | 0.03497  | -0.16419 | 0.00037  | -0.02414 | 0.60287  | -0.18247 | 7.31E-05 |
| 6.79E-06 | -0.19997 | 1.34E-05 | -0.28205 | 5.46E-10 | -0.31446 | 3.54E-12 | -0.0474  | 0.30676  |
| 1.33E-31 | -0.42407 | 8.29E-22 | -0.54884 | 4.32E-38 | -0.60217 | 2.05E-47 | -0.6149  | 6.56E-50 |
| 7.77E-08 | 0.077685 | 0.09358  | 0.15403  | 0.00084  | 0.184176 | 6.24E-05 | 0.67666  | 8.24E-64 |
| 1.74E-24 | -0.17979 | 9.36E-05 | -0.39796 | 3.58E-19 | -0.43687 | 3.47E-23 | -0.5023  | 3.20E-31 |
| 0.00469  | -0.22389 | 1.02E-06 | -0.25388 | 2.65E-08 | -0.22437 | 9.67E-07 | -0.3139  | 3.88E-12 |
| 2.32E-21 | -0.38646 | 4.39E-18 | -0.6318  | 2.12E-53 | -0.55704 | 2.04E-39 | -0.46848 | 7.48E-27 |

|          |          |          |          |          |          |          |          |          |
|----------|----------|----------|----------|----------|----------|----------|----------|----------|
| 8.18E-14 | -0.11089 | 0.01652  | -0.39702 | 4.41E-19 | -0.35287 | 3.86E-15 | -0.35887 | 1.22E-15 |
| 3.49E-20 | -0.19201 | 2.95E-05 | -0.47991 | 2.83E-28 | -0.44421 | 5.28E-24 | -0.50641 | 8.72E-32 |
| 3.83E-40 | 0.513592 | 8.60E-33 | 0.579217 | 3.42E-43 | 0.630837 | 3.39E-53 | 0.37581  | 4.11E-17 |
| 6.64E-18 | -0.25091 | 3.89E-08 | -0.42579 | 5.45E-22 | -0.42065 | 1.89E-21 | -0.41627 | 5.37E-21 |
| 0.01337  | 0.04709  | 0.30989  | 0.063618 | 0.1699   | 0.009743 | 0.83368  | -0.49632 | 2.06E-30 |
| 6.83E-09 | -0.24709 | 6.32E-08 | -0.28836 | 2.15E-10 | -0.29741 | 5.42E-11 | -0.28947 | 1.82E-10 |
| 3.25E-34 | 0.399791 | 2.38E-19 | 0.515829 | 4.13E-33 | 0.533259 | 1.13E-35 | 0.330244 | 2.41E-13 |
| 0.00041  | 0.030889 | 0.50548  | -0.18524 | 5.64E-05 | -0.13635 | 0.00315  | -0.22702 | 7.13E-07 |
| 2.80E-06 | -0.04682 | 0.31265  | -0.20098 | 1.21E-05 | -0.1898  | 3.66E-05 | -0.27338 | 1.89E-09 |
| 0.01044  | -0.04747 | 0.30601  | -0.20264 | 1.02E-05 | -0.1466  | 0.00149  | -0.15625 | 0.0007   |
| 1.08E-15 | -0.20939 | 5.03E-06 | -0.35852 | 1.30E-15 | -0.37228 | 8.47E-17 | -0.51878 | 1.56E-33 |
| 1.14E-30 | 0.333495 | 1.36E-13 | 0.377802 | 2.72E-17 | 0.479781 | 2.94E-28 | 0.66231  | 2.77E-60 |
| 6.37E-12 | -0.28419 | 3.99E-10 | -0.5112  | 1.87E-32 | -0.43361 | 7.89E-23 | -0.1513  | 0.00104  |
| 3.29E-07 | -0.18282 | 7.08E-05 | -0.23412 | 3.10E-07 | -0.26978 | 3.13E-09 | -0.27023 | 2.94E-09 |
| 5.61E-07 | -0.37225 | 8.52E-17 | -0.41773 | 3.80E-21 | -0.38939 | 2.34E-18 | -0.31214 | 5.18E-12 |
| 0.00254  | -0.01579 | 0.73369  | -0.07645 | 0.09891  | -0.08063 | 0.08174  | -0.20292 | 9.89E-06 |
| 1.39E-17 | -0.27456 | 1.60E-09 | -0.37418 | 5.74E-17 | -0.4129  | 1.19E-20 | -0.26235 | 8.64E-09 |
| 1.05E-11 | -0.31645 | 2.54E-12 | -0.37793 | 2.65E-17 | -0.44506 | 4.23E-24 | -0.09973 | 0.03118  |
| 1.70E-10 | -0.19211 | 2.92E-05 | -0.2592  | 1.32E-08 | -0.28547 | 3.31E-10 | -0.38502 | 5.97E-18 |
| 2.01E-08 | -0.17855 | 0.0001   | -0.25186 | 3.44E-08 | -0.26682 | 4.71E-09 | -0.44172 | 1.00E-23 |
| 0.0887   | 0.10362  | 0.02514  | 0.093496 | 0.04344  | 0.0184   | 0.69167  | -0.18438 | 6.12E-05 |
| 0.88321  | -0.38296 | 9.23E-18 | -0.1815  | 8.00E-05 | -0.14102 | 0.00225  | -0.23216 | 3.91E-07 |
| 1.60E-20 | -0.46264 | 3.81E-26 | -0.43381 | 7.50E-23 | -0.51433 | 6.75E-33 | -0.61993 | 6.32E-51 |
| 1.56E-21 | -0.25102 | 3.83E-08 | -0.41956 | 2.45E-21 | -0.43009 | 1.89E-22 | -0.48567 | 5.18E-29 |
| 2.32E-12 | 0.407503 | 4.14E-20 | 0.498773 | 9.64E-31 | 0.463127 | 3.33E-26 | 0.364347 | 4.16E-16 |
| 1.21E-08 | -0.20466 | 8.27E-06 | -0.2653  | 5.80E-09 | -0.28143 | 5.98E-10 | -0.41001 | 2.32E-20 |
| 4.24E-20 | 0.455303 | 2.81E-25 | 0.499083 | 8.75E-31 | 0.490477 | 1.23E-29 | 0.328459 | 3.29E-13 |
| 0.00091  | -0.09517 | 0.03979  | 0.234757 | 2.88E-07 | 0.140884 | 0.00228  | 0.196405 | 1.91E-05 |
| 1.02E-06 | -0.26051 | 1.11E-08 | -0.24626 | 7.02E-08 | -0.25372 | 2.71E-08 | -0.32046 | 1.30E-12 |
| 3.02E-29 | -0.35239 | 4.23E-15 | -0.46153 | 5.17E-26 | -0.51351 | 8.83E-33 | -0.5117  | 1.59E-32 |
| 2.52E-17 | -0.38283 | 9.50E-18 | -0.47416 | 1.49E-27 | -0.46349 | 3.01E-26 | -0.29943 | 3.96E-11 |
| 2.40E-31 | -0.25505 | 2.27E-08 | -0.5204  | 9.08E-34 | -0.50258 | 2.93E-31 | -0.5326  | 1.42E-35 |
| 1.34E-15 | -0.25514 | 2.25E-08 | -0.29385 | 9.37E-11 | -0.38321 | 8.76E-18 | -0.29592 | 6.83E-11 |
| 2.55E-34 | 0.324892 | 6.09E-13 | 0.450447 | 1.03E-24 | 0.492111 | 7.47E-30 | 0.456554 | 2.01E-25 |
| 2.64E-12 | -0.32601 | 5.03E-13 | -0.43198 | 1.18E-22 | -0.39216 | 1.28E-18 | -0.52696 | 9.94E-35 |
| 1.63E-21 | -0.378   | 2.61E-17 | -0.43077 | 1.60E-22 | -0.48576 | 5.05E-29 | -0.49688 | 1.73E-30 |
| 1.43E-13 | 0.200681 | 1.24E-05 | 0.326326 | 4.76E-13 | 0.365982 | 3.01E-16 | 0.258317 | 1.48E-08 |
| 0.00131  | 0.074341 | 0.10862  | -0.06317 | 0.17293  | 0.085787 | 0.06398  | -0.2977  | 5.18E-11 |
| 1.37E-20 | -0.05317 | 0.25147  | -0.32333 | 7.97E-13 | -0.34733 | 1.10E-14 | -0.37929 | 2.00E-17 |
| 4.28E-05 | -0.25947 | 1.27E-08 | -0.24635 | 6.94E-08 | -0.22589 | 8.13E-07 | -0.19269 | 2.76E-05 |
| 0.05064  | 0.036527 | 0.43098  | -0.25859 | 1.43E-08 | -0.15007 | 0.00114  | -0.18476 | 5.91E-05 |
| 1.62E-05 | -0.04168 | 0.36886  | -0.17096 | 0.00021  | -0.14749 | 0.00139  | -0.45852 | 1.18E-25 |
| 8.93E-09 | -0.36994 | 1.36E-16 | -0.35599 | 2.13E-15 | -0.35949 | 1.08E-15 | -0.3253  | 5.68E-13 |
| 1.16E-24 | 0.361956 | 6.67E-16 | 0.351558 | 4.95E-15 | 0.461548 | 5.14E-26 | 0.523753 | 2.95E-34 |
| 5.16E-06 | -0.2945  | 8.49E-11 | -0.36419 | 4.29E-16 | -0.32716 | 4.12E-13 | -0.47673 | 7.12E-28 |

|          |          |          |          |          |          |          |          |          |
|----------|----------|----------|----------|----------|----------|----------|----------|----------|
| 6.67E-09 | -0.3395  | 4.62E-14 | -0.41384 | 9.52E-21 | -0.39086 | 1.70E-18 | -0.47098 | 3.70E-27 |
| 0.80506  | -0.13186 | 0.00431  | -0.19768 | 1.69E-05 | -0.10762 | 0.02     | -0.37384 | 6.16E-17 |
| 0.2247   | 0.156158 | 0.00071  | -0.00179 | 0.96924  | 0.077046 | 0.09631  | -0.24807 | 5.58E-08 |
| 0.09358  | -0.19189 | 2.99E-05 | -0.13296 | 0.004    | -0.15853 | 0.00059  | -0.23085 | 4.57E-07 |
| 7.48E-10 | -0.20594 | 7.23E-06 | -0.20252 | 1.03E-05 | -0.24436 | 8.91E-08 | -0.33952 | 4.61E-14 |
| 0.00141  | -0.01556 | 0.73742  | -0.08766 | 0.05836  | -0.09974 | 0.03116  | -0.35283 | 3.89E-15 |
| 3.40E-07 | -0.10123 | 0.02872  | -0.23024 | 4.91E-07 | -0.19543 | 2.11E-05 | -0.3804  | 1.58E-17 |
| 2.27E-22 | -0.34109 | 3.46E-14 | -0.42405 | 8.33E-22 | -0.48758 | 2.93E-29 | -0.36865 | 1.76E-16 |
| 4.68E-24 | -0.13368 | 0.0038   | -0.24808 | 5.58E-08 | -0.33561 | 9.31E-14 | -0.41478 | 7.64E-21 |
| 2.37E-21 | -0.18311 | 6.89E-05 | -0.39919 | 2.72E-19 | -0.44046 | 1.39E-23 | -0.13191 | 0.0043   |
| 1.11E-25 | 0.447704 | 2.12E-24 | 0.646498 | 1.28E-56 | 0.589502 | 4.83E-45 | 0.240032 | 1.52E-07 |
| 1.74E-29 | 0.409267 | 2.76E-20 | 0.463333 | 3.14E-26 | 0.490829 | 1.10E-29 | 0.23355  | 3.32E-07 |
| 2.91E-05 | -0.05854 | 0.20668  | -0.22046 | 1.50E-06 | -0.17852 | 0.00011  | -0.45419 | 3.79E-25 |
| 2.31E-15 | 0.380928 | 1.42E-17 | 0.398793 | 2.97E-19 | 0.465675 | 1.64E-26 | 0.603399 | 1.19E-47 |
| 6.46E-41 | 0.358609 | 1.28E-15 | 0.350782 | 5.73E-15 | 0.507575 | 6.01E-32 | 0.59898  | 8.29E-47 |
| 2.15E-19 | 0.440864 | 1.25E-23 | 0.580757 | 1.83E-43 | 0.531033 | 2.45E-35 | 0.200897 | 1.22E-05 |
| 2.43E-06 | -0.40801 | 3.69E-20 | -0.38797 | 3.18E-18 | -0.37431 | 5.59E-17 | -0.35732 | 1.64E-15 |
| 6.82E-06 | -0.46382 | 2.75E-26 | -0.36299 | 5.44E-16 | -0.37793 | 2.65E-17 | -0.32289 | 8.59E-13 |
| 1.02E-11 | -0.41428 | 8.58E-21 | -0.43674 | 3.58E-23 | -0.43949 | 1.78E-23 | -0.47184 | 2.89E-27 |
| 5.08E-08 | 0.137917 | 0.00282  | -0.12805 | 0.00559  | -0.15919 | 0.00055  | -0.3597  | 1.04E-15 |
| 0.00172  | -0.12421 | 0.0072   | -0.27055 | 2.81E-09 | -0.21009 | 4.67E-06 | -0.38575 | 5.11E-18 |
| 1.90E-07 | -0.15791 | 0.00062  | -0.21095 | 4.26E-06 | -0.22519 | 8.81E-07 | -0.36332 | 5.10E-16 |
| 0.42199  | 0.001406 | 0.97583  | 0.027458 | 0.55393  | 0.004084 | 0.92987  | 0.460068 | 7.72E-26 |
| 1.11E-36 | -0.37639 | 3.64E-17 | -0.53755 | 2.51E-36 | -0.56995 | 1.40E-41 | -0.65756 | 3.68E-59 |
| 6.42E-24 | -0.25136 | 3.67E-08 | -0.33886 | 5.19E-14 | -0.41845 | 3.20E-21 | -0.54687 | 8.87E-38 |
| 2.13E-11 | -0.09187 | 0.04722  | -0.35626 | 2.02E-15 | -0.30663 | 1.27E-11 | -0.3936  | 9.38E-19 |
| 1.45E-10 | 0.483461 | 9.97E-29 | 0.374143 | 5.79E-17 | 0.422613 | 1.18E-21 | 0.495968 | 2.29E-30 |
| 5.15E-23 | -0.18341 | 6.70E-05 | -0.39411 | 8.38E-19 | -0.41392 | 9.34E-21 | -0.56413 | 1.36E-40 |
| 4.89E-11 | -0.18262 | 7.21E-05 | -0.29725 | 5.56E-11 | -0.3145  | 3.52E-12 | -0.54691 | 8.75E-38 |
| 0.01799  | -0.19068 | 3.36E-05 | -0.20427 | 8.61E-06 | -0.20181 | 1.11E-05 | -0.36298 | 5.45E-16 |
| 2.41E-16 | -0.45831 | 1.25E-25 | -0.44299 | 7.24E-24 | -0.4839  | 8.76E-29 | -0.34024 | 4.04E-14 |
| 0.02968  | 0.171249 | 0.0002   | 0.116314 | 0.01189  | 0.117071 | 0.01135  | 0.410433 | 2.11E-20 |
| 0.01088  | -0.21347 | 3.25E-06 | -0.21626 | 2.40E-06 | -0.21643 | 2.35E-06 | -0.3235  | 7.73E-13 |
| 9.99E-14 | -0.19366 | 2.51E-05 | -0.34489 | 1.72E-14 | -0.34102 | 3.51E-14 | -0.4459  | 3.40E-24 |
| 1.48E-15 | -0.37313 | 7.12E-17 | -0.42661 | 4.46E-22 | -0.42896 | 2.51E-22 | -0.44875 | 1.61E-24 |
| 0.00131  | -0.063   | 0.17409  | -0.18679 | 4.88E-05 | -0.14017 | 0.0024   | -0.27913 | 8.34E-10 |
| 1.27E-10 | -0.32692 | 4.29E-13 | -0.3924  | 1.22E-18 | -0.37182 | 9.29E-17 | -0.33661 | 7.79E-14 |
| 3.19E-11 | -0.22491 | 9.10E-07 | -0.3402  | 4.07E-14 | -0.31582 | 2.83E-12 | -0.48174 | 1.66E-28 |
| 0.00271  | -0.3234  | 7.87E-13 | -0.27686 | 1.16E-09 | -0.28519 | 3.45E-10 | -0.34431 | 1.92E-14 |
| 6.03E-07 | -0.31793 | 1.99E-12 | -0.49398 | 4.23E-30 | -0.40723 | 4.41E-20 | -0.19693 | 1.82E-05 |
| 2.07E-16 | -0.43925 | 1.89E-23 | -0.45041 | 1.04E-24 | -0.47081 | 3.88E-27 | -0.30308 | 2.23E-11 |
| 0.00031  | -0.13975 | 0.00247  | -0.27334 | 1.90E-09 | -0.22193 | 1.27E-06 | -0.27395 | 1.75E-09 |
| 2.90E-06 | -0.10406 | 0.02452  | -0.15735 | 0.00064  | -0.17565 | 0.00014  | -0.38763 | 3.42E-18 |
| 5.98E-15 | -0.2754  | 1.42E-09 | -0.45311 | 5.06E-25 | -0.41967 | 2.39E-21 | -0.46402 | 2.60E-26 |
| 0.15281  | 0.250089 | 4.32E-08 | 0.276094 | 1.29E-09 | 0.180828 | 8.51E-05 | 0.454879 | 3.15E-25 |



|          |          |          |          |          |          |          |          |          |
|----------|----------|----------|----------|----------|----------|----------|----------|----------|
| 1.63E-14 | -0.38627 | 4.57E-18 | -0.40696 | 4.69E-20 | -0.42728 | 3.78E-22 | -0.51253 | 1.22E-32 |
| 4.02E-07 | 0.387145 | 3.79E-18 | 0.412279 | 1.37E-20 | 0.381674 | 1.21E-17 | 0.259594 | 1.25E-08 |
| 7.47E-22 | -0.26726 | 4.43E-09 | -0.45411 | 3.88E-25 | -0.47033 | 4.45E-27 | -0.55507 | 4.27E-39 |
| 2.99E-22 | -0.15514 | 0.00077  | -0.45598 | 2.34E-25 | -0.46242 | 4.04E-26 | -0.23973 | 1.58E-07 |
| 0.60386  | -0.27825 | 9.47E-10 | -0.23622 | 2.41E-07 | -0.18768 | 4.48E-05 | -0.30709 | 1.18E-11 |
| 0.08221  | -0.13222 | 0.00421  | -0.43268 | 9.95E-23 | -0.27006 | 3.01E-09 | -0.17044 | 0.00022  |
| 1.27E-17 | -0.47651 | 7.58E-28 | -0.47239 | 2.47E-27 | -0.5021  | 3.40E-31 | -0.47712 | 6.36E-28 |
| 7.78E-17 | -0.16658 | 0.0003   | -0.37338 | 6.77E-17 | -0.37215 | 8.70E-17 | -0.40537 | 6.75E-20 |
| 1.89E-05 | -0.1927  | 2.76E-05 | -0.19974 | 1.37E-05 | -0.22666 | 7.43E-07 | -0.45961 | 8.74E-26 |
| 1.40E-22 | -0.25644 | 1.90E-08 | -0.48181 | 1.62E-28 | -0.45119 | 8.44E-25 | -0.64105 | 2.09E-55 |
| 1.02E-12 | -0.21482 | 2.81E-06 | -0.33263 | 1.58E-13 | -0.34365 | 2.17E-14 | -0.44846 | 1.74E-24 |
| 8.54E-14 | -0.55774 | 1.56E-39 | -0.48973 | 1.53E-29 | -0.53042 | 3.04E-35 | -0.36672 | 2.60E-16 |
| 0.00712  | -0.17557 | 0.00014  | -0.22571 | 8.29E-07 | -0.2157  | 2.55E-06 | -0.3122  | 5.13E-12 |
| 8.50E-12 | -0.40871 | 3.14E-20 | -0.35673 | 1.84E-15 | -0.40262 | 1.26E-19 | -0.37324 | 6.97E-17 |
| 1.28E-18 | 0.366659 | 2.63E-16 | 0.368046 | 1.99E-16 | 0.43235  | 1.08E-22 | 0.419993 | 2.21E-21 |
| 2.37E-48 | -0.3704  | 1.24E-16 | -0.56923 | 1.86E-41 | -0.59393 | 7.36E-46 | -0.66787 | 1.25E-61 |
| 6.10E-51 | -0.43162 | 1.29E-22 | -0.59766 | 1.47E-46 | -0.65059 | 1.51E-57 | -0.64987 | 2.21E-57 |
| 2.40E-25 | -0.46429 | 2.41E-26 | -0.55539 | 3.80E-39 | -0.59515 | 4.35E-46 | -0.6112  | 3.58E-49 |
| 0.04012  | 0.089662 | 0.05283  | -0.19658 | 1.88E-05 | -0.09564 | 0.03882  | -0.0771  | 0.09609  |
| 0.03289  | -0.15264 | 0.00094  | 0.257862 | 1.57E-08 | 0.096191 | 0.03771  | 0.315526 | 2.97E-12 |
| 1.57E-07 | -0.2912  | 1.40E-10 | -0.26944 | 3.28E-09 | -0.31357 | 4.10E-12 | -0.34934 | 7.53E-15 |
| 0.00712  | -0.38646 | 4.39E-18 | -0.25204 | 3.36E-08 | -0.26149 | 9.71E-09 | -0.25636 | 1.92E-08 |
| 6.41E-46 | -0.44705 | 2.52E-24 | -0.57874 | 4.15E-43 | -0.67666 | 8.24E-64 | -0.49355 | 4.82E-30 |
| 0.07642  | -0.1678  | 0.00027  | -0.14285 | 0.00197  | -0.13885 | 0.00264  | -0.40544 | 6.65E-20 |
| 1.62E-19 | -0.33905 | 5.01E-14 | -0.41424 | 8.66E-21 | -0.45405 | 3.93E-25 | -0.46373 | 2.81E-26 |
| 2.47E-11 | -0.16572 | 0.00032  | -0.26143 | 9.78E-09 | -0.309   | 8.65E-12 | -0.3799  | 1.76E-17 |
| 1.17E-13 | -0.42147 | 1.56E-21 | -0.43432 | 6.59E-23 | -0.48645 | 4.11E-29 | -0.33708 | 7.15E-14 |
| 1.23E-06 | -0.37478 | 5.08E-17 | -0.38997 | 2.07E-18 | -0.39085 | 1.71E-18 | -0.33111 | 2.07E-13 |
| 3.54E-08 | -0.35154 | 4.97E-15 | -0.30036 | 3.43E-11 | -0.36934 | 1.54E-16 | -0.32394 | 7.17E-13 |
| 3.60E-20 | -0.2612  | 1.01E-08 | -0.44263 | 7.94E-24 | -0.4307  | 1.63E-22 | -0.47713 | 6.36E-28 |
| 1.10E-33 | -0.26925 | 3.37E-09 | -0.35067 | 5.86E-15 | -0.47048 | 4.26E-27 | -0.5135  | 8.87E-33 |
| 5.49E-11 | -0.33471 | 1.09E-13 | -0.26658 | 4.87E-09 | -0.36597 | 3.02E-16 | -0.40444 | 8.34E-20 |
| 0.06693  | 0.110698 | 0.0167   | -0.09725 | 0.03565  | -0.02623 | 0.57178  | -0.32111 | 1.16E-12 |
| 1.18E-05 | -0.22185 | 1.29E-06 | -0.13021 | 0.00483  | -0.21878 | 1.81E-06 | -0.27408 | 1.72E-09 |
| 1.52E-05 | -0.44157 | 1.05E-23 | -0.31512 | 3.17E-12 | -0.34316 | 2.37E-14 | -0.30042 | 3.39E-11 |
| 1.19E-29 | 0.48703  | 3.45E-29 | 0.313306 | 4.28E-12 | 0.460089 | 7.67E-26 | 0.455673 | 2.54E-25 |
| 4.57E-09 | -0.26922 | 3.38E-09 | -0.28485 | 3.62E-10 | -0.32827 | 3.40E-13 | -0.33021 | 2.42E-13 |
| 5.44E-06 | -0.39505 | 6.82E-19 | -0.28743 | 2.47E-10 | -0.32573 | 5.27E-13 | -0.3352  | 1.00E-13 |
| 2.92E-18 | -0.33106 | 2.09E-13 | -0.3085  | 9.38E-12 | -0.40034 | 2.10E-19 | -0.64155 | 1.62E-55 |
| 0.00744  | -0.23163 | 4.17E-07 | -0.26154 | 9.64E-09 | -0.2344  | 3.00E-07 | -0.39685 | 4.58E-19 |
| 0.00062  | -0.19525 | 2.15E-05 | -0.24444 | 8.82E-08 | -0.22885 | 5.77E-07 | -0.25532 | 2.20E-08 |
| 0.41423  | 0.13663  | 0.00309  | -0.1877  | 4.47E-05 | -0.04257 | 0.3587   | -0.29967 | 3.82E-11 |
| 0.30655  | -0.16553 | 0.00033  | -0.09542 | 0.03927  | -0.10353 | 0.02526  | -0.02406 | 0.60407  |
| 0.00395  | -0.14422 | 0.00178  | -0.1118  | 0.01565  | -0.13015 | 0.00485  | -0.03875 | 0.40344  |
| 1.24E-06 | -0.29301 | 1.07E-10 | -0.23114 | 4.41E-07 | -0.27413 | 1.70E-09 | -0.08898 | 0.05465  |

|          |          |          |          |          |          |          |          |          |
|----------|----------|----------|----------|----------|----------|----------|----------|----------|
| 7.43E-05 | -0.21958 | 1.66E-06 | -0.20078 | 1.23E-05 | -0.22419 | 9.87E-07 | -0.06952 | 0.1336   |
| 0.00486  | -0.18526 | 5.63E-05 | -0.09167 | 0.04771  | -0.16878 | 0.00025  | 0.0076   | 0.86989  |
| 0.02209  | -0.12852 | 0.00541  | -0.0917  | 0.04765  | -0.11723 | 0.01123  | -0.02105 | 0.65008  |
| 0.0601   | -0.14424 | 0.00178  | -0.09213 | 0.0466   | -0.10798 | 0.01959  | -0.03958 | 0.39347  |
| 0.00478  | -0.20336 | 9.46E-06 | -0.11684 | 0.01151  | -0.17156 | 0.0002   | -0.04983 | 0.28258  |
| 2.13E-05 | -0.22662 | 7.47E-07 | -0.16693 | 0.00029  | -0.21661 | 2.31E-06 | -0.06617 | 0.15341  |
| 0.40104  | -0.15567 | 0.00074  | -0.07069 | 0.12717  | -0.0698  | 0.13203  | -0.00222 | 0.96184  |
| 0.00801  | -0.10297 | 0.02607  | -0.14482 | 0.0017   | -0.17357 | 0.00016  | -0.21993 | 1.60E-06 |
| 0.00029  | -0.17432 | 0.00015  | -0.10963 | 0.01779  | -0.16382 | 0.00038  | -0.0556  | 0.23043  |
| 0.59216  | -0.09787 | 0.03448  | -0.01663 | 0.72008  | -0.05    | 0.28093  | -0.0322  | 0.48753  |
| 0.49488  | -0.09504 | 0.04007  | 0.022801 | 0.62308  | 0.020061 | 0.66544  | -0.01861 | 0.6884   |
| 2.21E-05 | -0.21118 | 4.15E-06 | -0.16573 | 0.00032  | -0.21586 | 2.50E-06 | -0.06591 | 0.15504  |
| 0.00498  | -0.14301 | 0.00195  | -0.06847 | 0.13956  | -0.1414  | 0.00219  | -0.04218 | 0.36314  |
| 1.67E-06 | -0.26437 | 6.58E-09 | -0.20495 | 8.02E-06 | -0.26573 | 5.47E-09 | -0.12298 | 0.0078   |
| 0.0004   | -0.1413  | 0.00221  | -0.18383 | 6.44E-05 | -0.1939  | 2.45E-05 | -0.06167 | 0.18341  |
| 0.76472  | 0.008289 | 0.85822  | 0.020362 | 0.66074  | 0.024006 | 0.60483  | -0.02745 | 0.55402  |
| 0.00184  | -0.17819 | 0.00011  | -0.12503 | 0.00682  | -0.15402 | 0.00084  | -0.05086 | 0.27275  |
| 3.93E-06 | -0.1892  | 3.87E-05 | -0.19627 | 1.94E-05 | -0.24541 | 7.81E-08 | -0.13675 | 0.00306  |
| 0.04331  | -0.10304 | 0.02596  | -0.07439 | 0.10837  | -0.10995 | 0.01746  | -0.02349 | 0.61267  |
| 0.46878  | -0.02416 | 0.60247  | 0.026779 | 0.56377  | -0.01996 | 0.66707  | -0.06066 | 0.19065  |
| 0.01583  | -0.16008 | 0.00052  | -0.17135 | 0.0002   | -0.17212 | 0.00019  | -0.02226 | 0.63133  |
| 0.00061  | -0.14189 | 0.00211  | -0.10956 | 0.01786  | -0.15088 | 0.00107  | -0.06122 | 0.18663  |
| 0.00141  | -0.15022 | 0.00113  | -0.09809 | 0.03408  | -0.13963 | 0.00249  | -0.05107 | 0.27073  |
| 0.3408   | -0.17681 | 0.00012  | -0.10296 | 0.02609  | -0.12198 | 0.00832  | -0.04803 | 0.30034  |
| 0.0016   | -0.22999 | 5.05E-07 | -0.19633 | 1.93E-05 | -0.20785 | 5.92E-06 | -0.06315 | 0.17306  |
| 0.02363  | -0.0902  | 0.05142  | -0.03251 | 0.48333  | -0.1004  | 0.03005  | -0.01051 | 0.82087  |
| 1.85E-10 | -0.27273 | 2.07E-09 | -0.238   | 1.95E-07 | -0.30396 | 1.94E-11 | -0.15081 | 0.00108  |
| 0.00091  | -0.17548 | 0.00014  | -0.09525 | 0.03964  | -0.17221 | 0.00018  | -0.05162 | 0.26559  |
| 0.00082  | -0.18599 | 5.26E-05 | -0.13086 | 0.00462  | -0.17105 | 0.0002   | -0.05055 | 0.27568  |
| 0.00028  | -0.18141 | 8.06E-05 | -0.12134 | 0.00867  | -0.17    | 0.00022  | -0.05603 | 0.22682  |
| 2.01E-06 | -0.15813 | 0.0006   | -0.20372 | 9.11E-06 | -0.24913 | 4.88E-08 | -0.28453 | 3.79E-10 |
| 5.37E-07 | -0.19171 | 3.04E-05 | -0.2876  | 2.41E-10 | -0.30026 | 3.48E-11 | 0.113488 | 0.01413  |
| 0.01296  | -0.11007 | 0.01734  | -0.07067 | 0.12728  | -0.10458 | 0.02382  | -0.07146 | 0.12306  |
| 2.15E-07 | -0.18598 | 5.27E-05 | -0.2024  | 1.04E-05 | -0.2494  | 4.71E-08 | -0.05186 | 0.26338  |
| 0.04702  | -0.09198 | 0.04696  | -0.05043 | 0.27678  | -0.08636 | 0.06221  | 0.011296 | 0.80765  |
| 0.01459  | -0.11863 | 0.0103   | -0.0682  | 0.14114  | -0.10981 | 0.01761  | -0.10376 | 0.02494  |
| 0.01036  | -0.16104 | 0.00048  | -0.05733 | 0.2162   | -0.14118 | 0.00223  | -0.04715 | 0.30926  |
| 1.27E-06 | -0.20504 | 7.95E-06 | -0.22555 | 8.45E-07 | -0.2485  | 5.29E-08 | -0.16834 | 0.00026  |
| 0.00076  | -0.19656 | 1.88E-05 | -0.15025 | 0.00113  | -0.14226 | 0.00206  | -0.07295 | 0.11543  |
| 0.00065  | -0.25453 | 2.43E-08 | -0.15651 | 0.00069  | -0.21389 | 3.10E-06 | -0.07599 | 0.10099  |
| 0.00065  | -0.17789 | 0.00011  | -0.14782 | 0.00136  | -0.19196 | 2.96E-05 | -0.06931 | 0.13476  |
| 0.26999  | -0.01761 | 0.70424  | 0.018193 | 0.69496  | -0.01265 | 0.78512  | 0.001014 | 0.98256  |
| 2.70E-06 | -0.14445 | 0.00175  | -0.07076 | 0.12677  | -0.15952 | 0.00054  | -0.11326 | 0.01433  |
| 3.14E-05 | -0.22362 | 1.05E-06 | -0.16527 | 0.00034  | -0.22542 | 8.57E-07 | -0.07134 | 0.12367  |
| 0.02228  | -0.08804 | 0.05728  | -0.06496 | 0.16109  | -0.09416 | 0.04196  | 0.015648 | 0.73591  |

|          |          |          |          |          |          |          |          |          |
|----------|----------|----------|----------|----------|----------|----------|----------|----------|
| 5.48E-07 | -0.26451 | 6.46E-09 | -0.22026 | 1.54E-06 | -0.27459 | 1.60E-09 | -0.07733 | 0.09507  |
| 5.31E-05 | -0.17783 | 0.00011  | -0.13351 | 0.00385  | -0.17982 | 9.33E-05 | -0.04568 | 0.32462  |
| 8.48E-07 | -0.24283 | 1.08E-07 | -0.17867 | 0.0001   | -0.24364 | 9.74E-08 | -0.08362 | 0.07103  |
| 1.06E-07 | -0.22658 | 7.51E-07 | -0.21525 | 2.68E-06 | -0.27466 | 1.58E-09 | -0.04948 | 0.28596  |
| 6.61E-06 | -0.24998 | 4.38E-08 | -0.19579 | 2.03E-05 | -0.25972 | 1.23E-08 | -0.05546 | 0.2316   |
| 1.48E-09 | -0.25543 | 2.16E-08 | -0.23759 | 2.04E-07 | -0.2946  | 8.37E-11 | -0.20729 | 6.28E-06 |
| 1.05E-06 | -0.31818 | 1.90E-12 | -0.31891 | 1.68E-12 | -0.34131 | 3.33E-14 | -0.18338 | 6.72E-05 |
| 7.53E-05 | -0.07592 | 0.10129  | -0.06    | 0.19554  | -0.12256 | 0.00801  | -0.01295 | 0.78018  |
| 0.51725  | -0.01217 | 0.79317  | 0.058473 | 0.2072   | 0.017252 | 0.71001  | -0.10666 | 0.02115  |
| 0.00337  | -0.23434 | 3.02E-07 | -0.12269 | 0.00795  | -0.15549 | 0.00075  | -0.02335 | 0.6147   |
| 6.38E-05 | -0.14168 | 0.00215  | -0.09195 | 0.04703  | -0.14898 | 0.00124  | -0.04968 | 0.28396  |
| 0.01631  | -0.12406 | 0.00727  | -0.08126 | 0.07939  | -0.09341 | 0.04363  | -0.0164  | 0.72365  |
| 0.62957  | -0.24682 | 6.54E-08 | -0.07829 | 0.09103  | -0.11646 | 0.01178  | -0.03203 | 0.4899   |
| 0.00569  | -0.25558 | 2.12E-08 | -0.1431  | 0.00194  | -0.19622 | 1.95E-05 | -0.02323 | 0.61652  |
| 0.02852  | -0.17066 | 0.00021  | -0.10354 | 0.02525  | -0.14866 | 0.00127  | -0.02321 | 0.61682  |
| 5.84E-09 | -0.16709 | 0.00029  | -0.27573 | 1.36E-09 | -0.29607 | 6.67E-11 | -0.05752 | 0.21469  |
| 0.25744  | -0.11769 | 0.01092  | -0.0778  | 0.09307  | -0.13274 | 0.00406  | -0.04488 | 0.33314  |
| 1.68E-10 | -0.31891 | 1.68E-12 | -0.26225 | 8.76E-09 | -0.32598 | 5.05E-13 | -0.09188 | 0.04721  |
| 0.00404  | -0.18504 | 5.75E-05 | -0.14397 | 0.00181  | -0.15154 | 0.00102  | -0.04984 | 0.28243  |
| 6.54E-05 | -0.16306 | 0.0004   | -0.13054 | 0.00472  | -0.17922 | 9.86E-05 | -0.0301  | 0.51649  |
| 0.11445  | -0.08832 | 0.05648  | -0.06231 | 0.17887  | -0.08657 | 0.06158  | -0.02377 | 0.60839  |
| 0.0043   | -0.27953 | 7.88E-10 | -0.19037 | 3.46E-05 | -0.22845 | 6.05E-07 | -0.0277  | 0.55047  |
| 0.00216  | -0.13611 | 0.00321  | -0.0915  | 0.04813  | -0.13168 | 0.00437  | -0.04756 | 0.30509  |
| 0.01301  | -0.083   | 0.07315  | -0.04944 | 0.28633  | -0.08279 | 0.07389  | -0.029   | 0.53182  |
| 0.00055  | -0.16431 | 0.00036  | -0.14171 | 0.00214  | -0.18012 | 9.08E-05 | -0.05945 | 0.19966  |
| 0.00057  | -0.16083 | 0.00048  | -0.11644 | 0.0118   | -0.16361 | 0.00038  | -0.04717 | 0.30908  |
| 0.05914  | -0.16349 | 0.00039  | -0.1453  | 0.00164  | -0.17419 | 0.00015  | -0.05446 | 0.24012  |
| 0.02097  | -0.13923 | 0.00257  | -0.07191 | 0.12073  | -0.11242 | 0.01507  | -0.04209 | 0.3641   |
| 0.08862  | -0.11136 | 0.01606  | -0.11309 | 0.01448  | -0.121   | 0.00886  | -0.01489 | 0.74821  |
| 0.00022  | -0.17419 | 0.00015  | -0.13571 | 0.0033   | -0.18839 | 4.19E-05 | -0.05807 | 0.21035  |
| 0.00124  | -0.18389 | 6.40E-05 | -0.14083 | 0.00229  | -0.19006 | 3.56E-05 | -0.04303 | 0.35349  |
| 1.26E-05 | -0.18329 | 6.77E-05 | -0.16811 | 0.00026  | -0.21923 | 1.72E-06 | -0.06958 | 0.13325  |
| 2.19E-05 | -0.2143  | 2.97E-06 | -0.18541 | 5.55E-05 | -0.23058 | 4.71E-07 | -0.0523  | 0.25931  |
| 2.71E-07 | -0.26239 | 8.60E-09 | -0.21357 | 3.21E-06 | -0.27435 | 1.65E-09 | -0.07407 | 0.10989  |
| 0.0002   | -0.37565 | 4.24E-17 | -0.32835 | 3.35E-13 | -0.31326 | 4.32E-12 | -0.11095 | 0.01646  |
| 0.53765  | -0.08782 | 0.05792  | -0.02748 | 0.55356  | -0.04747 | 0.30602  | 0.031659 | 0.49493  |
| 0.00996  | -0.17906 | 1.00E-04 | -0.13267 | 0.00408  | -0.1669  | 0.00029  | -0.0351  | 0.44926  |
| 0.04626  | -0.0727  | 0.11668  | -0.05003 | 0.28066  | -0.09171 | 0.04763  | -0.0091  | 0.84445  |
| 0.9615   | -0.1462  | 0.00153  | -0.03739 | 0.42023  | -0.07301 | 0.11512  | -0.01569 | 0.73521  |
| 0.88935  | -0.13977 | 0.00247  | -0.09138 | 0.04843  | -0.10586 | 0.02214  | 0.018871 | 0.6842   |
| 0.24925  | -0.14454 | 0.00174  | -0.08142 | 0.07881  | -0.12912 | 0.0052   | 0.002448 | 0.95792  |
| 0.01474  | -0.08508 | 0.06623  | -0.1571  | 0.00066  | -0.15956 | 0.00054  | -0.03692 | 0.4261   |
| 0.27089  | -0.13295 | 0.004    | -0.08989 | 0.05223  | -0.12446 | 0.00708  | -0.0027  | 0.95354  |
| 0.00525  | -0.26226 | 8.75E-09 | -0.13028 | 0.0048   | -0.15483 | 0.00079  | -0.04021 | 0.38591  |
| 0.00026  | -0.21621 | 2.41E-06 | -0.14419 | 0.00178  | -0.19062 | 3.38E-05 | -0.13225 | 0.0042   |

|          |          |          |          |          |          |          |          |          |
|----------|----------|----------|----------|----------|----------|----------|----------|----------|
| 0.90959  | -0.09643 | 0.03723  | -0.00894 | 0.84729  | -0.00223 | 0.96174  | -0.01882 | 0.68504  |
| 0.01107  | -0.17201 | 0.00019  | -0.10416 | 0.02438  | -0.12506 | 0.00681  | -0.02463 | 0.59553  |
| 3.14E-07 | -0.22497 | 9.03E-07 | -0.15801 | 0.00061  | -0.217   | 2.21E-06 | -0.07372 | 0.11161  |
| 0.00151  | -0.1659  | 0.00032  | -0.11537 | 0.0126   | -0.14021 | 0.00239  | -0.06385 | 0.16836  |
| 5.87E-05 | -0.17238 | 0.00018  | -0.15167 | 0.00101  | -0.18707 | 4.75E-05 | -0.05543 | 0.23186  |
| 0.03311  | -0.10311 | 0.02587  | -0.07172 | 0.1217   | -0.11234 | 0.01515  | -0.05904 | 0.20286  |
| 2.58E-08 | -0.19671 | 1.86E-05 | -0.21343 | 3.26E-06 | -0.24999 | 4.38E-08 | -0.27796 | 9.87E-10 |
| 0.0723   | -0.22743 | 6.80E-07 | -0.09953 | 0.03153  | -0.1135  | 0.01412  | -0.05963 | 0.19832  |
| 0.0318   | -0.13305 | 0.00397  | -0.12214 | 0.00824  | -0.13134 | 0.00447  | -0.03005 | 0.51712  |
| 0.00057  | -0.2164  | 2.36E-06 | -0.17775 | 0.00011  | -0.21653 | 2.33E-06 | -0.06759 | 0.14471  |
| 0.00099  | -0.20814 | 5.74E-06 | -0.19001 | 3.58E-05 | -0.1983  | 1.58E-05 | -0.00018 | 0.99683  |
| 6.55E-07 | -0.25766 | 1.62E-08 | -0.20122 | 1.18E-05 | -0.2574  | 1.67E-08 | -0.07791 | 0.09261  |
| 0.00039  | -0.19347 | 2.56E-05 | -0.11729 | 0.0112   | -0.17395 | 0.00016  | -0.00455 | 0.9219   |
| 0.0003   | -0.18329 | 6.77E-05 | -0.14204 | 0.00209  | -0.18955 | 3.74E-05 | -0.04258 | 0.35857  |
| 0.00702  | -0.10859 | 0.01891  | -0.10302 | 0.026    | -0.12913 | 0.00519  | -0.02545 | 0.58325  |
| 0.00383  | -0.24786 | 5.73E-08 | -0.12741 | 0.00583  | -0.18098 | 8.39E-05 | -0.07657 | 0.09837  |
| 0.00013  | -0.16537 | 0.00033  | -0.1257  | 0.00653  | -0.17284 | 0.00017  | -0.06175 | 0.18285  |
| 8.07E-17 | -0.30125 | 2.98E-11 | -0.25297 | 2.98E-08 | -0.36732 | 2.30E-16 | -0.3247  | 6.30E-13 |
| 1.11E-07 | -0.2952  | 7.62E-11 | -0.23612 | 2.44E-07 | -0.29387 | 9.35E-11 | -0.08868 | 0.05548  |
| 0.62331  | -0.16709 | 0.00029  | -0.01186 | 0.79824  | -0.04224 | 0.36243  | -0.00854 | 0.854    |
| 0.00064  | -0.25339 | 2.83E-08 | -0.17906 | 1.00E-04 | -0.22099 | 1.42E-06 | -0.01642 | 0.72336  |
| 8.10E-06 | -0.24175 | 1.23E-07 | -0.20678 | 6.63E-06 | -0.25433 | 2.50E-08 | -0.06297 | 0.17429  |
| 4.37E-05 | -0.24572 | 7.51E-08 | -0.18604 | 5.24E-05 | -0.21675 | 2.27E-06 | -0.03174 | 0.49383  |
| 0.00025  | -0.16977 | 0.00023  | -0.13828 | 0.00275  | -0.16421 | 0.00037  | -0.04853 | 0.29528  |
| 0.00076  | -0.25468 | 2.39E-08 | -0.13012 | 0.00486  | -0.18343 | 6.69E-05 | -0.0149  | 0.74803  |
| 0.00797  | -0.17253 | 0.00018  | -0.11131 | 0.0161   | -0.13218 | 0.00422  | -0.08201 | 0.07666  |
| 0.02976  | -0.1624  | 0.00043  | -0.0518  | 0.26395  | -0.12655 | 0.00617  | -0.11344 | 0.01417  |
| 0.00037  | -0.235   | 2.79E-07 | -0.17096 | 0.00021  | -0.22124 | 1.38E-06 | -0.04908 | 0.28982  |
| 0.04427  | -0.12304 | 0.00777  | -0.06463 | 0.16323  | -0.08178 | 0.07747  | -0.13215 | 0.00423  |
| 0.00044  | -0.15098 | 0.00106  | -0.10668 | 0.02113  | -0.15878 | 0.00057  | -0.04863 | 0.29433  |
| 0.00558  | -0.22208 | 1.25E-06 | -0.12661 | 0.00615  | -0.17805 | 0.00011  | -0.0131  | 0.77761  |
| 0.00039  | -0.18012 | 9.08E-05 | -0.13966 | 0.00249  | -0.1818  | 7.78E-05 | -0.06517 | 0.15973  |
| 0.02253  | -0.22766 | 6.62E-07 | -0.14383 | 0.00183  | -0.16995 | 0.00022  | -0.00048 | 0.99182  |
| 0.24145  | -0.04112 | 0.37527  | -0.04827 | 0.29792  | -0.05083 | 0.27295  | 0.003291 | 0.94346  |
| 0.09784  | -0.09183 | 0.04734  | -0.07853 | 0.09006  | -0.09743 | 0.0353   | 0.009931 | 0.83052  |
| 0.03602  | -0.05327 | 0.25061  | -0.03728 | 0.42156  | -0.06642 | 0.15182  | -0.0153  | 0.74165  |
| 3.85E-05 | -0.20347 | 9.35E-06 | -0.15317 | 0.0009   | -0.20294 | 9.87E-06 | 0.049944 | 0.28144  |
| 0.00108  | -0.42    | 2.21E-21 | -0.25666 | 1.84E-08 | -0.29559 | 7.18E-11 | -0.06639 | 0.15202  |
| 0.00098  | -0.21886 | 1.80E-06 | -0.14275 | 0.00198  | -0.17258 | 0.00018  | -0.0837  | 0.07075  |
| 0.99553  | 0.008012 | 0.8629   | 0.028916 | 0.53307  | 0.021502 | 0.64303  | 0.008631 | 0.85242  |
| 0.79059  | -0.09359 | 0.04322  | 0.011606 | 0.80247  | -0.00533 | 0.90859  | 0.030026 | 0.51745  |
| 0.0337   | -0.16318 | 0.0004   | -0.11479 | 0.01306  | -0.15347 | 0.00088  | -0.01779 | 0.70141  |
| 0.96907  | -0.01592 | 0.73144  | 0.027842 | 0.54838  | -0.00609 | 0.89554  | 0.026225 | 0.57187  |
| 0.00012  | -0.08429 | 0.06876  | -0.09988 | 0.03092  | -0.13915 | 0.00258  | -0.06711 | 0.14763  |
| 0.09118  | -0.16574 | 0.00032  | -0.02556 | 0.58171  | -0.08185 | 0.07722  | -0.05457 | 0.23921  |

|          |          |          |          |          |          |          |          |          |
|----------|----------|----------|----------|----------|----------|----------|----------|----------|
| 0.10519  | -0.08877 | 0.05525  | -0.05206 | 0.26155  | -0.07354 | 0.11247  | -0.09484 | 0.0405   |
| 0.01502  | -0.16024 | 0.00051  | -0.11094 | 0.01647  | -0.12825 | 0.00551  | -0.11918 | 0.00994  |
| 0.27497  | -0.0663  | 0.15257  | -0.01742 | 0.70736  | -0.03509 | 0.44934  | -0.01489 | 0.74821  |
| 0.08924  | -0.09393 | 0.04248  | -0.07907 | 0.08786  | -0.09045 | 0.05078  | -0.1321  | 0.00424  |
| 0.00334  | -0.03292 | 0.47794  | -0.00653 | 0.88803  | -0.03707 | 0.42413  | -0.0989  | 0.03261  |
| 0.00849  | 0.072309 | 0.11865  | 0.182718 | 7.14E-05 | 0.139125 | 0.00259  | 0.016915 | 0.71543  |
| 0.70329  | -0.04362 | 0.34696  | 0.008135 | 0.86082  | 0.009854 | 0.83181  | 0.001178 | 0.97975  |
| 0.00103  | -0.11258 | 0.01493  | -0.22414 | 9.92E-07 | -0.18816 | 4.28E-05 | -0.15975 | 0.00053  |
| 0.00352  | -0.173   | 0.00017  | -0.14991 | 0.00116  | -0.16333 | 0.00039  | -0.06616 | 0.15342  |
| 0.01047  | -0.115   | 0.01289  | -0.10096 | 0.02915  | -0.12267 | 0.00796  | -0.0541  | 0.24328  |
| 0.10858  | -0.0584  | 0.2078   | 0.031363 | 0.49898  | -0.02823 | 0.54283  | -0.02117 | 0.6482   |
| 0.27714  | -0.04628 | 0.31833  | -0.01493 | 0.74765  | -0.01704 | 0.71348  | -0.01456 | 0.75369  |
| 0.00031  | -0.28898 | 1.96E-10 | -0.14205 | 0.00209  | -0.22354 | 1.06E-06 | -0.00023 | 0.99599  |
| 0.00862  | -0.18388 | 6.41E-05 | -0.09922 | 0.03206  | -0.14057 | 0.00233  | -0.10076 | 0.02947  |
| 0.02112  | -0.21221 | 3.72E-06 | -0.0927  | 0.04527  | -0.11869 | 0.01026  | -0.01486 | 0.74873  |
| 0.01502  | -0.12051 | 0.00914  | -0.07208 | 0.11983  | -0.0983  | 0.03369  | -0.01728 | 0.7095   |
| 0.07757  | -0.0786  | 0.08978  | -0.04967 | 0.28411  | -0.06438 | 0.16486  | -0.00648 | 0.88898  |
| 0.02194  | -0.02392 | 0.60613  | 0.075706 | 0.10226  | 0.087328 | 0.05933  | 0.024615 | 0.5957   |
| 0.00173  | -0.14575 | 0.00159  | -0.11401 | 0.01369  | -0.1563  | 0.0007   | -0.08203 | 0.07657  |
| 0.37525  | -0.18489 | 5.83E-05 | -0.02984 | 0.52005  | -0.07923 | 0.08721  | -0.19884 | 1.50E-05 |
| 0.1305   | -0.21318 | 3.35E-06 | -0.10672 | 0.02108  | -0.13832 | 0.00274  | -0.01741 | 0.70754  |
| 0.04187  | -0.06162 | 0.18376  | -0.08363 | 0.07098  | -0.10341 | 0.02543  | 0.01854  | 0.68944  |
| 0.51218  | -0.00886 | 0.84859  | -0.06384 | 0.16839  | -0.04247 | 0.35982  | 0.047553 | 0.30514  |
| 0.02464  | -0.13251 | 0.00412  | -0.10583 | 0.02217  | -0.13233 | 0.00417  | -0.05686 | 0.22005  |
| 0.04484  | -0.15091 | 0.00107  | -0.08232 | 0.07554  | -0.12741 | 0.00583  | -0.04676 | 0.31333  |
| 0.00024  | -0.12378 | 0.0074   | -0.12713 | 0.00594  | -0.16592 | 0.00032  | -0.09472 | 0.04074  |
| 0.56467  | -0.02363 | 0.61058  | -0.01128 | 0.80794  | -0.01382 | 0.76578  | 0.008814 | 0.84934  |
| 0.17172  | -0.06066 | 0.19066  | -0.0433  | 0.35052  | -0.06215 | 0.18001  | -0.08523 | 0.06575  |
| 0.35746  | -0.03231 | 0.48612  | 0.080105 | 0.08377  | 0.047132 | 0.30945  | -0.01936 | 0.67646  |
| 0.0046   | -0.12235 | 0.00812  | 0.045357 | 0.32805  | -0.06531 | 0.15882  | -0.05173 | 0.26454  |
| 0.9319   | -0.01657 | 0.72101  | 0.082646 | 0.07438  | 0.038746 | 0.4035   | 0.007521 | 0.87123  |
| 0.64808  | 0.000887 | 0.98475  | 0.038588 | 0.40543  | 0.008287 | 0.85824  | 0.050019 | 0.28072  |
| 9.74E-05 | -0.12364 | 0.00747  | -0.04693 | 0.31157  | -0.11049 | 0.01691  | -0.02823 | 0.54282  |
| 0.0392   | -0.13265 | 0.00408  | -0.03249 | 0.48371  | -0.06805 | 0.14203  | -0.02205 | 0.63451  |
| 0.08241  | -0.19999 | 1.33E-05 | -0.05591 | 0.22787  | -0.11528 | 0.01267  | 0.021633 | 0.641    |
| 0.17792  | -0.07632 | 0.0995   | -0.06993 | 0.13131  | -0.07365 | 0.11197  | -0.02363 | 0.61048  |
| 0.34368  | -0.14921 | 0.00122  | -0.10522 | 0.02296  | -0.09359 | 0.04322  | -0.07697 | 0.09667  |
| 0.09247  | -0.08517 | 0.06591  | -0.06216 | 0.17992  | -0.08625 | 0.06255  | -0.04025 | 0.3855   |
| 0.02034  | -0.08724 | 0.05958  | -0.07305 | 0.11492  | -0.10248 | 0.02679  | -0.03768 | 0.41661  |
| 0.14107  | -0.08396 | 0.06988  | -0.02177 | 0.63892  | -0.06462 | 0.16328  | -0.0165  | 0.72219  |
| 0.35612  | -0.09655 | 0.03701  | -0.01732 | 0.70891  | -0.03628 | 0.43417  | -0.00704 | 0.87932  |
| 0.05329  | -0.12554 | 0.0066   | -0.07204 | 0.12002  | -0.10589 | 0.0221   | -0.01316 | 0.77664  |
| 0.33827  | -0.05454 | 0.23945  | 0.02586  | 0.57722  | -0.03506 | 0.44968  | -0.02833 | 0.54136  |
| 0.09818  | -0.14763 | 0.00138  | -0.11593 | 0.01217  | -0.13486 | 0.0035   | -0.06311 | 0.17334  |
| 0.16739  | 0.005422 | 0.90697  | 0.073626 | 0.11207  | 0.060841 | 0.18936  | -0.01168 | 0.80125  |

|          |          |          |          |          |          |          |          |          |
|----------|----------|----------|----------|----------|----------|----------|----------|----------|
| 0.81608  | -0.05509 | 0.23471  | 0.011716 | 0.80064  | 0.01788  | 0.69995  | -0.04131 | 0.3731   |
| 1.03E-05 | -0.21101 | 4.23E-06 | -0.12366 | 0.00746  | -0.17693 | 0.00012  | -0.1039  | 0.02475  |
| 0.39973  | 0.072117 | 0.11963  | 0.126524 | 0.00618  | 0.124459 | 0.00708  | -0.03209 | 0.48902  |
| 0.89271  | 0.016443 | 0.72304  | 0.047545 | 0.30523  | 0.04374  | 0.3456   | -0.11137 | 0.01605  |
| 0.63579  | -0.01475 | 0.7506   | -0.02059 | 0.65713  | 0.002313 | 0.96025  | 0.006737 | 0.88456  |
| 0.91559  | -0.04725 | 0.30829  | 0.019658 | 0.67177  | 0.004282 | 0.92647  | 0.021682 | 0.64025  |
| 0.00011  | -0.21989 | 1.60E-06 | -0.20307 | 9.75E-06 | -0.23074 | 4.63E-07 | -0.24015 | 1.50E-07 |
| 0.3865   | -0.06218 | 0.17981  | -0.02418 | 0.60216  | -0.04568 | 0.3246   | -0.01898 | 0.68254  |
| 0.66824  | -0.0469  | 0.3118   | 0.008489 | 0.85483  | 0.010522 | 0.82059  | -0.0128  | 0.78266  |
| 0.04675  | -0.01468 | 0.7517   | -0.0848  | 0.06711  | -0.08395 | 0.06992  | 0.006013 | 0.89689  |
| 0.65572  | -0.16048 | 0.0005   | 0.011195 | 0.80933  | -0.03634 | 0.43331  | -0.06018 | 0.19421  |
| 0.56021  | -0.02225 | 0.6315   | 0.00919  | 0.84298  | 0.002471 | 0.95752  | -0.00556 | 0.90466  |
| 0.01606  | -0.13162 | 0.00438  | -0.09664 | 0.03682  | -0.10913 | 0.01833  | -0.13662 | 0.00309  |
| 0.01916  | 0.035436 | 0.44489  | 0.035488 | 0.44422  | 0.003995 | 0.93139  | -0.20028 | 1.30E-05 |
| 0.99807  | -0.0563  | 0.22462  | 0.019508 | 0.67413  | 0.007026 | 0.87964  | -0.04953 | 0.2855   |
| 0.42209  | -0.00734 | 0.87427  | -0.02717 | 0.55813  | -0.02891 | 0.53312  | -0.02674 | 0.56435  |
| 0.28667  | -0.02466 | 0.59501  | 0.0015   | 0.97422  | -0.02172 | 0.63971  | 0.017054 | 0.71319  |
| 0.02525  | -0.07453 | 0.10771  | -0.08326 | 0.07224  | -0.09935 | 0.03182  | 0.062761 | 0.17574  |
| 0.05896  | -0.19394 | 2.44E-05 | -0.1353  | 0.00339  | -0.15001 | 0.00115  | -0.0188  | 0.68529  |
| 0.00555  | -0.11146 | 0.01596  | -0.08092 | 0.08065  | -0.11633 | 0.01188  | -0.02657 | 0.56687  |
| 0.01757  | -0.11809 | 0.01065  | -0.05155 | 0.2662   | -0.08786 | 0.05778  | -0.03683 | 0.42718  |
| 0.72129  | -0.11914 | 0.00997  | -0.05981 | 0.19701  | -0.04787 | 0.30198  | 0.042958 | 0.3543   |
| 0.00227  | -0.15281 | 0.00092  | -0.19309 | 2.66E-05 | -0.22882 | 5.79E-07 | -0.0476  | 0.30465  |
| 0.40458  | -0.12657 | 0.00616  | -0.0149  | 0.74807  | -0.03533 | 0.4463   | -0.0308  | 0.50672  |
| 0.27361  | -0.00178 | 0.96938  | 0.053821 | 0.24572  | -0.00051 | 0.9913   | -0.05327 | 0.2506   |
| 0.51081  | -0.00616 | 0.89444  | -0.00536 | 0.90809  | -0.01284 | 0.78196  | -0.00676 | 0.88411  |
| 0.9019   | 0.011684 | 0.80117  | 0.026172 | 0.57264  | 0.032012 | 0.49013  | -0.03852 | 0.40628  |
| 0.11313  | -0.10492 | 0.02336  | -0.06991 | 0.1314   | -0.07456 | 0.10756  | -0.03293 | 0.47775  |
| 0.65756  | 0.013788 | 0.76633  | 0.025163 | 0.58754  | 0.022672 | 0.62505  | -0.05589 | 0.22799  |
| 0.021    | -0.13033 | 0.00479  | -0.10676 | 0.02103  | -0.12812 | 0.00556  | -0.07821 | 0.09137  |
| 0.24929  | -0.02    | 0.66637  | -0.01142 | 0.80556  | -0.0311  | 0.50255  | 0.002439 | 0.95807  |
| 0.12611  | -0.08651 | 0.06177  | -0.08732 | 0.05935  | -0.09167 | 0.04772  | -0.0157  | 0.73504  |
| 0.40001  | -0.00274 | 0.95292  | 0.037511 | 0.41867  | 0.009603 | 0.83604  | 0.060739 | 0.19011  |
| 0.0003   | -0.16149 | 0.00046  | -0.13943 | 0.00253  | -0.16817 | 0.00026  | -0.04854 | 0.29517  |
| 0.01384  | -0.11696 | 0.01143  | -0.09685 | 0.03641  | -0.12614 | 0.00634  | -0.01337 | 0.77327  |
| 0.24533  | -0.05497 | 0.23579  | -0.03078 | 0.50698  | -0.04205 | 0.36463  | -0.00991 | 0.83091  |
| 0.00898  | -0.1266  | 0.00615  | -0.09148 | 0.04819  | -0.12863 | 0.00537  | -0.03379 | 0.46635  |
| 0.15166  | -0.05753 | 0.21459  | -0.02383 | 0.6075   | -0.0573  | 0.21649  | -0.02245 | 0.62847  |
| 0.75376  | 0.001512 | 0.974    | -0.00153 | 0.97363  | 0.001914 | 0.9671   | 0.01335  | 0.77354  |
| 0.00921  | -0.11658 | 0.01169  | -0.09023 | 0.05134  | -0.1125  | 0.015    | -0.03613 | 0.43598  |
| 0.93434  | -0.03957 | 0.39363  | -0.01066 | 0.8182   | -0.00104 | 0.98207  | -0.02418 | 0.60227  |
| 0.05112  | -0.08558 | 0.06462  | -0.04897 | 0.29092  | -0.07303 | 0.11503  | -0.02428 | 0.60069  |
| 0.00662  | -0.12353 | 0.00753  | -0.08811 | 0.05707  | -0.13263 | 0.00409  | -0.02578 | 0.57843  |
| 0.01858  | -0.12    | 0.00944  | -0.08989 | 0.05223  | -0.12031 | 0.00926  | -0.03564 | 0.44221  |
| 0.01778  | -0.12596 | 0.00642  | -0.09131 | 0.04859  | -0.11704 | 0.01137  | -0.03592 | 0.43867  |

|          |          |          |          |          |          |          |          |          |
|----------|----------|----------|----------|----------|----------|----------|----------|----------|
| 0.94336  | 0.014486 | 0.75488  | 0.048561 | 0.295    | 0.027707 | 0.55033  | 0.008273 | 0.85848  |
| 0.77152  | -0.01725 | 0.71008  | -0.02103 | 0.65037  | -0.01354 | 0.77048  | 0.018084 | 0.6967   |
| 0.01614  | -0.10236 | 0.02697  | -0.06948 | 0.13378  | -0.10982 | 0.01759  | -0.03854 | 0.40602  |
| 0.00354  | -0.18196 | 7.66E-05 | -0.15503 | 0.00077  | -0.17646 | 0.00013  | -0.05528 | 0.23314  |
| 0.0148   | -0.08822 | 0.05677  | -0.06299 | 0.17417  | -0.09981 | 0.03104  | -0.04642 | 0.31684  |
| 0.05727  | -0.05281 | 0.25475  | -0.05027 | 0.27828  | -0.07448 | 0.10798  | -0.02035 | 0.66087  |
| 0.80077  | 0.005321 | 0.90871  | 0.024887 | 0.59164  | 0.012302 | 0.7909   | 0.043254 | 0.351    |
| 0.52774  | -0.01469 | 0.75152  | 0.013664 | 0.76837  | 0.005217 | 0.91048  | 0.006827 | 0.88302  |
| 0.1631   | -0.07491 | 0.10594  | -0.04175 | 0.36801  | -0.06876 | 0.13789  | 0.014029 | 0.76236  |
| 0.10282  | -0.02125 | 0.64687  | -0.00287 | 0.95062  | -0.02784 | 0.54838  | -0.11262 | 0.01489  |
| 0.20834  | -0.00183 | 0.96857  | -0.06031 | 0.19323  | -0.06351 | 0.17063  | 0.03572  | 0.44125  |
| 0.00042  | 0.038607 | 0.4052   | 0.181407 | 8.06E-05 | 0.173543 | 0.00016  | 0.019299 | 0.67743  |
| 1.10E-07 | -0.14889 | 0.00125  | -0.17334 | 0.00017  | -0.21324 | 3.33E-06 | -0.21932 | 1.71E-06 |
| 0.0398   | -0.06608 | 0.15393  | -0.04161 | 0.36957  | -0.06073 | 0.19018  | -0.01868 | 0.68729  |
| 0.69512  | -0.00664 | 0.88626  | 0.03059  | 0.50961  | 0.046255 | 0.31855  | -0.0403  | 0.38491  |
| 0.00318  | -0.10855 | 0.01895  | -0.15368 | 0.00086  | -0.16104 | 0.00048  | -0.19593 | 2.01E-05 |
| 0.00996  | -0.07111 | 0.12491  | -0.07235 | 0.11842  | -0.09147 | 0.0482   | -0.12865 | 0.00536  |
| 0.05225  | -0.08423 | 0.06896  | -0.05433 | 0.24125  | -0.08139 | 0.07891  | -0.0284  | 0.54042  |
| 0.00319  | -0.05498 | 0.23565  | -0.09862 | 0.03311  | -0.12991 | 0.00493  | 0.101954 | 0.02759  |
| 0.52361  | 0.005459 | 0.90634  | -0.0085  | 0.85459  | -0.03754 | 0.41837  | 0.011873 | 0.79803  |
| 0.0125   | 0.030998 | 0.50398  | 0.060071 | 0.19504  | 0.071474 | 0.12298  | 0.052395 | 0.25848  |
| 0.18503  | -0.05582 | 0.2286   | -0.0458  | 0.32334  | -0.06972 | 0.13247  | -0.05219 | 0.26038  |
| 0.78074  | 0.021412 | 0.64442  | 0.039358 | 0.39611  | 0.038931 | 0.40127  | -0.02585 | 0.57732  |
| 0.5448   | -0.03819 | 0.41029  | -0.02175 | 0.63926  | -0.03537 | 0.44577  | -0.00818 | 0.86012  |
| 0.00433  | -0.18174 | 7.82E-05 | -0.12748 | 0.0058   | -0.16905 | 0.00024  | -0.12265 | 0.00797  |
| 0.00756  | -0.01173 | 0.80041  | 0.022175 | 0.63267  | -0.02314 | 0.61798  | -0.12972 | 0.00499  |
| 0.08884  | -0.04337 | 0.34975  | -0.04178 | 0.36768  | -0.06912 | 0.13585  | 0.016955 | 0.71479  |
| 0.04442  | -0.11065 | 0.01675  | -0.06341 | 0.17133  | -0.10068 | 0.02959  | -0.05496 | 0.23582  |
| 0.15279  | -0.06148 | 0.18472  | -0.06711 | 0.14759  | -0.09811 | 0.03404  | -0.05563 | 0.2302   |
| 0.03469  | -0.07474 | 0.10672  | -0.09352 | 0.04338  | -0.1014  | 0.02845  | -0.10952 | 0.0179   |
| 0.02023  | -0.11911 | 0.00999  | -0.14327 | 0.00191  | -0.145   | 0.00168  | -0.17223 | 0.00018  |
| 0.0249   | -0.12108 | 0.00881  | -0.08144 | 0.07872  | -0.10646 | 0.02139  | -0.03685 | 0.42695  |
| 0.8324   | -0.17592 | 0.00013  | -0.02499 | 0.59012  | -0.06151 | 0.18451  | -0.0111  | 0.81095  |
| 0.20498  | -0.19729 | 1.75E-05 | -0.04561 | 0.32537  | -0.10989 | 0.01752  | -0.02347 | 0.61297  |
| 0.00013  | -0.07018 | 0.12992  | -0.07719 | 0.09568  | -0.13613 | 0.0032   | -0.07686 | 0.09712  |
| 0.62756  | 0.013352 | 0.77352  | -0.03001 | 0.51762  | -0.01136 | 0.8065   | -0.03769 | 0.41646  |
| 0.20834  | 0.031505 | 0.49703  | 0.079249 | 0.08714  | 0.093907 | 0.04252  | 0.01948  | 0.67457  |
| 0.57795  | -0.03203 | 0.48993  | -0.02507 | 0.58897  | -0.04025 | 0.38546  | 0.012698 | 0.78433  |
| 0.76562  | -0.00176 | 0.96967  | 0.038283 | 0.40915  | 0.019092 | 0.6807   | -0.13155 | 0.00441  |
| 0.30626  | -0.04053 | 0.38218  | -0.02199 | 0.63547  | -0.03142 | 0.49819  | -0.01987 | 0.66849  |
| 0.48512  | -0.26006 | 1.18E-08 | -0.17767 | 0.00011  | -0.15554 | 0.00074  | -0.04951 | 0.28562  |
| 0.05827  | -0.17472 | 0.00015  | -0.08491 | 0.06675  | -0.11988 | 0.00952  | -0.01394 | 0.7639   |
| 0.76519  | -0.07498 | 0.10561  | -0.0254  | 0.58404  | -0.00953 | 0.83723  | -0.01953 | 0.67385  |
| 0.12033  | -0.06242 | 0.1781   | -0.02613 | 0.57328  | -0.03858 | 0.40557  | -0.04898 | 0.29084  |
| 0.02394  | -0.00815 | 0.86059  | 0.152711 | 0.00093  | 0.104906 | 0.02338  | 0.005335 | 0.90847  |

|          |          |          |          |          |          |          |          |          |
|----------|----------|----------|----------|----------|----------|----------|----------|----------|
| 0.18815  | -0.05766 | 0.21361  | -0.02948 | 0.52506  | -0.04278 | 0.35629  | -0.03177 | 0.49341  |
| 0.00096  | -0.16622 | 0.00031  | -0.13585 | 0.00327  | -0.16493 | 0.00034  | -0.10667 | 0.02114  |
| 0.27446  | -0.04809 | 0.29976  | -0.0504  | 0.27702  | -0.05794 | 0.21137  | -0.03764 | 0.41711  |
| 2.64E-08 | -0.35857 | 1.29E-15 | -0.24716 | 6.27E-08 | -0.37676 | 3.38E-17 | 0.206555 | 6.78E-06 |
| 2.68E-10 | -0.50501 | 1.36E-31 | -0.3318  | 1.83E-13 | -0.46119 | 5.68E-26 | -0.09907 | 0.03232  |
| 0.00244  | -0.28465 | 3.73E-10 | -0.01802 | 0.69775  | -0.16571 | 0.00032  | 0.049713 | 0.28368  |
| 0.00016  | -0.21603 | 2.46E-06 | 0.059041 | 0.20281  | -0.16965 | 0.00023  | -0.00953 | 0.8373   |
| 0.05537  | -0.1086  | 0.0189   | 0.062017 | 0.18093  | -0.04862 | 0.29442  | 0.193454 | 2.56E-05 |
| 8.61E-13 | 0.172452 | 0.00018  | 0.242883 | 1.07E-07 | 0.246858 | 6.51E-08 | 0.325143 | 5.84E-13 |
| 0.05842  | 0.036571 | 0.43044  | 0.03236  | 0.48541  | 0.009387 | 0.83967  | 0.42312  | 1.04E-21 |
| 0.06871  | -0.13629 | 0.00317  | 0.045328 | 0.32836  | -0.09645 | 0.03719  | 0.185972 | 5.27E-05 |
| 0.08002  | 0.023346 | 0.6148   | 0.123711 | 0.00744  | 0.038218 | 0.40995  | 0.287619 | 2.40E-10 |
| 0.07179  | -0.1579  | 0.00062  | -0.10149 | 0.02831  | -0.08223 | 0.07584  | 0.23471  | 2.89E-07 |
| 0.77185  | 0.020857 | 0.65303  | 0.303253 | 2.17E-11 | 0.09173  | 0.04757  | 0.031338 | 0.49931  |
| 0.03481  | -0.30671 | 1.25E-11 | -0.15095 | 0.00107  | -0.22077 | 1.45E-06 | -0.01686 | 0.71627  |
| 0.1869   | -0.18086 | 8.48E-05 | -0.02178 | 0.63872  | -0.12875 | 0.00533  | -0.00772 | 0.8678   |
| 9.23E-06 | -0.08694 | 0.06046  | 0.257554 | 1.64E-08 | 0.13854  | 0.0027   | 0.165806 | 0.00032  |
| 0.04392  | 0.035157 | 0.44848  | 0.111245 | 0.01617  | 0.084309 | 0.06871  | 0.109314 | 0.01813  |
| 0.04553  | -0.15003 | 0.00115  | -0.01873 | 0.68638  | -0.15615 | 0.00071  | 0.168877 | 0.00025  |
| 0.08241  | -0.13961 | 0.0025   | 0.13388  | 0.00375  | -0.09209 | 0.04671  | -0.03156 | 0.4963   |
| 4.89E-11 | -0.41866 | 3.04E-21 | -0.1442  | 0.00178  | -0.34909 | 7.89E-15 | -0.03842 | 0.40746  |
| 8.52E-06 | -0.01723 | 0.71028  | 0.254088 | 2.58E-08 | 0.146049 | 0.00155  | 0.237944 | 1.96E-07 |
| 0.81508  | -0.02913 | 0.53004  | 0.107918 | 0.01966  | 0.001917 | 0.96705  | 0.093241 | 0.04401  |
| 0.01886  | -0.04236 | 0.36103  | 0.098945 | 0.03254  | 0.033813 | 0.46603  | -0.0638  | 0.16871  |
| 0.97338  | -0.04264 | 0.35786  | 0.317521 | 2.13E-12 | 0.082596 | 0.07456  | 0.037161 | 0.42303  |
| 0.08497  | -0.23284 | 3.61E-07 | -0.15173 | 0.001    | -0.22968 | 5.24E-07 | 0.115325 | 0.01264  |
| 7.26E-26 | 0.066158 | 0.15346  | 0.17109  | 0.0002   | 0.275888 | 1.33E-09 | 0.187776 | 4.44E-05 |
| 3.17E-09 | 0.309515 | 7.95E-12 | 0.429956 | 1.96E-22 | 0.361106 | 7.88E-16 | 0.222674 | 1.17E-06 |
| 0.37344  | -0.11156 | 0.01586  | 0.030418 | 0.512    | -0.0134  | 0.77275  | 0.169768 | 0.00023  |
| 0.00468  | -0.02544 | 0.58338  | -0.12332 | 0.00763  | -0.02591 | 0.57651  | 0.244169 | 9.12E-08 |
| 1.37E-10 | 0.060586 | 0.19122  | -0.00295 | 0.94931  | 0.109544 | 0.01788  | 0.316575 | 2.49E-12 |
| 2.80E-12 | -0.19838 | 1.57E-05 | -0.00871 | 0.85104  | -0.24564 | 7.58E-08 | 0.087017 | 0.06025  |
| 3.20E-10 | -0.1108  | 0.0166   | 0.032657 | 0.48142  | 0.068023 | 0.14217  | 0.169995 | 0.00022  |
| 0.96147  | 0.11288  | 0.01466  | 0.378935 | 2.15E-17 | 0.165856 | 0.00032  | 0.033    | 0.47682  |
| 0.0002   | -0.02554 | 0.58196  | 0.085978 | 0.06339  | -0.08609 | 0.06303  | 0.11749  | 0.01105  |
| 0.00641  | 0.142633 | 0.002    | 0.432837 | 9.56E-23 | 0.26035  | 1.13E-08 | 0.035969 | 0.43807  |
| 0.38932  | 0.072081 | 0.11982  | 0.195823 | 2.03E-05 | 0.082504 | 0.07488  | 0.178812 | 0.0001   |
| 0.02866  | -0.17392 | 0.00016  | -0.1983  | 1.58E-05 | -0.24515 | 8.07E-08 | 0.140466 | 0.00235  |
| 0.29705  | -0.10358 | 0.0252   | 0.007061 | 0.87904  | -0.02773 | 0.54994  | 0.24296  | 1.06E-07 |
| 2.82E-08 | -0.09666 | 0.03678  | 0.052568 | 0.2569   | 0.068099 | 0.14173  | 0.218811 | 1.81E-06 |
| 1.23E-11 | 0.249455 | 4.68E-08 | 0.54925  | 3.71E-38 | 0.406402 | 5.33E-20 | 0.34677  | 1.22E-14 |
| 1.09E-08 | 0.200138 | 1.31E-05 | 0.394635 | 7.47E-19 | 0.317789 | 2.03E-12 | 0.066215 | 0.1531   |
| 0.12379  | -0.37528 | 4.58E-17 | -0.06085 | 0.18932  | -0.18957 | 3.74E-05 | 0.01168  | 0.80124  |
| 8.23E-06 | 0.016458 | 0.72279  | 0.216865 | 2.24E-06 | 0.189211 | 3.87E-05 | 0.321756 | 1.04E-12 |
| 5.00E-07 | 0.094461 | 0.04131  | -0.01864 | 0.68783  | 0.072567 | 0.11734  | 0.301436 | 2.89E-11 |



|          |          |          |          |          |          |          |          |          |
|----------|----------|----------|----------|----------|----------|----------|----------|----------|
| 9.43E-06 | -0.23044 | 4.79E-07 | 0.094818 | 0.04054  | -0.17589 | 0.00013  | -0.02551 | 0.58239  |
| 0.0001   | -0.00075 | 0.98706  | 0.210111 | 4.66E-06 | -0.02214 | 0.63314  | 0.102699 | 0.02647  |
| 0.00013  | -0.08455 | 0.06791  | 0.214187 | 3.00E-06 | 0.118913 | 0.01011  | 0.113619 | 0.01402  |
| 0.00393  | -0.02883 | 0.53424  | 0.098434 | 0.03345  | -0.0674  | 0.14587  | 0.011262 | 0.80822  |
| 1.64E-15 | 0.295863 | 6.89E-11 | 0.310076 | 7.26E-12 | 0.326166 | 4.89E-13 | 0.319253 | 1.59E-12 |
| 1.21E-08 | -0.29141 | 1.36E-10 | -0.05076 | 0.27365  | -0.26713 | 4.52E-09 | -0.12991 | 0.00493  |
| 0.0033   | 0.07699  | 0.09656  | 0.074772 | 0.10658  | -0.03912 | 0.39896  | 0.086117 | 0.06296  |
| 0.00029  | -0.28942 | 1.83E-10 | -0.21081 | 4.33E-06 | -0.31483 | 3.33E-12 | -0.01241 | 0.78913  |
| 0.54547  | -0.14157 | 0.00217  | 0.037527 | 0.41847  | -0.10929 | 0.01815  | 0.085246 | 0.06568  |
| 0.24577  | -0.12356 | 0.00751  | 0.133195 | 0.00393  | 0.007701 | 0.86817  | 0.131786 | 0.00433  |
| 8.53E-08 | 0.008737 | 0.85064  | 0.062555 | 0.17717  | 0.095033 | 0.04009  | 0.207057 | 6.44E-06 |
| 0.44783  | -0.06735 | 0.14616  | -0.03527 | 0.44707  | -0.0989  | 0.03261  | 0.308685 | 9.10E-12 |
| 0.05855  | -0.28941 | 1.84E-10 | -0.1521  | 0.00098  | -0.23958 | 1.61E-07 | -0.01185 | 0.79846  |
| 0.68263  | -0.13345 | 0.00386  | 0.053712 | 0.24668  | -0.02654 | 0.56729  | 0.164745 | 0.00035  |
| 0.07863  | -0.2072  | 6.34E-06 | -0.00855 | 0.85382  | -0.1226  | 0.00799  | 0.201286 | 1.17E-05 |
| 0.00029  | -0.23554 | 2.62E-07 | 0.002213 | 0.96196  | -0.00531 | 0.90886  | 0.137418 | 0.00292  |
| 1.55E-11 | 0.057374 | 0.21588  | 0.360175 | 9.45E-16 | 0.266523 | 4.91E-09 | 0.187582 | 4.52E-05 |
| 0.49841  | -0.22303 | 1.13E-06 | 0.087712 | 0.05822  | -0.04262 | 0.35809  | -0.0084  | 0.8563   |
| 6.17E-10 | 0.106521 | 0.02132  | 0.297626 | 5.24E-11 | 0.225211 | 8.78E-07 | 0.222728 | 1.16E-06 |
| 2.20E-05 | -0.15524 | 0.00076  | -0.04857 | 0.29489  | -0.18961 | 3.72E-05 | 0.133929 | 0.00374  |
| 3.13E-06 | 0.212868 | 3.47E-06 | 0.293594 | 9.75E-11 | 0.269248 | 3.37E-09 | 0.332753 | 1.55E-13 |
| 0.00138  | -0.09762 | 0.03494  | 0.16841  | 0.00026  | -0.07826 | 0.09117  | -0.02276 | 0.6237   |
| 0.63651  | -0.24933 | 4.76E-08 | 0.049699 | 0.28381  | -0.08472 | 0.06737  | 0.181496 | 8.00E-05 |
| 4.13E-05 | 0.309522 | 7.94E-12 | 0.336662 | 7.71E-14 | 0.299934 | 3.66E-11 | 0.454941 | 3.10E-25 |
| 5.41E-07 | -0.33839 | 5.66E-14 | -0.14509 | 0.00167  | -0.31398 | 3.83E-12 | -0.08747 | 0.05891  |
| 1.44E-32 | 0.37248  | 8.13E-17 | 0.442153 | 8.99E-24 | 0.478033 | 4.89E-28 | 0.319229 | 1.60E-12 |
| 0.18987  | 0.060078 | 0.19498  | 0.09295  | 0.04468  | 0.031083 | 0.50281  | 0.114256 | 0.01349  |
| 0.02373  | -0.26544 | 5.69E-09 | -0.13494 | 0.00348  | -0.24295 | 1.06E-07 | 0.117539 | 0.01102  |
| 4.77E-13 | 0.247958 | 5.67E-08 | 0.118042 | 0.01068  | 0.191731 | 3.03E-05 | 0.363865 | 4.58E-16 |
| 6.26E-06 | -0.07233 | 0.11857  | -0.04054 | 0.3821   | 0.014131 | 0.76069  | 0.222923 | 1.14E-06 |
| 0.07217  | 0.081357 | 0.07903  | 0.019542 | 0.67359  | -0.04349 | 0.34839  | 0.263902 | 7.01E-09 |
| 0.00022  | 0.060891 | 0.18899  | -0.04098 | 0.37689  | 0.010359 | 0.82332  | -0.09071 | 0.0501   |
| 0.52381  | -0.00114 | 0.9804   | 0.225358 | 8.64E-07 | 0.054048 | 0.24373  | 0.108012 | 0.01956  |
| 6.37E-05 | -0.14043 | 0.00235  | 0.003063 | 0.94737  | -0.16631 | 0.00031  | 0.16721  | 0.00028  |
| 0.11603  | -0.01007 | 0.8282   | 0.012692 | 0.78443  | -0.06903 | 0.13635  | 0.267235 | 4.45E-09 |
| 4.53E-15 | -0.02719 | 0.55775  | 0.301579 | 2.83E-11 | 0.252453 | 3.19E-08 | 0.304585 | 1.76E-11 |
| 4.60E-06 | -0.03174 | 0.49385  | 0.080056 | 0.08396  | -0.13548 | 0.00335  | 0.01677  | 0.71775  |
| 0.06213  | -0.2153  | 2.66E-06 | 0.032606 | 0.48211  | -0.12471 | 0.00697  | 0.040795 | 0.37908  |
| 0.26931  | -0.20491 | 8.05E-06 | 0.003236 | 0.9444   | -0.10423 | 0.02429  | 0.221429 | 1.35E-06 |
| 0.74883  | -0.02558 | 0.58144  | 0.265543 | 5.61E-09 | 0.077758 | 0.09327  | 0.132228 | 0.0042   |
| 3.91E-14 | -0.33864 | 5.40E-14 | -0.09517 | 0.0398   | -0.32333 | 7.96E-13 | -0.06675 | 0.14978  |
| 0.98049  | -0.02395 | 0.6057   | 0.058892 | 0.20396  | -0.05681 | 0.22041  | 0.134412 | 0.00361  |
| 1.18E-06 | -0.20303 | 9.78E-06 | -0.11966 | 0.00965  | -0.27217 | 2.24E-09 | -0.03572 | 0.44129  |
| 0.00056  | 0.29137  | 1.37E-10 | 0.344141 | 1.98E-14 | 0.261071 | 1.03E-08 | 0.288529 | 2.10E-10 |
| 0.0169   | -0.08952 | 0.0532   | 0.120712 | 0.00902  | 0.051234 | 0.26919  | 0.296744 | 6.01E-11 |

|          |          |          |          |          |          |          |          |          |
|----------|----------|----------|----------|----------|----------|----------|----------|----------|
| 0.01331  | -0.23181 | 4.08E-07 | 0.039634 | 0.3928   | -0.13692 | 0.00303  | 0.039037 | 0.39999  |
| 7.10E-10 | -0.33975 | 4.42E-14 | -0.08707 | 0.0601   | -0.31463 | 3.44E-12 | -0.0788  | 0.08893  |
| 0.82395  | -0.24667 | 6.67E-08 | 0.061349 | 0.18568  | -0.06817 | 0.14132  | 0.077852 | 0.09287  |
| 0.18356  | -0.15915 | 0.00056  | 0.031365 | 0.49895  | -0.05126 | 0.26891  | 0.207157 | 6.37E-06 |
| 2.12E-06 | -0.13645 | 0.00313  | -0.06384 | 0.16842  | -0.0128  | 0.7827   | 0.088144 | 0.05699  |
| 1.28E-05 | -0.33783 | 6.25E-14 | -0.12081 | 0.00897  | -0.27532 | 1.44E-09 | 0.047414 | 0.30656  |
| 0.00033  | 0.007971 | 0.86361  | 0.056416 | 0.22366  | 0.062062 | 0.18061  | 0.125758 | 0.0065   |
| 0.03567  | -0.19631 | 1.93E-05 | 0.053304 | 0.25029  | -0.10251 | 0.02675  | 0.113633 | 0.01401  |
| 1.41E-11 | 0.041506 | 0.37083  | 0.348974 | 8.06E-15 | 0.273916 | 1.75E-09 | 0.206733 | 6.66E-06 |

| MMbrownp. | MMbrov   | MMsaddlep. | MMsadd   | MMorange | MMorar  | MMdarkmp. | MMdarl  | MMdarktu |
|-----------|----------|------------|----------|----------|---------|-----------|---------|----------|
| -0.09772  | 0.03476  | -0.13882   | 0.00264  | 0.046958 | 0.31125 | 0.025408  | 0.5839  | 0.035924 |
| -0.03327  | 0.4732   | -0.17597   | 0.00013  | -0.01444 | 0.75564 | -0.08696  | 0.0604  | -0.02477 |
| -0.05251  | 0.25739  | -0.14614   | 0.00154  | 0.040276 | 0.38518 | -0.04708  | 0.31003 | -0.00114 |
| 0.162249  | 0.00043  | -0.03619   | 0.43525  | 0.001695 | 0.97085 | -0.07788  | 0.09277 | -0.03302 |
| -0.05896  | 0.2034   | -0.26466   | 6.33E-09 | 0.005078 | 0.91285 | -0.11313  | 0.01444 | -0.0051  |
| -0.02179  | 0.63861  | -0.19683   | 1.84E-05 | 0.005829 | 0.90002 | -0.05893  | 0.20364 | -0.03152 |
| 0.036258  | 0.43439  | -0.14625   | 0.00153  | 0.010411 | 0.82246 | 0.004079  | 0.92994 | -0.07063 |
| -0.07049  | 0.12825  | -0.20817   | 5.72E-06 | 0.022537 | 0.62712 | -0.04181  | 0.36735 | 0.02242  |
| -0.02618  | 0.57258  | -0.15007   | 0.00114  | -0.00283 | 0.95134 | -0.05594  | 0.22758 | -0.03699 |
| 0.0003    | 0.99484  | -0.2357    | 2.57E-07 | -0.04196 | 0.36558 | -0.15191  | 0.00099 | -0.10341 |
| 0.012396  | 0.78933  | -0.07786   | 0.09284  | 0.054907 | 0.23631 | -0.01374  | 0.7672  | 0.031573 |
| -0.04173  | 0.36822  | -0.21396   | 3.08E-06 | 0.048843 | 0.2922  | -0.02081  | 0.65379 | -0.04798 |
| -0.09059  | 0.05041  | -0.27547   | 1.41E-09 | 0.013482 | 0.77137 | -0.05623  | 0.22521 | 0.029636 |
| 0.091531  | 0.04806  | 0.018481   | 0.69037  | 0.028406 | 0.54032 | -0.01231  | 0.79076 | 0.189233 |
| -0.03255  | 0.48284  | -0.16949   | 0.00023  | -0.0076  | 0.86984 | -0.03362  | 0.46858 | -0.03287 |
| 0.037444  | 0.4195   | -0.16846   | 0.00026  | -0.01341 | 0.77258 | -0.09744  | 0.03528 | 0.013113 |
| -0.06103  | 0.18796  | -0.10633   | 0.02155  | 0.051774 | 0.26417 | -0.02341  | 0.61391 | 0.118555 |
| 0.014502  | 0.75461  | -0.10872   | 0.01877  | 0.043727 | 0.34575 | -0.02398  | 0.60527 | -0.00065 |
| -0.17748  | 0.00012  | -0.28048   | 6.86E-10 | -0.02793 | 0.54713 | -0.07279  | 0.11623 | -0.06205 |
| -0.12705  | 0.00597  | -0.14919   | 0.00122  | 0.002042 | 0.9649  | 0.010324  | 0.82392 | 0.040128 |
| -0.0786   | 0.08975  | -0.24842   | 5.34E-08 | 0.019903 | 0.66792 | -0.03293  | 0.47779 | -0.0241  |
| -0.00779  | 0.86661  | -0.15906   | 0.00056  | 0.052211 | 0.26015 | -0.00466  | 0.91994 | 0.029105 |
| -0.07738  | 0.09488  | -0.17619   | 0.00013  | 0.027621 | 0.55157 | 0.105185  | 0.02301 | 0.086667 |
| 0.010883  | 0.81455  | -0.17344   | 0.00017  | 0.000302 | 0.99481 | -0.03141  | 0.49839 | -0.02428 |
| -0.1062   | 0.02172  | -0.13937   | 0.00254  | -0.01492 | 0.74776 | -0.04017  | 0.38647 | 0.01377  |
| -0.11655  | 0.01172  | -0.23867   | 1.79E-07 | -0.00323 | 0.94447 | -0.06313  | 0.17321 | 0.049479 |
| -0.05462  | 0.23875  | -0.08015   | 0.0836   | 0.064447 | 0.1644  | -0.01681  | 0.71707 | 0.004342 |
| -0.08898  | 0.05466  | -0.26061   | 1.09E-08 | 0.003135 | 0.94613 | -0.07462  | 0.10732 | -0.0019  |
| -0.05353  | 0.24828  | -0.22884   | 5.78E-07 | 0.027234 | 0.55716 | -0.02999  | 0.51792 | 0.022891 |
| 0.135273  | 0.0034   | -0.00352   | 0.93944  | 0.030106 | 0.51634 | -0.10376  | 0.02494 | -0.03444 |
| -0.0747   | 0.10692  | -0.15168   | 0.00101  | 0.011117 | 0.80976 | -0.0482   | 0.29858 | 0.065537 |
| -0.11742  | 0.0111   | -0.24353   | 9.87E-08 | -0.0205  | 0.65866 | -0.0835   | 0.07144 | -0.01712 |
| 0.020561  | 0.65763  | -0.1841    | 6.28E-05 | -0.02261 | 0.62594 | -0.1143   | 0.01345 | -0.0478  |
| 0.044951  | 0.3324   | -0.07126   | 0.12411  | -0.03228 | 0.48653 | -0.07039  | 0.12876 | -0.08734 |
| 0.065656  | 0.15661  | -0.11123   | 0.01618  | 0.018453 | 0.69082 | 0.006941  | 0.88109 | -0.06401 |
| 0.10541   | 0.02272  | 0.021124   | 0.64889  | 0.046651 | 0.31442 | 0.005445  | 0.90658 | 0.189713 |
| -0.02453  | 0.59701  | -0.13009   | 0.00487  | 0.011667 | 0.80146 | -0.04496  | 0.33235 | 0.047535 |
| -0.04491  | 0.33281  | -0.11053   | 0.01687  | -0.02397 | 0.60539 | -0.08616  | 0.06281 | -0.07255 |
| 0.304242  | 1.86E-11 | 0.065409   | 0.15818  | -0.00634 | 0.89129 | -0.08524  | 0.0657  | -0.04182 |
| -0.10707  | 0.02065  | -0.17838   | 0.00011  | 0.017476 | 0.70641 | 0.028389  | 0.54055 | 0.076831 |
| -0.06012  | 0.19465  | -0.10513   | 0.02308  | 0.043466 | 0.34864 | 0.008973  | 0.84665 | 0.001358 |
| -0.03844  | 0.40729  | -0.17808   | 0.00011  | -0.02761 | 0.55169 | -0.06713  | 0.14749 | -0.03711 |
| 0.013784  | 0.7664   | -0.2349    | 2.83E-07 | -0.02166 | 0.64064 | -0.02209  | 0.63397 | -0.03892 |
| -0.05134  | 0.26824  | -0.17651   | 0.00013  | 0.059648 | 0.1982  | 0.136558  | 0.00311 | 0.121975 |

|          |          |          |          |          |         |          |          |          |
|----------|----------|----------|----------|----------|---------|----------|----------|----------|
| 0.20496  | 8.01E-06 | 0.31553  | 2.96E-12 | 0.152838 | 0.00092 | 0.261559 | 9.62E-09 | 0.43105  |
| 0.063851 | 0.16835  | 0.109969 | 0.01744  | 0.056938 | 0.21939 | 0.071278 | 0.12401  | 0.151515 |
| -0.29975 | 3.77E-11 | -0.14415 | 0.00179  | 0.041584 | 0.36992 | 0.113494 | 0.01413  | 0.031963 |
| -0.02057 | 0.65747  | -0.03622 | 0.43491  | -0.01637 | 0.72419 | -0.0321  | 0.48889  | -0.01254 |
| -0.08618 | 0.06277  | -0.04505 | 0.33133  | 0.017932 | 0.69912 | 0.023961 | 0.60552  | 0.103055 |
| 0.232278 | 3.86E-07 | 0.380362 | 1.60E-17 | -0.00919 | 0.84296 | -0.00392 | 0.93273  | 0.165325 |
| 0.259362 | 1.29E-08 | -0.05522 | 0.23362  | 0.001724 | 0.97036 | -0.07129 | 0.12395  | -0.07445 |
| 0.21939  | 1.69E-06 | 0.146884 | 0.00146  | 0.059274 | 0.20103 | 0.121576 | 0.00854  | 0.169183 |
| -0.13633 | 0.00316  | -0.02977 | 0.52105  | -0.03867 | 0.40443 | -0.10467 | 0.02369  | -0.14456 |
| 0.197492 | 1.72E-05 | 0.331693 | 1.87E-13 | 0.090243 | 0.05131 | 0.213401 | 3.27E-06 | 0.16886  |
| 0.010339 | 0.82366  | 0.014353 | 0.75704  | 0.022126 | 0.63342 | 0.054743 | 0.23771  | 0.066741 |
| 0.076    | 0.10093  | 0.257283 | 1.70E-08 | 0.096882 | 0.03635 | 0.185693 | 5.41E-05 | 0.251469 |
| -0.04931 | 0.2876   | -0.21696 | 2.22E-06 | 0.002248 | 0.96136 | 0.045175 | 0.33     | -0.06044 |
| -0.03703 | 0.42463  | 0.204751 | 8.19E-06 | 0.031869 | 0.49206 | 0.202776 | 1.00E-05 | 0.009628 |
| -0.05344 | 0.24911  | -0.1213  | 0.00869  | 0.000413 | 0.9929  | 0.011994 | 0.79602  | -0.07276 |
| 0.172134 | 0.00019  | 0.288186 | 2.21E-10 | 0.087179 | 0.05977 | 0.1855   | 5.51E-05 | 0.147737 |
| 0.023174 | 0.61742  | 0.124483 | 0.00707  | 0.014832 | 0.74921 | 0.053306 | 0.25027  | 0.014325 |
| 0.071278 | 0.12401  | -0.20278 | 1.00E-05 | 0.005724 | 0.90181 | -0.05858 | 0.20635  | -0.0147  |
| -0.13752 | 0.0029   | -0.10081 | 0.0294   | 0.062596 | 0.17688 | 0.17811  | 0.00011  | 0.064231 |
| 0.089769 | 0.05254  | -0.08553 | 0.06478  | -0.03405 | 0.46295 | -0.13112 | 0.00454  | 0.009102 |
| -0.08385 | 0.07023  | -0.2928  | 1.10E-10 | 0.010214 | 0.82575 | 0.023969 | 0.60539  | -0.09651 |
| 0.338098 | 5.96E-14 | 0.442579 | 8.05E-24 | -0.05104 | 0.27098 | -0.08923 | 0.054    | -0.15158 |
| 0.051043 | 0.27098  | 0.047608 | 0.30459  | 0.074992 | 0.10555 | 0.144082 | 0.0018   | 0.099836 |
| -0.07961 | 0.08572  | -0.00375 | 0.9356   | -0.02894 | 0.53278 | -0.07143 | 0.12318  | -0.14618 |
| -0.14897 | 0.00124  | -0.49618 | 2.15E-30 | -0.0112  | 0.80927 | -0.07134 | 0.12369  | -0.07    |
| -0.22285 | 1.15E-06 | -0.39851 | 3.17E-19 | -0.03055 | 0.51019 | -0.07593 | 0.10123  | -0.09987 |
| 0.227484 | 6.76E-07 | 0.1522   | 0.00097  | -0.03609 | 0.43651 | -0.06018 | 0.19422  | -0.0614  |
| 0.139301 | 0.00255  | 0.098595 | 0.03316  | 0.004978 | 0.91456 | -0.05663 | 0.22187  | 0.047519 |
| -0.09018 | 0.05146  | -0.25012 | 4.30E-08 | 0.050261 | 0.2784  | 0.116942 | 0.01144  | 0.180089 |
| 0.039014 | 0.40026  | -0.0677  | 0.14409  | 0.048465 | 0.29596 | 0.128354 | 0.00547  | 0.09086  |
| -0.01937 | 0.67638  | -0.18939 | 3.80E-05 | 0.080102 | 0.08378 | 0.073847 | 0.11099  | 0.196457 |
| 0.141573 | 0.00216  | 0.184722 | 5.92E-05 | 0.047036 | 0.31044 | 0.020544 | 0.6579   | 0.071619 |
| 0.143595 | 0.00186  | -0.13795 | 0.00281  | 0.020433 | 0.65963 | 0.01532  | 0.74125  | -0.02661 |
| 0.204154 | 8.71E-06 | 0.091155 | 0.04899  | -0.02549 | 0.58274 | -0.10241 | 0.0269   | 0.016206 |
| -0.04645 | 0.3165   | -0.16583 | 0.00032  | -0.01391 | 0.76431 | -0.00167 | 0.97126  | -0.02002 |
| 0.02021  | 0.66312  | -0.02344 | 0.61334  | 0.010068 | 0.82821 | 0.013739 | 0.76713  | 0.031835 |
| -0.11155 | 0.01588  | -0.04459 | 0.3363   | 0.018597 | 0.68854 | 0.112548 | 0.01496  | -0.00989 |
| -0.00528 | 0.90933  | 0.05849  | 0.20707  | -0.00304 | 0.94772 | 0.017452 | 0.7068   | 0.087571 |
| 0.058285 | 0.20866  | -0.11207 | 0.01539  | 0.030941 | 0.50477 | 0.092124 | 0.04662  | 0.013358 |
| 0.302049 | 2.63E-11 | 0.322446 | 9.26E-13 | 0.013763 | 0.76675 | -0.1085  | 0.01901  | 0.061083 |
| 0.129007 | 0.00524  | 0.097851 | 0.03452  | 0.032476 | 0.48386 | -0.00086 | 0.98526  | 0.038369 |
| -0.02759 | 0.55201  | -0.09999 | 0.03074  | 0.000665 | 0.98857 | -0.11156 | 0.01587  | -0.02343 |
| 0.048627 | 0.29434  | 0.002961 | 0.94912  | -0.0134  | 0.77267 | 0.005196 | 0.91084  | 0.007085 |
| -0.04733 | 0.30739  | -0.15303 | 0.00091  | -0.00925 | 0.84193 | -0.05302 | 0.25286  | 0.042751 |
| -0.00472 | 0.91904  | -0.02191 | 0.63677  | 0.064753 | 0.1624  | 0.06811  | 0.14166  | 0.188196 |

|          |          |          |          |          |         |          |          |          |
|----------|----------|----------|----------|----------|---------|----------|----------|----------|
| 0.030078 | 0.51672  | -0.06764 | 0.14445  | -0.02678 | 0.56374 | -0.02777 | 0.5494   | -0.02687 |
| -0.20653 | 6.80E-06 | -0.06316 | 0.17299  | 0.10123  | 0.02872 | 0.133947 | 0.00373  | 0.218474 |
| -0.20348 | 9.34E-06 | -0.36755 | 2.20E-16 | 0.025759 | 0.57871 | 0.001934 | 0.96674  | 0.058304 |
| -0.11228 | 0.0152   | -0.18853 | 4.13E-05 | 0.032165 | 0.48806 | 0.085142 | 0.06601  | -0.08653 |
| 0.073444 | 0.11296  | 0.123795 | 0.0074   | 0.037829 | 0.41474 | 0.098975 | 0.03248  | 0.021837 |
| 0.099356 | 0.03182  | 0.032649 | 0.48153  | 0.008337 | 0.85739 | -0.01906 | 0.68124  | 0.035158 |
| -0.06942 | 0.13415  | -0.06211 | 0.18027  | -0.01796 | 0.69875 | 0.119136 | 0.00997  | -0.08742 |
| 0.035246 | 0.44733  | -0.11198 | 0.01548  | 0.084746 | 0.06728 | 0.120415 | 0.0092   | 0.178066 |
| -0.02462 | 0.59558  | -0.12374 | 0.00742  | 0.014103 | 0.76116 | 0.008874 | 0.84832  | -0.00877 |
| 0.173422 | 0.00017  | -0.10226 | 0.02713  | 0.023936 | 0.60589 | 0.028461 | 0.53954  | 0.086075 |
| 0.173691 | 0.00016  | 0.252363 | 3.23E-08 | 0.042326 | 0.36144 | 0.103696 | 0.02503  | 0.274942 |
| -0.12568 | 0.00654  | -0.24669 | 6.65E-08 | -0.0161  | 0.72865 | 0.069721 | 0.13246  | -0.12906 |
| 0.017422 | 0.70728  | -0.02988 | 0.51949  | 0.010612 | 0.81909 | -0.04371 | 0.3459   | 0.032368 |
| 0.188857 | 4.00E-05 | 0.084648 | 0.0676   | 0.028816 | 0.53448 | 0.053464 | 0.24888  | 0.025727 |
| -0.12415 | 0.00723  | -0.20403 | 8.82E-06 | 0.003347 | 0.94249 | 0.043657 | 0.34653  | -0.02581 |
| -0.02242 | 0.62889  | -0.04307 | 0.35302  | -0.02592 | 0.57635 | 0.06387  | 0.16822  | 0.04037  |
| -0.04274 | 0.35673  | 8.96E-05 | 0.99846  | 0.105505 | 0.02259 | 0.174851 | 0.00015  | 0.203562 |
| -0.04885 | 0.29215  | -0.13518 | 0.00342  | -0.0091  | 0.84444 | -0.01861 | 0.68839  | 0.023414 |
| 0.149952 | 0.00115  | 0.1459   | 0.00157  | 0.005193 | 0.91088 | 0.011942 | 0.79687  | 0.091567 |
| -0.18271 | 7.15E-05 | -0.43089 | 1.55E-22 | 0.00356  | 0.93885 | 0.037853 | 0.41444  | -0.02063 |
| 0.082306 | 0.07559  | 0.050643 | 0.27475  | -0.01055 | 0.82017 | -0.07324 | 0.11397  | 0.021575 |
| -0.10591 | 0.02207  | -0.1414  | 0.00219  | 0.069833 | 0.13183 | 0.16776  | 0.00027  | 0.158359 |
| 0.014555 | 0.75373  | 0.07138  | 0.12347  | -0.04    | 0.38847 | -0.0984  | 0.03351  | -0.09383 |
| 0.080785 | 0.08117  | -0.12658 | 0.00616  | 0.014017 | 0.76256 | -0.00031 | 0.99463  | 0.022807 |
| 0.147217 | 0.00142  | 0.179414 | 9.68E-05 | 0.036594 | 0.43015 | 0.098884 | 0.03265  | 0.167785 |
| -0.12546 | 0.00663  | -0.18234 | 7.40E-05 | 0.040825 | 0.37873 | 0.030469 | 0.51129  | 0.012945 |
| 0.262576 | 8.39E-09 | 0.302609 | 2.40E-11 | 0.051439 | 0.26727 | 0.035641 | 0.44226  | 0.103817 |
| 0.288349 | 2.15E-10 | 0.112848 | 0.01469  | 0.040504 | 0.38249 | 0.071614 | 0.12224  | 0.170383 |
| -0.15096 | 0.00107  | -0.14485 | 0.0017   | 0.049666 | 0.28414 | 0.116547 | 0.01172  | 0.033817 |
| -0.10726 | 0.02042  | -0.04257 | 0.35863  | -0.02266 | 0.62518 | -0.04678 | 0.31306  | -0.00878 |
| 0.148523 | 0.00129  | 0.180225 | 8.99E-05 | 0.014008 | 0.76271 | 0.011822 | 0.79888  | 0.111704 |
| 0.06994  | 0.13124  | -0.12272 | 0.00793  | -0.06571 | 0.15624 | -0.23374 | 3.25E-07 | -0.04851 |
| -0.08476 | 0.06726  | -0.01565 | 0.73592  | -0.02621 | 0.57213 | -0.05472 | 0.2379   | -0.09827 |
| -0.15618 | 0.00071  | -0.17555 | 0.00014  | -0.09128 | 0.04868 | -0.08064 | 0.08171  | -0.11145 |
| 0.430047 | 1.91E-22 | 0.158862 | 0.00057  | 0.040842 | 0.37853 | 0.029094 | 0.53054  | 0.064947 |
| 0.105408 | 0.02272  | 0.057549 | 0.21448  | -0.03258 | 0.48239 | -0.10472 | 0.02363  | -0.07659 |
| 0.165665 | 0.00032  | 0.133599 | 0.00382  | -0.02805 | 0.54536 | -0.08791 | 0.05765  | -0.05229 |
| -0.06894 | 0.13688  | -0.30382 | 1.98E-11 | -0.00815 | 0.86061 | -0.09187 | 0.04724  | -0.1134  |
| -0.10332 | 0.02557  | -0.13691 | 0.00303  | -0.0142  | 0.75956 | -0.09069 | 0.05016  | -0.16897 |
| 0.028518 | 0.53872  | 0.167515 | 0.00028  | 0.026248 | 0.57152 | 0.140281 | 0.00238  | 0.048893 |
| 0.34024  | 4.04E-14 | 0.022761 | 0.62369  | 0.012159 | 0.79328 | -0.16527 | 0.00034  | 0.051798 |
| -0.00893 | 0.84736  | 0.033077 | 0.4758   | -0.01422 | 0.75926 | 0.034896 | 0.45186  | 0.059201 |
| -0.02941 | 0.52608  | -0.12469 | 0.00698  | 0.075896 | 0.1014  | 0.128682 | 0.00535  | 0.207054 |
| 0.039301 | 0.3968   | 0.182312 | 7.42E-05 | 0.082608 | 0.07451 | 0.130482 | 0.00474  | 0.127049 |
| 0.090364 | 0.05099  | -0.01348 | 0.77147  | -0.00499 | 0.91432 | -0.05387 | 0.24525  | 0.035302 |

|          |          |          |          |          |          |          |          |          |
|----------|----------|----------|----------|----------|----------|----------|----------|----------|
| -0.05611 | 0.22616  | -0.04305 | 0.3533   | -0.07692 | 0.09687  | -0.13783 | 0.00284  | -0.03846 |
| -0.02688 | 0.56229  | -0.01026 | 0.82496  | 0.003232 | 0.94446  | 0.041164 | 0.37478  | -0.00211 |
| -0.0293  | 0.52762  | 0.020746 | 0.65475  | -0.04149 | 0.37103  | -0.05108 | 0.27059  | -0.08551 |
| 0.213213 | 3.34E-06 | 0.19103  | 3.25E-05 | 0.008249 | 0.85888  | -0.09941 | 0.03172  | 0.046385 |
| 0.307005 | 1.19E-11 | 0.520441 | 8.97E-34 | -0.03491 | 0.45171  | -0.06427 | 0.16554  | -0.03607 |
| -0.15739 | 0.00064  | -0.26761 | 4.22E-09 | -0.06802 | 0.14217  | -0.12949 | 0.00507  | -0.0798  |
| 0.22479  | 9.22E-07 | 0.149126 | 0.00123  | -0.02044 | 0.65959  | -0.05636 | 0.22409  | 0.013354 |
| -0.11029 | 0.01711  | -0.33477 | 1.08E-13 | -0.04515 | 0.33029  | -0.05499 | 0.23561  | -0.00247 |
| -0.03376 | 0.46669  | -0.15954 | 0.00054  | 0.00886  | 0.84857  | -0.09804 | 0.03417  | -0.02851 |
| 0.079127 | 0.08763  | 0.086252 | 0.06255  | -0.01888 | 0.68406  | -0.06599 | 0.15448  | -0.00853 |
| 0.015144 | 0.74411  | -0.06396 | 0.16759  | 0.021128 | 0.64882  | 0.006231 | 0.89318  | -0.0012  |
| -0.10176 | 0.02789  | -0.025   | 0.59     | -0.03628 | 0.43414  | -0.03097 | 0.50442  | -0.0295  |
| 0.225314 | 8.68E-07 | 0.303072 | 2.23E-11 | 0.009082 | 0.84481  | -0.03503 | 0.45016  | 0.069125 |
| 0.05782  | 0.21233  | -0.09529 | 0.03955  | 0.025772 | 0.57853  | 0.022606 | 0.62607  | 0.008985 |
| 0.019473 | 0.67468  | -0.01253 | 0.78713  | 0.205221 | 7.80E-06 | 0.296709 | 6.04E-11 | 0.574979 |
| -0.16128 | 0.00047  | -0.2408  | 1.38E-07 | 0.120184 | 0.00933  | 0.209818 | 4.81E-06 | 0.316617 |
| -0.06629 | 0.15266  | -0.12724 | 0.0059   | 0.014476 | 0.75503  | 0.021012 | 0.65062  | 0.070638 |
| 0.232947 | 3.57E-07 | 0.432301 | 1.09E-22 | 0.010364 | 0.82324  | -0.00468 | 0.91961  | 0.068805 |
| -0.03338 | 0.47175  | -0.13312 | 0.00395  | 0.013921 | 0.76414  | 0.106753 | 0.02103  | -0.04389 |
| -0.01949 | 0.67435  | -0.05446 | 0.24013  | -0.04523 | 0.32944  | -0.09662 | 0.03686  | -0.03415 |
| 0.444317 | 5.13E-24 | 0.161869 | 0.00045  | -0.01979 | 0.66965  | -0.04768 | 0.30389  | -0.06743 |
| -0.1961  | 1.97E-05 | -0.13321 | 0.00393  | 0.00133  | 0.97713  | 0.050232 | 0.27867  | 0.042027 |
| -0.01231 | 0.79082  | -0.28689 | 2.68E-10 | -0.0397  | 0.392    | -0.06433 | 0.16514  | -0.24679 |
| -0.12138 | 0.00865  | -0.10182 | 0.02779  | -0.03703 | 0.42464  | -0.09089 | 0.04965  | -0.00245 |
| 0.164702 | 0.00035  | 0.041844 | 0.36694  | 0.000292 | 0.99498  | 0.076075 | 0.10059  | -0.01444 |
| 0.016144 | 0.72787  | 0.005118 | 0.91217  | 0.064077 | 0.16684  | 0.032881 | 0.47842  | 0.176075 |
| -0.01885 | 0.68453  | -0.22951 | 5.34E-07 | 0.016536 | 0.72152  | 0.122492 | 0.00805  | -0.14883 |
| 0.069396 | 0.13428  | 0.076231 | 0.0999   | 0.033427 | 0.47114  | 0.08043  | 0.08252  | 0.043241 |
| 0.028753 | 0.53537  | 0.113919 | 0.01377  | -0.012   | 0.7959   | -0.0274  | 0.55482  | 0.080409 |
| -0.28281 | 4.89E-10 | -0.17306 | 0.00017  | -0.00622 | 0.89344  | 0.020021 | 0.66608  | -0.0386  |
| 0.221429 | 1.35E-06 | 0.182521 | 7.27E-05 | 0.008383 | 0.85662  | -0.01347 | 0.77158  | 0.026544 |
| -0.03199 | 0.49048  | -0.19272 | 2.75E-05 | -0.03694 | 0.42575  | -0.103   | 0.02603  | -0.02201 |
| 0.2271   | 7.07E-07 | 0.124665 | 0.00699  | 0.017447 | 0.70688  | 0.04684  | 0.31246  | 0.052677 |
| 0.169823 | 0.00023  | 0.261905 | 9.18E-09 | 0.036148 | 0.43579  | 0.004076 | 0.92999  | 0.10728  |
| 0.291455 | 1.35E-10 | 0.179705 | 9.43E-05 | 0.06761  | 0.14462  | 0.087563 | 0.05865  | 0.223409 |
| -0.03286 | 0.47868  | 0.102884 | 0.0262   | 0.067335 | 0.14626  | 0.061522 | 0.18445  | 0.228169 |
| 0.15694  | 0.00067  | 0.049981 | 0.28108  | 0.003945 | 0.93224  | -0.07918 | 0.08741  | -0.10801 |
| -0.11224 | 0.01524  | -0.21256 | 3.58E-06 | 0.003499 | 0.93989  | -0.00794 | 0.86407  | -0.01051 |
| 0.076808 | 0.09735  | 0.157978 | 0.00061  | 0.052563 | 0.25694  | 0.155692 | 0.00074  | 0.058389 |
| 0.392799 | 1.12E-18 | 0.261067 | 1.03E-08 | 0.010865 | 0.81485  | -0.00947 | 0.83823  | -0.04244 |
| -0.10151 | 0.02828  | -0.19703 | 1.80E-05 | 0.025881 | 0.57692  | -0.01293 | 0.78045  | -0.0262  |
| -0.0384  | 0.40768  | 0.055864 | 0.22822  | -0.00517 | 0.91121  | 0.037443 | 0.41951  | -0.01285 |
| 0.28527  | 3.40E-10 | 0.216102 | 2.44E-06 | -0.0063  | 0.89194  | -0.0506  | 0.27516  | 0.088068 |
| -0.04478 | 0.33426  | -0.01435 | 0.75708  | 0.092413 | 0.04594  | 0.149287 | 0.00121  | 0.242829 |
| 0.109661 | 0.01776  | 0.042575 | 0.35861  | 0.032845 | 0.47889  | 0.12997  | 0.00491  | 0.013044 |

|          |          |          |          |          |         |          |          |          |
|----------|----------|----------|----------|----------|---------|----------|----------|----------|
| -0.00392 | 0.93271  | -0.24448 | 8.77E-08 | 0.043004 | 0.35379 | 0.003672 | 0.93693  | 0.046546 |
| -0.06475 | 0.16244  | -0.25406 | 2.59E-08 | -0.05139 | 0.26772 | -0.07412 | 0.10969  | -0.09533 |
| 0.201614 | 1.13E-05 | 0.202745 | 1.01E-05 | -0.0235  | 0.61249 | -0.04602 | 0.32104  | -0.11489 |
| -0.09359 | 0.04323  | -0.16061 | 0.00049  | -0.00705 | 0.87927 | -0.05125 | 0.26907  | 0.008967 |
| -0.10174 | 0.02791  | -0.10342 | 0.02543  | 0.008262 | 0.85868 | 0.046406 | 0.31697  | 0.016467 |
| 0.159617 | 0.00054  | -0.07018 | 0.12995  | -0.02668 | 0.56526 | -0.01599 | 0.73034  | 0.036376 |
| 0.106181 | 0.02174  | 0.12979  | 0.00497  | 0.00377  | 0.93525 | -0.08765 | 0.05841  | -0.0027  |
| 0.081324 | 0.07915  | 0.058149 | 0.20973  | 0.011531 | 0.80373 | -0.0264  | 0.56925  | 0.022047 |
| -0.17469 | 0.00015  | -0.18307 | 6.91E-05 | 0.017772 | 0.70168 | 0.034033 | 0.46313  | 0.112301 |
| -0.01137 | 0.80634  | -0.31867 | 1.75E-12 | -0.01177 | 0.79973 | -0.11954 | 0.00972  | -0.06006 |
| -0.05454 | 0.23947  | -0.02028 | 0.66208  | 0.019484 | 0.6745  | 0.101307 | 0.02859  | -0.07249 |
| 0.17472  | 0.00015  | -0.19812 | 1.61E-05 | -0.03763 | 0.41723 | -0.11283 | 0.0147   | -0.06844 |
| -0.02306 | 0.61919  | 0.070928 | 0.12587  | 0.052202 | 0.26023 | 0.103357 | 0.02551  | 0.046846 |
| 0.056567 | 0.22242  | -0.13494 | 0.00348  | -0.03215 | 0.48829 | -0.15701 | 0.00066  | -0.0325  |
| 0.206036 | 7.16E-06 | 0.045807 | 0.32327  | 0.022718 | 0.62435 | -0.0396  | 0.39326  | 0.134411 |
| 0.01935  | 0.67662  | -0.08223 | 0.07586  | 0.029344 | 0.52702 | 0.049056 | 0.2901   | 0.044274 |
| 0.036638 | 0.42958  | 0.045346 | 0.32817  | 0.059499 | 0.19933 | 0.181335 | 8.12E-05 | 0.03857  |
| 0.109733 | 0.01768  | 0.299995 | 3.63E-11 | 0.029244 | 0.52843 | 0.134121 | 0.00369  | 0.055906 |
| 0.233582 | 3.31E-07 | 0.343306 | 2.31E-14 | 0.015953 | 0.73096 | 0.059733 | 0.19756  | 0.141353 |
| 0.068345 | 0.14029  | 0.142588 | 0.00201  | 0.03754  | 0.41831 | 0.119514 | 0.00974  | 0.212223 |
| -0.2857  | 3.20E-10 | -0.22056 | 1.49E-06 | 0.076532 | 0.09856 | 0.235171 | 2.74E-07 | 0.104915 |
| -0.22615 | 7.88E-07 | -0.24196 | 1.20E-07 | -0.00632 | 0.89174 | -0.02058 | 0.65728  | 0.071766 |
| 0.068168 | 0.14132  | -0.00368 | 0.93679  | -0.01197 | 0.79643 | -0.06952 | 0.13358  | 0.046411 |
| -0.02601 | 0.57497  | -0.06011 | 0.19471  | 0.029676 | 0.52235 | 0.077675 | 0.09362  | 0.096711 |
| 0.122065 | 0.00827  | 0.095041 | 0.04007  | 0.051995 | 0.26213 | 0.082082 | 0.07639  | 0.138514 |
| 0.015792 | 0.73357  | 0.110671 | 0.01673  | 0.05033  | 0.27774 | 0.058479 | 0.20715  | 0.021182 |
| 0.327356 | 3.98E-13 | 0.190284 | 3.49E-05 | -0.06285 | 0.17515 | -0.17318 | 0.00017  | -0.2185  |
| 0.165271 | 0.00033  | 0.096979 | 0.03616  | 0.024    | 0.60493 | 0.026998 | 0.56058  | -0.04873 |
| 0.358284 | 1.37E-15 | 0.479042 | 3.64E-28 | 0.05785  | 0.21209 | 0.150138 | 0.00114  | 0.02887  |
| 0.098442 | 0.03343  | 0.196377 | 1.92E-05 | 0.075204 | 0.10456 | 0.160117 | 0.00051  | 0.123879 |
| -0.0596  | 0.19858  | 0.038205 | 0.41011  | -0.00165 | 0.97158 | -0.01016 | 0.82666  | 0.018672 |
| 0.238853 | 1.75E-07 | 0.214664 | 2.85E-06 | 0.022988 | 0.62025 | 0.039913 | 0.38948  | 0.024574 |
| -0.1688  | 0.00025  | -0.22259 | 1.18E-06 | -0.01343 | 0.77225 | 0.003145 | 0.94596  | 0.041824 |
| 0.006648 | 0.88607  | -0.22445 | 9.58E-07 | -0.01116 | 0.80992 | -0.09052 | 0.05059  | -0.03527 |
| -0.14969 | 0.00118  | -0.22857 | 5.96E-07 | -0.05919 | 0.20168 | -0.11818 | 0.01059  | -0.17892 |
| -0.20123 | 1.18E-05 | -0.31924 | 1.59E-12 | 0.059101 | 0.20236 | 0.25721  | 1.71E-08 | -0.02501 |
| -0.06089 | 0.18904  | 0.030147 | 0.51577  | 0.012451 | 0.78843 | 0.100861 | 0.02931  | -0.10668 |
| 0.088078 | 0.05717  | -0.0859  | 0.06363  | -0.01107 | 0.8114  | -0.06561 | 0.15691  | 0.032803 |
| 0.209592 | 4.92E-06 | 0.297931 | 5.00E-11 | 0.045637 | 0.32507 | 0.116002 | 0.01212  | 0.115869 |
| -0.04492 | 0.33278  | -0.26419 | 6.74E-09 | 0.065073 | 0.16033 | 0.186092 | 5.21E-05 | 0.082089 |
| 0.171163 | 0.0002   | -0.13033 | 0.00479  | 0.019391 | 0.67598 | 0.06018  | 0.19422  | 0.131235 |
| 0.18128  | 8.16E-05 | 0.079052 | 0.08793  | 0.021802 | 0.63841 | 0.007972 | 0.86358  | 0.074096 |
| 0.063891 | 0.16808  | -0.06407 | 0.16692  | 0.018729 | 0.68644 | -0.0025  | 0.95701  | -0.00464 |
| 0.068059 | 0.14196  | -0.22139 | 1.35E-06 | 0.003342 | 0.94259 | 0.001494 | 0.97432  | 0.016198 |
| 0.143426 | 0.00189  | 0.054686 | 0.2382   | -0.04442 | 0.33814 | -0.07287 | 0.11583  | -0.00753 |

|          |          |          |          |          |          |          |          |          |
|----------|----------|----------|----------|----------|----------|----------|----------|----------|
| 0.02297  | 0.62052  | -0.07769 | 0.09356  | 0.023859 | 0.60705  | 0.045168 | 0.33007  | -0.03213 |
| 0.110732 | 0.01667  | 0.099159 | 0.03216  | 0.136244 | 0.00318  | 0.201789 | 1.11E-05 | 0.220216 |
| 0.061228 | 0.18655  | -0.13391 | 0.00374  | -0.01541 | 0.73982  | 0.0222   | 0.63229  | -0.08256 |
| -0.06484 | 0.16182  | 0.089986 | 0.05197  | 0.013191 | 0.77618  | 0.016977 | 0.71442  | 0.156737 |
| 0.031002 | 0.50392  | -0.02048 | 0.65885  | 0.046393 | 0.31711  | 0.147582 | 0.00138  | 0.216496 |
| -0.09923 | 0.03205  | -0.2599  | 1.20E-08 | 0.0249   | 0.59146  | -0.01433 | 0.75738  | 0.061333 |
| 0.030137 | 0.51591  | 0.120313 | 0.00926  | 0.000575 | 0.99011  | 0.051272 | 0.26883  | 0.047671 |
| 0.16944  | 0.00023  | 0.039508 | 0.39432  | 0.013775 | 0.76654  | 0.039815 | 0.39065  | 0.066029 |
| -0.00468 | 0.91967  | -0.21763 | 2.06E-06 | 0.032497 | 0.48357  | 0.048819 | 0.29244  | 0.089392 |
| 0.055431 | 0.23186  | 0.130969 | 0.00458  | 0.006455 | 0.88935  | -0.0111  | 0.81099  | 0.161537 |
| 0.077509 | 0.09432  | -0.06378 | 0.16885  | 0.008455 | 0.85541  | -0.02407 | 0.60383  | -0.01425 |
| 0.036667 | 0.42922  | 0.066145 | 0.15354  | -0.00284 | 0.9512   | 0.030158 | 0.51561  | 0.052976 |
| 0.200157 | 1.31E-05 | 0.318199 | 1.90E-12 | 0.066186 | 0.15328  | 0.040351 | 0.3843   | 0.1898   |
| 0.155532 | 0.00074  | 0.074647 | 0.10717  | -0.02831 | 0.54167  | -0.13362 | 0.00382  | -0.00093 |
| 0.076827 | 0.09727  | 0.146872 | 0.00146  | 0.073065 | 0.11483  | 0.186556 | 4.98E-05 | 0.205962 |
| 0.126816 | 0.00606  | -0.02015 | 0.66407  | -0.00224 | 0.96149  | -0.02767 | 0.55084  | 0.081642 |
| 0.205163 | 7.85E-06 | 0.137451 | 0.00292  | 0.037509 | 0.41869  | 0.001321 | 0.97728  | 0.077821 |
| 0.025994 | 0.57526  | -0.0179  | 0.69956  | 0.07702  | 0.09643  | 0.146259 | 0.00153  | 0.045391 |
| 0.082335 | 0.07548  | 0.159883 | 0.00052  | 0.081654 | 0.07794  | 0.100811 | 0.02939  | 0.225514 |
| 0.250637 | 4.03E-08 | 0.0597   | 0.19781  | 0.001951 | 0.96646  | -0.02967 | 0.52237  | 0.03114  |
| 0.204766 | 8.18E-06 | 0.045183 | 0.32991  | 0.073619 | 0.1121   | 0.043955 | 0.34323  | 0.08631  |
| 0.029659 | 0.52258  | -0.16314 | 0.0004   | 0.000571 | 0.99017  | -0.01452 | 0.75425  | -0.01777 |
| 0.26045  | 1.12E-08 | -0.05366 | 0.2471   | 0.020955 | 0.6515   | -0.01362 | 0.76916  | 0.143377 |
| 0.017742 | 0.70216  | -0.13037 | 0.00478  | -0.04841 | 0.29647  | -0.11016 | 0.01724  | -0.09466 |
| 0.10488  | 0.02341  | -0.09808 | 0.03409  | 0.004632 | 0.92049  | -0.04039 | 0.38378  | -0.02848 |
| 0.162881 | 0.00041  | 0.231527 | 4.22E-07 | 0.027627 | 0.55149  | 0.079904 | 0.08455  | 0.092197 |
| -0.01696 | 0.71467  | 0.060157 | 0.19439  | -0.06226 | 0.17924  | -0.05043 | 0.27678  | -0.02269 |
| -0.0545  | 0.23983  | -0.15856 | 0.00058  | 0.018181 | 0.69514  | 0.130296 | 0.0048   | 0.115774 |
| 0.067976 | 0.14245  | 0.030793 | 0.5068   | -0.0296  | 0.52345  | -0.07379 | 0.11127  | -0.02661 |
| 0.187161 | 4.71E-05 | 0.110549 | 0.01685  | -0.03076 | 0.50724  | 0.067338 | 0.14624  | -0.16847 |
| 0.322112 | 9.80E-13 | 0.191095 | 3.23E-05 | 0.063895 | 0.16805  | 0.083151 | 0.07262  | 0.167269 |
| 0.017534 | 0.70548  | 0.001763 | 0.96969  | 0.014074 | 0.76162  | -0.00326 | 0.944    | 0.101665 |
| 0.053489 | 0.24865  | 0.216252 | 2.40E-06 | 0.089237 | 0.05397  | 0.190386 | 3.45E-05 | 0.316744 |
| -0.09779 | 0.03462  | -0.30256 | 2.42E-11 | 0.015197 | 0.74325  | -0.02798 | 0.54647  | -0.00336 |
| 0.11072  | 0.01668  | 0.203084 | 9.73E-06 | 0.041696 | 0.36864  | 0.123793 | 0.0074   | -0.01163 |
| 0.023044 | 0.61939  | 0.295294 | 7.52E-11 | 0.053773 | 0.24614  | 0.186778 | 4.88E-05 | 0.335809 |
| 0.001221 | 0.97901  | -0.00412 | 0.92932  | -0.02652 | 0.56761  | -0.00412 | 0.9292   | -0.25318 |
| 0.432595 | 1.02E-22 | 0.390055 | 2.03E-18 | 0.014108 | 0.76108  | -0.00591 | 0.89865  | 0.092156 |
| 0.26853  | 3.72E-09 | 0.550838 | 2.07E-38 | 0.003334 | 0.94272  | -0.00583 | 0.9      | 0.038226 |
| -0.02608 | 0.57399  | -0.02058 | 0.65732  | 0.010301 | 0.82431  | -0.00342 | 0.94127  | 0.108928 |
| -0.19149 | 3.10E-05 | -0.2984  | 4.65E-11 | 0.000224 | 0.99614  | 0.034567 | 0.45614  | -0.04335 |
| -0.00769 | 0.86837  | -0.00432 | 0.92589  | -0.00741 | 0.87304  | -0.04059 | 0.38143  | 0.081743 |
| 0.05827  | 0.20878  | -0.10072 | 0.02954  | 0.021592 | 0.64164  | 0.05608  | 0.22643  | 0.056425 |
| 0.003064 | 0.94734  | 0.035142 | 0.44868  | 0.234485 | 2.97E-07 | 0.399523 | 2.53E-19 | 0.521941 |
| 0.134344 | 0.00363  | 0.032421 | 0.4846   | 0.012136 | 0.79365  | 0.000122 | 0.9979   | 0.040956 |



|          |          |          |          |          |         |          |          |          |
|----------|----------|----------|----------|----------|---------|----------|----------|----------|
| -0.01537 | 0.74043  | -0.07342 | 0.11308  | -0.0174  | 0.70764 | -0.09933 | 0.03187  | -0.04752 |
| 0.022421 | 0.62889  | 0.085832 | 0.06384  | 0.07456  | 0.10758 | 0.082456 | 0.07505  | 0.137295 |
| -0.14024 | 0.00239  | 0.041654 | 0.36912  | 0.054144 | 0.2429  | 0.126888 | 0.00604  | 0.095585 |
| 0.011393 | 0.80602  | 0.054116 | 0.24313  | -0.01269 | 0.78454 | 0.038877 | 0.40191  | -0.07064 |
| 0.107941 | 0.01964  | 0.080645 | 0.0817   | 0.001515 | 0.97396 | -0.02091 | 0.65227  | 0.022316 |
| 0.053797 | 0.24593  | 0.232375 | 3.82E-07 | 0.025657 | 0.58022 | 0.091674 | 0.04771  | 0.158679 |
| 0.067251 | 0.14676  | -0.0538  | 0.24587  | 0.045645 | 0.32498 | 0.061415 | 0.18521  | 0.12488  |
| 0.017988 | 0.69823  | 0.162633 | 0.00042  | -0.00744 | 0.8726  | 0.036327 | 0.43351  | 0.097153 |
| 0.068823 | 0.13753  | 0.04988  | 0.28206  | -0.02496 | 0.59062 | 0.00542  | 0.90701  | -0.08985 |
| -0.06212 | 0.1802   | -0.0113  | 0.80763  | -0.07791 | 0.09264 | -0.0527  | 0.25568  | -0.04212 |
| 0.054496 | 0.23984  | -0.04433 | 0.33914  | 0.03477  | 0.4535  | 0.092598 | 0.0455   | 0.046408 |
| 0.017894 | 0.69972  | -0.07246 | 0.11787  | 0.003095 | 0.94681 | 0.042843 | 0.3556   | -0.00541 |
| 0.303033 | 2.25E-11 | 0.024263 | 0.60098  | -0.08065 | 0.08169 | -0.19982 | 1.36E-05 | -0.25086 |
| 0.04925  | 0.2882   | -0.03482 | 0.45284  | 0.027881 | 0.54782 | 0.060749 | 0.19003  | 0.058184 |
| -0.14626 | 0.00153  | -0.12134 | 0.00867  | -0.07118 | 0.12452 | -0.1304  | 0.00477  | -0.17925 |
| 0.113489 | 0.01413  | 0.260525 | 1.10E-08 | -0.02536 | 0.58459 | -0.03287 | 0.47855  | -0.02248 |
| -0.1082  | 0.01935  | -0.27346 | 1.87E-09 | 0.03545  | 0.4447  | 0.088873 | 0.05496  | 0.303536 |
| 0.248655 | 5.19E-08 | 0.078098 | 0.09184  | -0.00133 | 0.97713 | -0.03016 | 0.51561  | 0.040483 |
| -0.05911 | 0.20226  | -0.16129 | 0.00047  | 0.007529 | 0.87109 | 0.007652 | 0.869    | 0.009971 |
| 0.184034 | 6.32E-05 | 0.062926 | 0.17461  | 0.000664 | 0.98859 | -0.00272 | 0.95327  | -0.05047 |
| 0.03403  | 0.46317  | -0.16998 | 0.00022  | -0.00036 | 0.99387 | -0.00441 | 0.92426  | 0.055253 |
| 0.110182 | 0.01722  | 0.187986 | 4.35E-05 | 0.040259 | 0.38538 | 0.044435 | 0.33799  | 0.161759 |
| 0.523849 | 2.86E-34 | 0.393894 | 8.78E-19 | 0.056377 | 0.22397 | 0.062165 | 0.17989  | 0.120275 |
| 0.040213 | 0.38593  | 0.074544 | 0.10765  | -0.0369  | 0.42624 | -0.05637 | 0.22406  | -0.06611 |
| 0.065554 | 0.15725  | -0.0122  | 0.79252  | 0.023999 | 0.60495 | 0.031305 | 0.49976  | 0.081135 |
| 0.286235 | 2.95E-10 | 0.11742  | 0.0111   | 0.011032 | 0.81206 | -0.04843 | 0.29635  | 0.105266 |
| -0.21057 | 4.44E-06 | -0.2373  | 2.12E-07 | -0.01812 | 0.69607 | -0.03165 | 0.49498  | -0.15749 |
| -0.01603 | 0.72973  | 0.007266 | 0.87556  | 0.030524 | 0.51052 | 0.069559 | 0.13336  | 0.065023 |
| 0.024355 | 0.5996   | 0.138587 | 0.00269  | 0.047099 | 0.3098  | 0.118819 | 0.01017  | 0.128383 |
| 0.02124  | 0.64708  | 0.101436 | 0.02839  | 0.026802 | 0.56343 | 0.123155 | 0.00771  | 0.008888 |
| -0.03592 | 0.43866  | -0.08061 | 0.08184  | 0.072573 | 0.11731 | 0.195941 | 2.00E-05 | 0.091819 |
| -0.11009 | 0.01732  | 0.004978 | 0.91455  | -0.03192 | 0.49133 | -0.0419  | 0.36634  | 0.007661 |
| 0.143396 | 0.00189  | -0.03804 | 0.41209  | -0.03753 | 0.41841 | -0.01913 | 0.68015  | -0.01707 |
| -0.0364  | 0.43264  | -0.22229 | 1.22E-06 | -0.02389 | 0.60652 | -0.08905 | 0.05448  | 0.030192 |
| -0.1887  | 4.06E-05 | -0.09905 | 0.03236  | -0.0046  | 0.92109 | 0.032426 | 0.48452  | 0.094249 |
| 0.11577  | 0.0123   | 0.120071 | 0.0094   | 0.03088  | 0.50561 | 0.052101 | 0.26116  | -0.01886 |
| 0.032996 | 0.47688  | 0.051934 | 0.26269  | 0.027001 | 0.56054 | 0.092705 | 0.04525  | 0.060115 |
| -0.21586 | 2.50E-06 | -0.38062 | 1.51E-17 | -0.07525 | 0.10435 | -0.1543  | 0.00082  | -0.22617 |
| 0.004358 | 0.92517  | 0.16081  | 0.00049  | 0.112076 | 0.01539 | 0.322446 | 9.26E-13 | 0.24967  |
| 0.181908 | 7.70E-05 | 0.319869 | 1.43E-12 | 0.048609 | 0.29452 | 0.141331 | 0.0022   | 0.17127  |
| -0.06429 | 0.1654   | 0.005979 | 0.89746  | 0.018018 | 0.69775 | 0.068526 | 0.13924  | 0.072627 |
| -0.07753 | 0.09425  | 0.111655 | 0.01578  | 0.026952 | 0.56125 | 0.186242 | 5.13E-05 | -0.01932 |
| -0.14361 | 0.00186  | -0.13667 | 0.00308  | 0.079552 | 0.08593 | 0.153952 | 0.00084  | 0.106517 |
| 0.23329  | 3.42E-07 | 0.134497 | 0.00359  | 0.098297 | 0.0337  | 0.184487 | 6.06E-05 | 0.135352 |
| 0.019586 | 0.6729   | -0.20657 | 6.77E-06 | -0.01513 | 0.74442 | -0.02285 | 0.62236  | -0.03112 |

|          |          |          |          |           |         |          |          |          |
|----------|----------|----------|----------|-----------|---------|----------|----------|----------|
| -0.01702 | 0.71376  | 0.02758  | 0.55216  | 0.124444  | 0.00709 | 0.166572 | 0.0003   | 0.236819 |
| -0.24932 | 4.77E-08 | -0.13871 | 0.00266  | -0.02117  | 0.64821 | 0.068491 | 0.13944  | 0.015567 |
| -0.09561 | 0.03889  | -0.19114 | 3.21E-05 | -0.08835  | 0.0564  | -0.12712 | 0.00594  | -0.16467 |
| -0.00962 | 0.8357   | 0.017501 | 0.70601  | 0.046496  | 0.31604 | 0.07175  | 0.12153  | 0.345805 |
| 0.178348 | 0.00011  | 0.096332 | 0.03743  | 0.041346  | 0.37267 | -0.00605 | 0.89632  | 0.111769 |
| 0.153767 | 0.00086  | -0.01678 | 0.71752  | 0.002129  | 0.9634  | -0.11642 | 0.01181  | 0.051268 |
| 0.081787 | 0.07745  | -0.13369 | 0.0038   | 0.017599  | 0.70445 | 0.002107 | 0.96377  | 0.022022 |
| 0.208198 | 5.71E-06 | 0.006492 | 0.88873  | -0.00385  | 0.93395 | 0.034513 | 0.45685  | 0.092603 |
| -0.07333 | 0.11355  | -0.06835 | 0.14024  | 0.028205  | 0.54318 | 0.039649 | 0.39262  | 0.035597 |
| 0.00013  | 0.99776  | -0.11395 | 0.01375  | -0.01891  | 0.68362 | -0.01728 | 0.70948  | -0.14448 |
| 0.125217 | 0.00674  | 0.059947 | 0.19596  | 0.02468   | 0.59473 | 0.012942 | 0.78028  | 0.119836 |
| 0.150398 | 0.00111  | -0.00774 | 0.86755  | 0.005709  | 0.90208 | -0.0028  | 0.95196  | 0.013686 |
| 0.099685 | 0.03125  | 0.017475 | 0.70643  | 0.001316  | 0.97737 | 0.029057 | 0.53107  | -0.02765 |
| 0.121126 | 0.00879  | 0.297323 | 5.50E-11 | 0.066572  | 0.1509  | 0.1231   | 0.00774  | 0.224527 |
| -0.08115 | 0.07979  | -0.18215 | 7.53E-05 | -0.0063   | 0.89196 | 0.07769  | 0.09356  | -0.04124 |
| -0.04703 | 0.31052  | -0.17981 | 9.34E-05 | -0.01071  | 0.81746 | -0.11232 | 0.01516  | -0.05599 |
| 0.201238 | 1.18E-05 | 0.237918 | 1.97E-07 | 0.006461  | 0.88926 | -0.002   | 0.9656   | 0.096346 |
| -0.02648 | 0.56812  | -0.16699 | 0.00029  | 0.068291  | 0.1406  | 0.066743 | 0.14985  | 0.191622 |
| 0.126577 | 0.00616  | 0.092767 | 0.04511  | 0.061349  | 0.18569 | 0.207385 | 6.22E-06 | 0.176731 |
| 0.13377  | 0.00378  | 0.117785 | 0.01085  | -0.01471  | 0.75122 | -0.00451 | 0.92264  | -0.02654 |
| 0.218591 | 1.85E-06 | 0.107469 | 0.02018  | 0.037593  | 0.41766 | -0.00595 | 0.89788  | 0.119005 |
| 0.32131  | 1.12E-12 | 0.234863 | 2.84E-07 | 0.025066  | 0.58897 | 0.021506 | 0.64297  | -0.08576 |
| 0.151235 | 0.00104  | 0.018683 | 0.68717  | 0.027911  | 0.5474  | 0.016588 | 0.72069  | 0.075857 |
| -0.00661 | 0.88676  | -0.14432 | 0.00177  | 0.020187  | 0.66347 | 0.020031 | 0.66592  | 0.100307 |
| 0.053172 | 0.25147  | -0.14019 | 0.00239  | -9.47E-05 | 0.99837 | -0.04768 | 0.30386  | -0.0263  |
| 0.223119 | 1.11E-06 | 0.487646 | 2.87E-29 | 0.022607  | 0.62605 | 0.154433 | 0.00081  | 0.018124 |
| -0.0739  | 0.11072  | -0.31094 | 6.31E-12 | 0.022777  | 0.62346 | -0.00656 | 0.88754  | 0.010856 |
| -0.31569 | 2.89E-12 | -0.52621 | 1.28E-34 | 0.03295   | 0.47749 | 0.052315 | 0.2592   | 0.085523 |
| 0.134398 | 0.00362  | 0.023207 | 0.61691  | 0.004821  | 0.91725 | 0.050087 | 0.28007  | 0.005224 |
| -0.1785  | 0.00011  | -0.27921 | 8.25E-10 | -0.03486  | 0.45231 | -0.06406 | 0.16698  | -0.0874  |
| -0.04191 | 0.36614  | 0.115963 | 0.01215  | 0.084263  | 0.06887 | 0.124248 | 0.00718  | 0.074716 |
| 0.004627 | 0.92057  | -0.01493 | 0.74755  | 0.022272  | 0.63118 | 0.017066 | 0.713    | 0.110038 |
| 0.093368 | 0.04373  | 0.098659 | 0.03305  | 0.031238  | 0.50068 | 0.019286 | 0.67764  | 0.165923 |
| -0.05155 | 0.26622  | 0.075911 | 0.10134  | -0.02349  | 0.61256 | -0.00981 | 0.83253  | 0.025506 |
| -0.31741 | 2.17E-12 | -0.37295 | 7.38E-17 | 0.00906   | 0.84518 | 0.055855 | 0.2283   | -0.03104 |
| 0.111235 | 0.01618  | -0.08599 | 0.06334  | 0.015875  | 0.73223 | -0.00697 | 0.88061  | 0.059263 |
| 0.097731 | 0.03474  | 0.243009 | 1.05E-07 | 0.037719  | 0.41609 | -0.00231 | 0.96038  | 0.148705 |
| -0.20297 | 9.84E-06 | -0.28534 | 3.37E-10 | 0.070851  | 0.12628 | 0.192341 | 2.86E-05 | 0.231888 |
| -0.11001 | 0.01739  | 0.149136 | 0.00123  | 0.038254  | 0.4095  | 0.143741 | 0.00184  | -0.04266 |
| 0.192746 | 2.75E-05 | 0.077298 | 0.09523  | 0.015423  | 0.73957 | -0.05508 | 0.23481  | 0.096382 |
| 0.125353 | 0.00668  | 0.258169 | 1.51E-08 | 0.02022   | 0.66297 | 0.040345 | 0.38437  | 0.017054 |
| 0.002606 | 0.95521  | 0.256986 | 1.77E-08 | -0.0052   | 0.91069 | -0.00788 | 0.8651   | 0.149339 |
| 0.024405 | 0.59884  | -0.13994 | 0.00244  | 0.117252  | 0.01122 | 0.33497  | 1.04E-13 | 0.233058 |
| 0.013224 | 0.77562  | -0.06004 | 0.19525  | 0.043851  | 0.34438 | 0.134704 | 0.00354  | 0.043339 |
| 0.122882 | 0.00785  | 0.168485 | 0.00025  | 0.034067  | 0.46268 | 0.072421 | 0.11808  | 0.070864 |

|          |          |          |          |          |         |          |          |          |
|----------|----------|----------|----------|----------|---------|----------|----------|----------|
| -0.02845 | 0.53976  | -0.23868 | 1.79E-07 | -0.02219 | 0.63238 | -0.11901 | 0.01005  | -0.0738  |
| 0.348796 | 8.33E-15 | 0.388159 | 3.05E-18 | 0.07111  | 0.1249  | 0.185093 | 5.72E-05 | 0.133264 |
| 0.103072 | 0.02592  | 0.016959 | 0.71471  | 0.001933 | 0.96676 | 0.002908 | 0.95003  | -0.08121 |
| 0.007571 | 0.87039  | 0.236082 | 2.45E-07 | 0.038347 | 0.40836 | 0.142919 | 0.00196  | 0.034184 |
| 0.056353 | 0.22417  | 0.011112 | 0.81071  | 0.067188 | 0.14715 | 0.160579 | 0.00049  | -0.01658 |
| -0.08869 | 0.05546  | 0.133681 | 0.0038   | 0.111288 | 0.01613 | 0.294748 | 8.17E-11 | 0.215143 |
| 0.123764 | 0.00741  | 0.341843 | 3.02E-14 | 0.056542 | 0.22263 | 0.170445 | 0.00022  | -0.0261  |
| 0.016445 | 0.723    | 0.150345 | 0.00112  | 0.050761 | 0.27364 | 0.05174  | 0.26448  | 0.116484 |
| 0.214287 | 2.97E-06 | 0.12914  | 0.00519  | 0.000408 | 0.99298 | -0.06326 | 0.17232  | 0.081331 |
| -0.1225  | 0.00805  | -0.20899 | 5.25E-06 | 0.026296 | 0.57083 | 0.063527 | 0.17052  | 0.030201 |
| -0.0107  | 0.8176   | -0.08657 | 0.06159  | -0.02734 | 0.55567 | -0.10384 | 0.02482  | -0.04058 |
| -0.08216 | 0.07611  | -0.02482 | 0.59269  | -0.00014 | 0.99764 | 0.144736 | 0.00171  | 0.003893 |
| 0.259844 | 1.21E-08 | 0.342136 | 2.86E-14 | -0.04651 | 0.31584 | -0.12841 | 0.00545  | -0.14323 |
| 0.226949 | 7.19E-07 | -0.07221 | 0.11915  | 0.061092 | 0.18754 | 0.07162  | 0.12221  | 0.075586 |
| 0.26127  | 1.00E-08 | 0.314074 | 3.77E-12 | 0.075305 | 0.1041  | 0.112002 | 0.01546  | 0.29027  |
| 0.12688  | 0.00604  | 0.223024 | 1.13E-06 | -0.00775 | 0.86742 | 0.013711 | 0.7676   | 0.077657 |
| -0.08714 | 0.05988  | -0.10474 | 0.0236   | 0.038831 | 0.40248 | 0.147326 | 0.00141  | 0.033817 |
| -0.01385 | 0.76529  | -0.03226 | 0.48674  | -0.0023  | 0.96048 | 0.030167 | 0.51549  | 0.051892 |
| 0.023229 | 0.61659  | -0.06848 | 0.13949  | -0.001   | 0.98285 | -0.02938 | 0.52648  | -0.05456 |
| -0.11867 | 0.01027  | -0.04856 | 0.29502  | 0.068967 | 0.13671 | 0.150313 | 0.00112  | 0.097219 |
| 0.03191  | 0.49151  | 0.022933 | 0.62107  | 0.018696 | 0.68697 | 0.051078 | 0.27065  | 0.029593 |
| -0.02809 | 0.54479  | -0.24458 | 8.66E-08 | -0.06215 | 0.17996 | -0.12195 | 0.00833  | -0.06387 |
| 0.000571 | 0.99019  | 0.048645 | 0.29416  | 0.047688 | 0.30378 | 0.174012 | 0.00016  | -0.03667 |
| 0.137993 | 0.0028   | -0.02102 | 0.65051  | 0.027065 | 0.55962 | -0.00688 | 0.88217  | 0.058613 |
| -0.0015  | 0.97417  | 0.066648 | 0.15043  | -0.02245 | 0.62844 | -0.09318 | 0.04416  | 0.08612  |
| 0.375204 | 4.65E-17 | 0.386863 | 4.03E-18 | 0.005196 | 0.91083 | -0.06824 | 0.14092  | -0.04675 |
| 0.402659 | 1.25E-19 | 0.272148 | 2.25E-09 | -0.05438 | 0.24087 | -0.15427 | 0.00082  | -0.16298 |
| -0.03871 | 0.4039   | -0.17702 | 0.00012  | 0.001613 | 0.97227 | 0.014739 | 0.75073  | 0.02752  |
| -0.00368 | 0.9368   | 0.025674 | 0.57997  | 0.030058 | 0.51701 | 0.086964 | 0.0604   | -0.0162  |
| 0.195634 | 2.07E-05 | -0.06133 | 0.18583  | -0.05973 | 0.19757 | -0.21472 | 2.83E-06 | -0.14832 |
| 0.133318 | 0.0039   | 0.031489 | 0.49724  | 0.035381 | 0.44559 | -0.04715 | 0.30931  | 0.086027 |
| 0.036855 | 0.42685  | -0.00815 | 0.86048  | 0.044695 | 0.33517 | 0.076447 | 0.09894  | 0.061671 |
| -0.21042 | 4.51E-06 | -0.1867  | 4.91E-05 | -0.01796 | 0.69872 | -0.05737 | 0.21592  | -0.129   |
| -0.24468 | 8.55E-08 | -0.41825 | 3.36E-21 | -0.05907 | 0.20257 | -0.0722  | 0.11919  | -0.22181 |
| -0.01941 | 0.67562  | 0.123967 | 0.00732  | 0.057626 | 0.21387 | 0.163603 | 0.00039  | 0.173219 |
| 0.235234 | 2.72E-07 | 0.109174 | 0.01827  | -0.06033 | 0.19314 | -0.09568 | 0.03874  | 0.025392 |
| -0.1992  | 1.45E-05 | -0.16821 | 0.00026  | -0.04272 | 0.35698 | -0.1076  | 0.02003  | -0.04385 |
| 0.135788 | 0.00328  | 0.002873 | 0.95063  | -0.05577 | 0.22905 | -0.15993 | 0.00052  | -0.16029 |
| -0.04033 | 0.3845   | -0.07643 | 0.09903  | 0.038066 | 0.41182 | 0.089423 | 0.05347  | 0.154387 |
| 0.137967 | 0.00281  | 0.112246 | 0.01523  | -0.03732 | 0.42105 | -0.16941 | 0.00024  | -0.11178 |
| 0.094848 | 0.04048  | -0.01511 | 0.7447   | -0.05768 | 0.21345 | -0.10116 | 0.02883  | 0.023562 |
| -0.0076  | 0.86983  | 0.277894 | 9.96E-10 | 0.041684 | 0.36877 | 0.124988 | 0.00684  | 0.31167  |
| -0.01599 | 0.73034  | -0.20293 | 9.89E-06 | -0.01241 | 0.78905 | -0.04817 | 0.2989   | 0.08787  |
| 0.279242 | 8.21E-10 | -0.01216 | 0.79329  | 0.007194 | 0.87678 | -0.01464 | 0.75241  | -0.05801 |
| 0.038524 | 0.40621  | -0.04615 | 0.31969  | -0.06045 | 0.19224 | -0.04982 | 0.28264  | 0.011114 |

|          |          |          |          |          |         |          |          |          |
|----------|----------|----------|----------|----------|---------|----------|----------|----------|
| 0.141056 | 0.00225  | 0.032859 | 0.47871  | 0.031569 | 0.49616 | 0.047364 | 0.30708  | -0.00743 |
| 0.140284 | 0.00238  | -0.09341 | 0.04363  | -0.07179 | 0.1213  | -0.14808 | 0.00133  | -0.18511 |
| 0.066625 | 0.15057  | 0.243971 | 9.34E-08 | 0.056609 | 0.22208 | 0.083888 | 0.07012  | 0.214597 |
| -0.17301 | 0.00017  | -0.36606 | 2.96E-16 | -0.02241 | 0.62903 | -0.09208 | 0.04674  | -0.07311 |
| -0.01694 | 0.71495  | -0.29018 | 1.64E-10 | 0.015822 | 0.73309 | -0.06739 | 0.14593  | -0.02365 |
| -0.15936 | 0.00055  | 0.024502 | 0.5974   | 0.036509 | 0.43121 | 0.092854 | 0.0449   | 0.060786 |
| 0.05822  | 0.20917  | 0.045991 | 0.32133  | -0.05592 | 0.22778 | -0.0521  | 0.26112  | -0.0651  |
| 0.209223 | 5.12E-06 | 0.254118 | 2.57E-08 | 0.053261 | 0.25067 | 0.189775 | 3.66E-05 | 0.107362 |
| 0.201144 | 1.19E-05 | 0.155911 | 0.00072  | 0.021453 | 0.64378 | 0.105174 | 0.02302  | -0.04333 |
| 0.146919 | 0.00145  | 0.054483 | 0.23995  | 0.036317 | 0.43364 | 0.032917 | 0.47793  | 0.041718 |
| 0.048377 | 0.29683  | 0.2532   | 2.89E-08 | 0.125277 | 0.00671 | 0.268275 | 3.86E-09 | 0.363192 |
| 0.152798 | 0.00092  | 0.11957  | 0.0097   | 0.074596 | 0.10741 | 0.162768 | 0.00041  | 0.314015 |
| 0.230486 | 4.77E-07 | 0.141724 | 0.00214  | -0.02339 | 0.61412 | -0.00314 | 0.94612  | 0.04238  |
| 0.027201 | 0.55764  | -0.0258  | 0.57816  | 0.014965 | 0.74704 | 0.000588 | 0.98989  | 0.081302 |
| 0.15757  | 0.00063  | 0.125832 | 0.00647  | -0.02269 | 0.62481 | -0.01972 | 0.67081  | 0.013098 |
| 0.04478  | 0.33424  | -0.02445 | 0.59819  | 0.039334 | 0.3964  | 0.036406 | 0.43252  | 0.050355 |
| 0.068828 | 0.1375   | 0.151237 | 0.00104  | 0.035056 | 0.44979 | 0.031411 | 0.49832  | 0.103013 |
| 0.078475 | 0.09028  | 0.219488 | 1.68E-06 | 0.073999 | 0.11026 | 0.150534 | 0.0011   | 0.126101 |
| 0.062434 | 0.17801  | 0.122766 | 0.00791  | -0.00652 | 0.88823 | -0.07005 | 0.13062  | -0.0434  |
| 0.045772 | 0.32364  | 0.160761 | 0.00049  | -0.02094 | 0.65169 | -0.03067 | 0.50844  | 0.012349 |
| -0.02135 | 0.64534  | 0.056953 | 0.21927  | -0.05517 | 0.23408 | -0.0772  | 0.09567  | -0.02218 |
| -0.01291 | 0.78081  | -0.11987 | 0.00952  | -0.04242 | 0.36038 | -0.09141 | 0.04835  | -0.16166 |
| 0.079962 | 0.08433  | -0.10771 | 0.0199   | 0.038077 | 0.41168 | 0.04597  | 0.32155  | 0.093847 |
| -0.01692 | 0.71536  | 0.230748 | 4.62E-07 | -0.06728 | 0.14658 | -0.07199 | 0.1203   | 0.052701 |
| 0.095812 | 0.03848  | -0.11728 | 0.0112   | 0.01323  | 0.77553 | -0.09652 | 0.03707  | 0.09591  |
| 0.088669 | 0.05552  | 0.137492 | 0.00291  | 0.054165 | 0.24272 | 0.05444  | 0.24032  | 0.162751 |
| 0.046701 | 0.31391  | 0.11696  | 0.01142  | -0.01927 | 0.67783 | 0.000322 | 0.99447  | -0.04364 |
| 0.127453 | 0.00581  | 0.039114 | 0.39906  | -0.00794 | 0.86414 | -0.03425 | 0.46027  | 0.046706 |
| 0.038386 | 0.40789  | 0.107926 | 0.01965  | -0.02274 | 0.62404 | -0.09856 | 0.03322  | -0.03643 |
| -0.09651 | 0.03707  | -0.10545 | 0.02266  | -0.00978 | 0.83312 | 0.02012  | 0.66452  | 0.072254 |
| 0.174115 | 0.00016  | 0.12318  | 0.0077   | 0.027982 | 0.54638 | 0.077628 | 0.09382  | -0.02274 |
| 0.133239 | 0.00392  | 0.366064 | 2.96E-16 | -0.05371 | 0.2467  | -0.10418 | 0.02436  | -0.00715 |
| -0.16119 | 0.00047  | -0.08495 | 0.06664  | 0.011836 | 0.79864 | 0.05974  | 0.19751  | -0.01695 |
| -0.03878 | 0.40315  | -0.16309 | 0.0004   | 0.003819 | 0.9344  | -0.06057 | 0.19135  | -0.07939 |
| 0.051671 | 0.26512  | -0.09083 | 0.04979  | -0.01732 | 0.70896 | -0.03364 | 0.46838  | -0.04186 |
| -0.08358 | 0.07117  | -0.16333 | 0.00039  | 0.079027 | 0.08803 | 0.159441 | 0.00054  | 0.098578 |
| 0.13868  | 0.00267  | 0.017119 | 0.71214  | 0.010204 | 0.82594 | -0.04753 | 0.30535  | -0.00552 |
| 0.07809  | 0.09187  | 0.052621 | 0.25642  | 0.01242  | 0.78894 | 0.008806 | 0.84947  | 0.031784 |
| -0.02486 | 0.59199  | -0.11262 | 0.0149   | 0.065159 | 0.15978 | 0.074855 | 0.10619  | 0.059899 |
| 0.132257 | 0.0042   | 0.094108 | 0.04208  | 0.056846 | 0.22014 | 0.148274 | 0.00131  | 0.07532  |
| 0.410092 | 2.28E-20 | 0.391286 | 1.55E-18 | 0.025392 | 0.58415 | -0.03548 | 0.44427  | 0.044822 |
| 0.02098  | 0.65112  | -0.25294 | 2.99E-08 | -0.0204  | 0.66012 | -0.0752  | 0.10458  | -0.1187  |
| 0.003678 | 0.93682  | -0.13366 | 0.00381  | -0.0029  | 0.95019 | 0.00039  | 0.9933   | 0.021577 |
| -0.0723  | 0.11869  | 0.23576  | 2.55E-07 | 0.079152 | 0.08753 | 0.182921 | 7.01E-05 | 0.195729 |
| 0.119901 | 0.0095   | -0.00049 | 0.99156  | 0.058434 | 0.2075  | -0.02697 | 0.56105  | 0.071843 |

|          |          |          |          |          |         |          |          |          |
|----------|----------|----------|----------|----------|---------|----------|----------|----------|
| 0.040814 | 0.37886  | 0.042098 | 0.36404  | 0.007721 | 0.86783 | 0.033844 | 0.46562  | -0.00785 |
| -0.04212 | 0.36373  | 0.145031 | 0.00168  | -0.08841 | 0.05624 | -0.11219 | 0.01529  | -0.15231 |
| 0.236622 | 2.30E-07 | 0.071981 | 0.12034  | -0.10809 | 0.01947 | -0.16821 | 0.00026  | -0.20989 |
| 0.234972 | 2.80E-07 | 0.212601 | 3.57E-06 | 0.001291 | 0.9778  | 0.050097 | 0.27997  | -0.08785 |
| -0.14939 | 0.0012   | -0.3308  | 2.18E-13 | -0.07642 | 0.09907 | -0.0992  | 0.0321   | -0.18638 |
| 0.17908  | 9.98E-05 | 0.007588 | 0.87009  | 0.0047   | 0.91931 | -0.03312 | 0.47527  | 0.040246 |
| -0.14217 | 0.00207  | -0.21986 | 1.61E-06 | -0.03282 | 0.47922 | -0.04758 | 0.30491  | -0.19221 |
| 0.114324 | 0.01343  | 0.295938 | 6.81E-11 | 0.011586 | 0.80282 | -0.00371 | 0.93625  | 0.111285 |
| 0.023998 | 0.60496  | -0.1136  | 0.01404  | -0.02064 | 0.65636 | -0.11251 | 0.01499  | 0.015555 |
| -0.0437  | 0.34603  | -0.27691 | 1.15E-09 | -0.05577 | 0.22899 | 0.000891 | 0.98468  | -0.19261 |
| 0.112712 | 0.01481  | 0.107763 | 0.01984  | 0.002962 | 0.9491  | 0.042173 | 0.36317  | -0.07544 |
| -0.0966  | 0.0369   | 0.008907 | 0.84776  | -0.00224 | 0.96158 | -0.00534 | 0.90841  | -0.02639 |
| 0.038985 | 0.40061  | 0.247947 | 5.67E-08 | 0.063672 | 0.16954 | 0.158549 | 0.00058  | 0.239974 |
| -0.10426 | 0.02425  | -0.14535 | 0.00164  | 0.051104 | 0.27041 | 0.116603 | 0.01168  | -0.02904 |
| 0.012352 | 0.79007  | -0.08348 | 0.0715   | 0.060604 | 0.19109 | 0.106467 | 0.02138  | 0.070491 |
| 0.016818 | 0.71699  | -0.01658 | 0.72084  | 0.091943 | 0.04706 | 0.181563 | 7.95E-05 | 0.231134 |
| 0.21745  | 2.10E-06 | 0.268595 | 3.69E-09 | 0.060692 | 0.19045 | 0.079398 | 0.08654  | 0.193857 |
| 0.343293 | 2.31E-14 | 0.417155 | 4.35E-21 | -0.02475 | 0.5937  | -0.12408 | 0.00726  | 0.033717 |
| -0.083   | 0.07313  | -0.22149 | 1.34E-06 | -0.03947 | 0.39477 | -0.04335 | 0.34992  | -0.06244 |
| 0.0806   | 0.08187  | 0.153895 | 0.00085  | 0.005787 | 0.90074 | -0.0494  | 0.28672  | 0.014205 |
| -0.1882  | 4.26E-05 | -0.22031 | 1.53E-06 | 0.051546 | 0.26627 | 0.146391 | 0.00151  | -0.12297 |
| 0.025032 | 0.58949  | 0.093325 | 0.04382  | -0.06149 | 0.18471 | -0.03646 | 0.43189  | -0.03508 |
| 0.117487 | 0.01106  | -0.00495 | 0.91501  | 0.029164 | 0.52956 | 0.035388 | 0.4455   | 0.063774 |
| -0.04433 | 0.33909  | -0.1934  | 2.58E-05 | 0.00936  | 0.84013 | -0.01317 | 0.7765   | 0.065915 |
| 0.106441 | 0.02142  | 0.142149 | 0.00207  | 0.034526 | 0.45668 | -0.07943 | 0.08641  | 0.085599 |
| -0.10033 | 0.03018  | -0.44164 | 1.03E-23 | 0.009571 | 0.83657 | -0.06017 | 0.1943   | 0.007904 |
| 0.013566 | 0.76998  | -0.27362 | 1.83E-09 | 0.04612  | 0.31997 | -0.00852 | 0.85432  | -0.04703 |
| 0.140407 | 0.00236  | 0.071454 | 0.12308  | 0.021899 | 0.63691 | -0.00906 | 0.84518  | 0.02088  |
| 0.242777 | 1.08E-07 | 0.01395  | 0.76367  | 0.019443 | 0.67515 | -0.05913 | 0.20212  | 0.182362 |
| 0.063124 | 0.17325  | -0.01239 | 0.78942  | -0.00302 | 0.94811 | -0.02625 | 0.57153  | 0.005649 |
| 0.183504 | 6.64E-05 | 0.194473 | 2.32E-05 | 0.041146 | 0.37499 | 0.096927 | 0.03627  | 0.229702 |
| 0.174607 | 0.00015  | 0.259682 | 1.24E-08 | -0.03068 | 0.50831 | -0.08447 | 0.0682   | -0.09287 |
| 0.22824  | 6.19E-07 | 0.169822 | 0.00023  | 0.0161   | 0.72859 | -0.00808 | 0.86172  | -0.01931 |
| 0.063972 | 0.16754  | -0.00132 | 0.97726  | -0.01542 | 0.73965 | -0.05194 | 0.26264  | -0.09518 |
| -0.12125 | 0.00872  | -0.23657 | 2.31E-07 | 0.017703 | 0.70279 | 0.006012 | 0.89691  | 0.036696 |
| -0.05265 | 0.25618  | 0.010825 | 0.81553  | -0.02017 | 0.66378 | 0.065044 | 0.16052  | 0.055773 |
| -0.01278 | 0.78303  | -0.03074 | 0.50749  | -0.02551 | 0.58239 | -0.05398 | 0.24434  | -0.06911 |
| 0.377998 | 2.61E-17 | 0.501753 | 3.80E-31 | 0.019463 | 0.67485 | 0.033351 | 0.47214  | 0.0912   |
| 0.227259 | 6.94E-07 | 0.273216 | 1.94E-09 | 0.079592 | 0.08578 | 0.131403 | 0.00445  | 0.143238 |
| 0.045573 | 0.32575  | 0.117615 | 0.01097  | 0.038544 | 0.40596 | 0.13723  | 0.00296  | 0.058554 |
| -0.05292 | 0.25373  | -0.06977 | 0.13221  | 0.047698 | 0.30367 | 0.124147 | 0.00723  | 0.019523 |
| 0.00143  | 0.97541  | 0.009937 | 0.83041  | -0.01865 | 0.68769 | -0.05073 | 0.27393  | -0.11368 |
| -0.06401 | 0.16728  | -0.26511 | 5.95E-09 | -0.01727 | 0.70965 | -0.04101 | 0.37662  | -0.1158  |
| -0.01244 | 0.78855  | -0.05677 | 0.22073  | 0.040114 | 0.38709 | 0.117565 | 0.011    | 0.00923  |
| 0.164298 | 0.00036  | 0.293774 | 9.49E-11 | 0.034024 | 0.46325 | 0.085437 | 0.06508  | 0.19267  |

|          |          |          |          |          |         |          |          |          |
|----------|----------|----------|----------|----------|---------|----------|----------|----------|
| 0.248211 | 5.49E-08 | 0.340314 | 3.99E-14 | 0.046556 | 0.31541 | 0.059011 | 0.20304  | 0.144537 |
| 0.055644 | 0.23007  | 0.101915 | 0.02765  | 0.072611 | 0.11711 | 0.192255 | 2.88E-05 | 0.101709 |
| 0.301778 | 2.74E-11 | 0.233402 | 3.38E-07 | 0.014387 | 0.75649 | -0.02539 | 0.58423  | -0.01635 |
| -0.05144 | 0.26731  | -0.25847 | 1.45E-08 | 0.001449 | 0.97508 | 0.073437 | 0.113    | 0.002943 |
| -0.02101 | 0.65068  | 0.05755  | 0.21447  | 0.061878 | 0.18191 | 0.060747 | 0.19005  | 0.274623 |
| 0.195439 | 2.11E-05 | 0.112716 | 0.01481  | 0.022418 | 0.62894 | 0.050925 | 0.27209  | -0.06406 |
| 0.126621 | 0.00614  | 0.01621  | 0.72679  | -0.00209 | 0.96405 | 0.034171 | 0.46132  | -0.16855 |
| -0.13103 | 0.00457  | -0.09319 | 0.04413  | 0.101792 | 0.02784 | 0.296605 | 6.14E-11 | 0.317688 |
| 0.272051 | 2.28E-09 | -0.22193 | 1.27E-06 | -0.01666 | 0.71956 | -0.14707 | 0.00144  | -0.0106  |
| -0.04865 | 0.29413  | -0.2963  | 6.44E-11 | -0.03078 | 0.50701 | -0.09287 | 0.04486  | -0.10082 |
| -0.13471 | 0.00354  | -0.04423 | 0.3402   | -0.04452 | 0.33711 | 0.052559 | 0.25698  | -0.15847 |
| 0.032105 | 0.48886  | -0.07679 | 0.09744  | -0.03993 | 0.38929 | -0.03901 | 0.40025  | -0.10839 |
| 0.077428 | 0.09467  | -0.05693 | 0.2195   | -0.0129  | 0.78101 | -0.03975 | 0.39145  | -0.07968 |
| -0.04162 | 0.36947  | -0.06413 | 0.16647  | -0.00401 | 0.93116 | -0.01667 | 0.7193   | -0.05117 |
| -0.15529 | 0.00076  | -0.09865 | 0.03305  | 0.014222 | 0.7592  | 0.050759 | 0.27365  | 0.088499 |
| 0.203587 | 9.24E-06 | 0.140152 | 0.0024   | 0.019261 | 0.67802 | -0.015   | 0.74654  | 0.035955 |
| -0.1237  | 0.00745  | 0.106876 | 0.02089  | 0.068089 | 0.14178 | 0.282618 | 5.03E-10 | 0.272474 |
| -0.01158 | 0.80283  | 0.118128 | 0.01062  | 0.039289 | 0.39694 | 0.088196 | 0.05684  | 0.069664 |
| 0.222951 | 1.14E-06 | -0.05353 | 0.24825  | 0.02383  | 0.60748 | -0.0039  | 0.93299  | 0.033594 |
| 0.187473 | 4.57E-05 | 0.0577   | 0.21327  | -0.01215 | 0.79344 | -0.06371 | 0.16932  | 0.030541 |
| 0.062383 | 0.17836  | 0.066989 | 0.14835  | 0.033119 | 0.47524 | 0.086842 | 0.06077  | 0.05557  |
| 0.138951 | 0.00262  | 0.294092 | 9.04E-11 | 0.000992 | 0.98294 | -0.0526  | 0.25657  | -0.02169 |
| 0.005061 | 0.91314  | 0.075677 | 0.10239  | 0.011362 | 0.80655 | 0.042288 | 0.36187  | 0.060526 |
| -0.13842 | 0.00272  | -0.19554 | 2.09E-05 | -0.00296 | 0.9491  | 0.007605 | 0.86981  | -0.005   |
| -0.00618 | 0.89397  | -0.1269  | 0.00603  | -0.05034 | 0.27762 | -0.10024 | 0.03032  | -0.06548 |
| 0.029298 | 0.52767  | -0.05599 | 0.22721  | -0.00493 | 0.91546 | -0.05415 | 0.24283  | -0.06173 |
| -0.08411 | 0.06939  | -0.15499 | 0.00078  | 0.028373 | 0.54079 | 0.024483 | 0.59768  | -0.05627 |
| -0.00422 | 0.92753  | -0.20047 | 1.27E-05 | 0.012562 | 0.78659 | -0.01031 | 0.82418  | 0.041046 |
| -0.10485 | 0.02346  | -0.1179  | 0.01078  | 0.021312 | 0.64596 | 0.095873 | 0.03835  | 0.029892 |
| 0.05654  | 0.22264  | -0.01364 | 0.76875  | 0.017264 | 0.70982 | 0.08542  | 0.06513  | -0.14109 |
| 0.239087 | 1.71E-07 | 0.133572 | 0.00383  | 0.022872 | 0.622   | 0.003078 | 0.9471   | -0.03235 |
| 0.237071 | 2.18E-07 | 0.271447 | 2.48E-09 | 0.017444 | 0.70692 | 0.189885 | 3.63E-05 | -0.05699 |
| 0.092719 | 0.04522  | 0.150701 | 0.00109  | 0.002573 | 0.95577 | -0.00881 | 0.84936  | -0.0398  |
| 0.076526 | 0.09859  | -0.00497 | 0.91462  | -0.00045 | 0.99223 | -0.05792 | 0.21154  | -0.04045 |
| 0.192614 | 2.78E-05 | 0.493672 | 4.64E-30 | 0.020723 | 0.65511 | -0.04766 | 0.30406  | 0.262404 |
| -0.11011 | 0.01729  | -0.1985  | 1.55E-05 | 0.04682  | 0.31267 | 0.075536 | 0.10304  | -0.0851  |
| 0.192579 | 2.79E-05 | 0.06482  | 0.16196  | 0.042875 | 0.35524 | 0.07751  | 0.09432  | 0.087466 |
| 0.238811 | 1.76E-07 | 0.116505 | 0.01175  | 0.0183   | 0.69326 | 0.000639 | 0.98901  | 0.046068 |
| -0.0828  | 0.07385  | -0.19703 | 1.80E-05 | -0.005   | 0.91422 | -0.03911 | 0.39908  | 0.057475 |
| 0.004962 | 0.91483  | -0.10496 | 0.0233   | 0.041057 | 0.37603 | 0.064896 | 0.16148  | 0.076326 |
| -0.19653 | 1.89E-05 | -0.12505 | 0.00682  | -0.0254  | 0.58402 | -0.13107 | 0.00455  | 0.040985 |
| -0.00866 | 0.85197  | -0.0961  | 0.0379   | 0.01488  | 0.74842 | 0.069437 | 0.13405  | -0.04514 |
| 0.123391 | 0.00759  | 0.046515 | 0.31584  | -0.00654 | 0.88789 | 0.000971 | 0.9833   | -0.05323 |
| 0.022205 | 0.6322   | -0.15646 | 0.00069  | 0.039752 | 0.3914  | -0.03534 | 0.44609  | 0.101092 |
| 0.170006 | 0.00022  | -0.03585 | 0.43953  | 0.010307 | 0.8242  | 0.024098 | 0.60345  | 0.047817 |

|          |          |          |          |          |         |          |          |          |
|----------|----------|----------|----------|----------|---------|----------|----------|----------|
| -0.11756 | 0.011    | -0.08685 | 0.06075  | -0.08221 | 0.07592 | -0.11297 | 0.01459  | -0.2739  |
| -0.06554 | 0.15734  | -0.25908 | 1.34E-08 | 0.036348 | 0.43325 | 0.105156 | 0.02305  | 0.052642 |
| 0.010376 | 0.82304  | -0.09339 | 0.04368  | -0.00342 | 0.94126 | 0.047082 | 0.30997  | -0.0369  |
| -0.23781 | 1.99E-07 | -0.25277 | 3.06E-08 | -0.06941 | 0.13417 | -0.09679 | 0.03653  | -0.06605 |
| 0.153644 | 0.00086  | 0.066484 | 0.15144  | 0.011461 | 0.8049  | -0.12921 | 0.00517  | -0.0631  |
| 0.154536 | 0.00081  | 0.089964 | 0.05203  | 0.041474 | 0.37119 | 0.066855 | 0.14916  | 0.042502 |
| 0.020723 | 0.65511  | -0.00619 | 0.89386  | 0.021552 | 0.64225 | 0.01776  | 0.70187  | 0.102729 |
| 0.017369 | 0.70813  | -0.14938 | 0.00121  | -0.01986 | 0.66854 | -0.08266 | 0.07433  | -0.03449 |
| -0.03314 | 0.47496  | -0.28053 | 6.81E-10 | -0.02305 | 0.61936 | -0.04496 | 0.3323   | -0.04462 |
| -0.02876 | 0.53528  | -0.00251 | 0.9568   | 0.155021 | 0.00078 | 0.230757 | 4.62E-07 | 0.374128 |
| 0.004251 | 0.92699  | 0.159133 | 0.00056  | 0.004798 | 0.91764 | -0.0253  | 0.58545  | -0.03377 |
| 0.114975 | 0.01291  | 0.146248 | 0.00153  | 0.020902 | 0.65232 | 0.15926  | 0.00055  | 0.092682 |
| -0.06149 | 0.18467  | -0.0993  | 0.03191  | 0.055571 | 0.23068 | 0.176089 | 0.00013  | 0.037035 |
| 0.082999 | 0.07315  | -0.00934 | 0.8405   | -0.01507 | 0.74528 | -0.07956 | 0.08589  | -0.01772 |
| 0.366785 | 2.56E-16 | 0.506505 | 8.45E-32 | 0.045852 | 0.32279 | 0.085849 | 0.06379  | 0.013977 |
| -0.24428 | 9.00E-08 | -0.39625 | 5.23E-19 | -0.05926 | 0.20115 | -0.05881 | 0.20458  | -0.29169 |
| -0.19685 | 1.83E-05 | -0.28989 | 1.71E-10 | -0.05617 | 0.22568 | -0.01135 | 0.8068   | -0.25522 |
| 0.162592 | 0.00042  | 0.428059 | 3.13E-22 | 0.017453 | 0.70678 | 0.063201 | 0.17273  | 0.09599  |
| -0.07704 | 0.09636  | -0.40203 | 1.44E-19 | 0.00644  | 0.8896  | -0.03712 | 0.42357  | 0.061466 |
| 0.056194 | 0.22549  | -0.12427 | 0.00717  | -0.00557 | 0.90442 | -0.08636 | 0.06222  | -0.07823 |
| 0.16346  | 0.00039  | 0.043725 | 0.34577  | -0.03306 | 0.476   | -0.09028 | 0.05121  | 0.017763 |
| -0.0449  | 0.33297  | -0.23886 | 1.75E-07 | -0.0263  | 0.5707  | -0.09209 | 0.04671  | -0.11871 |
| 0.040356 | 0.38424  | -0.1592  | 0.00055  | 0.010526 | 0.82054 | -0.01636 | 0.72442  | 0.000222 |
| -0.0329  | 0.47817  | -0.12813 | 0.00556  | 0.032453 | 0.48416 | 0.010237 | 0.82538  | 0.104911 |
| 0.104682 | 0.02368  | 0.300625 | 3.28E-11 | 0.047879 | 0.30184 | 0.072093 | 0.11976  | 0.033585 |
| 0.047337 | 0.30735  | -0.02415 | 0.60263  | -0.01328 | 0.77477 | -0.05782 | 0.21232  | 0.025213 |
| 0.259515 | 1.26E-08 | 0.546848 | 8.94E-38 | 0.036444 | 0.43203 | 0.115021 | 0.01287  | 0.101627 |
| 0.094108 | 0.04208  | 0.306626 | 1.27E-11 | 0.034289 | 0.45977 | 0.113998 | 0.0137   | 0.095385 |
| 0.160544 | 0.0005   | 0.120027 | 0.00943  | 0.047994 | 0.30068 | 0.06068  | 0.19053  | 0.066433 |
| 0.14252  | 0.00202  | 0.370953 | 1.11E-16 | 0.031027 | 0.50359 | 0.009912 | 0.83083  | 0.089425 |
| 0.009861 | 0.83169  | 0.074313 | 0.10875  | -0.01452 | 0.75439 | -0.07768 | 0.09359  | 0.051598 |
| -0.03681 | 0.42736  | 0.250805 | 3.94E-08 | -0.00972 | 0.83409 | -0.0011  | 0.98103  | 0.351857 |
| 0.221748 | 1.30E-06 | 0.084751 | 0.06727  | 0.023544 | 0.61181 | -0.05033 | 0.27775  | 0.01838  |
| 0.154524 | 0.00081  | 0.111448 | 0.01598  | 0.015339 | 0.74094 | -0.00255 | 0.95625  | 0.055667 |
| 0.066531 | 0.15115  | -0.09377 | 0.04282  | 0.000909 | 0.98437 | -0.03626 | 0.43433  | 0.029449 |
| -0.06877 | 0.13781  | -0.02037 | 0.66064  | -0.02861 | 0.53739 | -0.07189 | 0.12081  | -0.01033 |
| -0.06187 | 0.18198  | -0.03253 | 0.48317  | 0.0466   | 0.31495 | 0.064405 | 0.16468  | -0.00956 |
| 0.009336 | 0.84053  | -0.03686 | 0.42679  | -0.07913 | 0.08762 | -0.13843 | 0.00272  | -0.08158 |
| 0.177943 | 0.00011  | 0.156922 | 0.00067  | 0.058481 | 0.20714 | 0.116908 | 0.01146  | 0.192821 |
| 0.249348 | 4.75E-08 | 0.492745 | 6.16E-30 | 0.085562 | 0.06468 | 0.121321 | 0.00868  | 0.238787 |
| 0.016073 | 0.72902  | 0.223226 | 1.10E-06 | 0.107914 | 0.01967 | 0.209156 | 5.16E-06 | 0.260667 |
| 0.118133 | 0.01062  | 0.284833 | 3.63E-10 | 0.04697  | 0.31112 | 0.07035  | 0.129    | 0.076708 |
| 0.371995 | 8.97E-17 | 0.189667 | 3.70E-05 | -0.01162 | 0.80217 | -0.05346 | 0.24892  | -0.20492 |
| 0.187441 | 4.58E-05 | 0.009137 | 0.84389  | 0.009455 | 0.83852 | -0.0134  | 0.77278  | 0.051475 |
| -0.03593 | 0.43857  | -0.21725 | 2.15E-06 | -0.01172 | 0.80064 | -0.06926 | 0.13502  | -0.01218 |

|          |          |          |          |          |         |          |          |          |
|----------|----------|----------|----------|----------|---------|----------|----------|----------|
| 0.1607   | 0.00049  | 0.185558 | 5.48E-05 | 0.036772 | 0.4279  | 0.049503 | 0.28572  | -0.06122 |
| -0.12535 | 0.00668  | -0.22121 | 1.38E-06 | 0.036265 | 0.4343  | 0.058166 | 0.20959  | 0.136642 |
| 0.219856 | 1.61E-06 | 0.364609 | 3.95E-16 | 0.079132 | 0.08761 | 0.201572 | 1.14E-05 | 0.178352 |
| 0.160914 | 0.00048  | 0.161118 | 0.00047  | 0.063545 | 0.1704  | 0.102027 | 0.02748  | 0.134407 |
| 0.273485 | 1.86E-09 | 0.187858 | 4.40E-05 | 0.041079 | 0.37577 | 0.052166 | 0.26056  | 0.140815 |
| -0.02302 | 0.61969  | 0.114882 | 0.01298  | 0.044797 | 0.33406 | 0.086405 | 0.06208  | 0.072093 |
| -0.04682 | 0.31268  | 0.098509 | 0.03331  | -0.05146 | 0.26706 | -0.0442  | 0.34052  | 0.026758 |
| -0.10905 | 0.01841  | -0.02151 | 0.64298  | 0.047193 | 0.30883 | 0.020711 | 0.6553   | 0.098847 |
| 0.021576 | 0.64188  | 0.017716 | 0.70257  | -0.04739 | 0.30681 | -0.04141 | 0.37194  | 0.101338 |
| 0.026298 | 0.5708   | -0.10705 | 0.02067  | -0.02561 | 0.58091 | -0.04433 | 0.33913  | -0.04992 |
| -0.07737 | 0.09494  | -0.09808 | 0.03409  | -0.0187  | 0.68684 | -0.01904 | 0.6815   | -0.13559 |
| 0.1891   | 3.91E-05 | 0.122464 | 0.00806  | 0.008826 | 0.84913 | -0.00707 | 0.87882  | 0.116393 |
| -0.22223 | 1.23E-06 | -0.14819 | 0.00132  | 0.076116 | 0.10041 | 0.145501 | 0.00162  | 0.140528 |
| -0.20854 | 5.50E-06 | -0.07913 | 0.08763  | -0.04595 | 0.3218  | 0.012272 | 0.79139  | -0.01222 |
| -0.22943 | 5.39E-07 | -0.20213 | 1.07E-05 | 0.007665 | 0.86878 | 0.024154 | 0.60261  | 0.044138 |
| 0.317349 | 2.19E-12 | 0.351346 | 5.15E-15 | 0.023726 | 0.60906 | -0.02175 | 0.63916  | 0.09091  |
| 0.135352 | 0.00338  | -0.02078 | 0.65425  | -0.02971 | 0.52193 | -0.05168 | 0.26503  | 0.028309 |
| 0.007253 | 0.87578  | 0.21558  | 2.58E-06 | 0.046876 | 0.31209 | 0.119458 | 0.00977  | 0.152081 |
| 0.000563 | 0.99032  | -0.07694 | 0.09676  | -0.02814 | 0.54414 | 0.015821 | 0.7331   | -0.00318 |
| 0.033585 | 0.46905  | 0.006582 | 0.8872   | 0.067379 | 0.146   | 0.106885 | 0.02088  | 0.160245 |
| -0.09073 | 0.05006  | -0.23493 | 2.82E-07 | 0.085862 | 0.06375 | 0.130917 | 0.0046   | 0.175648 |
| 0.020445 | 0.65945  | 0.049924 | 0.28164  | 0.069165 | 0.13558 | 0.127393 | 0.00584  | 0.127026 |
| 0.015344 | 0.74086  | 0.030683 | 0.50833  | 0.021709 | 0.63983 | 0.053285 | 0.25046  | 0.044057 |
| 0.273402 | 1.89E-09 | 0.49008  | 1.38E-29 | -0.03213 | 0.48847 | -0.08459 | 0.06779  | 0.012445 |
| 0.34272  | 2.57E-14 | 0.506257 | 9.15E-32 | 0.008805 | 0.84948 | 0.051515 | 0.26657  | -0.0303  |
| 0.082412 | 0.07521  | -0.1375  | 0.00291  | -0.03144 | 0.49794 | 0.0037   | 0.93643  | -0.14095 |
| -0.07851 | 0.09012  | -0.1926  | 2.79E-05 | -0.01804 | 0.69732 | -0.04687 | 0.31211  | -0.08052 |
| 0.113287 | 0.01431  | 0.134734 | 0.00353  | -0.05629 | 0.22467 | -0.08276 | 0.07397  | 0.020345 |
| 0.209918 | 4.76E-06 | 0.176472 | 0.00013  | -0.00651 | 0.88846 | -0.01342 | 0.77237  | 0.083284 |
| 0.008174 | 0.86016  | 0.046642 | 0.31452  | -0.0059  | 0.89874 | -0.0139  | 0.76451  | -0.0757  |
| 0.150511 | 0.0011   | 0.122313 | 0.00814  | 0.019954 | 0.66713 | 0.06312  | 0.17328  | 0.103006 |
| 0.119951 | 0.00947  | 0.213497 | 3.24E-06 | -0.01237 | 0.78971 | -0.03856 | 0.40578  | 0.078034 |
| 0.017548 | 0.70526  | 0.055999 | 0.2271   | 0.023454 | 0.61316 | 0.021091 | 0.6494   | 0.084167 |
| 0.336635 | 7.75E-14 | 0.041398 | 0.37207  | -0.00393 | 0.93242 | -0.07947 | 0.08627  | -0.12511 |
| 0.039399 | 0.39562  | 0.115879 | 0.01221  | 0.039749 | 0.39143 | 0.070587 | 0.12771  | 0.225143 |
| 0.094871 | 0.04043  | -0.0507  | 0.27422  | -0.01584 | 0.73278 | -0.05711 | 0.21803  | -0.05051 |
| 0.327244 | 4.06E-13 | 0.242842 | 1.08E-07 | -0.0181  | 0.6964  | 0.003681 | 0.93677  | -0.09243 |
| 0.162978 | 0.00041  | 0.10535  | 0.02279  | 0.018834 | 0.68478 | 0.170181 | 0.00022  | -0.07327 |
| 0.429949 | 1.96E-22 | 0.463678 | 2.86E-26 | 0.032272 | 0.48661 | 0.063243 | 0.17244  | 0.115924 |
| 0.227509 | 6.74E-07 | 0.326438 | 4.67E-13 | 0.058894 | 0.20394 | 0.026172 | 0.57264  | 0.130029 |
| 0.137018 | 0.00301  | 0.03854  | 0.40601  | -0.01252 | 0.78732 | 0.00888  | 0.84823  | 0.024988 |
| -0.11755 | 0.01101  | -0.17005 | 0.00022  | 0.065183 | 0.15962 | 0.078454 | 0.09037  | 0.204124 |
| 0.056372 | 0.22402  | 0.010901 | 0.81425  | -0.02251 | 0.62753 | -0.04437 | 0.33866  | 0.027241 |
| 0.016216 | 0.7267   | -0.05542 | 0.23196  | 0.057313 | 0.21637 | 0.118346 | 0.01048  | 0.097986 |
| -0.08111 | 0.07995  | 0.00708  | 0.87872  | 0.080531 | 0.08213 | 0.211103 | 4.19E-06 | 0.267058 |



|          |          |          |          |          |         |          |         |          |
|----------|----------|----------|----------|----------|---------|----------|---------|----------|
| 0.158114 | 0.00061  | -0.01758 | 0.70475  | -0.08129 | 0.07929 | -0.11424 | 0.01351 | -0.15701 |
| 0.079133 | 0.0876   | 0.109182 | 0.01827  | 0.068123 | 0.14158 | 0.167115 | 0.00029 | 0.188684 |
| 0.064289 | 0.16544  | 0.020242 | 0.66262  | 0.042273 | 0.36204 | 0.075678 | 0.10239 | -0.01269 |
| -0.09313 | 0.04426  | 0.176102 | 0.00013  | 0.043223 | 0.35135 | 0.151108 | 0.00105 | 0.108182 |
| 0.055393 | 0.23218  | 0.384522 | 6.64E-18 | 0.038472 | 0.40684 | 0.093189 | 0.04413 | 0.186908 |
| -0.0501  | 0.27992  | -0.19247 | 2.82E-05 | 0.0535   | 0.24855 | 0.050878 | 0.27254 | 0.071408 |
| 0.107476 | 0.02017  | -0.01589 | 0.73195  | 0.01962  | 0.67237 | 0.010415 | 0.82238 | 0.097405 |
| -0.04478 | 0.33428  | -0.14202 | 0.0021   | -0.01288 | 0.78135 | -0.0174  | 0.70756 | -0.04453 |
| 0.120967 | 0.00888  | 0.159114 | 0.00056  | 0.032859 | 0.47871 | 0.142128 | 0.00208 | -0.01032 |
| 0.247562 | 5.96E-08 | 0.473676 | 1.71E-27 | 0.026271 | 0.57119 | 0.022713 | 0.62443 | 0.056646 |
| -0.08827 | 0.05664  | -0.19103 | 3.25E-05 | 0.066648 | 0.15043 | 0.127044 | 0.00597 | 0.104952 |
| -0.01659 | 0.72068  | -0.0976  | 0.03498  | 0.007254 | 0.87577 | 0.056662 | 0.22164 | -0.05325 |
| 0.281016 | 6.35E-10 | -0.05118 | 0.26967  | 0.006524 | 0.88819 | -0.03033 | 0.51328 | 0.063969 |
| 0.106717 | 0.02108  | 0.349982 | 6.67E-15 | 0.013223 | 0.77564 | -0.02376 | 0.60856 | 0.134467 |
| 0.060167 | 0.19432  | 0.139356 | 0.00254  | 0.048069 | 0.29992 | 0.039172 | 0.39835 | 0.19977  |
| 0.217637 | 2.06E-06 | 0.237024 | 2.19E-07 | 0.001828 | 0.96858 | 0.074979 | 0.10561 | 0.120814 |
| -0.14307 | 0.00194  | -0.10565 | 0.0224   | 0.01622  | 0.72664 | 0.056109 | 0.22619 | 0.044893 |
| 0.028774 | 0.53508  | 0.037161 | 0.42303  | 0.078133 | 0.09169 | 0.129893 | 0.00493 | 0.154288 |
| 0.107974 | 0.0196   | -0.0184  | 0.69172  | 0.040247 | 0.38552 | 0.040779 | 0.37927 | 0.060772 |
| -0.10902 | 0.01844  | -0.3534  | 3.49E-15 | 0.016691 | 0.71903 | -0.06061 | 0.19106 | 0.104005 |
| 0.340262 | 4.03E-14 | 0.193158 | 2.64E-05 | -0.03418 | 0.46125 | 0.024157 | 0.60256 | -0.08172 |
| 0.126022 | 0.00639  | -0.03133 | 0.49937  | -0.00303 | 0.94802 | -0.06228 | 0.17911 | 0.047741 |
| -0.07264 | 0.11695  | -0.29553 | 7.24E-11 | 0.013543 | 0.77036 | -0.00175 | 0.96994 | -0.03816 |
| -0.06802 | 0.14221  | 0.01682  | 0.71696  | 0.040076 | 0.38754 | 0.070027 | 0.13076 | 0.162989 |
| -0.07268 | 0.11675  | -0.14001 | 0.00243  | -0.01177 | 0.79976 | -0.01395 | 0.76366 | -0.13727 |
| -0.01874 | 0.68622  | 0.101601 | 0.02813  | -0.02572 | 0.57933 | -0.06624 | 0.15292 | 0.042162 |
| -0.01486 | 0.7487   | -0.10199 | 0.02753  | 0.035429 | 0.44497 | 0.104825 | 0.02348 | 0.054285 |
| 0.133343 | 0.00389  | -0.0286  | 0.53759  | 0.025569 | 0.58152 | -0.01152 | 0.80388 | 0.03017  |
| -0.24359 | 9.80E-08 | -0.30717 | 1.16E-11 | -0.02692 | 0.56175 | -0.04787 | 0.30192 | -0.00884 |
| 0.015328 | 0.74111  | 0.026719 | 0.56464  | 0.036363 | 0.43306 | 0.121967 | 0.00833 | 0.153267 |
| 0.16959  | 0.00023  | 0.09304  | 0.04448  | -0.00497 | 0.91475 | 1.58E-05 | 0.99973 | 0.069915 |
| 0.058191 | 0.20941  | 0.03161  | 0.49559  | 0.066545 | 0.15106 | 0.151176 | 0.00105 | 0.089911 |
| 0.095704 | 0.0387   | -0.12683 | 0.00606  | -0.01895 | 0.68301 | -0.07969 | 0.08539 | -0.08118 |
| 0.053878 | 0.24522  | 0.072077 | 0.11984  | -0.00242 | 0.95845 | -0.00064 | 0.98899 | 0.021603 |
| -0.07721 | 0.09562  | -0.17768 | 0.00011  | 0.009981 | 0.82967 | 0.004172 | 0.92835 | -0.07211 |
| -0.01258 | 0.78621  | 0.014059 | 0.76188  | 0.087152 | 0.05985 | 0.116589 | 0.01169 | 0.355203 |
| -0.16233 | 0.00043  | -0.13806 | 0.00279  | 0.004832 | 0.91705 | 0.018065 | 0.69701 | -0.01093 |
| 0.02967  | 0.52243  | -0.02619 | 0.57232  | 0.012699 | 0.78431 | 0.036122 | 0.43612 | 0.028909 |
| 0.029098 | 0.53049  | -0.04283 | 0.35578  | 0.011409 | 0.80576 | 0.044707 | 0.33504 | 0.076377 |
| -0.17894 | 0.0001   | 0.020381 | 0.66044  | 0.028876 | 0.53363 | 0.090636 | 0.05029 | 0.168833 |
| 0.138151 | 0.00277  | 0.409015 | 2.92E-20 | 0.017946 | 0.6989  | 0.083002 | 0.07314 | 0.185196 |
| 0.120821 | 0.00896  | -0.00657 | 0.88742  | 0.024542 | 0.59679 | -0.01218 | 0.79292 | 0.080309 |
| 0.184813 | 5.87E-05 | 0.262218 | 8.80E-09 | -0.00668 | 0.88546 | 0.119535 | 0.00972 | -0.08453 |
| -0.05812 | 0.20999  | -0.2148  | 2.81E-06 | 0.038506 | 0.40642 | 0.064094 | 0.16673 | 0.067146 |
| 0.206298 | 6.97E-06 | 0.115006 | 0.01289  | -0.01576 | 0.73417 | -0.06756 | 0.14491 | -0.11161 |

|          |          |          |          |          |         |          |          |          |
|----------|----------|----------|----------|----------|---------|----------|----------|----------|
| -0.03842 | 0.40753  | -0.1311  | 0.00454  | 0.015767 | 0.73398 | 0.012486 | 0.78784  | 0.004708 |
| -0.1387  | 0.00267  | -0.33972 | 4.44E-14 | -0.03206 | 0.48946 | -0.0326  | 0.48213  | 0.013556 |
| 0.305942 | 1.41E-11 | 0.337054 | 7.19E-14 | -0.0132  | 0.776   | 0.009822 | 0.83234  | -0.02781 |
| 0.028862 | 0.53383  | -0.13873 | 0.00266  | 0.012188 | 0.7928  | 0.005098 | 0.91251  | -0.00569 |
| -0.15586 | 0.00073  | -0.32264 | 8.95E-13 | 0.004679 | 0.91968 | 0.06735  | 0.14617  | -0.00992 |
| 0.205474 | 7.60E-06 | 0.289771 | 1.74E-10 | -0.04024 | 0.38561 | -0.12821 | 0.00553  | -0.08749 |
| 0.152217 | 0.00097  | 0.281003 | 6.36E-10 | 0.078604 | 0.08975 | 0.112617 | 0.0149   | 0.207044 |
| 0.131337 | 0.00447  | 0.027667 | 0.5509   | 0.024148 | 0.60269 | -0.01373 | 0.76728  | 0.07549  |
| 0.093684 | 0.04302  | -0.05762 | 0.21394  | -0.01664 | 0.71982 | -0.09117 | 0.04894  | -0.08587 |
| 0.207628 | 6.06E-06 | 0.133729 | 0.00379  | -0.01314 | 0.77696 | -0.09251 | 0.04571  | 0.093795 |
| -0.08323 | 0.07233  | 0.100432 | 0.03     | -0.03239 | 0.48506 | 0.040762 | 0.37947  | -0.04571 |
| -0.09326 | 0.04396  | -0.13083 | 0.00463  | 0.063194 | 0.17278 | 0.205975 | 7.21E-06 | 0.057232 |
| -0.02191 | 0.63668  | 0.280582 | 6.76E-10 | 0.041431 | 0.37169 | 0.228643 | 5.91E-07 | 0.132638 |
| -0.12057 | 0.0091   | -0.39676 | 4.67E-19 | -0.0622  | 0.17967 | -0.12289 | 0.00784  | -0.22689 |
| 0.142396 | 0.00204  | 0.192387 | 2.85E-05 | 0.001235 | 0.97876 | 0.143961 | 0.00181  | 0.064336 |
| 0.276137 | 1.28E-09 | 0.152899 | 0.00092  | 0.044859 | 0.33339 | 0.05664  | 0.22182  | 0.161273 |
| -0.13346 | 0.00386  | 0.04598  | 0.32145  | 0.011916 | 0.79731 | 0.021735 | 0.63943  | 0.119134 |
| 0.096774 | 0.03656  | 0.054225 | 0.24219  | 0.040189 | 0.38621 | 0.051739 | 0.26449  | 0.154564 |
| 0.111037 | 0.01637  | 0.026374 | 0.56969  | -0.006   | 0.89704 | -0.04518 | 0.32991  | -0.1175  |
| -0.01358 | 0.76981  | -0.11094 | 0.01647  | 0.024245 | 0.60124 | 0.039214 | 0.39784  | -0.05277 |
| 0.031697 | 0.4944   | -0.01703 | 0.71361  | -0.04718 | 0.30894 | -0.07339 | 0.11322  | -0.09527 |
| 0.041104 | 0.37548  | 0.135222 | 0.00341  | 0.013845 | 0.76539 | 0.084746 | 0.06729  | 0.102883 |
| 0.262129 | 8.91E-09 | 0.467537 | 9.75E-27 | 0.027728 | 0.55003 | 0.078501 | 0.09017  | 0.110514 |
| 0.064463 | 0.16429  | -0.09708 | 0.03596  | 0.006945 | 0.88102 | 0.044211 | 0.34043  | -0.02902 |
| 0.011239 | 0.8086   | -0.12062 | 0.00908  | 0.029383 | 0.52647 | 0.051522 | 0.26651  | 0.008464 |
| 0.08591  | 0.0636   | 0.031608 | 0.49562  | 0.097475 | 0.03522 | 0.16823  | 0.00026  | 0.368026 |
| -0.0481  | 0.29961  | 0.060662 | 0.19066  | -0.00866 | 0.85188 | 0.052288 | 0.25945  | -0.01785 |
| 0.160369 | 0.0005   | 0.019482 | 0.67454  | -0.02634 | 0.57024 | -0.04122 | 0.37408  | -0.05105 |
| 0.102268 | 0.02711  | 0.060093 | 0.19487  | 0.043232 | 0.35124 | 0.050175 | 0.27923  | 0.099527 |
| 0.464904 | 2.03E-26 | 0.0768   | 0.09738  | 0.010888 | 0.81447 | -0.09914 | 0.03219  | 0.044512 |
| -0.2646  | 6.38E-09 | -0.3211  | 1.16E-12 | 0.057221 | 0.21711 | 0.075059 | 0.10524  | 0.125137 |
| 0.270008 | 3.03E-09 | 0.285349 | 3.36E-10 | 0.018166 | 0.69538 | -0.00054 | 0.99068  | 0.079953 |
| 0.332039 | 1.76E-13 | 0.216882 | 2.24E-06 | 0.014861 | 0.74873 | -0.02253 | 0.62725  | 0.077669 |
| -0.02767 | 0.55085  | -0.06484 | 0.16183  | 0.015738 | 0.73445 | 0.030369 | 0.51267  | 0.04781  |
| -0.01735 | 0.70842  | -0.14891 | 0.00125  | -0.05802 | 0.21077 | -0.16943 | 0.00023  | -0.1751  |
| 0.032598 | 0.48221  | 0.110625 | 0.01678  | 0.07006  | 0.13058 | 0.106993 | 0.02075  | 0.098927 |
| 0.023042 | 0.61942  | -0.15717 | 0.00065  | -0.01087 | 0.8147  | -0.01655 | 0.72131  | 0.031918 |
| -0.02966 | 0.52252  | -0.16448 | 0.00036  | 0.007979 | 0.86346 | 0.013266 | 0.77493  | -0.00082 |
| 0.014539 | 0.754    | -0.08548 | 0.06495  | 0.022671 | 0.62507 | 0.039661 | 0.39249  | 0.000895 |
| 0.072146 | 0.11949  | 0.179658 | 9.47E-05 | -0.03173 | 0.49393 | -0.02101 | 0.6507   | 0.002912 |
| -0.01258 | 0.78633  | 0.187566 | 4.53E-05 | 0.072544 | 0.11745 | 0.151752 | 0.001    | 0.254056 |
| -0.13593 | 0.00325  | -0.09941 | 0.03173  | -0.01291 | 0.78076 | 0.008454 | 0.85542  | -0.07993 |
| 0.095192 | 0.03976  | 0.172094 | 0.00019  | 0.046145 | 0.31971 | 0.071642 | 0.1221   | 0.042504 |
| 0.177509 | 0.00012  | 0.347649 | 1.03E-14 | 0.048137 | 0.29924 | 0.118895 | 0.01012  | 0.11421  |
| -0.05009 | 0.28     | 0.096811 | 0.03649  | 0.175446 | 0.00014 | 0.394754 | 7.27E-19 | 0.411834 |

|          |          |          |          |          |         |          |          |          |
|----------|----------|----------|----------|----------|---------|----------|----------|----------|
| -0.11436 | 0.01341  | -0.20502 | 7.97E-06 | -0.01382 | 0.76576 | -0.0279  | 0.54751  | -0.02718 |
| 0.087341 | 0.05929  | 0.136164 | 0.00319  | 0.010527 | 0.82052 | 0.045346 | 0.32816  | -0.01156 |
| -0.10184 | 0.02776  | -0.01109 | 0.81105  | 0.035465 | 0.44451 | 0.076257 | 0.09978  | 0.057833 |
| -0.05135 | 0.26808  | -0.02957 | 0.52387  | -0.03838 | 0.40801 | -0.02602 | 0.57493  | -0.05587 |
| 0.085748 | 0.0641   | 0.036171 | 0.4355   | 0.014275 | 0.75834 | 0.005461 | 0.9063   | -0.02436 |
| 0.157194 | 0.00065  | -0.06352 | 0.17059  | -0.01939 | 0.67594 | -0.12339 | 0.0076   | 0.004368 |
| -0.16982 | 0.00023  | -0.23102 | 4.48E-07 | 0.000167 | 0.99713 | -0.02071 | 0.65526  | 0.011943 |
| 0.281647 | 5.79E-10 | 0.486342 | 4.24E-29 | 0.099709 | 0.03121 | 0.212446 | 3.63E-06 | 0.34537  |
| 0.231097 | 4.44E-07 | 0.294933 | 7.94E-11 | 0.115137 | 0.01278 | 0.175048 | 0.00014  | 0.426076 |
| -0.0041  | 0.92956  | -0.10203 | 0.02747  | 0.014849 | 0.74893 | 0.030709 | 0.50796  | -0.11115 |
| 0.087539 | 0.05872  | -0.02576 | 0.57866  | 0.004371 | 0.92494 | -0.01018 | 0.8264   | -0.02306 |
| 0.27768  | 1.03E-09 | 0.243238 | 1.02E-07 | 0.025696 | 0.57964 | 0.013507 | 0.77095  | -0.05487 |
| -0.19801 | 1.63E-05 | -0.2845  | 3.81E-10 | -0.01916 | 0.67954 | 0.02115  | 0.64847  | -0.10377 |
| 0.26594  | 5.31E-09 | 0.136523 | 0.00311  | -0.01048 | 0.82137 | -0.03289 | 0.47829  | 0.035651 |
| 0.087394 | 0.05914  | 0.053449 | 0.24901  | 0.053946 | 0.24463 | 0.097043 | 0.03604  | 0.189261 |
| 0.03259  | 0.48233  | 0.088274 | 0.05662  | 0.032295 | 0.48629 | 0.05698  | 0.21905  | -0.0207  |
| 0.135368 | 0.00338  | 0.076424 | 0.09904  | -0.02889 | 0.53342 | -0.05536 | 0.23249  | 0.027108 |
| 0.101865 | 0.02773  | -0.04793 | 0.3013   | 0.006858 | 0.8825  | -0.04289 | 0.35501  | 0.105339 |
| 0.317568 | 2.11E-12 | 0.319053 | 1.64E-12 | -0.0019  | 0.9673  | 0.044011 | 0.34262  | -0.02908 |
| 0.163105 | 0.0004   | 0.352536 | 4.11E-15 | 0.035747 | 0.4409  | 0.00336  | 0.94227  | 0.111788 |
| 0.106395 | 0.02147  | -0.01984 | 0.66894  | -0.04431 | 0.33931 | -0.14334 | 0.0019   | -0.09242 |
| 0.128978 | 0.00525  | 0.212826 | 3.48E-06 | 0.03106  | 0.50313 | 0.06204  | 0.18077  | 0.033155 |
| 0.002151 | 0.96302  | -0.01944 | 0.67528  | 0.050929 | 0.27205 | 0.084015 | 0.06969  | 0.162978 |
| 0.033902 | 0.46486  | -0.05781 | 0.21244  | 0.045836 | 0.32296 | 0.054618 | 0.23879  | 0.086709 |
| 0.099329 | 0.03187  | -0.02093 | 0.65189  | 0.058398 | 0.20778 | 0.063976 | 0.16751  | 0.121888 |
| 0.320259 | 1.34E-12 | 0.364419 | 4.10E-16 | 0.017716 | 0.70257 | -0.10744 | 0.02022  | 0.052915 |
| 0.116199 | 0.01198  | 0.239962 | 1.53E-07 | 0.065216 | 0.15941 | 0.180299 | 8.93E-05 | 0.208813 |
| 0.175461 | 0.00014  | 0.1018   | 0.02782  | 0.021391 | 0.64474 | -0.00894 | 0.84722  | 0.142988 |
| 0.152458 | 0.00095  | 0.047868 | 0.30195  | -0.0328  | 0.47955 | -0.12628 | 0.00628  | -0.03371 |
| 0.008181 | 0.86004  | -0.12331 | 0.00764  | -0.00655 | 0.88775 | -0.05352 | 0.2484   | 0.1144   |
| -0.04948 | 0.28594  | -0.13334 | 0.00389  | -0.0334  | 0.47153 | -0.04872 | 0.29341  | -0.05515 |
| 0.1972   | 1.77E-05 | 0.170884 | 0.00021  | 0.020267 | 0.66222 | -0.02876 | 0.5353   | 0.13193  |
| -0.02355 | 0.61167  | -0.10311 | 0.02587  | -0.04334 | 0.35005 | -0.09119 | 0.04891  | -0.16444 |
| -0.09764 | 0.03491  | -0.1389  | 0.00263  | 0.104667 | 0.0237  | 0.177715 | 0.00011  | 0.098938 |
| -0.05932 | 0.20069  | 0.093237 | 0.04402  | 0.061074 | 0.18767 | 0.189359 | 3.81E-05 | 0.01088  |
| 0.036458 | 0.43185  | 0.108477 | 0.01903  | -0.03227 | 0.48657 | -0.04775 | 0.3031   | -0.13293 |
| -0.06032 | 0.1932   | -0.20437 | 8.52E-06 | -0.01173 | 0.8004  | -0.04423 | 0.34021  | -0.12312 |
| 0.09407  | 0.04216  | 0.101677 | 0.02801  | 9.25E-05 | 0.99841 | -0.03173 | 0.494    | -0.10517 |
| 0.08691  | 0.06057  | -0.06245 | 0.17793  | 0.004219 | 0.92755 | -0.03339 | 0.47168  | 0.000234 |
| 0.070134 | 0.13018  | 0.0688   | 0.13766  | 0.046505 | 0.31594 | 0.118772 | 0.0102   | 0.111493 |
| 0.05498  | 0.23568  | -0.11039 | 0.01702  | -0.01046 | 0.82158 | -0.10213 | 0.02731  | -0.00728 |
| 0.108687 | 0.0188   | 0.078457 | 0.09035  | 0.017043 | 0.71337 | -0.09199 | 0.04695  | 0.028605 |
| -0.20303 | 9.78E-06 | -0.32629 | 4.79E-13 | -0.04427 | 0.33976 | -0.06926 | 0.13506  | -0.14212 |
| -0.05493 | 0.23613  | -0.24244 | 1.13E-07 | -0.0083  | 0.85803 | -0.04304 | 0.35338  | -0.06767 |
| 0.080883 | 0.0808   | -0.07704 | 0.09633  | 0.012106 | 0.79415 | -0.01517 | 0.74366  | 0.063248 |

|          |          |          |          |          |         |          |         |          |
|----------|----------|----------|----------|----------|---------|----------|---------|----------|
| -0.02259 | 0.62624  | -0.26965 | 3.19E-09 | -0.00095 | 0.98369 | -0.03403 | 0.4632  | -0.03622 |
| -0.07032 | 0.12918  | 0.0295   | 0.52482  | 0.040475 | 0.38283 | 0.056689 | 0.22142 | 0.1042   |
| 0.150142 | 0.00114  | 0.136887 | 0.00303  | 0.039563 | 0.39365 | 0.042612 | 0.3582  | 0.081212 |
| 0.161437 | 0.00046  | 0.182552 | 7.25E-05 | 0.015824 | 0.73306 | 0.024185 | 0.60215 | -0.05545 |
| 0.029961 | 0.51836  | -0.02107 | 0.64972  | 0.035072 | 0.44958 | -0.01889 | 0.68391 | 0.036206 |
| -0.02777 | 0.54949  | -0.21737 | 2.12E-06 | -0.03652 | 0.43102 | -0.08886 | 0.055   | -0.03774 |
| 0.119478 | 0.00976  | 0.295078 | 7.77E-11 | 0.029662 | 0.52255 | 0.077829 | 0.09297 | 0.14655  |
| 0.034782 | 0.45334  | -0.10569 | 0.02235  | 0.026471 | 0.56826 | 0.087421 | 0.05906 | 0.110532 |
| 0.176393 | 0.00013  | 0.239757 | 1.57E-07 | 0.018383 | 0.69193 | 0.022697 | 0.62468 | -0.07388 |
| -0.10386 | 0.0248   | 0.039364 | 0.39604  | -0.07627 | 0.09973 | -0.05222 | 0.26004 | -0.04185 |
| -0.19461 | 2.29E-05 | -0.29746 | 5.38E-11 | -0.0269  | 0.56197 | -0.04266 | 0.35764 | -0.15876 |
| 0.07587  | 0.10152  | -0.14579 | 0.00158  | 0.035533 | 0.44364 | -0.03785 | 0.41442 | 0.136566 |
| 0.182059 | 7.59E-05 | -0.17972 | 9.41E-05 | -0.02384 | 0.60738 | -0.06352 | 0.17056 | 0.036787 |
| 0.293535 | 9.84E-11 | 0.258582 | 1.43E-08 | 0.069822 | 0.1319  | 0.085834 | 0.06383 | 0.191221 |
| -0.03336 | 0.47201  | -0.17657 | 0.00013  | 0.072738 | 0.11648 | 0.011279 | 0.80792 | 0.183289 |
| 0.062418 | 0.17812  | -0.01388 | 0.76482  | -0.00981 | 0.83254 | -0.06472 | 0.16263 | -0.00824 |
| -0.0554  | 0.23209  | -0.05026 | 0.27841  | 0.01091  | 0.81409 | 0.02984  | 0.52005 | 0.011813 |
| 0.389498 | 2.29E-18 | 0.234813 | 2.86E-07 | -0.04083 | 0.37864 | -0.0438  | 0.34499 | 0.042492 |
| -0.07671 | 0.09778  | -0.18396 | 6.37E-05 | 0.005038 | 0.91354 | -0.04149 | 0.37102 | 0.090507 |
| 0.152553 | 0.00094  | 0.220746 | 1.46E-06 | 0.005583 | 0.90423 | -0.06853 | 0.13923 | 0.017444 |
| 0.114242 | 0.0135   | 0.174939 | 0.00014  | 0.07304  | 0.11496 | 0.0959   | 0.0383  | 0.140969 |
| 0.064462 | 0.1643   | -0.0791  | 0.08773  | 0.032299 | 0.48625 | 0.068939 | 0.13686 | 0.00544  |
| 0.191151 | 3.21E-05 | 0.192448 | 2.83E-05 | 0.019951 | 0.66718 | -0.05357 | 0.24794 | 0.353576 |
| 0.064865 | 0.16167  | 0.168185 | 0.00026  | 0.042673 | 0.35751 | 0.070944 | 0.12579 | 0.087979 |
| 0.13089  | 0.00461  | 0.092281 | 0.04625  | -0.00212 | 0.96364 | 0.05462  | 0.23877 | 0.146835 |
| 0.047199 | 0.30877  | -0.00877 | 0.85005  | 0.03155  | 0.49641 | 0.057271 | 0.21671 | 0.096434 |
| -0.01391 | 0.76436  | -0.05667 | 0.22155  | 0.033337 | 0.47234 | 0.064881 | 0.16157 | 0.193435 |
| 0.030654 | 0.50873  | -0.00223 | 0.96173  | -0.00774 | 0.86756 | -0.00818 | 0.86013 | -0.1515  |
| -0.04721 | 0.30868  | -0.22881 | 5.80E-07 | 0.008849 | 0.84875 | 0.020354 | 0.66087 | 0.046112 |
| 0.180915 | 8.44E-05 | 0.325894 | 5.13E-13 | -0.02514 | 0.58791 | -0.04191 | 0.36624 | 0.015141 |
| -0.12953 | 0.00506  | 0.027854 | 0.54822  | -0.00633 | 0.89153 | 0.050128 | 0.27967 | 0.061711 |
| 0.042765 | 0.35647  | -0.17763 | 0.00011  | 0.016035 | 0.72964 | -0.0279  | 0.54751 | 0.059552 |
| 0.02218  | 0.63259  | -0.20955 | 4.95E-06 | 0.010819 | 0.81561 | -0.01825 | 0.69406 | -0.04172 |
| 0.210464 | 4.49E-06 | -0.10206 | 0.02743  | -0.02474 | 0.59376 | -0.1524  | 0.00095 | -0.03149 |
| 0.2025   | 1.03E-05 | 0.011919 | 0.79726  | -0.01357 | 0.76989 | -0.05759 | 0.21413 | -0.01326 |
| 0.358905 | 1.21E-15 | 0.283278 | 4.56E-10 | 0.011133 | 0.81037 | -0.02107 | 0.64979 | 0.045595 |
| 0.086107 | 0.06299  | -0.31818 | 1.90E-12 | 0.00673  | 0.88468 | -0.01743 | 0.70708 | 0.057165 |
| 0.108484 | 0.01903  | -0.03584 | 0.4397   | -0.04377 | 0.34525 | -0.09514 | 0.03987 | -0.01091 |
| -0.00282 | 0.95156  | -0.26901 | 3.48E-09 | 0.016416 | 0.72347 | -0.06732 | 0.14633 | -0.07602 |
| 0.093661 | 0.04307  | 0.036912 | 0.42614  | -0.08003 | 0.08407 | -0.16278 | 0.00041 | -0.08409 |
| 0.004808 | 0.91747  | -0.21673 | 2.28E-06 | -0.02505 | 0.58916 | -0.05055 | 0.27563 | -0.12121 |
| 0.005074 | 0.91291  | 0.131508 | 0.00442  | 0.117223 | 0.01124 | 0.076879 | 0.09704 | 0.196745 |
| -0.01942 | 0.67556  | -0.1369  | 0.00303  | -0.04104 | 0.3762  | -0.06891 | 0.13705 | -0.14421 |
| -0.07784 | 0.09293  | 0.128017 | 0.0056   | 0.069336 | 0.13461 | 0.160198 | 0.00051 | 0.13023  |
| -0.17246 | 0.00018  | -0.0629  | 0.17479  | 0.030705 | 0.50803 | 0.054485 | 0.23994 | 0.082764 |

|          |          |          |          |          |         |          |          |          |
|----------|----------|----------|----------|----------|---------|----------|----------|----------|
| 0.118824 | 0.01017  | 0.186812 | 4.86E-05 | 0.098971 | 0.03249 | 0.179138 | 9.93E-05 | 0.318565 |
| 0.035203 | 0.44789  | 0.079285 | 0.08699  | -0.03426 | 0.46018 | -0.02239 | 0.62937  | -0.01406 |
| 0.068602 | 0.1388   | -0.168   | 0.00027  | -0.02155 | 0.64223 | -0.00668 | 0.88549  | -0.01338 |
| 0.100938 | 0.02918  | -0.31075 | 6.50E-12 | -0.01948 | 0.67453 | -0.06398 | 0.16746  | 0.063504 |
| 0.020436 | 0.65958  | -0.27973 | 7.65E-10 | -0.00502 | 0.91386 | -0.07013 | 0.13018  | -0.06248 |
| 0.130109 | 0.00486  | 0.306576 | 1.28E-11 | 0.036228 | 0.43478 | -0.01665 | 0.71973  | 0.010412 |
| 0.257668 | 1.61E-08 | 0.24902  | 4.95E-08 | 0.064777 | 0.16224 | 0.120014 | 0.00943  | 0.299561 |
| 0.320966 | 1.19E-12 | 0.079535 | 0.086    | 0.032849 | 0.47885 | -0.02312 | 0.61822  | 0.132359 |
| -0.30084 | 3.17E-11 | -0.28787 | 2.31E-10 | -0.02203 | 0.63485 | 0.044104 | 0.3416   | -0.11148 |
| 0.068945 | 0.13683  | 0.106724 | 0.02107  | 0.008184 | 0.85999 | -0.01395 | 0.76366  | 0.010774 |
| 0.085186 | 0.06587  | 0.040154 | 0.38662  | 0.028502 | 0.53894 | 0.052351 | 0.25887  | 0.026024 |
| -0.08366 | 0.07088  | -0.13284 | 0.00403  | -0.0096  | 0.83614 | -0.00255 | 0.95615  | -0.03487 |
| 0.197398 | 1.73E-05 | 0.130234 | 0.00482  | -0.00253 | 0.95657 | -0.07931 | 0.08689  | 0.038179 |
| 0.192051 | 2.94E-05 | -0.01352 | 0.77073  | -0.02644 | 0.56873 | -0.13526 | 0.0034   | -0.02031 |
| 0.036588 | 0.43021  | 0.144541 | 0.00174  | -0.03452 | 0.45672 | 0.004659 | 0.92002  | -0.26624 |
| 0.151764 | 0.001    | -0.05609 | 0.22635  | -0.02573 | 0.57921 | -0.02858 | 0.53785  | -0.01951 |
| 0.274417 | 1.63E-09 | 0.064108 | 0.16664  | -0.03371 | 0.46745 | -0.04815 | 0.29915  | -0.20549 |
| 0.233761 | 3.24E-07 | 0.16437  | 0.00036  | 0.061125 | 0.1873  | 0.064521 | 0.16391  | 0.080213 |
| -0.23246 | 3.78E-07 | -0.1901  | 3.55E-05 | -0.04965 | 0.28432 | -0.11102 | 0.01639  | -0.08838 |
| 0.26593  | 5.32E-09 | 0.016794 | 0.71737  | -0.00259 | 0.9554  | -0.07813 | 0.0917   | -0.04594 |
| 0.187358 | 4.62E-05 | 0.013831 | 0.76563  | 0.008699 | 0.85128 | -0.04586 | 0.32276  | 0.028461 |
| -0.21318 | 3.35E-06 | -0.27023 | 2.94E-09 | -0.00069 | 0.98806 | -0.04679 | 0.31294  | -0.05111 |
| 0.310095 | 7.24E-12 | 0.021083 | 0.64952  | -0.00984 | 0.83203 | 0.00033  | 0.99433  | 0.022556 |
| 0.018763 | 0.68591  | -0.22237 | 1.21E-06 | 0.048097 | 0.29964 | -0.04255 | 0.35885  | -0.00239 |
| 0.170542 | 0.00021  | -0.07232 | 0.11858  | 0.011911 | 0.7974  | -0.08902 | 0.05456  | -0.04263 |
| 0.074777 | 0.10655  | -0.0498  | 0.2828   | 0.01703  | 0.71358 | -0.02944 | 0.52568  | -0.07145 |
| 0.020621 | 0.65669  | 0.031112 | 0.50242  | 0.008729 | 0.85077 | -0.02063 | 0.65655  | 0.152271 |
| 0.108756 | 0.01873  | -0.08026 | 0.08317  | -0.00961 | 0.83596 | -0.10582 | 0.02219  | 0.009136 |
| 0.35995  | 9.87E-16 | -0.07544 | 0.10348  | -0.04636 | 0.31744 | -0.10711 | 0.02061  | -0.02674 |
| 0.176326 | 0.00013  | -0.09216 | 0.04654  | 0.035758 | 0.44076 | 0.019379 | 0.67617  | 0.064965 |
| -0.0928  | 0.04502  | -0.01301 | 0.77914  | -0.03756 | 0.41801 | -0.02856 | 0.53814  | -0.09168 |
| 0.190476 | 3.43E-05 | 0.050675 | 0.27445  | -0.06806 | 0.14195 | -0.12917 | 0.00518  | -0.02386 |
| 0.471213 | 3.46E-27 | 0.408568 | 3.24E-20 | -0.0003  | 0.9949  | 0.016802 | 0.71725  | 0.001519 |
| 0.143565 | 0.00187  | 0.058685 | 0.20555  | 0.038485 | 0.40668 | 0.056241 | 0.2251   | 0.09967  |
| 0.148175 | 0.00132  | 0.016768 | 0.7178   | -0.02142 | 0.64437 | -0.00389 | 0.93317  | 0.052895 |
| 0.064513 | 0.16397  | -0.05242 | 0.25827  | -0.02942 | 0.52593 | -0.10922 | 0.01822  | 0.026664 |
| 0.053192 | 0.25129  | -0.2809  | 6.45E-10 | -0.05811 | 0.21001 | -0.15591 | 0.00072  | -0.26315 |
| 0.093059 | 0.04443  | 0.004931 | 0.91536  | -0.01041 | 0.82246 | -0.0063  | 0.89199  | -0.02037 |
| 0.126181 | 0.00633  | -0.10708 | 0.02064  | 0.000175 | 0.99699 | -0.06159 | 0.18393  | -0.12819 |
| -0.1166  | 0.01168  | -0.23049 | 4.77E-07 | -0.02401 | 0.60484 | -0.11023 | 0.01717  | -0.09168 |
| 0.039405 | 0.39555  | 0.028074 | 0.54506  | 0.031616 | 0.49552 | 0.067695 | 0.14411  | 0.018621 |
| 0.309369 | 8.14E-12 | -0.0496  | 0.28481  | -0.01415 | 0.7604  | -0.10064 | 0.02966  | -0.03145 |
| 0.111683 | 0.01575  | 0.068015 | 0.14222  | 0.038351 | 0.40832 | 0.024296 | 0.60048  | 0.048285 |
| -0.06125 | 0.18638  | 0.121259 | 0.00871  | -0.01557 | 0.73719 | 0.018167 | 0.69538  | -0.02775 |
| -0.06071 | 0.19034  | -0.13503 | 0.00346  | 0.03934  | 0.39633 | 0.059795 | 0.1971   | 0.191055 |

|          |          |          |          |          |         |          |         |          |
|----------|----------|----------|----------|----------|---------|----------|---------|----------|
| 0.079032 | 0.08801  | -0.0192  | 0.67893  | 0.059118 | 0.20222 | 0.034768 | 0.45353 | 0.092119 |
| 0.346306 | 1.33E-14 | -0.04354 | 0.34786  | -0.01894 | 0.68311 | -0.06935 | 0.13454 | 0.044801 |
| 0.113769 | 0.0139   | -0.03968 | 0.39223  | 0.01442  | 0.75595 | -0.04663 | 0.31464 | -0.0464  |
| 0.103749 | 0.02496  | -0.09794 | 0.03434  | -0.02438 | 0.59925 | -0.0505  | 0.27614 | -0.00262 |
| 0.031209 | 0.50108  | -0.05334 | 0.24997  | -0.04288 | 0.35523 | -0.04919 | 0.28877 | -0.03549 |
| 0.216705 | 2.28E-06 | 0.040176 | 0.38636  | -0.00104 | 0.9822  | -0.03151 | 0.49695 | -0.02557 |
| 0.248955 | 4.99E-08 | 0.215936 | 2.48E-06 | 0.038418 | 0.4075  | 0.058002 | 0.21089 | 0.068084 |
| 0.250558 | 4.07E-08 | 0.042634 | 0.35795  | 0.05827  | 0.20879 | 0.070587 | 0.12771 | -0.12118 |
| -0.08429 | 0.06878  | -0.10682 | 0.02096  | -0.02879 | 0.5349  | -0.09275 | 0.04516 | -0.06872 |
| -0.10989 | 0.01752  | -0.25892 | 1.37E-08 | -0.04261 | 0.35822 | -0.05428 | 0.24168 | -0.10948 |
| 0.20165  | 1.13E-05 | 0.174867 | 0.00015  | 0.019202 | 0.67896 | 0.089678 | 0.05279 | 0.157937 |
| 0.074952 | 0.10573  | -0.03569 | 0.44168  | -0.02295 | 0.62083 | -0.06172 | 0.18301 | -0.03497 |
| -0.09729 | 0.03557  | -0.31959 | 1.50E-12 | -0.01356 | 0.77005 | -0.09403 | 0.04225 | -0.07401 |
| 0.062704 | 0.17614  | -0.03866 | 0.40461  | 0.040577 | 0.38163 | -0.01909 | 0.68069 | 0.040032 |
| 0.125704 | 0.00653  | -0.0748  | 0.10643  | 0.003923 | 0.93263 | -0.01303 | 0.77875 | 0.007298 |
| 0.160989 | 0.00048  | 0.151698 | 0.00101  | 0.031712 | 0.4942  | 0.078136 | 0.09168 | 0.093148 |
| 0.095787 | 0.03853  | -0.00583 | 0.90004  | 0.021374 | 0.645   | -0.03148 | 0.49741 | 0.01975  |
| 0.213958 | 3.08E-06 | 0.240445 | 1.44E-07 | 0.029049 | 0.53118 | -0.00471 | 0.91918 | 0.132945 |
| 0.113192 | 0.01439  | 0.040094 | 0.38734  | 0.018886 | 0.68396 | -0.00813 | 0.86098 | 0.016018 |
| 0.076565 | 0.09842  | -0.03738 | 0.42027  | -0.02091 | 0.65226 | -0.09201 | 0.0469  | 0.065617 |
| -0.00364 | 0.93749  | -0.18454 | 6.03E-05 | -0.03108 | 0.50282 | -0.06731 | 0.14641 | -0.06415 |
| 0.17266  | 0.00018  | 0.049221 | 0.28848  | 0.063651 | 0.16968 | 0.10481  | 0.0235  | 0.175335 |
| 0.336772 | 7.56E-14 | -0.07506 | 0.10522  | -0.05211 | 0.26109 | -0.17622 | 0.00013 | -0.08715 |
| -0.17656 | 0.00013  | -0.30073 | 3.23E-11 | -0.05846 | 0.20731 | -0.04855 | 0.29513 | -0.04554 |
| 0.063184 | 0.17284  | -0.01173 | 0.8004   | 0.036676 | 0.42911 | 0.065559 | 0.15723 | -0.0287  |
| -0.04943 | 0.28644  | -0.11382 | 0.01385  | -0.03755 | 0.41818 | -0.06458 | 0.1635  | -0.07939 |
| 0.150775 | 0.00108  | 0.240984 | 1.35E-07 | -0.00738 | 0.87356 | -0.06788 | 0.14299 | 0.058452 |
| 0.103606 | 0.02516  | 0.103014 | 0.02601  | 0.041258 | 0.37369 | -0.00103 | 0.98221 | 0.038321 |
| -0.19891 | 1.49E-05 | -0.0767  | 0.09783  | -0.02633 | 0.57035 | 0.091435 | 0.04829 | -0.18154 |
| 0.171043 | 0.0002   | 0.22314  | 1.11E-06 | 0.019666 | 0.67166 | 0.055884 | 0.22806 | 0.076847 |
| 0.030091 | 0.51655  | 0.002083 | 0.9642   | 0.016765 | 0.71785 | 0.049832 | 0.28252 | 0.064081 |
| 0.070316 | 0.12918  | 0.317046 | 2.30E-12 | 0.035669 | 0.4419  | 0.163332 | 0.00039 | -0.03242 |
| 0.091886 | 0.0472   | 0.114813 | 0.01304  | 0.057895 | 0.21173 | 0.144746 | 0.00171 | 0.040121 |
| 0.137778 | 0.00285  | -0.12684 | 0.00605  | 0.011374 | 0.80634 | -0.02327 | 0.61597 | 0.011618 |
| 0.04768  | 0.30385  | -0.05072 | 0.27406  | -0.05507 | 0.23488 | -0.12905 | 0.00522 | -0.09034 |
| 0.135658 | 0.00331  | 0.037322 | 0.42102  | 0.032276 | 0.48655 | 0.017067 | 0.71298 | 0.036814 |
| 0.107986 | 0.01959  | -0.05291 | 0.25381  | -0.00495 | 0.91498 | -0.02193 | 0.63648 | 0.010081 |
| 0.160039 | 0.00052  | 0.044652 | 0.33563  | -0.00877 | 0.85006 | -0.10429 | 0.02421 | 0.024907 |
| 0.139021 | 0.00261  | 0.296984 | 5.79E-11 | 0.077346 | 0.09502 | 0.105426 | 0.0227  | 0.204703 |
| 0.222363 | 1.21E-06 | -0.03133 | 0.49949  | 0.03987  | 0.38999 | -0.03358 | 0.46915 | -0.00952 |
| 0.224539 | 9.48E-07 | 0.020108 | 0.66471  | 0.01323  | 0.77554 | -0.07681 | 0.09733 | 0.009731 |
| 0.03773  | 0.41596  | 0.007147 | 0.87759  | 0.006785 | 0.88373 | -0.01656 | 0.72109 | 0.007831 |
| -0.11008 | 0.01733  | -0.01085 | 0.81507  | -0.01773 | 0.70236 | -0.03386 | 0.46539 | -0.10385 |
| 0.192759 | 2.74E-05 | -0.033   | 0.47683  | 0.040306 | 0.38483 | -0.03773 | 0.41596 | 0.148874 |
| -0.2138  | 3.13E-06 | -0.37373 | 6.29E-17 | 0.030313 | 0.51346 | 0.091984 | 0.04696 | -0.03783 |

|          |          |          |          |          |         |          |          |          |
|----------|----------|----------|----------|----------|---------|----------|----------|----------|
| -0.0184  | 0.69161  | -0.2588  | 1.39E-08 | -0.02013 | 0.6644  | -0.06259 | 0.17689  | -0.07332 |
| 0.010473 | 0.82142  | -0.12923 | 0.00516  | 0.005091 | 0.91264 | 0.058864 | 0.20417  | -0.0016  |
| 0.115368 | 0.0126   | 0.11762  | 0.01097  | -0.02351 | 0.61227 | -0.03531 | 0.44655  | -0.08083 |
| 0.172165 | 0.00019  | 0.05886  | 0.2042   | 0.046522 | 0.31577 | -0.00491 | 0.9157   | 0.062175 |
| 0.212825 | 3.48E-06 | 0.22374  | 1.04E-06 | 0.011605 | 0.80248 | -0.02808 | 0.54492  | 0.085206 |
| 0.332211 | 1.70E-13 | 0.069838 | 0.13181  | 0.024846 | 0.59226 | -0.03686 | 0.42684  | -0.02999 |
| 0.110351 | 0.01705  | 0.037671 | 0.41668  | 0.037236 | 0.42209 | -0.00295 | 0.9493   | 0.106927 |
| 0.240581 | 1.42E-07 | 0.155737 | 0.00073  | 0.096948 | 0.03622 | 0.083634 | 0.07097  | 0.234091 |
| 0.233775 | 3.23E-07 | 0.190935 | 3.28E-05 | 0.01097  | 0.81309 | -0.05107 | 0.2707   | -0.06112 |
| 0.372819 | 7.58E-17 | 0.023    | 0.62006  | 0.016491 | 0.72226 | 0.050211 | 0.27888  | 0.023223 |
| 0.038099 | 0.41141  | -0.31223 | 5.11E-12 | -0.02466 | 0.59506 | -0.10294 | 0.02612  | 0.009812 |
| 0.052696 | 0.25574  | 0.223711 | 1.04E-06 | 0.043417 | 0.34919 | 0.016324 | 0.72496  | 0.04624  |
| -0.07931 | 0.08691  | -0.28366 | 4.31E-10 | 0.003116 | 0.94646 | -0.00306 | 0.94744  | -0.05143 |
| 0.213002 | 3.42E-06 | 0.052819 | 0.25464  | 0.033697 | 0.46756 | 0.014106 | 0.7611   | 0.099501 |
| 0.390577 | 1.81E-18 | 0.123074 | 0.00775  | 0.00962  | 0.83574 | -0.09388 | 0.04258  | 0.139448 |
| 0.105126 | 0.02309  | -0.27864 | 8.95E-10 | 0.011899 | 0.7976  | -0.06175 | 0.1828   | 0.071192 |
| 0.555766 | 3.29E-39 | 0.119907 | 0.0095   | 0.013437 | 0.77211 | -0.07133 | 0.12372  | 0.093913 |
| 0.118796 | 0.01019  | 0.013533 | 0.77054  | -0.03382 | 0.46598 | -0.03156 | 0.4963   | -0.06654 |
| 0.054385 | 0.2408   | 0.134954 | 0.00348  | -0.04915 | 0.28913 | -0.08422 | 0.06901  | 0.022984 |
| -0.19172 | 3.03E-05 | -0.09392 | 0.04249  | -0.01285 | 0.78179 | 0.020256 | 0.66239  | -0.07166 |
| 0.145639 | 0.0016   | -0.02432 | 0.60013  | 0.023238 | 0.61644 | -0.03255 | 0.48284  | 0.059956 |
| 0.114267 | 0.01348  | -0.29639 | 6.35E-11 | -0.03158 | 0.49606 | -0.22176 | 1.30E-06 | -0.09302 |
| -0.00562 | 0.90365  | -0.23369 | 3.26E-07 | -0.00183 | 0.96857 | -0.07584 | 0.10167  | 0.062336 |
| -0.00616 | 0.89444  | -0.08619 | 0.06274  | 0.007621 | 0.86954 | -0.06906 | 0.13619  | 0.014335 |
| 0.129494 | 0.00507  | -0.155   | 0.00078  | -0.05015 | 0.27946 | -0.13373 | 0.00379  | -0.02255 |
| 0.055606 | 0.23038  | -0.00032 | 0.99458  | -0.01235 | 0.79002 | -0.01062 | 0.8189   | 0.044506 |
| -0.20706 | 6.44E-06 | -0.03994 | 0.38911  | -0.10413 | 0.02443 | -0.10081 | 0.02939  | -0.29256 |
| 0.092488 | 0.04576  | 0.049536 | 0.2854   | 0.030804 | 0.50666 | 0.046906 | 0.31178  | 0.198537 |
| -0.00159 | 0.9727   | -0.14298 | 0.00195  | 0.047965 | 0.30098 | 0.087146 | 0.05987  | 0.095648 |
| 0.141659 | 0.00215  | 0.00091  | 0.98435  | 0.023189 | 0.61718 | -0.01197 | 0.79642  | 0.161891 |
| -0.15825 | 0.0006   | -0.01043 | 0.82213  | -0.00018 | 0.99699 | 0.053348 | 0.2499   | -0.0459  |
| 0.125364 | 0.00668  | -0.03771 | 0.41618  | 0.020921 | 0.65203 | -0.00892 | 0.84757  | 0.035646 |
| -0.24791 | 5.70E-08 | -0.15446 | 0.00081  | -0.09381 | 0.04274 | -0.12052 | 0.00914  | -0.184   |
| 0.11569  | 0.01236  | 0.030411 | 0.5121   | 0.033531 | 0.46976 | 0.058896 | 0.20392  | 0.070194 |
| 0.159853 | 0.00053  | 0.030756 | 0.50732  | 0.014424 | 0.75589 | -0.02563 | 0.58068  | 0.078137 |
| 0.238107 | 1.92E-07 | 0.072216 | 0.11912  | 0.038817 | 0.40264 | -0.07123 | 0.12424  | 0.010998 |
| 0.15138  | 0.00103  | 0.008724 | 0.85085  | 0.037026 | 0.42472 | 0.014285 | 0.75816  | 0.05329  |
| 0.364636 | 3.93E-16 | 0.07261  | 0.11712  | 0.010673 | 0.81806 | -0.01161 | 0.80241  | -0.05839 |
| 0.1197   | 0.00962  | 0.213336 | 3.29E-06 | 0.024005 | 0.60484 | 0.074399 | 0.10834  | 0.129128 |
| -0.27408 | 1.71E-09 | 0.182914 | 7.01E-05 | 0.031041 | 0.50339 | 0.058416 | 0.20764  | 0.124986 |
| 0.125354 | 0.00668  | 0.043029 | 0.35351  | 0.009782 | 0.83302 | -0.0528  | 0.25478  | 0.124418 |
| 0.280678 | 6.67E-10 | 0.075446 | 0.10345  | -0.04492 | 0.33279 | -0.12631 | 0.00627  | -0.04902 |
| -0.03522 | 0.44761  | 0.149634 | 0.00118  | -0.04377 | 0.34525 | -0.08672 | 0.06113  | 0.026497 |
| 0.064161 | 0.16628  | -0.28711 | 2.59E-10 | 0.003096 | 0.9468  | -0.11447 | 0.01332  | -0.04078 |
| 0.19977  | 1.37E-05 | -0.0025  | 0.95695  | 0.048038 | 0.30023 | -0.0137  | 0.76778  | 0.189638 |

|          |          |          |          |          |         |          |          |          |
|----------|----------|----------|----------|----------|---------|----------|----------|----------|
| 0.245264 | 7.95E-08 | 0.196744 | 1.85E-05 | -0.06181 | 0.18238 | -0.27508 | 1.49E-09 | -0.07624 |
| 0.113412 | 0.0142   | -0.2317  | 4.13E-07 | -0.00324 | 0.94435 | -0.08989 | 0.05223  | 0.017814 |
| 0.272435 | 2.16E-09 | 0.18218  | 7.51E-05 | 0.031846 | 0.49238 | -0.00745 | 0.87252  | 0.143495 |
| 0.105888 | 0.0221   | -0.16699 | 0.00029  | -0.00419 | 0.92813 | -0.05109 | 0.27058  | -0.13134 |
| 0.251255 | 3.72E-08 | -0.06466 | 0.16298  | -0.02222 | 0.63195 | -0.18358 | 6.59E-05 | -0.07682 |
| 0.10086  | 0.02931  | -0.22037 | 1.52E-06 | -0.01309 | 0.77788 | -0.05871 | 0.20535  | -0.04442 |
| 0.204306 | 8.58E-06 | -0.15334 | 0.00089  | -0.02956 | 0.52393 | -0.07078 | 0.12667  | 0.022349 |
| 0.182365 | 7.38E-05 | -0.00412 | 0.92923  | -0.07531 | 0.10406 | -0.15638 | 0.0007   | -0.16369 |
| 0.233896 | 3.19E-07 | 0.259167 | 1.32E-08 | -0.03523 | 0.44757 | -0.10967 | 0.01775  | -0.06993 |
| 0.136312 | 0.00316  | 0.180592 | 8.69E-05 | 0.029345 | 0.527   | 0.030713 | 0.50791  | 0.098163 |
| 0.04415  | 0.3411   | -0.07781 | 0.09305  | -0.00649 | 0.88881 | -0.03609 | 0.43653  | 0.021819 |
| -0.14544 | 0.00163  | 0.121829 | 0.0084   | 0.017882 | 0.69992 | 0.086152 | 0.06285  | 0.122673 |
| -0.02354 | 0.61181  | -0.09872 | 0.03294  | -0.03389 | 0.46504 | -0.08706 | 0.06011  | -0.08991 |
| 0.101022 | 0.02905  | -0.07999 | 0.08422  | -0.0163  | 0.72542 | -0.06828 | 0.14067  | 0.016614 |
| 0.405571 | 6.45E-20 | 0.098635 | 0.03309  | -0.0104  | 0.82257 | -0.05291 | 0.25386  | 0.101313 |
| 0.573489 | 3.45E-42 | 0.255902 | 2.04E-08 | -0.01509 | 0.74492 | -0.12715 | 0.00593  | 0.010059 |
| -0.03851 | 0.40641  | -0.06738 | 0.14601  | 0.053042 | 0.25263 | 0.178951 | 0.0001   | 0.135172 |
| 0.308898 | 8.79E-12 | 0.150796 | 0.00108  | 0.037371 | 0.4204  | 0.105837 | 0.02217  | 0.039345 |
| 0.109228 | 0.01822  | 0.193495 | 2.55E-05 | 0.015105 | 0.74475 | 0.107504 | 0.02014  | 0.030871 |
| 0.008316 | 0.85775  | -0.10746 | 0.02019  | -0.03863 | 0.40489 | -0.08524 | 0.0657   | -0.05396 |
| 0.13299  | 0.00399  | 0.236731 | 2.27E-07 | 0.046121 | 0.31995 | 0.072785 | 0.11624  | 0.174439 |
| 0.204938 | 8.03E-06 | -0.04873 | 0.29335  | -0.07877 | 0.08905 | -0.25648 | 1.89E-08 | -0.20037 |
| 0.223302 | 1.09E-06 | 0.23943  | 1.64E-07 | 0.005967 | 0.89766 | 0.100441 | 0.02999  | -0.01891 |
| 0.124129 | 0.00724  | -0.03522 | 0.44763  | 0.00392  | 0.93267 | -0.07295 | 0.11542  | -0.00792 |
| 0.012612 | 0.78576  | 0.172146 | 0.00019  | 0.016345 | 0.72462 | 0.05544  | 0.23179  | -0.04004 |
| 0.333566 | 1.34E-13 | 0.004106 | 0.92948  | 0.010231 | 0.82548 | 0.003709 | 0.93629  | 0.086058 |
| 0.28081  | 6.54E-10 | 0.1276   | 0.00576  | 0.000293 | 0.99497 | -0.02145 | 0.6438   | 0.036502 |
| -0.02017 | 0.66374  | -0.13064 | 0.00469  | -0.01104 | 0.81192 | -0.05207 | 0.26147  | -0.00381 |
| 0.263259 | 7.65E-09 | 0.233426 | 3.37E-07 | 0.026138 | 0.57315 | -0.06282 | 0.17532  | 0.053897 |
| 0.395178 | 6.62E-19 | 0.024265 | 0.60094  | -0.06051 | 0.19177 | -0.12967 | 0.00501  | -0.04613 |
| 0.301523 | 2.85E-11 | 0.086427 | 0.06201  | 0.038643 | 0.40476 | 0.016076 | 0.72896  | 0.093078 |
| -0.14922 | 0.00122  | -0.05262 | 0.2564   | -0.04283 | 0.35569 | -0.07029 | 0.1293   | -0.099   |
| 0.13828  | 0.00275  | 0.040942 | 0.37736  | -0.01797 | 0.69855 | -0.02895 | 0.53252  | 0.010525 |
| 0.11348  | 0.01414  | 0.050762 | 0.27363  | 0.027001 | 0.56054 | -0.01188 | 0.79796  | 0.176825 |
| 0.495677 | 2.51E-30 | 0.164447 | 0.00036  | -0.01441 | 0.75618 | -0.17034 | 0.00022  | -0.03325 |
| 0.218029 | 1.97E-06 | 0.140376 | 0.00236  | 0.067801 | 0.14348 | 0.173025 | 0.00017  | 0.229549 |
| 0.077503 | 0.09435  | -0.28528 | 3.40E-10 | -0.04218 | 0.36313 | -0.19334 | 2.59E-05 | -0.07953 |
| -0.0951  | 0.03995  | -0.17324 | 0.00017  | 0.024752 | 0.59366 | 0.013977 | 0.76323  | 0.027565 |
| -0.11318 | 0.0144   | -0.19499 | 2.20E-05 | -0.00388 | 0.93335 | 0.12169  | 0.00848  | -0.00621 |
| 0.27769  | 1.03E-09 | -0.05728 | 0.21663  | 0.002025 | 0.96519 | -0.06784 | 0.14325  | 0.053206 |
| -0.21892 | 1.79E-06 | -0.17864 | 0.0001   | -0.08141 | 0.07882 | -0.06848 | 0.13949  | 0.002951 |
| -0.01503 | 0.7459   | -0.28599 | 3.06E-10 | -0.01838 | 0.69197 | -0.13324 | 0.00392  | -0.02703 |
| 0.181872 | 7.73E-05 | -0.06434 | 0.16509  | 0.001628 | 0.97202 | -0.06094 | 0.18861  | 0.036034 |
| -0.31538 | 3.04E-12 | -0.22539 | 8.60E-07 | 0.023109 | 0.6184  | 0.103871 | 0.02479  | -0.03423 |
| 0.02221  | 0.63213  | -0.12019 | 0.00933  | -0.02259 | 0.62625 | -0.04187 | 0.36665  | -0.08069 |



|          |          |          |          |          |         |          |          |          |
|----------|----------|----------|----------|----------|---------|----------|----------|----------|
| -0.00071 | 0.98787  | -0.22814 | 6.27E-07 | -0.01587 | 0.73224 | -0.05181 | 0.26385  | -0.03283 |
| 0.555497 | 3.64E-39 | 0.138835 | 0.00264  | -0.0071  | 0.87844 | -0.05705 | 0.2185   | 0.064194 |
| 0.126008 | 0.0064   | 0.297268 | 5.54E-11 | 0.04775  | 0.30315 | 0.045935 | 0.32191  | 0.121735 |
| 0.231833 | 4.07E-07 | 0.018135 | 0.69588  | 0.008808 | 0.84944 | -0.07133 | 0.12373  | -0.01013 |
| -0.06034 | 0.19302  | 0.211898 | 3.85E-06 | 0.008699 | 0.85127 | 0.073818 | 0.11114  | -0.06249 |
| 0.548442 | 4.99E-38 | 0.389693 | 2.19E-18 | -0.00031 | 0.9946  | -0.13017 | 0.00484  | 0.066541 |
| 0.112296 | 0.01519  | -0.102   | 0.02752  | 0.08806  | 0.05722 | 0.121211 | 0.00874  | 0.330231 |
| 0.213456 | 3.25E-06 | -0.05007 | 0.28022  | 0.022355 | 0.6299  | -0.02071 | 0.65536  | 0.034917 |
| 0.076849 | 0.09717  | -0.01569 | 0.73525  | 0.020661 | 0.65608 | -0.03283 | 0.47904  | 0.019587 |
| 0.138386 | 0.00273  | -0.13946 | 0.00252  | 0.029794 | 0.52069 | -0.04638 | 0.31727  | 0.092862 |
| -0.03074 | 0.50754  | -0.17851 | 0.00011  | -0.00647 | 0.88916 | -0.04068 | 0.38043  | -0.03493 |
| 0.116722 | 0.01159  | 0.246162 | 7.11E-08 | -0.02952 | 0.52458 | -0.06608 | 0.15391  | -0.14137 |
| -0.12806 | 0.00558  | -0.33575 | 9.08E-14 | 0.014286 | 0.75814 | -0.03232 | 0.48591  | 0.068017 |
| -0.24377 | 9.58E-08 | -0.1039  | 0.02474  | -0.01483 | 0.74917 | 0.081445 | 0.07871  | 0.078363 |
| 0.198458 | 1.56E-05 | -0.05721 | 0.21722  | -0.01195 | 0.79675 | -0.10843 | 0.01909  | -0.02404 |
| 0.361876 | 6.77E-16 | 0.048434 | 0.29627  | -0.0022  | 0.96211 | -0.09038 | 0.05094  | 0.116852 |
| 0.31445  | 3.54E-12 | -0.0827  | 0.07421  | 0.01578  | 0.73377 | -0.11632 | 0.01188  | -0.05744 |
| 0.232969 | 3.56E-07 | -0.05585 | 0.22837  | -0.0046  | 0.92107 | -0.15075 | 0.00108  | -0.00969 |
| 0.061981 | 0.18119  | 0.124184 | 0.00721  | 0.029207 | 0.52895 | 0.035429 | 0.44497  | 0.394224 |
| 0.079881 | 0.08464  | -0.1461  | 0.00155  | -0.01251 | 0.7875  | -0.07962 | 0.08568  | -0.04222 |
| 0.064647 | 0.16309  | -0.10278 | 0.02634  | -0.02289 | 0.62173 | -0.07596 | 0.10112  | -0.0537  |
| 0.133684 | 0.0038   | -0.15405 | 0.00084  | -0.01051 | 0.82074 | -0.12632 | 0.00627  | -0.10687 |
| 0.042909 | 0.35485  | -0.08758 | 0.05859  | 0.003287 | 0.94352 | -0.03728 | 0.42151  | 0.132464 |
| 0.176662 | 0.00012  | 0.032028 | 0.48991  | 0.010732 | 0.81707 | -0.10769 | 0.01993  | 0.138977 |
| 0.490817 | 1.11E-29 | 0.042209 | 0.36277  | -0.00014 | 0.99767 | -0.09352 | 0.04338  | -0.01002 |
| 0.256253 | 1.94E-08 | 0.050684 | 0.27436  | -0.01446 | 0.75532 | -0.06952 | 0.1336   | -0.06256 |
| 0.17804  | 0.00011  | 0.081944 | 0.07688  | 0.000889 | 0.98471 | -0.01892 | 0.6834   | 0.056037 |
| 0.27889  | 8.63E-10 | 0.077202 | 0.09564  | -0.01432 | 0.75765 | -0.03883 | 0.4025   | -0.13923 |
| 0.107189 | 0.02051  | -0.08277 | 0.07395  | -0.00118 | 0.97975 | -0.02577 | 0.57857  | 0.071135 |
| 0.071516 | 0.12275  | -0.04178 | 0.3677   | -0.00265 | 0.95441 | 0.004028 | 0.93082  | 0.019772 |
| 0.229493 | 5.35E-07 | 0.127451 | 0.00581  | -0.00296 | 0.94913 | -0.04804 | 0.30021  | 0.009589 |
| 0.212874 | 3.46E-06 | 0.093454 | 0.04353  | 0.018409 | 0.69152 | -0.07819 | 0.09147  | 0.090089 |
| 0.247518 | 5.99E-08 | 0.097017 | 0.03609  | 0.013879 | 0.76483 | 0.002669 | 0.95413  | 0.061872 |
| 0.342481 | 2.68E-14 | 0.120499 | 0.00915  | -0.042   | 0.36517 | -0.12617 | 0.00633  | -0.04925 |
| 0.098118 | 0.03403  | 0.208856 | 5.32E-06 | -0.00504 | 0.91351 | 0.001126 | 0.98063  | 0.089713 |
| 0.083388 | 0.07181  | -0.16931 | 0.00024  | -0.00306 | 0.94738 | -0.0288  | 0.53464  | -0.02202 |
| -0.19001 | 3.58E-05 | -0.19558 | 2.08E-05 | -0.03319 | 0.47428 | 0.027294 | 0.55629  | -0.09598 |
| 0.277444 | 1.06E-09 | -0.00938 | 0.83979  | -0.02267 | 0.62506 | -0.10217 | 0.02727  | -0.07254 |
| -0.02875 | 0.53549  | 0.243856 | 9.48E-08 | 0.098295 | 0.0337  | 0.241444 | 1.28E-07 | 0.303892 |
| -0.04706 | 0.31018  | -0.1402  | 0.00239  | 0.067273 | 0.14663 | 0.045966 | 0.32159  | 0.137077 |
| 0.170774 | 0.00021  | 0.079962 | 0.08432  | 0.017068 | 0.71295 | -0.01711 | 0.71229  | 0.063141 |
| 0.363784 | 4.65E-16 | 0.53313  | 1.19E-35 | -0.0205  | 0.65859 | 0.034987 | 0.45068  | -0.11564 |
| 0.22214  | 1.25E-06 | 0.091309 | 0.04861  | 0.038623 | 0.405   | -0.02693 | 0.56154  | 0.128073 |
| -0.01144 | 0.80517  | -0.11224 | 0.01523  | -0.0368  | 0.42755 | -0.05104 | 0.27096  | -0.01595 |
| -0.02968 | 0.5223   | -0.34169 | 3.10E-14 | -0.04189 | 0.36645 | -0.20076 | 1.23E-05 | -0.07834 |

|          |          |          |          |          |         |          |          |          |
|----------|----------|----------|----------|----------|---------|----------|----------|----------|
| 0.227116 | 7.06E-07 | 0.21924  | 1.72E-06 | 0.044081 | 0.34185 | 0.171076 | 0.0002   | 0.174061 |
| -0.08681 | 0.06086  | -0.23542 | 2.66E-07 | 0.000725 | 0.98754 | -0.03655 | 0.43065  | 0.0927   |
| -0.15723 | 0.00065  | -0.25153 | 3.59E-08 | -0.00115 | 0.9802  | 0.005535 | 0.90504  | -0.00344 |
| 0.192767 | 2.74E-05 | 0.114018 | 0.01369  | 0.031236 | 0.50072 | 0.073511 | 0.11263  | -0.03062 |
| 0.021529 | 0.64261  | -0.37327 | 6.92E-17 | -0.0671  | 0.14766 | -0.1543  | 0.00082  | -0.19366 |
| 0.238752 | 1.78E-07 | 0.133938 | 0.00373  | 0.030067 | 0.51688 | -0.0236  | 0.61092  | 0.050623 |
| -0.15779 | 0.00062  | 0.14483  | 0.0017   | 0.01438  | 0.7566  | 0.139832 | 0.00246  | -0.07053 |
| 0.140715 | 0.0023   | 0.014855 | 0.74884  | 0.01942  | 0.67552 | 0.058944 | 0.20356  | 0.041748 |
| -0.117   | 0.01139  | 0.142977 | 0.00195  | 0.148018 | 0.00134 | 0.459036 | 1.02E-25 | 0.063246 |
| 0.114483 | 0.0133   | 0.090357 | 0.05101  | 0.000943 | 0.98378 | -0.11163 | 0.01581  | -0.11801 |
| 0.093297 | 0.04389  | -0.05495 | 0.23591  | -0.00257 | 0.95574 | -0.09716 | 0.03582  | 0.008896 |
| 0.148559 | 0.00128  | -0.04139 | 0.37216  | 0.017016 | 0.7138  | -0.06627 | 0.15274  | 0.050364 |
| 0.169553 | 0.00023  | 0.15273  | 0.00093  | -0.00879 | 0.84974 | -0.08769 | 0.05828  | 0.013747 |
| 0.234396 | 3.00E-07 | 0.030047 | 0.51715  | -0.05592 | 0.2278  | -0.19687 | 1.83E-05 | -0.00614 |
| 0.568986 | 2.05E-41 | 0.175662 | 0.00014  | -0.04101 | 0.37655 | -0.13553 | 0.00334  | 0.005392 |
| 0.067239 | 0.14684  | 0.051563 | 0.26613  | 0.030041 | 0.51725 | 0.024243 | 0.60128  | 0.128065 |
| 0.151529 | 0.00102  | 0.117996 | 0.01071  | -0.02345 | 0.61324 | -0.03577 | 0.44059  | -0.13608 |
| 0.232128 | 3.93E-07 | 0.214182 | 3.01E-06 | 0.059002 | 0.20311 | 0.065849 | 0.1554   | 0.248192 |
| 0.025514 | 0.58234  | 0.320458 | 1.30E-12 | 0.066227 | 0.15303 | 0.223708 | 1.04E-06 | 0.118421 |
| 0.000115 | 0.99802  | 0.282457 | 5.15E-10 | 0.00998  | 0.82969 | 0.039436 | 0.39518  | 0.029941 |
| 0.051862 | 0.26335  | 0.374217 | 5.70E-17 | -0.00628 | 0.89228 | 0.047535 | 0.30533  | -0.0591  |
| 0.206962 | 6.50E-06 | 0.126626 | 0.00614  | 0.03627  | 0.43423 | -0.03885 | 0.40225  | 0.049233 |
| 0.423706 | 9.05E-22 | 0.386018 | 4.83E-18 | -0.02313 | 0.61802 | -0.10594 | 0.02203  | -0.07312 |
| 0.303157 | 2.20E-11 | 0.262345 | 8.65E-09 | 0.049393 | 0.2868  | 0.077105 | 0.09606  | 0.105941 |
| -0.06417 | 0.16621  | -0.36862 | 1.78E-16 | -0.03091 | 0.50524 | -0.14279 | 0.00198  | -0.19002 |
| 0.053174 | 0.25145  | 0.101546 | 0.02822  | -0.05736 | 0.21602 | -0.1091  | 0.01836  | -0.10648 |
| -0.09628 | 0.03754  | 0.059703 | 0.19779  | -0.03891 | 0.40154 | 0.017809 | 0.70108  | -0.13064 |
| 0.081975 | 0.07677  | -0.07274 | 0.11647  | -0.01038 | 0.82301 | -0.01988 | 0.66835  | 0.075132 |
| 0.083258 | 0.07225  | -0.19855 | 1.54E-05 | -0.02293 | 0.62119 | -0.12755 | 0.00578  | -0.01031 |
| 0.030612 | 0.50931  | -0.19831 | 1.58E-05 | -0.02419 | 0.60213 | -0.03976 | 0.39136  | -0.02031 |
| 0.094926 | 0.04032  | 0.166868 | 0.00029  | 0.029098 | 0.53049 | 0.010598 | 0.81932  | 0.020424 |
| 0.165799 | 0.00032  | -0.02544 | 0.5834   | -0.02106 | 0.64987 | -0.09916 | 0.03215  | 0.015908 |
| 0.109698 | 0.01772  | -0.07031 | 0.1292   | -0.01017 | 0.82648 | -0.05004 | 0.28055  | 0.017715 |
| 0.129053 | 0.00522  | 0.246712 | 6.63E-08 | -0.00562 | 0.90361 | 0.049871 | 0.28215  | -0.1203  |
| -0.1036  | 0.02517  | -0.03213 | 0.4885   | 0.031721 | 0.49409 | 0.055178 | 0.234    | 0.033401 |
| 0.038253 | 0.40952  | -0.09901 | 0.03242  | -0.01401 | 0.76261 | -0.02783 | 0.54861  | -0.03601 |
| 0.24163  | 1.25E-07 | 0.08453  | 0.06799  | 0.04122  | 0.37413 | 0.067062 | 0.14791  | 0.138262 |
| -0.03178 | 0.49325  | -0.08335 | 0.07193  | 0.014756 | 0.75046 | 0.003434 | 0.941    | 0.109413 |
| 0.166732 | 0.0003   | -0.03753 | 0.41847  | 0.047601 | 0.30466 | 0.017905 | 0.69956  | 0.191192 |
| 0.016388 | 0.72392  | -0.0764  | 0.09917  | 0.059167 | 0.20185 | 0.068999 | 0.13653  | 0.127119 |
| 0.174223 | 0.00015  | -0.03543 | 0.4449   | 0.0048   | 0.91761 | -0.0371  | 0.42377  | 0.130129 |
| 0.255173 | 2.24E-08 | 0.024735 | 0.59391  | -0.07905 | 0.08795 | -0.10572 | 0.02232  | -0.13253 |
| 0.073195 | 0.11419  | -0.12744 | 0.00582  | -0.01378 | 0.76644 | -0.08227 | 0.07573  | -0.03767 |
| 0.044755 | 0.33452  | -0.08051 | 0.08223  | -0.01396 | 0.76349 | -0.01991 | 0.6678   | 0.002628 |
| -0.04542 | 0.32733  | -0.20485 | 8.11E-06 | 0.065028 | 0.16062 | 0.105436 | 0.02268  | 0.062271 |

|          |          |          |          |           |          |          |          |          |
|----------|----------|----------|----------|-----------|----------|----------|----------|----------|
| 0.027578 | 0.55219  | -0.15525 | 0.00076  | 0.013932  | 0.76397  | -0.08055 | 0.08208  | 0.014256 |
| -0.13888 | 0.00263  | -0.04815 | 0.29909  | -0.05622  | 0.22531  | -0.04692 | 0.31168  | 0.020899 |
| -0.03036 | 0.51283  | -0.23506 | 2.77E-07 | -0.05248  | 0.25767  | -0.15895 | 0.00057  | -0.07344 |
| 0.04692  | 0.31164  | 0.140492 | 0.00234  | -0.00565  | 0.90308  | -0.04074 | 0.37968  | 0.064233 |
| 0.108051 | 0.01951  | 0.33768  | 6.42E-14 | -0.01736  | 0.70824  | 0.024009 | 0.60479  | -0.1332  |
| 0.09818  | 0.03391  | 0.277098 | 1.12E-09 | 0.005016  | 0.91391  | 0.046857 | 0.31229  | -0.06904 |
| 0.195548 | 2.08E-05 | 0.175058 | 0.00014  | 0.012102  | 0.79422  | -0.05727 | 0.2167   | 0.0359   |
| 0.286893 | 2.68E-10 | 0.273326 | 1.91E-09 | 0.108832  | 0.01864  | 0.189741 | 3.68E-05 | 0.452577 |
| 0.26582  | 5.40E-09 | 0.243735 | 9.62E-08 | -0.00454  | 0.92205  | -0.06209 | 0.18044  | 0.020575 |
| 0.21973  | 1.63E-06 | 0.148247 | 0.00131  | 0.106969  | 0.02077  | 0.029029 | 0.53147  | 0.352416 |
| -0.0118  | 0.79926  | -0.0639  | 0.16802  | 0.00339   | 0.94176  | -0.0055  | 0.90562  | 0.021373 |
| 0.134273 | 0.00365  | -0.03221 | 0.48742  | 0.013494  | 0.77118  | -0.09995 | 0.0308   | 0.054751 |
| 0.138777 | 0.00265  | -0.10253 | 0.02671  | 0.000603  | 0.98964  | -0.05182 | 0.2637   | 0.027026 |
| 0.278927 | 8.59E-10 | 0.224333 | 9.71E-07 | -0.01687  | 0.71612  | -0.07573 | 0.10215  | 0.06666  |
| 0.296567 | 6.18E-11 | 0.16447  | 0.00036  | 0.003487  | 0.9401   | -0.09303 | 0.0445   | -0.04497 |
| 0.135874 | 0.00326  | -0.11254 | 0.01497  | -0.00371  | 0.93632  | -0.03129 | 0.50003  | -0.00557 |
| 0.204977 | 8.00E-06 | 0.164071 | 0.00037  | 0.011739  | 0.80026  | -0.00896 | 0.84694  | 0.063825 |
| -0.05888 | 0.20407  | -0.02025 | 0.66245  | 0.187047  | 4.76E-05 | 0.243437 | 9.99E-08 | 0.410588 |
| 0.244744 | 8.49E-08 | 0.115264 | 0.01268  | -0.01564  | 0.73603  | -0.11323 | 0.01435  | 0.007286 |
| -0.13916 | 0.00258  | -0.27318 | 1.95E-09 | 0.031413  | 0.49829  | 0.072458 | 0.11789  | 0.152551 |
| 0.120591 | 0.00909  | 0.095589 | 0.03893  | 0.045649  | 0.32494  | 0.011362 | 0.80654  | 0.152385 |
| 0.149116 | 0.00123  | 0.107125 | 0.02059  | 0.018836  | 0.68474  | 0.029394 | 0.52631  | -0.06862 |
| -0.17733 | 0.00012  | 0.024421 | 0.59861  | -0.03071  | 0.50795  | 0.024862 | 0.59202  | -0.04449 |
| -0.08105 | 0.08017  | 0.012104 | 0.79419  | -0.04483  | 0.33376  | -0.04639 | 0.31715  | -0.13296 |
| -0.10609 | 0.02186  | 0.031991 | 0.49041  | -0.01457  | 0.75354  | -0.03576 | 0.44077  | -0.07406 |
| 0.192552 | 2.80E-05 | 0.067877 | 0.14303  | 0.040736  | 0.37977  | 0.087975 | 0.05747  | 0.12976  |
| 0.203566 | 9.26E-06 | 0.064787 | 0.16218  | 0.023736  | 0.60891  | -0.02215 | 0.63312  | 0.087154 |
| 0.004133 | 0.92903  | 0.121454 | 0.00861  | -0.02696  | 0.56115  | -0.03264 | 0.48164  | 0.045197 |
| 0.13574  | 0.00329  | 0.498703 | 9.85E-31 | 0.001073  | 0.98156  | 0.052453 | 0.25795  | 0.007117 |
| 0.106603 | 0.02122  | -0.01677 | 0.71777  | 0.122851  | 0.00787  | 0.194791 | 2.25E-05 | 0.080246 |
| 0.242796 | 1.08E-07 | 0.139216 | 0.00257  | -1.74E-05 | 0.9997   | -0.06655 | 0.15106  | 0.070178 |
| 0.052354 | 0.25885  | -0.05744 | 0.21537  | 0.007132  | 0.87784  | 0.013363 | 0.77334  | 0.007743 |
| 0.004051 | 0.93043  | -0.38137 | 1.29E-17 | -0.0422   | 0.36289  | -0.25626 | 1.94E-08 | -0.15128 |
| 0.02275  | 0.62387  | -0.07864 | 0.08962  | -0.00565  | 0.90309  | -0.04089 | 0.37795  | 0.006833 |
| 0.341598 | 3.16E-14 | 0.331501 | 1.93E-13 | -0.03661  | 0.42992  | -0.22795 | 6.41E-07 | -0.03555 |
| -0.13149 | 0.00442  | -0.07038 | 0.12881  | 0.005142  | 0.91176  | 0.032049 | 0.48963  | -0.07418 |
| 0.246662 | 6.67E-08 | 0.088946 | 0.05476  | -0.02471  | 0.59424  | -0.07282 | 0.11608  | 0.082414 |
| -0.00851 | 0.85441  | -0.04643 | 0.31671  | -0.01969  | 0.6712   | -0.02783 | 0.54855  | -0.00424 |
| 0.002387 | 0.95898  | 0.155515 | 0.00075  | 0.042585  | 0.35851  | 0.105497 | 0.0226   | 0.098513 |
| -0.05117 | 0.26975  | 0.076255 | 0.09979  | -0.01272  | 0.78392  | 0.027802 | 0.54896  | 0.067722 |
| 0.368739 | 1.73E-16 | 0.121464 | 0.0086   | 0.052003  | 0.26206  | 0.01214  | 0.79359  | 0.218856 |
| 0.311876 | 5.41E-12 | -0.05096 | 0.27176  | -0.04032  | 0.38464  | -0.05503 | 0.2353   | -0.13622 |
| 0.164992 | 0.00034  | 0.018886 | 0.68396  | 0.011341  | 0.8069   | 0.018204 | 0.69478  | 0.029711 |
| 0.186453 | 5.03E-05 | 0.275384 | 1.43E-09 | 0.021673  | 0.64039  | -0.07291 | 0.11563  | 0.097888 |
| 0.171851 | 0.00019  | 0.070038 | 0.1307   | 0.004734  | 0.91873  | -0.03806 | 0.41186  | 0.002311 |

|          |          |          |          |          |         |          |          |          |
|----------|----------|----------|----------|----------|---------|----------|----------|----------|
| 0.129456 | 0.00508  | -0.00457 | 0.92148  | 0.003654 | 0.93723 | -0.02198 | 0.63569  | 0.002919 |
| 0.116891 | 0.01147  | 0.108864 | 0.01861  | -0.01854 | 0.6894  | 0.063621 | 0.16989  | -0.08812 |
| 0.166127 | 0.00031  | -0.10897 | 0.01849  | -0.04655 | 0.31549 | -0.15849 | 0.00059  | -0.07751 |
| 0.009906 | 0.83094  | -0.23081 | 4.59E-07 | 0.011524 | 0.80384 | 0.003125 | 0.94631  | -0.03375 |
| -0.08931 | 0.05376  | -0.22889 | 5.74E-07 | 0.00168  | 0.97112 | -0.02446 | 0.59807  | -0.05171 |
| 0.312253 | 5.09E-12 | 0.142777 | 0.00198  | 0.001709 | 0.97062 | -0.05872 | 0.20527  | -0.00817 |
| 0.093945 | 0.04244  | -0.02095 | 0.65151  | 0.02314  | 0.61793 | -0.02158 | 0.64179  | 0.071046 |
| 0.248154 | 5.53E-08 | -0.10921 | 0.01824  | -0.03712 | 0.42357 | -0.13198 | 0.00428  | 0.011814 |
| 0.174946 | 0.00014  | 0.407679 | 3.98E-20 | -0.0254  | 0.584   | -0.04633 | 0.31776  | 0.07556  |
| -0.04952 | 0.28553  | 0.092437 | 0.04588  | 0.147484 | 0.00139 | 0.069213 | 0.13531  | 0.028984 |
| -0.11081 | 0.01659  | -0.10898 | 0.01848  | 0.110606 | 0.0168  | 0.127146 | 0.00593  | 0.440719 |
| 0.26243  | 8.55E-09 | 0.085384 | 0.06524  | 0.007188 | 0.87688 | -0.04692 | 0.31167  | 0.07695  |
| 0.158734 | 0.00058  | 0.010965 | 0.81318  | -0.01761 | 0.70432 | -0.10013 | 0.03051  | -0.01014 |
| 0.039908 | 0.38954  | 0.369845 | 1.39E-16 | -0.01501 | 0.74634 | 0.018148 | 0.69567  | 0.084556 |
| 0.085812 | 0.0639   | 0.317512 | 2.13E-12 | -0.037   | 0.4251  | -0.0824  | 0.07524  | 0.027836 |
| 0.20529  | 7.74E-06 | 0.097835 | 0.03455  | 0.010433 | 0.82208 | -0.02709 | 0.55931  | 0.022445 |
| 0.255726 | 2.08E-08 | 0.096461 | 0.03718  | 0.002651 | 0.95443 | -0.0522  | 0.26021  | -0.03834 |
| 0.013395 | 0.7728   | -0.21778 | 2.03E-06 | 0.014568 | 0.75353 | -0.04591 | 0.32216  | 0.08924  |
| 0.317466 | 2.15E-12 | 0.231852 | 4.06E-07 | -0.02264 | 0.62551 | -0.0953  | 0.03953  | 0.083302 |
| 0.276854 | 1.16E-09 | 0.216807 | 2.26E-06 | 0.014523 | 0.75427 | -0.00598 | 0.89741  | -0.0621  |
| 0.17445  | 0.00015  | 0.359008 | 1.19E-15 | 0.033097 | 0.47553 | 0.286631 | 2.78E-10 | 0.074862 |
| -0.16919 | 0.00024  | -0.05936 | 0.20035  | -0.0302  | 0.51502 | 0.024465 | 0.59794  | -0.10492 |
| 0.219223 | 1.73E-06 | 0.029663 | 0.52253  | -0.00393 | 0.93257 | -0.11266 | 0.01485  | -0.03466 |
| -0.06031 | 0.19326  | -0.15112 | 0.00105  | -0.08668 | 0.06126 | -0.18845 | 4.16E-05 | -0.19411 |
| 0.103231 | 0.02569  | 0.235825 | 2.53E-07 | 0.028957 | 0.53248 | 0.020137 | 0.66425  | 0.245815 |
| 0.100275 | 0.03026  | 0.003854 | 0.9338   | -0.02184 | 0.63788 | -0.00346 | 0.94052  | -0.04275 |
| -0.27215 | 2.25E-09 | -0.20964 | 4.90E-06 | -0.03886 | 0.40207 | -0.03736 | 0.42056  | -0.06148 |
| 0.123937 | 0.00733  | 0.117334 | 0.01116  | 0.053582 | 0.24783 | 0.105492 | 0.02261  | 0.206764 |
| 0.531851 | 1.85E-35 | 0.085196 | 0.06584  | 0.003844 | 0.93398 | -0.13574 | 0.00329  | 0.059996 |
| 0.04006  | 0.38773  | -0.15004 | 0.00115  | -0.04105 | 0.37614 | -0.05145 | 0.26718  | -0.17558 |
| 0.045747 | 0.3239   | -0.15284 | 0.00092  | 0.000428 | 0.99265 | -0.02769 | 0.55055  | 0.058675 |
| 0.104017 | 0.02458  | 0.000861 | 0.98519  | -0.02419 | 0.60204 | -0.03011 | 0.51632  | 0.108916 |
| 0.128355 | 0.00547  | 0.136628 | 0.00309  | 0.009665 | 0.83498 | 0.036522 | 0.43106  | 0.069857 |
| -0.09197 | 0.04699  | 0.118378 | 0.01046  | -0.01568 | 0.73546 | 0.028547 | 0.53831  | 0.076234 |
| -0.09227 | 0.04626  | -0.10076 | 0.02947  | 0.003557 | 0.93889 | -0.03419 | 0.46109  | -0.00181 |
| -0.18238 | 7.37E-05 | -0.26718 | 4.48E-09 | -0.06487 | 0.16167 | -0.14176 | 0.00213  | -0.18935 |
| 0.085451 | 0.06503  | -0.03591 | 0.43875  | 0.014168 | 0.76008 | -0.04504 | 0.33147  | 0.014528 |
| 0.109009 | 0.01845  | -0.19472 | 2.26E-05 | -0.05665 | 0.22178 | -0.16845 | 0.00026  | -0.10054 |
| 0.175443 | 0.00014  | -0.09855 | 0.03324  | -0.02119 | 0.64782 | -0.20823 | 5.69E-06 | -0.10593 |
| 0.288711 | 2.04E-10 | 0.016738 | 0.71827  | 0.039497 | 0.39445 | -0.03809 | 0.41154  | 0.091201 |
| -0.19083 | 3.31E-05 | -0.17628 | 0.00013  | -0.02895 | 0.53259 | 0.015588 | 0.73688  | -0.13205 |
| 0.255962 | 2.02E-08 | 0.08574  | 0.06412  | -0.01664 | 0.71983 | -0.0789  | 0.08856  | 0.055526 |
| 0.015192 | 0.74333  | -0.03193 | 0.49124  | 0.004489 | 0.92292 | -0.04867 | 0.29395  | 0.004447 |
| -0.01541 | 0.73982  | -0.14394 | 0.00182  | -0.02049 | 0.65882 | -0.0775  | 0.09435  | -0.07205 |
| 0.363281 | 5.14E-16 | 0.146299 | 0.00152  | -0.01218 | 0.79291 | -0.15167 | 0.00101  | 0.018501 |

|          |          |          |          |          |         |          |          |          |
|----------|----------|----------|----------|----------|---------|----------|----------|----------|
| 0.033181 | 0.47441  | 0.190854 | 3.30E-05 | 0.045327 | 0.32837 | 0.120003 | 0.00944  | 0.186759 |
| -0.02468 | 0.59466  | -0.12199 | 0.00831  | 0.069567 | 0.13332 | 0.083815 | 0.07036  | 0.079229 |
| 0.163169 | 0.0004   | 0.332092 | 1.74E-13 | 0.032631 | 0.48177 | 0.024817 | 0.59269  | 0.039452 |
| 0.080565 | 0.082    | 0.213184 | 3.35E-06 | 0.053396 | 0.24947 | 0.103811 | 0.02487  | 0.262187 |
| 0.317531 | 2.12E-12 | 0.26578  | 5.43E-09 | -0.00176 | 0.96968 | -0.22329 | 1.09E-06 | -0.04092 |
| -0.00322 | 0.94468  | -0.16214 | 0.00044  | 0.001228 | 0.97889 | -0.08942 | 0.05348  | -0.06904 |
| 0.214493 | 2.91E-06 | 0.073149 | 0.11442  | -0.02445 | 0.59812 | -0.08214 | 0.07618  | 0.086997 |
| 0.066682 | 0.15022  | -0.31651 | 2.52E-12 | 0.021761 | 0.63903 | -0.09471 | 0.04077  | 0.063702 |
| -0.10387 | 0.02478  | -0.05485 | 0.23681  | -0.01313 | 0.77723 | 0.019356 | 0.67653  | -0.04979 |
| 0.042611 | 0.3582   | -0.16478 | 0.00035  | -0.02747 | 0.55375 | -0.11046 | 0.01694  | -0.15472 |
| 0.186866 | 4.84E-05 | 0.356217 | 2.03E-15 | 0.04932  | 0.28751 | 0.079872 | 0.08468  | 0.1596   |
| -0.19963 | 1.38E-05 | -0.10957 | 0.01786  | -0.03371 | 0.46737 | -0.01404 | 0.76224  | -0.02641 |
| 0.234647 | 2.91E-07 | -0.09804 | 0.03417  | 0.00565  | 0.90308 | -0.05398 | 0.24432  | -0.00912 |
| 0.193922 | 2.45E-05 | 0.075811 | 0.10178  | 0.028371 | 0.54081 | 0.075074 | 0.10517  | 0.093576 |
| 0.166518 | 0.0003   | 0.019263 | 0.67799  | 0.061553 | 0.18422 | 0.0159   | 0.73183  | 0.167995 |
| 0.177731 | 0.00011  | 0.140318 | 0.00237  | 0.002665 | 0.95419 | -0.0189  | 0.68369  | 0.043468 |
| 0.214487 | 2.91E-06 | 0.057363 | 0.21596  | -0.00158 | 0.97288 | 0.006827 | 0.88303  | 0.05787  |
| 0.288179 | 2.21E-10 | 0.424023 | 8.38E-22 | 0.047921 | 0.30142 | 0.030814 | 0.50652  | 0.18798  |
| 0.160677 | 0.00049  | 0.170285 | 0.00022  | 0.020874 | 0.65275 | 0.099229 | 0.03204  | 0.077859 |
| 0.167576 | 0.00028  | 0.187848 | 4.41E-05 | 0.131744 | 0.00435 | 0.170855 | 0.00021  | 0.190692 |
| 0.153517 | 0.00087  | 0.047167 | 0.30909  | -0.01694 | 0.71506 | -0.00275 | 0.95281  | 0.028124 |
| -0.12818 | 0.00554  | 0.029221 | 0.52876  | -0.05022 | 0.27875 | 0.012567 | 0.7865   | -0.11918 |
| 0.375496 | 4.38E-17 | 0.047079 | 0.31     | 0.036444 | 0.43203 | -0.03639 | 0.43268  | 0.009637 |
| 0.235354 | 2.68E-07 | 0.083605 | 0.07107  | 0.032391 | 0.485   | 0.007356 | 0.87402  | 0.046209 |
| 0.327514 | 3.88E-13 | 0.504255 | 1.73E-31 | 0.086977 | 0.06037 | 0.203777 | 9.06E-06 | 0.298126 |
| 0.286076 | 3.02E-10 | 0.046547 | 0.3155   | 0.004925 | 0.91547 | -0.13269 | 0.00407  | 0.106228 |
| 0.06541  | 0.15817  | 0.134013 | 0.00372  | 0.030401 | 0.51223 | 0.00339  | 0.94176  | -0.02584 |
| 0.352439 | 4.19E-15 | 0.228787 | 5.81E-07 | 0.020777 | 0.65426 | 0.024884 | 0.5917   | 0.11127  |
| 0.14064  | 0.00232  | -0.04916 | 0.28909  | 0.04405  | 0.3422  | -0.00697 | 0.88058  | 0.021967 |
| 0.223665 | 1.05E-06 | 0.189748 | 3.67E-05 | 0.008318 | 0.85772 | 0.00281  | 0.9517   | 0.110602 |
| 0.016622 | 0.72015  | -0.18261 | 7.21E-05 | -0.02054 | 0.65799 | -0.0982  | 0.03388  | -0.05927 |
| 0.06387  | 0.16822  | -0.05446 | 0.24012  | -0.00915 | 0.84366 | -0.13149 | 0.00442  | 0.014295 |
| -0.00618 | 0.8941   | -0.04166 | 0.36909  | -0.00612 | 0.89503 | -0.05418 | 0.24255  | 0.037666 |
| 0.079921 | 0.08448  | -0.13276 | 0.00405  | 0.042384 | 0.36078 | 0.105501 | 0.0226   | 0.04792  |
| 0.361436 | 7.38E-16 | 0.262661 | 8.29E-09 | -0.04832 | 0.29737 | -0.08952 | 0.05322  | -0.14364 |
| 0.285194 | 3.44E-10 | 0.109679 | 0.01774  | 0.006691 | 0.88533 | -0.05866 | 0.20576  | 0.123609 |
| 0.256977 | 1.77E-08 | 0.180429 | 8.82E-05 | -0.01155 | 0.80338 | -0.11644 | 0.0118   | 0.01736  |
| 0.442877 | 7.45E-24 | -0.12991 | 0.00493  | -0.05838 | 0.20795 | -0.15536 | 0.00075  | -0.04796 |
| -0.02207 | 0.63427  | 0.043243 | 0.35112  | -0.01803 | 0.69761 | 0.075949 | 0.10116  | 0.078587 |
| 0.320897 | 1.20E-12 | 0.054415 | 0.24054  | -0.01991 | 0.66776 | -0.07933 | 0.0868   | 0.065537 |
| 0.200814 | 1.23E-05 | -0.12368 | 0.00745  | -0.05711 | 0.21803 | -0.19321 | 2.63E-05 | -0.05305 |
| 0.074017 | 0.11017  | -0.07431 | 0.10877  | -0.04418 | 0.34081 | -0.08914 | 0.05422  | 0.053869 |
| 0.120218 | 0.00931  | -0.31604 | 2.72E-12 | -0.03765 | 0.41696 | -0.13625 | 0.00317  | -0.03257 |
| 0.109116 | 0.01834  | -0.02003 | 0.66598  | -0.02823 | 0.54279 | -0.08543 | 0.0651   | 0.081279 |
| 0.337367 | 6.80E-14 | 0.120078 | 0.00939  | 0.007012 | 0.87988 | -0.00365 | 0.93732  | 0.117014 |

|          |          |          |          |          |         |          |          |          |
|----------|----------|----------|----------|----------|---------|----------|----------|----------|
| -0.21141 | 4.05E-06 | -0.26604 | 5.24E-09 | -0.04431 | 0.33932 | -0.01375 | 0.76701  | -0.18894 |
| 0.185459 | 5.53E-05 | -0.04399 | 0.34287  | -0.01355 | 0.77024 | -0.09988 | 0.03092  | 0.013776 |
| 0.083573 | 0.07118  | -0.04273 | 0.35684  | 0.033411 | 0.47135 | -0.03515 | 0.44857  | 0.053387 |
| 0.511951 | 1.47E-32 | 0.557797 | 1.53E-39 | 0.024462 | 0.59799 | -0.00012 | 0.99797  | 0.133265 |
| -0.11808 | 0.01065  | -0.3614  | 7.44E-16 | -0.02802 | 0.54588 | -0.01726 | 0.70989  | -0.05733 |
| 0.489821 | 1.49E-29 | 0.15892  | 0.00057  | 0.031876 | 0.49197 | -0.0431  | 0.35273  | 0.11105  |
| -0.00413 | 0.92905  | 0.047974 | 0.30088  | -0.05428 | 0.2417  | -0.06449 | 0.16411  | -0.05065 |
| -0.2395  | 1.62E-07 | -0.15863 | 0.00058  | -0.0418  | 0.36749 | -0.04694 | 0.31139  | -0.17314 |
| 0.000947 | 0.98371  | -0.2868  | 2.72E-10 | -0.03763 | 0.41722 | -0.05813 | 0.20991  | -0.05392 |
| 0.021505 | 0.64298  | -0.17109 | 0.0002   | -0.04356 | 0.34764 | -0.15327 | 0.00089  | -0.16314 |
| 0.363977 | 4.48E-16 | 0.105557 | 0.02253  | -0.06153 | 0.1844  | -0.15046 | 0.00111  | -0.02129 |
| 0.211309 | 4.10E-06 | -0.00627 | 0.89249  | -0.02083 | 0.65342 | -0.10981 | 0.0176   | 0.013403 |
| -0.04668 | 0.31413  | -0.01138 | 0.80617  | 0.023312 | 0.61533 | 0.186109 | 5.20E-05 | 0.095406 |
| -0.23698 | 2.20E-07 | -0.31736 | 2.19E-12 | -0.06195 | 0.18137 | -0.11068 | 0.01672  | -0.09803 |
| -0.01971 | 0.67096  | 0.128613 | 0.00538  | -0.05387 | 0.24528 | -0.00045 | 0.99234  | -0.04605 |
| 0.102511 | 0.02675  | 0.004256 | 0.92691  | 0.000813 | 0.98602 | 0.006124 | 0.895    | 0.021362 |
| 0.0845   | 0.06809  | -0.22042 | 1.51E-06 | -0.06155 | 0.18427 | -0.12833 | 0.00548  | -0.12025 |
| 0.176394 | 0.00013  | 0.020793 | 0.65401  | -0.01281 | 0.78241 | -0.03608 | 0.4366   | -0.00521 |
| 0.266279 | 5.07E-09 | 0.264879 | 6.14E-09 | -0.01021 | 0.82576 | -0.04392 | 0.34359  | -0.03098 |
| 0.164368 | 0.00036  | 0.024958 | 0.59059  | -0.04877 | 0.29294 | -0.07441 | 0.10827  | -0.07666 |
| 0.022975 | 0.62044  | -0.12977 | 0.00497  | -0.01334 | 0.77377 | -0.07725 | 0.09545  | 0.006353 |
| 0.192658 | 2.77E-05 | 0.088108 | 0.05709  | 0.051011 | 0.27128 | 0.055339 | 0.23263  | 0.108966 |
| 0.129999 | 0.0049   | 0.148749 | 0.00126  | 0.001863 | 0.96797 | -0.08691 | 0.06056  | -0.00655 |
| 0.003543 | 0.93914  | -0.17893 | 0.0001   | -0.04922 | 0.28853 | -0.11271 | 0.01481  | -0.10963 |
| -0.02734 | 0.55567  | -0.16355 | 0.00039  | -0.03438 | 0.45861 | -0.10379 | 0.0249   | -0.06486 |
| 0.146671 | 0.00148  | -0.02695 | 0.56125  | -0.01613 | 0.72811 | -0.06676 | 0.14977  | -0.08475 |
| 0.088932 | 0.0548   | 0.062491 | 0.17761  | -0.02141 | 0.64446 | 0.005023 | 0.9138   | 0.050661 |
| 0.029377 | 0.52655  | 0.30915  | 8.44E-12 | -0.00752 | 0.87118 | 0.054558 | 0.23931  | -0.06812 |
| 0.23106  | 4.46E-07 | 0.133913 | 0.00374  | -0.03739 | 0.42015 | -0.06462 | 0.16325  | -0.07256 |
| 0.11033  | 0.01707  | -0.0943  | 0.04167  | -0.07118 | 0.12454 | -0.21819 | 1.94E-06 | -0.22889 |
| 0.038453 | 0.40707  | -0.1373  | 0.00295  | 0.003021 | 0.94808 | -0.01332 | 0.77407  | 0.00484  |
| 0.130469 | 0.00474  | 0.147863 | 0.00135  | -0.01157 | 0.80301 | -0.04429 | 0.33953  | -0.03042 |
| 0.016075 | 0.72899  | -0.21563 | 2.57E-06 | 0.006521 | 0.88822 | -0.01225 | 0.79181  | 0.002022 |
| 0.087109 | 0.05998  | -0.22204 | 1.26E-06 | -0.05596 | 0.22746 | -0.17665 | 0.00012  | -0.14828 |
| 0.073426 | 0.11305  | -0.02272 | 0.62438  | -0.02403 | 0.6045  | -0.05454 | 0.23946  | -0.19316 |
| 0.123375 | 0.0076   | 0.184835 | 5.86E-05 | 0.066836 | 0.14928 | 0.037433 | 0.41964  | 0.11616  |
| -0.10782 | 0.01978  | -0.06114 | 0.18719  | -0.0482  | 0.29862 | -0.04431 | 0.3393   | -0.08187 |
| 0.022331 | 0.63027  | 0.007583 | 0.87018  | -0.00737 | 0.87386 | -0.02147 | 0.64353  | 0.039659 |
| -0.01318 | 0.77631  | 0.154456 | 0.00081  | 0.100655 | 0.02964 | 0.118023 | 0.01069  | 0.294299 |
| -0.04663 | 0.31461  | 0.007808 | 0.86637  | -0.02879 | 0.53491 | -0.04397 | 0.34303  | -0.06729 |
| 0.22684  | 7.28E-07 | 0.15867  | 0.00058  | 0.027065 | 0.55961 | 0.017828 | 0.70077  | 0.098119 |
| -0.09995 | 0.03081  | -0.16788 | 0.00027  | -0.05343 | 0.24916 | -0.10165 | 0.02806  | -0.07554 |
| 0.084028 | 0.06965  | 0.084115 | 0.06936  | -0.0224  | 0.62916 | -0.059   | 0.20309  | -0.15866 |
| 0.188436 | 4.17E-05 | -0.0323  | 0.48628  | -0.01871 | 0.68681 | -0.14598 | 0.00156  | -0.07201 |
| 0.185742 | 5.38E-05 | 0.193407 | 2.57E-05 | 0.096071 | 0.03795 | 0.191195 | 3.19E-05 | 0.382755 |

|          |          |          |          |          |         |           |         |          |
|----------|----------|----------|----------|----------|---------|-----------|---------|----------|
| 0.063395 | 0.17141  | 0.207765 | 5.97E-06 | 0.059582 | 0.1987  | 0.021242  | 0.64705 | 0.089223 |
| 0.079988 | 0.08422  | 0.002148 | 0.96308  | 0.001006 | 0.9827  | -0.03933  | 0.39647 | -0.01441 |
| -0.03105 | 0.50326  | 0.099256 | 0.03199  | 0.036431 | 0.4322  | 0.016275  | 0.72576 | 0.016155 |
| -0.11346 | 0.01416  | -0.21093 | 4.27E-06 | -0.01262 | 0.7856  | -0.01372  | 0.76746 | -0.02991 |
| 0.235448 | 2.65E-07 | 0.149077 | 0.00123  | -0.01188 | 0.79794 | -0.04912  | 0.28949 | -0.00745 |
| 0.084523 | 0.06801  | 0.239974 | 1.53E-07 | -0.00331 | 0.9431  | -0.00441  | 0.92434 | -0.00116 |
| 0.38369  | 7.92E-18 | 0.318174 | 1.91E-12 | 0.055482 | 0.23143 | 0.046032  | 0.3209  | 0.145107 |
| 0.184898 | 5.83E-05 | 0.059357 | 0.20041  | 0.001871 | 0.96784 | -0.05623  | 0.22523 | -0.00954 |
| 0.223113 | 1.12E-06 | 0.286813 | 2.71E-10 | 0.033558 | 0.4694  | -0.01648  | 0.7224  | 0.061806 |
| -0.10141 | 0.02843  | 0.003713 | 0.93621  | 0.028733 | 0.53566 | 0.082477  | 0.07498 | 0.185058 |
| 0.326882 | 4.32E-13 | 0.30528  | 1.57E-11 | 0.005183 | 0.91105 | -0.00229  | 0.96066 | 0.049981 |
| 0.150956 | 0.00107  | 0.32075  | 1.24E-12 | 0.058717 | 0.20531 | 0.060519  | 0.19172 | 0.159746 |
| 0.022557 | 0.62682  | -0.03133 | 0.49936  | 0.028475 | 0.53933 | 0.012968  | 0.77985 | 0.018602 |
| 0.266535 | 4.90E-09 | 0.194836 | 2.24E-05 | 0.001679 | 0.97113 | -0.05931  | 0.20076 | 0.004046 |
| 0.101753 | 0.0279   | 0.112222 | 0.01525  | 0.035725 | 0.44118 | 0.030845  | 0.50609 | 0.028774 |
| 0.179844 | 9.31E-05 | 0.263709 | 7.20E-09 | 0.059854 | 0.19665 | 0.055675  | 0.22981 | 0.132709 |
| 0.213224 | 3.33E-06 | 0.088238 | 0.05672  | 0.048344 | 0.29716 | 0.061912  | 0.18167 | 0.055197 |
| 0.041848 | 0.36689  | -0.09196 | 0.04702  | -0.0181  | 0.69644 | 0.083745  | 0.0706  | -0.25399 |
| 0.29357  | 9.79E-11 | 0.247963 | 5.66E-08 | -0.02625 | 0.57145 | -0.05869  | 0.2055  | 0.088619 |
| 0.366307 | 2.82E-16 | 0.10581  | 0.0222   | -0.00134 | 0.9769  | -0.04725  | 0.3082  | -0.01292 |
| 0.317625 | 2.09E-12 | 0.175981 | 0.00013  | 0.007077 | 0.87877 | -0.10995  | 0.01746 | 0.104224 |
| 0.073846 | 0.111    | -0.30151 | 2.86E-11 | 0.026586 | 0.56658 | 0.002045  | 0.96485 | 0.155993 |
| 0.102784 | 0.02634  | -0.06433 | 0.1652   | 0.037473 | 0.41914 | 0.021453  | 0.64379 | -0.01005 |
| 0.178574 | 0.0001   | 0.24222  | 1.16E-07 | -0.03581 | 0.4401  | -0.06698  | 0.14842 | -0.12893 |
| 0.278332 | 9.36E-10 | 0.166465 | 0.0003   | 0.00519  | 0.91094 | -0.15874  | 0.00058 | 0.068135 |
| -0.25307 | 2.94E-08 | -0.48537 | 5.67E-29 | -0.01168 | 0.80123 | -0.01217  | 0.79302 | -0.11044 |
| -0.04278 | 0.35625  | -0.31472 | 3.39E-12 | -0.00587 | 0.89931 | -0.05199  | 0.26215 | -0.08366 |
| 0.014096 | 0.76126  | -0.13235 | 0.00417  | 0.073149 | 0.11442 | 0.005303  | 0.909   | 0.239541 |
| 0.142195 | 0.00207  | 0.126244 | 0.0063   | 0.0031   | 0.94673 | -0.04138  | 0.37228 | -0.05781 |
| -0.22694 | 7.20E-07 | -0.19882 | 1.50E-05 | 0.103071 | 0.02592 | 0.084346  | 0.06859 | 0.110704 |
| 0.139449 | 0.00253  | 0.101798 | 0.02783  | -0.00503 | 0.9137  | -5.36E-05 | 0.99908 | 0.068509 |
| 0.148543 | 0.00128  | 0.072177 | 0.11933  | 0.004714 | 0.91907 | -0.06304  | 0.17385 | 0.143452 |
| 0.20987  | 4.78E-06 | 0.315566 | 2.95E-12 | 0.053987 | 0.24426 | 0.024583  | 0.59618 | 0.027732 |
| 0.216004 | 2.46E-06 | 0.313787 | 3.95E-12 | 0.031047 | 0.50331 | 0.124064  | 0.00727 | 0.199787 |
| 0.414185 | 8.78E-21 | 0.037488 | 0.41896  | -0.04242 | 0.36035 | -0.12721  | 0.00591 | 0.012462 |
| 0.361293 | 7.59E-16 | 0.094638 | 0.04093  | -0.03159 | 0.49586 | -0.06968  | 0.13268 | 0.075899 |
| 0.352474 | 4.16E-15 | 0.252445 | 3.19E-08 | 0.006549 | 0.88775 | -0.03468  | 0.45465 | -0.01201 |
| 0.074951 | 0.10574  | 0.241995 | 1.19E-07 | 0.044669 | 0.33545 | -0.0564   | 0.22379 | 0.258426 |
| 0.221499 | 1.34E-06 | 0.043675 | 0.34632  | -0.02917 | 0.52941 | -0.04495  | 0.33238 | -0.10581 |
| 0.090961 | 0.04947  | 0.100028 | 0.03068  | -0.00822 | 0.8594  | -0.04453  | 0.33701 | 0.02744  |
| -0.01356 | 0.77013  | -0.01841 | 0.69147  | 0.083239 | 0.07232 | 0.102015  | 0.0275  | 0.313082 |
| 0.177292 | 0.00012  | 0.267194 | 4.47E-09 | -0.04789 | 0.30169 | -0.08552  | 0.06482 | -0.03711 |
| 0.363713 | 4.72E-16 | 0.231133 | 4.42E-07 | 0.010039 | 0.82871 | -0.06952  | 0.13356 | -0.02759 |
| 0.28416  | 4.01E-10 | -0.09785 | 0.03453  | 0.011025 | 0.81218 | -0.09105  | 0.04926 | -0.01562 |
| 0.038085 | 0.41158  | -0.10347 | 0.02535  | -0.008   | 0.86307 | 0.069796  | 0.13204 | -0.10398 |

|          |          |          |          |          |         |          |          |          |
|----------|----------|----------|----------|----------|---------|----------|----------|----------|
| -0.03842 | 0.40742  | 0.057864 | 0.21198  | -0.03404 | 0.46309 | -0.06888 | 0.13721  | -0.11933 |
| 0.048192 | 0.29869  | -0.16289 | 0.00041  | -0.01086 | 0.81486 | -0.14422 | 0.00178  | -0.0227  |
| 0.299883 | 3.69E-11 | 0.293013 | 1.07E-10 | 0.048648 | 0.29414 | -0.04735 | 0.3072   | 0.021362 |
| -0.20789 | 5.90E-06 | 0.016477 | 0.72249  | 0.012324 | 0.79054 | 0.060061 | 0.19511  | -0.01047 |
| -0.02091 | 0.65222  | 0.033464 | 0.47065  | -0.06142 | 0.1852  | -0.05345 | 0.24901  | -0.18616 |
| -0.03925 | 0.39741  | -0.07066 | 0.12732  | -0.00978 | 0.83303 | -0.00178 | 0.96945  | -0.19697 |
| 0.166163 | 0.00031  | -0.0121  | 0.79433  | 0.020339 | 0.66109 | -0.06729 | 0.14654  | 0.008599 |
| 0.144699 | 0.00172  | 0.229294 | 5.48E-07 | 0.026765 | 0.56398 | 0.023153 | 0.61774  | 0.148319 |
| -0.09595 | 0.03819  | 0.041984 | 0.36533  | -0.03677 | 0.42791 | -0.01926 | 0.67807  | -0.03499 |
| -0.15677 | 0.00067  | 0.174896 | 0.00015  | -0.03706 | 0.42426 | 0.071935 | 0.12057  | -0.06011 |
| 0.269167 | 3.41E-09 | 0.291925 | 1.26E-10 | -0.02811 | 0.54459 | -0.09664 | 0.03683  | -0.00248 |
| 0.00476  | 0.91828  | -0.13947 | 0.00252  | 0.001198 | 0.9794  | -0.01226 | 0.79155  | 0.003904 |
| 0.076722 | 0.09772  | 0.082392 | 0.07528  | 0.037481 | 0.41905 | 0.009195 | 0.8429   | 0.101446 |
| 0.004001 | 0.93128  | -0.10026 | 0.0303   | -0.04183 | 0.36712 | -0.09499 | 0.04018  | 0.043004 |
| 0.090988 | 0.04941  | -0.09932 | 0.03188  | -0.02058 | 0.65734 | -0.05559 | 0.23055  | 0.018705 |
| 0.19098  | 3.26E-05 | -0.00369 | 0.93666  | -0.03568 | 0.44181 | -0.14319 | 0.00192  | -0.0642  |
| 0.091205 | 0.04886  | 0.103827 | 0.02485  | 0.078381 | 0.09067 | 0.093147 | 0.04423  | 0.147154 |
| -0.0362  | 0.43509  | -0.39841 | 3.24E-19 | -0.00834 | 0.85728 | -0.09907 | 0.03231  | -0.049   |
| 0.389002 | 2.54E-18 | 0.227465 | 6.78E-07 | -0.01743 | 0.70715 | -0.07878 | 0.08905  | -0.07385 |
| 0.323895 | 7.23E-13 | 0.265521 | 5.63E-09 | 0.011343 | 0.80686 | 0.022783 | 0.62337  | 0.064502 |
| 0.046711 | 0.3138   | -0.20532 | 7.72E-06 | -0.01191 | 0.79735 | -0.02639 | 0.5695   | 0.018408 |
| 0.087239 | 0.05959  | -0.01226 | 0.79155  | 0.047153 | 0.30924 | 0.060565 | 0.19138  | 0.046385 |
| 0.214864 | 2.79E-06 | -0.08931 | 0.05377  | -0.03131 | 0.49967 | -0.12226 | 0.00817  | 0.032424 |
| 0.107384 | 0.02028  | -0.05746 | 0.2152   | -0.00725 | 0.8758  | -0.06768 | 0.14418  | -0.00871 |
| -0.01314 | 0.77694  | 0.068355 | 0.14023  | 0.049921 | 0.28167 | 0.149549 | 0.00119  | 0.063643 |
| 0.128161 | 0.00554  | -0.02663 | 0.56595  | 0.012936 | 0.78039 | 0.003917 | 0.93271  | 0.051131 |
| 0.0742   | 0.10929  | -0.10106 | 0.02899  | -0.00036 | 0.99378 | -0.0223  | 0.63069  | 0.029951 |
| -0.00874 | 0.85065  | -0.36666 | 2.63E-16 | -0.02772 | 0.55018 | -0.14358 | 0.00187  | -0.0397  |
| 0.08089  | 0.08077  | 0.128438 | 0.00544  | 0.03409  | 0.46238 | 0.024782 | 0.5932   | 0.094727 |
| 0.324989 | 5.99E-13 | 0.051929 | 0.26274  | -0.04251 | 0.3593  | -0.13536 | 0.00338  | -0.15434 |
| -0.0973  | 0.03556  | -0.02282 | 0.62278  | 3.55E-05 | 0.99939 | -0.04173 | 0.36825  | -0.11666 |
| 0.030765 | 0.5072   | 0.021195 | 0.64777  | 0.071296 | 0.12392 | 0.100112 | 0.03053  | 0.144817 |
| 0.018257 | 0.69393  | -0.16291 | 0.00041  | -0.03712 | 0.4236  | -0.0847  | 0.06744  | -0.03921 |
| 0.012918 | 0.78069  | -0.08096 | 0.0805   | 0.028328 | 0.54142 | 0.018886 | 0.68396  | 0.04201  |
| 0.017371 | 0.7081   | 0.037829 | 0.41473  | -0.0261  | 0.57374 | -0.00235 | 0.95966  | 0.077538 |
| 0.032723 | 0.48053  | -0.01596 | 0.73091  | -0.06789 | 0.14296 | -0.01298 | 0.77974  | -0.09434 |
| 0.181315 | 8.13E-05 | 0.27808  | 9.70E-10 | -0.01255 | 0.78674 | 0.007645 | 0.86912  | -0.11252 |
| -0.16935 | 0.00024  | -0.01774 | 0.70212  | 0.087572 | 0.05862 | 0.212239 | 3.71E-06 | 0.241992 |
| 0.148406 | 0.0013   | 0.089594 | 0.05301  | -0.0051  | 0.91251 | -0.02848 | 0.53923  | -0.0467  |
| 0.262322 | 8.68E-09 | 0.181259 | 8.17E-05 | -0.00415 | 0.92871 | -0.05186 | 0.26341  | 0.08994  |
| 0.194378 | 2.34E-05 | 0.262655 | 8.30E-09 | 0.010305 | 0.82424 | 0.027231 | 0.55721  | 0.206395 |
| 0.200551 | 1.26E-05 | -0.10278 | 0.02634  | 0.028804 | 0.53466 | 0.053794 | 0.24595  | 0.067291 |
| 0.1058   | 0.02222  | -0.01418 | 0.7599   | -0.00075 | 0.98707 | -0.03272 | 0.48062  | -0.09347 |
| 0.160329 | 0.00051  | -0.01607 | 0.72906  | 0.015457 | 0.73903 | 0.042693 | 0.35729  | 0.039064 |
| 0.2902   | 1.63E-10 | 0.166355 | 0.00031  | 0.01501  | 0.7463  | 0.081671 | 0.07788  | -0.02135 |



|          |          |          |          |          |         |          |          |          |
|----------|----------|----------|----------|----------|---------|----------|----------|----------|
| 0.155138 | 0.00077  | -0.12362 | 0.00748  | -0.00795 | 0.86399 | -0.07691 | 0.09689  | 0.066065 |
| 0.166199 | 0.00031  | 0.021553 | 0.64224  | -0.03496 | 0.45098 | -0.12501 | 0.00683  | 0.019104 |
| 0.333766 | 1.29E-13 | 0.311485 | 5.77E-12 | -0.00032 | 0.99443 | -0.03703 | 0.42462  | 0.020354 |
| 0.067974 | 0.14246  | -0.20604 | 7.16E-06 | -0.00503 | 0.91368 | -0.05109 | 0.27058  | -0.21293 |
| 0.192438 | 2.83E-05 | 0.179651 | 9.47E-05 | -0.01241 | 0.78905 | -0.07409 | 0.10982  | 0.049752 |
| -0.09464 | 0.04092  | 0.232572 | 3.73E-07 | -0.0355  | 0.44402 | 0.00136  | 0.97661  | -0.15437 |
| 0.13897  | 0.00261  | 0.229612 | 5.28E-07 | 0.09381  | 0.04274 | 0.184632 | 5.97E-05 | 0.232955 |
| 0.130748 | 0.00465  | -0.07673 | 0.09771  | -0.0165  | 0.72219 | -0.0619  | 0.18179  | 0.082348 |
| 0.210174 | 4.63E-06 | 0.034536 | 0.45655  | 0.022787 | 0.6233  | -0.02341 | 0.61385  | 0.022699 |
| 0.107126 | 0.02059  | -0.03367 | 0.46787  | 0.044127 | 0.34135 | 0.144477 | 0.00175  | -0.00816 |
| -0.09827 | 0.03375  | -0.1184  | 0.01044  | -0.00182 | 0.96867 | 0.028181 | 0.54353  | 0.098652 |
| 0.164575 | 0.00036  | -0.00813 | 0.86095  | 0.006845 | 0.88271 | -0.04599 | 0.32132  | -0.00423 |
| 0.075199 | 0.10459  | 0.027703 | 0.55038  | 0.046256 | 0.31855 | 0.054373 | 0.24091  | 0.159002 |
| 0.432644 | 1.00E-22 | 0.084183 | 0.06913  | 0.032894 | 0.47824 | -0.08636 | 0.06222  | 0.102137 |
| 0.343702 | 2.15E-14 | 0.386355 | 4.49E-18 | 0.031568 | 0.49616 | 0.043805 | 0.34488  | 0.144912 |
| 0.009135 | 0.84392  | -0.18608 | 5.22E-05 | -0.00976 | 0.83347 | -0.05552 | 0.23113  | -0.11132 |
| 0.026189 | 0.57239  | 0.248959 | 4.99E-08 | 0.024484 | 0.59766 | 0.071871 | 0.12091  | 0.041677 |
| -0.07223 | 0.11908  | -0.22789 | 6.45E-07 | -0.01221 | 0.7924  | 0.035532 | 0.44366  | -0.07863 |
| 0.124555 | 0.00704  | -0.11758 | 0.01099  | -0.0337  | 0.4675  | -0.00198 | 0.9659   | -0.22626 |
| 0.071225 | 0.12429  | 0.100117 | 0.03053  | 0.131757 | 0.00434 | 0.119284 | 0.00988  | 0.387188 |
| -0.05549 | 0.23133  | -0.27659 | 1.20E-09 | -0.00454 | 0.92209 | -0.08341 | 0.07173  | -0.0295  |
| 0.118871 | 0.01014  | 0.105454 | 0.02266  | -0.03176 | 0.49361 | 0.005281 | 0.90938  | -0.13452 |
| 0.118173 | 0.01059  | 0.025875 | 0.57701  | 0.00399  | 0.93147 | -0.07268 | 0.11679  | 0.049531 |
| 0.117057 | 0.01136  | -0.04387 | 0.34415  | 0.009138 | 0.84387 | 0.00703  | 0.87957  | 0.048159 |
| 0.1865   | 5.01E-05 | 0.296022 | 6.72E-11 | 0.039878 | 0.38989 | 0.051373 | 0.26789  | 0.178528 |
| 0.081537 | 0.07837  | 0.212864 | 3.47E-06 | -0.02964 | 0.5229  | 0.009207 | 0.8427   | -0.0669  |
| 0.016443 | 0.72303  | -0.20992 | 4.75E-06 | 0.012132 | 0.79372 | -0.01682 | 0.71689  | -0.00762 |
| -0.02527 | 0.58601  | 0.032084 | 0.48915  | -0.01708 | 0.71274 | 0.013863 | 0.7651   | 0.015572 |
| 0.23791  | 1.97E-07 | 0.059269 | 0.20107  | -0.01296 | 0.78007 | -0.03846 | 0.40695  | 0.044207 |
| 0.191398 | 3.13E-05 | -0.14595 | 0.00156  | 0.002213 | 0.96196 | -0.09605 | 0.038    | -0.05248 |
| 0.058222 | 0.20916  | -0.33425 | 1.19E-13 | -0.03782 | 0.41485 | -0.14845 | 0.00129  | -0.02031 |
| 0.159976 | 0.00052  | 0.104669 | 0.02369  | -0.06874 | 0.13798 | -0.20203 | 1.08E-05 | -0.14895 |
| 0.001786 | 0.9693   | -0.19598 | 2.00E-05 | 0.011114 | 0.81069 | -0.01611 | 0.72842  | 0.086899 |
| 0.132679 | 0.00408  | 0.116646 | 0.01165  | 0.00042  | 0.99279 | -0.02825 | 0.5425   | 0.068506 |
| 0.184848 | 5.86E-05 | 0.192024 | 2.95E-05 | -0.02248 | 0.628   | -0.12224 | 0.00818  | 0.026942 |
| 0.245584 | 7.64E-08 | 0.265938 | 5.31E-09 | -0.01526 | 0.74219 | -0.01408 | 0.76151  | 0.072768 |
| 0.100108 | 0.03054  | -0.1868  | 4.87E-05 | -0.0173  | 0.70921 | -0.14315 | 0.00193  | -0.03662 |
| -0.03577 | 0.44066  | -0.35361 | 3.35E-15 | -0.00258 | 0.95573 | -0.06318 | 0.17287  | 0.016757 |
| 0.057633 | 0.21381  | -0.11141 | 0.01601  | -0.07024 | 0.12962 | -0.10833 | 0.0192   | -0.1364  |
| 0.141412 | 0.00219  | 0.131786 | 0.00433  | 0.009878 | 0.83141 | 0.043016 | 0.35366  | 0.114838 |
| 0.146057 | 0.00155  | -0.07341 | 0.11311  | -0.00092 | 0.98415 | 0.020783 | 0.65418  | 0.064946 |
| 0.297453 | 5.39E-11 | 0.244427 | 8.83E-08 | -0.00483 | 0.91706 | -0.05188 | 0.2632   | 0.009792 |
| 0.250852 | 3.92E-08 | 0.539442 | 1.29E-36 | 0.059788 | 0.19715 | 0.169241 | 0.00024  | 0.187236 |
| 0.38455  | 6.60E-18 | 0.155317 | 0.00076  | -0.01196 | 0.79655 | 0.001037 | 0.98216  | 0.041727 |
| 0.228936 | 5.71E-07 | 0.258881 | 1.37E-08 | 0.045776 | 0.32359 | 0.051994 | 0.26214  | 0.205479 |

|          |          |          |          |          |         |          |          |          |
|----------|----------|----------|----------|----------|---------|----------|----------|----------|
| 0.122821 | 0.00788  | -0.00477 | 0.9182   | 0.003614 | 0.93792 | -0.04956 | 0.28513  | 0.053707 |
| 0.181943 | 7.67E-05 | 0.138431 | 0.00272  | 0.030124 | 0.51609 | 0.034301 | 0.45961  | 0.135624 |
| 0.373188 | 7.03E-17 | 0.054447 | 0.24026  | 0.011623 | 0.8022  | -0.07054 | 0.12794  | 0.05996  |
| 0.549519 | 3.36E-38 | 0.150382 | 0.00112  | -0.0062  | 0.89369 | -0.01294 | 0.78025  | 0.029652 |
| -0.01223 | 0.79217  | 0.06014  | 0.19452  | 0.058819 | 0.20452 | 0.079932 | 0.08444  | 0.151681 |
| 0.092684 | 0.0453   | -0.03683 | 0.42711  | 0.010398 | 0.82267 | -0.00587 | 0.89935  | -0.02199 |
| 0.207852 | 5.92E-06 | 0.10196  | 0.02758  | 0.023342 | 0.61486 | -0.02758 | 0.55211  | 0.083835 |
| -0.02383 | 0.60743  | -0.21962 | 1.65E-06 | 0.059562 | 0.19885 | 0.004928 | 0.91542  | 0.197905 |
| 0.168388 | 0.00026  | -0.17934 | 9.75E-05 | -0.01508 | 0.74518 | -0.14991 | 0.00116  | 0.031173 |
| 0.254849 | 2.34E-08 | 0.280857 | 6.50E-10 | 0.043475 | 0.34854 | 0.062488 | 0.17763  | 0.008266 |
| 0.305292 | 1.57E-11 | 0.023942 | 0.60579  | -0.03723 | 0.42211 | -0.26137 | 9.86E-09 | -0.22888 |
| -0.11093 | 0.01647  | 0.094977 | 0.04021  | -0.00518 | 0.91114 | 0.06137  | 0.18553  | -0.00332 |
| 0.105397 | 0.02273  | 0.045595 | 0.32552  | 0.047393 | 0.30678 | 0.001946 | 0.96655  | 0.132041 |
| 0.159312 | 0.00055  | 0.151925 | 0.00099  | 0.039985 | 0.38863 | 0.018217 | 0.69458  | 0.071983 |
| 0.340198 | 4.07E-14 | 0.106918 | 0.02084  | -0.00622 | 0.89341 | -0.05463 | 0.2387   | -0.1049  |
| 0.582261 | 9.86E-44 | 0.151139 | 0.00105  | 7.71E-05 | 0.99867 | -0.08159 | 0.07816  | -0.00851 |
| -0.07719 | 0.09569  | -0.10515 | 0.02306  | 0.117588 | 0.01099 | 0.070046 | 0.13066  | 0.176189 |
| -0.00985 | 0.83188  | -0.3361  | 8.53E-14 | 0.067604 | 0.14465 | 0.048035 | 0.30027  | 0.238894 |
| 0.081177 | 0.0797   | 0.150337 | 0.00112  | 0.067415 | 0.14578 | 0.163255 | 0.0004   | 0.169978 |
| -0.08397 | 0.06985  | -0.20536 | 7.68E-06 | -0.00152 | 0.97386 | 0.017305 | 0.70915  | -0.01102 |
| -0.08425 | 0.0689   | -0.3106  | 6.66E-12 | -0.03027 | 0.514   | -0.08781 | 0.05792  | -0.1884  |
| 0.187119 | 4.72E-05 | -0.08738 | 0.05917  | 0.050051 | 0.28041 | 0.082119 | 0.07625  | 0.144031 |
| -0.17143 | 0.0002   | -0.22382 | 1.03E-06 | -0.05948 | 0.19945 | -0.08079 | 0.08114  | -0.14101 |
| 0.023977 | 0.60528  | -0.12718 | 0.00592  | -0.05377 | 0.24621 | -0.05822 | 0.20919  | -0.05844 |
| 0.273558 | 1.85E-09 | 0.088367 | 0.05636  | 0.010437 | 0.82202 | 0.007643 | 0.86916  | 0.044969 |
| -0.13917 | 0.00258  | -0.16475 | 0.00035  | 0.056785 | 0.22064 | 0.072505 | 0.11765  | 0.209306 |
| -0.06371 | 0.1693   | -0.33672 | 7.64E-14 | -0.00348 | 0.94013 | -0.07497 | 0.10567  | -0.04747 |
| 0.108585 | 0.01892  | -0.00984 | 0.83211  | -0.00157 | 0.97306 | -0.05391 | 0.24494  | 0.04986  |
| 0.267711 | 4.17E-09 | 0.271949 | 2.31E-09 | 0.01383  | 0.76564 | -0.01196 | 0.79655  | -0.01012 |
| 0.298734 | 4.41E-11 | -0.03664 | 0.42958  | -0.06021 | 0.19398 | -0.21732 | 2.13E-06 | -0.05365 |
| 0.035675 | 0.44182  | -0.28065 | 6.69E-10 | -0.0195  | 0.67419 | -0.15373 | 0.00086  | -0.03325 |
| 0.167855 | 0.00027  | -0.07708 | 0.09617  | -0.02873 | 0.53576 | -0.06679 | 0.14957  | 0.029844 |
| 0.128062 | 0.00558  | 0.033508 | 0.47007  | 0.055814 | 0.22864 | 0.023132 | 0.61806  | 0.252101 |
| 0.190093 | 3.55E-05 | 0.060437 | 0.19232  | 0.023013 | 0.61985 | -0.04138 | 0.37232  | 0.169434 |
| 0.23348  | 3.35E-07 | -0.04077 | 0.37942  | 0.014972 | 0.74693 | -0.05242 | 0.25821  | -0.05334 |
| 0.078281 | 0.09108  | -0.07777 | 0.09323  | -0.03163 | 0.49526 | -0.03358 | 0.46909  | 0.019929 |
| 0.05265  | 0.25616  | -0.07475 | 0.10668  | 0.002907 | 0.95004 | -0.00852 | 0.85426  | -0.09649 |
| 0.15189  | 0.00099  | 0.051926 | 0.26277  | 0.026371 | 0.56972 | 0.00849  | 0.8548   | 0.014426 |
| -0.03404 | 0.46303  | -0.07152 | 0.12275  | 0.023475 | 0.61284 | 0.063888 | 0.1681   | 0.122493 |
| 0.196918 | 1.82E-05 | -0.071   | 0.1255   | -0.03031 | 0.51345 | -0.06134 | 0.18573  | -0.09016 |
| -0.18427 | 6.18E-05 | -0.19447 | 2.32E-05 | 0.04819  | 0.29871 | 0.114215 | 0.01352  | 0.247403 |
| 0.076823 | 0.09728  | 0.001468 | 0.97476  | 0.021129 | 0.6488  | 0.043573 | 0.34745  | 0.12627  |
| 0.119506 | 0.00974  | 0.007012 | 0.87988  | 0.008932 | 0.84735 | -0.01587 | 0.73227  | 0.035545 |
| 0.022777 | 0.62346  | -0.02643 | 0.56891  | 0.03148  | 0.49736 | -0.03735 | 0.42062  | 0.109509 |
| 0.231284 | 4.34E-07 | 0.079625 | 0.08565  | 0.027102 | 0.55908 | 0.003248 | 0.94418  | 0.081981 |

|          |          |          |          |          |         |          |          |          |
|----------|----------|----------|----------|----------|---------|----------|----------|----------|
| 0.075629 | 0.10261  | 0.172959 | 0.00017  | 0.062991 | 0.17416 | 0.188838 | 4.01E-05 | 0.093376 |
| 0.126352 | 0.00625  | -0.06282 | 0.17533  | -0.04831 | 0.29748 | -0.11129 | 0.01613  | -0.12232 |
| 0.231026 | 4.47E-07 | 0.291861 | 1.27E-10 | 0.071334 | 0.12371 | -0.03428 | 0.45993  | 0.248513 |
| 0.151026 | 0.00106  | 0.01696  | 0.7147   | 0.012854 | 0.78175 | 0.004518 | 0.92243  | 0.034873 |
| -0.06852 | 0.13928  | 0.156534 | 0.00069  | 0.0073   | 0.87498 | 0.060706 | 0.19034  | 0.063081 |
| 0.082069 | 0.07644  | 0.043961 | 0.34318  | 0.003576 | 0.93857 | -0.01831 | 0.69314  | -0.06651 |
| 0.151195 | 0.00105  | -0.123   | 0.00779  | 0.064697 | 0.16277 | -0.01921 | 0.67889  | 0.086341 |
| 0.306737 | 1.25E-11 | 0.345355 | 1.58E-14 | 0.024871 | 0.59189 | 0.003546 | 0.93908  | 0.006045 |
| -0.24883 | 5.07E-08 | -0.11208 | 0.01538  | 0.045326 | 0.32838 | 0.040763 | 0.37945  | 0.174023 |
| 0.028584 | 0.53777  | -0.01327 | 0.77483  | 0.005351 | 0.90818 | -0.03838 | 0.40799  | 0.034344 |
| -0.01851 | 0.68998  | -0.23416 | 3.09E-07 | 0.023626 | 0.61057 | -0.02748 | 0.55355  | -0.02059 |
| 0.090193 | 0.05143  | -0.13204 | 0.00426  | 0.008704 | 0.85119 | -0.09929 | 0.03193  | 0.023672 |
| -0.04851 | 0.29552  | -0.22062 | 1.48E-06 | 0.031451 | 0.49777 | -0.00801 | 0.86301  | 0.085561 |
| 0.077423 | 0.09469  | -0.09503 | 0.04009  | 0.004146 | 0.92879 | -0.03311 | 0.47536  | 0.007961 |
| 0.167975 | 0.00027  | -0.12353 | 0.00753  | -0.0591  | 0.20235 | -0.15915 | 0.00056  | -0.02363 |
| 0.209039 | 5.22E-06 | 0.190242 | 3.50E-05 | -0.05749 | 0.21494 | -0.08022 | 0.08332  | -0.22061 |
| 0.055744 | 0.22923  | 0.05363  | 0.24741  | -0.02997 | 0.51824 | 0.00129  | 0.97782  | -0.08668 |
| -0.08663 | 0.06139  | -0.18012 | 9.08E-05 | -0.04731 | 0.30759 | -0.11114 | 0.01627  | -0.0279  |
| 0.167009 | 0.00029  | -0.06305 | 0.17376  | 0.000449 | 0.99228 | -0.07065 | 0.12735  | 0.014302 |
| 0.208601 | 5.47E-06 | 0.134854 | 0.0035   | -0.02885 | 0.53403 | -0.15693 | 0.00067  | -0.01184 |
| 0.218495 | 1.87E-06 | 0.204209 | 8.66E-06 | -0.03594 | 0.43837 | -0.0784  | 0.09058  | -0.0206  |
| 0.087393 | 0.05914  | 0.117957 | 0.01074  | 0.055743 | 0.22924 | 0.151785 | 0.001    | 0.109321 |
| 0.093194 | 0.04412  | 0.332356 | 1.66E-13 | -0.0365  | 0.43139 | -0.0381  | 0.41141  | 0.009112 |
| -0.02694 | 0.56145  | 0.009216 | 0.84255  | 0.000556 | 0.99043 | -0.00126 | 0.97839  | 0.096303 |
| 0.113072 | 0.01449  | 0.059813 | 0.19696  | 0.051581 | 0.26595 | 0.091936 | 0.04707  | 0.054354 |
| -0.1507  | 0.00109  | -0.22597 | 8.05E-07 | 0.164702 | 0.00035 | 0.181224 | 8.20E-05 | 0.438091 |
| 0.13986  | 0.00245  | 0.185113 | 5.71E-05 | -0.00401 | 0.93115 | -0.02889 | 0.53342  | -0.03255 |
| 0.024814 | 0.59274  | 0.206436 | 6.87E-06 | -0.00085 | 0.98546 | 0.07197  | 0.12039  | 0.013283 |
| 0.079594 | 0.08577  | 0.279696 | 7.69E-10 | 0.076993 | 0.09654 | 0.120937 | 0.00889  | 0.247363 |
| 0.077946 | 0.09248  | -0.00916 | 0.84353  | -0.01476 | 0.75044 | -0.06868 | 0.13833  | 0.0613   |
| -0.22857 | 5.96E-07 | -0.12219 | 0.00821  | -0.03411 | 0.46217 | 0.002786 | 0.95212  | -0.03781 |
| 0.157742 | 0.00062  | 0.171802 | 0.00019  | 0.05995  | 0.19593 | 0.10498  | 0.02328  | 0.148748 |
| 0.325773 | 5.24E-13 | 0.096021 | 0.03806  | -0.02385 | 0.60712 | -0.16607 | 0.00031  | -0.08616 |
| 0.156817 | 0.00067  | -0.03068 | 0.50841  | -0.00681 | 0.8833  | -0.03468 | 0.45467  | -0.06196 |
| 0.191623 | 3.06E-05 | 0.211219 | 4.14E-06 | 0.00322  | 0.94467 | -0.0957  | 0.03871  | 0.026234 |
| -0.03658 | 0.43036  | -0.07306 | 0.11486  | 0.024555 | 0.5966  | 0.127986 | 0.00561  | -0.05713 |
| 0.118394 | 0.01045  | -0.05832 | 0.20836  | -0.02641 | 0.56917 | -0.14278 | 0.00198  | -0.09544 |
| 0.150128 | 0.00114  | -0.04418 | 0.34073  | 0.018589 | 0.68866 | -0.03902 | 0.40022  | 0.12907  |
| 0.044009 | 0.34265  | -0.0657  | 0.15632  | -0.00038 | 0.99339 | -0.04102 | 0.37644  | 0.067993 |
| 0.457942 | 1.38E-25 | 0.088906 | 0.05487  | 0.008694 | 0.85136 | -0.04747 | 0.30601  | 0.039599 |
| -0.15698 | 0.00066  | -0.32198 | 1.00E-12 | 0.012492 | 0.78774 | -0.00683 | 0.88297  | -0.03599 |
| 0.177595 | 0.00011  | 0.177006 | 0.00012  | 0.015569 | 0.7372  | 0.064636 | 0.16316  | 0.202665 |
| 0.129116 | 0.0052   | 0.053402 | 0.24942  | -0.00882 | 0.84921 | -0.07954 | 0.08596  | 0.091893 |
| 0.047161 | 0.30916  | -0.02337 | 0.61445  | -0.01438 | 0.75662 | -0.06778 | 0.14362  | -0.01399 |
| 0.155333 | 0.00076  | -0.18984 | 3.64E-05 | 0.028138 | 0.54415 | -0.04082 | 0.37877  | 0.019039 |

|          |          |          |          |          |         |          |          |          |
|----------|----------|----------|----------|----------|---------|----------|----------|----------|
| 0.152028 | 0.00098  | -0.10035 | 0.03013  | -0.02811 | 0.54449 | -0.09256 | 0.04558  | -0.14556 |
| -0.08493 | 0.06669  | -0.20811 | 5.76E-06 | 0.028083 | 0.54493 | 0.042002 | 0.36512  | 0.01292  |
| 0.209999 | 4.71E-06 | 0.2692   | 3.39E-09 | 0.047588 | 0.30479 | 0.034171 | 0.46132  | 0.217746 |
| 0.263513 | 7.39E-09 | 0.146042 | 0.00155  | -0.01237 | 0.78979 | -0.00849 | 0.85487  | -0.10436 |
| 0.064424 | 0.16455  | 0.101162 | 0.02882  | 0.001696 | 0.97084 | -0.0732  | 0.11416  | -0.01855 |
| 0.028737 | 0.53561  | -0.19195 | 2.97E-05 | 0.00258  | 0.95565 | -0.03766 | 0.41687  | 0.026406 |
| 0.349744 | 6.97E-15 | 0.238123 | 1.92E-07 | -0.02107 | 0.64975 | -0.15101 | 0.00106  | -0.14139 |
| 0.005159 | 0.91146  | -0.16747 | 0.00028  | 0.057342 | 0.21613 | 0.090904 | 0.04962  | 0.148028 |
| 0.096859 | 0.0364   | -0.03307 | 0.47587  | 0.022395 | 0.62929 | -0.02912 | 0.53022  | 0.0821   |
| 0.228903 | 5.74E-07 | 0.212792 | 3.49E-06 | -0.00298 | 0.94878 | -0.07204 | 0.12004  | 0.004045 |
| 0.031119 | 0.50232  | -0.20318 | 9.64E-06 | -0.00674 | 0.88449 | -0.03202 | 0.49005  | 0.05367  |
| 0.072821 | 0.11606  | 0.163719 | 0.00038  | 0.028816 | 0.53448 | -0.01314 | 0.77694  | 0.092876 |
| 0.30612  | 1.37E-11 | 0.224917 | 9.08E-07 | -0.01606 | 0.72916 | -0.09816 | 0.03394  | 0.034628 |
| 0.108827 | 0.01865  | 0.185449 | 5.53E-05 | -0.01549 | 0.73842 | -0.09592 | 0.03826  | 0.027584 |
| 0.22664  | 7.45E-07 | 0.064169 | 0.16623  | -0.03125 | 0.50051 | -0.07931 | 0.08688  | -0.07477 |
| -0.00134 | 0.97702  | -0.13577 | 0.00329  | 0.007889 | 0.86499 | 0.019033 | 0.68164  | 0.038448 |
| 0.085046 | 0.06632  | 0.229091 | 5.61E-07 | 0.027546 | 0.55265 | 0.101157 | 0.02883  | 0.048867 |
| -0.09621 | 0.03768  | 0.016253 | 0.7261   | -0.00507 | 0.91292 | 0.111825 | 0.01562  | -0.13988 |
| 0.156727 | 0.00068  | -0.07196 | 0.12043  | -0.04399 | 0.3428  | -0.10192 | 0.02764  | -0.07355 |
| 0.150208 | 0.00113  | -0.06362 | 0.16991  | 0.009384 | 0.83972 | -0.0539  | 0.24499  | 0.013414 |
| 0.203771 | 9.06E-06 | 0.015858 | 0.7325   | -0.00582 | 0.90023 | -0.0649  | 0.16146  | 0.056408 |
| 0.052798 | 0.25482  | -0.14388 | 0.00183  | 0.002132 | 0.96335 | -0.02072 | 0.65521  | 0.016726 |
| 0.184251 | 6.19E-05 | 0.118167 | 0.0106   | 0.043962 | 0.34316 | 0.055528 | 0.23104  | 0.14823  |
| 0.117399 | 0.01112  | -0.00443 | 0.92389  | -0.04155 | 0.3703  | -0.12339 | 0.00759  | -0.07827 |
| 0.074401 | 0.10833  | -0.08373 | 0.07066  | -0.03296 | 0.47736 | -0.04667 | 0.31423  | -0.06727 |
| -0.06414 | 0.16645  | 0.071492 | 0.12288  | -0.03023 | 0.51465 | 0.111411 | 0.01601  | -0.00811 |
| 0.073866 | 0.1109   | -0.1141  | 0.01362  | -0.00424 | 0.92719 | -0.05325 | 0.25075  | -0.07893 |
| 0.192427 | 2.83E-05 | -0.03689 | 0.42637  | -0.01894 | 0.68311 | -0.12502 | 0.00683  | 0.001495 |
| 0.053879 | 0.24521  | -0.10865 | 0.01885  | -0.06232 | 0.17878 | -0.14713 | 0.00143  | -0.03621 |
| 0.421586 | 1.51E-21 | 0.362346 | 6.18E-16 | 0.046502 | 0.31597 | 0.054698 | 0.2381   | 0.090607 |
| 0.217552 | 2.08E-06 | -0.06222 | 0.17952  | -0.02237 | 0.62971 | -0.11028 | 0.01713  | -0.06727 |
| 0.003675 | 0.93686  | 0.090711 | 0.05011  | -0.05971 | 0.19776 | -0.00597 | 0.89767  | 0.002037 |
| 0.095807 | 0.03849  | -0.21419 | 3.00E-06 | -0.05556 | 0.23075 | -0.2104  | 4.52E-06 | -0.11816 |
| -0.0638  | 0.16868  | 0.211889 | 3.85E-06 | -0.03757 | 0.41789 | -0.00812 | 0.86111  | -0.03456 |
| 0.284043 | 4.08E-10 | 0.106158 | 0.02177  | 0.000991 | 0.98295 | -0.08871 | 0.0554   | 0.024526 |
| 0.096391 | 0.03732  | -0.13126 | 0.00449  | -0.01516 | 0.74384 | -0.06733 | 0.14629  | -0.076   |
| 0.352848 | 3.88E-15 | -0.03048 | 0.51118  | 0.070375 | 0.12886 | 0.024407 | 0.59881  | 0.179317 |
| 0.113608 | 0.01403  | 0.139434 | 0.00253  | -0.01217 | 0.79315 | 0.023942 | 0.6058   | -0.00507 |
| 0.290716 | 1.51E-10 | 0.068879 | 0.13721  | 0.012946 | 0.78022 | -0.04095 | 0.37728  | 0.134763 |
| 0.071202 | 0.12441  | 0.087682 | 0.05831  | -0.06762 | 0.14456 | -0.11314 | 0.01443  | -0.00761 |
| 0.120393 | 0.00921  | 0.004284 | 0.92644  | -0.00676 | 0.88414 | 0.0536   | 0.24767  | -0.03307 |
| 0.132732 | 0.00406  | 0.36671  | 2.60E-16 | 0.009494 | 0.83786 | 0.009441 | 0.83876  | 0.056859 |
| -0.27043 | 2.86E-09 | -0.30826 | 9.74E-12 | -0.09033 | 0.05109 | -0.13329 | 0.00391  | -0.21745 |
| 0.14573  | 0.00159  | 0.225493 | 8.50E-07 | -0.05827 | 0.20881 | -0.05504 | 0.23516  | -0.00424 |
| -0.06216 | 0.17994  | 0.224272 | 9.78E-07 | -0.00504 | 0.91342 | 0.000912 | 0.98432  | 0.00236  |

|          |          |          |          |          |         |          |          |          |
|----------|----------|----------|----------|----------|---------|----------|----------|----------|
| -0.08023 | 0.08328  | -0.00953 | 0.83721  | -0.01227 | 0.79149 | -0.02781 | 0.54882  | -0.05193 |
| -0.0791  | 0.08774  | -0.06868 | 0.13836  | 0.067074 | 0.14783 | 0.007832 | 0.86595  | 0.052785 |
| 0.056375 | 0.22399  | -0.08082 | 0.08103  | 0.065326 | 0.15871 | 0.017768 | 0.70174  | 0.26975  |
| 0.408142 | 3.58E-20 | 0.222061 | 1.26E-06 | 0.04891  | 0.29154 | 0.040833 | 0.37863  | 0.17827  |
| 0.011849 | 0.79844  | -0.21376 | 3.15E-06 | -0.05533 | 0.23272 | -0.12382 | 0.00739  | -0.12643 |
| 0.045645 | 0.32499  | 0.019169 | 0.67947  | 0.005071 | 0.91297 | -0.01552 | 0.73795  | -0.0446  |
| -0.29348 | 9.92E-11 | -0.1837  | 6.52E-05 | 0.109655 | 0.01777 | 0.33738  | 6.78E-14 | 0.151458 |
| -0.27252 | 2.14E-09 | -0.16287 | 0.00041  | 0.087307 | 0.05939 | 0.238547 | 1.82E-07 | 0.07576  |
| 0.10344  | 0.02539  | -0.06356 | 0.1703   | -0.0116  | 0.80261 | -0.0159  | 0.73187  | -0.02603 |
| 0.226557 | 7.53E-07 | -0.02209 | 0.634    | -0.04014 | 0.38675 | -0.07899 | 0.08816  | -0.08328 |
| 0.095694 | 0.03872  | -0.12721 | 0.00591  | -0.02747 | 0.55372 | -0.12202 | 0.0083   | -0.06953 |
| 0.170776 | 0.00021  | -0.07588 | 0.10149  | 0.026827 | 0.56308 | 0.030034 | 0.51735  | 0.157776 |
| 0.16894  | 0.00024  | 0.108761 | 0.01872  | 0.014127 | 0.76076 | 0.042176 | 0.36315  | 0.078211 |
| 0.131785 | 0.00433  | 0.05461  | 0.23886  | -0.01385 | 0.76527 | -0.13278 | 0.00405  | 0.043263 |
| 0.035467 | 0.44449  | -0.25522 | 2.23E-08 | -0.05332 | 0.25015 | -0.15394 | 0.00084  | -0.13694 |
| 0.185344 | 5.59E-05 | 0.045309 | 0.32856  | 0.056353 | 0.22417 | 0.031635 | 0.49525  | 0.111779 |
| 0.195339 | 2.13E-05 | 0.494902 | 3.18E-30 | 0.007316 | 0.87472 | 0.115466 | 0.01253  | 0.065108 |
| 0.109128 | 0.01832  | -0.18342 | 6.69E-05 | 0.00746  | 0.87227 | -0.06013 | 0.19461  | -0.00425 |
| -0.07875 | 0.08914  | 0.032869 | 0.47857  | 0.090255 | 0.05128 | 0.276216 | 1.27E-09 | 0.091174 |
| 0.04947  | 0.28604  | -0.1356  | 0.00332  | -0.03563 | 0.44244 | -0.06042 | 0.19243  | 0.022266 |
| 0.366785 | 2.56E-16 | 0.127833 | 0.00567  | 0.041132 | 0.37515 | -0.03508 | 0.44949  | 0.182548 |
| 0.253242 | 2.88E-08 | 0.25573  | 2.08E-08 | 0.008265 | 0.85863 | -0.05167 | 0.26516  | 0.129299 |
| 0.237833 | 1.99E-07 | 0.310391 | 6.90E-12 | 0.039914 | 0.38947 | 0.049131 | 0.28936  | -0.00247 |
| 0.104942 | 0.02333  | -0.12314 | 0.00772  | -0.03353 | 0.46983 | -0.1102  | 0.01721  | -0.08239 |
| 0.192959 | 2.69E-05 | 0.332589 | 1.59E-13 | 0.021847 | 0.63771 | -0.1623  | 0.00043  | 0.080904 |
| 0.176422 | 0.00013  | -0.00017 | 0.99711  | 0.037098 | 0.42381 | -0.00276 | 0.95257  | 0.089823 |
| 0.302595 | 2.41E-11 | -0.00247 | 0.95759  | -0.018   | 0.69809 | -0.08299 | 0.07318  | -0.01772 |
| 0.101491 | 0.02831  | 0.311919 | 5.37E-12 | 0.003069 | 0.94727 | 0.018765 | 0.68587  | -0.00174 |
| 0.28142  | 5.99E-10 | 0.215702 | 2.55E-06 | 0.029152 | 0.52973 | 0.018609 | 0.68834  | 0.019396 |
| -0.07619 | 0.10008  | -0.37391 | 6.06E-17 | -0.01992 | 0.6677  | 0.003666 | 0.93702  | -0.07286 |
| 0.020792 | 0.65403  | 0.247903 | 5.70E-08 | 0.032765 | 0.47997 | 0.059414 | 0.19997  | 0.087121 |
| -0.1767  | 0.00012  | -0.02696 | 0.56115  | -0.02397 | 0.60542 | -0.04372 | 0.34582  | -0.01055 |
| 0.260277 | 1.14E-08 | 0.219941 | 1.59E-06 | -0.03325 | 0.47354 | -0.07052 | 0.12804  | -0.01898 |
| 0.062599 | 0.17687  | -0.06352 | 0.17057  | 0.056885 | 0.21983 | 0.055676 | 0.2298   | 0.1107   |
| 0.125748 | 0.00651  | -0.09746 | 0.03525  | -0.02795 | 0.54679 | -0.14035 | 0.00237  | -0.04388 |
| 0.088176 | 0.0569   | 0.052255 | 0.25975  | -0.01241 | 0.7891  | -0.04233 | 0.36143  | 0.042755 |
| 0.171691 | 0.00019  | 0.097503 | 0.03517  | -0.02555 | 0.58186 | -0.11764 | 0.01095  | 0.082296 |
| 0.093504 | 0.04342  | -0.05347 | 0.2488   | -0.008   | 0.86318 | -0.09262 | 0.04545  | 0.014879 |
| 0.053606 | 0.24761  | -0.0391  | 0.39926  | -0.02327 | 0.61602 | -0.07605 | 0.10072  | -0.0598  |
| 0.219286 | 1.71E-06 | 0.421934 | 1.39E-21 | 0.025041 | 0.58935 | 0.051253 | 0.26901  | 0.236886 |
| 0.216689 | 2.29E-06 | 0.094115 | 0.04206  | -0.01367 | 0.76825 | -0.1046  | 0.02378  | 0.053649 |
| -0.0003  | 0.99476  | -0.17594 | 0.00013  | 0.068186 | 0.14121 | -0.0038  | 0.9348   | 0.142826 |
| 0.208222 | 5.69E-06 | 0.107318 | 0.02036  | -0.01181 | 0.79908 | 0.010122 | 0.82731  | 0.022899 |
| -0.02892 | 0.53296  | -0.04492 | 0.33275  | -0.00351 | 0.93966 | 0.06555  | 0.15728  | -0.07625 |
| 0.140551 | 0.00233  | 0.111175 | 0.01624  | 0.047937 | 0.30126 | 0.019337 | 0.67682  | 0.141616 |

|          |          |          |          |          |         |          |          |          |
|----------|----------|----------|----------|----------|---------|----------|----------|----------|
| -0.04793 | 0.30129  | -0.16966 | 0.00023  | -0.01195 | 0.79676 | 0.010572 | 0.81975  | -0.17391 |
| -0.06308 | 0.17357  | -0.17134 | 0.0002   | -0.02838 | 0.54071 | 0.046427 | 0.31675  | -0.13736 |
| 0.141903 | 0.00211  | 0.166047 | 0.00031  | -0.02906 | 0.53101 | -0.04853 | 0.29526  | -0.04767 |
| 0.490669 | 1.16E-29 | 0.181138 | 8.27E-05 | -0.01776 | 0.7018  | -0.10462 | 0.02376  | 0.026119 |
| 0.131366 | 0.00446  | 0.01983  | 0.66907  | -0.05036 | 0.27749 | -0.13417 | 0.00368  | -0.08649 |
| 0.132556 | 0.00411  | -0.11074 | 0.01666  | 0.012768 | 0.78317 | -0.05349 | 0.24864  | 0.068909 |
| 0.079733 | 0.08522  | -0.01979 | 0.66966  | 0.004383 | 0.92474 | -0.00776 | 0.86725  | 0.00087  |
| 0.083062 | 0.07293  | -0.11774 | 0.01088  | -0.00694 | 0.88116 | -0.12456 | 0.00704  | 0.053496 |
| 0.161168 | 0.00047  | -0.00558 | 0.90422  | 0.048563 | 0.29498 | 0.065472 | 0.15778  | 0.063962 |
| 0.163825 | 0.00038  | 0.004611 | 0.92084  | -0.00883 | 0.84913 | 0.032124 | 0.4886   | -0.0127  |
| 0.319508 | 1.52E-12 | 0.460572 | 6.72E-26 | 0.003126 | 0.94628 | -0.01095 | 0.81349  | 0.025336 |
| -0.17623 | 0.00013  | -0.12168 | 0.00848  | -0.04712 | 0.30957 | -0.01898 | 0.68244  | -0.13038 |
| -0.21294 | 3.44E-06 | -0.03057 | 0.50993  | -0.04863 | 0.29436 | -0.00227 | 0.96094  | -0.10156 |
| 0.202014 | 1.09E-05 | 0.230077 | 5.00E-07 | 0.042415 | 0.36043 | 0.000405 | 0.99303  | 0.232325 |
| 0.208403 | 5.59E-06 | 0.067043 | 0.14802  | -0.00754 | 0.87099 | -0.05375 | 0.24635  | 0.081938 |
| 0.147608 | 0.00138  | 0.051272 | 0.26883  | -0.00614 | 0.89473 | -0.05539 | 0.23223  | 0.01702  |
| 0.203833 | 9.01E-06 | 0.306915 | 1.21E-11 | 0.069267 | 0.135   | 0.055166 | 0.2341   | 0.26675  |
| 0.032324 | 0.4859   | -0.043   | 0.35385  | 0.078937 | 0.08839 | 0.148984 | 0.00124  | 0.305309 |
| 0.163653 | 0.00038  | 0.174757 | 0.00015  | 0.048153 | 0.29908 | 0.187021 | 4.77E-05 | 0.039768 |
| 0.06171  | 0.1831   | -0.1784  | 0.00011  | -0.00629 | 0.89214 | -0.06791 | 0.14284  | -0.03243 |
| 0.113053 | 0.01451  | 0.438242 | 2.45E-23 | 0.014699 | 0.75139 | 0.015937 | 0.73122  | 0.105942 |
| 0.025404 | 0.58397  | -0.10852 | 0.01898  | 0.007914 | 0.86456 | 0.016794 | 0.71738  | 0.045642 |
| -0.1888  | 4.02E-05 | -0.04632 | 0.31792  | 0.023039 | 0.61946 | 0.043534 | 0.34788  | 0.188262 |
| 0.033778 | 0.46649  | 0.228204 | 6.22E-07 | 0.022972 | 0.62048 | 0.067632 | 0.14448  | 0.066608 |
| 0.136276 | 0.00317  | -0.04334 | 0.35     | -0.01353 | 0.7706  | -0.12171 | 0.00847  | 0.006887 |
| 0.144029 | 0.00181  | -0.01179 | 0.79938  | 0.041998 | 0.36517 | -0.01911 | 0.68037  | 0.102949 |
| 0.211831 | 3.88E-06 | 0.064906 | 0.16141  | 0.021277 | 0.64651 | -0.12886 | 0.00529  | -0.04104 |
| 0.278753 | 8.81E-10 | 0.252174 | 3.31E-08 | 0.008489 | 0.85483 | -0.03046 | 0.51147  | -0.05047 |
| -0.09092 | 0.04957  | -0.03447 | 0.4574   | -0.01329 | 0.77446 | 0.056868 | 0.21996  | -0.0349  |
| 0.036752 | 0.42816  | 0.005905 | 0.89872  | 0.020973 | 0.65123 | -0.0379  | 0.41386  | 0.070032 |
| 0.037333 | 0.42089  | 0.039141 | 0.39872  | -0.00332 | 0.94296 | 0.033999 | 0.46358  | 0.028478 |
| 0.254721 | 2.38E-08 | 0.037974 | 0.41295  | 0.006444 | 0.88955 | -0.07122 | 0.1243   | -0.06488 |
| 0.220407 | 1.51E-06 | -0.03086 | 0.50583  | -0.01953 | 0.67374 | -0.11023 | 0.01717  | 0.033819 |
| 0.001929 | 0.96684  | 0.016181 | 0.72727  | -0.03797 | 0.41305 | -0.05035 | 0.27754  | -0.14995 |
| -0.04585 | 0.32279  | 0.221415 | 1.35E-06 | -0.0345  | 0.45696 | 0.098505 | 0.03332  | -0.00579 |
| 0.014956 | 0.74718  | 0.313561 | 4.10E-12 | -0.04443 | 0.33806 | 0.052529 | 0.25726  | -0.16112 |
| 0.117275 | 0.0112   | -0.08419 | 0.06911  | -0.00467 | 0.9198  | -0.01138 | 0.80632  | -0.06581 |
| -0.02079 | 0.65401  | -0.09598 | 0.03814  | -0.01807 | 0.69684 | -0.02457 | 0.59637  | -0.02958 |
| 0.014386 | 0.75651  | -0.08585 | 0.06379  | 0.005782 | 0.90082 | -0.02981 | 0.52042  | 0.097039 |
| 0.075533 | 0.10305  | 0.157003 | 0.00066  | -0.00261 | 0.95514 | 0.026115 | 0.57348  | 0.044074 |
| 0.087169 | 0.0598   | -0.00601 | 0.89689  | 0.003757 | 0.93547 | -0.01524 | 0.74252  | -0.01784 |
| 0.057514 | 0.21476  | -0.00113 | 0.98061  | -0.00957 | 0.8366  | 0.007028 | 0.8796   | -0.07068 |
| 0.224121 | 9.95E-07 | 0.069415 | 0.13417  | 0.055954 | 0.22748 | 0.0471   | 0.30979  | 0.058043 |
| -0.01269 | 0.78454  | -0.09617 | 0.03776  | 0.025853 | 0.57733 | 0.02677  | 0.5639   | 0.074756 |
| 0.130572 | 0.00471  | -0.07099 | 0.12555  | -0.03868 | 0.40435 | -0.17449 | 0.00015  | -0.07402 |

|          |          |          |          |          |          |          |          |          |
|----------|----------|----------|----------|----------|----------|----------|----------|----------|
| -0.19017 | 3.53E-05 | -0.00371 | 0.93629  | -0.00811 | 0.86132  | 0.055565 | 0.23073  | 0.039429 |
| -0.04161 | 0.3696   | -0.04922 | 0.28852  | 0.011411 | 0.80573  | -0.05086 | 0.27269  | -0.01364 |
| -0.13239 | 0.00416  | -0.45714 | 1.71E-25 | -0.01771 | 0.70273  | -0.07294 | 0.11546  | -0.10494 |
| 0.052232 | 0.25996  | -0.13627 | 0.00317  | 0.019856 | 0.66867  | -0.01891 | 0.6835   | 0.043203 |
| 0.302714 | 2.36E-11 | -0.03996 | 0.38887  | -0.02032 | 0.66145  | -0.05951 | 0.19926  | -0.11192 |
| 0.357635 | 1.55E-15 | 0.260249 | 1.15E-08 | 0.055407 | 0.23207  | -0.05737 | 0.21588  | 0.133548 |
| 0.012311 | 0.79075  | 0.397884 | 3.64E-19 | 0.023368 | 0.61447  | 0.112984 | 0.01457  | 0.062559 |
| 0.112095 | 0.01537  | -0.18148 | 8.01E-05 | -0.06942 | 0.13414  | -0.19682 | 1.84E-05 | -0.06068 |
| 0.273537 | 1.85E-09 | -0.12326 | 0.00766  | -0.02331 | 0.61535  | -0.12341 | 0.00759  | -0.02976 |
| 0.217919 | 2.00E-06 | 0.115749 | 0.01231  | -0.00274 | 0.95294  | -0.03327 | 0.47326  | 0.044877 |
| -0.00344 | 0.94094  | -0.24946 | 4.68E-08 | -0.0112  | 0.80931  | -0.04296 | 0.35423  | 0.026229 |
| 0.174579 | 0.00015  | 0.038537 | 0.40605  | -0.01468 | 0.75176  | -0.03745 | 0.41948  | 0.026746 |
| 0.052051 | 0.26162  | -0.15234 | 0.00096  | 0.035966 | 0.43811  | -0.04115 | 0.37492  | 0.083536 |
| 0.079585 | 0.0858   | 0.125888 | 0.00645  | -0.024   | 0.60499  | -0.02682 | 0.56322  | -0.0681  |
| 0.068326 | 0.1404   | -0.21535 | 2.65E-06 | 0.019013 | 0.68195  | -0.11322 | 0.01437  | 0.029157 |
| 0.353367 | 3.51E-15 | 0.158813 | 0.00057  | 0.038704 | 0.40401  | 0.033433 | 0.47106  | 0.101936 |
| 0.020938 | 0.65176  | -0.10746 | 0.02019  | -0.0079  | 0.86483  | -0.00769 | 0.86828  | -0.00345 |
| 0.154782 | 0.00079  | -0.02409 | 0.60356  | -0.03067 | 0.50846  | -0.0741  | 0.10978  | -0.01614 |
| 0.203985 | 8.87E-06 | -0.0384  | 0.40768  | -0.00988 | 0.83141  | -0.04302 | 0.3536   | -0.03    |
| -0.18166 | 7.88E-05 | 0.020869 | 0.65285  | 0.032297 | 0.48626  | 0.058882 | 0.20403  | 0.062555 |
| 0.092163 | 0.04653  | 0.028731 | 0.53569  | 0.020061 | 0.66545  | -0.01337 | 0.77322  | 0.165067 |
| 0.408162 | 3.56E-20 | 0.102423 | 0.02688  | -0.0077  | 0.86816  | -0.10023 | 0.03035  | 0.064894 |
| -0.14004 | 0.00242  | -0.16094 | 0.00048  | -0.00179 | 0.96921  | 0.04931  | 0.2876   | 0.009099 |
| 0.408768 | 3.10E-20 | 0.262446 | 8.53E-09 | -0.02458 | 0.5962   | -0.10366 | 0.02509  | 0.066904 |
| 0.303449 | 2.10E-11 | 0.152251 | 0.00096  | -0.01579 | 0.73359  | -0.00624 | 0.89294  | -0.06514 |
| 0.305527 | 1.51E-11 | 0.026289 | 0.57093  | 0.008943 | 0.84715  | -0.01843 | 0.69124  | -0.01577 |
| -0.09352 | 0.04339  | -0.07507 | 0.10517  | 0.182198 | 7.50E-05 | 0.281231 | 6.15E-10 | 0.370847 |
| 0.073686 | 0.11177  | 0.164064 | 0.00037  | 0.014662 | 0.75198  | -0.01514 | 0.74413  | 0.015581 |
| 0.065687 | 0.15642  | -0.07865 | 0.08955  | 0.025177 | 0.58734  | -0.00142 | 0.97561  | 0.10443  |
| 0.233385 | 3.39E-07 | 0.347078 | 1.15E-14 | 0.003425 | 0.94116  | -0.00786 | 0.86549  | -0.00656 |
| 0.172485 | 0.00018  | 0.300369 | 3.42E-11 | 0.106803 | 0.02097  | 0.144264 | 0.00177  | 0.193857 |
| 0.154809 | 0.00079  | -0.02633 | 0.57028  | -0.01562 | 0.73629  | 0.023309 | 0.61537  | 0.018041 |
| 0.096325 | 0.03745  | -0.08163 | 0.07802  | 0.085279 | 0.06558  | 0.069198 | 0.13539  | 0.122966 |
| 0.061899 | 0.18177  | -0.15103 | 0.00106  | -0.03431 | 0.45946  | -0.1061  | 0.02184  | 0.017906 |
| -0.20115 | 1.19E-05 | -0.24909 | 4.91E-08 | -0.00599 | 0.89723  | 0.071209 | 0.12438  | -0.18236 |
| 0.099221 | 0.03206  | -0.01431 | 0.7577   | 0.038417 | 0.40752  | 0.097709 | 0.03478  | 0.024901 |
| 0.087476 | 0.0589   | -0.38982 | 2.13E-18 | -0.07445 | 0.10811  | -0.25207 | 3.35E-08 | -0.23158 |
| 0.224679 | 9.33E-07 | 0.263639 | 7.27E-09 | -0.0011  | 0.98117  | 0.022751 | 0.62386  | 0.047744 |
| 0.169704 | 0.00023  | -0.03311 | 0.47529  | -0.01256 | 0.78667  | -0.04353 | 0.34792  | 0.058229 |
| 0.075543 | 0.103    | 0.023808 | 0.60782  | -0.00483 | 0.91714  | -0.03703 | 0.42471  | -0.01017 |
| 0.048954 | 0.29111  | 0.176035 | 0.00013  | -0.00671 | 0.88501  | -0.01449 | 0.75476  | 7.96E-05 |
| -0.00651 | 0.8884   | 0.247592 | 5.93E-08 | -0.03142 | 0.49817  | -0.01095 | 0.81341  | -0.08212 |
| -0.23491 | 2.82E-07 | 0.077062 | 0.09625  | -0.01486 | 0.74869  | 0.050196 | 0.27902  | -0.07043 |
| 0.14367  | 0.00185  | -0.07589 | 0.10142  | -0.00073 | 0.98752  | -0.07426 | 0.10901  | 0.067501 |
| 0.337381 | 6.78E-14 | 0.13544  | 0.00336  | -0.01669 | 0.71901  | -0.01373 | 0.76729  | 0.080671 |

|          |          |          |          |          |         |          |         |          |
|----------|----------|----------|----------|----------|---------|----------|---------|----------|
| 0.176776 | 0.00012  | 0.210026 | 4.70E-06 | 0.097537 | 0.0351  | 0.127194 | 0.00591 | 0.116545 |
| 0.086352 | 0.06224  | -0.05692 | 0.21955  | -0.02528 | 0.58577 | -0.10054 | 0.02982 | -0.08797 |
| 0.007473 | 0.87205  | -0.12049 | 0.00915  | 0.008977 | 0.84658 | -0.00918 | 0.84319 | -0.02036 |
| 0.13547  | 0.00335  | -0.09396 | 0.04241  | 0.010859 | 0.81496 | -0.11387 | 0.01381 | 0.112414 |
| 0.065985 | 0.15454  | -0.17205 | 0.00019  | -0.01063 | 0.81886 | -0.07994 | 0.08441 | -0.01574 |
| 0.191334 | 3.15E-05 | -0.12562 | 0.00656  | -0.02254 | 0.62708 | -0.13846 | 0.00271 | -0.06756 |
| 0.251443 | 3.63E-08 | 0.492999 | 5.70E-30 | 0.01659  | 0.72066 | 0.07161  | 0.12226 | 0.091119 |
| 0.117362 | 0.01114  | -0.0758  | 0.10186  | -0.00206 | 0.96451 | -0.06666 | 0.15033 | -0.03345 |
| 0.015814 | 0.73322  | -0.12594 | 0.00643  | -0.00855 | 0.85379 | 0.014185 | 0.75981 | -0.037   |
| 0.219502 | 1.67E-06 | 0.272696 | 2.08E-09 | 0.03784  | 0.4146  | 0.131544 | 0.00441 | 0.074251 |
| 0.163906 | 0.00038  | 0.093653 | 0.04309  | 0.019019 | 0.68185 | -0.02772 | 0.55015 | 0.037072 |
| 0.078093 | 0.09186  | -0.23136 | 4.30E-07 | 0.005723 | 0.90183 | -0.06636 | 0.1522  | 0.012195 |
| 0.074718 | 0.10683  | 0.012306 | 0.79083  | 0.028416 | 0.54018 | 0.010944 | 0.81352 | 0.068096 |
| 0.033739 | 0.467    | -0.06002 | 0.19542  | -0.03117 | 0.50167 | -0.03999 | 0.3886  | 0.004871 |
| 0.085152 | 0.06598  | 0.06185  | 0.18211  | -0.01863 | 0.68806 | -0.05662 | 0.22196 | 0.011704 |
| 0.105859 | 0.02214  | -0.1074  | 0.02027  | -0.02549 | 0.58265 | -0.05187 | 0.26327 | -0.07641 |
| 0.098443 | 0.03343  | 0.127018 | 0.00598  | 0.04059  | 0.38148 | 0.069871 | 0.13163 | 0.109577 |
| -0.07824 | 0.09126  | -0.33735 | 6.82E-14 | 0.002196 | 0.96226 | -0.00809 | 0.86165 | 0.005944 |
| 0.418879 | 2.89E-21 | 0.433327 | 8.46E-23 | 0.039305 | 0.39675 | -0.08124 | 0.07947 | 0.158719 |
| 0.343573 | 2.20E-14 | 0.538342 | 1.90E-36 | 0.038191 | 0.41028 | 0.045598 | 0.32548 | 0.214535 |
| 0.400824 | 1.89E-19 | 0.43846  | 2.31E-23 | -0.05845 | 0.20736 | -0.09918 | 0.03213 | -0.01531 |
| 0.271057 | 2.62E-09 | 0.154463 | 0.00081  | -0.0234  | 0.61403 | -0.16258 | 0.00042 | -0.00366 |
| -0.07346 | 0.11288  | -0.22474 | 9.27E-07 | 0.038777 | 0.40313 | 0.064258 | 0.16565 | -0.043   |
| -0.02226 | 0.63141  | 0.099126 | 0.03222  | 0.039345 | 0.39627 | 0.127104 | 0.00595 | 0.163916 |
| 0.121494 | 0.00858  | -0.10654 | 0.0213   | 0.018442 | 0.69099 | -0.04442 | 0.33815 | 0.067345 |
| 0.283366 | 4.51E-10 | 0.485884 | 4.86E-29 | 0.053047 | 0.25259 | 0.020464 | 0.65914 | 0.209962 |
| -0.08082 | 0.08102  | -0.16236 | 0.00043  | -0.04947 | 0.28607 | -0.1541  | 0.00083 | -0.1992  |
| 0.286605 | 2.79E-10 | 0.250486 | 4.11E-08 | 0.055698 | 0.22962 | 0.074097 | 0.10979 | 0.065518 |
| -0.30157 | 2.83E-11 | -0.05228 | 0.25951  | 0.048663 | 0.29398 | 0.097406 | 0.03535 | 0.255887 |
| 0.00941  | 0.83929  | -0.34567 | 1.49E-14 | -0.05509 | 0.23477 | -0.132   | 0.00427 | -0.1539  |
| 0.069083 | 0.13604  | -0.22568 | 8.32E-07 | -0.05313 | 0.25186 | -0.15905 | 0.00056 | -0.12385 |
| 0.018082 | 0.69673  | -0.19229 | 2.87E-05 | -0.00154 | 0.97345 | -0.06544 | 0.15798 | 0.133512 |
| 0.197648 | 1.69E-05 | 0.136619 | 0.00309  | -0.01775 | 0.70199 | -0.08874 | 0.05533 | -0.0531  |
| 0.063366 | 0.17161  | -0.10202 | 0.02749  | -0.06418 | 0.16617 | -0.10446 | 0.02397 | -0.04256 |
| 0.069118 | 0.13585  | -0.09486 | 0.04047  | -0.00878 | 0.84987 | -0.05379 | 0.24603 | 0.048704 |
| -0.12823 | 0.00552  | 0.025952 | 0.57588  | -0.05309 | 0.25222 | 0.019705 | 0.67103 | -0.1258  |
| -0.13976 | 0.00247  | -0.43139 | 1.37E-22 | 0.071467 | 0.12301 | 0.090909 | 0.0496  | 0.022311 |
| 0.207364 | 6.23E-06 | 0.06405  | 0.16702  | -0.00322 | 0.94474 | -0.0583  | 0.20856 | 0.032461 |
| 0.132146 | 0.00423  | 0.027922 | 0.54724  | -0.02587 | 0.57714 | -0.07479 | 0.10648 | -0.01841 |
| 0.004382 | 0.92476  | -0.23022 | 4.92E-07 | -0.0626  | 0.17688 | -0.0283  | 0.54183 | -0.06611 |
| 0.210281 | 4.58E-06 | 0.225575 | 8.42E-07 | 0.038333 | 0.40853 | 0.065566 | 0.15718 | 0.064002 |
| -0.03733 | 0.42089  | -0.15674 | 0.00068  | 0.002604 | 0.95524 | -0.03439 | 0.45848 | 0.03552  |
| 0.107    | 0.02074  | -0.23627 | 2.40E-07 | -0.075   | 0.10551 | -0.12231 | 0.00815 | -0.06369 |
| 0.015825 | 0.73303  | 0.219569 | 1.66E-06 | -0.02155 | 0.64233 | 0.11495  | 0.01293 | 0.02744  |
| 0.023015 | 0.61983  | 0.11754  | 0.01102  | -0.02276 | 0.62373 | 0.018186 | 0.69507 | -0.05249 |



|          |          |          |          |          |         |          |         |          |
|----------|----------|----------|----------|----------|---------|----------|---------|----------|
| 0.362587 | 5.89E-16 | 0.307064 | 1.18E-11 | 0.043057 | 0.3532  | 0.027714 | 0.55024 | 0.158591 |
| -0.0185  | 0.69     | 0.101713 | 0.02796  | -0.00296 | 0.94907 | 0.045597 | 0.3255  | -0.06754 |
| -0.04215 | 0.36346  | -0.38002 | 1.71E-17 | -0.00729 | 0.87518 | -0.07262 | 0.11708 | -0.1474  |
| -0.00228 | 0.96086  | -0.07255 | 0.11742  | 0.01523  | 0.74272 | -0.04074 | 0.3797  | 0.049059 |
| 0.008859 | 0.84858  | 0.034909 | 0.45169  | 0.066917 | 0.14879 | 0.115239 | 0.0127  | 0.104706 |
| 0.123744 | 0.00742  | -0.08944 | 0.05342  | -0.02594 | 0.57612 | -0.10866 | 0.01883 | 0.018934 |
| 0.140551 | 0.00233  | -0.18468 | 5.95E-05 | 0.000335 | 0.99423 | -0.01237 | 0.78973 | -0.03807 |
| 0.168717 | 0.00025  | 0.074276 | 0.10893  | 0.013333 | 0.77383 | -0.02513 | 0.58809 | -0.00786 |
| 0.173278 | 0.00017  | 0.014798 | 0.74976  | -0.07077 | 0.12673 | -0.13044 | 0.00475 | -0.29772 |
| 0.134965 | 0.00348  | -0.05529 | 0.23305  | -0.00468 | 0.91967 | -0.03872 | 0.40383 | 0.004692 |
| 0.162497 | 0.00042  | -0.08078 | 0.08117  | -0.06131 | 0.18597 | -0.15194 | 0.00099 | -0.15533 |
| 0.258296 | 1.49E-08 | 0.150706 | 0.00109  | 0.045136 | 0.33041 | -0.02968 | 0.52225 | 0.026888 |
| 0.134949 | 0.00348  | -0.01995 | 0.66725  | -0.03389 | 0.46503 | -0.05718 | 0.21745 | -0.08827 |
| 0.10013  | 0.0305   | -0.13839 | 0.00273  | -0.02264 | 0.62556 | -0.04091 | 0.37778 | 0.022788 |
| -0.04037 | 0.38403  | -0.07779 | 0.09313  | -0.0489  | 0.29166 | -0.09985 | 0.03098 | 0.013067 |
| 0.033495 | 0.47024  | -0.04672 | 0.31375  | 0.018013 | 0.69783 | -0.019   | 0.6821  | 0.204926 |
| 0.159542 | 0.00054  | -0.12738 | 0.00584  | -0.02231 | 0.63062 | 0.000489 | 0.99158 | -0.06902 |
| -0.14046 | 0.00235  | -0.13627 | 0.00317  | -0.00339 | 0.9417  | -0.0177  | 0.70281 | 0.048042 |
| -0.03857 | 0.40565  | 0.029539 | 0.52427  | -0.01609 | 0.72876 | 0.048765 | 0.29297 | -0.04788 |
| -0.08742 | 0.05907  | -0.21606 | 2.45E-06 | 0.047064 | 0.31015 | 0.028387 | 0.54058 | 0.141892 |
| -0.06617 | 0.15337  | -0.20853 | 5.51E-06 | -0.01897 | 0.68262 | -0.08075 | 0.08129 | 0.069675 |
| -0.17328 | 0.00017  | -0.10545 | 0.02266  | 0.019632 | 0.67218 | 0.039009 | 0.40032 | 0.038383 |
| 0.132809 | 0.00404  | 0.035661 | 0.442    | -0.01289 | 0.78114 | -0.10688 | 0.02088 | -0.07263 |
| 0.168477 | 0.00025  | -0.08338 | 0.07184  | -0.02588 | 0.57691 | -0.09509 | 0.03998 | -0.07967 |
| -0.13078 | 0.00464  | -0.31737 | 2.18E-12 | -0.06297 | 0.17431 | -0.10996 | 0.01745 | -0.15056 |
| -0.06816 | 0.14134  | -0.37967 | 1.84E-17 | -0.03385 | 0.46553 | -0.16143 | 0.00046 | -0.18498 |
| 0.037805 | 0.41503  | -0.14353 | 0.00187  | 0.009499 | 0.83779 | -0.06507 | 0.16036 | 0.050478 |
| 0.036189 | 0.43527  | -0.0938  | 0.04276  | 0.030345 | 0.51302 | 0.094287 | 0.04169 | 0.129755 |
| 0.186422 | 5.05E-05 | 0.061422 | 0.18516  | 0.037177 | 0.42282 | 0.004386 | 0.92469 | 0.14694  |
| -0.11368 | 0.01397  | -0.00155 | 0.97343  | -0.03151 | 0.49701 | -0.02092 | 0.65198 | -0.03301 |
| -0.08961 | 0.05297  | -0.09307 | 0.0444   | 0.052953 | 0.25343 | 0.054421 | 0.24049 | 0.127651 |
| 0.176876 | 0.00012  | 0.00542  | 0.90701  | -0.01453 | 0.75408 | -0.0628  | 0.17545 | 0.043701 |
| 0.080561 | 0.08202  | -0.08586 | 0.06374  | 0.016958 | 0.71474 | -0.05756 | 0.21439 | 0.103046 |
| 0.187309 | 4.64E-05 | 0.150555 | 0.0011   | 0.037244 | 0.42199 | 0.041046 | 0.37615 | 0.064388 |
| 0.034252 | 0.46026  | -0.38185 | 1.17E-17 | 0.012458 | 0.78831 | 0.010005 | 0.82927 | -0.07449 |
| 0.272547 | 2.13E-09 | 0.167634 | 0.00027  | 0.03891  | 0.40151 | 0.02448  | 0.59772 | 0.083185 |
| 0.080327 | 0.08291  | -0.07005 | 0.13061  | 0.084766 | 0.06722 | 0.068046 | 0.14204 | 0.138965 |
| 0.187369 | 4.61E-05 | -0.00247 | 0.95762  | -0.00377 | 0.9352  | -0.04865 | 0.29407 | 0.039369 |
| 0.084356 | 0.06856  | -0.00318 | 0.9454   | 0.01327  | 0.77488 | -0.02176 | 0.63906 | 0.036844 |
| -0.12321 | 0.00768  | -0.00245 | 0.95791  | -0.00741 | 0.87313 | -0.02201 | 0.63517 | -0.05509 |
| 0.211198 | 4.15E-06 | 0.084341 | 0.06861  | 0.035836 | 0.43976 | -0.02016 | 0.66395 | 0.067685 |
| -0.22204 | 1.26E-06 | -0.06866 | 0.13849  | -0.0664  | 0.15198 | -0.02541 | 0.58386 | -0.25191 |
| -0.06938 | 0.13439  | -0.083   | 0.07315  | 0.00678  | 0.88383 | 0.04409  | 0.34175 | -0.0938  |
| 0.182411 | 7.35E-05 | 0.019391 | 0.67597  | -0.0211  | 0.64928 | -0.05724 | 0.21693 | 0.01693  |
| 0.148435 | 0.0013   | 0.144792 | 0.00171  | -0.06393 | 0.16784 | 0.082794 | 0.07386 | -0.10025 |

|          |          |          |          |          |         |          |         |          |
|----------|----------|----------|----------|----------|---------|----------|---------|----------|
| -0.01461 | 0.7528   | -0.13698 | 0.00301  | 0.002906 | 0.95006 | -0.11362 | 0.01402 | 0.083396 |
| 0.040895 | 0.37791  | -0.18605 | 5.23E-05 | 0.006408 | 0.89016 | -0.104   | 0.0246  | 0.041172 |
| 0.01721  | 0.71067  | 0.147887 | 0.00135  | 0.023269 | 0.61597 | 0.059207 | 0.20154 | 0.098652 |
| 0.054382 | 0.24082  | -0.25638 | 1.91E-08 | 0.001405 | 0.97584 | -0.13675 | 0.00307 | -0.02596 |
| 0.041991 | 0.36525  | -0.04721 | 0.3087   | 0.012779 | 0.783   | -0.02232 | 0.63046 | 0.021476 |
| -0.02132 | 0.64582  | -0.0627  | 0.17616  | 0.006443 | 0.88955 | -0.04682 | 0.31263 | 0.025244 |
| 0.118527 | 0.01036  | -0.07747 | 0.09449  | 0.025785 | 0.57834 | -0.01592 | 0.73145 | 0.082991 |
| -0.04788 | 0.30186  | -0.12753 | 0.00578  | 0.020162 | 0.66387 | 0.057039 | 0.21857 | 0.183094 |
| 0.076009 | 0.10089  | -0.07303 | 0.11503  | 0.046056 | 0.32065 | -0.03616 | 0.43563 | 0.130756 |
| -0.04837 | 0.2969   | 0.029965 | 0.51831  | 0.050442 | 0.27667 | 0.002182 | 0.96249 | 0.287864 |
| 0.192966 | 2.69E-05 | 0.062045 | 0.18074  | -0.04868 | 0.29381 | -0.13382 | 0.00377 | -0.01142 |
| 0.027856 | 0.54819  | -0.17676 | 0.00012  | -0.01282 | 0.78232 | 0.006684 | 0.88546 | -0.01814 |
| -0.06737 | 0.14605  | -0.17172 | 0.00019  | -0.015   | 0.74653 | -0.06372 | 0.16925 | 0.020949 |
| -0.18945 | 3.78E-05 | -0.09762 | 0.03494  | -0.02566 | 0.58016 | -0.07578 | 0.10195 | -0.06158 |
| 0.093306 | 0.04387  | 0.084478 | 0.06816  | -0.0038  | 0.93476 | -0.08339 | 0.07182 | 0.139912 |
| 0.211764 | 3.90E-06 | 0.084839 | 0.06698  | 0.021012 | 0.65062 | 0.036898 | 0.42631 | 0.139237 |
| 0.018603 | 0.68844  | 0.208945 | 5.27E-06 | 0.047474 | 0.30595 | 0.102417 | 0.02689 | 0.051768 |
| 0.197178 | 1.77E-05 | 0.010031 | 0.82884  | 0.035435 | 0.44491 | 0.010123 | 0.82729 | 0.073227 |
| 0.203424 | 9.39E-06 | 0.101328 | 0.02856  | -0.00371 | 0.93627 | -0.07334 | 0.11349 | 0.038631 |
| -0.00926 | 0.84186  | -0.32771 | 3.74E-13 | -0.01781 | 0.7011  | -0.15138 | 0.00103 | -0.13478 |
| 0.146751 | 0.00147  | -0.06826 | 0.1408   | 0.096507 | 0.03709 | 0.08573  | 0.06416 | 0.151474 |
| -0.03649 | 0.43148  | -0.193   | 2.68E-05 | -0.04753 | 0.30543 | -0.1393  | 0.00255 | -0.14401 |
| 0.198664 | 1.53E-05 | 0.10105  | 0.029    | 0.01581  | 0.73328 | 0.013562 | 0.77005 | 0.117942 |
| -0.10199 | 0.02753  | -0.2467  | 6.64E-08 | 0.022323 | 0.6304  | 0.015165 | 0.74378 | -0.08063 |
| -0.17636 | 0.00013  | -0.1006  | 0.02973  | -0.02207 | 0.6343  | 0.001349 | 0.9768  | 0.035339 |
| 0.184641 | 5.97E-05 | 0.194304 | 2.36E-05 | 0.019368 | 0.67635 | -0.00811 | 0.86131 | 0.148002 |
| 0.0577   | 0.21328  | 0.008105 | 0.86133  | 0.032957 | 0.47739 | 0.036463 | 0.43179 | 0.137123 |
| 0.031917 | 0.49141  | -0.04715 | 0.30926  | -0.00252 | 0.95668 | -0.07141 | 0.1233  | -0.08955 |
| -0.11717 | 0.01128  | -0.25061 | 4.04E-08 | -0.03649 | 0.43142 | -0.06854 | 0.13913 | -0.11443 |
| 0.276272 | 1.26E-09 | 0.190878 | 3.29E-05 | 0.041209 | 0.37426 | 0.038533 | 0.4061  | 0.130535 |
| -0.07646 | 0.09887  | -0.2347  | 2.90E-07 | -0.01825 | 0.69407 | -0.03228 | 0.48646 | -0.12696 |
| 0.066386 | 0.15205  | -0.13493 | 0.00348  | -0.02348 | 0.61281 | -0.10316 | 0.0258  | -0.10543 |
| 0.253561 | 2.76E-08 | -0.02522 | 0.58676  | 0.025028 | 0.58954 | -0.04663 | 0.31469 | -0.02298 |
| -0.20695 | 6.51E-06 | -0.15536 | 0.00075  | 0.036595 | 0.43013 | 0.082048 | 0.07651 | 0.211124 |
| 0.281977 | 5.52E-10 | -0.12927 | 0.00514  | -0.05779 | 0.21255 | -0.12549 | 0.00662 | -0.18335 |
| 0.223315 | 1.09E-06 | 0.248477 | 5.30E-08 | 0.020158 | 0.66393 | 0.000406 | 0.99302 | 0.183024 |
| 0.14119  | 0.00223  | -0.05721 | 0.21718  | -0.00463 | 0.92052 | -0.00368 | 0.93671 | 0.019645 |
| -0.16519 | 0.00034  | -0.11073 | 0.01668  | -0.00628 | 0.89234 | -0.02926 | 0.52814 | -0.06553 |
| -0.03194 | 0.4911   | -0.02823 | 0.54286  | -0.02713 | 0.5586  | -0.06819 | 0.14118 | -0.00448 |
| 0.140143 | 0.0024   | -0.12955 | 0.00505  | -0.01819 | 0.69507 | -0.13916 | 0.00258 | -0.06307 |
| 0.144187 | 0.00178  | -0.04582 | 0.32309  | -0.0105  | 0.82096 | -0.08792 | 0.05762 | 0.00397  |
| 0.179615 | 9.50E-05 | 0.021532 | 0.64256  | 0.019539 | 0.67364 | -0.04796 | 0.30101 | 0.064784 |
| -0.20344 | 9.38E-06 | -0.28622 | 2.96E-10 | -0.04821 | 0.29855 | -0.07497 | 0.10565 | -0.1388  |
| 0.393963 | 8.65E-19 | 0.028559 | 0.53814  | -0.04157 | 0.37012 | -0.10263 | 0.02657 | -0.06341 |
| 0.004542 | 0.92202  | -0.14912 | 0.00123  | -0.02154 | 0.64237 | -0.07414 | 0.10956 | 0.005319 |

|          |          |          |          |          |         |          |          |          |
|----------|----------|----------|----------|----------|---------|----------|----------|----------|
| -0.04321 | 0.35149  | -0.46437 | 2.36E-26 | -0.03038 | 0.51248 | -0.09252 | 0.04569  | -0.14259 |
| 0.116824 | 0.01152  | -0.07334 | 0.11345  | -0.06757 | 0.14485 | -0.16015 | 0.00051  | -0.06201 |
| 0.04174  | 0.36812  | 0.084643 | 0.06762  | 0.016648 | 0.71973 | 0.033494 | 0.47025  | 0.170131 |
| 0.199457 | 1.41E-05 | 0.165517 | 0.00033  | -0.01984 | 0.66893 | -0.06238 | 0.17841  | 0.024154 |
| 0.076298 | 0.0996   | 0.089512 | 0.05323  | -0.02906 | 0.53101 | -0.08196 | 0.07682  | -0.01497 |
| 0.195524 | 2.09E-05 | 0.127047 | 0.00597  | 0.006488 | 0.88879 | -0.08073 | 0.08139  | 0.070877 |
| 0.135849 | 0.00327  | 0.095378 | 0.03937  | 0.00268  | 0.95395 | -0.03114 | 0.502    | 0.132597 |
| 0.162995 | 0.00041  | 0.036974 | 0.42536  | 0.052733 | 0.25541 | 0.036986 | 0.42521  | 0.106902 |
| -0.00451 | 0.9225   | -0.0983  | 0.0337   | -0.03481 | 0.45295 | -0.07097 | 0.12564  | -0.12426 |
| 0.130453 | 0.00475  | 0.192584 | 2.79E-05 | 0.033172 | 0.47453 | 0.154666 | 0.0008   | 0.098903 |
| 0.366651 | 2.63E-16 | 0.24698  | 6.41E-08 | 0.019134 | 0.68004 | -0.0548  | 0.23722  | 0.150184 |
| -0.16043 | 0.0005   | -0.23488 | 2.83E-07 | 0.08384  | 0.07027 | 0.137316 | 0.00294  | 0.376781 |
| -0.15091 | 0.00107  | 0.063518 | 0.17058  | 0.013467 | 0.77162 | 0.067982 | 0.14242  | 0.003522 |
| -0.03657 | 0.43047  | -0.35393 | 3.15E-15 | 0.016546 | 0.72138 | -0.10261 | 0.0266   | 0.057598 |
| 0.324304 | 6.74E-13 | 0.117978 | 0.01072  | -0.00527 | 0.9095  | -0.07311 | 0.11461  | -0.03333 |
| 0.009193 | 0.84294  | -0.15938 | 0.00055  | 0.03579  | 0.44035 | 0.02828  | 0.54212  | 0.066724 |
| 0.184139 | 6.26E-05 | -0.13616 | 0.00319  | -0.0117  | 0.80088 | -0.13206 | 0.00425  | 0.006182 |
| 0.048265 | 0.29796  | -0.26349 | 7.41E-09 | -0.04138 | 0.37223 | -0.12731 | 0.00587  | -0.0416  |
| -0.03903 | 0.40003  | -0.31793 | 1.99E-12 | -0.02131 | 0.64594 | -0.06426 | 0.16566  | -0.05841 |
| 0.31475  | 3.37E-12 | 0.163601 | 0.00039  | -0.0201  | 0.66487 | -0.05777 | 0.2127   | -0.01111 |
| 0.015633 | 0.73616  | -0.18695 | 4.80E-05 | -0.01477 | 0.75015 | -0.03964 | 0.39275  | -0.04856 |
| 0.180924 | 8.43E-05 | -0.00729 | 0.8752   | -0.0119  | 0.79758 | -0.06711 | 0.14763  | -0.06909 |
| 0.101513 | 0.02827  | -0.20335 | 9.46E-06 | 0.015062 | 0.74545 | -0.03251 | 0.48336  | 0.070264 |
| 0.174147 | 0.00016  | -0.04938 | 0.28687  | 0.025058 | 0.5891  | 0.002776 | 0.9523   | 0.013505 |
| 0.095799 | 0.0385   | 0.119218 | 0.00992  | 0.02709  | 0.55924 | 0.099486 | 0.0316   | 0.051565 |
| 0.018591 | 0.68863  | -0.27731 | 1.08E-09 | 0.032269 | 0.48664 | 0.078271 | 0.09112  | 0.013981 |
| 0.272238 | 2.22E-09 | 0.21925  | 1.72E-06 | -0.01629 | 0.72555 | -0.07064 | 0.12744  | 0.001602 |
| 0.048466 | 0.29595  | -0.057   | 0.21888  | -0.00594 | 0.89806 | -0.02116 | 0.64827  | -0.03515 |
| 0.115227 | 0.01271  | 0.05072  | 0.27403  | -0.06346 | 0.17096 | -0.0556  | 0.23047  | -0.14146 |
| 0.056694 | 0.22138  | -0.06086 | 0.18919  | 0.000355 | 0.9939  | -0.02974 | 0.52143  | -0.0282  |
| 0.229486 | 5.36E-07 | 0.242238 | 1.16E-07 | 0.046291 | 0.31817 | 0.13956  | 0.00251  | 0.117379 |
| 0.162004 | 0.00044  | -0.06528 | 0.15901  | 0.007293 | 0.8751  | -0.08586 | 0.06375  | 0.094147 |
| 0.235484 | 2.64E-07 | -0.19193 | 2.98E-05 | -0.02898 | 0.53222 | -0.20013 | 1.32E-05 | -0.1447  |
| 0.095838 | 0.03842  | -0.05334 | 0.24994  | 0.031072 | 0.50296 | 0.086863 | 0.06071  | 0.104202 |
| 0.371442 | 1.00E-16 | 0.219941 | 1.59E-06 | -0.02343 | 0.61347 | -0.12276 | 0.00791  | -0.03187 |
| -0.0851  | 0.06613  | 0.043784 | 0.34512  | -0.02735 | 0.55548 | 0.019475 | 0.67465  | -0.05076 |
| 0.115766 | 0.0123   | -0.06947 | 0.13384  | 0.003996 | 0.93137 | -0.0354  | 0.44538  | -0.09838 |
| 0.085599 | 0.06457  | 0.266089 | 5.21E-09 | 0.000476 | 0.99182 | 0.008002 | 0.86307  | -0.04241 |
| 0.108457 | 0.01906  | -0.17351 | 0.00016  | 0.035332 | 0.44622 | 0.011237 | 0.80863  | 0.112707 |
| -0.04241 | 0.36047  | 0.256024 | 2.00E-08 | 0.023342 | 0.61487 | 0.144189 | 0.00178  | 0.012329 |
| 0.004266 | 0.92675  | -0.15148 | 0.00102  | -0.01162 | 0.80222 | -0.01835 | 0.69247  | 0.001474 |
| 0.019514 | 0.67405  | -0.12798 | 0.00561  | -0.00486 | 0.9166  | -0.01351 | 0.77091  | 0.002721 |
| 0.074406 | 0.10831  | 0.124844 | 0.00691  | 0.030462 | 0.51139 | -0.10583 | 0.02217  | 0.191561 |
| 0.181089 | 8.30E-05 | 0.106313 | 0.02157  | 0.142854 | 0.00197 | 0.012706 | 0.78419  | 0.249334 |
| 0.139703 | 0.00248  | 0.026285 | 0.57098  | 0.077204 | 0.09563 | 0.005251 | 0.90989  | 0.264476 |

|          |          |          |          |          |         |          |          |          |
|----------|----------|----------|----------|----------|---------|----------|----------|----------|
| 0.2098   | 4.82E-06 | 0.026201 | 0.57222  | 0.005756 | 0.90127 | -0.03739 | 0.4202   | -0.04941 |
| 0.059491 | 0.19939  | -0.07411 | 0.10971  | 0.034776 | 0.45342 | -0.00792 | 0.86454  | 0.02034  |
| -0.18186 | 7.74E-05 | -0.06745 | 0.14559  | -0.05467 | 0.23838 | -0.03902 | 0.40021  | -0.03099 |
| 0.006443 | 0.88956  | -0.20964 | 4.90E-06 | -0.03389 | 0.46498 | -0.14979 | 0.00117  | -0.06218 |
| -0.00551 | 0.90551  | -0.36064 | 8.62E-16 | -0.03901 | 0.40028 | -0.10264 | 0.02655  | -0.09627 |
| -0.20622 | 7.03E-06 | -0.22157 | 1.33E-06 | -0.05669 | 0.22141 | -0.09925 | 0.032    | -0.07738 |
| -0.06893 | 0.13694  | -0.14841 | 0.0013   | 0.022558 | 0.6268  | 0.051521 | 0.26651  | 0.081141 |
| -0.25206 | 3.35E-08 | -0.03452 | 0.45678  | -0.06656 | 0.15098 | 0.053226 | 0.25099  | -0.15164 |
| 0.286139 | 2.99E-10 | 0.435274 | 5.19E-23 | -0.02244 | 0.62865 | -0.07804 | 0.09206  | 0.047583 |
| 0.097851 | 0.03452  | -0.2708  | 2.72E-09 | 0.015763 | 0.73405 | -0.10507 | 0.02315  | 0.046049 |
| -0.24145 | 1.28E-07 | -0.15584 | 0.00073  | -0.01972 | 0.67082 | 0.020817 | 0.65365  | -0.04736 |
| 0.154618 | 0.0008   | -0.04422 | 0.34037  | -0.028   | 0.54609 | -0.09134 | 0.04852  | -0.0263  |
| 0.162894 | 0.00041  | 0.117712 | 0.0109   | -0.01605 | 0.72932 | -0.07879 | 0.089    | -0.00256 |
| 0.031773 | 0.49337  | -0.16995 | 0.00022  | -0.00507 | 0.91305 | -0.03743 | 0.41972  | 0.003505 |
| 0.195165 | 2.17E-05 | 0.291759 | 1.29E-10 | 0.004181 | 0.9282  | 0.033157 | 0.47473  | 0.032791 |
| -0.0013  | 0.97765  | -0.12786 | 0.00566  | 0.009843 | 0.832   | 0.077418 | 0.09472  | 0.012029 |
| 0.123489 | 0.00755  | 0.005722 | 0.90184  | 0.022186 | 0.6325  | 0.002033 | 0.96505  | 0.050236 |
| 0.309991 | 7.36E-12 | 0.0553   | 0.23296  | -0.01222 | 0.79231 | -0.06312 | 0.1733   | 0.066702 |
| 0.031729 | 0.49398  | -0.30057 | 3.31E-11 | -0.00604 | 0.89643 | -0.04898 | 0.29081  | 0.088822 |
| 0.041633 | 0.36936  | -0.0405  | 0.3825   | -0.00272 | 0.95326 | 0.010462 | 0.8216   | -0.00097 |
| 0.007078 | 0.87876  | -0.20219 | 1.07E-05 | -0.01026 | 0.82492 | -0.05162 | 0.26559  | 0.035248 |
| 0.019267 | 0.67793  | -0.27004 | 3.02E-09 | -0.01141 | 0.80576 | -0.08456 | 0.06788  | 0.020277 |
| 0.154038 | 0.00084  | 0.042674 | 0.3575   | -0.01319 | 0.77627 | -0.06862 | 0.1387   | -0.02928 |
| -0.02043 | 0.65968  | -0.17382 | 0.00016  | 0.059043 | 0.2028  | 0.018171 | 0.69531  | 0.175159 |
| 0.023532 | 0.61198  | -0.14856 | 0.00128  | 0.009468 | 0.8383  | -0.06516 | 0.15978  | -0.01295 |
| -0.222   | 1.27E-06 | -0.24532 | 7.90E-08 | -0.06603 | 0.15427 | -0.06693 | 0.14872  | -0.07737 |
| 0.062197 | 0.17966  | -0.21402 | 3.06E-06 | -0.05286 | 0.25425 | -0.0405  | 0.38248  | -0.15767 |
| 0.177947 | 0.00011  | 0.198415 | 1.57E-05 | 0.011823 | 0.79886 | 0.006965 | 0.88067  | 0.056141 |
| 0.128323 | 0.00548  | -0.05351 | 0.24847  | -0.01471 | 0.75128 | -0.07499 | 0.10555  | -0.07021 |
| 0.113667 | 0.01398  | -0.1126  | 0.01491  | -0.01497 | 0.74695 | -0.08652 | 0.06174  | -0.07464 |
| 0.111542 | 0.01589  | -0.20086 | 1.22E-05 | 0.005439 | 0.90668 | -0.04937 | 0.28705  | 0.058572 |
| 0.305409 | 1.54E-11 | 0.165145 | 0.00034  | -0.01879 | 0.68542 | -0.05557 | 0.23067  | 0.015978 |
| 0.072826 | 0.11603  | -0.0554  | 0.23209  | 0.042721 | 0.35697 | 0.045674 | 0.32468  | 0.209043 |
| 0.031034 | 0.50348  | 0.153427 | 0.00088  | -0.00387 | 0.93356 | 0.05123  | 0.26923  | -0.06652 |
| 0.173636 | 0.00016  | 0.159393 | 0.00055  | -0.00375 | 0.93562 | -0.00531 | 0.90882  | 0.064008 |
| -0.0482  | 0.29864  | -0.07467 | 0.10704  | 0.005876 | 0.89922 | -0.00966 | 0.83513  | 0.117754 |
| 0.039827 | 0.3905   | 0.06656  | 0.15097  | -0.01821 | 0.6947  | 0.019043 | 0.68147  | -0.18439 |
| -0.1301  | 0.00486  | -0.12369 | 0.00745  | -0.00757 | 0.87035 | -0.05661 | 0.22206  | -0.01885 |
| 0.06367  | 0.16956  | 0.159438 | 0.00054  | 0.001882 | 0.96765 | 0.022558 | 0.62679  | -0.08366 |
| 0.193623 | 2.52E-05 | 0.2571   | 1.74E-08 | 0.042981 | 0.35405 | -0.02351 | 0.61236  | 0.088082 |
| 0.250115 | 4.31E-08 | 0.088939 | 0.05478  | 0.022975 | 0.62044 | 0.025688 | 0.57976  | 0.122788 |
| 0.320156 | 1.37E-12 | 0.247541 | 5.97E-08 | 0.03282  | 0.47923 | 0.08154  | 0.07836  | 0.1722   |
| 0.082079 | 0.0764   | -0.01621 | 0.72678  | 0.01914  | 0.67994 | -0.04545 | 0.32706  | 0.014283 |
| 0.141281 | 0.00221  | 0.103487 | 0.02533  | 0.124671 | 0.00699 | 0.222131 | 1.25E-06 | 0.28589  |
| 0.280344 | 7.00E-10 | 0.060264 | 0.1936   | -0.00838 | 0.85674 | -0.0405  | 0.38248  | -0.03711 |

|          |          |          |          |          |         |          |          |          |
|----------|----------|----------|----------|----------|---------|----------|----------|----------|
| 0.081359 | 0.07902  | -0.10279 | 0.02633  | -0.05228 | 0.2595  | -0.15329 | 0.00089  | -0.14734 |
| -0.05844 | 0.20745  | -0.21373 | 3.16E-06 | -0.00941 | 0.83921 | 0.031786 | 0.4932   | 0.046568 |
| -0.09408 | 0.04213  | -0.19873 | 1.52E-05 | 0.014511 | 0.75447 | -0.00726 | 0.87561  | -0.01072 |
| 0.071663 | 0.12199  | -0.03642 | 0.4324   | 0.029507 | 0.52472 | 0.025999 | 0.57519  | 0.072494 |
| 0.219171 | 1.74E-06 | 0.235571 | 2.61E-07 | -0.00834 | 0.85738 | -0.01814 | 0.69579  | -0.05533 |
| -0.04465 | 0.33567  | -0.18973 | 3.68E-05 | -0.00417 | 0.92844 | -0.03496 | 0.45106  | 0.008209 |
| -0.05739 | 0.21579  | -0.06022 | 0.19391  | 0.021683 | 0.64024 | 0.032546 | 0.48292  | 0.035012 |
| -0.20259 | 1.02E-05 | -0.15651 | 0.00069  | -0.05351 | 0.2485  | 0.098484 | 0.03336  | -0.15319 |
| -0.04689 | 0.3119   | -0.17295 | 0.00017  | -0.03349 | 0.47026 | 0.063875 | 0.16818  | -0.15873 |
| 0.314902 | 3.29E-12 | 0.27525  | 1.45E-09 | -0.00497 | 0.91463 | -0.05478 | 0.2374   | 0.042839 |
| 0.181605 | 7.92E-05 | 0.280213 | 7.13E-10 | 0.085404 | 0.06518 | 0.072185 | 0.11928  | 0.317637 |
| -0.00267 | 0.95412  | 0.179632 | 9.49E-05 | 0.012038 | 0.79529 | 0.071893 | 0.12079  | -0.02895 |
| 0.156152 | 0.00071  | -0.02959 | 0.52356  | -0.0033  | 0.94332 | -0.09196 | 0.04702  | 0.020483 |
| 0.11097  | 0.01644  | 0.137692 | 0.00287  | -0.00199 | 0.96572 | -0.07785 | 0.0929   | 0.101259 |
| 0.176575 | 0.00013  | -0.01206 | 0.795    | 0.033508 | 0.47006 | 0.009709 | 0.83425  | 0.052629 |
| 0.169052 | 0.00024  | 0.029566 | 0.52389  | 0.007162 | 0.87732 | -0.03584 | 0.43973  | 0.064999 |
| 0.030849 | 0.50603  | -0.04113 | 0.37522  | 0.007057 | 0.87911 | -0.01776 | 0.70184  | -0.0591  |
| 0.030697 | 0.50814  | -0.07404 | 0.11008  | 0.015032 | 0.74595 | -0.05398 | 0.24432  | 0.061672 |
| 0.155443 | 0.00075  | -0.01243 | 0.78875  | -0.03256 | 0.4827  | -0.04076 | 0.37946  | -0.20376 |
| 0.364386 | 4.13E-16 | 0.167012 | 0.00029  | -0.00419 | 0.92796 | -0.01882 | 0.68507  | -0.07113 |
| -0.10993 | 0.01748  | -0.06046 | 0.19213  | -0.00253 | 0.95659 | -0.0545  | 0.2398   | -0.05524 |
| -0.21567 | 2.55E-06 | -0.27306 | 1.98E-09 | 0.005025 | 0.91375 | -0.06967 | 0.13273  | 0.123622 |
| -0.19558 | 2.08E-05 | -0.26362 | 7.29E-09 | -0.0183  | 0.69323 | 0.06737  | 0.14605  | -0.09845 |
| 0.260994 | 1.04E-08 | 0.058274 | 0.20875  | 0.008089 | 0.86159 | 0.037448 | 0.41945  | 0.015289 |
| 0.184883 | 5.84E-05 | -0.0103  | 0.8243   | 0.049679 | 0.28401 | 0.068212 | 0.14106  | 0.109534 |
| -0.21135 | 4.08E-06 | 0.089125 | 0.05427  | 0.106147 | 0.02178 | 0.318961 | 1.67E-12 | 0.270659 |
| -0.02095 | 0.65165  | 0.025377 | 0.58436  | 0.038502 | 0.40647 | 0.072983 | 0.11524  | -0.00625 |
| -0.26379 | 7.12E-09 | -0.25548 | 2.15E-08 | -0.01262 | 0.78566 | -0.0197  | 0.67109  | -0.15073 |
| 0.249952 | 4.40E-08 | 0.128187 | 0.00553  | 0.017337 | 0.70864 | 0.008177 | 0.86011  | 0.069149 |
| 0.206143 | 7.08E-06 | 0.30494  | 1.66E-11 | -0.06637 | 0.15212 | -0.10249 | 0.02678  | -0.09708 |
| -0.05842 | 0.2076   | -0.37905 | 2.10E-17 | -0.0434  | 0.34939 | -0.23127 | 4.35E-07 | -0.0927  |
| -0.09673 | 0.03665  | 0.138886 | 0.00263  | -0.05921 | 0.20152 | -0.09483 | 0.04052  | -0.1216  |
| 0.044886 | 0.33311  | -0.09367 | 0.04305  | -0.03037 | 0.51262 | -0.08669 | 0.06121  | 0.041078 |
| 0.036919 | 0.42605  | -0.16444 | 0.00036  | 0.025458 | 0.58316 | 0.035054 | 0.44981  | -0.04646 |
| 0.422179 | 1.31E-21 | 0.271553 | 2.45E-09 | -0.0028  | 0.95194 | -0.03718 | 0.42275  | 0.000835 |
| 0.260485 | 1.11E-08 | 0.297133 | 5.66E-11 | 0.008295 | 0.85812 | -0.03116 | 0.50181  | 0.007014 |
| -0.04575 | 0.32387  | -0.05571 | 0.22955  | 0.017884 | 0.69989 | 0.014262 | 0.75854  | 0.113652 |
| -0.05447 | 0.24003  | -0.23815 | 1.91E-07 | 0.067122 | 0.14754 | 0.139334 | 0.00255  | 0.048655 |
| 0.064958 | 0.16107  | 0.054668 | 0.23835  | -0.00532 | 0.9087  | -0.03918 | 0.39828  | 0.040486 |
| -0.04276 | 0.35657  | 0.202775 | 1.00E-05 | -0.05487 | 0.23664 | -0.0559  | 0.22789  | -0.11959 |
| -0.15055 | 0.0011   | -0.0194  | 0.67579  | -0.0175  | 0.706   | 0.025504 | 0.58248  | -0.03426 |
| 0.019635 | 0.67214  | -0.20359 | 9.23E-06 | -0.02218 | 0.63263 | -0.09176 | 0.0475   | -0.02066 |
| 0.155126 | 0.00077  | 0.16186  | 0.00045  | -0.01178 | 0.79962 | -0.08634 | 0.06229  | -0.03672 |
| 0.025768 | 0.57858  | 0.013633 | 0.76888  | -0.02557 | 0.58148 | -0.09556 | 0.03899  | -0.02707 |
| 0.17668  | 0.00012  | -0.01598 | 0.73058  | 0.030932 | 0.5049  | -0.00632 | 0.89171  | 0.073597 |

|          |          |          |          |          |         |          |         |          |
|----------|----------|----------|----------|----------|---------|----------|---------|----------|
| 0.022679 | 0.62496  | 0.180942 | 8.42E-05 | 0.004781 | 0.91793 | 0.040967 | 0.37708 | 0.071541 |
| 0.072327 | 0.11856  | 0.083372 | 0.07186  | -0.02172 | 0.63968 | -0.08798 | 0.05745 | 0.051294 |
| 0.029226 | 0.52867  | -0.15312 | 0.0009   | 0.013975 | 0.76325 | -0.0519  | 0.26305 | 0.004034 |
| -0.24786 | 5.74E-08 | -0.10468 | 0.02368  | -0.08334 | 0.07196 | -0.12411 | 0.00725 | -0.24094 |
| 0.12867  | 0.00536  | -0.04781 | 0.30252  | -0.01978 | 0.66988 | -0.00952 | 0.83737 | -0.00174 |
| 0.1494   | 0.0012   | 0.191374 | 3.14E-05 | 0.044683 | 0.3353  | 0.00283  | 0.95137 | 0.031041 |
| -0.06579 | 0.1558   | -0.27421 | 1.68E-09 | 0.041245 | 0.37384 | -0.01996 | 0.66697 | 0.172009 |
| 0.012917 | 0.78071  | -0.10201 | 0.0275   | 0.031539 | 0.49657 | 0.073982 | 0.11034 | -0.00071 |
| -0.01343 | 0.77227  | -0.24847 | 5.31E-08 | 0.014702 | 0.75133 | -0.00358 | 0.93854 | -0.04323 |
| -0.0094  | 0.8394   | -0.22933 | 5.45E-07 | -0.02875 | 0.53541 | -0.08885 | 0.05501 | -0.04305 |
| 0.25516  | 2.24E-08 | 0.362099 | 6.48E-16 | -0.00671 | 0.88507 | -0.0239  | 0.60648 | 0.042002 |
| -0.08423 | 0.06897  | -0.40846 | 3.32E-20 | -0.02687 | 0.56251 | -0.1033  | 0.02559 | -0.18536 |
| 0.007597 | 0.86993  | -0.32696 | 4.27E-13 | -0.03151 | 0.49702 | -0.08254 | 0.07476 | -0.08112 |
| -0.03067 | 0.5085   | -0.26591 | 5.34E-09 | 0.042907 | 0.35488 | 0.036178 | 0.43541 | 0.094412 |
| 0.103017 | 0.026    | 0.052422 | 0.25823  | 0.024428 | 0.5985  | 0.057502 | 0.21485 | -0.03579 |
| -0.02082 | 0.65354  | -0.28784 | 2.32E-10 | 0.008349 | 0.8572  | -0.01774 | 0.70212 | -0.0672  |
| 0.089608 | 0.05297  | 0.052115 | 0.26103  | -0.00593 | 0.89838 | -0.05081 | 0.2732  | -0.00227 |
| 0.040269 | 0.38526  | -0.09265 | 0.04539  | 0.034627 | 0.45535 | -0.00527 | 0.90958 | 0.125314 |
| 0.210397 | 4.52E-06 | 0.030722 | 0.50778  | 0.042557 | 0.35882 | 0.03791  | 0.41374 | 0.081672 |
| 0.022652 | 0.62537  | 0.017525 | 0.70562  | 0.016802 | 0.71724 | 0.145244 | 0.00165 | 0.066663 |
| 0.032741 | 0.4803   | -0.06196 | 0.18135  | -0.00721 | 0.87655 | -0.01085 | 0.8151  | -0.01162 |
| 0.182506 | 7.28E-05 | 0.075098 | 0.10506  | 0.024939 | 0.59087 | 0.041592 | 0.36983 | 0.10914  |
| 0.147251 | 0.00142  | -0.06669 | 0.15019  | 0.041237 | 0.37394 | 0.052827 | 0.25457 | 0.033999 |
| 0.185509 | 5.50E-05 | -0.0107  | 0.81753  | -0.03441 | 0.45817 | -0.12232 | 0.00814 | -0.00384 |
| 0.083198 | 0.07246  | 0.024168 | 0.6024   | 0.015907 | 0.7317  | -0.00339 | 0.94184 | 0.082208 |
| 0.211102 | 4.19E-06 | 0.152863 | 0.00092  | 0.009483 | 0.83806 | -0.02726 | 0.55678 | 0.021216 |
| 0.232413 | 3.80E-07 | 0.077828 | 0.09297  | 0.02519  | 0.58714 | -0.01358 | 0.76977 | 0.100478 |
| 0.213077 | 3.39E-06 | -0.00364 | 0.93754  | -0.0369  | 0.42627 | -0.05666 | 0.22166 | -0.05051 |
| -0.02275 | 0.62383  | -0.26098 | 1.04E-08 | -0.01824 | 0.69417 | -0.09736 | 0.03545 | -0.04321 |
| 0.053913 | 0.24492  | -0.15925 | 0.00055  | -0.00019 | 0.99679 | -0.03852 | 0.40621 | -0.05308 |
| 0.001857 | 0.96807  | -0.14134 | 0.0022   | 0.032832 | 0.47908 | 0.013642 | 0.76873 | 0.07918  |
| 0.230893 | 4.55E-07 | 0.060142 | 0.1945   | 0.033962 | 0.46406 | 0.067203 | 0.14706 | 0.095081 |
| 0.20918  | 5.14E-06 | 0.086282 | 0.06246  | 0.047384 | 0.30688 | -0.03974 | 0.39154 | 0.10923  |
| -0.03359 | 0.46897  | -0.21811 | 1.95E-06 | -0.03705 | 0.42437 | -0.11656 | 0.01171 | -0.09983 |
| 0.242836 | 1.08E-07 | 0.020383 | 0.66041  | -0.01197 | 0.79647 | -0.04249 | 0.35963 | -0.00965 |
| 0.077615 | 0.09387  | -0.05703 | 0.21863  | -0.00771 | 0.86794 | -0.06759 | 0.14475 | 0.015618 |
| -0.37412 | 5.81E-17 | -0.22725 | 6.95E-07 | -0.03778 | 0.41537 | 0.034109 | 0.46213 | -0.07716 |
| -0.07981 | 0.08491  | -0.08232 | 0.07554  | 0.004422 | 0.92407 | 0.052617 | 0.25646 | -0.04041 |
| -0.07335 | 0.11341  | -0.27396 | 1.74E-09 | -0.01948 | 0.67451 | -0.04331 | 0.35041 | 0.00291  |
| 0.160454 | 0.0005   | 0.175835 | 0.00013  | 0.009373 | 0.83991 | 0.119747 | 0.00959 | 0.018777 |
| 0.078337 | 0.09085  | -0.23601 | 2.47E-07 | -0.00452 | 0.92242 | -0.09722 | 0.03571 | -0.06311 |
| 0.054264 | 0.24185  | -0.12674 | 0.0061   | -0.01276 | 0.78336 | -0.02954 | 0.52428 | -0.01246 |
| -0.2413  | 1.30E-07 | -0.45797 | 1.37E-25 | 0.008077 | 0.8618  | 0.141025 | 0.00225 | -0.0366  |
| 0.386427 | 4.42E-18 | 0.23688  | 2.23E-07 | 0.022888 | 0.62177 | -0.12895 | 0.00526 | 0.112753 |
| 0.157922 | 0.00061  | 0.092788 | 0.04506  | 0.008319 | 0.8577  | 0.026096 | 0.57376 | 0.003613 |

|          |          |          |          |          |         |          |          |          |
|----------|----------|----------|----------|----------|---------|----------|----------|----------|
| -0.02945 | 0.52551  | -0.24246 | 1.13E-07 | -0.02264 | 0.62552 | -0.03824 | 0.40966  | -0.05153 |
| 0.039519 | 0.39419  | -0.15073 | 0.00109  | -0.00184 | 0.96834 | -0.06296 | 0.17435  | 0.070218 |
| 0.044527 | 0.33698  | -0.01512 | 0.74458  | 0.011122 | 0.81056 | 0.006013 | 0.89688  | 0.088636 |
| 0.390879 | 1.70E-18 | 0.237784 | 2.00E-07 | 0.088933 | 0.05479 | 0.076037 | 0.10077  | 0.214646 |
| -0.04254 | 0.35905  | -0.17947 | 9.63E-05 | 0.024467 | 0.59792 | 0.002547 | 0.95622  | -0.0106  |
| 0.279817 | 7.55E-10 | 0.020589 | 0.6572   | -0.0332  | 0.4741  | -0.19053 | 3.41E-05 | -0.01373 |
| 0.288219 | 2.20E-10 | -0.00813 | 0.86085  | -0.00172 | 0.97039 | -0.0745  | 0.10788  | -0.09142 |
| 0.307068 | 1.18E-11 | 0.131394 | 0.00445  | 0.037255 | 0.42186 | -0.02846 | 0.53956  | 0.109477 |
| 0.08439  | 0.06845  | -0.07627 | 0.09973  | 0.009718 | 0.8341  | -0.07151 | 0.12276  | 0.052741 |
| -0.01735 | 0.70843  | -0.28267 | 4.99E-10 | -0.02704 | 0.56    | -0.03841 | 0.40761  | -0.11311 |
| 0.12395  | 0.00732  | 0.05231  | 0.25924  | 0.048406 | 0.29655 | 0.050405 | 0.27702  | 0.182714 |
| 0.112786 | 0.01475  | -0.14176 | 0.00214  | 0.013194 | 0.77613 | -0.02859 | 0.53766  | -0.15212 |
| -0.01785 | 0.70042  | -0.33659 | 7.81E-14 | -0.02673 | 0.56451 | -0.09078 | 0.04994  | 0.014748 |
| 0.304888 | 1.67E-11 | 0.313926 | 3.86E-12 | -0.01603 | 0.72969 | -0.05274 | 0.2553   | 0.069533 |
| 0.256481 | 1.89E-08 | -0.06427 | 0.16556  | 0.014286 | 0.75815 | -0.04554 | 0.32612  | -0.1004  |
| -0.0125  | 0.78753  | -0.11066 | 0.01674  | -0.00139 | 0.97614 | -0.02729 | 0.55633  | 0.011003 |
| 0.133619 | 0.00382  | 0.307351 | 1.13E-11 | 0.032454 | 0.48415 | 0.084603 | 0.06775  | 0.027983 |
| -0.07242 | 0.11811  | -0.12384 | 0.00738  | 0.019733 | 0.6706  | 0.044758 | 0.33448  | -0.04925 |
| 0.092183 | 0.04648  | -0.04437 | 0.33865  | -0.02376 | 0.6086  | -0.04303 | 0.35347  | -0.03115 |
| 0.216118 | 2.43E-06 | 0.578652 | 4.31E-43 | 0.053961 | 0.24449 | 0.172201 | 0.00018  | 0.112841 |
| 0.083156 | 0.0726   | 0.418745 | 2.98E-21 | -0.04052 | 0.38235 | 0.019156 | 0.67969  | -0.04092 |
| 0.146813 | 0.00147  | 0.139925 | 0.00244  | 0.040655 | 0.38072 | 0.104096 | 0.02447  | 0.086094 |
| -0.11651 | 0.01174  | -0.20789 | 5.90E-06 | -0.10065 | 0.02965 | -0.06102 | 0.18805  | -0.056   |
| -0.01475 | 0.75049  | -0.2287  | 5.87E-07 | 0.001312 | 0.97744 | -0.10143 | 0.0284   | 0.014641 |
| 0.220512 | 1.50E-06 | -0.15202 | 0.00098  | 0.041005 | 0.37663 | 0.026073 | 0.5741   | 0.043322 |
| -0.03628 | 0.43417  | -0.07129 | 0.12393  | 0.013505 | 0.771   | 0.084016 | 0.06969  | -0.00692 |
| 0.041539 | 0.37044  | -0.08289 | 0.07352  | 0.016945 | 0.71494 | -0.00778 | 0.8669   | -0.04323 |
| 0.111536 | 0.01589  | 0.132619 | 0.00409  | 0.086459 | 0.06192 | 0.154225 | 0.00083  | 0.157339 |
| -0.18063 | 8.66E-05 | -0.14959 | 0.00119  | 0.002966 | 0.94904 | 0.034288 | 0.45979  | -0.04045 |
| -0.02678 | 0.56373  | 0.106652 | 0.02116  | -0.03975 | 0.39144 | -0.05529 | 0.23303  | -0.07101 |
| 0.014687 | 0.75158  | -0.22746 | 6.78E-07 | -0.01906 | 0.68124 | -0.05189 | 0.26313  | 0.044767 |
| 0.385019 | 5.97E-18 | 0.015519 | 0.738    | 0.022553 | 0.62688 | -0.06424 | 0.16573  | 0.05031  |
| 0.035847 | 0.43962  | 0.200906 | 1.22E-05 | 0.020638 | 0.65644 | 0.061839 | 0.18219  | 0.058793 |
| -0.06805 | 0.142    | -0.10168 | 0.028    | -0.02871 | 0.53604 | -0.05235 | 0.2589   | -0.02363 |
| 0.15057  | 0.0011   | 0.026235 | 0.57172  | 0.049277 | 0.28793 | 0.038325 | 0.40864  | 0.297173 |
| 0.311275 | 5.97E-12 | 0.140041 | 0.00242  | -0.03538 | 0.44555 | -0.07237 | 0.11832  | -0.0389  |
| 0.247451 | 6.04E-08 | 0.154798 | 0.00079  | -0.02112 | 0.6489  | -0.14669 | 0.00148  | -0.01317 |
| 0.099356 | 0.03182  | 0.313715 | 4.00E-12 | 0.064981 | 0.16092 | 0.150051 | 0.00114  | 0.136184 |
| -0.1469  | 0.00146  | -0.08715 | 0.05986  | 0.039565 | 0.39363 | 0.054966 | 0.23581  | 0.186858 |
| -0.04099 | 0.37675  | -0.01479 | 0.74983  | -0.01484 | 0.74906 | -0.02136 | 0.64527  | -0.08172 |
| 0.064215 | 0.16593  | 0.007353 | 0.87408  | -0.00876 | 0.85025 | -0.07103 | 0.12532  | -0.0135  |
| 0.202915 | 9.90E-06 | 0.12844  | 0.00544  | 0.039044 | 0.39989 | -0.02917 | 0.52952  | 0.106945 |
| 0.010977 | 0.81297  | -0.14842 | 0.0013   | 0.065988 | 0.15452 | 0.057697 | 0.2133   | 0.288571 |
| -0.06787 | 0.14306  | -0.29516 | 7.67E-11 | -0.00601 | 0.89693 | -0.06646 | 0.15156  | -0.07232 |
| 0.12081  | 0.00897  | -0.05731 | 0.2164   | 0.000957 | 0.98354 | -0.00881 | 0.84935  | -0.00569 |

|          |          |          |          |          |         |          |          |          |
|----------|----------|----------|----------|----------|---------|----------|----------|----------|
| -0.085   | 0.06647  | -0.22447 | 9.55E-07 | -0.0384  | 0.40767 | -0.10124 | 0.0287   | -0.12022 |
| 0.06728  | 0.14659  | -0.03302 | 0.47649  | -0.02987 | 0.51959 | -0.11947 | 0.00977  | 0.019798 |
| 0.070504 | 0.12815  | -0.06219 | 0.17971  | 0.045035 | 0.3315  | 0.058953 | 0.20349  | 0.071007 |
| -0.18569 | 5.41E-05 | -0.20594 | 7.24E-06 | 0.001724 | 0.97036 | -0.00549 | 0.90579  | -0.06562 |
| 0.229979 | 5.06E-07 | 0.273259 | 1.93E-09 | -0.00958 | 0.8365  | -0.07731 | 0.09517  | 0.138651 |
| 0.048048 | 0.30014  | -0.02708 | 0.55943  | -0.01684 | 0.71658 | -0.10095 | 0.02917  | 0.110992 |
| 0.158375 | 0.00059  | -0.10884 | 0.01863  | 0.027959 | 0.54671 | -0.03374 | 0.46695  | 0.056046 |
| 0.354061 | 3.08E-15 | 0.01964  | 0.67205  | 0.008157 | 0.86044 | -0.0702  | 0.12982  | 0.02616  |
| 0.191935 | 2.97E-05 | 0.135562 | 0.00333  | 0.010852 | 0.81507 | -0.01464 | 0.75235  | 0.055794 |
| 0.046189 | 0.31925  | -0.19268 | 2.77E-05 | -0.058   | 0.21092 | -0.16057 | 0.0005   | -0.13932 |
| 0.32622  | 4.85E-13 | 0.034885 | 0.45201  | 0.007725 | 0.86777 | -0.08951 | 0.05324  | 0.018871 |
| -0.0092  | 0.84279  | -0.11885 | 0.01015  | 0.047322 | 0.30751 | 0.039342 | 0.3963   | 0.174933 |
| 0.259387 | 1.29E-08 | 0.186206 | 5.15E-05 | 0.024615 | 0.59571 | -0.06728 | 0.14662  | 0.129953 |
| -0.02056 | 0.65761  | -0.03957 | 0.39352  | -0.00309 | 0.94689 | -0.02133 | 0.64573  | 0.087305 |
| -0.21609 | 2.44E-06 | -0.31839 | 1.84E-12 | -0.03724 | 0.42199 | -0.03132 | 0.49955  | -0.01651 |
| 0.206687 | 6.69E-06 | -0.13768 | 0.00287  | 0.016913 | 0.71546 | -0.05075 | 0.27373  | 0.008925 |
| 0.215361 | 2.64E-06 | 0.132128 | 0.00423  | 0.092985 | 0.0446  | 0.074159 | 0.10949  | 0.269905 |
| 0.129154 | 0.00519  | 0.103607 | 0.02516  | 0.028703 | 0.53609 | 0.010885 | 0.81452  | 0.139223 |
| 0.008382 | 0.85664  | 0.019983 | 0.66666  | -0.07064 | 0.12743 | -0.1105  | 0.01691  | -0.09402 |
| 0.424504 | 7.46E-22 | 0.118078 | 0.01066  | 0.01776  | 0.70186 | -0.04228 | 0.362    | 0.093016 |
| 0.125076 | 0.0068   | 0.190193 | 3.52E-05 | 0.089133 | 0.05425 | 0.110893 | 0.01651  | 0.30779  |
| 0.262288 | 8.72E-09 | 0.164119 | 0.00037  | -0.01919 | 0.67917 | -0.05725 | 0.21684  | 0.060191 |
| 0.278449 | 9.20E-10 | 0.041321 | 0.37296  | -0.07001 | 0.13085 | -0.13431 | 0.00364  | -0.19625 |
| 0.089623 | 0.05293  | -0.2168  | 2.26E-06 | -0.00872 | 0.85089 | -0.07301 | 0.11511  | -0.00167 |
| 0.028541 | 0.53839  | 0.078287 | 0.09106  | 0.036925 | 0.42598 | 0.095177 | 0.03979  | 0.078505 |
| 0.214481 | 2.91E-06 | 0.268149 | 3.92E-09 | 0.115739 | 0.01232 | 0.156049 | 0.00071  | 0.267153 |
| -0.01134 | 0.80688  | -0.1611  | 0.00047  | 0.049233 | 0.28836 | 0.063504 | 0.17068  | 0.139393 |
| 0.058255 | 0.2089   | -0.22348 | 1.07E-06 | -0.00665 | 0.886   | -0.04858 | 0.29477  | 0.038831 |
| -0.08961 | 0.05296  | -0.11356 | 0.01407  | -0.03715 | 0.42314 | -0.01198 | 0.79632  | -0.04888 |
| 0.299575 | 3.87E-11 | 0.15215  | 0.00097  | 0.016008 | 0.73008 | -0.06112 | 0.18732  | 0.051196 |
| -0.22052 | 1.49E-06 | -0.40094 | 1.84E-19 | -0.03739 | 0.42023 | -0.03928 | 0.39702  | -0.08283 |
| 0.129634 | 0.00502  | 0.019816 | 0.66929  | -0.04307 | 0.35305 | -0.0694  | 0.13424  | -0.03145 |
| 0.324304 | 6.74E-13 | 0.232291 | 3.85E-07 | -0.04457 | 0.33656 | -0.12085 | 0.00895  | -0.03829 |
| 0.048229 | 0.29832  | -0.2992  | 4.10E-11 | -0.0472  | 0.30873 | -0.21206 | 3.78E-06 | -0.16129 |
| 0.229958 | 5.07E-07 | -0.01102 | 0.81223  | -0.01351 | 0.77084 | -0.07217 | 0.11935  | 0.003367 |
| 0.275954 | 1.31E-09 | 0.166646 | 0.0003   | 0.008381 | 0.85665 | 0.013196 | 0.7761   | -0.06583 |
| 0.065641 | 0.1567   | -0.27302 | 1.99E-09 | -0.07408 | 0.10984 | -0.17764 | 0.00011  | -0.2515  |
| 0.094428 | 0.04138  | -0.01591 | 0.73165  | -0.01535 | 0.74081 | -0.03045 | 0.51156  | 0.07455  |
| -0.06861 | 0.13877  | 0.154611 | 0.0008   | -0.00972 | 0.834   | 0.0178   | 0.70123  | 0.030433 |
| 0.093397 | 0.04366  | -0.10761 | 0.02001  | -0.01584 | 0.73281 | 0.006404 | 0.89022  | -0.05524 |
| -0.08651 | 0.06178  | 0.020127 | 0.66441  | -0.07697 | 0.09664 | -0.08418 | 0.06915  | -0.0851  |
| 0.119129 | 0.00998  | 0.021311 | 0.64598  | 0.042527 | 0.35915 | -0.00872 | 0.85096  | 0.123767 |
| -0.03537 | 0.44568  | 0.06222  | 0.1795   | -0.01858 | 0.68881 | -0.02814 | 0.54409  | -0.0536  |
| 0.185179 | 5.68E-05 | 0.027285 | 0.55643  | -0.00513 | 0.91199 | -0.02723 | 0.55716  | -0.00025 |
| 0.248159 | 5.52E-08 | 0.225465 | 8.53E-07 | -0.03466 | 0.45488 | -0.10746 | 0.02019  | 0.044131 |



|          |          |          |          |          |         |          |          |          |
|----------|----------|----------|----------|----------|---------|----------|----------|----------|
| -0.03099 | 0.50415  | -0.33996 | 4.25E-14 | -0.03298 | 0.47704 | -0.1511  | 0.00106  | -0.02583 |
| 0.158966 | 0.00056  | 0.336454 | 8.01E-14 | 0.005884 | 0.89909 | 0.008045 | 0.86235  | 0.026    |
| 0.058961 | 0.20343  | 0.22628  | 7.77E-07 | 0.010866 | 0.81483 | 0.107742 | 0.01987  | -0.03306 |
| 0.075233 | 0.10443  | 0.115249 | 0.0127   | 0.002854 | 0.95095 | -0.07311 | 0.1146   | -0.05835 |
| 0.036531 | 0.43093  | 0.090558 | 0.0505   | -0.01816 | 0.69541 | -0.00121 | 0.97926  | -0.08456 |
| 0.125783 | 0.00649  | 0.298324 | 4.71E-11 | 0.011023 | 0.81221 | 0.037959 | 0.41313  | 0.018795 |
| -0.00632 | 0.89162  | -0.23637 | 2.37E-07 | -0.03866 | 0.40455 | -0.10121 | 0.02875  | -0.06675 |
| 0.168366 | 0.00026  | 0.158405 | 0.00059  | -0.01049 | 0.82105 | -0.03568 | 0.44182  | -0.03602 |
| 0.039226 | 0.3977   | -0.02234 | 0.63016  | -0.00317 | 0.94546 | -0.09876 | 0.03286  | 0.033295 |
| -0.12945 | 0.00508  | -0.25231 | 3.25E-08 | 0.148296 | 0.00131 | 0.211518 | 4.01E-06 | 0.160094 |
| 0.255963 | 2.02E-08 | 0.290082 | 1.66E-10 | 0.042424 | 0.36032 | 0.157855 | 0.00062  | 0.128458 |
| -0.18787 | 4.40E-05 | -0.01342 | 0.77236  | 0.045424 | 0.32734 | 0.243179 | 1.03E-07 | -0.10678 |
| 0.133602 | 0.00382  | 0.308215 | 9.81E-12 | 0.021444 | 0.64393 | -0.00835 | 0.85725  | 0.131215 |
| 0.148595 | 0.00128  | -0.03714 | 0.4233   | -0.00203 | 0.96517 | -0.02503 | 0.58957  | 0.037728 |
| -0.10999 | 0.01742  | -0.21403 | 3.06E-06 | 0.027875 | 0.54791 | 0.030679 | 0.50838  | 0.122924 |
| 0.156863 | 0.00067  | 0.422022 | 1.36E-21 | 0.0144   | 0.75628 | 0.031344 | 0.49923  | 0.171286 |
| 0.357174 | 1.69E-15 | 0.198399 | 1.57E-05 | -0.01582 | 0.73306 | -0.03581 | 0.44011  | -0.03456 |
| -0.01363 | 0.76887  | -0.39544 | 6.25E-19 | 0.017286 | 0.70947 | 0.003285 | 0.94357  | -0.09061 |
| 0.324948 | 6.04E-13 | 0.349146 | 7.80E-15 | 0.08287  | 0.0736  | 0.10664  | 0.02117  | 0.186956 |
| 0.120948 | 0.00889  | 0.029942 | 0.51862  | 0.03055  | 0.51016 | 0.037262 | 0.42177  | 0.157641 |
| -0.0191  | 0.68061  | 0.2165   | 2.33E-06 | 0.008217 | 0.85943 | 0.093063 | 0.04442  | 0.069749 |
| 0.217352 | 2.12E-06 | 0.080468 | 0.08237  | 0.013901 | 0.76448 | 0.0098   | 0.83272  | 0.10273  |
| 0.247418 | 6.07E-08 | 0.045161 | 0.33015  | -0.00471 | 0.91923 | -0.11818 | 0.01059  | -0.01404 |
| -0.17868 | 0.0001   | -0.242   | 1.19E-07 | -0.06088 | 0.18906 | -0.0693  | 0.1348   | -0.01264 |
| -0.03034 | 0.51303  | -0.16749 | 0.00028  | -0.03704 | 0.42455 | -0.06941 | 0.13418  | -0.01621 |
| 0.169719 | 0.00023  | 0.404262 | 8.68E-20 | 0.000274 | 0.99529 | -0.00247 | 0.95755  | 0.045936 |
| 0.286767 | 2.73E-10 | 0.026106 | 0.57361  | 0.043786 | 0.3451  | -0.03639 | 0.4327   | -0.01427 |
| 0.199861 | 1.35E-05 | -0.03116 | 0.50169  | -0.01324 | 0.77536 | -0.08877 | 0.05525  | -0.01098 |
| -0.16261 | 0.00042  | -0.18769 | 4.48E-05 | -0.0622  | 0.17966 | -0.09286 | 0.04488  | -0.17745 |
| 0.017548 | 0.70526  | -0.40654 | 5.16E-20 | -0.02979 | 0.5208  | -0.22622 | 7.82E-07 | -0.12189 |
| -0.03509 | 0.44932  | 0.313231 | 4.33E-12 | -0.00536 | 0.90806 | 0.085289 | 0.06554  | -0.00288 |
| -0.10377 | 0.02493  | -0.04292 | 0.35474  | -0.05597 | 0.22736 | -0.0677  | 0.14408  | -0.1557  |
| 0.150485 | 0.00111  | 0.067962 | 0.14253  | 0.023615 | 0.61073 | -0.00144 | 0.97519  | 0.108523 |
| -0.02341 | 0.61385  | -0.14044 | 0.00235  | 0.049289 | 0.28781 | 0.082439 | 0.07511  | 0.142255 |
| 0.163379 | 0.00039  | 0.067816 | 0.14339  | 0.022981 | 0.62034 | 0.042132 | 0.36364  | 0.056088 |
| 0.287827 | 2.33E-10 | 0.030392 | 0.51236  | -0.00347 | 0.94033 | -0.04177 | 0.36781  | -0.02066 |
| 0.325992 | 5.04E-13 | 0.312668 | 4.75E-12 | -0.00482 | 0.91731 | -0.14269 | 0.00199  | 0.083101 |
| 0.381391 | 1.29E-17 | 0.208798 | 5.36E-06 | 0.04632  | 0.31788 | 0.070543 | 0.12794  | 0.182725 |
| 0.097749 | 0.03471  | -0.0985  | 0.03333  | -0.03295 | 0.47746 | -0.09762 | 0.03494  | -0.00559 |
| -0.19647 | 1.90E-05 | -0.1642  | 0.00037  | -0.0315  | 0.49705 | 0.008507 | 0.85453  | -0.0302  |
| 0.070561 | 0.12785  | 0.030916 | 0.50511  | -0.01777 | 0.70174 | -0.04502 | 0.33161  | 0.018732 |
| 0.073423 | 0.11306  | -0.19658 | 1.88E-05 | -0.01135 | 0.8067  | -0.10207 | 0.02742  | -0.09107 |
| 0.238067 | 1.93E-07 | 0.206191 | 7.05E-06 | 0.036806 | 0.42747 | 0.036753 | 0.42814  | 0.09174  |
| 0.150634 | 0.00109  | -0.05098 | 0.27154  | 0.010375 | 0.82305 | -0.00111 | 0.98097  | -0.02865 |
| 0.261631 | 9.52E-09 | 0.100108 | 0.03054  | 0.056942 | 0.21937 | 0.088338 | 0.05644  | 0.120833 |

|          |          |          |          |          |         |          |         |          |
|----------|----------|----------|----------|----------|---------|----------|---------|----------|
| 0.178644 | 0.0001   | 0.059322 | 0.20067  | 0.001367 | 0.97649 | -0.01788 | 0.69994 | -0.00024 |
| 0.347687 | 1.03E-14 | 0.170632 | 0.00021  | -0.0095  | 0.83783 | -0.10824 | 0.0193  | 0.056113 |
| -0.1658  | 0.00032  | -0.26129 | 9.97E-09 | -0.03768 | 0.4166  | -0.14726 | 0.00142 | -0.1115  |
| 0.05609  | 0.22635  | -0.15872 | 0.00058  | -0.02302 | 0.61977 | -0.09498 | 0.04021 | -0.04284 |
| -0.15443 | 0.00081  | -0.19422 | 2.38E-05 | -0.03778 | 0.41534 | -0.08934 | 0.0537  | -0.11648 |
| 0.203148 | 9.67E-06 | 0.175015 | 0.00014  | 0.006358 | 0.891   | -0.0286  | 0.53759 | 0.073914 |
| 0.191424 | 3.12E-05 | 0.335307 | 9.83E-14 | 0.048704 | 0.29358 | 0.110957 | 0.01645 | 0.09443  |
| 0.020968 | 0.6513   | 0.269157 | 3.41E-09 | 0.004291 | 0.92632 | 0.073545 | 0.11247 | 0.047194 |
| 0.163109 | 0.0004   | -0.01565 | 0.73592  | 0.035948 | 0.43834 | -0.05007 | 0.28023 | 0.149839 |
| -0.13962 | 0.0025   | -0.37613 | 3.84E-17 | 0.014702 | 0.75134 | 0.006429 | 0.88979 | -0.05658 |
| -0.03307 | 0.47593  | 0.264208 | 6.73E-09 | -0.01845 | 0.69095 | 0.113305 | 0.01429 | -0.10384 |
| 0.176804 | 0.00012  | -0.1437  | 0.00185  | -0.0008  | 0.98632 | -0.08981 | 0.05242 | 0.067448 |
| -0.10823 | 0.01931  | -0.10161 | 0.02811  | -0.03877 | 0.40327 | -0.02875 | 0.53543 | -0.09351 |
| 0.249615 | 4.59E-08 | 0.307411 | 1.12E-11 | 0.01492  | 0.74778 | 0.04471  | 0.335   | -0.01999 |
| 0.389511 | 2.28E-18 | 0.029922 | 0.51891  | 0.016662 | 0.7195  | -0.10974 | 0.01768 | 0.117171 |
| 0.196965 | 1.81E-05 | -0.06543 | 0.15807  | 0.005022 | 0.91381 | -0.13757 | 0.00289 | 0.057208 |
| 0.453965 | 4.03E-25 | -0.00533 | 0.90848  | -0.05147 | 0.26701 | -0.15104 | 0.00106 | -0.03943 |
| 0.345825 | 1.45E-14 | 0.179336 | 9.75E-05 | 0.017151 | 0.71163 | -0.04838 | 0.29684 | 0.085021 |
| 0.139662 | 0.00249  | -0.08781 | 0.05795  | -0.06579 | 0.15577 | -0.13514 | 0.00343 | -0.06551 |
| 0.246246 | 7.03E-08 | 0.146736 | 0.00147  | 0.038059 | 0.4119  | -0.02483 | 0.59244 | 0.157269 |
| 0.263819 | 7.09E-09 | 0.235364 | 2.67E-07 | -0.00386 | 0.93366 | -0.07689 | 0.097   | -0.05545 |
| -0.07993 | 0.08444  | -0.17401 | 0.00016  | -0.05992 | 0.19613 | -0.13152 | 0.00442 | -0.11434 |
| -0.18555 | 5.48E-05 | 0.06165  | 0.18353  | -0.00526 | 0.90976 | 0.066529 | 0.15116 | -0.04859 |
| -0.06416 | 0.16628  | -0.27415 | 1.70E-09 | -0.01875 | 0.68612 | -0.11233 | 0.01516 | 0.021312 |
| -0.02433 | 0.60003  | 0.212833 | 3.48E-06 | -0.02943 | 0.52581 | -0.04379 | 0.3451  | -0.10159 |
| 0.141407 | 0.00219  | 0.005683 | 0.90252  | 0.02435  | 0.59967 | 0.065986 | 0.15453 | 0.094358 |
| 0.097188 | 0.03576  | 0.016758 | 0.71795  | 0.020872 | 0.65278 | 0.035638 | 0.4423  | 0.009727 |
| -0.1214  | 0.00864  | -0.02317 | 0.61749  | -0.02088 | 0.65268 | 0.047039 | 0.31041 | 0.016806 |
| -0.11459 | 0.01322  | -0.16299 | 0.00041  | 0.001612 | 0.97229 | 0.125234 | 0.00673 | -0.05231 |
| -0.01376 | 0.76683  | -0.07145 | 0.12311  | 0.073122 | 0.11455 | 0.037954 | 0.41319 | 0.086177 |
| 0.097863 | 0.03449  | -0.03265 | 0.48158  | -0.0109  | 0.81427 | -0.01322 | 0.77573 | -0.0115  |
| 0.066577 | 0.15086  | 0.017255 | 0.70995  | 0.024166 | 0.60244 | 0.024199 | 0.60193 | 0.037096 |
| 0.318047 | 1.95E-12 | 0.100802 | 0.0294   | -0.0285  | 0.53903 | -0.07307 | 0.11479 | -0.02438 |
| 0.163846 | 0.00038  | 0.226917 | 7.22E-07 | 0.061493 | 0.18465 | 0.105384 | 0.02275 | 0.154786 |
| 0.064906 | 0.16141  | -0.14561 | 0.0016   | -0.00757 | 0.87034 | -0.04129 | 0.37332 | -0.0649  |
| 0.117212 | 0.01125  | 0.073895 | 0.11076  | 0.002265 | 0.96106 | 0.003419 | 0.94126 | -0.03964 |
| -0.04327 | 0.35079  | -0.15343 | 0.00088  | 0.070032 | 0.13074 | 0.14687  | 0.00146 | 0.085035 |
| 0.329678 | 2.66E-13 | 0.295916 | 6.83E-11 | 0.032798 | 0.47952 | 0.032634 | 0.48173 | 0.046679 |
| -0.10449 | 0.02393  | -0.11437 | 0.0134   | -0.03605 | 0.43706 | 0.020427 | 0.65972 | -0.05588 |
| 0.06015  | 0.19444  | -0.14084 | 0.00228  | 0.044995 | 0.33193 | -0.02777 | 0.54946 | 0.060513 |
| 0.156705 | 0.00068  | 0.14312  | 0.00193  | 0.031277 | 0.50015 | 0.025764 | 0.57864 | 0.052802 |
| 0.050488 | 0.27623  | -0.12183 | 0.0084   | 0.000427 | 0.99266 | -0.03749 | 0.41891 | 0.039825 |
| 0.329543 | 2.72E-13 | 0.06691  | 0.14883  | 0.013921 | 0.76414 | -0.06795 | 0.14257 | 0.124978 |
| -0.11788 | 0.01079  | 0.103832 | 0.02484  | -0.00999 | 0.8295  | 0.029229 | 0.52864 | -0.03467 |
| -0.18153 | 7.98E-05 | -0.22083 | 1.44E-06 | -0.05612 | 0.22613 | -0.15016 | 0.00113 | -0.1191  |

|          |          |          |          |          |         |          |          |          |
|----------|----------|----------|----------|----------|---------|----------|----------|----------|
| -0.13584 | 0.00327  | -0.20377 | 9.06E-06 | -0.04818 | 0.29884 | -0.1171  | 0.01132  | -0.06122 |
| -0.08746 | 0.05895  | -0.26361 | 7.29E-09 | 0.003387 | 0.9418  | 0.022548 | 0.62695  | -0.00994 |
| 0.278734 | 8.83E-10 | -0.03513 | 0.44888  | -0.01605 | 0.72938 | -0.1493  | 0.00121  | -0.09226 |
| -0.00818 | 0.86004  | -0.0715  | 0.12287  | -0.01632 | 0.72498 | -0.0126  | 0.786    | -0.08068 |
| 0.04629  | 0.31819  | -0.14833 | 0.00131  | -0.02887 | 0.53369 | -0.09002 | 0.05188  | -0.11915 |
| 0.190851 | 3.30E-05 | 0.305104 | 1.62E-11 | 0.066489 | 0.15141 | 0.117326 | 0.01117  | 0.22106  |
| 0.194368 | 2.34E-05 | -0.0631  | 0.17343  | -0.02143 | 0.64408 | -0.11652 | 0.01174  | -0.08819 |
| 0.170593 | 0.00021  | -0.00422 | 0.92746  | -0.00378 | 0.93514 | -0.13665 | 0.00309  | -0.07326 |
| 0.104057 | 0.02453  | 0.014069 | 0.76171  | 0.013072 | 0.77815 | 0.033581 | 0.4691   | 0.106996 |
| 0.108839 | 0.01864  | 0.034549 | 0.45637  | -0.02169 | 0.6401  | -0.04535 | 0.32808  | 0.030869 |
| 0.046362 | 0.31743  | -0.19504 | 2.19E-05 | -0.01235 | 0.79008 | -0.11676 | 0.01157  | 0.038284 |
| 0.279355 | 8.07E-10 | 0.356278 | 2.01E-15 | 0.03215  | 0.48825 | -0.02471 | 0.59436  | 0.079235 |
| 0.231971 | 4.00E-07 | 0.124115 | 0.00725  | 0.003922 | 0.93263 | -0.01578 | 0.73371  | 0.00242  |
| 0.257135 | 1.73E-08 | 0.192991 | 2.68E-05 | -0.00221 | 0.96209 | -0.02451 | 0.59725  | -0.01429 |
| 0.188357 | 4.20E-05 | 0.07959  | 0.08578  | 0.063223 | 0.17258 | -0.00192 | 0.96694  | 0.130281 |
| 0.03175  | 0.49369  | -0.3773  | 3.02E-17 | -0.03473 | 0.45407 | -0.16007 | 0.00052  | -0.14293 |
| 0.276629 | 1.19E-09 | 0.235177 | 2.73E-07 | 0.0153   | 0.74157 | 0.019367 | 0.67636  | 0.068915 |
| -0.12609 | 0.00636  | -0.28835 | 2.15E-10 | -0.02588 | 0.57691 | -0.08894 | 0.05479  | -0.05345 |
| -0.19862 | 1.53E-05 | -0.17782 | 0.00011  | 0.021206 | 0.64761 | 0.106794 | 0.02098  | -0.06977 |
| 0.134897 | 0.00349  | -0.08591 | 0.06359  | -0.01134 | 0.80698 | -0.07805 | 0.09205  | -0.08757 |
| -0.18835 | 4.20E-05 | -0.10953 | 0.01789  | -0.09421 | 0.04185 | -0.11962 | 0.00967  | -0.14282 |
| -0.02605 | 0.57438  | -0.21605 | 2.45E-06 | 0.038553 | 0.40586 | 0.0942   | 0.04188  | 0.014392 |
| 0.180573 | 8.71E-05 | 0.031453 | 0.49774  | 0.013573 | 0.76988 | 0.038023 | 0.41234  | 0.01058  |
| 0.315793 | 2.84E-12 | 0.275429 | 1.42E-09 | 0.019515 | 0.67402 | 0.016414 | 0.7235   | 0.035987 |
| 0.197019 | 1.80E-05 | 0.138614 | 0.00268  | -0.00135 | 0.97677 | -0.03566 | 0.44204  | -0.0514  |
| -0.11181 | 0.01563  | -0.08172 | 0.07768  | -0.0102  | 0.82595 | -0.04346 | 0.3487   | -0.00315 |
| 0.10258  | 0.02665  | 0.056453 | 0.22335  | -0.00055 | 0.99061 | 0.005748 | 0.9014   | 0.032409 |
| 0.05131  | 0.26848  | -0.0826  | 0.07455  | -0.0053  | 0.90899 | -0.01862 | 0.68818  | 0.005489 |
| 0.171695 | 0.00019  | 0.125097 | 0.00679  | 0.001993 | 0.96575 | -0.01764 | 0.70378  | 0.102794 |
| 0.10356  | 0.02522  | -0.12585 | 0.00647  | 0.035556 | 0.44335 | -0.03027 | 0.5141   | 0.028343 |
| 0.423858 | 8.72E-22 | 0.493731 | 4.56E-30 | 0.026739 | 0.56436 | -0.06201 | 0.18095  | 0.123846 |
| 0.051731 | 0.26456  | -0.06822 | 0.141    | 0.008347 | 0.85723 | 0.106204 | 0.02171  | 0.031451 |
| 0.084488 | 0.06813  | -0.05594 | 0.22759  | 0.0073   | 0.87498 | -0.16933 | 0.00024  | 8.10E-05 |
| 0.113832 | 0.01384  | 0.068482 | 0.13949  | -0.01056 | 0.81999 | 0.054314 | 0.24141  | -0.02369 |
| 0.053522 | 0.24836  | -0.07366 | 0.1119   | 0.003569 | 0.93869 | 0.028321 | 0.54152  | 0.01099  |
| 0.349119 | 7.84E-15 | 0.269032 | 3.47E-09 | 0.012093 | 0.79436 | -0.02493 | 0.59106  | 0.133424 |
| 0.204038 | 8.82E-06 | 0.177577 | 0.00011  | 0.013037 | 0.77871 | -0.03749 | 0.41892  | -0.00883 |
| 0.283898 | 4.17E-10 | 0.081667 | 0.07789  | 0.022722 | 0.6243  | 0.015704 | 0.73501  | 0.085973 |
| 0.20242  | 1.04E-05 | 0.010996 | 0.81266  | 0.035641 | 0.44226 | -0.03919 | 0.39819  | -0.03059 |
| 0.480256 | 2.56E-28 | -0.02655 | 0.56712  | -0.01116 | 0.80984 | -0.11639 | 0.01183  | 0.115393 |
| 0.081844 | 0.07725  | -0.06677 | 0.1497   | -0.02108 | 0.64958 | -0.06141 | 0.18522  | -0.04078 |
| 0.128516 | 0.00541  | 0.004699 | 0.91933  | 0.015044 | 0.74575 | 0.027404 | 0.5547   | 0.041388 |
| 0.377458 | 2.92E-17 | 0.041889 | 0.36642  | 0.004779 | 0.91797 | -0.11018 | 0.01723  | -0.04866 |
| 0.230604 | 4.70E-07 | 0.014646 | 0.75225  | -0.01599 | 0.7303  | -0.18101 | 8.36E-05 | -0.02809 |
| 0.385707 | 5.16E-18 | 0.060245 | 0.19374  | 0.010799 | 0.81595 | -0.02185 | 0.6377   | 0.024829 |

|          |          |          |          |          |         |          |          |          |
|----------|----------|----------|----------|----------|---------|----------|----------|----------|
| -0.09882 | 0.03275  | -0.08466 | 0.06757  | -0.0249  | 0.59148 | -0.05869 | 0.20551  | -0.06181 |
| 0.06141  | 0.18524  | 0.106453 | 0.0214   | -0.05686 | 0.21999 | -0.07526 | 0.10429  | -0.18298 |
| 0.082854 | 0.07365  | 0.011316 | 0.80731  | 0.009222 | 0.84245 | 0.020605 | 0.65695  | 0.085548 |
| 0.007225 | 0.87625  | -0.27945 | 7.96E-10 | -0.03285 | 0.4788  | -0.14446 | 0.00175  | -0.13668 |
| 0.005641 | 0.90324  | 0.039676 | 0.39231  | 0.040485 | 0.38272 | 0.096044 | 0.03801  | 0.171023 |
| 0.14667  | 0.00148  | 0.173549 | 0.00016  | 0.035833 | 0.4398  | 0.00881  | 0.8494   | 0.025137 |
| 0.02571  | 0.57944  | -0.11574 | 0.01232  | 0.007194 | 0.87679 | -0.02843 | 0.54002  | -0.02864 |
| 0.104471 | 0.02396  | -0.12941 | 0.0051   | 0.00579  | 0.90069 | -0.03604 | 0.43714  | -0.0554  |
| 0.085442 | 0.06506  | -0.07032 | 0.12916  | -0.00274 | 0.95293 | -0.01162 | 0.80217  | -0.03141 |
| 0.119759 | 0.00959  | -0.243   | 1.05E-07 | 0.003037 | 0.94782 | -0.02754 | 0.55271  | -0.05649 |
| 0.195332 | 2.13E-05 | -0.14296 | 0.00196  | -0.00584 | 0.89976 | -0.00956 | 0.83669  | -0.05957 |
| 0.128542 | 0.0054   | -0.06554 | 0.15737  | -0.02609 | 0.57385 | -0.12416 | 0.00722  | 0.002845 |
| 0.302175 | 2.57E-11 | 0.316512 | 2.52E-12 | 0.013641 | 0.76876 | -0.00405 | 0.93042  | 0.079853 |
| 0.018638 | 0.68788  | -0.15936 | 0.00055  | -0.00475 | 0.91845 | -0.02931 | 0.52748  | -0.06387 |
| -0.02632 | 0.57047  | 0.043547 | 0.34774  | 0.066655 | 0.15039 | -0.0055  | 0.90558  | 0.065667 |
| 0.149934 | 0.00115  | 0.002294 | 0.96057  | 0.008622 | 0.85258 | 0.022183 | 0.63254  | 0.083449 |
| 0.075594 | 0.10277  | -0.14868 | 0.00127  | -0.02265 | 0.62533 | -0.10028 | 0.03026  | -0.08383 |
| 0.090275 | 0.05122  | -0.09761 | 0.03496  | -0.0352  | 0.44792 | -0.1016  | 0.02814  | 0.046142 |
| 0.023975 | 0.6053   | 0.185176 | 5.68E-05 | -0.00962 | 0.83567 | -0.03231 | 0.48611  | 0.018688 |
| 0.232968 | 3.56E-07 | 0.069974 | 0.13105  | -0.02014 | 0.66428 | -0.09274 | 0.04518  | -0.04116 |
| 0.159578 | 0.00054  | -0.09687 | 0.03638  | -0.00634 | 0.89128 | -0.08576 | 0.06405  | 0.102966 |
| 0.080292 | 0.08305  | -0.20831 | 5.64E-06 | -0.00757 | 0.87039 | -0.00748 | 0.87195  | 0.012838 |
| 0.125983 | 0.00641  | 0.005447 | 0.90655  | 0.054494 | 0.23986 | 0.05676  | 0.22085  | 0.086186 |
| 0.181468 | 8.02E-05 | -0.13834 | 0.00274  | -0.0536  | 0.24767 | -0.14927 | 0.00122  | -0.09315 |
| 0.04451  | 0.33718  | 0.201269 | 1.17E-05 | -0.02462 | 0.59557 | 0.076204 | 0.10002  | 0.078782 |
| 0.135025 | 0.00346  | 0.109581 | 0.01784  | 0.005316 | 0.90879 | -0.13531 | 0.00339  | -0.02653 |
| 0.307367 | 1.13E-11 | -0.04028 | 0.38518  | -0.03184 | 0.49252 | -0.10322 | 0.02571  | 0.047075 |
| 0.043225 | 0.35132  | -0.15521 | 0.00076  | -0.0094  | 0.8394  | -0.10299 | 0.02605  | -0.00973 |
| 0.070057 | 0.1306   | -0.0524  | 0.25842  | 0.032493 | 0.48363 | -0.00072 | 0.98767  | 0.12448  |
| 0.315434 | 3.01E-12 | 0.029224 | 0.52871  | 0.008739 | 0.85061 | -0.03179 | 0.49319  | 0.081754 |
| 0.155284 | 0.00076  | 0.062354 | 0.17857  | -0.01536 | 0.74056 | -0.10943 | 0.01801  | -0.01655 |
| 0.064767 | 0.16231  | 0.112683 | 0.01484  | 0.016809 | 0.71713 | -0.02032 | 0.66138  | 0.053706 |
| 0.257027 | 1.76E-08 | 0.145399 | 0.00163  | 0.010855 | 0.81503 | -0.04977 | 0.28312  | 0.09214  |
| 0.122532 | 0.00803  | 0.225911 | 8.11E-07 | 0.078878 | 0.08863 | 0.19318  | 2.63E-05 | 0.109225 |
| 0.302324 | 2.51E-11 | 0.172883 | 0.00017  | 0.012072 | 0.79473 | -0.06935 | 0.13456  | 0.007683 |
| -0.02658 | 0.56665  | 0.274843 | 1.54E-09 | 0.036086 | 0.43658 | 0.192276 | 2.88E-05 | 0.102056 |
| 0.153823 | 0.00085  | 0.290195 | 1.63E-10 | 0.082666 | 0.07431 | 0.106861 | 0.0209   | 0.302104 |
| 0.156878 | 0.00067  | -0.02379 | 0.60807  | 0.038686 | 0.40424 | 0.023835 | 0.60741  | 0.083748 |
| 0.117864 | 0.0108   | 0.236201 | 2.42E-07 | 0.005551 | 0.90477 | 0.044718 | 0.33492  | -0.05012 |
| -0.19733 | 1.75E-05 | -0.03617 | 0.43551  | -0.04018 | 0.38627 | 0.022492 | 0.62781  | -0.04988 |
| 0.428664 | 2.69E-22 | 0.076912 | 0.0969   | -0.02375 | 0.60863 | -0.09078 | 0.04993  | -0.01838 |
| 0.195359 | 2.12E-05 | 0.0876   | 0.05854  | 0.021525 | 0.64268 | 0.020606 | 0.65693  | 0.031791 |
| 0.080996 | 0.08038  | -0.07793 | 0.09254  | 0.00036  | 0.99381 | -0.03781 | 0.41491  | 0.050378 |
| 0.284402 | 3.87E-10 | 0.107826 | 0.01977  | -0.02798 | 0.54638 | -0.11404 | 0.01367  | 0.057821 |
| 0.177544 | 0.00011  | -0.21074 | 4.35E-06 | 0.016566 | 0.72104 | -0.11777 | 0.01086  | -0.02051 |

|          |          |          |          |          |         |          |          |          |
|----------|----------|----------|----------|----------|---------|----------|----------|----------|
| 0.11663  | 0.01166  | 0.044001 | 0.34273  | 0.022969 | 0.62053 | 0.010688 | 0.81781  | 0.043172 |
| 0.129793 | 0.00497  | 0.052264 | 0.25966  | -0.03733 | 0.42095 | -0.01022 | 0.82558  | 0.19475  |
| 0.264555 | 6.42E-09 | 0.076581 | 0.09835  | 0.016325 | 0.72494 | -0.02876 | 0.53524  | 0.154475 |
| 0.125194 | 0.00675  | -0.07172 | 0.12167  | -0.00834 | 0.85739 | -0.08819 | 0.05687  | -0.05971 |
| 0.281363 | 6.04E-10 | 0.071916 | 0.12067  | -0.01806 | 0.69715 | -0.04245 | 0.36005  | 0.051821 |
| 0.049933 | 0.28155  | -0.10543 | 0.0227   | -0.04186 | 0.36674 | -0.11995 | 0.00947  | -0.1044  |
| 0.313885 | 3.89E-12 | 0.248196 | 5.50E-08 | 0.044494 | 0.33735 | 0.079645 | 0.08557  | 0.195132 |
| 0.070236 | 0.12962  | -0.0819  | 0.07706  | 0.008372 | 0.85681 | -0.03767 | 0.4167   | 0.077413 |
| 0.103263 | 0.02565  | -0.33011 | 2.46E-13 | 0.042224 | 0.36259 | -0.08665 | 0.06135  | 0.05154  |
| 0.08565  | 0.06441  | -0.20806 | 5.79E-06 | 0.010697 | 0.81766 | -0.11175 | 0.01569  | 0.059245 |
| 0.126973 | 0.006    | 0.029197 | 0.52909  | 0.018907 | 0.68362 | 0.021199 | 0.64771  | 0.069117 |
| 0.078158 | 0.09159  | -0.22891 | 5.73E-07 | -0.02354 | 0.61193 | -0.08158 | 0.0782   | -0.09063 |
| 0.272212 | 2.23E-09 | 0.147513 | 0.00139  | 0.048378 | 0.29682 | 0.034379 | 0.45859  | 0.118781 |
| 0.1414   | 0.00219  | -0.09728 | 0.03559  | 0.010252 | 0.82512 | -0.03351 | 0.47004  | 0.011836 |
| 0.173746 | 0.00016  | 0.043737 | 0.34564  | 0.002658 | 0.95431 | 0.004913 | 0.91567  | 0.050855 |
| 0.172168 | 0.00019  | 0.087651 | 0.0584   | 0.024324 | 0.60005 | -0.0509  | 0.2723   | 0.059347 |
| 0.231316 | 4.32E-07 | 0.178182 | 0.00011  | 0.068066 | 0.14192 | 0.064241 | 0.16576  | 0.107761 |
| 0.116773 | 0.01156  | -0.15396 | 0.00084  | -0.01408 | 0.76154 | -0.04823 | 0.29835  | -0.01467 |
| 0.161858 | 0.00045  | 0.115294 | 0.01266  | 0.033179 | 0.47444 | -0.04349 | 0.34834  | 0.051662 |
| -0.01477 | 0.75015  | -0.0841  | 0.06942  | -0.01182 | 0.7989  | -0.09642 | 0.03725  | 0.013635 |
| 0.160963 | 0.00048  | -0.14699 | 0.00145  | -0.01442 | 0.756   | -0.14438 | 0.00176  | -0.08086 |
| 0.075686 | 0.10236  | -0.1349  | 0.00349  | -0.02794 | 0.54697 | -0.10284 | 0.02627  | -0.149   |
| 0.197038 | 1.80E-05 | 0.098771 | 0.03285  | -0.0169  | 0.71564 | -0.09508 | 0.03999  | -0.00868 |
| 0.272145 | 2.25E-09 | 0.061961 | 0.18133  | 0.030226 | 0.51467 | -0.12022 | 0.00931  | -0.02308 |
| 0.13305  | 0.00397  | -0.14911 | 0.00123  | 3.01E-05 | 0.99948 | -0.07087 | 0.12617  | 0.097763 |
| 0.218564 | 1.86E-06 | -0.06612 | 0.15368  | -0.00079 | 0.98636 | -0.10254 | 0.0267   | 0.07991  |
| 0.218788 | 1.81E-06 | 0.149335 | 0.00121  | 0.0124   | 0.78926 | 0.005912 | 0.89861  | 0.141265 |
| 0.10909  | 0.01837  | -0.05741 | 0.21558  | 0.021093 | 0.64937 | -0.04946 | 0.28612  | 0.073215 |
| 0.0006   | 0.98968  | -0.13987 | 0.00245  | 0.001595 | 0.97257 | -0.06167 | 0.18337  | 0.081377 |
| 0.112618 | 0.01489  | 0.060998 | 0.18822  | -0.02926 | 0.52815 | -0.04775 | 0.30317  | -0.03034 |
| -0.03116 | 0.50174  | 0.135902 | 0.00325  | -0.02089 | 0.65258 | 0.062736 | 0.17592  | 0.107361 |
| 0.313725 | 3.99E-12 | -0.12715 | 0.00593  | -0.03218 | 0.48779 | -0.16435 | 0.00036  | -0.0535  |
| 0.095002 | 0.04015  | -0.10537 | 0.02277  | 0.012826 | 0.78221 | 0.000424 | 0.99271  | -0.12284 |
| 0.335841 | 8.93E-14 | 0.090829 | 0.04981  | 0.005949 | 0.89798 | -0.00241 | 0.95855  | 0.08444  |
| 0.217701 | 2.04E-06 | -0.01481 | 0.7495   | 0.002994 | 0.94855 | -0.06627 | 0.15279  | 0.018951 |
| 0.069532 | 0.13351  | -0.34345 | 2.25E-14 | -0.04345 | 0.3488  | -0.18588 | 5.32E-05 | -0.00502 |
| 0.2275   | 6.75E-07 | -0.07128 | 0.124    | -0.01128 | 0.80786 | -0.09703 | 0.03607  | -0.10817 |
| 0.069794 | 0.13205  | -0.14468 | 0.00172  | -0.0249  | 0.59151 | -0.13651 | 0.00312  | -0.12734 |
| 0.037432 | 0.41965  | -0.08185 | 0.07724  | 0.025023 | 0.58962 | -0.01537 | 0.74039  | 0.059823 |
| 0.274859 | 1.54E-09 | 0.176076 | 0.00013  | 0.013475 | 0.77149 | -0.05581 | 0.22864  | 0.175683 |
| 0.020161 | 0.66389  | -0.15212 | 0.00097  | 0.01935  | 0.67662 | 0.010203 | 0.82595  | 0.156356 |
| -0.00507 | 0.91295  | -0.18588 | 5.31E-05 | -0.0002  | 0.99648 | -0.02985 | 0.51998  | 0.131914 |
| 0.215833 | 2.51E-06 | 0.051725 | 0.26462  | 0.021382 | 0.64488 | -0.01816 | 0.69541  | 0.096993 |
| 0.130823 | 0.00463  | 0.004004 | 0.93124  | -0.01652 | 0.72186 | -0.0773  | 0.09523  | -0.0387  |
| 0.177791 | 0.00011  | 0.091659 | 0.04775  | 0.037118 | 0.42357 | -0.08764 | 0.05842  | 0.021082 |

|          |          |          |          |          |         |          |          |          |
|----------|----------|----------|----------|----------|---------|----------|----------|----------|
| 0.169594 | 0.00023  | -0.07736 | 0.09496  | 0.007851 | 0.86563 | -0.16669 | 0.0003   | 0.021316 |
| 0.200105 | 1.32E-05 | -0.00848 | 0.85499  | 0.022402 | 0.62918 | -0.0363  | 0.43388  | 0.084064 |
| 0.374003 | 5.95E-17 | 0.088162 | 0.05694  | -0.02232 | 0.63051 | -0.10451 | 0.02391  | 0.055082 |
| 0.496121 | 2.19E-30 | 0.195794 | 2.03E-05 | -0.00181 | 0.96889 | -0.07272 | 0.11658  | 0.110145 |
| -0.01124 | 0.80863  | -0.34981 | 6.88E-15 | -0.02236 | 0.62978 | -0.15592 | 0.00072  | -0.0122  |
| 0.067023 | 0.14814  | -0.13697 | 0.00302  | -0.06068 | 0.19055 | -0.1247  | 0.00697  | 0.061054 |
| 0.171022 | 0.0002   | -0.00214 | 0.96319  | 0.003974 | 0.93175 | -0.08267 | 0.0743   | 0.07173  |
| -0.15813 | 0.0006   | -0.09272 | 0.04522  | 0.030063 | 0.51694 | 0.022398 | 0.62925  | 0.054937 |
| 0.091004 | 0.04937  | 0.011262 | 0.80821  | 0.010455 | 0.82172 | -0.0541  | 0.2433   | 0.001935 |
| 0.101661 | 0.02804  | -0.02648 | 0.56809  | 0.029234 | 0.52857 | -0.00893 | 0.84736  | 0.06075  |
| 0.058379 | 0.20793  | 0.135796 | 0.00328  | -0.00123 | 0.97888 | 0.052506 | 0.25746  | 0.187017 |
| 0.166394 | 0.0003   | -0.14026 | 0.00238  | -0.0603  | 0.19336 | -0.21574 | 2.54E-06 | -0.08794 |
| 0.179241 | 9.83E-05 | -0.03481 | 0.45294  | -0.02419 | 0.60211 | -0.20646 | 6.85E-06 | -0.07992 |
| 0.075747 | 0.10208  | -0.03101 | 0.5038   | 0.02371  | 0.60929 | -0.0809  | 0.08072  | 0.103322 |
| 0.129183 | 0.00518  | -0.11118 | 0.01623  | 0.008937 | 0.84726 | -0.0777  | 0.09352  | -0.01451 |
| 0.19822  | 1.60E-05 | 0.091473 | 0.0482   | 0.030878 | 0.50563 | -0.03376 | 0.46672  | 0.09557  |
| 0.206772 | 6.63E-06 | 0.167537 | 0.00028  | -0.00072 | 0.98766 | -0.07021 | 0.12973  | 0.097054 |
| 0.227722 | 6.58E-07 | 0.113314 | 0.01428  | 0.006035 | 0.89651 | -0.02478 | 0.5933   | 0.120135 |
| 0.368515 | 1.81E-16 | 0.18382  | 6.45E-05 | 0.034789 | 0.45325 | -0.01513 | 0.74437  | 0.099775 |
| -0.06863 | 0.13866  | -0.13789 | 0.00283  | 0.015592 | 0.73682 | -0.01483 | 0.74923  | 0.040937 |
| -0.07317 | 0.11432  | -0.40431 | 8.59E-20 | -0.01155 | 0.8034  | -0.14137 | 0.0022   | -0.06403 |
| 0.039131 | 0.39885  | 0.000909 | 0.98437  | -0.04809 | 0.29972 | -0.0799  | 0.08458  | -0.07011 |
| 0.174811 | 0.00015  | 0.061526 | 0.18441  | 0.004804 | 0.91753 | -0.05026 | 0.27838  | 0.133379 |
| 0.116044 | 0.01209  | -0.09404 | 0.04223  | 0.009295 | 0.84121 | -0.04027 | 0.38521  | 0.045947 |
| 0.261544 | 9.64E-09 | 0.160186 | 0.00051  | 0.045088 | 0.33093 | 0.028191 | 0.54339  | 0.052803 |
| 0.189855 | 3.64E-05 | 0.229485 | 5.36E-07 | 0.054054 | 0.24368 | 0.063458 | 0.17099  | 0.062171 |
| -0.12972 | 0.00499  | -0.24292 | 1.07E-07 | -0.03927 | 0.39717 | -0.0443  | 0.33948  | -0.05547 |
| -0.03145 | 0.49779  | 0.096371 | 0.03736  | -0.03092 | 0.50508 | -0.06561 | 0.15691  | 0.063722 |
| 0.154159 | 0.00083  | -0.07935 | 0.08672  | 0.010548 | 0.82017 | -0.09351 | 0.04341  | 0.075879 |
| 0.049763 | 0.28319  | -0.15192 | 0.00099  | -0.01371 | 0.76757 | -0.09946 | 0.03163  | -0.07654 |
| 0.147849 | 0.00135  | 0.143815 | 0.00183  | 0.004236 | 0.92725 | 0.0129   | 0.78098  | 0.041325 |
| 0.269543 | 3.24E-09 | 0.220987 | 1.42E-06 | 0.032847 | 0.47887 | -0.03457 | 0.45615  | 0.172085 |
| 0.145584 | 0.00161  | -0.01793 | 0.6992   | 0.005712 | 0.90202 | -0.03753 | 0.41849  | 0.062264 |
| 0.224587 | 9.43E-07 | -0.12229 | 0.00816  | -0.00787 | 0.86531 | -0.07845 | 0.09039  | 0.002464 |
| -0.16804 | 0.00026  | -0.11512 | 0.0128   | -0.01512 | 0.74446 | 0.045022 | 0.33164  | -0.04401 |
| 0.197691 | 1.68E-05 | 0.154363 | 0.00082  | 0.019321 | 0.67708 | -0.01592 | 0.73144  | 0.103124 |
| 0.126193 | 0.00632  | 0.130075 | 0.00487  | 0.029479 | 0.52512 | -0.00993 | 0.83053  | 0.165644 |
| 0.118559 | 0.01034  | -0.19224 | 2.88E-05 | -0.0133  | 0.77429 | -0.09757 | 0.03503  | -0.0597  |
| 0.347932 | 9.79E-15 | 0.366226 | 2.87E-16 | 0.008484 | 0.85492 | -0.03047 | 0.51124  | 0.034528 |
| 0.18899  | 3.95E-05 | 0.08718  | 0.05977  | -0.007   | 0.88003 | -0.01772 | 0.70254  | 0.005266 |
| 0.134317 | 0.00364  | 0.064049 | 0.16703  | -0.03118 | 0.50145 | -0.04926 | 0.28808  | -0.03966 |
| 0.138419 | 0.00272  | -0.08119 | 0.07966  | 0.020625 | 0.65664 | 0.030748 | 0.50743  | 0.098124 |
| 0.21424  | 2.99E-06 | -0.03624 | 0.43468  | -0.0239  | 0.60648 | -0.07024 | 0.12957  | 0.045277 |
| -0.01788 | 0.69989  | -0.40349 | 1.03E-19 | 0.035842 | 0.43969 | -0.06735 | 0.14615  | 0.127646 |
| 0.009166 | 0.8434   | -0.22875 | 5.84E-07 | 0.011199 | 0.80927 | -0.0805  | 0.08226  | -0.04474 |

|          |          |          |          |          |         |          |         |          |
|----------|----------|----------|----------|----------|---------|----------|---------|----------|
| -0.11392 | 0.01377  | -0.16929 | 0.00024  | 0.127136 | 0.00594 | 0.157279 | 0.00065 | 0.286222 |
| 0.088166 | 0.05692  | -0.02163 | 0.64099  | -0.02577 | 0.57856 | -0.06198 | 0.18119 | -0.16398 |
| 0.281808 | 5.66E-10 | 0.370299 | 1.26E-16 | 0.072854 | 0.11589 | 0.034848 | 0.45249 | 0.36792  |
| 0.070362 | 0.12893  | -0.1609  | 0.00048  | 0.04999  | 0.281   | 0.006835 | 0.88288 | 0.129776 |
| 0.351841 | 4.69E-15 | 0.148688 | 0.00127  | 0.050645 | 0.27474 | -0.03166 | 0.49486 | 0.139377 |
| 0.090359 | 0.05101  | -0.32652 | 4.61E-13 | -0.0019  | 0.96739 | -0.12454 | 0.00705 | -0.01437 |
| 0.030615 | 0.50927  | -0.21885 | 1.80E-06 | 0.048714 | 0.29348 | -0.06482 | 0.16196 | -0.01625 |
| 0.175898 | 0.00013  | -0.02321 | 0.6168   | 0.031828 | 0.49262 | 0.014339 | 0.75728 | 0.062833 |
| -0.04225 | 0.36224  | -0.25386 | 2.66E-08 | -0.00244 | 0.95813 | -0.01143 | 0.80542 | -0.03229 |
| 0.261087 | 1.02E-08 | 0.185305 | 5.61E-05 | 0.008588 | 0.85316 | -0.08841 | 0.05623 | -0.0426  |
| 0.355504 | 2.33E-15 | 0.236263 | 2.40E-07 | -0.0253  | 0.58552 | -0.16825 | 0.00026 | -0.05039 |
| 0.148949 | 0.00125  | 0.172568 | 0.00018  | -0.016   | 0.73024 | -0.07869 | 0.08941 | -0.0333  |
| 0.083747 | 0.07059  | -0.23688 | 2.23E-07 | 0.019575 | 0.67307 | -0.1238  | 0.0074  | -0.04402 |
| 0.213397 | 3.27E-06 | 0.06248  | 0.17769  | 0.00764  | 0.86921 | -0.02265 | 0.62536 | 0.008083 |
| 0.024973 | 0.59036  | -0.14666 | 0.00148  | 0.000183 | 0.99686 | -0.11882 | 0.01017 | 0.000655 |
| 0.204215 | 8.66E-06 | 0.134519 | 0.00359  | 0.019049 | 0.68137 | -0.00917 | 0.84337 | 0.030946 |
| 0.347415 | 1.08E-14 | 0.416665 | 4.89E-21 | -0.01207 | 0.79467 | -0.08836 | 0.05637 | -0.01541 |
| 0.259842 | 1.21E-08 | 0.111878 | 0.01557  | 0.006713 | 0.88497 | -0.05917 | 0.20183 | 0.008542 |
| 0.200515 | 1.27E-05 | 0.256709 | 1.83E-08 | 0.033814 | 0.46601 | -0.05977 | 0.19729 | 0.085862 |
| 0.205703 | 7.42E-06 | -0.02148 | 0.64337  | -0.03517 | 0.44833 | -0.14641 | 0.00151 | -0.06677 |
| 0.276722 | 1.18E-09 | -0.0588  | 0.20468  | 0.011066 | 0.81148 | -0.07029 | 0.12933 | 0.002595 |
| -0.15644 | 0.00069  | -0.07263 | 0.117    | -0.03336 | 0.47201 | -0.01417 | 0.76004 | 0.015135 |
| 0.196917 | 1.82E-05 | 0.02183  | 0.63797  | 0.028872 | 0.53369 | -0.05899 | 0.20319 | 0.010685 |
| -0.07011 | 0.13031  | -0.09404 | 0.04222  | -0.03252 | 0.48325 | -0.04146 | 0.37135 | -0.11211 |
| -0.05398 | 0.24433  | -0.36463 | 3.93E-16 | 0.002583 | 0.95561 | -0.10324 | 0.02568 | 0.036906 |
| 0.201156 | 1.19E-05 | 0.012071 | 0.79473  | -0.02155 | 0.64223 | -0.06488 | 0.16157 | 0.123859 |
| 0.017803 | 0.70119  | -0.24708 | 6.33E-08 | -0.04281 | 0.35596 | -0.17753 | 0.00011 | 0.03941  |
| 0.116305 | 0.0119   | 0.168441 | 0.00026  | -0.00128 | 0.97797 | -0.00502 | 0.91377 | 0.138728 |
| 0.146087 | 0.00155  | 0.021131 | 0.64877  | -0.03411 | 0.46209 | 0.001559 | 0.97319 | -0.03416 |
| 0.382729 | 9.70E-18 | 0.323164 | 8.19E-13 | 0.035471 | 0.44443 | -0.03606 | 0.43691 | 0.091826 |
| 0.026305 | 0.57069  | -0.19834 | 1.58E-05 | -0.0652  | 0.15954 | -0.17277 | 0.00018 | -0.08068 |
| 0.13154  | 0.00441  | -0.11467 | 0.01315  | -0.03734 | 0.42082 | -0.09103 | 0.04929 | -0.04282 |
| -0.06493 | 0.16125  | -0.30695 | 1.20E-11 | -0.01568 | 0.73534 | -0.07927 | 0.08705 | -0.07249 |
| 0.042548 | 0.35893  | -0.14453 | 0.00174  | -0.00616 | 0.89445 | -0.07342 | 0.1131  | -0.0157  |
| 0.362377 | 6.14E-16 | 0.147325 | 0.00141  | 0.062659 | 0.17645 | -0.03371 | 0.46737 | 0.11928  |
| 0.508252 | 4.84E-32 | 0.11569  | 0.01236  | 0.021054 | 0.64997 | -0.00764 | 0.86915 | -0.05313 |
| 0.35191  | 4.63E-15 | 0.135619 | 0.00332  | -0.00284 | 0.95123 | -0.09129 | 0.04866 | -0.02172 |
| 0.344496 | 1.85E-14 | -0.01457 | 0.75346  | 0.046621 | 0.31474 | -0.08027 | 0.08312 | -0.159   |
| -0.34658 | 1.26E-14 | -0.3189  | 1.69E-12 | 0.032933 | 0.47772 | 0.004273 | 0.92662 | -0.02622 |
| 0.560728 | 5.03E-40 | 0.361161 | 7.79E-16 | 0.082    | 0.07668 | 0.028233 | 0.54278 | 0.364563 |
| 0.39923  | 2.70E-19 | 0.021616 | 0.64127  | 0.024709 | 0.5943  | 0.049506 | 0.28569 | -0.01169 |
| 0.299304 | 4.04E-11 | 0.05713  | 0.21784  | -0.03794 | 0.41342 | -0.05234 | 0.25893 | -0.04267 |
| 0.738517 | 1.25E-81 | 0.377855 | 2.69E-17 | 0.032801 | 0.47949 | -0.07243 | 0.11805 | 0.012542 |
| 0.546739 | 9.30E-38 | 0.130476 | 0.00474  | -0.0406  | 0.38139 | -0.12982 | 0.00496 | -0.11886 |
| 0.325946 | 5.08E-13 | 0.032358 | 0.48545  | -0.04006 | 0.38778 | -0.04928 | 0.28792 | -0.03419 |

|          |          |          |          |          |         |          |          |          |
|----------|----------|----------|----------|----------|---------|----------|----------|----------|
| 0.334824 | 1.07E-13 | 0.11174  | 0.0157   | -0.0263  | 0.57075 | -0.05625 | 0.22504  | -0.04807 |
| 0.299005 | 4.23E-11 | 0.321094 | 1.17E-12 | -0.05022 | 0.27877 | -0.00256 | 0.95599  | -0.07066 |
| 0.917343 | #####    | 0.460236 | 7.37E-26 | 0.016142 | 0.72791 | -0.09277 | 0.0451   | -0.0261  |
| 0.290432 | 1.58E-10 | 0.335899 | 8.84E-14 | 0.033979 | 0.46384 | -0.07491 | 0.10594  | 0.224947 |
| 0.337136 | 7.08E-14 | 0.103243 | 0.02568  | -0.04828 | 0.29779 | -0.06656 | 0.15097  | -0.02829 |
| 0.462375 | 4.10E-26 | 0.271519 | 2.46E-09 | 0.054292 | 0.2416  | 0.028813 | 0.53453  | 0.055704 |
| 0.29651  | 6.23E-11 | 0.269995 | 3.04E-09 | -0.02832 | 0.54148 | -0.11624 | 0.01195  | -0.0889  |
| 0.345451 | 1.55E-14 | 0.126918 | 0.00602  | 0.00175  | 0.96991 | -0.11187 | 0.01558  | 0.062317 |
| -0.50211 | 3.40E-31 | -0.41531 | 6.73E-21 | 0.016172 | 0.72741 | 0.117502 | 0.01105  | -0.05077 |
| 0.432254 | 1.11E-22 | 0.07269  | 0.11672  | -0.00518 | 0.91119 | -0.07792 | 0.0926   | -0.05557 |
| 0.394607 | 7.51E-19 | 0.322236 | 9.60E-13 | -0.0072  | 0.87675 | -0.03161 | 0.49565  | -0.01039 |
| 0.244247 | 9.03E-08 | 0.126753 | 0.00609  | -0.0899  | 0.05221 | -0.22535 | 8.65E-07 | -0.2446  |
| 0.316725 | 2.43E-12 | 0.085645 | 0.06442  | -0.00132 | 0.97724 | -0.07677 | 0.09752  | 0.047365 |
| 0.401864 | 1.49E-19 | 0.356329 | 1.99E-15 | 0.053119 | 0.25195 | -0.11432 | 0.01344  | 0.129154 |
| 0.420001 | 2.21E-21 | 0.476966 | 6.66E-28 | 0.008896 | 0.84795 | 0.030381 | 0.51251  | 0.162797 |
| 0.453511 | 4.55E-25 | 0.348643 | 8.57E-15 | 0.000423 | 0.99273 | -0.08492 | 0.06672  | 0.02017  |
| 0.924008 | #####    | 0.381456 | 1.27E-17 | -0.00609 | 0.89558 | -0.1156  | 0.01243  | -0.0504  |
| 0.277617 | 1.04E-09 | 0.250459 | 4.12E-08 | -0.0513  | 0.2686  | -0.00707 | 0.87881  | -0.1119  |
| 0.797535 | #####    | 0.434917 | 5.67E-23 | 0.043357 | 0.34985 | -0.03996 | 0.38895  | -0.01241 |
| 0.249543 | 4.63E-08 | 0.167129 | 0.00029  | 0.007647 | 0.86909 | 0.07205  | 0.11998  | 0.025564 |
| 0.299707 | 3.79E-11 | 0.207077 | 6.42E-06 | 0.021361 | 0.64521 | -0.00877 | 0.85014  | -0.07049 |
| 0.926646 | #####    | 0.358173 | 1.39E-15 | 0.007937 | 0.86417 | -0.12415 | 0.00723  | 0.002764 |
| 0.362383 | 6.13E-16 | -0.06797 | 0.14247  | 0.002718 | 0.95328 | -0.0391  | 0.39923  | -0.01088 |
| -0.23987 | 1.55E-07 | -0.16551 | 0.00033  | -0.01892 | 0.68337 | 0.028407 | 0.5403   | -0.02225 |
| 0.38568  | 5.19E-18 | 0.517438 | 2.43E-33 | 0.007408 | 0.87315 | 0.059578 | 0.19873  | -0.06343 |
| 0.768848 | 2.37E-92 | 0.396111 | 5.39E-19 | -0.04877 | 0.29296 | -0.14036 | 0.00237  | -0.12591 |
| 0.88634  | #####    | 0.413844 | 9.51E-21 | -0.0141  | 0.76128 | -0.08491 | 0.06674  | -0.05703 |
| 0.853426 | #####    | 0.408881 | 3.02E-20 | 0.102561 | 0.02667 | -0.03367 | 0.46796  | 0.143061 |
| 0.821146 | #####    | 0.389512 | 2.28E-18 | -0.01566 | 0.73573 | -0.09468 | 0.04083  | 0.036341 |
| 0.926236 | #####    | 0.423893 | 8.65E-22 | -0.00908 | 0.84477 | -0.1262  | 0.00632  | -0.05061 |
| 0.452789 | 5.52E-25 | 0.207608 | 6.07E-06 | -0.03169 | 0.49455 | -0.13197 | 0.00428  | -0.05027 |
| 0.273734 | 1.80E-09 | 0.173906 | 0.00016  | -0.08022 | 0.08331 | -0.04644 | 0.31662  | -0.12983 |
| 0.371335 | 1.03E-16 | 0.109048 | 0.01841  | 0.008386 | 0.85657 | -0.02103 | 0.6503   | -0.04304 |
| 0.339279 | 4.81E-14 | 0.287648 | 2.39E-10 | 0.017522 | 0.70567 | 0.034706 | 0.45433  | 0.117495 |
| 0.383191 | 8.80E-18 | -0.08549 | 0.06491  | -0.05808 | 0.21028 | -0.09822 | 0.03383  | -0.27495 |
| -0.3428  | 2.53E-14 | -0.27874 | 8.82E-10 | 0.003371 | 0.94209 | 0.06456  | 0.16366  | -0.03646 |
| 0.332185 | 1.71E-13 | 0.477798 | 5.23E-28 | 0.023474 | 0.61287 | -0.13373 | 0.00379  | 0.02876  |
| 0.313662 | 4.04E-12 | 0.31252  | 4.87E-12 | -0.02272 | 0.62433 | -0.05228 | 0.25955  | -0.13882 |
| 0.354722 | 2.71E-15 | 0.278637 | 8.95E-10 | -0.02196 | 0.63592 | 0.010967 | 0.81315  | -0.10458 |
| 0.466186 | 1.42E-26 | 0.408181 | 3.54E-20 | -0.03265 | 0.48157 | -0.0535  | 0.24857  | -0.06751 |
| 0.299042 | 4.21E-11 | 0.30399  | 1.93E-11 | -0.05092 | 0.27214 | -0.029   | 0.53191  | -0.16214 |
| 0.837416 | #####    | 0.179516 | 9.59E-05 | -0.01488 | 0.74835 | -0.10893 | 0.01854  | -0.07786 |
| 0.691868 | 8.98E-68 | 0.365893 | 3.06E-16 | 0.04532  | 0.32844 | -0.04223 | 0.36251  | 0.141407 |
| 0.328911 | 3.04E-13 | 0.278807 | 8.74E-10 | 0.024399 | 0.59894 | -0.07225 | 0.11897  | 0.153047 |
| 0.584269 | 4.30E-44 | 0.544724 | 1.93E-37 | 0.015152 | 0.74399 | -0.1066  | 0.02123  | 0.141274 |



|          |          |          |          |          |         |          |          |          |
|----------|----------|----------|----------|----------|---------|----------|----------|----------|
| 0.865696 | #####    | 0.327698 | 3.75E-13 | -0.00065 | 0.98884 | -0.12735 | 0.00585  | -0.06483 |
| 0.705104 | 1.99E-71 | 0.593244 | 9.86E-46 | 0.041633 | 0.36936 | 0.059053 | 0.20272  | 0.21736  |
| 0.73603  | 8.10E-81 | 0.355305 | 2.42E-15 | 0.076579 | 0.09836 | 0.019504 | 0.6742   | 0.085445 |
| 0.835211 | #####    | 0.388713 | 2.71E-18 | -0.01561 | 0.7365  | -0.0872  | 0.05969  | -0.01608 |
| 0.382906 | 9.35E-18 | -0.08722 | 0.05964  | 0.007995 | 0.86319 | -0.05189 | 0.26314  | 0.003792 |
| 0.325034 | 5.95E-13 | 0.462694 | 3.75E-26 | 0.010446 | 0.82187 | 0.070817 | 0.12647  | -0.02341 |
| 0.401107 | 1.77E-19 | 0.341734 | 3.08E-14 | 0.010562 | 0.81992 | 0.123737 | 0.00743  | 0.036084 |
| 0.766506 | 1.82E-91 | 0.327442 | 3.92E-13 | 0.017822 | 0.70088 | -0.03089 | 0.50545  | 0.023504 |
| 0.723062 | 1.00E-76 | 0.143134 | 0.00193  | -0.0327  | 0.48088 | -0.11674 | 0.01158  | -0.02585 |
| 0.506081 | 9.68E-32 | -0.054   | 0.24415  | 0.002922 | 0.94979 | -0.16802 | 0.00027  | -0.03625 |
| 0.562593 | 2.46E-40 | 0.342977 | 2.45E-14 | -0.04309 | 0.3528  | -0.11968 | 0.00963  | -0.08574 |
| 0.464173 | 2.49E-26 | 0.165174 | 0.00034  | 0.006693 | 0.88531 | -0.12397 | 0.00731  | -0.06949 |
| 0.938191 | #####    | 0.434852 | 5.77E-23 | -0.02353 | 0.61206 | -0.11591 | 0.01219  | -0.04415 |
| 0.172953 | 0.00017  | 0.004002 | 0.93126  | -0.02037 | 0.66059 | -0.06621 | 0.15314  | -0.14302 |
| 0.828088 | #####    | 0.350225 | 6.37E-15 | -0.01958 | 0.67304 | -0.10493 | 0.02334  | -0.04352 |
| 0.388423 | 2.88E-18 | -0.06841 | 0.13992  | -0.02241 | 0.62911 | -0.08797 | 0.05749  | -0.08404 |
| 0.332976 | 1.49E-13 | 0.147524 | 0.00139  | 0.096192 | 0.03771 | 0.24172  | 1.24E-07 | -0.05776 |
| 0.401078 | 1.78E-19 | 0.094319 | 0.04162  | 0.074716 | 0.10684 | 0.168116 | 0.00026  | -0.07116 |
| -0.26366 | 7.24E-09 | 0.072323 | 0.11858  | 0.051019 | 0.27121 | 0.099898 | 0.03089  | 0.140685 |
| 0.941951 | #####    | 0.479171 | 3.51E-28 | 0.005964 | 0.89772 | -0.11356 | 0.01407  | -0.01294 |
| 0.359683 | 1.04E-15 | 0.330974 | 2.12E-13 | -0.03291 | 0.47809 | -0.00685 | 0.88267  | -0.02972 |
| 0.573837 | 3.00E-42 | 0.092205 | 0.04643  | 0.009191 | 0.84297 | -0.0397  | 0.39201  | -0.03872 |
| 0.322029 | 9.94E-13 | 0.390678 | 1.77E-18 | 0.092229 | 0.04637 | 0.30316  | 2.20E-11 | 0.208944 |
| 0.596342 | 2.60E-46 | 0.167001 | 0.00029  | -0.03718 | 0.42284 | -0.13892 | 0.00262  | -0.12378 |
| 0.565906 | 6.83E-41 | 0.302913 | 2.29E-11 | 0.056748 | 0.22094 | 0.013747 | 0.76701  | 0.146352 |
| 0.560622 | 5.23E-40 | 0.674841 | 2.36E-63 | -0.00238 | 0.95909 | -0.06445 | 0.16435  | -0.02196 |
| 0.357774 | 1.51E-15 | 0.027249 | 0.55694  | -0.00088 | 0.98486 | -0.11844 | 0.01042  | 0.03879  |
| 0.476272 | 8.13E-28 | -0.05308 | 0.25231  | -0.01185 | 0.79837 | -0.17785 | 0.00011  | -0.03502 |
| 0.445456 | 3.82E-24 | 0.542466 | 4.36E-37 | 0.071229 | 0.12427 | 0.105431 | 0.02269  | 0.291225 |
| 0.300938 | 3.13E-11 | 0.153703 | 0.00086  | -0.0447  | 0.33517 | -0.05923 | 0.20141  | 0.152609 |
| 0.706886 | 6.19E-72 | 0.178432 | 0.00011  | -0.01037 | 0.82309 | -0.14534 | 0.00164  | -0.04006 |
| 0.886653 | #####    | 0.275068 | 1.49E-09 | -0.00099 | 0.98299 | -0.1564  | 0.00069  | -0.0666  |
| 0.893772 | #####    | 0.487184 | 3.30E-29 | -0.00523 | 0.91031 | -0.10884 | 0.01863  | -0.00318 |
| 0.85672  | #####    | 0.309842 | 7.54E-12 | -0.01269 | 0.78445 | -0.1117  | 0.01574  | -0.0082  |
| 0.254671 | 2.39E-08 | 0.406763 | 4.91E-20 | 0.053415 | 0.2493  | 0.114262 | 0.01348  | 0.239807 |
| 0.392142 | 1.29E-18 | 0.415275 | 6.79E-21 | 0.016668 | 0.7194  | -0.10031 | 0.03021  | 0.051816 |
| 0.473619 | 1.74E-27 | 0.685806 | 3.65E-66 | 0.004226 | 0.92743 | -0.09868 | 0.033    | 0.031621 |
| 0.299723 | 3.78E-11 | 0.083052 | 0.07296  | 0.017476 | 0.70642 | -0.0394  | 0.39567  | 0.159601 |
| 0.346295 | 1.33E-14 | 0.113777 | 0.01389  | 0.022986 | 0.62028 | -0.0499  | 0.28182  | -0.01184 |
| 0.332191 | 1.71E-13 | 0.137951 | 0.00281  | 0.063465 | 0.17094 | 0.114386 | 0.01338  | 0.058273 |
| 0.31332  | 4.27E-12 | -0.0351  | 0.44925  | 0.004375 | 0.92488 | -0.0541  | 0.24324  | -0.0582  |
| 0.704083 | 3.87E-71 | 0.19331  | 2.60E-05 | -0.02814 | 0.54415 | -0.10835 | 0.01918  | -0.06238 |
| 0.418988 | 2.82E-21 | 0.171975 | 0.00019  | -0.06401 | 0.1673  | -0.20352 | 9.30E-06 | -0.07026 |
| 0.380688 | 1.49E-17 | 0.207364 | 6.23E-06 | -0.01331 | 0.77416 | -0.07923 | 0.0872   | 0.07646  |
| 0.509088 | 3.70E-32 | 0.45044  | 1.03E-24 | -0.00959 | 0.83619 | -0.08111 | 0.07995  | -0.00651 |

|          |          |          |          |          |         |          |          |          |
|----------|----------|----------|----------|----------|---------|----------|----------|----------|
| -0.30443 | 1.80E-11 | -0.26118 | 1.01E-08 | -0.04774 | 0.30324 | 0.127051 | 0.00597  | -0.15645 |
| 0.504877 | 1.42E-31 | 0.220984 | 1.42E-06 | -0.00065 | 0.98883 | -0.06285 | 0.17512  | -0.08375 |
| 0.703754 | 4.79E-71 | 0.401978 | 1.46E-19 | 0.019792 | 0.66966 | -0.07642 | 0.09907  | -0.0155  |
| 0.386717 | 4.16E-18 | 0.367839 | 2.08E-16 | -0.00673 | 0.88475 | -0.03117 | 0.50163  | -0.10408 |
| 0.402433 | 1.31E-19 | 0.107916 | 0.01967  | -0.03434 | 0.45907 | -0.08704 | 0.06017  | -0.01219 |
| 0.587095 | 1.33E-44 | 0.221665 | 1.31E-06 | -0.00739 | 0.87348 | -0.07911 | 0.08769  | 0.053437 |
| 0.585111 | 3.03E-44 | 0.355677 | 2.26E-15 | -0.03211 | 0.48886 | -0.1091  | 0.01835  | -0.06568 |
| 0.794955 | #####    | 0.412458 | 1.32E-20 | 0.003009 | 0.94829 | -0.10251 | 0.02676  | -0.06197 |
| -0.26929 | 3.35E-09 | -0.30147 | 2.87E-11 | 0.008109 | 0.86126 | 0.080586 | 0.08192  | -0.07586 |
| 0.411034 | 1.83E-20 | 0.077348 | 0.09501  | -0.01584 | 0.73286 | 0.027527 | 0.55293  | -0.1931  |
| 0.602161 | 2.05E-47 | 0.066803 | 0.14948  | -0.01078 | 0.81621 | -0.05902 | 0.20298  | 0.042673 |
| 0.655253 | 1.27E-58 | 0.384765 | 6.30E-18 | -0.01968 | 0.67135 | -0.0799  | 0.08457  | 0.058233 |
| 0.769301 | 1.60E-92 | 0.268998 | 3.49E-09 | -0.03022 | 0.51477 | -0.10651 | 0.02133  | -0.00987 |
| 0.313541 | 4.12E-12 | 0.218972 | 1.78E-06 | 0.030798 | 0.50673 | 0.078813 | 0.0889   | -0.07838 |
| 0.398413 | 3.24E-19 | 0.03065  | 0.50878  | 0.042045 | 0.36463 | 0.033482 | 0.47041  | 0.097136 |
| 0.791735 | #####    | 0.1467   | 0.00148  | -0.01803 | 0.69751 | -0.1577  | 0.00063  | -0.11674 |
| 0.676081 | 1.15E-63 | 0.302818 | 2.33E-11 | 0.018728 | 0.68645 | -0.11415 | 0.01357  | 0.032475 |
| 0.353684 | 3.31E-15 | -0.26528 | 5.82E-09 | -0.05171 | 0.2648  | -0.19503 | 2.19E-05 | -0.21161 |
| 0.586648 | 1.60E-44 | 0.259117 | 1.33E-08 | 0.05675  | 0.22093 | -0.01848 | 0.69042  | -0.01471 |
| -0.291   | 1.44E-10 | -0.15963 | 0.00054  | 0.085522 | 0.06481 | 0.177662 | 0.00011  | 0.088832 |
| 0.594759 | 5.15E-46 | 0.632493 | 1.51E-53 | 0.005221 | 0.9104  | -0.14718 | 0.00143  | -0.00314 |
| 0.438698 | 2.18E-23 | 0.052162 | 0.2606   | 0.022814 | 0.62289 | 0.013211 | 0.77584  | -0.01392 |
| 0.806085 | #####    | 0.336565 | 7.85E-14 | 0.003038 | 0.94779 | -0.10939 | 0.01805  | -0.04609 |
| 0.840019 | #####    | 0.402241 | 1.37E-19 | 0.004589 | 0.92122 | -0.08721 | 0.05967  | 0.096327 |
| 0.529369 | 4.36E-35 | 0.052334 | 0.25903  | 0.051648 | 0.26534 | -0.05668 | 0.22151  | -0.01245 |
| 0.589238 | 5.40E-45 | 0.018262 | 0.69386  | 0.027872 | 0.54796 | -0.0314  | 0.49853  | -0.03263 |
| 0.900929 | #####    | 0.444715 | 4.63E-24 | -0.00757 | 0.87041 | -0.11171 | 0.01573  | -0.07546 |
| 0.437385 | 3.04E-23 | 0.307372 | 1.12E-11 | -0.00183 | 0.9685  | 0.027711 | 0.55027  | 0.188041 |
| 0.714244 | 4.51E-74 | 0.341775 | 3.06E-14 | -0.04895 | 0.29118 | -0.09882 | 0.03276  | -0.10018 |
| 0.654606 | 1.80E-58 | 0.418551 | 3.13E-21 | -0.0238  | 0.60801 | 0.042613 | 0.35818  | 0.265636 |
| 0.866773 | #####    | 0.323736 | 7.43E-13 | -0.00147 | 0.97468 | -0.12891 | 0.00527  | -0.00949 |
| 0.615442 | 5.11E-50 | 0.185882 | 5.31E-05 | -0.03809 | 0.41149 | -0.1877  | 4.47E-05 | -0.02225 |
| 0.789694 | #####    | 0.310981 | 6.26E-12 | -0.04125 | 0.37374 | -0.11319 | 0.01439  | -0.03887 |
| 0.441828 | 9.77E-24 | 0.189953 | 3.60E-05 | 0.02222  | 0.63197 | -0.00061 | 0.98944  | -0.03406 |
| 0.419961 | 2.23E-21 | 0.014002 | 0.76282  | -0.01737 | 0.70804 | -0.15727 | 0.00065  | -0.03496 |
| 0.575482 | 1.55E-42 | 0.481255 | 1.91E-28 | 0.025428 | 0.58361 | 0.014408 | 0.75614  | 0.006799 |
| 0.458984 | 1.04E-25 | -0.01772 | 0.70251  | -0.01968 | 0.67149 | -0.13841 | 0.00272  | -0.02252 |
| 0.342205 | 2.82E-14 | -0.13524 | 0.00341  | -0.01103 | 0.81206 | -0.12786 | 0.00566  | -0.13021 |
| 0.681211 | 5.69E-65 | 0.323099 | 8.29E-13 | -0.06967 | 0.13272 | -0.18709 | 4.74E-05 | -0.13364 |
| 0.377229 | 3.06E-17 | 0.368384 | 1.86E-16 | 0.012379 | 0.78961 | -0.14118 | 0.00223  | -0.01393 |
| 0.540004 | 1.05E-36 | 0.133477 | 0.00386  | -0.01494 | 0.7474  | -0.08932 | 0.05373  | -0.0101  |
| 0.346805 | 1.21E-14 | 0.177034 | 0.00012  | 0.011353 | 0.80669 | -0.07521 | 0.10453  | 0.137201 |
| 0.929228 | #####    | 0.492121 | 7.44E-30 | 0.020771 | 0.65436 | -0.09283 | 0.04496  | 0.015458 |
| 0.774346 | 1.80E-94 | 0.593892 | 7.47E-46 | -0.00677 | 0.88408 | -0.05162 | 0.26557  | 0.025865 |
| 0.722212 | 1.83E-76 | 0.323395 | 7.88E-13 | -0.01242 | 0.78891 | -0.03803 | 0.41226  | 0.1118   |

|          |          |          |          |          |         |          |          |          |
|----------|----------|----------|----------|----------|---------|----------|----------|----------|
| 0.907496 | #####    | 0.439354 | 1.84E-23 | -0.00154 | 0.97347 | -0.08141 | 0.07885  | -0.0252  |
| 0.700647 | 3.57E-70 | 0.275155 | 1.47E-09 | -0.03804 | 0.41209 | -0.07368 | 0.11183  | 0.010163 |
| 0.692536 | 5.94E-68 | 0.269628 | 3.20E-09 | -0.0067  | 0.88526 | -0.1197  | 0.00962  | -0.08491 |
| 0.716593 | 9.07E-75 | 0.381043 | 1.38E-17 | 0.037093 | 0.42388 | -0.05787 | 0.2119   | 0.030609 |
| 0.386566 | 4.29E-18 | 0.467088 | 1.11E-26 | 0.088421 | 0.05621 | 0.010715 | 0.81736  | 0.201891 |
| 0.398506 | 3.17E-19 | 0.313962 | 3.84E-12 | 0.016901 | 0.71565 | -0.03803 | 0.41221  | 0.045931 |
| -0.29525 | 7.57E-11 | 0.016285 | 0.72559  | 0.041808 | 0.36734 | 0.125649 | 0.00655  | 0.083973 |
| 0.343912 | 2.06E-14 | -0.04936 | 0.28709  | -0.04863 | 0.29433 | -0.21997 | 1.59E-06 | -0.09457 |
| 0.511777 | 1.55E-32 | 0.177042 | 0.00012  | 0.037831 | 0.41471 | -0.03155 | 0.49646  | 0.069698 |
| 0.522945 | 3.88E-34 | 0.196198 | 1.95E-05 | 0.011403 | 0.80585 | 0.017238 | 0.71023  | 0.014985 |
| 0.469766 | 5.21E-27 | 0.261745 | 9.38E-09 | 0.044328 | 0.33915 | -0.00335 | 0.94242  | -0.01894 |
| 0.922994 | #####    | 0.449068 | 1.48E-24 | -0.01121 | 0.80909 | -0.13636 | 0.00315  | -0.05195 |
| 0.36828  | 1.90E-16 | 0.25811  | 1.52E-08 | -0.00651 | 0.88848 | -0.01596 | 0.7309   | 0.075936 |
| 0.309833 | 7.55E-12 | 0.28072  | 6.63E-10 | -0.01812 | 0.69608 | -0.18214 | 7.54E-05 | -0.06571 |
| 0.896688 | #####    | 0.481072 | 2.01E-28 | -0.0026  | 0.95527 | -0.13747 | 0.00291  | -0.00928 |
| 0.877914 | #####    | 0.535165 | 5.82E-36 | -0.01402 | 0.76247 | -0.14069 | 0.00231  | -0.0129  |
| 0.693571 | 3.12E-68 | 0.324792 | 6.20E-13 | 0.019593 | 0.67279 | -0.08846 | 0.0561   | 0.053696 |
| 0.811578 | #####    | 0.306727 | 1.25E-11 | -0.0414  | 0.37203 | -0.11028 | 0.01712  | -0.08263 |
| -0.29017 | 1.64E-10 | -0.37852 | 2.34E-17 | 0.005542 | 0.90492 | 0.057053 | 0.21846  | -0.01647 |
| 0.463754 | 2.80E-26 | 0.28955  | 1.80E-10 | -0.01231 | 0.79073 | -0.07567 | 0.10244  | 0.001106 |
| 0.232447 | 3.78E-07 | -0.19765 | 1.69E-05 | 0.002106 | 0.9638  | -0.03059 | 0.50959  | -0.14534 |
| 0.848187 | #####    | 0.479511 | 3.18E-28 | 0.023408 | 0.61387 | -0.09602 | 0.03806  | 0.072466 |
| 0.574003 | 2.81E-42 | 0.161111 | 0.00047  | -0.04753 | 0.30537 | -0.21777 | 2.03E-06 | -0.0709  |
| 0.781323 | 3.00E-97 | 0.329195 | 2.89E-13 | -0.02218 | 0.63251 | -0.12768 | 0.00573  | -0.03361 |
| 0.585431 | 2.66E-44 | 0.24902  | 4.95E-08 | -0.0595  | 0.19928 | -0.13546 | 0.00336  | -0.09486 |
| 0.887088 | #####    | 0.425968 | 5.22E-22 | 0.025373 | 0.58442 | -0.10549 | 0.02262  | 0.016513 |
| 0.559132 | 9.24E-40 | 0.035913 | 0.43878  | -0.02209 | 0.63395 | -0.1132  | 0.01438  | -0.09678 |
| 0.34421  | 1.95E-14 | 0.074356 | 0.10855  | -0.00302 | 0.94819 | -0.04331 | 0.35038  | -0.03234 |
| 0.411003 | 1.85E-20 | 0.352076 | 4.49E-15 | 0.006421 | 0.88993 | 0.065926 | 0.15491  | -0.04655 |
| 0.87263  | #####    | 0.321787 | 1.04E-12 | -0.04889 | 0.29172 | -0.1431  | 0.00193  | -0.14104 |
| 0.704887 | 2.29E-71 | 0.186095 | 5.21E-05 | 0.005391 | 0.9075  | -0.1414  | 0.00219  | -0.09143 |
| 0.89998  | #####    | 0.320287 | 1.34E-12 | -0.01482 | 0.74944 | -0.13852 | 0.0027   | -0.04441 |
| 0.720323 | 6.86E-76 | 0.342328 | 2.76E-14 | 0.024731 | 0.59397 | -0.0576  | 0.21404  | 0.110188 |
| 0.369021 | 1.64E-16 | 0.394235 | 8.15E-19 | 0.007599 | 0.8699  | -0.10461 | 0.02378  | 0.008514 |
| 0.904753 | #####    | 0.3144   | 3.57E-12 | -0.02121 | 0.6475  | -0.12167 | 0.00849  | -0.06356 |
| 0.483722 | 9.23E-29 | 0.376356 | 3.67E-17 | -0.03851 | 0.40634 | -0.08505 | 0.06631  | -0.08001 |
| 0.822773 | #####    | 0.339765 | 4.41E-14 | -0.03974 | 0.39151 | -0.12258 | 0.008    | -0.00441 |
| 0.89166  | #####    | 0.370704 | 1.17E-16 | -0.02417 | 0.60238 | -0.16451 | 0.00036  | -0.08054 |
| 0.582163 | 1.03E-43 | 0.179766 | 9.37E-05 | 0.016286 | 0.72556 | -0.04589 | 0.3224   | -0.01775 |
| 0.809359 | #####    | 0.279629 | 7.76E-10 | -0.00808 | 0.86168 | -0.10413 | 0.02442  | -0.05892 |
| 0.936904 | #####    | 0.404469 | 8.28E-20 | -0.01266 | 0.785   | -0.14104 | 0.00225  | -0.04793 |
| 0.846783 | #####    | 0.254043 | 2.59E-08 | -0.01097 | 0.81313 | -0.1219  | 0.00836  | -0.07936 |
| 0.580665 | 1.90E-43 | 0.294497 | 8.49E-11 | -0.01717 | 0.71126 | -0.12388 | 0.00736  | -0.04488 |
| -0.31639 | 2.57E-12 | -0.02065 | 0.65629  | 0.027254 | 0.55686 | 0.253195 | 2.90E-08 | 0.217772 |
| 0.602201 | 2.02E-47 | 0.130739 | 0.00466  | -0.00754 | 0.87085 | -0.09229 | 0.04622  | -0.08247 |

|          |          |          |          |          |         |          |         |          |
|----------|----------|----------|----------|----------|---------|----------|---------|----------|
| 0.420474 | 1.97E-21 | 0.32958  | 2.70E-13 | -0.02934 | 0.52708 | -0.00322 | 0.94462 | -0.04082 |
| 0.32258  | 9.05E-13 | -0.03099 | 0.50413  | -0.00332 | 0.94292 | -0.01163 | 0.80204 | -0.07692 |
| 0.929045 | #####    | 0.409672 | 2.51E-20 | -0.00533 | 0.90852 | -0.1251  | 0.00679 | -0.07076 |
| 0.384817 | 6.23E-18 | 0.272318 | 2.20E-09 | 0.009491 | 0.83792 | -0.03131 | 0.49971 | 0.074796 |
| 0.611957 | 2.53E-49 | 0.261012 | 1.03E-08 | 0.012513 | 0.78739 | 0.024605 | 0.59586 | -0.06028 |
| 0.346249 | 1.34E-14 | 0.017676 | 0.70322  | -0.00079 | 0.98641 | -0.12203 | 0.00829 | 0.018657 |
| 0.83108  | #####    | 0.501923 | 3.60E-31 | -0.0088  | 0.84951 | -0.08988 | 0.05224 | -0.02893 |
| 0.904824 | #####    | 0.438022 | 2.59E-23 | 0.008652 | 0.85207 | -0.08735 | 0.05926 | 0.032014 |
| 0.646233 | 1.47E-56 | 0.169689 | 0.00023  | -0.05026 | 0.27836 | -0.12927 | 0.00514 | -0.11597 |
| 0.896895 | #####    | 0.398596 | 3.11E-19 | -0.00237 | 0.95918 | -0.12419 | 0.00721 | -0.0239  |
| 0.875647 | #####    | 0.461778 | 4.83E-26 | -0.00426 | 0.92684 | -0.12278 | 0.0079  | -0.01746 |
| 0.359303 | 1.12E-15 | 0.115699 | 0.01235  | 0.017219 | 0.71054 | -0.05756 | 0.21443 | 0.061491 |
| 0.440301 | 1.45E-23 | -0.00545 | 0.90657  | 0.029989 | 0.51797 | 0.015704 | 0.735   | -0.06061 |
| 0.807584 | #####    | 0.432144 | 1.14E-22 | -0.00101 | 0.9826  | -0.04284 | 0.35564 | 0.133419 |
| 0.392487 | 1.19E-18 | 0.250593 | 4.05E-08 | -0.01123 | 0.80879 | -0.12077 | 0.00899 | -0.01969 |
| -0.23939 | 1.64E-07 | -0.43337 | 8.37E-23 | 0.015363 | 0.74056 | -0.03251 | 0.48337 | 0.00532  |
| 0.360522 | 8.83E-16 | -0.13197 | 0.00428  | -0.02761 | 0.55179 | -0.15426 | 0.00082 | -0.09922 |
| 0.432386 | 1.07E-22 | 0.248095 | 5.57E-08 | -0.03503 | 0.45007 | -0.08066 | 0.08163 | -0.15384 |
| 0.552985 | 9.32E-39 | 0.483205 | 1.08E-28 | -0.00867 | 0.85169 | 0.025241 | 0.58638 | -0.14716 |
| 0.259538 | 1.26E-08 | 0.334167 | 1.20E-13 | -0.00431 | 0.92605 | -0.02558 | 0.5813  | -0.00241 |
| 0.413684 | 9.87E-21 | 0.30637  | 1.32E-11 | -0.03544 | 0.44478 | -0.12287 | 0.00785 | -0.05728 |
| 0.618327 | 1.34E-50 | 0.741111 | 1.73E-82 | 0.008685 | 0.85151 | -0.0539  | 0.24505 | -0.01199 |
| 0.749687 | 2.13E-85 | 0.228301 | 6.15E-07 | -0.02702 | 0.56026 | -0.12305 | 0.00777 | 0.000516 |
| 0.894612 | #####    | 0.468043 | 8.46E-27 | -0.00536 | 0.90811 | -0.12804 | 0.00559 | -0.03365 |
| 0.249017 | 4.95E-08 | 0.219892 | 1.60E-06 | -0.02222 | 0.63199 | -0.06556 | 0.15722 | 0.023452 |
| 0.91149  | #####    | 0.406367 | 5.37E-20 | -0.01207 | 0.79483 | -0.13104 | 0.00456 | -0.07251 |
| 0.339306 | 4.79E-14 | 0.157631 | 0.00063  | -0.01654 | 0.72147 | -0.03582 | 0.43997 | -0.04185 |
| 0.876637 | #####    | 0.365458 | 3.34E-16 | -0.01631 | 0.72512 | -0.12007 | 0.0094  | -0.08717 |
| 0.873994 | #####    | 0.3809   | 1.43E-17 | -0.01698 | 0.71444 | -0.14871 | 0.00127 | -0.03657 |
| 0.515433 | 4.71E-33 | 0.375873 | 4.05E-17 | -0.04013 | 0.38686 | -0.08462 | 0.06768 | -0.01874 |
| 0.783917 | 2.61E-98 | 0.324998 | 5.98E-13 | -0.01209 | 0.79444 | -0.12976 | 0.00498 | -0.00805 |
| 0.266446 | 4.96E-09 | 0.021532 | 0.64256  | -0.05148 | 0.26688 | -0.03462 | 0.45544 | -0.06849 |
| 0.911788 | #####    | 0.44658  | 2.85E-24 | 0.011411 | 0.80572 | -0.11038 | 0.01702 | 0.009279 |
| 0.8843   | #####    | 0.459775 | 8.36E-26 | 0.009907 | 0.83092 | -0.0403  | 0.3849  | -0.00099 |
| 0.853479 | #####    | 0.378848 | 2.19E-17 | -0.03058 | 0.50978 | -0.15835 | 0.00059 | -0.09299 |
| 0.58873  | 6.68E-45 | 0.648278 | 5.08E-57 | -0.01217 | 0.79315 | -0.01345 | 0.77197 | 0.06383  |
| 0.903493 | #####    | 0.340396 | 3.93E-14 | -0.02739 | 0.55489 | -0.14467 | 0.00172 | -0.09349 |
| 0.567848 | 3.20E-41 | 0.162558 | 0.00042  | -0.00557 | 0.90447 | -0.09413 | 0.04202 | -0.03344 |
| 0.61294  | 1.62E-49 | 0.419591 | 2.44E-21 | 0.013041 | 0.77865 | -0.12974 | 0.00499 | -0.00719 |
| 0.549494 | 3.39E-38 | 0.254101 | 2.58E-08 | 0.040448 | 0.38316 | -0.02299 | 0.62027 | 0.176595 |
| 0.787545 | #####    | 0.179078 | 9.98E-05 | -0.02801 | 0.54597 | -0.16864 | 0.00025 | -0.07839 |
| 0.756074 | 1.21E-87 | 0.247095 | 6.32E-08 | -0.0435  | 0.34829 | -0.15368 | 0.00086 | -0.14561 |
| 0.632817 | 1.28E-53 | 0.165434 | 0.00033  | -0.01397 | 0.76333 | -0.09068 | 0.05017 | -0.01519 |
| 0.525321 | 1.74E-34 | 0.642806 | 8.56E-56 | 0.045532 | 0.32618 | 0.040663 | 0.38062 | 0.148067 |
| 0.903704 | #####    | 0.414666 | 7.84E-21 | -0.01452 | 0.75427 | -0.13727 | 0.00295 | -0.03101 |

|          |          |          |          |          |         |          |          |          |
|----------|----------|----------|----------|----------|---------|----------|----------|----------|
| 0.821324 | #####    | 0.563834 | 1.53E-40 | 0.018155 | 0.69556 | -0.11259 | 0.01492  | 0.145804 |
| 0.899879 | #####    | 0.347844 | 9.95E-15 | -0.032   | 0.49027 | -0.16769 | 0.00027  | -0.07782 |
| 0.881624 | #####    | 0.434273 | 6.67E-23 | -0.02621 | 0.57213 | -0.12556 | 0.00659  | -0.00919 |
| 0.75149  | 5.02E-86 | 0.206181 | 7.06E-06 | 0.000229 | 0.99607 | -0.11459 | 0.01322  | 0.020227 |
| 0.537448 | 2.61E-36 | 0.223001 | 1.13E-06 | -0.03083 | 0.50626 | -0.11284 | 0.01469  | -0.07693 |
| 0.57204  | 6.13E-42 | 0.251069 | 3.81E-08 | -0.0648  | 0.16208 | -0.15342 | 0.00088  | -0.17307 |
| 0.803222 | #####    | 0.206275 | 6.99E-06 | -0.00429 | 0.92639 | -0.13113 | 0.00453  | 0.003897 |
| 0.857561 | #####    | 0.356694 | 1.86E-15 | -0.02051 | 0.65848 | -0.10558 | 0.0225   | -0.05903 |
| 0.903116 | #####    | 0.400288 | 2.13E-19 | -0.01496 | 0.74713 | -0.14238 | 0.00204  | -0.06624 |
| 0.835674 | #####    | 0.1971   | 1.79E-05 | -0.03451 | 0.45694 | -0.14601 | 0.00156  | -0.06656 |
| 0.833605 | #####    | 0.394338 | 7.97E-19 | 0.003226 | 0.94458 | -0.07046 | 0.12838  | 0.038943 |
| 0.901174 | #####    | 0.445665 | 3.61E-24 | -0.01243 | 0.78871 | -0.10988 | 0.01753  | -0.03881 |
| 0.397804 | 3.71E-19 | 0.334918 | 1.05E-13 | -0.00756 | 0.87049 | -0.04385 | 0.34439  | 0.020648 |
| 0.822145 | #####    | 0.422409 | 1.24E-21 | 0.003766 | 0.93531 | -0.09309 | 0.04435  | -0.05786 |
| 0.893856 | #####    | 0.361716 | 6.99E-16 | 0.025238 | 0.58643 | -0.1175  | 0.01105  | -0.00559 |
| 0.531171 | 2.34E-35 | -0.00055 | 0.99054  | -0.02468 | 0.59467 | -0.1227  | 0.00794  | -0.10045 |
| 0.704103 | 3.82E-71 | 0.234139 | 3.10E-07 | -0.05445 | 0.24021 | -0.20001 | 1.33E-05 | -0.02416 |
| 0.661485 | 4.35E-60 | 0.179157 | 9.91E-05 | -0.0356  | 0.44278 | -0.15447 | 0.00081  | 0.071153 |
| 0.846942 | #####    | 0.422635 | 1.17E-21 | -0.00993 | 0.8306  | -0.14439 | 0.00176  | -0.07987 |
| 0.563406 | 1.80E-40 | 0.060949 | 0.18857  | -0.04063 | 0.38099 | -0.14685 | 0.00146  | -0.08918 |
| 0.441822 | 9.79E-24 | 0.052387 | 0.25854  | -0.00483 | 0.91715 | -0.03587 | 0.4393   | -0.03886 |
| 0.495748 | 2.45E-30 | 0.468179 | 8.15E-27 | -0.01957 | 0.67309 | -0.0075  | 0.87154  | 0.086146 |
| 0.601417 | 2.85E-47 | 0.004385 | 0.9247   | -0.05411 | 0.24321 | -0.17987 | 9.29E-05 | -0.11931 |
| 0.875265 | #####    | 0.442653 | 7.90E-24 | -0.01487 | 0.74865 | -0.08142 | 0.07881  | -0.0308  |
| 0.677287 | 5.72E-64 | 0.196099 | 1.97E-05 | -0.03311 | 0.47534 | -0.11357 | 0.01406  | -0.09075 |
| 0.569613 | 1.60E-41 | 0.119129 | 0.00998  | -0.02413 | 0.603   | -0.10601 | 0.02195  | -0.06136 |
| 0.163355 | 0.00039  | 0.318851 | 1.70E-12 | 0.056093 | 0.22632 | 0.228879 | 5.75E-07 | 0.039808 |
| 0.388855 | 2.63E-18 | 0.409207 | 2.80E-20 | 0.043505 | 0.34821 | 0.012444 | 0.78854  | -0.04167 |
| 0.615731 | 4.47E-50 | 0.592267 | 1.50E-45 | 0.020922 | 0.65201 | 0.005639 | 0.90328  | -0.02087 |
| 0.432935 | 9.33E-23 | 0.339354 | 4.75E-14 | 0.062176 | 0.17982 | 0.086835 | 0.06079  | 0.191624 |
| 0.812953 | #####    | 0.367245 | 2.34E-16 | -0.02306 | 0.61917 | -0.08756 | 0.05867  | -0.10672 |
| 0.712428 | 1.54E-73 | 0.493704 | 4.60E-30 | 0.035423 | 0.44506 | -0.07061 | 0.12757  | 0.003734 |
| -0.53791 | 2.21E-36 | -0.56447 | 1.19E-40 | 0.034189 | 0.46108 | 0.093317 | 0.04384  | 0.003633 |
| 0.500704 | 5.28E-31 | 0.120019 | 0.00943  | 0.004013 | 0.93107 | -0.02279 | 0.62328  | -0.05791 |
| 0.935583 | #####    | 0.44437  | 5.06E-24 | -0.01865 | 0.68776 | -0.13361 | 0.00382  | -0.05084 |
| 0.910594 | #####    | 0.531251 | 2.28E-35 | 0.007696 | 0.86826 | -0.09947 | 0.03162  | -0.00095 |
| 0.68824  | 8.34E-67 | 0.447841 | 2.05E-24 | -0.00573 | 0.9018  | -0.11527 | 0.01268  | 0.063318 |
| 0.430692 | 1.63E-22 | 0.142619 | 0.002    | -0.05472 | 0.23792 | -0.20257 | 1.03E-05 | -0.13172 |
| 0.347825 | 9.99E-15 | 0.485184 | 5.99E-29 | 0.107187 | 0.02051 | 0.287254 | 2.54E-10 | 0.213117 |
| 0.41678  | 4.76E-21 | 0.062406 | 0.1782   | 0.019204 | 0.67893 | -0.01133 | 0.80706  | 0.073768 |
| 0.269812 | 3.12E-09 | 0.152463 | 0.00095  | 0.099066 | 0.03232 | 0.256692 | 1.84E-08 | 0.074882 |
| 0.631462 | 2.50E-53 | 0.443823 | 5.84E-24 | 0.038433 | 0.40732 | 0.112906 | 0.01464  | 0.020959 |
| 0.40383  | 9.58E-20 | 0.281436 | 5.97E-10 | 0.047321 | 0.30751 | -0.10067 | 0.02962  | 0.121851 |
| 0.481849 | 1.60E-28 | 0.378547 | 2.33E-17 | -0.00485 | 0.91671 | 0.027752 | 0.54968  | 0.129444 |
| 0.310641 | 6.62E-12 | 0.131938 | 0.00429  | 0.065482 | 0.15771 | -0.02168 | 0.64021  | 0.203052 |

|          |          |          |          |          |         |          |          |          |
|----------|----------|----------|----------|----------|---------|----------|----------|----------|
| 0.304881 | 1.68E-11 | -0.10385 | 0.02481  | -0.02291 | 0.62136 | -0.11986 | 0.00952  | 0.035605 |
| 0.525682 | 1.54E-34 | -0.11843 | 0.01042  | -0.03249 | 0.4836  | -0.15455 | 0.00081  | -0.08438 |
| 0.594655 | 5.39E-46 | 0.175458 | 0.00014  | 0.010515 | 0.82071 | -0.04905 | 0.29014  | 0.106257 |
| 0.685797 | 3.67E-66 | 0.278399 | 9.27E-10 | -0.02991 | 0.51905 | -0.1482  | 0.00132  | -0.01944 |
| -0.30759 | 1.09E-11 | -0.24158 | 1.26E-07 | -0.00579 | 0.90062 | 0.065163 | 0.15975  | -0.00944 |
| 0.563227 | 1.93E-40 | 0.370307 | 1.26E-16 | 0.028498 | 0.539   | 0.012397 | 0.78932  | 0.026093 |
| 0.452931 | 5.31E-25 | 0.087701 | 0.05825  | 0.040865 | 0.37826 | -0.03605 | 0.43701  | 0.020616 |
| 0.728786 | 1.68E-78 | 0.164878 | 0.00035  | -0.06428 | 0.16551 | -0.1892  | 3.87E-05 | -0.10106 |
| 0.90188  | #####    | 0.345566 | 1.52E-14 | -0.00241 | 0.95853 | -0.14629 | 0.00152  | -0.05521 |
| 0.500494 | 5.64E-31 | 0.191502 | 3.10E-05 | -0.05729 | 0.21655 | -0.13322 | 0.00393  | 0.015771 |
| 0.954761 | #####    | 0.415927 | 5.82E-21 | 0.002848 | 0.95105 | -0.10916 | 0.01829  | -0.01129 |
| 0.865544 | #####    | 0.464796 | 2.10E-26 | -0.01319 | 0.77619 | -0.08917 | 0.05414  | -0.04533 |
| 0.82867  | #####    | 0.302362 | 2.50E-11 | -0.00364 | 0.93746 | -0.11647 | 0.01178  | -0.02886 |
| 0.788834 | #####    | 0.304315 | 1.83E-11 | -0.0426  | 0.35836 | -0.1402  | 0.00239  | -0.05938 |
| 0.911869 | #####    | 0.373288 | 6.89E-17 | -0.00901 | 0.84605 | -0.12877 | 0.00532  | -0.03683 |
| 0.830268 | #####    | 0.174814 | 0.00015  | -0.01684 | 0.71664 | -0.13713 | 0.00298  | -0.08682 |
| 0.940334 | #####    | 0.398607 | 3.10E-19 | 0.01417  | 0.76006 | -0.08857 | 0.05579  | -0.02597 |
| 0.822702 | #####    | 0.2804   | 6.94E-10 | -0.0303  | 0.51358 | -0.12951 | 0.00506  | -0.04516 |
| 0.918692 | #####    | 0.333819 | 1.28E-13 | 0.006305 | 0.8919  | -0.10939 | 0.01805  | -0.01866 |
| 0.846868 | #####    | 0.308136 | 9.94E-12 | -0.0091  | 0.84446 | -0.09968 | 0.03126  | 0.036322 |
| 0.844103 | #####    | 0.287915 | 2.30E-10 | -0.002   | 0.9656  | -0.11509 | 0.01282  | -0.00222 |
| 0.902241 | #####    | 0.409758 | 2.46E-20 | -0.00052 | 0.99105 | -0.12329 | 0.00764  | -0.01137 |
| 0.91009  | #####    | 0.436311 | 3.99E-23 | -0.00202 | 0.96535 | -0.11407 | 0.01364  | -0.04808 |
| 0.302851 | 2.31E-11 | 0.127023 | 0.00598  | 0.066283 | 0.15268 | 0.013193 | 0.77615  | 0.192038 |
| 0.399528 | 2.52E-19 | 0.149721 | 0.00117  | -0.02982 | 0.52027 | -0.07632 | 0.0995   | -0.06364 |
| 0.673071 | 6.55E-63 | 0.305885 | 1.43E-11 | -0.04195 | 0.36573 | -0.08811 | 0.05708  | 0.008727 |
| 0.327407 | 3.95E-13 | 0.317376 | 2.18E-12 | -0.03024 | 0.51446 | -0.05616 | 0.22573  | -0.05913 |
| 0.384047 | 7.34E-18 | 0.296633 | 6.11E-11 | -0.00691 | 0.88162 | -0.10691 | 0.02085  | -0.05823 |
| 0.316799 | 2.40E-12 | 0.141487 | 0.00218  | 0.076484 | 0.09877 | -0.02649 | 0.568    | 0.351638 |
| 0.283518 | 4.41E-10 | 0.197854 | 1.66E-05 | 0.032482 | 0.48378 | 0.0166   | 0.7205   | 0.021286 |
| 0.343456 | 2.25E-14 | 0.251392 | 3.66E-08 | -0.00236 | 0.95947 | 0.019665 | 0.67167  | -0.15209 |
| 0.594377 | 6.07E-46 | 0.175102 | 0.00014  | 0.021816 | 0.63818 | -0.10548 | 0.02262  | -0.04689 |
| 0.478213 | 4.64E-28 | 0.50917  | 3.60E-32 | -0.05228 | 0.2595  | 0.049853 | 0.28232  | -0.12102 |
| 0.45042  | 1.04E-24 | 0.096112 | 0.03787  | -0.01745 | 0.70675 | -0.07116 | 0.12461  | -0.02766 |
| 0.489    | 1.91E-29 | 0.150044 | 0.00115  | 0.028639 | 0.537   | -0.00512 | 0.91213  | 0.04584  |
| 0.517595 | 2.31E-33 | 0.322621 | 8.99E-13 | -0.00563 | 0.90347 | -0.07534 | 0.10395  | 0.099841 |
| 0.584946 | 3.25E-44 | 0.278458 | 9.19E-10 | 0.037055 | 0.42435 | -0.01165 | 0.80174  | 0.103966 |
| 0.333491 | 1.36E-13 | 0.241888 | 1.21E-07 | 0.020495 | 0.65866 | 0.057158 | 0.21761  | 0.085794 |
| 0.448707 | 1.63E-24 | 0.251336 | 3.68E-08 | -0.00041 | 0.99289 | 0.026475 | 0.56821  | -0.04537 |
| 0.50999  | 2.77E-32 | 0.141019 | 0.00225  | -0.05176 | 0.26425 | -0.09735 | 0.03546  | 0.053364 |
| 0.91331  | #####    | 0.474803 | 1.24E-27 | 0.010899 | 0.81428 | -0.10735 | 0.02032  | 0.001808 |
| 0.380461 | 1.56E-17 | 0.150253 | 0.00113  | -0.00211 | 0.96379 | 0.008988 | 0.84639  | 0.046715 |
| 0.695053 | 1.24E-68 | 0.358098 | 1.42E-15 | -0.02432 | 0.60014 | -0.14552 | 0.00162  | -0.07366 |
| 0.613126 | 1.49E-49 | 0.145722 | 0.00159  | 0.007853 | 0.8656  | -0.04786 | 0.30204  | -0.04838 |
| 0.44881  | 1.59E-24 | 0.243455 | 9.96E-08 | 0.010654 | 0.81839 | -0.0802  | 0.08342  | 0.089813 |

|          |          |          |          |          |         |          |          |          |
|----------|----------|----------|----------|----------|---------|----------|----------|----------|
| 0.299393 | 3.98E-11 | 0.070882 | 0.12612  | -0.01524 | 0.74262 | -0.03884 | 0.40241  | -0.0745  |
| 0.342577 | 2.64E-14 | 0.144179 | 0.00179  | -0.03003 | 0.51745 | -0.12992 | 0.00492  | 0.02647  |
| 0.321427 | 1.10E-12 | 0.145391 | 0.00163  | -0.02009 | 0.66499 | -0.13038 | 0.00477  | 0.063724 |
| 0.541603 | 5.95E-37 | 0.524549 | 2.26E-34 | -0.00704 | 0.87936 | -0.01387 | 0.76497  | 0.003202 |
| 0.582564 | 8.70E-44 | 0.537993 | 2.15E-36 | -0.01158 | 0.80292 | -0.02017 | 0.66377  | 0.006806 |
| 0.332821 | 1.53E-13 | 0.357811 | 1.50E-15 | -0.00923 | 0.84234 | -0.06422 | 0.1659   | -0.04373 |
| 0.487016 | 3.47E-29 | 0.373036 | 7.25E-17 | 0.037096 | 0.42383 | 0.005958 | 0.89782  | 0.152643 |
| 0.542054 | 5.06E-37 | 0.381132 | 1.36E-17 | 0.035875 | 0.43926 | -0.09712 | 0.03589  | 0.133137 |
| 0.544187 | 2.35E-37 | 0.029596 | 0.52347  | 0.01467  | 0.75185 | -0.1412  | 0.00222  | 0.00736  |
| 0.30089  | 3.15E-11 | 0.000185 | 0.99682  | 0.018339 | 0.69263 | -0.09476 | 0.04067  | 0.170153 |
| 0.514431 | 6.54E-33 | 0.397113 | 4.32E-19 | 0.012163 | 0.7932  | -0.01652 | 0.72173  | 0.058296 |
| 0.320147 | 1.37E-12 | 0.146669 | 0.00148  | -0.0657  | 0.15633 | -0.15769 | 0.00063  | -0.07323 |
| 0.407241 | 4.40E-20 | 0.485948 | 4.77E-29 | 0.024203 | 0.60188 | -0.1215  | 0.00858  | 0.028437 |
| 0.30223  | 2.55E-11 | 0.465333 | 1.81E-26 | 0.02453  | 0.59697 | 0.046138 | 0.31978  | 0.020315 |
| 0.608372 | 1.29E-48 | 0.30322  | 2.18E-11 | 0.003081 | 0.94705 | -0.08165 | 0.07794  | -0.03977 |
| 0.410013 | 2.32E-20 | 0.033205 | 0.47409  | -0.0286  | 0.5376  | -0.12087 | 0.00893  | -0.13362 |
| 0.275756 | 1.35E-09 | -0.06309 | 0.17347  | -0.01784 | 0.70064 | -0.05968 | 0.19796  | -0.07308 |
| 0.336759 | 7.58E-14 | 0.125939 | 0.00643  | 0.018662 | 0.68751 | 0.006103 | 0.89535  | -0.06576 |
| 0.271892 | 2.33E-09 | -0.06444 | 0.16444  | 0.05031  | 0.27793 | 0.040269 | 0.38526  | -0.01574 |
| 0.595478 | 3.78E-46 | 0.160122 | 0.00051  | -0.05323 | 0.25091 | -0.13888 | 0.00263  | 0.014584 |
| 0.620029 | 6.03E-51 | 0.129293 | 0.00514  | -0.04169 | 0.36873 | -0.15849 | 0.00059  | -0.11176 |
| 0.324588 | 6.42E-13 | 0.113584 | 0.01405  | -0.00858 | 0.85327 | -0.06259 | 0.17692  | 0.009313 |
| 0.520343 | 9.27E-34 | 0.167806 | 0.00027  | 0.016956 | 0.71476 | -0.03759 | 0.41774  | 0.045802 |
| 0.345768 | 1.46E-14 | 0.396602 | 4.84E-19 | 0.083566 | 0.0712  | 0.004646 | 0.92024  | 0.333211 |
| 0.311724 | 5.55E-12 | 0.072041 | 0.12002  | -0.02856 | 0.53808 | -0.06565 | 0.15666  | -0.02967 |
| 0.426603 | 4.47E-22 | 0.369133 | 1.60E-16 | 0.05655  | 0.22255 | -0.02872 | 0.53582  | 0.219209 |
| 0.370052 | 1.33E-16 | 0.477752 | 5.30E-28 | -0.03496 | 0.45102 | 0.004337 | 0.92553  | -0.05622 |
| 0.550913 | 2.01E-38 | 0.400135 | 2.20E-19 | 0.051986 | 0.26221 | 0.105055 | 0.02318  | -0.0132  |
| 0.177762 | 0.00011  | 0.076379 | 0.09924  | 0.048317 | 0.29743 | 0.148509 | 0.00129  | -0.0393  |
| 0.34865  | 8.56E-15 | 0.575927 | 1.30E-42 | 0.059517 | 0.19919 | 0.088446 | 0.05614  | 0.06068  |
| 0.31457  | 3.47E-12 | 0.283779 | 4.24E-10 | 0.021181 | 0.64799 | 0.04672  | 0.31371  | 0.057646 |
| 0.233284 | 3.43E-07 | 0.313449 | 4.18E-12 | 0.016756 | 0.71798 | 0.099232 | 0.03203  | 0.051539 |
| 0.247791 | 5.79E-08 | 0.230159 | 4.95E-07 | 0.044349 | 0.33892 | 0.187208 | 4.68E-05 | 0.143852 |
| 0.376181 | 3.80E-17 | 0.244962 | 8.26E-08 | -0.00146 | 0.97488 | 0.039562 | 0.39367  | -0.0496  |
| 0.776872 | 1.82E-95 | 0.290028 | 1.67E-10 | -0.0173  | 0.70918 | -0.13697 | 0.00302  | -0.11816 |
| 0.61001  | 6.15E-49 | 0.20738  | 6.22E-06 | 0.022591 | 0.62629 | -0.02762 | 0.55155  | -0.04431 |
| 0.498213 | 1.15E-30 | 0.407111 | 4.53E-20 | 0.041227 | 0.37404 | -0.08027 | 0.08314  | 0.087607 |
| 0.338169 | 5.88E-14 | -0.00676 | 0.88417  | -0.02462 | 0.59569 | -0.12945 | 0.00508  | -0.04951 |
| 0.459209 | 9.76E-26 | 0.131724 | 0.00435  | -0.03013 | 0.51605 | -0.03181 | 0.49289  | -0.18057 |
| 0.416918 | 4.61E-21 | 0.447297 | 2.36E-24 | -0.05892 | 0.20372 | -0.16012 | 0.00051  | -0.1811  |
| 0.36431  | 4.19E-16 | 0.307565 | 1.09E-11 | 0.07541  | 0.10362 | 0.086089 | 0.06304  | 0.076814 |
| 0.32165  | 1.06E-12 | -0.05721 | 0.21716  | -0.01014 | 0.82708 | -0.06923 | 0.1352   | -0.05081 |
| 0.324171 | 6.90E-13 | 0.385022 | 5.97E-18 | 0.058731 | 0.2052  | 0.078913 | 0.08849  | 0.171671 |
| 0.833746 | #####    | 0.285659 | 3.21E-10 | -0.00652 | 0.8883  | -0.10584 | 0.02216  | -0.02918 |
| 0.326109 | 4.94E-13 | -0.03846 | 0.40697  | -0.04729 | 0.30784 | -0.25883 | 1.38E-08 | -0.21141 |

|          |          |          |          |          |         |          |          |          |
|----------|----------|----------|----------|----------|---------|----------|----------|----------|
| 0.854405 | #####    | 0.285903 | 3.10E-10 | -0.01682 | 0.71696 | -0.11451 | 0.01328  | -0.02835 |
| 0.47733  | 5.99E-28 | 0.186621 | 4.95E-05 | -0.06451 | 0.16401 | -0.15473 | 0.00079  | -0.18445 |
| 0.660063 | 9.47E-60 | 0.39039  | 1.89E-18 | -0.00703 | 0.87963 | -0.05653 | 0.22273  | -0.02958 |
| 0.395827 | 5.74E-19 | 0.292719 | 1.11E-10 | 0.016231 | 0.72646 | 0.072884 | 0.11574  | 0.187634 |
| 0.338147 | 5.90E-14 | 0.411651 | 1.59E-20 | -0.0476  | 0.30467 | -0.11775 | 0.01088  | -0.12308 |
| 0.429932 | 1.97E-22 | 0.596935 | 2.02E-46 | 0.026036 | 0.57464 | -0.00476 | 0.91829  | 0.054625 |
| 0.416081 | 5.62E-21 | 0.026492 | 0.56796  | -0.02225 | 0.63151 | -0.10892 | 0.01855  | -0.13473 |
| 0.431797 | 1.24E-22 | 0.331584 | 1.90E-13 | 0.029553 | 0.52408 | -0.00216 | 0.96289  | 0.083878 |
| 0.889005 | #####    | 0.414962 | 7.31E-21 | -0.00309 | 0.94689 | -0.1071  | 0.02062  | 0.010914 |
| 0.244153 | 9.14E-08 | 0.392661 | 1.15E-18 | 0.078196 | 0.09143 | 0.179495 | 9.61E-05 | 0.321407 |
| 0.940274 | #####    | 0.512872 | 1.09E-32 | 0.017532 | 0.70552 | -0.09877 | 0.03286  | 0.034433 |
| 0.781133 | 3.58E-97 | 0.316077 | 2.71E-12 | -0.01431 | 0.75774 | -0.08514 | 0.06602  | -0.02448 |
| 0.901246 | #####    | 0.361213 | 7.71E-16 | 0.018519 | 0.68977 | -0.07396 | 0.11044  | 0.026827 |
| 0.763915 | 1.69E-90 | 0.388899 | 2.60E-18 | 0.004186 | 0.92811 | 0.011399 | 0.80594  | 0.039613 |
| 0.941546 | #####    | 0.413795 | 9.62E-21 | -0.00329 | 0.94344 | -0.11884 | 0.01016  | -0.05058 |
| 0.723729 | 6.26E-77 | 0.158717 | 0.00058  | 0.005505 | 0.90556 | -0.14304 | 0.00194  | -0.09324 |
| 0.910429 | #####    | 0.421695 | 1.47E-21 | 0.01883  | 0.68484 | -0.07036 | 0.12895  | -0.0491  |
| 0.871099 | #####    | 0.346673 | 1.24E-14 | -0.0192  | 0.67904 | -0.09063 | 0.05032  | -0.09579 |
| 0.947258 | #####    | 0.358333 | 1.35E-15 | -0.00912 | 0.8441  | -0.13702 | 0.00301  | -0.02691 |
| 0.827458 | #####    | 0.223085 | 1.12E-06 | -0.00239 | 0.95898 | -0.10163 | 0.02809  | -0.04256 |
| 0.912167 | #####    | 0.441803 | 9.83E-24 | 0.021925 | 0.63651 | -0.06363 | 0.1698   | 0.045173 |
| 0.932409 | #####    | 0.428117 | 3.08E-22 | -0.00402 | 0.93101 | -0.13081 | 0.00463  | -0.04932 |
| 0.852594 | #####    | 0.37709  | 3.15E-17 | 0.010496 | 0.82103 | -0.09294 | 0.04471  | -0.00382 |
| 0.617055 | 2.42E-50 | 0.410917 | 1.88E-20 | 0.002815 | 0.95163 | -0.06554 | 0.15733  | -0.01745 |
| 0.770777 | 4.35E-93 | 0.433464 | 8.17E-23 | 0.014445 | 0.75555 | -0.09596 | 0.03818  | -0.03886 |
| 0.54464  | 1.99E-37 | 0.564723 | 1.08E-40 | 0.023331 | 0.61504 | -0.07002 | 0.13082  | 0.124199 |
| 0.766264 | 2.25E-91 | 0.276104 | 1.29E-09 | 0.016133 | 0.72804 | -0.0888  | 0.05516  | 0.06075  |
| 0.596289 | 2.66E-46 | 0.346348 | 1.32E-14 | -0.02045 | 0.65942 | -0.03355 | 0.46953  | 0.011938 |
| 0.620246 | 5.44E-51 | 0.233693 | 3.26E-07 | -0.01351 | 0.77085 | -0.16184 | 0.00045  | -0.08184 |
| 0.532943 | 1.27E-35 | 0.104369 | 0.0241   | -0.01014 | 0.82698 | -0.11567 | 0.01237  | -0.07823 |
| 0.485726 | 5.10E-29 | 0.344281 | 1.93E-14 | -0.00359 | 0.93836 | -0.00712 | 0.87804  | 0.093712 |
| 0.295145 | 7.69E-11 | 0.237804 | 1.99E-07 | 0.061887 | 0.18185 | -0.13153 | 0.00441  | 0.101821 |
| 0.884898 | #####    | 0.369061 | 1.62E-16 | 0.010024 | 0.82896 | -0.11917 | 0.00995  | -0.0423  |
| 0.90667  | #####    | 0.415999 | 5.73E-21 | 0.001081 | 0.98141 | -0.12601 | 0.0064   | -0.05242 |
| 0.383475 | 8.29E-18 | 0.263987 | 6.93E-09 | 0.016717 | 0.71862 | -0.07724 | 0.09549  | -0.02231 |
| 0.90849  | #####    | 0.359816 | 1.01E-15 | -0.01027 | 0.82474 | -0.10617 | 0.02175  | -0.05727 |
| 0.486584 | 3.95E-29 | 0.440658 | 1.32E-23 | 0.047651 | 0.30415 | 0.06248  | 0.17769  | 0.131943 |
| 0.047073 | 0.31006  | 0.170805 | 0.00021  | 0.132062 | 0.00425 | 0.230383 | 4.83E-07 | 0.093661 |
| 0.220307 | 1.53E-06 | 0.285602 | 3.24E-10 | 0.07195  | 0.1205  | 0.151437 | 0.00103  | 0.141513 |
| 0.023948 | 0.60571  | 0.079725 | 0.08525  | 0.113195 | 0.01439 | 0.215454 | 2.62E-06 | 0.024242 |
| 0.282765 | 4.92E-10 | 0.194259 | 2.37E-05 | 0.073382 | 0.11326 | 0.165877 | 0.00032  | 0.085514 |
| 0.694397 | 1.86E-68 | 0.226611 | 7.48E-07 | 0.003506 | 0.93976 | -0.03611 | 0.43626  | 0.044743 |
| 0.695991 | 6.86E-69 | 0.193258 | 2.61E-05 | -0.00293 | 0.94959 | -0.12881 | 0.00531  | 0.001421 |
| -0.30458 | 1.76E-11 | -0.33259 | 1.59E-13 | -0.0042  | 0.92783 | 0.13493  | 0.00348  | -0.10127 |
| 0.873604 | #####    | 0.362371 | 6.15E-16 | -0.00405 | 0.93052 | -0.12313 | 0.00773  | -0.04636 |



|          |          |          |          |          |         |          |          |          |
|----------|----------|----------|----------|----------|---------|----------|----------|----------|
| 0.850965 | #####    | 0.285391 | 3.34E-10 | -0.03316 | 0.47471 | -0.14853 | 0.00129  | -0.07728 |
| 0.676351 | 9.86E-64 | 0.04161  | 0.36962  | -0.0007  | 0.98793 | -0.11745 | 0.01108  | 0.02012  |
| 0.510233 | 2.56E-32 | 0.089343 | 0.05368  | -0.06708 | 0.14778 | -0.16504 | 0.00034  | -0.07258 |
| 0.405393 | 6.71E-20 | 0.112661 | 0.01486  | -0.03455 | 0.45632 | -0.042   | 0.36518  | -0.08656 |
| 0.88612  | #####    | 0.428614 | 2.73E-22 | 0.020351 | 0.6609  | -0.07639 | 0.09921  | 0.053636 |
| 0.457408 | 1.59E-25 | 0.556526 | 2.48E-39 | -0.00409 | 0.92976 | 0.034155 | 0.46153  | -0.02661 |
| 0.453416 | 4.66E-25 | 0.252599 | 3.13E-08 | -0.01636 | 0.72444 | -0.14163 | 0.00216  | 0.014879 |
| 0.833231 | #####    | 0.371135 | 1.07E-16 | -0.01768 | 0.70318 | -0.12518 | 0.00676  | -0.02049 |
| 0.712441 | 1.53E-73 | 0.182955 | 6.99E-05 | -0.0083  | 0.85804 | -0.11111 | 0.0163   | 0.036196 |
| 0.828722 | #####    | 0.209197 | 5.13E-06 | -0.03645 | 0.43201 | -0.18905 | 3.93E-05 | -0.06683 |
| 0.800536 | #####    | 0.255664 | 2.10E-08 | -0.01949 | 0.67439 | -0.14446 | 0.00175  | -0.02863 |
| 0.201538 | 1.14E-05 | 0.284249 | 3.96E-10 | 0.060751 | 0.19001 | 0.119875 | 0.00952  | 0.1481   |
| 0.287576 | 2.42E-10 | 0.233551 | 3.32E-07 | -0.03476 | 0.45368 | -0.13563 | 0.00332  | -0.09453 |
| 0.364854 | 3.76E-16 | 0.305989 | 1.40E-11 | -0.08    | 0.0842  | -0.24908 | 4.91E-08 | -0.07946 |
| 0.774162 | 2.13E-94 | 0.233833 | 3.21E-07 | -0.01992 | 0.66767 | -0.12004 | 0.00942  | -0.08761 |
| 0.273357 | 1.90E-09 | 0.460564 | 6.74E-26 | 0.013634 | 0.76886 | 0.012854 | 0.78175  | 0.176833 |
| 0.8932   | #####    | 0.358713 | 1.26E-15 | -0.00228 | 0.96087 | -0.14613 | 0.00154  | -0.0263  |
| 0.925955 | #####    | 0.385063 | 5.92E-18 | -0.00701 | 0.87994 | -0.14274 | 0.00199  | -0.0459  |
| 0.60714  | 2.24E-48 | 0.288853 | 2.00E-10 | -0.01026 | 0.82492 | -0.08877 | 0.05525  | -0.10712 |
| 0.919513 | #####    | 0.399543 | 2.51E-19 | -0.01733 | 0.70878 | -0.1183  | 0.01051  | -0.03952 |
| 0.748129 | 7.34E-85 | 0.280175 | 7.17E-10 | -0.00362 | 0.93785 | -0.14837 | 0.0013   | -0.01198 |
| 0.846782 | #####    | 0.287421 | 2.47E-10 | 0.004756 | 0.91836 | -0.09331 | 0.04386  | 0.020444 |
| 0.885823 | #####    | 0.302096 | 2.61E-11 | -0.02537 | 0.58454 | -0.13376 | 0.00378  | -0.06776 |
| 0.879329 | #####    | 0.28364  | 4.33E-10 | -0.02437 | 0.59932 | -0.16363 | 0.00038  | 0.002783 |
| 0.700877 | 3.08E-70 | 0.195924 | 2.01E-05 | -0.04361 | 0.34707 | -0.16637 | 0.00031  | -0.16034 |
| 0.312356 | 5.00E-12 | 0.466802 | 1.20E-26 | -0.00404 | 0.93058 | 0.011031 | 0.81208  | -0.03664 |
| 0.289146 | 1.91E-10 | 0.03462  | 0.45545  | -0.08833 | 0.05647 | -0.24515 | 8.07E-08 | -0.16997 |
| 0.365148 | 3.55E-16 | 0.256621 | 1.85E-08 | -0.0034  | 0.94153 | 0.032799 | 0.47952  | -0.06217 |
| 0.494254 | 3.88E-30 | -0.0005  | 0.99148  | -0.01282 | 0.78223 | -0.09621 | 0.03768  | -0.02263 |
| 0.419166 | 2.70E-21 | 0.646278 | 1.44E-56 | 0.001336 | 0.97703 | -0.08359 | 0.07114  | 0.080872 |
| 0.463348 | 3.13E-26 | 0.29164  | 1.31E-10 | -0.03195 | 0.49094 | -0.07194 | 0.12054  | 0.037719 |
| 0.941331 | #####    | 0.435393 | 5.03E-23 | -0.00305 | 0.94764 | -0.11803 | 0.01069  | -0.02752 |
| 0.880327 | #####    | 0.362614 | 5.86E-16 | 0.022354 | 0.62992 | -0.08865 | 0.05556  | -0.00408 |
| 0.465169 | 1.89E-26 | 0.376731 | 3.40E-17 | -0.00867 | 0.85185 | 0.017707 | 0.70272  | -0.07297 |
| 0.711338 | 3.21E-73 | 0.414776 | 7.64E-21 | 0.045676 | 0.32465 | 0.02772  | 0.55014  | 0.177521 |
| 0.43786  | 2.70E-23 | -0.03719 | 0.42262  | 0.049837 | 0.28247 | -0.06236 | 0.17854  | -0.00461 |
| 0.524722 | 2.13E-34 | 0.457989 | 1.36E-25 | 0.10208  | 0.0274  | 0.130806 | 0.00464  | 0.240192 |
| 0.814844 | #####    | 0.593554 | 8.63E-46 | 0.048712 | 0.2935  | -0.00886 | 0.84854  | 0.172837 |
| 0.359146 | 1.15E-15 | 0.00606  | 0.89608  | -0.07049 | 0.12826 | -0.16991 | 0.00023  | -0.28184 |
| 0.333914 | 1.26E-13 | 0.213185 | 3.35E-06 | 0.009767 | 0.83328 | -0.06102 | 0.18809  | 0.017497 |
| 0.289035 | 1.94E-10 | -0.18184 | 7.75E-05 | -0.00466 | 0.91995 | -0.07199 | 0.1203   | -0.14994 |
| -0.2918  | 1.28E-10 | -0.18675 | 4.89E-05 | 0.080459 | 0.08241 | 0.260104 | 1.17E-08 | 0.291782 |
| -0.23863 | 1.80E-07 | -0.18453 | 6.03E-05 | 0.09665  | 0.0368  | 0.217818 | 2.02E-06 | 0.314108 |
| 0.439229 | 1.90E-23 | 0.67579  | 1.37E-63 | -0.00626 | 0.8926  | -0.04335 | 0.34993  | -0.00012 |
| 0.263925 | 6.99E-09 | 0.04867  | 0.29392  | -0.01043 | 0.82217 | -0.1114  | 0.01603  | -0.00019 |

|          |          |          |          |          |         |          |          |          |
|----------|----------|----------|----------|----------|---------|----------|----------|----------|
| 0.416358 | 5.26E-21 | -0.02533 | 0.58502  | -0.0296  | 0.52347 | -0.09867 | 0.03303  | -0.14731 |
| 0.545111 | 1.68E-37 | 0.130834 | 0.00463  | -0.01735 | 0.70843 | -0.10516 | 0.02304  | -0.00786 |
| 0.269531 | 3.24E-09 | 0.015326 | 0.74114  | -0.04155 | 0.37029 | -0.10233 | 0.02701  | -0.05388 |
| 0.248064 | 5.59E-08 | 0.184283 | 6.17E-05 | -0.01666 | 0.71957 | 0.077031 | 0.09638  | -0.04787 |
| 0.396821 | 4.61E-19 | 0.031264 | 0.50033  | -0.05337 | 0.24971 | -0.18299 | 6.97E-05 | -0.04038 |
| 0.417781 | 3.75E-21 | 0.382097 | 1.11E-17 | -0.02855 | 0.53833 | -0.15639 | 0.0007   | -0.1128  |
| 0.453486 | 4.58E-25 | 0.576653 | 9.68E-43 | 0.028153 | 0.54393 | -0.03907 | 0.39955  | 0.076421 |
| 0.324537 | 6.48E-13 | 0.338388 | 5.65E-14 | -0.01065 | 0.81845 | -0.13716 | 0.00298  | 0.053476 |
| 0.376006 | 3.94E-17 | 0.239959 | 1.53E-07 | 0.023819 | 0.60766 | 0.033437 | 0.471    | -0.04385 |
| 0.500844 | 5.05E-31 | 0.108456 | 0.01906  | 0.098388 | 0.03353 | 0.016114 | 0.72835  | 0.189309 |
| 0.936539 | #####    | 0.442457 | 8.31E-24 | 0.003152 | 0.94585 | -0.10761 | 0.02002  | -0.00499 |
| 0.345609 | 1.51E-14 | 0.273195 | 1.94E-09 | -0.01844 | 0.69108 | -0.03319 | 0.47425  | 0.098657 |
| 0.384688 | 6.41E-18 | 0.066271 | 0.15276  | -0.06012 | 0.1947  | -0.19529 | 2.14E-05 | -0.05153 |
| 0.357155 | 1.70E-15 | 0.073866 | 0.1109   | 0.005485 | 0.90589 | -0.0486  | 0.29465  | 0.001616 |
| 0.897408 | #####    | 0.485536 | 5.39E-29 | 0.000766 | 0.98683 | -0.11732 | 0.01117  | -0.00928 |
| 0.507714 | 5.75E-32 | 0.286749 | 2.73E-10 | 0.046327 | 0.3178  | -0.04903 | 0.29036  | -0.00879 |
| 0.570084 | 1.33E-41 | 0.445294 | 3.98E-24 | -0.00993 | 0.83052 | 0.02799  | 0.54626  | 0.012975 |
| 0.897237 | #####    | 0.323478 | 7.77E-13 | -0.01338 | 0.77312 | -0.12978 | 0.00497  | -0.01951 |
| 0.431016 | 1.51E-22 | -0.0854  | 0.06518  | 0.000442 | 0.9924  | -0.15409 | 0.00083  | -0.00295 |
| 0.475687 | 9.63E-28 | 0.239798 | 1.56E-07 | -0.03897 | 0.40077 | -0.09068 | 0.05018  | -0.11897 |
| 0.382604 | 9.96E-18 | 0.243442 | 9.98E-08 | 0.040979 | 0.37693 | -0.00696 | 0.88072  | 0.265157 |
| 0.497249 | 1.55E-30 | -0.06616 | 0.15343  | -0.0262  | 0.57224 | -0.15836 | 0.00059  | -0.05206 |
| 0.87543  | #####    | 0.453533 | 4.52E-25 | -0.00045 | 0.99228 | -0.12522 | 0.00674  | -0.00631 |
| 0.672054 | 1.17E-62 | 0.212504 | 3.60E-06 | -0.02602 | 0.57486 | -0.14163 | 0.00216  | -0.09297 |
| 0.584134 | 4.55E-44 | 0.283445 | 4.45E-10 | -0.01776 | 0.70184 | -0.06359 | 0.17008  | 0.045021 |
| 0.932738 | #####    | 0.511271 | 1.83E-32 | 0.019967 | 0.66691 | -0.10012 | 0.03052  | -0.0095  |
| 0.459284 | 9.56E-26 | 0.282693 | 4.97E-10 | 0.03278  | 0.47977 | -0.08712 | 0.05996  | 0.056466 |
| -0.31666 | 2.45E-12 | -0.2436  | 9.78E-08 | 0.106496 | 0.02135 | 0.224673 | 9.34E-07 | 0.321028 |
| 0.739101 | 8.01E-82 | 0.20403  | 8.82E-06 | 0.02562  | 0.58076 | -0.07772 | 0.09341  | 0.038348 |
| 0.739501 | 5.91E-82 | 0.271396 | 2.50E-09 | -0.03515 | 0.44853 | -0.19689 | 1.82E-05 | 0.005079 |
| 0.218055 | 1.97E-06 | -0.06162 | 0.18373  | -0.0069  | 0.88179 | -0.13954 | 0.00251  | -0.12358 |
| 0.895935 | #####    | 0.430059 | 1.91E-22 | 0.005248 | 0.90995 | -0.0736  | 0.11218  | 0.007734 |
| 0.619823 | 6.64E-51 | 0.508253 | 4.84E-32 | -0.0229  | 0.62159 | -0.03007 | 0.51686  | -0.01744 |
| 0.92358  | #####    | 0.384245 | 7.04E-18 | -0.01455 | 0.75381 | -0.14262 | 0.002    | -0.06872 |
| 0.24313  | 1.04E-07 | 0.061857 | 0.18206  | 0.077898 | 0.09268 | 0.177221 | 0.00012  | 0.065823 |
| 0.374336 | 5.56E-17 | 0.287178 | 2.57E-10 | -0.04135 | 0.37264 | -0.04148 | 0.37112  | 0.055316 |
| 0.34893  | 8.12E-15 | 0.189127 | 3.90E-05 | -0.01475 | 0.75053 | 0.00219  | 0.96236  | 0.095417 |
| 0.917725 | #####    | 0.472984 | 2.09E-27 | -0.00144 | 0.97529 | -0.11369 | 0.01396  | -0.01709 |
| 0.475452 | 1.03E-27 | 0.299308 | 4.04E-11 | 0.023546 | 0.61178 | 0.015631 | 0.73618  | 0.172633 |
| 0.83509  | #####    | 0.409084 | 2.88E-20 | 0.033123 | 0.47518 | -0.00336 | 0.94219  | 0.062342 |
| 0.686693 | 2.13E-66 | 0.148527 | 0.00129  | -0.00999 | 0.8295  | -0.09886 | 0.03269  | -0.01257 |
| 0.519308 | 1.31E-33 | -0.14352 | 0.00187  | -0.0213  | 0.64612 | -0.10691 | 0.02085  | -0.11753 |
| 0.767476 | 7.87E-92 | 0.17192  | 0.00019  | -0.00736 | 0.874   | -0.08868 | 0.05548  | 0.062256 |
| 0.441398 | 1.09E-23 | 0.560425 | 5.64E-40 | 0.001215 | 0.9791  | -0.00502 | 0.91382  | 0.084557 |
| 0.77363  | 3.43E-94 | 0.367297 | 2.31E-16 | 0.029503 | 0.52478 | 0.011338 | 0.80694  | 0.029624 |

|          |          |          |          |          |         |          |          |          |
|----------|----------|----------|----------|----------|---------|----------|----------|----------|
| 0.452409 | 6.10E-25 | 0.146037 | 0.00155  | 0.043433 | 0.349   | -0.02248 | 0.62798  | -0.04725 |
| 0.473235 | 1.94E-27 | 0.207946 | 5.86E-06 | 0.000131 | 0.99775 | -0.00159 | 0.9727   | -0.05116 |
| 0.288245 | 2.19E-10 | 0.270286 | 2.92E-09 | 0.052454 | 0.25794 | 0.130823 | 0.00463  | -0.00963 |
| 0.383731 | 7.85E-18 | 0.179574 | 9.54E-05 | 0.044092 | 0.34174 | 0.085674 | 0.06433  | -0.01335 |
| 0.229477 | 5.36E-07 | 0.042404 | 0.36055  | 0.005696 | 0.9023  | -0.02222 | 0.63192  | -0.06253 |
| 0.421778 | 1.44E-21 | 0.22857  | 5.96E-07 | -0.0125  | 0.78763 | -0.06478 | 0.16222  | -0.00558 |
| 0.558017 | 1.41E-39 | 0.15418  | 0.00083  | -0.04031 | 0.38474 | -0.20141 | 1.15E-05 | -0.06291 |
| 0.343362 | 2.28E-14 | 0.314098 | 3.76E-12 | 0.061861 | 0.18203 | 0.114934 | 0.01294  | 0.317376 |
| 0.923093 | #####    | 0.344593 | 1.82E-14 | -0.02441 | 0.59877 | -0.14656 | 0.00149  | -0.10724 |
| 0.295451 | 7.34E-11 | 0.288519 | 2.10E-10 | -0.02534 | 0.58486 | -0.11351 | 0.01412  | 0.031799 |
| 0.352162 | 4.42E-15 | 0.015976 | 0.7306   | 0.1461   | 0.00155 | 0.064503 | 0.16403  | 0.329165 |
| 0.576732 | 9.37E-43 | 0.175413 | 0.00014  | 0.003755 | 0.9355  | -0.10381 | 0.02487  | -0.0489  |
| 0.412329 | 1.36E-20 | 0.206457 | 6.85E-06 | 0.095453 | 0.03921 | 0.172097 | 0.00019  | 0.15416  |
| 0.370383 | 1.24E-16 | 0.170152 | 0.00022  | -0.03961 | 0.39315 | -0.10648 | 0.02136  | -0.10533 |
| 0.551751 | 1.47E-38 | 0.281037 | 6.33E-10 | -0.00133 | 0.97708 | -0.0953  | 0.03954  | -0.03609 |
| 0.393679 | 9.21E-19 | 0.453468 | 4.60E-25 | 0.003657 | 0.93718 | -0.08735 | 0.05926  | 0.018289 |
| -0.28418 | 4.00E-10 | -0.10691 | 0.02085  | 0.037353 | 0.42063 | 0.227033 | 7.12E-07 | 0.085692 |
| 0.377156 | 3.11E-17 | 0.381178 | 1.34E-17 | -0.0727  | 0.11665 | -0.0654  | 0.15821  | -0.13349 |
| 0.331456 | 1.95E-13 | 0.253265 | 2.87E-08 | 0.042064 | 0.36442 | -0.04675 | 0.31341  | 0.01358  |
| 0.302208 | 2.56E-11 | 0.075207 | 0.10455  | 0.028653 | 0.5368  | 0.031099 | 0.50259  | -0.0004  |
| 0.268875 | 3.55E-09 | 0.094655 | 0.04089  | 0.003759 | 0.93544 | -0.00138 | 0.97619  | 0.049544 |
| 0.729319 | 1.14E-78 | 0.45207  | 6.68E-25 | -0.01602 | 0.72987 | -0.11405 | 0.01366  | -0.06822 |
| 0.646859 | 1.06E-56 | 0.34227  | 2.79E-14 | -0.00168 | 0.97105 | -0.12075 | 0.009    | -0.08098 |
| 0.236798 | 2.25E-07 | 0.184959 | 5.79E-05 | -0.04511 | 0.3307  | -0.02026 | 0.66226  | 0.072802 |
| 0.848633 | #####    | 0.455927 | 2.38E-25 | -0.03282 | 0.47926 | -0.07345 | 0.11293  | -0.05276 |
| 0.712421 | 1.55E-73 | 0.311131 | 6.11E-12 | -0.01375 | 0.76702 | -0.11951 | 0.00974  | -0.0091  |
| 0.692002 | 8.27E-68 | 0.032082 | 0.48918  | -0.04584 | 0.32289 | -0.15233 | 0.00096  | -0.06412 |
| -0.27328 | 1.92E-09 | -0.31577 | 2.85E-12 | 0.066893 | 0.14893 | 0.14334  | 0.0019   | 0.125402 |
| 0.373122 | 7.13E-17 | 0.483406 | 1.01E-28 | -0.0139  | 0.7645  | 0.048792 | 0.29271  | 0.053036 |
| 0.417069 | 4.45E-21 | -0.13299 | 0.00399  | -0.08198 | 0.07676 | -0.18181 | 7.77E-05 | -0.06414 |
| 0.284736 | 3.68E-10 | 0.388713 | 2.71E-18 | 0.011252 | 0.80838 | 0.07218  | 0.11931  | 0.020434 |
| 0.491846 | 8.09E-30 | 0.128814 | 0.00531  | -0.00041 | 0.99286 | -0.15026 | 0.00113  | 0.047799 |
| 0.297528 | 5.32E-11 | 0.11517  | 0.01276  | 0.054367 | 0.24095 | 0.019781 | 0.66984  | 0.001507 |
| 0.362932 | 5.50E-16 | 0.089425 | 0.05346  | -0.01323 | 0.77556 | -0.00605 | 0.89622  | -0.0753  |
| 0.928321 | #####    | 0.506756 | 7.81E-32 | 0.006382 | 0.89061 | -0.10642 | 0.02144  | -0.031   |
| 0.656877 | 5.33E-59 | 0.469436 | 5.72E-27 | -0.04099 | 0.37685 | -0.07388 | 0.11081  | -0.00262 |
| 0.272825 | 2.05E-09 | -0.09082 | 0.04983  | 0.021713 | 0.63977 | -0.11166 | 0.01577  | 0.103599 |
| 0.232646 | 3.70E-07 | 0.373319 | 6.85E-17 | -0.00857 | 0.8534  | -0.03315 | 0.47488  | 0.059306 |
| 0.358915 | 1.21E-15 | 0.343891 | 2.07E-14 | 0.07884  | 0.08879 | 0.16251  | 0.00042  | 0.189901 |
| 0.800552 | #####    | 0.295972 | 6.77E-11 | -0.01801 | 0.69795 | -0.12927 | 0.00514  | -0.10742 |
| 0.57022  | 1.26E-41 | 0.074876 | 0.10609  | -0.02766 | 0.55106 | -0.09695 | 0.03621  | -0.08591 |
| 0.422419 | 1.24E-21 | 0.113452 | 0.01416  | 0.014104 | 0.76114 | -0.04655 | 0.3155   | -0.05197 |
| 0.705932 | 1.16E-71 | 0.250279 | 4.22E-08 | 0.020797 | 0.65396 | -0.09401 | 0.04229  | 0.04821  |
| 0.355937 | 2.15E-15 | 0.327045 | 4.20E-13 | 0.034569 | 0.45611 | -0.05237 | 0.25868  | 0.220619 |
| 0.334582 | 1.12E-13 | -0.02195 | 0.63618  | 0.049526 | 0.28549 | 0.018405 | 0.69159  | 0.265934 |

|          |          |          |          |           |         |          |          |          |
|----------|----------|----------|----------|-----------|---------|----------|----------|----------|
| 0.496958 | 1.69E-30 | 0.34157  | 3.17E-14 | -0.00793  | 0.86424 | -0.02122 | 0.64744  | 0.05289  |
| 0.483963 | 8.60E-29 | 0.211994 | 3.81E-06 | -0.01523  | 0.74273 | -0.11132 | 0.0161   | 0.109078 |
| 0.343014 | 2.43E-14 | 0.408089 | 3.62E-20 | 0.07163   | 0.12216 | 0.109376 | 0.01806  | 0.062046 |
| 0.223213 | 1.10E-06 | 0.304248 | 1.85E-11 | 0.022835  | 0.62257 | -0.06348 | 0.17086  | -0.06054 |
| 0.554497 | 5.30E-39 | 0.299789 | 3.74E-11 | -0.01834  | 0.69265 | -0.20544 | 7.62E-06 | -0.08121 |
| 0.271508 | 2.46E-09 | 0.39277  | 1.12E-18 | 0.007704  | 0.86813 | 0.008814 | 0.84934  | 0.075522 |
| -0.35265 | 4.03E-15 | -0.46826 | 7.96E-27 | -0.08133  | 0.07912 | -0.08159 | 0.07819  | -0.12431 |
| 0.3224   | 9.33E-13 | 0.240285 | 1.47E-07 | 0.017552  | 0.7052  | -0.13241 | 0.00415  | -0.00597 |
| 0.527716 | 7.68E-35 | 0.15977  | 0.00053  | -0.0377   | 0.41629 | -0.10127 | 0.02866  | -0.00868 |
| 0.350731 | 5.79E-15 | 0.03497  | 0.4509   | 0.010593  | 0.81941 | -0.02462 | 0.59558  | -0.03398 |
| 0.330401 | 2.34E-13 | 0.054413 | 0.24056  | 0.00697   | 0.88059 | -0.03518 | 0.44822  | -0.0013  |
| 0.313636 | 4.05E-12 | 0.125203 | 0.00675  | 0.013926  | 0.76406 | -0.0252  | 0.58698  | 0.019974 |
| 0.269983 | 3.04E-09 | -0.0327  | 0.4808   | -0.03484  | 0.4526  | -0.05747 | 0.21514  | -0.03451 |
| 0.447159 | 2.45E-24 | 0.614537 | 7.76E-50 | -0.01351  | 0.77083 | -0.03425 | 0.46022  | -0.0255  |
| 0.454699 | 3.31E-25 | 0.590575 | 3.07E-45 | -0.0151   | 0.74482 | -0.10696 | 0.02078  | -0.03699 |
| 0.296665 | 6.08E-11 | 0.357768 | 1.51E-15 | -0.0111   | 0.81094 | -0.04564 | 0.32503  | 0.014753 |
| 0.422796 | 1.13E-21 | 0.013822 | 0.76576  | -4.93E-05 | 0.99915 | -0.10026 | 0.0303   | -0.12693 |
| -0.25819 | 1.51E-08 | -0.25528 | 2.21E-08 | 0.109873  | 0.01754 | 0.217567 | 2.07E-06 | 0.042202 |
| 0.335645 | 9.25E-14 | -0.06083 | 0.18945  | -0.00292  | 0.94977 | -0.03282 | 0.47917  | -0.02098 |
| 0.730944 | 3.49E-79 | 0.071063 | 0.12515  | -0.05122  | 0.26933 | -0.21287 | 3.46E-06 | -0.0641  |
| 0.541898 | 5.35E-37 | -0.02466 | 0.59511  | -0.03013  | 0.51602 | -0.14179 | 0.00213  | -0.03159 |
| -0.36506 | 3.62E-16 | -0.28408 | 4.06E-10 | 0.021855  | 0.63758 | 0.089693 | 0.05275  | 0.122756 |
| 0.51826  | 1.85E-33 | 0.266908 | 4.65E-09 | -0.00543  | 0.90683 | -0.07307 | 0.11481  | -0.09696 |
| 0.527114 | 9.43E-35 | 0.14659  | 0.00149  | -0.03945  | 0.39496 | -0.1364  | 0.00314  | -0.18198 |
| 0.493892 | 4.34E-30 | 0.026765 | 0.56397  | -0.03772  | 0.41614 | -0.08427 | 0.06884  | -0.04624 |
| 0.477839 | 5.17E-28 | 0.267983 | 4.01E-09 | -0.05455  | 0.23938 | -0.15678 | 0.00067  | -0.13154 |
| 0.263482 | 7.42E-09 | 0.130136 | 0.00485  | 0.036095  | 0.43647 | -0.05029 | 0.27808  | 0.004727 |
| 0.771278 | 2.79E-93 | 0.273527 | 1.85E-09 | -0.01539  | 0.74004 | -0.1027  | 0.02646  | -0.07914 |
| -0.25089 | 3.90E-08 | -0.31271 | 4.72E-12 | 0.040476  | 0.38282 | 0.033645 | 0.46824  | 0.058203 |
| 0.490758 | 1.13E-29 | 0.477933 | 5.03E-28 | 0.006492  | 0.88872 | -0.06975 | 0.13228  | 0.106295 |
| 0.248492 | 5.29E-08 | 0.028421 | 0.5401   | -0.06207  | 0.18058 | -0.07662 | 0.09818  | -0.17464 |
| 0.894404 | #####    | 0.34951  | 7.29E-15 | -0.02812  | 0.54436 | -0.12184 | 0.0084   | -0.06166 |
| 0.421381 | 1.59E-21 | 0.152056 | 0.00098  | -0.03695  | 0.4257  | -0.12985 | 0.00495  | 0.000396 |
| 0.614412 | 8.22E-50 | 0.196873 | 1.83E-05 | -0.00161  | 0.97226 | -0.06034 | 0.19302  | -0.01749 |
| 0.391353 | 1.53E-18 | 0.150345 | 0.00112  | 0.023245  | 0.61634 | 0.009616 | 0.83581  | 0.019561 |
| 0.320925 | 1.20E-12 | 0.199806 | 1.36E-05 | 0.018371  | 0.69212 | -0.0163  | 0.72531  | 0.07842  |
| 0.335149 | 1.01E-13 | -0.00328 | 0.94365  | 0.057689  | 0.21337 | -0.02278 | 0.62341  | -0.02156 |
| 0.358585 | 1.29E-15 | 0.036043 | 0.43713  | 0.038328  | 0.4086  | -0.05438 | 0.24085  | -0.04848 |
| 0.240533 | 1.43E-07 | 0.353409 | 3.48E-15 | 0.1059    | 0.02209 | 0.199152 | 1.45E-05 | 0.218141 |
| 0.416574 | 5.00E-21 | 0.349291 | 7.59E-15 | 0.028784  | 0.53494 | -0.15326 | 0.00089  | 0.146884 |
| 0.473106 | 2.02E-27 | 0.332417 | 1.64E-13 | 0.042929  | 0.35463 | 0.114522 | 0.01327  | 0.233316 |
| 0.60962  | 7.33E-49 | 0.120778 | 0.00899  | -0.02563  | 0.58064 | -0.10344 | 0.02539  | -0.05377 |
| 0.570034 | 1.36E-41 | 0.13717  | 0.00297  | -0.02026  | 0.66231 | -0.09312 | 0.0443   | -0.14489 |
| -0.26037 | 1.13E-08 | -0.15169 | 0.00101  | 0.074736  | 0.10675 | 0.22246  | 1.20E-06 | 0.206625 |
| 0.333057 | 1.47E-13 | 0.41359  | 1.01E-20 | 0.053553  | 0.24808 | 0.030382 | 0.51249  | 0.197757 |

|          |          |          |          |          |         |          |          |          |
|----------|----------|----------|----------|----------|---------|----------|----------|----------|
| 0.301414 | 2.90E-11 | 0.407124 | 4.52E-20 | 0.035448 | 0.44473 | -0.06469 | 0.16278  | 0.007405 |
| 0.459374 | 9.32E-26 | 0.650066 | 1.99E-57 | 0.052311 | 0.25924 | 0.019564 | 0.67325  | 0.195821 |
| 0.589014 | 5.93E-45 | 0.242476 | 1.13E-07 | 0.030641 | 0.50891 | -0.04382 | 0.34473  | -0.0577  |
| 0.273249 | 1.93E-09 | 0.149837 | 0.00116  | -0.04675 | 0.31342 | -0.21787 | 2.01E-06 | -0.07163 |
| 0.37258  | 7.96E-17 | 0.257324 | 1.69E-08 | -0.00973 | 0.83388 | -0.17893 | 0.0001   | 0.04962  |
| 0.39138  | 1.52E-18 | 0.199085 | 1.46E-05 | -0.0172  | 0.71091 | -0.17325 | 0.00017  | 0.013717 |
| 0.313917 | 3.87E-12 | 0.31284  | 4.62E-12 | -0.00263 | 0.95473 | -0.15277 | 0.00093  | 0.042001 |
| 0.308219 | 9.81E-12 | 0.296537 | 6.21E-11 | -0.01184 | 0.79855 | -0.1476  | 0.00138  | 0.007062 |
| 0.557791 | 1.54E-39 | 0.100562 | 0.02979  | -0.0447  | 0.33509 | -0.10282 | 0.02629  | -0.25666 |
| 0.258549 | 1.44E-08 | -0.13134 | 0.00447  | 0.065431 | 0.15804 | 0.022107 | 0.6337   | 0.031242 |
| 0.330948 | 2.13E-13 | 0.384595 | 6.53E-18 | 0.008588 | 0.85316 | 0.031583 | 0.49597  | 0.092664 |
| 0.345211 | 1.62E-14 | 0.227276 | 6.93E-07 | 0.018801 | 0.6853  | -0.05512 | 0.23448  | 0.056016 |
| 0.495439 | 2.70E-30 | 0.07475  | 0.10668  | -0.04244 | 0.36013 | -0.17016 | 0.00022  | -0.0547  |
| 0.827337 | #####    | 0.233888 | 3.19E-07 | 0.013179 | 0.77638 | -0.08477 | 0.06722  | -0.02823 |
| 0.664408 | 8.68E-61 | 0.250534 | 4.08E-08 | -0.02365 | 0.61016 | -0.23563 | 2.59E-07 | -0.05351 |
| 0.544516 | 2.08E-37 | 0.498474 | 1.06E-30 | -0.01545 | 0.73908 | -0.0138  | 0.76614  | 0.029573 |
| 0.612393 | 2.08E-49 | 0.257186 | 1.72E-08 | 0.000699 | 0.98798 | -0.03392 | 0.46468  | 0.023234 |
| 0.700589 | 3.70E-70 | 0.318195 | 1.90E-12 | 0.016526 | 0.7217  | -0.03028 | 0.51386  | 0.08095  |
| 0.725487 | 1.80E-77 | 0.316282 | 2.62E-12 | -0.03288 | 0.47844 | -0.14358 | 0.00187  | -0.09812 |
| 0.650039 | 2.02E-57 | 0.186419 | 5.05E-05 | -0.00206 | 0.96454 | -0.05995 | 0.19594  | 0.019362 |
| 0.515944 | 3.98E-33 | 0.21796  | 1.99E-06 | 0.00299  | 0.94862 | -0.10585 | 0.02215  | 0.036305 |
| 0.598559 | 9.96E-47 | 0.272451 | 2.16E-09 | -0.01069 | 0.81774 | -0.09881 | 0.03278  | -0.00937 |
| 0.666465 | 2.76E-61 | 0.274346 | 1.65E-09 | -0.01044 | 0.82196 | -0.13553 | 0.00334  | 0.098572 |
| 0.490297 | 1.29E-29 | -0.13469 | 0.00354  | -0.03556 | 0.44333 | -0.13045 | 0.00475  | -0.02873 |
| 0.519073 | 1.41E-33 | 0.166354 | 0.00031  | -0.01003 | 0.82877 | -0.0961  | 0.03789  | 0.06792  |
| 0.674086 | 3.65E-63 | 0.244662 | 8.57E-08 | -0.02343 | 0.61346 | -0.09351 | 0.0434   | 0.065885 |
| 0.358421 | 1.33E-15 | 0.317558 | 2.11E-12 | -0.00412 | 0.92927 | -0.09729 | 0.03556  | -0.06674 |
| 0.536874 | 3.19E-36 | 0.111591 | 0.01584  | -0.0696  | 0.13316 | -0.1472  | 0.00142  | -0.09704 |
| 0.341508 | 3.21E-14 | -0.10015 | 0.03047  | -0.04883 | 0.29233 | -0.10032 | 0.0302   | -0.17863 |
| 0.310849 | 6.40E-12 | 0.328895 | 3.05E-13 | 0.021643 | 0.64084 | -0.00387 | 0.9335   | 0.03113  |
| 0.26185  | 9.25E-09 | 0.19094  | 3.27E-05 | 0.030883 | 0.50556 | 0.083787 | 0.07045  | -0.07478 |
| 0.310065 | 7.27E-12 | 0.323986 | 7.12E-13 | -0.0232  | 0.61704 | -0.10921 | 0.01823  | -0.00461 |
| 0.548638 | 4.64E-38 | 0.186833 | 4.86E-05 | 0.022304 | 0.63068 | -0.0767  | 0.09783  | -0.01091 |
| 0.945185 | #####    | 0.415053 | 7.16E-21 | -0.00913 | 0.84393 | -0.12463 | 0.00701  | -0.06483 |
| 0.627917 | 1.40E-52 | 0.172506 | 0.00018  | -0.01094 | 0.81364 | -0.07461 | 0.10736  | -0.00781 |
| 0.38829  | 2.97E-18 | 0.091739 | 0.04755  | -0.00085 | 0.98545 | -0.07369 | 0.11173  | 0.023469 |
| 0.439644 | 1.71E-23 | 0.091672 | 0.04771  | -0.0259  | 0.57658 | -0.08492 | 0.06673  | -0.0587  |
| 0.605568 | 4.53E-48 | 0.236757 | 2.26E-07 | 0.010021 | 0.829   | -0.06695 | 0.1486   | 0.100686 |
| 0.394659 | 7.43E-19 | 0.296769 | 5.99E-11 | 0.051397 | 0.26766 | -0.04752 | 0.30548  | 0.115537 |
| 0.410404 | 2.12E-20 | 0.032098 | 0.48896  | -0.08528 | 0.06556 | -0.18354 | 6.62E-05 | -0.12549 |
| 0.68114  | 5.94E-65 | 0.186025 | 5.24E-05 | -0.03566 | 0.44204 | -0.06627 | 0.15273  | -0.16763 |
| 0.591622 | 1.97E-45 | 0.271913 | 2.33E-09 | 0.012064 | 0.79485 | 0.021972 | 0.63578  | 0.074899 |
| 0.831093 | #####    | 0.270579 | 2.80E-09 | -0.02209 | 0.63391 | -0.15377 | 0.00086  | -0.07178 |
| 0.641701 | 1.50E-55 | 0.292486 | 1.15E-10 | 0.049396 | 0.28676 | 0.082547 | 0.07473  | 0.418219 |
| 0.719544 | 1.18E-75 | 0.250681 | 4.00E-08 | 0.009292 | 0.84128 | -0.08841 | 0.05623  | -0.02145 |

|          |          |          |          |          |         |          |          |          |
|----------|----------|----------|----------|----------|---------|----------|----------|----------|
| 0.41316  | 1.12E-20 | 0.378526 | 2.34E-17 | 0.015261 | 0.74222 | -0.06745 | 0.14557  | 0.037046 |
| 0.898524 | #####    | 0.399494 | 2.54E-19 | -0.01707 | 0.71294 | -0.11738 | 0.01113  | -0.07741 |
| 0.328497 | 3.27E-13 | 0.258592 | 1.43E-08 | -0.04382 | 0.34471 | -0.11764 | 0.01095  | -0.17362 |
| 0.354932 | 2.60E-15 | 0.349301 | 7.58E-15 | -0.04222 | 0.36265 | -0.13354 | 0.00384  | -0.06515 |
| 0.180148 | 9.05E-05 | 0.138379 | 0.00273  | -0.01377 | 0.76667 | -0.11018 | 0.01723  | -0.00873 |
| 0.658349 | 2.40E-59 | 0.134114 | 0.00369  | -0.02704 | 0.56004 | -0.16209 | 0.00044  | -0.11589 |
| 0.474362 | 1.41E-27 | 0.293243 | 1.03E-10 | 0.012381 | 0.78958 | 0.034605 | 0.45564  | 0.064    |
| 0.412639 | 1.26E-20 | 0.201596 | 1.13E-05 | -0.0008  | 0.98617 | -0.12716 | 0.00593  | 0.031586 |
| 0.819138 | #####    | 0.345936 | 1.42E-14 | 0.004637 | 0.92039 | -0.06657 | 0.15088  | -0.08289 |
| 0.386127 | 4.72E-18 | 0.221627 | 1.32E-06 | 0.005656 | 0.90298 | -0.03258 | 0.48244  | -0.11387 |
| 0.485075 | 6.18E-29 | 0.16304  | 0.0004   | 0.057972 | 0.21112 | -0.01561 | 0.7365   | 0.106146 |
| 0.355277 | 2.44E-15 | -0.08845 | 0.05612  | -0.01714 | 0.71182 | -0.13673 | 0.00307  | -0.04602 |
| 0.428559 | 2.76E-22 | 0.018807 | 0.68521  | -0.01688 | 0.71593 | -0.13768 | 0.00287  | -0.02746 |
| 0.887571 | #####    | 0.453471 | 4.60E-25 | 0.010294 | 0.82441 | -0.06782 | 0.14334  | -0.0424  |
| -0.37741 | 2.95E-17 | -0.46533 | 1.81E-26 | -0.07299 | 0.11523 | -0.06581 | 0.15562  | -0.08622 |
| 0.303322 | 2.15E-11 | 0.386419 | 4.43E-18 | 0.099009 | 0.03243 | 0.017992 | 0.69816  | 0.318957 |
| 0.558974 | 9.81E-40 | 0.056174 | 0.22566  | 0.007259 | 0.87568 | -0.07991 | 0.08452  | 0.007257 |
| 0.702327 | 1.21E-70 | 0.285905 | 3.10E-10 | 0.037746 | 0.41576 | 0.026097 | 0.57374  | 0.072399 |
| 0.589542 | 4.75E-45 | 0.18249  | 7.30E-05 | 0.023369 | 0.61446 | -0.01281 | 0.78253  | 0.029352 |
| 0.603811 | 9.91E-48 | 0.21291  | 3.45E-06 | -0.03812 | 0.41114 | -0.04181 | 0.36732  | -0.16395 |
| 0.555546 | 3.58E-39 | 0.179892 | 9.27E-05 | -0.0165  | 0.72214 | -0.12036 | 0.00923  | -0.01404 |
| 0.833041 | #####    | 0.251818 | 3.46E-08 | -0.03724 | 0.42199 | -0.19405 | 2.42E-05 | -0.04776 |
| 0.778844 | 2.99E-96 | 0.296062 | 6.68E-11 | -0.00319 | 0.94515 | -0.12101 | 0.00886  | 0.037636 |
| 0.403478 | 1.04E-19 | 0.314103 | 3.75E-12 | 0.044703 | 0.33508 | 0.03166  | 0.49491  | 0.298184 |
| 0.421713 | 1.47E-21 | 0.273376 | 1.89E-09 | -0.0042  | 0.92793 | -0.01386 | 0.76513  | 0.147915 |
| 0.348864 | 8.22E-15 | 0.116186 | 0.01199  | -0.02712 | 0.55883 | -0.1047  | 0.02365  | -0.02034 |
| 0.809695 | #####    | 0.217985 | 1.98E-06 | 0.003065 | 0.94733 | -0.10166 | 0.02804  | -0.02129 |
| 0.587224 | 1.26E-44 | -0.05605 | 0.2267   | -0.05284 | 0.25445 | -0.22834 | 6.13E-07 | -0.11048 |
| 0.886279 | #####    | 0.388467 | 2.86E-18 | -0.00379 | 0.93493 | -0.13373 | 0.00379  | -0.04955 |
| 0.581116 | 1.58E-43 | 0.210363 | 4.54E-06 | 0.017755 | 0.70196 | -0.09275 | 0.04515  | -0.03494 |
| 0.633106 | 1.11E-53 | 0.297226 | 5.58E-11 | 0.014548 | 0.75385 | 0.014375 | 0.75668  | 0.03887  |
| 0.840818 | #####    | 0.239371 | 1.65E-07 | 0.017446 | 0.70689 | -0.01086 | 0.81487  | 0.076906 |
| 0.739308 | 6.85E-82 | 0.395515 | 6.15E-19 | -0.02997 | 0.51818 | -0.08605 | 0.06317  | -0.00454 |
| 0.404222 | 8.76E-20 | 0.138154 | 0.00277  | -0.02221 | 0.63207 | -0.06264 | 0.17658  | -0.1101  |
| 0.554776 | 4.78E-39 | 0.458149 | 1.30E-25 | -0.00196 | 0.96633 | -0.05633 | 0.2244   | 0.079516 |
| 0.377705 | 2.78E-17 | 0.319965 | 1.41E-12 | 0.014382 | 0.75658 | -0.06236 | 0.17852  | 0.122786 |
| 0.722833 | 1.18E-76 | 0.099546 | 0.03149  | -0.03141 | 0.49839 | -0.20026 | 1.30E-05 | -0.0969  |
| 0.582048 | 1.08E-43 | 0.145018 | 0.00168  | -0.01005 | 0.82849 | -0.07391 | 0.11068  | 0.066345 |
| 0.71396  | 5.47E-74 | 0.25846  | 1.45E-08 | -0.01063 | 0.81879 | -0.14592 | 0.00157  | -0.06581 |
| 0.332077 | 1.74E-13 | 0.41048  | 2.08E-20 | -0.00921 | 0.84264 | -0.03262 | 0.4819   | -0.05516 |
| 0.571108 | 8.87E-42 | 0.243237 | 1.02E-07 | 0.034634 | 0.45527 | 0.042494 | 0.35953  | 0.074602 |
| 0.821371 | #####    | 0.358541 | 1.30E-15 | -0.01399 | 0.76299 | -0.11883 | 0.01017  | -0.0585  |
| 0.514355 | 6.70E-33 | 0.044512 | 0.33715  | -0.03613 | 0.43603 | -0.14261 | 0.00201  | -0.07944 |
| 0.658676 | 2.01E-59 | 0.325942 | 5.09E-13 | 0.010666 | 0.81818 | -0.05667 | 0.2216   | -0.12202 |
| 0.41721  | 4.30E-21 | 0.275681 | 1.37E-09 | 0.045793 | 0.32342 | -0.01596 | 0.73089  | -0.0344  |

|          |          |          |          |          |         |          |          |          |
|----------|----------|----------|----------|----------|---------|----------|----------|----------|
| 0.45164  | 7.49E-25 | 0.166335 | 0.00031  | -0.0013  | 0.97756 | -0.04993 | 0.28154  | -0.01504 |
| 0.555042 | 4.32E-39 | 0.004766 | 0.91818  | -0.01824 | 0.69416 | -0.11848 | 0.01039  | 0.021585 |
| 0.862916 | #####    | 0.400625 | 1.97E-19 | -0.00123 | 0.97891 | -0.11556 | 0.01246  | 0.004103 |
| 0.861911 | #####    | 0.479914 | 2.83E-28 | 0.004468 | 0.92328 | -0.10289 | 0.02619  | -0.06926 |
| 0.685225 | 5.18E-66 | 0.063883 | 0.16813  | -0.00061 | 0.98951 | -0.14937 | 0.00121  | -0.06098 |
| 0.327899 | 3.62E-13 | 0.139892 | 0.00245  | 0.010198 | 0.82602 | -0.09961 | 0.03138  | -0.05585 |
| 0.591502 | 2.07E-45 | 0.066798 | 0.14951  | -0.03363 | 0.4685  | -0.10622 | 0.02168  | -0.07373 |
| 0.527465 | 8.37E-35 | 0.304179 | 1.87E-11 | 0.028962 | 0.53241 | -0.0141  | 0.76123  | 0.056629 |
| 0.863279 | #####    | 0.342539 | 2.66E-14 | 0.055217 | 0.23367 | -0.00468 | 0.91971  | 0.076114 |
| 0.449092 | 1.47E-24 | 0.187743 | 4.45E-05 | -0.01441 | 0.75611 | -0.02725 | 0.55693  | -0.03764 |
| 0.288456 | 2.12E-10 | 0.028743 | 0.53551  | -0.02157 | 0.64204 | -0.07493 | 0.10585  | -0.02057 |
| 0.496848 | 1.75E-30 | 0.132723 | 0.00406  | -0.02693 | 0.56153 | -0.17214 | 0.00019  | -0.16954 |
| 0.728842 | 1.61E-78 | 0.355749 | 2.23E-15 | 0.027943 | 0.54694 | -0.06506 | 0.16042  | 0.014832 |
| 0.864311 | #####    | 0.445181 | 4.10E-24 | 0.015528 | 0.73786 | -0.10762 | 0.02     | 0.07872  |
| 0.453027 | 5.18E-25 | 0.441094 | 1.18E-23 | -0.00712 | 0.8781  | -0.15697 | 0.00066  | -0.07837 |
| 0.511737 | 1.57E-32 | 0.316815 | 2.39E-12 | -0.02407 | 0.6039  | -0.01648 | 0.72243  | -0.12867 |
| 0.850427 | #####    | 0.38985  | 2.12E-18 | -0.00742 | 0.87292 | -0.13613 | 0.0032   | 0.024618 |
| 0.867023 | #####    | 0.398903 | 2.90E-19 | 0.036204 | 0.43507 | -0.06649 | 0.15142  | 0.103988 |
| 0.239404 | 1.64E-07 | 0.274396 | 1.64E-09 | 0.034302 | 0.4596  | 0.03615  | 0.43576  | 0.147493 |
| 0.917547 | #####    | 0.439615 | 1.72E-23 | -0.00315 | 0.94583 | -0.10009 | 0.03057  | -0.00571 |
| 0.87417  | #####    | 0.392319 | 1.24E-18 | -0.01525 | 0.74233 | -0.1504  | 0.00111  | -0.04651 |
| 0.652071 | 6.93E-58 | 0.226752 | 7.36E-07 | -0.00912 | 0.84409 | -0.11304 | 0.01452  | 0.04095  |
| 0.648729 | 4.02E-57 | -0.02873 | 0.53571  | -0.02991 | 0.51904 | -0.18472 | 5.93E-05 | -0.10197 |
| 0.73653  | 5.57E-81 | 0.510918 | 2.05E-32 | -0.00904 | 0.84544 | -0.06177 | 0.18267  | 0.110121 |
| 0.252805 | 3.05E-08 | 0.101124 | 0.02889  | 0.096915 | 0.03629 | 0.102715 | 0.02644  | 0.256598 |
| 0.897988 | #####    | 0.395135 | 6.69E-19 | -0.05622 | 0.2253  | -0.15244 | 0.00095  | -0.08519 |
| 0.910693 | #####    | 0.52402  | 2.70E-34 | 0.017159 | 0.7115  | -0.10433 | 0.02415  | 0.007002 |
| 0.91602  | #####    | 0.461204 | 5.65E-26 | 0.009359 | 0.84014 | -0.1222  | 0.00821  | 0.037159 |
| 0.616095 | 3.78E-50 | 0.217213 | 2.16E-06 | 0.051631 | 0.26549 | -0.07    | 0.13089  | 0.205367 |
| 0.675381 | 1.73E-63 | 0.419612 | 2.43E-21 | -0.03117 | 0.50166 | -0.05131 | 0.26847  | 0.032573 |
| 0.818393 | #####    | 0.349388 | 7.45E-15 | -0.02471 | 0.59435 | -0.11493 | 0.01295  | -0.01181 |
| 0.782561 | 9.39E-98 | 0.254135 | 2.56E-08 | -0.00905 | 0.84535 | -0.09854 | 0.03326  | -0.04789 |
| 0.913696 | #####    | 0.500825 | 5.08E-31 | 0.00543  | 0.90683 | -0.12087 | 0.00893  | -0.01738 |
| 0.697053 | 3.51E-69 | 0.241872 | 1.21E-07 | -0.03067 | 0.50849 | -0.12542 | 0.00665  | -0.12042 |
| 0.878714 | #####    | 0.384082 | 7.29E-18 | -0.00398 | 0.93159 | -0.11749 | 0.01106  | -0.00012 |
| 0.798565 | #####    | 0.175498 | 0.00014  | -0.02629 | 0.57093 | -0.13114 | 0.00453  | -0.04351 |
| 0.667672 | 1.40E-61 | 0.191836 | 3.00E-05 | 0.008896 | 0.84796 | -0.08921 | 0.05404  | 0.026168 |
| 0.867281 | #####    | 0.510377 | 2.44E-32 | -0.0213  | 0.64615 | -0.11284 | 0.0147   | -0.04399 |
| 0.565361 | 8.44E-41 | 0.282353 | 5.23E-10 | -0.00068 | 0.98829 | -0.02576 | 0.57868  | 0.03948  |
| 0.298686 | 4.45E-11 | 0.397795 | 3.71E-19 | 0.033048 | 0.47619 | 0.110592 | 0.01681  | 0.027413 |
| 0.379027 | 2.11E-17 | 0.431395 | 1.37E-22 | 0.103371 | 0.02549 | 0.088281 | 0.0566   | 0.239279 |
| 0.413906 | 9.37E-21 | 0.309429 | 8.06E-12 | -0.06837 | 0.14012 | -0.15314 | 0.0009   | -0.27847 |
| 0.623162 | 1.37E-51 | 0.157042 | 0.00066  | -0.02343 | 0.61352 | -0.11581 | 0.01227  | 0.01627  |
| 0.726545 | 8.43E-78 | 0.023486 | 0.61268  | -0.06246 | 0.17785 | -0.21632 | 2.38E-06 | -0.11694 |
| 0.450562 | 9.97E-25 | 0.558426 | 1.21E-39 | 0.058694 | 0.20548 | -0.02357 | 0.61136  | 0.177378 |

|          |          |          |          |          |         |          |          |          |
|----------|----------|----------|----------|----------|---------|----------|----------|----------|
| 0.848825 | #####    | 0.233156 | 3.48E-07 | -0.00467 | 0.91981 | -0.08932 | 0.05374  | -0.05048 |
| 0.60908  | 9.36E-49 | 0.096385 | 0.03733  | 0.015714 | 0.73484 | -0.07275 | 0.11642  | 0.063002 |
| 0.950165 | #####    | 0.434652 | 6.07E-23 | -0.00899 | 0.84643 | -0.11469 | 0.01313  | -0.05662 |
| 0.68765  | 1.19E-66 | 0.180895 | 8.45E-05 | -0.02453 | 0.59693 | -0.1898  | 3.66E-05 | -0.07404 |
| -0.34038 | 3.94E-14 | -0.21039 | 4.52E-06 | -0.03819 | 0.41024 | -0.02011 | 0.66475  | -0.08672 |
| 0.607989 | 1.53E-48 | 0.13385  | 0.00376  | -0.01113 | 0.81045 | -0.08752 | 0.05878  | -0.05117 |
| 0.329956 | 2.53E-13 | 0.060375 | 0.19278  | -0.05582 | 0.22861 | -0.14494 | 0.00169  | -0.03508 |
| 0.6461   | 1.57E-56 | 0.368789 | 1.72E-16 | 0.026468 | 0.56831 | -0.0501  | 0.2799   | 0.076617 |
| 0.863482 | #####    | 0.235636 | 2.59E-07 | -0.00483 | 0.91711 | -0.13518 | 0.00342  | -0.03645 |
| 0.234283 | 3.04E-07 | -0.0657  | 0.15632  | 0.028902 | 0.53326 | 0.064495 | 0.16408  | 0.094578 |
| -0.2481  | 5.56E-08 | -0.33942 | 4.69E-14 | -0.0082  | 0.8597  | 0.008433 | 0.85577  | 0.004792 |
| -0.22579 | 8.22E-07 | -0.08955 | 0.05314  | 0.043219 | 0.35139 | 0.067969 | 0.14249  | 0.182462 |
| 0.643134 | 7.24E-56 | 0.449271 | 1.40E-24 | 0.002154 | 0.96298 | 0.017892 | 0.69977  | -0.02391 |
| 0.594944 | 4.76E-46 | 0.1219   | 0.00836  | 0.042172 | 0.36319 | -0.10076 | 0.02947  | 0.036974 |
| 0.245852 | 7.39E-08 | -0.01031 | 0.82421  | 0.033211 | 0.47401 | 0.015843 | 0.73275  | -0.02694 |
| 0.637226 | 1.44E-54 | 0.456423 | 2.08E-25 | 0.002679 | 0.95395 | -0.06961 | 0.13306  | -0.0967  |
| 0.866726 | #####    | 0.245746 | 7.49E-08 | 0.000414 | 0.99288 | -0.11322 | 0.01436  | -0.00147 |
| 0.633509 | 9.13E-54 | 0.228104 | 6.29E-07 | -0.03796 | 0.41312 | -0.17239 | 0.00018  | -0.03642 |
| 0.587747 | 1.01E-44 | 0.540526 | 8.74E-37 | 0.022383 | 0.62948 | 0.014304 | 0.75785  | 0.015997 |
| 0.326709 | 4.46E-13 | -0.00012 | 0.99796  | -0.05614 | 0.22596 | -0.09602 | 0.03807  | -0.11216 |
| 0.736877 | 4.30E-81 | 0.173332 | 0.00017  | -0.00277 | 0.95239 | -0.08799 | 0.05743  | -0.01362 |
| 0.364912 | 3.72E-16 | 0.079405 | 0.08652  | -0.04702 | 0.31059 | -0.27764 | 1.03E-09 | -0.07878 |
| 0.568987 | 2.05E-41 | 0.334921 | 1.05E-13 | -0.0022  | 0.96221 | -0.13515 | 0.00343  | -0.04478 |
| 0.358367 | 1.34E-15 | 0.505223 | 1.27E-31 | -0.02987 | 0.51957 | -0.16453 | 0.00036  | -0.11142 |
| 0.846508 | #####    | 0.318564 | 1.79E-12 | -0.03245 | 0.48418 | -0.10831 | 0.01922  | -0.11232 |
| 0.342309 | 2.77E-14 | 0.50058  | 5.49E-31 | -0.02711 | 0.5589  | -0.01046 | 0.82168  | 0.009093 |
| 0.397823 | 3.69E-19 | 0.325591 | 5.40E-13 | -0.04921 | 0.28857 | -0.04397 | 0.3431   | -0.00651 |
| 0.426514 | 4.57E-22 | 0.198797 | 1.51E-05 | 0.058328 | 0.20833 | 0.156637 | 0.00068  | 0.128663 |
| 0.561513 | 3.72E-40 | 0.088076 | 0.05718  | -0.00367 | 0.93696 | -0.08524 | 0.06569  | 0.031973 |
| 0.235155 | 2.74E-07 | 0.04315  | 0.35216  | 0.050024 | 0.28068 | 0.006853 | 0.88258  | 0.089223 |
| -0.26297 | 7.95E-09 | -0.20932 | 5.07E-06 | 0.115849 | 0.01224 | 0.30702  | 1.19E-11 | 0.009889 |
| 0.709958 | 8.07E-73 | 0.108831 | 0.01865  | -0.05014 | 0.27952 | -0.16738 | 0.00028  | -0.09013 |
| 0.398084 | 3.48E-19 | -0.02848 | 0.5392   | 0.054097 | 0.24331 | -0.03591 | 0.43879  | 0.017048 |
| 0.785075 | 8.70E-99 | 0.288616 | 2.07E-10 | -0.03431 | 0.45956 | -0.19292 | 2.70E-05 | -0.03918 |
| 0.69237  | 6.58E-68 | 0.085933 | 0.06353  | -0.02595 | 0.5759  | -0.14839 | 0.0013   | -0.10509 |
| 0.795552 | #####    | 0.397527 | 3.94E-19 | -0.0345  | 0.45703 | -0.15319 | 0.0009   | -0.01485 |
| 0.753688 | 8.50E-87 | 0.316524 | 2.51E-12 | -0.01831 | 0.69302 | -0.09136 | 0.04849  | -0.08797 |
| 0.32174  | 1.04E-12 | 0.060902 | 0.18892  | -0.00212 | 0.96357 | -0.03425 | 0.46032  | 0.192761 |
| 0.891866 | #####    | 0.391814 | 1.38E-18 | -0.00278 | 0.95214 | -0.17378 | 0.00016  | -0.0427  |
| 0.463422 | 3.07E-26 | 0.438451 | 2.32E-23 | 0.04361  | 0.34705 | -0.03729 | 0.42139  | 0.116365 |
| 0.495216 | 2.89E-30 | 0.593269 | 9.75E-46 | 0.031389 | 0.49861 | -0.04349 | 0.34833  | 0.070322 |
| 0.789499 | #####    | 0.385788 | 5.07E-18 | 0.0001   | 0.99827 | -0.10611 | 0.02182  | -0.01073 |
| 0.813667 | #####    | 0.410568 | 2.04E-20 | -0.01549 | 0.73846 | -0.11252 | 0.01498  | -0.03925 |
| 0.317134 | 2.27E-12 | -0.12437 | 0.00712  | -0.04573 | 0.32413 | -0.1001  | 0.03055  | -0.08891 |
| 0.285137 | 3.47E-10 | 0.395992 | 5.54E-19 | -0.01612 | 0.72824 | 0.07127  | 0.12405  | -0.01462 |



|          |          |          |          |          |         |          |          |          |
|----------|----------|----------|----------|----------|---------|----------|----------|----------|
| 0.243459 | 9.96E-08 | 0.547755 | 6.42E-38 | 0.056596 | 0.22218 | 0.081882 | 0.07711  | 0.212385 |
| 0.423818 | 8.81E-22 | 0.283049 | 4.72E-10 | -0.00078 | 0.98654 | -0.04905 | 0.29019  | 0.041159 |
| 0.470538 | 4.19E-27 | 0.375678 | 4.22E-17 | 0.014407 | 0.75616 | -0.11108 | 0.01633  | 0.020619 |
| 0.570032 | 1.36E-41 | 0.509364 | 3.38E-32 | 0.00125  | 0.9785  | 0.004566 | 0.92161  | -0.0553  |
| 0.244664 | 8.57E-08 | -0.0217  | 0.63999  | 0.010192 | 0.82613 | 0.064646 | 0.1631   | -0.14601 |
| 0.648293 | 5.04E-57 | 0.466648 | 1.25E-26 | 0.013101 | 0.77767 | 0.016249 | 0.72616  | 0.061278 |
| 0.558927 | 9.98E-40 | 0.378703 | 2.26E-17 | -0.01952 | 0.674   | -0.01571 | 0.73491  | -0.10268 |
| 0.842365 | #####    | 0.426857 | 4.20E-22 | -0.00884 | 0.8489  | -0.11685 | 0.0115   | 0.024551 |
| 0.645961 | 1.69E-56 | 0.421953 | 1.38E-21 | -0.01394 | 0.76382 | -0.13981 | 0.00246  | -0.04316 |
| -0.37448 | 5.40E-17 | -0.4675  | 9.86E-27 | 0.015869 | 0.73233 | 0.153781 | 0.00086  | -0.10953 |
| 0.311274 | 5.97E-12 | 0.183857 | 6.42E-05 | -0.01988 | 0.66828 | -0.05954 | 0.19899  | 0.006097 |
| 0.542242 | 4.73E-37 | 0.145499 | 0.00162  | -0.01247 | 0.78818 | -0.09112 | 0.04907  | -0.06439 |
| 0.238425 | 1.85E-07 | 0.025187 | 0.58718  | 0.034132 | 0.46183 | -0.01846 | 0.69074  | 0.149282 |
| -0.33444 | 1.15E-13 | -0.29492 | 7.96E-11 | 0.002062 | 0.96455 | 0.175607 | 0.00014  | -0.19314 |
| 0.476102 | 8.54E-28 | 0.608723 | 1.10E-48 | 0.016216 | 0.72671 | -0.02861 | 0.53734  | 0.165487 |
| 0.897826 | #####    | 0.38071  | 1.48E-17 | -0.00386 | 0.93362 | -0.08862 | 0.05564  | -0.04896 |
| 0.819153 | #####    | 0.218779 | 1.81E-06 | -0.03087 | 0.50569 | -0.13187 | 0.00431  | -0.07078 |
| 0.868276 | #####    | 0.370358 | 1.25E-16 | -0.01941 | 0.6756  | -0.12982 | 0.00496  | -0.08026 |
| 0.266499 | 4.92E-09 | -0.12315 | 0.00771  | -0.01965 | 0.67187 | -0.04209 | 0.36413  | -0.05728 |
| 0.834536 | #####    | 0.38814  | 3.06E-18 | -0.02293 | 0.62113 | -0.12379 | 0.0074   | -0.04919 |
| 0.325142 | 5.84E-13 | 0.222398 | 1.21E-06 | 0.031094 | 0.50267 | -0.01935 | 0.67667  | 0.119499 |
| 0.437996 | 2.60E-23 | 0.010137 | 0.82706  | -0.0028  | 0.95196 | -0.08158 | 0.07823  | -0.03947 |
| 0.859378 | #####    | 0.503059 | 2.52E-31 | 0.007012 | 0.87988 | -0.08857 | 0.05579  | 0.049029 |
| 0.542659 | 4.07E-37 | 0.10933  | 0.01811  | -0.03041 | 0.51208 | -0.16238 | 0.00043  | 0.02809  |
| 0.945767 | #####    | 0.358442 | 1.32E-15 | -0.00592 | 0.8984  | -0.12451 | 0.00706  | -0.01684 |
| 0.289871 | 1.71E-10 | 0.316404 | 2.56E-12 | 0.047517 | 0.30552 | 0.063061 | 0.17369  | 0.145897 |
| 0.72627  | 1.03E-77 | 0.169792 | 0.00023  | 0.038679 | 0.40432 | -0.08778 | 0.05802  | 0.026708 |
| 0.476037 | 8.70E-28 | 0.512392 | 1.27E-32 | -0.05459 | 0.23902 | -0.21135 | 4.08E-06 | -0.02661 |
| 0.835864 | #####    | 0.275799 | 1.34E-09 | -0.02613 | 0.57325 | -0.18032 | 8.91E-05 | -0.02906 |
| 0.474104 | 1.52E-27 | 0.134581 | 0.00357  | 0.010715 | 0.81737 | -0.0032  | 0.94503  | 0.080677 |
| 0.318288 | 1.87E-12 | 0.433414 | 8.28E-23 | -0.00713 | 0.87787 | 0.05772  | 0.21312  | -0.08474 |
| 0.328012 | 3.55E-13 | 0.063046 | 0.17379  | 0.001994 | 0.96572 | -0.07607 | 0.10062  | -0.04901 |
| 0.267127 | 4.52E-09 | -0.08344 | 0.07164  | -0.07724 | 0.09547 | -0.14123 | 0.00222  | -0.07485 |
| 0.333231 | 1.42E-13 | -0.07162 | 0.12222  | -0.0397  | 0.39206 | -0.14028 | 0.00238  | -0.16751 |
| -0.41277 | 1.22E-20 | -0.34348 | 2.23E-14 | -0.05481 | 0.2371  | -0.01606 | 0.72927  | -0.01112 |
| 0.362906 | 5.53E-16 | 0.414013 | 9.14E-21 | -0.0223  | 0.63073 | -0.06817 | 0.1413   | -0.11983 |
| 0.604438 | 7.50E-48 | 0.264133 | 6.80E-09 | -0.00608 | 0.8958  | -0.10578 | 0.02224  | -0.00639 |
| 0.392588 | 1.17E-18 | 0.383474 | 8.29E-18 | 0.023641 | 0.61034 | 0.041379 | 0.37229  | 0.11489  |
| 0.474936 | 1.19E-27 | 0.538258 | 1.96E-36 | -0.03355 | 0.46951 | -0.1471  | 0.00143  | 0.095707 |
| 0.709261 | 1.28E-72 | 0.361861 | 6.79E-16 | -0.00899 | 0.84639 | -0.07649 | 0.09876  | 0.012519 |
| 0.778324 | 4.82E-96 | 0.488257 | 2.39E-29 | -0.00966 | 0.83509 | -0.03996 | 0.38892  | -0.10103 |
| 0.576508 | 1.03E-42 | 0.27974  | 7.64E-10 | 0.018395 | 0.69174 | -0.00834 | 0.8573   | -0.01043 |
| 0.530168 | 3.31E-35 | 0.38395  | 7.49E-18 | -0.03525 | 0.44722 | -0.15065 | 0.00109  | -0.09526 |
| 0.50576  | 1.07E-31 | 0.393763 | 9.04E-19 | 0.007579 | 0.87024 | -0.03188 | 0.49195  | 0.112945 |
| 0.663126 | 1.76E-60 | 0.371333 | 1.03E-16 | 0.00289  | 0.95033 | -0.05575 | 0.22916  | 0.02593  |

|          |          |          |          |          |         |          |         |          |
|----------|----------|----------|----------|----------|---------|----------|---------|----------|
| 0.645172 | 2.54E-56 | 0.375966 | 3.98E-17 | -0.03453 | 0.45661 | -0.09971 | 0.03122 | -0.0887  |
| 0.504337 | 1.68E-31 | 0.035726 | 0.44117  | -0.01751 | 0.70587 | -0.06707 | 0.14785 | -0.11757 |
| 0.381279 | 1.32E-17 | 0.365612 | 3.24E-16 | 0.059956 | 0.19589 | 0.04211  | 0.36389 | 0.020253 |
| 0.867074 | #####    | 0.498908 | 9.24E-31 | -0.00158 | 0.97283 | -0.09756 | 0.03505 | -0.00042 |
| 0.563192 | 1.95E-40 | 0.194408 | 2.33E-05 | 0.051601 | 0.26577 | -0.07204 | 0.12002 | -0.03233 |
| 0.330072 | 2.48E-13 | 0.131417 | 0.00445  | 0.002104 | 0.96382 | -0.05218 | 0.26042 | -0.00414 |
| 0.867039 | #####    | 0.453217 | 4.92E-25 | -0.01915 | 0.67982 | -0.10044 | 0.02999 | -0.02844 |
| 0.385078 | 5.90E-18 | 0.49399  | 4.21E-30 | 0.082048 | 0.07651 | 0.066331 | 0.15238 | 0.108058 |
| 0.655526 | 1.10E-58 | 0.451883 | 7.02E-25 | -0.00812 | 0.86116 | -0.13991 | 0.00244 | -0.04372 |
| 0.242369 | 1.14E-07 | -0.15233 | 0.00096  | 0.018386 | 0.69189 | -0.08575 | 0.06408 | 0.121503 |
| 0.237089 | 2.17E-07 | -0.02707 | 0.55947  | -0.00693 | 0.88125 | -0.04164 | 0.36931 | -0.01101 |
| 0.546987 | 8.50E-38 | 0.47306  | 2.04E-27 | 0.014303 | 0.75787 | -0.01131 | 0.80735 | 0.10546  |
| 0.840188 | #####    | 0.25644  | 1.90E-08 | 0.034229 | 0.46056 | -0.09271 | 0.04524 | 0.105914 |
| 0.382528 | 1.01E-17 | 0.25094  | 3.87E-08 | 0.051183 | 0.26967 | 0.013884 | 0.76475 | 0.109993 |
| 0.420221 | 2.10E-21 | 0.436438 | 3.87E-23 | -0.00963 | 0.83564 | -0.12777 | 0.00569 | -0.00425 |
| 0.434584 | 6.17E-23 | 0.47056  | 4.16E-27 | 0.043257 | 0.35096 | 0.009506 | 0.83767 | 0.214302 |
| 0.379768 | 1.81E-17 | 0.510464 | 2.37E-32 | 0.042194 | 0.36294 | 0.029384 | 0.52645 | 0.200792 |
| 0.490184 | 1.34E-29 | 0.478611 | 4.13E-28 | 0.028727 | 0.53574 | -0.02855 | 0.53827 | 0.062626 |
| 0.328799 | 3.10E-13 | -0.19863 | 1.53E-05 | 0.005186 | 0.91101 | -0.11871 | 0.01024 | -0.13866 |
| 0.424485 | 7.49E-22 | 0.228017 | 6.36E-07 | -0.00951 | 0.83766 | -0.10408 | 0.0245  | -0.06609 |
| 0.267276 | 4.42E-09 | 0.235595 | 2.60E-07 | 0.02156  | 0.64213 | -0.07183 | 0.1211  | 0.174575 |
| 0.684992 | 5.96E-66 | 0.264363 | 6.59E-09 | 0.031749 | 0.4937  | -0.02881 | 0.53459 | 0.164654 |
| 0.316686 | 2.44E-12 | 0.481363 | 1.85E-28 | -0.02902 | 0.53152 | -0.01952 | 0.67392 | -0.09127 |
| 0.366898 | 2.51E-16 | 0.409337 | 2.72E-20 | -0.05007 | 0.28022 | -0.0962  | 0.03769 | -0.0782  |
| 0.270498 | 2.83E-09 | 0.088888 | 0.05492  | -0.06711 | 0.14764 | -0.01661 | 0.72037 | -0.02222 |
| 0.261692 | 9.45E-09 | 0.152775 | 0.00093  | -0.00988 | 0.83146 | 0.030626 | 0.50911 | -0.08898 |
| 0.376763 | 3.37E-17 | -0.03893 | 0.40125  | -0.02402 | 0.60468 | -0.05908 | 0.20254 | 0.097948 |
| -0.3356  | 9.32E-14 | -0.41252 | 1.30E-20 | -0.06891 | 0.13703 | -0.10698 | 0.02076 | -0.06598 |
| 0.603037 | 1.40E-47 | 0.437275 | 3.13E-23 | -0.00383 | 0.93423 | -0.10363 | 0.02512 | 0.015969 |
| 0.55605  | 2.96E-39 | 0.155891 | 0.00072  | 0.018913 | 0.68353 | -0.06337 | 0.17158 | 0.05729  |
| 0.49883  | 9.47E-31 | 0.369717 | 1.42E-16 | 0.013173 | 0.77646 | -0.05236 | 0.25877 | 0.056708 |
| 0.905978 | #####    | 0.425065 | 6.51E-22 | -0.02133 | 0.64574 | -0.1527  | 0.00093 | -0.04844 |
| 0.911464 | #####    | 0.3777   | 2.78E-17 | -0.00823 | 0.85917 | -0.13198 | 0.00428 | -0.02101 |
| 0.931063 | #####    | 0.409193 | 2.81E-20 | -0.01855 | 0.68926 | -0.13106 | 0.00456 | -0.04889 |
| 0.492644 | 6.35E-30 | 0.542983 | 3.62E-37 | 0.014032 | 0.76232 | -0.12852 | 0.00541 | 0.056948 |
| 0.257881 | 1.57E-08 | 0.459869 | 8.15E-26 | -0.02396 | 0.60553 | -0.10986 | 0.01755 | 0.026402 |
| 0.379242 | 2.02E-17 | 0.085861 | 0.06375  | 0.000605 | 0.98959 | 0.027802 | 0.54897 | -0.14888 |
| 0.46932  | 5.91E-27 | 0.445481 | 3.79E-24 | 0.031825 | 0.49267 | -0.09406 | 0.04217 | 0.032044 |
| 0.133222 | 0.00393  | 0.278797 | 8.75E-10 | 0.069021 | 0.1364  | 0.068086 | 0.1418  | 0.260826 |
| 0.466435 | 1.33E-26 | 0.518574 | 1.67E-33 | 0.030129 | 0.51602 | 0.001311 | 0.97746 | -0.06377 |
| 0.467715 | 9.28E-27 | 0.112633 | 0.01488  | -0.02587 | 0.57704 | -0.02569 | 0.57973 | -0.1722  |
| -0.37723 | 3.06E-17 | -0.12149 | 0.00858  | -0.02511 | 0.58838 | 0.165494 | 0.00033 | -0.01926 |
| 0.601043 | 3.36E-47 | 0.529457 | 4.23E-35 | 0.04352  | 0.34803 | -0.03035 | 0.51295 | 0.040894 |
| 0.305333 | 1.56E-11 | 0.324211 | 6.85E-13 | -0.09181 | 0.04737 | -0.06042 | 0.19244 | 0.072743 |
| 0.721734 | 2.56E-76 | 0.606355 | 3.19E-48 | 0.004282 | 0.92647 | -0.03196 | 0.4909  | 0.058171 |

|          |          |          |          |          |          |          |          |          |
|----------|----------|----------|----------|----------|----------|----------|----------|----------|
| 0.436023 | 4.29E-23 | 0.513962 | 7.62E-33 | 0.028828 | 0.53431  | 0.008377 | 0.85672  | 0.160988 |
| 0.529964 | 3.55E-35 | 0.699978 | 5.47E-70 | 0.060304 | 0.1933   | 0.087495 | 0.05885  | 0.09156  |
| 0.479259 | 3.42E-28 | 0.201747 | 1.12E-05 | -0.03149 | 0.49724  | -0.0817  | 0.07776  | -0.08098 |
| -0.38359 | 8.08E-18 | -0.34185 | 3.01E-14 | 0.064088 | 0.16677  | 0.069482 | 0.13379  | 0.194957 |
| 0.334417 | 1.15E-13 | 0.14044  | 0.00235  | 0.051646 | 0.26536  | 0.034689 | 0.45455  | 0.095831 |
| 0.260938 | 1.04E-08 | 0.036653 | 0.4294   | -0.0134  | 0.77273  | -0.10678 | 0.021    | -0.09477 |
| 0.394712 | 7.34E-19 | 0.401218 | 1.73E-19 | -0.00012 | 0.99795  | -0.00456 | 0.92172  | 0.073387 |
| 0.26462  | 6.36E-09 | 0.051818 | 0.26376  | -0.02311 | 0.61841  | -0.21145 | 4.04E-06 | -0.0487  |
| 0.391928 | 1.35E-18 | 0.574483 | 2.32E-42 | 0.030822 | 0.50641  | 0.046541 | 0.31557  | 0.152651 |
| 0.913301 | #####    | 0.345746 | 1.47E-14 | -0.02656 | 0.567    | -0.12271 | 0.00794  | -0.06431 |
| 0.718958 | 1.77E-75 | 0.162192 | 0.00043  | 0.005945 | 0.89805  | -0.13674 | 0.00307  | -0.06569 |
| 0.621153 | 3.55E-51 | 0.299402 | 3.98E-11 | -0.03058 | 0.50974  | -0.13643 | 0.00313  | 0.008469 |
| 0.319785 | 1.45E-12 | 0.303232 | 2.18E-11 | -0.01958 | 0.67307  | -0.14052 | 0.00234  | -0.16276 |
| 0.360643 | 8.62E-16 | -0.02118 | 0.64794  | 0.006899 | 0.88179  | 0.007777 | 0.86689  | -0.07547 |
| 0.880063 | #####    | 0.469835 | 5.11E-27 | 0.00706  | 0.87905  | -0.12646 | 0.00621  | -0.02305 |
| 0.737157 | 3.48E-81 | 0.355529 | 2.32E-15 | 0.00549  | 0.90581  | 0.018127 | 0.69601  | 0.024493 |
| 0.921465 | #####    | 0.324455 | 6.57E-13 | -0.01633 | 0.72492  | -0.14118 | 0.00223  | -0.05915 |
| 0.562288 | 2.77E-40 | 0.262213 | 8.81E-09 | 0.041001 | 0.37667  | -0.05166 | 0.26523  | 0.041346 |
| 0.516468 | 3.35E-33 | 0.127036 | 0.00598  | 0.26251  | 8.46E-09 | 0.007902 | 0.86477  | 0.159073 |
| 0.263845 | 7.07E-09 | 0.068676 | 0.13837  | 0.00058  | 0.99003  | -0.01915 | 0.67978  | -0.10795 |
| 0.739182 | 7.54E-82 | 0.162779 | 0.00041  | -0.03067 | 0.50854  | -0.14911 | 0.00123  | -0.13383 |
| 0.915775 | #####    | 0.330347 | 2.36E-13 | -0.01906 | 0.68117  | -0.1476  | 0.00138  | -0.0642  |
| 0.325493 | 5.50E-13 | 0.111452 | 0.01597  | -0.01075 | 0.81684  | 0.047029 | 0.31052  | 0.015632 |
| -0.33459 | 1.12E-13 | -0.43644 | 3.86E-23 | 0.024977 | 0.5903   | 0.124361 | 0.00713  | -0.16518 |
| 0.445378 | 3.90E-24 | 0.156543 | 0.00069  | -0.0253  | 0.58549  | -0.07979 | 0.08498  | -0.13432 |
| 0.484087 | 8.29E-29 | 0.081838 | 0.07727  | -0.06723 | 0.14689  | -0.14639 | 0.00151  | -0.1614  |
| 0.419134 | 2.72E-21 | 0.128409 | 0.00545  | -0.03308 | 0.47575  | -0.0891  | 0.05434  | -0.03375 |
| 0.552412 | 1.15E-38 | 0.217061 | 2.19E-06 | -0.00265 | 0.9544   | -0.07848 | 0.09027  | -0.06507 |
| 0.287989 | 2.27E-10 | -0.0164  | 0.7237   | 0.014097 | 0.76126  | -0.0516  | 0.26576  | 0.025007 |
| 0.316058 | 2.71E-12 | -0.17283 | 0.00017  | 0.004136 | 0.92897  | -0.09248 | 0.04578  | -0.09447 |
| 0.209396 | 5.03E-06 | 0.342004 | 2.93E-14 | -0.0041  | 0.9296   | -0.10104 | 0.02902  | -0.01271 |
| 0.522835 | 4.02E-34 | 0.461936 | 4.62E-26 | -0.02369 | 0.60964  | -0.0627  | 0.17616  | 0.045461 |
| 0.272165 | 2.25E-09 | 0.265539 | 5.61E-09 | 0.038254 | 0.40951  | -0.02765 | 0.55114  | 0.076747 |
| 0.78643  | 2.38E-99 | 0.305294 | 1.57E-11 | 0.022173 | 0.63269  | -0.04884 | 0.29226  | 0.04915  |
| 0.627576 | 1.65E-52 | 0.146487 | 0.0015   | 0.095898 | 0.0383   | -0.04248 | 0.35964  | 0.029754 |
| 0.590178 | 3.63E-45 | -0.04524 | 0.32927  | -0.03254 | 0.48301  | -0.1223  | 0.00815  | -0.07087 |
| 0.754157 | 5.80E-87 | 0.321186 | 1.15E-12 | -0.00491 | 0.91576  | -0.04269 | 0.35732  | 0.047794 |
| 0.707328 | 4.62E-72 | 0.339625 | 4.52E-14 | -0.01055 | 0.82014  | -0.03679 | 0.42768  | -0.13164 |
| 0.453526 | 4.53E-25 | 0.245156 | 8.06E-08 | -0.00263 | 0.95472  | 0.004351 | 0.92528  | 0.075687 |
| -0.22827 | 6.17E-07 | -0.36826 | 1.91E-16 | -0.04415 | 0.34112  | -0.03143 | 0.49803  | -0.20843 |
| 0.523483 | 3.23E-34 | 0.191129 | 3.22E-05 | -0.06518 | 0.15964  | -0.09941 | 0.03173  | -0.16424 |
| 0.561105 | 4.35E-40 | 0.404006 | 9.20E-20 | 0.013636 | 0.76883  | 0.047187 | 0.30889  | 0.028208 |
| 0.33429  | 1.18E-13 | 0.168881 | 0.00025  | 0.157087 | 0.00066  | 0.193176 | 2.63E-05 | -0.01296 |
| 0.326498 | 4.62E-13 | 0.25761  | 1.63E-08 | -0.02859 | 0.5377   | -0.07046 | 0.12838  | 0.066149 |
| 0.753341 | 1.13E-86 | 0.215906 | 2.49E-06 | -0.02393 | 0.60593  | -0.18005 | 9.13E-05 | -0.1199  |

|          |          |          |          |          |         |          |          |          |
|----------|----------|----------|----------|----------|---------|----------|----------|----------|
| 0.736176 | 7.26E-81 | 0.36094  | 8.14E-16 | -0.01677 | 0.71771 | -0.08627 | 0.06249  | -0.01216 |
| 0.340089 | 4.15E-14 | 0.125965 | 0.00642  | 0.03219  | 0.48771 | 0.045617 | 0.32528  | 0.050687 |
| 0.715454 | 1.98E-74 | 0.178271 | 0.00011  | -0.00179 | 0.9693  | -0.18682 | 4.86E-05 | -0.06288 |
| 0.395748 | 5.84E-19 | 0.214686 | 2.85E-06 | 0.122893 | 0.00784 | 0.11287  | 0.01467  | 0.136539 |
| 0.378848 | 2.19E-17 | 0.29961  | 3.85E-11 | 0.061867 | 0.18199 | -0.08936 | 0.05363  | 0.087976 |
| 0.289809 | 1.73E-10 | -0.18604 | 5.23E-05 | -0.05989 | 0.1964  | -0.16235 | 0.00043  | -0.06472 |
| 0.892781 | #####    | 0.450009 | 1.15E-24 | -0.01759 | 0.70464 | -0.09287 | 0.04487  | -0.00162 |
| 0.741062 | 1.80E-82 | 0.32284  | 8.66E-13 | -0.02016 | 0.66391 | -0.10936 | 0.01808  | -0.03226 |
| 0.873195 | #####    | 0.445306 | 3.97E-24 | 0.008954 | 0.84697 | -0.1147  | 0.01313  | 0.023415 |
| 0.491394 | 9.28E-30 | 0.471944 | 2.81E-27 | -0.05675 | 0.22089 | -0.17762 | 0.00011  | -0.00932 |
| 0.2274   | 6.83E-07 | 0.259112 | 1.33E-08 | 0.016358 | 0.72441 | 0.005601 | 0.90392  | 0.189947 |
| 0.285022 | 3.53E-10 | 0.252895 | 3.01E-08 | -0.00633 | 0.89145 | -0.00199 | 0.96579  | -0.05959 |
| 0.436362 | 3.94E-23 | -0.01494 | 0.74739  | 0.010116 | 0.8274  | -0.14619 | 0.00154  | -0.05884 |
| 0.423432 | 9.67E-22 | 0.423114 | 1.04E-21 | 0.115297 | 0.01266 | 0.089457 | 0.05337  | 0.215534 |
| 0.356782 | 1.83E-15 | 0.202529 | 1.03E-05 | -0.00377 | 0.9352  | 0.098404 | 0.0335   | -0.03236 |
| 0.898163 | #####    | 0.49619  | 2.14E-30 | -0.00553 | 0.90516 | -0.13016 | 0.00484  | -0.03611 |
| 0.730743 | 4.04E-79 | 0.255298 | 2.20E-08 | -0.01079 | 0.81607 | -0.10728 | 0.0204   | -0.05585 |
| 0.374046 | 5.90E-17 | 0.156439 | 0.00069  | 0.178403 | 0.00011 | 0.253379 | 2.83E-08 | 0.1377   |
| 0.448543 | 1.70E-24 | 0.071933 | 0.12058  | -0.03331 | 0.47264 | -0.06796 | 0.14252  | -0.02525 |
| 0.644435 | 3.72E-56 | 0.069783 | 0.13211  | 0.023184 | 0.61726 | -0.10203 | 0.02748  | -0.01709 |
| 0.312818 | 4.64E-12 | 0.146701 | 0.00148  | 0.026169 | 0.57269 | -0.05894 | 0.20359  | -0.06128 |
| 0.445797 | 3.49E-24 | 0.450755 | 9.48E-25 | 0.08552  | 0.06482 | 0.006905 | 0.8817   | 0.174025 |
| 0.303759 | 2.00E-11 | 0.038938 | 0.40118  | -0.0467  | 0.31389 | -0.10966 | 0.01776  | -0.11251 |
| 0.813919 | #####    | 0.25257  | 3.14E-08 | -0.01222 | 0.7922  | -0.14282 | 0.00198  | -0.06723 |
| 0.530252 | 3.22E-35 | 0.298299 | 4.72E-11 | -0.02946 | 0.52537 | -0.13615 | 0.0032   | -0.15484 |
| 0.362327 | 6.20E-16 | 0.103444 | 0.02539  | 0.02499  | 0.59011 | -0.08221 | 0.07594  | -0.06533 |
| 0.312176 | 5.15E-12 | -0.03071 | 0.50794  | -0.04102 | 0.37641 | -0.0887  | 0.05542  | -0.10902 |
| 0.429707 | 2.08E-22 | 0.226997 | 7.15E-07 | -0.01095 | 0.81336 | -0.15297 | 0.00091  | -0.01461 |
| 0.781182 | 3.42E-97 | 0.163263 | 0.0004   | -0.0287  | 0.5362  | -0.16588 | 0.00032  | -0.067   |
| 0.654325 | 2.09E-58 | 0.239597 | 1.60E-07 | 0.025665 | 0.58011 | -0.07724 | 0.09548  | 0.03995  |
| 0.577621 | 6.55E-43 | 0.135945 | 0.00324  | -0.04446 | 0.33774 | -0.12633 | 0.00626  | -0.14902 |
| 0.89882  | #####    | 0.515927 | 4.00E-33 | 0.007648 | 0.86908 | -0.06666 | 0.15034  | 0.016755 |
| 0.808443 | #####    | 0.279021 | 8.47E-10 | -0.02466 | 0.59499 | -0.1177  | 0.01091  | -0.06372 |
| 0.739866 | 4.48E-82 | 0.243619 | 9.76E-08 | -0.01038 | 0.82304 | -0.08773 | 0.05817  | -0.0591  |
| 0.83451  | #####    | 0.273504 | 1.86E-09 | 0.018853 | 0.68448 | -0.1159  | 0.0122   | 0.013436 |
| 0.758042 | 2.38E-88 | 0.330189 | 2.43E-13 | 0.006894 | 0.88189 | -0.01409 | 0.76139  | -0.07774 |
| 0.935766 | #####    | 0.435699 | 4.66E-23 | -0.00511 | 0.91232 | -0.12864 | 0.00537  | -0.05654 |
| 0.733325 | 6.06E-80 | 0.201986 | 1.09E-05 | -0.03294 | 0.4776  | -0.16178 | 0.00045  | -0.10844 |
| 0.429051 | 2.45E-22 | 0.09778  | 0.03465  | 0.065795 | 0.15573 | 0.056345 | 0.22424  | 0.142804 |
| 0.288002 | 2.27E-10 | 0.235801 | 2.54E-07 | -0.06356 | 0.17027 | -0.09431 | 0.04163  | -0.06981 |
| 0.482191 | 1.45E-28 | 0.470922 | 3.76E-27 | -0.02036 | 0.66079 | -0.03562 | 0.44248  | -0.01568 |
| 0.797246 | #####    | 0.242113 | 1.18E-07 | 0.017299 | 0.70926 | -0.06554 | 0.15734  | 0.025686 |
| 0.357915 | 1.47E-15 | 0.629027 | 8.19E-53 | 0.042089 | 0.36414 | 0.193434 | 2.57E-05 | 0.17877  |
| 0.459638 | 8.68E-26 | 0.559194 | 9.02E-40 | 0.03257  | 0.48259 | 0.097393 | 0.03538  | 0.064822 |
| 0.469921 | 4.99E-27 | 0.380609 | 1.52E-17 | -0.03724 | 0.42209 | 0.00171  | 0.9706   | -0.11312 |

|          |          |          |          |          |         |          |          |          |
|----------|----------|----------|----------|----------|---------|----------|----------|----------|
| 0.473647 | 1.73E-27 | 0.568415 | 2.56E-41 | -0.01598 | 0.73055 | -0.06459 | 0.16348  | 0.038138 |
| 0.405818 | 6.09E-20 | 0.429782 | 2.04E-22 | -0.00981 | 0.83263 | -0.01787 | 0.70015  | 0.153356 |
| 0.417955 | 3.60E-21 | 0.746575 | 2.50E-84 | 0.033933 | 0.46444 | 0.026528 | 0.56743  | 0.14847  |
| 0.359238 | 1.13E-15 | 0.494269 | 3.86E-30 | 0.054792 | 0.2373  | 0.010542 | 0.82026  | 0.149502 |
| 0.52943  | 4.27E-35 | 0.196008 | 1.99E-05 | -0.00573 | 0.90163 | -0.05815 | 0.20972  | -0.01357 |
| 0.291905 | 1.26E-10 | 0.483703 | 9.28E-29 | 0.023708 | 0.60932 | 0.126489 | 0.0062   | -0.0127  |
| 0.405409 | 6.69E-20 | 0.472293 | 2.54E-27 | 0.013487 | 0.77129 | 0.017953 | 0.69879  | 0.024987 |
| -0.27421 | 1.68E-09 | -0.407   | 4.65E-20 | -0.02377 | 0.60836 | -0.18249 | 7.29E-05 | -0.12929 |
| 0.717428 | 5.11E-75 | 0.374186 | 5.73E-17 | 0.025476 | 0.5829  | -0.05091 | 0.27223  | 0.109417 |
| 0.594228 | 6.47E-46 | 0.23508  | 2.77E-07 | -0.00245 | 0.95783 | -0.07064 | 0.12744  | -0.08686 |
| 0.262759 | 8.18E-09 | 0.149638 | 0.00118  | 0.004036 | 0.93069 | 0.00903  | 0.84569  | 0.172512 |
| 0.364602 | 3.96E-16 | 0.289266 | 1.88E-10 | -0.01844 | 0.69099 | -0.11595 | 0.01216  | 0.007991 |
| 0.3451   | 1.66E-14 | 0.337899 | 6.17E-14 | 0.028066 | 0.54518 | -0.10934 | 0.0181   | 0.074431 |
| 0.369007 | 1.64E-16 | 0.487935 | 2.63E-29 | 0.029876 | 0.51956 | 0.030092 | 0.51654  | 0.228877 |
| 0.297846 | 5.07E-11 | 0.463627 | 2.90E-26 | 0.09031  | 0.05113 | 0.07826  | 0.09117  | 0.055656 |
| 0.798099 | #####    | 0.524047 | 2.67E-34 | 0.011951 | 0.79674 | -0.11399 | 0.01371  | 0.011871 |
| 0.289832 | 1.72E-10 | 0.193529 | 2.54E-05 | 0.071852 | 0.121   | -0.00457 | 0.92158  | 0.137296 |
| -0.29158 | 1.32E-10 | -0.26488 | 6.14E-09 | 0.034154 | 0.46154 | 0.014906 | 0.748    | 0.051916 |
| 0.683479 | 1.48E-65 | 0.135339 | 0.00339  | -0.02458 | 0.59618 | -0.16176 | 0.00045  | -0.09652 |
| 0.361119 | 7.86E-16 | 0.192833 | 2.72E-05 | -0.01623 | 0.72641 | -0.02815 | 0.544    | 0.060602 |
| 0.489528 | 1.63E-29 | 0.367266 | 2.33E-16 | -0.02712 | 0.55881 | -0.15806 | 0.00061  | -0.02213 |
| -0.27918 | 8.28E-10 | -0.42705 | 4.00E-22 | -0.02904 | 0.53134 | -0.06514 | 0.15991  | -0.16223 |
| 0.295312 | 7.49E-11 | 0.385268 | 5.66E-18 | -0.02777 | 0.54948 | -0.14711 | 0.00143  | 0.001177 |
| -0.38851 | 2.83E-18 | -0.40348 | 1.04E-19 | 0.000614 | 0.98944 | 0.064399 | 0.16471  | -0.06198 |
| 0.321975 | 1.00E-12 | -0.03672 | 0.42861  | 0.069339 | 0.1346  | -0.04575 | 0.32382  | 0.045464 |
| 0.371589 | 9.74E-17 | 0.492691 | 6.26E-30 | 0.012394 | 0.78937 | 0.119334 | 0.00985  | -0.09249 |
| 0.39506  | 6.80E-19 | 0.064452 | 0.16437  | 0.110451 | 0.01695 | 0.065083 | 0.16027  | 0.354768 |
| 0.32735  | 3.99E-13 | 0.484832 | 6.64E-29 | 0.000351 | 0.99397 | -0.00387 | 0.93353  | 0.062729 |
| 0.575912 | 1.30E-42 | 0.507034 | 7.14E-32 | 0.003266 | 0.94388 | -0.1011  | 0.02892  | -0.01206 |
| 0.382811 | 9.54E-18 | 0.36401  | 4.45E-16 | -0.01016 | 0.82671 | 0.02992  | 0.51893  | 0.180349 |
| 0.411331 | 1.71E-20 | 0.060844 | 0.18934  | 0.01197  | 0.79641 | -0.09188 | 0.0472   | -0.00551 |
| 0.402889 | 1.19E-19 | 0.587071 | 1.34E-44 | 0.053594 | 0.24772 | 0.116762 | 0.01157  | 0.059126 |
| 0.263571 | 7.33E-09 | 0.369363 | 1.53E-16 | 0.076843 | 0.0972  | 0.170033 | 0.00022  | 0.161593 |
| 0.476512 | 7.59E-28 | 0.297205 | 5.60E-11 | 0.00765  | 0.86905 | -0.10596 | 0.02202  | 0.049922 |
| 0.467696 | 9.33E-27 | 0.631931 | 1.98E-53 | 0.030447 | 0.51159 | 0.038916 | 0.40144  | 0.109751 |
| 0.51811  | 1.95E-33 | 0.198707 | 1.52E-05 | 0.015495 | 0.73841 | -0.08247 | 0.07499  | 0.003204 |
| 0.287479 | 2.45E-10 | 0.29856  | 4.54E-11 | 0.120066 | 0.0094  | 0.252324 | 3.24E-08 | 0.29121  |
| 0.734332 | 2.87E-80 | 0.364355 | 4.16E-16 | -0.01296 | 0.78003 | -0.08105 | 0.08016  | -0.09699 |
| 0.484648 | 7.02E-29 | 0.578519 | 4.55E-43 | -0.01703 | 0.71357 | -0.14671 | 0.00148  | -0.03125 |
| 0.731604 | 2.15E-79 | 0.381761 | 1.19E-17 | -0.02437 | 0.59939 | -0.07189 | 0.12079  | -0.10616 |
| 0.598608 | 9.75E-47 | 0.193875 | 2.46E-05 | -0.00881 | 0.84941 | -0.14267 | 0.002    | 0.103118 |
| 0.42338  | 9.80E-22 | 0.349137 | 7.81E-15 | 0.024337 | 0.59986 | 0.110088 | 0.01732  | 0.125219 |
| 0.437751 | 2.77E-23 | 0.160946 | 0.00048  | -0.01831 | 0.69312 | -0.09988 | 0.03093  | -0.04202 |
| 0.281454 | 5.96E-10 | 0.252388 | 3.22E-08 | 0.006004 | 0.89704 | 0.234811 | 2.86E-07 | -0.08101 |
| 0.27786  | 1.00E-09 | 0.054683 | 0.23823  | 0.003974 | 0.93174 | -0.02882 | 0.53436  | -0.00413 |

|          |          |          |          |          |         |          |         |          |
|----------|----------|----------|----------|----------|---------|----------|---------|----------|
| 0.304998 | 1.64E-11 | 0.049395 | 0.28678  | 0.041145 | 0.375   | 0.047185 | 0.30891 | 0.022816 |
| -0.22982 | 5.15E-07 | -0.28904 | 1.94E-10 | 0.094059 | 0.04218 | 0.122005 | 0.00831 | 0.090026 |
| -0.35574 | 2.23E-15 | -0.21042 | 4.51E-06 | 0.071191 | 0.12447 | 0.117467 | 0.01107 | 0.152542 |
| 0.492802 | 6.05E-30 | 0.59963  | 6.24E-47 | 0.04947  | 0.28604 | -0.02498 | 0.59024 | 0.118339 |
| 0.500735 | 5.23E-31 | 0.423022 | 1.07E-21 | -0.00831 | 0.85794 | -0.03469 | 0.45457 | -0.10625 |
| 0.463249 | 3.22E-26 | 0.016953 | 0.71481  | -0.04454 | 0.33681 | -0.13058 | 0.00471 | -0.11162 |
| 0.289307 | 1.87E-10 | 0.408221 | 3.51E-20 | 0.011283 | 0.80786 | 0.059886 | 0.19642 | 0.202579 |
| 0.647499 | 7.62E-57 | 0.252144 | 3.32E-08 | -0.0188  | 0.68527 | -0.10798 | 0.01959 | -0.0825  |
| -0.25246 | 3.19E-08 | -0.37582 | 4.10E-17 | -0.00994 | 0.8303  | -0.00858 | 0.85329 | -0.1009  |
| 0.307445 | 1.11E-11 | 0.172936 | 0.00017  | -0.02187 | 0.63728 | -0.0389  | 0.40165 | -0.05846 |
| 0.486399 | 4.17E-29 | 0.192571 | 2.79E-05 | 0.103853 | 0.02481 | 0.033756 | 0.46678 | 0.191664 |
| 0.259644 | 1.24E-08 | 0.233337 | 3.41E-07 | -0.02841 | 0.5402  | -0.00349 | 0.94005 | -0.11066 |
| 0.548224 | 5.41E-38 | 0.220045 | 1.58E-06 | -0.01955 | 0.67354 | -0.10777 | 0.01983 | -0.15609 |
| 0.256385 | 1.91E-08 | 0.066886 | 0.14898  | 0.090403 | 0.05089 | 0.044744 | 0.33463 | 0.138893 |
| 0.374056 | 5.89E-17 | 0.389863 | 2.11E-18 | -0.05114 | 0.27008 | -0.01327 | 0.7748  | -0.19819 |
| 0.543833 | 2.67E-37 | 0.025808 | 0.57799  | 0.011204 | 0.80919 | -0.10361 | 0.02515 | -0.04015 |
| -0.37557 | 4.32E-17 | -0.3282  | 3.44E-13 | -0.02198 | 0.63572 | 0.027985 | 0.54633 | -0.1781  |
| 0.272568 | 2.12E-09 | 0.023376 | 0.61434  | -0.00375 | 0.93563 | -0.01468 | 0.75174 | -0.05316 |
| 0.481794 | 1.63E-28 | 0.11055  | 0.01685  | 0.026427 | 0.56891 | 0.113493 | 0.01413 | -0.10547 |
| 0.74098  | 1.91E-82 | 0.499715 | 7.19E-31 | 0.033523 | 0.46987 | -0.0829  | 0.07347 | -0.00882 |
| 0.41474  | 7.71E-21 | 0.007903 | 0.86474  | -0.05746 | 0.21518 | -0.13704 | 0.003   | -0.12239 |
| 0.519354 | 1.29E-33 | 0.125189 | 0.00675  | -0.02824 | 0.54274 | -0.08725 | 0.05955 | -0.01715 |
| -0.22065 | 1.47E-06 | -0.01701 | 0.71397  | 0.066667 | 0.15031 | 0.121419 | 0.00862 | 0.086086 |
| 0.560201 | 6.15E-40 | 0.344801 | 1.75E-14 | -0.00687 | 0.88226 | -0.04377 | 0.3453  | -0.12148 |
| 0.517961 | 2.05E-33 | 0.603184 | 1.31E-47 | 0.065452 | 0.1579  | 0.090758 | 0.04999 | 0.140176 |
| 0.321266 | 1.13E-12 | 0.06442  | 0.16457  | 0.004336 | 0.92555 | -0.04612 | 0.31998 | 0.01502  |
| 0.928205 | #####    | 0.42843  | 2.85E-22 | -0.0271  | 0.55911 | -0.12991 | 0.00493 | -0.03594 |
| 0.253074 | 2.94E-08 | 0.156839 | 0.00067  | 0.03932  | 0.39658 | -0.0243  | 0.60043 | 0.024791 |
| 0.483039 | 1.13E-28 | 0.680336 | 9.55E-65 | 0.05667  | 0.22157 | 0.059994 | 0.19561 | 0.330872 |
| 0.226664 | 7.43E-07 | -0.14547 | 0.00162  | -0.05651 | 0.2229  | -0.14554 | 0.00161 | -0.17121 |
| 0.345431 | 1.56E-14 | 0.55618  | 2.82E-39 | -0.02515 | 0.58769 | -0.10693 | 0.02082 | -0.02991 |
| 0.297893 | 5.03E-11 | -0.05088 | 0.27256  | -0.03324 | 0.47357 | -0.038   | 0.41256 | -0.04914 |
| 0.307924 | 1.03E-11 | -0.13946 | 0.00252  | 0.032888 | 0.47833 | -0.08638 | 0.06214 | 0.017086 |
| 0.833926 | #####    | 0.492773 | 6.10E-30 | -0.0128  | 0.7827  | -0.06218 | 0.17981 | -0.01259 |
| 0.706884 | 6.19E-72 | 0.296019 | 6.72E-11 | 0.005555 | 0.9047  | -0.04198 | 0.36541 | -0.04298 |
| 0.47331  | 1.90E-27 | -0.06388 | 0.16815  | -0.00623 | 0.89316 | -0.12308 | 0.00775 | 0.039196 |
| 0.663132 | 1.76E-60 | 0.188578 | 4.11E-05 | 0.018517 | 0.68981 | -0.07518 | 0.10466 | -0.03131 |
| 0.300439 | 3.38E-11 | -0.08391 | 0.07003  | -0.01292 | 0.78059 | -0.06572 | 0.15623 | -0.03629 |
| 0.925929 | #####    | 0.39557  | 6.08E-19 | -0.00743 | 0.87282 | -0.15866 | 0.00058 | -0.01565 |
| 0.890523 | #####    | 0.367669 | 2.15E-16 | -0.01597 | 0.73069 | -0.11019 | 0.01722 | -0.02922 |
| 0.823909 | #####    | 0.685844 | 3.57E-66 | 0.03173  | 0.49396 | -0.01505 | 0.74567 | 0.085128 |
| 0.506528 | 8.39E-32 | 0.055092 | 0.23473  | -0.07007 | 0.13052 | -0.14    | 0.00243 | -0.0489  |
| 0.644937 | 2.87E-56 | 0.331579 | 1.90E-13 | 0.018851 | 0.68452 | -0.00541 | 0.90721 | 0.107083 |
| 0.770428 | 5.92E-93 | 0.156401 | 0.00069  | -0.01872 | 0.68658 | -0.13876 | 0.00265 | -0.07458 |
| 0.743239 | 3.37E-83 | 0.388353 | 2.93E-18 | -0.01525 | 0.74233 | -0.08017 | 0.08352 | 0.026123 |

|          |          |          |          |          |          |          |          |          |
|----------|----------|----------|----------|----------|----------|----------|----------|----------|
| 0.650988 | 1.23E-57 | 0.212861 | 3.47E-06 | 0.001927 | 0.96687  | -0.09313 | 0.04427  | -0.02082 |
| 0.550684 | 2.19E-38 | 0.069587 | 0.13321  | -0.00947 | 0.83834  | -0.16204 | 0.00044  | 0.130424 |
| 0.844869 | #####    | 0.370274 | 1.27E-16 | -0.02384 | 0.60727  | -0.11478 | 0.01307  | -0.0428  |
| 0.341541 | 3.19E-14 | 0.469197 | 6.12E-27 | 0.003479 | 0.94023  | -0.0917  | 0.04766  | -0.0211  |
| 0.869674 | #####    | 0.35471  | 2.72E-15 | -0.00514 | 0.91178  | -0.13886 | 0.00264  | -0.0581  |
| 0.865097 | #####    | 0.305961 | 1.41E-11 | -0.02844 | 0.53979  | -0.18183 | 7.75E-05 | -0.02535 |
| 0.349832 | 6.86E-15 | 0.014463 | 0.75525  | -0.0119  | 0.79765  | -0.0495  | 0.28577  | 0.090116 |
| 0.262444 | 8.54E-09 | -0.03106 | 0.50311  | 0.029099 | 0.53048  | 0.050081 | 0.28012  | -0.02869 |
| 0.404634 | 7.98E-20 | 0.52278  | 4.10E-34 | 0.052123 | 0.26096  | 0.101149 | 0.02885  | 0.213008 |
| 0.511923 | 1.48E-32 | 0.527285 | 8.90E-35 | 0.00938  | 0.83978  | 0.001075 | 0.98151  | -0.0149  |
| 0.325772 | 5.24E-13 | 0.012345 | 0.79019  | 0.030959 | 0.50452  | 0.039663 | 0.39246  | -0.01646 |
| 0.895218 | #####    | 0.398863 | 2.93E-19 | -0.01046 | 0.82169  | -0.08071 | 0.08145  | -0.05226 |
| 0.552127 | 1.28E-38 | 0.286038 | 3.04E-10 | -0.02397 | 0.60531  | -0.14565 | 0.0016   | -0.11193 |
| 0.435005 | 5.55E-23 | 0.017299 | 0.70925  | 0.04009  | 0.38738  | -0.0714  | 0.12334  | 0.044163 |
| 0.422865 | 1.11E-21 | -0.03699 | 0.42512  | -0.07332 | 0.11357  | -0.20891 | 5.30E-06 | -0.24091 |
| 0.445648 | 3.63E-24 | 0.369144 | 1.60E-16 | 0.06393  | 0.16782  | 0.095701 | 0.0387   | 0.104033 |
| 0.341751 | 3.07E-14 | -0.06506 | 0.16039  | 0.006963 | 0.88071  | -0.12797 | 0.00561  | 0.005802 |
| 0.794102 | #####    | 0.235977 | 2.48E-07 | -0.01571 | 0.73495  | -0.19745 | 1.72E-05 | 0.009954 |
| 0.52755  | 8.13E-35 | 0.261994 | 9.07E-09 | 0.042083 | 0.3642   | -0.04011 | 0.3872   | 0.116058 |
| 0.918925 | #####    | 0.445382 | 3.89E-24 | -0.02072 | 0.65515  | -0.13662 | 0.00309  | -0.05263 |
| 0.908717 | #####    | 0.438807 | 2.12E-23 | 0.002074 | 0.96435  | -0.12044 | 0.00918  | -0.0231  |
| 0.680217 | 1.02E-64 | 0.270545 | 2.82E-09 | -0.04862 | 0.2944   | -0.14249 | 0.00202  | -0.07418 |
| 0.840929 | #####    | 0.474043 | 1.54E-27 | -0.01467 | 0.75192  | -0.06422 | 0.1659   | -0.01254 |
| 0.499584 | 7.49E-31 | 0.61657  | 3.03E-50 | -0.01546 | 0.73902  | -0.09984 | 0.031    | 0.036378 |
| -0.33509 | 1.02E-13 | -0.47122 | 3.45E-27 | 0.058606 | 0.20617  | 0.091911 | 0.04713  | 0.057921 |
| 0.266968 | 4.62E-09 | 0.1626   | 0.00042  | -0.0658  | 0.15568  | -0.16495 | 0.00034  | -0.14552 |
| 0.269864 | 3.09E-09 | 0.380589 | 1.52E-17 | -0.01211 | 0.79406  | -0.05422 | 0.24221  | -0.00497 |
| 0.424705 | 7.10E-22 | -0.03941 | 0.39553  | -0.03842 | 0.40745  | -0.11759 | 0.01098  | -0.22481 |
| 0.339243 | 4.84E-14 | 0.19238  | 2.85E-05 | -0.04562 | 0.32522  | -0.16159 | 0.00046  | -0.15188 |
| 0.240454 | 1.44E-07 | -0.20851 | 5.52E-06 | -0.09436 | 0.04153  | -0.24387 | 9.46E-08 | -0.25571 |
| 0.402759 | 1.22E-19 | 0.034777 | 0.45341  | 0.026031 | 0.57472  | -0.04982 | 0.28265  | -0.00288 |
| 0.391887 | 1.36E-18 | 0.146125 | 0.00154  | -0.03393 | 0.46447  | 0.074558 | 0.10759  | -0.17188 |
| 0.443221 | 6.82E-24 | 0.342044 | 2.91E-14 | 0.008918 | 0.84758  | 0.074263 | 0.10899  | -0.02906 |
| 0.303237 | 2.18E-11 | -0.01479 | 0.74987  | -0.02271 | 0.62445  | -0.06523 | 0.15934  | -0.05138 |
| 0.273456 | 1.87E-09 | 0.04985  | 0.28236  | -0.03718 | 0.4228   | -0.07369 | 0.11177  | -0.12157 |
| 0.467068 | 1.11E-26 | 0.239424 | 1.64E-07 | 0.054063 | 0.2436   | -0.00741 | 0.87315  | 0.138758 |
| 0.508975 | 3.84E-32 | 0.453107 | 5.07E-25 | -0.01357 | 0.76991  | -0.01377 | 0.76662  | -0.03932 |
| 0.405543 | 6.49E-20 | 0.267868 | 4.08E-09 | 0.191317 | 3.16E-05 | 0.300212 | 3.50E-11 | 0.580357 |
| 0.278494 | 9.14E-10 | -0.10026 | 0.03029  | -0.05387 | 0.2453   | -0.19424 | 2.37E-05 | -0.16451 |
| 0.913543 | #####    | 0.436308 | 4.00E-23 | 0.00468  | 0.91966  | -0.11649 | 0.01176  | -0.0353  |
| 0.33554  | 9.43E-14 | -0.06642 | 0.15185  | -0.01338 | 0.7731   | -0.08654 | 0.06166  | -0.06016 |
| 0.561935 | 3.17E-40 | 0.142455 | 0.00203  | -0.03306 | 0.47598  | -0.06586 | 0.15534  | -0.01795 |
| 0.819993 | #####    | 0.430227 | 1.83E-22 | -0.01862 | 0.68823  | -0.11421 | 0.01353  | -0.00293 |
| 0.78586  | 4.11E-99 | 0.330245 | 2.41E-13 | 0.013472 | 0.77154  | -0.08819 | 0.05686  | 0.095778 |
| 0.62109  | 3.66E-51 | 0.263242 | 7.67E-09 | 0.024362 | 0.59949  | -0.09628 | 0.03753  | 0.111258 |

|          |          |          |          |          |          |          |          |          |
|----------|----------|----------|----------|----------|----------|----------|----------|----------|
| 0.362426 | 6.08E-16 | -0.0401  | 0.38721  | 0.015472 | 0.73878  | -0.09196 | 0.04703  | -0.01235 |
| 0.894815 | #####    | 0.424254 | 7.93E-22 | 0.008448 | 0.85552  | -0.12131 | 0.00868  | -0.0253  |
| 0.826608 | #####    | 0.382826 | 9.51E-18 | -0.02381 | 0.60778  | -0.15903 | 0.00056  | -0.05875 |
| 0.870379 | #####    | 0.399583 | 2.49E-19 | 0.026772 | 0.56387  | -0.14007 | 0.00242  | 0.000458 |
| 0.884859 | #####    | 0.496705 | 1.83E-30 | -0.00274 | 0.95298  | -0.11864 | 0.01029  | -0.03434 |
| 0.422954 | 1.09E-21 | 0.101565 | 0.02819  | -0.02189 | 0.63706  | -0.06201 | 0.18097  | -0.08057 |
| 0.785338 | 6.77E-99 | 0.267815 | 4.11E-09 | 0.014354 | 0.75703  | -0.04643 | 0.31674  | 0.080468 |
| 0.208799 | 5.36E-06 | 0.448833 | 1.58E-24 | -0.02253 | 0.62726  | 0.05508  | 0.23484  | -0.08319 |
| 0.332946 | 1.50E-13 | 0.34975  | 6.96E-15 | 0.232543 | 3.74E-07 | 0.38137  | 1.29E-17 | 0.189109 |
| 0.351203 | 5.30E-15 | -0.04338 | 0.34965  | 0.004674 | 0.91977  | -0.08416 | 0.06921  | -0.05364 |
| 0.677719 | 4.44E-64 | 0.381967 | 1.14E-17 | 0.000726 | 0.98752  | -0.04329 | 0.35058  | 0.094326 |
| 0.318035 | 1.95E-12 | 0.379386 | 1.96E-17 | 0.033753 | 0.46682  | -0.01597 | 0.73062  | -0.07542 |
| 0.536702 | 3.39E-36 | 0.088828 | 0.05508  | 0.006341 | 0.89129  | -0.08308 | 0.07288  | -0.02293 |
| 0.558797 | 1.05E-39 | 0.224412 | 9.62E-07 | 0.006034 | 0.89653  | -0.03636 | 0.43313  | -0.06249 |
| 0.53366  | 9.86E-36 | 0.481253 | 1.91E-28 | 0.028694 | 0.53621  | -0.06339 | 0.17145  | 0.115416 |
| 0.354484 | 2.84E-15 | 0.451884 | 7.02E-25 | -0.00631 | 0.89191  | -0.12039 | 0.00921  | 0.104148 |
| 0.617408 | 2.05E-50 | 0.347166 | 1.13E-14 | 0.007082 | 0.87868  | -0.03316 | 0.47464  | 0.085592 |
| 0.500233 | 6.12E-31 | 0.087923 | 0.05761  | -0.0561  | 0.22627  | -0.12962 | 0.00502  | -0.13762 |
| 0.520802 | 7.95E-34 | 0.21237  | 3.66E-06 | -0.03154 | 0.49659  | -0.13571 | 0.0033   | -0.00824 |
| 0.297173 | 5.63E-11 | 0.247266 | 6.18E-08 | 0.031277 | 0.50015  | -0.11083 | 0.01658  | 0.093635 |
| 0.289244 | 1.88E-10 | 0.061498 | 0.18461  | -0.06541 | 0.15815  | -0.12172 | 0.00846  | -0.11602 |
| 0.375891 | 4.04E-17 | 0.398814 | 2.96E-19 | 0.102841 | 0.02626  | 0.347609 | 1.04E-14 | 0.113226 |
| 0.615553 | 4.86E-50 | 0.078392 | 0.09062  | 0.02105  | 0.65002  | -0.03756 | 0.41802  | 0.049284 |
| -0.25721 | 1.71E-08 | -0.34697 | 1.17E-14 | -0.01258 | 0.78635  | 0.032694 | 0.48093  | -0.1491  |
| 0.315333 | 3.06E-12 | 0.328316 | 3.37E-13 | 0.019377 | 0.6762   | -0.11831 | 0.0105   | 0.122329 |
| 0.774628 | 1.40E-94 | 0.298982 | 4.25E-11 | 0.009668 | 0.83493  | -0.09541 | 0.0393   | -0.03531 |
| 0.249371 | 4.73E-08 | -0.08466 | 0.06756  | 0.045043 | 0.33142  | -0.01343 | 0.7722   | 0.08484  |
| 0.8375   | #####    | 0.284613 | 3.75E-10 | -0.01117 | 0.80979  | -0.12184 | 0.00839  | -0.07292 |
| 0.883099 | #####    | 0.411815 | 1.53E-20 | -0.02385 | 0.6072   | -0.12009 | 0.00938  | -0.03379 |
| 0.908356 | #####    | 0.341708 | 3.09E-14 | 0.003568 | 0.93871  | -0.11769 | 0.01092  | -0.04066 |
| 0.342905 | 2.48E-14 | 0.073065 | 0.11484  | 0.004095 | 0.92967  | -0.0351  | 0.44918  | 0.060038 |
| 0.470921 | 3.76E-27 | 0.443946 | 5.65E-24 | 0.040419 | 0.38349  | 0.084651 | 0.06759  | 0.16366  |
| -0.22215 | 1.24E-06 | -0.27663 | 1.19E-09 | 0.070569 | 0.1278   | 0.077658 | 0.09369  | 0.112898 |
| 0.429255 | 2.33E-22 | 0.11121  | 0.0162   | -0.0117  | 0.80094  | -0.16402 | 0.00037  | -0.05111 |
| 0.373878 | 6.11E-17 | 0.098663 | 0.03304  | 0.20223  | 1.06E-05 | 0.458063 | 1.33E-25 | -0.01897 |
| 0.317213 | 2.24E-12 | 0.194364 | 2.34E-05 | 0.104509 | 0.02391  | 0.250792 | 3.95E-08 | 0.190041 |
| 0.695877 | 7.37E-69 | 0.122031 | 0.00829  | -0.01785 | 0.70038  | -0.13938 | 0.00254  | 0.000417 |
| 0.442257 | 8.75E-24 | 0.601129 | 3.24E-47 | 0.035773 | 0.44056  | 0.028291 | 0.54196  | 0.097255 |
| 0.372251 | 8.51E-17 | 0.196968 | 1.81E-05 | -0.00021 | 0.99639  | -0.05692 | 0.2195   | -0.06256 |
| 0.310066 | 7.27E-12 | 0.01738  | 0.70796  | 0.027694 | 0.55051  | 0.082084 | 0.07638  | 0.112662 |
| 0.761891 | 9.46E-90 | 0.256433 | 1.90E-08 | -0.08542 | 0.06514  | -0.23357 | 3.31E-07 | -0.17751 |
| 0.440951 | 1.22E-23 | 0.125156 | 0.00677  | -0.03983 | 0.39045  | -0.10728 | 0.0204   | -0.06292 |
| 0.170333 | 0.00022  | -0.07049 | 0.12821  | -0.03406 | 0.46274  | -0.01303 | 0.77884  | -0.17714 |
| 0.717483 | 4.92E-75 | 0.405409 | 6.69E-20 | -0.02028 | 0.66208  | -0.10014 | 0.03048  | -0.08878 |
| 0.728334 | 2.32E-78 | 0.520355 | 9.23E-34 | -0.0205  | 0.65854  | -0.06431 | 0.16532  | -0.02737 |



|          |          |          |          |          |         |          |          |          |
|----------|----------|----------|----------|----------|---------|----------|----------|----------|
| -0.21129 | 4.11E-06 | -0.20302 | 9.80E-06 | 0.008765 | 0.85016 | 0.028246 | 0.5426   | 0.099929 |
| 0.615194 | 5.73E-50 | 0.107622 | 0.02     | -0.04626 | 0.3185  | -0.18991 | 3.62E-05 | -0.16268 |
| 0.833992 | #####    | 0.456508 | 2.03E-25 | 0.011832 | 0.79872 | -0.07385 | 0.11097  | 0.026865 |
| 0.279506 | 7.90E-10 | 0.065326 | 0.15871  | 0.089473 | 0.05333 | 0.14491  | 0.00169  | -0.01932 |
| 0.711544 | 2.79E-73 | 0.226553 | 7.53E-07 | -0.01231 | 0.7907  | -0.05494 | 0.23603  | -0.08154 |
| 0.492243 | 7.17E-30 | 0.389658 | 2.21E-18 | 0.004449 | 0.92362 | -0.02517 | 0.5875   | -0.06574 |
| -0.42548 | 5.89E-22 | -0.33703 | 7.22E-14 | -0.05152 | 0.26652 | -0.02053 | 0.65805  | -0.2469  |
| 0.064242 | 0.16575  | 0.012662 | 0.78493  | 0.083803 | 0.0704  | 0.064819 | 0.16197  | -0.09064 |
| 0.019147 | 0.67982  | 0.020775 | 0.65429  | 0.161152 | 0.00047 | 0.205449 | 7.62E-06 | 0.030338 |
| 0.367079 | 2.42E-16 | 0.250226 | 4.24E-08 | -0.02914 | 0.5299  | 0.017656 | 0.70353  | -0.17617 |
| 0.267093 | 4.54E-09 | 0.067562 | 0.1449   | 0.017035 | 0.71349 | 0.02794  | 0.54699  | 0.06129  |
| 0.833849 | #####    | 0.30394  | 1.95E-11 | -0.02357 | 0.61148 | -0.10052 | 0.02986  | -0.10552 |
| 0.28926  | 1.88E-10 | 0.098312 | 0.03367  | 0.030102 | 0.51639 | -0.03795 | 0.4132   | 0.079066 |
| 0.260988 | 1.04E-08 | 0.01331  | 0.77421  | -0.00731 | 0.87478 | -0.10129 | 0.02862  | -0.01235 |
| 0.831252 | #####    | 0.253794 | 2.68E-08 | -0.01778 | 0.7015  | -0.09691 | 0.03629  | -0.02491 |
| 0.891107 | #####    | 0.430391 | 1.76E-22 | 0.002911 | 0.94998 | -0.11793 | 0.01075  | 0.024319 |
| 0.413124 | 1.13E-20 | 0.340065 | 4.17E-14 | -0.02014 | 0.66424 | 0.024921 | 0.59114  | -0.24958 |
| 0.562365 | 2.68E-40 | 0.098071 | 0.03411  | -0.029   | 0.53181 | -0.07786 | 0.09285  | -0.06589 |
| 0.437911 | 2.66E-23 | 0.193623 | 2.52E-05 | 0.015915 | 0.73158 | -0.01312 | 0.77728  | 0.02179  |
| 0.666998 | 2.05E-61 | 0.416406 | 5.20E-21 | 0.019096 | 0.68064 | 0.029956 | 0.51843  | 0.06451  |
| 0.812876 | #####    | 0.281047 | 6.32E-10 | -0.00768 | 0.86847 | -0.10869 | 0.0188   | -0.04698 |
| 0.86564  | #####    | 0.468235 | 8.02E-27 | -0.01901 | 0.68198 | -0.1791  | 9.96E-05 | -0.0365  |
| 0.877116 | #####    | 0.332221 | 1.70E-13 | -0.00204 | 0.96491 | -0.11697 | 0.01142  | 0.080937 |
| 0.92794  | #####    | 0.389163 | 2.46E-18 | -0.02114 | 0.64868 | -0.15204 | 0.00098  | -0.02405 |
| 0.758435 | 1.72E-88 | 0.286986 | 2.64E-10 | -0.0024  | 0.95866 | -0.13413 | 0.00368  | -0.06042 |
| 0.932746 | #####    | 0.388204 | 3.02E-18 | -0.01155 | 0.80337 | -0.08297 | 0.07325  | -0.02108 |
| 0.379697 | 1.83E-17 | -0.0882  | 0.05684  | 0.011847 | 0.79846 | -0.07109 | 0.12503  | 0.000735 |
| 0.657078 | 4.78E-59 | 0.123512 | 0.00754  | 0.006105 | 0.89532 | -0.05999 | 0.19564  | -0.00359 |
| 0.623007 | 1.48E-51 | -0.03947 | 0.39474  | -0.03331 | 0.47263 | -0.13577 | 0.00329  | -0.09184 |
| 0.365865 | 3.08E-16 | 0.141287 | 0.00221  | -0.02102 | 0.65054 | -0.1355  | 0.00335  | -0.08822 |
| 0.424852 | 6.85E-22 | 0.320209 | 1.35E-12 | -0.03132 | 0.4995  | -0.10716 | 0.02054  | -0.09174 |
| 0.490671 | 1.16E-29 | 0.376862 | 3.31E-17 | 0.040325 | 0.3846  | 0.011154 | 0.81003  | 0.334545 |
| 0.392224 | 1.27E-18 | 0.358626 | 1.28E-15 | 0.009583 | 0.83636 | 0.023339 | 0.61491  | 0.120937 |
| 0.904935 | #####    | 0.438396 | 2.35E-23 | -0.00178 | 0.96941 | -0.11565 | 0.01239  | -0.04953 |
| 0.546456 | 1.03E-37 | 0.250193 | 4.26E-08 | 0.048114 | 0.29947 | -0.01174 | 0.80027  | 0.132453 |
| 0.671397 | 1.71E-62 | 0.118622 | 0.0103   | 0.012456 | 0.78834 | -0.11565 | 0.01239  | -0.06676 |
| 0.444936 | 4.37E-24 | 0.306222 | 1.35E-11 | 0.048796 | 0.29267 | 0.004754 | 0.91839  | 0.304829 |
| 0.905196 | #####    | 0.252047 | 3.36E-08 | -0.00807 | 0.86192 | -0.14239 | 0.00204  | -0.07231 |
| -0.33382 | 1.28E-13 | -0.09393 | 0.04247  | 0.099946 | 0.03081 | 0.26541  | 5.71E-09 | 0.024843 |
| 0.422831 | 1.12E-21 | -0.03459 | 0.45588  | -0.00286 | 0.95093 | -0.11575 | 0.01231  | 0.066757 |
| 0.804484 | #####    | 0.616395 | 3.29E-50 | -0.01361 | 0.76924 | -0.07151 | 0.12278  | 0.014439 |
| 0.663114 | 1.78E-60 | 0.277272 | 1.09E-09 | -0.03775 | 0.41565 | -0.16778 | 0.00027  | -0.05794 |
| 0.262625 | 8.33E-09 | 0.044937 | 0.33256  | 0.010279 | 0.82466 | 0.100275 | 0.03026  | 0.052717 |
| 0.485841 | 4.92E-29 | 0.438348 | 2.38E-23 | -0.04482 | 0.33376 | -0.09387 | 0.04261  | 0.041655 |
| 0.279276 | 8.17E-10 | 0.01416  | 0.76022  | -0.00163 | 0.97199 | -0.15983 | 0.00053  | -0.12612 |

|          |          |          |          |          |         |          |          |          |
|----------|----------|----------|----------|----------|---------|----------|----------|----------|
| -0.24837 | 5.38E-08 | 0.028712 | 0.53595  | 0.056398 | 0.2238  | 0.213967 | 3.08E-06 | 0.033774 |
| 0.547579 | 6.84E-38 | 0.048387 | 0.29673  | -0.01253 | 0.78707 | -0.19422 | 2.38E-05 | -0.10351 |
| 0.621672 | 2.78E-51 | 0.219478 | 1.68E-06 | -0.0175  | 0.70596 | -0.121   | 0.00886  | -0.14332 |
| 0.328762 | 3.12E-13 | -0.03574 | 0.44095  | 0.04394  | 0.3434  | -0.00117 | 0.97991  | 0.093331 |
| 0.454453 | 3.53E-25 | 0.49865  | 1.00E-30 | 0.040435 | 0.38331 | 0.031553 | 0.49637  | -0.00512 |
| 0.400826 | 1.89E-19 | 0.098446 | 0.03343  | -0.01558 | 0.73698 | -0.10822 | 0.01932  | -0.11059 |
| 0.213285 | 3.31E-06 | 0.009719 | 0.83408  | 0.034951 | 0.45114 | 0.005786 | 0.90076  | -0.05848 |
| -0.24893 | 5.01E-08 | -0.21478 | 2.82E-06 | 0.039291 | 0.39692 | 0.28384  | 4.20E-10 | 0.098232 |
| 0.655677 | 1.02E-58 | 0.088347 | 0.05642  | -0.0558  | 0.22876 | -0.19161 | 3.07E-05 | -0.12938 |
| 0.351228 | 5.27E-15 | 0.159917 | 0.00052  | 0.026923 | 0.56168 | 0.040414 | 0.38355  | 0.094306 |
| 0.266891 | 4.66E-09 | -0.03513 | 0.44889  | -0.01455 | 0.75383 | -0.08523 | 0.06573  | -0.14185 |
| -0.23261 | 3.71E-07 | -0.31401 | 3.81E-12 | 0.048496 | 0.29565 | 0.143048 | 0.00194  | 0.284175 |
| 0.508931 | 3.89E-32 | 0.247923 | 5.69E-08 | -0.03263 | 0.48177 | -0.07183 | 0.1211   | -0.16424 |
| 0.40083  | 1.88E-19 | 0.157331 | 0.00064  | -0.05759 | 0.21416 | -0.10392 | 0.02472  | -0.15385 |
| -0.29607 | 6.67E-11 | -0.3732  | 7.01E-17 | 0.0782   | 0.09142 | 0.334007 | 1.24E-13 | 0.01569  |
| 0.855009 | #####    | 0.492786 | 6.08E-30 | -0.00687 | 0.88231 | -0.08969 | 0.05274  | 0.118809 |
| 0.9317   | #####    | 0.432547 | 1.03E-22 | -0.00677 | 0.88406 | -0.12099 | 0.00886  | -0.07201 |
| 0.245942 | 7.30E-08 | -0.15006 | 0.00114  | -0.01166 | 0.80156 | -0.0647  | 0.16272  | -0.07265 |
| 0.565262 | 8.77E-41 | 0.501265 | 4.43E-31 | -0.0074  | 0.87322 | -0.11799 | 0.01071  | 0.053228 |
| 0.540112 | 1.01E-36 | 0.003148 | 0.94591  | 0.008734 | 0.85069 | -0.0409  | 0.37782  | -0.12029 |
| 0.396209 | 5.28E-19 | 0.143723 | 0.00185  | -0.0746  | 0.10738 | -0.08171 | 0.07775  | -0.14259 |
| 0.430579 | 1.68E-22 | 0.036612 | 0.42992  | -0.04203 | 0.36478 | -0.11041 | 0.01699  | -0.22179 |
| 0.593667 | 8.23E-46 | 0.084913 | 0.06675  | -0.00589 | 0.89902 | -0.10567 | 0.02238  | 0.066103 |
| 0.66333  | 1.58E-60 | 0.555104 | 4.22E-39 | 0.032001 | 0.49027 | 0.082782 | 0.0739   | 0.142441 |
| 0.903429 | #####    | 0.478722 | 4.00E-28 | 0.011441 | 0.80522 | -0.11162 | 0.01581  | -0.00781 |
| 0.915209 | #####    | 0.35658  | 1.90E-15 | -0.01637 | 0.72429 | -0.13895 | 0.00262  | -0.09105 |
| 0.601847 | 2.36E-47 | 0.139976 | 0.00243  | -0.01539 | 0.74011 | -0.10794 | 0.01964  | -0.00926 |
| 0.489484 | 1.65E-29 | 0.124557 | 0.00704  | 0.007488 | 0.87178 | -0.06782 | 0.14339  | 0.053817 |
| 0.648702 | 4.07E-57 | 0.212228 | 3.71E-06 | -0.01535 | 0.74069 | -0.08413 | 0.06931  | 0.065134 |
| 0.918848 | #####    | 0.36344  | 4.98E-16 | -0.02107 | 0.64969 | -0.10248 | 0.02679  | -0.03053 |
| 0.892603 | #####    | 0.397237 | 4.20E-19 | 0.013499 | 0.7711  | -0.0796  | 0.08575  | 0.033753 |
| 0.510791 | 2.14E-32 | 0.343516 | 2.22E-14 | 0.026455 | 0.5685  | -0.11522 | 0.01272  | 0.044302 |
| 0.911697 | #####    | 0.400816 | 1.89E-19 | 0.015083 | 0.74511 | -0.06615 | 0.15351  | 0.021503 |
| 0.441235 | 1.14E-23 | 0.393814 | 8.94E-19 | 0.017924 | 0.69924 | -0.04022 | 0.38586  | 0.020876 |
| 0.381358 | 1.29E-17 | -0.04138 | 0.37225  | -0.01696 | 0.71474 | -0.12184 | 0.0084   | -0.05993 |
| 0.90343  | #####    | 0.40416  | 8.89E-20 | -0.00266 | 0.95436 | -0.10912 | 0.01833  | -0.06494 |
| 0.314643 | 3.43E-12 | 0.090584 | 0.05043  | 0.006323 | 0.8916  | 0.039569 | 0.39359  | -0.08753 |
| 0.812853 | #####    | 0.491273 | 9.63E-30 | -0.00744 | 0.87269 | -0.04055 | 0.38192  | 0.105103 |
| 0.37047  | 1.22E-16 | 0.030737 | 0.50758  | -0.0474  | 0.30669 | -0.11325 | 0.01433  | -0.22449 |
| 0.679162 | 1.91E-64 | 0.27493  | 1.52E-09 | -0.06448 | 0.16421 | -0.18884 | 4.01E-05 | -0.032   |
| 0.361857 | 6.80E-16 | 0.512928 | 1.07E-32 | 0.176305 | 0.00013 | 0.220321 | 1.53E-06 | 0.34322  |
| 0.40451  | 8.21E-20 | 0.264326 | 6.62E-09 | 0.018459 | 0.69073 | -0.04372 | 0.3458   | -0.00587 |
| 0.927769 | #####    | 0.340708 | 3.71E-14 | -0.01454 | 0.75402 | -0.15547 | 0.00075  | -0.0816  |
| 0.451062 | 8.74E-25 | 0.594096 | 6.85E-46 | 0.000571 | 0.99019 | -0.08379 | 0.07045  | 0.197053 |
| 0.845735 | #####    | 0.284306 | 3.92E-10 | -0.03339 | 0.47165 | -0.15889 | 0.00057  | -0.08267 |

|          |          |          |          |          |         |          |          |          |
|----------|----------|----------|----------|----------|---------|----------|----------|----------|
| 0.334738 | 1.09E-13 | -0.16274 | 0.00041  | -0.03706 | 0.42426 | -0.18867 | 4.08E-05 | -0.05703 |
| 0.702404 | 1.15E-70 | 0.593939 | 7.32E-46 | 0.013941 | 0.76382 | -0.00991 | 0.83083  | 0.103185 |
| 0.257218 | 1.71E-08 | -0.09069 | 0.05016  | -0.05425 | 0.24197 | -0.17865 | 0.0001   | -0.1069  |
| 0.277486 | 1.06E-09 | -0.16643 | 0.0003   | -0.05917 | 0.20181 | -0.18739 | 4.61E-05 | -0.1141  |
| -0.27027 | 2.92E-09 | -0.05786 | 0.21203  | 0.067798 | 0.1435  | 0.260976 | 1.04E-08 | 0.164577 |
| 0.552301 | 1.20E-38 | 0.226433 | 7.63E-07 | 0.031828 | 0.49263 | -0.0665  | 0.15135  | 0.058727 |
| 0.266729 | 4.77E-09 | 0.058743 | 0.20511  | 0.028064 | 0.5452  | 0.046151 | 0.31965  | 0.107183 |
| 0.406865 | 4.80E-20 | 0.216062 | 2.45E-06 | 0.02942  | 0.52594 | -0.09792 | 0.0344   | 0.031089 |
| 0.867071 | #####    | 0.4779   | 5.08E-28 | -0.00824 | 0.85897 | -0.13567 | 0.00331  | -0.04585 |
| 0.804897 | #####    | 0.417073 | 4.44E-21 | 0.000263 | 0.99549 | -0.09659 | 0.03692  | -0.02255 |
| 0.39848  | 3.19E-19 | -0.1495  | 0.00119  | -0.01528 | 0.74196 | -0.16537 | 0.00033  | -0.01106 |
| 0.670245 | 3.28E-62 | 0.261514 | 9.67E-09 | -0.01259 | 0.78606 | -0.06683 | 0.14932  | 0.083358 |
| 0.570332 | 1.21E-41 | 0.107203 | 0.0205   | -0.02375 | 0.60872 | -0.13516 | 0.00343  | -0.08643 |
| 0.554777 | 4.77E-39 | 0.231576 | 4.19E-07 | -0.00987 | 0.83154 | -0.14142 | 0.00219  | 0.064549 |
| 0.468294 | 7.89E-27 | 0.292866 | 1.09E-10 | -0.02379 | 0.60804 | -0.13983 | 0.00246  | 0.02474  |
| 0.749189 | 3.16E-85 | 0.299899 | 3.68E-11 | -0.02132 | 0.64589 | -0.11023 | 0.01718  | 0.021835 |
| 0.614262 | 8.81E-50 | 0.244581 | 8.66E-08 | -0.03183 | 0.49255 | -0.14669 | 0.00148  | -0.09999 |
| 0.439318 | 1.86E-23 | 0.290135 | 1.65E-10 | -0.03293 | 0.47778 | -0.06425 | 0.16569  | 0.053626 |
| 0.507577 | 6.00E-32 | -0.00872 | 0.85097  | -0.07799 | 0.09231 | -0.20352 | 9.30E-06 | -0.10061 |
| 0.927553 | #####    | 0.440322 | 1.44E-23 | 0.021399 | 0.64461 | -0.07628 | 0.0997   | -0.01347 |
| 0.784682 | 1.26E-98 | 0.265852 | 5.38E-09 | -0.04629 | 0.31823 | -0.15448 | 0.00081  | -0.05862 |
| 0.550539 | 2.31E-38 | 0.372744 | 7.70E-17 | 0.011045 | 0.81185 | -0.02017 | 0.66374  | 0.126764 |
| 0.328062 | 3.52E-13 | 0.056139 | 0.22594  | -0.03287 | 0.47858 | -0.08268 | 0.07425  | 0.064822 |
| 0.452247 | 6.37E-25 | -0.11015 | 0.01725  | -0.05046 | 0.27648 | -0.19034 | 3.47E-05 | -0.05173 |
| 0.345861 | 1.44E-14 | 0.192007 | 2.95E-05 | 0.01744  | 0.70699 | -0.10926 | 0.01818  | 0.030514 |
| 0.297794 | 5.11E-11 | 0.147955 | 0.00134  | 0.030069 | 0.51686 | 0.021488 | 0.64324  | 0.029728 |
| 0.361712 | 7.00E-16 | 0.409247 | 2.77E-20 | 0.010039 | 0.8287  | 0.030401 | 0.51224  | 0.017684 |
| 0.40229  | 1.36E-19 | 0.027355 | 0.55542  | 0.039518 | 0.39419 | -0.0439  | 0.34389  | 0.00539  |
| 0.468928 | 6.60E-27 | -0.01895 | 0.68296  | -0.00942 | 0.83907 | -0.18071 | 8.60E-05 | -0.13197 |
| 0.069937 | 0.13126  | 0.038361 | 0.4082   | 0.002308 | 0.96033 | 0.030335 | 0.51315  | 0.125796 |
| 0.108742 | 0.01874  | 0.232615 | 3.71E-07 | 0.010863 | 0.81489 | 0.091371 | 0.04845  | 0.034282 |
| 0.029986 | 0.51801  | 0.017288 | 0.70942  | -0.01226 | 0.79165 | 0.011903 | 0.79752  | 0.049244 |
| -0.06916 | 0.13562  | 0.164695 | 0.00035  | 0.055812 | 0.22866 | 0.240009 | 1.52E-07 | 0.130877 |
| 0.018068 | 0.69695  | -0.03835 | 0.4083   | 0.00558  | 0.90428 | 0.030439 | 0.51171  | -0.0453  |
| 0.399468 | 2.56E-19 | 0.280141 | 7.21E-10 | 0.037371 | 0.42041 | 0.09434  | 0.04157  | 0.172252 |
| 0.084645 | 0.06761  | 0.175785 | 0.00013  | 0.008524 | 0.85424 | 0.13044  | 0.00475  | 0.126083 |
| 0.13332  | 0.0039   | 0.272165 | 2.24E-09 | 0.021285 | 0.64638 | 0.090364 | 0.05099  | 0.265685 |
| 0.183105 | 6.89E-05 | 0.223594 | 1.06E-06 | -0.01662 | 0.72014 | 0.049937 | 0.28151  | 0.07669  |
| -0.07806 | 0.09202  | 0.153076 | 0.0009   | -0.00656 | 0.88757 | 0.100223 | 0.03035  | 0.070236 |
| 0.041989 | 0.36527  | 0.162653 | 0.00042  | 0.05957  | 0.19879 | 0.15423  | 0.00083  | 0.102971 |
| 0.074077 | 0.10988  | 0.052662 | 0.25605  | 0.011261 | 0.80823 | 0.02988  | 0.51949  | 0.089126 |
| 0.093821 | 0.04271  | 0.166303 | 0.00031  | 0.019515 | 0.67402 | 0.064322 | 0.16522  | 0.106219 |
| 0.187626 | 4.50E-05 | 0.162393 | 0.00043  | 0.001908 | 0.9672  | -0.04363 | 0.34684  | 0.095089 |
| 0.187225 | 4.68E-05 | 0.38767  | 3.39E-18 | 0.056958 | 0.21923 | 0.169033 | 0.00024  | 0.228237 |
| -0.0234  | 0.61395  | -0.06092 | 0.18875  | -0.03435 | 0.45903 | -0.03988 | 0.38982  | 0.025354 |

|          |          |          |          |          |         |          |          |          |
|----------|----------|----------|----------|----------|---------|----------|----------|----------|
| 0.267464 | 4.31E-09 | 0.301402 | 2.91E-11 | 0.017934 | 0.69909 | 0.093505 | 0.04342  | 0.085103 |
| 0.127815 | 0.00567  | 0.236844 | 2.24E-07 | -0.01449 | 0.75485 | -0.04801 | 0.30052  | 0.002392 |
| 0.09793  | 0.03437  | 0.435143 | 5.36E-23 | 0.043368 | 0.34972 | 0.116847 | 0.0115   | 0.090837 |
| 0.073564 | 0.11237  | 0.151226 | 0.00104  | -0.0027  | 0.95368 | 0.038919 | 0.4014   | 0.084521 |
| 0.04439  | 0.33848  | 0.141235 | 0.00222  | -0.00035 | 0.99397 | 0.084204 | 0.06906  | 0.063388 |
| 0.164506 | 0.00036  | 0.147036 | 0.00144  | 0.026785 | 0.56369 | -0.006   | 0.8971   | 0.21289  |
| 0.401252 | 1.71E-19 | 0.435784 | 4.56E-23 | 0.044541 | 0.33684 | 0.057176 | 0.21747  | 0.16185  |
| 0.196278 | 1.94E-05 | 0.428572 | 2.76E-22 | 0.013393 | 0.77284 | 0.057139 | 0.21777  | 0.164043 |
| 0.058634 | 0.20595  | 0.051924 | 0.26279  | -0.02473 | 0.59397 | 0.017343 | 0.70855  | -0.02024 |
| 0.187636 | 4.50E-05 | 0.207758 | 5.98E-06 | 0.01046  | 0.82164 | 0.042543 | 0.35898  | 0.109945 |
| 0.016875 | 0.71606  | 0.088533 | 0.0559   | 0.009998 | 0.82939 | 0.062185 | 0.17975  | 0.142604 |
| 0.027601 | 0.55186  | 0.07915  | 0.08754  | -0.0176  | 0.70436 | 0.0208   | 0.65391  | -0.02251 |
| -0.05409 | 0.24335  | -0.07169 | 0.12187  | -0.00387 | 0.93346 | 0.015559 | 0.73736  | 0.004416 |
| 0.173921 | 0.00016  | 0.28391  | 4.16E-10 | 0.024518 | 0.59715 | 0.064644 | 0.16311  | 0.168084 |
| -0.02721 | 0.55758  | -0.14525 | 0.00165  | 0.011802 | 0.79922 | -0.02399 | 0.605    | 0.072811 |
| 0.150529 | 0.0011   | 0.304705 | 1.72E-11 | 0.014479 | 0.75499 | 0.053669 | 0.24706  | 0.092538 |
| 0.451208 | 8.40E-25 | 0.293776 | 9.48E-11 | -0.00468 | 0.91958 | -0.02269 | 0.62475  | 0.077445 |
| 0.009385 | 0.8397   | 0.087913 | 0.05764  | 0.072266 | 0.11887 | 0.180779 | 8.54E-05 | 0.201293 |
| -0.09689 | 0.03634  | -0.02328 | 0.61582  | 0.062574 | 0.17704 | 0.11016  | 0.01724  | 0.180397 |
| 0.08954  | 0.05315  | 0.099218 | 0.03206  | -0.01294 | 0.78034 | 0.062103 | 0.18032  | -0.00204 |
| 0.074343 | 0.10861  | 0.099883 | 0.03092  | 0.022833 | 0.6226  | 0.140243 | 0.00238  | 0.039755 |
| -0.12364 | 0.00747  | 0.065185 | 0.15961  | 0.015408 | 0.73981 | -0.04082 | 0.37877  | 0.140141 |
| 0.019196 | 0.67905  | 0.030289 | 0.51379  | -0.04481 | 0.33388 | -0.01579 | 0.73363  | -0.05618 |
| 0.341614 | 3.15E-14 | 0.304393 | 1.81E-11 | 0.018578 | 0.68884 | 0.063673 | 0.16953  | 0.16468  |
| -0.08396 | 0.06988  | 0.029836 | 0.52011  | 0.02617  | 0.57268 | 0.159916 | 0.00052  | 0.085403 |
| 0.092362 | 0.04606  | 0.38193  | 1.15E-17 | 0.070186 | 0.12989 | 0.211068 | 4.21E-06 | 0.210175 |
| 0.160794 | 0.00049  | 0.218402 | 1.89E-06 | 0.044934 | 0.33259 | 0.074993 | 0.10555  | 0.155309 |
| 0.102227 | 0.02717  | 0.224099 | 9.97E-07 | 0.020086 | 0.66505 | 0.097285 | 0.03558  | 0.09011  |
| 0.031875 | 0.49198  | 0.023442 | 0.61335  | -0.04742 | 0.30654 | -0.06935 | 0.13454  | -0.06785 |
| 0.066776 | 0.14964  | 0.174003 | 0.00016  | 0.036519 | 0.43109 | 0.061847 | 0.18213  | 0.09059  |
| 0.206771 | 6.63E-06 | 0.129371 | 0.00511  | -0.00393 | 0.93246 | 0.00541  | 0.90718  | 0.019409 |
| 0.113607 | 0.01403  | 0.213092 | 3.38E-06 | 0.020756 | 0.6546  | 0.069319 | 0.13471  | 0.095914 |
| 0.032448 | 0.48423  | 0.076532 | 0.09856  | -0.06945 | 0.134   | -0.01798 | 0.69831  | -0.00987 |
| 0.034368 | 0.45873  | -0.03984 | 0.39037  | 0.060373 | 0.19279 | 0.016405 | 0.72365  | 0.010868 |
| 0.026135 | 0.57319  | -0.03062 | 0.50918  | 0.038399 | 0.40774 | 0.005713 | 0.902    | -0.00424 |
| 0.018423 | 0.69131  | -0.01068 | 0.81792  | 0.009055 | 0.84526 | -0.01339 | 0.77288  | -0.02324 |
| -0.0061  | 0.89533  | -0.08099 | 0.08038  | 0.030892 | 0.50544 | 0.003428 | 0.94111  | -0.01786 |
| -0.05199 | 0.26221  | -0.12594 | 0.00643  | 0.023598 | 0.61099 | -0.01189 | 0.79776  | -0.04311 |
| 0.119161 | 0.00996  | 0.046219 | 0.31894  | 0.013501 | 0.77106 | 0.007649 | 0.86906  | -0.04983 |
| -0.01699 | 0.71427  | -0.07412 | 0.10969  | 0.052543 | 0.25713 | -0.04401 | 0.34259  | 0.024345 |
| -0.0045  | 0.92268  | -0.11256 | 0.01494  | 0.034926 | 0.45147 | 0.01001  | 0.82918  | -0.01712 |
| 0.024034 | 0.60442  | -0.00104 | 0.98203  | 0.047315 | 0.30758 | 0.022404 | 0.62915  | 0.014461 |
| 0.03774  | 0.41584  | -0.0234  | 0.61402  | 0.067589 | 0.14474 | 0.027492 | 0.55343  | 0.025135 |
| 0.020817 | 0.65364  | 0.064442 | 0.16443  | 0.001727 | 0.97032 | 0.000295 | 0.99493  | -0.03558 |
| 0.057853 | 0.21206  | -0.01435 | 0.75708  | 0.026204 | 0.57217 | -0.00179 | 0.96928  | -0.01242 |

|          |          |          |          |          |         |          |          |          |
|----------|----------|----------|----------|----------|---------|----------|----------|----------|
| 0.04066  | 0.38066  | -0.01443 | 0.75577  | 0.079884 | 0.08463 | 0.025608 | 0.58095  | 0.024112 |
| -0.02067 | 0.65588  | -0.02603 | 0.57471  | 0.04845  | 0.29611 | 0.043945 | 0.34335  | 0.014568 |
| 0.043172 | 0.35191  | -0.05122 | 0.26932  | 0.055538 | 0.23096 | 0.024377 | 0.59926  | 0.012569 |
| -0.07868 | 0.08944  | -0.14637 | 0.00152  | -0.00302 | 0.94818 | -0.04468 | 0.33537  | -0.07488 |
| 0.155415 | 0.00075  | 0.096805 | 0.0365   | 0.015469 | 0.73883 | -0.00706 | 0.87911  | 0.044232 |
| 0.12702  | 0.00598  | -0.01398 | 0.76321  | 0.070252 | 0.12953 | 0.035984 | 0.43787  | 0.032024 |
| 0.037622 | 0.41729  | -0.09372 | 0.04294  | 0.018979 | 0.68249 | 0.012925 | 0.78057  | 0.021985 |
| -0.01577 | 0.73392  | -0.0478  | 0.30265  | 0.033772 | 0.46657 | 0.002168 | 0.96274  | -0.03086 |
| 0.101907 | 0.02766  | -0.04916 | 0.28904  | 0.092248 | 0.04633 | 0.010436 | 0.82204  | -0.01867 |
| 0.028013 | 0.54593  | -0.04986 | 0.28229  | 0.110501 | 0.0169  | 0.046019 | 0.32103  | -0.0176  |
| 0.101085 | 0.02895  | -0.1299  | 0.00493  | 0.037039 | 0.42456 | -0.05809 | 0.21021  | -0.08865 |
| 0.236693 | 2.28E-07 | 0.041768 | 0.36781  | 0.060142 | 0.1945  | -0.00111 | 0.98092  | -0.02117 |
| 0.044373 | 0.33866  | -0.16335 | 0.00039  | 0.040042 | 0.38795 | -0.02052 | 0.65828  | -0.04591 |
| 0.044012 | 0.34261  | -0.08495 | 0.06662  | 0.047183 | 0.30893 | 0.0229   | 0.62159  | -0.00373 |
| -0.0147  | 0.7514   | -0.07499 | 0.10558  | 0.050585 | 0.27531 | 0.01587  | 0.73232  | 0.014504 |
| -0.11666 | 0.01164  | -0.3237  | 7.48E-13 | 0.019981 | 0.6667  | -0.06247 | 0.17777  | 0.049656 |
| -0.00169 | 0.97091  | -0.07517 | 0.10472  | 0.0679   | 0.1429  | 0.007063 | 0.879    | 0.024597 |
| -0.01855 | 0.68926  | -0.06993 | 0.1313   | 0.075335 | 0.10396 | 0.034968 | 0.45093  | -0.00034 |
| -0.02187 | 0.63742  | -0.04225 | 0.36233  | 0.028309 | 0.5417  | 0.059649 | 0.19819  | 0.178339 |
| 0.002039 | 0.96495  | -0.14127 | 0.00221  | 0.02613  | 0.57326 | -0.04103 | 0.37636  | 0.025654 |
| -0.08662 | 0.06143  | -0.13215 | 0.00423  | 0.04093  | 0.37751 | -0.0672  | 0.1471   | -0.07293 |
| 0.053953 | 0.24456  | 0.003355 | 0.94235  | 0.049129 | 0.28938 | 0.002039 | 0.96495  | 0.010221 |
| 0.110758 | 0.01664  | -0.20006 | 1.33E-05 | 0.01634  | 0.7247  | -0.06034 | 0.19301  | -0.05742 |
| 0.02878  | 0.53499  | 0.027988 | 0.54629  | 0.01887  | 0.68421 | 0.077343 | 0.09504  | 0.01105  |
| 0.053436 | 0.24912  | 0.015934 | 0.73126  | 0.02515  | 0.58774 | 0.027054 | 0.55976  | 0.027391 |
| 0.070216 | 0.12973  | 0.0767   | 0.09782  | 0.042702 | 0.35719 | 0.014163 | 0.76016  | 0.033426 |
| 0.055444 | 0.23175  | -0.02913 | 0.52999  | 0.02066  | 0.6561  | -0.01682 | 0.71695  | -0.0301  |
| 0.165504 | 0.00033  | -0.13301 | 0.00398  | 0.054962 | 0.23584 | -0.02616 | 0.57275  | 0.071421 |
| 0.030438 | 0.51172  | -0.04766 | 0.30409  | 0.052302 | 0.25932 | 0.01815  | 0.69564  | 0.016755 |
| 0.029091 | 0.53059  | -0.03201 | 0.49014  | 0.057802 | 0.21247 | 0.018428 | 0.69122  | 0.015715 |
| -0.0025  | 0.95711  | -0.00631 | 0.89187  | 0.050026 | 0.28065 | 0.049742 | 0.2834   | 0.084384 |
| 0.025727 | 0.57919  | -0.02832 | 0.54156  | 0.054676 | 0.23829 | 0.030987 | 0.50414  | 0.016076 |
| 0.024436 | 0.59839  | -0.02683 | 0.563    | 0.099152 | 0.03218 | 0.053617 | 0.24752  | 0.020163 |
| -0.00677 | 0.88407  | -0.00496 | 0.91479  | 0.104938 | 0.02333 | 0.114926 | 0.01295  | 0.037614 |
| 0.046521 | 0.31577  | -0.01421 | 0.75936  | 0.048931 | 0.29133 | -0.01147 | 0.80466  | 0.022123 |
| 0.079911 | 0.08452  | -0.09892 | 0.03258  | 0.111174 | 0.01624 | -0.00213 | 0.96334  | 0.009087 |
| -0.06678 | 0.14961  | -0.19939 | 1.42E-05 | 0.018897 | 0.68378 | 0.042977 | 0.35409  | 0.062919 |
| -0.01156 | 0.80332  | -0.12717 | 0.00592  | 0.035531 | 0.44367 | 0.007377 | 0.87368  | 0.047837 |
| 0.0575   | 0.21487  | -0.04153 | 0.37055  | 0.100464 | 0.02995 | 0.021315 | 0.64591  | -0.00244 |
| -0.01255 | 0.78671  | -0.07374 | 0.11149  | 0.072513 | 0.11761 | -0.01481 | 0.7496   | -0.03462 |
| 0.023664 | 0.60999  | -0.04225 | 0.36228  | 0.063087 | 0.1735  | -0.01933 | 0.67691  | -0.01847 |
| 0.057167 | 0.21754  | -0.09919 | 0.03212  | 0.048063 | 0.29999 | 0.000962 | 0.98346  | 0.013649 |
| 0.051684 | 0.265    | 0.062612 | 0.17677  | 0.122205 | 0.0082  | 0.179093 | 9.97E-05 | 0.071908 |
| 0.025702 | 0.57955  | -0.05278 | 0.25502  | 0.041158 | 0.37485 | 0.008458 | 0.85536  | 0.00448  |
| 0.063727 | 0.16918  | -0.00152 | 0.97379  | 0.145957 | 0.00156 | 0.029618 | 0.52316  | 0.026459 |

|          |         |          |          |          |          |          |          |          |
|----------|---------|----------|----------|----------|----------|----------|----------|----------|
| 0.11118  | 0.01623 | -0.00319 | 0.94526  | 0.071248 | 0.12417  | 0.02917  | 0.52946  | 0.035401 |
| 0.057553 | 0.21445 | -0.0525  | 0.25753  | 0.100537 | 0.02983  | 0.023957 | 0.60558  | 0.019784 |
| 0.058763 | 0.20495 | 0.008775 | 0.85     | 0.043908 | 0.34376  | -0.02567 | 0.58003  | 0.067457 |
| -0.04773 | 0.30334 | -0.05457 | 0.23917  | 0.02092  | 0.65204  | -0.02781 | 0.54887  | -0.0473  |
| -0.02813 | 0.54432 | 0.111085 | 0.01633  | -0.01901 | 0.68194  | 0.009399 | 0.83947  | 0.012773 |
| 0.023525 | 0.61209 | -0.06361 | 0.16997  | 0.033948 | 0.46425  | -0.00534 | 0.90844  | -0.01042 |
| 0.073242 | 0.11396 | -0.02965 | 0.52265  | 0.098531 | 0.03328  | 0.031291 | 0.49995  | 0.044346 |
| -0.01794 | 0.69893 | -0.11699 | 0.0114   | 0.050488 | 0.27623  | -0.05945 | 0.19971  | 0.022311 |
| -0.02434 | 0.59979 | -0.03823 | 0.40983  | 0.058426 | 0.20756  | 0.003293 | 0.94342  | -0.03252 |
| 0.027409 | 0.55463 | -0.17877 | 0.0001   | 0.056257 | 0.22496  | -0.02854 | 0.53841  | -0.01485 |
| 0.036305 | 0.43379 | -0.09461 | 0.04099  | 0.0697   | 0.13258  | -0.00591 | 0.89865  | 0.001437 |
| -0.0232  | 0.61696 | -0.12637 | 0.00625  | 0.034124 | 0.46194  | -0.00813 | 0.86098  | 0.004725 |
| 0.09904  | 0.03237 | 0.047515 | 0.30554  | 0.04426  | 0.33989  | 0.008097 | 0.86147  | 0.029135 |
| 0.028327 | 0.54144 | -0.03842 | 0.40747  | 0.008738 | 0.85063  | 0.034577 | 0.45601  | -0.10771 |
| 0.018852 | 0.68449 | -0.07252 | 0.11759  | 0.058589 | 0.2063   | 0.012605 | 0.78587  | -0.00795 |
| 0.023422 | 0.61365 | -0.06795 | 0.14263  | 0.105564 | 0.02252  | 0.026048 | 0.57447  | 0.230684 |
| 0.022734 | 0.6241  | -0.0038  | 0.93469  | 0.054955 | 0.2359   | 0.012937 | 0.78038  | 0.187333 |
| 0.022994 | 0.62016 | 0.000173 | 0.99703  | 0.047285 | 0.30789  | 0.018192 | 0.69498  | -0.00072 |
| 0.060224 | 0.19389 | -0.00903 | 0.84575  | 0.056231 | 0.22518  | 0.034053 | 0.46287  | 0.018542 |
| 0.039336 | 0.39638 | -0.01413 | 0.76076  | 0.052382 | 0.25859  | 0.033335 | 0.47237  | 0.021153 |
| 0.025987 | 0.57537 | -0.05532 | 0.23277  | 0.054456 | 0.24019  | 0.052181 | 0.26043  | -0.00811 |
| 0.035045 | 0.44993 | -0.04327 | 0.35079  | 0.07041  | 0.12867  | 0.023485 | 0.6127   | 0.029415 |
| 0.004175 | 0.9283  | -0.10894 | 0.01852  | 0.027379 | 0.55506  | 0.023606 | 0.61087  | 0.087921 |
| -0.00247 | 0.95761 | -0.07272 | 0.11658  | 0.045699 | 0.32441  | 0.017312 | 0.70904  | 0.004734 |
| 0.072046 | 0.12    | 0.14826  | 0.00131  | 0.142379 | 0.00204  | 0.116562 | 0.01171  | 0.073208 |
| 0.12089  | 0.00892 | -0.00555 | 0.90479  | 0.054855 | 0.23675  | -0.00339 | 0.94182  | 0.014894 |
| 0.002914 | 0.94992 | -0.0254  | 0.58397  | 0.212638 | 3.55E-06 | 0.190172 | 3.53E-05 | 0.243663 |
| -0.03148 | 0.49737 | -0.17305 | 0.00017  | 0.038521 | 0.40624  | 0.006975 | 0.88051  | 0.065155 |
| 0.02429  | 0.60057 | -0.18936 | 3.82E-05 | -0.00497 | 0.91469  | -0.08228 | 0.07566  | -0.09814 |
| 0.03741  | 0.41992 | -0.08876 | 0.05528  | 0.017035 | 0.71349  | -0.02813 | 0.54432  | -0.06163 |
| 0.033289 | 0.47297 | -0.0487  | 0.29361  | 0.085558 | 0.0647   | 0.022854 | 0.62229  | 0.003984 |
| 0.033069 | 0.4759  | -0.10528 | 0.02289  | 0.055101 | 0.23466  | 0.015612 | 0.7365   | 0.012185 |
| 0.056971 | 0.21913 | 0.09917  | 0.03214  | 0.019895 | 0.66804  | -0.00527 | 0.90949  | -0.02361 |
| 0.06426  | 0.16563 | -0.05772 | 0.21312  | 0.047267 | 0.30807  | 0.007355 | 0.87405  | 0.011078 |
| 0.003557 | 0.93889 | -0.04808 | 0.29983  | 0.041888 | 0.36643  | 0.001551 | 0.97333  | 0.007615 |
| 0.057942 | 0.21136 | -0.00251 | 0.95693  | 0.532001 | 1.76E-35 | 0.146689 | 0.00148  | 0.187808 |
| 0.007996 | 0.86318 | 0.02138  | 0.64492  | 0.022691 | 0.62476  | -0.02263 | 0.62563  | 0.014222 |
| -0.00782 | 0.86608 | -0.00132 | 0.97735  | 0.371672 | 9.58E-17 | 0.100847 | 0.02933  | 0.060538 |
| 0.03239  | 0.48501 | -0.00962 | 0.8357   | 0.04714  | 0.30937  | 0.02396  | 0.60553  | 0.010955 |
| 0.051492 | 0.26678 | 0.009036 | 0.84559  | 0.080264 | 0.08315  | 0.082692 | 0.07422  | -0.00033 |
| 0.040296 | 0.38495 | -0.06194 | 0.18148  | 0.096241 | 0.03761  | 0.114595 | 0.01321  | 0.039081 |
| 0.020932 | 0.65186 | -0.06396 | 0.1676   | 0.051198 | 0.26952  | 0.018234 | 0.69431  | 0.005295 |
| -0.00841 | 0.85615 | -0.07027 | 0.12945  | 0.089393 | 0.05355  | 0.133822 | 0.00377  | 0.035491 |
| 0.016038 | 0.72959 | -0.00758 | 0.87027  | 0.020317 | 0.66144  | -0.03356 | 0.46936  | -0.04984 |
| 0.039824 | 0.39054 | -0.03307 | 0.47584  | 0.06783  | 0.14331  | 0.021783 | 0.63869  | 0.06399  |

|          |         |          |         |          |         |          |         |          |
|----------|---------|----------|---------|----------|---------|----------|---------|----------|
| 0.056816 | 0.22038 | -0.01138 | 0.80618 | 0.111568 | 0.01586 | 0.014039 | 0.76221 | 0.021474 |
| 0.079075 | 0.08784 | 0.010689 | 0.8178  | 0.100576 | 0.02977 | 0.015572 | 0.73715 | 0.046374 |
| -0.00174 | 0.97003 | -0.1249  | 0.00688 | 0.052087 | 0.26128 | -0.0092  | 0.84287 | 0.003062 |
| -0.00309 | 0.94691 | -0.0391  | 0.39918 | 0.031047 | 0.50331 | -0.00904 | 0.84551 | -0.01183 |
| 0.060066 | 0.19507 | -0.00773 | 0.8677  | 0.085899 | 0.06363 | 0.020669 | 0.65595 | 0.018103 |
| 0.112174 | 0.0153  | -0.0099  | 0.83096 | 0.016278 | 0.72569 | -0.00214 | 0.96326 | -0.01445 |
| -0.03527 | 0.44699 | -0.17847 | 0.00011 | 0.044953 | 0.33238 | -0.00165 | 0.97158 | 0.040704 |
| 0.072466 | 0.11785 | 0.051467 | 0.26701 | 0.036457 | 0.43187 | 0.004549 | 0.9219  | -0.04699 |
| 0.041672 | 0.36891 | 0.057521 | 0.2147  | 0.003997 | 0.93134 | -0.05654 | 0.2226  | -0.04288 |
| 0.057765 | 0.21276 | -0.01283 | 0.78214 | 0.070938 | 0.12582 | 0.022459 | 0.62832 | 0.024623 |
| 0.043112 | 0.35258 | -0.02039 | 0.66025 | 0.047623 | 0.30444 | 0.040245 | 0.38555 | 0.013465 |
| 0.051973 | 0.26233 | -0.05788 | 0.21182 | 0.029325 | 0.52728 | -0.02908 | 0.53076 | -0.03852 |
| 0.020634 | 0.65649 | -0.02472 | 0.59411 | 0.066087 | 0.1539  | 0.036981 | 0.42528 | 0.014525 |
| 0.002756 | 0.95264 | -0.04611 | 0.32009 | 0.074784 | 0.10652 | 0.010901 | 0.81424 | 0.009172 |
| 0.023899 | 0.60645 | -0.01261 | 0.78582 | 0.05414  | 0.24293 | 0.01652  | 0.7218  | 0.009654 |
| -0.03514 | 0.44876 | -0.06354 | 0.17045 | 0.039291 | 0.39691 | 0.070828 | 0.12641 | -0.00335 |
| 0.027267 | 0.55669 | -0.02598 | 0.57553 | 0.063464 | 0.17095 | 0.022614 | 0.62595 | 0.016246 |
| 0.094803 | 0.04058 | -0.0163  | 0.72536 | 0.113795 | 0.01387 | 0.021645 | 0.64083 | -0.00665 |
| 0.036529 | 0.43097 | 0.006456 | 0.88933 | 0.062312 | 0.17886 | 0.009429 | 0.83896 | 0.014814 |
| 0.020257 | 0.66238 | -0.02797 | 0.54658 | 0.04257  | 0.35868 | 0.010037 | 0.82874 | -0.02053 |
| 0.068844 | 0.13741 | 0.031575 | 0.49607 | 0.090621 | 0.05033 | 0.010766 | 0.8165  | 0.037514 |
| 0.028396 | 0.54046 | -0.0431  | 0.35269 | 0.053133 | 0.25181 | -0.00051 | 0.99129 | -0.01893 |
| 0.06123  | 0.18654 | -0.05039 | 0.27716 | 0.062296 | 0.17898 | 0.009993 | 0.82948 | 0.008755 |
| 0.121723 | 0.00846 | -0.03418 | 0.46117 | -0.01065 | 0.81846 | -0.02492 | 0.5912  | -0.05284 |
| 0.038528 | 0.40615 | -0.03742 | 0.41978 | 0.040123 | 0.38699 | 0.000888 | 0.98474 | 0.013622 |
| 0.086248 | 0.06256 | -0.02683 | 0.56302 | 0.079826 | 0.08485 | 0.014779 | 0.75007 | 0.034456 |
| 0.091546 | 0.04802 | -0.01001 | 0.82926 | 0.006549 | 0.88775 | -0.07728 | 0.0953  | -0.04874 |
| 0.04521  | 0.32962 | -0.0833  | 0.07212 | 0.042348 | 0.36118 | -0.00843 | 0.85584 | -0.01727 |
| 0.092337 | 0.04611 | 0.030178 | 0.51534 | 0.045304 | 0.32862 | -0.00626 | 0.89268 | -0.0341  |
| 0.04504  | 0.33144 | 0.062066 | 0.18058 | 0.0071   | 0.87838 | -0.03873 | 0.40376 | -0.0885  |
| -0.03282 | 0.4792  | -0.09341 | 0.04364 | 0.025816 | 0.57787 | -0.01186 | 0.79829 | -0.04345 |
| 0.089601 | 0.05299 | -0.03101 | 0.50383 | 0.053422 | 0.24925 | -0.02409 | 0.60362 | -0.01857 |
| 0.058248 | 0.20895 | -0.03885 | 0.40225 | 0.051347 | 0.26813 | -0.01122 | 0.809   | -0.017   |
| 0.068174 | 0.14129 | -0.00883 | 0.84913 | 0.049341 | 0.28731 | 0.001744 | 0.97001 | 0.136029 |
| 0.023627 | 0.61055 | -0.04835 | 0.29707 | 0.076652 | 0.09804 | -0.01398 | 0.76325 | -0.01761 |
| 0.101235 | 0.02871 | 0.155913 | 0.00072 | 0.025252 | 0.58622 | 0.000419 | 0.9928  | 0.057004 |
| 0.037197 | 0.42257 | -0.01737 | 0.70804 | 0.05908  | 0.20252 | 0.010663 | 0.81824 | 0.016564 |
| 0.075032 | 0.10536 | -0.08057 | 0.08197 | 0.061028 | 0.188   | -0.01701 | 0.71386 | 0.023951 |
| 0.012025 | 0.7955  | -0.0393  | 0.39683 | 0.078958 | 0.08831 | 0.03925  | 0.39741 | -0.00523 |
| -0.02672 | 0.56457 | -0.10388 | 0.02477 | 0.036068 | 0.4368  | -0.02723 | 0.5572  | -0.04063 |
| 0.008052 | 0.86222 | -0.1297  | 0.005   | 0.036498 | 0.43136 | -0.02173 | 0.63949 | -0.0044  |
| 0.143783 | 0.00184 | -0.06107 | 0.18769 | 0.081857 | 0.0772  | -0.00429 | 0.92631 | -0.00511 |
| 0.094298 | 0.04166 | -0.04486 | 0.33343 | 0.115648 | 0.01239 | 0.014563 | 0.75361 | -0.0029  |
| 0.088388 | 0.0563  | -0.04751 | 0.30562 | 0.053291 | 0.25041 | 0.005743 | 0.9015  | 0.001205 |
| 0.013719 | 0.76747 | -0.03749 | 0.4189  | 0.054555 | 0.23933 | -0.00214 | 0.9633  | -0.0033  |

|          |         |          |         |          |          |          |         |          |
|----------|---------|----------|---------|----------|----------|----------|---------|----------|
| 0.016352 | 0.7245  | -0.06381 | 0.1686  | 0.063661 | 0.16962  | 0.003326 | 0.94286 | -0.02074 |
| 0.065402 | 0.15822 | -0.08527 | 0.06559 | 0.113946 | 0.01375  | 0.031831 | 0.49258 | 0.003138 |
| 0.027343 | 0.55558 | -0.07682 | 0.0973  | 0.059129 | 0.20214  | 0.015386 | 0.74018 | 0.020117 |
| 0.016182 | 0.72726 | -0.04898 | 0.29088 | 0.05888  | 0.20405  | 0.013666 | 0.76834 | 0.02241  |
| 0.024664 | 0.59497 | -0.07097 | 0.12564 | 0.057577 | 0.21426  | 0.012984 | 0.7796  | 0.029897 |
| 0.019654 | 0.67183 | -0.00592 | 0.8985  | 0.066172 | 0.15337  | 0.035092 | 0.44933 | 0.019731 |
| 0.016909 | 0.71551 | -0.02522 | 0.58674 | 0.051493 | 0.26678  | 0.011087 | 0.81114 | 0.006075 |
| 0.035933 | 0.43852 | -0.04133 | 0.37282 | 0.123042 | 0.00777  | 0.019904 | 0.66791 | 0.001154 |
| 0.040994 | 0.37676 | -0.00941 | 0.83924 | 0.079994 | 0.0842   | 0.011935 | 0.79699 | 0.016443 |
| 0.066874 | 0.14905 | -0.01196 | 0.79657 | 0.109519 | 0.01791  | 0.021102 | 0.64921 | 0.010544 |
| -0.00681 | 0.88333 | -0.02228 | 0.63101 | 0.028765 | 0.53521  | -0.00708 | 0.87866 | -0.01648 |
| 0.053957 | 0.24453 | -0.01717 | 0.71133 | 0.061874 | 0.18194  | 0.019102 | 0.68054 | 0.01791  |
| -0.01693 | 0.71515 | -0.01177 | 0.79969 | 0.032915 | 0.47796  | 0.018983 | 0.68242 | 0.014924 |
| 0.021972 | 0.63579 | -0.02924 | 0.52853 | 0.050178 | 0.2792   | 0.028663 | 0.53665 | 0.142927 |
| 0.019123 | 0.68021 | -0.05063 | 0.27491 | 0.045286 | 0.32881  | 0.016649 | 0.7197  | 0.024148 |
| 0.013045 | 0.77859 | -0.06673 | 0.14992 | 0.056967 | 0.21916  | 0.015702 | 0.73504 | 0.019216 |
| 0.032365 | 0.48535 | -0.02596 | 0.5757  | 0.092486 | 0.04576  | 0.015877 | 0.73219 | -0.00637 |
| 0.026333 | 0.57028 | -0.06125 | 0.18642 | 0.078848 | 0.08876  | 0.021919 | 0.6366  | 0.010147 |
| 0.046309 | 0.31799 | 0.025883 | 0.57689 | 0.041915 | 0.36612  | 0.007805 | 0.86641 | 0.020469 |
| 0.036067 | 0.43681 | -0.00236 | 0.9594  | 0.058135 | 0.20984  | 0.043315 | 0.35031 | 0.034784 |
| 0.005148 | 0.91166 | -0.03186 | 0.49224 | 0.070287 | 0.12934  | 0.010438 | 0.822   | -0.00141 |
| 0.019864 | 0.66854 | -0.07883 | 0.08884 | 0.053492 | 0.24862  | 0.021812 | 0.63825 | 0.026689 |
| 0.061739 | 0.1829  | 0.005198 | 0.9108  | 0.067321 | 0.14634  | -0.00945 | 0.8386  | -0.00054 |
| 0.075252 | 0.10434 | -0.01183 | 0.7987  | 0.078938 | 0.08839  | 0.001542 | 0.97348 | 0.016193 |
| 0.041725 | 0.36831 | -0.05066 | 0.27458 | 0.039739 | 0.39155  | 0.001655 | 0.97155 | -0.02429 |
| 0.088273 | 0.05662 | 0.002834 | 0.9513  | 0.06658  | 0.15085  | 0.000683 | 0.98826 | 0.008927 |
| 0.097126 | 0.03588 | -0.01622 | 0.72662 | 0.104992 | 0.02326  | 0.01355  | 0.77026 | 0.019864 |
| 0.023533 | 0.61197 | -0.10038 | 0.03008 | 0.139876 | 0.00245  | 0.037922 | 0.41359 | 0.014363 |
| 0.138965 | 0.00262 | -0.05707 | 0.21835 | 0.03633  | 0.43348  | -0.08898 | 0.05466 | -0.0122  |
| 0.044339 | 0.33903 | -0.10183 | 0.02778 | 0.056388 | 0.22389  | -0.0129  | 0.78094 | -0.00604 |
| 0.022667 | 0.62513 | -0.05171 | 0.26476 | 0.05913  | 0.20213  | 0.02198  | 0.63566 | 0.006815 |
| 0.085881 | 0.06369 | 0.026779 | 0.56378 | 0.071965 | 0.12042  | -0.00831 | 0.85793 | -0.00339 |
| 0.07307  | 0.11481 | -0.01477 | 0.75025 | 0.196548 | 1.89E-05 | 0.041367 | 0.37242 | 0.028764 |
| 0.01205  | 0.79508 | -0.01634 | 0.72469 | 0.055721 | 0.22942  | 0.020418 | 0.65987 | 0.029653 |
| -0.0205  | 0.65854 | -0.07553 | 0.10305 | 0.075095 | 0.10507  | 0.010104 | 0.82761 | 0.009796 |
| 0.021928 | 0.63645 | -0.06709 | 0.14774 | 0.061556 | 0.1842   | 0.015891 | 0.73197 | 0.014409 |
| 0.035345 | 0.44606 | -0.04327 | 0.35077 | 0.074458 | 0.10806  | 0.017166 | 0.71138 | 0.004457 |
| 0.055503 | 0.23125 | -0.05084 | 0.27285 | 0.061034 | 0.18796  | 0.019452 | 0.67502 | 0.010386 |
| 0.010965 | 0.81318 | -0.02964 | 0.52287 | 0.048833 | 0.2923   | 0.018107 | 0.69634 | -0.00426 |
| 0.073642 | 0.11199 | -0.00403 | 0.93079 | 0.045903 | 0.32226  | 0.012364 | 0.78986 | 0.016162 |
| 0.006631 | 0.88636 | -0.03086 | 0.5059  | 0.026843 | 0.56284  | -0.01855 | 0.68925 | -0.03165 |
| 0.034373 | 0.45867 | -0.01963 | 0.67218 | 0.058614 | 0.2061   | 0.042418 | 0.36039 | 0.006407 |
| 0.033349 | 0.47218 | 0.013077 | 0.77806 | 0.051544 | 0.2663   | -0.00775 | 0.8674  | 0.009251 |
| 0.060216 | 0.19395 | 0.043885 | 0.344   | 0.061009 | 0.18814  | 0.00334  | 0.94261 | -0.03138 |
| 0.024994 | 0.59005 | -0.04245 | 0.36004 | 0.050798 | 0.27329  | 0.006196 | 0.89377 | -0.00582 |



|          |         |          |         |          |         |          |         |          |
|----------|---------|----------|---------|----------|---------|----------|---------|----------|
| 0.016876 | 0.71605 | -0.02807 | 0.54513 | 0.050503 | 0.27609 | 0.042624 | 0.35806 | 0.012626 |
| 0.030893 | 0.50543 | -0.05549 | 0.23139 | 0.061324 | 0.18586 | 0.055478 | 0.23146 | 0.016448 |
| 0.017981 | 0.69834 | -0.03893 | 0.4013  | 0.038158 | 0.41068 | -0.02624 | 0.57169 | -0.01845 |
| 0.006735 | 0.88458 | -0.06137 | 0.18553 | 0.026058 | 0.57432 | -0.00877 | 0.85002 | -0.02561 |
| 0.036009 | 0.43755 | -0.05819 | 0.20942 | 0.066895 | 0.14892 | 0.014588 | 0.7532  | 0.010119 |
| 0.037544 | 0.41826 | 0.070753 | 0.12681 | 0.07146  | 0.12305 | 0.045638 | 0.32505 | 0.009803 |
| 0.031095 | 0.50265 | -0.0427  | 0.35718 | 0.042719 | 0.35699 | -0.00769 | 0.86833 | -0.03505 |
| 0.035947 | 0.43834 | -0.01078 | 0.81633 | 0.060001 | 0.19555 | 0.020213 | 0.66307 | 0.003576 |
| 0.094813 | 0.04055 | 0.068389 | 0.14003 | 0.04059  | 0.38148 | 0.009093 | 0.84463 | 0.05248  |
| 0.022454 | 0.6284  | 0.072083 | 0.11981 | 0.060336 | 0.19306 | 0.032152 | 0.48822 | 0.020541 |
| 0.023406 | 0.6139  | 0.004808 | 0.91746 | 0.049074 | 0.28992 | 0.019766 | 0.67008 | 0.004852 |
| 0.000171 | 0.99706 | -0.06904 | 0.13627 | 0.073788 | 0.11128 | 0.00623  | 0.89319 | -0.01877 |
| 0.038736 | 0.40362 | -0.00435 | 0.9253  | 0.073445 | 0.11295 | 0.015621 | 0.73635 | 0.018993 |
| 0.034426 | 0.45798 | -0.01867 | 0.68739 | 0.067027 | 0.14812 | 0.018877 | 0.68409 | 0.016746 |
| 0.033953 | 0.46419 | -0.01167 | 0.80147 | 0.054439 | 0.24033 | 0.025089 | 0.58864 | 0.018906 |
| -0.02744 | 0.55419 | -0.06336 | 0.17167 | 0.04245  | 0.36003 | -0.01667 | 0.71932 | -0.03468 |
| 0.043787 | 0.34509 | -0.01455 | 0.75387 | 0.060254 | 0.19367 | 0.028979 | 0.53216 | 0.008658 |
| 0.007867 | 0.86536 | -0.03746 | 0.41926 | 0.027695 | 0.55051 | -0.01719 | 0.71105 | 0.002564 |
| 0.052391 | 0.25851 | -0.05446 | 0.24012 | 0.050539 | 0.27575 | 0.015233 | 0.74266 | -0.00206 |
| 0.049458 | 0.28616 | -0.00608 | 0.89573 | 0.051801 | 0.26392 | 0.006362 | 0.89093 | -0.00435 |
| 0.0464   | 0.31703 | -0.04573 | 0.32407 | 0.067122 | 0.14754 | 0.009532 | 0.83723 | 0.009969 |
| 0.013316 | 0.77412 | -0.07714 | 0.09592 | 0.096118 | 0.03786 | 0.021802 | 0.6384  | 0.007062 |
| -0.01092 | 0.81391 | -0.05876 | 0.20495 | 0.038036 | 0.41218 | -0.00667 | 0.88572 | -0.00208 |
| 0.066301 | 0.15257 | -0.00303 | 0.94801 | 0.131592 | 0.00439 | 0.03858  | 0.40552 | 0.020416 |
| 0.011827 | 0.79879 | -0.0928  | 0.04503 | 0.064969 | 0.161   | 0.039328 | 0.39648 | 0.034235 |
| 0.049444 | 0.2863  | 0.037162 | 0.42301 | 0.051259 | 0.26896 | -0.00748 | 0.87197 | -0.04232 |
| 0.004991 | 0.91434 | -0.06793 | 0.1427  | 0.068941 | 0.13685 | 0.005874 | 0.89926 | 0.064036 |
| 0.058915 | 0.20378 | -0.15862 | 0.00058 | 0.030949 | 0.50465 | -0.06974 | 0.13235 | -0.02417 |
| 0.004478 | 0.92312 | -0.04348 | 0.34847 | 0.05727  | 0.21671 | 0.015679 | 0.73541 | 0.007684 |
| 0.00101  | 0.98263 | 0.042615 | 0.35816 | 0.026405 | 0.56923 | 0.016977 | 0.71443 | 0.027009 |
| -0.0567  | 0.2213  | -0.06588 | 0.15522 | 0.037689 | 0.41646 | 0.032049 | 0.48962 | -0.01202 |
| 0.022891 | 0.62171 | -0.03165 | 0.49511 | 0.063387 | 0.17147 | -0.00855 | 0.8538  | -0.01499 |
| 0.014289 | 0.75811 | 0.002231 | 0.96166 | 0.055854 | 0.22831 | 0.017707 | 0.70272 | -0.00301 |
| 0.077216 | 0.09558 | -0.04539 | 0.32773 | 0.05198  | 0.26226 | -0.0057  | 0.9023  | -0.03144 |
| -0.0317  | 0.4943  | -0.17331 | 0.00017 | 0.032661 | 0.48137 | 0.033915 | 0.46468 | 0.006338 |
| 0.038055 | 0.41195 | -0.00669 | 0.88544 | 0.041474 | 0.37119 | 0.01567  | 0.73555 | 0.007165 |
| 0.030845 | 0.50609 | -0.06394 | 0.16774 | 0.117239 | 0.01123 | 0.016257 | 0.72603 | 0.011655 |
| 0.049145 | 0.28922 | -0.00991 | 0.83088 | 0.099374 | 0.03179 | 0.070279 | 0.12938 | 0.032852 |
| -0.02595 | 0.57593 | -0.12818 | 0.00554 | 0.01082  | 0.8156  | -0.0537  | 0.24677 | -0.06014 |
| 0.023723 | 0.6091  | 0.000617 | 0.98939 | 0.025531 | 0.58209 | -0.01998 | 0.66666 | -0.00744 |
| 0.068052 | 0.142   | -0.01734 | 0.70854 | 0.096903 | 0.03631 | 0.0234   | 0.61398 | 0.015139 |
| 0.085835 | 0.06383 | 0.059843 | 0.19674 | 0.040659 | 0.38068 | -0.04479 | 0.33415 | -0.01268 |
| 0.03414  | 0.46173 | -0.03918 | 0.39824 | 0.058043 | 0.21056 | 0.017082 | 0.71274 | 0.016969 |
| -0.02761 | 0.55178 | 0.006557 | 0.88762 | 0.016319 | 0.72505 | 0.013719 | 0.76747 | -0.02302 |
| -0.01416 | 0.76029 | -0.07446 | 0.10804 | 0.026901 | 0.56199 | 0.02002  | 0.6661  | 0.023933 |

|          |          |          |          |          |         |          |          |          |
|----------|----------|----------|----------|----------|---------|----------|----------|----------|
| 0.062073 | 0.18053  | -0.02973 | 0.52158  | 0.119887 | 0.00951 | 0.031382 | 0.49871  | 0.069018 |
| 0.029828 | 0.52021  | 0.033722 | 0.46724  | 0.07967  | 0.08547 | 0.074532 | 0.10771  | 0.064622 |
| 0.116094 | 0.01205  | -0.02139 | 0.64481  | 0.085613 | 0.06452 | 0.018951 | 0.68293  | 0.012877 |
| 0.005138 | 0.91183  | -0.00855 | 0.85381  | 0.035372 | 0.44571 | -0.03286 | 0.47871  | -0.03578 |
| 0.065377 | 0.15838  | -0.02929 | 0.52774  | 0.077759 | 0.09327 | -0.01526 | 0.74218  | 0.022153 |
| -0.00194 | 0.96672  | -0.08018 | 0.08348  | 0.062688 | 0.17625 | 0.002885 | 0.95042  | -0.00072 |
| 0.221315 | 1.37E-06 | 0.025638 | 0.58051  | 0.020407 | 0.66004 | -0.04216 | 0.36336  | -0.04248 |
| 0.062833 | 0.17525  | -0.00081 | 0.98612  | 0.058542 | 0.20666 | 0.004058 | 0.9303   | -0.00996 |
| 0.003111 | 0.94654  | -0.01799 | 0.69825  | 0.050131 | 0.27964 | 0.020676 | 0.65584  | 0.030197 |
| -0.01379 | 0.76622  | -0.11651 | 0.01175  | 0.043502 | 0.34824 | 0.065617 | 0.15686  | -0.01474 |
| 0.091425 | 0.04832  | -0.01461 | 0.75277  | 0.083382 | 0.07183 | 0.015216 | 0.74294  | -0.03083 |
| -0.03566 | 0.44195  | -0.13635 | 0.00315  | 0.06854  | 0.13916 | -0.00467 | 0.91977  | -0.00518 |
| 0.07531  | 0.10407  | 0.061141 | 0.18718  | 0.096551 | 0.037   | 0.02018  | 0.66358  | 0.032984 |
| -0.00843 | 0.85589  | -0.04891 | 0.29158  | 0.018471 | 0.69054 | -0.01485 | 0.74884  | -0.00686 |
| -0.04411 | 0.34149  | -0.08765 | 0.05839  | 0.02277  | 0.62356 | -0.02161 | 0.64143  | -0.03558 |
| 0.019123 | 0.68021  | -0.05063 | 0.27491  | 0.045286 | 0.32881 | 0.016649 | 0.7197   | 0.024148 |
| 0.043785 | 0.34511  | -0.0447  | 0.33507  | 0.053218 | 0.25105 | 0.007536 | 0.87097  | -0.00248 |
| -0.00891 | 0.84779  | -0.09884 | 0.03272  | 0.041011 | 0.37655 | 0.017092 | 0.71257  | -0.01623 |
| 0.097782 | 0.03464  | 0.083645 | 0.07093  | 0.050342 | 0.27763 | 0.040063 | 0.3877   | 0.112209 |
| -0.00425 | 0.92696  | -0.04789 | 0.30172  | 0.034013 | 0.4634  | -0.02166 | 0.64059  | 0.010999 |
| 0.036848 | 0.42695  | -0.0425  | 0.35943  | 0.0415   | 0.37089 | -0.01687 | 0.71622  | 0.037204 |
| 0.009043 | 0.84547  | -0.03713 | 0.42344  | 0.042215 | 0.3627  | -0.00891 | 0.84768  | -0.01175 |
| 0.02072  | 0.65516  | -0.09753 | 0.03512  | 0.02862  | 0.53727 | -0.02251 | 0.62758  | -0.02258 |
| -0.03473 | 0.45396  | -0.09501 | 0.04013  | 0.012623 | 0.78558 | -0.01714 | 0.71179  | -0.01493 |
| 0.167953 | 0.00027  | 0.079803 | 0.08494  | 0.067814 | 0.14341 | 0.014462 | 0.75526  | 0.010275 |
| 0.105938 | 0.02204  | 0.029378 | 0.52653  | 0.026879 | 0.56232 | 0.004431 | 0.92392  | -0.00446 |
| 0.035352 | 0.44597  | -0.02019 | 0.6635   | 0.062512 | 0.17747 | 0.024621 | 0.59561  | 0.015532 |
| 0.014235 | 0.75898  | 0.042469 | 0.35982  | 0.018171 | 0.69531 | -0.05638 | 0.22399  | 0.084022 |
| 0.110471 | 0.01693  | 0.06513  | 0.15997  | -0.03623 | 0.43476 | -0.11683 | 0.01152  | 0.012663 |
| 0.120155 | 0.00935  | -0.03903 | 0.4001   | -0.03782 | 0.41479 | -0.16527 | 0.00033  | -0.04739 |
| -0.07121 | 0.1244   | -0.26463 | 6.35E-09 | -0.02313 | 0.61811 | 0.020688 | 0.65565  | -0.02071 |
| 0.106006 | 0.02196  | 0.080163 | 0.08354  | -0.02348 | 0.61285 | -0.06157 | 0.18412  | 0.014985 |
| -0.05262 | 0.25644  | 0.013558 | 0.77012  | 0.008133 | 0.86086 | -0.02729 | 0.55629  | 0.049915 |
| -0.25157 | 3.57E-08 | -0.07043 | 0.12854  | 0.076721 | 0.09773 | 0.14232  | 0.00205  | 0.092675 |
| 0.112865 | 0.01468  | 0.13369  | 0.0038   | 0.021948 | 0.63615 | -0.02709 | 0.55922  | 0.050902 |
| -0.02793 | 0.54718  | -0.23214 | 3.93E-07 | -0.01594 | 0.73112 | -0.07341 | 0.11315  | -0.06714 |
| 0.217644 | 2.06E-06 | 0.203809 | 9.03E-06 | -0.05127 | 0.26889 | -0.06881 | 0.13762  | -0.04257 |
| -0.17107 | 0.0002   | 0.14329  | 0.00191  | 0.092642 | 0.0454  | 0.184094 | 6.28E-05 | 0.230872 |
| 0.07533  | 0.10398  | 0.020695 | 0.65554  | 0.016672 | 0.71933 | 0.020758 | 0.65457  | 0.079021 |
| -0.10348 | 0.02534  | -0.11889 | 0.01012  | 0.023455 | 0.61315 | 0.038385 | 0.40791  | 0.097274 |
| 0.093297 | 0.04389  | 0.08841  | 0.05624  | -0.00288 | 0.95045 | -0.03435 | 0.459    | 0.02236  |
| 0.003827 | 0.93427  | -0.05477 | 0.23745  | 0.000319 | 0.99452 | -0.10888 | 0.01859  | -0.00525 |
| -0.32595 | 5.08E-13 | -0.3094  | 8.11E-12 | -0.01625 | 0.72609 | -0.03136 | 0.49902  | -0.02238 |
| 0.156256 | 0.0007   | 0.332152 | 1.72E-13 | 0.05148  | 0.26689 | 0.059659 | 0.19812  | 0.180535 |
| -0.10877 | 0.01871  | -0.10527 | 0.02289  | -0.02264 | 0.62559 | -0.06439 | 0.16477  | 0.017166 |

|          |          |          |          |          |         |          |         |          |
|----------|----------|----------|----------|----------|---------|----------|---------|----------|
| -0.01377 | 0.76662  | -0.01592 | 0.73145  | 0.029734 | 0.52154 | 0.047897 | 0.30166 | -0.03021 |
| -0.00997 | 0.82989  | 0.097769 | 0.03467  | 0.091045 | 0.04926 | 0.061625 | 0.18371 | 0.259291 |
| 0.006726 | 0.88473  | -0.09206 | 0.04678  | -0.03742 | 0.41978 | -0.01254 | 0.78687 | -0.08749 |
| -0.10461 | 0.02377  | -0.03895 | 0.40101  | 0.02373  | 0.609   | 0.161613 | 0.00045 | -0.08531 |
| -0.04689 | 0.31197  | -0.23324 | 3.45E-07 | -0.02561 | 0.58092 | -0.05753 | 0.21461 | -0.15271 |
| -0.00924 | 0.84218  | -0.01759 | 0.70464  | -0.01907 | 0.68099 | -0.00629 | 0.89221 | -0.02793 |
| -0.04488 | 0.33319  | -0.08774 | 0.05814  | 0.072039 | 0.12003 | 0.031098 | 0.5026  | 0.103254 |
| -0.03368 | 0.46777  | -0.12311 | 0.00773  | -0.03186 | 0.49222 | -0.13311 | 0.00396 | -0.04518 |
| 0.355705 | 2.25E-15 | 0.007751 | 0.86733  | -0.0173  | 0.70928 | -0.09294 | 0.0447  | -0.08274 |
| -0.12857 | 0.00539  | -0.24877 | 5.11E-08 | 0.017692 | 0.70296 | -0.05152 | 0.26648 | 0.076474 |
| -0.02188 | 0.63712  | 3.81E-05 | 0.99935  | -0.01335 | 0.77361 | -0.06436 | 0.16494 | 0.018561 |
| -0.0154  | 0.73989  | 0.04208  | 0.36423  | 0.031587 | 0.49591 | 0.048216 | 0.29845 | 0.088519 |
| 0.107929 | 0.01965  | -0.13603 | 0.00322  | -0.04677 | 0.31322 | -0.14521 | 0.00165 | -0.22008 |
| 0.021518 | 0.64278  | 0.201291 | 1.17E-05 | 0.054054 | 0.24368 | 0.074522 | 0.10776 | 0.165767 |
| 0.001957 | 0.96636  | -0.1245  | 0.00706  | -0.03141 | 0.49835 | -0.08402 | 0.06968 | 0.016196 |
| 0.064181 | 0.16615  | -0.05744 | 0.21533  | -0.04862 | 0.2944  | -0.01589 | 0.73194 | 0.065633 |
| -0.02372 | 0.60914  | 0.023311 | 0.61534  | -0.03358 | 0.46912 | -0.02988 | 0.51956 | 0.033639 |
| -0.03823 | 0.40981  | -0.10191 | 0.02766  | -0.02353 | 0.61196 | -0.09886 | 0.03268 | -0.00842 |
| -0.10266 | 0.02653  | -0.16803 | 0.00027  | -0.02814 | 0.54406 | -0.12606 | 0.00638 | -0.03402 |
| 0.023944 | 0.60577  | -0.00065 | 0.98876  | -0.03905 | 0.39979 | -0.10462 | 0.02376 | 0.024309 |
| 0.052194 | 0.26031  | -0.10896 | 0.01851  | -0.00739 | 0.87354 | -0.11993 | 0.00948 | -0.00809 |
| 0.034607 | 0.45562  | -0.07299 | 0.11522  | -0.04331 | 0.35041 | -0.17096 | 0.00021 | -0.04668 |
| -0.23926 | 1.67E-07 | -0.21604 | 2.46E-06 | 0.033757 | 0.46677 | 0.048745 | 0.29317 | 0.001848 |
| -0.23829 | 1.88E-07 | -0.05634 | 0.22427  | 0.072055 | 0.11995 | 0.172935 | 0.00017 | 0.213764 |
| 0.028248 | 0.54257  | -0.01997 | 0.66684  | -0.02493 | 0.59093 | -0.10114 | 0.02886 | 0.012887 |
| 0.040994 | 0.37675  | 0.147245 | 0.00142  | 0.105649 | 0.02241 | 0.098851 | 0.0327  | 0.34233  |
| 0.057056 | 0.21844  | -0.1384  | 0.00272  | -0.03296 | 0.47742 | -0.10384 | 0.02483 | -0.01193 |
| -0.00919 | 0.84304  | 0.075651 | 0.10251  | 0.001302 | 0.97762 | 0.034862 | 0.4523  | 0.125655 |
| -0.15139 | 0.00103  | -0.0017  | 0.97075  | 0.038893 | 0.40172 | 0.107463 | 0.02019 | 0.128467 |
| -0.25658 | 1.86E-08 | -0.18714 | 4.72E-05 | 0.047605 | 0.30462 | 0.049026 | 0.2904  | 0.056867 |
| -0.12674 | 0.0061   | -0.09234 | 0.04612  | -0.0495  | 0.28576 | -0.07977 | 0.08508 | 0.010385 |
| 0.059293 | 0.20089  | -0.1047  | 0.02365  | 0.005801 | 0.9005  | -0.0155  | 0.73825 | -0.02436 |
| -0.2164  | 2.36E-06 | -0.22843 | 6.06E-07 | -0.03934 | 0.39638 | -0.05107 | 0.27077 | -0.10553 |
| -0.0944  | 0.04144  | -0.04371 | 0.34593  | 0.02409  | 0.60357 | 0.009951 | 0.83018 | 0.078816 |
| 0.063267 | 0.17228  | 0.00983  | 0.83221  | 0.079616 | 0.08568 | 0.027431 | 0.55431 | 0.318021 |
| -0.04405 | 0.34217  | -0.03512 | 0.44894  | -0.00753 | 0.87112 | -0.03501 | 0.45038 | 0.030337 |
| 0.080986 | 0.08041  | -0.0328  | 0.47946  | -0.03933 | 0.39644 | -0.12083 | 0.00896 | -0.01328 |
| -0.07353 | 0.11254  | 0.045284 | 0.32883  | 0.052807 | 0.25475 | 0.000104 | 0.99821 | 0.170463 |
| 0.119651 | 0.00965  | -0.04175 | 0.36802  | -0.01621 | 0.72674 | -0.12635 | 0.00626 | 0.097907 |
| -0.12285 | 0.00787  | -0.04942 | 0.28654  | 0.041034 | 0.3763  | 0.091971 | 0.04699 | 0.301807 |
| 0.060957 | 0.18852  | 0.210533 | 4.45E-06 | -0.00067 | 0.98849 | 0.082191 | 0.07599 | 0.020457 |
| 0.158249 | 0.0006   | 0.243033 | 1.05E-07 | -0.01807 | 0.69686 | -0.10475 | 0.02359 | 0.024374 |
| -0.13362 | 0.00382  | -0.00702 | 0.87975  | -0.00512 | 0.91211 | 0.005106 | 0.91237 | 0.094569 |
| -0.06849 | 0.13947  | -0.0901  | 0.05167  | 0.006811 | 0.88329 | 0.024608 | 0.59581 | -0.02564 |
| -0.12579 | 0.00649  | 0.095901 | 0.0383   | 0.00199  | 0.96579 | 0.105864 | 0.02214 | 0.061997 |

|          |          |          |          |          |         |          |          |          |
|----------|----------|----------|----------|----------|---------|----------|----------|----------|
| -0.16048 | 0.0005   | 0.016969 | 0.71455  | 0.038696 | 0.40411 | 0.051402 | 0.26762  | 0.122084 |
| -0.03952 | 0.39413  | -0.1089  | 0.01857  | -0.04495 | 0.33236 | -0.02529 | 0.58572  | -0.03104 |
| -0.04414 | 0.34116  | -0.02769 | 0.55059  | 0.028384 | 0.54063 | 0.062561 | 0.17713  | 0.354879 |
| -0.13182 | 0.00433  | -0.02638 | 0.56953  | -0.01387 | 0.76494 | -0.01225 | 0.79183  | 0.02686  |
| -0.15771 | 0.00062  | -0.18935 | 3.82E-05 | 0.052394 | 0.25848 | 0.092896 | 0.04481  | 0.071144 |
| 0.116673 | 0.01163  | -0.03642 | 0.43239  | 0.032845 | 0.4789  | -0.05901 | 0.20308  | 0.111871 |
| -0.01009 | 0.8279   | -0.06532 | 0.15874  | -0.01456 | 0.75372 | -0.10808 | 0.01948  | 0.038705 |
| -0.18116 | 8.25E-05 | -0.0385  | 0.4065   | 0.045317 | 0.32848 | 0.102677 | 0.0265   | 0.110039 |
| -0.01566 | 0.73574  | -0.05289 | 0.25401  | 0.013143 | 0.77696 | -0.03356 | 0.46931  | 0.115526 |
| 0.031798 | 0.49303  | 0.208258 | 5.67E-06 | 0.0825   | 0.0749  | 0.04728  | 0.30794  | 0.305838 |
| 0.04703  | 0.31051  | 0.208031 | 5.81E-06 | 0.062961 | 0.17437 | 0.051442 | 0.26725  | 0.241835 |
| -0.04116 | 0.37481  | -0.09488 | 0.04041  | -0.04977 | 0.28313 | -0.15292 | 0.00092  | -0.04395 |
| 0.241594 | 1.25E-07 | 0.240115 | 1.50E-07 | -0.02088 | 0.65265 | -0.116   | 0.01212  | 0.000551 |
| -0.02905 | 0.53118  | -0.06363 | 0.16982  | -0.01716 | 0.7115  | -0.13728 | 0.00295  | -0.04285 |
| -0.03784 | 0.41463  | -0.1469  | 0.00146  | -0.00159 | 0.97269 | -0.10694 | 0.02081  | 0.030475 |
| -0.00227 | 0.96105  | -0.03573 | 0.44115  | -0.01795 | 0.69878 | -0.11675 | 0.01157  | -0.00502 |
| 0.030938 | 0.5048   | -0.00982 | 0.83238  | -0.01529 | 0.74177 | -0.14944 | 0.0012   | -0.00771 |
| -0.02695 | 0.56131  | -0.08453 | 0.06798  | -0.03017 | 0.51544 | -0.12774 | 0.0057   | -0.00776 |
| -0.11437 | 0.0134   | -0.05153 | 0.26643  | 0.066205 | 0.15316 | 0.020673 | 0.65589  | 0.185265 |
| 0.140309 | 0.00237  | 0.10664  | 0.02117  | 0.075778 | 0.10194 | -0.00369 | 0.93657  | 0.202527 |
| -0.0554  | 0.23209  | 0.004526 | 0.92229  | 0.005577 | 0.90433 | 0.098398 | 0.03352  | 0.115533 |
| -0.09083 | 0.04981  | 0.036452 | 0.43193  | 0.027274 | 0.55658 | 0.062616 | 0.17674  | 0.0852   |
| -0.06467 | 0.16296  | -0.05044 | 0.27672  | 0.012181 | 0.79291 | 0.004695 | 0.9194   | 0.041776 |
| -0.26325 | 7.66E-09 | 0.034938 | 0.45132  | 0.078738 | 0.0892  | 0.155351 | 0.00076  | 0.157629 |
| 0.075457 | 0.1034   | -0.05248 | 0.25773  | 0.005001 | 0.91417 | -0.07355 | 0.11246  | 0.01519  |
| 0.123217 | 0.00768  | 0.140137 | 0.0024   | -0.02318 | 0.61728 | -0.03635 | 0.43325  | 0.184637 |
| 0.134903 | 0.00349  | 0.267937 | 4.04E-09 | 0.078366 | 0.09073 | 0.103939 | 0.02469  | 0.149793 |
| -0.01748 | 0.70631  | -0.08421 | 0.06906  | -0.02697 | 0.56093 | -0.14572 | 0.00159  | 0.016844 |
| 0.050263 | 0.27838  | -0.06318 | 0.17286  | 0.033437 | 0.471   | -0.03398 | 0.4638   | 0.074869 |
| 0.02419  | 0.60207  | 0.074249 | 0.10906  | 0.039195 | 0.39807 | 0.018963 | 0.68274  | 0.201591 |
| -0.16358 | 0.00039  | -0.37759 | 2.84E-17 | -0.06966 | 0.13282 | -0.07763 | 0.09381  | -0.04072 |
| -0.00659 | 0.88703  | 0.001527 | 0.97375  | -0.0419  | 0.36624 | -0.13162 | 0.00438  | -0.00162 |
| -0.06241 | 0.17815  | -0.31415 | 3.72E-12 | -0.00627 | 0.89257 | 0.019309 | 0.67726  | -0.10095 |
| -0.07145 | 0.12309  | -0.08909 | 0.05438  | -0.00131 | 0.97748 | 0.03824  | 0.40968  | 0.064338 |
| -0.12537 | 0.00667  | -0.16709 | 0.00029  | 0.00446  | 0.92343 | 0.060951 | 0.18856  | 0.078734 |
| -0.05333 | 0.2501   | -0.30385 | 1.98E-11 | -0.0259  | 0.57671 | -0.06283 | 0.17528  | -0.07701 |
| -0.03033 | 0.51323  | -0.30942 | 8.07E-12 | -0.02105 | 0.64999 | -0.03153 | 0.49665  | -0.08921 |
| -0.09214 | 0.04658  | -0.30511 | 1.62E-11 | -0.01524 | 0.74254 | -0.04889 | 0.29171  | -0.01893 |
| -0.12736 | 0.00585  | -0.14814 | 0.00132  | -0.00745 | 0.87239 | 0.019114 | 0.68035  | 0.051098 |
| -0.11833 | 0.01049  | -0.03746 | 0.41927  | -0.00913 | 0.844   | -0.00574 | 0.90147  | -0.04303 |
| -0.02024 | 0.66269  | -0.23678 | 2.25E-07 | -0.04002 | 0.38818 | -0.19104 | 3.24E-05 | -0.05071 |
| -0.13845 | 0.00271  | -0.17816 | 0.00011  | -0.01091 | 0.81417 | -0.01087 | 0.81484  | -0.04595 |
| -0.15785 | 0.00062  | -0.32346 | 7.78E-13 | -0.03879 | 0.40294 | -0.08534 | 0.06539  | -0.08416 |
| -0.05024 | 0.27864  | -0.08443 | 0.06833  | -0.0065  | 0.88859 | -0.115   | 0.01289  | 0.026349 |
| 0.244513 | 8.74E-08 | 0.083544 | 0.07128  | 0.024351 | 0.59965 | -0.05524 | 0.23351  | 0.136219 |

|          |          |          |          |          |          |          |          |          |
|----------|----------|----------|----------|----------|----------|----------|----------|----------|
| 0.277211 | 1.10E-09 | 0.265199 | 5.88E-09 | -0.02739 | 0.55489  | -0.05573 | 0.22938  | 0.040263 |
| 0.086322 | 0.06233  | -0.11383 | 0.01384  | -0.02814 | 0.54414  | -0.02488 | 0.5918   | -0.07084 |
| 0.018295 | 0.69334  | -0.01988 | 0.66833  | -0.0732  | 0.11418  | -0.1356  | 0.00332  | -0.04776 |
| 0.072496 | 0.1177   | -0.07927 | 0.08707  | -0.00884 | 0.84893  | -0.03432 | 0.45941  | 0.042404 |
| 0.055919 | 0.22777  | -0.1103  | 0.0171   | -0.0223  | 0.63077  | -0.02185 | 0.63767  | -0.05193 |
| -0.1384  | 0.00272  | 0.024646 | 0.59524  | 0.194244 | 2.37E-05 | 0.19231  | 2.87E-05 | 0.501442 |
| -0.37766 | 2.80E-17 | -0.22309 | 1.12E-06 | 0.062379 | 0.1784   | 0.137501 | 0.00291  | 0.064625 |
| -0.00344 | 0.94087  | -0.02237 | 0.62973  | -0.02554 | 0.58193  | -0.0734  | 0.11319  | 0.008246 |
| -0.02801 | 0.54597  | -0.00548 | 0.90592  | 0.035689 | 0.44164  | 0.012657 | 0.78501  | 0.125917 |
| 0.0105   | 0.82097  | -0.0972  | 0.03575  | 0.036362 | 0.43307  | -0.02461 | 0.5957   | 0.157969 |
| -0.17524 | 0.00014  | -0.2509  | 3.89E-08 | -0.00855 | 0.85375  | -0.09713 | 0.03588  | 0.006569 |
| -0.10708 | 0.02064  | -0.18135 | 8.11E-05 | -0.04384 | 0.34446  | -0.14746 | 0.0014   | -0.04992 |
| -0.156   | 0.00072  | -0.02956 | 0.52399  | -0.02955 | 0.52413  | 0.065845 | 0.15542  | -0.06357 |
| -0.29818 | 4.81E-11 | -0.26047 | 1.11E-08 | 0.027748 | 0.54974  | 0.017852 | 0.7004   | 0.121357 |
| 0.061583 | 0.18401  | 0.115111 | 0.0128   | -0.04951 | 0.28567  | -0.15186 | 0.00099  | -0.06158 |
| 0.120542 | 0.00912  | -0.01573 | 0.73451  | -0.04554 | 0.32606  | -0.13189 | 0.0043   | -0.03823 |
| -0.0519  | 0.26301  | -0.07961 | 0.08571  | -0.02812 | 0.54442  | -0.02445 | 0.59816  | 0.029541 |
| 0.089437 | 0.05343  | -0.0547  | 0.23808  | -0.034   | 0.46359  | -0.11053 | 0.01688  | -0.01215 |
| 0.113027 | 0.01453  | 0.127253 | 0.00589  | -0.03165 | 0.49505  | -0.04069 | 0.38034  | -0.03588 |
| -0.04864 | 0.29419  | 0.033115 | 0.47529  | 0.049805 | 0.28279  | 0.063369 | 0.17159  | 0.136829 |
| -0.13183 | 0.00432  | -0.22019 | 1.55E-06 | 0.011385 | 0.80616  | -0.04606 | 0.32057  | 0.011571 |
| 0.16407  | 0.00037  | 0.098496 | 0.03334  | -0.0467  | 0.31394  | -0.17064 | 0.00021  | -0.07524 |
| -0.01288 | 0.78125  | 0.358498 | 1.31E-15 | 0.088106 | 0.0571   | 0.117706 | 0.01091  | 0.297148 |
| -0.05455 | 0.23936  | 0.21132  | 4.09E-06 | 0.051478 | 0.26691  | 0.081541 | 0.07835  | 0.25492  |
| 0.029802 | 0.52058  | -0.1092  | 0.01825  | -0.01865 | 0.68765  | -0.15122 | 0.00105  | -0.04197 |
| -0.18062 | 8.67E-05 | -0.05373 | 0.24648  | 0.047042 | 0.31038  | 0.086078 | 0.06308  | 0.171899 |
| 0.0988   | 0.0328   | -0.00275 | 0.95274  | 0.03931  | 0.39669  | 0.034693 | 0.45449  | 0.092313 |
| -0.17415 | 0.00016  | -0.04355 | 0.34773  | 0.001006 | 0.98271  | 0.013284 | 0.77465  | 0.045947 |
| -0.06423 | 0.16584  | -0.16059 | 0.00049  | -0.00971 | 0.83417  | -0.12018 | 0.00934  | 0.022896 |
| -0.2283  | 6.15E-07 | 0.114044 | 0.01367  | 0.079461 | 0.08629  | 0.155317 | 0.00076  | 0.182141 |
| -0.25357 | 2.76E-08 | -0.32454 | 6.48E-13 | -0.02105 | 0.64997  | 0.040372 | 0.38405  | -0.06379 |
| 0.160392 | 0.0005   | 0.245933 | 7.31E-08 | 0.022163 | 0.63284  | -0.08716 | 0.05982  | 0.171737 |
| -0.07465 | 0.10717  | 0.121943 | 0.00834  | -0.04252 | 0.35918  | -0.1393  | 0.00255  | -0.01458 |
| -0.00733 | 0.87442  | -0.08711 | 0.05997  | 0.011298 | 0.80761  | -0.06903 | 0.13637  | 0.049306 |
| 0.113108 | 0.01446  | 0.295882 | 6.87E-11 | 0.006707 | 0.88506  | 0.03864  | 0.40479  | -0.01838 |
| -0.24424 | 9.04E-08 | -0.20783 | 5.94E-06 | 0.003008 | 0.94832  | -0.01299 | 0.77954  | 0.020473 |
| 0.065575 | 0.15712  | 0.089166 | 0.05416  | -0.00242 | 0.95836  | -0.02694 | 0.56138  | 0.090588 |
| 0.0008   | 0.98625  | 0.044008 | 0.34265  | -0.04682 | 0.31266  | -0.11768 | 0.01093  | 0.036777 |
| 0.058227 | 0.20912  | 0.261269 | 1.00E-08 | 0.005387 | 0.90758  | -0.01233 | 0.79048  | 0.069136 |
| 0.008261 | 0.85869  | -0.10337 | 0.0255   | -0.02054 | 0.658    | -0.1571  | 0.00066  | -0.06458 |
| -0.12227 | 0.00817  | -0.11694 | 0.01144  | -0.02702 | 0.56019  | -0.13079 | 0.00464  | -0.10463 |
| 0.033459 | 0.47072  | -0.10517 | 0.02303  | -0.03352 | 0.46984  | -0.15272 | 0.00093  | -0.08435 |
| -0.0631  | 0.17344  | -0.17798 | 0.00011  | 0.010466 | 0.82154  | -0.09442 | 0.0414   | 0.047349 |
| 0.112885 | 0.01466  | -0.02618 | 0.5726   | -0.01501 | 0.74633  | 0.06376  | 0.16895  | 0.092044 |
| 0.049713 | 0.28368  | 0.055929 | 0.22769  | 0.059695 | 0.19784  | 0.038859 | 0.40214  | 0.221475 |

|          |          |          |          |          |         |          |          |          |
|----------|----------|----------|----------|----------|---------|----------|----------|----------|
| 0.022521 | 0.62736  | -0.07215 | 0.11946  | 0.002488 | 0.95724 | -0.09162 | 0.04783  | 0.070714 |
| -0.05245 | 0.25793  | 0.018366 | 0.69221  | 0.001789 | 0.96925 | -0.01893 | 0.68333  | 0.092187 |
| 0.062798 | 0.17549  | 0.077712 | 0.09346  | 0.017226 | 0.71042 | 0.034115 | 0.46205  | 0.066914 |
| 0.018814 | 0.6851   | -0.03094 | 0.50477  | -0.02147 | 0.64357 | -0.05655 | 0.22252  | -0.03306 |
| -0.01362 | 0.76908  | 0.011178 | 0.80961  | -0.00347 | 0.9403  | -0.03721 | 0.42237  | 0.03403  |
| 0.097234 | 0.03568  | 0.208599 | 5.47E-06 | -0.01732 | 0.70896 | -0.05327 | 0.25057  | 0.016125 |
| -0.25236 | 3.23E-08 | -0.1856  | 5.45E-05 | 0.003781 | 0.93505 | 0.045044 | 0.3314   | 0.005884 |
| -0.27482 | 1.54E-09 | -0.15572 | 0.00073  | 0.053689 | 0.24688 | 0.183348 | 6.74E-05 | 0.138168 |
| 0.062376 | 0.17841  | -0.11453 | 0.01327  | -0.02203 | 0.63495 | -0.13862 | 0.00268  | -0.03512 |
| -0.03086 | 0.50583  | -0.11719 | 0.01126  | 0.033395 | 0.47157 | -0.03533 | 0.44621  | 0.071762 |
| 0.013613 | 0.76921  | 0.055804 | 0.22873  | -0.00173 | 0.97028 | -0.05564 | 0.23009  | 0.046835 |
| -0.04685 | 0.3124   | -0.1228  | 0.00789  | -0.01358 | 0.76981 | -0.08369 | 0.07076  | 0.03621  |
| -0.04907 | 0.28993  | -0.11256 | 0.01494  | -0.04221 | 0.36276 | -0.06471 | 0.16266  | -0.06379 |
| -0.09988 | 0.03092  | -0.12459 | 0.00702  | 0.034344 | 0.45905 | 0.193781 | 2.48E-05 | -0.08508 |
| -0.0509  | 0.27235  | -0.19225 | 2.88E-05 | -0.02184 | 0.63787 | -0.14941 | 0.0012   | -0.05805 |
| -0.13712 | 0.00299  | -0.23191 | 4.03E-07 | -0.02301 | 0.61984 | -0.05513 | 0.2344   | -0.05478 |
| -0.15453 | 0.00081  | -0.19945 | 1.41E-05 | -0.01576 | 0.73404 | -0.07827 | 0.09114  | -0.02012 |
| 0.169315 | 0.00024  | -0.02062 | 0.65666  | -0.04898 | 0.29086 | -0.1123  | 0.01518  | -0.17554 |
| 0.11492  | 0.01295  | 0.066341 | 0.15232  | 0.032964 | 0.47731 | 0.083536 | 0.0713   | 0.112092 |
| 0.022325 | 0.63036  | -0.05356 | 0.24802  | -0.0128  | 0.78268 | -0.12934 | 0.00512  | -0.08445 |
| -0.23202 | 3.98E-07 | -0.13795 | 0.00281  | 0.032667 | 0.48129 | 0.016321 | 0.725    | 0.137115 |
| 0.135868 | 0.00326  | 0.16894  | 0.00025  | -0.00116 | 0.98003 | -0.04986 | 0.28222  | 0.088847 |
| -0.22716 | 7.02E-07 | -0.18977 | 3.67E-05 | 0.044855 | 0.33343 | 0.09521  | 0.03972  | 0.169341 |
| -0.00461 | 0.92093  | -0.08397 | 0.06985  | -0.00683 | 0.8829  | -0.00199 | 0.96587  | -0.02648 |
| 0.005423 | 0.90695  | -0.00032 | 0.99447  | 0.095544 | 0.03903 | 0.11866  | 0.01027  | 0.225786 |
| 0.018786 | 0.68553  | 0.044647 | 0.33569  | 0.004084 | 0.92986 | -0.0132  | 0.77602  | 0.050843 |
| -0.05468 | 0.23829  | -0.0722  | 0.11923  | -0.01151 | 0.80412 | -0.03537 | 0.44579  | 0.018723 |
| -0.05879 | 0.20477  | 0.239336 | 1.65E-07 | 0.088765 | 0.05525 | 0.240235 | 1.48E-07 | 0.44764  |
| -0.0677  | 0.14407  | -0.05548 | 0.23146  | -0.00756 | 0.8705  | -0.06668 | 0.15022  | 0.030373 |
| -0.05443 | 0.2404   | 0.077913 | 0.09262  | 0.077147 | 0.09588 | 0.068901 | 0.13708  | 0.283777 |
| -0.09821 | 0.03386  | -0.09709 | 0.03596  | -0.02871 | 0.53605 | -0.04086 | 0.37828  | 0.013042 |
| 0.190338 | 3.47E-05 | 0.239024 | 1.72E-07 | 0.06283  | 0.17527 | 0.083897 | 0.07008  | 0.205151 |
| 0.133496 | 0.00385  | 0.066967 | 0.14848  | -0.02346 | 0.61303 | -0.13164 | 0.00438  | -0.01282 |
| 0.236412 | 2.36E-07 | 0.189287 | 3.84E-05 | -0.02698 | 0.56085 | -0.08425 | 0.06892  | 0.053118 |
| -0.10892 | 0.01855  | 0.118194 | 0.01058  | 0.04719  | 0.30886 | 0.068293 | 0.14059  | 0.131656 |
| 0.102121 | 0.02733  | 0.257903 | 1.56E-08 | 0.020386 | 0.66036 | -0.05969 | 0.19789  | 0.12908  |
| -0.02159 | 0.64163  | 0.000412 | 0.99291  | 0.018311 | 0.69307 | -0.0291  | 0.53052  | 0.049643 |
| -0.04411 | 0.34148  | -0.12339 | 0.0076   | -0.01845 | 0.69092 | -0.06449 | 0.16413  | -0.03602 |
| 0.259229 | 1.31E-08 | 0.127683 | 0.00572  | 0.043261 | 0.35092 | 0.11314  | 0.01443  | 0.094251 |
| -0.01098 | 0.81299  | 0.01382  | 0.7658   | 0.029956 | 0.51843 | 0.06385  | 0.16835  | 0.071467 |
| -0.09472 | 0.04075  | -0.29582 | 6.93E-11 | -0.00615 | 0.89448 | -0.01123 | 0.80876  | -0.06873 |
| -0.11917 | 0.00995  | -0.17176 | 0.00019  | -0.02592 | 0.57639 | 0.005975 | 0.89753  | -0.0113  |
| 0.153588 | 0.00087  | -0.07565 | 0.10253  | -0.00348 | 0.94018 | 0.016323 | 0.72497  | -0.0214  |
| 0.036011 | 0.43753  | 0.142079 | 0.00209  | 0.032939 | 0.47764 | 0.068849 | 0.13738  | 0.172437 |
| 0.083111 | 0.07276  | -0.06104 | 0.1879   | 0.035601 | 0.44277 | 0.09817  | 0.03393  | 0.121863 |

|          |          |          |          |          |         |          |         |          |
|----------|----------|----------|----------|----------|---------|----------|---------|----------|
| 0.042519 | 0.35925  | -0.19511 | 2.18E-05 | -0.03819 | 0.41034 | -0.14601 | 0.00156 | 0.007947 |
| -0.05151 | 0.26657  | -0.14996 | 0.00115  | -0.01679 | 0.71751 | -0.06925 | 0.13508 | -0.00774 |
| 0.227961 | 6.40E-07 | -0.05891 | 0.20385  | 0.046635 | 0.31459 | 0.090488 | 0.05067 | 0.117595 |
| -0.0133  | 0.7744   | -0.12031 | 0.00926  | -0.0019  | 0.9673  | 5.29E-05 | 0.99909 | -0.06463 |
| 0.060113 | 0.19472  | 0.016125 | 0.72818  | 0.020476 | 0.65896 | 0.052448 | 0.25799 | 0.033684 |
| 0.093221 | 0.04406  | 0.080118 | 0.08372  | -0.02507 | 0.58886 | -0.03334 | 0.47233 | -0.07655 |
| -0.06117 | 0.18698  | -0.1978  | 1.67E-05 | -0.01621 | 0.72677 | -0.03917 | 0.39842 | -0.04848 |
| 0.040017 | 0.38825  | -0.11404 | 0.01367  | -0.03404 | 0.46299 | -0.07609 | 0.10052 | -0.10976 |
| 0.100046 | 0.03065  | -0.00901 | 0.84609  | 0.00795  | 0.86395 | 5.21E-05 | 0.9991  | 0.136882 |
| -0.01844 | 0.69095  | -0.0718  | 0.12129  | -0.01545 | 0.73907 | -0.01707 | 0.71293 | -0.01049 |
| -0.12596 | 0.00642  | -0.3578  | 1.50E-15 | -0.00738 | 0.8737  | 0.033626 | 0.4685  | 0.022787 |
| -0.10742 | 0.02024  | -0.2534  | 2.82E-08 | -0.04533 | 0.32829 | -0.05435 | 0.2411  | -0.12145 |
| 0.038652 | 0.40465  | 0.087674 | 0.05833  | 0.056234 | 0.22516 | 0.14609  | 0.00155 | 0.110028 |
| 0.062663 | 0.17642  | -0.08472 | 0.06735  | 0.003648 | 0.93733 | -0.02531 | 0.5854  | 0.009494 |
| -0.12213 | 0.00824  | 0.053635 | 0.24736  | 0.027827 | 0.5486  | 0.068139 | 0.14149 | 0.088714 |
| 0.012936 | 0.78039  | 0.05418  | 0.24258  | -0.0034  | 0.94156 | -0.0186  | 0.6885  | 0.031067 |
| 0.021516 | 0.64282  | -0.10511 | 0.02311  | -0.00663 | 0.88638 | 0.039775 | 0.39113 | -0.0376  |
| -0.111   | 0.01641  | -0.10218 | 0.02725  | -0.0105  | 0.82101 | -0.02989 | 0.51932 | -0.0475  |
| -0.00977 | 0.83323  | -0.10468 | 0.02368  | 0.043252 | 0.35102 | 0.096191 | 0.03771 | 0.098536 |
| -0.05519 | 0.23387  | -0.12924 | 0.00516  | 0.04953  | 0.28545 | 0.024774 | 0.59334 | 0.111602 |
| 0.041346 | 0.37267  | 0.017497 | 0.70608  | 0.016426 | 0.7233  | 0.027919 | 0.54728 | -0.00161 |
| -0.06664 | 0.1505   | -0.06706 | 0.14791  | 0.038171 | 0.41053 | -0.00615 | 0.89455 | 0.117274 |
| -0.03099 | 0.50405  | -0.11014 | 0.01727  | 0.000955 | 0.98359 | 0.022252 | 0.63148 | 0.041524 |
| -0.05194 | 0.26264  | -0.22904 | 5.64E-07 | 0.003096 | 0.9468  | 0.038364 | 0.40816 | -0.01335 |
| -0.05923 | 0.20138  | -0.13612 | 0.00321  | -0.00758 | 0.87019 | -0.00613 | 0.89486 | -0.07164 |
| 0.024941 | 0.59085  | -0.08521 | 0.0658   | 0.016494 | 0.72221 | 0.025459 | 0.58316 | 0.03237  |
| -0.18964 | 3.71E-05 | -0.16044 | 0.0005   | -0.04085 | 0.37849 | -0.03356 | 0.46939 | -0.12223 |
| 0.030886 | 0.50552  | 0.008698 | 0.8513   | 0.024688 | 0.59461 | 0.068509 | 0.13934 | 0.10601  |
| 0.065996 | 0.15447  | -0.00388 | 0.93335  | -0.02133 | 0.64568 | -0.14581 | 0.00158 | -0.02823 |
| -0.07018 | 0.12991  | -0.20032 | 1.29E-05 | -0.02778 | 0.54935 | -0.06171 | 0.18308 | -0.09711 |
| 0.070965 | 0.12567  | 0.136746 | 0.00307  | 0.040678 | 0.38045 | 0.109563 | 0.01786 | 0.107044 |
| 0.006914 | 0.88153  | -0.07328 | 0.11377  | -0.03026 | 0.51413 | -0.03151 | 0.49702 | -0.01842 |
| 0.058271 | 0.20878  | -0.03403 | 0.46318  | 0.025156 | 0.58764 | 0.000563 | 0.99033 | 0.071954 |
| 0.134735 | 0.00353  | -0.14125 | 0.00222  | -0.01702 | 0.71366 | -0.0586  | 0.20619 | -0.12697 |
| 0.058222 | 0.20916  | -0.05473 | 0.23782  | -0.00873 | 0.85067 | -0.02458 | 0.59623 | 0.010684 |
| 0.090034 | 0.05185  | -0.09771 | 0.03479  | 0.02971  | 0.52187 | 0.008637 | 0.85233 | 0.041296 |
| 0.030361 | 0.51278  | -0.07827 | 0.09114  | 0.015542 | 0.73764 | 0.012956 | 0.78006 | 0.029223 |
| -0.14393 | 0.00182  | -0.14308 | 0.00194  | -0.02128 | 0.64639 | -0.03416 | 0.4614  | -0.0917  |
| -0.09588 | 0.03835  | -0.26102 | 1.03E-08 | -0.01883 | 0.68484 | -0.0576  | 0.21405 | -0.05236 |
| 0.114133 | 0.01359  | 0.219001 | 1.77E-06 | 0.007834 | 0.86592 | 0.047978 | 0.30084 | 0.086826 |
| -0.04529 | 0.32875  | -0.04896 | 0.29103  | -0.02535 | 0.58473 | 0.020007 | 0.66629 | 0.01886  |
| -0.09949 | 0.03159  | -0.19604 | 1.99E-05 | 0.019706 | 0.67101 | 0.050692 | 0.27429 | -0.05642 |
| 0.1052   | 0.02299  | -0.06952 | 0.13357  | 0.019502 | 0.67423 | 0.025696 | 0.57965 | -0.04085 |
| -0.14537 | 0.00163  | -0.32235 | 9.41E-13 | -0.01084 | 0.81528 | -0.01224 | 0.792   | -0.15338 |
| 0.0511   | 0.27045  | -0.00761 | 0.86971  | 0.016544 | 0.72141 | 0.073573 | 0.11233 | 0.026854 |

|          |          |          |          |          |         |          |         |          |
|----------|----------|----------|----------|----------|---------|----------|---------|----------|
| 0.116801 | 0.01154  | 0.116141 | 0.01202  | 0.017992 | 0.69816 | 0.029427 | 0.52585 | 0.120675 |
| 0.072256 | 0.11892  | -0.09825 | 0.03379  | 0.021242 | 0.64705 | 0.040183 | 0.38628 | 0.064468 |
| -0.0605  | 0.19183  | -0.27142 | 2.49E-09 | -0.02273 | 0.62419 | -0.05675 | 0.22096 | -0.0213  |
| -0.03299 | 0.47697  | -0.04271 | 0.35714  | -0.01175 | 0.80002 | -0.01093 | 0.81381 | 0.019811 |
| 0.00756  | 0.87056  | -0.11074 | 0.01666  | -0.01941 | 0.67564 | 0.001033 | 0.98224 | 0.074691 |
| 0.229892 | 5.11E-07 | 0.280363 | 6.98E-10 | -0.04465 | 0.33561 | 0.042265 | 0.36213 | 0.034321 |
| 0.100653 | 0.02964  | 0.062695 | 0.1762   | 0.0006   | 0.98968 | 0.010628 | 0.81883 | 0.02987  |
| -0.12102 | 0.00885  | -0.1772  | 0.00012  | -0.02409 | 0.60359 | -0.05234 | 0.25896 | -0.01585 |
| -0.02846 | 0.53954  | 0.013316 | 0.77411  | 0.003708 | 0.93631 | 0.032284 | 0.48645 | 0.022071 |
| 0.060012 | 0.19548  | 0.019303 | 0.67736  | 0.012713 | 0.78407 | 0.096386 | 0.03733 | 0.003385 |
| 0.187313 | 4.64E-05 | 0.088672 | 0.05551  | 0.013684 | 0.76805 | 0.044404 | 0.33832 | 0.151569 |
| 0.205061 | 7.93E-06 | 0.160872 | 0.00048  | 0.01835  | 0.69246 | 0.004688 | 0.91951 | 0.06375  |
| 0.103062 | 0.02594  | -0.09769 | 0.03482  | 0.039726 | 0.39171 | 0.063837 | 0.16844 | 0.048354 |
| 0.343755 | 2.12E-14 | -0.03916 | 0.39849  | -0.00422 | 0.92759 | -0.04374 | 0.3456  | -0.07116 |
| 0.161113 | 0.00047  | 0.056422 | 0.22361  | 0.010896 | 0.81433 | 0.044715 | 0.33495 | 0.044184 |
| 0.166537 | 0.0003   | -0.1794  | 9.70E-05 | 0.060031 | 0.19533 | -0.07424 | 0.1091  | -0.01668 |
| -0.10758 | 0.02006  | 0.022928 | 0.62115  | -0.03983 | 0.39042 | 0.023083 | 0.61879 | 0.046736 |
| -0.1212  | 0.00875  | -0.19976 | 1.37E-05 | -0.01101 | 0.81235 | -0.00441 | 0.9243  | -0.04614 |
| 0.133207 | 0.00393  | 0.194347 | 2.35E-05 | 0.017593 | 0.70455 | 0.027866 | 0.54805 | 0.046335 |
| 0.163358 | 0.00039  | 0.137086 | 0.00299  | 0.06832  | 0.14043 | 0.178806 | 0.0001  | 0.118535 |
| -0.05591 | 0.22785  | -0.16005 | 0.00052  | -0.01066 | 0.8183  | -0.00435 | 0.92529 | -0.08567 |
| 0.062877 | 0.17494  | 0.03565  | 0.44215  | -0.00402 | 0.93088 | 0.001543 | 0.97346 | -0.02655 |
| -0.01981 | 0.66941  | -0.09566 | 0.0388   | -0.01066 | 0.81831 | -0.00955 | 0.83697 | 0.042768 |
| -0.01311 | 0.77751  | -0.0635  | 0.17068  | 0.020088 | 0.66503 | 0.04852  | 0.29541 | 0.042773 |
| -0.08809 | 0.05714  | -0.21625 | 2.40E-06 | 0.024436 | 0.59839 | 0.050152 | 0.27945 | 0.025007 |
| -0.09755 | 0.03508  | -0.04186 | 0.3667   | 0.014903 | 0.74805 | 0.057191 | 0.21735 | -0.0166  |
| -0.02931 | 0.52743  | -0.14916 | 0.00123  | 0.009068 | 0.84505 | 0.05249  | 0.25761 | 0.005807 |
| -0.14119 | 0.00223  | -0.1923  | 2.87E-05 | -0.02773 | 0.54993 | -0.00759 | 0.87008 | 0.009361 |
| -0.21818 | 1.94E-06 | -0.22775 | 6.56E-07 | 0.005201 | 0.91075 | 0.029655 | 0.52265 | 0.001075 |
| -0.03323 | 0.47376  | -0.15168 | 0.00101  | -0.02009 | 0.66502 | 0.021216 | 0.64746 | 0.049931 |
| 0.14732  | 0.00141  | 0.087277 | 0.05948  | 0.022246 | 0.63158 | 0.067214 | 0.14699 | 0.045343 |
| 0.036876 | 0.4266   | 0.037175 | 0.42286  | 0.050705 | 0.27417 | 0.104792 | 0.02353 | 0.10582  |
| -0.03273 | 0.48048  | 0.044733 | 0.33476  | 0.052908 | 0.25383 | 0.098904 | 0.03261 | 0.134262 |
| 0.060959 | 0.1885   | 0.081688 | 0.07782  | 0.005797 | 0.90058 | -0.02484 | 0.59235 | -0.05343 |
| 0.311455 | 5.80E-12 | 0.137175 | 0.00297  | -0.0021  | 0.96388 | -0.01964 | 0.6721  | 0.003221 |
| -0.05808 | 0.2103   | -0.12707 | 0.00596  | 0.016279 | 0.72568 | 0.035616 | 0.44257 | 0.031937 |
| -0.0186  | 0.68852  | 0.035756 | 0.44078  | 0.021048 | 0.65005 | 0.079969 | 0.0843  | 0.017991 |
| -0.08289 | 0.07351  | -0.09179 | 0.04742  | 0.024119 | 0.60314 | 0.052315 | 0.2592  | 0.013724 |
| -0.0781  | 0.09183  | -0.11458 | 0.01322  | 0.016843 | 0.71657 | 0.04862  | 0.29442 | 0.087686 |
| -0.09518 | 0.03979  | -0.14661 | 0.00149  | 0.003892 | 0.93316 | 0.020663 | 0.65605 | 0.001074 |
| -0.09142 | 0.04832  | -0.20757 | 6.10E-06 | 0.034833 | 0.45268 | 0.06589  | 0.15514 | 0.062757 |
| 0.091774 | 0.04747  | -0.07409 | 0.1098   | 0.015451 | 0.73912 | 0.055528 | 0.23104 | 0.061727 |
| -0.01256 | 0.78663  | 0.091893 | 0.04718  | 0.016769 | 0.71778 | 0.028178 | 0.54357 | 0.105046 |
| 0.194633 | 2.28E-05 | 0.173604 | 0.00016  | -0.00555 | 0.90485 | -0.01474 | 0.75079 | 0.075761 |
| 0.022197 | 0.63233  | -0.16388 | 0.00038  | -0.01429 | 0.75814 | -0.02025 | 0.6625  | -0.03932 |



|          |          |          |          |          |         |          |         |          |
|----------|----------|----------|----------|----------|---------|----------|---------|----------|
| -0.08455 | 0.06793  | -0.26566 | 5.52E-09 | -0.00573 | 0.90167 | -0.01522 | 0.74291 | -0.0628  |
| 0.020371 | 0.66059  | -0.05862 | 0.20608  | 0.011352 | 0.80672 | 0.009617 | 0.8358  | -0.00285 |
| 0.029809 | 0.52049  | -0.12453 | 0.00705  | -0.0148  | 0.74979 | -0.04172 | 0.36838 | -0.06607 |
| -0.00962 | 0.83573  | -0.059   | 0.20317  | 0.0201   | 0.66484 | 0.00845  | 0.85549 | 0.064797 |
| 0.100819 | 0.02937  | 0.13707  | 0.003    | 0.012219 | 0.79227 | 0.057774 | 0.21269 | 0.068232 |
| -0.12891 | 0.00527  | -0.24849 | 5.30E-08 | 0.027781 | 0.54927 | 0.068383 | 0.14007 | -0.00693 |
| -0.16797 | 0.00027  | -0.22633 | 7.73E-07 | -0.02295 | 0.62086 | -0.01105 | 0.81169 | -0.08247 |
| 0.099533 | 0.03152  | 0.136078 | 0.00321  | 0.014868 | 0.74862 | 0.043956 | 0.34323 | 0.043032 |
| 0.170196 | 0.00022  | 0.124457 | 0.00709  | 0.003332 | 0.94276 | 0.061803 | 0.18244 | 0.015531 |
| 0.051855 | 0.26342  | 0.119393 | 0.00981  | 0.006172 | 0.89418 | 0.074567 | 0.10755 | -0.02142 |
| -0.10821 | 0.01933  | -0.24902 | 4.95E-08 | 0.002123 | 0.96351 | 0.018622 | 0.68814 | -0.08381 |
| 0.06026  | 0.19363  | -0.05309 | 0.25223  | -0.00013 | 0.9978  | -0.02396 | 0.60554 | 0.053138 |
| 0.02293  | 0.62113  | -0.15234 | 0.00096  | -0.00701 | 0.87987 | -0.02364 | 0.61031 | 0.010099 |
| 0.156229 | 0.0007   | 0.133525 | 0.00384  | 0.010499 | 0.82098 | 0.003429 | 0.94109 | 0.130352 |
| -0.05789 | 0.2118   | -0.16102 | 0.00048  | -0.0337  | 0.46752 | -0.05242 | 0.25825 | -0.07839 |
| 0.109763 | 0.01765  | -0.02011 | 0.66471  | -0.00393 | 0.93245 | 0.038542 | 0.40599 | 0.101194 |
| 0.020357 | 0.66082  | 0.111564 | 0.01587  | 0.026804 | 0.5634  | 0.053978 | 0.24435 | 0.032616 |
| -0.05794 | 0.2114   | -0.10862 | 0.01888  | -0.00568 | 0.90261 | -0.00627 | 0.89258 | -0.01804 |
| -0.08041 | 0.0826   | -0.05483 | 0.237    | -0.00154 | 0.97344 | 0.014604 | 0.75294 | 0.049322 |
| -0.01795 | 0.69877  | -0.16198 | 0.00044  | 0.004101 | 0.92956 | -0.01609 | 0.72878 | -0.00026 |
| -0.02317 | 0.61754  | -0.09905 | 0.03235  | -0.00698 | 0.88035 | -0.00171 | 0.97058 | -0.00527 |
| 0.084389 | 0.06845  | -0.00409 | 0.92977  | -0.0572  | 0.21729 | -0.07993 | 0.08445 | 0.00588  |
| 0.097675 | 0.03484  | 0.310581 | 6.69E-12 | 0.044253 | 0.33997 | 0.130754 | 0.00465 | 0.033609 |
| -0.14098 | 0.00226  | -0.11668 | 0.01162  | -0.01864 | 0.68782 | 0.045736 | 0.32402 | -0.02019 |
| -0.06915 | 0.13568  | -0.21067 | 4.39E-06 | -0.04805 | 0.30015 | -0.04685 | 0.31233 | 0.000418 |
| -0.01775 | 0.70198  | -0.14031 | 0.00237  | -0.01186 | 0.79823 | 0.007892 | 0.86494 | 0.007986 |
| 0.042119 | 0.36379  | -0.05747 | 0.21513  | 0.029252 | 0.52832 | 0.053093 | 0.25218 | 0.04634  |
| -0.06033 | 0.19313  | -0.11461 | 0.0132   | -0.00885 | 0.84877 | 0.01992  | 0.66766 | -0.02528 |
| -0.03414 | 0.46169  | -0.12331 | 0.00764  | 0.01698  | 0.71438 | 0.081581 | 0.07821 | -0.03091 |
| -0.01928 | 0.67766  | 0.014325 | 0.7575   | -0.02087 | 0.65279 | 0.0033   | 0.9433  | -0.06997 |
| -0.10485 | 0.02345  | -0.31763 | 2.09E-12 | -0.0152  | 0.74328 | -0.04284 | 0.35564 | -0.05589 |
| 0.083256 | 0.07226  | -0.08663 | 0.0614   | -0.04118 | 0.37455 | -0.03659 | 0.43024 | -0.04773 |
| -0.14794 | 0.00135  | -0.17961 | 9.51E-05 | -0.01511 | 0.74474 | 0.061223 | 0.18659 | -0.13138 |
| 0.019687 | 0.67131  | -0.05185 | 0.26349  | 0.017718 | 0.70254 | 0.021392 | 0.64472 | 0.109275 |
| -0.05919 | 0.20168  | -0.03663 | 0.42968  | -0.00755 | 0.8707  | 0.015072 | 0.74529 | -0.00837 |
| -0.13561 | 0.00332  | -0.05521 | 0.23372  | 0.059447 | 0.19972 | 0.121317 | 0.00868 | 0.113414 |
| -0.08429 | 0.06879  | -0.03576 | 0.44071  | 0.054092 | 0.24335 | 0.140199 | 0.00239 | 0.106206 |
| 0.32661  | 4.53E-13 | 0.203915 | 8.93E-06 | 0.022629 | 0.62571 | 0.032266 | 0.48668 | 0.080306 |
| 0.269148 | 3.42E-09 | 0.068917 | 0.13699  | 6.52E-06 | 0.99989 | -0.00738 | 0.8737  | 0.010649 |
| -0.03441 | 0.45813  | -0.17146 | 0.0002   | 0.006838 | 0.88283 | 0.028703 | 0.53609 | 0.04161  |
| -0.15098 | 0.00107  | -0.05044 | 0.27667  | -0.01218 | 0.79299 | 0.014782 | 0.75002 | -0.01454 |
| -0.01694 | 0.71503  | 0.037398 | 0.42008  | 0.044322 | 0.33922 | 0.134011 | 0.00372 | 0.057924 |
| -0.01432 | 0.7576   | -0.15843 | 0.00059  | 0.052617 | 0.25646 | 0.117868 | 0.0108  | 0.042519 |
| -0.03658 | 0.43033  | -0.01214 | 0.79365  | 0.020579 | 0.65735 | 0.100816 | 0.02938 | 0.038489 |
| -0.01103 | 0.81211  | -0.20727 | 6.30E-06 | -0.0063  | 0.89204 | -0.02951 | 0.52468 | -0.04663 |

|          |          |          |          |          |          |          |          |          |
|----------|----------|----------|----------|----------|----------|----------|----------|----------|
| -0.0764  | 0.09916  | -0.31951 | 1.52E-12 | -0.00815 | 0.86053  | 0.034013 | 0.46339  | -0.07071 |
| 0.121882 | 0.00837  | -0.08407 | 0.06949  | 0.015221 | 0.74286  | -0.01502 | 0.74613  | 0.025285 |
| -0.02978 | 0.52087  | -0.29251 | 1.15E-10 | -0.01379 | 0.76625  | -0.05004 | 0.28051  | -0.06232 |
| -0.15896 | 0.00057  | -0.24875 | 5.12E-08 | 0.000162 | 0.99722  | -0.01264 | 0.78534  | -0.00534 |
| -0.03072 | 0.50783  | -0.23667 | 2.28E-07 | 0.021568 | 0.642    | 0.010826 | 0.81551  | 0.045893 |
| -0.19277 | 2.74E-05 | -0.07654 | 0.09855  | 0.027599 | 0.55189  | 0.126374 | 0.00625  | 0.040032 |
| -0.09153 | 0.04807  | -0.19473 | 2.26E-05 | 0.027879 | 0.54786  | 0.086373 | 0.06218  | 0.063045 |
| 0.04008  | 0.3875   | -0.11327 | 0.01432  | 0.015899 | 0.73184  | 0.037819 | 0.41486  | 0.087455 |
| 0.090624 | 0.05033  | -0.04184 | 0.36699  | 0.022177 | 0.63263  | 0.033019 | 0.47658  | 0.06295  |
| -0.04554 | 0.32613  | 0.0193   | 0.67741  | -0.00423 | 0.92742  | 0.036778 | 0.42782  | 0.051394 |
| 0.099672 | 0.03128  | 0.014164 | 0.76016  | 0.061809 | 0.1824   | 0.082443 | 0.0751   | 0.079445 |
| 0.052312 | 0.25923  | 0.26633  | 5.04E-09 | 0.230092 | 4.99E-07 | 0.57993  | 2.56E-43 | 0.136856 |
| -0.06929 | 0.13489  | 0.106255 | 0.02165  | 0.195647 | 2.06E-05 | 0.625444 | 4.61E-52 | 0.323759 |
| 0.122619 | 0.00798  | 0.03197  | 0.4907   | 0.227998 | 6.37E-07 | 0.500353 | 5.89E-31 | 0.424879 |
| -0.04101 | 0.37661  | 0.008601 | 0.85293  | 0.269002 | 3.49E-09 | 0.364572 | 3.98E-16 | 0.056999 |
| -0.12856 | 0.0054   | 0.135841 | 0.00327  | 0.243264 | 1.02E-07 | 0.68205  | 3.46E-65 | 0.532932 |
| -0.0893  | 0.0538   | 0.070555 | 0.12788  | 0.310173 | 7.15E-12 | 0.59822  | 1.15E-46 | 0.397507 |
| -0.05727 | 0.21673  | 0.295526 | 7.25E-11 | 0.22673  | 7.38E-07 | 0.483651 | 9.43E-29 | 0.385506 |
| -0.076   | 0.10094  | -0.02769 | 0.55054  | 0.313744 | 3.98E-12 | 0.507471 | 6.21E-32 | 0.407183 |
| -0.09131 | 0.04861  | -0.06358 | 0.17018  | 0.177648 | 0.00011  | 0.661879 | 3.51E-60 | 0.30777  |
| -0.05247 | 0.25778  | 0.019119 | 0.68027  | 0.370776 | 1.15E-16 | 0.651021 | 1.21E-57 | 0.216927 |
| -0.08396 | 0.06986  | -0.00113 | 0.98061  | 0.302338 | 2.51E-11 | 0.667425 | 1.61E-61 | 0.236909 |
| -0.08218 | 0.07604  | -0.01181 | 0.799    | 0.182682 | 7.17E-05 | 0.505585 | 1.13E-31 | 0.178926 |
| -0.11312 | 0.01446  | 0.076508 | 0.09867  | 0.345756 | 1.47E-14 | 0.779791 | 1.25E-96 | 0.247908 |
| -0.05842 | 0.20761  | 0.09332  | 0.04383  | 0.496284 | 2.08E-30 | 0.708721 | 1.84E-72 | 0.559022 |
| -0.08483 | 0.06703  | 0.036399 | 0.4326   | 0.385733 | 5.13E-18 | 0.546498 | 1.02E-37 | 0.603321 |
| -0.09319 | 0.04413  | 0.145837 | 0.00158  | 0.299222 | 4.09E-11 | 0.612043 | 2.44E-49 | 0.521543 |
| -0.06382 | 0.16856  | -0.00019 | 0.9968   | 0.179214 | 9.86E-05 | 0.526031 | 1.36E-34 | 0.363922 |
| -0.14846 | 0.00129  | 0.014599 | 0.75302  | 0.219598 | 1.66E-06 | 0.586264 | 1.88E-44 | 0.113242 |
| 0.060549 | 0.1915   | 0.184606 | 5.99E-05 | 0.05089  | 0.27242  | 0.459908 | 8.06E-26 | 0.06055  |
| 0.013908 | 0.76436  | 0.313252 | 4.32E-12 | 0.203195 | 9.62E-06 | 0.606492 | 3.00E-48 | 0.223756 |
| -0.00143 | 0.97549  | 0.163927 | 0.00037  | 0.20195  | 1.09E-05 | 0.587798 | 9.88E-45 | 0.227854 |
| 0.038188 | 0.41031  | 0.085551 | 0.06472  | 0.2175   | 2.09E-06 | 0.561248 | 4.12E-40 | 0.148984 |
| -0.15231 | 0.00096  | -0.14606 | 0.00155  | 0.152504 | 0.00095  | 0.532784 | 1.34E-35 | 0.230477 |
| -0.17376 | 0.00016  | -0.11207 | 0.01539  | 0.140745 | 0.0023   | 0.432875 | 9.47E-23 | -0.10745 |
| -0.1207  | 0.00903  | -0.0411  | 0.37556  | 0.364697 | 3.88E-16 | 0.625635 | 4.21E-52 | 0.124716 |
| -0.10858 | 0.01892  | 0.122485 | 0.00805  | 0.436215 | 4.09E-23 | 0.916568 | #####    | 0.449253 |
| -0.05267 | 0.25598  | -0.01443 | 0.75573  | 0.222259 | 1.23E-06 | 0.532301 | 1.58E-35 | 0.105005 |
| -0.02697 | 0.561    | 0.018631 | 0.68799  | 0.294113 | 9.01E-11 | 0.563638 | 1.64E-40 | 0.241957 |
| 0.006793 | 0.88361  | 0.01394  | 0.76382  | 0.193706 | 2.50E-05 | 0.405228 | 6.97E-20 | 0.032085 |
| -0.0889  | 0.05489  | -0.02087 | 0.65289  | 0.20153  | 1.14E-05 | 0.530921 | 2.55E-35 | 0.106663 |
| -0.15889 | 0.00057  | 0.096464 | 0.03717  | 0.259558 | 1.26E-08 | 0.803079 | #####    | 0.241697 |
| -0.08367 | 0.07085  | -0.12516 | 0.00677  | 0.135151 | 0.00343  | 0.466584 | 1.27E-26 | 0.040706 |
| -0.10551 | 0.02259  | -0.01818 | 0.69521  | 0.154231 | 0.00083  | 0.497759 | 1.32E-30 | 0.233368 |
| -0.10083 | 0.02936  | 0.07226  | 0.1189   | 0.311551 | 5.71E-12 | 0.662296 | 2.79E-60 | 0.498355 |

|          |          |          |          |          |          |          |          |          |
|----------|----------|----------|----------|----------|----------|----------|----------|----------|
| -0.10621 | 0.0217   | 0.006299 | 0.89202  | 0.261578 | 9.59E-09 | 0.507416 | 6.32E-32 | 0.558926 |
| -0.03137 | 0.49894  | 0.023552 | 0.61168  | 0.247012 | 6.38E-08 | 0.590333 | 3.40E-45 | 0.41453  |
| -0.11533 | 0.01264  | 0.148173 | 0.00132  | 0.287292 | 2.52E-10 | 0.804907 | #####    | 0.326035 |
| -0.11281 | 0.01472  | 0.115475 | 0.01252  | 0.271424 | 2.49E-09 | 0.75149  | 5.03E-86 | 0.261552 |
| -0.09058 | 0.05044  | 0.091113 | 0.04909  | 0.27823  | 9.49E-10 | 0.676312 | 1.01E-63 | 0.228626 |
| -0.05119 | 0.26956  | -0.04064 | 0.38088  | 0.115511 | 0.01249  | 0.319433 | 1.54E-12 | 0.324343 |
| -0.04422 | 0.34033  | 0.006843 | 0.88275  | 0.430054 | 1.91E-22 | 0.591282 | 2.27E-45 | 0.247004 |
| -0.12271 | 0.00794  | 0.019055 | 0.68129  | 0.245768 | 7.47E-08 | 0.727351 | 4.72E-78 | 0.146609 |
| -0.06583 | 0.15554  | -0.01816 | 0.69555  | 0.262505 | 8.47E-09 | 0.516399 | 3.43E-33 | 0.211324 |
| -0.18017 | 9.03E-05 | 0.005048 | 0.91336  | 0.542782 | 3.90E-37 | 0.646336 | 1.39E-56 | 0.45899  |
| -0.06157 | 0.18412  | -0.04227 | 0.36207  | 0.116485 | 0.01177  | 0.391971 | 1.34E-18 | 0.020633 |
| -0.03228 | 0.4865   | -0.08033 | 0.08288  | 0.021109 | 0.64911  | 0.180177 | 9.03E-05 | -0.00624 |
| -0.09021 | 0.05139  | -0.01241 | 0.78907  | 0.230372 | 4.83E-07 | 0.571051 | 9.08E-42 | 0.112965 |
| -0.06939 | 0.13431  | -0.00091 | 0.98441  | 0.31443  | 3.56E-12 | 0.59543  | 3.86E-46 | 0.109233 |
| -0.10934 | 0.0181   | 0.008529 | 0.85415  | 0.215249 | 2.68E-06 | 0.718632 | 2.22E-75 | 0.200677 |
| -0.05343 | 0.24917  | -0.06051 | 0.19175  | 0.176633 | 0.00012  | 0.489512 | 1.64E-29 | 0.030506 |
| -0.27383 | 1.78E-09 | -0.05679 | 0.2206   | 0.220283 | 1.53E-06 | 0.691484 | 1.14E-67 | 0.258896 |
| -0.09523 | 0.03967  | -0.09152 | 0.04808  | 0.176609 | 0.00012  | 0.390285 | 1.93E-18 | 0.334422 |
| -0.0803  | 0.083    | 0.193578 | 2.53E-05 | 0.367237 | 2.34E-16 | 0.642673 | 9.16E-56 | 0.71409  |
| -0.24464 | 8.60E-08 | -0.22818 | 6.24E-07 | 0.185384 | 5.57E-05 | 0.526494 | 1.17E-34 | 0.019825 |
| -0.1324  | 0.00415  | 0.060169 | 0.1943   | 0.31976  | 1.46E-12 | 0.867497 | #####    | 0.369953 |
| -0.10034 | 0.03015  | -0.02058 | 0.65733  | 0.234876 | 2.83E-07 | 0.514664 | 6.06E-33 | 0.148349 |
| -0.11945 | 0.00978  | -0.00832 | 0.85775  | 0.187095 | 4.74E-05 | 0.56196  | 3.14E-40 | 0.050079 |
| -0.19963 | 1.38E-05 | -0.07819 | 0.09148  | 0.31648  | 2.53E-12 | 0.761043 | 1.93E-89 | 0.394939 |
| 0.234302 | 3.04E-07 | 0.158036 | 0.00061  | 0.264274 | 6.67E-09 | 0.482016 | 1.53E-28 | 0.119402 |
| -0.1074  | 0.02026  | 0.002218 | 0.96187  | 0.228196 | 6.23E-07 | 0.562349 | 2.70E-40 | 0.130062 |
| -0.14593 | 0.00157  | 0.054345 | 0.24115  | 0.526097 | 1.33E-34 | 0.796393 | #####    | 0.588703 |
| -0.17847 | 0.00011  | 0.057767 | 0.21275  | 0.170602 | 0.00021  | 0.535838 | 4.60E-36 | 0.209112 |
| -0.18073 | 8.58E-05 | -0.0842  | 0.06907  | 0.282046 | 5.46E-10 | 0.730578 | 4.55E-79 | 0.199847 |
| 0.160564 | 0.0005   | 0.181538 | 7.97E-05 | 0.305052 | 1.63E-11 | 0.617792 | 1.72E-50 | 0.123689 |
| -0.09861 | 0.03314  | 0.131868 | 0.00431  | 0.34997  | 6.68E-15 | 0.8421   | #####    | 0.518596 |
| -0.09114 | 0.04903  | 0.009115 | 0.84426  | 0.233533 | 3.33E-07 | 0.538296 | 1.93E-36 | 0.137018 |
| -0.05537 | 0.23237  | -0.02233 | 0.63025  | 0.093044 | 0.04447  | 0.340082 | 4.16E-14 | -0.12811 |
| -0.23597 | 2.49E-07 | 0.040641 | 0.38088  | 0.374628 | 5.24E-17 | 0.670574 | 2.72E-62 | 0.577204 |
| -0.1753  | 0.00014  | 0.057348 | 0.21609  | 0.246111 | 7.15E-08 | 0.654654 | 1.76E-58 | 0.159705 |
| -0.11632 | 0.01188  | -0.01056 | 0.81997  | 0.170609 | 0.00021  | 0.447068 | 2.50E-24 | 0.013731 |
| -0.12767 | 0.00573  | 0.030421 | 0.51196  | 0.165885 | 0.00032  | 0.577288 | 7.49E-43 | 0.10802  |
| -0.19705 | 1.79E-05 | -0.06471 | 0.16265  | 0.152921 | 0.00092  | 0.562765 | 2.30E-40 | 0.058549 |
| -0.10254 | 0.0267   | 0.182215 | 7.48E-05 | 0.129336 | 0.00512  | 0.514839 | 5.72E-33 | 0.013    |
| -0.14629 | 0.00153  | 0.038113 | 0.41124  | 0.386187 | 4.66E-18 | 0.838873 | #####    | 0.38108  |
| -0.12163 | 0.00851  | -0.04494 | 0.33249  | 0.408015 | 3.68E-20 | 0.784375 | 1.69E-98 | 0.306268 |
| -0.01259 | 0.78604  | 0.095865 | 0.03837  | 0.275587 | 1.38E-09 | 0.452121 | 6.59E-25 | 0.301601 |
| -0.03626 | 0.43437  | 0.128612 | 0.00538  | 0.521394 | 6.52E-34 | 0.731967 | 1.65E-79 | 0.399949 |
| -0.05165 | 0.26534  | 0.021604 | 0.64146  | 0.237095 | 2.17E-07 | 0.61493  | 6.48E-50 | 0.227769 |
| -0.05995 | 0.19591  | -0.00974 | 0.83377  | 0.252986 | 2.98E-08 | 0.552049 | 1.32E-38 | 0.16583  |

|          |          |          |          |          |          |          |          |          |
|----------|----------|----------|----------|----------|----------|----------|----------|----------|
| 0.026712 | 0.56475  | 0.381607 | 1.23E-17 | 0.167066 | 0.00029  | 0.522607 | 4.34E-34 | 0.243021 |
| -0.07811 | 0.09178  | 0.002989 | 0.94863  | 0.143042 | 0.00194  | 0.536227 | 4.01E-36 | 0.120979 |
| -0.10338 | 0.02547  | 0.138404 | 0.00272  | 0.229984 | 5.06E-07 | 0.501878 | 3.65E-31 | 0.340683 |
| 0.068088 | 0.14179  | 0.257788 | 1.59E-08 | 0.318559 | 1.79E-12 | 0.676493 | 9.08E-64 | 0.292434 |
| -0.11406 | 0.01366  | 0.179217 | 9.86E-05 | 0.410726 | 1.97E-20 | 0.742956 | 4.19E-83 | 0.549222 |
| -0.07682 | 0.0973   | 0.150751 | 0.00108  | 0.460417 | 7.01E-26 | 0.827511 | #####    | 0.488144 |
| -0.10498 | 0.02328  | 0.113899 | 0.01379  | 0.357498 | 1.59E-15 | 0.755525 | 1.90E-87 | 0.422482 |
| -0.13945 | 0.00253  | 0.098216 | 0.03385  | 0.250472 | 4.11E-08 | 0.783321 | 4.59E-98 | 0.272431 |
| -0.14039 | 0.00236  | 0.121955 | 0.00833  | 0.252536 | 3.15E-08 | 0.824743 | #####    | 0.300784 |
| -0.13815 | 0.00277  | 0.062554 | 0.17717  | 0.273419 | 1.88E-09 | 0.785075 | 8.70E-99 | 0.283183 |
| -0.11869 | 0.01026  | -0.02221 | 0.63216  | 0.218774 | 1.81E-06 | 0.632114 | 1.81E-53 | 0.194424 |
| -0.1568  | 0.00067  | 0.121067 | 0.00882  | 0.290863 | 1.48E-10 | 0.868797 | #####    | 0.356631 |
| -0.14323 | 0.00192  | 0.052477 | 0.25773  | 0.349514 | 7.28E-15 | 0.882124 | #####    | 0.350305 |
| -0.14769 | 0.00137  | 0.007009 | 0.87992  | 0.295815 | 6.94E-11 | 0.705363 | 1.68E-71 | 0.336835 |
| -0.11333 | 0.01427  | -0.01116 | 0.80988  | 0.369471 | 1.49E-16 | 0.787797 | #####    | 0.399565 |
| -0.11454 | 0.01326  | 0.097112 | 0.03591  | 0.253138 | 2.92E-08 | 0.79868  | #####    | 0.278084 |
| 0.087176 | 0.05978  | 0.331446 | 1.95E-13 | 0.236926 | 2.22E-07 | 0.529799 | 3.76E-35 | 0.359248 |
| 0.025066 | 0.58898  | 0.040382 | 0.38392  | 0.265375 | 5.74E-09 | 0.499598 | 7.45E-31 | 0.430183 |
| -0.09564 | 0.03882  | 0.066413 | 0.15188  | 0.286276 | 2.93E-10 | 0.679228 | 1.83E-64 | 0.422355 |
| -0.07446 | 0.10807  | 0.100385 | 0.03008  | 0.394456 | 7.76E-19 | 0.673477 | 5.19E-63 | 0.539315 |
| -0.09798 | 0.03428  | 0.126714 | 0.00611  | 0.313574 | 4.09E-12 | 0.774157 | 2.13E-94 | 0.366821 |
| -0.03083 | 0.50625  | 0.202942 | 9.87E-06 | 0.206718 | 6.67E-06 | 0.599429 | 6.82E-47 | 0.396312 |
| 0.062516 | 0.17744  | -0.16131 | 0.00047  | 0.166854 | 0.00029  | 0.512996 | 1.04E-32 | 0.003925 |
| 0.047521 | 0.30548  | 0.15746  | 0.00064  | 0.370786 | 1.15E-16 | 0.703242 | 6.69E-71 | 0.577122 |
| 0.208151 | 5.74E-06 | 0.313599 | 4.08E-12 | 0.173728 | 0.00016  | 0.529079 | 4.81E-35 | 0.458589 |
| 0.166915 | 0.00029  | 0.29598  | 6.76E-11 | 0.194152 | 2.39E-05 | 0.537375 | 2.68E-36 | 0.289538 |
| 0.17131  | 0.0002   | 0.158282 | 0.0006   | -0.02471 | 0.59431  | -0.03902 | 0.4002   | -0.02368 |
| 0.063962 | 0.16761  | 0.029772 | 0.521    | 0.033908 | 0.46478  | 0.029963 | 0.51833  | 0.075261 |
| 0.042338 | 0.3613   | 0.087074 | 0.06008  | 0.002329 | 0.95997  | 0.041813 | 0.36729  | -0.06583 |
| 0.139201 | 0.00257  | 0.357192 | 1.69E-15 | 0.069935 | 0.13127  | 0.193261 | 2.61E-05 | 0.254387 |
| 0.156691 | 0.00068  | 0.37773  | 2.76E-17 | -0.04248 | 0.35965  | 0.015462 | 0.73894  | 0.038562 |
| 0.207362 | 6.23E-06 | 0.133433 | 0.00387  | -0.03258 | 0.48244  | -0.10799 | 0.01958  | 0.032333 |
| 0.1364   | 0.00314  | 0.213032 | 3.41E-06 | 0.054367 | 0.24096  | 0.069186 | 0.13546  | 0.173851 |
| -0.13698 | 0.00302  | -0.14428 | 0.00177  | -0.00313 | 0.94619  | 0.014126 | 0.76078  | 0.028933 |
| 0.176074 | 0.00013  | 0.131803 | 0.00433  | 0.011189 | 0.80944  | -0.02104 | 0.65023  | 0.049413 |
| 0.023463 | 0.61304  | 0.016959 | 0.71471  | 0.013085 | 0.77793  | 0.04464  | 0.33577  | 0.047598 |
| 0.019251 | 0.67818  | 0.055449 | 0.23171  | 0.007243 | 0.87595  | 0.045396 | 0.32763  | 0.084977 |
| 0.019013 | 0.68194  | -0.02503 | 0.58948  | -0.00521 | 0.91053  | -0.02067 | 0.65593  | 0.007279 |
| 0.104498 | 0.02392  | 0.174911 | 0.00015  | 0.008983 | 0.84648  | 0.032022 | 0.48999  | 0.016652 |
| -0.00366 | 0.93713  | 0.134719 | 0.00354  | 0.003497 | 0.93992  | -0.01661 | 0.72039  | 0.096193 |
| 0.172429 | 0.00018  | 0.187618 | 4.51E-05 | -0.01363 | 0.76895  | -0.02301 | 0.61994  | 0.031072 |
| -0.06584 | 0.15545  | -0.14299 | 0.00195  | 0.003954 | 0.93209  | 0.009454 | 0.83854  | 0.095442 |
| 0.28981  | 1.73E-10 | 0.32967  | 2.66E-13 | 0.019577 | 0.67304  | 0.081554 | 0.0783   | 0.146365 |
| 0.15884  | 0.00057  | 0.114689 | 0.01314  | 0.005793 | 0.90064  | -0.05587 | 0.22814  | -0.02598 |
| -0.05345 | 0.24904  | 0.012221 | 0.79225  | 0.037732 | 0.41594  | 0.15922  | 0.00055  | 0.062586 |

|          |          |          |          |          |         |          |          |          |
|----------|----------|----------|----------|----------|---------|----------|----------|----------|
| -0.0044  | 0.92439  | 0.071658 | 0.12201  | 0.011634 | 0.80202 | 0.03709  | 0.42391  | 0.059127 |
| 0.10742  | 0.02024  | -0.021   | 0.65076  | 0.027015 | 0.56034 | 0.01201  | 0.79576  | 0.188804 |
| 0.203495 | 9.33E-06 | 0.081441 | 0.07872  | 0.005272 | 0.90954 | 0.001538 | 0.97356  | 0.036288 |
| 0.21196  | 3.82E-06 | 0.117495 | 0.01105  | -0.03946 | 0.39489 | -0.09381 | 0.04274  | -0.03154 |
| 0.118678 | 0.01026  | 0.294194 | 8.90E-11 | 0.018565 | 0.68904 | 0.010215 | 0.82575  | 0.070026 |
| 0.216333 | 2.38E-06 | 0.171638 | 0.00019  | -0.03473 | 0.45401 | -0.08023 | 0.08327  | -0.11094 |
| 0.2337   | 3.26E-07 | 0.00769  | 0.86835  | -0.04852 | 0.29543 | -0.12419 | 0.00721  | -0.02805 |
| 0.173318 | 0.00017  | 0.146316 | 0.00152  | -0.02424 | 0.60132 | -0.04113 | 0.37516  | 0.035763 |
| 0.21082  | 4.32E-06 | 0.318253 | 1.88E-12 | 0.001075 | 0.98152 | 0.022386 | 0.62944  | -0.03515 |
| 0.040859 | 0.37833  | 0.06507  | 0.16035  | 0.004311 | 0.92597 | 0.043133 | 0.35235  | 0.0826   |
| -0.01355 | 0.7702   | -0.09676 | 0.03658  | 4.57E-05 | 0.99921 | -0.01347 | 0.7715   | -0.00667 |
| 0.11926  | 0.00989  | 0.221172 | 1.39E-06 | 0.083349 | 0.07194 | 0.113459 | 0.01416  | 0.355474 |
| -0.08747 | 0.05893  | 0.010572 | 0.81976  | 0.00041  | 0.99295 | 0.000124 | 0.99786  | 0.044764 |
| 0.132104 | 0.00424  | 0.2007   | 1.24E-05 | 0.009393 | 0.83957 | 0.047631 | 0.30435  | 0.07099  |
| -0.06928 | 0.1349   | -0.04371 | 0.34594  | 0.001137 | 0.98045 | 0.044125 | 0.34138  | 0.035642 |
| 0.168339 | 0.00026  | 0.111491 | 0.01593  | 0.032313 | 0.48606 | 0.063442 | 0.17109  | 0.078716 |
| 0.344102 | 1.99E-14 | 0.146951 | 0.00145  | -0.04217 | 0.36324 | -0.09053 | 0.05058  | -0.07619 |
| 0.175945 | 0.00013  | 0.308646 | 9.15E-12 | 0.062613 | 0.17677 | 0.165532 | 0.00033  | 0.11256  |
| 0.11011  | 0.0173   | 0.00417  | 0.92839  | -0.00893 | 0.84738 | -0.02771 | 0.55023  | -0.01832 |
| -0.04779 | 0.30271  | -0.05648 | 0.22309  | -0.03216 | 0.48809 | -0.06084 | 0.18933  | 0.058583 |
| 0.034556 | 0.45628  | 0.099808 | 0.03105  | 0.040009 | 0.38834 | 0.107304 | 0.02038  | 0.104259 |
| 0.278472 | 9.17E-10 | 0.479163 | 3.52E-28 | -0.01076 | 0.81653 | -0.0564  | 0.22375  | 0.061699 |
| 0.254973 | 2.30E-08 | 0.290209 | 1.63E-10 | 0.02908  | 0.53075 | 0.094415 | 0.04141  | 0.195432 |
| 0.321536 | 1.08E-12 | 0.198555 | 1.54E-05 | -0.02506 | 0.58911 | -0.09082 | 0.04983  | -0.10768 |
| 0.061186 | 0.18686  | -0.08321 | 0.07241  | 0.004082 | 0.92989 | -0.0298  | 0.52063  | 0.016572 |
| 0.140738 | 0.0023   | 0.263533 | 7.37E-09 | 0.011782 | 0.79954 | 0.051456 | 0.26712  | 0.163928 |
| 0.304753 | 1.71E-11 | 0.171799 | 0.00019  | 0.010775 | 0.81636 | -0.02479 | 0.59313  | 0.049597 |
| 0.284343 | 3.90E-10 | 0.116698 | 0.01161  | 0.027596 | 0.55194 | -0.06377 | 0.16887  | 0.058656 |
| 0.224808 | 9.20E-07 | 0.246954 | 6.43E-08 | 0.004075 | 0.93002 | -0.01012 | 0.82731  | 0.050995 |
| 0.03019  | 0.51517  | 0.172905 | 0.00017  | 0.139843 | 0.00246 | 0.283123 | 4.67E-10 | 0.419876 |
| 0.142184 | 0.00207  | 0.194379 | 2.34E-05 | -0.01388 | 0.76488 | -0.03365 | 0.46822  | 0.031489 |
| 0.169653 | 0.00023  | 0.194212 | 2.38E-05 | 0.041621 | 0.3695  | 0.107085 | 0.02064  | 0.148228 |
| 0.303701 | 2.02E-11 | 0.227891 | 6.45E-07 | 0.03731  | 0.42117 | 0.068872 | 0.13725  | 0.200173 |
| 0.076636 | 0.09811  | 0.204558 | 8.35E-06 | 0.009888 | 0.83123 | 0.076081 | 0.10057  | 0.190254 |
| 0.143734 | 0.00185  | 0.267027 | 4.58E-09 | 0.027934 | 0.54707 | 0.03896  | 0.40091  | 0.137485 |
| 0.094354 | 0.04154  | 0.146665 | 0.00148  | -0.03343 | 0.47107 | -0.01024 | 0.82524  | -0.03464 |
| 0.163159 | 0.0004   | 0.264394 | 6.56E-09 | 0.046475 | 0.31626 | 0.048226 | 0.29835  | 0.239603 |
| 0.196619 | 1.87E-05 | 0.122305 | 0.00815  | 0.021176 | 0.64808 | -0.08995 | 0.05206  | 0.084963 |
| 0.076878 | 0.09705  | 0.249077 | 4.91E-08 | 0.000198 | 0.9966  | 0.044902 | 0.33293  | 0.13445  |
| 0.047369 | 0.30702  | 0.371132 | 1.07E-16 | 0.064584 | 0.1635  | 0.153382 | 0.00088  | 0.243996 |
| 0.206009 | 7.18E-06 | 0.208582 | 5.48E-06 | 0.025854 | 0.57732 | 0.056947 | 0.21932  | 0.045751 |
| -0.01521 | 0.74303  | 0.053665 | 0.24709  | 0.112171 | 0.0153  | 0.248478 | 5.30E-08 | 0.22895  |
| 0.110325 | 0.01708  | 0.205888 | 7.27E-06 | 0.015805 | 0.73337 | -0.01549 | 0.73842  | 0.124453 |
| 0.084253 | 0.0689   | 0.314701 | 3.40E-12 | 0.047653 | 0.30414 | 0.101692 | 0.02799  | 0.146914 |
| -0.05298 | 0.25315  | -0.12458 | 0.00703  | -0.05344 | 0.24909 | -0.10634 | 0.02154  | -0.07252 |

|          |          |          |          |          |         |          |          |          |
|----------|----------|----------|----------|----------|---------|----------|----------|----------|
| 0.305835 | 1.44E-11 | 0.365358 | 3.41E-16 | -0.03084 | 0.5061  | -0.1013  | 0.02861  | 0.025355 |
| 0.11216  | 0.01531  | 0.140363 | 0.00236  | 0.053559 | 0.24803 | 0.039605 | 0.39315  | 0.231152 |
| 0.195887 | 2.02E-05 | 0.214536 | 2.89E-06 | -0.02486 | 0.59206 | -0.03037 | 0.51263  | 0.074487 |
| 0.147961 | 0.00134  | 0.415768 | 6.05E-21 | 0.075269 | 0.10427 | 0.126829 | 0.00606  | 0.202017 |
| 0.256057 | 1.99E-08 | 0.313799 | 3.95E-12 | 0.045309 | 0.32857 | 0.022999 | 0.62008  | 0.054559 |
| -0.0119  | 0.79759  | -0.1091  | 0.01835  | 0.01174  | 0.80024 | 0.004294 | 0.92626  | 0.033561 |
| -0.11374 | 0.01392  | -0.07718 | 0.09572  | 0.004181 | 0.9282  | 0.041232 | 0.37399  | 0.121478 |
| 0.148948 | 0.00125  | -0.00764 | 0.86921  | -0.00726 | 0.87564 | -0.10405 | 0.02453  | 0.041931 |
| 0.030172 | 0.51542  | -0.05306 | 0.25244  | -0.02437 | 0.59937 | -0.02207 | 0.6342   | -0.04566 |
| 0.039633 | 0.39282  | 0.137423 | 0.00292  | -0.09728 | 0.03559 | -0.1218  | 0.00842  | -0.21698 |
| -0.14896 | 0.00124  | -0.2436  | 9.79E-08 | -0.01798 | 0.69842 | -0.0853  | 0.06552  | -0.08482 |
| 0.090153 | 0.05154  | 0.179579 | 9.54E-05 | 0.019622 | 0.67234 | 0.024693 | 0.59453  | 0.201346 |
| 0.40369  | 9.89E-20 | 0.338806 | 5.24E-14 | 0.013285 | 0.77463 | 0.049984 | 0.28106  | 0.079707 |
| 0.199913 | 1.35E-05 | 0.138626 | 0.00268  | 0.055873 | 0.22815 | 0.178697 | 0.0001   | 0.210925 |
| -0.0337  | 0.46756  | 0.012196 | 0.79266  | 0.004203 | 0.92782 | -0.01809 | 0.69653  | 0.060807 |
| 0.24593  | 7.32E-08 | 0.088785 | 0.0552   | 0.012972 | 0.77979 | -0.01053 | 0.82039  | 0.068783 |
| 0.211255 | 4.12E-06 | 0.133876 | 0.00375  | -0.03456 | 0.45626 | -0.10918 | 0.01827  | 0.063637 |
| 0.052989 | 0.2531   | 0.078749 | 0.08916  | -0.00198 | 0.96594 | -0.01202 | 0.79552  | -0.02356 |
| 0.078681 | 0.08944  | 0.015662 | 0.73568  | -0.03579 | 0.44041 | -0.1753  | 0.00014  | -0.06965 |
| 0.075214 | 0.10452  | -0.09244 | 0.04587  | -0.02489 | 0.59157 | -0.05389 | 0.24513  | -0.00132 |
| 0.166015 | 0.00031  | 0.082465 | 0.07502  | -0.00666 | 0.88585 | -0.07749 | 0.09439  | 0.088369 |
| 0.363117 | 5.31E-16 | 0.370243 | 1.28E-16 | 0.032081 | 0.48919 | 0.05932  | 0.20068  | 0.176219 |
| 0.272216 | 2.23E-09 | 0.1598   | 0.00053  | 0.01089  | 0.81444 | 0.006619 | 0.88657  | 0.074449 |
| 0.029638 | 0.52288  | 0.057094 | 0.21813  | 0.003603 | 0.9381  | 0.015404 | 0.73989  | 0.027559 |
| -0.17003 | 0.00022  | -0.17832 | 0.00011  | 0.037276 | 0.42159 | 0.061691 | 0.18324  | 0.077961 |
| 0.102831 | 0.02627  | 0.419935 | 2.25E-21 | 0.107644 | 0.01998 | 0.277721 | 1.02E-09 | 0.319678 |
| 0.24476  | 8.47E-08 | 0.41135  | 1.70E-20 | 0.012725 | 0.78387 | 0.102613 | 0.0266   | 0.128345 |
| 0.092863 | 0.04488  | 0.057192 | 0.21735  | -0.0071  | 0.8784  | 0.015864 | 0.73241  | 0.046334 |
| 0.257029 | 1.76E-08 | 0.179844 | 9.31E-05 | 0.025068 | 0.58896 | 0.008689 | 0.85144  | 0.070712 |
| -0.03242 | 0.48458  | -0.1955  | 2.09E-05 | 0.037781 | 0.41532 | 0.008427 | 0.85587  | 0.196083 |
| 0.115918 | 0.01218  | 0.085278 | 0.06558  | 0.002215 | 0.96193 | 0.014558 | 0.7537   | 0.096763 |
| 0.152384 | 0.00095  | 0.062366 | 0.17848  | -0.00086 | 0.98524 | -0.02091 | 0.65224  | 0.152522 |
| 0.103906 | 0.02474  | 0.025979 | 0.57547  | -0.03708 | 0.42409 | -0.06693 | 0.14872  | 0.014026 |
| 0.059374 | 0.20028  | 0.174834 | 0.00015  | 0.000974 | 0.98326 | 0.051208 | 0.26943  | 0.060929 |
| 0.08379  | 0.07044  | 0.095613 | 0.03889  | -0.01178 | 0.79957 | -0.02563 | 0.58066  | 0.068829 |
| -0.0258  | 0.5781   | -0.05448 | 0.24     | 0.024435 | 0.5984  | 0.036445 | 0.43202  | -0.01156 |
| -0.09407 | 0.04215  | -0.20917 | 5.15E-06 | -0.0114  | 0.80588 | 0.003538 | 0.93922  | -0.02299 |
| 0.250883 | 3.90E-08 | 0.439291 | 1.87E-23 | 0.009713 | 0.83418 | -0.05784 | 0.21218  | 0.201925 |
| 0.027331 | 0.55576  | 0.025774 | 0.5785   | 0.029637 | 0.5229  | 0.023161 | 0.6176   | 0.090991 |
| -0.16489 | 0.00035  | 0.015116 | 0.74458  | 0.039235 | 0.39759 | 0.163393 | 0.00039  | 0.002431 |
| 0.17913  | 9.93E-05 | 0.435538 | 4.85E-23 | -0.01165 | 0.80174 | -0.00989 | 0.83129  | 0.003369 |
| 0.03582  | 0.43996  | 0.110008 | 0.0174   | 0.046706 | 0.31385 | 0.024657 | 0.59507  | 0.08466  |
| 0.137531 | 0.0029   | 0.171241 | 0.0002   | -0.00306 | 0.94742 | -0.00438 | 0.92477  | -0.03854 |
| 0.121104 | 0.0088   | 0.088419 | 0.05621  | -0.01031 | 0.82414 | -0.02226 | 0.63137  | 0.082209 |
| 0.128562 | 0.0054   | 0.08348  | 0.07149  | 0.035214 | 0.44774 | 0.044834 | 0.33367  | 0.059291 |

|          |          |          |          |          |         |          |          |          |
|----------|----------|----------|----------|----------|---------|----------|----------|----------|
| 0.16562  | 0.00033  | 0.266801 | 4.72E-09 | 0.053636 | 0.24735 | 0.009533 | 0.83722  | 0.057174 |
| 0.0899   | 0.0522   | 0.126701 | 0.00611  | 0.032321 | 0.48595 | 0.06703  | 0.1481   | 0.079457 |
| 0.012945 | 0.78024  | 0.089823 | 0.0524   | -0.03562 | 0.44249 | -0.06359 | 0.17006  | -0.02184 |
| 0.24826  | 5.45E-08 | 0.094032 | 0.04224  | 0.046361 | 0.31744 | -0.02441 | 0.59882  | 0.114822 |
| 0.158546 | 0.00058  | 0.124274 | 0.00717  | -0.00236 | 0.95948 | 0.024764 | 0.59348  | 0.014298 |
| 0.213717 | 3.16E-06 | 0.154879 | 0.00078  | 0.010321 | 0.82397 | -0.01241 | 0.78905  | 0.129574 |
| 0.110274 | 0.01713  | 0.065893 | 0.15512  | 0.030304 | 0.51359 | -0.00148 | 0.97457  | 0.09836  |
| -0.03061 | 0.50932  | -0.06685 | 0.14921  | 0.00073  | 0.98744 | -0.00077 | 0.98684  | 0.058997 |
| -0.00877 | 0.85004  | 0.039096 | 0.39926  | 0.009787 | 0.83293 | 0.009335 | 0.84054  | 0.06283  |
| 0.132094 | 0.00424  | 0.005106 | 0.91237  | 0.015968 | 0.73071 | -0.07401 | 0.11022  | -0.00096 |
| 0.179272 | 9.81E-05 | 0.488317 | 2.35E-29 | 0.087736 | 0.05815 | 0.321898 | 1.02E-12 | 0.068237 |
| 0.192585 | 2.79E-05 | 0.331743 | 1.85E-13 | 0.018251 | 0.69404 | 0.099681 | 0.03126  | -0.04751 |
| 0.095719 | 0.03867  | 0.276655 | 1.19E-09 | 0.012484 | 0.78788 | 0.202986 | 9.83E-06 | -0.1086  |
| 0.009454 | 0.83854  | 0.301344 | 2.93E-11 | -0.00121 | 0.97912 | 0.1161   | 0.01205  | -0.03106 |
| -0.04405 | 0.34215  | 0.089793 | 0.05248  | 0.015746 | 0.73433 | 0.112947 | 0.0146   | -0.08229 |
| 0.188106 | 4.30E-05 | 0.554729 | 4.86E-39 | 0.04627  | 0.31839 | 0.223684 | 1.05E-06 | 0.080655 |
| -0.00185 | 0.96827  | -0.24784 | 5.75E-08 | -0.00935 | 0.84038 | 0.043187 | 0.35174  | -0.30247 |
| 0.071942 | 0.12053  | 0.236494 | 2.33E-07 | -0.04052 | 0.38229 | 0.024616 | 0.59569  | -0.19136 |
| 0.043766 | 0.34532  | -0.12396 | 0.00732  | 0.00392  | 0.93267 | 0.186194 | 5.16E-05 | -0.2079  |
| 0.200322 | 1.29E-05 | 0.412451 | 1.32E-20 | 0.016814 | 0.71706 | 0.114284 | 0.01347  | -0.05149 |
| 0.10166  | 0.02804  | 0.208101 | 5.77E-06 | -0.00735 | 0.87405 | 0.097907 | 0.03441  | -0.1622  |
| 0.005641 | 0.90323  | 0.12486  | 0.0069   | -0.0088  | 0.84961 | 0.110313 | 0.01709  | -0.14474 |
| 0.323953 | 7.16E-13 | 0.520029 | 1.03E-33 | 0.033518 | 0.46993 | 0.225576 | 8.42E-07 | 0.030631 |
| 0.189293 | 3.84E-05 | 0.289115 | 1.92E-10 | 0.025439 | 0.58345 | 0.090378 | 0.05096  | -0.01127 |
| 0.207357 | 6.24E-06 | 0.209066 | 5.21E-06 | -0.00698 | 0.88039 | 0.136535 | 0.00311  | -0.27862 |
| 0.030967 | 0.50441  | 0.065969 | 0.15464  | 0.042193 | 0.36295 | 0.194493 | 2.31E-05 | -0.05706 |
| 0.296247 | 6.49E-11 | 0.314774 | 3.36E-12 | 0.063854 | 0.16833 | 0.293772 | 9.49E-11 | 0.006709 |
| 0.032894 | 0.47824  | 0.292105 | 1.22E-10 | 0.086041 | 0.06319 | 0.304972 | 1.65E-11 | 0.066646 |
| 0.275756 | 1.35E-09 | 0.359165 | 1.15E-15 | 0.03182  | 0.49273 | 0.165426 | 0.00033  | -0.03335 |
| 0.317249 | 2.23E-12 | 0.20048  | 1.27E-05 | 0.018528 | 0.68963 | 0.097908 | 0.03441  | -0.06318 |
| 0.128166 | 0.00554  | 0.060277 | 0.1935   | 0.04482  | 0.33381 | 0.107589 | 0.02004  | -0.0182  |
| 0.165995 | 0.00032  | 0.017229 | 0.71038  | -0.01708 | 0.71282 | 0.049626 | 0.28453  | -0.23454 |
| 0.071029 | 0.12533  | 0.155064 | 0.00077  | 0.041095 | 0.37558 | 0.234189 | 3.08E-07 | 0.045606 |
| 0.26898  | 3.50E-09 | 0.227059 | 7.10E-07 | -0.05616 | 0.22578 | -0.04869 | 0.29372  | -0.18309 |
| 0.125876 | 0.00645  | 0.144318 | 0.00177  | 0.001698 | 0.97081 | 0.185541 | 5.49E-05 | -0.13653 |
| 0.090856 | 0.04974  | 0.209649 | 4.89E-06 | 0.016609 | 0.72035 | 0.144563 | 0.00174  | -0.08551 |
| 0.335742 | 9.09E-14 | 0.423345 | 9.88E-22 | 0.046016 | 0.32107 | 0.055805 | 0.22872  | -0.00164 |
| 0.242188 | 1.17E-07 | 0.282538 | 5.09E-10 | 0.004587 | 0.92126 | 0.040092 | 0.38736  | -0.03163 |
| 0.263045 | 7.87E-09 | 0.35467  | 2.74E-15 | 0.021938 | 0.6363  | 0.163143 | 0.0004   | -0.12245 |
| 0.11834  | 0.01048  | 0.390137 | 1.99E-18 | 0.017924 | 0.69925 | 0.132138 | 0.00423  | -0.0138  |
| 0.235578 | 2.61E-07 | 0.150146 | 0.00114  | 0.039602 | 0.39319 | 0.193444 | 2.57E-05 | -0.0301  |
| 0.005512 | 0.90544  | 0.154135 | 0.00083  | 0.037536 | 0.41837 | 0.117995 | 0.01071  | -0.03093 |
| 0.190673 | 3.36E-05 | 0.288942 | 1.97E-10 | 0.022251 | 0.6315  | 0.096566 | 0.03697  | -0.09265 |
| 0.183729 | 6.50E-05 | 0.219949 | 1.59E-06 | -0.02642 | 0.56901 | -0.03213 | 0.48854  | -0.1479  |
| 0.160023 | 0.00052  | 0.241117 | 1.33E-07 | 0.026687 | 0.5651  | 0.133806 | 0.00377  | 0.062919 |

|          |          |          |          |          |         |          |          |          |
|----------|----------|----------|----------|----------|---------|----------|----------|----------|
| 0.197563 | 1.70E-05 | 0.309313 | 8.22E-12 | 0.070143 | 0.13012 | 0.194185 | 2.38E-05 | 0.02719  |
| 0.203323 | 9.49E-06 | 0.431384 | 1.37E-22 | 0.031816 | 0.49279 | 0.221    | 1.42E-06 | -0.06214 |
| 0.162671 | 0.00042  | 0.008058 | 0.86213  | -0.03039 | 0.51234 | 0.054828 | 0.23699  | -0.2898  |
| 0.045688 | 0.32452  | 0.110211 | 0.01719  | -0.00459 | 0.92111 | 0.153529 | 0.00087  | -0.15134 |
| 0.129383 | 0.00511  | 0.220398 | 1.51E-06 | -0.00019 | 0.99668 | 0.110822 | 0.01658  | -0.11569 |
| 0.120656 | 0.00906  | 0.17924  | 9.84E-05 | 0.026714 | 0.56471 | 0.153302 | 0.00089  | 0.022955 |
| 0.125137 | 0.00678  | 0.270706 | 2.75E-09 | 0.054757 | 0.2376  | 0.222127 | 1.25E-06 | -0.03784 |
| 0.070941 | 0.1258   | 0.130804 | 0.00464  | 0.07998  | 0.08425 | 0.313887 | 3.89E-12 | 0.011816 |
| 0.335976 | 8.72E-14 | 0.429389 | 2.25E-22 | 0.016022 | 0.72984 | 0.107602 | 0.02003  | 0.046441 |
| 0.142086 | 0.00208  | 0.192345 | 2.86E-05 | 0.051484 | 0.26685 | 0.211165 | 4.16E-06 | -0.00248 |
| -0.04163 | 0.36936  | 0.186468 | 5.03E-05 | 0.058306 | 0.2085  | 0.356532 | 1.92E-15 | -0.05625 |
| 0.325652 | 5.35E-13 | 0.442487 | 8.24E-24 | 0.02711  | 0.55896 | 0.15242  | 0.00095  | 0.020727 |
| -0.00919 | 0.84298  | 0.0822   | 0.07596  | 0.039988 | 0.38859 | 0.203956 | 8.89E-06 | -0.07208 |
| 0.117628 | 0.01096  | 0.484727 | 6.86E-29 | 0.038103 | 0.41135 | 0.294862 | 8.03E-11 | 0.086537 |
| 0.339409 | 4.70E-14 | 0.460363 | 7.12E-26 | -0.00367 | 0.93696 | 0.189811 | 3.65E-05 | -0.06897 |
| 0.27816  | 9.59E-10 | 0.264906 | 6.12E-09 | 0.002358 | 0.95946 | 0.105405 | 0.02272  | -0.1331  |
| 0.172765 | 0.00018  | 0.146767 | 0.00147  | 0.007978 | 0.86348 | 0.074926 | 0.10585  | -0.13137 |
| -0.00469 | 0.91956  | 0.162926 | 0.00041  | 0.074673 | 0.10705 | 0.238996 | 1.72E-07 | 0.047754 |
| 0.360148 | 9.50E-16 | 0.545999 | 1.22E-37 | 0.019634 | 0.67215 | 0.089006 | 0.05459  | 0.018349 |
| 0.15777  | 0.00062  | 0.48462  | 7.08E-29 | 0.092462 | 0.04582 | 0.152809 | 0.00092  | 0.336658 |
| 0.303073 | 2.23E-11 | 0.543611 | 2.89E-37 | 0.050799 | 0.27328 | 0.062598 | 0.17687  | 0.239325 |
| 0.37642  | 3.62E-17 | 0.535014 | 6.14E-36 | 0.038373 | 0.40805 | 0.10446  | 0.02397  | 0.062368 |
| 0.451845 | 7.09E-25 | 0.499988 | 6.60E-31 | 0.038537 | 0.40605 | 0.155936 | 0.00072  | 0.059925 |
| -0.08621 | 0.06268  | -0.34334 | 2.29E-14 | 0.017753 | 0.70199 | 0.122104 | 0.00825  | -0.16335 |
| -0.0636  | 0.17     | -0.06858 | 0.13894  | 0.060899 | 0.18894 | 0.29371  | 9.58E-11 | -0.11273 |
| 0.199277 | 1.43E-05 | 0.354474 | 2.84E-15 | 0.016347 | 0.72459 | 0.131835 | 0.00432  | 0.018062 |
| 0.142165 | 0.00207  | 0.070789 | 0.12662  | -0.03472 | 0.4542  | 0.025568 | 0.58154  | -0.24671 |
| 0.125128 | 0.00678  | 0.138469 | 0.00271  | 0.074247 | 0.10907 | 0.265199 | 5.88E-09 | 0.020896 |
| -0.02155 | 0.64229  | 0.189806 | 3.65E-05 | 0.04951  | 0.28565 | 0.259638 | 1.24E-08 | 0.046531 |
| -0.08155 | 0.07834  | -0.0877  | 0.05826  | 0.05496  | 0.23586 | 0.324591 | 6.42E-13 | -0.08264 |
| 0.00949  | 0.83794  | 0.157093 | 0.00066  | 0.059246 | 0.20125 | 0.283852 | 4.20E-10 | 0.021188 |
| 0.014503 | 0.7546   | -0.02045 | 0.65939  | 0.135067 | 0.00345 | 0.508367 | 4.66E-32 | 0.177335 |
| 0.155178 | 0.00077  | 0.324052 | 7.04E-13 | -0.06663 | 0.15055 | -0.02942 | 0.52595  | -0.06219 |
| 0.098662 | 0.03304  | 0.391545 | 1.47E-18 | 0.06995  | 0.13119 | 0.251542 | 3.59E-08 | 0.056684 |
| 0.026783 | 0.56371  | -0.07462 | 0.10728  | 0.025988 | 0.57534 | 0.169968 | 0.00022  | -0.19677 |
| 0.221146 | 1.39E-06 | 0.306484 | 1.30E-11 | 0.074353 | 0.10856 | 0.3038   | 1.99E-11 | 0.129486 |
| 0.191446 | 3.12E-05 | 0.277483 | 1.06E-09 | 0.042244 | 0.36237 | 0.243317 | 1.01E-07 | -0.02466 |
| 0.146921 | 0.00145  | 0.25166  | 3.53E-08 | 0.015609 | 0.73655 | 0.12872  | 0.00534  | -0.0597  |
| 0.24922  | 4.83E-08 | 0.341519 | 3.20E-14 | 0.024508 | 0.59731 | 0.07672  | 0.09774  | -0.10456 |
| -0.08243 | 0.07515  | 0.058012 | 0.21081  | 0.037773 | 0.41542 | 0.182174 | 7.51E-05 | 0.034161 |
| 0.153177 | 0.0009   | 0.182814 | 7.08E-05 | -0.02869 | 0.53625 | -0.11076 | 0.01664  | -0.17956 |
| 0.076387 | 0.09921  | -0.0543  | 0.24155  | -0.00279 | 0.95199 | 0.039722 | 0.39175  | -0.13278 |
| 0.081569 | 0.07825  | 0.168682 | 0.00025  | 0.039818 | 0.39061 | 0.168629 | 0.00025  | 0.014397 |
| 0.044889 | 0.33307  | 0.383731 | 7.85E-18 | 0.039405 | 0.39555 | 0.188647 | 4.08E-05 | 0.064411 |
| 0.373884 | 6.10E-17 | 0.479265 | 3.42E-28 | 0.054879 | 0.23655 | 0.146213 | 0.00153  | 0.095896 |



|          |          |          |          |          |         |          |          |          |
|----------|----------|----------|----------|----------|---------|----------|----------|----------|
| 0.340078 | 4.16E-14 | 0.448037 | 1.94E-24 | -0.02298 | 0.62039 | 0.040466 | 0.38294  | -0.04685 |
| 0.141252 | 0.00222  | -0.00584 | 0.89986  | 0.015135 | 0.74427 | 0.154726 | 0.00079  | -0.17259 |
| 0.383516 | 8.22E-18 | 0.337878 | 6.20E-14 | 0.086964 | 0.0604  | 0.305874 | 1.43E-11 | 0.139546 |
| 0.152608 | 0.00094  | 0.22656  | 7.52E-07 | 0.020308 | 0.66158 | 0.139342 | 0.00255  | -0.05648 |
| 0.102905 | 0.02617  | -0.07805 | 0.09205  | -0.02819 | 0.54339 | 0.048527 | 0.29533  | -0.23857 |
| 0.082266 | 0.07573  | 0.010943 | 0.81355  | 0.00667  | 0.8857  | 0.162367 | 0.00043  | -0.20765 |
| 0.256775 | 1.82E-08 | 0.222045 | 1.26E-06 | 0.076928 | 0.09683 | 0.242179 | 1.17E-07 | 0.080838 |
| 0.316347 | 2.59E-12 | 0.536966 | 3.09E-36 | -0.0215  | 0.64306 | 0.073833 | 0.11106  | 0.00307  |
| 0.024046 | 0.60423  | 0.142523 | 0.00202  | 0.029192 | 0.52916 | 0.178809 | 0.0001   | -0.1106  |
| 0.278917 | 8.60E-10 | 0.397417 | 4.04E-19 | 0.061945 | 0.18144 | 0.338684 | 5.36E-14 | -0.00227 |
| 0.028193 | 0.54335  | 0.231164 | 4.40E-07 | 0.017307 | 0.70913 | 0.204329 | 8.56E-06 | -0.08219 |
| 0.006635 | 0.88629  | -0.12321 | 0.00768  | 0.106256 | 0.02164 | 0.397567 | 3.91E-19 | -0.01934 |
| -0.08844 | 0.05614  | 0.172497 | 0.00018  | 0.095884 | 0.03833 | 0.362944 | 5.49E-16 | 0.079546 |
| 0.049969 | 0.2812   | 0.291599 | 1.32E-10 | 0.054096 | 0.24332 | 0.248511 | 5.28E-08 | -0.03977 |
| 0.184856 | 5.85E-05 | 0.534696 | 6.86E-36 | -0.00941 | 0.83922 | 0.09975  | 0.03114  | 0.163795 |
| 0.313958 | 3.84E-12 | 0.437398 | 3.03E-23 | 0.047585 | 0.30482 | 0.160592 | 0.00049  | 0.136692 |
| 0.23727  | 2.13E-07 | 0.411618 | 1.60E-20 | 0.0288   | 0.53471 | 0.176259 | 0.00013  | 0.029306 |
| 0.093765 | 0.04283  | 0.146643 | 0.00148  | 0.100935 | 0.02919 | 0.329195 | 2.89E-13 | 0.114303 |
| 0.126643 | 0.00613  | 0.393876 | 8.82E-19 | 0.018922 | 0.68339 | 0.128645 | 0.00537  | -0.0552  |
| 0.107387 | 0.02028  | 0.259433 | 1.28E-08 | 0.024276 | 0.60079 | 0.160318 | 0.00051  | -0.04639 |
| 0.319789 | 1.45E-12 | 0.586937 | 1.42E-44 | 0.034124 | 0.46193 | 0.196948 | 1.81E-05 | 0.136373 |
| 0.118466 | 0.0104   | 0.130674 | 0.00468  | 0.043333 | 0.35012 | 0.176144 | 0.00013  | -0.01847 |
| 0.124187 | 0.00721  | 0.355235 | 2.46E-15 | 0.116015 | 0.01211 | 0.422591 | 1.19E-21 | 0.103977 |
| 0.212509 | 3.60E-06 | 0.480577 | 2.33E-28 | 0.03101  | 0.50382 | 0.194033 | 2.42E-05 | 0.07286  |
| 0.004083 | 0.92988  | 0.154585 | 0.0008   | 0.004979 | 0.91455 | 0.111735 | 0.0157   | -0.23169 |
| 0.178954 | 0.0001   | 0.396824 | 4.61E-19 | -0.01886 | 0.68434 | -0.01739 | 0.70776  | -0.14578 |
| 0.171592 | 0.00019  | 0.367057 | 2.43E-16 | 0.028885 | 0.5335  | 0.121801 | 0.00842  | 0.008855 |
| 0.267954 | 4.03E-09 | 0.170701 | 0.00021  | 0.028573 | 0.53793 | 0.076538 | 0.09853  | -0.11166 |
| 0.156793 | 0.00067  | 0.296099 | 6.64E-11 | -0.01055 | 0.82018 | 0.046708 | 0.31384  | -0.16448 |
| 0.16117  | 0.00047  | 0.504893 | 1.41E-31 | 0.069286 | 0.1349  | 0.207682 | 6.03E-06 | 0.153999 |
| 0.002846 | 0.95108  | 0.167378 | 0.00028  | 0.050609 | 0.27508 | 0.244022 | 9.29E-08 | -0.05249 |
| 0.119617 | 0.00967  | 0.19728  | 1.75E-05 | 0.090529 | 0.05057 | 0.209524 | 4.96E-06 | 0.044003 |
| -0.00298 | 0.9488   | 0.059301 | 0.20083  | 1.08E-05 | 0.99981 | 0.14853  | 0.00129  | -0.20321 |
| 0.237717 | 2.01E-07 | 0.188879 | 3.99E-05 | 0.085554 | 0.06471 | 0.212334 | 3.67E-06 | 0.055028 |
| 0.284586 | 3.77E-10 | 0.526078 | 1.34E-34 | 0.072491 | 0.11772 | 0.277712 | 1.02E-09 | 0.181327 |
| 0.088359 | 0.05638  | 0.233483 | 3.35E-07 | 0.081384 | 0.07893 | 0.244872 | 8.35E-08 | 0.162194 |
| 0.222478 | 1.20E-06 | 0.29768  | 5.20E-11 | 0.001397 | 0.97598 | 0.124147 | 0.00723  | -0.20986 |
| 0.006015 | 0.89686  | 0.234143 | 3.09E-07 | 0.064641 | 0.16313 | 0.186997 | 4.78E-05 | 0.079256 |
| 0.286911 | 2.67E-10 | 0.422545 | 1.20E-21 | 0.015714 | 0.73484 | 0.088208 | 0.05681  | 0.04488  |
| 0.094592 | 0.04103  | 0.330364 | 2.36E-13 | 0.072608 | 0.11713 | 0.332295 | 1.68E-13 | 0.096877 |
| 0.054366 | 0.24096  | 0.14087  | 0.00228  | 0.011516 | 0.80398 | 0.113491 | 0.01413  | -0.05365 |
| 0.116365 | 0.01185  | 0.284267 | 3.95E-10 | 0.041138 | 0.37508 | 0.209692 | 4.87E-06 | 0.058924 |
| 0.143012 | 0.00195  | 0.437756 | 2.77E-23 | 0.002395 | 0.95883 | 0.086188 | 0.06274  | -0.0272  |
| 0.070888 | 0.12608  | 0.235163 | 2.74E-07 | -0.01898 | 0.68248 | 0.047979 | 0.30083  | -0.02806 |
| 0.076006 | 0.10091  | 0.272212 | 2.23E-09 | 0.015282 | 0.74186 | 0.15104  | 0.00106  | -0.07603 |

|          |          |          |          |          |         |          |          |          |
|----------|----------|----------|----------|----------|---------|----------|----------|----------|
| 0.361391 | 7.45E-16 | 0.542977 | 3.63E-37 | 0.0157   | 0.73506 | 0.163024 | 0.0004   | -0.04485 |
| 0.168703 | 0.00025  | 0.331268 | 2.01E-13 | 0.108887 | 0.01858 | 0.333277 | 1.41E-13 | 0.239683 |
| -0.00334 | 0.94264  | 0.193576 | 2.53E-05 | 0.000593 | 0.9898  | 0.238574 | 1.82E-07 | -0.08164 |
| 0.350048 | 6.58E-15 | 0.594569 | 5.59E-46 | 0.015536 | 0.73773 | 0.164373 | 0.00036  | -0.06446 |
| 0.395431 | 6.26E-19 | 0.471406 | 3.27E-27 | -0.00163 | 0.97203 | 0.060621 | 0.19096  | -0.00517 |
| 0.010078 | 0.82804  | 0.14714  | 0.00143  | 0.017595 | 0.7045  | 0.174678 | 0.00015  | -0.00883 |
| 0.268784 | 3.59E-09 | 0.341262 | 3.36E-14 | -0.03352 | 0.46986 | 0.027502 | 0.55328  | -0.11228 |
| 0.223851 | 1.03E-06 | 0.15671  | 0.00068  | -0.04177 | 0.36781 | -0.02543 | 0.58352  | -0.19995 |
| 0.205781 | 7.36E-06 | 0.424236 | 7.96E-22 | 0.052429 | 0.25816 | 0.215354 | 2.65E-06 | 0.018962 |
| 0.340964 | 3.54E-14 | 0.320817 | 1.22E-12 | 0.012679 | 0.78465 | 0.079973 | 0.08428  | 0.062894 |
| 0.123742 | 0.00742  | 0.449583 | 1.29E-24 | -0.00261 | 0.95522 | 0.075217 | 0.1045   | -0.08259 |
| 0.117795 | 0.01085  | 0.264208 | 6.73E-09 | -0.02932 | 0.52736 | 0.070843 | 0.12632  | -0.10101 |
| 0.186134 | 5.19E-05 | 0.303316 | 2.15E-11 | -0.02189 | 0.63704 | 0.097807 | 0.0346   | 0.041017 |
| 0.328258 | 3.40E-13 | 0.51752  | 2.37E-33 | 0.068221 | 0.14101 | 0.147894 | 0.00135  | 0.149378 |
| 0.153763 | 0.00086  | 0.222139 | 1.25E-06 | -0.01822 | 0.69453 | 0.102546 | 0.0267   | -0.10419 |
| 0.236071 | 2.46E-07 | 0.157893 | 0.00062  | -0.01502 | 0.74613 | -0.03467 | 0.45477  | -0.21729 |
| 0.348614 | 8.62E-15 | 0.46654  | 1.29E-26 | 0.014205 | 0.75948 | -0.00906 | 0.84512  | 0.002777 |
| 0.227478 | 6.77E-07 | 0.162903 | 0.00041  | 0.017243 | 0.71015 | 0.06527  | 0.15907  | -0.09997 |
| 0.102112 | 0.02735  | 0.168918 | 0.00025  | 0.027716 | 0.5502  | 0.010849 | 0.81513  | 0.007718 |
| 0.099916 | 0.03086  | 0.151871 | 0.00099  | -0.00819 | 0.85987 | 0.046952 | 0.3113   | -0.09157 |
| 0.095827 | 0.03845  | 0.440661 | 1.32E-23 | 0.02128  | 0.64646 | 0.141951 | 0.00211  | 0.043581 |
| 0.111038 | 0.01637  | -0.16007 | 0.00052  | -0.0098  | 0.83278 | -0.10621 | 0.0217   | 0.054408 |
| 0.216812 | 2.25E-06 | 0.01579  | 0.73361  | -0.00335 | 0.94251 | -0.07078 | 0.12665  | 0.021769 |
| 0.088112 | 0.05708  | -0.1008  | 0.0294   | 2.75E-05 | 0.99953 | -0.01391 | 0.76426  | -0.00826 |
| 0.1272   | 0.00591  | 0.064603 | 0.16338  | -0.00194 | 0.96656 | 0.000946 | 0.98374  | 0.083813 |
| 0.064113 | 0.1666   | -0.2369  | 2.22E-07 | -0.0256  | 0.58111 | -0.11635 | 0.01186  | -0.04887 |
| 0.112844 | 0.01469  | -0.15634 | 0.0007   | -0.04322 | 0.35136 | -0.10741 | 0.02026  | -0.10327 |
| 0.379285 | 2.00E-17 | 0.144411 | 0.00176  | -0.01097 | 0.81303 | -0.09614 | 0.03781  | 0.053205 |
| -0.01622 | 0.72657  | -0.14235 | 0.00204  | -0.03746 | 0.41932 | -0.07798 | 0.09232  | 0.058373 |
| 0.097101 | 0.03593  | -0.03631 | 0.43372  | 0.017875 | 0.70002 | 0.043699 | 0.34606  | 0.115969 |
| 0.189018 | 3.94E-05 | 0.05806  | 0.21043  | -0.03617 | 0.43552 | -0.08483 | 0.06703  | 0.080575 |
| 0.328994 | 3.00E-13 | 0.14906  | 0.00124  | -0.02501 | 0.58981 | -0.11617 | 0.012    | -0.00113 |
| 0.067051 | 0.14798  | -0.07153 | 0.1227   | -0.04264 | 0.35793 | -0.11468 | 0.01315  | 0.007421 |
| 0.276231 | 1.26E-09 | 0.062047 | 0.18072  | -0.03113 | 0.50218 | -0.14307 | 0.00194  | -0.01561 |
| 0.119966 | 0.00946  | -0.0059  | 0.89885  | 0.010442 | 0.82193 | -0.03326 | 0.47333  | 0.032557 |
| 0.103554 | 0.02523  | -0.12291 | 0.00784  | -0.00691 | 0.88161 | -0.06846 | 0.1396   | 0.021961 |
| -0.00355 | 0.93904  | -0.19639 | 1.92E-05 | -0.03006 | 0.51695 | -0.11477 | 0.01307  | -0.10946 |
| 0.051354 | 0.26807  | -0.04308 | 0.35289  | -0.00957 | 0.83662 | -0.03659 | 0.43015  | -0.01191 |
| 0.108525 | 0.01898  | 0.081224 | 0.07952  | 0.01544  | 0.7393  | -0.06333 | 0.17185  | 0.083602 |
| 0.085952 | 0.06347  | -0.06141 | 0.18523  | 0.008042 | 0.86239 | -0.03391 | 0.4647   | 0.025075 |
| 0.129116 | 0.0052   | -0.00734 | 0.8743   | -0.02255 | 0.62685 | -0.07504 | 0.10532  | -0.02547 |
| 0.102581 | 0.02664  | 0.025452 | 0.58325  | -0.02663 | 0.56596 | -0.0904  | 0.0509   | 0.02581  |
| 0.113608 | 0.01403  | -0.01634 | 0.72464  | -0.05567 | 0.22985 | -0.14123 | 0.00222  | -0.08593 |
| 0.291715 | 1.30E-10 | 0.320332 | 1.33E-12 | -0.02477 | 0.59332 | -0.10866 | 0.01883  | 0.026699 |
| -0.02539 | 0.58422  | -0.16197 | 0.00044  | -0.04123 | 0.37402 | -0.03158 | 0.496    | -0.0391  |

|          |          |          |          |          |         |          |          |          |
|----------|----------|----------|----------|----------|---------|----------|----------|----------|
| 0.174596 | 0.00015  | 0.016994 | 0.71415  | -0.0084  | 0.85637 | -0.10719 | 0.02051  | -0.0303  |
| 0.048423 | 0.29637  | -0.0481  | 0.29959  | -0.01853 | 0.68967 | -0.03931 | 0.39668  | 0.030553 |
| 0.154128 | 0.00083  | 0.033133 | 0.47505  | 0.009789 | 0.8329  | -0.04043 | 0.38338  | 0.069315 |
| 0.355115 | 2.51E-15 | 0.050074 | 0.28019  | 0.005407 | 0.90724 | -0.13716 | 0.00298  | 0.035084 |
| 0.27321  | 1.94E-09 | 0.203824 | 9.01E-06 | 0.020439 | 0.65954 | -0.04846 | 0.296    | 0.046177 |
| 0.276671 | 1.19E-09 | 0.251435 | 3.64E-08 | -0.01784 | 0.70067 | -0.03089 | 0.50553  | 0.120643 |
| 0.198005 | 1.63E-05 | -0.08488 | 0.06687  | -0.00901 | 0.84607 | -0.07918 | 0.0874   | 0.011246 |
| 0.20428  | 8.60E-06 | 0.037864 | 0.4143   | 0.007234 | 0.8761  | -0.01543 | 0.73953  | 0.035884 |
| 0.101319 | 0.02857  | -0.09135 | 0.0485   | -0.04035 | 0.3843  | -0.09315 | 0.04423  | -0.02124 |
| 0.023003 | 0.62001  | -0.07061 | 0.12757  | 0.003657 | 0.93717 | -0.08386 | 0.07022  | 0.075148 |
| 0.277561 | 1.05E-09 | -0.0568  | 0.22049  | -0.00892 | 0.8475  | -0.10361 | 0.02515  | -0.07721 |
| 0.254026 | 2.60E-08 | 0.104877 | 0.02342  | -0.00365 | 0.93729 | -0.08624 | 0.06257  | -0.02237 |
| 0.075374 | 0.10378  | 0.057722 | 0.2131   | -0.0005  | 0.99137 | -0.03553 | 0.44372  | -0.01402 |
| 0.111598 | 0.01583  | -0.0341  | 0.4623   | -0.02555 | 0.58178 | -0.07473 | 0.10676  | 0.037271 |
| 0.140228 | 0.00239  | 0.058437 | 0.20748  | -0.03003 | 0.51737 | -0.09703 | 0.03606  | 0.070448 |
| 0.055759 | 0.2291   | 0.022269 | 0.63122  | 0.015661 | 0.7357  | -0.05746 | 0.21523  | 0.091624 |
| 0.086051 | 0.06316  | -0.00524 | 0.91006  | 0.027046 | 0.55989 | -0.0258  | 0.57816  | 0.016404 |
| 0.105191 | 0.023    | -0.07756 | 0.0941   | -0.03695 | 0.42561 | -0.17175 | 0.00019  | -0.05656 |
| 0.017872 | 0.70008  | 0.009688 | 0.8346   | -0.01881 | 0.68523 | -0.03398 | 0.4638   | 0.03779  |
| 0.108659 | 0.01883  | -0.05357 | 0.24791  | -0.02006 | 0.66553 | -0.11981 | 0.00955  | -0.07727 |
| 0.254093 | 2.58E-08 | 0.086859 | 0.06072  | 0.016193 | 0.72707 | -0.01294 | 0.7804   | 0.021933 |
| 0.301346 | 2.93E-11 | 0.186808 | 4.87E-05 | 0.007313 | 0.87476 | -0.10528 | 0.02289  | -0.04323 |
| 0.133025 | 0.00398  | 0.111701 | 0.01574  | -0.00428 | 0.92653 | -0.0452  | 0.32973  | 0.054576 |
| 0.148375 | 0.0013   | 0.182086 | 7.57E-05 | 0.025166 | 0.5875  | -0.01921 | 0.67877  | -0.00026 |
| 0.362971 | 5.46E-16 | -0.11558 | 0.01244  | -0.05843 | 0.20754 | -0.22258 | 1.19E-06 | -0.09571 |
| 0.408442 | 3.34E-20 | 0.39714  | 4.29E-19 | -0.06406 | 0.16693 | -0.25141 | 3.65E-08 | -0.26323 |
| 0.178362 | 0.00011  | 0.479229 | 3.45E-28 | 0.035117 | 0.449   | 0.05032  | 0.27784  | 0.275969 |
| 0.251171 | 3.76E-08 | 0.464693 | 2.16E-26 | -0.0075  | 0.87164 | -0.13942 | 0.00253  | 0.049342 |
| 0.385608 | 5.27E-18 | 0.438007 | 2.60E-23 | 0.017152 | 0.71162 | 0.00514  | 0.91178  | 0.110572 |
| 0.380739 | 1.47E-17 | 0.337115 | 7.11E-14 | -0.00226 | 0.96107 | -0.00173 | 0.9703   | 0.108201 |
| 0.166786 | 0.00029  | 0.303312 | 2.15E-11 | -0.01074 | 0.81687 | -0.06633 | 0.15237  | 0.128802 |
| 0.285068 | 3.51E-10 | 0.318803 | 1.72E-12 | 0.01335  | 0.77354 | 0.053326 | 0.25009  | -0.01089 |
| 0.241604 | 1.25E-07 | 0.592284 | 1.49E-45 | 0.077997 | 0.09226 | 0.065298 | 0.15889  | 0.180834 |
| 0.359049 | 1.18E-15 | 0.371918 | 9.11E-17 | -0.00578 | 0.90085 | -0.00288 | 0.95057  | -0.02447 |
| 0.240906 | 1.37E-07 | 0.411708 | 1.57E-20 | 0.046257 | 0.31853 | -0.04696 | 0.31128  | 0.323056 |
| 0.261085 | 1.02E-08 | 0.35427  | 2.96E-15 | -0.04228 | 0.36198 | -0.09177 | 0.04747  | -0.03835 |
| 0.300744 | 3.22E-11 | 0.522844 | 4.01E-34 | 0.010777 | 0.81632 | 0.044004 | 0.3427   | 0.090272 |
| 0.33909  | 4.98E-14 | 0.27182  | 2.36E-09 | -0.00344 | 0.94082 | 0.002533 | 0.95647  | 0.019549 |
| 0.270798 | 2.72E-09 | 0.355201 | 2.47E-15 | 0.006506 | 0.88848 | -0.02546 | 0.5832   | -0.03338 |
| 0.342126 | 2.87E-14 | 0.440042 | 1.55E-23 | -0.00024 | 0.99589 | 0.071688 | 0.12186  | -0.06272 |
| 0.22661  | 7.48E-07 | 0.164299 | 0.00036  | 0.01277  | 0.78314 | 0.001416 | 0.97566  | -0.06207 |
| 0.037135 | 0.42336  | 0.170869 | 0.00021  | 0.06326  | 0.17233 | 0.202277 | 1.06E-05 | -0.00529 |
| 0.418746 | 2.98E-21 | 0.361197 | 7.74E-16 | -0.03284 | 0.47892 | -0.08549 | 0.06489  | 0.062787 |
| 0.343868 | 2.08E-14 | 0.248114 | 5.55E-08 | 0.01519  | 0.74337 | 0.002813 | 0.95166  | 0.043236 |
| -0.36355 | 4.87E-16 | -0.46676 | 1.21E-26 | -0.07107 | 0.12512 | -0.14388 | 0.00183  | -0.1285  |

|          |          |          |          |          |         |          |          |          |
|----------|----------|----------|----------|----------|---------|----------|----------|----------|
| 0.362678 | 5.79E-16 | 0.329453 | 2.76E-13 | -0.0021  | 0.96392 | -0.03829 | 0.40904  | 0.041041 |
| 0.305511 | 1.52E-11 | 0.391881 | 1.36E-18 | 0.037902 | 0.41383 | 0.006947 | 0.88098  | 0.124603 |
| 0.264344 | 6.60E-09 | 0.119551 | 0.00971  | -0.00339 | 0.94183 | -0.01769 | 0.70306  | 0.006346 |
| 0.185343 | 5.59E-05 | 0.292944 | 1.08E-10 | 0.03921  | 0.39789 | 0.125059 | 0.00681  | 0.167976 |
| 0.295208 | 7.62E-11 | 0.363077 | 5.35E-16 | -0.04806 | 0.30005 | -0.07782 | 0.093    | -0.14598 |
| 0.301996 | 2.65E-11 | 0.119628 | 0.00967  | -0.03712 | 0.42351 | -0.09579 | 0.03851  | -0.05246 |
| 0.175799 | 0.00013  | 0.209619 | 4.91E-06 | 0.014292 | 0.75805 | 0.016917 | 0.71539  | 0.008849 |
| 0.246936 | 6.45E-08 | 0.317066 | 2.29E-12 | 0.012561 | 0.7866  | 0.005108 | 0.91233  | -0.02891 |
| 0.35253  | 4.12E-15 | 0.259541 | 1.26E-08 | 0.011876 | 0.79799 | 0.054221 | 0.24222  | 0.128634 |
| 0.131168 | 0.00452  | 0.361023 | 8.01E-16 | 0.11412  | 0.0136  | 0.173742 | 0.00016  | 0.171627 |
| 0.134524 | 0.00358  | 0.450851 | 9.24E-25 | 0.080974 | 0.08046 | 0.238537 | 1.82E-07 | 0.113993 |
| 0.326511 | 4.61E-13 | 0.397718 | 3.78E-19 | 0.094949 | 0.04027 | 0.192194 | 2.90E-05 | 0.165605 |
| 0.044209 | 0.34046  | 0.202304 | 1.05E-05 | -0.02068 | 0.65571 | 0.052161 | 0.26061  | -0.08261 |
| 0.349574 | 7.20E-15 | 0.207372 | 6.23E-06 | 0.030531 | 0.51043 | -0.03019 | 0.51512  | 0.001941 |
| 0.302313 | 2.52E-11 | 0.368955 | 1.66E-16 | 0.020508 | 0.65846 | -0.02883 | 0.53427  | 0.075736 |
| 0.214159 | 3.01E-06 | 0.177195 | 0.00012  | 0.026562 | 0.56693 | -0.00745 | 0.87245  | 0.053764 |
| 0.212445 | 3.63E-06 | 0.401595 | 1.59E-19 | 0.061825 | 0.18229 | 0.066999 | 0.14829  | 0.08037  |
| 0.146627 | 0.00149  | 0.267778 | 4.13E-09 | -0.00725 | 0.8759  | 0.06532  | 0.15874  | -0.08201 |
| -0.19198 | 2.96E-05 | -0.35735 | 1.64E-15 | -0.03116 | 0.50179 | 0.016131 | 0.72808  | -0.04312 |
| 0.332822 | 1.53E-13 | 0.2532   | 2.89E-08 | -0.00178 | 0.96946 | -0.06933 | 0.13466  | 0.052074 |
| 0.351149 | 5.35E-15 | 0.479017 | 3.67E-28 | 0.007646 | 0.86911 | -0.04904 | 0.29028  | 0.084541 |
| 0.331115 | 2.07E-13 | 0.363397 | 5.02E-16 | 0.027872 | 0.54796 | 0.029116 | 0.53024  | 0.089569 |
| 0.395662 | 5.95E-19 | 0.506089 | 9.65E-32 | -0.03065 | 0.50877 | -0.11365 | 0.01399  | -0.15887 |
| 0.34178  | 3.05E-14 | 0.361163 | 7.79E-16 | -0.00522 | 0.91035 | 0.017502 | 0.70599  | 0.078067 |
| 0.176776 | 0.00012  | 0.256256 | 1.94E-08 | 0.018021 | 0.69769 | 0.04231  | 0.36161  | 0.153439 |
| 0.307315 | 1.13E-11 | 0.380453 | 1.57E-17 | 0.030176 | 0.51536 | 0.039534 | 0.394    | 0.060345 |
| 0.461157 | 5.72E-26 | 0.277562 | 1.04E-09 | -0.06009 | 0.19489 | -0.17455 | 0.00015  | -0.12284 |
| 0.17298  | 0.00017  | 0.247795 | 5.78E-08 | 0.023317 | 0.61524 | -0.04044 | 0.38327  | 0.128007 |
| -0.25874 | 1.40E-08 | -0.24629 | 7.00E-08 | -0.02359 | 0.6111  | -0.0202  | 0.66328  | -0.03832 |
| 0.090538 | 0.05054  | 0.154092 | 0.00083  | 0.093022 | 0.04452 | 0.152815 | 0.00092  | 0.025947 |
| 0.324648 | 6.36E-13 | 0.454894 | 3.14E-25 | 0.022972 | 0.62048 | -0.03714 | 0.42334  | 0.082449 |
| 0.400743 | 1.92E-19 | 0.467073 | 1.11E-26 | 0.019955 | 0.66711 | 0.050057 | 0.28036  | 0.008745 |
| 0.275866 | 1.33E-09 | 0.25361  | 2.74E-08 | 0.026531 | 0.56739 | 0.012433 | 0.78872  | 0.045296 |
| 0.231421 | 4.27E-07 | 0.287998 | 2.27E-10 | 0.008961 | 0.84685 | 0.024252 | 0.60114  | 0.067404 |
| 0.003673 | 0.9369   | 0.206545 | 6.79E-06 | 0.016925 | 0.71526 | 0.214023 | 3.06E-06 | -0.11757 |
| 0.160542 | 0.0005   | 0.401445 | 1.64E-19 | -0.03001 | 0.51761 | -0.06821 | 0.14109  | -0.09675 |
| 0.248067 | 5.59E-08 | 0.273479 | 1.87E-09 | 0.048348 | 0.29712 | -0.00639 | 0.89053  | 0.004576 |
| 0.179217 | 9.86E-05 | 0.101849 | 0.02775  | -0.01799 | 0.69826 | -0.09048 | 0.0507   | 0.045733 |
| 0.27106  | 2.62E-09 | 0.497971 | 1.24E-30 | 0.001706 | 0.97067 | 0.07593  | 0.10125  | -0.03028 |
| 0.2643   | 6.64E-09 | 0.317119 | 2.27E-12 | -0.02079 | 0.65406 | -0.05146 | 0.26712  | 0.055614 |
| 0.307853 | 1.04E-11 | 0.251476 | 3.62E-08 | -0.01284 | 0.7819  | -0.03836 | 0.40825  | -0.01685 |
| 0.156278 | 0.0007   | 0.004905 | 0.91581  | -0.00889 | 0.84805 | 0.004471 | 0.92324  | 0.017383 |
| 0.298655 | 4.47E-11 | 0.212103 | 3.76E-06 | -0.02211 | 0.63373 | 0.048126 | 0.29935  | -0.07371 |
| 0.247966 | 5.66E-08 | 0.509281 | 3.48E-32 | 0.024486 | 0.59764 | 0.037257 | 0.42182  | 0.040009 |
| 0.27403  | 1.73E-09 | 0.341228 | 3.38E-14 | -0.01838 | 0.69191 | -0.04298 | 0.35405  | -0.1148  |

|          |          |          |          |          |         |          |          |          |
|----------|----------|----------|----------|----------|---------|----------|----------|----------|
| 0.29335  | 1.01E-10 | 0.347867 | 9.91E-15 | 0.005928 | 0.89833 | 0.058056 | 0.21046  | 0.076438 |
| 0.353975 | 3.13E-15 | 0.53556  | 5.07E-36 | -0.00239 | 0.95897 | -0.09228 | 0.04626  | 0.08385  |
| 0.167787 | 0.00027  | 0.396821 | 4.61E-19 | 0.054883 | 0.23652 | 0.045836 | 0.32296  | 0.096053 |
| 0.410418 | 2.11E-20 | 0.39055  | 1.82E-18 | 0.005613 | 0.90371 | -0.00503 | 0.91371  | 0.038047 |
| 0.25377  | 2.69E-08 | 0.32886  | 3.07E-13 | 0.034    | 0.46356 | 0.058712 | 0.20535  | 0.007481 |
| 0.272068 | 2.28E-09 | 0.325481 | 5.51E-13 | 0.017935 | 0.69907 | 0.018238 | 0.69425  | -0.03762 |
| 0.274636 | 1.58E-09 | 0.439996 | 1.56E-23 | 0.011836 | 0.79865 | 0.085614 | 0.06452  | 0.101662 |
| 0.384298 | 6.96E-18 | 0.535955 | 4.41E-36 | -0.01587 | 0.73228 | -0.08588 | 0.0637   | 0.047808 |
| 0.074644 | 0.10718  | 0.477902 | 5.08E-28 | 0.027061 | 0.55966 | 0.099645 | 0.03132  | -0.01856 |
| -0.21172 | 3.92E-06 | -0.45091 | 9.10E-25 | -0.05101 | 0.27133 | -0.06848 | 0.13951  | -0.13069 |
| 0.349123 | 7.84E-15 | 0.394809 | 7.18E-19 | -0.03058 | 0.50969 | -0.11985 | 0.00953  | 0.014224 |
| 0.24367  | 9.70E-08 | 0.168246 | 0.00026  | -0.00859 | 0.85317 | 0.018555 | 0.6892   | 0.088927 |
| -0.01877 | 0.6858   | -0.34762 | 1.04E-14 | -0.04833 | 0.29733 | -0.09239 | 0.04599  | -0.1942  |
| 0.18485  | 5.85E-05 | -0.08785 | 0.05783  | 0.055093 | 0.23472 | -0.01919 | 0.67909  | 0.056501 |
| 0.053984 | 0.24429  | 0.215382 | 2.64E-06 | -0.01639 | 0.72385 | -0.04897 | 0.29096  | -0.01438 |
| 0.29809  | 4.88E-11 | 0.321649 | 1.06E-12 | 0.019909 | 0.66783 | -0.04104 | 0.37618  | 0.129498 |
| 0.349886 | 6.79E-15 | 0.644586 | 3.44E-56 | 0.046843 | 0.31243 | 0.063373 | 0.17156  | 0.066589 |
| 0.241319 | 1.30E-07 | 0.38947  | 2.30E-18 | 0.066746 | 0.14983 | 0.115344 | 0.01262  | 0.125864 |
| 0.161233 | 0.00047  | 0.211782 | 3.90E-06 | 0.073265 | 0.11384 | 0.14992  | 0.00116  | 0.190869 |
| 0.214491 | 2.91E-06 | 0.204526 | 8.38E-06 | -0.02442 | 0.59868 | -0.07664 | 0.09807  | -0.0453  |
| 0.188198 | 4.26E-05 | 0.169814 | 0.00023  | -0.01469 | 0.75153 | -0.05157 | 0.26604  | -0.05526 |
| 0.226684 | 7.42E-07 | 0.184051 | 6.31E-05 | -0.03671 | 0.42865 | -0.10183 | 0.02777  | 0.072642 |
| 0.261978 | 9.09E-09 | 0.192949 | 2.69E-05 | 0.002821 | 0.95153 | -0.07245 | 0.11793  | 0.056669 |
| 0.271075 | 2.61E-09 | 0.056208 | 0.22537  | -0.04421 | 0.34047 | -0.07434 | 0.10861  | -0.09319 |
| 0.347503 | 1.06E-14 | 0.612808 | 1.72E-49 | 0.085801 | 0.06394 | 0.094519 | 0.04118  | 0.231757 |
| 0.146055 | 0.00155  | 0.490272 | 1.30E-29 | 0.087019 | 0.06024 | 0.103222 | 0.02571  | 0.289014 |
| 0.042441 | 0.36013  | 0.107942 | 0.01964  | 0.041739 | 0.36814 | 0.058184 | 0.20946  | 0.127449 |
| 0.180297 | 8.93E-05 | 0.350148 | 6.46E-15 | 0.043381 | 0.34958 | 0.110656 | 0.01675  | 0.106909 |
| 0.350562 | 5.98E-15 | 0.504025 | 1.86E-31 | 0.048318 | 0.29742 | 0.054173 | 0.24264  | 0.048648 |
| 0.153693 | 0.00086  | 0.279299 | 8.14E-10 | -0.04165 | 0.36917 | 0.003563 | 0.93879  | 0.063174 |
| 0.380709 | 1.48E-17 | 0.373429 | 6.69E-17 | 0.022564 | 0.6267  | -0.00281 | 0.95172  | 0.097692 |
| 0.212071 | 3.78E-06 | 0.438182 | 2.48E-23 | 0.028252 | 0.54251 | 0.052444 | 0.25802  | 0.145612 |
| 0.276609 | 1.20E-09 | 0.423421 | 9.70E-22 | 0.052641 | 0.25624 | 0.196564 | 1.88E-05 | 0.077646 |
| 0.277853 | 1.00E-09 | 0.388632 | 2.76E-18 | -0.02932 | 0.5274  | 0.016741 | 0.71822  | -0.09037 |
| 0.235818 | 2.53E-07 | 0.235489 | 2.63E-07 | -0.04271 | 0.35705 | -0.04119 | 0.37447  | -0.10774 |
| 0.051888 | 0.26311  | 0.240658 | 1.41E-07 | -0.03724 | 0.42207 | -0.04116 | 0.37482  | 0.158133 |
| 0.274669 | 1.58E-09 | 0.48751  | 2.99E-29 | 0.102277 | 0.0271  | 0.293865 | 9.36E-11 | 0.204805 |
| 0.196988 | 1.81E-05 | 0.220265 | 1.54E-06 | 0.0236   | 0.61095 | 0.037616 | 0.41737  | 0.099013 |
| -0.10254 | 0.0267   | -0.3231  | 8.28E-13 | 0.016683 | 0.71915 | -0.00582 | 0.90019  | -0.08639 |
| 0.483401 | 1.02E-28 | 0.607936 | 1.57E-48 | 0.036786 | 0.42773 | 0.1329   | 0.00401  | 0.068081 |
| -0.09944 | 0.03168  | -0.39289 | 1.09E-18 | -0.05411 | 0.24317 | -0.1441  | 0.0018   | -0.10331 |
| 0.308149 | 9.92E-12 | 0.386636 | 4.23E-18 | -0.02069 | 0.65562 | -0.00275 | 0.95275  | 0.003189 |
| 0.384586 | 6.55E-18 | 0.186025 | 5.24E-05 | -0.01977 | 0.67001 | -0.07119 | 0.12447  | -0.00304 |
| 0.229887 | 5.11E-07 | 0.286721 | 2.75E-10 | -0.02724 | 0.55714 | -0.09804 | 0.03417  | -0.01131 |
| 0.329487 | 2.75E-13 | 0.22416  | 9.90E-07 | -0.06155 | 0.18421 | -0.06281 | 0.17541  | -0.09975 |

|          |          |          |          |          |         |          |          |          |
|----------|----------|----------|----------|----------|---------|----------|----------|----------|
| -0.12812 | 0.00556  | -0.08581 | 0.06389  | 0.030579 | 0.50976 | -0.00232 | 0.96017  | 0.033789 |
| 0.291764 | 1.29E-10 | 0.395508 | 6.16E-19 | 0.017351 | 0.70842 | 0.098939 | 0.03255  | 1.73E-05 |
| 0.038077 | 0.41167  | -0.19598 | 2.00E-05 | -0.00961 | 0.83594 | -0.09482 | 0.04054  | 0.055894 |
| 0.388681 | 2.73E-18 | 0.443362 | 6.58E-24 | 0.017868 | 0.70014 | 0.045937 | 0.3219   | -0.03808 |
| 0.343202 | 2.35E-14 | 0.215954 | 2.48E-06 | -0.03519 | 0.44804 | -0.0799  | 0.08456  | -0.08821 |
| 0.384925 | 6.09E-18 | 0.087902 | 0.05768  | 0.016448 | 0.72295 | -0.05142 | 0.26745  | 0.031181 |
| 0.361921 | 6.72E-16 | 0.387972 | 3.18E-18 | 0.013715 | 0.76753 | -0.02392 | 0.60609  | 0.048101 |
| 0.286713 | 2.75E-10 | 0.25901  | 1.35E-08 | 0.037814 | 0.41492 | 0.126892 | 0.00603  | 0.216773 |
| -0.22288 | 1.14E-06 | -0.44239 | 8.45E-24 | -0.092   | 0.04692 | -0.23171 | 4.13E-07 | -0.15368 |
| 0.161479 | 0.00046  | 0.160032 | 0.00052  | -0.00198 | 0.96594 | 0.005362 | 0.908    | 0.041909 |
| 0.358826 | 1.23E-15 | 0.594497 | 5.76E-46 | 0.013532 | 0.77055 | -0.01393 | 0.76401  | 0.048189 |
| 0.279387 | 8.04E-10 | 0.426659 | 4.41E-22 | -0.00269 | 0.95379 | 0.040111 | 0.38713  | 0.05253  |
| 0.271209 | 2.57E-09 | 0.537985 | 2.16E-36 | 0.088021 | 0.05733 | 0.085162 | 0.06595  | 0.278353 |
| 0.230514 | 4.75E-07 | 0.37175  | 9.43E-17 | 0.049615 | 0.28463 | -0.01679 | 0.7174   | 0.162918 |
| 0.179364 | 9.73E-05 | 0.294652 | 8.29E-11 | 0.018722 | 0.68655 | 0.024523 | 0.59708  | 0.038975 |
| 0.371466 | 9.99E-17 | 0.392834 | 1.11E-18 | -0.02958 | 0.52372 | 0.004367 | 0.92502  | -0.15567 |
| 0.274988 | 1.51E-09 | 0.28897  | 1.96E-10 | -0.00533 | 0.90861 | -0.04113 | 0.37513  | -0.06249 |
| 0.185948 | 5.28E-05 | 0.260799 | 1.06E-08 | 0.062739 | 0.17589 | 0.195006 | 2.20E-05 | 0.118939 |
| 0.236842 | 2.24E-07 | 0.368549 | 1.80E-16 | 0.01718  | 0.71117 | 0.144777 | 0.00171  | 0.02841  |
| 0.313185 | 4.37E-12 | 0.517149 | 2.68E-33 | 0.085566 | 0.06467 | 0.147363 | 0.00141  | 0.26134  |
| 0.236948 | 2.21E-07 | 0.164714 | 0.00035  | 0.036252 | 0.43447 | 0.045791 | 0.32344  | 0.041072 |
| 0.13607  | 0.00322  | 0.243068 | 1.05E-07 | -0.02844 | 0.53988 | -0.00034 | 0.9942   | -0.08272 |
| 0.258527 | 1.44E-08 | 0.555188 | 4.09E-39 | 0.039202 | 0.39799 | 0.051987 | 0.2622   | 0.090836 |
| 0.194037 | 2.42E-05 | 0.302154 | 2.58E-11 | -0.01433 | 0.75749 | 0.094278 | 0.04171  | -0.0121  |
| 0.36884  | 1.70E-16 | 0.22322  | 1.10E-06 | -0.00722 | 0.87629 | -0.02774 | 0.54991  | -0.05117 |
| 0.301254 | 2.98E-11 | 0.455488 | 2.67E-25 | 0.008322 | 0.85765 | -0.02682 | 0.56315  | -0.04858 |
| 0.268053 | 3.98E-09 | 0.312331 | 5.02E-12 | -0.02494 | 0.59091 | -0.01697 | 0.71456  | -0.07113 |
| 0.240877 | 1.37E-07 | 0.509636 | 3.10E-32 | 0.090445 | 0.05078 | 0.235488 | 2.63E-07 | 0.220332 |
| 0.229233 | 5.52E-07 | 0.447483 | 2.25E-24 | 0.028139 | 0.54413 | 0.010509 | 0.82081  | 0.135378 |
| 0.055888 | 0.22803  | 0.154922 | 0.00078  | 0.066766 | 0.14971 | 0.149958 | 0.00115  | 0.191541 |
| 0.294787 | 8.12E-11 | 0.319071 | 1.64E-12 | -0.00166 | 0.97146 | 0.066258 | 0.15284  | 0.0274   |
| 0.338645 | 5.40E-14 | 0.616272 | 3.48E-50 | 0.049689 | 0.28392 | 0.113169 | 0.01441  | 0.144714 |
| 0.40345  | 1.04E-19 | 0.312334 | 5.02E-12 | -0.02537 | 0.58451 | -0.08345 | 0.0716   | 0.011291 |
| 0.253219 | 2.89E-08 | 0.445908 | 3.39E-24 | 0.005965 | 0.8977  | 0.070276 | 0.1294   | 0.126424 |
| 0.252014 | 3.37E-08 | 0.26373  | 7.18E-09 | -0.02513 | 0.58801 | -0.0777  | 0.0935   | 0.027287 |
| 0.345166 | 1.64E-14 | 0.346926 | 1.18E-14 | -0.01887 | 0.68423 | -0.04674 | 0.31347  | -0.13734 |
| 0.114644 | 0.01317  | 0.219789 | 1.62E-06 | 0.034613 | 0.45553 | 0.031328 | 0.49946  | -0.01622 |
| 0.249637 | 4.58E-08 | 0.409409 | 2.67E-20 | 0.030515 | 0.51065 | 0.049352 | 0.28719  | 0.123025 |
| 0.366666 | 2.62E-16 | 0.349399 | 7.44E-15 | 0.061976 | 0.18122 | 0.120282 | 0.00927  | 0.161118 |
| 0.477857 | 5.14E-28 | 0.5503   | 2.52E-38 | -0.01115 | 0.81013 | 0.00273  | 0.95309  | -0.05806 |
| 0.230705 | 4.65E-07 | 0.187609 | 4.51E-05 | -0.02924 | 0.52854 | -0.03834 | 0.4085   | -0.03371 |
| 0.213958 | 3.08E-06 | 0.234873 | 2.84E-07 | -0.01371 | 0.7676  | -0.00985 | 0.8319   | 0.010198 |
| 0.300782 | 3.21E-11 | 0.373606 | 6.46E-17 | -0.01217 | 0.79311 | -0.08674 | 0.06106  | -0.08563 |
| 0.220786 | 1.45E-06 | 0.223467 | 1.07E-06 | 0.041964 | 0.36557 | 0.017564 | 0.70501  | 0.167767 |
| 0.307142 | 1.17E-11 | 0.30602  | 1.40E-11 | -0.01035 | 0.82347 | -0.04904 | 0.29021  | -0.05082 |

|          |          |          |          |          |          |          |          |          |
|----------|----------|----------|----------|----------|----------|----------|----------|----------|
| 0.075388 | 0.10372  | 0.120154 | 0.00935  | -0.05731 | 0.21639  | -0.06076 | 0.18993  | -0.08338 |
| 0.453796 | 4.21E-25 | 0.243985 | 9.33E-08 | -0.0128  | 0.78263  | -0.04913 | 0.28938  | -0.03345 |
| 0.207054 | 6.44E-06 | 0.377896 | 2.67E-17 | 0.059622 | 0.1984   | 0.146319 | 0.00152  | 0.167333 |
| 0.232658 | 3.69E-07 | 0.277671 | 1.03E-09 | 0.001344 | 0.9769   | 0.060294 | 0.19338  | -0.11844 |
| 0.139231 | 0.00257  | 0.191355 | 3.15E-05 | -0.01249 | 0.78781  | 0.007061 | 0.87905  | 0.076682 |
| 0.189743 | 3.68E-05 | 0.243666 | 9.71E-08 | -0.10392 | 0.02472  | -0.1311  | 0.00454  | -0.21558 |
| 0.140277 | 0.00238  | 0.311223 | 6.02E-12 | -0.04407 | 0.342    | 0.006519 | 0.88826  | 0.0509   |
| 0.184608 | 5.99E-05 | 0.336387 | 8.10E-14 | -0.03254 | 0.48302  | -0.00685 | 0.8827   | -0.15767 |
| 0.247039 | 6.36E-08 | 0.325638 | 5.36E-13 | -0.0106  | 0.81928  | 0.034065 | 0.46271  | 0.031198 |
| 0.300241 | 3.49E-11 | 0.213065 | 3.39E-06 | 0.032383 | 0.48511  | 0.061804 | 0.18244  | 0.026256 |
| 0.330358 | 2.36E-13 | 0.297197 | 5.60E-11 | -0.00505 | 0.91329  | 0.032737 | 0.48034  | -0.16349 |
| -0.02103 | 0.65039  | -0.3572  | 1.68E-15 | -0.0458  | 0.32335  | -0.17351 | 0.00016  | -0.09858 |
| 0.118369 | 0.01046  | 0.085236 | 0.06571  | -0.01233 | 0.79051  | -0.02349 | 0.61261  | 0.095489 |
| 0.337706 | 6.39E-14 | 0.375851 | 4.07E-17 | -0.00069 | 0.98805  | -0.02799 | 0.54625  | -0.07564 |
| 0.227489 | 6.76E-07 | 0.356364 | 1.98E-15 | -0.02981 | 0.52044  | -0.01678 | 0.71758  | -0.12658 |
| 0.32264  | 8.96E-13 | 0.432648 | 1.00E-22 | 0.054267 | 0.24182  | 0.059838 | 0.19678  | 0.192552 |
| 0.246024 | 7.23E-08 | 0.1485   | 0.00129  | -0.00296 | 0.94914  | -0.04529 | 0.32874  | -0.03142 |
| 0.287394 | 2.48E-10 | 0.396579 | 4.86E-19 | 0.020301 | 0.66169  | 0.019988 | 0.6666   | 0.089131 |
| 0.33078  | 2.19E-13 | 0.562905 | 2.18E-40 | 0.034833 | 0.45268  | 0.08328  | 0.07218  | 0.070418 |
| 0.157191 | 0.00065  | 0.429758 | 2.06E-22 | 0.019904 | 0.66791  | 0.09241  | 0.04594  | 0.07313  |
| 0.249833 | 4.46E-08 | 0.243886 | 9.44E-08 | -0.0429  | 0.35497  | -0.1351  | 0.00344  | -0.05672 |
| 0.305219 | 1.59E-11 | 0.241684 | 1.24E-07 | -0.02203 | 0.63487  | -0.08181 | 0.07736  | -0.04754 |
| 0.008923 | 0.8475   | 0.310032 | 7.31E-12 | 0.201601 | 1.13E-05 | 0.278721 | 8.85E-10 | 0.500378 |
| -0.21769 | 2.05E-06 | -0.26208 | 8.96E-09 | -0.0384  | 0.40777  | -0.08318 | 0.07252  | -0.02841 |
| 0.203968 | 8.88E-06 | 0.279174 | 8.29E-10 | 0.037357 | 0.42059  | 0.069762 | 0.13223  | -0.01245 |
| 0.227687 | 6.60E-07 | 0.248695 | 5.16E-08 | 0.002907 | 0.95005  | -0.00801 | 0.86296  | -0.00636 |
| 0.30179  | 2.74E-11 | 0.212747 | 3.51E-06 | -0.01407 | 0.76162  | 0.011194 | 0.80936  | 0.009181 |
| 0.173346 | 0.00017  | 0.317885 | 2.00E-12 | 0.015467 | 0.73886  | 0.11009  | 0.01732  | 0.08269  |
| 0.173603 | 0.00016  | 0.249138 | 4.88E-08 | -0.00236 | 0.95947  | 0.035116 | 0.44902  | -0.05679 |
| 0.188907 | 3.98E-05 | 0.347011 | 1.16E-14 | -0.00512 | 0.91216  | 0.090569 | 0.05047  | 0.025633 |
| 0.196769 | 1.85E-05 | 0.294246 | 8.83E-11 | 0.044141 | 0.3412   | 0.152908 | 0.00092  | 0.074379 |
| 0.390154 | 1.98E-18 | 0.436467 | 3.84E-23 | 0.083757 | 0.07056  | 0.083321 | 0.07204  | 0.318543 |
| 0.092903 | 0.04479  | 0.085335 | 0.0654   | -0.03852 | 0.40628  | 0.079467 | 0.08627  | -0.22144 |
| 0.293394 | 1.01E-10 | 0.496787 | 1.78E-30 | 0.051318 | 0.2684   | 0.119309 | 0.00986  | 0.009186 |
| 0.286909 | 2.67E-10 | 0.530282 | 3.18E-35 | 0.012462 | 0.78823  | 0.055124 | 0.23446  | 0.009939 |
| 0.35518  | 2.48E-15 | 0.314526 | 3.50E-12 | -0.01201 | 0.79568  | 0.035705 | 0.44143  | 0.016521 |
| 0.281912 | 5.57E-10 | 0.312529 | 4.86E-12 | -0.01073 | 0.81716  | 0.011079 | 0.81128  | -0.03795 |
| 0.215716 | 2.54E-06 | 0.27746  | 1.06E-09 | 0.026708 | 0.5648   | 0.007855 | 0.86557  | 0.135728 |
| 0.197056 | 1.79E-05 | 0.134362 | 0.00363  | 0.012369 | 0.78979  | 0.036292 | 0.43396  | 0.077379 |
| -0.15732 | 0.00064  | -0.25559 | 2.12E-08 | -0.02715 | 0.5584   | -0.07538 | 0.10375  | -0.08175 |
| 0.234872 | 2.84E-07 | 0.146065 | 0.00155  | -0.01957 | 0.67321  | -0.04806 | 0.29998  | -0.01043 |
| 0.29976  | 3.76E-11 | 0.287722 | 2.37E-10 | 0.050916 | 0.27217  | -0.00302 | 0.94816  | 0.172251 |
| 0.231296 | 4.33E-07 | 0.33817  | 5.88E-14 | -0.0248  | 0.59292  | -0.0563  | 0.22458  | -0.11646 |
| 0.145052 | 0.00167  | 0.133582 | 0.00383  | 0.011407 | 0.8058   | -0.00989 | 0.83118  | 0.065206 |
| -0.08113 | 0.07986  | -0.1069  | 0.02085  | -0.00368 | 0.93681  | -0.04869 | 0.29374  | -0.04969 |

|          |          |          |          |          |          |          |          |          |
|----------|----------|----------|----------|----------|----------|----------|----------|----------|
| 0.157039 | 0.00066  | -0.05626 | 0.22491  | 0.015731 | 0.73456  | -0.1056  | 0.02247  | 0.115329 |
| 0.105988 | 0.02198  | -0.26938 | 3.31E-09 | -0.04369 | 0.34615  | -0.21917 | 1.74E-06 | 0.000793 |
| 0.328683 | 3.16E-13 | 0.083843 | 0.07027  | 0.016461 | 0.72274  | -0.11592 | 0.01218  | 0.032897 |
| 0.253494 | 2.79E-08 | -0.05519 | 0.23388  | 0.025123 | 0.58813  | -0.06111 | 0.18741  | 0.066777 |
| 0.095709 | 0.03869  | -0.11345 | 0.01416  | 0.005073 | 0.91293  | -0.04364 | 0.34667  | 0.01152  |
| -0.05916 | 0.20187  | -0.43811 | 2.53E-23 | -0.04348 | 0.34846  | -0.17509 | 0.00014  | -0.15863 |
| 0.058204 | 0.2093   | -0.30887 | 8.83E-12 | -0.0567  | 0.22133  | -0.15882 | 0.00057  | -0.05697 |
| 0.08627  | 0.06249  | -0.1577  | 0.00063  | 0.03382  | 0.46594  | 0.01712  | 0.71213  | 0.00515  |
| 0.11014  | 0.01726  | 0.04832  | 0.2974   | -0.03205 | 0.48966  | -0.1045  | 0.02392  | 0.026198 |
| 0.061271 | 0.18624  | -0.39009 | 2.01E-18 | -0.05021 | 0.27888  | -0.21532 | 2.66E-06 | -0.09285 |
| 0.021756 | 0.63911  | -0.45419 | 3.80E-25 | 0.019931 | 0.66748  | -0.16122 | 0.00047  | -0.12263 |
| 0.025149 | 0.58775  | -0.46877 | 6.90E-27 | -0.04007 | 0.38767  | -0.15666 | 0.00068  | -0.11622 |
| 0.145965 | 0.00156  | -0.17029 | 0.00022  | 0.037784 | 0.41529  | -0.07878 | 0.08905  | 0.048494 |
| 0.188221 | 4.25E-05 | -0.22803 | 6.35E-07 | 0.004755 | 0.91838  | -0.1413  | 0.00221  | 0.008065 |
| 0.134758 | 0.00353  | -0.16211 | 0.00044  | -0.02056 | 0.65771  | -0.15035 | 0.00112  | -0.03906 |
| 0.100985 | 0.02911  | -0.20645 | 6.86E-06 | -0.0152  | 0.74327  | -0.148   | 0.00134  | -0.07974 |
| 0.119372 | 0.00982  | -0.22165 | 1.32E-06 | -0.02299 | 0.62014  | -0.11125 | 0.01617  | -0.00836 |
| 0.130131 | 0.00485  | -0.16162 | 0.00045  | -0.01575 | 0.73425  | -0.10852 | 0.01898  | -0.03679 |
| 0.003267 | 0.94386  | -0.35207 | 4.49E-15 | -0.01637 | 0.72421  | -0.12706 | 0.00597  | -0.06896 |
| 0.06182  | 0.18232  | -0.19151 | 3.10E-05 | -0.01832 | 0.69288  | -0.14643 | 0.00151  | -0.07061 |
| 0.235239 | 2.71E-07 | -0.14702 | 0.00144  | -0.01573 | 0.73461  | -0.17661 | 0.00012  | -0.0295  |
| 0.260845 | 1.06E-08 | -0.07894 | 0.08838  | 0.023464 | 0.61302  | -0.13036 | 0.00478  | 0.040852 |
| 0.168729 | 0.00025  | -0.02836 | 0.54093  | 0.052041 | 0.26171  | -0.10154 | 0.02823  | 0.055494 |
| 0.048648 | 0.29414  | -0.25448 | 2.45E-08 | -0.01278 | 0.78291  | -0.14428 | 0.00177  | -0.01141 |
| 0.051996 | 0.26212  | -0.16685 | 0.00029  | -0.0134  | 0.7728   | -0.08413 | 0.06932  | -0.05038 |
| 0.085257 | 0.06565  | -0.29419 | 8.90E-11 | 0.015968 | 0.73071  | -0.17008 | 0.00022  | -0.01928 |
| 0.131419 | 0.00444  | -0.23637 | 2.37E-07 | -0.03175 | 0.49374  | -0.15386 | 0.00085  | -0.04732 |
| 0.145841 | 0.00158  | -0.06081 | 0.18956  | 0.004293 | 0.92629  | -0.07905 | 0.08792  | 0.020871 |
| 0.179636 | 9.49E-05 | -0.07449 | 0.10793  | 0.01496  | 0.74713  | -0.08711 | 0.05996  | 0.034528 |
| 0.082351 | 0.07542  | -0.25711 | 1.74E-08 | 0.022758 | 0.62374  | -0.05918 | 0.20174  | 0.012078 |
| 0.179087 | 9.97E-05 | -0.08136 | 0.07901  | 0.028254 | 0.54249  | -0.0875  | 0.05882  | 0.015647 |
| 0.187943 | 4.37E-05 | -0.20014 | 1.31E-05 | -0.01318 | 0.77634  | -0.10187 | 0.02771  | -0.05418 |
| 0.159809 | 0.00053  | -0.23136 | 4.30E-07 | 0.01005  | 0.82851  | -0.18411 | 6.27E-05 | -0.10076 |
| 0.152687 | 0.00093  | -0.08902 | 0.05454  | 0.012248 | 0.79179  | -0.05814 | 0.20979  | 0.001612 |
| 0.147946 | 0.00134  | -0.0953  | 0.03952  | 0.032589 | 0.48234  | -0.01683 | 0.71673  | 0.041742 |
| 0.159715 | 0.00053  | -0.04743 | 0.30641  | 0.055927 | 0.2277   | -0.00738 | 0.87356  | -0.01167 |
| 0.13595  | 0.00324  | -0.1588  | 0.00057  | 0.043142 | 0.35224  | -0.06025 | 0.19372  | 0.015877 |
| -0.03648 | 0.43162  | -0.38102 | 1.39E-17 | 0.022159 | 0.63291  | -0.17949 | 9.61E-05 | -0.09699 |
| -0.13898 | 0.00261  | -0.41311 | 1.13E-20 | 0.000141 | 0.99757  | -0.10063 | 0.02968  | -0.10598 |
| -0.04003 | 0.38811  | -0.33139 | 1.97E-13 | -0.06022 | 0.19393  | -0.18466 | 5.96E-05 | -0.12828 |
| -0.01535 | 0.74074  | 0.040389 | 0.38385  | 0.196561 | 1.88E-05 | 0.236673 | 2.28E-07 | 0.481123 |
| 0.115964 | 0.01215  | 0.221149 | 1.39E-06 | 0.237755 | 2.00E-07 | 0.333236 | 1.42E-13 | 0.821705 |
| -0.19654 | 1.89E-05 | 0.012153 | 0.79337  | 0.205362 | 7.68E-06 | 0.31258  | 4.82E-12 | 0.569949 |
| -0.04107 | 0.37587  | 0.132896 | 0.00401  | 0.179637 | 9.49E-05 | 0.312759 | 4.68E-12 | 0.600926 |
| 0.058623 | 0.20603  | 0.340074 | 4.17E-14 | 0.157385 | 0.00064  | 0.179825 | 9.32E-05 | 0.631569 |



|          |          |          |          |          |          |          |          |          |
|----------|----------|----------|----------|----------|----------|----------|----------|----------|
| -0.07071 | 0.12706  | 0.146009 | 0.00156  | 0.270628 | 2.78E-09 | 0.333249 | 1.42E-13 | 0.828624 |
| -0.08482 | 0.06705  | 0.022083 | 0.63408  | 0.202921 | 9.89E-06 | 0.407232 | 4.41E-20 | 0.679811 |
| 0.125855 | 0.00646  | 0.302312 | 2.52E-11 | 0.153106 | 0.0009   | 0.371793 | 9.34E-17 | 0.552011 |
| 0.0656   | 0.15696  | 0.119729 | 0.0096   | 0.078163 | 0.09157  | 0.039581 | 0.39345  | 0.545874 |
| 0.1178   | 0.01084  | 0.208426 | 5.57E-06 | 0.23308  | 3.51E-07 | 0.33104  | 2.09E-13 | 0.732107 |
| -0.00605 | 0.89621  | 0.171768 | 0.00019  | 0.217644 | 2.06E-06 | 0.255163 | 2.24E-08 | 0.80359  |
| 0.093636 | 0.04312  | 0.230934 | 4.52E-07 | 0.21294  | 3.44E-06 | 0.336169 | 8.43E-14 | 0.763533 |
| -0.06026 | 0.19364  | 0.190602 | 3.38E-05 | 0.186995 | 4.78E-05 | 0.37912  | 2.07E-17 | 0.661161 |
| -0.03801 | 0.41246  | 0.111321 | 0.0161   | 0.268155 | 3.92E-09 | 0.384625 | 6.49E-18 | 0.838866 |
| -0.05191 | 0.2629   | 0.103249 | 0.02567  | 0.273669 | 1.82E-09 | 0.37101  | 1.10E-16 | 0.840226 |
| -0.06344 | 0.17113  | 0.050418 | 0.27689  | 0.219088 | 1.75E-06 | 0.238781 | 1.77E-07 | 0.712647 |
| 0.001454 | 0.975    | -0.03816 | 0.41071  | 0.150556 | 0.0011   | 0.220596 | 1.48E-06 | 0.559619 |
| -0.02217 | 0.63281  | 0.308223 | 9.80E-12 | 0.206309 | 6.96E-06 | 0.237928 | 1.96E-07 | 0.630149 |
| -0.02195 | 0.63612  | 0.281821 | 5.65E-10 | 0.244834 | 8.39E-08 | 0.330114 | 2.46E-13 | 0.635998 |
| -0.01584 | 0.73285  | 0.08262  | 0.07447  | 0.217948 | 1.99E-06 | 0.319369 | 1.56E-12 | 0.729018 |
| 0.008945 | 0.84713  | 0.138122 | 0.00278  | 0.262079 | 8.97E-09 | 0.209007 | 5.24E-06 | 0.652604 |
| -0.02    | 0.66636  | 0.179788 | 9.36E-05 | 0.328461 | 3.29E-13 | 0.402843 | 1.20E-19 | 0.795087 |
| -0.06301 | 0.17407  | -0.03771 | 0.41617  | 0.141851 | 0.00212  | 0.164839 | 0.00035  | 0.479962 |
| -0.04785 | 0.30215  | 0.153856 | 0.00085  | 0.230478 | 4.77E-07 | 0.361113 | 7.87E-16 | 0.784461 |
| 0.025456 | 0.58319  | 0.188964 | 3.96E-05 | 0.175635 | 0.00014  | 0.350895 | 5.61E-15 | 0.552301 |
| -0.00059 | 0.98982  | 0.030145 | 0.51579  | 0.282673 | 4.99E-10 | 0.218351 | 1.90E-06 | 0.59754  |
| -0.04957 | 0.28505  | 0.077393 | 0.09482  | 0.098253 | 0.03378  | 0.232155 | 3.92E-07 | 0.53583  |
| -0.04966 | 0.28423  | -0.06703 | 0.14808  | 0.174108 | 0.00016  | 0.134022 | 0.00371  | 0.501828 |
| -0.06303 | 0.17392  | 0.171914 | 0.00019  | 0.213532 | 3.23E-06 | 0.356661 | 1.87E-15 | 0.604365 |
| -0.1069  | 0.02085  | 0.07539  | 0.10371  | 0.219293 | 1.71E-06 | 0.432967 | 9.26E-23 | 0.555834 |
| 0.011878 | 0.79795  | 0.331708 | 1.86E-13 | 0.233726 | 3.25E-07 | 0.307033 | 1.19E-11 | 0.707481 |
| -0.02156 | 0.64218  | 0.277136 | 1.11E-09 | 0.284061 | 4.07E-10 | 0.284924 | 3.58E-10 | 0.690565 |
| 0.061954 | 0.18137  | 0.278604 | 9.00E-10 | 0.076351 | 0.09937  | 0.103109 | 0.02587  | 0.429338 |
| -0.06446 | 0.16432  | -0.04752 | 0.30551  | 0.334467 | 1.14E-13 | 0.377385 | 2.97E-17 | 0.486974 |
| 0.014412 | 0.75608  | 0.120322 | 0.00925  | 0.321974 | 1.00E-12 | 0.261144 | 1.02E-08 | 0.557321 |
| 0.100488 | 0.02991  | 0.428433 | 2.85E-22 | 0.167118 | 0.00029  | 0.286633 | 2.78E-10 | 0.50233  |
| -0.01647 | 0.72268  | 0.179297 | 9.78E-05 | 0.253232 | 2.88E-08 | 0.298248 | 4.76E-11 | 0.773815 |
| 0.127522 | 0.00579  | 0.323608 | 7.60E-13 | 0.162216 | 0.00043  | 0.143632 | 0.00186  | 0.415247 |
| -0.01205 | 0.79516  | 0.17728  | 0.00012  | 0.18271  | 7.15E-05 | 0.199045 | 1.47E-05 | 0.687707 |
| -0.02853 | 0.53852  | 0.125262 | 0.00672  | 0.065693 | 0.15638  | 0.187696 | 4.47E-05 | 0.650243 |
| -0.03724 | 0.42205  | -0.11194 | 0.01551  | 0.009374 | 0.83989  | -0.01129 | 0.80776  | 0.242951 |
| -0.05573 | 0.22934  | 0.002704 | 0.95354  | 0.129838 | 0.00495  | 0.200976 | 1.21E-05 | 0.655658 |
| -0.16115 | 0.00047  | 0.096028 | 0.03804  | 0.183101 | 6.89E-05 | 0.405205 | 7.01E-20 | 0.625881 |
| 0.011709 | 0.80076  | 0.285256 | 3.41E-10 | 0.256127 | 1.98E-08 | 0.384095 | 7.27E-18 | 0.850745 |
| -0.19125 | 3.18E-05 | -0.30709 | 1.18E-11 | 0.201528 | 1.14E-05 | 0.308273 | 9.72E-12 | 0.464273 |
| 0.178605 | 0.0001   | 0.238506 | 1.83E-07 | 0.244549 | 8.70E-08 | 0.234935 | 2.81E-07 | 0.690149 |
| -0.11527 | 0.01268  | 0.031229 | 0.5008   | 0.194841 | 2.24E-05 | 0.291462 | 1.35E-10 | 0.549864 |
| -0.0596  | 0.19857  | 0.321474 | 1.09E-12 | 0.161925 | 0.00044  | 0.302752 | 2.35E-11 | 0.587753 |
| -0.01453 | 0.75414  | 0.043243 | 0.35112  | 0.240124 | 1.50E-07 | 0.406948 | 4.71E-20 | 0.654045 |
| 0.268888 | 3.54E-09 | 0.364599 | 3.96E-16 | 0.145142 | 0.00166  | 0.142557 | 0.00201  | 0.535899 |

|          |          |          |          |          |          |          |          |          |
|----------|----------|----------|----------|----------|----------|----------|----------|----------|
| -0.05441 | 0.24062  | 0.281506 | 5.91E-10 | 0.161988 | 0.00044  | 0.272377 | 2.18E-09 | 0.579928 |
| -0.11047 | 0.01694  | 0.067268 | 0.14666  | 0.195647 | 2.06E-05 | 0.30656  | 1.28E-11 | 0.764275 |
| -0.07566 | 0.10248  | -0.05802 | 0.21071  | 0.292532 | 1.15E-10 | 0.256434 | 1.90E-08 | 0.59342  |
| 0.033417 | 0.47126  | 0.201472 | 1.15E-05 | 0.133756 | 0.00378  | 0.106815 | 0.02096  | 0.453017 |
| -0.05935 | 0.20044  | 0.005169 | 0.91129  | 0.403164 | 1.11E-19 | 0.256325 | 1.93E-08 | 0.64976  |
| -0.0421  | 0.36396  | -0.12183 | 0.0084   | 0.217955 | 1.99E-06 | 0.268503 | 3.74E-09 | 0.552039 |
| -0.06817 | 0.14132  | 0.26517  | 5.90E-09 | 0.161605 | 0.00045  | 0.348642 | 8.57E-15 | 0.546878 |
| -0.01521 | 0.74308  | 0.169281 | 0.00024  | 0.299494 | 3.92E-11 | 0.396934 | 4.49E-19 | 0.802466 |
| 0.039604 | 0.39316  | 0.299235 | 4.08E-11 | 0.252733 | 3.08E-08 | 0.332816 | 1.53E-13 | 0.854181 |
| -0.01952 | 0.67401  | 0.131677 | 0.00437  | 0.295363 | 7.44E-11 | 0.400398 | 2.08E-19 | 0.856747 |
| -0.04282 | 0.35582  | 0.106963 | 0.02078  | 0.334189 | 1.20E-13 | 0.361494 | 7.30E-16 | 0.66824  |
| -0.03757 | 0.41791  | 0.065954 | 0.15473  | 0.267315 | 4.40E-09 | 0.294781 | 8.13E-11 | 0.734252 |
| -0.10463 | 0.02375  | 0.222756 | 1.16E-06 | 0.09267  | 0.04533  | 0.187821 | 4.42E-05 | 0.474018 |
| -0.06043 | 0.19235  | -0.11027 | 0.01713  | 0.371619 | 9.68E-17 | 0.392879 | 1.10E-18 | 0.70915  |
| 0.117278 | 0.0112   | 0.024927 | 0.59104  | 0.166893 | 0.00029  | 0.213489 | 3.24E-06 | 0.489555 |
| 0.117174 | 0.01127  | 0.425512 | 5.84E-22 | 0.159495 | 0.00054  | 0.322119 | 9.79E-13 | 0.573849 |
| 0.062145 | 0.18003  | 0.444723 | 4.62E-24 | 0.198997 | 1.48E-05 | 0.358802 | 1.23E-15 | 0.717352 |
| -0.05862 | 0.20605  | 0.037206 | 0.42246  | 0.218741 | 1.82E-06 | 0.129488 | 0.00507  | 0.528299 |
| -0.09332 | 0.04383  | 0.024726 | 0.59405  | 0.035964 | 0.43813  | 0.02687  | 0.56245  | 0.396033 |
| -0.04793 | 0.30137  | -0.05064 | 0.27477  | 0.07554  | 0.10302  | 0.154981 | 0.00078  | 0.436131 |
| -0.07762 | 0.09383  | 0.005781 | 0.90085  | 0.27514  | 1.48E-09 | 0.455578 | 2.61E-25 | 0.636781 |
| 0.143206 | 0.00192  | 0.442239 | 8.79E-24 | 0.12874  | 0.00533  | 0.253286 | 2.86E-08 | 0.541343 |
| -0.06588 | 0.1552   | -0.12699 | 0.00599  | 0.173695 | 0.00016  | 0.200269 | 1.30E-05 | 0.547127 |
| 0.249783 | 4.49E-08 | 0.150691 | 0.00109  | 0.347893 | 9.86E-15 | 0.29126  | 1.39E-10 | 0.651095 |
| 0.166922 | 0.00029  | 0.249475 | 4.67E-08 | 0.187185 | 4.70E-05 | 0.25398  | 2.62E-08 | 0.492963 |
| 0.102298 | 0.02707  | 0.365758 | 3.15E-16 | 0.056112 | 0.22617  | 0.043979 | 0.34297  | 0.387146 |
| -0.00331 | 0.94321  | 0.001525 | 0.97377  | 0.094886 | 0.0404   | 0.110887 | 0.01652  | 0.464134 |
| -0.05652 | 0.22281  | 0.063141 | 0.17313  | 0.271198 | 2.57E-09 | 0.264141 | 6.79E-09 | 0.724272 |
| -0.09889 | 0.03264  | 0.017333 | 0.70871  | 0.242177 | 1.17E-07 | 0.28251  | 5.11E-10 | 0.530228 |
| -0.0107  | 0.81764  | 0.084247 | 0.06892  | 0.093959 | 0.0424   | 0.336437 | 8.03E-14 | 0.559478 |
| 0.064182 | 0.16615  | 0.231374 | 4.29E-07 | 0.174313 | 0.00015  | 0.237025 | 2.19E-07 | 0.662298 |
| 0.043312 | 0.35035  | 0.054659 | 0.23843  | 0.112922 | 0.01463  | 0.038863 | 0.40209  | 0.459591 |
| -0.1517  | 0.00101  | -0.20515 | 7.85E-06 | 0.189572 | 3.74E-05 | 0.322569 | 9.07E-13 | 0.553283 |
| 0.129392 | 0.0051   | 0.110816 | 0.01659  | 0.187311 | 4.64E-05 | 0.201453 | 1.15E-05 | 0.613071 |
| -0.05065 | 0.27472  | -0.03338 | 0.4718   | 0.128877 | 0.00528  | 0.265112 | 5.95E-09 | 0.511973 |
| -0.16118 | 0.00047  | -0.13738 | 0.00293  | 0.267067 | 4.55E-09 | 0.294027 | 9.13E-11 | 0.508024 |
| -0.09401 | 0.0423   | -0.02387 | 0.60685  | 0.118145 | 0.01061  | 0.231236 | 4.37E-07 | 0.512523 |
| -0.06744 | 0.14561  | -0.09384 | 0.04266  | 0.129398 | 0.0051   | 0.24739  | 6.09E-08 | 0.473977 |
| -0.09031 | 0.05114  | -0.07398 | 0.11037  | 0.331703 | 1.86E-13 | 0.224782 | 9.22E-07 | 0.454474 |
| -0.05475 | 0.23764  | -0.00581 | 0.9004   | 0.243004 | 1.05E-07 | 0.12805  | 0.00559  | 0.595133 |
| -0.01499 | 0.74665  | 0.031751 | 0.49367  | 0.086027 | 0.06324  | 0.095977 | 0.03814  | 0.577281 |
| -0.00557 | 0.90438  | 0.251807 | 3.47E-08 | 0.180715 | 8.59E-05 | 0.317728 | 2.05E-12 | 0.50173  |
| 0.108152 | 0.0194   | 0.36932  | 1.54E-16 | 0.039446 | 0.39506  | -0.0055  | 0.90557  | 0.388289 |
| 0.176126 | 0.00013  | 0.349666 | 7.07E-15 | 0.093554 | 0.04331  | 0.054585 | 0.23907  | 0.504512 |
| -0.07596 | 0.1011   | 0.133759 | 0.00378  | 0.482233 | 1.43E-28 | 0.616336 | 3.38E-50 | 0.779267 |

|          |          |          |          |          |          |          |          |          |
|----------|----------|----------|----------|----------|----------|----------|----------|----------|
| -0.03026 | 0.51419  | 0.048793 | 0.2927   | 0.262319 | 8.68E-09 | 0.327124 | 4.15E-13 | 0.581808 |
| 0.151883 | 0.00099  | 0.373693 | 6.34E-17 | 0.148882 | 0.00125  | 0.110689 | 0.01671  | 0.543814 |
| 0.197029 | 1.80E-05 | 0.452394 | 6.13E-25 | 0.112235 | 0.01524  | 0.100131 | 0.0305   | 0.526671 |
| -0.17373 | 0.00016  | 0.147216 | 0.00142  | 0.15627  | 0.0007   | 0.3568   | 1.82E-15 | 0.579337 |
| -0.11633 | 0.01188  | 0.011549 | 0.80342  | 0.382153 | 1.10E-17 | 0.527341 | 8.73E-35 | 0.569791 |
| -0.08179 | 0.07744  | 0.069192 | 0.13543  | 0.334216 | 1.19E-13 | 0.606553 | 2.92E-48 | 0.761744 |
| -0.08769 | 0.0583   | -0.05704 | 0.21854  | 0.476125 | 8.49E-28 | 0.522584 | 4.38E-34 | 0.676938 |
| 0.069084 | 0.13604  | 0.39788  | 3.64E-19 | 0.143146 | 0.00193  | 0.247545 | 5.97E-08 | 0.570242 |
| 0.171913 | 0.00019  | 0.306596 | 1.27E-11 | 0.250115 | 4.31E-08 | 0.297384 | 5.44E-11 | 0.614912 |
| 0.024773 | 0.59334  | 0.198028 | 1.63E-05 | 0.207199 | 6.34E-06 | 0.205671 | 7.44E-06 | 0.805367 |
| -0.05238 | 0.25859  | -0.06324 | 0.17248  | 0.133488 | 0.00385  | 0.149895 | 0.00116  | 0.49623  |
| -0.05242 | 0.25821  | 0.144959 | 0.00168  | 0.254202 | 2.54E-08 | 0.362294 | 6.24E-16 | 0.922598 |
| -0.11425 | 0.01349  | -0.12997 | 0.00491  | 0.171512 | 0.0002   | 0.315514 | 2.97E-12 | 0.559042 |
| -0.05888 | 0.20404  | -0.0181  | 0.6964   | 0.23493  | 2.82E-07 | 0.219418 | 1.69E-06 | 0.60027  |
| -0.06282 | 0.17533  | 0.136211 | 0.00318  | 0.221737 | 1.30E-06 | 0.337095 | 7.13E-14 | 0.814877 |
| -0.03628 | 0.43405  | -0.04965 | 0.28431  | 0.044657 | 0.33558  | 0.080315 | 0.08296  | 0.425827 |
| -0.02347 | 0.61289  | 0.01811  | 0.69629  | 0.143401 | 0.00189  | 0.239728 | 1.58E-07 | 0.511764 |
| -0.10921 | 0.01823  | -0.12194 | 0.00834  | 0.137561 | 0.00289  | 0.142959 | 0.00195  | 0.434058 |
| 0.056984 | 0.21902  | 0.043624 | 0.34688  | 0.197226 | 1.76E-05 | 0.17413  | 0.00016  | 0.678539 |
| -0.109   | 0.01846  | 0.22549  | 8.51E-07 | 0.191371 | 3.14E-05 | 0.433378 | 8.35E-23 | 0.599305 |
| -0.10333 | 0.02554  | 0.017175 | 0.71124  | 0.176438 | 0.00013  | 0.555144 | 4.16E-39 | 0.613067 |
| 0.054018 | 0.24399  | 0.207858 | 5.92E-06 | 0.117732 | 0.01089  | 0.129847 | 0.00495  | 0.404911 |
| -0.01635 | 0.72448  | 0.141864 | 0.00212  | 0.197541 | 1.71E-05 | 0.243271 | 1.02E-07 | 0.744006 |
| -0.03902 | 0.40016  | 0.152977 | 0.00091  | 0.504037 | 1.85E-31 | 0.611335 | 3.37E-49 | 0.799583 |
| -0.07231 | 0.11864  | 0.036184 | 0.43534  | 0.220547 | 1.49E-06 | 0.258833 | 1.38E-08 | 0.586986 |
| 0.132756 | 0.00405  | 0.427489 | 3.60E-22 | 0.162193 | 0.00043  | 0.178272 | 0.00011  | 0.725916 |
| -0.07458 | 0.10747  | -0.01474 | 0.75067  | 0.171682 | 0.00019  | 0.24282  | 1.08E-07 | 0.721464 |
| 0.034278 | 0.45992  | 0.190954 | 3.27E-05 | 0.190942 | 3.27E-05 | 0.325669 | 5.33E-13 | 0.636039 |
| -0.04371 | 0.34593  | -0.02471 | 0.59436  | 0.37963  | 1.86E-17 | 0.275521 | 1.40E-09 | 0.53912  |
| -0.06527 | 0.15905  | 0.055868 | 0.22819  | 0.249603 | 4.60E-08 | 0.373404 | 6.73E-17 | 0.773927 |
| 0.075457 | 0.1034   | 0.164008 | 0.00037  | 0.114491 | 0.0133   | 0.050129 | 0.27966  | 0.54809  |
| -0.05456 | 0.23929  | 0.031792 | 0.49312  | 0.314915 | 3.28E-12 | 0.2482   | 5.49E-08 | 0.688939 |
| 0.120627 | 0.00907  | 0.384118 | 7.23E-18 | 0.205191 | 7.82E-06 | 0.166055 | 0.00031  | 0.563211 |
| -0.02781 | 0.54891  | 0.1843   | 6.16E-05 | 0.137423 | 0.00292  | 0.2356   | 2.60E-07 | 0.664986 |
| -0.1091  | 0.01835  | -0.03261 | 0.48207  | 0.136536 | 0.00311  | 0.184739 | 5.92E-05 | 0.483613 |
| 0.016694 | 0.71899  | 0.328243 | 3.41E-13 | 0.082524 | 0.07481  | 0.209379 | 5.04E-06 | 0.514807 |
| -0.04022 | 0.38587  | -0.06944 | 0.13404  | 0.115982 | 0.01214  | 0.132744 | 0.00406  | 0.561067 |
| 0.021858 | 0.63753  | 0.274841 | 1.54E-09 | 0.138391 | 0.00273  | 0.172548 | 0.00018  | 0.484827 |
| -0.00918 | 0.84318  | 0.237873 | 1.98E-07 | 0.163009 | 0.0004   | 0.264913 | 6.11E-09 | 0.473347 |
| -0.0524  | 0.25838  | 0.065894 | 0.15511  | 0.310191 | 7.12E-12 | 0.385289 | 5.64E-18 | 0.523296 |
| 0.046409 | 0.31695  | 0.228009 | 6.36E-07 | 0.125508 | 0.00661  | 0.279861 | 7.51E-10 | 0.664806 |
| -0.00259 | 0.95551  | 0.319059 | 1.64E-12 | 0.190279 | 3.49E-05 | 0.319807 | 1.45E-12 | 0.777296 |
| -0.19032 | 3.48E-05 | -0.14672 | 0.00148  | 0.232596 | 3.72E-07 | 0.490637 | 1.17E-29 | 0.554335 |
| -0.08259 | 0.07458  | 0.017875 | 0.70003  | 0.161543 | 0.00046  | 0.244592 | 8.65E-08 | 0.641062 |
| -0.10201 | 0.0275   | 0.02444  | 0.59833  | 0.291109 | 1.42E-10 | 0.240746 | 1.39E-07 | 0.578792 |

|          |          |          |          |          |          |          |          |           |
|----------|----------|----------|----------|----------|----------|----------|----------|-----------|
| -0.12192 | 0.00835  | 0.088958 | 0.05472  | 0.33309  | 1.46E-13 | 0.374616 | 5.25E-17 | 0.653466  |
| 0.03409  | 0.46239  | 0.042723 | 0.35694  | 0.404992 | 7.36E-20 | 0.294945 | 7.93E-11 | 0.51014   |
| 0.014294 | 0.75802  | 0.310582 | 6.68E-12 | 0.116595 | 0.01169  | 0.321366 | 1.11E-12 | 0.506619  |
| -0.00386 | 0.93373  | -0.05925 | 0.20125  | 0.173428 | 0.00017  | 0.148471 | 0.00129  | 0.4675    |
| 0.131332 | 0.00447  | 0.278171 | 9.57E-10 | 0.062981 | 0.17423  | 0.032692 | 0.48095  | 0.493449  |
| 0.2983   | 4.72E-11 | 0.187714 | 4.46E-05 | 0.163104 | 0.0004   | 0.258174 | 1.51E-08 | 0.56584   |
| -0.03368 | 0.46776  | 0.156709 | 0.00068  | 0.160745 | 0.00049  | 0.202403 | 1.04E-05 | 0.73145   |
| -0.00173 | 0.97032  | 0.326509 | 4.61E-13 | 0.140882 | 0.00228  | 0.259668 | 1.24E-08 | 0.482263  |
| 0.211559 | 3.99E-06 | 0.602758 | 1.58E-47 | 0.083987 | 0.06978  | 0.198957 | 1.48E-05 | 0.446967  |
| 0.258029 | 1.54E-08 | 0.346371 | 1.31E-14 | 0.205558 | 7.53E-06 | 0.275241 | 1.45E-09 | 0.60119   |
| 0.184521 | 6.04E-05 | 0.500597 | 5.46E-31 | 0.153082 | 0.0009   | 0.44237  | 8.50E-24 | 0.50204   |
| -0.10202 | 0.02749  | 0.065294 | 0.15891  | 0.137713 | 0.00286  | 0.326623 | 4.52E-13 | 0.549604  |
| 0.111517 | 0.01591  | 0.296621 | 6.13E-11 | 0.143184 | 0.00192  | 0.360869 | 8.25E-16 | 0.570143  |
| -0.00169 | 0.97096  | 0.320229 | 1.35E-12 | 0.197568 | 1.70E-05 | 0.314197 | 3.69E-12 | 0.648922  |
| -0.03225 | 0.48693  | -0.02235 | 0.63002  | 0.153276 | 0.00089  | 0.175509 | 0.00014  | 0.594845  |
| -0.04866 | 0.29403  | -0.13085 | 0.00462  | 0.190825 | 3.31E-05 | 0.287696 | 2.37E-10 | 0.604629  |
| -0.10514 | 0.02307  | -0.02785 | 0.54832  | 0.454878 | 3.15E-25 | 0.48104  | 2.03E-28 | 0.697323  |
| 0.088176 | 0.0569   | -0.05937 | 0.20029  | 0.020464 | 0.65915  | -0.03306 | 0.47596  | -0.00186  |
| 0.123276 | 0.00765  | -0.10036 | 0.03012  | -0.06303 | 0.17391  | -0.05516 | 0.23414  | -0.25861  |
| 0.033114 | 0.4753   | -0.12794 | 0.00563  | 0.00913  | 0.844    | 0.009089 | 0.84469  | 0.006369  |
| 0.03702  | 0.42479  | -0.01157 | 0.80315  | 0.003943 | 0.93227  | 0.010702 | 0.81758  | -0.00073  |
| 0.011776 | 0.79964  | -0.17524 | 0.00014  | -0.0142  | 0.75963  | -0.06266 | 0.17646  | -0.14386  |
| 0.026571 | 0.5668   | -0.11608 | 0.01206  | -0.01392 | 0.76421  | -0.02289 | 0.62171  | -0.05522  |
| 0.100303 | 0.03022  | 0.029426 | 0.52586  | -0.01306 | 0.77836  | 0.06275  | 0.17582  | -0.13256  |
| 0.108002 | 0.01957  | 0.026904 | 0.56195  | -0.01157 | 0.80312  | 0.012447 | 0.78849  | -0.13258  |
| 0.271562 | 2.44E-09 | 0.228629 | 5.92E-07 | -0.01743 | 0.70719  | 0.012064 | 0.79485  | -0.01115  |
| 0.114369 | 0.0134   | -0.03482 | 0.45287  | -0.01729 | 0.70943  | 0.001937 | 0.9667   | -0.10547  |
| 0.027324 | 0.55586  | -0.04931 | 0.28761  | 0.009229 | 0.84233  | -0.01531 | 0.74141  | -0.00972  |
| 0.021718 | 0.6397   | -0.12782 | 0.00567  | -0.00498 | 0.91451  | -0.01884 | 0.68468  | -0.11433  |
| -0.02832 | 0.54148  | -0.04109 | 0.37564  | -0.00269 | 0.95369  | -0.00861 | 0.85285  | -0.02931  |
| 0.256498 | 1.88E-08 | 0.128561 | 0.0054   | -0.01157 | 0.80302  | -0.05425 | 0.24195  | -0.02853  |
| 0.10992  | 0.01749  | 0.006612 | 0.88668  | 0.008436 | 0.85573  | -0.00782 | 0.86609  | -0.11402  |
| 0.262038 | 9.02E-09 | 0.07679  | 0.09743  | -0.00127 | 0.97819  | -0.01236 | 0.78985  | -0.21517  |
| 0.250219 | 4.25E-08 | 0.106181 | 0.02174  | -0.02068 | 0.65584  | 0.0144   | 0.75627  | -0.12626  |
| 0.311866 | 5.42E-12 | 0.220907 | 1.43E-06 | -0.00423 | 0.92737  | -0.02114 | 0.64864  | 0.093948  |
| 0.166062 | 0.00031  | 0.043154 | 0.35212  | -0.01197 | 0.79637  | -0.02943 | 0.52578  | -0.03151  |
| 0.205648 | 7.46E-06 | 0.13549  | 0.00335  | -0.00426 | 0.92684  | 0.016654 | 0.71963  | -0.00665  |
| 0.110311 | 0.01709  | 0.112251 | 0.01523  | -0.00676 | 0.88413  | -0.05672 | 0.22115  | -2.35E-05 |
| 0.096895 | 0.03633  | -0.08782 | 0.05791  | 0.04516  | 0.33016  | -0.02627 | 0.57119  | 0.026445  |
| 0.183578 | 6.59E-05 | -0.05261 | 0.25652  | -0.03369 | 0.46761  | -0.05845 | 0.20741  | -0.19646  |
| -0.0224  | 0.62927  | -0.12119 | 0.00875  | -0.01311 | 0.77756  | 0.018372 | 0.69212  | -0.08613  |
| -0.01112 | 0.8106   | -0.0909  | 0.04963  | -0.00274 | 0.95286  | -0.03434 | 0.45906  | -0.09619  |
| 0.07417  | 0.10944  | -0.03583 | 0.43988  | 0.025822 | 0.57779  | -0.02589 | 0.57685  | 0.02348   |
| 0.18843  | 4.17E-05 | -0.11964 | 0.00966  | -0.02929 | 0.52782  | -0.0808  | 0.08112  | -0.1399   |
| -0.11601 | 0.01212  | -0.20805 | 5.80E-06 | -0.00511 | 0.91236  | -0.02325 | 0.61626  | -0.13049  |

|          |          |          |          |          |         |          |         |          |
|----------|----------|----------|----------|----------|---------|----------|---------|----------|
| 0.157281 | 0.00065  | 0.094923 | 0.04032  | 0.026115 | 0.57349 | -0.01381 | 0.76604 | 0.015301 |
| 0.019004 | 0.68209  | -0.1485  | 0.00129  | -0.01772 | 0.70255 | -0.05058 | 0.27533 | -0.05549 |
| -0.00676 | 0.88413  | -0.00799 | 0.86331  | 0.000225 | 0.99613 | -0.03706 | 0.42433 | 0.04622  |
| 0.078921 | 0.08846  | 0.077168 | 0.09579  | 0.001587 | 0.97272 | 0.014652 | 0.75215 | -0.13392 |
| 0.019631 | 0.6722   | -0.09576 | 0.03858  | 0.003643 | 0.93742 | -0.06035 | 0.19294 | -0.0203  |
| 0.037663 | 0.41679  | -0.15437 | 0.00082  | -0.02788 | 0.54783 | -0.08313 | 0.0727  | -0.11487 |
| 0.01472  | 0.75104  | -0.01929 | 0.67751  | -0.01414 | 0.7606  | -0.012   | 0.79584 | -0.16768 |
| 0.032951 | 0.47748  | -0.04388 | 0.34411  | 0.021596 | 0.64157 | 0.009653 | 0.83519 | 0.039482 |
| -0.05368 | 0.24698  | -0.06096 | 0.18851  | 0.009456 | 0.83851 | 0.007635 | 0.86929 | -0.04679 |
| 0.068374 | 0.14012  | 0.024553 | 0.59663  | 0.025892 | 0.57676 | -0.00864 | 0.8522  | 0.051042 |
| 0.164434 | 0.00036  | -0.01808 | 0.69682  | 0.005609 | 0.90378 | -0.03778 | 0.41529 | 0.008731 |
| 0.002523 | 0.95664  | -0.15745 | 0.00064  | -0.00185 | 0.96814 | -0.04805 | 0.30015 | -0.00611 |
| 0.250924 | 3.88E-08 | 0.047794 | 0.3027   | 0.000232 | 0.99601 | -0.04916 | 0.28909 | -0.06027 |
| 0.111128 | 0.01628  | 0.026538 | 0.56729  | 0.018508 | 0.68994 | 0.024117 | 0.60316 | 0.038458 |
| 0.047613 | 0.30454  | -0.0879  | 0.05769  | 0.08812  | 0.05705 | 0.014196 | 0.75963 | 0.085153 |
| 0.016983 | 0.71432  | -0.08667 | 0.06127  | 0.002005 | 0.96553 | 0.03078  | 0.50698 | -0.09483 |
| -0.00462 | 0.92064  | -0.12107 | 0.00882  | -0.01896 | 0.68285 | -0.03839 | 0.40787 | -0.11013 |
| 0.085973 | 0.0634   | -0.11662 | 0.01167  | -0.03527 | 0.44697 | -0.03097 | 0.50435 | -0.10587 |
| 0.089494 | 0.05328  | -0.06718 | 0.14722  | 0.057269 | 0.21672 | 0.006978 | 0.88046 | 0.041814 |
| 0.045321 | 0.32843  | -0.07295 | 0.11541  | 0.00797  | 0.86361 | -0.00204 | 0.96485 | -0.02407 |
| -0.04578 | 0.32355  | 0.031602 | 0.49571  | -0.02752 | 0.55305 | -0.03769 | 0.41645 | -0.12058 |
| 0.209124 | 5.17E-06 | 0.249832 | 4.46E-08 | -0.0039  | 0.93294 | 0.101044 | 0.02901 | -0.01073 |
| 0.239222 | 1.68E-07 | 0.132713 | 0.00407  | 0.011099 | 0.81094 | 0.013454 | 0.77183 | -0.0313  |
| 0.195432 | 2.11E-05 | -0.06145 | 0.18496  | -0.02433 | 0.59993 | -0.06264 | 0.17656 | -0.05965 |
| 0.369206 | 1.58E-16 | 0.01443  | 0.75579  | -0.02602 | 0.5749  | -0.07527 | 0.10425 | -0.16549 |
| -0.20354 | 9.28E-06 | -0.30177 | 2.74E-11 | -0.04263 | 0.35802 | -0.0595  | 0.19934 | -0.19461 |
| 0.071953 | 0.12048  | 0.110235 | 0.01717  | 0.029841 | 0.52004 | 0.146299 | 0.00152 | 0.03759  |
| -0.08315 | 0.07263  | -0.20617 | 7.07E-06 | -0.03517 | 0.44833 | -0.12367 | 0.00746 | -0.1495  |
| 0.025854 | 0.57732  | 0.040997 | 0.37672  | -0.06524 | 0.15928 | -0.08281 | 0.0738  | -0.18667 |
| -0.01233 | 0.7904   | -0.17263 | 0.00018  | -0.05176 | 0.26431 | -0.07808 | 0.09191 | -0.06197 |
| 0.349503 | 7.29E-15 | 0.202242 | 1.06E-05 | -0.04218 | 0.36315 | -0.15212 | 0.00097 | -0.08525 |
| -0.11269 | 0.01483  | -0.12536 | 0.00668  | -0.0476  | 0.30467 | -0.04856 | 0.29503 | -0.1938  |
| -0.23616 | 2.43E-07 | -0.10577 | 0.02226  | 0.00582  | 0.90018 | 0.066435 | 0.15174 | -0.00506 |
| -0.15958 | 0.00054  | -0.43706 | 3.30E-23 | -0.00492 | 0.9156  | -0.02295 | 0.62083 | -0.05496 |
| 0.044376 | 0.33863  | -0.05466 | 0.2384   | -0.05782 | 0.21234 | -0.08149 | 0.07855 | -0.11948 |
| -0.09665 | 0.03681  | -0.2505  | 4.10E-08 | -0.01434 | 0.75733 | -0.02069 | 0.65567 | -0.0467  |
| -0.26553 | 5.62E-09 | -0.47268 | 2.28E-27 | -0.05876 | 0.20499 | -0.1099  | 0.01751 | -0.18182 |
| -0.18157 | 7.94E-05 | -0.45772 | 1.46E-25 | 0.022591 | 0.62629 | 0.00751  | 0.87141 | 0.071995 |
| 0.096187 | 0.03772  | 0.011109 | 0.81077  | -0.03641 | 0.43252 | -0.0897  | 0.05273 | -0.12619 |
| -0.11528 | 0.01267  | -0.31799 | 1.97E-12 | -0.10734 | 0.02033 | -0.13736 | 0.00293 | -0.33273 |
| 0.077775 | 0.0932   | -0.0196  | 0.67271  | 0.007015 | 0.87982 | -0.03872 | 0.40378 | 0.016111 |
| -0.25875 | 1.40E-08 | -0.24446 | 8.80E-08 | -0.04916 | 0.28905 | 0.00797  | 0.86362 | -0.13869 |
| 0.246462 | 6.84E-08 | 0.18374  | 6.50E-05 | 0.006008 | 0.89697 | -0.06733 | 0.14626 | 0.007738 |
| -0.20151 | 1.14E-05 | -0.49228 | 7.09E-30 | -0.03901 | 0.40028 | -0.1135  | 0.01412 | -0.14092 |
| 0.136414 | 0.00314  | 0.064154 | 0.16633  | -0.02785 | 0.54826 | -0.13381 | 0.00377 | -0.04557 |

|          |          |          |          |          |         |          |          |          |
|----------|----------|----------|----------|----------|---------|----------|----------|----------|
| -0.28396 | 4.13E-10 | -0.06235 | 0.17862  | -0.02277 | 0.62356 | 0.077856 | 0.09285  | 0.083595 |
| -0.12086 | 0.00894  | -0.15993 | 0.00052  | -0.02028 | 0.66197 | 0.035187 | 0.4481   | -0.1361  |
| -0.19033 | 3.47E-05 | -0.15961 | 0.00054  | -0.00548 | 0.90597 | 0.070483 | 0.12827  | -0.23224 |
| -0.13866 | 0.00267  | -0.08317 | 0.07255  | -0.03184 | 0.4924  | -0.02372 | 0.60915  | -0.05733 |
| -0.24123 | 1.31E-07 | -0.4679  | 8.80E-27 | -0.02501 | 0.58989 | -0.07234 | 0.1185   | -0.16829 |
| -0.1521  | 0.00098  | -0.18459 | 6.00E-05 | -0.0109  | 0.81419 | -0.02973 | 0.52164  | -0.17113 |
| -0.12233 | 0.00813  | -0.13767 | 0.00287  | -0.01702 | 0.7137  | -0.02304 | 0.61939  | -0.09826 |
| -0.13726 | 0.00295  | -0.17231 | 0.00018  | 0.034896 | 0.45186 | -0.04453 | 0.33697  | -0.02813 |
| -0.03971 | 0.39186  | -0.15243 | 0.00095  | -0.0554  | 0.2321  | -0.17597 | 0.00013  | -0.08752 |
| 0.334064 | 1.23E-13 | 0.238631 | 1.80E-07 | -0.0163  | 0.72539 | -0.03992 | 0.38939  | -0.07115 |
| -0.18795 | 4.37E-05 | -0.11835 | 0.01048  | -0.03579 | 0.44031 | -0.04379 | 0.34511  | -0.07088 |
| 0.014596 | 0.75307  | 0.020643 | 0.65636  | 0.042553 | 0.35886 | 0.077495 | 0.09439  | 0.142978 |
| -0.07448 | 0.10797  | -0.36864 | 1.77E-16 | 0.055191 | 0.23389 | 0.18003  | 9.15E-05 | 0.056866 |
| -0.07522 | 0.10451  | -0.11807 | 0.01066  | -0.01146 | 0.80485 | -0.04828 | 0.29778  | -0.0847  |
| -0.03114 | 0.50201  | -0.28629 | 2.93E-10 | 0.043776 | 0.34521 | 0.108744 | 0.01874  | -0.06111 |
| -0.15009 | 0.00114  | -0.06003 | 0.19535  | -0.00629 | 0.89223 | 0.017041 | 0.7134   | -0.10425 |
| -0.06853 | 0.13922  | -0.05018 | 0.27922  | -0.03278 | 0.47971 | -0.02522 | 0.58666  | -0.08618 |
| -0.27308 | 1.97E-09 | -0.20765 | 6.05E-06 | -0.07895 | 0.08834 | -0.08646 | 0.06191  | -0.13948 |
| -0.16723 | 0.00028  | -0.20461 | 8.31E-06 | -0.02394 | 0.60582 | -0.02074 | 0.6548   | -0.08681 |
| -0.32238 | 9.37E-13 | -0.34635 | 1.31E-14 | -0.04135 | 0.37266 | -0.04803 | 0.30034  | -0.15328 |
| -0.09021 | 0.0514   | -0.23498 | 2.80E-07 | -0.00582 | 0.9002  | -0.03871 | 0.40393  | -0.05039 |
| 0.14134  | 0.0022   | 0.10395  | 0.02468  | 0.02308  | 0.61884 | -0.02748 | 0.55364  | 0.156316 |
| -0.14197 | 0.0021   | -0.22992 | 5.09E-07 | -0.05972 | 0.19767 | -0.10169 | 0.02799  | -0.19736 |
| -0.04161 | 0.36966  | -0.04054 | 0.38207  | 0.020611 | 0.65685 | 0.024478 | 0.59776  | -0.0258  |
| -0.13331 | 0.0039   | 0.058354 | 0.20812  | 0.071413 | 0.1233  | 0.115942 | 0.01217  | 0.054203 |
| -0.02625 | 0.57152  | 0.003152 | 0.94584  | -0.07706 | 0.09625 | -0.09827 | 0.03375  | -0.12206 |
| 0.035066 | 0.44965  | 0.046381 | 0.31723  | -0.03005 | 0.51719 | -0.1299  | 0.00493  | -0.02635 |
| -0.26946 | 3.28E-09 | -0.29352 | 9.86E-11 | -0.00616 | 0.89441 | -0.03895 | 0.401    | -0.19649 |
| -0.31712 | 2.27E-12 | -0.34939 | 7.45E-15 | -0.04611 | 0.32008 | -0.05471 | 0.23803  | -0.19327 |
| -0.26701 | 4.59E-09 | -0.1103  | 0.01711  | -0.01426 | 0.75862 | 0.017652 | 0.7036   | -0.05888 |
| -0.31018 | 7.14E-12 | -0.36368 | 4.75E-16 | -0.02776 | 0.54951 | 0.034826 | 0.45277  | -0.2259  |
| -0.17666 | 0.00012  | -0.14851 | 0.00129  | -0.01003 | 0.82878 | 0.064718 | 0.16263  | 0.045318 |
| -0.23573 | 2.56E-07 | -0.20673 | 6.66E-06 | -0.06838 | 0.14009 | -0.05214 | 0.26084  | -0.15633 |
| 0.114284 | 0.01347  | -0.02084 | 0.65326  | 0.021577 | 0.64186 | 0.036792 | 0.42765  | 0.070124 |
| -0.11563 | 0.0124   | -0.18179 | 7.78E-05 | 0.024178 | 0.60225 | 0.014154 | 0.76031  | -0.02664 |
| -0.28196 | 5.54E-10 | -0.21216 | 3.74E-06 | -0.03736 | 0.4205  | -0.00433 | 0.92572  | -0.13609 |
| -0.13388 | 0.00375  | -0.22881 | 5.80E-07 | -0.00425 | 0.92707 | -0.03069 | 0.50824  | -0.06741 |
| -0.03998 | 0.38866  | 0.067552 | 0.14496  | -0.07473 | 0.10679 | -0.0685  | 0.1394   | -0.13728 |
| -0.12981 | 0.00496  | -0.09088 | 0.04967  | -0.05346 | 0.2489  | -0.04185 | 0.36692  | -0.11757 |
| -0.10723 | 0.02046  | -0.167   | 0.00029  | -0.03248 | 0.48387 | -0.05777 | 0.21271  | -0.08385 |
| -0.06575 | 0.15602  | -0.07353 | 0.11255  | -0.00254 | 0.95638 | 0.031279 | 0.50013  | -0.03253 |
| -0.09269 | 0.04528  | -0.23526 | 2.71E-07 | 0.008805 | 0.84948 | 0.006034 | 0.89652  | -0.09899 |
| -0.04017 | 0.38645  | 0.132501 | 0.00413  | -0.0227  | 0.62457 | 0.033384 | 0.47171  | -0.09066 |
| -0.1136  | 0.01404  | -0.18235 | 7.39E-05 | -0.01342 | 0.77239 | 0.062155 | 0.17996  | 1.30E-05 |
| -0.18199 | 7.64E-05 | -0.25368 | 2.72E-08 | -0.01904 | 0.68152 | -0.03005 | 0.51715  | -0.16177 |

|          |          |          |          |          |         |          |          |          |
|----------|----------|----------|----------|----------|---------|----------|----------|----------|
| -0.12775 | 0.0057   | -0.13386 | 0.00376  | -0.01429 | 0.75805 | -0.00268 | 0.95389  | -0.07487 |
| -0.11649 | 0.01176  | 0.040787 | 0.37918  | 0.001399 | 0.97595 | 0.012562 | 0.78659  | 0.133672 |
| -0.31045 | 6.83E-12 | -0.34254 | 2.65E-14 | 2.71E-05 | 0.99953 | 0.016284 | 0.72561  | -0.08224 |
| -0.11296 | 0.01459  | -0.22128 | 1.37E-06 | -0.00711 | 0.87816 | 0.071751 | 0.12153  | -0.07029 |
| -0.11005 | 0.01736  | -0.06345 | 0.17104  | -0.0144  | 0.75633 | 0.011266 | 0.80815  | 0.029817 |
| -0.26745 | 4.32E-09 | -0.24966 | 4.56E-08 | 0.015033 | 0.74593 | 0.071794 | 0.12131  | 0.102073 |
| -0.15446 | 0.00081  | -0.21826 | 1.92E-06 | 0.010382 | 0.82294 | -0.05896 | 0.20345  | 0.037105 |
| -0.19765 | 1.69E-05 | -0.1087  | 0.01878  | -0.01619 | 0.72716 | -0.01046 | 0.82162  | -0.06783 |
| 0.206317 | 6.96E-06 | 0.299071 | 4.19E-11 | -0.05537 | 0.23235 | -0.11564 | 0.01239  | -0.00183 |
| -0.19588 | 2.02E-05 | -0.29083 | 1.48E-10 | -0.02133 | 0.64576 | -0.09539 | 0.03934  | -0.21172 |
| -0.24907 | 4.92E-08 | -0.45741 | 1.59E-25 | 0.00553  | 0.90513 | 0.01867  | 0.68737  | 0.034817 |
| -0.15413 | 0.00083  | -0.38494 | 6.07E-18 | -0.02384 | 0.60741 | -0.09794 | 0.03436  | -0.0679  |
| -0.18335 | 6.73E-05 | -0.35483 | 2.66E-15 | -0.04687 | 0.31213 | -0.13794 | 0.00281  | -0.16138 |
| -0.09925 | 0.032    | -0.17249 | 0.00018  | -0.01254 | 0.78697 | -0.04148 | 0.37107  | -0.12958 |
| -0.08084 | 0.08095  | -0.28748 | 2.45E-10 | -0.04493 | 0.33268 | -0.133   | 0.00399  | -0.1103  |
| -0.13775 | 0.00285  | -0.16352 | 0.00039  | 0.018744 | 0.68621 | 0.018416 | 0.69141  | 0.023268 |
| 0.238899 | 1.74E-07 | 0.466925 | 1.16E-26 | -0.02088 | 0.65269 | -0.04723 | 0.3084   | 0.138048 |
| -0.24195 | 1.20E-07 | -0.34485 | 1.74E-14 | -0.0827  | 0.07419 | -0.03831 | 0.40881  | -0.20363 |
| -0.00793 | 0.86437  | -0.30982 | 7.57E-12 | -0.04059 | 0.38143 | -0.10557 | 0.02251  | -0.10483 |
| -0.16144 | 0.00046  | -0.18162 | 7.91E-05 | 0.020834 | 0.65338 | -0.02632 | 0.57046  | 0.009636 |
| -0.12378 | 0.0074   | -0.32716 | 4.12E-13 | -0.02648 | 0.56815 | -0.15347 | 0.00088  | -0.17621 |
| -0.26739 | 4.35E-09 | -0.15507 | 0.00077  | -0.06985 | 0.13172 | -0.07713 | 0.09595  | -0.04828 |
| -0.26628 | 5.07E-09 | -0.36006 | 9.67E-16 | -0.01135 | 0.80676 | -0.03568 | 0.44179  | -0.04577 |
| -0.1311  | 0.00454  | 0.076508 | 0.09867  | 0.019654 | 0.67183 | 0.090489 | 0.05067  | 0.103916 |
| 0.013    | 0.77933  | 0.276035 | 1.30E-09 | 0.045849 | 0.32283 | 0.212178 | 3.73E-06 | 0.112089 |
| -0.02032 | 0.66145  | -0.04503 | 0.33152  | -0.0266  | 0.56641 | -0.0058  | 0.90059  | -0.10792 |
| -0.08323 | 0.07233  | -0.04419 | 0.34062  | 0.00539  | 0.90751 | 0.029033 | 0.5314   | -0.05769 |
| -0.24829 | 5.43E-08 | -0.43419 | 6.81E-23 | -0.06773 | 0.14389 | -0.11008 | 0.01733  | -0.21943 |
| -0.07523 | 0.10442  | -0.10529 | 0.02287  | 0.036613 | 0.4299  | 0.056657 | 0.22168  | -0.01038 |
| -0.00807 | 0.86196  | -0.2543  | 2.51E-08 | 0.026077 | 0.57404 | 0.019395 | 0.67591  | 0.033221 |
| -0.05484 | 0.23685  | -0.02619 | 0.57244  | 0.056549 | 0.22257 | 0.212868 | 3.47E-06 | -0.04055 |
| -0.15054 | 0.0011   | -0.2402  | 1.49E-07 | -0.02965 | 0.52265 | -0.01713 | 0.7119   | -0.00883 |
| -0.12502 | 0.00683  | -0.35071 | 5.81E-15 | -0.04022 | 0.38582 | -0.1316  | 0.00439  | -0.14769 |
| 0.093417 | 0.04362  | -0.12603 | 0.00639  | -0.0252  | 0.58696 | -0.11414 | 0.01359  | -0.09002 |
| 0.297806 | 5.10E-11 | 0.050655 | 0.27465  | -0.04312 | 0.35247 | -0.11959 | 0.00969  | -0.01003 |
| -0.05932 | 0.20066  | -0.37185 | 9.24E-17 | -0.04072 | 0.37991 | -0.1554  | 0.00075  | -0.09816 |
| -0.23219 | 3.90E-07 | -0.13081 | 0.00463  | -0.03448 | 0.45729 | -0.00804 | 0.86241  | -0.11314 |
| -0.18511 | 5.71E-05 | -0.10851 | 0.019    | -0.02    | 0.66641 | 0.002656 | 0.95435  | -0.09415 |
| -0.1866  | 4.97E-05 | -0.1136  | 0.01404  | -0.01403 | 0.76239 | -0.01002 | 0.82905  | -0.10591 |
| -0.24828 | 5.44E-08 | -0.37983 | 1.78E-17 | -0.01284 | 0.78193 | -0.03316 | 0.47463  | -0.26024 |
| -0.05393 | 0.24476  | 0.022894 | 0.62168  | -0.00717 | 0.87713 | 0.018825 | 0.68492  | 0.019339 |
| -0.30149 | 2.87E-11 | -0.20618 | 7.05E-06 | -0.03197 | 0.49064 | 0.020552 | 0.65778  | -0.11647 |
| -0.15725 | 0.00065  | -0.14696 | 0.00145  | -0.03182 | 0.49272 | -0.00915 | 0.84374  | -0.05287 |
| -0.0476  | 0.30463  | -0.10611 | 0.02183  | -0.02268 | 0.62486 | -0.0177  | 0.70286  | -0.02191 |
| -0.30036 | 3.42E-11 | -0.2886  | 2.08E-10 | -0.01244 | 0.78866 | 0.000138 | 0.99763  | -0.10789 |

|          |          |          |          |          |         |          |         |          |
|----------|----------|----------|----------|----------|---------|----------|---------|----------|
| 0.261452 | 9.76E-09 | 0.213267 | 3.32E-06 | 0.013958 | 0.76353 | 0.053267 | 0.25062 | -0.02868 |
| -0.09465 | 0.04091  | -0.05903 | 0.20289  | 0.016941 | 0.715   | 0.007818 | 0.86619 | 0.125592 |
| -0.12271 | 0.00794  | -0.11076 | 0.01664  | -0.03458 | 0.45598 | -0.01729 | 0.70946 | -0.03099 |
| -0.19292 | 2.70E-05 | -0.14709 | 0.00144  | -0.0306  | 0.50946 | -0.01281 | 0.78253 | -0.16617 |
| -0.34408 | 2.00E-14 | -0.28551 | 3.29E-10 | -0.0229  | 0.62159 | 0.008176 | 0.86012 | -0.05255 |
| -0.21374 | 3.15E-06 | -0.22137 | 1.36E-06 | -0.03093 | 0.50498 | -0.08619 | 0.06275 | -0.14489 |
| -0.29907 | 4.19E-11 | -0.19201 | 2.95E-05 | -0.00252 | 0.95662 | 0.045371 | 0.3279  | -0.06546 |
| -0.20536 | 7.69E-06 | -0.05155 | 0.26627  | 0.009097 | 0.84455 | 0.036665 | 0.42924 | -0.0379  |
| -0.19218 | 2.90E-05 | -0.32925 | 2.86E-13 | -0.02473 | 0.59392 | -0.04255 | 0.35894 | -0.08177 |
| -0.1741  | 0.00016  | -0.08603 | 0.06324  | -0.033   | 0.47682 | -0.01152 | 0.80398 | -0.10054 |
| -0.30146 | 2.88E-11 | -0.18991 | 3.62E-05 | -0.04893 | 0.29138 | -0.05926 | 0.20113 | -0.11826 |
| -0.26634 | 5.03E-09 | -0.2375  | 2.07E-07 | -0.00969 | 0.83464 | 0.01941  | 0.67568 | -0.06851 |
| -0.2901  | 1.66E-10 | -0.27511 | 1.48E-09 | -0.03366 | 0.46809 | -0.02129 | 0.64631 | -0.15164 |
| 0.000111 | 0.99809  | 0.266594 | 4.86E-09 | 0.01992  | 0.66765 | 0.035288 | 0.44679 | 0.086028 |
| -0.24791 | 5.70E-08 | -0.18353 | 6.62E-05 | -0.01204 | 0.79518 | -0.01881 | 0.68518 | -0.13052 |
| -0.28586 | 3.12E-10 | -0.02099 | 0.65096  | 0.029499 | 0.52484 | 0.087074 | 0.06008 | 0.186096 |
| -0.08417 | 0.06917  | -0.06445 | 0.16437  | -0.04395 | 0.34324 | -0.05056 | 0.27554 | -0.10911 |
| -0.23412 | 3.10E-07 | -0.15088 | 0.00107  | -0.03075 | 0.50735 | 0.006389 | 0.89048 | -0.18166 |
| -0.19141 | 3.13E-05 | -0.25233 | 3.24E-08 | -0.04317 | 0.35195 | -0.0267  | 0.56495 | -0.06479 |
| -0.12434 | 0.00714  | -0.29016 | 1.64E-10 | -0.03173 | 0.49395 | -0.12987 | 0.00494 | -0.10564 |
| -0.05942 | 0.19993  | -0.39071 | 1.76E-18 | -0.00325 | 0.94408 | -0.07949 | 0.08619 | -0.17277 |
| -0.32251 | 9.16E-13 | -0.18657 | 4.98E-05 | -0.03284 | 0.47896 | -0.01341 | 0.77248 | -0.0629  |
| -0.18309 | 6.90E-05 | -0.3045  | 1.78E-11 | -0.04898 | 0.29087 | -0.02127 | 0.64664 | -0.28108 |
| -0.17657 | 0.00013  | 0.029015 | 0.53167  | -0.02256 | 0.62684 | 0.012277 | 0.79131 | -0.09064 |
| -0.25261 | 3.13E-08 | -0.36194 | 6.69E-16 | 0.021138 | 0.64866 | 0.052942 | 0.25353 | 0.123184 |
| -0.2883  | 2.17E-10 | -0.30371 | 2.02E-11 | -0.04738 | 0.30692 | -0.06855 | 0.13909 | -0.16586 |
| -0.18177 | 7.80E-05 | -0.20139 | 1.16E-05 | -0.01809 | 0.69663 | -0.03332 | 0.4726  | -0.08296 |
| -0.11681 | 0.01153  | -0.12814 | 0.00555  | -0.01494 | 0.74744 | -0.02099 | 0.65103 | -0.05321 |
| -0.13253 | 0.00412  | -0.11671 | 0.01161  | 0.005936 | 0.89819 | -0.00369 | 0.93653 | 0.017554 |
| -0.14059 | 0.00232  | -0.20609 | 7.12E-06 | -0.00701 | 0.87984 | -0.0367  | 0.42885 | -0.12689 |
| 0.163264 | 0.0004   | 0.071296 | 0.12392  | -0.00973 | 0.83397 | -0.05963 | 0.19833 | -0.04078 |
| -0.19614 | 1.97E-05 | -0.18134 | 8.11E-05 | -0.02725 | 0.55688 | -0.07602 | 0.10084 | -0.10729 |
| -0.28453 | 3.79E-10 | -0.09817 | 0.03393  | -0.01912 | 0.68023 | 0.005237 | 0.91014 | -0.085   |
| -0.27942 | 8.00E-10 | -0.33221 | 1.70E-13 | -0.01707 | 0.71291 | -0.00278 | 0.9523  | -0.06249 |
| -0.08371 | 0.0707   | -0.18881 | 4.02E-05 | 0.00146  | 0.9749  | -0.04997 | 0.28123 | 0.022421 |
| -0.06033 | 0.19311  | -0.01871 | 0.68674  | -0.0204  | 0.66021 | 0.006869 | 0.88231 | -0.04337 |
| -0.18708 | 4.74E-05 | -0.15598 | 0.00072  | -0.05216 | 0.26064 | -0.11379 | 0.01387 | -0.19665 |
| -0.14265 | 0.002    | -0.08281 | 0.0738   | -0.01465 | 0.75212 | -0.02276 | 0.62374 | -0.12503 |
| -0.1361  | 0.00321  | -0.28759 | 2.41E-10 | -0.01384 | 0.76551 | -0.09519 | 0.03976 | -0.09135 |
| 0.06909  | 0.13601  | -0.03868 | 0.40429  | -0.01926 | 0.67803 | -0.03115 | 0.50185 | -0.06568 |
| 0.144013 | 0.00181  | -0.2435  | 9.91E-08 | -0.00274 | 0.95291 | -0.11145 | 0.01598 | -0.04054 |
| -0.24022 | 1.49E-07 | -0.32523 | 5.75E-13 | -0.01677 | 0.71777 | -0.09328 | 0.04392 | -0.04158 |
| 0.013946 | 0.76374  | 0.156794 | 0.00067  | 0.119528 | 0.00973 | 0.178546 | 0.0001  | 0.382444 |
| -0.13478 | 0.00352  | -0.1561  | 0.00071  | -0.06619 | 0.15328 | -0.00842 | 0.85599 | -0.09196 |
| -0.18485 | 5.86E-05 | 0.028144 | 0.54405  | 0.003711 | 0.93625 | 0.059809 | 0.19699 | -0.01769 |



|          |          |          |          |          |         |          |          |          |
|----------|----------|----------|----------|----------|---------|----------|----------|----------|
| -0.07173 | 0.12163  | -0.04411 | 0.34155  | -0.04971 | 0.28367 | -0.08113 | 0.07986  | -0.13091 |
| -0.23086 | 4.56E-07 | -0.23749 | 2.07E-07 | -0.0354  | 0.44541 | 0.004768 | 0.91815  | -0.03533 |
| -0.21111 | 4.19E-06 | -0.21178 | 3.90E-06 | -0.04128 | 0.37338 | -0.09698 | 0.03617  | -0.16233 |
| -0.28704 | 2.62E-10 | -0.39777 | 3.73E-19 | -0.0704  | 0.12872 | -0.11553 | 0.01248  | -0.1313  |
| -0.23756 | 2.05E-07 | -0.15544 | 0.00075  | 0.009838 | 0.83208 | 0.10285  | 0.02625  | 0.090131 |
| -0.13728 | 0.00295  | -0.35132 | 5.18E-15 | -0.03944 | 0.39512 | -0.08646 | 0.06191  | -0.1525  |
| -0.21042 | 4.51E-06 | -0.37313 | 7.12E-17 | -0.03789 | 0.41402 | -0.0761  | 0.1005   | -0.12078 |
| 0.312981 | 4.51E-12 | 0.262924 | 8.00E-09 | -0.02979 | 0.52074 | -0.04161 | 0.36968  | 0.147165 |
| -0.20988 | 4.77E-06 | -0.19402 | 2.42E-05 | 0.063898 | 0.16803 | 0.084558 | 0.0679   | 0.056379 |
| -0.17751 | 0.00012  | -0.21058 | 4.43E-06 | -0.00694 | 0.8811  | -0.01064 | 0.81865  | -0.04122 |
| -0.25017 | 4.27E-08 | -0.27703 | 1.13E-09 | -0.03081 | 0.50664 | -0.01668 | 0.71918  | -0.12763 |
| -0.10295 | 0.02611  | -0.14806 | 0.00133  | 0.023281 | 0.61579 | 0.02194  | 0.63628  | 0.03878  |
| -0.31945 | 1.54E-12 | -0.40211 | 1.41E-19 | -0.05066 | 0.27458 | -0.07373 | 0.11154  | -0.1816  |
| -0.15725 | 0.00065  | -0.04702 | 0.31065  | -0.00904 | 0.84546 | 0.000314 | 0.99461  | -0.0374  |
| -0.28531 | 3.39E-10 | -0.35968 | 1.04E-15 | -0.05613 | 0.226   | -0.06617 | 0.15336  | -0.1673  |
| -0.30872 | 9.04E-12 | -0.30674 | 1.24E-11 | -0.00494 | 0.9152  | 0.160751 | 0.00049  | -0.04087 |
| -0.153   | 0.00091  | 0.112739 | 0.01479  | 0.039586 | 0.39338 | 0.046083 | 0.32036  | 0.000726 |
| -0.16687 | 0.00029  | -0.12085 | 0.00894  | -0.01109 | 0.81105 | -0.04422 | 0.3403   | -0.08496 |
| -0.23707 | 2.18E-07 | -0.1579  | 0.00062  | 0.01172  | 0.80058 | 0.058137 | 0.20983  | 0.001551 |
| 0.140937 | 0.00227  | 0.027236 | 0.55713  | 0.05056  | 0.27555 | 0.069044 | 0.13627  | -0.00512 |
| -0.12896 | 0.00525  | -0.04187 | 0.36666  | 0.010424 | 0.82224 | 0.027452 | 0.55402  | 0.000338 |
| 0.18473  | 5.92E-05 | 0.016142 | 0.7279   | -0.03468 | 0.45467 | -0.12195 | 0.00834  | -0.08706 |
| -0.29561 | 7.16E-11 | -0.20983 | 4.80E-06 | -0.01246 | 0.78824 | -0.04267 | 0.35752  | -0.09447 |
| -0.11599 | 0.01213  | 0.021623 | 0.64116  | -0.04016 | 0.3865  | -0.03264 | 0.48159  | 0.00943  |
| 0.041166 | 0.37476  | -0.00991 | 0.83095  | -0.04778 | 0.30279 | -0.03679 | 0.42768  | -0.0208  |
| -0.10849 | 0.01902  | -0.00298 | 0.94884  | -0.01261 | 0.78585 | 0.009082 | 0.84481  | -0.08442 |
| -0.07257 | 0.11734  | -0.06622 | 0.15305  | -0.0819  | 0.07704 | -0.14193 | 0.00211  | -0.19281 |
| -0.16706 | 0.00029  | -0.22909 | 5.61E-07 | -0.00517 | 0.91124 | 0.048341 | 0.2972   | -0.02355 |
| -0.2302  | 4.93E-07 | -0.19809 | 1.62E-05 | -0.05067 | 0.2745  | -0.01311 | 0.77754  | 0.0015   |
| 0.369306 | 1.55E-16 | 0.213615 | 3.20E-06 | -0.07901 | 0.08809 | -0.18115 | 8.26E-05 | -0.0117  |
| -0.26633 | 5.04E-09 | -0.41037 | 2.14E-20 | -0.04225 | 0.36225 | -0.0808  | 0.08113  | -0.16392 |
| -0.21392 | 3.09E-06 | -0.2865  | 2.84E-10 | 0.056269 | 0.22487 | 0.003555 | 0.93892  | -0.05927 |
| -0.22833 | 6.13E-07 | -0.1589  | 0.00057  | -0.06825 | 0.14083 | -0.07947 | 0.08627  | -0.16765 |
| -0.0554  | 0.23213  | 0.01084  | 0.81527  | -0.01332 | 0.77404 | 0.057857 | 0.21203  | -0.02826 |
| -0.41604 | 5.68E-21 | -0.41952 | 2.48E-21 | -0.032   | 0.49023 | -0.0395  | 0.39435  | -0.07432 |
| -0.07031 | 0.12918  | -0.19708 | 1.79E-05 | 0.020223 | 0.66291 | -0.02398 | 0.6052   | -0.00599 |
| -0.09158 | 0.04794  | -0.24329 | 1.02E-07 | -0.04219 | 0.36304 | -0.09256 | 0.04559  | -0.09021 |
| 0.297754 | 5.14E-11 | 0.106934 | 0.02082  | 0.005835 | 0.89992 | -0.04912 | 0.28942  | -0.01411 |
| 0.324036 | 7.06E-13 | 0.28841  | 2.13E-10 | 0.06303  | 0.1739  | 0.097213 | 0.03572  | 0.192193 |
| 0.275832 | 1.34E-09 | 0.167363 | 0.00028  | -0.01986 | 0.66857 | -0.10798 | 0.0196   | 0.127624 |
| -0.02761 | 0.55177  | -0.03242 | 0.48462  | -0.00757 | 0.87037 | 0.025011 | 0.5898   | -0.01259 |
| -0.34009 | 4.15E-14 | -0.29481 | 8.10E-11 | -0.08686 | 0.0607  | -0.03598 | 0.4379   | -0.10164 |
| -0.06956 | 0.13338  | 0.076555 | 0.09846  | -0.02586 | 0.57721 | 0.031824 | 0.49268  | -0.03108 |
| -0.09352 | 0.04339  | -0.1319  | 0.0043   | -0.0636  | 0.17003 | -0.11583 | 0.01225  | -0.11077 |
| -0.04787 | 0.30189  | -0.24878 | 5.11E-08 | -0.00075 | 0.98707 | -0.11766 | 0.01094  | -0.0516  |

|          |          |          |          |          |         |          |         |          |
|----------|----------|----------|----------|----------|---------|----------|---------|----------|
| -0.22651 | 7.56E-07 | -0.24031 | 1.47E-07 | 0.045822 | 0.32311 | 0.040216 | 0.38589 | 0.103288 |
| -0.03967 | 0.39242  | -0.22897 | 5.69E-07 | 0.014379 | 0.75662 | -0.04458 | 0.33642 | -0.02946 |
| -0.1917  | 3.04E-05 | -0.13794 | 0.00282  | 0.032991 | 0.47695 | 0.105797 | 0.02222 | 0.0269   |
| -0.16747 | 0.00028  | -0.22735 | 6.87E-07 | -0.03028 | 0.51385 | -0.01722 | 0.71059 | -0.06544 |
| -0.08447 | 0.06819  | -0.14801 | 0.00134  | -0.00696 | 0.88068 | -0.07239 | 0.11825 | -0.05955 |
| -0.16326 | 0.0004   | -0.06312 | 0.1733   | 0.01124  | 0.80859 | 0.088071 | 0.05719 | 0.027647 |
| -0.29383 | 9.41E-11 | -0.52008 | 1.01E-33 | -0.07174 | 0.12157 | -0.12323 | 0.00767 | -0.1578  |
| -0.17904 | 0.0001   | -0.23684 | 2.24E-07 | -0.04428 | 0.33973 | -0.05429 | 0.24166 | -0.1583  |
| -0.23491 | 2.82E-07 | -0.29531 | 7.50E-11 | -0.04434 | 0.33905 | -0.04976 | 0.28322 | -0.1333  |
| -0.14175 | 0.00214  | -0.23606 | 2.46E-07 | -0.01978 | 0.6699  | -0.07712 | 0.09598 | -0.07072 |
| -0.03971 | 0.39189  | -0.29702 | 5.76E-11 | -0.00501 | 0.91394 | -0.03846 | 0.40698 | -0.13747 |
| -0.15378 | 0.00086  | -0.17793 | 0.00011  | -0.02268 | 0.62495 | 0.098058 | 0.03413 | -0.24809 |
| -0.20879 | 5.36E-06 | 0.096997 | 0.03613  | 0.087311 | 0.05938 | 0.168974 | 0.00024 | 0.111719 |
| -0.13169 | 0.00436  | -0.08284 | 0.07369  | -0.00897 | 0.84668 | 0.04669  | 0.31402 | 0.039523 |
| 0.13882  | 0.00264  | 0.069466 | 0.13388  | -0.0427  | 0.35717 | -0.03013 | 0.51598 | -0.05292 |
| -0.21882 | 1.81E-06 | -0.16813 | 0.00026  | 0.004649 | 0.92018 | 0.03131  | 0.4997  | -0.06769 |
| -0.16587 | 0.00032  | -0.18508 | 5.73E-05 | -0.00161 | 0.97239 | 0.032254 | 0.48686 | -0.12378 |
| -0.17346 | 0.00017  | -0.21973 | 1.63E-06 | -0.04034 | 0.38437 | -0.04424 | 0.34009 | -0.13847 |
| -0.10649 | 0.02136  | -0.15549 | 0.00075  | -0.01716 | 0.71143 | -0.0205  | 0.65853 | -0.05116 |
| -0.09833 | 0.03363  | -0.22448 | 9.54E-07 | -0.02902 | 0.53164 | -0.06565 | 0.15665 | -0.03803 |
| -0.04358 | 0.34735  | -0.30345 | 2.10E-11 | -0.08394 | 0.06994 | -0.17639 | 0.00013 | -0.17432 |
| -0.15151 | 0.00102  | -0.16413 | 0.00037  | -0.00911 | 0.84437 | 0.026984 | 0.56079 | 0.03756  |
| -0.03389 | 0.46497  | 0.108579 | 0.01892  | -0.05338 | 0.2496  | -0.08856 | 0.05582 | -0.10877 |
| -0.06284 | 0.17517  | 0.040918 | 0.37765  | 0.024672 | 0.59485 | 0.014736 | 0.75077 | 0.040274 |
| -0.0632  | 0.17272  | -0.29634 | 6.39E-11 | -0.00133 | 0.97714 | -0.02265 | 0.62542 | 0.0033   |
| -0.23427 | 3.05E-07 | -0.16904 | 0.00024  | -0.00291 | 0.95004 | 0.000619 | 0.98936 | -0.08253 |
| -0.15146 | 0.00103  | -0.08633 | 0.0623   | -0.03217 | 0.48794 | -0.03382 | 0.46593 | -0.00825 |
| -0.01503 | 0.74604  | -0.29303 | 1.06E-10 | -0.00636 | 0.89091 | -0.06397 | 0.16756 | -0.09887 |
| -0.22144 | 1.35E-06 | -0.217   | 2.21E-06 | -0.00018 | 0.99699 | -0.00756 | 0.87061 | -0.06563 |
| -0.23968 | 1.59E-07 | -0.24405 | 9.26E-08 | -0.06763 | 0.14451 | -0.04855 | 0.29512 | -0.13332 |
| -0.08066 | 0.08164  | -0.27678 | 1.17E-09 | -0.0099  | 0.83112 | -0.08102 | 0.08029 | 7.60E-05 |
| -0.2845  | 3.82E-10 | -0.2526  | 3.13E-08 | -0.04538 | 0.32782 | -0.0989  | 0.03261 | -0.08687 |
| -0.26245 | 8.53E-09 | -0.35257 | 4.09E-15 | -0.05984 | 0.19672 | -0.11228 | 0.0152  | -0.14968 |
| -0.22012 | 1.56E-06 | -0.22096 | 1.42E-06 | -0.00245 | 0.95792 | 0.048179 | 0.29882 | 0.140301 |
| -0.21883 | 1.80E-06 | -0.08841 | 0.05624  | -0.02253 | 0.62727 | 0.023697 | 0.60949 | -0.03617 |
| -0.16338 | 0.00039  | -0.05846 | 0.2073   | -0.03979 | 0.39096 | -0.00206 | 0.96451 | -0.07979 |
| -0.23874 | 1.78E-07 | -0.48046 | 2.41E-28 | -0.03805 | 0.41201 | -0.05663 | 0.22194 | -0.1662  |
| -0.35251 | 4.14E-15 | -0.33723 | 6.97E-14 | -0.0532  | 0.25123 | -0.04071 | 0.38002 | -0.16095 |
| -0.33201 | 1.77E-13 | -0.2305  | 4.76E-07 | -0.00259 | 0.9555  | 0.039428 | 0.39528 | -0.06031 |
| -0.13926 | 0.00256  | -0.20935 | 5.05E-06 | 0.038373 | 0.40804 | 0.022778 | 0.62345 | -0.00145 |
| 0.38833  | 2.94E-18 | 0.25852  | 1.44E-08 | 0.034846 | 0.45251 | 0.017588 | 0.70462 | -0.02112 |
| -0.039   | 0.40039  | -0.0715  | 0.12285  | -0.05658 | 0.2223  | -0.0341  | 0.46227 | -0.17496 |
| -0.20405 | 8.80E-06 | -0.05571 | 0.22953  | -0.09708 | 0.03597 | -0.04338 | 0.3496  | -0.14302 |
| -0.1192  | 0.00993  | -0.15231 | 0.00096  | -0.01738 | 0.70799 | -0.03477 | 0.45355 | -0.14649 |
| -0.25194 | 3.41E-08 | -0.22615 | 7.89E-07 | -0.02001 | 0.66623 | -0.00643 | 0.88977 | -0.0827  |

|          |          |          |          |          |         |          |          |          |
|----------|----------|----------|----------|----------|---------|----------|----------|----------|
| 0.075973 | 0.10106  | 0.128451 | 0.00544  | 0.0279   | 0.54755 | 0.1071   | 0.02062  | 0.065532 |
| -0.23197 | 4.00E-07 | -0.35736 | 1.63E-15 | -0.0646  | 0.16339 | -0.05757 | 0.21435  | -0.19973 |
| 0.073683 | 0.11179  | 0.107041 | 0.02069  | 0.013315 | 0.77413 | 0.03682  | 0.4273   | 0.036058 |
| -0.08774 | 0.05813  | -0.06195 | 0.18143  | -0.01086 | 0.815   | 0.022026 | 0.63495  | -0.12758 |
| -0.23766 | 2.03E-07 | -0.18589 | 5.31E-05 | 0.007362 | 0.87394 | 0.009589 | 0.83628  | -0.01698 |
| -0.19623 | 1.95E-05 | -0.25384 | 2.66E-08 | -0.03547 | 0.4444  | -0.09286 | 0.04489  | -0.15452 |
| 0.346933 | 1.18E-14 | 0.460947 | 6.06E-26 | 0.023541 | 0.61185 | 0.062356 | 0.17855  | 0.010734 |
| 0.325552 | 5.44E-13 | 0.081482 | 0.07857  | -0.07421 | 0.10924 | -0.12558 | 0.00658  | -0.07019 |
| -0.14883 | 0.00126  | -0.16913 | 0.00024  | 0.031966 | 0.49075 | 0.09899  | 0.03246  | -0.03333 |
| -0.09829 | 0.03371  | -0.11847 | 0.0104   | -0.01678 | 0.71767 | -0.03573 | 0.44109  | -0.08846 |
| -0.11059 | 0.01681  | -0.18954 | 3.75E-05 | -0.02869 | 0.53625 | -0.06259 | 0.17692  | -0.15191 |
| 0.060689 | 0.19047  | 0.110692 | 0.01671  | -0.04941 | 0.28666 | -0.06703 | 0.14808  | 0.000599 |
| -0.10588 | 0.02212  | 0.004527 | 0.92227  | 0.004817 | 0.91732 | 0.066043 | 0.15418  | -0.03666 |
| -0.22538 | 8.61E-07 | -0.08847 | 0.05607  | 0.040662 | 0.38063 | 0.110856 | 0.01655  | 0.078921 |
| -0.31843 | 1.83E-12 | -0.30964 | 7.80E-12 | -0.01742 | 0.70738 | -0.00702 | 0.87982  | -0.12277 |
| 0.259848 | 1.21E-08 | -0.02891 | 0.53321  | -0.05845 | 0.20741 | -0.10932 | 0.01812  | -0.1018  |
| 0.062321 | 0.1788   | -0.01415 | 0.76032  | -0.01575 | 0.7342  | -0.01612 | 0.7282   | 0.026907 |
| -0.26052 | 1.11E-08 | -0.14039 | 0.00236  | -0.03505 | 0.44985 | 0.00114  | 0.98039  | -0.05926 |
| -0.12368 | 0.00745  | -0.2779  | 9.95E-10 | -0.066   | 0.15444 | -0.11971 | 0.00961  | -0.16147 |
| -0.23349 | 3.34E-07 | -0.2829  | 4.83E-10 | -0.02084 | 0.65324 | -0.02774 | 0.54984  | -0.00859 |
| -0.13924 | 0.00256  | -0.29146 | 1.35E-10 | -0.02771 | 0.55031 | -0.02892 | 0.53302  | -0.05516 |
| -0.13833 | 0.00274  | -0.13857 | 0.00269  | -0.01106 | 0.81153 | -0.00087 | 0.9851   | -0.00668 |
| -0.217   | 2.21E-06 | -0.02707 | 0.55957  | 0.119889 | 0.00951 | 0.363983 | 4.47E-16 | 0.188418 |
| -0.16281 | 0.00041  | -0.03869 | 0.40419  | 0.011409 | 0.80576 | -0.05609 | 0.22632  | 0.052302 |
| 0.040024 | 0.38816  | 0.425778 | 5.47E-22 | 0.039214 | 0.39784 | 0.048943 | 0.29121  | 0.113328 |
| -0.16451 | 0.00036  | -0.15709 | 0.00066  | -0.08856 | 0.05582 | -0.13542 | 0.00337  | -0.17886 |
| -0.06898 | 0.13663  | 0.096152 | 0.03779  | 0.02279  | 0.62326 | 0.07426  | 0.109    | 0.081949 |
| -0.08685 | 0.06075  | -0.1666  | 0.0003   | -0.04236 | 0.36101 | -0.06981 | 0.13197  | -0.27981 |
| -0.13912 | 0.00259  | -0.07125 | 0.12416  | -0.00794 | 0.86405 | 0.044766 | 0.3344   | -0.00228 |
| -0.0895  | 0.05326  | -0.30034 | 3.43E-11 | -0.0409  | 0.37791 | -0.07463 | 0.10726  | -0.14474 |
| 0.112567 | 0.01494  | 0.134364 | 0.00363  | 0.03374  | 0.46699 | 0.070142 | 0.13013  | 0.133402 |
| -0.33663 | 7.76E-14 | -0.28107 | 6.30E-10 | -0.03461 | 0.45561 | -0.00051 | 0.99121  | -0.02861 |
| -0.16629 | 0.00031  | -0.28954 | 1.80E-10 | -0.00831 | 0.85791 | -0.03195 | 0.49091  | -0.06587 |
| -0.20094 | 1.21E-05 | -0.34176 | 3.07E-14 | -0.03141 | 0.49831 | -0.068   | 0.1423   | -0.09231 |
| -0.14113 | 0.00224  | -0.23955 | 1.61E-07 | -0.03544 | 0.44484 | -0.11634 | 0.01187  | -0.11687 |
| -0.18464 | 5.97E-05 | -0.31317 | 4.38E-12 | -0.02705 | 0.5599  | -0.07086 | 0.12623  | -0.13312 |
| -0.28713 | 2.59E-10 | -0.2409  | 1.37E-07 | -0.0289  | 0.53329 | 0.006117 | 0.89511  | -0.13889 |
| -0.16709 | 0.00029  | -0.05928 | 0.20102  | -0.00556 | 0.90458 | 0.022608 | 0.62604  | -0.02745 |
| -0.07839 | 0.09063  | -0.20148 | 1.15E-05 | -0.02431 | 0.6002  | -0.07831 | 0.09098  | -0.1112  |
| -0.02362 | 0.61069  | 0.022682 | 0.62491  | 0.030546 | 0.51022 | 0.092877 | 0.04485  | 0.175186 |
| -0.17503 | 0.00014  | -0.16259 | 0.00042  | -0.0136  | 0.76947 | -0.03784 | 0.41466  | -0.10447 |
| -0.41529 | 6.77E-21 | -0.4611  | 5.81E-26 | -0.03911 | 0.39913 | 0.011978 | 0.79628  | -0.06534 |
| -0.25989 | 1.20E-08 | -0.22767 | 6.62E-07 | -0.0294  | 0.52621 | -0.04338 | 0.34956  | -0.03936 |
| -0.12364 | 0.00747  | -0.03848 | 0.40674  | -0.01178 | 0.79952 | 0.016927 | 0.71523  | -0.04884 |
| -0.14945 | 0.0012   | -0.13703 | 0.003    | -0.02961 | 0.52321 | -0.01075 | 0.81674  | -0.10718 |

|          |          |          |          |          |         |          |          |          |
|----------|----------|----------|----------|----------|---------|----------|----------|----------|
| -0.17382 | 0.00016  | -0.08528 | 0.06558  | -0.04393 | 0.34353 | 0.029383 | 0.52646  | -0.02336 |
| -0.20787 | 5.91E-06 | -0.01129 | 0.8077   | 0.027952 | 0.54681 | 0.159257 | 0.00055  | 0.008603 |
| 0.003024 | 0.94804  | -0.11671 | 0.0116   | -0.00982 | 0.83232 | -0.04846 | 0.29597  | -0.03078 |
| -0.15712 | 0.00066  | -0.18154 | 7.97E-05 | 0.054814 | 0.2371  | 0.176446 | 0.00013  | 0.118789 |
| -0.13202 | 0.00426  | -0.22159 | 1.33E-06 | 0.00785  | 0.86565 | 0.088419 | 0.05622  | -0.01708 |
| 0.23582  | 2.53E-07 | 0.15228  | 0.00096  | 0.012398 | 0.7893  | -0.00934 | 0.84048  | 0.143716 |
| -0.21105 | 4.21E-06 | -0.3174  | 2.17E-12 | -0.02656 | 0.56699 | -0.06677 | 0.14969  | -0.08661 |
| 0.144442 | 0.00175  | -0.05717 | 0.21755  | -0.02896 | 0.53241 | -0.17325 | 0.00017  | -0.05911 |
| -0.21853 | 1.86E-06 | -0.28232 | 5.25E-10 | -0.02609 | 0.57379 | 0.012073 | 0.7947   | -0.08824 |
| -0.19075 | 3.34E-05 | -0.26644 | 4.97E-09 | -0.05944 | 0.19975 | -0.11276 | 0.01477  | -0.10822 |
| -0.22672 | 7.38E-07 | -0.068   | 0.14229  | -0.02947 | 0.52529 | 0.033253 | 0.47344  | -0.05696 |
| -0.10026 | 0.0303   | -0.22201 | 1.26E-06 | -0.01624 | 0.72625 | -0.01163 | 0.80204  | -0.02658 |
| -0.20318 | 9.63E-06 | -0.16836 | 0.00026  | -0.0309  | 0.50528 | -0.06593 | 0.15486  | -0.14168 |
| -0.16151 | 0.00046  | -0.18523 | 5.65E-05 | 0.009065 | 0.8451  | 0.028869 | 0.53373  | -0.02773 |
| -0.21991 | 1.60E-06 | -0.10085 | 0.02933  | 0.008015 | 0.86286 | 0.032852 | 0.47881  | -0.06827 |
| -0.14449 | 0.00174  | 0.032073 | 0.4893   | -0.01499 | 0.74662 | -0.07397 | 0.11042  | 0.012539 |
| -0.04407 | 0.34199  | 0.125199 | 0.00675  | -0.01324 | 0.77536 | -0.01317 | 0.77659  | -0.09019 |
| -0.09099 | 0.0494   | -0.19757 | 1.70E-05 | 0.003045 | 0.94768 | -0.00957 | 0.83655  | 0.071506 |
| 0.152884 | 0.00092  | 0.203193 | 9.62E-06 | 0.030064 | 0.51693 | 0.043438 | 0.34895  | 0.036986 |
| 0.217261 | 2.15E-06 | 0.372545 | 8.02E-17 | 0.020184 | 0.66352 | -0.07512 | 0.10497  | 0.173249 |
| -0.31442 | 3.56E-12 | -0.22177 | 1.30E-06 | 0.0041   | 0.92959 | 0.064314 | 0.16528  | -0.09109 |
| -0.23106 | 4.46E-07 | -0.25318 | 2.90E-08 | -0.02545 | 0.58322 | -0.10197 | 0.02757  | -0.11441 |
| -0.13241 | 0.00415  | -0.14656 | 0.00149  | 0.043153 | 0.35212 | 0.125832 | 0.00647  | 0.008484 |
| -0.0014  | 0.97598  | -0.14898 | 0.00124  | 0.010983 | 0.81287 | -0.07358 | 0.1123   | -0.03693 |
| -0.15824 | 0.0006   | -0.27172 | 2.39E-09 | -0.00835 | 0.8571  | -0.06874 | 0.13798  | -0.08639 |
| -0.12334 | 0.00762  | -0.23167 | 4.15E-07 | -0.04459 | 0.33628 | -0.09028 | 0.0512   | -0.14681 |
| -0.0922  | 0.04644  | -0.22968 | 5.24E-07 | -0.04432 | 0.33928 | -0.12825 | 0.00551  | -0.10916 |
| -0.00541 | 0.90714  | -0.12814 | 0.00555  | -0.00312 | 0.94637 | -0.04664 | 0.31457  | -0.03511 |
| -0.20725 | 6.31E-06 | -0.13348 | 0.00385  | 0.149516 | 0.00119 | 0.258038 | 1.54E-08 | 0.263493 |
| -0.18258 | 7.24E-05 | -0.43185 | 1.22E-22 | -0.04233 | 0.3614  | -0.01782 | 0.70086  | -0.15915 |
| -0.21937 | 1.70E-06 | -0.24096 | 1.36E-07 | 0.003803 | 0.93468 | 0.004814 | 0.91737  | -0.0837  |
| -0.25507 | 2.27E-08 | -0.0894  | 0.05353  | -0.04417 | 0.3409  | 0.02638  | 0.56959  | -0.00814 |
| -0.03098 | 0.50421  | 0.127991 | 0.00561  | -0.02485 | 0.5922  | -0.02889 | 0.53338  | -0.05511 |
| -0.25022 | 4.25E-08 | -0.27332 | 1.91E-09 | 0.004857 | 0.91663 | 0.005404 | 0.90729  | -0.09746 |
| -0.06622 | 0.15306  | -0.00399 | 0.93142  | 0.006762 | 0.88413 | -0.04472 | 0.33494  | 0.081594 |
| -0.18091 | 8.44E-05 | -0.46064 | 6.60E-26 | -0.05807 | 0.21033 | -0.08901 | 0.05458  | -0.18903 |
| -0.14976 | 0.00117  | -0.23842 | 1.85E-07 | -0.06669 | 0.1502  | -0.09269 | 0.04529  | -0.22853 |
| -0.17874 | 0.0001   | -0.26335 | 7.56E-09 | -0.09778 | 0.03464 | -0.09994 | 0.03083  | -0.16264 |
| -0.22514 | 8.85E-07 | -0.28043 | 6.91E-10 | -0.03092 | 0.50511 | -0.04307 | 0.353    | -0.10761 |
| -0.22609 | 7.94E-07 | -0.07653 | 0.09856  | -0.06364 | 0.16979 | -0.12703 | 0.00598  | -0.11471 |
| -0.14361 | 0.00186  | -0.26919 | 3.40E-09 | 0.022722 | 0.6243  | 0.028608 | 0.53744  | 0.179631 |
| 0.120768 | 0.00899  | 0.21464  | 2.86E-06 | 0.122995 | 0.00779 | 0.086228 | 0.06262  | 0.324129 |
| -0.14525 | 0.00165  | -0.45124 | 8.34E-25 | 0.006235 | 0.89311 | -0.09005 | 0.05181  | -0.10265 |
| -0.21226 | 3.70E-06 | -0.19317 | 2.64E-05 | 0.032524 | 0.48321 | 0.119475 | 0.00976  | 0.117363 |
| -0.22214 | 1.25E-06 | -0.14439 | 0.00176  | 0.051063 | 0.27079 | 0.138552 | 0.00269  | 0.080583 |

|          |          |          |          |          |         |          |          |          |
|----------|----------|----------|----------|----------|---------|----------|----------|----------|
| -0.34258 | 2.64E-14 | -0.20823 | 5.69E-06 | 0.052448 | 0.25799 | 0.142829 | 0.00197  | 0.14304  |
| -0.23251 | 3.75E-07 | -0.1297  | 0.005    | 0.011487 | 0.80447 | 0.019918 | 0.66769  | -0.06565 |
| -0.22492 | 9.08E-07 | -0.26772 | 4.16E-09 | 0.069156 | 0.13563 | 0.216888 | 2.24E-06 | 0.180384 |
| 0.029822 | 0.52031  | -0.10225 | 0.02714  | 0.012297 | 0.79099 | 0.005876 | 0.89922  | -0.08918 |
| -0.15461 | 0.0008   | -0.03298 | 0.47714  | 0.026934 | 0.56151 | 0.116012 | 0.01211  | 0.042281 |
| -0.2208  | 1.45E-06 | -0.34944 | 7.38E-15 | -0.05139 | 0.26773 | -0.1125  | 0.015    | -0.14244 |
| -0.16708 | 0.00029  | -0.2742  | 1.69E-09 | -0.03274 | 0.48031 | -0.02803 | 0.54565  | -0.11082 |
| -0.23613 | 2.44E-07 | -0.10884 | 0.01864  | -0.03181 | 0.49285 | -0.00612 | 0.89507  | -0.09423 |
| -0.12345 | 0.00757  | -0.1834  | 6.70E-05 | -0.06318 | 0.17285 | -0.112   | 0.01546  | -0.11703 |
| -0.14836 | 0.0013   | -0.00774 | 0.86758  | -0.0497  | 0.28383 | 0.002382 | 0.95906  | -0.0493  |
| 0.033739 | 0.46701  | 0.141645 | 0.00215  | 0.034621 | 0.45544 | 0.143207 | 0.00192  | 0.135271 |
| -0.17691 | 0.00012  | 0.02572  | 0.5793   | -0.03656 | 0.43059 | -0.02747 | 0.55371  | -0.12553 |
| -0.10286 | 0.02623  | 0.044482 | 0.33747  | 0.081125 | 0.07989 | 0.165972 | 0.00032  | 0.129345 |
| -0.1217  | 0.00847  | -0.28527 | 3.40E-10 | -0.05301 | 0.25288 | -0.10741 | 0.02025  | -0.01675 |
| -0.26162 | 9.53E-09 | -0.33638 | 8.11E-14 | -0.06584 | 0.15543 | -0.11731 | 0.01118  | -0.18804 |
| -0.02643 | 0.56887  | -0.00847 | 0.85522  | -0.06289 | 0.17482 | -0.08524 | 0.06569  | -0.10557 |
| 0.054079 | 0.24346  | 0.069733 | 0.13239  | 0.03592  | 0.43869 | 0.042205 | 0.36281  | 0.09794  |
| -0.05577 | 0.229    | -0.23265 | 3.69E-07 | -0.06243 | 0.17806 | -0.03722 | 0.42229  | -0.21826 |
| -0.00441 | 0.92434  | -0.06657 | 0.15094  | -0.00938 | 0.83974 | -0.0185  | 0.69012  | 0.013268 |
| -0.11238 | 0.01511  | -0.4233  | 9.98E-22 | -0.02782 | 0.54874 | -0.1874  | 4.60E-05 | -0.17412 |
| 0.063815 | 0.16858  | -0.06708 | 0.14777  | 0.01212  | 0.79392 | -0.03538 | 0.44562  | 0.081331 |
| -0.27329 | 1.92E-09 | -0.2472  | 6.23E-08 | -0.0325  | 0.48356 | -0.03532 | 0.44634  | -0.11449 |
| -0.17962 | 9.50E-05 | -0.1596  | 0.00054  | -0.09406 | 0.04218 | -0.02995 | 0.51848  | -0.18085 |
| -0.26597 | 5.29E-09 | -0.31555 | 2.95E-12 | -0.03908 | 0.39946 | 0.044571 | 0.33651  | -0.17334 |
| -0.17965 | 9.48E-05 | -0.26168 | 9.46E-09 | -0.10056 | 0.02979 | -0.18215 | 7.53E-05 | -0.16761 |
| -0.05237 | 0.2587   | 0.030872 | 0.50572  | -0.0084  | 0.85627 | 0.058297 | 0.20858  | -0.00062 |
| -0.19024 | 3.50E-05 | -0.21116 | 4.16E-06 | -0.03369 | 0.46762 | 0.023665 | 0.60998  | -0.09024 |
| -0.19124 | 3.18E-05 | -0.0733  | 0.11369  | -0.00939 | 0.83957 | 0.084031 | 0.06964  | -0.07874 |
| -0.11039 | 0.01701  | 0.009351 | 0.84028  | -0.00257 | 0.95589 | 0.01816  | 0.69549  | -0.00836 |
| -0.19197 | 2.96E-05 | -0.4004  | 2.08E-19 | -0.04315 | 0.35211 | -0.17453 | 0.00015  | -0.14933 |
| -0.09752 | 0.03514  | -0.06554 | 0.15736  | -0.05828 | 0.20874 | -0.09752 | 0.03514  | -0.14823 |
| -0.11212 | 0.01535  | -0.41095 | 1.87E-20 | -0.01453 | 0.75418 | -0.03374 | 0.46695  | -0.07411 |
| -0.10701 | 0.02072  | -0.08658 | 0.06155  | -0.00764 | 0.86922 | -0.01603 | 0.72965  | -0.0239  |
| -0.20797 | 5.85E-06 | -0.13523 | 0.00341  | -0.05193 | 0.26275 | -0.04667 | 0.31425  | -0.16357 |
| -0.14333 | 0.0019   | -0.22022 | 1.55E-06 | -0.05417 | 0.24267 | -0.06852 | 0.13928  | -0.14868 |
| -0.101   | 0.02908  | -0.05368 | 0.24692  | 0.051823 | 0.26371 | 0.159848 | 0.00053  | 0.042675 |
| -0.21119 | 4.15E-06 | -0.06418 | 0.16616  | -0.01097 | 0.81303 | 0.037511 | 0.41867  | -0.09729 |
| 0.177869 | 0.00011  | 0.19092  | 3.28E-05 | 0.036701 | 0.4288  | 0.042052 | 0.36456  | 0.211494 |
| -0.15642 | 0.00069  | -0.08532 | 0.06543  | -0.00898 | 0.84661 | 0.022121 | 0.63349  | 0.022644 |
| 0.051333 | 0.26827  | -0.13654 | 0.00311  | -0.00997 | 0.82985 | -0.07524 | 0.10442  | -0.01293 |
| -0.23812 | 1.92E-07 | -0.32951 | 2.74E-13 | -0.08577 | 0.06404 | -0.06565 | 0.15663  | -0.11756 |
| -0.23119 | 4.39E-07 | -0.10531 | 0.02284  | -0.10995 | 0.01746 | -0.05517 | 0.23406  | -0.26081 |
| -0.19134 | 3.15E-05 | -0.24668 | 6.66E-08 | 0.064084 | 0.16679 | 0.134346 | 0.00363  | 0.115236 |
| -0.15599 | 0.00072  | -0.09452 | 0.04117  | -0.00081 | 0.986   | 0.012027 | 0.79547  | -0.07052 |
| 0.100217 | 0.03036  | 0.022676 | 0.62499  | -0.01219 | 0.79271 | -0.10491 | 0.02337  | -0.02396 |

|          |          |          |          |          |         |           |          |          |
|----------|----------|----------|----------|----------|---------|-----------|----------|----------|
| -0.27298 | 2.00E-09 | -0.1392  | 0.00257  | -0.01708 | 0.71278 | 0.016186  | 0.72719  | -0.07747 |
| -0.27955 | 7.85E-10 | -0.174   | 0.00016  | -0.01834 | 0.69255 | 0.043953  | 0.34325  | -0.14185 |
| -0.03449 | 0.45718  | -0.03651 | 0.43123  | 0.045491 | 0.32662 | 0.08864   | 0.0556   | 0.045584 |
| 0.251228 | 3.73E-08 | 0.485226 | 5.91E-29 | 0.050015 | 0.28076 | 0.0209    | 0.65235  | 0.087073 |
| 0.194238 | 2.37E-05 | -0.15669 | 0.00068  | -0.04085 | 0.37846 | -0.09081  | 0.04986  | -0.22224 |
| 0.034246 | 0.46034  | -0.06484 | 0.16185  | 0.021809 | 0.63828 | 0.044771  | 0.33434  | 0.113746 |
| -0.05956 | 0.19885  | 0.148033 | 0.00134  | -0.0278  | 0.54895 | 0.006232  | 0.89316  | -0.07419 |
| -0.23852 | 1.83E-07 | -0.35958 | 1.06E-15 | -0.02975 | 0.52135 | -0.05365  | 0.24727  | -0.14614 |
| 0.278292 | 9.41E-10 | -0.03306 | 0.47596  | 0.011763 | 0.79986 | -0.1047   | 0.02365  | 0.029256 |
| -0.17839 | 0.00011  | -0.14939 | 0.0012   | -0.02621 | 0.57214 | 0.008879  | 0.84823  | -0.06053 |
| -0.09962 | 0.03137  | -0.11308 | 0.01448  | -0.01957 | 0.67319 | -0.01996  | 0.66709  | -0.08395 |
| -0.1586  | 0.00058  | -0.19466 | 2.27E-05 | -0.01726 | 0.70995 | -0.03705  | 0.42436  | -0.0876  |
| -0.14288 | 0.00197  | -0.23359 | 3.30E-07 | 0.000848 | 0.98542 | -0.03203  | 0.48985  | -0.05396 |
| -0.27418 | 1.69E-09 | -0.23037 | 4.83E-07 | -0.00701 | 0.87983 | 0.000746  | 0.98717  | -0.11358 |
| -0.23974 | 1.57E-07 | -0.33832 | 5.72E-14 | 0.006979 | 0.88043 | 0.017136  | 0.71186  | 0.02333  |
| -0.16673 | 0.0003   | -0.09195 | 0.04705  | -0.01547 | 0.73881 | -0.02261  | 0.62598  | -0.10818 |
| -0.10649 | 0.02135  | -0.15532 | 0.00076  | -0.01724 | 0.7102  | -0.02446  | 0.59801  | -0.04536 |
| -0.20934 | 5.06E-06 | -0.29148 | 1.35E-10 | -0.03745 | 0.41945 | -0.06105  | 0.18785  | -0.17027 |
| -0.21824 | 1.92E-06 | -0.24544 | 7.78E-08 | -0.029   | 0.53182 | -0.04408  | 0.34187  | -0.12476 |
| -0.32457 | 6.44E-13 | -0.29962 | 3.85E-11 | -0.04125 | 0.37382 | -0.06317  | 0.17292  | -0.17941 |
| -0.11014 | 0.01727  | -0.15584 | 0.00073  | -0.03544 | 0.44487 | -0.04944  | 0.28631  | -0.14515 |
| 0.018346 | 0.69253  | -0.00781 | 0.86627  | 0.018827 | 0.68489 | -6.03E-05 | 0.99896  | -0.02052 |
| -0.28709 | 2.60E-10 | -0.215   | 2.75E-06 | -0.033   | 0.47688 | -0.01938  | 0.67618  | -0.1286  |
| -0.22659 | 7.50E-07 | -0.31246 | 4.92E-12 | -0.01233 | 0.79048 | -0.00231  | 0.96024  | -0.17771 |
| 0.09858  | 0.03319  | -0.06034 | 0.19307  | -0.03558 | 0.44307 | -0.17129  | 0.0002   | -0.14587 |
| -0.19686 | 1.83E-05 | -0.37924 | 2.02E-17 | -0.0325  | 0.48351 | -0.06313  | 0.1732   | -0.20314 |
| -0.25027 | 4.22E-08 | -0.21062 | 4.41E-06 | 0.00313  | 0.94622 | 0.031817  | 0.49277  | -0.04475 |
| -0.16708 | 0.00029  | -0.17844 | 0.00011  | -0.02755 | 0.55258 | -0.0298   | 0.52058  | -0.09421 |
| -0.12777 | 0.00569  | -0.18126 | 8.17E-05 | 0.008992 | 0.84633 | -0.01857  | 0.68894  | -0.02379 |
| -0.1932  | 2.63E-05 | -0.14987 | 0.00116  | -0.01916 | 0.67968 | 0.065043  | 0.16052  | -0.11538 |
| -0.14024 | 0.00239  | -0.28959 | 1.79E-10 | -0.0582  | 0.20931 | -0.13587  | 0.00326  | -0.12118 |
| -0.10118 | 0.02879  | -0.06069 | 0.19045  | -0.0618  | 0.18244 | -0.07776  | 0.09324  | -0.09861 |
| -0.1203  | 0.00926  | -0.09937 | 0.03179  | -0.03679 | 0.4277  | -0.02607  | 0.57419  | -0.08036 |
| 0.035753 | 0.44082  | 0.087635 | 0.05844  | 0.061248 | 0.18641 | 0.081632  | 0.07802  | 0.152405 |
| -0.21594 | 2.48E-06 | 0.063382 | 0.1715   | 0.017756 | 0.70193 | 0.178311  | 0.00011  | -0.02083 |
| -0.2183  | 1.91E-06 | -0.34429 | 1.92E-14 | -0.07505 | 0.10526 | -0.06     | 0.19556  | -0.12379 |
| -0.18563 | 5.44E-05 | -0.01425 | 0.75871  | 0.033573 | 0.4692  | 0.075378  | 0.10376  | -0.03277 |
| -0.11558 | 0.01244  | -0.12274 | 0.00792  | -0.05055 | 0.27561 | -0.04526  | 0.3291   | -0.05857 |
| -0.30451 | 1.78E-11 | -0.26234 | 8.66E-09 | 0.024281 | 0.60071 | 0.151767  | 0.001    | 0.041248 |
| -0.23568 | 2.58E-07 | -0.1808  | 8.53E-05 | 0.08182  | 0.07734 | 0.228053  | 6.33E-07 | 0.068505 |
| -0.13205 | 0.00426  | -0.03978 | 0.39109  | -0.01289 | 0.78109 | 0.024319  | 0.60013  | -0.04517 |
| -0.22417 | 9.89E-07 | -0.12529 | 0.00671  | -0.01521 | 0.74303 | 0.086794  | 0.06091  | -0.02277 |
| -0.23677 | 2.26E-07 | -0.19383 | 2.47E-05 | -0.04293 | 0.35457 | 0.041204  | 0.37432  | -0.12965 |
| -0.14576 | 0.00159  | -0.27458 | 1.60E-09 | 0.055878 | 0.22811 | 0.074374  | 0.10846  | 0.056829 |
| -0.16974 | 0.00023  | -0.18179 | 7.78E-05 | -0.05464 | 0.23863 | -0.10146  | 0.02836  | -0.15472 |

|          |          |          |          |          |         |          |          |          |
|----------|----------|----------|----------|----------|---------|----------|----------|----------|
| 0.146135 | 0.00154  | 0.155076 | 0.00077  | -0.00827 | 0.85852 | -0.04277 | 0.35647  | -0.10656 |
| -0.04856 | 0.295    | -0.23093 | 4.52E-07 | -0.03651 | 0.43117 | -0.131   | 0.00457  | -0.11243 |
| -0.11036 | 0.01704  | 0.039506 | 0.39434  | -0.01448 | 0.7549  | 0.106738 | 0.02105  | 0.072369 |
| 0.324639 | 6.36E-13 | 0.2182   | 1.93E-06 | 0.012495 | 0.7877  | -0.07643 | 0.09902  | 0.049731 |
| 0.085824 | 0.06387  | -0.14508 | 0.00167  | -0.06055 | 0.19152 | -0.12653 | 0.00618  | -0.22856 |
| -0.14672 | 0.00148  | -0.3473  | 1.10E-14 | -0.01753 | 0.70553 | -0.04752 | 0.3055   | -0.09155 |
| -0.2866  | 2.79E-10 | -0.16629 | 0.00031  | -0.05416 | 0.24277 | -0.0371  | 0.42383  | -0.10631 |
| -0.12623 | 0.0063   | -0.10007 | 0.03061  | -0.05476 | 0.23754 | -0.04646 | 0.31645  | -0.16213 |
| -0.03693 | 0.42596  | -0.17464 | 0.00015  | -0.02533 | 0.58504 | -0.08425 | 0.06892  | -0.05602 |
| -0.23877 | 1.77E-07 | -0.16796 | 0.00027  | 0.012406 | 0.78917 | 0.021877 | 0.63725  | -0.11187 |
| -0.03529 | 0.4468   | -0.14007 | 0.00242  | 0.068231 | 0.14096 | 0.246033 | 7.22E-08 | -0.08278 |
| 0.399651 | 2.46E-19 | 0.177371 | 0.00012  | -0.02784 | 0.54839 | -0.1122  | 0.01527  | -0.01016 |
| -0.07966 | 0.08551  | -0.17512 | 0.00014  | -0.01847 | 0.69058 | -0.05001 | 0.28081  | -0.13734 |
| -0.30898 | 8.68E-12 | -0.17063 | 0.00021  | 0.043237 | 0.35119 | 0.057698 | 0.21329  | 0.204351 |
| -0.07145 | 0.12308  | -0.31425 | 3.66E-12 | -0.03567 | 0.44183 | -0.05358 | 0.24786  | -0.0882  |
| -0.05    | 0.28086  | -0.22251 | 1.19E-06 | -0.07937 | 0.08666 | -0.14766 | 0.00137  | -0.12169 |
| -0.2236  | 1.06E-06 | -0.01238 | 0.78955  | -0.03366 | 0.46811 | -0.03854 | 0.40603  | -0.05307 |
| -0.2227  | 1.17E-06 | -0.37761 | 2.83E-17 | -0.05874 | 0.20513 | -0.16142 | 0.00046  | -0.16406 |
| -0.10824 | 0.0193   | -0.28182 | 5.65E-10 | -0.02888 | 0.53351 | -0.03485 | 0.45241  | -0.06276 |
| -0.25262 | 3.12E-08 | -0.1312  | 0.00451  | 0.000524 | 0.99099 | 0.038828 | 0.40251  | -0.05662 |
| -0.18067 | 8.63E-05 | -0.43061 | 1.66E-22 | -0.03229 | 0.48641 | -0.06518 | 0.15965  | -0.09155 |
| -0.18185 | 7.74E-05 | -0.25728 | 1.70E-08 | -0.03897 | 0.40083 | -0.0264  | 0.56925  | -0.10831 |
| -0.31528 | 3.09E-12 | -0.32835 | 3.35E-13 | -0.03643 | 0.4322  | 0.001124 | 0.98067  | -0.08772 |
| -0.24115 | 1.33E-07 | -0.26468 | 6.31E-09 | -0.01899 | 0.68231 | -0.00821 | 0.85952  | -0.11657 |
| -0.26433 | 6.62E-09 | -0.32058 | 1.27E-12 | -0.0193  | 0.6774  | -0.05411 | 0.24316  | -0.07894 |
| -0.24227 | 1.15E-07 | -0.19447 | 2.32E-05 | -0.00654 | 0.88793 | 0.037372 | 0.4204   | -0.07756 |
| -0.26984 | 3.10E-09 | -0.16391 | 0.00038  | -0.02353 | 0.61199 | -0.00595 | 0.89791  | -0.07791 |
| -0.34793 | 9.80E-15 | -0.30078 | 3.21E-11 | -0.05142 | 0.26743 | -0.03008 | 0.5167   | -0.07961 |
| -0.31259 | 4.82E-12 | -0.25751 | 1.65E-08 | -0.02953 | 0.52437 | -0.00693 | 0.88122  | -0.03469 |
| -0.24552 | 7.70E-08 | -0.37461 | 5.26E-17 | -0.00354 | 0.93925 | -0.04723 | 0.30848  | -0.06378 |
| -0.26833 | 3.82E-09 | -0.38694 | 3.97E-18 | -0.01729 | 0.70936 | 0.012983 | 0.77962  | -0.15217 |
| -0.28156 | 5.87E-10 | -0.3266  | 4.54E-13 | -0.03253 | 0.48315 | -0.0839  | 0.07006  | -0.00828 |
| -0.02264 | 0.62554  | -0.22015 | 1.56E-06 | -0.0276  | 0.55193 | -0.06025 | 0.19372  | -0.08714 |
| -0.30915 | 8.44E-12 | -0.17172 | 0.00019  | -0.05981 | 0.19697 | -0.02875 | 0.53547  | -0.17533 |
| -0.15649 | 0.00069  | -0.12519 | 0.00675  | -0.01921 | 0.67883 | -0.02288 | 0.62182  | -0.12005 |
| -0.02545 | 0.58335  | -0.11563 | 0.0124   | 0.036244 | 0.43457 | 0.002353 | 0.95955  | 0.091735 |
| -0.02243 | 0.62881  | -0.11887 | 0.01014  | -0.04732 | 0.30757 | -0.16292 | 0.00041  | -0.08125 |
| 0.032021 | 0.49001  | 0.076835 | 0.09723  | -0.03592 | 0.43867 | -0.04873 | 0.29331  | -0.0476  |
| -0.03157 | 0.49613  | -0.0173  | 0.7093   | 0.058375 | 0.20796 | 0.083587 | 0.07113  | 0.212162 |
| -0.05428 | 0.24169  | 0.236602 | 2.30E-07 | 0.00891  | 0.84771 | 0.175626 | 0.00014  | 0.148239 |
| 0.228841 | 5.78E-07 | 0.179261 | 9.82E-05 | 0.029283 | 0.52788 | 0.08698  | 0.06036  | 0.064217 |
| -0.14497 | 0.00168  | -0.31011 | 7.22E-12 | 0.010823 | 0.81556 | -0.02113 | 0.64875  | 0.007571 |
| -0.14526 | 0.00165  | 0.002673 | 0.95405  | -0.05775 | 0.21287 | -0.12154 | 0.00856  | -0.11248 |
| -0.1128  | 0.01473  | -0.21778 | 2.03E-06 | -0.04916 | 0.28912 | -0.12885 | 0.00529  | -0.1847  |
| -0.20482 | 8.13E-06 | -0.09279 | 0.04505  | -0.01207 | 0.79472 | 0.02758  | 0.55216  | -0.05033 |

|          |          |          |          |          |         |          |         |          |
|----------|----------|----------|----------|----------|---------|----------|---------|----------|
| 0.086007 | 0.0633   | 0.065924 | 0.15492  | 0.019561 | 0.6733  | -0.10317 | 0.02579 | -0.06388 |
| -0.07283 | 0.11599  | -0.23887 | 1.75E-07 | 0.008865 | 0.84848 | -0.03075 | 0.50743 | -0.03651 |
| -0.22824 | 6.19E-07 | -0.10153 | 0.02824  | -0.00861 | 0.85279 | 0.023505 | 0.6124  | -0.08222 |
| -0.19796 | 1.64E-05 | -0.26587 | 5.37E-09 | 0.010933 | 0.81372 | 0.06302  | 0.17397 | 0.024607 |
| -0.3632  | 5.23E-16 | -0.567   | 4.46E-41 | -0.0871  | 0.06001 | -0.13979 | 0.00246 | -0.23412 |
| -0.27909 | 8.39E-10 | -0.39259 | 1.17E-18 | -0.09245 | 0.04585 | -0.16076 | 0.00049 | -0.20482 |
| -0.19063 | 3.37E-05 | -0.25522 | 2.23E-08 | -0.03824 | 0.40973 | -0.05177 | 0.26421 | -0.19059 |
| -0.07878 | 0.08903  | -0.20251 | 1.03E-05 | -0.0378  | 0.4151  | -0.08729 | 0.05946 | -0.15934 |
| -0.27193 | 2.32E-09 | -0.14091 | 0.00227  | -0.04446 | 0.33771 | -0.01471 | 0.75114 | -0.13598 |
| -0.12916 | 0.00518  | -0.30133 | 2.94E-11 | -0.06417 | 0.16621 | -0.11691 | 0.01146 | -0.212   |
| 0.018408 | 0.69153  | 0.012057 | 0.79497  | -0.02788 | 0.54781 | -0.12069 | 0.00904 | -0.00256 |
| -0.11128 | 0.01614  | -0.16445 | 0.00036  | -0.05185 | 0.26348 | -0.02744 | 0.55412 | -0.08562 |
| -0.11697 | 0.01142  | -0.15857 | 0.00058  | -0.05007 | 0.28026 | -0.04288 | 0.35523 | -0.16827 |
| -0.22746 | 6.78E-07 | -0.22703 | 7.13E-07 | -0.06128 | 0.18615 | -0.10486 | 0.02344 | -0.16808 |
| -0.04903 | 0.29038  | -0.20772 | 6.00E-06 | -0.0293  | 0.52768 | -0.03313 | 0.47504 | -0.01563 |
| 0.146187 | 0.00154  | -0.02125 | 0.64693  | -0.002   | 0.96562 | -0.01573 | 0.73465 | 0.045534 |
| -0.2306  | 4.70E-07 | 0.073711 | 0.11165  | 0.00921  | 0.84266 | 0.111715 | 0.01572 | 0.035172 |
| -0.09597 | 0.03816  | -0.33502 | 1.04E-13 | -0.01978 | 0.66983 | -0.08253 | 0.07478 | -0.08377 |
| -0.05632 | 0.22445  | 0.111124 | 0.01629  | 0.010915 | 0.81401 | 0.081989 | 0.07672 | -0.04622 |
| -0.2328  | 3.63E-07 | -0.27346 | 1.87E-09 | -0.03158 | 0.49596 | -0.08989 | 0.05223 | -0.23772 |
| -0.26454 | 6.43E-09 | -0.12133 | 0.00867  | -0.02084 | 0.65328 | 0.034372 | 0.45869 | 0.020592 |
| -0.27622 | 1.27E-09 | -0.4122  | 1.40E-20 | -0.02345 | 0.61319 | 0.042883 | 0.35515 | -0.11516 |
| -0.30835 | 9.61E-12 | -0.25487 | 2.33E-08 | -0.03561 | 0.44261 | 0.012241 | 0.79192 | -0.12318 |
| -0.02493 | 0.59096  | -0.17702 | 0.00012  | -0.06679 | 0.14954 | -0.13565 | 0.00331 | -0.19244 |
| -0.1299  | 0.00493  | -0.24898 | 4.97E-08 | 0.016539 | 0.72148 | -0.05963 | 0.19837 | -0.047   |
| -0.27659 | 1.20E-09 | -0.13488 | 0.0035   | -0.02037 | 0.66058 | -0.00166 | 0.97145 | -0.11863 |
| 0.062491 | 0.17761  | -0.30467 | 1.73E-11 | 0.013458 | 0.77178 | 0.067621 | 0.14455 | -0.03831 |
| -0.06703 | 0.1481   | 0.051777 | 0.26414  | 0.000621 | 0.98932 | 0.040711 | 0.38006 | 0.01738  |
| -0.22689 | 7.24E-07 | -0.28337 | 4.50E-10 | -0.00156 | 0.9732  | 0.00187  | 0.96785 | -0.05361 |
| 0.296545 | 6.20E-11 | 0.12849  | 0.00542  | 0.020659 | 0.65611 | -0.04146 | 0.3714  | 0.023405 |
| -0.03312 | 0.47528  | -0.03885 | 0.40223  | -0.01294 | 0.7804  | -0.0558  | 0.2288  | -0.01667 |
| 0.094759 | 0.04067  | 0.024952 | 0.59067  | 0.014202 | 0.75954 | 0.084921 | 0.06672 | 0.048583 |
| -0.1543  | 0.00082  | -0.25797 | 1.55E-08 | -0.03538 | 0.44557 | -0.08576 | 0.06406 | -0.03943 |
| -0.12642 | 0.00623  | -0.18692 | 4.82E-05 | -0.0298  | 0.52068 | -0.04783 | 0.30237 | -0.0976  |
| -0.21635 | 2.37E-06 | -0.27118 | 2.58E-09 | -0.04876 | 0.29304 | -0.05688 | 0.21985 | -0.11275 |
| -0.1043  | 0.02419  | -0.0016  | 0.97257  | 0.00664  | 0.88621 | 0.016262 | 0.72595 | 0.026802 |
| -0.2619  | 9.19E-09 | -0.19594 | 2.00E-05 | -0.04598 | 0.32148 | -0.03389 | 0.46501 | -0.13974 |
| -0.24586 | 7.38E-08 | -0.2067  | 6.68E-06 | -0.00296 | 0.94921 | -0.02092 | 0.65197 | -0.06338 |
| -0.23134 | 4.31E-07 | -0.19633 | 1.93E-05 | -0.02114 | 0.64861 | -0.01121 | 0.8091  | -0.12576 |
| -0.11461 | 0.0132   | -0.35901 | 1.19E-15 | -0.04864 | 0.29425 | -0.12746 | 0.00581 | -0.18404 |
| -0.13511 | 0.00344  | -0.24747 | 6.03E-08 | -0.0126  | 0.78602 | -0.04148 | 0.37113 | -0.1069  |
| -0.289   | 1.95E-10 | -0.39031 | 1.92E-18 | -0.06652 | 0.15119 | -0.12117 | 0.00876 | -0.19082 |
| -0.08122 | 0.07955  | -0.01191 | 0.79737  | 0.028122 | 0.54437 | 0.033882 | 0.46512 | -0.0241  |
| 0.353698 | 3.30E-15 | 0.38703  | 3.89E-18 | -0.00031 | 0.99473 | -0.0007  | 0.98798 | 0.042149 |
| -0.10315 | 0.0258   | -0.22601 | 8.02E-07 | 0.020212 | 0.66308 | -0.06872 | 0.13814 | -0.00987 |



|          |          |          |          |          |         |          |          |          |
|----------|----------|----------|----------|----------|---------|----------|----------|----------|
| 0.049547 | 0.28529  | -0.25372 | 2.70E-08 | -0.08849 | 0.05602 | -0.17551 | 0.00014  | -0.23109 |
| -0.22571 | 8.29E-07 | -0.23868 | 1.79E-07 | -0.02524 | 0.58646 | -0.04682 | 0.3127   | -0.10305 |
| 0.085049 | 0.06631  | 0.051178 | 0.26971  | -0.03313 | 0.47515 | -0.03578 | 0.44049  | -0.12818 |
| -0.02123 | 0.64721  | -0.15311 | 0.0009   | 0.037059 | 0.42431 | 0.024795 | 0.59302  | 0.026717 |
| -0.03498 | 0.45079  | -0.07073 | 0.12693  | 0.026435 | 0.56879 | -0.07641 | 0.09911  | 0.009866 |
| 0.244159 | 9.13E-08 | 0.552416 | 1.15E-38 | 0.022896 | 0.62164 | -0.04573 | 0.32411  | 0.082528 |
| 0.044787 | 0.33417  | 0.151865 | 0.00099  | 0.040907 | 0.37778 | 0.08312  | 0.07273  | -0.05885 |
| -0.10995 | 0.01746  | -0.33311 | 1.45E-13 | -0.02004 | 0.66578 | -0.05482 | 0.23704  | -0.13749 |
| -0.19218 | 2.90E-05 | -0.23498 | 2.80E-07 | 0.000637 | 0.98904 | 0.093725 | 0.04292  | -0.02826 |
| -0.12286 | 0.00786  | 0.035937 | 0.43847  | 0.100553 | 0.02981 | 0.236872 | 2.23E-07 | 0.19142  |
| -0.23461 | 2.93E-07 | -0.28538 | 3.35E-10 | -0.03087 | 0.50578 | 0.002071 | 0.9644   | -0.08765 |
| -0.2629  | 8.03E-09 | -0.1918  | 3.01E-05 | 0.0535   | 0.24855 | 0.114315 | 0.01344  | 0.066662 |
| -0.20523 | 7.79E-06 | -0.1055  | 0.0226   | -0.01772 | 0.70249 | -0.05011 | 0.27989  | -0.0942  |
| -0.27136 | 2.51E-09 | -0.44119 | 1.15E-23 | -0.08899 | 0.05463 | -0.14086 | 0.00228  | -0.1556  |
| 0.308328 | 9.64E-12 | 0.583588 | 5.70E-44 | 0.014159 | 0.76024 | 0.004709 | 0.91916  | 0.107924 |
| -0.17155 | 0.0002   | -0.25767 | 1.61E-08 | 0.055439 | 0.2318  | 0.082107 | 0.0763   | -0.0742  |
| -0.02822 | 0.54292  | 0.099448 | 0.03166  | 0.036703 | 0.42877 | 0.057249 | 0.21689  | 0.106173 |
| -0.17487 | 0.00015  | -0.12473 | 0.00696  | -0.08486 | 0.06693 | -0.10493 | 0.02334  | -0.09648 |
| -0.16709 | 0.00029  | -0.45139 | 8.01E-25 | 0.00114  | 0.98039 | -0.02229 | 0.63084  | -0.06602 |
| -0.02367 | 0.60993  | -0.11736 | 0.01114  | -0.00174 | 0.97014 | -0.04341 | 0.34921  | -0.07878 |
| -0.15955 | 0.00054  | -0.27895 | 8.56E-10 | -0.01142 | 0.80563 | -0.01301 | 0.77923  | -0.05669 |
| -0.06072 | 0.19025  | -0.00758 | 0.87026  | 0.002594 | 0.95541 | -0.04263 | 0.35804  | -0.12105 |
| -0.2385  | 1.83E-07 | -0.27267 | 2.09E-09 | -0.02475 | 0.59363 | 0.014521 | 0.7543   | 0.056508 |
| 0.055468 | 0.23154  | -0.09513 | 0.03989  | -0.04641 | 0.31695 | -0.02436 | 0.59958  | -0.1847  |
| -0.02054 | 0.65796  | -0.09371 | 0.04296  | 0.010852 | 0.81507 | -0.01384 | 0.76543  | -0.20963 |
| -0.12999 | 0.0049   | -0.23651 | 2.33E-07 | -0.06164 | 0.18357 | -0.14796 | 0.00134  | -0.1829  |
| 0.071729 | 0.12164  | 0.023167 | 0.61752  | -0.03231 | 0.48615 | -0.01758 | 0.70469  | -0.04361 |
| -0.18481 | 5.87E-05 | -0.225   | 9.00E-07 | -0.04032 | 0.38463 | -0.07346 | 0.11286  | -0.12434 |
| -0.01327 | 0.77489  | -0.2326  | 3.71E-07 | -0.01027 | 0.82474 | -0.12457 | 0.00704  | -0.07531 |
| -0.16638 | 0.0003   | -0.31347 | 4.17E-12 | -0.00192 | 0.96705 | -0.04548 | 0.32674  | -0.08217 |
| -0.12752 | 0.00579  | 0.072778 | 0.11627  | -0.00276 | 0.9525  | 0.072098 | 0.11973  | 0.041895 |
| -0.0489  | 0.29167  | -0.03007 | 0.51687  | -0.01299 | 0.77951 | -0.12091 | 0.00891  | -0.11125 |
| -0.14003 | 0.00242  | -0.05559 | 0.23055  | -0.01182 | 0.79897 | -0.00128 | 0.97794  | -0.00606 |
| -0.13767 | 0.00287  | -0.2745  | 1.62E-09 | -0.03291 | 0.47804 | -0.03806 | 0.41189  | -0.10172 |
| -0.02603 | 0.57466  | -0.00287 | 0.95073  | 0.030014 | 0.51762 | 0.058274 | 0.20875  | 0.075437 |
| -0.08794 | 0.05758  | -0.05041 | 0.27699  | 0.036289 | 0.434   | 0.065187 | 0.1596   | 0.00748  |
| -0.15945 | 0.00054  | -0.06584 | 0.15542  | -0.02274 | 0.62402 | 0.001765 | 0.96965  | -0.05497 |
| -0.10572 | 0.02232  | -0.29257 | 1.14E-10 | -0.02952 | 0.52458 | 0.01242  | 0.78895  | -0.12371 |
| -0.17438 | 0.00015  | -0.28268 | 4.98E-10 | -0.06038 | 0.19275 | -0.07515 | 0.10481  | -0.07776 |
| -0.14852 | 0.00129  | -0.37708 | 3.16E-17 | -0.04201 | 0.36506 | -0.05987 | 0.19657  | -0.007   |
| -0.18987 | 3.63E-05 | -0.11803 | 0.01069  | -0.01973 | 0.67065 | 0.004987 | 0.9144   | -0.1065  |
| -0.32404 | 7.05E-13 | -0.21631 | 2.38E-06 | -0.02294 | 0.62095 | 0.019088 | 0.68075  | -0.10197 |
| -0.12438 | 0.00712  | -0.07388 | 0.11083  | 0.007977 | 0.86349 | -0.03145 | 0.49782  | -0.04839 |
| -0.02062 | 0.65668  | 0.031371 | 0.49886  | -0.07338 | 0.11326 | 0.032903 | 0.47812  | -0.21431 |
| -0.06663 | 0.15053  | -0.27749 | 1.06E-09 | -0.01662 | 0.72021 | -0.09154 | 0.04805  | -0.15455 |

|          |          |          |          |          |         |          |          |          |
|----------|----------|----------|----------|----------|---------|----------|----------|----------|
| -0.26308 | 7.83E-09 | -0.2846  | 3.76E-10 | -0.05296 | 0.25337 | -0.05784 | 0.21217  | -0.13087 |
| -0.09316 | 0.0442   | -0.00223 | 0.96169  | 0.00599  | 0.89729 | 0.033104 | 0.47543  | 0.089772 |
| -0.1919  | 2.98E-05 | -0.40032 | 2.11E-19 | -0.07681 | 0.09734 | -0.17079 | 0.00021  | -0.24259 |
| -0.11135 | 0.01607  | -0.18051 | 8.75E-05 | -0.06354 | 0.17046 | -0.17501 | 0.00014  | -0.07472 |
| -0.14548 | 0.00162  | -0.18062 | 8.67E-05 | 0.008696 | 0.85133 | -0.03197 | 0.49071  | -0.04535 |
| 0.36017  | 9.46E-16 | 0.143474 | 0.00188  | 0.010905 | 0.81418 | -0.00813 | 0.86088  | 0.054778 |
| -0.15972 | 0.00053  | 0.006588 | 0.88709  | -0.02526 | 0.58612 | 0.017614 | 0.7042   | -0.07556 |
| 0.025504 | 0.58248  | 0.022756 | 0.62377  | -0.00721 | 0.87644 | 0.015937 | 0.73122  | 0.132232 |
| -0.11017 | 0.01724  | 0.024739 | 0.59385  | -0.00203 | 0.96517 | 0.020465 | 0.65913  | -0.18974 |
| -0.29039 | 1.58E-10 | -0.00261 | 0.95515  | -0.03489 | 0.45196 | 0.057361 | 0.21599  | -0.01793 |
| -0.23733 | 2.11E-07 | -0.112   | 0.01546  | -0.03415 | 0.46155 | 0.021308 | 0.64602  | -0.03539 |
| -0.10587 | 0.02213  | -0.26261 | 8.35E-09 | -0.05343 | 0.2492  | -0.09838 | 0.03355  | -0.16924 |
| -0.1626  | 0.00042  | -0.1626  | 0.00042  | 0.016101 | 0.72857 | 0.063222 | 0.17258  | -0.10931 |
| -0.17119 | 0.0002   | -0.20334 | 9.47E-06 | -0.04298 | 0.35406 | -0.05478 | 0.23741  | -0.06805 |
| -0.22234 | 1.22E-06 | -0.38257 | 1.00E-17 | -0.06648 | 0.15144 | -0.11333 | 0.01427  | -0.15677 |
| 0.103592 | 0.02518  | 0.139863 | 0.00245  | 0.034954 | 0.45111 | 0.023738 | 0.60888  | 0.058995 |
| -0.1405  | 0.00234  | -0.1566  | 0.00068  | -0.0552  | 0.23383 | -0.13561 | 0.00332  | -0.10033 |
| -0.15004 | 0.00115  | 0.134097 | 0.00369  | 0.045682 | 0.32459 | 0.152862 | 0.00092  | 0.155772 |
| 0.133765 | 0.00378  | 0.075486 | 0.10327  | 0.051326 | 0.26833 | -0.01513 | 0.74435  | 0.136253 |
| -0.16233 | 0.00043  | -0.33474 | 1.09E-13 | -0.06199 | 0.18115 | -0.11396 | 0.01374  | -0.17321 |
| -0.14528 | 0.00164  | -0.18364 | 6.56E-05 | -0.04776 | 0.303   | -0.07031 | 0.12923  | -0.10381 |
| -0.17151 | 0.0002   | -0.02969 | 0.5222   | -0.00573 | 0.90171 | 0.019241 | 0.67835  | -0.11051 |
| -0.1641  | 0.00037  | -0.0807  | 0.0815   | -0.01647 | 0.72253 | 0.027906 | 0.54747  | 0.041891 |
| -0.0765  | 0.09869  | -0.11289 | 0.01465  | -0.07372 | 0.11163 | -0.03186 | 0.49221  | -0.15054 |
| -0.19875 | 1.51E-05 | -0.19615 | 1.96E-05 | -0.05418 | 0.24261 | -0.11645 | 0.01179  | -0.1376  |
| -0.12536 | 0.00668  | -0.29055 | 1.55E-10 | -0.04248 | 0.35972 | -0.08416 | 0.06922  | -0.09697 |
| -0.28561 | 3.24E-10 | -0.09399 | 0.04233  | -0.02543 | 0.58359 | 0.038371 | 0.40808  | -0.10501 |
| -0.12854 | 0.0054   | 0.049547 | 0.28529  | -0.06138 | 0.18548 | -0.15508 | 0.00077  | -0.08664 |
| -0.05944 | 0.1998   | 0.28164  | 5.80E-10 | 0.040364 | 0.38415 | 0.153762 | 0.00086  | 0.097125 |
| 0.063863 | 0.16826  | 0.053606 | 0.24762  | 0.015503 | 0.73827 | 0.063806 | 0.16864  | 0.030886 |
| -0.18899 | 3.95E-05 | -0.2455  | 7.72E-08 | -0.0625  | 0.17753 | -0.08812 | 0.05706  | -0.17201 |
| -0.27278 | 2.06E-09 | -0.14491 | 0.00169  | -0.01186 | 0.79818 | 0.020937 | 0.65178  | -0.11735 |
| 0.192879 | 2.71E-05 | 0.052034 | 0.26177  | -0.01492 | 0.74774 | -0.07882 | 0.08887  | -0.12917 |
| -0.15949 | 0.00054  | 0.086919 | 0.06054  | 0.036827 | 0.42721 | 0.194538 | 2.30E-05 | 0.015502 |
| 0.216333 | 2.38E-06 | 0.258031 | 1.54E-08 | -0.02806 | 0.54532 | -0.12103 | 0.00884  | 0.002466 |
| -0.07919 | 0.08736  | -0.07989 | 0.08461  | -0.02674 | 0.56427 | -0.03146 | 0.49762  | -0.1909  |
| -0.06475 | 0.16241  | -0.12699 | 0.006    | -0.01698 | 0.71436 | -0.02323 | 0.61652  | 0.06008  |
| -0.23372 | 3.25E-07 | -0.09152 | 0.04809  | -0.03471 | 0.45425 | -0.04771 | 0.30354  | -0.11462 |
| -0.28442 | 3.86E-10 | -0.2128  | 3.49E-06 | -0.0211  | 0.64919 | 0.006814 | 0.88324  | -0.06606 |
| 0.161942 | 0.00044  | -0.0084  | 0.85633  | -0.04572 | 0.32418 | -0.11054 | 0.01686  | -0.05609 |
| -0.22028 | 1.54E-06 | -0.11559 | 0.01244  | -0.00463 | 0.92047 | 0.002639 | 0.95464  | 0.001891 |
| -0.1863  | 5.11E-05 | -0.14489 | 0.00169  | -0.03934 | 0.39638 | -0.06556 | 0.1572   | -0.06681 |
| -0.18295 | 6.99E-05 | -0.29983 | 3.72E-11 | -0.0096  | 0.83607 | -0.05879 | 0.20478  | -0.16348 |
| -0.13284 | 0.00403  | -0.23836 | 1.86E-07 | 0.000428 | 0.99264 | 0.023159 | 0.61764  | 0.035852 |
| 0.062209 | 0.17958  | -0.09726 | 0.03563  | 0.014995 | 0.74654 | 0.025948 | 0.57594  | 0.141315 |

|          |          |          |          |          |         |          |          |          |
|----------|----------|----------|----------|----------|---------|----------|----------|----------|
| -0.17494 | 0.00014  | -0.19967 | 1.38E-05 | -0.00328 | 0.94365 | -0.0042  | 0.92792  | -0.03674 |
| -0.12185 | 0.00839  | -0.31656 | 2.50E-12 | -0.04643 | 0.31675 | -0.13703 | 0.003    | -0.21826 |
| -0.13672 | 0.00307  | -0.01478 | 0.75002  | -0.03835 | 0.40827 | 0.03677  | 0.42793  | -0.06917 |
| -0.07072 | 0.12701  | -0.06195 | 0.1814   | -0.02442 | 0.59868 | -0.01686 | 0.71635  | -0.13407 |
| -0.15479 | 0.00079  | -0.10662 | 0.0212   | -0.05313 | 0.25184 | -0.11408 | 0.01364  | -0.13247 |
| -0.16948 | 0.00023  | -0.09348 | 0.04348  | -0.01486 | 0.74877 | 0.06953  | 0.13352  | -0.02    |
| -0.23287 | 3.60E-07 | -0.126   | 0.0064   | -0.0095  | 0.83775 | 0.029073 | 0.53084  | -0.05219 |
| -0.09498 | 0.04021  | 0.086648 | 0.06135  | 0.009134 | 0.84394 | 0.070284 | 0.12935  | 0.05368  |
| -0.26293 | 7.99E-09 | -0.1729  | 0.00017  | -0.05841 | 0.20771 | -0.02796 | 0.5467   | -0.15753 |
| -0.12238 | 0.00811  | -0.04269 | 0.35735  | -0.02018 | 0.66353 | 0.023472 | 0.6129   | -0.14917 |
| -0.25098 | 3.85E-08 | -0.26658 | 4.87E-09 | -0.05383 | 0.2456  | -0.0552  | 0.23379  | -0.0751  |
| -0.11796 | 0.01073  | -0.36696 | 2.47E-16 | -0.03833 | 0.40861 | -0.07979 | 0.085    | -0.14862 |
| -0.00748 | 0.87189  | 0.071383 | 0.12345  | -0.00118 | 0.97971 | 0.015217 | 0.74292  | -0.05196 |
| -0.02702 | 0.56029  | -0.108   | 0.01957  | -0.04117 | 0.37475 | -0.07103 | 0.12533  | -0.09387 |
| -0.2959  | 6.85E-11 | -0.28851 | 2.10E-10 | -0.04067 | 0.38051 | -0.0635  | 0.17067  | -0.12566 |
| -0.18353 | 6.62E-05 | -0.17653 | 0.00013  | -0.0034  | 0.94153 | 0.061018 | 0.18807  | -0.16463 |
| -0.15253 | 0.00094  | -0.31252 | 4.87E-12 | 0.002706 | 0.95349 | 0.058051 | 0.2105   | -0.08941 |
| 0.030766 | 0.50718  | -0.01256 | 0.78659  | -0.02699 | 0.56063 | -0.03113 | 0.50211  | -0.14343 |
| -0.36411 | 4.36E-16 | -0.28392 | 4.15E-10 | -0.02087 | 0.6528  | 0.026337 | 0.57023  | -0.12062 |
| -0.20877 | 5.37E-06 | -0.17698 | 0.00012  | -0.00315 | 0.9458  | -0.00306 | 0.9475   | -0.15893 |
| -0.19331 | 2.60E-05 | -0.12673 | 0.0061   | -0.01882 | 0.68494 | 0.025702 | 0.57956  | -0.04714 |
| -0.0047  | 0.91928  | -0.09405 | 0.0422   | -0.02369 | 0.60967 | -0.04911 | 0.28956  | 0.027947 |
| -0.22207 | 1.25E-06 | -0.22796 | 6.40E-07 | 0.010034 | 0.82879 | 0.054585 | 0.23907  | -0.04428 |
| -0.19027 | 3.49E-05 | -0.13295 | 0.004    | 0.027225 | 0.55729 | 0.113496 | 0.01413  | -0.00985 |
| -0.31846 | 1.82E-12 | -0.31417 | 3.71E-12 | -0.00773 | 0.8676  | 0.026194 | 0.57232  | -0.16815 |
| -0.28529 | 3.39E-10 | -0.24082 | 1.38E-07 | -0.04701 | 0.3107  | -0.06479 | 0.16216  | -0.08826 |
| -0.02359 | 0.6111   | 0.109951 | 0.01746  | 0.018114 | 0.69621 | 0.074697 | 0.10693  | 0.036159 |
| -0.20951 | 4.97E-06 | -0.1291  | 0.0052   | 0.039121 | 0.39896 | 0.050395 | 0.27712  | 0.126399 |
| -0.04559 | 0.32554  | -0.0016  | 0.97241  | -0.06227 | 0.17914 | -0.00939 | 0.83955  | -0.02681 |
| -0.24178 | 1.23E-07 | -0.17815 | 0.00011  | -0.04281 | 0.35596 | -0.02408 | 0.60365  | -0.12241 |
| 0.006991 | 0.88024  | -0.05073 | 0.27396  | 0.008317 | 0.85774 | 0.025081 | 0.58875  | 0.033047 |
| -0.26265 | 8.30E-09 | -0.07024 | 0.1296   | -0.03402 | 0.46327 | 0.032659 | 0.4814   | -0.12934 |
| -0.20737 | 6.23E-06 | 0.112254 | 0.01522  | 0.137044 | 0.003   | 0.406738 | 4.94E-20 | 0.239167 |
| -0.13039 | 0.00477  | -0.09807 | 0.03411  | -0.05804 | 0.21056 | -0.06627 | 0.15273  | -0.06837 |
| -0.14222 | 0.00206  | -0.02447 | 0.5979   | 0.07529  | 0.10417 | 0.128636 | 0.00537  | 0.208292 |
| -0.0817  | 0.07777  | 0.054141 | 0.24292  | 0.045174 | 0.33001 | 0.124394 | 0.00711  | 0.196226 |
| 0.042041 | 0.36468  | -0.0814  | 0.07886  | -0.05496 | 0.23587 | -0.09714 | 0.03586  | -0.18691 |
| -0.19341 | 2.57E-05 | -0.14115 | 0.00223  | -0.03876 | 0.40334 | -0.0094  | 0.83937  | -0.06612 |
| -0.23622 | 2.41E-07 | -0.1873  | 4.64E-05 | -0.00893 | 0.8474  | 0.01027  | 0.82482  | -0.08504 |
| -0.17852 | 0.00011  | -0.26808 | 3.96E-09 | -0.00994 | 0.83034 | -0.06304 | 0.17385  | -0.09838 |
| -0.15889 | 0.00057  | -0.24179 | 1.22E-07 | -0.06259 | 0.17696 | -0.07978 | 0.08505  | -0.14847 |
| -0.26121 | 1.01E-08 | -0.16339 | 0.00039  | -0.02935 | 0.52689 | 0.0023   | 0.96046  | -0.14056 |
| -0.15416 | 0.00083  | -0.24522 | 8.00E-08 | -0.04276 | 0.35655 | -0.0716  | 0.12233  | -0.13085 |
| 0.064018 | 0.16724  | -0.19729 | 1.75E-05 | -0.0143  | 0.75788 | -0.12029 | 0.00927  | -0.10888 |
| -0.23539 | 2.67E-07 | -0.25768 | 1.61E-08 | -0.01318 | 0.7764  | -0.0327  | 0.48085  | -0.15496 |

|          |          |          |          |          |         |          |         |          |
|----------|----------|----------|----------|----------|---------|----------|---------|----------|
| -0.19345 | 2.56E-05 | -0.48893 | 1.95E-29 | -0.05639 | 0.22386 | -0.10144 | 0.02838 | -0.13019 |
| -0.26737 | 4.37E-09 | -0.35735 | 1.63E-15 | -0.0609  | 0.18889 | -0.0789  | 0.08854 | -0.13163 |
| 0.30471  | 1.72E-11 | 0.458736 | 1.11E-25 | 0.034204 | 0.46089 | 0.049142 | 0.28925 | 0.109573 |
| 0.122305 | 0.00815  | 0.382426 | 1.03E-17 | 0.012857 | 0.7817  | 0.080797 | 0.08112 | 0.028354 |
| -0.18558 | 5.46E-05 | -0.23688 | 2.23E-07 | -0.04237 | 0.36091 | -0.12401 | 0.00729 | -0.08929 |
| -0.056   | 0.22709  | -0.15537 | 0.00075  | -0.05639 | 0.22385 | -0.10321 | 0.02572 | -0.1342  |
| -0.07183 | 0.12111  | -0.30781 | 1.05E-11 | -0.03288 | 0.47845 | -0.10866 | 0.01883 | -0.09761 |
| 0.164214 | 0.00037  | 0.175147 | 0.00014  | -0.02372 | 0.6091  | -0.06282 | 0.17533 | -0.04973 |
| -0.11548 | 0.01252  | -0.06381 | 0.1686   | 0.006545 | 0.88782 | 0.030737 | 0.50758 | -0.06258 |
| 0.006402 | 0.89026  | 0.081824 | 0.07732  | 0.051335 | 0.26825 | 0.13255  | 0.00411 | 0.038953 |
| -0.08172 | 0.07771  | 0.037811 | 0.41496  | -0.03074 | 0.50753 | -0.0525  | 0.25752 | 0.017685 |
| -0.24251 | 1.12E-07 | -0.22296 | 1.13E-06 | -0.04581 | 0.32321 | 0.003786 | 0.93497 | -0.09957 |
| -0.13363 | 0.00381  | -0.15853 | 0.00058  | 0.004728 | 0.91884 | -0.00565 | 0.90304 | 0.068936 |
| -0.18145 | 8.03E-05 | -0.31779 | 2.03E-12 | -0.04782 | 0.30247 | -0.09657 | 0.03696 | -0.18352 |
| -0.29245 | 1.16E-10 | -0.14854 | 0.00129  | -0.03178 | 0.49332 | -0.0247  | 0.59448 | -0.12844 |
| -0.24053 | 1.43E-07 | -0.04091 | 0.37776  | 0.003964 | 0.93192 | 0.098284 | 0.03372 | -0.04281 |
| -0.31644 | 2.54E-12 | -0.20788 | 5.90E-06 | 0.0188   | 0.68532 | 0.094648 | 0.04091 | -0.02149 |
| -0.32211 | 9.81E-13 | -0.14648 | 0.0015   | -0.05068 | 0.27444 | 0.017702 | 0.70279 | -0.06326 |
| -0.11917 | 0.00995  | -0.12221 | 0.0082   | -0.02256 | 0.62675 | -0.02833 | 0.54137 | -0.12153 |
| -0.28848 | 2.11E-10 | -0.43076 | 1.60E-22 | -0.06366 | 0.16965 | -0.14782 | 0.00136 | -0.20032 |
| -0.1848  | 5.88E-05 | -0.29001 | 1.68E-10 | -0.03051 | 0.51066 | -0.09404 | 0.04223 | -0.051   |
| -0.12263 | 0.00798  | -0.30265 | 2.39E-11 | -0.03828 | 0.40915 | -0.07304 | 0.11499 | -0.15071 |
| 0.013623 | 0.76904  | 0.036261 | 0.43436  | 0.022026 | 0.63496 | 0.077458 | 0.09454 | 0.059354 |
| -0.06792 | 0.14279  | -0.0803  | 0.08301  | -0.0203  | 0.66178 | -0.04575 | 0.32382 | -0.05151 |
| -0.26657 | 4.87E-09 | -0.30647 | 1.30E-11 | -0.02181 | 0.63822 | -0.02011 | 0.66466 | -0.10064 |
| -0.37842 | 2.39E-17 | -0.37232 | 8.39E-17 | -0.01174 | 0.80023 | 0.048935 | 0.2913  | -0.05745 |
| -0.17541 | 0.00014  | -0.19191 | 2.98E-05 | -0.03062 | 0.50914 | -0.04338 | 0.34958 | -0.08798 |
| 0.093237 | 0.04402  | 0.156701 | 0.00068  | 0.02722  | 0.55736 | 0.01019  | 0.82616 | 0.051578 |
| 0.19648  | 1.90E-05 | 0.095057 | 0.04004  | -0.11451 | 0.01329 | -0.14211 | 0.00208 | -0.27815 |
| -0.06115 | 0.18713  | -0.03451 | 0.45682  | 0.024977 | 0.5903  | -0.0402  | 0.38607 | 0.096558 |
| -0.2101  | 4.67E-06 | -0.25299 | 2.97E-08 | -0.02643 | 0.56893 | -0.02458 | 0.5962  | -0.00946 |
| -0.20476 | 8.18E-06 | -0.19415 | 2.39E-05 | 0.035186 | 0.4481  | 0.073809 | 0.11117 | -0.03016 |
| 0.00151  | 0.97403  | -0.15027 | 0.00113  | -0.05313 | 0.25182 | -0.03849 | 0.40665 | -0.09292 |
| 0.052435 | 0.25811  | 0.043475 | 0.34854  | 0.042947 | 0.35443 | 0.042947 | 0.35442 | 0.209214 |
| -0.02032 | 0.66133  | 0.12638  | 0.00624  | -0.0651  | 0.16013 | -0.04167 | 0.3689  | -0.05279 |
| -0.13628 | 0.00317  | -0.2569  | 1.78E-08 | -0.04599 | 0.32136 | -0.14172 | 0.00214 | -0.20934 |
| 0.279283 | 8.16E-10 | 0.028151 | 0.54396  | -0.10065 | 0.02964 | -0.10591 | 0.02208 | -0.06847 |
| -0.08844 | 0.05616  | -0.26491 | 6.11E-09 | -0.07338 | 0.11329 | -0.11389 | 0.01379 | -0.18049 |
| 0.115387 | 0.01259  | 0.12737  | 0.00585  | 0.017296 | 0.70929 | 0.020265 | 0.66226 | 0.034173 |
| -0.15565 | 0.00074  | -0.01997 | 0.66692  | -0.03918 | 0.3982  | 0.013304 | 0.77431 | -0.02895 |
| -0.28452 | 3.80E-10 | -0.10754 | 0.0201   | -0.01837 | 0.69208 | 0.083606 | 0.07107 | -0.08842 |
| -0.23845 | 1.84E-07 | -0.19223 | 2.89E-05 | -0.02379 | 0.60805 | 0.00868  | 0.85161 | -0.09905 |
| -0.23847 | 1.84E-07 | -0.28651 | 2.83E-10 | -0.03564 | 0.44233 | -0.02821 | 0.54316 | -0.03545 |
| -0.08291 | 0.07345  | -0.1277  | 0.00572  | -0.02319 | 0.61717 | 0.008743 | 0.85054 | -0.04694 |
| 0.243562 | 9.83E-08 | -0.16085 | 0.00048  | -0.02306 | 0.61916 | -0.05708 | 0.21822 | -0.10574 |

|          |          |          |          |          |         |          |          |          |
|----------|----------|----------|----------|----------|---------|----------|----------|----------|
| -0.07303 | 0.11503  | 0.212251 | 3.70E-06 | -0.01638 | 0.72397 | 0.085424 | 0.06512  | -0.10341 |
| 0.01946  | 0.67489  | -0.13168 | 0.00437  | -0.03209 | 0.48905 | -0.13666 | 0.00308  | -0.14482 |
| -0.14757 | 0.00138  | 0.228723 | 5.86E-07 | 0.054698 | 0.2381  | 0.183355 | 6.73E-05 | 0.097976 |
| -0.08433 | 0.06863  | 0.006596 | 0.88695  | 0.035513 | 0.4439  | 0.046334 | 0.31772  | 0.090757 |
| 0.043949 | 0.3433   | -0.2655  | 5.64E-09 | -0.03116 | 0.50172 | -0.1207  | 0.00903  | -0.01711 |
| -0.07355 | 0.11242  | -0.10275 | 0.02639  | 0.008356 | 0.85709 | -0.03851 | 0.40644  | 0.012996 |
| -0.05691 | 0.21961  | -0.2102  | 4.61E-06 | 0.005856 | 0.89956 | -0.02329 | 0.61567  | 0.055879 |
| 0.027716 | 0.5502   | 0.002625 | 0.95488  | -0.04726 | 0.30813 | -0.09862 | 0.03311  | -0.02504 |
| -0.20751 | 6.14E-06 | -0.25387 | 2.65E-08 | -0.01553 | 0.73788 | 0.003699 | 0.93645  | -0.07919 |
| 0.192849 | 2.72E-05 | 0.033758 | 0.46675  | 0.001598 | 0.97253 | 0.017243 | 0.71016  | 0.080722 |
| -0.05631 | 0.22451  | -0.09831 | 0.03367  | -0.03592 | 0.43863 | -0.0646  | 0.16341  | -0.1148  |
| -0.09791 | 0.03441  | -0.3341  | 1.22E-13 | -0.04159 | 0.36987 | -0.12022 | 0.00931  | -0.24095 |
| -0.14846 | 0.00129  | -0.09228 | 0.04624  | -0.00752 | 0.87126 | 0.023428 | 0.61357  | -0.05745 |
| 0.285179 | 3.45E-10 | 0.111446 | 0.01598  | 0.043658 | 0.34651 | 0.052295 | 0.25938  | 0.173274 |
| -0.04231 | 0.36164  | -0.27439 | 1.64E-09 | -0.00853 | 0.8541  | -0.05023 | 0.27873  | -0.12471 |
| -0.18902 | 3.94E-05 | -0.22554 | 8.46E-07 | -0.01115 | 0.81016 | -0.07044 | 0.12849  | -0.15611 |
| -0.03319 | 0.47434  | -0.19946 | 1.41E-05 | -0.04785 | 0.30212 | -0.09741 | 0.03534  | -0.12858 |
| -0.07588 | 0.10147  | 0.045318 | 0.32847  | -0.04258 | 0.35861 | -0.07807 | 0.09194  | -0.15722 |
| -0.3073  | 1.14E-11 | -0.16014 | 0.00051  | -0.05317 | 0.25145 | 0.017079 | 0.71278  | -0.12109 |
| -0.20496 | 8.01E-06 | 0.012003 | 0.79586  | -0.00029 | 0.995   | 0.018562 | 0.6891   | 0.081416 |
| -0.24275 | 1.09E-07 | -0.18284 | 7.06E-05 | -0.02926 | 0.52821 | -0.03678 | 0.42779  | -0.1154  |
| -0.14113 | 0.00224  | -0.10903 | 0.01842  | -0.03533 | 0.4462  | -0.04264 | 0.3579   | -0.13803 |
| 0.021981 | 0.63565  | -0.08471 | 0.0674   | -0.04534 | 0.32822 | -0.07399 | 0.11031  | -0.0637  |
| -0.13744 | 0.00292  | -0.12342 | 0.00758  | -0.05883 | 0.20441 | -0.08278 | 0.07392  | -0.08797 |
| -0.00306 | 0.94735  | -0.27312 | 1.96E-09 | 0.010298 | 0.82435 | -0.02827 | 0.54222  | -0.03868 |
| 0.197468 | 1.72E-05 | -0.11916 | 0.00996  | -0.01494 | 0.74746 | -0.08066 | 0.08164  | -0.00161 |
| -0.05123 | 0.26924  | 0.099463 | 0.03164  | 0.053009 | 0.25293 | 0.14287  | 0.00197  | 0.10161  |
| -0.04302 | 0.35361  | -0.2646  | 6.38E-09 | -0.10826 | 0.01928 | -0.20535 | 7.69E-06 | -0.22787 |
| -0.01792 | 0.69934  | 0.100313 | 0.0302   | -0.04791 | 0.30152 | -0.10227 | 0.0271   | -0.12614 |
| 0.329662 | 2.67E-13 | 0.179579 | 9.54E-05 | -0.05756 | 0.21442 | -0.10228 | 0.0271   | -0.09841 |
| -0.11354 | 0.01409  | -0.09359 | 0.04322  | -0.0256  | 0.58109 | -0.06484 | 0.16183  | -0.1495  |
| 0.189418 | 3.79E-05 | 0.037142 | 0.42326  | 0.009692 | 0.83453 | 0.021657 | 0.64064  | -0.12554 |
| -0.19386 | 2.46E-05 | -0.35096 | 5.54E-15 | 0.029499 | 0.52484 | 0.131633 | 0.00438  | -0.16399 |
| -0.257   | 1.76E-08 | -0.12109 | 0.00881  | 0.062344 | 0.17863 | 0.1958   | 2.03E-05 | 0.341864 |
| -0.29524 | 7.58E-11 | -0.53996 | 1.07E-36 | -0.08199 | 0.07672 | -0.21448 | 2.91E-06 | -0.22733 |
| -0.00289 | 0.9504   | 0.157623 | 0.00063  | 0.055534 | 0.23099 | 0.114421 | 0.01335  | 0.157139 |
| -0.02274 | 0.62396  | -0.11969 | 0.00963  | 0.026169 | 0.57269 | 0.010094 | 0.82777  | 0.084559 |
| -0.11246 | 0.01504  | -0.28471 | 3.70E-10 | -0.02068 | 0.65572 | -0.14014 | 0.0024   | -0.12515 |
| 0.008553 | 0.85375  | -0.00134 | 0.97689  | 0.009682 | 0.8347  | 0.016577 | 0.72087  | -0.04484 |
| -0.14283 | 0.00197  | -0.19637 | 1.92E-05 | -0.02599 | 0.57533 | -0.04489 | 0.33309  | -0.07811 |
| -0.1885  | 4.14E-05 | -0.28554 | 3.27E-10 | -0.02801 | 0.54598 | -0.01783 | 0.70079  | -0.15977 |
| -0.18529 | 5.62E-05 | -0.26318 | 7.73E-09 | -0.02266 | 0.62523 | -0.01302 | 0.77906  | -0.04444 |
| -0.03724 | 0.42199  | 0.026202 | 0.5722   | -0.03864 | 0.40481 | -0.0113  | 0.80765  | -0.08933 |
| -0.30782 | 1.05E-11 | -0.21616 | 2.42E-06 | -0.03573 | 0.44111 | -0.02281 | 0.623    | -0.08085 |
| -0.20638 | 6.91E-06 | -0.2636  | 7.30E-09 | -0.07178 | 0.12139 | -0.1036  | 0.02516  | -0.15629 |

|          |          |          |          |          |         |          |         |          |
|----------|----------|----------|----------|----------|---------|----------|---------|----------|
| -0.20594 | 7.23E-06 | -0.2289  | 5.74E-07 | -0.05903 | 0.20293 | -0.08521 | 0.0658  | -0.14938 |
| -0.19226 | 2.88E-05 | -0.15056 | 0.0011   | -0.04231 | 0.36158 | -0.04371 | 0.34594 | -0.09914 |
| 0.19075  | 3.34E-05 | 0.124121 | 0.00724  | -0.08911 | 0.0543  | -0.09083 | 0.0498  | -0.12071 |
| -0.13579 | 0.00328  | -0.30574 | 1.46E-11 | 0.002118 | 0.96359 | -0.08719 | 0.05974 | 0.080673 |
| -0.16418 | 0.00037  | -0.18012 | 9.07E-05 | -0.03199 | 0.49041 | -0.05527 | 0.23321 | -0.12918 |
| -0.25385 | 2.66E-08 | -0.19615 | 1.96E-05 | -0.04384 | 0.34453 | -0.06549 | 0.15765 | -0.15498 |
| -0.31805 | 1.95E-12 | -0.30948 | 8.00E-12 | -0.03307 | 0.47584 | -0.00368 | 0.93684 | -0.07482 |
| -0.22329 | 1.09E-06 | -0.35237 | 4.25E-15 | -0.06592 | 0.15496 | -0.09761 | 0.03497 | -0.17552 |
| 0.25106  | 3.81E-08 | 0.330439 | 2.33E-13 | 0.03003  | 0.51739 | 0.089763 | 0.05256 | 0.091366 |
| -0.19007 | 3.56E-05 | -0.36918 | 1.59E-16 | -0.01309 | 0.77788 | 0.047919 | 0.30143 | -0.07642 |
| -0.19092 | 3.28E-05 | -0.13797 | 0.00281  | -0.05646 | 0.22331 | -0.04409 | 0.34174 | -0.03376 |
| 0.002023 | 0.96522  | -0.03471 | 0.45423  | -0.00572 | 0.90196 | -0.04573 | 0.32406 | -0.1623  |
| -0.12279 | 0.0079   | -0.14422 | 0.00178  | -0.0593  | 0.20087 | -0.05066 | 0.27458 | -0.17803 |
| -0.19977 | 1.36E-05 | -0.21813 | 1.95E-06 | -0.0058  | 0.90045 | -0.0276  | 0.55187 | 0.024844 |
| -0.16036 | 0.0005   | -0.29947 | 3.93E-11 | -0.04118 | 0.37459 | -0.11667 | 0.01163 | -0.23686 |
| -0.23167 | 4.15E-07 | -0.23877 | 1.77E-07 | -0.03677 | 0.42795 | -0.09131 | 0.0486  | -0.18278 |
| -0.16193 | 0.00044  | -0.21741 | 2.11E-06 | -0.00887 | 0.84844 | -0.02725 | 0.55699 | 0.010071 |
| -0.0105  | 0.82101  | -0.17194 | 0.00019  | -0.02855 | 0.53828 | -0.13801 | 0.0028  | -0.12641 |
| -0.29268 | 1.12E-10 | -0.34107 | 3.48E-14 | -0.04034 | 0.38442 | -0.04267 | 0.35756 | -0.14071 |
| -0.22243 | 1.20E-06 | -0.5165  | 3.31E-33 | -0.05786 | 0.212   | -0.12948 | 0.00507 | -0.18539 |
| -0.25072 | 3.98E-08 | -0.19726 | 1.76E-05 | -0.03147 | 0.49757 | -0.038   | 0.41264 | -0.1335  |
| -0.17809 | 0.00011  | -0.26597 | 5.29E-09 | -0.04772 | 0.30344 | -0.08164 | 0.07799 | -0.08511 |
| -0.18955 | 3.74E-05 | -0.29023 | 1.62E-10 | -0.0644  | 0.16473 | -0.07798 | 0.09232 | -0.09093 |
| -0.20135 | 1.16E-05 | -0.19791 | 1.65E-05 | -0.01886 | 0.68436 | -0.02621 | 0.57209 | -0.0793  |
| -0.17017 | 0.00022  | -0.09271 | 0.04524  | -0.02199 | 0.63543 | -0.01744 | 0.70705 | -0.03722 |
| 0.023448 | 0.61326  | -0.27649 | 1.22E-09 | -0.05874 | 0.20514 | -0.16409 | 0.00037 | -0.14972 |
| -0.32845 | 3.29E-13 | -0.21167 | 3.94E-06 | -0.0755  | 0.10319 | -0.04888 | 0.29181 | -0.19033 |
| -0.03549 | 0.44424  | 0.206879 | 6.56E-06 | 0.045645 | 0.32498 | 0.155385 | 0.00075 | 0.233965 |
| -0.35059 | 5.95E-15 | -0.35022 | 6.37E-15 | -0.0396  | 0.39325 | -0.07976 | 0.08513 | -0.10566 |
| 0.133187 | 0.00393  | 0.118168 | 0.0106   | -0.00735 | 0.87414 | -0.00786 | 0.86541 | 0.021858 |
| -0.13603 | 0.00323  | -0.19443 | 2.33E-05 | 0.005076 | 0.91288 | 0.054989 | 0.23561 | -0.01508 |
| -0.01966 | 0.67179  | -0.07232 | 0.11858  | -0.02772 | 0.55017 | -0.0534  | 0.24939 | 0.008443 |
| -0.33506 | 1.03E-13 | -0.3717  | 9.52E-17 | -0.02337 | 0.61452 | -0.01651 | 0.72199 | -0.1496  |
| -0.11683 | 0.01152  | -0.03547 | 0.44445  | 0.026386 | 0.56951 | -0.0287  | 0.53606 | 0.034039 |
| -0.1707  | 0.00021  | -0.32821 | 3.44E-13 | -0.06976 | 0.13226 | -0.14055 | 0.00233 | -0.08755 |
| 0.035135 | 0.44877  | -0.11133 | 0.01608  | -0.00929 | 0.84124 | -0.06166 | 0.18348 | -0.17061 |
| -0.12249 | 0.00805  | -0.04695 | 0.31131  | -0.00111 | 0.98086 | 0.04114  | 0.37506 | -0.12319 |
| -0.20755 | 6.11E-06 | -0.23207 | 3.95E-07 | -0.0513  | 0.26855 | -0.05493 | 0.23613 | -0.1769  |
| -0.31531 | 3.08E-12 | -0.35188 | 4.66E-15 | -0.01696 | 0.71468 | -0.02077 | 0.65435 | -0.01073 |
| -0.25545 | 2.16E-08 | -0.23555 | 2.61E-07 | -0.01654 | 0.72154 | -0.0369  | 0.42633 | -0.12377 |
| -0.1645  | 0.00036  | -0.06224 | 0.17935  | -0.03555 | 0.44338 | 0.00404  | 0.93061 | 0.023131 |
| -0.22213 | 1.25E-06 | -0.17848 | 0.00011  | -0.01565 | 0.73594 | 0.015212 | 0.74301 | -0.05865 |
| 0.052323 | 0.25913  | 0.132626 | 0.00409  | -0.0332  | 0.47414 | -0.00036 | 0.99379 | -0.05642 |
| -0.22689 | 7.24E-07 | -0.36506 | 3.62E-16 | -0.06101 | 0.1881  | -0.09693 | 0.03626 | -0.18426 |
| -0.07031 | 0.12919  | 0.018671 | 0.68736  | -0.01973 | 0.67071 | -0.021   | 0.65077 | 0.016352 |

|          |          |          |          |          |         |          |          |          |
|----------|----------|----------|----------|----------|---------|----------|----------|----------|
| -0.20805 | 5.79E-06 | -0.08461 | 0.06772  | -0.01596 | 0.73084 | 0.058874 | 0.2041   | -0.1552  |
| -0.14394 | 0.00182  | -0.07658 | 0.09837  | 0.018835 | 0.68477 | 0.099827 | 0.03101  | -0.01152 |
| 0.009894 | 0.83114  | 0.163025 | 0.0004   | -0.04766 | 0.30404 | -0.06535 | 0.15857  | -0.03489 |
| 0.287682 | 2.38E-10 | 0.056015 | 0.22697  | 0.027886 | 0.54776 | 0.082009 | 0.07665  | 0.032127 |
| -0.1972  | 1.77E-05 | 0.034501 | 0.45699  | -0.00045 | 0.99227 | 0.052776 | 0.25502  | 0.099941 |
| -0.24704 | 6.36E-08 | -0.23629 | 2.39E-07 | 0.01705  | 0.71326 | 0.138687 | 0.00267  | -0.11448 |
| -0.13871 | 0.00266  | -0.32999 | 2.52E-13 | -0.04558 | 0.32564 | -0.13454 | 0.00358  | -0.08632 |
| -0.15806 | 0.00061  | -0.13794 | 0.00281  | -0.0426  | 0.35836 | -0.0742  | 0.10929  | -0.02673 |
| -0.13197 | 0.00428  | -0.01982 | 0.6692   | 0.062895 | 0.17482 | 0.134022 | 0.00371  | 0.240155 |
| -0.24372 | 9.64E-08 | -0.34897 | 8.06E-15 | -0.04743 | 0.30641 | -0.01599 | 0.73042  | -0.16276 |
| -0.29475 | 8.18E-11 | -0.50558 | 1.14E-31 | -0.02352 | 0.61222 | 0.035863 | 0.43942  | -0.19811 |
| -0.00402 | 0.93103  | 0.008872 | 0.84836  | -0.01329 | 0.77461 | -0.03279 | 0.47957  | 0.050879 |
| -0.09543 | 0.03926  | -0.16465 | 0.00035  | -0.04965 | 0.28432 | -0.10713 | 0.02059  | -0.11896 |
| -0.15716 | 0.00065  | -0.26184 | 9.26E-09 | -0.00718 | 0.87705 | -0.04996 | 0.2813   | 0.073707 |
| 0.063698 | 0.16937  | 0.231809 | 4.08E-07 | -0.03281 | 0.47931 | -0.09579 | 0.03852  | 0.03492  |
| 0.081497 | 0.07852  | -0.08336 | 0.07189  | 0.010226 | 0.82555 | -0.05635 | 0.22419  | 0.013506 |
| 0.063971 | 0.16755  | 0.038682 | 0.40428  | 0.066042 | 0.15418 | 0.107686 | 0.01993  | 0.088776 |
| 0.058081 | 0.21027  | -0.13384 | 0.00376  | -0.01294 | 0.78031 | -0.04903 | 0.29037  | -0.032   |
| -0.32219 | 9.68E-13 | -0.25449 | 2.45E-08 | -0.03419 | 0.46112 | -0.00884 | 0.84887  | -0.11614 |
| -0.23886 | 1.75E-07 | -0.2703  | 2.91E-09 | -0.02093 | 0.65195 | -0.00787 | 0.86524  | -0.04847 |
| -0.32016 | 1.37E-12 | -0.24083 | 1.38E-07 | -0.02186 | 0.6375  | -0.00169 | 0.9709   | -0.10004 |
| -0.13925 | 0.00256  | -0.09656 | 0.03699  | -0.00674 | 0.88449 | 0.022015 | 0.63512  | -0.05172 |
| -0.05826 | 0.20884  | 0.097385 | 0.03539  | -0.03373 | 0.46714 | 0.026895 | 0.56208  | 0.053721 |
| -0.19525 | 2.15E-05 | -0.36272 | 5.74E-16 | -0.03037 | 0.5127  | -0.07246 | 0.11789  | -0.09893 |
| 0.059902 | 0.1963   | -0.15601 | 0.00072  | -0.00753 | 0.87109 | 0.002475 | 0.95746  | -0.11452 |
| 0.21041  | 4.51E-06 | 0.130673 | 0.00468  | 0.005417 | 0.90705 | -0.03004 | 0.51728  | 0.100073 |
| -0.02336 | 0.61457  | 0.013162 | 0.77665  | 0.00011  | 0.99812 | 0.016459 | 0.72278  | -0.0875  |
| 0.187327 | 4.63E-05 | 0.129714 | 0.00499  | -0.03871 | 0.40391 | -0.01826 | 0.69392  | -0.0461  |
| -0.26291 | 8.02E-09 | -0.28016 | 7.19E-10 | -0.0255  | 0.58257 | -0.0202  | 0.66324  | -0.14156 |
| -0.10971 | 0.01771  | -0.29496 | 7.91E-11 | -0.05803 | 0.21067 | -0.09719 | 0.03576  | -0.10246 |
| -0.20943 | 5.01E-06 | -0.29325 | 1.03E-10 | -0.02863 | 0.53716 | -0.12879 | 0.00531  | -0.17576 |
| -0.05523 | 0.23353  | -0.06413 | 0.16648  | -0.02543 | 0.58352 | -0.08344 | 0.07164  | -0.07732 |
| -0.03214 | 0.4884   | -0.25201 | 3.37E-08 | -0.02631 | 0.57055 | -0.09827 | 0.03375  | -0.13099 |
| -0.24318 | 1.03E-07 | -0.17617 | 0.00013  | -0.03002 | 0.5176  | -0.07314 | 0.11446  | -0.13643 |
| -0.11776 | 0.01087  | -0.0508  | 0.2733   | 0.007618 | 0.86959 | 0.066533 | 0.15114  | -0.00825 |
| 0.022063 | 0.63439  | 0.014012 | 0.76264  | -0.02717 | 0.55815 | -0.06536 | 0.15852  | 0.029896 |
| -0.07299 | 0.11522  | -0.08352 | 0.07135  | -0.00184 | 0.96834 | -0.0364  | 0.43261  | -0.09455 |
| -0.1109  | 0.0165   | -0.32633 | 4.76E-13 | 0.002872 | 0.95064 | -0.04274 | 0.35673  | -0.04447 |
| -0.18291 | 7.02E-05 | -0.32488 | 6.11E-13 | -0.02749 | 0.55342 | -0.08261 | 0.07452  | -0.18657 |
| -0.30208 | 2.61E-11 | -0.35707 | 1.73E-15 | 0.014282 | 0.75822 | 0.045926 | 0.32201  | 0.104989 |
| 0.121343 | 0.00867  | -0.05911 | 0.20228  | -0.0197  | 0.67109 | 0.061153 | 0.1871   | 0.027607 |
| -0.13043 | 0.00475  | 0.024255 | 0.60109  | 0.06391  | 0.16795 | 0.189923 | 3.61E-05 | 0.148137 |
| -0.2659  | 5.34E-09 | -0.10879 | 0.01869  | -0.00191 | 0.96714 | 0.098151 | 0.03396  | -0.12071 |
| -0.31425 | 3.66E-12 | -0.31294 | 4.54E-12 | -0.01329 | 0.7745  | -0.02311 | 0.61836  | -0.09539 |
| -0.20814 | 5.74E-06 | -0.24165 | 1.25E-07 | 0.146113 | 0.00155 | 0.330186 | 2.43E-13 | 0.355893 |

|          |          |          |          |          |         |          |          |          |
|----------|----------|----------|----------|----------|---------|----------|----------|----------|
| -0.20222 | 1.06E-05 | -0.20681 | 6.61E-06 | -0.06242 | 0.17808 | -0.03297 | 0.47721  | -0.1253  |
| -0.10874 | 0.01874  | -0.04214 | 0.36357  | -0.00919 | 0.84305 | -0.03046 | 0.51142  | 0.026409 |
| -0.10517 | 0.02303  | -0.01322 | 0.77571  | 0.003791 | 0.93488 | 0.059941 | 0.196    | -0.13996 |
| -0.24237 | 1.14E-07 | -0.216   | 2.46E-06 | -0.03949 | 0.39454 | -0.04151 | 0.37078  | -0.14083 |
| -0.04795 | 0.30108  | -0.04551 | 0.3264   | 0.006839 | 0.88282 | 0.005898 | 0.89884  | 0.008361 |
| -0.37896 | 2.14E-17 | -0.34459 | 1.82E-14 | -0.04785 | 0.30212 | -0.0133  | 0.77435  | -0.08336 |
| -0.14382 | 0.00183  | 0.020161 | 0.66388  | -0.01406 | 0.76184 | 0.016177 | 0.72733  | -0.0178  |
| -0.2806  | 6.74E-10 | -0.09666 | 0.03679  | -0.05806 | 0.21042 | -0.04115 | 0.37492  | -0.15865 |
| -0.22877 | 5.82E-07 | -0.60185 | 2.36E-47 | -0.0012  | 0.9793  | -0.06686 | 0.14912  | -0.06898 |
| -0.27627 | 1.26E-09 | -0.06108 | 0.18761  | 0.117578 | 0.01099 | 0.165686 | 0.00032  | 0.364829 |
| -0.16687 | 0.00029  | -0.09866 | 0.03304  | 0.009925 | 0.83061 | 0.02757  | 0.55231  | -0.02731 |
| -0.06326 | 0.1723   | 0.143713 | 0.00185  | 0.025549 | 0.58182 | 0.081853 | 0.07721  | 0.0226   |
| -0.18017 | 9.03E-05 | -0.05578 | 0.22889  | -0.01273 | 0.78375 | 0.005193 | 0.91089  | -0.05113 |
| -0.22421 | 9.85E-07 | -0.35897 | 1.19E-15 | -0.04514 | 0.3304  | -0.0263  | 0.57077  | -0.19154 |
| -0.16977 | 0.00023  | -0.20191 | 1.10E-05 | -0.02243 | 0.6287  | -0.01364 | 0.76872  | -0.06653 |
| -0.2009  | 1.22E-05 | -0.29803 | 4.93E-11 | -0.02401 | 0.60476 | 0.011792 | 0.79938  | -0.07082 |
| -0.23885 | 1.76E-07 | -0.24776 | 5.81E-08 | -0.04142 | 0.37187 | -0.00134 | 0.97698  | -0.02611 |
| -0.06484 | 0.16182  | 0.117272 | 0.01121  | 0.002673 | 0.95406 | 0.098177 | 0.03392  | 0.002959 |
| 0.094843 | 0.04049  | 0.021235 | 0.64715  | 0.008362 | 0.85698 | -0.02275 | 0.62385  | 0.094417 |
| -0.05246 | 0.25792  | -0.27282 | 2.05E-09 | -0.02542 | 0.58369 | -0.1348  | 0.00352  | -0.1647  |
| 0.222382 | 1.21E-06 | 0.041218 | 0.37416  | -0.02631 | 0.57065 | -0.13319 | 0.00393  | 0.006757 |
| 0.313695 | 4.01E-12 | 0.272488 | 2.15E-09 | 0.076815 | 0.09732 | 0.100654 | 0.02964  | 0.257743 |
| -0.21833 | 1.91E-06 | -0.23403 | 3.14E-07 | -0.02094 | 0.65176 | -0.02355 | 0.6117   | -0.0498  |
| -0.24688 | 6.49E-08 | -0.48247 | 1.33E-28 | -0.06194 | 0.18145 | -0.11032 | 0.01708  | -0.14754 |
| -0.27933 | 8.10E-10 | -0.20347 | 9.35E-06 | -0.01148 | 0.80454 | -0.02557 | 0.58157  | -0.08563 |
| -0.13105 | 0.00456  | -0.39432 | 8.00E-19 | -0.04534 | 0.32828 | -0.15454 | 0.00081  | -0.1013  |
| -0.2212  | 1.38E-06 | -0.03136 | 0.49903  | -0.04481 | 0.33395 | -0.01416 | 0.76029  | -0.03901 |
| 0.107758 | 0.01985  | 0.351582 | 4.93E-15 | 0.11561  | 0.01242 | 0.190266 | 3.50E-05 | 0.469895 |
| -0.08948 | 0.05331  | 0.004526 | 0.9223   | 0.002013 | 0.96539 | 0.01317  | 0.77652  | 0.032903 |
| 0.001753 | 0.96986  | 0.119905 | 0.0095   | 0.00162  | 0.97215 | 0.005612 | 0.90373  | 0.014398 |
| 0.013729 | 0.7673   | -0.14449 | 0.00175  | -0.02764 | 0.55125 | -0.01929 | 0.67761  | -0.07309 |
| -0.26001 | 1.18E-08 | -0.4238  | 8.85E-22 | 0.013145 | 0.77693 | 0.030648 | 0.50881  | -0.05186 |
| -0.17092 | 0.00021  | -0.16588 | 0.00032  | 0.017455 | 0.70675 | -0.03068 | 0.50838  | -0.0991  |
| -0.1481  | 0.00133  | -0.17597 | 0.00013  | -0.02803 | 0.5457  | -0.12377 | 0.00741  | -0.14167 |
| -0.14905 | 0.00124  | -0.2767  | 1.18E-09 | 0.030637 | 0.50896 | 0.034855 | 0.45239  | 0.078809 |
| -0.13403 | 0.00371  | 0.057926 | 0.21148  | -0.0325  | 0.48351 | -0.07799 | 0.09228  | -0.08128 |
| -0.20312 | 9.70E-06 | -0.12915 | 0.00519  | -0.04048 | 0.38273 | -0.01995 | 0.66717  | -0.18693 |
| 0.042285 | 0.36191  | 0.122129 | 0.00824  | -0.03822 | 0.4099  | -0.04845 | 0.29614  | -0.10976 |
| -0.24354 | 9.86E-08 | -0.28399 | 4.11E-10 | -0.04019 | 0.38621 | -0.04006 | 0.3877   | -0.07805 |
| -0.24965 | 4.57E-08 | -0.45595 | 2.36E-25 | -0.04662 | 0.31473 | -0.10899 | 0.01847  | -0.18247 |
| -0.25771 | 1.60E-08 | -0.2123  | 3.69E-06 | 0.009254 | 0.8419  | 0.079092 | 0.08777  | -0.07119 |
| -0.21058 | 4.43E-06 | -0.20981 | 4.81E-06 | 0.01574  | 0.73442 | 0.043032 | 0.35348  | -0.01632 |
| -0.12078 | 0.00899  | -0.28094 | 6.42E-10 | -0.0441  | 0.3416  | -0.11472 | 0.01312  | -0.19099 |
| -0.09465 | 0.0409   | -0.32069 | 1.25E-12 | -0.05171 | 0.26475 | -0.14728 | 0.00141  | -0.22048 |
| 0.162832 | 0.00041  | 0.378023 | 2.60E-17 | 0.002848 | 0.95105 | 0.143513 | 0.00188  | 0.026239 |



|          |          |          |          |          |         |          |          |          |
|----------|----------|----------|----------|----------|---------|----------|----------|----------|
| -0.11083 | 0.01657  | -0.26434 | 6.60E-09 | -0.01995 | 0.66712 | -0.12094 | 0.0089   | -0.00569 |
| -0.02778 | 0.54923  | -0.00043 | 0.99264  | -0.0213  | 0.64611 | -0.10941 | 0.01802  | -0.07583 |
| 0.263072 | 7.84E-09 | 0.127719 | 0.00571  | 0.003955 | 0.93207 | 0.034922 | 0.45153  | 0.008425 |
| -0.01395 | 0.76363  | -0.10846 | 0.01906  | 0.018723 | 0.68654 | -0.00917 | 0.84337  | 0.029334 |
| 0.027599 | 0.55189  | -0.16185 | 0.00045  | 0.002623 | 0.95491 | -0.0964  | 0.0373   | -0.07883 |
| -0.21015 | 4.64E-06 | -0.10703 | 0.02071  | -0.03473 | 0.45405 | 0.022842 | 0.62247  | -0.02347 |
| -0.15189 | 0.00099  | -0.25487 | 2.33E-08 | 0.029566 | 0.5239  | 0.055519 | 0.23112  | 0.063357 |
| -0.08745 | 0.05898  | -0.36249 | 6.00E-16 | 0.040315 | 0.38472 | -0.06748 | 0.1454   | -0.13572 |
| -0.09109 | 0.04914  | -0.17403 | 0.00016  | -0.0417  | 0.3686  | -0.11085 | 0.01656  | -0.13717 |
| -0.06759 | 0.14473  | -0.17743 | 0.00012  | -0.01375 | 0.76704 | -0.06835 | 0.14027  | 0.070573 |
| -0.01298 | 0.77973  | -0.2574  | 1.67E-08 | -0.00344 | 0.94095 | 0.015572 | 0.73714  | 0.035772 |
| -0.15077 | 0.00108  | -0.25446 | 2.46E-08 | -0.02945 | 0.52553 | -0.0712  | 0.1244   | -0.14006 |
| 0.058913 | 0.20379  | -0.18794 | 4.37E-05 | -0.0024  | 0.95877 | -0.08828 | 0.05661  | -0.07558 |
| 0.264801 | 6.21E-09 | 0.250306 | 4.20E-08 | 0.040906 | 0.37779 | 0.018776 | 0.6857   | 0.228474 |
| -0.28327 | 4.57E-10 | -0.36831 | 1.89E-16 | 0.007274 | 0.87543 | 0.005587 | 0.90416  | -0.04453 |
| 0.055625 | 0.23023  | 0.097136 | 0.03586  | -0.01743 | 0.70718 | 0.023183 | 0.61727  | 0.058482 |
| -0.07145 | 0.12308  | -0.02123 | 0.6472   | 0.024681 | 0.59472 | -0.01221 | 0.79249  | 0.021407 |
| -0.16499 | 0.00034  | 0.005149 | 0.91164  | -0.01319 | 0.77627 | 0.035472 | 0.44443  | -0.02495 |
| -0.15429 | 0.00082  | -0.24243 | 1.13E-07 | 9.27E-05 | 0.99841 | -0.0762  | 0.10005  | -0.13206 |
| -0.0721  | 0.11971  | -0.29613 | 6.61E-11 | 0.015322 | 0.74122 | -0.05795 | 0.21133  | 0.075996 |
| 0.117408 | 0.01111  | 0.06676  | 0.14975  | -0.00552 | 0.90522 | -0.07199 | 0.12027  | 0.080014 |
| -0.24105 | 1.34E-07 | 0.081134 | 0.07986  | 0.036367 | 0.43301 | 0.141265 | 0.00221  | -0.01278 |
| 0.102055 | 0.02743  | 0.010773 | 0.81639  | 0.022942 | 0.62093 | -0.05188 | 0.26318  | 0.103565 |
| 0.298611 | 4.50E-11 | 0.203724 | 9.11E-06 | 0.024623 | 0.59558 | -0.01626 | 0.72591  | 0.058647 |
| 0.195987 | 2.00E-05 | 0.004698 | 0.91934  | -0.02977 | 0.52105 | -0.08624 | 0.06259  | 0.098135 |
| 0.244873 | 8.35E-08 | 0.217777 | 2.03E-06 | 0.011753 | 0.80003 | -0.06381 | 0.16863  | 0.098762 |
| 0.405666 | 6.31E-20 | 0.218512 | 1.87E-06 | -0.00673 | 0.88464 | -0.10468 | 0.02368  | 0.09891  |
| 0.188907 | 3.98E-05 | -0.00116 | 0.98014  | -0.00757 | 0.87048 | -0.08773 | 0.05815  | 0.131631 |
| 0.298047 | 4.91E-11 | 0.279712 | 7.67E-10 | 0.020768 | 0.65441 | -0.08765 | 0.0584   | 0.12853  |
| 0.20551  | 7.57E-06 | 0.054175 | 0.24262  | 0.01135  | 0.80675 | -0.08244 | 0.07509  | 0.070874 |
| 0.319974 | 1.41E-12 | 0.079499 | 0.08614  | -0.01027 | 0.8248  | -0.07432 | 0.10871  | 0.098773 |
| 0.131616 | 0.00439  | 0.036237 | 0.43465  | -0.01812 | 0.69616 | -0.10758 | 0.02006  | 0.02367  |
| 0.261941 | 9.14E-09 | -0.04725 | 0.30829  | -0.04875 | 0.29313 | -0.17563 | 0.00014  | -0.02758 |
| -0.16909 | 0.00024  | -0.08356 | 0.07123  | -0.02972 | 0.52173 | 0.046873 | 0.31213  | -0.11606 |
| 0.102547 | 0.02669  | -0.17058 | 0.00021  | -0.02121 | 0.64753 | -0.09399 | 0.04234  | -0.02925 |
| 0.221761 | 1.30E-06 | 0.185589 | 5.46E-05 | -0.02515 | 0.58773 | -0.14823 | 0.00132  | 0.023215 |
| -0.2502  | 4.26E-08 | -0.11916 | 0.00996  | 0.039522 | 0.39415 | 0.16671  | 0.0003   | 0.014676 |
| 0.095246 | 0.03964  | 0.289161 | 1.91E-10 | 0.01759  | 0.70459 | 0.084698 | 0.06744  | -0.03898 |
| 0.157016 | 0.00066  | -0.12515 | 0.00677  | -0.00614 | 0.89468 | -0.12257 | 0.00801  | 0.035497 |
| 0.249052 | 4.93E-08 | 0.002643 | 0.95458  | 0.003787 | 0.93495 | -0.09457 | 0.04108  | -0.01593 |
| 0.006795 | 0.88357  | -0.06362 | 0.16991  | -0.0269  | 0.56194 | -0.04093 | 0.3775   | -0.09611 |
| 0.128022 | 0.0056   | -0.14166 | 0.00215  | -0.00118 | 0.97972 | -0.08141 | 0.07882  | 0.067212 |
| 0.036287 | 0.43402  | -0.24596 | 7.28E-08 | -0.04703 | 0.31051 | -0.13364 | 0.00381  | -0.05699 |
| 0.331239 | 2.02E-13 | 0.005008 | 0.91405  | -0.07166 | 0.12202 | -0.2009  | 1.22E-05 | -0.05896 |
| 0.197764 | 1.67E-05 | -0.04118 | 0.37455  | -0.08018 | 0.08346 | -0.14812 | 0.00133  | -0.19374 |

|          |          |          |          |          |         |          |          |          |
|----------|----------|----------|----------|----------|---------|----------|----------|----------|
| 0.379109 | 2.07E-17 | 0.070215 | 0.12973  | -0.04051 | 0.3824  | -0.16406 | 0.00037  | 0.001668 |
| 0.37184  | 9.26E-17 | 0.302634 | 2.39E-11 | 0.000355 | 0.99389 | -0.0902  | 0.05141  | 0.125461 |
| 0.152926 | 0.00092  | -0.02009 | 0.66499  | -0.04722 | 0.30856 | -0.11963 | 0.00967  | -0.06492 |
| 0.112034 | 0.01543  | -0.25587 | 2.05E-08 | -0.02035 | 0.66093 | -0.15413 | 0.00083  | -0.04788 |
| 0.289956 | 1.69E-10 | 0.117929 | 0.01076  | -0.00054 | 0.99067 | 0.012553 | 0.78674  | 0.163279 |
| 0.197855 | 1.66E-05 | -0.08889 | 0.05491  | 0.000565 | 0.99028 | -0.10976 | 0.01765  | 0.099865 |
| 0.1221   | 0.00826  | -0.02398 | 0.60523  | -0.02668 | 0.56523 | -0.16721 | 0.00028  | 0.058161 |
| 0.263286 | 7.62E-09 | 0.076536 | 0.09855  | -0.00687 | 0.88232 | -0.0923  | 0.0462   | 0.007507 |
| 0.077469 | 0.09449  | -0.10535 | 0.0228   | 0.034054 | 0.46285 | -0.04643 | 0.3167   | -0.0221  |
| 0.104801 | 0.02352  | 0.059854 | 0.19665  | -0.01629 | 0.72551 | -0.01319 | 0.77611  | 0.040722 |
| 0.255113 | 2.26E-08 | 0.091019 | 0.04933  | -0.00661 | 0.88663 | -0.11518 | 0.01275  | 0.016766 |
| 0.44156  | 1.05E-23 | 0.067269 | 0.14665  | -0.01507 | 0.74536 | -0.1461  | 0.00155  | -0.00688 |
| 0.122164 | 0.00822  | -0.01418 | 0.75982  | 0.000975 | 0.98323 | -0.03821 | 0.41006  | 0.124877 |
| 0.104364 | 0.02411  | -0.14948 | 0.0012   | -0.01852 | 0.68978 | -0.11642 | 0.01181  | -0.0696  |
| 0.161962 | 0.00044  | 0.076445 | 0.09895  | -0.00093 | 0.984   | -0.06981 | 0.13196  | 0.039537 |
| 0.229027 | 5.65E-07 | 0.030553 | 0.51013  | 0.00944  | 0.83877 | -0.04095 | 0.37727  | 0.041424 |
| 0.348161 | 9.38E-15 | 0.067658 | 0.14433  | -0.03134 | 0.49935 | -0.15306 | 0.00091  | -0.0404  |
| 0.204094 | 8.77E-06 | 0.115426 | 0.01256  | -0.0437  | 0.34606 | -0.15614 | 0.00071  | -0.0809  |
| 0.245842 | 7.40E-08 | 0.172411 | 0.00018  | 0.005092 | 0.91261 | -0.16463 | 0.00035  | 0.038536 |
| 0.465841 | 1.57E-26 | 0.183371 | 6.72E-05 | -0.01094 | 0.81357 | -0.10049 | 0.02992  | 0.056809 |
| 0.425614 | 5.69E-22 | 0.04335  | 0.34993  | -0.01317 | 0.77647 | -0.1272  | 0.00591  | 0.035684 |
| 0.055958 | 0.22744  | -0.11863 | 0.01029  | -0.04159 | 0.36982 | -0.15551 | 0.00075  | -0.09735 |
| 0.300802 | 3.19E-11 | -0.12914 | 0.00519  | -0.05351 | 0.24849 | -0.15526 | 0.00076  | -0.03801 |
| 0.523263 | 3.48E-34 | 0.320138 | 1.37E-12 | -0.00609 | 0.89552 | -0.08998 | 0.052    | 0.060175 |
| 0.217827 | 2.02E-06 | 0.010298 | 0.82435  | 0.010065 | 0.82826 | -0.08872 | 0.05538  | 0.04232  |
| 0.301184 | 3.01E-11 | -0.00984 | 0.832    | -0.01568 | 0.73532 | -0.14101 | 0.00225  | -0.00207 |
| 0.237593 | 2.04E-07 | 0.183639 | 6.56E-05 | 0.014417 | 0.75601 | -0.03497 | 0.45092  | 0.042188 |
| 0.294068 | 9.07E-11 | 0.235856 | 2.52E-07 | 0.02391  | 0.60629 | -0.03497 | 0.45096  | 0.204503 |
| -0.03494 | 0.45133  | 0.045594 | 0.32553  | 0.010764 | 0.81654 | 0.113933 | 0.01376  | -0.02345 |
| 0.240617 | 1.41E-07 | 0.079124 | 0.08764  | 0.012553 | 0.78673 | -0.06561 | 0.15689  | 0.072947 |
| 0.090585 | 0.05042  | -0.14614 | 0.00154  | -0.03964 | 0.39279 | -0.13604 | 0.00322  | -0.06869 |
| 0.202796 | 1.00E-05 | -0.11004 | 0.01736  | -0.033   | 0.47685 | -0.09314 | 0.04425  | 0.034546 |
| 0.11787  | 0.0108   | 0.003731 | 0.9359   | -0.01196 | 0.79657 | -0.10453 | 0.02388  | 0.03069  |
| 0.080013 | 0.08413  | -0.13017 | 0.00484  | 0.002974 | 0.94889 | -0.07104 | 0.12527  | -0.03385 |
| 0.247053 | 6.35E-08 | 0.011185 | 0.80951  | 0.04077  | 0.37937 | -0.03535 | 0.44598  | 0.156145 |
| 0.194888 | 2.23E-05 | 0.018536 | 0.68951  | 0.020298 | 0.66174 | -0.03206 | 0.48945  | 0.18201  |
| 0.197201 | 1.77E-05 | 0.016283 | 0.72563  | -0.00594 | 0.89808 | -0.0525  | 0.25748  | -0.02408 |
| 0.343893 | 2.07E-14 | -0.083   | 0.07316  | -0.02393 | 0.606   | -0.12212 | 0.00824  | -0.01829 |
| 0.131417 | 0.00445  | -0.11973 | 0.0096   | -0.03453 | 0.45661 | -0.12058 | 0.0091   | 0.052897 |
| -0.18756 | 4.53E-05 | -0.12782 | 0.00567  | -0.00944 | 0.83873 | 0.055253 | 0.23336  | -0.20959 |
| 0.426332 | 4.78E-22 | 0.344728 | 1.78E-14 | -0.02362 | 0.6107  | -0.12273 | 0.00793  | -0.02338 |
| 0.192974 | 2.69E-05 | 0.173108 | 0.00017  | 0.049576 | 0.28501 | -0.02013 | 0.66442  | 0.085757 |
| -0.08243 | 0.07515  | -0.2667  | 4.79E-09 | -0.03725 | 0.42186 | -0.07331 | 0.11364  | -0.01673 |
| -0.21147 | 4.03E-06 | 0.112161 | 0.01531  | 0.040714 | 0.38003 | 0.255417 | 2.17E-08 | 0.001009 |
| 0.295387 | 7.41E-11 | 0.055871 | 0.22817  | 0.024086 | 0.60363 | -0.02735 | 0.55551  | 0.112179 |

|          |          |          |          |          |         |          |          |          |
|----------|----------|----------|----------|----------|---------|----------|----------|----------|
| 0.081535 | 0.07837  | 0.03524  | 0.44742  | -0.0078  | 0.86657 | -0.11439 | 0.01338  | 0.076352 |
| 0.221437 | 1.35E-06 | 0.277761 | 1.02E-09 | 0.013504 | 0.77101 | -0.0259  | 0.57668  | 0.073464 |
| 0.045868 | 0.32262  | -0.0667  | 0.1501   | 0.002307 | 0.96034 | -0.02974 | 0.52145  | -0.11045 |
| 0.046    | 0.32123  | -0.05596 | 0.2274   | -0.04314 | 0.35227 | -0.03215 | 0.48823  | 0.009699 |
| 0.177621 | 0.00011  | -0.02362 | 0.61066  | -0.01163 | 0.80201 | -0.09339 | 0.04368  | 0.034325 |
| 0.294648 | 8.30E-11 | 0.05778  | 0.21264  | -0.01144 | 0.80532 | -0.12416 | 0.00723  | 0.045406 |
| 0.10599  | 0.02198  | -0.13164 | 0.00438  | -0.0479  | 0.3016  | -0.08039 | 0.08266  | 0.082249 |
| 0.215393 | 2.63E-06 | -0.1642  | 0.00037  | -0.05497 | 0.23574 | -0.17407 | 0.00016  | -0.11651 |
| 0.245055 | 8.16E-08 | 0.064767 | 0.16231  | 0.023058 | 0.61918 | -0.02899 | 0.53201  | 0.078331 |
| 0.169839 | 0.00023  | 0.054685 | 0.23822  | 0.02443  | 0.59848 | -0.06812 | 0.14158  | 0.077511 |
| 0.131848 | 0.00432  | -0.18805 | 4.32E-05 | -0.07299 | 0.11521 | -0.15045 | 0.00111  | -0.08665 |
| 0.215594 | 2.58E-06 | -0.02656 | 0.56702  | -0.05173 | 0.26459 | -0.17331 | 0.00017  | -0.06105 |
| -0.02875 | 0.53536  | -0.15516 | 0.00077  | -0.01259 | 0.78617 | -0.04622 | 0.31893  | -0.02373 |
| 0.207577 | 6.09E-06 | 0.055558 | 0.23079  | -0.05093 | 0.27201 | -0.13016 | 0.00484  | 0.010407 |
| 0.420527 | 1.95E-21 | 0.226614 | 7.48E-07 | -0.01008 | 0.82801 | -0.07169 | 0.12186  | 0.0916   |
| 0.138779 | 0.00265  | 0.018109 | 0.6963   | -0.03133 | 0.49942 | -0.13973 | 0.00247  | -0.00241 |
| 0.16564  | 0.00032  | 0.009957 | 0.83008  | -0.01835 | 0.69246 | -0.12285 | 0.00787  | 0.032553 |
| 0.127544 | 0.00578  | -0.12975 | 0.00498  | -0.02166 | 0.64064 | -0.08234 | 0.07545  | 0.044312 |
| 0.123192 | 0.00769  | -0.14393 | 0.00182  | -0.0164  | 0.72378 | -0.10557 | 0.02251  | -0.03297 |
| 0.064615 | 0.1633   | -0.04082 | 0.37877  | 0.029434 | 0.52575 | -0.05729 | 0.21656  | 0.078911 |
| -0.01265 | 0.78508  | -0.192   | 2.95E-05 | -0.01058 | 0.81956 | -0.06001 | 0.19549  | -0.02764 |
| 0.064822 | 0.16195  | -0.24181 | 1.22E-07 | -0.07827 | 0.09114 | -0.19244 | 2.83E-05 | 0.007124 |
| 0.088162 | 0.05694  | -0.03714 | 0.42333  | 0.001295 | 0.97774 | -0.07088 | 0.12611  | 0.078634 |
| 0.112967 | 0.01459  | -0.26459 | 6.38E-09 | -0.03763 | 0.41716 | -0.20006 | 1.33E-05 | -0.08566 |
| 0.472527 | 2.38E-27 | 0.039531 | 0.39404  | -0.02016 | 0.66392 | -0.14563 | 0.0016   | -0.00482 |
| 0.255619 | 2.11E-08 | 0.007507 | 0.87146  | -0.05072 | 0.27402 | -0.19442 | 2.33E-05 | -0.07639 |
| 0.225809 | 8.20E-07 | 0.082618 | 0.07448  | -0.00262 | 0.95499 | -0.02766 | 0.55094  | 0.013723 |
| 0.07114  | 0.12474  | -0.09466 | 0.04089  | -0.01414 | 0.76061 | -0.09742 | 0.03532  | 0.002545 |
| 0.31414  | 3.73E-12 | -0.02822 | 0.543    | -0.01948 | 0.67465 | -0.1138  | 0.01387  | -0.00169 |
| 0.156569 | 0.00069  | -0.05994 | 0.196    | -0.06143 | 0.18513 | -0.15487 | 0.00078  | -0.03096 |
| 0.297617 | 5.25E-11 | 0.182389 | 7.36E-05 | 0.063514 | 0.17061 | -0.06438 | 0.16484  | 0.167925 |
| 0.350386 | 6.18E-15 | 0.085751 | 0.06409  | -0.03691 | 0.42621 | -0.16878 | 0.00025  | 0.053569 |
| 0.111091 | 0.01632  | -0.27999 | 7.37E-10 | -0.0119  | 0.79756 | -0.17633 | 0.00013  | -0.06597 |
| 0.163473 | 0.00039  | 0.090669 | 0.05021  | 0.004542 | 0.92202 | -0.05977 | 0.1973   | 0.027842 |
| 0.01295  | 0.78017  | -0.18793 | 4.37E-05 | -0.06682 | 0.14936 | -0.17794 | 0.00011  | -0.10599 |
| 0.15076  | 0.00108  | -0.08569 | 0.06427  | 0.005296 | 0.90913 | -0.10828 | 0.01926  | -0.04737 |
| 0.16077  | 0.00049  | -0.11345 | 0.01416  | -0.05728 | 0.21665 | -0.17091 | 0.00021  | -0.02061 |
| 0.211684 | 3.94E-06 | -0.00631 | 0.8918   | -0.00651 | 0.88841 | -0.12189 | 0.00837  | -0.01979 |
| 0.11876  | 0.01021  | -0.02501 | 0.58976  | 0.038613 | 0.40512 | -0.06072 | 0.19021  | 0.023981 |
| 0.143245 | 0.00191  | -0.02938 | 0.52649  | -0.02637 | 0.56972 | -0.14721 | 0.00142  | 0.062176 |
| 0.279492 | 7.92E-10 | 0.050178 | 0.27919  | -0.01035 | 0.82353 | -0.09958 | 0.03143  | -0.0204  |
| 0.070711 | 0.12704  | -0.11833 | 0.01049  | -0.05027 | 0.27834 | -0.11448 | 0.01331  | -0.06006 |
| 0.150507 | 0.0011   | -0.10747 | 0.02018  | -0.03781 | 0.41495 | -0.14806 | 0.00133  | 0.071727 |
| 0.03141  | 0.49833  | -0.10265 | 0.02655  | 0.047813 | 0.30251 | -0.02968 | 0.52229  | 0.065303 |
| 0.244332 | 8.93E-08 | 0.094094 | 0.04211  | -0.01914 | 0.68001 | -0.16396 | 0.00037  | 0.034356 |

|          |          |          |          |          |         |          |          |          |
|----------|----------|----------|----------|----------|---------|----------|----------|----------|
| 0.118503 | 0.01038  | -0.14078 | 0.00229  | -0.02273 | 0.62418 | -0.1103  | 0.0171   | -0.03817 |
| 0.196305 | 1.93E-05 | 0.219373 | 1.70E-06 | -0.0355  | 0.44401 | -0.14871 | 0.00127  | 0.008507 |
| 0.035475 | 0.44439  | -0.22726 | 6.94E-07 | -0.01028 | 0.82457 | -0.07189 | 0.12083  | -0.0388  |
| 0.349295 | 7.59E-15 | 0.285804 | 3.15E-10 | 0.019624 | 0.67232 | -0.091   | 0.04939  | 0.093108 |
| 0.227736 | 6.57E-07 | 0.109441 | 0.01799  | 0.010704 | 0.81754 | -0.07448 | 0.10794  | 0.04413  |
| 0.276335 | 1.25E-09 | 0.069316 | 0.13473  | -0.01041 | 0.82241 | -0.09661 | 0.03689  | 0.058527 |
| 0.177826 | 0.00011  | 0.025789 | 0.57828  | 0.002717 | 0.9533  | -0.08914 | 0.05424  | 0.012854 |
| 0.213615 | 3.20E-06 | -0.15229 | 0.00096  | -0.00727 | 0.87543 | -0.17127 | 0.0002   | 0.03694  |
| 0.021448 | 0.64386  | -0.22815 | 6.26E-07 | -0.05381 | 0.24585 | -0.13976 | 0.00247  | 0.015369 |
| 0.039367 | 0.39601  | -0.03152 | 0.49681  | -0.02849 | 0.53909 | -0.09321 | 0.04409  | -0.09572 |
| 0.398853 | 2.93E-19 | 0.092596 | 0.0455   | -0.042   | 0.36511 | -0.16159 | 0.00046  | 0.049786 |
| 0.241607 | 1.25E-07 | 0.117409 | 0.01111  | 0.006573 | 0.88734 | -0.08111 | 0.07993  | 0.073868 |
| 0.159559 | 0.00054  | -0.08339 | 0.07182  | -0.03498 | 0.45083 | -0.1648  | 0.00035  | -0.04508 |
| 0.120728 | 0.00901  | -0.05399 | 0.24428  | 0.001    | 0.9828  | -0.02844 | 0.53986  | 0.013563 |
| 0.188109 | 4.30E-05 | -0.0152  | 0.74325  | -0.00524 | 0.9101  | -0.07425 | 0.10904  | 0.122681 |
| 0.207463 | 6.17E-06 | 0.076094 | 0.10051  | -0.00037 | 0.9937  | -0.09238 | 0.04602  | -0.02012 |
| 0.211646 | 3.95E-06 | 0.081286 | 0.07929  | -0.02081 | 0.65372 | -0.09657 | 0.03695  | -0.05826 |
| 0.157333 | 0.00064  | -0.13959 | 0.0025   | -0.01308 | 0.77793 | -0.13059 | 0.0047   | -0.01262 |
| -0.09602 | 0.03806  | 0.13213  | 0.00423  | -0.009   | 0.84613 | 0.04833  | 0.2973   | -0.06069 |
| 0.026739 | 0.56435  | -0.24808 | 5.58E-08 | -0.02232 | 0.63042 | -0.14519 | 0.00166  | -0.04722 |
| 0.206452 | 6.86E-06 | 0.0139   | 0.76449  | -0.01918 | 0.67927 | -0.14177 | 0.00213  | 0.017122 |
| 0.031487 | 0.49728  | -0.21559 | 2.58E-06 | -0.01482 | 0.74938 | -0.10626 | 0.02164  | -0.0446  |
| 0.342818 | 2.52E-14 | 0.090601 | 0.05038  | 0.003526 | 0.93942 | -0.0733  | 0.11369  | 0.090674 |
| 0.21155  | 3.99E-06 | 0.008381 | 0.85665  | 0.008942 | 0.84718 | -0.0739  | 0.11074  | 0.05962  |
| 0.139867 | 0.00245  | -0.04902 | 0.29046  | -0.02851 | 0.53882 | -0.08865 | 0.05556  | 0.037704 |
| 0.199392 | 1.42E-05 | 0.082758 | 0.07399  | 0.008056 | 0.86215 | -0.01768 | 0.70314  | 0.038137 |
| 0.134946 | 0.00348  | -0.23311 | 3.50E-07 | 0.045647 | 0.32496 | -0.02948 | 0.52515  | 0.147187 |
| 0.2193   | 1.71E-06 | -0.01113 | 0.81034  | -0.03438 | 0.45855 | -0.16912 | 0.00024  | -0.08957 |
| 0.194518 | 2.31E-05 | -0.00752 | 0.87116  | -0.0189  | 0.68366 | -0.15936 | 0.00055  | -0.02236 |
| 0.317785 | 2.03E-12 | 0.083602 | 0.07108  | 0.011416 | 0.80565 | -0.1066  | 0.02122  | 0.031496 |
| 0.211734 | 3.92E-06 | -0.04708 | 0.30999  | -0.02952 | 0.5246  | -0.11712 | 0.01131  | 0.021519 |
| 0.210094 | 4.67E-06 | -0.02164 | 0.64086  | -0.00803 | 0.86261 | -0.14275 | 0.00199  | 0.047312 |
| 0.429152 | 2.39E-22 | 0.055419 | 0.23196  | -0.02659 | 0.56653 | -0.21282 | 3.48E-06 | 0.00609  |
| 0.133028 | 0.00398  | -0.1694  | 0.00024  | -0.05863 | 0.20598 | -0.15198 | 0.00099  | -0.12657 |
| 0.452278 | 6.32E-25 | 0.240827 | 1.38E-07 | -0.00447 | 0.92332 | -0.12581 | 0.00648  | 0.098238 |
| 0.205353 | 7.69E-06 | 0.051084 | 0.27059  | -0.01106 | 0.81156 | -0.1237  | 0.00744  | 0.106936 |
| 0.090838 | 0.04978  | -0.01975 | 0.67026  | -0.01984 | 0.66886 | -0.0847  | 0.06742  | 0.026808 |
| 0.16412  | 0.00037  | -0.00505 | 0.91327  | -0.05277 | 0.25509 | -0.14257 | 0.00201  | 0.016265 |
| 0.023654 | 0.61014  | -0.30322 | 2.18E-11 | -0.04865 | 0.29407 | -0.21584 | 2.51E-06 | -0.08514 |
| 0.25045  | 4.12E-08 | 0.032081 | 0.48918  | 0.002536 | 0.95641 | -0.07119 | 0.12449  | -0.0477  |
| 0.126418 | 0.00623  | -0.15881 | 0.00057  | -0.02021 | 0.66307 | -0.13848 | 0.00271  | 0.022413 |
| 0.29194  | 1.25E-10 | 0.392235 | 1.26E-18 | 0.080277 | 0.0831  | 0.036139 | 0.4359   | 0.191634 |
| 0.064449 | 0.16439  | -0.19392 | 2.45E-05 | -0.02732 | 0.55598 | -0.0669  | 0.1489   | -0.02941 |
| 0.084963 | 0.06658  | -0.12261 | 0.00799  | -0.04563 | 0.3251  | -0.10838 | 0.01914  | -0.02623 |
| 0.183072 | 6.91E-05 | 0.070471 | 0.12833  | -0.0155  | 0.73832 | -0.08941 | 0.0535   | 0.030926 |

|          |          |          |          |          |         |          |          |          |
|----------|----------|----------|----------|----------|---------|----------|----------|----------|
| 0.169168 | 0.00024  | -0.15631 | 0.0007   | -0.03683 | 0.42715 | -0.14795 | 0.00134  | -0.03089 |
| 0.36159  | 7.17E-16 | 0.301582 | 2.83E-11 | 0.032687 | 0.48101 | -0.07037 | 0.12886  | 0.146376 |
| 0.223589 | 1.06E-06 | 0.042906 | 0.35489  | -0.00015 | 0.99747 | -0.1197  | 0.00962  | 0.09393  |
| 0.237151 | 2.16E-07 | -0.05872 | 0.20525  | -0.02578 | 0.57843 | -0.19566 | 2.06E-05 | -0.1418  |
| 0.143285 | 0.00191  | -0.24437 | 8.89E-08 | -0.03837 | 0.40807 | -0.15052 | 0.0011   | -0.09021 |
| 0.295852 | 6.90E-11 | -0.03098 | 0.50417  | 0.009398 | 0.83949 | -0.13733 | 0.00294  | -0.06599 |
| 0.147021 | 0.00144  | -0.05521 | 0.23369  | -0.02634 | 0.57022 | -0.06366 | 0.1696   | 0.030955 |
| 0.355023 | 2.56E-15 | 0.255178 | 2.24E-08 | 0.022176 | 0.63265 | -0.07361 | 0.11215  | 0.052915 |
| 0.198094 | 1.62E-05 | -0.06136 | 0.18563  | -0.02377 | 0.60846 | -0.11715 | 0.01129  | -0.04695 |
| 0.182174 | 7.51E-05 | -0.09879 | 0.03282  | -0.02307 | 0.61899 | -0.12184 | 0.00839  | -0.02102 |
| 0.312442 | 4.93E-12 | -0.02235 | 0.62992  | -0.0336  | 0.46889 | -0.15259 | 0.00094  | -0.0141  |
| 0.396823 | 4.61E-19 | 0.275319 | 1.44E-09 | -0.00423 | 0.92739 | -0.05737 | 0.2159   | 0.052415 |
| 0.372141 | 8.71E-17 | -0.02625 | 0.57153  | -0.0444  | 0.33838 | -0.20428 | 8.60E-06 | -0.09747 |
| 0.236092 | 2.45E-07 | -0.01883 | 0.68488  | 0.002481 | 0.95736 | -0.08612 | 0.06296  | 0.204422 |
| 0.266198 | 5.13E-09 | 0.191189 | 3.20E-05 | 0.013924 | 0.7641  | -0.12075 | 0.009    | 0.073989 |
| 0.121712 | 0.00846  | 0.006446 | 0.88951  | -0.04812 | 0.29942 | -0.10737 | 0.0203   | -0.08764 |
| 0.246795 | 6.56E-08 | 0.081802 | 0.0774   | 0.029515 | 0.52461 | 0.01529  | 0.74173  | 0.102023 |
| 0.265426 | 5.70E-09 | 0.00759  | 0.87006  | -0.00659 | 0.88702 | -0.15316 | 0.0009   | -0.05949 |
| 0.003021 | 0.9481   | -0.18208 | 7.58E-05 | 0.014287 | 0.75814 | -0.01438 | 0.75665  | 0.010917 |
| 0.322589 | 9.04E-13 | 0.155846 | 0.00073  | -0.00289 | 0.95038 | -0.08451 | 0.06804  | 0.02476  |
| 0.04515  | 0.33027  | 0.074067 | 0.10993  | 0.006966 | 0.88066 | -0.04499 | 0.33202  | 0.013261 |
| 0.213822 | 3.13E-06 | 0.018524 | 0.68969  | -0.01762 | 0.70403 | -0.08429 | 0.06877  | 0.029187 |
| 0.15377  | 0.00086  | -0.01699 | 0.7143   | -0.01816 | 0.69543 | -0.09271 | 0.04525  | 0.011785 |
| 0.193449 | 2.56E-05 | -0.07932 | 0.08685  | -0.0321  | 0.489   | -0.11429 | 0.01346  | 0.043867 |
| 0.232437 | 3.79E-07 | -0.04542 | 0.32739  | -0.00715 | 0.87747 | -0.08703 | 0.06022  | 0.039434 |
| 0.122894 | 0.00784  | -0.17054 | 0.00021  | -0.0079  | 0.86478 | -0.09971 | 0.03121  | 0.026492 |
| 0.348636 | 8.58E-15 | 0.166075 | 0.00031  | 0.030719 | 0.50783 | -0.03742 | 0.4198   | 0.074164 |
| 0.125934 | 0.00643  | -0.17147 | 0.0002   | 0.010041 | 0.82866 | -0.09874 | 0.03291  | -0.02486 |
| 0.325443 | 5.54E-13 | 0.262637 | 8.32E-09 | 0.042694 | 0.35728 | -0.02098 | 0.65104  | 0.110398 |
| 0.363367 | 5.05E-16 | -0.03033 | 0.51321  | 0.000165 | 0.99716 | -0.09232 | 0.04616  | 0.001203 |
| 0.149636 | 0.00118  | -0.00681 | 0.88336  | -0.03835 | 0.40832 | -0.11445 | 0.01333  | -0.01818 |
| 0.177511 | 0.00012  | 0.010872 | 0.81474  | 0.004656 | 0.92007 | -0.09306 | 0.04442  | 0.005471 |
| 0.068325 | 0.14041  | -0.17355 | 0.00016  | -0.01584 | 0.73285 | -0.16014 | 0.00051  | -0.02432 |
| 0.139502 | 0.00252  | 0.005714 | 0.90199  | -0.04288 | 0.35522 | -0.13788 | 0.00283  | -0.03347 |
| 0.095808 | 0.03849  | -0.11477 | 0.01307  | -0.04677 | 0.31322 | -0.14657 | 0.00149  | -0.02782 |
| 0.042465 | 0.35986  | -0.00128 | 0.97804  | -0.03572 | 0.4412  | -0.09135 | 0.04851  | -0.00806 |
| -0.00998 | 0.82976  | -0.11808 | 0.01065  | -0.08147 | 0.07862 | -0.16026 | 0.00051  | -0.05435 |
| 0.236131 | 2.44E-07 | 0.026482 | 0.5681   | 0.004851 | 0.91672 | -0.04516 | 0.33019  | 0.098598 |
| 0.197247 | 1.76E-05 | -0.07152 | 0.12274  | 0.018826 | 0.6849  | -0.13285 | 0.00403  | 0.001772 |
| 0.016727 | 0.71845  | -0.11796 | 0.01073  | 0.011021 | 0.81224 | -0.08032 | 0.08293  | 0.099836 |
| 0.353785 | 3.24E-15 | 0.328324 | 3.37E-13 | 0.005309 | 0.90891 | -0.0546  | 0.23892  | 0.097259 |
| 0.362448 | 6.05E-16 | 0.233215 | 3.46E-07 | -0.00808 | 0.86177 | -0.06652 | 0.15123  | 0.095547 |
| 0.202078 | 1.08E-05 | 0.088097 | 0.05712  | -0.03412 | 0.46204 | -0.14931 | 0.00121  | 0.065055 |
| 0.182218 | 7.48E-05 | 0.066327 | 0.15241  | -0.02017 | 0.66376 | -0.1273  | 0.00587  | 0.069111 |
| 0.200363 | 1.29E-05 | 0.163495 | 0.00039  | -0.00368 | 0.9368  | -0.11202 | 0.01544  | 0.089271 |

|          |          |          |          |          |         |          |          |          |
|----------|----------|----------|----------|----------|---------|----------|----------|----------|
| 0.252603 | 3.13E-08 | 0.036805 | 0.42749  | -0.02614 | 0.57315 | -0.13369 | 0.0038   | 0.011013 |
| 0.280332 | 7.01E-10 | -0.05727 | 0.21667  | 0.021921 | 0.63657 | -0.10658 | 0.02125  | 0.001726 |
| 0.121522 | 0.00857  | -0.23205 | 3.97E-07 | -0.03101 | 0.50379 | -0.15814 | 0.0006   | -0.03915 |
| 0.347923 | 9.81E-15 | 0.145849 | 0.00158  | 0.004976 | 0.9146  | -0.12094 | 0.00889  | 0.09015  |
| 0.22303  | 1.13E-06 | 0.002179 | 0.96255  | -0.0686  | 0.13878 | -0.19064 | 3.37E-05 | -0.04399 |
| 0.357233 | 1.67E-15 | 0.414576 | 8.01E-21 | -0.01615 | 0.72775 | -0.08035 | 0.08283  | 0.019797 |
| 0.120237 | 0.0093   | -0.10678 | 0.02101  | 0.011535 | 0.80366 | -0.02903 | 0.53144  | 0.001949 |
| 0.027127 | 0.55872  | -0.22427 | 9.78E-07 | -0.03952 | 0.39418 | -0.09956 | 0.03146  | -0.113   |
| 0.35229  | 4.31E-15 | 0.157857 | 0.00062  | 0.024727 | 0.59403 | -0.05714 | 0.21777  | 0.055073 |
| 0.226937 | 7.20E-07 | -0.03854 | 0.40603  | -0.02804 | 0.54559 | -0.12339 | 0.0076   | 0.025321 |
| 0.232894 | 3.59E-07 | -0.05148 | 0.26685  | -0.02464 | 0.5954  | -0.14034 | 0.00237  | -0.0908  |
| 0.184901 | 5.83E-05 | 0.040098 | 0.38728  | -0.03436 | 0.45882 | -0.13233 | 0.00418  | 0.020312 |
| 0.103318 | 0.02557  | -0.07929 | 0.08697  | -0.02875 | 0.53541 | -0.09119 | 0.04891  | -0.04334 |
| -0.03994 | 0.38912  | 0.162439 | 0.00042  | 0.045857 | 0.32274 | 0.224179 | 9.88E-07 | 0.002705 |
| 0.33444  | 1.15E-13 | -0.04061 | 0.38128  | 0.008832 | 0.84903 | -0.10685 | 0.02092  | 0.051167 |
| 0.059574 | 0.19876  | -0.01566 | 0.73565  | -0.04241 | 0.36044 | -0.14525 | 0.00165  | -0.07361 |
| 0.136357 | 0.00315  | -0.12292 | 0.00783  | -0.0215  | 0.64299 | -0.07121 | 0.12436  | -0.03512 |
| 0.09987  | 0.03094  | -0.0526  | 0.25664  | 0.020958 | 0.65145 | -0.07132 | 0.12378  | 0.06187  |
| 0.135486 | 0.00335  | -0.089   | 0.05462  | -0.00326 | 0.94396 | -0.07981 | 0.08492  | 0.082213 |
| 0.217278 | 2.14E-06 | -0.03707 | 0.42415  | -0.03062 | 0.50922 | -0.16287 | 0.00041  | 0.064872 |
| 0.241854 | 1.21E-07 | 0.010226 | 0.82556  | 0.020267 | 0.66223 | -0.05441 | 0.24062  | 0.051077 |
| 0.148962 | 0.00124  | -0.07435 | 0.10858  | -0.04977 | 0.28312 | -0.13624 | 0.00318  | -0.09915 |
| 0.204895 | 8.07E-06 | -0.07124 | 0.12422  | -0.00659 | 0.88701 | -0.13496 | 0.00348  | 0.033351 |
| 0.121881 | 0.00837  | -0.15072 | 0.00109  | 0.01029  | 0.82448 | -0.07051 | 0.12812  | 0.001254 |
| 0.172169 | 0.00019  | 0.037297 | 0.42134  | -0.01355 | 0.77032 | -0.09779 | 0.03463  | 0.054521 |
| 0.31244  | 4.93E-12 | 0.102412 | 0.0269   | 0.009473 | 0.83823 | -0.06369 | 0.16943  | 0.117595 |
| 0.130153 | 0.00485  | 0.068996 | 0.13654  | -0.00657 | 0.88739 | -0.03314 | 0.47496  | 0.029785 |
| 0.143717 | 0.00185  | -0.11216 | 0.01531  | -0.0353  | 0.44658 | -0.13912 | 0.00259  | -0.09343 |
| 0.362437 | 6.07E-16 | 0.143157 | 0.00193  | 0.026746 | 0.56424 | -0.07892 | 0.08848  | 0.118586 |
| 0.137693 | 0.00287  | -0.08446 | 0.06821  | -0.00139 | 0.97608 | -0.12789 | 0.00564  | -0.10887 |
| 0.151045 | 0.00106  | 0.105761 | 0.02227  | 0.008904 | 0.84782 | -0.07861 | 0.08973  | 0.009775 |
| 0.27264  | 2.10E-09 | 0.088827 | 0.05508  | 0.02061  | 0.65687 | -0.04826 | 0.29801  | 0.058778 |
| 0.16909  | 0.00024  | -0.06344 | 0.17111  | 0.003855 | 0.93379 | -0.07995 | 0.08438  | 0.014439 |
| 0.22922  | 5.53E-07 | 0.149547 | 0.00119  | -0.01873 | 0.68641 | -0.06241 | 0.17815  | 0.034603 |
| 0.130681 | 0.00468  | 0.018803 | 0.68526  | 0.032251 | 0.48689 | -0.01106 | 0.81159  | 0.12545  |
| 0.075241 | 0.1044   | -0.11552 | 0.01249  | -0.035   | 0.45054 | -0.11053 | 0.01687  | 0.058812 |
| 0.264687 | 6.30E-09 | 0.164475 | 0.00036  | -0.01609 | 0.72868 | -0.09079 | 0.0499   | 0.038    |
| 0.053347 | 0.24991  | -0.18469 | 5.94E-05 | -0.01578 | 0.73382 | -0.11813 | 0.01062  | 0.019994 |
| 0.202164 | 1.07E-05 | 0.068457 | 0.13964  | 0.026709 | 0.56479 | -0.02456 | 0.5966   | 0.017153 |
| 0.202099 | 1.08E-05 | -0.06537 | 0.15845  | 0.036723 | 0.42852 | -0.088   | 0.05741  | 0.021338 |
| 0.271935 | 2.32E-09 | 0.149929 | 0.00116  | 0.031083 | 0.50281 | -0.08879 | 0.05518  | 0.016689 |
| 0.260437 | 1.12E-08 | 0.084549 | 0.06793  | 0.001338 | 0.977   | -0.02611 | 0.57359  | -0.00299 |
| 0.340148 | 4.11E-14 | -0.06389 | 0.16808  | -0.02905 | 0.53124 | -0.18775 | 4.45E-05 | -0.10024 |
| 0.15217  | 0.00097  | -0.12113 | 0.00879  | -0.01594 | 0.73112 | -0.07292 | 0.11556  | 0.009855 |
| -0.03197 | 0.49075  | -0.19705 | 1.80E-05 | -0.01149 | 0.80436 | -0.14562 | 0.0016   | -0.05325 |

|          |          |          |          |          |         |          |          |          |
|----------|----------|----------|----------|----------|---------|----------|----------|----------|
| -0.04858 | 0.2948   | -0.24893 | 5.01E-08 | -0.04683 | 0.31256 | -0.11263 | 0.01489  | -0.10312 |
| 0.072941 | 0.11545  | -0.12748 | 0.0058   | -0.03018 | 0.51526 | -0.12911 | 0.0052   | 0.007539 |
| 0.322504 | 9.17E-13 | 0.248561 | 5.25E-08 | 0.031629 | 0.49534 | -0.09174 | 0.04754  | 0.008417 |
| 0.162358 | 0.00043  | -0.03169 | 0.49444  | 0.030828 | 0.50632 | -0.08114 | 0.07982  | -0.03217 |
| -0.01423 | 0.75902  | -0.19936 | 1.42E-05 | 0.026762 | 0.56402 | -0.02675 | 0.56422  | -0.04966 |
| 0.101633 | 0.02808  | -0.07597 | 0.10107  | 0.023923 | 0.60608 | -0.04282 | 0.35585  | 0.015935 |
| 0.391147 | 1.60E-18 | 0.299412 | 3.97E-11 | 0.014351 | 0.75709 | -0.06795 | 0.14263  | 0.082667 |
| 0.218956 | 1.78E-06 | 0.08009  | 0.08383  | -0.0379  | 0.41386 | -0.10496 | 0.02331  | -0.12058 |
| 0.034615 | 0.45551  | -0.24741 | 6.07E-08 | -0.00675 | 0.88428 | -0.08025 | 0.0832   | -0.04904 |
| 0.285153 | 3.46E-10 | 0.014189 | 0.75974  | 0.01034  | 0.82365 | -0.18256 | 7.25E-05 | -0.0506  |
| 0.246405 | 6.89E-08 | 0.236772 | 2.26E-07 | 0.016757 | 0.71797 | -0.04433 | 0.3391   | 0.113886 |
| 0.150572 | 0.0011   | -0.04765 | 0.30418  | -0.0479  | 0.30162 | -0.17077 | 0.00021  | -0.00038 |
| 0.294845 | 8.05E-11 | 0.05647  | 0.22321  | -0.02115 | 0.64843 | -0.15657 | 0.00069  | -0.03591 |
| 0.145261 | 0.00165  | -0.1077  | 0.01991  | -0.01899 | 0.68235 | -0.06062 | 0.191    | 0.082944 |
| 0.180438 | 8.82E-05 | 0.033794 | 0.46628  | -0.02566 | 0.58021 | -0.12811 | 0.00556  | 0.038636 |
| 0.217707 | 2.04E-06 | 0.117821 | 0.01083  | -0.02664 | 0.56586 | -0.03521 | 0.44777  | 0.062181 |
| 0.098644 | 0.03307  | 0.075489 | 0.10325  | -0.01896 | 0.68284 | -0.11073 | 0.01667  | -0.09933 |
| 0.287414 | 2.48E-10 | 0.024033 | 0.60443  | 0.037077 | 0.42408 | -0.07859 | 0.08982  | 0.070004 |
| 0.157007 | 0.00066  | -0.14067 | 0.00231  | -0.01566 | 0.73578 | -0.08402 | 0.06968  | 0.007629 |
| 0.191139 | 3.21E-05 | -0.00868 | 0.85157  | 0.04246  | 0.35992 | -0.04696 | 0.31119  | -0.01355 |
| 0.071792 | 0.12131  | -0.07275 | 0.11639  | 0.003173 | 0.94547 | -0.03618 | 0.43534  | -0.10146 |
| 0.187565 | 4.53E-05 | 0.040117 | 0.38706  | -0.01217 | 0.79302 | -0.10351 | 0.0253   | -0.05662 |
| 0.12627  | 0.00629  | -0.00698 | 0.88037  | 0.027111 | 0.55894 | -0.04441 | 0.33827  | -0.03316 |
| 0.193344 | 2.59E-05 | 0.074953 | 0.10573  | -0.02561 | 0.58097 | -0.17465 | 0.00015  | -0.09959 |
| 0.056771 | 0.22075  | -0.273   | 2.00E-09 | -0.0278  | 0.54906 | -0.22021 | 1.55E-06 | -0.10661 |
| 0.108786 | 0.01869  | -0.00287 | 0.95066  | -0.01975 | 0.67027 | -0.09214 | 0.04658  | -0.07139 |
| 0.170634 | 0.00021  | 0.044436 | 0.33797  | 0.015228 | 0.74275 | -0.07573 | 0.10215  | 0.040484 |
| 0.27305  | 1.98E-09 | -0.02456 | 0.59655  | -0.02124 | 0.64706 | -0.15899 | 0.00056  | -0.05885 |
| 0.196336 | 1.93E-05 | 0.070095 | 0.13039  | -0.00304 | 0.94785 | -0.06094 | 0.18867  | 0.00327  |
| 0.105273 | 0.02289  | -0.2227  | 1.17E-06 | 0.014567 | 0.75354 | -0.10511 | 0.02311  | 0.004007 |
| 0.066238 | 0.15296  | -0.14699 | 0.00145  | 0.018559 | 0.68914 | -0.02135 | 0.64535  | 0.011582 |
| 0.189902 | 3.62E-05 | -0.10391 | 0.02473  | 0.024084 | 0.60366 | -0.1212  | 0.00874  | -0.08229 |
| 0.137072 | 0.003    | -0.09499 | 0.04019  | -0.03456 | 0.45623 | -0.12326 | 0.00766  | -0.0864  |
| 0.260738 | 1.07E-08 | 0.089393 | 0.05355  | -0.00269 | 0.9537  | -0.11234 | 0.01514  | 0.058995 |
| 0.141676 | 0.00215  | 0.011544 | 0.8035   | 0.008582 | 0.85326 | -0.04658 | 0.31515  | 0.03727  |
| 0.374519 | 5.36E-17 | 0.295437 | 7.35E-11 | 0.029327 | 0.52725 | -0.07729 | 0.09524  | 0.072997 |
| 0.171032 | 0.0002   | -0.02092 | 0.65208  | -0.0386  | 0.40533 | -0.14715 | 0.00143  | -0.06387 |
| 0.29908  | 4.18E-11 | 0.145683 | 0.0016   | 0.009261 | 0.8418  | -0.05905 | 0.20271  | 0.042804 |
| 0.263748 | 7.16E-09 | 0.048795 | 0.29267  | 0.026863 | 0.56255 | -0.06794 | 0.14268  | 0.121902 |
| 0.074093 | 0.1098   | -0.08434 | 0.0686   | 0.036823 | 0.42726 | -0.08639 | 0.06212  | -0.06532 |
| 0.056722 | 0.22115  | -0.07086 | 0.12622  | -0.02808 | 0.54496 | -0.08612 | 0.06297  | -0.04562 |
| 0.082261 | 0.07575  | 0.052368 | 0.25872  | 0.010314 | 0.82409 | -0.08483 | 0.067    | -0.01029 |
| 0.150777 | 0.00108  | -0.15791 | 0.00062  | -0.03702 | 0.42481 | -0.1486  | 0.00128  | -0.05848 |
| 0.256309 | 1.93E-08 | 0.030303 | 0.5136   | 0.007438 | 0.87264 | -0.11226 | 0.01522  | 0.083849 |
| 0.064393 | 0.16475  | 0.005182 | 0.91107  | 0.021187 | 0.6479  | -0.02799 | 0.54629  | 0.170356 |

|          |          |          |          |          |         |          |          |          |
|----------|----------|----------|----------|----------|---------|----------|----------|----------|
| 0.011333 | 0.80703  | -0.20174 | 1.12E-05 | 0.007022 | 0.8797  | -0.12692 | 0.00602  | -0.03096 |
| 0.262567 | 8.40E-09 | 0.371241 | 1.05E-16 | 0.028022 | 0.54581 | 0.135394 | 0.00337  | 0.090271 |
| 0.153929 | 0.00085  | 0.057236 | 0.21698  | -0.01282 | 0.78228 | -0.02069 | 0.65556  | -0.08497 |
| 0.13209  | 0.00424  | 0.107264 | 0.02042  | 0.064601 | 0.16339 | -0.00119 | 0.97955  | -0.03444 |
| 0.318173 | 1.91E-12 | 0.476091 | 8.57E-28 | 0.010535 | 0.82038 | -0.05548 | 0.23142  | 0.176612 |
| -0.0846  | 0.06776  | -0.31999 | 1.41E-12 | -0.0064  | 0.89033 | -0.03696 | 0.42557  | -0.08005 |
| -0.14199 | 0.0021   | -0.31656 | 2.50E-12 | -0.0378  | 0.41514 | -0.08681 | 0.06086  | -0.13567 |
| -0.20107 | 1.20E-05 | -0.35558 | 2.30E-15 | -0.02283 | 0.62269 | -0.02544 | 0.58336  | -0.05333 |
| -0.12095 | 0.00889  | -0.31058 | 6.68E-12 | -0.02501 | 0.58988 | -0.05837 | 0.20797  | -0.14073 |
| 0.09055  | 0.05052  | 0.0622   | 0.17964  | -0.01379 | 0.76624 | -0.02405 | 0.60423  | -0.13339 |
| -0.20256 | 1.03E-05 | -0.41957 | 2.45E-21 | -0.05639 | 0.22386 | -0.1877  | 4.47E-05 | -0.17396 |
| -0.1546  | 0.0008   | -0.22274 | 1.16E-06 | 0.079987 | 0.08423 | 0.234274 | 3.05E-07 | 0.158988 |
| -0.03301 | 0.47668  | -0.12702 | 0.00598  | 0.024077 | 0.60377 | -0.06314 | 0.17317  | -0.03817 |
| -0.05785 | 0.21208  | -0.16147 | 0.00046  | -0.01981 | 0.66934 | -0.06226 | 0.17921  | -0.07059 |
| 0.11906  | 0.01002  | 0.257569 | 1.64E-08 | 0.038388 | 0.40787 | -0.0537  | 0.2468   | -0.02362 |
| 0.203921 | 8.92E-06 | 0.136606 | 0.0031   | 0.035798 | 0.44024 | -0.0449  | 0.33298  | 0.017531 |
| 0.156764 | 0.00067  | 0.006279 | 0.89236  | 0.051185 | 0.26965 | 0.012319 | 0.79062  | 0.269958 |
| 0.02953  | 0.5244   | 0.243983 | 9.33E-08 | 0.075703 | 0.10228 | 0.203903 | 8.94E-06 | 0.04588  |
| -0.04382 | 0.34476  | -0.0429  | 0.35493  | 0.056436 | 0.22349 | -0.00993 | 0.83054  | 0.166577 |
| 0.202685 | 1.01E-05 | -0.07593 | 0.10124  | -0.02088 | 0.65273 | -0.12344 | 0.00757  | 0.056765 |
| 0.270923 | 2.67E-09 | 0.492455 | 6.72E-30 | 0.010422 | 0.82228 | 0.027214 | 0.55745  | -0.02439 |
| -0.10364 | 0.02512  | -0.35337 | 3.51E-15 | 0.074864 | 0.10615 | 0.111233 | 0.01618  | 0.004488 |
| -0.08965 | 0.05287  | -0.2462  | 7.07E-08 | 0.000356 | 0.99387 | -0.06079 | 0.18974  | 0.03786  |
| 0.231085 | 4.44E-07 | 0.207968 | 5.85E-06 | -0.06163 | 0.18367 | -0.16845 | 0.00026  | -0.05597 |
| 0.036509 | 0.43121  | -0.08761 | 0.05851  | -0.00389 | 0.93314 | -0.01718 | 0.71123  | -0.07156 |
| 0.11143  | 0.01599  | 0.097911 | 0.03441  | -0.0297  | 0.52196 | -0.02424 | 0.60138  | -0.10449 |
| -0.03134 | 0.49922  | 0.085253 | 0.06566  | 0.052924 | 0.25369 | 0.050738 | 0.27386  | 0.15429  |
| -0.06593 | 0.1549   | -0.1491  | 0.00123  | -0.04109 | 0.37559 | -0.08843 | 0.05617  | -0.04843 |
| 0.133191 | 0.00393  | -0.02312 | 0.61824  | -0.00655 | 0.88773 | -0.04003 | 0.38809  | -0.09103 |
| -0.02169 | 0.64015  | -0.16281 | 0.00041  | 0.014899 | 0.74812 | 0.039903 | 0.3896   | 0.02987  |
| 0.189551 | 3.74E-05 | 0.320579 | 1.27E-12 | 0.054692 | 0.23815 | 0.100582 | 0.02976  | 0.196376 |
| 0.020965 | 0.65135  | -0.02787 | 0.54806  | 0.071553 | 0.12256 | 0.15394  | 0.00084  | -0.01015 |
| -0.06458 | 0.16353  | -0.13685 | 0.00304  | 0.05387  | 0.24529 | 0.057579 | 0.21424  | 0.004026 |
| -0.0194  | 0.67591  | -0.04634 | 0.31763  | -0.00344 | 0.94089 | 0.02649  | 0.56798  | 0.038425 |
| 0.00986  | 0.8317   | -0.15549 | 0.00075  | 0.058148 | 0.20974 | 0.018527 | 0.68964  | -0.0393  |
| 0.104012 | 0.02459  | 0.011347 | 0.8068   | -0.03919 | 0.39815 | -0.06114 | 0.18716  | 0.054361 |
| 0.039821 | 0.39057  | -0.13785 | 0.00283  | -0.03341 | 0.47135 | -0.10459 | 0.0238   | -0.01859 |
| -0.00632 | 0.89171  | -0.07917 | 0.08748  | -0.00601 | 0.89696 | -0.02279 | 0.62322  | 0.01655  |
| -0.08907 | 0.05441  | -0.20314 | 9.67E-06 | 0.001294 | 0.97775 | -0.03444 | 0.45785  | -0.10589 |
| -0.03679 | 0.4277   | -0.06666 | 0.15033  | -0.00148 | 0.97455 | -0.02991 | 0.51906  | -0.07746 |
| 0.009288 | 0.84133  | -0.04658 | 0.31516  | 0.003059 | 0.94743 | -0.01602 | 0.72995  | 0.023183 |
| 0.014432 | 0.75576  | -0.11333 | 0.01427  | -0.04713 | 0.30944 | -0.06995 | 0.13116  | -0.06767 |
| -0.06169 | 0.18323  | -0.03825 | 0.40957  | -0.0224  | 0.62927 | 0.031977 | 0.49061  | -0.04409 |
| 0.00018  | 0.99691  | -0.01859 | 0.68872  | -0.00665 | 0.88598 | 0.023289 | 0.61567  | -0.00087 |
| -0.04946 | 0.28613  | -0.06851 | 0.13933  | -0.01308 | 0.77807 | -0.01074 | 0.817    | 0.043908 |



|          |          |          |          |          |         |          |         |          |
|----------|----------|----------|----------|----------|---------|----------|---------|----------|
| -0.06476 | 0.16237  | 0.008278 | 0.85839  | -0.01851 | 0.68995 | -0.02862 | 0.53724 | -0.07964 |
| -0.04538 | 0.32786  | -0.16015 | 0.00051  | 0.050924 | 0.2721  | -0.03816 | 0.41062 | -0.04492 |
| 0.042161 | 0.36331  | 0.088154 | 0.05696  | -0.02731 | 0.55602 | -0.01421 | 0.75947 | -0.0328  |
| -0.00809 | 0.8616   | -0.12146 | 0.0086   | -0.01249 | 0.78782 | -0.06937 | 0.13441 | 0.000425 |
| 0.010858 | 0.81496  | -0.03953 | 0.39407  | 0.035682 | 0.44173 | 0.026344 | 0.57012 | -0.02805 |
| 0.001475 | 0.97464  | -0.11316 | 0.01442  | -0.03253 | 0.48307 | -0.10055 | 0.02981 | -0.07478 |
| 0.235744 | 2.56E-07 | 0.004722 | 0.91893  | 0.003086 | 0.94697 | -0.07837 | 0.0907  | -0.06291 |
| 0.133237 | 0.00392  | 0.070559 | 0.12786  | -0.00937 | 0.8399  | -0.00797 | 0.86355 | -0.02028 |
| -0.02141 | 0.64447  | 0.037763 | 0.41555  | -0.00298 | 0.94884 | -0.01178 | 0.79962 | -0.01276 |
| -0.00283 | 0.95142  | -0.01101 | 0.81245  | 0.015479 | 0.73866 | -0.00959 | 0.83623 | -0.03873 |
| -0.0213  | 0.64611  | -0.01471 | 0.75123  | -0.00977 | 0.83315 | 0.002693 | 0.95372 | 0.030254 |
| 0.000625 | 0.98925  | -0.13548 | 0.00335  | -0.02327 | 0.61597 | 0.021116 | 0.64901 | -0.03533 |
| -0.01159 | 0.80269  | 0.066486 | 0.15143  | -0.01196 | 0.79657 | 0.044144 | 0.34117 | -0.03414 |
| -0.11388 | 0.0138   | -0.10993 | 0.01749  | -0.00894 | 0.84722 | -0.03412 | 0.46193 | -0.03787 |
| -0.03653 | 0.431    | -0.07462 | 0.10731  | -0.0189  | 0.68374 | -0.03365 | 0.46818 | -0.06117 |
| -0.02496 | 0.59053  | -0.01632 | 0.72498  | -0.01634 | 0.72463 | -0.03182 | 0.49279 | -0.01244 |
| -0.07388 | 0.11083  | -0.13176 | 0.00434  | -0.02226 | 0.63133 | 0.04416  | 0.34099 | -0.00062 |
| 0.033071 | 0.47588  | 0.063971 | 0.16755  | 0.026985 | 0.56078 | -0.01828 | 0.69365 | -0.03794 |
| 0.066399 | 0.15196  | -0.05369 | 0.24691  | 0.026247 | 0.57154 | -0.02494 | 0.59089 | -0.02769 |
| 0.092707 | 0.04525  | -0.13787 | 0.00283  | -0.01863 | 0.68798 | -0.08913 | 0.05425 | -0.12678 |
| 0.034024 | 0.46325  | 0.055229 | 0.23357  | -0.05205 | 0.26166 | -0.03553 | 0.44367 | -0.05398 |
| 0.035119 | 0.44897  | -0.00262 | 0.95505  | 0.001936 | 0.96671 | -0.04342 | 0.34911 | -0.04914 |
| 0.044512 | 0.33715  | -0.00134 | 0.97701  | -0.01206 | 0.79496 | -0.03411 | 0.4621  | -0.01541 |
| -0.02934 | 0.52702  | -0.00464 | 0.92027  | 0.106274 | 0.02162 | 0.044008 | 0.34266 | 0.223701 |
| -0.03011 | 0.51628  | -0.04633 | 0.31778  | -0.00924 | 0.84215 | -0.0605  | 0.19185 | 0.005825 |
| 0.157235 | 0.00065  | 0.190702 | 3.35E-05 | 0.027693 | 0.55053 | -0.04283 | 0.35575 | -0.00711 |
| -0.02353 | 0.61201  | -0.03802 | 0.41234  | 0.020334 | 0.66118 | 0.065709 | 0.15628 | 0.037662 |
| 0.052847 | 0.25438  | -0.01541 | 0.73971  | -0.02626 | 0.57134 | 0.024308 | 0.60029 | -0.03955 |
| 0.023907 | 0.60633  | -0.02945 | 0.52548  | 0.073679 | 0.11181 | 0.028802 | 0.53467 | -0.00628 |
| -0.00632 | 0.89165  | -0.01296 | 0.78005  | -0.01855 | 0.68927 | -0.01608 | 0.72896 | -0.03873 |
| -0.03155 | 0.49641  | -0.06707 | 0.14783  | -0.01694 | 0.71502 | 0.003191 | 0.94517 | -0.0338  |
| -0.01378 | 0.76647  | 0.129241 | 0.00516  | -0.00488 | 0.91628 | 0.020338 | 0.66111 | -0.01455 |
| 0.15791  | 0.00062  | 0.171718 | 0.00019  | -0.01379 | 0.76627 | 0.007029 | 0.87959 | 0.081984 |
| 0.023162 | 0.61759  | 0.000555 | 0.99045  | -0.07997 | 0.0843  | -0.10168 | 0.02802 | -0.04281 |
| -0.06227 | 0.17913  | -0.04952 | 0.28555  | -0.04315 | 0.35212 | -0.03999 | 0.3886  | -0.02808 |
| -0.0195  | 0.67433  | -0.07196 | 0.12044  | 0.005101 | 0.91246 | -0.00803 | 0.86255 | -0.01864 |
| 0.000335 | 0.99423  | -0.0432  | 0.35155  | -0.01023 | 0.82542 | 0.040516 | 0.38235 | 0.028225 |
| -0.01604 | 0.72961  | 0.024506 | 0.59733  | 0.012169 | 0.79311 | 0.051036 | 0.27105 | -0.02156 |
| 0.019006 | 0.68205  | 0.023522 | 0.61214  | -0.00961 | 0.8359  | -0.03367 | 0.46786 | -0.04536 |
| 0.107863 | 0.01973  | 0.008283 | 0.85831  | -0.01163 | 0.80216 | -0.0213  | 0.64614 | -0.03037 |
| -0.02239 | 0.62942  | -0.02959 | 0.52353  | -0.00958 | 0.83639 | -0.00786 | 0.8654  | -0.01547 |
| 0.002403 | 0.95869  | -0.03325 | 0.47343  | -0.03617 | 0.43555 | -0.04125 | 0.37374 | -0.0319  |
| 0.071147 | 0.1247   | -0.08258 | 0.07462  | -0.04168 | 0.36883 | -0.11305 | 0.01451 | -0.03256 |
| -0.07432 | 0.1087   | -0.19375 | 2.49E-05 | -0.03288 | 0.47848 | -0.08078 | 0.08119 | -0.07253 |
| -0.0025  | 0.95706  | -0.10614 | 0.02178  | -0.02439 | 0.5991  | -0.06532 | 0.15876 | -0.07529 |

|          |          |          |          |          |         |          |          |          |
|----------|----------|----------|----------|----------|---------|----------|----------|----------|
| 0.009813 | 0.8325   | -0.3392  | 4.88E-14 | -0.02461 | 0.59585 | -0.11239 | 0.0151   | -0.07002 |
| 0.064823 | 0.16194  | -0.02071 | 0.65527  | -0.04638 | 0.31729 | -0.07478 | 0.10656  | -0.00986 |
| 0.061489 | 0.18468  | -0.00536 | 0.90804  | 0.050168 | 0.27929 | 0.038441 | 0.40722  | 0.11161  |
| 0.001258 | 0.97837  | 0.126814 | 0.00607  | 0.003525 | 0.93944 | 0.11791  | 0.01077  | -0.00141 |
| -0.01705 | 0.71333  | 0.038763 | 0.40329  | -0.02706 | 0.55966 | 0.037164 | 0.42299  | -0.02173 |
| 0.031669 | 0.49479  | -0.04047 | 0.3829   | -0.01987 | 0.66841 | 0.007569 | 0.87041  | 0.072274 |
| 0.211828 | 3.88E-06 | -0.01988 | 0.66821  | -0.06898 | 0.13663 | -0.04803 | 0.30034  | -0.03914 |
| -0.05171 | 0.26476  | -0.08815 | 0.05697  | -0.00667 | 0.88575 | -0.02375 | 0.60875  | -0.04663 |
| 0.042535 | 0.35907  | 0.071397 | 0.12338  | -0.00014 | 0.99751 | 0.045894 | 0.32235  | 0.058415 |
| -0.04927 | 0.28798  | -0.04019 | 0.38625  | 0.042589 | 0.35846 | 0.029753 | 0.52127  | 0.016342 |
| 0.112579 | 0.01493  | 0.235222 | 2.72E-07 | 0.004053 | 0.9304  | 0.129428 | 0.00509  | 0.003135 |
| -0.20214 | 1.07E-05 | 0.000682 | 0.98827  | 0.081688 | 0.07781 | 0.178743 | 0.0001   | 0.255969 |
| -0.12759 | 0.00576  | 0.071187 | 0.12449  | -0.00126 | 0.97842 | 0.046733 | 0.31358  | -0.01214 |
| 0.023851 | 0.60718  | -0.05267 | 0.25597  | -0.06509 | 0.16025 | -0.05621 | 0.22536  | -0.06388 |
| 0.04885  | 0.29213  | 0.283562 | 4.38E-10 | 0.012964 | 0.77992 | 0.016651 | 0.71968  | 0.073193 |
| 0.094914 | 0.04034  | 0.147576 | 0.00138  | 0.106714 | 0.02108 | 0.242116 | 1.18E-07 | -0.05863 |
| -0.17854 | 0.0001   | -0.3253  | 5.68E-13 | -0.03933 | 0.39641 | -0.11625 | 0.01194  | -0.10679 |
| 0.008007 | 0.86299  | -0.17609 | 0.00013  | 0.039902 | 0.38961 | -0.03169 | 0.49444  | -0.0077  |
| -0.06245 | 0.17787  | 0.052748 | 0.25527  | -0.04651 | 0.31593 | -0.00785 | 0.86572  | -0.05668 |
| -0.11165 | 0.01578  | -0.07841 | 0.09055  | 0.085345 | 0.06537 | 0.257699 | 1.61E-08 | 0.027161 |
| -0.04434 | 0.33902  | 0.144214 | 0.00178  | -0.04285 | 0.35551 | -0.07978 | 0.08504  | -0.00147 |
| 0.096872 | 0.03637  | 0.256518 | 1.88E-08 | -0.03198 | 0.49051 | -0.02094 | 0.65172  | -0.03465 |
| -0.14972 | 0.00117  | -0.163   | 0.00041  | -0.03855 | 0.40586 | 0.032545 | 0.48293  | -0.1344  |
| 0.145205 | 0.00165  | 0.443707 | 6.01E-24 | 0.075963 | 0.1011  | 0.136876 | 0.00304  | 0.188774 |
| 0.234409 | 3.00E-07 | 0.415319 | 6.72E-21 | 0.008446 | 0.85556 | 0.006063 | 0.89604  | 0.101305 |
| 0.020573 | 0.65744  | 0.038436 | 0.40728  | 0.12204  | 0.00829 | 0.273607 | 1.83E-09 | 0.139157 |
| 0.119696 | 0.00962  | -0.26155 | 9.63E-09 | -0.00694 | 0.88107 | -0.12755 | 0.00577  | -0.09196 |
| 0.075036 | 0.10534  | -0.02087 | 0.6529   | -0.01374 | 0.76715 | -0.08853 | 0.05591  | -0.01914 |
| 0.033209 | 0.47403  | -0.19588 | 2.02E-05 | -0.02437 | 0.59933 | -0.12944 | 0.00509  | -0.01882 |
| -0.08115 | 0.07978  | -0.28783 | 2.33E-10 | -0.06717 | 0.14722 | -0.02117 | 0.6482   | -0.21512 |
| 0.325483 | 5.51E-13 | 0.25237  | 3.22E-08 | -0.01874 | 0.68634 | -0.14803 | 0.00134  | -0.1627  |
| 0.028605 | 0.53748  | -0.0267  | 0.56494  | 0.023078 | 0.61887 | 0.003968 | 0.93186  | -0.00624 |
| -0.11488 | 0.01298  | -0.05518 | 0.23397  | 0.008776 | 0.84997 | 0.07116  | 0.12463  | 0.041476 |
| -0.1424  | 0.00204  | -0.04913 | 0.28936  | 0.122895 | 0.00784 | 0.166169 | 0.00031  | 0.112977 |
| -0.08136 | 0.07903  | -0.02867 | 0.53661  | 0.147566 | 0.00138 | 0.202809 | 1.00E-05 | 0.059192 |
| -0.21935 | 1.70E-06 | -0.01405 | 0.76207  | 0.04926  | 0.28809 | 0.211195 | 4.15E-06 | -0.01897 |
| -0.19432 | 2.35E-05 | -0.30934 | 8.18E-12 | -0.02485 | 0.59221 | -0.07015 | 0.13011  | -0.14506 |
| -0.06011 | 0.19477  | -0.14011 | 0.00241  | 0.027813 | 0.54881 | -0.09458 | 0.04106  | -0.04554 |
| -0.17318 | 0.00017  | -0.14578 | 0.00158  | 0.073514 | 0.11262 | 0.199755 | 1.37E-05 | 0.061018 |
| -0.05943 | 0.19984  | 0.150626 | 0.00109  | 0.054028 | 0.2439  | 0.167503 | 0.00028  | 0.183789 |
| -0.16366 | 0.00038  | -0.18541 | 5.55E-05 | -0.03956 | 0.39374 | -0.11123 | 0.01618  | 0.001469 |
| 0.048867 | 0.29196  | -0.16885 | 0.00025  | 0.022794 | 0.62319 | 0.009892 | 0.83117  | -0.02374 |
| -0.03195 | 0.49094  | -0.22277 | 1.16E-06 | -0.02876 | 0.53521 | -0.14119 | 0.00223  | -0.07537 |
| 0.361792 | 6.89E-16 | 0.07001  | 0.13086  | -0.07398 | 0.11037 | -0.19219 | 2.90E-05 | -0.02656 |
| 0.152061 | 0.00098  | 0.000175 | 0.997    | -0.05332 | 0.25017 | -0.06849 | 0.13943  | -0.0318  |

|          |          |          |          |          |         |          |          |          |
|----------|----------|----------|----------|----------|---------|----------|----------|----------|
| -0.03478 | 0.45338  | -0.10479 | 0.02354  | 0.006788 | 0.88368 | 0.038249 | 0.40957  | -0.00187 |
| 0.149894 | 0.00116  | -0.04175 | 0.36804  | -0.03918 | 0.3982  | -0.13727 | 0.00295  | -0.03362 |
| 0.033442 | 0.47094  | 0.405552 | 6.47E-20 | -0.03296 | 0.47741 | 0.010683 | 0.8179   | -0.05726 |
| -0.02577 | 0.57861  | -0.28165 | 5.79E-10 | -0.01752 | 0.70568 | -0.09019 | 0.05144  | -0.06093 |
| 0.195523 | 2.09E-05 | 0.033773 | 0.46655  | 0.087836 | 0.05786 | 0.015513 | 0.73811  | 0.156547 |
| 0.009382 | 0.83976  | -0.09626 | 0.03757  | 0.156805 | 0.00067 | 0.221403 | 1.35E-06 | 0.415474 |
| 0.012981 | 0.77964  | -0.27249 | 2.15E-09 | -0.0238  | 0.60794 | -0.03038 | 0.51246  | -0.20883 |
| -0.10107 | 0.02898  | -0.37238 | 8.29E-17 | -0.02122 | 0.64742 | -0.09688 | 0.03636  | -0.05252 |
| 0.081931 | 0.07693  | 0.017986 | 0.69827  | 0.109414 | 0.01802 | 0.086518 | 0.06174  | 0.189958 |
| -0.02256 | 0.6268   | -0.15354 | 0.00087  | 0.054945 | 0.23598 | -0.00561 | 0.90371  | 0.109602 |
| -0.00918 | 0.84312  | -0.05488 | 0.23658  | 0.067382 | 0.14598 | 0.083239 | 0.07232  | 0.240093 |
| -0.07003 | 0.13072  | -0.17739 | 0.00012  | 0.031013 | 0.50378 | -0.0512  | 0.26948  | -0.02995 |
| 0.203763 | 9.07E-06 | -0.18853 | 4.13E-05 | 0.016369 | 0.72423 | -0.07127 | 0.12406  | 0.096082 |
| -0.03138 | 0.49878  | 0.022692 | 0.62475  | -0.03416 | 0.46149 | 0.029764 | 0.52112  | -0.05286 |
| 0.179415 | 9.68E-05 | -0.04683 | 0.31258  | -0.10204 | 0.02745 | -0.25901 | 1.35E-08 | -0.07773 |
| 0.140009 | 0.00243  | -0.12904 | 0.00523  | -0.0314  | 0.49847 | -0.03195 | 0.49102  | -0.07679 |
| 0.164082 | 0.00037  | 0.276826 | 1.16E-09 | -0.00633 | 0.89147 | -0.14555 | 0.00161  | 0.095284 |
| 0.193726 | 2.50E-05 | -0.15836 | 0.00059  | -0.0189  | 0.68374 | -0.08267 | 0.07429  | -0.05801 |
| -0.17171 | 0.00019  | 0.033877 | 0.46519  | -0.02963 | 0.52306 | 0.009619 | 0.83577  | -0.05986 |
| 0.055496 | 0.23132  | -0.07885 | 0.08873  | 0.029179 | 0.52934 | -0.01903 | 0.68171  | -0.01327 |
| -0.00925 | 0.84205  | -0.04595 | 0.32176  | 0.007622 | 0.86952 | 0.010803 | 0.81589  | -0.02083 |
| -0.03208 | 0.48919  | -0.05501 | 0.23544  | -0.01597 | 0.73063 | -0.02315 | 0.61785  | -0.04701 |
| -0.07533 | 0.10396  | 0.297288 | 5.53E-11 | 0.043183 | 0.35179 | 0.143006 | 0.00195  | 0.034399 |
| -0.09481 | 0.04056  | -0.19439 | 2.34E-05 | -0.03809 | 0.4115  | -0.09511 | 0.03992  | -0.08621 |
| -0.23511 | 2.76E-07 | -0.33599 | 8.70E-14 | -0.01539 | 0.74006 | 0.011646 | 0.80181  | -0.14615 |
| 0.097697 | 0.0348   | 0.186718 | 4.91E-05 | 0.01987  | 0.66844 | 0.143674 | 0.00185  | 0.020674 |
| -0.18532 | 5.60E-05 | -0.48061 | 2.30E-28 | -0.03296 | 0.47741 | -0.08502 | 0.06641  | -0.13764 |
| -0.21516 | 2.70E-06 | -0.42252 | 1.21E-21 | -0.03512 | 0.44891 | -0.08742 | 0.05908  | -0.10981 |
| 0.073599 | 0.1122   | 0.052885 | 0.25404  | 0.002347 | 0.95965 | 0.115429 | 0.01256  | 0.064922 |
| 0.198043 | 1.62E-05 | 0.022812 | 0.62292  | -0.00184 | 0.96835 | -0.02267 | 0.62515  | -0.04466 |
| 0.073742 | 0.1115   | 0.345962 | 1.41E-14 | 0.103616 | 0.02514 | 0.217043 | 2.20E-06 | 0.352723 |
| -0.00733 | 0.87442  | -0.18785 | 4.41E-05 | -0.00266 | 0.95434 | -0.03295 | 0.47751  | 0.115927 |
| 0.011783 | 0.79952  | -0.00959 | 0.83618  | 0.065003 | 0.16078 | 0.008795 | 0.84965  | -0.03512 |
| 0.145697 | 0.00159  | 0.194289 | 2.36E-05 | 0.065634 | 0.15675 | 0.097573 | 0.03503  | 0.08733  |
| 0.099591 | 0.03142  | -0.0452  | 0.32973  | -0.00751 | 0.87137 | -0.09174 | 0.04755  | -0.04857 |
| 0.185798 | 5.35E-05 | 0.166179 | 0.00031  | 0.000827 | 0.98577 | 0.028354 | 0.54106  | 0.000888 |
| 0.238308 | 1.87E-07 | 0.452587 | 5.82E-25 | 0.001408 | 0.97579 | 0.009598 | 0.83612  | 0.230649 |
| -0.10652 | 0.02132  | -0.21345 | 3.25E-06 | -0.02493 | 0.591   | -0.05248 | 0.25771  | -0.02828 |
| 0.131481 | 0.00443  | 0.232777 | 3.64E-07 | -0.0086  | 0.85298 | 0.021721 | 0.63964  | -0.12457 |
| -0.11878 | 0.0102   | -0.20614 | 7.08E-06 | -0.06015 | 0.19441 | -0.0698  | 0.13203  | -0.2332  |
| 0.025713 | 0.5794   | -0.02768 | 0.55066  | 0.063613 | 0.16994 | -0.00753 | 0.8711   | 0.242861 |
| 0.145403 | 0.00163  | 0.023965 | 0.60546  | -0.0437  | 0.34601 | -0.08681 | 0.06087  | -0.08113 |
| 0.038592 | 0.40537  | -0.16412 | 0.00037  | -0.04525 | 0.32923 | -0.06211 | 0.18025  | -0.16997 |
| -0.22949 | 5.36E-07 | -0.38772 | 3.35E-18 | -0.00289 | 0.95025 | 0.135256 | 0.00341  | -0.17428 |
| -0.00589 | 0.89899  | -0.06873 | 0.13809  | -0.02393 | 0.60604 | -0.04342 | 0.34912  | -0.087   |

|          |          |          |          |          |         |          |          |          |
|----------|----------|----------|----------|----------|---------|----------|----------|----------|
| -0.15232 | 0.00096  | -0.34057 | 3.81E-14 | -0.03803 | 0.4123  | -0.10496 | 0.02331  | -0.15441 |
| 0.044386 | 0.33852  | 0.225282 | 8.71E-07 | 0.033753 | 0.46682 | 0.085726 | 0.06417  | 0.142976 |
| 0.212366 | 3.66E-06 | -0.10969 | 0.01773  | 0.022432 | 0.62873 | -0.02156 | 0.64211  | -0.10904 |
| 0.07413  | 0.10963  | 0.205103 | 7.89E-06 | 0.106068 | 0.02188 | 0.188806 | 4.02E-05 | 0.237411 |
| -0.14709 | 0.00144  | -0.18147 | 8.02E-05 | 0.145645 | 0.0016  | 0.449277 | 1.40E-24 | -0.0527  |
| 0.028322 | 0.54152  | -0.15006 | 0.00114  | 0.048169 | 0.29892 | -0.02447 | 0.59783  | 0.043966 |
| 0.081858 | 0.0772   | -0.03888 | 0.40183  | 0.025784 | 0.57835 | 0.036173 | 0.43546  | 0.009797 |
| -0.15359 | 0.00087  | -0.36445 | 4.08E-16 | 0.014018 | 0.76256 | 0.040273 | 0.38522  | 0.067441 |
| -0.01522 | 0.74285  | -0.05448 | 0.24001  | 0.042658 | 0.35768 | -0.02802 | 0.54582  | 0.094227 |
| 0.188793 | 4.03E-05 | 0.219256 | 1.72E-06 | -0.03797 | 0.41301 | -0.07116 | 0.12464  | 0.094044 |
| 0.181544 | 7.96E-05 | -0.12047 | 0.00916  | 0.064197 | 0.16605 | 0.024009 | 0.60479  | 0.01005  |
| 0.20533  | 7.71E-06 | 0.084011 | 0.0697   | -0.02962 | 0.52311 | -0.13377 | 0.00378  | -0.02942 |
| -0.04516 | 0.33017  | -0.26491 | 6.11E-09 | -0.02359 | 0.61117 | -0.06423 | 0.16583  | -0.07212 |
| 0.02801  | 0.54599  | -0.26906 | 3.46E-09 | -0.06336 | 0.17163 | -0.16154 | 0.00046  | -0.10904 |
| -0.09053 | 0.05056  | 0.061933 | 0.18153  | 0.015477 | 0.7387  | 0.085381 | 0.06525  | 0.027628 |
| -0.16084 | 0.00048  | -0.46317 | 3.29E-26 | -0.06905 | 0.13622 | -0.16302 | 0.0004   | -0.1324  |
| 0.144672 | 0.00172  | 0.101641 | 0.02807  | 0.001969 | 0.96615 | 0.113021 | 0.01454  | -0.12291 |
| 0.065498 | 0.15762  | 0.075919 | 0.1013   | -0.01504 | 0.74576 | 0.062173 | 0.17984  | -0.13361 |
| 0.087818 | 0.05791  | 0.042483 | 0.35966  | -0.01553 | 0.73788 | -0.00237 | 0.9593   | -0.05718 |
| 0.115667 | 0.01237  | 0.072203 | 0.11919  | -0.00431 | 0.92595 | 0.031881 | 0.49191  | -0.08349 |
| -0.00504 | 0.91342  | -0.07267 | 0.11679  | 0.054555 | 0.23933 | 0.002935 | 0.94957  | 0.046201 |
| 0.137994 | 0.0028   | 0.075693 | 0.10232  | -0.04346 | 0.34875 | -0.03778 | 0.41532  | -0.04462 |
| 0.050452 | 0.27658  | 0.052581 | 0.25679  | -0.0103  | 0.82424 | -0.09937 | 0.0318   | -0.06901 |
| -0.08976 | 0.05256  | -0.26257 | 8.39E-09 | 0.001595 | 0.97257 | -0.03052 | 0.51064  | -0.03836 |
| -0.05135 | 0.26808  | -0.07684 | 0.09722  | -0.02322 | 0.61669 | -0.03975 | 0.39145  | -0.04895 |
| -0.12529 | 0.00671  | -0.07702 | 0.09645  | 6.02E-05 | 0.99896 | 0.036399 | 0.43261  | -0.03499 |
| -0.03407 | 0.46264  | -0.10892 | 0.01855  | 0.012876 | 0.78138 | -0.03572 | 0.44118  | -0.01327 |
| 0.057634 | 0.2138   | 0.00938  | 0.8398   | 0.019338 | 0.67681 | -0.01202 | 0.79563  | 0.048715 |
| 0.035515 | 0.44387  | 0.045152 | 0.33024  | -0.00284 | 0.95122 | 0.026692 | 0.56504  | -0.00908 |
| 0.111544 | 0.01588  | 0.206163 | 7.07E-06 | -0.01711 | 0.71223 | 0.014417 | 0.756    | 0.043674 |
| -0.11061 | 0.01679  | -0.1903  | 3.49E-05 | -0.04041 | 0.38363 | -0.07596 | 0.10112  | -0.12781 |
| 0.025801 | 0.5781   | 0.031611 | 0.49558  | -0.00346 | 0.94061 | 0.021679 | 0.64029  | -0.0717  |
| 0.065973 | 0.15462  | 0.034427 | 0.45797  | 0.043097 | 0.35274 | -0.00337 | 0.94206  | -0.04509 |
| -0.00663 | 0.88643  | -0.057   | 0.2189   | -0.00417 | 0.92839 | -0.00449 | 0.92291  | -0.02026 |
| 0.200425 | 1.28E-05 | 0.419781 | 2.33E-21 | 0.005632 | 0.90338 | 0.08522  | 0.06576  | 0.070099 |
| -0.08621 | 0.06268  | -0.12563 | 0.00656  | 0.001909 | 0.96718 | -0.00095 | 0.9836   | -0.07318 |
| 0.229982 | 5.06E-07 | 0.339052 | 5.01E-14 | 0.015388 | 0.74015 | 0.01603  | 0.72972  | 0.164951 |
| 0.15772  | 0.00062  | 0.14358  | 0.00187  | -0.03691 | 0.42611 | 0.039456 | 0.39493  | -0.09539 |
| -0.25733 | 1.69E-08 | -0.19635 | 1.93E-05 | 0.001103 | 0.98104 | 0.009477 | 0.83815  | -0.09089 |
| 0.103745 | 0.02496  | 0.324412 | 6.62E-13 | 0.005219 | 0.91043 | -0.00737 | 0.87384  | 0.025467 |
| 0.013371 | 0.7732   | 0.031612 | 0.49557  | -0.00457 | 0.92151 | -0.00542 | 0.90704  | -0.01732 |
| 0.099326 | 0.03187  | 0.097512 | 0.03515  | -0.07299 | 0.11523 | -0.10597 | 0.022    | -0.05888 |
| -0.03902 | 0.40015  | -0.08968 | 0.05277  | 0.008061 | 0.86207 | -0.0417  | 0.36856  | -0.06355 |
| 0.046801 | 0.31287  | -0.20909 | 5.19E-06 | -0.01013 | 0.82716 | -0.01756 | 0.70513  | -0.05192 |
| -0.13211 | 0.00424  | -0.32594 | 5.09E-13 | 0.086379 | 0.06216 | 0.077165 | 0.0958   | 0.055466 |

|          |          |          |          |          |          |          |          |          |
|----------|----------|----------|----------|----------|----------|----------|----------|----------|
| -0.01739 | 0.70784  | -0.36865 | 1.76E-16 | -0.04779 | 0.3027   | -0.14617 | 0.00154  | -0.01542 |
| -0.0369  | 0.42635  | -0.21657 | 2.32E-06 | -0.04006 | 0.38771  | -0.09153 | 0.04807  | -0.06056 |
| 0.019838 | 0.66894  | 0.004323 | 0.92576  | 0.045369 | 0.32792  | -0.02169 | 0.64016  | 0.197491 |
| -0.00109 | 0.98132  | -0.1737  | 0.00016  | 0.038726 | 0.40374  | -0.03015 | 0.51571  | -0.03275 |
| -0.11321 | 0.01437  | -0.21762 | 2.06E-06 | 0.205498 | 7.58E-06 | 0.321202 | 1.14E-12 | 0.053628 |
| 0.033476 | 0.47049  | 0.005248 | 0.90995  | 0.077268 | 0.09536  | 0.035414 | 0.44518  | -0.06048 |
| -0.15067 | 0.00109  | -0.26557 | 5.59E-09 | 0.090508 | 0.05062  | 0.066468 | 0.15154  | 0.126498 |
| 0.131349 | 0.00447  | 0.102819 | 0.02629  | -0.03388 | 0.46516  | 0.019415 | 0.67559  | 0.124374 |
| 0.212845 | 3.47E-06 | 0.199086 | 1.46E-05 | 0.041493 | 0.37097  | 0.043193 | 0.35168  | 0.130641 |
| 0.220983 | 1.42E-06 | 0.325159 | 5.82E-13 | -0.05856 | 0.20654  | -0.03014 | 0.5158   | -0.16658 |
| 0.01307  | 0.77817  | -0.10298 | 0.02605  | 0.027315 | 0.55599  | 0.153072 | 0.0009   | -0.18016 |
| -0.02558 | 0.58129  | -0.30178 | 2.74E-11 | -0.01503 | 0.746    | -0.09232 | 0.04616  | -0.0867  |
| -0.01005 | 0.82854  | -0.29114 | 1.42E-10 | -0.05171 | 0.26475  | -0.11958 | 0.0097   | -0.15767 |
| -0.02312 | 0.61827  | -0.1679  | 0.00027  | 0.085868 | 0.06373  | -0.05077 | 0.27351  | -0.04059 |
| 0.008466 | 0.85522  | 0.011223 | 0.80887  | 0.072351 | 0.11844  | 0.08068  | 0.08157  | 0.198349 |
| 0.036007 | 0.43758  | 0.189057 | 3.93E-05 | 0.063048 | 0.17377  | 0.166684 | 0.0003   | 0.379849 |
| 0.053418 | 0.24928  | 0.258944 | 1.36E-08 | -0.00833 | 0.85748  | -0.058   | 0.21091  | -0.10321 |
| -0.10492 | 0.02336  | -0.20159 | 1.13E-05 | 0.02714  | 0.55852  | 0.033449 | 0.47084  | 0.181767 |
| -0.03757 | 0.41799  | -0.07905 | 0.08794  | 0.0445   | 0.33728  | 0.075342 | 0.10393  | 0.100893 |
| -0.04774 | 0.30324  | -0.0097  | 0.83445  | -0.01033 | 0.82384  | -0.00568 | 0.9025   | -0.01465 |
| 0.099534 | 0.03151  | -0.12471 | 0.00697  | -0.00983 | 0.83229  | -0.06989 | 0.13153  | -0.02171 |
| 0.06744  | 0.14563  | -0.06549 | 0.15764  | 0.030285 | 0.51384  | -0.00231 | 0.96026  | -0.00755 |
| 0.066925 | 0.14874  | 0.333622 | 1.33E-13 | 0.02774  | 0.54985  | 0.133453 | 0.00386  | 0.068974 |
| -0.00785 | 0.86558  | 0.021749 | 0.63921  | -0.00842 | 0.85593  | -0.06674 | 0.14987  | -0.01176 |
| -0.15435 | 0.00082  | -0.33842 | 5.62E-14 | -0.05321 | 0.25114  | -0.04042 | 0.38345  | -0.24654 |
| -0.1868  | 4.87E-05 | -0.42288 | 1.11E-21 | -0.02372 | 0.60914  | -0.10305 | 0.02596  | -0.08135 |
| -0.04915 | 0.28914  | 0.006074 | 0.89584  | 0.101732 | 0.02793  | 0.202674 | 1.01E-05 | 0.063571 |
| 0.071301 | 0.12389  | -0.02241 | 0.6291   | -0.01454 | 0.75405  | -0.04565 | 0.32491  | -0.07526 |
| 0.03175  | 0.49368  | 0.001099 | 0.9811   | -0.0095  | 0.83781  | -0.05284 | 0.25449  | -0.06757 |
| 0.018349 | 0.69247  | -0.02502 | 0.5896   | 0.035136 | 0.44875  | 0.011192 | 0.80938  | -0.02714 |
| 0.198535 | 1.55E-05 | -0.07051 | 0.12812  | -0.02823 | 0.54276  | -0.1479  | 0.00135  | -0.08769 |
| 0.219562 | 1.66E-06 | 0.084691 | 0.06747  | 0.015801 | 0.73343  | -0.09573 | 0.03864  | 0.000294 |
| -0.11827 | 0.01053  | -0.05472 | 0.2379   | 0.097403 | 0.03536  | 0.079688 | 0.0854   | 0.14242  |
| -0.1225  | 0.00805  | -0.21154 | 4.00E-06 | -0.01663 | 0.72003  | -0.04906 | 0.29003  | -0.10227 |
| -0.10782 | 0.01977  | 0.138889 | 0.00263  | 0.014427 | 0.75584  | 0.148558 | 0.00128  | -0.06365 |
| 0.01489  | 0.74827  | -0.08476 | 0.06723  | 0.029803 | 0.52058  | -0.02592 | 0.57642  | -0.01355 |
| -0.19448 | 2.32E-05 | 0.018481 | 0.69038  | 0.015529 | 0.73786  | 0.080281 | 0.08309  | -0.02783 |
| 0.086267 | 0.0625   | 0.052709 | 0.25563  | 0.086746 | 0.06105  | 0.067136 | 0.14746  | 0.226112 |
| -0.12296 | 0.00781  | -0.10048 | 0.02992  | 0.114033 | 0.01367  | 0.245183 | 8.03E-08 | 0.288028 |
| -0.1468  | 0.00147  | -0.22527 | 8.72E-07 | 0.009131 | 0.84399  | 0.028231 | 0.54282  | 0.131811 |
| 0.044837 | 0.33363  | -0.01446 | 0.75537  | -0.04732 | 0.30757  | -0.0544  | 0.24071  | 0.065452 |
| 0.243786 | 9.56E-08 | 0.043784 | 0.34512  | -0.02679 | 0.56361  | -0.09623 | 0.03763  | 0.039167 |
| -0.17818 | 0.00011  | -0.3946  | 7.52E-19 | 0.008155 | 0.86048  | -0.06118 | 0.18692  | -0.14091 |
| 0.14518  | 0.00166  | -0.06752 | 0.14516  | -0.01027 | 0.8248   | -0.02543 | 0.58361  | -0.01849 |
| 0.089845 | 0.05235  | -0.08887 | 0.05498  | 0.234694 | 2.90E-07 | 0.010699 | 0.81764  | 0.004725 |

|          |          |          |          |          |         |          |          |          |
|----------|----------|----------|----------|----------|---------|----------|----------|----------|
| 0.006544 | 0.88785  | -0.13733 | 0.00294  | -0.04046 | 0.38297 | -0.11055 | 0.01685  | -0.05829 |
| -0.12058 | 0.0091   | -0.38975 | 2.16E-18 | 0.006961 | 0.88074 | -0.03792 | 0.41356  | -0.1033  |
| -0.18249 | 7.29E-05 | -0.25766 | 1.62E-08 | 0.097711 | 0.03478 | 0.096922 | 0.03628  | 0.210549 |
| 0.013178 | 0.77639  | -0.21686 | 2.24E-06 | -0.01024 | 0.82529 | -0.05009 | 0.28004  | 0.050597 |
| 0.063341 | 0.17178  | -0.36776 | 2.11E-16 | 0.01936  | 0.67646 | -0.12159 | 0.00853  | -0.04971 |
| -0.04084 | 0.37855  | -0.17981 | 9.34E-05 | -0.01503 | 0.746   | 0.099704 | 0.03122  | -0.04841 |
| 0.03227  | 0.48664  | 0.435999 | 4.32E-23 | 0.058735 | 0.20516 | 0.087329 | 0.05933  | 0.201505 |
| -0.05292 | 0.25373  | -0.35755 | 1.57E-15 | 0.03066  | 0.50865 | -0.07245 | 0.11792  | -0.03589 |
| 0.093892 | 0.04255  | -0.03514 | 0.44876  | 0.0297   | 0.52201 | 0.078743 | 0.08918  | 0.058855 |
| -0.03179 | 0.49308  | -0.0557  | 0.22959  | 0.006636 | 0.88628 | 0.019917 | 0.66771  | -0.05975 |
| 0.06142  | 0.18517  | 0.21732  | 2.13E-06 | 0.045806 | 0.32328 | 0.12924  | 0.00516  | 0.129473 |
| -0.05357 | 0.24796  | 0.013461 | 0.77172  | -0.00576 | 0.90113 | -0.02003 | 0.66589  | -0.0198  |
| 0.037548 | 0.41822  | 0.214848 | 2.80E-06 | -0.01746 | 0.7067  | 0.009441 | 0.83876  | -0.19168 |
| 0.036697 | 0.42884  | -0.16396 | 0.00037  | 0.031671 | 0.49476 | -0.03184 | 0.49244  | -0.08878 |
| 0.222905 | 1.14E-06 | 0.271657 | 2.41E-09 | 0.072076 | 0.11985 | 0.326322 | 4.76E-13 | 0.011388 |
| 0.103782 | 0.02491  | -0.12934 | 0.00512  | -0.06356 | 0.17029 | -0.08195 | 0.07685  | -0.30591 |
| 0.060157 | 0.19439  | 0.265316 | 5.79E-09 | 0.085724 | 0.06418 | 0.338285 | 5.76E-14 | 0.023797 |
| 0.094255 | 0.04176  | 0.216816 | 2.25E-06 | -0.00828 | 0.85832 | -0.1     | 0.03071  | -0.00072 |
| 0.076075 | 0.10059  | 0.16116  | 0.00047  | 0.055725 | 0.22939 | 0.201008 | 1.20E-05 | 0.069867 |
| 0.100696 | 0.02957  | -0.01213 | 0.79379  | -0.00806 | 0.86202 | 0.001588 | 0.9727   | -0.12224 |
| -0.00375 | 0.93559  | -0.10662 | 0.0212   | 0.067513 | 0.14519 | 0.177589 | 0.00011  | 0.029826 |
| -0.03279 | 0.47961  | -0.16604 | 0.00031  | -0.01343 | 0.77223 | 0.00165  | 0.97164  | -0.1703  |
| 0.062605 | 0.17682  | 0.100072 | 0.0306   | 0.036997 | 0.42508 | -0.05086 | 0.27274  | 0.076898 |
| 0.042416 | 0.36041  | -0.21375 | 3.15E-06 | -0.07262 | 0.11705 | -0.15852 | 0.00059  | -0.16472 |
| -0.04895 | 0.29113  | -0.16373 | 0.00038  | -0.03204 | 0.48976 | -0.03108 | 0.50281  | -0.06819 |
| -0.11784 | 0.01082  | -0.05865 | 0.20579  | -0.02454 | 0.59678 | -0.00824 | 0.85903  | -0.0096  |
| 0.084392 | 0.06844  | 0.023329 | 0.61506  | -0.01636 | 0.72441 | -0.0406  | 0.38131  | -0.04404 |
| -0.08646 | 0.06192  | -0.15331 | 0.00089  | -0.01881 | 0.68516 | -0.01089 | 0.81449  | -0.07125 |
| 0.015043 | 0.74576  | 0.092289 | 0.04623  | 0.106869 | 0.02089 | 0.019104 | 0.6805   | -0.01348 |
| -0.12325 | 0.00766  | -0.17797 | 0.00011  | -0.02483 | 0.5925  | 0.02053  | 0.65811  | -0.11906 |
| 0.170826 | 0.00021  | 0.356389 | 1.97E-15 | 0.024478 | 0.59775 | -0.04559 | 0.32554  | 0.046026 |
| 0.000527 | 0.99094  | 0.305298 | 1.57E-11 | 0.039804 | 0.39078 | 0.132249 | 0.0042   | -0.01171 |
| 0.152499 | 0.00095  | 0.287799 | 2.34E-10 | 0.04633  | 0.31777 | 0.041396 | 0.37209  | 0.083066 |
| -0.0661  | 0.15381  | -0.23563 | 2.59E-07 | -0.00372 | 0.93617 | -0.13717 | 0.00298  | -0.03516 |
| 0.069875 | 0.13161  | 0.235007 | 2.79E-07 | -0.03844 | 0.40721 | -0.06569 | 0.15639  | -0.04859 |
| -0.11853 | 0.01036  | -0.48784 | 2.71E-29 | 0.000271 | 0.99533 | -0.07801 | 0.09221  | -0.01841 |
| 0.164649 | 0.00035  | 0.20877  | 5.37E-06 | 0.013791 | 0.76629 | 0.05833  | 0.20832  | 0.071194 |
| 0.105462 | 0.02265  | 0.376261 | 3.74E-17 | 0.074302 | 0.1088  | 0.072649 | 0.11692  | 0.16802  |
| 0.00647  | 0.8891   | -0.09011 | 0.05165  | 0.040126 | 0.38696 | 0.011066 | 0.81149  | -0.07505 |
| 0.303714 | 2.02E-11 | 0.208458 | 5.55E-06 | 0.02251  | 0.62753 | -0.06002 | 0.19541  | 0.022406 |
| 0.217206 | 2.16E-06 | 0.25052  | 4.09E-08 | 0.029392 | 0.52635 | -0.02809 | 0.54481  | 0.193981 |
| 0.019746 | 0.67038  | -0.07054 | 0.12797  | 0.046408 | 0.31695 | 0.031546 | 0.49647  | 0.079873 |
| -0.15811 | 0.00061  | -0.24026 | 1.48E-07 | 0.046295 | 0.31814 | 0.146132 | 0.00154  | 0.137126 |
| -0.05256 | 0.25697  | -0.14801 | 0.00134  | 0.03668  | 0.42906 | -0.01492 | 0.74774  | -0.04535 |
| -0.05249 | 0.25762  | -0.16971 | 0.00023  | 0.028067 | 0.54516 | 0.091132 | 0.04905  | 0.017033 |

|          |          |          |          |          |         |          |          |          |
|----------|----------|----------|----------|----------|---------|----------|----------|----------|
| 0.046584 | 0.31512  | -0.34336 | 2.28E-14 | -0.04122 | 0.37414 | -0.1699  | 0.00023  | -0.19979 |
| -0.02743 | 0.55434  | -0.06351 | 0.17064  | 0.06882  | 0.13755 | -0.00477 | 0.91816  | -0.00774 |
| 0.007682 | 0.86849  | -0.11602 | 0.01211  | 0.079192 | 0.08737 | 0.112567 | 0.01494  | 0.176428 |
| 0.204674 | 8.25E-06 | 0.314271 | 3.65E-12 | 0.039951 | 0.38903 | 0.094953 | 0.04026  | 0.116124 |
| 0.052221 | 0.26006  | -0.20186 | 1.10E-05 | -0.0322  | 0.48763 | -0.08937 | 0.05361  | -0.01827 |
| 0.168773 | 0.00025  | 0.248319 | 5.41E-08 | -0.00446 | 0.9234  | -0.01219 | 0.79281  | 0.059191 |
| 0.062784 | 0.17558  | -0.17601 | 0.00013  | -0.00631 | 0.89191 | -0.10464 | 0.02374  | -0.03904 |
| -0.06841 | 0.13991  | 0.091978 | 0.04697  | 0.021242 | 0.64705 | 0.007905 | 0.86471  | 0.036835 |
| -0.08545 | 0.06505  | 0.130297 | 0.0048   | 0.000393 | 0.99324 | -0.01936 | 0.67647  | 0.019477 |
| 0.115251 | 0.01269  | 0.206978 | 6.49E-06 | 0.026932 | 0.56155 | 0.092497 | 0.04574  | 0.062349 |
| 0.105324 | 0.02283  | -0.09646 | 0.03718  | -0.01284 | 0.78198 | 0.009563 | 0.83671  | 0.001465 |
| 0.131798 | 0.00433  | 0.212235 | 3.71E-06 | 0.050253 | 0.27848 | 0.037213 | 0.42238  | 0.050969 |
| -0.08694 | 0.06048  | -0.06172 | 0.18304  | -0.0302  | 0.51497 | -0.04183 | 0.3671   | -0.13054 |
| 0.1779   | 0.00011  | -0.13394 | 0.00374  | -0.08633 | 0.06232 | -0.16207 | 0.00044  | -0.19065 |
| -0.05538 | 0.23228  | -0.06638 | 0.15207  | -0.02351 | 0.61237 | 0.021034 | 0.65027  | 0.056594 |
| -0.11004 | 0.01737  | -0.27835 | 9.33E-10 | -0.0125  | 0.78753 | 0.045917 | 0.32211  | -0.03777 |
| -0.11386 | 0.01382  | -0.04628 | 0.31831  | 0.126301 | 0.00628 | 0.35549  | 2.34E-15 | 0.307695 |
| 0.000564 | 0.9903   | 0.101581 | 0.02817  | 0.078154 | 0.09161 | 0.178407 | 0.00011  | 0.121537 |
| 0.006566 | 0.88746  | -0.02142 | 0.64432  | -0.03327 | 0.47324 | -0.02342 | 0.61367  | -0.04391 |
| -0.08505 | 0.06629  | 0.153004 | 0.00091  | 0.128981 | 0.00525 | 0.202764 | 1.01E-05 | 0.350102 |
| 0.002374 | 0.95919  | 0.207269 | 6.29E-06 | 0.071246 | 0.12418 | 0.154593 | 0.0008   | 0.130647 |
| -0.05255 | 0.25707  | -0.18082 | 8.51E-05 | -0.05798 | 0.21109 | -0.08275 | 0.07401  | -0.0517  |
| 0.008408 | 0.8562   | -0.19796 | 1.64E-05 | 0.013188 | 0.77622 | 0.026697 | 0.56497  | -0.01621 |
| -0.03774 | 0.41581  | -0.14788 | 0.00135  | -0.0032  | 0.94495 | 0.033846 | 0.46559  | -0.22755 |
| -0.1506  | 0.0011   | -0.11697 | 0.01142  | -0.0191  | 0.68056 | -0.05875 | 0.20504  | -0.06885 |
| 0.096343 | 0.03741  | 0.126239 | 0.0063   | 0.043649 | 0.34661 | 0.103926 | 0.02471  | -0.06861 |
| 0.224    | 1.01E-06 | 0.030778 | 0.50701  | -0.02755 | 0.55266 | -0.03234 | 0.48571  | -0.1018  |
| 0.00144  | 0.97524  | 0.021945 | 0.6362   | -0.02037 | 0.66063 | 0.079655 | 0.08553  | -0.07197 |
| 0.176182 | 0.00013  | -0.18473 | 5.92E-05 | 0.084475 | 0.06817 | 0.162419 | 0.00043  | -0.04377 |
| -0.22893 | 5.72E-07 | -0.24807 | 5.58E-08 | 0.049    | 0.29065 | 0.149613 | 0.00118  | 0.126342 |
| 0.036217 | 0.43491  | -0.22775 | 6.55E-07 | 0.013858 | 0.76518 | -0.0962  | 0.0377   | -0.10313 |
| 0.135923 | 0.00325  | 0.120216 | 0.00931  | -0.0087  | 0.85124 | -0.05442 | 0.24054  | 0.113507 |
| -0.05414 | 0.2429   | -0.14074 | 0.0023   | 0.02152  | 0.64275 | 0.071879 | 0.12086  | -0.12465 |
| 0.220105 | 1.56E-06 | -0.11418 | 0.01355  | -0.02497 | 0.59039 | -0.07604 | 0.10077  | -0.12918 |
| -0.0407  | 0.38018  | -0.1296  | 0.00503  | -0.01657 | 0.72095 | -0.05911 | 0.20227  | -0.03971 |
| 0.067977 | 0.14244  | 0.035129 | 0.44885  | 0.018653 | 0.68765 | 0.154654 | 0.0008   | 0.178844 |
| 0.1947   | 2.27E-05 | 0.454824 | 3.20E-25 | -0.08539 | 0.06522 | 0.031099 | 0.50259  | 0.046469 |
| -0.05943 | 0.19987  | 0.057004 | 0.21886  | 0.016641 | 0.71983 | 0.080554 | 0.08204  | 0.063164 |
| 0.101192 | 0.02878  | 0.1574   | 0.00064  | 0.009885 | 0.83128 | -0.03507 | 0.44958  | -0.03041 |
| -0.15481 | 0.00079  | -0.37633 | 3.69E-17 | 0.038251 | 0.40955 | 0.062605 | 0.17682  | 0.123388 |
| -0.11894 | 0.0101   | -0.17597 | 0.00013  | -0.03878 | 0.40309 | 0.012105 | 0.79418  | -0.18807 |
| 0.100779 | 0.02944  | -0.18028 | 8.94E-05 | 0.021629 | 0.64107 | -0.05526 | 0.23327  | 0.027371 |
| 0.12212  | 0.00825  | 0.191297 | 3.16E-05 | 0.022184 | 0.63253 | 0.022305 | 0.63067  | 0.051644 |
| -0.1159  | 0.0122   | 8.19E-05 | 0.99859  | -0.04764 | 0.30431 | 0.017393 | 0.70774  | -0.13159 |
| 0.048819 | 0.29244  | 0.122628 | 0.00798  | 0.055656 | 0.22996 | 0.005952 | 0.89793  | 0.169361 |

|          |          |          |          |          |          |          |          |          |
|----------|----------|----------|----------|----------|----------|----------|----------|----------|
| 0.059047 | 0.20277  | 0.155989 | 0.00072  | 0.130135 | 0.00485  | 0.28308  | 4.70E-10 | 0.236654 |
| 0.24688  | 6.49E-08 | -0.02797 | 0.5465   | 0.043748 | 0.34552  | -0.02186 | 0.63751  | 0.039311 |
| 0.113219 | 0.01436  | 0.367907 | 2.05E-16 | 0.104713 | 0.02363  | 0.271032 | 2.63E-09 | 0.119991 |
| 0.176707 | 0.00012  | 0.238917 | 1.74E-07 | 0.130788 | 0.00464  | 0.136867 | 0.00304  | 0.368938 |
| -0.15571 | 0.00073  | -0.4166  | 4.97E-21 | -0.0756  | 0.10276  | -0.14831 | 0.00131  | -0.13295 |
| -0.05504 | 0.23519  | -0.08848 | 0.05604  | -0.03419 | 0.46113  | 0.007754 | 0.86728  | -0.04971 |
| 0.073277 | 0.11378  | 0.244442 | 8.81E-08 | 0.01288  | 0.78132  | 0.041897 | 0.36632  | 0.145187 |
| -0.05242 | 0.25822  | -0.27693 | 1.14E-09 | -0.02229 | 0.63087  | -0.04861 | 0.29448  | -0.02561 |
| -0.1189  | 0.01012  | -0.19135 | 3.15E-05 | 0.106388 | 0.02148  | 0.053477 | 0.24876  | -0.06195 |
| 0.152134 | 0.00097  | 0.236454 | 2.35E-07 | 0.075965 | 0.10109  | 0.059253 | 0.2012   | 0.194388 |
| 0.010178 | 0.82637  | 0.020464 | 0.65915  | 0.024006 | 0.60484  | 0.00806  | 0.86209  | 0.036445 |
| 0.023588 | 0.61114  | -0.08563 | 0.06446  | 0.064367 | 0.16492  | 0.053138 | 0.25178  | 0.238973 |
| -0.11948 | 0.00976  | -0.23026 | 4.90E-07 | 0.024403 | 0.59887  | 0.048771 | 0.29292  | -0.12463 |
| -0.15316 | 0.0009   | -0.22385 | 1.03E-06 | 0.003263 | 0.94394  | 0.074001 | 0.11025  | -0.08402 |
| -0.04677 | 0.31314  | 0.025481 | 0.58282  | 0.018015 | 0.6978   | 0.000581 | 0.99002  | 0.103372 |
| -0.07905 | 0.08793  | 0.2693   | 3.35E-09 | 0.077633 | 0.0938   | 0.135863 | 0.00326  | 0.384317 |
| 0.107305 | 0.02038  | -0.03631 | 0.43369  | 0.086767 | 0.06099  | 0.034247 | 0.46032  | 0.016423 |
| 0.066794 | 0.14954  | 0.030385 | 0.51246  | 0.351998 | 4.56E-15 | 0.099506 | 0.03156  | 0.425567 |
| -0.20387 | 8.97E-06 | -0.32116 | 1.15E-12 | 0.087237 | 0.0596   | -0.0341  | 0.46223  | 0.056675 |
| 0.077326 | 0.09511  | 0.143458 | 0.00188  | 0.063234 | 0.17251  | 0.128101 | 0.00557  | 0.186398 |
| -0.03306 | 0.47596  | 0.091755 | 0.04751  | 0.044983 | 0.33206  | 0.092249 | 0.04633  | 0.176529 |
| 0.041678 | 0.36884  | -0.01462 | 0.75265  | -0.01972 | 0.67073  | -0.0863  | 0.0624   | 0.014668 |
| -0.0634  | 0.17139  | 0.103658 | 0.02508  | -0.08407 | 0.0695   | -0.03195 | 0.49092  | -0.23509 |
| -0.0955  | 0.03913  | -0.08964 | 0.05287  | -0.06445 | 0.16436  | -0.09266 | 0.04537  | -0.10061 |
| 0.005719 | 0.90191  | -0.16274 | 0.00041  | 0.127269 | 0.00588  | 0.246543 | 6.77E-08 | 0.032267 |
| -0.21939 | 1.70E-06 | -0.30605 | 1.39E-11 | -0.00353 | 0.9393   | -0.01911 | 0.68038  | -0.08865 |
| -0.23572 | 2.56E-07 | -0.15399 | 0.00084  | 0.087445 | 0.05899  | 0.133527 | 0.00384  | 0.140572 |
| 0.001632 | 0.97194  | -0.15816 | 0.0006   | 0.029395 | 0.5263   | 0.067968 | 0.14249  | 0.090524 |
| -0.14415 | 0.00179  | -0.41135 | 1.70E-20 | -0.03949 | 0.39451  | 0.006744 | 0.88443  | -0.3402  |
| -0.05745 | 0.21529  | -0.27295 | 2.01E-09 | -0.00104 | 0.98217  | 0.107198 | 0.0205   | -0.00793 |
| 0.16665  | 0.0003   | 0.037164 | 0.42298  | 0.045    | 0.33187  | -0.01415 | 0.76044  | 0.360396 |
| -0.00764 | 0.86916  | -0.30857 | 9.27E-12 | -0.00514 | 0.91174  | 0.018446 | 0.69094  | 0.014534 |
| -0.0863  | 0.06239  | -0.08477 | 0.06722  | 0.024398 | 0.59894  | 0.022299 | 0.63076  | -0.09264 |
| -0.02067 | 0.65594  | -0.10571 | 0.02234  | 0.060793 | 0.18971  | 0.003066 | 0.94732  | 0.041109 |
| 0.026728 | 0.56451  | -0.15364 | 0.00087  | -0.06016 | 0.19438  | -0.06276 | 0.17572  | -0.10169 |
| -0.20424 | 8.64E-06 | -0.04938 | 0.28689  | -0.0692  | 0.13537  | -0.08039 | 0.08268  | -0.0579  |
| 0.043259 | 0.35094  | 0.13493  | 0.00348  | 0.009133 | 0.84396  | 0.103785 | 0.02491  | 0.087069 |
| 0.019867 | 0.66849  | -0.1621  | 0.00044  | 0.012597 | 0.786    | -0.03139 | 0.49865  | -0.11066 |
| 0.141736 | 0.00214  | 0.115503 | 0.0125   | 0.021186 | 0.64791  | 0.076533 | 0.09856  | -0.11513 |
| 0.122546 | 0.00802  | 0.130583 | 0.00471  | 0.032773 | 0.47986  | -0.06547 | 0.15776  | 0.079018 |
| -0.08815 | 0.05698  | -0.02349 | 0.61256  | -0.0002  | 0.99652  | -0.02515 | 0.5877   | -0.01898 |
| 0.074435 | 0.10817  | -0.10326 | 0.02565  | -0.03358 | 0.4691   | -0.11494 | 0.01294  | -0.06706 |
| -0.01305 | 0.77853  | -0.174   | 0.00016  | 0.052951 | 0.25345  | -0.02266 | 0.62532  | 0.00841  |
| -0.05704 | 0.21857  | -0.0085  | 0.85473  | 0.035366 | 0.44579  | 0.150079 | 0.00114  | -0.08967 |
| -0.09031 | 0.05113  | -0.14094 | 0.00227  | 0.126293 | 0.00628  | 0.307433 | 1.11E-11 | 0.023534 |



|          |          |          |          |          |         |          |          |          |
|----------|----------|----------|----------|----------|---------|----------|----------|----------|
| 0.233514 | 3.33E-07 | 0.092348 | 0.04609  | 0.078527 | 0.09006 | 0.089603 | 0.05298  | -0.05033 |
| 0.056819 | 0.22036  | -0.05721 | 0.21721  | 0.005138 | 0.91183 | 0.045759 | 0.32378  | -0.04317 |
| -0.02867 | 0.53654  | 0.097426 | 0.03531  | 0.11063  | 0.01677 | 0.231803 | 4.08E-07 | 0.270947 |
| 0.021537 | 0.64249  | -0.01196 | 0.79663  | -0.02465 | 0.59524 | -0.06429 | 0.16546  | 0.1177   |
| -0.15407 | 0.00084  | -0.29028 | 1.61E-10 | 0.018935 | 0.68317 | -0.04915 | 0.28915  | -0.09468 |
| -0.04548 | 0.32677  | 0.000439 | 0.99245  | 0.018292 | 0.69339 | 0.151028 | 0.00106  | 0.113694 |
| 0.056972 | 0.21912  | -0.1545  | 0.00081  | -0.0081  | 0.86141 | -0.03054 | 0.51025  | -0.22598 |
| -0.00379 | 0.93495  | 0.014533 | 0.7541   | 0.03788  | 0.41411 | -0.02646 | 0.56849  | 0.163789 |
| -0.00497 | 0.91461  | 0.174369 | 0.00015  | 0.009393 | 0.83958 | -0.05164 | 0.26545  | -0.01761 |
| 0.004988 | 0.91438  | -0.10961 | 0.01781  | -0.00052 | 0.99112 | -0.04466 | 0.3356   | -0.01226 |
| -0.06768 | 0.14417  | 0.00993  | 0.83052  | 0.010744 | 0.81688 | -0.01722 | 0.71058  | -0.00251 |
| -0.0676  | 0.14467  | 0.083173 | 0.07255  | 0.055024 | 0.23531 | 0.158252 | 0.0006   | 0.255739 |
| 0.170058 | 0.00022  | 0.396886 | 4.54E-19 | -0.01099 | 0.81268 | 0.014865 | 0.74866  | -0.07082 |
| 0.040483 | 0.38274  | 0.228041 | 6.34E-07 | -0.00146 | 0.97486 | 0.012327 | 0.79048  | -0.10357 |
| 0.178008 | 0.00011  | 0.414605 | 7.95E-21 | 0.00575  | 0.90137 | 0.029159 | 0.52963  | 0.262641 |
| -0.01396 | 0.76353  | -0.26742 | 4.34E-09 | -0.0251  | 0.58843 | 0.052878 | 0.2541   | -0.18692 |
| 0.090085 | 0.05171  | 0.360457 | 8.94E-16 | 0.040496 | 0.38259 | 0.33578  | 9.03E-14 | 0.114855 |
| -0.16043 | 0.0005   | -0.11581 | 0.01226  | -0.0063  | 0.89202 | 0.036322 | 0.43358  | -0.0474  |
| -0.02449 | 0.59751  | -0.16848 | 0.00025  | 0.020961 | 0.65141 | 0.066746 | 0.14983  | 0.063571 |
| 0.016744 | 0.71817  | -0.0523  | 0.25938  | -0.00753 | 0.87115 | -0.04491 | 0.33284  | 0.062145 |
| -0.02858 | 0.53785  | -0.0184  | 0.69171  | 0.001279 | 0.97801 | -0.01077 | 0.81647  | 0.000973 |
| 0.086644 | 0.06136  | 0.133048 | 0.00397  | -0.00701 | 0.87996 | -0.04614 | 0.31977  | -0.12065 |
| 0.051244 | 0.26909  | 0.1779   | 0.00011  | -0.01428 | 0.75819 | -0.07955 | 0.08594  | -0.02394 |
| -0.06592 | 0.15495  | -0.26324 | 7.66E-09 | -0.04387 | 0.34415 | -0.15675 | 0.00068  | -0.05053 |
| 0.043341 | 0.35003  | -0.00554 | 0.90489  | 0.072635 | 0.11699 | 0.158922 | 0.00057  | 0.195924 |
| -0.07141 | 0.1233   | 0.066474 | 0.1515   | 0.033944 | 0.4643  | 0.121795 | 0.00842  | 0.193477 |
| -0.01487 | 0.74865  | -0.12703 | 0.00598  | -0.00134 | 0.9769  | 0.023    | 0.62006  | 0.040318 |
| 0.123128 | 0.00773  | 0.269607 | 3.21E-09 | 0.055526 | 0.23106 | -0.00491 | 0.91573  | 0.019025 |
| 0.017986 | 0.69826  | -0.02347 | 0.61293  | 0.032673 | 0.4812  | 0.08642  | 0.06204  | -0.01009 |
| -0.09726 | 0.03562  | -0.02651 | 0.56765  | 0.059984 | 0.19568 | 0.123372 | 0.0076   | 0.130978 |
| 0.15644  | 0.00069  | -0.24945 | 4.69E-08 | -0.02994 | 0.51864 | -0.14315 | 0.00193  | -0.09456 |
| 0.030591 | 0.5096   | -0.0843  | 0.06874  | 0.012034 | 0.79534 | -0.02815 | 0.54403  | 0.0164   |
| 0.206345 | 6.93E-06 | 0.09205  | 0.0468   | -0.05802 | 0.21072 | 0.009087 | 0.84472  | -0.18853 |
| -0.08036 | 0.08278  | -0.11747 | 0.01107  | 0.025734 | 0.57909 | -0.00456 | 0.92176  | 0.101434 |
| -0.1733  | 0.00017  | -0.21027 | 4.58E-06 | 0.013238 | 0.77539 | 0.170461 | 0.00021  | -0.25408 |
| 0.017118 | 0.71216  | 0.054864 | 0.23668  | 0.050564 | 0.27551 | 0.174341 | 0.00015  | -0.01792 |
| 0.075269 | 0.10427  | -0.11182 | 0.01562  | -0.00926 | 0.84179 | 0.098005 | 0.03423  | -0.17206 |
| -0.1424  | 0.00204  | -0.28636 | 2.90E-10 | 0.030405 | 0.51218 | 0.041533 | 0.37051  | -0.03649 |
| -0.19663 | 1.87E-05 | -0.2439  | 9.43E-08 | -0.01213 | 0.79375 | -0.04521 | 0.32958  | -0.00184 |
| 0.000871 | 0.98502  | -0.2172  | 2.16E-06 | 0.015615 | 0.73646 | -0.00974 | 0.8338   | 0.072799 |
| 0.265378 | 5.74E-09 | 0.377296 | 3.02E-17 | -0.01074 | 0.81698 | 0.01476  | 0.75039  | -0.02423 |
| 0.056919 | 0.21955  | -0.18473 | 5.92E-05 | -0.01478 | 0.75003 | -0.04379 | 0.34508  | -0.04407 |
| -0.05079 | 0.27334  | -0.02298 | 0.62029  | 0.021043 | 0.65014 | -0.00602 | 0.89675  | 0.010867 |
| -0.03644 | 0.43206  | 0.145473 | 0.00162  | -0.06553 | 0.15741 | 0.034852 | 0.45244  | -0.05881 |
| -0.01923 | 0.67848  | 0.179708 | 9.42E-05 | -0.00618 | 0.89407 | 0.067061 | 0.14791  | 0.083835 |

|          |          |          |          |          |          |          |          |          |
|----------|----------|----------|----------|----------|----------|----------|----------|----------|
| -0.03771 | 0.41619  | 0.004862 | 0.91655  | -0.00686 | 0.88239  | -0.01823 | 0.69431  | 0.022175 |
| -0.13462 | 0.00356  | -0.24622 | 7.05E-08 | 0.121432 | 0.00862  | 0.005037 | 0.91355  | 0.15419  |
| 0.162731 | 0.00041  | -0.20169 | 1.12E-05 | 0.005507 | 0.90552  | -0.039   | 0.40045  | -0.0841  |
| 0.124813 | 0.00692  | -0.29346 | 9.95E-11 | -0.02466 | 0.59505  | 0.045639 | 0.32505  | -0.30342 |
| -0.03644 | 0.43215  | 0.14633  | 0.00152  | -0.03942 | 0.39532  | -0.01748 | 0.70642  | -0.17903 |
| 0.06731  | 0.14641  | -0.03748 | 0.4191   | 0.063394 | 0.17142  | 0.097006 | 0.03611  | 0.396376 |
| -0.05254 | 0.25718  | -0.09531 | 0.03951  | 0.022117 | 0.63356  | -0.03588 | 0.43921  | -0.01127 |
| 0.191377 | 3.14E-05 | -0.29011 | 1.65E-10 | -0.0099  | 0.8311   | -0.0118  | 0.79924  | -0.12948 |
| -0.03991 | 0.38951  | 0.181758 | 7.81E-05 | 0.069457 | 0.13393  | 0.142883 | 0.00197  | 0.288548 |
| -0.20734 | 6.24E-06 | -0.21904 | 1.76E-06 | 0.005992 | 0.89724  | 0.065441 | 0.15798  | 0.088968 |
| 0.036196 | 0.43517  | 0.210973 | 4.25E-06 | 0.017104 | 0.71238  | 0.187415 | 4.59E-05 | 0.080734 |
| -0.09173 | 0.04756  | -0.46058 | 6.71E-26 | -0.06584 | 0.15545  | -0.13154 | 0.00441  | -0.28406 |
| 0.130097 | 0.00486  | 0.097515 | 0.03514  | 0.070343 | 0.12903  | 0.108932 | 0.01854  | 0.120629 |
| 0.106962 | 0.02078  | 0.046788 | 0.31301  | 0.010415 | 0.82238  | -0.02303 | 0.61965  | 0.080426 |
| 0.079251 | 0.08713  | -0.10196 | 0.02758  | 0.055275 | 0.23318  | 0.044149 | 0.34111  | 0.154858 |
| -0.048   | 0.3006   | -0.25684 | 1.80E-08 | 0.041954 | 0.36568  | 0.095456 | 0.03921  | -0.03508 |
| 0.147134 | 0.00143  | 0.212919 | 3.45E-06 | -0.03361 | 0.46868  | -0.08776 | 0.05807  | -0.02131 |
| 0.190147 | 3.54E-05 | 0.445833 | 3.46E-24 | 0.153819 | 0.00085  | 0.261216 | 1.01E-08 | 0.230096 |
| 0.004934 | 0.91531  | 0.006793 | 0.8836   | 0.027865 | 0.54806  | -0.06284 | 0.17517  | -0.18549 |
| -0.15722 | 0.00065  | -0.23991 | 1.54E-07 | 0.001531 | 0.97368  | 0.053128 | 0.25186  | -0.01857 |
| 0.069217 | 0.13529  | 0.173982 | 0.00016  | 0.153813 | 0.00085  | 0.201994 | 1.09E-05 | 0.448386 |
| -0.10255 | 0.02669  | -0.1203  | 0.00926  | 0.216791 | 2.26E-06 | 0.3516   | 4.91E-15 | 0.18912  |
| -0.05771 | 0.21318  | -0.16102 | 0.00048  | 0.012851 | 0.78179  | -0.01809 | 0.69665  | 0.009499 |
| 0.094529 | 0.04116  | -0.15485 | 0.00079  | -0.07106 | 0.12519  | -0.20612 | 7.10E-06 | -0.03485 |
| 0.105529 | 0.02256  | 0.372286 | 8.45E-17 | 0.006192 | 0.89383  | 0.016543 | 0.72141  | 0.079567 |
| -0.10424 | 0.02427  | -0.28237 | 5.21E-10 | 0.080861 | 0.08088  | 0.063191 | 0.1728   | 0.263208 |
| -0.17923 | 9.84E-05 | -0.44219 | 8.89E-24 | 0.022036 | 0.6348   | -0.09577 | 0.03857  | -0.00133 |
| 0.022142 | 0.63316  | -0.31691 | 2.35E-12 | -0.01469 | 0.75148  | -0.14667 | 0.00148  | -0.04579 |
| -0.0285  | 0.53902  | 0.353403 | 3.49E-15 | 0.036031 | 0.43727  | 0.100142 | 0.03049  | 0.275947 |
| 0.156468 | 0.00069  | 0.159581 | 0.00054  | 0.107607 | 0.02002  | 0.106385 | 0.02148  | 0.149215 |
| 0.147581 | 0.00138  | 0.405011 | 7.32E-20 | 0.047254 | 0.3082   | 0.065699 | 0.15634  | 0.126666 |
| 0.05833  | 0.20831  | -0.16645 | 0.0003   | 0.064356 | 0.16499  | -0.01633 | 0.72478  | 0.050495 |
| -0.00295 | 0.94935  | 0.087124 | 0.05993  | 0.012937 | 0.78037  | -0.06536 | 0.15848  | 0.045863 |
| -0.04857 | 0.29495  | -0.09598 | 0.03814  | 0.064835 | 0.16187  | 0.092035 | 0.04684  | 0.207623 |
| -0.02265 | 0.62545  | -0.24775 | 5.81E-08 | 0.021258 | 0.6468   | -0.04092 | 0.37761  | 0.045453 |
| 0.134915 | 0.00349  | -0.29098 | 1.45E-10 | 0.001915 | 0.96708  | -0.06051 | 0.19175  | -0.07632 |
| -0.07773 | 0.09339  | -0.06737 | 0.14603  | 0.059095 | 0.2024   | 0.191121 | 3.22E-05 | 0.043399 |
| -0.02637 | 0.56973  | -0.19993 | 1.34E-05 | -0.04151 | 0.37074  | -0.20299 | 9.82E-06 | -0.18678 |
| -0.12734 | 0.00586  | -0.33088 | 2.15E-13 | -0.02086 | 0.65294  | -0.07662 | 0.09816  | -0.0822  |
| 0.061406 | 0.18528  | 0.017962 | 0.69864  | -0.03312 | 0.47527  | -0.04749 | 0.30583  | 0.004544 |
| 0.089028 | 0.05453  | 0.103013 | 0.02601  | 0.059274 | 0.20103  | 0.001553 | 0.9733   | 0.082159 |
| -0.03991 | 0.38956  | -0.15095 | 0.00107  | -0.00372 | 0.93607  | -0.04243 | 0.36029  | 0.034157 |
| 0.275948 | 1.32E-09 | 0.311338 | 5.91E-12 | 0.015292 | 0.74171  | 0.011199 | 0.80926  | -0.08922 |
| -0.16585 | 0.00032  | -0.09745 | 0.03528  | -0.06225 | 0.17931  | -0.10267 | 0.02651  | -0.13435 |
| 0.037002 | 0.42501  | 0.059678 | 0.19797  | -0.01135 | 0.80681  | 0.027167 | 0.55814  | -0.0277  |

|          |          |          |          |          |         |          |          |          |
|----------|----------|----------|----------|----------|---------|----------|----------|----------|
| -0.03654 | 0.4308   | -0.23975 | 1.57E-07 | -0.0314  | 0.49851 | -0.07714 | 0.09589  | -0.03863 |
| 0.060844 | 0.18933  | 0.043601 | 0.34714  | -0.10195 | 0.02759 | -0.17999 | 9.18E-05 | -0.16595 |
| 0.159036 | 0.00056  | 0.024868 | 0.59193  | -0.01319 | 0.7762  | -0.00888 | 0.84821  | 0.019425 |
| -0.16715 | 0.00029  | -0.11576 | 0.0123   | 0.075044 | 0.10531 | 0.117202 | 0.01125  | 0.184575 |
| 0.054673 | 0.23831  | -0.19546 | 2.10E-05 | 0.026186 | 0.57243 | 0.087753 | 0.0581   | -0.00576 |
| 0.009249 | 0.84199  | 0.043554 | 0.34766  | 0.119161 | 0.00996 | 0.188959 | 3.96E-05 | 0.292307 |
| -0.18464 | 5.97E-05 | -0.43366 | 7.78E-23 | 0.081756 | 0.07757 | 0.161108 | 0.00047  | 0.183593 |
| -0.17665 | 0.00012  | -0.1442  | 0.00178  | -0.02459 | 0.59603 | -0.05746 | 0.21519  | 0.020364 |
| 0.010062 | 0.82832  | 0.240223 | 1.48E-07 | 0.019743 | 0.67044 | 0.058022 | 0.21073  | 0.229689 |
| -0.08375 | 0.07056  | -0.28408 | 4.06E-10 | 0.052809 | 0.25473 | -0.00643 | 0.88981  | -0.00601 |
| 0.02196  | 0.63597  | -0.06172 | 0.18302  | 0.092212 | 0.04641 | 0.360947 | 8.13E-16 | -0.0019  |
| 0.069138 | 0.13573  | 0.11483  | 0.01303  | -0.02621 | 0.5721  | -0.05477 | 0.23749  | 0.022546 |
| 0.05024  | 0.2786   | 0.038161 | 0.41065  | 0.017931 | 0.69914 | 0.172177 | 0.00018  | -0.0224  |
| -0.06926 | 0.13504  | -0.18673 | 4.90E-05 | 0.021076 | 0.64962 | 0.075173 | 0.10471  | -0.08725 |
| 0.127386 | 0.00584  | 0.1235   | 0.00754  | -0.01943 | 0.67542 | 0.090059 | 0.05178  | -0.09952 |
| 0.066503 | 0.15132  | 0.473452 | 1.83E-27 | 0.069191 | 0.13544 | 0.190456 | 3.43E-05 | 0.315856 |
| 0.067295 | 0.1465   | -0.06659 | 0.15079  | -0.00989 | 0.83122 | -0.02229 | 0.63088  | -0.04167 |
| 0.015672 | 0.73552  | -0.04647 | 0.31626  | 0.025493 | 0.58264 | 0.04909  | 0.28976  | -0.00956 |
| -0.01321 | 0.77579  | 0.185168 | 5.68E-05 | 0.10872  | 0.01877 | 0.075798 | 0.10184  | 0.100864 |
| -0.07976 | 0.08513  | -0.1873  | 4.64E-05 | -0.01242 | 0.78888 | -0.07751 | 0.09432  | 0.019762 |
| -0.03391 | 0.46472  | -0.15963 | 0.00053  | 0.08312  | 0.07273 | 0.065758 | 0.15596  | 0.262312 |
| -0.0823  | 0.07561  | -0.30515 | 1.60E-11 | 0.018158 | 0.69552 | 0.014971 | 0.74694  | 0.032455 |
| 0.126092 | 0.00636  | 0.178699 | 0.0001   | 0.086744 | 0.06106 | 0.075606 | 0.10272  | 0.408868 |
| -0.0416  | 0.36979  | -0.12697 | 0.006    | -0.01161 | 0.80247 | -0.00087 | 0.98507  | -0.05647 |
| -0.17666 | 0.00012  | -0.28088 | 6.47E-10 | 0.042822 | 0.35584 | 0.009455 | 0.83853  | 0.146347 |
| -0.03767 | 0.41673  | -0.20494 | 8.03E-06 | -0.02071 | 0.65536 | -0.06926 | 0.13504  | 0.043414 |
| 0.298178 | 4.81E-11 | 0.173745 | 0.00016  | -0.01203 | 0.79548 | 0.024072 | 0.60384  | 0.050666 |
| -0.11144 | 0.01599  | -0.33952 | 4.60E-14 | 0.03609  | 0.43653 | -0.02271 | 0.62451  | 0.102474 |
| -0.01095 | 0.81336  | -0.08338 | 0.07185  | 0.029354 | 0.52688 | 0.037248 | 0.42194  | 0.046461 |
| 0.212996 | 3.42E-06 | 0.211801 | 3.89E-06 | 0.027229 | 0.55723 | 0.111261 | 0.01615  | -0.01848 |
| 0.111032 | 0.01638  | -0.00798 | 0.86338  | 0.046629 | 0.31466 | 0.030166 | 0.51551  | -0.02951 |
| -0.08333 | 0.072    | -0.30167 | 2.79E-11 | 0.005659 | 0.90292 | -0.00216 | 0.96283  | -0.00552 |
| 0.093965 | 0.04239  | -0.09611 | 0.03788  | 0.041548 | 0.37034 | -0.03363 | 0.46841  | -0.02621 |
| -0.05456 | 0.23927  | -0.27727 | 1.09E-09 | 0.019403 | 0.67579 | -0.02694 | 0.56136  | -0.03712 |
| 0.294143 | 8.97E-11 | -0.07273 | 0.11652  | -0.01674 | 0.71825 | -0.04009 | 0.3874   | 0.15464  |
| 0.264523 | 6.44E-09 | 0.252308 | 3.25E-08 | -0.0149  | 0.74812 | -0.09227 | 0.04627  | 0.004347 |
| 0.019423 | 0.67547  | 0.014936 | 0.7475   | -0.00694 | 0.88106 | -0.04515 | 0.33022  | 0.054173 |
| -0.10884 | 0.01863  | -0.16493 | 0.00034  | 0.064076 | 0.16685 | 0.199593 | 1.39E-05 | -0.00149 |
| -0.02585 | 0.57736  | -0.0219  | 0.63694  | -0.02286 | 0.62219 | 0.016361 | 0.72435  | -0.07913 |
| 0.093248 | 0.044    | -0.09833 | 0.03364  | 0.090244 | 0.0513  | 0.013114 | 0.77744  | 0.252439 |
| 0.001879 | 0.9677   | -0.02341 | 0.61382  | 0.048396 | 0.29665 | 0.002091 | 0.96406  | 0.11775  |
| 0.007986 | 0.86334  | 0.158344 | 0.00059  | 0.084945 | 0.06664 | 0.160831 | 0.00048  | -0.05523 |
| -0.02886 | 0.53381  | -0.26084 | 1.06E-08 | -0.05561 | 0.23039 | -0.14154 | 0.00217  | -0.15669 |
| 0.332787 | 1.54E-13 | 0.284538 | 3.79E-10 | -0.00989 | 0.83124 | -0.03369 | 0.46769  | 0.108216 |
| -0.0062  | 0.89375  | -0.14861 | 0.00128  | -0.0443  | 0.33951 | 0.1003   | 0.03022  | -0.08448 |

|          |          |          |          |          |         |          |          |          |
|----------|----------|----------|----------|----------|---------|----------|----------|----------|
| -0.03274 | 0.4803   | -0.27197 | 2.31E-09 | -0.02757 | 0.55229 | -0.10893 | 0.01854  | -0.16483 |
| -0.09867 | 0.03303  | -0.08925 | 0.05392  | 0.007559 | 0.87059 | 0.016793 | 0.71739  | -0.11649 |
| -0.05662 | 0.22197  | 0.004586 | 0.92127  | -0.03314 | 0.47493 | 0.011452 | 0.80504  | 0.070042 |
| -0.03783 | 0.4147   | -0.10925 | 0.01819  | -0.04017 | 0.38639 | -0.14298 | 0.00195  | -0.09292 |
| 0.006067 | 0.89596  | -0.00017 | 0.99709  | 0.031357 | 0.49905 | 0.009779 | 0.83308  | 0.084664 |
| 0.116435 | 0.0118   | 0.012304 | 0.79086  | -0.00563 | 0.90341 | 0.018692 | 0.68702  | -0.05501 |
| 0.234007 | 3.14E-07 | 0.1572   | 0.00065  | -0.02199 | 0.6355  | -0.14464 | 0.00173  | 0.005745 |
| 0.177432 | 0.00012  | 0.10799  | 0.01958  | 0.000591 | 0.98983 | -0.02658 | 0.56667  | -0.14436 |
| -0.16535 | 0.00033  | -0.12046 | 0.00917  | 0.00424  | 0.92719 | -0.03398 | 0.46385  | -0.01278 |
| -0.03056 | 0.50998  | -0.13948 | 0.00252  | -0.01412 | 0.76094 | -0.0063  | 0.89202  | 0.042068 |
| 0.107478 | 0.02017  | -0.06291 | 0.17471  | 0.028493 | 0.53908 | -0.05908 | 0.2025   | -0.033   |
| 0.102676 | 0.0265   | -0.07998 | 0.08424  | -0.0209  | 0.6524  | -0.03885 | 0.40228  | -0.0353  |
| 0.020146 | 0.66411  | -0.16574 | 0.00032  | 0.019375 | 0.67624 | -0.10296 | 0.02608  | -0.09953 |
| -0.06442 | 0.16461  | 0.01213  | 0.79375  | -0.02287 | 0.62209 | 0.112026 | 0.01543  | 0.011548 |
| 0.152164 | 0.00097  | 0.034066 | 0.46269  | -0.00482 | 0.91734 | -0.04986 | 0.28229  | 0.022937 |
| 0.072828 | 0.11602  | -0.08244 | 0.07511  | 0.053975 | 0.24437 | 0.008414 | 0.8561   | 0.157227 |
| -0.18831 | 4.22E-05 | 0.015726 | 0.73464  | 0.008813 | 0.84935 | 0.013255 | 0.77512  | 0.060057 |
| -0.00839 | 0.85655  | 0.003652 | 0.93726  | 0.035265 | 0.44708 | 0.028411 | 0.54024  | 0.026581 |
| -0.19208 | 2.93E-05 | -0.36854 | 1.80E-16 | -0.03331 | 0.4727  | 0.083123 | 0.07272  | -0.21421 |
| -0.0207  | 0.65547  | -0.09134 | 0.04853  | -0.01509 | 0.74504 | -0.06113 | 0.1873   | -0.02637 |
| -0.01674 | 0.71829  | -0.06563 | 0.1568   | -0.04799 | 0.30068 | -0.11267 | 0.01485  | -0.02291 |
| 0.057457 | 0.21522  | 0.066778 | 0.14963  | -0.02585 | 0.57741 | -0.10728 | 0.02041  | -0.00944 |
| 0.238635 | 1.80E-07 | -0.0152  | 0.74328  | -0.12251 | 0.00804 | -0.24997 | 4.39E-08 | -0.27814 |
| -0.03617 | 0.43557  | -0.11757 | 0.011    | 0.032571 | 0.48257 | -0.0298  | 0.52059  | -0.03839 |
| -0.02239 | 0.62932  | -0.07004 | 0.13071  | 0.029002 | 0.53185 | 0.004646 | 0.92024  | 0.139212 |
| -0.08992 | 0.05214  | -0.32164 | 1.06E-12 | -0.04663 | 0.31466 | -0.21339 | 3.28E-06 | -0.22715 |
| -0.04782 | 0.30247  | -0.32079 | 1.23E-12 | -0.03367 | 0.46786 | 0.060754 | 0.18999  | -0.28652 |
| 0.14909  | 0.00123  | 0.361212 | 7.72E-16 | 0.009273 | 0.8416  | 0.036011 | 0.43753  | 0.326399 |
| -0.21792 | 2.00E-06 | -0.2016  | 1.13E-05 | 0.01674  | 0.71824 | -0.00069 | 0.98818  | -0.05352 |
| -0.13242 | 0.00415  | -0.27729 | 1.09E-09 | -0.07328 | 0.11376 | -0.09103 | 0.04929  | 0.014624 |
| -0.0488  | 0.29267  | -0.0754  | 0.10367  | -0.01933 | 0.67694 | -0.11884 | 0.01016  | 0.019278 |
| -0.06619 | 0.15328  | -0.05016 | 0.27932  | -0.02301 | 0.61994 | -0.03193 | 0.49123  | -0.07728 |
| -0.15599 | 0.00072  | -0.40535 | 6.78E-20 | -0.02276 | 0.62377 | -0.0695  | 0.13369  | -0.16111 |
| 0.049734 | 0.28347  | 0.149299 | 0.00121  | 0.109017 | 0.01844 | 0.361404 | 7.43E-16 | 0.102841 |
| -0.03798 | 0.41287  | 0.007745 | 0.86743  | 0.066429 | 0.15178 | 0.026205 | 0.57216  | 0.283127 |
| -0.10942 | 0.01802  | -0.30276 | 2.35E-11 | -0.00376 | 0.93537 | -0.01275 | 0.78349  | -0.12362 |
| -0.27779 | 1.01E-09 | -0.27088 | 2.69E-09 | -0.0312  | 0.50116 | -0.07845 | 0.0904   | 0.003466 |
| -0.05268 | 0.25593  | 0.017153 | 0.7116   | -0.02518 | 0.58728 | 0.018467 | 0.69061  | -0.12988 |
| 0.208675 | 5.43E-06 | 0.02429  | 0.60058  | 0.027152 | 0.55836 | -0.04704 | 0.31039  | -0.00576 |
| 0.22375  | 1.04E-06 | 0.137648 | 0.00287  | 0.028047 | 0.54545 | 0.009591 | 0.83623  | 0.180162 |
| -0.08462 | 0.06769  | -0.18551 | 5.50E-05 | 0.033993 | 0.46366 | -0.0239  | 0.60642  | -0.04369 |
| -0.02012 | 0.66447  | -0.07576 | 0.10202  | 0.022565 | 0.62668 | 0.00027  | 0.99536  | -0.00052 |
| -0.01866 | 0.6875   | -0.17025 | 0.00022  | -0.04308 | 0.35295 | -0.15308 | 0.0009   | -0.12893 |
| -0.1042  | 0.02433  | -0.20367 | 9.16E-06 | -0.0065  | 0.88867 | -0.0198  | 0.66956  | -0.05881 |
| -0.12363 | 0.00748  | -0.2133  | 3.31E-06 | -0.02742 | 0.55444 | -0.00778 | 0.86677  | -0.14455 |

|          |          |          |          |          |         |          |          |          |
|----------|----------|----------|----------|----------|---------|----------|----------|----------|
| 0.165479 | 0.00033  | -0.08979 | 0.0525   | -0.00415 | 0.92881 | -0.09483 | 0.04051  | 0.011664 |
| 0.12604  | 0.00638  | 0.203538 | 9.28E-06 | 0.096638 | 0.03683 | 0.197316 | 1.75E-05 | 0.270763 |
| -0.16495 | 0.00034  | -0.19242 | 2.84E-05 | -0.01739 | 0.70772 | -0.06654 | 0.15109  | -0.05879 |
| -0.0699  | 0.13146  | -0.16001 | 0.00052  | 0.005832 | 0.89997 | -0.00794 | 0.86412  | 0.003945 |
| 0.185314 | 5.60E-05 | 0.170447 | 0.00022  | 0.053232 | 0.25094 | 0.080039 | 0.08403  | 0.089788 |
| -0.10011 | 0.03054  | -0.20863 | 5.45E-06 | 0.028182 | 0.54352 | -0.03136 | 0.49905  | -0.05597 |
| 0.015344 | 0.74085  | 0.208421 | 5.57E-06 | 0.055684 | 0.22973 | 0.125686 | 0.00654  | 0.319297 |
| -0.05563 | 0.23021  | -0.12801 | 0.0056   | -0.00826 | 0.85871 | 0.031522 | 0.4968   | -0.09026 |
| -0.04256 | 0.35875  | -0.04295 | 0.35443  | -0.00679 | 0.88367 | -0.02452 | 0.59706  | 0.002871 |
| -0.0388  | 0.40288  | -0.03203 | 0.48991  | -0.04661 | 0.31488 | -0.05251 | 0.2574   | -0.01717 |
| -0.08789 | 0.0577   | -0.10705 | 0.02068  | 0.094028 | 0.04225 | 0.154035 | 0.00084  | 0.274461 |
| 0.026249 | 0.57152  | 0.061593 | 0.18394  | -0.0701  | 0.13034 | -0.10838 | 0.01914  | 0.020581 |
| 0.103571 | 0.02521  | 0.181724 | 7.83E-05 | 0.033519 | 0.46991 | 0.013518 | 0.77079  | 0.134468 |
| 0.068717 | 0.13814  | 0.092688 | 0.04529  | -0.03456 | 0.45627 | -0.09835 | 0.03359  | -0.09541 |
| -0.15546 | 0.00075  | 0.036836 | 0.42709  | 0.023471 | 0.61291 | 0.18861  | 4.10E-05 | -0.02802 |
| 0.106624 | 0.02119  | 0.159817 | 0.00053  | -0.00707 | 0.87893 | -0.06359 | 0.17009  | -0.01139 |
| 0.060072 | 0.19503  | 0.137823 | 0.00284  | 0.001288 | 0.97785 | 0.10001  | 0.03071  | 0.062396 |
| -0.06251 | 0.17747  | -0.39241 | 1.21E-18 | -0.00481 | 0.91745 | -0.08184 | 0.07726  | 0.005111 |
| 0.168498 | 0.00025  | -0.04113 | 0.37518  | 0.103295 | 0.0256  | 0.38279  | 9.58E-18 | 0.088816 |
| 0.213119 | 3.37E-06 | 0.197994 | 1.63E-05 | -0.00653 | 0.8881  | -0.07226 | 0.1189   | 0.023228 |
| -0.13214 | 0.00423  | -0.19891 | 1.49E-05 | -0.01655 | 0.72137 | -0.02321 | 0.6169   | -0.12756 |
| -0.06238 | 0.1784   | -0.13601 | 0.00323  | 0.013842 | 0.76545 | 0.037476 | 0.41911  | -0.00667 |
| -0.0997  | 0.03123  | -0.13665 | 0.00309  | 0.07895  | 0.08834 | 0.151203 | 0.00105  | 0.200331 |
| 0.018272 | 0.69371  | 0.204133 | 8.73E-06 | 0.07572  | 0.1022  | 0.122788 | 0.0079   | 0.114561 |
| -0.00701 | 0.87994  | -0.21014 | 4.64E-06 | -0.03536 | 0.44586 | -0.08563 | 0.06447  | -0.00397 |
| 0.06998  | 0.13102  | 0.209522 | 4.96E-06 | 0.083607 | 0.07106 | 0.149514 | 0.00119  | 0.212091 |
| -0.06668 | 0.1502   | -0.14864 | 0.00128  | 0.003815 | 0.93447 | -0.01504 | 0.74585  | -0.04438 |
| 0.279429 | 7.99E-10 | -0.2703  | 2.91E-09 | -0.00619 | 0.89394 | -0.13386 | 0.00376  | -0.06482 |
| 0.106154 | 0.02177  | 0.014793 | 0.74985  | 0.020791 | 0.65405 | -0.04181 | 0.36732  | -0.01278 |
| 0.103996 | 0.02461  | 0.045844 | 0.32288  | 0.011498 | 0.80428 | -0.00384 | 0.93398  | 0.049754 |
| 0.25818  | 1.51E-08 | 0.471358 | 3.32E-27 | -0.01512 | 0.74455 | -0.02748 | 0.55354  | -0.00404 |
| 0.29716  | 5.64E-11 | 0.465614 | 1.67E-26 | 0.028695 | 0.5362  | -0.00222 | 0.96178  | 0.014996 |
| 0.085644 | 0.06443  | -0.07063 | 0.12748  | -0.00826 | 0.85865 | -0.04395 | 0.34334  | -0.01271 |
| 0.064256 | 0.16566  | -0.02617 | 0.5726   | 0.00465  | 0.92018 | 0.05099  | 0.27147  | 0.12286  |
| -0.03724 | 0.4221   | -0.08349 | 0.07145  | -0.02624 | 0.57167 | 0.005446 | 0.90657  | -0.00172 |
| -0.20066 | 1.25E-05 | -0.07228 | 0.11882  | 0.082765 | 0.07396 | 0.281386 | 6.02E-10 | 0.090199 |
| 0.21595  | 2.48E-06 | 0.377568 | 2.86E-17 | 0.002934 | 0.94958 | -0.05147 | 0.26698  | 0.068636 |
| 0.104702 | 0.02365  | -0.23268 | 3.68E-07 | -0.02664 | 0.56579 | -0.12259 | 0.008    | -0.05086 |
| -0.07045 | 0.12847  | -0.1249  | 0.00688  | 0.049022 | 0.29043 | 0.069172 | 0.13554  | 0.111595 |
| -0.06129 | 0.18614  | -0.26741 | 4.34E-09 | 0.175005 | 0.00014 | 0.295662 | 7.10E-11 | 0.273753 |
| 0.135378 | 0.00338  | 0.049901 | 0.28186  | -0.01278 | 0.78298 | -0.04381 | 0.34484  | 0.223546 |
| 0.005305 | 0.90897  | 0.186696 | 4.92E-05 | 0.067132 | 0.14748 | 0.155921 | 0.00072  | 0.172163 |
| -0.02721 | 0.55748  | -0.06127 | 0.18622  | 0.010131 | 0.82716 | 0.018068 | 0.69696  | 0.020088 |
| 0.040393 | 0.3838   | 0.234142 | 3.09E-07 | 0.022677 | 0.62499 | 0.110986 | 0.01642  | 0.039871 |
| -0.06572 | 0.15623  | 0.106965 | 0.02078  | 0.031874 | 0.49199 | 0.080138 | 0.08364  | 0.321398 |

|          |          |          |          |          |         |          |          |          |
|----------|----------|----------|----------|----------|---------|----------|----------|----------|
| 0.03277  | 0.4799   | -0.01767 | 0.70327  | 0.040757 | 0.37953 | -0.01672 | 0.71856  | 0.007553 |
| 0.010646 | 0.81851  | -0.16935 | 0.00024  | -0.03288 | 0.47848 | -0.12447 | 0.00708  | -0.00898 |
| -0.05658 | 0.22232  | -0.14256 | 0.00201  | 0.002627 | 0.95485 | -0.04867 | 0.29393  | -0.03949 |
| 0.059901 | 0.1963   | 0.088647 | 0.05558  | 0.01593  | 0.73133 | -0.04561 | 0.3254   | -0.00878 |
| 0.002306 | 0.96036  | 0.198544 | 1.54E-05 | -0.07327 | 0.11381 | -0.06172 | 0.18306  | -0.10516 |
| -0.04611 | 0.32003  | -0.12398 | 0.00731  | 0.021374 | 0.64501 | -0.02884 | 0.53418  | -0.01178 |
| 0.067271 | 0.14664  | -0.19715 | 1.78E-05 | -0.04047 | 0.38294 | -0.04197 | 0.36555  | -0.1654  |
| -0.03075 | 0.50735  | -0.05516 | 0.23417  | -0.01455 | 0.75375 | -0.04996 | 0.28131  | 0.017501 |
| 0.22539  | 8.60E-07 | 0.439217 | 1.91E-23 | 0.022847 | 0.62238 | -0.00561 | 0.90373  | 0.145301 |
| -0.09893 | 0.03256  | -0.30278 | 2.34E-11 | 0.00923  | 0.84232 | -0.0517  | 0.26481  | -0.10034 |
| 0.213782 | 3.14E-06 | 0.272837 | 2.04E-09 | 0.00258  | 0.95565 | -0.00565 | 0.90316  | -0.00268 |
| 0.159393 | 0.00055  | 0.414038 | 9.09E-21 | 0.014147 | 0.76043 | 0.036962 | 0.42552  | 0.077495 |
| -0.07075 | 0.12684  | -0.23231 | 3.85E-07 | 0.00868  | 0.85161 | 0.074906 | 0.10595  | 0.019865 |
| -0.15612 | 0.00071  | -0.05203 | 0.26185  | 0.061647 | 0.18355 | 0.242033 | 1.19E-07 | 0.113725 |
| -0.08852 | 0.05593  | -0.23347 | 3.35E-07 | 0.001417 | 0.97564 | -0.05591 | 0.22786  | -0.02849 |
| 0.055662 | 0.22992  | 0.221866 | 1.28E-06 | 0.000271 | 0.99534 | 0.044918 | 0.33276  | 0.075571 |
| 0.30828  | 9.71E-12 | 0.259931 | 1.20E-08 | 0.042586 | 0.35849 | 0.052321 | 0.25915  | 0.115563 |
| 0.103841 | 0.02483  | 0.178434 | 0.00011  | 0.029138 | 0.52993 | -0.11867 | 0.01027  | 0.101452 |
| 0.126625 | 0.00614  | 0.233957 | 3.16E-07 | 0.041219 | 0.37414 | 0.072076 | 0.11985  | 0.075891 |
| -0.01701 | 0.71397  | -0.17734 | 0.00012  | 0.035042 | 0.44997 | 0.022474 | 0.62809  | 0.086034 |
| -0.00703 | 0.87952  | -0.33132 | 1.99E-13 | 0.001225 | 0.97894 | -0.12895 | 0.00526  | -0.06662 |
| 0.005568 | 0.90449  | -0.34203 | 2.91E-14 | 0.016362 | 0.72435 | -0.04477 | 0.33433  | -0.04807 |
| 0.117697 | 0.01091  | 0.10975  | 0.01767  | 0.026135 | 0.57318 | -0.01057 | 0.81982  | 0.035024 |
| 0.058179 | 0.20949  | -0.17501 | 0.00014  | 0.016882 | 0.71596 | -0.06828 | 0.14067  | -0.04767 |
| -0.07359 | 0.11223  | 0.020124 | 0.66446  | 0.118747 | 0.01022 | 0.052477 | 0.25773  | 0.300736 |
| -0.04849 | 0.29566  | -0.34146 | 3.24E-14 | 0.172901 | 0.00017 | 0.073525 | 0.11256  | 0.146817 |
| 0.14708  | 0.00144  | -0.09212 | 0.04663  | -0.04065 | 0.38078 | 0.014466 | 0.75519  | -0.13785 |
| 0.274839 | 1.54E-09 | 0.263153 | 7.76E-09 | -0.03022 | 0.51472 | -0.03906 | 0.3997   | 0.070233 |
| 0.186345 | 5.08E-05 | -0.18785 | 4.41E-05 | -0.00038 | 0.99344 | 0.008476 | 0.85505  | -0.09863 |
| -0.00778 | 0.86679  | -0.06213 | 0.18017  | 0.01821  | 0.69468 | -0.00464 | 0.92031  | -0.02909 |
| 0.043205 | 0.35154  | -0.36535 | 3.41E-16 | 0.008798 | 0.8496  | 0.063299 | 0.17206  | 0.025183 |
| -0.08001 | 0.08414  | -0.1046  | 0.02379  | 0.020974 | 0.6512  | 0.122467 | 0.00806  | 0.21658  |
| -0.05779 | 0.21259  | -0.16513 | 0.00034  | 0.051662 | 0.26521 | 0.039089 | 0.39935  | 0.045376 |
| -0.07374 | 0.11151  | -0.26249 | 8.48E-09 | 0.007383 | 0.87358 | 0.023319 | 0.61521  | -0.06463 |
| 0.214248 | 2.98E-06 | 0.385891 | 4.96E-18 | 0.11071  | 0.01669 | 0.135617 | 0.00332  | 0.436489 |
| 0.043353 | 0.3499   | -0.11179 | 0.01565  | -0.01117 | 0.8098  | 0.041408 | 0.37196  | -0.04494 |
| 0.051866 | 0.26332  | 0.012509 | 0.78746  | 0.104429 | 0.02402 | 0.069613 | 0.13306  | 0.209963 |
| 0.018325 | 0.69285  | -0.09508 | 0.03998  | 0.005882 | 0.89911 | 0.006346 | 0.8912   | -0.10743 |
| -0.11061 | 0.01679  | -0.1984  | 1.57E-05 | -0.00882 | 0.84925 | -0.00765 | 0.869    | -0.0125  |
| -0.23987 | 1.55E-07 | -0.32328 | 8.04E-13 | 0.002091 | 0.96405 | 0.087854 | 0.05781  | -0.09092 |
| -0.13679 | 0.00306  | -0.26165 | 9.51E-09 | -0.0357  | 0.44151 | -0.02768 | 0.55073  | -0.07046 |
| -0.1277  | 0.00572  | -0.26008 | 1.17E-08 | -0.01644 | 0.7231  | -0.01273 | 0.78383  | -0.02396 |
| -0.16072 | 0.00049  | -0.27193 | 2.32E-09 | 0.07102  | 0.12538 | 0.119631 | 0.00966  | 0.055715 |
| 0.006415 | 0.89003  | 0.071603 | 0.1223   | 0.006879 | 0.88214 | 0.066476 | 0.15149  | 0.099949 |
| 0.098943 | 0.03254  | -0.19343 | 2.57E-05 | 0.002438 | 0.95809 | -0.00393 | 0.93242  | -0.00968 |

|          |          |          |          |          |          |          |          |          |
|----------|----------|----------|----------|----------|----------|----------|----------|----------|
| -0.03075 | 0.5074   | -0.16267 | 0.00042  | 0.045088 | 0.33093  | 0.07808  | 0.09192  | 0.010224 |
| -0.00093 | 0.98397  | -0.1344  | 0.00362  | 0.066112 | 0.15375  | -0.00955 | 0.83686  | 0.165352 |
| 0.038465 | 0.40692  | -0.06086 | 0.18925  | 0.013754 | 0.76688  | -0.01646 | 0.72269  | -0.00178 |
| -0.19282 | 2.73E-05 | -0.12017 | 0.00934  | -0.00276 | 0.95258  | 0.001455 | 0.97498  | 0.087141 |
| -0.08899 | 0.05465  | -0.20132 | 1.17E-05 | 0.069972 | 0.13106  | 0.039914 | 0.38946  | 0.359918 |
| -0.21034 | 4.55E-06 | -0.10731 | 0.02037  | -0.02639 | 0.56944  | 0.041424 | 0.37177  | -0.06902 |
| -0.02866 | 0.53669  | -0.24089 | 1.37E-07 | -0.00028 | 0.99511  | -0.01576 | 0.73409  | -0.03584 |
| -0.11775 | 0.01088  | 0.094996 | 0.04017  | -0.00133 | 0.9771   | 0.079006 | 0.08812  | -0.05641 |
| 0.11687  | 0.01149  | 0.370893 | 1.12E-16 | 0.01838  | 0.69199  | 0.16988  | 0.00023  | 0.063389 |
| 0.131222 | 0.00451  | 0.014567 | 0.75355  | 0.003218 | 0.9447   | 0.010767 | 0.81649  | 0.041587 |
| 0.181959 | 7.66E-05 | 0.158684 | 0.00058  | 0.039153 | 0.39858  | -0.02397 | 0.60543  | 0.023664 |
| 0.159928 | 0.00052  | 0.287333 | 2.51E-10 | 0.001091 | 0.98124  | 0.150516 | 0.0011   | -0.08655 |
| 0.012967 | 0.77988  | 0.01928  | 0.67773  | 0.032523 | 0.48323  | 0.173853 | 0.00016  | -0.0979  |
| -0.06418 | 0.16618  | -0.32075 | 1.24E-12 | -0.01012 | 0.8274   | 0.011692 | 0.80104  | -0.15766 |
| 0.066653 | 0.1504   | 0.288094 | 2.24E-10 | 0.025138 | 0.58791  | 0.233542 | 3.32E-07 | -0.03805 |
| -0.00592 | 0.89854  | 0.173379 | 0.00017  | 0.179916 | 9.25E-05 | 0.399582 | 2.49E-19 | 0.218519 |
| 0.073463 | 0.11287  | 0.039823 | 0.39055  | -0.00266 | 0.95422  | -0.03253 | 0.48314  | 0.002001 |
| 0.211022 | 4.23E-06 | 0.430661 | 1.64E-22 | 0.007008 | 0.87995  | -0.00327 | 0.9438   | -0.0472  |
| -0.06475 | 0.16242  | -0.02101 | 0.65069  | 0.095589 | 0.03893  | 0.337265 | 6.92E-14 | 0.022647 |
| 0.242797 | 1.08E-07 | 0.250553 | 4.07E-08 | 0.040708 | 0.38009  | -0.03369 | 0.4677   | 0.054318 |
| -0.05379 | 0.24602  | -0.28555 | 3.26E-10 | 0.005203 | 0.91071  | -0.07744 | 0.09462  | -0.1463  |
| -0.02896 | 0.53241  | -0.05279 | 0.2549   | 0.011172 | 0.80971  | -0.01554 | 0.73762  | -0.01823 |
| -0.13923 | 0.00257  | -0.46798 | 8.62E-27 | -0.01669 | 0.71906  | -0.05825 | 0.20897  | -0.02844 |
| -0.085   | 0.06647  | -0.00089 | 0.98474  | -0.04252 | 0.35926  | -0.09759 | 0.03501  | -0.09145 |
| -0.04724 | 0.30839  | -0.00888 | 0.84814  | 0.026887 | 0.5622   | 0.179208 | 9.86E-05 | -0.03051 |
| 0.203424 | 9.39E-06 | -0.00132 | 0.97734  | 0.012471 | 0.78809  | -0.03971 | 0.3919   | 0.092674 |
| -0.07672 | 0.09776  | -0.09338 | 0.0437   | -0.02129 | 0.64634  | 0.01345  | 0.7719   | 0.047897 |
| -0.04069 | 0.38026  | -0.20723 | 6.32E-06 | 0.024814 | 0.59273  | -0.0072  | 0.87667  | -0.01926 |
| 0.304843 | 1.69E-11 | 0.433666 | 7.77E-23 | 0.090457 | 0.05075  | 0.132965 | 0.004    | 0.168639 |
| 0.280193 | 7.15E-10 | 0.01714  | 0.7118   | -0.03026 | 0.51418  | -0.15217 | 0.00097  | -0.17555 |
| 0.178253 | 0.00011  | 0.160697 | 0.00049  | 0.000157 | 0.9973   | 0.029973 | 0.51819  | -0.1313  |
| -0.01299 | 0.77957  | -0.22609 | 7.94E-07 | -0.00219 | 0.96238  | -0.07471 | 0.10685  | -0.14347 |
| -0.04371 | 0.34597  | -0.13117 | 0.00452  | 0.005926 | 0.89837  | -0.02262 | 0.62587  | 0.054655 |
| -0.04959 | 0.28487  | -0.28389 | 4.17E-10 | -0.06354 | 0.17043  | -0.1454  | 0.00163  | -0.15633 |
| -0.05215 | 0.26068  | -0.26132 | 9.93E-09 | -0.10798 | 0.01959  | -0.13778 | 0.00285  | -0.22385 |
| 0.019628 | 0.67224  | 0.122054 | 0.00828  | -0.06774 | 0.14382  | -0.04142 | 0.37178  | -0.10625 |
| 0.027301 | 0.55619  | 0.17042  | 0.00022  | 0.002006 | 0.96551  | 0.094021 | 0.04227  | -0.11464 |
| 0.020111 | 0.66466  | -0.1361  | 0.00321  | 0.041455 | 0.37141  | -0.06881 | 0.13761  | -0.0022  |
| -0.06072 | 0.19023  | 0.065295 | 0.1589   | 0.005711 | 0.90203  | 0.031423 | 0.49815  | -0.01262 |
| 0.209811 | 4.81E-06 | 0.207411 | 6.20E-06 | 0.005652 | 0.90304  | -0.05812 | 0.20997  | 0.152777 |
| 0.15021  | 0.00113  | -0.19023 | 3.51E-05 | -0.0224  | 0.62916  | -0.02878 | 0.53498  | -0.05893 |
| -0.14732 | 0.00141  | -0.1831  | 6.89E-05 | -0.0498  | 0.28286  | -0.07052 | 0.12807  | -0.19018 |
| 0.07237  | 0.11834  | -0.12028 | 0.00928  | -0.0399  | 0.38962  | -0.0896  | 0.053    | -0.01406 |
| -0.0327  | 0.48088  | 0.013502 | 0.77104  | 0.000137 | 0.99765  | -0.07278 | 0.11627  | -0.0126  |
| -0.08241 | 0.07523  | -0.32544 | 5.54E-13 | -0.10495 | 0.02331  | -0.22501 | 8.98E-07 | -0.12269 |

|          |          |          |          |          |         |          |          |          |
|----------|----------|----------|----------|----------|---------|----------|----------|----------|
| -0.02798 | 0.54644  | -0.14783 | 0.00136  | 0.008882 | 0.84819 | -0.00783 | 0.86597  | 0.110236 |
| 0.087435 | 0.05902  | 0.075412 | 0.10361  | -0.04874 | 0.29319 | -0.10608 | 0.02187  | -0.04023 |
| -0.06861 | 0.13873  | -0.16414 | 0.00037  | 0.080577 | 0.08196 | -0.00454 | 0.92203  | -0.00234 |
| 0.03434  | 0.4591   | 0.061928 | 0.18156  | 0.001325 | 0.97721 | -0.11767 | 0.01093  | 0.034729 |
| -0.12341 | 0.00759  | -0.20634 | 6.94E-06 | 0.012115 | 0.794   | 0.014776 | 0.75012  | -0.06454 |
| 0.031169 | 0.50164  | -0.08662 | 0.06142  | 0.157974 | 0.00061 | 0.05462  | 0.23877  | 0.099496 |
| 0.029438 | 0.52569  | 0.104987 | 0.02327  | -0.04354 | 0.34786 | -0.07997 | 0.08429  | 0.065271 |
| 0.054794 | 0.23727  | -0.11514 | 0.01278  | -0.00963 | 0.83551 | 0.010197 | 0.82604  | -0.03744 |
| -0.04059 | 0.3815   | 0.017318 | 0.70895  | -0.04113 | 0.37515 | -0.04984 | 0.28245  | 0.012479 |
| -0.13129 | 0.00449  | -0.22992 | 5.10E-07 | 0.003618 | 0.93785 | -0.00147 | 0.9747   | -0.07497 |
| 0.030125 | 0.51608  | -0.23507 | 2.77E-07 | 0.035625 | 0.44246 | -0.0426  | 0.35832  | -0.09445 |
| 0.076155 | 0.10024  | 0.060644 | 0.1908   | 0.048796 | 0.29267 | 0.095866 | 0.03837  | 0.260359 |
| 0.002691 | 0.95376  | -0.4614  | 5.35E-26 | -0.04278 | 0.35633 | -0.07116 | 0.12462  | -0.17666 |
| 0.224783 | 9.22E-07 | 0.255958 | 2.02E-08 | 0.080966 | 0.08048 | 0.11554  | 0.01247  | 0.32276  |
| -0.11911 | 0.00999  | -0.22723 | 6.96E-07 | 0.059336 | 0.20056 | 0.05058  | 0.27535  | 0.033219 |
| -0.09771 | 0.03478  | -0.0848  | 0.06712  | -0.01168 | 0.80127 | 0.106753 | 0.02103  | 0.129615 |
| -0.2374  | 2.09E-07 | -0.1283  | 0.00549  | 0.012231 | 0.79208 | 0.026689 | 0.56508  | -0.02392 |
| -0.04637 | 0.31733  | 0.228654 | 5.90E-07 | 0.141975 | 0.0021  | 0.377941 | 2.64E-17 | 0.085276 |
| -0.15516 | 0.00077  | -0.0691  | 0.13595  | 0.016417 | 0.72346 | 0.052611 | 0.25651  | 0.050357 |
| -0.0455  | 0.32656  | -0.06816 | 0.14137  | -0.00972 | 0.8341  | 0.052395 | 0.25847  | 0.004296 |
| 0.250493 | 4.10E-08 | 0.109121 | 0.01833  | -0.06605 | 0.1541  | -0.12751 | 0.00579  | -0.19777 |
| 0.139321 | 0.00255  | -0.03325 | 0.4735   | 0.049924 | 0.28163 | 0.013782 | 0.76644  | -0.07127 |
| -0.04731 | 0.30768  | 0.110384 | 0.01702  | 0.106139 | 0.02179 | 0.278692 | 8.88E-10 | 0.248523 |
| -0.09217 | 0.04651  | -0.32832 | 3.37E-13 | -0.02498 | 0.59032 | -0.02861 | 0.53741  | -0.0934  |
| -0.03782 | 0.41488  | -0.23734 | 2.11E-07 | 0.000289 | 0.99503 | -0.01438 | 0.75656  | -0.06271 |
| -0.16641 | 0.0003   | -0.21162 | 3.96E-06 | 0.025151 | 0.58772 | 0.085077 | 0.06622  | 0.008949 |
| -0.10274 | 0.02641  | -0.11464 | 0.01318  | -0.06161 | 0.18384 | -0.15146 | 0.00103  | -0.07139 |
| 0.120982 | 0.00887  | 0.077657 | 0.0937   | 0.006471 | 0.88909 | 0.028646 | 0.53689  | -0.04828 |
| -0.10371 | 0.025    | -0.07657 | 0.09839  | -0.02014 | 0.66424 | 0.107234 | 0.02046  | -0.04433 |
| 0.184827 | 5.87E-05 | 0.131872 | 0.00431  | 0.02079  | 0.65407 | 0.06977  | 0.13219  | -0.04002 |
| 0.216389 | 2.36E-06 | 0.093472 | 0.04349  | 0.005018 | 0.91387 | 0.091524 | 0.04808  | -0.0358  |
| 0.098759 | 0.03287  | -0.34988 | 6.79E-15 | -0.02882 | 0.53438 | -0.13561 | 0.00332  | -0.12377 |
| -0.01949 | 0.67443  | 0.249768 | 4.50E-08 | 0.092778 | 0.04508 | 0.193639 | 2.52E-05 | 0.113861 |
| -0.03148 | 0.49742  | -0.11222 | 0.01526  | -0.00834 | 0.85743 | 0.041102 | 0.3755   | 0.063304 |
| -0.03983 | 0.39049  | 0.216164 | 2.42E-06 | 0.081012 | 0.08032 | 0.258091 | 1.53E-08 | 0.144439 |
| 0.026242 | 0.57161  | 0.047136 | 0.30941  | -0.01801 | 0.69794 | 0.130929 | 0.0046   | -0.15199 |
| 0.054225 | 0.24219  | 0.246651 | 6.68E-08 | 0.124017 | 0.00729 | 0.250435 | 4.13E-08 | 0.176005 |
| 0.054542 | 0.23944  | -0.01077 | 0.81644  | -0.00019 | 0.99677 | -0.05121 | 0.26939  | -0.04045 |
| -0.07675 | 0.09759  | -0.16855 | 0.00025  | -0.00234 | 0.95974 | -0.1012  | 0.02876  | 0.036285 |
| 0.073876 | 0.11085  | 0.187463 | 4.57E-05 | 0.009536 | 0.83717 | 0.01701  | 0.71389  | 0.08715  |
| -0.20166 | 1.13E-05 | -0.08781 | 0.05793  | 0.114819 | 0.01303 | 0.317174 | 2.25E-12 | 0.029332 |
| 0.065499 | 0.1576   | -0.01445 | 0.75545  | -0.01024 | 0.82535 | -0.06495 | 0.16112  | 0.069258 |
| -0.18113 | 8.28E-05 | -0.09898 | 0.03248  | 0.034855 | 0.4524  | 0.184388 | 6.11E-05 | 0.003934 |
| 0.022481 | 0.62798  | -0.25198 | 3.39E-08 | -0.03078 | 0.50702 | 0.021805 | 0.63836  | -0.12284 |
| -0.03789 | 0.41403  | -0.16116 | 0.00047  | 0.006415 | 0.89003 | 0.008561 | 0.85362  | 0.021478 |



|          |          |          |          |          |         |          |          |          |
|----------|----------|----------|----------|----------|---------|----------|----------|----------|
| 0.195036 | 2.19E-05 | -0.03464 | 0.45517  | -0.01271 | 0.78417 | -0.00294 | 0.94955  | -0.05606 |
| 0.01208  | 0.79459  | 0.063038 | 0.17384  | -0.022   | 0.63539 | -0.10757 | 0.02007  | -0.08368 |
| -0.01186 | 0.79827  | -0.23325 | 3.44E-07 | -0.0484  | 0.29663 | -0.10635 | 0.02152  | -0.23519 |
| -0.07188 | 0.12083  | -0.14206 | 0.00209  | 0.010837 | 0.81532 | -0.01745 | 0.70691  | -0.08242 |
| -0.09284 | 0.04493  | -0.1277  | 0.00572  | -0.02514 | 0.58785 | -0.0963  | 0.0375   | -0.15664 |
| -0.09088 | 0.04968  | -0.24232 | 1.15E-07 | -0.01097 | 0.81314 | -0.05112 | 0.27024  | -0.06282 |
| -0.0348  | 0.45312  | -0.07657 | 0.09838  | 0.075456 | 0.1034  | 0.065255 | 0.15916  | 0.331535 |
| 0.008575 | 0.85338  | -0.19325 | 2.61E-05 | 0.071744 | 0.12156 | -0.0149  | 0.74814  | 0.008757 |
| 0.119617 | 0.00967  | -0.07771 | 0.09347  | 0.057064 | 0.21838 | 0.058567 | 0.20647  | 0.231837 |
| 0.2745   | 1.62E-09 | 0.241605 | 1.25E-07 | 0.023622 | 0.61063 | 0.103096 | 0.02589  | -0.08666 |
| -0.11836 | 0.01047  | -0.17008 | 0.00022  | 0.058237 | 0.20904 | 0.15741  | 0.00064  | 0.117942 |
| 0.065869 | 0.15527  | -0.09678 | 0.03655  | -0.01379 | 0.76622 | 0.016551 | 0.72129  | 0.009104 |
| -0.0518  | 0.26392  | -0.44176 | 9.94E-24 | -0.04121 | 0.37427 | -0.09087 | 0.04969  | -0.15587 |
| 0.074182 | 0.10938  | 0.265958 | 5.30E-09 | 0.027141 | 0.5585  | 0.007278 | 0.87536  | 0.156139 |
| -0.06691 | 0.14885  | -0.08588 | 0.0637   | 0.034845 | 0.45252 | 0.038017 | 0.41242  | -0.06493 |
| -0.1827  | 7.15E-05 | -0.29604 | 6.71E-11 | -0.01283 | 0.7822  | -0.05093 | 0.27204  | -0.07016 |
| 0.029626 | 0.52305  | 0.026717 | 0.56467  | -0.03901 | 0.40033 | -0.09428 | 0.04169  | -0.03984 |
| -0.06983 | 0.13183  | -0.0237  | 0.60949  | -0.04816 | 0.29901 | -0.06122 | 0.18658  | -0.02963 |
| -0.01715 | 0.71162  | 0.085573 | 0.06465  | 0.013519 | 0.77075 | 0.080428 | 0.08252  | -0.05387 |
| 0.165732 | 0.00032  | -0.02578 | 0.57834  | 0.002593 | 0.95543 | -0.04443 | 0.33807  | 0.079169 |
| -0.11518 | 0.01275  | -0.30257 | 2.42E-11 | 0.037199 | 0.42255 | 0.043524 | 0.348    | 0.235295 |
| -0.02677 | 0.56391  | -0.19707 | 1.79E-05 | 0.031233 | 0.50075 | -0.03791 | 0.41376  | 0.159031 |
| -0.0977  | 0.03479  | -0.27153 | 2.45E-09 | 0.165571 | 0.00033 | 0.313029 | 4.48E-12 | 0.112426 |
| -0.178   | 0.00011  | -0.22114 | 1.39E-06 | -0.07515 | 0.10484 | -0.20735 | 6.24E-06 | -0.20611 |
| 0.18424  | 6.20E-05 | 0.135312 | 0.00339  | 0.128411 | 0.00545 | 0.015593 | 0.7368   | 0.078159 |
| -0.0551  | 0.23465  | -0.17276 | 0.00018  | 0.020863 | 0.65294 | -0.04133 | 0.37282  | -0.00957 |
| 0.06487  | 0.16164  | 0.042275 | 0.36202  | -0.00356 | 0.93892 | 0.014222 | 0.7592   | -0.01991 |
| -0.0477  | 0.3037   | -0.10803 | 0.01953  | -0.01666 | 0.71957 | -0.04267 | 0.35755  | -0.03878 |
| 0.037296 | 0.42135  | -0.19089 | 3.29E-05 | 0.036863 | 0.42675 | -0.02237 | 0.62974  | -0.00666 |
| 0.001938 | 0.96669  | 0.117763 | 0.01087  | 0.004356 | 0.9252  | 0.023447 | 0.61327  | -0.03566 |
| 0.045471 | 0.32683  | 0.272791 | 2.06E-09 | 0.127905 | 0.00564 | 0.378346 | 2.43E-17 | 0.041193 |
| 0.151187 | 0.00105  | 0.267211 | 4.46E-09 | 0.121993 | 0.00831 | 0.352537 | 4.11E-15 | 0.064939 |
| 0.126751 | 0.00609  | 0.159171 | 0.00056  | 0.03742  | 0.4198  | 0.118313 | 0.0105   | -0.12286 |
| -0.04344 | 0.34891  | -0.29235 | 1.18E-10 | -0.06973 | 0.13241 | -0.14995 | 0.00115  | -0.24978 |
| -0.16691 | 0.00029  | -0.30521 | 1.59E-11 | -0.05226 | 0.25967 | 0.076132 | 0.10034  | -0.27462 |
| -0.04129 | 0.3733   | -0.04358 | 0.34735  | 0.015931 | 0.73132 | 0.101777 | 0.02786  | 0.080875 |
| 0.206884 | 6.55E-06 | 0.150476 | 0.00111  | -0.01239 | 0.78945 | -0.10389 | 0.02476  | 0.096805 |
| 0.056891 | 0.21977  | 0.235843 | 2.52E-07 | 0.061491 | 0.18467 | 0.037657 | 0.41686  | -0.02299 |
| 0.123797 | 0.0074   | 0.255008 | 2.29E-08 | 0.048148 | 0.29913 | 0.035968 | 0.43808  | -0.00793 |
| -0.11131 | 0.01611  | -0.34947 | 7.34E-15 | 0.05016  | 0.27937 | -0.0402  | 0.38603  | 0.193806 |
| -0.08983 | 0.05238  | -0.2966  | 6.15E-11 | -0.03015 | 0.51569 | -0.15895 | 0.00057  | -0.12216 |
| -0.15531 | 0.00076  | -0.32842 | 3.31E-13 | 0.042514 | 0.35931 | 0.013961 | 0.76349  | -0.02232 |
| -0.0857  | 0.06424  | -0.40477 | 7.74E-20 | -0.0256  | 0.58107 | -0.15555 | 0.00074  | -0.0635  |
| 0.23369  | 3.27E-07 | 0.320014 | 1.40E-12 | -0.0111  | 0.81089 | -0.0411  | 0.3755   | 0.060993 |
| 0.020563 | 0.65761  | -0.10849 | 0.01902  | 0.011193 | 0.80937 | 0.038187 | 0.41033  | 0.06435  |

|          |          |          |          |           |         |          |          |          |
|----------|----------|----------|----------|-----------|---------|----------|----------|----------|
| 0.035283 | 0.44686  | 0.08666  | 0.06131  | -0.04653  | 0.31571 | -0.13182 | 0.00432  | -0.23601 |
| -0.17974 | 9.40E-05 | -0.4225  | 1.21E-21 | -0.01448  | 0.75504 | -0.11218 | 0.01529  | 0.020002 |
| 0.062923 | 0.17463  | 0.083545 | 0.07127  | 0.004237  | 0.92724 | -0.0689  | 0.13711  | 0.057113 |
| 0.19416  | 2.39E-05 | 0.095628 | 0.03885  | -0.01366  | 0.7684  | -0.06041 | 0.19252  | 0.017288 |
| 0.075816 | 0.10176  | 0.008726 | 0.85083  | -0.00472  | 0.91893 | -0.04608 | 0.32034  | -0.03308 |
| 0.213167 | 3.36E-06 | 0.236871 | 2.23E-07 | 0.093876  | 0.04259 | 0.098681 | 0.03301  | 0.26649  |
| -0.02955 | 0.52409  | 0.031924 | 0.49132  | 0.025249  | 0.58626 | -0.02405 | 0.60415  | 0.196944 |
| -0.00463 | 0.92059  | 0.127254 | 0.00589  | 0.071425  | 0.12323 | 0.108292 | 0.01924  | 0.319109 |
| 0.25662  | 1.85E-08 | 0.02383  | 0.60749  | 0.026441  | 0.56871 | -0.04171 | 0.36853  | -0.01481 |
| -0.00665 | 0.88601  | 0.109522 | 0.01791  | 0.102     | 0.02752 | 0.140924 | 0.00227  | 0.320011 |
| 0.239977 | 1.53E-07 | 0.144728 | 0.00171  | -0.02092  | 0.65202 | -0.04518 | 0.32994  | 0.109007 |
| -0.08786 | 0.05781  | -0.08536 | 0.06531  | 0.000203  | 0.9965  | 0.052281 | 0.25951  | -0.00026 |
| -0.00115 | 0.98027  | 0.006913 | 0.88157  | 0.059815  | 0.19694 | 0.104567 | 0.02383  | 0.016669 |
| -0.03522 | 0.44767  | -0.12229 | 0.00815  | 0.068611  | 0.13875 | 0.049488 | 0.28586  | 0.00566  |
| -0.12604 | 0.00639  | -0.28368 | 4.30E-10 | 0.021932  | 0.6364  | -0.00036 | 0.9938   | -0.03401 |
| -0.00088 | 0.98495  | 0.059656 | 0.19814  | 0.079122  | 0.08765 | 0.137804 | 0.00284  | -0.014   |
| 0.003105 | 0.94665  | 0.036489 | 0.43146  | 0.11677   | 0.01156 | 0.206727 | 6.66E-06 | 0.034646 |
| -0.13959 | 0.0025   | -0.16342 | 0.00039  | -0.02027  | 0.66223 | -0.06872 | 0.13813  | 0.196876 |
| 0.047105 | 0.30973  | -0.02212 | 0.63351  | -0.00881  | 0.84943 | 0.029949 | 0.51852  | -0.03174 |
| 0.096748 | 0.03661  | -0.03018 | 0.51533  | -0.02295  | 0.62077 | -0.03036 | 0.51283  | -0.00266 |
| -0.01872 | 0.68658  | -0.07781 | 0.09306  | 0.078127  | 0.09172 | 0.11566  | 0.01238  | -0.00748 |
| -0.11502 | 0.01288  | -0.13756 | 0.00289  | 0.033592  | 0.46895 | 0.13969  | 0.00248  | 0.144178 |
| 0.022305 | 0.63067  | -0.05843 | 0.20755  | -0.01677  | 0.71782 | -0.04475 | 0.33456  | 0.00381  |
| -0.07764 | 0.09375  | 0.007643 | 0.86916  | -0.02249  | 0.6279  | 0.042219 | 0.36266  | 0.006919 |
| -0.14943 | 0.0012   | -0.22143 | 1.35E-06 | -0.03548  | 0.44429 | -0.02975 | 0.52126  | -0.03882 |
| -0.11749 | 0.01105  | -0.1887  | 4.06E-05 | 0.005109  | 0.91232 | 0.04048  | 0.38277  | -0.05715 |
| 0.150808 | 0.00108  | -0.05758 | 0.21424  | -0.02006  | 0.66543 | -0.08638 | 0.06217  | -0.09029 |
| -0.08215 | 0.07613  | -0.07316 | 0.11438  | 0.000585  | 0.98995 | 0.032572 | 0.48256  | -0.12143 |
| 0.047088 | 0.30991  | -0.01038 | 0.82293  | 0.001498  | 0.97425 | -0.02015 | 0.66399  | -0.00467 |
| -0.06301 | 0.17402  | -0.07981 | 0.08493  | 0.031259  | 0.5004  | 0.064575 | 0.16356  | -0.01567 |
| 0.074559 | 0.10758  | -0.13565 | 0.00331  | 0.011368  | 0.80644 | -0.0962  | 0.0377   | -0.0159  |
| 0.225173 | 8.82E-07 | 0.277571 | 1.04E-09 | -0.00589  | 0.899   | -0.05396 | 0.24449  | -0.04129 |
| -0.04525 | 0.32922  | -0.25209 | 3.34E-08 | 0.019192  | 0.67911 | -0.04182 | 0.36725  | -0.00693 |
| 0.176122 | 0.00013  | 0.2022   | 1.07E-05 | 0.039492  | 0.3945  | 0.020273 | 0.66214  | 0.109701 |
| -0.0105  | 0.82104  | -0.20381 | 9.03E-06 | 0.059768  | 0.1973  | 0.040581 | 0.38159  | 0.334362 |
| 0.05623  | 0.22519  | -0.00036 | 0.99383  | 0.020472  | 0.65902 | 0.10361  | 0.02515  | -0.0665  |
| 0.048856 | 0.29207  | 0.141941 | 0.00211  | 0.065039  | 0.16055 | 0.106106 | 0.02183  | 0.054179 |
| 0.186524 | 5.00E-05 | 0.242829 | 1.08E-07 | 0.029934  | 0.51874 | 0.058336 | 0.20827  | 0.126483 |
| 0.096343 | 0.03741  | -0.26623 | 5.10E-09 | 0.020959  | 0.65144 | -0.05624 | 0.22515  | 0.014545 |
| 0.010486 | 0.8212   | -0.05337 | 0.24972  | -0.03427  | 0.45999 | -0.02655 | 0.56716  | -0.13331 |
| -0.04596 | 0.32165  | -0.29653 | 6.22E-11 | -0.00409  | 0.92971 | -0.03796 | 0.41308  | -0.06711 |
| 0.010229 | 0.82552  | -0.03114 | 0.50205  | -9.29E-05 | 0.9984  | -0.02424 | 0.60137  | -0.11601 |
| 0.046493 | 0.31607  | -0.099   | 0.03244  | -0.02599  | 0.57533 | -0.07807 | 0.09198  | 0.017827 |
| 0.049653 | 0.28426  | 0.018362 | 0.69227  | 0.020355  | 0.66084 | 0.033876 | 0.46519  | -0.06449 |
| 0.17241  | 0.00018  | 0.215866 | 2.50E-06 | -0.00693  | 0.88127 | -0.04014 | 0.38682  | 0.090813 |

|          |          |          |          |          |          |          |          |          |
|----------|----------|----------|----------|----------|----------|----------|----------|----------|
| -0.15947 | 0.00054  | -0.11294 | 0.01461  | 0.034209 | 0.46082  | 0.281168 | 6.21E-10 | 0.376306 |
| -0.05913 | 0.20215  | 0.110923 | 0.01648  | 0.070162 | 0.13002  | 0.199589 | 1.39E-05 | 0.367862 |
| 0.277704 | 1.02E-09 | 0.326629 | 4.52E-13 | 0.007823 | 0.8661   | -0.01498 | 0.74672  | 0.117085 |
| -0.0228  | 0.62304  | -0.04436 | 0.33883  | 0.033577 | 0.46914  | 0.015544 | 0.7376   | 0.299449 |
| 0.166605 | 0.0003   | -0.14593 | 0.00157  | -0.02071 | 0.65529  | -0.06807 | 0.1419   | -0.06602 |
| 0.163815 | 0.00038  | 0.000757 | 0.98698  | 0.127513 | 0.00579  | 0.002478 | 0.95741  | 0.109782 |
| -0.09416 | 0.04197  | -0.25528 | 2.21E-08 | -0.01642 | 0.72333  | -0.08867 | 0.05553  | -0.06683 |
| -0.03852 | 0.40631  | -0.00048 | 0.99178  | 0.05467  | 0.23834  | 0.182923 | 7.01E-05 | -0.00188 |
| -0.16092 | 0.00048  | -0.29639 | 6.34E-11 | -0.00599 | 0.89723  | -0.04742 | 0.30654  | -0.00313 |
| -0.01188 | 0.79783  | -0.14794 | 0.00135  | 0.040991 | 0.3768   | 0.10347  | 0.02535  | 0.308124 |
| -0.07074 | 0.12688  | -0.19268 | 2.76E-05 | 0.061885 | 0.18187  | 5.35E-05 | 0.99908  | 0.049087 |
| 0.228393 | 6.09E-07 | 0.076215 | 0.09997  | 0.045434 | 0.32723  | -0.02851 | 0.5388   | 0.08373  |
| -0.01461 | 0.75284  | -0.05109 | 0.2705   | 0.009727 | 0.83395  | 0.008401 | 0.85631  | 0.087015 |
| 0.166118 | 0.00031  | 0.241786 | 1.23E-07 | 0.009811 | 0.83254  | -0.04174 | 0.36818  | 0.026645 |
| 0.181818 | 7.76E-05 | 0.093552 | 0.04331  | -0.00905 | 0.84539  | -0.14717 | 0.00143  | 0.135305 |
| -0.04623 | 0.31878  | -0.31877 | 1.73E-12 | -0.00584 | 0.89985  | -0.08268 | 0.07428  | -0.10924 |
| 0.036827 | 0.42721  | 0.049515 | 0.28561  | 0.02357  | 0.61141  | 0.065153 | 0.15982  | 0.272632 |
| -0.12942 | 0.00509  | -0.35504 | 2.55E-15 | 0.093941 | 0.04245  | 0.147575 | 0.00138  | 0.265609 |
| -0.11776 | 0.01087  | 0.106829 | 0.02094  | 0.054054 | 0.24368  | 0.157807 | 0.00062  | 0.031306 |
| 0.171818 | 0.00019  | 0.291218 | 1.40E-10 | -0.00237 | 0.95922  | 0.016029 | 0.72973  | -0.00955 |
| -0.12077 | 0.00899  | -0.15671 | 0.00068  | -0.02572 | 0.57936  | 0.067232 | 0.14688  | 0.006371 |
| -0.07428 | 0.10891  | -0.19877 | 1.51E-05 | -0.00287 | 0.95074  | -0.02842 | 0.54014  | -0.03902 |
| -0.07261 | 0.1171   | -0.17442 | 0.00015  | 0.012814 | 0.7824   | 0.096749 | 0.03661  | -0.00644 |
| 0.048486 | 0.29575  | 0.156857 | 0.00067  | -0.04071 | 0.38004  | -0.16928 | 0.00024  | 0.113781 |
| -0.22643 | 7.63E-07 | -0.28372 | 4.27E-10 | -0.01728 | 0.70963  | 0.03073  | 0.50768  | -0.02845 |
| -0.02368 | 0.60976  | -0.09248 | 0.04578  | 0.022465 | 0.62823  | -0.00047 | 0.99184  | 0.016204 |
| -0.14304 | 0.00194  | -0.15047 | 0.00111  | 0.048356 | 0.29704  | 0.053574 | 0.24789  | 0.057042 |
| 0.075583 | 0.10282  | 0.285696 | 3.20E-10 | 0.059916 | 0.19619  | 0.088562 | 0.05582  | 0.250846 |
| 0.211731 | 3.92E-06 | -0.06719 | 0.14714  | 0.01836  | 0.69231  | 0.024268 | 0.60089  | -0.05883 |
| -0.0021  | 0.96387  | -0.02704 | 0.55999  | 0.056467 | 0.22324  | 0.00169  | 0.97094  | 0.108509 |
| -0.12404 | 0.00728  | -0.01297 | 0.77986  | -0.02447 | 0.59794  | 0.052219 | 0.26008  | -0.15306 |
| -0.10427 | 0.02424  | 0.016444 | 0.72301  | -0.03937 | 0.39593  | 0.019329 | 0.67695  | -0.18241 |
| 0.006996 | 0.88016  | -0.06824 | 0.14091  | 0.043421 | 0.34913  | 0.018198 | 0.69489  | 0.083318 |
| -0.07502 | 0.10542  | -0.1771  | 0.00012  | 0.013577 | 0.7698   | -0.02111 | 0.64906  | -0.02508 |
| 0.147004 | 0.00144  | 0.3212   | 1.14E-12 | 0.218192 | 1.94E-06 | 0.433812 | 7.49E-23 | 0.129453 |
| -0.10468 | 0.02367  | -0.22235 | 1.22E-06 | -0.0291  | 0.53046  | -0.03929 | 0.39697  | -0.22214 |
| -0.07829 | 0.09105  | -0.39471 | 7.34E-19 | -0.03253 | 0.48312  | -0.06437 | 0.1649   | -0.0921  |
| 0.086937 | 0.06049  | -0.11638 | 0.01185  | -0.03848 | 0.40674  | -0.13527 | 0.0034   | -0.06389 |
| -0.10503 | 0.02321  | -0.45205 | 6.71E-25 | -0.0574  | 0.21566  | -0.15085 | 0.00108  | -0.19172 |
| -0.12231 | 0.00815  | -0.46251 | 3.94E-26 | 0.045511 | 0.3264   | 0.099167 | 0.03215  | -0.08796 |
| 0.210594 | 4.42E-06 | 0.083229 | 0.07235  | 0.032961 | 0.47735  | 0.03559  | 0.44292  | 0.054655 |
| -0.13863 | 0.00268  | -0.01029 | 0.82454  | 0.010161 | 0.82666  | 0.028763 | 0.53523  | -0.01962 |
| -0.08471 | 0.06739  | -0.43168 | 1.27E-22 | -0.03596 | 0.43823  | -0.08044 | 0.08249  | -0.23963 |
| -0.02283 | 0.62262  | 0.090882 | 0.04967  | 0.148302 | 0.00131  | 0.39349  | 9.60E-19 | 0.20929  |
| -0.1215  | 0.00858  | -0.41433 | 8.49E-21 | -0.01043 | 0.82217  | -0.03198 | 0.49055  | -0.10752 |

|          |          |          |          |          |         |          |          |          |
|----------|----------|----------|----------|----------|---------|----------|----------|----------|
| 0.057139 | 0.21777  | 0.134487 | 0.00359  | 0.108901 | 0.01857 | 0.064131 | 0.16648  | 0.285947 |
| 0.024418 | 0.59865  | 0.123379 | 0.0076   | 0.063853 | 0.16833 | 0.206637 | 6.73E-06 | 0.12324  |
| 0.015133 | 0.7443   | -0.13635 | 0.00315  | -0.0091  | 0.84455 | -0.06383 | 0.16851  | -0.06201 |
| 0.074624 | 0.10727  | 0.088678 | 0.05549  | 0.05909  | 0.20243 | 0.062249 | 0.1793   | -0.02602 |
| 0.009887 | 0.83125  | -0.38479 | 6.27E-18 | -0.02267 | 0.6251  | 0.044719 | 0.33491  | -0.14226 |
| 0.05167  | 0.26513  | -0.11684 | 0.01151  | 0.007413 | 0.87306 | -0.02273 | 0.62417  | 0.032226 |
| -0.03746 | 0.41932  | -0.17672 | 0.00012  | 0.084308 | 0.06872 | 0.105956 | 0.02202  | 0.125953 |
| 0.024401 | 0.59891  | -0.12469 | 0.00698  | 0.025378 | 0.58435 | -0.02724 | 0.55709  | -0.00127 |
| 0.05395  | 0.24459  | 0.047635 | 0.30432  | 0.038322 | 0.40867 | 0.18502  | 5.76E-05 | 0.227992 |
| -0.17668 | 0.00012  | -0.23812 | 1.92E-07 | -0.0001  | 0.99827 | -0.02969 | 0.52213  | -0.02491 |
| -0.06525 | 0.15919  | -0.03489 | 0.45193  | 0.03182  | 0.49273 | 0.165193 | 0.00034  | 0.207478 |
| 0.07288  | 0.11576  | -0.04828 | 0.2978   | 0.047154 | 0.30923 | 0.112302 | 0.01518  | -0.04648 |
| -0.05516 | 0.23412  | 0.089762 | 0.05256  | 0.11619  | 0.01198 | 0.375534 | 4.35E-17 | -0.00978 |
| 0.213314 | 3.30E-06 | 0.133259 | 0.00392  | 0.089801 | 0.05246 | 0.196636 | 1.87E-05 | 0.223021 |
| 0.04455  | 0.33673  | 0.091988 | 0.04695  | 0.002874 | 0.95061 | -0.04454 | 0.33681  | 0.088111 |
| 0.19495  | 2.21E-05 | 0.282272 | 5.29E-10 | 0.039725 | 0.39172 | 0.007135 | 0.87779  | 0.092546 |
| 0.097174 | 0.03579  | 0.156438 | 0.00069  | 0.040471 | 0.38288 | -0.00993 | 0.83058  | 0.071754 |
| -0.06352 | 0.17057  | -0.01598 | 0.73057  | 0.06046  | 0.19215 | 0.17213  | 0.00019  | 0.057122 |
| -0.14967 | 0.00118  | 0.037164 | 0.42299  | 0.015206 | 0.7431  | 0.237731 | 2.01E-07 | 0.06132  |
| -0.15382 | 0.00085  | 0.082131 | 0.07621  | 0.033942 | 0.46432 | 0.189819 | 3.65E-05 | 0.058722 |
| -0.15936 | 0.00055  | -0.00468 | 0.91974  | 0.017906 | 0.69954 | 0.063085 | 0.17352  | 0.033464 |
| 0.054681 | 0.23825  | 0.121138 | 0.00878  | 0.044306 | 0.33939 | 0.036139 | 0.43591  | -0.01917 |
| -0.02485 | 0.59215  | -0.00854 | 0.85398  | 0.013063 | 0.77828 | 0.104981 | 0.02328  | -0.09639 |
| -0.12391 | 0.00734  | -0.19855 | 1.54E-05 | 0.0159   | 0.73182 | 0.014347 | 0.75715  | 0.120811 |
| -0.09285 | 0.04492  | -0.32189 | 1.02E-12 | -0.00109 | 0.98127 | -0.03606 | 0.43695  | 0.013718 |
| 0.247227 | 6.21E-08 | 0.223439 | 1.07E-06 | -0.05519 | 0.23386 | -0.07176 | 0.12149  | 0.058906 |
| 0.098554 | 0.03323  | -0.02968 | 0.52232  | -0.08908 | 0.05439 | -0.12451 | 0.00706  | -0.16717 |
| 0.127034 | 0.00598  | 0.233434 | 3.37E-07 | -0.06037 | 0.19278 | -0.1786  | 0.0001   | -0.13013 |
| -0.05513 | 0.23437  | 0.017205 | 0.71077  | -0.01465 | 0.75219 | 0.051659 | 0.26523  | 0.040266 |
| 0.193328 | 2.59E-05 | 0.149764 | 0.00117  | -0.00813 | 0.86082 | -0.00568 | 0.90249  | -0.02724 |
| 0.036904 | 0.42624  | 0.057295 | 0.21651  | 0.045049 | 0.33135 | 0.069722 | 0.13246  | 0.145653 |
| 0.163763 | 0.00038  | 0.268746 | 3.61E-09 | 0.040999 | 0.3767  | 0.123767 | 0.00741  | 0.217956 |
| 0.186221 | 5.14E-05 | 0.22728  | 6.92E-07 | 0.065963 | 0.15468 | 0.227353 | 6.87E-07 | 0.062146 |
| -0.02618 | 0.5725   | -0.08728 | 0.05948  | -0.00898 | 0.84651 | 0.038988 | 0.40057  | -0.04567 |
| 0.00267  | 0.95411  | -0.19512 | 2.18E-05 | 0.011254 | 0.80835 | 0.005801 | 0.90051  | -0.10549 |
| 0.018815 | 0.68509  | -0.26769 | 4.18E-09 | -0.02281 | 0.62291 | -0.14101 | 0.00226  | -0.09088 |
| -0.20478 | 8.17E-06 | 0.00436  | 0.92514  | 0.062625 | 0.17668 | 0.218001 | 1.98E-06 | 0.13672  |
| 0.163137 | 0.0004   | 0.138725 | 0.00266  | 0.007445 | 0.87252 | 0.050339 | 0.27765  | 0.157079 |
| -0.05938 | 0.20025  | -0.08792 | 0.05762  | 0.023587 | 0.61116 | 0.151538 | 0.00102  | 0.312482 |
| -0.01055 | 0.82015  | -0.22233 | 1.22E-06 | -0.03591 | 0.43882 | -0.09355 | 0.04332  | -0.06507 |
| 0.151739 | 0.001    | -0.01521 | 0.74303  | -0.02844 | 0.53979 | -0.03013 | 0.51594  | -0.07616 |
| -0.11892 | 0.01011  | -0.39939 | 2.60E-19 | -0.01428 | 0.75817 | -0.11645 | 0.01179  | 0.01314  |
| 0.031664 | 0.49486  | -0.12848 | 0.00543  | 0.010183 | 0.82628 | -0.03098 | 0.50419  | 0.042191 |
| 0.069302 | 0.13481  | 0.095229 | 0.03968  | 0.029659 | 0.52258 | -0.0468  | 0.31285  | 0.160599 |
| -0.04975 | 0.28332  | -0.15945 | 0.00054  | 0.042815 | 0.35591 | 0.010998 | 0.81263  | 0.244276 |

|          |          |          |          |          |         |          |          |          |
|----------|----------|----------|----------|----------|---------|----------|----------|----------|
| -0.01777 | 0.70173  | -0.05063 | 0.27489  | -0.05325 | 0.25074 | -0.12885 | 0.00529  | -0.04182 |
| 0.053712 | 0.24668  | 0.062827 | 0.17529  | 0.063098 | 0.17343 | 0.022196 | 0.63235  | 0.212675 |
| 0.230648 | 4.68E-07 | 0.232728 | 3.66E-07 | -0.00212 | 0.96352 | -0.00983 | 0.83214  | 0.046619 |
| -0.07767 | 0.09363  | -0.14448 | 0.00175  | 0.006051 | 0.89624 | -0.01954 | 0.67366  | 0.015942 |
| -0.14716 | 0.00143  | -0.36161 | 7.14E-16 | 0.032263 | 0.48673 | 0.029822 | 0.5203   | 0.152918 |
| 0.054202 | 0.24239  | -0.08244 | 0.07512  | 0.030201 | 0.51501 | 0.183763 | 6.48E-05 | 0.195299 |
| 0.057375 | 0.21587  | 0.322348 | 9.42E-13 | 0.158414 | 0.00059 | 0.454561 | 3.43E-25 | 0.157424 |
| -0.06304 | 0.17379  | -0.10915 | 0.0183   | 0.048291 | 0.29769 | 0.009242 | 0.84212  | 0.049064 |
| -0.00189 | 0.96753  | -0.14132 | 0.0022   | 0.043141 | 0.35226 | 0.043303 | 0.35045  | 0.058303 |
| -0.17374 | 0.00016  | -0.41058 | 2.03E-20 | -0.01492 | 0.74785 | -0.05098 | 0.27158  | -0.03662 |
| -0.08828 | 0.05659  | -0.3121  | 5.22E-12 | -0.08189 | 0.07706 | -0.14603 | 0.00155  | -0.25399 |
| -0.06246 | 0.17784  | -0.2755  | 1.40E-09 | -0.023   | 0.61999 | -0.08653 | 0.06169  | -0.1243  |
| -0.14967 | 0.00118  | -0.40233 | 1.35E-19 | 0.088964 | 0.05471 | 0.093571 | 0.04327  | 0.062539 |
| 0.190464 | 3.43E-05 | 0.116111 | 0.01204  | 0.039073 | 0.39954 | -0.09733 | 0.03549  | 0.118137 |
| 0.082335 | 0.07548  | 0.165296 | 0.00033  | -0.0044  | 0.92439 | -0.03081 | 0.50651  | 0.063066 |
| -0.14075 | 0.0023   | -0.35626 | 2.02E-15 | -0.01516 | 0.74378 | -0.06544 | 0.158    | -0.11431 |
| -0.19222 | 2.89E-05 | -0.41022 | 2.21E-20 | -0.02168 | 0.64023 | -0.07616 | 0.10022  | -0.11662 |
| -0.05557 | 0.23067  | -0.14232 | 0.00205  | 0.101422 | 0.02841 | 0.100393 | 0.03007  | 0.077491 |
| -0.17909 | 9.97E-05 | -0.49598 | 2.29E-30 | -0.01616 | 0.72759 | -0.01061 | 0.81918  | -0.03205 |
| 0.035057 | 0.44977  | -0.33831 | 5.73E-14 | -0.05024 | 0.27863 | -0.12296 | 0.00781  | -0.14927 |
| 0.050176 | 0.27921  | -0.08237 | 0.07537  | 0.004433 | 0.92388 | 0.062668 | 0.17638  | 0.015411 |
| -0.15554 | 0.00074  | -0.37656 | 3.52E-17 | 0.083981 | 0.0698  | 0.139362 | 0.00254  | 0.166456 |
| -0.04692 | 0.31163  | -0.11097 | 0.01644  | 0.11812  | 0.01063 | 0.07173  | 0.12164  | 0.144553 |
| 0.021806 | 0.63833  | 0.029534 | 0.52435  | 0.028044 | 0.54549 | -0.0558  | 0.22878  | 0.246446 |
| -0.02814 | 0.54417  | 0.255403 | 2.17E-08 | 0.074148 | 0.10954 | 0.113799 | 0.01387  | 0.355871 |
| -0.00524 | 0.91004  | 0.022465 | 0.62822  | -0.02918 | 0.52934 | -0.0437  | 0.34599  | -0.00895 |
| -0.23814 | 1.91E-07 | -0.31713 | 2.27E-12 | 0.110175 | 0.01723 | 0.137806 | 0.00284  | 0.031479 |
| 0.215448 | 2.62E-06 | 0.143684 | 0.00185  | -0.04459 | 0.33626 | -0.06184 | 0.18215  | -0.10071 |
| 0.118104 | 0.01064  | 0.196723 | 1.85E-05 | -0.036   | 0.43763 | -0.10606 | 0.02189  | -0.07206 |
| -0.21648 | 2.34E-06 | -0.42523 | 6.25E-22 | -0.03368 | 0.46778 | -0.07565 | 0.10251  | -0.18644 |
| 0.168998 | 0.00024  | 0.064453 | 0.16436  | -0.05485 | 0.23678 | -0.03567 | 0.44186  | -0.03904 |
| -0.00697 | 0.88061  | -0.09583 | 0.03844  | 0.007045 | 0.87931 | -0.06961 | 0.13308  | 0.018807 |
| -0.06526 | 0.15912  | -0.22245 | 1.20E-06 | -0.03489 | 0.45189 | -0.11612 | 0.01203  | -0.12781 |
| 0.08071  | 0.08145  | -0.15898 | 0.00056  | 0.119871 | 0.00952 | 0.290914 | 1.46E-10 | 0.030728 |
| -0.06799 | 0.14237  | -0.12262 | 0.00798  | -0.01458 | 0.75328 | -0.04087 | 0.37825  | -0.09501 |
| 0.029841 | 0.52003  | -0.1464  | 0.00151  | -0.01939 | 0.67605 | -0.01867 | 0.68745  | -0.08136 |
| 0.16853  | 0.00025  | 0.089978 | 0.052    | -0.04997 | 0.28121 | -0.0827  | 0.07417  | -0.24041 |
| -0.0206  | 0.65697  | -0.20163 | 1.13E-05 | 0.048733 | 0.29329 | 0.073192 | 0.1142   | 0.00367  |
| -0.04594 | 0.32182  | -0.18131 | 8.13E-05 | 0.035593 | 0.44287 | 0.031919 | 0.49139  | 0.154788 |
| -0.21341 | 3.27E-06 | -0.17793 | 0.00011  | 0.11266  | 0.01486 | 0.354457 | 2.85E-15 | 0.020232 |
| -0.04311 | 0.35256  | -0.03053 | 0.5105   | 0.145646 | 0.0016  | 0.208693 | 5.42E-06 | 0.280516 |
| -0.01523 | 0.7427   | -0.00052 | 0.991    | 0.02187  | 0.63736 | 0.055879 | 0.2281   | 0.022899 |
| 0.111071 | 0.01634  | -0.26408 | 6.84E-09 | -0.04496 | 0.33228 | -0.04202 | 0.36495  | -0.23258 |
| 0.213524 | 3.23E-06 | 0.101909 | 0.02766  | 0.10622  | 0.02169 | 0.02512  | 0.58818  | 0.196494 |
| 0.119254 | 0.0099   | 0.169942 | 0.00022  | -0.06195 | 0.18137 | -0.13143 | 0.00444  | -0.03595 |

|          |          |          |          |          |          |          |          |          |
|----------|----------|----------|----------|----------|----------|----------|----------|----------|
| -0.1145  | 0.01329  | -0.07269 | 0.11669  | 0.129154 | 0.00519  | 0.121941 | 0.00834  | 0.352878 |
| 0.003429 | 0.94108  | 0.076516 | 0.09863  | -0.01003 | 0.82879  | 0.0149   | 0.7481   | -0.01555 |
| -0.08913 | 0.05425  | 0.060118 | 0.19469  | 0.048179 | 0.29882  | 0.025041 | 0.58935  | 0.050741 |
| 0.067658 | 0.14433  | -0.01478 | 0.75     | 0.034818 | 0.45287  | -0.04353 | 0.3479   | -0.0523  |
| -0.04232 | 0.36156  | 0.205723 | 7.40E-06 | 0.038973 | 0.40075  | 0.005699 | 0.90224  | 0.113982 |
| 0.082521 | 0.07482  | -0.09802 | 0.0342   | 0.016678 | 0.71925  | -0.03308 | 0.47569  | -0.01153 |
| -0.01897 | 0.6827   | 0.058071 | 0.21035  | 0.060312 | 0.19324  | 0.062916 | 0.17468  | 0.106087 |
| -0.1372  | 0.00297  | -0.27246 | 2.15E-09 | -0.02251 | 0.62754  | -0.07478 | 0.10655  | -0.1303  |
| 0.098678 | 0.03301  | 0.032787 | 0.47968  | 0.04896  | 0.29105  | 0.122611 | 0.00799  | 0.135051 |
| 0.018351 | 0.69245  | 0.04227  | 0.36208  | -0.03032 | 0.51335  | -0.05499 | 0.2356   | -0.15062 |
| 0.141546 | 0.00217  | 0.198793 | 1.51E-05 | 0.010333 | 0.82376  | -0.00654 | 0.88783  | 0.070896 |
| -0.14816 | 0.00132  | -0.38735 | 3.63E-18 | 0.009196 | 0.84289  | -0.01766 | 0.70353  | -0.00394 |
| -0.1031  | 0.02588  | -0.38672 | 4.16E-18 | -0.03023 | 0.51465  | -0.03013 | 0.51603  | -0.03357 |
| -0.11285 | 0.01469  | -0.23663 | 2.30E-07 | 0.010397 | 0.82269  | 0.034787 | 0.45327  | -0.04325 |
| -0.17645 | 0.00013  | -0.19214 | 2.91E-05 | 0.038509 | 0.40638  | 0.161536 | 0.00046  | -0.00964 |
| -0.16675 | 0.0003   | -0.38226 | 1.07E-17 | 0.081339 | 0.0791   | 0.193423 | 2.57E-05 | 0.145771 |
| -0.01023 | 0.82549  | 0.089866 | 0.05229  | 0.059612 | 0.19847  | 0.03971  | 0.39189  | 0.163701 |
| 0.0018   | 0.96906  | 0.38731  | 3.66E-18 | 0.160748 | 0.00049  | 0.287796 | 2.34E-10 | 0.420542 |
| 0.022928 | 0.62115  | -0.41286 | 1.20E-20 | 0.005401 | 0.90734  | -0.06445 | 0.16438  | -0.03818 |
| -0.04695 | 0.31133  | -0.03965 | 0.39263  | 0.103464 | 0.02536  | 0.280221 | 7.12E-10 | 0.112564 |
| 0.096749 | 0.03661  | 0.145502 | 0.00162  | -0.06014 | 0.19453  | -0.03152 | 0.49682  | 0.09217  |
| -0.03918 | 0.39822  | -0.04954 | 0.28536  | 0.208561 | 5.49E-06 | 0.098466 | 0.03339  | 0.32245  |
| -0.05329 | 0.25042  | -0.24793 | 5.69E-08 | 0.00036  | 0.99382  | 0.019675 | 0.67151  | -0.09519 |
| -0.01826 | 0.69389  | -0.20365 | 9.18E-06 | -0.03129 | 0.5      | -0.13587 | 0.00326  | -0.03085 |
| 0.015747 | 0.73431  | -0.04214 | 0.36361  | 0.017572 | 0.70488  | -0.03917 | 0.3984   | 0.005145 |
| -0.07467 | 0.10705  | -0.13178 | 0.00434  | 0.143173 | 0.00192  | 0.313793 | 3.95E-12 | 0.09848  |
| -0.07607 | 0.1006   | -0.08041 | 0.08259  | 0.031559 | 0.49629  | -0.00876 | 0.85019  | -0.06162 |
| 0.03596  | 0.43817  | -0.39778 | 3.73E-19 | 0.044241 | 0.34011  | -0.00745 | 0.87245  | -0.0421  |
| 0.00891  | 0.84772  | -0.15611 | 0.00071  | 0.009976 | 0.82975  | -0.03466 | 0.4549   | 0.013707 |
| -0.19048 | 3.42E-05 | -0.08642 | 0.06203  | -0.03459 | 0.4559   | -0.05759 | 0.21412  | -0.01527 |
| -0.28198 | 5.52E-10 | -0.39154 | 1.47E-18 | 0.006861 | 0.88244  | 0.01758  | 0.70475  | -0.15436 |
| -0.01431 | 0.75782  | -0.01585 | 0.73261  | 0.030175 | 0.51537  | 0.039206 | 0.39795  | 0.292244 |
| 0.092895 | 0.04481  | 0.142242 | 0.00206  | -0.00561 | 0.90368  | -0.06272 | 0.17604  | -0.06086 |
| 0.014164 | 0.76015  | -0.05933 | 0.20064  | 0.010658 | 0.81832  | -0.0422  | 0.36283  | -0.09958 |
| -0.0049  | 0.91591  | -0.05862 | 0.20608  | -0.00942 | 0.83906  | -0.02904 | 0.53134  | -0.10606 |
| -0.05551 | 0.23118  | -0.23597 | 2.49E-07 | 0.019507 | 0.67415  | -0.02828 | 0.54213  | 0.09524  |
| 0.186069 | 5.22E-05 | 0.13535  | 0.00338  | 0.053194 | 0.25127  | -0.0085  | 0.85472  | 0.095719 |
| 0.025125 | 0.5881   | 0.001062 | 0.98173  | 0.042951 | 0.35439  | 0.083821 | 0.07034  | 0.094125 |
| -0.10654 | 0.02129  | -0.16137 | 0.00046  | 0.004174 | 0.92832  | 0.004514 | 0.9225   | 0.115258 |
| -0.1131  | 0.01447  | -0.0609  | 0.18894  | -0.0153  | 0.74149  | 0.082727 | 0.0741   | 0.010699 |
| 0.115314 | 0.01265  | 0.370812 | 1.14E-16 | 0.013967 | 0.76339  | 0.165151 | 0.00034  | 0.144343 |
| -0.10908 | 0.01837  | -0.18696 | 4.80E-05 | -0.00117 | 0.97988  | -0.01137 | 0.80645  | -0.04549 |
| -0.10608 | 0.02186  | -0.18906 | 3.93E-05 | 0.004359 | 0.92515  | -0.02272 | 0.62425  | -0.08383 |
| -0.00039 | 0.99332  | -0.07717 | 0.09576  | 0.039426 | 0.3953   | -0.00705 | 0.8792   | -0.02756 |
| -0.08693 | 0.06051  | 0.105341 | 0.02281  | 0.149588 | 0.00119  | 0.353626 | 3.34E-15 | 0.351483 |

|          |          |          |          |          |          |          |          |          |
|----------|----------|----------|----------|----------|----------|----------|----------|----------|
| -0.03851 | 0.40636  | -0.06026 | 0.1936   | 0.027353 | 0.55544  | 0.10256  | 0.02667  | 0.039003 |
| 0.056817 | 0.22038  | 0.119565 | 0.0097   | -0.01866 | 0.68761  | -0.01794 | 0.69892  | 0.17615  |
| 0.171756 | 0.00019  | -0.07335 | 0.11345  | -0.01718 | 0.71115  | -0.03398 | 0.46384  | 0.049522 |
| -0.05163 | 0.26549  | -0.11753 | 0.01103  | -0.01691 | 0.71553  | -0.0414  | 0.37201  | -0.08601 |
| 0.211556 | 3.99E-06 | -0.04794 | 0.30118  | 0.144412 | 0.00176  | 0.339578 | 4.56E-14 | 0.025377 |
| -0.057   | 0.21886  | -0.08526 | 0.06564  | 0.011205 | 0.80916  | 0.060113 | 0.19472  | -0.05209 |
| -0.05998 | 0.19568  | -0.10739 | 0.02028  | 0.336222 | 8.34E-14 | 0.166297 | 0.00031  | 0.111657 |
| -0.10193 | 0.02762  | -0.19078 | 3.33E-05 | -0.01451 | 0.7544   | -0.04412 | 0.34143  | -0.08011 |
| -0.08724 | 0.05959  | -0.07958 | 0.08583  | -0.005   | 0.9141   | -0.01789 | 0.69973  | -0.1012  |
| -0.05944 | 0.19976  | -0.118   | 0.01071  | -0.01061 | 0.81905  | -0.04172 | 0.36835  | -0.06192 |
| -0.09166 | 0.04775  | -0.08654 | 0.06169  | -0.01195 | 0.79672  | -0.02387 | 0.60687  | -0.06097 |
| -0.0261  | 0.57372  | -0.0104  | 0.82264  | -0.00948 | 0.83814  | -0.02206 | 0.63441  | -0.01348 |
| -0.01976 | 0.67016  | -0.04938 | 0.28687  | -0.00739 | 0.87341  | -0.02014 | 0.66424  | -0.02619 |
| -0.02355 | 0.61166  | -0.14967 | 0.00118  | 0.031752 | 0.49366  | -0.04431 | 0.33935  | -0.03249 |
| -0.1098  | 0.01762  | -0.01967 | 0.67163  | 0.000204 | 0.9965   | 0.101809 | 0.02781  | 0.029175 |
| -0.04222 | 0.36262  | -0.12316 | 0.00771  | -0.01289 | 0.78118  | 0.013728 | 0.76732  | -0.04359 |
| -0.04267 | 0.35759  | -0.10983 | 0.01758  | -0.01157 | 0.80306  | -0.01778 | 0.70155  | -0.04904 |
| -0.03482 | 0.4528   | -0.12531 | 0.0067   | -0.00596 | 0.89786  | 0.060914 | 0.18883  | 0.069709 |
| 0.132395 | 0.00416  | 0.204311 | 8.57E-06 | 0.008567 | 0.85351  | -0.02163 | 0.64101  | -0.03432 |
| 0.106453 | 0.0214   | 0.220578 | 1.48E-06 | 0.046315 | 0.31792  | 0.012898 | 0.78101  | -0.0391  |
| -0.00446 | 0.92338  | -0.12565 | 0.00655  | -0.02679 | 0.56355  | -0.0228  | 0.62311  | -0.06648 |
| 0.124963 | 0.00685  | 0.165833 | 0.00032  | 0.014815 | 0.74949  | -0.04309 | 0.35282  | -0.10735 |
| 0.148992 | 0.00124  | 0.172488 | 0.00018  | -0.05471 | 0.23796  | 0.015672 | 0.73552  | 0.008074 |
| 0.002498 | 0.95707  | -0.08986 | 0.05231  | -0.00401 | 0.93118  | -0.00859 | 0.85307  | -0.02198 |
| -0.04901 | 0.29056  | -0.07747 | 0.09451  | -0.00787 | 0.86526  | -0.02531 | 0.58536  | -0.02906 |
| -0.12475 | 0.00695  | -0.26933 | 3.33E-09 | -0.05505 | 0.23507  | -0.12122 | 0.00873  | -0.19752 |
| 0.135871 | 0.00326  | 0.059561 | 0.19886  | -0.02626 | 0.57138  | -0.0109  | 0.81428  | 0.000562 |
| 0.06691  | 0.14883  | 0.088618 | 0.05566  | -0.00985 | 0.83191  | -0.02423 | 0.60152  | -0.0265  |
| -0.0969  | 0.03632  | -0.20443 | 8.47E-06 | -0.00157 | 0.97298  | -0.01265 | 0.78518  | -0.04183 |
| -0.00825 | 0.8589   | -0.0669  | 0.14891  | -0.03289 | 0.47833  | 0.027615 | 0.55166  | 0.097278 |
| -0.0224  | 0.62917  | 0.004827 | 0.91715  | 0.025118 | 0.5882   | -0.00986 | 0.83168  | -0.04949 |
| -0.05625 | 0.22502  | -0.07315 | 0.11443  | -0.02706 | 0.55969  | -0.03709 | 0.42389  | -0.08569 |
| 0.012859 | 0.78167  | 0.018845 | 0.6846   | -0.01466 | 0.75199  | 0.004489 | 0.92293  | 0.073457 |
| 0.043308 | 0.35039  | -0.0263  | 0.57073  | -0.01711 | 0.71234  | -0.01109 | 0.81107  | -0.01403 |
| 0.219211 | 1.73E-06 | 0.413926 | 9.33E-21 | 0.009186 | 0.84306  | -0.03485 | 0.45244  | 0.15847  |
| -0.15127 | 0.00104  | -0.46973 | 5.27E-27 | -0.02836 | 0.54101  | -0.0758  | 0.10185  | -0.10786 |
| -0.07544 | 0.10347  | -0.06767 | 0.14424  | 0.011136 | 0.81031  | -0.06589 | 0.15511  | -0.09866 |
| 0.15467  | 0.0008   | 0.004171 | 0.92836  | 0.050415 | 0.27693  | 0.032766 | 0.47995  | 0.02408  |
| 0.040041 | 0.38797  | -0.13847 | 0.00271  | 0.014189 | 0.75974  | 0.054418 | 0.24052  | -0.01857 |
| -0.02735 | 0.55551  | 0.029551 | 0.52411  | 0.001684 | 0.97105  | 0.03475  | 0.45375  | 0.039232 |
| 0.002273 | 0.96094  | -0.01245 | 0.78844  | -0.03092 | 0.50506  | -0.0004  | 0.99304  | -0.00998 |
| -0.04099 | 0.37679  | 0.019158 | 0.67965  | -0.01058 | 0.81954  | -0.0201  | 0.66477  | 0.106459 |
| 0.042665 | 0.3576   | 0.208132 | 5.75E-06 | 0.064318 | 0.16525  | -0.01973 | 0.67066  | 0.079627 |
| 0.029985 | 0.51802  | 0.058369 | 0.20801  | 0.094146 | 0.042    | -0.00502 | 0.91381  | -0.00404 |
| -0.02359 | 0.61116  | -0.02509 | 0.58865  | -0.03911 | 0.39911  | -0.04294 | 0.35451  | -0.03445 |

|          |          |          |          |          |         |          |          |          |
|----------|----------|----------|----------|----------|---------|----------|----------|----------|
| -0.08073 | 0.08138  | -0.15472 | 0.00079  | -0.04051 | 0.38243 | 0.018975 | 0.68254  | 0.086771 |
| -0.0464  | 0.317    | -0.10306 | 0.02595  | -0.01793 | 0.69913 | 0.016071 | 0.72905  | -0.00929 |
| 0.009322 | 0.84077  | -0.03576 | 0.44069  | 0.019446 | 0.67511 | -0.00993 | 0.83057  | 0.132542 |
| 0.106549 | 0.02128  | 0.059425 | 0.19989  | -0.01122 | 0.80898 | -0.08148 | 0.07856  | 0.07295  |
| -0.07397 | 0.11041  | -0.11292 | 0.01462  | -0.01425 | 0.75875 | -0.01993 | 0.66752  | -0.04949 |
| -0.08539 | 0.06521  | -0.09954 | 0.0315   | -0.03696 | 0.4255  | -0.00137 | 0.97643  | -0.07643 |
| 0.019402 | 0.6758   | 0.073531 | 0.11253  | -0.01046 | 0.82161 | -0.01187 | 0.79815  | -0.03914 |
| 0.019203 | 0.67895  | 0.071909 | 0.12071  | -0.02624 | 0.57161 | -0.02305 | 0.61933  | -0.01661 |
| 0.011201 | 0.80923  | -0.0295  | 0.52477  | -0.01088 | 0.81464 | -0.02435 | 0.59969  | -0.0338  |
| -0.03527 | 0.44705  | -0.14275 | 0.00199  | -0.04472 | 0.33494 | 0.002775 | 0.95231  | -0.01103 |
| -0.07087 | 0.12618  | -0.05629 | 0.2247   | -0.04753 | 0.30538 | -0.07849 | 0.0902   | -0.05199 |
| 0.178118 | 0.00011  | 0.03423  | 0.46054  | -0.02118 | 0.64801 | -0.05082 | 0.2731   | -0.04153 |
| -0.11993 | 0.00949  | -0.15028 | 0.00112  | -0.06269 | 0.17622 | -0.08679 | 0.06092  | -0.06983 |
| -0.00251 | 0.95692  | -0.06042 | 0.19248  | 0.0178   | 0.70123 | 0.052827 | 0.25457  | 0.02853  |
| -0.02243 | 0.62869  | -0.00653 | 0.88816  | -0.01597 | 0.73076 | 0.003097 | 0.94679  | -0.03859 |
| -0.00293 | 0.94959  | 0.035594 | 0.44286  | 0.119777 | 0.00958 | 0.181439 | 8.04E-05 | 0.162801 |
| 0.168352 | 0.00026  | 0.172278 | 0.00018  | 0.018615 | 0.68824 | -0.05734 | 0.21616  | -0.02766 |
| 0.166931 | 0.00029  | 0.105659 | 0.0224   | 0.009876 | 0.83143 | 0.053964 | 0.24447  | 0.000485 |
| -0.00167 | 0.97122  | 0.252987 | 2.98E-08 | 0.000202 | 0.99653 | -0.02373 | 0.60892  | 0.01007  |
| 0.152343 | 0.00096  | 0.175289 | 0.00014  | 0.042982 | 0.35403 | 0.138608 | 0.00268  | 0.13956  |
| -0.23305 | 3.53E-07 | -0.17646 | 0.00013  | 0.066464 | 0.15156 | 0.116378 | 0.01184  | 0.292383 |
| 0.071788 | 0.12134  | 0.174555 | 0.00015  | 0.023034 | 0.61954 | -0.03243 | 0.48441  | 0.057378 |
| 0.071806 | 0.12124  | -0.03013 | 0.51602  | -0.03926 | 0.39728 | -0.07489 | 0.10604  | -0.08763 |
| 0.000781 | 0.98657  | -0.01856 | 0.68906  | 0.019624 | 0.67231 | 0.032714 | 0.48065  | -0.03212 |
| 0.009276 | 0.84154  | -0.01385 | 0.76538  | 0.038342 | 0.40843 | 0.051313 | 0.26845  | -0.01584 |
| -0.21647 | 2.34E-06 | -0.1204  | 0.0092   | -0.01943 | 0.67537 | -0.03121 | 0.50112  | -0.08458 |
| 0.057511 | 0.21478  | 0.083996 | 0.06975  | 0.033284 | 0.47304 | 0.04626  | 0.3185   | -0.08291 |
| 0.157633 | 0.00063  | 0.465997 | 1.50E-26 | 0.094708 | 0.04078 | 0.037332 | 0.42089  | 0.324967 |
| 0.265962 | 5.30E-09 | 0.4746   | 1.32E-27 | -0.01261 | 0.78582 | -0.02353 | 0.61206  | -0.14595 |
| 0.128132 | 0.00555  | 0.273718 | 1.80E-09 | 0.021967 | 0.63585 | 0.052258 | 0.25972  | -0.07017 |
| 0.049368 | 0.28704  | -0.21836 | 1.90E-06 | 0.057103 | 0.21806 | -0.0402  | 0.38607  | 0.048537 |
| 0.167463 | 0.00028  | 0.104009 | 0.02459  | 0.004537 | 0.92211 | -0.00795 | 0.86389  | -0.05174 |
| 0.190826 | 3.31E-05 | 0.105847 | 0.02216  | -0.00654 | 0.88789 | -0.12173 | 0.00846  | -0.03881 |
| 0.03575  | 0.44086  | -0.06631 | 0.15252  | 0.07569  | 0.10233 | 0.066353 | 0.15225  | 0.313801 |
| -0.08602 | 0.06326  | -0.3705  | 1.21E-16 | -0.02657 | 0.56686 | -0.13862 | 0.00268  | -0.09812 |
| 0.031002 | 0.50393  | -0.18226 | 7.45E-05 | -0.05879 | 0.20471 | -0.14433 | 0.00177  | -0.07878 |
| -0.0307  | 0.50813  | 0.136693 | 0.00308  | 0.053709 | 0.24671 | 0.216432 | 2.35E-06 | 0.059958 |
| 0.069848 | 0.13175  | -0.05776 | 0.21281  | 0.037934 | 0.41344 | 0.144531 | 0.00174  | -0.02693 |
| 0.100641 | 0.02966  | 0.195016 | 2.20E-05 | 0.037576 | 0.41787 | 0.208124 | 5.75E-06 | -0.0099  |
| 0.190147 | 3.54E-05 | 0.170756 | 0.00021  | 0.042464 | 0.35987 | 0.121288 | 0.0087   | 0.008166 |
| 0.012228 | 0.79212  | 0.027979 | 0.54643  | 0.09151  | 0.04811 | 0.122245 | 0.00818  | 0.279896 |
| 0.085911 | 0.0636   | -0.11476 | 0.01309  | -0.03231 | 0.48604 | -0.11077 | 0.01663  | -0.25743 |
| -0.04829 | 0.29771  | -0.07396 | 0.11044  | -0.02694 | 0.56137 | -0.04651 | 0.31593  | -0.0308  |
| -0.05375 | 0.24636  | -0.13934 | 0.00255  | -0.02529 | 0.58572 | 0.008484 | 0.85492  | -0.02763 |
| -0.10603 | 0.02192  | -0.18646 | 5.03E-05 | -0.01483 | 0.74921 | -0.02689 | 0.56217  | -0.08173 |



|          |          |          |          |          |          |          |          |          |
|----------|----------|----------|----------|----------|----------|----------|----------|----------|
| -0.07418 | 0.10938  | -0.34763 | 1.04E-14 | 0.010234 | 0.82542  | 0.018119 | 0.69614  | -0.08438 |
| -0.10732 | 0.02036  | -0.24235 | 1.14E-07 | 0.023611 | 0.61079  | -0.00634 | 0.89138  | 0.079028 |
| 0.193019 | 2.67E-05 | 0.360414 | 9.02E-16 | -0.04323 | 0.35125  | -0.00771 | 0.86798  | -0.03463 |
| 0.039361 | 0.39608  | 0.074707 | 0.10688  | 0.036685 | 0.429    | 0.054845 | 0.23684  | 0.069501 |
| 0.030686 | 0.50829  | 0.211815 | 3.88E-06 | -0.03062 | 0.50927  | 0.075471 | 0.10334  | -0.00654 |
| -0.08769 | 0.05829  | -0.01287 | 0.78141  | -0.01538 | 0.7403   | 0.015044 | 0.74575  | -0.02816 |
| -0.16597 | 0.00032  | -0.43738 | 3.04E-23 | -0.00909 | 0.84468  | -0.0552  | 0.23378  | -0.08061 |
| -0.02394 | 0.60586  | 0.038749 | 0.40347  | 0.054737 | 0.23776  | -0.02894 | 0.53272  | 0.119797 |
| -0.008   | 0.86303  | 0.037972 | 0.41296  | 0.02867  | 0.53656  | 0.009392 | 0.83959  | 0.081667 |
| -0.03175 | 0.4937   | -0.15976 | 0.00053  | 0.024323 | 0.60008  | -0.0391  | 0.39921  | -0.0289  |
| -0.04407 | 0.34199  | 0.02314  | 0.61793  | 0.004823 | 0.9172   | -0.03078 | 0.50702  | 0.017784 |
| -0.08257 | 0.07464  | 0.147998 | 0.00134  | 0.186717 | 4.91E-05 | 0.478512 | 4.25E-28 | 0.325712 |
| -0.06128 | 0.18617  | -0.10955 | 0.01788  | -0.01337 | 0.77326  | 0.090165 | 0.05151  | -0.06481 |
| -0.14133 | 0.0022   | -0.2375  | 2.07E-07 | 0.213503 | 3.24E-06 | 0.420438 | 1.99E-21 | 0.30912  |
| -0.04928 | 0.2879   | -0.27878 | 8.77E-10 | -0.01844 | 0.69102  | -0.08217 | 0.07607  | -0.05188 |
| -0.07309 | 0.11469  | 0.127482 | 0.0058   | 0.006677 | 0.88558  | -0.00601 | 0.89702  | 0.06405  |
| -0.08208 | 0.0764   | -0.25552 | 2.14E-08 | 0.100277 | 0.03026  | 0.149749 | 0.00117  | 0.03074  |
| 0.010263 | 0.82493  | 0.040963 | 0.37712  | -0.0023  | 0.96049  | -0.04325 | 0.35105  | -0.08124 |
| -0.14936 | 0.00121  | -0.04948 | 0.28593  | 0.031157 | 0.5018   | -0.05293 | 0.25363  | 0.007635 |
| -0.06978 | 0.13213  | -0.10949 | 0.01794  | 0.002839 | 0.95121  | 0.020864 | 0.65291  | -0.17965 |
| -0.08347 | 0.07151  | -0.12371 | 0.00744  | 0.007491 | 0.87173  | -0.00388 | 0.93327  | -0.15183 |
| 0.202285 | 1.06E-05 | 0.368052 | 1.99E-16 | 0.003821 | 0.93437  | -0.00724 | 0.876    | 0.048554 |
| 0.160479 | 0.0005   | 0.167734 | 0.00027  | 0.102061 | 0.02743  | -0.05332 | 0.25016  | 0.061637 |
| -0.00572 | 0.90182  | -0.13419 | 0.00367  | -0.00351 | 0.93965  | -0.07991 | 0.08451  | 0.044253 |
| 0.136653 | 0.00309  | -0.3224  | 9.34E-13 | -0.02905 | 0.53113  | -0.10976 | 0.01766  | -0.20083 |
| -0.00519 | 0.9109   | -0.24368 | 9.69E-08 | -0.01597 | 0.73074  | -0.00645 | 0.88943  | -0.08925 |
| -0.00541 | 0.90716  | 0.00955  | 0.83692  | 0.111541 | 0.01589  | 0.256496 | 1.88E-08 | 0.318962 |
| -0.05709 | 0.2182   | -0.07163 | 0.12214  | 0.122035 | 0.00829  | 0.221424 | 1.35E-06 | 0.397691 |
| 0.014426 | 0.75585  | 0.070299 | 0.12927  | 0.034279 | 0.4599   | 0.025161 | 0.58757  | -0.04018 |
| 0.005198 | 0.91079  | -0.02944 | 0.5257   | 0.011703 | 0.80086  | 0.007288 | 0.87519  | -0.19786 |
| -0.08533 | 0.06542  | -0.20467 | 8.25E-06 | 0.019385 | 0.67607  | 0.132254 | 0.0042   | -0.08528 |
| 0.001477 | 0.9746   | -0.08817 | 0.0569   | 0.014431 | 0.75577  | 0.140036 | 0.00242  | -0.15028 |
| -0.09261 | 0.04548  | -0.17805 | 0.00011  | 0.016561 | 0.72113  | 0.042158 | 0.36334  | -0.04833 |
| 0.088832 | 0.05507  | 0.146448 | 0.00151  | 0.066381 | 0.15208  | 0.261453 | 9.75E-09 | 0.139018 |
| 0.210189 | 4.62E-06 | 0.01923  | 0.67852  | 0.172956 | 0.00017  | -0.00557 | 0.90436  | 0.016188 |
| 0.026462 | 0.5684   | 0.119657 | 0.00965  | 0.134169 | 0.00367  | 0.44015  | 1.50E-23 | 0.084687 |
| 0.244214 | 9.07E-08 | 0.273282 | 1.92E-09 | 0.02094  | 0.65173  | 0.083943 | 0.06993  | 0.169761 |
| -0.02828 | 0.54209  | -0.11747 | 0.01107  | 0.066373 | 0.15212  | 0.098697 | 0.03298  | 0.194292 |
| -0.01868 | 0.68726  | -0.24914 | 4.88E-08 | 0.047061 | 0.31018  | -0.00899 | 0.84638  | 0.019254 |
| 0.03251  | 0.4834   | 0.009214 | 0.84259  | 0.014272 | 0.75837  | 0.008151 | 0.86054  | 0.034079 |
| 0.18873  | 4.05E-05 | -0.0995  | 0.03158  | -0.00982 | 0.83242  | -0.06996 | 0.13115  | -0.00041 |
| 0.081317 | 0.07918  | 0.375872 | 4.05E-17 | 0.051101 | 0.27044  | 0.079743 | 0.08518  | 0.126342 |
| 0.168674 | 0.00025  | 0.116363 | 0.01185  | 0.00122  | 0.97902  | -0.02932 | 0.52739  | -0.11041 |
| 0.110296 | 0.01711  | 0.381298 | 1.31E-17 | 0.02642  | 0.56901  | 0.154049 | 0.00084  | 0.096113 |
| 0.069541 | 0.13346  | 0.000214 | 0.99631  | 0.084475 | 0.06817  | 0.124274 | 0.00717  | 0.031482 |

|          |          |          |          |          |         |          |          |          |
|----------|----------|----------|----------|----------|---------|----------|----------|----------|
| 0.003951 | 0.93214  | -0.02891 | 0.53321  | -0.00166 | 0.97151 | -0.00371 | 0.93622  | -0.0231  |
| -0.00224 | 0.96143  | -0.03109 | 0.50267  | -0.00223 | 0.9617  | -0.01894 | 0.68314  | -0.02415 |
| -0.16492 | 0.00034  | -0.28225 | 5.31E-10 | -0.08884 | 0.05504 | -0.174   | 0.00016  | -0.14116 |
| 0.005666 | 0.90281  | -0.11772 | 0.0109   | 0.046399 | 0.31705 | 0.129678 | 0.005    | 0.194536 |
| 0.225942 | 8.08E-07 | 0.092746 | 0.04516  | -0.00117 | 0.97989 | -0.07366 | 0.1119   | -0.03881 |
| -0.02041 | 0.66     | -0.3842  | 7.10E-18 | 0.035834 | 0.43979 | -0.13443 | 0.00361  | -0.12558 |
| -0.04446 | 0.33776  | -0.25552 | 2.14E-08 | -0.04754 | 0.30529 | -0.10597 | 0.022    | -0.0976  |
| -0.0863  | 0.06239  | -0.09055 | 0.05051  | 0.002553 | 0.95611 | -0.01079 | 0.81611  | -0.05184 |
| -0.00989 | 0.83113  | -0.08783 | 0.05788  | 0.005212 | 0.91057 | -0.02591 | 0.57644  | -0.03108 |
| -0.01716 | 0.71144  | -0.04185 | 0.36682  | -0.0021  | 0.96382 | -0.05514 | 0.23434  | -0.02628 |
| 0.122521 | 0.00803  | 0.457509 | 1.55E-25 | 0.100804 | 0.0294  | 0.159975 | 0.00052  | 0.250629 |
| -0.02428 | 0.60065  | -0.17706 | 0.00012  | 0.042384 | 0.36078 | -0.02967 | 0.52248  | 0.03012  |
| 0.042572 | 0.35865  | 0.053596 | 0.2477   | 0.024864 | 0.59199 | -0.02529 | 0.58559  | -0.0364  |
| -0.05419 | 0.24249  | 0.029701 | 0.522    | 0.014703 | 0.75132 | -0.03312 | 0.47522  | 0.028322 |
| -0.09864 | 0.03307  | 0.188698 | 4.06E-05 | -0.02067 | 0.656   | -0.01341 | 0.7725   | -0.03345 |
| 0.151556 | 0.00102  | -0.0725  | 0.11765  | 0.035004 | 0.45046 | -0.04603 | 0.32095  | 0.143738 |
| 0.060403 | 0.19257  | 0.251635 | 3.54E-08 | 0.045331 | 0.32832 | 0.069744 | 0.13233  | 0.133086 |
| 0.070233 | 0.12963  | -0.18837 | 4.20E-05 | -0.03117 | 0.50156 | -0.20952 | 4.96E-06 | -0.09529 |
| -0.07642 | 0.09905  | 0.016244 | 0.72625  | -0.01038 | 0.82299 | 0.00401  | 0.93113  | 0.01674  |
| -0.1269  | 0.00603  | -0.2583  | 1.49E-08 | 0.002537 | 0.9564  | 0.006065 | 0.89601  | -0.06502 |
| 0.089252 | 0.05392  | 0.241858 | 1.21E-07 | 0.019072 | 0.68101 | 0.088265 | 0.05665  | 0.123445 |
| -0.13678 | 0.00306  | -0.15827 | 0.0006   | 0.037536 | 0.41836 | -0.00358 | 0.93852  | -0.06228 |
| -0.21247 | 3.62E-06 | -0.17537 | 0.00014  | -0.12524 | 0.00673 | -0.18976 | 3.67E-05 | -0.27542 |
| 0.038723 | 0.40378  | 0.210102 | 4.66E-06 | 0.022091 | 0.63395 | 0.080744 | 0.08132  | -0.11483 |
| -0.01803 | 0.6976   | 0.283379 | 4.50E-10 | 0.161467 | 0.00046 | 0.400658 | 1.96E-19 | 0.396339 |
| -0.01389 | 0.76458  | -0.04966 | 0.28415  | -0.02554 | 0.58195 | -0.0353  | 0.4466   | -0.02119 |
| -0.01874 | 0.68627  | -0.13379 | 0.00377  | -0.05754 | 0.21454 | -0.19731 | 1.75E-05 | -0.11675 |
| 0.088322 | 0.05649  | 0.116966 | 0.01142  | 0.001675 | 0.97121 | 0.021267 | 0.64666  | 0.04282  |
| 0.089519 | 0.05321  | -0.34213 | 2.86E-14 | -0.03096 | 0.50453 | -0.10503 | 0.02321  | -0.06395 |
| -0.00181 | 0.96891  | -0.10525 | 0.02292  | -0.04125 | 0.37378 | -0.08325 | 0.07229  | -0.04021 |
| -0.00662 | 0.8866   | 0.028846 | 0.53405  | 0.113392 | 0.01422 | 0.063573 | 0.17021  | 0.190673 |
| 0.10197  | 0.02756  | 0.008092 | 0.86154  | -0.04306 | 0.35321 | -0.06826 | 0.14078  | -0.09024 |
| -0.10678 | 0.021    | -0.05292 | 0.25376  | -0.00277 | 0.95232 | -0.03039 | 0.51241  | 0.041729 |
| -0.01205 | 0.79513  | 0.00976  | 0.83339  | 0.017146 | 0.71172 | 0.084868 | 0.06689  | 0.03723  |
| 0.000551 | 0.99053  | 0.068005 | 0.14228  | 0.014773 | 0.75017 | 0.045829 | 0.32304  | 0.060006 |
| 0.103907 | 0.02474  | 0.303002 | 2.26E-11 | 0.011794 | 0.79934 | 0.162976 | 0.00041  | -0.01849 |
| -0.0212  | 0.64763  | -0.01225 | 0.79178  | -0.00341 | 0.94133 | -0.00044 | 0.99249  | -0.01853 |
| 0.009383 | 0.83974  | 0.006209 | 0.89354  | -0.00984 | 0.83211 | -0.02662 | 0.56614  | 0.027105 |
| 0.030276 | 0.51397  | 0.054641 | 0.23859  | 0.060053 | 0.19517 | 0.144271 | 0.00177  | 0.000829 |
| 0.008464 | 0.85526  | 0.051778 | 0.26413  | -0.00955 | 0.83697 | -0.00897 | 0.84671  | 0.08419  |
| 0.010439 | 0.82199  | 0.015426 | 0.73952  | -0.00631 | 0.89186 | 0.006516 | 0.88832  | 0.123582 |
| -0.02207 | 0.6342   | -0.04934 | 0.28735  | -0.0052  | 0.9108  | -0.02118 | 0.64796  | -0.03445 |
| -0.01838 | 0.69202  | 0.027372 | 0.55517  | -0.01072 | 0.81733 | -0.02856 | 0.53812  | -0.00187 |
| -0.02287 | 0.62201  | -0.0203  | 0.66168  | -0.01416 | 0.76016 | 0.034673 | 0.45475  | -0.03445 |
| -0.00184 | 0.96841  | -0.10055 | 0.02981  | -0.01755 | 0.70516 | 0.007098 | 0.87842  | -0.05717 |

|          |          |          |          |          |          |          |          |          |
|----------|----------|----------|----------|----------|----------|----------|----------|----------|
| 0.051047 | 0.27094  | 0.012125 | 0.79383  | 0.018148 | 0.69567  | 0.006271 | 0.8925   | -0.01006 |
| 0.029633 | 0.52295  | -0.01857 | 0.6889   | 0.006011 | 0.89692  | -0.05448 | 0.23998  | 0.022232 |
| 1.72E-05 | 0.9997   | 0.333311 | 1.40E-13 | 0.203199 | 9.61E-06 | 0.432519 | 1.04E-22 | 0.142967 |
| -0.0525  | 0.25752  | 0.136711 | 0.00307  | -0.0019  | 0.96739  | 0.093239 | 0.04402  | 0.061172 |
| 0.182158 | 7.52E-05 | 0.476992 | 6.61E-28 | -0.03226 | 0.4868   | -0.03611 | 0.43623  | -0.08778 |
| 0.025671 | 0.58001  | -0.18268 | 7.17E-05 | 0.02588  | 0.57694  | 0.062324 | 0.17877  | 0.106686 |
| -0.15369 | 0.00086  | -0.0725  | 0.11769  | -0.00037 | 0.99368  | -0.04902 | 0.29046  | 0.106305 |
| -0.12957 | 0.00504  | 0.051921 | 0.26281  | 0.033266 | 0.47328  | 0.131917 | 0.0043   | 0.03472  |
| -0.15407 | 0.00084  | -0.23357 | 3.31E-07 | -0.05271 | 0.25558  | -0.00012 | 0.9979   | -0.15362 |
| 0.004844 | 0.91686  | -0.10582 | 0.02219  | 0.011243 | 0.80854  | 0.021    | 0.6508   | 0.060572 |
| -0.061   | 0.18823  | 0.26955  | 3.23E-09 | 0.092756 | 0.04513  | 0.27926  | 8.19E-10 | 0.184759 |
| 0.061272 | 0.18623  | -0.27324 | 1.93E-09 | 0.004216 | 0.9276   | -0.10631 | 0.02158  | -0.0871  |
| -0.06801 | 0.14226  | -0.13004 | 0.00488  | 0.005225 | 0.91034  | 0.023712 | 0.60926  | -0.04166 |
| -0.04716 | 0.30916  | 0.202044 | 1.08E-05 | 0.052171 | 0.26052  | 0.116131 | 0.01203  | 0.074266 |
| -0.03746 | 0.41924  | 0.111057 | 0.01635  | -0.01884 | 0.6847   | -0.00143 | 0.97545  | -0.14701 |
| -0.19888 | 1.49E-05 | -0.15368 | 0.00086  | -0.06517 | 0.1597   | -0.0519  | 0.263    | -0.12348 |
| 0.133889 | 0.00375  | 0.234181 | 3.08E-07 | -0.04394 | 0.34337  | -0.07255 | 0.11742  | 0.051058 |
| 0.122772 | 0.00791  | 0.042011 | 0.36503  | -0.01775 | 0.70206  | -0.06203 | 0.18086  | 0.003754 |
| -0.14139 | 0.00219  | -0.15448 | 0.00081  | -0.01645 | 0.72298  | -0.00143 | 0.97535  | 0.049966 |
| 0.030914 | 0.50514  | 0.366196 | 2.88E-16 | -0.02834 | 0.54125  | 0.024082 | 0.60369  | 0.18822  |
| 0.270751 | 2.74E-09 | 0.053749 | 0.24636  | 0.017928 | 0.69918  | 0.094716 | 0.04076  | -0.14818 |
| 0.09911  | 0.03225  | 0.399088 | 2.78E-19 | 0.052773 | 0.25505  | 0.112254 | 0.01522  | 0.154459 |
| 0.284443 | 3.85E-10 | 0.067948 | 0.14261  | 0.030525 | 0.51052  | 0.017398 | 0.70766  | 0.028494 |
| -0.1473  | 0.00141  | -0.00074 | 0.98727  | 0.048177 | 0.29884  | 0.237986 | 1.95E-07 | 0.306724 |
| -0.11826 | 0.01053  | -0.4129  | 1.19E-20 | -0.01899 | 0.68235  | -0.10638 | 0.02149  | -0.09875 |
| -0.10847 | 0.01904  | -0.22187 | 1.28E-06 | 0.047891 | 0.30172  | 0.003872 | 0.93348  | 0.050551 |
| 0.147006 | 0.00144  | 0.076935 | 0.0968   | 0.008241 | 0.85902  | -0.06954 | 0.13345  | -0.05069 |
| 0.022526 | 0.62728  | -0.0408  | 0.37904  | 0.131996 | 0.00427  | 0.080459 | 0.08241  | 0.332613 |
| 0.171738 | 0.00019  | -0.09955 | 0.03148  | -0.00673 | 0.88465  | -0.09474 | 0.04072  | 0.021611 |
| 0.231697 | 4.13E-07 | 0.321002 | 1.18E-12 | 0.004271 | 0.92665  | 0.114627 | 0.01319  | -0.03504 |
| 0.040265 | 0.38531  | -0.05517 | 0.23408  | 0.133949 | 0.00373  | 0.179028 | 0.0001   | 0.341955 |
| 0.03461  | 0.45558  | -0.0838  | 0.07041  | 0.087454 | 0.05896  | 0.10246  | 0.02682  | 0.245674 |
| -0.15816 | 0.0006   | -0.48141 | 1.82E-28 | -0.01625 | 0.72621  | -0.1038  | 0.02488  | -0.14374 |
| -0.08359 | 0.0711   | -0.14134 | 0.0022   | 0.078566 | 0.0899   | 0.192582 | 2.79E-05 | 0.061849 |
| -0.13467 | 0.00355  | -0.25059 | 4.05E-08 | 0.004919 | 0.91557  | 0.035731 | 0.44111  | 0.051442 |
| -0.17587 | 0.00013  | -0.33517 | 1.01E-13 | -0.02032 | 0.6614   | -0.02805 | 0.54534  | -0.06759 |
| -0.20641 | 6.89E-06 | -0.40005 | 2.25E-19 | -0.00821 | 0.85954  | -0.0891  | 0.05434  | -0.02576 |
| -0.14404 | 0.0018   | -0.20494 | 8.03E-06 | 0.036033 | 0.43725  | 0.161028 | 0.00048  | 0.191304 |
| -0.12006 | 0.0094   | -0.21417 | 3.01E-06 | 0.047425 | 0.30645  | 0.170224 | 0.00022  | 0.157932 |
| -0.00027 | 0.99532  | -0.36105 | 7.97E-16 | 0.080333 | 0.08289  | 0.086754 | 0.06103  | 0.170657 |
| 0.051243 | 0.2691   | 0.464283 | 2.42E-26 | 0.074862 | 0.10616  | 0.222845 | 1.15E-06 | 0.324571 |
| 0.064473 | 0.16423  | 0.397677 | 3.81E-19 | 0.019477 | 0.67463  | 0.131255 | 0.0045   | 0.269773 |
| -0.1861  | 5.20E-05 | -0.25796 | 1.55E-08 | -0.01233 | 0.79041  | 0.03283  | 0.4791   | -0.19549 |
| -0.15852 | 0.00059  | -0.16058 | 0.0005   | -0.03334 | 0.47228  | -0.0807  | 0.08148  | -0.07635 |
| 0.01854  | 0.68945  | -0.3187  | 1.75E-12 | -0.00583 | 0.89995  | -0.15433 | 0.00082  | -0.09452 |

|          |          |          |          |          |         |          |         |          |
|----------|----------|----------|----------|----------|---------|----------|---------|----------|
| 0.22987  | 5.12E-07 | -0.08142 | 0.07878  | 0.029336 | 0.52713 | 0.025161 | 0.58757 | -0.07608 |
| -0.14301 | 0.00195  | -0.20107 | 1.20E-05 | -0.01724 | 0.71014 | -0.04447 | 0.33757 | -0.10803 |
| -0.09557 | 0.03898  | -0.09096 | 0.04948  | -0.00078 | 0.98661 | 0.017846 | 0.70049 | -0.02516 |
| -0.07778 | 0.09316  | -0.17528 | 0.00014  | -0.03748 | 0.41909 | -0.03472 | 0.45413 | -0.10629 |
| 0.167574 | 0.00028  | 0.235519 | 2.62E-07 | -0.05207 | 0.26141 | -0.08691 | 0.06057 | -0.04242 |
| -0.03734 | 0.42082  | 0.041883 | 0.36649  | -0.03932 | 0.39653 | -0.01946 | 0.67493 | -0.06039 |
| -0.02889 | 0.53346  | -0.06027 | 0.19353  | 0.027751 | 0.5497  | 0.008055 | 0.86217 | 0.088957 |
| -0.01882 | 0.68496  | -0.08623 | 0.06262  | 0.035617 | 0.44256 | -0.01943 | 0.67535 | 0.057262 |
| 0.080419 | 0.08256  | -0.16285 | 0.00041  | 0.051827 | 0.26368 | -0.05212 | 0.26098 | 0.028116 |
| 0.211998 | 3.81E-06 | 0.353835 | 3.21E-15 | 0.016686 | 0.71912 | 0.086487 | 0.06183 | 0.149013 |
| -0.22851 | 6.01E-07 | -0.43141 | 1.37E-22 | -0.00307 | 0.94719 | -0.00953 | 0.83729 | -0.03359 |
| 0.352731 | 3.96E-15 | 0.317277 | 2.21E-12 | 0.030862 | 0.50586 | -0.09629 | 0.03751 | -0.00659 |
| -0.06815 | 0.1414   | -0.139   | 0.00261  | 0.074153 | 0.10952 | 0.104807 | 0.02351 | 0.140408 |
| -0.04032 | 0.38467  | 0.003354 | 0.94237  | -0.01436 | 0.75691 | 0.024056 | 0.60409 | 0.009773 |
| 0.058746 | 0.20508  | 0.200781 | 1.23E-05 | -0.02649 | 0.56795 | -0.07698 | 0.09659 | -0.02445 |
| 0.007741 | 0.8675   | 0.163416 | 0.00039  | -0.05007 | 0.28025 | 0.01473  | 0.75088 | 0.106102 |
| 0.084417 | 0.06836  | 0.051826 | 0.26368  | 0.057704 | 0.21324 | -0.00524 | 0.91011 | 0.260041 |
| 0.034351 | 0.45896  | 0.182479 | 7.30E-05 | -0.0271  | 0.55912 | 0.10603  | 0.02193 | 0.192413 |
| -0.05368 | 0.247    | -0.08366 | 0.07087  | -0.01128 | 0.808   | -0.04035 | 0.38435 | -0.03994 |
| 0.068572 | 0.13898  | -0.00815 | 0.8606   | -0.02088 | 0.65266 | 0.004846 | 0.91681 | -0.04967 |
| 0.167736 | 0.00027  | 0.072937 | 0.11547  | 0.026412 | 0.56913 | -0.02416 | 0.60245 | 0.098811 |
| 0.054593 | 0.239    | -0.27462 | 1.59E-09 | 0.090713 | 0.0501  | 0.06192  | 0.18162 | 0.042409 |
| -0.03526 | 0.44714  | -0.14783 | 0.00136  | -0.00558 | 0.90432 | -0.05671 | 0.22121 | -0.09271 |
| -0.09585 | 0.0384   | -0.38513 | 5.83E-18 | 0.059007 | 0.20307 | 0.00261  | 0.95514 | 0.124276 |
| 0.316052 | 2.72E-12 | 0.472287 | 2.55E-27 | 0.070814 | 0.12648 | 0.084692 | 0.06746 | 0.210419 |
| -0.01408 | 0.76154  | -0.1794  | 9.69E-05 | -0.02346 | 0.61304 | -0.00532 | 0.90864 | -0.1092  |
| -0.12044 | 0.00918  | -0.41307 | 1.14E-20 | 0.011423 | 0.80553 | -0.0389  | 0.40167 | -0.09068 |
| -0.12164 | 0.0085   | -0.12372 | 0.00743  | 0.053338 | 0.24999 | 0.075652 | 0.10251 | 0.045783 |
| -0.15154 | 0.00102  | -0.23331 | 3.42E-07 | -0.00281 | 0.95172 | 0.155491 | 0.00075 | -0.02914 |
| -0.05951 | 0.19923  | -0.52854 | 5.80E-35 | -0.02068 | 0.6558  | -0.10969 | 0.01773 | -0.11801 |
| 0.08583  | 0.06385  | -0.05389 | 0.24512  | 0.011863 | 0.79819 | 0.015276 | 0.74197 | -0.08775 |
| 0.013753 | 0.76691  | -0.06557 | 0.15718  | 0.027695 | 0.55051 | 0.042456 | 0.35996 | -0.03839 |
| -0.05572 | 0.22941  | -0.14734 | 0.00141  | -0.01054 | 0.82022 | -0.03241 | 0.48479 | 0.003504 |
| -0.06035 | 0.19296  | -0.08203 | 0.07658  | -0.02061 | 0.65684 | -0.08937 | 0.05361 | -0.09188 |
| -0.16134 | 0.00047  | -0.24573 | 7.50E-08 | -0.02185 | 0.63764 | -0.04661 | 0.31485 | -0.13749 |
| -0.02774 | 0.54989  | -0.07306 | 0.11488  | 0.051334 | 0.26825 | -0.01259 | 0.78608 | -0.02913 |
| -0.01767 | 0.7033   | -0.05567 | 0.22986  | 0.033852 | 0.46551 | -0.01897 | 0.68259 | -0.0284  |
| -0.0011  | 0.98112  | -0.06139 | 0.18538  | 0.019986 | 0.66663 | -0.03223 | 0.4872  | -0.01499 |
| 0.093533 | 0.04336  | -0.02779 | 0.5492   | 0.043356 | 0.34986 | -0.00645 | 0.88943 | -0.01852 |
| 0.027753 | 0.54967  | -0.05454 | 0.23949  | 0.007956 | 0.86385 | -0.05086 | 0.27274 | -0.04657 |
| -0.07303 | 0.11503  | -0.30856 | 9.29E-12 | 0.039092 | 0.39931 | 0.035021 | 0.45024 | 0.023857 |
| 0.134282 | 0.00365  | 0.078775 | 0.08905  | 0.008974 | 0.84663 | -0.06825 | 0.14083 | -0.11337 |
| -0.02933 | 0.52725  | -0.20998 | 4.72E-06 | 0.06352  | 0.17056 | 0.126224 | 0.00631 | 0.202048 |
| -0.07253 | 0.1175   | -0.18002 | 9.16E-05 | 0.090007 | 0.05192 | 0.039741 | 0.39153 | 0.253214 |
| 0.02517  | 0.58743  | -0.18454 | 6.02E-05 | 0.138475 | 0.00271 | 0.038802 | 0.40282 | 0.010805 |

|          |          |          |          |          |          |          |          |          |
|----------|----------|----------|----------|----------|----------|----------|----------|----------|
| 0.035108 | 0.44912  | -0.01513 | 0.74442  | 0.044551 | 0.33673  | -0.03524 | 0.44745  | 0.038353 |
| -0.04677 | 0.31316  | -0.16833 | 0.00026  | 0.067506 | 0.14523  | 0.337024 | 7.23E-14 | 0.087982 |
| -0.13797 | 0.00281  | -0.22176 | 1.30E-06 | 0.227227 | 6.97E-07 | 0.293721 | 9.56E-11 | 0.159657 |
| -0.07937 | 0.08667  | -0.24298 | 1.06E-07 | -0.00633 | 0.89157  | -0.03001 | 0.51767  | -0.04567 |
| -0.14241 | 0.00203  | -0.27862 | 8.98E-10 | -0.03936 | 0.39613  | -0.04599 | 0.32138  | -0.09043 |
| -0.10429 | 0.02421  | -0.1991  | 1.46E-05 | -0.03174 | 0.49383  | -0.10922 | 0.01823  | -0.01046 |
| 0.132569 | 0.00411  | -0.11705 | 0.01136  | 0.013012 | 0.77913  | -0.10636 | 0.02152  | -0.10603 |
| 0.291925 | 1.26E-10 | 0.006127 | 0.89495  | 0.026054 | 0.57438  | -0.09083 | 0.04979  | 0.201762 |
| 0.097488 | 0.03519  | 0.038144 | 0.41086  | 0.025229 | 0.58656  | 0.068824 | 0.13753  | -0.0218  |
| 0.123595 | 0.00749  | 0.027522 | 0.553    | 0.054343 | 0.24117  | -0.01541 | 0.73976  | 0.025103 |
| 0.249698 | 4.54E-08 | 0.295509 | 7.27E-11 | 0.076931 | 0.09681  | 0.193469 | 2.56E-05 | 0.068483 |
| 0.029234 | 0.52856  | -0.13356 | 0.00384  | 0.001016 | 0.98252  | 0.013362 | 0.77335  | -0.11142 |
| -0.14402 | 0.00181  | -0.39441 | 7.84E-19 | -0.01645 | 0.72291  | -0.09539 | 0.03934  | -0.0906  |
| -0.1753  | 0.00014  | -0.17805 | 0.00011  | 0.0017   | 0.97077  | 0.026543 | 0.56721  | 0.016574 |
| 0.001904 | 0.96727  | -0.16784 | 0.00027  | 0.004795 | 0.9177   | 0.022394 | 0.6293   | 0.113022 |
| -0.10201 | 0.02751  | -0.09127 | 0.0487   | -0.00428 | 0.92648  | 0.062229 | 0.17944  | -0.0734  |
| 0.094358 | 0.04153  | -0.00512 | 0.9121   | -0.00657 | 0.88739  | -0.01843 | 0.69126  | 0.050853 |
| 0.017005 | 0.71398  | 0.322592 | 9.03E-13 | 0.089923 | 0.05214  | 0.342128 | 2.86E-14 | 0.254529 |
| 0.06168  | 0.18332  | 0.282176 | 5.36E-10 | 0.055736 | 0.2293   | 0.166922 | 0.00029  | 0.17926  |
| 0.01309  | 0.77785  | 0.315311 | 3.07E-12 | 0.000339 | 0.99417  | 0.044408 | 0.33828  | 0.095093 |
| 0.013233 | 0.77548  | 0.019993 | 0.66651  | 0.036812 | 0.4274   | 0.305299 | 1.57E-11 | 0.033278 |
| -0.11736 | 0.01114  | -0.13991 | 0.00244  | 0.014549 | 0.75383  | 0.077157 | 0.09583  | 0.069291 |
| 0.270002 | 3.04E-09 | -0.038   | 0.41257  | 0.021367 | 0.64511  | -0.0579  | 0.21168  | 0.051536 |
| -0.11688 | 0.01148  | -0.06301 | 0.17402  | -0.00264 | 0.9547   | 0.005052 | 0.9133   | 0.002147 |
| -0.11524 | 0.01271  | 0.077359 | 0.09497  | 0.034976 | 0.45082  | 0.225662 | 8.34E-07 | -0.01391 |
| 0.006946 | 0.881    | -0.07714 | 0.09593  | -0.02661 | 0.56631  | -0.11948 | 0.00976  | -0.12867 |
| 0.060679 | 0.19054  | 0.044095 | 0.3417   | 0.036044 | 0.43711  | 0.001009 | 0.98265  | -0.02702 |
| -0.16333 | 0.00039  | -0.17799 | 0.00011  | -0.01685 | 0.71652  | -0.04659 | 0.31506  | -0.11851 |
| 0.10796  | 0.01962  | -0.04581 | 0.32325  | -0.01042 | 0.82237  | 0.017591 | 0.70457  | -0.06675 |
| -0.00724 | 0.87599  | -0.10651 | 0.02132  | 0.053925 | 0.24481  | 0.015528 | 0.73787  | 0.032918 |
| 0.048547 | 0.29514  | -0.0117  | 0.80097  | 0.032404 | 0.48482  | 0.071915 | 0.12067  | -0.06588 |
| -0.24755 | 5.97E-08 | -0.43011 | 1.89E-22 | -0.01619 | 0.72716  | -0.04996 | 0.28133  | -0.14841 |
| -0.03661 | 0.42996  | -0.11522 | 0.01272  | -0.02288 | 0.62195  | -0.07365 | 0.11194  | -0.04992 |
| -0.08294 | 0.07336  | -0.22404 | 1.00E-06 | 0.002081 | 0.96422  | 0.040615 | 0.38118  | -0.03091 |
| -0.079   | 0.08813  | -0.1286  | 0.00538  | 0.007577 | 0.87028  | 0.078653 | 0.08955  | -0.19035 |
| -0.25795 | 1.55E-08 | -0.49719 | 1.57E-30 | 0.05672  | 0.22116  | 0.128707 | 0.00534  | 0.007616 |
| 0.121635 | 0.00851  | -0.3     | 3.62E-11 | 0.023988 | 0.60511  | -0.08833 | 0.05647  | -0.01322 |
| -0.02235 | 0.63001  | -0.37461 | 5.26E-17 | 0.023082 | 0.61881  | -0.08095 | 0.08055  | -0.01132 |
| -0.02619 | 0.57233  | -0.17319 | 0.00017  | 0.05573  | 0.22935  | 0.078168 | 0.09155  | 0.169821 |
| 0.0299   | 0.51921  | 0.030605 | 0.50941  | 0.011788 | 0.79944  | -0.00727 | 0.8755   | -0.1112  |
| 0.024662 | 0.59501  | -0.26818 | 3.91E-09 | -0.06535 | 0.15853  | -0.14407 | 0.0018   | -0.24828 |
| -0.2243  | 9.74E-07 | -0.32892 | 3.03E-13 | 0.086077 | 0.06308  | -0.01066 | 0.81835  | 0.137755 |
| 0.033449 | 0.47085  | 0.174793 | 0.00015  | -0.0404  | 0.38378  | -0.0062  | 0.89373  | 0.022288 |
| -0.12231 | 0.00815  | -0.12704 | 0.00597  | -0.01533 | 0.74113  | 0.012518 | 0.78731  | -0.02979 |
| -0.00393 | 0.93255  | -0.21231 | 3.68E-06 | 0.070273 | 0.12941  | 0.04586  | 0.32271  | 0.135334 |

|          |          |          |          |          |         |          |          |          |
|----------|----------|----------|----------|----------|---------|----------|----------|----------|
| 0.129634 | 0.00502  | 0.227208 | 6.98E-07 | 0.062249 | 0.1793  | 0.229848 | 5.14E-07 | 0.168209 |
| -0.01509 | 0.74493  | -0.01351 | 0.77088  | 0.020167 | 0.66379 | 0.085581 | 0.06462  | 0.143359 |
| 0.266728 | 4.77E-09 | 0.379315 | 1.99E-17 | -0.01833 | 0.69281 | -0.07623 | 0.09989  | 0.098518 |
| -0.02303 | 0.61955  | -0.06963 | 0.13299  | -0.00511 | 0.91224 | 0.009071 | 0.84499  | 0.028182 |
| -0.10479 | 0.02353  | -0.08138 | 0.07893  | 0.073884 | 0.11081 | -0.02121 | 0.64755  | 0.417239 |
| 0.003603 | 0.9381   | 0.096027 | 0.03804  | -0.03484 | 0.45265 | -0.02351 | 0.61231  | -0.11215 |
| 0.045929 | 0.32199  | 0.238075 | 1.93E-07 | 0.043118 | 0.35251 | 0.066837 | 0.14927  | 0.065397 |
| 0.019686 | 0.67133  | -0.00142 | 0.97552  | 0.051917 | 0.26284 | -0.02876 | 0.53526  | 0.048705 |
| 0.052154 | 0.26068  | 0.111877 | 0.01557  | 0.003977 | 0.93169 | -0.06553 | 0.15744  | 0.059695 |
| -0.00769 | 0.86837  | -0.17314 | 0.00017  | 0.045859 | 0.32272 | -0.0073  | 0.87502  | 0.057609 |
| -0.01143 | 0.80548  | -0.13423 | 0.00366  | 0.027293 | 0.5563  | -0.00648 | 0.88889  | 0.140987 |
| 0.047144 | 0.30934  | -0.13207 | 0.00425  | -0.04933 | 0.28743 | -0.16804 | 0.00026  | -0.17565 |
| 0.040063 | 0.38771  | 0.425342 | 6.08E-22 | 0.123017 | 0.00778 | 0.362952 | 5.48E-16 | 0.171874 |
| -0.17033 | 0.00022  | -0.37721 | 3.08E-17 | -0.02634 | 0.57012 | -0.01117 | 0.80982  | -0.14922 |
| 0.23456  | 2.94E-07 | 0.111385 | 0.01604  | -0.03511 | 0.44907 | -0.09129 | 0.04865  | 0.016989 |
| -0.14064 | 0.00232  | -0.41977 | 2.34E-21 | -0.01425 | 0.75874 | -0.08021 | 0.08335  | -0.0199  |
| -0.27037 | 2.88E-09 | -0.40829 | 3.46E-20 | 0.06786  | 0.14313 | 0.007734 | 0.86761  | -0.11902 |
| -0.20544 | 7.62E-06 | -0.45381 | 4.20E-25 | 0.020492 | 0.6587  | 0.010223 | 0.82561  | 0.05843  |
| -0.03364 | 0.46835  | -0.14786 | 0.00135  | 0.023918 | 0.60616 | -0.01486 | 0.74882  | -0.0151  |
| 0.096607 | 0.03689  | 0.024008 | 0.60481  | -0.02708 | 0.55941 | -0.0497  | 0.28382  | 0.034765 |
| 0.025324 | 0.58515  | 0.191347 | 3.15E-05 | 0.012336 | 0.79033 | 0.045963 | 0.32162  | 0.137354 |
| 0.078301 | 0.091    | 0.256998 | 1.76E-08 | 0.05375  | 0.24634 | 0.087649 | 0.0584   | 0.164949 |
| 0.180149 | 9.05E-05 | 0.052576 | 0.25683  | 0.030093 | 0.51652 | 0.003869 | 0.93354  | 0.225096 |
| 0.088793 | 0.05518  | 0.022251 | 0.6315   | -0.02179 | 0.63852 | -0.20451 | 8.39E-06 | 0.039045 |
| 0.076314 | 0.09953  | 0.180233 | 8.98E-05 | -0.04535 | 0.32807 | 0.099947 | 0.03081  | -0.15263 |
| -0.04709 | 0.30991  | 0.052595 | 0.25665  | -0.0264  | 0.56936 | 0.040689 | 0.38032  | 0.04391  |
| 0.036139 | 0.43591  | 0.23583  | 2.53E-07 | 0.085863 | 0.06374 | 0.315147 | 3.16E-12 | 0.182145 |
| -0.08442 | 0.06833  | -0.22546 | 8.53E-07 | 0.031609 | 0.49561 | -0.00678 | 0.88385  | -0.04349 |
| 0.068988 | 0.13659  | 0.040434 | 0.38332  | 0.033264 | 0.4733  | 0.009318 | 0.84083  | 0.204614 |
| -0.17125 | 0.0002   | -0.25855 | 1.44E-08 | 0.017116 | 0.7122  | -0.02908 | 0.53076  | -0.00074 |
| 0.095964 | 0.03817  | 0.342345 | 2.75E-14 | -0.01335 | 0.77352 | -0.00152 | 0.97388  | 0.263833 |
| -0.072   | 0.12026  | 0.070169 | 0.12998  | 0.115704 | 0.01235 | 0.348372 | 9.02E-15 | 0.212873 |
| 0.065516 | 0.1575   | -0.19008 | 3.56E-05 | -0.00998 | 0.82961 | -0.10764 | 0.01999  | -0.07573 |
| 0.098417 | 0.03348  | 0.142743 | 0.00199  | 0.048603 | 0.29458 | -0.00704 | 0.87936  | 0.076448 |
| -0.11851 | 0.01037  | -0.43367 | 7.76E-23 | -0.04064 | 0.38084 | -0.12973 | 0.00499  | -0.08776 |
| -0.1273  | 0.00587  | -0.03122 | 0.50098  | -0.00862 | 0.85256 | 0.076062 | 0.10065  | 0.082014 |
| 0.186784 | 4.88E-05 | 0.45691  | 1.82E-25 | 0.122243 | 0.00818 | 0.18153  | 7.97E-05 | 0.410749 |
| 0.001537 | 0.97358  | -0.07891 | 0.08852  | 0.071209 | 0.12438 | -0.03281 | 0.47938  | -0.03202 |
| -0.07114 | 0.12473  | -0.12469 | 0.00698  | 0.021563 | 0.64208 | -0.03377 | 0.46663  | -0.03887 |
| 0.031955 | 0.4909   | 0.203083 | 9.73E-06 | 0.154112 | 0.00083 | 0.218642 | 1.84E-06 | 0.311653 |
| -0.11233 | 0.01516  | -0.39929 | 2.66E-19 | -0.04032 | 0.38467 | -0.09418 | 0.04192  | -0.30176 |
| -0.07286 | 0.11587  | -0.23347 | 3.35E-07 | -0.00214 | 0.96326 | -0.07937 | 0.08667  | -0.12983 |
| -0.19846 | 1.56E-05 | -0.30116 | 3.02E-11 | 0.104835 | 0.02347 | 0.30126  | 2.97E-11 | 0.199942 |
| -0.1337  | 0.0038   | -0.06859 | 0.13885  | -0.00537 | 0.90785 | -0.05823 | 0.20907  | -0.06285 |
| -0.15567 | 0.00074  | -0.35948 | 1.08E-15 | -0.02786 | 0.54818 | -0.07382 | 0.11114  | -0.10356 |

|          |          |          |          |          |         |          |          |          |
|----------|----------|----------|----------|----------|---------|----------|----------|----------|
| -0.13352 | 0.00385  | 0.19103  | 3.25E-05 | 0.118168 | 0.0106  | 0.287449 | 2.46E-10 | 0.340092 |
| -0.24362 | 9.76E-08 | -0.08797 | 0.05747  | 0.037267 | 0.42171 | 0.19674  | 1.85E-05 | 0.156598 |
| -0.04962 | 0.28461  | -0.25357 | 2.76E-08 | 0.075487 | 0.10326 | 0.137228 | 0.00296  | 0.023368 |
| -0.20231 | 1.05E-05 | -0.34938 | 7.47E-15 | -0.00525 | 0.90995 | 0.043211 | 0.35148  | -0.01488 |
| 0.107931 | 0.01965  | -0.06798 | 0.1424   | -0.00423 | 0.92739 | -0.10925 | 0.01819  | -0.01463 |
| -0.07333 | 0.11355  | -0.32186 | 1.02E-12 | 0.007031 | 0.87955 | 0.099774 | 0.0311   | -0.1811  |
| 0.078854 | 0.08873  | 0.179904 | 9.26E-05 | 0.086023 | 0.06325 | 0.166063 | 0.00031  | 0.151216 |
| -0.20326 | 9.56E-06 | -0.18303 | 6.94E-05 | 0.06094  | 0.18864 | 0.220799 | 1.45E-06 | 0.056689 |
| 0.080175 | 0.0835   | -0.02672 | 0.56463  | 0.021169 | 0.64818 | -0.03423 | 0.46056  | 0.044743 |
| 0.041716 | 0.3684   | -0.13495 | 0.00348  | -0.00637 | 0.89081 | -0.06881 | 0.13759  | -0.05214 |
| 0.022041 | 0.63472  | -0.20342 | 9.40E-06 | -0.01054 | 0.82037 | 0.051769 | 0.26421  | -0.19794 |
| -0.14343 | 0.00189  | -0.13318 | 0.00394  | 0.065194 | 0.15956 | 0.255979 | 2.02E-08 | 0.002908 |
| 0.080261 | 0.08317  | -0.07074 | 0.12687  | 0.02889  | 0.53344 | -0.08378 | 0.07048  | -0.05255 |
| 0.018248 | 0.69408  | 0.273769 | 1.79E-09 | -0.00292 | 0.94985 | 0.10087  | 0.02929  | -0.084   |
| -0.06534 | 0.15861  | -0.17392 | 0.00016  | -0.02738 | 0.55504 | -0.09759 | 0.035    | -0.08321 |
| -0.09037 | 0.05097  | -0.15709 | 0.00066  | 0.012505 | 0.78753 | 0.010201 | 0.82598  | -0.07986 |
| -0.12207 | 0.00827  | -0.41052 | 2.06E-20 | -0.03602 | 0.43739 | -0.0811  | 0.08     | -0.11895 |
| -0.01608 | 0.72898  | -0.14259 | 0.00201  | -0.01063 | 0.81872 | -0.04102 | 0.37649  | -0.1082  |
| -0.01885 | 0.68455  | -0.12753 | 0.00578  | 0.039779 | 0.39107 | -0.03016 | 0.51553  | 0.011768 |
| -0.03343 | 0.47115  | -0.2583  | 1.48E-08 | -0.02038 | 0.66043 | -0.07826 | 0.09115  | 0.000898 |
| 0.191543 | 3.09E-05 | 0.244611 | 8.63E-08 | -0.00428 | 0.92651 | -0.06521 | 0.15946  | -0.00166 |
| 0.041063 | 0.37596  | 0.333069 | 1.46E-13 | 0.053519 | 0.24838 | 0.062356 | 0.17855  | 0.298234 |
| 0.208547 | 5.50E-06 | 0.093478 | 0.04348  | -0.00545 | 0.90656 | -0.02079 | 0.65407  | 0.057185 |
| -0.15994 | 0.00052  | 0.097317 | 0.03552  | -0.02787 | 0.54798 | 0.027573 | 0.55226  | -0.09283 |
| 0.163724 | 0.00038  | 0.101578 | 0.02817  | 0.00697  | 0.88059 | -0.0699  | 0.13145  | 0.19785  |
| -0.09916 | 0.03217  | -0.22708 | 7.09E-07 | -0.0128  | 0.78264 | -0.00708 | 0.87872  | -0.12724 |
| -0.04108 | 0.37575  | -0.1134  | 0.01421  | -0.04229 | 0.36181 | -0.1024  | 0.02692  | -0.09069 |
| -0.09504 | 0.04006  | -0.30841 | 9.50E-12 | -0.04048 | 0.38279 | -0.07816 | 0.09159  | -0.21204 |
| -0.01028 | 0.82458  | -0.13035 | 0.00478  | 0.027226 | 0.55728 | -0.01398 | 0.7631   | -0.02902 |
| 0.025077 | 0.58882  | 0.327185 | 4.10E-13 | 0.126239 | 0.0063  | 0.238815 | 1.76E-07 | 0.380219 |
| 0.186351 | 5.08E-05 | 0.11766  | 0.01094  | -0.01372 | 0.76744 | 0.034525 | 0.45669  | 0.040938 |
| 0.012281 | 0.79124  | -0.43374 | 7.62E-23 | -0.01412 | 0.76096 | -0.10234 | 0.02701  | -0.13608 |
| -0.14277 | 0.00198  | 0.01384  | 0.76547  | 0.078527 | 0.09006 | 0.071918 | 0.12066  | 0.215762 |
| -0.09005 | 0.05181  | 0.038939 | 0.40116  | 0.013121 | 0.77734 | 0.068985 | 0.13661  | -0.02729 |
| 0.144805 | 0.0017   | 0.217572 | 2.07E-06 | 0.007065 | 0.87897 | 0.067332 | 0.14628  | -0.0427  |
| 0.169111 | 0.00024  | 0.14403  | 0.00181  | 0.00769  | 0.86837 | 0.018965 | 0.6827   | 0.02684  |
| -0.01426 | 0.75853  | 0.062439 | 0.17797  | 0.033946 | 0.46428 | 0.048391 | 0.2967   | 0.04558  |
| -0.01058 | 0.8196   | 0.019448 | 0.67508  | -0.01146 | 0.80492 | -0.00994 | 0.83032  | -0.01065 |
| 0.039908 | 0.38954  | 0.047587 | 0.3048   | 0.065124 | 0.16    | 0.051015 | 0.27125  | 0.02982  |
| 0.065805 | 0.15567  | 0.389814 | 2.14E-18 | 0.014067 | 0.76175 | 0.181395 | 8.07E-05 | 0.157865 |
| -0.09671 | 0.03669  | -0.18263 | 7.20E-05 | 0.011354 | 0.80668 | -0.03296 | 0.4774   | -0.06405 |
| 0.190997 | 3.26E-05 | 0.117972 | 0.01073  | 0.092333 | 0.04612 | 0.074028 | 0.11012  | 0.033292 |
| -0.0851  | 0.06615  | -0.40257 | 1.27E-19 | -0.11843 | 0.01042 | -0.27767 | 1.03E-09 | -0.28927 |
| -0.09447 | 0.04129  | -0.11025 | 0.01715  | 0.021708 | 0.63984 | 0.097227 | 0.03569  | -0.00038 |
| -0.27095 | 2.66E-09 | -0.3325  | 1.62E-13 | -0.04261 | 0.35825 | -0.13403 | 0.00371  | -0.23068 |

|          |          |          |          |          |          |          |          |          |
|----------|----------|----------|----------|----------|----------|----------|----------|----------|
| -0.16066 | 0.00049  | -0.13531 | 0.00339  | 0.04399  | 0.34285  | 0.202878 | 9.94E-06 | 0.056349 |
| 0.028815 | 0.53449  | -0.00095 | 0.98375  | 0.001119 | 0.98076  | 0.002861 | 0.95084  | 0.019816 |
| -0.12335 | 0.00762  | 0.017074 | 0.71287  | 0.015528 | 0.73786  | 0.132215 | 0.00421  | 0.07866  |
| -0.01813 | 0.69603  | -0.14072 | 0.0023   | -0.04637 | 0.31735  | -0.08862 | 0.05567  | 0.02432  |
| -0.15928 | 0.00055  | -0.22156 | 1.33E-06 | 0.041571 | 0.37008  | 0.017506 | 0.70594  | 0.268376 |
| -0.02994 | 0.51863  | 0.389427 | 2.32E-18 | 0.034059 | 0.46279  | 0.133973 | 0.00373  | 0.25703  |
| 0.013549 | 0.77027  | -0.30583 | 1.44E-11 | -0.08283 | 0.07373  | -0.13731 | 0.00294  | -0.27829 |
| 0.014637 | 0.7524   | 0.086324 | 0.06233  | -0.00603 | 0.89668  | 0.041878 | 0.36655  | 0.018452 |
| -0.01985 | 0.66876  | 0.079479 | 0.08622  | -0.05252 | 0.25734  | -0.08495 | 0.06663  | 0.022102 |
| 0.060517 | 0.19173  | 0.014861 | 0.74874  | 0.019597 | 0.67274  | -0.13111 | 0.00454  | -0.02764 |
| -0.07439 | 0.10838  | -0.17376 | 0.00016  | 0.009352 | 0.84026  | -0.05288 | 0.2541   | -0.01459 |
| 0.069405 | 0.13423  | 0.105704 | 0.02234  | 0.008839 | 0.84891  | -0.05269 | 0.25583  | 0.029155 |
| -0.05178 | 0.26411  | -0.33977 | 4.40E-14 | -0.03541 | 0.44525  | -0.0831  | 0.07278  | -0.14481 |
| -0.14992 | 0.00116  | -0.36323 | 5.19E-16 | -0.05405 | 0.2437   | -0.0687  | 0.13821  | -0.20247 |
| -0.12261 | 0.00799  | -0.30401 | 1.93E-11 | -0.00363 | 0.93765  | -0.06351 | 0.17064  | -0.10927 |
| -0.04525 | 0.32918  | -0.1243  | 0.00716  | -0.04964 | 0.28442  | 0.011074 | 0.81135  | -0.02635 |
| 0.266372 | 5.01E-09 | 0.077384 | 0.09486  | -0.03855 | 0.40593  | -0.07568 | 0.10239  | 0.061061 |
| 0.108595 | 0.0189   | 0.24466  | 8.58E-08 | 0.003767 | 0.9353   | 0.091345 | 0.04852  | 0.074332 |
| -0.00607 | 0.89592  | -0.12844 | 0.00544  | 0.084381 | 0.06848  | 0.033042 | 0.47626  | 0.140491 |
| -0.00643 | 0.88975  | -0.1044  | 0.02406  | 0.009214 | 0.84258  | -0.05994 | 0.19599  | 0.111019 |
| 0.025469 | 0.583    | -0.15876 | 0.00057  | 0.02191  | 0.63674  | -0.07455 | 0.10762  | 0.074151 |
| 0.143002 | 0.00195  | 0.28078  | 6.57E-10 | 0.085401 | 0.06519  | 0.048409 | 0.29651  | 0.232067 |
| -0.03256 | 0.48269  | -0.10604 | 0.02191  | 0.01712  | 0.71213  | 0.05406  | 0.24363  | 0.082862 |
| 0.015526 | 0.7379   | -0.08732 | 0.05936  | -0.02606 | 0.57431  | -0.03384 | 0.46568  | -0.0457  |
| 0.207823 | 5.94E-06 | 0.415384 | 6.62E-21 | 0.022926 | 0.62119  | 0.132713 | 0.00407  | 0.131239 |
| 0.091001 | 0.04937  | 0.134739 | 0.00353  | 0.050178 | 0.27919  | 0.00505  | 0.91333  | 0.072868 |
| -0.09831 | 0.03368  | -0.25183 | 3.46E-08 | 0.114559 | 0.01324  | 0.181778 | 7.79E-05 | 0.170409 |
| -0.05152 | 0.26654  | -0.03837 | 0.40812  | 0.01069  | 0.81779  | 0.117749 | 0.01088  | -0.03544 |
| 0.140295 | 0.00238  | 0.064975 | 0.16097  | 0.004601 | 0.92102  | -0.17647 | 0.00013  | 0.044929 |
| 0.038995 | 0.40049  | 0.039454 | 0.39497  | -0.00873 | 0.85079  | -0.03423 | 0.46048  | -0.06836 |
| -0.12605 | 0.00638  | -0.05458 | 0.23914  | -0.00461 | 0.92084  | -0.01543 | 0.73944  | -0.09503 |
| 0.036919 | 0.42605  | 0.026766 | 0.56395  | 0.011288 | 0.80778  | 0.005333 | 0.90849  | -0.08928 |
| 0.154324 | 0.00082  | 0.164475 | 0.00036  | 0.190995 | 3.26E-05 | 0.158745 | 0.00057  | 0.405115 |
| 0.197222 | 1.76E-05 | 0.209386 | 5.03E-06 | -0.00523 | 0.91027  | -0.00446 | 0.92348  | 0.035373 |
| -0.01795 | 0.6988   | -0.14219 | 0.00207  | -0.00458 | 0.92131  | -0.06183 | 0.18222  | 0.012221 |
| -0.05979 | 0.19714  | -0.37336 | 6.79E-17 | 0.031576 | 0.49606  | -0.00065 | 0.98886  | -0.07168 |
| -0.08087 | 0.08085  | -0.20855 | 5.50E-06 | -0.01032 | 0.82401  | -0.00435 | 0.92538  | -0.05454 |
| -0.02259 | 0.62636  | -0.18111 | 8.29E-05 | 0.036993 | 0.42513  | -0.08202 | 0.07661  | -0.08823 |
| -0.08745 | 0.05898  | -0.21444 | 2.92E-06 | -0.00936 | 0.84015  | -0.08879 | 0.05519  | -0.11185 |
| -0.06509 | 0.16025  | -0.34556 | 1.52E-14 | -0.02213 | 0.63338  | -0.03923 | 0.39761  | -0.20246 |
| -0.18564 | 5.44E-05 | -0.3783  | 2.45E-17 | 0.016395 | 0.72381  | -0.00023 | 0.99598  | -0.06475 |
| 0.266301 | 5.06E-09 | 0.39995  | 2.30E-19 | 0.06502  | 0.16067  | 0.057643 | 0.21373  | 0.230998 |
| 0.000514 | 0.99117  | -0.03654 | 0.43083  | -0.04271 | 0.35705  | -0.12007 | 0.0094   | -0.02726 |
| 0.045808 | 0.32326  | -0.14215 | 0.00208  | -0.09438 | 0.04147  | -0.05854 | 0.20671  | -0.31182 |
| -0.18086 | 8.48E-05 | -0.08886 | 0.055    | 0.146598 | 0.00149  | 0.317474 | 2.14E-12 | 0.203868 |



|          |          |          |          |          |         |          |          |          |
|----------|----------|----------|----------|----------|---------|----------|----------|----------|
| 0.129725 | 0.00499  | -0.05036 | 0.2775   | 0.01376  | 0.7668  | -0.09283 | 0.04497  | -0.08406 |
| 0.098603 | 0.03315  | -0.40652 | 5.19E-20 | -0.00852 | 0.85427 | -0.17377 | 0.00016  | -0.14736 |
| 0.006782 | 0.88379  | -0.04879 | 0.29277  | 0.005633 | 0.90337 | -0.04434 | 0.33899  | 0.116569 |
| -0.02028 | 0.66205  | -0.00751 | 0.8714   | -0.01998 | 0.66672 | -0.03797 | 0.41298  | -0.04167 |
| 0.013244 | 0.7753   | 0.006614 | 0.88665  | 0.019342 | 0.67676 | 0.055205 | 0.23377  | 0.123801 |
| 0.078812 | 0.0889   | 0.086181 | 0.06276  | 0.010372 | 0.82311 | -0.01492 | 0.74772  | -0.00831 |
| -0.17052 | 0.00021  | -0.47871 | 4.01E-28 | -0.03894 | 0.40114 | -0.1639  | 0.00038  | -0.15578 |
| -0.00552 | 0.90523  | -0.07796 | 0.0924   | 0.017896 | 0.69969 | 0.049605 | 0.28473  | -0.05634 |
| 0.142176 | 0.00207  | 0.09214  | 0.04658  | -0.01415 | 0.76038 | -0.06579 | 0.15578  | 0.029971 |
| 0.028946 | 0.53264  | 0.374615 | 5.25E-17 | 0.087489 | 0.05886 | 0.397575 | 3.90E-19 | 0.179956 |
| 0.004803 | 0.91755  | -0.03161 | 0.49555  | 0.048719 | 0.29343 | -0.02112 | 0.64901  | 0.280983 |
| 0.076496 | 0.09872  | 0.001572 | 0.97297  | 0.015171 | 0.74368 | -0.07002 | 0.13079  | 0.053685 |
| -0.10594 | 0.02204  | -0.11916 | 0.00996  | 0.123617 | 0.00748 | 0.332937 | 1.50E-13 | 0.16572  |
| -0.0005  | 0.99148  | 0.001789 | 0.96925  | -0.05994 | 0.19604 | 0.021501 | 0.64304  | -0.00981 |
| 0.076614 | 0.0982   | -0.23746 | 2.08E-07 | -0.03773 | 0.4159  | -0.1182  | 0.01058  | -0.05304 |
| -0.01563 | 0.7362   | -0.15272 | 0.00093  | -0.03003 | 0.51737 | -0.11958 | 0.00969  | -0.01829 |
| 0.029033 | 0.53141  | -0.16113 | 0.00047  | -0.07163 | 0.12214 | -0.12945 | 0.00508  | -0.04582 |
| 0.09541  | 0.0393   | 0.400036 | 2.25E-19 | 0.020608 | 0.6569  | 0.03298  | 0.47709  | 0.036656 |
| 0.08452  | 0.06802  | -0.10486 | 0.02344  | 0.058132 | 0.20987 | 0.012254 | 0.79169  | 0.02259  |
| 0.074468 | 0.10801  | -0.05437 | 0.24094  | -0.02671 | 0.5648  | -0.12894 | 0.00526  | -0.04707 |
| -0.03977 | 0.39121  | 0.036787 | 0.42771  | 0.057164 | 0.21757 | 0.121407 | 0.00863  | 0.078243 |
| 0.138517 | 0.0027   | -0.10474 | 0.02359  | 0.023211 | 0.61686 | -0.0045  | 0.92267  | -0.05676 |
| 0.08869  | 0.05546  | 0.07404  | 0.11006  | 0.046257 | 0.31853 | 0.009283 | 0.84142  | -0.03192 |
| 0.142227 | 0.00206  | 0.138245 | 0.00275  | 0.027401 | 0.55475 | 0.023984 | 0.60517  | 0.044741 |
| -0.07173 | 0.12166  | -0.10411 | 0.02445  | 0.082801 | 0.07384 | 0.29908  | 4.18E-11 | -0.10408 |
| 0.009299 | 0.84115  | 0.074832 | 0.1063   | 0.049692 | 0.28388 | 0.068464 | 0.1396   | 0.096603 |
| 0.068132 | 0.14153  | 0.136769 | 0.00306  | 0.002858 | 0.95089 | 0.057417 | 0.21554  | 0.033619 |
| -0.10073 | 0.02952  | -0.31113 | 6.12E-12 | -0.03048 | 0.51114 | -0.11221 | 0.01526  | -0.14873 |
| -0.00598 | 0.8974   | -0.13109 | 0.00455  | 0.042458 | 0.35994 | -0.04034 | 0.38447  | -0.01554 |
| 0.037367 | 0.42045  | 0.073744 | 0.11149  | -0.10353 | 0.02526 | -0.11515 | 0.01277  | -0.19105 |
| -0.05246 | 0.25787  | -0.10282 | 0.02629  | -0.00227 | 0.96101 | 0.005704 | 0.90216  | -0.04801 |
| -0.04872 | 0.29344  | -0.09442 | 0.04139  | 0.098859 | 0.03269 | 0.255501 | 2.15E-08 | -0.05378 |
| -0.1253  | 0.0067   | -0.15692 | 0.00067  | 0.004013 | 0.93107 | 0.020891 | 0.65249  | 0.196442 |
| 0.075256 | 0.10433  | 0.00151  | 0.97404  | 0.004544 | 0.92199 | -0.02993 | 0.51877  | 0.103707 |
| -0.05529 | 0.23302  | 0.09074  | 0.05003  | 0.083117 | 0.07274 | 0.130072 | 0.00487  | 0.230221 |
| 0.014674 | 0.75179  | -0.06836 | 0.14018  | 0.035694 | 0.44158 | -0.05242 | 0.25821  | 0.150049 |
| -0.22614 | 7.90E-07 | -0.34878 | 8.36E-15 | -0.00325 | 0.94414 | 0.03202  | 0.49002  | 0.017553 |
| 0.101813 | 0.02781  | 0.074854 | 0.10619  | -0.02564 | 0.58041 | -0.03478 | 0.45333  | 0.067223 |
| -0.03297 | 0.47723  | -0.40749 | 4.16E-20 | -0.01562 | 0.73637 | -0.04769 | 0.30374  | -0.07798 |
| 0.070247 | 0.12956  | 0.090756 | 0.04999  | 0.004147 | 0.92878 | -0.01026 | 0.82506  | 0.040285 |
| 0.190541 | 3.40E-05 | -0.0634  | 0.1714   | 0.002443 | 0.95801 | 0.054156 | 0.24279  | -0.01187 |
| -0.10381 | 0.02488  | -0.25875 | 1.40E-08 | -0.05296 | 0.25335 | -0.12658 | 0.00616  | -0.2277  |
| -0.18201 | 7.63E-05 | -0.12523 | 0.00674  | 0.085898 | 0.06363 | 0.101425 | 0.02841  | 0.206967 |
| -0.05101 | 0.2713   | -0.35526 | 2.45E-15 | -0.03752 | 0.41856 | -0.07345 | 0.11292  | -0.17777 |
| 0.25679  | 1.81E-08 | 0.102571 | 0.02666  | 0.002258 | 0.96118 | -0.07226 | 0.1189   | -0.03119 |

|          |          |          |          |          |          |          |          |          |
|----------|----------|----------|----------|----------|----------|----------|----------|----------|
| -0.23903 | 1.72E-07 | -0.50428 | 1.72E-31 | -0.01715 | 0.7116   | -0.09332 | 0.04384  | -0.30589 |
| -0.1628  | 0.00041  | -0.13318 | 0.00394  | -0.04204 | 0.3647   | 0.026484 | 0.56808  | -0.04212 |
| 0.15919  | 0.00055  | 0.09869  | 0.03299  | -0.01759 | 0.70454  | 0.030707 | 0.508    | -0.07452 |
| 0.141109 | 0.00224  | 0.134937 | 0.00348  | -0.04191 | 0.36616  | -0.17756 | 0.00011  | 0.026238 |
| -0.01834 | 0.69265  | -0.14413 | 0.00179  | -0.0249  | 0.59143  | -0.12146 | 0.0086   | -0.07485 |
| -0.02598 | 0.57549  | 0.013164 | 0.77662  | -0.00843 | 0.85574  | -0.05639 | 0.22387  | -0.06612 |
| -0.02683 | 0.56299  | 0.173638 | 0.00016  | 0.13393  | 0.00374  | 0.160821 | 0.00049  | 0.200783 |
| 0.177931 | 0.00011  | 0.26755  | 4.26E-09 | 0.002222 | 0.96181  | 0.022457 | 0.62835  | -0.06732 |
| -0.04752 | 0.30548  | -0.35999 | 9.80E-16 | 0.030591 | 0.5096   | -0.03524 | 0.44745  | -0.10764 |
| -0.00447 | 0.92323  | -0.0422  | 0.36289  | 0.058995 | 0.20317  | 0.150555 | 0.0011   | 0.021092 |
| 0.128463 | 0.00543  | 0.167643 | 0.00027  | 0.008977 | 0.84658  | 0.010537 | 0.82034  | 0.073603 |
| -0.07383 | 0.11106  | 0.065935 | 0.15486  | 0.009987 | 0.82958  | 0.005049 | 0.91335  | -0.00995 |
| 0.122172 | 0.00822  | -0.28948 | 1.82E-10 | 0.033214 | 0.47396  | -0.03438 | 0.45864  | -0.06741 |
| -0.04525 | 0.32921  | -0.07884 | 0.0888   | -0.0077  | 0.86823  | -0.00494 | 0.91517  | -0.02019 |
| -0.08678 | 0.06095  | 0.13318  | 0.00394  | 0.20372  | 9.11E-06 | 0.387499 | 3.52E-18 | 0.38475  |
| 0.122561 | 0.00801  | 0.244688 | 8.55E-08 | 0.099122 | 0.03223  | 0.136178 | 0.00319  | 0.000186 |
| -0.01547 | 0.73877  | -0.12753 | 0.00578  | 0.005033 | 0.91362  | 0.014341 | 0.75725  | 0.065188 |
| 0.094341 | 0.04157  | 0.145245 | 0.00165  | -0.0226  | 0.62617  | -0.03341 | 0.47139  | -0.06233 |
| 0.064001 | 0.16735  | -0.02025 | 0.6625   | 0.014547 | 0.75387  | 0.02675  | 0.5642   | 0.000556 |
| 0.060404 | 0.19256  | -0.30564 | 1.48E-11 | -0.00292 | 0.94974  | -0.06796 | 0.14255  | -0.08035 |
| -0.11049 | 0.01691  | -0.18857 | 4.11E-05 | 0.046203 | 0.3191   | 0.014688 | 0.75156  | 0.162814 |
| -0.12616 | 0.00633  | -0.29477 | 8.15E-11 | -0.02941 | 0.52613  | -0.04537 | 0.32788  | -0.05267 |
| -0.08632 | 0.06234  | -0.36814 | 1.95E-16 | -0.00359 | 0.9384   | -0.08142 | 0.07879  | -0.09178 |
| -0.05708 | 0.21823  | -0.14503 | 0.00168  | -0.01292 | 0.78071  | -0.07439 | 0.1084   | -0.05719 |
| -0.0196  | 0.67269  | -0.11998 | 0.00945  | 0.069939 | 0.13125  | 0.130188 | 0.00483  | 0.244099 |
| -0.18488 | 5.84E-05 | -0.09263 | 0.04543  | 0.022786 | 0.62332  | 0.03301  | 0.47668  | -0.02626 |
| -0.08757 | 0.05863  | -0.12745 | 0.00582  | 0.008934 | 0.84731  | -0.05819 | 0.20944  | -0.06351 |
| -0.11513 | 0.01279  | 0.057515 | 0.21475  | 0.093641 | 0.04311  | 0.299798 | 3.74E-11 | 0.435009 |
| -0.06125 | 0.18638  | -0.12136 | 0.00866  | 0.045329 | 0.32835  | 0.130273 | 0.00481  | 0.213832 |
| -0.06966 | 0.13279  | -0.11984 | 0.00954  | 0.024264 | 0.60095  | 0.029853 | 0.51987  | -0.00445 |
| 0.014762 | 0.75036  | -0.0395  | 0.39444  | 0.108316 | 0.01921  | 0.183856 | 6.42E-05 | 0.410243 |
| -0.16102 | 0.00048  | -0.16756 | 0.00028  | 0.057469 | 0.21512  | 0.155625 | 0.00074  | 0.027837 |
| -0.05529 | 0.23303  | -0.10213 | 0.02732  | -0.03579 | 0.44029  | -0.01871 | 0.6867   | 0.148331 |
| 0.146968 | 0.00145  | 0.213309 | 3.30E-06 | 0.027688 | 0.55061  | 0.063725 | 0.16919  | 0.195919 |
| 0.254541 | 2.43E-08 | 0.029339 | 0.52709  | -0.03017 | 0.51545  | -0.14702 | 0.00144  | -0.14312 |
| -0.08511 | 0.06611  | -0.28114 | 6.23E-10 | -0.00367 | 0.937    | 0.031735 | 0.4939   | -0.20202 |
| -0.21561 | 2.57E-06 | -0.26857 | 3.70E-09 | -0.02232 | 0.6305   | -0.09316 | 0.04421  | -0.13469 |
| -0.00109 | 0.98125  | 0.121353 | 0.00866  | 0.095176 | 0.03979  | 0.135595 | 0.00333  | 0.243965 |
| 0.141063 | 0.00225  | 0.346197 | 1.35E-14 | 0.011229 | 0.80877  | 0.047075 | 0.31004  | 0.123134 |
| 0.182894 | 7.03E-05 | 0.141757 | 0.00214  | 0.165046 | 0.00034  | 0.22353  | 1.06E-06 | 0.166385 |
| -0.0099  | 0.83111  | 0.168575 | 0.00025  | 0.063484 | 0.17081  | 0.171787 | 0.00019  | 0.119832 |
| -0.13348 | 0.00386  | 0.199433 | 1.41E-05 | 0.017968 | 0.69854  | 0.025704 | 0.57953  | 0.10467  |
| -0.08018 | 0.08349  | -0.03368 | 0.46774  | 0.073435 | 0.11301  | 0.154839 | 0.00079  | 0.066319 |
| 0.249406 | 4.71E-08 | 0.456172 | 2.22E-25 | 0.004286 | 0.9264   | 0.014142 | 0.76051  | 0.15798  |
| -0.04808 | 0.29985  | 0.005677 | 0.90261  | -0.03436 | 0.45884  | 0.006872 | 0.88225  | -0.07176 |

|          |          |          |          |          |         |          |         |          |
|----------|----------|----------|----------|----------|---------|----------|---------|----------|
| 0.070663 | 0.1273   | -0.31802 | 1.96E-12 | -0.01526 | 0.74217 | -0.08186 | 0.07719 | -0.12597 |
| -0.22839 | 6.09E-07 | -0.22596 | 8.06E-07 | 0.036642 | 0.42954 | 0.070682 | 0.12719 | 0.181834 |
| 0.149498 | 0.00119  | 0.336903 | 7.39E-14 | 0.033754 | 0.4668  | -0.048   | 0.30063 | 0.239579 |
| -0.13738 | 0.00293  | -0.45947 | 9.08E-26 | -0.02413 | 0.60292 | -0.03072 | 0.50788 | -0.03743 |
| -0.0949  | 0.04037  | -0.17849 | 0.00011  | -0.0566  | 0.22216 | -0.15009 | 0.00114 | -0.17741 |
| -0.22799 | 6.38E-07 | -0.27827 | 9.44E-10 | 0.056948 | 0.21932 | 0.121768 | 0.00843 | 0.093426 |
| 0.084054 | 0.06956  | -0.102   | 0.02752  | 0.006997 | 0.88013 | 0.014671 | 0.75184 | 0.111344 |
| -0.0514  | 0.26764  | -0.14603 | 0.00156  | -0.0116  | 0.8025  | -0.04861 | 0.2945  | -0.10188 |
| 0.03097  | 0.50436  | -0.1392  | 0.00257  | -0.01125 | 0.80846 | -0.05312 | 0.2519  | -0.05843 |
| -0.02976 | 0.52115  | -0.17838 | 0.00011  | -0.03083 | 0.50635 | -0.07864 | 0.08962 | -0.08929 |
| 0.173523 | 0.00016  | 0.020506 | 0.65849  | 0.047088 | 0.30991 | -0.03259 | 0.48237 | -0.00659 |
| 0.021369 | 0.64509  | -0.02346 | 0.61307  | -0.01937 | 0.67633 | -0.05891 | 0.20382 | 0.040416 |
| 0.003176 | 0.94543  | 0.004558 | 0.92174  | -0.00917 | 0.84326 | -0.06867 | 0.13843 | -0.0401  |
| -0.02322 | 0.61676  | -0.09343 | 0.04359  | -0.03523 | 0.4476  | -0.03147 | 0.49754 | -0.05253 |
| 0.027032 | 0.56009  | -0.12064 | 0.00906  | -0.01533 | 0.74114 | -0.08797 | 0.05747 | -0.08435 |
| -0.06303 | 0.17387  | -0.18762 | 4.50E-05 | 0.070758 | 0.12678 | 0.150841 | 0.00108 | 0.058229 |
| 0.023688 | 0.60963  | -0.07877 | 0.08907  | -0.04615 | 0.31961 | -0.12296 | 0.00781 | -0.01199 |
| -0.1139  | 0.01378  | -0.36911 | 1.61E-16 | 0.053398 | 0.24945 | 0.051696 | 0.26489 | 0.075    |
| -0.02758 | 0.55213  | 0.102416 | 0.02689  | -0.00734 | 0.87425 | -0.02943 | 0.52583 | 0.047541 |
| 0.225189 | 8.80E-07 | 0.14722  | 0.00142  | 0.069755 | 0.13227 | -0.06785 | 0.14316 | 0.205099 |
| 0.196498 | 1.90E-05 | 0.149817 | 0.00117  | 0.010062 | 0.82832 | -0.06189 | 0.18185 | -0.01636 |
| 0.02782  | 0.54871  | -0.1459  | 0.00157  | 0.03477  | 0.45349 | -0.0253  | 0.58548 | -0.06129 |
| 0.148817 | 0.00126  | 0.378737 | 2.24E-17 | -0.04033 | 0.38458 | -0.00832 | 0.85771 | 0.006628 |
| -0.25703 | 1.76E-08 | -0.39842 | 3.23E-19 | 0.028727 | 0.53575 | 0.062477 | 0.17771 | 0.055447 |
| -0.08029 | 0.08305  | -0.17058 | 0.00021  | -0.04638 | 0.31723 | -0.01378 | 0.76654 | 0.00814  |
| 0.148857 | 0.00125  | 0.195221 | 2.15E-05 | 0.005298 | 0.90909 | -0.0378  | 0.41514 | 0.060453 |
| -0.01608 | 0.72894  | -0.06169 | 0.18321  | -0.00929 | 0.84124 | -0.0297  | 0.52204 | -0.01851 |
| 0.018914 | 0.68352  | -0.03337 | 0.4719   | 0.054834 | 0.23693 | 0.003581 | 0.93849 | 0.031616 |
| 0.208149 | 5.74E-06 | -0.03279 | 0.4796   | -0.04227 | 0.36203 | -0.07982 | 0.08487 | -0.23422 |
| -0.19959 | 1.39E-05 | -0.46182 | 4.77E-26 | -0.03422 | 0.46065 | -0.09106 | 0.04922 | -0.20423 |
| -0.14398 | 0.00181  | -0.08937 | 0.05361  | 0.00442  | 0.92411 | 0.02896  | 0.53244 | 0.016091 |
| 0.191091 | 3.23E-05 | 0.13885  | 0.00264  | 0.035407 | 0.44525 | 0.065081 | 0.16028 | -0.06011 |
| -0.16949 | 0.00023  | 0.003659 | 0.93714  | 0.03014  | 0.51586 | 0.168627 | 0.00025 | 0.237587 |
| -0.15758 | 0.00063  | -0.17951 | 9.60E-05 | 0.004513 | 0.92251 | 0.111566 | 0.01586 | 0.028134 |
| -0.10521 | 0.02298  | -0.11911 | 0.00999  | -0.01447 | 0.75509 | -0.06471 | 0.1627  | -0.07255 |
| -0.198   | 1.63E-05 | -0.34114 | 3.43E-14 | -0.0291  | 0.53041 | -0.05603 | 0.22687 | -0.07508 |
| -0.04995 | 0.28139  | 0.068463 | 0.13961  | 0.012337 | 0.79032 | 0.022174 | 0.63268 | 0.087651 |
| -0.01064 | 0.81868  | 0.02615  | 0.57296  | 0.004865 | 0.9165  | -0.00949 | 0.83796 | 0.006086 |
| 0.019698 | 0.67114  | 0.035849 | 0.43959  | 0.052327 | 0.25909 | 0.05148  | 0.2669  | 0.171302 |
| 0.135479 | 0.00335  | 0.051109 | 0.27036  | -0.03413 | 0.46192 | -0.05322 | 0.251   | -0.01843 |
| -0.13169 | 0.00436  | -0.29741 | 5.42E-11 | -0.01511 | 0.74475 | -0.0216  | 0.64154 | -0.04739 |
| -0.12353 | 0.00752  | -0.00839 | 0.85643  | 0.132948 | 0.004   | 0.176256 | 0.00013 | 0.353431 |
| 0.004514 | 0.92249  | 0.001883 | 0.96762  | -0.05522 | 0.23365 | -0.05838 | 0.20789 | -0.11917 |
| -0.08057 | 0.08199  | -0.16045 | 0.0005   | -0.0175  | 0.70605 | -0.01754 | 0.70546 | -0.05905 |
| -0.01454 | 0.75406  | 0.078034 | 0.09211  | 0.010348 | 0.82352 | 0.068462 | 0.13961 | -0.0012  |

|          |          |          |          |          |          |          |          |          |
|----------|----------|----------|----------|----------|----------|----------|----------|----------|
| -0.11762 | 0.01096  | -0.32846 | 3.29E-13 | 0.000658 | 0.98868  | 0.002674 | 0.95405  | -0.01658 |
| -0.03051 | 0.51066  | -0.26368 | 7.23E-09 | 0.284234 | 3.97E-10 | 0.380352 | 1.60E-17 | 0.07334  |
| -0.16923 | 0.00024  | -0.37008 | 1.32E-16 | -0.02815 | 0.54392  | -0.0126  | 0.78596  | -0.06215 |
| 0.026465 | 0.56835  | 0.108287 | 0.01925  | 0.13539  | 0.00337  | 0.343402 | 2.27E-14 | 0.443586 |
| -0.04371 | 0.34599  | -0.1081  | 0.01946  | -0.01098 | 0.8129   | -0.02657 | 0.56688  | -0.05138 |
| -0.07886 | 0.0887   | -0.20873 | 5.40E-06 | -0.00712 | 0.87799  | -0.0229  | 0.62152  | -0.05839 |
| 0.098562 | 0.03322  | 0.10505  | 0.02319  | 0.060294 | 0.19338  | 0.029777 | 0.52093  | 0.019157 |
| 0.015774 | 0.73387  | 0.033197 | 0.4742   | 0.002967 | 0.94902  | 0.02916  | 0.52961  | -0.02425 |
| -0.08758 | 0.05861  | -0.23807 | 1.93E-07 | 0.010073 | 0.82814  | -0.0248  | 0.59301  | -0.06616 |
| 0.177929 | 0.00011  | -0.06062 | 0.19095  | 0.062105 | 0.18031  | 0.072167 | 0.11938  | 0.083015 |
| -0.15026 | 0.00113  | -0.20801 | 5.82E-06 | 0.153612 | 0.00087  | 0.292693 | 1.12E-10 | 0.331218 |
| 0.00491  | 0.91572  | -0.00964 | 0.83546  | 0.015568 | 0.73721  | 0.014866 | 0.74866  | -0.02232 |
| 0.216189 | 2.41E-06 | 0.072207 | 0.11917  | 0.002299 | 0.96048  | -0.14663 | 0.00149  | -0.0115  |
| -0.00993 | 0.83059  | -0.13001 | 0.00489  | -0.01814 | 0.6958   | -0.09176 | 0.04749  | 0.046911 |
| -0.03896 | 0.40086  | -0.10161 | 0.02813  | 0.025324 | 0.58514  | 0.04658  | 0.31517  | 0.02564  |
| -0.21413 | 3.02E-06 | -0.26306 | 7.86E-09 | 0.04198  | 0.36538  | 0.098936 | 0.03255  | 0.205233 |
| -0.12936 | 0.00511  | -0.06137 | 0.18553  | -0.02343 | 0.61347  | 0.059253 | 0.20119  | -0.17752 |
| -0.02238 | 0.62948  | -0.01287 | 0.78153  | 0.019628 | 0.67225  | -0.00073 | 0.98744  | 0.022395 |
| -0.22012 | 1.56E-06 | -0.51003 | 2.74E-32 | 0.00218  | 0.96252  | -0.04963 | 0.28452  | -0.09944 |
| 0.169249 | 0.00024  | -0.02295 | 0.62087  | -0.00038 | 0.99352  | -0.0283  | 0.54184  | -0.04438 |
| -0.04317 | 0.3519   | -0.2572  | 1.72E-08 | 0.004817 | 0.91732  | -0.0864  | 0.06208  | -0.02177 |
| 0.231501 | 4.23E-07 | 0.032952 | 0.47747  | -0.02426 | 0.60105  | -0.09699 | 0.03615  | -0.05162 |
| -0.08299 | 0.07317  | -0.11738 | 0.01113  | 0.021539 | 0.64246  | -0.01068 | 0.81789  | -0.06147 |
| 0.034236 | 0.46046  | 0.090602 | 0.05038  | -0.00526 | 0.90976  | -0.00109 | 0.98132  | -0.05832 |
| -0.02493 | 0.59098  | 0.174053 | 0.00016  | 0.110454 | 0.01695  | 0.267279 | 4.42E-09 | 0.173062 |
| -0.25936 | 1.29E-08 | -0.35884 | 1.23E-15 | -0.01331 | 0.77426  | 0.110584 | 0.01682  | -0.12697 |
| 0.198965 | 1.48E-05 | 0.485983 | 4.72E-29 | 0.05398  | 0.24433  | 0.299764 | 3.76E-11 | 0.000866 |
| -0.13665 | 0.00309  | -0.20176 | 1.11E-05 | -0.03731 | 0.42122  | -0.02681 | 0.56326  | -0.12633 |
| 0.03921  | 0.39789  | 0.077798 | 0.0931   | 0.015835 | 0.73288  | -0.04425 | 0.33998  | -0.03783 |
| 0.142899 | 0.00196  | 0.457907 | 1.39E-25 | 0.051784 | 0.26407  | 0.176649 | 0.00012  | 0.04348  |
| -0.1711  | 0.0002   | -0.29768 | 5.20E-11 | -0.02304 | 0.6194   | -0.0739  | 0.11075  | -0.14345 |
| -0.16722 | 0.00028  | -0.06812 | 0.14161  | -0.03845 | 0.40715  | -0.05511 | 0.23456  | -0.1644  |
| -0.09018 | 0.05148  | -0.42013 | 2.14E-21 | 0.004542 | 0.92202  | -0.06453 | 0.16388  | -0.08835 |
| -0.04039 | 0.38379  | -0.04208 | 0.36419  | 0.04567  | 0.32472  | 0.070746 | 0.12685  | 0.107128 |
| -0.04687 | 0.31216  | 0.205046 | 7.94E-06 | 0.069906 | 0.13143  | 0.188975 | 3.96E-05 | 0.310389 |
| -0.22659 | 7.50E-07 | -0.19651 | 1.89E-05 | -0.00446 | 0.92342  | 0.012575 | 0.78636  | 0.01457  |
| 0.189594 | 3.73E-05 | 0.291156 | 1.41E-10 | 0.016825 | 0.71687  | 0.054356 | 0.24105  | 0.025323 |
| -0.08883 | 0.05508  | 0.058188 | 0.20943  | 0.009492 | 0.83791  | 0.029655 | 0.52265  | -0.00182 |
| -0.13618 | 0.00319  | -0.04822 | 0.29839  | -0.03172 | 0.49405  | 0.069315 | 0.13474  | -0.01088 |
| -0.12063 | 0.00907  | -0.13083 | 0.00463  | 0.017989 | 0.69821  | 0.053889 | 0.24512  | -0.02968 |
| -0.00899 | 0.84638  | -0.14978 | 0.00117  | 0.044933 | 0.33259  | 0.042181 | 0.36309  | 0.179503 |
| -0.12784 | 0.00567  | -0.22642 | 7.65E-07 | 0.074423 | 0.10823  | 0.151114 | 0.00105  | 0.237611 |
| 0.020542 | 0.65793  | -0.18264 | 7.20E-05 | 0.021739 | 0.63938  | -0.02982 | 0.52027  | -0.01649 |
| -0.11087 | 0.01654  | 0.105936 | 0.02204  | 0.066036 | 0.15422  | 0.143422 | 0.00189  | 0.217654 |
| -0.11871 | 0.01024  | -0.38078 | 1.46E-17 | -0.01082 | 0.81566  | 0.029269 | 0.52807  | -0.08695 |

|          |          |          |          |          |          |          |          |          |
|----------|----------|----------|----------|----------|----------|----------|----------|----------|
| 0.044551 | 0.33672  | -0.05469 | 0.23815  | -0.01882 | 0.68497  | -0.07868 | 0.08943  | -0.04708 |
| -0.06583 | 0.15551  | -0.2217  | 1.31E-06 | 0.013459 | 0.77176  | -0.02645 | 0.56852  | -0.02744 |
| -0.0851  | 0.06616  | -0.2782  | 9.54E-10 | 0.018242 | 0.69418  | 0.000209 | 0.99641  | 0.06921  |
| -0.16525 | 0.00034  | -0.36299 | 5.44E-16 | 0.032015 | 0.49009  | 0.030337 | 0.51313  | 0.049637 |
| -0.09295 | 0.04467  | -0.18921 | 3.87E-05 | 0.041377 | 0.37231  | 0.023066 | 0.61906  | 0.040208 |
| -0.02449 | 0.59762  | -0.07518 | 0.10468  | -0.00049 | 0.99154  | -0.01273 | 0.78387  | 0.028803 |
| -0.00233 | 0.95987  | 0.18016  | 9.04E-05 | 0.057154 | 0.21765  | 0.160934 | 0.00048  | 0.257771 |
| -0.03801 | 0.41247  | -0.1351  | 0.00344  | 0.027625 | 0.55152  | 0.020657 | 0.65614  | 0.041752 |
| -0.0032  | 0.94502  | -0.15338 | 0.00088  | 0.002684 | 0.95388  | -0.0246  | 0.59599  | 0.008977 |
| -0.04877 | 0.29297  | -0.11083 | 0.01657  | -0.01486 | 0.74882  | -0.02609 | 0.57383  | -0.03991 |
| -0.07639 | 0.09919  | -0.04678 | 0.31309  | -0.01819 | 0.69495  | -0.0011  | 0.98116  | -0.04822 |
| -0.10169 | 0.02799  | -0.24924 | 4.81E-08 | -0.01695 | 0.71482  | -0.04373 | 0.34572  | -0.05622 |
| 0.174438 | 0.00015  | 0.348663 | 8.54E-15 | 0.016791 | 0.71742  | 0.108825 | 0.01865  | 0.020847 |
| -0.26055 | 1.10E-08 | -0.3478  | 1.00E-14 | 0.031884 | 0.49186  | 0.008082 | 0.86172  | -0.04391 |
| 0.046956 | 0.31126  | -0.0081  | 0.86133  | 0.005936 | 0.89821  | -0.10708 | 0.02064  | -0.07183 |
| 0.043108 | 0.35262  | 0.063424 | 0.17122  | 0.046447 | 0.31655  | 0.134935 | 0.00348  | 0.103088 |
| -0.13431 | 0.00364  | -0.497   | 1.67E-30 | -0.03629 | 0.43399  | -0.1106  | 0.0168   | -0.11795 |
| -0.0746  | 0.1074   | -0.16995 | 0.00022  | 0.059492 | 0.19938  | -0.05109 | 0.27055  | 0.089179 |
| -0.20659 | 6.76E-06 | -0.25094 | 3.87E-08 | 0.005598 | 0.90397  | 0.085147 | 0.066    | -0.13503 |
| 0.080586 | 0.08192  | 0.25748  | 1.65E-08 | 0.164149 | 0.00037  | 0.232017 | 3.98E-07 | 0.367164 |
| 0.19613  | 1.97E-05 | 0.373427 | 6.70E-17 | 0.069163 | 0.13559  | 0.103818 | 0.02486  | 0.104763 |
| -0.02266 | 0.62523  | -0.32491 | 6.08E-13 | 0.058379 | 0.20793  | -0.00835 | 0.85713  | 0.230331 |
| 0.006114 | 0.89517  | -0.21849 | 1.87E-06 | 0.019443 | 0.67515  | 0.007131 | 0.87785  | -0.0231  |
| 0.004144 | 0.92883  | 0.032336 | 0.48574  | -0.03314 | 0.47495  | -0.081   | 0.08035  | -0.00732 |
| 0.067564 | 0.14489  | -0.14162 | 0.00216  | 0.037653 | 0.41691  | -0.03442 | 0.45806  | -0.00948 |
| -0.05138 | 0.26779  | 0.082981 | 0.07321  | 0.022638 | 0.62557  | 0.041528 | 0.37057  | 0.039975 |
| -0.14841 | 0.0013   | -0.30367 | 2.03E-11 | -0.05263 | 0.25632  | -0.08941 | 0.05351  | -0.10646 |
| -0.10951 | 0.01792  | -0.01994 | 0.66736  | -0.06093 | 0.1887   | -0.06307 | 0.17364  | -0.07632 |
| -0.12719 | 0.00591  | -0.28841 | 2.13E-10 | 0.032805 | 0.47943  | 0.164134 | 0.00037  | 0.188079 |
| -0.16914 | 0.00024  | -0.3152  | 3.13E-12 | -0.02716 | 0.55817  | -0.10588 | 0.02211  | -0.00336 |
| 0.227289 | 6.92E-07 | 0.097892 | 0.03444  | 0.022834 | 0.62259  | 0.0124   | 0.78928  | 0.200952 |
| 0.001879 | 0.96769  | 0.073795 | 0.11125  | -0.02869 | 0.53628  | 0.041719 | 0.36838  | -0.11773 |
| -0.12548 | 0.00663  | -0.08004 | 0.08404  | 0.126582 | 0.00616  | 0.262295 | 8.71E-09 | 0.050886 |
| 0.095196 | 0.03975  | 0.094114 | 0.04206  | 0.022868 | 0.62206  | -0.04287 | 0.35527  | 0.125125 |
| -0.12787 | 0.00565  | -0.18316 | 6.86E-05 | -0.00098 | 0.9832   | 0.073975 | 0.11037  | -0.00767 |
| 0.032066 | 0.48939  | -0.08957 | 0.05306  | -0.04827 | 0.29792  | -0.15999 | 0.00052  | -0.01141 |
| 0.218981 | 1.77E-06 | 0.274389 | 1.64E-09 | 0.038621 | 0.40503  | -0.03614 | 0.43583  | 0.087468 |
| -0.05943 | 0.19982  | -0.19324 | 2.62E-05 | -0.02523 | 0.58655  | 0.063518 | 0.17058  | -0.10595 |
| -0.04959 | 0.28491  | -0.21576 | 2.53E-06 | 0.032074 | 0.48929  | -0.01009 | 0.82788  | 0.111649 |
| 0.056785 | 0.22064  | -0.03325 | 0.47346  | 0.239517 | 1.62E-07 | 0.262376 | 8.62E-09 | 0.285747 |
| -0.07818 | 0.09149  | -0.20258 | 1.02E-05 | -0.00384 | 0.934    | -0.06041 | 0.19249  | -0.061   |
| -0.05257 | 0.25686  | -0.0719  | 0.12077  | 0.111746 | 0.01569  | 0.212732 | 3.52E-06 | -0.00054 |
| -0.10313 | 0.02584  | -0.28776 | 2.35E-10 | -0.01585 | 0.73259  | -0.03619 | 0.43521  | -0.07719 |
| -0.09286 | 0.0449   | -0.40819 | 3.54E-20 | -0.00456 | 0.92166  | -0.02512 | 0.58825  | -0.0541  |
| 0.002366 | 0.95934  | -0.05578 | 0.22892  | 0.032756 | 0.48009  | -0.04034 | 0.38437  | -0.11501 |

|          |          |          |          |          |          |          |          |          |
|----------|----------|----------|----------|----------|----------|----------|----------|----------|
| 0.157332 | 0.00064  | -0.14    | 0.00243  | -0.019   | 0.68218  | -0.07564 | 0.10254  | -0.14649 |
| 0.015551 | 0.73749  | 0.083825 | 0.07033  | -0.00523 | 0.9103   | 0.146262 | 0.00153  | -0.18342 |
| 0.02718  | 0.55794  | 0.03468  | 0.45467  | 0.059873 | 0.19651  | -0.02495 | 0.59075  | 0.255121 |
| 0.160707 | 0.00049  | 0.237295 | 2.12E-07 | -0.00577 | 0.90106  | -0.03059 | 0.50963  | -0.0327  |
| 0.224225 | 9.83E-07 | 0.251518 | 3.60E-08 | 0.018792 | 0.68545  | -0.06056 | 0.19143  | -0.0216  |
| -0.13102 | 0.00457  | -0.27093 | 2.67E-09 | -0.009   | 0.84624  | -0.06038 | 0.19272  | 0.053979 |
| 0.229222 | 5.53E-07 | 0.006507 | 0.88847  | 0.02219  | 0.63243  | -0.03902 | 0.40014  | 0.005869 |
| -0.0638  | 0.16868  | -0.34301 | 2.44E-14 | -0.00169 | 0.97089  | -0.02666 | 0.56548  | -0.12597 |
| -0.08046 | 0.08241  | -0.15873 | 0.00058  | 0.140948 | 0.00227  | 0.425556 | 5.77E-22 | 0.033014 |
| -0.25011 | 4.31E-08 | -0.44898 | 1.52E-24 | 0.025307 | 0.5854   | -0.00842 | 0.85596  | -0.02144 |
| 0.242054 | 1.19E-07 | 0.414569 | 8.02E-21 | 0.030851 | 0.50601  | 0.087668 | 0.05835  | 0.003502 |
| -0.06572 | 0.1562   | -0.19336 | 2.59E-05 | 0.001402 | 0.97589  | -0.02854 | 0.53843  | -0.03211 |
| -0.16172 | 0.00045  | -0.43745 | 2.99E-23 | 0.022447 | 0.62849  | -0.07778 | 0.09317  | -0.18889 |
| 0.068413 | 0.1399   | -0.22584 | 8.17E-07 | 0.005266 | 0.90963  | -0.08751 | 0.0588   | -0.01956 |
| 0.051463 | 0.26705  | 0.305901 | 1.42E-11 | 0.059138 | 0.20207  | 0.025659 | 0.58019  | 0.330637 |
| -0.07029 | 0.12931  | -0.20768 | 6.03E-06 | -0.00188 | 0.9676   | -0.01438 | 0.75654  | -0.04572 |
| -0.08636 | 0.06221  | -0.12607 | 0.00637  | -0.02504 | 0.58933  | 0.065629 | 0.15678  | 0.015565 |
| 0.132093 | 0.00424  | 0.147093 | 0.00143  | -0.04731 | 0.30767  | -0.18424 | 6.20E-05 | -0.10442 |
| -0.09846 | 0.0334   | -0.24743 | 6.05E-08 | -0.00614 | 0.89472  | -0.05748 | 0.21503  | -0.08278 |
| 0.016403 | 0.72368  | 0.143712 | 0.00185  | -0.00129 | 0.97786  | 0.126907 | 0.00603  | 0.07269  |
| -0.12188 | 0.00837  | -0.26797 | 4.02E-09 | 0.015342 | 0.74089  | 0.05409  | 0.24337  | 0.046234 |
| 0.069467 | 0.13388  | 0.414645 | 7.88E-21 | 0.049237 | 0.28833  | 0.06129  | 0.18611  | 0.001996 |
| -0.06714 | 0.14744  | -0.14611 | 0.00155  | 0.008809 | 0.84941  | 0.035026 | 0.45018  | -0.05835 |
| -0.11233 | 0.01515  | -0.23166 | 4.15E-07 | -0.03129 | 0.49997  | -0.03889 | 0.40176  | 0.097595 |
| 0.040537 | 0.38211  | 0.069509 | 0.13364  | -0.00449 | 0.92299  | -0.01737 | 0.70804  | -0.03423 |
| -0.0649  | 0.16147  | -0.22139 | 1.35E-06 | 0.001071 | 0.98158  | -0.06971 | 0.1325   | -0.03054 |
| -0.09081 | 0.04984  | -0.15834 | 0.00059  | 0.000244 | 0.9958   | -0.02142 | 0.64424  | -0.04502 |
| -0.00865 | 0.85212  | -0.11096 | 0.01645  | 0.04732  | 0.30753  | -0.02033 | 0.66129  | 0.047276 |
| 0.068224 | 0.141    | -0.03189 | 0.4918   | 0.036957 | 0.42558  | 0.003987 | 0.93152  | -0.02833 |
| 0.01436  | 0.75694  | -0.12209 | 0.00826  | -0.05692 | 0.21955  | -0.12902 | 0.00523  | 0.007068 |
| 0.000235 | 0.99597  | 0.007674 | 0.86863  | -0.02302 | 0.61972  | -0.0368  | 0.42749  | 0.008174 |
| 0.285561 | 3.26E-10 | 0.127502 | 0.00579  | 0.006654 | 0.88597  | -0.08407 | 0.06952  | 0.089938 |
| -0.19904 | 1.47E-05 | -0.32619 | 4.88E-13 | -0.03728 | 0.42155  | 1.01E-05 | 0.99983  | -0.07494 |
| -0.13909 | 0.00259  | -0.1821  | 7.56E-05 | 0.201646 | 1.13E-05 | 0.218735 | 1.82E-06 | 0.150823 |
| 0.262724 | 8.22E-09 | 0.452539 | 5.90E-25 | 0.057177 | 0.21746  | 0.074981 | 0.1056   | 0.120635 |
| -0.11372 | 0.01394  | -0.21992 | 1.60E-06 | 0.088327 | 0.05647  | 0.344778 | 1.76E-14 | -0.10301 |
| -0.09658 | 0.03693  | -0.08469 | 0.06746  | 0.100344 | 0.03015  | 0.390303 | 1.92E-18 | -0.03843 |
| 0.02742  | 0.55447  | 0.064183 | 0.16614  | 0.146941 | 0.00145  | 0.426394 | 4.70E-22 | 0.049625 |
| -0.11932 | 0.00986  | -0.11159 | 0.01584  | 0.089742 | 0.05262  | 0.07064  | 0.12742  | 0.378348 |
| 0.078645 | 0.08958  | 0.350168 | 6.44E-15 | 0.0327   | 0.48084  | 0.089609 | 0.05297  | 0.08637  |
| -0.09696 | 0.0362   | -0.19766 | 1.69E-05 | -0.02317 | 0.61741  | -0.02364 | 0.61036  | -0.08167 |
| 0.064898 | 0.16146  | -0.10833 | 0.0192   | 0.031501 | 0.49708  | -0.06741 | 0.14581  | -0.15609 |
| -0.11004 | 0.01737  | -0.17222 | 0.00018  | -0.00954 | 0.83708  | -0.04486 | 0.33337  | -0.0293  |
| -0.07854 | 0.09     | -0.00731 | 0.87475  | 0.013016 | 0.77906  | 0.003851 | 0.93386  | -0.04896 |
| 0.008697 | 0.85132  | -0.09691 | 0.0363   | -0.00823 | 0.85925  | 0.019905 | 0.66789  | 0.064288 |

|          |          |          |          |          |         |          |          |          |
|----------|----------|----------|----------|----------|---------|----------|----------|----------|
| 0.096426 | 0.03725  | 0.412626 | 1.26E-20 | 0.037154 | 0.42312 | 0.250113 | 4.31E-08 | -0.01896 |
| -0.02431 | 0.60028  | -0.08567 | 0.06434  | -0.0534  | 0.24945 | -0.06316 | 0.17302  | -0.12521 |
| 0.095155 | 0.03983  | 0.389389 | 2.34E-18 | 0.017713 | 0.70262 | 0.091521 | 0.04808  | 0.03914  |
| -0.0689  | 0.1371   | -0.1286  | 0.00538  | 0.151722 | 0.00101 | 0.047742 | 0.30323  | 0.009678 |
| 0.080846 | 0.08094  | 0.162162 | 0.00043  | 0.036244 | 0.43457 | 0.006128 | 0.89493  | 0.174728 |
| 0.018513 | 0.68987  | -0.01002 | 0.82908  | -0.00751 | 0.87139 | 0.010526 | 0.82053  | 0.064423 |
| -0.20164 | 1.13E-05 | -0.34776 | 1.01E-14 | 0.012619 | 0.78564 | -0.07757 | 0.09407  | 0.096734 |
| 0.016464 | 0.7227   | -0.14407 | 0.0018   | 0.036691 | 0.42892 | 0.00317  | 0.94552  | 0.024038 |
| -0.18664 | 4.94E-05 | -0.19846 | 1.56E-05 | 0.056776 | 0.22071 | 0.268886 | 3.54E-09 | 0.336675 |
| -0.15841 | 0.00059  | -0.23224 | 3.88E-07 | 0.020186 | 0.66349 | 0.014484 | 0.75491  | 0.049995 |
| 0.043938 | 0.34343  | -0.15421 | 0.00083  | -0.01894 | 0.68312 | -0.06913 | 0.13575  | 0.0147   |
| 0.075073 | 0.10517  | 0.103656 | 0.02509  | 0.086248 | 0.06256 | 0.017919 | 0.69933  | 0.185482 |
| -0.00658 | 0.88717  | -0.02621 | 0.5721   | 0.039193 | 0.3981  | 0.023219 | 0.61673  | -0.02328 |
| -0.02752 | 0.55308  | -0.00234 | 0.95977  | -0.01232 | 0.79066 | -0.00458 | 0.92141  | -0.02539 |
| 0.286311 | 2.92E-10 | 0.193409 | 2.57E-05 | -0.01473 | 0.75093 | -0.06308 | 0.17356  | 0.104755 |
| 0.021317 | 0.64589  | 0.046619 | 0.31475  | 0.014989 | 0.74665 | -0.01948 | 0.67455  | -0.04433 |
| 0.09541  | 0.0393   | 0.065178 | 0.15966  | -0.03085 | 0.50604 | -0.06379 | 0.16874  | 0.041004 |
| 0.114671 | 0.01315  | -0.01435 | 0.75706  | -0.02532 | 0.58523 | -0.0565  | 0.22298  | -0.06705 |
| 0.082857 | 0.07364  | -0.0113  | 0.80758  | 0.011061 | 0.81157 | 0.105582 | 0.02249  | 0.167325 |
| 0.090583 | 0.05043  | 0.279723 | 7.66E-10 | 0.039767 | 0.39122 | 0.113015 | 0.01454  | 0.010612 |
| 0.229462 | 5.37E-07 | -0.13348 | 0.00386  | 0.00126  | 0.97834 | -0.05303 | 0.25272  | 0.152637 |
| 0.196523 | 1.89E-05 | 0.082961 | 0.07328  | -0.02462 | 0.5956  | -0.04211 | 0.36387  | -0.02909 |
| -0.00597 | 0.89761  | 0.106165 | 0.02176  | 0.069123 | 0.13582 | 0.090998 | 0.04938  | 0.016285 |
| -0.07382 | 0.11114  | -0.04886 | 0.29201  | -0.00875 | 0.85045 | -0.02106 | 0.64993  | 0.070239 |
| -0.19717 | 1.77E-05 | -0.337   | 7.26E-14 | -0.03431 | 0.45947 | -0.08101 | 0.0803   | -0.11318 |
| -0.14316 | 0.00193  | -0.22927 | 5.49E-07 | 0.034514 | 0.45683 | 0.022618 | 0.62588  | 0.08339  |
| 0.07279  | 0.11621  | 0.40197  | 1.46E-19 | 0.029643 | 0.52281 | 0.121062 | 0.00882  | 0.112337 |
| 0.089412 | 0.0535   | -0.03342 | 0.4713   | 0.040484 | 0.38273 | 0.00863  | 0.85244  | -0.06547 |
| -0.09138 | 0.04843  | -0.26594 | 5.32E-09 | -0.03625 | 0.43454 | -0.06003 | 0.19531  | -0.12924 |
| 0.071365 | 0.12355  | 0.104162 | 0.02438  | 0.037603 | 0.41753 | 0.051447 | 0.2672   | 0.238354 |
| 0.012688 | 0.7845   | 0.11335  | 0.01425  | 0.01807  | 0.69691 | -0.00759 | 0.87006  | 0.050469 |
| -0.00942 | 0.83904  | -0.18494 | 5.81E-05 | -0.00378 | 0.93501 | 0.116176 | 0.01199  | -0.19044 |
| -0.01093 | 0.81381  | -0.18884 | 4.01E-05 | 0.002847 | 0.95107 | -0.02729 | 0.55638  | -0.16998 |
| -0.05888 | 0.20404  | -0.20668 | 6.70E-06 | 0.044898 | 0.33298 | 0.09284  | 0.04494  | -0.16242 |
| 0.206634 | 6.73E-06 | 0.266211 | 5.12E-09 | 0.039599 | 0.39323 | 0.034687 | 0.45457  | -0.00556 |
| -0.01699 | 0.71414  | -0.04802 | 0.30038  | 0.030393 | 0.51234 | -0.04356 | 0.34756  | 0.002056 |
| -0.04056 | 0.38184  | -0.21397 | 3.08E-06 | 0.026237 | 0.57169 | -0.0369  | 0.42628  | -0.04339 |
| -0.00117 | 0.97994  | -0.11097 | 0.01643  | 0.050879 | 0.27252 | 0.045159 | 0.33017  | 0.145985 |
| 0.069275 | 0.13496  | 0.125942 | 0.00643  | 0.049177 | 0.28891 | 0.094176 | 0.04193  | 0.219375 |
| -0.00327 | 0.9439   | -0.06572 | 0.15623  | 0.096546 | 0.03701 | 0.198345 | 1.58E-05 | 0.007454 |
| 0.249443 | 4.69E-08 | -0.22467 | 9.34E-07 | -0.04136 | 0.37245 | -0.15478 | 0.00079  | -0.15931 |
| -0.05637 | 0.22406  | 0.38355  | 8.16E-18 | 0.031378 | 0.49877 | 0.211043 | 4.22E-06 | 0.049798 |
| -0.16874 | 0.00025  | -0.42686 | 4.19E-22 | -0.03537 | 0.44571 | -0.08166 | 0.07793  | -0.12141 |
| 0.050397 | 0.2771   | 0.102275 | 0.0271   | -0.035   | 0.45051 | -0.11184 | 0.01561  | -0.18157 |
| 0.071391 | 0.12341  | -0.27389 | 1.76E-09 | -0.0149  | 0.74809 | -0.17551 | 0.00014  | -0.12719 |

|          |          |          |          |          |         |          |          |          |
|----------|----------|----------|----------|----------|---------|----------|----------|----------|
| 0.134059 | 0.0037   | -0.0332  | 0.47411  | -0.02165 | 0.64081 | -0.10102 | 0.02905  | -0.09537 |
| 0.059355 | 0.20042  | 0.228369 | 6.10E-07 | 0.009227 | 0.84237 | 0.08244  | 0.07511  | -0.1115  |
| 0.052265 | 0.25966  | 0.322947 | 8.50E-13 | 0.057452 | 0.21526 | 0.152265 | 0.00096  | 0.17447  |
| 0.116417 | 0.01182  | -0.02057 | 0.65747  | 0.036471 | 0.4317  | -0.02454 | 0.59683  | -0.11945 |
| 0.011918 | 0.79728  | -0.05098 | 0.2716   | 0.01457  | 0.7535  | 0.024644 | 0.59527  | -0.00457 |
| -0.09493 | 0.04031  | -0.10193 | 0.02762  | 0.046876 | 0.31209 | 0.120738 | 0.00901  | 0.271912 |
| 0.197366 | 1.74E-05 | 0.217998 | 1.98E-06 | -0.01382 | 0.76573 | -0.03986 | 0.39007  | 0.003265 |
| -0.05052 | 0.27593  | -0.07783 | 0.09298  | 0.010452 | 0.82177 | 0.008656 | 0.85201  | 0.068749 |
| -0.10678 | 0.021    | -0.27091 | 2.68E-09 | -0.04065 | 0.38079 | -0.14063 | 0.00232  | -0.08583 |
| 0.053593 | 0.24773  | 0.048039 | 0.30023  | 0.021606 | 0.64142 | -0.10657 | 0.02126  | 0.062321 |
| 0.051277 | 0.26879  | -0.11336 | 0.01424  | 0.158005 | 0.00061 | 0.141307 | 0.00221  | 0.455554 |
| 0.016233 | 0.72644  | 0.106618 | 0.0212   | -0.01011 | 0.82757 | -0.07496 | 0.10572  | 0.048374 |
| 0.090758 | 0.04999  | 0.08818  | 0.05689  | -0.00465 | 0.92024 | -0.08819 | 0.05687  | 0.024804 |
| 0.19935  | 1.42E-05 | 0.317552 | 2.12E-12 | 0.008006 | 0.863   | 0.025967 | 0.57565  | 0.090075 |
| -0.11121 | 0.0162   | 0.018487 | 0.69028  | 0.056418 | 0.22364 | 0.297464 | 5.38E-11 | -0.02777 |
| -0.16486 | 0.00035  | -0.38252 | 1.01E-17 | -0.02232 | 0.63046 | -0.13171 | 0.00436  | -0.16681 |
| 0.007254 | 0.87576  | -0.14206 | 0.00209  | 0.003013 | 0.94822 | -0.02543 | 0.58365  | -0.22842 |
| -0.18343 | 6.69E-05 | -0.51512 | 5.22E-33 | -0.01896 | 0.68278 | -0.07254 | 0.11748  | -0.14194 |
| 0.018031 | 0.69754  | 0.020352 | 0.66089  | -0.01016 | 0.82665 | -0.10349 | 0.02532  | 0.080846 |
| -0.1563  | 0.0007   | -0.30213 | 2.59E-11 | 0.00863  | 0.85244 | -0.01622 | 0.7267   | -0.05903 |
| -0.16062 | 0.00049  | -0.25054 | 4.08E-08 | 0.009128 | 0.84403 | -0.03532 | 0.44638  | -0.16655 |
| 0.02861  | 0.53741  | -0.05094 | 0.27193  | 0.051415 | 0.2675  | -0.02185 | 0.63771  | 0.175111 |
| -0.05146 | 0.26711  | -0.05404 | 0.24382  | 0.007809 | 0.86635 | -0.02117 | 0.64822  | 0.041349 |
| -0.05781 | 0.21238  | -0.33568 | 9.20E-14 | -0.01021 | 0.82579 | -0.00205 | 0.96483  | -0.10724 |
| 0.226081 | 7.95E-07 | 0.233623 | 3.29E-07 | 0.013134 | 0.77712 | 0.15161  | 0.00101  | -0.05433 |
| 0.14661  | 0.00149  | 0.108952 | 0.01851  | -0.0297  | 0.52199 | -0.07401 | 0.11018  | 0.168468 |
| 0.054696 | 0.23812  | 0.191667 | 3.05E-05 | -0.01386 | 0.76517 | -0.08224 | 0.07582  | -0.0232  |
| -0.11485 | 0.01301  | -0.32241 | 9.32E-13 | 0.010328 | 0.82386 | 0.089197 | 0.05407  | -0.10699 |
| 0.077759 | 0.09326  | 0.194041 | 2.42E-05 | 0.100106 | 0.03054 | 0.364992 | 3.66E-16 | -0.01162 |
| -0.08749 | 0.05887  | -0.17565 | 0.00014  | 0.083448 | 0.0716  | 0.001422 | 0.97555  | 0.157475 |
| 0.001961 | 0.96629  | -0.26134 | 9.90E-09 | -0.01083 | 0.81539 | -0.0821  | 0.07631  | -0.07591 |
| -0.07679 | 0.09743  | -0.32667 | 4.49E-13 | 0.006022 | 0.89674 | 0.039159 | 0.39851  | -0.05577 |
| 0.165955 | 0.00032  | 0.09134  | 0.04853  | 0.00257  | 0.95584 | -0.06771 | 0.14403  | 0.026787 |
| -0.00799 | 0.86327  | 0.053629 | 0.24741  | 0.132946 | 0.004   | 0.110986 | 0.01642  | 0.225407 |
| -0.12892 | 0.00527  | -0.50968 | 3.05E-32 | -0.05891 | 0.20385 | -0.15711 | 0.00066  | -0.14149 |
| 0.142469 | 0.00203  | -0.16139 | 0.00046  | 0.069815 | 0.13193 | -0.01545 | 0.73914  | 0.016709 |
| -0.06973 | 0.1324   | -0.09527 | 0.03959  | -0.02153 | 0.64263 | -0.07636 | 0.0993   | -0.01106 |
| -0.12776 | 0.00569  | 0.20797  | 5.85E-06 | 0.039177 | 0.39829 | 0.105146 | 0.02306  | -0.00284 |
| -0.0126  | 0.78591  | -0.09794 | 0.03435  | 0.004945 | 0.91512 | -0.05973 | 0.1976   | -0.04185 |
| 0.016755 | 0.71801  | -0.11047 | 0.01693  | 0.019357 | 0.67652 | 0.026103 | 0.57366  | 0.038669 |
| -0.04892 | 0.29145  | -0.30654 | 1.29E-11 | 0.020043 | 0.66573 | -0.03446 | 0.45752  | -0.03778 |
| 0.040186 | 0.38625  | 0.051422 | 0.26743  | 0.035267 | 0.44706 | -0.07975 | 0.08514  | 0.136835 |
| 0.216353 | 2.37E-06 | -0.02991 | 0.51903  | 0.021045 | 0.6501  | -0.07957 | 0.08585  | -0.0784  |
| -0.05954 | 0.19905  | 0.186823 | 4.86E-05 | 0.074904 | 0.10596 | 0.20174  | 1.12E-05 | 0.145508 |
| -0.08505 | 0.06629  | -0.27268 | 2.09E-09 | 0.029677 | 0.52234 | 0.041761 | 0.36789  | -0.08199 |



|          |          |          |          |          |         |          |          |          |
|----------|----------|----------|----------|----------|---------|----------|----------|----------|
| 0.048647 | 0.29414  | -0.07441 | 0.10831  | 0.016826 | 0.71685 | -0.06962 | 0.133    | -0.053   |
| -0.19427 | 2.37E-05 | -0.09783 | 0.03456  | 0.058349 | 0.20816 | 0.167957 | 0.00027  | 0.111228 |
| -0.00384 | 0.93404  | 0.117206 | 0.01125  | 0.037463 | 0.41927 | 0.121744 | 0.00845  | 0.019163 |
| 0.059206 | 0.20155  | 0.171146 | 0.0002   | -0.04545 | 0.32705 | -0.01524 | 0.74262  | -0.29546 |
| 0.079859 | 0.08472  | 0.193539 | 2.54E-05 | 0.067955 | 0.14257 | 0.094844 | 0.04049  | 0.2258   |
| 0.049794 | 0.2829   | -0.14141 | 0.00219  | -0.01471 | 0.75123 | -0.04906 | 0.29011  | -0.05041 |
| -0.02815 | 0.54392  | -0.04007 | 0.38765  | 0.120197 | 0.00932 | 0.263967 | 6.95E-09 | -0.10624 |
| -0.03932 | 0.39655  | -0.24726 | 6.19E-08 | 0.007914 | 0.86456 | -0.04887 | 0.29193  | 0.009202 |
| 0.238498 | 1.83E-07 | 0.548928 | 4.18E-38 | -0.05141 | 0.26759 | 0.047336 | 0.30737  | -0.10973 |
| 0.167622 | 0.00027  | -0.03224 | 0.48708  | -0.02131 | 0.64601 | -0.02949 | 0.52503  | -0.12002 |
| 0.08418  | 0.06914  | 0.05907  | 0.20259  | -0.06277 | 0.17569 | -0.11431 | 0.01345  | 0.033192 |
| -0.06086 | 0.18919  | -0.14873 | 0.00127  | -0.08417 | 0.06916 | -0.17265 | 0.00018  | -0.13346 |
| -0.07328 | 0.11376  | -0.26075 | 1.07E-08 | -0.07173 | 0.12166 | -0.15665 | 0.00068  | -0.19971 |
| 0.197302 | 1.75E-05 | 0.18407  | 6.30E-05 | 0.009603 | 0.83604 | -0.01844 | 0.6911   | 0.032971 |
| -0.08907 | 0.05441  | -0.1383  | 0.00274  | 0.001932 | 0.96679 | 0.005021 | 0.91383  | 0.06227  |
| -0.05003 | 0.28064  | -0.03    | 0.51782  | 0.042399 | 0.36061 | 0.172433 | 0.00018  | 0.333043 |
| -0.07084 | 0.12635  | -0.13769 | 0.00287  | 0.041761 | 0.36789 | 0.037313 | 0.42114  | -0.02143 |
| -0.07752 | 0.09426  | -0.23529 | 2.70E-07 | 0.000912 | 0.98431 | -0.06545 | 0.15792  | -0.05551 |
| 0.064559 | 0.16367  | 0.053723 | 0.24659  | 0.091681 | 0.04769 | 0.006691 | 0.88534  | 0.106148 |
| -0.05342 | 0.24922  | -0.20224 | 1.06E-05 | -0.00561 | 0.9038  | -0.05734 | 0.21614  | -0.08562 |
| -0.08123 | 0.07951  | -0.19492 | 2.22E-05 | -0.02479 | 0.59304 | -0.11005 | 0.01736  | -0.1584  |
| 0.122031 | 0.00829  | -0.04345 | 0.34884  | 0.006009 | 0.89695 | -0.07655 | 0.09849  | -0.05803 |
| -0.11169 | 0.01575  | -0.22892 | 5.73E-07 | 0.009676 | 0.83481 | -0.02401 | 0.60481  | -0.03862 |
| -0.07165 | 0.12204  | -0.13695 | 0.00302  | 0.005621 | 0.90357 | 0.011557 | 0.80329  | -0.02813 |
| -0.06155 | 0.18428  | -0.11293 | 0.01462  | 3.66E-05 | 0.99937 | 0.011533 | 0.80369  | -0.08539 |
| -0.12039 | 0.00921  | -0.01873 | 0.68646  | 0.004352 | 0.92526 | -0.02038 | 0.66043  | -0.08159 |
| -0.06254 | 0.17727  | -0.2631  | 7.81E-09 | 0.009319 | 0.84081 | -0.07634 | 0.09941  | -0.12023 |
| -0.11634 | 0.01187  | 0.092539 | 0.04564  | -0.064   | 0.16732 | -0.07899 | 0.0882   | 0.056492 |
| 0.221199 | 1.38E-06 | 0.048634 | 0.29428  | 0.020983 | 0.65106 | 0.012517 | 0.78733  | 0.005905 |
| 0.085118 | 0.06609  | 0.001263 | 0.97829  | 0.025118 | 0.58821 | -0.04041 | 0.38365  | 0.113169 |
| 0.004851 | 0.91673  | 0.077284 | 0.09529  | -0.00645 | 0.8895  | 0.036742 | 0.42828  | 0.052168 |
| -0.01271 | 0.78413  | -0.04688 | 0.31205  | -0.00888 | 0.84815 | -0.00183 | 0.96853  | 0.024692 |
| 0.007255 | 0.87575  | -0.00626 | 0.89269  | -0.00259 | 0.95548 | -0.02979 | 0.52069  | 0.074459 |
| 0.033028 | 0.47645  | 0.023436 | 0.61344  | -0.01166 | 0.80159 | -0.03673 | 0.42843  | -0.03645 |
| 0.103205 | 0.02573  | 0.033023 | 0.47651  | 0.047534 | 0.30534 | 0.010274 | 0.82476  | 0.117741 |
| 0.223116 | 1.11E-06 | 0.050309 | 0.27794  | 0.040371 | 0.38406 | 0.068001 | 0.1423   | 0.224384 |
| -0.08484 | 0.06699  | -0.28132 | 6.08E-10 | -0.0028  | 0.95185 | -0.05365 | 0.24722  | -0.01402 |
| 0.099108 | 0.03225  | -0.00488 | 0.91617  | -0.02528 | 0.58574 | -0.00746 | 0.87228  | -0.09458 |
| -0.13122 | 0.00451  | -0.29602 | 6.72E-11 | -0.01336 | 0.77342 | -0.05013 | 0.27968  | -0.03755 |
| 0.059841 | 0.19675  | 0.051194 | 0.26956  | 0.048481 | 0.2958  | 0.001602 | 0.97245  | -0.00497 |
| -0.06304 | 0.17383  | 0.103325 | 0.02556  | -0.01635 | 0.72459 | -0.0173  | 0.70929  | 0.019368 |
| -0.15313 | 0.0009   | -0.0827  | 0.07418  | 0.048812 | 0.29251 | 0.094056 | 0.04219  | -0.02961 |
| -0.00744 | 0.87264  | 0.013192 | 0.77615  | 0.05665  | 0.22174 | 0.058718 | 0.2053   | 0.042001 |
| 0.014437 | 0.75567  | 0.179278 | 9.80E-05 | 0.039648 | 0.39264 | 0.072171 | 0.11936  | 0.156675 |
| -0.13376 | 0.00378  | -0.17623 | 0.00013  | 0.034803 | 0.45307 | 0.064369 | 0.16491  | 0.002847 |

|          |          |          |          |          |         |          |          |          |
|----------|----------|----------|----------|----------|---------|----------|----------|----------|
| -0.1441  | 0.0018   | -0.00739 | 0.87352  | 0.064657 | 0.16303 | 0.138774 | 0.00265  | 0.058436 |
| -0.04773 | 0.30338  | -0.18885 | 4.00E-05 | -0.01917 | 0.67952 | -0.08092 | 0.08064  | 0.012019 |
| 0.028334 | 0.54134  | 0.099804 | 0.03105  | 0.015335 | 0.74101 | 0.056254 | 0.22499  | 0.105887 |
| -0.13294 | 0.004    | -0.07509 | 0.10511  | 0.166759 | 0.0003  | 0.23435  | 3.02E-07 | 0.466423 |
| -0.17426 | 0.00015  | 0.074103 | 0.10976  | 0.094172 | 0.04194 | 0.337208 | 6.99E-14 | 0.270317 |
| -0.09661 | 0.03687  | -0.10898 | 0.01848  | 0.008099 | 0.86143 | -0.07457 | 0.10754  | -0.15435 |
| 0.025906 | 0.57655  | 0.140997 | 0.00226  | 0.078226 | 0.09131 | 0.035967 | 0.43809  | 0.09779  |
| 0.004761 | 0.91827  | 0.016134 | 0.72804  | 0.033238 | 0.47364 | 0.020486 | 0.65881  | 0.029588 |
| 0.030181 | 0.51529  | 0.032853 | 0.47879  | 0.01913  | 0.68009 | 0.012086 | 0.79449  | 0.063011 |
| 0.144259 | 0.00178  | -0.15518 | 0.00077  | 0.021058 | 0.6499  | -0.05682 | 0.22036  | -0.01427 |
| 0.037608 | 0.41746  | -0.12427 | 0.00717  | 0.008068 | 0.86196 | -0.05656 | 0.22246  | -0.04439 |
| 0.004236 | 0.92725  | -0.08049 | 0.0823   | -0.01582 | 0.73312 | -0.04594 | 0.32184  | -0.03518 |
| -0.18262 | 7.21E-05 | -0.26149 | 9.71E-09 | -0.00983 | 0.83219 | -0.04584 | 0.32288  | -0.05192 |
| 0.005312 | 0.90886  | -0.0842  | 0.06906  | 0.005022 | 0.9138  | -0.00983 | 0.83214  | -0.01108 |
| 0.157855 | 0.00062  | -0.19375 | 2.49E-05 | -0.00678 | 0.88388 | -0.04298 | 0.3541   | -0.06423 |
| 0.114363 | 0.0134   | 0.017445 | 0.70692  | 0.016955 | 0.71478 | 0.162666 | 0.00042  | -0.15163 |
| 0.092664 | 0.04535  | 0.092844 | 0.04493  | 0.029742 | 0.52142 | 0.080135 | 0.08365  | -0.06914 |
| 0.115227 | 0.01271  | 0.045128 | 0.3305   | -0.04446 | 0.33775 | -0.21153 | 4.00E-06 | -0.10505 |
| 0.066415 | 0.15187  | 0.202432 | 1.04E-05 | 0.152107 | 0.00098 | 0.107498 | 0.02015  | 0.331346 |
| -0.1787  | 0.0001   | -0.16309 | 0.0004   | 0.039359 | 0.39611 | 0.139708 | 0.00248  | 0.21341  |
| -0.11087 | 0.01654  | 0.060669 | 0.19062  | 0.024324 | 0.60005 | 0.052828 | 0.25456  | 0.205371 |
| 0.035329 | 0.44626  | -0.02295 | 0.62076  | 0.0184   | 0.69166 | 0.020451 | 0.65935  | -0.03399 |
| -0.02173 | 0.63954  | -0.17632 | 0.00013  | -0.10159 | 0.02814 | -0.08825 | 0.05669  | -0.23813 |
| 0.071831 | 0.12111  | -0.11573 | 0.01232  | 0.006917 | 0.88149 | -0.07247 | 0.11782  | 0.013504 |
| -0.21671 | 2.28E-06 | -0.42597 | 5.21E-22 | -0.03576 | 0.44076 | -0.04387 | 0.34421  | -0.16295 |
| 0.030145 | 0.5158   | -0.01106 | 0.81163  | 0.117725 | 0.01089 | 0.184474 | 6.06E-05 | 0.200905 |
| -0.02274 | 0.62395  | -0.00838 | 0.85667  | -0.04202 | 0.36488 | -0.00927 | 0.84169  | 0.023203 |
| -0.05196 | 0.26242  | -0.02628 | 0.57108  | 0.052408 | 0.25835 | 0.054456 | 0.24019  | 0.053632 |
| 0.205353 | 7.69E-06 | 0.045997 | 0.32127  | -0.05925 | 0.20123 | -0.03648 | 0.4316   | -0.17743 |
| 0.149579 | 0.00119  | 0.373284 | 6.90E-17 | 0.032092 | 0.48904 | 0.104512 | 0.02391  | 0.111372 |
| -0.29208 | 1.23E-10 | -0.46891 | 6.63E-27 | -0.07582 | 0.10173 | -0.0669  | 0.14887  | -0.21113 |
| -0.08848 | 0.05605  | 0.136724 | 0.00307  | 0.016963 | 0.71466 | 0.039531 | 0.39404  | 0.037897 |
| 0.078584 | 0.08983  | 0.054032 | 0.24387  | 0.092003 | 0.04691 | 0.085282 | 0.06557  | 0.135709 |
| 0.003902 | 0.93298  | -0.18573 | 5.39E-05 | 0.01104  | 0.81193 | -0.00133 | 0.97708  | -0.0252  |
| 0.190475 | 3.43E-05 | 0.140783 | 0.00229  | -0.04937 | 0.28701 | -0.10191 | 0.02766  | -0.00947 |
| 0.095413 | 0.0393   | 0.080206 | 0.08338  | 0.014483 | 0.75491 | 0.115519 | 0.01249  | -0.00789 |
| 0.266181 | 5.14E-09 | 0.297452 | 5.39E-11 | 0.076043 | 0.10074 | 0.248568 | 5.24E-08 | -0.0711  |
| -0.15335 | 0.00088  | -0.1904  | 3.45E-05 | -0.00392 | 0.93269 | -0.00471 | 0.91906  | -0.04241 |
| 0.155394 | 0.00075  | 0.356317 | 2.00E-15 | 0.019035 | 0.6816  | -0.01843 | 0.69118  | 0.190728 |
| -0.01855 | 0.68927  | 0.037268 | 0.4217   | -0.02277 | 0.62352 | 0.118451 | 0.01041  | -0.11809 |
| 0.142618 | 0.002    | 0.080231 | 0.08328  | -0.01134 | 0.80685 | 0.026417 | 0.56906  | 0.01267  |
| 0.181765 | 7.80E-05 | 0.320391 | 1.31E-12 | 0.081315 | 0.07919 | 0.185045 | 5.75E-05 | 0.177091 |
| 0.187603 | 4.51E-05 | 0.10202  | 0.02749  | 0.026918 | 0.56175 | -0.01651 | 0.7219   | -0.01408 |
| 0.100166 | 0.03044  | 0.296677 | 6.07E-11 | 0.108575 | 0.01893 | 0.006002 | 0.89708  | 0.243054 |
| -0.18635 | 5.08E-05 | -0.22771 | 6.59E-07 | -0.09024 | 0.05132 | -0.12578 | 0.0065   | -0.14223 |

|          |          |          |          |          |         |          |          |          |
|----------|----------|----------|----------|----------|---------|----------|----------|----------|
| 0.191754 | 3.03E-05 | 0.044939 | 0.33253  | 0.073608 | 0.11216 | 0.160118 | 0.00051  | 0.07574  |
| 0.058034 | 0.21064  | 0.115744 | 0.01232  | -0.03542 | 0.44513 | -0.00724 | 0.87607  | -0.09856 |
| 0.028362 | 0.54094  | -0.01586 | 0.73243  | -0.01521 | 0.74304 | -0.01878 | 0.68563  | -0.01456 |
| -0.09709 | 0.03594  | -0.13749 | 0.00291  | -0.02775 | 0.54975 | -0.03866 | 0.40452  | -0.07589 |
| 0.041557 | 0.37023  | 0.083291 | 0.07214  | -0.01801 | 0.69789 | -0.0229  | 0.62162  | 0.035539 |
| 0.089183 | 0.05411  | -0.11052 | 0.01688  | -0.04433 | 0.33909 | -0.03544 | 0.44486  | -0.13532 |
| -0.0222  | 0.63229  | -0.10317 | 0.02578  | -0.02028 | 0.66206 | 0.010969 | 0.81312  | -0.03999 |
| 0.054024 | 0.24394  | 0.067842 | 0.14324  | -0.01288 | 0.78136 | 0.01559  | 0.73685  | -0.00971 |
| -0.00994 | 0.83041  | 0.097046 | 0.03604  | 0.015635 | 0.73613 | 0.214825 | 2.80E-06 | 0.040035 |
| 0.149203 | 0.00122  | 0.057142 | 0.21775  | 0.027207 | 0.55755 | 0.075473 | 0.10333  | -0.12041 |
| 0.231938 | 4.02E-07 | 0.32763  | 3.80E-13 | -0.00648 | 0.88894 | 0.019486 | 0.67449  | 0.045485 |
| 0.080733 | 0.08136  | -0.0984  | 0.03351  | 0.090896 | 0.04964 | -0.07501 | 0.10544  | -0.02369 |
| 0.037004 | 0.42499  | 0.110928 | 0.01648  | 0.099124 | 0.03222 | -0.02057 | 0.65752  | -0.04006 |
| 0.18448  | 6.06E-05 | 0.211313 | 4.10E-06 | -0.03541 | 0.44525 | -0.08925 | 0.05394  | -0.03458 |
| -0.06342 | 0.17126  | -0.11263 | 0.01488  | -0.00245 | 0.95786 | -0.05052 | 0.27592  | -0.01933 |
| -0.04199 | 0.3653   | -0.08225 | 0.0758   | 0.05172  | 0.26467 | 0.071957 | 0.12046  | 0.353628 |
| -0.12704 | 0.00598  | -0.24214 | 1.17E-07 | 0.005083 | 0.91276 | -0.01829 | 0.69339  | 0.079525 |
| -0.11737 | 0.01114  | -0.16532 | 0.00033  | 0.012886 | 0.78122 | 0.046078 | 0.32041  | 0.127635 |
| -0.12764 | 0.00574  | 0.021483 | 0.64333  | -0.00982 | 0.83234 | -0.03652 | 0.43112  | 0.090434 |
| -0.09679 | 0.03654  | 0.007568 | 0.87044  | 0.003388 | 0.9418  | -0.01524 | 0.74258  | 0.074486 |
| 0.108383 | 0.01914  | 0.109329 | 0.01811  | 0.014998 | 0.7465  | -0.07284 | 0.11598  | -0.01299 |
| 0.09774  | 0.03472  | -0.09641 | 0.03728  | 0.012215 | 0.79235 | -0.00882 | 0.84921  | -0.09451 |
| -0.05611 | 0.22619  | -0.10505 | 0.02319  | -0.01258 | 0.78627 | -0.02291 | 0.6214   | -0.04013 |
| 0.00339  | 0.94175  | -0.04175 | 0.36803  | -0.02759 | 0.55196 | -0.0271  | 0.55907  | -0.07058 |
| 0.032133 | 0.48848  | -0.28381 | 4.22E-10 | -0.01468 | 0.75171 | -0.07803 | 0.09211  | -0.16629 |
| -0.18595 | 5.28E-05 | -0.11332 | 0.01427  | 0.017242 | 0.71016 | 0.078464 | 0.09032  | 0.086595 |
| 0.133195 | 0.00393  | 0.234656 | 2.91E-07 | 0.039478 | 0.39468 | 0.044858 | 0.3334   | 0.016074 |
| -0.04478 | 0.33427  | -0.10822 | 0.01933  | 0.015603 | 0.73664 | -0.01956 | 0.67338  | -0.06289 |
| -0.19531 | 2.13E-05 | -0.36186 | 6.80E-16 | -0.01881 | 0.68517 | 0.030846 | 0.50608  | -0.13837 |
| -0.081   | 0.08036  | 0.018948 | 0.68298  | 0.013161 | 0.77668 | 0.118331 | 0.01049  | -0.00166 |
| -0.15688 | 0.00067  | -0.46449 | 2.28E-26 | -0.05783 | 0.21222 | -0.09341 | 0.04364  | -0.19078 |
| -0.11515 | 0.01277  | -0.44043 | 1.40E-23 | -0.06918 | 0.13548 | -0.06557 | 0.15718  | -0.22763 |
| -0.15834 | 0.00059  | -0.40159 | 1.59E-19 | -0.07418 | 0.10938 | -0.04609 | 0.32029  | -0.19079 |
| -0.14381 | 0.00184  | -0.2724  | 2.17E-09 | -0.05095 | 0.27188 | 0.002716 | 0.95333  | -0.12206 |
| -0.22053 | 1.49E-06 | -0.30998 | 7.38E-12 | -0.0239  | 0.60642 | 0.104691 | 0.02366  | -0.03115 |
| -0.14029 | 0.00238  | -0.09462 | 0.04097  | -0.034   | 0.46354 | 0.082092 | 0.07635  | -0.04874 |
| 0.070352 | 0.12898  | 0.253037 | 2.96E-08 | -0.00041 | 0.9929  | 0.015726 | 0.73464  | 0.001871 |
| 0.19177  | 3.02E-05 | 0.168421 | 0.00026  | -0.02209 | 0.63402 | -0.15307 | 0.0009   | 0.028306 |
| 0.161359 | 0.00046  | 0.176909 | 0.00012  | 0.001972 | 0.96611 | -0.10546 | 0.02265  | 0.062687 |
| -0.09941 | 0.03172  | -0.06695 | 0.14861  | -0.01963 | 0.67221 | -0.07322 | 0.11407  | -0.00182 |
| -0.23607 | 2.46E-07 | -0.05524 | 0.23344  | 0.007542 | 0.87086 | 0.064529 | 0.16387  | -0.06318 |
| -0.16687 | 0.00029  | 0.043358 | 0.34984  | 0.029937 | 0.5187  | 0.098109 | 0.03404  | 0.008071 |
| -0.11108 | 0.01633  | -0.14925 | 0.00122  | 0.055563 | 0.23074 | 0.154945 | 0.00078  | 0.073849 |
| -0.19329 | 2.60E-05 | -0.16978 | 0.00023  | 0.173162 | 0.00017 | 0.215898 | 2.49E-06 | 0.12772  |
| 0.225233 | 8.76E-07 | -0.16539 | 0.00033  | 0.0146   | 0.75301 | -0.09082 | 0.04984  | -0.12143 |

|          |          |          |          |          |         |          |          |          |
|----------|----------|----------|----------|----------|---------|----------|----------|----------|
| -0.18861 | 4.10E-05 | -0.1466  | 0.00149  | 0.017489 | 0.7062  | 0.051885 | 0.26314  | -0.00283 |
| -0.14774 | 0.00137  | -0.15891 | 0.00057  | 0.017361 | 0.70826 | 0.038949 | 0.40105  | -0.01469 |
| -0.23997 | 1.53E-07 | -0.07688 | 0.09705  | 0.016638 | 0.71988 | 0.061388 | 0.1854   | -0.02335 |
| -0.07096 | 0.12568  | -0.09258 | 0.04554  | 0.022715 | 0.62441 | 0.263696 | 7.21E-09 | 0.11984  |
| -0.17515 | 0.00014  | -0.27167 | 2.40E-09 | 0.022712 | 0.62444 | 0.107819 | 0.01978  | 0.073226 |
| 0.108164 | 0.01938  | 0.336847 | 7.46E-14 | 0.078479 | 0.09026 | 0.213965 | 3.08E-06 | 0.202483 |
| -0.13044 | 0.00475  | -0.36632 | 2.81E-16 | -0.02813 | 0.54429 | -0.09964 | 0.03134  | -0.17287 |
| 0.227001 | 7.15E-07 | 0.266762 | 4.75E-09 | 0.059829 | 0.19684 | -0.10519 | 0.023    | 0.145425 |
| 0.126867 | 0.00604  | 0.107503 | 0.02014  | -0.06433 | 0.16515 | -0.15166 | 0.00101  | -0.10519 |
| 0.124239 | 0.00719  | 0.10533  | 0.02282  | 0.014897 | 0.74814 | 0.012223 | 0.79221  | 0.10227  |
| 0.090709 | 0.05011  | 0.291096 | 1.43E-10 | -0.03666 | 0.42936 | 0.01891  | 0.68358  | 0.076875 |
| 0.005899 | 0.89883  | 0.103095 | 0.02589  | -0.00122 | 0.97903 | 0.126664 | 0.00613  | 0.034337 |
| -0.25098 | 3.85E-08 | -0.43419 | 6.81E-23 | -0.04041 | 0.38355 | -0.07654 | 0.09855  | -0.19735 |
| -0.1237  | 0.00744  | -0.18544 | 5.54E-05 | 0.089897 | 0.05221 | 0.317945 | 1.98E-12 | 0.095519 |
| 0.116195 | 0.01198  | -0.20791 | 5.88E-06 | -0.0116  | 0.80258 | -0.12028 | 0.00927  | -0.18024 |
| 0.221731 | 1.30E-06 | -0.00324 | 0.94439  | -0.01663 | 0.72009 | -0.13817 | 0.00277  | -0.12257 |
| 0.072164 | 0.11939  | -0.16415 | 0.00037  | 0.091207 | 0.04886 | 0.059921 | 0.19615  | 0.001803 |
| -0.02321 | 0.61679  | -0.09747 | 0.03523  | 0.007723 | 0.8678  | 0.055327 | 0.23274  | 0.079138 |
| 0.240406 | 1.45E-07 | -0.18913 | 3.90E-05 | 0.009707 | 0.83429 | -0.02771 | 0.55022  | -0.09719 |
| -0.01317 | 0.77644  | 0.078852 | 0.08874  | -0.08952 | 0.05321 | -0.0676  | 0.14467  | -0.14387 |
| 0.072457 | 0.1179   | 0.377417 | 2.95E-17 | 0.051537 | 0.26636 | 0.106096 | 0.02184  | 0.258546 |
| 0.105544 | 0.02254  | 0.163902 | 0.00038  | 0.078287 | 0.09106 | 0.099438 | 0.03168  | 0.237333 |
| 0.05654  | 0.22263  | 0.073444 | 0.11296  | 0.163859 | 0.00038 | 0.207886 | 5.90E-06 | 0.45673  |
| -0.0272  | 0.55767  | -0.04599 | 0.32129  | 0.099285 | 0.03194 | 0.147026 | 0.00144  | 0.316364 |
| -0.0556  | 0.23041  | -0.04882 | 0.29239  | 0.035453 | 0.44467 | 0.047566 | 0.30501  | 0.153496 |
| 0.079493 | 0.08617  | 0.099709 | 0.03121  | -0.07411 | 0.10972 | -0.09473 | 0.04072  | -0.18241 |
| 0.066073 | 0.15399  | 0.420343 | 2.04E-21 | 0.00907  | 0.84501 | -0.04697 | 0.31117  | 0.062062 |
| -0.0088  | 0.84952  | -0.01955 | 0.6735   | -0.03615 | 0.43572 | -0.03029 | 0.51378  | -0.10746 |
| -0.12918 | 0.00518  | -0.29259 | 1.14E-10 | -0.05547 | 0.23155 | -0.19617 | 1.96E-05 | -0.10984 |
| -0.13428 | 0.00365  | 0.169998 | 0.00022  | 0.082017 | 0.07662 | 0.17147  | 0.0002   | 0.174534 |
| 0.015247 | 0.74245  | -0.02001 | 0.66625  | 0.063337 | 0.17181 | 0.104986 | 0.02327  | 0.237468 |
| 0.182672 | 7.17E-05 | 0.252766 | 3.06E-08 | 0.065699 | 0.15634 | 0.068857 | 0.13734  | 0.345153 |
| 0.212101 | 3.76E-06 | 0.394982 | 6.92E-19 | -0.01638 | 0.72411 | -0.07084 | 0.12633  | 0.065479 |
| 0.090534 | 0.05055  | 0.021249 | 0.64694  | -0.02709 | 0.55919 | -0.03833 | 0.40854  | -0.04342 |
| 0.044681 | 0.33531  | 0.019768 | 0.67005  | 0.038782 | 0.40307 | -0.02093 | 0.65196  | 0.018475 |
| -0.03349 | 0.47034  | 0.000447 | 0.99231  | -0.01515 | 0.74407 | -0.01145 | 0.80503  | 0.05369  |
| -0.0508  | 0.27324  | -0.03322 | 0.47387  | -0.01948 | 0.67451 | -0.0281  | 0.5447   | -0.04055 |
| -0.01002 | 0.82894  | -0.18307 | 6.91E-05 | -0.04854 | 0.29523 | -0.12568 | 0.00654  | -0.10276 |
| 0.071265 | 0.12408  | -0.02523 | 0.58653  | -0.07719 | 0.09571 | -0.08667 | 0.06127  | -0.20556 |
| 0.061964 | 0.18131  | 0.035585 | 0.44298  | 0.119152 | 0.00996 | 0.196829 | 1.83E-05 | 0.254085 |
| -0.09823 | 0.03382  | 0.000239 | 0.99589  | -0.02726 | 0.55683 | -0.04198 | 0.36536  | -0.06161 |
| -0.0913  | 0.04862  | -0.17278 | 0.00018  | 0.012306 | 0.79084 | -0.09595 | 0.0382   | -0.04354 |
| -0.04379 | 0.34504  | 0.022523 | 0.62734  | -0.01153 | 0.80378 | 0.019886 | 0.66819  | -0.08905 |
| -0.06401 | 0.16731  | -0.01546 | 0.73901  | 0.006743 | 0.88445 | 0.023203 | 0.61697  | 0.006796 |
| -0.04513 | 0.33047  | 0.010866 | 0.81483  | 0.029658 | 0.5226  | 0.02002  | 0.66608  | 0.068398 |

|          |          |          |          |          |          |          |          |          |
|----------|----------|----------|----------|----------|----------|----------|----------|----------|
| -0.01232 | 0.79062  | 0.112487 | 0.01501  | 0.128595 | 0.00538  | 0.171971 | 0.00019  | 0.385727 |
| -0.09615 | 0.0378   | -0.28347 | 4.43E-10 | 0.023473 | 0.61288  | 0.005269 | 0.90959  | -0.03407 |
| -0.15174 | 0.001    | -0.13471 | 0.00354  | -0.00416 | 0.92849  | 0.01361  | 0.76926  | -0.13768 |
| -0.02557 | 0.58147  | -0.07476 | 0.10662  | 0.046467 | 0.31634  | 0.007737 | 0.86756  | -0.04667 |
| -0.03832 | 0.4087   | -0.0645  | 0.16404  | 0.045527 | 0.32624  | 0.021005 | 0.65072  | 0.260651 |
| -0.04967 | 0.28412  | -0.24699 | 6.40E-08 | -0.00694 | 0.88111  | -0.00233 | 0.95987  | -0.05837 |
| 0.004675 | 0.91975  | 0.08439  | 0.06845  | 0.039852 | 0.3902   | 0.12513  | 0.00678  | 0.15364  |
| 0.100853 | 0.02932  | 0.052978 | 0.25321  | -0.01606 | 0.72921  | -0.10483 | 0.02348  | -0.01629 |
| -0.23257 | 3.73E-07 | -0.03771 | 0.41626  | 0.060213 | 0.19398  | 0.174114 | 0.00016  | 0.114435 |
| 0.091449 | 0.04826  | 0.063074 | 0.17359  | 0.03773  | 0.41596  | 0.013536 | 0.77049  | -0.00273 |
| 0.055426 | 0.2319   | 0.064845 | 0.1618   | -0.06752 | 0.14517  | -0.18478 | 5.89E-05 | 0.00422  |
| 0.094798 | 0.04059  | 0.185335 | 5.59E-05 | -0.04615 | 0.3197   | -0.12054 | 0.00912  | 0.012448 |
| 0.266036 | 5.24E-09 | 0.21235  | 3.66E-06 | 0.018243 | 0.69416  | -0.04492 | 0.33274  | 0.100438 |
| -0.00893 | 0.8473   | -0.03901 | 0.40028  | 0.017659 | 0.70348  | -0.0268  | 0.56343  | -0.01681 |
| 0.085879 | 0.06369  | 0.146789 | 0.00147  | -0.0432  | 0.35159  | -0.01968 | 0.67147  | 0.000957 |
| -0.25127 | 3.71E-08 | -0.24079 | 1.39E-07 | -0.04024 | 0.38562  | -0.02313 | 0.61812  | -0.12825 |
| -0.0711  | 0.12494  | 0.023424 | 0.61363  | 0.07439  | 0.10838  | 0.132322 | 0.00418  | 0.177468 |
| -0.12544 | 0.00664  | -0.29999 | 3.63E-11 | -0.01706 | 0.71305  | -0.02929 | 0.52772  | -0.14359 |
| -0.13504 | 0.00346  | -0.31314 | 4.40E-12 | -0.05277 | 0.25508  | -0.14295 | 0.00196  | -0.2722  |
| 0.130441 | 0.00475  | 0.251742 | 3.49E-08 | 0.060948 | 0.18858  | 0.186685 | 4.92E-05 | 0.179437 |
| 0.066184 | 0.15329  | 0.180747 | 8.57E-05 | 0.025765 | 0.57863  | 0.055129 | 0.23442  | 0.158962 |
| 0.109969 | 0.01744  | 0.226081 | 7.95E-07 | 0.083445 | 0.07161  | 0.142452 | 0.00203  | 0.330913 |
| 0.225661 | 8.34E-07 | 0.077929 | 0.09255  | -0.01201 | 0.79568  | -0.07312 | 0.11457  | 0.121723 |
| -0.10009 | 0.03058  | -0.11884 | 0.01016  | 0.02054  | 0.65796  | 0.004422 | 0.92407  | -0.09333 |
| -0.10795 | 0.01963  | -0.19903 | 1.47E-05 | -0.07287 | 0.11583  | 0.02765  | 0.55115  | -0.17753 |
| -0.14273 | 0.00199  | 0.101378 | 0.02848  | 0.067559 | 0.14492  | 0.275675 | 1.37E-09 | 0.052787 |
| 0.087437 | 0.05901  | 0.246174 | 7.10E-08 | 0.021474 | 0.64345  | 0.273581 | 1.84E-09 | 0.110873 |
| -0.01219 | 0.79283  | 0.019346 | 0.67668  | 0.006767 | 0.88404  | 0.131903 | 0.0043   | -0.06858 |
| 0.226141 | 7.89E-07 | -0.01141 | 0.80578  | 0.044103 | 0.34162  | 0.153951 | 0.00084  | -0.03005 |
| -0.11847 | 0.0104   | -0.19791 | 1.65E-05 | 0.003229 | 0.94452  | 0.042372 | 0.36092  | -0.13165 |
| -0.00226 | 0.96118  | -0.02049 | 0.65879  | 0.046468 | 0.31632  | -0.00078 | 0.98665  | 0.23017  |
| -0.06933 | 0.13462  | -0.15867 | 0.00058  | 0.087544 | 0.0587   | 0.080441 | 0.08247  | -0.013   |
| -0.13673 | 0.00307  | -0.2333  | 3.42E-07 | 0.025419 | 0.58375  | 0.085414 | 0.06515  | -0.00627 |
| 0.022044 | 0.63467  | 0.08414  | 0.06927  | 0.045684 | 0.32457  | 0.116821 | 0.01152  | 0.088817 |
| 0.110029 | 0.01738  | 0.034718 | 0.45417  | 0.115579 | 0.01244  | 0.207633 | 6.06E-06 | 0.30227  |
| -0.03319 | 0.47429  | -0.30411 | 1.90E-11 | 0.015752 | 0.73423  | -0.01631 | 0.72524  | 0.109804 |
| 0.045756 | 0.32381  | 0.192373 | 2.85E-05 | 0.027451 | 0.55402  | -0.06753 | 0.14509  | 0.188103 |
| -0.17797 | 0.00011  | -0.44541 | 3.86E-24 | -0.0059  | 0.89886  | -0.04409 | 0.34179  | -0.07337 |
| 0.007807 | 0.86639  | -0.20073 | 1.24E-05 | -0.02444 | 0.59828  | -0.07691 | 0.09693  | -0.12351 |
| -0.06622 | 0.15307  | -0.2208  | 1.45E-06 | -0.02244 | 0.62863  | -0.07234 | 0.11847  | -0.11407 |
| -0.00731 | 0.87473  | -0.29187 | 1.27E-10 | -0.02453 | 0.59701  | 0.009756 | 0.83345  | -0.09662 |
| -0.12265 | 0.00797  | -0.08477 | 0.06719  | 0.035684 | 0.44171  | 0.110287 | 0.01712  | -0.03063 |
| -0.11413 | 0.01359  | -0.02501 | 0.58978  | 0.236514 | 2.33E-07 | 0.460282 | 7.28E-26 | 0.17664  |
| -0.16199 | 0.00044  | -0.06131 | 0.18597  | 0.379102 | 2.08E-17 | 0.372954 | 7.38E-17 | 0.175884 |
| -0.1714  | 0.0002   | -0.04467 | 0.33544  | 0.133346 | 0.00389  | 0.32126  | 1.13E-12 | 0.076337 |

|          |          |          |          |          |          |          |          |          |
|----------|----------|----------|----------|----------|----------|----------|----------|----------|
| -0.01006 | 0.8284   | 0.061592 | 0.18394  | 0.005972 | 0.89758  | 0.001943 | 0.9666   | 0.049118 |
| -0.1381  | 0.00278  | -0.36811 | 1.97E-16 | 0.025913 | 0.57645  | 0.018013 | 0.69782  | 0.088266 |
| -0.11441 | 0.01337  | -0.32579 | 5.22E-13 | -0.02454 | 0.59684  | -0.0083  | 0.85796  | -0.06537 |
| 0.204909 | 8.06E-06 | -0.06671 | 0.15006  | -0.03217 | 0.48803  | -0.07054 | 0.12796  | -0.10047 |
| 0.005215 | 0.91051  | -0.11445 | 0.01333  | -0.00203 | 0.96508  | -0.03915 | 0.39864  | -0.00745 |
| 0.1368   | 0.00305  | 0.054513 | 0.23969  | 0.014843 | 0.74903  | -0.0142  | 0.75964  | 0.023605 |
| 0.004444 | 0.92369  | -0.23244 | 3.79E-07 | -0.02247 | 0.6281   | -0.11487 | 0.01299  | -0.20745 |
| 0.045017 | 0.3317   | -0.11192 | 0.01553  | -0.02126 | 0.64671  | -0.07364 | 0.11199  | -0.09279 |
| -0.06425 | 0.16571  | -0.16293 | 0.00041  | -0.05944 | 0.19978  | -0.02794 | 0.547    | -0.18629 |
| -0.20565 | 7.45E-06 | -0.26162 | 9.54E-09 | 0.052769 | 0.25508  | 0.219396 | 1.69E-06 | 0.047921 |
| -0.19724 | 1.76E-05 | -0.31317 | 4.38E-12 | 0.002309 | 0.96032  | -0.03076 | 0.5073   | -0.07695 |
| 0.144326 | 0.00177  | -0.09638 | 0.03734  | 0.028045 | 0.54548  | -0.05808 | 0.21026  | 0.022681 |
| 0.045238 | 0.32932  | 0.043875 | 0.34412  | -0.00866 | 0.85199  | -0.04039 | 0.38386  | -0.06765 |
| 0.020858 | 0.653    | 0.036541 | 0.43082  | 0.021038 | 0.65021  | -0.0616  | 0.18392  | -0.01155 |
| -0.10218 | 0.02724  | 0.064858 | 0.16172  | 0.119734 | 0.0096   | 0.354745 | 2.70E-15 | 0.184876 |
| -0.0186  | 0.68849  | 0.078101 | 0.09183  | -0.03307 | 0.47593  | -0.00461 | 0.92083  | 0.023858 |
| 0.119799 | 0.00956  | 0.383475 | 8.29E-18 | -0.0183  | 0.69332  | -0.07833 | 0.09088  | 0.101501 |
| 0.106412 | 0.02145  | 0.266548 | 4.89E-09 | -0.04886 | 0.29203  | 0.031917 | 0.49141  | -0.0662  |
| -0.02653 | 0.56746  | 0.081812 | 0.07736  | -0.04848 | 0.29585  | 0.084567 | 0.06787  | -0.2074  |
| 0.028124 | 0.54435  | -0.0615  | 0.1846   | 0.010263 | 0.82494  | -0.00815 | 0.86065  | -0.03528 |
| 0.079693 | 0.08538  | 0.433992 | 7.16E-23 | 0.01541  | 0.73978  | 0.093244 | 0.04401  | 0.020801 |
| -0.07963 | 0.08562  | 0.107618 | 0.02001  | 0.059469 | 0.19955  | 0.20186  | 1.10E-05 | -0.0503  |
| 0.027307 | 0.5561   | -0.0439  | 0.34382  | -0.00262 | 0.95496  | -0.0772  | 0.09565  | -0.1194  |
| 0.009411 | 0.83926  | 0.062883 | 0.1749   | 0.088935 | 0.05479  | 0.092119 | 0.04663  | 0.131558 |
| -0.15679 | 0.00067  | -0.13303 | 0.00398  | 0.043809 | 0.34484  | 0.176318 | 0.00013  | -0.1622  |
| -0.00649 | 0.88882  | -0.28069 | 6.65E-10 | 0.040003 | 0.38841  | 0.211391 | 4.06E-06 | 0.065514 |
| 0.005974 | 0.89755  | -0.06452 | 0.16395  | 0.024277 | 0.60077  | 0.058173 | 0.20955  | -0.03308 |
| -0.02404 | 0.60434  | -0.17627 | 0.00013  | -0.00728 | 0.87525  | -0.11473 | 0.01311  | -0.07425 |
| -0.06211 | 0.18025  | 0.008407 | 0.85622  | 0.237296 | 2.12E-07 | 0.3816   | 1.23E-17 | 0.022536 |
| -0.0347  | 0.45435  | -0.08074 | 0.08133  | 0.033752 | 0.46683  | 0.06262  | 0.17672  | -0.00674 |
| -0.15072 | 0.00109  | -0.24372 | 9.64E-08 | -0.02919 | 0.52914  | -0.01012 | 0.82732  | -0.13883 |
| 0.092575 | 0.04555  | -0.0062  | 0.89373  | -0.02143 | 0.6441   | -0.13146 | 0.00443  | -0.06019 |
| -0.06667 | 0.15029  | -0.08977 | 0.05254  | 0.063697 | 0.16938  | 0.179848 | 9.30E-05 | 0.333825 |
| 0.211559 | 3.99E-06 | -0.18641 | 5.05E-05 | -0.01052 | 0.82057  | -0.09935 | 0.03183  | -0.10714 |
| 0.051095 | 0.27049  | -0.25715 | 1.73E-08 | -0.03161 | 0.49559  | -0.11519 | 0.01274  | 0.001148 |
| -0.29749 | 5.36E-11 | -0.21572 | 2.54E-06 | -0.0469  | 0.31182  | -0.0055  | 0.90557  | -0.28688 |
| 0.127993 | 0.00561  | -0.00884 | 0.84883  | -0.03808 | 0.41165  | -0.0729  | 0.11567  | 0.024508 |
| 0.020527 | 0.65817  | -0.21621 | 2.41E-06 | -0.04027 | 0.38522  | -0.06635 | 0.15224  | -0.02332 |
| -0.1277  | 0.00572  | -0.32052 | 1.28E-12 | -0.04559 | 0.32562  | -0.06676 | 0.14974  | -0.00198 |
| 0.155846 | 0.00073  | 0.119208 | 0.00993  | 0.091525 | 0.04807  | 0.186986 | 4.78E-05 | 0.281013 |
| -0.18617 | 5.17E-05 | -0.22871 | 5.87E-07 | -0.04003 | 0.38806  | -0.07938 | 0.08663  | -0.104   |
| -0.04649 | 0.31615  | -0.00406 | 0.93022  | 0.015463 | 0.73892  | 0.116886 | 0.01148  | 0.05034  |
| 0.033881 | 0.46514  | 0.12672  | 0.0061   | -0.05084 | 0.27287  | -0.06895 | 0.13682  | 0.043378 |
| -0.10357 | 0.02521  | -0.18252 | 7.28E-05 | -0.02917 | 0.52941  | -0.04056 | 0.38188  | -0.10634 |
| -0.03148 | 0.49742  | 0.116295 | 0.0119   | 0.002827 | 0.95142  | -0.01027 | 0.8248   | 0.019084 |

|          |          |          |          |          |          |          |          |          |
|----------|----------|----------|----------|----------|----------|----------|----------|----------|
| -0.06589 | 0.15515  | 0.182164 | 7.52E-05 | 0.004973 | 0.91465  | 0.035581 | 0.44302  | -0.004   |
| -0.04527 | 0.32894  | -0.03853 | 0.40614  | -0.00451 | 0.92263  | -0.05418 | 0.24259  | 0.036964 |
| -0.03388 | 0.46518  | -0.11255 | 0.01495  | 0.020762 | 0.6545   | 0.030525 | 0.51052  | 0.026001 |
| 0.045364 | 0.32797  | -0.12756 | 0.00577  | 0.023015 | 0.61983  | 0.033278 | 0.47311  | -0.00569 |
| -0.07285 | 0.11591  | 0.020471 | 0.65903  | 0.063192 | 0.17279  | 0.119096 | 0.01     | 0.149237 |
| -0.04357 | 0.34745  | 0.112004 | 0.01545  | 0.026187 | 0.57242  | 0.103126 | 0.02584  | 0.009245 |
| -0.00591 | 0.89858  | -0.03882 | 0.40259  | 0.031595 | 0.4958   | 0.037531 | 0.41842  | 0.189549 |
| -0.02752 | 0.55308  | -0.11476 | 0.01308  | -0.00272 | 0.95323  | -0.02488 | 0.59177  | 0.012007 |
| -0.05527 | 0.23321  | -0.13823 | 0.00276  | 0.078174 | 0.09152  | -0.00033 | 0.9943   | -0.00998 |
| 0.047604 | 0.30463  | 0.200084 | 1.32E-05 | 0.003235 | 0.94441  | 0.076506 | 0.09868  | -0.02751 |
| 0.12245  | 0.00807  | 0.089278 | 0.05386  | 0.036588 | 0.43022  | 0.002627 | 0.95486  | 0.142392 |
| 0.009949 | 0.83022  | -0.21668 | 2.29E-06 | 0.028423 | 0.54007  | 0.017906 | 0.69953  | -0.0756  |
| 0.194196 | 2.38E-05 | -0.26792 | 4.05E-09 | 0.042383 | 0.36079  | -0.1105  | 0.0169   | -0.04842 |
| -0.01193 | 0.79715  | -0.04803 | 0.30028  | 0.046818 | 0.3127   | 0.122332 | 0.00813  | -0.02311 |
| 0.106277 | 0.02162  | 0.15998  | 0.00052  | 0.031223 | 0.50089  | 0.093685 | 0.04301  | -0.09033 |
| -0.23392 | 3.18E-07 | -0.30046 | 3.37E-11 | 0.028312 | 0.54165  | 0.069444 | 0.134    | -0.10295 |
| -0.27811 | 9.67E-10 | -0.15405 | 0.00084  | 0.113361 | 0.01424  | 0.189124 | 3.90E-05 | 0.238125 |
| -0.00977 | 0.83324  | -0.08394 | 0.06993  | -0.02714 | 0.5585   | -0.01199 | 0.79606  | -0.00074 |
| -0.06264 | 0.17658  | -0.08595 | 0.06349  | -0.0045  | 0.92272  | -0.01514 | 0.74411  | 0.001629 |
| 0.07582  | 0.10175  | 0.221392 | 1.35E-06 | -0.00832 | 0.85771  | -0.0358  | 0.44025  | -0.07261 |
| -0.02656 | 0.56703  | -0.00491 | 0.91569  | -0.00784 | 0.86574  | -0.02599 | 0.57527  | -0.10712 |
| -0.10208 | 0.02739  | -0.111   | 0.01641  | 0.003288 | 0.9435   | 0.043361 | 0.34981  | 0.125406 |
| -0.02698 | 0.5608   | -0.00297 | 0.94896  | 0.009503 | 0.83772  | 0.002414 | 0.95851  | -0.01248 |
| 0.115566 | 0.01245  | 0.104165 | 0.02438  | 0.066899 | 0.14889  | 0.117399 | 0.01112  | 0.108616 |
| 0.044743 | 0.33465  | -0.00934 | 0.84044  | 0.186647 | 4.94E-05 | 0.1214   | 0.00864  | 0.410239 |
| -0.10983 | 0.01759  | -0.32908 | 2.95E-13 | -0.01854 | 0.6895   | -0.07053 | 0.12804  | -0.00181 |
| -0.07298 | 0.11526  | -0.10242 | 0.02688  | -0.04651 | 0.31588  | -0.05359 | 0.24772  | 0.005724 |
| 0.143491 | 0.00188  | 0.014415 | 0.75604  | -0.0112  | 0.80933  | -0.18285 | 7.06E-05 | 0.009392 |
| 0.233666 | 3.27E-07 | 0.306703 | 1.25E-11 | 0.048791 | 0.29271  | 0.005279 | 0.90942  | 0.263472 |
| 0.045009 | 0.33178  | 0.073135 | 0.11449  | -0.0361  | 0.43635  | -0.11041 | 0.01699  | -0.10354 |
| 0.026701 | 0.56491  | -0.06594 | 0.15484  | -0.00906 | 0.8452   | -0.10671 | 0.02109  | -0.07107 |
| -0.15086 | 0.00108  | -0.29877 | 4.39E-11 | -0.02993 | 0.51876  | 0.008883 | 0.84818  | -0.18156 |
| 0.070975 | 0.12562  | 0.14366  | 0.00186  | 0.08037  | 0.08275  | 0.361141 | 7.82E-16 | 0.093621 |
| -0.00529 | 0.90922  | 0.089261 | 0.0539   | 0.060682 | 0.19052  | 0.028986 | 0.53207  | -0.01259 |
| -0.0011  | 0.98112  | 0.007126 | 0.87793  | 0.078868 | 0.08867  | 0.280601 | 6.74E-10 | -0.02693 |
| 0.223167 | 1.11E-06 | 0.110567 | 0.01683  | -0.00924 | 0.84209  | -0.09765 | 0.03489  | -0.05268 |
| 0.022593 | 0.62627  | -0.0681  | 0.14172  | 0.030166 | 0.5155   | -0.045   | 0.33188  | -0.02607 |
| 0.07638  | 0.09924  | 0.234858 | 2.84E-07 | 0.086603 | 0.06148  | 0.080054 | 0.08397  | 0.377587 |
| -0.27057 | 2.80E-09 | -0.27336 | 1.90E-09 | 0.092088 | 0.04671  | 0.208483 | 5.54E-06 | 0.149345 |
| -0.13679 | 0.00306  | -0.22176 | 1.30E-06 | -0.03359 | 0.46892  | 0.11749  | 0.01105  | -0.16767 |
| -0.22867 | 5.89E-07 | -0.44718 | 2.43E-24 | -0.00548 | 0.90591  | 0.007078 | 0.87875  | 0.005041 |
| 0.202865 | 9.95E-06 | 0.235857 | 2.52E-07 | -0.03875 | 0.40344  | -0.07059 | 0.1277   | -0.0918  |
| 0.112777 | 0.01475  | 0.198299 | 1.58E-05 | -0.00824 | 0.859    | -0.01052 | 0.8207   | -0.13518 |
| -0.04414 | 0.34118  | -0.15001 | 0.00115  | 0.02277  | 0.62356  | -0.00138 | 0.97627  | -0.06535 |
| 0.110788 | 0.01662  | -0.25134 | 3.68E-08 | -0.08193 | 0.07692  | -0.25144 | 3.63E-08 | -0.23207 |

|          |          |           |          |          |         |          |          |          |
|----------|----------|-----------|----------|----------|---------|----------|----------|----------|
| -0.06371 | 0.16926  | -0.11627  | 0.01192  | -0.01267 | 0.78487 | 0.044855 | 0.33344  | -0.13146 |
| -0.08084 | 0.08098  | -0.29959  | 3.86E-11 | 0.031258 | 0.50041 | -0.04656 | 0.31532  | 0.133055 |
| -0.01465 | 0.75211  | -0.05383  | 0.24565  | 0.020436 | 0.65958 | -0.05781 | 0.2124   | 0.161595 |
| -0.09123 | 0.04881  | -0.18692  | 4.82E-05 | -0.0592  | 0.20162 | -0.0608  | 0.18967  | -0.07922 |
| -0.24168 | 1.24E-07 | -0.06958  | 0.13323  | -0.04071 | 0.38009 | -0.06288 | 0.1749   | -0.10074 |
| -0.09036 | 0.05101  | -0.12692  | 0.00602  | 0.073257 | 0.11389 | 0.145966 | 0.00156  | 0.179696 |
| -0.17537 | 0.00014  | -0.37481  | 5.05E-17 | 0.052112 | 0.26105 | 0.022016 | 0.6351   | -0.03074 |
| 0.071864 | 0.12094  | 0.005659  | 0.90292  | 0.013495 | 0.77116 | -0.05675 | 0.22095  | 0.087246 |
| -0.041   | 0.37666  | -0.10338  | 0.02547  | -0.01554 | 0.73768 | 0.09251  | 0.04571  | -0.09096 |
| 0.021879 | 0.63721  | -0.19788  | 1.65E-05 | -0.05263 | 0.25633 | -0.21655 | 2.32E-06 | -0.20632 |
| -0.12383 | 0.00738  | -0.16335  | 0.00039  | 0.126903 | 0.00603 | 0.212725 | 3.52E-06 | 0.19793  |
| -0.10981 | 0.0176   | -0.01966  | 0.67171  | 0.096658 | 0.03679 | 0.21723  | 2.15E-06 | 0.168711 |
| -0.03632 | 0.43356  | 0.077205  | 0.09563  | -0.00589 | 0.89901 | 0.014767 | 0.75027  | -0.03748 |
| 0.049822 | 0.28262  | -0.16847  | 0.00026  | -0.03045 | 0.51154 | -0.14679 | 0.00147  | -0.06773 |
| 0.251456 | 3.63E-08 | 0.440399  | 1.41E-23 | -0.05311 | 0.25202 | -0.06527 | 0.15904  | 0.026565 |
| 0.155291 | 0.00076  | -0.25653  | 1.87E-08 | -0.01803 | 0.69757 | 0.002061 | 0.96457  | -0.23709 |
| 0.044024 | 0.34248  | -0.1459   | 0.00157  | -0.06554 | 0.15734 | -0.12345 | 0.00757  | -0.04879 |
| 0.116836 | 0.01151  | 0.027721  | 0.55013  | -0.03014 | 0.5158  | -0.08942 | 0.05347  | 0.067589 |
| -0.07413 | 0.10965  | -0.24105  | 1.34E-07 | 0.03176  | 0.49356 | -0.02997 | 0.51823  | 0.027967 |
| 0.093341 | 0.04379  | -0.04961  | 0.28466  | -0.01242 | 0.78886 | -0.05097 | 0.27166  | -0.02283 |
| -0.17861 | 0.0001   | -0.43336  | 8.38E-23 | -0.0102  | 0.82599 | -0.06423 | 0.16584  | -0.02247 |
| -0.10928 | 0.01816  | -0.43866  | 2.20E-23 | -0.03925 | 0.39746 | -0.14993 | 0.00116  | -0.14477 |
| 0.139013 | 0.00261  | 0.103301  | 0.02559  | 0.014064 | 0.7618  | -0.07422 | 0.10918  | -0.11825 |
| -0.05232 | 0.25915  | -0.08556  | 0.06469  | 0.014378 | 0.75664 | 0.051257 | 0.26897  | 0.184114 |
| 0.11581  | 0.01227  | -0.02304  | 0.61952  | 0.031794 | 0.49309 | -0.00608 | 0.89573  | 0.062251 |
| -0.1175  | 0.01105  | -0.28654  | 2.82E-10 | -0.02073 | 0.65504 | -0.00055 | 0.99046  | -0.03605 |
| -0.08534 | 0.06538  | -0.1803   | 8.93E-05 | 0.01532  | 0.74125 | -0.00379 | 0.93484  | 0.033208 |
| -0.02912 | 0.53014  | -0.31829  | 1.87E-12 | 0.009166 | 0.84339 | -0.08977 | 0.05254  | 0.024946 |
| 0.034055 | 0.46285  | -0.25262  | 3.12E-08 | -0.0142  | 0.75959 | -0.11195 | 0.0155   | 0.095355 |
| -0.21181 | 3.88E-06 | -0.50858  | 4.35E-32 | -0.04329 | 0.35058 | -0.12813 | 0.00556  | -0.18087 |
| 0.038753 | 0.40342  | -0.10741  | 0.02026  | -0.02437 | 0.5993  | -0.035   | 0.45047  | -0.11762 |
| -0.03031 | 0.51349  | 0.16348   | 0.00039  | -0.0341  | 0.46219 | -0.08174 | 0.07763  | 0.028342 |
| -0.15848 | 0.00059  | -0.40724  | 4.40E-20 | 0.00565  | 0.90307 | -0.06382 | 0.16857  | -0.03629 |
| 0.107748 | 0.01986  | 0.026915  | 0.56178  | -0.00567 | 0.90272 | -0.06391 | 0.16797  | 0.044058 |
| 0.138169 | 0.00277  | 0.251748  | 3.49E-08 | 0.091751 | 0.04752 | 0.101627 | 0.02809  | 0.077119 |
| 0.052514 | 0.25739  | -0.30374  | 2.01E-11 | -0.01433 | 0.75744 | -0.05114 | 0.27008  | -0.13364 |
| -0.06155 | 0.18426  | -0.02847  | 0.53937  | 0.051991 | 0.26216 | 0.124985 | 0.00684  | -0.01797 |
| 0.249524 | 4.64E-08 | -0.00443  | 0.9239   | 0.031689 | 0.49451 | 0.16187  | 0.00045  | 0.194552 |
| -0.13027 | 0.00481  | -0.22344  | 1.08E-06 | -0.00583 | 0.90009 | 0.00344  | 0.9409   | -0.08398 |
| 0.04439  | 0.33847  | -0.36897  | 1.65E-16 | -0.01716 | 0.71142 | -0.09862 | 0.03312  | -0.10188 |
| -0.06475 | 0.16242  | -0.10612  | 0.02181  | 0.061653 | 0.18351 | 0.181236 | 8.19E-05 | 0.424473 |
| 0.1914   | 3.13E-05 | 0.40322   | 1.10E-19 | 0.044423 | 0.33812 | 0.167349 | 0.00028  | 0.060767 |
| -0.17521 | 0.00014  | -0.20166  | 1.13E-05 | 0.045748 | 0.32389 | 0.252894 | 3.01E-08 | 0.04663  |
| 0.07053  | 0.12802  | -6.24E-06 | 0.99989  | -0.03894 | 0.40121 | -0.01143 | 0.80549  | -0.0482  |
| 0.004532 | 0.92219  | 0.13392   | 0.00374  | 0.080857 | 0.0809  | 0.154234 | 0.00083  | 0.053703 |



|          |          |          |          |          |         |          |          |          |
|----------|----------|----------|----------|----------|---------|----------|----------|----------|
| -0.07389 | 0.1108   | -0.04495 | 0.33239  | 0.093177 | 0.04416 | 0.032404 | 0.48482  | 0.134355 |
| 0.097283 | 0.03558  | -0.0146  | 0.75299  | 0.011744 | 0.80018 | 0.011819 | 0.79892  | 0.004912 |
| -0.13491 | 0.00349  | -0.31382 | 3.93E-12 | -0.03971 | 0.39185 | -0.04609 | 0.32025  | -0.09448 |
| -0.08171 | 0.07772  | -0.02038 | 0.66052  | -0.00531 | 0.90881 | 0.048696 | 0.29366  | -0.18584 |
| -0.20346 | 9.36E-06 | -0.14578 | 0.00158  | 0.091137 | 0.04903 | 0.219221 | 1.73E-06 | -0.03091 |
| -0.18619 | 5.16E-05 | -0.43723 | 3.16E-23 | -0.01541 | 0.73981 | -0.0729  | 0.11566  | -0.12633 |
| -0.03868 | 0.40427  | -0.19823 | 1.59E-05 | 0.016548 | 0.72133 | -0.01385 | 0.76526  | 0.197024 |
| 0.069755 | 0.13227  | 0.025345 | 0.58484  | 0.074926 | 0.10586 | -0.00523 | 0.91024  | 0.107144 |
| 0.108171 | 0.01938  | 0.447833 | 2.05E-24 | 0.08616  | 0.06283 | 0.286077 | 3.02E-10 | 0.294144 |
| 0.165351 | 0.00033  | 0.191392 | 3.13E-05 | 0.020224 | 0.66289 | 0.042904 | 0.35491  | 0.129406 |
| -0.18269 | 7.16E-05 | -0.32537 | 5.61E-13 | -0.01541 | 0.73985 | -0.03398 | 0.46384  | -0.11872 |
| -0.06029 | 0.19339  | -0.24716 | 6.26E-08 | 0.010016 | 0.82908 | -0.01119 | 0.8094   | -0.02812 |
| -0.15102 | 0.00106  | -0.22089 | 1.43E-06 | -0.09423 | 0.04182 | -0.2055  | 7.58E-06 | -0.2378  |
| -0.12368 | 0.00746  | -0.32027 | 1.34E-12 | -0.05475 | 0.23762 | -0.07391 | 0.11069  | -0.17379 |
| 0.053156 | 0.25161  | 0.04386  | 0.34429  | -0.00166 | 0.97151 | 0.011394 | 0.80602  | 0.109158 |
| -0.17395 | 0.00016  | -0.44923 | 1.42E-24 | 0.004105 | 0.92951 | -0.0874  | 0.05911  | -0.12577 |
| -0.00366 | 0.93705  | -0.05187 | 0.26332  | 0.046214 | 0.31899 | 0.061855 | 0.18208  | 0.04226  |
| -0.07376 | 0.1114   | -0.2214  | 1.35E-06 | 0.027739 | 0.54987 | -0.01614 | 0.7279   | 0.061459 |
| 0.008406 | 0.85623  | -0.27332 | 1.91E-09 | -0.04423 | 0.3402  | -0.0706  | 0.12762  | -0.22121 |
| 0.093161 | 0.0442   | 0.137643 | 0.00288  | 0.074187 | 0.10935 | 0.211585 | 3.98E-06 | 0.08908  |
| 0.18967  | 3.70E-05 | 0.223016 | 1.13E-06 | 0.10047  | 0.02994 | 0.099958 | 0.03079  | 0.16159  |
| 0.113575 | 0.01406  | 0.361589 | 7.17E-16 | 0.057228 | 0.21705 | 0.192732 | 2.75E-05 | 0.186657 |
| 0.096317 | 0.03746  | -0.17864 | 0.0001   | 0.0248   | 0.59294 | -0.08574 | 0.06414  | -0.04333 |
| -0.22351 | 1.07E-06 | -0.48184 | 1.61E-28 | -0.02942 | 0.52597 | -0.02631 | 0.57068  | -0.06863 |
| 0.017896 | 0.6997   | 0.035214 | 0.44775  | -0.02648 | 0.56816 | 0.055076 | 0.23486  | -0.00624 |
| 0.008357 | 0.85707  | 0.231718 | 4.12E-07 | -0.02074 | 0.65482 | 0.032704 | 0.48079  | -0.06694 |
| -0.04354 | 0.34777  | -0.07954 | 0.086    | 0.008528 | 0.85417 | 0.040897 | 0.37789  | 0.085895 |
| 0.120301 | 0.00926  | -0.17533 | 0.00014  | 0.005234 | 0.91018 | -0.11679 | 0.01154  | -0.04283 |
| -0.10078 | 0.02944  | -0.16263 | 0.00042  | -0.01329 | 0.7745  | -0.0213  | 0.64616  | -0.0866  |
| -0.00433 | 0.92569  | -0.28065 | 6.70E-10 | -0.01403 | 0.76241 | -0.11065 | 0.01675  | -0.12503 |
| 0.007458 | 0.8723   | -0.01595 | 0.73099  | 0.131994 | 0.00427 | 0.223356 | 1.08E-06 | 0.16276  |
| -0.09298 | 0.04461  | -0.43208 | 1.16E-22 | -0.04996 | 0.28133 | -0.17703 | 0.00012  | -0.12715 |
| 0.137273 | 0.00295  | -0.00695 | 0.88092  | 0.034313 | 0.45945 | -0.11068 | 0.01672  | 0.045655 |
| -0.00882 | 0.84917  | 0.033079 | 0.47578  | -0.02438 | 0.59915 | -0.0928  | 0.04502  | 0.038036 |
| 0.15753  | 0.00063  | 0.256895 | 1.79E-08 | 0.076238 | 0.09987 | 0.034315 | 0.45943  | 0.24398  |
| 0.275472 | 1.41E-09 | 0.339685 | 4.47E-14 | -0.0054  | 0.90728 | 0.0515   | 0.26671  | 0.039098 |
| 0.152678 | 0.00093  | 0.309885 | 7.49E-12 | 0.003553 | 0.93896 | 0.025904 | 0.57658  | 0.16416  |
| -0.09513 | 0.03989  | 0.098337 | 0.03363  | 0.037095 | 0.42386 | 0.047077 | 0.31002  | 0.071119 |
| -0.13021 | 0.00483  | -0.08171 | 0.07773  | 0.001084 | 0.98137 | 0.107295 | 0.02039  | -0.04964 |
| -0.02212 | 0.6335   | -0.24308 | 1.04E-07 | 0.010585 | 0.81953 | 0.177985 | 0.00011  | -0.07632 |
| -0.14276 | 0.00198  | -0.29846 | 4.60E-11 | 0.016457 | 0.72281 | -0.00758 | 0.87022  | 0.005025 |
| 0.086114 | 0.06297  | 0.114562 | 0.01324  | -0.0177  | 0.70288 | -0.01072 | 0.81721  | -0.09921 |
| 0.201536 | 1.14E-05 | 0.223275 | 1.09E-06 | -0.0029  | 0.95009 | -0.1023  | 0.02706  | -0.05981 |
| -0.19941 | 1.42E-05 | -0.03462 | 0.45539  | 0.033335 | 0.47236 | 0.194892 | 2.22E-05 | 0.03439  |
| -0.0849  | 0.06679  | -0.15828 | 0.0006   | 0.01061  | 0.81911 | -0.0488  | 0.2926   | 0.012728 |

|          |          |          |          |           |          |          |          |          |
|----------|----------|----------|----------|-----------|----------|----------|----------|----------|
| -0.11577 | 0.01229  | -0.40196 | 1.46E-19 | -0.01756  | 0.70502  | -0.09493 | 0.04031  | -0.00476 |
| -0.12175 | 0.00845  | -0.30739 | 1.12E-11 | 0.053093  | 0.25218  | 0.09895  | 0.03253  | 0.097862 |
| -0.1714  | 0.0002   | -0.38358 | 8.11E-18 | 0.011236  | 0.80864  | -0.05717 | 0.21748  | 0.084721 |
| -0.01187 | 0.79812  | -0.27372 | 1.80E-09 | 0.024166  | 0.60242  | 0.049961 | 0.28128  | -0.03387 |
| -0.06896 | 0.13675  | -0.10675 | 0.02104  | -0.01122  | 0.80895  | -0.06371 | 0.16929  | -0.05743 |
| -0.04297 | 0.35413  | -0.09417 | 0.04193  | -0.01134  | 0.80695  | -0.06409 | 0.16673  | -0.06645 |
| -0.10068 | 0.0296   | -0.10603 | 0.02193  | 0.06233   | 0.17873  | -0.02886 | 0.53381  | -0.04518 |
| -0.10121 | 0.02875  | -0.07643 | 0.09901  | 0.043364  | 0.34977  | -0.01679 | 0.71742  | -0.05782 |
| -0.10108 | 0.02895  | -0.38879 | 2.66E-18 | 0.007599  | 0.8699   | -0.04456 | 0.33663  | -0.07225 |
| -0.08637 | 0.06218  | -0.04762 | 0.30449  | 0.000781  | 0.98658  | 0.074698 | 0.10693  | 0.04951  |
| -0.00718 | 0.87707  | 0.274377 | 1.64E-09 | 0.00512   | 0.91214  | 0.144355 | 0.00176  | 0.067361 |
| -0.16759 | 0.00028  | 0.027904 | 0.5475   | -0.06664  | 0.1505   | 0.000646 | 0.98889  | -0.15208 |
| -0.04602 | 0.32106  | 0.117852 | 0.01081  | 0.031818  | 0.49277  | 0.053739 | 0.24645  | 0.084948 |
| 0.119734 | 0.0096   | -0.08718 | 0.05976  | 0.012     | 0.79591  | -0.04774 | 0.3032   | 0.09746  |
| -0.08767 | 0.05833  | -0.16076 | 0.00049  | 0.023922  | 0.6061   | -0.06691 | 0.14883  | -0.10467 |
| -0.11227 | 0.01521  | -0.30802 | 1.01E-11 | 0.006206  | 0.89359  | 0.043119 | 0.35251  | 0.021277 |
| -0.00844 | 0.85566  | -0.04193 | 0.36592  | -0.02715  | 0.5584   | -0.17647 | 0.00013  | 0.033918 |
| 0.182093 | 7.57E-05 | 0.356466 | 1.94E-15 | 0.055669  | 0.22986  | 0.117434 | 0.01109  | 0.009687 |
| 0.018886 | 0.68395  | -0.07946 | 0.0863   | 0.008628  | 0.85248  | 0.038789 | 0.40298  | 0.036474 |
| -0.0402  | 0.38602  | -0.38174 | 1.20E-17 | -0.06887  | 0.13724  | -0.12528 | 0.00671  | -0.23178 |
| -0.06016 | 0.19435  | -0.2136  | 3.20E-06 | -0.01501  | 0.74624  | -0.05255 | 0.25703  | -0.07661 |
| 0.007242 | 0.87597  | 0.114551 | 0.01325  | -0.00755  | 0.87077  | -0.06606 | 0.15406  | -0.06049 |
| -0.01443 | 0.75575  | 0.172014 | 0.00019  | 0.008328  | 0.85755  | 0.013206 | 0.77593  | 0.067312 |
| 0.073957 | 0.11046  | 0.342459 | 2.70E-14 | 0.08725   | 0.05956  | 0.114468 | 0.01332  | 0.310861 |
| -0.24133 | 1.30E-07 | -0.32852 | 3.25E-13 | 0.090313  | 0.05112  | 0.188019 | 4.34E-05 | 0.269144 |
| -0.18777 | 4.44E-05 | -0.33082 | 2.18E-13 | -0.05682  | 0.22036  | -0.07557 | 0.10289  | -0.26854 |
| 0.037135 | 0.42336  | -0.06326 | 0.1723   | 0.046347  | 0.31759  | -0.03606 | 0.43696  | -0.04066 |
| -0.12446 | 0.00708  | -0.15525 | 0.00076  | -0.04107  | 0.37586  | -0.12733 | 0.00586  | -0.16325 |
| -0.04855 | 0.29513  | -0.13679 | 0.00306  | -0.00075  | 0.98713  | -0.03475 | 0.45379  | 0.01444  |
| 0.052416 | 0.25828  | -0.03845 | 0.40706  | -0.00069  | 0.98808  | -0.02771 | 0.55023  | 0.181958 |
| 0.219575 | 1.66E-06 | 0.063349 | 0.17173  | -0.00255  | 0.95609  | 0.079898 | 0.08458  | -0.17967 |
| 0.098606 | 0.03314  | 0.425111 | 6.43E-22 | 0.11525   | 0.01269  | 0.281583 | 5.85E-10 | 0.285737 |
| 0.016438 | 0.72312  | -0.05463 | 0.23869  | 0.029439  | 0.52569  | 0.151168 | 0.00105  | -0.14108 |
| 0.175282 | 0.00014  | 0.379182 | 2.04E-17 | 0.126953  | 0.00601  | 0.213194 | 3.35E-06 | 0.318004 |
| 0.018073 | 0.69688  | 0.106287 | 0.02161  | 0.083718  | 0.07069  | 0.114432 | 0.01335  | 0.383168 |
| 0.135553 | 0.00334  | 0.176462 | 0.00013  | 0.033962  | 0.46406  | 0.013122 | 0.77731  | 0.276672 |
| 0.000365 | 0.99372  | -0.01478 | 0.75001  | 0.019258  | 0.67807  | 0.039228 | 0.39767  | 0.241938 |
| -0.14813 | 0.00133  | -0.38649 | 4.37E-18 | 0.014001  | 0.76283  | 0.090671 | 0.05021  | -0.10213 |
| -0.15877 | 0.00057  | -0.43883 | 2.11E-23 | 0.072091  | 0.11977  | 0.155079 | 0.00077  | -0.07808 |
| -0.13249 | 0.00413  | -0.41112 | 1.79E-20 | 0.018557  | 0.68917  | 0.103822 | 0.02485  | -0.13353 |
| -0.08083 | 0.08101  | -0.38392 | 7.55E-18 | 0.003304  | 0.94323  | -0.02819 | 0.54337  | -0.20889 |
| -0.08282 | 0.07377  | -0.09264 | 0.0454   | 0.179691  | 9.44E-05 | 0.400383 | 2.08E-19 | 0.041492 |
| 0.172979 | 0.00017  | 0.201885 | 1.10E-05 | 0.038616  | 0.40509  | -0.02727 | 0.55658  | 0.036063 |
| 0.083674 | 0.07084  | -0.16046 | 0.0005   | -0.02527  | 0.58597  | -0.12921 | 0.00516  | -0.11987 |
| 0.184689 | 5.94E-05 | 0.338749 | 5.30E-14 | -5.16E-06 | 0.99991  | -0.05645 | 0.22339  | 0.040539 |

|          |          |          |          |          |          |          |          |          |
|----------|----------|----------|----------|----------|----------|----------|----------|----------|
| -0.11174 | 0.0157   | -0.19795 | 1.64E-05 | -0.01276 | 0.78326  | -0.02068 | 0.65581  | 0.010559 |
| -0.14449 | 0.00175  | -0.33479 | 1.08E-13 | 0.026802 | 0.56343  | 0.065903 | 0.15505  | 0.054539 |
| 0.03797  | 0.41299  | 0.051654 | 0.26527  | 0.141857 | 0.00212  | 0.23388  | 3.19E-07 | 0.087509 |
| -0.09047 | 0.05071  | -0.09657 | 0.03695  | 0.044228 | 0.34025  | 0.375235 | 4.62E-17 | -0.03427 |
| -0.06302 | 0.17394  | -0.1075  | 0.02014  | 0.024683 | 0.59469  | 0.06579  | 0.15576  | 0.063308 |
| 0.243481 | 9.93E-08 | 0.465449 | 1.75E-26 | 0.184734 | 5.92E-05 | 0.429086 | 2.43E-22 | 0.398564 |
| -0.06047 | 0.19208  | 0.053493 | 0.24862  | 0.089626 | 0.05292  | 0.256692 | 1.84E-08 | -0.04691 |
| -0.01555 | 0.73746  | -0.0368  | 0.4275   | 0.088049 | 0.05726  | 0.16342  | 0.00039  | 0.18325  |
| -0.1014  | 0.02845  | -0.12634 | 0.00626  | 0.054667 | 0.23836  | 0.119398 | 0.00981  | 0.057987 |
| 0.033024 | 0.4765   | -0.101   | 0.02909  | -0.01041 | 0.82249  | 0.225601 | 8.40E-07 | -0.14287 |
| 0.204031 | 8.82E-06 | 0.178116 | 0.00011  | 0.039266 | 0.39722  | 0.039673 | 0.39235  | 0.255025 |
| -0.0513  | 0.26853  | -0.07147 | 0.12302  | 0.160087 | 0.00052  | 0.185708 | 5.40E-05 | 0.205028 |
| -0.03343 | 0.47114  | -0.04041 | 0.38366  | 0.096305 | 0.03749  | 0.152082 | 0.00098  | 0.192347 |
| -0.0927  | 0.04526  | 0.047861 | 0.30202  | 0.211246 | 4.13E-06 | 0.448127 | 1.90E-24 | 0.198665 |
| 0.005517 | 0.90535  | -0.04562 | 0.32521  | 0.036735 | 0.42837  | 0.036469 | 0.43172  | -0.00142 |
| -0.05911 | 0.20227  | 0.010924 | 0.81386  | 0.080968 | 0.08048  | 0.172683 | 0.00018  | 0.034306 |
| -0.0284  | 0.54043  | -0.09809 | 0.03408  | 0.326906 | 4.31E-13 | 0.356654 | 1.87E-15 | 0.110785 |
| 0.12825  | 0.00551  | 0.067674 | 0.14423  | 0.320857 | 1.21E-12 | 0.229005 | 5.67E-07 | 0.033824 |
| 0.218774 | 1.81E-06 | -0.01534 | 0.74089  | 0.155023 | 0.00078  | -0.02058 | 0.65728  | -0.01965 |
| -0.23492 | 2.82E-07 | -0.41088 | 1.90E-20 | 0.189065 | 3.92E-05 | 0.112341 | 0.01514  | -0.01395 |
| -0.03191 | 0.49146  | -0.01454 | 0.75405  | -0.00556 | 0.90468  | -0.01308 | 0.77794  | -0.03102 |
| 0.058316 | 0.20842  | 0.042628 | 0.35802  | 0.033772 | 0.46656  | -0.02358 | 0.61133  | -0.01956 |
| 0.014276 | 0.75832  | -0.02993 | 0.51878  | 0.15173  | 0.001    | 0.007632 | 0.86935  | 0.11602  |
| -0.07125 | 0.12415  | -0.10601 | 0.02195  | 0.111465 | 0.01596  | 0.005409 | 0.9072   | -0.01169 |
| 0.166234 | 0.00031  | 0.367464 | 2.24E-16 | 0.059913 | 0.19621  | 0.019167 | 0.67952  | 0.121532 |
| 0.185162 | 5.68E-05 | 0.068221 | 0.14101  | 0.058359 | 0.20809  | -0.07218 | 0.11929  | -0.0527  |
| -0.07261 | 0.11712  | -0.20743 | 6.19E-06 | 0.214804 | 2.81E-06 | 0.036425 | 0.43228  | -0.01312 |
| 0.250467 | 4.12E-08 | 0.166547 | 0.0003   | 0.060771 | 0.18987  | -0.05727 | 0.21672  | 0.017322 |
| 0.054034 | 0.24385  | -0.09516 | 0.03983  | 0.265249 | 5.84E-09 | 0.339498 | 4.62E-14 | 0.142518 |
| -0.013   | 0.7794   | -0.21451 | 2.90E-06 | 0.131574 | 0.0044   | 0.116937 | 0.01144  | 0.212252 |
| 0.024272 | 0.60084  | -0.038   | 0.41263  | 0.0164   | 0.72373  | 0.118315 | 0.0105   | 0.01037  |
| 0.004076 | 0.93     | -0.08706 | 0.06013  | -0.00899 | 0.84641  | -0.01492 | 0.74776  | -0.04647 |
| 0.243986 | 9.33E-08 | 0.300031 | 3.61E-11 | -0.01083 | 0.81547  | 0.015284 | 0.74184  | 0.019664 |
| 0.139579 | 0.0025   | -0.0453  | 0.32866  | -0.07806 | 0.09201  | -0.07174 | 0.12157  | -0.03625 |
| 0.162741 | 0.00041  | 0.045727 | 0.32412  | -0.01459 | 0.75309  | -0.17803 | 0.00011  | -0.09141 |
| 0.14979  | 0.00117  | 0.032609 | 0.48206  | 0.008221 | 0.85936  | 0.038924 | 0.40134  | -0.05516 |
| -0.10403 | 0.02457  | -0.24444 | 8.82E-08 | 0.021004 | 0.65074  | 0.109631 | 0.01779  | -0.04586 |
| -0.10456 | 0.02384  | -0.16287 | 0.00041  | -0.01958 | 0.67302  | 0.012019 | 0.79561  | -0.02001 |
| 0.02037  | 0.66061  | -0.09397 | 0.04238  | 0.086969 | 0.06039  | 0.011898 | 0.79761  | 0.110707 |
| -0.16098 | 0.00048  | -0.00422 | 0.92746  | 0.06455  | 0.16373  | 0.134984 | 0.00347  | 0.104697 |
| 0.0244   | 0.59892  | -0.13196 | 0.00428  | -0.00974 | 0.83374  | -0.10557 | 0.02251  | 0.07591  |
| 0.009581 | 0.83639  | -0.01498 | 0.74682  | -0.00598 | 0.89738  | -0.0106  | 0.8193   | 0.072658 |
| -0.15791 | 0.00062  | -0.14626 | 0.00153  | -0.02211 | 0.63364  | -0.01675 | 0.71806  | -0.15217 |
| -0.06874 | 0.13801  | -0.06475 | 0.16242  | -0.02198 | 0.63566  | -0.02449 | 0.5976   | -0.0703  |
| -0.01466 | 0.75202  | 0.111279 | 0.01614  | 0.017585 | 0.70467  | 0.034741 | 0.45387  | 0.088195 |

|          |          |          |          |          |         |          |          |          |
|----------|----------|----------|----------|----------|---------|----------|----------|----------|
| -0.10983 | 0.01759  | -0.1156  | 0.01242  | 0.116872 | 0.01149 | 0.272158 | 2.25E-09 | -0.00721 |
| -0.05857 | 0.20644  | -0.00479 | 0.91785  | 0.083824 | 0.07033 | 0.173947 | 0.00016  | 0.040984 |
| 0.069455 | 0.13394  | 0.051126 | 0.2702   | 0.068838 | 0.13744 | 0.068508 | 0.13934  | 0.077077 |
| -0.07878 | 0.08903  | -0.05435 | 0.24107  | 0.077646 | 0.09374 | 0.260594 | 1.09E-08 | -0.02355 |
| -0.04312 | 0.35247  | -0.10985 | 0.01756  | 0.020597 | 0.65707 | 0.143077 | 0.00194  | 0.030329 |
| -0.04212 | 0.36382  | -0.10094 | 0.02918  | 0.017535 | 0.70547 | 0.161435 | 0.00046  | -0.02135 |
| -0.02045 | 0.65932  | -0.0089  | 0.84793  | 0.011574 | 0.80302 | -0.02936 | 0.52686  | -0.04774 |
| -0.07171 | 0.12172  | -0.24011 | 1.50E-07 | 0.052858 | 0.25428 | 0.054533 | 0.23952  | 0.000744 |
| 0.071218 | 0.12433  | 0.029691 | 0.52214  | -0.01967 | 0.67158 | -0.05684 | 0.2202   | 0.0391   |
| 0.104675 | 0.02368  | -0.15769 | 0.00063  | 0.015673 | 0.7355  | -0.01597 | 0.73063  | -0.01821 |
| 0.208711 | 5.41E-06 | 0.006624 | 0.88648  | -0.03721 | 0.42247 | -0.11636 | 0.01186  | -0.14272 |
| -0.01053 | 0.8204   | 0.174435 | 0.00015  | 0.037007 | 0.42496 | 0.119522 | 0.00973  | 0.384862 |
| -0.00685 | 0.88267  | 0.077495 | 0.09438  | 0.025936 | 0.57611 | 0.001377 | 0.97632  | 0.130818 |
| 0.248103 | 5.56E-08 | 0.079008 | 0.08811  | 0.021902 | 0.63685 | 0.010603 | 0.81923  | -0.01434 |
| 0.002809 | 0.95173  | -0.19042 | 3.44E-05 | -0.02069 | 0.65569 | -0.12338 | 0.0076   | -0.12196 |
| 0.124511 | 0.00706  | -0.09709 | 0.03594  | -0.01748 | 0.7064  | -0.07607 | 0.1006   | -0.03128 |
| 0.11657  | 0.0117   | 0.353996 | 3.11E-15 | -0.06307 | 0.17363 | 0.000593 | 0.9898   | -0.13918 |
| -0.12591 | 0.00644  | 0.136201 | 0.00319  | 0.013107 | 0.77757 | 0.085142 | 0.06601  | -0.08686 |
| -0.04154 | 0.37042  | -0.17658 | 0.00013  | 0.010041 | 0.82866 | -0.0067  | 0.88516  | 0.090292 |
| 0.144701 | 0.00172  | 0.176353 | 0.00013  | -0.01086 | 0.81493 | -0.04263 | 0.35801  | 0.13518  |
| -0.01386 | 0.7652   | -0.2009  | 1.22E-05 | 0.025934 | 0.57614 | 0.00829  | 0.8582   | 0.089943 |
| 0.162272 | 0.00043  | 0.151552 | 0.00102  | -0.03122 | 0.50087 | 0.015918 | 0.73153  | -0.24475 |
| -0.15237 | 0.00096  | -0.2104  | 4.52E-06 | 0.077541 | 0.09419 | 0.280665 | 6.68E-10 | 0.1033   |
| 0.260281 | 1.14E-08 | 0.213316 | 3.30E-06 | -0.01361 | 0.7693  | -0.01622 | 0.7267   | -0.01327 |
| 0.305636 | 1.49E-11 | 0.118384 | 0.01045  | -0.00452 | 0.92247 | -0.15245 | 0.00095  | 0.091165 |
| -0.12579 | 0.00649  | 0.327734 | 3.73E-13 | 0.119717 | 0.00961 | 0.267074 | 4.55E-09 | 0.322199 |
| -0.00148 | 0.97464  | 0.050694 | 0.27427  | 0.016227 | 0.72653 | 0.111866 | 0.01558  | -0.07242 |
| -0.09585 | 0.0384   | -0.1774  | 0.00012  | 0.011477 | 0.80462 | -0.0201  | 0.66483  | -0.0801  |
| 0.030971 | 0.50436  | 0.100304 | 0.03022  | 0.023794 | 0.60803 | 0.26835  | 3.82E-09 | 0.009563 |
| -0.00962 | 0.83581  | -0.09683 | 0.03646  | -0.00863 | 0.85248 | -0.05546 | 0.23165  | -0.10013 |
| -0.1363  | 0.00316  | -0.18571 | 5.40E-05 | 0.022512 | 0.62751 | 0.207509 | 6.14E-06 | -0.08475 |
| -0.19597 | 2.00E-05 | -0.29261 | 1.13E-10 | 0.011444 | 0.80518 | 0.237152 | 2.16E-07 | -0.10845 |
| -0.01217 | 0.79303  | 0.039037 | 0.39998  | -0.01431 | 0.75782 | 0.027165 | 0.55816  | 0.00158  |
| -0.02225 | 0.63153  | 0.007482 | 0.8719   | -0.01484 | 0.74902 | -0.00887 | 0.8484   | -0.07281 |
| -0.0174  | 0.70758  | -0.12861 | 0.00538  | 0.014044 | 0.76212 | -0.05616 | 0.22578  | -0.03138 |
| 0.287588 | 2.41E-10 | 0.116845 | 0.01151  | -0.0185  | 0.69008 | -0.11864 | 0.01029  | -0.159   |
| -0.07368 | 0.11178  | -0.24904 | 4.94E-08 | 0.112739 | 0.01479 | 0.211769 | 3.90E-06 | 0.126554 |
| 0.068994 | 0.13656  | 0.054064 | 0.24359  | 0.089972 | 0.05201 | 0.27739  | 1.07E-09 | 0.355967 |
| -0.0869  | 0.06059  | -0.23105 | 4.46E-07 | -0.0219  | 0.63686 | -0.12035 | 0.00923  | -0.085   |
| 0.119092 | 0.01     | -0.00439 | 0.92464  | 0.009862 | 0.83167 | -0.04788 | 0.30182  | -0.02493 |
| -0.06501 | 0.16074  | -0.41325 | 1.09E-20 | 0.057237 | 0.21698 | 0.025495 | 0.58261  | 0.024995 |
| -0.043   | 0.35384  | -0.10901 | 0.01845  | -0.00523 | 0.91021 | -0.00866 | 0.85195  | -0.02206 |
| 0.05834  | 0.20824  | -0.09704 | 0.03605  | -0.01002 | 0.82907 | -0.00613 | 0.89494  | -0.0421  |
| -0.10737 | 0.0203   | -0.10165 | 0.02806  | 0.012839 | 0.782   | -0.0007  | 0.98803  | -0.03903 |
| -0.01568 | 0.73545  | -0.10309 | 0.02589  | 0.069752 | 0.13229 | 0.109547 | 0.01788  | 0.0998   |

|          |          |          |          |          |         |          |          |          |
|----------|----------|----------|----------|----------|---------|----------|----------|----------|
| -0.03299 | 0.47691  | -0.05465 | 0.23854  | -0.01491 | 0.74789 | -0.00707 | 0.8789   | -0.05417 |
| -0.17717 | 0.00012  | -0.11756 | 0.01101  | 0.045363 | 0.32799 | 0.211971 | 3.82E-06 | -0.01417 |
| -0.00047 | 0.99188  | -0.15079 | 0.00108  | 0.038864 | 0.40208 | 0.022519 | 0.62739  | 0.009162 |
| 0.034764 | 0.45357  | -0.02249 | 0.6278   | -0.02213 | 0.63341 | -0.06843 | 0.1398   | -0.0292  |
| 0.139622 | 0.00249  | -0.00588 | 0.89918  | 0.009324 | 0.84073 | 0.096423 | 0.03725  | -0.15973 |
| 0.049652 | 0.28427  | 0.049704 | 0.28376  | -0.0342  | 0.46099 | -0.0614  | 0.18529  | 0.089433 |
| 0.046585 | 0.31511  | 0.064352 | 0.16502  | -0.03686 | 0.42675 | -0.06793 | 0.14273  | 0.125663 |
| -0.09557 | 0.03897  | -0.23357 | 3.31E-07 | 0.025346 | 0.58483 | 0.090064 | 0.05177  | 0.013095 |
| -0.12844 | 0.00544  | -0.32568 | 5.32E-13 | -0.07171 | 0.12177 | -0.13588 | 0.00326  | -0.08841 |
| 0.107028 | 0.0207   | 0.177543 | 0.00011  | -0.01964 | 0.67211 | -0.06401 | 0.16727  | -0.01487 |
| -0.06889 | 0.13716  | -0.09424 | 0.04179  | 0.093462 | 0.04352 | 0.093466 | 0.0435   | 0.350865 |
| -0.03888 | 0.40184  | -0.00545 | 0.9065   | -0.04661 | 0.31489 | -0.04574 | 0.32399  | -0.06069 |
| 0.156457 | 0.00069  | 0.26879  | 3.59E-09 | 0.027825 | 0.54863 | 0.106651 | 0.02116  | 0.048752 |
| -0.07785 | 0.0929   | -0.30816 | 9.91E-12 | 0.013994 | 0.76294 | -0.03579 | 0.4403   | -0.01842 |
| -0.08974 | 0.05261  | -0.08344 | 0.07164  | -0.02879 | 0.5348  | -0.07918 | 0.08741  | 0.012338 |
| 0.038141 | 0.4109   | -0.159   | 0.00056  | -0.00349 | 0.94009 | 0.015065 | 0.74541  | -0.06309 |
| -0.10171 | 0.02797  | -0.14872 | 0.00127  | 0.086078 | 0.06308 | 0.323636 | 7.56E-13 | -0.08062 |
| -0.0728  | 0.11616  | 0.262641 | 8.31E-09 | 0.157206 | 0.00065 | 0.497051 | 1.64E-30 | 0.165322 |
| -0.10411 | 0.02445  | -0.38712 | 3.81E-18 | 0.140912 | 0.00227 | 0.095932 | 0.03823  | 0.301912 |
| -0.01153 | 0.80381  | 0.022755 | 0.62379  | -0.01914 | 0.67995 | -0.04251 | 0.35938  | -0.04291 |
| 0.063465 | 0.17094  | 0.190931 | 3.28E-05 | 0.049738 | 0.28343 | 0.083169 | 0.07256  | 0.021933 |
| -0.04069 | 0.38032  | -0.31614 | 2.68E-12 | -0.03318 | 0.47441 | -0.12519 | 0.00675  | -0.05423 |
| 0.042686 | 0.35737  | 0.093979 | 0.04236  | 0.046135 | 0.31981 | 0.033462 | 0.47067  | 0.174161 |
| -0.31573 | 2.87E-12 | -0.24045 | 1.44E-07 | -0.00459 | 0.92116 | 0.193527 | 2.54E-05 | -0.11076 |
| 0.167335 | 0.00028  | 0.282559 | 5.07E-10 | -0.04191 | 0.36619 | -0.0211  | 0.64931  | -0.04915 |
| -0.21932 | 1.71E-06 | -0.36374 | 4.70E-16 | -0.00347 | 0.9403  | 0.059048 | 0.20276  | -0.10724 |
| -0.0245  | 0.59735  | 0.101458 | 0.02836  | 0.056136 | 0.22597 | 0.171085 | 0.0002   | 0.387749 |
| -0.1954  | 2.12E-05 | -0.40411 | 8.98E-20 | -0.0416  | 0.36971 | -0.07632 | 0.0995   | -0.14765 |
| -0.06178 | 0.1826   | -0.06673 | 0.14993  | -0.00682 | 0.88315 | 0.007783 | 0.86679  | -0.03801 |
| -0.02073 | 0.655    | -0.1699  | 0.00023  | 0.04123  | 0.37402 | 0.017542 | 0.70536  | 0.047551 |
| 0.16065  | 0.00049  | 0.206286 | 6.98E-06 | -0.02018 | 0.66356 | 0.041733 | 0.36821  | -0.14036 |
| -0.11008 | 0.01732  | -0.20688 | 6.56E-06 | 0.114931 | 0.01295 | 0.11576  | 0.0123   | 0.021756 |
| -0.03853 | 0.40609  | -0.01702 | 0.71375  | 0.037542 | 0.41828 | 0.072276 | 0.11882  | -0.01962 |
| -0.09378 | 0.04281  | -0.08217 | 0.07607  | 0.087425 | 0.05905 | 0.249242 | 4.81E-08 | 0.021095 |
| -0.03756 | 0.41803  | -0.14405 | 0.0018   | 0.066155 | 0.15348 | 0.073177 | 0.11428  | 0.128426 |
| -0.21067 | 4.39E-06 | -0.35551 | 2.33E-15 | -0.05285 | 0.25436 | -0.17197 | 0.00019  | -0.00427 |
| -0.05676 | 0.22088  | -0.2524  | 3.21E-08 | -0.04721 | 0.30865 | 0.033506 | 0.47009  | -0.0839  |
| -0.06807 | 0.14188  | -0.37485 | 5.01E-17 | -0.02217 | 0.63269 | -0.12711 | 0.00595  | -0.11683 |
| -0.08825 | 0.05669  | -0.11739 | 0.01112  | 0.055559 | 0.23078 | 0.030751 | 0.50739  | 0.176888 |
| -0.10591 | 0.02208  | -0.14832 | 0.00131  | -0.04101 | 0.37661 | 0.012565 | 0.78654  | -0.08693 |
| 0.078657 | 0.08953  | 0.047123 | 0.30955  | 0.128359 | 0.00547 | 0.024961 | 0.59054  | 0.242556 |
| -0.01422 | 0.75927  | -0.0043  | 0.92611  | 0.056175 | 0.22564 | 0.102999 | 0.02603  | 0.076577 |
| -0.04306 | 0.35316  | 0.171831 | 0.00019  | 0.007701 | 0.86818 | 0.013475 | 0.77149  | 0.002232 |
| 0.141616 | 0.00216  | 0.123091 | 0.00774  | 0.14987  | 0.00116 | 0.113807 | 0.01386  | 0.344399 |
| -0.05896 | 0.20346  | -0.11415 | 0.01358  | 0.17045  | 0.00021 | 0.232213 | 3.89E-07 | 0.286896 |

|          |          |          |          |          |         |          |          |          |
|----------|----------|----------|----------|----------|---------|----------|----------|----------|
| 0.138354 | 0.00273  | 0.138441 | 0.00272  | 0.012103 | 0.7942  | 0.021476 | 0.64343  | 0.013772 |
| 0.191075 | 3.23E-05 | 0.042041 | 0.36469  | 0.081841 | 0.07726 | 0.004464 | 0.92335  | 0.274253 |
| -0.22919 | 5.55E-07 | -0.48356 | 9.69E-29 | -0.06018 | 0.19422 | -0.17515 | 0.00014  | -0.25156 |
| -0.07822 | 0.09133  | -0.10649 | 0.02135  | 0.065622 | 0.15683 | 0.118117 | 0.01063  | 0.018381 |
| 0.030284 | 0.51386  | 0.146918 | 0.00145  | 0.014612 | 0.75281 | -0.02171 | 0.63974  | 0.104347 |
| 0.070453 | 0.12843  | -0.07123 | 0.12428  | -0.01727 | 0.70964 | -0.01801 | 0.69795  | -0.10793 |
| -0.10406 | 0.02452  | -0.03272 | 0.48051  | 0.018195 | 0.69492 | 0.123783 | 0.0074   | 0.14889  |
| -0.17086 | 0.00021  | -0.20549 | 7.59E-06 | 0.04203  | 0.36481 | 0.019541 | 0.67362  | 0.235414 |
| -0.08928 | 0.05386  | -0.07109 | 0.12503  | -0.0093  | 0.84109 | 0.024588 | 0.5961   | -0.01527 |
| 0.00027  | 0.99536  | -0.08736 | 0.05924  | 0.022622 | 0.62582 | 0.015338 | 0.74096  | 0.054193 |
| 0.095145 | 0.03985  | 0.281869 | 5.61E-10 | -0.02639 | 0.56942 | -0.06788 | 0.143    | -0.15145 |
| 0.263165 | 7.75E-09 | -0.10968 | 0.01773  | -0.00484 | 0.91686 | -0.07537 | 0.1038   | -0.05898 |
| -0.10295 | 0.0261   | -0.20388 | 8.96E-06 | 0.005458 | 0.90637 | -0.07336 | 0.11337  | -0.02056 |
| 0.196841 | 1.83E-05 | 0.244527 | 8.72E-08 | 0.071475 | 0.12297 | 0.146611 | 0.00149  | 0.277542 |
| 0.046041 | 0.3208   | -0.1062  | 0.02172  | 0.017774 | 0.70165 | -0.02389 | 0.60657  | -0.05529 |
| 0.16506  | 0.00034  | 0.062581 | 0.17699  | 0.173587 | 0.00016 | 0.034936 | 0.45134  | 0.410969 |
| -0.061   | 0.18817  | 0.020073 | 0.66526  | -0.01493 | 0.74755 | -0.01449 | 0.75475  | -0.02354 |
| 0.059668 | 0.19805  | 0.013798 | 0.76617  | 0.022281 | 0.63104 | 0.043095 | 0.35277  | 0.005533 |
| -0.04338 | 0.34963  | -0.04412 | 0.34148  | 0.11499  | 0.0129  | 0.194933 | 2.22E-05 | 0.301735 |
| 0.232996 | 3.55E-07 | 0.200846 | 1.22E-05 | 0.030275 | 0.51398 | -0.00166 | 0.97142  | 0.105456 |
| 0.22426  | 9.79E-07 | 0.406876 | 4.78E-20 | 0.036535 | 0.43089 | 0.030023 | 0.5175   | 0.185807 |
| 0.076731 | 0.09769  | -0.07827 | 0.09112  | 0.032727 | 0.48049 | -0.0192  | 0.67897  | -0.01178 |
| 0.146757 | 0.00147  | -0.059   | 0.20314  | 0.028396 | 0.54046 | -0.03078 | 0.50701  | 0.062216 |
| -0.09662 | 0.03687  | -0.35436 | 2.91E-15 | 0.063467 | 0.17093 | -0.07776 | 0.09327  | 0.026324 |
| -0.09167 | 0.04771  | -0.38377 | 7.78E-18 | 0.007048 | 0.87927 | -0.08583 | 0.06383  | -0.10687 |
| -0.17793 | 0.00011  | -0.36646 | 2.74E-16 | 0.074698 | 0.10693 | 0.06151  | 0.18453  | 0.040197 |
| -0.02132 | 0.64578  | -0.06866 | 0.13844  | 0.112791 | 0.01474 | 0.146325 | 0.00152  | 0.370416 |
| 0.035182 | 0.44816  | -0.01398 | 0.76323  | 0.103536 | 0.02526 | 0.125318 | 0.0067   | 0.41391  |
| -0.05316 | 0.25157  | 0.035383 | 0.44557  | 0.03014  | 0.51586 | 0.162855 | 0.00041  | 0.074416 |
| 0.151363 | 0.00103  | 0.176639 | 0.00012  | 0.043627 | 0.34685 | -0.06225 | 0.17928  | 0.050215 |
| -0.14887 | 0.00125  | -0.24141 | 1.28E-07 | -0.02035 | 0.66095 | -0.04041 | 0.3836   | -0.00187 |
| -0.01438 | 0.75667  | 0.258405 | 1.46E-08 | 0.030063 | 0.51693 | 0.114389 | 0.01338  | 0.014597 |
| -0.05685 | 0.22014  | -0.04081 | 0.37889  | -0.00173 | 0.97032 | 0.020239 | 0.66266  | 0.000619 |
| -0.0413  | 0.37317  | 0.023212 | 0.61684  | 0.009005 | 0.84611 | 0.05081  | 0.27318  | -0.05149 |
| 0.192223 | 2.89E-05 | 0.34083  | 3.63E-14 | 0.076911 | 0.0969  | 0.164328 | 0.00036  | 0.087251 |
| 0.057417 | 0.21554  | 0.044182 | 0.34075  | 0.003834 | 0.93415 | -0.0243  | 0.60044  | 0.04593  |
| 0.269844 | 3.10E-09 | 0.171996 | 0.00019  | 0.005283 | 0.90935 | -0.09288 | 0.04484  | 0.053879 |
| 0.184743 | 5.91E-05 | -0.16815 | 0.00026  | 0.003288 | 0.94351 | -0.03847 | 0.40691  | 0.138855 |
| -0.19226 | 2.88E-05 | -0.26179 | 9.32E-09 | -0.02289 | 0.62169 | -0.00902 | 0.84582  | -0.12279 |
| 0.12316  | 0.00771  | -0.00179 | 0.96924  | -0.00666 | 0.88588 | -0.03872 | 0.40378  | -0.15794 |
| -0.05098 | 0.27155  | -0.03121 | 0.50107  | -0.01941 | 0.67567 | -0.0296  | 0.52345  | -0.09604 |
| -0.08279 | 0.07388  | -0.24509 | 8.13E-08 | 0.11777  | 0.01086 | 0.191152 | 3.21E-05 | 0.275898 |
| -0.04401 | 0.34258  | -0.24453 | 8.72E-08 | 0.037914 | 0.41368 | 0.168148 | 0.00026  | -0.05803 |
| -0.11832 | 0.01049  | 0.01281  | 0.78247  | 0.142237 | 0.00206 | 0.262263 | 8.75E-09 | -0.00652 |
| 0.122299 | 0.00815  | -0.34191 | 2.98E-14 | 0.020369 | 0.66063 | 0.070603 | 0.12762  | -0.10192 |

|          |          |          |          |          |         |          |          |          |
|----------|----------|----------|----------|----------|---------|----------|----------|----------|
| -0.09295 | 0.04468  | -0.27725 | 1.09E-09 | 0.002124 | 0.96349 | -0.05388 | 0.2452   | -0.09023 |
| 0.256948 | 1.77E-08 | 0.126108 | 0.00636  | 0.053206 | 0.25117 | 0.056164 | 0.22574  | 0.259781 |
| 0.008079 | 0.86177  | -0.09943 | 0.03169  | 0.075371 | 0.10379 | 0.094216 | 0.04184  | 0.175385 |
| -0.07031 | 0.12921  | 0.037815 | 0.41491  | 0.023315 | 0.61528 | -0.00174 | 0.97014  | 0.117159 |
| -0.23606 | 2.46E-07 | -0.21538 | 2.64E-06 | 0.047001 | 0.31081 | 0.14988  | 0.00116  | 0.073448 |
| 0.218893 | 1.79E-06 | 0.23262  | 3.71E-07 | 0.01433  | 0.75743 | -0.08946 | 0.05336  | 0.050654 |
| -0.06557 | 0.15714  | -0.41978 | 2.33E-21 | -0.04689 | 0.31198 | -0.19433 | 2.35E-05 | -0.25222 |
| 0.108689 | 0.0188   | 0.02123  | 0.64723  | -0.00482 | 0.91726 | -0.06325 | 0.17242  | 0.001772 |
| 0.121686 | 0.00848  | 0.259236 | 1.31E-08 | 0.012852 | 0.78177 | 0.077238 | 0.09549  | 0.168628 |
| 0.002042 | 0.9649   | -0.00976 | 0.83335  | 0.02595  | 0.5759  | 0.097896 | 0.03443  | 0.158764 |
| -0.13788 | 0.00283  | -0.32958 | 2.71E-13 | -0.01131 | 0.80739 | -0.01803 | 0.69763  | -0.08661 |
| -0.04882 | 0.29247  | 0.03087  | 0.50575  | -0.02589 | 0.57672 | 0.11043  | 0.01697  | -0.04876 |
| 0.127853 | 0.00566  | -0.33046 | 2.32E-13 | -0.01804 | 0.69746 | -0.09063 | 0.0503   | -0.11414 |
| -0.04274 | 0.35671  | -0.15513 | 0.00077  | -0.00116 | 0.98003 | 0.005    | 0.91418  | -0.04233 |
| -0.10106 | 0.02899  | -0.3144  | 3.57E-12 | -0.0005  | 0.99134 | -0.0408  | 0.379    | 0.002181 |
| -0.11966 | 0.00965  | -0.33547 | 9.55E-14 | -0.02231 | 0.63065 | -0.03302 | 0.47658  | -0.11094 |
| -0.08907 | 0.05441  | -0.13051 | 0.00473  | 0.011884 | 0.79785 | 0.030839 | 0.50618  | 0.142052 |
| -0.09725 | 0.03564  | -0.04558 | 0.32572  | 0.012659 | 0.78497 | 0.070996 | 0.12551  | 0.119192 |
| -0.11082 | 0.01658  | -0.34654 | 1.27E-14 | -0.02802 | 0.54582 | -0.02287 | 0.62208  | -0.09406 |
| -0.06393 | 0.16781  | -0.05928 | 0.20096  | 0.011427 | 0.80547 | 0.094858 | 0.04046  | 0.118422 |
| -0.03306 | 0.47608  | -0.06383 | 0.1685   | -0.01637 | 0.72413 | 0.021817 | 0.63817  | -0.04351 |
| -0.08123 | 0.07949  | -0.22017 | 1.55E-06 | -0.0226  | 0.62618 | 0.006247 | 0.8929   | -0.05471 |
| -0.06136 | 0.18557  | -0.10963 | 0.01779  | -0.01706 | 0.71316 | -0.00962 | 0.83574  | 0.063976 |
| -0.00444 | 0.92376  | -0.14977 | 0.00117  | 0.007255 | 0.87575 | -0.00962 | 0.8358   | -0.01585 |
| -0.05692 | 0.21951  | -0.07529 | 0.10417  | -0.01328 | 0.77469 | -0.00302 | 0.94805  | -0.02224 |
| 0.021394 | 0.64469  | 0.031159 | 0.50176  | -0.02555 | 0.58178 | -0.03625 | 0.4345   | -0.02838 |
| 0.000198 | 0.99659  | -0.13828 | 0.00275  | 0.034576 | 0.45602 | -0.01491 | 0.74798  | -0.04428 |
| -0.08293 | 0.07338  | -0.20014 | 1.32E-05 | -0.00431 | 0.926   | 0.002803 | 0.95183  | -0.04239 |
| -0.02043 | 0.65969  | 0.018971 | 0.6826   | 0.034477 | 0.45732 | 0.102705 | 0.02646  | -0.00836 |
| -0.05041 | 0.27696  | -0.12542 | 0.00665  | -0.00971 | 0.83415 | -0.02097 | 0.65129  | -0.05279 |
| -0.03704 | 0.42457  | -0.17431 | 0.00015  | -0.0165  | 0.72217 | -0.02371 | 0.60932  | -0.0493  |
| -0.10405 | 0.02454  | -0.24306 | 1.05E-07 | -0.01152 | 0.80386 | 0.001137 | 0.98044  | -0.08625 |
| 0.030727 | 0.50771  | -0.04697 | 0.31114  | 0.001278 | 0.97802 | 0.023304 | 0.61544  | -0.04035 |
| 0.020497 | 0.65863  | -0.08587 | 0.06372  | -0.00739 | 0.87337 | -0.09659 | 0.03692  | 1.16E-05 |
| -0.0761  | 0.10048  | -0.33696 | 7.31E-14 | -0.0123  | 0.79099 | -0.10449 | 0.02393  | -0.0146  |
| -0.06409 | 0.16678  | -0.20281 | 1.00E-05 | -0.02861 | 0.53738 | -0.06053 | 0.19164  | -0.01864 |
| -0.07702 | 0.09641  | -0.27481 | 1.55E-09 | -0.03333 | 0.47237 | -0.02584 | 0.57752  | -0.02416 |
| 0.174905 | 0.00015  | 0.320901 | 1.20E-12 | -0.03046 | 0.51145 | -0.09686 | 0.0364   | -0.11014 |
| 0.129801 | 0.00496  | 0.267565 | 4.25E-09 | 0.007578 | 0.87026 | -0.0354  | 0.44535  | 0.022112 |
| -0.20133 | 1.16E-05 | -0.45483 | 3.19E-25 | -0.08278 | 0.07392 | -0.14583 | 0.00158  | -0.1423  |
| -0.03509 | 0.44941  | 0.042296 | 0.36178  | 0.011618 | 0.80228 | 0.028653 | 0.5368   | 0.029885 |
| 0.003482 | 0.94018  | 0.383452 | 8.33E-18 | 0.037448 | 0.41945 | 0.123476 | 0.00755  | 0.081878 |
| 0.152162 | 0.00097  | 0.092075 | 0.04674  | 0.02783  | 0.54856 | -0.0074  | 0.87322  | 0.08576  |
| 0.018547 | 0.68933  | -0.15598 | 0.00072  | -0.02541 | 0.58383 | -0.17332 | 0.00017  | -0.05016 |
| -0.12786 | 0.00566  | -0.01588 | 0.73207  | -0.00375 | 0.93561 | 0.040272 | 0.38522  | 0.125857 |

|          |          |          |          |          |         |          |          |          |
|----------|----------|----------|----------|----------|---------|----------|----------|----------|
| 0.228428 | 6.06E-07 | 0.159873 | 0.00052  | -0.0387  | 0.40401 | -0.13749 | 0.00291  | -0.10458 |
| -0.02316 | 0.61769  | -0.17925 | 9.83E-05 | -0.0338  | 0.46623 | -0.04377 | 0.34529  | -0.06102 |
| -0.11818 | 0.01059  | -0.27246 | 2.16E-09 | 0.002078 | 0.96429 | -0.05417 | 0.24268  | -0.13383 |
| -0.04856 | 0.29496  | -0.02036 | 0.66072  | -0.05968 | 0.19796 | -0.08442 | 0.06835  | -0.07044 |
| -0.14934 | 0.00121  | -0.1128  | 0.01474  | 0.045458 | 0.32697 | 0.087429 | 0.05904  | 0.198422 |
| -0.00152 | 0.97394  | -0.1335  | 0.00385  | -0.05537 | 0.23233 | -0.09923 | 0.03204  | -0.13812 |
| -0.14714 | 0.00143  | -0.45838 | 1.22E-25 | -0.01135 | 0.80671 | -0.12475 | 0.00695  | -0.13734 |
| -0.16208 | 0.00044  | -0.03583 | 0.43989  | -0.00988 | 0.83144 | 0.143026 | 0.00195  | -0.12322 |
| 0.143666 | 0.00186  | -0.11703 | 0.01137  | 0.054136 | 0.24296 | 0.133639 | 0.00381  | 0.219458 |
| -0.10711 | 0.02061  | -0.28586 | 3.12E-10 | 0.039884 | 0.38983 | 0.023596 | 0.61102  | 0.104434 |
| -0.17072 | 0.00021  | -0.20815 | 5.74E-06 | -0.04443 | 0.33805 | -0.05125 | 0.26906  | -0.0965  |
| 0.097173 | 0.03579  | 0.166943 | 0.00029  | -0.00098 | 0.98323 | -0.01719 | 0.71103  | 0.074122 |
| -0.17879 | 0.0001   | 0.051098 | 0.27046  | 0.03897  | 0.40079 | 0.120976 | 0.00887  | 0.088572 |
| -0.08665 | 0.06133  | -0.23381 | 3.22E-07 | 0.014733 | 0.75083 | -0.02466 | 0.5951   | -0.02151 |
| 0.339614 | 4.53E-14 | 0.490718 | 1.14E-29 | -0.05016 | 0.27936 | -0.06949 | 0.13375  | 0.068607 |
| -0.08352 | 0.07135  | -0.2495  | 4.65E-08 | 0.011218 | 0.80895 | -0.0184  | 0.69164  | -0.04363 |
| 0.049896 | 0.28191  | 0.251434 | 3.64E-08 | -0.01642 | 0.72342 | -0.02864 | 0.53694  | 0.000871 |
| -0.02041 | 0.65992  | -0.17283 | 0.00017  | -0.03252 | 0.48321 | -0.09559 | 0.03894  | -0.16447 |
| 0.055399 | 0.23213  | -0.09856 | 0.03323  | -0.00651 | 0.88839 | -0.03475 | 0.4538   | -0.1832  |
| 0.156029 | 0.00072  | 0.367207 | 2.36E-16 | 0.015343 | 0.74088 | -0.10053 | 0.02984  | 0.150803 |
| -0.13776 | 0.00285  | -0.21036 | 4.54E-06 | 0.070556 | 0.12787 | 0.088525 | 0.05592  | 0.23187  |
| -0.02178 | 0.63873  | -0.24542 | 7.80E-08 | -0.01201 | 0.79567 | -0.04461 | 0.33612  | -0.10996 |
| -0.11941 | 0.0098   | -0.22752 | 6.73E-07 | 0.060545 | 0.19152 | 0.055564 | 0.23074  | 0.138747 |
| 0.159626 | 0.00054  | 0.364501 | 4.04E-16 | 0.03562  | 0.44253 | 0.026207 | 0.57213  | 0.076449 |
| 0.174584 | 0.00015  | -0.03228 | 0.48645  | 0.002552 | 0.95614 | -0.09804 | 0.03417  | -0.04195 |
| -0.06636 | 0.15221  | -0.15655 | 0.00069  | 0.030029 | 0.51741 | 0.04623  | 0.31882  | -0.00224 |
| -0.06701 | 0.1482   | -0.11437 | 0.0134   | -0.02286 | 0.62216 | -0.08883 | 0.05507  | -0.15399 |
| -0.10339 | 0.02546  | -0.34142 | 3.26E-14 | 0.013868 | 0.76501 | -0.02243 | 0.62878  | 0.163034 |
| 0.095576 | 0.03896  | 0.108059 | 0.0195   | 0.036049 | 0.43705 | 0.077296 | 0.09524  | 0.123308 |
| -0.19547 | 2.10E-05 | -0.24088 | 1.37E-07 | 0.147396 | 0.0014  | 0.38274  | 9.68E-18 | 0.326366 |
| -0.12044 | 0.00918  | -0.14695 | 0.00145  | -0.03863 | 0.40488 | 0.000572 | 0.99017  | 0.060801 |
| -0.09318 | 0.04415  | -0.27148 | 2.47E-09 | -0.01084 | 0.81526 | -0.08721 | 0.05968  | -0.04768 |
| 0.14607  | 0.00155  | 0.032362 | 0.48539  | 0.043142 | 0.35224 | -0.05221 | 0.26019  | 0.180305 |
| 0.106277 | 0.02162  | 0.197636 | 1.69E-05 | -0.06488 | 0.1616  | -0.0944  | 0.04143  | -0.03335 |
| -0.13305 | 0.00397  | -0.23238 | 3.81E-07 | -0.05415 | 0.24289 | -0.17412 | 0.00016  | -0.07255 |
| -0.0257  | 0.57953  | -0.03957 | 0.39353  | -0.00944 | 0.83875 | -0.03026 | 0.5142   | 0.034557 |
| 0.199396 | 1.42E-05 | 0.219451 | 1.68E-06 | -0.00038 | 0.99347 | -0.02506 | 0.58904  | -0.07304 |
| 0.020024 | 0.66602  | -0.10613 | 0.02181  | -0.01145 | 0.80514 | -0.0758  | 0.10185  | -0.10584 |
| 0.081189 | 0.07965  | 0.156163 | 0.00071  | -0.07419 | 0.10934 | -0.13776 | 0.00285  | -0.06052 |
| 0.155683 | 0.00074  | -0.07262 | 0.11704  | -0.01439 | 0.75643 | -0.13779 | 0.00285  | -0.02953 |
| 0.082368 | 0.07537  | -0.19891 | 1.49E-05 | -0.05275 | 0.25526 | -0.0941  | 0.0421   | -0.08403 |
| -0.03331 | 0.47268  | -0.08336 | 0.07192  | 0.001339 | 0.97697 | -0.04176 | 0.36793  | 0.068864 |
| 0.140503 | 0.00234  | 0.065996 | 0.15447  | 0.087707 | 0.05823 | 0.10784  | 0.01975  | 0.201505 |
| -0.16684 | 0.00029  | -0.38499 | 6.01E-18 | -0.01921 | 0.67879 | 0.001658 | 0.9715   | -0.09408 |
| -0.12891 | 0.00527  | -0.23395 | 3.16E-07 | 0.040265 | 0.38531 | 0.093231 | 0.04404  | 0.130626 |



|          |          |          |          |          |         |          |          |          |
|----------|----------|----------|----------|----------|---------|----------|----------|----------|
| -0.01633 | 0.72493  | -0.22236 | 1.21E-06 | 0.002898 | 0.9502  | -0.03227 | 0.48667  | -0.0541  |
| -0.14368 | 0.00185  | -0.33757 | 6.56E-14 | -0.096   | 0.03809 | -0.12376 | 0.00741  | -0.12012 |
| -0.07207 | 0.11986  | 0.147638 | 0.00138  | 0.04283  | 0.35574 | 0.148039 | 0.00134  | 0.228719 |
| 0.034677 | 0.4547   | 0.18639  | 5.06E-05 | -0.03002 | 0.51756 | -0.05446 | 0.24019  | -0.16969 |
| -0.03964 | 0.39278  | -0.07764 | 0.09376  | -0.00938 | 0.83977 | 0.006073 | 0.89586  | -0.10191 |
| 0.235923 | 2.50E-07 | 0.052949 | 0.25347  | -0.07269 | 0.11673 | -0.1782  | 0.00011  | -0.2901  |
| -0.09173 | 0.04757  | -0.406   | 5.85E-20 | 0.027543 | 0.55269 | 0.055695 | 0.22964  | -0.1136  |
| 0.012528 | 0.78715  | -0.03214 | 0.48837  | 0.010144 | 0.82694 | -0.09106 | 0.04923  | 0.035195 |
| -0.04459 | 0.33625  | -0.15018 | 0.00113  | -0.00309 | 0.94685 | -0.10422 | 0.0243   | -0.00609 |
| -0.15472 | 0.00079  | -0.28971 | 1.76E-10 | -0.02948 | 0.52515 | -0.03444 | 0.45786  | -0.21846 |
| -0.11716 | 0.01129  | -0.21934 | 1.70E-06 | 0.066541 | 0.15109 | 0.10321  | 0.02572  | 0.23329  |
| -0.15173 | 0.001    | -0.1938  | 2.48E-05 | 0.019773 | 0.66996 | 0.031245 | 0.50059  | 0.054909 |
| -0.13892 | 0.00262  | -0.29777 | 5.13E-11 | -0.01694 | 0.71494 | 0.008736 | 0.85066  | -0.14634 |
| -0.00037 | 0.99369  | 0.054265 | 0.24184  | -0.03619 | 0.43532 | -0.03514 | 0.44872  | 0.011765 |
| -0.04666 | 0.31435  | 0.038414 | 0.40755  | 0.156082 | 0.00071 | 0.291653 | 1.31E-10 | 0.347519 |
| 0.189756 | 3.67E-05 | 0.255049 | 2.28E-08 | -0.01662 | 0.72023 | 0.072499 | 0.11768  | -0.15056 |
| 0.016705 | 0.71881  | -0.20263 | 1.02E-05 | 0.007431 | 0.87275 | -0.01288 | 0.78129  | -0.14876 |
| -0.02517 | 0.58742  | 0.067918 | 0.14279  | -0.01329 | 0.77447 | -0.07613 | 0.10033  | -0.07187 |
| -0.03708 | 0.42407  | -0.0104  | 0.8227   | -0.03147 | 0.49754 | -0.12812 | 0.00556  | -0.13212 |
| 0.084243 | 0.06893  | -0.18243 | 7.34E-05 | -0.01511 | 0.74474 | -0.05436 | 0.24102  | -0.08283 |
| -0.17858 | 0.0001   | -0.23706 | 2.18E-07 | 0.110111 | 0.01729 | 0.218924 | 1.78E-06 | 0.393212 |
| 0.089237 | 0.05397  | 0.170075 | 0.00022  | -0.04683 | 0.31258 | -0.03782 | 0.41483  | -0.17739 |
| 0.024415 | 0.5987   | 0.074024 | 0.11014  | 0.006518 | 0.88828 | 0.099538 | 0.03151  | 0.101835 |
| 0.041377 | 0.37231  | 0.033023 | 0.47652  | 0.003574 | 0.93861 | 0.123445 | 0.00757  | -0.07068 |
| -0.04519 | 0.3298   | -0.02183 | 0.63803  | 0.000592 | 0.98982 | 0.093015 | 0.04453  | 0.013096 |
| -0.08431 | 0.06869  | 0.02719  | 0.5578   | 0.011632 | 0.80204 | -0.13343 | 0.00387  | 0.083696 |
| -0.0271  | 0.55916  | -0.04866 | 0.29398  | 0.006993 | 0.8802  | 0.06171  | 0.1831   | -0.12921 |
| 0.144209 | 0.00178  | 0.180501 | 8.76E-05 | 0.031687 | 0.49455 | 0.186178 | 5.17E-05 | 0.063719 |
| 0.193941 | 2.44E-05 | -0.05945 | 0.19972  | -0.07423 | 0.10916 | -0.05955 | 0.19891  | -0.16446 |
| -0.0157  | 0.73505  | 0.051433 | 0.26733  | -0.00935 | 0.84031 | 0.077805 | 0.09307  | 0.049124 |
| 0.026399 | 0.56932  | -0.00909 | 0.84472  | 0.016541 | 0.72145 | 0.003471 | 0.94036  | 0.036243 |
| -0.15186 | 0.00099  | -0.0953  | 0.03953  | 0.007523 | 0.87119 | -0.03053 | 0.5104   | -0.1317  |
| -0.10254 | 0.0267   | -0.30803 | 1.01E-11 | 0.00571  | 0.90206 | -0.03916 | 0.3985   | 0.06256  |
| 0.031524 | 0.49678  | -0.03178 | 0.4933   | 0.009179 | 0.84318 | -0.00348 | 0.94025  | -0.08933 |
| 0.047676 | 0.3039   | 0.48564  | 5.23E-29 | 0.033186 | 0.47434 | 0.225966 | 8.05E-07 | 0.082252 |
| 0.255109 | 2.26E-08 | 0.419782 | 2.33E-21 | -0.02742 | 0.55448 | -0.00514 | 0.91187  | -0.09535 |
| -0.11685 | 0.0115   | -0.36247 | 6.03E-16 | 0.010784 | 0.81621 | 0.01337  | 0.77322  | -0.01286 |
| 0.097909 | 0.03441  | -0.19397 | 2.43E-05 | 0.027032 | 0.56009 | -0.05264 | 0.25626  | -0.0281  |
| 0.082397 | 0.07526  | 0.270677 | 2.76E-09 | 0.095144 | 0.03986 | 0.162053 | 0.00044  | 0.38097  |
| 0.225464 | 8.53E-07 | -0.37066 | 1.18E-16 | -0.09912 | 0.03223 | -0.2557  | 2.09E-08 | -0.25484 |
| 0.025382 | 0.5843   | -0.26949 | 3.26E-09 | -0.00082 | 0.9859  | -0.12098 | 0.00887  | 0.09061  |
| 0.055237 | 0.2335   | -0.04769 | 0.30379  | -0.01964 | 0.67213 | -0.02756 | 0.55245  | 0.03777  |
| 0.19494  | 2.21E-05 | 0.281964 | 5.53E-10 | 0.073779 | 0.11132 | 0.016415 | 0.72348  | 0.273394 |
| -0.02368 | 0.60976  | -0.07832 | 0.0909   | 0.051174 | 0.26975 | 0.07853  | 0.09005  | 0.217259 |
| 0.160056 | 0.00052  | 0.284997 | 3.54E-10 | 0.024187 | 0.60212 | -0.00056 | 0.99032  | 0.026007 |

|          |          |          |          |          |         |          |          |          |
|----------|----------|----------|----------|----------|---------|----------|----------|----------|
| 0.029101 | 0.53045  | -0.03518 | 0.44819  | -0.0277  | 0.55048 | -0.05436 | 0.24099  | 0.006648 |
| -0.03418 | 0.46126  | -0.19746 | 1.72E-05 | 0.02716  | 0.55823 | -0.03248 | 0.48376  | 0.061625 |
| 0.290041 | 1.67E-10 | 0.237249 | 2.13E-07 | -0.07616 | 0.10021 | -0.0727  | 0.11667  | -0.24814 |
| -0.15975 | 0.00053  | -0.13062 | 0.00469  | 0.04071  | 0.38008 | 0.221833 | 1.29E-06 | -0.03036 |
| -0.02228 | 0.63102  | -0.04117 | 0.37469  | 0.078999 | 0.08814 | 0.258913 | 1.37E-08 | 0.120779 |
| -0.05234 | 0.25897  | 0.043019 | 0.35362  | -0.00702 | 0.87966 | 0.088909 | 0.05486  | 0.159057 |
| -0.05625 | 0.225    | -0.15983 | 0.00053  | 0.028025 | 0.54577 | 0.074036 | 0.11008  | 0.008567 |
| -0.06153 | 0.18439  | -0.12909 | 0.00521  | -0.06875 | 0.13797 | -0.11458 | 0.01323  | -0.00581 |
| -0.04169 | 0.36867  | -0.08681 | 0.06086  | -0.00019 | 0.99668 | -0.02758 | 0.55218  | -0.03096 |
| -0.14309 | 0.00194  | -0.05956 | 0.19888  | 0.105523 | 0.02257 | 0.17206  | 0.00019  | 0.002505 |
| 0.010478 | 0.82133  | -0.02823 | 0.54289  | 0.089279 | 0.05385 | 0.103219 | 0.02571  | 0.197159 |
| -0.04536 | 0.32803  | -0.12796 | 0.00562  | 0.010245 | 0.82525 | -0.01163 | 0.80212  | -0.05285 |
| 0.049069 | 0.28997  | 0.359115 | 1.16E-15 | 0.036719 | 0.42856 | 0.038992 | 0.40052  | 0.100052 |
| 0.194015 | 2.43E-05 | 0.368546 | 1.80E-16 | 0.014134 | 0.76065 | 0.012337 | 0.79031  | -0.04071 |
| -0.08318 | 0.07252  | 0.065332 | 0.15867  | -0.03517 | 0.44831 | -0.07296 | 0.11538  | 0.098941 |
| 0.197003 | 1.80E-05 | 0.289451 | 1.83E-10 | 0.009183 | 0.84311 | -0.02468 | 0.59469  | 0.002534 |
| 0.118792 | 0.01019  | 0.085411 | 0.06516  | -0.02662 | 0.56612 | 0.010137 | 0.82706  | -0.12529 |
| 0.167187 | 0.00028  | 0.480612 | 2.30E-28 | 0.04215  | 0.36344 | 0.134485 | 0.00359  | 0.213359 |
| -0.06584 | 0.15545  | 0.134343 | 0.00363  | 0.000443 | 0.99238 | 0.045621 | 0.32524  | 0.286415 |
| -0.02694 | 0.56141  | -0.04136 | 0.37255  | 0.004898 | 0.91593 | -0.00544 | 0.9066   | 0.023358 |
| -0.02763 | 0.55147  | -0.01735 | 0.70836  | 0.012631 | 0.78544 | -0.00797 | 0.8636   | -0.01356 |
| 0.058327 | 0.20834  | 0.025431 | 0.58357  | -0.11176 | 0.01568 | -0.25298 | 2.98E-08 | -0.34656 |
| 0.049956 | 0.28133  | 0.224669 | 9.34E-07 | 0.025044 | 0.58931 | 0.108401 | 0.01912  | 0.058373 |
| 0.091571 | 0.04796  | -0.05874 | 0.20509  | 0.07715  | 0.09587 | 0.088319 | 0.05649  | 0.157095 |
| -0.23499 | 2.80E-07 | -0.38309 | 8.99E-18 | 0.1013   | 0.02861 | 0.067956 | 0.14257  | 0.232248 |
| -0.12489 | 0.00689  | -0.43311 | 8.93E-23 | -0.03306 | 0.47605 | -0.13901 | 0.00261  | -0.1444  |
| -0.01848 | 0.69039  | -0.08419 | 0.06912  | -0.00226 | 0.96117 | -0.02427 | 0.60081  | 0.100171 |
| 0.049153 | 0.28915  | 0.098546 | 0.03325  | 0.008674 | 0.85171 | 0.018949 | 0.68296  | 0.105208 |
| -0.04041 | 0.38362  | -0.32037 | 1.32E-12 | -0.03443 | 0.45796 | -0.14169 | 0.00215  | -0.17835 |
| -0.11792 | 0.01076  | -0.35561 | 2.29E-15 | -0.01458 | 0.75332 | -0.06418 | 0.16614  | -0.01337 |
| 0.128632 | 0.00537  | -0.0114  | 0.80588  | -0.0116  | 0.80257 | -0.02153 | 0.6426   | 0.059533 |
| 0.022792 | 0.62323  | -0.03734 | 0.42078  | 0.067134 | 0.14747 | 0.196726 | 1.85E-05 | 0.192816 |
| 0.062447 | 0.17792  | 0.013222 | 0.77566  | -0.01915 | 0.67979 | -0.04227 | 0.36203  | -0.01429 |
| -0.04525 | 0.32916  | -0.09216 | 0.04654  | -0.02917 | 0.52941 | -0.02347 | 0.613    | 0.005696 |
| -0.04132 | 0.37297  | -0.07054 | 0.12799  | 0.05532  | 0.2328  | -0.07595 | 0.10115  | 0.018466 |
| -0.00949 | 0.83796  | -0.03172 | 0.49412  | 0.021294 | 0.64624 | -0.02303 | 0.61956  | 0.007143 |
| -0.27366 | 1.82E-09 | -0.3026  | 2.41E-11 | -0.02322 | 0.61672 | 0.088729 | 0.05535  | -0.26629 |
| 0.031482 | 0.49734  | -0.16774 | 0.00027  | 0.002373 | 0.95921 | 0.035276 | 0.44695  | -0.0226  |
| 0.189402 | 3.80E-05 | -0.19638 | 1.92E-05 | 0.053525 | 0.24833 | -0.03831 | 0.40876  | 0.110921 |
| -0.117   | 0.0114   | -0.20544 | 7.62E-06 | -0.08218 | 0.07605 | -0.07896 | 0.0883   | -0.09686 |
| -0.10551 | 0.02258  | -0.25105 | 3.82E-08 | -0.01229 | 0.79115 | -0.06689 | 0.14893  | -0.1046  |
| 0.007653 | 0.86898  | -0.0615  | 0.18459  | 0.072647 | 0.11693 | 0.06311  | 0.17335  | 0.003165 |
| 0.008691 | 0.85141  | 0.10515  | 0.02306  | 0.096042 | 0.03801 | 0.186359 | 5.08E-05 | 0.134667 |
| -0.00141 | 0.97571  | -0.05404 | 0.24378  | 0.013623 | 0.76905 | -0.06677 | 0.14965  | -0.11822 |
| 0.115146 | 0.01278  | -0.17786 | 0.00011  | 0.025001 | 0.58995 | 0.077686 | 0.09357  | -0.19196 |

|          |          |          |          |          |         |          |          |          |
|----------|----------|----------|----------|----------|---------|----------|----------|----------|
| -0.0276  | 0.55192  | -0.24551 | 7.71E-08 | -0.01158 | 0.80299 | -0.05238 | 0.25865  | -0.21369 |
| 0.082793 | 0.07387  | 0.252551 | 3.15E-08 | 0.057235 | 0.217   | 0.147347 | 0.00141  | 0.226469 |
| 0.044467 | 0.33764  | -0.05244 | 0.25811  | -0.01655 | 0.72134 | -0.09449 | 0.04125  | -0.04237 |
| -0.03492 | 0.45158  | 0.312288 | 5.06E-12 | 0.006651 | 0.88602 | 0.141975 | 0.0021   | -0.02585 |
| -0.00483 | 0.91706  | 0.018614 | 0.68826  | -0.02428 | 0.60076 | -0.06228 | 0.17907  | -0.03555 |
| -0.1757  | 0.00014  | -0.15206 | 0.00098  | 0.040856 | 0.37836 | 0.027953 | 0.5468   | -0.07437 |
| 0.05699  | 0.21897  | 0.133932 | 0.00374  | -0.02074 | 0.65489 | 0.001808 | 0.96892  | -0.12637 |
| -0.12483 | 0.00691  | -0.22627 | 7.78E-07 | 0.006517 | 0.8883  | 0.065595 | 0.157    | -0.05768 |
| -0.14312 | 0.00193  | -0.04463 | 0.33589  | 0.01675  | 0.71808 | 0.06617  | 0.15338  | -0.04951 |
| -0.17545 | 0.00014  | -0.28386 | 4.19E-10 | 0.012283 | 0.79121 | -0.02256 | 0.62682  | -0.12053 |
| -0.0364  | 0.43265  | -0.06143 | 0.18512  | 0.042376 | 0.36087 | 0.011026 | 0.81216  | -0.0439  |
| -0.19479 | 2.25E-05 | -0.22323 | 1.10E-06 | 0.000946 | 0.98374 | 0.021134 | 0.64873  | -0.06392 |
| 0.088872 | 0.05496  | 0.197063 | 1.79E-05 | 0.087873 | 0.05776 | 0.207709 | 6.01E-06 | 0.391183 |
| -0.00332 | 0.94291  | 0.066853 | 0.14918  | 0.013097 | 0.77772 | 0.006168 | 0.89425  | 0.061627 |
| 0.195848 | 2.02E-05 | 0.105735 | 0.0223   | 0.043833 | 0.34458 | 0.017448 | 0.70686  | 0.290922 |
| 0.221957 | 1.27E-06 | 0.127669 | 0.00573  | -0.03582 | 0.44002 | -0.14306 | 0.00194  | 0.032555 |
| -0.11771 | 0.01091  | -0.28467 | 3.72E-10 | 0.011273 | 0.80804 | 0.067938 | 0.14267  | 0.013548 |
| 0.001464 | 0.97482  | -0.035   | 0.45051  | -0.02781 | 0.54892 | -0.0178  | 0.70117  | -0.03211 |
| -0.04192 | 0.36606  | -0.02561 | 0.58095  | -0.03743 | 0.4197  | -0.07146 | 0.12307  | -0.12585 |
| 0.021799 | 0.63844  | 0.035235 | 0.44748  | 0.01998  | 0.66671 | -0.0556  | 0.2304   | -0.07883 |
| -0.01688 | 0.71592  | -0.04962 | 0.28456  | -0.05939 | 0.20013 | -0.09929 | 0.03193  | -0.08827 |
| 0.041734 | 0.3682   | 0.068095 | 0.14175  | -0.04106 | 0.37601 | -0.06217 | 0.17988  | -0.0019  |
| 0.049052 | 0.29014  | 0.088326 | 0.05647  | -0.02076 | 0.65456 | -0.06671 | 0.15007  | -0.10144 |
| 0.037628 | 0.41722  | 0.06648  | 0.15146  | -0.03019 | 0.51522 | -0.06931 | 0.13474  | 0.023293 |
| -0.02251 | 0.62748  | -0.10279 | 0.02633  | -0.04685 | 0.31238 | -0.09497 | 0.04023  | -0.1265  |
| -0.00306 | 0.94734  | -0.05303 | 0.25275  | 0.067107 | 0.14763 | 0.099352 | 0.03183  | 0.225666 |
| 0.23655  | 2.32E-07 | 0.207023 | 6.46E-06 | 0.062626 | 0.17668 | 0.214972 | 2.76E-06 | 0.253809 |
| 0.128133 | 0.00555  | -0.00343 | 0.941    | 0.006044 | 0.89636 | -0.06615 | 0.15349  | -0.04134 |
| -0.01384 | 0.7655   | -0.14823 | 0.00132  | 0.10542  | 0.0227  | 0.401249 | 1.72E-19 | 0.168189 |
| 0.209097 | 5.19E-06 | 0.055022 | 0.23533  | 0.017246 | 0.71011 | 0.098837 | 0.03273  | -0.20475 |
| -0.02101 | 0.65072  | 0.038947 | 0.40107  | 0.124658 | 0.00699 | 0.343556 | 2.20E-14 | 0.034295 |
| -0.11711 | 0.01132  | -0.19504 | 2.19E-05 | 0.035741 | 0.44098 | -0.01708 | 0.71281  | -0.09602 |
| 0.135593 | 0.00333  | 0.390529 | 1.83E-18 | 0.024735 | 0.59392 | 0.091265 | 0.04871  | 0.214823 |
| 0.067259 | 0.14672  | 0.277876 | 9.99E-10 | 0.068579 | 0.13893 | 0.112814 | 0.01472  | 0.26791  |
| -0.15586 | 0.00073  | -0.11693 | 0.01145  | -0.05745 | 0.21527 | -0.06621 | 0.15316  | -0.03339 |
| 0.135509 | 0.00335  | 0.174675 | 0.00015  | 0.024151 | 0.60266 | 0.019498 | 0.67429  | 0.125288 |
| 0.024166 | 0.60243  | -0.10778 | 0.01982  | 0.057682 | 0.21342 | 0.053661 | 0.24713  | -0.00939 |
| -0.07339 | 0.11321  | 0.022769 | 0.62358  | 0.036202 | 0.4351  | 0.078063 | 0.09199  | 0.148364 |
| 0.012955 | 0.78007  | -0.0911  | 0.04913  | 0.026436 | 0.56878 | 0.023002 | 0.62003  | 0.034703 |
| 0.053394 | 0.24949  | 0.041151 | 0.37493  | 0.016057 | 0.72927 | 0.092218 | 0.0464   | 0.077053 |
| 0.041105 | 0.37547  | 0.035194 | 0.44801  | 0.007987 | 0.86333 | -0.01238 | 0.78959  | -0.0433  |
| -0.03404 | 0.46298  | -0.16341 | 0.00039  | 0.075837 | 0.10167 | 0.093366 | 0.04373  | 0.01026  |
| -0.01503 | 0.74592  | -0.24111 | 1.33E-07 | 0.019654 | 0.67184 | 0.008099 | 0.86143  | -0.07644 |
| 0.101956 | 0.02759  | 0.335308 | 9.83E-14 | 0.100926 | 0.0292  | 0.146683 | 0.00148  | 0.288019 |
| -0.13291 | 0.00401  | -0.02904 | 0.53124  | 0.027073 | 0.55949 | 0.218547 | 1.86E-06 | -0.10125 |

|          |          |          |          |          |         |          |          |          |
|----------|----------|----------|----------|----------|---------|----------|----------|----------|
| -0.04418 | 0.34078  | -0.08219 | 0.07601  | 0.060014 | 0.19545 | 0.063665 | 0.16959  | 0.254122 |
| -0.00419 | 0.92808  | -0.14809 | 0.00133  | 0.004061 | 0.93025 | -0.01479 | 0.74983  | -0.02484 |
| 0.066061 | 0.15407  | -0.19156 | 3.08E-05 | 0.002651 | 0.95444 | -0.11652 | 0.01174  | 0.037987 |
| -0.0487  | 0.29357  | -0.15274 | 0.00093  | -0.01117 | 0.80973 | -0.04504 | 0.33143  | -0.05344 |
| -0.10706 | 0.02067  | -0.14189 | 0.00212  | 0.033399 | 0.47151 | -0.00351 | 0.93972  | -0.06497 |
| -0.01924 | 0.67843  | -0.14483 | 0.0017   | 0.022566 | 0.62668 | -0.01667 | 0.7193   | 0.038416 |
| -0.01075 | 0.81676  | -0.12594 | 0.00643  | 0.019432 | 0.67533 | -0.01591 | 0.73159  | 0.034649 |
| -0.0316  | 0.49567  | -0.09092 | 0.04958  | 0.110156 | 0.01725 | 0.179237 | 9.84E-05 | 0.07505  |
| -0.11991 | 0.0095   | -0.10581 | 0.02221  | 0.006481 | 0.8889  | 0.102889 | 0.02619  | -0.04054 |
| -0.06096 | 0.18849  | -0.16001 | 0.00052  | -0.04126 | 0.37372 | 0.011092 | 0.81106  | -0.18916 |
| 0.032783 | 0.47973  | 0.026981 | 0.56083  | 0.031    | 0.50395 | 0.134174 | 0.00367  | 0.008309 |
| -0.20294 | 9.88E-06 | -0.1824  | 7.36E-05 | -0.00253 | 0.95651 | -0.00716 | 0.87735  | 0.049841 |
| -0.06553 | 0.15741  | -0.15913 | 0.00056  | 0.0522   | 0.26025 | 0.038056 | 0.41193  | 0.113893 |
| 0.095974 | 0.03815  | -0.16407 | 0.00037  | 0.012489 | 0.78779 | -0.02284 | 0.62253  | -0.04434 |
| 0.027808 | 0.54888  | -0.18806 | 4.32E-05 | 0.019999 | 0.66642 | -0.08413 | 0.0693   | -0.03621 |
| -0.06379 | 0.16874  | -0.06086 | 0.18919  | 0.054436 | 0.24036 | -0.01188 | 0.79791  | 0.097114 |
| -0.01656 | 0.72118  | -0.08861 | 0.05569  | 0.019434 | 0.6753  | -0.03481 | 0.45292  | -0.07205 |
| -0.1029  | 0.02617  | 0.225534 | 8.46E-07 | -0.01589 | 0.73199 | 0.025241 | 0.58639  | -0.13457 |
| -0.02459 | 0.59604  | -0.20698 | 6.49E-06 | 0.031326 | 0.49948 | 0.001018 | 0.9825   | 0.058091 |
| 0.147542 | 0.00139  | 0.115294 | 0.01266  | 0.0953   | 0.03953 | 0.230373 | 4.83E-07 | 0.325783 |
| -0.13933 | 0.00255  | -0.30727 | 1.14E-11 | -0.00518 | 0.91117 | -0.05322 | 0.251    | -0.14661 |
| 0.108142 | 0.01941  | -0.07206 | 0.11992  | -0.01023 | 0.82544 | -0.09984 | 0.031    | -0.08617 |
| -0.13039 | 0.00477  | -0.35666 | 1.87E-15 | -0.03419 | 0.46107 | -0.06394 | 0.16773  | -0.08304 |
| -0.00517 | 0.9112   | -0.12381 | 0.00739  | 0.028604 | 0.53749 | -0.02119 | 0.6479   | 0.025436 |
| -0.04463 | 0.33587  | -0.3535  | 3.42E-15 | 0.014732 | 0.75085 | 0.001685 | 0.97103  | -0.06067 |
| 0.048726 | 0.29336  | -0.08966 | 0.05283  | 0.05524  | 0.23347 | -0.03789 | 0.41396  | 0.231901 |
| -0.08936 | 0.05364  | -0.38525 | 5.69E-18 | 0.018441 | 0.69102 | -0.02365 | 0.61023  | 0.018596 |
| -0.21851 | 1.87E-06 | -0.07056 | 0.12788  | -0.02103 | 0.65038 | 0.003263 | 0.94393  | -0.00982 |
| -0.05416 | 0.24274  | -0.2099  | 4.77E-06 | 0.035232 | 0.44751 | -0.03885 | 0.40221  | -0.20287 |
| 0.030596 | 0.50952  | -0.00799 | 0.86323  | 0.123009 | 0.00779 | 0.11551  | 0.01249  | 0.114643 |
| -0.12837 | 0.00547  | -0.46768 | 9.36E-27 | 0.058944 | 0.20356 | 0.033395 | 0.47156  | 0.154953 |
| -0.01881 | 0.68523  | -0.11891 | 0.01011  | 0.059539 | 0.19902 | 0.033399 | 0.4715   | 0.170065 |
| -0.2564  | 1.91E-08 | -0.52628 | 1.25E-34 | -0.04472 | 0.3349  | -0.00337 | 0.94215  | -0.13564 |
| 0.023344 | 0.61483  | 0.166217 | 0.00031  | 0.034592 | 0.45582 | -0.03688 | 0.42652  | 0.062923 |
| 0.006061 | 0.89608  | 0.184025 | 6.32E-05 | -0.02833 | 0.54141 | 0.00801  | 0.86294  | -0.03823 |
| 0.112933 | 0.01462  | 0.023238 | 0.61645  | -0.03767 | 0.41669 | -0.07808 | 0.09193  | -0.03816 |
| -0.00189 | 0.96744  | 0.140483 | 0.00234  | -0.02947 | 0.52528 | -0.0108  | 0.81595  | -0.0251  |
| 0.180368 | 8.87E-05 | 0.145832 | 0.00158  | 0.00423  | 0.92736 | -0.07194 | 0.12057  | 0.049594 |
| 0.018943 | 0.68305  | -0.1022  | 0.02721  | 0.060015 | 0.19545 | 0.041547 | 0.37034  | 0.308168 |
| -0.00612 | 0.89513  | 0.044367 | 0.33873  | 0.018642 | 0.68783 | 0.02955  | 0.52412  | 0.121813 |
| -0.08047 | 0.08237  | -0.28621 | 2.96E-10 | -0.01172 | 0.80057 | -0.06975 | 0.13228  | -0.07094 |
| -0.10083 | 0.02935  | -0.23554 | 2.62E-07 | -0.04166 | 0.36903 | -0.08141 | 0.07883  | -0.15662 |
| 0.369032 | 1.63E-16 | 0.442915 | 7.38E-24 | -0.0197  | 0.67113 | -0.00249 | 0.95718  | 0.001047 |
| -0.07921 | 0.08728  | -0.01647 | 0.72255  | -0.00822 | 0.85932 | 0.052829 | 0.25454  | 0.090041 |
| -0.07215 | 0.11946  | -0.14963 | 0.00118  | -0.0176  | 0.70437 | -0.0638  | 0.16869  | -0.03422 |

|          |          |          |          |          |          |          |          |          |
|----------|----------|----------|----------|----------|----------|----------|----------|----------|
| -0.07794 | 0.09252  | -0.16373 | 0.00038  | -0.01768 | 0.70315  | -0.06967 | 0.13274  | -0.05123 |
| 0.199287 | 1.43E-05 | 0.326472 | 4.64E-13 | 0.002145 | 0.96312  | 0.040702 | 0.38016  | 0.052539 |
| 0.010366 | 0.82321  | -0.1157  | 0.01235  | -0.01008 | 0.82809  | -0.04143 | 0.37172  | -0.0659  |
| -0.01272 | 0.7839   | -0.11956 | 0.00971  | 0.017816 | 0.70098  | -0.0325  | 0.48359  | 0.027523 |
| 0.072458 | 0.11789  | 0.110706 | 0.0167   | -0.01934 | 0.6767   | -0.01492 | 0.74775  | -0.03343 |
| -0.01286 | 0.78165  | 0.029941 | 0.51864  | -0.01215 | 0.79341  | -0.06861 | 0.13878  | -0.08217 |
| -0.14902 | 0.00124  | 0.081601 | 0.07813  | -0.01945 | 0.6751   | 0.009506 | 0.83767  | -0.02375 |
| 0.106517 | 0.02132  | 0.065437 | 0.158    | -0.00263 | 0.9548   | -0.03702 | 0.42479  | -0.04297 |
| -0.08603 | 0.06321  | -0.20564 | 7.47E-06 | -0.05009 | 0.28     | -0.17784 | 0.00011  | -0.06613 |
| -0.07393 | 0.1106   | -0.11888 | 0.01013  | 0.035987 | 0.43784  | -0.00862 | 0.85269  | -0.00054 |
| -0.02099 | 0.65091  | -0.00616 | 0.89439  | -0.07817 | 0.09155  | -0.05863 | 0.206    | -0.08755 |
| -0.1995  | 1.40E-05 | -0.11337 | 0.01423  | -0.00023 | 0.99609  | 0.10888  | 0.01859  | 0.059312 |
| 0.009733 | 0.83384  | -0.09365 | 0.04308  | 0.045817 | 0.32316  | 0.195076 | 2.18E-05 | 0.090227 |
| -0.03178 | 0.49322  | -0.17458 | 0.00015  | -0.01037 | 0.82311  | -0.08405 | 0.06956  | -0.05525 |
| 0.229187 | 5.55E-07 | 0.134634 | 0.00356  | 0.002283 | 0.96076  | 0.052669 | 0.25599  | -0.07358 |
| 0.031515 | 0.49689  | 0.089322 | 0.05374  | 0.020778 | 0.65425  | 0.101981 | 0.02755  | 0.098509 |
| -0.13446 | 0.0036   | -0.33215 | 1.72E-13 | 0.083586 | 0.07113  | 0.002856 | 0.95092  | -0.01002 |
| -0.1096  | 0.01783  | -0.25124 | 3.73E-08 | 0.031004 | 0.5039   | 0.045399 | 0.3276   | 0.102494 |
| 0.200393 | 1.28E-05 | 0.180011 | 9.17E-05 | -0.00084 | 0.98562  | -0.0029  | 0.95009  | -0.00495 |
| 0.054651 | 0.2385   | -0.10183 | 0.02778  | 0.090949 | 0.0495   | -0.01714 | 0.71173  | 0.034878 |
| 0.111646 | 0.01579  | -0.1237  | 0.00744  | 0.187162 | 4.71E-05 | 0.216487 | 2.34E-06 | 0.385522 |
| -0.05567 | 0.22982  | -0.09159 | 0.04791  | 0.021533 | 0.64255  | 0.017521 | 0.70569  | 0.177661 |
| 0.009024 | 0.84579  | -0.18116 | 8.25E-05 | 0.021149 | 0.64849  | 0.013267 | 0.77492  | -0.02224 |
| 0.029617 | 0.52318  | -0.07688 | 0.09705  | 0.027979 | 0.54643  | 0.072679 | 0.11677  | 0.034147 |
| -0.01371 | 0.76762  | -0.08769 | 0.05828  | 0.011501 | 0.80423  | 0.020174 | 0.66367  | 0.036023 |
| -0.00488 | 0.91625  | 0.109141 | 0.01831  | -0.01452 | 0.75437  | -0.02117 | 0.64812  | 0.032717 |
| 0.11343  | 0.01418  | 0.317509 | 2.13E-12 | -0.01636 | 0.72432  | -0.00213 | 0.96339  | 0.042199 |
| 0.038282 | 0.40916  | 0.062899 | 0.1748   | 0.059598 | 0.19858  | 0.01655  | 0.7213   | 0.047562 |
| -0.17931 | 9.77E-05 | -0.14155 | 0.00217  | 0.04812  | 0.29942  | 0.102526 | 0.02672  | 0.089269 |
| -0.00475 | 0.91853  | -0.14087 | 0.00228  | -0.03023 | 0.51457  | -0.16971 | 0.00023  | -0.13943 |
| -0.04686 | 0.31223  | -0.06587 | 0.15527  | 0.138663 | 0.00267  | 0.261441 | 9.77E-09 | 0.377679 |
| -0.15217 | 0.00097  | -0.14814 | 0.00132  | 0.091802 | 0.0474   | 0.243851 | 9.49E-08 | 0.255503 |
| -0.00375 | 0.9355   | 0.087683 | 0.0583   | -0.02466 | 0.59499  | -0.04882 | 0.29242  | -0.0691  |
| 0.139479 | 0.00252  | 0.129979 | 0.0049   | 0.003707 | 0.93633  | -0.08437 | 0.0685   | 0.111378 |
| -0.03228 | 0.48656  | -0.08308 | 0.07288  | -0.01353 | 0.77063  | 0.000661 | 0.98863  | -0.12655 |
| -0.09748 | 0.03521  | -0.22445 | 9.58E-07 | -0.02984 | 0.52006  | -0.1189  | 0.01012  | -0.1004  |
| 0.014594 | 0.75311  | 0.092633 | 0.04542  | 0.027197 | 0.55769  | 0.181313 | 8.13E-05 | 0.005664 |
| 0.017813 | 0.70102  | -0.01811 | 0.69626  | -0.038   | 0.41268  | -0.12583 | 0.00648  | -0.10962 |
| -0.01115 | 0.81017  | -0.11464 | 0.01317  | 0.026167 | 0.57271  | 0.178779 | 0.0001   | -0.12759 |
| -0.05694 | 0.21937  | -0.26556 | 5.59E-09 | -0.00983 | 0.83228  | -0.10942 | 0.01801  | -0.03119 |
| 0.032232 | 0.48714  | -0.04731 | 0.30759  | 0.051073 | 0.27069  | 0.037278 | 0.42157  | -0.00064 |
| 0.030947 | 0.50469  | -0.1283  | 0.00549  | 0.057312 | 0.21638  | 0.134677 | 0.00355  | 0.179579 |
| -0.03506 | 0.44973  | -0.2637  | 7.21E-09 | -0.03263 | 0.48178  | -0.10346 | 0.02537  | -0.09425 |
| 0.10321  | 0.02572  | 0.20381  | 9.03E-06 | 0.174542 | 0.00015  | 0.02169  | 0.64012  | 0.305932 |
| 0.074946 | 0.10576  | 0.141819 | 0.00213  | 0.069153 | 0.13565  | -0.0265  | 0.56778  | 0.073926 |

|          |          |          |          |          |          |          |          |          |
|----------|----------|----------|----------|----------|----------|----------|----------|----------|
| 0.05607  | 0.22652  | 0.265302 | 5.80E-09 | 0.003716 | 0.93617  | 0.065069 | 0.16036  | 0.122332 |
| -0.19906 | 1.47E-05 | -0.25074 | 3.97E-08 | 0.214162 | 3.01E-06 | 0.224951 | 9.05E-07 | 0.039128 |
| 0.064751 | 0.16242  | 0.148671 | 0.00127  | 0.005955 | 0.89788  | 0.046938 | 0.31145  | 0.127941 |
| -0.1038  | 0.02489  | -0.31401 | 3.81E-12 | 0.015023 | 0.74609  | 0.017205 | 0.71076  | -0.06873 |
| -0.07197 | 0.12041  | -0.21565 | 2.56E-06 | -0.0098  | 0.83269  | -0.03421 | 0.46075  | -0.00524 |
| 0.032141 | 0.48838  | 0.066256 | 0.15285  | 0.108685 | 0.0188   | 0.101828 | 0.02778  | 0.064987 |
| -0.14281 | 0.00198  | -0.45987 | 8.14E-26 | -0.00384 | 0.93401  | -0.01781 | 0.70107  | -0.10797 |
| -0.12427 | 0.00717  | -0.09966 | 0.0313   | 0.071108 | 0.12491  | 0.225227 | 8.77E-07 | 0.201018 |
| 0.035552 | 0.4434   | 0.048072 | 0.29989  | 0.085499 | 0.06488  | 0.007371 | 0.87377  | 0.066804 |
| -0.01725 | 0.71007  | 0.060373 | 0.19279  | 0.001349 | 0.9768   | 0.073796 | 0.11124  | -0.01231 |
| -0.08678 | 0.06094  | -0.1189  | 0.01012  | -0.01543 | 0.73953  | 0.026784 | 0.56369  | -0.00277 |
| -0.04197 | 0.36546  | 0.145051 | 0.00167  | -0.01559 | 0.73681  | -0.04848 | 0.29585  | 0.009083 |
| -0.02669 | 0.56509  | 0.046831 | 0.31256  | -0.02354 | 0.61181  | -0.0517  | 0.26483  | 0.002154 |
| -0.04207 | 0.36437  | -0.15658 | 0.00068  | -0.00114 | 0.98044  | -0.0201  | 0.66478  | 0.030814 |
| -0.17963 | 9.49E-05 | -0.24187 | 1.21E-07 | 0.016065 | 0.72915  | 0.004483 | 0.92302  | 0.042448 |
| -0.22511 | 8.88E-07 | -0.33236 | 1.66E-13 | -0.02281 | 0.62299  | -0.04589 | 0.32243  | -0.16763 |
| 0.037531 | 0.41842  | 0.26978  | 3.13E-09 | 0.014819 | 0.74942  | 0.099343 | 0.03184  | 0.037824 |
| -0.13578 | 0.00328  | -0.10361 | 0.02515  | 0.05596  | 0.22742  | 0.079649 | 0.08555  | 0.145734 |
| 0.001219 | 0.97904  | -0.13826 | 0.00275  | -0.02416 | 0.60246  | -0.08457 | 0.06787  | -0.06356 |
| 0.045379 | 0.32782  | -0.0555  | 0.23128  | 0.050423 | 0.27685  | 0.040916 | 0.37767  | 0.024915 |
| 0.008993 | 0.84631  | 0.082372 | 0.07535  | 0.009673 | 0.83485  | 0.00132  | 0.97731  | 0.0082   |
| -0.19438 | 2.34E-05 | -0.1065  | 0.02134  | -0.00476 | 0.91832  | 0.021318 | 0.64588  | 0.04875  |
| 0.147131 | 0.00143  | -0.05819 | 0.20938  | -0.05339 | 0.24952  | -0.13221 | 0.00421  | -0.16975 |
| 0.001209 | 0.97921  | -0.05606 | 0.22663  | 0.002785 | 0.95214  | -0.02729 | 0.55637  | -0.03489 |
| -0.03955 | 0.39382  | -0.07752 | 0.09426  | 0.058994 | 0.20318  | -0.01669 | 0.71913  | 0.210581 |
| -0.03384 | 0.46569  | -0.11234 | 0.01514  | -0.05361 | 0.2476   | 0.012787 | 0.78285  | -0.09341 |
| -0.04783 | 0.30237  | -0.14585 | 0.00158  | -0.01069 | 0.81773  | -0.02849 | 0.53912  | -0.05125 |
| -0.04012 | 0.38703  | -0.2173  | 2.14E-06 | 0.02752  | 0.55303  | -0.05945 | 0.19967  | -0.10758 |
| 0.265087 | 5.97E-09 | 0.353255 | 3.59E-15 | 0.014655 | 0.7521   | 0.152321 | 0.00096  | 0.070143 |
| -0.0337  | 0.46755  | 0.027996 | 0.54617  | -0.01087 | 0.81474  | -0.05331 | 0.25025  | -0.08157 |
| -0.13168 | 0.00437  | -0.06465 | 0.16306  | 0.02522  | 0.58669  | 0.041815 | 0.36726  | -0.07756 |
| 0.098564 | 0.03322  | -0.06012 | 0.19465  | -0.03585 | 0.43961  | -0.11414 | 0.01359  | -0.08441 |
| 0.156977 | 0.00066  | -0.03066 | 0.50861  | 0.035664 | 0.44196  | 0.11514  | 0.01278  | 0.056466 |
| -0.03943 | 0.39519  | -0.14256 | 0.00201  | 0.006535 | 0.88799  | -0.07343 | 0.11301  | 0.229737 |
| 0.273988 | 1.74E-09 | 0.518883 | 1.51E-33 | -0.00812 | 0.86102  | 0.055648 | 0.23003  | 0.115967 |
| 0.090165 | 0.05151  | 0.295558 | 7.22E-11 | 0.071769 | 0.12144  | 0.123645 | 0.00747  | 0.301666 |
| -0.2162  | 2.41E-06 | -0.06962 | 0.13301  | 0.012785 | 0.7829   | 0.107135 | 0.02058  | 0.128946 |
| 0.051917 | 0.26284  | 0.253656 | 2.73E-08 | 0.062702 | 0.17615  | 0.123034 | 0.00777  | 0.177976 |
| 0.030677 | 0.50841  | 0.311629 | 5.64E-12 | 0.009623 | 0.8357   | 0.115441 | 0.01255  | 0.068005 |
| -0.04607 | 0.32046  | -0.21123 | 4.13E-06 | 0.009855 | 0.83179  | 0.003449 | 0.94075  | 0.02967  |
| 0.033625 | 0.46851  | -0.38278 | 9.59E-18 | 0.014391 | 0.75643  | -0.02511 | 0.58839  | -0.03061 |
| -0.07845 | 0.09037  | -0.28411 | 4.04E-10 | 0.152104 | 0.00098  | -0.00401 | 0.93113  | 0.101818 |
| -0.08709 | 0.06002  | -0.08042 | 0.08257  | 0.145522 | 0.00162  | 0.155523 | 0.00075  | 0.003152 |
| 0.225069 | 8.93E-07 | 0.095213 | 0.03971  | -0.04634 | 0.31761  | -0.12232 | 0.00814  | -0.06702 |
| -0.07346 | 0.11288  | -0.18072 | 8.59E-05 | 0.015541 | 0.73765  | 0.006559 | 0.88758  | -0.0206  |

|          |          |          |          |          |         |          |          |          |
|----------|----------|----------|----------|----------|---------|----------|----------|----------|
| 0.021094 | 0.64934  | 0.091203 | 0.04887  | -0.04058 | 0.38166 | 0.013556 | 0.77015  | -0.04692 |
| 0.049787 | 0.28296  | -0.09639 | 0.03732  | 0.008726 | 0.85082 | 0.014317 | 0.75764  | -0.05891 |
| -0.0458  | 0.32333  | -0.07431 | 0.10876  | -0.03253 | 0.48317 | 0.005252 | 0.90987  | -0.02597 |
| -0.06848 | 0.13948  | -0.06148 | 0.18475  | 0.02435  | 0.59967 | 0.049314 | 0.28757  | 0.06406  |
| 0.05265  | 0.25616  | -0.07149 | 0.12291  | 0.090818 | 0.04983 | -0.03546 | 0.44456  | -0.0724  |
| -0.03989 | 0.38977  | -0.23963 | 1.60E-07 | 0.005412 | 0.90715 | -0.00104 | 0.98205  | 0.032607 |
| 0.147015 | 0.00144  | -0.04364 | 0.34669  | -0.00679 | 0.8837  | -0.09554 | 0.03904  | 0.007382 |
| 0.023705 | 0.60937  | 0.008713 | 0.85104  | -0.00445 | 0.92359 | -0.01473 | 0.75095  | -0.01962 |
| 0.099026 | 0.0324   | 0.077083 | 0.09615  | 0.032838 | 0.47899 | -0.07088 | 0.12614  | -0.00821 |
| 0.080909 | 0.0807   | 0.038956 | 0.40096  | -0.06019 | 0.19414 | -0.10195 | 0.0276   | -0.01763 |
| 0.160467 | 0.0005   | 0.021221 | 0.64738  | -0.0127  | 0.78425 | -0.00519 | 0.91098  | -0.00527 |
| -0.01693 | 0.71518  | 0.002626 | 0.95487  | 0.015085 | 0.74507 | -0.01573 | 0.7346   | 0.016132 |
| 0.143569 | 0.00187  | 0.104412 | 0.02404  | -0.00857 | 0.85339 | -0.08452 | 0.06802  | -0.02386 |
| 0.13176  | 0.00434  | 0.125786 | 0.00649  | -0.03117 | 0.50165 | -0.04589 | 0.32239  | 0.035513 |
| 0.065604 | 0.15694  | -0.05648 | 0.22314  | 0.018288 | 0.69346 | -0.01712 | 0.71208  | -0.01348 |
| 0.083103 | 0.07279  | 0.051429 | 0.26737  | 0.002919 | 0.94984 | 0.061638 | 0.18362  | 0.091215 |
| 0.033653 | 0.46814  | -0.15459 | 0.0008   | -0.02172 | 0.63962 | -0.07958 | 0.08582  | -0.09261 |
| 0.125391 | 0.00666  | 0.222205 | 1.24E-06 | -0.03698 | 0.42523 | -0.07234 | 0.11849  | 0.101004 |
| -0.05381 | 0.2458   | -0.00954 | 0.83716  | 0.013692 | 0.76792 | 0.069063 | 0.13616  | 0.261827 |
| 0.0956   | 0.03891  | -0.05585 | 0.22837  | 0.055319 | 0.2328  | -0.02586 | 0.5773   | 0.032128 |
| -0.05279 | 0.25486  | -0.13085 | 0.00462  | 0.000486 | 0.99164 | -0.03696 | 0.42555  | 0.011135 |
| -0.10212 | 0.02734  | -0.05049 | 0.27625  | -0.04543 | 0.32725 | -0.0384  | 0.40775  | -0.08091 |
| 0.029739 | 0.52147  | 0.044726 | 0.33483  | 0.002137 | 0.96327 | -0.03029 | 0.51373  | -0.01078 |
| 0.050591 | 0.27525  | 0.073412 | 0.11312  | 0.031114 | 0.50239 | 0.008173 | 0.86018  | 0.035333 |
| -0.04294 | 0.35447  | 0.009035 | 0.8456   | 0.036952 | 0.42564 | 0.039312 | 0.39666  | 0.275342 |
| -0.06205 | 0.18069  | -0.17811 | 0.00011  | 0.063452 | 0.17103 | 0.04266  | 0.35765  | 0.030142 |
| -0.15131 | 0.00104  | -0.37125 | 1.04E-16 | -0.04937 | 0.28703 | -0.14948 | 0.0012   | -0.17568 |
| -0.05972 | 0.19769  | -0.11591 | 0.01219  | 0.008251 | 0.85885 | -0.03075 | 0.50747  | -0.01083 |
| -0.23403 | 3.14E-07 | -0.31282 | 4.63E-12 | -0.05927 | 0.20105 | -0.06651 | 0.1513   | -0.1832  |
| -0.05754 | 0.21457  | -0.32047 | 1.29E-12 | 0.027237 | 0.55711 | 0.017087 | 0.71266  | 0.03903  |
| -0.16915 | 0.00024  | -0.11453 | 0.01327  | -0.04608 | 0.32044 | 0.016338 | 0.72472  | -0.10344 |
| -0.05528 | 0.23314  | -0.2004  | 1.28E-05 | 0.005578 | 0.90431 | -0.02661 | 0.56622  | -0.06971 |
| -0.16438 | 0.00036  | -0.23302 | 3.54E-07 | 0.011066 | 0.81148 | -0.03136 | 0.49902  | -0.07777 |
| -0.15577 | 0.00073  | -0.24664 | 6.69E-08 | -0.00188 | 0.96765 | -0.04772 | 0.30341  | -0.08718 |
| -0.0026  | 0.95537  | -0.08323 | 0.07236  | 0.041802 | 0.36742 | 0.044539 | 0.33686  | 0.013561 |
| 0.219499 | 1.67E-06 | 0.220376 | 1.52E-06 | 0.012541 | 0.78694 | -0.10808 | 0.01948  | -0.01069 |
| 0.112918 | 0.01463  | -0.01632 | 0.725    | 0.070577 | 0.12776 | 0.061235 | 0.1865   | 0.23653  |
| -0.12086 | 0.00894  | -0.24111 | 1.33E-07 | -0.0035  | 0.93988 | 0.070783 | 0.12665  | -0.0951  |
| -0.30311 | 2.22E-11 | -0.25073 | 3.98E-08 | 0.040674 | 0.3805  | 0.193211 | 2.62E-05 | 0.076378 |
| 0.040139 | 0.3868   | -0.17041 | 0.00022  | -0.00747 | 0.87202 | -0.01387 | 0.76503  | 0.05142  |
| 0.047099 | 0.3098   | 0.040605 | 0.38131  | 0.045284 | 0.32883 | 0.040101 | 0.38725  | 0.150353 |
| -0.0635  | 0.17067  | -0.18985 | 3.64E-05 | 0.060624 | 0.19095 | 0.010237 | 0.82537  | 0.022142 |
| 0.114067 | 0.01365  | -0.03931 | 0.39663  | 0.030216 | 0.51481 | 0.044764 | 0.33442  | 0.030629 |
| 0.088404 | 0.05626  | -0.26927 | 3.36E-09 | 0.001629 | 0.97199 | -0.05162 | 0.26556  | -0.03976 |
| 0.005129 | 0.91197  | -0.03599 | 0.4378   | -0.02355 | 0.61173 | -0.1024  | 0.02692  | -0.01136 |

|          |          |          |          |           |          |          |          |          |
|----------|----------|----------|----------|-----------|----------|----------|----------|----------|
| -0.26473 | 6.27E-09 | -0.44236 | 8.52E-24 | -0.01125  | 0.80839  | -0.05599 | 0.22717  | -0.07635 |
| 0.027415 | 0.55454  | -0.12303 | 0.00778  | -0.05518  | 0.23396  | -0.15065 | 0.00109  | -0.13163 |
| -0.14036 | 0.00236  | 0.153485 | 0.00088  | -0.02694  | 0.56148  | 0.057589 | 0.21416  | 0.200944 |
| -0.06272 | 0.17601  | -0.17029 | 0.00022  | -7.48E-05 | 0.99871  | -0.06664 | 0.15047  | 0.087542 |
| 0.043926 | 0.34356  | -0.12579 | 0.00649  | 0.00258   | 0.95566  | -0.04936 | 0.28709  | 0.009143 |
| 0.070807 | 0.12652  | -0.06622 | 0.15309  | 0.08074   | 0.08134  | 0.01455  | 0.75382  | 0.216617 |
| -0.06489 | 0.16151  | -0.13368 | 0.0038   | -0.05096  | 0.27172  | -0.09677 | 0.03658  | -0.13658 |
| -0.05235 | 0.25886  | -0.19541 | 2.11E-05 | 0.037979  | 0.41288  | -0.00424 | 0.92721  | 0.107854 |
| 0.002049 | 0.96478  | -0.01951 | 0.67418  | 0.00378   | 0.93506  | 0.070297 | 0.12928  | 0.129383 |
| -0.18699 | 4.78E-05 | -0.13817 | 0.00277  | -0.00301  | 0.94832  | 0.022978 | 0.62039  | 0.11013  |
| -0.16856 | 0.00025  | -0.23146 | 4.25E-07 | -0.07     | 0.13091  | -0.15389 | 0.00085  | -0.07728 |
| -0.10683 | 0.02094  | -0.37719 | 3.09E-17 | 0.018711  | 0.68672  | -0.06487 | 0.16166  | -0.00907 |
| -0.0519  | 0.26296  | -0.39778 | 3.73E-19 | -0.0046   | 0.92105  | -0.01117 | 0.80981  | -0.1466  |
| -0.02631 | 0.57068  | -0.21677 | 2.26E-06 | -0.01034  | 0.82358  | -0.06804 | 0.14205  | -0.0336  |
| 0.090367 | 0.05098  | -0.07823 | 0.0913   | -0.00356  | 0.93883  | -0.04627 | 0.31844  | 0.004139 |
| -0.05832 | 0.20837  | -0.30541 | 1.54E-11 | 0.012178  | 0.79295  | 0.053603 | 0.24765  | -0.02352 |
| -0.08482 | 0.06706  | -0.23551 | 2.63E-07 | 0.124089  | 0.00726  | 0.006553 | 0.88769  | 0.020836 |
| -0.01472 | 0.75108  | -0.06788 | 0.14303  | -0.01105  | 0.81117  | 0.076761 | 0.09756  | -0.02797 |
| -0.09057 | 0.05046  | -0.23881 | 1.76E-07 | 0.013261  | 0.77501  | 0.153355 | 0.00088  | -0.10894 |
| -0.09805 | 0.03416  | -0.28716 | 2.57E-10 | 0.038935  | 0.40121  | 0.073158 | 0.11437  | 0.07378  |
| 0.13555  | 0.00334  | 0.23695  | 2.21E-07 | -0.02234  | 0.63011  | 0.016439 | 0.72309  | -0.02794 |
| 0.050216 | 0.27883  | -0.01197 | 0.79643  | -0.00675  | 0.88427  | 0.047957 | 0.30106  | 0.007958 |
| -0.05052 | 0.27595  | -0.16131 | 0.00047  | -0.0456   | 0.32551  | -0.12589 | 0.00645  | -0.16541 |
| 0.117212 | 0.01125  | 0.004402 | 0.92441  | -0.06389  | 0.16806  | -0.15497 | 0.00078  | -0.06034 |
| 0.243922 | 9.40E-08 | 0.03704  | 0.42454  | -0.03652  | 0.43105  | -0.04842 | 0.29636  | 0.045444 |
| -0.00763 | 0.86937  | -0.28218 | 5.36E-10 | -0.04354  | 0.34783  | -0.11579 | 0.01228  | -0.11752 |
| 0.006855 | 0.88254  | -0.14154 | 0.00217  | -0.01236  | 0.78992  | 0.034227 | 0.46059  | 0.034993 |
| 0.148109 | 0.00133  | -0.1199  | 0.0095   | 0.009972  | 0.82982  | 0.040526 | 0.38224  | 0.061578 |
| 0.024179 | 0.60224  | 0.008646 | 0.85217  | -0.01242  | 0.78887  | 0.010194 | 0.8261   | -0.03972 |
| 0.055554 | 0.23082  | 0.004778 | 0.91798  | -0.00376  | 0.93538  | -0.03361 | 0.46868  | -0.00593 |
| 0.093889 | 0.04256  | 0.09466  | 0.04088  | 0.242146  | 1.17E-07 | 0.088868 | 0.05497  | 0.261014 |
| 0.236254 | 2.40E-07 | 0.293736 | 9.54E-11 | 0.034004  | 0.46351  | -0.01887 | 0.68427  | 0.194694 |
| 0.138265 | 0.00275  | -0.02942 | 0.52591  | 0.033124  | 0.47517  | -0.00708 | 0.87871  | 0.07432  |
| -0.0381  | 0.41144  | -0.16864 | 0.00025  | 0.023935  | 0.6059   | 0.021468 | 0.64355  | 0.102034 |
| 0.0012   | 0.97937  | 0.373646 | 6.40E-17 | 0.130377  | 0.00477  | 0.207968 | 5.85E-06 | 0.379941 |
| 0.011368 | 0.80645  | -0.00276 | 0.95263  | 0.029661  | 0.52257  | 0.004991 | 0.91433  | 0.01485  |
| 0.054882 | 0.23652  | 0.027452 | 0.55401  | 0.034407  | 0.45822  | 0.065642 | 0.1567   | -0.02484 |
| 0.018858 | 0.6844   | -0.31102 | 6.22E-12 | 0.02251   | 0.62753  | 0.037243 | 0.42201  | -0.04358 |
| -0.10121 | 0.02875  | -0.15244 | 0.00095  | 0.010484  | 0.82123  | -0.02957 | 0.52381  | -0.11144 |
| 0.227949 | 6.41E-07 | 0.086332 | 0.0623   | -0.01558  | 0.73696  | -0.05057 | 0.27549  | 0.044533 |
| 0.213694 | 3.17E-06 | 0.465168 | 1.89E-26 | 0.045265  | 0.32903  | 0.127799 | 0.00568  | 0.126847 |
| 0.065207 | 0.15947  | 0.126095 | 0.00636  | 0.004621  | 0.92067  | 0.160905 | 0.00048  | 0.112577 |
| 0.000872 | 0.985    | 0.171701 | 0.00019  | 0.091499  | 0.04814  | 0.182649 | 7.19E-05 | 0.290907 |
| -0.05064 | 0.27479  | 0.339637 | 4.51E-14 | 0.104355  | 0.02412  | 0.287422 | 2.47E-10 | 0.415853 |
| -0.1667  | 0.0003   | -0.42455 | 7.37E-22 | -0.03376  | 0.46676  | -0.07614 | 0.10031  | -0.18312 |



|          |          |          |          |           |          |          |          |          |
|----------|----------|----------|----------|-----------|----------|----------|----------|----------|
| 0.089166 | 0.05416  | -0.1164  | 0.01183  | 0.022398  | 0.62925  | -0.01593 | 0.73134  | 0.084929 |
| -0.03511 | 0.44904  | -0.04395 | 0.34326  | 0.01521   | 0.74304  | 0.032404 | 0.48483  | 0.207243 |
| 0.027437 | 0.55422  | -0.33581 | 8.99E-14 | 0.000174  | 0.99701  | -0.04265 | 0.35779  | -0.06308 |
| 0.011036 | 0.81198  | 0.113423 | 0.01419  | 0.282274  | 5.29E-10 | 0.390072 | 2.02E-18 | 0.393771 |
| -0.02507 | 0.58894  | 0.106378 | 0.02149  | -0.00393  | 0.93258  | -0.07131 | 0.12384  | -0.02101 |
| 0.063768 | 0.1689   | -0.03489 | 0.45194  | 0.030906  | 0.50525  | -0.09451 | 0.04121  | 0.048714 |
| -0.19351 | 2.55E-05 | -0.50763 | 5.90E-32 | -0.01499  | 0.74657  | -0.09186 | 0.04726  | -0.09198 |
| -0.06998 | 0.13101  | -0.14774 | 0.00137  | 0.041499  | 0.37091  | 0.17766  | 0.00011  | 0.101349 |
| -0.04127 | 0.37353  | -0.03967 | 0.39233  | -0.00769  | 0.86838  | -0.00408 | 0.9299   | -0.04294 |
| -0.10702 | 0.02071  | -0.13963 | 0.00249  | 0.086342  | 0.06227  | 0.055445 | 0.23174  | 0.099032 |
| -0.05266 | 0.25606  | -0.09556 | 0.03899  | -0.02253  | 0.62727  | -0.04221 | 0.36281  | -0.10785 |
| -0.04572 | 0.3242   | 0.141008 | 0.00226  | 0.049535  | 0.28541  | 0.025599 | 0.58108  | 0.018031 |
| -0.14632 | 0.00152  | -0.27872 | 8.85E-10 | -0.01565  | 0.73582  | -0.04597 | 0.32156  | -0.05777 |
| -0.04533 | 0.32837  | 0.240446 | 1.44E-07 | 0.022365  | 0.62975  | 0.09675  | 0.03661  | 0.015772 |
| 0.025366 | 0.58453  | -0.07802 | 0.09216  | -0.04002  | 0.38826  | -0.07803 | 0.09211  | -0.05011 |
| -0.16564 | 0.00032  | -0.21378 | 3.14E-06 | -0.05106  | 0.27081  | -0.08643 | 0.06201  | -0.1958  |
| -0.01872 | 0.68655  | -0.00019 | 0.99679  | 0.107295  | 0.02039  | 0.211168 | 4.16E-06 | 0.131391 |
| -0.08813 | 0.05703  | -0.24147 | 1.27E-07 | -0.02031  | 0.66155  | -0.04139 | 0.37215  | -0.12134 |
| -0.11231 | 0.01517  | -0.10297 | 0.02607  | -0.01252  | 0.78723  | 0.102301 | 0.02706  | 0.01057  |
| 0.15687  | 0.00067  | -0.20068 | 1.24E-05 | -0.00988  | 0.83135  | -0.1152  | 0.01273  | -0.09429 |
| 0.012802 | 0.78261  | 0.020463 | 0.65917  | 0.050882  | 0.2725   | 0.060439 | 0.1923   | 0.199548 |
| -0.00198 | 0.96591  | -0.09616 | 0.03777  | -8.73E-05 | 0.9985   | 0.008511 | 0.85446  | -0.02062 |
| -0.06946 | 0.13392  | -0.02331 | 0.61533  | -0.00869  | 0.85138  | -0.027   | 0.56054  | 0.041958 |
| -0.01705 | 0.71325  | -0.11247 | 0.01503  | -0.0114   | 0.80589  | -0.03157 | 0.49615  | -0.00671 |
| -0.10341 | 0.02544  | -0.06283 | 0.17524  | 0.097329  | 0.0355   | 0.230906 | 4.54E-07 | -0.02326 |
| 0.178717 | 0.0001   | 0.10338  | 0.02548  | 0.001831  | 0.96852  | -0.02171 | 0.6398   | -0.04627 |
| -0.0222  | 0.63236  | -0.06504 | 0.16057  | -0.00175  | 0.96988  | -0.00069 | 0.9881   | 0.009643 |
| -0.08201 | 0.07665  | -0.22195 | 1.27E-06 | 0.010215  | 0.82574  | -0.00552 | 0.90524  | 0.019171 |
| 0.149018 | 0.00124  | -0.01056 | 0.82003  | -0.0146   | 0.75303  | -0.02311 | 0.61833  | -0.03018 |
| 0.042498 | 0.35949  | 0.060292 | 0.19339  | -0.00384  | 0.93399  | -0.04882 | 0.29243  | -0.0052  |
| 0.088397 | 0.05628  | 0.08465  | 0.0676   | 0.02137   | 0.64506  | -0.02965 | 0.52278  | 0.082929 |
| -0.02862 | 0.53726  | -0.07066 | 0.12733  | -0.00427  | 0.92676  | -0.03293 | 0.47774  | -0.0422  |
| 0.218833 | 1.80E-06 | 0.307797 | 1.05E-11 | -0.01283  | 0.78221  | -0.0295  | 0.5248   | -0.01194 |
| -0.04648 | 0.31622  | -0.03387 | 0.46528  | 0.007622  | 0.86952  | -0.00483 | 0.91717  | -0.06874 |
| 0.014174 | 0.75999  | 0.034447 | 0.4577   | 0.024538  | 0.59685  | -0.0044  | 0.92443  | -0.04554 |
| 0.096991 | 0.03614  | 0.02649  | 0.56798  | -0.04397  | 0.34312  | -0.06315 | 0.17309  | -0.04135 |
| 0.186196 | 5.16E-05 | -0.12721 | 0.00591  | -0.00395  | 0.93214  | -0.07719 | 0.09569  | -0.07031 |
| 0.086786 | 0.06093  | -0.07337 | 0.11331  | -0.00205  | 0.96482  | -0.044   | 0.34269  | -0.05995 |
| -0.01722 | 0.71052  | -0.06304 | 0.17385  | 0.017606  | 0.70434  | -0.01113 | 0.81049  | -0.00128 |
| 0.107832 | 0.01976  | -0.02844 | 0.53978  | 0.043806  | 0.34488  | -0.05305 | 0.25253  | 0.03758  |
| 0.090003 | 0.05193  | -0.04232 | 0.36156  | -0.0051   | 0.91247  | -0.05871 | 0.20539  | 0.009319 |
| 0.151389 | 0.00103  | -0.17333 | 0.00017  | -0.00495  | 0.91503  | -0.04541 | 0.32745  | -0.07385 |
| 0.103649 | 0.0251   | -0.13976 | 0.00247  | 0.036505  | 0.43126  | -0.05895 | 0.20351  | 0.016417 |
| 0.017498 | 0.70606  | -0.06958 | 0.13326  | 0.026789  | 0.56363  | -0.02326 | 0.61614  | -0.05713 |
| 0.025755 | 0.57879  | -0.06339 | 0.17143  | 0.033635  | 0.46838  | -0.01992 | 0.66762  | -0.02597 |

|          |         |          |          |          |          |          |          |          |
|----------|---------|----------|----------|----------|----------|----------|----------|----------|
| 0.03483  | 0.45272 | 0.014399 | 0.7563   | 0.027994 | 0.54621  | -0.01561 | 0.73655  | -0.04357 |
| 0.00256  | 0.956   | -0.06921 | 0.13535  | 0.01934  | 0.67679  | 0.018018 | 0.69775  | 0.019012 |
| -0.0662  | 0.15322 | -0.1201  | 0.00938  | -0.006   | 0.89716  | -0.02418 | 0.60217  | -0.04055 |
| -0.01086 | 0.81487 | -0.05015 | 0.27943  | -0.00937 | 0.83987  | -0.02325 | 0.61633  | -0.02943 |
| -0.02645 | 0.56859 | -0.09676 | 0.03659  | 0.016407 | 0.72361  | -0.00529 | 0.90921  | 0.003147 |
| 0.011341 | 0.80689 | -0.06535 | 0.15855  | 0.008502 | 0.85461  | -0.00437 | 0.92488  | -0.00896 |
| 0.018355 | 0.69238 | 0.000503 | 0.99135  | 0.108802 | 0.01868  | 0.06916  | 0.13561  | 0.103124 |
| 0.023947 | 0.60573 | -0.06994 | 0.13124  | 0.012954 | 0.7801   | -0.0101  | 0.8276   | -0.03087 |
| -0.0554  | 0.23211 | -0.21072 | 4.36E-06 | 0.03608  | 0.43665  | -0.05799 | 0.211    | -0.08447 |
| -0.0077  | 0.86821 | -0.08889 | 0.0549   | 0.006269 | 0.89253  | 0.002303 | 0.96041  | 0.000223 |
| 0.012507 | 0.78749 | 0.183497 | 6.64E-05 | 0.057359 | 0.216    | 0.191943 | 2.97E-05 | 0.176646 |
| -0.03494 | 0.45134 | -0.11491 | 0.01296  | 0.050073 | 0.2802   | -0.01849 | 0.69026  | -0.02649 |
| -0.03634 | 0.43338 | -0.08571 | 0.06423  | 0.035354 | 0.44595  | 0.036935 | 0.42586  | -0.02073 |
| 0.048133 | 0.29928 | -0.04014 | 0.38681  | 0.014436 | 0.75569  | -0.02143 | 0.64407  | -0.0276  |
| 0.026467 | 0.56832 | 0.117131 | 0.0113   | 0.024396 | 0.59898  | 0.082867 | 0.07361  | 0.154096 |
| 0.049194 | 0.28874 | 0.105953 | 0.02202  | 0.032569 | 0.4826   | 0.076858 | 0.09713  | 0.142572 |
| 0.020134 | 0.6643  | -0.01209 | 0.79449  | 0.030392 | 0.51236  | 0.010577 | 0.81967  | -0.00119 |
| 0.137501 | 0.0029  | 0.060701 | 0.19038  | -0.01475 | 0.75048  | -0.06257 | 0.17706  | -0.02045 |
| 0.074478 | 0.10797 | 0.07849  | 0.09022  | 0.073859 | 0.11094  | -0.01167 | 0.80139  | 0.031796 |
| 0.164557 | 0.00036 | -0.11264 | 0.01488  | 0.020199 | 0.66329  | -0.00219 | 0.96238  | 0.070252 |
| 0.014605 | 0.75292 | -0.10152 | 0.02825  | -0.00447 | 0.92332  | -0.06972 | 0.13247  | 0.044326 |
| 0.143358 | 0.0019  | 0.42661  | 4.46E-22 | -0.01653 | 0.72164  | 0.005235 | 0.91017  | -0.01858 |
| 0.17058  | 0.00021 | 0.472957 | 2.11E-27 | -0.00096 | 0.98347  | 0.005462 | 0.9063   | 0.019628 |
| -0.05325 | 0.25081 | -0.02295 | 0.62075  | 0.025482 | 0.58281  | 0.069729 | 0.13242  | 0.131724 |
| 0.003936 | 0.9324  | -0.102   | 0.02751  | 0.047701 | 0.30364  | 0.152568 | 0.00094  | 0.127771 |
| -0.09294 | 0.0447  | -0.27884 | 8.70E-10 | -0.00438 | 0.92474  | 0.008805 | 0.84949  | -0.13331 |
| 0.159562 | 0.00054 | 0.153912 | 0.00085  | 0.026371 | 0.56973  | -0.01451 | 0.75442  | 0.111133 |
| -0.02102 | 0.65052 | 0.139897 | 0.00245  | -0.03292 | 0.47786  | -0.08732 | 0.05936  | 0.028664 |
| 0.050567 | 0.27548 | 0.272819 | 2.05E-09 | -0.00332 | 0.94301  | 0.040841 | 0.37854  | -0.07202 |
| 0.063172 | 0.17293 | 0.522164 | 5.04E-34 | 0.014202 | 0.75953  | 0.141134 | 0.00224  | 0.085181 |
| 0.075536 | 0.10304 | -0.19748 | 1.72E-05 | -0.00127 | 0.97808  | -0.08749 | 0.05886  | -0.0591  |
| 0.020653 | 0.6562  | 0.041785 | 0.36762  | 0.024111 | 0.60326  | 0.157214 | 0.00065  | 0.006419 |
| -0.11459 | 0.01322 | -0.31611 | 2.69E-12 | -0.00488 | 0.91632  | -0.02788 | 0.54781  | -0.06478 |
| -0.0745  | 0.10786 | -0.0937  | 0.04299  | 0.282544 | 5.08E-10 | 0.277828 | 1.01E-09 | 0.384816 |
| -0.12311 | 0.00774 | -0.04869 | 0.29374  | 0.067396 | 0.14589  | 0.225748 | 8.26E-07 | 0.208423 |
| -0.05388 | 0.2452  | -0.08268 | 0.07426  | 0.005251 | 0.90989  | -0.00651 | 0.88841  | 0.097698 |
| -0.07026 | 0.12946 | -0.03255 | 0.48281  | -0.02202 | 0.63509  | 0.032157 | 0.48817  | -0.04002 |
| -0.01501 | 0.7463  | -0.10405 | 0.02453  | 0.01891  | 0.68357  | -0.03839 | 0.40783  | -0.00983 |
| -0.09166 | 0.04775 | -0.24629 | 6.99E-08 | -0.01584 | 0.73283  | -0.02327 | 0.61594  | -0.06161 |
| -0.08447 | 0.06817 | -0.15434 | 0.00082  | -0.00076 | 0.98686  | 0.029563 | 0.52394  | -0.02678 |
| -0.01821 | 0.69473 | -0.13156 | 0.0044   | 0.02377  | 0.60839  | -0.00138 | 0.97624  | -0.05594 |
| -0.08318 | 0.07253 | -0.20223 | 1.06E-05 | 0.151999 | 0.00098  | 0.042561 | 0.35877  | 0.186343 |
| -0.02876 | 0.53526 | 0.031682 | 0.49461  | -0.01783 | 0.7008   | -0.13884 | 0.00264  | 0.02342  |
| -0.16655 | 0.0003  | -0.33579 | 9.01E-14 | 0.084884 | 0.06684  | -0.07866 | 0.08953  | -0.07995 |
| 0.034523 | 0.45672 | -0.11718 | 0.01127  | 0.11879  | 0.01019  | 0.131519 | 0.00441  | 0.178585 |

|          |          |          |          |          |         |          |          |          |
|----------|----------|----------|----------|----------|---------|----------|----------|----------|
| -0.07308 | 0.11476  | -0.17392 | 0.00016  | -0.01054 | 0.82035 | -0.03713 | 0.42346  | 0.000824 |
| -0.1398  | 0.00246  | -0.19502 | 2.20E-05 | -0.02712 | 0.55879 | -0.07071 | 0.12704  | -0.07575 |
| 0.108077 | 0.01948  | 0.049537 | 0.28539  | -0.034   | 0.4635  | 0.08282  | 0.07377  | -0.30195 |
| -0.24412 | 9.17E-08 | -0.12184 | 0.0084   | 0.070748 | 0.12683 | 0.013704 | 0.76772  | 0.227198 |
| -0.19706 | 1.79E-05 | -0.00139 | 0.9761   | 0.047269 | 0.30805 | 0.116793 | 0.01154  | 0.172157 |
| 0.213298 | 3.31E-06 | 0.377031 | 3.19E-17 | 0.040942 | 0.37736 | 0.013175 | 0.77643  | 0.081029 |
| 0.118877 | 0.01013  | 0.176198 | 0.00013  | 0.039053 | 0.39978 | -0.05    | 0.28087  | 0.110786 |
| 0.060826 | 0.18947  | -0.14614 | 0.00154  | -0.01518 | 0.74356 | -0.12071 | 0.00903  | 0.013497 |
| -0.01311 | 0.77748  | -0.15175 | 0.001    | 0.010705 | 0.81753 | -0.0224  | 0.62923  | -0.03224 |
| -0.02803 | 0.54568  | -0.10746 | 0.02019  | 0.011835 | 0.79866 | -0.03877 | 0.40319  | -0.03912 |
| 0.00981  | 0.83255  | 0.157555 | 0.00063  | 0.04782  | 0.30244 | -0.00846 | 0.85537  | 0.095274 |
| -0.11755 | 0.01102  | -0.24862 | 5.21E-08 | -0.00167 | 0.97132 | 0.005692 | 0.90236  | 0.005547 |
| -0.03573 | 0.44117  | -0.14328 | 0.00191  | -0.00223 | 0.96159 | -0.0563  | 0.22462  | -0.0366  |
| 0.066335 | 0.15236  | 0.103608 | 0.02515  | -0.00417 | 0.92838 | -0.02993 | 0.51874  | -0.11744 |
| 0.056356 | 0.22415  | 0.132115 | 0.00424  | -0.0312  | 0.50114 | 0.039102 | 0.3992   | -0.14304 |
| -0.18163 | 7.90E-05 | 0.03     | 0.51782  | -0.02726 | 0.55675 | 0.13854  | 0.0027   | -0.00819 |
| -0.10118 | 0.0288   | -0.0058  | 0.90061  | 0.061284 | 0.18615 | 0.440354 | 1.43E-23 | 0.075543 |
| -0.01707 | 0.71292  | 0.081396 | 0.07888  | -0.00575 | 0.90136 | 0.148194 | 0.00132  | -0.05256 |
| -0.12234 | 0.00813  | -0.18395 | 6.37E-05 | 0.064733 | 0.16253 | 0.221318 | 1.37E-06 | -0.0738  |
| -0.08221 | 0.07593  | -0.12737 | 0.00584  | -0.01345 | 0.77184 | -0.01889 | 0.68382  | -0.02875 |
| -0.04911 | 0.28955  | -0.08994 | 0.05208  | -0.03679 | 0.4277  | -0.05687 | 0.21991  | -0.06508 |
| -0.04637 | 0.31733  | -0.01237 | 0.78975  | 0.004323 | 0.92577 | -0.04604 | 0.32085  | -0.05283 |
| -0.11276 | 0.01477  | -0.21116 | 4.16E-06 | -0.00819 | 0.85991 | -0.06321 | 0.17267  | -0.10657 |
| -0.11765 | 0.01094  | -0.25423 | 2.53E-08 | -0.01031 | 0.82411 | -0.05658 | 0.22233  | -0.05832 |
| 0.004358 | 0.92517  | -0.10798 | 0.01959  | 0.05896  | 0.20344 | -0.01225 | 0.79168  | 0.043209 |
| -0.02645 | 0.56852  | -0.16561 | 0.00033  | 0.016783 | 0.71755 | -0.03205 | 0.48968  | -0.05893 |
| 0.00964  | 0.83542  | -0.07596 | 0.10113  | -0.06706 | 0.14789 | -0.0796  | 0.08574  | -0.05063 |
| 0.299594 | 3.86E-11 | 0.45733  | 1.63E-25 | 0.017501 | 0.70601 | 0.041796 | 0.36749  | 0.115477 |
| 0.058595 | 0.20625  | 0.011148 | 0.81013  | 0.007134 | 0.8778  | 0.013123 | 0.77729  | -0.12477 |
| -0.06537 | 0.15843  | -0.16996 | 0.00022  | 0.076673 | 0.09794 | 0.173539 | 0.00016  | 0.416129 |
| 0.009351 | 0.84028  | -0.12562 | 0.00656  | 0.025729 | 0.57917 | -0.08155 | 0.07831  | -0.11518 |
| 0.137923 | 0.00282  | -0.05357 | 0.2479   | 0.013755 | 0.76688 | -0.06679 | 0.14953  | 0.065595 |
| -0.14169 | 0.00215  | -0.18778 | 4.44E-05 | -0.02032 | 0.66144 | -0.08508 | 0.06621  | -0.13554 |
| 0.040907 | 0.37777  | -0.01195 | 0.7967   | -0.07153 | 0.12267 | -0.14271 | 0.00199  | -0.19708 |
| 0.059419 | 0.19993  | 0.004701 | 0.9193   | -0.05285 | 0.25439 | -0.08277 | 0.07394  | -0.1592  |
| -0.03916 | 0.39855  | -0.11867 | 0.01027  | 0.064517 | 0.16394 | 0.166528 | 0.0003   | -0.04417 |
| -0.00252 | 0.95674  | -0.1692  | 0.00024  | -0.00603 | 0.8966  | -0.03853 | 0.40611  | 0.006152 |
| 0.005064 | 0.91309  | -0.09705 | 0.03603  | -0.01249 | 0.7877  | 0.011725 | 0.8005   | -0.11307 |
| 0.013153 | 0.7768   | -0.22423 | 9.83E-07 | 0.027365 | 0.55527 | 0.006068 | 0.89595  | -0.01395 |
| 0.06931  | 0.13476  | 0.235907 | 2.51E-07 | 0.019967 | 0.66692 | 0.069568 | 0.13331  | 0.055898 |
| 0.132575 | 0.00411  | -0.14714 | 0.00143  | -0.00181 | 0.96889 | -0.03378 | 0.46641  | -0.16704 |
| 0.080253 | 0.0832   | -0.16932 | 0.00024  | 0.094885 | 0.0404  | 0.030165 | 0.51552  | 0.227087 |
| -0.05942 | 0.19992  | -0.02787 | 0.54805  | 0.071407 | 0.12333 | 0.083    | 0.07314  | 0.015711 |
| 0.003661 | 0.93711  | -0.00428 | 0.92645  | 0.003347 | 0.94249 | 0.010616 | 0.81902  | -0.1061  |
| -0.01628 | 0.7256   | -0.06732 | 0.14636  | 0.012499 | 0.78763 | -0.04152 | 0.37062  | 0.032413 |

|          |          |          |          |          |         |          |          |          |
|----------|----------|----------|----------|----------|---------|----------|----------|----------|
| -0.19319 | 2.63E-05 | -0.17607 | 0.00013  | -0.0568  | 0.22054 | -0.15344 | 0.00088  | -0.16915 |
| -0.06088 | 0.18907  | -0.12187 | 0.00838  | -0.0184  | 0.69166 | 0.005769 | 0.90105  | -0.06584 |
| 0.215478 | 2.61E-06 | 0.188042 | 4.33E-05 | 0.004797 | 0.91765 | -0.05723 | 0.21704  | 0.061526 |
| 0.013903 | 0.76443  | -0.16886 | 0.00025  | -0.01071 | 0.8174  | -0.05316 | 0.25153  | -0.00271 |
| -0.03691 | 0.42618  | -0.16354 | 0.00039  | 0.012437 | 0.78866 | -0.0145  | 0.75463  | 0.111188 |
| 0.065629 | 0.15678  | 0.064303 | 0.16535  | 0.065833 | 0.15549 | 0.050315 | 0.27788  | 0.061878 |
| -0.11393 | 0.01376  | -0.12081 | 0.00897  | -0.00052 | 0.99104 | 0.026006 | 0.57508  | 0.047559 |
| 0.030854 | 0.50597  | 0.172445 | 0.00018  | -0.04679 | 0.313   | -0.05621 | 0.22537  | -0.08751 |
| -0.01222 | 0.79229  | 0.001904 | 0.96727  | 0.006983 | 0.88036 | 0.06343  | 0.17118  | 0.131906 |
| 0.196478 | 1.90E-05 | 0.421855 | 1.42E-21 | -0.00083 | 0.98568 | 0.037993 | 0.41271  | 0.011719 |
| 0.196114 | 1.97E-05 | -0.19669 | 1.86E-05 | 0.009621 | 0.83573 | -0.11243 | 0.01507  | -0.01138 |
| -0.14027 | 0.00238  | 0.008767 | 0.85012  | -0.0522  | 0.26021 | -0.01739 | 0.7078   | -0.14533 |
| 0.117653 | 0.01094  | 0.27124  | 2.56E-09 | 0.131523 | 0.00441 | 0.30748  | 1.10E-11 | 0.431388 |
| 0.00357  | 0.93867  | 0.017617 | 0.70416  | 0.021809 | 0.63829 | 0.207683 | 6.03E-06 | -0.14365 |
| -0.02119 | 0.64786  | -0.2723  | 2.20E-09 | -0.01617 | 0.72747 | -0.13692 | 0.00303  | -0.06884 |
| -0.05591 | 0.22785  | -0.08683 | 0.0608   | -0.00522 | 0.91046 | -0.01068 | 0.81795  | -0.04899 |
| -0.0064  | 0.89025  | -0.05319 | 0.25131  | 0.011169 | 0.80976 | -0.03782 | 0.41483  | -0.02098 |
| -0.04423 | 0.34025  | -0.13511 | 0.00344  | 0.004561 | 0.92169 | -0.02241 | 0.62905  | -0.03272 |
| 0.078796 | 0.08897  | 0.261327 | 9.92E-09 | 0.149286 | 0.00121 | 0.192876 | 2.71E-05 | 0.407096 |
| -0.06578 | 0.15582  | -0.13339 | 0.00388  | 0.057948 | 0.21131 | 0.02     | 0.6664   | -0.00155 |
| 0.059304 | 0.2008   | -0.05034 | 0.27768  | 0.060272 | 0.19354 | 0.043239 | 0.35116  | 0.050044 |
| -0.06326 | 0.17229  | -0.24252 | 1.12E-07 | -0.00425 | 0.92707 | 0.024987 | 0.59016  | -0.02954 |
| -0.07949 | 0.08618  | -0.24299 | 1.06E-07 | 0.019776 | 0.66991 | -0.04004 | 0.38801  | -0.08105 |
| -0.02861 | 0.53736  | -0.10629 | 0.0216   | -0.00103 | 0.98234 | -0.03828 | 0.4092   | -0.04278 |
| 0.017262 | 0.70984  | -0.0727  | 0.11667  | 0.030496 | 0.51092 | 0.031715 | 0.49417  | 0.096    |
| -0.05379 | 0.24597  | -0.14635 | 0.00152  | -0.01308 | 0.77799 | -0.07034 | 0.12907  | -0.02783 |
| 0.086837 | 0.06078  | 0.104292 | 0.0242   | 0.086497 | 0.0618  | 0.066074 | 0.15399  | 0.047183 |
| 0.032784 | 0.47972  | -0.02008 | 0.66514  | 0.01074  | 0.81694 | 0.033065 | 0.47596  | 0.024001 |
| 0.039851 | 0.39022  | -0.01706 | 0.71303  | 0.034633 | 0.45528 | 0.056714 | 0.22121  | 0.087309 |
| 0.014569 | 0.75351  | 0.077491 | 0.0944   | 0.060119 | 0.19467 | 0.074404 | 0.10832  | 0.10356  |
| 0.021652 | 0.64071  | -0.11449 | 0.0133   | 0.072203 | 0.11919 | -0.01002 | 0.82894  | 0.022938 |
| 0.029756 | 0.52123  | -0.08593 | 0.06354  | 0.119953 | 0.00947 | 0.120608 | 0.00908  | 0.118555 |
| -0.0284  | 0.54044  | -0.16528 | 0.00033  | 0.092261 | 0.0463  | 0.01161  | 0.8024   | -0.01101 |
| -0.08251 | 0.07486  | -0.32746 | 3.91E-13 | -0.01866 | 0.68748 | -0.10681 | 0.02096  | -0.09218 |
| -0.13586 | 0.00326  | -0.1082  | 0.01935  | 0.01717  | 0.71133 | 0.077757 | 0.09327  | 0.009159 |
| -0.12999 | 0.0049   | -0.23126 | 4.35E-07 | -0.01556 | 0.73741 | -0.04571 | 0.32429  | -0.03448 |
| 0.093799 | 0.04276  | 0.091976 | 0.04698  | 0.0203   | 0.66171 | 0.109357 | 0.01808  | 0.13733  |
| -0.05842 | 0.20758  | -0.14623 | 0.00153  | 0.043971 | 0.34306 | 0.166157 | 0.00031  | 0.069672 |
| 0.022796 | 0.62316  | -0.06761 | 0.14463  | -0.02277 | 0.62358 | -0.03642 | 0.4324   | 0.072259 |
| 0.107651 | 0.01997  | 0.043378 | 0.34962  | 0.17672  | 0.00012 | 0.027941 | 0.54696  | 0.057693 |
| -0.10817 | 0.01937  | -0.04566 | 0.3248   | 0.031234 | 0.50074 | 0.072281 | 0.1188   | 0.127691 |
| 0.050393 | 0.27714  | -0.24488 | 8.34E-08 | -0.01106 | 0.81152 | 0.00526  | 0.90975  | -0.10643 |
| -0.20848 | 5.54E-06 | -0.34474 | 1.77E-14 | 0.020811 | 0.65373 | -0.03192 | 0.49136  | 0.016385 |
| -0.04087 | 0.37818  | -0.11529 | 0.01266  | 0.088991 | 0.05463 | 0.031025 | 0.50362  | 0.220943 |
| -0.04538 | 0.32785  | 0.058172 | 0.20955  | 0.031952 | 0.49094 | 0.311595 | 5.67E-12 | 0.077234 |

|          |          |           |          |          |         |          |          |          |
|----------|----------|-----------|----------|----------|---------|----------|----------|----------|
| -0.14217 | 0.00207  | -0.23558  | 2.61E-07 | 0.092876 | 0.04485 | 0.163443 | 0.00039  | 0.115851 |
| -0.05418 | 0.24258  | -0.43804  | 2.58E-23 | 0.037834 | 0.41467 | -0.01525 | 0.74242  | 0.020797 |
| -0.04164 | 0.36924  | -0.18426  | 6.19E-05 | 0.001553 | 0.97329 | 0.026061 | 0.57427  | 0.092431 |
| -0.01304 | 0.77874  | 0.005671  | 0.90273  | 0.059448 | 0.19971 | 0.114449 | 0.01333  | 0.09744  |
| 0.054704 | 0.23805  | 0.36639   | 2.77E-16 | 0.10554  | 0.02255 | 0.152901 | 0.00092  | 0.034194 |
| -0.01678 | 0.71753  | 0.167002  | 0.00029  | -0.04957 | 0.28509 | -0.04259 | 0.35846  | -0.14546 |
| -0.06717 | 0.14725  | -0.27546  | 1.41E-09 | -0.04064 | 0.38091 | -0.10362 | 0.02514  | -0.14073 |
| 0.019561 | 0.6733   | -8.78E-05 | 0.99849  | 0.078967 | 0.08827 | -0.00171 | 0.97064  | 0.149921 |
| -0.06474 | 0.1625   | -0.27801  | 9.80E-10 | -0.00021 | 0.9964  | -0.01692 | 0.71531  | -0.0363  |
| 0.000299 | 0.99487  | -0.08047  | 0.08238  | -0.04097 | 0.37706 | -0.13368 | 0.0038   | -0.14614 |
| 0.056164 | 0.22573  | -0.15655  | 0.00069  | -0.06948 | 0.13383 | -0.05558 | 0.23062  | -0.25402 |
| 0.102629 | 0.02657  | 0.106685  | 0.02112  | 0.092066 | 0.04676 | 0.037956 | 0.41317  | -0.01504 |
| 0.022967 | 0.62056  | -0.45309  | 5.09E-25 | -0.0455  | 0.32654 | -0.19447 | 2.32E-05 | -0.14572 |
| -0.07169 | 0.12182  | -0.09394  | 0.04246  | 0.004487 | 0.92296 | 0.063956 | 0.16765  | 0.138006 |
| -0.05    | 0.28094  | -0.3494   | 7.43E-15 | -0.02268 | 0.62499 | -0.07702 | 0.09641  | -0.09751 |
| 0.068517 | 0.13929  | -0.13613  | 0.0032   | 0.038867 | 0.40203 | 0.011884 | 0.79785  | -0.03648 |
| -0.09404 | 0.04222  | -0.11373  | 0.01392  | 0.139902 | 0.00244 | 0.147978 | 0.00134  | 0.298254 |
| 0.092236 | 0.04636  | 0.117263  | 0.01121  | -0.01889 | 0.68383 | -0.0838  | 0.07041  | 0.011227 |
| 0.017473 | 0.70646  | 0.388194  | 3.03E-18 | 0.067378 | 0.146   | 0.113615 | 0.01403  | 0.269927 |
| -0.01808 | 0.6968   | -0.06992  | 0.13135  | 0.020207 | 0.66316 | -0.01452 | 0.75438  | -0.02578 |
| -0.09448 | 0.04127  | -0.06452  | 0.16392  | -0.02005 | 0.66569 | -0.05132 | 0.26842  | -0.0169  |
| -0.05326 | 0.25067  | -0.22698  | 7.17E-07 | 0.041225 | 0.37408 | -0.01085 | 0.81512  | -0.03478 |
| 0.074816 | 0.10637  | -0.1307   | 0.00467  | -0.0027  | 0.95359 | -0.10614 | 0.02179  | -0.06635 |
| -0.00842 | 0.85593  | 0.077144  | 0.09589  | 0.034656 | 0.45498 | -0.0375  | 0.41882  | 0.22515  |
| -0.08231 | 0.07556  | 0.112462  | 0.01503  | -0.05413 | 0.24299 | -0.04612 | 0.31993  | -0.03376 |
| 0.131239 | 0.0045   | 0.156886  | 0.00067  | -0.00887 | 0.84838 | -0.08138 | 0.07895  | 0.033265 |
| 0.029779 | 0.52091  | -0.18378  | 6.47E-05 | -0.02958 | 0.52372 | 0.004071 | 0.93009  | -0.17473 |
| -0.19638 | 1.92E-05 | -0.29262  | 1.13E-10 | -0.03272 | 0.48054 | -0.09962 | 0.03137  | -0.12964 |
| -0.04714 | 0.30933  | -0.09581  | 0.03849  | 0.009615 | 0.83583 | 0.012892 | 0.78111  | -0.06959 |
| 0.237529 | 2.06E-07 | 0.211675  | 3.94E-06 | 0.0225   | 0.62768 | -0.0696  | 0.13313  | -0.01101 |
| -0.04713 | 0.30948  | 0.140536  | 0.00233  | -0.01451 | 0.7545  | 0.079992 | 0.08421  | -0.06409 |
| -0.08061 | 0.08184  | -0.16618  | 0.00031  | 0.007296 | 0.87505 | -0.02764 | 0.55133  | -0.05175 |
| 0.077336 | 0.09506  | -0.1042   | 0.02432  | -0.01893 | 0.68318 | -0.05086 | 0.27269  | -0.04794 |
| 0.07748  | 0.09445  | -0.3152   | 3.13E-12 | -0.00539 | 0.90751 | -0.07209 | 0.11978  | -0.12038 |
| 0.044852 | 0.33347  | 0.042429  | 0.36026  | -0.01767 | 0.70331 | -0.01526 | 0.74224  | -0.05894 |
| -0.10657 | 0.02126  | -0.31269  | 4.74E-12 | 0.001951 | 0.96647 | -0.0694  | 0.13427  | -0.07947 |
| -0.16085 | 0.00048  | -0.30162  | 2.81E-11 | 0.026568 | 0.56684 | 0.019279 | 0.67774  | 0.081989 |
| 0.137977 | 0.00281  | 0.16713   | 0.00029  | 0.029255 | 0.52827 | 0.021182 | 0.64798  | 0.075364 |
| -0.01816 | 0.69555  | 0.017985  | 0.69828  | -0.00216 | 0.96284 | -0.00689 | 0.88188  | -0.02859 |
| -0.0002  | 0.99648  | -0.08987  | 0.05227  | 0.015733 | 0.73453 | -0.05436 | 0.241    | -0.05047 |
| -0.10573 | 0.0223   | -0.14339  | 0.00189  | 0.120541 | 0.00912 | 0.167022 | 0.00029  | 0.384641 |
| -0.1147  | 0.01313  | -0.3518   | 4.73E-15 | 0.018612 | 0.6883  | -0.04417 | 0.34086  | -0.03205 |
| -0.15203 | 0.00098  | -0.15232  | 0.00096  | 0.016564 | 0.72109 | 0.032109 | 0.48881  | 0.056124 |
| -0.03927 | 0.39716  | -0.06679  | 0.14957  | -0.01561 | 0.73648 | 0.055487 | 0.23139  | -0.03685 |
| 0.360379 | 9.08E-16 | 0.327306  | 4.02E-13 | -0.04431 | 0.33932 | -0.09182 | 0.04734  | -0.03763 |

|          |          |          |          |          |         |          |          |          |
|----------|----------|----------|----------|----------|---------|----------|----------|----------|
| -0.05429 | 0.24159  | -0.11662 | 0.01167  | 0.035945 | 0.43837 | 0.064628 | 0.16322  | 0.041425 |
| 0.110563 | 0.01684  | -0.04113 | 0.37516  | -0.04966 | 0.28418 | -0.13882 | 0.00264  | 0.013179 |
| 0.008757 | 0.85031  | 0.159127 | 0.00056  | 0.083756 | 0.07056 | 0.31073  | 6.53E-12 | 0.187488 |
| 0.126932 | 0.00602  | 0.225775 | 8.23E-07 | 0.065617 | 0.15686 | 0.244913 | 8.31E-08 | 0.295723 |
| 0.180102 | 9.09E-05 | 0.418697 | 3.02E-21 | 0.084546 | 0.06794 | 0.087619 | 0.05849  | 0.249552 |
| -0.14621 | 0.00153  | -0.3742  | 5.72E-17 | 0.004447 | 0.92364 | 0.003004 | 0.94838  | -0.07261 |
| -0.0599  | 0.19631  | -0.21153 | 4.00E-06 | 0.004919 | 0.91558 | -0.03385 | 0.46554  | -0.03836 |
| -0.01898 | 0.68248  | -0.07755 | 0.09417  | 0.008398 | 0.85636 | 0.013349 | 0.77357  | -0.02383 |
| -0.17321 | 0.00017  | -0.01363 | 0.76895  | -0.0803  | 0.08302 | -0.12932 | 0.00513  | -0.1136  |
| 0.207685 | 6.02E-06 | 0.357874 | 1.48E-15 | 0.014562 | 0.75363 | -0.00914 | 0.84384  | 0.051607 |
| -0.11633 | 0.01188  | -0.15928 | 0.00055  | 0.048025 | 0.30037 | 0.089857 | 0.05231  | 0.047936 |
| -0.2682  | 3.89E-09 | -0.32424 | 6.81E-13 | 0.02069  | 0.65562 | 0.076281 | 0.09968  | -0.13299 |
| 0.227611 | 6.66E-07 | 0.139011 | 0.00261  | -0.06176 | 0.18274 | -0.09988 | 0.03092  | -0.05554 |
| 0.186453 | 5.03E-05 | 0.330807 | 2.18E-13 | -0.01448 | 0.75505 | -0.04126 | 0.37367  | 0.231344 |
| -0.01315 | 0.77687  | 0.125454 | 0.00664  | -0.03267 | 0.4812  | -0.12918 | 0.00518  | -0.12136 |
| 0.17624  | 0.00013  | 0.137038 | 0.003    | 0.017331 | 0.70874 | 0.010356 | 0.82337  | 0.037103 |
| 0.058605 | 0.20618  | -0.02004 | 0.6658   | 0.00299  | 0.94862 | -0.10436 | 0.02411  | -0.02062 |
| -0.27774 | 1.02E-09 | -0.37571 | 4.19E-17 | -0.01384 | 0.76554 | 0.04934  | 0.28731  | -0.12112 |
| -0.03342 | 0.47123  | 0.207326 | 6.26E-06 | -0.02584 | 0.57755 | 0.111223 | 0.01619  | -0.04572 |
| 0.237852 | 1.98E-07 | 0.338713 | 5.33E-14 | 0.011824 | 0.79884 | 0.096893 | 0.03633  | -0.03375 |
| -0.031   | 0.504    | -0.19356 | 2.54E-05 | 0.046845 | 0.31241 | 0.035085 | 0.44941  | 0.226759 |
| -0.14461 | 0.00173  | -0.39359 | 9.39E-19 | -0.06496 | 0.16108 | -0.10742 | 0.02024  | -0.24397 |
| 0.127628 | 0.00575  | -0.30543 | 1.54E-11 | -0.03594 | 0.43846 | -0.14594 | 0.00156  | -0.12994 |
| 0.091275 | 0.04869  | 0.33296  | 1.49E-13 | -0.01938 | 0.67622 | 0.031238 | 0.50068  | 0.087423 |
| -0.09921 | 0.03208  | -0.30074 | 3.23E-11 | -0.03495 | 0.45113 | -0.0444  | 0.33836  | -0.09391 |
| 0.069772 | 0.13218  | 0.253168 | 2.91E-08 | 0.06235  | 0.1786  | 0.14803  | 0.00134  | 0.232017 |
| 0.027192 | 0.55777  | 0.009427 | 0.839    | -0.02208 | 0.63416 | -0.08853 | 0.05592  | -0.0231  |
| 0.100501 | 0.02989  | 0.307347 | 1.13E-11 | -0.03453 | 0.45656 | -0.074   | 0.11025  | -0.05195 |
| -0.0746  | 0.10739  | -0.16653 | 0.0003   | 0.001732 | 0.97023 | -0.08225 | 0.0758   | -0.04753 |
| -0.14468 | 0.00172  | -0.24816 | 5.52E-08 | 0.001937 | 0.9667  | 0.022163 | 0.63285  | 0.027931 |
| -0.05343 | 0.24917  | 0.008973 | 0.84665  | 0.040107 | 0.38718 | 0.058979 | 0.20329  | 0.123587 |
| -0.07895 | 0.08833  | -0.29601 | 6.73E-11 | -0.03054 | 0.51027 | -0.12421 | 0.0072   | -0.11195 |
| 0.037466 | 0.41923  | 0.25552  | 2.14E-08 | 0.025718 | 0.57933 | 0.040376 | 0.384    | -0.01122 |
| 0.02162  | 0.64121  | 0.423661 | 9.15E-22 | 0.040722 | 0.37994 | 0.044691 | 0.33521  | 0.195504 |
| 0.069792 | 0.13207  | 0.102526 | 0.02673  | -0.00579 | 0.90061 | 0.006068 | 0.89594  | 0.033361 |
| -0.11695 | 0.01143  | -0.49629 | 2.08E-30 | -0.04531 | 0.32852 | -0.04457 | 0.33654  | -0.02357 |
| 0.183395 | 6.71E-05 | -0.05896 | 0.20347  | -0.02896 | 0.53241 | -0.07443 | 0.10817  | -0.12231 |
| -0.0772  | 0.09566  | -0.29665 | 6.10E-11 | -0.02293 | 0.62109 | -0.14363 | 0.00186  | -0.10471 |
| 0.179873 | 9.28E-05 | 0.198961 | 1.48E-05 | 0.010536 | 0.82036 | -0.13604 | 0.00322  | 0.122587 |
| -0.13107 | 0.00455  | -0.13174 | 0.00435  | -0.01372 | 0.76743 | 0.049852 | 0.28233  | -0.03379 |
| 0.049697 | 0.28383  | -0.12459 | 0.00702  | -0.08936 | 0.05364 | -0.1931  | 2.65E-05 | -0.30782 |
| -0.0686  | 0.13879  | -0.16401 | 0.00037  | -0.00875 | 0.85034 | 0.032098 | 0.48896  | 0.001548 |
| 0.217714 | 2.04E-06 | 0.463495 | 3.01E-26 | 0.052437 | 0.25809 | 0.041937 | 0.36587  | 0.260133 |
| 0.050615 | 0.27502  | 0.384173 | 7.15E-18 | 0.129338 | 0.00512 | 0.321998 | 1.00E-12 | 0.445624 |
| -0.1592  | 0.00055  | -0.05476 | 0.23757  | 0.123557 | 0.00751 | 0.196593 | 1.88E-05 | 0.197729 |

|          |          |          |          |          |         |          |          |          |
|----------|----------|----------|----------|----------|---------|----------|----------|----------|
| 0.285791 | 3.15E-10 | 0.257349 | 1.68E-08 | 0.012775 | 0.78305 | -0.04291 | 0.35482  | 0.100337 |
| -0.10033 | 0.03018  | -0.32302 | 8.40E-13 | -0.00886 | 0.84848 | -0.06032 | 0.19317  | -0.09601 |
| 0.099289 | 0.03194  | -0.07664 | 0.09808  | -0.02447 | 0.59785 | -0.10902 | 0.01845  | -0.09299 |
| -0.19086 | 3.30E-05 | -0.07259 | 0.11721  | 0.103444 | 0.02539 | 0.275458 | 1.41E-09 | 0.11889  |
| -0.12089 | 0.00892  | 0.253976 | 2.62E-08 | 0.088989 | 0.05464 | 0.296707 | 6.05E-11 | 0.097024 |
| 0.147829 | 0.00136  | 0.210895 | 4.28E-06 | 0.130415 | 0.00476 | 0.148467 | 0.00129  | 0.414788 |
| -0.08934 | 0.05368  | -0.36279 | 5.66E-16 | -0.01628 | 0.7256  | -0.02659 | 0.56655  | -0.19669 |
| -0.30693 | 1.21E-11 | -0.52202 | 5.30E-34 | 0.001136 | 0.98046 | 0.094001 | 0.04231  | -0.10912 |
| -0.16832 | 0.00026  | -0.28231 | 5.26E-10 | 0.022552 | 0.62688 | -0.0206  | 0.65696  | -0.03937 |
| -0.10997 | 0.01744  | -0.23341 | 3.38E-07 | 0.051637 | 0.26543 | 0.012952 | 0.78013  | 0.063779 |
| -0.04053 | 0.38216  | -0.24381 | 9.53E-08 | 3.36E-05 | 0.99942 | 0.014267 | 0.75846  | -0.18066 |
| -0.10981 | 0.01761  | -0.12346 | 0.00756  | 0.039143 | 0.3987  | 0.019827 | 0.66911  | 0.006465 |
| -0.15269 | 0.00093  | -0.26006 | 1.17E-08 | 0.065568 | 0.15717 | 0.032645 | 0.48159  | 0.034932 |
| 0.030255 | 0.51426  | 0.116975 | 0.01141  | -0.00096 | 0.98348 | -0.03432 | 0.45931  | 0.08966  |
| 0.196223 | 1.95E-05 | 0.198331 | 1.58E-05 | -0.06484 | 0.16181 | -0.2148  | 2.81E-06 | -0.02659 |
| -0.103   | 0.02603  | 0.098083 | 0.03409  | 0.024561 | 0.59652 | 0.181383 | 8.08E-05 | 0.07247  |
| -0.17692 | 0.00012  | -0.4127  | 1.24E-20 | -0.05644 | 0.2235  | -0.05523 | 0.23359  | -0.17506 |
| 0.160474 | 0.0005   | 0.209043 | 5.22E-06 | 0.03347  | 0.47057 | 0.051496 | 0.26674  | -0.07327 |
| -0.02295 | 0.6208   | 0.137549 | 0.0029   | -0.01793 | 0.69923 | -0.02131 | 0.64592  | -0.08722 |
| -0.06322 | 0.17261  | -0.25478 | 2.36E-08 | 0.046008 | 0.32115 | 0.014901 | 0.74809  | 0.034287 |
| -0.06364 | 0.16975  | -0.12077 | 0.00899  | 0.009944 | 0.8303  | 0.086924 | 0.06052  | -0.04598 |
| -0.20837 | 5.60E-06 | -0.22822 | 6.21E-07 | -0.02943 | 0.52577 | -0.03931 | 0.39672  | -0.0292  |
| 0.175787 | 0.00013  | 0.026203 | 0.57219  | -0.00116 | 0.98003 | -0.12382 | 0.00739  | 0.07533  |
| 0.130451 | 0.00475  | 0.112281 | 0.0152   | 0.048054 | 0.30008 | 0.132221 | 0.00421  | 0.068405 |
| -0.01705 | 0.71327  | 0.243755 | 9.60E-08 | -0.06834 | 0.14029 | 0.045268 | 0.329    | -0.01965 |
| 0.213404 | 3.27E-06 | 0.324072 | 7.02E-13 | 0.033848 | 0.46557 | 0.189607 | 3.72E-05 | -0.02953 |
| -0.18792 | 4.38E-05 | -0.1794  | 9.70E-05 | 0.095732 | 0.03864 | 0.26561  | 5.56E-09 | -0.06916 |
| 0.169671 | 0.00023  | 0.014897 | 0.74814  | 0.05457  | 0.2392  | -0.01744 | 0.70692  | 0.148221 |
| 0.135242 | 0.00341  | -0.03766 | 0.41681  | -0.01713 | 0.71199 | 0.021836 | 0.63787  | -0.03822 |
| 0.124984 | 0.00684  | 0.110337 | 0.01707  | -0.00942 | 0.83907 | -0.06879 | 0.13774  | -0.06837 |
| 0.194009 | 2.43E-05 | 0.491256 | 9.68E-30 | 0.021004 | 0.65074 | 0.141584 | 0.00216  | 0.007203 |
| 0.203599 | 9.23E-06 | 0.182219 | 7.48E-05 | -0.03263 | 0.48177 | -0.09017 | 0.05149  | -0.18759 |
| -0.07392 | 0.11065  | -0.22637 | 7.69E-07 | 0.031408 | 0.49835 | 0.1038   | 0.02488  | -0.01797 |
| -0.16888 | 0.00025  | -0.16978 | 0.00023  | -0.03926 | 0.39728 | -0.00618 | 0.89396  | -0.14909 |
| 0.17367  | 0.00016  | -0.22078 | 1.45E-06 | -0.02209 | 0.63393 | -0.2328  | 3.63E-07 | -0.10114 |
| 0.260122 | 1.17E-08 | 0.406742 | 4.93E-20 | 0.065864 | 0.1553  | 0.029144 | 0.52984  | 0.167957 |
| -0.12077 | 0.00899  | -0.21118 | 4.16E-06 | -0.00081 | 0.98611 | -0.04074 | 0.37978  | 0.02827  |
| -0.02279 | 0.6233   | 0.174487 | 0.00015  | 0.150868 | 0.00107 | 0.222617 | 1.18E-06 | 0.281378 |
| 0.078342 | 0.09083  | 0.177666 | 0.00011  | 0.108674 | 0.01882 | 0.157642 | 0.00063  | 0.294092 |
| -0.047   | 0.31077  | -0.07051 | 0.12814  | -0.01427 | 0.75842 | -0.0587  | 0.20541  | 0.086605 |
| 0.260303 | 1.14E-08 | 0.115266 | 0.01268  | 0.098946 | 0.03254 | -0.02966 | 0.52252  | 0.118674 |
| -0.14418 | 0.00179  | -0.21396 | 3.08E-06 | -0.04071 | 0.38009 | -0.08163 | 0.07804  | -0.12721 |
| -0.02925 | 0.5284   | -0.40496 | 7.41E-20 | -0.02327 | 0.61593 | -0.09151 | 0.0481   | -0.09007 |
| -0.11243 | 0.01506  | -0.5193  | 1.31E-33 | -0.00203 | 0.96516 | -0.10774 | 0.01986  | -0.05039 |
| -0.07735 | 0.09501  | -0.28678 | 2.72E-10 | -0.10668 | 0.02112 | -0.18726 | 4.66E-05 | -0.21645 |

|          |          |          |          |          |         |          |          |          |
|----------|----------|----------|----------|----------|---------|----------|----------|----------|
| 0.177663 | 0.00011  | -0.40824 | 3.50E-20 | -0.0281  | 0.54465 | -0.17685 | 0.00012  | -0.1999  |
| -0.02648 | 0.56817  | -0.18802 | 4.34E-05 | 0.1196   | 0.00968 | 0.101652 | 0.02806  | 0.378194 |
| -0.11076 | 0.01664  | -0.51057 | 2.30E-32 | -0.01179 | 0.79941 | -0.07703 | 0.09639  | -0.12514 |
| 0.078628 | 0.08965  | 0.258246 | 1.50E-08 | 0.010121 | 0.82733 | -0.02314 | 0.6179   | 0.029028 |
| 0.190161 | 3.53E-05 | 0.050082 | 0.28011  | 0.027601 | 0.55186 | 0.052153 | 0.26068  | 0.047963 |
| -0.13275 | 0.00406  | -0.24299 | 1.06E-07 | -0.01864 | 0.68791 | -0.00853 | 0.85418  | -0.13176 |
| -0.07103 | 0.12535  | -0.08845 | 0.05612  | 0.111349 | 0.01607 | 0.215515 | 2.60E-06 | 0.16248  |
| -0.01434 | 0.75728  | -0.02836 | 0.54094  | 0.078915 | 0.08848 | 0.291046 | 1.44E-10 | 0.067346 |
| 0.013877 | 0.76487  | -0.08373 | 0.07066  | -0.03056 | 0.50998 | -0.05259 | 0.25672  | -0.04301 |
| 0.248595 | 5.23E-08 | 0.198588 | 1.54E-05 | 0.090424 | 0.05084 | -0.00377 | 0.93529  | 0.1788   |
| 0.049588 | 0.28489  | -0.14441 | 0.00176  | -0.03466 | 0.45495 | -0.10758 | 0.02005  | -0.02843 |
| -0.08452 | 0.06801  | -0.02672 | 0.56457  | -0.01565 | 0.73595 | 0.016999 | 0.71407  | 0.000526 |
| -0.01519 | 0.74333  | -0.10688 | 0.02088  | 0.015729 | 0.7346  | 0.016405 | 0.72365  | 0.017931 |
| 0.046224 | 0.31888  | -0.01192 | 0.79725  | 0.015203 | 0.74315 | 0.020919 | 0.65207  | -0.00361 |
| 0.037932 | 0.41346  | -0.10565 | 0.02241  | 0.0275   | 0.55331 | -0.05053 | 0.27582  | -0.07607 |
| 0.131468 | 0.00443  | 0.076181 | 0.10012  | -0.00436 | 0.92519 | -0.00665 | 0.88605  | -0.03371 |
| -0.03107 | 0.50297  | 0.019034 | 0.68161  | 0.118207 | 0.01057 | 0.168015 | 0.00027  | 0.425731 |
| -0.07435 | 0.10859  | 0.023987 | 0.60512  | 0.033128 | 0.47512 | 0.057281 | 0.21662  | 0.110512 |
| 0.183197 | 6.83E-05 | 0.154969 | 0.00078  | -0.00142 | 0.97554 | -0.10398 | 0.02463  | 0.036116 |
| -0.01618 | 0.72722  | 0.047556 | 0.30512  | -0.04494 | 0.33256 | 0.030716 | 0.50787  | 0.009103 |
| 0.035061 | 0.44973  | 0.072521 | 0.11757  | 0.06622  | 0.15307 | 0.049702 | 0.28379  | 0.348167 |
| -0.11962 | 0.00967  | -0.09546 | 0.0392   | -0.04008 | 0.38744 | -0.03138 | 0.49878  | 0.020528 |
| -0.02249 | 0.6278   | 0.034495 | 0.45707  | -0.0076  | 0.86984 | 0.047959 | 0.30103  | -0.00344 |
| -0.05088 | 0.27254  | -0.14733 | 0.00141  | 0.033157 | 0.47473 | 0.081866 | 0.07717  | 0.230654 |
| -0.19222 | 2.89E-05 | -0.34079 | 3.66E-14 | -0.02072 | 0.65511 | 0.043374 | 0.34966  | -0.05099 |
| 0.012492 | 0.78774  | -0.10084 | 0.02933  | -0.00094 | 0.98386 | -0.04012 | 0.38703  | -0.01866 |
| -0.00703 | 0.87954  | -0.07853 | 0.09006  | 0.005406 | 0.90725 | -0.01918 | 0.6793   | -0.02409 |
| -0.00186 | 0.9681   | -0.09783 | 0.03456  | -0.00859 | 0.85312 | -0.0387  | 0.40404  | -0.00629 |
| 0.160463 | 0.0005   | 0.074902 | 0.10597  | -0.01922 | 0.67866 | -0.1496  | 0.00118  | -0.10395 |
| 0.273695 | 1.81E-09 | 0.384348 | 6.89E-18 | 0.03137  | 0.49887 | -0.02214 | 0.6332   | 0.211193 |
| 0.096559 | 0.03698  | 0.139302 | 0.00255  | -0.01019 | 0.82622 | -0.01427 | 0.75843  | 0.027353 |
| -0.15736 | 0.00064  | -0.2835  | 4.42E-10 | 0.01899  | 0.68231 | 0.038811 | 0.40272  | -0.04005 |
| -0.01009 | 0.82783  | 0.207785 | 5.96E-06 | -0.01123 | 0.80872 | 0.00099  | 0.98299  | 0.016756 |
| -0.0529  | 0.25387  | -0.37858 | 2.31E-17 | -0.02734 | 0.55569 | -0.09248 | 0.04577  | -0.04797 |
| 0.086442 | 0.06197  | -0.11531 | 0.01265  | -0.08162 | 0.07806 | -0.20564 | 7.47E-06 | -0.27674 |
| -0.05079 | 0.27333  | -0.05289 | 0.25398  | 0.060437 | 0.19232 | 0.164996 | 0.00034  | -0.03676 |
| -0.07543 | 0.10355  | -0.1316  | 0.00439  | -0.02123 | 0.64719 | -0.06936 | 0.13448  | -0.04289 |
| 0.106155 | 0.02177  | 0.188804 | 4.02E-05 | 0.078029 | 0.09213 | 0.129553 | 0.00505  | 0.102023 |
| -0.10123 | 0.02872  | -0.05677 | 0.22073  | -0.04476 | 0.33447 | -0.03734 | 0.42085  | -0.10093 |
| 0.061484 | 0.18472  | 0.135791 | 0.00328  | 0.00969  | 0.83457 | -0.04408 | 0.34184  | 0.072663 |
| -0.05425 | 0.24194  | -0.08038 | 0.08272  | -0.00196 | 0.96629 | -0.00431 | 0.92599  | -0.09155 |
| 0.04885  | 0.29213  | 0.008011 | 0.86292  | -0.03184 | 0.49246 | 0.013454 | 0.77183  | -0.05914 |
| 0.064914 | 0.16136  | 0.23638  | 2.37E-07 | 0.063128 | 0.17323 | 0.103783 | 0.02491  | 0.033097 |
| 0.136572 | 0.0031   | 0.094182 | 0.04191  | 0.023348 | 0.61477 | -0.00094 | 0.9838   | 0.106469 |
| 0.209941 | 4.74E-06 | 0.259358 | 1.29E-08 | -0.01642 | 0.72336 | -0.07153 | 0.1227   | -0.04538 |



|          |          |          |          |          |         |          |          |          |
|----------|----------|----------|----------|----------|---------|----------|----------|----------|
| -0.17539 | 0.00014  | -0.23175 | 4.11E-07 | -0.02852 | 0.53867 | -0.03758 | 0.41778  | -0.17372 |
| 0.195003 | 2.20E-05 | 0.386053 | 4.79E-18 | 0.063178 | 0.17288 | 0.161098 | 0.00047  | 0.106219 |
| 0.154988 | 0.00078  | 0.170329 | 0.00022  | 0.071616 | 0.12223 | 0.129787 | 0.00497  | 0.251512 |
| 0.03359  | 0.46898  | 0.00767  | 0.8687   | -0.02144 | 0.64399 | -0.04525 | 0.32915  | -0.01952 |
| 0.033464 | 0.47064  | -0.05822 | 0.20918  | -0.00539 | 0.90757 | 0.044733 | 0.33475  | -0.05225 |
| 0.117566 | 0.011    | -0.04191 | 0.36621  | -0.08367 | 0.07086 | -0.079   | 0.08812  | -0.10524 |
| 0.009492 | 0.8379   | -0.05882 | 0.20449  | 0.064707 | 0.1627  | 0.0652   | 0.15952  | 0.027302 |
| -0.16039 | 0.0005   | -0.24457 | 8.67E-08 | -0.01188 | 0.79799 | -0.0452  | 0.32977  | -0.18241 |
| 0.23929  | 1.66E-07 | 0.385802 | 5.05E-18 | 0.045515 | 0.32637 | 0.134901 | 0.00349  | 0.158559 |
| -0.02928 | 0.52791  | -0.06512 | 0.16002  | 0.029976 | 0.51815 | 0.010186 | 0.82624  | 0.005387 |
| 0.175332 | 0.00014  | 0.097576 | 0.03503  | -0.00161 | 0.97236 | 4.24E-05 | 0.99927  | -0.00641 |
| -0.0721  | 0.11974  | 0.138825 | 0.00264  | -0.01825 | 0.69402 | 0.089877 | 0.05226  | 0.073168 |
| 0.035034 | 0.45008  | -0.0178  | 0.70125  | -0.05961 | 0.19852 | -0.17293 | 0.00017  | 0.034103 |
| 0.013026 | 0.7789   | -0.27043 | 2.86E-09 | -0.01934 | 0.67679 | -0.06064 | 0.19082  | -0.02055 |
| -0.15923 | 0.00055  | -0.1449  | 0.00169  | -0.0381  | 0.41144 | -0.00168 | 0.97117  | -0.07592 |
| -0.13066 | 0.00468  | -0.0617  | 0.18315  | 0.038514 | 0.40632 | 0.101523 | 0.02826  | 0.097371 |
| 0.126556 | 0.00617  | -0.30237 | 2.50E-11 | -0.035   | 0.45052 | -0.13423 | 0.00366  | -0.10307 |
| 0.104992 | 0.02326  | 0.281189 | 6.19E-10 | 0.108553 | 0.01895 | 0.051688 | 0.26496  | 0.256958 |
| -0.07221 | 0.11914  | -0.16487 | 0.00035  | -0.04031 | 0.38478 | -0.09365 | 0.0431   | -0.0564  |
| -0.1589  | 0.00057  | 0.128598 | 0.00538  | 0.047464 | 0.30605 | 0.183373 | 6.72E-05 | 0.15204  |
| 0.234209 | 3.07E-07 | -0.08166 | 0.07791  | -0.02971 | 0.52189 | -0.12693 | 0.00602  | -0.06441 |
| 0.053434 | 0.24914  | 0.181876 | 7.72E-05 | 0.026562 | 0.56694 | 0.09383  | 0.04269  | 0.144019 |
| -0.00405 | 0.93043  | -0.2755  | 1.40E-09 | -0.02459 | 0.59602 | -0.09454 | 0.04114  | -0.00629 |
| -0.0865  | 0.06179  | -0.20287 | 9.95E-06 | 0.024931 | 0.59099 | -0.02632 | 0.57048  | -0.01555 |
| -0.14116 | 0.00223  | -0.19915 | 1.45E-05 | -0.02737 | 0.55514 | -0.11235 | 0.01513  | -0.16104 |
| -0.0425  | 0.35948  | -0.16249 | 0.00042  | -0.00654 | 0.88792 | 0.029669 | 0.52245  | 0.01596  |
| 0.06326  | 0.17233  | 0.175052 | 0.00014  | -0.01506 | 0.74555 | -0.02613 | 0.57329  | 0.047326 |
| -0.06147 | 0.18484  | -0.07233 | 0.11852  | 0.002065 | 0.96449 | -0.03259 | 0.48234  | -0.04444 |
| -0.01363 | 0.76895  | -0.30559 | 1.50E-11 | -0.03375 | 0.46688 | -0.07342 | 0.11307  | -0.14917 |
| 0.065884 | 0.15518  | -0.00065 | 0.98888  | -0.00519 | 0.91092 | -0.06593 | 0.1549   | 0.040388 |
| -0.04303 | 0.3535   | -0.08434 | 0.06861  | 0.034516 | 0.4568  | 0.009705 | 0.83432  | 0.007748 |
| -0.0165  | 0.72218  | 0.1167   | 0.01161  | 0.005611 | 0.90374 | 0.036215 | 0.43494  | 0.228391 |
| 0.068249 | 0.14085  | -0.24773 | 5.83E-08 | 0.004591 | 0.92119 | -0.07631 | 0.09955  | -0.07296 |
| 0.065081 | 0.16028  | -0.01134 | 0.80686  | -0.03123 | 0.50086 | -0.07931 | 0.08689  | -0.0499  |
| 0.077796 | 0.09311  | -0.11288 | 0.01466  | 0.016069 | 0.72908 | -0.1047  | 0.02365  | -0.07664 |
| -0.07944 | 0.08637  | -0.17458 | 0.00015  | 0.017441 | 0.70698 | -0.05223 | 0.26     | -0.05813 |
| 0.017748 | 0.70206  | -0.07072 | 0.12699  | -0.00543 | 0.90685 | -0.04956 | 0.28519  | -0.02072 |
| -0.01169 | 0.80105  | -0.16025 | 0.00051  | -0.06498 | 0.16095 | -0.10746 | 0.02019  | -0.02079 |
| 0.082732 | 0.07408  | -0.18916 | 3.89E-05 | -0.04065 | 0.38083 | -0.00481 | 0.91748  | -0.00922 |
| 0.271529 | 2.45E-09 | 0.432021 | 1.17E-22 | 0.072786 | 0.11623 | 0.023053 | 0.61925  | 0.108397 |
| -0.07579 | 0.1019   | -0.19871 | 1.52E-05 | -0.02432 | 0.6001  | -0.09216 | 0.04654  | -0.07517 |
| -0.20094 | 1.21E-05 | -0.32317 | 8.19E-13 | -0.01829 | 0.69341 | -0.06725 | 0.14675  | -0.06513 |
| 0.007757 | 0.86723  | -0.26054 | 1.10E-08 | 0.046948 | 0.31135 | -0.05698 | 0.21902  | 0.016096 |
| -0.08191 | 0.07701  | -0.10222 | 0.02718  | 0.101764 | 0.02788 | -0.04173 | 0.36822  | 0.364409 |
| 0.217328 | 2.13E-06 | 0.016137 | 0.72798  | -0.04131 | 0.37306 | 0.001535 | 0.97361  | -0.0457  |

|          |          |          |          |           |         |          |          |          |
|----------|----------|----------|----------|-----------|---------|----------|----------|----------|
| 0.232351 | 3.83E-07 | 0.074811 | 0.1064   | -0.00976  | 0.83336 | 0.043855 | 0.34434  | -0.07016 |
| -0.07848 | 0.09027  | -0.21825 | 1.92E-06 | -0.02169  | 0.64008 | -0.0245  | 0.59745  | -0.00879 |
| 0.150581 | 0.0011   | 0.37726  | 3.04E-17 | -0.04405  | 0.34217 | -0.07932 | 0.08686  | -0.02888 |
| 0.054812 | 0.23712  | -0.00355 | 0.93906  | 0.018948  | 0.68298 | -0.08247 | 0.07501  | -0.01648 |
| 0.090525 | 0.05058  | -0.04324 | 0.35119  | -0.0102   | 0.82597 | -0.05276 | 0.25516  | -0.09888 |
| 0.037234 | 0.42212  | -0.31286 | 4.61E-12 | -0.03058  | 0.50972 | -0.11867 | 0.01026  | -0.05712 |
| -0.1577  | 0.00063  | -0.08522 | 0.06578  | -0.03731  | 0.42121 | 0.028948 | 0.53262  | -0.17584 |
| 0.024071 | 0.60386  | -0.17152 | 0.0002   | -0.01179  | 0.79945 | -0.04078 | 0.37927  | -0.07589 |
| 0.046001 | 0.32122  | 0.005828 | 0.90005  | 0.020484  | 0.65883 | -0.02259 | 0.62633  | 0.042483 |
| -0.08822 | 0.05678  | -0.09476 | 0.04067  | 0.040719  | 0.37997 | -0.05448 | 0.23997  | -0.00865 |
| 0.04854  | 0.29521  | 0.101976 | 0.02756  | 0.039105  | 0.39916 | 0.017973 | 0.69846  | 0.041657 |
| 0.209159 | 5.16E-06 | 0.201963 | 1.09E-05 | 0.049951  | 0.28138 | 0.077095 | 0.0961   | 0.144886 |
| -0.01776 | 0.7019   | -0.07181 | 0.12121  | 0.007288  | 0.87518 | 0.008636 | 0.85234  | -0.04701 |
| 0.151881 | 0.00099  | 0.156674 | 0.00068  | -0.02005  | 0.66558 | -0.06362 | 0.16993  | -0.0366  |
| 0.030005 | 0.51774  | -0.10084 | 0.02934  | -0.0369   | 0.42631 | -0.03398 | 0.46387  | -0.11466 |
| 0.008851 | 0.84872  | -0.02388 | 0.60668  | 0.025331  | 0.58505 | 0.015344 | 0.74086  | -0.00477 |
| -0.12446 | 0.00708  | -0.05267 | 0.256    | -0.0428   | 0.35613 | -0.05164 | 0.26541  | 0.030067 |
| -0.01353 | 0.77063  | -0.0635  | 0.17068  | -5.13E-05 | 0.99912 | -0.0182  | 0.69485  | -0.02358 |
| 0.110565 | 0.01684  | 0.057177 | 0.21746  | -0.00358  | 0.93858 | -0.01341 | 0.77264  | -0.03495 |
| -0.00845 | 0.85556  | -0.02137 | 0.64514  | 0.016986  | 0.71429 | 0.015304 | 0.74151  | 0.079356 |
| -0.01691 | 0.71543  | -0.10313 | 0.02584  | 0.005774  | 0.90096 | 0.000708 | 0.98782  | -0.05861 |
| 0.25695  | 1.77E-08 | 0.452428 | 6.07E-25 | 0.070622  | 0.12751 | 0.029394 | 0.52631  | 0.123831 |
| 0.09303  | 0.0445   | -0.12761 | 0.00575  | -0.04132  | 0.37295 | 0.022398 | 0.62925  | -0.02417 |
| -0.10759 | 0.02004  | -0.26528 | 5.81E-09 | 0.029983  | 0.51806 | 0.048284 | 0.29776  | 0.090472 |
| -0.04951 | 0.2857   | -0.29272 | 1.11E-10 | -0.02709  | 0.5592  | -0.09289 | 0.04482  | -0.17672 |
| 0.231153 | 4.41E-07 | 0.203535 | 9.29E-06 | -0.0405   | 0.38258 | -0.12795 | 0.00562  | -0.14522 |
| -0.12275 | 0.00792  | -0.27382 | 1.78E-09 | -0.00512  | 0.91209 | -0.02678 | 0.56373  | -0.01306 |
| -0.12223 | 0.00819  | -0.17893 | 0.0001   | 0.13974   | 0.00247 | 0.197382 | 1.74E-05 | 0.168742 |
| 0.111509 | 0.01592  | 0.149649 | 0.00118  | 0.022317  | 0.63049 | -0.01244 | 0.78856  | 0.154167 |
| 0.032324 | 0.48591  | 0.026195 | 0.5723   | -0.01554  | 0.73762 | -0.02667 | 0.56539  | -0.12076 |
| 0.1744   | 0.00015  | -0.04295 | 0.35441  | 0.000362  | 0.99378 | -0.08881 | 0.05512  | 0.008429 |
| -0.1317  | 0.00436  | -0.36813 | 1.96E-16 | 0.005273  | 0.90953 | -0.01715 | 0.71164  | -0.03527 |
| 0.008913 | 0.84767  | 0.002991 | 0.94861  | 0.062847  | 0.17515 | 0.057848 | 0.21211  | 0.204244 |
| 0.162581 | 0.00042  | 0.282051 | 5.46E-10 | 0.147654  | 0.00138 | 0.191761 | 3.02E-05 | 0.432645 |
| 0.027674 | 0.55081  | -0.26226 | 8.75E-09 | 0.023006  | 0.61996 | -0.11365 | 0.014    | -0.11294 |
| -0.05654 | 0.22263  | -0.10368 | 0.02506  | 0.028513  | 0.53879 | -0.02443 | 0.5985   | -0.06628 |
| -0.0239  | 0.60648  | 0.037133 | 0.42337  | 0.005261  | 0.90973 | 0.003653 | 0.93725  | -0.00367 |
| -0.07509 | 0.1051   | 0.006917 | 0.88149  | -0.00201  | 0.96543 | -0.01203 | 0.79549  | 0.018597 |
| -0.12273 | 0.00792  | -0.27656 | 1.21E-09 | 0.084018  | 0.06968 | 0.195764 | 2.04E-05 | -0.03246 |
| 0.063689 | 0.16943  | 0.21723  | 2.15E-06 | 0.170956  | 0.00021 | 0.452021 | 6.77E-25 | 0.076882 |
| 0.045263 | 0.32905  | -0.16068 | 0.00049  | 0.050822  | 0.27306 | 0.017756 | 0.70194  | 0.173899 |
| 0.069152 | 0.13565  | 0.202008 | 1.09E-05 | 0.071466  | 0.12302 | 0.042228 | 0.36255  | 0.405394 |
| -0.10543 | 0.02269  | -0.12452 | 0.00706  | 0.043541  | 0.34781 | 0.04049  | 0.38266  | -0.01646 |
| -0.15959 | 0.00054  | -0.17332 | 0.00017  | 0.014756  | 0.75046 | -0.04049 | 0.38271  | 0.05612  |
| -0.03068 | 0.50839  | -0.11148 | 0.01594  | 0.057215  | 0.21715 | 0.138106 | 0.00278  | 0.040791 |

|          |          |          |          |          |         |          |          |          |
|----------|----------|----------|----------|----------|---------|----------|----------|----------|
| 0.133267 | 0.00391  | 0.025248 | 0.58627  | -0.00051 | 0.99119 | 0.00561  | 0.90376  | 0.062553 |
| -0.00697 | 0.88058  | -0.27766 | 1.03E-09 | -0.04204 | 0.36474 | -0.15366 | 0.00086  | -0.09634 |
| -0.05731 | 0.21639  | 0.074676 | 0.10703  | 0.124742 | 0.00695 | 0.244509 | 8.74E-08 | 0.372086 |
| 0.192178 | 2.90E-05 | 0.290598 | 1.54E-10 | 0.136695 | 0.00308 | -0.01156 | 0.80322  | 0.270587 |
| 0.028747 | 0.53546  | 0.185483 | 5.52E-05 | 0.063759 | 0.16896 | 0.212119 | 3.76E-06 | 0.391389 |
| 0.037743 | 0.41579  | 0.191987 | 2.96E-05 | 0.059768 | 0.1973  | 0.099611 | 0.03138  | 0.320256 |
| -0.05135 | 0.26812  | -0.28642 | 2.87E-10 | -0.03133 | 0.4994  | -0.07925 | 0.08715  | -0.09697 |
| -0.20012 | 1.32E-05 | -0.38549 | 5.40E-18 | 0.086973 | 0.06038 | 0.214543 | 2.89E-06 | -0.02511 |
| -0.03722 | 0.42227  | -0.14025 | 0.00238  | -0.04632 | 0.31792 | -0.0656  | 0.15696  | -0.03842 |
| 0.234857 | 2.84E-07 | 0.174802 | 0.00015  | 0.083598 | 0.07109 | 0.072737 | 0.11648  | 0.033237 |
| 0.016954 | 0.71479  | -0.32434 | 6.70E-13 | -0.06369 | 0.16946 | -0.18221 | 7.49E-05 | -0.28359 |
| -0.07533 | 0.10398  | 0.190334 | 3.47E-05 | 0.113272 | 0.01432 | 0.393425 | 9.73E-19 | 0.303838 |
| -0.03056 | 0.51008  | -0.13643 | 0.00313  | -0.01285 | 0.78188 | 0.015566 | 0.73725  | 0.026028 |
| -0.13998 | 0.00243  | -0.15691 | 0.00067  | -0.01157 | 0.80306 | 0.066959 | 0.14853  | -0.03791 |
| -0.02603 | 0.57476  | -0.00512 | 0.91218  | -0.00533 | 0.9086  | -0.06247 | 0.17777  | -0.02168 |
| -0.1354  | 0.00337  | 0.010668 | 0.81814  | 0.111563 | 0.01587 | 0.282831 | 4.87E-10 | 0.261556 |
| -0.22099 | 1.42E-06 | 0.043168 | 0.35196  | 0.048587 | 0.29474 | 0.214616 | 2.87E-06 | -0.12939 |
| -0.05437 | 0.2409   | 0.02752  | 0.55302  | 0.100473 | 0.02994 | 0.151221 | 0.00105  | 0.323079 |
| -0.15945 | 0.00054  | -0.34966 | 7.08E-15 | -0.00837 | 0.85677 | -0.05849 | 0.20704  | 0.018782 |
| 0.028142 | 0.54408  | -0.20234 | 1.05E-05 | 0.022904 | 0.62152 | -0.09653 | 0.03705  | -0.06216 |
| 0.225307 | 8.69E-07 | 0.41995  | 2.24E-21 | -0.07266 | 0.11688 | -0.14929 | 0.00121  | -0.08199 |
| 0.085291 | 0.06554  | -0.19841 | 1.57E-05 | -0.02837 | 0.54081 | -0.10716 | 0.02054  | -0.11572 |
| -0.05912 | 0.20219  | -0.27273 | 2.07E-09 | -0.01757 | 0.70485 | -0.04703 | 0.31055  | -0.07848 |
| 0.081453 | 0.07868  | 0.058721 | 0.20528  | -0.0173  | 0.70927 | 0.085324 | 0.06543  | -0.15466 |
| 0.227824 | 6.50E-07 | -0.04528 | 0.32884  | 0.016212 | 0.72677 | -0.1276  | 0.00576  | 0.059325 |
| -0.18233 | 7.40E-05 | -0.17155 | 0.0002   | 0.025469 | 0.58301 | 0.316491 | 2.53E-12 | 0.150554 |
| 0.096386 | 0.03733  | 0.038611 | 0.40515  | 0.038079 | 0.41165 | -0.01528 | 0.74186  | -0.02728 |
| 0.108038 | 0.01953  | -0.09837 | 0.03357  | 0.031244 | 0.5006  | 0.109748 | 0.01767  | -0.03524 |
| -0.11941 | 0.0098   | -0.10248 | 0.02679  | 0.045908 | 0.3222  | 0.185987 | 5.26E-05 | 0.243738 |
| 0.023188 | 0.61719  | -0.15632 | 0.0007   | 0.026692 | 0.56504 | 0.048079 | 0.29982  | 0.129973 |
| -0.00878 | 0.84989  | -0.1404  | 0.00236  | 0.011105 | 0.81083 | 0.040482 | 0.38275  | -0.02297 |
| -0.11604 | 0.0121   | -0.49424 | 3.90E-30 | -0.00778 | 0.86679 | -0.12212 | 0.00824  | -0.07341 |
| -0.1788  | 0.0001   | -0.33909 | 4.98E-14 | -0.00508 | 0.91287 | -0.07045 | 0.12843  | -0.09231 |
| -0.0826  | 0.07455  | -0.15121 | 0.00105  | -0.05218 | 0.26041 | -0.08005 | 0.08398  | -0.08054 |
| -0.22649 | 7.58E-07 | -0.53055 | 2.90E-35 | -0.06295 | 0.17443 | -0.20018 | 1.31E-05 | -0.1862  |
| -0.03987 | 0.39001  | -0.12256 | 0.00801  | 0.054381 | 0.24083 | 0.017416 | 0.70737  | -0.05097 |
| 0.09391  | 0.04251  | -0.00278 | 0.95226  | -0.03237 | 0.48522 | -0.04263 | 0.35799  | -0.04994 |
| -0.00949 | 0.83791  | -0.26717 | 4.49E-09 | -0.05059 | 0.27527 | -0.02686 | 0.56265  | -0.29071 |
| 0.269202 | 3.39E-09 | 0.240029 | 1.52E-07 | -0.07018 | 0.12991 | -0.16046 | 0.0005   | -0.06241 |
| -0.06098 | 0.18834  | -0.14145 | 0.00218  | 0.023593 | 0.61107 | -0.01197 | 0.79642  | -0.08744 |
| -0.19686 | 1.83E-05 | 0.042598 | 0.35836  | 0.003628 | 0.93767 | 0.083053 | 0.07296  | -0.16966 |
| -0.05261 | 0.25655  | 0.025247 | 0.5863   | -0.01622 | 0.72666 | 0.071666 | 0.12197  | 0.057141 |
| 0.284218 | 3.98E-10 | 0.210042 | 4.69E-06 | -0.01079 | 0.81612 | 0.002899 | 0.95018  | 0.100538 |
| 0.006309 | 0.89184  | 0.150699 | 0.00109  | 0.04046  | 0.38301 | -0.07201 | 0.12017  | 0.134414 |
| -0.08007 | 0.08391  | -0.01463 | 0.75247  | 0.173862 | 0.00016 | 0.243382 | 1.01E-07 | 0.464654 |

|          |          |          |          |          |         |          |          |          |
|----------|----------|----------|----------|----------|---------|----------|----------|----------|
| 0.139463 | 0.00252  | -0.08809 | 0.05713  | -0.03968 | 0.39225 | -0.1711  | 0.0002   | -0.14472 |
| -0.16712 | 0.00029  | -0.23912 | 1.70E-07 | -0.01982 | 0.66919 | -0.01273 | 0.7838   | -0.07232 |
| 0.024651 | 0.59516  | 0.098752 | 0.03288  | 0.017914 | 0.6994  | 0.199571 | 1.39E-05 | -0.01286 |
| -0.01958 | 0.67297  | -0.14413 | 0.00179  | 0.026932 | 0.56155 | 0.112799 | 0.01473  | 0.333597 |
| 0.049575 | 0.28502  | 0.355229 | 2.46E-15 | -0.01206 | 0.79492 | 0.012495 | 0.7877   | 0.065779 |
| -0.06588 | 0.15518  | -0.15371 | 0.00086  | -0.04856 | 0.29497 | -0.06177 | 0.18269  | -0.17226 |
| 0.033282 | 0.47306  | 0.001345 | 0.97687  | 0.015559 | 0.73736 | 0.132917 | 0.00401  | 0.043098 |
| -0.08312 | 0.07272  | -0.04554 | 0.32608  | -0.02605 | 0.57449 | -0.08717 | 0.05978  | -0.06526 |
| -0.15108 | 0.00106  | -0.02143 | 0.64408  | 0.054033 | 0.24386 | 0.078978 | 0.08823  | 0.151827 |
| 0.171679 | 0.00019  | 0.03425  | 0.46028  | -0.0329  | 0.47812 | -0.09436 | 0.04152  | -0.10976 |
| 0.030431 | 0.51182  | 0.141872 | 0.00212  | 0.002933 | 0.9496  | -0.00452 | 0.92242  | 0.080424 |
| -0.01842 | 0.69132  | -0.31921 | 1.60E-12 | 0.009337 | 0.8405  | -0.05998 | 0.19572  | -0.09603 |
| -0.13223 | 0.0042   | -0.12939 | 0.0051   | 0.044401 | 0.33835 | 0.091674 | 0.04771  | -0.05735 |
| 0.114498 | 0.01329  | -0.05976 | 0.19733  | -0.02589 | 0.5768  | -0.01733 | 0.70873  | -0.00432 |
| 0.051988 | 0.2622   | 0.062941 | 0.17451  | -0.00344 | 0.94085 | 0.033024 | 0.4765   | -0.09003 |
| 0.099739 | 0.03116  | 0.202639 | 1.02E-05 | 0.035843 | 0.43968 | 0.050856 | 0.27274  | 0.369625 |
| 0.099153 | 0.03217  | 0.222709 | 1.17E-06 | -0.01477 | 0.75019 | -0.08044 | 0.08246  | 0.118785 |
| -0.00229 | 0.96058  | 0.036419 | 0.43236  | 0.008378 | 0.85671 | 0.006871 | 0.88227  | -0.04393 |
| 0.174797 | 0.00015  | 0.243692 | 9.68E-08 | 0.008729 | 0.85078 | 0.036119 | 0.43616  | -0.07736 |
| 0.036264 | 0.43432  | -0.07672 | 0.09775  | 0.018643 | 0.6878  | -0.02116 | 0.64839  | -0.02421 |
| 0.304082 | 1.90E-11 | 0.142864 | 0.00197  | -0.03055 | 0.51022 | -0.22175 | 1.30E-06 | -0.04479 |
| 0.306765 | 1.24E-11 | 0.24902  | 4.95E-08 | 0.0573   | 0.21647 | 0.138857 | 0.00264  | 0.204839 |
| 0.009766 | 0.83329  | -0.22364 | 1.05E-06 | -0.02599 | 0.57526 | -0.08803 | 0.05732  | -0.10226 |
| 0.071444 | 0.12314  | 0.012515 | 0.78737  | -0.01184 | 0.79855 | -0.06728 | 0.14662  | -0.08735 |
| -0.18143 | 8.05E-05 | -0.32377 | 7.39E-13 | -0.01653 | 0.72155 | -0.01035 | 0.82349  | -0.18975 |
| 0.122117 | 0.00825  | 0.226671 | 7.43E-07 | 0.081028 | 0.08025 | 0.273494 | 1.86E-09 | 0.047541 |
| 0.034994 | 0.45059  | -0.19695 | 1.81E-05 | 0.000504 | 0.99133 | -0.0549  | 0.23641  | -0.06679 |
| -0.22308 | 1.12E-06 | -0.4654  | 1.77E-26 | 0.038475 | 0.40681 | 0.211202 | 4.15E-06 | -0.16704 |
| -0.03556 | 0.44324  | -0.24975 | 4.51E-08 | -0.0021  | 0.96393 | 0.040693 | 0.38027  | -0.1135  |
| -0.1701  | 0.00022  | -0.32794 | 3.60E-13 | -0.01729 | 0.70943 | 0.100661 | 0.02963  | -0.26235 |
| 0.282756 | 4.93E-10 | 0.183203 | 6.83E-05 | 0.093405 | 0.04364 | 0.066989 | 0.14835  | 0.167677 |
| 0.012922 | 0.78062  | -0.25455 | 2.43E-08 | 0.007005 | 0.88    | -0.02576 | 0.57876  | -0.11796 |
| 0.085484 | 0.06493  | -0.02403 | 0.60451  | 0.021783 | 0.63869 | -0.02196 | 0.63598  | 0.051543 |
| -0.20877 | 5.37E-06 | -0.52102 | 7.38E-34 | -0.02145 | 0.6438  | -0.09527 | 0.03959  | -0.0063  |
| -0.1176  | 0.01098  | 0.071409 | 0.12332  | -0.06487 | 0.16165 | -0.14641 | 0.00151  | -0.06042 |
| 0.071744 | 0.12156  | -0.28704 | 2.62E-10 | -0.01701 | 0.71391 | -0.0376  | 0.41757  | -0.0149  |
| -0.0898  | 0.05245  | -0.18466 | 5.96E-05 | 0.026436 | 0.56878 | -0.02175 | 0.63926  | -0.02371 |
| 0.033225 | 0.47382  | -0.07068 | 0.12722  | -0.0339  | 0.46495 | -0.11778 | 0.01086  | -0.08746 |
| -0.10467 | 0.02369  | -0.15033 | 0.00112  | -0.04325 | 0.35102 | 0.007373 | 0.87375  | -0.06578 |
| -0.0125  | 0.78769  | 0.056419 | 0.22364  | -0.03548 | 0.44431 | -0.03445 | 0.45764  | -0.01747 |
| -0.103   | 0.02603  | -0.46026 | 7.32E-26 | -0.04768 | 0.30384 | -0.1578  | 0.00062  | -0.06175 |
| -0.03049 | 0.51101  | -0.18502 | 5.76E-05 | 0.067841 | 0.14324 | 0.036121 | 0.43613  | 0.13319  |
| 0.032921 | 0.47788  | 0.235017 | 2.79E-07 | -0.00477 | 0.91807 | 0.035563 | 0.44325  | 0.069928 |
| 0.216014 | 2.46E-06 | 0.134205 | 0.00367  | -0.03267 | 0.48124 | -0.09771 | 0.03478  | 0.112036 |
| 0.152861 | 0.00092  | 0.083274 | 0.0722   | 0.080926 | 0.08064 | 0.094222 | 0.04183  | 0.386129 |

|          |          |          |          |          |          |          |         |          |
|----------|----------|----------|----------|----------|----------|----------|---------|----------|
| 0.009547 | 0.83698  | -0.21555 | 2.59E-06 | -0.01664 | 0.7198   | -0.05152 | 0.26654 | -0.07762 |
| -0.12222 | 0.00819  | -0.19028 | 3.49E-05 | -0.00327 | 0.94374  | 0.071564 | 0.1225  | -0.03826 |
| 0.11269  | 0.01483  | 0.274872 | 1.53E-09 | -0.01815 | 0.69565  | 0.031038 | 0.50344 | -0.02713 |
| 0.023342 | 0.61486  | -0.03882 | 0.40255  | 0.014266 | 0.75848  | -0.05233 | 0.25911 | 0.061729 |
| -0.06587 | 0.15527  | -0.18689 | 4.83E-05 | 0.007529 | 0.87109  | 0.000792 | 0.98639 | -0.09284 |
| 0.142114 | 0.00208  | 0.313964 | 3.84E-12 | 0.045419 | 0.32739  | 0.167048 | 0.00029 | 0.069777 |
| 0.063112 | 0.17334  | 0.317262 | 2.22E-12 | 0.054985 | 0.23564  | 0.052652 | 0.25614 | 0.185762 |
| -0.15008 | 0.00114  | -0.21156 | 3.99E-06 | -0.0289  | 0.53331  | 0.0008   | 0.98625 | -0.24595 |
| 0.012265 | 0.79151  | -0.18556 | 5.48E-05 | 0.037269 | 0.42168  | -0.03    | 0.51777 | 0.001245 |
| 0.092775 | 0.04509  | -0.03434 | 0.45904  | 0.022719 | 0.62433  | 0.007433 | 0.87272 | -0.13363 |
| 0.227079 | 7.09E-07 | 0.063864 | 0.16826  | -0.07499 | 0.10555  | -0.01492 | 0.74782 | 0.075184 |
| -0.00607 | 0.89587  | -0.24063 | 1.41E-07 | 0.001925 | 0.9669   | -0.02077 | 0.65439 | -0.10513 |
| -0.09313 | 0.04426  | -0.45822 | 1.28E-25 | 0.009208 | 0.84268  | -0.04857 | 0.29487 | -0.00878 |
| 0.121004 | 0.00886  | -0.0282  | 0.54326  | 0.037915 | 0.41367  | 0.000733 | 0.98739 | -0.00207 |
| -0.03797 | 0.41304  | -0.08457 | 0.06787  | 0.052452 | 0.25796  | 0.062572 | 0.17705 | 0.050399 |
| -0.03679 | 0.42767  | 0.031481 | 0.49735  | 0.022545 | 0.627    | -0.01823 | 0.69432 | 0.104235 |
| 0.021372 | 0.64503  | -0.09237 | 0.04603  | -0.00021 | 0.99647  | -0.01996 | 0.6671  | -0.00423 |
| -0.03188 | 0.49188  | -0.03987 | 0.39003  | 0.006545 | 0.88782  | 0.010052 | 0.82848 | -0.06018 |
| -0.01559 | 0.73693  | 0.238852 | 1.75E-07 | -0.0355  | 0.44404  | -0.06504 | 0.16055 | -0.10651 |
| -0.18252 | 7.28E-05 | -0.16609 | 0.00031  | 0.012333 | 0.79039  | 0.088418 | 0.05622 | 0.137372 |
| 0.044123 | 0.3414   | -0.11497 | 0.01292  | -0.01486 | 0.74882  | -0.10301 | 0.02602 | -0.01687 |
| 0.021402 | 0.64458  | 0.15608  | 0.00071  | -0.03603 | 0.43733  | 0.025565 | 0.58159 | -0.03165 |
| -0.10565 | 0.02241  | -0.43743 | 3.01E-23 | -0.02615 | 0.57293  | -0.06263 | 0.17662 | -0.10846 |
| 0.246847 | 6.52E-08 | 0.348655 | 8.55E-15 | 0.037784 | 0.41529  | 0.087917 | 0.05763 | 0.180041 |
| 0.004021 | 0.93094  | 0.015078 | 0.74519  | -0.00525 | 0.90988  | -0.09331 | 0.04385 | -0.01818 |
| 0.008447 | 0.85553  | 0.175038 | 0.00014  | 0.035971 | 0.43804  | 0.119885 | 0.00951 | 0.152055 |
| -0.02934 | 0.52701  | -0.05833 | 0.20829  | 0.006645 | 0.88612  | -0.06986 | 0.13167 | -0.08687 |
| -0.0457  | 0.32435  | -0.1016  | 0.02813  | 0.081839 | 0.07727  | -0.02321 | 0.61689 | -0.0311  |
| -0.00638 | 0.89058  | -0.12269 | 0.00795  | -0.01208 | 0.79459  | -0.09723 | 0.03569 | -0.01761 |
| -0.05263 | 0.25636  | -0.12191 | 0.00836  | 0.03442  | 0.45806  | -0.01263 | 0.78538 | 0.08672  |
| 0.077225 | 0.09554  | -0.09004 | 0.05184  | 0.097717 | 0.03477  | 0.067144 | 0.14741 | 0.161964 |
| 0.179176 | 9.89E-05 | 0.274125 | 1.70E-09 | 0.043657 | 0.34652  | 0.102978 | 0.02606 | 0.059529 |
| 0.090277 | 0.05122  | 0.080996 | 0.08038  | -0.00111 | 0.98087  | -0.02969 | 0.5221  | 0.021353 |
| 0.070781 | 0.12666  | 0.053378 | 0.24963  | 0.00088  | 0.98486  | -0.0234  | 0.61404 | 0.035614 |
| -0.01742 | 0.70732  | 0.09626  | 0.03758  | 0.234387 | 3.01E-07 | 0.135643 | 0.00331 | 0.42741  |
| -0.00639 | 0.89039  | -0.04221 | 0.3627   | 0.144002 | 0.00181  | 0.055279 | 0.23314 | 0.186016 |
| -0.02906 | 0.53096  | 0.222243 | 1.23E-06 | 0.038848 | 0.40227  | 0.087698 | 0.05826 | 0.066588 |
| 0.19957  | 1.39E-05 | 0.247616 | 5.92E-08 | -0.07642 | 0.09907  | -0.14779 | 0.00136 | -0.17337 |
| -0.10359 | 0.02518  | -0.10459 | 0.0238   | -0.02259 | 0.62632  | -0.06847 | 0.13954 | -0.11296 |
| 0.217953 | 1.99E-06 | -0.04559 | 0.32559  | -0.01645 | 0.72294  | -0.07549 | 0.10327 | -0.03896 |
| 0.060527 | 0.19166  | 0.043818 | 0.34475  | -0.00819 | 0.85997  | -0.10504 | 0.0232  | -0.06096 |
| -0.02089 | 0.65258  | -0.10461 | 0.02377  | 0.031803 | 0.49297  | 0.067477 | 0.14541 | -0.08483 |
| 0.15677  | 0.00067  | 0.267381 | 4.36E-09 | 0.040761 | 0.37948  | 0.085505 | 0.06486 | 0.014312 |
| 0.037496 | 0.41885  | 0.02018  | 0.66358  | -0.0039  | 0.93306  | 0.017815 | 0.70099 | -0.02206 |
| -0.03367 | 0.46798  | -0.08194 | 0.07691  | 0.044089 | 0.34177  | -0.02256 | 0.62681 | 0.017374 |

|          |          |          |          |          |          |          |          |          |
|----------|----------|----------|----------|----------|----------|----------|----------|----------|
| -0.13622 | 0.00318  | -0.2834  | 4.48E-10 | 0.003688 | 0.93665  | -0.00942 | 0.83916  | -0.09225 |
| -0.13455 | 0.00358  | 0.141598 | 0.00216  | 0.037127 | 0.42345  | 0.233965 | 3.16E-07 | 0.054581 |
| -0.13514 | 0.00343  | -0.22943 | 5.39E-07 | 0.081138 | 0.07984  | 0.191469 | 3.11E-05 | 0.030943 |
| 0.087668 | 0.05835  | 0.169378 | 0.00024  | 0.063256 | 0.17236  | 0.22677  | 7.34E-07 | -0.09254 |
| 0.118051 | 0.01067  | -0.04236 | 0.36102  | 0.131887 | 0.0043   | 0.139506 | 0.00252  | 0.247285 |
| -0.01827 | 0.69381  | -0.21593 | 2.48E-06 | 0.022634 | 0.62563  | -0.03759 | 0.41764  | -0.0678  |
| 0.05019  | 0.27908  | -0.10815 | 0.0194   | 0.032889 | 0.47831  | -0.0564  | 0.22379  | -0.09346 |
| 0.006428 | 0.88981  | -0.15939 | 0.00055  | 0.006487 | 0.88881  | -0.0565  | 0.22297  | -0.06173 |
| -0.1301  | 0.00486  | -0.04392 | 0.34359  | -0.0072  | 0.87664  | 0.133026 | 0.00398  | -0.18844 |
| -0.12526 | 0.00672  | -0.35896 | 1.20E-15 | -0.04132 | 0.37297  | -0.07374 | 0.11149  | -0.24559 |
| 0.12021  | 0.00932  | -0.14875 | 0.00126  | -0.02413 | 0.60303  | -0.09519 | 0.03975  | -0.07586 |
| -0.04669 | 0.31407  | -0.08259 | 0.07459  | 0.004758 | 0.91832  | -0.0314  | 0.49843  | -0.04575 |
| 0.021455 | 0.64376  | -0.01639 | 0.72396  | -0.00772 | 0.86788  | -0.01998 | 0.66668  | -0.03274 |
| -0.03876 | 0.40331  | 0.047387 | 0.30685  | 0.003104 | 0.94666  | 0.070965 | 0.12568  | 0.084585 |
| 0.218352 | 1.90E-06 | 0.161896 | 0.00044  | 0.028131 | 0.54424  | 0.042077 | 0.36427  | 0.175734 |
| 0.05176  | 0.2643   | -0.06397 | 0.16758  | 0.018707 | 0.68678  | -0.055   | 0.23548  | 0.009423 |
| 0.036513 | 0.43116  | -0.02259 | 0.62636  | -0.02394 | 0.6058   | -0.06422 | 0.1659   | 0.036346 |
| 0.117689 | 0.01092  | 0.012712 | 0.7841   | -0.01083 | 0.81543  | -0.04334 | 0.35004  | -0.02201 |
| -0.09171 | 0.04762  | 0.233513 | 3.34E-07 | 0.071763 | 0.12147  | 0.122873 | 0.00785  | 0.353301 |
| -0.05823 | 0.20912  | -0.18463 | 5.98E-05 | 0.029346 | 0.52698  | 0.015135 | 0.74426  | 0.083718 |
| 0.150986 | 0.00106  | 0.198118 | 1.61E-05 | 0.025236 | 0.58646  | 0.08538  | 0.06526  | 0.224304 |
| -0.02306 | 0.61916  | -0.14787 | 0.00135  | -0.01041 | 0.82244  | 0.002906 | 0.95005  | 0.04823  |
| -0.07923 | 0.08723  | -0.26814 | 3.93E-09 | -0.04263 | 0.35797  | -0.08694 | 0.06047  | -0.14073 |
| 0.076398 | 0.09915  | 0.275689 | 1.37E-09 | 0.023747 | 0.60874  | -0.01706 | 0.71313  | 0.053604 |
| 0.052155 | 0.26066  | 0.145833 | 0.00158  | -0.04184 | 0.36697  | -0.01818 | 0.69522  | -0.07828 |
| -0.00427 | 0.92676  | -0.08762 | 0.05847  | 0.025512 | 0.58236  | -0.0258  | 0.57809  | 0.031245 |
| -0.15083 | 0.00108  | -0.27312 | 1.96E-09 | -0.01502 | 0.74611  | -0.03975 | 0.39144  | 0.034884 |
| 0.145078 | 0.00167  | 0.25871  | 1.41E-08 | -0.04381 | 0.3448   | -0.08969 | 0.05276  | -0.07158 |
| -0.09238 | 0.04602  | -0.01178 | 0.79956  | 0.183523 | 6.63E-05 | 0.384644 | 6.47E-18 | 0.272462 |
| 0.178643 | 0.0001   | -0.1662  | 0.00031  | -0.00934 | 0.84053  | -0.07841 | 0.09054  | 0.036644 |
| 0.155636 | 0.00074  | -0.17489 | 0.00015  | -0.01137 | 0.80645  | -0.06822 | 0.141    | 0.106181 |
| -0.0941  | 0.04209  | -0.03334 | 0.47229  | -0.01985 | 0.66876  | 0.036745 | 0.42825  | -0.01657 |
| -0.00928 | 0.84144  | -0.0174  | 0.70758  | -0.01232 | 0.79055  | 0.010459 | 0.82166  | 0.016498 |
| -0.13513 | 0.00344  | -0.03914 | 0.39873  | 0.009241 | 0.84213  | 0.065662 | 0.15657  | 0.098763 |
| -0.01127 | 0.808    | -0.15306 | 0.00091  | 0.011186 | 0.80949  | -0.05296 | 0.25339  | 0.018227 |
| 0.114986 | 0.0129   | 0.163086 | 0.0004   | 0.012006 | 0.79582  | 0.024168 | 0.60241  | -0.00998 |
| 0.058887 | 0.20399  | 0.201777 | 1.11E-05 | 0.019665 | 0.67166  | 0.029973 | 0.51819  | 0.116636 |
| 0.069006 | 0.13649  | 0.205524 | 7.56E-06 | 0.027405 | 0.55469  | 0.013324 | 0.77398  | 0.008227 |
| -0.06567 | 0.15649  | -0.35575 | 2.23E-15 | -0.06685 | 0.14921  | -0.14486 | 0.0017   | -0.19235 |
| 0.088521 | 0.05593  | 0.22663  | 7.46E-07 | -0.00249 | 0.95713  | -0.01513 | 0.74431  | -0.05173 |
| 0.068675 | 0.13838  | -0.09053 | 0.05056  | -0.01191 | 0.79734  | 0.00836  | 0.85701  | -0.02687 |
| -0.10019 | 0.0304   | -0.05252 | 0.25733  | 0.015184 | 0.74347  | 0.033719 | 0.46727  | 0.017957 |
| 0.213263 | 3.32E-06 | 0.096957 | 0.03621  | -0.02769 | 0.55057  | -0.20303 | 9.78E-06 | 0.011236 |
| 0.010057 | 0.8284   | -0.01874 | 0.68627  | 0.071149 | 0.12469  | 0.210945 | 4.26E-06 | 0.169012 |
| -0.0372  | 0.42253  | -0.0441  | 0.34166  | 0.055531 | 0.23102  | 0.030508 | 0.51075  | 0.109698 |

|          |          |          |          |          |         |          |          |          |
|----------|----------|----------|----------|----------|---------|----------|----------|----------|
| -0.03125 | 0.50051  | -0.19093 | 3.28E-05 | -0.00133 | 0.97717 | -0.11198 | 0.01548  | 0.013492 |
| -0.06136 | 0.18562  | -0.42654 | 4.54E-22 | -0.01621 | 0.72688 | -0.0835  | 0.07143  | -0.12811 |
| 0.058384 | 0.20789  | 0.033997 | 0.4636   | 0.022217 | 0.63203 | 0.013288 | 0.77457  | 0.134258 |
| 0.09907  | 0.03232  | 0.142928 | 0.00196  | -0.02335 | 0.61471 | -0.08683 | 0.0608   | -0.00843 |
| -0.14393 | 0.00182  | -0.391   | 1.65E-18 | 0.081859 | 0.07719 | 0.035352 | 0.44596  | 0.185456 |
| 0.17256  | 0.00018  | 0.020319 | 0.6614   | 0.078422 | 0.0905  | 0.084587 | 0.0678   | -0.03837 |
| 0.097658 | 0.03488  | -0.08615 | 0.06285  | -0.02265 | 0.62543 | -0.06254 | 0.17728  | -0.10892 |
| -0.10119 | 0.02878  | -0.41861 | 3.08E-21 | -0.02107 | 0.64978 | -0.11089 | 0.01652  | -0.08612 |
| -0.0989  | 0.03262  | -0.19083 | 3.31E-05 | -0.0046  | 0.92101 | -0.01121 | 0.80905  | 0.022413 |
| 0.144048 | 0.0018   | 0.441973 | 9.41E-24 | 0.000187 | 0.99678 | 0.203375 | 9.44E-06 | -0.05833 |
| 0.110367 | 0.01703  | -0.05647 | 0.22319  | 0.025484 | 0.58278 | 0.109858 | 0.01755  | -0.12922 |
| -0.04832 | 0.29736  | 0.064514 | 0.16396  | 0.066153 | 0.15349 | 0.265522 | 5.63E-09 | 0.065227 |
| -0.1451  | 0.00167  | 0.000455 | 0.99218  | 0.076756 | 0.09758 | 0.196187 | 1.96E-05 | 0.187072 |
| 0.269546 | 3.23E-09 | 0.379197 | 2.04E-17 | 0.030638 | 0.50895 | 0.179683 | 9.45E-05 | -0.04873 |
| 0.061628 | 0.18369  | -0.3053  | 1.57E-11 | 0.018217 | 0.69458 | -0.13221 | 0.00421  | -0.0612  |
| -0.0514  | 0.26763  | -0.49575 | 2.46E-30 | -0.06644 | 0.15169 | -0.18909 | 3.92E-05 | -0.11275 |
| -0.0526  | 0.25665  | -0.11944 | 0.00978  | -0.06185 | 0.18211 | -0.08321 | 0.0724   | 0.017245 |
| 0.136493 | 0.00312  | 0.08413  | 0.06931  | -0.01096 | 0.81321 | 0.051022 | 0.27118  | -0.00872 |
| 0.174305 | 0.00015  | 0.186799 | 4.87E-05 | 0.031771 | 0.4934  | -0.04571 | 0.32426  | 0.195852 |
| 0.269856 | 3.10E-09 | 0.364201 | 4.28E-16 | -0.05446 | 0.24017 | 0.008579 | 0.85331  | -0.0274  |
| -0.00928 | 0.8414   | 0.053394 | 0.24949  | 0.043225 | 0.35132 | 0.085378 | 0.06526  | 0.069696 |
| -0.02808 | 0.54502  | -0.18828 | 4.23E-05 | -0.03189 | 0.49174 | -0.02329 | 0.61566  | -0.08952 |
| -0.07465 | 0.10716  | -0.11877 | 0.01021  | -0.02086 | 0.653   | 0.050341 | 0.27763  | -0.03496 |
| -0.05084 | 0.2729   | -0.04138 | 0.37225  | -0.00913 | 0.84395 | 0.113391 | 0.01422  | 0.005271 |
| -0.04413 | 0.34132  | 0.05354  | 0.2482   | -0.02801 | 0.54601 | -0.00576 | 0.90119  | -0.0585  |
| -0.0143  | 0.75785  | -0.04285 | 0.3555   | -0.02323 | 0.61663 | -0.01047 | 0.82147  | 0.002282 |
| 0.015381 | 0.74025  | 0.089564 | 0.05309  | -0.02571 | 0.57941 | -0.03751 | 0.41869  | 0.001605 |
| 0.031532 | 0.49665  | 0.034775 | 0.45343  | -0.0006  | 0.98962 | -0.02748 | 0.55355  | -0.0031  |
| 0.210902 | 4.28E-06 | 0.198322 | 1.58E-05 | 0.072732 | 0.1165  | 0.007279 | 0.87534  | 0.172677 |
| -0.0125  | 0.78761  | 0.068145 | 0.14146  | -0.03533 | 0.4463  | 0.034748 | 0.45378  | 0.008883 |
| 0.005652 | 0.90305  | 0.041142 | 0.37503  | -0.00109 | 0.98122 | 0.05815  | 0.20972  | 0.035414 |
| -0.00861 | 0.85284  | 0.056419 | 0.22363  | 0.021354 | 0.64532 | 0.077096 | 0.0961   | 0.102336 |
| -0.01139 | 0.80611  | -0.02397 | 0.60539  | -0.04792 | 0.30144 | -0.09609 | 0.03791  | -0.00673 |
| 0.049953 | 0.28136  | 0.005929 | 0.89832  | 0.064771 | 0.16229 | 0.066754 | 0.14978  | 0.042633 |
| 0.08835  | 0.05641  | 0.139443 | 0.00253  | 0.026692 | 0.56504 | 0.082653 | 0.07436  | -0.00679 |
| 0.046791 | 0.31297  | 0.089709 | 0.0527   | -0.0007  | 0.98804 | 0.011467 | 0.8048   | 0.1325   |
| 0.015033 | 0.74593  | 0.010733 | 0.81706  | -0.00851 | 0.85444 | -0.01721 | 0.71063  | -0.04038 |
| -0.06353 | 0.17052  | -0.04509 | 0.33093  | -0.03722 | 0.42226 | 0.001028 | 0.98232  | 0.010833 |
| -0.08603 | 0.06323  | -0.04577 | 0.32363  | 0.013453 | 0.77185 | 0.14993  | 0.00116  | 0.013124 |
| -0.05079 | 0.27339  | -0.0473  | 0.30774  | -0.00672 | 0.88482 | 0.006179 | 0.89407  | -0.0283  |
| 0.124377 | 0.00712  | 0.119943 | 0.00948  | 0.01088  | 0.8146  | -0.05654 | 0.22267  | 0.089455 |
| 0.083915 | 0.07002  | 0.064428 | 0.16452  | -0.01403 | 0.76242 | 0.073647 | 0.11196  | 0.024678 |
| 0.159144 | 0.00056  | 0.004511 | 0.92255  | 0.000923 | 0.98413 | -0.04247 | 0.35975  | -0.02373 |
| 0.120872 | 0.00893  | -0.19981 | 1.36E-05 | 0.008916 | 0.84761 | -0.04586 | 0.32274  | -0.0553  |
| -0.08947 | 0.05334  | -0.01057 | 0.81977  | -0.00818 | 0.86    | 0.080047 | 0.08399  | -0.03653 |

|          |          |          |          |          |         |          |         |          |
|----------|----------|----------|----------|----------|---------|----------|---------|----------|
| -0.01055 | 0.82008  | 0.084183 | 0.06913  | 0.047207 | 0.30869 | 0.045978 | 0.32146 | -0.03331 |
| 0.063052 | 0.17374  | 0.026413 | 0.56911  | -0.01433 | 0.75741 | -0.08076 | 0.08126 | 0.062375 |
| -0.03583 | 0.43989  | -0.08664 | 0.06138  | -0.03895 | 0.40097 | -0.05457 | 0.23919 | -0.05613 |
| -0.11526 | 0.01269  | -0.22913 | 5.58E-07 | -0.00765 | 0.86907 | -0.01454 | 0.75395 | 0.055741 |
| -0.12453 | 0.00705  | 0.00222  | 0.96183  | -0.0087  | 0.8512  | 0.17221  | 0.00018 | 0.092361 |
| -0.09704 | 0.03604  | -0.07418 | 0.10939  | -0.01378 | 0.76652 | 0.022375 | 0.62961 | -0.07605 |
| 0.004283 | 0.92645  | 0.006912 | 0.88158  | -0.03152 | 0.49684 | -0.00651 | 0.88847 | -0.13632 |
| -0.03344 | 0.47097  | -0.03663 | 0.42969  | 0.08949  | 0.05329 | 0.070778 | 0.12668 | -0.03011 |
| -0.08513 | 0.06604  | -0.18883 | 4.01E-05 | -0.0525  | 0.25748 | -0.06851 | 0.13934 | -0.05878 |
| 0.015753 | 0.73421  | -0.09218 | 0.0465   | -0.01195 | 0.79667 | -0.01888 | 0.68408 | -0.01979 |
| 0.019893 | 0.66808  | -0.07428 | 0.10893  | 0.015705 | 0.73499 | -0.01859 | 0.68864 | -0.02603 |
| -0.0439  | 0.34384  | 0.04356  | 0.34759  | -0.03532 | 0.44632 | -0.00393 | 0.93252 | 0.106391 |
| 0.124813 | 0.00692  | 0.147497 | 0.00139  | 0.087925 | 0.05761 | 0.03564  | 0.44227 | 0.088289 |
| -0.06002 | 0.1954   | -0.05571 | 0.22947  | -0.06303 | 0.17389 | -0.06253 | 0.17733 | -0.08683 |
| -0.0162  | 0.72698  | -0.09065 | 0.05026  | 0.027443 | 0.55415 | 0.140146 | 0.0024  | 0.169765 |
| 0.051483 | 0.26686  | -0.00864 | 0.85224  | 0.016742 | 0.7182  | 0.030139 | 0.51588 | 0.052543 |
| -0.02742 | 0.55452  | -0.05695 | 0.21933  | -0.00624 | 0.89304 | -0.07419 | 0.10935 | -0.09911 |
| -0.08603 | 0.06323  | -0.06429 | 0.16544  | -0.02606 | 0.57426 | 0.036594 | 0.43014 | -0.12499 |
| -0.01215 | 0.79334  | -0.02241 | 0.62903  | -0.01217 | 0.79309 | -0.03999 | 0.38861 | -0.04891 |
| -0.15643 | 0.00069  | -0.20914 | 5.17E-06 | -0.01673 | 0.7184  | 0.036886 | 0.42647 | -0.12188 |
| -0.01936 | 0.67648  | 0.038357 | 0.40825  | 0.097255 | 0.03564 | 0.046466 | 0.31634 | 0.027764 |
| -0.05038 | 0.27725  | -0.12162 | 0.00852  | 0.006626 | 0.88645 | -0.02183 | 0.63797 | -0.04001 |
| -0.03102 | 0.50368  | -0.08098 | 0.08045  | -0.01396 | 0.76351 | -0.00205 | 0.96476 | -0.00924 |
| -0.13949 | 0.00252  | -0.18815 | 4.28E-05 | -0.02895 | 0.53265 | -0.04709 | 0.30989 | -0.03189 |
| 0.05535  | 0.23255  | 0.036173 | 0.43547  | -0.01551 | 0.73821 | -0.04366 | 0.34654 | -0.01271 |
| -0.11237 | 0.01512  | -0.12709 | 0.00595  | -0.0493  | 0.28772 | -0.02146 | 0.64373 | -0.08552 |
| -0.04977 | 0.28312  | -0.14737 | 0.0014   | 0.106663 | 0.02114 | 0.036989 | 0.42518 | -0.01715 |
| -0.11042 | 0.01698  | -0.09407 | 0.04215  | -0.01315 | 0.77693 | 0.002074 | 0.96434 | 0.010928 |
| 0.074066 | 0.10994  | 0.13036  | 0.00478  | -0.03143 | 0.49799 | -0.01233 | 0.79036 | -0.02436 |
| 0.059042 | 0.2028   | -0.07585 | 0.10161  | -0.00253 | 0.9566  | -0.04679 | 0.31301 | -0.06165 |
| 0.113174 | 0.0144   | -0.15756 | 0.00063  | -0.03832 | 0.40864 | -0.00722 | 0.8763  | -0.1968  |
| 0.008716 | 0.85099  | 0.068138 | 0.1415   | -0.01402 | 0.76249 | -0.01456 | 0.75367 | -0.03675 |
| 0.021772 | 0.63886  | 0.146956 | 0.00145  | 0.101302 | 0.0286  | 0.170165 | 0.00022 | 0.320819 |
| 0.001639 | 0.97182  | -0.05645 | 0.22339  | -0.02235 | 0.62995 | -0.04519 | 0.32984 | -0.05546 |
| 0.328659 | 3.18E-13 | 0.23136  | 4.30E-07 | -0.02758 | 0.55221 | -0.09876 | 0.03286 | 0.074341 |
| 0.080221 | 0.08332  | 0.077375 | 0.0949   | 0.010698 | 0.81764 | 0.007114 | 0.87815 | -0.03731 |
| -0.04263 | 0.35796  | -0.10292 | 0.02614  | -0.02439 | 0.59901 | -0.02947 | 0.52521 | -0.10859 |
| 0.167329 | 0.00028  | 0.244015 | 9.29E-08 | 0.042986 | 0.35399 | 0.020927 | 0.65193 | 0.108304 |
| -0.00162 | 0.97208  | -0.01549 | 0.73856  | -0.03653 | 0.4309  | 0.027377 | 0.5551  | 0.016578 |
| 0.146359 | 0.00152  | 0.176751 | 0.00012  | -0.02941 | 0.52609 | -0.05173 | 0.26456 | -0.01537 |
| 0.062692 | 0.17622  | -0.06969 | 0.13262  | -0.03031 | 0.51348 | -0.06123 | 0.18654 | -0.06888 |
| -0.02116 | 0.64832  | 0.012604 | 0.78588  | -0.02433 | 0.59992 | -0.04301 | 0.35372 | -0.02598 |
| 0.080541 | 0.08209  | 0.003681 | 0.93676  | -0.03149 | 0.49728 | -0.00866 | 0.85199 | -0.04802 |
| 0.054435 | 0.24037  | -0.00297 | 0.949    | -0.00953 | 0.83721 | -0.08275 | 0.07401 | 0.038085 |
| -0.06493 | 0.16122  | -0.02305 | 0.61934  | -0.00033 | 0.99426 | 0.010631 | 0.81876 | -0.03306 |



|          |          |          |          |          |         |          |          |          |
|----------|----------|----------|----------|----------|---------|----------|----------|----------|
| -0.05502 | 0.23538  | -0.03425 | 0.46026  | -0.0201  | 0.66484 | 0.024845 | 0.59227  | 0.002849 |
| 0.144556 | 0.00174  | -0.02996 | 0.51843  | -0.01393 | 0.764   | -0.04083 | 0.37871  | -0.01206 |
| -0.0677  | 0.1441   | 0.021147 | 0.64852  | -0.05154 | 0.26638 | -0.02513 | 0.58802  | 0.016094 |
| 0.041554 | 0.37027  | 0.208518 | 5.52E-06 | 0.070521 | 0.12806 | 0.002947 | 0.94935  | 0.052676 |
| 0.046891 | 0.31194  | 0.026815 | 0.56325  | -0.02114 | 0.64859 | -0.00156 | 0.97321  | 0.006181 |
| -0.07418 | 0.1094   | -0.12346 | 0.00756  | -0.02952 | 0.52453 | -0.03823 | 0.40983  | -0.02343 |
| -0.10408 | 0.0245   | -0.1549  | 0.00078  | 0.014843 | 0.74904 | 0.043676 | 0.34631  | 0.004199 |
| -0.05956 | 0.19887  | -0.0033  | 0.94322  | 0.026166 | 0.57273 | 0.025644 | 0.58041  | 0.061536 |
| 0.010409 | 0.82249  | 0.081851 | 0.07722  | -0.00642 | 0.89001 | -0.01067 | 0.81818  | 0.001376 |
| 0.065039 | 0.16055  | 0.08175  | 0.07759  | -0.01883 | 0.68491 | 0.021536 | 0.6425   | 0.051389 |
| -0.06219 | 0.17968  | 0.046053 | 0.32068  | 0.011414 | 0.80568 | 0.287588 | 2.41E-10 | 0.072601 |
| 0.043521 | 0.34803  | 0.073445 | 0.11296  | -0.04224 | 0.36241 | -0.01495 | 0.7473   | 0.03756  |
| 0.010451 | 0.82178  | 0.039643 | 0.39269  | -0.00532 | 0.90872 | 0.119073 | 0.01001  | 0.041459 |
| 0.196289 | 1.94E-05 | -0.10271 | 0.02646  | -0.07171 | 0.12174 | -0.05853 | 0.20678  | -0.09776 |
| 0.087043 | 0.06017  | 0.065929 | 0.15489  | 0.025394 | 0.58412 | 0.081835 | 0.07728  | 0.187372 |
| -0.08347 | 0.07151  | -0.14376 | 0.00184  | -0.02508 | 0.58881 | 0.052899 | 0.25392  | -0.02996 |
| 0.206206 | 7.04E-06 | 0.06853  | 0.13922  | -0.00139 | 0.97617 | -0.04953 | 0.28541  | 0.034744 |
| -0.05844 | 0.20747  | 0.034955 | 0.45109  | 0.008989 | 0.84638 | 0.047038 | 0.31042  | -0.01067 |
| 0.075228 | 0.10445  | 0.084116 | 0.06935  | -0.01844 | 0.69104 | -0.03176 | 0.49352  | -0.04288 |
| -0.0454  | 0.32762  | -0.00494 | 0.91521  | 0.035766 | 0.44065 | 0.175525 | 0.00014  | -0.00178 |
| -0.06668 | 0.15024  | -0.08874 | 0.05532  | 0.087032 | 0.0602  | 0.075522 | 0.1031   | 0.028903 |
| -0.05039 | 0.27717  | -0.04635 | 0.31754  | -0.02809 | 0.54485 | -0.03313 | 0.47505  | -0.0276  |
| -0.01446 | 0.75531  | -0.14245 | 0.00203  | -0.03339 | 0.47164 | -0.04621 | 0.31902  | -0.07158 |
| 0.005115 | 0.91221  | -0.24989 | 4.43E-08 | 0.006555 | 0.88766 | -0.07295 | 0.11543  | -0.09581 |
| 0.163093 | 0.0004   | -0.05782 | 0.2123   | 0.026962 | 0.5611  | -0.03122 | 0.50097  | 0.027362 |
| 0.09191  | 0.04714  | 0.020645 | 0.65633  | -0.02084 | 0.65335 | -0.03814 | 0.41092  | -0.05858 |
| -0.0713  | 0.12392  | -0.00951 | 0.83761  | -0.01382 | 0.76583 | 0.033591 | 0.46896  | -0.02428 |
| -0.07167 | 0.12196  | -0.01225 | 0.79176  | 0.009673 | 0.83485 | 0.058823 | 0.20449  | -0.01111 |
| -0.13767 | 0.00287  | -0.10395 | 0.02468  | -0.01956 | 0.67324 | -0.02247 | 0.62813  | -0.05743 |
| -0.0635  | 0.1707   | -0.00933 | 0.84057  | -0.04291 | 0.35489 | -0.02646 | 0.56839  | -0.1249  |
| 0.210156 | 4.64E-06 | 0.302603 | 2.41E-11 | 0.000747 | 0.98716 | -0.02349 | 0.6126   | 0.143108 |
| 0.132547 | 0.00411  | 0.012086 | 0.79448  | -0.02896 | 0.53248 | -0.16353 | 0.00039  | -0.05081 |
| -0.02743 | 0.55427  | -0.03757 | 0.41799  | 0.003543 | 0.93913 | 0.038642 | 0.40476  | -0.00062 |
| -0.05238 | 0.25864  | -0.01481 | 0.74949  | -0.0148  | 0.74976 | 0.003736 | 0.93582  | -0.02988 |
| 0.05477  | 0.23749  | 0.280171 | 7.18E-10 | -0.02789 | 0.54772 | -0.1329  | 0.00401  | -0.01206 |
| -0.07826 | 0.09118  | -0.16075 | 0.00049  | -0.00463 | 0.92044 | -0.04418 | 0.34077  | -0.10904 |
| 0.110608 | 0.01679  | 0.029232 | 0.52859  | 0.019137 | 0.67999 | -0.10397 | 0.02465  | -0.01997 |
| 0.012365 | 0.78985  | -0.00151 | 0.97408  | -0.03843 | 0.40731 | -0.0135  | 0.77107  | -0.09033 |
| -0.05111 | 0.27031  | -0.0157  | 0.73508  | -0.02649 | 0.56804 | 0.02977  | 0.52104  | 0.007739 |
| -0.01595 | 0.73109  | -0.00582 | 0.90016  | -0.01012 | 0.82738 | -0.03293 | 0.47772  | 0.002743 |
| -0.01458 | 0.75326  | 0.040829 | 0.37869  | 0.014624 | 0.75262 | 0.033009 | 0.47671  | 0.019882 |
| -0.01249 | 0.78777  | 0.104866 | 0.02343  | -0.03687 | 0.42672 | 0.030349 | 0.51295  | -0.01325 |
| -0.03486 | 0.45229  | -0.01703 | 0.71354  | -0.00514 | 0.91172 | -0.03267 | 0.48128  | 0.023763 |
| -0.13174 | 0.00435  | -0.09    | 0.05194  | 0.001249 | 0.97852 | 0.024514 | 0.59721  | -0.06264 |
| 0.044413 | 0.33823  | -0.00722 | 0.8763   | 0.005118 | 0.91217 | 0.011893 | 0.7977   | -0.04647 |

|          |          |          |          |          |         |           |          |          |
|----------|----------|----------|----------|----------|---------|-----------|----------|----------|
| 0.055567 | 0.23071  | 0.030809 | 0.50659  | -0.02648 | 0.56819 | -0.01262  | 0.78568  | -0.01411 |
| -0.04827 | 0.29789  | -0.14373 | 0.00185  | -0.04935 | 0.28721 | -0.04525  | 0.32921  | -0.08339 |
| -0.00553 | 0.9051   | -0.03948 | 0.39461  | -0.01523 | 0.74273 | -0.0644   | 0.16474  | 0.020351 |
| 0.041449 | 0.37148  | -0.03149 | 0.49724  | 0.007365 | 0.87388 | 0.021649  | 0.64076  | 0.10989  |
| 0.002351 | 0.95958  | -0.12926 | 0.00515  | -0.0417  | 0.36864 | -0.04787  | 0.30195  | -0.03127 |
| -0.03041 | 0.51218  | -0.07146 | 0.12303  | -0.01875 | 0.68603 | 0.022178  | 0.63261  | -0.0981  |
| -0.04891 | 0.29153  | -0.20938 | 5.04E-06 | -0.05813 | 0.2099  | -0.06914  | 0.13571  | 8.28E-06 |
| 0.208461 | 5.55E-06 | 0.212903 | 3.45E-06 | -0.04356 | 0.34761 | 0.003529  | 0.93937  | 0.063791 |
| -0.15151 | 0.00102  | -0.18873 | 4.05E-05 | 0.06364  | 0.16976 | 0.091622  | 0.04784  | 0.05806  |
| 0.065716 | 0.15623  | 0.009722 | 0.83404  | -0.03839 | 0.40782 | 0.021925  | 0.63651  | 0.113418 |
| -0.01632 | 0.72496  | -0.05538 | 0.23227  | -0.00306 | 0.94737 | -0.00492  | 0.91556  | -0.03713 |
| -0.01287 | 0.78145  | -0.06254 | 0.17725  | 0.041808 | 0.36734 | -0.02127  | 0.64662  | -0.02199 |
| 0.198485 | 1.55E-05 | 0.233713 | 3.26E-07 | 0.029878 | 0.51953 | -0.03232  | 0.4859   | -0.00151 |
| 0.228482 | 6.02E-07 | 0.23895  | 1.73E-07 | 0.034976 | 0.45082 | -0.05531  | 0.23288  | -0.01457 |
| -0.03148 | 0.49732  | -0.01885 | 0.68457  | -0.04957 | 0.28507 | -0.0376   | 0.41751  | -0.00829 |
| 0.026925 | 0.56165  | -0.03022 | 0.51478  | -0.00322 | 0.94471 | -0.0109   | 0.8142   | -0.04661 |
| -0.17023 | 0.00022  | -0.22529 | 8.71E-07 | -0.04266 | 0.35766 | -0.09051  | 0.05061  | -0.13347 |
| -0.03926 | 0.3973   | 0.025863 | 0.57718  | -0.02071 | 0.65527 | 0.122404  | 0.0081   | 0.061501 |
| 0.058379 | 0.20793  | 0.044267 | 0.33982  | 0.004487 | 0.92297 | -0.00848  | 0.855    | -0.02985 |
| -0.1165  | 0.01175  | -0.003   | 0.94836  | -0.04381 | 0.34478 | -0.06724  | 0.14681  | -0.08335 |
| 0.115892 | 0.0122   | -0.13226 | 0.0042   | 0.035116 | 0.44901 | 0.02815   | 0.54398  | 0.201125 |
| 0.13654  | 0.00311  | -0.02033 | 0.66121  | -0.05049 | 0.27625 | -0.09387  | 0.0426   | -0.13675 |
| 0.01315  | 0.77685  | 0.325976 | 5.06E-13 | 0.032721 | 0.48056 | 0.132661  | 0.00408  | 0.190208 |
| 0.19261  | 2.78E-05 | 0.257263 | 1.70E-08 | -0.02237 | 0.6297  | -0.03067  | 0.50849  | 0.089675 |
| 0.024452 | 0.59813  | 0.030423 | 0.51194  | -0.0774  | 0.09477 | -0.14097  | 0.00226  | -0.13994 |
| -0.01403 | 0.76239  | -0.10451 | 0.02391  | 0.012256 | 0.79166 | 0.028033  | 0.54565  | 0.005567 |
| 0.307243 | 1.15E-11 | 0.143469 | 0.00188  | -0.04128 | 0.37341 | -0.07311  | 0.1146   | -0.0632  |
| -0.04276 | 0.35655  | -0.01365 | 0.76867  | 0.068848 | 0.13738 | 0.088712  | 0.0554   | 0.303625 |
| -0.10868 | 0.01881  | -0.29424 | 8.83E-11 | -0.01338 | 0.77309 | -0.05749  | 0.21498  | -0.09019 |
| -0.03345 | 0.4708   | -0.09766 | 0.03487  | 0.00516  | 0.91145 | 0.051053  | 0.27089  | 0.056355 |
| -0.11085 | 0.01655  | -0.14665 | 0.00148  | 0.03554  | 0.44356 | 0.187676  | 4.48E-05 | 0.107392 |
| -0.23302 | 3.54E-07 | -0.40946 | 2.64E-20 | -0.00461 | 0.92088 | -0.00282  | 0.95149  | -0.08035 |
| -0.21926 | 1.72E-06 | -0.19477 | 2.25E-05 | -0.03461 | 0.45555 | -0.01587  | 0.73224  | -0.1544  |
| -0.05743 | 0.21544  | 0.049344 | 0.28727  | 0.024567 | 0.59642 | 0.073459  | 0.11288  | -0.01965 |
| 0.074243 | 0.10909  | 0.188037 | 4.33E-05 | -0.04679 | 0.31302 | -0.08067  | 0.0816   | -0.14424 |
| 0.163895 | 0.00038  | 0.149028 | 0.00124  | 0.001383 | 0.97621 | -0.05256  | 0.257    | -0.05523 |
| -0.09228 | 0.04625  | -0.1421  | 0.00208  | 0.005827 | 0.90006 | 0.030379  | 0.51254  | 0.01904  |
| -0.1924  | 2.84E-05 | -0.41863 | 3.06E-21 | 0.023004 | 0.62    | 0.039673  | 0.39234  | 0.052469 |
| 0.084772 | 0.0672   | 0.298    | 4.95E-11 | 0.129066 | 0.00522 | 0.303306  | 2.15E-11 | 0.375201 |
| 0.019278 | 0.67776  | -0.1121  | 0.01537  | 0.092454 | 0.04584 | 0.090801  | 0.04988  | 0.074814 |
| -0.09063 | 0.05032  | 0.19199  | 2.96E-05 | -0.04766 | 0.30409 | 0.024946  | 0.59077  | -0.01493 |
| 0.098926 | 0.03257  | 0.024353 | 0.59962  | -0.03731 | 0.42114 | 0.002291  | 0.96062  | -0.03395 |
| -0.04188 | 0.36652  | 0.07376  | 0.11142  | 0.001132 | 0.98054 | -4.10E-05 | 0.9993   | 0.079524 |
| -0.03478 | 0.45332  | -0.03209 | 0.48903  | 0.105519 | 0.02258 | 0.181094  | 8.30E-05 | 0.239257 |
| -0.08247 | 0.075    | -0.04899 | 0.29076  | 0.049646 | 0.28433 | 0.07423   | 0.10915  | -0.04961 |

|          |          |          |          |          |         |          |          |          |
|----------|----------|----------|----------|----------|---------|----------|----------|----------|
| 0.119672 | 0.00964  | -0.05999 | 0.19566  | -0.06192 | 0.18164 | -0.16569 | 0.00032  | -0.19545 |
| -0.05998 | 0.19572  | -0.22125 | 1.38E-06 | -0.08434 | 0.06862 | -0.14381 | 0.00184  | -0.11363 |
| 0.033404 | 0.47144  | 0.094849 | 0.04048  | 0.0049   | 0.9159  | 0.020338 | 0.66111  | 0.142215 |
| -0.15058 | 0.0011   | -0.45458 | 3.42E-25 | 0.007702 | 0.86816 | -0.11923 | 0.00991  | -0.1696  |
| -0.13288 | 0.00402  | -0.13017 | 0.00484  | 0.068589 | 0.13888 | 0.285602 | 3.24E-10 | -0.03031 |
| -0.1837  | 6.52E-05 | -0.14591 | 0.00157  | -0.01749 | 0.70613 | 0.247901 | 5.71E-08 | -0.21626 |
| -0.14103 | 0.00225  | -0.05401 | 0.24406  | 0.048244 | 0.29816 | 0.25525  | 2.22E-08 | -0.13778 |
| -0.20078 | 1.23E-05 | -0.24928 | 4.79E-08 | 0.003194 | 0.94511 | 0.199472 | 1.41E-05 | -0.18866 |
| -0.16606 | 0.00031  | -0.46424 | 2.45E-26 | -0.0039  | 0.93306 | -0.00266 | 0.9543   | -0.18767 |
| -0.15329 | 0.00089  | -0.18807 | 4.32E-05 | -0.01295 | 0.78014 | 0.228394 | 6.09E-07 | -0.23869 |
| -0.03501 | 0.45034  | 0.038151 | 0.41077  | 0.036392 | 0.4327  | 0.004439 | 0.92378  | 0.097172 |
| -0.1581  | 0.00061  | -0.32669 | 4.47E-13 | 0.018468 | 0.69059 | 0.082497 | 0.07491  | -0.03293 |
| 0.1385   | 0.0027   | 0.131022 | 0.00457  | 0.038568 | 0.40567 | 0.212734 | 3.52E-06 | -0.05236 |
| 0.190368 | 3.46E-05 | 0.179853 | 9.30E-05 | 0.064506 | 0.16401 | 0.232236 | 3.88E-07 | -0.05206 |
| 0.127526 | 0.00578  | 0.103987 | 0.02462  | 0.018915 | 0.68349 | 0.198391 | 1.57E-05 | -0.04957 |
| 0.177759 | 0.00011  | 0.111495 | 0.01593  | 0.015739 | 0.73444 | 0.135838 | 0.00327  | -0.07201 |
| 0.038205 | 0.41011  | -0.00916 | 0.84346  | -0.04786 | 0.30206 | -0.0099  | 0.83108  | 0.088959 |
| 0.057743 | 0.21294  | 0.091719 | 0.0476   | -0.0561  | 0.22627 | -0.08349 | 0.07147  | 0.029024 |
| -0.00275 | 0.9528   | -0.00641 | 0.89006  | 0.003183 | 0.94531 | -0.0308  | 0.50667  | -0.07754 |
| -0.06458 | 0.16353  | -0.09899 | 0.03247  | 0.012626 | 0.78551 | 0.042549 | 0.35891  | 0.070757 |
| -0.15619 | 0.00071  | -0.36698 | 2.46E-16 | 0.034608 | 0.45561 | 0.034402 | 0.4583   | -0.00664 |
| 0.01083  | 0.81544  | -0.23369 | 3.27E-07 | -0.01219 | 0.79268 | -0.02873 | 0.53565  | -0.03048 |
| 0.250648 | 4.02E-08 | -0.0383  | 0.40888  | -0.04877 | 0.29292 | -0.01261 | 0.78581  | -0.00634 |
| -0.16731 | 0.00028  | -0.14995 | 0.00115  | 0.049751 | 0.28331 | 0.092685 | 0.0453   | 0.219852 |
| -0.11866 | 0.01028  | -0.35033 | 6.25E-15 | 0.029174 | 0.52941 | 0.020182 | 0.66355  | -0.0161  |
| 0.155463 | 0.00075  | 0.486546 | 3.99E-29 | 0.02524  | 0.58639 | 0.068911 | 0.13703  | 0.190851 |
| -0.15464 | 0.0008   | -0.32158 | 1.07E-12 | -0.00405 | 0.93042 | -0.02876 | 0.53533  | -0.06067 |
| 0.124059 | 0.00727  | -0.0223  | 0.63074  | 0.024418 | 0.59864 | -0.05173 | 0.26455  | 0.068671 |
| -0.13917 | 0.00258  | -0.1401  | 0.00241  | 0.076517 | 0.09863 | 0.023685 | 0.60968  | 0.29412  |
| 0.079415 | 0.08648  | 0.18839  | 4.19E-05 | 0.026909 | 0.56187 | 0.052341 | 0.25897  | 0.255575 |
| 0.224002 | 1.01E-06 | 0.111468 | 0.01596  | -0.01392 | 0.76415 | -0.16634 | 0.00031  | -0.17006 |
| -0.06994 | 0.13123  | -0.21732 | 2.13E-06 | 0.010552 | 0.82009 | -0.04918 | 0.28885  | -0.03559 |
| -0.03796 | 0.41315  | 0.193806 | 2.48E-05 | 0.085001 | 0.06646 | 0.278914 | 8.60E-10 | 0.056393 |
| -0.07064 | 0.12742  | 0.00884  | 0.8489   | 0.130081 | 0.00487 | 0.319818 | 1.45E-12 | 0.408198 |
| 0.15112  | 0.00105  | 0.32472  | 6.28E-13 | 0.020309 | 0.66157 | 0.14466  | 0.00172  | -0.02965 |
| -0.08837 | 0.05634  | -0.30151 | 2.86E-11 | 0.028657 | 0.53675 | -0.04252 | 0.3592   | 0.015926 |
| -0.07101 | 0.12546  | 0.122216 | 0.00819  | -0.03729 | 0.42139 | -0.11055 | 0.01685  | -0.07455 |
| 0.321112 | 1.16E-12 | 0.327498 | 3.89E-13 | 0.01668  | 0.71921 | 0.004099 | 0.92961  | 0.076397 |
| -0.10984 | 0.01757  | -0.17489 | 0.00015  | 0.089153 | 0.05419 | 0.322993 | 8.44E-13 | -0.06972 |
| -0.1786  | 0.0001   | -0.21686 | 2.24E-06 | 0.027997 | 0.54616 | 0.060764 | 0.18992  | 0.167139 |
| -0.05555 | 0.23088  | -0.17074 | 0.00021  | 0.016789 | 0.71745 | 0.021438 | 0.64402  | 0.224246 |
| 0.058478 | 0.20716  | -0.17587 | 0.00013  | 0.010919 | 0.81396 | -0.04746 | 0.30606  | 0.084145 |
| -0.04049 | 0.38261  | -0.10072 | 0.02954  | 0.012166 | 0.79315 | -0.02188 | 0.63719  | -0.07593 |
| -0.04698 | 0.31101  | -0.12404 | 0.00728  | 0.005088 | 0.91268 | -0.02796 | 0.54668  | -0.09813 |
| 0.181852 | 7.74E-05 | 0.310806 | 6.45E-12 | -0.05114 | 0.27009 | -0.10802 | 0.01955  | -0.05103 |

|          |          |          |          |          |         |          |          |          |
|----------|----------|----------|----------|----------|---------|----------|----------|----------|
| -0.08899 | 0.05464  | -0.11567 | 0.01237  | 0.002152 | 0.963   | 0.066385 | 0.15205  | -0.05811 |
| -0.02505 | 0.58915  | -0.02736 | 0.55534  | 0.090042 | 0.05183 | 0.098024 | 0.0342   | 0.237037 |
| 0.158442 | 0.00059  | -0.16094 | 0.00048  | -0.0219  | 0.63686 | -0.08113 | 0.07985  | -0.12065 |
| 0.143811 | 0.00184  | 0.326619 | 4.52E-13 | -0.01333 | 0.77391 | -0.09495 | 0.04026  | 0.031071 |
| -0.11713 | 0.0113   | -0.35898 | 1.19E-15 | -0.00232 | 0.96019 | -0.06435 | 0.16504  | -0.09414 |
| 0.059804 | 0.19703  | -0.16804 | 0.00026  | 0.086316 | 0.06235 | -0.05739 | 0.21573  | 0.263843 |
| -0.11319 | 0.01439  | -0.49927 | 8.25E-31 | 0.023154 | 0.61771 | -0.01669 | 0.71903  | -0.08076 |
| -0.05181 | 0.26385  | -0.16328 | 0.0004   | 0.013481 | 0.77139 | 0.059359 | 0.20039  | 0.115617 |
| -0.0084  | 0.85632  | -0.2246  | 9.42E-07 | 0.00498  | 0.91453 | -0.04515 | 0.33021  | -0.1135  |
| 0.095689 | 0.03873  | -0.09062 | 0.05034  | -0.03613 | 0.436   | -0.0862  | 0.0627   | -0.19608 |
| -0.06706 | 0.14792  | -0.2187  | 1.83E-06 | 0.007819 | 0.86617 | -0.01387 | 0.76503  | 0.128648 |
| 0.010493 | 0.82109  | -0.05549 | 0.23136  | 0.026537 | 0.56731 | 0.011899 | 0.79759  | 0.113991 |
| -0.01526 | 0.74215  | -0.06381 | 0.1686   | 0.003996 | 0.93137 | -0.03282 | 0.47929  | 0.019221 |
| 0.112236 | 0.01524  | 0.127343 | 0.00586  | -0.02586 | 0.57726 | -0.03947 | 0.39472  | 0.057456 |
| 0.012287 | 0.79115  | -0.09941 | 0.03173  | 0.033415 | 0.47129 | 0.078867 | 0.08868  | 0.087495 |
| -0.19429 | 2.36E-05 | -0.25794 | 1.56E-08 | 0.004251 | 0.927   | 0.056051 | 0.22667  | 0.058274 |
| -0.0334  | 0.4715   | -0.07206 | 0.11991  | -0.068   | 0.14233 | 0.036892 | 0.42639  | -0.40189 |
| -0.00547 | 0.90618  | 0.310977 | 6.27E-12 | 0.029142 | 0.52986 | 0.243549 | 9.85E-08 | -0.08992 |
| -0.06717 | 0.14726  | -0.06244 | 0.17794  | 0.016256 | 0.72605 | 0.06885  | 0.13738  | 0.110269 |
| 0.050382 | 0.27724  | -0.03434 | 0.45915  | 0.090919 | 0.04958 | 0.105438 | 0.02268  | 0.362064 |
| 0.179879 | 9.28E-05 | -0.0984  | 0.03351  | 0.030434 | 0.51178 | -0.0484  | 0.29659  | 0.111441 |
| -0.147   | 0.00144  | -0.23508 | 2.77E-07 | 0.067742 | 0.14383 | 0.110442 | 0.01696  | 0.277216 |
| 0.074262 | 0.109    | -0.09327 | 0.04396  | 0.059341 | 0.20052 | -0.07374 | 0.1115   | 0.058884 |
| 0.171922 | 0.00019  | 0.344696 | 1.79E-14 | -0.02763 | 0.55138 | -0.04913 | 0.28933  | 0.130709 |
| 0.13626  | 0.00317  | 0.176292 | 0.00013  | 0.048294 | 0.29767 | 0.223165 | 1.11E-06 | 0.106795 |
| -0.04745 | 0.30622  | -0.18171 | 7.84E-05 | 0.077793 | 0.09312 | 0.063482 | 0.17082  | -0.00013 |
| 0.014836 | 0.74915  | -0.15084 | 0.00108  | -0.01077 | 0.81652 | -0.09786 | 0.03451  | -0.10602 |
| 0.160429 | 0.0005   | 0.18022  | 8.99E-05 | 0.01381  | 0.76597 | -0.05072 | 0.27399  | 0.16983  |
| -0.02079 | 0.65409  | -0.24356 | 9.84E-08 | 0.023773 | 0.60835 | -0.04612 | 0.31998  | -0.02757 |
| -0.03432 | 0.45936  | 0.073319 | 0.11357  | 0.086581 | 0.06155 | 0.144799 | 0.00171  | 0.240642 |
| -0.09179 | 0.04743  | -0.1627  | 0.00042  | 0.01906  | 0.68119 | 0.12596  | 0.00642  | -0.01146 |
| 0.016417 | 0.72346  | -0.02277 | 0.62352  | 0.086989 | 0.06033 | 0.259765 | 1.22E-08 | 0.139463 |
| -0.13801 | 0.0028   | -0.12212 | 0.00825  | -0.06508 | 0.16031 | -0.02058 | 0.65726  | -0.07319 |
| 0.03884  | 0.40237  | -0.18018 | 9.03E-05 | -0.04137 | 0.37236 | -0.06087 | 0.18917  | -0.11912 |
| -0.18832 | 4.21E-05 | -0.04752 | 0.30546  | 0.103332 | 0.02555 | 0.177153 | 0.00012  | 0.280201 |
| 0.010553 | 0.82008  | -0.21509 | 2.72E-06 | 0.041817 | 0.36724 | -0.0257  | 0.57961  | 0.095529 |
| -0.15815 | 0.0006   | -0.42055 | 1.94E-21 | -0.05024 | 0.27864 | -0.12491 | 0.00688  | -0.04615 |
| 0.074853 | 0.1062   | -0.33223 | 1.70E-13 | -0.00323 | 0.94455 | -0.10697 | 0.02077  | -0.13163 |
| -0.32435 | 6.69E-13 | -0.14269 | 0.00199  | 0.090073 | 0.05175 | 0.381761 | 1.19E-17 | 0.222293 |
| -0.05174 | 0.26444  | -0.08272 | 0.07412  | 0.025736 | 0.57906 | 0.123222 | 0.00768  | -0.01591 |
| -0.06184 | 0.18215  | -0.01189 | 0.79776  | 0.020265 | 0.66226 | 0.096455 | 0.03719  | -0.05261 |
| -0.01306 | 0.7783   | -0.00315 | 0.94594  | 0.020983 | 0.65107 | 0.030711 | 0.50794  | -0.00866 |
| 0.038591 | 0.40539  | 0.444723 | 4.62E-24 | 0.075462 | 0.10337 | 0.131142 | 0.00453  | 0.216057 |
| -0.0376  | 0.41753  | -0.11982 | 0.00955  | 0.002744 | 0.95284 | -0.03665 | 0.42941  | -0.03841 |
| 0.100704 | 0.02956  | -0.18742 | 4.59E-05 | 0.013068 | 0.7782  | 0.010458 | 0.82166  | -0.00188 |

|          |          |          |          |          |          |          |          |          |
|----------|----------|----------|----------|----------|----------|----------|----------|----------|
| -0.02268 | 0.62488  | -0.10743 | 0.02023  | 0.012491 | 0.78777  | -0.0595  | 0.1993   | -0.00147 |
| -0.04745 | 0.30617  | -0.10156 | 0.0282   | 0.031229 | 0.5008   | 0.001641 | 0.97179  | -0.03265 |
| -0.04393 | 0.34349  | -0.07394 | 0.11056  | -0.01848 | 0.69033  | -0.0615  | 0.18462  | -0.09852 |
| 0.006122 | 0.89503  | 0.059608 | 0.1985   | 0.042337 | 0.36131  | 0.109573 | 0.01785  | 0.024757 |
| 0.189809 | 3.65E-05 | 0.43329  | 8.54E-23 | 0.085668 | 0.06435  | 0.188496 | 4.14E-05 | 0.180904 |
| 0.287381 | 2.49E-10 | 0.156532 | 0.00069  | 0.332233 | 1.70E-13 | 0.215503 | 2.60E-06 | 0.338659 |
| 0.143646 | 0.00186  | 0.387406 | 3.59E-18 | 0.032823 | 0.4792   | 0.18884  | 4.01E-05 | 0.233721 |
| 0.248052 | 5.60E-08 | 0.45003  | 1.15E-24 | 0.054074 | 0.2435   | 0.145165 | 0.00166  | 0.174021 |
| 0.149216 | 0.00122  | 0.068257 | 0.1408   | 0.112038 | 0.01542  | 0.179724 | 9.41E-05 | 0.131188 |
| 0.215054 | 2.73E-06 | 0.265535 | 5.62E-09 | 0.073017 | 0.11507  | 0.289701 | 1.76E-10 | -0.01284 |
| 0.101768 | 0.02787  | 0.055295 | 0.23301  | 0.005018 | 0.91388  | 0.077328 | 0.0951   | -0.01511 |
| 0.034221 | 0.46066  | 0.179482 | 9.62E-05 | 0.203202 | 9.61E-06 | 0.459883 | 8.11E-26 | 0.099209 |
| -0.02205 | 0.63459  | 0.024966 | 0.59046  | 0.131478 | 0.00443  | 0.347787 | 1.01E-14 | 0.005309 |
| 0.001618 | 0.97218  | 0.05803  | 0.21067  | 0.251383 | 3.66E-08 | 0.403836 | 9.57E-20 | 0.157625 |
| -0.14634 | 0.00152  | -0.04578 | 0.32353  | 0.147222 | 0.00142  | 0.352806 | 3.91E-15 | 0.199944 |
| -0.06138 | 0.18543  | -0.03409 | 0.46235  | 0.04394  | 0.3434   | 0.152115 | 0.00098  | 0.134802 |
| -0.07618 | 0.10013  | -0.23554 | 2.62E-07 | 0.149215 | 0.00122  | 0.041801 | 0.36742  | 0.378939 |
| -0.0576  | 0.21407  | -0.19999 | 1.33E-05 | -0.04585 | 0.32279  | -0.03358 | 0.46908  | -0.14052 |
| -0.07368 | 0.11181  | 0.044518 | 0.33708  | -0.03689 | 0.42638  | 0.04489  | 0.33306  | -0.23907 |
| 0.182161 | 7.52E-05 | 0.057554 | 0.21444  | -0.00351 | 0.93977  | -0.04901 | 0.29056  | -0.06925 |
| 0.008243 | 0.85899  | -0.12757 | 0.00577  | 0.075725 | 0.10218  | 0.025926 | 0.57626  | 0.298962 |
| -0.01676 | 0.71787  | 0.007672 | 0.86866  | 0.053016 | 0.25286  | 0.034019 | 0.46332  | 0.101977 |
| -0.07924 | 0.08717  | -0.03442 | 0.45802  | -0.01223 | 0.79213  | 0.005985 | 0.89736  | -0.01105 |
| -0.20523 | 7.79E-06 | -0.13305 | 0.00397  | 0.038031 | 0.41224  | 0.130127 | 0.00485  | 0.062694 |
| 0.009231 | 0.84231  | -0.18692 | 4.82E-05 | 0.159654 | 0.00053  | 0.076499 | 0.09871  | 0.291179 |
| 0.109727 | 0.01769  | -0.0543  | 0.24151  | 0.001896 | 0.9674   | -0.14437 | 0.00176  | 0.013296 |
| 0.127337 | 0.00586  | 0.163038 | 0.0004   | 0.016307 | 0.72522  | 0.055288 | 0.23306  | -0.13027 |
| -0.05181 | 0.26382  | -0.09954 | 0.0315   | 0.000925 | 0.9841   | 0.029994 | 0.5179   | 0.000346 |
| -0.01614 | 0.72789  | -0.01639 | 0.72381  | 0.036529 | 0.43096  | 0.074303 | 0.1088   | 0.033185 |
| 0.055446 | 0.23173  | 0.237128 | 2.16E-07 | 0.120866 | 0.00894  | 0.123142 | 0.00772  | 0.185741 |
| -0.07182 | 0.12119  | -0.07648 | 0.09879  | 0.000629 | 0.98919  | -0.00011 | 0.99817  | -0.06677 |
| -0.0005  | 0.99134  | -0.02136 | 0.64519  | 0.022516 | 0.62744  | -0.04266 | 0.3576   | 0.008185 |
| -0.05093 | 0.27207  | -0.11722 | 0.01124  | -0.02775 | 0.54975  | 0.059389 | 0.20016  | -0.07961 |
| 0.265589 | 5.57E-09 | 0.259441 | 1.28E-08 | -0.02501 | 0.58985  | -0.04122 | 0.3741   | 0.147117 |
| 0.328395 | 3.32E-13 | 0.270266 | 2.93E-09 | 0.021819 | 0.63814  | -0.07747 | 0.09447  | 0.097198 |
| -0.03788 | 0.41408  | -0.40476 | 7.75E-20 | -0.0012  | 0.97934  | -0.04627 | 0.31839  | -0.021   |
| -0.04977 | 0.28312  | -0.08585 | 0.06379  | 0.059263 | 0.20112  | 0.161716 | 0.00045  | 0.117338 |
| 0.047937 | 0.30125  | 0.045273 | 0.32895  | 0.008757 | 0.8503   | -0.11125 | 0.01616  | -0.21528 |
| 0.064042 | 0.16708  | 0.109943 | 0.01747  | 0.11721  | 0.01125  | 0.275648 | 1.37E-09 | 0.239676 |
| 0.160892 | 0.00048  | 0.344362 | 1.90E-14 | -0.02507 | 0.58889  | -0.07194 | 0.12054  | -0.10224 |
| 0.030463 | 0.51137  | -0.31217 | 5.16E-12 | -0.04129 | 0.37328  | -0.17002 | 0.00022  | -0.12348 |
| 0.192796 | 2.73E-05 | 0.31225  | 5.09E-12 | 0.013417 | 0.77245  | 0.014401 | 0.75626  | 0.096196 |
| 0.190086 | 3.56E-05 | 0.09136  | 0.04848  | -0.00655 | 0.88781  | -0.06519 | 0.15958  | 0.091733 |
| -0.1171  | 0.01132  | -0.22883 | 5.79E-07 | 0.022938 | 0.62101  | 0.046983 | 0.31099  | -0.05685 |
| -0.14145 | 0.00218  | -0.23616 | 2.43E-07 | 0.052467 | 0.25782  | 0.230162 | 4.95E-07 | 0.078609 |

|          |          |          |          |          |          |          |          |          |
|----------|----------|----------|----------|----------|----------|----------|----------|----------|
| 0.020577 | 0.65739  | -0.13465 | 0.00355  | -0.04412 | 0.34144  | -0.14748 | 0.00139  | -0.10471 |
| -0.20897 | 5.26E-06 | -0.26493 | 6.10E-09 | 0.089762 | 0.05256  | 0.141443 | 0.00219  | 0.207681 |
| 0.041409 | 0.37194  | 0.075647 | 0.10253  | 0.088156 | 0.05695  | 0.098419 | 0.03348  | 0.100913 |
| 0.050361 | 0.27744  | 0.045778 | 0.32358  | 0.062956 | 0.1744   | 0.276342 | 1.24E-09 | 0.105202 |
| 0.128134 | 0.00555  | 0.103241 | 0.02568  | 0.03371  | 0.46739  | -0.08123 | 0.07951  | 0.162987 |
| 0.108766 | 0.01872  | -0.12595 | 0.00642  | 0.078152 | 0.09161  | -0.01792 | 0.6993   | 0.013742 |
| -0.02204 | 0.6347   | -0.09084 | 0.04977  | 0.100645 | 0.02966  | 0.05836  | 0.20808  | 0.180558 |
| -0.08722 | 0.05964  | -0.15987 | 0.00052  | 0.007949 | 0.86398  | 0.156912 | 0.00067  | 0.088369 |
| -0.09355 | 0.04331  | -0.13113 | 0.00453  | 0.038032 | 0.41224  | -0.01621 | 0.72674  | 0.0895   |
| 0.195625 | 2.07E-05 | 0.307898 | 1.03E-11 | 0.116821 | 0.01152  | 0.160674 | 0.00049  | 0.199611 |
| -0.02706 | 0.55971  | 0.057707 | 0.21322  | 0.073815 | 0.11115  | 0.035843 | 0.43968  | 0.271649 |
| -0.13775 | 0.00285  | -0.16808 | 0.00026  | -0.00144 | 0.97517  | -0.02503 | 0.58948  | -0.02116 |
| -0.1496  | 0.00118  | -0.19978 | 1.36E-05 | -0.03252 | 0.48331  | -0.08103 | 0.08025  | 0.008573 |
| -0.06044 | 0.19231  | -0.0801  | 0.08379  | 0.004622 | 0.92065  | 0.020508 | 0.65846  | 0.051374 |
| -0.15292 | 0.00092  | -0.16222 | 0.00043  | 0.038364 | 0.40815  | 0.068405 | 0.13994  | 0.096676 |
| -0.06167 | 0.18337  | 0.048879 | 0.29184  | -0.02429 | 0.60058  | -0.02164 | 0.64093  | -0.06129 |
| -0.01885 | 0.68453  | 0.143744 | 0.00184  | 0.00274  | 0.9529   | -0.00602 | 0.89682  | 0.103712 |
| 0.131973 | 0.00428  | 0.135127 | 0.00344  | 0.121506 | 0.00858  | 0.159119 | 0.00056  | 0.268055 |
| 0.107086 | 0.02063  | 0.295253 | 7.56E-11 | -0.04074 | 0.37968  | -0.11077 | 0.01664  | 0.012407 |
| -0.03716 | 0.423    | 0.068715 | 0.13815  | 0.052745 | 0.2553   | 0.083874 | 0.07016  | 0.136304 |
| -0.10999 | 0.01742  | -0.14649 | 0.0015   | -0.02038 | 0.66039  | 0.048297 | 0.29764  | 0.026202 |
| -0.05064 | 0.27483  | -0.06463 | 0.16317  | 0.003944 | 0.93226  | 0.024405 | 0.59884  | 0.022153 |
| -0.10175 | 0.02791  | -0.12412 | 0.00724  | -0.00393 | 0.93258  | 0.068522 | 0.13926  | -0.0016  |
| 0.035742 | 0.44096  | -0.0212  | 0.64776  | -0.07908 | 0.08783  | -0.17459 | 0.00015  | -0.18433 |
| 0.210179 | 4.63E-06 | 0.136244 | 0.00318  | -0.03363 | 0.46843  | 0.009996 | 0.82942  | 0.090369 |
| 0.033329 | 0.47244  | -0.16151 | 0.00046  | -0.03029 | 0.51378  | -0.1311  | 0.00454  | -0.15748 |
| -0.04168 | 0.36884  | -0.01632 | 0.72503  | -0.04416 | 0.34103  | 0.065926 | 0.15491  | -0.07967 |
| -0.16161 | 0.00045  | -0.12856 | 0.0054   | -0.01631 | 0.72525  | 0.102591 | 0.02663  | -0.08014 |
| 0.033734 | 0.46707  | -0.24287 | 1.07E-07 | -0.03651 | 0.43119  | -0.0599  | 0.19628  | -0.16409 |
| 0.34381  | 2.10E-14 | 0.198925 | 1.49E-05 | -0.01674 | 0.7182   | -0.20913 | 5.17E-06 | 0.019384 |
| -0.06113 | 0.18725  | -0.32999 | 2.52E-13 | -0.03055 | 0.51023  | -0.09774 | 0.03472  | -0.051   |
| 0.081931 | 0.07693  | 0.080264 | 0.08315  | 0.025814 | 0.57791  | -0.04387 | 0.34418  | 0.111683 |
| -0.12157 | 0.00854  | -0.06134 | 0.18573  | 0.080322 | 0.08293  | 0.15856  | 0.00058  | 0.134699 |
| -0.04994 | 0.2815   | -0.09674 | 0.03662  | 0.01871  | 0.68675  | -0.00539 | 0.90744  | -0.03388 |
| 0.136035 | 0.00322  | -0.02631 | 0.57057  | 0.004897 | 0.91595  | -0.05229 | 0.25941  | -0.01174 |
| 0.150526 | 0.0011   | 0.068171 | 0.14131  | 0.022111 | 0.63365  | -0.00349 | 0.94008  | 0.006055 |
| 0.063917 | 0.1679   | -0.17896 | 0.0001   | 0.011167 | 0.8098   | 0.006164 | 0.89431  | -0.08225 |
| -0.23273 | 3.66E-07 | -0.43035 | 1.77E-22 | -0.01114 | 0.81025  | -0.00423 | 0.92729  | 0.000761 |
| -0.16788 | 0.00027  | -0.0249  | 0.59147  | -0.01177 | 0.79969  | 0.083192 | 0.07248  | 0.0146   |
| 0.004081 | 0.92991  | 0.156326 | 0.0007   | 0.005047 | 0.91338  | 0.024106 | 0.60333  | -0.05741 |
| 0.010997 | 0.81264  | -0.04839 | 0.29673  | 0.028498 | 0.539    | 0.014535 | 0.75407  | 0.1137   |
| 0.140324 | 0.00237  | -0.17006 | 0.00022  | 0.248487 | 5.30E-08 | 0.070725 | 0.12696  | 0.169643 |
| -0.00202 | 0.96529  | 0.015633 | 0.73616  | 0.065452 | 0.1579   | 0.033819 | 0.46595  | 0.176578 |
| -0.05053 | 0.27581  | -0.23906 | 1.71E-07 | 0.015172 | 0.74367  | -0.00996 | 0.83004  | -0.07424 |
| 0.02605  | 0.57444  | 0.059935 | 0.19605  | 0.004396 | 0.92452  | 0.023481 | 0.61276  | -0.14181 |

|          |          |          |          |          |          |          |          |          |
|----------|----------|----------|----------|----------|----------|----------|----------|----------|
| 0.168469 | 0.00026  | 0.250272 | 4.22E-08 | 0.024789 | 0.59311  | 0.165638 | 0.00032  | 0.297802 |
| -0.0802  | 0.08341  | 0.00155  | 0.97335  | 0.081642 | 0.07798  | 0.177921 | 0.00011  | 0.219149 |
| 0.077296 | 0.09524  | -0.28702 | 2.63E-10 | -0.04238 | 0.36085  | -0.06386 | 0.16825  | -0.26471 |
| 0.125813 | 0.00648  | -0.09346 | 0.04352  | 0.030463 | 0.51138  | -0.04638 | 0.31725  | -0.09616 |
| 0.152435 | 0.00095  | 0.222078 | 1.25E-06 | 0.028464 | 0.53949  | 0.001454 | 0.975    | 0.101033 |
| 0.231883 | 4.05E-07 | -0.03912 | 0.39892  | -0.07231 | 0.11866  | -0.15137 | 0.00103  | -0.11509 |
| 0.05874  | 0.20513  | -0.18434 | 6.14E-05 | 0.018759 | 0.68596  | -0.03295 | 0.47752  | -0.05301 |
| -0.03404 | 0.463    | -0.05758 | 0.21423  | 0.015836 | 0.73285  | 0.004993 | 0.9143   | -0.02272 |
| -0.09298 | 0.0446   | -0.25776 | 1.59E-08 | -0.04947 | 0.286    | -0.04133 | 0.37285  | -0.13865 |
| -0.14565 | 0.0016   | -0.32677 | 4.41E-13 | 0.007218 | 0.87638  | -0.09239 | 0.04599  | -0.08977 |
| -0.04951 | 0.28565  | -0.05829 | 0.20865  | 0.069029 | 0.13635  | 0.120318 | 0.00925  | 0.305898 |
| -0.07366 | 0.11191  | 0.054061 | 0.24361  | 0.108689 | 0.0188   | 0.116868 | 0.01149  | 0.209592 |
| -0.07256 | 0.11738  | -0.16826 | 0.00026  | 0.074977 | 0.10562  | 0.113052 | 0.01451  | 0.071258 |
| -0.0205  | 0.65866  | -0.22636 | 7.70E-07 | -0.01798 | 0.69839  | -0.10316 | 0.02579  | -0.17401 |
| 0.177574 | 0.00011  | 0.419075 | 2.76E-21 | -0.00667 | 0.88568  | -0.00229 | 0.96072  | 0.207404 |
| 0.016212 | 0.72676  | -0.25419 | 2.55E-08 | 0.00747  | 0.8721   | 0.122029 | 0.00829  | -0.05511 |
| 0.086692 | 0.06121  | 0.316179 | 2.66E-12 | 0.026757 | 0.56409  | 0.018597 | 0.68854  | 0.186339 |
| -0.19654 | 1.89E-05 | -0.04663 | 0.31468  | 0.159315 | 0.00055  | 0.177961 | 0.00011  | 0.341389 |
| -0.11841 | 0.01043  | -0.18178 | 7.79E-05 | 0.021978 | 0.63568  | 0.011551 | 0.80339  | -0.06143 |
| 0.00372  | 0.9361   | -0.07536 | 0.10386  | 0.191996 | 2.96E-05 | 0.340628 | 3.77E-14 | 0.302502 |
| 0.051729 | 0.26458  | -0.00226 | 0.96123  | 0.028843 | 0.5341   | 0.003297 | 0.94336  | 0.011867 |
| -0.05073 | 0.27391  | 0.010573 | 0.81974  | 0.031808 | 0.4929   | -0.00809 | 0.86151  | -0.04851 |
| -0.03661 | 0.43     | -0.1187  | 0.01025  | -0.03578 | 0.44049  | -0.10756 | 0.02007  | -0.09946 |
| 0.014141 | 0.76054  | 0.307324 | 1.13E-11 | 0.054405 | 0.24062  | 0.181344 | 8.11E-05 | 0.055355 |
| -0.0246  | 0.59588  | -0.12847 | 0.00543  | -0.05258 | 0.25683  | -0.12222 | 0.00819  | -0.18104 |
| 0.032244 | 0.48699  | -0.08163 | 0.07803  | 0.065184 | 0.15961  | -0.0013  | 0.97765  | -0.00168 |
| -0.06687 | 0.14904  | -0.06448 | 0.16416  | -0.00807 | 0.86193  | 0.003815 | 0.93447  | 0.000802 |
| -0.09364 | 0.04311  | -0.16587 | 0.00032  | 0.015473 | 0.73876  | -0.03171 | 0.49417  | 0.046725 |
| -0.04925 | 0.28816  | -0.18645 | 5.03E-05 | -0.01248 | 0.78802  | -0.06136 | 0.18558  | -0.07482 |
| 0.159777 | 0.00053  | 0.188311 | 4.22E-05 | 0.001151 | 0.98021  | -0.10003 | 0.03068  | -0.03266 |
| -0.09269 | 0.04529  | -0.09295 | 0.04468  | 0.059293 | 0.20089  | 0.049246 | 0.28823  | 0.194195 |
| -0.18828 | 4.23E-05 | -0.29345 | 9.97E-11 | -0.07512 | 0.10496  | -0.14681 | 0.00147  | -0.2198  |
| -0.0865  | 0.0618   | -0.14909 | 0.00123  | -0.02885 | 0.53407  | 0.011795 | 0.79933  | 0.009931 |
| 0.199985 | 1.34E-05 | 0.038565 | 0.4057   | -0.02743 | 0.5543   | -0.11821 | 0.01057  | -0.12445 |
| 0.103986 | 0.02462  | 0.003915 | 0.93276  | 0.036371 | 0.43296  | -0.09663 | 0.03685  | 0.037742 |
| 0.122966 | 0.00781  | 0.214617 | 2.87E-06 | 0.027826 | 0.54862  | 0.139655 | 0.00249  | 0.142517 |
| 0.18877  | 4.04E-05 | 0.168334 | 0.00026  | -0.06619 | 0.15324  | -0.2203  | 1.53E-06 | -0.14798 |
| -0.01031 | 0.82412  | -0.23164 | 4.16E-07 | -0.01676 | 0.71799  | -0.14957 | 0.00119  | -0.1662  |
| 0.019285 | 0.67765  | 0.243768 | 9.58E-08 | 0.033214 | 0.47397  | 0.049266 | 0.28804  | -0.01489 |
| -0.07396 | 0.11046  | -0.00761 | 0.86969  | -0.00112 | 0.98075  | -0.04676 | 0.31328  | -0.08338 |
| 0.084067 | 0.06952  | 0.248008 | 5.63E-08 | 0.071282 | 0.12399  | 0.086106 | 0.063    | 0.110575 |
| 0.115412 | 0.01257  | 0.236673 | 2.28E-07 | -0.00329 | 0.94343  | -0.09336 | 0.04374  | -0.00253 |
| -0.08656 | 0.0616   | -0.2542  | 2.54E-08 | -0.04908 | 0.28987  | -0.10584 | 0.02216  | -0.21093 |
| 0.161623 | 0.00045  | 0.070168 | 0.12999  | 0.017026 | 0.71363  | -0.03353 | 0.46971  | -0.05989 |
| 0.075019 | 0.10542  | 0.128146 | 0.00555  | -0.00702 | 0.87981  | 0.06699  | 0.14834  | -0.04915 |

|          |          |          |          |          |          |          |          |          |
|----------|----------|----------|----------|----------|----------|----------|----------|----------|
| 0.165452 | 0.00033  | -0.05172 | 0.26466  | -0.03466 | 0.45489  | -0.08123 | 0.07951  | -0.13248 |
| 0.066317 | 0.15247  | 0.146508 | 0.0015   | 0.102455 | 0.02683  | 0.258402 | 1.46E-08 | 0.033346 |
| -0.15931 | 0.00055  | -0.25948 | 1.27E-08 | -0.06917 | 0.13555  | -0.10589 | 0.0221   | -0.11825 |
| 0.13186  | 0.00431  | 0.105585 | 0.02249  | -0.01109 | 0.81101  | -0.07817 | 0.09156  | -0.0072  |
| -0.07746 | 0.09453  | -0.29628 | 6.45E-11 | -0.02687 | 0.5625   | -0.09168 | 0.04769  | -0.10283 |
| 0.145645 | 0.0016   | 0.061055 | 0.18781  | 0.029607 | 0.52332  | -0.06229 | 0.17905  | 0.064706 |
| 0.056572 | 0.22238  | -0.02885 | 0.53399  | 0.030514 | 0.51066  | 0.031938 | 0.49114  | 0.090851 |
| 0.011147 | 0.81013  | -0.18845 | 4.16E-05 | 0.066651 | 0.15041  | -0.0227  | 0.62461  | 0.131481 |
| 0.024228 | 0.60151  | 0.058351 | 0.20815  | 0.120963 | 0.00888  | 0.102003 | 0.02751  | 0.165665 |
| 0.112603 | 0.01491  | 0.04927  | 0.288    | 0.047407 | 0.30663  | 0.055051 | 0.23508  | -0.06835 |
| -0.06789 | 0.14298  | -0.18333 | 6.75E-05 | -0.01668 | 0.71929  | -0.04992 | 0.28163  | -0.24573 |
| -0.09119 | 0.04889  | -0.23758 | 2.05E-07 | 0.074772 | 0.10658  | 0.053294 | 0.25038  | 0.193614 |
| -0.05278 | 0.25499  | -0.14202 | 0.0021   | 0.001734 | 0.97019  | -0.05478 | 0.23739  | -0.05204 |
| -0.00289 | 0.95028  | -0.15997 | 0.00052  | 0.023457 | 0.61312  | 0.068381 | 0.14008  | -0.07457 |
| 0.060865 | 0.18918  | 0.369571 | 1.47E-16 | 0.031676 | 0.4947   | 0.201474 | 1.15E-05 | 0.057398 |
| 0.235775 | 2.55E-07 | 0.321272 | 1.13E-12 | 0.000503 | 0.99135  | 0.007859 | 0.86549  | 0.13552  |
| 0.280096 | 7.25E-10 | 0.42725  | 3.81E-22 | 0.023727 | 0.60905  | -0.0971  | 0.03594  | 0.066448 |
| -0.14763 | 0.00138  | -0.30738 | 1.12E-11 | -0.0472  | 0.3088   | -0.02707 | 0.55952  | -0.10349 |
| 0.091385 | 0.04842  | -0.07187 | 0.1209   | -0.02776 | 0.54959  | -0.04676 | 0.3133   | -0.23233 |
| -0.11721 | 0.01125  | 0.049898 | 0.28189  | 0.062048 | 0.18071  | 0.08962  | 0.05294  | -0.02305 |
| -0.02593 | 0.57619  | 0.034784 | 0.45331  | 0.022707 | 0.62452  | -0.06341 | 0.17129  | -0.01768 |
| -0.05764 | 0.21379  | -0.21885 | 1.80E-06 | 0.031257 | 0.50042  | -0.03682 | 0.42731  | -0.04957 |
| 0.177947 | 0.00011  | 0.380915 | 1.42E-17 | 0.031186 | 0.5014   | 0.067185 | 0.14716  | 0.079349 |
| -0.03288 | 0.4784   | 0.018449 | 0.69089  | 0.032175 | 0.48791  | 0.095027 | 0.0401   | 0.242506 |
| -0.01032 | 0.82397  | -0.10905 | 0.01841  | -0.02518 | 0.5873   | -0.11859 | 0.01032  | -0.08461 |
| 0.063855 | 0.16832  | 0.008867 | 0.84845  | 0.004393 | 0.92456  | -0.02681 | 0.56337  | -0.08421 |
| -0.17307 | 0.00017  | -0.23066 | 4.67E-07 | 0.011926 | 0.79715  | -0.10611 | 0.02183  | 0.039563 |
| 0.046341 | 0.31765  | -0.00546 | 0.90638  | 0.207042 | 6.45E-06 | 0.272167 | 2.24E-09 | 0.031978 |
| -0.15557 | 0.00074  | -0.32851 | 3.26E-13 | -0.01914 | 0.67986  | -0.07272 | 0.11656  | -0.12393 |
| 0.028077 | 0.54501  | 0.150951 | 0.00107  | 0.011173 | 0.8097   | 0.004994 | 0.9143   | 0.088157 |
| 0.053859 | 0.24539  | -0.06376 | 0.16894  | -0.04732 | 0.30752  | -0.1346  | 0.00356  | -0.23718 |
| 0.268457 | 3.76E-09 | 0.109195 | 0.01825  | -0.01593 | 0.73135  | -0.12072 | 0.00902  | 0.003355 |
| 0.218679 | 1.83E-06 | 0.21306  | 3.39E-06 | 0.030617 | 0.50924  | 0.041542 | 0.3704   | -0.06951 |
| -0.28597 | 3.07E-10 | -0.45091 | 9.11E-25 | -0.04896 | 0.29107  | -0.14395 | 0.00182  | -0.2584  |
| 0.135564 | 0.00333  | -0.19102 | 3.25E-05 | -0.01729 | 0.70941  | -0.06259 | 0.17696  | -0.116   |
| 0.063307 | 0.17201  | 0.096596 | 0.03691  | 0.12863  | 0.00537  | 0.075632 | 0.1026   | 0.361174 |
| 0.129768 | 0.00497  | 0.028587 | 0.53773  | 0.0434   | 0.34937  | 0.116291 | 0.01191  | -0.00199 |
| -0.0777  | 0.09353  | -0.05678 | 0.22071  | 0.038934 | 0.40123  | 0.157042 | 0.00066  | -0.19717 |
| -0.15732 | 0.00065  | -0.3629  | 5.54E-16 | 0.00115  | 0.98022  | -0.02903 | 0.53149  | -0.02319 |
| -0.00256 | 0.95593  | -0.17518 | 0.00014  | -0.03098 | 0.50422  | -0.0878  | 0.05796  | -0.15753 |
| 0.026986 | 0.56076  | 0.027284 | 0.55644  | -0.02046 | 0.65928  | -0.01162 | 0.80223  | -0.12228 |
| 0.011377 | 0.8063   | 0.025075 | 0.58885  | 0.009455 | 0.83852  | -0.03254 | 0.483    | -0.03328 |
| 0.192208 | 2.89E-05 | 0.138063 | 0.00279  | -0.01191 | 0.79741  | -0.04828 | 0.29776  | -0.05788 |
| -0.17871 | 0.0001   | -0.40056 | 2.00E-19 | -0.02755 | 0.55261  | -0.09763 | 0.03493  | -0.11729 |
| -0.02834 | 0.54132  | -0.43107 | 1.49E-22 | -0.02012 | 0.66456  | -0.10568 | 0.02237  | -0.17207 |



|          |          |          |          |          |          |          |          |          |
|----------|----------|----------|----------|----------|----------|----------|----------|----------|
| -0.13392 | 0.00374  | -0.41743 | 4.08E-21 | -0.03168 | 0.49466  | -0.10218 | 0.02725  | -0.11482 |
| -0.00772 | 0.86778  | -0.01642 | 0.72334  | 0.042944 | 0.35447  | 0.016634 | 0.71995  | 0.005492 |
| -0.05222 | 0.26004  | 0.142654 | 0.002    | 0.080228 | 0.08329  | 0.354965 | 2.59E-15 | 0.118859 |
| -0.0378  | 0.41505  | -0.16003 | 0.00052  | -0.00011 | 0.99815  | -0.05647 | 0.2232   | -0.03449 |
| 0.210264 | 4.58E-06 | 0.006876 | 0.88219  | 0.003831 | 0.93419  | -0.03006 | 0.51692  | -0.07116 |
| -0.04449 | 0.33742  | -0.02762 | 0.55151  | -0.01819 | 0.69507  | -0.06632 | 0.15246  | -0.06685 |
| 0.16963  | 0.00023  | -0.12944 | 0.00509  | -0.059   | 0.20315  | -0.07548 | 0.10328  | -0.24304 |
| -0.11469 | 0.01314  | -0.40499 | 7.36E-20 | 0.000178 | 0.99694  | -0.04561 | 0.32541  | -0.08287 |
| 0.030392 | 0.51236  | 0.159033 | 0.00056  | 0.157983 | 0.00061  | 0.335828 | 8.96E-14 | 0.409237 |
| -0.01646 | 0.72275  | -0.06156 | 0.18414  | 0.026753 | 0.56414  | 0.002768 | 0.95243  | 0.012603 |
| -0.02638 | 0.56967  | -0.18934 | 3.82E-05 | -0.03295 | 0.47743  | -0.0564  | 0.22378  | -0.15464 |
| 0.078864 | 0.08869  | 0.064077 | 0.16684  | 0.014201 | 0.75954  | 0.019084 | 0.68082  | 0.032679 |
| 0.084747 | 0.06728  | -0.04116 | 0.3748   | 0.156226 | 0.0007   | 0.159129 | 0.00056  | 0.379699 |
| -0.01796 | 0.6986   | -0.1645  | 0.00036  | 0.118652 | 0.01028  | 0.033482 | 0.4704   | 0.235144 |
| 0.132928 | 0.00401  | -0.2742  | 1.69E-09 | 0.001458 | 0.97494  | -0.07735 | 0.09502  | -0.09798 |
| -0.09843 | 0.03345  | -0.0701  | 0.13038  | -0.0626  | 0.17689  | -0.06048 | 0.19203  | -0.26559 |
| -0.15901 | 0.00056  | 0.11583  | 0.01225  | 0.045024 | 0.33161  | 0.176719 | 0.00012  | 0.094641 |
| -0.01712 | 0.71218  | -0.11132 | 0.01609  | -0.00125 | 0.97849  | 0.062774 | 0.17566  | 0.074515 |
| -0.16327 | 0.0004   | 0.069307 | 0.13478  | 0.053503 | 0.24853  | 0.179462 | 9.64E-05 | 0.114054 |
| -0.02593 | 0.57622  | -0.01775 | 0.70208  | 0.087438 | 0.05901  | 0.039584 | 0.39341  | 0.130266 |
| 0.272255 | 2.22E-09 | 0.121455 | 0.0086   | -0.00379 | 0.93495  | 0.014648 | 0.75222  | -0.04515 |
| 0.034392 | 0.45843  | 0.126244 | 0.0063   | -0.01923 | 0.67854  | 0.015117 | 0.74456  | 0.07813  |
| -0.00058 | 0.99006  | -0.03724 | 0.422    | 0.061535 | 0.18435  | 0.10943  | 0.018    | 0.138864 |
| -0.10847 | 0.01904  | -0.26337 | 7.53E-09 | -0.00665 | 0.88604  | 0.01664  | 0.71986  | -0.0599  |
| 0.069262 | 0.13503  | -0.13292 | 0.00401  | -0.08398 | 0.06979  | -0.07866 | 0.08953  | 0.022064 |
| 0.068143 | 0.14147  | -0.25581 | 2.06E-08 | 0.019151 | 0.67977  | -0.07474 | 0.10672  | -0.04878 |
| -0.00095 | 0.98371  | -0.20041 | 1.28E-05 | 0.005484 | 0.90592  | -0.01207 | 0.79478  | 0.004287 |
| 0.010249 | 0.82517  | -0.2696  | 3.21E-09 | -0.00936 | 0.84015  | -0.04786 | 0.30201  | -0.11777 |
| 0.027831 | 0.54854  | -0.03662 | 0.42983  | 0.053921 | 0.24484  | -0.06253 | 0.17733  | 0.000307 |
| 0.077964 | 0.0924   | 0.293196 | 1.04E-10 | 0.105755 | 0.02227  | 0.279172 | 8.29E-10 | 0.303941 |
| -0.16521 | 0.00034  | -0.25796 | 1.55E-08 | -0.01322 | 0.77561  | 0.000605 | 0.98959  | -0.03204 |
| -0.06204 | 0.18074  | -0.10163 | 0.02809  | -0.01004 | 0.82869  | -0.03497 | 0.4509   | -0.06128 |
| -0.06218 | 0.1798   | -0.24265 | 1.10E-07 | -0.03587 | 0.43932  | -0.03839 | 0.40784  | -0.05729 |
| -0.13682 | 0.00305  | -0.28581 | 3.14E-10 | 0.046006 | 0.32117  | 0.071778 | 0.12139  | 0.125054 |
| -0.16479 | 0.00035  | -0.07496 | 0.10572  | 0.064408 | 0.16466  | 0.250147 | 4.29E-08 | 0.032299 |
| -0.10292 | 0.02615  | -0.40043 | 2.06E-19 | -0.04852 | 0.29538  | -0.1643  | 0.00036  | -0.15865 |
| -0.05484 | 0.23685  | -0.21195 | 3.83E-06 | 0.205904 | 7.26E-06 | 0.155428 | 0.00075  | 0.093934 |
| -0.12491 | 0.00688  | -0.17144 | 0.0002   | -0.06135 | 0.18571  | -0.08188 | 0.07712  | -0.05978 |
| 0.22168  | 1.31E-06 | 0.168377 | 0.00026  | -0.02589 | 0.57674  | 0.0023   | 0.96047  | 0.049538 |
| -0.07745 | 0.09457  | -0.21485 | 2.79E-06 | 0.012782 | 0.78294  | -0.02876 | 0.53534  | -0.05259 |
| 0.020381 | 0.66044  | 0.067258 | 0.14672  | 0.021255 | 0.64684  | -0.00572 | 0.90192  | -0.0563  |
| -0.15501 | 0.00078  | -0.26404 | 6.88E-09 | -0.00487 | 0.9164   | 0.038602 | 0.40526  | -0.10657 |
| -0.2268  | 7.32E-07 | -0.28175 | 5.71E-10 | 0.085177 | 0.0659   | 0.232867 | 3.60E-07 | 0.293075 |
| 0.024575 | 0.5963   | -0.05511 | 0.23454  | -0.00402 | 0.9309   | -0.02568 | 0.57993  | -0.01212 |
| -0.05737 | 0.21593  | -0.25106 | 3.82E-08 | -0.00639 | 0.89052  | -0.05228 | 0.25949  | 0.03147  |

|          |          |          |          |          |          |          |          |          |
|----------|----------|----------|----------|----------|----------|----------|----------|----------|
| -0.09605 | 0.03801  | 0.177315 | 0.00012  | -0.00119 | 0.97946  | 0.09324  | 0.04402  | 0.136171 |
| 0.060263 | 0.1936   | 0.239423 | 1.64E-07 | 0.109033 | 0.01843  | 0.12538  | 0.00667  | 0.234447 |
| -0.02892 | 0.53296  | -0.0563  | 0.22458  | 0.042816 | 0.3559   | 0.071621 | 0.12221  | 0.069282 |
| 0.098816 | 0.03277  | -0.03575 | 0.44084  | -0.00101 | 0.98257  | -0.12626 | 0.00629  | -0.07254 |
| 0.044068 | 0.342    | 0.030728 | 0.50771  | 0.079961 | 0.08433  | 0.076716 | 0.09775  | 0.11311  |
| 0.042164 | 0.36328  | 0.081615 | 0.07808  | 0.049067 | 0.28999  | 0.053179 | 0.2514   | 0.188756 |
| -0.21753 | 2.08E-06 | -0.28058 | 6.76E-10 | 0.073997 | 0.11027  | 0.048456 | 0.29604  | 0.061659 |
| -0.0204  | 0.66019  | -0.02719 | 0.5578   | -0.02811 | 0.54457  | -0.05219 | 0.26031  | -0.04861 |
| -0.04221 | 0.36279  | -0.04604 | 0.32081  | 0.215774 | 2.53E-06 | 0.022946 | 0.62087  | 0.383576 |
| 0.14708  | 0.00144  | -0.05315 | 0.25163  | -0.06632 | 0.15245  | -0.17988 | 9.28E-05 | -0.17602 |
| -0.0705  | 0.12816  | -0.22531 | 8.68E-07 | -0.00062 | 0.98929  | -0.07053 | 0.12802  | -0.11933 |
| -0.1555  | 0.00075  | -0.44353 | 6.30E-24 | -0.02404 | 0.6043   | -0.01966 | 0.67172  | -0.17671 |
| 0.152156 | 0.00097  | 0.403902 | 9.42E-20 | 0.029656 | 0.52263  | 0.069096 | 0.13597  | 0.195998 |
| 0.072815 | 0.11609  | -0.05381 | 0.24583  | -0.00924 | 0.84216  | -0.00866 | 0.85187  | 0.039236 |
| -0.27716 | 1.11E-09 | -0.36674 | 2.59E-16 | -0.06389 | 0.16809  | -0.15037 | 0.00112  | -0.14513 |
| 0.065239 | 0.15927  | 0.185048 | 5.75E-05 | 0.129047 | 0.00522  | 0.128739 | 0.00533  | 0.368932 |
| 0.001031 | 0.98227  | -0.1296  | 0.00503  | 0.053699 | 0.24679  | 0.031984 | 0.49051  | 0.020563 |
| 0.010737 | 0.817    | 0.036454 | 0.43191  | -0.00808 | 0.86182  | 0.017999 | 0.69805  | -0.03727 |
| 0.009721 | 0.83405  | -0.34926 | 7.64E-15 | 0.017674 | 0.70325  | -0.12836 | 0.00547  | -0.07053 |
| -0.0795  | 0.08616  | -0.33443 | 1.15E-13 | 0.00346  | 0.94055  | 0.054357 | 0.24104  | -0.10256 |
| -0.09999 | 0.03075  | -0.19558 | 2.08E-05 | -0.02919 | 0.52914  | -0.04971 | 0.28368  | -0.06593 |
| 0.028753 | 0.53538  | -0.02605 | 0.57446  | 0.065237 | 0.15927  | 0.036634 | 0.42964  | 0.111471 |
| -0.05073 | 0.27394  | -0.31091 | 6.33E-12 | 0.034916 | 0.4516   | -0.06543 | 0.15804  | -0.09447 |
| -0.0682  | 0.14112  | -0.26431 | 6.64E-09 | 0.054212 | 0.24231  | 0.002151 | 0.96302  | 0.091453 |
| 0.246184 | 7.09E-08 | 0.430597 | 1.67E-22 | -0.00427 | 0.92673  | 0.006272 | 0.89247  | -0.012   |
| -0.08518 | 0.06589  | -0.20201 | 1.09E-05 | 0.00411  | 0.92941  | 0.017807 | 0.70112  | -0.02414 |
| 0.048005 | 0.30057  | -0.25263 | 3.12E-08 | 0.021916 | 0.63665  | 0.01543  | 0.73946  | -0.01846 |
| -0.03655 | 0.43068  | -0.10919 | 0.01826  | 0.011126 | 0.81048  | -0.01717 | 0.71137  | 0.017716 |
| -0.11086 | 0.01655  | -0.39124 | 1.57E-18 | 0.001515 | 0.97396  | -0.01563 | 0.73618  | -0.05176 |
| 0.110839 | 0.01657  | 0.29955  | 3.89E-11 | 0.05102  | 0.2712   | 0.127008 | 0.00599  | 0.243254 |
| 0.026762 | 0.56402  | -0.07991 | 0.08453  | -0.0048  | 0.91764  | 0.136583 | 0.0031   | 0.012945 |
| -0.02017 | 0.66369  | 0.065893 | 0.15512  | -0.01026 | 0.82494  | 0.063367 | 0.1716   | -0.04673 |
| -0.1066  | 0.02122  | -0.11816 | 0.0106   | -0.01959 | 0.67287  | -0.02641 | 0.5691   | 0.042611 |
| 0.13084  | 0.00462  | 0.194665 | 2.27E-05 | 0.081956 | 0.07684  | 0.200016 | 1.33E-05 | 0.237553 |
| -0.06614 | 0.15355  | -0.04821 | 0.29846  | 0.003263 | 0.94393  | 0.032689 | 0.48099  | 0.043319 |
| -0.0954  | 0.03931  | -0.02395 | 0.60561  | 0.049477 | 0.28597  | 0.297051 | 5.73E-11 | 0.339224 |
| 0.143192 | 0.00192  | 0.135782 | 0.00328  | -0.02398 | 0.60518  | -0.04992 | 0.28171  | 0.031052 |
| -0.02525 | 0.58627  | 0.085186 | 0.06587  | 0.084915 | 0.06674  | 0.150867 | 0.00107  | 0.264561 |
| -0.03127 | 0.50023  | 0.074815 | 0.10638  | 0.035508 | 0.44397  | 0.132763 | 0.00405  | 0.273112 |
| -0.03096 | 0.50456  | -0.06492 | 0.1613   | -0.0075  | 0.87152  | -0.01742 | 0.70727  | -0.03422 |
| 0.038937 | 0.40118  | -0.03869 | 0.40416  | -0.00971 | 0.83423  | -0.0196  | 0.67267  | -0.03572 |
| -0.08817 | 0.05692  | -0.11996 | 0.00947  | 0.031861 | 0.49218  | 0.082789 | 0.07388  | 0.135123 |
| 0.032125 | 0.4886   | -0.03693 | 0.42595  | 0.044208 | 0.34046  | 0.027646 | 0.5512   | 0.05064  |
| -0.04225 | 0.36226  | -0.03194 | 0.49114  | -0.00693 | 0.88125  | -0.02929 | 0.52779  | 0.044697 |
| 0.063148 | 0.17309  | -0.02735 | 0.55545  | 0.016471 | 0.72258  | 0.01693  | 0.71518  | 0.009896 |

|          |          |          |          |          |         |          |          |          |
|----------|----------|----------|----------|----------|---------|----------|----------|----------|
| -0.06296 | 0.17438  | -0.06616 | 0.15345  | 0.120408 | 0.0092  | 0.241807 | 1.22E-07 | 0.112349 |
| 0.119393 | 0.00981  | 0.208457 | 5.55E-06 | -0.08233 | 0.07548 | -0.14636 | 0.00152  | -0.06954 |
| 0.017708 | 0.7027   | -0.05903 | 0.20292  | 0.002066 | 0.96448 | -0.01456 | 0.75364  | -0.05526 |
| -0.04    | 0.38849  | -0.39465 | 7.44E-19 | -0.02528 | 0.58584 | -0.1217  | 0.00847  | -0.01009 |
| 0.022434 | 0.6287   | -0.08942 | 0.05346  | 0.037785 | 0.41527 | 0.001566 | 0.97308  | -0.01167 |
| -0.02286 | 0.62218  | -0.04882 | 0.29239  | -0.00738 | 0.87362 | -0.01327 | 0.77486  | -0.00873 |
| 0.056354 | 0.22416  | -0.12296 | 0.00781  | 0.040535 | 0.38213 | 0.001822 | 0.96868  | -0.04719 |
| 0.11471  | 0.01312  | 0.012101 | 0.79423  | 0.032737 | 0.48035 | -0.00717 | 0.87712  | -0.01136 |
| 0.181514 | 7.98E-05 | 0.119748 | 0.00959  | 0.031293 | 0.49993 | -0.03841 | 0.4076   | 0.056099 |
| 0.048271 | 0.29789  | 0.004218 | 0.92756  | 0.06908  | 0.13606 | 0.038907 | 0.40155  | 0.14643  |
| -0.09005 | 0.0518   | -0.13597 | 0.00324  | 0.034776 | 0.45342 | -0.02844 | 0.53987  | 0.05632  |
| 0.278853 | 8.68E-10 | 0.07348  | 0.11278  | -0.0422  | 0.36286 | -0.16052 | 0.0005   | -0.19025 |
| -0.04622 | 0.31893  | 0.037105 | 0.42372  | -0.01468 | 0.75175 | -0.01276 | 0.78334  | -0.11349 |
| 0.063545 | 0.1704   | -0.1783  | 0.00011  | -0.04464 | 0.33574 | -0.09276 | 0.04513  | -0.06317 |
| 0.227052 | 7.11E-07 | 0.052053 | 0.2616   | 0.00357  | 0.93867 | -0.02883 | 0.53424  | -0.03099 |
| 0.003528 | 0.93939  | -0.03028 | 0.51391  | 0.073569 | 0.11235 | 0.139365 | 0.00254  | 0.212693 |
| -0.03613 | 0.43595  | -0.10358 | 0.0252   | 0.001751 | 0.9699  | -0.01477 | 0.75025  | 0.000308 |
| 0.175236 | 0.00014  | -0.12591 | 0.00644  | -0.00162 | 0.97206 | -0.07656 | 0.09844  | -0.08126 |
| 0.103088 | 0.0259   | -0.02587 | 0.57716  | -0.02667 | 0.56543 | -0.10248 | 0.0268   | -0.03153 |
| -0.06803 | 0.14211  | -0.04931 | 0.28764  | 0.029741 | 0.52144 | 0.091554 | 0.048    | 0.070978 |
| -0.05904 | 0.20279  | 0.020342 | 0.66105  | 0.066445 | 0.15168 | 0.105058 | 0.02318  | 0.216913 |
| 0.006102 | 0.89537  | 0.011532 | 0.80371  | 0.035286 | 0.44682 | 0.062848 | 0.17515  | -0.08172 |
| 0.014576 | 0.7534   | -0.06856 | 0.13906  | 0.00683  | 0.88297 | 0.019211 | 0.67881  | 0.029277 |
| 0.164457 | 0.00036  | 0.23799  | 1.95E-07 | 0.00443  | 0.92394 | 0.010986 | 0.81283  | -0.02631 |
| -0.17313 | 0.00017  | -0.14219 | 0.00207  | 0.095477 | 0.03916 | 0.408668 | 3.17E-20 | 0.05198  |
| -0.20506 | 7.93E-06 | -0.15663 | 0.00068  | 0.069001 | 0.13652 | 0.230942 | 4.52E-07 | 0.111961 |
| -0.06141 | 0.18522  | -0.30543 | 1.53E-11 | 0.011768 | 0.79978 | 0.047041 | 0.31039  | 0.003671 |
| 0.049379 | 0.28693  | -0.40374 | 9.78E-20 | -0.05997 | 0.19579 | -0.09099 | 0.04941  | -0.19101 |
| 0.059458 | 0.19963  | -0.14548 | 0.00162  | -0.01088 | 0.81452 | -0.00897 | 0.84671  | -0.07647 |
| 0.049997 | 0.28093  | 0.069457 | 0.13394  | -0.04312 | 0.35252 | -0.09733 | 0.0355   | -0.12456 |
| -0.13244 | 0.00414  | -0.23297 | 3.56E-07 | 0.054606 | 0.23889 | 0.113457 | 0.01416  | 0.05968  |
| -0.16946 | 0.00023  | -0.04694 | 0.31143  | 0.148062 | 0.00133 | 0.311965 | 5.33E-12 | 0.386637 |
| -0.10269 | 0.02648  | -0.21054 | 4.45E-06 | 0.033195 | 0.47423 | 0.057297 | 0.2165   | -0.00358 |
| -0.1702  | 0.00022  | -0.3782  | 2.50E-17 | 0.038647 | 0.40471 | 0.029721 | 0.52172  | 0.065496 |
| -0.0203  | 0.66166  | 0.104785 | 0.02354  | 0.01701  | 0.71389 | 0.14917  | 0.00122  | 0.122175 |
| 0.054251 | 0.24196  | 0.181553 | 7.96E-05 | 0.030491 | 0.51098 | 0.056605 | 0.22211  | 0.159277 |
| -0.13191 | 0.0043   | -0.00205 | 0.96481  | -0.07407 | 0.10992 | -0.05714 | 0.21778  | -0.20963 |
| -0.13378 | 0.00378  | -0.09867 | 0.03303  | 0.011157 | 0.80997 | -0.00806 | 0.8621   | -0.06704 |
| -0.14249 | 0.00202  | 0.209129 | 5.17E-06 | 0.047797 | 0.30267 | 0.166207 | 0.00031  | 0.015102 |
| 0.19337  | 2.58E-05 | 0.396797 | 4.63E-19 | 0.013301 | 0.77436 | -0.02544 | 0.58337  | 0.126501 |
| 0.094668 | 0.04086  | 0.17676  | 0.00012  | 0.008738 | 0.85062 | 0.087463 | 0.05894  | 0.09322  |
| -0.06133 | 0.18585  | -0.04872 | 0.29347  | 0.048997 | 0.29068 | 0.042432 | 0.36024  | 0.211202 |
| 0.07839  | 0.09063  | -0.09814 | 0.03399  | 0.01932  | 0.67709 | -0.03758 | 0.41776  | 0.080085 |
| -0.09348 | 0.04348  | -0.00501 | 0.91407  | -0.02695 | 0.56126 | 0.042797 | 0.35611  | -0.06897 |
| -0.00816 | 0.86034  | -0.09076 | 0.04999  | 0.035676 | 0.44181 | 0.00878  | 0.84992  | 0.008099 |

|          |          |          |          |          |         |          |          |          |
|----------|----------|----------|----------|----------|---------|----------|----------|----------|
| 0.077376 | 0.09489  | -0.27317 | 1.95E-09 | -0.02155 | 0.64233 | -0.09678 | 0.03656  | -0.06459 |
| -0.07024 | 0.12958  | -0.41109 | 1.81E-20 | -0.02373 | 0.60904 | -0.0334  | 0.47147  | -0.11741 |
| 0.033586 | 0.46902  | 0.232761 | 3.65E-07 | -0.01543 | 0.73943 | 0.059141 | 0.20204  | -0.15145 |
| 0.049261 | 0.28809  | -0.14249 | 0.00202  | 0.044064 | 0.34204 | 0.04105  | 0.37611  | 0.051579 |
| -0.11243 | 0.01507  | -0.33964 | 4.51E-14 | -0.03377 | 0.4666  | -0.11605 | 0.01209  | -0.16542 |
| -0.05636 | 0.2241   | -0.03612 | 0.43614  | 0.056283 | 0.22475 | 0.172625 | 0.00018  | 0.242845 |
| -0.07916 | 0.08749  | -0.01739 | 0.70778  | -0.0091  | 0.84446 | -0.0044  | 0.92444  | -0.06042 |
| 0.003416 | 0.94132  | -0.05076 | 0.27362  | -0.00054 | 0.99066 | -0.00058 | 0.99007  | -0.02766 |
| 0.023466 | 0.61299  | -0.0837  | 0.07076  | 0.026301 | 0.57075 | -0.01315 | 0.77682  | -0.03023 |
| 0.000216 | 0.99628  | -0.07401 | 0.11021  | 0.026451 | 0.56855 | -0.0182  | 0.69479  | -0.04505 |
| 0.003694 | 0.93655  | -0.09679 | 0.03652  | 0.036589 | 0.4302  | 0.006675 | 0.8856   | -0.01285 |
| -0.08721 | 0.05968  | -0.18493 | 5.81E-05 | -0.00474 | 0.9187  | -0.02665 | 0.56561  | -0.06028 |
| -0.16979 | 0.00023  | -0.21261 | 3.56E-06 | 0.017852 | 0.70039 | 0.047866 | 0.30197  | -0.01851 |
| -0.21484 | 2.80E-06 | -0.15494 | 0.00078  | 0.002988 | 0.94866 | 0.062048 | 0.18071  | 0.004717 |
| 0.078766 | 0.08909  | -0.04022 | 0.38588  | -0.00648 | 0.88896 | -0.01222 | 0.79231  | -0.13172 |
| -0.11891 | 0.01011  | -0.07238 | 0.11826  | -0.0539  | 0.24501 | -0.10533 | 0.02283  | -0.1436  |
| 0.054005 | 0.2441   | -0.25712 | 1.73E-08 | 0.023439 | 0.61339 | 0.043998 | 0.34277  | 0.102714 |
| 0.138441 | 0.00272  | 0.190617 | 3.38E-05 | 0.049733 | 0.28349 | -0.01578 | 0.73375  | 0.179023 |
| -0.04258 | 0.35856  | -0.17503 | 0.00014  | 0.100593 | 0.02974 | -0.03878 | 0.40307  | 0.262228 |
| -0.05008 | 0.2801   | -0.26991 | 3.08E-09 | 0.016344 | 0.72463 | -0.05455 | 0.23934  | -0.08694 |
| 0.11957  | 0.0097   | 0.124621 | 0.00701  | 0.032733 | 0.48041 | 0.136457 | 0.00313  | 0.06843  |
| -0.1552  | 0.00076  | -0.31348 | 4.16E-12 | -0.04964 | 0.28442 | -0.14813 | 0.00133  | -0.08483 |
| -0.12931 | 0.00513  | -0.19881 | 1.50E-05 | -0.0179  | 0.6997  | 0.062962 | 0.17436  | -0.11611 |
| 0.110674 | 0.01673  | 0.050119 | 0.27976  | -0.01138 | 0.80626 | -0.08197 | 0.07679  | -0.0075  |
| -0.06997 | 0.13106  | -0.07358 | 0.11232  | 0.039354 | 0.39616 | 0.033375 | 0.47182  | 0.216303 |
| -0.125   | 0.00684  | -0.18657 | 4.98E-05 | 0.04328  | 0.35071 | 0.074239 | 0.10911  | 0.054086 |
| 0.151305 | 0.00104  | 0.25442  | 2.47E-08 | -0.02708 | 0.55936 | -0.01782 | 0.70085  | -0.1005  |
| -0.03695 | 0.42562  | -0.04005 | 0.38781  | 0.077905 | 0.09265 | 0.14342  | 0.00189  | 0.021449 |
| -0.06855 | 0.13911  | 0.138456 | 0.00271  | 0.058717 | 0.20531 | 0.269515 | 3.25E-09 | 0.172244 |
| -0.13098 | 0.00458  | -0.32025 | 1.34E-12 | -0.031   | 0.504   | -0.08862 | 0.05564  | -0.11943 |
| 0.227277 | 6.93E-07 | 0.421192 | 1.66E-21 | -0.02104 | 0.65013 | 0.137811 | 0.00284  | -0.0027  |
| 0.222053 | 1.26E-06 | 0.071831 | 0.12111  | 0.020052 | 0.66558 | 0.036149 | 0.43578  | 0.015189 |
| 0.169279 | 0.00024  | 0.198889 | 1.49E-05 | 0.011146 | 0.81016 | 0.107578 | 0.02006  | 0.057918 |
| -0.10474 | 0.0236   | -0.0547  | 0.23812  | -0.01335 | 0.77361 | 0.039678 | 0.39228  | 0.028883 |
| -0.10517 | 0.02303  | -0.01581 | 0.73324  | 0.04182  | 0.36721 | 0.085642 | 0.06443  | 0.077719 |
| -0.14917 | 0.00122  | 0.028119 | 0.54442  | 0.044779 | 0.33426 | 0.12903  | 0.00523  | 0.264513 |
| 0.003995 | 0.93139  | -0.36828 | 1.90E-16 | -0.08757 | 0.05864 | -0.209   | 5.24E-06 | -0.21115 |
| 0.129586 | 0.00504  | 0.287929 | 2.29E-10 | 0.000294 | 0.99494 | 0.026144 | 0.57305  | 0.057786 |
| 0.067494 | 0.14531  | -0.07234 | 0.11849  | 0.023625 | 0.61058 | -0.00703 | 0.87962  | 0.059321 |
| -0.00948 | 0.83803  | 0.012518 | 0.78732  | 0.034033 | 0.46313 | 0.142795 | 0.00198  | 0.216522 |
| -0.05807 | 0.21035  | -0.18038 | 8.86E-05 | 0.029477 | 0.52514 | 0.042046 | 0.36463  | 0.100451 |
| 0.001074 | 0.98154  | 0.198699 | 1.52E-05 | 0.015653 | 0.73583 | 0.085686 | 0.0643   | 0.011333 |
| 0.206086 | 7.13E-06 | -0.17789 | 0.00011  | -0.0029  | 0.95015 | -0.05917 | 0.20182  | -0.13421 |
| 0.059452 | 0.19968  | 0.114736 | 0.0131   | 0.113353 | 0.01425 | 0.276738 | 1.18E-09 | 0.326865 |
| 0.011337 | 0.80696  | -0.03867 | 0.40446  | -0.00858 | 0.85321 | -0.06177 | 0.18267  | -0.05177 |

|          |          |          |          |          |          |          |          |          |
|----------|----------|----------|----------|----------|----------|----------|----------|----------|
| -0.00168 | 0.97107  | 0.033311 | 0.47268  | 0.005021 | 0.91382  | -0.06141 | 0.18523  | -0.11234 |
| 0.056522 | 0.22278  | -0.04663 | 0.31464  | 0.085723 | 0.06418  | 0.021873 | 0.63731  | 0.102831 |
| -0.20002 | 1.33E-05 | -0.27606 | 1.29E-09 | -0.00406 | 0.93022  | 0.01169  | 0.80108  | 0.007381 |
| 0.145913 | 0.00157  | 0.165775 | 0.00032  | -0.0154  | 0.73998  | 0.125413 | 0.00665  | -0.10701 |
| 0.122289 | 0.00816  | -0.01921 | 0.67875  | -0.03423 | 0.46053  | -0.04812 | 0.29943  | -0.15763 |
| 0.021178 | 0.64803  | -0.06935 | 0.13453  | -0.01996 | 0.667    | -0.06326 | 0.17236  | 0.010868 |
| -0.00105 | 0.98199  | -0.05308 | 0.25231  | 0.00492  | 0.91555  | 0.045299 | 0.32867  | 0.046606 |
| 0.097467 | 0.03524  | -0.05908 | 0.20252  | -0.04859 | 0.29466  | -0.16053 | 0.0005   | -0.09098 |
| -0.02199 | 0.63554  | -0.16962 | 0.00023  | 0.067525 | 0.14512  | 0.179754 | 9.39E-05 | 0.034207 |
| 0.092883 | 0.04484  | 0.403062 | 1.14E-19 | 0.121625 | 0.00851  | 0.406435 | 5.29E-20 | 0.10261  |
| 0.003836 | 0.9341   | -0.06974 | 0.13235  | 0.068101 | 0.14171  | -0.04896 | 0.291    | 0.177363 |
| 0.168364 | 0.00026  | 0.197796 | 1.67E-05 | 0.036137 | 0.43593  | 0.105912 | 0.02207  | 0.072207 |
| 0.175186 | 0.00014  | -0.16136 | 0.00046  | 0.009383 | 0.83973  | -0.13231 | 0.00418  | 0.125739 |
| -0.08188 | 0.07712  | -0.13928 | 0.00256  | -0.00805 | 0.86225  | -0.03619 | 0.4352   | -0.07493 |
| -0.02676 | 0.56404  | 0.091233 | 0.04879  | 0.102695 | 0.02647  | 0.245699 | 7.53E-08 | 0.096878 |
| -0.02288 | 0.62185  | -0.44034 | 1.43E-23 | -0.0682  | 0.14114  | -0.20334 | 9.48E-06 | -0.23109 |
| -0.08646 | 0.0619   | -0.26242 | 8.56E-09 | 0.009561 | 0.83674  | 0.100248 | 0.03031  | -0.1401  |
| -0.21166 | 3.95E-06 | -0.35287 | 3.86E-15 | 0.037727 | 0.416    | 0.059733 | 0.19756  | 0.280745 |
| -0.01226 | 0.79159  | -0.14835 | 0.0013   | -0.0161  | 0.72854  | -0.07598 | 0.10104  | -0.03416 |
| 0.081898 | 0.07705  | -0.08449 | 0.06812  | 0.06552  | 0.15747  | 0.021884 | 0.63714  | 0.102625 |
| -0.07252 | 0.11759  | -0.09258 | 0.04555  | 0.015348 | 0.74079  | 0.066213 | 0.15312  | -0.02698 |
| 0.028805 | 0.53464  | 0.018987 | 0.68236  | 0.014983 | 0.74674  | 0.035104 | 0.44917  | 0.035572 |
| 0.035512 | 0.44391  | 0.093575 | 0.04326  | 0.039188 | 0.39815  | 0.127494 | 0.0058   | -0.02479 |
| -0.09108 | 0.04917  | -0.34712 | 1.14E-14 | -0.03463 | 0.45528  | -0.09225 | 0.04632  | -0.00799 |
| -0.10727 | 0.02042  | -0.02057 | 0.65754  | 0.195093 | 2.18E-05 | 0.242279 | 1.15E-07 | 0.364128 |
| -0.08845 | 0.05613  | -0.32969 | 2.65E-13 | 0.014068 | 0.76173  | -0.06778 | 0.14362  | -0.01259 |
| 0.141706 | 0.00214  | -0.00709 | 0.87847  | -0.02362 | 0.61059  | -0.05329 | 0.25042  | -0.11951 |
| 0.113867 | 0.01381  | -0.0836  | 0.07108  | -0.01415 | 0.76037  | -0.05524 | 0.23345  | -0.03723 |
| -0.10071 | 0.02955  | -0.07209 | 0.11978  | 0.05431  | 0.24145  | 0.031105 | 0.50251  | -0.01037 |
| -0.0386  | 0.40524  | -0.04702 | 0.31056  | -0.05162 | 0.26558  | -0.09431 | 0.04165  | -0.03653 |
| -0.1217  | 0.00847  | -0.2549  | 2.32E-08 | 0.003892 | 0.93315  | -0.02938 | 0.52657  | 0.159037 |
| 0.316939 | 2.34E-12 | -0.11842 | 0.01043  | -0.05248 | 0.25769  | -0.12534 | 0.00669  | -0.09413 |
| 0.073757 | 0.11143  | -0.24544 | 7.78E-08 | -0.0101  | 0.82767  | 0.008835 | 0.84899  | -0.20605 |
| -0.0489  | 0.29161  | -0.22769 | 6.61E-07 | -0.02389 | 0.60657  | -0.08154 | 0.07835  | -0.07435 |
| 0.019877 | 0.66833  | 0.0121   | 0.79426  | 0.093953 | 0.04242  | 0.20248  | 1.04E-05 | 0.214582 |
| 0.061472 | 0.1848   | 0.199121 | 1.46E-05 | 0.051514 | 0.26658  | -0.03106 | 0.50308  | 0.004219 |
| -0.10732 | 0.02036  | -0.18424 | 6.20E-05 | -0.00697 | 0.88065  | -0.08474 | 0.0673   | -0.06458 |
| -0.04829 | 0.29773  | -0.16445 | 0.00036  | 0.029813 | 0.52043  | 0.04941  | 0.28663  | 0.077973 |
| -0.08469 | 0.06747  | 0.062188 | 0.17973  | 0.146953 | 0.00145  | 0.307812 | 1.05E-11 | 0.212965 |
| 0.098379 | 0.03355  | 0.357552 | 1.57E-15 | 0.028024 | 0.54577  | -0.01529 | 0.74176  | 0.084698 |
| -0.06808 | 0.14183  | -0.07369 | 0.11177  | 0.038568 | 0.40567  | 0.119847 | 0.00953  | 0.144711 |
| -0.09361 | 0.04318  | -0.17353 | 0.00016  | -0.00946 | 0.83848  | -0.03978 | 0.39105  | -0.08531 |
| 0.015183 | 0.74348  | 0.099675 | 0.03127  | 0.069491 | 0.13374  | 0.15252  | 0.00094  | 0.167386 |
| -0.00997 | 0.82987  | 0.074789 | 0.1065   | 0.063489 | 0.17077  | 0.07895  | 0.08834  | 0.345251 |
| 0.054984 | 0.23565  | -0.06511 | 0.16006  | -0.02658 | 0.56673  | -0.09533 | 0.03946  | 0.010412 |

|          |         |          |          |          |         |          |          |          |
|----------|---------|----------|----------|----------|---------|----------|----------|----------|
| 0.055744 | 0.22923 | 0.174827 | 0.00015  | -0.01968 | 0.67143 | 0.062676 | 0.17633  | 0.16625  |
| 0.161481 | 0.00046 | 0.182749 | 7.12E-05 | 0.003107 | 0.94661 | -0.0618  | 0.18246  | 0.075729 |
| -0.04452 | 0.33712 | 0.035186 | 0.4481   | -0.0525  | 0.25749 | -0.05804 | 0.21057  | -0.02869 |
| -0.03883 | 0.40245 | -0.06619 | 0.15325  | 0.027705 | 0.55037 | -0.02231 | 0.63058  | 0.073433 |
| 0.013288 | 0.77458 | -0.15761 | 0.00063  | 0.072216 | 0.11913 | 0.11779  | 0.01085  | 0.249283 |
| 0.029674 | 0.52237 | -0.10492 | 0.02336  | -0.00328 | 0.94367 | -0.05575 | 0.22918  | -0.03307 |
| 0.028165 | 0.54376 | -0.03016 | 0.51561  | 0.01962  | 0.67236 | -0.03722 | 0.42226  | 0.069737 |
| 0.025718 | 0.57932 | 0.09947  | 0.03162  | -0.01563 | 0.73625 | -0.07016 | 0.13001  | -0.08753 |
| -0.16551 | 0.00033 | -0.16141 | 0.00046  | 0.033996 | 0.46362 | 0.092139 | 0.04659  | 0.022216 |
| 0.050013 | 0.28078 | 0.078251 | 0.09121  | -0.00572 | 0.90183 | 0.016855 | 0.71639  | -0.03225 |
| -0.07671 | 0.09777 | -0.2071  | 6.41E-06 | -0.01229 | 0.79102 | 0.092626 | 0.04544  | -0.12127 |
| -0.10178 | 0.02786 | -0.07057 | 0.12778  | 0.018562 | 0.68908 | 0.073355 | 0.1134   | 0.009799 |
| -0.08791 | 0.05765 | -0.19982 | 1.36E-05 | -0.03502 | 0.45025 | -0.10777 | 0.01984  | -0.04832 |
| -0.00455 | 0.92187 | 0.068758 | 0.1379   | 0.047858 | 0.30205 | 0.067672 | 0.14424  | 0.111592 |
| 0.146321 | 0.00152 | 0.371118 | 1.07E-16 | 0.058263 | 0.20884 | 0.236457 | 2.35E-07 | 0.075851 |
| -0.02176 | 0.63905 | 0.026965 | 0.56106  | 0.026552 | 0.56708 | 0.061754 | 0.18279  | 0.141561 |
| 0.129182 | 0.00518 | 0.096036 | 0.03802  | 0.017562 | 0.70504 | 0.086461 | 0.06191  | 0.018734 |
| -0.00895 | 0.84706 | 0.020755 | 0.65461  | 0.008134 | 0.86083 | -0.05813 | 0.20987  | -0.10663 |
| -0.05861 | 0.20616 | -0.11597 | 0.01215  | -0.01022 | 0.82562 | -0.06386 | 0.1683   | -0.07287 |
| 0.045083 | 0.33099 | -0.05147 | 0.26694  | -0.01546 | 0.73902 | -0.10494 | 0.02333  | -0.04867 |
| 0.041347 | 0.37266 | -0.0158  | 0.73339  | 0.023231 | 0.61655 | -0.01743 | 0.7072   | -0.00734 |
| 0.04398  | 0.34297 | -0.07881 | 0.08889  | -0.03168 | 0.4947  | -0.04901 | 0.29058  | -0.03825 |
| -0.03644 | 0.43205 | -0.07825 | 0.09123  | 0.024392 | 0.59905 | 0.033328 | 0.47245  | 0.015802 |
| -0.03732 | 0.42106 | -0.12798 | 0.00561  | -0.01956 | 0.67337 | 0.012144 | 0.79352  | -0.02269 |
| 0.065184 | 0.15962 | -0.0752  | 0.10459  | -0.029   | 0.53186 | -0.07083 | 0.1264   | -0.01469 |
| 0.041987 | 0.3653  | -0.04628 | 0.31834  | -0.02232 | 0.6305  | -0.03029 | 0.51372  | -0.01655 |
| 0.01859  | 0.68864 | -0.05863 | 0.20596  | -0.01275 | 0.78347 | 0.002204 | 0.96212  | 0.026332 |
| -0.0496  | 0.2848  | -0.0389  | 0.40164  | -0.01496 | 0.74716 | -0.00814 | 0.86079  | -0.02282 |
| -0.01157 | 0.803   | -0.02154 | 0.64244  | 0.040892 | 0.37795 | 0.003359 | 0.94229  | -0.02483 |
| -0.08649 | 0.06181 | -0.1595  | 0.00054  | 0.010061 | 0.82833 | -0.01375 | 0.76701  | -0.06132 |
| 0.024094 | 0.60352 | -0.02377 | 0.6084   | -0.01679 | 0.71744 | -0.0326  | 0.48219  | -0.02697 |
| -0.00882 | 0.8493  | -0.17313 | 0.00017  | -0.0541  | 0.24326 | -0.05915 | 0.202    | -0.10857 |
| -0.03399 | 0.4637  | -0.10577 | 0.02225  | -0.07273 | 0.11654 | -0.03937 | 0.39594  | -0.10437 |
| -0.14447 | 0.00175 | -0.36914 | 1.60E-16 | -0.04898 | 0.29083 | -0.16962 | 0.00023  | -0.05686 |
| -0.04015 | 0.38666 | -0.0533  | 0.2503   | -0.0018  | 0.96911 | -0.01972 | 0.67085  | -0.02968 |
| -0.04318 | 0.35181 | -0.1265  | 0.00619  | 0.01945  | 0.67504 | -0.02982 | 0.5204   | 0.072383 |
| -0.03973 | 0.39163 | 0.054528 | 0.23956  | -0.0198  | 0.66962 | -0.01574 | 0.7344   | -0.06832 |
| -0.0807  | 0.08148 | -0.02795 | 0.5468   | 0.078247 | 0.09122 | 0.132747 | 0.00406  | 0.239618 |
| 0.099672 | 0.03128 | 0.276866 | 1.15E-09 | 0.054204 | 0.24237 | 0.082246 | 0.0758   | 0.098745 |
| 0.073259 | 0.11388 | -0.05903 | 0.20291  | -0.04388 | 0.34401 | -0.20311 | 9.71E-06 | -0.14793 |
| 0.100783 | 0.02943 | 0.082496 | 0.07491  | 0.002962 | 0.9491  | 0.064591 | 0.16346  | 0.064324 |
| 0.091136 | 0.04903 | -0.06877 | 0.13784  | 0.012843 | 0.78192 | -0.00839 | 0.85647  | 0.000686 |
| 0.011095 | 0.811   | -0.17742 | 0.00012  | 0.020452 | 0.65933 | 0.034471 | 0.45739  | 0.111658 |
| -0.11438 | 0.01339 | -0.11311 | 0.01446  | 0.041157 | 0.37487 | 0.143299 | 0.00191  | 0.020909 |
| 0.037203 | 0.4225  | 0.035019 | 0.45026  | 0.005653 | 0.90303 | 0.056669 | 0.22158  | 0.059322 |

|          |          |          |          |          |         |          |          |          |
|----------|----------|----------|----------|----------|---------|----------|----------|----------|
| -0.04938 | 0.28693  | -0.21496 | 2.76E-06 | 0.034363 | 0.4588  | -0.01025 | 0.82523  | 0.22631  |
| -0.07722 | 0.09554  | 0.018836 | 0.68474  | -0.05585 | 0.22838 | -0.02312 | 0.6182   | -0.09174 |
| -0.00382 | 0.93444  | 0.033204 | 0.4741   | -0.01394 | 0.76381 | 0.01433  | 0.75743  | -0.02153 |
| -0.02292 | 0.62124  | -0.18245 | 7.32E-05 | -0.00735 | 0.87405 | -0.03677 | 0.42795  | -0.01972 |
| 0.121827 | 0.0084   | -0.03336 | 0.47201  | 0.009931 | 0.83052 | -0.00955 | 0.83701  | -0.03591 |
| -0.11682 | 0.01152  | -0.15401 | 0.00084  | -0.01094 | 0.81353 | 0.010428 | 0.82217  | -0.04829 |
| -0.08755 | 0.05869  | -0.06506 | 0.16039  | 0.013068 | 0.77821 | -0.01107 | 0.8115   | -0.06046 |
| 0.127541 | 0.00578  | 0.425479 | 5.88E-22 | 0.097929 | 0.03437 | 0.218987 | 1.77E-06 | 0.046477 |
| -0.18433 | 6.15E-05 | -0.028   | 0.54608  | -0.01342 | 0.77237 | 0.003576 | 0.93857  | 0.135514 |
| 0.176434 | 0.00013  | -0.07411 | 0.10972  | 0.022947 | 0.62086 | -0.05147 | 0.26703  | 0.054463 |
| 0.062113 | 0.18025  | -0.11851 | 0.01037  | 0.006991 | 0.88024 | -0.06288 | 0.17495  | 0.002642 |
| 0.132997 | 0.00399  | -0.05505 | 0.23505  | 0.026614 | 0.56617 | 0.005897 | 0.89886  | 0.057444 |
| 0.178989 | 0.0001   | 0.281436 | 5.97E-10 | -0.00508 | 0.91287 | -0.01619 | 0.72707  | -0.01728 |
| -0.06442 | 0.16461  | -0.08962 | 0.05295  | 0.143916 | 0.00182 | 0.12136  | 0.00866  | 0.103599 |
| -0.02288 | 0.62193  | -0.19244 | 2.83E-05 | -0.01178 | 0.7996  | -0.02062 | 0.65678  | -0.05858 |
| 0.084199 | 0.06908  | -0.2275  | 6.75E-07 | -0.02859 | 0.53773 | -0.0718  | 0.12128  | -0.18413 |
| -0.01736 | 0.70834  | -0.05197 | 0.26239  | 0.054336 | 0.24123 | 0.016526 | 0.7217   | -0.03131 |
| 0.269999 | 3.04E-09 | 0.440266 | 1.46E-23 | -0.00469 | 0.91952 | -0.07571 | 0.10223  | 0.025623 |
| 0.187667 | 4.48E-05 | 0.397623 | 3.86E-19 | -0.01017 | 0.82642 | 0.053269 | 0.2506   | 0.102463 |
| 0.128513 | 0.00541  | -0.2719  | 2.33E-09 | 0.022842 | 0.62246 | -0.05824 | 0.209    | -0.03386 |
| -0.01349 | 0.77131  | 0.078746 | 0.08917  | 0.019239 | 0.67837 | -0.00597 | 0.89766  | 0.067273 |
| 0.087985 | 0.05744  | 0.232006 | 3.99E-07 | 0.07759  | 0.09398 | 0.081894 | 0.07707  | 0.030613 |
| -0.02694 | 0.56136  | -0.08505 | 0.06631  | 0.022969 | 0.62053 | 0.008462 | 0.85528  | -0.11438 |
| 0.112721 | 0.0148   | -0.0627  | 0.17617  | -0.03298 | 0.47714 | -0.05351 | 0.24844  | 0.028648 |
| 0.035437 | 0.44487  | -0.20007 | 1.32E-05 | -0.02062 | 0.6567  | -0.06387 | 0.16824  | -0.07902 |
| -0.0762  | 0.10002  | -0.19958 | 1.39E-05 | 0.027503 | 0.55327 | 0.09491  | 0.04035  | 0.060726 |
| -0.17509 | 0.00014  | -0.291   | 1.45E-10 | -0.01721 | 0.71072 | 0.024215 | 0.6017   | 0.023623 |
| 0.071944 | 0.12053  | -0.25966 | 1.24E-08 | 0.057794 | 0.21253 | 0.00986  | 0.83171  | 0.079581 |
| 0.010929 | 0.81377  | -0.37644 | 3.61E-17 | -0.00558 | 0.90434 | -0.05241 | 0.25831  | -0.11635 |
| 0.039736 | 0.39158  | 0.35786  | 1.48E-15 | 0.141956 | 0.0021  | 0.163202 | 0.0004   | 0.382301 |
| -0.02645 | 0.56862  | 0.167285 | 0.00028  | 0.013346 | 0.77361 | 0.026971 | 0.56097  | 0.047569 |
| -0.01102 | 0.81229  | -0.19235 | 2.86E-05 | 0.017477 | 0.70639 | -0.11408 | 0.01364  | -0.09772 |
| 0.016075 | 0.72899  | -0.09568 | 0.03874  | 0.016338 | 0.72474 | 0.001615 | 0.97223  | 0.002083 |
| -0.12155 | 0.00855  | -0.22153 | 1.33E-06 | 0.002207 | 0.96207 | 0.000985 | 0.98306  | -0.07888 |
| 0.139758 | 0.00247  | 0.039235 | 0.39759  | 0.057557 | 0.21442 | -0.01411 | 0.7611   | 0.060244 |
| -0.03821 | 0.41003  | -0.04922 | 0.28852  | 0.055937 | 0.22762 | 0.04768  | 0.30386  | -0.00032 |
| -0.00111 | 0.98096  | -0.07042 | 0.12863  | 0.012169 | 0.79311 | -0.00573 | 0.90174  | -0.01531 |
| 0.031634 | 0.49526  | 0.165933 | 0.00032  | -0.01982 | 0.66926 | 0.035815 | 0.44003  | 0.066235 |
| -0.01275 | 0.78339  | -0.05304 | 0.25268  | 0.024131 | 0.60295 | -0.03807 | 0.41182  | -0.01993 |
| 0.11878  | 0.0102   | 0.182168 | 7.52E-05 | 0.026947 | 0.56133 | 0.125941 | 0.00643  | -0.00865 |
| 0.052632 | 0.25632  | -0.09883 | 0.03274  | 0.004565 | 0.92163 | -0.0779  | 0.09269  | -0.04449 |
| 0.181751 | 7.81E-05 | 0.216585 | 2.31E-06 | -0.00822 | 0.85936 | 0.002154 | 0.96297  | 0.074304 |
| 0.02982  | 0.52034  | 0.204773 | 8.17E-06 | -0.03097 | 0.5044  | -0.06461 | 0.16334  | -0.11498 |
| 0.039393 | 0.3957   | 0.085499 | 0.06488  | 0.083241 | 0.07231 | 0.023433 | 0.61349  | -0.02013 |
| 0.179144 | 9.92E-05 | 0.294399 | 8.62E-11 | 0.004846 | 0.91682 | 0.002172 | 0.96267  | -0.03203 |

|          |          |          |          |          |         |          |          |          |
|----------|----------|----------|----------|----------|---------|----------|----------|----------|
| -0.06667 | 0.15029  | -0.08417 | 0.06916  | 0.013041 | 0.77865 | 0.172282 | 0.00018  | 0.044792 |
| 0.041536 | 0.37048  | 0.121481 | 0.00859  | 0.111332 | 0.01609 | 0.392209 | 1.27E-18 | 0.282833 |
| 0.027661 | 0.551    | -0.04134 | 0.37276  | -0.05335 | 0.24989 | -0.11324 | 0.01435  | -0.12374 |
| 0.083382 | 0.07183  | 0.141186 | 0.00223  | 0.08487  | 0.06689 | 0.130669 | 0.00468  | 0.281192 |
| 0.001471 | 0.97471  | -0.45114 | 8.55E-25 | -0.05903 | 0.20287 | -0.2051  | 7.90E-06 | -0.22272 |
| 0.01012  | 0.82735  | -0.29407 | 9.07E-11 | -0.02541 | 0.58382 | -0.11884 | 0.01016  | -0.15213 |
| 0.039734 | 0.39162  | -0.05739 | 0.21573  | -0.00699 | 0.88026 | 0.007339 | 0.87431  | -0.00904 |
| 0.002453 | 0.95784  | -0.31338 | 4.22E-12 | 0.106361 | 0.02151 | 0.206736 | 6.66E-06 | -0.04923 |
| -0.07267 | 0.11679  | 0.07188  | 0.12086  | 0.138653 | 0.00268 | 0.301342 | 2.94E-11 | 0.034141 |
| -0.17455 | 0.00015  | -0.05915 | 0.20198  | -0.0218  | 0.63844 | -0.01922 | 0.67868  | -0.14114 |
| -0.15109 | 0.00106  | -0.2263  | 7.75E-07 | 0.036345 | 0.43328 | 0.0529   | 0.25391  | 0.015353 |
| 0.205817 | 7.33E-06 | -0.15751 | 0.00064  | -0.01469 | 0.75147 | -0.12178 | 0.00843  | 0.026881 |
| -0.03057 | 0.50986  | -0.41049 | 2.08E-20 | 0.012652 | 0.78508 | 0.010054 | 0.82845  | 0.067768 |
| -0.06131 | 0.18597  | -0.03548 | 0.44433  | 0.144027 | 0.00181 | 0.143926 | 0.00182  | 0.117045 |
| 0.08687  | 0.06068  | -0.00896 | 0.84686  | -0.01547 | 0.73883 | -0.081   | 0.08035  | -0.00442 |
| 0.074694 | 0.10695  | -0.05252 | 0.25737  | 0.005845 | 0.89976 | 0.100351 | 0.03014  | 0.005629 |
| 0.210212 | 4.61E-06 | -0.05127 | 0.26886  | 0.043838 | 0.34453 | -0.06444 | 0.16442  | 0.038123 |
| 0.03152  | 0.49683  | 0.024997 | 0.59001  | -0.00295 | 0.94927 | -0.03026 | 0.51415  | -0.09242 |
| 0.179383 | 9.71E-05 | -0.156   | 0.00072  | 0.021379 | 0.64493 | -0.02227 | 0.63113  | 0.004136 |
| -0.05821 | 0.20929  | 0.228266 | 6.18E-07 | 0.006681 | 0.88551 | 0.136102 | 0.00321  | -0.07352 |
| 0.216697 | 2.28E-06 | 0.308603 | 9.22E-12 | 0.029361 | 0.52678 | 0.072658 | 0.11688  | 0.069004 |
| 0.200846 | 1.22E-05 | -0.1159  | 0.0122   | -0.00654 | 0.88795 | -0.06559 | 0.15702  | -0.01172 |
| -0.1253  | 0.0067   | -0.17174 | 0.00019  | 0.002663 | 0.95424 | -0.02086 | 0.65303  | -0.07113 |
| 0.063112 | 0.17333  | 0.361734 | 6.97E-16 | 0.025035 | 0.58945 | 0.08708  | 0.06006  | 0.001897 |
| -0.07531 | 0.10406  | -0.26275 | 8.19E-09 | -0.04493 | 0.33265 | -0.1971  | 1.79E-05 | -0.09409 |
| -0.11038 | 0.01702  | -0.28963 | 1.78E-10 | -0.02163 | 0.64098 | -0.05429 | 0.24158  | -0.10052 |
| 0.140064 | 0.00242  | -0.11399 | 0.01371  | 0.038313 | 0.40879 | 0.07692  | 0.09686  | -0.16439 |
| 0.128889 | 0.00528  | 0.028081 | 0.54496  | 0.030785 | 0.50692 | 0.100488 | 0.02991  | 0.000632 |
| 0.159489 | 0.00054  | -0.23526 | 2.71E-07 | -0.01017 | 0.82646 | -0.14102 | 0.00225  | -0.13817 |
| 0.132549 | 0.00411  | 0.344118 | 1.99E-14 | 0.019304 | 0.67734 | -0.0021  | 0.96382  | -0.05536 |
| -0.16731 | 0.00028  | 0.192728 | 2.75E-05 | 0.117606 | 0.01097 | 0.259169 | 1.32E-08 | 0.374401 |
| -0.09984 | 0.03099  | 0.275473 | 1.41E-09 | 0.011118 | 0.81062 | 0.168435 | 0.00026  | 0.093384 |
| -0.1133  | 0.01429  | -0.17589 | 0.00013  | -0.01766 | 0.70351 | -0.02416 | 0.60245  | -0.04612 |
| 0.163698 | 0.00038  | 0.035883 | 0.43916  | -0.00628 | 0.89241 | -0.06408 | 0.16685  | -0.12736 |
| 0.252213 | 3.29E-08 | 0.272684 | 2.09E-09 | -0.01292 | 0.78063 | 0.070227 | 0.12966  | -0.07508 |
| -0.05917 | 0.20183  | 0.044381 | 0.33857  | -0.02531 | 0.5854  | -0.02081 | 0.65375  | 0.075655 |
| -0.008   | 0.86309  | -0.02231 | 0.63052  | -0.00798 | 0.86344 | -0.01045 | 0.82187  | 0.021053 |
| -0.05862 | 0.20608  | -0.1196  | 0.00968  | -0.01441 | 0.75606 | -0.04911 | 0.2896   | 0.006272 |
| -0.19351 | 2.55E-05 | -0.14847 | 0.00129  | -0.02149 | 0.64316 | 0.031513 | 0.49692  | -0.09521 |
| 0.00109  | 0.98126  | 0.030887 | 0.50551  | 0.046195 | 0.31918 | 0.194192 | 2.38E-05 | 0.00114  |
| -0.11795 | 0.01074  | -0.14243 | 0.00203  | 0.057247 | 0.2169  | 0.044262 | 0.33987  | -0.04375 |
| -0.04762 | 0.3045   | -0.08554 | 0.06476  | 0.00249  | 0.9572  | -0.01493 | 0.74762  | -0.04376 |
| -0.00847 | 0.85521  | -0.10025 | 0.0303   | 0.002918 | 0.94986 | 0.0557   | 0.2296   | -0.11515 |
| -0.1511  | 0.00106  | -0.35256 | 4.09E-15 | 0.001152 | 0.9802  | -0.08257 | 0.07465  | -0.05116 |
| -0.12331 | 0.00764  | -0.26821 | 3.89E-09 | 0.017766 | 0.70177 | 0.178581 | 0.0001   | -0.15023 |



|          |          |          |          |          |          |           |          |          |
|----------|----------|----------|----------|----------|----------|-----------|----------|----------|
| -0.08612 | 0.06295  | -0.18593 | 5.29E-05 | 0.074015 | 0.11018  | 0.136082  | 0.00321  | 0.034503 |
| 0.000293 | 0.99496  | -0.3895  | 2.28E-18 | 0.041861 | 0.36674  | -0.01708  | 0.71276  | 0.017593 |
| 0.062782 | 0.1756   | -0.16648 | 0.0003   | 0.021017 | 0.65054  | 0.011063  | 0.81153  | 0.081762 |
| 0.222474 | 1.20E-06 | 0.33536  | 9.74E-14 | -0.00454 | 0.92208  | 0.074606  | 0.10736  | -0.13064 |
| 0.111846 | 0.0156   | -0.11717 | 0.01128  | -0.0401  | 0.38726  | -0.06495  | 0.16114  | -0.00675 |
| -0.07889 | 0.0886   | -0.24547 | 7.75E-08 | -0.02271 | 0.62443  | -0.06726  | 0.14674  | -0.06182 |
| -0.1609  | 0.00048  | -0.02278 | 0.62336  | 0.004132 | 0.92904  | 0.095403  | 0.03932  | -0.0746  |
| -0.0814  | 0.07888  | -0.31685 | 2.38E-12 | 0.032112 | 0.48877  | -0.08432  | 0.06868  | 0.163278 |
| 0.235829 | 2.53E-07 | 0.424545 | 7.38E-22 | 0.192631 | 2.78E-05 | 0.080133  | 0.08366  | 0.35669  |
| 0.272441 | 2.16E-09 | 0.173342 | 0.00017  | -0.02291 | 0.62136  | -0.07414  | 0.10958  | 0.004041 |
| -0.11499 | 0.0129   | -0.32938 | 2.80E-13 | -0.04875 | 0.2931   | -0.12308  | 0.00775  | -0.12152 |
| 0.039234 | 0.39761  | 0.126355 | 0.00625  | -0.02953 | 0.52439  | -0.00704  | 0.87948  | 0.013925 |
| -0.07374 | 0.11154  | -0.29113 | 1.42E-10 | 0.012556 | 0.78669  | -0.09619  | 0.03771  | -0.01758 |
| 0.020492 | 0.65871  | -0.14744 | 0.0014   | 0.021406 | 0.64451  | -0.04146  | 0.37133  | -0.02408 |
| -0.01913 | 0.68006  | -0.06261 | 0.1768   | 0.048603 | 0.29458  | -0.02481  | 0.59283  | 0.114833 |
| -0.00791 | 0.86455  | 0.118733 | 0.01023  | 0.084058 | 0.06955  | 0.214782  | 2.82E-06 | 0.289954 |
| 0.051643 | 0.26538  | -0.00425 | 0.92702  | 0.003804 | 0.93465  | -0.00212  | 0.96355  | 0.102004 |
| -0.10179 | 0.02785  | -0.16943 | 0.00023  | 0.024155 | 0.6026   | 0.046322  | 0.31785  | 0.148437 |
| -0.10397 | 0.02465  | -0.1178  | 0.01084  | 0.031863 | 0.49215  | -9.29E-06 | 0.99984  | 0.077065 |
| 0.192491 | 2.82E-05 | 0.46151  | 5.20E-26 | 0.086945 | 0.06046  | 0.139851  | 0.00245  | 0.297344 |
| -0.11617 | 0.012    | -0.24057 | 1.42E-07 | 0.014041 | 0.76217  | -0.03032  | 0.51331  | -0.05203 |
| 0.011726 | 0.80047  | -0.19991 | 1.35E-05 | 0.021453 | 0.64378  | -0.04177  | 0.36775  | 0.043834 |
| -0.12031 | 0.00926  | -0.2125  | 3.60E-06 | 0.007566 | 0.87046  | -0.01402  | 0.76245  | 0.03224  |
| 0.016551 | 0.72128  | 0.160127 | 0.00051  | 0.031212 | 0.50104  | 0.119501  | 0.00974  | 0.011226 |
| -0.18125 | 8.18E-05 | -0.4498  | 1.22E-24 | 0.092085 | 0.04671  | 0.192754  | 2.74E-05 | 0.082299 |
| -0.13334 | 0.00389  | -0.27099 | 2.65E-09 | 0.004369 | 0.92498  | -0.06247  | 0.17773  | -0.05532 |
| -0.16605 | 0.00031  | -0.25085 | 3.92E-08 | 0.051486 | 0.26684  | 0.007312  | 0.87478  | 0.154004 |
| 0.005621 | 0.90357  | -0.06825 | 0.14085  | -0.02655 | 0.56717  | 0.039928  | 0.3893   | -0.02397 |
| -0.02152 | 0.64273  | -0.11413 | 0.01359  | -0.00845 | 0.85554  | -0.01812  | 0.69618  | -0.04181 |
| -0.1612  | 0.00047  | -0.22561 | 8.40E-07 | 0.015899 | 0.73184  | 0.021062  | 0.64984  | 0.25242  |
| -0.0879  | 0.05769  | -0.21287 | 3.47E-06 | -0.04282 | 0.35591  | -0.06077  | 0.18987  | -0.07926 |
| -0.01574 | 0.73446  | -0.11466 | 0.01316  | 0.035523 | 0.44377  | -0.00778  | 0.86676  | -0.01716 |
| 0.15266  | 0.00093  | 0.441194 | 1.15E-23 | -0.0252  | 0.58702  | -0.01886  | 0.68431  | -0.10116 |
| 0.152581 | 0.00094  | -0.11903 | 0.01003  | -0.00737 | 0.87387  | -0.10086  | 0.02931  | 0.082867 |
| 0.209578 | 4.93E-06 | 0.065428 | 0.15806  | -0.02471 | 0.59427  | 0.029481  | 0.52509  | -0.09906 |
| 0.010038 | 0.82872  | -0.37624 | 3.76E-17 | -0.0228  | 0.6231   | -0.14355  | 0.00187  | -0.07149 |
| -0.00365 | 0.93734  | -0.16118 | 0.00047  | 0.020357 | 0.66081  | 0.007731  | 0.86767  | 0.1248   |
| 0.192084 | 2.93E-05 | 0.405671 | 6.30E-20 | 0.009359 | 0.84015  | 0.062111  | 0.18027  | 0.079543 |
| -0.00804 | 0.86249  | 0.098048 | 0.03415  | 0.133041 | 0.00397  | 0.181133  | 8.27E-05 | 0.335023 |
| -0.01278 | 0.78296  | -0.02844 | 0.53981  | 0.002083 | 0.96419  | -0.06582  | 0.15558  | -0.05217 |
| -0.02078 | 0.65417  | -0.06837 | 0.14013  | -0.07662 | 0.09816  | -0.15312  | 0.0009   | 0.017224 |
| 0.047955 | 0.30108  | -0.13249 | 0.00413  | -0.06367 | 0.16955  | -0.13631  | 0.00316  | -0.17303 |
| 0.129849 | 0.00495  | -0.01572 | 0.73471  | -0.01818 | 0.69516  | -0.03262  | 0.48197  | 0.086507 |
| 0.193544 | 2.54E-05 | 0.266457 | 4.95E-09 | 0.061251 | 0.18639  | -0.05835  | 0.20814  | 0.206624 |
| 0.017022 | 0.7137   | 0.004369 | 0.92498  | -0.00778 | 0.8669   | -0.0289   | 0.53334  | 0.082707 |

|          |          |          |          |          |          |          |          |          |
|----------|----------|----------|----------|----------|----------|----------|----------|----------|
| 0.078449 | 0.09039  | 0.080397 | 0.08264  | 0.005645 | 0.90316  | -0.08977 | 0.05253  | 0.029144 |
| 0.129182 | 0.00518  | 0.170517 | 0.00021  | -0.0052  | 0.91072  | -0.02288 | 0.62192  | 0.008437 |
| 0.082721 | 0.07412  | 0.240501 | 1.43E-07 | -0.02669 | 0.56502  | -0.01902 | 0.68186  | -0.06835 |
| 0.122941 | 0.00782  | -0.09826 | 0.03376  | -0.04746 | 0.3061   | -0.13316 | 0.00394  | -0.00925 |
| -0.0945  | 0.04122  | -0.22684 | 7.29E-07 | -0.00778 | 0.86683  | 0.006437 | 0.88966  | 0.072412 |
| 0.048404 | 0.29656  | -0.02704 | 0.55994  | 0.041658 | 0.36908  | 0.059887 | 0.19641  | 0.032624 |
| -0.04321 | 0.35144  | -0.28926 | 1.88E-10 | 0.048258 | 0.29803  | 0.008637 | 0.85232  | 0.04543  |
| 0.036097 | 0.43643  | -0.07717 | 0.09577  | 0.014946 | 0.74734  | 0.082329 | 0.0755   | -0.0699  |
| -0.16665 | 0.0003   | -0.29264 | 1.13E-10 | -0.01797 | 0.69854  | -0.06507 | 0.16037  | -0.21083 |
| 0.104023 | 0.02457  | 0.125837 | 0.00647  | -0.05514 | 0.23428  | -0.00326 | 0.94407  | -0.11924 |
| -0.06701 | 0.14824  | -0.10778 | 0.01982  | 0.037195 | 0.4226   | 0.049469 | 0.28606  | 0.265288 |
| -0.12728 | 0.00588  | -0.27101 | 2.64E-09 | 0.042524 | 0.35919  | 0.031879 | 0.49193  | 0.032331 |
| -0.15897 | 0.00056  | 0.003995 | 0.93139  | 0.110896 | 0.01651  | 0.400862 | 1.87E-19 | 0.101978 |
| 0.241832 | 1.22E-07 | 0.185314 | 5.60E-05 | -0.06366 | 0.16965  | -0.11961 | 0.00968  | 0.051316 |
| -0.12745 | 0.00581  | -0.10444 | 0.024    | 0.010179 | 0.82635  | -0.01806 | 0.69715  | 0.096405 |
| -0.15427 | 0.00082  | -0.23393 | 3.17E-07 | 0.005667 | 0.9028   | -0.02063 | 0.65661  | -0.12821 |
| -0.07282 | 0.11607  | -0.29702 | 5.76E-11 | -0.02244 | 0.62865  | -0.0166  | 0.72046  | -0.01248 |
| -0.0455  | 0.3265   | -0.11404 | 0.01367  | 0.087031 | 0.06021  | 0.049758 | 0.28324  | 0.187109 |
| 0.031201 | 0.50119  | 0.059621 | 0.1984   | -0.03118 | 0.50145  | 0.052612 | 0.2565   | -0.19466 |
| 0.205559 | 7.53E-06 | 0.082843 | 0.07369  | 0.005121 | 0.91211  | -0.03568 | 0.44171  | 0.200363 |
| 0.068521 | 0.13927  | -0.05803 | 0.21064  | 0.042025 | 0.36486  | -0.01697 | 0.71458  | -0.07569 |
| -0.15073 | 0.00109  | -0.48358 | 9.63E-29 | -0.05896 | 0.20346  | -0.07974 | 0.08521  | -0.21831 |
| -0.01298 | 0.77965  | -0.01156 | 0.80329  | 0.035111 | 0.44907  | -0.01945 | 0.67507  | -0.0047  |
| -0.0282  | 0.54323  | -0.04438 | 0.33855  | -0.00718 | 0.87698  | -0.03378 | 0.46644  | -0.0134  |
| 0.004242 | 0.92715  | 0.089886 | 0.05224  | 0.175936 | 0.00013  | 0.362462 | 6.04E-16 | 0.150678 |
| 0.034816 | 0.4529   | -0.08691 | 0.06058  | 0.024677 | 0.59478  | 0.076183 | 0.10011  | 0.192194 |
| -0.07732 | 0.09512  | -0.35273 | 3.96E-15 | 0.001174 | 0.97981  | -0.03483 | 0.45274  | -0.0831  |
| -0.17375 | 0.00016  | 0.127799 | 0.00568  | -0.01105 | 0.8118   | 0.140647 | 0.00232  | -0.04507 |
| -0.11941 | 0.0098   | -0.01217 | 0.79305  | -0.03443 | 0.45787  | 0.040755 | 0.37955  | -0.074   |
| 0.103237 | 0.02568  | 0.202376 | 1.05E-05 | 0.032646 | 0.48157  | 0.080668 | 0.08161  | 0.131023 |
| 0.034338 | 0.45913  | -0.0996  | 0.0314   | -0.02794 | 0.54704  | -0.06037 | 0.19281  | -0.01184 |
| -0.1069  | 0.02086  | -0.17164 | 0.00019  | 0.024117 | 0.60317  | 0.001607 | 0.97238  | -0.13815 |
| 0.044991 | 0.33197  | -0.06006 | 0.19514  | -0.00921 | 0.84261  | 0.007153 | 0.87748  | -0.20324 |
| 0.084764 | 0.06723  | 0.046633 | 0.31461  | 0.011773 | 0.7997   | -0.00419 | 0.928    | -0.0598  |
| -0.27292 | 2.02E-09 | -0.32153 | 1.08E-12 | 0.040449 | 0.38315  | 0.081103 | 0.07997  | -0.00628 |
| 0.122372 | 0.00811  | 0.219392 | 1.69E-06 | 0.02838  | 0.54068  | 0.15605  | 0.00071  | 0.073776 |
| -0.13337 | 0.00388  | -0.1189  | 0.01012  | 0.049745 | 0.28337  | 0.126861 | 0.00605  | 0.137043 |
| 0.129266 | 0.00515  | 0.051638 | 0.26543  | 0.025767 | 0.5786   | -0.04003 | 0.3881   | -0.09797 |
| -0.21918 | 1.73E-06 | -0.20575 | 7.38E-06 | 0.200396 | 1.28E-05 | 0.239383 | 1.64E-07 | 0.406874 |
| -0.28883 | 2.00E-10 | -0.24602 | 7.23E-08 | -0.00182 | 0.9688   | 0.188067 | 4.32E-05 | -0.12555 |
| -0.11103 | 0.01638  | -0.30145 | 2.88E-11 | -0.00242 | 0.95842  | 0.006138 | 0.89475  | 0.00869  |
| -0.05286 | 0.25429  | 0.142346 | 0.00205  | -0.01627 | 0.72583  | 0.133838 | 0.00376  | -0.08935 |
| -0.0248  | 0.5929   | 0.01295  | 0.78016  | 0.022838 | 0.62252  | 0.12476  | 0.00695  | -0.04363 |
| 0.135367 | 0.00338  | 0.275527 | 1.40E-09 | 0.098486 | 0.03336  | 0.163567 | 0.00039  | 0.150845 |
| 0.175167 | 0.00014  | 0.062359 | 0.17853  | -0.01236 | 0.79001  | -0.04019 | 0.38617  | -0.05408 |

|          |          |          |          |          |          |          |          |          |
|----------|----------|----------|----------|----------|----------|----------|----------|----------|
| 0.036986 | 0.42522  | 0.191689 | 3.05E-05 | 0.159001 | 0.00056  | 0.166416 | 0.0003   | 0.315758 |
| -0.04503 | 0.33152  | -0.07247 | 0.11785  | -0.05019 | 0.27905  | -0.02159 | 0.6416   | -0.00916 |
| 0.220638 | 1.47E-06 | 0.293581 | 9.77E-11 | 0.018117 | 0.69617  | 0.050573 | 0.27542  | -0.00073 |
| -0.06321 | 0.17265  | 0.067858 | 0.14314  | 0.051018 | 0.27122  | 0.071202 | 0.12441  | 0.147423 |
| -0.0813  | 0.07924  | -0.1381  | 0.00278  | 0.016921 | 0.71532  | 0.038049 | 0.41202  | 0.173907 |
| -0.2226  | 1.18E-06 | -0.12437 | 0.00712  | -0.00271 | 0.95346  | 0.094695 | 0.04081  | -0.13087 |
| -0.07567 | 0.10242  | -0.26349 | 7.42E-09 | 0.017132 | 0.71194  | -0.04688 | 0.31204  | -0.0376  |
| 0.163814 | 0.00038  | 0.282089 | 5.43E-10 | -0.01911 | 0.68037  | 0.030707 | 0.508    | -0.1248  |
| -0.08098 | 0.08045  | -0.44333 | 6.62E-24 | -0.00972 | 0.83403  | -0.03683 | 0.42713  | -0.11395 |
| 0.057063 | 0.21839  | 0.250057 | 4.34E-08 | 0.003574 | 0.93861  | 0.177462 | 0.00012  | -0.07646 |
| -0.05901 | 0.20306  | -0.21546 | 2.61E-06 | 0.016575 | 0.7209   | -0.02981 | 0.52042  | -0.0494  |
| -0.11258 | 0.01493  | -0.14482 | 0.0017   | 0.082258 | 0.07576  | 0.031405 | 0.4984   | 0.276758 |
| 0.0118   | 0.79925  | -0.01561 | 0.73647  | -0.02264 | 0.62553  | 0.041491 | 0.371    | -0.18513 |
| -0.0058  | 0.90046  | -0.04432 | 0.33924  | 0.051817 | 0.26377  | 0.085891 | 0.06366  | 0.136909 |
| 0.259415 | 1.28E-08 | 0.164684 | 0.00035  | 0.055366 | 0.23241  | -0.06129 | 0.18611  | 0.034975 |
| -0.11594 | 0.01217  | -0.0226  | 0.62616  | 0.072836 | 0.11598  | 0.148385 | 0.0013   | 0.009432 |
| 0.181411 | 8.06E-05 | -0.29724 | 5.56E-11 | -0.02892 | 0.53306  | -0.04016 | 0.38657  | -0.10157 |
| -0.13177 | 0.00434  | -0.18299 | 6.97E-05 | -0.04843 | 0.29626  | -0.08255 | 0.07472  | -0.1765  |
| -0.07369 | 0.11176  | -0.06251 | 0.17751  | 0.044697 | 0.33515  | 0.055533 | 0.231    | 0.026786 |
| 0.171899 | 0.00019  | -0.00588 | 0.89915  | 0.048962 | 0.29102  | -0.06894 | 0.13684  | -0.03265 |
| -0.19551 | 2.09E-05 | -0.4293  | 2.30E-22 | -0.00187 | 0.96777  | -0.10508 | 0.02314  | -0.10155 |
| 0.113537 | 0.01409  | 0.40806  | 3.64E-20 | 0.061993 | 0.1811   | 0.043801 | 0.34494  | 0.147585 |
| 0.060381 | 0.19274  | 0.230331 | 4.85E-07 | 0.046411 | 0.31692  | 0.08132  | 0.07917  | 0.122936 |
| 0.08072  | 0.08141  | 0.242283 | 1.15E-07 | 0.025719 | 0.57931  | 0.20101  | 1.20E-05 | 0.237221 |
| -0.03645 | 0.4319   | -0.2155  | 2.60E-06 | -0.01129 | 0.80768  | -0.02041 | 0.66007  | 0.044205 |
| 0.02897  | 0.5323   | -0.03925 | 0.39744  | -0.00363 | 0.93758  | -0.01069 | 0.81773  | -0.01456 |
| -0.04695 | 0.31136  | -0.38818 | 3.04E-18 | -0.02981 | 0.52044  | -0.07786 | 0.09284  | -0.06879 |
| -0.0267  | 0.5649   | 0.033166 | 0.47461  | 0.246241 | 7.04E-08 | 0.379102 | 2.08E-17 | 0.186083 |
| 0.159253 | 0.00055  | 0.336601 | 7.80E-14 | 0.075769 | 0.10198  | 0.144865 | 0.0017   | 0.181451 |
| -0.05673 | 0.22111  | -0.27289 | 2.03E-09 | 0.009498 | 0.83781  | -0.08566 | 0.06438  | -0.11843 |
| 0.072699 | 0.11667  | 0.108231 | 0.01931  | -0.0141  | 0.76127  | -0.0167  | 0.71894  | -0.04533 |
| -0.23951 | 1.62E-07 | -0.48763 | 2.89E-29 | -0.04916 | 0.28903  | -0.09118 | 0.04892  | -0.23852 |
| -0.06911 | 0.13592  | -0.20111 | 1.19E-05 | -0.05318 | 0.25136  | -0.17566 | 0.00014  | -0.20446 |
| -0.10403 | 0.02457  | -0.19226 | 2.88E-05 | 0.016954 | 0.71479  | 0.14258  | 0.00201  | 0.036803 |
| 0.172664 | 0.00018  | 0.158342 | 0.00059  | 0.030724 | 0.50776  | 0.021037 | 0.65023  | 0.03743  |
| -0.02972 | 0.52174  | -0.13647 | 0.00313  | 0.026936 | 0.56149  | -0.02471 | 0.59427  | -0.02416 |
| 0.095465 | 0.03919  | 0.045504 | 0.32648  | 0.001497 | 0.97426  | -0.05353 | 0.24828  | -0.06429 |
| -0.06151 | 0.18453  | 0.088418 | 0.05622  | 0.082568 | 0.07465  | 0.030436 | 0.51174  | 0.208664 |
| -0.23059 | 4.71E-07 | -0.31689 | 2.36E-12 | 0.023608 | 0.61084  | 0.010803 | 0.81589  | 0.123882 |
| 0.10601  | 0.02195  | 0.039277 | 0.39709  | 0.026757 | 0.56409  | -0.03681 | 0.42738  | 0.024515 |
| 0.01146  | 0.80491  | 0.057895 | 0.21174  | -0.01236 | 0.78987  | -0.02426 | 0.60098  | 0.053523 |
| -0.00993 | 0.83048  | -0.06734 | 0.14623  | -0.00271 | 0.95346  | 0.087559 | 0.05866  | -0.10495 |
| -0.09754 | 0.0351   | -0.28614 | 2.99E-10 | 0.024984 | 0.5902   | 0.122302 | 0.00815  | -0.03106 |
| 0.025892 | 0.57676  | 0.003587 | 0.93838  | 0.000164 | 0.99718  | 0.010076 | 0.82808  | 0.035602 |
| -0.08861 | 0.05569  | -0.06492 | 0.16129  | 0.020127 | 0.66442  | 0.057866 | 0.21196  | 0.080847 |

|          |          |          |          |          |          |          |          |          |
|----------|----------|----------|----------|----------|----------|----------|----------|----------|
| -0.17951 | 9.59E-05 | -0.37395 | 6.02E-17 | -0.02985 | 0.51984  | -0.06754 | 0.14505  | -0.14664 |
| -0.16763 | 0.00027  | -0.25488 | 2.33E-08 | 0.05638  | 0.22395  | 0.170555 | 0.00021  | 0.158491 |
| -0.15008 | 0.00114  | -0.36917 | 1.59E-16 | 0.066206 | 0.15316  | 0.109697 | 0.01772  | 0.146822 |
| -0.0711  | 0.12497  | -0.20205 | 1.08E-05 | 0.073281 | 0.11376  | 0.081596 | 0.07815  | 0.258078 |
| 0.029346 | 0.52699  | 0.144227 | 0.00178  | -0.00134 | 0.9769   | 0.016309 | 0.7252   | -0.04922 |
| 0.025193 | 0.58709  | 0.156484 | 0.00069  | 0.153472 | 0.00088  | 0.453258 | 4.87E-25 | 0.166303 |
| 0.225443 | 8.55E-07 | 0.189823 | 3.65E-05 | -0.03643 | 0.43226  | -0.0576  | 0.2141   | -0.05718 |
| 0.073649 | 0.11196  | -0.15052 | 0.0011   | 0.03247  | 0.48393  | -0.01977 | 0.67008  | -0.0768  |
| 0.202445 | 1.04E-05 | 0.049371 | 0.28701  | -0.04637 | 0.31739  | -0.14374 | 0.00185  | -0.07011 |
| 0.185879 | 5.31E-05 | 0.344837 | 1.74E-14 | -0.01941 | 0.67569  | -0.00274 | 0.95289  | -0.06339 |
| 0.252197 | 3.30E-08 | 0.14268  | 0.002    | 0.00376  | 0.93542  | -0.10841 | 0.01911  | -0.01029 |
| 0.13034  | 0.00478  | 0.248111 | 5.56E-08 | -0.02955 | 0.52406  | -0.04036 | 0.38418  | -0.02836 |
| 0.098358 | 0.03359  | -0.27226 | 2.21E-09 | -0.09276 | 0.04511  | -0.2111  | 4.19E-06 | -0.15159 |
| 0.060916 | 0.18881  | -0.03321 | 0.47402  | -0.02581 | 0.57795  | -0.02378 | 0.60829  | -0.03217 |
| -0.09339 | 0.04368  | -0.32657 | 4.57E-13 | 0.045239 | 0.32931  | 0.048062 | 0.3      | 0.018758 |
| -0.05812 | 0.20995  | -0.14808 | 0.00133  | -0.03895 | 0.40102  | -0.00483 | 0.91701  | -0.23467 |
| -0.01271 | 0.7841   | -0.1121  | 0.01536  | 0.025076 | 0.58883  | 0.005919 | 0.8985   | 0.006893 |
| -0.06276 | 0.17577  | -0.21382 | 3.13E-06 | -0.01943 | 0.67543  | -0.10919 | 0.01825  | -0.14866 |
| -0.16155 | 0.00046  | -0.17854 | 0.0001   | -0.01784 | 0.70056  | -0.03998 | 0.38873  | -0.06533 |
| 0.071332 | 0.12372  | -0.14424 | 0.00178  | 0.001125 | 0.98065  | -0.04588 | 0.32253  | 0.017059 |
| -0.08194 | 0.0769   | -0.11078 | 0.01662  | -0.01894 | 0.68311  | 0.012297 | 0.79098  | 0.023369 |
| -0.13237 | 0.00416  | -0.11069 | 0.01671  | 0.062358 | 0.17854  | 0.146144 | 0.00154  | 0.078002 |
| 0.057725 | 0.21308  | 0.000938 | 0.98388  | 0.002451 | 0.95787  | -0.01505 | 0.74572  | 0.022412 |
| -0.14749 | 0.00139  | -0.06041 | 0.19249  | -0.01414 | 0.76048  | 0.015624 | 0.7363   | -0.03803 |
| -0.11527 | 0.01268  | -0.1532  | 0.0009   | -0.01469 | 0.75157  | 0.020515 | 0.65835  | -0.06289 |
| 0.182559 | 7.25E-05 | 0.027337 | 0.55567  | 0.010349 | 0.82349  | 0.019304 | 0.67735  | 0.113316 |
| -0.10394 | 0.02469  | -0.02246 | 0.62829  | -0.04706 | 0.31014  | 0.110797 | 0.01661  | -0.12796 |
| -0.10293 | 0.02613  | -0.17386 | 0.00016  | -0.03207 | 0.48928  | -0.01956 | 0.67324  | -0.07241 |
| 0.101115 | 0.0289   | 0.077332 | 0.09508  | 0.051314 | 0.26844  | 0.006234 | 0.89311  | 0.194163 |
| 0.185052 | 5.74E-05 | -0.21537 | 2.64E-06 | -0.02304 | 0.61946  | -0.08172 | 0.0777   | -0.09084 |
| -0.0505  | 0.27609  | -0.06904 | 0.1363   | 0.182442 | 7.33E-05 | 0.093579 | 0.04325  | 0.334975 |
| 0.052034 | 0.26177  | 0.061884 | 0.18187  | -0.00916 | 0.84344  | -0.09098 | 0.04942  | 0.015306 |
| -0.11867 | 0.01027  | -0.16693 | 0.00029  | 0.040565 | 0.38178  | 0.050677 | 0.27443  | -0.04205 |
| -0.05489 | 0.23642  | -0.12415 | 0.00723  | 0.054443 | 0.2403   | 0.012563 | 0.78657  | 0.14302  |
| -0.03293 | 0.47771  | 0.147503 | 0.00139  | 0.02214  | 0.63319  | -0.02932 | 0.5273   | -0.03098 |
| -0.02774 | 0.54987  | 0.045611 | 0.32534  | 0.019375 | 0.67623  | 0.097355 | 0.03545  | -0.0659  |
| -0.1314  | 0.00445  | -0.26946 | 3.27E-09 | 0.164007 | 0.00037  | 0.265034 | 6.01E-09 | 0.170728 |
| 0.249694 | 4.54E-08 | 0.218562 | 1.86E-06 | 0.074388 | 0.10839  | 0.195011 | 2.20E-05 | -0.00191 |
| -0.03631 | 0.43373  | 0.030775 | 0.50706  | -0.00111 | 0.98099  | 0.01319  | 0.77619  | -0.05183 |
| 0.02384  | 0.60733  | -0.05309 | 0.25222  | -0.04452 | 0.33711  | -0.05337 | 0.24967  | -0.13407 |
| -0.06587 | 0.15523  | -0.2925  | 1.15E-10 | 0.021311 | 0.64599  | -0.00092 | 0.98418  | -0.02533 |
| 0.046792 | 0.31296  | -0.09242 | 0.04593  | -0.02008 | 0.66511  | -0.1345  | 0.00359  | -0.12131 |
| 0.066439 | 0.15172  | -0.08675 | 0.06105  | -0.04199 | 0.36527  | -0.08382 | 0.07035  | -0.05816 |
| 0.033329 | 0.47244  | -0.15137 | 0.00103  | 0.006456 | 0.88934  | -0.01783 | 0.7007   | 0.013363 |
| 0.053367 | 0.24973  | 0.216946 | 2.22E-06 | 0.047755 | 0.30309  | 0.128745 | 0.00533  | 0.023003 |

|          |          |          |          |          |         |          |          |          |
|----------|----------|----------|----------|----------|---------|----------|----------|----------|
| -0.05607 | 0.22652  | -0.36023 | 9.34E-16 | 0.020695 | 0.65555 | -0.0092  | 0.84275  | 0.049864 |
| -0.02593 | 0.57618  | -0.04909 | 0.28978  | -0.00896 | 0.84691 | 0.020263 | 0.66229  | -0.03906 |
| -0.01797 | 0.69846  | 0.064567 | 0.16362  | -0.00298 | 0.94883 | 0.017337 | 0.70865  | -0.02243 |
| -0.16769 | 0.00027  | -0.24618 | 7.09E-08 | -0.0714  | 0.12337 | -0.16152 | 0.00046  | -0.15582 |
| -0.13718 | 0.00297  | -0.29485 | 8.04E-11 | 0.041235 | 0.37395 | 0.007078 | 0.87875  | 0.027076 |
| 0.062742 | 0.17587  | -0.08569 | 0.06429  | 0.005805 | 0.90044 | 0.017431 | 0.70713  | -0.20123 |
| 0.184737 | 5.92E-05 | 0.235292 | 2.70E-07 | -0.00287 | 0.95061 | -0.06284 | 0.17518  | 0.057329 |
| 0.049205 | 0.28864  | -0.04135 | 0.37259  | -0.05795 | 0.21128 | -0.06025 | 0.19371  | 0.012425 |
| 0.134369 | 0.00362  | 0.464583 | 2.22E-26 | -0.04678 | 0.31309 | 0.017172 | 0.7113   | 0.025625 |
| 0.231596 | 4.18E-07 | 0.220516 | 1.49E-06 | -0.0124  | 0.78925 | 0.002057 | 0.96463  | -0.13763 |
| 0.231969 | 4.00E-07 | 0.097553 | 0.03507  | -0.03598 | 0.43786 | 0.067432 | 0.14568  | -0.14677 |
| 0.053987 | 0.24426  | -0.00104 | 0.98206  | 0.058393 | 0.20782 | 0.066388 | 0.15203  | 0.155944 |
| 0.305554 | 1.50E-11 | 0.230012 | 5.04E-07 | -0.00362 | 0.93782 | -0.1332  | 0.00393  | 0.003665 |
| 0.117131 | 0.0113   | 0.059629 | 0.19834  | 0.065635 | 0.15674 | 0.021261 | 0.64676  | 0.280729 |
| -0.07965 | 0.08554  | -0.03458 | 0.45603  | 0.174801 | 0.00015 | 0.250195 | 4.26E-08 | 0.30039  |
| 0.170256 | 0.00022  | -0.22748 | 6.76E-07 | 0.023208 | 0.6169  | -0.01317 | 0.7765   | -0.04406 |
| 0.257098 | 1.74E-08 | -0.04997 | 0.28117  | 0.047839 | 0.30224 | 0.075803 | 0.10182  | 0.181839 |
| 0.04899  | 0.29075  | 0.045902 | 0.32226  | 0.01873  | 0.68643 | -0.00814 | 0.86081  | 0.02261  |
| 0.172752 | 0.00018  | 0.313633 | 4.06E-12 | -0.00457 | 0.92145 | -0.04074 | 0.37971  | 0.207499 |
| -0.23627 | 2.40E-07 | -0.31115 | 6.09E-12 | 0.11551  | 0.01249 | 0.237554 | 2.05E-07 | 0.189245 |
| -0.1469  | 0.00146  | -0.29299 | 1.07E-10 | 0.051308 | 0.2685  | 0.124876 | 0.00689  | 0.345252 |
| 0.169445 | 0.00023  | 0.055802 | 0.22874  | -0.01642 | 0.72343 | -0.05854 | 0.20671  | 0.091072 |
| 0.203902 | 8.94E-06 | 0.301771 | 2.74E-11 | 0.015843 | 0.73274 | 0.01785  | 0.70043  | 0.132535 |
| -0.1365  | 0.00312  | -0.35735 | 1.63E-15 | -0.00449 | 0.92294 | 0.022124 | 0.63345  | -0.0069  |
| 0.221613 | 1.32E-06 | 0.092842 | 0.04493  | 0.070634 | 0.12745 | 0.15125  | 0.00104  | 0.177413 |
| 0.116596 | 0.01169  | 0.418661 | 3.04E-21 | 0.014681 | 0.75168 | -0.03213 | 0.48856  | -0.04506 |
| 0.169241 | 0.00024  | 0.22627  | 7.78E-07 | 0.011636 | 0.80198 | 0.012944 | 0.78025  | 0.179038 |
| -0.06822 | 0.14101  | -0.25189 | 3.43E-08 | -0.01589 | 0.73192 | 0.032462 | 0.48405  | -0.1311  |
| -0.0207  | 0.65551  | -0.18617 | 5.17E-05 | -0.03844 | 0.40729 | -0.037   | 0.42505  | -0.09964 |
| 0.00426  | 0.92685  | -0.04885 | 0.29208  | 0.080743 | 0.08132 | 0.031138 | 0.50206  | 0.012744 |
| 0.106908 | 0.02085  | 0.078657 | 0.08953  | -0.05432 | 0.24141 | -0.0614  | 0.18531  | 0.052414 |
| 0.024705 | 0.59436  | 0.304847 | 1.68E-11 | -0.0376  | 0.41756 | -0.06745 | 0.14555  | -0.15229 |
| 0.211617 | 3.97E-06 | -0.08275 | 0.07403  | -0.06494 | 0.16122 | -0.06679 | 0.14953  | -0.1459  |
| 0.036961 | 0.42553  | -0.04733 | 0.30742  | 0.00752  | 0.87125 | 0.012041 | 0.79523  | -0.0927  |
| -0.149   | 0.00124  | -0.02205 | 0.63464  | 0.062045 | 0.18074 | 0.190809 | 3.32E-05 | 0.153079 |
| 0.112013 | 0.01545  | 0.210351 | 4.54E-06 | 0.030069 | 0.51686 | 0.053182 | 0.25138  | 0.126957 |
| 0.120122 | 0.00937  | 0.260825 | 1.06E-08 | 0.055402 | 0.23211 | 0.082969 | 0.07325  | 0.134672 |
| -0.08835 | 0.0564   | 0.096307 | 0.03748  | 0.015392 | 0.74007 | 0.092949 | 0.04469  | -0.01232 |
| 0.310338 | 6.96E-12 | 0.335908 | 8.83E-14 | 0.018644 | 0.68779 | -0.02094 | 0.65171  | 0.113208 |
| 0.19968  | 1.38E-05 | 0.153203 | 0.0009   | -0.04963 | 0.28452 | -0.17832 | 0.00011  | -0.09348 |
| -0.06218 | 0.1798   | -0.3487  | 8.47E-15 | -0.00835 | 0.85714 | -0.18148 | 8.01E-05 | -0.15749 |
| -0.23007 | 5.01E-07 | -0.18352 | 6.63E-05 | -0.0246  | 0.59591 | 0.054708 | 0.23801  | 0.06952  |
| -0.01495 | 0.74731  | 0.00762  | 0.86954  | -0.02642 | 0.569   | -0.00582 | 0.90026  | -0.07575 |
| 0.076507 | 0.09867  | 0.038251 | 0.40955  | -0.02769 | 0.55063 | -0.04084 | 0.37856  | 0.013089 |
| 0.045381 | 0.32779  | -0.09054 | 0.05053  | -0.03262 | 0.48187 | -0.13936 | 0.00254  | -0.01988 |

|          |          |          |          |          |         |          |          |          |
|----------|----------|----------|----------|----------|---------|----------|----------|----------|
| -0.10788 | 0.01971  | 0.117226 | 0.01124  | -0.01382 | 0.76576 | -0.04263 | 0.35794  | 0.154587 |
| -0.07222 | 0.11908  | -0.14819 | 0.00132  | 0.006455 | 0.88936 | -0.03811 | 0.41122  | -0.08766 |
| 0.33791  | 6.16E-14 | 0.246269 | 7.01E-08 | 0.034351 | 0.45896 | -0.04775 | 0.30311  | 0.126507 |
| -0.07408 | 0.10986  | -0.13664 | 0.00309  | 0.008427 | 0.85588 | 0.002971 | 0.94894  | -0.09829 |
| -0.11191 | 0.01554  | -0.17233 | 0.00018  | 0.177324 | 0.00012 | 0.189213 | 3.87E-05 | 0.139032 |
| -0.01874 | 0.68624  | -0.18302 | 6.95E-05 | 0.021246 | 0.64699 | 0.055351 | 0.23253  | 0.032329 |
| 0.212524 | 3.60E-06 | 0.103049 | 0.02596  | -0.00514 | 0.91187 | -0.09063 | 0.05031  | 0.007318 |
| -0.03366 | 0.46811  | -0.03653 | 0.431    | 0.008586 | 0.8532  | 0.006431 | 0.88977  | -0.00891 |
| -0.10331 | 0.02558  | -0.05652 | 0.22279  | -0.01011 | 0.82749 | -0.04053 | 0.38215  | -0.07712 |
| -0.01516 | 0.74388  | -0.01717 | 0.71127  | 0.01178  | 0.79958 | 0.008513 | 0.85442  | 0.007694 |
| -0.03634 | 0.43334  | -0.11089 | 0.01652  | 0.014936 | 0.74751 | 0.005453 | 0.90644  | -0.01292 |
| 0.007222 | 0.87631  | -0.07957 | 0.08586  | 0.003916 | 0.93273 | -0.02043 | 0.65967  | -0.03872 |
| -0.07139 | 0.1234   | -0.14477 | 0.00171  | 0.026796 | 0.56351 | -0.00694 | 0.88107  | -0.05963 |
| 0.128917 | 0.00527  | -0.0956  | 0.0389   | -0.03155 | 0.49641 | -0.09118 | 0.04892  | -0.0965  |
| 0.161627 | 0.00045  | 0.030769 | 0.50713  | -0.00537 | 0.90783 | -0.05349 | 0.24861  | -0.08183 |
| 0.200628 | 1.25E-05 | -0.09276 | 0.04512  | -0.04771 | 0.30352 | -0.09961 | 0.03139  | -0.15816 |
| -0.00864 | 0.85222  | 0.053665 | 0.2471   | 0.071507 | 0.1228  | 0.065573 | 0.15714  | 0.39511  |
| -0.07552 | 0.10311  | -0.23155 | 4.21E-07 | 0.012679 | 0.78464 | -0.0303  | 0.5137   | -0.06989 |
| -0.08397 | 0.06985  | -0.21278 | 3.50E-06 | 0.035284 | 0.44684 | 0.097765 | 0.03468  | 0.004088 |
| 0.24146  | 1.28E-07 | 0.435569 | 4.82E-23 | 0.036504 | 0.43127 | 0.01293  | 0.78048  | 0.087131 |
| 0.22943  | 5.39E-07 | 0.377875 | 2.68E-17 | 0.014737 | 0.75077 | 0.057523 | 0.21469  | 0.09349  |
| -0.16099 | 0.00048  | -0.29239 | 1.17E-10 | 0.028655 | 0.53677 | -0.01121 | 0.80911  | 0.036029 |
| -0.01991 | 0.66779  | -0.06867 | 0.13838  | 0.034075 | 0.46258 | -0.03197 | 0.49073  | 0.01488  |
| -0.04634 | 0.31762  | -0.15951 | 0.00054  | -0.04147 | 0.3712  | -0.08547 | 0.06496  | -0.18747 |
| 0.021172 | 0.64813  | 0.01039  | 0.82281  | -0.00302 | 0.94809 | -0.06093 | 0.18872  | -0.03624 |
| -0.09033 | 0.05107  | -0.10018 | 0.03043  | 0.05769  | 0.21335 | 0.090374 | 0.05097  | 0.221989 |
| 0.090591 | 0.05041  | -0.21499 | 2.75E-06 | 0.055821 | 0.22858 | -0.05686 | 0.22003  | 0.099225 |
| 0.142308 | 0.00205  | 0.182907 | 7.02E-05 | 0.103219 | 0.02571 | 0.309853 | 7.53E-12 | 0.309592 |
| 0.034099 | 0.46227  | -0.04851 | 0.2955   | 0.007538 | 0.87095 | 0.065616 | 0.15686  | 0.011454 |
| 0.125099 | 0.00679  | -0.11038 | 0.01702  | 0.019345 | 0.67671 | -0.0448  | 0.334    | 0.036449 |
| -0.08094 | 0.08057  | -0.18556 | 5.47E-05 | 0.057455 | 0.21523 | 0.222175 | 1.24E-06 | 0.06675  |
| -0.10839 | 0.01913  | -0.28602 | 3.05E-10 | 0.066229 | 0.15302 | 0.249014 | 4.95E-08 | 0.021362 |
| 0.008875 | 0.84831  | 0.046653 | 0.31441  | 0.022019 | 0.63507 | 0.012137 | 0.79364  | 0.013404 |
| -0.02439 | 0.59906  | -0.36443 | 4.10E-16 | -0.01262 | 0.78561 | 0.021426 | 0.6442   | -0.20621 |
| -0.12684 | 0.00605  | -0.08494 | 0.06665  | 0.061339 | 0.18576 | 0.021223 | 0.64735  | 0.027115 |
| -0.29452 | 8.46E-11 | -0.1361  | 0.00321  | -0.0053  | 0.90914 | 0.110376 | 0.01703  | -0.17179 |
| 0.087294 | 0.05943  | -0.27692 | 1.14E-09 | -0.02738 | 0.55498 | -0.11315 | 0.01443  | -0.15016 |
| 0.058655 | 0.20579  | 0.241704 | 1.24E-07 | -0.02005 | 0.66569 | 0.02791  | 0.54741  | 0.069913 |
| 0.00896  | 0.84688  | 0.218313 | 1.91E-06 | -0.01722 | 0.71049 | -0.03263 | 0.48175  | 0.081586 |
| 0.033426 | 0.47115  | -0.08413 | 0.06932  | 0.013046 | 0.77858 | -0.01723 | 0.71034  | 0.008524 |
| 0.165248 | 0.00034  | 0.154881 | 0.00078  | -0.03159 | 0.49592 | -0.04322 | 0.35141  | 0.029803 |
| -0.05267 | 0.25597  | -0.03458 | 0.45594  | -0.06719 | 0.1471  | -0.06262 | 0.17673  | -0.09352 |
| -0.08791 | 0.05766  | 0.146866 | 0.00146  | 0.051407 | 0.26757 | 0.169255 | 0.00024  | 0.057835 |
| 0.097575 | 0.03503  | 0.094252 | 0.04176  | 0.008835 | 0.84898 | -0.04522 | 0.32956  | -0.03823 |
| -0.11043 | 0.01697  | -0.46328 | 3.19E-26 | 0.014477 | 0.75503 | -0.07094 | 0.12581  | -0.03743 |

|           |          |          |          |          |         |          |          |          |
|-----------|----------|----------|----------|----------|---------|----------|----------|----------|
| -0.01618  | 0.72728  | 0.071373 | 0.12351  | -0.00743 | 0.87272 | -0.02613 | 0.57326  | 0.025934 |
| -0.03323  | 0.47382  | -0.04562 | 0.32524  | -0.0087  | 0.85132 | 0.013309 | 0.77422  | 0.031129 |
| -0.03584  | 0.43973  | -0.03524 | 0.44741  | -0.00282 | 0.95162 | -0.01312 | 0.77729  | -0.00999 |
| 0.075446  | 0.10345  | -0.04417 | 0.34089  | 0.004351 | 0.92528 | -0.04082 | 0.37879  | -0.04211 |
| 0.117682  | 0.01092  | 0.160335 | 0.0005   | 0.058732 | 0.20519 | 0.056338 | 0.2243   | 0.208491 |
| 0.020249  | 0.66251  | -0.09174 | 0.04755  | 0.008254 | 0.8588  | -0.03861 | 0.40515  | 0.027449 |
| -2.47E-05 | 0.99958  | -0.3024  | 2.48E-11 | -0.0207  | 0.65547 | -0.06307 | 0.17365  | 0.01315  |
| 0.110497  | 0.0169   | -0.17374 | 0.00016  | -0.01467 | 0.75182 | -0.07422 | 0.10921  | 0.030663 |
| 0.040981  | 0.37691  | -0.08052 | 0.08217  | -0.01725 | 0.71003 | -0.0507  | 0.27425  | -0.01397 |
| -0.04361  | 0.34704  | -0.08467 | 0.06754  | -0.02546 | 0.58313 | -0.06895 | 0.13681  | -0.04788 |
| -0.05073  | 0.27392  | -0.18617 | 5.17E-05 | 0.006423 | 0.88989 | -0.00594 | 0.89806  | 0.092652 |
| 0.037295  | 0.42136  | -0.13612 | 0.00321  | -0.04295 | 0.35443 | -0.17495 | 0.00014  | -0.04917 |
| 0.177417  | 0.00012  | 0.146761 | 0.00147  | 0.045787 | 0.32348 | 0.027154 | 0.55832  | 0.175777 |
| -0.27441  | 1.64E-09 | -0.41976 | 2.34E-21 | 0.007458 | 0.87231 | 0.070206 | 0.12978  | -0.07882 |
| -0.27505  | 1.49E-09 | -0.23427 | 3.05E-07 | -0.0484  | 0.29659 | 0.042738 | 0.35678  | -0.20615 |
| -0.23773  | 2.01E-07 | -0.21197 | 3.82E-06 | -0.0297  | 0.52198 | 0.026855 | 0.56267  | -0.07035 |
| 0.138911  | 0.00263  | 0.104684 | 0.02367  | -0.00886 | 0.8485  | 0.011786 | 0.79947  | -0.07632 |
| -0.02731  | 0.55608  | 0.008661 | 0.85192  | 0.004661 | 0.91998 | 0.02472  | 0.59414  | -0.04919 |
| 0.071327  | 0.12375  | -0.05278 | 0.255    | -0.00905 | 0.84537 | -0.02659 | 0.56656  | -0.02843 |
| -0.01627  | 0.72582  | -0.05338 | 0.24963  | -0.01042 | 0.8223  | 0.000925 | 0.98409  | -0.02864 |
| 0.029345  | 0.52701  | 0.287063 | 2.61E-10 | 0.101926 | 0.02763 | 0.26972  | 3.16E-09 | 0.160617 |
| -0.27479  | 1.55E-09 | -0.10879 | 0.01869  | 0.014013 | 0.76263 | 0.080524 | 0.08216  | -0.02233 |
| -0.08157  | 0.07825  | -0.36863 | 1.77E-16 | 0.019148 | 0.67981 | 0.132214 | 0.00421  | -0.19677 |
| 0.046821  | 0.31266  | -0.09177 | 0.04748  | -0.00439 | 0.92466 | -0.03568 | 0.4418   | 0.002047 |
| -0.01603  | 0.72966  | 0.044713 | 0.33497  | 0.011803 | 0.79919 | 0.073648 | 0.11196  | -0.05861 |
| 0.073468  | 0.11284  | 0.000993 | 0.98293  | -0.02047 | 0.65905 | -0.05689 | 0.21975  | -0.1063  |
| 0.02857   | 0.53798  | 0.248055 | 5.60E-08 | 0.00913  | 0.84401 | 0.089097 | 0.05435  | 0.14556  |
| -0.0775   | 0.09436  | 0.31092  | 6.33E-12 | 0.151606 | 0.00101 | 0.469558 | 5.52E-27 | 0.278031 |
| 0.164092  | 0.00037  | 0.402838 | 1.20E-19 | 0.097858 | 0.0345  | 0.148439 | 0.0013   | 0.276232 |
| 0.128318  | 0.00549  | 0.169262 | 0.00024  | -0.04668 | 0.31415 | -0.03709 | 0.42386  | -0.07231 |
| 0.14593   | 0.00157  | 0.109226 | 0.01822  | -0.00454 | 0.92201 | -0.00108 | 0.98149  | 0.128624 |
| -0.05212  | 0.26102  | 0.089871 | 0.05228  | 0.146039 | 0.00155 | 0.076786 | 0.09745  | 0.211895 |
| 0.213864  | 3.11E-06 | 0.453562 | 4.49E-25 | 0.001161 | 0.98004 | 0.021565 | 0.64206  | 0.067051 |
| 0.171861  | 0.00019  | 0.087967 | 0.05749  | 0.015627 | 0.73625 | 0.033085 | 0.47569  | 0.011924 |
| 0.00978   | 0.83306  | -0.02011 | 0.66461  | -0.05295 | 0.25342 | -0.15098 | 0.00107  | -0.20368 |
| 0.35678   | 1.83E-15 | 0.373285 | 6.90E-17 | 0.037266 | 0.42172 | 0.047159 | 0.30918  | 0.16621  |
| 0.118126  | 0.01062  | 0.288768 | 2.02E-10 | 0.062403 | 0.17823 | 0.082536 | 0.07477  | 0.073247 |
| 0.22453   | 9.49E-07 | 0.086283 | 0.06245  | 0.016546 | 0.72136 | -0.02433 | 0.59993  | -0.04923 |
| 0.151006  | 0.00106  | 0.246851 | 6.52E-08 | -0.01544 | 0.73923 | -0.0238  | 0.608    | 0.160758 |
| 0.043521  | 0.34803  | -0.08237 | 0.07536  | 0.012862 | 0.78161 | -0.04637 | 0.31732  | -0.07933 |
| 0.003368  | 0.94213  | 0.031232 | 0.50076  | 0.007568 | 0.87044 | 0.109595 | 0.01783  | 0.103427 |
| -0.08689  | 0.06063  | -0.22581 | 8.20E-07 | -0.00829 | 0.85813 | -0.05105 | 0.27093  | -0.04401 |
| 0.131651  | 0.00437  | -0.23399 | 3.15E-07 | 0.012993 | 0.77945 | -0.03661 | 0.42997  | -0.09917 |
| -0.11353  | 0.01409  | -0.19919 | 1.45E-05 | 0.032957 | 0.4774  | 0.051883 | 0.26317  | 0.039966 |
| -0.02258  | 0.62642  | -0.09525 | 0.03963  | 0.001843 | 0.96831 | -0.06657 | 0.15092  | -0.0252  |

|          |          |          |          |          |         |          |          |          |
|----------|----------|----------|----------|----------|---------|----------|----------|----------|
| 0.030345 | 0.51301  | -0.0401  | 0.38729  | 0.003158 | 0.94573 | -0.06388 | 0.16818  | -0.00912 |
| 0.212367 | 3.66E-06 | 0.121595 | 0.00853  | 0.073274 | 0.1138  | 0.123539 | 0.00752  | 0.165549 |
| 0.132027 | 0.00426  | -0.20926 | 5.10E-06 | 0.043366 | 0.34975 | -0.0629  | 0.17479  | 0.0946   |
| 0.274783 | 1.55E-09 | 0.215765 | 2.53E-06 | -0.01291 | 0.78077 | 0.018741 | 0.68625  | 0.173629 |
| 0.232929 | 3.57E-07 | 0.044645 | 0.3357   | -0.03551 | 0.44391 | -0.12377 | 0.00741  | -0.18227 |
| 0.150449 | 0.00111  | 0.169134 | 0.00024  | 0.011347 | 0.8068  | 0.042518 | 0.35926  | 0.10836  |
| 0.15712  | 0.00066  | 0.148633 | 0.00128  | -0.02345 | 0.61322 | -0.11527 | 0.01268  | 0.027653 |
| 0.278631 | 8.96E-10 | 0.042223 | 0.36261  | 0.032918 | 0.47793 | -0.0004  | 0.99308  | 0.213005 |
| 0.089782 | 0.05251  | -0.00777 | 0.86695  | 0.002098 | 0.96393 | -0.08669 | 0.06123  | -0.11565 |
| 0.152071 | 0.00098  | 0.115299 | 0.01266  | 0.076628 | 0.09814 | 0.249695 | 4.54E-08 | 0.065234 |
| 0.085256 | 0.06565  | 0.239358 | 1.65E-07 | -0.00171 | 0.97066 | -0.05415 | 0.24283  | 0.042534 |
| 0.038383 | 0.40792  | 0.386432 | 4.42E-18 | 0.111626 | 0.01581 | 0.378897 | 2.17E-17 | 0.251128 |
| -0.02582 | 0.57779  | -0.25924 | 1.31E-08 | -0.0039  | 0.93308 | 0.006414 | 0.89005  | -0.02722 |
| -0.0064  | 0.8903   | -0.22344 | 1.07E-06 | -0.04402 | 0.34256 | -0.141   | 0.00226  | -0.15599 |
| 0.233117 | 3.50E-07 | 0.282102 | 5.42E-10 | -0.00797 | 0.86359 | -0.06298 | 0.17423  | 0.028298 |
| 0.227309 | 6.90E-07 | 0.088139 | 0.057    | -0.03577 | 0.44061 | -0.14919 | 0.00122  | -0.14683 |
| 0.1451   | 0.00167  | 0.104641 | 0.02373  | 0.012256 | 0.79166 | -0.04147 | 0.37129  | -0.00715 |
| -0.14333 | 0.0019   | -0.45678 | 1.88E-25 | 0.097359 | 0.03544 | 0.164521 | 0.00036  | 0.15222  |
| 0.094293 | 0.04167  | 0.042301 | 0.36172  | 0.178332 | 0.00011 | 0.095553 | 0.03901  | 0.156691 |
| -0.03421 | 0.4608   | -0.13381 | 0.00377  | 0.148063 | 0.00133 | 0.211462 | 4.03E-06 | 0.377003 |
| -0.14098 | 0.00226  | -0.37667 | 3.44E-17 | 0.067452 | 0.14556 | 0.040604 | 0.38132  | -0.04581 |
| -0.02205 | 0.63462  | 0.015301 | 0.74155  | -0.02311 | 0.61837 | -0.05132 | 0.26838  | -0.09827 |
| 0.023623 | 0.61061  | -0.23439 | 3.01E-07 | 0.080941 | 0.08058 | 0.039146 | 0.39866  | 0.12858  |
| -0.0969  | 0.03631  | -0.44833 | 1.80E-24 | 0.007999 | 0.86312 | -0.01283 | 0.78218  | -0.14344 |
| -0.02306 | 0.61915  | -0.07436 | 0.10854  | 0.093169 | 0.04418 | 0.223008 | 1.13E-06 | 0.022747 |
| 0.045121 | 0.33057  | -0.14899 | 0.00124  | 0.037282 | 0.42151 | -0.05398 | 0.24435  | 0.05559  |
| -0.1884  | 4.18E-05 | -0.32691 | 4.30E-13 | -0.0433  | 0.35048 | -0.09998 | 0.03076  | -0.01625 |
| -0.14277 | 0.00198  | -0.55359 | 7.44E-39 | -0.04406 | 0.34214 | -0.13661 | 0.00309  | -0.2066  |
| 0.297492 | 5.35E-11 | 0.038071 | 0.41175  | -0.00812 | 0.8611  | -0.05239 | 0.2585   | 0.105556 |
| 0.012266 | 0.79149  | -0.07385 | 0.11096  | -0.0134  | 0.77264 | -0.0306  | 0.50947  | -0.04197 |
| 0.046931 | 0.31153  | -0.08173 | 0.07764  | -0.01862 | 0.68825 | -0.04111 | 0.37538  | -0.06576 |
| -0.16084 | 0.00048  | -0.44401 | 5.56E-24 | -0.0085  | 0.85462 | -0.03047 | 0.51133  | -0.07491 |
| -0.09567 | 0.03877  | -0.18628 | 5.12E-05 | -0.01204 | 0.79518 | -0.06034 | 0.19302  | -0.09301 |
| -0.03085 | 0.50596  | -0.16952 | 0.00023  | -0.00459 | 0.92118 | -0.03662 | 0.4298   | -0.02887 |
| 0.065515 | 0.1575   | -0.10063 | 0.02967  | -0.01266 | 0.78498 | -0.07647 | 0.09885  | -0.05846 |
| -0.16011 | 0.00051  | 0.016258 | 0.72602  | 0.073653 | 0.11194 | 0.303926 | 1.95E-11 | -0.09669 |
| -0.13622 | 0.00318  | -0.03067 | 0.50848  | -0.01949 | 0.67448 | -0.0663  | 0.15259  | -0.00711 |
| 0.256576 | 1.86E-08 | -0.04907 | 0.28997  | -0.06129 | 0.18609 | -0.16523 | 0.00034  | -0.11895 |
| -0.01619 | 0.72714  | -0.09023 | 0.05134  | 0.081819 | 0.07734 | 0.104983 | 0.02327  | 0.125059 |
| -0.08681 | 0.06086  | -0.30963 | 7.81E-12 | 0.024239 | 0.60133 | 0.04756  | 0.30508  | 0.207185 |
| -0.02093 | 0.65196  | 0.010785 | 0.81619  | -0.01807 | 0.69695 | -0.00211 | 0.96369  | 0.125839 |
| -0.04788 | 0.30184  | -0.19837 | 1.57E-05 | 0.010555 | 0.82004 | -0.0976  | 0.03498  | -0.08841 |
| 0.018449 | 0.69089  | 0.247926 | 5.69E-08 | -0.01461 | 0.75286 | 0.040147 | 0.38671  | 0.120457 |
| -0.04718 | 0.30897  | 0.012697 | 0.78435  | 0.003139 | 0.94606 | 0.07588  | 0.10148  | 0.101633 |
| 0.00901  | 0.84603  | 0.261073 | 1.03E-08 | 0.030932 | 0.50489 | 0.042822 | 0.35583  | 0.020151 |



|          |          |          |          |          |         |          |          |          |
|----------|----------|----------|----------|----------|---------|----------|----------|----------|
| -0.13997 | 0.00243  | -0.17001 | 0.00022  | -0.02114 | 0.64865 | 0.02476  | 0.59353  | -0.06346 |
| -0.00459 | 0.9212   | 0.100907 | 0.02923  | -0.04023 | 0.38578 | -0.00868 | 0.85154  | -0.0517  |
| 0.097618 | 0.03495  | 0.150032 | 0.00115  | -0.0207  | 0.65553 | 0.024079 | 0.60374  | 0.057018 |
| 0.025649 | 0.58035  | -0.25415 | 2.56E-08 | 0.020343 | 0.66103 | 0.085883 | 0.06368  | 0.024709 |
| 0.016087 | 0.72879  | -0.052   | 0.26212  | 0.009828 | 0.83225 | -0.06366 | 0.1696   | 0.05182  |
| 0.11028  | 0.01712  | -0.00895 | 0.84707  | -0.03952 | 0.39421 | -0.13374 | 0.00379  | -0.00726 |
| 0.034982 | 0.45075  | -0.21083 | 4.31E-06 | 0.015163 | 0.74381 | -0.01714 | 0.71188  | 0.125686 |
| 0.096258 | 0.03758  | 0.040782 | 0.37923  | -0.05323 | 0.25095 | -0.02126 | 0.64681  | -0.14203 |
| -0.03925 | 0.39741  | -0.12538 | 0.00667  | -0.00132 | 0.97727 | -0.01499 | 0.7467   | -0.0529  |
| 0.154319 | 0.00082  | 0.463382 | 3.10E-26 | 0.04285  | 0.35552 | 0.099497 | 0.03158  | 0.133208 |
| -0.04191 | 0.36618  | -0.07002 | 0.13082  | -0.01101 | 0.8125  | -0.10688 | 0.02088  | 0.013906 |
| 0.046568 | 0.31529  | -0.11071 | 0.01669  | -0.00855 | 0.85381 | -0.06738 | 0.14597  | 0.109627 |
| 0.004043 | 0.93057  | -0.17053 | 0.00021  | -0.02309 | 0.61863 | -0.03414 | 0.46177  | 0.04154  |
| 0.229337 | 5.45E-07 | 0.167084 | 0.00029  | 0.00346  | 0.94056 | -0.06939 | 0.13432  | 0.026235 |
| 0.110221 | 0.01718  | -0.00835 | 0.8572   | 0.068566 | 0.13901 | 0.214099 | 3.03E-06 | -0.04998 |
| -0.10837 | 0.01915  | -0.33329 | 1.41E-13 | -0.00404 | 0.9307  | 0.013111 | 0.7775   | -0.01186 |
| -0.00942 | 0.83919  | -0.1743  | 0.00015  | -0.01474 | 0.75072 | -0.09581 | 0.03849  | -0.03832 |
| 0.035372 | 0.44571  | 0.320378 | 1.32E-12 | 0.089022 | 0.05455 | 0.314977 | 3.25E-12 | 0.134015 |
| 0.096301 | 0.03749  | -0.11603 | 0.0121   | 0.006283 | 0.89229 | -0.05323 | 0.25093  | 0.103827 |
| -0.17257 | 0.00018  | -0.34572 | 1.48E-14 | -0.03365 | 0.46824 | -0.11118 | 0.01623  | -0.1543  |
| 0.073609 | 0.11215  | 0.355304 | 2.43E-15 | 0.10403  | 0.02456 | 0.202942 | 9.87E-06 | 0.430232 |
| -0.07984 | 0.08479  | 0.046585 | 0.31511  | -0.07864 | 0.0896  | -0.09343 | 0.04359  | -0.00289 |
| -0.14658 | 0.00149  | -0.31642 | 2.56E-12 | 0.01473  | 0.75088 | 0.033274 | 0.47317  | 0.108444 |
| 0.074084 | 0.10985  | 0.052219 | 0.26008  | 0.005244 | 0.91002 | 0.045515 | 0.32636  | -0.00753 |
| -0.02646 | 0.56838  | -0.08683 | 0.0608   | -0.03927 | 0.39716 | -0.05278 | 0.25499  | -0.04835 |
| -0.01631 | 0.72523  | -0.37226 | 8.50E-17 | -0.04162 | 0.36948 | -0.12736 | 0.00585  | -0.1461  |
| 0.037123 | 0.4235   | -0.17942 | 9.68E-05 | -0.02075 | 0.6547  | -0.11554 | 0.01247  | -0.07772 |
| -0.00363 | 0.93769  | -0.07944 | 0.08638  | 0.023771 | 0.60838 | 0.064574 | 0.16357  | 0.021649 |
| -0.11005 | 0.01736  | -0.34908 | 7.90E-15 | -0.04471 | 0.33504 | -0.06018 | 0.19424  | -0.13563 |
| -0.03708 | 0.42406  | 0.089007 | 0.05459  | 0.101413 | 0.02843 | 0.055212 | 0.23371  | 0.258904 |
| -0.13991 | 0.00244  | -0.0819  | 0.07703  | -0.01286 | 0.78171 | 0.100413 | 0.03004  | 0.044955 |
| -0.04524 | 0.32925  | -0.09982 | 0.03103  | 0.011466 | 0.80481 | 0.124451 | 0.00709  | 0.022654 |
| -0.03379 | 0.4664   | 0.006766 | 0.88405  | 0.082301 | 0.0756  | 0.029113 | 0.53028  | 0.174739 |
| -0.09189 | 0.04719  | -0.10373 | 0.02499  | -0.01812 | 0.69619 | 0.08007  | 0.08391  | 0.052373 |
| 0.000281 | 0.99517  | -0.27836 | 9.32E-10 | 0.056712 | 0.22123 | -0.10807 | 0.01949  | -0.06119 |
| 0.024496 | 0.59749  | -0.23915 | 1.69E-07 | 0.01798  | 0.69836 | -0.02037 | 0.66054  | 0.137208 |
| 0.116241 | 0.01194  | 0.204034 | 8.82E-06 | 0.060576 | 0.1913  | 0.12035  | 0.00923  | 0.150842 |
| 0.290756 | 1.50E-10 | 0.344038 | 2.02E-14 | 0.043297 | 0.35052 | 0.01774  | 0.70218  | 0.117973 |
| -0.20124 | 1.18E-05 | -0.26498 | 6.05E-09 | -0.04112 | 0.37529 | -0.11834 | 0.01048  | -0.13426 |
| 0.082836 | 0.07371  | -0.06416 | 0.16629  | 0.001343 | 0.97691 | -0.04948 | 0.28598  | 0.037401 |
| 0.004312 | 0.92596  | -0.3198  | 1.45E-12 | 0.013715 | 0.76753 | -0.12903 | 0.00523  | -0.04733 |
| -0.07382 | 0.11111  | -0.26553 | 5.62E-09 | -0.01307 | 0.77824 | 0.161673 | 0.00045  | -0.17179 |
| 0.218465 | 1.88E-06 | 0.145715 | 0.00159  | -0.02831 | 0.54174 | -0.05879 | 0.20475  | 0.012774 |
| 0.003172 | 0.9455   | -0.08203 | 0.07658  | -0.0001  | 0.99823 | -0.07543 | 0.10352  | 0.019908 |
| -0.05399 | 0.2442   | -0.12214 | 0.00823  | -0.01192 | 0.79724 | 0.026894 | 0.5621   | 0.206383 |

|          |          |          |          |          |          |          |          |          |
|----------|----------|----------|----------|----------|----------|----------|----------|----------|
| 0.195468 | 2.10E-05 | 0.05582  | 0.22859  | -0.06462 | 0.16328  | -0.13401 | 0.00371  | 0.030478 |
| 0.076521 | 0.09861  | 0.043292 | 0.35057  | -0.01614 | 0.72795  | -0.09068 | 0.05018  | -0.01557 |
| -0.00323 | 0.94451  | 0.000712 | 0.98776  | -0.07526 | 0.1043   | -0.09792 | 0.0344   | -0.05035 |
| 0.079755 | 0.08514  | 0.151394 | 0.00103  | 0.031094 | 0.50266  | 0.015672 | 0.73552  | 0.121643 |
| -0.14057 | 0.00233  | -0.04234 | 0.36132  | 0.060498 | 0.19187  | 0.139294 | 0.00255  | 0.240913 |
| 0.215563 | 2.59E-06 | 0.501706 | 3.86E-31 | 0.004341 | 0.92545  | 0.049638 | 0.28441  | 0.140335 |
| 0.072019 | 0.12014  | -0.28998 | 1.69E-10 | -0.01756 | 0.70509  | -0.17445 | 0.00015  | -0.10813 |
| 0.066646 | 0.15044  | -0.27522 | 1.46E-09 | 0.009379 | 0.83981  | -0.12948 | 0.00507  | 0.012423 |
| -0.06795 | 0.1426   | -0.0537  | 0.24676  | 0.015545 | 0.73759  | 0.040659 | 0.38067  | -0.04247 |
| 0.066035 | 0.15423  | -0.07004 | 0.13067  | -0.02811 | 0.54451  | -0.00339 | 0.94172  | 0.026607 |
| 0.039008 | 0.40033  | 0.016181 | 0.72726  | -0.02659 | 0.56653  | 0.009587 | 0.8363   | 0.028882 |
| 0.026115 | 0.57348  | 0.041305 | 0.37314  | 0.003422 | 0.9412   | -0.08035 | 0.08281  | -0.04673 |
| 0.040592 | 0.38146  | -0.15985 | 0.00053  | 0.026629 | 0.56596  | -0.08755 | 0.05868  | 0.061646 |
| -0.02514 | 0.58791  | -0.1752  | 0.00014  | 0.01633  | 0.72487  | -0.01839 | 0.69187  | 0.102184 |
| -0.10484 | 0.02346  | -0.16384 | 0.00038  | 0.387885 | 3.24E-18 | 0.513882 | 7.82E-33 | 0.289375 |
| 0.176834 | 0.00012  | -0.01791 | 0.69944  | 0.128853 | 0.00529  | 0.249216 | 4.83E-08 | 0.315473 |
| -0.01463 | 0.75253  | 0.338789 | 5.26E-14 | 0.05222  | 0.26007  | 0.123279 | 0.00765  | 0.310148 |
| 0.071873 | 0.1209   | -0.17307 | 0.00017  | 0.029958 | 0.5184   | 0.031235 | 0.50073  | 0.267169 |
| -0.10226 | 0.02713  | -0.26064 | 1.09E-08 | -0.08036 | 0.08279  | -0.10159 | 0.02815  | -0.11098 |
| 0.058286 | 0.20866  | -0.17947 | 9.63E-05 | 0.029275 | 0.52799  | -0.15212 | 0.00097  | -0.07658 |
| 0.107347 | 0.02033  | -0.12092 | 0.00891  | -0.00224 | 0.96153  | -0.0488  | 0.29267  | -0.02184 |
| 0.090968 | 0.04946  | -0.02134 | 0.64549  | -0.06662 | 0.15063  | -0.07317 | 0.11434  | -0.22968 |
| 0.032897 | 0.4782   | -0.04334 | 0.35002  | -0.05736 | 0.21598  | -0.12234 | 0.00813  | -0.10849 |
| -0.17565 | 0.00014  | -0.38392 | 7.55E-18 | -0.00356 | 0.9388   | 0.113913 | 0.01377  | 0.098974 |
| 0.020223 | 0.66291  | -0.06242 | 0.17808  | -0.00308 | 0.94703  | -0.02666 | 0.56547  | 0.149786 |
| 0.138744 | 0.00266  | 0.190004 | 3.58E-05 | 0.016308 | 0.72521  | 0.026948 | 0.56131  | 0.107824 |
| -0.23435 | 3.02E-07 | -0.1518  | 0.001    | -0.01343 | 0.77225  | 0.002622 | 0.95494  | 0.010873 |
| -0.01908 | 0.68093  | -0.22184 | 1.29E-06 | 0.01969  | 0.67126  | -0.01056 | 0.82003  | 0.045407 |
| -0.07348 | 0.11277  | 0.001569 | 0.97303  | 0.011781 | 0.79955  | -0.05284 | 0.25445  | -0.06752 |
| -0.00426 | 0.92693  | -0.23667 | 2.29E-07 | -0.03263 | 0.48179  | -0.08605 | 0.06318  | -0.16032 |
| 0.39239  | 1.22E-18 | 0.467478 | 9.92E-27 | 0.004684 | 0.91959  | -0.00414 | 0.92887  | -0.05048 |
| 0.202251 | 1.06E-05 | 0.051888 | 0.26311  | -0.00357 | 0.93868  | -0.04226 | 0.36219  | 0.090714 |
| 0.119296 | 0.00987  | -0.01036 | 0.82334  | 0.005906 | 0.89871  | -0.09172 | 0.04759  | -0.08722 |
| 0.300866 | 3.16E-11 | -0.01775 | 0.70205  | -0.05701 | 0.21878  | -0.23089 | 4.55E-07 | -0.08231 |
| -0.09907 | 0.03232  | -0.08262 | 0.07446  | -0.01387 | 0.76495  | 0.001005 | 0.98271  | -0.00516 |
| -0.22859 | 5.95E-07 | -0.19214 | 2.92E-05 | -0.06739 | 0.14593  | -0.05233 | 0.25905  | -0.1017  |
| 0.227773 | 6.54E-07 | 0.255773 | 2.07E-08 | -0.02711 | 0.55893  | -0.07443 | 0.10819  | -0.02835 |
| 0.227151 | 7.03E-07 | 0.279995 | 7.36E-10 | 0.001485 | 0.97447  | -0.13137 | 0.00446  | 0.146094 |
| 0.044347 | 0.33894  | -0.17706 | 0.00012  | -0.05733 | 0.21621  | -0.08478 | 0.06719  | -0.08946 |
| 0.111877 | 0.01557  | -0.04788 | 0.30182  | 0.040303 | 0.38487  | -0.14681 | 0.00147  | -0.09876 |
| -0.00347 | 0.9404   | -0.14155 | 0.00217  | 0.005812 | 0.90031  | 0.0117   | 0.80091  | -0.035   |
| -0.03447 | 0.45747  | -0.26239 | 8.59E-09 | 0.004067 | 0.93016  | -0.03723 | 0.42219  | -0.05483 |
| 0.158392 | 0.00059  | 0.216574 | 2.31E-06 | 0.087666 | 0.05835  | 0.148553 | 0.00128  | 0.419457 |
| -0.16201 | 0.00044  | -0.19801 | 1.63E-05 | 0.038707 | 0.40398  | 0.07756  | 0.09411  | 0.152374 |
| 0.120215 | 0.00931  | -0.01029 | 0.82448  | 0.023282 | 0.61578  | -0.02762 | 0.55159  | 0.090184 |

|          |          |          |          |          |         |          |          |          |
|----------|----------|----------|----------|----------|---------|----------|----------|----------|
| 0.153864 | 0.00085  | 0.187998 | 4.35E-05 | 0.012685 | 0.78454 | -0.01408 | 0.76151  | 0.0601   |
| 0.155576 | 0.00074  | -0.03334 | 0.47224  | 0.00486  | 0.91659 | -0.06622 | 0.15309  | 0.091199 |
| -0.02217 | 0.63281  | -0.12762 | 0.00575  | -0.01934 | 0.67671 | 0.031171 | 0.5016   | 0.055081 |
| 0.181261 | 8.17E-05 | 0.269056 | 3.46E-09 | 0.001475 | 0.97463 | -0.00237 | 0.95933  | 0.073972 |
| -0.27192 | 2.32E-09 | -0.3357  | 9.17E-14 | -0.05677 | 0.22074 | -0.04695 | 0.31133  | -0.02697 |
| 0.035005 | 0.45045  | -0.07731 | 0.09519  | -0.02745 | 0.554   | -0.17431 | 0.00015  | -0.00134 |
| 0.104453 | 0.02398  | -0.02665 | 0.56562  | 0.026151 | 0.57294 | 0.001399 | 0.97595  | 0.115272 |
| 0.085295 | 0.06553  | -0.10622 | 0.02169  | -0.04024 | 0.38556 | -0.13477 | 0.00352  | -0.05552 |
| -0.01748 | 0.70641  | -0.14707 | 0.00144  | -0.00172 | 0.97036 | -0.03118 | 0.50153  | 0.033176 |
| -0.03925 | 0.39737  | -0.34581 | 1.45E-14 | -0.02533 | 0.58503 | -0.09092 | 0.04958  | -0.00215 |
| -0.00057 | 0.99014  | -0.12117 | 0.00876  | -0.00842 | 0.85604 | -0.17388 | 0.00016  | -0.14694 |
| 0.074319 | 0.10872  | 0.198153 | 1.61E-05 | -0.01424 | 0.75896 | 0.055321 | 0.23279  | -0.10247 |
| 5.90E-05 | 0.99898  | -0.05206 | 0.26154  | 0.035652 | 0.44212 | -0.03763 | 0.4172   | 0.033257 |
| -0.11258 | 0.01493  | -0.17877 | 0.0001   | 0.008649 | 0.85213 | 0.000381 | 0.99345  | -0.08908 |
| 0.240317 | 1.47E-07 | -0.01094 | 0.81359  | -0.01635 | 0.72457 | -0.11018 | 0.01722  | -0.01714 |
| -0.06234 | 0.17865  | -0.13179 | 0.00433  | 0.006545 | 0.88783 | -0.0164  | 0.72365  | -0.07489 |
| -0.14139 | 0.00219  | -0.14475 | 0.00171  | 0.014636 | 0.75242 | 0.076975 | 0.09662  | 0.066588 |
| 0.103756 | 0.02495  | 0.096379 | 0.03734  | -0.05265 | 0.25616 | -0.15504 | 0.00077  | -0.08835 |
| 0.029238 | 0.52852  | -0.03432 | 0.45931  | 0.014472 | 0.75509 | -0.00619 | 0.89394  | -0.06812 |
| -0.02851 | 0.53889  | -0.24247 | 1.13E-07 | -0.03904 | 0.3999  | -0.13157 | 0.0044   | -0.10767 |
| -0.08167 | 0.07786  | -0.16565 | 0.00032  | 0.04417  | 0.34088 | 0.092783 | 0.04507  | 0.041685 |
| 0.130894 | 0.00461  | 0.355929 | 2.15E-15 | 0.138025 | 0.0028  | 0.13712  | 0.00298  | 0.462304 |
| 0.031583 | 0.49596  | 0.008956 | 0.84694  | 0.011364 | 0.80652 | -0.08811 | 0.05708  | -0.04732 |
| -0.05079 | 0.2734   | -0.00558 | 0.90429  | 0.012725 | 0.78388 | -0.04868 | 0.29385  | 0.030215 |
| 0.043153 | 0.35212  | 0.033052 | 0.47613  | 0.002279 | 0.96083 | 0.020287 | 0.66192  | -0.0813  |
| 0.056489 | 0.22306  | -0.00837 | 0.85687  | 0.007325 | 0.87456 | -0.04272 | 0.35703  | 0.001719 |
| 0.021116 | 0.649    | 0.332738 | 1.55E-13 | 0.120267 | 0.00928 | 0.393848 | 8.87E-19 | 0.105995 |
| -0.04839 | 0.29673  | -0.19809 | 1.62E-05 | 0.035509 | 0.44395 | 0.043344 | 0.34999  | 0.13796  |
| -0.00604 | 0.89639  | -0.11321 | 0.01437  | -0.00627 | 0.89255 | -0.10401 | 0.02459  | -0.04422 |
| -0.06533 | 0.15868  | -0.2815  | 5.92E-10 | -0.01221 | 0.79236 | -0.10044 | 0.02999  | -0.10323 |
| 0.021819 | 0.63814  | -0.01702 | 0.71366  | 0.014874 | 0.74852 | 0.068875 | 0.13723  | -0.01524 |
| 0.014068 | 0.76173  | -0.02995 | 0.51847  | 0.000907 | 0.9844  | -0.11146 | 0.01596  | -0.06866 |
| 0.076167 | 0.10018  | 0.06671  | 0.15005  | -0.00101 | 0.98262 | -0.08164 | 0.07799  | -0.08754 |
| -0.01425 | 0.75873  | -0.03664 | 0.42952  | 0.006764 | 0.88409 | -0.08688 | 0.06065  | -0.02881 |
| -0.00626 | 0.89268  | 0.141311 | 0.00221  | -0.01476 | 0.75042 | -0.08914 | 0.05423  | -0.00074 |
| 0.091196 | 0.04889  | 0.209544 | 4.95E-06 | 0.054701 | 0.23807 | 0.001829 | 0.96855  | -0.01732 |
| -0.03494 | 0.45134  | 0.258925 | 1.37E-08 | 0.017062 | 0.71306 | 0.071925 | 0.12062  | 0.009458 |
| -0.07143 | 0.12321  | 0.105878 | 0.02212  | 0.037083 | 0.424   | -0.00458 | 0.92145  | 0.076647 |
| -0.06653 | 0.15118  | -0.12774 | 0.0057   | 0.036556 | 0.43062 | 0.065878 | 0.15521  | 0.0042   |
| -0.06078 | 0.18981  | -0.19488 | 2.23E-05 | -0.00676 | 0.8842  | -0.08403 | 0.06964  | -0.14974 |
| 0.04654  | 0.31558  | 0.003887 | 0.93323  | 0.018483 | 0.69034 | -0.06005 | 0.19522  | -0.04496 |
| -0.06813 | 0.14153  | -0.07904 | 0.08797  | -0.00934 | 0.84048 | -0.05157 | 0.26607  | 0.032562 |
| 0.004355 | 0.92522  | -0.18566 | 5.43E-05 | -0.00905 | 0.8454  | -0.06781 | 0.14343  | -0.0379  |
| 0.051724 | 0.26463  | 0.01877  | 0.68579  | 0.01237  | 0.78978 | -0.07836 | 0.09074  | -0.04007 |
| 0.10536  | 0.02278  | 0.172502 | 0.00018  | -0.02084 | 0.65329 | 0.034572 | 0.45607  | -0.14072 |

|          |          |          |          |           |          |          |         |          |
|----------|----------|----------|----------|-----------|----------|----------|---------|----------|
| -0.00042 | 0.99284  | -0.04394 | 0.34339  | -0.04478  | 0.33421  | -0.16673 | 0.0003  | -0.12448 |
| -0.03719 | 0.42262  | -0.02066 | 0.65613  | -0.017    | 0.71413  | -0.15051 | 0.0011  | -0.15718 |
| -0.02299 | 0.62027  | -0.04326 | 0.35093  | -0.02195  | 0.63616  | -0.09965 | 0.03131 | -0.01101 |
| -0.00643 | 0.88981  | -0.01145 | 0.80511  | 0.000244  | 0.99581  | -0.0983  | 0.03369 | -0.07025 |
| 0.009412 | 0.83925  | 0.102859 | 0.02623  | 0.057924  | 0.2115   | 0.071282 | 0.12399 | 0.081826 |
| -0.02926 | 0.52826  | 0.194682 | 2.27E-05 | 0.012016  | 0.79566  | -0.00393 | 0.93245 | 0.012448 |
| 0.154113 | 0.00083  | -0.05152 | 0.26654  | -0.00692  | 0.88147  | -0.12996 | 0.00491 | -0.13404 |
| 0.034256 | 0.4602   | 0.091356 | 0.04849  | 0.002664  | 0.95421  | -0.10023 | 0.03034 | -0.05284 |
| 0.01251  | 0.78744  | -0.06077 | 0.18987  | 0.054231  | 0.24214  | -0.02822 | 0.54297 | -0.07257 |
| 0.008361 | 0.85699  | 0.038132 | 0.41101  | -0.01482  | 0.74933  | -0.11199 | 0.01547 | -0.08497 |
| 0.010251 | 0.82514  | 0.078277 | 0.0911   | 0.020151  | 0.66404  | -0.06399 | 0.16741 | -0.02912 |
| 0.014451 | 0.75544  | 0.043694 | 0.34612  | 0.036529  | 0.43096  | -0.07059 | 0.12769 | 0.019249 |
| 0.045559 | 0.3259   | 0.045194 | 0.3298   | -4.36E-05 | 0.99925  | -0.08621 | 0.06268 | -0.02659 |
| 0.15486  | 0.00079  | -0.08651 | 0.06175  | -0.03476  | 0.45361  | -0.08422 | 0.06902 | -0.13229 |
| 0.028029 | 0.5457   | 0.136759 | 0.00306  | 0.018359  | 0.69233  | -0.05865 | 0.20583 | -0.00688 |
| 0.053089 | 0.25222  | 0.136357 | 0.00315  | 0.023481  | 0.61275  | -0.06944 | 0.13404 | -0.01832 |
| 0.015115 | 0.7446   | 0.040972 | 0.37702  | 0.024609  | 0.59579  | -0.05472 | 0.23793 | -0.0582  |
| 0.086317 | 0.06235  | 0.153812 | 0.00085  | -0.00247  | 0.95754  | -0.08264 | 0.0744  | 0.01281  |
| 0.001926 | 0.96688  | -0.03398 | 0.46386  | -0.00677  | 0.88395  | -0.13358 | 0.00383 | -0.09739 |
| 0.03659  | 0.43019  | 0.186886 | 4.83E-05 | 0.196127  | 1.97E-05 | 0.099971 | 0.03077 | 0.379991 |
| 0.000498 | 0.99143  | 0.040147 | 0.38671  | -0.01694  | 0.71503  | -0.04001 | 0.38831 | -0.05494 |
| 0.011221 | 0.8089   | 0.007096 | 0.87845  | -0.0018   | 0.9691   | -0.08998 | 0.05198 | -0.10025 |
| -0.00649 | 0.88869  | 0.026519 | 0.56756  | 0.033204  | 0.47411  | -0.03485 | 0.45242 | -0.02876 |
| -0.10674 | 0.02105  | -0.14279 | 0.00198  | 0.021557  | 0.64218  | 0.023179 | 0.61733 | -0.05161 |
| -0.04154 | 0.37045  | 0.036399 | 0.43261  | 0.022625  | 0.62578  | -0.05081 | 0.2732  | -0.05554 |
| -0.12242 | 0.00809  | -0.16737 | 0.00028  | -0.01751  | 0.70589  | -0.13464 | 0.00356 | -0.06516 |
| 0.003001 | 0.94843  | -0.00968 | 0.83473  | 0.015374  | 0.74037  | -0.07156 | 0.12252 | -0.05218 |
| -0.04136 | 0.37246  | 0.064418 | 0.16459  | 0.111197  | 0.01622  | 0.143409 | 0.00189 | 0.427359 |
| 0.194454 | 2.32E-05 | 0.164605 | 0.00035  | 0.019426  | 0.67543  | -0.09641 | 0.03727 | -0.05859 |
| 0.16943  | 0.00023  | -0.08209 | 0.07637  | 0.016051  | 0.72937  | -0.10326 | 0.02565 | 0.046636 |
| 0.067505 | 0.14524  | 0.062494 | 0.17759  | 0.056064  | 0.22656  | -0.05329 | 0.25039 | -0.06745 |
| -0.00608 | 0.89583  | -0.00191 | 0.9672   | 0.027307  | 0.55611  | -0.02959 | 0.52356 | -0.05643 |
| -0.01564 | 0.7361   | -0.11119 | 0.01623  | 0.04511   | 0.3307   | -0.00287 | 0.95061 | 0.052818 |
| -0.11796 | 0.01074  | -0.15246 | 0.00095  | -0.00544  | 0.90663  | -0.08367 | 0.07084 | -0.06948 |
| -0.08052 | 0.08217  | 0.021617 | 0.64126  | 0.185195  | 5.67E-05 | 0.136359 | 0.00315 | 0.217755 |
| -0.03932 | 0.39661  | 0.106028 | 0.02193  | 0.148624  | 0.00128  | 0.047323 | 0.3075  | 0.279077 |
| 0.013578 | 0.76979  | 0.010293 | 0.82444  | -0.02866  | 0.53663  | -0.12076 | 0.00899 | -0.15637 |
| -0.13656 | 0.00311  | -0.05061 | 0.27507  | -0.00154  | 0.97358  | -0.0195  | 0.67423 | -0.07639 |
| -0.14463 | 0.00173  | -0.01182 | 0.79888  | -0.00223  | 0.96171  | -0.07902 | 0.08808 | -0.06069 |
| -0.02627 | 0.57119  | 0.072647 | 0.11693  | 0.016969  | 0.71456  | -0.07953 | 0.08601 | -0.0212  |
| -0.08019 | 0.08346  | 0.001278 | 0.97803  | -0.00671  | 0.88505  | -0.03963 | 0.39285 | -0.03076 |
| 0.001204 | 0.9793   | 0.001781 | 0.96937  | 0.043286  | 0.35064  | -0.02687 | 0.5624  | 0.008998 |
| 0.013848 | 0.76535  | -0.04385 | 0.34435  | -0.00347  | 0.94043  | -0.05134 | 0.26823 | -0.06723 |
| -0.00329 | 0.94339  | 0.005086 | 0.91272  | 0.067352  | 0.14616  | -0.0174  | 0.70771 | 0.046891 |
| -0.03449 | 0.45716  | 0.161152 | 0.00047  | -0.0485   | 0.29559  | -0.02138 | 0.64498 | -0.08695 |

|          |          |          |          |          |         |          |         |          |
|----------|----------|----------|----------|----------|---------|----------|---------|----------|
| 0.174944 | 0.00014  | 0.123158 | 0.00771  | -0.00266 | 0.95434 | -0.00249 | 0.95714 | -0.07825 |
| 0.27817  | 9.58E-10 | 0.242262 | 1.16E-07 | 0.005653 | 0.90303 | -0.08542 | 0.06514 | 0.075284 |
| -0.07585 | 0.10161  | 0.253359 | 2.84E-08 | 0.020172 | 0.66372 | 0.05402  | 0.24398 | -0.00184 |
| 0.076115 | 0.10042  | 0.286876 | 2.68E-10 | -0.0108  | 0.81593 | -0.08277 | 0.07394 | 0.069319 |
| -0.13657 | 0.0031   | -0.1679  | 0.00027  | 0.009274 | 0.84158 | -0.09664 | 0.03682 | -0.06037 |
| 0.026576 | 0.56672  | 0.176915 | 0.00012  | 0.005262 | 0.9097  | -0.01066 | 0.81825 | 0.037079 |
| 0.174303 | 0.00015  | 0.027753 | 0.54968  | 0.004018 | 0.931   | -0.13402 | 0.00371 | -0.03883 |
| -0.03862 | 0.40508  | -0.11727 | 0.0112   | 0.002552 | 0.95613 | -0.12641 | 0.00623 | -0.07297 |
| -0.05909 | 0.20244  | 0.029281 | 0.52791  | 0.088682 | 0.05548 | 0.051598 | 0.2658  | 0.202357 |
| 0.172437 | 0.00018  | 0.275312 | 1.44E-09 | -0.01856 | 0.68919 | -0.01664 | 0.7199  | -0.16581 |
| 0.009828 | 0.83224  | 0.031782 | 0.49325  | 0.026452 | 0.56854 | -0.04421 | 0.34045 | -0.06494 |
| 0.091834 | 0.04732  | 0.110501 | 0.0169   | 0.013419 | 0.7724  | -0.05836 | 0.20805 | -0.04445 |
| -0.10078 | 0.02944  | -0.02922 | 0.52877  | 0.027254 | 0.55687 | -0.02318 | 0.61738 | -0.01697 |
| -0.02235 | 0.62996  | 0.007695 | 0.86828  | 0.093235 | 0.04403 | 0.050223 | 0.27876 | 0.049793 |
| -0.06311 | 0.17334  | -0.03589 | 0.43905  | 0.058929 | 0.20367 | -0.00945 | 0.8386  | 0.008224 |
| -0.07563 | 0.10259  | 0.026158 | 0.57285  | 0.053817 | 0.24575 | 0.056072 | 0.2265  | 0.173055 |
| -0.05756 | 0.21436  | -0.0093  | 0.84121  | 0.011716 | 0.80064 | -0.05323 | 0.25094 | -0.07137 |
| -0.08461 | 0.06773  | -0.1948  | 2.25E-05 | 0.001673 | 0.97124 | -0.01573 | 0.73457 | -0.12898 |
| -0.03882 | 0.40257  | 0.147407 | 0.0014   | 0.015884 | 0.73208 | -0.03364 | 0.4683  | 0.01018  |
| -0.08411 | 0.06937  | -0.0267  | 0.56498  | 0.00318  | 0.94537 | -0.07302 | 0.11507 | -0.10845 |
| -0.01257 | 0.78646  | 0.003765 | 0.93533  | 0.046547 | 0.3155  | -0.04844 | 0.29618 | 0.025157 |
| -0.05939 | 0.20013  | -0.07038 | 0.12883  | -0.00685 | 0.8826  | -0.11447 | 0.01332 | -0.0252  |
| -0.08877 | 0.05524  | -0.19752 | 1.71E-05 | -0.00634 | 0.89127 | -0.11267 | 0.01485 | -0.1006  |
| -0.04202 | 0.36494  | -0.07147 | 0.12298  | 0.002148 | 0.96307 | -0.08503 | 0.06636 | -0.07485 |
| -0.02292 | 0.62128  | 0.066545 | 0.15106  | 0.00381  | 0.93456 | -0.02211 | 0.63368 | -0.06606 |
| 0.013226 | 0.77559  | -0.0263  | 0.57082  | 0.037646 | 0.41699 | -0.04126 | 0.37361 | -0.02494 |
| 0.026122 | 0.57338  | 0.011496 | 0.80432  | 0.057392 | 0.21573 | -0.03842 | 0.40749 | -0.05263 |
| 0.070723 | 0.12697  | 0.150227 | 0.00113  | -0.02775 | 0.54971 | -0.03655 | 0.43074 | -0.07895 |
| 0.077236 | 0.09549  | 0.271677 | 2.40E-09 | 0.042029 | 0.36482 | 0.110627 | 0.01677 | 0.116115 |
| 0.048581 | 0.2948   | -0.03694 | 0.42576  | 0.007432 | 0.87274 | -0.05346 | 0.24887 | -0.07465 |
| 0.010835 | 0.81535  | -0.01171 | 0.80074  | 0.016973 | 0.71449 | -0.05628 | 0.2248  | -0.01837 |
| 0.058562 | 0.2065   | 0.043501 | 0.34825  | 0.028712 | 0.53595 | -0.1007  | 0.02957 | 0.010569 |
| -0.21691 | 2.23E-06 | -0.10487 | 0.02342  | 0.101962 | 0.02758 | 0.058162 | 0.20963 | 0.135297 |
| -0.11923 | 0.00991  | -0.12643 | 0.00622  | 0.018389 | 0.69185 | -0.08052 | 0.08216 | -0.08512 |
| -0.05747 | 0.21511  | -0.06781 | 0.14341  | 0.042216 | 0.36268 | -0.08617 | 0.06281 | -0.01678 |
| -0.07498 | 0.10563  | -0.09061 | 0.05036  | 0.030878 | 0.50563 | -0.03957 | 0.39355 | -0.02007 |
| -0.11614 | 0.01202  | -0.13428 | 0.00365  | -0.03221 | 0.48744 | -0.1508  | 0.00108 | -0.15874 |
| 0.082685 | 0.07424  | 0.087203 | 0.0597   | 0.001897 | 0.96739 | 0.042613 | 0.35818 | 0.094556 |
| -0.01718 | 0.71121  | 0.010909 | 0.81412  | 0.024525 | 0.59705 | -0.0371  | 0.42378 | -0.01987 |
| -0.05221 | 0.26019  | 0.010176 | 0.8264   | -0.00189 | 0.96757 | -0.05943 | 0.19984 | -0.0583  |
| -0.19935 | 1.42E-05 | -0.1252  | 0.00675  | 0.019431 | 0.67534 | -0.0339  | 0.46484 | -0.05324 |
| 0.121076 | 0.00882  | 0.141145 | 0.00223  | 0.059705 | 0.19777 | -0.04888 | 0.29185 | -0.03556 |
| -0.05538 | 0.23229  | 0.025106 | 0.58839  | 0.082329 | 0.0755  | 0.022967 | 0.62056 | 0.047932 |
| -0.01949 | 0.67437  | 0.086869 | 0.06069  | 0.056665 | 0.22161 | -0.0193  | 0.67742 | -0.03162 |
| -0.08722 | 0.05965  | -0.04699 | 0.3109   | 0.022611 | 0.62599 | 0.001924 | 0.96692 | -0.00324 |

|          |          |          |          |          |         |          |         |          |
|----------|----------|----------|----------|----------|---------|----------|---------|----------|
| -0.07275 | 0.1164   | -0.02608 | 0.57404  | 0.027015 | 0.56034 | -0.04832 | 0.29743 | -0.03914 |
| 0.158334 | 0.00059  | 0.033842 | 0.46565  | 0.008538 | 0.85399 | -0.12165 | 0.0085  | -0.01003 |
| -0.12385 | 0.00737  | -0.06846 | 0.13965  | 0.00102  | 0.98247 | -0.09461 | 0.04099 | -0.01779 |
| 0.01808  | 0.69676  | -0.02718 | 0.5579   | 0.046665 | 0.31428 | -0.00146 | 0.97482 | 0.04094  |
| -0.11784 | 0.01081  | -0.06467 | 0.16291  | 0.038364 | 0.40816 | -0.02788 | 0.54781 | 0.013901 |
| 0.040234 | 0.38568  | 0.129511 | 0.00506  | 0.039772 | 0.39116 | -0.01268 | 0.78454 | 0.022744 |
| 0.000555 | 0.99046  | 0.017652 | 0.7036   | -0.0133  | 0.77445 | -0.11482 | 0.01303 | -0.11229 |
| -0.02217 | 0.63277  | 0.080004 | 0.08416  | 0.06107  | 0.1877  | -0.01325 | 0.77527 | -0.05497 |
| -0.07945 | 0.08632  | -0.02491 | 0.59124  | 0.018819 | 0.68502 | -0.03472 | 0.45412 | 0.031152 |
| -0.01274 | 0.78367  | 0.105045 | 0.02319  | 0.013326 | 0.77395 | 0.079236 | 0.08719 | -0.03506 |
| -0.0293  | 0.52765  | 0.108816 | 0.01866  | 0.005202 | 0.91073 | -0.05418 | 0.24262 | -0.03977 |
| 0.211923 | 3.84E-06 | 0.132642 | 0.00409  | 0.009509 | 0.83761 | -0.13958 | 0.0025  | -0.07548 |
| -0.00473 | 0.91877  | -0.00388 | 0.93329  | 0.02652  | 0.56755 | -0.02448 | 0.59777 | -0.02906 |
| -0.06622 | 0.15308  | 0.054361 | 0.24101  | 0.004148 | 0.92877 | -0.0953  | 0.03954 | -0.04002 |
| -0.16931 | 0.00024  | -0.04608 | 0.3204   | 0.091594 | 0.0479  | 0.099324 | 0.03188 | 0.18306  |
| -0.04703 | 0.31048  | -0.02517 | 0.5874   | -0.00131 | 0.97751 | -0.04019 | 0.38614 | -0.09453 |
| 0.192909 | 2.70E-05 | 0.100593 | 0.02974  | -0.03052 | 0.51056 | -0.13955 | 0.00251 | -0.04537 |
| 0.046209 | 0.31904  | -0.06211 | 0.18028  | 0.034694 | 0.45448 | -0.07322 | 0.11408 | -0.08207 |
| -0.00746 | 0.87234  | -0.02151 | 0.64294  | 0.030349 | 0.51296 | -0.00327 | 0.94374 | 0.016897 |
| -0.0632  | 0.17271  | -0.12237 | 0.00811  | -0.01401 | 0.76268 | -0.04738 | 0.30695 | -0.09934 |
| 0.130878 | 0.00461  | 0.056742 | 0.22099  | -0.01177 | 0.79973 | -0.05362 | 0.24751 | -0.02484 |
| -0.27807 | 9.71E-10 | -0.25051 | 4.09E-08 | -0.00907 | 0.84509 | -0.11368 | 0.01397 | -0.10807 |
| -0.08309 | 0.07285  | -0.02554 | 0.58197  | 0.006075 | 0.89582 | 0.059298 | 0.20085 | -0.0638  |
| 0.046308 | 0.31799  | -0.13316 | 0.00394  | 0.071851 | 0.12101 | -0.07478 | 0.10655 | -0.02219 |
| -0.02794 | 0.54696  | 0.000865 | 0.98513  | 0.051307 | 0.26851 | -0.02372 | 0.60908 | 0.013802 |
| 0.014575 | 0.75342  | 0.055421 | 0.23194  | 0.032861 | 0.47868 | -0.05259 | 0.25668 | 0.053888 |
| 0.14898  | 0.00124  | 0.074633 | 0.10723  | 0.002235 | 0.96159 | -0.10306 | 0.02594 | -0.02226 |
| -0.02805 | 0.54542  | 0.037312 | 0.42114  | -0.02076 | 0.65446 | -0.13883 | 0.00264 | -0.1085  |
| 0.013584 | 0.7697   | 0.021147 | 0.64853  | 0.042157 | 0.36336 | -0.06225 | 0.17927 | -0.02889 |
| -0.1096  | 0.01782  | -0.33294 | 1.50E-13 | 0.003503 | 0.93981 | -0.13663 | 0.00309 | -0.15785 |
| 0.019045 | 0.68144  | -0.18379 | 6.46E-05 | -0.03712 | 0.42359 | -0.12947 | 0.00507 | -0.14167 |
| -0.03263 | 0.48173  | -0.06667 | 0.1503   | 0.023554 | 0.61166 | -0.0497  | 0.2838  | -0.03392 |
| -0.06863 | 0.13864  | -0.22399 | 1.01E-06 | 0.001478 | 0.97458 | -0.03475 | 0.45375 | -0.00552 |
| -0.02033 | 0.66124  | 0.231018 | 4.48E-07 | 0.001945 | 0.96656 | 0.019428 | 0.67539 | 0.092342 |
| 0.005306 | 0.90896  | 0.023275 | 0.61589  | -0.00965 | 0.8352  | -0.0726  | 0.11717 | -0.07467 |
| -0.0935  | 0.04342  | -0.04478 | 0.33429  | 0.042111 | 0.36389 | 0.005791 | 0.90067 | -0.01304 |
| -0.13095 | 0.00459  | -0.22377 | 1.04E-06 | 0.006997 | 0.88013 | -0.05543 | 0.23184 | -0.02236 |
| 0.012272 | 0.7914   | 0.084757 | 0.06725  | 0.036482 | 0.43156 | -0.02073 | 0.65506 | -0.02922 |
| -0.02285 | 0.62236  | -0.04713 | 0.30944  | 0.080645 | 0.0817  | -0.04    | 0.38849 | -0.05706 |
| 0.097037 | 0.03605  | 0.054627 | 0.23871  | -0.01858 | 0.6888  | -0.13163 | 0.00438 | -0.15399 |
| -0.11628 | 0.01192  | -0.09672 | 0.03667  | 0.011999 | 0.79593 | -0.11377 | 0.01389 | -0.08983 |
| 0.290379 | 1.59E-10 | 0.165088 | 0.00034  | 0.018234 | 0.69431 | -0.10576 | 0.02227 | -0.00306 |
| 0.127127 | 0.00594  | 0.051955 | 0.2625   | -0.00276 | 0.95252 | -0.06328 | 0.17222 | 0.010535 |
| -0.01796 | 0.69871  | 0.03893  | 0.40127  | 0.023816 | 0.6077  | -0.04007 | 0.38766 | 0.017106 |
| -0.10388 | 0.02477  | -0.10619 | 0.02172  | 0.002496 | 0.9571  | -0.06255 | 0.17723 | 0.033815 |

|          |          |          |          |          |         |          |         |          |
|----------|----------|----------|----------|----------|---------|----------|---------|----------|
| -0.2016  | 1.13E-05 | -0.27585 | 1.33E-09 | -0.01689 | 0.71575 | -0.0167  | 0.71889 | -0.11414 |
| -0.00187 | 0.96782  | 0.047957 | 0.30105  | 0.041048 | 0.37613 | -0.02986 | 0.5198  | -0.01519 |
| -0.1359  | 0.00325  | -0.07825 | 0.0912   | 0.019643 | 0.67202 | -0.07172 | 0.1217  | 0.014596 |
| 0.095907 | 0.03828  | 0.028948 | 0.53261  | 0.033078 | 0.47579 | -0.06624 | 0.15294 | 0.010948 |
| 0.178069 | 0.00011  | 0.315    | 3.24E-12 | -0.0041  | 0.92964 | -0.01499 | 0.74665 | -0.09376 |
| -0.1361  | 0.00321  | -0.02218 | 0.63264  | 0.100565 | 0.02979 | 0.047105 | 0.30973 | 0.163492 |
| 0.204312 | 8.57E-06 | 0.026941 | 0.56141  | 0.033617 | 0.46863 | -0.08959 | 0.05303 | -0.0769  |
| -0.06506 | 0.16041  | -0.04155 | 0.37031  | -0.06032 | 0.19316 | -0.14602 | 0.00156 | -0.13774 |
| 0.128893 | 0.00528  | 0.075261 | 0.1043   | 0.051337 | 0.26823 | -0.01928 | 0.67769 | 0.030729 |
| -0.14188 | 0.00212  | -0.10378 | 0.02491  | 0.062919 | 0.17466 | -0.00081 | 0.98607 | 0.016603 |
| -0.07409 | 0.10984  | -0.05973 | 0.19759  | 0.042003 | 0.36512 | -0.04051 | 0.3824  | 0.023366 |
| 0.003735 | 0.93585  | 0.017426 | 0.70721  | -0.00249 | 0.95713 | -0.10044 | 0.02999 | -0.09308 |
| -0.04557 | 0.32578  | -0.04229 | 0.36185  | 0.00943  | 0.83894 | -0.08103 | 0.08024 | -0.08232 |
| -0.07458 | 0.10749  | -0.26462 | 6.36E-09 | -0.02396 | 0.60556 | -0.1409  | 0.00227 | -0.07065 |
| 0.093366 | 0.04373  | -0.00641 | 0.89005  | -0.04839 | 0.29672 | -0.12191 | 0.00836 | -0.1615  |
| -0.06368 | 0.1695   | -0.11778 | 0.01085  | 0.013648 | 0.76864 | -0.08213 | 0.07622 | -0.09237 |
| 0.040396 | 0.38376  | 0.069591 | 0.13319  | 0.01341  | 0.77255 | -0.07022 | 0.12972 | -0.0449  |
| 0.00581  | 0.90035  | 0.028985 | 0.53209  | 0.039318 | 0.3966  | -0.03394 | 0.4643  | -0.02283 |
| -0.16729 | 0.00028  | -0.2803  | 7.04E-10 | -0.0208  | 0.65398 | -0.06578 | 0.15581 | -0.09381 |
| 0.004248 | 0.92705  | 0.056537 | 0.22267  | 0.074777 | 0.10655 | -0.00626 | 0.89275 | -0.0304  |
| -0.06501 | 0.16076  | -0.12552 | 0.00661  | 0.007823 | 0.86611 | -0.05875 | 0.20503 | -0.03877 |
| -0.04121 | 0.37424  | 0.042166 | 0.36326  | 0.005611 | 0.90375 | -0.03826 | 0.40947 | -0.05658 |
| 0.051508 | 0.26664  | 0.088501 | 0.05599  | 0.016314 | 0.72511 | -0.08897 | 0.05468 | -0.01758 |
| 0.071739 | 0.12159  | -0.05192 | 0.26282  | 0.054527 | 0.23958 | -0.03957 | 0.39362 | -0.01165 |
| -0.05311 | 0.25204  | -0.01125 | 0.8084   | 0.010956 | 0.81332 | -0.02295 | 0.62083 | -0.01611 |
| 0.097576 | 0.03503  | 0.120089 | 0.00939  | 0.008291 | 0.85818 | -0.06615 | 0.1535  | -0.08681 |
| -0.05703 | 0.21867  | -0.04094 | 0.37737  | -0.00378 | 0.93516 | -0.07701 | 0.09647 | -0.03129 |
| -0.06704 | 0.14804  | -0.05191 | 0.26288  | 0.015963 | 0.73081 | -0.07507 | 0.10517 | -0.06405 |
| 0.014577 | 0.75338  | -0.01705 | 0.71318  | 0.00705  | 0.87923 | 0.032053 | 0.48957 | -0.11059 |
| -0.27936 | 8.07E-10 | -0.30375 | 2.01E-11 | -0.02317 | 0.61745 | -0.11025 | 0.01715 | -0.13102 |
| -0.05995 | 0.19593  | 0.006624 | 0.88648  | -0.00528 | 0.90933 | -0.06027 | 0.19357 | -0.05686 |
| -0.01612 | 0.72821  | 0.048091 | 0.2997   | -0.01176 | 0.79983 | -0.07632 | 0.09952 | -0.02838 |
| -0.02844 | 0.5399   | -0.01437 | 0.7568   | 0.021979 | 0.63568 | -0.07155 | 0.1226  | -0.08445 |
| -0.0129  | 0.78104  | 0.004893 | 0.91602  | 0.000557 | 0.99043 | -0.06647 | 0.15154 | -0.0276  |
| -0.04001 | 0.38835  | -0.02607 | 0.5741   | 0.03692  | 0.42604 | -0.07253 | 0.11752 | -0.04832 |
| -0.11531 | 0.01265  | -0.08751 | 0.05879  | 0.010603 | 0.81923 | -0.07915 | 0.08754 | -0.065   |
| 0.094959 | 0.04024  | -0.10729 | 0.02039  | 1.96E-05 | 0.99966 | -0.07007 | 0.13053 | -0.09046 |
| 0.001247 | 0.97856  | 0.001569 | 0.97302  | -0.01506 | 0.74545 | -0.10048 | 0.02993 | -0.11433 |
| -0.08119 | 0.07966  | -0.04314 | 0.35232  | 0.028846 | 0.53405 | -0.02298 | 0.62042 | 0.046329 |
| -0.10298 | 0.02605  | -0.14806 | 0.00133  | -0.01178 | 0.79955 | -0.07537 | 0.1038  | -0.1149  |
| 0.046029 | 0.32093  | 0.015542 | 0.73763  | -0.00265 | 0.95446 | -0.09046 | 0.05074 | -0.06918 |
| -0.04998 | 0.28112  | -0.25307 | 2.94E-08 | 0.011519 | 0.80392 | -0.0409  | 0.37786 | -0.0248  |
| 0.158414 | 0.00059  | 0.008695 | 0.85135  | 0.030592 | 0.50958 | -0.06209 | 0.18043 | -0.02101 |
| 0.029084 | 0.53069  | -0.12753 | 0.00578  | -0.02279 | 0.62325 | -0.11044 | 0.01696 | -0.1415  |
| -0.0791  | 0.08774  | -0.10156 | 0.0282   | 0.000865 | 0.98513 | -0.09888 | 0.03265 | -0.09779 |

|          |         |          |          |          |          |          |         |          |
|----------|---------|----------|----------|----------|----------|----------|---------|----------|
| -0.11059 | 0.01681 | -0.12896 | 0.00525  | 0.019188 | 0.67918  | -0.04333 | 0.3501  | -0.0667  |
| -0.02434 | 0.59988 | -0.06101 | 0.18816  | -0.01471 | 0.75113  | -0.12811 | 0.00556 | -0.04738 |
| 0.049389 | 0.28683 | 0.024061 | 0.60401  | 0.078097 | 0.09185  | 0.027567 | 0.55235 | 0.165447 |
| -0.06834 | 0.14034 | -0.00474 | 0.91862  | -0.00036 | 0.99372  | -0.0608  | 0.18965 | -0.09727 |
| 0.020595 | 0.6571  | -0.02155 | 0.64226  | 0.032771 | 0.47989  | 0.021246 | 0.64698 | -0.05667 |
| 0.081045 | 0.08019 | -0.00206 | 0.96457  | -0.00239 | 0.95896  | -0.0765  | 0.0987  | -0.07416 |
| 0.097851 | 0.03452 | 0.020207 | 0.66316  | -0.0356  | 0.44274  | -0.12596 | 0.00642 | -0.13122 |
| -0.0164  | 0.72369 | 0.010515 | 0.82071  | 0.004845 | 0.91683  | -0.05034 | 0.27763 | -0.0009  |
| -0.03844 | 0.40726 | -0.00646 | 0.88926  | 0.034475 | 0.45734  | -0.03393 | 0.46445 | -0.02052 |
| -0.14875 | 0.00126 | -0.22846 | 6.04E-07 | 0.034356 | 0.45889  | -0.00223 | 0.96162 | 0.09378  |
| -0.03237 | 0.48529 | -0.05975 | 0.19742  | 0.000646 | 0.9889   | -0.05633 | 0.22437 | -0.10533 |
| 0.134553 | 0.00358 | 0.089149 | 0.0542   | 0.008394 | 0.85644  | -0.04325 | 0.35108 | 0.098926 |
| 0.045641 | 0.32503 | 0.000765 | 0.98685  | -0.0031  | 0.94674  | -0.07736 | 0.09494 | -0.07787 |
| -0.04071 | 0.38007 | -0.04428 | 0.33962  | 0.011888 | 0.79778  | -0.06081 | 0.18956 | -0.06867 |
| 0.007797 | 0.86655 | -0.26567 | 5.52E-09 | -0.01046 | 0.82159  | -0.08784 | 0.05785 | -0.01738 |
| 0.033514 | 0.46998 | -0.03172 | 0.49416  | 0.020104 | 0.66477  | -0.00993 | 0.8305  | -0.06755 |
| 0.021953 | 0.63608 | 0.036934 | 0.42587  | -0.00483 | 0.91705  | -0.08753 | 0.05874 | -0.06206 |
| -0.12962 | 0.00502 | -0.01689 | 0.7159   | 0.026133 | 0.57322  | -0.01849 | 0.69028 | -0.05593 |
| -0.00219 | 0.96231 | 0.006463 | 0.88921  | -0.00067 | 0.98841  | -0.08936 | 0.05364 | -0.06474 |
| 0.065275 | 0.15904 | -0.07777 | 0.09321  | -0.01264 | 0.78522  | -0.15492 | 0.00078 | -0.11147 |
| 0.002946 | 0.94937 | 0.10529  | 0.02287  | 0.140189 | 0.00239  | 0.069659 | 0.1328  | 0.309456 |
| -0.03385 | 0.46556 | -0.26537 | 5.74E-09 | 0.119452 | 0.00977  | 0.176567 | 0.00013 | -0.07092 |
| -0.15656 | 0.00069 | -0.20538 | 7.67E-06 | 0.014154 | 0.76032  | -0.01899 | 0.68233 | -0.0422  |
| -0.07801 | 0.09219 | -0.20159 | 1.13E-05 | 0.012859 | 0.78167  | -0.04961 | 0.28465 | 0.016536 |
| -0.00034 | 0.99417 | -0.0432  | 0.35165  | 0.02882  | 0.53442  | -0.01774 | 0.70216 | -0.03392 |
| 0.114092 | 0.01363 | 0.112541 | 0.01496  | 0.014459 | 0.75531  | -0.07419 | 0.10932 | -0.11978 |
| 0.021032 | 0.6503  | 0.015873 | 0.73226  | 0.088261 | 0.05666  | -0.03394 | 0.46441 | 0.096563 |
| 0.005567 | 0.90449 | -0.16049 | 0.0005   | -0.00013 | 0.99776  | -0.08344 | 0.07162 | -0.07566 |
| -0.06489 | 0.16153 | -0.15585 | 0.00073  | 0.014847 | 0.74897  | -0.00569 | 0.90246 | -0.02536 |
| -0.08102 | 0.08027 | -0.19809 | 1.62E-05 | 0.003922 | 0.93264  | -0.04422 | 0.34029 | 0.050049 |
| 0.030878 | 0.50564 | -0.15731 | 0.00065  | -0.00636 | 0.89095  | -0.0099  | 0.83099 | -0.05512 |
| 0.052651 | 0.25615 | -0.04963 | 0.28446  | 0.188264 | 4.24E-05 | -0.00779 | 0.86661 | 0.082929 |
| -0.0711  | 0.12496 | -0.20986 | 4.79E-06 | 0.00237  | 0.95926  | -0.05199 | 0.26215 | -0.02074 |
| 0.022015 | 0.63512 | -0.11959 | 0.00969  | 0.072906 | 0.11563  | -0.02104 | 0.65022 | -0.01332 |
| -0.01882 | 0.68504 | -0.19015 | 3.53E-05 | 0.049456 | 0.28618  | 0.014721 | 0.75102 | 0.050788 |
| -0.07124 | 0.12422 | -0.16595 | 0.00032  | 0.037828 | 0.41475  | 0.003445 | 0.94081 | -0.01973 |
| -0.05235 | 0.25892 | -0.15131 | 0.00104  | 0.053419 | 0.24927  | 0.064355 | 0.165   | 0.096658 |
| 0.06747  | 0.14545 | -0.11815 | 0.01061  | 0.082968 | 0.07326  | -0.01468 | 0.75176 | 0.012528 |
| -0.07801 | 0.09221 | -0.11816 | 0.0106   | -0.00558 | 0.90427  | -0.02357 | 0.61143 | -0.06979 |
| -0.14225 | 0.00206 | -0.19116 | 3.21E-05 | 0.035074 | 0.44955  | 0.019847 | 0.6688  | 0.248591 |
| -0.00751 | 0.87149 | -0.07726 | 0.09538  | 0.038797 | 0.40289  | 0.00224  | 0.96149 | -0.02125 |
| -0.01071 | 0.81752 | -0.11512 | 0.0128   | 0.024179 | 0.60223  | -0.04493 | 0.33258 | -0.00485 |
| -0.03207 | 0.48939 | -0.15159 | 0.00102  | -0.00211 | 0.96375  | -0.0509  | 0.27229 | -0.06977 |
| -0.02422 | 0.60161 | -0.19651 | 1.89E-05 | 0.156893 | 0.00067  | 0.043682 | 0.34625 | 0.006588 |
| -0.01228 | 0.79133 | -0.07825 | 0.0912   | 0.266659 | 4.82E-09 | 0.037461 | 0.41929 | 0.135324 |



|          |         |          |          |          |          |          |          |          |
|----------|---------|----------|----------|----------|----------|----------|----------|----------|
| 0.025125 | 0.5881  | -0.10114 | 0.02886  | 0.063278 | 0.17221  | -0.0454  | 0.32758  | -0.0408  |
| -0.0246  | 0.59593 | -0.08219 | 0.076    | 0.013572 | 0.76988  | -0.0193  | 0.6774   | -0.04477 |
| -0.04723 | 0.30845 | -0.12032 | 0.00925  | 0.002244 | 0.96143  | -0.02392 | 0.60616  | -0.05439 |
| 0.015304 | 0.74151 | -0.06129 | 0.18609  | -0.00605 | 0.89621  | -0.0406  | 0.38139  | -0.04834 |
| 0.062658 | 0.17646 | 0.040789 | 0.37915  | 0.110556 | 0.01685  | 0.059097 | 0.20238  | 0.075191 |
| -0.04844 | 0.29623 | -0.08915 | 0.05421  | 0.013189 | 0.7762   | 0.002578 | 0.95569  | -0.01569 |
| 0.037725 | 0.41602 | -0.26898 | 3.50E-09 | -0.01394 | 0.76391  | -0.06007 | 0.19507  | -0.07509 |
| -0.07125 | 0.12414 | -0.09522 | 0.0397   | 0.02619  | 0.57237  | 0.077551 | 0.09415  | 0.120247 |
| -0.04601 | 0.32108 | -0.16135 | 0.00046  | 0.013546 | 0.77032  | -0.01982 | 0.66919  | -0.02851 |
| -0.00504 | 0.91356 | -0.12469 | 0.00698  | 0.005585 | 0.9042   | -0.02904 | 0.53137  | -0.04211 |
| 0.010756 | 0.81668 | -0.11    | 0.01741  | 0.022575 | 0.62653  | -0.0456  | 0.32546  | -0.07615 |
| -0.01903 | 0.68174 | -0.11116 | 0.01626  | 0.025306 | 0.58542  | -0.02005 | 0.66565  | -0.03704 |
| 0.040799 | 0.37904 | -0.05901 | 0.20307  | 0.018136 | 0.69587  | -0.02876 | 0.53534  | -0.049   |
| 0.009669 | 0.83492 | -0.09766 | 0.03488  | 0.017884 | 0.69989  | -0.03517 | 0.44825  | -0.02774 |
| -0.04346 | 0.34865 | -0.1189  | 0.01012  | 0.016534 | 0.72156  | -0.0371  | 0.4238   | -0.04253 |
| -0.03025 | 0.51433 | -0.12365 | 0.00747  | 0.016898 | 0.7157   | -0.02894 | 0.53274  | -0.05111 |
| -0.01411 | 0.76099 | -0.09158 | 0.04795  | 0.01789  | 0.69979  | -0.03844 | 0.40718  | -0.04764 |
| 0.024203 | 0.60188 | -0.05626 | 0.22493  | 0.022805 | 0.62303  | -0.02509 | 0.5887   | -0.0584  |
| -0.02654 | 0.56728 | -0.10251 | 0.02675  | -0.00497 | 0.91469  | -0.0467  | 0.31389  | -0.04808 |
| 0.006432 | 0.88975 | -0.08407 | 0.0695   | 0.006798 | 0.88351  | -0.03833 | 0.40858  | -0.02519 |
| 0.027076 | 0.55946 | -0.06096 | 0.18846  | 0.009115 | 0.84425  | -0.0414  | 0.3721   | -0.02889 |
| -0.0351  | 0.44927 | -0.11693 | 0.01144  | 0.006654 | 0.88597  | -0.03414 | 0.46169  | -0.04239 |
| -0.09585 | 0.03841 | -0.1501  | 0.00114  | 0.013509 | 0.77092  | -0.0125  | 0.78754  | -0.03563 |
| -0.04093 | 0.37755 | -0.1486  | 0.00128  | 0.023907 | 0.60633  | -0.02749 | 0.55349  | -0.01652 |
| -0.02975 | 0.52134 | -0.18689 | 4.83E-05 | 0.015784 | 0.73371  | -0.02695 | 0.56127  | -0.00176 |
| 0.016909 | 0.71552 | -0.11141 | 0.01601  | 0.088766 | 0.05525  | -0.01024 | 0.82539  | 0.006556 |
| 0.047131 | 0.30947 | -0.14615 | 0.00154  | -0.02614 | 0.57307  | -0.06986 | 0.13171  | -0.10435 |
| -0.04655 | 0.31549 | -0.10892 | 0.01855  | 0.039751 | 0.39141  | 0.027583 | 0.55211  | 0.124162 |
| 0.063735 | 0.16912 | -0.0666  | 0.15073  | -0.00246 | 0.95766  | -0.05391 | 0.24494  | -0.0381  |
| 0.03272  | 0.48058 | -0.07989 | 0.0846   | 0.037556 | 0.41811  | -0.01011 | 0.82753  | 0.023611 |
| 0.057864 | 0.21198 | -0.06997 | 0.13107  | 0.008115 | 0.86117  | -0.04927 | 0.28795  | -0.01009 |
| -0.0497  | 0.28384 | -0.13761 | 0.00288  | 0.068289 | 0.14061  | 0.02999  | 0.51796  | 0.088274 |
| -0.02174 | 0.63928 | -0.13068 | 0.00467  | 0.02964  | 0.52286  | 0.004578 | 0.92141  | 0.00139  |
| -0.03722 | 0.42225 | -0.1028  | 0.02631  | 0.018321 | 0.69292  | -0.02675 | 0.56419  | -0.0167  |
| -0.04267 | 0.35752 | -0.15781 | 0.00062  | -0.00057 | 0.99012  | -0.0353  | 0.44666  | -0.05005 |
| -0.04282 | 0.3559  | -0.1617  | 0.00045  | 0.058915 | 0.20378  | 0.021152 | 0.64844  | 0.123407 |
| -0.02389 | 0.60652 | -0.1014  | 0.02845  | 0.038637 | 0.40483  | -0.0232  | 0.61704  | -0.04898 |
| -0.03038 | 0.51256 | -0.13237 | 0.00417  | 0.055022 | 0.23532  | 0.01115  | 0.81008  | 0.031426 |
| -0.04098 | 0.37696 | -0.19643 | 1.91E-05 | -0.01761 | 0.70427  | -0.15859 | 0.00058  | -0.10309 |
| -0.07671 | 0.09778 | -0.01175 | 0.80003  | 0.246417 | 6.88E-08 | 0.270014 | 3.03E-09 | 0.494251 |
| -0.07347 | 0.11284 | -0.1311  | 0.00454  | -0.00655 | 0.88779  | -0.10945 | 0.01798  | -0.11109 |
| -0.0092  | 0.84279 | -0.09846 | 0.0334   | 0.046508 | 0.31591  | -0.04681 | 0.31277  | -0.02084 |
| -0.17439 | 0.00015 | -0.22553 | 8.47E-07 | -0.00919 | 0.84297  | -0.02934 | 0.52703  | -0.12592 |
| 0.065656 | 0.15661 | -0.06472 | 0.16262  | -0.00074 | 0.98727  | -0.13088 | 0.00461  | -0.04594 |
| -0.05581 | 0.22868 | -0.18554 | 5.49E-05 | 0.005255 | 0.90982  | -0.12223 | 0.00819  | -0.08464 |

|          |          |          |          |          |          |          |         |          |
|----------|----------|----------|----------|----------|----------|----------|---------|----------|
| 0.124772 | 0.00694  | 0.018355 | 0.69238  | -0.00576 | 0.90114  | -0.13708 | 0.00299 | -0.08161 |
| -0.10329 | 0.02561  | -0.1691  | 0.00024  | -0.0457  | 0.32438  | -0.13317 | 0.00394 | -0.14302 |
| 0.039433 | 0.39521  | -0.01912 | 0.68018  | 0.056849 | 0.22012  | 0.12553  | 0.0066  | 0.057571 |
| -0.06406 | 0.16696  | -0.15208 | 0.00098  | -0.00319 | 0.94526  | -0.14471 | 0.00172 | 0.007102 |
| 0.040977 | 0.37695  | 0.00523  | 0.91025  | 0.039703 | 0.39198  | 0.010869 | 0.81478 | -0.0523  |
| -0.06872 | 0.13814  | -0.21711 | 2.18E-06 | -0.01926 | 0.67802  | -0.06378 | 0.16885 | -0.14703 |
| 0.235673 | 2.58E-07 | 0.236784 | 2.25E-07 | 0.01797  | 0.69851  | 0.016768 | 0.71779 | -0.11987 |
| -0.00265 | 0.95449  | -0.06615 | 0.15348  | -0.02119 | 0.6479   | 0.018169 | 0.69534 | -0.1158  |
| 0.019239 | 0.67838  | -0.11732 | 0.01118  | -0.0029  | 0.95025  | -0.14923 | 0.00122 | -0.09698 |
| 0.065771 | 0.15588  | -0.05233 | 0.25909  | -0.01079 | 0.81619  | -0.05785 | 0.21212 | 0.060418 |
| 0.029867 | 0.51968  | -0.07201 | 0.12017  | 0.002219 | 0.96186  | -0.13161 | 0.00439 | -0.03221 |
| 0.212883 | 3.46E-06 | -0.06266 | 0.17646  | -0.01566 | 0.73568  | -0.15862 | 0.00058 | -0.06395 |
| -0.05155 | 0.26624  | -0.11943 | 0.00979  | 0.054051 | 0.2437   | 0.108309 | 0.01922 | -0.04006 |
| -0.03701 | 0.42497  | -0.27756 | 1.05E-09 | -0.0423  | 0.36175  | -0.14113 | 0.00224 | -0.14018 |
| 0.101119 | 0.02889  | 0.077138 | 0.09592  | 0.057815 | 0.21236  | 0.080288 | 0.08306 | 0.003568 |
| -0.18099 | 8.38E-05 | -0.15462 | 0.0008   | 0.110545 | 0.01686  | 0.140353 | 0.00237 | 0.061765 |
| -0.02833 | 0.54134  | -0.17849 | 0.00011  | 0.024804 | 0.59287  | -0.09177 | 0.04747 | -0.03766 |
| -0.15387 | 0.00085  | -0.03754 | 0.41834  | -0.06293 | 0.1746   | -0.09665 | 0.0368  | -0.12411 |
| -0.03412 | 0.46194  | -0.15935 | 0.00055  | 0.023441 | 0.61336  | 0.010262 | 0.82496 | -0.02815 |
| 0.056807 | 0.22046  | 0.168266 | 0.00026  | 0.024599 | 0.59594  | -0.02663 | 0.56596 | -0.01221 |
| -0.00422 | 0.92757  | 0.055032 | 0.23524  | 0.000425 | 0.99269  | -0.04631 | 0.31802 | -0.06573 |
| -0.14417 | 0.00179  | -0.10611 | 0.02183  | -0.02108 | 0.64951  | -0.09903 | 0.03238 | -0.10474 |
| -0.1488  | 0.00126  | -0.25381 | 2.68E-08 | 0.048585 | 0.29476  | -0.07264 | 0.11695 | 0.003216 |
| -0.11807 | 0.01066  | -0.14249 | 0.00202  | 0.096392 | 0.03731  | -0.01408 | 0.76148 | 0.038831 |
| 0.070335 | 0.12908  | 0.159157 | 0.00056  | 0.037096 | 0.42384  | -0.00649 | 0.88884 | 0.068287 |
| 0.149899 | 0.00116  | 0.11214  | 0.01533  | -0.02689 | 0.56217  | -0.15582 | 0.00073 | -0.07755 |
| 0.048352 | 0.29708  | -0.12246 | 0.00807  | 0.014991 | 0.74661  | -0.10277 | 0.02636 | -0.08869 |
| -0.18747 | 4.57E-05 | -0.20286 | 9.96E-06 | 0.093103 | 0.04433  | 0.010508 | 0.82083 | 0.043375 |
| 0.219245 | 1.72E-06 | 0.052544 | 0.25712  | 0.294234 | 8.84E-11 | 0.029939 | 0.51867 | 0.197109 |
| -0.09837 | 0.03356  | -0.18842 | 4.17E-05 | 0.017911 | 0.69945  | -0.00944 | 0.83871 | -0.04338 |
| 0.276802 | 1.16E-09 | 0.098069 | 0.03411  | 0.005333 | 0.90849  | -0.13346 | 0.00386 | -0.03098 |
| 0.047432 | 0.30638  | 0.065901 | 0.15507  | 0.00397  | 0.93181  | -0.10276 | 0.02638 | -0.03938 |
| -0.04845 | 0.29613  | 0.014354 | 0.75703  | -0.00372 | 0.93618  | -0.00032 | 0.99446 | 0.021382 |
| -0.10712 | 0.02059  | -0.17948 | 9.63E-05 | 0.014152 | 0.76035  | -0.05955 | 0.19895 | -0.0795  |
| 0.0298   | 0.52061  | -0.04985 | 0.28237  | 0.01384  | 0.76547  | -0.12029 | 0.00927 | -0.06234 |
| -0.02047 | 0.6591   | -0.0862  | 0.06271  | -0.007   | 0.88009  | -0.10771 | 0.0199  | -0.08406 |
| 0.246442 | 6.86E-08 | 0.24256  | 1.11E-07 | 0.014926 | 0.74767  | -0.09067 | 0.0502  | 0.120892 |
| -0.13186 | 0.00431  | -0.24397 | 9.35E-08 | -0.0246  | 0.59597  | -0.11698 | 0.01141 | -0.0864  |
| -0.02683 | 0.56309  | -0.18396 | 6.36E-05 | 0.038245 | 0.40962  | -0.01348 | 0.77136 | 0.025054 |
| 0.063569 | 0.17023  | -0.07699 | 0.09654  | -0.01907 | 0.68108  | -0.1268  | 0.00607 | -0.10579 |
| 0.135808 | 0.00328  | 0.02391  | 0.60629  | -0.00298 | 0.94878  | -0.07566 | 0.10247 | -0.11503 |
| 0.088475 | 0.05606  | -0.00812 | 0.86103  | -0.01103 | 0.81207  | -0.0189  | 0.68366 | -0.17661 |
| 0.097967 | 0.0343   | -0.00384 | 0.93402  | 0.014569 | 0.75352  | -0.06566 | 0.15658 | -0.07353 |
| -0.01249 | 0.78773  | -0.03152 | 0.49679  | 0.022016 | 0.63511  | 0.002392 | 0.95889 | -0.10576 |
| 0.106829 | 0.02094  | -0.05363 | 0.24737  | -0.04525 | 0.32918  | -0.13987 | 0.00245 | -0.13186 |

|          |          |          |          |          |         |          |          |          |
|----------|----------|----------|----------|----------|---------|----------|----------|----------|
| -0.12716 | 0.00593  | -0.21042 | 4.51E-06 | 0.009953 | 0.83015 | -0.10994 | 0.01747  | 0.029995 |
| 0.145093 | 0.00167  | 0.00562  | 0.9036   | 0.053201 | 0.25121 | -0.02118 | 0.64796  | 0.027634 |
| 0.023364 | 0.61453  | -0.07223 | 0.11908  | -0.02443 | 0.59853 | -0.10584 | 0.02216  | -0.13463 |
| -0.01419 | 0.75974  | -0.01797 | 0.69846  | 0.013493 | 0.77119 | -0.07    | 0.13091  | -0.05051 |
| 0.002067 | 0.96446  | 0.096738 | 0.03663  | 0.003825 | 0.9343  | 0.038522 | 0.40623  | 0.049918 |
| -0.14368 | 0.00185  | -0.33121 | 2.03E-13 | -0.03556 | 0.4433  | -0.16245 | 0.00042  | -0.12732 |
| 0.314879 | 3.30E-12 | 0.259637 | 1.24E-08 | 0.024738 | 0.59386 | -0.0554  | 0.23212  | -0.01468 |
| -0.08303 | 0.07304  | -0.06831 | 0.14051  | -0.00069 | 0.98812 | -0.09851 | 0.03331  | -0.11349 |
| -0.09205 | 0.04681  | -0.11649 | 0.01176  | -0.02356 | 0.61149 | -0.07948 | 0.0862   | -0.13197 |
| 0.001222 | 0.97898  | -0.14549 | 0.00162  | -0.03418 | 0.46125 | -0.13362 | 0.00382  | -0.12691 |
| 0.10058  | 0.02976  | -0.03157 | 0.4961   | -0.02506 | 0.58905 | -0.14364 | 0.00186  | -0.12293 |
| 0.08663  | 0.0614   | 0.109922 | 0.01749  | 0.006187 | 0.89392 | 0.05214  | 0.2608   | 0.035485 |
| 0.022043 | 0.63469  | -0.01222 | 0.7922   | 0.012184 | 0.79286 | 0.004164 | 0.92848  | -0.04991 |
| 0.241003 | 1.35E-07 | 0.053513 | 0.24844  | -0.00522 | 0.91045 | 0.02497  | 0.59041  | -0.21538 |
| -0.00464 | 0.9203   | -0.23699 | 2.20E-07 | -0.02086 | 0.65303 | -0.05893 | 0.20363  | -0.14312 |
| -0.04717 | 0.30908  | -0.05315 | 0.25165  | 0.067276 | 0.14661 | -0.04295 | 0.35438  | 0.199687 |
| 0.061442 | 0.18501  | -0.07822 | 0.09134  | 0.008996 | 0.84627 | -0.05793 | 0.21149  | -0.00259 |
| 0.024001 | 0.60491  | -0.02144 | 0.64396  | 0.01904  | 0.68152 | -0.07124 | 0.12421  | -0.04316 |
| 0.061846 | 0.18214  | -0.08043 | 0.0825   | 0.001758 | 0.96977 | -0.05062 | 0.27496  | -0.12036 |
| 0.033252 | 0.47346  | 0.13137  | 0.00446  | 0.016174 | 0.72739 | -0.0532  | 0.25119  | -0.01032 |
| 0.162233 | 0.00043  | 0.013615 | 0.76918  | 0.081248 | 0.07944 | 0.008707 | 0.85114  | 0.133981 |
| -0.07941 | 0.08651  | -0.10254 | 0.02671  | 0.116588 | 0.01169 | 0.06495  | 0.16113  | 0.082226 |
| 0.237515 | 2.06E-07 | 0.111324 | 0.01609  | 0.065047 | 0.1605  | 0.030745 | 0.50747  | -0.02381 |
| 0.077487 | 0.09442  | -0.06361 | 0.16998  | -0.00994 | 0.8304  | -0.10343 | 0.0254   | -0.08141 |
| 0.096891 | 0.03634  | -0.00027 | 0.99531  | -0.00867 | 0.85182 | -0.13319 | 0.00393  | -0.07533 |
| -0.07731 | 0.0952   | -0.19455 | 2.30E-05 | 0.047793 | 0.30272 | -0.00689 | 0.88192  | 0.040731 |
| 0.022826 | 0.62271  | -0.04231 | 0.36162  | 0.046773 | 0.31316 | 0.010561 | 0.81995  | -0.05782 |
| -0.03856 | 0.40574  | -0.06632 | 0.15247  | 0.051098 | 0.27047 | -0.00388 | 0.93328  | 0.030125 |
| -0.14061 | 0.00232  | -0.15391 | 0.00085  | 0.02406  | 0.60402 | -0.05337 | 0.24969  | 0.008907 |
| 0.052651 | 0.25615  | -0.16385 | 0.00038  | -0.00336 | 0.94221 | -0.1115  | 0.01593  | -0.12523 |
| 0.036253 | 0.43445  | -0.09761 | 0.03496  | 0.074943 | 0.10578 | -0.0669  | 0.14886  | 0.139906 |
| 0.060703 | 0.19037  | 0.012844 | 0.78192  | -0.00602 | 0.89683 | -0.11731 | 0.01118  | -0.06789 |
| 0.04304  | 0.35339  | -0.15697 | 0.00066  | 0.024476 | 0.59779 | -0.0923  | 0.04621  | -0.03952 |
| -0.23608 | 2.45E-07 | -0.23903 | 1.72E-07 | 0.127452 | 0.00581 | 0.308741 | 9.01E-12 | 0.158294 |
| 0.009764 | 0.83332  | -0.05653 | 0.22269  | 0.024646 | 0.59525 | 0.024739 | 0.59385  | -0.04564 |
| -0.13064 | 0.00469  | -0.17289 | 0.00017  | -0.00831 | 0.85777 | -0.10853 | 0.01897  | -0.11163 |
| 0.020076 | 0.66521  | -0.04643 | 0.31675  | 0.010439 | 0.82198 | -0.1061  | 0.02184  | -0.05752 |
| 0.100231 | 0.03034  | -0.09586 | 0.03838  | 0.002067 | 0.96446 | -0.12463 | 0.007    | -0.05318 |
| 0.306314 | 1.33E-11 | 0.092934 | 0.04472  | -0.02284 | 0.62244 | -0.11155 | 0.01588  | -0.09535 |
| -0.12288 | 0.00785  | -0.27768 | 1.03E-09 | -0.02484 | 0.59234 | -0.09288 | 0.04485  | -0.18653 |
| -0.17731 | 0.00012  | -0.1449  | 0.00169  | -0.0228  | 0.62317 | -0.03736 | 0.4206   | -0.07044 |
| -0.04703 | 0.31048  | -0.06439 | 0.1648   | -0.00225 | 0.9613  | -0.08232 | 0.07554  | -0.06361 |
| 0.038823 | 0.40257  | -0.17864 | 0.0001   | 0.044735 | 0.33473 | 0.001563 | 0.97312  | 0.004382 |
| -0.22322 | 1.10E-06 | -0.24901 | 4.96E-08 | 0.07487  | 0.10612 | 0.025596 | 0.58113  | -0.00377 |
| 0.083358 | 0.07191  | -0.01157 | 0.80313  | 0.044359 | 0.33882 | -0.07182 | 0.12114  | -0.02633 |

|           |          |          |          |          |         |          |          |          |
|-----------|----------|----------|----------|----------|---------|----------|----------|----------|
| 0.218585  | 1.85E-06 | 0.001843 | 0.96831  | 0.005675 | 0.90265 | -0.12828 | 0.0055   | -0.00057 |
| 0.030811  | 0.50656  | -0.07432 | 0.1087   | -0.00716 | 0.8774  | -0.13663 | 0.00309  | -0.08145 |
| 0.395263  | 6.50E-19 | 0.290119 | 1.65E-10 | 0.013573 | 0.76987 | -0.11443 | 0.01335  | -0.07224 |
| 0.067399  | 0.14588  | -0.04898 | 0.29084  | 0.012019 | 0.79559 | -0.07756 | 0.0941   | -0.14557 |
| -0.05783  | 0.21227  | -0.18762 | 4.51E-05 | 0.044817 | 0.33385 | 0.033767 | 0.46664  | 0.041769 |
| -0.19648  | 1.90E-05 | -0.2245  | 9.52E-07 | 0.006233 | 0.89313 | -0.0299  | 0.51926  | 0.079572 |
| -0.00713  | 0.87783  | -0.02887 | 0.53368  | -0.01484 | 0.7491  | -0.10825 | 0.01929  | -0.01292 |
| -0.16245  | 0.00042  | -0.12438 | 0.00712  | 0.026273 | 0.57117 | 0.025887 | 0.57684  | -0.0302  |
| 0.076483  | 0.09878  | 0.031807 | 0.49292  | 0.023958 | 0.60556 | -0.06737 | 0.14602  | -0.04757 |
| 0.025975  | 0.57554  | -0.01478 | 0.74999  | 0.007029 | 0.87959 | -0.12026 | 0.00928  | -0.06667 |
| -5.72E-05 | 0.99902  | -0.02794 | 0.54701  | 0.049549 | 0.28528 | -0.0467  | 0.3139   | -0.02216 |
| 0.065822  | 0.15556  | -0.15584 | 0.00073  | -0.0213  | 0.64623 | -0.10884 | 0.01863  | -0.16419 |
| -0.08703  | 0.06021  | -0.11968 | 0.00963  | -0.01401 | 0.76262 | -0.10827 | 0.01927  | -0.07443 |
| 0.022813  | 0.6229   | 0.032064 | 0.48943  | 0.017342 | 0.70856 | 0.126215 | 0.00631  | -0.06064 |
| 0.014536  | 0.75405  | 0.068222 | 0.14101  | 0.043074 | 0.353   | -0.04232 | 0.36151  | -0.07196 |
| -0.10047  | 0.02995  | -0.14503 | 0.00168  | -0.02225 | 0.63156 | 0.013508 | 0.77095  | -0.09708 |
| -0.08905  | 0.05447  | -0.03306 | 0.47608  | 0.049777 | 0.28305 | -0.0488  | 0.29258  | 0.03622  |
| -0.01313  | 0.77716  | 0.079133 | 0.0876   | 0.025695 | 0.57966 | 0.083701 | 0.07074  | -0.03476 |
| 0.085064  | 0.06626  | 0.109372 | 0.01806  | 0.069248 | 0.13511 | 0.064039 | 0.16709  | 0.113593 |
| 0.123722  | 0.00743  | 0.019965 | 0.66695  | 0.020807 | 0.6538  | -0.03118 | 0.50142  | -0.04502 |
| -0.00738  | 0.87369  | -0.05433 | 0.24125  | -0.03559 | 0.44286 | -0.18035 | 8.89E-05 | -0.14219 |
| -0.06484  | 0.16186  | -0.1878  | 4.43E-05 | 0.02467  | 0.59488 | -0.04983 | 0.28256  | -0.04706 |
| 0.016915  | 0.71542  | 0.218483 | 1.87E-06 | 0.047054 | 0.31025 | 0.079734 | 0.08522  | -0.04099 |
| -0.06397  | 0.16758  | -0.12006 | 0.00941  | 0.013244 | 0.77529 | -0.05159 | 0.26584  | -0.00225 |
| -0.06531  | 0.15879  | -0.00572 | 0.90185  | 0.093701 | 0.04298 | 0.034245 | 0.46034  | 0.145372 |
| -0.14945  | 0.0012   | -0.23121 | 4.38E-07 | 0.058404 | 0.20773 | -0.02203 | 0.63491  | 0.168664 |
| 0.110606  | 0.0168   | 0.052493 | 0.25758  | -0.03352 | 0.46996 | -0.01268 | 0.78461  | -0.19709 |
| 0.070279  | 0.12938  | 0.010971 | 0.81308  | 0.047512 | 0.30556 | -0.01608 | 0.72883  | 0.001878 |
| 0.063768  | 0.1689   | -0.02753 | 0.55284  | 0.038561 | 0.40576 | -0.03027 | 0.51411  | 0.015085 |
| 0.107219  | 0.02048  | -0.02971 | 0.52183  | 0.031392 | 0.49857 | -0.0427  | 0.35724  | -0.02663 |
| 0.073727  | 0.11157  | -0.19374 | 2.49E-05 | 0.016876 | 0.71605 | -0.13865 | 0.00268  | 0.006476 |
| 0.123217  | 0.00768  | 0.010705 | 0.81752  | 0.02891  | 0.53315 | -0.06208 | 0.18051  | -0.03856 |
| 0.12953   | 0.00506  | 0.192106 | 2.92E-05 | 0.023661 | 0.61004 | 0.091402 | 0.04838  | 0.007274 |
| -0.07672  | 0.09772  | 0.040231 | 0.38571  | -0.01204 | 0.79526 | -0.00028 | 0.99516  | -0.03936 |
| 0.004236  | 0.92726  | 0.093821 | 0.04271  | 0.006054 | 0.89618 | -0.04665 | 0.31449  | 0.0719   |
| 0.026334  | 0.57027  | 0.013253 | 0.77515  | 0.015714 | 0.73485 | -0.08515 | 0.066    | -0.02785 |
| -0.19314  | 2.64E-05 | -0.22011 | 1.56E-06 | -0.00468 | 0.91968 | -0.10378 | 0.02491  | -0.04299 |
| 0.08291   | 0.07346  | -0.0955  | 0.03912  | -0.0378  | 0.41509 | -0.00449 | 0.92295  | -0.19926 |
| -0.09884  | 0.03273  | -0.20667 | 6.71E-06 | -0.03119 | 0.5013  | -0.14456 | 0.00174  | -0.05769 |
| 0.150658  | 0.00109  | 0.189507 | 3.76E-05 | 0.006455 | 0.88936 | 0.07682  | 0.0973   | -0.13081 |
| -0.10825  | 0.01928  | -0.20669 | 6.69E-06 | -0.07362 | 0.11211 | -0.1185  | 0.01037  | -0.14728 |
| -0.00155  | 0.97339  | 0.061944 | 0.18144  | -0.00257 | 0.95576 | -0.05523 | 0.23355  | -0.05496 |
| 0.015905  | 0.73174  | -0.19361 | 2.52E-05 | 0.029009 | 0.53175 | 0.002297 | 0.96051  | -0.0573  |
| 0.111995  | 0.01546  | -0.13702 | 0.00301  | 0.01019  | 0.82616 | -0.12143 | 0.00862  | -0.05776 |
| 0.196192  | 1.96E-05 | -0.10993 | 0.01748  | -0.07287 | 0.11581 | -0.20979 | 4.82E-06 | -0.21304 |

|          |          |          |          |          |          |          |          |          |
|----------|----------|----------|----------|----------|----------|----------|----------|----------|
| -0.03337 | 0.47184  | -0.08482 | 0.06705  | 0.139021 | 0.00261  | 0.121168 | 0.00876  | 0.038339 |
| -0.11126 | 0.01616  | -0.08817 | 0.05692  | 0.049161 | 0.28906  | 0.072039 | 0.12004  | 0.029123 |
| 0.005131 | 0.91195  | -0.07797 | 0.0924   | 0.005945 | 0.89805  | -0.10763 | 0.01999  | -0.08971 |
| 0.021669 | 0.64045  | -0.06105 | 0.18784  | -0.01069 | 0.81778  | -0.14598 | 0.00156  | -0.07594 |
| -0.17073 | 0.00021  | -0.27965 | 7.74E-10 | 0.161442 | 0.00046  | 0.028205 | 0.54319  | 0.261549 |
| -0.14168 | 0.00215  | -0.22414 | 9.93E-07 | -0.02566 | 0.5802   | -0.12222 | 0.00819  | -0.04957 |
| 0.160137 | 0.00051  | -0.0065  | 0.88863  | 0.093098 | 0.04434  | -0.03227 | 0.48668  | 0.01623  |
| -0.06847 | 0.13957  | -0.1518  | 0.001    | 0.031438 | 0.49794  | -0.11203 | 0.01543  | 0.004408 |
| 0.094977 | 0.04021  | -0.00936 | 0.84013  | 0.003536 | 0.93925  | -0.139   | 0.00261  | -0.03725 |
| -0.04546 | 0.32699  | -0.16077 | 0.00049  | 0.042649 | 0.35778  | -0.07562 | 0.10263  | 0.018711 |
| -0.04833 | 0.29734  | -0.15807 | 0.00061  | -0.00505 | 0.91325  | -0.13569 | 0.0033   | -0.08051 |
| 0.207635 | 6.06E-06 | 0.129469 | 0.00508  | 0.037499 | 0.41882  | 0.044309 | 0.33936  | -0.06915 |
| 0.038505 | 0.40644  | -0.00806 | 0.86211  | 0.011863 | 0.79819  | -0.09865 | 0.03306  | -0.05752 |
| 0.076403 | 0.09913  | -0.1373  | 0.00295  | -0.0451  | 0.33081  | -0.07948 | 0.08623  | -0.17084 |
| -0.01857 | 0.689    | -0.30177 | 2.75E-11 | -0.03562 | 0.44252  | -0.17015 | 0.00022  | -0.12823 |
| 0.115924 | 0.01218  | -0.04165 | 0.36919  | 0.033944 | 0.4643   | -0.09509 | 0.03997  | -0.0494  |
| 0.24933  | 4.76E-08 | 0.351927 | 4.62E-15 | 0.067169 | 0.14726  | 0.285715 | 3.19E-10 | 0.133102 |
| -0.03117 | 0.50157  | -0.06709 | 0.14774  | 0.033664 | 0.468    | -0.08954 | 0.05316  | 0.019039 |
| -0.21693 | 2.23E-06 | -0.35069 | 5.83E-15 | -0.02665 | 0.56565  | -0.15078 | 0.00108  | -0.07437 |
| 0.039274 | 0.39712  | -0.076   | 0.10095  | -0.04704 | 0.31045  | -0.09975 | 0.03114  | -0.11538 |
| 0.092027 | 0.04685  | -0.03693 | 0.42586  | -0.02673 | 0.56446  | -0.12767 | 0.00573  | -0.1115  |
| 0.191374 | 3.14E-05 | -0.06696 | 0.14855  | -0.03327 | 0.47323  | -0.13331 | 0.0039   | -0.06098 |
| 0.176808 | 0.00012  | 0.02984  | 0.52006  | -0.01717 | 0.71124  | -0.12453 | 0.00705  | -0.05449 |
| 0.032491 | 0.48365  | 0.02099  | 0.65096  | 0.107104 | 0.02061  | 0.08667  | 0.06128  | 0.138629 |
| 0.284895 | 3.60E-10 | 0.017768 | 0.70174  | 0.034415 | 0.45813  | -0.08686 | 0.0607   | -0.03731 |
| -0.19358 | 2.53E-05 | -0.27149 | 2.47E-09 | -0.00734 | 0.87432  | -0.09272 | 0.04522  | -0.06409 |
| -0.14655 | 0.00149  | -0.07509 | 0.10511  | 0.187163 | 4.71E-05 | 0.236879 | 2.23E-07 | 0.265148 |
| -0.14303 | 0.00194  | -0.29128 | 1.39E-10 | 0.02709  | 0.55925  | -0.01538 | 0.74024  | -0.0029  |
| -0.01272 | 0.7839   | -0.33308 | 1.46E-13 | -0.0017  | 0.97084  | -0.13897 | 0.00261  | -0.15344 |
| -0.00743 | 0.87274  | -0.11667 | 0.01163  | 0.067985 | 0.1424   | -0.04329 | 0.35061  | 0.04428  |
| -0.06256 | 0.17714  | -0.12761 | 0.00575  | 0.021861 | 0.63749  | -0.03693 | 0.42594  | 0.197202 |
| -0.01765 | 0.70369  | -0.08613 | 0.06292  | -0.01279 | 0.78273  | -0.12381 | 0.00739  | -0.09271 |
| 0.107046 | 0.02068  | -0.05359 | 0.24776  | 0.100577 | 0.02977  | -0.05774 | 0.21295  | 0.121904 |
| 0.0035   | 0.93987  | -0.19562 | 2.07E-05 | 0.006117 | 0.89512  | -0.00342 | 0.9412   | 0.062588 |
| -0.0891  | 0.05433  | -0.19824 | 1.59E-05 | 0.01896  | 0.68279  | -0.13338 | 0.00388  | -0.07829 |
| 0.078694 | 0.08938  | -0.0733  | 0.11368  | -0.03925 | 0.39744  | -0.10044 | 0.02999  | -0.0853  |
| -0.08155 | 0.0783   | -0.24938 | 4.73E-08 | -0.01183 | 0.79883  | 0.022889 | 0.62175  | -0.03435 |
| 0.020142 | 0.66419  | 0.127827 | 0.00567  | 0.144303 | 0.00177  | 0.302664 | 2.38E-11 | 0.187314 |
| 0.070001 | 0.13091  | 0.02717  | 0.55808  | 0.025382 | 0.5843   | -0.07009 | 0.13039  | -0.03633 |
| -0.10412 | 0.02445  | -0.0752  | 0.10456  | -0.04267 | 0.35754  | -0.04241 | 0.36053  | -0.16711 |
| 0.138227 | 0.00276  | -0.06084 | 0.18935  | 0.068928 | 0.13693  | -0.01947 | 0.67475  | 0.010081 |
| 0.081959 | 0.07683  | -0.05265 | 0.25612  | 0.001226 | 0.97891  | -0.11286 | 0.01468  | -0.06544 |
| 0.130158 | 0.00484  | 0.073489 | 0.11274  | 0.043376 | 0.34964  | 0.0223   | 0.63075  | 0.011778 |
| 0.091792 | 0.04742  | 0.069354 | 0.13451  | 0.055108 | 0.23459  | -0.07519 | 0.10464  | 0.124977 |
| 0.096032 | 0.03803  | -0.01047 | 0.82143  | 0.023904 | 0.60638  | -0.07107 | 0.1251   | -0.01515 |

|          |          |          |          |          |         |          |          |          |
|----------|----------|----------|----------|----------|---------|----------|----------|----------|
| 0.116224 | 0.01196  | -0.06084 | 0.18937  | 0.010813 | 0.81572 | -0.08527 | 0.0656   | -0.02593 |
| 0.063154 | 0.17305  | -0.11558 | 0.01244  | 0.001414 | 0.97568 | -0.1362  | 0.00319  | -0.04918 |
| 0.002419 | 0.95842  | -0.08227 | 0.0757   | 0.017482 | 0.70632 | -0.07537 | 0.10379  | -0.04882 |
| 0.034963 | 0.451    | -0.08184 | 0.07725  | -0.02004 | 0.6658  | -0.13764 | 0.00288  | -0.09471 |
| -0.03662 | 0.42982  | -0.24469 | 8.54E-08 | 0.075935 | 0.10123 | 0.128301 | 0.00549  | -0.01744 |
| -0.08122 | 0.07953  | -0.12845 | 0.00544  | 0.011242 | 0.80855 | -0.03897 | 0.4008   | -0.07091 |
| -0.03091 | 0.50524  | -0.09249 | 0.04575  | -0.00598 | 0.8974  | -0.05228 | 0.25951  | -0.07538 |
| -0.04859 | 0.29476  | -0.15732 | 0.00065  | 0.0684   | 0.13997 | -0.04053 | 0.38222  | -0.03887 |
| 0.016674 | 0.7193   | -0.04361 | 0.34708  | 0.040203 | 0.38604 | -0.05204 | 0.2617   | -0.0171  |
| -0.13484 | 0.00351  | -0.18101 | 8.37E-05 | 0.047324 | 0.30749 | 0.037467 | 0.41921  | 0.063066 |
| 0.260697 | 1.08E-08 | 0.125051 | 0.00681  | -0.0028  | 0.9519  | -0.01417 | 0.76013  | -0.01865 |
| 0.218047 | 1.97E-06 | 0.128166 | 0.00554  | 0.024053 | 0.60413 | 0.00966  | 0.83508  | 0.088981 |
| 0.031573 | 0.4961   | -0.06011 | 0.19471  | 0.001233 | 0.9788  | -0.13117 | 0.00452  | -0.01251 |
| 0.042721 | 0.35696  | -0.12448 | 0.00708  | 0.018754 | 0.68605 | -0.08486 | 0.06692  | -0.0741  |
| 0.238525 | 1.83E-07 | 0.273372 | 1.89E-09 | 0.00831  | 0.85785 | 0.086208 | 0.06268  | 0.065071 |
| -0.33705 | 7.20E-14 | -0.45995 | 7.97E-26 | -0.0323  | 0.48617 | -0.02685 | 0.56278  | -0.11947 |
| -0.07005 | 0.13061  | -0.0023  | 0.96049  | -0.00966 | 0.83514 | 0.0922   | 0.04644  | -0.13375 |
| -0.02402 | 0.60464  | -0.11671 | 0.0116   | -0.03241 | 0.48474 | -0.13638 | 0.00315  | -0.08096 |
| 0.017277 | 0.70961  | -0.21986 | 1.61E-06 | -0.00207 | 0.96442 | -0.00954 | 0.83712  | -0.05372 |
| -0.08338 | 0.07185  | -0.02983 | 0.52017  | 0.066637 | 0.1505  | 0.112323 | 0.01516  | 0.130175 |
| -0.08361 | 0.07107  | -0.10219 | 0.02724  | 0.039296 | 0.39686 | -0.07869 | 0.0894   | 0.107277 |
| -0.11331 | 0.01429  | -0.10708 | 0.02065  | 0.013212 | 0.77582 | 0.033211 | 0.47402  | -0.11611 |
| -0.04289 | 0.3551   | -0.12268 | 0.00795  | 0.035142 | 0.44868 | 0.094035 | 0.04224  | -0.04873 |
| -0.03603 | 0.43729  | -0.1528  | 0.00092  | 0.030438 | 0.51172 | -0.04041 | 0.38356  | -0.06158 |
| -0.06942 | 0.13412  | -0.12978 | 0.00497  | 0.02534  | 0.58491 | -0.01626 | 0.72598  | 0.008999 |
| 0.009043 | 0.84547  | -0.11765 | 0.01094  | -0.02351 | 0.61238 | -0.13212 | 0.00424  | -0.1399  |
| 0.318736 | 1.73E-12 | 0.10566  | 0.02239  | -0.01503 | 0.74591 | -0.16339 | 0.00039  | -0.10251 |
| 0.248157 | 5.52E-08 | 0.123209 | 0.00769  | 0.015034 | 0.74592 | -0.06734 | 0.1462   | -0.04742 |
| 0.174528 | 0.00015  | 0.208297 | 5.65E-06 | 0.00096  | 0.98349 | -0.02633 | 0.5703   | 0.013109 |
| 0.225965 | 8.06E-07 | 0.165516 | 0.00033  | 0.010595 | 0.81938 | -0.11123 | 0.01619  | -0.01527 |
| 0.079704 | 0.08533  | -0.0296  | 0.52339  | -0.0063  | 0.89192 | -0.09488 | 0.04042  | -0.05294 |
| -0.09416 | 0.04196  | -0.15569 | 0.00074  | 0.020539 | 0.65797 | -0.06494 | 0.16117  | -0.02211 |
| 0.112812 | 0.01472  | -0.07493 | 0.10586  | -0.029   | 0.53181 | -0.10933 | 0.01811  | -0.03292 |
| 0.137348 | 0.00294  | 0.022175 | 0.63267  | -0.04241 | 0.36052 | -0.22454 | 9.48E-07 | -0.07824 |
| -0.11743 | 0.01109  | -0.21514 | 2.71E-06 | -0.03364 | 0.46838 | -0.10225 | 0.02714  | -0.1265  |
| 0.205171 | 7.84E-06 | 0.155161 | 0.00077  | 0.009674 | 0.83484 | 0.05749  | 0.21495  | -0.02187 |
| 0.05514  | 0.23432  | -0.14053 | 0.00234  | -0.04968 | 0.28397 | -0.04734 | 0.30735  | -0.17553 |
| -0.09843 | 0.03346  | -0.15813 | 0.0006   | -0.00919 | 0.84304 | -0.10113 | 0.02887  | -0.06595 |
| 0.014682 | 0.75167  | 0.178494 | 0.00011  | 0.174904 | 0.00015 | 0.107633 | 0.01999  | 0.440243 |
| 0.043879 | 0.34408  | 0.109698 | 0.01772  | 0.015744 | 0.73436 | 0.047876 | 0.30187  | -0.0472  |
| -0.15099 | 0.00106  | -0.21568 | 2.55E-06 | 0.015345 | 0.74084 | -0.00049 | 0.99165  | -0.01965 |
| 0.276096 | 1.29E-09 | 0.12146  | 0.0086   | -0.04272 | 0.35697 | -0.05949 | 0.19938  | -0.16073 |
| -0.04706 | 0.31019  | -0.16094 | 0.00048  | 0.028026 | 0.54574 | -0.09353 | 0.04335  | 0.015608 |
| -0.05482 | 0.23709  | 0.04281  | 0.35597  | 0.01633  | 0.72486 | 0.040063 | 0.3877   | 0.037222 |
| -0.09751 | 0.03515  | -0.17653 | 0.00013  | 0.04911  | 0.28957 | -0.03225 | 0.4869   | 0.096092 |

|          |         |          |          |          |         |          |         |          |
|----------|---------|----------|----------|----------|---------|----------|---------|----------|
| -0.05499 | 0.23559 | -0.08729 | 0.05944  | 0.069526 | 0.13355 | 0.096145 | 0.0378  | 0.082392 |
| -0.07034 | 0.12906 | -0.1075  | 0.02014  | 0.018507 | 0.68996 | -0.02096 | 0.6514  | 0.013011 |
| -0.05623 | 0.22517 | -0.08635 | 0.06225  | 0.007455 | 0.87234 | -0.02263 | 0.62568 | -0.02784 |
| -0.04903 | 0.29032 | -0.13514 | 0.00343  | 0.01519  | 0.74337 | -0.0442  | 0.34058 | 0.003204 |
| -0.08093 | 0.08061 | -0.08311 | 0.07275  | 0.079195 | 0.08735 | 0.147288 | 0.00141 | 0.019679 |
| -0.06357 | 0.1702  | -0.10407 | 0.0245   | 0.004138 | 0.92894 | -0.05045 | 0.27663 | -0.0326  |
| 0.023363 | 0.61455 | -0.02729 | 0.55636  | 0.050201 | 0.27897 | -0.0293  | 0.5276  | 0.056578 |
| -0.05324 | 0.25082 | -0.07642 | 0.09904  | 0.032921 | 0.47788 | -0.0475  | 0.30566 | -0.0179  |
| -0.02606 | 0.57435 | -0.01912 | 0.68025  | 0.029829 | 0.52021 | -0.0478  | 0.30267 | -0.00701 |
| -0.06323 | 0.17256 | -0.08183 | 0.07729  | -0.00274 | 0.95297 | -0.03866 | 0.40455 | -0.01754 |
| -0.04569 | 0.32452 | -0.08785 | 0.05783  | 0.021278 | 0.6465  | -0.05308 | 0.2523  | -0.04915 |
| 0.105843 | 0.02216 | 0.1129   | 0.01464  | 0.016266 | 0.72589 | -0.02691 | 0.56189 | 0.237454 |
| 0.005887 | 0.89903 | 0.015663 | 0.73567  | 0.001688 | 0.97097 | -0.03999 | 0.38859 | -0.02949 |
| 0.048886 | 0.29178 | 0.0564   | 0.22379  | 0.05493  | 0.23611 | 0.026856 | 0.56264 | -0.0062  |
| -0.05938 | 0.20023 | -0.06292 | 0.17466  | 0.042517 | 0.35927 | 0.008846 | 0.8488  | 0.100213 |
| -0.02342 | 0.61374 | -0.09086 | 0.04974  | 0.073957 | 0.11046 | -0.03694 | 0.42574 | -0.01823 |
| -0.0372  | 0.42256 | -0.04721 | 0.30864  | 0.04425  | 0.34    | 0.018426 | 0.69125 | 0.061367 |
| 0.009697 | 0.83445 | 0.017463 | 0.70662  | 0.036233 | 0.43471 | 0.076356 | 0.09934 | 0.167542 |
| -0.01231 | 0.7907  | -0.08173 | 0.07768  | -0.0018  | 0.96903 | -0.05499 | 0.23563 | -0.01465 |
| -0.03985 | 0.39023 | 0.016114 | 0.72836  | 0.043717 | 0.34586 | -0.0314  | 0.49851 | -0.02642 |
| -0.1185  | 0.01038 | -0.0783  | 0.09102  | 0.032066 | 0.4894  | -0.03871 | 0.40395 | -0.05302 |
| 0.005907 | 0.89869 | 0.036779 | 0.42782  | 0.049528 | 0.28548 | -0.00134 | 0.977   | 0.029868 |
| -0.05145 | 0.26716 | -0.11869 | 0.01026  | -0.00202 | 0.96519 | -0.05    | 0.2809  | -0.02952 |
| -0.01765 | 0.70367 | 0.031687 | 0.49455  | 0.112432 | 0.01506 | 0.079723 | 0.08526 | -0.01869 |
| -0.0104  | 0.82262 | 0.071578 | 0.12243  | 0.062027 | 0.18086 | 0.125155 | 0.00677 | 0.021381 |
| -0.08502 | 0.06639 | -0.09203 | 0.04684  | 0.016554 | 0.72124 | -0.00942 | 0.83918 | -0.03564 |
| -0.08847 | 0.05608 | -0.16773 | 0.00027  | 0.051237 | 0.26916 | -0.01962 | 0.67232 | -0.02885 |
| -0.04881 | 0.29256 | -0.08785 | 0.05782  | -0.01047 | 0.82145 | -0.0638  | 0.16868 | -0.03019 |
| -0.0389  | 0.4016  | -0.07383 | 0.11109  | -0.00304 | 0.94769 | -0.04176 | 0.36793 | 0.017619 |
| -0.08224 | 0.07581 | -0.11277 | 0.01476  | -0.02068 | 0.65573 | -0.10066 | 0.02963 | -0.01596 |
| -0.04364 | 0.34676 | -0.11302 | 0.01454  | 0.036037 | 0.4372  | -0.05682 | 0.22033 | -0.01353 |
| -0.08595 | 0.06346 | -0.13842 | 0.00272  | 0.023929 | 0.60599 | -0.04429 | 0.33958 | -0.10219 |
| -0.0509  | 0.27231 | -0.08349 | 0.07147  | 0.03733  | 0.42092 | -0.01111 | 0.81068 | 0.019024 |
| 0.043466 | 0.34864 | -0.02182 | 0.63806  | 0.009142 | 0.84379 | -0.05375 | 0.24631 | -0.05781 |
| -0.01789 | 0.69986 | 0.009155 | 0.84357  | -0.00355 | 0.93902 | -0.14095 | 0.00226 | 0.040053 |
| -0.12187 | 0.00838 | -0.2343  | 3.04E-07 | 0.009537 | 0.83715 | -0.04552 | 0.32627 | -0.08833 |
| -0.03042 | 0.51191 | -0.18005 | 9.13E-05 | 0.043232 | 0.35124 | -0.01113 | 0.81043 | 0.022537 |
| 0.120427 | 0.00919 | -0.08501 | 0.06645  | -0.00618 | 0.89411 | -0.09765 | 0.03489 | -0.08746 |
| 0.118732 | 0.01023 | -0.03617 | 0.43554  | -0.02722 | 0.5573  | -0.07877 | 0.08909 | -0.06028 |
| 0.032183 | 0.48781 | 0.005419 | 0.90702  | 0.025253 | 0.58621 | -0.01187 | 0.79813 | 0.008894 |
| -0.08055 | 0.08204 | -0.02832 | 0.54149  | 0.05862  | 0.20605 | 0.020756 | 0.65459 | 0.095167 |
| 0.044125 | 0.34137 | 0.066438 | 0.15172  | -0.00446 | 0.92338 | -0.06569 | 0.15642 | -0.00034 |
| -0.10319 | 0.02575 | -0.18765 | 4.49E-05 | 0.030748 | 0.50743 | 0.025741 | 0.57899 | 0.117829 |
| -0.01704 | 0.71334 | -0.11742 | 0.0111   | 0.028308 | 0.54172 | -0.02408 | 0.60379 | -0.03731 |
| -0.0338  | 0.46623 | -0.11868 | 0.01026  | 0.07047  | 0.12834 | -0.02948 | 0.52504 | -0.05104 |

|          |          |          |          |          |         |          |         |          |
|----------|----------|----------|----------|----------|---------|----------|---------|----------|
| 0.149973 | 0.00115  | 0.009228 | 0.84236  | 0.04078  | 0.37926 | -0.0385  | 0.40653 | -0.0272  |
| 0.103947 | 0.02468  | -0.05894 | 0.2036   | 0.016004 | 0.73014 | -0.05947 | 0.19954 | -0.04228 |
| -0.0473  | 0.30775  | -0.11959 | 0.00969  | 0.026411 | 0.56914 | -0.02383 | 0.60751 | -0.03078 |
| -0.00357 | 0.9386   | 0.008796 | 0.84963  | 0.045643 | 0.32501 | -0.01608 | 0.72884 | -0.04298 |
| 0.127    | 0.00599  | 0.080321 | 0.08294  | 0.056612 | 0.22205 | -0.01768 | 0.70319 | 0.323852 |
| -0.00141 | 0.97582  | -0.07404 | 0.11005  | 0.030318 | 0.51338 | -0.01282 | 0.78237 | -0.01204 |
| -0.03487 | 0.45221  | -0.12738 | 0.00584  | 0.029397 | 0.52628 | -0.01845 | 0.6909  | -0.00899 |
| -0.04991 | 0.28177  | -0.1415  | 0.00218  | 0.021383 | 0.64487 | -0.00283 | 0.95136 | -0.01667 |
| 0.086953 | 0.06044  | -0.00945 | 0.83862  | 0.039224 | 0.39773 | -0.04257 | 0.3587  | -0.01153 |
| 0.018507 | 0.68996  | -0.03011 | 0.51631  | 0.081122 | 0.0799  | -0.03027 | 0.51405 | -0.01871 |
| -0.05505 | 0.23507  | -0.07632 | 0.0995   | 0.007981 | 0.86342 | 0.01482  | 0.74941 | -0.0648  |
| -0.12593 | 0.00643  | 0.00962  | 0.83575  | -0.02425 | 0.6012  | -0.07455 | 0.10762 | -0.05605 |
| -0.12265 | 0.00797  | -0.20366 | 9.17E-06 | 0.010388 | 0.82284 | -0.03549 | 0.44424 | -0.06996 |
| 0.139199 | 0.00257  | 0.008945 | 0.84712  | 0.025137 | 0.58792 | -0.05724 | 0.21698 | -0.03757 |
| -0.06229 | 0.17902  | -0.08567 | 0.06433  | -0.00463 | 0.92051 | -0.02764 | 0.55126 | -0.03892 |
| -0.02926 | 0.52819  | -0.01841 | 0.69149  | 0.041511 | 0.37076 | -0.00134 | 0.97696 | -0.03582 |
| -0.05941 | 0.19998  | -0.21224 | 3.71E-06 | -0.01343 | 0.77217 | -0.02478 | 0.59324 | -0.09678 |
| -0.0723  | 0.11872  | -0.13569 | 0.0033   | -0.00172 | 0.97036 | -0.01356 | 0.77013 | -0.05516 |
| -0.09212 | 0.04662  | -0.13828 | 0.00275  | 0.001729 | 0.97028 | -0.03875 | 0.40341 | -0.06468 |
| -0.09401 | 0.0423   | -0.23817 | 1.91E-07 | 0.00733  | 0.87447 | -0.09938 | 0.03178 | -0.04802 |
| -0.21388 | 3.11E-06 | -0.24604 | 7.21E-08 | -0.04457 | 0.3365  | 0.040398 | 0.38374 | -0.1099  |
| -0.03368 | 0.4678   | -0.30285 | 2.31E-11 | -0.04972 | 0.28361 | -0.11215 | 0.01531 | -0.11298 |
| -0.07014 | 0.13016  | -0.00629 | 0.89213  | -0.06576 | 0.15598 | -0.05895 | 0.20354 | -0.15983 |
| -0.30641 | 1.31E-11 | -0.33539 | 9.68E-14 | -0.02294 | 0.62092 | -0.00992 | 0.83064 | -0.10042 |
| -0.21963 | 1.65E-06 | -0.14257 | 0.00201  | 0.051066 | 0.27076 | 0.132775 | 0.00405 | 0.00483  |
| -0.18447 | 6.07E-05 | -0.27791 | 9.94E-10 | -0.04401 | 0.34265 | -0.03559 | 0.44292 | -0.03552 |
| -0.20175 | 1.12E-05 | -0.14514 | 0.00166  | -0.01013 | 0.82714 | -0.01766 | 0.70351 | 0.009337 |
| 0.14316  | 0.00193  | -0.12007 | 0.0094   | -0.06913 | 0.13576 | -0.12116 | 0.00877 | -0.08287 |
| -0.15447 | 0.00081  | -0.29339 | 1.01E-10 | -0.0148  | 0.74972 | -0.01668 | 0.71919 | 0.067497 |
| 0.12166  | 0.00849  | 0.016764 | 0.71786  | -0.03906 | 0.39975 | -0.09987 | 0.03094 | -0.09773 |
| -0.1405  | 0.00234  | -0.10461 | 0.02377  | -0.0088  | 0.84952 | 0.056974 | 0.21911 | -0.04484 |
| -0.09642 | 0.03725  | 0.149732 | 0.00117  | 0.009952 | 0.83016 | 0.118762 | 0.01021 | -0.09349 |
| 0.015905 | 0.73174  | 0.210903 | 4.28E-06 | 0.025778 | 0.57844 | 0.125695 | 0.00653 | 0.052025 |
| 0.350845 | 5.67E-15 | 0.193591 | 2.53E-05 | 0.054549 | 0.23939 | -0.03476 | 0.45363 | 0.199593 |
| -0.20368 | 9.15E-06 | -0.18033 | 8.90E-05 | -0.05366 | 0.24713 | -0.04553 | 0.32621 | -0.02304 |
| -0.03857 | 0.40569  | 0.02083  | 0.65344  | 0.017008 | 0.71392 | 0.018662 | 0.68751 | 0.106391 |
| -0.15547 | 0.00075  | -0.13093 | 0.0046   | -0.01774 | 0.70218 | -0.04568 | 0.32459 | -0.03682 |
| -0.23679 | 2.25E-07 | -0.30367 | 2.03E-11 | 0.008106 | 0.86131 | 0.067726 | 0.14392 | -0.12854 |
| -0.01672 | 0.71855  | 0.009853 | 0.83182  | -0.00112 | 0.9808  | -0.00155 | 0.97333 | -0.03481 |
| -0.18286 | 7.05E-05 | -0.18572 | 5.39E-05 | -0.03974 | 0.39151 | -0.0288  | 0.53464 | -0.16893 |
| 0.104817 | 0.0235   | 0.046506 | 0.31593  | -0.0448  | 0.33405 | -0.08387 | 0.07016 | -0.14406 |
| -0.19585 | 2.02E-05 | -0.15936 | 0.00055  | -0.05608 | 0.22647 | 0.003306 | 0.9432  | -0.13961 |
| -0.04951 | 0.28564  | -0.06368 | 0.16952  | -0.0186  | 0.68856 | 0.098911 | 0.0326  | -0.0037  |
| -0.11813 | 0.01062  | -0.2372  | 2.14E-07 | -0.01582 | 0.73319 | -0.03428 | 0.45995 | -0.00263 |
| -0.21145 | 4.04E-06 | -0.14184 | 0.00212  | -0.07787 | 0.09279 | -0.03816 | 0.41069 | -0.14911 |



|          |          |          |          |          |         |          |         |          |
|----------|----------|----------|----------|----------|---------|----------|---------|----------|
| -0.14108 | 0.00224  | -0.00665 | 0.88612  | -0.00445 | 0.92359 | 0.018767 | 0.68584 | 0.000941 |
| -0.15172 | 0.00101  | -0.31882 | 1.71E-12 | -0.05801 | 0.21081 | -0.06245 | 0.17787 | -0.19662 |
| -0.32188 | 1.02E-12 | -0.35714 | 1.70E-15 | -0.05242 | 0.25828 | 0.002851 | 0.95101 | -0.23504 |
| -0.18085 | 8.49E-05 | -0.20829 | 5.65E-06 | -0.05681 | 0.22047 | 0.034352 | 0.45895 | -0.03143 |
| -0.08818 | 0.05689  | -0.11576 | 0.01231  | -0.06151 | 0.18453 | -0.06851 | 0.13932 | -0.16555 |
| -0.11718 | 0.01127  | -0.06236 | 0.17851  | -0.04405 | 0.34218 | -0.04963 | 0.28445 | -0.1001  |
| -0.08323 | 0.07236  | 0.008346 | 0.85725  | -0.05055 | 0.27568 | -0.0565  | 0.22298 | -0.15369 |
| -0.09703 | 0.03608  | -0.17989 | 9.27E-05 | -0.05693 | 0.21944 | -0.0431  | 0.35275 | -0.16367 |
| -0.2634  | 7.50E-09 | -0.33766 | 6.45E-14 | -0.00198 | 0.96597 | 0.019634 | 0.67216 | 0.017288 |
| -0.04769 | 0.30378  | -0.13128 | 0.00449  | 0.013822 | 0.76577 | 0.036828 | 0.4272  | 0.009406 |
| -0.10879 | 0.01869  | -0.11432 | 0.01343  | -0.01336 | 0.77342 | -0.00211 | 0.96368 | -0.05482 |
| -0.19967 | 1.38E-05 | -0.18386 | 6.42E-05 | -0.02433 | 0.59998 | 0.027593 | 0.55198 | -0.02938 |
| -0.23952 | 1.62E-07 | -0.23462 | 2.92E-07 | -0.02664 | 0.56578 | 0.007109 | 0.87823 | -0.01316 |
| -0.07048 | 0.12829  | 0.076069 | 0.10062  | -0.02078 | 0.65416 | -0.00237 | 0.95929 | 0.037508 |
| -0.09914 | 0.03219  | -0.01288 | 0.7813   | -0.04    | 0.38844 | 0.009235 | 0.84224 | -0.0664  |
| -0.10524 | 0.02293  | -0.22624 | 7.81E-07 | -0.04067 | 0.38057 | -0.06897 | 0.1367  | -0.0814  |
| -0.06216 | 0.17995  | 0.04747  | 0.30599  | 0.029657 | 0.52262 | 0.153938 | 0.00084 | 0.041506 |
| -0.16125 | 0.00047  | -0.24479 | 8.43E-08 | -0.04673 | 0.31356 | 0.005329 | 0.90856 | -0.08228 |
| -0.172   | 0.00019  | -0.04683 | 0.31256  | 0.009785 | 0.83297 | 0.157036 | 0.00066 | 0.024777 |
| -0.03148 | 0.49734  | 0.161601 | 0.00045  | -0.01538 | 0.74029 | 0.047154 | 0.30923 | -0.09357 |
| -0.18701 | 4.78E-05 | -0.3615  | 7.29E-16 | -0.02081 | 0.65369 | -0.02755 | 0.55264 | -0.0799  |
| 0.124413 | 0.00711  | 0.124097 | 0.00725  | -0.00782 | 0.86608 | -0.08206 | 0.07648 | 0.010736 |
| 0.013206 | 0.77593  | 0.210161 | 4.63E-06 | -0.07876 | 0.08912 | 0.004091 | 0.92973 | -0.09969 |
| -0.0637  | 0.16935  | 0.027578 | 0.55218  | -0.05701 | 0.21882 | 0.022949 | 0.62084 | -0.09899 |
| 0.043146 | 0.3522   | 0.072522 | 0.11757  | -0.05388 | 0.24523 | -0.02678 | 0.56378 | -0.07457 |
| -0.196   | 1.99E-05 | -0.11477 | 0.01307  | 0.002465 | 0.95764 | -0.01697 | 0.71453 | 0.105021 |
| -0.10132 | 0.02858  | -0.08099 | 0.0804   | -0.01912 | 0.68019 | -0.06843 | 0.1398  | -0.01385 |
| -0.20142 | 1.15E-05 | -0.16152 | 0.00046  | -0.04708 | 0.30999 | 0.0322   | 0.48757 | -0.09322 |
| -0.0177  | 0.70283  | 0.161158 | 0.00047  | 0.027321 | 0.5559  | 0.018378 | 0.69202 | 0.139267 |
| -0.08981 | 0.05244  | -0.03322 | 0.47395  | -0.02709 | 0.55919 | 0.00024  | 0.99587 | -0.05995 |
| -0.02249 | 0.62786  | 0.107071 | 0.02065  | -0.03933 | 0.39649 | 0.035375 | 0.44567 | -0.06333 |
| -0.02633 | 0.57029  | -0.16965 | 0.00023  | -0.02735 | 0.5555  | -0.02495 | 0.59066 | -0.04818 |
| -0.20615 | 7.08E-06 | -0.26031 | 1.14E-08 | -0.02946 | 0.52538 | -0.02252 | 0.62733 | -0.05256 |
| 0.033404 | 0.47145  | 0.198188 | 1.60E-05 | 0.05051  | 0.27602 | 0.16552  | 0.00033 | 0.145464 |
| 0.033022 | 0.47653  | 0.301586 | 2.82E-11 | 0.042237 | 0.36244 | 0.149582 | 0.00119 | 0.087805 |
| -0.17161 | 0.00019  | 0.09645  | 0.0372   | -0.02386 | 0.60697 | 0.074919 | 0.10589 | 0.02374  |
| -0.08075 | 0.0813   | -0.09547 | 0.03919  | -0.01962 | 0.67243 | -0.10609 | 0.02185 | -0.09126 |
| -0.11096 | 0.01645  | -0.17383 | 0.00016  | -0.00186 | 0.96801 | 0.009259 | 0.84183 | -0.0752  |
| -0.15226 | 0.00096  | -0.18202 | 7.62E-05 | -0.03311 | 0.47529 | -0.08455 | 0.06792 | -0.08718 |
| -0.27911 | 8.36E-10 | -0.34545 | 1.55E-14 | -0.01981 | 0.66941 | 0.025756 | 0.57877 | -0.12978 |
| -0.2057  | 7.42E-06 | -0.17447 | 0.00015  | 0.00253  | 0.95652 | 0.058803 | 0.20465 | -0.15445 |
| -0.14956 | 0.00119  | -0.06303 | 0.1739   | -0.06703 | 0.14811 | 0.036022 | 0.43738 | -0.03341 |
| -0.13933 | 0.00255  | 0.014763 | 0.75035  | 0.026258 | 0.57138 | 0.059625 | 0.19838 | -0.02071 |
| -0.18468 | 5.95E-05 | -0.27613 | 1.28E-09 | -0.01855 | 0.68925 | -0.0026  | 0.9553  | -0.11019 |
| -0.07406 | 0.10998  | 0.15308  | 0.0009   | 0.001723 | 0.97038 | 0.04153  | 0.37055 | -0.0679  |

|          |          |          |          |          |         |          |         |          |
|----------|----------|----------|----------|----------|---------|----------|---------|----------|
| -0.10751 | 0.02013  | -0.02194 | 0.63621  | -0.03628 | 0.43406 | 0.050977 | 0.2716  | -0.08027 |
| 0.122937 | 0.00782  | -0.10958 | 0.01784  | -0.01643 | 0.72317 | -0.06033 | 0.19308 | -0.10461 |
| -0.18297 | 6.98E-05 | -0.07329 | 0.1137   | -0.0404  | 0.38372 | 0.057278 | 0.21665 | -0.066   |
| -0.17161 | 0.00019  | -0.22303 | 1.13E-06 | -0.08028 | 0.0831  | -0.01872 | 0.68653 | -0.08982 |
| -0.17245 | 0.00018  | -0.02156 | 0.64215  | -0.06901 | 0.13649 | 0.066935 | 0.14868 | -0.19492 |
| -0.16548 | 0.00033  | -0.27354 | 1.85E-09 | -0.01655 | 0.72135 | -0.0011  | 0.98106 | -0.05319 |
| -0.1337  | 0.0038   | -0.06443 | 0.16449  | 0.036221 | 0.43486 | 0.095853 | 0.03839 | 0.119725 |
| -0.10905 | 0.0184   | -0.0242  | 0.60187  | 0.018851 | 0.68452 | 0.036033 | 0.43725 | 0.06355  |
| -0.14943 | 0.0012   | -0.32017 | 1.36E-12 | -0.0536  | 0.24764 | -0.04427 | 0.3398  | -0.15156 |
| -0.12957 | 0.00504  | -0.22238 | 1.21E-06 | 0.000241 | 0.99586 | 0.03089  | 0.50547 | 0.000825 |
| -0.18326 | 6.79E-05 | -0.04074 | 0.37967  | -0.04494 | 0.33254 | -0.01979 | 0.66976 | -0.08339 |
| -0.17192 | 0.00019  | -0.1499  | 0.00116  | -0.07051 | 0.12812 | -0.1255  | 0.00662 | -0.1727  |
| -0.20152 | 1.14E-05 | -0.39378 | 9.00E-19 | -0.0518  | 0.26397 | -0.03112 | 0.50225 | -0.15195 |
| -0.11579 | 0.01228  | 0.093192 | 0.04413  | 0.002944 | 0.94941 | 0.050507 | 0.27605 | -0.02742 |
| -0.06851 | 0.1393   | -0.0511  | 0.27041  | -0.04628 | 0.31832 | -0.03878 | 0.40309 | -0.09573 |
| -0.12381 | 0.00739  | -0.1807  | 8.61E-05 | -0.02818 | 0.54361 | -0.00437 | 0.9249  | -0.01182 |
| 0.044263 | 0.33986  | 0.219411 | 1.69E-06 | -0.01357 | 0.76991 | 0.022248 | 0.63154 | 0.042071 |
| -0.13143 | 0.00444  | -0.2485  | 5.29E-08 | -0.01168 | 0.80132 | -0.02166 | 0.64065 | -0.04106 |
| -0.0244  | 0.5989   | -0.14116 | 0.00223  | -0.09433 | 0.0416  | -0.10612 | 0.02181 | -0.18429 |
| -0.10728 | 0.02041  | -0.07809 | 0.09187  | -0.03001 | 0.51766 | 0.028997 | 0.53192 | -0.00383 |
| -0.09568 | 0.03874  | -0.26811 | 3.95E-09 | -0.04688 | 0.3121  | -0.06648 | 0.15147 | -0.10344 |
| 0.018245 | 0.69413  | 0.077987 | 0.0923   | -0.0044  | 0.92441 | 0.045383 | 0.32777 | 0.035294 |
| -0.07478 | 0.10655  | -0.10788 | 0.01971  | -0.03349 | 0.47025 | 0.011341 | 0.80689 | -0.07145 |
| -0.1369  | 0.00303  | -0.23714 | 2.16E-07 | -0.08676 | 0.06102 | -0.09393 | 0.04247 | -0.05473 |
| -0.18848 | 4.15E-05 | -0.23947 | 1.63E-07 | -0.03571 | 0.44135 | -0.03504 | 0.45004 | -0.09577 |
| -0.18023 | 8.98E-05 | -0.25306 | 2.95E-08 | -0.06448 | 0.1642  | -0.1111  | 0.01631 | -0.05133 |
| -0.07536 | 0.10385  | -0.18728 | 4.65E-05 | -0.05995 | 0.19594 | -0.0571  | 0.21806 | -0.08595 |
| -0.20077 | 1.23E-05 | -0.22042 | 1.51E-06 | 0.037818 | 0.41487 | 0.052495 | 0.25757 | 0.021744 |
| -0.22606 | 7.97E-07 | -0.33177 | 1.84E-13 | -0.03533 | 0.44622 | 0.015823 | 0.73308 | -0.08729 |
| -0.14177 | 0.00213  | -0.21845 | 1.88E-06 | -0.05861 | 0.20613 | -0.07972 | 0.08527 | -0.14555 |
| -0.16072 | 0.00049  | -0.13285 | 0.00403  | -0.04394 | 0.34342 | 0.019844 | 0.66886 | -0.14323 |
| -0.27945 | 7.97E-10 | -0.40013 | 2.21E-19 | 0.01421  | 0.75939 | 0.11982  | 0.00955 | 0.024972 |
| -0.04713 | 0.30949  | -0.16813 | 0.00026  | -0.05099 | 0.27151 | -0.02435 | 0.59967 | -0.06224 |
| -0.16447 | 0.00036  | -0.00989 | 0.83129  | -0.01864 | 0.68778 | 0.055495 | 0.23132 | -0.11518 |
| -0.14664 | 0.00148  | -0.15395 | 0.00084  | -0.01323 | 0.77557 | 0.00122  | 0.97902 | -0.04161 |
| 0.202474 | 1.04E-05 | 0.191377 | 3.14E-05 | 0.034    | 0.46356 | 0.03406  | 0.46277 | 0.088599 |
| 0.001815 | 0.9688   | -0.31893 | 1.68E-12 | 0.002351 | 0.95959 | -0.00436 | 0.92522 | -0.09864 |
| -0.20847 | 5.55E-06 | -0.19758 | 1.70E-05 | -0.02606 | 0.57426 | -0.02727 | 0.55668 | -0.11865 |
| -0.09533 | 0.03948  | -0.12585 | 0.00646  | -0.03093 | 0.50496 | 0.033137 | 0.475   | -0.08457 |
| -0.06402 | 0.16719  | -0.18182 | 7.76E-05 | -0.00847 | 0.85519 | -0.0014  | 0.97595 | -0.01665 |
| -0.05322 | 0.25101  | -0.05067 | 0.27451  | -0.04312 | 0.35244 | -0.02411 | 0.60331 | -0.10209 |
| -0.18953 | 3.75E-05 | -0.23756 | 2.05E-07 | -0.04324 | 0.35121 | -0.00407 | 0.93014 | -0.17627 |
| -0.18169 | 7.85E-05 | -0.23729 | 2.12E-07 | -0.08429 | 0.06877 | -0.11572 | 0.01233 | -0.20672 |
| -0.07276 | 0.11638  | -0.01188 | 0.79783  | -0.042   | 0.36516 | 0.042294 | 0.3618  | -0.01377 |
| 0.039541 | 0.39391  | 0.175385 | 0.00014  | 0.00467  | 0.91982 | -0.04627 | 0.31839 | 0.023332 |

|          |          |          |          |          |         |          |         |          |
|----------|----------|----------|----------|----------|---------|----------|---------|----------|
| 0.091167 | 0.04896  | 0.150034 | 0.00115  | 0.017284 | 0.70949 | -0.02227 | 0.63125 | 0.066084 |
| 0.103961 | 0.02466  | 0.148896 | 0.00125  | 0.021564 | 0.64207 | -0.01002 | 0.82904 | 0.039251 |
| 0.022902 | 0.62155  | 0.127736 | 0.0057   | -0.00396 | 0.93195 | -0.03755 | 0.41815 | 0.032538 |
| 0.054136 | 0.24296  | 0.12875  | 0.00533  | -0.01674 | 0.71829 | -0.04297 | 0.35422 | 0.034295 |
| 0.093708 | 0.04296  | 0.189877 | 3.63E-05 | 0.021764 | 0.63899 | -0.04144 | 0.37158 | 0.10296  |
| 0.056568 | 0.22241  | 0.141001 | 0.00226  | -0.0015  | 0.97419 | -0.08333 | 0.07202 | 0.015671 |
| 0.038092 | 0.4115   | 0.079138 | 0.08758  | -0.01067 | 0.81809 | -0.09914 | 0.03219 | 0.014799 |
| 0.049965 | 0.28124  | 0.063899 | 0.16803  | -0.01982 | 0.66917 | -0.09102 | 0.04933 | 0.014913 |
| 0.06026  | 0.19363  | 0.171655 | 0.00019  | 0.013521 | 0.77073 | -0.03894 | 0.4011  | 0.04006  |
| 0.095598 | 0.03891  | 0.223232 | 1.10E-06 | 0.047563 | 0.30504 | 0.020998 | 0.65083 | 0.103088 |
| 0.097661 | 0.03487  | 0.134538 | 0.00358  | 0.033944 | 0.46431 | -0.04129 | 0.37332 | 0.04875  |
| 0.053753 | 0.24632  | 0.062671 | 0.17637  | -0.00026 | 0.99547 | -0.08763 | 0.05847 | -0.00637 |
| -0.15036 | 0.00112  | -0.29074 | 1.50E-10 | -0.07788 | 0.09275 | -0.07945 | 0.08636 | -0.24402 |
| -0.03009 | 0.51656  | -0.02521 | 0.58681  | -0.05017 | 0.27931 | -0.00233 | 0.9599  | -0.06357 |
| -0.06555 | 0.15725  | -0.03714 | 0.4233   | -0.04477 | 0.33437 | -0.02526 | 0.58615 | -0.21741 |
| -0.22858 | 5.96E-07 | -0.33396 | 1.25E-13 | -0.05114 | 0.27007 | -0.01941 | 0.67562 | -0.05367 |
| -0.17039 | 0.00022  | -0.24905 | 4.93E-08 | -0.0653  | 0.15888 | -0.05583 | 0.22851 | -0.09266 |
| -0.01686 | 0.71625  | 0.054477 | 0.24     | 0.007307 | 0.87486 | 0.069382 | 0.13435 | 0.068633 |
| -0.24552 | 7.70E-08 | -0.26527 | 5.82E-09 | -0.05536 | 0.23248 | -0.03347 | 0.47055 | -0.15294 |
| -0.12529 | 0.00671  | -0.15037 | 0.00112  | -0.02655 | 0.56712 | 0.008785 | 0.84983 | -0.02671 |
| -0.12542 | 0.00665  | 0.005752 | 0.90134  | 0.002028 | 0.96514 | 0.05593  | 0.22768 | -0.00032 |
| -0.24919 | 4.84E-08 | -0.13504 | 0.00346  | -0.00155 | 0.97334 | 0.102633 | 0.02657 | -0.08628 |
| -0.0313  | 0.4998   | -0.09121 | 0.04885  | -0.01375 | 0.76697 | -0.00765 | 0.86905 | 0.004745 |
| 0.16982  | 0.00023  | 0.053935 | 0.24472  | -0.01868 | 0.68716 | -0.0512  | 0.2695  | -0.0225  |
| -0.03373 | 0.46716  | 0.093246 | 0.044    | -0.01145 | 0.80512 | 0.034665 | 0.45487 | 0.119319 |
| -0.06606 | 0.15408  | -0.24108 | 1.34E-07 | -0.01645 | 0.72294 | -0.02837 | 0.54078 | -0.09141 |
| -0.10266 | 0.02652  | -0.22878 | 5.82E-07 | -0.00334 | 0.94254 | 0.031991 | 0.49042 | -0.00827 |
| -0.20304 | 9.77E-06 | -0.1203  | 0.00926  | -0.04241 | 0.36043 | 0.05863  | 0.20598 | -0.12916 |
| -0.07107 | 0.12514  | -0.04466 | 0.33556  | -0.0052  | 0.9107  | 0.051489 | 0.2668  | -0.00489 |
| -0.181   | 8.37E-05 | -0.12684 | 0.00606  | -0.01916 | 0.67965 | 0.048201 | 0.2986  | 0.053595 |
| -0.223   | 1.13E-06 | -0.26627 | 5.08E-09 | -0.05851 | 0.20691 | -0.038   | 0.4126  | -0.14329 |
| -0.02126 | 0.64676  | -0.02112 | 0.64894  | -0.00467 | 0.91976 | 0.021293 | 0.64625 | -0.04608 |
| -0.15498 | 0.00078  | -0.0366  | 0.43008  | -0.0015  | 0.97424 | 0.099225 | 0.03205 | -0.01871 |
| -0.11733 | 0.01117  | -0.0361  | 0.43644  | -0.0244  | 0.59887 | 0.067781 | 0.1436  | -0.11761 |
| -0.15798 | 0.00061  | 0.047992 | 0.3007   | -0.02228 | 0.63103 | 0.08331  | 0.07208 | -0.0649  |
| -0.25137 | 3.67E-08 | -0.20808 | 5.78E-06 | -0.02776 | 0.54961 | 0.046254 | 0.31857 | -0.08844 |
| -0.02572 | 0.57924  | 0.098464 | 0.0334   | 0.01258  | 0.78628 | 0.065765 | 0.15592 | 0.053393 |
| -0.01658 | 0.72081  | 0.063106 | 0.17337  | -0.0066  | 0.88691 | 0.041915 | 0.36612 | -0.03946 |
| -0.02764 | 0.55137  | 0.086451 | 0.06194  | -0.01215 | 0.79337 | -0.06691 | 0.14885 | 0.038456 |
| -0.17541 | 0.00014  | -0.31368 | 4.02E-12 | -0.02082 | 0.65361 | -0.01314 | 0.77703 | -0.11983 |
| -0.10533 | 0.02282  | -0.15252 | 0.00094  | 0.01268  | 0.78462 | 0.030719 | 0.50783 | 0.108406 |
| -0.10062 | 0.02969  | -0.24199 | 1.19E-07 | -0.01698 | 0.71434 | -0.00478 | 0.918   | -0.07366 |
| -0.17468 | 0.00015  | -0.16956 | 0.00023  | -0.03606 | 0.43696 | -0.04603 | 0.32086 | -0.05718 |
| -0.0454  | 0.32755  | -0.17719 | 0.00012  | -0.0213  | 0.64616 | -0.04989 | 0.28199 | -0.08853 |
| -0.04319 | 0.3517   | 0.239313 | 1.66E-07 | -0.01774 | 0.70225 | -0.01501 | 0.74625 | 0.10021  |

|          |          |          |          |          |         |          |         |          |
|----------|----------|----------|----------|----------|---------|----------|---------|----------|
| 0.005284 | 0.90933  | 0.13993  | 0.00244  | -0.0035  | 0.93993 | 0.031132 | 0.50214 | 0.059581 |
| -0.06016 | 0.1944   | 0.044242 | 0.34009  | 0.01938  | 0.67616 | 0.057201 | 0.21727 | -0.00021 |
| -0.22979 | 5.17E-07 | -0.29392 | 9.27E-11 | 0.011467 | 0.8048  | 0.068151 | 0.14142 | -0.05892 |
| -0.19527 | 2.14E-05 | -0.20139 | 1.16E-05 | -0.00762 | 0.86951 | 0.021529 | 0.64262 | -0.02792 |
| -0.06952 | 0.13358  | 0.104745 | 0.02359  | -0.01565 | 0.7358  | 0.060307 | 0.19328 | -0.02719 |
| -0.09322 | 0.04406  | -0.13619 | 0.00319  | -0.03018 | 0.51524 | -0.0087  | 0.85127 | -0.08161 |
| -0.15906 | 0.00056  | -0.03232 | 0.48592  | 0.00859  | 0.85312 | 0.068281 | 0.14066 | 0.026413 |
| -0.21465 | 2.86E-06 | -0.22179 | 1.29E-06 | -0.00315 | 0.94585 | 0.026208 | 0.57211 | -0.0438  |
| -0.10362 | 0.02514  | -0.06161 | 0.18383  | 0.028013 | 0.54593 | 0.140356 | 0.00237 | 0.128368 |
| -0.09139 | 0.0484   | -0.10308 | 0.02591  | 0.008344 | 0.85728 | -0.01475 | 0.75052 | -0.02186 |
| -0.20409 | 8.77E-06 | -0.28269 | 4.98E-10 | -0.03369 | 0.46767 | -0.03477 | 0.45351 | -0.08028 |
| -0.12979 | 0.00497  | -0.24991 | 4.42E-08 | -0.02743 | 0.55431 | 0.003158 | 0.94573 | -0.08506 |
| -0.12539 | 0.00666  | 0.00985  | 0.83188  | 0.026733 | 0.56444 | 0.033561 | 0.46936 | 0.062679 |
| -0.00407 | 0.93003  | 0.005231 | 0.91024  | -0.02862 | 0.53726 | -0.0047  | 0.91938 | 0.072144 |
| 0.017871 | 0.7001   | -0.02603 | 0.57474  | -0.01126 | 0.80829 | 0.054138 | 0.24295 | -0.0342  |
| -0.10653 | 0.0213   | -0.03289 | 0.47833  | 0.005842 | 0.89981 | 0.027006 | 0.56047 | 0.000279 |
| -0.24045 | 1.44E-07 | -0.13772 | 0.00286  | -0.02515 | 0.5877  | -0.00851 | 0.85455 | -0.06678 |
| 0.019437 | 0.67525  | 0.039758 | 0.39133  | -0.04574 | 0.32395 | -0.03735 | 0.42065 | -0.02344 |
| -0.24287 | 1.07E-07 | -0.14185 | 0.00212  | -0.03494 | 0.45126 | -0.01894 | 0.6831  | -0.05309 |
| -0.06885 | 0.13737  | 0.073064 | 0.11484  | -0.05805 | 0.2105  | -0.10238 | 0.02695 | -0.17938 |
| -0.17884 | 0.0001   | -0.12811 | 0.00556  | -0.08057 | 0.082   | -0.10849 | 0.01902 | -0.1874  |
| -0.22321 | 1.10E-06 | -0.27538 | 1.43E-09 | -0.05548 | 0.23145 | -0.05392 | 0.24486 | -0.06679 |
| -0.25776 | 1.59E-08 | -0.38443 | 6.77E-18 | -0.05459 | 0.23904 | -0.1255  | 0.00662 | -0.04197 |
| -0.07363 | 0.11205  | -0.19453 | 2.30E-05 | -0.09039 | 0.05093 | -0.12211 | 0.00825 | -0.17689 |
| -0.22971 | 5.22E-07 | -0.23872 | 1.78E-07 | -0.05812 | 0.20998 | -0.02543 | 0.58357 | -0.06765 |
| 0.10449  | 0.02393  | 0.171689 | 0.00019  | -0.03256 | 0.48271 | 0.013956 | 0.76357 | -0.01309 |
| -0.22898 | 5.68E-07 | -0.09247 | 0.04581  | -0.0291  | 0.53048 | 0.027802 | 0.54896 | -0.1073  |
| -0.22359 | 1.06E-06 | -0.13514 | 0.00343  | -0.03403 | 0.46318 | -0.05202 | 0.26189 | 0.025564 |
| -0.16086 | 0.00048  | -0.02973 | 0.52158  | 0.023864 | 0.60697 | 0.145507 | 0.00162 | 0.112687 |
| -0.09825 | 0.03379  | 0.152762 | 0.00093  | -0.03207 | 0.48938 | 0.001937 | 0.9667  | -0.04461 |
| -0.12832 | 0.00549  | -0.18397 | 6.35E-05 | -0.00306 | 0.94749 | -0.02065 | 0.6563  | -0.00626 |
| -0.07492 | 0.10589  | -0.24433 | 8.93E-08 | -0.01958 | 0.67304 | -0.01326 | 0.77511 | -0.0682  |
| -0.06701 | 0.14819  | -0.01857 | 0.68903  | 0.001855 | 0.96812 | 0.014457 | 0.75535 | 0.073163 |
| -0.08091 | 0.08069  | -0.05318 | 0.25144  | -0.00294 | 0.94954 | 0.137069 | 0.003   | 0.013935 |
| -0.20468 | 8.25E-06 | -0.23355 | 3.32E-07 | -0.02477 | 0.59342 | -0.0361  | 0.43638 | -0.10062 |
| -0.11455 | 0.01325  | -0.18265 | 7.19E-05 | -0.02914 | 0.52989 | -0.03969 | 0.39216 | -0.10375 |
| -0.0049  | 0.91585  | -0.30818 | 9.87E-12 | -0.03089 | 0.50553 | -0.0699  | 0.13147 | -0.11291 |
| -0.03182 | 0.49274  | -0.11942 | 0.00979  | -0.03527 | 0.447   | 0.024929 | 0.59103 | -0.02259 |
| -0.02191 | 0.63679  | -0.03186 | 0.49225  | -0.03158 | 0.49594 | -0.0013  | 0.97772 | -0.10925 |
| -0.04015 | 0.38667  | 0.001091 | 0.98125  | -0.0148  | 0.74967 | 0.066864 | 0.14911 | -0.01797 |
| -0.09447 | 0.04129  | -0.14735 | 0.00141  | -0.03324 | 0.47359 | -0.01463 | 0.7525  | -0.01129 |
| -0.17813 | 0.00011  | -0.39947 | 2.55E-19 | -0.05923 | 0.20136 | -0.09158 | 0.04793 | -0.16026 |
| 0.099881 | 0.03092  | -0.04013 | 0.38688  | -0.018   | 0.69804 | -0.00358 | 0.93844 | 0.033814 |
| -0.16329 | 0.0004   | -0.14136 | 0.0022   | -0.04667 | 0.31425 | -0.0358  | 0.44026 | -0.10274 |
| -0.06614 | 0.15358  | 0.198876 | 1.49E-05 | 0.065845 | 0.15542 | 0.138268 | 0.00275 | 0.10086  |

|          |          |          |          |           |         |          |          |          |
|----------|----------|----------|----------|-----------|---------|----------|----------|----------|
| 0.065619 | 0.15685  | 0.138285 | 0.00275  | -0.02546  | 0.58319 | 0.007685 | 0.86845  | -0.02655 |
| -0.08302 | 0.07307  | -0.04917 | 0.28902  | -0.02476  | 0.5936  | 0.017259 | 0.7099   | 0.018225 |
| 0.026666 | 0.56542  | -0.14104 | 0.00225  | -9.96E-05 | 0.99829 | -0.01882 | 0.68507  | -0.06487 |
| -0.15401 | 0.00084  | -0.16367 | 0.00038  | -0.06487  | 0.16163 | -0.04978 | 0.283    | -0.07581 |
| -0.08917 | 0.05415  | -0.19928 | 1.43E-05 | -0.05345  | 0.24898 | -0.05238 | 0.25863  | -0.11678 |
| -0.18497 | 5.79E-05 | -0.10944 | 0.01799  | -0.01757  | 0.70495 | -0.06457 | 0.16362  | -0.01907 |
| -0.12217 | 0.00822  | -0.26068 | 1.08E-08 | -0.00091  | 0.98441 | 0.011072 | 0.81139  | -0.04724 |
| -0.15309 | 0.0009   | -0.11513 | 0.01279  | -0.01234  | 0.79032 | 0.038358 | 0.40824  | -0.04912 |
| -0.00547 | 0.90621  | -0.20232 | 1.05E-05 | -0.01831  | 0.69303 | -0.00015 | 0.9975   | -0.15736 |
| -0.00883 | 0.84908  | -0.01453 | 0.75411  | -0.05189  | 0.26305 | -0.04419 | 0.34065  | -0.05464 |
| -0.16261 | 0.00042  | -0.31373 | 3.99E-12 | -0.05725  | 0.21691 | -0.11937 | 0.00983  | -0.22448 |
| -0.26747 | 4.31E-09 | -0.20836 | 5.61E-06 | 0.014234  | 0.759   | 0.09311  | 0.04432  | -0.00504 |
| -0.01087 | 0.81485  | 0.128235 | 0.00552  | 0.039992  | 0.38855 | 0.109017 | 0.01844  | 0.045121 |
| -0.12479 | 0.00693  | -0.24412 | 9.17E-08 | -0.05866  | 0.20573 | -0.05827 | 0.20875  | -0.0472  |
| 0.198982 | 1.48E-05 | 0.201553 | 1.14E-05 | 0.001419  | 0.9756  | 0.044538 | 0.33687  | 0.048808 |
| -0.23476 | 2.88E-07 | -0.14882 | 0.00126  | -0.0598   | 0.19706 | 0.000621 | 0.98932  | -0.06783 |
| 0.066365 | 0.15217  | 0.018752 | 0.68608  | -0.01541  | 0.73984 | -0.00487 | 0.91635  | 0.027498 |
| -0.07804 | 0.09206  | 0.063439 | 0.17112  | -0.03002  | 0.51753 | -0.00355 | 0.93904  | -0.00913 |
| 0.004592 | 0.92117  | -0.22393 | 1.02E-06 | -0.07674  | 0.09763 | -0.09164 | 0.0478   | -0.16519 |
| -0.19167 | 3.05E-05 | -0.22725 | 6.94E-07 | -0.0591   | 0.20238 | -0.02422 | 0.60159  | -0.08617 |
| -0.18138 | 8.08E-05 | -0.28953 | 1.81E-10 | 0.043994  | 0.34281 | 0.111106 | 0.0163   | -0.13674 |
| -0.11399 | 0.01371  | -0.26405 | 6.88E-09 | -0.05072  | 0.27403 | -0.08365 | 0.07092  | -0.12456 |
| -0.03653 | 0.43096  | -0.20986 | 4.79E-06 | -0.00495  | 0.91508 | -0.09613 | 0.03784  | -0.03101 |
| 0.036238 | 0.43465  | -0.24648 | 6.82E-08 | -0.03606  | 0.4369  | -0.05292 | 0.25375  | -0.15407 |
| -0.10627 | 0.02162  | -0.267   | 4.59E-09 | -0.03568  | 0.44178 | 0.00107  | 0.98161  | -0.16959 |
| 0.077216 | 0.09558  | -0.09512 | 0.03991  | -0.00655  | 0.88766 | 0.005639 | 0.90326  | -0.06945 |
| 0.093122 | 0.04429  | -0.00263 | 0.95472  | 0.025956  | 0.57582 | 0.098018 | 0.03421  | 0.074779 |
| -0.05995 | 0.19594  | -0.18858 | 4.11E-05 | 0.003325  | 0.94287 | 0.013349 | 0.77356  | -0.06277 |
| -0.10052 | 0.02985  | -0.33909 | 4.98E-14 | -0.01453  | 0.75419 | -0.0263  | 0.57081  | -0.0933  |
| -0.21517 | 2.70E-06 | -0.31945 | 1.54E-12 | -0.00981  | 0.83259 | -0.01367 | 0.76827  | -0.00746 |
| 0.001076 | 0.98149  | -0.13294 | 0.004    | 0.030775  | 0.50706 | -0.00523 | 0.91027  | -0.01084 |
| -0.25441 | 2.47E-08 | -0.33182 | 1.82E-13 | -0.02971  | 0.5219  | 0.026094 | 0.57379  | -0.18399 |
| -0.24064 | 1.41E-07 | -0.52466 | 2.17E-34 | -0.08831  | 0.05651 | -0.18766 | 4.49E-05 | -0.24236 |
| 0.068787 | 0.13774  | -0.11823 | 0.01056  | -0.01199  | 0.79611 | -0.02827 | 0.5422   | -0.14675 |
| 0.094431 | 0.04137  | 0.072333 | 0.11853  | -0.06314  | 0.17314 | -0.08753 | 0.05874  | -0.18084 |
| 0.030371 | 0.51265  | -0.18581 | 5.35E-05 | -0.04221  | 0.36273 | -0.09506 | 0.04004  | -0.05275 |
| -0.01251 | 0.78741  | -0.05152 | 0.2665   | -0.00969  | 0.83464 | 0.007751 | 0.86733  | -0.02056 |
| -0.02332 | 0.61514  | -0.2352  | 2.73E-07 | -0.01095  | 0.81338 | -0.02723 | 0.55728  | -0.08599 |
| -0.0452  | 0.32971  | -0.28818 | 2.21E-10 | -0.03976  | 0.39127 | -0.09688 | 0.03636  | -0.1761  |
| -0.02747 | 0.55369  | -0.10171 | 0.02797  | -0.02204  | 0.63477 | -0.02844 | 0.53983  | -0.02123 |
| 0.002434 | 0.95816  | -0.09867 | 0.03303  | -0.02931  | 0.52755 | 0.002415 | 0.95848  | -0.07046 |
| -0.08567 | 0.06435  | -0.34623 | 1.34E-14 | -0.08001  | 0.08412 | -0.10178 | 0.02785  | -0.19461 |
| -0.03147 | 0.49753  | -0.30872 | 9.04E-12 | -0.07079  | 0.12659 | -0.14464 | 0.00173  | -0.22238 |
| -0.07753 | 0.09424  | -0.29722 | 5.58E-11 | -0.04125  | 0.37374 | -0.08759 | 0.05857  | -0.15586 |
| 0.018646 | 0.68776  | -0.25655 | 1.87E-08 | -0.07478  | 0.10656 | -0.10908 | 0.01838  | -0.10491 |

|          |          |          |          |          |         |          |          |          |
|----------|----------|----------|----------|----------|---------|----------|----------|----------|
| -0.06404 | 0.16708  | -0.184   | 6.34E-05 | -0.01903 | 0.68175 | -0.07068 | 0.12722  | -0.11543 |
| -0.04755 | 0.30515  | -0.0814  | 0.07886  | -0.03073 | 0.50763 | -0.03312 | 0.47517  | -0.08499 |
| 0.077612 | 0.09389  | -0.16059 | 0.00049  | 0.00454  | 0.92205 | -0.07093 | 0.12586  | -0.0323  |
| -0.15004 | 0.00115  | -0.12949 | 0.00507  | -0.03546 | 0.44454 | -0.01626 | 0.72604  | -0.14021 |
| -0.13821 | 0.00276  | -0.29967 | 3.82E-11 | -0.02768 | 0.55073 | -0.02482 | 0.59262  | -0.19824 |
| 0.011126 | 0.81049  | -0.10908 | 0.01838  | 0.026964 | 0.56108 | -0.02188 | 0.63722  | -0.04402 |
| -0.22778 | 6.53E-07 | -0.33003 | 2.50E-13 | -0.00888 | 0.84822 | 0.095496 | 0.03913  | -0.11924 |
| -0.05123 | 0.26926  | -0.23785 | 1.98E-07 | -0.0323  | 0.48623 | -0.04246 | 0.35994  | -0.13926 |
| -0.17137 | 0.0002   | -0.48746 | 3.04E-29 | 0.03657  | 0.43045 | -0.06364 | 0.16976  | -0.07958 |
| 0.127359 | 0.00585  | -0.08232 | 0.07555  | -0.0487  | 0.29361 | -0.04966 | 0.28421  | -0.16686 |
| -0.18533 | 5.59E-05 | -0.28782 | 2.33E-10 | -0.02012 | 0.6646  | 0.045623 | 0.32522  | -0.12723 |
| -0.00615 | 0.89462  | -0.10008 | 0.03059  | -0.02627 | 0.57117 | -0.01717 | 0.71138  | -0.13895 |
| -0.10991 | 0.0175   | -0.14792 | 0.00135  | 0.013448 | 0.77193 | 0.032188 | 0.48774  | -0.056   |
| -0.22181 | 1.29E-06 | -0.2471  | 6.32E-08 | -0.0343  | 0.45962 | -0.03292 | 0.47787  | -0.23193 |
| -0.16035 | 0.0005   | -0.40877 | 3.09E-20 | -0.06845 | 0.1397  | -0.14299 | 0.00195  | -0.30934 |
| -0.03828 | 0.40917  | -0.16475 | 0.00035  | -0.01139 | 0.80611 | -0.00969 | 0.83461  | -0.13747 |
| 0.054291 | 0.24162  | -0.17432 | 0.00015  | -0.01676 | 0.71784 | -0.08544 | 0.06505  | -0.14429 |
| 0.022003 | 0.6353   | -0.08745 | 0.05897  | 0.013473 | 0.77153 | 0.037975 | 0.41294  | -0.0481  |
| -0.03392 | 0.46456  | -0.29828 | 4.74E-11 | -0.04476 | 0.3345  | -0.07298 | 0.11526  | -0.22779 |
| -0.08555 | 0.06473  | -0.32613 | 4.92E-13 | -0.00011 | 0.9981  | -0.03249 | 0.48365  | -0.19654 |
| -0.09929 | 0.03194  | -0.33425 | 1.19E-13 | -0.03045 | 0.51157 | -0.03723 | 0.42216  | -0.18431 |
| 0.18868  | 4.07E-05 | -0.15369 | 0.00086  | -0.03527 | 0.44707 | -0.1994  | 1.42E-05 | -0.2025  |
| 0.024689 | 0.5946   | -0.12305 | 0.00777  | -0.02529 | 0.5856  | -0.12751 | 0.00579  | -0.14212 |
| -0.00039 | 0.99334  | -0.25036 | 4.17E-08 | 0.00117  | 0.97988 | 0.020244 | 0.66258  | -0.11982 |
| 0.032359 | 0.48543  | -0.13112 | 0.00454  | -0.03478 | 0.45341 | -0.11366 | 0.01399  | -0.14524 |
| -0.0392  | 0.39806  | -0.25908 | 1.34E-08 | -0.00082 | 0.98597 | -0.0562  | 0.2254   | -0.08467 |
| 0.141356 | 0.0022   | -0.10077 | 0.02945  | -0.0444  | 0.33841 | -0.11533 | 0.01264  | -0.14748 |
| -0.10159 | 0.02816  | -0.33564 | 9.27E-14 | -0.03864 | 0.40479 | -0.10781 | 0.01979  | -0.20055 |
| -0.0264  | 0.56929  | -0.23835 | 1.87E-07 | -0.04398 | 0.34294 | -0.11558 | 0.01244  | -0.23888 |
| -0.19853 | 1.55E-05 | -0.37198 | 8.99E-17 | 0.013549 | 0.77027 | -0.01156 | 0.80319  | -0.1035  |
| -0.05825 | 0.2089   | -0.24942 | 4.71E-08 | 0.023494 | 0.61257 | -0.0307  | 0.50811  | -0.05207 |
| -0.1304  | 0.00477  | -0.38165 | 1.22E-17 | -0.03252 | 0.48329 | -0.08872 | 0.05538  | -0.24143 |
| 0.044148 | 0.34112  | -0.09945 | 0.03166  | -0.0572  | 0.21727 | -0.16341 | 0.00039  | -0.19876 |
| 0.071213 | 0.12435  | 0.01656  | 0.72115  | -0.02345 | 0.61328 | 0.047501 | 0.30568  | -0.13925 |
| -0.02749 | 0.55341  | -0.02157 | 0.64204  | -0.03725 | 0.42193 | 0.01959  | 0.67284  | -0.06321 |
| 0.032226 | 0.48723  | -0.01271 | 0.78408  | -0.00375 | 0.9356  | 0.037963 | 0.41308  | -0.08747 |
| -0.07321 | 0.11413  | -0.21614 | 2.43E-06 | 0.004675 | 0.91975 | -0.0275  | 0.55331  | 0.098989 |
| -0.04991 | 0.28176  | -0.23878 | 1.77E-07 | -0.01311 | 0.77759 | -0.06201 | 0.18095  | -0.12578 |
| 0.023406 | 0.61389  | -0.07537 | 0.10381  | -0.02738 | 0.55508 | 0.00953  | 0.83727  | -0.10434 |
| -0.01125 | 0.80837  | -0.16676 | 0.0003   | -0.00538 | 0.90773 | -0.0427  | 0.35718  | -0.09027 |
| -0.00354 | 0.93912  | -0.16917 | 0.00024  | -0.02573 | 0.57909 | -0.03794 | 0.41338  | -0.1713  |
| 0.087704 | 0.05824  | -0.1474  | 0.0014   | -0.00562 | 0.90358 | -0.00287 | 0.95073  | 0.009923 |
| 0.190364 | 3.46E-05 | 0.376294 | 3.72E-17 | 0.056007 | 0.22704 | 0.157516 | 0.00064  | 0.061974 |
| 0.251493 | 3.61E-08 | 0.367167 | 2.37E-16 | 0.001767 | 0.96962 | 0.034691 | 0.45453  | -0.07043 |
| -0.04621 | 0.31905  | -0.16977 | 0.00023  | -0.029   | 0.53181 | -0.03718 | 0.42274  | -0.07775 |

|          |          |          |          |          |         |          |          |           |
|----------|----------|----------|----------|----------|---------|----------|----------|-----------|
| 0.090181 | 0.05146  | -0.09153 | 0.04806  | 0.025912 | 0.57647 | -0.00068 | 0.98837  | 0.041338  |
| 0.170064 | 0.00022  | 0.307548 | 1.09E-11 | -0.01292 | 0.78065 | -0.08968 | 0.05279  | 0.039701  |
| 0.094969 | 0.04022  | 0.42831  | 2.94E-22 | 0.026571 | 0.56681 | 0.141068 | 0.00225  | 0.043206  |
| 0.210414 | 4.51E-06 | 0.119362 | 0.00983  | -0.00549 | 0.90584 | 0.045285 | 0.32882  | 0.003068  |
| 0.098361 | 0.03358  | -0.07516 | 0.10478  | -0.07163 | 0.12214 | -0.12696 | 0.006    | -0.0836   |
| 0.046211 | 0.31901  | 0.066894 | 0.14893  | -0.08323 | 0.07236 | -0.14666 | 0.00148  | -0.0865   |
| 0.15353  | 0.00087  | 0.248753 | 5.12E-08 | -0.02984 | 0.52004 | 0.010761 | 0.81659  | -0.057    |
| 0.164911 | 0.00035  | 0.221755 | 1.30E-06 | 0.001237 | 0.97873 | -0.01437 | 0.75672  | 0.066353  |
| 0.120192 | 0.00933  | 0.2167   | 2.28E-06 | -0.00052 | 0.99114 | 0.035544 | 0.4435   | -0.02292  |
| -0.00062 | 0.98927  | -0.09899 | 0.03246  | -0.00586 | 0.89942 | 0.028164 | 0.54377  | -0.07083  |
| -0.21057 | 4.44E-06 | -0.30943 | 8.07E-12 | 0.023597 | 0.61101 | 0.132658 | 0.00408  | -0.05509  |
| 0.237509 | 2.07E-07 | 0.085936 | 0.06352  | -0.03846 | 0.40701 | -0.04596 | 0.32164  | -0.09777  |
| -0.01644 | 0.72305  | -0.09264 | 0.0454   | 0.042845 | 0.35558 | 0.129771 | 0.00497  | 0.046515  |
| 0.163891 | 0.00038  | 0.295756 | 7.00E-11 | -0.03308 | 0.4758  | -0.04786 | 0.30208  | -0.013    |
| -0.18671 | 4.91E-05 | -0.28124 | 6.14E-10 | 0.019385 | 0.67607 | 0.031883 | 0.49188  | 0.013876  |
| 0.032471 | 0.48393  | 0.121779 | 0.00843  | -0.02311 | 0.61832 | 0.064848 | 0.16179  | -0.00437  |
| -0.09351 | 0.0434   | -0.27546 | 1.41E-09 | 0.005997 | 0.89716 | 0.011105 | 0.81084  | 0.104523  |
| 0.206471 | 6.84E-06 | 0.206806 | 6.61E-06 | 0.00835  | 0.85717 | -0.03226 | 0.48671  | 0.05832   |
| 0.101209 | 0.02875  | -0.16289 | 0.00041  | -0.03941 | 0.39553 | -0.10462 | 0.02376  | -0.1176   |
| -0.15047 | 0.00111  | -0.34424 | 1.94E-14 | -0.08387 | 0.07018 | -0.14642 | 0.00151  | -0.26599  |
| 0.256822 | 1.80E-08 | 0.149086 | 0.00123  | -0.06296 | 0.17437 | -0.07339 | 0.1132   | -0.13597  |
| 0.146323 | 0.00152  | 0.044366 | 0.33874  | 0.000204 | 0.9965  | 0.062544 | 0.17724  | 0.058949  |
| 0.16951  | 0.00023  | 0.107803 | 0.0198   | -0.00686 | 0.88241 | -0.03653 | 0.43094  | -0.03397  |
| 0.231149 | 4.41E-07 | 0.252567 | 3.14E-08 | -0.00446 | 0.92342 | -0.0634  | 0.17139  | -0.05033  |
| -0.14611 | 0.00154  | -0.19137 | 3.14E-05 | -0.01334 | 0.77379 | -0.00654 | 0.88791  | -0.03084  |
| -0.02565 | 0.5803   | 0.008385 | 0.85658  | -0.02072 | 0.65518 | 0.008032 | 0.86256  | -0.13286  |
| -0.03816 | 0.41072  | -0.29016 | 1.64E-10 | 0.002495 | 0.95711 | 0.017222 | 0.71049  | -0.02811  |
| -0.13177 | 0.00434  | -0.32951 | 2.74E-13 | 0.033052 | 0.47613 | 0.098486 | 0.03336  | 0.157803  |
| -0.01372 | 0.76745  | -0.09001 | 0.05192  | 0.013955 | 0.76358 | 0.037956 | 0.41316  | -0.02233  |
| 0.337608 | 6.51E-14 | -0.03681 | 0.42739  | -0.06971 | 0.13249 | -0.21653 | 2.33E-06 | -0.1604   |
| 0.105537 | 0.02255  | 0.045034 | 0.33151  | -0.0311  | 0.50256 | -0.05903 | 0.20292  | -0.1201   |
| 0.051073 | 0.2707   | -0.17673 | 0.00012  | -0.01436 | 0.75698 | -0.1429  | 0.00196  | -0.06161  |
| 0.066855 | 0.14916  | 0.070969 | 0.12565  | -0.04258 | 0.35861 | -0.00048 | 0.99172  | -0.07504  |
| 0.149962 | 0.00115  | 0.134174 | 0.00367  | 0.010145 | 0.82692 | 0.027546 | 0.55265  | -0.11658  |
| 0.096743 | 0.03662  | -0.18285 | 7.06E-05 | -0.06783 | 0.14333 | -0.13864 | 0.00268  | -0.11975  |
| 0.370621 | 1.19E-16 | 0.188018 | 4.34E-05 | 0.040695 | 0.38025 | 0.10269  | 0.02648  | 0.077854  |
| 0.113609 | 0.01403  | 0.163    | 0.00041  | 0.023268 | 0.61598 | 0.03387  | 0.46528  | -9.60E-05 |
| 0.281763 | 5.69E-10 | 0.036768 | 0.42796  | 0.009503 | 0.83771 | -0.05448 | 0.23994  | 0.005444  |
| 0.175345 | 0.00014  | 0.134662 | 0.00355  | -0.02397 | 0.60541 | -0.03469 | 0.45456  | 0.02918   |
| 0.063582 | 0.17015  | 0.072254 | 0.11893  | -0.00663 | 0.88644 | 0.026618 | 0.56611  | 0.009557  |
| 0.078916 | 0.08848  | 0.053785 | 0.24604  | -0.04475 | 0.33455 | -0.08987 | 0.05227  | -0.05281  |
| -0.02127 | 0.64662  | 0.147871 | 0.00135  | 0.029329 | 0.52723 | 0.195884 | 2.02E-05 | 0.034444  |
| 0.155521 | 0.00075  | 0.151921 | 0.00099  | 0.017835 | 0.70066 | 0.061123 | 0.18731  | 0.071437  |
| 0.077028 | 0.09639  | 0.049169 | 0.28899  | 0.001029 | 0.98231 | -0.00475 | 0.91854  | 0.061844  |
| 0.123052 | 0.00776  | 0.078745 | 0.08917  | 0.014871 | 0.74857 | 0.033289 | 0.47298  | 0.043775  |

|          |          |          |          |          |         |          |          |          |
|----------|----------|----------|----------|----------|---------|----------|----------|----------|
| 0.000295 | 0.99493  | -0.07386 | 0.11093  | -0.03945 | 0.39499 | -0.04979 | 0.28292  | -0.06927 |
| 0.108757 | 0.01873  | 0.097699 | 0.0348   | -0.06738 | 0.146   | -0.04953 | 0.2855   | -0.03159 |
| 0.044023 | 0.34249  | 0.127735 | 0.0057   | 0.015226 | 0.74278 | 0.030664 | 0.50859  | 0.050234 |
| 0.07383  | 0.11108  | 0.170781 | 0.00021  | -0.00412 | 0.92927 | 0.004369 | 0.92499  | -0.02825 |
| -0.00521 | 0.91061  | -0.08094 | 0.08059  | -0.01836 | 0.69235 | 0.104375 | 0.02409  | -0.15253 |
| -0.10777 | 0.01983  | -0.17091 | 0.00021  | -0.04782 | 0.3024  | -0.04943 | 0.28644  | -0.01364 |
| 0.056256 | 0.22497  | -0.16032 | 0.00051  | -0.0183  | 0.69323 | -0.0516  | 0.26581  | -0.0494  |
| -0.0231  | 0.61848  | -0.10078 | 0.02944  | 0.005502 | 0.90561 | 0.071275 | 0.12402  | 0.06221  |
| 0.122753 | 0.00792  | 0.086701 | 0.06119  | -0.05645 | 0.22334 | -0.01358 | 0.76973  | -0.01258 |
| 0.222786 | 1.16E-06 | 0.117117 | 0.01131  | -0.01823 | 0.69433 | -0.09414 | 0.04201  | 0.077768 |
| 0.008198 | 0.85976  | -0.03721 | 0.42245  | -0.04328 | 0.3507  | -0.08182 | 0.07732  | 0.015505 |
| 0.221716 | 1.31E-06 | 0.069901 | 0.13146  | -0.01061 | 0.81906 | -0.10892 | 0.01855  | 0.03552  |
| 0.208012 | 5.82E-06 | 0.163375 | 0.00039  | 0.017126 | 0.71203 | 0.009645 | 0.83533  | 0.14226  |
| -0.02642 | 0.56898  | -0.1943  | 2.36E-05 | 0.014993 | 0.74658 | 0.015957 | 0.7309   | 0.042847 |
| -0.06615 | 0.15353  | -0.251   | 3.85E-08 | -0.04612 | 0.31999 | -0.06651 | 0.15128  | -0.04606 |
| -0.01365 | 0.76853  | 0.079999 | 0.08418  | 0.019385 | 0.67607 | 0.080381 | 0.08271  | -0.01947 |
| -0.06498 | 0.16093  | -0.18021 | 9.00E-05 | -0.01086 | 0.81498 | -0.02537 | 0.5845   | -0.02662 |
| 0.029723 | 0.52169  | -0.08774 | 0.05814  | 0.019523 | 0.67389 | 0.030619 | 0.50921  | 0.069586 |
| 0.009992 | 0.82949  | -0.18853 | 4.13E-05 | -0.07006 | 0.13058 | -0.13722 | 0.00296  | -0.16587 |
| -0.022   | 0.63535  | 0.112927 | 0.01462  | -0.00538 | 0.90776 | -0.09867 | 0.03303  | 0.0716   |
| -0.00887 | 0.84845  | -0.09581 | 0.03847  | -0.03559 | 0.44287 | -0.0164  | 0.72374  | -0.14133 |
| -0.01726 | 0.70994  | 0.04354  | 0.34781  | 0.050714 | 0.27408 | 0.122469 | 0.00806  | 0.147347 |
| 0.103595 | 0.02517  | 0.244927 | 8.29E-08 | 0.002359 | 0.95945 | 0.030741 | 0.50753  | -0.06515 |
| 0.031496 | 0.49715  | -0.08426 | 0.06889  | -0.03245 | 0.48415 | -0.10241 | 0.02689  | -0.10528 |
| 0.103694 | 0.02503  | 0.055711 | 0.2295   | -0.00229 | 0.96063 | 0.019424 | 0.67545  | -0.1165  |
| 0.287149 | 2.58E-10 | 0.117731 | 0.01089  | -0.0225  | 0.62764 | 0.041082 | 0.37573  | -0.02628 |
| 0.184396 | 6.11E-05 | 0.059128 | 0.20215  | -0.032   | 0.4903  | -0.01247 | 0.78816  | -0.05968 |
| 0.133255 | 0.00392  | 0.146469 | 0.0015   | 0.018319 | 0.69295 | 0.113914 | 0.01377  | 0.022102 |
| 0.15051  | 0.0011   | -0.01513 | 0.74442  | -0.02008 | 0.66518 | -0.08825 | 0.0567   | -0.02873 |
| 0.148122 | 0.00133  | 0.057989 | 0.21099  | -0.04606 | 0.32065 | -0.09991 | 0.03087  | -0.24273 |
| -0.04665 | 0.31441  | -0.06957 | 0.13332  | 0.030141 | 0.51585 | 0.154398 | 0.00081  | 0.009678 |
| 0.219559 | 1.66E-06 | 0.389724 | 2.18E-18 | 0.019721 | 0.67079 | -0.01658 | 0.72079  | 0.050349 |
| 0.20262  | 1.02E-05 | 0.025906 | 0.57656  | -0.04932 | 0.2875  | -0.10152 | 0.02826  | 0.024653 |
| -0.07899 | 0.08817  | -0.10412 | 0.02444  | -0.02743 | 0.55427 | -0.0436  | 0.34714  | -0.08327 |
| 0.164962 | 0.00034  | 0.057235 | 0.217    | -0.01369 | 0.76797 | -0.06783 | 0.14331  | -0.02014 |
| 0.107827 | 0.01977  | 0.117029 | 0.01138  | -0.0096  | 0.83612 | 0.046061 | 0.32059  | -0.12616 |
| 0.126977 | 0.006    | 0.048967 | 0.29098  | 0.034666 | 0.45485 | 0.076678 | 0.09792  | 0.046863 |
| 0.023296 | 0.61556  | -0.02895 | 0.53262  | -0.01232 | 0.79052 | 0.000463 | 0.99204  | 0.01177  |
| -0.02985 | 0.51998  | 0.192519 | 2.81E-05 | 0.019408 | 0.6757  | 0.19568  | 2.06E-05 | -0.02554 |
| 0.203946 | 8.90E-06 | 0.006271 | 0.89249  | -0.01514 | 0.74425 | -0.06273 | 0.17594  | 0.009289 |
| -0.0117  | 0.80095  | 0.026204 | 0.57218  | 0.019967 | 0.66692 | -0.02042 | 0.65988  | -0.02607 |
| 0.096769 | 0.03657  | -0.07586 | 0.10158  | 0.016371 | 0.7242  | 0.030005 | 0.51774  | 0.018555 |
| -0.12437 | 0.00712  | -0.44214 | 9.02E-24 | -0.05987 | 0.19656 | -0.1552  | 0.00076  | -0.12034 |
| 0.125967 | 0.00642  | -0.00063 | 0.98921  | -0.03549 | 0.44421 | -0.09935 | 0.03183  | -0.01057 |
| -0.11055 | 0.01685  | -0.1953  | 2.14E-05 | -0.04495 | 0.3324  | -0.01639 | 0.72388  | -0.04129 |



|          |          |          |          |          |         |          |         |          |
|----------|----------|----------|----------|----------|---------|----------|---------|----------|
| -0.06122 | 0.18658  | -0.26094 | 1.05E-08 | -0.04314 | 0.35222 | -0.14652 | 0.0015  | -0.01675 |
| 0.017536 | 0.70546  | 0.028966 | 0.53235  | 0.015577 | 0.73707 | 0.095209 | 0.03972 | -0.00691 |
| 0.064765 | 0.16232  | 0.193781 | 2.48E-05 | -0.02023 | 0.66283 | 0.054715 | 0.23795 | -0.07531 |
| 0.03515  | 0.44857  | 0.035698 | 0.44152  | 0.087881 | 0.05773 | 0.090349 | 0.05103 | 0.334609 |
| -0.13125 | 0.0045   | -0.37156 | 9.80E-17 | -0.0436  | 0.34716 | -0.09576 | 0.03859 | -0.05944 |
| 0.001427 | 0.97547  | 0.016924 | 0.71528  | 0.043356 | 0.34986 | 0.085808 | 0.06391 | 0.107403 |
| 0.115817 | 0.01226  | -0.05851 | 0.20691  | -0.0136  | 0.76944 | -0.0255  | 0.5825  | -0.04233 |
| -0.02627 | 0.57119  | 0.014401 | 0.75626  | -0.00476 | 0.91831 | -0.01208 | 0.79455 | -0.00865 |
| 0.204201 | 8.67E-06 | 0.035794 | 0.4403   | -0.01461 | 0.75288 | -0.04297 | 0.35417 | 0.040559 |
| -0.02202 | 0.63505  | -0.11844 | 0.01041  | -0.0762  | 0.10003 | -0.10233 | 0.02701 | -0.03334 |
| -0.13724 | 0.00296  | -0.27569 | 1.37E-09 | 0.019988 | 0.66659 | 0.107954 | 0.01962 | 0.013027 |
| 0.177772 | 0.00011  | 0.212311 | 3.68E-06 | 0.03023  | 0.51461 | 0.081029 | 0.08025 | 0.126621 |
| 0.040063 | 0.3877   | -0.16702 | 0.00029  | -0.00058 | 0.98994 | -0.06432 | 0.16526 | 0.023636 |
| 0.13335  | 0.00389  | -0.12199 | 0.00831  | -0.05184 | 0.26354 | -0.09544 | 0.03924 | -0.00663 |
| 0.115031 | 0.01287  | -0.06517 | 0.15971  | -0.0222  | 0.63223 | -0.04405 | 0.34215 | -0.02365 |
| 0.059491 | 0.19939  | -0.07491 | 0.10595  | -0.01765 | 0.70367 | -0.11727 | 0.01121 | -0.04563 |
| -0.0789  | 0.08853  | -0.03844 | 0.40728  | 0.051292 | 0.26865 | 0.104581 | 0.02381 | 0.046328 |
| 0.120056 | 0.00941  | -0.07049 | 0.12823  | 0.043104 | 0.35267 | 0.091782 | 0.04745 | 0.074652 |
| 0.058634 | 0.20595  | 0.019738 | 0.67052  | 0.047505 | 0.30564 | 0.091823 | 0.04735 | 0.052326 |
| 0.046334 | 0.31773  | 0.067778 | 0.14362  | -0.00861 | 0.85274 | -0.02093 | 0.65186 | -0.01898 |
| 0.082403 | 0.07524  | -0.1584  | 0.00059  | -0.02057 | 0.65753 | -0.07251 | 0.11764 | 0.015537 |
| 0.122591 | 0.008    | 0.080459 | 0.08241  | -0.05731 | 0.21637 | -0.04649 | 0.31609 | 0.019834 |
| 0.000978 | 0.98319  | -0.21935 | 1.70E-06 | -0.08859 | 0.05574 | -0.09612 | 0.03786 | -0.19378 |
| 0.246039 | 7.22E-08 | -0.01725 | 0.71002  | -0.02385 | 0.60722 | 0.014532 | 0.75412 | -0.11015 |
| 0.16196  | 0.00044  | 0.184647 | 5.97E-05 | 0.009699 | 0.83441 | 0.029275 | 0.52799 | 0.079566 |
| -0.01271 | 0.78414  | 0.023193 | 0.61713  | -0.08373 | 0.07065 | -0.14168 | 0.00215 | -0.12337 |
| 0.27285  | 2.04E-09 | 0.088752 | 0.05529  | -0.06241 | 0.17817 | -0.13882 | 0.00264 | -0.05112 |
| 0.06759  | 0.14473  | -0.21869 | 1.83E-06 | -0.03087 | 0.50577 | -0.06122 | 0.1866  | -0.00713 |
| -0.04357 | 0.34743  | -0.1122  | 0.01527  | -0.02845 | 0.53969 | -0.00452 | 0.9224  | -0.04069 |
| -0.04917 | 0.28899  | -0.21078 | 4.34E-06 | -0.06309 | 0.1735  | -0.16342 | 0.00039 | -0.18929 |
| 0.093254 | 0.04398  | -0.09724 | 0.03566  | -0.01288 | 0.78125 | 0.002621 | 0.95495 | -0.01869 |
| 0.093277 | 0.04393  | 0.024338 | 0.59984  | -0.0142  | 0.75963 | 0.043695 | 0.3461  | -0.05903 |
| 0.288365 | 2.15E-10 | 0.121073 | 0.00882  | 0.008824 | 0.84917 | 0.004368 | 0.92499 | 0.045677 |
| -0.00038 | 0.99354  | -0.07947 | 0.08626  | -0.01597 | 0.73067 | -0.06802 | 0.14222 | -0.05827 |
| -0.01824 | 0.69429  | -0.17406 | 0.00016  | 0.01705  | 0.71325 | -0.00949 | 0.838   | 0.009359 |
| 0.116985 | 0.01141  | 0.225576 | 8.42E-07 | -0.01739 | 0.70786 | -0.04585 | 0.32286 | 0.036188 |
| -0.10644 | 0.02142  | -0.2546  | 2.41E-08 | -0.04969 | 0.28386 | -0.02982 | 0.52037 | -0.16145 |
| 0.080734 | 0.08136  | 0.106507 | 0.02133  | -0.0191  | 0.68057 | 0.002985 | 0.94871 | -0.04624 |
| 0.01887  | 0.68421  | -0.03624 | 0.43466  | 0.053291 | 0.25041 | 0.048318 | 0.29743 | 0.113238 |
| 0.031601 | 0.49571  | -0.2104  | 4.52E-06 | -0.00819 | 0.85991 | -0.00977 | 0.83321 | -0.09825 |
| 0.145762 | 0.00159  | -0.07432 | 0.1087   | 0.013263 | 0.77499 | 0.004738 | 0.91866 | 0.013389 |
| -0.17348 | 0.00016  | -0.18987 | 3.63E-05 | 0.00858  | 0.85329 | 0.014941 | 0.74743 | 0.028117 |
| 0.184878 | 5.84E-05 | 0.157561 | 0.00063  | 0.009475 | 0.83818 | -0.03759 | 0.41775 | 0.071367 |
| -0.2589  | 1.37E-08 | -0.22887 | 5.76E-07 | -0.00075 | 0.98716 | 0.116681 | 0.01162 | -0.08609 |
| 0.085189 | 0.06586  | 0.074011 | 0.1102   | 0.004294 | 0.92626 | 0.008084 | 0.86168 | -0.04142 |

|          |          |          |          |          |         |          |          |          |
|----------|----------|----------|----------|----------|---------|----------|----------|----------|
| -0.01025 | 0.82516  | -0.12638 | 0.00624  | -0.05239 | 0.25848 | -0.07081 | 0.12649  | -0.19016 |
| 0.086521 | 0.06173  | 0.050129 | 0.27967  | -0.01626 | 0.72602 | -0.04423 | 0.34025  | 0.044007 |
| 0.09252  | 0.04568  | 0.112618 | 0.01489  | 0.016959 | 0.71472 | 0.112411 | 0.01508  | -0.00505 |
| 0.21162  | 3.96E-06 | 0.060716 | 0.19027  | 0.020306 | 0.66162 | 0.005912 | 0.89861  | -0.07456 |
| 0.193463 | 2.56E-05 | -0.01008 | 0.82807  | 0.033483 | 0.4704  | 0.184152 | 6.25E-05 | -0.03151 |
| 0.12977  | 0.00497  | 0.234215 | 3.07E-07 | 0.031294 | 0.49992 | 0.087431 | 0.05903  | 0.064274 |
| -0.0672  | 0.14706  | -0.22901 | 5.66E-07 | -0.02046 | 0.65926 | 0.016613 | 0.72029  | -0.05668 |
| 0.020307 | 0.6616   | -0.10284 | 0.02627  | 0.00409  | 0.92976 | 0.016088 | 0.72878  | -0.00048 |
| -0.08345 | 0.07161  | -0.24527 | 7.95E-08 | -0.05127 | 0.26886 | -0.07015 | 0.1301   | -0.03059 |
| 0.160858 | 0.00048  | 0.154216 | 0.00083  | -0.00668 | 0.88548 | 0.034433 | 0.45788  | 0.029721 |
| 0.013536 | 0.77048  | -0.09188 | 0.04722  | -0.06152 | 0.18446 | -0.11064 | 0.01676  | -0.06387 |
| 0.187968 | 4.36E-05 | 0.123893 | 0.00735  | 0.000114 | 0.99804 | 0.017121 | 0.71211  | 0.030794 |
| 0.234524 | 2.96E-07 | -0.04753 | 0.30542  | -0.02172 | 0.63968 | -0.14624 | 0.00153  | -0.00014 |
| 0.056094 | 0.22631  | -0.00907 | 0.84507  | -0.04378 | 0.34513 | -0.02173 | 0.63953  | -0.11195 |
| 0.06999  | 0.13097  | 0.066122 | 0.15369  | -0.0162  | 0.72688 | -0.03917 | 0.39833  | -0.08743 |
| 0.128087 | 0.00557  | 0.148001 | 0.00134  | -0.00581 | 0.90043 | -0.04941 | 0.28665  | 0.077901 |
| 0.133432 | 0.00387  | 0.136739 | 0.00307  | 0.027666 | 0.55092 | 0.055701 | 0.22959  | 0.172404 |
| -0.15027 | 0.00113  | -0.32567 | 5.33E-13 | -0.07663 | 0.09812 | -0.01837 | 0.69219  | -0.11959 |
| -0.10989 | 0.01752  | -0.2627  | 8.25E-09 | -0.03118 | 0.50151 | 0.010786 | 0.81617  | -0.19104 |
| -0.19183 | 3.00E-05 | -0.31346 | 4.17E-12 | -0.05991 | 0.19626 | -0.04996 | 0.28133  | -0.11984 |
| 0.008106 | 0.86131  | -0.14595 | 0.00156  | -0.04436 | 0.33876 | -0.04199 | 0.36524  | -0.07896 |
| 0.059575 | 0.19875  | -0.13455 | 0.00358  | 0.056659 | 0.22167 | 0.063231 | 0.17252  | 0.034064 |
| 0.219549 | 1.66E-06 | 0.135595 | 0.00333  | -0.0465  | 0.31602 | -0.10917 | 0.01828  | -0.15531 |
| 0.09972  | 0.0312   | -0.00979 | 0.83281  | -0.02418 | 0.60229 | -0.04017 | 0.38645  | -0.17699 |
| 0.284634 | 3.74E-10 | 0.124671 | 0.00699  | -0.05191 | 0.26292 | -0.12998 | 0.0049   | 0.041363 |
| -0.01676 | 0.7179   | -0.21421 | 3.00E-06 | -0.02977 | 0.52109 | -0.02091 | 0.65215  | -0.08652 |
| -0.17804 | 0.00011  | -0.05084 | 0.27291  | -0.03998 | 0.38873 | -0.04633 | 0.31781  | -0.16241 |
| -0.04653 | 0.3157   | -0.2022  | 1.07E-05 | -0.02224 | 0.63172 | -0.043   | 0.3538   | -0.02128 |
| -0.00258 | 0.95558  | -0.19091 | 3.28E-05 | -0.03509 | 0.44933 | -0.08164 | 0.078    | 0.069709 |
| 0.213613 | 3.20E-06 | 0.310604 | 6.66E-12 | 0.034069 | 0.46266 | 0.031278 | 0.50013  | 0.105151 |
| -0.13827 | 0.00275  | -0.18136 | 8.10E-05 | 0.064814 | 0.16201 | 0.142866 | 0.00197  | 0.182218 |
| 0.127377 | 0.00584  | 0.050716 | 0.27406  | 0.028651 | 0.53683 | 0.002776 | 0.95229  | 0.023855 |
| -0.20482 | 8.13E-06 | -0.28668 | 2.76E-10 | -0.09734 | 0.03548 | -0.09846 | 0.0334   | -0.1395  |
| 0.03467  | 0.4548   | -0.15994 | 0.00052  | -0.05308 | 0.25228 | -0.07803 | 0.09212  | -0.10677 |
| -0.16557 | 0.00033  | -0.06119 | 0.18683  | 0.005304 | 0.90899 | -0.05654 | 0.2226   | 0.07332  |
| -0.21658 | 2.31E-06 | -0.40123 | 1.72E-19 | -0.05146 | 0.26709 | -0.03981 | 0.39072  | -0.16745 |
| -0.10621 | 0.0217   | -0.3373  | 6.88E-14 | 0.000475 | 0.99183 | -0.05633 | 0.22434  | -0.11317 |
| -0.17916 | 9.91E-05 | -0.39578 | 5.80E-19 | -0.05925 | 0.20122 | -0.08195 | 0.07686  | -0.11107 |
| 0.121676 | 0.00848  | -0.09136 | 0.04849  | -0.01877 | 0.68584 | -0.08228 | 0.07567  | -0.07041 |
| 0.20261  | 1.02E-05 | 0.187496 | 4.56E-05 | -0.04095 | 0.37725 | -0.1008  | 0.0294   | -0.10334 |
| 0.127582 | 0.00576  | -0.08982 | 0.05242  | -0.02079 | 0.65403 | -0.09887 | 0.03267  | 0.027851 |
| 0.071815 | 0.12119  | -0.17874 | 0.0001   | -0.04857 | 0.2949  | -0.06198 | 0.18118  | -0.04144 |
| 0.331459 | 1.94E-13 | 0.129652 | 0.00501  | -0.06455 | 0.1637  | -0.16792 | 0.00027  | -0.0594  |
| -0.07214 | 0.11951  | -0.28131 | 6.08E-10 | 0.016643 | 0.71981 | -0.04851 | 0.29554  | -0.10852 |
| 0.155898 | 0.00072  | 0.034055 | 0.46284  | 0.005112 | 0.91227 | -0.05372 | 0.24658  | -0.00601 |

|          |          |          |          |          |         |          |          |          |
|----------|----------|----------|----------|----------|---------|----------|----------|----------|
| -0.15778 | 0.00062  | -0.14104 | 0.00225  | 0.107651 | 0.01997 | 0.222037 | 1.26E-06 | 0.329342 |
| 0.230405 | 4.81E-07 | -0.0289  | 0.53323  | -0.01518 | 0.74347 | -0.02246 | 0.62833  | 0.016855 |
| 0.306357 | 1.32E-11 | 0.136142 | 0.0032   | -0.02506 | 0.58907 | -0.05258 | 0.25677  | -0.01373 |
| 0.070376 | 0.12885  | 0.002688 | 0.9538   | -0.01773 | 0.70241 | -0.10151 | 0.02827  | 0.061348 |
| 0.098433 | 0.03345  | -0.03466 | 0.45499  | -0.00748 | 0.87198 | 0.009915 | 0.83079  | -0.08078 |
| -0.00641 | 0.89019  | 0.102726 | 0.02643  | -0.00026 | 0.99553 | 0.059401 | 0.20007  | 0.030334 |
| 0.087534 | 0.05873  | -0.16226 | 0.00043  | -0.0404  | 0.38373 | -0.06386 | 0.16827  | -0.13084 |
| -0.15474 | 0.00079  | -0.17739 | 0.00012  | 0.032316 | 0.48601 | 0.02167  | 0.64044  | 0.109066 |
| 0.090032 | 0.05185  | 0.010016 | 0.82908  | 0.007296 | 0.87506 | 0.044423 | 0.33812  | 0.029702 |
| 0.02766  | 0.55101  | 0.20317  | 9.64E-06 | -0.01347 | 0.77151 | -0.05902 | 0.20295  | -0.02222 |
| -0.01515 | 0.74395  | 0.074355 | 0.10855  | 0.002681 | 0.95393 | -0.08496 | 0.0666   | 0.157327 |
| 0.156728 | 0.00068  | -0.01251 | 0.78751  | -0.0307  | 0.50809 | -0.06073 | 0.19017  | -0.22478 |
| 0.178302 | 0.00011  | -0.01197 | 0.7965   | -0.04492 | 0.33276 | -0.08824 | 0.05673  | -0.03365 |
| 0.030412 | 0.51208  | -0.12824 | 0.00551  | -0.00756 | 0.8706  | -0.0736  | 0.11219  | -0.00345 |
| 0.107069 | 0.02065  | 0.001074 | 0.98153  | 0.015532 | 0.7378  | 0.038312 | 0.40879  | -0.02927 |
| 0.007015 | 0.87983  | -0.06577 | 0.15586  | -0.03925 | 0.39741 | -0.0081  | 0.86134  | -0.08835 |
| -0.15818 | 0.0006   | -0.34469 | 1.79E-14 | -0.073   | 0.11516 | -0.15099 | 0.00106  | -0.1179  |
| 0.228785 | 5.81E-07 | 0.243951 | 9.37E-08 | 0.036688 | 0.42896 | 0.019001 | 0.68213  | 0.091764 |
| 0.017735 | 0.70227  | -0.06586 | 0.15534  | -0.02251 | 0.62761 | -0.03195 | 0.49098  | 0.025514 |
| 0.24     | 1.53E-07 | 0.319458 | 1.54E-12 | -0.01631 | 0.72513 | 0.066763 | 0.14973  | -0.05091 |
| 0.221036 | 1.41E-06 | 0.111336 | 0.01608  | 0.031615 | 0.49553 | 0.02415  | 0.60266  | 0.05709  |
| 0.202357 | 1.05E-05 | 0.140027 | 0.00242  | -0.00735 | 0.87405 | -0.00352 | 0.93948  | -0.01185 |
| 0.198731 | 1.52E-05 | -0.01162 | 0.80225  | -0.05014 | 0.27959 | -0.11889 | 0.01013  | -0.03793 |
| -0.25464 | 2.40E-08 | -0.32447 | 6.55E-13 | -0.07736 | 0.09497 | -0.1103  | 0.0171   | -0.18348 |
| 0.052716 | 0.25557  | -0.01103 | 0.81214  | 0.021795 | 0.63851 | 0.050442 | 0.27667  | 0.054622 |
| 0.14464  | 0.00173  | -0.05355 | 0.24808  | -0.05539 | 0.23224 | -0.075   | 0.10552  | -0.05391 |
| 0.149464 | 0.0012   | 0.057037 | 0.21859  | -0.06045 | 0.19223 | -0.09251 | 0.04571  | -0.11739 |
| 0.146418 | 0.00151  | 0.160283 | 0.00051  | -0.00191 | 0.96722 | -0.02119 | 0.64784  | -0.01093 |
| 0.111244 | 0.01617  | 0.176204 | 0.00013  | 0.000523 | 0.99101 | -0.00812 | 0.86112  | -0.0931  |
| 0.228651 | 5.91E-07 | 0.053395 | 0.24949  | 0.015205 | 0.74313 | 0.050373 | 0.27733  | 0.095685 |
| -0.01475 | 0.75062  | -0.0205  | 0.65866  | -0.02966 | 0.52262 | -0.03442 | 0.458    | -0.00738 |
| 0.066101 | 0.15381  | -0.22208 | 1.25E-06 | -0.00878 | 0.84996 | -0.05843 | 0.20751  | 0.040849 |
| -0.00278 | 0.95228  | -0.0174  | 0.70762  | 0.019334 | 0.67688 | 0.073532 | 0.11253  | -0.06259 |
| 0.128774 | 0.00532  | 0.202507 | 1.03E-05 | 0.0324   | 0.48489 | 0.057871 | 0.21192  | 0.073462 |
| 0.08762  | 0.05848  | -0.05261 | 0.25651  | -0.03414 | 0.46178 | -0.05868 | 0.20557  | 0.023203 |
| 0.093116 | 0.0443   | 0.144142 | 0.00179  | -0.02716 | 0.55829 | -0.02155 | 0.64222  | 0.012075 |
| -0.03834 | 0.4084   | -0.12063 | 0.00907  | -0.05905 | 0.20275 | -0.03679 | 0.42763  | -0.1092  |
| 0.101301 | 0.0286   | 0.064558 | 0.16367  | 0.055428 | 0.23189 | 0.055159 | 0.23416  | 0.066582 |
| 0.053651 | 0.24722  | 0.055903 | 0.2279   | -0.03449 | 0.45711 | -0.11093 | 0.01647  | -0.11576 |
| -0.06504 | 0.16055  | -0.26447 | 6.49E-09 | -0.02959 | 0.52361 | -0.08088 | 0.08081  | 0.000624 |
| -0.02131 | 0.64594  | -0.2251  | 8.89E-07 | -0.05649 | 0.22301 | -0.09359 | 0.04322  | -0.13367 |
| 0.224226 | 9.83E-07 | -0.1298  | 0.00496  | -0.03268 | 0.48107 | -0.11223 | 0.01524  | -0.07461 |
| -0.09509 | 0.03998  | -0.32253 | 9.12E-13 | 0.023089 | 0.61871 | 0.01623  | 0.72647  | 0.013801 |
| -0.0538  | 0.24594  | -0.11115 | 0.01626  | 0.024013 | 0.60474 | 0.021812 | 0.63825  | 0.044797 |
| 0.071772 | 0.12142  | 0.306007 | 1.40E-11 | 0.049375 | 0.28697 | 0.043421 | 0.34914  | 0.224733 |

|          |          |          |          |          |         |          |          |          |
|----------|----------|----------|----------|----------|---------|----------|----------|----------|
| 0.149659 | 0.00118  | 0.112359 | 0.01513  | -0.00525 | 0.9099  | 0.016482 | 0.72241  | 0.175502 |
| 0.095201 | 0.03974  | 0.095939 | 0.03822  | -0.04713 | 0.3095  | -0.11803 | 0.01069  | 0.013108 |
| -0.00126 | 0.97832  | -0.03789 | 0.41398  | -0.07213 | 0.11959 | -0.11656 | 0.01171  | -0.02447 |
| 0.132284 | 0.00419  | 0.137022 | 0.00301  | -0.00172 | 0.97044 | -0.00645 | 0.88944  | 0.067507 |
| 0.11086  | 0.01654  | 0.121235 | 0.00873  | 0.00662  | 0.88655 | 0.047613 | 0.30453  | 0.139363 |
| -0.10037 | 0.03011  | -0.14378 | 0.00184  | -0.02498 | 0.59021 | -0.0115  | 0.80424  | -0.04614 |
| 0.106918 | 0.02084  | -0.00011 | 0.99809  | -0.01455 | 0.75388 | -0.03913 | 0.39888  | -0.10301 |
| 0.165583 | 0.00033  | -0.04516 | 0.3302   | -0.01328 | 0.77475 | -0.05513 | 0.23441  | -0.02555 |
| -0.0334  | 0.47148  | -0.21463 | 2.86E-06 | -0.05944 | 0.19975 | -0.09223 | 0.04636  | -0.07668 |
| -0.02457 | 0.59638  | -0.16464 | 0.00035  | -0.05391 | 0.24493 | -0.09907 | 0.03231  | -0.05076 |
| 0.102055 | 0.02743  | 0.246857 | 6.51E-08 | 0.095186 | 0.03977 | 0.230772 | 4.61E-07 | 0.264011 |
| -0.13407 | 0.0037   | -0.34066 | 3.74E-14 | -0.03532 | 0.44634 | -0.08675 | 0.06103  | -0.13235 |
| 0.087751 | 0.05811  | 0.185369 | 5.58E-05 | -0.01118 | 0.80962 | 0.020995 | 0.65089  | 0.007951 |
| 0.141347 | 0.0022   | 0.272569 | 2.12E-09 | 0.006082 | 0.8957  | 0.05633  | 0.22436  | 0.064323 |
| 0.176552 | 0.00013  | 0.142837 | 0.00197  | -0.03448 | 0.45731 | -0.07753 | 0.09423  | -0.06589 |
| 0.148479 | 0.00129  | 0.12343  | 0.00758  | 0.019832 | 0.66904 | 0.036739 | 0.42832  | -0.00281 |
| -0.06554 | 0.15731  | -0.10325 | 0.02567  | -0.04137 | 0.37243 | -0.05646 | 0.22333  | -0.06314 |
| 0.104621 | 0.02376  | 0.065319 | 0.15875  | -0.03923 | 0.39768 | -0.01292 | 0.78058  | 0.115057 |
| -0.13889 | 0.00263  | -0.15916 | 0.00056  | -0.00471 | 0.91915 | 0.058408 | 0.2077   | 0.071964 |
| -0.06487 | 0.16164  | -0.17989 | 9.27E-05 | -0.03449 | 0.45716 | -0.06314 | 0.17317  | -0.01991 |
| -0.1554  | 0.00075  | -0.33665 | 7.73E-14 | -0.04261 | 0.3582  | -0.05589 | 0.22801  | -0.10304 |
| -0.08841 | 0.05623  | -0.17383 | 0.00016  | -0.02821 | 0.5431  | -0.01633 | 0.72489  | -0.09463 |
| -0.11145 | 0.01598  | -0.11557 | 0.01245  | 0.000829 | 0.98574 | 0.060457 | 0.19217  | 0.031045 |
| 0.069453 | 0.13396  | -0.02487 | 0.59183  | -0.01082 | 0.81563 | 0.006812 | 0.88329  | -0.02606 |
| -0.04382 | 0.34476  | -0.13799 | 0.00281  | -0.01231 | 0.79073 | -0.04916 | 0.28912  | 0.00319  |
| -0.0607  | 0.19039  | -0.23007 | 5.00E-07 | -0.07988 | 0.08464 | -0.09646 | 0.03719  | -0.01698 |
| -0.07753 | 0.09424  | -0.25127 | 3.71E-08 | 0.026921 | 0.56171 | 0.008438 | 0.8557   | -0.03357 |
| -0.20248 | 1.03E-05 | -0.39123 | 1.57E-18 | -0.0577  | 0.21325 | -0.06047 | 0.19204  | -0.09276 |
| -0.04092 | 0.37762  | -0.01006 | 0.82827  | 0.011224 | 0.80885 | 0.101902 | 0.02767  | 0.009003 |
| 0.04471  | 0.33501  | 0.311955 | 5.34E-12 | 0.002346 | 0.95968 | -0.09096 | 0.04947  | 0.083692 |
| 0.095422 | 0.03928  | 0.24739  | 6.09E-08 | -0.00032 | 0.99454 | 0.042015 | 0.36498  | 0.076839 |
| 0.070594 | 0.12767  | 0.1036   | 0.02517  | 0.011863 | 0.79819 | 0.061641 | 0.18359  | 0.049039 |
| 0.227929 | 6.42E-07 | 0.270263 | 2.93E-09 | 0.053789 | 0.246   | 0.176858 | 0.00012  | 0.194128 |
| -0.01366 | 0.76838  | -0.13688 | 0.00304  | 0.017883 | 0.69991 | 0.019624 | 0.67231  | 0.003588 |
| 0.100976 | 0.02912  | 0.013689 | 0.76796  | -0.03053 | 0.51045 | -0.01017 | 0.82648  | -0.06685 |
| -0.03404 | 0.46309  | -0.00788 | 0.86507  | -0.03442 | 0.45801 | -0.03242 | 0.48457  | -0.11519 |
| 0.441525 | 1.06E-23 | 0.065184 | 0.15962  | -0.03192 | 0.49131 | -0.03685 | 0.42697  | -0.01529 |
| 0.038934 | 0.40123  | -0.1991  | 1.46E-05 | -0.05826 | 0.20883 | -0.12192 | 0.00835  | -0.17919 |
| 0.2595   | 1.27E-08 | 0.223472 | 1.07E-06 | -0.04118 | 0.37458 | -0.13146 | 0.00443  | -0.10819 |
| -0.12543 | 0.00665  | -0.1885  | 4.14E-05 | -0.05474 | 0.23772 | -0.08619 | 0.06275  | -0.06581 |
| 0.052866 | 0.25421  | -0.08881 | 0.05514  | -0.00548 | 0.90593 | 0.009915 | 0.83079  | 0.001633 |
| -0.07063 | 0.12749  | -0.23263 | 3.70E-07 | 0.003265 | 0.9439  | -0.04206 | 0.36443  | -0.00294 |
| -0.07155 | 0.12259  | -0.35235 | 4.26E-15 | -0.01284 | 0.78205 | -0.05247 | 0.25779  | -0.00629 |
| -0.12504 | 0.00682  | -0.38903 | 2.53E-18 | -0.06046 | 0.19218 | -0.07908 | 0.08783  | -0.1353  |
| 0.277221 | 1.10E-09 | 0.223601 | 1.06E-06 | 0.035022 | 0.45023 | 0.004415 | 0.92418  | 0.148682 |

|          |          |          |          |          |         |          |          |          |
|----------|----------|----------|----------|----------|---------|----------|----------|----------|
| -0.06015 | 0.19443  | -0.25945 | 1.27E-08 | -0.01685 | 0.71651 | -0.05068 | 0.27437  | -0.05535 |
| 0.033134 | 0.47504  | -0.04506 | 0.33123  | 0.007542 | 0.87087 | -0.0527  | 0.25572  | 0.049335 |
| -0.12235 | 0.00812  | 0.034342 | 0.45908  | 0.130977 | 0.00458 | 0.428905 | 2.54E-22 | 0.191304 |
| 0.03359  | 0.46898  | 0.099662 | 0.03129  | 0.039499 | 0.39443 | 0.201139 | 1.19E-05 | 0.0751   |
| 0.284756 | 3.67E-10 | 0.178092 | 0.00011  | -0.00461 | 0.92085 | -0.0358  | 0.44018  | 0.00781  |
| 0.099922 | 0.03085  | -0.10711 | 0.02061  | -0.02003 | 0.66599 | -0.04995 | 0.28139  | 0.02973  |
| -0.03389 | 0.46499  | 0.291829 | 1.28E-10 | 0.032418 | 0.48463 | 0.149726 | 0.00117  | 0.220165 |
| 0.197023 | 1.80E-05 | 0.276803 | 1.16E-09 | -0.02003 | 0.66599 | -0.11581 | 0.01227  | -0.04658 |
| 0.00722  | 0.87634  | 0.166514 | 0.0003   | 0.001875 | 0.96776 | -0.01972 | 0.67083  | 0.031359 |
| 0.018226 | 0.69444  | 0.038424 | 0.40742  | 0.027102 | 0.55908 | 0.058952 | 0.2035   | -0.00394 |
| -0.00157 | 0.97307  | -0.03574 | 0.44097  | 0.001673 | 0.97123 | -0.00141 | 0.97571  | 0.068672 |
| 0.126697 | 0.00611  | -0.01911 | 0.68034  | -0.02179 | 0.63857 | -0.10843 | 0.01909  | -0.03596 |
| 0.120762 | 0.00899  | 0.237242 | 2.13E-07 | 0.030663 | 0.50861 | 0.134909 | 0.00349  | 0.179815 |
| 0.0016   | 0.97249  | 0.195533 | 2.09E-05 | -0.0261  | 0.57377 | 0.034153 | 0.46155  | -0.00567 |
| 0.065354 | 0.15853  | 0.06233  | 0.17873  | -0.00681 | 0.88338 | -0.01225 | 0.79177  | -0.02435 |
| -0.19598 | 2.00E-05 | -0.17014 | 0.00022  | -0.01025 | 0.82519 | 0.03212  | 0.48866  | -0.01351 |
| -0.0317  | 0.4944   | -0.00378 | 0.93511  | -0.01463 | 0.75249 | -0.0254  | 0.58403  | -0.04085 |
| -0.10547 | 0.02263  | -0.08498 | 0.06653  | 0.007479 | 0.87194 | 0.047997 | 0.30065  | 0.037106 |
| 0.101254 | 0.02868  | 0.097477 | 0.03522  | 0.013066 | 0.77823 | 0.052429 | 0.25816  | 0.027746 |
| -0.09156 | 0.04798  | -0.14207 | 0.00209  | -0.002   | 0.96563 | 0.074659 | 0.10711  | 0.144063 |
| 0.06357  | 0.17023  | 0.087454 | 0.05897  | 0.042725 | 0.35692 | 0.091685 | 0.04768  | 0.12841  |
| 0.025553 | 0.58176  | -0.18542 | 5.55E-05 | -0.0087  | 0.85124 | -0.04074 | 0.37977  | -0.06003 |
| 0.163328 | 0.00039  | 0.052805 | 0.25476  | -0.02644 | 0.56869 | -0.02133 | 0.64569  | 0.024308 |
| 0.02066  | 0.65609  | 0.297364 | 5.46E-11 | 0.004677 | 0.91971 | 0.042223 | 0.36261  | 0.037715 |
| 0.454759 | 3.25E-25 | 0.313873 | 3.90E-12 | -0.02799 | 0.54632 | 0.037725 | 0.41602  | -0.14395 |
| 0.156242 | 0.0007   | -0.01799 | 0.69823  | 0.038761 | 0.40332 | -0.02718 | 0.55795  | 0.089505 |
| 0.017865 | 0.70019  | 0.000801 | 0.98623  | -0.03421 | 0.46075 | -0.04173 | 0.36822  | -0.09877 |
| -0.00623 | 0.89314  | 0.111287 | 0.01613  | 0.027184 | 0.55789 | 0.103514 | 0.02529  | 0.050787 |
| 0.258827 | 1.38E-08 | 0.155595 | 0.00074  | 0.006111 | 0.89522 | -0.01638 | 0.72413  | 0.022574 |
| 0.130729 | 0.00466  | 0.176927 | 0.00012  | -0.00792 | 0.8645  | 0.054861 | 0.2367   | 0.116172 |
| -0.09791 | 0.0344   | -0.16311 | 0.0004   | -0.00569 | 0.90243 | 0.05791  | 0.21161  | -0.08352 |
| -0.19106 | 3.24E-05 | -0.26723 | 4.45E-09 | 0.001676 | 0.97119 | 0.002079 | 0.96426  | 0.058648 |
| 0.259608 | 1.25E-08 | 0.157767 | 0.00062  | 0.007628 | 0.86941 | -0.029   | 0.53184  | 0.084184 |
| 0.197854 | 1.66E-05 | 0.257435 | 1.66E-08 | 0.03193  | 0.49124 | 0.082286 | 0.07565  | 0.097985 |
| 0.091499 | 0.04814  | -0.02533 | 0.58513  | -0.01169 | 0.80102 | -0.00241 | 0.95866  | 0.009146 |
| 0.060202 | 0.19406  | 0.112692 | 0.01483  | -0.00344 | 0.94084 | 0.108302 | 0.01923  | 0.099069 |
| -0.19573 | 2.05E-05 | -0.28179 | 5.68E-10 | 0.015251 | 0.74238 | 0.000241 | 0.99585  | 0.070331 |
| 0.021883 | 0.63715  | -0.07881 | 0.0889   | 0.019647 | 0.67195 | 0.000532 | 0.99086  | -0.00426 |
| 0.151602 | 0.00101  | -0.02684 | 0.56282  | 0.022108 | 0.63369 | 0.024592 | 0.59605  | 0.062356 |
| 0.032277 | 0.48654  | 0.023785 | 0.60817  | 0.014161 | 0.76019 | 0.013737 | 0.76718  | 0.083545 |
| 0.036454 | 0.43191  | 0.187172 | 4.70E-05 | -0.04387 | 0.34417 | 0.003913 | 0.93278  | 0.003467 |
| -0.22664 | 7.46E-07 | -0.22339 | 1.08E-06 | -0.00894 | 0.84726 | -0.01694 | 0.71497  | 0.036668 |
| 0.139722 | 0.00248  | 0.007388 | 0.8735   | -0.01699 | 0.71424 | -0.03682 | 0.42731  | 0.126517 |
| 0.196421 | 1.91E-05 | 0.082538 | 0.07476  | -0.02035 | 0.66092 | -0.05102 | 0.27118  | 0.025792 |
| 0.046874 | 0.31212  | -0.16226 | 0.00043  | -0.04068 | 0.3804  | -0.08243 | 0.07515  | -0.06382 |

|          |          |          |          |          |         |          |          |          |
|----------|----------|----------|----------|----------|---------|----------|----------|----------|
| -0.08435 | 0.06858  | 0.134214 | 0.00366  | -0.01605 | 0.72945 | 0.056916 | 0.21957  | 0.063736 |
| 0.10333  | 0.02555  | 0.159321 | 0.00055  | -0.01508 | 0.74522 | 0.013095 | 0.77775  | 0.08382  |
| 0.057218 | 0.21713  | 0.023956 | 0.6056   | 0.012146 | 0.79349 | 0.008644 | 0.8522   | -0.04239 |
| 0.125442 | 0.00664  | -0.03586 | 0.4394   | -0.0293  | 0.52759 | -0.01889 | 0.68383  | 0.113573 |
| 0.22207  | 1.25E-06 | 0.183383 | 6.71E-05 | -0.03213 | 0.48853 | -0.07907 | 0.08786  | 0.002545 |
| 0.091579 | 0.04794  | -0.00658 | 0.88722  | -0.02676 | 0.56411 | -0.05458 | 0.2391   | 0.043094 |
| -0.19726 | 1.76E-05 | -0.37928 | 2.00E-17 | -0.03658 | 0.43037 | -0.07279 | 0.11623  | -0.17462 |
| 0.045062 | 0.33121  | -0.09082 | 0.04983  | -0.07611 | 0.10043 | -0.13152 | 0.00441  | -0.01856 |
| -0.02179 | 0.63859  | -0.18256 | 7.25E-05 | -0.05123 | 0.26919 | -0.09109 | 0.04914  | -0.03609 |
| -0.10438 | 0.02409  | -0.1661  | 0.00031  | -0.01732 | 0.70897 | 0.029946 | 0.51857  | -0.00519 |
| 0.076484 | 0.09877  | 0.023985 | 0.60515  | -0.03514 | 0.44875 | -0.04879 | 0.29269  | -0.0742  |
| 0.081129 | 0.07988  | 0.198419 | 1.56E-05 | -0.0085  | 0.85459 | 0.059216 | 0.20148  | 0.066783 |
| -0.1122  | 0.01528  | -0.13664 | 0.00309  | -0.06123 | 0.18654 | -0.03331 | 0.47274  | -0.11821 |
| -0.21525 | 2.67E-06 | -0.39959 | 2.49E-19 | -0.02641 | 0.56915 | -0.03451 | 0.45694  | -0.13939 |
| 0.102566 | 0.02667  | 0.034542 | 0.45646  | -0.03329 | 0.473   | -0.03917 | 0.39843  | -0.06804 |
| 0.02708  | 0.5594   | 0.227861 | 6.47E-07 | 0.000822 | 0.98586 | -0.05508 | 0.23487  | -0.04079 |
| 0.148287 | 0.00131  | 0.048788 | 0.29275  | 0.002676 | 0.95402 | -0.02524 | 0.58641  | 0.050606 |
| 0.111174 | 0.01624  | -0.06644 | 0.15171  | -0.04257 | 0.35868 | -0.10809 | 0.01947  | -0.09483 |
| -0.00968 | 0.83468  | -0.09032 | 0.05111  | -0.01843 | 0.69116 | -0.06391 | 0.16795  | -0.09201 |
| 0.097876 | 0.03447  | 0.157619 | 0.00063  | 0.02758  | 0.55217 | 0.098643 | 0.03307  | 0.038879 |
| 0.072949 | 0.11541  | -0.0841  | 0.06941  | -0.05565 | 0.23005 | -0.12    | 0.00944  | -0.04331 |
| 0.17831  | 0.00011  | 0.159376 | 0.00055  | -0.00907 | 0.84501 | 0.037417 | 0.41984  | -0.05037 |
| 0.096735 | 0.03664  | 0.027305 | 0.55613  | -0.04484 | 0.33363 | -0.08194 | 0.07691  | -0.13792 |
| 0.20471  | 8.22E-06 | 0.248059 | 5.59E-08 | -0.01569 | 0.7352  | -0.07613 | 0.10033  | -0.07345 |
| 0.004903 | 0.91585  | -0.21272 | 3.52E-06 | -0.04008 | 0.3875  | -0.12484 | 0.00691  | -0.03932 |
| 0.096328 | 0.03744  | 0.032545 | 0.48293  | -0.00349 | 0.94001 | -0.0249  | 0.59151  | 0.041302 |
| 0.058092 | 0.21018  | 0.009363 | 0.84008  | -0.00711 | 0.87817 | -0.04155 | 0.37033  | 0.016517 |
| 0.213377 | 3.28E-06 | 0.256976 | 1.77E-08 | 0.03725  | 0.42192 | 0.071921 | 0.12064  | 0.066689 |
| -0.03477 | 0.45352  | 0.151547 | 0.00102  | 0.139988 | 0.00243 | 0.254663 | 2.39E-08 | 0.49833  |
| 0.303771 | 2.00E-11 | 0.308678 | 9.11E-12 | 0.045607 | 0.32539 | 0.067944 | 0.14263  | 0.152776 |
| 0.094891 | 0.04039  | -0.02355 | 0.61169  | 0.015974 | 0.73062 | 0.037795 | 0.41516  | 0.015113 |
| 0.111825 | 0.01562  | 0.049767 | 0.28316  | 0.013389 | 0.77291 | 0.047431 | 0.30639  | 0.021741 |
| 0.068476 | 0.13953  | -0.16474 | 0.00035  | -0.04438 | 0.33862 | -0.12217 | 0.00822  | -0.06653 |
| 0.072874 | 0.11579  | -0.17976 | 9.38E-05 | -0.01397 | 0.76327 | -0.09131 | 0.04861  | 0.050909 |
| 0.170853 | 0.00021  | 0.22191  | 1.28E-06 | 0.02805  | 0.5454  | 0.066202 | 0.15318  | -0.00312 |
| -0.13023 | 0.00482  | -0.26744 | 4.33E-09 | -0.02832 | 0.54151 | -0.03526 | 0.44709  | -0.10243 |
| 0.274526 | 1.61E-09 | 0.176871 | 0.00012  | -0.07092 | 0.12589 | -0.12557 | 0.00659  | -0.08479 |
| 0.106131 | 0.0218   | 0.290445 | 1.57E-10 | -0.01036 | 0.82328 | 0.050151 | 0.27946  | 0.053086 |
| 0.194001 | 2.43E-05 | 0.15886  | 0.00057  | 0.001564 | 0.97311 | 0.012526 | 0.78719  | 0.106838 |
| -0.1361  | 0.00321  | 0.077314 | 0.09516  | -0.0013  | 0.97766 | 0.044353 | 0.33888  | -0.00154 |
| 0.343414 | 2.26E-14 | 0.087131 | 0.05991  | -0.05033 | 0.2777  | -0.10864 | 0.01886  | -0.18913 |
| 0.023454 | 0.61316  | 0.139621 | 0.00249  | 0.068187 | 0.14121 | 0.147019 | 0.00144  | 0.138376 |
| -0.10165 | 0.02806  | -0.06125 | 0.18638  | -0.02003 | 0.66595 | 0.044481 | 0.33749  | 0.034152 |
| 0.162731 | 0.00041  | -0.03493 | 0.45142  | 0.010848 | 0.81514 | 0.036355 | 0.43317  | 0.04399  |
| 0.442932 | 7.35E-24 | 0.272012 | 2.29E-09 | -0.00387 | 0.93349 | -0.03211 | 0.48878  | 0.077075 |

|          |          |          |          |          |         |          |          |          |
|----------|----------|----------|----------|----------|---------|----------|----------|----------|
| 0.019402 | 0.6758   | -0.06953 | 0.13353  | -0.01335 | 0.77361 | -0.01898 | 0.68242  | -0.03346 |
| -0.10252 | 0.02674  | -0.0532  | 0.25124  | -0.03728 | 0.42157 | -0.00044 | 0.99242  | -0.07814 |
| 0.006192 | 0.89384  | -0.15907 | 0.00056  | -0.07758 | 0.09402 | -0.17524 | 0.00014  | -0.17485 |
| -0.07866 | 0.08954  | -0.20488 | 8.08E-06 | -0.06885 | 0.13738 | -0.07612 | 0.10038  | -0.15216 |
| 0.127544 | 0.00578  | -0.00605 | 0.89631  | -0.00428 | 0.92642 | 0.002286 | 0.9607   | 0.025637 |
| 0.007082 | 0.87868  | -0.09709 | 0.03594  | -0.01054 | 0.82031 | -0.02928 | 0.52788  | -0.03428 |
| -0.10913 | 0.01832  | -0.18486 | 5.85E-05 | -0.00177 | 0.96957 | 0.022078 | 0.63415  | 0.026733 |
| 0.116502 | 0.01175  | 0.372616 | 7.90E-17 | -0.00461 | 0.92092 | 0.016246 | 0.72622  | -0.10047 |
| 0.04177  | 0.36778  | 0.006697 | 0.88524  | -0.01415 | 0.76031 | 0.010616 | 0.81903  | -0.00202 |
| 0.096782 | 0.03655  | 0.078871 | 0.08866  | -0.00569 | 0.90232 | -0.03112 | 0.50233  | -0.03843 |
| -0.1596  | 0.00054  | -0.29073 | 1.51E-10 | -0.02298 | 0.62036 | -0.04    | 0.38844  | -0.02719 |
| 0.128911 | 0.00527  | 0.118883 | 0.01013  | -0.01142 | 0.80559 | -0.01372 | 0.76746  | -0.04416 |
| -0.07488 | 0.10605  | -0.1463  | 0.00152  | -0.02438 | 0.59925 | -0.03971 | 0.39186  | -0.02348 |
| 0.030776 | 0.50704  | -0.19646 | 1.90E-05 | -0.00876 | 0.85017 | -0.05369 | 0.24685  | 0.033024 |
| -0.10648 | 0.02137  | -0.11732 | 0.01117  | 0.051586 | 0.26591 | 0.1205   | 0.00915  | 0.264184 |
| 0.197581 | 1.70E-05 | 0.109064 | 0.01839  | -0.03412 | 0.46197 | -0.03414 | 0.46178  | -0.11945 |
| -0.1472  | 0.00142  | -0.35875 | 1.25E-15 | -0.06648 | 0.15144 | -0.10646 | 0.02139  | -0.16231 |
| 0.083683 | 0.07081  | 0.026808 | 0.56335  | -0.05321 | 0.25114 | -0.06917 | 0.13555  | -0.09482 |
| -0.07635 | 0.09935  | -0.16514 | 0.00034  | -0.02874 | 0.53551 | -0.03313 | 0.47502  | -0.0883  |
| 0.088537 | 0.05588  | 0.015301 | 0.74156  | -0.02712 | 0.55882 | -0.02451 | 0.5973   | -0.07927 |
| 0.098953 | 0.03252  | 0.163116 | 0.0004   | 0.013528 | 0.77061 | 0.073343 | 0.11346  | -0.08199 |
| 0.002683 | 0.9539   | 0.076117 | 0.10041  | 0.011953 | 0.7967  | 0.068791 | 0.13771  | -0.00594 |
| 0.162216 | 0.00043  | 0.107531 | 0.02011  | 0.032221 | 0.4873  | 0.059744 | 0.19748  | 0.162956 |
| 0.024468 | 0.59791  | -0.08334 | 0.07198  | -0.0132  | 0.77608 | -0.00103 | 0.98224  | 0.027529 |
| -0.08359 | 0.0711   | -0.22338 | 1.08E-06 | 0.007947 | 0.864   | 0.003575 | 0.93859  | -0.11695 |
| 0.026846 | 0.5628   | -0.08674 | 0.06107  | -0.03721 | 0.42237 | -0.10048 | 0.02993  | -0.0643  |
| 0.017108 | 0.71232  | -0.12141 | 0.00863  | -0.0176  | 0.70439 | -0.03042 | 0.51203  | -0.08878 |
| 0.106518 | 0.02132  | -0.04118 | 0.37464  | -0.0229  | 0.62163 | -0.05523 | 0.23352  | -0.0029  |
| -0.0377  | 0.41627  | -0.2911  | 1.42E-10 | -0.04082 | 0.37883 | -0.10269 | 0.02648  | -0.13513 |
| 0.214253 | 2.98E-06 | 0.184439 | 6.08E-05 | -0.00865 | 0.85212 | -0.06281 | 0.17544  | 0.004103 |
| -0.0699  | 0.13147  | -0.03268 | 0.48105  | 0.015216 | 0.74294 | -0.07843 | 0.09047  | 0.024735 |
| 0.163793 | 0.00038  | 0.048008 | 0.30054  | -0.05826 | 0.20884 | -0.14311 | 0.00193  | -0.10353 |
| 0.057407 | 0.21561  | 0.17898  | 0.0001   | -0.02419 | 0.602   | -0.05525 | 0.23335  | -0.0631  |
| -0.08964 | 0.05289  | -0.19879 | 1.51E-05 | -0.03852 | 0.40631 | -0.04322 | 0.35133  | -0.08981 |
| -0.02706 | 0.55964  | 0.000809 | 0.98609  | -0.0006  | 0.98964 | 0.022483 | 0.62794  | 0.068052 |
| -0.03504 | 0.44998  | 0.026138 | 0.57314  | -0.0625  | 0.17752 | -0.05329 | 0.25045  | -0.02556 |
| -0.14895 | 0.00125  | -0.3304  | 2.34E-13 | 0.001852 | 0.96816 | -0.04329 | 0.35063  | 0.003403 |
| -0.08263 | 0.07444  | -0.13756 | 0.00289  | -0.01155 | 0.80342 | -0.04157 | 0.37009  | -0.04797 |
| -0.07415 | 0.10953  | -0.19654 | 1.89E-05 | -0.00845 | 0.85544 | 0.001836 | 0.96844  | 0.01841  |
| 0.081814 | 0.07735  | -0.2659  | 5.34E-09 | -0.03843 | 0.40733 | -0.20578 | 7.36E-06 | -0.02853 |
| 0.153774 | 0.00086  | 0.292721 | 1.11E-10 | 0.017881 | 0.69993 | 0.023347 | 0.61479  | -0.05476 |
| 0.088797 | 0.05516  | -0.0827  | 0.07421  | -0.05746 | 0.21521 | -0.13918 | 0.00258  | -0.06335 |
| -0.11042 | 0.01698  | 0.236913 | 2.22E-07 | -0.00856 | 0.85366 | 0.091336 | 0.04854  | 0.113965 |
| 0.161319 | 0.00047  | 0.115905 | 0.01219  | 0.003641 | 0.93745 | 0.003562 | 0.93881  | 0.052318 |
| 0.093507 | 0.04341  | -0.0507  | 0.27425  | 0.007952 | 0.86391 | -0.0258  | 0.57814  | -0.0268  |

|          |          |          |          |          |         |          |          |          |
|----------|----------|----------|----------|----------|---------|----------|----------|----------|
| 0.175412 | 0.00014  | 0.114033 | 0.01367  | -0.05855 | 0.20663 | -0.1034  | 0.02545  | -0.14231 |
| 0.226711 | 7.39E-07 | 0.069872 | 0.13162  | -0.09408 | 0.04213 | -0.10075 | 0.02949  | -0.18049 |
| 0.000285 | 0.99511  | -0.12421 | 0.0072   | -0.04977 | 0.28317 | -0.02821 | 0.54316  | -0.25519 |
| 0.166609 | 0.0003   | 0.30143  | 2.89E-11 | -0.04769 | 0.30371 | -0.01247 | 0.78807  | -0.07376 |
| -0.12201 | 0.0083   | -0.02014 | 0.66428  | 0.035264 | 0.4471  | 0.017992 | 0.69816  | 0.004552 |
| 0.291317 | 1.38E-10 | 0.325805 | 5.21E-13 | 0.010144 | 0.82694 | 0.00415  | 0.92873  | -0.02721 |
| -0.05053 | 0.27587  | -0.01794 | 0.69905  | 0.021977 | 0.6357  | 0.063283 | 0.17217  | 0.003975 |
| 0.016297 | 0.7254   | -0.14195 | 0.00211  | -0.05888 | 0.20406 | -0.09626 | 0.03758  | -0.056   |
| 0.182958 | 6.99E-05 | 0.042711 | 0.35708  | -0.0185  | 0.69002 | -0.08306 | 0.07293  | 0.135522 |
| 0.036288 | 0.43401  | -0.08962 | 0.05294  | -0.00715 | 0.87748 | -0.0024  | 0.95881  | -0.00165 |
| -0.03538 | 0.44563  | -0.2501  | 4.32E-08 | -0.05744 | 0.21538 | -0.14874 | 0.00127  | 0.009962 |
| 0.103049 | 0.02596  | -0.10414 | 0.02441  | 0.002019 | 0.96529 | -0.05415 | 0.24288  | -0.02062 |
| -0.06146 | 0.18488  | -0.15322 | 0.00089  | -0.01955 | 0.67341 | -0.02966 | 0.52263  | 0.009492 |
| -0.01595 | 0.73108  | -0.12423 | 0.00719  | -0.04256 | 0.35879 | -0.03096 | 0.5045   | -0.02457 |
| -0.16357 | 0.00039  | -0.18751 | 4.55E-05 | 0.043171 | 0.35193 | 0.145187 | 0.00166  | 0.081346 |
| 0.138896 | 0.00263  | 0.070241 | 0.12959  | -0.03328 | 0.47313 | -0.03523 | 0.44749  | -0.12783 |
| 0.008727 | 0.8508   | -0.0971  | 0.03592  | 0.073209 | 0.11412 | 0.092927 | 0.04474  | 0.229964 |
| 0.110466 | 0.01694  | 0.112261 | 0.01522  | 0.032876 | 0.47848 | 0.091613 | 0.04786  | 0.102495 |
| 0.197581 | 1.70E-05 | -0.09114 | 0.04902  | -0.0326  | 0.48218 | -0.16373 | 0.00038  | 0.026209 |
| 0.137674 | 0.00287  | 0.072099 | 0.11973  | -0.03393 | 0.46443 | -0.06414 | 0.1664   | -0.14981 |
| -0.14527 | 0.00165  | -0.21621 | 2.41E-06 | 0.010843 | 0.81522 | -0.04367 | 0.34635  | 0.056054 |
| 0.217463 | 2.10E-06 | 0.101703 | 0.02798  | -0.02201 | 0.63524 | -0.01813 | 0.69591  | -0.04275 |
| 0.281234 | 6.15E-10 | -0.01182 | 0.79888  | -0.01782 | 0.7009  | -0.07386 | 0.11093  | -0.04875 |
| -0.06394 | 0.16773  | -0.23124 | 4.36E-07 | -0.03831 | 0.40881 | -0.07222 | 0.1191   | -0.04127 |
| -0.03968 | 0.39225  | 0.090789 | 0.04991  | 0.003363 | 0.94221 | -0.00468 | 0.91959  | -0.06405 |
| 0.220254 | 1.54E-06 | 0.336855 | 7.45E-14 | 0.014988 | 0.74666 | 0.069278 | 0.13494  | 0.090583 |
| -0.01288 | 0.78139  | 0.236452 | 2.35E-07 | 0.014949 | 0.74731 | 0.023714 | 0.60924  | -0.00629 |
| -0.08417 | 0.06916  | -0.00133 | 0.9772   | -0.02103 | 0.65032 | 0.024038 | 0.60435  | -0.05097 |
| 0.187197 | 4.69E-05 | 0.346273 | 1.33E-14 | 0.035807 | 0.44013 | 0.042388 | 0.36074  | 0.204398 |
| -0.05639 | 0.22384  | -0.12805 | 0.00558  | -0.01595 | 0.73106 | -0.03073 | 0.50773  | -0.03058 |
| 0.261152 | 1.02E-08 | 0.01707  | 0.71293  | -0.07219 | 0.11925 | -0.12439 | 0.00712  | -0.07012 |
| 0.192655 | 2.77E-05 | -0.29722 | 5.59E-11 | -0.05815 | 0.20976 | -0.19196 | 2.97E-05 | -0.0868  |
| 0.559404 | 8.33E-40 | 0.03417  | 0.46133  | 0.004172 | 0.92835 | -0.07242 | 0.11806  | 0.040086 |
| -0.21204 | 3.79E-06 | -0.42392 | 8.59E-22 | -0.00947 | 0.83835 | -0.09303 | 0.0445   | -0.05446 |
| 0.040861 | 0.3783   | -0.06985 | 0.13177  | 0.023499 | 0.61249 | 0.148149 | 0.00132  | 0.049742 |
| 0.09964  | 0.03133  | -0.15594 | 0.00072  | -0.04706 | 0.3102  | -0.10445 | 0.02398  | -0.0217  |
| 0.195987 | 2.00E-05 | -0.03387 | 0.46522  | 0.016238 | 0.72635 | -0.00934 | 0.84055  | 0.029043 |
| 0.00402  | 0.93095  | -0.10174 | 0.02792  | -0.02661 | 0.5663  | -0.05534 | 0.23267  | -0.08092 |
| -0.04272 | 0.35699  | 0.326443 | 4.66E-13 | 0.031208 | 0.5011  | 0.057286 | 0.21658  | 0.091944 |
| -0.08004 | 0.08401  | -0.14661 | 0.00149  | 0.042921 | 0.35472 | 0.032496 | 0.48358  | 0.101492 |
| 0.031272 | 0.50022  | 0.104467 | 0.02397  | 0.023154 | 0.61772 | 0.058982 | 0.20327  | 0.141593 |
| 0.056308 | 0.22454  | -0.01086 | 0.81492  | -0.00263 | 0.95475 | -0.03255 | 0.48286  | 0.003903 |
| 0.223138 | 1.11E-06 | 0.144408 | 0.00176  | -0.02858 | 0.53785 | 0.00718  | 0.87703  | -0.05381 |
| 0.197773 | 1.67E-05 | 0.029949 | 0.51853  | -0.02205 | 0.63452 | -0.06971 | 0.1325   | -0.09503 |
| 0.058982 | 0.20326  | -0.03999 | 0.38853  | -0.03766 | 0.4168  | -0.08465 | 0.0676   | -0.01079 |



|          |          |          |          |          |          |          |          |          |
|----------|----------|----------|----------|----------|----------|----------|----------|----------|
| 0.070798 | 0.12657  | 0.097334 | 0.03549  | 0.020725 | 0.65507  | 0.079774 | 0.08506  | 0.078469 |
| 0.121091 | 0.00881  | 0.013833 | 0.76558  | -0.00184 | 0.96837  | -0.05931 | 0.20075  | -0.00035 |
| 0.08013  | 0.08367  | -0.01687 | 0.71609  | 0.017979 | 0.69837  | 0.028993 | 0.53198  | -0.00232 |
| 0.090999 | 0.04938  | 0.046079 | 0.3204   | 0.022421 | 0.62889  | 0.016429 | 0.72327  | -0.0036  |
| 0.009769 | 0.83324  | -0.22039 | 1.52E-06 | -0.02767 | 0.55079  | -0.0011  | 0.98104  | -0.06211 |
| 0.350797 | 5.72E-15 | 0.222309 | 1.22E-06 | 0.024275 | 0.6008   | -0.00044 | 0.9925   | 0.094833 |
| -0.02456 | 0.59651  | -0.16749 | 0.00028  | -0.00616 | 0.89432  | -0.08319 | 0.0725   | 0.00022  |
| -0.05327 | 0.25059  | -0.31423 | 3.67E-12 | -0.09531 | 0.03951  | -0.19348 | 2.56E-05 | -0.16552 |
| -0.22919 | 5.55E-07 | -0.2167  | 2.28E-06 | -0.00192 | 0.96704  | 0.113123 | 0.01445  | -0.0773  |
| -0.13517 | 0.00343  | -0.31137 | 5.88E-12 | -0.00487 | 0.91641  | -0.0313  | 0.49977  | 0.101456 |
| -0.10402 | 0.02458  | -0.27091 | 2.68E-09 | -0.00795 | 0.86399  | 0.018195 | 0.69493  | 0.037964 |
| -0.02646 | 0.56842  | -0.22818 | 6.24E-07 | -0.0452  | 0.3297   | -0.07693 | 0.09683  | -0.04085 |
| -0.12208 | 0.00826  | -0.13263 | 0.00409  | 0.007648 | 0.86908  | 0.019371 | 0.67629  | 0.004155 |
| 0.106816 | 0.02096  | -0.01387 | 0.76492  | -0.00829 | 0.85828  | -0.03444 | 0.45778  | 0.064469 |
| 0.109015 | 0.01845  | 0.072856 | 0.11588  | 0.016316 | 0.72509  | -0.0184  | 0.69173  | 0.067491 |
| 0.034878 | 0.45209  | -0.00245 | 0.95786  | -0.0156  | 0.7367   | 0.054636 | 0.23863  | 0.053961 |
| -0.0869  | 0.0606   | -0.26265 | 8.30E-09 | -0.01231 | 0.7907   | -0.03894 | 0.40119  | 0.033777 |
| 0.236377 | 2.37E-07 | 0.290811 | 1.49E-10 | -0.02952 | 0.52448  | -0.07615 | 0.10024  | -0.15374 |
| -0.04284 | 0.35565  | 0.040242 | 0.38558  | -0.0246  | 0.59587  | 0.028305 | 0.54176  | -0.01674 |
| 0.070737 | 0.1269   | 0.138022 | 0.0028   | 0.00228  | 0.96081  | 0.07208  | 0.11983  | 0.12228  |
| -0.0914  | 0.04839  | -0.25036 | 4.17E-08 | -0.06854 | 0.13913  | -0.16471 | 0.00035  | -0.05105 |
| 0.238159 | 1.91E-07 | 0.061811 | 0.18239  | 0.027908 | 0.54745  | 0.002237 | 0.96154  | 0.10206  |
| -0.03221 | 0.48738  | -0.01954 | 0.67366  | 0.006127 | 0.89495  | 0.006792 | 0.88362  | -0.05614 |
| 0.16734  | 0.00028  | 0.060796 | 0.18968  | -0.00346 | 0.94055  | -0.02004 | 0.66572  | -0.02541 |
| -0.12527 | 0.00672  | -0.11876 | 0.01021  | -0.00213 | 0.96345  | 0.038775 | 0.40315  | -0.01347 |
| -0.00399 | 0.93144  | -0.11713 | 0.0113   | 0.000159 | 0.99727  | 0.058451 | 0.20737  | -0.03126 |
| 0.147841 | 0.00136  | -0.04127 | 0.3735   | -0.01028 | 0.82473  | 0.019075 | 0.68097  | 0.036785 |
| 0.013213 | 0.7758   | -0.19412 | 2.40E-05 | -0.02776 | 0.54954  | -0.0568  | 0.22054  | -0.02147 |
| 0.013586 | 0.76967  | -0.16193 | 0.00044  | -0.01608 | 0.72883  | -0.00403 | 0.93082  | -0.01022 |
| 0.045616 | 0.32529  | 0.246574 | 6.75E-08 | 0.021565 | 0.64206  | -0.0051  | 0.91241  | 0.012766 |
| 0.175245 | 0.00014  | 0.173793 | 0.00016  | -0.02889 | 0.53344  | -0.10946 | 0.01797  | -0.08696 |
| 0.177874 | 0.00011  | 0.119603 | 0.00968  | -0.01705 | 0.71325  | -0.05553 | 0.23103  | 0.006556 |
| -0.13417 | 0.00367  | -0.21076 | 4.35E-06 | -0.06306 | 0.17372  | -0.13085 | 0.00462  | -0.07275 |
| 0.061074 | 0.18767  | -0.00285 | 0.95103  | 4.41E-05 | 0.99924  | -0.05194 | 0.26268  | 0.060591 |
| 0.034676 | 0.45472  | 0.21754  | 2.08E-06 | -0.00069 | 0.98806  | 0.063699 | 0.16936  | 0.074345 |
| -0.05229 | 0.25945  | 0.130722 | 0.00466  | 0.18138  | 8.08E-05 | 0.337967 | 6.10E-14 | 0.498141 |
| 0.125893 | 0.00645  | 0.077112 | 0.09603  | -0.04988 | 0.28207  | -0.10873 | 0.01876  | -0.26059 |
| 0.215436 | 2.62E-06 | 0.13189  | 0.0043   | -0.00182 | 0.96878  | -0.06374 | 0.1691   | -0.04938 |
| 0.193535 | 2.54E-05 | 0.137474 | 0.00291  | -0.00584 | 0.89976  | 0.004514 | 0.9225   | -0.0945  |
| -0.02722 | 0.55741  | -0.17338 | 0.00017  | 0.005068 | 0.91302  | -0.08832 | 0.05649  | 0.081136 |
| -0.01499 | 0.74655  | -0.06999 | 0.13095  | -0.02722 | 0.55742  | -0.10311 | 0.02586  | -0.18575 |
| 0.061284 | 0.18615  | 0.008407 | 0.85622  | 0.087296 | 0.05943  | 0.141904 | 0.00211  | 0.222605 |
| 0.26824  | 3.87E-09 | 0.426087 | 5.07E-22 | 0.06806  | 0.14196  | 0.072786 | 0.11623  | 0.258863 |
| 0.091982 | 0.04696  | -0.19322 | 2.62E-05 | -0.01414 | 0.76059  | -0.09932 | 0.03189  | -0.09648 |
| -0.17311 | 0.00017  | -0.29598 | 6.76E-11 | -0.05955 | 0.19896  | -0.04721 | 0.30863  | -0.1403  |

|          |          |          |          |          |         |          |          |          |
|----------|----------|----------|----------|----------|---------|----------|----------|----------|
| -0.0209  | 0.65236  | -0.07378 | 0.1113   | -0.00795 | 0.86393 | -0.04592 | 0.32209  | -0.00599 |
| 0.177157 | 0.00012  | 0.15249  | 0.00095  | 0.047493 | 0.30575 | 0.082896 | 0.07351  | 0.166063 |
| 0.047905 | 0.30158  | 0.270018 | 3.03E-09 | 0.05824  | 0.20902 | 0.030923 | 0.50501  | 0.060727 |
| 0.171199 | 0.0002   | 0.082302 | 0.0756   | 0.011116 | 0.81065 | 0.066592 | 0.15077  | -0.06543 |
| 0.050629 | 0.27489  | -0.08198 | 0.07675  | -0.04936 | 0.2871  | -0.05741 | 0.21557  | -0.00475 |
| -0.01956 | 0.67334  | 0.022184 | 0.63252  | 0.048289 | 0.29772 | 0.097753 | 0.0347   | 0.179168 |
| 0.030748 | 0.50743  | -0.22287 | 1.15E-06 | -0.02033 | 0.66128 | -0.03361 | 0.46873  | 0.026713 |
| 0.196242 | 1.95E-05 | 0.0219   | 0.63689  | -0.04016 | 0.38653 | -0.08806 | 0.05723  | -0.08184 |
| -0.02918 | 0.5293   | -0.15438 | 0.00082  | -0.06012 | 0.19465 | -0.12083 | 0.00896  | -0.11715 |
| 0.04482  | 0.33381  | 0.017947 | 0.69889  | -0.00317 | 0.94552 | -0.03492 | 0.45153  | -0.01381 |
| -0.05625 | 0.22499  | 0.004322 | 0.92579  | 0.00082  | 0.98589 | 0.069692 | 0.13262  | 0.017091 |
| -0.15248 | 0.00095  | -0.00544 | 0.90675  | 0.006946 | 0.881   | 0.071598 | 0.12233  | 0.101436 |
| 0.111751 | 0.01569  | 0.073166 | 0.11433  | 0.001232 | 0.97882 | -0.02407 | 0.60384  | -0.01642 |
| 0.058835 | 0.20439  | 0.138008 | 0.0028   | -0.0129  | 0.78102 | -0.04563 | 0.32519  | 0.090949 |
| -0.25037 | 4.17E-08 | -0.42592 | 5.28E-22 | -0.03958 | 0.39349 | -0.051   | 0.2714   | -0.08777 |
| 0.116892 | 0.01147  | 0.162298 | 0.00043  | 0.002664 | 0.95421 | 0.020057 | 0.66551  | 0.012747 |
| 0.043186 | 0.35175  | -0.16869 | 0.00025  | -0.03222 | 0.48727 | -0.00734 | 0.87438  | -0.07155 |
| 0.104462 | 0.02397  | -0.12017 | 0.00934  | -0.00847 | 0.85507 | 0.005673 | 0.90269  | -0.01601 |
| 0.149237 | 0.00122  | -0.05361 | 0.24755  | -0.03128 | 0.50012 | -0.03893 | 0.40127  | -0.06625 |
| 0.039646 | 0.39266  | -0.19368 | 2.51E-05 | -0.05793 | 0.21143 | -0.11308 | 0.01449  | -0.02482 |
| 0.146052 | 0.00155  | -0.01864 | 0.68788  | -0.02621 | 0.57215 | -0.00574 | 0.90161  | -0.03548 |
| -0.07977 | 0.08506  | -0.18537 | 5.57E-05 | -0.05306 | 0.25251 | -0.08893 | 0.05481  | -0.07686 |
| 0.021252 | 0.64689  | 0.029906 | 0.51913  | 0.086255 | 0.06254 | 0.103649 | 0.0251   | 0.230804 |
| -0.0856  | 0.06455  | -0.27291 | 2.02E-09 | -0.031   | 0.50395 | -0.04514 | 0.33034  | -0.02982 |
| -0.10871 | 0.01877  | -0.23695 | 2.21E-07 | -0.01576 | 0.73412 | 0.059975 | 0.19575  | -0.04695 |
| -0.18466 | 5.96E-05 | -0.02975 | 0.52132  | 0.02488  | 0.59175 | 0.042307 | 0.36165  | 0.032831 |
| 0.019367 | 0.67635  | -0.1613  | 0.00047  | -0.03824 | 0.40972 | -0.006   | 0.89703  | -0.20677 |
| 0.10882  | 0.01866  | 0.179065 | 9.99E-05 | -0.01387 | 0.76497 | -0.07314 | 0.11446  | 0.005691 |
| 0.096182 | 0.03773  | -0.02455 | 0.5967   | 0.036725 | 0.42849 | 0.039683 | 0.39222  | 0.097747 |
| 0.094517 | 0.04119  | 0.004291 | 0.92631  | -0.00929 | 0.84137 | -0.08708 | 0.06007  | 0.062825 |
| 0.059295 | 0.20087  | 0.319728 | 1.47E-12 | 0.033094 | 0.47557 | 0.129092 | 0.00521  | 0.220345 |
| -0.09289 | 0.04482  | -0.1178  | 0.01084  | 0.02266  | 0.62523 | 0.018444 | 0.69096  | 0.023571 |
| 0.150108 | 0.00114  | -0.15755 | 0.00063  | -0.07942 | 0.08646 | -0.19283 | 2.72E-05 | -0.0998  |
| 0.125789 | 0.00649  | -0.0305  | 0.5108   | -0.01453 | 0.75413 | -0.0603  | 0.19332  | 0.017968 |
| -0.00267 | 0.95404  | -0.12013 | 0.00936  | -0.05046 | 0.27652 | -0.0988  | 0.03279  | -0.12396 |
| -0.03913 | 0.3988   | -0.10632 | 0.02157  | -0.04072 | 0.37995 | -0.01658 | 0.72076  | -0.1027  |
| -0.10768 | 0.01994  | -0.31185 | 5.43E-12 | -0.01894 | 0.68315 | -0.06551 | 0.15756  | -0.06731 |
| -0.2048  | 8.15E-06 | -0.36235 | 6.17E-16 | 0.015012 | 0.74627 | 0.007318 | 0.87468  | 0.002999 |
| 0.072589 | 0.11723  | 0.015337 | 0.74097  | 0.045831 | 0.32302 | 0.092091 | 0.0467   | 0.179176 |
| 0.032568 | 0.48262  | -0.05116 | 0.26986  | -0.03978 | 0.39105 | -0.00878 | 0.84995  | -0.05355 |
| -0.13038 | 0.00477  | -0.02755 | 0.55256  | 0.03308  | 0.47575 | 0.003428 | 0.94111  | 0.028217 |
| -0.00044 | 0.9924   | -0.04357 | 0.34744  | -0.03446 | 0.4575  | -0.05928 | 0.20102  | -0.08519 |
| -0.00764 | 0.86921  | -0.00321 | 0.94485  | 0.140299 | 0.00238 | 0.281692 | 5.75E-10 | 0.226544 |
| 0.053216 | 0.25108  | 0.001702 | 0.97074  | -0.04268 | 0.3574  | -0.07424 | 0.10911  | -0.02033 |
| 0.233214 | 3.46E-07 | 0.374033 | 5.92E-17 | 0.034531 | 0.45661 | 0.035831 | 0.43983  | 0.010595 |

|          |          |          |          |          |         |          |          |          |
|----------|----------|----------|----------|----------|---------|----------|----------|----------|
| 0.048349 | 0.29712  | -0.06633 | 0.1524   | -0.06529 | 0.15896 | -0.12517 | 0.00676  | -0.05607 |
| 0.184173 | 6.24E-05 | -0.08223 | 0.07585  | -0.03903 | 0.40008 | -0.16269 | 0.00042  | -0.2638  |
| 0.023507 | 0.61236  | -0.08519 | 0.06587  | 0.027687 | 0.55063 | 0.074037 | 0.11008  | 0.101563 |
| 0.160752 | 0.00049  | 0.14541  | 0.00163  | 0.044597 | 0.33623 | 0.158052 | 0.00061  | 0.165525 |
| 0.070334 | 0.12908  | -0.15801 | 0.00061  | -0.0437  | 0.346   | -0.13776 | 0.00285  | -0.01033 |
| -0.02249 | 0.62785  | -0.08252 | 0.07481  | -0.0341  | 0.46221 | -0.12233 | 0.00813  | 0.005291 |
| -0.25676 | 1.82E-08 | -0.34422 | 1.95E-14 | 0.103249 | 0.02567 | 0.119667 | 0.00964  | 0.23423  |
| -0.02399 | 0.605    | -0.13287 | 0.00402  | -0.01507 | 0.7454  | 0.029869 | 0.51965  | -0.05274 |
| -0.17084 | 0.00021  | -0.28663 | 2.78E-10 | 0.0375   | 0.41881 | 0.094739 | 0.04071  | 0.110024 |
| 0.141615 | 0.00216  | -0.09465 | 0.04089  | -0.00362 | 0.93778 | -0.03197 | 0.49063  | -0.07813 |
| -0.03428 | 0.45984  | 0.079859 | 0.08473  | -0.01182 | 0.79897 | 0.042794 | 0.35614  | 0.091506 |
| 0.20632  | 6.95E-06 | 0.014203 | 0.7595   | -0.01294 | 0.78036 | -0.10285 | 0.02624  | -0.05781 |
| 0.096309 | 0.03748  | 0.026219 | 0.57196  | -0.01236 | 0.78994 | -0.00877 | 0.85009  | -0.08045 |
| -0.00297 | 0.94894  | 0.057265 | 0.21675  | -0.03062 | 0.5092  | 0.035671 | 0.44188  | 0.022587 |
| -0.02028 | 0.66195  | -0.03596 | 0.43815  | -0.02194 | 0.63626 | 0.002071 | 0.9644   | -0.08825 |
| 0.046995 | 0.31087  | 0.130475 | 0.00474  | -0.01227 | 0.79135 | -0.07404 | 0.11008  | -0.03873 |
| 0.236054 | 2.46E-07 | 0.04139  | 0.37216  | 0.003312 | 0.9431  | -0.03687 | 0.42672  | -0.0152  |
| -0.14572 | 0.00159  | -0.32403 | 7.07E-13 | -0.04502 | 0.33166 | -0.04087 | 0.37816  | -0.1012  |
| 0.163153 | 0.0004   | 0.21021  | 4.61E-06 | 0.005943 | 0.89808 | 0.003269 | 0.94383  | 0.106719 |
| -0.03752 | 0.41853  | -0.13822 | 0.00276  | -0.01868 | 0.68726 | -0.07186 | 0.12095  | -0.05541 |
| -0.02106 | 0.6499   | -0.04356 | 0.34758  | -0.05899 | 0.20317 | -0.07973 | 0.08523  | -0.22099 |
| -0.03821 | 0.41008  | -0.15264 | 0.00094  | -0.03779 | 0.41527 | -0.10415 | 0.0244   | -0.12987 |
| 0.333913 | 1.26E-13 | 0.095604 | 0.0389   | 0.015062 | 0.74545 | -0.00383 | 0.93424  | 0.077383 |
| -0.21487 | 2.79E-06 | -0.4474  | 2.29E-24 | -0.06475 | 0.1624  | -0.13081 | 0.00463  | -0.07643 |
| 0.115143 | 0.01278  | -0.00561 | 0.90381  | 0.003049 | 0.9476  | -0.0102  | 0.82592  | 0.079882 |
| 0.154883 | 0.00078  | 0.015345 | 0.74084  | -0.00185 | 0.96813 | 0.025144 | 0.58782  | -0.06334 |
| 0.061052 | 0.18783  | 0.144958 | 0.00168  | 0.032956 | 0.47741 | 0.105565 | 0.02252  | 0.048409 |
| -0.09541 | 0.03931  | -0.28806 | 2.25E-10 | 0.011808 | 0.7991  | 0.022818 | 0.62283  | -0.04006 |
| -0.01361 | 0.76924  | -0.07176 | 0.12147  | 0.015759 | 0.73411 | 0.004357 | 0.92519  | 0.061966 |
| 0.311358 | 5.89E-12 | 0.159854 | 0.00053  | -0.03899 | 0.40054 | -0.09586 | 0.03839  | -0.06997 |
| 0.189568 | 3.74E-05 | -0.0005  | 0.99134  | 0.026219 | 0.57195 | -0.0057  | 0.90224  | 0.057785 |
| -0.00113 | 0.98062  | -0.00862 | 0.85265  | -0.04864 | 0.29418 | -0.15061 | 0.0011   | -0.06284 |
| -0.00092 | 0.98422  | -0.10058 | 0.02977  | 0.023051 | 0.61929 | 0.028156 | 0.54388  | 0.078219 |
| -0.08043 | 0.08251  | -0.2528  | 3.05E-08 | -0.03952 | 0.39417 | -0.08845 | 0.05613  | -0.05003 |
| 0.124134 | 0.00724  | -0.08179 | 0.07746  | -0.01613 | 0.7281  | -0.03237 | 0.48532  | -0.10763 |
| 0.099141 | 0.03219  | 0.15186  | 0.00099  | -0.05505 | 0.23508 | -0.07558 | 0.10286  | -0.04503 |
| -0.1117  | 0.01574  | -0.13813 | 0.00278  | 0.053087 | 0.25223 | 0.108776 | 0.01871  | 0.095274 |
| 0.381497 | 1.26E-17 | 0.341635 | 3.13E-14 | 0.038996 | 0.40048 | 0.008556 | 0.85369  | 0.160671 |
| 0.021315 | 0.64592  | -0.119   | 0.01006  | -0.0254  | 0.58401 | -0.03665 | 0.42941  | -0.07374 |
| -0.09583 | 0.03844  | -0.28986 | 1.72E-10 | 0.012679 | 0.78464 | 0.018893 | 0.68385  | 0.042254 |
| -0.12384 | 0.00738  | -0.19943 | 1.41E-05 | -0.05302 | 0.25281 | -0.03663 | 0.42965  | -0.19294 |
| -0.05645 | 0.22338  | -0.2689  | 3.54E-09 | -0.07592 | 0.10131 | -0.19037 | 3.46E-05 | -0.17497 |
| 0.256558 | 1.87E-08 | 0.500758 | 5.19E-31 | 0.041116 | 0.37534 | 0.09947  | 0.03162  | 0.071837 |
| -0.027   | 0.56052  | -0.06653 | 0.15116  | -0.00936 | 0.84005 | 0.012685 | 0.78454  | -0.00345 |
| 0.195301 | 2.14E-05 | -0.12569 | 0.00653  | -0.02971 | 0.52182 | -0.08194 | 0.07691  | -0.05577 |

|          |          |          |          |          |         |          |          |          |
|----------|----------|----------|----------|----------|---------|----------|----------|----------|
| -0.11279 | 0.01474  | -0.13817 | 0.00277  | -0.00026 | 0.99558 | 0.122086 | 0.00826  | -0.02673 |
| 0.197096 | 1.79E-05 | 0.085176 | 0.0659   | -0.02546 | 0.58311 | -0.06098 | 0.18832  | -0.14982 |
| 0.104975 | 0.02329  | -0.06649 | 0.15141  | -0.03923 | 0.39764 | -0.09159 | 0.04791  | -0.05986 |
| 0.0163   | 0.72534  | -0.08542 | 0.06512  | -0.04641 | 0.31695 | -0.02759 | 0.55202  | -0.19413 |
| 0.07091  | 0.12597  | -0.19111 | 3.22E-05 | -0.03992 | 0.38945 | -0.08996 | 0.05203  | -0.00195 |
| 0.155939 | 0.00072  | -0.00789 | 0.86495  | 0.030788 | 0.50688 | 0.10436  | 0.02411  | 0.007079 |
| -0.0686  | 0.1388   | -0.18047 | 8.79E-05 | 0.003111 | 0.94654 | 0.006779 | 0.88383  | 0.087201 |
| 0.09577  | 0.03856  | 0.151    | 0.00106  | 0.003652 | 0.93727 | 0.007045 | 0.87931  | 0.056505 |
| 0.030028 | 0.51742  | -0.16829 | 0.00026  | -0.01222 | 0.79234 | -0.06013 | 0.19458  | 0.003932 |
| 0.143898 | 0.00182  | 0.275651 | 1.37E-09 | 0.09062  | 0.05034 | 0.246401 | 6.89E-08 | 0.246527 |
| -0.16695 | 0.00029  | -0.34841 | 8.95E-15 | 0.007245 | 0.87592 | 0.022923 | 0.62123  | -0.07027 |
| 0.114201 | 0.01354  | 0.126448 | 0.00621  | -0.02974 | 0.52146 | 0.011368 | 0.80644  | -0.03929 |
| 0.139103 | 0.00259  | -0.02567 | 0.57997  | -0.02822 | 0.54291 | -0.01775 | 0.70202  | 0.022129 |
| -0.05419 | 0.24252  | 0.102467 | 0.02681  | 0.032507 | 0.48343 | 0.032425 | 0.48454  | 0.049724 |
| -0.08938 | 0.05359  | -0.16692 | 0.00029  | -0.03548 | 0.44434 | -0.00103 | 0.98229  | -0.10035 |
| 0.115758 | 0.01231  | -0.15616 | 0.00071  | -0.05788 | 0.21183 | -0.1324  | 0.00416  | -0.078   |
| 0.074625 | 0.10727  | -0.07065 | 0.12738  | -0.0093  | 0.84115 | -0.09408 | 0.04214  | 0.009779 |
| 0.119139 | 0.00997  | 0.017195 | 0.71092  | 0.058297 | 0.20858 | 0.082212 | 0.07592  | 0.226036 |
| -0.12298 | 0.0078   | 0.017366 | 0.70817  | 0.023419 | 0.61369 | 0.110564 | 0.01684  | 0.115974 |
| -0.0391  | 0.39921  | -0.06023 | 0.19384  | -0.04664 | 0.31457 | -0.02214 | 0.63319  | -0.20575 |
| 0.143158 | 0.00193  | 0.198523 | 1.55E-05 | -0.01284 | 0.78193 | -0.01051 | 0.82085  | -0.05451 |
| 0.078977 | 0.08823  | 0.136227 | 0.00318  | -0.03186 | 0.49223 | -0.10739 | 0.02028  | -0.0404  |
| -0.04098 | 0.37691  | -0.2653  | 5.80E-09 | -0.02725 | 0.5569  | -0.06014 | 0.19449  | -0.03547 |
| -0.12346 | 0.00756  | -0.34117 | 3.42E-14 | -0.03898 | 0.40065 | -0.05038 | 0.27727  | -0.11    |
| 0.019713 | 0.6709   | -0.16553 | 0.00033  | -0.01371 | 0.76754 | 0.061232 | 0.18653  | -0.04408 |
| 0.175777 | 0.00013  | 0.206421 | 6.88E-06 | -0.00213 | 0.96344 | -0.03002 | 0.51757  | 0.02129  |
| 0.175743 | 0.00013  | 0.274663 | 1.58E-09 | 0.030025 | 0.51747 | 0.004088 | 0.92979  | 0.072505 |
| 0.097045 | 0.03604  | 0.206856 | 6.57E-06 | -0.00931 | 0.84104 | -0.00664 | 0.88616  | 0.004811 |
| -0.01365 | 0.76865  | -0.1666  | 0.0003   | -0.01004 | 0.82874 | -0.06557 | 0.15716  | -0.05866 |
| -0.08389 | 0.07011  | -0.16699 | 0.00029  | -0.0348  | 0.45317 | -0.02718 | 0.5579   | -0.06333 |
| 0.095289 | 0.03955  | -0.02649 | 0.56798  | -0.02292 | 0.62126 | -0.05408 | 0.24343  | 0.016737 |
| 0.244877 | 8.35E-08 | 0.133436 | 0.00387  | -0.06203 | 0.18085 | -0.04661 | 0.31485  | -0.14422 |
| 0.026646 | 0.56571  | -0.04468 | 0.33534  | -0.0033  | 0.94324 | 0.00527  | 0.90957  | 0.035425 |
| -0.01114 | 0.81018  | -0.11462 | 0.0132   | 0.125727 | 0.00652 | 0.253236 | 2.88E-08 | 0.335681 |
| -0.09028 | 0.05122  | -0.22762 | 6.66E-07 | 0.004777 | 0.918   | -0.03626 | 0.43441  | 0.039066 |
| 0.022891 | 0.62172  | -0.09735 | 0.03545  | -0.04866 | 0.29398 | -0.03625 | 0.43448  | -0.08673 |
| 0.003229 | 0.94451  | -0.12852 | 0.00541  | -0.05785 | 0.21212 | -0.1137  | 0.01395  | -0.06352 |
| 0.034726 | 0.45407  | -0.05493 | 0.2361   | -0.00109 | 0.98127 | 0.009589 | 0.83626  | -0.01395 |
| 0.044364 | 0.33876  | -0.06919 | 0.13545  | -0.0454  | 0.32764 | -0.088   | 0.05739  | -0.09629 |
| 0.078821 | 0.08886  | 0.055021 | 0.23534  | 0.006005 | 0.89703 | 0.09325  | 0.044    | -0.02928 |
| -0.00248 | 0.95734  | 0.207125 | 6.39E-06 | 0.094277 | 0.04171 | 0.162523 | 0.00042  | 0.289407 |
| -0.183   | 6.96E-05 | -0.2285  | 6.01E-07 | -0.00548 | 0.90591 | 0.060871 | 0.18914  | 0.048692 |
| 0.006588 | 0.88709  | 0.019392 | 0.67597  | -0.00252 | 0.9567  | -0.03071 | 0.50798  | 0.025091 |
| 0.222047 | 1.26E-06 | 0.258486 | 1.45E-08 | -0.01532 | 0.7413  | -0.04385 | 0.34442  | -0.02849 |
| 0.138291 | 0.00275  | -0.08863 | 0.05563  | 0.00976  | 0.83338 | 0.077577 | 0.09404  | -0.03856 |

|          |          |          |          |          |         |          |          |          |
|----------|----------|----------|----------|----------|---------|----------|----------|----------|
| -0.14393 | 0.00182  | 0.097228 | 0.03569  | 0.035643 | 0.44223 | 0.053183 | 0.25137  | 0.063147 |
| -0.06865 | 0.13852  | -0.12751 | 0.00579  | 0.009491 | 0.83791 | 0.07652  | 0.09862  | -0.02605 |
| 0.317102 | 2.28E-12 | 0.61497  | 6.36E-50 | 0.064444 | 0.16442 | -0.00319 | 0.94512  | 0.163576 |
| 0.077985 | 0.09231  | -0.01974 | 0.67043  | -0.02099 | 0.65097 | -0.00987 | 0.83153  | 0.047413 |
| 0.414221 | 8.70E-21 | 0.045362 | 0.32799  | -0.01108 | 0.81129 | -0.06879 | 0.13774  | 0.019164 |
| 0.107931 | 0.01965  | -0.05302 | 0.25287  | -0.02103 | 0.65039 | -0.0046  | 0.92106  | -0.11176 |
| 0.019226 | 0.67858  | -0.11953 | 0.00972  | -0.02552 | 0.58219 | -0.04215 | 0.36344  | -0.05018 |
| 0.213534 | 3.23E-06 | -0.01837 | 0.69217  | -0.02855 | 0.53821 | -0.05011 | 0.2798   | 0.030557 |
| 0.021839 | 0.63783  | 0.095804 | 0.03849  | 0.009294 | 0.84124 | 0.105876 | 0.02212  | 0.122877 |
| 0.003166 | 0.94559  | -0.12841 | 0.00545  | 0.017188 | 0.71103 | 0.017613 | 0.70423  | -0.01993 |
| -0.06007 | 0.19502  | -0.25994 | 1.19E-08 | 0.02155  | 0.64228 | 0.015148 | 0.74406  | -0.05748 |
| 0.192696 | 2.76E-05 | 0.213283 | 3.31E-06 | -0.05585 | 0.22837 | -0.09938 | 0.03179  | -0.14296 |
| 0.100882 | 0.02927  | -0.05048 | 0.27632  | -0.02988 | 0.51951 | -0.10794 | 0.01964  | -0.11025 |
| 0.041415 | 0.37188  | 0.023418 | 0.61371  | -0.03926 | 0.39726 | -0.04689 | 0.31194  | 0.049103 |
| 0.145476 | 0.00162  | 0.046413 | 0.3169   | 0.026724 | 0.56457 | 0.008296 | 0.8581   | 0.039153 |
| 0.027549 | 0.55261  | -0.04398 | 0.34302  | -0.01971 | 0.67103 | -0.05684 | 0.2202   | 0.038277 |
| 0.032326 | 0.48587  | -0.19982 | 1.36E-05 | -0.05422 | 0.24225 | -0.15302 | 0.00091  | -0.09198 |
| -0.12572 | 0.00652  | -0.19275 | 2.75E-05 | -0.06258 | 0.17698 | -0.08204 | 0.07655  | -0.20089 |
| -0.09378 | 0.0428   | -0.30592 | 1.42E-11 | -0.01593 | 0.73139 | -0.02986 | 0.51979  | -0.13461 |
| -0.03508 | 0.44948  | -0.16234 | 0.00043  | -0.05229 | 0.2594  | -0.09197 | 0.04698  | -0.02433 |
| -0.05689 | 0.21975  | -0.02031 | 0.6616   | 0.016561 | 0.72112 | 0.069945 | 0.13122  | -0.04825 |
| -0.01956 | 0.67332  | 0.216969 | 2.22E-06 | -0.00732 | 0.87458 | 0.048913 | 0.29151  | -0.02219 |
| 0.121153 | 0.00877  | 0.059785 | 0.19717  | -0.00954 | 0.83702 | 0.008544 | 0.85389  | -0.04871 |
| -0.05666 | 0.22164  | -0.0276  | 0.55187  | -0.0066  | 0.8869  | 0.021673 | 0.64039  | -0.05    |
| 0.086893 | 0.06061  | 0.120227 | 0.00931  | 0.007885 | 0.86506 | 0.010305 | 0.82423  | 0.000466 |
| 0.001486 | 0.97445  | 0.089954 | 0.05206  | -0.02104 | 0.65013 | -0.02196 | 0.63599  | -0.1805  |
| 0.18507  | 5.73E-05 | 0.366505 | 2.71E-16 | -0.0067  | 0.88515 | -0.00153 | 0.97366  | -0.11792 |
| 0.08835  | 0.05641  | 0.360529 | 8.82E-16 | 0.099381 | 0.03178 | 0.214316 | 2.96E-06 | 0.287104 |
| 0.173087 | 0.00017  | 0.150985 | 0.00106  | -0.02959 | 0.52354 | 0.011523 | 0.80386  | -0.13801 |
| 0.078554 | 0.08996  | -0.13758 | 0.00289  | -0.0286  | 0.53756 | -0.15261 | 0.00094  | -0.15653 |
| 0.270154 | 2.97E-09 | -0.06594 | 0.15482  | 0.008208 | 0.85958 | -0.10375 | 0.02495  | -0.01487 |
| 0.028316 | 0.5416   | 0.114218 | 0.01352  | 0.031275 | 0.50017 | 0.09771  | 0.03478  | 0.094656 |
| 0.174801 | 0.00015  | 0.341344 | 3.31E-14 | -0.00899 | 0.84645 | -0.07693 | 0.09681  | 0.036918 |
| 0.221809 | 1.29E-06 | 0.137433 | 0.00292  | -0.03243 | 0.48448 | -0.07032 | 0.12917  | -0.01074 |
| 0.037427 | 0.41972  | 0.141057 | 0.00225  | -0.07448 | 0.10794 | -0.13576 | 0.00329  | -0.14373 |
| 0.066525 | 0.15119  | -0.07777 | 0.09323  | -0.03586 | 0.43947 | -0.04534 | 0.32828  | -0.09154 |
| 0.077727 | 0.0934   | -0.17245 | 0.00018  | -0.04616 | 0.31959 | -0.13726 | 0.00295  | -0.02677 |
| -0.12876 | 0.00532  | -0.27132 | 2.53E-09 | -0.03898 | 0.40063 | -0.01461 | 0.75277  | -0.06824 |
| 0.131836 | 0.00432  | 0.045149 | 0.33028  | 0.002062 | 0.96456 | -0.04092 | 0.37768  | 0.120323 |
| -0.04837 | 0.29694  | -0.23585 | 2.52E-07 | -0.03242 | 0.48455 | -0.07285 | 0.1159   | -0.05616 |
| 0.113832 | 0.01384  | -0.14706 | 0.00144  | -0.0784  | 0.09057 | -0.12127 | 0.00871  | -0.06781 |
| -0.11199 | 0.01547  | -0.25755 | 1.64E-08 | -0.04037 | 0.38413 | -0.08002 | 0.08412  | -0.08526 |
| 0.249721 | 4.53E-08 | 0.328438 | 3.30E-13 | 0.001971 | 0.96612 | 0.04645  | 0.31651  | 0.075973 |
| 0.159789 | 0.00053  | 0.12591  | 0.00644  | -0.02345 | 0.61324 | -0.00241 | 0.95853  | -0.01513 |
| 0.126039 | 0.00639  | 0.011375 | 0.80632  | 0.000928 | 0.98404 | 0.05101  | 0.27129  | -0.0105  |

|          |          |          |          |          |         |          |          |          |
|----------|----------|----------|----------|----------|---------|----------|----------|----------|
| 0.051441 | 0.26725  | -0.13035 | 0.00478  | 0.005883 | 0.89911 | -0.09693 | 0.03626  | 0.012447 |
| 0.198925 | 1.49E-05 | 0.2719   | 2.33E-09 | 0.059916 | 0.19619 | 0.099725 | 0.03119  | 0.127116 |
| -0.05967 | 0.19802  | -0.17243 | 0.00018  | -0.00591 | 0.89862 | 0.010022 | 0.82898  | -0.02799 |
| 0.073184 | 0.11425  | -0.0506  | 0.2752   | -0.05052 | 0.27591 | -0.04689 | 0.31193  | -0.23931 |
| -0.09873 | 0.03293  | -0.14472 | 0.00172  | 0.007512 | 0.87139 | 0.01151  | 0.80408  | -0.02907 |
| 0.335284 | 9.87E-14 | 0.228609 | 5.94E-07 | 0.047904 | 0.30159 | -0.03176 | 0.49355  | 0.033314 |
| -0.13936 | 0.00254  | -0.08433 | 0.06863  | 0.014741 | 0.75069 | 0.02126  | 0.64676  | 0.018509 |
| -0.05654 | 0.22268  | -0.05111 | 0.27033  | 0.062008 | 0.181   | 0.121725 | 0.00846  | 0.156776 |
| 0.172359 | 0.00018  | 0.22142  | 1.35E-06 | -0.00577 | 0.90095 | -0.04721 | 0.30866  | -0.01011 |
| 0.060933 | 0.18869  | -0.00451 | 0.92264  | -0.00579 | 0.9007  | -0.00594 | 0.89817  | 0.028786 |
| 0.216278 | 2.39E-06 | 0.326779 | 4.40E-13 | -0.01119 | 0.80948 | 0.070675 | 0.12723  | -0.10257 |
| -0.12445 | 0.00709  | -0.04804 | 0.30023  | 0.037019 | 0.4248  | 0.071607 | 0.12228  | 0.015401 |
| 0.072758 | 0.11637  | 0.171611 | 0.00019  | 0.036513 | 0.43116 | 0.06423  | 0.16583  | -0.00433 |
| 0.155979 | 0.00072  | 0.225855 | 8.16E-07 | 0.000339 | 0.99418 | -0.0264  | 0.56935  | 0.092641 |
| 0.100595 | 0.02974  | 0.052871 | 0.25417  | -0.03252 | 0.48325 | -0.12508 | 0.0068   | 0.083321 |
| -0.14999 | 0.00115  | -0.07779 | 0.09314  | -0.03122 | 0.50099 | 0.025636 | 0.58054  | -0.11728 |
| -0.01522 | 0.74281  | 0.133632 | 0.00381  | -0.00811 | 0.86129 | 0.00659  | 0.88705  | 0.026179 |
| 0.037567 | 0.41797  | -0.20957 | 4.93E-06 | -0.03705 | 0.4244  | -0.08385 | 0.07023  | -0.08552 |
| 0.087769 | 0.05806  | -0.00224 | 0.96158  | -0.05296 | 0.25341 | -0.14118 | 0.00223  | -0.06445 |
| -0.02855 | 0.53828  | 0.003316 | 0.94302  | -0.00697 | 0.88058 | 0.015917 | 0.73154  | -0.03522 |
| -0.05829 | 0.20863  | -0.08646 | 0.06193  | -0.04577 | 0.32368 | -0.02023 | 0.66277  | 0.000411 |
| 0.002409 | 0.95859  | -0.36194 | 6.69E-16 | -0.04566 | 0.32487 | -0.11113 | 0.01628  | -0.03634 |
| 0.020783 | 0.65417  | -0.0691  | 0.13592  | -0.01924 | 0.67831 | 0.005764 | 0.90113  | 0.014656 |
| 0.051031 | 0.2711   | 0.14496  | 0.00168  | 0.092447 | 0.04586 | 0.202333 | 1.05E-05 | 0.218093 |
| 0.06607  | 0.15401  | -0.13769 | 0.00287  | -0.02112 | 0.64892 | -0.131   | 0.00457  | 0.067328 |
| -0.0513  | 0.26854  | 0.057369 | 0.21592  | -0.0361  | 0.43643 | 0.09814  | 0.03398  | 0.009475 |
| 0.062858 | 0.17508  | 0.115515 | 0.01249  | 0.049035 | 0.2903  | 0.104333 | 0.02415  | 0.188044 |
| -0.17513 | 0.00014  | -0.25059 | 4.05E-08 | -0.02153 | 0.64265 | -0.02384 | 0.60727  | -0.07679 |
| 0.2243   | 9.75E-07 | 0.104286 | 0.02421  | -0.0527  | 0.25574 | -0.07232 | 0.1186   | -0.05    |
| -0.05515 | 0.2342   | -0.19875 | 1.51E-05 | -0.05484 | 0.2369  | -0.08859 | 0.05574  | -0.06792 |
| 0.118398 | 0.01044  | -0.11871 | 0.01024  | -0.04423 | 0.34026 | -0.13481 | 0.00351  | -0.08241 |
| -0.07593 | 0.10123  | -0.16009 | 0.00052  | 0.024965 | 0.59049 | 0.061063 | 0.18775  | 0.001877 |
| 0.167609 | 0.00027  | 0.041109 | 0.37542  | 0.005472 | 0.90612 | 0.047137 | 0.3094   | 0.006586 |
| 0.190695 | 3.35E-05 | -0.03311 | 0.47529  | 0.021848 | 0.63769 | 0.056878 | 0.21989  | 0.077028 |
| 0.191483 | 3.11E-05 | 0.409836 | 2.42E-20 | 0.08205  | 0.0765  | 0.152057 | 0.00098  | 0.221189 |
| 0.061323 | 0.18587  | -0.04371 | 0.34588  | 0.024016 | 0.60469 | -0.02395 | 0.60575  | 0.07378  |
| 0.084497 | 0.0681   | -0.02733 | 0.55578  | -0.04396 | 0.34322 | -0.07315 | 0.11443  | -0.06089 |
| -0.11346 | 0.01416  | -0.22093 | 1.43E-06 | -0.02354 | 0.61192 | 0.04253  | 0.35912  | -0.0118  |
| -0.06572 | 0.15621  | -0.17584 | 0.00013  | -0.055   | 0.23549 | -0.13699 | 0.00301  | -0.15318 |
| -0.00139 | 0.97606  | -0.03962 | 0.39299  | -0.04107 | 0.37586 | -0.10216 | 0.02727  | 0.108002 |
| 0.174346 | 0.00015  | 0.197505 | 1.71E-05 | -0.05462 | 0.23877 | -0.08226 | 0.07573  | -0.11418 |
| 0.109809 | 0.0176   | 0.035751 | 0.44085  | 0.000795 | 0.98633 | -0.01671 | 0.71873  | -0.02224 |
| 0.090605 | 0.05037  | -0.02427 | 0.60091  | 0.006641 | 0.88619 | -0.03102 | 0.50374  | 0.056972 |
| 0.032139 | 0.48841  | -0.22551 | 8.49E-07 | 0.002632 | 0.95476 | -0.01617 | 0.72739  | -0.0082  |
| -0.01776 | 0.70183  | -0.18505 | 5.74E-05 | -0.05197 | 0.26236 | -0.06586 | 0.15533  | -0.12204 |

|          |          |          |          |          |         |          |          |          |
|----------|----------|----------|----------|----------|---------|----------|----------|----------|
| -0.04104 | 0.37624  | -0.23188 | 4.05E-07 | -0.07456 | 0.10757 | -0.14901 | 0.00124  | -0.09725 |
| -0.09493 | 0.04031  | -0.27193 | 2.32E-09 | -0.0158  | 0.7334  | -0.00048 | 0.99169  | -0.07888 |
| 0.099366 | 0.0318   | 0.187095 | 4.74E-05 | -0.02735 | 0.55549 | -0.05912 | 0.20223  | -0.05231 |
| 0.049818 | 0.28266  | -0.04676 | 0.31333  | -0.01502 | 0.74614 | -0.02712 | 0.55874  | 0.080486 |
| 0.125537 | 0.0066   | 0.046338 | 0.31769  | 0.010924 | 0.81387 | 0.029912 | 0.51905  | -0.01255 |
| -0.09027 | 0.05125  | -0.16761 | 0.00027  | -0.04897 | 0.29091 | 0.004538 | 0.92209  | -0.09441 |
| 0.246838 | 6.53E-08 | 0.050066 | 0.28027  | -0.03645 | 0.43197 | -0.12046 | 0.00917  | -0.09521 |
| -0.03819 | 0.4103   | -0.15068 | 0.00109  | -0.00377 | 0.93523 | 0.010821 | 0.8156   | -0.0914  |
| -0.01222 | 0.79221  | -0.01682 | 0.71699  | 0.010889 | 0.81445 | 0.044762 | 0.33444  | -0.04466 |
| -0.11008 | 0.01732  | -0.08415 | 0.06924  | -0.00656 | 0.88762 | -0.03218 | 0.48784  | 0.016223 |
| 0.177497 | 0.00012  | 0.095515 | 0.03908  | -0.01665 | 0.71966 | -0.02996 | 0.51844  | 0.025281 |
| 0.266976 | 4.61E-09 | 0.053546 | 0.24814  | -0.0217  | 0.63996 | 0.000675 | 0.9884   | -0.03497 |
| 0.053829 | 0.24565  | 0.101429 | 0.0284   | 0.072009 | 0.12019 | 0.195055 | 2.19E-05 | 0.137784 |
| 0.12012  | 0.00937  | -0.0572  | 0.21727  | 0.002703 | 0.95355 | 0.006613 | 0.88666  | 0.121637 |
| 0.218784 | 1.81E-06 | 0.254875 | 2.33E-08 | -0.03905 | 0.39983 | -0.12747 | 0.00581  | -0.1247  |
| 0.176435 | 0.00013  | -0.08113 | 0.07988  | -0.07778 | 0.09316 | -0.14102 | 0.00225  | -0.19072 |
| 0.174243 | 0.00015  | 0.058689 | 0.20552  | 0.019255 | 0.67812 | 0.023528 | 0.61205  | -0.06449 |
| -0.11322 | 0.01437  | -0.30705 | 1.18E-11 | -0.07401 | 0.11021 | -0.09736 | 0.03544  | -0.29997 |
| -0.0112  | 0.80919  | -0.00904 | 0.84552  | -0.03171 | 0.49419 | -0.01889 | 0.6839   | -0.13768 |
| -0.07059 | 0.1277   | -0.13558 | 0.00333  | 0.007823 | 0.86611 | 0.004405 | 0.92437  | -0.02548 |
| -0.08792 | 0.05761  | -0.14645 | 0.00151  | -0.00554 | 0.90489 | -0.03727 | 0.42164  | 0.053386 |
| 0.055769 | 0.22902  | 0.076415 | 0.09908  | 0.013618 | 0.76914 | -0.09107 | 0.0492   | 0.194396 |
| 0.13776  | 0.00285  | 0.154844 | 0.00079  | 0.013415 | 0.77248 | 0.004541 | 0.92204  | -0.04991 |
| 0.043652 | 0.34657  | 0.094201 | 0.04187  | -0.02337 | 0.6145  | -0.06727 | 0.14665  | -0.09301 |
| 0.12324  | 0.00767  | -0.08387 | 0.07016  | -0.01657 | 0.72105 | -0.05564 | 0.23013  | -0.01849 |
| -0.01994 | 0.6674   | -0.05811 | 0.21006  | 0.026465 | 0.56835 | 0.12528  | 0.00671  | -0.04689 |
| -0.08714 | 0.05988  | -0.39115 | 1.60E-18 | -0.04533 | 0.32836 | -0.10494 | 0.02333  | -0.06661 |
| 0.084838 | 0.06699  | -0.01976 | 0.67012  | -0.00271 | 0.95337 | 0.02945  | 0.52552  | 0.002584 |
| 0.089502 | 0.05325  | 0.05671  | 0.22125  | -0.0169  | 0.71562 | 0.042977 | 0.3541   | -0.03321 |
| -0.0458  | 0.32339  | -0.13518 | 0.00342  | -0.00613 | 0.89496 | -0.05264 | 0.25628  | -0.09834 |
| 0.038523 | 0.40622  | 0.191075 | 3.23E-05 | 0.124482 | 0.00707 | 0.332748 | 1.55E-13 | 0.242908 |
| 0.273325 | 1.91E-09 | 0.048518 | 0.29543  | -0.03494 | 0.45124 | -0.12937 | 0.00511  | 0.033152 |
| -0.25592 | 2.03E-08 | -0.3465  | 1.28E-14 | -0.03936 | 0.39611 | -0.10797 | 0.0196   | -0.15779 |
| 0.163583 | 0.00039  | 0.007765 | 0.86709  | 0.048058 | 0.30003 | 0.093922 | 0.04249  | 0.230904 |
| 0.042755 | 0.35659  | -0.11462 | 0.01319  | 0.026832 | 0.563   | 0.000138 | 0.99763  | 0.039436 |
| -0.0318  | 0.49301  | -0.07123 | 0.12428  | 0.098006 | 0.03423 | 0.121898 | 0.00836  | 0.210568 |
| -0.13551 | 0.00334  | -0.18748 | 4.56E-05 | -0.02426 | 0.60103 | 0.011786 | 0.79947  | -0.16498 |
| -0.18933 | 3.82E-05 | -0.14414 | 0.00179  | -0.04046 | 0.38301 | 0.056793 | 0.22057  | -0.21155 |
| 0.061957 | 0.18135  | -0.12098 | 0.00887  | -0.00979 | 0.83297 | -0.04045 | 0.38317  | 0.015787 |
| 0.114999 | 0.01289  | 0.021948 | 0.63616  | -0.03262 | 0.48192 | -0.04276 | 0.35652  | -0.16253 |
| -0.18122 | 8.20E-05 | -0.15589 | 0.00072  | -0.02218 | 0.63256 | -0.04095 | 0.37724  | -0.00314 |
| -0.10943 | 0.018    | -0.25681 | 1.81E-08 | -0.0545  | 0.23981 | -0.10323 | 0.0257   | -0.07269 |
| -0.15384 | 0.00085  | -0.24932 | 4.76E-08 | -0.00285 | 0.95106 | 0.078449 | 0.09038  | 0.001455 |
| 0.026861 | 0.56258  | -0.18991 | 3.62E-05 | 0.000835 | 0.98565 | 0.109553 | 0.01787  | 0.101558 |
| 0.147376 | 0.0014   | -0.00543 | 0.90692  | 0.057819 | 0.21234 | 0.060256 | 0.19366  | 0.051579 |

|          |          |          |          |          |         |          |          |          |
|----------|----------|----------|----------|----------|---------|----------|----------|----------|
| 0.013597 | 0.76947  | -0.12297 | 0.00781  | -0.04874 | 0.29326 | -0.11511 | 0.0128   | -0.13787 |
| -0.06564 | 0.15669  | 0.143095 | 0.00194  | 0.028095 | 0.54477 | 0.104056 | 0.02453  | 0.075493 |
| -0.03563 | 0.44236  | -0.17018 | 0.00022  | 0.057247 | 0.2169  | 0.06436  | 0.16497  | 0.17164  |
| 0.038708 | 0.40396  | 0.010878 | 0.81463  | -0.02829 | 0.54191 | -0.07512 | 0.10494  | 0.041132 |
| 0.050486 | 0.27625  | -0.01325 | 0.77514  | -0.01804 | 0.69733 | -0.03278 | 0.47973  | 0.026535 |
| -0.00014 | 0.99751  | 0.082299 | 0.07561  | 0.035213 | 0.44776 | 0.120558 | 0.00911  | 0.219462 |
| -0.10817 | 0.01938  | -0.27938 | 8.05E-10 | -0.07588 | 0.10147 | -0.10193 | 0.02762  | -0.13727 |
| 0.123849 | 0.00737  | -0.16126 | 0.00047  | -0.03271 | 0.48074 | -0.11935 | 0.00984  | -0.05842 |
| 0.025546 | 0.58186  | -0.12097 | 0.00888  | -0.01411 | 0.76096 | 0.005507 | 0.90552  | -0.00474 |
| 0.151846 | 0.001    | 0.024576 | 0.59628  | 0.049605 | 0.28473 | 0.007794 | 0.8666   | 0.1521   |
| 0.090813 | 0.04985  | 0.187532 | 4.54E-05 | 0.002496 | 0.95711 | 0.01641  | 0.72357  | 0.141563 |
| -0.02441 | 0.59872  | -0.22451 | 9.51E-07 | -0.02862 | 0.53726 | -0.12473 | 0.00696  | 0.063666 |
| 0.017499 | 0.70605  | -0.22973 | 5.21E-07 | -0.0046  | 0.92097 | -0.03339 | 0.47164  | 0.033209 |
| 0.060393 | 0.19265  | -0.01584 | 0.73279  | 0.088703 | 0.05543 | 0.168298 | 0.00026  | 0.308055 |
| 0.056814 | 0.2204   | 0.025145 | 0.5878   | -0.05637 | 0.22403 | -0.08006 | 0.08395  | -0.10299 |
| 0.004768 | 0.91815  | 0.084202 | 0.06907  | 0.002342 | 0.95975 | 0.055715 | 0.22947  | -0.00536 |
| -0.05713 | 0.21788  | 0.212368 | 3.66E-06 | 0.040777 | 0.37929 | 0.150013 | 0.00115  | 0.197305 |
| 0.002384 | 0.95903  | 0.100784 | 0.02943  | 0.026018 | 0.57491 | 0.118386 | 0.01045  | 0.254636 |
| 0.001128 | 0.9806   | -0.05536 | 0.23245  | 0.004626 | 0.92059 | -0.00663 | 0.8863   | 0.018611 |
| 0.06354  | 0.17043  | 0.016403 | 0.72368  | -0.01141 | 0.80579 | -0.08511 | 0.06611  | 0.048089 |
| 0.156082 | 0.00071  | 0.135977 | 0.00324  | -0.03856 | 0.40582 | -0.06556 | 0.1572   | -0.03511 |
| -0.04964 | 0.28439  | -0.0439  | 0.34385  | 0.036202 | 0.4351  | 4.11E-05 | 0.99929  | 0.242151 |
| -0.07771 | 0.09349  | -0.02307 | 0.61894  | -0.03407 | 0.4626  | -0.01948 | 0.67454  | -0.10744 |
| 0.100811 | 0.02939  | 0.008293 | 0.85814  | 0.004487 | 0.92297 | -0.00568 | 0.90261  | 0.043735 |
| -0.2101  | 4.66E-06 | -0.3919  | 1.36E-18 | -0.06644 | 0.1517  | -0.1337  | 0.0038   | -0.13556 |
| 0.078969 | 0.08827  | -0.13361 | 0.00382  | -0.03528 | 0.44692 | -0.04423 | 0.34019  | -0.17282 |
| 0.243691 | 9.68E-08 | 0.240074 | 1.51E-07 | 0.018075 | 0.69683 | -0.00795 | 0.86391  | 0.017536 |
| 0.217741 | 2.04E-06 | -0.06633 | 0.15239  | -0.07474 | 0.10672 | -0.14185 | 0.00212  | -0.12815 |
| -0.10699 | 0.02075  | 0.090988 | 0.04941  | 0.098324 | 0.03365 | 0.264046 | 6.88E-09 | 0.191638 |
| -0.03743 | 0.41972  | -0.09739 | 0.03538  | 0.030114 | 0.51622 | 0.194822 | 2.24E-05 | 0.048921 |
| -0.03998 | 0.38867  | -0.10695 | 0.0208   | -0.07702 | 0.09642 | -0.07259 | 0.11723  | -0.11754 |
| 0.037111 | 0.42365  | -0.20546 | 7.61E-06 | -0.04873 | 0.29334 | -0.11677 | 0.01156  | -0.05829 |
| 0.291331 | 1.38E-10 | 0.267782 | 4.13E-09 | 0.012795 | 0.78272 | 0.014246 | 0.7588   | 0.143318 |
| -0.09959 | 0.03142  | -0.258   | 1.54E-08 | 0.005351 | 0.90818 | -0.03774 | 0.41579  | -0.02524 |
| 0.232493 | 3.76E-07 | 0.289501 | 1.81E-10 | 0.023063 | 0.6191  | 0.092909 | 0.04478  | 0.095344 |
| 0.151616 | 0.00101  | 0.193797 | 2.48E-05 | 0.030339 | 0.51309 | -0.03305 | 0.4761   | -0.00214 |
| -0.04718 | 0.30894  | -0.03669 | 0.42898  | -0.0518  | 0.26393 | -0.03162 | 0.49546  | -0.0327  |
| 0.09349  | 0.04345  | -0.2351  | 2.76E-07 | -0.04098 | 0.3769  | -0.11741 | 0.01111  | -0.14551 |
| -0.03416 | 0.46152  | -0.27146 | 2.48E-09 | -0.0214  | 0.64454 | -0.0471  | 0.30975  | -0.16407 |
| 0.004556 | 0.92178  | -0.11831 | 0.01051  | -0.02409 | 0.60359 | -0.07769 | 0.09354  | -0.09001 |
| 0.138964 | 0.00262  | -0.01054 | 0.82035  | 0.010093 | 0.82779 | -0.03165 | 0.4951   | 0.016629 |
| 0.011873 | 0.79802  | -0.19429 | 2.36E-05 | -0.01222 | 0.79231 | -0.00181 | 0.96884  | -0.04394 |
| -0.26699 | 4.60E-09 | -0.39015 | 1.98E-18 | -0.03212 | 0.48867 | -0.09649 | 0.03713  | -0.17172 |
| -0.17598 | 0.00013  | -0.32892 | 3.03E-13 | -0.08026 | 0.08317 | -0.09858 | 0.03318  | -0.17773 |
| 0.053935 | 0.24472  | -0.22215 | 1.24E-06 | -0.08    | 0.0842  | -0.16845 | 0.00026  | -0.17565 |



|          |          |          |          |          |         |          |          |          |
|----------|----------|----------|----------|----------|---------|----------|----------|----------|
| 0.163398 | 0.00039  | 0.014932 | 0.74758  | -0.02657 | 0.56676 | -0.00485 | 0.91683  | -0.0926  |
| -0.05882 | 0.20455  | -0.08928 | 0.05384  | 0.011813 | 0.79903 | 0.022563 | 0.62672  | 0.031836 |
| -0.26037 | 1.13E-08 | -0.41399 | 9.19E-21 | -0.02197 | 0.63578 | -0.00738 | 0.87368  | -0.04057 |
| -0.06323 | 0.1725   | 0.049493 | 0.28582  | 0.011518 | 0.80394 | 0.099714 | 0.03121  | 0.127214 |
| 0.086165 | 0.06281  | 0.110779 | 0.01662  | 0.004977 | 0.91458 | -0.01831 | 0.69312  | -0.04212 |
| -0.00921 | 0.84263  | 0.065489 | 0.15767  | 0.009227 | 0.84237 | 0.030444 | 0.51163  | 0.077372 |
| -0.00954 | 0.83713  | -0.12276 | 0.00791  | -0.06269 | 0.17624 | -0.0831  | 0.07279  | -0.1752  |
| 0.147471 | 0.00139  | 0.078835 | 0.08881  | -0.01042 | 0.82223 | -0.11665 | 0.01164  | 0.10379  |
| 0.193725 | 2.50E-05 | -0.07613 | 0.10034  | -0.05368 | 0.24697 | -0.12817 | 0.00554  | -0.06172 |
| -0.11046 | 0.01695  | -0.13972 | 0.00248  | -0.05536 | 0.23243 | -0.04373 | 0.3457   | -0.05373 |
| 0.05947  | 0.19954  | -0.06722 | 0.14696  | -0.03841 | 0.40764 | -0.03688 | 0.42651  | 0.003927 |
| -0.25868 | 1.41E-08 | -0.36037 | 9.10E-16 | -0.05433 | 0.24126 | -0.01715 | 0.71159  | -0.09487 |
| -0.03846 | 0.40696  | -0.12841 | 0.00545  | 0.015533 | 0.73778 | -0.0406  | 0.38133  | -0.08928 |
| -0.00709 | 0.87857  | 0.102269 | 0.02711  | 0.080035 | 0.08404 | 0.142223 | 0.00206  | 0.279404 |
| 0.159885 | 0.00052  | 0.095015 | 0.04013  | -0.02633 | 0.57026 | -0.07644 | 0.09898  | -0.00977 |
| -0.0184  | 0.69162  | 0.029123 | 0.53013  | -0.03864 | 0.4048  | -0.05514 | 0.23431  | -0.10222 |
| 0.100927 | 0.0292   | 0.09614  | 0.03782  | 0.034392 | 0.45843 | 0.095272 | 0.03959  | 0.040385 |
| 0.14737  | 0.00141  | 0.066133 | 0.15362  | -0.01857 | 0.68896 | -0.08851 | 0.05595  | -0.04919 |
| 0.122379 | 0.00811  | 0.153756 | 0.00086  | -0.02159 | 0.64171 | -0.08131 | 0.07921  | -0.05551 |
| 0.061539 | 0.18432  | 0.007824 | 0.86609  | 0.012498 | 0.78765 | -0.01214 | 0.7936   | 0.123945 |
| 0.127184 | 0.00592  | 0.052415 | 0.25829  | -0.00824 | 0.85911 | -0.02007 | 0.66525  | -0.02461 |
| -0.02559 | 0.58122  | -0.15483 | 0.00079  | -0.07524 | 0.10441 | -0.18075 | 8.57E-05 | -0.14985 |
| 0.150718 | 0.00109  | 0.001221 | 0.97901  | -0.01516 | 0.74383 | -0.07909 | 0.08777  | 0.00439  |
| -0.19764 | 1.69E-05 | -0.28353 | 4.40E-10 | -0.06713 | 0.14752 | -0.11534 | 0.01263  | -0.17884 |
| 0.109869 | 0.01754  | 0.322141 | 9.76E-13 | 0.035462 | 0.44456 | 0.048173 | 0.29888  | 0.072645 |
| 0.023874 | 0.60683  | -0.00811 | 0.86127  | -0.02061 | 0.65682 | -0.02904 | 0.53131  | -0.10768 |
| 0.036651 | 0.42942  | -0.16848 | 0.00025  | -0.02609 | 0.57392 | -0.04675 | 0.31345  | -0.00257 |
| -0.08049 | 0.08228  | -0.14409 | 0.0018   | -0.03859 | 0.40536 | 0.007918 | 0.8645   | -0.07942 |
| 0.019419 | 0.67554  | -0.19103 | 3.25E-05 | -0.04493 | 0.33265 | -0.03201 | 0.49009  | 0.028497 |
| 0.288056 | 2.25E-10 | 0.284978 | 3.55E-10 | -0.04949 | 0.28585 | -0.12488 | 0.00689  | -0.11056 |
| -0.1251  | 0.00679  | -0.19183 | 3.00E-05 | -0.01868 | 0.68723 | 0.011183 | 0.80954  | -0.00424 |
| 0.068838 | 0.13744  | -0.10571 | 0.02233  | -0.06497 | 0.161   | -0.11237 | 0.01512  | -0.17578 |
| 0.113518 | 0.01411  | 0.125301 | 0.0067   | 0.001186 | 0.97961 | 0.063967 | 0.16757  | 0.01648  |
| 0.068558 | 0.13905  | 0.166586 | 0.0003   | 0.047807 | 0.30257 | 0.187258 | 4.66E-05 | 0.125681 |
| 0.362707 | 5.75E-16 | 0.178373 | 0.00011  | -0.00064 | 0.98896 | -0.05809 | 0.21021  | 0.029013 |
| 0.33533  | 9.79E-14 | 0.279684 | 7.70E-10 | -0.02864 | 0.53693 | -0.04362 | 0.3469   | -0.08462 |
| -0.13235 | 0.00417  | -0.29311 | 1.05E-10 | -0.03543 | 0.44494 | -0.00731 | 0.87484  | -0.17713 |
| 0.097104 | 0.03592  | -0.01398 | 0.76324  | -0.00899 | 0.84644 | -0.0117  | 0.80092  | 0.053433 |
| 0.017894 | 0.69973  | 0.130591 | 0.0047   | -0.00179 | 0.96914 | -0.03547 | 0.4444   | -0.02153 |
| 0.03615  | 0.43576  | 0.025949 | 0.57592  | 0.036189 | 0.43527 | 0.1277   | 0.00572  | 0.121077 |
| 0.070746 | 0.12685  | 0.105774 | 0.02225  | -0.002   | 0.96569 | -0.03696 | 0.4256   | 0.035552 |
| 0.150864 | 0.00107  | 0.05102  | 0.27119  | -0.02008 | 0.66514 | -0.02978 | 0.52093  | -0.09267 |
| 0.180634 | 8.66E-05 | 0.163463 | 0.00039  | -0.04336 | 0.34979 | -0.07469 | 0.10697  | -0.03596 |
| 0.168538 | 0.00025  | 0.129601 | 0.00503  | 0.010164 | 0.8266  | -0.0049  | 0.91591  | 0.029455 |
| 0.216124 | 2.43E-06 | 0.1531   | 0.0009   | -0.00457 | 0.92151 | -0.10409 | 0.02449  | -0.04391 |

|          |          |          |          |          |         |          |          |          |
|----------|----------|----------|----------|----------|---------|----------|----------|----------|
| 0.158235 | 0.0006   | 0.040179 | 0.38633  | 0.022701 | 0.62461 | -0.0416  | 0.36974  | 0.076243 |
| 0.238145 | 1.91E-07 | 0.032484 | 0.48375  | -0.01061 | 0.81914 | -0.05302 | 0.25282  | -0.03627 |
| 0.008057 | 0.86213  | 0.06037  | 0.19281  | -0.00507 | 0.91305 | 0.078969 | 0.08827  | 0.141817 |
| 0.243259 | 1.02E-07 | 0.330886 | 2.15E-13 | 0.031621 | 0.49545 | 0.068634 | 0.13861  | 0.114828 |
| -0.15618 | 0.00071  | -0.34567 | 1.49E-14 | -0.04974 | 0.28337 | -0.05709 | 0.21819  | -0.11793 |
| 0.068866 | 0.13729  | 0.354961 | 2.59E-15 | -0.08812 | 0.05706 | -0.05581 | 0.22864  | -0.21254 |
| -0.05433 | 0.24132  | -0.15487 | 0.00078  | -0.03061 | 0.5094  | -0.03187 | 0.49199  | -0.12099 |
| -0.17371 | 0.00016  | -0.18525 | 5.64E-05 | -0.00265 | 0.95438 | 0.019356 | 0.67653  | 0.046162 |
| 0.082152 | 0.07614  | -0.13162 | 0.00438  | 0.031612 | 0.49557 | 0.037441 | 0.41954  | 0.085756 |
| 0.028915 | 0.53308  | -0.08955 | 0.05312  | -0.00159 | 0.97262 | 0.002781 | 0.9522   | -0.00392 |
| 0.114814 | 0.01304  | 0.044305 | 0.33941  | 0.022795 | 0.62318 | 0.017928 | 0.69919  | 0.097166 |
| 0.19317  | 2.64E-05 | -0.02023 | 0.66276  | -0.03015 | 0.51576 | -0.11553 | 0.01248  | -0.0967  |
| 0.297348 | 5.48E-11 | -0.00464 | 0.92029  | -0.03317 | 0.47453 | -0.06843 | 0.13981  | -0.05772 |
| -0.1278  | 0.00568  | -0.11141 | 0.01601  | -0.03338 | 0.47178 | -0.07821 | 0.09137  | -0.09623 |
| -0.01923 | 0.67854  | -0.21748 | 2.10E-06 | -0.03038 | 0.51249 | -0.05929 | 0.2009   | -0.01546 |
| -0.05479 | 0.2373   | -0.16576 | 0.00032  | -0.01617 | 0.72737 | -0.08201 | 0.07665  | -0.10577 |
| 0.245454 | 7.77E-08 | 0.223198 | 1.10E-06 | 0.016602 | 0.72047 | -0.0137  | 0.76777  | 0.094504 |
| -0.02515 | 0.58768  | -0.15153 | 0.00102  | -0.01843 | 0.69114 | -0.08726 | 0.05952  | -0.01878 |
| 0.348088 | 9.51E-15 | 0.215315 | 2.66E-06 | -0.0049  | 0.91586 | -0.03199 | 0.49041  | -0.02557 |
| -0.00279 | 0.95203  | -0.30045 | 3.38E-11 | -0.06259 | 0.17694 | -0.11539 | 0.01259  | -0.24684 |
| 0.081901 | 0.07704  | -0.23608 | 2.45E-07 | -0.00059 | 0.9898  | 0.032358 | 0.48545  | -0.0936  |
| 0.107217 | 0.02048  | 0.067872 | 0.14306  | 0.037166 | 0.42297 | 0.087021 | 0.06024  | 0.234921 |
| 0.044009 | 0.34264  | -0.04633 | 0.31779  | -0.07378 | 0.1113  | -0.12555 | 0.0066   | -0.15198 |
| 0.101442 | 0.02838  | -0.06706 | 0.14791  | -0.02033 | 0.66119 | -0.05151 | 0.2666   | -0.15353 |
| -0.09475 | 0.04069  | -0.27628 | 1.25E-09 | -0.08214 | 0.07619 | -0.12192 | 0.00835  | -0.1619  |
| -0.00956 | 0.83681  | -0.15365 | 0.00086  | -0.03115 | 0.50191 | -0.02494 | 0.59079  | -0.07639 |
| 0.058505 | 0.20695  | 0.008465 | 0.85523  | 0.002311 | 0.96027 | 0.020704 | 0.6554   | -0.02747 |
| 0.188442 | 4.17E-05 | 0.038021 | 0.41237  | 0.014783 | 0.75    | -0.02231 | 0.63066  | 0.065646 |
| 0.093026 | 0.04451  | 0.192517 | 2.81E-05 | 0.046004 | 0.32119 | 0.099514 | 0.03155  | -0.03279 |
| 0.02808  | 0.54497  | 0.126455 | 0.00621  | 0.052452 | 0.25795 | 0.124612 | 0.00701  | 0.161562 |
| 0.050358 | 0.27747  | 0.169595 | 0.00023  | -0.05447 | 0.24005 | 0.025225 | 0.58661  | -0.05359 |
| 0.161276 | 0.00047  | 0.426452 | 4.64E-22 | 0.037897 | 0.41389 | 0.007388 | 0.87348  | 0.094655 |
| 0.104826 | 0.02348  | 0.034188 | 0.4611   | -0.0273  | 0.55626 | -0.05332 | 0.25018  | -0.01865 |
| 0.115003 | 0.01289  | 0.03734  | 0.42079  | -0.00096 | 0.98342 | 0.023777 | 0.60828  | -0.00332 |
| 0.129539 | 0.00505  | -0.06416 | 0.1663   | -0.07845 | 0.09039 | -0.18373 | 6.50E-05 | -0.05473 |
| -0.03874 | 0.40356  | -0.26634 | 5.03E-09 | 0.021128 | 0.64882 | -0.02206 | 0.63443  | -0.02502 |
| 0.279688 | 7.70E-10 | 0.037311 | 0.42116  | -0.01743 | 0.7071  | -0.0344  | 0.45832  | -0.14391 |
| -0.08593 | 0.06354  | 0.069687 | 0.13265  | -0.01263 | 0.78546 | 0.074936 | 0.10581  | -0.04195 |
| 0.040665 | 0.38061  | -0.03019 | 0.51511  | -0.02028 | 0.66205 | 0.000965 | 0.98341  | -0.09588 |
| 0.157595 | 0.00063  | 0.033361 | 0.47201  | 0.020383 | 0.66042 | -0.01005 | 0.82855  | 0.019515 |
| 0.125498 | 0.00662  | 0.063759 | 0.16896  | 0.013294 | 0.77448 | 0.049693 | 0.28387  | -0.02501 |
| 0.249924 | 4.41E-08 | -0.0283  | 0.54176  | -0.0738  | 0.11123 | -0.09019 | 0.05145  | -0.14113 |
| 0.026705 | 0.56485  | 0.0913   | 0.04863  | -0.02331 | 0.61542 | -0.01166 | 0.80151  | 0.012116 |
| -0.04226 | 0.3622   | 0.026231 | 0.57178  | -0.01002 | 0.82909 | -0.01161 | 0.80248  | -0.01758 |
| -0.15926 | 0.00055  | -0.16169 | 0.00045  | 0.002825 | 0.95145 | 0.062481 | 0.17768  | -0.0037  |

|          |          |          |          |          |         |          |         |          |
|----------|----------|----------|----------|----------|---------|----------|---------|----------|
| 0.091772 | 0.04747  | 0.221705 | 1.31E-06 | 0.010586 | 0.81952 | 0.006247 | 0.8929  | 0.042092 |
| 0.043612 | 0.34702  | 0.007409 | 0.87313  | -0.00113 | 0.98059 | -0.02574 | 0.57893 | 0.045942 |
| 0.120708 | 0.00903  | 0.044559 | 0.33664  | -0.04515 | 0.3303  | -0.11475 | 0.01309 | -0.00548 |
| 0.070652 | 0.12736  | 0.13419  | 0.00367  | -0.00357 | 0.93867 | -0.07887 | 0.08866 | 0.002731 |
| 0.086074 | 0.06309  | 0.125989 | 0.00641  | -0.00641 | 0.89007 | -0.10781 | 0.01979 | 0.025559 |
| 0.03822  | 0.40993  | -0.14487 | 0.0017   | -0.03762 | 0.41738 | -0.13708 | 0.00299 | -0.02155 |
| 0.041465 | 0.3713   | -0.0284  | 0.54046  | -0.0047  | 0.91925 | -0.03223 | 0.48723 | 0.035574 |
| 0.108484 | 0.01903  | -0.03647 | 0.43177  | 0.017936 | 0.69906 | -0.01534 | 0.74084 | 0.081853 |
| -0.0659  | 0.1551   | -0.07588 | 0.10148  | 0.020254 | 0.66242 | 0.065263 | 0.15911 | 0.062454 |
| 0.157835 | 0.00062  | -0.16198 | 0.00044  | -0.00773 | 0.86766 | -0.04782 | 0.30247 | -0.14096 |
| 0.076956 | 0.09671  | -0.01794 | 0.69903  | 0.045227 | 0.32944 | 0.110101 | 0.0173  | 0.059933 |
| 0.067574 | 0.14483  | -0.04715 | 0.3093   | 0.024743 | 0.59378 | -0.01019 | 0.82615 | 0.119268 |
| -0.00282 | 0.9516   | -0.0989  | 0.03262  | -0.04895 | 0.29111 | -0.09303 | 0.0445  | -0.07205 |
| -0.17688 | 0.00012  | -0.19628 | 1.94E-05 | 0.006151 | 0.89454 | 0.025    | 0.58996 | 0.001282 |
| 0.389307 | 2.38E-18 | 0.298723 | 4.42E-11 | 0.00143  | 0.9754  | 0.0079   | 0.86481 | -0.01654 |
| -0.02324 | 0.61648  | 0.020883 | 0.65262  | 0.036194 | 0.4352  | 0.050338 | 0.27766 | 0.121017 |
| 0.00894  | 0.8472   | 0.083231 | 0.07234  | 0.012609 | 0.7858  | 0.043608 | 0.34706 | -0.01554 |
| 0.117141 | 0.0113   | -0.12787 | 0.00565  | -0.03034 | 0.51309 | -0.06146 | 0.18487 | -0.10686 |
| -0.02456 | 0.59654  | -0.06241 | 0.1782   | 0.014298 | 0.75795 | 0.004734 | 0.91874 | -0.039   |
| 0.028932 | 0.53284  | 0.022549 | 0.62694  | -0.03332 | 0.47258 | 0.010022 | 0.82899 | -0.08594 |
| 0.321304 | 1.12E-12 | 0.183208 | 6.83E-05 | 0.006277 | 0.89239 | 0.015392 | 0.74008 | 0.096661 |
| 0.152471 | 0.00095  | -0.05073 | 0.27391  | 0.007652 | 0.869   | -0.07846 | 0.09035 | 0.021592 |
| 0.212345 | 3.67E-06 | -0.11604 | 0.0121   | -0.03867 | 0.40443 | -0.06212 | 0.18022 | -0.04475 |
| -0.13597 | 0.00324  | -0.24185 | 1.22E-07 | 0.035593 | 0.44287 | 0.128395 | 0.00546 | 0.098443 |
| 0.046981 | 0.31101  | -0.07401 | 0.11022  | -0.01991 | 0.66776 | -0.0388  | 0.40282 | -0.04814 |
| -0.02489 | 0.59153  | -0.11303 | 0.01453  | -0.00811 | 0.86132 | -0.01768 | 0.7031  | -0.05456 |
| 0.159925 | 0.00052  | 0.096551 | 0.037    | -0.03621 | 0.43495 | 0.013764 | 0.76672 | -0.06988 |
| 0.056613 | 0.22204  | 0.091641 | 0.04779  | -0.00321 | 0.94489 | -0.01947 | 0.67481 | -0.16956 |
| -0.11324 | 0.01435  | -0.31946 | 1.54E-12 | -0.02838 | 0.54071 | -0.02524 | 0.58634 | 0.00184  |
| 0.104416 | 0.02404  | -0.10567 | 0.02238  | -0.02693 | 0.56159 | -0.13395 | 0.00373 | -0.05526 |
| -0.03685 | 0.42697  | -0.1213  | 0.00869  | -0.05368 | 0.247   | -0.15388 | 0.00085 | 0.023565 |
| 0.143946 | 0.00182  | 0.000825 | 0.98582  | -0.01131 | 0.80734 | -0.01402 | 0.76244 | 0.04092  |
| -0.12842 | 0.00545  | -0.07057 | 0.12779  | -0.06241 | 0.17821 | -0.09962 | 0.03136 | -0.20369 |
| 0.344304 | 1.92E-14 | 0.12025  | 0.00929  | -0.00493 | 0.91536 | -0.01498 | 0.74686 | -0.04996 |
| -0.06374 | 0.16906  | 0.042925 | 0.35468  | -0.06524 | 0.15924 | -0.07171 | 0.12175 | 0.025354 |
| 0.030202 | 0.515    | -0.05943 | 0.19986  | -0.00482 | 0.9172  | -0.01834 | 0.69266 | -0.02621 |
| -0.05024 | 0.27862  | -0.25734 | 1.69E-08 | -0.02547 | 0.58305 | -0.08361 | 0.07107 | -0.07592 |
| 0.099298 | 0.03192  | -0.1923  | 2.87E-05 | -0.05713 | 0.21784 | -0.15354 | 0.00087 | -0.04824 |
| 0.004471 | 0.92323  | -0.09127 | 0.0487   | 8.87E-06 | 0.99985 | -0.05347 | 0.24882 | 0.052792 |
| -0.05297 | 0.25327  | -0.0677  | 0.1441   | -0.03732 | 0.42106 | -0.01644 | 0.723   | -0.02852 |
| 0.079401 | 0.08653  | 0.287162 | 2.57E-10 | 0.003291 | 0.94345 | -0.04015 | 0.38673 | -0.0168  |
| -0.0514  | 0.26764  | -0.14004 | 0.00242  | -0.05109 | 0.27054 | -0.068   | 0.14232 | -0.15416 |
| 0.175658 | 0.00014  | 0.22121  | 1.38E-06 | 0.030106 | 0.51634 | 0.090836 | 0.04979 | 0.175702 |
| 0.045733 | 0.32406  | 0.127114 | 0.00595  | 0.050442 | 0.27666 | 0.112444 | 0.01505 | 0.071752 |
| 0.016296 | 0.7254   | -0.15948 | 0.00054  | -0.02556 | 0.58172 | -0.0725  | 0.11767 | -0.06443 |

|          |          |          |          |          |         |          |         |          |
|----------|----------|----------|----------|----------|---------|----------|---------|----------|
| -0.15769 | 0.00063  | -0.33278 | 1.54E-13 | 0.008971 | 0.84669 | 0.059976 | 0.19574 | 0.086467 |
| 0.040878 | 0.37811  | 0.014526 | 0.75421  | 0.019696 | 0.67118 | 0.054623 | 0.23875 | 0.066255 |
| 0.096243 | 0.03761  | 0.047883 | 0.3018   | -0.01512 | 0.74451 | 0.003919 | 0.9327  | -0.1161  |
| 0.007032 | 0.87953  | -0.19491 | 2.22E-05 | 0.047737 | 0.30328 | -0.02543 | 0.58353 | 0.093988 |
| 0.005738 | 0.90158  | -0.16683 | 0.00029  | -0.04223 | 0.36257 | -0.04293 | 0.35466 | -0.0278  |
| 0.175979 | 0.00013  | 0.076439 | 0.09897  | -0.00422 | 0.92756 | -0.04118 | 0.37463 | 0.047639 |
| 0.145133 | 0.00166  | -0.11679 | 0.01154  | -0.04167 | 0.36889 | -0.10357 | 0.02521 | -0.04257 |
| 0.010583 | 0.81957  | -0.18104 | 8.34E-05 | -0.07082 | 0.12645 | -0.11967 | 0.00964 | -0.11025 |
| 0.270444 | 2.85E-09 | -0.01987 | 0.6685   | 0.021079 | 0.64958 | -0.07058 | 0.12772 | 0.026742 |
| 0.072392 | 0.11823  | -0.02028 | 0.66198  | -0.01596 | 0.73081 | -0.06066 | 0.19065 | 0.009244 |
| 0.102613 | 0.0266   | -0.15713 | 0.00066  | -0.03495 | 0.45115 | -0.08801 | 0.05737 | 0.005207 |
| 0.037003 | 0.42501  | 0.101091 | 0.02894  | 0.001566 | 0.97307 | 0.008411 | 0.85614 | -0.04885 |
| 0.12322  | 0.00768  | -0.0324  | 0.48484  | -0.02388 | 0.60669 | -0.09544 | 0.03925 | 0.057146 |
| 0.206255 | 7.00E-06 | 0.360089 | 9.61E-16 | -0.00417 | 0.92844 | 0.02408  | 0.60372 | 0.00882  |
| 0.209689 | 4.87E-06 | 0.392407 | 1.22E-18 | -0.01803 | 0.69749 | -0.03826 | 0.4094  | -0.0821  |
| 0.07459  | 0.10743  | 0.056373 | 0.22401  | -0.0327  | 0.48091 | -0.08549 | 0.0649  | -0.01755 |
| -0.04731 | 0.30767  | -0.14245 | 0.00203  | -0.06236 | 0.17855 | -0.1171  | 0.01133 | -0.05225 |
| 0.126992 | 0.00599  | -0.00651 | 0.88843  | -0.01529 | 0.74182 | -0.0564  | 0.22381 | -0.00143 |
| 0.005016 | 0.9139   | -0.3026  | 2.41E-11 | -0.03166 | 0.49498 | -0.05693 | 0.21945 | -0.03406 |
| 0.11843  | 0.01042  | -0.13864 | 0.00268  | 0.024679 | 0.59475 | -0.02945 | 0.52553 | 0.075303 |
| 0.047689 | 0.30377  | 0.188097 | 4.30E-05 | 0.002583 | 0.95561 | 0.010747 | 0.81683 | 0.132815 |
| 0.162421 | 0.00043  | 0.238689 | 1.79E-07 | 0.029227 | 0.52866 | 0.001494 | 0.97431 | 0.08189  |
| 0.136979 | 0.00302  | -0.01213 | 0.7938   | -0.01335 | 0.77356 | 0.010469 | 0.82149 | -0.06659 |
| 0.115358 | 0.01261  | 0.167406 | 0.00028  | -0.01657 | 0.72097 | -0.01074 | 0.81695 | 0.011902 |
| 0.135488 | 0.00335  | 0.235243 | 2.71E-07 | 0.003248 | 0.94418 | -0.01067 | 0.81808 | -0.00209 |
| 0.064626 | 0.16323  | 0.025637 | 0.58052  | -0.03611 | 0.43622 | -0.07047 | 0.12834 | -0.14292 |
| -0.03641 | 0.43252  | -0.00672 | 0.88477  | 0.025605 | 0.58099 | 0.0611   | 0.18748 | -0.02313 |
| 0.094001 | 0.04231  | 0.102014 | 0.0275   | -0.01466 | 0.75202 | 0.005917 | 0.89852 | 0.030418 |
| 0.028117 | 0.54445  | -0.00954 | 0.83715  | -0.06195 | 0.18137 | -0.11618 | 0.01199 | -0.06977 |
| 0.164287 | 0.00036  | -0.01629 | 0.72548  | -0.00998 | 0.82968 | 0.008091 | 0.86157 | 0.041391 |
| 0.209741 | 4.85E-06 | 0.100596 | 0.02974  | -0.02624 | 0.57164 | -0.08656 | 0.06161 | -0.11504 |
| 0.003421 | 0.94123  | -0.11204 | 0.01542  | -0.07147 | 0.12302 | -0.10346 | 0.02537 | -0.1381  |
| 0.094534 | 0.04115  | 0.068854 | 0.13735  | 0.023682 | 0.60973 | 0.043418 | 0.34917 | 0.02336  |
| 0.206569 | 6.77E-06 | 0.430378 | 1.76E-22 | 0.041989 | 0.36527 | 0.043939 | 0.34342 | 0.113901 |
| 0.078265 | 0.09114  | -0.05581 | 0.22866  | 0.010685 | 0.81786 | 0.014616 | 0.75274 | -0.00026 |
| 0.12377  | 0.00741  | 0.034547 | 0.4564   | 0.016032 | 0.72968 | -0.00112 | 0.98079 | 0.013528 |
| 0.097869 | 0.03448  | -0.13873 | 0.00266  | 0.049075 | 0.28991 | -0.00725 | 0.87587 | 0.015444 |
| 0.38822  | 3.01E-18 | 0.242142 | 1.17E-07 | -0.03416 | 0.46146 | -0.09771 | 0.03478 | 0.096715 |
| 0.179265 | 9.81E-05 | 0.06757  | 0.14485  | -0.05996 | 0.19587 | -0.14012 | 0.00241 | 0.037232 |
| 0.066591 | 0.15078  | 0.074397 | 0.10835  | -0.06404 | 0.1671  | -0.13846 | 0.00271 | -0.15803 |
| 0.013003 | 0.77929  | -0.05494 | 0.23602  | -0.01801 | 0.69783 | -0.12499 | 0.00684 | -0.04454 |
| 0.094956 | 0.04025  | 0.100542 | 0.02982  | 0.047284 | 0.3079  | 0.071178 | 0.12454 | 0.017641 |
| -0.25408 | 2.58E-08 | -0.29573 | 7.02E-11 | -0.03293 | 0.4778  | -0.00603 | 0.89652 | -0.01726 |
| 0.212706 | 3.53E-06 | -0.09434 | 0.04158  | -0.03753 | 0.41848 | -0.05044 | 0.27667 | -0.05977 |
| 0.205761 | 7.37E-06 | -0.01103 | 0.81216  | -0.04698 | 0.31104 | -0.09934 | 0.03184 | -0.09242 |

|          |          |          |          |          |         |          |         |          |
|----------|----------|----------|----------|----------|---------|----------|---------|----------|
| -0.02707 | 0.55958  | 0.027024 | 0.56021  | 0.01642  | 0.7234  | 0.042697 | 0.35724 | 0.062373 |
| 0.032739 | 0.48032  | -0.14866 | 0.00127  | -0.00282 | 0.95151 | -0.03599 | 0.43786 | -0.02799 |
| 0.137744 | 0.00286  | 0.19599  | 1.99E-05 | 0.042739 | 0.35676 | 0.106881 | 0.02088 | 0.013083 |
| 0.191172 | 3.20E-05 | 0.11133  | 0.01609  | 0.020491 | 0.65873 | 0.041466 | 0.37128 | 0.032019 |
| 0.230874 | 4.56E-07 | 0.113353 | 0.01425  | 0.009323 | 0.84075 | 0.042965 | 0.35422 | 0.093065 |
| 0.014238 | 0.75894  | -0.00401 | 0.9311   | -0.02969 | 0.52211 | -0.02614 | 0.57316 | -0.03414 |
| 0.080121 | 0.08371  | 0.014191 | 0.7597   | 0.004664 | 0.91994 | 0.003989 | 0.93148 | -0.00994 |
| -0.03734 | 0.42076  | -0.24498 | 8.24E-08 | -0.07839 | 0.09061 | -0.17453 | 0.00015 | -0.142   |
| 0.014664 | 0.75196  | -0.00228 | 0.96073  | -0.00551 | 0.90544 | 0.053708 | 0.24671 | -0.04062 |
| 0.080563 | 0.08201  | -0.09846 | 0.03341  | -0.00351 | 0.93975 | -0.01974 | 0.67048 | -0.00102 |
| -0.17189 | 0.00019  | -0.35211 | 4.46E-15 | 0.020423 | 0.65979 | 0.11959  | 0.00969 | -0.00455 |
| 0.062129 | 0.18014  | -0.10434 | 0.02414  | -0.05844 | 0.20744 | -0.15199 | 0.00098 | -0.20794 |
| 0.270491 | 2.84E-09 | 0.3605   | 8.87E-16 | 0.071639 | 0.12211 | 0.091426 | 0.04832 | 0.294841 |
| 0.205333 | 7.71E-06 | 0.189606 | 3.73E-05 | 0.022459 | 0.62832 | -0.00085 | 0.98544 | 0.049615 |
| 0.091519 | 0.04809  | 0.147153 | 0.00143  | 0.014772 | 0.75019 | -0.04195 | 0.36572 | 0.016467 |
| -0.00931 | 0.8409   | 0.079557 | 0.08592  | 0.014222 | 0.75921 | -0.02064 | 0.65634 | 0.103111 |
| 0.04593  | 0.32197  | 0.086449 | 0.06195  | 0.048288 | 0.29773 | 0.068121 | 0.1416  | 0.193399 |
| 0.264807 | 6.20E-09 | 0.233758 | 3.24E-07 | -0.00979 | 0.83287 | -0.00566 | 0.90299 | -0.03916 |
| 0.399337 | 2.63E-19 | 0.332093 | 1.74E-13 | -0.00799 | 0.86327 | -0.03846 | 0.40698 | -0.0201  |
| 0.37583  | 4.09E-17 | 0.040659 | 0.38067  | -0.01921 | 0.67877 | -0.08639 | 0.06213 | 0.051021 |
| 0.182625 | 7.21E-05 | 0.292041 | 1.24E-10 | 0.015376 | 0.74033 | 0.004216 | 0.9276  | 0.054459 |
| -0.15813 | 0.0006   | -0.31651 | 2.52E-12 | -0.00436 | 0.92512 | 0.025644 | 0.58041 | 0.00565  |
| 0.125177 | 0.00676  | -0.0107  | 0.81769  | -0.01843 | 0.69122 | -0.02072 | 0.65518 | -0.05012 |
| 0.066205 | 0.15317  | -0.04318 | 0.35181  | 0.006566 | 0.88746 | 0.001263 | 0.97829 | 0.00495  |
| -0.16087 | 0.00048  | -0.33532 | 9.81E-14 | -0.0149  | 0.74808 | 0.018166 | 0.69539 | 0.077008 |
| 0.162432 | 0.00042  | -0.17311 | 0.00017  | -0.02822 | 0.543   | -0.07789 | 0.09269 | -0.04727 |
| 0.38645  | 4.40E-18 | 0.039737 | 0.39158  | 0.02473  | 0.59399 | -0.01408 | 0.76154 | 0.037917 |
| 0.174016 | 0.00016  | 0.353267 | 3.58E-15 | 0.002677 | 0.95398 | 0.065766 | 0.15591 | 0.136241 |
| -0.02966 | 0.52253  | -0.23722 | 2.14E-07 | -0.04714 | 0.30935 | -0.11321 | 0.01437 | -0.13284 |
| 0.087384 | 0.05917  | -0.15787 | 0.00062  | -0.06044 | 0.19233 | -0.12945 | 0.00508 | -0.06472 |
| 0.067431 | 0.14568  | -0.22499 | 9.01E-07 | -0.03165 | 0.49505 | -0.10177 | 0.02787 | -0.01911 |
| -0.08345 | 0.0716   | -0.24786 | 5.73E-08 | 0.016944 | 0.71495 | 0.074414 | 0.10827 | 0.002596 |
| -0.02645 | 0.56862  | 0.065066 | 0.16037  | -0.03753 | 0.41841 | -0.01092 | 0.81389 | -0.02842 |
| 0.122116 | 0.00825  | 0.001727 | 0.97031  | -0.01544 | 0.73922 | -0.03541 | 0.44516 | -0.0321  |
| -0.01466 | 0.75205  | -0.09894 | 0.03255  | -0.03545 | 0.44476 | -0.09443 | 0.04139 | -0.09892 |
| -0.0366  | 0.43009  | -0.11756 | 0.011    | -0.06877 | 0.13782 | -0.05153 | 0.26643 | -0.06958 |
| 0.206584 | 6.76E-06 | 0.074239 | 0.10911  | -0.05509 | 0.23477 | -0.16221 | 0.00043 | -0.11018 |
| 0.126453 | 0.00621  | -0.03489 | 0.45192  | -0.0527  | 0.25575 | -0.11464 | 0.01318 | -0.21159 |
| 0.037211 | 0.4224   | -0.1342  | 0.00367  | -0.03989 | 0.38978 | -0.05925 | 0.20125 | 0.019851 |
| 0.023638 | 0.61039  | 0.020587 | 0.65722  | -0.0283  | 0.54185 | -0.15787 | 0.00062 | -0.03718 |
| 0.128291 | 0.0055   | -0.00662 | 0.88653  | -0.0407  | 0.38024 | -0.06404 | 0.16707 | -0.06021 |
| -0.05481 | 0.23717  | -0.05337 | 0.24971  | -0.02717 | 0.55811 | 0.020241 | 0.66263 | -0.11438 |
| 0.240399 | 1.45E-07 | 0.204898 | 8.07E-06 | 0.043597 | 0.34719 | 0.00388  | 0.93336 | 0.08717  |
| 0.0768   | 0.09739  | -0.06888 | 0.13721  | -0.02573 | 0.57908 | -0.02537 | 0.58449 | -0.0496  |
| 0.129986 | 0.0049   | -0.01041 | 0.8225   | -0.0431  | 0.35272 | -0.07473 | 0.10676 | -0.06638 |

|          |          |          |          |          |         |          |         |          |
|----------|----------|----------|----------|----------|---------|----------|---------|----------|
| 0.0487   | 0.29362  | -0.17571 | 0.00014  | -0.0345  | 0.45697 | -0.06764 | 0.14444 | -0.09934 |
| 0.222305 | 1.22E-06 | 0.187171 | 4.70E-05 | -0.01021 | 0.82575 | -0.03565 | 0.44218 | 0.024312 |
| 0.013348 | 0.77358  | -0.00489 | 0.91614  | 0.024955 | 0.59064 | 0.044208 | 0.34046 | -0.02162 |
| 0.152651 | 0.00094  | 0.110117 | 0.01729  | 0.01614  | 0.72793 | -0.00622 | 0.89342 | -0.15772 |
| 0.014697 | 0.75142  | 0.129661 | 0.00501  | 0.016809 | 0.71713 | 0.063579 | 0.17017 | -0.02886 |
| 0.092877 | 0.04485  | 0.028199 | 0.54328  | 0.003293 | 0.94343 | 0.027014 | 0.56035 | 0.069382 |
| 0.128814 | 0.00531  | 0.162841 | 0.00041  | -0.01061 | 0.81904 | -0.04578 | 0.3236  | 0.032433 |
| -0.07405 | 0.10999  | -0.15799 | 0.00061  | -0.00814 | 0.86065 | -0.07896 | 0.08832 | -0.04306 |
| -0.06233 | 0.17875  | -0.15793 | 0.00061  | -0.02442 | 0.59856 | -0.01445 | 0.75539 | -0.03187 |
| -0.01498 | 0.74683  | 0.033262 | 0.47333  | -0.04922 | 0.28852 | -0.06354 | 0.17041 | -0.02626 |
| -0.03275 | 0.48013  | -0.18961 | 3.72E-05 | -0.01511 | 0.74464 | -0.05578 | 0.2289  | -0.05171 |
| -0.10862 | 0.01887  | -0.29409 | 9.03E-11 | -0.00587 | 0.89939 | 0.018628 | 0.68804 | -0.04448 |
| -0.02921 | 0.52889  | -0.0518  | 0.26389  | -0.03657 | 0.43049 | -0.03663 | 0.42971 | 0.022528 |
| 0.072031 | 0.12008  | -0.1338  | 0.00377  | -0.04205 | 0.36461 | -0.04008 | 0.38746 | -0.02252 |
| 0.078304 | 0.09099  | -0.08394 | 0.06994  | -0.04762 | 0.30448 | -0.13038 | 0.00477 | -0.05282 |
| 0.274603 | 1.59E-09 | 0.204248 | 8.63E-06 | -0.00554 | 0.90491 | -0.03181 | 0.49285 | 0.038871 |
| -0.14648 | 0.0015   | -0.31848 | 1.81E-12 | -0.05916 | 0.20188 | -0.03949 | 0.3945  | -0.12455 |
| -0.14442 | 0.00175  | -0.19776 | 1.67E-05 | -0.01025 | 0.82513 | -0.01142 | 0.80564 | -0.05848 |
| 0.161641 | 0.00045  | 0.016292 | 0.72547  | -0.02417 | 0.60244 | -0.11689 | 0.01147 | -0.06647 |
| -0.04654 | 0.31559  | -0.1046  | 0.02378  | -0.02917 | 0.52952 | -0.04663 | 0.31467 | -0.07552 |
| -0.01054 | 0.82034  | -0.06785 | 0.1432   | 0.023184 | 0.61726 | 0.071679 | 0.1219  | 0.005316 |
| 0.037862 | 0.41432  | -0.05337 | 0.24972  | -0.05968 | 0.19797 | -0.11133 | 0.01609 | -0.09914 |
| 0.067875 | 0.14305  | 0.208294 | 5.65E-06 | 0.039117 | 0.39901 | 0.110003 | 0.01741 | 0.145516 |
| 0.020715 | 0.65524  | 0.013676 | 0.76817  | 0.02595  | 0.57591 | 0.014437 | 0.75568 | 0.033683 |
| -0.10188 | 0.0277   | -0.23482 | 2.85E-07 | -0.04558 | 0.3257  | -0.03696 | 0.4256  | -0.07902 |
| -0.10421 | 0.02431  | -0.1717  | 0.00019  | -0.03229 | 0.48638 | 0.009113 | 0.84429 | 0.062795 |
| 0.011999 | 0.79593  | -0.12398 | 0.00731  | -0.03962 | 0.39298 | -0.06363 | 0.16981 | -0.03341 |
| 0.033438 | 0.471    | -0.10483 | 0.02347  | 0.009613 | 0.83586 | 0.059261 | 0.20113 | -0.06068 |
| 0.124608 | 0.00702  | 0.077585 | 0.094    | -0.00482 | 0.91721 | -0.0372  | 0.42259 | -0.00213 |
| -0.11242 | 0.01507  | -0.31047 | 6.81E-12 | -0.01968 | 0.6715  | -0.01141 | 0.80577 | -0.0755  |
| 0.054208 | 0.24234  | -0.08396 | 0.06986  | 0.017864 | 0.70021 | -0.00259 | 0.95541 | 0.217863 |
| -0.13161 | 0.00439  | -0.18931 | 3.83E-05 | -0.0391  | 0.39927 | -0.04665 | 0.31448 | -0.08469 |
| 0.133243 | 0.00392  | 0.108911 | 0.01856  | 0.032351 | 0.48554 | 0.035684 | 0.4417  | 0.119194 |
| -0.01222 | 0.79224  | -0.04323 | 0.35131  | -0.03638 | 0.43281 | -0.03027 | 0.5141  | 0.026391 |
| -0.17026 | 0.00022  | -0.21578 | 2.52E-06 | -0.00533 | 0.90851 | -0.01228 | 0.7913  | -0.0237  |
| 0.153466 | 0.00088  | -0.15032 | 0.00112  | -0.00696 | 0.88075 | -0.08045 | 0.08245 | -0.01694 |
| -0.10624 | 0.02166  | -0.17245 | 0.00018  | -0.03872 | 0.40379 | 0.015024 | 0.74607 | -0.04431 |
| 0.232417 | 3.80E-07 | 0.161899 | 0.00044  | -0.01671 | 0.71867 | -0.02026 | 0.66226 | -0.03564 |
| 0.082956 | 0.0733   | -0.03172 | 0.49409  | 0.013898 | 0.76452 | 0.062332 | 0.17872 | -0.0606  |
| 0.162332 | 0.00043  | 0.20101  | 1.20E-05 | 0.005472 | 0.90612 | 0.037985 | 0.41281 | -0.04093 |
| -0.02842 | 0.54015  | -0.14092 | 0.00227  | -0.02463 | 0.59553 | -0.00573 | 0.90171 | -0.01595 |
| 0.077309 | 0.09518  | -0.16755 | 0.00028  | -0.01649 | 0.7222  | -0.02675 | 0.56423 | -0.1141  |
| -0.02447 | 0.59787  | -0.07851 | 0.09014  | 0.043276 | 0.35075 | 0.104283 | 0.02422 | 0.128871 |
| -0.02922 | 0.52882  | -0.10125 | 0.02868  | -0.0668  | 0.14947 | -0.03472 | 0.45414 | -0.08537 |
| 0.131705 | 0.00436  | 0.215132 | 2.71E-06 | 0.042054 | 0.36454 | 0.112908 | 0.01464 | 0.008523 |

|          |          |          |          |          |         |          |          |          |
|----------|----------|----------|----------|----------|---------|----------|----------|----------|
| 0.17838  | 0.00011  | 0.175857 | 0.00013  | 0.012136 | 0.79366 | 0.028433 | 0.53993  | 0.036758 |
| -0.00683 | 0.88289  | -0.05133 | 0.26833  | -0.03471 | 0.45426 | -0.03239 | 0.48508  | 0.050399 |
| 0.109417 | 0.01802  | 0.020455 | 0.65929  | -0.01419 | 0.75968 | -0.07341 | 0.1131   | 0.001955 |
| 0.316633 | 2.47E-12 | 0.258312 | 1.48E-08 | -0.00263 | 0.95479 | -0.05564 | 0.23009  | 0.040045 |
| -0.04139 | 0.3722   | -0.06558 | 0.1571   | -0.05037 | 0.27732 | -0.08323 | 0.07234  | 0.011368 |
| -0.09203 | 0.04685  | -0.3036  | 2.05E-11 | -0.03371 | 0.46734 | -0.09462 | 0.04096  | -0.02306 |
| 0.03252  | 0.48326  | -0.09032 | 0.0511   | -0.00907 | 0.84509 | -0.03783 | 0.41467  | -0.05576 |
| 0.212464 | 3.62E-06 | 0.10359  | 0.02518  | -0.01269 | 0.78442 | -0.09657 | 0.03696  | -0.08059 |
| 0.102589 | 0.02663  | 0.221495 | 1.34E-06 | 0.008715 | 0.85101 | 0.014487 | 0.75486  | 0.002291 |
| -0.09574 | 0.03863  | -0.22316 | 1.11E-06 | -0.01715 | 0.71161 | -0.02531 | 0.58531  | -0.09433 |
| 0.320978 | 1.19E-12 | 0.077157 | 0.09583  | 0.030989 | 0.5041  | 0.089598 | 0.053    | 0.149954 |
| -0.21792 | 1.99E-06 | -0.41251 | 1.30E-20 | -0.0325  | 0.48353 | -0.03789 | 0.41398  | -0.09887 |
| 0.084922 | 0.06672  | -0.0672  | 0.14708  | -0.08758 | 0.05859 | -0.12254 | 0.00802  | -0.15994 |
| -0.30155 | 2.84E-11 | -0.28346 | 4.44E-10 | -0.02129 | 0.64631 | -0.01286 | 0.78163  | -0.03127 |
| 0.073751 | 0.11146  | 0.174676 | 0.00015  | 0.026618 | 0.56612 | 0.078658 | 0.08953  | 0.113552 |
| -0.05202 | 0.26189  | 0.265561 | 5.60E-09 | 0.079152 | 0.08753 | 0.182058 | 7.59E-05 | 0.181265 |
| -0.02033 | 0.66126  | -0.23387 | 3.20E-07 | -0.05631 | 0.22452 | -0.08598 | 0.06337  | -0.15584 |
| -0.00313 | 0.9462   | 0.155399 | 0.00075  | -0.02398 | 0.60527 | -0.05088 | 0.27251  | -0.02936 |
| 0.114834 | 0.01302  | 0.307236 | 1.15E-11 | 0.038736 | 0.40363 | 0.096507 | 0.03709  | 0.239179 |
| -0.03718 | 0.42277  | -0.08445 | 0.06826  | -0.00918 | 0.8432  | 0.01361  | 0.76926  | -0.03769 |
| 0.055356 | 0.2325   | -0.17975 | 9.39E-05 | -0.01884 | 0.68461 | -0.04542 | 0.32733  | -0.14161 |
| -0.09342 | 0.04361  | -0.20071 | 1.24E-05 | -0.00019 | 0.99674 | 0.082627 | 0.07445  | 0.015945 |
| 0.079693 | 0.08538  | -0.00877 | 0.85002  | -0.01979 | 0.66974 | -0.04549 | 0.32658  | -0.02205 |
| 0.007492 | 0.87173  | -0.09234 | 0.04611  | -0.02395 | 0.60568 | -0.01408 | 0.7615   | -0.0598  |
| 0.006423 | 0.8899   | -0.30914 | 8.45E-12 | -0.05171 | 0.26479 | -0.13776 | 0.00285  | -0.11437 |
| 0.076816 | 0.09732  | -0.06379 | 0.16878  | -0.01475 | 0.75049 | -0.06121 | 0.18669  | -0.04845 |
| 0.185796 | 5.36E-05 | 0.109096 | 0.01836  | 0.013646 | 0.76867 | -0.01676 | 0.71786  | 0.025292 |
| 0.007421 | 0.87292  | -0.05947 | 0.19952  | -0.03092 | 0.50509 | 0.013919 | 0.76418  | -0.03594 |
| 0.028618 | 0.53729  | -0.18819 | 4.27E-05 | 0.004642 | 0.9203  | 0.007414 | 0.87304  | 0.070057 |
| 0.081668 | 0.07789  | 0.078269 | 0.09113  | 0.002306 | 0.96036 | -0.00655 | 0.8878   | 0.006833 |
| -0.18125 | 8.18E-05 | -0.33053 | 2.29E-13 | -0.02012 | 0.66447 | 0.001593 | 0.97261  | -0.1117  |
| 0.0248   | 0.59294  | 0.151089 | 0.00106  | -0.02183 | 0.63795 | 0.030967 | 0.50441  | 0.021614 |
| -0.12643 | 0.00622  | -0.15261 | 0.00094  | -0.00715 | 0.8775  | -0.1442  | 0.00178  | 0.023686 |
| -0.06621 | 0.15311  | -0.18514 | 5.70E-05 | -0.0344  | 0.45837 | -0.03463 | 0.4553   | -0.10371 |
| 0.037293 | 0.42139  | 0.11733  | 0.01116  | 0.026643 | 0.56576 | 0.1102   | 0.0172   | 0.030047 |
| 0.109049 | 0.01841  | 0.276424 | 1.23E-09 | -0.00648 | 0.8889  | 0.019286 | 0.67764  | 0.232759 |
| 0.039868 | 0.39002  | -0.00948 | 0.83808  | 0.001341 | 0.97694 | 0.007573 | 0.87034  | -0.02217 |
| -0.08906 | 0.05445  | 0.009543 | 0.83705  | 0.095448 | 0.03922 | 0.083092 | 0.07283  | 0.326756 |
| 0.047382 | 0.30689  | -0.16174 | 0.00045  | -0.00597 | 0.89765 | -0.0511  | 0.27042  | -0.11414 |
| -0.088   | 0.05738  | -0.31921 | 1.60E-12 | -0.06623 | 0.153   | -0.1003  | 0.03023  | -0.09765 |
| 0.091626 | 0.04783  | 0.031058 | 0.50315  | -0.01206 | 0.79487 | -0.03828 | 0.40918  | 0.061391 |
| 0.06586  | 0.15533  | 0.127512 | 0.00579  | 0.015844 | 0.73273 | -0.05492 | 0.23616  | 0.010994 |
| 0.053854 | 0.24543  | -0.11685 | 0.0115   | -0.06566 | 0.15656 | -0.13046 | 0.00475  | -0.04542 |
| 0.018162 | 0.69545  | 0.005138 | 0.91182  | -0.07475 | 0.10666 | -0.03529 | 0.44675  | 0.034927 |
| 0.125069 | 0.00681  | -0.03574 | 0.44096  | -0.04157 | 0.37011 | -0.06547 | 0.1578   | 0.031799 |

|          |          |          |          |          |         |          |         |          |
|----------|----------|----------|----------|----------|---------|----------|---------|----------|
| 0.141351 | 0.0022   | 0.017498 | 0.70606  | -0.00786 | 0.86541 | -0.0273  | 0.55615 | 0.064577 |
| -0.03687 | 0.42665  | -0.03781 | 0.41493  | 0.041707 | 0.36851 | 0.05506  | 0.235   | 0.15792  |
| 0.024991 | 0.59009  | -0.23937 | 1.65E-07 | 0.006331 | 0.89146 | -0.02419 | 0.60204 | -0.03394 |
| 0.102925 | 0.02614  | 0.040671 | 0.38053  | -0.08288 | 0.07355 | -0.12786 | 0.00566 | -0.06402 |
| 0.171445 | 0.0002   | 0.152993 | 0.00091  | 0.04611  | 0.32007 | 0.024785 | 0.59316 | -0.04748 |
| -0.00259 | 0.95557  | 0.035389 | 0.44549  | 0.033734 | 0.46707 | 0.073181 | 0.11426 | 0.109828 |
| 0.121804 | 0.00841  | 0.18741  | 4.60E-05 | -0.00546 | 0.90635 | -0.04843 | 0.29635 | 0.020464 |
| 0.252258 | 3.27E-08 | 0.306338 | 1.33E-11 | -0.0172  | 0.7108  | -0.0296  | 0.5234  | 0.053226 |
| 0.306742 | 1.24E-11 | 0.171149 | 0.0002   | 0.03671  | 0.42868 | 0.008187 | 0.85993 | 0.09006  |
| -0.00554 | 0.90492  | -0.1729  | 0.00017  | -0.03175 | 0.49374 | -0.1135  | 0.01413 | -0.04688 |
| 0.047453 | 0.30617  | -0.10565 | 0.0224   | -0.0265  | 0.56789 | -0.03289 | 0.47823 | 0.07512  |
| 0.204569 | 8.34E-06 | 0.199046 | 1.47E-05 | -0.0092  | 0.84283 | 0.039668 | 0.3924  | 0.070879 |
| -0.02762 | 0.5516   | -0.16501 | 0.00034  | -0.02772 | 0.55011 | -0.04036 | 0.38421 | -0.03171 |
| -0.07563 | 0.10262  | -0.25774 | 1.60E-08 | -0.01834 | 0.69262 | -0.05566 | 0.2299  | -0.03065 |
| 0.105011 | 0.02324  | 0.064573 | 0.16358  | -0.02321 | 0.61683 | -0.01328 | 0.77465 | -0.09602 |
| 0.08849  | 0.05602  | -0.18799 | 4.35E-05 | 0.06153  | 0.18439 | 0.042051 | 0.36457 | 0.132029 |
| 0.034084 | 0.46246  | -0.04246 | 0.35992  | -0.01563 | 0.73621 | -0.05459 | 0.23903 | -0.05936 |
| -0.12448 | 0.00708  | -0.12903 | 0.00523  | -0.01693 | 0.71518 | 0.027779 | 0.54929 | -0.01902 |
| 0.178768 | 0.0001   | 0.185528 | 5.49E-05 | 0.068234 | 0.14093 | 0.091777 | 0.04746 | 0.079685 |
| 0.009961 | 0.83001  | 0.113308 | 0.01429  | 0.053863 | 0.24536 | 0.144599 | 0.00173 | 0.013691 |
| 0.182834 | 7.07E-05 | 0.418297 | 3.32E-21 | 0.019589 | 0.67285 | 0.106728 | 0.02106 | 0.053054 |
| 0.041605 | 0.36968  | 0.146665 | 0.00148  | 0.01092  | 0.81392 | 0.048871 | 0.29192 | -0.00618 |
| 0.078532 | 0.09004  | 0.088195 | 0.05684  | -0.03709 | 0.42396 | 0.012262 | 0.79157 | -0.03619 |
| 0.147161 | 0.00143  | -0.08201 | 0.07665  | 0.029167 | 0.52951 | -0.03152 | 0.49686 | 0.016659 |
| 0.134282 | 0.00365  | 0.195763 | 2.04E-05 | 0.022866 | 0.6221  | 0.002958 | 0.94916 | -0.03466 |
| 0.085721 | 0.06419  | 0.024536 | 0.59689  | 0.017475 | 0.70642 | 0.048998 | 0.29067 | 0.097282 |
| 0.012199 | 0.7926   | -0.2107  | 4.38E-06 | 0.043966 | 0.34312 | 0.078791 | 0.08899 | 0.114074 |
| 0.041248 | 0.37381  | 0.280604 | 6.74E-10 | 0.018541 | 0.68943 | 0.087287 | 0.05945 | 0.073974 |
| -0.00049 | 0.99165  | 0.319181 | 1.61E-12 | 0.016731 | 0.71839 | 0.050863 | 0.27268 | 0.018162 |
| 0.052937 | 0.25357  | -0.02255 | 0.62696  | 0.041799 | 0.36746 | 0.018383 | 0.69193 | 0.000832 |
| 0.074896 | 0.106    | 0.180351 | 8.89E-05 | 0.085787 | 0.06398 | 0.07944  | 0.08638 | 0.232738 |
| 0.127162 | 0.00593  | 0.111595 | 0.01584  | 0.037737 | 0.41587 | 0.068897 | 0.13711 | 0.040813 |
| 0.14619  | 0.00154  | 0.148038 | 0.00134  | 0.012485 | 0.78785 | 0.045383 | 0.32777 | 0.057506 |
| -0.16971 | 0.00023  | -0.10689 | 0.02087  | 0.06168  | 0.18332 | 0.156053 | 0.00071 | 0.119459 |
| -0.08473 | 0.06734  | -0.04187 | 0.36669  | 0.009333 | 0.84058 | 0.082709 | 0.07416 | -0.0024  |
| 0.158405 | 0.00059  | 0.198573 | 1.54E-05 | 0.018102 | 0.6964  | 0.058104 | 0.21009 | 0.070099 |
| 0.008882 | 0.84819  | 0.166238 | 0.00031  | 0.061617 | 0.18377 | 0.159348 | 0.00055 | 0.22579  |
| -0.11607 | 0.01207  | -0.14361 | 0.00186  | 0.003424 | 0.94118 | 0.009268 | 0.84168 | 0.021345 |
| 0.152509 | 0.00095  | 0.170039 | 0.00022  | -0.04171 | 0.36844 | 0.038704 | 0.40401 | -0.01146 |
| 0.146228 | 0.00153  | 0.131022 | 0.00457  | -0.03921 | 0.3979  | -0.02397 | 0.6054  | 0.02067  |
| 0.023592 | 0.61108  | -0.03472 | 0.45416  | -0.0176  | 0.7045  | -0.14697 | 0.00145 | -0.04587 |
| 0.098228 | 0.03382  | 0.021905 | 0.63681  | 0.007946 | 0.86402 | 0.014341 | 0.75724 | 0.066742 |
| -0.1577  | 0.00063  | -0.10952 | 0.01791  | 0.002639 | 0.95464 | 0.053262 | 0.25067 | -0.0443  |
| 0.064345 | 0.16507  | 0.08453  | 0.06799  | 0.001043 | 0.98207 | -0.0355  | 0.44405 | 0.053531 |
| 0.035118 | 0.44898  | 0.212287 | 3.69E-06 | 0.032391 | 0.485   | 0.047054 | 0.31025 | 0.023721 |



|          |          |          |          |          |         |          |          |          |
|----------|----------|----------|----------|----------|---------|----------|----------|----------|
| 0.22814  | 6.27E-07 | 0.226663 | 7.43E-07 | 0.061014 | 0.1881  | 0.112949 | 0.0146   | 0.019032 |
| 0.188377 | 4.19E-05 | 0.000278 | 0.99522  | 0.023813 | 0.60774 | 0.006979 | 0.88043  | -0.03098 |
| 0.06911  | 0.13589  | 0.088628 | 0.05563  | 0.005716 | 0.90195 | 0.023417 | 0.61372  | 0.047455 |
| 0.066282 | 0.15269  | -0.02056 | 0.65758  | 0.030474 | 0.51122 | 0.04955  | 0.28527  | 0.056943 |
| 0.282002 | 5.50E-10 | 0.110854 | 0.01655  | 0.028673 | 0.53652 | -0.05612 | 0.22609  | 0.047121 |
| -0.02003 | 0.66589  | 0.000182 | 0.99686  | 0.040448 | 0.38315 | 0.084741 | 0.0673   | 0.084322 |
| 0.020961 | 0.65141  | -0.03542 | 0.44509  | 0.052997 | 0.25303 | 0.15254  | 0.00094  | 0.143301 |
| 0.032555 | 0.48278  | 0.104952 | 0.02332  | 0.033027 | 0.47646 | 0.041286 | 0.37337  | 0.035012 |
| -0.10012 | 0.03052  | -0.11033 | 0.01707  | -0.0051  | 0.91252 | -0.07592 | 0.10131  | -0.07908 |
| -0.2017  | 1.12E-05 | -0.21322 | 3.34E-06 | 0.01303  | 0.77883 | 0.073371 | 0.11332  | -0.00762 |
| 0.350518 | 6.03E-15 | 0.209862 | 4.78E-06 | 0.10936  | 0.01808 | 0.142569 | 0.00201  | 0.308579 |
| -0.06629 | 0.15265  | -0.11541 | 0.01257  | -0.02378 | 0.6082  | 0.010055 | 0.82843  | -0.11037 |
| -0.22965 | 5.26E-07 | -0.26353 | 7.37E-09 | -0.08026 | 0.08317 | -0.06418 | 0.16615  | -0.12061 |
| -0.0761  | 0.10049  | -0.11467 | 0.01315  | 0.012319 | 0.79062 | 0.099023 | 0.0324   | -0.08416 |
| 0.133294 | 0.00391  | 0.183031 | 6.94E-05 | 0.008996 | 0.84627 | 0.06256  | 0.17713  | -0.00095 |
| -0.03587 | 0.43935  | -0.01255 | 0.7868   | -0.03885 | 0.40229 | 0.012896 | 0.78106  | -0.04047 |
| 0.034028 | 0.4632   | -0.02689 | 0.56211  | 0.051146 | 0.27001 | 0.067419 | 0.14575  | 0.105922 |
| -0.08763 | 0.05846  | -0.00587 | 0.89934  | 0.000726 | 0.98751 | 0.057503 | 0.21485  | 0.042143 |
| -0.15315 | 0.0009   | -0.16362 | 0.00038  | -0.00255 | 0.9562  | -0.00064 | 0.98904  | 0.062919 |
| -0.05784 | 0.21218  | -0.11562 | 0.01241  | 0.015609 | 0.73654 | 0.025532 | 0.58207  | 0.026513 |
| 0.081536 | 0.07837  | -0.033   | 0.47681  | -0.02287 | 0.62199 | -0.12201 | 0.0083   | -0.02908 |
| -0.00373 | 0.93599  | -0.21906 | 1.76E-06 | -0.01725 | 0.71008 | -0.02596 | 0.57572  | -0.25153 |
| 0.06564  | 0.15671  | 0.101163 | 0.02882  | 0.009942 | 0.83033 | 0.053704 | 0.24675  | 0.076996 |
| 0.125289 | 0.00671  | 0.084656 | 0.06758  | 0.030215 | 0.51482 | 0.027572 | 0.55227  | 0.019056 |
| 0.180724 | 8.59E-05 | 0.139436 | 0.00253  | 0.012607 | 0.78584 | -0.00573 | 0.90171  | -0.01275 |
| -0.28768 | 2.38E-10 | -0.35382 | 3.22E-15 | 0.004955 | 0.91496 | 0.036879 | 0.42655  | 0.026879 |
| -0.15996 | 0.00052  | -0.22054 | 1.49E-06 | -0.09984 | 0.03099 | -0.20874 | 5.39E-06 | -0.07819 |
| -0.06099 | 0.18825  | 0.124109 | 0.00725  | 0.007066 | 0.87895 | 0.037204 | 0.42248  | 0.100619 |
| 0.048319 | 0.29742  | 0.040008 | 0.38835  | 0.048196 | 0.29864 | 0.086703 | 0.06118  | 0.072189 |
| 0.01937  | 0.67631  | -0.0348  | 0.45315  | 0.010421 | 0.82228 | 0.018429 | 0.69121  | -0.02472 |
| -0.17859 | 0.0001   | -0.28646 | 2.85E-10 | -0.05942 | 0.19989 | -0.07982 | 0.08488  | -0.1497  |
| -0.11131 | 0.01611  | -0.14382 | 0.00183  | 0.048264 | 0.29797 | 0.101306 | 0.0286   | -0.00671 |
| -0.01609 | 0.72872  | -0.15106 | 0.00106  | 0.029544 | 0.52421 | 0.04469  | 0.33522  | 0.062789 |
| 0.045065 | 0.33118  | 0.077933 | 0.09253  | 0.048849 | 0.29214 | 0.145348 | 0.00164  | -0.03149 |
| 0.175485 | 0.00014  | 0.136532 | 0.00311  | -0.01909 | 0.68073 | 0.04435  | 0.33891  | -0.02881 |
| 0.030553 | 0.51013  | -0.02855 | 0.53827  | 0.03295  | 0.4775  | 0.006703 | 0.88513  | 0.062624 |
| 0.037243 | 0.42201  | 0.00901  | 0.84602  | -0.03122 | 0.50088 | -0.07311 | 0.11462  | -0.03133 |
| 0.012631 | 0.78544  | -0.0045  | 0.92267  | -0.0102  | 0.82593 | 0.108324 | 0.0192   | -0.0222  |
| -0.17272 | 0.00018  | -0.28242 | 5.17E-10 | -0.02489 | 0.59153 | -0.01428 | 0.75821  | -0.03836 |
| -0.16586 | 0.00032  | -0.09111 | 0.04909  | 0.001816 | 0.96879 | 0.016314 | 0.72512  | 0.073173 |
| -0.02722 | 0.5573   | -0.13383 | 0.00376  | 0.002988 | 0.94865 | 0.010769 | 0.81645  | 0.027037 |
| -0.03336 | 0.47207  | 0.055372 | 0.23236  | 0.019569 | 0.67318 | 0.07215  | 0.11946  | -0.02128 |
| -0.14803 | 0.00134  | -0.07958 | 0.08582  | -0.05479 | 0.23728 | -0.12417 | 0.00722  | -0.07462 |
| 0.254715 | 2.38E-08 | 0.218702 | 1.83E-06 | 0.05521  | 0.23373 | 0.089672 | 0.0528   | 0.112076 |
| 0.02728  | 0.5565   | -0.07162 | 0.1222   | 0.07449  | 0.10791 | 0.038889 | 0.40177  | 0.104316 |

|          |          |          |          |          |         |          |          |          |
|----------|----------|----------|----------|----------|---------|----------|----------|----------|
| -0.05562 | 0.2303   | -0.01961 | 0.67257  | 0.025103 | 0.58843 | 0.085988 | 0.06336  | 0.104135 |
| -0.02314 | 0.61789  | 0.047538 | 0.3053   | 0.011494 | 0.80434 | 0.032056 | 0.48953  | 0.088035 |
| 0.025358 | 0.58464  | 0.001738 | 0.97012  | 0.022362 | 0.6298  | 0.010602 | 0.81926  | 0.05781  |
| -0.08429 | 0.06879  | -0.30878 | 8.96E-12 | -0.01578 | 0.73373 | -0.03444 | 0.45781  | -0.04635 |
| 0.072211 | 0.11915  | -0.02757 | 0.55228  | 0.037537 | 0.41835 | 0.070511 | 0.12812  | 0.006016 |
| 0.092684 | 0.0453   | 0.257167 | 1.72E-08 | 0.06397  | 0.16755 | 0.124526 | 0.00705  | 0.258441 |
| 0.073465 | 0.11286  | 0.144385 | 0.00176  | 0.011424 | 0.8055  | 0.015519 | 0.738    | 0.071128 |
| 0.103036 | 0.02597  | -0.04229 | 0.36182  | 0.052083 | 0.26133 | 0.007561 | 0.87056  | 0.013122 |
| -0.18188 | 7.72E-05 | -0.4002  | 2.17E-19 | 0.02743  | 0.55433 | 0.064771 | 0.16229  | 0.060535 |
| 0.150531 | 0.0011   | 0.242051 | 1.19E-07 | 0.061465 | 0.18485 | 0.204504 | 8.40E-06 | 0.05684  |
| 0.035348 | 0.44602  | -0.26523 | 5.86E-09 | -0.05189 | 0.26311 | -0.06916 | 0.13562  | -0.15161 |
| 0.247845 | 5.75E-08 | 0.155286 | 0.00076  | 0.04969  | 0.28391 | 0.067372 | 0.14604  | 0.07846  |
| 0.416391 | 5.22E-21 | 0.168651 | 0.00025  | -0.03806 | 0.41188 | -0.05663 | 0.22191  | -0.03636 |
| 0.109799 | 0.01762  | 0.301655 | 2.79E-11 | 0.032527 | 0.48317 | 0.118792 | 0.01019  | 0.043066 |
| -0.09435 | 0.04155  | 0.111874 | 0.01557  | 0.027353 | 0.55544 | 0.149007 | 0.00124  | 0.101112 |
| -0.07218 | 0.11933  | -0.06386 | 0.16826  | 0.007496 | 0.87165 | 0.081016 | 0.0803   | -0.00401 |
| 0.357634 | 1.55E-15 | 0.060072 | 0.19503  | -0.06282 | 0.17533 | -0.09838 | 0.03356  | -0.08401 |
| -0.14537 | 0.00163  | -0.09907 | 0.03232  | 0.062186 | 0.17974 | 0.165975 | 0.00032  | 0.054808 |
| -0.01779 | 0.70139  | -0.14012 | 0.00241  | 0.009801 | 0.83269 | 0.021777 | 0.63879  | -0.03099 |
| 0.076479 | 0.0988   | -0.03321 | 0.474    | -0.02634 | 0.57023 | -0.09105 | 0.04924  | 0.020442 |
| -0.0458  | 0.32333  | 0.020301 | 0.6617   | 0.023936 | 0.6059  | 0.128023 | 0.0056   | 0.04594  |
| -0.00727 | 0.87557  | 0.000765 | 0.98685  | 0.029901 | 0.5192  | 0.051451 | 0.26716  | 0.039972 |
| -0.01563 | 0.73627  | 0.082017 | 0.07662  | 0.009465 | 0.83836 | 0.052836 | 0.25448  | 0.082361 |
| -0.04555 | 0.32601  | 0.05477  | 0.23748  | 0.040923 | 0.37759 | 0.158352 | 0.00059  | 0.060421 |
| 0.12761  | 0.00575  | 0.214108 | 3.03E-06 | 0.026133 | 0.57322 | 0.00424  | 0.92719  | 0.084724 |
| 0.071973 | 0.12038  | 0.18482  | 5.87E-05 | 0.050643 | 0.27475 | 0.172407 | 0.00018  | 0.166809 |
| -0.07907 | 0.08787  | -0.01202 | 0.79561  | -0.03131 | 0.49975 | 0.006531 | 0.88806  | -0.01255 |
| 0.257512 | 1.65E-08 | 0.135717 | 0.0033   | 0.005225 | 0.91034 | 0.025227 | 0.58659  | 0.007009 |
| -0.09893 | 0.03256  | 0.005884 | 0.89909  | -0.01737 | 0.70807 | 0.039593 | 0.3933   | -0.03713 |
| -0.00853 | 0.85414  | 0.064792 | 0.16215  | 0.011362 | 0.80655 | 0.083497 | 0.07144  | 0.064252 |
| 0.030381 | 0.51252  | -0.09305 | 0.04445  | 0.015165 | 0.74377 | 0.016058 | 0.72926  | -0.08154 |
| -0.12907 | 0.00521  | -0.18418 | 6.23E-05 | -0.01005 | 0.82858 | -0.01251 | 0.78742  | 0.087696 |
| 0.158632 | 0.00058  | 0.186401 | 5.06E-05 | 0.01015  | 0.82683 | 0.010119 | 0.82736  | 0.117838 |
| 0.223732 | 1.04E-06 | 0.280508 | 6.83E-10 | 0.031585 | 0.49594 | -0.02197 | 0.63575  | 0.070321 |
| -0.07123 | 0.12427  | 0.064243 | 0.16574  | 0.099228 | 0.03204 | 0.154782 | 0.00079  | 0.191815 |
| 0.057819 | 0.21234  | 0.072848 | 0.11592  | 0.027952 | 0.5468  | 0.01317  | 0.77652  | -0.00926 |
| 0.061447 | 0.18498  | 0.14775  | 0.00137  | 0.028373 | 0.54078 | 0.053685 | 0.24692  | 0.074202 |
| 0.111357 | 0.01606  | 0.100963 | 0.02914  | -0.02041 | 0.66001 | -0.02046 | 0.65915  | 0.052879 |
| -0.06902 | 0.13642  | -0.12206 | 0.00828  | -0.07412 | 0.10968 | -0.09723 | 0.03569  | -0.09537 |
| -0.06894 | 0.13686  | -0.13407 | 0.0037   | 0.027897 | 0.54759 | 0.082728 | 0.07409  | -0.04247 |
| -0.17437 | 0.00015  | -0.26525 | 5.84E-09 | -0.07857 | 0.08989 | -0.10677 | 0.02102  | -0.17012 |
| 0.029743 | 0.52141  | -0.00456 | 0.92167  | 0.000959 | 0.98351 | 0.029105 | 0.5304   | -0.02257 |
| 0.068713 | 0.13816  | 0.080433 | 0.0825   | 0.020468 | 0.65908 | 0.024549 | 0.59668  | 0.090722 |
| 0.12213  | 0.00824  | 0.016545 | 0.72139  | -0.02458 | 0.5962  | -0.04629 | 0.31819  | 0.037427 |
| -0.10619 | 0.02173  | -0.24513 | 8.09E-08 | -0.00594 | 0.89816 | -0.05058 | 0.27532  | -0.01136 |

|          |          |          |          |          |         |          |         |          |
|----------|----------|----------|----------|----------|---------|----------|---------|----------|
| -0.05408 | 0.24345  | -0.14113 | 0.00224  | -0.05425 | 0.24198 | 0.030565 | 0.50996 | -0.07732 |
| -0.10153 | 0.02825  | -0.19055 | 3.40E-05 | -0.0202  | 0.66321 | -0.01282 | 0.78235 | -0.13414 |
| -0.05656 | 0.22245  | -0.13402 | 0.00371  | -0.01828 | 0.69364 | -0.07872 | 0.08926 | -0.09143 |
| 0.094134 | 0.04202  | 0.119856 | 0.00953  | 0.048881 | 0.29182 | 0.090426 | 0.05083 | 0.086546 |
| 0.207116 | 6.40E-06 | 0.05525  | 0.23339  | 0.026871 | 0.56243 | 0.004169 | 0.9284  | 0.082145 |
| -0.07021 | 0.12975  | -0.30427 | 1.85E-11 | -0.02417 | 0.6023  | -0.03605 | 0.43707 | -0.01325 |
| 0.176853 | 0.00012  | -0.00088 | 0.98494  | 0.02029  | 0.66186 | 0.007324 | 0.87457 | 0.04203  |
| -0.14655 | 0.0015   | -0.34539 | 1.57E-14 | -0.01658 | 0.72079 | -0.00331 | 0.9432  | -0.02017 |
| 0.18912  | 3.90E-05 | 0.178778 | 0.0001   | 0.007332 | 0.87444 | 0.04853  | 0.29531 | 0.11335  |
| 0.052286 | 0.25946  | -0.10372 | 0.02499  | -0.01567 | 0.73555 | -0.11232 | 0.01516 | -0.01867 |
| 0.073653 | 0.11193  | 0.044912 | 0.33282  | 0.017771 | 0.70169 | 0.047395 | 0.30676 | 0.047233 |
| -0.11572 | 0.01234  | -0.13307 | 0.00397  | 0.059326 | 0.20063 | 0.122285 | 0.00816 | 0.087797 |
| -0.01767 | 0.70323  | -0.09229 | 0.04623  | 0.00132  | 0.9773  | -0.01015 | 0.82692 | 0.081755 |
| 0.078497 | 0.09019  | -0.09964 | 0.03134  | 0.03254  | 0.48299 | -0.0127  | 0.78438 | 0.038939 |
| -0.07711 | 0.09603  | -0.08534 | 0.06537  | 0.029459 | 0.5254  | 0.006607 | 0.88676 | 0.091528 |
| -0.07664 | 0.09808  | 0.096678 | 0.03675  | 0.00511  | 0.91231 | 0.121267 | 0.00871 | -0.00727 |
| -0.1147  | 0.01313  | -0.20462 | 8.30E-06 | -0.06703 | 0.14811 | -0.14637 | 0.00152 | -0.06314 |
| -0.21071 | 4.37E-06 | -0.39446 | 7.76E-19 | 0.000626 | 0.98924 | -0.00666 | 0.88591 | 0.002405 |
| -0.14573 | 0.00159  | -0.26395 | 6.97E-09 | 0.003942 | 0.9323  | -0.0088  | 0.84952 | -0.03754 |
| 0.080199 | 0.0834   | 0.001313 | 0.97742  | 0.017253 | 0.70999 | 0.085817 | 0.06389 | -0.09692 |
| 0.16871  | 0.00025  | 0.175043 | 0.00014  | 0.069813 | 0.13194 | 0.032808 | 0.4794  | 0.172017 |
| -0.05544 | 0.23181  | -0.10626 | 0.02164  | 0.03404  | 0.46303 | 0.037559 | 0.41808 | 0.091409 |
| 0.025771 | 0.57854  | 0.133859 | 0.00376  | -0.00385 | 0.93387 | -0.04573 | 0.32406 | 0.057219 |
| 0.153249 | 0.00089  | 0.331838 | 1.82E-13 | 0.047057 | 0.31022 | 0.098377 | 0.03355 | 0.13626  |
| -0.09936 | 0.03182  | -0.00589 | 0.89896  | -0.00322 | 0.94459 | 0.134272 | 0.00365 | 0.030477 |
| -0.1825  | 7.29E-05 | -0.19409 | 2.41E-05 | -0.0064  | 0.89022 | -0.02198 | 0.6356  | -0.11904 |
| -0.10947 | 0.01796  | -0.01466 | 0.75204  | 0.034094 | 0.46233 | 0.105723 | 0.02231 | 0.129983 |
| 0.032384 | 0.48509  | 0.141298 | 0.00221  | -0.00534 | 0.9084  | -0.01598 | 0.73049 | 0.078727 |
| 0.251094 | 3.80E-08 | 0.172718 | 0.00018  | 0.00737  | 0.87379 | 0.037924 | 0.41356 | 0.0326   |
| 0.205061 | 7.93E-06 | 0.030119 | 0.51616  | -0.0106  | 0.81935 | -0.02646 | 0.56847 | 0.032575 |
| 0.095711 | 0.03868  | 0.146646 | 0.00148  | -0.00689 | 0.88195 | 0.061426 | 0.18513 | 0.007811 |
| -0.0884  | 0.05628  | -0.07414 | 0.10958  | 0.076907 | 0.09692 | 0.112778 | 0.01475 | 0.234068 |
| -0.04579 | 0.32348  | 0.008524 | 0.85424  | 0.06193  | 0.18155 | 0.070534 | 0.12799 | 0.060351 |
| -0.09265 | 0.04537  | 0.14645  | 0.00151  | 0.047567 | 0.30501 | 0.119088 | 0.01    | 0.120247 |
| 0.033643 | 0.46828  | 0.025624 | 0.58071  | 0.052601 | 0.2566  | 0.124178 | 0.00722 | 0.115381 |
| 0.114282 | 0.01347  | -0.06221 | 0.17955  | 0.088703 | 0.05543 | 0.154204 | 0.00083 | 0.109539 |
| 0.135875 | 0.00326  | 0.162922 | 0.00041  | 0.028589 | 0.53771 | 0.082519 | 0.07483 | 0.039363 |
| -0.17128 | 0.0002   | -0.19483 | 2.24E-05 | -0.04141 | 0.3719  | -0.08423 | 0.06899 | -0.08966 |
| -0.11833 | 0.01049  | -0.09251 | 0.04572  | 0.023126 | 0.61815 | 0.063548 | 0.17038 | -0.00202 |
| 0.205688 | 7.43E-06 | 0.176133 | 0.00013  | 0.059414 | 0.19997 | 0.048856 | 0.29207 | 0.171471 |
| 0.07859  | 0.08981  | -0.02403 | 0.60444  | 0.077805 | 0.09307 | 0.119524 | 0.00973 | 0.109139 |
| 0.032607 | 0.48209  | 0.006916 | 0.8815   | 0.011411 | 0.80573 | 0.061771 | 0.18267 | 0.006286 |
| -0.19543 | 2.11E-05 | -0.48986 | 1.48E-29 | -0.00207 | 0.9645  | -0.02153 | 0.64263 | 0.027672 |
| -0.1373  | 0.00295  | -0.08845 | 0.05612  | -0.03785 | 0.41442 | 0.073841 | 0.11102 | -0.01227 |
| -0.0819  | 0.07706  | -0.14267 | 0.002    | 0.060062 | 0.1951  | 0.081037 | 0.08022 | 0.019711 |

|          |          |          |          |          |         |          |          |          |
|----------|----------|----------|----------|----------|---------|----------|----------|----------|
| -0.11986 | 0.00953  | -0.00399 | 0.93143  | 0.083093 | 0.07282 | 0.180251 | 8.97E-05 | 0.163233 |
| -0.09481 | 0.04056  | -0.17156 | 0.0002   | -0.03579 | 0.44038 | -0.01365 | 0.76859  | -0.02659 |
| -0.11287 | 0.01467  | -0.10466 | 0.0237   | -0.02965 | 0.52265 | -0.00296 | 0.94906  | 0.000873 |
| 0.154423 | 0.00081  | 0.104407 | 0.02405  | 0.019503 | 0.67421 | 0.006193 | 0.89381  | 0.014326 |
| 0.011005 | 0.81251  | -0.14435 | 0.00176  | -0.00531 | 0.90897 | -0.02149 | 0.64316  | 0.017038 |
| -0.00544 | 0.9066   | 0.04839  | 0.2967   | 0.053076 | 0.25233 | 0.186439 | 5.04E-05 | 0.025767 |
| 0.308524 | 9.34E-12 | 0.262432 | 8.55E-09 | -0.00074 | 0.98734 | 0.012182 | 0.79288  | 0.031022 |
| -0.07897 | 0.08826  | -0.43454 | 6.24E-23 | -0.01805 | 0.69719 | -0.04033 | 0.38458  | -0.10779 |
| 0.057778 | 0.21266  | 0.021557 | 0.64217  | -0.01456 | 0.75359 | -0.04831 | 0.29751  | -0.05301 |
| 0.28036  | 6.98E-10 | 0.131227 | 0.0045   | 0.014992 | 0.7466  | 0.030225 | 0.51468  | 0.051933 |
| -0.11075 | 0.01665  | -0.04597 | 0.32156  | 0.059255 | 0.20118 | 0.192645 | 2.77E-05 | 0.108616 |
| 0.031294 | 0.49992  | 0.127649 | 0.00574  | 0.003323 | 0.9429  | 0.138143 | 0.00277  | 0.125904 |
| -0.09339 | 0.04367  | -0.14566 | 0.0016   | -0.00316 | 0.94576 | 0.057342 | 0.21613  | -0.01204 |
| 0.232699 | 3.67E-07 | 0.142208 | 0.00207  | 0.045183 | 0.32991 | 0.056387 | 0.22389  | 0.129821 |
| -0.13915 | 0.00258  | -0.23501 | 2.79E-07 | 0.042122 | 0.36376 | 0.079584 | 0.08581  | 0.061936 |
| 0.124699 | 0.00697  | 0.03454  | 0.45649  | -0.01893 | 0.68321 | -0.07626 | 0.09979  | 0.013841 |
| 0.01933  | 0.67694  | -0.05642 | 0.2236   | -0.02247 | 0.62817 | -0.05668 | 0.22147  | -0.09034 |
| 0.010429 | 0.82215  | 0.046196 | 0.31918  | 0.008033 | 0.86255 | 0.039147 | 0.39866  | 0.071557 |
| -0.0684  | 0.13998  | -0.11654 | 0.01172  | 0.028549 | 0.53827 | 0.030747 | 0.50744  | 0.103703 |
| 0.06574  | 0.15608  | 0.027506 | 0.55322  | 0.049089 | 0.28978 | 0.055389 | 0.23221  | 0.140011 |
| 0.036077 | 0.4367   | 0.09463  | 0.04095  | 0.046983 | 0.31099 | 0.074612 | 0.10733  | 0.057474 |
| 0.056113 | 0.22616  | -0.00205 | 0.96478  | 0.002314 | 0.96022 | 0.009761 | 0.83338  | 0.123307 |
| -0.09792 | 0.03439  | -0.09148 | 0.04818  | 0.042473 | 0.35977 | 0.127761 | 0.00569  | 0.148349 |
| 0.138591 | 0.00269  | 0.054179 | 0.24259  | 0.013057 | 0.77839 | -0.00273 | 0.95305  | 0.021306 |
| -0.1719  | 0.00019  | -0.23311 | 3.50E-07 | -0.00435 | 0.92522 | 0.036768 | 0.42795  | 0.029429 |
| 0.044574 | 0.33647  | 0.120659 | 0.00905  | 0.058106 | 0.21007 | 0.11868  | 0.01026  | 0.125372 |
| 0.107498 | 0.02015  | 0.025394 | 0.58411  | 0.031732 | 0.49393 | 0.053354 | 0.24985  | 0.05306  |
| -0.10921 | 0.01824  | -0.04663 | 0.31466  | 0.026845 | 0.56281 | 0.128914 | 0.00527  | 0.11283  |
| -0.07084 | 0.12634  | -0.03198 | 0.49055  | -0.02402 | 0.60456 | -0.05283 | 0.25454  | -0.06627 |
| -0.0038  | 0.93466  | 0.207666 | 6.04E-06 | 0.032213 | 0.48741 | 0.105359 | 0.02278  | 0.143658 |
| 0.0853   | 0.06551  | 0.336886 | 7.41E-14 | 0.004423 | 0.92405 | 0.101733 | 0.02793  | -0.01645 |
| -0.0319  | 0.49169  | -0.04316 | 0.35202  | 0.01683  | 0.71679 | 0.032252 | 0.48688  | 0.045233 |
| 0.088597 | 0.05572  | 0.0959   | 0.0383   | 0.022086 | 0.63403 | 0.056744 | 0.22097  | 0.035534 |
| -0.27784 | 1.00E-09 | -0.32811 | 3.49E-13 | 0.059021 | 0.20296 | 0.108826 | 0.01865  | 0.154001 |
| -0.04324 | 0.35118  | 0.078039 | 0.09209  | 0.023687 | 0.60965 | 0.005637 | 0.9033   | 0.091614 |
| -0.10447 | 0.02396  | 0.016365 | 0.72429  | 0.056582 | 0.2223  | 0.111734 | 0.01571  | 0.191243 |
| -0.01971 | 0.67093  | -0.00622 | 0.89332  | 0.009861 | 0.8317  | 0.057358 | 0.21601  | 0.023239 |
| 0.058221 | 0.20917  | -0.05137 | 0.26795  | 0.009178 | 0.84319 | -0.04432 | 0.33925  | 0.014835 |
| 0.259533 | 1.26E-08 | 0.30242  | 2.48E-11 | 0.04705  | 0.3103  | 0.035396 | 0.4454   | 0.152892 |
| 0.138678 | 0.00267  | -0.01362 | 0.76911  | 0.001146 | 0.9803  | -0.03576 | 0.44067  | -0.0445  |
| 0.056127 | 0.22604  | 0.010474 | 0.8214   | 0.027636 | 0.55135 | -0.01707 | 0.71291  | 0.093807 |
| -0.01565 | 0.73589  | 0.033573 | 0.4692   | -0.04332 | 0.35028 | 0.053538 | 0.24821  | 0.046611 |
| 0.078999 | 0.08814  | -0.07591 | 0.10134  | 0.124472 | 0.00708 | 0.195944 | 2.00E-05 | 0.373061 |
| 0.017633 | 0.7039   | 0.113101 | 0.01447  | 0.020866 | 0.65288 | 0.096219 | 0.03766  | 0.059973 |
| 0.05295  | 0.25345  | 0.325097 | 5.88E-13 | -0.00482 | 0.91722 | 0.084533 | 0.06798  | 0.064175 |

|          |          |           |          |          |         |          |          |          |
|----------|----------|-----------|----------|----------|---------|----------|----------|----------|
| 0.231894 | 4.04E-07 | 0.176184  | 0.00013  | -0.00587 | 0.89929 | -0.02956 | 0.52404  | -0.04573 |
| -0.12577 | 0.0065   | -0.19296  | 2.69E-05 | -0.00726 | 0.87574 | 0.025406 | 0.58393  | -0.00179 |
| -0.12694 | 0.00601  | -0.09988  | 0.03092  | 0.03201  | 0.49015 | 0.10811  | 0.01945  | 0.045592 |
| 0.118444 | 0.01041  | 0.236899  | 2.22E-07 | -0.04201 | 0.36502 | -0.06849 | 0.13947  | -0.10995 |
| 0.016695 | 0.71897  | -0.07488  | 0.10608  | -0.02651 | 0.56763 | -0.01371 | 0.76759  | -0.08352 |
| -0.00115 | 0.9803   | 0.214038  | 3.05E-06 | 0.068028 | 0.14215 | 0.250563 | 4.07E-08 | 0.111716 |
| -0.08885 | 0.05502  | -0.20431  | 8.58E-06 | 0.035841 | 0.4397  | 0.07929  | 0.08697  | 0.054334 |
| 0.028093 | 0.54478  | 0.09049   | 0.05067  | 0.05425  | 0.24197 | 0.231796 | 4.09E-07 | 0.140495 |
| 0.110542 | 0.01686  | 0.098925  | 0.03257  | 0.066387 | 0.15204 | 0.118307 | 0.0105   | 0.107957 |
| -0.01311 | 0.77746  | 0.278181  | 9.56E-10 | 0.017702 | 0.70279 | 0.016735 | 0.71832  | 0.025881 |
| 0.018027 | 0.6976   | -0.02566  | 0.58025  | 0.067449 | 0.14557 | 0.097    | 0.03613  | 0.137193 |
| -0.15207 | 0.00098  | -0.21316  | 3.36E-06 | 0.063823 | 0.16853 | 0.12498  | 0.00685  | 0.004935 |
| 0.064865 | 0.16167  | 0.044616  | 0.33602  | 0.029969 | 0.51826 | 0.08423  | 0.06898  | 0.099838 |
| 0.016633 | 0.71996  | 0.048263  | 0.29798  | 0.00423  | 0.92736 | -0.01993 | 0.66747  | 0.0787   |
| 0.091046 | 0.04926  | 0.036843  | 0.42701  | -0.03135 | 0.4991  | -0.05991 | 0.19621  | -0.01107 |
| -0.05294 | 0.25357  | -0.0848   | 0.06712  | -0.04616 | 0.31953 | -0.09689 | 0.03633  | -0.07216 |
| 0.177248 | 0.00012  | 0.204489  | 8.41E-06 | 0.018321 | 0.69292 | -0.0303  | 0.51358  | 0.119304 |
| -0.13963 | 0.00249  | -0.16275  | 0.00041  | -0.01471 | 0.7512  | 0.049492 | 0.28582  | -0.05566 |
| 0.255741 | 2.08E-08 | 0.25581   | 2.06E-08 | -0.01336 | 0.77338 | -0.03339 | 0.47158  | 0.029705 |
| -0.13841 | 0.00272  | -0.07225  | 0.11895  | 0.024555 | 0.5966  | 0.092987 | 0.0446   | 0.042395 |
| -0.13064 | 0.00469  | -0.10689  | 0.02087  | 0.038896 | 0.40168 | 0.068436 | 0.13976  | -0.01222 |
| -0.22862 | 5.93E-07 | -0.25286  | 3.02E-08 | -0.00587 | 0.89929 | 0.04806  | 0.30001  | -0.01644 |
| -0.12445 | 0.00709  | -0.03085  | 0.50604  | 0.072783 | 0.11625 | 0.185633 | 5.44E-05 | 0.109869 |
| 0.049939 | 0.28149  | 0.300969  | 3.11E-11 | 0.030879 | 0.50562 | 0.171034 | 0.0002   | 0.057471 |
| 0.122131 | 0.00824  | 0.179184  | 9.89E-05 | 0.004501 | 0.92273 | 0.026553 | 0.56707  | 0.111612 |
| 0.011258 | 0.80829  | 0.138272  | 0.00275  | 0.012595 | 0.78604 | 0.10314  | 0.02582  | -0.0673  |
| -0.17044 | 0.00022  | -0.32517  | 5.81E-13 | -0.02482 | 0.59269 | -0.08292 | 0.07341  | 0.118163 |
| 0.062925 | 0.17462  | 0.056939  | 0.21939  | 0.077794 | 0.09312 | 0.111673 | 0.01576  | 0.226024 |
| 0.028001 | 0.54611  | -0.04969  | 0.28394  | 0.03223  | 0.48718 | 0.061799 | 0.18247  | 0.033525 |
| -0.0311  | 0.50253  | 0.035653  | 0.4421   | -0.00148 | 0.9746  | 0.064098 | 0.1667   | 0.013844 |
| -0.09931 | 0.03189  | -0.2685   | 3.74E-09 | -0.03253 | 0.48309 | -0.07172 | 0.12167  | -0.01596 |
| -0.1754  | 0.00014  | -0.11719  | 0.01126  | 0.043899 | 0.34385 | 0.056362 | 0.2241   | 0.09759  |
| -0.07748 | 0.09446  | -8.66E-05 | 0.99851  | -0.0063  | 0.89207 | 0.009311 | 0.84095  | -0.00559 |
| -0.02829 | 0.54193  | 0.029165  | 0.52954  | 0.037597 | 0.4176  | 0.101466 | 0.02834  | 0.053693 |
| -0.14615 | 0.00154  | -0.26263  | 8.33E-09 | 0.031086 | 0.50278 | 0.049499 | 0.28576  | 0.01595  |
| 0.073904 | 0.11072  | 0.087341  | 0.0593   | 0.033993 | 0.46366 | 0.068379 | 0.14009  | 0.025043 |
| -0.23271 | 3.67E-07 | -0.24189  | 1.21E-07 | -0.02959 | 0.52357 | -0.05262 | 0.25641  | -0.10458 |
| -0.18202 | 7.62E-05 | -0.1696   | 0.00023  | 0.054974 | 0.23574 | 0.089561 | 0.0531   | 0.009592 |
| 0.097735 | 0.03473  | 0.129169  | 0.00518  | 0.004327 | 0.9257  | 0.034436 | 0.45785  | -0.05697 |
| -0.00911 | 0.84429  | -0.03795  | 0.41319  | -0.04182 | 0.36717 | -0.00829 | 0.85827  | -0.0292  |
| -0.08406 | 0.06953  | 0.02525   | 0.58625  | 0.016759 | 0.71794 | 0.093258 | 0.04398  | 0.054136 |
| -0.16756 | 0.00028  | -0.17555  | 0.00014  | 0.068401 | 0.13996 | 0.113031 | 0.01453  | 0.184168 |
| -0.02953 | 0.5244   | 0.05134   | 0.26819  | 0.053472 | 0.2488  | 0.08866  | 0.05554  | 0.083153 |
| 0.042821 | 0.35584  | 0.015872  | 0.73228  | 0.038028 | 0.41228 | 0.034332 | 0.4592   | 0.043979 |
| -0.06786 | 0.14312  | -0.09873  | 0.03291  | 0.002446 | 0.95795 | 0.078286 | 0.09106  | 0.097134 |

|          |          |          |          |          |         |          |          |          |
|----------|----------|----------|----------|----------|---------|----------|----------|----------|
| -0.14324 | 0.00192  | -0.08426 | 0.06888  | -0.01554 | 0.73774 | 0.081751 | 0.07758  | 0.096499 |
| 0.075802 | 0.10183  | 0.204686 | 8.24E-06 | 0.008303 | 0.85797 | -0.00522 | 0.9104   | 0.001962 |
| 0.123133 | 0.00772  | 0.046318 | 0.31789  | -0.00257 | 0.95583 | 0.046005 | 0.32118  | -0.07428 |
| 0.070162 | 0.13002  | -0.00461 | 0.9208   | 0.032104 | 0.48888 | 0.023131 | 0.61807  | 0.214385 |
| -0.05674 | 0.22097  | -0.14915 | 0.00123  | -0.01094 | 0.81365 | -0.02493 | 0.59105  | -0.01531 |
| -0.03055 | 0.51015  | 0.082482 | 0.07496  | 0.046227 | 0.31884 | 0.067693 | 0.14412  | 0.0572   |
| -0.1506  | 0.0011   | -0.30152 | 2.86E-11 | -0.03643 | 0.43217 | -0.12625 | 0.0063   | -0.04968 |
| 0.004404 | 0.92439  | 0.061671 | 0.18338  | 0.024362 | 0.59949 | 0.066911 | 0.14882  | 0.076829 |
| -0.01499 | 0.74666  | -0.07123 | 0.12429  | 0.034477 | 0.45731 | 0.077815 | 0.09303  | 0.041752 |
| -0.03007 | 0.5169   | -0.089   | 0.0546   | 0.038341 | 0.40844 | 0.097061 | 0.03601  | 0.053347 |
| -0.00516 | 0.91143  | 0.110904 | 0.0165   | 0.053069 | 0.25239 | 0.158596 | 0.00058  | 0.072543 |
| -0.02189 | 0.637    | 0.256622 | 1.85E-08 | 0.039021 | 0.40018 | 0.122551 | 0.00802  | 0.079548 |
| -0.0254  | 0.58408  | 0.16476  | 0.00035  | 0.033539 | 0.46965 | 0.046822 | 0.31265  | 0.046956 |
| 0.034733 | 0.45398  | 0.106917 | 0.02084  | 0.04948  | 0.28595 | 0.081327 | 0.07914  | 0.129534 |
| -0.03548 | 0.44436  | -0.08721 | 0.05968  | 0.003813 | 0.9345  | -0.0169  | 0.71571  | -0.01995 |
| 0.233617 | 3.29E-07 | 0.462938 | 3.51E-26 | 0.034793 | 0.4532  | 0.079595 | 0.08576  | 0.061858 |
| -0.17193 | 0.00019  | -0.02971 | 0.52193  | -0.01068 | 0.81787 | 0.073317 | 0.11359  | -0.04058 |
| -0.17764 | 0.00011  | -0.1274  | 0.00583  | -0.01091 | 0.81413 | 0.080994 | 0.08038  | -0.02546 |
| -0.15718 | 0.00065  | -0.11778 | 0.01085  | -0.02479 | 0.59308 | 0.035807 | 0.44013  | -0.09592 |
| 0.059146 | 0.20201  | 0.087994 | 0.05741  | 0.027296 | 0.55627 | 0.097695 | 0.03481  | 0.050685 |
| 0.394924 | 7.00E-19 | 0.321249 | 1.14E-12 | 0.030178 | 0.51534 | 0.039097 | 0.39926  | 0.100522 |
| -0.01541 | 0.73986  | -0.11912 | 0.00998  | 0.021408 | 0.64449 | 0.023763 | 0.60849  | 0.011659 |
| 0.035642 | 0.44224  | 0.018078 | 0.6968   | 0.019294 | 0.6775  | 0.037772 | 0.41543  | 0.031695 |
| 0.093581 | 0.04325  | -0.02744 | 0.55417  | -0.02786 | 0.54818 | -0.03762 | 0.41729  | -0.00559 |
| 0.18872  | 4.06E-05 | -0.00337 | 0.94216  | -0.00274 | 0.95291 | -0.06928 | 0.13493  | -0.00667 |
| -0.13056 | 0.00471  | -0.20089 | 1.22E-05 | 0.013886 | 0.76472 | 0.020961 | 0.65141  | 0.034239 |
| 0.010648 | 0.81848  | 0.350533 | 6.01E-15 | 0.038111 | 0.41127 | 0.212928 | 3.44E-06 | 0.106159 |
| 0.073285 | 0.11374  | 0.153274 | 0.00089  | 0.054503 | 0.23978 | 0.169126 | 0.00024  | 0.105762 |
| 0.104572 | 0.02382  | 0.029695 | 0.52209  | 0.016495 | 0.7222  | 0.01221  | 0.79242  | 0.074564 |
| -0.25201 | 3.38E-08 | -0.31683 | 2.39E-12 | 0.016617 | 0.72022 | 0.080352 | 0.08282  | 0.05698  |
| 0.152215 | 0.00097  | 0.173006 | 0.00017  | 0.065793 | 0.15574 | 0.109221 | 0.01822  | 0.096346 |
| -0.04643 | 0.31677  | -0.15085 | 0.00108  | 0.009657 | 0.83512 | 0.107309 | 0.02037  | -0.14378 |
| -0.16445 | 0.00036  | -0.35393 | 3.15E-15 | -0.01973 | 0.6707  | -0.03963 | 0.39287  | -0.06795 |
| -0.05345 | 0.24902  | -0.09761 | 0.03497  | 0.012289 | 0.79111 | 0.024263 | 0.60097  | 0.012378 |
| -0.0188  | 0.68525  | -0.06901 | 0.13648  | 0.025059 | 0.58908 | 0.088199 | 0.05683  | 0.052369 |
| -0.0028  | 0.95192  | -0.12409 | 0.00726  | 0.043764 | 0.34534 | 0.062225 | 0.17947  | 0.069381 |
| 0.055999 | 0.2271   | 0.130165 | 0.00484  | 0.064195 | 0.16606 | 0.131558 | 0.0044   | 0.144112 |
| -0.05825 | 0.20897  | -0.18375 | 6.49E-05 | 0.0274   | 0.55476 | -0.00719 | 0.87684  | -0.0245  |
| -0.13134 | 0.00447  | -0.05377 | 0.24613  | 0.032594 | 0.48227 | 0.054714 | 0.23796  | 0.138055 |
| -0.11807 | 0.01066  | -0.06687 | 0.14904  | 0.057957 | 0.21124 | 0.174947 | 0.00014  | 0.152069 |
| -0.07281 | 0.11611  | 0.007483 | 0.87187  | 0.008789 | 0.84976 | 0.015429 | 0.73947  | -0.01232 |
| -0.0897  | 0.05272  | -0.47615 | 8.42E-28 | -0.02422 | 0.60166 | -0.06839 | 0.14     | -0.13829 |
| 0.284971 | 3.56E-10 | 0.399503 | 2.54E-19 | 0.045597 | 0.32549 | 0.046733 | 0.31357  | 0.188678 |
| 0.037434 | 0.41963  | 0.099124 | 0.03222  | 0.042008 | 0.36506 | 0.086815 | 0.06085  | 0.093942 |
| -0.09757 | 0.03504  | -0.13754 | 0.0029   | 0.085265 | 0.06562 | 0.171766 | 0.00019  | 0.313301 |

|          |          |          |          |          |         |          |          |          |
|----------|----------|----------|----------|----------|---------|----------|----------|----------|
| -0.09204 | 0.04682  | -0.01178 | 0.79956  | 0.026455 | 0.5685  | 0.050399 | 0.27708  | 0.015044 |
| 0.058517 | 0.20685  | 0.161644 | 0.00045  | 0.056302 | 0.2246  | 0.1629   | 0.00041  | 0.100979 |
| -0.14859 | 0.00128  | -0.20231 | 1.05E-05 | 0.018373 | 0.69209 | -0.02565 | 0.58028  | -0.02297 |
| 0.098072 | 0.03411  | 0.094876 | 0.04042  | -0.0022  | 0.9622  | -0.00897 | 0.84663  | -0.06764 |
| 0.035637 | 0.4423   | -0.02529 | 0.58566  | 0.002088 | 0.96411 | -0.0152  | 0.74316  | 0.057996 |
| -0.09025 | 0.05128  | -0.15886 | 0.00057  | -0.0113  | 0.80759 | 0.025489 | 0.58271  | 0.017358 |
| 0.040405 | 0.38366  | -0.03154 | 0.49661  | -0.01542 | 0.73958 | -0.01231 | 0.79078  | -0.00537 |
| -0.00473 | 0.91874  | -0.04332 | 0.35021  | -0.01527 | 0.74211 | 0.00394  | 0.93233  | -0.01976 |
| 0.063965 | 0.16758  | 0.202229 | 1.06E-05 | 0.029873 | 0.51959 | 0.060936 | 0.18867  | 0.108592 |
| 0.07855  | 0.08997  | 0.342077 | 2.89E-14 | 0.065761 | 0.15595 | 0.145262 | 0.00165  | 0.132522 |
| 0.028587 | 0.53773  | 0.006483 | 0.88887  | 0.037379 | 0.42031 | 0.044126 | 0.34136  | 0.111546 |
| 0.087511 | 0.0588   | 0.020398 | 0.66017  | 0.032913 | 0.47798 | 0.057753 | 0.21286  | 0.077731 |
| 0.070673 | 0.12724  | 0.00293  | 0.94964  | 0.019201 | 0.67897 | -0.04601 | 0.32111  | 0.067797 |
| -0.13356 | 0.00383  | -0.22148 | 1.34E-06 | 0.011022 | 0.81222 | 0.01582  | 0.73312  | -0.05028 |
| -0.16347 | 0.00039  | -0.1984  | 1.57E-05 | -0.00863 | 0.85242 | 0.020936 | 0.65179  | 0.047199 |
| -0.17917 | 9.90E-05 | -0.37139 | 1.01E-16 | 0.032643 | 0.4816  | 0.065671 | 0.15651  | 0.098886 |
| -0.15668 | 0.00068  | -0.41334 | 1.07E-20 | 0.009892 | 0.83117 | -0.07998 | 0.08425  | -0.10789 |
| 0.039517 | 0.39421  | 0.095006 | 0.04015  | 0.032025 | 0.48994 | 0.069953 | 0.13117  | 0.069596 |
| 0.077635 | 0.09379  | 0.013636 | 0.76883  | 0.000652 | 0.98878 | -0.02732 | 0.55591  | 0.019968 |
| -0.12786 | 0.00566  | -0.17298 | 0.00017  | 0.028437 | 0.53987 | 0.042489 | 0.35959  | 0.00111  |
| -0.05889 | 0.204    | -0.14484 | 0.0017   | 0.064641 | 0.16313 | 0.144842 | 0.0017   | 0.120957 |
| -0.11714 | 0.0113   | -0.03871 | 0.4039   | 0.076602 | 0.09826 | 0.109549 | 0.01788  | 0.224999 |
| 0.157896 | 0.00062  | 0.163984 | 0.00037  | 0.037743 | 0.4158  | 0.038019 | 0.41239  | 0.143041 |
| -0.01555 | 0.73752  | -0.09198 | 0.04697  | 0.030887 | 0.50552 | 0.022034 | 0.63483  | 0.066079 |
| -0.03855 | 0.40589  | 0.136945 | 0.00302  | 0.052955 | 0.25341 | 0.098948 | 0.03253  | 0.102373 |
| -0.15925 | 0.00055  | 0.02298  | 0.62037  | 0.04149  | 0.37101 | 0.148626 | 0.00128  | 0.076794 |
| -0.19808 | 1.62E-05 | -0.32736 | 3.98E-13 | -0.01377 | 0.76664 | -0.04241 | 0.36043  | -0.02899 |
| 0.260897 | 1.05E-08 | 0.344471 | 1.86E-14 | 0.102871 | 0.02622 | 0.206069 | 7.14E-06 | 0.209807 |
| -0.16372 | 0.00038  | -0.11188 | 0.01557  | -0.01836 | 0.69234 | -0.0312  | 0.50122  | -0.07917 |
| 0.06275  | 0.17582  | 0.044896 | 0.333    | 0.017331 | 0.70875 | 0.051843 | 0.26353  | 0.117396 |
| 0.047036 | 0.31045  | 0.134967 | 0.00348  | 0.021411 | 0.64443 | 0.097523 | 0.03513  | 0.129282 |
| 0.016376 | 0.72412  | 0.187326 | 4.63E-05 | 0.006747 | 0.88438 | 0.041562 | 0.37017  | -0.02175 |
| -0.04249 | 0.35961  | -0.08444 | 0.06828  | 0.020402 | 0.66012 | 0.050731 | 0.27392  | 0.031781 |
| 0.063939 | 0.16776  | 0.002538 | 0.95638  | 0.000499 | 0.99142 | -0.01142 | 0.80563  | 0.023774 |
| 0.010067 | 0.82823  | -0.18867 | 4.07E-05 | 0.055481 | 0.23144 | 0.020811 | 0.65373  | 0.142163 |
| -0.13099 | 0.00458  | -0.07355 | 0.11243  | -0.00891 | 0.84767 | 0.046057 | 0.32064  | 0.038044 |
| 0.10353  | 0.02526  | 0.09994  | 0.03082  | -0.00857 | 0.85342 | 0.018052 | 0.69721  | 0.025301 |
| 0.007071 | 0.87888  | 0.098469 | 0.03339  | -0.04166 | 0.36907 | -0.05531 | 0.2329   | -0.06172 |
| -0.07317 | 0.1143   | -0.08854 | 0.05589  | 0.034007 | 0.46347 | 0.140072 | 0.00241  | -0.00216 |
| -0.07644 | 0.09898  | -0.05375 | 0.24632  | 0.005739 | 0.90155 | 0.059646 | 0.19822  | 0.095096 |
| 0.201637 | 1.13E-05 | 0.426999 | 4.06E-22 | 0.018196 | 0.69492 | 0.094056 | 0.04219  | 0.03743  |
| -0.0461  | 0.32017  | -0.00526 | 0.90979  | 0.047068 | 0.31011 | 0.140625 | 0.00232  | 0.120682 |
| 0.218493 | 1.87E-06 | 0.288575 | 2.08E-10 | 0.07133  | 0.12374 | -0.00538 | 0.90774  | 0.155952 |
| 0.351903 | 4.64E-15 | 0.410606 | 2.02E-20 | -0.00833 | 0.85759 | 0.03692  | 0.42604  | -0.00371 |
| -0.0845  | 0.06808  | -0.11262 | 0.01489  | 0.014897 | 0.74815 | 0.010522 | 0.82059  | 0.011297 |

|          |          |          |          |          |         |          |          |          |
|----------|----------|----------|----------|----------|---------|----------|----------|----------|
| 0.006021 | 0.89675  | -0.00548 | 0.90606  | -0.03599 | 0.43781 | -0.07534 | 0.10393  | -0.18764 |
| 0.100671 | 0.02961  | -0.23121 | 4.38E-07 | 0.000962 | 0.98346 | -0.07472 | 0.10683  | -0.06239 |
| 0.019168 | 0.6795   | 0.13296  | 0.004    | 0.040104 | 0.38721 | 0.132098 | 0.00424  | 0.029523 |
| -0.27736 | 1.07E-09 | -0.46136 | 5.42E-26 | 0.014137 | 0.76059 | 0.001261 | 0.97831  | 0.052951 |
| 0.002306 | 0.96036  | 0.15906  | 0.00056  | 0.004551 | 0.92186 | 0.045367 | 0.32795  | 0.034715 |
| 0.142389 | 0.00204  | 0.107381 | 0.02029  | 0.026643 | 0.56576 | 0.028121 | 0.54439  | 0.030779 |
| -0.09751 | 0.03515  | 0.09017  | 0.0515   | 0.047535 | 0.30533 | 0.155784 | 0.00073  | 0.146615 |
| 0.107045 | 0.02068  | 0.155456 | 0.00075  | 0.030556 | 0.51009 | -0.03824 | 0.40963  | -0.00088 |
| 0.257594 | 1.63E-08 | 0.154726 | 0.00079  | 0.026291 | 0.5709  | 0.071187 | 0.12449  | 0.030866 |
| -0.09324 | 0.04402  | -0.09995 | 0.03081  | 0.036774 | 0.42788 | 0.15389  | 0.00085  | 0.025664 |
| -0.04475 | 0.33461  | -0.08146 | 0.07866  | 0.051116 | 0.2703  | 0.114551 | 0.01325  | 0.088683 |
| 0.288781 | 2.02E-10 | -0.18887 | 4.00E-05 | 1.21E-05 | 0.99979 | -0.06119 | 0.1868   | 0.038634 |
| 0.072808 | 0.11612  | 0.10857  | 0.01893  | -0.00169 | 0.97096 | -0.00152 | 0.97392  | 0.002022 |
| 0.34212  | 2.87E-14 | 0.211849 | 3.87E-06 | 0.024251 | 0.60116 | 0.034809 | 0.45299  | 0.028335 |
| 0.089479 | 0.05332  | -0.0347  | 0.4544   | -0.01482 | 0.74941 | -0.04308 | 0.35297  | -0.05896 |
| -0.06935 | 0.13454  | -0.15804 | 0.00061  | 0.039208 | 0.39791 | 0.058953 | 0.20348  | 0.104957 |
| -0.16207 | 0.00044  | 0.045429 | 0.32729  | -0.05137 | 0.26791 | -0.01843 | 0.69123  | 0.090306 |
| -0.00245 | 0.95795  | -0.02718 | 0.55791  | 0.016416 | 0.72347 | 0.007617 | 0.8696   | -0.02077 |
| 0.22327  | 1.10E-06 | 0.330984 | 2.11E-13 | -0.03636 | 0.43311 | -0.07712 | 0.09601  | -0.039   |
| -0.06171 | 0.18309  | -0.00405 | 0.93039  | -0.01391 | 0.76436 | 0.019586 | 0.6729   | 0.050792 |
| 0.073822 | 0.11111  | 0.020285 | 0.66194  | 0.017854 | 0.70037 | 0.013141 | 0.77701  | -0.00885 |
| -0.11239 | 0.0151   | -0.19984 | 1.35E-05 | 0.000301 | 0.99483 | 0.019191 | 0.67913  | -0.00179 |
| -0.06084 | 0.18936  | -0.17305 | 0.00017  | -0.03972 | 0.39179 | -0.10049 | 0.02992  | -0.0765  |
| -0.15813 | 0.0006   | 0.126149 | 0.00634  | 0.030515 | 0.51066 | 0.131092 | 0.00455  | 0.009534 |
| 0.099652 | 0.03131  | 0.177258 | 0.00012  | 0.04636  | 0.31746 | 0.042894 | 0.35502  | 0.156068 |
| -0.08557 | 0.06466  | 0.012389 | 0.78945  | 0.027548 | 0.55262 | 0.024963 | 0.59051  | 0.034707 |
| 0.240846 | 1.38E-07 | 0.112581 | 0.01493  | 0.038742 | 0.40355 | -0.01721 | 0.71067  | 0.19226  |
| 0.264677 | 6.31E-09 | 0.325529 | 5.46E-13 | 0.01283  | 0.78214 | 0.06786  | 0.14313  | 0.009081 |
| 0.039142 | 0.39872  | -0.0413  | 0.37315  | -0.00661 | 0.88668 | 0.053595 | 0.24771  | 0.064905 |
| -0.11828 | 0.01052  | -0.02353 | 0.61197  | 0.02333  | 0.61505 | 0.066429 | 0.15178  | -0.04629 |
| -0.10728 | 0.02041  | -0.30348 | 2.09E-11 | 0.007368 | 0.87383 | 0.024673 | 0.59483  | 0.108211 |
| 0.138356 | 0.00273  | 0.125741 | 0.00651  | 0.049525 | 0.28551 | 0.072124 | 0.1196   | 0.109298 |
| -0.03949 | 0.39455  | 0.003638 | 0.93751  | 0.026843 | 0.56284 | 0.0593   | 0.20084  | 0.083292 |
| 0.027282 | 0.55647  | -0.05769 | 0.21337  | 0.063447 | 0.17106 | 0.081343 | 0.07908  | 0.19369  |
| -0.04427 | 0.33981  | -0.10548 | 0.02262  | 0.024548 | 0.59671 | 0.005862 | 0.89946  | 0.096346 |
| 0.032744 | 0.48026  | -0.0558  | 0.22875  | 0.046986 | 0.31096 | 0.076421 | 0.09905  | 0.025786 |
| -0.10951 | 0.01792  | -0.23031 | 4.86E-07 | 0.013313 | 0.77416 | 0.028344 | 0.5412   | -0.07088 |
| 0.021827 | 0.63802  | 0.042761 | 0.35652  | 0.015452 | 0.7391  | 0.107803 | 0.0198   | 0.117253 |
| 0.003282 | 0.94362  | -0.03845 | 0.40711  | 0.006814 | 0.88324 | -0.02664 | 0.56573  | 0.019289 |
| 0.01568  | 0.7354   | -0.02127 | 0.64657  | -0.00013 | 0.9978  | -0.02711 | 0.55891  | 0.168348 |
| 0.112557 | 0.01495  | 0.081976 | 0.07677  | 0.003802 | 0.9347  | -0.03201 | 0.49018  | 0.01401  |
| 0.092898 | 0.0448   | 0.124813 | 0.00692  | 0.014084 | 0.76147 | 0.003866 | 0.9336   | 0.000341 |
| -0.03677 | 0.42787  | -0.13756 | 0.00289  | 0.036014 | 0.43749 | 0.100615 | 0.02971  | 0.105631 |
| -0.07464 | 0.10719  | 0.08303  | 0.07304  | 0.039849 | 0.39024 | 0.173475 | 0.00016  | 0.14199  |
| 0.124088 | 0.00726  | 0.330062 | 2.49E-13 | 0.132622 | 0.00409 | 0.307657 | 1.07E-11 | 0.297884 |



|          |          |          |          |          |         |          |          |          |
|----------|----------|----------|----------|----------|---------|----------|----------|----------|
| -0.06146 | 0.18485  | 0.003482 | 0.94018  | 0.042951 | 0.35439 | 0.044594 | 0.33626  | 0.175085 |
| -0.0528  | 0.25483  | -0.30106 | 3.07E-11 | -0.00855 | 0.85387 | -0.04288 | 0.35517  | -0.05686 |
| -0.09938 | 0.03177  | 0.002927 | 0.9497   | -0.01892 | 0.68347 | 0.016462 | 0.72273  | 0.013634 |
| 0.116301 | 0.0119   | 0.237048 | 2.18E-07 | 0.058725 | 0.20524 | 0.097104 | 0.03593  | 0.230917 |
| 0.086537 | 0.06168  | 0.155859 | 0.00073  | 0.023739 | 0.60886 | 0.03044  | 0.5117   | 0.041171 |
| 0.008766 | 0.85014  | 0.14301  | 0.00195  | 0.048837 | 0.29226 | 0.028061 | 0.54524  | 0.07933  |
| -0.11362 | 0.01402  | -0.21708 | 2.19E-06 | 0.04697  | 0.31112 | 0.024599 | 0.59595  | 0.119325 |
| -0.16651 | 0.0003   | -0.01638 | 0.72405  | 0.104757 | 0.02357 | 0.058413 | 0.20767  | 0.183773 |
| -0.22907 | 5.62E-07 | -0.24982 | 4.47E-08 | 0.048534 | 0.29527 | 0.020951 | 0.65156  | 0.161634 |
| -0.27489 | 1.53E-09 | -0.24839 | 5.36E-08 | 0.037872 | 0.4142  | 0.051423 | 0.26742  | 0.166278 |
| 0.01326  | 0.77504  | -0.03329 | 0.47299  | 0.075095 | 0.10507 | 0.097886 | 0.03445  | 0.258596 |
| -0.21591 | 2.49E-06 | -0.06993 | 0.13128  | 0.106988 | 0.02075 | 0.194826 | 2.24E-05 | 0.328081 |
| -0.27898 | 8.52E-10 | -0.27502 | 1.50E-09 | -0.00238 | 0.95917 | 0.089339 | 0.05369  | 0.06136  |
| -0.08148 | 0.07859  | -0.05101 | 0.27125  | 0.0824   | 0.07525 | 0.064998 | 0.16081  | 0.184746 |
| 0.051175 | 0.26974  | 0.131859 | 0.00431  | 0.104589 | 0.0238  | 0.074367 | 0.10849  | 0.267205 |
| -0.2819  | 5.58E-10 | -0.32552 | 5.47E-13 | 0.178885 | 0.0001  | 0.258048 | 1.53E-08 | 0.46812  |
| -0.10215 | 0.02729  | -0.04045 | 0.38318  | 0.023445 | 0.6133  | 0.12115  | 0.00877  | 0.072049 |
| -0.01523 | 0.7427   | 0.099838 | 0.031    | 0.035754 | 0.44081 | 0.028908 | 0.53318  | 0.135573 |
| -0.18144 | 8.04E-05 | 0.069816 | 0.13193  | 0.124098 | 0.00725 | 0.170086 | 0.00022  | 0.276482 |
| -0.08868 | 0.05548  | 0.073635 | 0.11202  | 0.103439 | 0.02539 | 0.165779 | 0.00032  | 0.276929 |
| -0.04775 | 0.30315  | 0.041397 | 0.37208  | 0.075484 | 0.10328 | 0.086254 | 0.06254  | 0.197419 |
| -0.24001 | 1.52E-07 | -0.1157  | 0.01235  | 0.075842 | 0.10164 | 0.0764   | 0.09915  | 0.160519 |
| -0.21408 | 3.04E-06 | -0.17513 | 0.00014  | 0.043239 | 0.35117 | -0.00123 | 0.97878  | 0.118475 |
| -0.14588 | 0.00157  | -0.06448 | 0.16417  | 0.091667 | 0.04773 | 0.085981 | 0.06338  | 0.2859   |
| -0.18749 | 4.56E-05 | -0.03249 | 0.48361  | 0.102786 | 0.02634 | 0.18242  | 7.34E-05 | 0.19199  |
| -0.02478 | 0.59318  | -0.07543 | 0.10354  | 0.022961 | 0.62065 | -0.05997 | 0.19579  | 0.084516 |
| -0.11704 | 0.01137  | -0.11596 | 0.01215  | 0.02827  | 0.54226 | 0.002381 | 0.95907  | 0.137554 |
| -0.18395 | 6.37E-05 | -0.15855 | 0.00058  | 0.102967 | 0.02608 | 0.096648 | 0.03681  | 0.225775 |
| -0.26091 | 1.05E-08 | -0.13891 | 0.00263  | 0.096856 | 0.0364  | 0.201393 | 1.16E-05 | 0.252193 |
| 0.075358 | 0.10386  | 0.359711 | 1.03E-15 | 0.142016 | 0.0021  | 0.196149 | 1.96E-05 | 0.390307 |
| -0.15161 | 0.00101  | -0.18179 | 7.78E-05 | 0.115607 | 0.01242 | 0.139295 | 0.00255  | 0.411772 |
| 0.115355 | 0.01261  | 0.208227 | 5.69E-06 | 0.120353 | 0.00923 | 0.243267 | 1.02E-07 | 0.377887 |
| -0.0789  | 0.08855  | -0.03898 | 0.40072  | 0.123428 | 0.00758 | 0.191751 | 3.03E-05 | 0.559191 |
| -0.11779 | 0.01085  | -0.03375 | 0.46688  | 0.10268  | 0.0265  | 0.088429 | 0.05619  | 0.259074 |
| -0.15478 | 0.00079  | -0.16124 | 0.00047  | 0.044003 | 0.34271 | 0.055122 | 0.23447  | 0.120866 |
| -0.13451 | 0.00359  | -0.10259 | 0.02663  | 0.079339 | 0.08678 | 0.08104  | 0.08021  | 0.280999 |
| -0.30002 | 3.61E-11 | -0.22855 | 5.98E-07 | 0.11442  | 0.01336 | 0.207213 | 6.33E-06 | 0.270013 |
| 0.044003 | 0.34271  | 0.19616  | 1.96E-05 | 0.061894 | 0.1818  | 0.028746 | 0.53548  | 0.136252 |
| 0.145734 | 0.00159  | 0.142739 | 0.00199  | 0.107871 | 0.01972 | 0.139005 | 0.00261  | 0.28958  |
| -0.21961 | 1.65E-06 | -0.03284 | 0.479    | 0.129983 | 0.0049  | 0.196488 | 1.90E-05 | 0.305816 |
| 0.019989 | 0.66658  | 0.070289 | 0.12932  | 0.032755 | 0.4801  | 0.017235 | 0.71028  | 0.178387 |
| -0.0878  | 0.05797  | 0.129785 | 0.00497  | 0.081962 | 0.07682 | 0.101147 | 0.02885  | 0.260602 |
| -0.28883 | 2.00E-10 | 0.016691 | 0.71903  | 0.166459 | 0.0003  | 0.316327 | 2.60E-12 | 0.373555 |
| 0.027425 | 0.55439  | 0.066982 | 0.14839  | 0.046621 | 0.31474 | 0.042594 | 0.35841  | 0.161663 |
| 0.04553  | 0.32621  | 0.219879 | 1.60E-06 | 0.049691 | 0.28389 | 0.037165 | 0.42298  | 0.121386 |

|          |          |          |          |          |          |          |          |          |
|----------|----------|----------|----------|----------|----------|----------|----------|----------|
| -0.00886 | 0.84858  | 0.056476 | 0.22317  | 0.078119 | 0.09175  | 0.158348 | 0.00059  | 0.315661 |
| -0.12396 | 0.00732  | 0.090955 | 0.04949  | 0.130283 | 0.0048   | 0.261613 | 9.55E-09 | 0.433762 |
| -0.07349 | 0.11275  | 0.142105 | 0.00208  | 0.053077 | 0.25232  | 0.182627 | 7.20E-05 | 0.426731 |
| -0.09758 | 0.03503  | -0.20238 | 1.05E-05 | 0.025455 | 0.58321  | 0.017987 | 0.69825  | 0.080686 |
| -0.08546 | 0.065    | 0.054444 | 0.24029  | 0.117243 | 0.01123  | 0.11688  | 0.01148  | 0.259834 |
| -0.15794 | 0.00061  | -0.12878 | 0.00532  | 0.056206 | 0.22539  | 0.066962 | 0.14852  | 0.130911 |
| -0.18232 | 7.41E-05 | -0.0369  | 0.42624  | 0.070755 | 0.1268   | 0.185599 | 5.46E-05 | 0.245649 |
| -0.05691 | 0.21966  | 0.146905 | 0.00146  | 0.074402 | 0.10833  | 0.042989 | 0.35396  | 0.248247 |
| -0.20258 | 1.02E-05 | -0.06588 | 0.1552   | 0.042339 | 0.36129  | 0.121404 | 0.00863  | 0.143393 |
| 0.278873 | 8.65E-10 | 0.179234 | 9.84E-05 | 0.017073 | 0.71288  | -0.04359 | 0.34722  | 0.051687 |
| -0.10843 | 0.01908  | -0.14688 | 0.00146  | 0.089649 | 0.05286  | 0.051614 | 0.26564  | 0.201472 |
| -0.25939 | 1.28E-08 | -0.22128 | 1.37E-06 | 0.088128 | 0.05703  | 0.124142 | 0.00723  | 0.127547 |
| -0.0182  | 0.69487  | 0.047664 | 0.30402  | 0.083488 | 0.07147  | 0.064366 | 0.16493  | 0.229742 |
| -0.14111 | 0.00224  | 0.107211 | 0.02049  | 0.13202  | 0.00427  | 0.279007 | 8.49E-10 | 0.358737 |
| -0.00563 | 0.90341  | 0.091769 | 0.04748  | 0.18111  | 8.29E-05 | 0.293398 | 1.00E-10 | 0.428008 |
| -0.2397  | 1.58E-07 | -0.37307 | 7.21E-17 | 0.037222 | 0.42227  | 0.099922 | 0.03085  | 0.132368 |
| -0.1874  | 4.60E-05 | -0.06171 | 0.18314  | 0.07863  | 0.08964  | 0.080543 | 0.08208  | 0.205253 |
| -0.10672 | 0.02107  | 0.094263 | 0.04174  | 0.147602 | 0.00138  | 0.146841 | 0.00146  | 0.515364 |
| 0.039512 | 0.39427  | 0.193741 | 2.49E-05 | 0.095634 | 0.03884  | 0.122845 | 0.00787  | 0.252451 |
| -0.0393  | 0.39686  | 0.056913 | 0.2196   | 0.112174 | 0.0153   | 0.16723  | 0.00028  | 0.224525 |
| -0.18494 | 5.80E-05 | -0.01611 | 0.72848  | 0.112474 | 0.01502  | 0.181453 | 8.03E-05 | 0.247403 |
| -0.1979  | 1.65E-05 | -0.31382 | 3.93E-12 | 0.022527 | 0.62727  | -0.01043 | 0.82222  | 0.122672 |
| -0.19503 | 2.19E-05 | 0.064738 | 0.1625   | 0.153053 | 0.00091  | 0.308464 | 9.43E-12 | 0.413264 |
| -0.09234 | 0.04611  | -0.03493 | 0.45141  | 0.041278 | 0.37345  | 0.046305 | 0.31803  | 0.09721  |
| -0.21177 | 3.90E-06 | -0.13723 | 0.00296  | 0.031819 | 0.49275  | 0.062086 | 0.18044  | 0.156515 |
| -0.19634 | 1.93E-05 | -0.26034 | 1.13E-08 | -0.00112 | 0.98068  | -0.07157 | 0.12247  | 0.040531 |
| -0.10108 | 0.02896  | 0.189911 | 3.62E-05 | 0.081321 | 0.07916  | 0.23223  | 3.88E-07 | 0.197363 |
| -0.07136 | 0.12357  | -0.00413 | 0.92907  | 0.102667 | 0.02652  | 0.13675  | 0.00306  | 0.225149 |
| -0.1934  | 2.58E-05 | -0.12994 | 0.00492  | 0.099211 | 0.03207  | 0.105886 | 0.02211  | 0.146815 |
| 0.107456 | 0.0202   | 0.203661 | 9.17E-06 | 0.015419 | 0.73964  | -0.0374  | 0.41999  | 0.029167 |
| 0.133779 | 0.00378  | 0.115148 | 0.01277  | 0.127636 | 0.00574  | 0.128891 | 0.00528  | 0.356448 |
| -0.05661 | 0.22208  | -0.01659 | 0.72072  | 0.111495 | 0.01593  | 0.109978 | 0.01743  | 0.21027  |
| 0.0107   | 0.81761  | 0.039197 | 0.39806  | -0.01037 | 0.82311  | -0.10209 | 0.02737  | -0.0296  |
| -0.10723 | 0.02046  | -0.10748 | 0.02017  | -0.01408 | 0.76149  | -0.12891 | 0.00527  | -0.09023 |
| 0.039549 | 0.39382  | -0.00575 | 0.90145  | -0.00433 | 0.92569  | -0.01198 | 0.79627  | -0.10322 |
| 0.024218 | 0.60166  | -0.03362 | 0.46851  | 0.001285 | 0.97791  | -0.1358  | 0.00328  | -0.09333 |
| 0.168019 | 0.00027  | -0.06432 | 0.16521  | -0.03188 | 0.49187  | -0.14248 | 0.00203  | -0.0645  |
| 0.0253   | 0.58551  | -0.0917  | 0.04765  | -0.01684 | 0.71659  | -0.14307 | 0.00194  | -0.05802 |
| -0.01112 | 0.81054  | -0.3106  | 6.67E-12 | -0.00371 | 0.93625  | -0.0587  | 0.20545  | -0.12745 |
| -0.05274 | 0.25536  | -0.1837  | 6.52E-05 | -0.01359 | 0.76958  | -0.03144 | 0.49786  | -0.08486 |
| 0.206888 | 6.55E-06 | 0.140559 | 0.00233  | 0.00235  | 0.95961  | -0.04388 | 0.34403  | -0.12799 |
| 0.108546 | 0.01896  | 0.032034 | 0.48983  | -0.02126 | 0.64672  | -0.09226 | 0.04629  | -0.07811 |
| 0.14172  | 0.00214  | 0.201108 | 1.19E-05 | -0.00427 | 0.92663  | -0.0157  | 0.73508  | -0.10339 |
| -0.00116 | 0.97997  | -0.08015 | 0.0836   | -0.06207 | 0.18055  | -0.19994 | 1.34E-05 | -0.13936 |
| 0.13893  | 0.00262  | -0.0012  | 0.97931  | -0.01783 | 0.70069  | -0.11194 | 0.01551  | -0.04713 |

|          |          |          |          |           |         |          |          |          |
|----------|----------|----------|----------|-----------|---------|----------|----------|----------|
| 0.043753 | 0.34546  | -0.04781 | 0.30253  | 0.020854  | 0.65307 | -0.09702 | 0.0361   | -0.07175 |
| -0.11541 | 0.01257  | -0.27317 | 1.95E-09 | -0.04618  | 0.31929 | -0.12783 | 0.00567  | -0.09605 |
| -0.03483 | 0.45273  | -0.33309 | 1.46E-13 | -0.0431   | 0.35268 | -0.06124 | 0.18644  | -0.16867 |
| -0.17661 | 0.00012  | -0.20208 | 1.08E-05 | -0.07452  | 0.10775 | -0.14002 | 0.00242  | -0.11505 |
| -0.04201 | 0.36507  | -0.07957 | 0.08586  | -0.04723  | 0.30841 | -0.10865 | 0.01884  | -0.17473 |
| 0.033602 | 0.46882  | -0.12476 | 0.00695  | 0.000955  | 0.98357 | -0.08399 | 0.06978  | -0.00903 |
| -0.00079 | 0.98647  | 0.020784 | 0.65415  | -6.42E-05 | 0.9989  | 0.006816 | 0.88321  | -0.07698 |
| 0.095979 | 0.03814  | -0.00605 | 0.89622  | 0.010844  | 0.8152  | -0.00736 | 0.87391  | -0.20607 |
| 0.069272 | 0.13498  | 0.053341 | 0.24997  | 0.091478  | 0.04819 | -0.02095 | 0.65159  | 0.102282 |
| -0.05268 | 0.25586  | -0.26805 | 3.98E-09 | -0.00722  | 0.87633 | -0.14041 | 0.00236  | -0.14564 |
| 0.14405  | 0.0018   | -0.09732 | 0.03552  | -0.01947  | 0.67475 | -0.20344 | 9.38E-06 | -0.10653 |
| -0.019   | 0.6821   | -0.04171 | 0.36852  | -0.01004  | 0.82876 | -0.08769 | 0.05828  | 0.033769 |
| -0.09078 | 0.04993  | -0.15288 | 0.00092  | -0.01198  | 0.79626 | -0.12726 | 0.00589  | -0.05233 |
| -0.05273 | 0.25545  | -0.08062 | 0.08179  | 0.015885  | 0.73207 | -0.09111 | 0.0491   | -0.00619 |
| -0.02539 | 0.58413  | -0.04995 | 0.28141  | 0.016825  | 0.71688 | -0.08242 | 0.07519  | 0.001231 |
| -0.17168 | 0.00019  | -0.2124  | 3.64E-06 | -0.02896  | 0.53237 | -0.09759 | 0.035    | -0.08301 |
| 0.242363 | 1.14E-07 | 0.177682 | 0.00011  | 0.034616  | 0.4555  | 0.079986 | 0.08423  | -0.02063 |
| 0.396549 | 4.89E-19 | 0.071652 | 0.12204  | -0.0085   | 0.85472 | -0.11996 | 0.00946  | -0.1409  |
| 0.132027 | 0.00426  | -0.08781 | 0.05793  | -0.00865  | 0.85207 | -0.10066 | 0.02963  | -0.06019 |
| -0.21317 | 3.35E-06 | -0.29149 | 1.34E-10 | -0.04421  | 0.34048 | 0.054587 | 0.23906  | -0.19234 |
| -0.07189 | 0.12082  | -0.3616  | 7.15E-16 | -0.03526  | 0.44718 | -0.14516 | 0.00166  | -0.1961  |
| -0.01174 | 0.80033  | -0.06322 | 0.17262  | 0.015069  | 0.74534 | -0.00993 | 0.83045  | -0.08558 |
| -0.01613 | 0.72805  | -0.16219 | 0.00043  | -0.00822  | 0.85938 | -0.02944 | 0.52573  | -0.1524  |
| 0.023447 | 0.61328  | -0.04074 | 0.37977  | 0.028348  | 0.54114 | 0.066945 | 0.14861  | -0.10625 |
| 0.066438 | 0.15172  | 0.119513 | 0.00974  | -0.03737  | 0.42046 | -0.02587 | 0.57706  | -0.13512 |
| -0.12841 | 0.00545  | -0.14774 | 0.00137  | 0.047124  | 0.30954 | 0.018842 | 0.68465  | 0.076322 |
| -0.17024 | 0.00022  | -0.13195 | 0.00429  | 0.049262  | 0.28807 | 0.017601 | 0.70441  | -0.00212 |
| 0.018741 | 0.68626  | -0.05708 | 0.21828  | 0.054102  | 0.24326 | -0.06586 | 0.15534  | 0.091609 |
| 0.038765 | 0.40327  | -0.22557 | 8.43E-07 | 0.009646  | 0.8353  | -0.09126 | 0.04873  | -0.10789 |
| -0.19181 | 3.01E-05 | -0.19533 | 2.13E-05 | -0.04989  | 0.28201 | -0.09866 | 0.03305  | -0.17524 |
| -0.11553 | 0.01248  | -0.11849 | 0.01038  | -0.03896  | 0.40088 | -0.10855 | 0.01895  | -0.13952 |
| -0.11814 | 0.01061  | -0.12063 | 0.00907  | -0.01986  | 0.66859 | -0.11259 | 0.01492  | -0.13435 |
| -0.12172 | 0.00846  | -0.11875 | 0.01022  | -0.01708  | 0.71285 | -0.09916 | 0.03215  | -0.11876 |
| -0.23858 | 1.81E-07 | -0.23143 | 4.27E-07 | 0.054507  | 0.23974 | 0.065539 | 0.15735  | -0.01136 |
| -0.2664  | 4.99E-09 | -0.23338 | 3.39E-07 | -0.02453  | 0.59692 | -0.09188 | 0.0472   | -0.14352 |
| 0.02364  | 0.61035  | -0.0105  | 0.82092  | 0.024134  | 0.60291 | -0.06174 | 0.18289  | -0.00452 |
| 0.17544  | 0.00014  | 0.0687   | 0.13824  | -0.05752  | 0.21469 | -0.11977 | 0.00958  | -0.12652 |
| 0.350041 | 6.59E-15 | 0.193675 | 2.51E-05 | -0.05538  | 0.23232 | -0.09791 | 0.03441  | -0.07091 |
| 0.298534 | 4.55E-11 | 0.133372 | 0.00388  | -0.05281  | 0.2547  | -0.09289 | 0.04481  | -0.1122  |
| 0.056915 | 0.21958  | -0.0303  | 0.51369  | -0.01531  | 0.74149 | -0.07298 | 0.11527  | -0.08414 |
| -0.06502 | 0.16064  | -0.1081  | 0.01945  | 0.036185  | 0.43531 | -0.07612 | 0.10041  | -0.07421 |
| -0.25518 | 2.24E-08 | -0.30905 | 8.58E-12 | 0.076208  | 0.1     | 0.060859 | 0.18923  | 0.004024 |
| -0.00436 | 0.9252   | -0.09511 | 0.03994  | 0.025235  | 0.58647 | -0.03735 | 0.42071  | -0.06581 |
| -0.01794 | 0.69893  | -0.03977 | 0.39118  | -0.00329  | 0.9435  | -0.10063 | 0.02968  | -0.09847 |
| 0.013593 | 0.76954  | -0.12538 | 0.00667  | -0.03023  | 0.51456 | -0.15118 | 0.00105  | -0.07248 |

|          |          |          |          |          |          |          |          |          |
|----------|----------|----------|----------|----------|----------|----------|----------|----------|
| -0.25773 | 1.60E-08 | -0.5179  | 2.09E-33 | -0.04623 | 0.31877  | -0.11667 | 0.01163  | -0.15064 |
| -0.13453 | 0.00358  | -0.20486 | 8.09E-06 | -0.04563 | 0.32509  | -0.07171 | 0.12172  | -0.15012 |
| -0.12266 | 0.00797  | -0.21914 | 1.74E-06 | 0.007776 | 0.8669   | -0.11098 | 0.01642  | 0.005798 |
| 0.192763 | 2.74E-05 | 0.264058 | 6.86E-09 | 0.009426 | 0.83902  | -0.01639 | 0.72395  | 0.03907  |
| 0.152434 | 0.00095  | 0.145222 | 0.00165  | 0.016642 | 0.71981  | 0.052178 | 0.26046  | -0.05355 |
| 0.005241 | 0.91007  | -0.06708 | 0.1478   | 0.160232 | 0.00051  | 0.074762 | 0.10663  | 0.140041 |
| -0.1353  | 0.00339  | -0.06582 | 0.15555  | -0.07373 | 0.11157  | -0.06031 | 0.19324  | -0.15875 |
| -0.01826 | 0.69387  | -0.00934 | 0.84041  | -0.03965 | 0.39265  | -0.08983 | 0.05238  | -0.05741 |
| 0.129192 | 0.00517  | 0.049998 | 0.28092  | 0.00045  | 0.99226  | -0.01251 | 0.78752  | -0.07376 |
| 0.143923 | 0.00182  | 0.019188 | 0.67919  | -0.04522 | 0.32952  | -0.14365 | 0.00186  | -0.08667 |
| -0.10858 | 0.01892  | -0.22466 | 9.36E-07 | -0.04064 | 0.38093  | -0.08896 | 0.05472  | -0.18232 |
| -0.05397 | 0.24437  | 0.090442 | 0.05079  | -0.02968 | 0.52236  | -0.04526 | 0.32907  | -0.12998 |
| -0.12418 | 0.00722  | -0.09079 | 0.0499   | 0.025686 | 0.5798   | 0.069945 | 0.13122  | 0.112063 |
| 0.089614 | 0.05296  | -0.03197 | 0.49065  | -0.03906 | 0.39975  | -0.11327 | 0.01432  | -0.1443  |
| 0.125772 | 0.0065   | 0.032419 | 0.48462  | 0.019796 | 0.66961  | -0.09305 | 0.04446  | -0.01632 |
| 0.077641 | 0.09376  | -0.04758 | 0.30491  | -0.00869 | 0.85146  | -0.03638 | 0.4329   | -0.1338  |
| -0.06726 | 0.14668  | -0.10103 | 0.02904  | 0.184427 | 6.09E-05 | 0.356659 | 1.87E-15 | -0.04308 |
| 0.024148 | 0.6027   | -0.02145 | 0.64385  | 0.00105  | 0.98195  | -0.0737  | 0.11171  | -0.06015 |
| -0.04529 | 0.32875  | 0.199734 | 1.37E-05 | 0.110078 | 0.01733  | 0.275033 | 1.50E-09 | 0.214554 |
| -0.1232  | 0.00769  | -0.10411 | 0.02446  | -0.03969 | 0.39217  | 0.022722 | 0.62429  | -0.16913 |
| -0.0739  | 0.11073  | 0.136801 | 0.00305  | 0.057012 | 0.21879  | 0.047916 | 0.30146  | 0.164381 |
| -0.07145 | 0.12312  | -0.1349  | 0.00349  | -0.01112 | 0.8106   | -0.0216  | 0.64158  | -0.26431 |
| 0.027985 | 0.54633  | -0.00233 | 0.95993  | 0.030221 | 0.51474  | -0.07523 | 0.10443  | -0.01647 |
| -0.06291 | 0.17475  | -0.05616 | 0.22574  | -0.02709 | 0.5592   | -0.14566 | 0.0016   | -0.09942 |
| -0.00983 | 0.83217  | 0.099703 | 0.03122  | 0.038409 | 0.40761  | -0.05142 | 0.26749  | 0.031828 |
| 0.133272 | 0.00391  | 0.014576 | 0.75339  | -0.02993 | 0.51878  | -0.12577 | 0.0065   | -0.03735 |
| -0.09875 | 0.03289  | -0.19031 | 3.48E-05 | -0.00586 | 0.89947  | -0.02948 | 0.52504  | -0.10458 |
| -0.0857  | 0.06425  | -0.11514 | 0.01278  | -0.06452 | 0.16389  | 0.068491 | 0.13944  | -0.17021 |
| -0.09641 | 0.03728  | -0.19775 | 1.67E-05 | 0.06286  | 0.17506  | -0.03056 | 0.51006  | 0.026248 |
| -0.11716 | 0.01129  | -0.17617 | 0.00013  | -0.03387 | 0.46533  | -0.13795 | 0.00281  | -0.13862 |
| 0.285561 | 3.26E-10 | 0.544407 | 2.17E-37 | 0.040786 | 0.37919  | 0.084375 | 0.0685   | 0.112817 |
| 0.281114 | 6.26E-10 | 0.111108 | 0.0163   | -0.01852 | 0.68981  | -0.05109 | 0.27054  | -0.00254 |
| 0.010656 | 0.81834  | -0.01311 | 0.77749  | 0.018972 | 0.6826   | -0.10345 | 0.02538  | -0.04493 |
| -0.10097 | 0.02913  | -0.12607 | 0.00637  | 0.008393 | 0.85645  | -0.07866 | 0.0895   | -0.02085 |
| -0.0846  | 0.06775  | -0.13672 | 0.00307  | 0.039285 | 0.39698  | -0.06237 | 0.17846  | -0.01444 |
| 0.035576 | 0.44309  | -0.04042 | 0.38352  | 0.012086 | 0.79448  | -0.07113 | 0.12482  | -0.05934 |
| -0.10768 | 0.01993  | -0.15587 | 0.00072  | -0.04295 | 0.3544   | -0.13047 | 0.00474  | -0.17753 |
| -0.00043 | 0.99267  | 0.032251 | 0.48689  | 0.007317 | 0.87468  | -0.11682 | 0.01152  | -0.0657  |
| 0.146118 | 0.00154  | 0.1613   | 0.00047  | 0.008137 | 0.86079  | 0.019654 | 0.67183  | -0.09355 |
| 0.010884 | 0.81453  | 0.079584 | 0.08581  | 0.018054 | 0.69717  | 0.053153 | 0.25164  | 0.07138  |
| -0.06277 | 0.1757   | -0.23956 | 1.61E-07 | -0.04468 | 0.33538  | -0.14329 | 0.00191  | -0.03478 |
| -0.12225 | 0.00818  | -0.1571  | 0.00066  | 0.047302 | 0.30771  | -0.11256 | 0.01495  | 0.132901 |
| -0.05019 | 0.2791   | -0.00859 | 0.85305  | 0.061999 | 0.18106  | 0.06485  | 0.16177  | 0.029864 |
| -0.24209 | 1.18E-07 | -0.23257 | 3.73E-07 | -0.05744 | 0.21537  | -0.15696 | 0.00066  | -0.15888 |
| -0.08436 | 0.06853  | -0.10225 | 0.02715  | 0.001005 | 0.98272  | -0.04126 | 0.37372  | -0.13041 |

|          |          |          |          |          |         |          |          |          |
|----------|----------|----------|----------|----------|---------|----------|----------|----------|
| -0.14086 | 0.00228  | -0.25665 | 1.84E-08 | -0.00605 | 0.89632 | -0.0242  | 0.60187  | -0.08824 |
| -0.12002 | 0.00943  | -0.13671 | 0.00307  | 0.022845 | 0.62242 | -0.08123 | 0.07948  | 0.142617 |
| 0.333089 | 1.46E-13 | 0.058848 | 0.2043   | -0.03744 | 0.4196  | -0.32891 | 3.04E-13 | -0.29938 |
| -0.22226 | 1.23E-06 | -0.03902 | 0.40023  | 0.059988 | 0.19565 | 0.283144 | 4.65E-10 | 0.018011 |
| 0.010345 | 0.82356  | 0.17139  | 0.0002   | 0.116641 | 0.01165 | 0.38707  | 3.85E-18 | 0.058546 |
| 0.043026 | 0.35355  | 0.052899 | 0.25392  | 0.02503  | 0.58952 | -0.00569 | 0.90233  | -0.05428 |
| 0.260159 | 1.16E-08 | 0.175407 | 0.00014  | 0.048621 | 0.2944  | -0.04987 | 0.28212  | 0.148063 |
| -0.00117 | 0.9799   | -0.07314 | 0.11446  | 0.002308 | 0.96033 | -0.09812 | 0.03402  | -0.09062 |
| -0.08466 | 0.06757  | -0.12718 | 0.00592  | 0.020878 | 0.6527  | -0.02251 | 0.62749  | -0.06756 |
| -0.14177 | 0.00213  | -0.1145  | 0.01329  | 0.00312  | 0.94638 | -0.09824 | 0.0338   | -0.0834  |
| 0.135606 | 0.00332  | 0.255598 | 2.12E-08 | -0.03046 | 0.51139 | -0.01781 | 0.70102  | -0.03731 |
| 0.030411 | 0.5121   | 0.276641 | 1.19E-09 | 0.00958  | 0.83643 | 0.028448 | 0.53972  | 0.015656 |
| 0.061263 | 0.1863   | -0.18851 | 4.14E-05 | -0.00221 | 0.96202 | -0.05253 | 0.25722  | -0.09868 |
| 0.08485  | 0.06695  | 0.084792 | 0.06714  | -0.00366 | 0.93708 | -0.05124 | 0.26914  | -0.01557 |
| 0.081852 | 0.07722  | 0.078292 | 0.09103  | -0.01025 | 0.82508 | -0.0671  | 0.14768  | -0.017   |
| 0.06797  | 0.14248  | 0.032527 | 0.48317  | -0.03288 | 0.47844 | -0.10387 | 0.02479  | -0.0878  |
| 0.123387 | 0.0076   | -0.00352 | 0.93953  | 0.042296 | 0.36177 | -0.00586 | 0.89949  | -0.04983 |
| 0.064698 | 0.16276  | 0.12849  | 0.00542  | 0.001932 | 0.96679 | -0.01048 | 0.82135  | 0.021591 |
| 0.100667 | 0.02962  | 0.067693 | 0.14412  | 0.055945 | 0.22755 | 0.04822  | 0.29841  | -0.00344 |
| 0.128128 | 0.00556  | 0.133202 | 0.00393  | 0.009008 | 0.84607 | -0.02251 | 0.62747  | 0.001202 |
| 0.097548 | 0.03508  | 0.104711 | 0.02364  | -0.00787 | 0.86526 | -0.04103 | 0.37631  | -0.03145 |
| 0.090874 | 0.04969  | 0.108077 | 0.01948  | -0.00264 | 0.95462 | -0.02347 | 0.61286  | -0.02014 |
| -0.02118 | 0.64798  | 0.112378 | 0.01511  | -0.01525 | 0.74244 | -0.04005 | 0.38784  | -0.14439 |
| -0.09864 | 0.03307  | -0.12358 | 0.0075   | 0.027589 | 0.55203 | 0.005989 | 0.8973   | -0.09054 |
| 0.002971 | 0.94894  | -0.0213  | 0.64614  | 0.004628 | 0.92055 | -0.06908 | 0.13605  | 0.054343 |
| -0.14861 | 0.00128  | -0.15529 | 0.00076  | -0.00552 | 0.90529 | -0.13128 | 0.00449  | -0.1836  |
| -0.0826  | 0.07454  | -0.09899 | 0.03245  | -0.03105 | 0.50321 | -0.06785 | 0.14317  | -0.12227 |
| 0.156949 | 0.00066  | 0.088645 | 0.05558  | -0.02899 | 0.53201 | -0.15322 | 0.00089  | -0.11053 |
| 0.083129 | 0.0727   | -0.00966 | 0.8351   | 0.057073 | 0.2183  | 0.178633 | 0.0001   | -0.10162 |
| -0.14862 | 0.00128  | -0.06755 | 0.14494  | 0.017824 | 0.70085 | -0.03791 | 0.41376  | -0.13798 |
| 0.009148 | 0.8437   | 0.046722 | 0.31369  | 0.020194 | 0.66337 | -0.0653  | 0.15885  | -0.07512 |
| 0.03039  | 0.51239  | -0.05654 | 0.22263  | -0.00184 | 0.96844 | -0.02393 | 0.60603  | -0.0465  |
| -0.17662 | 0.00012  | -0.37031 | 1.26E-16 | 0.055271 | 0.23322 | 0.04588  | 0.32249  | -0.09839 |
| 0.076834 | 0.09724  | -0.02343 | 0.61351  | 0.011797 | 0.7993  | -0.02468 | 0.59473  | -0.09851 |
| 0.132831 | 0.00403  | -0.18866 | 4.08E-05 | -0.05221 | 0.2602  | -0.1313  | 0.00448  | -0.32749 |
| 0.105212 | 0.02297  | 0.051747 | 0.26442  | -0.0152  | 0.74325 | -0.13391 | 0.00374  | -0.10604 |
| 0.124989 | 0.00684  | 0.059639 | 0.19827  | -0.00709 | 0.87852 | -0.10439 | 0.02407  | -0.09251 |
| 0.015552 | 0.73748  | -0.00077 | 0.98674  | 0.002398 | 0.95877 | -0.09001 | 0.0519   | -0.08746 |
| -0.15997 | 0.00052  | -0.35678 | 1.82E-15 | 0.030814 | 0.50652 | -0.074   | 0.11026  | -0.07229 |
| 0.088126 | 0.05704  | -0.12717 | 0.00592  | -0.03238 | 0.4851  | -0.20373 | 9.10E-06 | -0.06894 |
| -0.03392 | 0.46461  | -0.02523 | 0.5865   | 0.003491 | 0.94002 | 0.009217 | 0.84253  | -0.08477 |
| -0.10558 | 0.0225   | -0.12454 | 0.00705  | 0.03863  | 0.40491 | 0.054653 | 0.23849  | -0.14046 |
| 0.006895 | 0.88186  | -0.04187 | 0.36669  | 0.020234 | 0.66273 | -0.12111 | 0.00879  | -0.02262 |
| 0.078919 | 0.08847  | 0.061636 | 0.18363  | 0.015205 | 0.74313 | -0.1035  | 0.02531  | -0.04989 |
| 0.084336 | 0.06863  | -0.00447 | 0.92325  | -0.01464 | 0.75233 | -0.10524 | 0.02294  | -0.11001 |

|          |          |          |          |          |         |           |          |          |
|----------|----------|----------|----------|----------|---------|-----------|----------|----------|
| -0.1014  | 0.02845  | -0.17627 | 0.00013  | -0.02667 | 0.56529 | -0.09331  | 0.04385  | -0.12794 |
| 0.050198 | 0.279    | -0.00984 | 0.83198  | 0.085436 | 0.06508 | 0.019163  | 0.67958  | 0.086522 |
| 0.075528 | 0.10307  | 0.015315 | 0.74133  | 0.037869 | 0.41424 | -0.03939  | 0.39575  | -0.03485 |
| -0.13522 | 0.00341  | -0.10815 | 0.0194   | -0.01064 | 0.81854 | -0.09005  | 0.05182  | -0.0612  |
| -0.14445 | 0.00175  | -0.16147 | 0.00046  | 0.063639 | 0.16976 | 0.047229  | 0.30846  | 0.019959 |
| -0.16844 | 0.00026  | -0.18981 | 3.65E-05 | 0.010533 | 0.82042 | -0.05138  | 0.26779  | -0.06121 |
| -0.05283 | 0.25457  | -0.05671 | 0.22122  | 0.06061  | 0.19105 | -0.04725  | 0.30826  | 0.031438 |
| -0.15154 | 0.00102  | -0.12886 | 0.00529  | 0.100525 | 0.02985 | 0.006833  | 0.88292  | 0.102861 |
| -0.07171 | 0.12172  | -0.11693 | 0.01144  | 0.024872 | 0.59187 | -0.05235  | 0.25885  | -0.08213 |
| -0.04783 | 0.30233  | -0.07286 | 0.11584  | -0.01538 | 0.74024 | -0.13436  | 0.00363  | -0.10167 |
| -0.06211 | 0.18025  | -0.16117 | 0.00047  | 0.013378 | 0.77309 | -0.07917  | 0.08746  | 0.109643 |
| -0.03469 | 0.45451  | -0.12571 | 0.00653  | 0.05816  | 0.20964 | 0.207264  | 6.30E-06 | -0.01792 |
| 0.014836 | 0.74914  | -0.06221 | 0.17961  | 0.034013 | 0.46339 | -0.07261  | 0.11714  | -0.0362  |
| 0.076999 | 0.09652  | 0.060652 | 0.19074  | -0.03887 | 0.40202 | -0.12927  | 0.00514  | -0.07914 |
| 0.063486 | 0.17079  | 0.004636 | 0.92041  | -0.02245 | 0.62849 | -0.1392   | 0.00257  | -0.0884  |
| 0.057148 | 0.21769  | -0.02584 | 0.57749  | -0.04178 | 0.36762 | -0.13194  | 0.00429  | -0.17761 |
| 0.094873 | 0.04043  | -0.06457 | 0.16361  | -0.01918 | 0.67935 | -0.15679  | 0.00067  | -0.08653 |
| -0.1446  | 0.00173  | -0.2119  | 3.85E-06 | 0.022201 | 0.63227 | -0.07452  | 0.10778  | -0.03667 |
| 0.080264 | 0.08315  | 0.11401  | 0.01369  | 0.020763 | 0.65448 | 0.054374  | 0.24089  | -0.02147 |
| 0.100109 | 0.03054  | 0.071022 | 0.12537  | 0.014886 | 0.74833 | 0.055675  | 0.22981  | -0.09267 |
| 0.049922 | 0.28166  | 0.031488 | 0.49726  | -0.01157 | 0.80315 | -5.29E-05 | 0.99909  | -0.11269 |
| -0.05491 | 0.2363   | 0.059106 | 0.20232  | -0.03781 | 0.41494 | -0.02086  | 0.653    | -0.09497 |
| 0.088546 | 0.05586  | 0.079795 | 0.08498  | 0.072714 | 0.11659 | 0.006039  | 0.89644  | 0.033388 |
| -0.0769  | 0.09693  | -0.07855 | 0.08998  | 0.021293 | 0.64625 | 0.059572  | 0.19878  | 0.029372 |
| -0.08461 | 0.06771  | -0.08429 | 0.06876  | -0.03682 | 0.42732 | -0.1003   | 0.03022  | -0.10973 |
| 0.006544 | 0.88785  | 0.081447 | 0.0787   | 0.008018 | 0.86281 | -0.05519  | 0.23386  | -0.00078 |
| -0.10419 | 0.02434  | -0.10576 | 0.02227  | -0.01652 | 0.72182 | -0.04299  | 0.35392  | -0.1065  |
| 0.061131 | 0.18725  | 0.106941 | 0.02081  | 0.000231 | 0.99602 | -0.04255  | 0.3589   | 0.026227 |
| -0.09809 | 0.03407  | -0.15319 | 0.0009   | -0.05056 | 0.27554 | -0.11406  | 0.01365  | -0.23595 |
| -0.05788 | 0.21184  | -0.04994 | 0.28151  | -0.05006 | 0.28037 | -0.16944  | 0.00023  | -0.04433 |
| -0.04953 | 0.28543  | -0.11238 | 0.01511  | -0.03519 | 0.44805 | -0.11752  | 0.01103  | -0.14679 |
| -0.04187 | 0.36662  | 0.010894 | 0.81437  | -0.02117 | 0.64812 | -0.03387  | 0.46531  | -0.1545  |
| -0.20492 | 8.05E-06 | -0.25781 | 1.58E-08 | 0.015522 | 0.73796 | 0.083931  | 0.06997  | -0.14061 |
| 0.117602 | 0.01098  | 0.324238 | 6.82E-13 | -0.00954 | 0.83704 | -0.02069  | 0.65555  | 0.061342 |
| 0.102415 | 0.02689  | -0.01369 | 0.76798  | 0.044829 | 0.33372 | -0.10384  | 0.02483  | 0.045929 |
| -0.02541 | 0.58386  | -0.24732 | 6.14E-08 | -0.03358 | 0.4691  | -0.19801  | 1.63E-05 | -0.18798 |
| -0.01279 | 0.78274  | -0.1225  | 0.00804  | 0.059222 | 0.20143 | -0.0861   | 0.06302  | -0.07809 |
| 0.17187  | 0.00019  | 0.011303 | 0.80753  | -0.02382 | 0.60766 | -0.13647  | 0.00313  | -0.07501 |
| 0.269433 | 3.29E-09 | 0.052969 | 0.25329  | -0.04477 | 0.3344  | -0.10875  | 0.01874  | -0.04274 |
| -0.15586 | 0.00073  | -0.14727 | 0.00142  | -0.04126 | 0.37367 | -0.11531  | 0.01265  | 0.010981 |
| -0.12525 | 0.00673  | -0.28294 | 4.80E-10 | -0.04126 | 0.37368 | -0.10978  | 0.01763  | -0.06609 |
| -0.07292 | 0.11558  | -0.16403 | 0.00037  | 0.038448 | 0.40714 | -0.02403  | 0.60452  | 0.046718 |
| 0.275369 | 1.43E-09 | 0.107632 | 0.01999  | -0.01679 | 0.7175  | -0.11969  | 0.00963  | -0.0519  |
| 0.166412 | 0.0003   | 0.248638 | 5.20E-08 | 0.019124 | 0.68019 | 0.029782  | 0.52087  | -0.06596 |
| -0.12278 | 0.0079   | -0.13142 | 0.00444  | -0.0738  | 0.11124 | -0.09244  | 0.04586  | -0.15191 |

|          |          |          |          |          |         |          |         |          |
|----------|----------|----------|----------|----------|---------|----------|---------|----------|
| -0.09406 | 0.04217  | -0.01094 | 0.81361  | -0.02985 | 0.51987 | -0.0364  | 0.43259 | -0.10869 |
| -0.06325 | 0.17236  | -0.15394 | 0.00085  | -0.02247 | 0.62819 | 0.027383 | 0.555   | -0.21159 |
| -0.04728 | 0.30796  | -0.08016 | 0.08355  | 0.027753 | 0.54966 | -0.07441 | 0.10827 | -0.03224 |
| 0.198962 | 1.48E-05 | 0.199082 | 1.46E-05 | -0.01944 | 0.67513 | 0.043297 | 0.35052 | -0.03962 |
| -0.13903 | 0.0026   | -0.31344 | 4.19E-12 | -0.02976 | 0.52113 | -0.14895 | 0.00125 | -0.13532 |
| 0.250777 | 3.96E-08 | 0.132081 | 0.00425  | -0.04457 | 0.33652 | -0.13299 | 0.00399 | -0.20914 |
| 0.017148 | 0.71167  | -0.09587 | 0.03835  | 0.012025 | 0.7955  | -0.04532 | 0.32844 | -0.01967 |
| 0.017927 | 0.69919  | -0.01513 | 0.74434  | 0.00362  | 0.93781 | -0.05692 | 0.21953 | 0.026847 |
| -0.2346  | 2.93E-07 | -0.30254 | 2.43E-11 | -0.01631 | 0.72522 | -0.01592 | 0.73146 | -0.17263 |
| -0.20594 | 7.23E-06 | -0.25303 | 2.96E-08 | -0.0324  | 0.48489 | -0.15242 | 0.00095 | -0.14358 |
| -0.06039 | 0.19265  | -0.04323 | 0.35125  | 0.056092 | 0.22633 | 0.05318  | 0.2514  | 0.04723  |
| -0.10272 | 0.02644  | -0.23226 | 3.87E-07 | -0.01123 | 0.8087  | -0.07221 | 0.11918 | -0.16825 |
| -0.11417 | 0.01356  | -0.15303 | 0.00091  | 0.059235 | 0.20133 | 0.086155 | 0.06284 | -0.04498 |
| 0.10967  | 0.01775  | 0.053526 | 0.24832  | 0.093647 | 0.0431  | 0.037449 | 0.41945 | 0.05899  |
| 0.099232 | 0.03204  | 0.147689 | 0.00137  | -0.01048 | 0.82129 | -0.03555 | 0.44349 | 0.061838 |
| -0.08183 | 0.07731  | -0.04367 | 0.34636  | -0.05155 | 0.26623 | -0.10532 | 0.02283 | -0.03362 |
| 0.122538 | 0.00803  | -0.0584  | 0.20779  | 0.042353 | 0.36113 | 0.059149 | 0.20198 | 0.023075 |
| 0.334992 | 1.04E-13 | 0.281876 | 5.60E-10 | -0.02795 | 0.54684 | -0.14919 | 0.00122 | -0.11402 |
| -0.04806 | 0.30001  | -0.0189  | 0.68372  | 0.042444 | 0.3601  | -0.02342 | 0.61374 | -0.02642 |
| -0.1704  | 0.00022  | -0.29691 | 5.86E-11 | -0.03429 | 0.4597  | -0.15297 | 0.00091 | -0.20193 |
| -0.03199 | 0.49047  | -0.10815 | 0.0194   | 0.062178 | 0.1798  | -0.05036 | 0.27743 | 0.033551 |
| -0.09116 | 0.04897  | -0.02777 | 0.54939  | 0.123766 | 0.00741 | 0.109092 | 0.01836 | 0.037957 |
| -0.00011 | 0.99808  | -0.08761 | 0.05852  | 0.006177 | 0.89409 | -0.08066 | 0.08166 | -0.08928 |
| 0.058673 | 0.20564  | -0.02687 | 0.5624   | -0.02166 | 0.64052 | -0.06977 | 0.13219 | -0.05947 |
| -0.09572 | 0.03867  | -0.16181 | 0.00045  | -0.00438 | 0.92483 | -0.10504 | 0.02319 | -0.08307 |
| -0.08503 | 0.06637  | -0.11452 | 0.01328  | -0.05429 | 0.24164 | -0.12831 | 0.00549 | -0.05735 |
| -0.01537 | 0.74039  | -0.07421 | 0.10924  | 0.004264 | 0.92678 | -0.0942  | 0.04188 | -0.0581  |
| -0.10016 | 0.03045  | -0.19647 | 1.90E-05 | 0.070829 | 0.1264  | -0.02143 | 0.64419 | 0.028094 |
| -0.04918 | 0.28887  | -0.02694 | 0.56145  | 0.008848 | 0.84876 | -0.0773  | 0.09523 | -0.04805 |
| -0.06056 | 0.19144  | -0.09792 | 0.03439  | 0.052294 | 0.2594  | 0.041025 | 0.3764  | -0.07929 |
| -0.10909 | 0.01836  | -0.2137  | 3.17E-06 | -0.03809 | 0.41153 | -0.1376  | 0.00289 | -0.19051 |
| -0.10177 | 0.02787  | -0.21031 | 4.56E-06 | -0.01307 | 0.77822 | -0.08393 | 0.06998 | -0.07402 |
| 0.121948 | 0.00834  | 0.039729 | 0.39167  | -0.02935 | 0.5269  | -0.06395 | 0.16765 | -0.13437 |
| -0.02949 | 0.52491  | -0.22718 | 7.00E-07 | -0.01242 | 0.78897 | -0.15077 | 0.00108 | -0.09719 |
| -0.08357 | 0.0712   | -0.1855  | 5.51E-05 | -0.06559 | 0.15702 | -0.13985 | 0.00245 | -0.18416 |
| -0.07707 | 0.09622  | -0.02827 | 0.5423   | -0.00011 | 0.99819 | -0.07342 | 0.11308 | -0.02133 |
| 0.06627  | 0.15276  | 0.075785 | 0.10191  | 0.037947 | 0.41328 | -0.02064 | 0.65642 | -0.04726 |
| -0.36737 | 2.28E-16 | -0.34166 | 3.12E-14 | 0.024971 | 0.59039 | 0.092814 | 0.045   | -0.07284 |
| 0.05745  | 0.21527  | 0.061637 | 0.18362  | 0.010774 | 0.81638 | -0.07873 | 0.08924 | -0.02652 |
| 0.086957 | 0.06042  | -0.07076 | 0.12675  | -0.03999 | 0.38858 | -0.10209 | 0.02739 | -0.12588 |
| 0.054018 | 0.24399  | 0.360936 | 8.14E-16 | -0.00453 | 0.92221 | 0.163259 | 0.0004  | -0.07969 |
| 0.05974  | 0.19751  | 0.051941 | 0.26263  | 0.050093 | 0.28001 | -0.04473 | 0.33479 | 0.054301 |
| 0.114427 | 0.01335  | 0.08719  | 0.05974  | -0.01753 | 0.70558 | -0.05187 | 0.26331 | -0.04275 |
| 0.021737 | 0.63941  | -0.10119 | 0.02878  | -0.05851 | 0.20688 | -0.14997 | 0.00115 | -0.17003 |
| 0.147457 | 0.0014   | 0.052574 | 0.25685  | 0.018243 | 0.69416 | -0.08553 | 0.06477 | 0.046579 |

|          |          |          |          |          |         |          |         |          |
|----------|----------|----------|----------|----------|---------|----------|---------|----------|
| -0.1176  | 0.01098  | -0.09254 | 0.04564  | -0.02017 | 0.66372 | 0.007955 | 0.86387 | -0.12457 |
| -0.10616 | 0.02176  | -0.13527 | 0.0034   | -0.02609 | 0.5738  | -0.11085 | 0.01655 | -0.06705 |
| -0.1123  | 0.01518  | -0.27093 | 2.67E-09 | -0.01655 | 0.72127 | -0.15061 | 0.0011  | -0.19544 |
| -0.22676 | 7.35E-07 | -0.2212  | 1.38E-06 | -0.01248 | 0.78798 | -0.11999 | 0.00945 | -0.13262 |
| -0.12602 | 0.0064   | -0.28156 | 5.86E-10 | 0.005997 | 0.89716 | -0.07416 | 0.10947 | -0.04281 |
| -0.06752 | 0.14517  | -0.12968 | 0.005    | 0.029113 | 0.53028 | 0.038708 | 0.40397 | -0.01123 |
| 0.079508 | 0.08611  | 0.00111  | 0.98092  | -0.00584 | 0.89984 | -0.13144 | 0.00444 | -0.06892 |
| 0.144605 | 0.00173  | 0.210657 | 4.40E-06 | -0.04213 | 0.36363 | -0.06051 | 0.19178 | -0.08819 |
| -0.01042 | 0.82233  | -0.05719 | 0.21738  | 0.006577 | 0.88729 | -0.10678 | 0.021   | -0.0247  |
| -0.12818 | 0.00554  | -0.01915 | 0.67972  | -0.01956 | 0.67331 | -0.04388 | 0.34401 | 0.037459 |
| 0.180004 | 9.17E-05 | 0.291297 | 1.38E-10 | 0.031032 | 0.50352 | 0.062964 | 0.17435 | 0.058769 |
| 0.177392 | 0.00012  | 0.085075 | 0.06623  | 0.007271 | 0.87548 | -0.11858 | 0.01032 | -0.05272 |
| 0.255094 | 2.26E-08 | 0.090395 | 0.05091  | 0.019413 | 0.67563 | -0.09623 | 0.03763 | 0.001906 |
| -0.18073 | 8.58E-05 | -0.14025 | 0.00238  | 0.041661 | 0.36903 | -0.02383 | 0.60742 | 0.055006 |
| 0.105059 | 0.02317  | 0.061665 | 0.18342  | 0.001044 | 0.98205 | 0.015152 | 0.74398 | -0.15398 |
| -0.02688 | 0.56234  | -0.01961 | 0.67246  | -0.01023 | 0.82543 | -0.12749 | 0.0058  | -0.0719  |
| 0.021596 | 0.64158  | -0.01528 | 0.74195  | -0.05351 | 0.24848 | -0.13103 | 0.00456 | -0.1449  |
| -0.17246 | 0.00018  | -0.40142 | 1.65E-19 | 0.010101 | 0.82766 | 0.049647 | 0.28432 | -0.19838 |
| -0.13915 | 0.00258  | -0.11507 | 0.01284  | -0.02651 | 0.56775 | -0.11709 | 0.01133 | -0.05924 |
| -0.09543 | 0.03926  | -0.18412 | 6.27E-05 | 0.002835 | 0.95128 | -0.06448 | 0.16417 | -0.16941 |
| 0.115297 | 0.01266  | -0.02957 | 0.52382  | 0.060134 | 0.19457 | -0.06341 | 0.1713  | 0.067075 |
| -0.14998 | 0.00115  | -0.11379 | 0.01388  | -0.03722 | 0.4223  | 0.000236 | 0.99595 | -0.08808 |
| -0.05297 | 0.25332  | -0.14696 | 0.00145  | 0.007042 | 0.87937 | -0.09915 | 0.03218 | -0.04291 |
| -0.07495 | 0.10573  | -0.28837 | 2.15E-10 | -0.0324  | 0.48482 | -0.08721 | 0.05967 | -0.23013 |
| 0.060322 | 0.19317  | -0.19498 | 2.20E-05 | -0.02847 | 0.53937 | -0.06463 | 0.16323 | -0.03308 |
| -0.02538 | 0.58438  | -0.07873 | 0.08924  | -0.06275 | 0.1758  | -0.11036 | 0.01704 | -0.10988 |
| 0.191827 | 3.00E-05 | 0.020638 | 0.65644  | 0.005376 | 0.90776 | -0.02758 | 0.55213 | 0.097878 |
| 0.080395 | 0.08265  | 0.177704 | 0.00011  | -0.00694 | 0.88106 | 0.005805 | 0.90043 | 0.066431 |
| 0.114897 | 0.01297  | -0.11476 | 0.01308  | -0.02762 | 0.55161 | -0.10287 | 0.02622 | -0.05567 |
| 0.168078 | 0.00026  | 0.059788 | 0.19715  | -0.05667 | 0.22156 | -0.10908 | 0.01838 | -0.00549 |
| 0.200565 | 1.26E-05 | 0.181496 | 8.00E-05 | -0.06606 | 0.15405 | -0.13706 | 0.003   | -0.05974 |
| 0.06256  | 0.17713  | 0.001621 | 0.97213  | -0.05463 | 0.23873 | -0.08978 | 0.05252 | -0.06151 |
| 0.109558 | 0.01787  | -0.04629 | 0.31819  | -0.0633  | 0.17203 | -0.15263 | 0.00094 | -0.05489 |
| 0.105233 | 0.02295  | 0.00165  | 0.97164  | -0.01888 | 0.68404 | -0.08445 | 0.06824 | 0.015083 |
| 0.127134 | 0.00594  | 0.126751 | 0.00609  | -0.00853 | 0.85417 | -0.07043 | 0.12858 | 0.028005 |
| 0.064585 | 0.1635   | -0.17552 | 0.00014  | -0.06789 | 0.14298 | -0.13329 | 0.00391 | -0.07604 |
| 0.087736 | 0.05815  | 0.093594 | 0.04322  | 0.019824 | 0.66917 | 0.095193 | 0.03975 | 0.152278 |
| 0.282756 | 4.93E-10 | 0.161623 | 0.00045  | -0.01626 | 0.72599 | 0.020371 | 0.6606  | 0.125948 |
| 0.341659 | 3.12E-14 | 0.161836 | 0.00045  | -0.02211 | 0.63359 | -0.08925 | 0.05392 | 0.016533 |
| 0.214968 | 2.76E-06 | 0.207006 | 6.47E-06 | -0.0426  | 0.3583  | -0.13313 | 0.00395 | -0.05592 |
| -0.01    | 0.82941  | -0.0411  | 0.37554  | -0.0479  | 0.30167 | -0.04841 | 0.29651 | 0.02164  |
| 0.189826 | 3.65E-05 | -0.00882 | 0.84916  | -0.07636 | 0.09931 | -0.14158 | 0.00216 | -0.09572 |
| 0.20464  | 8.28E-06 | 0.040444 | 0.3832   | -0.01911 | 0.68045 | -0.09236 | 0.04605 | -0.06144 |
| 0.223402 | 1.08E-06 | -0.22168 | 1.31E-06 | -0.0858  | 0.06395 | -0.13378 | 0.00378 | -0.16074 |
| 0.022521 | 0.62736  | -0.15451 | 0.00081  | -0.07077 | 0.12674 | -0.13326 | 0.00391 | -0.04628 |



|          |          |          |          |          |         |          |          |          |
|----------|----------|----------|----------|----------|---------|----------|----------|----------|
| 0.348562 | 8.70E-15 | 0.176478 | 0.00013  | -0.00154 | 0.9735  | 0.002064 | 0.96451  | 0.082661 |
| 0.102088 | 0.02738  | -0.06664 | 0.1505   | -0.03446 | 0.4575  | -0.08988 | 0.05226  | -0.03679 |
| 0.07471  | 0.10687  | -0.04202 | 0.36494  | 0.006347 | 0.8912  | 0.030845 | 0.50609  | 0.127557 |
| 0.244762 | 8.47E-08 | 0.162434 | 0.00042  | 0.003682 | 0.93676 | 0.007383 | 0.87357  | 0.113268 |
| 0.128129 | 0.00556  | -0.00653 | 0.88812  | -0.02794 | 0.54694 | -0.02302 | 0.61982  | -0.03692 |
| 0.122215 | 0.0082   | -0.03352 | 0.46989  | -0.05308 | 0.25231 | -0.05523 | 0.23359  | -0.13315 |
| 0.222374 | 1.21E-06 | 0.003936 | 0.9324   | -0.04737 | 0.30702 | -0.06473 | 0.16257  | -0.00052 |
| 0.05975  | 0.19743  | -0.17642 | 0.00013  | -0.06138 | 0.18543 | -0.1395  | 0.00252  | 0.021739 |
| 0.220177 | 1.55E-06 | -0.16476 | 0.00035  | -0.09169 | 0.04767 | -0.19337 | 2.58E-05 | -0.11122 |
| 0.123423 | 0.00758  | 0.148963 | 0.00124  | -0.00352 | 0.93949 | -0.02665 | 0.56568  | -0.00351 |
| 0.061403 | 0.1853   | 0.010756 | 0.81667  | -0.00341 | 0.9414  | 0.001309 | 0.97749  | 0.035614 |
| 0.28016  | 7.19E-10 | -0.0306  | 0.50949  | -0.06652 | 0.15124 | -0.18909 | 3.91E-05 | -0.15766 |
| 0.216708 | 2.28E-06 | -0.0488  | 0.29265  | -0.08663 | 0.06139 | -0.17378 | 0.00016  | -0.09494 |
| 0.085317 | 0.06545  | -0.05495 | 0.23596  | -0.04316 | 0.35209 | -0.08251 | 0.07486  | -0.02696 |
| 0.176964 | 0.00012  | 0.150998 | 0.00106  | -0.02402 | 0.60464 | -0.11878 | 0.01019  | 0.002269 |
| 0.206061 | 7.14E-06 | 0.168771 | 0.00025  | -0.05968 | 0.19793 | -0.15201 | 0.00098  | -0.01359 |
| 0.135414 | 0.00337  | -0.02368 | 0.60968  | -0.00855 | 0.85376 | -0.09892 | 0.03258  | 0.06188  |
| 0.180824 | 8.51E-05 | -0.1348  | 0.00352  | -0.04423 | 0.34019 | -0.12024 | 0.0093   | -0.08644 |
| -0.05027 | 0.27834  | -0.08729 | 0.05943  | -0.07767 | 0.09365 | -0.0605  | 0.19184  | -0.00207 |
| 0.114496 | 0.01329  | -0.09628 | 0.03754  | -0.0783  | 0.09098 | -0.13678 | 0.00306  | -0.08088 |
| -0.07745 | 0.09457  | -0.05698 | 0.21908  | -0.01961 | 0.67251 | 0.0485   | 0.29561  | 0.05656  |
| -0.08244 | 0.07509  | -0.43082 | 1.58E-22 | -0.07205 | 0.11997 | -0.19445 | 2.32E-05 | -0.11004 |
| -0.02197 | 0.63576  | -0.06806 | 0.14195  | -0.02961 | 0.52321 | -0.09927 | 0.03197  | -0.00021 |
| 0.032946 | 0.47755  | -0.08163 | 0.07803  | -0.04154 | 0.37043 | -0.10136 | 0.02852  | 0.009427 |
| 0.313241 | 4.33E-12 | 0.123011 | 0.00778  | 0.025793 | 0.57821 | 0.009814 | 0.83248  | 0.102346 |
| 0.070488 | 0.12824  | 0.044605 | 0.33614  | -0.02959 | 0.52362 | -0.0638  | 0.16871  | -0.01608 |
| 0.103224 | 0.0257   | 0.163123 | 0.0004   | 0.027929 | 0.54714 | 0.060617 | 0.191    | 0.151321 |
| 0.009147 | 0.84372  | -0.1522  | 0.00097  | -0.07971 | 0.08533 | -0.17331 | 0.00017  | -0.08967 |
| -0.02664 | 0.56586  | -0.16689 | 0.00029  | -0.01626 | 0.72591 | -0.02668 | 0.56525  | -0.05989 |
| 0.075616 | 0.10267  | -0.00938 | 0.83973  | -0.02962 | 0.52308 | -0.03015 | 0.51569  | 0.104794 |
| 0.070726 | 0.12695  | 0.159083 | 0.00056  | -0.04224 | 0.36238 | -0.08314 | 0.07265  | -0.01274 |
| 0.133173 | 0.00394  | -0.01214 | 0.7936   | -0.05927 | 0.20105 | -0.1993  | 1.43E-05 | -0.00521 |
| 0.234427 | 2.99E-07 | -0.08836 | 0.05639  | -0.05785 | 0.21209 | -0.15149 | 0.00102  | -0.0991  |
| 0.087926 | 0.05761  | -0.04639 | 0.31715  | -0.02887 | 0.5337  | -0.02523 | 0.58649  | -0.03354 |
| 0.045045 | 0.33139  | 0.042076 | 0.36428  | -0.0451  | 0.33085 | -0.09308 | 0.04438  | -0.05296 |
| 0.17797  | 0.00011  | -0.08093 | 0.08063  | -0.04516 | 0.33013 | -0.12176 | 0.00844  | -0.1229  |
| 0.093972 | 0.04238  | -0.01379 | 0.76622  | -0.05494 | 0.23603 | -0.1066  | 0.02122  | -0.05111 |
| 0.109106 | 0.01835  | -0.06948 | 0.13381  | -0.07829 | 0.09106 | -0.17078 | 0.00021  | -0.07048 |
| 0.215874 | 2.50E-06 | 0.123747 | 0.00742  | -0.01687 | 0.71615 | -0.01757 | 0.70484  | 0.00033  |
| 0.022199 | 0.63229  | 0.03031  | 0.5135   | 0.001563 | 0.97313 | 0.046523 | 0.31576  | 0.031444 |
| 0.24331  | 1.01E-07 | -0.03421 | 0.46084  | -0.06141 | 0.18523 | -0.14542 | 0.00163  | -0.09824 |
| 0.218143 | 1.95E-06 | 0.122856 | 0.00786  | -0.02355 | 0.61168 | -0.01982 | 0.66927  | -0.00577 |
| 0.163169 | 0.0004   | -0.05628 | 0.22474  | -0.02478 | 0.59324 | -0.11045 | 0.01695  | -0.06318 |
| -0.03878 | 0.40307  | -0.2806  | 6.74E-10 | -0.07696 | 0.0967  | -0.10836 | 0.01916  | -0.07158 |
| 0.200279 | 1.30E-05 | 0.02024  | 0.66265  | -0.02757 | 0.55228 | -0.02172 | 0.6397   | -0.00521 |

|          |          |          |          |          |         |          |          |          |
|----------|----------|----------|----------|----------|---------|----------|----------|----------|
| -0.01312 | 0.77738  | -0.13726 | 0.00296  | -0.03911 | 0.39908 | -0.03759 | 0.41768  | -0.07611 |
| 0.079704 | 0.08533  | -0.10669 | 0.02111  | -0.03619 | 0.4352  | -0.05812 | 0.20996  | -0.02506 |
| 0.170048 | 0.00022  | -0.01904 | 0.68159  | -0.03597 | 0.43801 | -0.1291  | 0.00521  | -0.01717 |
| 0.129443 | 0.00509  | 0.123945 | 0.00733  | -0.00334 | 0.94254 | 0.019751 | 0.67031  | 0.108665 |
| 0.110988 | 0.01642  | 0.179694 | 9.44E-05 | -0.03006 | 0.51704 | -0.01795 | 0.69886  | 0.045392 |
| -0.03301 | 0.47675  | 0.102235 | 0.02716  | 0.005165 | 0.91137 | 0.063485 | 0.17081  | 0.117825 |
| 0.026474 | 0.56821  | -0.22688 | 7.25E-07 | -0.01991 | 0.6678  | -0.11106 | 0.01635  | 0.078719 |
| 0.151211 | 0.00105  | 0.189919 | 3.61E-05 | -0.03618 | 0.43544 | -0.05175 | 0.26437  | -0.0219  |
| 0.21231  | 3.68E-06 | 0.005976 | 0.89751  | 0.08937  | 0.05361 | -0.05035 | 0.27759  | 0.22392  |
| 0.178815 | 0.0001   | 0.002429 | 0.95824  | -0.0914  | 0.04837 | -0.15387 | 0.00085  | -0.12911 |
| 0.220778 | 1.45E-06 | 0.321972 | 1.00E-12 | -0.02071 | 0.65539 | -0.00899 | 0.84632  | 0.010498 |
| -0.06295 | 0.17443  | -0.08948 | 0.05332  | -0.07176 | 0.12149 | -0.0865  | 0.06179  | -0.10431 |
| 0.029788 | 0.52078  | -0.22596 | 8.06E-07 | -0.05009 | 0.28002 | -0.11872 | 0.01023  | -0.05853 |
| -0.06605 | 0.15416  | -0.31309 | 4.43E-12 | -0.0386  | 0.40523 | -0.11831 | 0.0105   | -0.07002 |
| 0.090076 | 0.05174  | -0.02369 | 0.6096   | -0.0125  | 0.78763 | -0.0697  | 0.13259  | 0.053991 |
| -0.07118 | 0.12454  | -0.16954 | 0.00023  | -0.07376 | 0.11143 | -0.10927 | 0.01817  | -0.03817 |
| 0.066723 | 0.14997  | 0.080235 | 0.08327  | -0.03626 | 0.43437 | -0.06629 | 0.15264  | 0.062639 |
| 0.139841 | 0.00246  | -0.02406 | 0.60395  | -0.0615  | 0.18458 | -0.06814 | 0.14148  | -0.13047 |
| 0.042144 | 0.3635   | -0.15784 | 0.00062  | -0.05541 | 0.23206 | -0.08011 | 0.08374  | -0.09013 |
| 0.206799 | 6.61E-06 | 0.0711   | 0.12495  | -0.01271 | 0.78412 | -0.09346 | 0.04353  | -0.03482 |
| 0.179825 | 9.32E-05 | 0.250466 | 4.12E-08 | -0.01444 | 0.75567 | -0.03504 | 0.44999  | 0.056384 |
| 0.05183  | 0.26365  | -0.25609 | 1.99E-08 | -0.07412 | 0.10967 | -0.17759 | 0.00011  | -0.15102 |
| 0.046913 | 0.31171  | 0.038256 | 0.40948  | -0.02493 | 0.59095 | -0.09302 | 0.04452  | -0.05827 |
| 0.230275 | 4.89E-07 | 0.025927 | 0.57625  | -0.02776 | 0.54951 | -0.04714 | 0.30938  | 0.073307 |
| 0.136913 | 0.00303  | 0.183289 | 6.77E-05 | -0.05009 | 0.28004 | -0.10189 | 0.02768  | 0.032758 |
| 0.085492 | 0.0649   | -0.12854 | 0.00541  | 0.008978 | 0.84657 | -0.08003 | 0.08405  | -0.00329 |
| -0.07256 | 0.11735  | -0.23892 | 1.74E-07 | -0.03136 | 0.49895 | -0.08352 | 0.07136  | -0.06223 |
| 0.063002 | 0.17409  | -0.03316 | 0.47463  | 0.002267 | 0.96103 | 0.011358 | 0.80662  | -0.04122 |
| -0.00122 | 0.97903  | -0.06385 | 0.16835  | -0.05293 | 0.25364 | -0.11374 | 0.01392  | -0.02888 |
| 0.161925 | 0.00044  | 0.035948 | 0.43833  | -0.00214 | 0.96314 | -0.01927 | 0.67781  | 0.032182 |
| 0.051309 | 0.26849  | -0.11896 | 0.01009  | -0.04094 | 0.37733 | -0.10057 | 0.02978  | -0.02055 |
| 0.041028 | 0.37636  | -0.33028 | 2.39E-13 | -0.07    | 0.13089 | -0.18038 | 8.86E-05 | -0.07819 |
| 0.063038 | 0.17384  | 0.117735 | 0.01089  | -0.02057 | 0.65748 | -0.03787 | 0.41418  | 0.085334 |
| 0.11656  | 0.01171  | 0.075475 | 0.10332  | 0.020145 | 0.66413 | 0.000383 | 0.99342  | -0.00364 |
| 0.191133 | 3.21E-05 | 0.008261 | 0.85868  | -0.02573 | 0.57915 | -0.0902  | 0.05141  | 0.05685  |
| 0.110391 | 0.01701  | -0.06363 | 0.16982  | -0.02681 | 0.56336 | -0.10047 | 0.02995  | -0.01047 |
| 0.066602 | 0.15071  | -0.04091 | 0.37774  | -0.04249 | 0.35953 | -0.08931 | 0.05377  | 0.01703  |
| 0.150071 | 0.00114  | 0.180839 | 8.50E-05 | -0.02755 | 0.55264 | -0.03929 | 0.39689  | -0.04207 |
| 0.190231 | 3.51E-05 | 0.365653 | 3.21E-16 | 0.003503 | 0.93982 | 0.083708 | 0.07072  | 0.137072 |
| -0.06174 | 0.18292  | -0.1249  | 0.00688  | -0.03518 | 0.44814 | -0.08466 | 0.06756  | -0.02924 |
| 0.036082 | 0.43663  | -0.0847  | 0.06745  | -0.05027 | 0.27836 | -0.07423 | 0.10913  | 0.021118 |
| 0.117902 | 0.01077  | -0.04626 | 0.31847  | -0.02372 | 0.60916 | -0.04484 | 0.33359  | -0.04547 |
| 0.199584 | 1.39E-05 | 0.096266 | 0.03756  | -0.01441 | 0.75618 | -0.02149 | 0.64319  | -0.07718 |
| -0.02549 | 0.58272  | -0.22475 | 9.26E-07 | -0.10395 | 0.02467 | -0.16858 | 0.00025  | -0.21038 |
| 0.119625 | 0.00967  | 0.291251 | 1.39E-10 | -0.01594 | 0.73123 | -0.01353 | 0.77051  | 0.093251 |

|          |          |          |          |          |          |          |          |          |
|----------|----------|----------|----------|----------|----------|----------|----------|----------|
| 0.140645 | 0.00232  | -0.00657 | 0.88747  | -0.02371 | 0.60923  | -0.05284 | 0.25443  | -0.07209 |
| 0.00164  | 0.97181  | -0.15103 | 0.00106  | -0.03678 | 0.42777  | -0.01596 | 0.73091  | -0.00723 |
| 0.157636 | 0.00063  | -0.10359 | 0.02517  | -0.05432 | 0.24139  | -0.12936 | 0.00511  | -0.10651 |
| 0.041497 | 0.37093  | -0.12551 | 0.00661  | -0.01242 | 0.78891  | -0.01096 | 0.81331  | -0.02481 |
| 0.003701 | 0.93643  | -0.18503 | 5.75E-05 | -0.04157 | 0.37014  | -0.06385 | 0.16837  | -0.03188 |
| 0.145831 | 0.00158  | 0.159512 | 0.00054  | -0.04433 | 0.33917  | -0.0881  | 0.05711  | -0.05345 |
| 0.329784 | 2.61E-13 | 0.007426 | 0.87284  | -0.06494 | 0.16116  | -0.1632  | 0.0004   | -0.11142 |
| 0.037777 | 0.41538  | -0.13434 | 0.00363  | -0.06959 | 0.13321  | -0.12051 | 0.00914  | -0.05533 |
| 0.213559 | 3.22E-06 | 0.209657 | 4.89E-06 | -0.05612 | 0.2261   | -0.10764 | 0.01999  | 0.000121 |
| 0.146873 | 0.00146  | 0.106672 | 0.02113  | -0.02052 | 0.65828  | -0.05579 | 0.22885  | 0.022636 |
| 0.296317 | 6.42E-11 | 0.331666 | 1.87E-13 | -0.04001 | 0.38838  | -0.07189 | 0.1208   | 0.006219 |
| 0.030923 | 0.50501  | -0.08482 | 0.06703  | -0.05838 | 0.20795  | -0.08849 | 0.05601  | -0.04226 |
| 0.063581 | 0.17016  | -0.1272  | 0.00591  | -0.07689 | 0.09698  | -0.11334 | 0.01426  | -0.10686 |
| 0.00603  | 0.8966   | -0.00445 | 0.92362  | -0.00399 | 0.9315   | -0.00471 | 0.91912  | 0.034455 |
| 0.124447 | 0.00709  | 0.224678 | 9.34E-07 | -0.02449 | 0.59759  | -0.05714 | 0.2178   | 0.03056  |
| 0.158873 | 0.00057  | 0.277149 | 1.11E-09 | -0.00848 | 0.85492  | -0.04841 | 0.2965   | 0.002746 |
| -0.01539 | 0.74007  | -0.12998 | 0.0049   | -0.03102 | 0.50368  | -0.10059 | 0.02974  | -0.04647 |
| 0.305322 | 1.56E-11 | 0.168086 | 0.00026  | -0.07176 | 0.12147  | -0.12543 | 0.00665  | -0.08212 |
| 0.162293 | 0.00043  | -0.02719 | 0.55777  | -0.00732 | 0.87462  | -0.12518 | 0.00676  | 0.026365 |
| 0.039649 | 0.39263  | -0.1901  | 3.55E-05 | -0.04571 | 0.32426  | -0.11823 | 0.01055  | 0.011255 |
| 0.048844 | 0.29219  | -0.17695 | 0.00012  | -0.02695 | 0.56122  | -0.07503 | 0.10538  | -0.11244 |
| 0.085896 | 0.06364  | 0.129632 | 0.00502  | -0.00707 | 0.87886  | -0.03343 | 0.47112  | 0.02136  |
| 0.157598 | 0.00063  | 0.204946 | 8.02E-06 | 0.038631 | 0.4049   | 0.061647 | 0.18355  | 0.187843 |
| -0.04244 | 0.36016  | -0.25932 | 1.30E-08 | -0.05187 | 0.26331  | -0.06439 | 0.16477  | -0.06551 |
| 0.088724 | 0.05537  | -0.05361 | 0.24761  | 0.007507 | 0.87146  | 0.009975 | 0.82978  | 0.058247 |
| 0.222962 | 1.13E-06 | 0.191841 | 3.00E-05 | -0.02961 | 0.52328  | -0.07777 | 0.09323  | -0.00234 |
| 0.026877 | 0.56235  | -0.08633 | 0.0623   | -0.05769 | 0.21335  | -0.0378  | 0.41515  | -0.12386 |
| 0.01229  | 0.79109  | -0.11364 | 0.01401  | -0.01747 | 0.70655  | -0.14307 | 0.00194  | -0.00266 |
| 0.16687  | 0.00029  | -0.09432 | 0.04162  | -0.03821 | 0.40999  | -0.06619 | 0.15323  | -0.11328 |
| 0.148266 | 0.00131  | 0.055628 | 0.2302   | -0.0755  | 0.1032   | -0.17717 | 0.00012  | -0.07443 |
| 0.089646 | 0.05287  | -0.0444  | 0.33835  | -0.05146 | 0.26711  | -0.09081 | 0.04986  | 0.052078 |
| 0.141892 | 0.00211  | 0.148619 | 0.00128  | -0.05265 | 0.25619  | -0.08894 | 0.05478  | -0.02615 |
| 0.050341 | 0.27763  | -0.10817 | 0.01938  | -0.04114 | 0.3751   | -0.14773 | 0.00137  | 0.002989 |
| 0.052951 | 0.25345  | -0.16477 | 0.00035  | -0.0555  | 0.23131  | -0.1029  | 0.02617  | -0.01504 |
| 0.051727 | 0.26461  | -0.00015 | 0.99735  | -0.06135 | 0.18571  | -0.12984 | 0.00495  | -0.10248 |
| 0.132636 | 0.00409  | -0.04929 | 0.2878   | -0.02709 | 0.55923  | -0.01741 | 0.70753  | -0.12741 |
| 0.073721 | 0.11161  | -0.16957 | 0.00023  | -0.05973 | 0.19761  | -0.15238 | 0.00096  | 0.000578 |
| -0.03308 | 0.4758   | -0.02033 | 0.66122  | 0.410295 | 2.18E-20 | 0.39777  | 3.73E-19 | 0.174168 |
| 0.002489 | 0.95722  | 0.142555 | 0.00201  | 0.507485 | 6.18E-32 | 0.594221 | 6.49E-46 | 0.2666   |
| 0.072622 | 0.11706  | -0.01377 | 0.76655  | 0.765399 | 4.74E-91 | 0.172449 | 0.00018  | 0.169917 |
| -0.02846 | 0.53954  | 0.143862 | 0.00183  | 0.555173 | 4.12E-39 | 0.376597 | 3.49E-17 | 0.361085 |
| -0.02263 | 0.62577  | -0.02875 | 0.53544  | 0.591396 | 2.17E-45 | 0.431073 | 1.48E-22 | 0.255961 |
| -0.10351 | 0.0253   | -0.00687 | 0.88223  | 0.547455 | 7.16E-38 | 0.572249 | 5.65E-42 | 0.189276 |
| -0.01857 | 0.68892  | 0.071726 | 0.12166  | 0.806678 | #####    | 0.446259 | 3.10E-24 | 0.294083 |
| -0.01477 | 0.75027  | 0.088846 | 0.05503  | 0.925133 | #####    | 0.475701 | 9.59E-28 | 0.416215 |

|          |         |          |         |          |          |          |          |          |
|----------|---------|----------|---------|----------|----------|----------|----------|----------|
| -0.04295 | 0.35435 | -0.02442 | 0.59856 | 0.778035 | 6.29E-96 | 0.464902 | 2.04E-26 | 0.38103  |
| -0.06353 | 0.1705  | 0.081501 | 0.0785  | 0.7432   | 3.47E-83 | 0.576125 | 1.20E-42 | 0.545103 |
| -0.03384 | 0.46562 | 0.00762  | 0.86954 | 0.325945 | 5.08E-13 | 0.356544 | 1.91E-15 | 0.37589  |
| 0.012322 | 0.79057 | 0.072879 | 0.11576 | 0.620765 | 4.26E-51 | 0.509642 | 3.09E-32 | 0.294589 |
| -0.0352  | 0.44788 | 0.030804 | 0.50665 | 0.54414  | 2.39E-37 | 0.453959 | 4.03E-25 | 0.523556 |
| -0.02518 | 0.58725 | 0.056674 | 0.22154 | 0.804757 | #####    | 0.462241 | 4.25E-26 | 0.346573 |
| -0.10593 | 0.02206 | 0.052396 | 0.25846 | 0.410239 | 2.20E-20 | 0.366891 | 2.51E-16 | 0.458429 |
| -0.06533 | 0.15869 | -0.01597 | 0.73066 | 0.562536 | 2.51E-40 | 0.507273 | 6.62E-32 | 0.198675 |
| -0.03162 | 0.49545 | 0.079665 | 0.08549 | 0.839179 | #####    | 0.54905  | 3.99E-38 | 0.381582 |
| 0.006872 | 0.88225 | 0.014016 | 0.76258 | 0.864663 | #####    | 0.333182 | 1.43E-13 | 0.275317 |
| -0.04133 | 0.37289 | 0.117472 | 0.01107 | 0.794467 | #####    | 0.358542 | 1.30E-15 | 0.275542 |
| 0.020666 | 0.65599 | 0.071859 | 0.12097 | 0.842825 | #####    | 0.363631 | 4.79E-16 | 0.307401 |
| 0.069356 | 0.1345  | -0.04164 | 0.36928 | 0.576656 | 9.67E-43 | 0.127453 | 0.00581  | 0.203243 |
| -0.04975 | 0.28332 | -0.14648 | 0.0015  | 0.591475 | 2.10E-45 | 0.106761 | 0.02102  | 0.068219 |
| 0.00375  | 0.93558 | -0.02455 | 0.59672 | 0.631359 | 2.63E-53 | 0.151812 | 0.001    | 0.159939 |
| 0.088241 | 0.05671 | 0.00019  | 0.99673 | 0.678276 | 3.21E-64 | 0.151126 | 0.00105  | 0.179573 |
| 0.093048 | 0.04446 | 0.018923 | 0.68337 | 0.554449 | 5.40E-39 | 0.105011 | 0.02324  | 0.205157 |
| -0.01338 | 0.77312 | 0.120055 | 0.00941 | 0.816487 | #####    | 0.548874 | 4.26E-38 | 0.419688 |
| 0.050145 | 0.27951 | 0.06822  | 0.14102 | 0.898583 | #####    | 0.300996 | 3.10E-11 | 0.254602 |
| 0.004437 | 0.92382 | 0.081352 | 0.07905 | 0.911936 | #####    | 0.363039 | 5.39E-16 | 0.262956 |
| 0.038063 | 0.41185 | 0.055041 | 0.23517 | 0.882579 | #####    | 0.258517 | 1.44E-08 | 0.235575 |
| 0.042832 | 0.35572 | 0.023059 | 0.61916 | 0.595844 | 3.23E-46 | 0.140918 | 0.00227  | 0.130904 |
| -0.00409 | 0.92973 | 0.048065 | 0.29997 | 0.89682  | #####    | 0.335054 | 1.03E-13 | 0.262472 |
| 0.029438 | 0.5257  | 0.063906 | 0.16798 | 0.921419 | #####    | 0.276349 | 1.24E-09 | 0.245332 |
| -0.0325  | 0.48351 | -0.03171 | 0.4943  | 0.521415 | 6.48E-34 | 0.235246 | 2.71E-07 | 0.314694 |
| 0.013195 | 0.77611 | 0.043012 | 0.3537  | 0.931749 | #####    | 0.268219 | 3.89E-09 | 0.222645 |
| -0.00556 | 0.90455 | 0.022819 | 0.62281 | 0.941218 | #####    | 0.296953 | 5.82E-11 | 0.306567 |
| -0.04024 | 0.38562 | -0.01895 | 0.68293 | 0.919088 | #####    | 0.354922 | 2.61E-15 | 0.29753  |
| -0.01892 | 0.68335 | 0.048169 | 0.29892 | 0.959395 | #####    | 0.41331  | 1.08E-20 | 0.305904 |
| 0.004634 | 0.92044 | 0.060853 | 0.18927 | 0.873255 | #####    | 0.311709 | 5.56E-12 | 0.254141 |
| -0.00597 | 0.89765 | -0.01025 | 0.82508 | 0.810653 | #####    | 0.17872  | 0.0001   | 0.210166 |
| 0.178639 | 0.0001  | 0.059529 | 0.1991  | 0.577661 | 6.44E-43 | 0.176689 | 0.00012  | 0.087254 |
| -0.02845 | 0.53964 | 0.06773  | 0.1439  | 0.934779 | #####    | 0.524993 | 1.94E-34 | 0.353093 |
| -0.07556 | 0.10293 | 0.124547 | 0.00704 | 0.786786 | 1.69E-99 | 0.573869 | 2.96E-42 | 0.390113 |
| -0.13079 | 0.00464 | -0.10494 | 0.02333 | 0.56339  | 1.81E-40 | 0.32558  | 5.41E-13 | 0.198284 |
| -0.01937 | 0.67625 | 0.017658 | 0.70349 | 0.694112 | 2.23E-68 | 0.208063 | 5.79E-06 | 0.183484 |
| -0.00362 | 0.93779 | 0.018655 | 0.68761 | 0.951039 | #####    | 0.324507 | 6.51E-13 | 0.250361 |
| -0.00481 | 0.91749 | 0.041435 | 0.37164 | 0.96583  | #####    | 0.344899 | 1.72E-14 | 0.258367 |
| 0.008107 | 0.86129 | 0.041786 | 0.3676  | 0.930884 | #####    | 0.237074 | 2.18E-07 | 0.226639 |
| -0.0094  | 0.83944 | 0.043095 | 0.35277 | 0.964927 | #####    | 0.353514 | 3.41E-15 | 0.301551 |
| 0.008234 | 0.85914 | 0.036471 | 0.43169 | 0.935433 | #####    | 0.267212 | 4.46E-09 | 0.235442 |
| -0.0138  | 0.76621 | 0.043647 | 0.34663 | 0.955756 | #####    | 0.371031 | 1.09E-16 | 0.305238 |
| -0.06438 | 0.16482 | 0.035036 | 0.45004 | 0.861326 | #####    | 0.385006 | 5.99E-18 | 0.237737 |
| -0.03892 | 0.40137 | 0.03325  | 0.47349 | 0.877189 | #####    | 0.320296 | 1.33E-12 | 0.222691 |
| -0.09696 | 0.03621 | 0.02263  | 0.62569 | 0.733948 | 3.82E-80 | 0.372569 | 7.98E-17 | 0.185882 |

|          |          |          |          |          |          |          |          |          |
|----------|----------|----------|----------|----------|----------|----------|----------|----------|
| 0.057474 | 0.21508  | 0.122396 | 0.0081   | 0.427313 | 3.76E-22 | 0.158724 | 0.00058  | 0.126768 |
| 0.036476 | 0.43163  | 0.045292 | 0.32874  | 0.855437 | #####    | 0.239879 | 1.55E-07 | 0.196104 |
| 0.107697 | 0.01992  | 0.026133 | 0.57322  | 0.678744 | 2.44E-64 | 0.13878  | 0.00265  | 0.176249 |
| 0.001977 | 0.96601  | 0.082082 | 0.07639  | 0.902508 | #####    | 0.300716 | 3.24E-11 | 0.250046 |
| -0.02083 | 0.65339  | 0.087428 | 0.05904  | 0.87211  | #####    | 0.388136 | 3.07E-18 | 0.301168 |
| -0.00701 | 0.87987  | 0.072553 | 0.11741  | 0.917136 | #####    | 0.442214 | 8.85E-24 | 0.312747 |
| 0.037445 | 0.41949  | 0.035835 | 0.43978  | 0.885903 | #####    | 0.277667 | 1.03E-09 | 0.2587   |
| -0.00137 | 0.97639  | 0.043638 | 0.34673  | 0.962769 | #####    | 0.377789 | 2.73E-17 | 0.27023  |
| 0.03021  | 0.51489  | 0.051716 | 0.2647   | 0.939197 | #####    | 0.39883  | 2.95E-19 | 0.288944 |
| 0.094513 | 0.0412   | 0.05102  | 0.27119  | 0.416134 | 5.55E-21 | 0.059875 | 0.1965   | 0.088932 |
| -0.00092 | 0.98422  | 0.038701 | 0.40406  | 0.923397 | #####    | 0.284305 | 3.92E-10 | 0.242996 |
| 0.007663 | 0.86883  | 0.046374 | 0.31731  | 0.87312  | #####    | 0.352995 | 3.77E-15 | 0.246077 |
| 0.027206 | 0.55757  | 0.045961 | 0.32164  | 0.913045 | #####    | 0.283094 | 4.69E-10 | 0.215348 |
| -0.08466 | 0.06757  | -0.08862 | 0.05566  | 0.303849 | 1.97E-11 | 0.4833   | 1.05E-28 | 0.317962 |
| -0.00058 | 0.98996  | 0.041857 | 0.36679  | 0.939879 | #####    | 0.402786 | 1.21E-19 | 0.298283 |
| 0.113289 | 0.0143   | 0.004236 | 0.92726  | 0.219105 | 1.75E-06 | 0.203512 | 9.31E-06 | 0.269077 |
| -0.07374 | 0.11151  | -0.06645 | 0.15167  | 0.199241 | 1.44E-05 | 0.245344 | 7.87E-08 | 0.15976  |
| -0.09934 | 0.03185  | -0.05736 | 0.216    | 0.250573 | 4.06E-08 | 0.530068 | 3.43E-35 | 0.160091 |
| 0.091924 | 0.0471   | 0.021508 | 0.64294  | 0.193721 | 2.50E-05 | 0.267554 | 4.26E-09 | 0.229067 |
| 0.11238  | 0.01511  | 0.223706 | 1.04E-06 | 0.014905 | 0.74802  | 0.056265 | 0.2249   | 0.020082 |
| 0.066672 | 0.15028  | 0.333988 | 1.24E-13 | 0.000281 | 0.99516  | 0.089291 | 0.05382  | 0.15048  |
| 0.141727 | 0.00214  | 0.410575 | 2.04E-20 | -0.08001 | 0.08414  | -0.1408  | 0.00229  | -0.20992 |
| -0.15286 | 0.00092  | -0.0651  | 0.16015  | -0.03105 | 0.50322  | -0.01734 | 0.70862  | 0.058383 |
| 0.141398 | 0.00219  | 0.234314 | 3.03E-07 | -0.00456 | 0.92174  | -0.075   | 0.10551  | -0.05155 |
| 0.154517 | 0.00081  | 0.3302   | 2.43E-13 | -0.02356 | 0.61162  | 0.122255 | 0.00817  | 0.078965 |
| -0.1274  | 0.00583  | 0.091996 | 0.04693  | -0.00338 | 0.94192  | 0.065383 | 0.15834  | 0.015805 |
| 0.034941 | 0.45127  | 0.39997  | 2.29E-19 | 0.004676 | 0.91973  | 0.061376 | 0.18549  | 0.048345 |
| 0.011043 | 0.81187  | 0.168014 | 0.00027  | -0.05429 | 0.24165  | -0.03837 | 0.4081   | -0.04965 |
| 0.105605 | 0.02247  | 0.292783 | 1.10E-10 | 0.032165 | 0.48806  | 0.041614 | 0.36958  | 0.066069 |
| 0.108231 | 0.01931  | 0.413783 | 9.65E-21 | 0.044254 | 0.33997  | 0.165508 | 0.00033  | 0.117674 |
| -0.04517 | 0.33007  | 0.235239 | 2.71E-07 | 0.001479 | 0.97457  | 0.030649 | 0.5088   | 0.104137 |
| -0.03405 | 0.46293  | 0.174038 | 0.00016  | -0.01748 | 0.70634  | 0.003675 | 0.93687  | -0.08583 |
| -0.03108 | 0.50291  | 0.242598 | 1.11E-07 | -0.01531 | 0.74133  | 0.008184 | 0.85999  | 0.003491 |
| 0.138227 | 0.00276  | 0.352347 | 4.26E-15 | 0.026553 | 0.56706  | 0.054127 | 0.24304  | 0.025072 |
| 0.009945 | 0.83029  | 0.268596 | 3.69E-09 | 0.034766 | 0.45355  | 0.100475 | 0.02993  | 0.207022 |
| 0.062791 | 0.17553  | 0.252289 | 3.26E-08 | 0.010574 | 0.81973  | 0.080339 | 0.08287  | 0.053624 |
| 0.035014 | 0.45033  | 0.261969 | 9.10E-09 | -0.01931 | 0.67726  | 0.019454 | 0.67498  | 0.006548 |
| 0.013264 | 0.77497  | 0.31566  | 2.90E-12 | -0.00928 | 0.84153  | 0.045476 | 0.32679  | -0.04593 |
| 0.113765 | 0.0139   | 0.228936 | 5.71E-07 | -0.02412 | 0.60317  | -0.02884 | 0.53414  | -0.01419 |
| 0.098663 | 0.03304  | 0.240538 | 1.43E-07 | -0.04527 | 0.32902  | -0.02421 | 0.60179  | -0.00802 |
| -0.02772 | 0.5501   | 0.130016 | 0.00489  | -0.00078 | 0.98654  | 0.039488 | 0.39456  | 0.090947 |
| 0.067982 | 0.14241  | 0.085193 | 0.06585  | 0.010845 | 0.81518  | 0.118471 | 0.0104   | 0.009639 |
| 0.037899 | 0.41387  | 0.218052 | 1.97E-06 | -0.0268  | 0.56351  | -0.00695 | 0.88088  | 0.048171 |
| 0.035668 | 0.44191  | 0.238814 | 1.76E-07 | -0.0202  | 0.66324  | -0.02537 | 0.58449  | -0.00633 |
| -0.19247 | 2.82E-05 | 0.088555 | 0.05584  | -0.02364 | 0.61029  | -0.0773  | 0.09523  | 0.078924 |

|          |          |          |          |          |         |          |          |          |
|----------|----------|----------|----------|----------|---------|----------|----------|----------|
| -0.14026 | 0.00238  | -0.04287 | 0.35526  | 0.035968 | 0.43808 | 0.155624 | 0.00074  | 0.200443 |
| 0.073514 | 0.11262  | 0.268555 | 3.71E-09 | 0.010336 | 0.82372 | 0.115701 | 0.01235  | 0.018783 |
| -0.17394 | 0.00016  | 0.200074 | 1.32E-05 | 0.006887 | 0.882   | 0.08533  | 0.06541  | 0.051347 |
| 0.124053 | 0.00727  | 0.237865 | 1.98E-07 | 0.012478 | 0.78798 | 0.077466 | 0.09451  | 0.041939 |
| 0.041596 | 0.36978  | 0.251661 | 3.53E-08 | -0.03082 | 0.5064  | -0.04826 | 0.29797  | -0.04597 |
| 0.134331 | 0.00363  | 0.509417 | 3.33E-32 | 0.029647 | 0.52276 | 0.119433 | 0.00979  | 0.172095 |
| -0.10415 | 0.0244   | 0.15302  | 0.00091  | 0.024185 | 0.60214 | 0.214753 | 2.82E-06 | 0.032896 |
| 0.133825 | 0.00376  | 0.255941 | 2.03E-08 | 0.025572 | 0.58148 | 0.173049 | 0.00017  | 0.11099  |
| -0.06161 | 0.18382  | 0.102231 | 0.02717  | -0.00877 | 0.85002 | -0.01987 | 0.66838  | 0.043602 |
| -0.10763 | 0.02     | 0.182458 | 7.32E-05 | -0.00363 | 0.93761 | 0.029558 | 0.52401  | 0.025969 |
| 0.235427 | 2.65E-07 | 0.378786 | 2.22E-17 | 0.029796 | 0.52067 | 0.145231 | 0.00165  | 0.104679 |
| -0.17951 | 9.60E-05 | 0.111071 | 0.01634  | -0.02809 | 0.54479 | 0.044259 | 0.33991  | 0.029552 |
| -0.12776 | 0.00569  | -0.08775 | 0.05812  | -0.02875 | 0.5354  | 0.007834 | 0.86592  | -0.09306 |
| -0.02148 | 0.64339  | 0.232829 | 3.62E-07 | -0.03984 | 0.39037 | 0.095469 | 0.03918  | 0.077752 |
| 0.168504 | 0.00025  | 0.481533 | 1.76E-28 | -0.07633 | 0.09945 | -0.15848 | 0.00059  | -0.04418 |
| 0.015227 | 0.74277  | 0.295631 | 7.14E-11 | 0.037005 | 0.42497 | 0.153297 | 0.00089  | 0.134894 |
| -0.04899 | 0.29071  | 0.152678 | 0.00093  | 0.036389 | 0.43273 | 0.103657 | 0.02508  | 0.069775 |
| -0.021   | 0.65077  | 0.248857 | 5.05E-08 | -0.03692 | 0.42602 | -0.03087 | 0.50581  | -0.03537 |
| -0.0817  | 0.07778  | -0.01854 | 0.6895   | -0.04101 | 0.37661 | -0.06952 | 0.13356  | 0.01124  |
| -0.0527  | 0.25567  | 0.119264 | 0.00989  | -0.0061  | 0.89539 | 0.030609 | 0.50935  | 0.009192 |
| -0.01493 | 0.74766  | 0.226978 | 7.17E-07 | -0.01002 | 0.829   | 0.049685 | 0.28395  | -0.02234 |
| 0.270202 | 2.95E-09 | 0.180254 | 8.97E-05 | -0.03127 | 0.50025 | 0.107899 | 0.01969  | -0.01263 |
| 0.220279 | 1.53E-06 | 0.476463 | 7.70E-28 | -0.00284 | 0.95119 | 0.059105 | 0.20233  | -0.00838 |
| 0.011017 | 0.81231  | 0.260193 | 1.15E-08 | 0.002696 | 0.95366 | 0.084026 | 0.06965  | 0.0602   |
| 0.039389 | 0.39575  | 0.216737 | 2.27E-06 | -0.04141 | 0.37189 | 0.125826 | 0.00648  | -0.03539 |
| 0.059002 | 0.20311  | 0.320126 | 1.37E-12 | -0.0183  | 0.6932  | -0.0091  | 0.84451  | -0.00674 |
| 0.257663 | 1.61E-08 | 0.542796 | 3.88E-37 | 0.013571 | 0.7699  | 0.030387 | 0.51243  | -0.0015  |
| 0.011288 | 0.80777  | 0.29838  | 4.66E-11 | -0.03602 | 0.43738 | -0.04986 | 0.28222  | -0.11845 |
| 0.144078 | 0.0018   | 0.258326 | 1.48E-08 | 0.004973 | 0.91465 | 0.034428 | 0.45796  | 0.08929  |
| 0.194201 | 2.38E-05 | 0.522632 | 4.31E-34 | -0.02565 | 0.58036 | 0.015496 | 0.73839  | -0.00405 |
| 0.300871 | 3.16E-11 | 0.445684 | 3.60E-24 | -0.01235 | 0.79013 | 0.012092 | 0.79439  | -0.07001 |
| -0.15687 | 0.00067  | -0.0263  | 0.57077  | -0.03429 | 0.45982 | 0.136756 | 0.00306  | 0.010379 |
| 0.008059 | 0.86211  | 0.07791  | 0.09263  | 0.008576 | 0.85336 | 0.013598 | 0.76947  | 0.024249 |
| -0.12316 | 0.00771  | 0.190336 | 3.47E-05 | -0.03716 | 0.423   | 0.026992 | 0.56067  | -0.10236 |
| 0.055429 | 0.23188  | 0.393087 | 1.05E-18 | 0.016051 | 0.72937 | 0.07278  | 0.11626  | 0.116902 |
| 0.020369 | 0.66063  | 0.254667 | 2.39E-08 | 0.017115 | 0.7122  | 0.0939   | 0.04254  | 0.114574 |
| 0.000641 | 0.98897  | 0.173398 | 0.00017  | 0.001828 | 0.96857 | 0.036456 | 0.43188  | 0.043618 |
| 0.276236 | 1.26E-09 | 0.202426 | 1.04E-05 | -0.0513  | 0.26858 | -0.06283 | 0.17525  | -0.12519 |
| 0.051926 | 0.26277  | 0.273354 | 1.90E-09 | 0.018344 | 0.69256 | 0.056396 | 0.22383  | 0.018297 |
| 0.132915 | 0.00401  | 0.281396 | 6.01E-10 | 0.04948  | 0.28595 | 0.07534  | 0.10394  | 0.025603 |
| 0.100774 | 0.02945  | 0.309926 | 7.44E-12 | 0.026008 | 0.57505 | 0.076467 | 0.09885  | 0.176481 |
| 0.119787 | 0.00957  | 0.324694 | 6.30E-13 | 0.005455 | 0.90641 | 0.047724 | 0.30342  | 0.069432 |
| 0.050115 | 0.2798   | 0.32986  | 2.57E-13 | -0.03631 | 0.43378 | 0.072407 | 0.11815  | 0.037397 |
| 0.061688 | 0.18326  | 0.267412 | 4.34E-09 | -0.0551  | 0.23469 | -0.02046 | 0.65925  | -0.06888 |
| -0.05928 | 0.20096  | 0.268742 | 3.62E-09 | -0.0007  | 0.98789 | 0.11725  | 0.01122  | 0.010191 |

|          |          |          |          |          |         |          |          |          |
|----------|----------|----------|----------|----------|---------|----------|----------|----------|
| 0.032801 | 0.47949  | 0.486771 | 3.73E-29 | 0.008133 | 0.86085 | 0.074536 | 0.10769  | 0.165417 |
| -0.08904 | 0.05449  | 0.313478 | 4.16E-12 | 0.020887 | 0.65256 | 0.096892 | 0.03633  | 0.020663 |
| 0.116283 | 0.01191  | 0.357238 | 1.67E-15 | -0.03472 | 0.4542  | -0.03964 | 0.39268  | -0.04652 |
| -0.03342 | 0.4712   | 0.226551 | 7.53E-07 | -0.03811 | 0.4113  | -0.01075 | 0.81675  | -0.08898 |
| -0.18043 | 8.82E-05 | -0.05241 | 0.2583   | -0.01367 | 0.76824 | 0.053107 | 0.25205  | -0.01745 |
| -0.05895 | 0.20354  | 0.115791 | 0.01228  | -0.02153 | 0.64262 | -0.00896 | 0.84695  | -0.01798 |
| 0.175897 | 0.00013  | 0.48283  | 1.20E-28 | 0.007735 | 0.8676  | 0.113866 | 0.01381  | 0.04599  |
| -0.0213  | 0.64609  | 0.15265  | 0.00094  | 0.015575 | 0.7371  | 0.045218 | 0.32954  | 0.01973  |
| -0.00441 | 0.92435  | 0.195182 | 2.16E-05 | -0.04057 | 0.38174 | -0.00361 | 0.93805  | -0.06923 |
| -0.102   | 0.02752  | 0.1857   | 5.40E-05 | -0.02574 | 0.57903 | 0.123567 | 0.00751  | 0.087802 |
| 0.181633 | 7.90E-05 | 0.207893 | 5.89E-06 | -0.02218 | 0.63254 | -0.00583 | 0.90001  | 0.016433 |
| 0.384987 | 6.01E-18 | 0.501914 | 3.61E-31 | 0.019299 | 0.67743 | 0.126489 | 0.0062   | 0.122363 |
| 0.029651 | 0.5227   | 0.276194 | 1.27E-09 | 0.005856 | 0.89957 | 0.116812 | 0.01153  | 0.140567 |
| 0.033498 | 0.4702   | 0.286184 | 2.97E-10 | -0.00468 | 0.91965 | 0.043784 | 0.34512  | 0.064026 |
| -0.01461 | 0.75278  | 0.174935 | 0.00014  | 0.000363 | 0.99375 | 0.027519 | 0.55304  | -0.04853 |
| 0.081756 | 0.07757  | 0.108684 | 0.01881  | -0.01293 | 0.78047 | 0.00164  | 0.97181  | -0.05073 |
| -0.06446 | 0.16431  | 0.136747 | 0.00307  | 0.01551  | 0.73816 | 0.037636 | 0.41712  | 0.071236 |
| 0.144652 | 0.00172  | 0.336479 | 7.97E-14 | 0.05269  | 0.2558  | 0.181567 | 7.95E-05 | 0.1119   |
| -0.04162 | 0.36954  | 0.049537 | 0.28539  | -0.03092 | 0.50507 | 0.024742 | 0.5938   | -0.10185 |
| 0.313698 | 4.01E-12 | 0.364111 | 4.36E-16 | 0.006374 | 0.89074 | -0.00277 | 0.95237  | 0.093476 |
| 0.055917 | 0.22779  | 0.168198 | 0.00026  | -0.03295 | 0.47751 | 0.001408 | 0.9758   | 0.099507 |
| 0.081617 | 0.07807  | 0.359717 | 1.03E-15 | 0.029087 | 0.53065 | 0.151228 | 0.00104  | 0.003432 |
| 0.123684 | 0.00745  | 0.251813 | 3.46E-08 | 0.011699 | 0.80092 | 0.062551 | 0.1772   | 0.039755 |
| 0.052412 | 0.25832  | 0.329335 | 2.82E-13 | 0.008586 | 0.85318 | 0.039309 | 0.3967   | 0.129831 |
| -0.10968 | 0.01773  | 0.16776  | 0.00027  | 0.005478 | 0.90602 | 0.111045 | 0.01636  | 0.067857 |
| 0.033439 | 0.47097  | 0.314797 | 3.35E-12 | 0.003055 | 0.94751 | 0.024776 | 0.5933   | 0.107769 |
| -0.11438 | 0.01339  | 0.001748 | 0.96995  | -0.03299 | 0.47691 | 0.020884 | 0.65261  | -0.08851 |
| 0.045777 | 0.32359  | 0.368133 | 1.96E-16 | 0.012601 | 0.78593 | 0.070105 | 0.13033  | 0.109376 |
| 0.007733 | 0.86763  | 0.172917 | 0.00017  | -0.02589 | 0.57673 | -0.02934 | 0.52712  | 0.058659 |
| 0.335727 | 9.12E-14 | 0.631515 | 2.43E-53 | -0.00344 | 0.94093 | 0.078632 | 0.08963  | 0.031026 |
| 0.079458 | 0.08631  | 0.270787 | 2.72E-09 | -0.00232 | 0.9602  | 0.043292 | 0.35057  | 0.058002 |
| -0.11681 | 0.01153  | 0.261356 | 9.88E-09 | 0.051774 | 0.26417 | 0.221744 | 1.30E-06 | 0.079451 |
| 0.111067 | 0.01634  | 0.365071 | 3.61E-16 | 0.025986 | 0.57538 | 0.112527 | 0.01498  | 0.10564  |
| 0.026533 | 0.56736  | 0.369202 | 1.58E-16 | 0.008666 | 0.85184 | 0.069077 | 0.13608  | 0.061567 |
| -0.14213 | 0.00208  | 0.043967 | 0.34311  | 0.005916 | 0.89853 | 0.075137 | 0.10487  | 0.141569 |
| 0.041798 | 0.36746  | 0.338494 | 5.55E-14 | -0.00566 | 0.90287 | 0.081126 | 0.07989  | 0.120062 |
| -0.09242 | 0.04592  | 0.194979 | 2.21E-05 | -0.00193 | 0.96677 | 0.132836 | 0.00403  | 0.065138 |
| 0.086123 | 0.06294  | 0.438835 | 2.10E-23 | 0.05319  | 0.2513  | 0.075101 | 0.10504  | 0.219607 |
| 0.06658  | 0.15085  | 0.231872 | 4.05E-07 | -0.02251 | 0.62755 | 0.070664 | 0.12729  | 0.050736 |
| 0.035296 | 0.44669  | 0.217394 | 2.11E-06 | 0.026543 | 0.56721 | 0.145101 | 0.00167  | 0.066029 |
| 0.105896 | 0.02209  | 0.290652 | 1.52E-10 | -0.00187 | 0.96784 | 0.024364 | 0.59946  | -0.01413 |
| 0.169147 | 0.00024  | 0.3935   | 9.57E-19 | -0.02324 | 0.61645 | -0.00901 | 0.84602  | -0.03717 |
| -0.00784 | 0.86578  | 0.25136  | 3.67E-08 | 0.025052 | 0.58918 | 0.125551 | 0.00659  | 0.109982 |
| -0.05404 | 0.24382  | 0.202351 | 1.05E-05 | -0.00992 | 0.83065 | 0.062287 | 0.17903  | 0.005618 |
| 0.111859 | 0.01559  | 0.534296 | 7.89E-36 | 0.057196 | 0.21731 | 0.185553 | 5.48E-05 | 0.226572 |

|          |          |          |          |          |          |          |          |          |
|----------|----------|----------|----------|----------|----------|----------|----------|----------|
| -0.02393 | 0.60605  | 0.160906 | 0.00048  | -0.00964 | 0.83539  | 0.042632 | 0.35797  | -0.04961 |
| 0.042003 | 0.36512  | 0.25864  | 1.42E-08 | 0.021554 | 0.64223  | 0.082863 | 0.07362  | 0.108396 |
| -0.06925 | 0.13509  | 0.247301 | 6.16E-08 | -0.03237 | 0.48527  | 0.063092 | 0.17347  | 0.043857 |
| -0.02985 | 0.51987  | 0.180775 | 8.55E-05 | -0.02302 | 0.6197   | 0.00396  | 0.93199  | 0.067146 |
| 0.010035 | 0.82877  | 0.056962 | 0.2192   | -0.02509 | 0.58863  | 0.088087 | 0.05715  | 0.175372 |
| 0.003437 | 0.94095  | 0.164713 | 0.00035  | -0.03007 | 0.51686  | -0.05358 | 0.24781  | -0.06271 |
| -0.02936 | 0.52682  | 0.111417 | 0.01601  | 0.007306 | 0.87488  | 0.061537 | 0.18433  | 0.079698 |
| -0.01106 | 0.81162  | 0.305613 | 1.49E-11 | 0.019184 | 0.67924  | 0.125874 | 0.00646  | 0.054664 |
| 0.149593 | 0.00119  | 0.102602 | 0.02661  | -0.03741 | 0.41991  | -0.0383  | 0.40889  | -0.02911 |
| -0.06691 | 0.1488   | 0.169586 | 0.00023  | -0.0428  | 0.35606  | -0.03319 | 0.47431  | -0.08055 |
| 0.073266 | 0.11384  | 0.297333 | 5.49E-11 | -0.01516 | 0.74388  | 0.051768 | 0.26422  | 0.002003 |
| 0.048469 | 0.29592  | 0.302894 | 2.30E-11 | -0.0168  | 0.7173   | 0.014498 | 0.75468  | -0.02123 |
| -0.02859 | 0.53767  | 0.025203 | 0.58694  | 0.020411 | 0.65997  | 0.052558 | 0.25699  | -0.01316 |
| -0.17236 | 0.00018  | -0.01686 | 0.71635  | -0.02519 | 0.5871   | 0.04846  | 0.296    | -0.00225 |
| -0.07043 | 0.12854  | 0.146943 | 0.00145  | -0.00794 | 0.86409  | 0.063641 | 0.16975  | -0.00908 |
| -0.02044 | 0.65956  | 0.121526 | 0.00857  | -0.00934 | 0.84043  | 0.031519 | 0.49684  | 0.098842 |
| 0.066714 | 0.15002  | 0.225322 | 8.67E-07 | 0.002453 | 0.95783  | -0.01003 | 0.82882  | 0.040116 |
| 0.020502 | 0.65856  | 0.300879 | 3.16E-11 | -0.04744 | 0.30631  | 0.047185 | 0.30891  | 0.017064 |
| 0.207361 | 6.23E-06 | 0.377893 | 2.67E-17 | -0.00947 | 0.83819  | 0.004938 | 0.91525  | 0.073818 |
| 0.030128 | 0.51603  | -0.0716  | 0.12233  | 0.092379 | 0.04602  | 0.041952 | 0.3657   | -0.03688 |
| 0.097117 | 0.0359   | -0.20493 | 8.04E-06 | 0.043264 | 0.35089  | -0.09956 | 0.03147  | -0.0788  |
| 0.130962 | 0.00459  | 0.060111 | 0.19474  | 0.125214 | 0.00674  | 0.060607 | 0.19107  | 0.035971 |
| 0.069753 | 0.13228  | -0.05183 | 0.26365  | 0.074577 | 0.1075   | -0.01886 | 0.68435  | -0.01801 |
| 0.113811 | 0.01386  | 0.043279 | 0.35072  | 0.073078 | 0.11477  | -0.02055 | 0.65779  | -0.02068 |
| 0.041368 | 0.37242  | -0.01658 | 0.72079  | 0.050606 | 0.27511  | -0.02551 | 0.58243  | -0.00697 |
| 0.035548 | 0.44345  | -0.0033  | 0.94325  | 0.088413 | 0.05623  | 0.006909 | 0.88163  | -0.02495 |
| 0.075862 | 0.10156  | 0.03157  | 0.49614  | 0.135953 | 0.00324  | 0.151703 | 0.00101  | 0.305235 |
| 0.131034 | 0.00456  | 0.02186  | 0.6375   | 0.115791 | 0.01228  | -0.00278 | 0.95219  | 0.02009  |
| 0.107926 | 0.01965  | 0.000365 | 0.99373  | 0.116126 | 0.01203  | -0.00979 | 0.83289  | 0.010705 |
| 0.082102 | 0.07632  | 0.007852 | 0.86561  | 0.217104 | 2.18E-06 | 0.196408 | 1.91E-05 | 0.078064 |
| 0.105462 | 0.02265  | -0.07072 | 0.12697  | 0.114247 | 0.0135   | -0.03308 | 0.47578  | -0.00025 |
| 0.001247 | 0.97856  | -0.09501 | 0.04015  | 0.068138 | 0.1415   | -0.00437 | 0.9249   | 0.033125 |
| 0.059745 | 0.19747  | -0.00674 | 0.88457  | 0.137841 | 0.00284  | 0.010316 | 0.82404  | 0.02428  |
| 0.12108  | 0.00881  | 0.035558 | 0.44332  | 0.126223 | 0.00631  | 0.027053 | 0.55979  | 0.067366 |
| 0.085745 | 0.06411  | 0.005604 | 0.90386  | 0.136362 | 0.00315  | 0.030775 | 0.50706  | 0.020174 |
| -0.01085 | 0.8151   | -0.14547 | 0.00162  | 0.074011 | 0.1102   | -0.01058 | 0.81957  | -0.02202 |
| 0.106775 | 0.02101  | 0.018316 | 0.693    | 0.171926 | 0.00019  | 0.036686 | 0.42898  | 0.047995 |
| 0.127357 | 0.00585  | 0.13626  | 0.00317  | 0.069857 | 0.13171  | -0.00339 | 0.94183  | 0.081906 |
| 0.039656 | 0.39254  | -0.04089 | 0.37792  | 0.120698 | 0.00903  | 0.011698 | 0.80094  | 0.0756   |
| 0.05568  | 0.22977  | 0.009118 | 0.8442   | 0.144318 | 0.00177  | 0.026873 | 0.5624   | 0.044521 |
| 0.077001 | 0.09651  | 0.005717 | 0.90193  | 0.161106 | 0.00047  | 0.035284 | 0.44685  | 0.019584 |
| -0.01515 | 0.74403  | -0.02721 | 0.55758  | 0.09902  | 0.03241  | -0.01525 | 0.74237  | 0.051444 |
| 0.091971 | 0.04699  | 0.011435 | 0.80533  | 0.157898 | 0.00062  | 0.020187 | 0.66348  | 0.039168 |
| 0.061252 | 0.18638  | -0.02342 | 0.61366  | 0.047379 | 0.30692  | 0.017854 | 0.70037  | 0.03308  |
| -0.02158 | 0.64187  | -0.12277 | 0.00791  | 0.044188 | 0.34068  | -0.09871 | 0.03296  | -0.07659 |



|          |          |          |          |          |         |          |          |          |
|----------|----------|----------|----------|----------|---------|----------|----------|----------|
| 0.034085 | 0.46244  | -0.12634 | 0.00626  | 0.065715 | 0.15624 | -0.02773 | 0.54998  | -0.01614 |
| 0.067334 | 0.14627  | 0.034624 | 0.4554   | 0.052474 | 0.25775 | -0.00153 | 0.97365  | -0.00249 |
| -0.04803 | 0.30028  | 0.160968 | 0.00048  | 0.11973  | 0.0096  | 0.087957 | 0.05752  | 0.101618 |
| 0.039998 | 0.38847  | -0.05321 | 0.25113  | 0.100903 | 0.02924 | -0.00589 | 0.89899  | -0.00221 |
| 0.092369 | 0.04604  | -0.01021 | 0.82578  | 0.12532  | 0.0067  | 0.002413 | 0.95852  | -0.00295 |
| 0.083966 | 0.06985  | -0.00148 | 0.97448  | 0.144217 | 0.00178 | 0.014567 | 0.75355  | 0.034084 |
| 0.090129 | 0.0516   | -0.05224 | 0.25984  | 0.123233 | 0.00767 | -0.00137 | 0.97648  | 0.113872 |
| 0.058449 | 0.20738  | 0.01186  | 0.79824  | 0.102265 | 0.02712 | -0.00557 | 0.9044   | 0.009141 |
| 0.0397   | 0.39202  | -0.00728 | 0.87525  | 0.111825 | 0.01562 | 0.016849 | 0.71648  | 0.061869 |
| -0.09223 | 0.04638  | -0.24596 | 7.29E-08 | 0.063167 | 0.17296 | 0.01021  | 0.82583  | 0.039305 |
| 0.024767 | 0.59343  | 0.012531 | 0.7871   | 0.07326  | 0.11387 | -0.02646 | 0.56848  | 0.007631 |
| 0.113362 | 0.01424  | -0.05784 | 0.21214  | 0.089203 | 0.05406 | -0.01566 | 0.73568  | 0.015807 |
| -0.01043 | 0.82206  | -0.11886 | 0.01014  | 0.050084 | 0.2801  | -0.01172 | 0.80064  | 0.016112 |
| 0.003665 | 0.93703  | -0.10665 | 0.02115  | 0.062269 | 0.17916 | -0.00541 | 0.90716  | -0.06329 |
| 0.108917 | 0.01855  | 0.037776 | 0.41539  | 0.133917 | 0.00374 | 0.026349 | 0.57005  | 0.036099 |
| 0.071312 | 0.12383  | -0.02391 | 0.6063   | 0.152893 | 0.00092 | 0.006896 | 0.88185  | 0.007401 |
| -0.01761 | 0.7042   | -0.14032 | 0.00237  | 0.104578 | 0.02381 | -0.01902 | 0.68191  | 0.115419 |
| 0.027076 | 0.55945  | -0.27917 | 8.30E-10 | 0.048414 | 0.29647 | -0.09769 | 0.03482  | -0.02322 |
| 0.141029 | 0.00225  | 0.034393 | 0.45841  | 0.087467 | 0.05893 | 0.026881 | 0.56229  | -0.00812 |
| 0.028764 | 0.53522  | -0.18225 | 7.46E-05 | 0.081249 | 0.07943 | -0.03961 | 0.39313  | -0.06054 |
| 0.097702 | 0.03479  | 0.051358 | 0.26803  | 0.108545 | 0.01896 | 0.020729 | 0.65501  | 0.033988 |
| 0.052705 | 0.25566  | -0.02249 | 0.62783  | 0.134204 | 0.00367 | 0.02344  | 0.61338  | 0.006987 |
| 0.237172 | 2.15E-07 | 0.10861  | 0.01889  | 0.089898 | 0.05221 | -0.01835 | 0.69246  | -0.01474 |
| 0.101708 | 0.02797  | 0.01063  | 0.81878  | 0.135525 | 0.00334 | 0.009674 | 0.83483  | -0.0061  |
| 0.066575 | 0.15088  | -0.0083  | 0.85809  | 0.169551 | 0.00023 | 0.056165 | 0.22573  | 0.043218 |
| 0.129985 | 0.0049   | -0.16227 | 0.00043  | 0.069885 | 0.13155 | -0.05072 | 0.27402  | -0.01389 |
| 0.125755 | 0.00651  | 0.035741 | 0.44098  | 0.114836 | 0.01302 | 0.012381 | 0.78959  | 0.01602  |
| 0.052104 | 0.26113  | -0.14975 | 0.00117  | 0.055913 | 0.22782 | -0.04796 | 0.30101  | -0.06554 |
| 0.081462 | 0.07864  | 0.014007 | 0.76274  | 0.129619 | 0.00502 | 0.0212   | 0.6477   | 0.021627 |
| 0.085417 | 0.06514  | -0.05473 | 0.23787  | 0.0613   | 0.18603 | 0.045022 | 0.33164  | -0.09877 |
| 0.071463 | 0.12303  | -0.17267 | 0.00018  | 0.081052 | 0.08016 | -0.06488 | 0.16157  | -0.02277 |
| 0.080616 | 0.08181  | -0.08152 | 0.07843  | 0.132385 | 0.00416 | 0.213895 | 3.10E-06 | -0.07206 |
| 0.076605 | 0.09824  | -0.0636  | 0.17002  | 0.151806 | 0.001   | 0.022547 | 0.62696  | -0.00184 |
| 0.08162  | 0.07806  | -0.02986 | 0.51978  | 0.089452 | 0.05339 | 0.011001 | 0.81257  | -0.00101 |
| 0.282713 | 4.96E-10 | 0.048444 | 0.29617  | 0.139806 | 0.00246 | -0.00127 | 0.97822  | 0.009575 |
| 0.037267 | 0.4217   | -0.11922 | 0.00992  | 0.102283 | 0.02709 | 0.010677 | 0.81799  | -0.03871 |
| 0.079688 | 0.0854   | 0.109044 | 0.01841  | 0.09925  | 0.032   | -0.03979 | 0.39096  | 0.000353 |
| 0.052357 | 0.25882  | -0.05662 | 0.222    | 0.102377 | 0.02695 | 0.007346 | 0.8742   | 0.02076  |
| 0.084078 | 0.06948  | -0.00063 | 0.98909  | 0.15002  | 0.00115 | 0.033707 | 0.46743  | 0.049302 |
| 0.006568 | 0.88743  | -0.17177 | 0.00019  | 0.057099 | 0.21809 | -0.04683 | 0.31255  | -0.07332 |
| 0.13167  | 0.00437  | -0.01193 | 0.79706  | 0.10117  | 0.02881 | -0.01257 | 0.78645  | 0.02796  |
| 0.043122 | 0.35247  | -0.01091 | 0.81414  | 0.108892 | 0.01858 | -0.0057  | 0.9022   | 0.037745 |
| 0.022057 | 0.63448  | 0.02814  | 0.54412  | 0.099245 | 0.03201 | -0.01421 | 0.75943  | 0.003435 |
| 0.072444 | 0.11796  | 0.093658 | 0.04307  | 0.099745 | 0.03115 | 0.147708 | 0.00137  | 0.059021 |
| 0.047045 | 0.31035  | 0.02058  | 0.65734  | 0.093913 | 0.04251 | 0.045133 | 0.33045  | 0.009644 |

|          |          |          |          |          |          |          |          |          |
|----------|----------|----------|----------|----------|----------|----------|----------|----------|
| 0.025791 | 0.57824  | -0.0473  | 0.30777  | 0.072418 | 0.11809  | 0.023395 | 0.61407  | 0.036503 |
| 0.103885 | 0.02477  | 0.025795 | 0.57818  | 0.139042 | 0.0026   | 0.006768 | 0.88402  | 0.019954 |
| 0.063614 | 0.16994  | -0.01578 | 0.73381  | 0.221863 | 1.28E-06 | 0.18607  | 5.22E-05 | 0.227326 |
| 0.019444 | 0.67514  | -0.05884 | 0.20437  | 0.067761 | 0.14372  | -0.02079 | 0.65408  | 0.135518 |
| 0.214947 | 2.77E-06 | -0.02763 | 0.5514   | 0.086801 | 0.06089  | -0.04869 | 0.29369  | -0.02358 |
| -0.08363 | 0.07097  | -0.17514 | 0.00014  | 0.111729 | 0.01571  | 0.007306 | 0.87488  | -0.02314 |
| 0.098387 | 0.03353  | -0.00569 | 0.9024   | 0.131255 | 0.0045   | -0.0003  | 0.9948   | -0.00627 |
| -0.00166 | 0.97146  | -0.04592 | 0.32202  | 0.067512 | 0.1452   | -0.00744 | 0.87267  | -0.00294 |
| 0.116056 | 0.01208  | 0.000666 | 0.98855  | 0.182298 | 7.43E-05 | 0.058413 | 0.20767  | 0.049845 |
| -0.0301  | 0.5164   | -0.21732 | 2.13E-06 | 0.06984  | 0.1318   | -0.06247 | 0.17773  | -0.02362 |
| 0.012995 | 0.77941  | -0.11881 | 0.01018  | 0.102863 | 0.02623  | 0.006575 | 0.88731  | -0.0144  |
| 0.150995 | 0.00106  | 0.00921  | 0.84265  | 0.101828 | 0.02778  | 0.013057 | 0.77839  | 0.055438 |
| 0.023322 | 0.61517  | -0.08042 | 0.08254  | 0.173358 | 0.00017  | 0.084238 | 0.06895  | 0.100387 |
| 0.092495 | 0.04574  | -0.00787 | 0.86524  | 0.161006 | 0.00048  | 0.038512 | 0.40635  | 0.019894 |
| 0.063762 | 0.16894  | 0.089755 | 0.05258  | 0.140993 | 0.00226  | 0.061055 | 0.1878   | 0.053523 |
| 0.017159 | 0.7115   | 0.017741 | 0.70217  | 0.122512 | 0.00804  | 0.032281 | 0.48648  | 0.027577 |
| 0.012966 | 0.77989  | 0.040971 | 0.37703  | 0.05834  | 0.20823  | 0.007406 | 0.87319  | -0.03637 |
| 0.059343 | 0.20051  | -0.01279 | 0.78282  | 0.139703 | 0.00248  | 0.016061 | 0.72922  | 0.017171 |
| -0.07703 | 0.09637  | -0.12873 | 0.00534  | 0.061342 | 0.18574  | -0.00864 | 0.85229  | 0.020903 |
| 0.00749  | 0.87176  | -0.07247 | 0.11783  | 0.075424 | 0.10355  | -0.01618 | 0.7273   | -0.02299 |
| 0.035267 | 0.44707  | -0.10901 | 0.01846  | 0.072105 | 0.1197   | 0.01079  | 0.81611  | -0.02311 |
| 0.017907 | 0.69951  | 0.074042 | 0.11005  | 0.09556  | 0.03899  | 0.053671 | 0.24704  | -0.00745 |
| 0.021994 | 0.63545  | -0.01511 | 0.74474  | 0.069525 | 0.13355  | -0.03281 | 0.47933  | -0.09031 |
| 0.061021 | 0.18805  | -0.25157 | 3.57E-08 | 0.073581 | 0.11229  | 0.007253 | 0.87578  | -0.03174 |
| -0.03823 | 0.40976  | -0.08629 | 0.06244  | 0.041673 | 0.3689   | -0.01773 | 0.70238  | -0.05577 |
| -0.01979 | 0.66964  | -0.20195 | 1.09E-05 | 0.076273 | 0.09971  | -0.05331 | 0.25025  | -0.05727 |
| 0.04904  | 0.29026  | -0.03845 | 0.40705  | 0.102831 | 0.02627  | -0.02443 | 0.5984   | 0.010644 |
| 0.019638 | 0.67208  | -0.05109 | 0.2705   | 0.158001 | 0.00061  | 0.040035 | 0.38804  | 0.051843 |
| 0.005415 | 0.9071   | -0.20864 | 5.45E-06 | 0.086241 | 0.06258  | 0.067929 | 0.14273  | 0.042004 |
| 0.028637 | 0.53703  | -0.18324 | 6.80E-05 | 0.084894 | 0.06681  | -0.05388 | 0.24524  | -0.02305 |
| 0.238945 | 1.74E-07 | -0.06854 | 0.13914  | 0.061947 | 0.18143  | -0.01207 | 0.7947   | -0.04029 |
| 0.000704 | 0.98789  | -0.17641 | 0.00013  | 0.07188  | 0.12086  | -0.01806 | 0.69714  | -0.03867 |
| 0.001005 | 0.98272  | -0.06816 | 0.14135  | 0.160224 | 0.00051  | 0.037977 | 0.41291  | 0.02792  |
| 0.023974 | 0.60531  | -0.03038 | 0.51256  | 0.153753 | 0.00086  | 0.027724 | 0.55009  | 0.059696 |
| 0.119979 | 0.00945  | 0.039462 | 0.39487  | 0.119226 | 0.00991  | 0.003992 | 0.93145  | 0.026088 |
| 0.06396  | 0.16762  | -0.00019 | 0.99675  | 0.13214  | 0.00423  | 0.023141 | 0.61792  | 0.013968 |
| -0.01403 | 0.76238  | -0.1402  | 0.00239  | 0.1055   | 0.0226   | 0.05713  | 0.21784  | 0.019324 |
| 0.098967 | 0.0325   | 0.012345 | 0.79018  | 0.154224 | 0.00083  | 0.025399 | 0.58405  | 0.019964 |
| 0.015023 | 0.74609  | -0.09311 | 0.04431  | 0.09339  | 0.04368  | -0.02446 | 0.59809  | -0.03683 |
| 0.003706 | 0.93634  | -0.05105 | 0.2709   | 0.063147 | 0.1731   | -0.01037 | 0.82308  | -0.00164 |
| 0.272228 | 2.23E-09 | 0.069367 | 0.13444  | 0.014917 | 0.74782  | -0.06918 | 0.13549  | -0.11256 |
| 0.159553 | 0.00054  | -0.01989 | 0.66816  | 0.108578 | 0.01892  | -0.00395 | 0.9321   | 0.027077 |
| 0.071937 | 0.12056  | -0.03946 | 0.39494  | 0.07998  | 0.08426  | 0.000162 | 0.99721  | -0.02612 |
| 0.094736 | 0.04072  | 0.04973  | 0.28351  | 0.105117 | 0.0231   | 0.023712 | 0.60927  | 0.048557 |
| 0.029109 | 0.53034  | -0.01017 | 0.82642  | 0.141501 | 0.00218  | 0.061205 | 0.18672  | 0.05278  |

|          |          |          |          |          |         |          |         |          |
|----------|----------|----------|----------|----------|---------|----------|---------|----------|
| 0.048305 | 0.29755  | -0.04998 | 0.28108  | 0.139957 | 0.00243 | 0.042399 | 0.36061 | 0.024853 |
| -0.01727 | 0.70974  | -0.02233 | 0.63029  | 0.055573 | 0.23067 | -0.01761 | 0.7043  | -0.02808 |
| -0.02516 | 0.58752  | -0.07498 | 0.1056   | 0.033921 | 0.4646  | 0.086297 | 0.06241 | -0.06251 |
| -0.01997 | 0.66691  | -0.23541 | 2.66E-07 | 0.050621 | 0.27497 | -0.1266  | 0.00615 | -0.04799 |
| -0.0412  | 0.37441  | -0.16309 | 0.0004   | 0.068456 | 0.13964 | 0.035663 | 0.44198 | -0.05621 |
| -0.02578 | 0.57839  | -0.02136 | 0.64527  | 0.096711 | 0.03669 | 0.015997 | 0.73025 | 0.039222 |
| -0.00434 | 0.9254   | -0.05646 | 0.2233   | 0.078382 | 0.09066 | -0.00891 | 0.84778 | -0.01935 |
| 0.214951 | 2.76E-06 | 0.293461 | 9.95E-11 | 0.08353  | 0.07132 | 0.043931 | 0.3435  | 0.078858 |
| 0.324695 | 6.30E-13 | 0.464895 | 2.04E-26 | 0.057205 | 0.21723 | 0.022612 | 0.62597 | 0.139821 |
| 0.055438 | 0.2318   | -0.11217 | 0.0153   | 0.122958 | 0.00781 | -0.04642 | 0.31683 | 0.026897 |
| 0.068878 | 0.13722  | 0.048992 | 0.29073  | 0.144052 | 0.0018  | 0.027057 | 0.55973 | 0.049601 |
| 0.039009 | 0.40032  | -0.04097 | 0.37709  | 0.078664 | 0.0895  | -0.0268  | 0.5635  | 0.001263 |
| 0.113284 | 0.01431  | -0.00391 | 0.93284  | 0.135492 | 0.00335 | 0.017432 | 0.70712 | 0.037573 |
| 0.052563 | 0.25695  | -0.02727 | 0.55661  | 0.151139 | 0.00105 | 0.042586 | 0.35849 | 0.067833 |
| 0.067662 | 0.1443   | 0.012119 | 0.79393  | 0.105053 | 0.02318 | -0.0103  | 0.82428 | -0.00133 |
| 0.16934  | 0.00024  | 0.049625 | 0.28454  | 0.105603 | 0.02247 | 0.016146 | 0.72784 | 0.030512 |
| 0.093533 | 0.04335  | 0.073816 | 0.11115  | 0.079058 | 0.0879  | -0.03409 | 0.46233 | -0.01188 |
| 0.098551 | 0.03324  | -0.26026 | 1.14E-08 | 0.051915 | 0.26287 | -0.04283 | 0.35574 | -0.06517 |
| 0.010173 | 0.82645  | -0.10337 | 0.0255   | 0.099152 | 0.03217 | -0.02792 | 0.54724 | 0.028147 |
| -0.00109 | 0.98121  | -0.12539 | 0.00666  | 0.062655 | 0.17648 | -0.02574 | 0.57895 | -0.06167 |
| 0.005687 | 0.90244  | -0.03833 | 0.40863  | 0.043979 | 0.34298 | 0.091456 | 0.04824 | 0.036374 |
| 0.065824 | 0.15555  | -0.00898 | 0.84662  | 0.153465 | 0.00088 | 0.027849 | 0.5483  | 0.011526 |
| 0.087614 | 0.0585   | -0.00081 | 0.98605  | 0.040786 | 0.37918 | -0.02325 | 0.61626 | -0.00868 |
| 0.032611 | 0.48204  | -0.13986 | 0.00245  | 0.065926 | 0.15491 | -0.01427 | 0.75847 | -0.02727 |
| 0.11731  | 0.01118  | -0.06448 | 0.16421  | 0.079726 | 0.08525 | -0.00628 | 0.89239 | 0.021172 |
| 0.277661 | 1.03E-09 | -0.04491 | 0.33285  | 0.116882 | 0.01148 | -0.00612 | 0.89511 | -0.03564 |
| 0.135177 | 0.00342  | 0.022212 | 0.6321   | 0.115085 | 0.01282 | 0.029785 | 0.52082 | 0.075856 |
| 0.034033 | 0.46313  | -0.1206  | 0.00909  | 0.040901 | 0.37784 | -0.08926 | 0.0539  | -0.09868 |
| -0.00862 | 0.85258  | -0.09261 | 0.04547  | 0.122333 | 0.00813 | 0.142383 | 0.00204 | 0.048055 |
| 0.115258 | 0.01269  | -0.00501 | 0.914    | 0.06161  | 0.18381 | -0.02969 | 0.52215 | -0.02728 |
| 0.127367 | 0.00585  | -0.0375  | 0.41879  | 0.136598 | 0.0031  | 0.009118 | 0.8442  | 0.012533 |
| 0.411014 | 1.84E-20 | 0.370476 | 1.22E-16 | 0.039172 | 0.39835 | -0.02617 | 0.57274 | 0.018818 |
| 0.154833 | 0.00079  | 0.041381 | 0.37227  | 0.114327 | 0.01343 | 0.010297 | 0.82437 | 0.031846 |
| 0.109814 | 0.0176   | 0.06253  | 0.17734  | 0.140891 | 0.00228 | 0.014748 | 0.75058 | 0.008324 |
| 0.139712 | 0.00248  | 0.023585 | 0.61118  | 0.140165 | 0.0024  | 0.011042 | 0.81189 | 0.029276 |
| 0.329729 | 2.63E-13 | 0.038924 | 0.40135  | 0.063187 | 0.17283 | -0.0215  | 0.64313 | 0.030473 |
| 0.102187 | 0.02723  | 0.067483 | 0.14537  | 0.053093 | 0.25218 | 0.002007 | 0.9655  | -0.06183 |
| 0.020289 | 0.66188  | 0.058421 | 0.2076   | 0.080476 | 0.08234 | -0.0045  | 0.9227  | 0.026897 |
| 0.055186 | 0.23394  | 0.014949 | 0.7473   | 0.13891  | 0.00263 | 0.024257 | 0.60106 | 0.048509 |
| 0.017243 | 0.71015  | -0.11411 | 0.01361  | 0.126278 | 0.00629 | 0.007731 | 0.86766 | 0.002193 |
| 0.061067 | 0.18771  | -0.01999 | 0.66657  | 0.147624 | 0.00138 | 0.018475 | 0.69048 | 0.042343 |
| 0.03015  | 0.51573  | -0.03505 | 0.44986  | 0.05144  | 0.26726 | -0.02391 | 0.60624 | -0.02881 |
| 0.191827 | 3.00E-05 | -0.00666 | 0.88592  | 0.136378 | 0.00315 | -0.02194 | 0.63633 | 0.01604  |
| 0.068592 | 0.13886  | -0.00066 | 0.98861  | 0.10964  | 0.01778 | -0.02856 | 0.53806 | 0.007103 |
| 0.010717 | 0.81732  | -0.06486 | 0.16173  | 0.06688  | 0.14901 | -0.02977 | 0.52106 | -0.00833 |

|          |          |          |          |          |         |          |         |           |
|----------|----------|----------|----------|----------|---------|----------|---------|-----------|
| 0.050731 | 0.27392  | -0.14674 | 0.00147  | 0.039756 | 0.39135 | -0.05426 | 0.24184 | -0.05398  |
| 0.084187 | 0.06912  | -0.10925 | 0.0182   | 0.108645 | 0.01885 | 0.038942 | 0.40112 | 0.188014  |
| 0.115417 | 0.01257  | 0.049452 | 0.28622  | 0.104276 | 0.02423 | 0.023431 | 0.61351 | 0.018617  |
| 0.060912 | 0.18884  | 0.112486 | 0.01501  | 0.128617 | 0.00538 | 0.044514 | 0.33713 | 0.030757  |
| 0.193712 | 2.50E-05 | 0.142237 | 0.00206  | 0.068298 | 0.14056 | 0.000456 | 0.99215 | 0.033311  |
| -0.00633 | 0.89141  | -0.10778 | 0.01982  | 0.110525 | 0.01688 | 0.013318 | 0.77408 | 0.129732  |
| 0.088267 | 0.05664  | 0.019699 | 0.67113  | 0.146664 | 0.00148 | 0.013911 | 0.76431 | 0.060666  |
| -0.0753  | 0.10414  | -0.2273  | 6.90E-07 | 0.061891 | 0.18182 | -0.02254 | 0.62702 | -0.03672  |
| 0.12472  | 0.00696  | 0.032081 | 0.48919  | 0.080789 | 0.08115 | -0.003   | 0.94849 | 0.041458  |
| 0.065542 | 0.15733  | -0.01431 | 0.75769  | 0.111106 | 0.0163  | 0.03238  | 0.48515 | 0.024415  |
| -0.06738 | 0.14601  | -0.15961 | 0.00054  | 0.070256 | 0.12951 | 0.038433 | 0.40731 | 0.032772  |
| 0.090737 | 0.05004  | -0.01078 | 0.81627  | 0.072241 | 0.119   | 0.007499 | 0.8716  | -0.02571  |
| 0.059089 | 0.20245  | -0.01577 | 0.73395  | 0.069594 | 0.13317 | 0.019648 | 0.67193 | 0.036357  |
| 0.069485 | 0.13377  | -0.001   | 0.98278  | 0.159178 | 0.00056 | 0.029949 | 0.51853 | 0.031788  |
| 0.017575 | 0.70483  | -0.10025 | 0.03031  | 0.059912 | 0.19622 | -0.02752 | 0.55304 | -0.04789  |
| 0.044529 | 0.33697  | -0.04352 | 0.34809  | 0.147664 | 0.00137 | 0.015142 | 0.74415 | 0.011232  |
| 0.002405 | 0.95867  | -0.06236 | 0.17851  | 0.130627 | 0.00469 | 0.020899 | 0.65237 | 0.013799  |
| 0.083013 | 0.0731   | 0.028242 | 0.54266  | 0.122117 | 0.00825 | 0.028511 | 0.53881 | 0.082066  |
| -0.04815 | 0.29911  | -0.19786 | 1.65E-05 | 0.052083 | 0.26132 | -0.00847 | 0.8551  | -0.08403  |
| 0.043093 | 0.3528   | -0.02344 | 0.6134   | 0.145767 | 0.00159 | 0.022513 | 0.62749 | 0.008786  |
| 0.115317 | 0.01264  | 0.011999 | 0.79593  | 0.131029 | 0.00457 | 0.011847 | 0.79846 | 0.007166  |
| 0.08465  | 0.0676   | 0.037589 | 0.4177   | 0.141203 | 0.00222 | 0.020039 | 0.66579 | -5.72E-05 |
| 0.026458 | 0.56845  | 0.040194 | 0.38615  | 0.094091 | 0.04211 | 0.01298  | 0.77966 | 0.007461  |
| 0.081422 | 0.07879  | 0.001285 | 0.9779   | 0.114767 | 0.01308 | 0.032332 | 0.48579 | 0.06068   |
| 0.082627 | 0.07445  | 0.062491 | 0.17761  | 0.16603  | 0.00031 | 0.088894 | 0.0549  | 0.274887  |
| 0.152512 | 0.00095  | -0.03596 | 0.43813  | 0.106624 | 0.02119 | -0.01955 | 0.67355 | 0.008569  |
| 0.103491 | 0.02532  | 0.028043 | 0.54551  | 0.144818 | 0.0017  | 0.02583  | 0.57767 | 0.030599  |
| 0.108235 | 0.0193   | -0.05295 | 0.25349  | 0.143285 | 0.00191 | 0.018509 | 0.68994 | -0.00486  |
| 0.095502 | 0.03911  | -0.10453 | 0.02388  | 0.086591 | 0.06152 | -0.00253 | 0.95658 | 0.041208  |
| 0.188452 | 4.16E-05 | -0.09049 | 0.05067  | 0.069314 | 0.13474 | -0.02357 | 0.61139 | 0.061352  |
| 0.335945 | 8.77E-14 | 0.176295 | 0.00013  | 0.081812 | 0.07736 | -0.02638 | 0.56966 | 0.014547  |
| -0.01538 | 0.74019  | -0.18045 | 8.81E-05 | 0.077428 | 0.09467 | -0.03382 | 0.46592 | -0.01257  |
| 0.052203 | 0.26023  | -0.04108 | 0.37571  | 0.117145 | 0.01129 | 0.09177  | 0.04747 | 0.08333   |
| 0.073105 | 0.11464  | -0.01481 | 0.74958  | 0.153091 | 0.0009  | 0.02587  | 0.57709 | 0.036184  |
| 0.075419 | 0.10358  | 0.135379 | 0.00338  | 0.123503 | 0.00754 | 0.089119 | 0.05429 | 0.41956   |
| 0.106071 | 0.02187  | -0.06724 | 0.14682  | 0.120265 | 0.00928 | 0.014369 | 0.7568  | 0.003048  |
| 0.046359 | 0.31747  | -0.06109 | 0.18758  | 0.073579 | 0.1123  | -0.04367 | 0.34634 | -0.04433  |
| -0.12126 | 0.00871  | -0.24266 | 1.10E-07 | 0.03273  | 0.48044 | -0.0479  | 0.30165 | -0.09423  |
| -0.059   | 0.20315  | -0.17945 | 9.65E-05 | 0.064012 | 0.16728 | -0.00096 | 0.98344 | -0.07639  |
| -0.14447 | 0.00175  | -0.24714 | 6.28E-08 | 0.011252 | 0.80838 | 0.001064 | 0.9817  | -0.074    |
| -0.026   | 0.57514  | -0.20464 | 8.28E-06 | 0.08942  | 0.05348 | 0.085474 | 0.06496 | 0.014864  |
| 0.107056 | 0.02067  | 0.015919 | 0.73151  | 0.10132  | 0.02857 | 0.023325 | 0.61513 | 0.033937  |
| 0.073773 | 0.11135  | 0.011207 | 0.80914  | 0.133573 | 0.00383 | 0.011    | 0.8126  | 0.064068  |
| 0.017406 | 0.70754  | -0.24345 | 9.97E-08 | 0.062298 | 0.17896 | -0.02515 | 0.58773 | -0.06353  |
| -0.02913 | 0.53009  | -0.01812 | 0.6962   | 0.147394 | 0.0014  | 0.134768 | 0.00352 | -0.03401  |

|          |         |          |          |          |          |          |          |          |
|----------|---------|----------|----------|----------|----------|----------|----------|----------|
| 0.085617 | 0.06451 | -0.00128 | 0.97807  | 0.112311 | 0.01517  | -0.00637 | 0.8908   | -0.00786 |
| 0.049578 | 0.28499 | 0.103401 | 0.02545  | 0.083749 | 0.07058  | 0.050508 | 0.27604  | -0.01444 |
| 0.086149 | 0.06286 | 0.070869 | 0.12619  | 0.075185 | 0.10465  | -0.0161  | 0.72851  | -0.01778 |
| -0.029   | 0.53193 | -0.11315 | 0.01443  | 0.083533 | 0.07131  | 0.02811  | 0.54454  | 0.005522 |
| 0.049546 | 0.2853  | -0.03367 | 0.46797  | 0.155064 | 0.00077  | 0.048306 | 0.29754  | 0.081274 |
| 0.155491 | 0.00075 | 0.052204 | 0.26021  | 0.149    | 0.00124  | 0.018781 | 0.68562  | 0.031905 |
| 0.090077 | 0.05174 | 0.015238 | 0.74259  | 0.106405 | 0.02146  | -0.01945 | 0.675    | 0.008009 |
| 0.038949 | 0.40104 | -0.00153 | 0.97371  | 0.001448 | 0.97511  | -0.03102 | 0.50374  | -0.04205 |
| -0.01771 | 0.70267 | -0.15735 | 0.00064  | 0.083719 | 0.07068  | 0.162523 | 0.00042  | 0.123785 |
| -0.00103 | 0.98226 | -0.10041 | 0.03004  | 0.127035 | 0.00598  | -0.0006  | 0.98977  | 0.109847 |
| 0.04695  | 0.31133 | -0.16955 | 0.00023  | 0.077568 | 0.09407  | -0.05673 | 0.22106  | 0.015115 |
| 0.0219   | 0.63689 | -0.21645 | 2.35E-06 | 0.049892 | 0.28195  | -0.07951 | 0.08609  | -0.08998 |
| 0.08532  | 0.06545 | 0.053061 | 0.25247  | 0.136267 | 0.00317  | 0.011306 | 0.80747  | 0.020928 |
| 0.075579 | 0.10284 | 0.024066 | 0.60393  | 0.150426 | 0.00111  | 0.034004 | 0.46352  | 0.016955 |
| -0.00458 | 0.92139 | -0.05755 | 0.21446  | 0.095131 | 0.03988  | -0.01657 | 0.72096  | 0.026791 |
| -0.00206 | 0.96464 | -0.17221 | 0.00018  | 0.074932 | 0.10583  | -0.04597 | 0.32157  | 0.035267 |
| -0.05098 | 0.27158 | 0.021941 | 0.63627  | 0.455152 | 2.93E-25 | 0.489058 | 1.88E-29 | 0.494846 |
| -0.00899 | 0.8464  | 0.011816 | 0.79898  | 0.346995 | 1.17E-14 | 0.348636 | 8.58E-15 | 0.41107  |
| 0.060141 | 0.19451 | 0.033276 | 0.47314  | 0.349323 | 7.55E-15 | 0.086236 | 0.0626   | 0.119196 |
| 0.054668 | 0.23835 | -0.02497 | 0.59037  | 0.2003   | 1.29E-05 | 0.044827 | 0.33374  | 0.057427 |
| 0.045082 | 0.33099 | -0.03723 | 0.42223  | 0.159188 | 0.00055  | 0.027359 | 0.55535  | 0.032721 |
| 0.063825 | 0.16852 | -0.00823 | 0.85928  | 0.187685 | 4.48E-05 | 0.039723 | 0.39175  | 0.041863 |
| 0.063043 | 0.17381 | -0.02424 | 0.60132  | 0.204568 | 8.35E-06 | 0.037318 | 0.42106  | 0.020289 |
| 0.077669 | 0.09365 | 0.00978  | 0.83305  | 0.167781 | 0.00027  | 0.019333 | 0.67689  | 0.070903 |
| 0.055688 | 0.2297  | -0.01689 | 0.71576  | 0.248914 | 5.02E-08 | 0.058122 | 0.20995  | 0.053907 |
| 0.054624 | 0.23873 | -0.00318 | 0.94534  | 0.166365 | 0.00031  | 0.056171 | 0.22568  | 0.026364 |
| 0.030946 | 0.5047  | -0.05772 | 0.21313  | 0.140895 | 0.00227  | 0.057809 | 0.21241  | 0.074167 |
| 0.070999 | 0.12549 | -0.02913 | 0.53007  | 0.109039 | 0.01842  | 0.009476 | 0.83817  | 0.030358 |
| 0.032445 | 0.48428 | -0.01496 | 0.74704  | 0.087065 | 0.06011  | -0.02845 | 0.53974  | -0.04923 |
| 0.127013 | 0.00599 | 0.068559 | 0.13905  | 0.43505  | 5.49E-23 | 0.135497 | 0.00335  | 0.131941 |
| 0.102932 | 0.02613 | 0.044598 | 0.33621  | 0.296945 | 5.83E-11 | 0.116327 | 0.01188  | 0.06883  |
| 0.099134 | 0.03221 | -0.0172  | 0.71091  | 0.351597 | 4.91E-15 | 0.058495 | 0.20703  | 0.069397 |
| 0.029246 | 0.5284  | 0.022738 | 0.62404  | 0.228868 | 5.76E-07 | 0.052475 | 0.25775  | 4.88E-05 |
| 0.141519 | 0.00217 | 0.137661 | 0.00287  | 0.384064 | 7.32E-18 | 0.038326 | 0.40862  | 0.06377  |
| 0.070048 | 0.13065 | 0.065329 | 0.15869  | 0.129336 | 0.00512  | 0.010908 | 0.81414  | 0.078287 |
| 0.101915 | 0.02765 | 0.025632 | 0.58059  | 0.142348 | 0.00204  | 0.027286 | 0.5564   | 0.036354 |
| 0.033357 | 0.47207 | -0.03917 | 0.39832  | 0.139088 | 0.00259  | 0.0279   | 0.54756  | 0.010623 |
| 0.142118 | 0.00208 | 0.063472 | 0.17089  | 0.112144 | 0.01532  | 0.008696 | 0.85133  | 0.061283 |
| 0.063555 | 0.17033 | 0.037103 | 0.42376  | 0.067939 | 0.14266  | 0.026746 | 0.56426  | 0.013586 |
| -0.00516 | 0.91143 | -0.00075 | 0.98702  | 0.379807 | 1.79E-17 | 0.288988 | 1.96E-10 | 0.131532 |
| 0.104594 | 0.02379 | 0.051386 | 0.26777  | 0.041951 | 0.36571  | 0.014577 | 0.75338  | -0.00797 |
| 0.058117 | 0.20998 | -0.01949 | 0.67442  | 0.140482 | 0.00234  | 0.017901 | 0.69962  | 0.006242 |
| 0.024361 | 0.59951 | -0.01231 | 0.7908   | 0.083864 | 0.0702   | 0.027448 | 0.55407  | -0.02478 |
| -0.00336 | 0.94228 | -0.09076 | 0.04997  | 0.052686 | 0.25583  | -0.01802 | 0.69765  | -0.05262 |
| 0.01344  | 0.77207 | -0.01318 | 0.77629  | 0.093641 | 0.04311  | 0.011971 | 0.79639  | -0.00285 |

|          |          |          |          |          |          |          |          |          |
|----------|----------|----------|----------|----------|----------|----------|----------|----------|
| -0.06142 | 0.18515  | -0.02936 | 0.52674  | 0.106494 | 0.02135  | 0.137535 | 0.0029   | 0.096305 |
| 0.095353 | 0.03942  | 0.029701 | 0.522    | 0.130328 | 0.00479  | 0.017718 | 0.70254  | 0.002971 |
| 0.119076 | 0.01001  | 0.171993 | 0.00019  | 0.149104 | 0.00123  | 0.045309 | 0.32857  | 0.145172 |
| 0.11936  | 0.00983  | -0.15526 | 0.00076  | 0.077079 | 0.09617  | -0.02482 | 0.5926   | 0.006727 |
| 0.049562 | 0.28514  | 0.078971 | 0.08826  | 0.104522 | 0.02389  | 0.043543 | 0.34779  | 0.1135   |
| 0.116933 | 0.01144  | 0.039432 | 0.39523  | 0.138967 | 0.00262  | 0.027039 | 0.55999  | 0.049663 |
| 0.044733 | 0.33476  | -0.07543 | 0.10355  | 0.095944 | 0.03821  | 0.003939 | 0.93235  | 0.023109 |
| 0.001481 | 0.97454  | -0.03338 | 0.47174  | 0.212363 | 3.66E-06 | 0.280797 | 6.55E-10 | 0.567501 |
| 0.01001  | 0.82918  | -0.00054 | 0.99078  | 0.155804 | 0.00073  | 0.226532 | 7.55E-07 | 0.675579 |
| 0.100438 | 0.02999  | 0.062132 | 0.18012  | 0.104882 | 0.02341  | -0.01322 | 0.77577  | 0.002157 |
| 0.069318 | 0.13472  | 0.098512 | 0.03331  | 0.110762 | 0.01664  | 0.125133 | 0.00678  | -0.00105 |
| 0.072607 | 0.11713  | -0.0193  | 0.67739  | 0.141319 | 0.00221  | 0.031575 | 0.49608  | 0.05273  |
| 0.051378 | 0.26784  | -0.03826 | 0.40939  | 0.084604 | 0.06775  | 0.041785 | 0.36761  | -0.00599 |
| 0.097555 | 0.03507  | -0.00077 | 0.98681  | 0.129526 | 0.00506  | 0.026748 | 0.56423  | 0.040859 |
| 0.027435 | 0.55426  | -0.05216 | 0.26058  | 0.107957 | 0.01962  | -0.01735 | 0.70836  | -0.00211 |
| 0.257905 | 1.56E-08 | 0.049461 | 0.28613  | 0.146209 | 0.00153  | -0.00759 | 0.87011  | 0.130011 |
| 0.16284  | 0.00041  | 0.01213  | 0.79375  | 0.07441  | 0.10829  | -0.01647 | 0.72252  | -0.00922 |
| -0.04235 | 0.36114  | -0.11522 | 0.01272  | 0.091963 | 0.04701  | 0.001502 | 0.97417  | 0.198128 |
| 0.055606 | 0.23039  | -0.08296 | 0.07327  | 0.076072 | 0.10061  | -0.00779 | 0.86659  | -0.00488 |
| 0.012054 | 0.79502  | -0.04203 | 0.36478  | 0.134453 | 0.0036   | 0.036234 | 0.43469  | 0.1048   |
| 0.01549  | 0.73849  | -0.05476 | 0.23754  | 0.065955 | 0.15473  | -0.01575 | 0.73428  | -0.00036 |
| 0.115148 | 0.01277  | -0.12673 | 0.0061   | 0.030837 | 0.5062   | -0.03316 | 0.47464  | 0.034855 |
| 0.009567 | 0.83663  | -0.08335 | 0.07194  | 0.18685  | 4.85E-05 | 0.160336 | 0.0005   | 0.261773 |
| 0.036071 | 0.43677  | -0.02751 | 0.5532   | 0.126143 | 0.00634  | -0.01834 | 0.69269  | -0.01948 |
| 0.060116 | 0.19469  | -0.00168 | 0.9712   | 0.147724 | 0.00137  | 0.058517 | 0.20686  | 0.069799 |
| 0.000222 | 0.99619  | -0.06361 | 0.16998  | 0.062327 | 0.17876  | 0.007537 | 0.87097  | 0.088495 |
| 0.112026 | 0.01543  | 0.046722 | 0.31368  | 0.160851 | 0.00048  | 0.029326 | 0.52728  | 0.04035  |
| 0.073134 | 0.11449  | -0.16071 | 0.00049  | 0.04841  | 0.2965   | 0.004145 | 0.92882  | -0.01871 |
| 0.024769 | 0.5934   | -0.04333 | 0.35015  | 0.088713 | 0.0554   | 0.017858 | 0.7003   | 0.013587 |
| 0.018837 | 0.68473  | -0.04816 | 0.29901  | 0.140793 | 0.00229  | 0.015636 | 0.73611  | 0.010692 |
| 0.084432 | 0.06831  | -0.01875 | 0.68612  | 0.161044 | 0.00048  | 0.02512  | 0.58818  | 0.021968 |
| -0.0601  | 0.19478  | -0.22344 | 1.07E-06 | 0.158524 | 0.00059  | 0.09477  | 0.04065  | 0.029813 |
| -0.01363 | 0.76901  | -0.11639 | 0.01183  | 0.005086 | 0.91271  | -0.07345 | 0.11295  | 0.025026 |
| 0.422253 | 1.29E-21 | 0.205797 | 7.34E-06 | 0.075194 | 0.10461  | -0.04407 | 0.34198  | 0.022673 |
| 0.102059 | 0.02743  | 0.003021 | 0.94808  | 0.116393 | 0.01183  | -0.01596 | 0.73092  | 0.018704 |
| 0.078372 | 0.0907   | 0.031751 | 0.49367  | 0.114187 | 0.01355  | 0.029365 | 0.52673  | 0.012657 |
| 0.038609 | 0.40517  | -0.04843 | 0.29628  | 0.107675 | 0.01994  | -0.00095 | 0.98361  | 0.001003 |
| 0.001612 | 0.97228  | 0.020215 | 0.66304  | 0.102964 | 0.02608  | 0.190723 | 3.34E-05 | 0.157123 |
| 0.054408 | 0.2406   | -0.01583 | 0.7329   | 0.12875  | 0.00533  | 0.042897 | 0.35499  | -0.00052 |
| 0.110228 | 0.01718  | 0.010882 | 0.81456  | 0.108964 | 0.0185   | 0.004986 | 0.91442  | -0.03725 |
| 0.106852 | 0.02092  | 0.041197 | 0.3744   | 0.111362 | 0.01606  | -0.0039  | 0.93299  | -0.00476 |
| 0.003931 | 0.93248  | -0.08211 | 0.07628  | 0.061696 | 0.1832   | 0.002185 | 0.96244  | 0.041422 |
| 0.097529 | 0.03512  | 0.043361 | 0.3498   | 0.12892  | 0.00527  | 0.021103 | 0.6492   | 0.028723 |
| 0.086302 | 0.06239  | 0.052031 | 0.2618   | 0.094274 | 0.04171  | -0.00752 | 0.8713   | 0.032937 |
| -0.06288 | 0.17492  | -0.20195 | 1.09E-05 | 0.033386 | 0.47168  | -0.08726 | 0.05954  | -0.02618 |

|          |          |          |          |          |         |          |         |          |
|----------|----------|----------|----------|----------|---------|----------|---------|----------|
| 0.013623 | 0.76905  | -0.09786 | 0.0345   | 0.106828 | 0.02094 | 0.012561 | 0.7866  | 0.152065 |
| 0.039727 | 0.3917   | -0.18245 | 7.32E-05 | 0.100579 | 0.02976 | -0.01428 | 0.7582  | -0.01085 |
| 0.019852 | 0.66873  | -0.04384 | 0.34449  | 0.110127 | 0.01728 | 0.061873 | 0.18195 | 0.055975 |
| 0.072394 | 0.11821  | -0.34688 | 1.19E-14 | 0.021678 | 0.6403  | -0.105   | 0.02325 | -0.10129 |
| -0.04226 | 0.36213  | -0.19389 | 2.45E-05 | 0.086183 | 0.06276 | -0.03806 | 0.41187 | -0.05755 |
| -0.02855 | 0.53828  | -0.08709 | 0.06004  | 0.090205 | 0.0514  | -0.01121 | 0.80913 | -0.0477  |
| 0.075449 | 0.10344  | -0.06239 | 0.17834  | 0.113806 | 0.01386 | -0.02023 | 0.66284 | 0.018714 |
| 0.171847 | 0.00019  | 0.10014  | 0.03049  | 0.025088 | 0.58866 | -0.08785 | 0.05783 | 0.003497 |
| 0.006537 | 0.88795  | -0.04756 | 0.30506  | 0.079308 | 0.0869  | -0.00439 | 0.92457 | -0.00094 |
| 0.237106 | 2.17E-07 | 0.019563 | 0.67327  | 0.108224 | 0.01932 | 0.001625 | 0.97206 | 0.0379   |
| 0.084425 | 0.06833  | 0.051434 | 0.26732  | 0.102651 | 0.02654 | -0.01672 | 0.71857 | 0.002094 |
| 0.120961 | 0.00888  | -0.15645 | 0.00069  | 0.069375 | 0.13439 | -0.0924  | 0.04597 | -0.09138 |
| -0.02938 | 0.52649  | -0.18064 | 8.66E-05 | 0.059475 | 0.1995  | -0.00861 | 0.85282 | -0.02393 |
| 0.042529 | 0.35913  | -0.03327 | 0.47323  | 0.084195 | 0.06909 | 0.004277 | 0.92655 | -0.01618 |
| -0.00836 | 0.85702  | -0.10265 | 0.02654  | 0.099866 | 0.03095 | 0.099732 | 0.03117 | 0.356204 |
| 0.08426  | 0.06888  | -0.02771 | 0.55033  | 0.132193 | 0.00421 | 0.01421  | 0.75939 | 0.038087 |
| 0.121837 | 0.0084   | -0.04462 | 0.33594  | 0.12762  | 0.00575 | 0.026809 | 0.56333 | 0.058385 |
| 0.005331 | 0.90852  | -0.08103 | 0.08024  | 0.126181 | 0.00633 | -0.00204 | 0.96487 | -0.00195 |
| 0.047298 | 0.30775  | -0.00021 | 0.99646  | 0.164435 | 0.00036 | 0.031773 | 0.49337 | 0.031833 |
| 0.005542 | 0.90493  | -0.05363 | 0.24738  | 0.136498 | 0.00312 | 0.083078 | 0.07287 | 0.031149 |
| 0.025699 | 0.5796   | -0.04377 | 0.34531  | 0.145139 | 0.00166 | 0.024423 | 0.59858 | 0.006134 |
| 0.008541 | 0.85394  | -0.11049 | 0.01691  | 0.074547 | 0.10764 | -0.01988 | 0.66829 | -0.00956 |
| 0.071676 | 0.12192  | 0.007123 | 0.87798  | 0.170125 | 0.00022 | 0.038446 | 0.40716 | 0.033919 |
| 0.108253 | 0.01929  | 0.038739 | 0.40359  | 0.124793 | 0.00693 | 0.02638  | 0.5696  | 0.035557 |
| 0.118152 | 0.01061  | 0.049974 | 0.28115  | 0.143083 | 0.00194 | 0.03551  | 0.44394 | 0.059978 |
| 0.058979 | 0.20329  | 0.029013 | 0.53169  | 0.162639 | 0.00042 | 0.0436   | 0.34715 | 0.054834 |
| 0.073429 | 0.11304  | -0.0178  | 0.70115  | 0.153516 | 0.00087 | 0.01093  | 0.81377 | 0.023353 |
| 0.079402 | 0.08653  | 0.010567 | 0.81983  | 0.08591  | 0.0636  | 0.042648 | 0.3578  | 0.017676 |
| 0.075853 | 0.1016   | 0.018814 | 0.6851   | 0.141193 | 0.00223 | 0.03506  | 0.44974 | 0.052642 |
| 0.066645 | 0.15045  | -0.03445 | 0.45768  | 0.161081 | 0.00047 | 0.036585 | 0.43025 | 0.035294 |
| 0.070907 | 0.12598  | 0.008528 | 0.85416  | 0.143938 | 0.00182 | 0.019752 | 0.6703  | 0.038806 |
| 0.10234  | 0.027    | 0.021054 | 0.64997  | 0.145338 | 0.00164 | 0.013392 | 0.77286 | 0.033337 |
| 0.086806 | 0.06087  | 0.026582 | 0.56664  | 0.157712 | 0.00063 | 0.032967 | 0.47726 | 0.059574 |
| 0.088678 | 0.05549  | 0.003494 | 0.93997  | 0.137952 | 0.00281 | -0.00121 | 0.97917 | 0.014601 |
| 0.123581 | 0.0075   | 0.011468 | 0.80477  | 0.149347 | 0.00121 | 0.041607 | 0.36966 | 0.031313 |
| 0.121495 | 0.00858  | 0.009488 | 0.83796  | 0.10519  | 0.023   | 0.003777 | 0.93512 | 0.019463 |
| 0.152059 | 0.00098  | 0.094224 | 0.04182  | 0.055054 | 0.23506 | -0.05192 | 0.26281 | -0.00199 |
| 0.068542 | 0.13914  | -0.01599 | 0.7304   | 0.119535 | 0.00972 | -0.00688 | 0.8821  | 0.007379 |
| 0.110493 | 0.01691  | 0.018498 | 0.69011  | 0.118151 | 0.01061 | 0.003759 | 0.93543 | 0.054323 |
| 0.063352 | 0.1717   | 0.001968 | 0.96617  | 0.135491 | 0.00335 | 0.022855 | 0.62226 | 0.006838 |
| 0.079222 | 0.08725  | 0.024119 | 0.60314  | 0.131888 | 0.0043  | 0.020877 | 0.65271 | 0.054669 |
| 0.080354 | 0.08281  | 0.007413 | 0.87306  | 0.155522 | 0.00075 | 0.036486 | 0.43151 | 0.027866 |
| 0.053534 | 0.24825  | -0.01877 | 0.68583  | 0.105231 | 0.02295 | -0.00783 | 0.86606 | 0.006792 |
| 0.019027 | 0.68173  | -0.03142 | 0.49822  | 0.151797 | 0.001   | 0.047483 | 0.30586 | 0.009696 |
| 0.112139 | 0.01533  | 0.010888 | 0.81447  | 0.144295 | 0.00177 | 0.011329 | 0.8071  | 0.0075   |

|          |         |          |          |          |         |           |         |          |
|----------|---------|----------|----------|----------|---------|-----------|---------|----------|
| 0.060672 | 0.1906  | 0.008074 | 0.86185  | 0.08839  | 0.05629 | 0.005753  | 0.90132 | 0.000349 |
| 0.022856 | 0.62226 | -0.07081 | 0.12651  | 0.155933 | 0.00072 | 0.016435  | 0.72316 | -0.0093  |
| 0.052875 | 0.25413 | -0.01111 | 0.81068  | 0.142267 | 0.00206 | 0.007036  | 0.87946 | 0.00337  |
| 0.062608 | 0.1768  | -0.00264 | 0.95459  | 0.151909 | 0.00099 | 0.010392  | 0.82277 | 0.034637 |
| 0.079476 | 0.08624 | 0.052473 | 0.25776  | 0.161657 | 0.00045 | 0.033559  | 0.46938 | 0.060482 |
| 0.087907 | 0.05766 | 0.031721 | 0.49408  | 0.149829 | 0.00116 | 0.019897  | 0.66801 | 0.027756 |
| 0.041274 | 0.3735  | -0.04948 | 0.2859   | 0.153514 | 0.00087 | 0.025478  | 0.58286 | 0.040597 |
| -0.00313 | 0.94615 | -0.21768 | 2.05E-06 | 0.089788 | 0.0525  | -0.04044  | 0.38319 | -0.0462  |
| 0.014731 | 0.75086 | -0.15466 | 0.0008   | 0.107754 | 0.01985 | -0.00676  | 0.8841  | -0.02991 |
| 0.178585 | 0.0001  | 0.026055 | 0.57436  | 0.143524 | 0.00187 | 0.001379  | 0.97629 | 0.027523 |
| 0.113925 | 0.01376 | 0.043933 | 0.34348  | 0.165526 | 0.00033 | 0.037757  | 0.41562 | 0.05465  |
| 0.034123 | 0.46195 | -0.06709 | 0.14772  | 0.120813 | 0.00897 | -9.58E-05 | 0.99835 | -0.02852 |
| 0.067418 | 0.14576 | 0.007316 | 0.87471  | 0.146086 | 0.00155 | 0.049213  | 0.28856 | 0.060189 |
| 0.014536 | 0.75405 | -0.03133 | 0.49945  | 0.145707 | 0.00159 | 0.017562  | 0.70504 | 0.011148 |
| 0.03155  | 0.49641 | -0.01103 | 0.81209  | 0.129292 | 0.00514 | 0.010467  | 0.82151 | -0.00563 |
| 0.04202  | 0.36493 | -0.04971 | 0.28369  | 0.100404 | 0.03005 | 0.00477   | 0.91812 | -0.02187 |
| 0.031848 | 0.49235 | -0.02718 | 0.55799  | 0.133044 | 0.00397 | 0.038226  | 0.40984 | -0.00393 |
| 0.061454 | 0.18493 | 0.006121 | 0.89504  | 0.140785 | 0.00229 | 0.042581  | 0.35855 | 0.005483 |
| 0.052478 | 0.25772 | 0.021331 | 0.64567  | 0.104948 | 0.02332 | -0.01052  | 0.8206  | 0.010099 |
| 0.055303 | 0.23294 | -0.00969 | 0.83454  | 0.154781 | 0.00079 | 0.024677  | 0.59477 | 0.0062   |
| 0.05397  | 0.24442 | -0.05877 | 0.20487  | 0.096841 | 0.03643 | -0.00703  | 0.87951 | -0.028   |
| 0.054221 | 0.24223 | -0.00732 | 0.87472  | 0.10499  | 0.02327 | 0.024753  | 0.59364 | -0.00041 |
| 0.034151 | 0.46158 | -0.00672 | 0.8849   | 0.067891 | 0.14295 | 0.011384  | 0.80618 | -0.01368 |
| 0.042558 | 0.35881 | -0.01531 | 0.74135  | 0.141557 | 0.00217 | 0.03354   | 0.46965 | 0.04748  |
| 0.085322 | 0.06544 | 0.010284 | 0.82459  | 0.145142 | 0.00166 | 0.041331  | 0.37285 | 0.048397 |
| 0.082713 | 0.07414 | -0.00794 | 0.8641   | 0.154164 | 0.00083 | 0.034585  | 0.45591 | 0.026023 |
| 0.072911 | 0.1156  | -0.03942 | 0.39532  | 0.085426 | 0.06511 | -0.01203  | 0.79536 | -0.01358 |
| 0.07685  | 0.09717 | 0.010737 | 0.817    | 0.160379 | 0.0005  | 0.044009  | 0.34264 | 0.046794 |
| 0.071986 | 0.12031 | -0.00738 | 0.8737   | 0.152742 | 0.00093 | 0.024647  | 0.59523 | 0.029997 |
| 0.122763 | 0.00791 | 0.051391 | 0.26772  | 0.149758 | 0.00117 | 0.025731  | 0.57913 | 0.058632 |
| 0.108864 | 0.01861 | 0.02997  | 0.51824  | 0.128604 | 0.00538 | 0.008108  | 0.86128 | 0.012677 |
| 0.066126 | 0.15366 | -0.03939 | 0.39571  | 0.139201 | 0.00257 | 0.021595  | 0.64159 | 0.032307 |
| 0.12373  | 0.00743 | 0.043242 | 0.35113  | 0.103689 | 0.02504 | 0.002303  | 0.96041 | 0.029931 |
| 0.078142 | 0.09166 | 0.020071 | 0.66529  | 0.14694  | 0.00145 | 0.027722  | 0.55012 | 0.042156 |
| 0.05732  | 0.21631 | -0.00583 | 0.89997  | 0.109365 | 0.01807 | 0.025642  | 0.58045 | 0.049179 |
| 0.110287 | 0.01712 | 0.025738 | 0.57902  | 0.145169 | 0.00166 | 0.024118  | 0.60316 | 0.041004 |
| 0.116735 | 0.01159 | 0.047281 | 0.30792  | 0.173991 | 0.00016 | 0.054136  | 0.24296 | 0.055533 |
| 0.04953  | 0.28546 | 0.052793 | 0.25487  | 0.096017 | 0.03806 | -0.00272  | 0.95324 | -0.01958 |
| 0.06489  | 0.16151 | 0.002492 | 0.95717  | 0.15943  | 0.00054 | 0.015658  | 0.73576 | 0.050154 |
| 0.06598  | 0.15457 | 0.000738 | 0.98731  | 0.153359 | 0.00088 | 0.040986  | 0.37685 | 0.062229 |
| 0.115067 | 0.01284 | 0.046772 | 0.31317  | 0.098644 | 0.03307 | 0.018678  | 0.68724 | 0.007856 |
| 0.049117 | 0.2895  | 0.003804 | 0.93466  | 0.155988 | 0.00072 | 0.027846  | 0.54833 | 0.077752 |
| 0.117574 | 0.011   | 0.047394 | 0.30677  | 0.145177 | 0.00166 | 0.015602  | 0.73667 | 0.033741 |
| 0.103415 | 0.02543 | 0.018623 | 0.68812  | 0.15136  | 0.00103 | 0.019875  | 0.66836 | 0.027197 |
| 0.065034 | 0.16058 | 0.005077 | 0.91288  | 0.088816 | 0.05511 | 0.015933  | 0.7313  | -0.00259 |



|          |          |          |          |          |          |          |         |          |
|----------|----------|----------|----------|----------|----------|----------|---------|----------|
| 0.043544 | 0.34778  | -0.04543 | 0.32726  | 0.16649  | 0.0003   | 0.050618 | 0.27499 | 0.054562 |
| 0.112064 | 0.0154   | 0.062223 | 0.17949  | 0.144163 | 0.00179  | 0.033554 | 0.46946 | 0.035498 |
| 0.148265 | 0.00131  | -0.03185 | 0.49229  | 0.116513 | 0.01175  | 0.023454 | 0.61317 | 0.044032 |
| 0.111226 | 0.01619  | -0.08219 | 0.07602  | 0.098843 | 0.03272  | 0.007386 | 0.87352 | -0.02688 |
| 0.087319 | 0.05936  | 0.018081 | 0.69674  | 0.12753  | 0.00578  | 0.025906 | 0.57655 | 0.0251   |
| 0.083653 | 0.0709   | 0.024916 | 0.59121  | 0.108713 | 0.01877  | 0.010483 | 0.82124 | 0.026139 |
| 0.122899 | 0.00784  | 0.053464 | 0.24887  | 0.115907 | 0.01219  | 0.025651 | 0.58031 | 0.042735 |
| 0.092192 | 0.04646  | 0.048005 | 0.30057  | 0.170381 | 0.00022  | 0.030228 | 0.51464 | 0.031022 |
| 0.033432 | 0.47108  | -0.02071 | 0.65529  | 0.156715 | 0.00068  | 0.059532 | 0.19908 | 0.038471 |
| 0.109224 | 0.01822  | 0.014159 | 0.76023  | 0.092955 | 0.04467  | 0.01633  | 0.72486 | 0.013799 |
| 0.091539 | 0.04804  | -0.00698 | 0.88039  | 0.120003 | 0.00944  | 0.001774 | 0.9695  | 0.034383 |
| 0.047908 | 0.30155  | -0.03071 | 0.50795  | 0.114043 | 0.01367  | 0.006155 | 0.89446 | 0.002395 |
| 0.099185 | 0.03212  | 0.030768 | 0.50716  | 0.090268 | 0.05124  | 0.025306 | 0.58542 | 0.052543 |
| 0.047928 | 0.30135  | -0.04614 | 0.31978  | 0.133794 | 0.00377  | 0.022423 | 0.62886 | 0.034981 |
| 0.001944 | 0.96658  | 0.001625 | 0.97206  | 0.081675 | 0.07786  | -0.00501 | 0.91402 | -0.00122 |
| 0.07303  | 0.11501  | 0.020615 | 0.6568   | 0.126336 | 0.00626  | -0.00382 | 0.93447 | 0.036433 |
| 0.069741 | 0.13235  | 0.060919 | 0.18879  | 0.069772 | 0.13217  | -0.00935 | 0.84023 | 0.012853 |
| 0.051107 | 0.27038  | -0.02028 | 0.66207  | 0.147244 | 0.00142  | 0.01876  | 0.68595 | 0.010919 |
| 0.059122 | 0.20219  | 0.000797 | 0.9863   | 0.151082 | 0.00106  | 0.029449 | 0.52553 | 0.005324 |
| 0.070739 | 0.12689  | -0.05469 | 0.23813  | 0.106877 | 0.02088  | 0.023178 | 0.61735 | 0.039416 |
| 0.080806 | 0.08109  | 0.001087 | 0.98131  | 0.162996 | 0.00041  | 0.029893 | 0.51932 | 0.041098 |
| 0.033829 | 0.46581  | -0.07811 | 0.09179  | 0.113882 | 0.0138   | 0.03768  | 0.41658 | 0.001211 |
| 0.084721 | 0.06737  | -0.00367 | 0.93704  | 0.188316 | 4.22E-05 | 0.034572 | 0.45607 | 0.04976  |
| 0.012111 | 0.79407  | -0.06157 | 0.18412  | 0.059467 | 0.19957  | -0.00783 | 0.86592 | -0.01392 |
| 0.048595 | 0.29466  | -0.00196 | 0.96624  | 0.098615 | 0.03312  | 0.009189 | 0.843   | 0.010275 |
| -0.01751 | 0.70583  | -0.07722 | 0.09556  | 0.135422 | 0.00337  | 0.026213 | 0.57205 | -0.01442 |
| 0.02377  | 0.60839  | -0.00966 | 0.83499  | 0.064831 | 0.16189  | -0.00633 | 0.8915  | -0.00595 |
| 0.121218 | 0.00874  | 0.048268 | 0.29792  | 0.136824 | 0.00305  | 0.027589 | 0.55204 | 0.009862 |
| 0.09444  | 0.04135  | 0.052249 | 0.2598   | 0.103338 | 0.02554  | 0.037327 | 0.42096 | 0.05954  |
| 0.052151 | 0.2607   | -0.00953 | 0.83719  | 0.141276 | 0.00221  | 0.014965 | 0.74703 | 0.104909 |
| 0.076812 | 0.09733  | -0.07423 | 0.10913  | 0.141106 | 0.00224  | 0.01868  | 0.68721 | 0.013846 |
| 0.061863 | 0.18202  | -0.00447 | 0.92317  | 0.161421 | 0.00046  | 0.000381 | 0.99345 | 0.034187 |
| 0.067645 | 0.14441  | 0.018674 | 0.68732  | 0.136619 | 0.00309  | 0.013638 | 0.7688  | 0.033109 |
| -0.00057 | 0.99021  | -0.10012 | 0.03052  | 0.123589 | 0.0075   | 0.039293 | 0.39689 | 0.088964 |
| 0.279498 | 7.91E-10 | -0.03892 | 0.40144  | 0.08087  | 0.08085  | -0.05729 | 0.21656 | 0.007563 |
| 0.014871 | 0.74857  | -0.06595 | 0.15476  | 0.204416 | 8.48E-06 | 0.144524 | 0.00174 | 0.101781 |
| 0.08133  | 0.07913  | -0.0033  | 0.94325  | 0.158753 | 0.00057  | 0.037856 | 0.41441 | 0.080717 |
| 0.019314 | 0.6772   | -0.05092 | 0.27218  | 0.110832 | 0.01657  | 0.007151 | 0.87751 | 0.015445 |
| 0.258966 | 1.36E-08 | -0.18647 | 5.03E-05 | 0.02655  | 0.56712  | -0.09486 | 0.04046 | -0.11489 |
| 0.078951 | 0.08834  | -0.10433 | 0.02415  | 0.039246 | 0.39746  | -0.02438 | 0.59927 | 0.056396 |
| -0.03965 | 0.39259  | 0.012684 | 0.78456  | 0.056889 | 0.21979  | 0.011654 | 0.80167 | -0.02239 |
| 0.099641 | 0.03133  | -0.01189 | 0.79772  | 0.074795 | 0.10647  | -0.00374 | 0.93571 | 0.011463 |
| 0.019513 | 0.67406  | -0.06412 | 0.16654  | 0.126781 | 0.00608  | 0.016786 | 0.7175  | 0.026948 |
| 0.090401 | 0.0509   | -0.04573 | 0.32404  | 0.12925  | 0.00515  | 0.014464 | 0.75523 | 0.008944 |
| 0.042357 | 0.36108  | -0.01553 | 0.73787  | 0.130112 | 0.00486  | 0.019716 | 0.67086 | 0.048032 |

|          |          |           |          |          |          |          |          |          |
|----------|----------|-----------|----------|----------|----------|----------|----------|----------|
| -0.0641  | 0.16666  | -0.02734  | 0.55569  | 0.321546 | 1.08E-12 | 0.412185 | 1.40E-20 | 0.106429 |
| 0.093975 | 0.04237  | -0.0276   | 0.55184  | 0.131814 | 0.00433  | 0.002924 | 0.94976  | -0.00156 |
| 0.082469 | 0.07501  | -0.06759  | 0.14473  | 0.065009 | 0.16075  | -0.02786 | 0.54813  | -0.00772 |
| 0.094866 | 0.04044  | 0.064092  | 0.16674  | 0.12996  | 0.00491  | -0.00152 | 0.97393  | 0.013601 |
| 0.048398 | 0.29662  | -0.0285   | 0.53899  | 0.07184  | 0.12106  | -0.02131 | 0.64604  | -0.03396 |
| 0.07713  | 0.09595  | -0.04168  | 0.3688   | 0.097801 | 0.03461  | -0.00735 | 0.87409  | -0.00617 |
| 0.120999 | 0.00886  | 0.055621  | 0.23026  | 0.103663 | 0.02508  | 0.005314 | 0.90882  | 0.011165 |
| 0.10785  | 0.01974  | 0.041079  | 0.37576  | 0.11389  | 0.01379  | 0.004063 | 0.93022  | 0.02799  |
| 0.040193 | 0.38616  | -0.06658  | 0.15086  | 0.076085 | 0.10055  | -0.02045 | 0.65933  | -0.0079  |
| 0.10906  | 0.0184   | -0.03525  | 0.44724  | 0.108538 | 0.01897  | -0.01165 | 0.8018   | -0.0126  |
| 0.067092 | 0.14773  | 0.000293  | 0.99496  | 0.145737 | 0.00159  | 0.02658  | 0.56667  | 0.01837  |
| 0.025046 | 0.58928  | 0.04593   | 0.32197  | 0.096086 | 0.03792  | 0.023558 | 0.6116   | 0.034763 |
| 0.005879 | 0.89917  | -0.055    | 0.2355   | 0.05118  | 0.2697   | 0.050538 | 0.27575  | 0.000786 |
| 0.113457 | 0.01416  | 0.00428   | 0.92651  | 0.098938 | 0.03255  | 0.029714 | 0.52182  | 0.041285 |
| 0.071353 | 0.12361  | 0.002151  | 0.96302  | 0.157107 | 0.00066  | 0.032131 | 0.48851  | 0.038024 |
| -0.00556 | 0.90462  | -0.11332  | 0.01428  | 0.060849 | 0.1893   | -0.01988 | 0.66834  | -0.02492 |
| 0.075551 | 0.10297  | -0.00514  | 0.91178  | 0.109987 | 0.01742  | 0.008121 | 0.86106  | 0.025076 |
| 0.066062 | 0.15406  | -0.02655  | 0.56712  | 0.128578 | 0.00539  | 0.01426  | 0.75858  | -0.02623 |
| 0.098343 | 0.03361  | 0.06938   | 0.13436  | 0.088509 | 0.05596  | 0.003175 | 0.94544  | 0.013459 |
| 0.067863 | 0.14311  | 0.021424  | 0.64423  | 0.094168 | 0.04195  | -0.01266 | 0.78503  | -0.00572 |
| 0.106144 | 0.02178  | 0.022057  | 0.63448  | 0.092604 | 0.04549  | -0.0079  | 0.86474  | 0.017168 |
| 0.104818 | 0.02349  | 0.033695  | 0.46758  | 0.118647 | 0.01028  | 0.007831 | 0.86596  | -0.00178 |
| 0.036086 | 0.43658  | -0.04285  | 0.3555   | 0.053755 | 0.2463   | -0.00456 | 0.92165  | -0.02885 |
| 0.315829 | 2.82E-12 | 0.092641  | 0.0454   | 0.128952 | 0.00526  | -0.00873 | 0.85077  | 0.026072 |
| 0.113062 | 0.0145   | 0.078564  | 0.08991  | 0.107654 | 0.01997  | -0.01108 | 0.81131  | 0.036781 |
| 0.098335 | 0.03363  | -0.01719  | 0.71105  | 0.126449 | 0.00621  | 0.020436 | 0.65958  | 0.03035  |
| 0.090001 | 0.05194  | 0.0106    | 0.81928  | 0.146682 | 0.00148  | 0.013078 | 0.77805  | 0.029602 |
| 0.099232 | 0.03204  | -0.0388   | 0.40287  | 0.104377 | 0.02409  | -0.02379 | 0.60811  | -0.01125 |
| 0.02691  | 0.56186  | 0.094238  | 0.04179  | 0.067122 | 0.14754  | -0.01087 | 0.8148   | 0.097375 |
| -0.00496 | 0.91487  | -0.00089  | 0.98465  | 0.052879 | 0.25409  | -0.00076 | 0.98689  | 0.008475 |
| 0.032058 | 0.4895   | -0.20745  | 6.17E-06 | 0.040072 | 0.3876   | -0.04324 | 0.35116  | -0.03823 |
| 0.117019 | 0.01138  | -0.01051  | 0.82088  | 0.079312 | 0.08689  | -0.02285 | 0.62238  | -0.01089 |
| 0.136143 | 0.0032   | 0.042724  | 0.35694  | 0.149283 | 0.00121  | 0.024137 | 0.60287  | 0.047783 |
| -0.00869 | 0.85147  | -0.09471  | 0.04078  | 0.07499  | 0.10556  | -0.00743 | 0.87284  | 0.01537  |
| 0.038852 | 0.40222  | -0.01355  | 0.77021  | 0.049627 | 0.28451  | -0.02526 | 0.58612  | 0.083456 |
| 0.0212   | 0.6477   | -0.06156  | 0.18414  | 0.06265  | 0.17651  | -0.02553 | 0.58212  | 0.140832 |
| 0.138066 | 0.00279  | 0.002056  | 0.96465  | 0.082996 | 0.07316  | -0.01433 | 0.75742  | -0.00623 |
| 0.0066   | 0.88689  | -1.42E-05 | 0.99976  | 0.287445 | 2.47E-10 | 0.592395 | 1.42E-45 | 0.243192 |
| 0.02368  | 0.60975  | -0.10275  | 0.02639  | 0.048751 | 0.29311  | -0.00985 | 0.83187  | -0.01961 |
| 0.084913 | 0.06675  | -0.10641  | 0.02145  | 0.101023 | 0.02905  | -0.01086 | 0.8149   | -0.01978 |
| 0.092513 | 0.0457   | -0.01389  | 0.76472  | 0.116501 | 0.01175  | -0.00049 | 0.99154  | 0.004475 |
| 0.078335 | 0.09085  | 0.014501  | 0.75463  | 0.162902 | 0.00041  | 0.030477 | 0.51118  | 0.036437 |
| 0.093141 | 0.04424  | 0.073128  | 0.11452  | 0.054744 | 0.23771  | 0.051406 | 0.26758  | 0.02223  |
| 0.016154 | 0.72771  | -0.02993  | 0.51885  | 0.142067 | 0.00209  | 0.034643 | 0.45515  | 0.026684 |
| 0.117479 | 0.01106  | 0.106384  | 0.02149  | 0.071705 | 0.12177  | 0.02496  | 0.59055  | 0.046208 |

|          |          |          |         |          |          |           |         |          |
|----------|----------|----------|---------|----------|----------|-----------|---------|----------|
| 0.039175 | 0.39831  | -0.02267 | 0.6251  | 0.101361 | 0.02851  | 0.01684   | 0.71664 | -0.01193 |
| 0.027415 | 0.55455  | -0.11463 | 0.01319 | 0.129403 | 0.0051   | 0.037184  | 0.42274 | 0.035217 |
| 0.039908 | 0.38954  | -0.09011 | 0.05165 | 0.053885 | 0.24516  | -0.04815  | 0.29915 | -0.0155  |
| 0.002944 | 0.94941  | 0.008741 | 0.85057 | 0.066727 | 0.14994  | -0.03273  | 0.48045 | -0.02916 |
| 0.044403 | 0.33833  | -0.06769 | 0.14415 | 0.148751 | 0.00126  | 0.015433  | 0.73941 | 0.025373 |
| 0.013498 | 0.77111  | 0.001383 | 0.97622 | 0.101145 | 0.02885  | 0.003254  | 0.9441  | -0.01831 |
| 0.157044 | 0.00066  | 0.02119  | 0.64785 | 0.0933   | 0.04388  | -0.04627  | 0.3184  | 0.040662 |
| 0.035579 | 0.44305  | -0.08799 | 0.05743 | 0.124428 | 0.0071   | 0.01656   | 0.72115 | 0.001591 |
| 0.007426 | 0.87284  | -0.10172 | 0.02795 | 0.085273 | 0.0656   | 0.064828  | 0.16191 | -0.01035 |
| 0.101922 | 0.02764  | 0.014377 | 0.75665 | 0.135563 | 0.00333  | 0.022062  | 0.63439 | 0.031958 |
| 0.154237 | 0.00083  | 0.12195  | 0.00834 | 0.061757 | 0.18277  | -0.02568  | 0.57993 | 0.002736 |
| 0.070912 | 0.12596  | -0.10615 | 0.02177 | 0.109393 | 0.01804  | -0.00244  | 0.95807 | -0.00774 |
| 0.129187 | 0.00517  | -0.04859 | 0.29471 | 0.089513 | 0.05322  | -0.00691  | 0.88158 | 0.025793 |
| 0.195687 | 2.06E-05 | -0.13574 | 0.00329 | 0.051456 | 0.26711  | -0.0317   | 0.4944  | 0.087874 |
| 0.085536 | 0.06476  | -0.02943 | 0.52586 | 0.136821 | 0.00305  | 0.005687  | 0.90246 | 0.019348 |
| 0.181349 | 8.11E-05 | 0.045626 | 0.32518 | 0.076511 | 0.09866  | -0.02831  | 0.5417  | -0.01779 |
| 0.033377 | 0.4718   | 0.063235 | 0.1725  | 0.266991 | 4.60E-09 | 0.179012  | 0.0001  | 0.392084 |
| -0.02631 | 0.57069  | -0.15996 | 0.00052 | 0.052055 | 0.26158  | -0.01303  | 0.7789  | -0.04422 |
| 0.054381 | 0.24083  | -0.02827 | 0.54223 | 0.133426 | 0.00387  | 0.065639  | 0.15672 | 0.023356 |
| 0.101285 | 0.02863  | 0.039614 | 0.39305 | 0.147866 | 0.00135  | 0.016113  | 0.72838 | 0.017628 |
| 0.014197 | 0.75962  | -0.05604 | 0.22672 | 0.111031 | 0.01638  | -0.02056  | 0.65767 | -0.02532 |
| -0.07107 | 0.1251   | -0.08533 | 0.06541 | 0.197982 | 1.63E-05 | 0.161449  | 0.00046 | 0.250824 |
| 0.250585 | 4.05E-08 | 0.153607 | 0.00087 | 0.117685 | 0.01092  | 0.043302  | 0.35046 | 0.085704 |
| 0.189815 | 3.65E-05 | 0.049579 | 0.28498 | 0.03226  | 0.48676  | 0.014212  | 0.75936 | -0.09129 |
| 0.036175 | 0.43544  | -0.06411 | 0.16661 | 0.089886 | 0.05224  | -0.0119   | 0.79752 | -0.00975 |
| 0.116951 | 0.01143  | 0.038348 | 0.40835 | 0.101079 | 0.02896  | -0.01292  | 0.78059 | -0.01367 |
| -0.04906 | 0.29009  | -0.13594 | 0.00324 | 0.042269 | 0.36208  | -0.00667  | 0.88565 | -0.0498  |
| 0.087603 | 0.05853  | -0.0242  | 0.60195 | 0.147094 | 0.00143  | 0.024224  | 0.60157 | 0.046424 |
| 0.046645 | 0.31449  | -0.03033 | 0.51329 | 0.123646 | 0.00747  | 0.006499  | 0.88861 | 0.001413 |
| 0.142561 | 0.00201  | -0.03722 | 0.42226 | 0.136327 | 0.00316  | -6.94E-05 | 0.99881 | 0.001318 |
| 0.121343 | 0.00867  | -0.01855 | 0.68931 | 0.088012 | 0.05736  | -0.04336  | 0.3498  | -0.04161 |
| 0.188691 | 4.07E-05 | -0.04604 | 0.3208  | 0.033038 | 0.47631  | -0.04579  | 0.32348 | -0.00366 |
| 0.046267 | 0.31843  | -0.05485 | 0.23678 | 0.079105 | 0.08772  | 0.005605  | 0.90384 | 0.011558 |
| 0.043633 | 0.34679  | -0.06694 | 0.14867 | 0.038943 | 0.40111  | 0.006347  | 0.89119 | -0.01387 |
| 0.10081  | 0.02939  | 0.030199 | 0.51504 | 0.166388 | 0.0003   | 0.028446  | 0.53975 | 0.065539 |
| -0.0037  | 0.9364   | -0.17122 | 0.0002  | 0.066814 | 0.14941  | -0.0658   | 0.15571 | -0.0315  |
| 0.053403 | 0.24941  | -0.12695 | 0.00601 | 0.099803 | 0.03105  | -0.01482  | 0.74939 | -0.0236  |
| 0.01004  | 0.82868  | 0.026441 | 0.5687  | 0.028261 | 0.54239  | -0.0354   | 0.44536 | 0.052612 |
| 0.100472 | 0.02994  | 0.015453 | 0.73909 | 0.15227  | 0.00096  | 0.007217  | 0.8764  | 0.028486 |
| 0.031959 | 0.49084  | -0.03338 | 0.47179 | 0.049289 | 0.28781  | -0.04345  | 0.34876 | -0.02845 |
| 0.092217 | 0.0464   | 0.02932  | 0.52736 | 0.141534 | 0.00217  | 0.053478  | 0.24875 | 0.095059 |
| 0.025051 | 0.58921  | -0.06636 | 0.15221 | 0.100241 | 0.03032  | -0.015    | 0.74644 | -0.02994 |
| 0.103848 | 0.02482  | -0.05648 | 0.2231  | 0.090397 | 0.05091  | -0.01613  | 0.72804 | 0.00333  |
| -0.01818 | 0.69524  | -0.11338 | 0.01423 | 0.052435 | 0.25811  | -0.00817  | 0.8603  | -0.05021 |
| 0.065706 | 0.15629  | -0.00088 | 0.98479 | 0.133633 | 0.00381  | 0.002606  | 0.95521 | 0.00441  |

|          |          |          |          |          |         |          |          |          |
|----------|----------|----------|----------|----------|---------|----------|----------|----------|
| 0.077096 | 0.0961   | -0.03745 | 0.41939  | 0.07531  | 0.10408 | 0.008619 | 0.85263  | -0.00572 |
| 0.031715 | 0.49417  | -0.10961 | 0.01782  | 0.066659 | 0.15036 | 0.011579 | 0.80292  | 0.080466 |
| 0.043293 | 0.35056  | 0.008091 | 0.86157  | 0.133855 | 0.00376 | -0.01006 | 0.82843  | 0.012626 |
| 0.093887 | 0.04256  | 0.017571 | 0.7049   | 0.141663 | 0.00215 | 0.009705 | 0.83432  | 0.027077 |
| 0.060282 | 0.19346  | -0.00755 | 0.87078  | 0.107928 | 0.01965 | 0.028583 | 0.53779  | 0.024979 |
| 0.106967 | 0.02078  | -0.02396 | 0.60557  | 0.137638 | 0.00288 | 0.020912 | 0.65217  | 0.063048 |
| -0.03895 | 0.40101  | -0.15209 | 0.00098  | 0.075431 | 0.10352 | 0.019143 | 0.6799   | -0.00573 |
| 0.046327 | 0.3178   | -0.0703  | 0.12927  | 0.137166 | 0.00298 | 0.022656 | 0.62531  | 0.017854 |
| 0.219141 | 1.74E-06 | 0.038462 | 0.40696  | 0.094912 | 0.04034 | -0.02062 | 0.65679  | 0.0245   |
| 0.123485 | 0.00755  | 0.053474 | 0.24878  | 0.152045 | 0.00098 | 0.031189 | 0.50135  | 0.052941 |
| 0.050041 | 0.28051  | -0.01784 | 0.70066  | 0.119438 | 0.00978 | 0.007551 | 0.87071  | 0.022818 |
| 0.009371 | 0.83995  | 0.053883 | 0.24517  | 0.11754  | 0.01102 | 0.092219 | 0.04639  | -0.01005 |
| 0.078707 | 0.08933  | -0.05358 | 0.24781  | 0.13001  | 0.00489 | 0.010681 | 0.81794  | -0.04241 |
| 0.154084 | 0.00084  | -0.05243 | 0.2582   | 0.128784 | 0.00532 | -0.02893 | 0.53288  | 0.01478  |
| 0.074604 | 0.10737  | 0.015258 | 0.74226  | 0.128601 | 0.00538 | 0.024888 | 0.59163  | 0.047271 |
| 0.059544 | 0.19899  | -0.1666  | 0.0003   | 0.069851 | 0.13173 | -0.05225 | 0.25982  | 0.052836 |
| 0.043044 | 0.35334  | -0.20166 | 1.13E-05 | 0.095072 | 0.04001 | -0.00482 | 0.91732  | -0.00793 |
| 0.036446 | 0.43201  | -0.06958 | 0.13324  | 0.03989  | 0.38975 | -0.02914 | 0.52986  | -0.00464 |
| 0.040938 | 0.37742  | -0.01351 | 0.77089  | 0.114455 | 0.01333 | -0.00371 | 0.93626  | -0.01913 |
| 0.033308 | 0.47272  | -0.01641 | 0.72351  | 0.068482 | 0.13949 | -0.02038 | 0.66043  | -0.017   |
| 0.058601 | 0.20621  | -0.05689 | 0.21975  | 0.102981 | 0.02605 | 0.002689 | 0.95378  | 0.04147  |
| 0.139665 | 0.00249  | 0.039862 | 0.39009  | 0.12667  | 0.00612 | 0.016979 | 0.71439  | 0.049107 |
| 0.076012 | 0.10088  | -0.09737 | 0.03542  | 0.071213 | 0.12436 | -0.04285 | 0.35554  | 0.055357 |
| 0.031099 | 0.50259  | -0.0857  | 0.06424  | 0.051088 | 0.27056 | -0.01216 | 0.79326  | -0.01268 |
| 0.132956 | 0.004    | 0.075578 | 0.10284  | 0.168336 | 0.00026 | 0.080396 | 0.08265  | 0.017519 |
| 0.033188 | 0.47431  | -0.05306 | 0.25244  | 0.167003 | 0.00029 | 0.025493 | 0.58265  | -0.00089 |
| 0.080386 | 0.08268  | -0.02828 | 0.5421   | 0.12751  | 0.00579 | 0.018218 | 0.69456  | 0.01268  |
| 0.061552 | 0.18423  | -0.06439 | 0.1648   | 0.12213  | 0.00824 | 0.006287 | 0.89221  | 0.052025 |
| 0.060158 | 0.19438  | 0.00277  | 0.95239  | 0.151624 | 0.00101 | 0.088137 | 0.05701  | 0.029459 |
| -0.02067 | 0.65591  | -0.12768 | 0.00572  | 0.110008 | 0.0174  | 0.018807 | 0.68521  | -0.01374 |
| 0.047634 | 0.30433  | -0.0791  | 0.08773  | 0.159977 | 0.00052 | 0.013013 | 0.77912  | 0.010322 |
| 0.007568 | 0.87044  | -0.01931 | 0.67728  | 0.038687 | 0.40422 | -0.02052 | 0.65833  | -0.02842 |
| 0.095739 | 0.03863  | 0.009789 | 0.8329   | 0.097635 | 0.03492 | 0.045311 | 0.32855  | 0.048465 |
| 0.073707 | 0.11167  | -0.00769 | 0.86836  | 0.122887 | 0.00785 | 0.023185 | 0.61725  | 0.01374  |
| 0.018513 | 0.68987  | 0.08464  | 0.06763  | 0.064601 | 0.16339 | 0.184153 | 6.25E-05 | -0.03144 |
| -0.03033 | 0.51322  | -0.16699 | 0.00029  | 0.082146 | 0.07616 | -0.07765 | 0.09374  | -0.04919 |
| 0.023274 | 0.6159   | -0.05042 | 0.27687  | 0.05273  | 0.25543 | -0.0117  | 0.80092  | -0.01237 |
| 0.012889 | 0.78116  | -0.09018 | 0.05147  | 0.14707  | 0.00144 | 0.028726 | 0.53575  | 0.071027 |
| 0.045389 | 0.32771  | -0.11406 | 0.01365  | 0.086828 | 0.06081 | -0.07962 | 0.08566  | -0.03946 |
| -0.04323 | 0.35131  | -0.00558 | 0.90426  | 0.07696  | 0.09669 | -0.01502 | 0.7462   | -0.01854 |
| -0.04257 | 0.35862  | -0.04573 | 0.32412  | 0.076467 | 0.09885 | -0.02718 | 0.55791  | -0.05573 |
| -0.02268 | 0.62498  | -0.04638 | 0.31729  | 0.071986 | 0.12031 | -0.00319 | 0.94519  | 0.022241 |
| 0.021087 | 0.64946  | -0.05118 | 0.26969  | 0.089371 | 0.05361 | -0.03017 | 0.51543  | -0.01643 |
| 0.015769 | 0.73395  | -0.05542 | 0.23193  | 0.106118 | 0.02182 | -0.01739 | 0.70782  | -0.0074  |
| 0.051361 | 0.268    | -0.09533 | 0.03947  | 0.065854 | 0.15536 | 0.04958  | 0.28497  | 0.006782 |

|          |          |          |          |          |          |          |          |          |
|----------|----------|----------|----------|----------|----------|----------|----------|----------|
| 0.144035 | 0.0018   | 0.12628  | 0.00628  | 0.102271 | 0.02711  | 0.023969 | 0.6054   | 0.046677 |
| -0.13513 | 0.00344  | -0.2081  | 5.76E-06 | 0.097121 | 0.03589  | 0.272269 | 2.21E-09 | -0.03891 |
| -0.03738 | 0.42036  | -0.0943  | 0.04166  | 0.122411 | 0.00809  | 0.243148 | 1.04E-07 | 0.003927 |
| 0.010415 | 0.82238  | -0.12026 | 0.00929  | 0.110043 | 0.01736  | 0.013377 | 0.7731   | 0.044237 |
| 0.093216 | 0.04407  | -0.05362 | 0.24751  | 0.075987 | 0.10099  | -0.02308 | 0.61884  | -0.0118  |
| 0.095106 | 0.03994  | -0.0049  | 0.91592  | 0.102717 | 0.02644  | 0.030385 | 0.51246  | 0.010286 |
| 0.009036 | 0.84559  | -0.03572 | 0.44131  | 0.082066 | 0.07645  | -0.0084  | 0.85637  | 0.003385 |
| -0.0345  | 0.45696  | -0.07011 | 0.13028  | 0.180907 | 8.44E-05 | 0.276476 | 1.22E-09 | 0.49396  |
| 0.11565  | 0.01239  | 0.004563 | 0.92166  | 0.142006 | 0.0021   | -0.00398 | 0.93172  | -0.00904 |
| 0.108251 | 0.01929  | 0.044686 | 0.33527  | 0.135455 | 0.00336  | 0.011854 | 0.79834  | 0.029881 |
| 0.058651 | 0.20582  | -0.04499 | 0.33199  | 0.072372 | 0.11833  | -0.02109 | 0.64939  | -0.03138 |
| 0.061659 | 0.18346  | -0.12725 | 0.00589  | 0.08364  | 0.07095  | -0.05257 | 0.25686  | -0.01885 |
| 0.057803 | 0.21246  | 0.014394 | 0.75638  | 0.127564 | 0.00577  | 0.009539 | 0.83711  | 0.020333 |
| 0.058761 | 0.20497  | -0.13871 | 0.00266  | 0.06485  | 0.16177  | -0.06699 | 0.14834  | -0.00577 |
| -0.00095 | 0.98375  | -0.16881 | 0.00025  | 0.103379 | 0.02548  | -0.01731 | 0.70905  | -0.02145 |
| 0.112857 | 0.01468  | 0.074095 | 0.1098   | 0.148783 | 0.00126  | 0.021838 | 0.63784  | 0.029097 |
| -0.08117 | 0.07973  | -0.19678 | 1.84E-05 | 0.113029 | 0.01453  | 0.03458  | 0.45598  | 0.211003 |
| 0.050342 | 0.27762  | -0.02884 | 0.53421  | 0.104577 | 0.02382  | 0.023996 | 0.60498  | 0.039328 |
| 0.142072 | 0.00209  | 0.06504  | 0.16055  | 0.076794 | 0.09741  | -0.02158 | 0.6418   | 0.018354 |
| -0.01035 | 0.82346  | -0.20245 | 1.04E-05 | -0.01768 | 0.7032   | -0.05481 | 0.23711  | 0.037798 |
| 0.041993 | 0.36523  | -0.06195 | 0.18144  | -0.01287 | 0.78144  | 0.020554 | 0.65775  | -0.11142 |
| -0.10313 | 0.02583  | -0.27186 | 2.34E-09 | -0.02578 | 0.57846  | -0.07705 | 0.09632  | -0.08007 |
| -0.07688 | 0.09703  | -0.24852 | 5.27E-08 | -0.03871 | 0.4039   | -0.07247 | 0.11785  | -0.15666 |
| -0.01543 | 0.73943  | -0.03234 | 0.48569  | 0.008221 | 0.85936  | 0.050832 | 0.27297  | -0.1027  |
| 0.217788 | 2.02E-06 | 0.147637 | 0.00138  | -0.00374 | 0.9358   | 0.00291  | 0.94999  | 0.006153 |
| -0.13962 | 0.0025   | -0.25971 | 1.23E-08 | -0.05728 | 0.21664  | -0.02851 | 0.53882  | -0.17113 |
| 0.106085 | 0.02186  | -0.06746 | 0.14548  | 0.011516 | 0.80398  | -0.00857 | 0.85341  | 0.045763 |
| -0.05722 | 0.2171   | -0.09287 | 0.04487  | -0.03141 | 0.49829  | -0.02991 | 0.51914  | -0.08731 |
| 0.039271 | 0.39716  | -0.04656 | 0.31537  | 0.002394 | 0.95885  | 0.027306 | 0.55613  | -0.01953 |
| -0.12996 | 0.00491  | -0.23181 | 4.08E-07 | -0.00546 | 0.9063   | -0.03711 | 0.42371  | -0.05017 |
| -0.17406 | 0.00016  | -0.37526 | 4.60E-17 | -0.05072 | 0.27401  | -0.10752 | 0.02012  | -0.21529 |
| 0.115289 | 0.01266  | -0.17394 | 0.00016  | -0.02795 | 0.54681  | -0.06749 | 0.14534  | -0.02625 |
| 0.07326  | 0.11387  | -0.13726 | 0.00296  | -0.00754 | 0.87098  | -0.02806 | 0.54529  | -0.01111 |
| 0.180693 | 8.61E-05 | 0.062203 | 0.17962  | -0.06058 | 0.19123  | -0.12725 | 0.00589  | -0.0598  |
| -0.09498 | 0.0402   | -0.09654 | 0.03702  | -0.01263 | 0.78551  | -0.04041 | 0.38355  | -0.00173 |
| 0.147037 | 0.00144  | 0.005626 | 0.90349  | -0.02857 | 0.53797  | -0.04322 | 0.35142  | -0.04162 |
| -0.01443 | 0.75584  | -0.11463 | 0.01318  | -0.03866 | 0.4045   | -0.11504 | 0.01286  | -0.06264 |
| -0.10566 | 0.0224   | -0.37773 | 2.76E-17 | 0.015882 | 0.73212  | -0.04645 | 0.31653  | -0.09661 |
| -0.01898 | 0.68241  | -0.13394 | 0.00373  | -0.02619 | 0.57234  | -0.03895 | 0.40109  | -0.16277 |
| -0.02864 | 0.53692  | -0.20101 | 1.20E-05 | -0.02133 | 0.64564  | -0.03351 | 0.46999  | -0.13508 |
| -0.05749 | 0.21495  | -0.13504 | 0.00346  | -0.01024 | 0.82539  | -0.04869 | 0.29372  | -0.07164 |
| 0.143058 | 0.00194  | -0.074   | 0.11027  | -0.02211 | 0.63366  | -0.05236 | 0.25882  | -0.00697 |
| -0.05715 | 0.21766  | -0.10985 | 0.01757  | -0.01549 | 0.73846  | -0.05572 | 0.22939  | -0.05817 |
| -0.05304 | 0.25266  | -0.2847  | 3.71E-10 | -0.02735 | 0.55548  | -0.10187 | 0.02771  | -0.08051 |
| -0.01521 | 0.74297  | -0.19366 | 2.51E-05 | -0.04847 | 0.29594  | -0.08321 | 0.07241  | -0.16116 |

|          |          |          |          |          |         |          |          |          |
|----------|----------|----------|----------|----------|---------|----------|----------|----------|
| 0.103675 | 0.02506  | 0.068099 | 0.14172  | -0.00991 | 0.83091 | 0.022365 | 0.62976  | -0.11085 |
| -0.04117 | 0.37471  | -0.3763  | 3.71E-17 | -0.09424 | 0.04178 | -0.17352 | 0.00016  | -0.19018 |
| -0.12394 | 0.00733  | -0.10229 | 0.02708  | -0.04199 | 0.36523 | -0.05731 | 0.21639  | -0.13781 |
| -0.00791 | 0.86458  | -0.1277  | 0.00572  | -0.05762 | 0.21391 | -0.06348 | 0.17082  | -0.12648 |
| -0.00931 | 0.84096  | 0.013488 | 0.77128  | -0.02165 | 0.64081 | -0.062   | 0.18108  | -0.07047 |
| -0.05845 | 0.2074   | -0.22269 | 1.17E-06 | -0.05804 | 0.21057 | -0.10648 | 0.02136  | -0.09786 |
| -0.01251 | 0.78751  | 0.058023 | 0.21072  | -0.0077  | 0.86814 | 0.002558 | 0.95603  | -0.02568 |
| 0.092045 | 0.04681  | -0.0509  | 0.27236  | -0.02986 | 0.51971 | -0.10699 | 0.02075  | -0.09643 |
| 0.079314 | 0.08688  | -0.0197  | 0.67112  | 0.027611 | 0.55171 | 0.038516 | 0.4063   | -0.0117  |
| -0.00772 | 0.86788  | -0.19634 | 1.93E-05 | -0.04987 | 0.2822  | -0.14933 | 0.00121  | -0.13435 |
| -0.11876 | 0.01021  | -0.24326 | 1.02E-07 | -0.03932 | 0.39653 | -0.09864 | 0.03307  | 0.009833 |
| -0.04751 | 0.30554  | -0.17526 | 0.00014  | -0.01412 | 0.76088 | -0.09165 | 0.04776  | -0.09161 |
| -0.17101 | 0.0002   | -0.22948 | 5.36E-07 | -0.03291 | 0.47804 | -0.08573 | 0.06416  | -0.0496  |
| 0.029076 | 0.53079  | -0.19292 | 2.70E-05 | -0.03179 | 0.49316 | -0.07691 | 0.09689  | -0.06912 |
| 0.002627 | 0.95485  | 0.150085 | 0.00114  | 0.0709   | 0.12602 | 0.099992 | 0.03074  | 0.192846 |
| 0.23553  | 2.62E-07 | 0.114018 | 0.01369  | -0.01169 | 0.80112 | -0.04923 | 0.28838  | 0.044127 |
| 0.175829 | 0.00013  | 0.045394 | 0.32765  | -0.03438 | 0.45863 | 0.038179 | 0.41043  | -0.08776 |
| -0.05766 | 0.21358  | -0.1588  | 0.00057  | -0.04192 | 0.36604 | -0.09374 | 0.04289  | -0.09952 |
| -0.00981 | 0.83254  | -0.09843 | 0.03346  | 0.003097 | 0.94678 | 0.023635 | 0.61043  | 0.019045 |
| -0.01298 | 0.77966  | -0.07975 | 0.08515  | -0.03916 | 0.39846 | -0.06741 | 0.14578  | -0.20582 |
| -0.14387 | 0.00183  | -0.28392 | 4.15E-10 | -0.03463 | 0.45536 | -0.07036 | 0.12892  | -0.1197  |
| 0.082875 | 0.07358  | -0.26413 | 6.80E-09 | -0.00123 | 0.9788  | -0.06664 | 0.1505   | -0.05252 |
| 0.098254 | 0.03378  | -0.08035 | 0.08282  | -0.03073 | 0.50766 | -0.07895 | 0.08833  | -0.06346 |
| 0.00417  | 0.92839  | -0.16047 | 0.0005   | -0.0469  | 0.31183 | -0.09954 | 0.0315   | -0.11555 |
| -0.16668 | 0.0003   | -0.24478 | 8.45E-08 | -0.01128 | 0.808   | -0.0394  | 0.39563  | -0.05123 |
| 0.122674 | 0.00796  | 0.007983 | 0.86339  | -0.01251 | 0.7874  | -0.03638 | 0.43285  | 0.010915 |
| 0.046067 | 0.32053  | -0.08926 | 0.05391  | 0.018792 | 0.68545 | 0.003853 | 0.93381  | 0.018823 |
| -0.0536  | 0.24764  | -0.23147 | 4.25E-07 | -0.02725 | 0.55692 | -0.05351 | 0.24849  | -0.04892 |
| -0.00545 | 0.90651  | -0.09791 | 0.03442  | 0.001632 | 0.97194 | -0.03471 | 0.45428  | -0.00619 |
| -0.09823 | 0.03383  | -0.34371 | 2.14E-14 | -0.06667 | 0.15032 | -0.14924 | 0.00122  | -0.12135 |
| -0.04244 | 0.36009  | -0.18846 | 4.16E-05 | -0.05647 | 0.2232  | -0.08053 | 0.08212  | -0.11299 |
| -0.19382 | 2.47E-05 | -0.21209 | 3.77E-06 | -0.01582 | 0.73304 | -0.04487 | 0.33326  | -0.10987 |
| 0.019662 | 0.67171  | -0.23116 | 4.41E-07 | -0.0531  | 0.25209 | -0.08138 | 0.07895  | -0.20169 |
| 0.370881 | 1.12E-16 | 0.071418 | 0.12327  | -0.01716 | 0.71141 | -0.05584 | 0.22844  | -0.06272 |
| 0.04921  | 0.28858  | -0.07188 | 0.12085  | -0.04971 | 0.28371 | -0.10048 | 0.02993  | -0.12763 |
| -0.05521 | 0.23372  | -0.00646 | 0.88932  | -0.04377 | 0.34526 | -0.01454 | 0.75406  | -0.21458 |
| 0.065238 | 0.15927  | -0.11807 | 0.01066  | -0.0227  | 0.62465 | -0.08543 | 0.06508  | -0.10553 |
| -0.06387 | 0.16824  | -0.16703 | 0.00029  | -0.03407 | 0.4626  | -0.05585 | 0.22837  | -0.10929 |
| 0.043637 | 0.34675  | -0.17969 | 9.44E-05 | -0.00109 | 0.98129 | -0.05506 | 0.23497  | -0.06823 |
| 0.022992 | 0.62018  | -0.11296 | 0.01459  | 0.004489 | 0.92292 | -0.00822 | 0.85932  | -0.05016 |
| -0.07487 | 0.10614  | -0.28237 | 5.21E-10 | -0.04724 | 0.30834 | -0.12424 | 0.00719  | -0.09457 |
| -0.05822 | 0.20919  | -0.24906 | 4.93E-08 | -0.0217  | 0.63997 | 0.037685 | 0.41651  | -0.15195 |
| 0.086613 | 0.06145  | -0.2431  | 1.04E-07 | -0.07115 | 0.12468 | -0.1951  | 2.18E-05 | -0.19183 |
| -0.00413 | 0.92909  | -0.14883 | 0.00126  | -0.04312 | 0.35248 | -0.07798 | 0.09232  | -0.05403 |
| -0.05765 | 0.21364  | -0.19965 | 1.38E-05 | -0.04899 | 0.29078 | -0.12453 | 0.00705  | -0.05138 |

|          |          |          |          |          |         |          |         |           |
|----------|----------|----------|----------|----------|---------|----------|---------|-----------|
| -0.1279  | 0.00564  | -0.32592 | 5.10E-13 | -0.01601 | 0.73004 | -0.0343  | 0.45965 | -0.01452  |
| -0.04653 | 0.31569  | -0.33838 | 5.66E-14 | -0.1032  | 0.02573 | -0.16857 | 0.00025 | -0.03957  |
| -0.10896 | 0.0185   | -0.25088 | 3.90E-08 | 0.017753 | 0.70198 | -0.01002 | 0.82899 | 0.031191  |
| -0.07987 | 0.08468  | -0.25486 | 2.33E-08 | -0.03989 | 0.38972 | -0.09959 | 0.03141 | -0.05376  |
| -0.01262 | 0.7856   | -0.12081 | 0.00897  | -0.03962 | 0.393   | -0.09076 | 0.04999 | -0.09126  |
| 0.083407 | 0.07174  | 0.026972 | 0.56096  | 0.019658 | 0.67177 | -0.06446 | 0.1643  | -0.13323  |
| -0.01642 | 0.72346  | -0.03376 | 0.4667   | 0.000522 | 0.99103 | -0.05665 | 0.22177 | -0.12101  |
| 0.068485 | 0.13948  | -0.00745 | 0.87238  | 0.021166 | 0.64823 | -0.00531 | 0.9088  | -0.06744  |
| 0.104127 | 0.02443  | 0.108512 | 0.019    | 0.016198 | 0.72699 | -0.02416 | 0.6025  | 0.050753  |
| -0.18003 | 9.15E-05 | -0.14255 | 0.00201  | 0.005911 | 0.89862 | 0.022476 | 0.62805 | -0.12261  |
| 0.229587 | 5.30E-07 | 0.206272 | 6.99E-06 | 0.051206 | 0.26945 | -0.03819 | 0.41034 | 0.155991  |
| 0.204928 | 8.04E-06 | 0.192746 | 2.75E-05 | 0.010569 | 0.81981 | -0.08253 | 0.0748  | 0.038909  |
| 0.179712 | 9.42E-05 | 0.126121 | 0.00635  | 0.005039 | 0.91351 | -0.09243 | 0.04588 | 0.000504  |
| 0.231651 | 4.16E-07 | 0.136705 | 0.00307  | -0.0041  | 0.92963 | -0.12726 | 0.00589 | 0.013134  |
| 0.010865 | 0.81486  | -0.14334 | 0.0019   | 0.028375 | 0.54075 | 0.073254 | 0.1139  | -0.00057  |
| 0.223464 | 1.07E-06 | 0.176784 | 0.00012  | -0.02822 | 0.543   | -0.01596 | 0.7309  | -0.05919  |
| -0.09166 | 0.04775  | -0.09648 | 0.03714  | 0.001926 | 0.96689 | 0.007132 | 0.87784 | -0.09073  |
| 0.272769 | 2.06E-09 | 0.260081 | 1.17E-08 | -0.05883 | 0.20446 | -0.00072 | 0.98755 | -0.0696   |
| 0.003549 | 0.93902  | 0.08126  | 0.07939  | 0.042036 | 0.36474 | 0.028369 | 0.54085 | 0.125711  |
| 0.022825 | 0.62272  | 0.068998 | 0.13653  | 0.026568 | 0.56685 | -0.03155 | 0.49638 | 0.018584  |
| 0.01404  | 0.7622   | 0.110276 | 0.01713  | 0.004454 | 0.92353 | 0.008993 | 0.84631 | 0.030212  |
| -0.02202 | 0.63498  | -0.02468 | 0.59467  | -0.00547 | 0.90613 | -0.04995 | 0.28137 | -0.05931  |
| -0.10169 | 0.028    | -0.13302 | 0.00398  | -0.00383 | 0.93426 | -0.07638 | 0.09925 | -0.00856  |
| 0.024169 | 0.60238  | 0.106072 | 0.02187  | 0.041127 | 0.37521 | -0.00337 | 0.94202 | 0.064069  |
| -0.05492 | 0.23618  | 0.017319 | 0.70893  | 0.045397 | 0.32763 | 0.126201 | 0.00632 | -0.03146  |
| -0.08291 | 0.07345  | -0.182   | 7.63E-05 | -0.05535 | 0.23255 | -0.09246 | 0.04582 | -0.19545  |
| -0.08297 | 0.07325  | -0.11151 | 0.01592  | 0.058235 | 0.20906 | 0.147684 | 0.00137 | 0.172079  |
| 0.065604 | 0.15694  | 0.031713 | 0.49419  | 0.046893 | 0.31192 | 0.059884 | 0.19643 | 0.085314  |
| -0.06767 | 0.14425  | -0.21154 | 4.00E-06 | 0.011939 | 0.79694 | -0.02655 | 0.56714 | -0.01095  |
| 0.038817 | 0.40265  | 0.022545 | 0.627    | 0.034459 | 0.45755 | 0.055353 | 0.23252 | 0.021187  |
| 0.179453 | 9.65E-05 | 0.207673 | 6.03E-06 | 0.008916 | 0.84761 | 0.037674 | 0.41665 | -0.03153  |
| -0.0467  | 0.31392  | -0.06998 | 0.13102  | 0.00501  | 0.91401 | 0.138651 | 0.00268 | -0.10214  |
| -0.06584 | 0.15542  | 0.041879 | 0.36653  | 0.057295 | 0.21651 | 0.002067 | 0.96447 | 0.066132  |
| -0.03862 | 0.40508  | -0.05667 | 0.22154  | 0.034047 | 0.46295 | 0.084649 | 0.0676  | -0.03989  |
| 0.068119 | 0.14161  | 0.092365 | 0.04605  | 0.016006 | 0.7301  | 0.011228 | 0.80878 | -8.88E-05 |
| -0.06975 | 0.13228  | -0.05102 | 0.27116  | -0.00882 | 0.84916 | -0.06053 | 0.19165 | -0.05405  |
| 0.056022 | 0.22692  | 0.112788 | 0.01474  | -0.03634 | 0.4333  | -0.09195 | 0.04703 | -0.12606  |
| -0.12242 | 0.00809  | -0.05485 | 0.23679  | 0.038506 | 0.40643 | 0.064584 | 0.16351 | 0.029778  |
| -0.13135 | 0.00447  | -0.24009 | 1.51E-07 | -0.00344 | 0.94082 | -0.01664 | 0.71989 | -0.09528  |
| 0.047116 | 0.30962  | 0.094732 | 0.04073  | 0.023444 | 0.61332 | 0.032624 | 0.48187 | -0.09656  |
| 0.103036 | 0.02598  | 0.059858 | 0.19662  | 0.02383  | 0.60749 | -0.0451  | 0.33078 | -0.08028  |
| 0.259138 | 1.33E-08 | 0.16834  | 0.00026  | -0.01505 | 0.74557 | -0.07493 | 0.10583 | 0.01068   |
| 0.187881 | 4.39E-05 | 0.105845 | 0.02216  | -0.04236 | 0.361   | -0.13408 | 0.0037  | -0.14342  |
| -0.18599 | 5.26E-05 | -0.23226 | 3.87E-07 | -0.00181 | 0.96887 | 0.009394 | 0.83956 | -0.19539  |
| -0.07588 | 0.10147  | 0.043681 | 0.34626  | -0.00344 | 0.94098 | -0.03912 | 0.39895 | -0.07878  |

|          |          |          |          |          |         |           |         |          |
|----------|----------|----------|----------|----------|---------|-----------|---------|----------|
| 0.097761 | 0.03468  | 0.297067 | 5.72E-11 | 0.06529  | 0.15894 | 0.075821  | 0.10174 | 0.10315  |
| 0.007256 | 0.87574  | 0.05546  | 0.23162  | -0.02852 | 0.53866 | 0.060969  | 0.18843 | -0.1995  |
| 0.007772 | 0.86698  | -0.18461 | 5.99E-05 | -0.09156 | 0.04799 | -0.0972   | 0.03575 | -0.24442 |
| -0.13055 | 0.00472  | -0.41717 | 4.34E-21 | -0.00942 | 0.83906 | 0.003813  | 0.9345  | -0.12843 |
| -0.11796 | 0.01073  | -0.02166 | 0.64064  | -0.01264 | 0.78537 | -0.00317  | 0.94546 | 0.084761 |
| 0.099232 | 0.03204  | 0.134086 | 0.0037   | -0.01785 | 0.70042 | -0.00612  | 0.895   | 0.029864 |
| -0.25461 | 2.41E-08 | -0.13846 | 0.00271  | -0.03075 | 0.50745 | 0.028964  | 0.53239 | -0.01018 |
| 0.002459 | 0.95773  | -0.14813 | 0.00133  | -0.05964 | 0.19829 | -0.14994  | 0.00115 | -0.08135 |
| -0.15536 | 0.00075  | -0.02274 | 0.624    | 0.057803 | 0.21246 | 0.15057   | 0.0011  | 0.035463 |
| -0.14396 | 0.00182  | -0.17769 | 0.00011  | -0.02705 | 0.55989 | -0.06321  | 0.1727  | -0.10447 |
| -0.15245 | 0.00095  | -0.04482 | 0.33382  | 0.018633 | 0.68797 | 0.038463  | 0.40695 | 0.017298 |
| -0.08519 | 0.06587  | -0.09053 | 0.05057  | -0.04023 | 0.38575 | -0.05241  | 0.2583  | -0.08336 |
| -0.12263 | 0.00798  | -0.00471 | 0.91909  | -0.07459 | 0.10742 | -0.04347  | 0.34863 | -0.11965 |
| -0.08399 | 0.06977  | -0.0744  | 0.10833  | -0.07297 | 0.11532 | -0.03732  | 0.42106 | -0.11304 |
| -0.09615 | 0.03779  | -0.05082 | 0.27306  | -0.07526 | 0.10432 | -0.08885  | 0.05503 | -0.13998 |
| -0.05647 | 0.22318  | 0.086772 | 0.06098  | -0.03737 | 0.42043 | -0.00387  | 0.93356 | -0.06637 |
| -0.0918  | 0.0474   | -0.08815 | 0.05698  | -0.09318 | 0.04416 | -0.13033  | 0.00479 | -0.1506  |
| -0.11361 | 0.01403  | -0.19854 | 1.55E-05 | -0.08362 | 0.07103 | -0.15239  | 0.00095 | -0.17661 |
| 0.316166 | 2.67E-12 | 0.409403 | 2.67E-20 | -0.04036 | 0.38423 | -0.04178  | 0.36771 | -0.08656 |
| -0.14713 | 0.00143  | -0.05172 | 0.2647   | -0.07529 | 0.10416 | -0.04398  | 0.343   | -0.19513 |
| -0.21177 | 3.90E-06 | -0.24421 | 9.07E-08 | -0.04972 | 0.28365 | -0.08452  | 0.06801 | -0.18168 |
| 0.122957 | 0.00781  | 0.113144 | 0.01443  | -0.09006 | 0.05178 | -0.11982  | 0.00955 | -0.13077 |
| -0.15296 | 0.00091  | 0.063523 | 0.17055  | 0.014443 | 0.75558 | 0.14851   | 0.00129 | 0.121119 |
| -0.13132 | 0.00447  | 0.016498 | 0.72214  | -0.11039 | 0.01701 | -0.17821  | 0.00011 | -0.27553 |
| -0.12214 | 0.00824  | -0.11959 | 0.00969  | -0.05995 | 0.19597 | -0.10925  | 0.01819 | -0.05253 |
| 0.078016 | 0.09218  | 0.250651 | 4.02E-08 | -0.04951 | 0.28563 | -0.10798  | 0.0196  | -0.09736 |
| -0.09601 | 0.03807  | 0.130033 | 0.00489  | 0.014723 | 0.75099 | 0.082847  | 0.07368 | 0.137302 |
| 0.163365 | 0.00039  | 0.18904  | 3.93E-05 | -0.02438 | 0.59927 | -0.0671   | 0.1477  | -0.05623 |
| 0.039084 | 0.39941  | 0.134221 | 0.00366  | 0.022597 | 0.6262  | -0.00916  | 0.84355 | 0.122105 |
| -0.05436 | 0.24104  | -0.02695 | 0.56128  | -0.03731 | 0.42111 | -0.02447  | 0.59783 | -0.13664 |
| -0.12674 | 0.0061   | 0.177096 | 0.00012  | 0.004805 | 0.91752 | 0.063802  | 0.16867 | 0.006745 |
| -0.02639 | 0.56941  | -0.04632 | 0.31785  | -0.05368 | 0.24697 | -0.03305  | 0.4761  | -0.10559 |
| -0.01561 | 0.73648  | 0.235587 | 2.60E-07 | -0.00404 | 0.93058 | 0.052009  | 0.262   | 0.09229  |
| 0.01786  | 0.70027  | 0.106128 | 0.0218   | -0.05328 | 0.25047 | -0.14469  | 0.00172 | -0.15671 |
| -0.06178 | 0.18259  | 0.169689 | 0.00023  | -0.03927 | 0.39713 | -0.05406  | 0.24359 | -0.05533 |
| -0.06203 | 0.1808   | -0.01763 | 0.70392  | 0.012675 | 0.78472 | 0.005205  | 0.91069 | -0.02794 |
| -0.113   | 0.01456  | -0.02691 | 0.56181  | -0.01822 | 0.69447 | -0.03104  | 0.50334 | -0.05937 |
| -0.02696 | 0.56109  | 0.294237 | 8.84E-11 | 0.036835 | 0.42711 | 0.082072  | 0.07642 | 0.071656 |
| -0.19801 | 1.63E-05 | -0.1203  | 0.00926  | -0.03058 | 0.50979 | 0.005461  | 0.90631 | -0.11005 |
| -0.21116 | 4.17E-06 | -0.07163 | 0.12218  | -0.06383 | 0.16846 | -0.05971  | 0.19773 | -0.05507 |
| -0.06078 | 0.18978  | 0.020011 | 0.66624  | -0.01837 | 0.69207 | -4.03E-05 | 0.99931 | 0.018602 |
| -0.08308 | 0.07286  | -0.10295 | 0.0261   | -0.06273 | 0.17599 | -0.09188  | 0.04722 | -0.1642  |
| -0.03818 | 0.41043  | -0.02766 | 0.55106  | -0.03396 | 0.46415 | -0.00119  | 0.97952 | 0.016362 |
| 0.008048 | 0.86229  | 0.036563 | 0.43053  | -0.07302 | 0.11508 | -0.06686  | 0.14914 | -0.1001  |
| 0.064109 | 0.16663  | 0.22533  | 8.66E-07 | -0.04594 | 0.32183 | -0.10797  | 0.0196  | -0.08492 |



|          |          |          |          |          |         |          |          |          |
|----------|----------|----------|----------|----------|---------|----------|----------|----------|
| -0.03762 | 0.41737  | -0.05592 | 0.22774  | -0.0355  | 0.44404 | 0.055267 | 0.23324  | -0.05563 |
| 0.197128 | 1.78E-05 | 0.403404 | 1.05E-19 | -0.0243  | 0.60044 | -0.06866 | 0.13846  | -0.00906 |
| 0.089465 | 0.05335  | 0.163915 | 0.00038  | -0.02333 | 0.61503 | -0.06829 | 0.1406   | -0.06017 |
| -0.16857 | 0.00025  | -0.15198 | 0.00099  | -0.04564 | 0.32504 | -0.00569 | 0.90232  | -0.15101 |
| -0.0634  | 0.17139  | 0.068761 | 0.13788  | -0.02813 | 0.54428 | -0.04752 | 0.30546  | -0.05433 |
| 0.000864 | 0.98514  | -0.11132 | 0.0161   | -0.0885  | 0.05598 | -0.15261 | 0.00094  | -0.17451 |
| -0.08371 | 0.07072  | 0.100444 | 0.02999  | 0.025646 | 0.58039 | 0.110952 | 0.01645  | 0.126347 |
| -0.11737 | 0.01113  | -0.15746 | 0.00064  | 0.007002 | 0.88005 | -0.00661 | 0.8868   | 0.058254 |
| 0.016474 | 0.72253  | -0.17358 | 0.00016  | -0.04034 | 0.38447 | -0.11274 | 0.01479  | -0.17465 |
| -0.00711 | 0.87828  | 0.050585 | 0.27531  | -0.01568 | 0.73535 | -0.05547 | 0.23154  | 0.040038 |
| 0.073323 | 0.11356  | 0.185505 | 5.50E-05 | -0.05926 | 0.20112 | -0.03921 | 0.39785  | -0.04519 |
| 0.044142 | 0.34119  | -0.16985 | 0.00023  | -0.05514 | 0.23435 | -0.10703 | 0.0207   | -0.17632 |
| 0.069664 | 0.13278  | 0.283923 | 4.15E-10 | -0.03509 | 0.44938 | -0.00057 | 0.9902   | -0.04644 |
| -0.14538 | 0.00163  | 0.09562  | 0.03887  | -0.0259  | 0.57668 | -0.04191 | 0.36618  | -0.03141 |
| -0.21224 | 3.71E-06 | -0.09916 | 0.03216  | -0.06748 | 0.14542 | -0.03006 | 0.51693  | -0.1615  |
| 0.175606 | 0.00014  | 0.623287 | 1.29E-51 | -0.01429 | 0.75802 | 0.065006 | 0.16076  | -0.03672 |
| -0.0138  | 0.7661   | 0.220891 | 1.43E-06 | -0.07322 | 0.11406 | -0.03997 | 0.38882  | -0.16545 |
| -0.10707 | 0.02065  | 0.243309 | 1.01E-07 | -0.0144  | 0.75636 | 0.036722 | 0.42853  | -0.0496  |
| 0.027073 | 0.55949  | 0.094106 | 0.04208  | -0.04574 | 0.32393 | -0.01122 | 0.80896  | -0.06831 |
| 0.251096 | 3.80E-08 | 0.326504 | 4.62E-13 | -0.01668 | 0.71916 | -0.06783 | 0.14328  | -0.06823 |
| -0.12374 | 0.00742  | 0.036222 | 0.43485  | -0.00081 | 0.98611 | 0.013576 | 0.76983  | -0.02966 |
| 0.162093 | 0.00044  | 0.322625 | 8.98E-13 | -0.01365 | 0.76858 | 0.072704 | 0.11665  | -0.03608 |
| -0.04542 | 0.32737  | -0.02006 | 0.66546  | -0.03071 | 0.50795 | -0.03647 | 0.43176  | -0.05266 |
| -0.07367 | 0.11186  | 0.102965 | 0.02608  | -0.02345 | 0.61321 | 0.001642 | 0.97178  | -0.0485  |
| -0.04637 | 0.31735  | -0.10254 | 0.0267   | -0.07944 | 0.08638 | -0.14669 | 0.00148  | -0.16747 |
| -0.03538 | 0.44561  | 0.146803 | 0.00147  | 0.03017  | 0.51545 | 0.048074 | 0.29987  | 0.002526 |
| 0.256059 | 1.99E-08 | 0.118725 | 0.01023  | -0.08126 | 0.07939 | -0.12424 | 0.00719  | -0.12914 |
| -0.06989 | 0.13154  | 0.049218 | 0.2885   | -0.0505  | 0.27614 | -0.06329 | 0.17214  | -0.12988 |
| -0.09867 | 0.03302  | -0.00911 | 0.84427  | -0.07044 | 0.1285  | -0.06311 | 0.17335  | -0.16013 |
| -0.02495 | 0.59067  | 0.115171 | 0.01276  | -0.02872 | 0.53589 | 0.021239 | 0.64709  | -0.08009 |
| -0.10047 | 0.02994  | -0.04467 | 0.33542  | -0.04192 | 0.36604 | -0.07863 | 0.08965  | -0.13975 |
| -0.03058 | 0.50976  | 0.099584 | 0.03143  | -0.02799 | 0.54622 | -0.01092 | 0.81395  | -0.06034 |
| -0.01888 | 0.68403  | 0.042694 | 0.35727  | -0.06806 | 0.14198 | -0.11869 | 0.01026  | -0.17872 |
| 0.17882  | 0.0001   | 0.194324 | 2.35E-05 | -0.07508 | 0.10515 | -0.12687 | 0.00604  | -0.09769 |
| 0.263454 | 7.45E-09 | 0.581997 | 1.10E-43 | -0.0176  | 0.70445 | 0.023546 | 0.61177  | -0.04642 |
| 0.306732 | 1.25E-11 | 0.308296 | 9.69E-12 | -0.03032 | 0.51335 | -0.08016 | 0.08355  | -0.18615 |
| -0.22818 | 6.24E-07 | -0.2827  | 4.97E-10 | -0.06222 | 0.17949 | -0.10558 | 0.0225   | -0.15899 |
| 0.344823 | 1.75E-14 | 0.282745 | 4.93E-10 | 0.01176  | 0.7999  | 0.0095   | 0.83776  | 0.129255 |
| -0.07287 | 0.11583  | -0.11999 | 0.00944  | -0.04902 | 0.29048 | -0.0985  | 0.03332  | -0.03529 |
| -0.01755 | 0.70521  | -0.0105  | 0.82092  | -0.03874 | 0.40353 | -0.06698 | 0.14842  | -0.09536 |
| -0.06313 | 0.17319  | -0.28072 | 6.62E-10 | -0.05321 | 0.2511  | -0.05418 | 0.24256  | -0.11962 |
| 0.027675 | 0.5508   | 0.0016   | 0.97248  | 0.018301 | 0.69324 | -0.06    | 0.19557  | 0.061611 |
| 0.025804 | 0.57806  | 0.205247 | 7.78E-06 | -0.01684 | 0.71658 | -0.0202  | 0.66326  | 0.004891 |
| -0.00701 | 0.87993  | 0.016052 | 0.72936  | -0.04923 | 0.28842 | -0.20182 | 1.11E-05 | -0.07054 |
| 0.076819 | 0.0973   | 0.272383 | 2.18E-09 | -0.05233 | 0.25906 | -0.0628  | 0.1755   | -0.10332 |

|          |          |          |          |          |         |          |         |          |
|----------|----------|----------|----------|----------|---------|----------|---------|----------|
| 0.102545 | 0.0267   | 0.366743 | 2.58E-16 | -0.08772 | 0.05818 | -0.12952 | 0.00506 | -0.12229 |
| -0.008   | 0.86302  | 0.151829 | 0.001    | -0.03401 | 0.4634  | -0.04176 | 0.36789 | -0.01747 |
| -0.13637 | 0.00315  | 0.038077 | 0.41168  | -0.03321 | 0.47407 | -0.01583 | 0.73291 | -0.07369 |
| -0.07294 | 0.11546  | 0.099042 | 0.03237  | 0.009726 | 0.83397 | 0.097479 | 0.03521 | 0.064584 |
| -0.21714 | 2.18E-06 | 0.015565 | 0.73726  | 0.003786 | 0.93497 | 0.065674 | 0.15649 | -0.0992  |
| 0.037046 | 0.42446  | 0.139346 | 0.00254  | -0.00237 | 0.95933 | -0.04989 | 0.28196 | 0.025549 |
| 0.226871 | 7.26E-07 | 0.277494 | 1.06E-09 | -0.01605 | 0.72938 | 0.039733 | 0.39162 | -0.01451 |
| -0.11025 | 0.01715  | -0.12082 | 0.00896  | -0.00821 | 0.8596  | -0.03732 | 0.42106 | 0.054153 |
| 0.000855 | 0.9853   | -0.02265 | 0.62542  | 0.010201 | 0.82598 | -0.0531  | 0.25213 | -0.0124  |
| 0.031929 | 0.49126  | -0.25533 | 2.19E-08 | 0.009975 | 0.82978 | -0.03869 | 0.40422 | 0.024198 |
| -0.2498  | 4.48E-08 | -0.24016 | 1.50E-07 | -0.05056 | 0.27552 | -0.06558 | 0.1571  | -0.10075 |
| -0.07727 | 0.09535  | -0.03053 | 0.51051  | 0.029504 | 0.52476 | 0.004338 | 0.9255  | 0.013237 |
| 0.280097 | 7.25E-10 | 0.553352 | 8.13E-39 | -0.01023 | 0.8255  | 0.01331  | 0.77421 | 0.036735 |
| -0.05089 | 0.27243  | 0.066879 | 0.14902  | -0.0829  | 0.07351 | -0.12013 | 0.00936 | -0.21215 |
| -0.08806 | 0.05724  | 0.121823 | 0.0084   | -0.03147 | 0.4975  | 0.014979 | 0.74682 | -0.05556 |
| -0.02322 | 0.6167   | 0.252464 | 3.18E-08 | -0.05817 | 0.20958 | -0.08272 | 0.07412 | -0.12548 |
| -0.11133 | 0.01609  | 0.173009 | 0.00017  | -0.01362 | 0.76909 | -0.01075 | 0.81678 | 0.040553 |
| -0.02969 | 0.52215  | -0.0089  | 0.84786  | -0.01457 | 0.75357 | -0.04785 | 0.30211 | -0.04199 |
| -0.11489 | 0.01298  | -0.16316 | 0.0004   | -0.03126 | 0.50039 | -0.097   | 0.03613 | -0.10008 |
| -0.15508 | 0.00077  | -0.27969 | 7.69E-10 | -0.06763 | 0.14449 | -0.02952 | 0.5245  | -0.15513 |
| -0.22081 | 1.45E-06 | -0.36721 | 2.35E-16 | -0.03038 | 0.51259 | -0.05289 | 0.25403 | -0.14835 |
| -0.0696  | 0.13313  | -0.07556 | 0.10293  | -0.05766 | 0.21358 | -0.08464 | 0.06764 | -0.12485 |
| -0.20393 | 8.92E-06 | 0.082569 | 0.07465  | -0.0526  | 0.25663 | -0.03105 | 0.50326 | -0.1513  |
| -0.15887 | 0.00057  | -0.20626 | 6.99E-06 | -0.06361 | 0.16993 | -0.0497  | 0.28379 | -0.10723 |
| 0.123805 | 0.00739  | 0.130213 | 0.00483  | 0.039517 | 0.39421 | 0.100449 | 0.02998 | 0.156994 |
| -0.20737 | 6.22E-06 | -0.28298 | 4.76E-10 | -0.05711 | 0.21801 | -0.04251 | 0.35937 | -0.10409 |
| 0.153848 | 0.00085  | 0.363238 | 5.18E-16 | 0.028335 | 0.54133 | 0.10742  | 0.02024 | 0.105018 |
| -0.11116 | 0.01625  | -0.09302 | 0.04452  | -0.01203 | 0.79547 | -0.02114 | 0.64863 | -0.01766 |
| -0.10763 | 0.02     | -0.12563 | 0.00656  | -0.0692  | 0.1354  | -0.02004 | 0.66573 | -0.03195 |
| 0.260606 | 1.09E-08 | 0.540357 | 9.29E-37 | 0.005018 | 0.91388 | 0.046995 | 0.31086 | -0.06935 |
| 0.068677 | 0.13837  | 0.277565 | 1.04E-09 | 0.006816 | 0.8832  | 0.132572 | 0.00411 | -0.07288 |
| 0.159872 | 0.00052  | 0.23398  | 3.15E-07 | -0.03031 | 0.51344 | -0.00504 | 0.9135  | -0.0788  |
| 0.038951 | 0.40102  | 0.037336 | 0.42084  | 0.023758 | 0.60857 | 0.037776 | 0.41539 | 0.039245 |
| 0.091423 | 0.04832  | 0.098072 | 0.03411  | -0.04898 | 0.29089 | -0.14585 | 0.00158 | -0.12328 |
| 0.039085 | 0.3994   | 0.051984 | 0.26223  | -0.06243 | 0.17804 | -0.04482 | 0.3338  | -0.07097 |
| -0.28854 | 2.09E-10 | -0.08957 | 0.05308  | -0.00697 | 0.88066 | 0.038837 | 0.4024  | -0.01519 |
| -0.0392  | 0.39805  | 0.010653 | 0.81841  | -0.0591  | 0.20235 | -0.02922 | 0.52873 | -0.12309 |
| 0.222342 | 1.22E-06 | 0.097172 | 0.03579  | 0.007383 | 0.87356 | -0.07123 | 0.12427 | 0.124157 |
| 0.030089 | 0.51657  | 0.154601 | 0.0008   | -0.05364 | 0.24728 | -0.01137 | 0.80642 | -0.06296 |
| -0.03704 | 0.42457  | -0.21047 | 4.49E-06 | -0.03157 | 0.4961  | -0.07399 | 0.11028 | -0.09934 |
| -0.0658  | 0.15569  | -0.04324 | 0.35119  | -0.03749 | 0.41893 | -0.01143 | 0.80535 | -0.02699 |
| -0.06146 | 0.18487  | 0.210418 | 4.51E-06 | -0.02395 | 0.60567 | 0.038195 | 0.41023 | -0.0874  |
| -0.03231 | 0.48613  | -0.0197  | 0.67118  | -0.00663 | 0.88646 | -0.05115 | 0.26993 | 0.010145 |
| -0.24122 | 1.31E-07 | -0.59414 | 6.73E-46 | 0.001249 | 0.97853 | -0.09337 | 0.04373 | -0.06227 |
| -0.18317 | 6.85E-05 | -0.04417 | 0.3409   | -0.05278 | 0.25496 | -0.07467 | 0.10706 | -0.10703 |

|          |          |          |          |          |         |          |          |          |
|----------|----------|----------|----------|----------|---------|----------|----------|----------|
| 0.013601 | 0.76942  | 0.277909 | 9.94E-10 | -0.00367 | 0.9369  | 0.056869 | 0.21995  | 0.022309 |
| -0.07542 | 0.10358  | -0.21324 | 3.33E-06 | -0.03879 | 0.403   | -0.0974  | 0.03537  | -0.12079 |
| 0.131127 | 0.00453  | 0.30619  | 1.36E-11 | -0.0314  | 0.49848 | 0.010899 | 0.81428  | 0.071658 |
| 0.036819 | 0.42732  | -0.20666 | 6.71E-06 | 0.03735  | 0.42068 | 0.015761 | 0.73408  | 0.041579 |
| -0.00783 | 0.86605  | 0.026615 | 0.56616  | -0.01645 | 0.72289 | -0.05715 | 0.21767  | -0.05953 |
| -0.15277 | 0.00093  | -0.12689 | 0.00604  | -0.07097 | 0.12567 | -0.05864 | 0.2059   | -0.08551 |
| 0.265276 | 5.82E-09 | 0.411744 | 1.55E-20 | 0.008613 | 0.85273 | 0.020937 | 0.65178  | 0.017859 |
| -0.02277 | 0.62364  | 0.004993 | 0.9143   | -0.054   | 0.24417 | -0.02835 | 0.54114  | -0.03099 |
| -0.1785  | 0.00011  | -0.16176 | 0.00045  | 0.05132  | 0.26838 | 0.074481 | 0.10795  | 0.120053 |
| 0.131059 | 0.00456  | -0.02687 | 0.56238  | -0.00051 | 0.99125 | 0.001534 | 0.97363  | -0.00856 |
| 0.045964 | 0.32161  | -0.09055 | 0.05053  | -0.04413 | 0.34133 | -0.09031 | 0.05112  | -0.12108 |
| 0.159306 | 0.00055  | 0.41115  | 1.78E-20 | -0.03004 | 0.51731 | -0.03261 | 0.48211  | -0.14288 |
| -0.21521 | 2.69E-06 | -0.15035 | 0.00112  | -0.03227 | 0.4867  | -0.03756 | 0.41807  | -0.03385 |
| -0.06766 | 0.1443   | 0.01843  | 0.69119  | -0.05208 | 0.26131 | -0.0486  | 0.29459  | -0.17111 |
| 0.118078 | 0.01066  | 0.33049  | 2.31E-13 | 0.010115 | 0.82742 | 0.042982 | 0.35404  | -0.03469 |
| -0.14239 | 0.00204  | -0.02673 | 0.56454  | 0.020423 | 0.65978 | -0.00598 | 0.89743  | -0.02121 |
| -0.16169 | 0.00045  | -0.13423 | 0.00366  | -0.06766 | 0.14433 | -0.02915 | 0.52982  | -0.1595  |
| -0.13083 | 0.00463  | -0.01135 | 0.80683  | -0.06089 | 0.18897 | -0.02862 | 0.53722  | -0.14815 |
| -0.00624 | 0.893    | 0.15989  | 0.00052  | -0.07552 | 0.10312 | -0.16493 | 0.00034  | -0.15667 |
| -0.117   | 0.0114   | -0.06018 | 0.19425  | -0.08072 | 0.08143 | -0.06286 | 0.17505  | -0.20696 |
| -0.12742 | 0.00582  | -0.09675 | 0.03661  | -0.08191 | 0.077   | -0.10489 | 0.0234   | -0.14242 |
| 0.021634 | 0.64099  | 0.094957 | 0.04025  | -0.03186 | 0.49223 | -0.0883  | 0.05653  | -0.07242 |
| 0.055733 | 0.22932  | 0.264256 | 6.68E-09 | -0.03593 | 0.43853 | -0.02779 | 0.54916  | -0.05837 |
| -0.07279 | 0.1162   | 0.148063 | 0.00133  | -0.04758 | 0.30486 | -0.06478 | 0.16221  | -0.04298 |
| -0.04459 | 0.33626  | 0.033822 | 0.46591  | -0.04453 | 0.33697 | -0.01955 | 0.67346  | -0.10116 |
| -0.11122 | 0.01619  | -0.08483 | 0.06702  | -0.07421 | 0.10926 | -0.12151 | 0.00857  | -0.07598 |
| -0.24316 | 1.03E-07 | -0.17696 | 0.00012  | -0.03832 | 0.40872 | -0.0279  | 0.54753  | -0.09149 |
| 0.031858 | 0.49222  | 0.286748 | 2.73E-10 | -0.0248  | 0.59301 | -0.01298 | 0.77969  | -0.0059  |
| -0.09857 | 0.0332   | -0.01653 | 0.72163  | -0.02008 | 0.66521 | -0.00886 | 0.84848  | -0.00823 |
| -0.05917 | 0.2018   | -0.08847 | 0.05609  | -0.0293  | 0.52763 | -0.02146 | 0.64374  | -0.02423 |
| 0.084654 | 0.06758  | 0.22862  | 5.93E-07 | -0.00828 | 0.85832 | 0.043019 | 0.35362  | -0.0464  |
| -0.11511 | 0.0128   | 0.022592 | 0.62628  | -0.0497  | 0.28376 | -0.08368 | 0.07082  | -0.15743 |
| 0.005287 | 0.90928  | -0.0249  | 0.59138  | 0.00661  | 0.88671 | -0.02599 | 0.57536  | -0.00011 |
| -0.17307 | 0.00017  | -0.35402 | 3.10E-15 | -0.11061 | 0.01679 | -0.1886  | 4.10E-05 | -0.26574 |
| -0.15751 | 0.00064  | -0.31009 | 7.24E-12 | -0.00299 | 0.94854 | -0.00957 | 0.83665  | -0.06578 |
| -0.1073  | 0.02038  | -0.1958  | 2.03E-05 | -0.05648 | 0.22309 | -0.11656 | 0.01171  | -0.1484  |
| 0.0414   | 0.37205  | 0.027112 | 0.55893  | -0.03877 | 0.40322 | -0.11945 | 0.00978  | -0.10055 |
| -0.08125 | 0.07944  | -0.12844 | 0.00544  | -0.05232 | 0.25919 | -0.07449 | 0.10789  | -0.01362 |
| -0.11043 | 0.01697  | 0.046453 | 0.31649  | 0.026716 | 0.56469 | 0.099101 | 0.03226  | -0.07794 |
| -0.07507 | 0.10519  | 0.011693 | 0.80103  | -0.04011 | 0.38717 | -0.01035 | 0.8235   | -0.03892 |
| -0.07465 | 0.10715  | -0.04112 | 0.37531  | -0.03517 | 0.44835 | -0.09056 | 0.05048  | 0.018851 |
| -0.21322 | 3.34E-06 | -0.05813 | 0.20987  | -0.03347 | 0.47052 | -0.00042 | 0.99284  | -0.06758 |
| -0.01414 | 0.7605   | 0.114823 | 0.01303  | -0.03097 | 0.5043  | -0.0337  | 0.46747  | -0.11563 |
| -0.30498 | 1.65E-11 | -0.12202 | 0.0083   | -0.06373 | 0.16913 | -0.09327 | 0.04395  | -0.07957 |
| 0.289681 | 1.76E-10 | 0.595641 | 3.52E-46 | -0.03016 | 0.51559 | 0.012228 | 0.79213  | -0.06352 |

|          |          |          |          |          |         |          |         |          |
|----------|----------|----------|----------|----------|---------|----------|---------|----------|
| 0.010195 | 0.82607  | 0.007223 | 0.87629  | -0.00636 | 0.89091 | -0.04272 | 0.35699 | 0.042017 |
| 0.03427  | 0.46002  | 0.059516 | 0.19919  | -0.10122 | 0.02874 | -0.17877 | 0.0001  | -0.15797 |
| -0.04671 | 0.31383  | 0.086681 | 0.06125  | -0.01808 | 0.6968  | -0.02368 | 0.60982 | 0.005148 |
| -0.06518 | 0.15963  | 0.046575 | 0.31522  | -0.0341  | 0.4622  | -0.04977 | 0.28315 | -0.09195 |
| 0.051741 | 0.26447  | 0.227654 | 6.63E-07 | -0.04897 | 0.29095 | -0.06129 | 0.18609 | -0.06973 |
| 0.015107 | 0.74471  | 0.189382 | 3.81E-05 | -0.02866 | 0.53664 | -0.03785 | 0.41442 | -0.04183 |
| -0.10945 | 0.01798  | 0.194566 | 2.30E-05 | -0.02957 | 0.52387 | 0.024312 | 0.60024 | -0.02724 |
| 0.07905  | 0.08794  | 0.12372  | 0.00743  | -0.02259 | 0.6263  | -0.01225 | 0.79179 | -0.00726 |
| -0.16347 | 0.00039  | -0.10255 | 0.02668  | -0.04474 | 0.33468 | -0.06033 | 0.1931  | -0.13452 |
| -0.15015 | 0.00114  | -0.03793 | 0.41348  | -0.01813 | 0.69593 | -0.0151  | 0.7448  | -0.05461 |
| -0.13924 | 0.00256  | -0.04851 | 0.29546  | -0.06004 | 0.19524 | -0.0145  | 0.75456 | -0.16715 |
| -0.05333 | 0.25005  | 0.15365  | 0.00086  | -0.01674 | 0.71818 | 0.03704  | 0.42454 | -0.07677 |
| -0.13253 | 0.00412  | -0.11979 | 0.00957  | -0.05908 | 0.20252 | -0.07782 | 0.09303 | -0.165   |
| -0.22836 | 6.11E-07 | -0.30332 | 2.15E-11 | -0.0933  | 0.04388 | -0.10229 | 0.02708 | -0.19989 |
| 0.21798  | 1.98E-06 | 0.247387 | 6.09E-08 | -0.08105 | 0.08015 | -0.07073 | 0.12693 | -0.1045  |
| -0.03517 | 0.44835  | 0.225486 | 8.51E-07 | -0.02704 | 0.55991 | 0.009112 | 0.84431 | -0.01714 |
| -0.1851  | 5.72E-05 | -0.09968 | 0.03126  | -0.05549 | 0.23138 | -0.06075 | 0.19002 | -0.14615 |
| -0.09428 | 0.04169  | 0.101837 | 0.02777  | -0.00015 | 0.99737 | -0.00558 | 0.90426 | -0.0728  |
| 0.018924 | 0.68336  | 0.15921  | 0.00055  | -0.00864 | 0.85231 | -0.06862 | 0.1387  | -0.09875 |
| -0.08134 | 0.0791   | -0.23766 | 2.03E-07 | -0.09048 | 0.05069 | -0.13506 | 0.00345 | -0.12687 |
| -0.12469 | 0.00698  | 0.006383 | 0.89058  | -0.01112 | 0.81054 | 0.032132 | 0.48851 | -0.01768 |
| -0.04817 | 0.29894  | -0.00149 | 0.97434  | -0.02779 | 0.54907 | -0.05291 | 0.25381 | 0.019194 |
| 0.038331 | 0.40856  | 0.243007 | 1.05E-07 | -0.01986 | 0.66853 | 0.044919 | 0.33275 | -0.03195 |
| -0.17525 | 0.00014  | -0.08987 | 0.05228  | -0.01233 | 0.79049 | -0.01101 | 0.81245 | -0.0514  |
| -0.06644 | 0.15168  | 0.094107 | 0.04208  | -0.05358 | 0.24783 | -0.09103 | 0.04931 | -0.09021 |
| -0.21508 | 2.73E-06 | -0.17228 | 0.00018  | -0.0617  | 0.18315 | -0.03434 | 0.45913 | -0.15132 |
| 0.225872 | 8.14E-07 | -0.13657 | 0.0031   | -0.00748 | 0.87199 | -0.05661 | 0.2221  | -0.1359  |
| 0.293104 | 1.05E-10 | 0.049225 | 0.28843  | -0.08341 | 0.07174 | -0.11997 | 0.00946 | -0.14953 |
| -0.2342  | 3.07E-07 | -0.18962 | 3.72E-05 | -0.04713 | 0.30946 | -0.03667 | 0.42914 | -0.09041 |
| -0.01631 | 0.72521  | -0.06978 | 0.13214  | 0.039146 | 0.39867 | 0.119401 | 0.00981 | -0.00771 |
| -0.05362 | 0.24748  | -0.16611 | 0.00031  | -0.04981 | 0.28277 | -0.03287 | 0.47863 | -0.07366 |
| 0.218757 | 1.82E-06 | 0.178975 | 0.0001   | 0.044139 | 0.34121 | 0.035382 | 0.44558 | 0.160742 |
| 0.000829 | 0.98575  | 0.09867  | 0.03303  | -0.05795 | 0.21128 | -0.06536 | 0.15851 | -0.05977 |
| -0.15723 | 0.00065  | -0.12924 | 0.00516  | -0.05481 | 0.23715 | 0.037967 | 0.41303 | -0.0198  |
| 0.014209 | 0.75942  | 0.137618 | 0.00288  | -0.03429 | 0.45977 | -0.06673 | 0.14991 | 0.013724 |
| -0.11105 | 0.01636  | -0.07939 | 0.08659  | -0.03289 | 0.47832 | -0.07585 | 0.10163 | -0.02125 |
| -0.0992  | 0.03209  | -0.14563 | 0.0016   | -0.06758 | 0.14478 | -0.08283 | 0.07375 | -0.13503 |
| 0.01489  | 0.74826  | 0.238684 | 1.79E-07 | -0.02063 | 0.65653 | -0.00344 | 0.94082 | -0.02091 |
| 0.07001  | 0.13086  | 0.252091 | 3.34E-08 | 0.003144 | 0.94598 | 0.035172 | 0.44829 | 0.064459 |
| 0.152608 | 0.00094  | 0.273884 | 1.76E-09 | -0.00485 | 0.91672 | 0.002158 | 0.96291 | 0.084241 |
| -0.07154 | 0.12261  | -0.1622  | 0.00043  | -0.0376  | 0.41756 | -0.10446 | 0.02398 | -0.06438 |
| -0.03978 | 0.39104  | -0.11289 | 0.01466  | -0.05861 | 0.20614 | -0.01242 | 0.78886 | -0.04463 |
| -0.07123 | 0.12428  | 0.047333 | 0.3074   | -0.04455 | 0.33672 | -0.0924  | 0.04596 | -0.07409 |
| -0.12014 | 0.00936  | 0.001888 | 0.96755  | 0.000103 | 0.99823 | 0.023204 | 0.61696 | -0.05288 |
| -0.00821 | 0.85958  | 0.162712 | 0.00041  | -0.05114 | 0.27005 | 0.024793 | 0.59305 | -0.0616  |

|          |          |          |          |          |         |          |          |          |
|----------|----------|----------|----------|----------|---------|----------|----------|----------|
| -0.0305  | 0.51093  | -0.00662 | 0.88648  | -0.089   | 0.05461 | -0.15247 | 0.00095  | -0.17687 |
| -0.02749 | 0.5535   | -0.18577 | 5.37E-05 | -0.05308 | 0.25228 | -0.10926 | 0.01819  | -0.138   |
| -0.03611 | 0.43626  | 0.069221 | 0.13527  | -0.03479 | 0.45325 | -0.03391 | 0.46469  | -0.02847 |
| 0.065482 | 0.15771  | 0.145934 | 0.00157  | -0.02262 | 0.62592 | -0.08437 | 0.06853  | -0.04687 |
| -0.19148 | 3.11E-05 | -0.0676  | 0.1447   | -0.04666 | 0.31438 | -0.02117 | 0.64809  | -0.07643 |
| -0.16917 | 0.00024  | -0.25412 | 2.57E-08 | -0.06538 | 0.15838 | -0.10187 | 0.02771  | -0.17642 |
| 0.071934 | 0.12058  | 0.191435 | 3.12E-05 | -0.0327  | 0.48079 | -0.02989 | 0.5194   | -0.00967 |
| -0.08693 | 0.06049  | 0.260429 | 1.12E-08 | -0.0211  | 0.64919 | 0.021555 | 0.64221  | -0.01466 |
| 0.04829  | 0.2977   | -0.11046 | 0.01694  | -0.07073 | 0.12694 | -0.17394 | 0.00016  | -0.13891 |
| -0.21123 | 4.14E-06 | -0.13366 | 0.00381  | -0.04482 | 0.33379 | 0.037025 | 0.42473  | -0.12226 |
| -0.02444 | 0.5983   | 0.067195 | 0.1471   | -0.04701 | 0.31072 | -0.02108 | 0.64957  | -0.00849 |
| 0.267179 | 4.48E-09 | 0.304538 | 1.77E-11 | -0.03844 | 0.40719 | 0.026119 | 0.57342  | -0.08221 |
| 0.057192 | 0.21734  | 0.151096 | 0.00106  | -0.0894  | 0.05352 | -0.12866 | 0.00536  | -0.17241 |
| -0.01306 | 0.77832  | -0.09094 | 0.04952  | -0.0465  | 0.31601 | -0.08283 | 0.07373  | -0.03062 |
| -0.20106 | 1.20E-05 | -0.1232  | 0.00769  | -0.0405  | 0.38252 | -0.02598 | 0.57542  | -0.13025 |
| -0.1606  | 0.00049  | -0.05606 | 0.22659  | -0.00957 | 0.83658 | 0.017485 | 0.70628  | -0.07294 |
| -0.20257 | 1.03E-05 | -0.00299 | 0.94866  | -0.00996 | 0.83011 | 0.037811 | 0.41495  | -0.03047 |
| -0.11578 | 0.01229  | -0.05025 | 0.27851  | 0.022427 | 0.62881 | 0.038401 | 0.40771  | -0.01243 |
| -0.19181 | 3.01E-05 | -0.18698 | 4.79E-05 | -0.02065 | 0.65628 | 0.008675 | 0.85168  | -0.13598 |
| -0.11976 | 0.00959  | -0.11125 | 0.01616  | -0.02646 | 0.56843 | 0.043963 | 0.34315  | -0.029   |
| -0.13087 | 0.00461  | 0.020264 | 0.66226  | -0.03579 | 0.44041 | 0.011792 | 0.79937  | -0.00946 |
| 0.077323 | 0.09512  | 0.237266 | 2.13E-07 | -0.02604 | 0.57456 | 0.028114 | 0.54448  | -0.02773 |
| 0.104088 | 0.02448  | 0.163445 | 0.00039  | -0.05328 | 0.25055 | -0.00647 | 0.88905  | -0.05467 |
| -0.06869 | 0.13828  | -0.08403 | 0.06966  | -0.02375 | 0.6087  | 0.001059 | 0.9818   | -0.0041  |
| -0.13014 | 0.00485  | 0.023906 | 0.60634  | -0.02668 | 0.56525 | -0.0345  | 0.45699  | -0.01899 |
| -0.06193 | 0.18158  | 0.171815 | 0.00019  | -0.03603 | 0.43733 | -0.0105  | 0.82097  | -0.14964 |
| 0.113067 | 0.0145   | 0.289254 | 1.88E-10 | 0.016149 | 0.72778 | 0.095661 | 0.03879  | 0.088446 |
| -0.01712 | 0.71215  | 0.199428 | 1.41E-05 | -0.00273 | 0.95306 | 0.055937 | 0.22762  | 0.03752  |
| 0.211998 | 3.81E-06 | -0.01668 | 0.71926  | -0.05893 | 0.20364 | -0.20413 | 8.74E-06 | -0.18433 |
| 0.201887 | 1.10E-05 | 0.277539 | 1.05E-09 | -0.0073  | 0.87504 | 0.024855 | 0.59212  | -0.09258 |
| -0.15983 | 0.00053  | -0.29748 | 5.36E-11 | 0.025785 | 0.57833 | 0.12425  | 0.00718  | -0.00073 |
| 0.043039 | 0.3534   | 0.11975  | 0.00959  | -0.02267 | 0.62514 | -0.00311 | 0.94651  | -0.04767 |
| -0.08836 | 0.05638  | -0.1483  | 0.00131  | -0.02289 | 0.62179 | -0.04534 | 0.3282   | -0.0542  |
| -0.01007 | 0.82825  | 0.251005 | 3.84E-08 | -0.02527 | 0.58594 | 0.004773 | 0.91807  | -0.01896 |
| 0.017251 | 0.71002  | 0.21025  | 4.59E-06 | -0.01521 | 0.74302 | -0.0169  | 0.71567  | -0.01247 |
| -0.13212 | 0.00424  | -0.02444 | 0.59835  | -0.05465 | 0.23849 | -0.03165 | 0.4951   | -0.0999  |
| -0.05447 | 0.24007  | 0.096402 | 0.03729  | -0.02337 | 0.61449 | -0.02126 | 0.6467   | -0.05196 |
| -0.07868 | 0.08943  | 0.019217 | 0.67872  | -0.02777 | 0.54947 | -0.01069 | 0.81773  | -0.0834  |
| -0.08486 | 0.06692  | -0.15628 | 0.0007   | -0.05159 | 0.26582 | -0.07447 | 0.108    | -0.08803 |
| -0.13951 | 0.00252  | -0.16092 | 0.00048  | -0.01819 | 0.69502 | -0.02951 | 0.52475  | 0.146808 |
| -0.05039 | 0.27718  | 0.006927 | 0.88133  | -0.00119 | 0.9796  | 0.002141 | 0.96319  | -0.02754 |
| -0.16445 | 0.00036  | -0.13167 | 0.00437  | -0.0739  | 0.11071 | -0.08172 | 0.0777   | -0.08867 |
| -0.18496 | 5.79E-05 | -0.01949 | 0.67437  | -0.05343 | 0.24922 | -0.05473 | 0.23786  | -0.14727 |
| -0.08294 | 0.07335  | 0.1367   | 0.00308  | -0.04946 | 0.28611 | -0.05725 | 0.2169   | 0.010295 |
| -0.02752 | 0.55307  | 0.105087 | 0.02314  | -0.00672 | 0.88486 | 0.065552 | 0.15727  | 0.058133 |

|          |          |          |          |          |         |          |         |          |
|----------|----------|----------|----------|----------|---------|----------|---------|----------|
| -0.14617 | 0.00154  | -0.05007 | 0.28023  | -0.01915 | 0.67981 | 0.066326 | 0.15241 | 0.014475 |
| -0.24708 | 6.33E-08 | -0.31593 | 2.77E-12 | -0.06671 | 0.15004 | -0.03872 | 0.40379 | -0.20303 |
| 0.133049 | 0.00397  | 0.204991 | 7.99E-06 | -0.05368 | 0.247   | -0.03336 | 0.47208 | -0.05209 |
| -0.20383 | 9.01E-06 | -0.18317 | 6.85E-05 | -0.08507 | 0.06623 | -0.10935 | 0.01809 | -0.11199 |
| 0.047284 | 0.30789  | 0.067623 | 0.14454  | -0.02251 | 0.62753 | -0.0568  | 0.22048 | -0.11604 |
| 0.228768 | 5.83E-07 | 0.493431 | 4.99E-30 | 0.013515 | 0.77083 | 0.014532 | 0.75411 | 0.100112 |
| 0.095492 | 0.03913  | 0.352836 | 3.89E-15 | -0.02984 | 0.5201  | -0.02107 | 0.64972 | -0.02911 |
| 0.007263 | 0.87561  | 0.132589 | 0.0041   | -0.0329  | 0.47819 | -0.01001 | 0.82923 | 0.031354 |
| -0.03207 | 0.4893   | 0.004844 | 0.91685  | -0.03388 | 0.46512 | -0.05604 | 0.22674 | -0.07549 |
| -0.1218  | 0.00842  | -0.33869 | 5.35E-14 | 0.04736  | 0.30712 | 0.040263 | 0.38534 | 0.075394 |
| 0.082049 | 0.0765   | 0.315099 | 3.18E-12 | 0.017746 | 0.7021  | 0.003389 | 0.94178 | 0.094537 |
| -0.09577 | 0.03856  | 0.01364  | 0.76877  | -0.03998 | 0.38874 | -0.02857 | 0.53796 | -0.03397 |
| 0.023678 | 0.60977  | -0.09132 | 0.04858  | 0.01805  | 0.69723 | -0.0121  | 0.79431 | -0.07375 |
| -0.1463  | 0.00152  | -0.16856 | 0.00025  | -0.02625 | 0.57143 | 0.033117 | 0.47526 | -0.04153 |
| -0.22014 | 1.56E-06 | -0.21183 | 3.87E-06 | -0.06511 | 0.1601  | -0.0793  | 0.08692 | -0.08964 |
| -0.14855 | 0.00128  | -0.05136 | 0.26805  | -0.01284 | 0.782   | 0.001136 | 0.98047 | -0.00314 |
| -0.04673 | 0.3136   | -0.08508 | 0.06621  | -0.09009 | 0.05171 | -0.15618 | 0.00071 | -0.18293 |
| 0.103205 | 0.02573  | 0.307915 | 1.03E-11 | -0.02298 | 0.62039 | 0.000676 | 0.98838 | 0.005698 |
| -0.06161 | 0.1838   | 0.003307 | 0.94318  | -0.04443 | 0.33807 | -0.0768  | 0.09737 | -0.05231 |
| 0.002402 | 0.95872  | 0.19875  | 1.51E-05 | -0.01906 | 0.68124 | 0.026982 | 0.56082 | -0.02298 |
| 0.062671 | 0.17637  | 0.363869 | 4.58E-16 | 0.0196   | 0.67269 | -0.01643 | 0.72325 | 0.18518  |
| -0.10752 | 0.02012  | -0.0786  | 0.08976  | -0.04652 | 0.31581 | -0.0792  | 0.08732 | -0.18508 |
| 0.007855 | 0.86556  | 0.053682 | 0.24694  | -0.06778 | 0.14361 | -0.08349 | 0.07147 | -0.16748 |
| -0.0208  | 0.65399  | 0.051739 | 0.26449  | -0.04534 | 0.32824 | -0.05255 | 0.25704 | -0.10688 |
| 0.293072 | 1.06E-10 | 0.14057  | 0.00233  | -0.00778 | 0.86685 | 0.051852 | 0.26345 | -0.0255  |
| 0.035092 | 0.44932  | 0.145678 | 0.0016   | 0.008927 | 0.84742 | 0.039298 | 0.39684 | 0.018986 |
| 0.010399 | 0.82266  | -0.01771 | 0.70271  | -0.0316  | 0.49567 | 0.001921 | 0.96697 | -0.01682 |
| -0.10297 | 0.02606  | -0.0405  | 0.38256  | -0.01397 | 0.76341 | 0.052488 | 0.25763 | -0.01207 |
| -0.12496 | 0.00686  | -0.19164 | 3.06E-05 | -0.05566 | 0.22994 | -0.05573 | 0.22935 | -0.14551 |
| 0.035047 | 0.4499   | 0.178683 | 0.0001   | 0.009866 | 0.83161 | 0.026311 | 0.57061 | 0.012406 |
| -0.02836 | 0.54092  | 0.077149 | 0.09587  | -0.01963 | 0.67223 | -0.00814 | 0.86066 | -0.0419  |
| 0.00497  | 0.9147   | 0.154338 | 0.00082  | -0.06841 | 0.13994 | -0.08011 | 0.08376 | -0.13078 |
| -0.12812 | 0.00556  | -0.13121 | 0.00451  | -0.01167 | 0.80143 | 0.001886 | 0.96758 | -0.0432  |
| -0.15637 | 0.0007   | -0.08765 | 0.05839  | -0.00814 | 0.86069 | -0.026   | 0.57523 | -0.02382 |
| -0.17279 | 0.00018  | 0.030566 | 0.50995  | -0.06579 | 0.15574 | -0.11612 | 0.01203 | -0.09833 |
| -0.25325 | 2.88E-08 | -0.32665 | 4.50E-13 | -0.0442  | 0.34055 | -0.09432 | 0.04162 | -0.15723 |
| -0.06064 | 0.19082  | 0.116726 | 0.01159  | -0.01206 | 0.79498 | 0.060598 | 0.19114 | 0.003972 |
| 0.062151 | 0.17999  | 0.282723 | 4.95E-10 | 0.036451 | 0.43195 | 0.153252 | 0.00089 | 0.034719 |
| -0.0328  | 0.47952  | -0.09652 | 0.03707  | -0.06049 | 0.1919  | -0.11692 | 0.01145 | -0.1463  |
| 0.086831 | 0.0608   | 0.286857 | 2.69E-10 | -0.00164 | 0.97186 | 0.027113 | 0.55892 | 0.09017  |
| -0.10411 | 0.02446  | -0.01844 | 0.69103  | 0.021172 | 0.64813 | -0.0268  | 0.56344 | 0.079685 |
| 0.002185 | 0.96244  | -0.02396 | 0.60553  | -0.02006 | 0.66549 | -0.00314 | 0.94613 | -0.05061 |
| -0.03522 | 0.44766  | 0.0516   | 0.26578  | -0.03939 | 0.39569 | -0.05793 | 0.21145 | -0.07517 |
| 0.15314  | 0.0009   | 0.096213 | 0.03767  | -0.03267 | 0.48131 | -0.04942 | 0.28652 | -0.10143 |
| -0.08403 | 0.06963  | -0.17906 | 1.00E-04 | -0.04792 | 0.3014  | -0.04866 | 0.29397 | -0.13976 |

|          |          |          |          |          |         |          |          |          |
|----------|----------|----------|----------|----------|---------|----------|----------|----------|
| -0.23339 | 3.38E-07 | -0.15501 | 0.00078  | -0.07271 | 0.11661 | -0.01918 | 0.67937  | -0.12812 |
| 0.408891 | 3.01E-20 | 0.25039  | 4.16E-08 | -0.00291 | 0.95006 | 0.025557 | 0.58169  | -0.10924 |
| 0.11139  | 0.01603  | -0.01    | 0.82928  | -0.081   | 0.08035 | -0.11652 | 0.01174  | -0.13779 |
| 0.065545 | 0.15731  | -0.0086  | 0.85303  | -0.05865 | 0.20585 | -0.09792 | 0.03439  | -0.03936 |
| 0.27002  | 3.03E-09 | 0.358964 | 1.20E-15 | 0.01442  | 0.75594 | 0.088013 | 0.05736  | 0.028674 |
| -0.08471 | 0.06741  | 0.248295 | 5.43E-08 | 0.032899 | 0.47817 | 0.109232 | 0.01821  | 0.035829 |
| -0.16213 | 0.00044  | -0.17814 | 0.00011  | -0.02047 | 0.65898 | 0.046824 | 0.31263  | -0.08668 |
| -0.09087 | 0.04971  | -0.20676 | 6.64E-06 | -0.07169 | 0.12185 | -0.10728 | 0.0204   | -0.2045  |
| 0.028962 | 0.53241  | 0.000572 | 0.99017  | -0.02736 | 0.55541 | -0.0657  | 0.15633  | -0.06948 |
| -0.0067  | 0.88521  | 0.066895 | 0.14892  | -0.00506 | 0.91316 | 0.007828 | 0.86602  | 0.052901 |
| 0.006495 | 0.88867  | 0.099833 | 0.031    | 0.027424 | 0.55442 | 0.127454 | 0.00581  | 0.036749 |
| 0.032944 | 0.47757  | 0.161427 | 0.00046  | -0.01846 | 0.69075 | -0.04924 | 0.28824  | 0.032211 |
| -0.10058 | 0.02976  | -0.13321 | 0.00393  | -0.04457 | 0.33656 | -0.05638 | 0.22398  | -0.09334 |
| -0.10863 | 0.01887  | 0.031486 | 0.49729  | -0.06464 | 0.16313 | -0.06419 | 0.16609  | -0.13096 |
| -0.00216 | 0.96281  | 0.303518 | 2.08E-11 | -0.00936 | 0.84017 | 0.044829 | 0.33372  | -0.01685 |
| -0.01167 | 0.80142  | 0.104098 | 0.02447  | 0.014577 | 0.75339 | 0.063434 | 0.17115  | 0.032184 |
| -0.0125  | 0.7876   | -0.0037  | 0.93638  | 0.006586 | 0.88712 | 0.013978 | 0.76321  | 0.016802 |
| -0.03951 | 0.39434  | 0.018019 | 0.69773  | -0.02169 | 0.64012 | -0.01972 | 0.67075  | -0.09056 |
| 0.076539 | 0.09853  | 0.150918 | 0.00107  | 0.00727  | 0.87549 | 0.089878 | 0.05226  | -0.03859 |
| 0.089592 | 0.05302  | 0.004963 | 0.91482  | -0.07166 | 0.12201 | -0.08803 | 0.0573   | -0.0579  |
| 0.284381 | 3.88E-10 | 0.362681 | 5.78E-16 | -0.03139 | 0.49854 | 0.037187 | 0.4227   | 0.022492 |
| -0.28932 | 1.86E-10 | -0.29218 | 1.21E-10 | -0.05748 | 0.21505 | -0.04259 | 0.35842  | -0.16136 |
| -0.27883 | 8.71E-10 | -0.34521 | 1.62E-14 | -0.05767 | 0.2135  | -0.10531 | 0.02284  | -0.15077 |
| 0.005246 | 0.90997  | 0.087966 | 0.05749  | -0.04194 | 0.36581 | 0.006136 | 0.89478  | -0.06746 |
| 0.353566 | 3.38E-15 | 0.079523 | 0.08605  | -0.02322 | 0.61677 | -0.08256 | 0.07468  | -0.06822 |
| 0.091269 | 0.04871  | 0.009543 | 0.83704  | 0.00791  | 0.86463 | -0.00634 | 0.89126  | 0.050316 |
| -0.03004 | 0.51733  | 0.010969 | 0.8131   | -0.05881 | 0.2046  | -0.06446 | 0.16433  | -0.058   |
| 0.124702 | 0.00697  | 0.317478 | 2.14E-12 | 0.005447 | 0.90654 | 0.191984 | 2.96E-05 | 0.078768 |
| -0.27043 | 2.86E-09 | -0.13729 | 0.00295  | -0.00604 | 0.89639 | 0.034845 | 0.45252  | -0.01977 |
| -0.12838 | 0.00546  | -0.09829 | 0.03371  | -0.04827 | 0.29788 | 0.029552 | 0.5241   | -0.07685 |
| 0.066287 | 0.15265  | 0.083306 | 0.07209  | -0.02051 | 0.65836 | 0.027651 | 0.55114  | 0.088078 |
| -0.11625 | 0.01193  | 0.01472  | 0.75105  | -0.03032 | 0.51338 | 0.004749 | 0.91847  | -0.09227 |
| 0.044916 | 0.33278  | 0.09962  | 0.03137  | -0.04253 | 0.35918 | -0.04274 | 0.3568   | -0.05881 |
| 0.163003 | 0.00041  | -0.05667 | 0.22155  | 0.092094 | 0.04669 | 0.006055 | 0.89616  | 0.056782 |
| 0.174371 | 0.00015  | -0.02281 | 0.62292  | 0.031576 | 0.49605 | 0.00168  | 0.97111  | -0.00962 |
| 0.035202 | 0.4479   | 0.089596 | 0.053    | 0.149746 | 0.00117 | 0.331453 | 1.95E-13 | 0.027237 |
| 0.218985 | 1.77E-06 | 0.022019 | 0.63505  | 0.013508 | 0.77095 | 0.049223 | 0.28845  | -0.04683 |
| 0.019435 | 0.67528  | -0.12891 | 0.00527  | 0.046291 | 0.31818 | -0.06705 | 0.14797  | -0.01918 |
| 0.126199 | 0.00632  | -0.0583  | 0.20855  | 0.055656 | 0.22996 | -0.0083  | 0.8581   | 0.004596 |
| 0.179833 | 9.32E-05 | 0.022932 | 0.62109  | 0.060166 | 0.19432 | 0.030731 | 0.50766  | 0.02811  |
| 0.104064 | 0.02452  | 0.005416 | 0.90707  | 0.026475 | 0.56821 | -0.06456 | 0.16364  | -0.06609 |
| 0.062498 | 0.17757  | -0.02272 | 0.62429  | 0.036635 | 0.42963 | 0.011477 | 0.80463  | 0.009751 |
| 0.026409 | 0.56917  | -0.11736 | 0.01115  | 0.048339 | 0.29721 | 0.000253 | 0.99565  | -0.037   |
| 0.108413 | 0.01911  | -0.04261 | 0.35824  | 0.049551 | 0.28525 | 0.010603 | 0.81924  | 0.010997 |
| 0.105098 | 0.02312  | -0.02987 | 0.51966  | 0.075027 | 0.10539 | 0.01899  | 0.68231  | 0.04684  |

|          |          |          |          |           |         |          |         |          |
|----------|----------|----------|----------|-----------|---------|----------|---------|----------|
| 0.205788 | 7.35E-06 | 0.110644 | 0.01676  | 0.067307  | 0.14643 | -0.03059 | 0.50961 | 0.084914 |
| 0.002581 | 0.95563  | -0.11472 | 0.01311  | -0.00744  | 0.87256 | -0.0519  | 0.26297 | -0.00608 |
| 0.159178 | 0.00056  | 0.038536 | 0.40606  | -0.00231  | 0.96031 | -0.00699 | 0.88029 | 0.008804 |
| 0.157877 | 0.00062  | -0.02141 | 0.6444   | 0.066637  | 0.1505  | -0.00663 | 0.8864  | 0.050838 |
| 0.015302 | 0.74155  | -0.19162 | 3.06E-05 | 0.037629  | 0.4172  | -0.01399 | 0.76304 | -0.015   |
| 0.136367 | 0.00315  | -0.02598 | 0.57542  | 0.088284  | 0.05659 | 0.02897  | 0.53229 | 0.040543 |
| 0.093664 | 0.04306  | -0.06669 | 0.15016  | 0.110413  | 0.01699 | 0.107524 | 0.02012 | 0.083795 |
| 0.110058 | 0.01735  | -0.05959 | 0.19865  | 0.049718  | 0.28363 | -0.00498 | 0.91451 | 0.017346 |
| 0.087324 | 0.05935  | -0.07938 | 0.08661  | 0.042013  | 0.365   | 0.001949 | 0.96649 | 0.014906 |
| 0.152708 | 0.00093  | -0.00734 | 0.87434  | 0.037717  | 0.41612 | -0.00505 | 0.91337 | 0.01695  |
| -0.01967 | 0.67155  | -0.03709 | 0.42387  | 0.018775  | 0.68571 | -0.02534 | 0.58489 | -0.02377 |
| 0.081282 | 0.07931  | -0.06923 | 0.13522  | 0.055051  | 0.23508 | 0.015528 | 0.73786 | 0.095618 |
| 0.088768 | 0.05524  | 0.08182  | 0.07733  | 0.032111  | 0.48878 | 0.062247 | 0.17932 | 0.020243 |
| 0.129472 | 0.00508  | -0.00109 | 0.98122  | 0.033678  | 0.46781 | -0.00954 | 0.83714 | -0.0038  |
| 0.130368 | 0.00478  | -0.04965 | 0.28426  | 0.028679  | 0.53642 | -0.00061 | 0.98951 | 0.00391  |
| 0.100311 | 0.0302   | -0.03005 | 0.51716  | 0.033238  | 0.47365 | 0.02672  | 0.56462 | 0.025734 |
| 0.001104 | 0.98102  | -0.052   | 0.26212  | -1.91E-05 | 0.99967 | -0.00538 | 0.90768 | 0.090981 |
| 0.101434 | 0.02839  | -0.09286 | 0.04488  | 0.044204  | 0.34051 | 0.019239 | 0.67837 | 0.004463 |
| 0.119751 | 0.00959  | -0.06328 | 0.17217  | 0.040453  | 0.3831  | 0.000818 | 0.98594 | 0.012333 |
| -0.04699 | 0.31091  | -0.24027 | 1.48E-07 | 0.020663  | 0.65604 | -0.01316 | 0.77674 | -0.04848 |
| 0.048509 | 0.29552  | -0.09204 | 0.04683  | 6.04E-05  | 0.99896 | -0.06441 | 0.16465 | -0.0106  |
| 0.178377 | 0.00011  | 0.013198 | 0.77606  | -0.00048  | 0.99168 | 0.008062 | 0.86206 | -0.02539 |
| 0.075138 | 0.10487  | 0.025703 | 0.57954  | 0.078279  | 0.09109 | 0.020956 | 0.65149 | 0.036702 |
| 0.018286 | 0.69347  | -0.15885 | 0.00057  | 0.016842  | 0.7166  | -0.03304 | 0.47629 | -0.00126 |
| 0.029048 | 0.5312   | -0.23674 | 2.27E-07 | 0.030991  | 0.50407 | -0.04638 | 0.31728 | 0.01803  |
| 0.127231 | 0.0059   | -0.05281 | 0.25468  | 0.046266  | 0.31844 | 0.005969 | 0.89763 | 0.021479 |
| 0.136866 | 0.00304  | -0.02056 | 0.65765  | 0.031588  | 0.4959  | -0.01977 | 0.67005 | 0.05713  |
| 0.098779 | 0.03283  | 0.01867  | 0.68738  | 0.109515  | 0.01791 | 0.084884 | 0.06684 | 0.073798 |
| 0.084607 | 0.06774  | -0.10687 | 0.0209   | 0.006718  | 0.88488 | 0.003863 | 0.93365 | -0.00514 |
| 0.176279 | 0.00013  | 0.026169 | 0.57269  | 0.059653  | 0.19816 | 0.004191 | 0.92803 | 0.03973  |
| 0.062013 | 0.18096  | -0.08139 | 0.07891  | 0.029744  | 0.52139 | -0.01101 | 0.81243 | -0.0284  |
| 0.104504 | 0.02392  | -0.08747 | 0.05891  | 0.021912  | 0.63671 | 0.010553 | 0.82007 | 0.03478  |
| 0.08356  | 0.07122  | -0.0644  | 0.16471  | 0.01615   | 0.72777 | -0.05871 | 0.20539 | -0.01604 |
| 0.076795 | 0.09741  | -0.06686 | 0.14914  | 0.044051  | 0.34218 | 0.021209 | 0.64756 | 0.063891 |
| 0.236499 | 2.33E-07 | -0.02361 | 0.61081  | 0.003385  | 0.94184 | -0.04642 | 0.3168  | 0.004041 |
| 0.041928 | 0.36598  | -0.01053 | 0.82053  | -0.03144  | 0.49794 | 0.059719 | 0.19767 | -0.25943 |
| -0.04562 | 0.3253   | -0.15633 | 0.0007   | 0.042482  | 0.35967 | -0.01748 | 0.70631 | 0.001175 |
| -0.03565 | 0.44217  | -0.14187 | 0.00212  | 0.058317  | 0.20842 | -0.01522 | 0.7428  | 0.093901 |
| 0.017995 | 0.69811  | -0.26808 | 3.96E-09 | -0.0021   | 0.96383 | -0.11539 | 0.01259 | -0.0478  |
| 0.112832 | 0.0147   | -0.10928 | 0.01816  | 0.086892  | 0.06062 | 0.013424 | 0.77233 | 0.01459  |
| 0.23354  | 3.32E-07 | 0.142009 | 0.0021   | 0.025773  | 0.57852 | 0.024701 | 0.59441 | 0.019156 |
| 0.170507 | 0.00021  | -0.04084 | 0.37859  | 0.074876  | 0.10609 | -0.00696 | 0.88078 | 0.033478 |
| 0.279592 | 7.80E-10 | 0.109353 | 0.01808  | 0.097529  | 0.03512 | 0.010649 | 0.81847 | 0.230552 |
| 0.109628 | 0.01779  | 0.062436 | 0.178    | 0.090466  | 0.05073 | -0.02818 | 0.5436  | -0.0163  |
| 0.185673 | 5.42E-05 | 0.025238 | 0.58643  | 0.047853  | 0.3021  | -0.01746 | 0.7066  | 0.029606 |



|          |          |          |          |          |         |          |         |          |
|----------|----------|----------|----------|----------|---------|----------|---------|----------|
| 0.203456 | 9.36E-06 | 0.327109 | 4.16E-13 | 0.059329 | 0.20061 | 0.091555 | 0.048   | 0.102587 |
| -0.04848 | 0.29582  | -0.07196 | 0.12045  | 0.035275 | 0.44696 | 0.029158 | 0.52964 | 0.078685 |
| 0.161093 | 0.00047  | 0.145482 | 0.00162  | 0.067433 | 0.14567 | 0.013719 | 0.76747 | 0.130348 |
| 0.399218 | 2.70E-19 | -0.01168 | 0.8012   | -0.01432 | 0.75762 | -0.12197 | 0.00832 | -0.00949 |
| 0.406016 | 5.82E-20 | -0.16726 | 0.00028  | 7.34E-05 | 0.99874 | -0.10063 | 0.02968 | -0.08333 |
| 0.009362 | 0.84009  | -0.20658 | 6.76E-06 | 0.02262  | 0.62585 | -0.0509  | 0.27237 | -0.01497 |
| 0.119389 | 0.00981  | -0.03049 | 0.51104  | 0.102981 | 0.02605 | 0.001728 | 0.9703  | 0.010229 |
| 0.120712 | 0.00902  | -0.01825 | 0.69402  | 0.029541 | 0.52424 | 0.002369 | 0.95929 | 0.01943  |
| 0.167519 | 0.00028  | 0.004714 | 0.91907  | 0.104437 | 0.02401 | 0.036098 | 0.43643 | 0.043996 |
| 0.136728 | 0.00307  | 0.018499 | 0.69009  | 0.037298 | 0.42132 | 0.006607 | 0.88676 | 0.05389  |
| 0.107672 | 0.01995  | 0.069929 | 0.1313   | 0.004461 | 0.92341 | 0.020553 | 0.65776 | 0.060492 |
| 0.12383  | 0.00738  | 0.013503 | 0.77102  | 0.042231 | 0.36252 | 0.034417 | 0.4581  | 0.018394 |
| 0.114281 | 0.01347  | -0.06057 | 0.19136  | 0.034947 | 0.4512  | -0.00312 | 0.94644 | 0.046116 |
| 0.03626  | 0.43436  | -0.07525 | 0.10434  | 0.002018 | 0.96531 | -0.03654 | 0.43082 | -0.02287 |
| 0.008694 | 0.85136  | -0.0996  | 0.0314   | 0.032792 | 0.47961 | -0.03523 | 0.44749 | -0.03014 |
| 0.141911 | 0.00211  | -0.05451 | 0.23975  | 0.048223 | 0.29838 | -0.02056 | 0.6577  | 0.003883 |
| 0.081962 | 0.07682  | -0.02525 | 0.58621  | 0.037829 | 0.41474 | 0.008894 | 0.84798 | 0.004376 |
| 0.115828 | 0.01225  | -0.01131 | 0.80738  | 0.058066 | 0.21039 | 0.043933 | 0.34348 | 0.054251 |
| 0.042458 | 0.35993  | -0.13663 | 0.00309  | 0.069354 | 0.13451 | -0.0303  | 0.51364 | 0.098842 |
| 0.117884 | 0.01079  | -0.07156 | 0.1225   | 0.050001 | 0.28089 | -0.00451 | 0.92253 | 0.006809 |
| -0.00506 | 0.91324  | -0.18087 | 8.47E-05 | 0.056447 | 0.2234  | 0.048079 | 0.29982 | -0.01326 |
| 0.199999 | 1.33E-05 | -0.0605  | 0.19185  | 0.007975 | 0.86354 | -0.0907  | 0.05012 | 0.021273 |
| 0.04089  | 0.37797  | 0.003543 | 0.93913  | -0.00108 | 0.98146 | -0.066   | 0.15443 | -0.03662 |
| 0.293174 | 1.04E-10 | 0.311044 | 6.20E-12 | 0.029233 | 0.52858 | 0.030639 | 0.50893 | 0.133016 |
| 0.213543 | 3.22E-06 | -0.04963 | 0.28449  | 0.017898 | 0.69967 | -0.06254 | 0.17728 | -0.02656 |
| 0.156848 | 0.00067  | -0.06954 | 0.13345  | 0.074747 | 0.10669 | -0.05585 | 0.22838 | 0.072022 |
| 0.182729 | 7.14E-05 | -0.06755 | 0.14496  | 0.018658 | 0.68757 | -0.03929 | 0.39689 | 0.030044 |
| 0.123566 | 0.00751  | -0.06814 | 0.1415   | 0.014793 | 0.74985 | -0.02542 | 0.58374 | -0.00847 |
| 0.219421 | 1.69E-06 | -0.02876 | 0.53524  | 0.008935 | 0.8473  | -0.03924 | 0.39757 | -0.00041 |
| 0.006635 | 0.88628  | -0.10533 | 0.02282  | 0.045004 | 0.33183 | -0.03465 | 0.45503 | -0.00947 |
| 0.102291 | 0.02708  | -0.01081 | 0.8157   | 0.039771 | 0.39117 | -0.01027 | 0.82483 | 0.03737  |
| 0.023853 | 0.60714  | -0.16588 | 0.00032  | 0.040486 | 0.38271 | -0.01655 | 0.72123 | -0.00362 |
| 0.113131 | 0.01444  | 0.088516 | 0.05594  | 0.025179 | 0.5873  | -0.00793 | 0.86427 | -0.06055 |
| 0.154806 | 0.00079  | -0.14503 | 0.00168  | -0.01068 | 0.81799 | -0.10029 | 0.03024 | -0.0216  |
| 0.00154  | 0.97352  | -0.25759 | 1.63E-08 | -0.0146  | 0.75307 | -0.08498 | 0.06653 | 0.0218   |
| 0.067282 | 0.14658  | -0.14758 | 0.00138  | 0.034466 | 0.45745 | -0.05041 | 0.27697 | 0.028864 |
| 0.127723 | 0.00571  | -0.03599 | 0.43775  | 0.129573 | 0.00504 | 0.17304  | 0.00017 | 0.006758 |
| -0.04468 | 0.33535  | -0.18089 | 8.45E-05 | 0.021311 | 0.64598 | -0.01742 | 0.70727 | -0.01447 |
| 0.160829 | 0.00048  | 0.142762 | 0.00198  | 0.071984 | 0.12032 | 0.079981 | 0.08425 | 0.09442  |
| -0.15302 | 0.00091  | 0.03368  | 0.46779  | 0.002982 | 0.94876 | 0.1177   | 0.01091 | 0.056622 |
| 0.18399  | 6.35E-05 | -0.00519 | 0.91086  | 0.042722 | 0.35695 | 0.017711 | 0.70265 | 0.016582 |
| 0.144907 | 0.00169  | -0.03368 | 0.46779  | 0.017216 | 0.71059 | -0.06015 | 0.19448 | 0.000701 |
| 0.075826 | 0.10172  | -0.07178 | 0.1214   | -0.00626 | 0.8926  | -0.05695 | 0.21932 | 0.034543 |
| 0.310359 | 6.93E-12 | 0.072003 | 0.12022  | 0.002869 | 0.9507  | -0.07448 | 0.10795 | -0.01905 |
| -0.00495 | 0.91506  | -0.21155 | 3.99E-06 | 0.025331 | 0.58505 | -0.06463 | 0.16319 | -0.01732 |

|          |          |          |          |          |         |          |         |          |
|----------|----------|----------|----------|----------|---------|----------|---------|----------|
| 0.138382 | 0.00273  | -0.02104 | 0.65016  | 0.081052 | 0.08016 | 0.022994 | 0.62015 | 0.035726 |
| 0.053627 | 0.24743  | -0.08521 | 0.06579  | 0.059538 | 0.19903 | -0.02299 | 0.62022 | 0.031962 |
| 0.094264 | 0.04174  | -0.02128 | 0.64653  | 0.030401 | 0.51224 | -0.03903 | 0.4001  | -0.06194 |
| -0.0209  | 0.65242  | -0.11117 | 0.01624  | 0.03375  | 0.46687 | -0.04989 | 0.28194 | 0.002861 |
| 0.030075 | 0.51677  | -0.01496 | 0.74715  | 0.039604 | 0.39317 | 0.040766 | 0.37942 | 0.227717 |
| 0.025055 | 0.58915  | -0.20465 | 8.27E-06 | 0.042319 | 0.36152 | -0.00949 | 0.83795 | 0.07211  |
| 0.285536 | 3.27E-10 | -0.00979 | 0.83282  | 0.014449 | 0.75548 | -0.09028 | 0.05121 | 0.011102 |
| -0.07775 | 0.09332  | -0.03014 | 0.51591  | -0.05563 | 0.23022 | -0.02583 | 0.5777  | -0.11388 |
| 0.070455 | 0.12842  | -0.10925 | 0.01819  | 0.031091 | 0.5027  | 0.023758 | 0.60857 | 0.023516 |
| 0.176356 | 0.00013  | 0.037936 | 0.41342  | 0.020347 | 0.66098 | -0.00093 | 0.984   | 0.02888  |
| 0.061712 | 0.18309  | -0.08633 | 0.0623   | 0.058535 | 0.20671 | 0.007813 | 0.86627 | 0.014864 |
| 0.121144 | 0.00878  | -0.07208 | 0.1198   | 0.056583 | 0.22229 | -0.01011 | 0.82743 | 0.02481  |
| 0.182941 | 7.00E-05 | -0.00956 | 0.83679  | 0.027115 | 0.55888 | -0.0444  | 0.33841 | 0.00345  |
| 0.095655 | 0.0388   | -0.06968 | 0.13271  | 0.077958 | 0.09243 | 0.008015 | 0.86285 | 0.021665 |
| 0.004715 | 0.91906  | -0.10901 | 0.01845  | 0.003803 | 0.93468 | -0.0264  | 0.56924 | 0.029741 |
| 0.189751 | 3.67E-05 | 0.070928 | 0.12587  | 0.117681 | 0.01092 | 0.033466 | 0.47062 | 0.134972 |
| 0.330385 | 2.35E-13 | -0.0138  | 0.76618  | 0.014992 | 0.7466  | -0.03388 | 0.46508 | -0.0497  |
| -0.06987 | 0.13162  | -0.06624 | 0.15297  | -0.05562 | 0.23028 | -0.06576 | 0.15595 | -0.00651 |
| 0.09705  | 0.03603  | -0.05946 | 0.19964  | 0.054525 | 0.23959 | -0.00389 | 0.93315 | 0.018331 |
| 0.162074 | 0.00044  | -0.02741 | 0.55459  | 0.049645 | 0.28434 | -0.0024  | 0.95874 | 0.020033 |
| 0.035179 | 0.4482   | -0.05946 | 0.19961  | 0.069087 | 0.13602 | -0.03997 | 0.38885 | 0.04758  |
| 0.089361 | 0.05363  | -0.05738 | 0.2158   | 0.058557 | 0.20655 | -0.0057  | 0.90226 | -0.0229  |
| -0.03847 | 0.40684  | -0.14667 | 0.00148  | 0.021047 | 0.65007 | -0.05505 | 0.2351  | -0.04402 |
| 0.135678 | 0.00331  | -0.06472 | 0.16261  | 0.074275 | 0.10893 | -0.00524 | 0.91007 | 0.027041 |
| 0.049366 | 0.28706  | -0.08845 | 0.05613  | 0.059372 | 0.20029 | -0.01466 | 0.75199 | 0.01033  |
| 0.283647 | 4.32E-10 | 0.117124 | 0.01131  | 0.02534  | 0.58491 | -0.05124 | 0.26912 | 0.05599  |
| 0.236538 | 2.32E-07 | 0.09203  | 0.04685  | 0.062519 | 0.17742 | 0.018737 | 0.68632 | -0.00575 |
| 0.031286 | 0.50002  | -0.10904 | 0.01842  | 0.111589 | 0.01584 | 0.075768 | 0.10198 | 0.079881 |
| 0.076096 | 0.1005   | -0.03147 | 0.49745  | 0.032599 | 0.4822  | 0.024114 | 0.60321 | 0.0022   |
| 0.144002 | 0.00181  | -0.04477 | 0.33433  | 0.020115 | 0.6646  | -0.06023 | 0.19388 | 0.050547 |
| 0.091951 | 0.04704  | -0.10678 | 0.021    | 0.027086 | 0.5593  | -0.00565 | 0.90302 | 0.007758 |
| 0.144115 | 0.00179  | -0.03358 | 0.46911  | 0.004657 | 0.92005 | -0.01308 | 0.77801 | -0.02959 |
| -0.03691 | 0.4262   | -0.08659 | 0.06153  | 0.022753 | 0.62383 | -0.00477 | 0.91818 | 0.060222 |
| 0.291267 | 1.39E-10 | -0.05773 | 0.21305  | -0.00153 | 0.97375 | -0.0794  | 0.08654 | -0.11429 |
| 0.084821 | 0.06704  | -0.09703 | 0.03607  | 0.018374 | 0.69207 | -0.01753 | 0.70551 | -0.00672 |
| 0.106908 | 0.02085  | -0.11497 | 0.01291  | 0.06596  | 0.1547  | -0.01172 | 0.80059 | 0.016081 |
| 0.116679 | 0.01163  | -0.14772 | 0.00137  | 0.078192 | 0.09145 | -0.03145 | 0.49777 | -0.07767 |
| 0.03027  | 0.51405  | -0.1176  | 0.01098  | 0.025573 | 0.58147 | -0.00154 | 0.97351 | 0.012425 |
| 0.486227 | 4.39E-29 | 0.224414 | 9.62E-07 | 0.006534 | 0.88801 | -0.1093  | 0.01814 | 0.009073 |
| 0.045412 | 0.32746  | -0.17006 | 0.00022  | 0.013718 | 0.76749 | -0.02051 | 0.65839 | 0.009204 |
| 0.12603  | 0.00639  | -0.09617 | 0.03775  | 0.006854 | 0.88257 | -0.03273 | 0.48048 | -0.02966 |
| 0.173599 | 0.00016  | -0.01958 | 0.67299  | 0.081229 | 0.0795  | 0.004244 | 0.92712 | 0.025593 |
| 0.067811 | 0.14342  | -0.14625 | 0.00153  | 0.030053 | 0.51707 | -0.03174 | 0.4938  | -0.02507 |
| 0.329901 | 2.56E-13 | -0.00804 | 0.8624   | 0.05658  | 0.22231 | -0.0621  | 0.18034 | 0.072673 |
| 0.185307 | 5.61E-05 | 0.029755 | 0.52124  | 0.106781 | 0.021   | 0.038891 | 0.40174 | 0.202756 |

|          |          |          |          |          |         |          |         |          |
|----------|----------|----------|----------|----------|---------|----------|---------|----------|
| 0.099405 | 0.03174  | -0.09828 | 0.03374  | 0.033335 | 0.47236 | -0.00222 | 0.96179 | 0.005948 |
| 0.063798 | 0.1687   | -0.0863  | 0.06241  | 0.027564 | 0.55239 | 0.000217 | 0.99626 | 0.026319 |
| 0.049243 | 0.28826  | -0.04365 | 0.3466   | 0.015771 | 0.73391 | -0.01173 | 0.80037 | 0.037571 |
| -0.11837 | 0.01047  | 0.033473 | 0.47052  | -0.01276 | 0.78323 | 0.016811 | 0.71709 | -0.00164 |
| -0.03118 | 0.50143  | -0.15191 | 0.00099  | 0.065066 | 0.16038 | 0.113618 | 0.01402 | -0.05535 |
| 0.078887 | 0.0886   | -0.14107 | 0.00225  | 0.059282 | 0.20097 | -0.02478 | 0.59326 | 0.017225 |
| 0.153671 | 0.00086  | -0.09226 | 0.04629  | 0.028091 | 0.54482 | -0.02179 | 0.63853 | 0.018232 |
| 0.10067  | 0.02961  | -0.07994 | 0.0844   | 0.030537 | 0.51034 | 0.001637 | 0.97185 | 0.067499 |
| 0.208787 | 5.36E-06 | 0.0512   | 0.26951  | 0.017268 | 0.70975 | -0.00936 | 0.84013 | 0.01508  |
| 0.315985 | 2.75E-12 | -0.08559 | 0.06458  | 0.001848 | 0.96823 | -0.12233 | 0.00813 | -0.03198 |
| 0.374192 | 5.73E-17 | 0.019113 | 0.68037  | -0.00052 | 0.99099 | -0.01892 | 0.68345 | -0.02708 |
| 0.126298 | 0.00628  | -0.01206 | 0.79494  | 0.048096 | 0.29965 | 0.014451 | 0.75544 | 0.036138 |
| 0.105688 | 0.02236  | -0.18536 | 5.58E-05 | 0.04913  | 0.28937 | -0.0163  | 0.72532 | 0.038532 |
| 0.079692 | 0.08538  | -0.13378 | 0.00378  | -0.01046 | 0.8216  | -0.06339 | 0.17147 | -0.01307 |
| 0.133348 | 0.00389  | -0.04214 | 0.36353  | 0.093911 | 0.04251 | -0.0418  | 0.36747 | -0.00459 |
| 0.335556 | 9.40E-14 | 0.289022 | 1.95E-10 | 0.013169 | 0.77654 | -0.06023 | 0.19386 | 0.090572 |
| 0.065178 | 0.15966  | -0.06779 | 0.14353  | 0.038577 | 0.40556 | 0.012887 | 0.7812  | -0.00532 |
| 0.040975 | 0.37698  | -0.12422 | 0.0072   | 0.024873 | 0.59186 | -0.08311 | 0.07278 | -0.05614 |
| -0.18637 | 5.07E-05 | -0.07359 | 0.11224  | -0.11581 | 0.01227 | -0.07611 | 0.10046 | -0.20261 |
| 0.131065 | 0.00455  | -0.01319 | 0.77611  | 0.065599 | 0.15697 | 0.010825 | 0.81552 | 0.024323 |
| 0.133009 | 0.00398  | -0.00759 | 0.87008  | 0.062464 | 0.1778  | 0.080594 | 0.08189 | 0.147549 |
| 0.123451 | 0.00757  | -0.06622 | 0.15305  | 0.03047  | 0.51128 | -0.05863 | 0.206   | -0.03524 |
| 0.047306 | 0.30767  | -0.08016 | 0.08355  | 0.054788 | 0.23733 | 0.005915 | 0.89856 | 0.010248 |
| -0.10744 | 0.02022  | -0.07292 | 0.11558  | -0.01473 | 0.75093 | -0.03099 | 0.50415 | -0.02232 |
| -0.02448 | 0.59768  | -0.1242  | 0.00721  | 0.041338 | 0.37276 | -0.01445 | 0.75541 | -0.01939 |
| 0.314635 | 3.44E-12 | -0.12314 | 0.00772  | -0.01285 | 0.78175 | -0.11492 | 0.01296 | -0.05043 |
| 0.235326 | 2.69E-07 | -0.01877 | 0.68573  | -0.01766 | 0.70352 | -0.0631  | 0.17344 | -0.03106 |
| 0.013583 | 0.76971  | -0.15769 | 0.00063  | 0.043603 | 0.34712 | 0.105506 | 0.02259 | 0.033483 |
| 0.013763 | 0.76674  | -0.08081 | 0.08109  | 0.006996 | 0.88014 | 0.007885 | 0.86506 | 0.021561 |
| 0.447649 | 2.15E-24 | 0.244492 | 8.76E-08 | 0.027869 | 0.548   | -0.07878 | 0.08904 | 0.083629 |
| 0.073794 | 0.11125  | 0.025049 | 0.58923  | 0.098341 | 0.03362 | 0.075371 | 0.10379 | 0.021177 |
| -0.01846 | 0.69064  | -0.26748 | 4.30E-09 | 0.015893 | 0.73194 | -0.04944 | 0.28632 | 0.059467 |
| 0.076139 | 0.10031  | -0.15545 | 0.00075  | 0.065433 | 0.15802 | -0.00233 | 0.95999 | 0.045125 |
| 0.177155 | 0.00012  | 0.124832 | 0.00691  | 0.044208 | 0.34046 | -0.02633 | 0.57027 | 0.144759 |
| 0.013765 | 0.7667   | -0.11548 | 0.01252  | 0.044847 | 0.33352 | 0.005187 | 0.91099 | 0.020625 |
| 0.071538 | 0.12264  | -0.03791 | 0.41379  | 0.13114  | 0.00453 | 0.081277 | 0.07933 | 0.136071 |
| 0.09103  | 0.0493   | 0.028853 | 0.53396  | 0.076642 | 0.09808 | 0.052405 | 0.25838 | 0.063443 |
| -0.01196 | 0.79653  | -0.03362 | 0.46864  | 0.027889 | 0.54772 | -0.00941 | 0.83927 | -0.01477 |
| 0.080467 | 0.08238  | -0.1265  | 0.00619  | 0.007427 | 0.87282 | -0.02457 | 0.59638 | -0.03298 |
| 0.115355 | 0.01261  | -0.01365 | 0.76852  | 0.06293  | 0.17458 | 0.011371 | 0.80639 | 0.112424 |
| -0.11651 | 0.01175  | 0.116012 | 0.01211  | -0.02745 | 0.554   | 0.068613 | 0.13873 | -0.00494 |
| -0.04658 | 0.31518  | -0.1742  | 0.00015  | 0.057547 | 0.2145  | 0.028873 | 0.53367 | -0.00482 |
| -0.02037 | 0.66061  | -0.24352 | 9.88E-08 | 0.020865 | 0.6529  | -0.08876 | 0.05528 | -0.04616 |
| 0.046743 | 0.31346  | 0.110407 | 0.01699  | -0.04533 | 0.32838 | -0.01862 | 0.68824 | -0.07534 |
| -0.07394 | 0.11056  | -0.13113 | 0.00453  | -0.00307 | 0.94718 | -0.03698 | 0.42532 | -0.07528 |

|          |          |          |          |          |         |          |         |          |
|----------|----------|----------|----------|----------|---------|----------|---------|----------|
| -0.05981 | 0.19695  | 0.148879 | 0.00125  | -0.03265 | 0.48149 | -0.02427 | 0.60084 | -0.00868 |
| 0.074599 | 0.10739  | -0.09199 | 0.04695  | 0.064988 | 0.16088 | -0.01554 | 0.73763 | 0.009772 |
| 0.09069  | 0.05016  | 0.099887 | 0.03091  | 0.117104 | 0.01132 | 0.077465 | 0.09451 | 0.163868 |
| 0.189679 | 3.70E-05 | -0.06916 | 0.13563  | 0.027035 | 0.56005 | -0.00019 | 0.99679 | 0.04653  |
| 0.084552 | 0.06792  | 0.041723 | 0.36833  | 0.107737 | 0.01987 | -0.00082 | 0.98594 | 0.02547  |
| 0.030077 | 0.51674  | -0.08671 | 0.06116  | 0.0521   | 0.26117 | -0.03049 | 0.51094 | 0.001658 |
| 0.059712 | 0.19772  | -0.02808 | 0.54491  | 0.036389 | 0.43273 | -0.00652 | 0.88822 | 0.006197 |
| 0.130657 | 0.00468  | -0.01631 | 0.72522  | 0.058719 | 0.20529 | -0.00394 | 0.93226 | -0.01595 |
| 0.116934 | 0.01144  | -0.09707 | 0.036    | 0.020045 | 0.6657  | -0.06072 | 0.19021 | -0.02145 |
| 0.098382 | 0.03354  | -0.08827 | 0.05663  | 0.040417 | 0.38351 | 0.013697 | 0.76784 | 0.010347 |
| 0.114778 | 0.01307  | 0.021206 | 0.6476   | 0.035247 | 0.44732 | -0.00557 | 0.9045  | 0.066649 |
| 0.091578 | 0.04794  | -0.06667 | 0.15027  | 0.040033 | 0.38805 | -0.0009  | 0.98455 | 0.014704 |
| -0.08215 | 0.07615  | -0.12374 | 0.00742  | -0.0687  | 0.13826 | 0.010862 | 0.81491 | -0.10427 |
| 0.066607 | 0.15068  | -0.10803 | 0.01954  | -0.01355 | 0.77025 | -0.09031 | 0.05112 | -0.04331 |
| 0.043929 | 0.34352  | -0.12225 | 0.00818  | 0.03361  | 0.46871 | -0.00813 | 0.86091 | 0.006775 |
| 0.042724 | 0.35694  | -0.02361 | 0.61086  | 0.081208 | 0.07958 | -0.03063 | 0.50901 | -0.00899 |
| 0.091393 | 0.0484   | -0.03899 | 0.40061  | 0.032213 | 0.4874  | -0.00753 | 0.87111 | -0.05829 |
| 0.086321 | 0.06234  | -0.02751 | 0.55322  | 0.049893 | 0.28193 | 0.020556 | 0.65771 | -0.00218 |
| 0.015703 | 0.73503  | -0.16849 | 0.00025  | 0.029643 | 0.52281 | -0.06942 | 0.13414 | 0.00437  |
| 0.034086 | 0.46244  | -0.15791 | 0.00062  | -0.00761 | 0.86967 | -0.02689 | 0.56212 | -0.18814 |
| 0.09102  | 0.04933  | 0.008418 | 0.85603  | 0.032364 | 0.48536 | -0.03896 | 0.40087 | -0.01793 |
| 0.102867 | 0.02622  | -0.10187 | 0.02772  | 0.087211 | 0.05967 | -0.0074  | 0.87321 | 0.055011 |
| 0.031694 | 0.49445  | -0.08774 | 0.05815  | -0.05748 | 0.21502 | -0.14397 | 0.00181 | -0.07131 |
| 0.181891 | 7.71E-05 | -0.02266 | 0.62528  | 0.02394  | 0.60583 | -0.00888 | 0.84818 | 0.002477 |
| 0.128793 | 0.00531  | -0.01669 | 0.71906  | 0.043382 | 0.34957 | 0.000932 | 0.98397 | 0.034077 |
| -0.00344 | 0.9409   | 0.024007 | 0.60482  | 0.053001 | 0.25299 | 0.090466 | 0.05073 | 0.079907 |
| -0.00457 | 0.92153  | -0.03153 | 0.49669  | 0.054317 | 0.24139 | 0.014754 | 0.75048 | 0.148166 |
| -0.02041 | 0.66004  | -0.10157 | 0.02818  | 0.000902 | 0.98449 | -0.0354  | 0.4454  | -0.01686 |
| 0.368749 | 1.73E-16 | 0.181096 | 8.30E-05 | 0.003093 | 0.94684 | -0.12241 | 0.00809 | -0.01267 |
| -0.00291 | 0.94996  | -0.11652 | 0.01174  | 0.025927 | 0.57624 | 0.036068 | 0.43681 | 0.023485 |
| 0.198628 | 1.53E-05 | 0.00553  | 0.90514  | 0.078558 | 0.08994 | -0.00647 | 0.88904 | 0.08664  |
| 0.088323 | 0.05648  | -0.04448 | 0.33755  | 0.022608 | 0.62604 | -0.01332 | 0.77401 | 0.008486 |
| 0.077135 | 0.09593  | -0.14279 | 0.00198  | -0.00772 | 0.86781 | -0.05911 | 0.2023  | -0.04433 |
| 0.099137 | 0.0322   | -0.02784 | 0.54845  | 0.100714 | 0.02954 | 0.009052 | 0.84532 | 0.023936 |
| 0.188219 | 4.26E-05 | 0.062475 | 0.17773  | 0.024142 | 0.60279 | -0.01832 | 0.69293 | 0.098359 |
| 0.154214 | 0.00083  | -0.06777 | 0.14367  | 0.006264 | 0.89261 | -0.05725 | 0.21684 | 0.011977 |
| 0.285046 | 3.52E-10 | 0.027439 | 0.5542   | 0.042016 | 0.36497 | -0.09717 | 0.03581 | 0.042013 |
| 0.064509 | 0.16399  | -0.21215 | 3.74E-06 | 0.029324 | 0.52729 | 0.046893 | 0.31192 | 0.035958 |
| 0.021101 | 0.64923  | -0.09212 | 0.04663  | 0.055411 | 0.23202 | 0.005715 | 0.90198 | 0.001687 |
| 0.059774 | 0.19725  | -0.02633 | 0.57037  | 0.094999 | 0.04016 | 0.045524 | 0.32627 | 0.048445 |
| 0.141636 | 0.00215  | 0.052493 | 0.25758  | 0.059723 | 0.19764 | -0.00422 | 0.92749 | 0.10143  |
| 0.119536 | 0.00972  | -0.04727 | 0.30808  | 0.055868 | 0.22819 | -0.01518 | 0.74356 | 0.034847 |
| 0.074148 | 0.10954  | -0.18719 | 4.69E-05 | 0.00874  | 0.85058 | -0.03321 | 0.474   | -0.07731 |
| 0.242398 | 1.14E-07 | 0.001274 | 0.9781   | 0.031559 | 0.49629 | -0.01434 | 0.7572  | -0.06381 |
| -0.21725 | 2.15E-06 | -0.09109 | 0.04916  | -0.09292 | 0.04476 | -0.11181 | 0.01563 | -0.10959 |

|          |          |          |          |          |         |          |          |          |
|----------|----------|----------|----------|----------|---------|----------|----------|----------|
| 0.283075 | 4.70E-10 | 0.163093 | 0.0004   | 0.044485 | 0.33744 | -0.00538 | 0.90774  | 0.260092 |
| -0.06281 | 0.17543  | -0.20977 | 4.83E-06 | 0.033566 | 0.46929 | -0.05627 | 0.22484  | -0.0023  |
| 0.215266 | 2.67E-06 | 0.043511 | 0.34814  | 0.122179 | 0.00821 | 0.01043  | 0.82214  | 0.010987 |
| 0.00263  | 0.9548   | -0.08503 | 0.06638  | 0.140869 | 0.00228 | 0.209223 | 5.12E-06 | 0.041972 |
| 0.52588  | 1.44E-34 | 0.24123  | 1.31E-07 | 0.041255 | 0.37373 | 0.012606 | 0.78585  | 0.139727 |
| 0.138348 | 0.00273  | -0.12897 | 0.00525  | 0.042463 | 0.35989 | -0.10536 | 0.02279  | -0.08258 |
| 0.079298 | 0.08694  | -0.07095 | 0.12574  | 0.058113 | 0.21002 | 0.019909 | 0.66782  | 0.09601  |
| 0.274826 | 1.54E-09 | 0.174261 | 0.00015  | 0.096536 | 0.03703 | 0.002407 | 0.95863  | 0.080905 |
| 0.092371 | 0.04603  | -0.14966 | 0.00118  | 0.091136 | 0.04903 | -0.02338 | 0.61436  | 0.038858 |
| -0.0574  | 0.2157   | -0.07426 | 0.109    | 0.012325 | 0.79051 | 0.08077  | 0.08123  | -0.00894 |
| 0.014579 | 0.75334  | -0.00497 | 0.91464  | 0.028762 | 0.53525 | 0.074283 | 0.10889  | 0.034378 |
| 0.126774 | 0.00608  | -0.02108 | 0.64951  | 0.025451 | 0.58328 | -0.02347 | 0.61299  | -0.03174 |
| -0.13977 | 0.00247  | -0.29412 | 9.00E-11 | 0.032254 | 0.48685 | -0.03307 | 0.47588  | 0.154215 |
| 0.115676 | 0.01237  | -0.07771 | 0.09348  | 0.053632 | 0.24738 | -0.00411 | 0.9295   | 0.01061  |
| 0.089082 | 0.05439  | 0.008955 | 0.84695  | 0.113918 | 0.01377 | 0.20162  | 1.13E-05 | 0.10225  |
| 0.089088 | 0.05437  | -0.02451 | 0.59733  | 0.024116 | 0.60318 | 0.028437 | 0.53987  | 0.023238 |
| -0.11213 | 0.01534  | -0.04005 | 0.38788  | -0.00751 | 0.87142 | 0.005842 | 0.8998   | 0.059267 |
| 0.100155 | 0.03046  | -0.18593 | 5.29E-05 | 0.053762 | 0.24624 | -0.08096 | 0.0805   | -0.00151 |
| 0.174951 | 0.00014  | -0.04388 | 0.34403  | 0.073614 | 0.11213 | -0.04753 | 0.3054   | 0.038343 |
| 0.185321 | 5.60E-05 | -0.05048 | 0.27627  | 0.036213 | 0.43497 | -0.00663 | 0.88636  | -0.0056  |
| 0.25871  | 1.41E-08 | 0.183543 | 6.62E-05 | 0.01327  | 0.77487 | -0.04512 | 0.33055  | 0.022005 |
| 0.053104 | 0.25208  | -0.03704 | 0.42455  | 0.053367 | 0.24973 | 0.047277 | 0.30796  | 0.064476 |
| 0.067814 | 0.14341  | -0.11478 | 0.01306  | 0.028634 | 0.53707 | -0.05398 | 0.24429  | -0.01161 |
| 0.207341 | 6.25E-06 | 0.0639   | 0.16802  | 0.049675 | 0.28405 | -0.01171 | 0.80081  | -0.00921 |
| -0.02738 | 0.55502  | -0.23985 | 1.55E-07 | 0.026915 | 0.56178 | -0.03055 | 0.51016  | 0.052283 |
| 0.034171 | 0.46132  | -0.13194 | 0.00429  | 0.098789 | 0.03281 | -0.03605 | 0.43706  | -0.00386 |
| 0.003298 | 0.94334  | -0.10018 | 0.03043  | -0.00321 | 0.94487 | -0.00099 | 0.98301  | -0.00507 |
| 0.067193 | 0.14712  | -0.06518 | 0.15965  | 0.035239 | 0.44742 | -0.0084  | 0.85639  | -0.0233  |
| 0.01875  | 0.68611  | -0.11925 | 0.0099   | -0.01711 | 0.71233 | -0.0131  | 0.77766  | -0.01798 |
| 0.000143 | 0.99755  | -0.0709  | 0.12604  | 0.134993 | 0.00347 | 0.224793 | 9.21E-07 | 0.147805 |
| 0.093621 | 0.04316  | -0.09818 | 0.03392  | 0.060212 | 0.19399 | 0.011591 | 0.80273  | 0.019411 |
| 0.065555 | 0.15725  | -0.00787 | 0.86527  | 0.033423 | 0.47119 | 0.00447  | 0.92325  | 0.083595 |
| 0.224342 | 9.70E-07 | 0.018267 | 0.69379  | 0.021809 | 0.63829 | -0.00071 | 0.98784  | -0.00828 |
| 0.119048 | 0.01003  | -0.0052  | 0.91071  | 0.045454 | 0.32701 | 0.034965 | 0.45097  | 0.036376 |
| 0.222359 | 1.21E-06 | 0.015397 | 0.74     | 0.047326 | 0.30747 | -0.05694 | 0.21939  | 0.03586  |
| 0.130865 | 0.00462  | -0.03143 | 0.49809  | 0.038031 | 0.41224 | 0.002762 | 0.95254  | 0.022046 |
| 0.150509 | 0.0011   | -0.05545 | 0.23167  | 0.036436 | 0.43214 | 0.00851  | 0.85448  | 0.046818 |
| 0.051599 | 0.26579  | -0.09704 | 0.03605  | -0.00651 | 0.88839 | -0.06208 | 0.18049  | 0.052652 |
| -0.05173 | 0.26462  | -0.26776 | 4.14E-09 | 0.015865 | 0.73239 | -0.05847 | 0.20725  | 0.016983 |
| -0.00693 | 0.88127  | -0.18479 | 5.89E-05 | 0.051158 | 0.2699  | -0.02729 | 0.55636  | -0.02335 |
| 0.015588 | 0.73688  | -0.12763 | 0.00574  | 0.064606 | 0.16336 | -0.00466 | 0.92008  | -0.00752 |
| 0.092403 | 0.04596  | -0.07373 | 0.11158  | 0.048191 | 0.2987  | -0.00982 | 0.83234  | 0.069249 |
| 0.12413  | 0.00724  | 0.01301  | 0.77917  | 0.036329 | 0.4335  | -0.03216 | 0.48818  | -0.04317 |
| 0.111475 | 0.01595  | -0.09467 | 0.04086  | 0.075074 | 0.10517 | 0.019767 | 0.67005  | 0.033775 |
| 0.102091 | 0.02738  | -0.07671 | 0.09777  | 0.04235  | 0.36116 | -0.00325 | 0.94409  | 0.010143 |

|          |          |          |          |          |          |          |          |          |
|----------|----------|----------|----------|----------|----------|----------|----------|----------|
| 0.160836 | 0.00048  | -0.01705 | 0.7132   | 0.047121 | 0.30957  | -0.01022 | 0.82561  | 0.072871 |
| -0.06995 | 0.13121  | -0.0622  | 0.17966  | 0.022996 | 0.62012  | 0.032438 | 0.48437  | 0.125587 |
| 0.017338 | 0.70863  | -0.11754 | 0.01102  | 0.049991 | 0.28099  | -0.0225  | 0.62772  | -0.01046 |
| 0.191082 | 3.23E-05 | -0.02939 | 0.52642  | -0.01158 | 0.80285  | -0.09517 | 0.03981  | -0.09173 |
| 0.003772 | 0.9352   | -0.06592 | 0.15493  | 0.061964 | 0.1813   | 0.01153  | 0.80374  | 0.007743 |
| 0.099854 | 0.03097  | -0.04382 | 0.34474  | 0.132967 | 0.004    | 0.062927 | 0.1746   | 0.099956 |
| 0.103687 | 0.02504  | -0.01504 | 0.74574  | 0.042384 | 0.36078  | 0.047275 | 0.30798  | 0.05102  |
| 0.156113 | 0.00071  | -0.01412 | 0.7608   | 0.074906 | 0.10595  | 0.016798 | 0.71731  | 0.043398 |
| 0.159306 | 0.00055  | -0.04134 | 0.37278  | 0.039892 | 0.38973  | -0.05761 | 0.21397  | 0.041096 |
| 0.012869 | 0.7815   | 0.181831 | 7.75E-05 | -0.0069  | 0.88178  | 0.051487 | 0.26683  | -0.03342 |
| 0.127691 | 0.00572  | -0.03825 | 0.40951  | 0.046547 | 0.31551  | 0.032655 | 0.48145  | 0.05407  |
| 0.293411 | 1.00E-10 | 0.032777 | 0.47981  | -0.01424 | 0.75884  | -0.02243 | 0.62871  | -0.00775 |
| 0.025449 | 0.5833   | -0.25378 | 2.68E-08 | 0.004701 | 0.91929  | -0.02979 | 0.52069  | -0.03319 |
| 0.15596  | 0.00072  | -0.11533 | 0.01264  | 0.020416 | 0.65989  | -0.06376 | 0.16896  | -0.09478 |
| 0.210495 | 4.47E-06 | 0.033252 | 0.47346  | 0.044099 | 0.34166  | -0.06037 | 0.19284  | 0.039944 |
| 0.14663  | 0.00149  | -0.04078 | 0.37924  | 0.009006 | 0.84609  | -0.02285 | 0.62235  | 0.019106 |
| 0.070813 | 0.12649  | -0.01196 | 0.79654  | 0.02294  | 0.62097  | -0.03484 | 0.45254  | 0.056642 |
| 0.121592 | 0.00853  | -0.06512 | 0.16002  | 0.037484 | 0.41901  | -0.00335 | 0.9424   | 0.005106 |
| 0.022125 | 0.63343  | -0.22811 | 6.29E-07 | 0.024126 | 0.60303  | -0.05791 | 0.21163  | -0.01571 |
| 0.214155 | 3.01E-06 | -0.03112 | 0.5023   | 0.008786 | 0.84981  | -0.05485 | 0.23678  | -0.04425 |
| 0.155357 | 0.00076  | 0.159508 | 0.00054  | -0.00051 | 0.99127  | -0.05983 | 0.19686  | 0.001641 |
| 0.012886 | 0.78121  | -0.11364 | 0.014    | 0.022287 | 0.63094  | 0.012733 | 0.78375  | -0.02491 |
| 0.052981 | 0.25318  | -0.07464 | 0.1072   | 0.028448 | 0.53972  | -0.04261 | 0.35819  | 0.034603 |
| -0.02886 | 0.5338   | -0.20399 | 8.86E-06 | 0.013103 | 0.77764  | -0.02997 | 0.51825  | -0.02578 |
| 0.447816 | 2.06E-24 | 0.165628 | 0.00032  | 0.012204 | 0.79253  | -0.03526 | 0.44714  | -0.02856 |
| 0.155209 | 0.00076  | 0.024592 | 0.59605  | 0.099852 | 0.03097  | 0.035921 | 0.43868  | 0.032352 |
| -0.23653 | 2.32E-07 | -0.15154 | 0.00102  | -0.01454 | 0.75395  | 0.002665 | 0.9542   | -0.01599 |
| 0.193797 | 2.48E-05 | -0.05841 | 0.20765  | 0.052806 | 0.25475  | -0.01321 | 0.77582  | -0.07031 |
| 0.008213 | 0.85949  | -0.13691 | 0.00303  | 0.017636 | 0.70385  | -0.00425 | 0.92708  | -0.00284 |
| 0.037831 | 0.4147   | -0.09865 | 0.03306  | 0.029104 | 0.53041  | 0.001719 | 0.97045  | 0.004579 |
| 0.037287 | 0.42146  | -0.12617 | 0.00633  | 0.008458 | 0.85535  | -0.06398 | 0.16749  | -0.03512 |
| -0.06017 | 0.19428  | -0.09277 | 0.0451   | -0.06714 | 0.14745  | -0.02727 | 0.5567   | 0.01774  |
| 0.101222 | 0.02873  | -0.10469 | 0.02366  | 0.072683 | 0.11675  | -0.02143 | 0.64414  | -0.00029 |
| -0.01234 | 0.79025  | -0.18724 | 4.67E-05 | 0.436044 | 4.27E-23 | 0.304318 | 1.83E-11 | 0.171611 |
| 0.106487 | 0.02136  | -0.04128 | 0.37339  | 0.030795 | 0.50678  | -0.0125  | 0.7876   | 0.030264 |
| 0.176313 | 0.00013  | -0.00341 | 0.94139  | 0.022709 | 0.62449  | 0.000622 | 0.98931  | 0.003314 |
| 0.133148 | 0.00395  | -0.03209 | 0.48904  | 0.043032 | 0.35347  | -0.007   | 0.88016  | 0.069428 |
| 0.108982 | 0.01848  | 0.051433 | 0.26733  | 0.042229 | 0.36254  | -0.00231 | 0.96024  | -0.02282 |
| 0.191099 | 3.22E-05 | -0.06279 | 0.17552  | 0.023572 | 0.61138  | -0.0132  | 0.7761   | 0.047526 |
| 0.060735 | 0.19013  | -0.06411 | 0.16659  | 0.071954 | 0.12048  | 0.046564 | 0.31533  | 0.087956 |
| 0.055383 | 0.23227  | -0.14312 | 0.00193  | 0.055417 | 0.23198  | -0.01001 | 0.82917  | -0.00509 |
| -0.03092 | 0.505    | -0.19506 | 2.19E-05 | 0.039655 | 0.39256  | 0.063078 | 0.17356  | 0.093123 |
| -0.09573 | 0.03865  | -0.25124 | 3.73E-08 | -0.00104 | 0.98212  | -0.11384 | 0.01384  | -0.06161 |
| 0.079534 | 0.08601  | -0.04883 | 0.2923   | 0.042128 | 0.36369  | 0.001097 | 0.98113  | 0.029841 |
| 0.035989 | 0.4378   | -0.11897 | 0.01007  | 0.046622 | 0.31473  | 0.013337 | 0.77376  | 0.023604 |

|          |          |          |          |          |         |          |         |          |
|----------|----------|----------|----------|----------|---------|----------|---------|----------|
| 0.099333 | 0.03186  | -0.11831 | 0.0105   | 0.051751 | 0.26438 | -0.00856 | 0.8536  | 0.009988 |
| 0.062631 | 0.17664  | -0.05854 | 0.2067   | 0.03809  | 0.41152 | 0.010576 | 0.8197  | 0.01881  |
| 0.155336 | 0.00076  | -0.03498 | 0.45082  | 0.056865 | 0.21999 | -0.00411 | 0.92942 | 0.008774 |
| 0.151283 | 0.00104  | -0.03426 | 0.46017  | 0.037669 | 0.41671 | -0.0078  | 0.86647 | -0.0014  |
| 0.058492 | 0.20705  | -0.13381 | 0.00377  | 0.074737 | 0.10674 | 0.027166 | 0.55815 | -0.03299 |
| -0.02379 | 0.60812  | -0.06009 | 0.19487  | 0.033556 | 0.46943 | 0.022885 | 0.6218  | -0.01357 |
| 0.147565 | 0.00138  | -0.05968 | 0.19792  | 0.055154 | 0.23421 | -0.0211  | 0.6493  | 0.015768 |
| 0.111101 | 0.01631  | -0.04213 | 0.36366  | 0.040805 | 0.37897 | -0.00475 | 0.91842 | 0.017675 |
| 0.007143 | 0.87765  | -0.07954 | 0.08598  | 0.011208 | 0.80912 | -0.03863 | 0.40493 | 0.020099 |
| -0.16753 | 0.00028  | -0.14364 | 0.00186  | -0.06145 | 0.18495 | -0.02703 | 0.56019 | 0.011    |
| -0.00645 | 0.88949  | -0.18465 | 5.96E-05 | 0.035126 | 0.44889 | -0.00242 | 0.95837 | 0.002171 |
| 0.256243 | 1.95E-08 | -0.18252 | 7.28E-05 | 0.005835 | 0.89992 | -0.07732 | 0.09512 | -0.05446 |
| 0.083242 | 0.07231  | 0.124554 | 0.00704  | 0.04504  | 0.33145 | 0.060844 | 0.18934 | 0.022392 |
| -0.01503 | 0.74605  | -0.13017 | 0.00484  | 0.032608 | 0.48208 | -0.01027 | 0.82489 | -0.03189 |
| -0.07291 | 0.11559  | -0.19983 | 1.36E-05 | -0.01658 | 0.72086 | -0.07299 | 0.11522 | -0.12963 |
| 0.004881 | 0.91623  | -0.26317 | 7.74E-09 | 0.010246 | 0.82522 | -0.00339 | 0.94176 | 0.217555 |
| 0.054249 | 0.24198  | -0.20786 | 5.91E-06 | 0.018521 | 0.68975 | 0.012544 | 0.78688 | -0.03693 |
| -0.00724 | 0.87608  | -0.26964 | 3.19E-09 | -0.02505 | 0.58927 | -0.11301 | 0.01454 | -0.1297  |
| 0.066916 | 0.14879  | -0.12216 | 0.00822  | 0.005938 | 0.89817 | -0.07081 | 0.1265  | -0.01199 |
| 0.10504  | 0.0232   | -0.08603 | 0.06323  | 0.070198 | 0.12982 | -0.00509 | 0.91262 | 0.046627 |
| 0.108518 | 0.01899  | -0.06111 | 0.18742  | 0.059373 | 0.20028 | 0.027702 | 0.55041 | 0.043611 |
| -0.1107  | 0.0167   | 0.119262 | 0.00989  | 0.008303 | 0.85798 | 0.017523 | 0.70566 | 0.054858 |
| 0.025179 | 0.5873   | -0.13266 | 0.00408  | 0.045129 | 0.33049 | -0.00994 | 0.83035 | 0.034688 |
| 0.009151 | 0.84365  | -0.22794 | 6.41E-07 | 0.02069  | 0.65563 | -0.0218  | 0.63849 | -0.02578 |
| 0.118245 | 0.01054  | -0.08406 | 0.06953  | 0.01384  | 0.76547 | -0.08516 | 0.06595 | -0.07727 |
| 0.058847 | 0.2043   | -0.06028 | 0.19351  | 0.054866 | 0.23666 | -0.01441 | 0.75607 | 0.156381 |
| -0.00579 | 0.90065  | -0.0907  | 0.05013  | 0.020914 | 0.65214 | 0.00173  | 0.97026 | 0.039089 |
| 0.120947 | 0.00889  | 0.054058 | 0.24364  | 0.017605 | 0.70436 | -0.04212 | 0.36379 | -0.00485 |
| 0.009998 | 0.82938  | -0.27169 | 2.40E-09 | 0.052505 | 0.25747 | -0.04216 | 0.36333 | -0.03564 |
| 0.05962  | 0.19842  | -0.09796 | 0.03432  | 0.030674 | 0.50846 | -0.03896 | 0.40087 | 0.014557 |
| 0.070915 | 0.12594  | -0.09271 | 0.04524  | 0.041712 | 0.36845 | -0.00368 | 0.93685 | -0.00965 |
| 0.118008 | 0.0107   | 0.017209 | 0.7107   | 0.090028 | 0.05186 | 0.032725 | 0.4805  | 0.061652 |
| 0.247095 | 6.32E-08 | -0.07909 | 0.08779  | -0.01217 | 0.79317 | -0.06285 | 0.17512 | -0.07483 |
| 0.0035   | 0.93988  | -0.15966 | 0.00053  | 0.036292 | 0.43396 | -0.02538 | 0.58434 | 0.006655 |
| 0.079331 | 0.08681  | -0.01337 | 0.77318  | 0.048644 | 0.29417 | 0.025572 | 0.58148 | 0.075789 |
| 0.021233 | 0.64718  | -0.19351 | 2.55E-05 | 0.023423 | 0.61364 | -0.04887 | 0.29196 | 0.000943 |
| 0.032848 | 0.47886  | -0.09043 | 0.05083  | 0.095452 | 0.03922 | 0.166238 | 0.00031 | 0.071786 |
| 0.151769 | 0.001    | 0.060652 | 0.19074  | 0.026282 | 0.57103 | 0.004265 | 0.92677 | 0.067738 |
| 0.068281 | 0.14066  | -0.1214  | 0.00863  | 0.030562 | 0.51    | -0.00691 | 0.88165 | -0.00483 |
| -0.02782 | 0.54872  | -0.16997 | 0.00022  | 0.023007 | 0.61995 | -0.03667 | 0.42923 | -0.08606 |
| 0.117834 | 0.01082  | -0.09809 | 0.03408  | -0.00466 | 0.91993 | -0.02468 | 0.59467 | 0.006883 |
| 0.181976 | 7.65E-05 | -0.04075 | 0.37964  | -0.02793 | 0.54714 | -0.08056 | 0.08201 | -0.06878 |
| 0.143385 | 0.00189  | -0.03611 | 0.43622  | 0.004526 | 0.92229 | -0.06509 | 0.16021 | 0.019121 |
| 0.029655 | 0.52265  | -0.12059 | 0.00909  | 0.022705 | 0.62455 | -0.03121 | 0.50101 | -0.02578 |
| -0.16743 | 0.00028  | -0.44002 | 1.56E-23 | -0.01339 | 0.77286 | -0.09821 | 0.03386 | 0.079697 |

|          |          |          |          |          |         |          |          |          |
|----------|----------|----------|----------|----------|---------|----------|----------|----------|
| 0.351902 | 4.64E-15 | -0.12318 | 0.0077   | 0.037307 | 0.4212  | -0.04909 | 0.28977  | 0.027035 |
| 0.145169 | 0.00166  | -0.02348 | 0.61272  | 0.066145 | 0.15354 | -0.03379 | 0.46631  | -0.00101 |
| 0.014793 | 0.74986  | -0.08492 | 0.06673  | 0.036518 | 0.4311  | -0.01882 | 0.68499  | 0.060591 |
| 0.079332 | 0.08681  | -0.11192 | 0.01553  | 0.038923 | 0.40136 | 0.012177 | 0.79297  | 0.039774 |
| -0.02569 | 0.57977  | -0.24557 | 7.66E-08 | 0.021318 | 0.64587 | -0.03586 | 0.43951  | -0.04059 |
| 0.052717 | 0.25555  | -0.04812 | 0.29941  | 0.016555 | 0.72123 | -0.00578 | 0.9009   | -0.02925 |
| 0.023821 | 0.60762  | -0.0455  | 0.32651  | 0.047085 | 0.30994 | -0.03361 | 0.46866  | -0.03612 |
| -0.10411 | 0.02445  | -0.07733 | 0.0951   | -0.0566  | 0.22212 | -0.02588 | 0.57699  | -0.00424 |
| -0.04245 | 0.36001  | -0.24776 | 5.81E-08 | 0.03323  | 0.47376 | 0.074202 | 0.10928  | 0.08997  |
| 0.098851 | 0.0327   | -0.07935 | 0.08674  | 0.034385 | 0.45851 | 0.013719 | 0.76747  | 0.013891 |
| -0.05915 | 0.202    | -0.00727 | 0.87557  | 0.104553 | 0.02385 | 0.220133 | 1.56E-06 | 0.121338 |
| 0.003673 | 0.93691  | -0.25742 | 1.67E-08 | 0.04896  | 0.29104 | -0.0354  | 0.44531  | 0.033305 |
| 0.130555 | 0.00472  | -0.09579 | 0.03853  | 0.052796 | 0.25484 | -0.06162 | 0.18375  | 0.020395 |
| 0.216917 | 2.23E-06 | -0.00978 | 0.83308  | 0.041848 | 0.36688 | -0.04953 | 0.28544  | 0.028704 |
| 0.036844 | 0.427    | -0.14714 | 0.00143  | 0.068814 | 0.13758 | -0.00304 | 0.94768  | -0.01999 |
| 0.338762 | 5.28E-14 | -0.04509 | 0.33087  | 0.017691 | 0.70297 | -0.16016 | 0.00051  | 0.001054 |
| -0.16236 | 0.00043  | -0.16774 | 0.00027  | 0.025245 | 0.58632 | 0.102052 | 0.02744  | 0.049231 |
| 0.000974 | 0.98325  | -0.1285  | 0.00542  | 0.050544 | 0.27569 | -0.02962 | 0.52308  | 0.031296 |
| 0.053264 | 0.25065  | -0.15576 | 0.00073  | 0.011747 | 0.80012 | -0.03258 | 0.4824   | 0.022294 |
| 0.087381 | 0.05918  | -0.00347 | 0.94037  | 0.069403 | 0.13423 | 0.040725 | 0.3799   | 0.289081 |
| -0.0167  | 0.71894  | -0.16422 | 0.00037  | 0.000876 | 0.98494 | -0.08959 | 0.05301  | -0.00889 |
| -0.01674 | 0.7182   | -0.16215 | 0.00043  | 0.02477  | 0.59339 | -0.01612 | 0.72829  | -0.02739 |
| 0.185499 | 5.51E-05 | 0.2069   | 6.54E-06 | 0.034289 | 0.45977 | 0.007494 | 0.87169  | 0.093376 |
| 0.068062 | 0.14195  | -0.03334 | 0.47227  | 0.062382 | 0.17838 | 0.013559 | 0.7701   | 0.157959 |
| -0.29297 | 1.07E-10 | -0.12705 | 0.00597  | -0.02598 | 0.57547 | 0.015938 | 0.73121  | -0.09809 |
| -0.03222 | 0.48731  | -0.27874 | 8.82E-10 | 0.03174  | 0.49382 | -0.0119  | 0.79758  | -0.01566 |
| 0.129451 | 0.00508  | -0.02688 | 0.56234  | 0.049748 | 0.28334 | -0.06536 | 0.15848  | 0.037608 |
| -0.01918 | 0.67924  | 0.051979 | 0.26228  | -0.01874 | 0.68623 | -0.01602 | 0.72985  | 0.002366 |
| -0.09075 | 0.05     | 0.239877 | 1.55E-07 | -0.02615 | 0.57295 | 0.115041 | 0.01286  | 0.051099 |
| 0.098763 | 0.03286  | -0.11626 | 0.01193  | 0.038936 | 0.4012  | -0.00693 | 0.88128  | -0.0154  |
| -0.04456 | 0.33667  | -0.17778 | 0.00011  | 0.033746 | 0.46692 | -0.02786 | 0.54809  | -0.04369 |
| -0.09682 | 0.03648  | -0.15099 | 0.00106  | -0.0142  | 0.7596  | -0.0207  | 0.65539  | -0.02663 |
| 0.133786 | 0.00377  | -0.00227 | 0.96106  | 0.035587 | 0.44295 | -0.02573 | 0.57911  | -0.01861 |
| 0.143411 | 0.00189  | -0.07699 | 0.09656  | 0.031831 | 0.49259 | -0.01665 | 0.71964  | 0.007875 |
| 0.377026 | 3.20E-17 | 0.047044 | 0.31036  | 0.016412 | 0.72353 | -0.09921 | 0.03207  | -0.00528 |
| 0.20761  | 6.07E-06 | 0.050649 | 0.2747   | 0.094531 | 0.04116 | -0.00103 | 0.98225  | 0.043677 |
| 0.163669 | 0.00038  | -0.0517  | 0.26482  | 0.025043 | 0.58932 | -0.02749 | 0.5534   | -0.0114  |
| 0.008319 | 0.8577   | -0.1729  | 0.00017  | 0.022515 | 0.62746 | -0.05206 | 0.26156  | -0.01745 |
| -0.02536 | 0.58467  | -0.17296 | 0.00017  | 0.033841 | 0.46566 | 0.031592 | 0.49584  | 0.042548 |
| 0.078936 | 0.0884   | 0.104017 | 0.02458  | 0.006847 | 0.88268 | -0.05246 | 0.2579   | -0.065   |
| 0.130492 | 0.00474  | 0.017147 | 0.7117   | 0.030245 | 0.5144  | -0.01737 | 0.70808  | 0.017868 |
| 0.134335 | 0.00363  | -0.00174 | 0.97009  | 0.115484 | 0.01251 | 0.023942 | 0.6058   | 0.033271 |
| 0.020767 | 0.65442  | -0.09222 | 0.0464   | 0.068265 | 0.14076 | -0.02449 | 0.59755  | 0.00134  |
| 0.0394   | 0.3956   | -0.1033  | 0.02559  | 0.132387 | 0.00416 | 0.044335 | 0.33907  | 0.045708 |
| -0.08335 | 0.07194  | -0.16809 | 0.00026  | 0.026802 | 0.56343 | -0.04537 | 0.32792  | -0.03528 |



|          |          |          |          |          |         |          |          |          |
|----------|----------|----------|----------|----------|---------|----------|----------|----------|
| 0.009288 | 0.84134  | -0.12871 | 0.00534  | 0.046391 | 0.31713 | -0.02125 | 0.64695  | -0.00772 |
| 0.369066 | 1.62E-16 | 0.077372 | 0.09491  | 0.052866 | 0.25421 | 0.074398 | 0.10835  | 0.018839 |
| -0.04896 | 0.29103  | -0.19973 | 1.37E-05 | 0.034154 | 0.46154 | -0.03271 | 0.48065  | -0.00546 |
| -0.05676 | 0.22085  | -0.20296 | 9.86E-06 | 0.019856 | 0.66866 | 0.053141 | 0.25175  | 0.008199 |
| 0.106878 | 0.02088  | -0.0725  | 0.11768  | 0.060441 | 0.19229 | -0.00534 | 0.90838  | 0.210204 |
| 0.261078 | 1.03E-08 | 0.031991 | 0.49041  | 0.010934 | 0.8137  | -0.02727 | 0.5567   | -0.05099 |
| 0.115897 | 0.0122   | -0.09511 | 0.03992  | -0.00706 | 0.87908 | -0.10315 | 0.02581  | -0.02607 |
| 0.024796 | 0.593    | -0.11873 | 0.01023  | 0.032375 | 0.48522 | -0.01381 | 0.76598  | 0.040871 |
| -0.07737 | 0.09493  | -0.05727 | 0.21675  | -0.05569 | 0.22966 | 0.010222 | 0.82563  | -0.08772 |
| 0.135559 | 0.00333  | -0.03177 | 0.49335  | 0.025962 | 0.57572 | -0.01864 | 0.68783  | 0.013181 |
| 0.148114 | 0.00133  | -0.18235 | 7.39E-05 | 0.018195 | 0.69492 | -0.05887 | 0.20415  | -0.05667 |
| 0.014047 | 0.76207  | -0.1718  | 0.00019  | 0.094939 | 0.04029 | 0.022447 | 0.6285   | 0.019609 |
| -0.06129 | 0.1861   | -0.22575 | 8.26E-07 | 0.011876 | 0.79798 | -0.0368  | 0.42751  | -0.03885 |
| 0.059632 | 0.19832  | -0.06187 | 0.18196  | 0.01262  | 0.78562 | 0.019804 | 0.66948  | 0.013748 |
| 0.193019 | 2.67E-05 | 0.073585 | 0.11227  | 0.026309 | 0.57063 | -0.03983 | 0.3905   | 0.028852 |
| 0.101912 | 0.02765  | -0.0475  | 0.30565  | 0.039929 | 0.38929 | -0.00639 | 0.89045  | 0.001145 |
| 0.185093 | 5.72E-05 | 0.062196 | 0.17967  | 0.066829 | 0.14932 | 0.030821 | 0.50642  | 0.089876 |
| -0.15235 | 0.00096  | 0.080456 | 0.08242  | -0.00269 | 0.95376 | 0.016683 | 0.71917  | 0.059729 |
| 0.299656 | 3.82E-11 | 0.17166  | 0.00019  | 0.032255 | 0.48684 | 0.019564 | 0.67325  | 0.202173 |
| 0.108339 | 0.01919  | -0.07238 | 0.11827  | 0.087402 | 0.05912 | -0.04275 | 0.3566   | -0.0161  |
| 0.09796  | 0.03431  | -0.09438 | 0.04149  | 0.025146 | 0.58779 | 0.070674 | 0.12724  | 0.063354 |
| 0.192494 | 2.82E-05 | 0.060226 | 0.19388  | 0.038198 | 0.4102  | -0.01485 | 0.74892  | 0.03796  |
| 0.006742 | 0.88447  | -0.19726 | 1.76E-05 | 0.008889 | 0.84806 | -0.00902 | 0.84594  | 0.005301 |
| 0.056728 | 0.2211   | -0.15247 | 0.00095  | 0.03153  | 0.49669 | -0.05474 | 0.23771  | -0.07166 |
| 0.091693 | 0.04766  | 0.000281 | 0.99518  | 0.08069  | 0.08153 | 0.043194 | 0.35167  | 0.078677 |
| 0.013935 | 0.76391  | 0.186584 | 4.97E-05 | 0.160996 | 0.00048 | 0.228174 | 6.24E-07 | 0.318695 |
| 0.139895 | 0.00245  | 0.07102  | 0.12538  | 0.074395 | 0.10836 | -0.01327 | 0.77484  | 0.049579 |
| 0.111566 | 0.01586  | -0.06964 | 0.13291  | 0.029823 | 0.52029 | -0.01891 | 0.68362  | -0.00447 |
| -0.01388 | 0.76474  | -0.11617 | 0.01199  | 0.035772 | 0.44058 | 0.011974 | 0.79635  | -0.00526 |
| -0.0521  | 0.26115  | -0.16228 | 0.00043  | 0.016327 | 0.7249  | -0.02639 | 0.56941  | -0.1076  |
| 0.117322 | 0.01117  | -0.04654 | 0.31558  | 0.104826 | 0.02348 | 0.015577 | 0.73706  | 0.0652   |
| 0.12515  | 0.00677  | 0.017596 | 0.70449  | 0.071028 | 0.12534 | -0.0377  | 0.41634  | -0.00115 |
| 0.109218 | 0.01823  | -0.0436  | 0.3471   | 0.04781  | 0.30254 | 0.015217 | 0.74293  | -0.00231 |
| 0.088694 | 0.05545  | -0.04971 | 0.28368  | 0.033475 | 0.4705  | -0.00034 | 0.99414  | -0.00406 |
| 0.173871 | 0.00016  | 0.02612  | 0.5734   | 0.096988 | 0.03615 | 0.018791 | 0.68545  | 0.046663 |
| 0.059423 | 0.1999   | -0.09889 | 0.03263  | 0.053191 | 0.2513  | 0.008662 | 0.85191  | 0.013948 |
| 0.174309 | 0.00015  | -0.00905 | 0.84543  | 0.020514 | 0.65836 | -0.00284 | 0.95122  | 0.000447 |
| 0.166959 | 0.00029  | 0.004151 | 0.92872  | 0.087654 | 0.05839 | 0.02187  | 0.63736  | 0.037613 |
| 0.057488 | 0.21497  | -0.05343 | 0.2492   | 0.046839 | 0.31248 | 0.012351 | 0.79008  | 0.013978 |
| 0.008005 | 0.86303  | -0.10473 | 0.02361  | 0.053679 | 0.24697 | 0.04325  | 0.35104  | 0.078454 |
| 0.143135 | 0.00193  | 0.029441 | 0.52565  | 0.059129 | 0.20214 | 0.029349 | 0.52694  | 0.020259 |
| 0.100744 | 0.0295   | -0.07279 | 0.11622  | 0.067801 | 0.14348 | 0.004807 | 0.91748  | 0.03     |
| 0.127235 | 0.0059   | -0.0794  | 0.08652  | 0.058647 | 0.20585 | -0.00505 | 0.9134   | 0.045933 |
| -0.0217  | 0.63998  | -0.13362 | 0.00382  | 0.032851 | 0.47882 | -0.01397 | 0.76334  | -0.0381  |
| 0.109389 | 0.01805  | -0.07078 | 0.12666  | 0.032015 | 0.49008 | -0.01659 | 0.72065  | 0.011491 |

|          |          |          |          |          |         |          |         |          |
|----------|----------|----------|----------|----------|---------|----------|---------|----------|
| 0.128353 | 0.00547  | -0.05406 | 0.24359  | 0.047824 | 0.3024  | 0.003611 | 0.93798 | 0.03521  |
| 0.292261 | 1.19E-10 | -0.05438 | 0.24087  | 0.001725 | 0.97035 | -0.0584  | 0.20776 | -0.05169 |
| 0.138739 | 0.00266  | 0.000937 | 0.9839   | 0.015176 | 0.74359 | -0.00756 | 0.8706  | 0.002017 |
| 0.152679 | 0.00093  | 0.049061 | 0.29005  | 0.022909 | 0.62144 | -0.01353 | 0.77062 | -0.0123  |
| 0.122724 | 0.00793  | -0.01334 | 0.77366  | 0.048848 | 0.29215 | -0.01159 | 0.80276 | -0.01039 |
| 0.015208 | 0.74307  | -0.1014  | 0.02845  | 0.080826 | 0.08101 | 0.008839 | 0.84892 | 0.00405  |
| 0.037651 | 0.41694  | -0.11084 | 0.01657  | 0.000219 | 0.99623 | -0.02967 | 0.52245 | -0.03434 |
| 0.073191 | 0.11421  | -0.05633 | 0.22434  | 0.04498  | 0.3321  | 0.015795 | 0.73352 | 0.028609 |
| 0.030226 | 0.51466  | -0.08588 | 0.0637   | 0.032343 | 0.48565 | -0.0001  | 0.99822 | 0.038784 |
| 0.104372 | 0.02409  | -0.03787 | 0.41426  | 0.101478 | 0.02833 | 0.011663 | 0.80153 | 0.006548 |
| 0.046196 | 0.31918  | -0.06786 | 0.14312  | 0.031008 | 0.50384 | 0.015027 | 0.74602 | 0.030272 |
| 0.06811  | 0.14166  | -0.07995 | 0.08436  | 0.024305 | 0.60035 | -0.00109 | 0.98121 | 0.026361 |
| 0.092412 | 0.04594  | -0.04799 | 0.30067  | 0.096069 | 0.03796 | 0.00151  | 0.97404 | 0.028875 |
| 0.131414 | 0.00445  | -0.01432 | 0.75767  | 0.123823 | 0.00738 | 0.016533 | 0.72159 | 0.054558 |
| 0.114088 | 0.01363  | -0.0528  | 0.25478  | 0.030643 | 0.50888 | 0.006951 | 0.88091 | 0.033184 |
| 0.082439 | 0.07511  | -0.04596 | 0.32166  | 0.044545 | 0.33679 | 0.019482 | 0.67454 | 0.033054 |
| 0.060372 | 0.1928   | -0.05088 | 0.2725   | 0.068043 | 0.14206 | 0.021756 | 0.6391  | 0.025239 |
| 0.040101 | 0.38725  | -0.07535 | 0.10389  | 0.045966 | 0.32159 | 0.010071 | 0.82816 | 0.011929 |
| 0.05787  | 0.21193  | -0.00952 | 0.8374   | 0.03775  | 0.41571 | 0.025786 | 0.57832 | 0.136663 |
| 0.131759 | 0.00434  | -0.02527 | 0.58598  | 0.068402 | 0.13996 | 0.01688  | 0.71598 | 0.047765 |
| 0.143986 | 0.00181  | 0.068837 | 0.13745  | 0.029924 | 0.51888 | 0.016258 | 0.72602 | 0.063593 |
| 0.046644 | 0.3145   | -0.05976 | 0.19739  | 0.047395 | 0.30676 | 0.015637 | 0.73609 | 0.047741 |
| 0.016516 | 0.72186  | -0.01198 | 0.79622  | 0.039672 | 0.39236 | -0.00475 | 0.91847 | 0.127913 |
| 0.032377 | 0.48519  | -0.07578 | 0.10194  | 0.041947 | 0.36576 | 0.002965 | 0.94905 | 0.010013 |
| 0.001741 | 0.97008  | -0.14612 | 0.00154  | 0.049645 | 0.28434 | -0.0186  | 0.68856 | -0.01429 |
| 0.079824 | 0.08486  | -0.02492 | 0.59115  | 0.05884  | 0.20435 | 0.00431  | 0.92599 | 0.020366 |
| 0.044554 | 0.3367   | -0.09444 | 0.04134  | 0.062391 | 0.17831 | 0.00855  | 0.8538  | 0.03809  |
| 0.076295 | 0.09961  | -0.00134 | 0.97701  | 0.023102 | 0.61851 | 0.013187 | 0.77624 | -0.00747 |
| 0.005245 | 0.90999  | -0.11314 | 0.01443  | 0.072493 | 0.11771 | 0.005337 | 0.90842 | -0.0231  |
| 0.105395 | 0.02274  | -0.07914 | 0.08758  | 0.062904 | 0.17476 | 0.009267 | 0.84169 | 0.017358 |
| 0.064491 | 0.16411  | 0.018693 | 0.68701  | 0.058335 | 0.20827 | -0.00385 | 0.93395 | 0.024951 |
| 0.247159 | 6.27E-08 | 0.055267 | 0.23324  | 0.034713 | 0.45424 | -0.01723 | 0.71035 | 0.001808 |
| 0.020517 | 0.65832  | -0.12517 | 0.00676  | 0.09263  | 0.04543 | 0.035574 | 0.44312 | 0.040994 |
| 0.035684 | 0.4417   | 0.001547 | 0.9734   | 0.107992 | 0.01958 | 0.062216 | 0.17953 | 0.030607 |
| 0.092812 | 0.045    | 0.081675 | 0.07786  | 0.068759 | 0.1379  | 0.074986 | 0.10558 | -0.04568 |
| 0.040378 | 0.38398  | -0.07255 | 0.11741  | 0.099979 | 0.03076 | 0.086402 | 0.06209 | 0.114727 |
| 0.141125 | 0.00224  | -0.04398 | 0.34291  | 0.034129 | 0.46187 | -0.03567 | 0.44184 | 0.031212 |
| 0.039589 | 0.39335  | -0.08897 | 0.0547   | 0.039135 | 0.3988  | 0.014279 | 0.75826 | 0.028707 |
| 0.032116 | 0.48872  | -0.14928 | 0.00121  | 0.019895 | 0.66805 | -0.00628 | 0.89226 | 0.004849 |
| 0.076049 | 0.10071  | -0.09063 | 0.05032  | 0.084389 | 0.06845 | 0.020512 | 0.65839 | 0.044163 |
| 0.066509 | 0.15128  | -0.09156 | 0.04799  | 0.0518   | 0.26392 | 0.009875 | 0.83145 | 0.032016 |
| 0.132759 | 0.00405  | -0.00839 | 0.85655  | 0.038518 | 0.40628 | 3.47E-05 | 0.9994  | 0.01054  |
| -0.0369  | 0.42624  | -0.2054  | 7.66E-06 | 0.02926  | 0.5282  | -0.00094 | 0.98379 | 0.10856  |
| 0.035616 | 0.44258  | -0.1666  | 0.0003   | 0.012921 | 0.78064 | -0.02683 | 0.56304 | -0.04678 |
| 0.078663 | 0.08951  | -0.07734 | 0.09505  | 0.015661 | 0.73569 | -0.00679 | 0.88372 | -0.07487 |

|          |          |          |          |          |         |           |         |          |
|----------|----------|----------|----------|----------|---------|-----------|---------|----------|
| 0.016516 | 0.72186  | -0.13189 | 0.0043   | 0.068343 | 0.1403  | 0.035415  | 0.44516 | -0.01176 |
| 0.059086 | 0.20247  | -0.08041 | 0.08258  | 0.06057  | 0.19134 | 0.005514  | 0.9054  | 0.013267 |
| 0.072116 | 0.11964  | -0.09059 | 0.0504   | 0.020832 | 0.65342 | -0.01477  | 0.75022 | 0.009669 |
| 0.044766 | 0.3344   | -0.0784  | 0.09061  | 0.043811 | 0.34482 | 0.007578  | 0.87025 | 0.013381 |
| 0.031252 | 0.50049  | -0.11482 | 0.01303  | 0.061409 | 0.18525 | 0.083056  | 0.07295 | 0.042772 |
| 0.10178  | 0.02786  | -0.02767 | 0.55091  | 0.090818 | 0.04983 | 0.033731  | 0.46712 | 0.043762 |
| 0.139922 | 0.00244  | -0.05332 | 0.25016  | 0.029539 | 0.52427 | -0.02249  | 0.62783 | 0.046242 |
| 0.164249 | 0.00037  | -0.06082 | 0.18948  | 0.053546 | 0.24814 | -0.06424  | 0.16577 | 0.008585 |
| -0.07106 | 0.12516  | -0.11765 | 0.01094  | -0.0744  | 0.10835 | -0.14364  | 0.00186 | -0.20691 |
| 0.212463 | 3.62E-06 | 0.237901 | 1.97E-07 | 0.109969 | 0.01744 | 0.09916   | 0.03216 | 0.124962 |
| 0.117766 | 0.01087  | -0.06676 | 0.14976  | 0.015328 | 0.74112 | -0.02813  | 0.5442  | -0.00099 |
| 0.156571 | 0.00069  | 0.075898 | 0.10139  | 0.015092 | 0.74496 | -0.06552  | 0.15745 | -0.01147 |
| 0.159145 | 0.00056  | -0.04432 | 0.33928  | 0.075102 | 0.10504 | -0.01486  | 0.74876 | 0.015708 |
| 0.087778 | 0.05803  | -0.09428 | 0.0417   | 0.036444 | 0.43204 | -0.03766  | 0.41677 | -0.02613 |
| 0.099303 | 0.03191  | -0.07877 | 0.08909  | 0.05447  | 0.24006 | -0.00379  | 0.93489 | 0.013148 |
| 0.141232 | 0.00222  | -0.13883 | 0.00264  | 0.00647  | 0.88911 | -0.07009  | 0.13044 | -0.10866 |
| 0.040368 | 0.3841   | -0.14207 | 0.00209  | 0.022285 | 0.63098 | 0.002903  | 0.95011 | -0.01077 |
| 0.078377 | 0.09068  | -0.06548 | 0.1577   | 0.025835 | 0.57759 | -5.52E-05 | 0.99905 | -0.02181 |
| 0.240388 | 1.45E-07 | 0.031948 | 0.491    | 0.049301 | 0.28769 | 0.00555   | 0.90479 | -0.02285 |
| 0.090173 | 0.05149  | -0.05708 | 0.21826  | 0.043833 | 0.34458 | 0.064219  | 0.1659  | -0.02184 |
| 0.166235 | 0.00031  | -0.0015  | 0.97429  | 0.065801 | 0.15569 | 0.010356  | 0.82338 | 0.031409 |
| -0.07512 | 0.10495  | -0.30968 | 7.75E-12 | 0.022573 | 0.62657 | -0.01242  | 0.78892 | 0.056177 |
| 0.138041 | 0.0028   | -0.05411 | 0.24323  | 0.043987 | 0.34289 | -0.00832  | 0.85771 | 0.009717 |
| 0.055999 | 0.22711  | -0.0915  | 0.04813  | 0.041453 | 0.37143 | 0.121798  | 0.00842 | 0.015906 |
| 0.039671 | 0.39237  | -0.07468 | 0.10703  | 0.067202 | 0.14706 | 0.110638  | 0.01676 | 0.05775  |
| 0.063259 | 0.17234  | -0.11977 | 0.00958  | 0.007653 | 0.86898 | 0.006169  | 0.89422 | -0.041   |
| 0.025676 | 0.57995  | -0.08585 | 0.06377  | 0.064247 | 0.16572 | 0.047898  | 0.30165 | 0.139407 |
| 0.072231 | 0.11905  | -0.08448 | 0.06816  | 0.041379 | 0.37229 | -0.01247  | 0.7881  | 0.008329 |
| -0.28256 | 5.07E-10 | -0.05435 | 0.24113  | 0.017067 | 0.71298 | 0.064496  | 0.16408 | 0.227473 |
| 0.115757 | 0.01231  | -0.13851 | 0.0027   | 0.012411 | 0.78909 | -0.08989  | 0.05223 | 0.013608 |
| 0.237436 | 2.08E-07 | -0.00997 | 0.8298   | 0.039427 | 0.39529 | -0.02379  | 0.60813 | 0.01101  |
| 0.183335 | 6.74E-05 | -0.02342 | 0.61372  | 0.068009 | 0.14225 | -0.00393  | 0.93252 | 0.020337 |
| 0.143488 | 0.00188  | 0.075639 | 0.10257  | 0.039694 | 0.39209 | -0.00408  | 0.92996 | 0.005858 |
| -0.0306  | 0.50942  | -0.14848 | 0.00129  | -0.00756 | 0.87054 | -0.00222  | 0.96176 | 0.027499 |
| 0.158481 | 0.00059  | -0.03521 | 0.4478   | 0.038729 | 0.40371 | -0.01621  | 0.72678 | 0.079639 |
| 0.022767 | 0.62361  | -0.12755 | 0.00578  | -0.0085  | 0.85469 | -0.00952  | 0.8374  | -0.03032 |
| 0.111076 | 0.01633  | -0.07019 | 0.12986  | 0.057117 | 0.21795 | -0.00016  | 0.99722 | 0.00932  |
| 0.00059  | 0.98985  | -0.26253 | 8.44E-09 | 0.041962 | 0.36559 | -0.02687  | 0.56244 | -0.01746 |
| -0.02046 | 0.65917  | -0.19075 | 3.34E-05 | 0.040825 | 0.37873 | -0.01806  | 0.69711 | 0.014948 |
| 0.134091 | 0.0037   | -0.06683 | 0.1493   | 0.079883 | 0.08463 | 0.024895  | 0.59153 | 0.035924 |
| 0.052612 | 0.2565   | -0.04722 | 0.30855  | 0.129457 | 0.00508 | 0.0683    | 0.14055 | 0.130637 |
| 0.080113 | 0.08374  | -0.04552 | 0.32626  | 0.099222 | 0.03205 | 0.051296  | 0.26861 | 0.055864 |
| 0.026723 | 0.56458  | -0.05769 | 0.21334  | 0.084209 | 0.06904 | -0.01784  | 0.70056 | -0.02214 |
| 0.041468 | 0.37126  | -0.10172 | 0.02795  | 0.061365 | 0.18557 | 0.009718  | 0.8341  | 0.007746 |
| 0.078452 | 0.09037  | -0.06088 | 0.18909  | 0.111669 | 0.01577 | 0.023353  | 0.6147  | 0.031031 |

|          |          |          |          |          |         |          |         |          |
|----------|----------|----------|----------|----------|---------|----------|---------|----------|
| 0.058265 | 0.20883  | -0.04845 | 0.29606  | 0.068932 | 0.13691 | 0.026094 | 0.57379 | 0.046584 |
| -0.30186 | 2.70E-11 | -0.25418 | 2.55E-08 | -0.01342 | 0.77245 | 0.038665 | 0.40448 | 0.101559 |
| 0.220185 | 1.55E-06 | 0.154265 | 0.00082  | -0.02195 | 0.63606 | -0.13136 | 0.00446 | -0.05645 |
| 0.122819 | 0.00788  | -0.10013 | 0.0305   | 0.016635 | 0.71993 | -0.02203 | 0.63495 | 0.032498 |
| 0.008629 | 0.85246  | -0.11214 | 0.01533  | 0.021648 | 0.64077 | 0.017983 | 0.6983  | 0.010505 |
| 0.053733 | 0.24649  | 0.349546 | 7.24E-15 | -0.04221 | 0.3628  | 0.030026 | 0.51745 | -0.10443 |
| -0.05851 | 0.2069   | -0.24475 | 8.48E-08 | 0.020712 | 0.65528 | -0.03965 | 0.39266 | -0.0418  |
| 0.091006 | 0.04936  | -0.30181 | 2.73E-11 | -0.00078 | 0.98651 | -0.07803 | 0.09214 | 0.014829 |
| 0.081303 | 0.07923  | -0.10846 | 0.01906  | 0.033666 | 0.46797 | -0.0122  | 0.79255 | -0.00381 |
| 0.015012 | 0.74627  | -0.13771 | 0.00286  | 0.067812 | 0.14342 | 0.014316 | 0.75765 | 0.049308 |
| -0.00366 | 0.93713  | -0.19964 | 1.38E-05 | -0.00256 | 0.95598 | -0.05121 | 0.2694  | -0.0284  |
| -0.0242  | 0.60198  | 0.07828  | 0.09108  | 0.052543 | 0.25712 | 0.13063  | 0.00469 | -0.00569 |
| 0.077883 | 0.09274  | -0.07347 | 0.11286  | 0.029563 | 0.52393 | -0.02004 | 0.66576 | -0.01911 |
| 0.112472 | 0.01503  | -0.05974 | 0.19749  | -0.00212 | 0.96358 | -0.04556 | 0.32584 | -0.03835 |
| 0.044106 | 0.34158  | -0.09696 | 0.03621  | 0.040756 | 0.37954 | -0.00842 | 0.85601 | 0.012922 |
| 0.186488 | 5.02E-05 | -0.03172 | 0.49411  | 0.057695 | 0.21332 | -0.01247 | 0.78815 | -0.00603 |
| -0.00487 | 0.91634  | -0.13468 | 0.00355  | 0.053407 | 0.24938 | 0.020708 | 0.65535 | 0.000734 |
| 0.022638 | 0.62558  | -0.02102 | 0.65046  | 0.08307  | 0.0729  | 0.027413 | 0.55457 | 0.028586 |
| 0.070391 | 0.12877  | -0.01902 | 0.68179  | 0.026026 | 0.57479 | -0.03715 | 0.42321 | -0.01714 |
| 0.046467 | 0.31634  | -0.02118 | 0.64808  | 0.031258 | 0.50041 | 0.030825 | 0.50637 | 0.095037 |
| 0.000859 | 0.98523  | -0.09875 | 0.03288  | -0.01059 | 0.8194  | -0.0071  | 0.87839 | -0.04438 |
| -0.01274 | 0.78364  | -0.06982 | 0.13189  | 0.011603 | 0.80252 | -0.00579 | 0.90065 | 0.042826 |
| -0.02333 | 0.61504  | -0.26917 | 3.41E-09 | -0.01046 | 0.82155 | -0.095   | 0.04016 | -0.07979 |
| 0.104808 | 0.02351  | 0.00144  | 0.97524  | 0.045602 | 0.32544 | -0.02284 | 0.62247 | 0.08273  |
| 0.155418 | 0.00075  | -0.05798 | 0.21105  | 0.012774 | 0.78306 | -0.04912 | 0.28947 | 0.050177 |
| 0.222537 | 1.19E-06 | 0.061352 | 0.18566  | 0.060205 | 0.19404 | 0.007607 | 0.86978 | 0.040239 |
| 0.129379 | 0.00511  | -0.04421 | 0.34044  | 0.046208 | 0.31904 | 0.006071 | 0.8959  | 0.01939  |
| 0.174952 | 0.00014  | 0.045196 | 0.32977  | 0.019365 | 0.67638 | -0.02894 | 0.53273 | -0.01945 |
| 0.137099 | 0.00299  | 0.091654 | 0.04776  | 0.047589 | 0.30479 | -0.01447 | 0.75508 | 0.024897 |
| -0.09547 | 0.03918  | 0.027463 | 0.55384  | -0.01557 | 0.73721 | -0.01616 | 0.72758 | -0.00162 |
| 0.109377 | 0.01806  | -0.04605 | 0.32069  | 0.06508  | 0.16029 | 0.021237 | 0.64713 | 0.024448 |
| -0.12986 | 0.00494  | 0.066727 | 0.14995  | -0.01114 | 0.81017 | 0.072849 | 0.11592 | -0.02484 |
| 0.104644 | 0.02373  | -0.09723 | 0.03568  | 0.028213 | 0.54306 | -0.02681 | 0.56329 | 0.023865 |
| 0.314773 | 3.36E-12 | -0.03995 | 0.3891   | -0.03189 | 0.49172 | -0.0837  | 0.07075 | -0.03651 |
| 0.218629 | 1.84E-06 | 0.079414 | 0.08648  | -0.01038 | 0.82296 | -0.01824 | 0.69422 | -0.01674 |
| 0.176355 | 0.00013  | 0.149537 | 0.00119  | 0.031508 | 0.49699 | -0.04853 | 0.29529 | 0.013399 |
| 0.09168  | 0.04769  | -0.0754  | 0.10364  | 0.032396 | 0.48494 | -0.00211 | 0.9637  | 0.031591 |
| 0.005604 | 0.90387  | -0.07075 | 0.1268   | 0.013352 | 0.77351 | 0.023061 | 0.61912 | 0.015799 |
| 0.153024 | 0.00091  | -0.05452 | 0.23964  | 0.063667 | 0.16958 | -0.01943 | 0.67542 | 0.012342 |
| 0.037681 | 0.41656  | -0.21268 | 3.54E-06 | 0.002205 | 0.96209 | -0.05277 | 0.25508 | 0.00451  |
| 0.062754 | 0.17579  | -0.0591  | 0.20233  | -0.01482 | 0.74943 | -0.04429 | 0.33958 | -0.01361 |
| 0.293723 | 9.56E-11 | 0.058621 | 0.20605  | 0.022008 | 0.63523 | -0.07328 | 0.11376 | 0.095881 |
| 0.009391 | 0.8396   | -0.01428 | 0.75823  | 0.051389 | 0.26774 | 0.023491 | 0.61262 | -0.01628 |
| 0.128991 | 0.00524  | 0.025178 | 0.58731  | 0.042433 | 0.36022 | 0.052186 | 0.26038 | 0.031409 |
| -0.10158 | 0.02816  | -0.08727 | 0.05951  | 0.066235 | 0.15298 | 0.103903 | 0.02474 | 0.084896 |

|          |          |          |          |          |         |          |          |          |
|----------|----------|----------|----------|----------|---------|----------|----------|----------|
| 0.137255 | 0.00296  | -0.00726 | 0.87564  | 0.005866 | 0.89939 | -0.04826 | 0.29803  | -0.01347 |
| 0.082115 | 0.07627  | -0.03951 | 0.39425  | -0.00125 | 0.97851 | 0.003776 | 0.93514  | -0.03304 |
| 0.041447 | 0.3715   | -0.13558 | 0.00333  | -0.01897 | 0.68259 | -0.04274 | 0.35673  | -0.00399 |
| 0.151622 | 0.00101  | -0.0313  | 0.49988  | 0.063796 | 0.16871 | 0.00417  | 0.9284   | 0.005132 |
| 0.020997 | 0.65085  | -0.08694 | 0.06048  | 0.024069 | 0.60389 | -0.0139  | 0.76447  | -0.01394 |
| -0.02156 | 0.64213  | 0.062504 | 0.17752  | 0.065846 | 0.15541 | 0.06258  | 0.177    | 0.100153 |
| 0.21376  | 3.15E-06 | 0.075488 | 0.10326  | -0.01033 | 0.82373 | -0.03847 | 0.40689  | -0.00597 |
| 0.060606 | 0.19107  | -0.06276 | 0.17577  | 0.018494 | 0.69018 | -0.0198  | 0.66961  | 0.022041 |
| -0.00129 | 0.97781  | -0.09545 | 0.03922  | 0.006851 | 0.88262 | -0.01844 | 0.69111  | 0.033306 |
| 0.111894 | 0.01556  | -0.12891 | 0.00527  | 0.004073 | 0.93004 | -0.05198 | 0.26225  | 0.030399 |
| 0.022311 | 0.63058  | -0.06713 | 0.14749  | 0.005013 | 0.91397 | 0.008611 | 0.85277  | 0.02997  |
| 0.047383 | 0.30688  | -0.02542 | 0.58373  | 0.012774 | 0.78307 | -0.02153 | 0.64263  | -0.00957 |
| 0.076928 | 0.09683  | -0.10624 | 0.02166  | 0.060096 | 0.19485 | -0.00948 | 0.83818  | 0.041471 |
| 0.278713 | 8.86E-10 | 0.066611 | 0.15066  | 0.046497 | 0.31602 | 0.022169 | 0.63276  | 0.059096 |
| 0.095258 | 0.03962  | -0.06867 | 0.13844  | 0.015811 | 0.73326 | 0.007361 | 0.87395  | 0.055025 |
| 0.180665 | 8.63E-05 | 0.033269 | 0.47324  | 0.036508 | 0.43123 | 0.041752 | 0.368    | 0.020637 |
| 0.089862 | 0.0523   | -0.07999 | 0.08421  | -0.00538 | 0.90762 | -0.03129 | 0.49999  | -0.08094 |
| 0.03712  | 0.42354  | -0.11547 | 0.01253  | 0.005047 | 0.91339 | -0.10708 | 0.02064  | -0.06083 |
| 0.054196 | 0.24244  | -0.20318 | 9.64E-06 | -0.02168 | 0.64023 | -0.10958 | 0.01784  | -0.01794 |
| 0.072191 | 0.11926  | -0.08706 | 0.06011  | 0.069594 | 0.13317 | 0.002378 | 0.95912  | 0.000876 |
| 0.024195 | 0.602    | -0.08468 | 0.0675   | 0.037943 | 0.41332 | -0.00799 | 0.86333  | 0.024921 |
| 0.121136 | 0.00878  | -0.07238 | 0.11827  | 0.02192  | 0.63658 | 0.011967 | 0.79647  | 0.027276 |
| 0.120205 | 0.00932  | 0.041041 | 0.37621  | 0.004016 | 0.93103 | -0.02451 | 0.59727  | 0.036988 |
| 0.086567 | 0.06159  | -0.06436 | 0.16497  | 0.039062 | 0.39968 | -0.00834 | 0.8573   | 0.016165 |
| 0.12544  | 0.00664  | -0.02735 | 0.55541  | 0.02096  | 0.65143 | 0.025022 | 0.58964  | 0.018664 |
| 0.024539 | 0.59684  | -0.13791 | 0.00282  | 0.040882 | 0.37807 | -0.02202 | 0.63508  | -0.01268 |
| -0.04747 | 0.30602  | -0.197   | 1.80E-05 | 0.030093 | 0.51652 | -0.00929 | 0.84137  | 0.010065 |
| 0.063687 | 0.16944  | -0.05556 | 0.23079  | 0.113101 | 0.01447 | 0.002372 | 0.95924  | 0.012585 |
| 0.118043 | 0.01068  | 0.029074 | 0.53083  | 0.020516 | 0.65833 | -0.0082  | 0.85964  | 0.038903 |
| -0.01361 | 0.76932  | 0.061197 | 0.18678  | 0.107432 | 0.02023 | 0.29059  | 1.54E-10 | 0.123733 |
| 0.090526 | 0.05058  | -0.15595 | 0.00072  | 0.078113 | 0.09178 | -0.02952 | 0.52457  | -0.03322 |
| 0.017784 | 0.70148  | -0.16942 | 0.00023  | -0.03089 | 0.50547 | -0.10582 | 0.0222   | -0.06666 |
| -0.15424 | 0.00083  | -0.09571 | 0.03869  | -0.03944 | 0.39514 | 0.00674  | 0.88451  | -0.03821 |
| 0.160199 | 0.00051  | -0.20916 | 5.16E-06 | 0.05878  | 0.20482 | -0.05368 | 0.24697  | 0.007367 |
| 0.015003 | 0.74641  | -0.2886  | 2.08E-10 | -0.00295 | 0.94932 | -0.0735  | 0.11267  | -0.08687 |
| -0.07213 | 0.11957  | -0.15026 | 0.00113  | 0.022556 | 0.62683 | -0.04365 | 0.34665  | 0.016321 |
| 0.140986 | 0.00226  | -0.25371 | 2.71E-08 | 0.017401 | 0.70762 | -0.10707 | 0.02066  | -0.0422  |
| -0.07627 | 0.09974  | -0.22415 | 9.91E-07 | 0.006517 | 0.88829 | -0.05581 | 0.22872  | -0.06794 |
| -0.00353 | 0.93929  | -0.05625 | 0.225    | 0.043083 | 0.35291 | 0.073206 | 0.11414  | 0.133353 |
| -0.08861 | 0.05569  | 0.183506 | 6.64E-05 | -0.03443 | 0.45794 | 0.021637 | 0.64095  | -0.04258 |
| 0.087486 | 0.05887  | -0.0603  | 0.19335  | 0.018067 | 0.69696 | -0.03318 | 0.47449  | 0.043415 |
| 0.138063 | 0.00279  | 0.215816 | 2.52E-06 | 0.087354 | 0.05926 | 0.058516 | 0.20686  | 0.133891 |
| 0.019373 | 0.67626  | -0.09096 | 0.04947  | 0.070143 | 0.13013 | -0.05763 | 0.2138   | -0.06006 |
| 0.002389 | 0.95894  | -0.13237 | 0.00416  | 0.024117 | 0.60316 | 0.014518 | 0.75434  | 0.020706 |
| 0.207534 | 6.12E-06 | -0.05283 | 0.2545   | 0.088277 | 0.05661 | -0.04035 | 0.38434  | -0.02949 |

|          |          |          |          |          |         |          |         |          |
|----------|----------|----------|----------|----------|---------|----------|---------|----------|
| -0.21913 | 1.74E-06 | -0.0864  | 0.06209  | -0.03482 | 0.45283 | 0.011068 | 0.81146 | -0.0233  |
| 0.039624 | 0.39293  | -0.08156 | 0.07828  | 0.045215 | 0.32957 | 0.039868 | 0.39001 | -0.01715 |
| 0.094938 | 0.04029  | -0.06325 | 0.17238  | 0.094105 | 0.04208 | 0.021517 | 0.64279 | 0.048022 |
| -0.04694 | 0.31143  | -0.2178  | 2.02E-06 | 0.014988 | 0.74666 | -0.0173  | 0.70921 | -0.05388 |
| 0.238407 | 1.85E-07 | 0.297515 | 5.34E-11 | 0.058204 | 0.2093  | 0.101417 | 0.02842 | 0.252089 |
| 0.134314 | 0.00364  | -0.15237 | 0.00096  | 0.017086 | 0.71268 | -0.0533  | 0.25037 | -0.067   |
| 0.145847 | 0.00158  | -0.11585 | 0.01224  | 0.064308 | 0.16531 | -0.02861 | 0.53739 | 0.046233 |
| 0.253115 | 2.93E-08 | 0.138055 | 0.00279  | 0.058216 | 0.20921 | 0.027484 | 0.55355 | 0.033136 |
| 0.044382 | 0.33856  | -0.15308 | 0.0009   | 0.019966 | 0.66693 | 0.015076 | 0.74523 | -0.00126 |
| 0.024669 | 0.59489  | 0.100525 | 0.02985  | 0.071898 | 0.12077 | 0.046056 | 0.32064 | -0.00026 |
| -0.01069 | 0.8178   | -0.12099 | 0.00886  | 0.095901 | 0.0383  | 0.012149 | 0.79343 | -0.00041 |
| 0.020374 | 0.66055  | 0.342256 | 2.80E-14 | 0.023795 | 0.60802 | 0.106262 | 0.02164 | 0.067448 |
| 0.00449  | 0.92291  | -0.19841 | 1.57E-05 | 0.03256  | 0.48273 | -0.07638 | 0.09922 | -0.02425 |
| -0.09041 | 0.05087  | -0.27279 | 2.06E-09 | 0.020773 | 0.65434 | 0.046537 | 0.31561 | -0.00778 |
| 0.390463 | 1.86E-18 | 0.038466 | 0.40691  | -0.04246 | 0.35994 | -0.17575 | 0.00013 | -0.05211 |
| 0.002278 | 0.96084  | -0.25136 | 3.67E-08 | -0.03098 | 0.50416 | -0.05429 | 0.24167 | -0.04545 |
| -0.01182 | 0.79884  | -0.09442 | 0.04139  | 0.029348 | 0.52696 | 0.038812 | 0.4027  | 0.1012   |
| 0.128548 | 0.0054   | -0.01704 | 0.7134   | 0.005438 | 0.90669 | -0.09045 | 0.05077 | -0.05914 |
| 0.124553 | 0.00704  | 0.129455 | 0.00508  | 0.045142 | 0.33036 | -0.02338 | 0.61426 | -0.00263 |
| 0.004758 | 0.91832  | -0.12843 | 0.00544  | 0.061138 | 0.1872  | 0.012504 | 0.78754 | 0.051009 |
| 0.158068 | 0.00061  | -0.04442 | 0.33816  | 0.03281  | 0.47936 | 0.029171 | 0.52946 | 0.013092 |
| 0.025128 | 0.58805  | -0.20599 | 7.20E-06 | 0.022517 | 0.62742 | -0.00419 | 0.92812 | 0.080998 |
| 0.044157 | 0.34102  | 0.021015 | 0.65057  | 0.011587 | 0.8028  | 0.006339 | 0.89133 | 0.056704 |
| 0.01949  | 0.67442  | -0.12563 | 0.00656  | 0.007869 | 0.86533 | -0.01681 | 0.71706 | -0.00666 |
| 0.020642 | 0.65636  | -0.16004 | 0.00052  | 0.024469 | 0.59789 | -0.05543 | 0.23185 | -0.03699 |
| -0.05655 | 0.22254  | -0.16994 | 0.00022  | 0.008587 | 0.85317 | 0.046057 | 0.32063 | 0.020405 |
| -0.0196  | 0.67267  | -0.18318 | 6.84E-05 | -0.00307 | 0.94722 | 0.018224 | 0.69447 | 0.059023 |
| 0.151323 | 0.00104  | -0.0254  | 0.58407  | 0.060527 | 0.19166 | 0.020554 | 0.65774 | 0.01793  |
| -0.01805 | 0.69728  | 0.140257 | 0.00238  | -0.08249 | 0.07492 | -0.06213 | 0.18013 | -0.11025 |
| 0.065994 | 0.15448  | -0.13165 | 0.00438  | 0.037858 | 0.41438 | -0.02928 | 0.52796 | 0.037833 |
| -0.04662 | 0.31473  | -0.12807 | 0.00558  | -0.04587 | 0.32265 | -0.02178 | 0.63875 | -0.08943 |
| 0.089332 | 0.05371  | -0.18251 | 7.28E-05 | 0.019714 | 0.67089 | -0.03419 | 0.46108 | 0.079568 |
| 0.05689  | 0.21978  | -0.05187 | 0.26324  | 0.069461 | 0.13391 | 0.019731 | 0.67063 | 0.033283 |
| 0.094401 | 0.04144  | 0.088259 | 0.05666  | 0.098365 | 0.03357 | 0.117576 | 0.011   | 0.185342 |
| 0.20219  | 1.07E-05 | -0.01048 | 0.82126  | 0.018197 | 0.6949  | 0.046114 | 0.32004 | -0.04797 |
| 0.219777 | 1.62E-06 | 0.01531  | 0.74141  | 0.037311 | 0.42116 | -0.01677 | 0.71773 | 0.034872 |
| 0.10668  | 0.02112  | -0.04868 | 0.2938   | 0.041358 | 0.37254 | 0.006398 | 0.89032 | 0.005296 |
| 0.086938 | 0.06048  | -0.03231 | 0.48607  | 0.025316 | 0.58527 | 0.013063 | 0.77829 | 0.018471 |
| -0.00877 | 0.85007  | -0.00692 | 0.88152  | 0.031985 | 0.4905  | 0.025039 | 0.58938 | 0.038924 |
| 0.153356 | 0.00088  | -0.02035 | 0.661    | 0.04826  | 0.298   | -0.00487 | 0.91641 | 0.026652 |
| 0.010494 | 0.82106  | 0.013016 | 0.77907  | -0.01861 | 0.68829 | -0.00809 | 0.86157 | -0.02401 |
| -0.04425 | 0.33998  | -0.11648 | 0.01177  | 0.014198 | 0.7596  | -0.04759 | 0.30481 | 0.016958 |
| 0.074599 | 0.1074   | -0.13494 | 0.00348  | 0.036495 | 0.43139 | -0.03888 | 0.40192 | 0.00352  |
| 0.156544 | 0.00069  | 0.271272 | 2.54E-09 | 0.055556 | 0.23081 | 0.128766 | 0.00532 | 0.129825 |
| 0.098592 | 0.03317  | -0.02997 | 0.51829  | 0.07091  | 0.12597 | 0.02027  | 0.66217 | 0.046754 |

|          |          |          |          |          |         |          |         |          |
|----------|----------|----------|----------|----------|---------|----------|---------|----------|
| 0.125    | 0.00684  | -0.05603 | 0.22682  | 0.070517 | 0.12809 | 0.004481 | 0.92306 | 0.020391 |
| 0.040017 | 0.38825  | -0.06708 | 0.14782  | 0.078806 | 0.08893 | 0.068607 | 0.13877 | 0.046265 |
| 0.042442 | 0.36012  | -0.15353 | 0.00087  | 0.020065 | 0.66539 | -0.08597 | 0.06341 | -0.1163  |
| 0.291816 | 1.28E-10 | 0.017886 | 0.69986  | 0.048278 | 0.29782 | -0.05171 | 0.26477 | 0.033794 |
| -0.13878 | 0.00265  | -0.00659 | 0.88701  | -0.04166 | 0.36902 | 0.018765 | 0.68587 | -0.09043 |
| 0.088682 | 0.05548  | -0.05061 | 0.27503  | 0.051209 | 0.26943 | 0.016026 | 0.72977 | 0.025481 |
| 0.079563 | 0.08589  | -0.0923  | 0.04621  | 0.042109 | 0.3639  | -0.0089  | 0.84797 | -0.02069 |
| -0.04332 | 0.35022  | -0.2478  | 5.78E-08 | -0.00863 | 0.85248 | -0.0887  | 0.05542 | -0.07118 |
| 0.001589 | 0.97269  | -0.31229 | 5.06E-12 | 0.013247 | 0.77525 | -0.04624 | 0.31866 | -0.02993 |
| 0.176321 | 0.00013  | -0.0088  | 0.84965  | 0.043055 | 0.35321 | -0.02691 | 0.56192 | 0.015172 |
| -0.08866 | 0.05554  | -0.26303 | 7.89E-09 | 0.164981 | 0.00034 | 0.06048  | 0.192   | 0.096556 |
| 0.020851 | 0.65312  | -0.14823 | 0.00132  | 0.04742  | 0.3065  | 0.175912 | 0.00013 | 0.212062 |
| 0.038723 | 0.40379  | -0.1877  | 4.47E-05 | 0.012752 | 0.78344 | -0.02622 | 0.57193 | 0.03558  |
| -0.02922 | 0.5287   | -0.14549 | 0.00162  | 0.076113 | 0.10043 | -0.00612 | 0.8951  | -0.00118 |
| -0.02302 | 0.61981  | -0.18736 | 4.62E-05 | 0.051255 | 0.26899 | -0.01698 | 0.71443 | -0.03674 |
| 0.084928 | 0.0667   | 0.155991 | 0.00072  | -0.01972 | 0.67077 | -0.00372 | 0.93607 | 0.049515 |
| 0.162694 | 0.00042  | -0.00226 | 0.96112  | 0.115599 | 0.01243 | -0.0055  | 0.90559 | -0.0034  |
| -0.06017 | 0.19432  | -0.19631 | 1.93E-05 | 0.013397 | 0.77277 | 0.019232 | 0.67848 | -0.00809 |
| 0.107044 | 0.02068  | -0.0415  | 0.37092  | 0.029205 | 0.52897 | 0.005578 | 0.90432 | 0.057987 |
| 0.126227 | 0.00631  | -0.05679 | 0.22059  | 0.045376 | 0.32785 | 0.006826 | 0.88305 | 0.015128 |
| 0.134032 | 0.00371  | -0.11472 | 0.01311  | -0.00972 | 0.83402 | -0.09887 | 0.03267 | -0.00519 |
| 0.118534 | 0.01036  | -0.1308  | 0.00464  | 0.029153 | 0.52971 | -0.06833 | 0.14039 | 0.014025 |
| 0.119989 | 0.00945  | -0.14126 | 0.00221  | 0.00666  | 0.88587 | -0.06431 | 0.16533 | -0.02829 |
| 0.118363 | 0.01047  | -0.06726 | 0.14668  | 0.036732 | 0.4284  | -0.00069 | 0.98815 | 0.007648 |
| 0.114139 | 0.01359  | -0.07484 | 0.10627  | 0.034288 | 0.45979 | -0.0034  | 0.94154 | 0.020303 |
| 0.094265 | 0.04173  | -0.15388 | 0.00085  | 0.008072 | 0.86189 | -0.06096 | 0.18851 | -0.02046 |
| 0.196036 | 1.99E-05 | -0.08291 | 0.07346  | 0.032261 | 0.48676 | -0.04911 | 0.28956 | 0.008663 |
| 0.101015 | 0.02906  | -0.02537 | 0.5845   | 0.078075 | 0.09194 | 0.024156 | 0.60258 | 0.032149 |
| 0.101476 | 0.02833  | -0.09499 | 0.04019  | 0.006901 | 0.88176 | -0.01789 | 0.69985 | -0.00244 |
| 0.090479 | 0.0507   | -0.01719 | 0.71108  | 0.063923 | 0.16786 | 0.009636 | 0.83547 | 0.051308 |
| 0.059662 | 0.19809  | -0.11924 | 0.0099   | 0.06032  | 0.19318 | -0.00309 | 0.94692 | 0.03188  |
| 0.112252 | 0.01523  | -0.06928 | 0.13491  | 0.034534 | 0.45657 | -0.00643 | 0.88969 | 0.01937  |
| 0.115304 | 0.01265  | -0.08278 | 0.07393  | 0.035354 | 0.44594 | -0.0053  | 0.90911 | 0.009863 |
| 0.065432 | 0.15803  | -0.04759 | 0.30479  | 0.167786 | 0.00027 | 0.055208 | 0.23374 | 0.190614 |
| 0.018975 | 0.68255  | -0.07935 | 0.08674  | 0.028713 | 0.53594 | -0.01401 | 0.76276 | 0.019058 |
| 0.05621  | 0.22536  | -0.04548 | 0.32679  | 0.057058 | 0.21842 | 0.012278 | 0.7913  | 0.014701 |
| 0.116543 | 0.01172  | -0.08305 | 0.07297  | 0.048422 | 0.29638 | -0.02762 | 0.55158 | -0.01361 |
| 0.15088  | 0.00107  | 0.025627 | 0.58067  | -0.00587 | 0.89931 | 0.008289 | 0.85822 | -0.02869 |
| 0.041358 | 0.37254  | -0.03765 | 0.417    | 0.022006 | 0.63527 | 0.01401  | 0.76269 | 0.007664 |
| 0.145623 | 0.0016   | -0.05527 | 0.2332   | 0.037682 | 0.41654 | -0.02409 | 0.6036  | 0.178847 |
| 0.095902 | 0.03829  | -0.04151 | 0.37074  | 0.046634 | 0.3146  | 0.01     | 0.82936 | 0.034511 |
| 0.087713 | 0.05822  | -0.06499 | 0.16084  | 0.055047 | 0.23512 | -0.03501 | 0.45041 | -0.00915 |
| 0.067169 | 0.14726  | -0.06404 | 0.16709  | 0.068849 | 0.13738 | 0.05058  | 0.27536 | 0.164768 |
| 0.073107 | 0.11463  | 0.010206 | 0.8259   | -0.03523 | 0.44755 | -0.08985 | 0.05232 | -0.05101 |
| 0.0957   | 0.03871  | -0.08715 | 0.05987  | -0.0315  | 0.49706 | -0.03015 | 0.51574 | 0.003701 |

|          |          |          |          |          |          |          |          |          |
|----------|----------|----------|----------|----------|----------|----------|----------|----------|
| -0.08781 | 0.05793  | -0.31058 | 6.69E-12 | 0.206951 | 6.51E-06 | 0.064578 | 0.16354  | 0.229668 |
| -0.04145 | 0.37144  | -0.12778 | 0.00569  | -0.03347 | 0.4706   | -0.03008 | 0.51665  | -0.07045 |
| 0.108173 | 0.01937  | -0.08868 | 0.05548  | 0.044128 | 0.34134  | 0.00421  | 0.92771  | 0.008329 |
| 0.077428 | 0.09467  | 0.093697 | 0.04299  | -0.02636 | 0.56983  | -0.00033 | 0.99437  | -0.05815 |
| 0.053888 | 0.24513  | 0.504234 | 1.74E-31 | 0.048611 | 0.2945   | 0.137878 | 0.00283  | 0.15162  |
| 0.077144 | 0.09589  | -0.11245 | 0.01505  | 0.095963 | 0.03817  | 0.008265 | 0.85861  | 0.013745 |
| 0.06616  | 0.15345  | -0.20732 | 6.26E-06 | 0.019585 | 0.67292  | -0.0436  | 0.34713  | -0.05904 |
| 0.2439   | 9.43E-08 | -0.01894 | 0.68307  | 0.031597 | 0.49578  | -0.05154 | 0.2663   | -0.01733 |
| 0.031733 | 0.49392  | -0.16436 | 0.00036  | 0.032789 | 0.47965  | -0.05415 | 0.24284  | -0.08971 |
| 0.075025 | 0.1054   | -0.03268 | 0.48116  | 0.098628 | 0.0331   | 0.224877 | 9.12E-07 | 0.09679  |
| 0.035719 | 0.44126  | 0.039886 | 0.3898   | 0.216413 | 2.36E-06 | 0.521744 | 5.80E-34 | 0.170439 |
| 0.087568 | 0.05864  | -0.05354 | 0.24817  | 0.184555 | 6.02E-05 | 0.112923 | 0.01462  | 0.086186 |
| 0.125525 | 0.00661  | -0.0592  | 0.2016   | 0.069881 | 0.13157  | -0.03343 | 0.47103  | -0.00532 |
| -0.06678 | 0.14965  | -0.22475 | 9.26E-07 | 0.032829 | 0.47911  | 0.151582 | 0.00102  | 0.159054 |
| 0.069921 | 0.13135  | -0.06299 | 0.17419  | 0.072124 | 0.1196   | 0.000511 | 0.99122  | 0.032022 |
| -0.13664 | 0.00309  | 0.087795 | 0.05798  | 0.043765 | 0.34532  | 0.172657 | 0.00018  | 0.027128 |
| 0.299676 | 3.81E-11 | 0.022994 | 0.62015  | 0.076506 | 0.09868  | -0.02387 | 0.60681  | 0.048843 |
| 0.012751 | 0.78345  | -0.15033 | 0.00112  | 0.02307  | 0.61899  | 0.024068 | 0.60391  | 0.021589 |
| 0.120442 | 0.00918  | -0.19349 | 2.55E-05 | 0.019052 | 0.68133  | -0.05893 | 0.20365  | -0.03165 |
| 0.106898 | 0.02086  | -0.05389 | 0.24512  | 0.101067 | 0.02898  | 0.029808 | 0.5205   | 0.004014 |
| 0.094734 | 0.04072  | -0.06123 | 0.18652  | 0.091763 | 0.04749  | 0.01221  | 0.79242  | 0.0151   |
| 0.189297 | 3.84E-05 | 0.048992 | 0.29072  | 0.028172 | 0.54366  | 0.027622 | 0.55155  | 0.072561 |
| 0.187059 | 4.75E-05 | -0.20078 | 1.23E-05 | 0.016477 | 0.72248  | -0.09503 | 0.0401   | -0.04789 |
| -0.01039 | 0.82285  | -0.30579 | 1.45E-11 | 0.012733 | 0.78375  | -0.02824 | 0.54271  | -0.02896 |
| 0.022725 | 0.62425  | -0.06799 | 0.14235  | 0.029562 | 0.52395  | 0.01397  | 0.76334  | 0.0326   |
| -0.04611 | 0.32006  | -0.0377  | 0.41631  | 0.157111 | 0.00066  | 0.163147 | 0.0004   | 0.291687 |
| 0.14382  | 0.00183  | -0.05876 | 0.205    | 0.074847 | 0.10623  | 0.008422 | 0.85596  | 0.051084 |
| 0.102449 | 0.02684  | -0.05047 | 0.27644  | 0.099181 | 0.03212  | 0.03056  | 0.51003  | 0.040769 |
| -0.16498 | 0.00034  | -0.10426 | 0.02425  | -0.04611 | 0.32012  | 0.017277 | 0.7096   | -0.02562 |
| 0.279446 | 7.97E-10 | 0.027489 | 0.55347  | -0.01401 | 0.7627   | -0.05138 | 0.26779  | -0.04802 |
| -0.06611 | 0.15374  | -0.25287 | 3.02E-08 | 0.053621 | 0.24748  | 0.023903 | 0.60638  | -0.06061 |
| 0.119087 | 0.01     | -0.06544 | 0.158    | 0.077449 | 0.09458  | 0.009014 | 0.84595  | 0.028981 |
| 0.259081 | 1.34E-08 | 0.173376 | 0.00017  | 0.00227  | 0.96099  | -0.06123 | 0.18652  | 0.004082 |
| 0.138322 | 0.00274  | -0.01917 | 0.67954  | -0.01315 | 0.77682  | -0.09581 | 0.03848  | 0.040196 |
| 0.161639 | 0.00045  | 0.074884 | 0.10605  | 0.077788 | 0.09314  | 0.028381 | 0.54067  | 0.138893 |
| 0.156325 | 0.0007   | -0.05329 | 0.25038  | 0.026368 | 0.56978  | -0.01809 | 0.69665  | 0.020905 |
| 0.027719 | 0.55016  | -0.22091 | 1.43E-06 | 0.001138 | 0.98043  | -0.09031 | 0.05113  | -0.06424 |
| 0.130113 | 0.00486  | -0.01289 | 0.78113  | 0.07316  | 0.11436  | 0.034498 | 0.45704  | 0.086717 |
| 0.275686 | 1.37E-09 | 0.106117 | 0.02182  | 0.027344 | 0.55558  | -0.05194 | 0.26262  | 0.057445 |
| 0.178397 | 0.00011  | 0.015149 | 0.74404  | 0.062669 | 0.17638  | 0.020978 | 0.65114  | 0.023979 |
| 0.12769  | 0.00572  | 0.029649 | 0.52273  | 0.009642 | 0.83537  | -0.01359 | 0.76963  | 0.061245 |
| 0.046523 | 0.31575  | -0.1915  | 3.10E-05 | -0.00125 | 0.97852  | -0.05908 | 0.20248  | -0.05237 |
| 0.108731 | 0.01876  | -0.05273 | 0.25545  | 0.020941 | 0.65172  | -0.00692 | 0.88141  | -0.00223 |
| 0.253351 | 2.84E-08 | 0.099329 | 0.03187  | -0.00078 | 0.98656  | -0.10523 | 0.02295  | 0.047607 |
| 0.079891 | 0.0846   | -0.07244 | 0.11799  | 0.032532 | 0.4831   | 0.007028 | 0.8796   | 0.024837 |



|          |          |          |          |          |         |          |         |          |
|----------|----------|----------|----------|----------|---------|----------|---------|----------|
| 0.106944 | 0.0208   | -0.14595 | 0.00156  | 0.053601 | 0.24766 | -0.03097 | 0.50442 | 0.034866 |
| -0.16747 | 0.00028  | 0.003608 | 0.93802  | 0.012477 | 0.788   | 0.088412 | 0.05623 | 0.072378 |
| 0.233777 | 3.23E-07 | 0.067755 | 0.14375  | 0.042863 | 0.35537 | -0.01306 | 0.77837 | 0.019037 |
| 0.098127 | 0.03401  | -0.05753 | 0.21463  | -0.00765 | 0.86899 | -0.02897 | 0.53231 | 0.001541 |
| 0.125943 | 0.00643  | -0.02055 | 0.65782  | 0.09339  | 0.04368 | 0.046158 | 0.31957 | 0.061606 |
| 0.126185 | 0.00632  | -0.00183 | 0.96851  | 0.013408 | 0.7726  | -0.01291 | 0.78082 | 0.047706 |
| 0.069689 | 0.13264  | -0.04684 | 0.31243  | 0.079863 | 0.08471 | 0.021616 | 0.64126 | 0.005338 |
| 0.319828 | 1.44E-12 | -0.13644 | 0.00313  | 6.06E-06 | 0.9999  | -0.16053 | 0.0005  | -0.08712 |
| -0.03822 | 0.40991  | -0.12282 | 0.00788  | 0.015955 | 0.73094 | 0.070929 | 0.12586 | 0.026413 |
| 0.118889 | 0.01013  | -0.18878 | 4.03E-05 | 0.039623 | 0.39294 | -0.10641 | 0.02145 | -0.01616 |
| 0.239754 | 1.57E-07 | -0.0731  | 0.11466  | 0.076781 | 0.09747 | 0.00407  | 0.93009 | 0.035145 |
| 0.049429 | 0.28644  | -0.00553 | 0.90514  | -0.03384 | 0.46561 | -0.01691 | 0.71556 | -0.07694 |
| 0.145164 | 0.00166  | -0.03779 | 0.41527  | 0.001519 | 0.97388 | -0.09089 | 0.04966 | -0.02181 |
| 0.519525 | 1.22E-33 | 0.055897 | 0.22795  | -0.02029 | 0.66188 | -0.1256  | 0.00657 | -0.01744 |
| 0.20796  | 5.85E-06 | 0.067814 | 0.1434   | 0.102991 | 0.02604 | -0.01824 | 0.69425 | 0.065081 |
| 0.057518 | 0.21473  | -0.1337  | 0.0038   | 0.020632 | 0.65652 | -0.03262 | 0.48189 | -0.03756 |
| 0.321373 | 1.11E-12 | 0.037902 | 0.41384  | 0.028165 | 0.54376 | -0.0292  | 0.52904 | 0.030497 |
| 0.202466 | 1.04E-05 | -0.03055 | 0.51021  | 0.059059 | 0.20268 | 0.005819 | 0.9002  | -0.02345 |
| -0.08401 | 0.06972  | -0.43466 | 6.06E-23 | 0.006948 | 0.88097 | -0.10877 | 0.01871 | -0.11758 |
| -0.06657 | 0.1509   | -0.32872 | 3.14E-13 | -0.01185 | 0.79847 | -0.05547 | 0.23152 | 0.030632 |
| -0.03636 | 0.43304  | -0.11085 | 0.01656  | -0.04168 | 0.36877 | -0.07415 | 0.10953 | -0.02328 |
| 0.287854 | 2.32E-10 | 0.142936 | 0.00196  | 0.005531 | 0.90511 | -0.07684 | 0.09721 | -0.02593 |
| -0.0185  | 0.6901   | 0.128328 | 0.00548  | -0.01509 | 0.74508 | 0.044528 | 0.33697 | -0.00821 |
| 0.174101 | 0.00016  | -0.12313 | 0.00772  | -0.02855 | 0.53827 | -0.07667 | 0.09796 | -0.05939 |
| 0.087967 | 0.05749  | -0.03562 | 0.4425   | 0.036082 | 0.43663 | -0.00435 | 0.92537 | 0.062979 |
| 0.035407 | 0.44525  | -0.01631 | 0.72514  | 0.038409 | 0.40761 | -0.01372 | 0.76751 | 0.021449 |
| 0.006193 | 0.89382  | -0.15564 | 0.00074  | 0.03742  | 0.4198  | -0.0275  | 0.55328 | -0.00535 |
| 0.161495 | 0.00046  | -0.09441 | 0.04142  | 0.032413 | 0.48471 | -0.06427 | 0.16556 | 0.016532 |
| 0.210652 | 4.40E-06 | 0.056063 | 0.22657  | 0.061374 | 0.1855  | -0.03292 | 0.4779  | 0.048718 |
| 0.212746 | 3.51E-06 | -0.05295 | 0.25348  | -0.00283 | 0.95134 | -0.09762 | 0.03495 | -0.05777 |
| 0.0469   | 0.31185  | -0.25838 | 1.47E-08 | 0.017074 | 0.71287 | -0.13628 | 0.00317 | -0.11017 |
| 0.150867 | 0.00107  | -0.08559 | 0.06459  | 0.04099  | 0.37681 | -0.02552 | 0.58229 | 0.001117 |
| 0.131738 | 0.00435  | -0.13619 | 0.00319  | -0.00095 | 0.98368 | -0.11498 | 0.0129  | 0.018554 |
| 0.090757 | 0.04999  | -0.11491 | 0.01296  | 0.031495 | 0.49717 | -0.08982 | 0.05242 | -0.01144 |
| 0.246925 | 6.45E-08 | -0.10664 | 0.02117  | -0.0003  | 0.99484 | -0.0962  | 0.0377  | -0.01196 |
| 0.181884 | 7.72E-05 | -0.07639 | 0.09918  | -0.0031  | 0.94678 | -0.10614 | 0.02178 | -0.09648 |
| 0.093332 | 0.04381  | -0.11196 | 0.01549  | 0.031676 | 0.4947  | -0.06758 | 0.14478 | -0.01174 |
| 0.007281 | 0.8753   | -0.24743 | 6.06E-08 | 0.019189 | 0.67916 | -0.09681 | 0.03649 | -0.0899  |
| 0.198595 | 1.54E-05 | 0.234504 | 2.96E-07 | 0.009712 | 0.8342  | -0.00899 | 0.84643 | 0.014031 |
| -0.03947 | 0.39473  | -0.2744  | 1.64E-09 | 0.02227  | 0.6312  | -0.03613 | 0.43599 | -0.05858 |
| 0.054292 | 0.24161  | -0.16291 | 0.00041  | 0.039009 | 0.40032 | -0.08848 | 0.05604 | -0.06526 |
| 0.068794 | 0.1377   | -0.04405 | 0.34221  | 0.043658 | 0.34651 | 0.013069 | 0.77818 | 0.066833 |
| 0.16329  | 0.0004   | 0.002721 | 0.95324  | 0.036664 | 0.42926 | -0.03515 | 0.44856 | 0.032623 |
| -0.0187  | 0.68689  | -0.13305 | 0.00397  | 0.006468 | 0.88914 | -0.04069 | 0.38029 | -0.06224 |
| 0.16155  | 0.00046  | -0.10858 | 0.01892  | 0.017543 | 0.70534 | -0.07114 | 0.12471 | 0.042566 |

|          |          |          |          |          |         |          |         |          |
|----------|----------|----------|----------|----------|---------|----------|---------|----------|
| 0.001926 | 0.96688  | -0.33167 | 1.87E-13 | 0.119009 | 0.01005 | -0.05612 | 0.2261  | -0.05072 |
| 0.01242  | 0.78893  | -0.23734 | 2.11E-07 | 0.037752 | 0.41568 | -0.05007 | 0.28022 | -0.02758 |
| 0.100798 | 0.02941  | -0.23471 | 2.89E-07 | 0.019383 | 0.6761  | 0.000412 | 0.99291 | -0.03612 |
| 0.16922  | 0.00024  | 0.080865 | 0.08087  | 0.040058 | 0.38776 | -0.02927 | 0.52805 | 0.076258 |
| 0.037705 | 0.41626  | -0.19766 | 1.69E-05 | -0.00067 | 0.98843 | -0.03453 | 0.4566  | 0.047716 |
| 0.188219 | 4.26E-05 | 0.012822 | 0.78228  | 0.01318  | 0.77635 | -0.0989  | 0.03261 | -0.06977 |
| 0.176588 | 0.00013  | 0.26954  | 3.24E-09 | -0.05119 | 0.26959 | -0.0519  | 0.263   | -0.00368 |
| 0.284221 | 3.97E-10 | 0.491675 | 8.52E-30 | 0.012681 | 0.78461 | -0.02347 | 0.61292 | -0.09002 |
| 0.08716  | 0.05983  | 0.331602 | 1.90E-13 | -0.01032 | 0.82406 | 0.046297 | 0.31811 | 0.087606 |
| 0.00879  | 0.84975  | -0.20631 | 6.96E-06 | -0.00721 | 0.87655 | -0.05843 | 0.20752 | -0.08957 |
| -0.1126  | 0.01491  | -0.34293 | 2.47E-14 | 0.015632 | 0.73618 | 0.027179 | 0.55796 | -0.03807 |
| -0.12565 | 0.00655  | -0.42114 | 1.68E-21 | -0.00807 | 0.8619  | -0.05079 | 0.27333 | -0.15829 |
| 0.123612 | 0.00749  | -0.22657 | 7.51E-07 | 0.000777 | 0.98664 | -0.07465 | 0.10716 | 0.0947   |
| -0.26261 | 8.35E-09 | -0.59078 | 2.81E-45 | -0.04784 | 0.30223 | -0.07001 | 0.13085 | -0.15127 |
| -0.12441 | 0.00711  | -0.41339 | 1.06E-20 | -0.02882 | 0.53448 | -0.01294 | 0.78029 | -0.02492 |
| -0.01443 | 0.75579  | -0.30714 | 1.17E-11 | -0.03244 | 0.48437 | -0.13385 | 0.00376 | -0.14742 |
| 0.184722 | 5.92E-05 | 0.417321 | 4.19E-21 | 0.074372 | 0.10847 | 0.154331 | 0.00082 | 0.214483 |
| -0.0229  | 0.62154  | -0.33679 | 7.53E-14 | -0.06576 | 0.15598 | -0.14557 | 0.00161 | -0.11462 |
| -0.129   | 0.00524  | -0.36772 | 2.12E-16 | -0.00831 | 0.85785 | -0.02573 | 0.5791  | -0.15053 |
| -0.05751 | 0.21475  | -0.18874 | 4.05E-05 | -0.02831 | 0.54164 | -0.06846 | 0.13964 | -0.08665 |
| -0.00079 | 0.98644  | -0.26834 | 3.82E-09 | 0.022579 | 0.62647 | -0.07802 | 0.09218 | 0.031789 |
| 0.153955 | 0.00084  | 0.330629 | 2.25E-13 | -0.01005 | 0.82852 | 0.01147  | 0.80474 | -0.10441 |
| -0.04241 | 0.36044  | -0.23789 | 1.97E-07 | 0.017373 | 0.70806 | -0.04681 | 0.31283 | -0.04409 |
| -0.08012 | 0.08372  | -0.25635 | 1.92E-08 | 0.00053  | 0.99089 | -0.06274 | 0.17587 | -0.06028 |
| -0.0782  | 0.09142  | -0.31545 | 3.00E-12 | -0.04987 | 0.28217 | -0.1111  | 0.01631 | -0.00818 |
| 0.028451 | 0.53967  | -0.26757 | 4.25E-09 | -0.0307  | 0.50805 | -0.12892 | 0.00527 | -0.02875 |
| 0.079467 | 0.08627  | -0.21667 | 2.29E-06 | -0.07076 | 0.12679 | -0.14387 | 0.00183 | -0.22394 |
| -0.00789 | 0.865    | -0.2698  | 3.12E-09 | -0.05337 | 0.24968 | -0.09246 | 0.04582 | -0.14316 |
| -0.03106 | 0.50308  | -0.13399 | 0.00372  | 0.00941  | 0.83928 | -0.10874 | 0.01875 | 0.026933 |
| 0.094767 | 0.04065  | -0.11901 | 0.01005  | -0.07148 | 0.12294 | -0.07559 | 0.1028  | -0.26956 |
| 0.104023 | 0.02457  | -0.37561 | 4.28E-17 | -0.03602 | 0.43737 | -0.14474 | 0.00171 | -0.23644 |
| 0.041972 | 0.36547  | -0.26102 | 1.03E-08 | -0.01326 | 0.77509 | -0.14778 | 0.00136 | -0.04535 |
| -0.04393 | 0.34356  | -0.33039 | 2.35E-13 | -0.06983 | 0.13183 | -0.15029 | 0.00112 | -0.24856 |
| -0.06489 | 0.16154  | -0.32405 | 7.04E-13 | 0.001465 | 0.97481 | -0.05017 | 0.27929 | 0.039138 |
| -0.07373 | 0.11155  | -0.32622 | 4.85E-13 | -0.02983 | 0.52017 | -0.11037 | 0.01703 | -0.10328 |
| -0.08892 | 0.05483  | -0.29584 | 6.92E-11 | -0.03165 | 0.49511 | -0.07746 | 0.09453 | -0.1045  |
| -0.05576 | 0.22909  | -0.32369 | 7.48E-13 | -0.01472 | 0.75102 | -0.04974 | 0.28343 | -0.14233 |
| -0.02988 | 0.51943  | -0.11596 | 0.01215  | -0.04471 | 0.33498 | -0.12459 | 0.00702 | -0.06158 |
| -0.25034 | 4.18E-08 | -0.43351 | 8.08E-23 | -0.01079 | 0.81608 | -0.01979 | 0.66963 | -0.02899 |
| 0.061829 | 0.18226  | -0.06337 | 0.17156  | 0.022323 | 0.6304  | -0.04495 | 0.33238 | -0.04502 |
| -0.05745 | 0.21531  | -0.29971 | 3.79E-11 | 0.005023 | 0.9138  | -0.02855 | 0.53827 | -0.0314  |
| 0.197027 | 1.80E-05 | -0.17087 | 0.00021  | -0.00066 | 0.98857 | -0.09216 | 0.04653 | 0.022826 |
| 0.054761 | 0.23756  | -0.0998  | 0.03106  | -0.01261 | 0.78585 | -0.00354 | 0.93919 | -0.13729 |
| 0.035574 | 0.44312  | -0.13374 | 0.00379  | 0.016234 | 0.72641 | 0.064774 | 0.16227 | -0.0136  |
| -0.02218 | 0.63262  | -0.35436 | 2.90E-15 | 0.042512 | 0.35933 | -0.0222  | 0.63222 | 0.09669  |

|          |          |          |          |          |         |          |          |          |
|----------|----------|----------|----------|----------|---------|----------|----------|----------|
| -0.13336 | 0.00389  | -0.16308 | 0.0004   | 0.00873  | 0.85076 | 0.004006 | 0.9312   | 0.004391 |
| -0.02024 | 0.66265  | -0.36531 | 3.44E-16 | 0.01233  | 0.79043 | -0.02767 | 0.55082  | -0.09478 |
| -0.09037 | 0.05098  | -0.27599 | 1.31E-09 | -0.05112 | 0.27025 | -0.05613 | 0.22602  | 0.011834 |
| 0.186388 | 5.06E-05 | -0.00825 | 0.85886  | -0.07164 | 0.12213 | -0.12243 | 0.00808  | -0.08602 |
| 0.101461 | 0.02835  | -0.22708 | 7.09E-07 | 0.003219 | 0.94469 | -0.03308 | 0.47582  | -0.0443  |
| -0.17438 | 0.00015  | -0.37297 | 7.35E-17 | -0.07209 | 0.11975 | -0.0866  | 0.0615   | -0.15714 |
| 0.278229 | 9.50E-10 | -0.12547 | 0.00663  | -0.04632 | 0.31789 | -0.18926 | 3.85E-05 | -0.26739 |
| 0.088521 | 0.05593  | -0.10632 | 0.02156  | -0.04147 | 0.37126 | -0.10043 | 0.03     | -0.08948 |
| -0.09827 | 0.03374  | -0.35694 | 1.77E-15 | -0.03689 | 0.42636 | -0.07109 | 0.12501  | -0.01854 |
| -0.17468 | 0.00015  | -0.37043 | 1.23E-16 | -0.02704 | 0.55995 | -0.06333 | 0.17182  | -0.14329 |
| 0.020023 | 0.66604  | -0.4525  | 5.95E-25 | -0.05299 | 0.25308 | -0.23373 | 3.25E-07 | -0.08727 |
| 0.054011 | 0.24406  | -0.2258  | 8.21E-07 | -0.00854 | 0.85394 | -0.02087 | 0.65282  | 0.000896 |
| 0.033922 | 0.46459  | -0.1727  | 0.00018  | 0.015435 | 0.73938 | -0.08686 | 0.06071  | -0.02696 |
| 0.005492 | 0.90578  | -0.20458 | 8.34E-06 | -0.04055 | 0.38194 | -0.13432 | 0.00364  | -0.23115 |
| -0.06391 | 0.16792  | -0.24057 | 1.42E-07 | -0.0017  | 0.97077 | -0.02143 | 0.64418  | -0.09748 |
| 0.261144 | 1.02E-08 | 0.566889 | 4.66E-41 | -0.01452 | 0.75433 | 0.028514 | 0.53878  | 0.099112 |
| 0.190299 | 3.48E-05 | 0.444653 | 4.70E-24 | 0.081393 | 0.0789  | 0.125385 | 0.00667  | 0.322453 |
| -0.14428 | 0.00177  | -0.37228 | 8.47E-17 | 0.011338 | 0.80695 | 0.029141 | 0.52988  | 0.00641  |
| -0.00073 | 0.98739  | -0.30621 | 1.36E-11 | -0.057   | 0.21885 | -0.11583 | 0.01225  | -0.15847 |
| -0.00725 | 0.87578  | -0.3752  | 4.66E-17 | -0.03096 | 0.50451 | -0.08334 | 0.07196  | -0.08399 |
| 0.001795 | 0.96914  | -0.36598 | 3.01E-16 | -0.05231 | 0.25924 | -0.15841 | 0.00059  | -0.14377 |
| -0.11733 | 0.01117  | -0.32531 | 5.67E-13 | -0.00597 | 0.89768 | -0.04015 | 0.38666  | -0.05626 |
| 0.069524 | 0.13356  | -0.16454 | 0.00036  | -0.04936 | 0.28711 | -0.12801 | 0.0056   | -0.08826 |
| -0.13801 | 0.0028   | -0.2502  | 4.26E-08 | -0.03394 | 0.46431 | -0.05445 | 0.24021  | -0.1845  |
| 0.177966 | 0.00011  | 0.328845 | 3.07E-13 | 0.030597 | 0.50952 | 0.028757 | 0.53532  | 0.138222 |
| -0.12322 | 0.00768  | -0.4094  | 2.68E-20 | -0.04412 | 0.34145 | -0.14508 | 0.00167  | -0.09839 |
| 0.032413 | 0.48471  | -0.12981 | 0.00496  | -0.01528 | 0.74183 | -0.03788 | 0.41406  | -0.08938 |
| 0.146222 | 0.00153  | 0.398093 | 3.47E-19 | -0.01817 | 0.69528 | -0.0034  | 0.94151  | -0.02114 |
| 0.121138 | 0.00878  | -0.0926  | 0.0455   | 0.006083 | 0.89569 | -0.07988 | 0.08466  | -0.00938 |
| -0.01772 | 0.70256  | -0.10512 | 0.02309  | 0.043075 | 0.35299 | 0.112363 | 0.01512  | 0.041328 |
| -0.0103  | 0.82431  | -0.2105  | 4.47E-06 | 0.000318 | 0.99453 | -0.05651 | 0.22289  | 0.013888 |
| 0.018648 | 0.68773  | -0.21425 | 2.98E-06 | -0.07572 | 0.10219 | -0.1867  | 4.91E-05 | -0.18273 |
| -0.04348 | 0.34853  | -0.2086  | 5.47E-06 | -0.04803 | 0.30027 | -0.1166  | 0.01168  | -0.21618 |
| 0.146065 | 0.00155  | -0.08804 | 0.05729  | -0.02883 | 0.53435 | -0.15451 | 0.00081  | -0.04901 |
| -0.08189 | 0.07707  | -0.35958 | 1.06E-15 | -0.02639 | 0.56938 | -0.10374 | 0.02496  | -0.04128 |
| 0.067221 | 0.14694  | 0.222794 | 1.16E-06 | -0.06345 | 0.17107 | -0.1973  | 1.75E-05 | -0.25093 |
| 0.179199 | 9.87E-05 | 0.267967 | 4.02E-09 | 0.054444 | 0.24029 | 0.135    | 0.00347  | 0.20257  |
| -0.01891 | 0.68354  | -0.26167 | 9.48E-09 | -0.01237 | 0.78976 | -0.0616  | 0.18386  | -0.02092 |
| -0.24874 | 5.13E-08 | -0.32923 | 2.88E-13 | -0.03302 | 0.4765  | -0.06508 | 0.16025  | -0.10195 |
| 0.042118 | 0.3638   | -0.24399 | 9.32E-08 | -0.01146 | 0.80488 | -0.08254 | 0.07474  | -0.08677 |
| 0.078067 | 0.09197  | -0.18164 | 7.90E-05 | -0.01697 | 0.71459 | -0.06869 | 0.13831  | -0.15115 |
| -0.08557 | 0.06467  | -0.29595 | 6.80E-11 | -0.01101 | 0.81238 | -0.03553 | 0.44367  | -0.11485 |
| 0.045926 | 0.32201  | -0.13007 | 0.00487  | -0.02379 | 0.60815 | -0.07353 | 0.11253  | -0.07833 |
| 0.268842 | 3.57E-09 | 0.492696 | 6.25E-30 | 0.002018 | 0.9653  | 0.060596 | 0.19115  | 0.112591 |
| -0.23189 | 4.04E-07 | 0.049416 | 0.28657  | 0.02766  | 0.55102 | 0.083053 | 0.07296  | 0.03948  |

|          |          |          |          |          |         |          |          |          |
|----------|----------|----------|----------|----------|---------|----------|----------|----------|
| -0.03825 | 0.40959  | -0.15077 | 0.00108  | -0.01146 | 0.80487 | -0.01454 | 0.75405  | 0.089236 |
| -0.17868 | 0.0001   | 0.186477 | 5.02E-05 | 0.002753 | 0.95268 | 0.058982 | 0.20327  | 0.081027 |
| -0.01154 | 0.80362  | -0.3953  | 6.44E-19 | 0.030254 | 0.51428 | -0.0379  | 0.41385  | -0.0563  |
| -0.06951 | 0.13361  | -0.10438 | 0.02408  | 0.01518  | 0.74352 | 0.001425 | 0.97549  | -0.00382 |
| -0.04953 | 0.28544  | -0.28396 | 4.13E-10 | -0.01103 | 0.81216 | -0.08293 | 0.07338  | -0.02734 |
| 0.1102   | 0.0172   | -0.13752 | 0.0029   | -0.03604 | 0.4371  | -0.03659 | 0.43016  | -0.01965 |
| 0.118614 | 0.0103   | -0.19449 | 2.31E-05 | -0.03485 | 0.4525  | -0.11229 | 0.01519  | -0.09238 |
| 0.003419 | 0.94126  | -0.20097 | 1.21E-05 | 0.004412 | 0.92424 | -0.0505  | 0.27611  | -0.03884 |
| 0.109938 | 0.01747  | 0.347773 | 1.01E-14 | 0.023672 | 0.60987 | -0.00951 | 0.83763  | 0.015575 |
| -0.02141 | 0.64443  | -0.10658 | 0.02124  | -0.03774 | 0.41589 | -0.17208 | 0.00019  | -0.10095 |
| -0.14755 | 0.00139  | -0.58524 | 2.88E-44 | 0.035194 | 0.44801 | -0.02032 | 0.66139  | 0.016687 |
| -0.32583 | 5.19E-13 | -0.50194 | 3.58E-31 | 0.066475 | 0.15149 | 0.153259 | 0.00089  | 0.093485 |
| 0.142019 | 0.00209  | -0.14872 | 0.00127  | -0.00035 | 0.99392 | -0.04142 | 0.37186  | 0.021887 |
| -0.05545 | 0.23169  | -0.15326 | 0.00089  | -0.03571 | 0.44133 | -0.08911 | 0.0543   | -0.18235 |
| -0.01347 | 0.77159  | -0.16172 | 0.00045  | 0.001371 | 0.97642 | -0.02417 | 0.60243  | -0.01894 |
| -0.01299 | 0.77948  | -0.25783 | 1.58E-08 | -0.001   | 0.98276 | -0.11876 | 0.01021  | -0.06709 |
| 0.057043 | 0.21854  | -0.18484 | 5.86E-05 | -0.04301 | 0.35369 | -0.1248  | 0.00693  | -0.18271 |
| -0.13556 | 0.00333  | -0.38438 | 6.84E-18 | -0.06764 | 0.14446 | -0.10509 | 0.02314  | -0.2613  |
| 0.008544 | 0.8539   | -0.24846 | 5.32E-08 | -0.03122 | 0.5009  | -0.1043  | 0.0242   | -0.04191 |
| -0.01265 | 0.78509  | -0.12224 | 0.00818  | -0.03494 | 0.45128 | -0.06099 | 0.18824  | -0.03627 |
| -0.12811 | 0.00556  | -0.36831 | 1.89E-16 | -0.01821 | 0.69476 | -0.09535 | 0.03943  | -0.1128  |
| 0.132399 | 0.00416  | -0.23195 | 4.01E-07 | 0.001185 | 0.97963 | -0.08507 | 0.06625  | 0.040589 |
| 0.059108 | 0.2023   | 0.05134  | 0.2682   | -0.03997 | 0.38883 | -0.0353  | 0.44669  | -0.13091 |
| -0.01654 | 0.72141  | -0.16174 | 0.00045  | -0.03764 | 0.41711 | -0.07161 | 0.12229  | 0.002234 |
| -0.12569 | 0.00653  | -0.33031 | 2.38E-13 | -0.03572 | 0.4413  | -0.10244 | 0.02685  | 0.033385 |
| -0.02942 | 0.52594  | -0.26904 | 3.47E-09 | -0.07529 | 0.10416 | -0.20192 | 1.10E-05 | -0.1722  |
| 0.008267 | 0.85858  | -0.25164 | 3.54E-08 | -0.01024 | 0.8254  | -0.06112 | 0.18736  | -0.08491 |
| -0.04644 | 0.31659  | -0.34868 | 8.51E-15 | -0.02183 | 0.63799 | -0.16452 | 0.00036  | -0.09424 |
| -0.03845 | 0.40706  | -0.2691  | 3.44E-09 | -0.03525 | 0.44728 | -0.08538 | 0.06526  | 0.06045  |
| -0.07671 | 0.09777  | -0.30572 | 1.47E-11 | 0.014432 | 0.75575 | 0.022474 | 0.62808  | 0.141048 |
| -0.03706 | 0.42433  | -0.2144  | 2.94E-06 | -0.02565 | 0.58038 | -0.10982 | 0.01759  | -0.07911 |
| -0.08867 | 0.05551  | -0.27118 | 2.58E-09 | -0.0264  | 0.56932 | -0.06294 | 0.17449  | -0.13923 |
| 0.016342 | 0.72466  | -0.1211  | 0.0088   | 0.00697  | 0.88059 | -0.01764 | 0.70386  | 0.016011 |
| 0.163064 | 0.0004   | -0.26711 | 4.53E-09 | -0.03819 | 0.4103  | -0.07125 | 0.12414  | -0.12244 |
| 0.032972 | 0.4772   | -0.32534 | 5.64E-13 | -0.02974 | 0.52139 | -0.13281 | 0.00404  | -0.22212 |
| -0.20151 | 1.14E-05 | -0.38493 | 6.09E-18 | -0.09108 | 0.04917 | -0.17251 | 0.00018  | -0.18928 |
| -0.05596 | 0.2274   | -0.30389 | 1.96E-11 | -0.01906 | 0.68119 | -0.03846 | 0.40701  | -0.10161 |
| -0.01201 | 0.79573  | -0.36112 | 7.86E-16 | -0.02624 | 0.57168 | -0.04619 | 0.31921  | -0.07409 |
| -0.26082 | 1.06E-08 | -0.48415 | 8.15E-29 | -0.03471 | 0.45428 | -0.10418 | 0.02436  | -0.05934 |
| 0.116353 | 0.01186  | -0.32771 | 3.74E-13 | -0.04608 | 0.32041 | -0.11157 | 0.01586  | -0.28471 |
| -0.15969 | 0.00053  | -0.50679 | 7.72E-32 | -0.06198 | 0.1812  | -0.08479 | 0.06714  | -0.08689 |
| 0.059825 | 0.19687  | -0.20073 | 1.24E-05 | -0.06781 | 0.14342 | -0.17121 | 0.0002   | -0.22381 |
| 0.289367 | 1.85E-10 | 0.456788 | 1.88E-25 | 0.016958 | 0.71472 | -0.0575  | 0.2149   | 0.144959 |
| -0.1681  | 0.00026  | -0.34798 | 9.71E-15 | -0.00154 | 0.97349 | -0.06059 | 0.19122  | 0.113943 |
| -0.02222 | 0.632    | -0.06691 | 0.14881  | 0.03088  | 0.5056  | 0.023323 | 0.61515  | 0.112775 |

|          |          |          |          |          |         |          |          |          |
|----------|----------|----------|----------|----------|---------|----------|----------|----------|
| -0.11622 | 0.01196  | -0.42539 | 6.01E-22 | -0.03502 | 0.45029 | -0.09715 | 0.03584  | -0.15939 |
| -0.0856  | 0.06458  | -0.49403 | 4.16E-30 | -0.04294 | 0.35455 | -0.14066 | 0.00231  | -0.11069 |
| 0.333451 | 1.37E-13 | 0.562102 | 2.97E-40 | 0.005115 | 0.91222 | -0.04492 | 0.33279  | 0.08565  |
| -0.2165  | 2.33E-06 | -0.45265 | 5.72E-25 | -0.07844 | 0.09042 | -0.11184 | 0.01561  | -0.08613 |
| -0.15022 | 0.00113  | -0.24803 | 5.62E-08 | -0.05151 | 0.26657 | -0.00012 | 0.99801  | -0.16738 |
| -0.1095  | 0.01793  | -0.44734 | 2.33E-24 | -0.03614 | 0.43585 | -0.07814 | 0.09166  | -0.26717 |
| 0.018858 | 0.6844   | -0.06684 | 0.14927  | -0.0088  | 0.84958 | -0.03427 | 0.45996  | 0.086722 |
| -0.05023 | 0.27873  | -0.249   | 4.96E-08 | 0.003692 | 0.93658 | -0.11514 | 0.01278  | 0.072618 |
| 0.085694 | 0.06427  | 0.004051 | 0.93043  | 0.056055 | 0.22664 | 0.029894 | 0.51929  | 0.255778 |
| 0.005319 | 0.90873  | -0.3542  | 3.00E-15 | -0.0273  | 0.55618 | -0.10704 | 0.02069  | -0.16259 |
| 0.007439 | 0.87262  | -0.17386 | 0.00016  | 0.010212 | 0.8258  | -0.01797 | 0.69849  | 0.00441  |
| 0.100208 | 0.03038  | -0.11681 | 0.01153  | -0.07545 | 0.10345 | -0.21665 | 2.30E-06 | -0.24526 |
| 0.0605   | 0.19185  | -0.13115 | 0.00453  | -0.0053  | 0.90899 | -0.03833 | 0.40852  | -0.01249 |
| -0.043   | 0.3538   | -0.25518 | 2.24E-08 | -0.00354 | 0.93912 | 0.007754 | 0.86727  | -0.03888 |
| -0.10062 | 0.0297   | -0.43749 | 2.96E-23 | 0.01264  | 0.78528 | -0.04657 | 0.31524  | 0.025475 |
| 0.04976  | 0.28323  | -0.24732 | 6.14E-08 | -0.00401 | 0.9312  | -0.05323 | 0.25097  | -0.07254 |
| 0.175809 | 0.00013  | 0.30692  | 1.21E-11 | -0.0114  | 0.80586 | -0.06234 | 0.17864  | -0.069   |
| 0.130647 | 0.00469  | -0.14251 | 0.00202  | 0.028461 | 0.53953 | 0.002167 | 0.96276  | -0.06472 |
| -0.01867 | 0.68739  | -0.01544 | 0.73927  | 0.02974  | 0.52145 | 0.145696 | 0.00159  | -0.08983 |
| -0.19582 | 2.03E-05 | -0.35496 | 2.59E-15 | -0.06334 | 0.17178 | -0.06755 | 0.14494  | -0.19577 |
| -0.15351 | 0.00087  | -0.18952 | 3.76E-05 | -0.01632 | 0.72502 | -0.04043 | 0.38338  | -0.06599 |
| -0.17863 | 0.0001   | -0.37359 | 6.48E-17 | -0.13334 | 0.00389 | -0.14792 | 0.00135  | -0.21204 |
| -0.16479 | 0.00035  | -0.43527 | 5.19E-23 | -0.07253 | 0.11751 | -0.15291 | 0.00092  | -0.10313 |
| -0.04085 | 0.37843  | -0.20726 | 6.30E-06 | -0.07123 | 0.12427 | -0.16039 | 0.0005   | -0.16616 |
| -0.10559 | 0.02249  | -0.49068 | 1.15E-29 | -0.03244 | 0.48439 | -0.07125 | 0.12418  | -0.0854  |
| -0.08083 | 0.08101  | -0.42113 | 1.69E-21 | 0.003432 | 0.94103 | -0.07837 | 0.09073  | -0.0742  |
| -0.0578  | 0.21248  | -0.21523 | 2.68E-06 | 0.012653 | 0.78508 | -0.01122 | 0.80898  | -0.01062 |
| 0.131548 | 0.00441  | -0.42349 | 9.55E-22 | -0.05378 | 0.2461  | -0.17386 | 0.00016  | -0.14083 |
| -0.2816  | 5.84E-10 | -0.4155  | 6.45E-21 | 0.019556 | 0.67337 | -0.03681 | 0.42738  | 0.129037 |
| -0.1544  | 0.00081  | -0.19759 | 1.70E-05 | -0.04366 | 0.34645 | -0.03786 | 0.41438  | -0.20959 |
| -0.01135 | 0.80669  | -0.20009 | 1.32E-05 | -0.00367 | 0.93701 | -0.06212 | 0.18018  | 0.068693 |
| -0.09744 | 0.03528  | -0.35499 | 2.57E-15 | -0.0067  | 0.88513 | -0.04064 | 0.38093  | -0.08869 |
| -0.17039 | 0.00022  | -0.47765 | 5.46E-28 | -0.0478  | 0.30259 | -0.03952 | 0.39414  | -0.22109 |
| -0.0877  | 0.05824  | -0.26612 | 5.18E-09 | 0.015633 | 0.73616 | 0.038923 | 0.40136  | -0.09416 |
| -0.05752 | 0.21475  | -0.19757 | 1.70E-05 | -0.02062 | 0.65675 | 0.004118 | 0.92929  | 0.063634 |
| -0.13259 | 0.0041   | -0.46515 | 1.90E-26 | -0.02659 | 0.56657 | -0.03777 | 0.41544  | -0.04252 |
| -0.05378 | 0.24609  | -0.23108 | 4.44E-07 | -0.05895 | 0.20351 | -0.08478 | 0.06717  | -0.05994 |
| 0.038861 | 0.40211  | -0.19904 | 1.47E-05 | -0.00524 | 0.91004 | -0.00953 | 0.83725  | 0.01552  |
| -0.11704 | 0.01136  | -0.48213 | 1.48E-28 | 0.00023  | 0.99605 | -0.15627 | 0.0007   | -0.1165  |
| 0.113838 | 0.01384  | -0.1628  | 0.00041  | -0.00922 | 0.84254 | -0.02707 | 0.55959  | -0.05555 |
| -0.10144 | 0.02838  | -0.29566 | 7.10E-11 | -0.01627 | 0.7259  | 0.039619 | 0.39299  | -0.12065 |
| 0.001707 | 0.97066  | 0.2889   | 1.98E-10 | 0.004394 | 0.92456 | 0.141865 | 0.00212  | 0.330902 |
| 0.12931  | 0.00513  | -0.30971 | 7.70E-12 | -0.0388  | 0.40282 | -0.11523 | 0.01271  | -0.12236 |
| -0.09219 | 0.04647  | -0.41729 | 4.22E-21 | -0.03243 | 0.48453 | -0.09744 | 0.03528  | -0.18393 |
| 0.259535 | 1.26E-08 | -0.01127 | 0.80808  | -0.06785 | 0.14318 | -0.13198 | 0.00428  | -0.20347 |

|          |          |          |          |          |         |          |          |           |
|----------|----------|----------|----------|----------|---------|----------|----------|-----------|
| -0.00769 | 0.86837  | -0.11914 | 0.00997  | -0.00383 | 0.93417 | -0.01408 | 0.76158  | -0.04297  |
| -0.02235 | 0.62991  | -0.33912 | 4.96E-14 | -0.0161  | 0.7286  | -0.08249 | 0.07492  | -0.16439  |
| -0.1955  | 2.10E-05 | -0.46891 | 6.62E-27 | -0.08294 | 0.07337 | -0.1196  | 0.00968  | -0.14374  |
| -0.07506 | 0.10525  | -0.36626 | 2.84E-16 | -0.00772 | 0.86781 | -0.09667 | 0.03677  | -0.13781  |
| -0.02616 | 0.57281  | 0.172843 | 0.00017  | 0.084187 | 0.06912 | 0.18831  | 4.22E-05 | 0.259767  |
| -0.1583  | 0.0006   | -0.49998 | 6.62E-31 | -0.02925 | 0.52832 | -0.07708 | 0.09618  | -0.01605  |
| -0.12292 | 0.00783  | -0.34495 | 1.70E-14 | -0.04471 | 0.33497 | -0.02008 | 0.66509  | -0.01396  |
| -0.07543 | 0.10354  | -0.43595 | 4.38E-23 | -0.01805 | 0.69725 | -0.05132 | 0.26836  | -0.02578  |
| -0.12719 | 0.00592  | -0.30269 | 2.37E-11 | 0.013329 | 0.77389 | -0.01008 | 0.82798  | 0.113565  |
| 0.212673 | 3.54E-06 | 0.524605 | 2.21E-34 | 0.060324 | 0.19316 | 0.179157 | 9.91E-05 | 0.17547   |
| 0.257749 | 1.60E-08 | 0.405047 | 7.26E-20 | -0.0392  | 0.39804 | 0.087099 | 0.06     | -0.01192  |
| 0.08445  | 0.06825  | -0.25253 | 3.16E-08 | -0.02756 | 0.5525  | -0.12475 | 0.00695  | 0.010803  |
| -0.07289 | 0.11573  | -0.28855 | 2.09E-10 | -0.06966 | 0.1328  | -0.10983 | 0.01758  | -0.12827  |
| -0.05604 | 0.22674  | -0.25842 | 1.46E-08 | 0.038272 | 0.40928 | 0.070537 | 0.12797  | 0.097868  |
| -0.15703 | 0.00066  | -0.36853 | 1.81E-16 | -0.01674 | 0.7182  | -0.05622 | 0.22528  | -0.01131  |
| -0.03328 | 0.47311  | -0.32901 | 2.98E-13 | -0.04871 | 0.2935  | -0.19634 | 1.93E-05 | -0.11354  |
| -0.02682 | 0.56317  | -0.30437 | 1.82E-11 | -0.01686 | 0.71631 | -0.02425 | 0.6012   | -0.06268  |
| 0.04781  | 0.30254  | -0.32257 | 9.07E-13 | -0.01174 | 0.80018 | -0.07303 | 0.11502  | -0.04891  |
| -0.08496 | 0.06659  | -0.4115  | 1.64E-20 | -0.03611 | 0.43626 | -0.14553 | 0.00161  | -0.17804  |
| -0.03095 | 0.50462  | -0.34026 | 4.03E-14 | -0.0381  | 0.41141 | -0.14397 | 0.00181  | -0.08536  |
| -0.08064 | 0.08171  | -0.30461 | 1.75E-11 | -0.05982 | 0.19692 | -0.06288 | 0.17491  | -0.10842  |
| 0.015703 | 0.73502  | -0.2917  | 1.30E-10 | 0.018644 | 0.68779 | -0.03196 | 0.49084  | -0.01009  |
| -0.02632 | 0.57052  | -0.31188 | 5.41E-12 | -0.0492  | 0.28868 | -0.11008 | 0.01732  | -0.12169  |
| -0.07337 | 0.11333  | -0.3008  | 3.20E-11 | -0.02291 | 0.62141 | -0.06542 | 0.15813  | -0.10983  |
| -0.12318 | 0.0077   | -0.33184 | 1.82E-13 | -0.02648 | 0.56813 | -0.09468 | 0.04085  | -0.10705  |
| 0.01947  | 0.67473  | -0.40178 | 1.52E-19 | 0.014669 | 0.75187 | -0.05406 | 0.24361  | -0.03151  |
| 0.165364 | 0.00033  | -0.08705 | 0.06014  | 0.014079 | 0.76155 | -0.01769 | 0.70306  | 0.009759  |
| 0.137113 | 0.00299  | -0.25352 | 2.78E-08 | -0.06481 | 0.16204 | -0.13546 | 0.00336  | -0.03097  |
| -0.03455 | 0.45635  | -0.32831 | 3.37E-13 | -0.05731 | 0.21636 | -0.10836 | 0.01916  | 0.025257  |
| 0.112221 | 0.01525  | -0.11593 | 0.01218  | -0.00703 | 0.87961 | 0.06484  | 0.16184  | -0.07018  |
| 0.217841 | 2.01E-06 | 0.015586 | 0.73693  | -0.03472 | 0.45419 | -0.07367 | 0.11186  | -0.055    |
| 0.027627 | 0.55148  | -0.3156  | 2.93E-12 | -0.04161 | 0.36959 | -0.13101 | 0.00457  | -0.00254  |
| -0.02318 | 0.61726  | -0.2405  | 1.43E-07 | -0.03805 | 0.41202 | -0.08184 | 0.07726  | -0.02373  |
| -0.04726 | 0.30817  | -0.23769 | 2.02E-07 | -0.0161  | 0.72861 | -0.05057 | 0.2755   | 0.103418  |
| -0.04031 | 0.38478  | -0.26255 | 8.42E-09 | -0.01282 | 0.78237 | -0.06897 | 0.13666  | -0.03963  |
| -0.01896 | 0.68283  | -0.26245 | 8.53E-09 | -0.04044 | 0.38328 | -0.18139 | 8.07E-05 | -0.07293  |
| -0.16409 | 0.00037  | -0.38176 | 1.19E-17 | -0.0288  | 0.53475 | -0.12091 | 0.00891  | -0.03721  |
| 0.073    | 0.11516  | -0.02246 | 0.62833  | -0.06699 | 0.14834 | -0.12239 | 0.0081   | -0.03364  |
| 0.037677 | 0.41662  | -0.44244 | 8.35E-24 | -0.05067 | 0.27451 | -0.18764 | 4.50E-05 | -0.03808  |
| -0.07307 | 0.11483  | -0.27939 | 8.03E-10 | -0.05968 | 0.19793 | -0.19711 | 1.78E-05 | -0.19543  |
| -0.01619 | 0.72706  | -0.09239 | 0.04598  | 0.054986 | 0.23564 | -0.01268 | 0.78464  | -0.01426  |
| 0.159225 | 0.00055  | 0.482106 | 1.49E-28 | 0.045487 | 0.32667 | 0.091763 | 0.04749  | 0.129433  |
| 0.407754 | 3.91E-20 | 0.650774 | 1.37E-57 | 0.02711  | 0.55896 | -0.01983 | 0.66906  | 0.017409  |
| -0.2305  | 4.76E-07 | -0.5288  | 5.30E-35 | 0.05001  | 0.28081 | -0.01213 | 0.79382  | -5.32E-05 |
| 0.193235 | 2.62E-05 | 0.540511 | 8.79E-37 | 0.076797 | 0.0974  | 0.110291 | 0.01711  | 0.381814  |

|          |          |          |          |          |         |          |          |          |
|----------|----------|----------|----------|----------|---------|----------|----------|----------|
| 0.266704 | 4.79E-09 | 0.629507 | 6.49E-53 | 0.080444 | 0.08246 | 0.178915 | 0.0001   | 0.354108 |
| 0.425005 | 6.60E-22 | 0.693559 | 3.14E-68 | 0.00835  | 0.85718 | -0.08279 | 0.07388  | 0.064307 |
| 0.214529 | 2.89E-06 | 0.514794 | 5.81E-33 | 0.040606 | 0.38129 | 0.127084 | 0.00596  | 0.095773 |
| 0.109762 | 0.01765  | 0.497871 | 1.27E-30 | 0.027058 | 0.55972 | 0.072348 | 0.11845  | 0.07954  |
| 0.364773 | 3.83E-16 | 0.649314 | 2.96E-57 | -0.00571 | 0.90212 | 0.023432 | 0.6135   | 0.050744 |
| 0.340142 | 4.11E-14 | 0.610391 | 5.17E-49 | 0.060274 | 0.19352 | 0.182228 | 7.48E-05 | 0.140488 |
| 0.417472 | 4.04E-21 | 0.730962 | 3.44E-79 | 0.022958 | 0.62069 | 0.110081 | 0.01733  | 0.100943 |
| 0.293175 | 1.04E-10 | 0.682675 | 2.39E-65 | 0.016389 | 0.72391 | 0.097346 | 0.03546  | 0.00387  |
| 0.292617 | 1.13E-10 | 0.665747 | 4.12E-61 | 0.069726 | 0.13243 | 0.045472 | 0.32683  | 0.072806 |
| 0.163921 | 0.00038  | 0.512116 | 1.39E-32 | 0.104669 | 0.02369 | 0.194699 | 2.27E-05 | 0.406956 |
| -0.16865 | 0.00025  | -0.54905 | 4.00E-38 | -0.06315 | 0.17309 | -0.06039 | 0.19267  | -0.32122 |
| 0.26641  | 4.98E-09 | 0.629402 | 6.83E-53 | -0.00511 | 0.91225 | -0.04735 | 0.30718  | 0.201275 |
| 0.318029 | 1.95E-12 | 0.567227 | 4.08E-41 | 0.038267 | 0.40935 | 0.091195 | 0.04889  | 0.10861  |
| 0.351107 | 5.39E-15 | 0.642442 | 1.03E-55 | 0.101079 | 0.02896 | 0.027845 | 0.54835  | 0.197259 |
| 0.422696 | 1.16E-21 | 0.848772 | #####    | 0.055485 | 0.23141 | 0.137738 | 0.00286  | 0.184388 |
| 0.303045 | 2.24E-11 | 0.557429 | 1.76E-39 | 0.059689 | 0.19789 | 0.178694 | 0.0001   | 0.253479 |
| 0.248188 | 5.50E-08 | 0.476578 | 7.45E-28 | 0.013708 | 0.76765 | -0.01334 | 0.77376  | 0.034089 |
| 0.232842 | 3.61E-07 | 0.512886 | 1.08E-32 | 0.089709 | 0.0527  | 0.09886  | 0.03269  | 0.302761 |
| 0.140305 | 0.00237  | 0.665543 | 4.62E-61 | 0.080809 | 0.08108 | 0.264093 | 6.83E-09 | 0.204396 |
| 0.225061 | 8.93E-07 | 0.543327 | 3.20E-37 | 0.006474 | 0.88904 | 0.073261 | 0.11387  | 0.157262 |
| 0.219851 | 1.61E-06 | 0.589367 | 5.11E-45 | -0.01722 | 0.71056 | -0.04751 | 0.30562  | 0.075174 |
| 0.194321 | 2.35E-05 | 0.568387 | 2.59E-41 | 0.006028 | 0.89664 | -0.10725 | 0.02044  | -0.05382 |
| -0.1843  | 6.16E-05 | -0.57005 | 1.35E-41 | 0.01545  | 0.73914 | -0.0327  | 0.4808   | -0.14167 |
| -0.20375 | 9.09E-06 | -0.66347 | 1.46E-60 | -0.06277 | 0.1757  | -0.20821 | 5.70E-06 | -0.18019 |
| 0.194325 | 2.35E-05 | 0.665857 | 3.88E-61 | 0.053478 | 0.24875 | 0.117502 | 0.01105  | 0.267591 |
| 0.400255 | 2.14E-19 | 0.735231 | 1.47E-80 | -0.01988 | 0.66822 | -0.02893 | 0.53288  | 0.059038 |
| 0.307634 | 1.08E-11 | 0.556584 | 2.42E-39 | -0.05198 | 0.26225 | -0.02714 | 0.55856  | -0.03562 |
| 0.171444 | 0.0002   | 0.527977 | 7.02E-35 | 0.070965 | 0.12568 | 0.281568 | 5.86E-10 | 0.181586 |
| 0.529374 | 4.35E-35 | 0.669224 | 5.86E-62 | 0.002535 | 0.95643 | 0.081012 | 0.08031  | 0.032247 |
| 0.249052 | 4.93E-08 | 0.536038 | 4.29E-36 | 0.076433 | 0.099   | 0.169779 | 0.00023  | 0.41919  |
| 0.309119 | 8.48E-12 | 0.537829 | 2.28E-36 | 0.017224 | 0.71045 | 0.071548 | 0.12259  | 0.065299 |
| 0.324129 | 6.95E-13 | 0.546891 | 8.80E-38 | 0.065094 | 0.16019 | 0.159777 | 0.00053  | 0.222859 |
| 0.314697 | 3.40E-12 | 0.493139 | 5.46E-30 | 0.071778 | 0.12139 | 0.032659 | 0.48139  | 0.186346 |
| 0.275696 | 1.36E-09 | 0.532967 | 1.26E-35 | -0.04748 | 0.30586 | -0.17964 | 9.48E-05 | -0.19898 |
| 0.312737 | 4.70E-12 | 0.536271 | 3.95E-36 | 0.023429 | 0.61354 | 0.021815 | 0.6382   | -0.03199 |
| 0.309205 | 8.36E-12 | 0.575715 | 1.41E-42 | 0.03688  | 0.42655 | -0.00652 | 0.88823  | 0.225036 |
| 0.316284 | 2.61E-12 | 0.750099 | 1.53E-85 | 0.097099 | 0.03593 | 0.188622 | 4.09E-05 | 0.353217 |
| -0.20088 | 1.22E-05 | -0.6233  | 1.28E-51 | 0.042332 | 0.36137 | -0.01347 | 0.77163  | -0.17542 |
| 0.157668 | 0.00063  | 0.50707  | 7.06E-32 | -0.04547 | 0.32688 | -0.01164 | 0.80192  | -0.0486  |
| 0.153661 | 0.00086  | 0.588035 | 8.95E-45 | -0.0113  | 0.80751 | 0.016776 | 0.71766  | -0.03536 |
| 0.317113 | 2.28E-12 | 0.666797 | 2.29E-61 | 0.048413 | 0.29647 | 0.056327 | 0.22439  | 0.178234 |
| 0.401945 | 1.47E-19 | 0.697261 | 3.08E-69 | -0.01683 | 0.71673 | -0.10873 | 0.01876  | 0.03313  |
| 0.372529 | 8.04E-17 | 0.595261 | 4.15E-46 | -0.00432 | 0.9258  | -0.0515  | 0.26671  | 0.000806 |
| 0.479908 | 2.83E-28 | 0.600341 | 4.57E-47 | 0.012864 | 0.78158 | -0.03829 | 0.40905  | 0.143343 |
| 0.252026 | 3.37E-08 | 0.586689 | 1.57E-44 | 0.063093 | 0.17347 | 0.113394 | 0.01421  | 0.282181 |

|          |          |          |          |          |         |          |          |          |
|----------|----------|----------|----------|----------|---------|----------|----------|----------|
| 0.098844 | 0.03272  | 0.422584 | 1.19E-21 | 0.003996 | 0.93137 | -0.04328 | 0.35073  | 0.187867 |
| -0.26949 | 3.26E-09 | -0.5382  | 2.00E-36 | -0.04135 | 0.37262 | -0.08821 | 0.05681  | -0.2883  |
| 0.330029 | 2.50E-13 | 0.58543  | 2.66E-44 | 0.043982 | 0.34294 | -0.03572 | 0.44125  | 0.067042 |
| 0.286528 | 2.83E-10 | 0.736372 | 6.28E-81 | 0.086242 | 0.06258 | 0.055401 | 0.23211  | 0.368722 |
| 0.143158 | 0.00193  | 0.682292 | 3.00E-65 | 0.102642 | 0.02655 | 0.203239 | 9.58E-06 | 0.289231 |
| 0.242629 | 1.10E-07 | 0.422754 | 1.14E-21 | -0.03931 | 0.39673 | 0.126957 | 0.00601  | -0.09723 |
| 0.250959 | 3.86E-08 | 0.597496 | 1.58E-46 | 0.058304 | 0.20851 | 0.064979 | 0.16093  | 0.281224 |
| 0.374207 | 5.71E-17 | 0.587333 | 1.20E-44 | -0.03014 | 0.51592 | -0.04568 | 0.32456  | -0.08426 |
| 0.324599 | 6.41E-13 | 0.510495 | 2.35E-32 | 0.039401 | 0.39559 | 0.111405 | 0.01602  | 0.035241 |
| 0.230506 | 4.76E-07 | 0.482296 | 1.41E-28 | 0.010379 | 0.823   | -0.05672 | 0.2212   | 0.054488 |
| -0.2622  | 8.82E-09 | -0.58325 | 6.56E-44 | -0.02771 | 0.55034 | -0.07089 | 0.12605  | -0.18677 |
| 0.299765 | 3.76E-11 | 0.750935 | 7.85E-86 | 0.061203 | 0.18673 | 0.101002 | 0.02908  | 0.119519 |
| 0.444252 | 5.22E-24 | 0.589989 | 3.93E-45 | 0.005352 | 0.90818 | -0.09732 | 0.03552  | 0.103915 |
| 0.341669 | 3.11E-14 | 0.492372 | 6.90E-30 | 0.002955 | 0.94923 | -0.06882 | 0.13752  | 0.162001 |
| 0.226523 | 7.55E-07 | 0.586138 | 1.98E-44 | 0.00634  | 0.89131 | 0.044208 | 0.34047  | 0.056639 |
| 0.287537 | 2.43E-10 | 0.514832 | 5.73E-33 | -0.03077 | 0.5071  | -0.04058 | 0.38159  | -0.01139 |
| 0.415663 | 6.20E-21 | 0.668562 | 8.51E-62 | 0.023777 | 0.60829 | -0.00569 | 0.90234  | -0.04841 |
| 0.276349 | 1.24E-09 | 0.608339 | 1.31E-48 | 0.023425 | 0.61361 | 0.057017 | 0.21875  | 0.047326 |
| -0.1344  | 0.00362  | -0.58453 | 3.85E-44 | -0.04003 | 0.38804 | -0.13936 | 0.00254  | -0.16651 |
| -0.18133 | 8.12E-05 | -0.44784 | 2.04E-24 | -0.01307 | 0.7782  | 0.021474 | 0.64346  | 0.01351  |
| -0.15279 | 0.00092  | -0.54575 | 1.33E-37 | -0.06643 | 0.15176 | -0.1053  | 0.02286  | -0.21676 |
| 0.204942 | 8.03E-06 | 0.40215  | 1.40E-19 | -0.00358 | 0.93858 | -0.04019 | 0.38625  | -0.06885 |
| -0.23779 | 2.00E-07 | -0.63402 | 7.09E-54 | -0.03966 | 0.3925  | 0.016721 | 0.71855  | -0.1481  |
| 0.403114 | 1.13E-19 | 0.744996 | 8.60E-84 | 0.034344 | 0.45906 | -0.0043  | 0.9262   | 0.299085 |
| 0.450109 | 1.12E-24 | 0.733645 | 4.78E-80 | 0.091822 | 0.04735 | 0.207031 | 6.45E-06 | 0.298538 |
| -0.27445 | 1.63E-09 | -0.55993 | 6.83E-40 | -0.03102 | 0.50365 | -0.04664 | 0.31451  | -0.13766 |
| -0.14995 | 0.00115  | -0.52623 | 1.28E-34 | -0.06443 | 0.16454 | -0.0636  | 0.17002  | -0.1207  |
| 0.326519 | 4.60E-13 | 0.691677 | 1.01E-67 | 0.06348  | 0.17084 | 0.113908 | 0.01378  | 0.178436 |
| 0.456881 | 1.84E-25 | 0.91495  | #####    | 0.050198 | 0.279   | 0.03336  | 0.47202  | 0.192567 |
| -0.27735 | 1.08E-09 | -0.66763 | 1.43E-61 | -0.03234 | 0.48575 | -0.08856 | 0.05583  | -0.21221 |
| 0.270704 | 2.75E-09 | 0.507158 | 6.87E-32 | 0.038529 | 0.40615 | -0.05976 | 0.19735  | 0.123373 |
| 0.241795 | 1.22E-07 | 0.698105 | 1.80E-69 | -0.00251 | 0.95691 | 0.062374 | 0.17843  | 0.106338 |
| -0.33901 | 5.05E-14 | -0.63208 | 1.84E-53 | -0.05625 | 0.22502 | -0.13731 | 0.00295  | -0.20205 |
| -0.23734 | 2.11E-07 | -0.45696 | 1.80E-25 | -0.00034 | 0.99415 | 0.052421 | 0.25824  | -0.25304 |
| 0.303358 | 2.13E-11 | 0.712453 | 1.52E-73 | 0.019731 | 0.67063 | 0.102695 | 0.02647  | 0.049974 |
| 0.250203 | 4.26E-08 | 0.556699 | 2.32E-39 | 0.055319 | 0.23281 | 0.069361 | 0.13447  | 0.175474 |
| 0.238054 | 1.93E-07 | 0.578369 | 4.83E-43 | 0.014493 | 0.75476 | 0.026526 | 0.56746  | 0.132172 |
| 0.39493  | 7.00E-19 | 0.807134 | #####    | 0.016535 | 0.72154 | 0.021376 | 0.64497  | 0.069183 |
| 0.14819  | 0.00132  | 0.390561 | 1.82E-18 | 0.034106 | 0.46217 | -0.01099 | 0.81281  | 0.208483 |
| 0.174184 | 0.00015  | 0.227826 | 6.50E-07 | -0.04973 | 0.28353 | 0.082007 | 0.07666  | -0.15547 |
| 0.21354  | 3.22E-06 | 0.542449 | 4.39E-37 | 0.004674 | 0.91976 | 0.122556 | 0.00802  | 0.017487 |
| 0.276452 | 1.22E-09 | 0.50668  | 8.00E-32 | -0.02455 | 0.59666 | -0.10869 | 0.01879  | 0.026693 |
| 0.186668 | 4.93E-05 | 0.511911 | 1.49E-32 | 0.107055 | 0.02067 | 0.228071 | 6.32E-07 | 0.23407  |
| 0.457797 | 1.43E-25 | 0.665727 | 4.17E-61 | 0.023149 | 0.6178  | -0.09161 | 0.04787  | 0.153551 |
| 0.334492 | 1.14E-13 | 0.746572 | 2.51E-84 | 0.024903 | 0.59141 | 0.049582 | 0.28495  | 0.01509  |



|          |          |          |          |          |         |          |          |          |
|----------|----------|----------|----------|----------|---------|----------|----------|----------|
| 0.147259 | 0.00142  | 0.548859 | 4.28E-38 | 0.035195 | 0.44799 | 0.136068 | 0.00322  | 0.020235 |
| 0.288073 | 2.24E-10 | 0.469311 | 5.92E-27 | -0.01767 | 0.70338 | -0.07433 | 0.10866  | -0.09642 |
| 0.242568 | 1.11E-07 | 0.488634 | 2.13E-29 | 0.00525  | 0.90991 | -0.04998 | 0.28112  | 0.000912 |
| 0.253456 | 2.80E-08 | 0.478745 | 3.97E-28 | 0.019116 | 0.68032 | -0.01765 | 0.70363  | -0.00585 |
| 0.362509 | 5.98E-16 | 0.813419 | #####    | 0.050006 | 0.28085 | 0.140096 | 0.00241  | 0.207375 |
| 0.209066 | 5.21E-06 | 0.580261 | 2.24E-43 | 0.004813 | 0.91737 | -0.01755 | 0.7053   | 0.00955  |
| 0.405348 | 6.78E-20 | 0.676364 | 9.79E-64 | 0.007    | 0.88008 | 0.022039 | 0.63475  | 0.071811 |
| -0.19819 | 1.60E-05 | -0.56317 | 1.97E-40 | 0.038256 | 0.40949 | -0.03109 | 0.50272  | 0.012741 |
| 0.173001 | 0.00017  | 0.524803 | 2.07E-34 | 0.014002 | 0.76282 | 0.169543 | 0.00023  | 0.099752 |
| 0.220549 | 1.49E-06 | 0.489855 | 1.48E-29 | -0.00589 | 0.899   | 0.057332 | 0.21622  | 0.09214  |
| 0.340083 | 4.16E-14 | 0.734858 | 1.94E-80 | 0.015428 | 0.73949 | 0.094974 | 0.04021  | 0.043022 |
| 0.256595 | 1.86E-08 | 0.550654 | 2.21E-38 | 0.04128  | 0.37343 | 0.206953 | 6.51E-06 | 0.141748 |
| 0.402969 | 1.16E-19 | 0.686792 | 2.01E-66 | 0.106433 | 0.02142 | 0.042997 | 0.35386  | 0.342812 |
| 0.405654 | 6.33E-20 | 0.63294  | 1.21E-53 | -0.01993 | 0.66756 | -0.13462 | 0.00356  | 0.005852 |
| 0.264383 | 6.57E-09 | 0.514377 | 6.65E-33 | 0.018237 | 0.69427 | 0.04217  | 0.36321  | 0.125215 |
| 0.258146 | 1.52E-08 | 0.704466 | 3.02E-71 | 0.08139  | 0.07891 | -0.00686 | 0.88241  | 0.335724 |
| 0.309407 | 8.09E-12 | 0.662797 | 2.12E-60 | 0.093502 | 0.04343 | 0.282869 | 4.85E-10 | 0.290365 |
| -0.17053 | 0.00021  | -0.56198 | 3.11E-40 | -0.02705 | 0.55984 | -0.10377 | 0.02492  | -0.28049 |
| -0.14066 | 0.00231  | -0.55422 | 5.89E-39 | 0.051368 | 0.26794 | 0.029667 | 0.52247  | 0.10078  |
| 0.437532 | 2.93E-23 | 0.909608 | #####    | 0.011319 | 0.80726 | 0.054759 | 0.23758  | 0.074983 |
| 0.212915 | 3.45E-06 | 0.528591 | 5.69E-35 | 0.029817 | 0.52038 | -0.01052 | 0.82065  | 0.105259 |
| 0.294199 | 8.89E-11 | 0.638826 | 6.44E-55 | 0.037408 | 0.41995 | 0.151341 | 0.00104  | 0.011568 |
| 0.417258 | 4.25E-21 | 0.617551 | 1.92E-50 | -0.00147 | 0.97472 | 0.009899 | 0.83106  | -0.11344 |
| 0.122557 | 0.00802  | 0.512983 | 1.05E-32 | 0.07367  | 0.11185 | 0.199973 | 1.34E-05 | 0.229114 |
| 0.322797 | 8.72E-13 | 0.52684  | 1.04E-34 | 0.031474 | 0.49746 | 0.096846 | 0.03642  | 0.100983 |
| 0.191259 | 3.17E-05 | 0.505639 | 1.11E-31 | -0.0056  | 0.90386 | -0.01914 | 0.67996  | 0.074284 |
| 0.286258 | 2.94E-10 | 0.655842 | 9.29E-59 | 0.029467 | 0.52529 | 0.04842  | 0.29641  | 0.140483 |
| 0.395699 | 5.91E-19 | 0.808442 | #####    | 0.014661 | 0.752   | 0.061237 | 0.18649  | 0.113573 |
| 0.36982  | 1.39E-16 | 0.581506 | 1.34E-43 | 0.075771 | 0.10197 | 0.256858 | 1.80E-08 | 0.152243 |
| 0.111799 | 0.01564  | 0.559169 | 9.11E-40 | 0.005103 | 0.91242 | 0.03055  | 0.51017  | 0.051419 |
| 0.06266  | 0.17644  | 0.538959 | 1.53E-36 | -0.00141 | 0.97576 | 0.169137 | 0.00024  | 0.25124  |
| 0.173261 | 0.00017  | 0.567319 | 3.94E-41 | 0.038973 | 0.40075 | 0.137272 | 0.00295  | 0.127923 |
| 0.386243 | 4.60E-18 | 0.592679 | 1.25E-45 | 0.011274 | 0.80801 | 0.040823 | 0.37875  | -0.02946 |
| 0.158065 | 0.00061  | 0.610217 | 5.60E-49 | 0.096503 | 0.03709 | 0.259042 | 1.35E-08 | 0.241696 |
| -0.23208 | 3.95E-07 | -0.55017 | 2.65E-38 | -0.0611  | 0.18751 | -0.10379 | 0.02489  | -0.25827 |
| 0.246613 | 6.71E-08 | 0.562446 | 2.60E-40 | -0.03066 | 0.50866 | -0.04984 | 0.2825   | 0.004765 |
| 0.338262 | 5.78E-14 | 0.748292 | 6.45E-85 | 0.084176 | 0.06915 | 0.135118 | 0.00344  | 0.051044 |
| 0.165407 | 0.00033  | 0.574052 | 2.75E-42 | 0.068334 | 0.14035 | 0.129872 | 0.00494  | 0.211162 |
| 0.205597 | 7.50E-06 | 0.524467 | 2.32E-34 | 0.03937  | 0.39597 | 0.050181 | 0.27917  | 0.266102 |
| 0.240716 | 1.40E-07 | 0.363402 | 5.02E-16 | -0.00365 | 0.93732 | -0.05254 | 0.25717  | 0.317351 |
| -0.21048 | 4.48E-06 | -0.55448 | 5.34E-39 | -0.02935 | 0.52694 | -0.12078 | 0.00898  | -0.17072 |
| 0.248281 | 5.44E-08 | 0.39854  | 3.15E-19 | 0.028016 | 0.54589 | -0.06059 | 0.19123  | 0.213965 |
| 0.503121 | 2.47E-31 | 0.80064  | #####    | 0.043046 | 0.35332 | 0.010262 | 0.82495  | 0.115833 |
| 0.21378  | 3.14E-06 | 0.548785 | 4.40E-38 | 0.016841 | 0.71661 | 0.17175  | 0.00019  | 0.149743 |
| 0.380761 | 1.47E-17 | 0.456456 | 2.06E-25 | 0.040825 | 0.37873 | -0.07172 | 0.12167  | 0.231319 |

|          |          |          |          |          |         |          |          |          |
|----------|----------|----------|----------|----------|---------|----------|----------|----------|
| -0.00204 | 0.96489  | -0.02149 | 0.64315  | 0.029049 | 0.53118 | -0.02847 | 0.53946  | 0.108922 |
| -0.07719 | 0.09571  | -0.34142 | 3.26E-14 | 0.016642 | 0.71982 | -0.05197 | 0.26238  | 0.055355 |
| 0.201856 | 1.10E-05 | 0.012016 | 0.79564  | 0.037596 | 0.41761 | -0.04938 | 0.28696  | -0.02064 |
| 0.240822 | 1.38E-07 | 0.03081  | 0.50657  | 0.052915 | 0.25377 | -0.00832 | 0.85761  | -0.03112 |
| -0.00329 | 0.94348  | -0.0399  | 0.38969  | 0.074897 | 0.10599 | 0.069429 | 0.13409  | 0.127572 |
| 0.101031 | 0.02903  | -0.15062 | 0.0011   | 0.030267 | 0.51409 | -0.05769 | 0.21339  | -0.01306 |
| -0.00215 | 0.96302  | -0.07844 | 0.09041  | 0.011378 | 0.80627 | 0.031497 | 0.49714  | 0.051507 |
| -0.05316 | 0.2516   | -0.29632 | 6.42E-11 | 0.019339 | 0.67679 | 0.015566 | 0.73724  | 0.023562 |
| -0.09944 | 0.03168  | -0.32454 | 6.48E-13 | 0.009189 | 0.84301 | 0.042457 | 0.35996  | -0.02953 |
| 0.061298 | 0.18605  | -0.20994 | 4.75E-06 | 0.010588 | 0.81949 | -0.08159 | 0.07817  | -0.01056 |
| 0.26299  | 7.93E-09 | 0.048724 | 0.29338  | -0.05163 | 0.26553 | -0.0713  | 0.12389  | -0.18015 |
| 0.041049 | 0.37611  | 0.059776 | 0.19723  | 0.056391 | 0.22386 | 0.108698 | 0.01879  | 0.140574 |
| -0.13522 | 0.00341  | -0.10452 | 0.0239   | -0.05189 | 0.26305 | -0.04078 | 0.37922  | -0.05485 |
| 0.303536 | 2.08E-11 | -0.08598 | 0.06339  | -0.02114 | 0.6486  | -0.13742 | 0.00292  | -0.02852 |
| -0.05609 | 0.22632  | 0.15919  | 0.00055  | -0.00276 | 0.95256 | 0.080034 | 0.08405  | 0.078789 |
| 0.040621 | 0.38112  | -0.06307 | 0.17362  | 0.002597 | 0.95536 | 0.003994 | 0.9314   | -0.04684 |
| 0.431989 | 1.18E-22 | 0.429321 | 2.29E-22 | 0.076004 | 0.10092 | 0.164833 | 0.00035  | 0.184887 |
| -0.1481  | 0.00133  | -0.04575 | 0.32392  | -0.04277 | 0.3564  | 0.011612 | 0.80238  | -0.14209 |
| -0.02988 | 0.51951  | -0.42735 | 3.72E-22 | -0.03352 | 0.46994 | -0.17971 | 9.42E-05 | -0.04666 |
| 0.114071 | 0.01364  | -0.10687 | 0.0209   | 0.00481  | 0.91744 | 0.027763 | 0.54953  | 0.006148 |
| 0.145267 | 0.00165  | 0.29844  | 4.62E-11 | -0.02319 | 0.61717 | -0.04018 | 0.3863   | 0.011952 |
| -0.14902 | 0.00124  | -0.00225 | 0.96138  | -0.02732 | 0.55599 | 0.018425 | 0.69127  | -0.00366 |
| 0.223779 | 1.03E-06 | 0.27645  | 1.22E-09 | 0.098269 | 0.03375 | 0.085843 | 0.06381  | 0.231354 |
| -0.00672 | 0.88478  | 0.001248 | 0.97853  | -0.01707 | 0.71297 | -0.02216 | 0.63297  | 0.082667 |
| -0.06855 | 0.1391   | 0.044048 | 0.34221  | 0.071488 | 0.1229  | 0.146484 | 0.0015   | 0.141408 |
| -0.05928 | 0.201    | -0.19347 | 2.56E-05 | -0.03882 | 0.40255 | -0.02663 | 0.56593  | -0.05986 |
| -0.08164 | 0.07799  | -0.17589 | 0.00013  | -0.09766 | 0.03488 | -0.1714  | 0.0002   | -0.18494 |
| 0.044508 | 0.33719  | -0.05925 | 0.20124  | 0.029618 | 0.52317 | 0.018147 | 0.69569  | -0.01944 |
| 0.098968 | 0.0325   | 0.047529 | 0.3054   | 0.040701 | 0.38018 | 0.049487 | 0.28588  | 0.037228 |
| 0.050815 | 0.27313  | -0.07825 | 0.0912   | 0.006786 | 0.88372 | -0.01456 | 0.75371  | 0.0606   |
| 0.000687 | 0.98819  | -0.10992 | 0.01749  | 0.033242 | 0.47359 | 0.042002 | 0.36513  | -0.02778 |
| 0.07913  | 0.08762  | -0.03117 | 0.50161  | -0.02813 | 0.54431 | -0.09286 | 0.0449   | -0.03111 |
| 0.132158 | 0.00422  | 0.204563 | 8.35E-06 | 0.021151 | 0.64846 | 0.023158 | 0.61765  | 0.142209 |
| -0.06802 | 0.14221  | -0.06499 | 0.16086  | -0.0267  | 0.56488 | -0.07065 | 0.12739  | -0.09948 |
| 0.184099 | 6.28E-05 | 0.084253 | 0.0689   | -0.00517 | 0.91127 | -0.03911 | 0.39911  | 0.031975 |
| 0.106301 | 0.02159  | -0.3195  | 1.53E-12 | -0.00438 | 0.92482 | -0.04957 | 0.28509  | -0.06275 |
| 0.27307  | 1.98E-09 | -0.13383 | 0.00376  | -0.00346 | 0.94054 | -0.08459 | 0.06779  | -0.05772 |
| 0.042108 | 0.36392  | 0.045105 | 0.33075  | -0.02489 | 0.59165 | -0.06511 | 0.16007  | -0.01045 |
| -0.13002 | 0.00489  | -0.28321 | 4.61E-10 | 0.036517 | 0.43111 | 0.018322 | 0.69291  | 0.068245 |
| -0.07123 | 0.12428  | 0.071294 | 0.12392  | -0.10087 | 0.02928 | -0.05427 | 0.24183  | -0.03791 |
| -0.10193 | 0.02762  | 0.142668 | 0.002    | 0.070283 | 0.12936 | 0.140714 | 0.0023   | 0.031703 |
| -0.07426 | 0.10901  | 0.186043 | 5.23E-05 | -0.00493 | 0.91544 | 0.009157 | 0.84355  | 0.075548 |
| 0.072426 | 0.11805  | 0.083935 | 0.06996  | -0.04271 | 0.35709 | -0.04928 | 0.28786  | -0.00462 |
| -0.09678 | 0.03656  | -0.35758 | 1.56E-15 | 0.060436 | 0.19233 | 0.075506 | 0.10317  | 0.18605  |
| 0.120829 | 0.00896  | -0.34716 | 1.13E-14 | -0.03211 | 0.48884 | -0.15344 | 0.00088  | -0.15726 |

|          |          |          |          |          |         |          |          |          |
|----------|----------|----------|----------|----------|---------|----------|----------|----------|
| -0.10133 | 0.02857  | -0.3681  | 1.97E-16 | 0.053032 | 0.25272 | 0.068003 | 0.14229  | 0.123158 |
| 0.090252 | 0.05128  | 0.167609 | 0.00027  | -0.04702 | 0.31058 | -0.07117 | 0.12458  | -0.02215 |
| -0.02037 | 0.66059  | -0.10941 | 0.01803  | 0.135322 | 0.00339 | 0.052432 | 0.25814  | 0.099817 |
| 0.043692 | 0.34614  | -0.15446 | 0.00081  | 0.059708 | 0.19775 | 0.060622 | 0.19096  | 0.122053 |
| 0.020862 | 0.65295  | -0.00745 | 0.87241  | -0.04376 | 0.34536 | -0.10285 | 0.02625  | -0.02296 |
| -0.01265 | 0.78516  | -0.05174 | 0.26449  | 0.014324 | 0.75752 | 0.027632 | 0.55141  | -0.01706 |
| -0.18358 | 6.59E-05 | -0.06666 | 0.15035  | -0.03793 | 0.41352 | -0.05532 | 0.23283  | -0.0594  |
| 0.119505 | 0.00974  | -0.06367 | 0.16957  | 0.021268 | 0.64664 | -0.03506 | 0.44968  | -0.08263 |
| 0.078754 | 0.08914  | -0.01158 | 0.80283  | -0.00075 | 0.98703 | -0.02744 | 0.55418  | -0.04342 |
| -0.00124 | 0.9786   | -0.01387 | 0.765    | -0.04573 | 0.32409 | -0.05767 | 0.21354  | -0.01201 |
| -0.05733 | 0.21624  | -0.09294 | 0.04471  | -0.05024 | 0.27862 | -0.06151 | 0.1845   | -0.06647 |
| -0.06284 | 0.17522  | -0.01034 | 0.8237   | -0.07097 | 0.12564 | -0.08067 | 0.0816   | -0.09548 |
| -0.0359  | 0.43896  | 0.041721 | 0.36835  | -0.03198 | 0.4906  | -0.03309 | 0.47556  | 0.02557  |
| 0.064376 | 0.16487  | 0.184072 | 6.30E-05 | -0.02346 | 0.6131  | 0.139639 | 0.00249  | 0.051035 |
| 0.152699 | 0.00093  | -0.1595  | 0.00054  | 0.029613 | 0.52323 | -0.07987 | 0.08468  | 0.01663  |
| -0.31619 | 2.66E-12 | -0.25103 | 3.83E-08 | -0.06858 | 0.1389  | -0.04896 | 0.29109  | -0.1186  |
| -0.04269 | 0.35731  | -0.2736  | 1.83E-09 | 0.043349 | 0.34994 | -0.01126 | 0.8082   | 0.00596  |
| 0.033008 | 0.47671  | -0.00709 | 0.8786   | -0.02954 | 0.52422 | -0.06961 | 0.1331   | -0.05022 |
| -0.04196 | 0.36566  | 0.004699 | 0.91934  | -0.08196 | 0.07682 | -0.16665 | 0.0003   | -0.24784 |
| 0.15448  | 0.00081  | -0.07712 | 0.096    | 0.039382 | 0.39583 | 0.036004 | 0.43762  | -0.04289 |
| 0.113911 | 0.01378  | -0.07207 | 0.11985  | 0.028834 | 0.53422 | 0.022468 | 0.62817  | 0.043108 |
| 0.009145 | 0.84376  | -0.30285 | 2.31E-11 | -0.01632 | 0.72497 | -0.08817 | 0.0569   | -0.10205 |
| 0.166503 | 0.0003   | -0.03193 | 0.49124  | -0.03347 | 0.47053 | -0.05672 | 0.22118  | -0.00474 |
| 0.00226  | 0.96115  | 0.145232 | 0.00165  | -0.02742 | 0.55445 | 0.016192 | 0.72708  | 0.084691 |
| 0.102084 | 0.02739  | 0.064038 | 0.1671   | 0.038386 | 0.40789 | 0.164167 | 0.00037  | -0.03866 |
| 0.062956 | 0.1744   | -0.02044 | 0.65952  | 0.060412 | 0.19251 | 0.052249 | 0.2598   | 0.226316 |
| 0.050784 | 0.27342  | -0.05165 | 0.26531  | 0.03756  | 0.41807 | 0.02756  | 0.55245  | -0.12463 |
| -0.22817 | 6.24E-07 | -0.13934 | 0.00255  | -0.03152 | 0.49688 | 0.06342  | 0.17124  | -0.00442 |
| -0.08225 | 0.0758   | 0.007252 | 0.87579  | -0.06101 | 0.18816 | -0.1053  | 0.02287  | -0.07652 |
| 0.168547 | 0.00025  | 0.042277 | 0.36199  | -0.02845 | 0.53965 | -0.04531 | 0.32859  | -0.25566 |
| 0.039135 | 0.39879  | 0.029143 | 0.52986  | 0.043328 | 0.35018 | 0.104118 | 0.02444  | 0.155367 |
| -0.04673 | 0.31357  | -0.0607  | 0.1904   | 0.126681 | 0.00612 | 0.201601 | 1.13E-05 | 0.143174 |
| 0.01813  | 0.69596  | -0.11602 | 0.01211  | 0.026538 | 0.56728 | -0.03643 | 0.43226  | 0.025801 |
| 0.416002 | 5.72E-21 | 0.316579 | 2.49E-12 | -0.03216 | 0.48818 | -0.15759 | 0.00063  | -0.17576 |
| 0.036265 | 0.4343   | 0.205594 | 7.50E-06 | -0.00731 | 0.87486 | 0.000885 | 0.98479  | 0.099799 |
| -0.09914 | 0.0322   | 0.137402 | 0.00293  | 0.046119 | 0.31998 | 0.050382 | 0.27724  | 0.065357 |
| 0.031002 | 0.50393  | -0.19746 | 1.72E-05 | 0.033674 | 0.46787 | -0.04877 | 0.29295  | 0.076968 |
| -0.08124 | 0.07948  | -0.33805 | 6.01E-14 | 0.002621 | 0.95495 | -0.04851 | 0.2955   | -0.00788 |
| 0.104747 | 0.02359  | -0.07793 | 0.09255  | 0.010604 | 0.81922 | -0.07265 | 0.11692  | -0.02451 |
| 0.31839  | 1.84E-12 | 0.489468 | 1.66E-29 | -0.018   | 0.69812 | -0.01013 | 0.82723  | -0.03013 |
| -0.10552 | 0.02258  | -0.24875 | 5.13E-08 | 0.033733 | 0.46708 | 0.044358 | 0.33883  | 0.011276 |
| 0.031603 | 0.49569  | -0.12179 | 0.00842  | 0.022355 | 0.62991 | -0.03193 | 0.49123  | 0.019852 |
| 0.065637 | 0.15673  | -0.00852 | 0.85428  | 0.000476 | 0.99181 | 0.000811 | 0.98605  | 0.068053 |
| 0.206684 | 6.69E-06 | 0.21123  | 4.13E-06 | -0.00359 | 0.93836 | -0.03491 | 0.45167  | -0.00985 |
| 0.132646 | 0.00408  | -0.0712  | 0.12441  | 0.029839 | 0.52007 | -0.00474 | 0.91857  | 0.099605 |

|          |          |          |          |          |         |           |          |           |
|----------|----------|----------|----------|----------|---------|-----------|----------|-----------|
| 0.208848 | 5.33E-06 | 0.105081 | 0.02315  | 0.046085 | 0.32033 | 0.02792   | 0.54727  | 0.080901  |
| 0.196162 | 1.96E-05 | -0.11551 | 0.01249  | 0.013264 | 0.77496 | -0.09856  | 0.03322  | -0.09381  |
| -0.00232 | 0.96013  | 0.044571 | 0.33651  | 0.156957 | 0.00066 | 0.219076  | 1.75E-06 | 0.505216  |
| 0.094323 | 0.04161  | 0.237229 | 2.14E-07 | -0.01404 | 0.76223 | -0.01198  | 0.7962   | 0.191123  |
| 0.005476 | 0.90605  | -0.17722 | 0.00012  | -0.05477 | 0.23749 | -0.10292  | 0.02614  | 0.067855  |
| -0.1033  | 0.02559  | -0.34896 | 8.08E-15 | -0.02601 | 0.57495 | -0.05511  | 0.23454  | -0.11536  |
| -0.06844 | 0.13971  | -0.34948 | 7.33E-15 | -0.00506 | 0.91312 | -0.0591   | 0.20235  | -0.08276  |
| -0.08278 | 0.0739   | -0.35644 | 1.95E-15 | -0.00762 | 0.86947 | -0.04449  | 0.33736  | -0.06154  |
| 0.037924 | 0.41356  | 0.122769 | 0.00791  | 0.120383 | 0.00921 | 0.182441  | 7.33E-05 | 0.223871  |
| 0.018166 | 0.69539  | -0.05473 | 0.23783  | -0.03256 | 0.48266 | -0.05937  | 0.20033  | -0.10295  |
| -0.1215  | 0.00858  | -0.28403 | 4.09E-10 | -0.00741 | 0.87303 | -0.0383   | 0.40895  | 0.066113  |
| 0.081585 | 0.07819  | -0.26108 | 1.03E-08 | 0.017898 | 0.69967 | -0.05073  | 0.27389  | -0.04461  |
| -0.05618 | 0.22563  | -0.12107 | 0.00882  | 0.031812 | 0.49284 | 0.033751  | 0.46685  | 0.037733  |
| -0.01133 | 0.80704  | -0.14489 | 0.00169  | 0.032471 | 0.48393 | 0.017454  | 0.70676  | 0.02233   |
| -0.02728 | 0.55651  | -0.10455 | 0.02385  | 0.033045 | 0.47622 | -1.70E-05 | 0.99971  | 0.061676  |
| 0.293846 | 9.38E-11 | 0.202399 | 1.04E-05 | 0.015366 | 0.7405  | -0.03586  | 0.4394   | 0.006698  |
| 0.345562 | 1.52E-14 | 0.184418 | 6.10E-05 | 0.022236 | 0.63172 | -0.02455  | 0.59671  | -0.01191  |
| 0.045239 | 0.32931  | 0.030375 | 0.51259  | 0.033542 | 0.46962 | 0.058591  | 0.20629  | 0.07217   |
| 0.007137 | 0.87775  | -0.1262  | 0.00632  | -0.02089 | 0.6525  | -0.076    | 0.10093  | 0.029981  |
| 0.124091 | 0.00726  | 0.121954 | 0.00833  | 0.087247 | 0.05957 | 0.003931  | 0.93248  | 0.118029  |
| -0.07438 | 0.10845  | 0.011174 | 0.80969  | -0.03457 | 0.4561  | -0.05603  | 0.22686  | -0.00178  |
| 0.327027 | 4.22E-13 | 0.236242 | 2.41E-07 | -0.01254 | 0.78696 | -0.01931  | 0.67722  | -0.04443  |
| -0.0961  | 0.03789  | -0.14332 | 0.0019   | -0.08707 | 0.06008 | -0.10077  | 0.02946  | -0.09991  |
| 0.001197 | 0.97941  | 0.125528 | 0.0066   | -0.01683 | 0.71683 | 0.013796  | 0.76619  | -0.03175  |
| 0.279331 | 8.10E-10 | 0.096763 | 0.03658  | 0.028885 | 0.5335  | -0.02274  | 0.62401  | 0.014057  |
| -0.00758 | 0.87018  | -0.13429 | 0.00364  | 0.012011 | 0.79573 | -0.07634  | 0.09942  | 0.056198  |
| 0.148887 | 0.00125  | -0.15314 | 0.0009   | 0.024512 | 0.59725 | 0.086303  | 0.06239  | -0.01024  |
| 0.002108 | 0.96377  | -0.14839 | 0.0013   | 0.065831 | 0.15551 | 0.099405  | 0.03174  | 0.098738  |
| -0.0667  | 0.15009  | 0.017702 | 0.7028   | 0.098576 | 0.03319 | 0.240249  | 1.48E-07 | 0.213372  |
| 0.147921 | 0.00135  | -0.08606 | 0.06313  | 0.005022 | 0.91381 | -0.06372  | 0.16923  | -7.64E-05 |
| 0.195967 | 2.00E-05 | 0.207777 | 5.97E-06 | 0.087425 | 0.05905 | 0.266544  | 4.89E-09 | 0.011297  |
| -0.00247 | 0.95749  | -0.04628 | 0.31831  | 0.039904 | 0.38959 | 0.009141  | 0.84381  | 0.058125  |
| -0.01305 | 0.77844  | 0.019627 | 0.67226  | -0.01244 | 0.78861 | 0.005526  | 0.9052   | -0.01927  |
| 0.185294 | 5.61E-05 | 0.039231 | 0.39764  | 0.021981 | 0.63565 | -0.02337  | 0.61446  | 0.036662  |
| 0.117456 | 0.01108  | 0.106652 | 0.02116  | -0.06832 | 0.14041 | -0.11779  | 0.01085  | -0.0596   |
| -0.01036 | 0.82326  | -0.1185  | 0.01038  | -0.04063 | 0.38096 | -0.09477  | 0.04064  | -0.07901  |
| 0.058895 | 0.20394  | -0.16038 | 0.0005   | 0.01074  | 0.81695 | -0.01401  | 0.76273  | -0.005    |
| -0.20107 | 1.20E-05 | -0.11449 | 0.0133   | -0.06317 | 0.17294 | -0.04538  | 0.32777  | -0.16075  |
| -0.01977 | 0.67003  | -0.22709 | 7.08E-07 | 0.138298 | 0.00274 | 0.064962  | 0.16105  | 0.175183  |
| -0.12847 | 0.00543  | -0.07006 | 0.13057  | -0.07992 | 0.0845  | -0.09205  | 0.04679  | 0.025396  |
| -0.12914 | 0.00519  | 0.036868 | 0.4267   | -0.07341 | 0.11312 | -0.06311  | 0.17335  | -0.0351   |
| -0.00179 | 0.96921  | -0.12441 | 0.00711  | -0.00456 | 0.92179 | -0.02707  | 0.55952  | 0.022373  |
| -0.16772 | 0.00027  | -0.12766 | 0.00573  | -0.04335 | 0.34997 | -0.05699  | 0.21898  | -0.05424  |
| 0.151328 | 0.00104  | 0.080638 | 0.08172  | 0.069234 | 0.13519 | 0.061766  | 0.18271  | 0.068919  |
| -0.16641 | 0.0003   | -0.26366 | 7.24E-09 | -0.09641 | 0.03728 | -0.09069  | 0.05016  | -0.15473  |

|          |          |          |          |          |         |          |          |          |
|----------|----------|----------|----------|----------|---------|----------|----------|----------|
| 0.102917 | 0.02615  | 0.06918  | 0.1355   | 0.029461 | 0.52538 | -0.01472 | 0.75099  | 0.071585 |
| 0.074547 | 0.10764  | 0.047039 | 0.31041  | -0.03959 | 0.39338 | -0.04341 | 0.34929  | -0.0443  |
| -0.08258 | 0.07463  | -0.05324 | 0.25086  | 0.006978 | 0.88045 | 0.029433 | 0.52576  | -0.06193 |
| 0.259604 | 1.25E-08 | 0.33235  | 1.66E-13 | -0.02277 | 0.62359 | -0.00606 | 0.896    | -0.04966 |
| 0.021951 | 0.63611  | 0.082715 | 0.07414  | -0.02966 | 0.52251 | -0.06488 | 0.16161  | -0.03141 |
| 0.036896 | 0.42634  | -0.01615 | 0.72782  | -0.02516 | 0.58761 | -0.04515 | 0.33031  | -0.01492 |
| -0.18833 | 4.21E-05 | -0.17502 | 0.00014  | 0.033856 | 0.46546 | -0.01838 | 0.69206  | -0.01132 |
| -0.01694 | 0.71501  | -0.15613 | 0.00071  | 0.026545 | 0.56718 | 0.014967 | 0.74701  | -0.07846 |
| -0.05783 | 0.21224  | -0.24456 | 8.68E-08 | 0.007001 | 0.88006 | 0.005617 | 0.90364  | -0.00455 |
| 0.022213 | 0.63208  | -0.09469 | 0.04081  | 0.008667 | 0.85182 | -0.0104  | 0.82265  | -0.00956 |
| 0.14968  | 0.00118  | -0.09427 | 0.04172  | 0.096946 | 0.03623 | 0.13716  | 0.00298  | 0.066417 |
| 0.130539 | 0.00472  | 0.068591 | 0.13887  | 0.049107 | 0.28959 | 0.04797  | 0.30092  | 0.196327 |
| 0.064336 | 0.16513  | -0.1623  | 0.00043  | 0.015711 | 0.73489 | -0.03959 | 0.39331  | 0.047559 |
| -0.1035  | 0.02531  | 0.069834 | 0.13183  | 0.03095  | 0.50464 | 0.052175 | 0.26048  | 0.060041 |
| 0.195486 | 2.10E-05 | 0.340256 | 4.03E-14 | -0.00342 | 0.94124 | -0.0066  | 0.88681  | 0.071256 |
| -0.12389 | 0.00735  | -0.2102  | 4.62E-06 | 0.075072 | 0.10518 | 0.129099 | 0.0052   | 0.182025 |
| 0.192391 | 2.84E-05 | 0.032765 | 0.47997  | 0.046139 | 0.31977 | 0.05084  | 0.27289  | 0.149052 |
| 0.14861  | 0.00128  | 0.300491 | 3.35E-11 | -0.00085 | 0.98543 | -0.07338 | 0.11326  | 0.026046 |
| 0.231094 | 4.44E-07 | 0.232891 | 3.59E-07 | -0.03577 | 0.44066 | 0.009796 | 0.83279  | -0.03135 |
| -0.14468 | 0.00172  | 0.069512 | 0.13363  | -0.02559 | 0.58121 | 0.009912 | 0.83084  | 0.02482  |
| 0.097287 | 0.03558  | 0.036572 | 0.43042  | -0.0108  | 0.81598 | -0.00293 | 0.94958  | -0.06902 |
| 0.051999 | 0.26209  | -0.17078 | 0.00021  | -0.00542 | 0.90698 | -0.08487 | 0.06687  | -0.12521 |
| -0.07229 | 0.11873  | -0.22365 | 1.05E-06 | -0.03073 | 0.50766 | -0.12264 | 0.00797  | -0.048   |
| -0.00469 | 0.91957  | -0.18547 | 5.52E-05 | 0.014078 | 0.76157 | -0.00916 | 0.84352  | -0.04652 |
| -0.12845 | 0.00544  | -0.25985 | 1.21E-08 | -0.08939 | 0.05354 | -0.08284 | 0.07369  | -0.15869 |
| -0.00343 | 0.94106  | 0.066591 | 0.15078  | 0.072963 | 0.11534 | 0.078248 | 0.09122  | 0.073046 |
| -0.07225 | 0.11895  | -0.02443 | 0.5984   | -0.02826 | 0.54244 | -0.02249 | 0.62788  | -0.07815 |
| 0.171774 | 0.00019  | 0.400386 | 2.08E-19 | 0.015466 | 0.73887 | 0.066446 | 0.15167  | 0.183964 |
| 0.19495  | 2.21E-05 | 0.049059 | 0.29007  | -0.0936  | 0.04321 | -0.09399 | 0.04233  | -0.20553 |
| 0.241564 | 1.26E-07 | -0.17702 | 0.00012  | -0.05919 | 0.20171 | -0.21402 | 3.06E-06 | -0.17795 |
| 0.019164 | 0.67956  | -0.00592 | 0.8985   | -0.06301 | 0.17406 | -0.05253 | 0.25722  | -0.23995 |
| 0.038849 | 0.40225  | 0.048867 | 0.29196  | 0.043832 | 0.3446  | 0.056351 | 0.22419  | 0.1091   |
| -0.22416 | 9.91E-07 | -0.08242 | 0.07519  | -0.02318 | 0.61725 | 0.007394 | 0.87338  | -0.05908 |
| -0.14832 | 0.00131  | -0.08531 | 0.06548  | -0.03518 | 0.44817 | -0.00328 | 0.94369  | -0.04923 |
| -0.02703 | 0.56014  | -0.21227 | 3.70E-06 | 0.018556 | 0.68919 | -0.05146 | 0.26704  | 0.02901  |
| 0.012293 | 0.79105  | -0.01237 | 0.78969  | -0.01012 | 0.82726 | -0.00123 | 0.97892  | 0.004797 |
| -0.12855 | 0.0054   | 0.031334 | 0.49936  | -0.03349 | 0.47024 | 0.00659  | 0.88706  | 0.049344 |
| -0.06703 | 0.14812  | -0.04288 | 0.35519  | -0.0425  | 0.35952 | -0.00237 | 0.95921  | 0.061136 |
| -0.05954 | 0.19904  | -0.10907 | 0.01839  | 0.059814 | 0.19695 | 0.036741 | 0.42829  | 0.155946 |
| 0.19371  | 2.50E-05 | 0.323027 | 8.39E-13 | 0.041869 | 0.36665 | 0.182442 | 7.33E-05 | 0.029436 |
| 0.059474 | 0.19952  | -0.11353 | 0.0141   | 0.042579 | 0.35857 | -0.01953 | 0.67379  | 0.104722 |
| 0.10366  | 0.02508  | 0.094476 | 0.04128  | 0.038838 | 0.40239 | 0.061912 | 0.18167  | 0.02798  |
| 0.078405 | 0.09057  | 0.130186 | 0.00484  | 0.07136  | 0.12358 | 0.189559 | 3.74E-05 | 0.240018 |
| -0.14887 | 0.00125  | 0.171376 | 0.0002   | -0.00286 | 0.95079 | 0.131734 | 0.00435  | -0.09323 |
| -0.00719 | 0.87678  | -0.08739 | 0.05915  | -0.07884 | 0.08878 | -0.14399 | 0.00181  | -0.02009 |

|          |          |          |          |          |         |          |          |          |
|----------|----------|----------|----------|----------|---------|----------|----------|----------|
| 0.126807 | 0.00607  | -0.03558 | 0.44299  | 0.042353 | 0.36114 | 0.01599  | 0.73036  | -0.05374 |
| 0.109878 | 0.01753  | -0.01428 | 0.75817  | 0.025609 | 0.58094 | -0.00307 | 0.94725  | 0.004302 |
| -0.18675 | 4.89E-05 | -0.23807 | 1.93E-07 | -0.04021 | 0.38601 | -0.04425 | 0.34002  | -0.06371 |
| 0.026503 | 0.56779  | 0.105578 | 0.0225   | 0.000107 | 0.99817 | -0.03223 | 0.48711  | 0.073526 |
| 0.040957 | 0.37719  | -0.04903 | 0.29035  | -0.01701 | 0.71388 | 0.02653  | 0.56741  | -0.00484 |
| 0.013021 | 0.77899  | -0.06849 | 0.13943  | 0.06013  | 0.19459 | 0.005416 | 0.90707  | 0.104072 |
| -0.04879 | 0.29273  | -0.01495 | 0.74736  | -0.043   | 0.35389 | -0.01372 | 0.76747  | -0.01513 |
| -0.12179 | 0.00842  | -0.11717 | 0.01128  | -0.03426 | 0.46019 | -0.07527 | 0.10424  | -0.06606 |
| -0.08483 | 0.06703  | -0.17524 | 0.00014  | -0.01325 | 0.77521 | -0.02103 | 0.65035  | -0.05275 |
| 0.190849 | 3.30E-05 | -0.03181 | 0.49284  | 0.031675 | 0.49471 | -0.02334 | 0.61494  | -0.01429 |
| 0.133137 | 0.00395  | 0.286559 | 2.81E-10 | -0.03655 | 0.43069 | -0.09261 | 0.04547  | 0.032081 |
| -0.13393 | 0.00374  | -0.18813 | 4.29E-05 | -0.05706 | 0.21844 | -0.1026  | 0.02661  | -0.10645 |
| 0.135347 | 0.00338  | 0.160422 | 0.0005   | 0.013385 | 0.77297 | 0.090171 | 0.05149  | 0.128106 |
| 0.142483 | 0.00202  | 0.187003 | 4.78E-05 | -0.07744 | 0.09463 | -0.09732 | 0.03551  | -0.11332 |
| -0.1445  | 0.00174  | 0.086074 | 0.06309  | 0.016304 | 0.72528 | 0.08788  | 0.05774  | -0.04332 |
| 0.136175 | 0.00319  | -0.06991 | 0.13142  | 0.01941  | 0.67568 | -0.0229  | 0.62156  | 0.023447 |
| -0.11542 | 0.01256  | -0.23167 | 4.15E-07 | 0.019955 | 0.66711 | 0.033083 | 0.47572  | 0.086012 |
| 0.077788 | 0.09314  | 0.09712  | 0.03589  | 0.044947 | 0.33244 | 0.064609 | 0.16334  | 0.169384 |
| 0.322324 | 9.46E-13 | 0.134146 | 0.00368  | -0.02804 | 0.54557 | -0.10216 | 0.02728  | -0.0784  |
| 0.179219 | 9.85E-05 | 0.072473 | 0.11782  | 0.032695 | 0.48091 | -0.00474 | 0.91869  | 0.090134 |
| 0.158763 | 0.00057  | -0.13325 | 0.00392  | -0.02909 | 0.53064 | -0.14217 | 0.00207  | -0.15774 |
| 0.372951 | 7.38E-17 | 0.138261 | 0.00275  | -0.03541 | 0.44521 | -0.1328  | 0.00404  | -0.1807  |
| 0.02423  | 0.60147  | -0.05782 | 0.21235  | -0.02258 | 0.62654 | -0.01726 | 0.70992  | -0.03343 |
| -0.21962 | 1.65E-06 | -0.32236 | 9.40E-13 | -0.05647 | 0.22321 | -0.13995 | 0.00244  | -0.23147 |
| -0.05007 | 0.28021  | -0.23518 | 2.73E-07 | 0.006722 | 0.8848  | -0.00648 | 0.88884  | -0.20218 |
| 0.065913 | 0.15499  | -0.21046 | 4.49E-06 | 0.002349 | 0.95963 | -0.05118 | 0.26965  | 0.041241 |
| 0.142583 | 0.00201  | -0.18595 | 5.28E-05 | -0.04011 | 0.3871  | -0.05276 | 0.25515  | -0.06111 |
| 0.098214 | 0.03385  | 0.173891 | 0.00016  | -0.01465 | 0.75223 | -0.075   | 0.10551  | 0.048357 |
| 0.086314 | 0.06236  | -0.10352 | 0.02528  | -0.04059 | 0.38144 | -0.09313 | 0.04426  | -0.19104 |
| 0.013951 | 0.76365  | -0.2341  | 3.11E-07 | -0.0179  | 0.69964 | -0.09119 | 0.0489   | -0.08065 |
| 0.221645 | 1.32E-06 | 0.061684 | 0.18329  | 0.05669  | 0.22142 | 0.050725 | 0.27398  | 0.069799 |
| 0.359631 | 1.05E-15 | -0.17374 | 0.00016  | -0.04419 | 0.34069 | -0.18855 | 4.12E-05 | -0.05479 |
| 0.110792 | 0.01661  | 0.148498 | 0.00129  | 0.010763 | 0.81656 | 0.084621 | 0.06769  | -0.02442 |
| 0.162205 | 0.00043  | -0.02841 | 0.54024  | 0.001217 | 0.97907 | -0.10579 | 0.02223  | -0.01531 |
| 0.054793 | 0.23729  | 0.060729 | 0.19018  | -0.0316  | 0.49577 | -0.03129 | 0.50003  | 0.004046 |
| 0.124308 | 0.00715  | 0.094012 | 0.04229  | 0.056536 | 0.22267 | 0.115471 | 0.01252  | 0.12461  |
| -0.07321 | 0.11413  | -0.44426 | 5.21E-24 | 0.0536   | 0.24767 | 0.017955 | 0.69876  | -0.01665 |
| 0.161002 | 0.00048  | 0.056724 | 0.22113  | 0.021194 | 0.6478  | -0.02632 | 0.57044  | -0.08317 |
| -0.2202  | 1.55E-06 | -0.19306 | 2.66E-05 | 0.063826 | 0.16851 | 0.093665 | 0.04306  | 0.205394 |
| 0.349862 | 6.82E-15 | 0.006133 | 0.89484  | 0.022794 | 0.6232  | -0.00803 | 0.86254  | -0.04914 |
| 0.129773 | 0.00497  | 0.325971 | 5.06E-13 | 0.045652 | 0.32491 | 0.128598 | 0.00538  | 0.023434 |
| 0.058463 | 0.20728  | -0.16419 | 0.00037  | 0.009177 | 0.84321 | -0.03335 | 0.4722   | 0.060969 |
| -0.06976 | 0.13223  | -0.06716 | 0.14733  | -0.08188 | 0.07712 | -0.16935 | 0.00024  | -0.09593 |
| -0.07041 | 0.12865  | -0.00333 | 0.94274  | -0.06717 | 0.14723 | -0.09766 | 0.03487  | -0.03734 |
| -0.02684 | 0.56286  | 0.122954 | 0.00781  | -0.06492 | 0.16133 | 0.012345 | 0.79019  | -0.10367 |

|          |          |          |          |          |         |          |         |          |
|----------|----------|----------|----------|----------|---------|----------|---------|----------|
| -0.00317 | 0.94556  | 0.060279 | 0.19349  | -0.01785 | 0.70039 | -0.00016 | 0.9973  | 0.00061  |
| 0.069857 | 0.1317   | 0.042357 | 0.36109  | 0.061698 | 0.18319 | 0.035087 | 0.44939 | -0.04849 |
| 0.121701 | 0.00847  | -0.08279 | 0.07387  | 0.017425 | 0.70723 | -0.01738 | 0.70789 | 0.023246 |
| -0.02001 | 0.66624  | 0.15676  | 0.00067  | 0.000408 | 0.99299 | 0.003985 | 0.93156 | 0.050316 |
| 0.097361 | 0.03543  | 0.191947 | 2.97E-05 | -0.01756 | 0.705   | 0.057599 | 0.21408 | 0.039184 |
| -0.10359 | 0.02519  | -0.23675 | 2.26E-07 | 0.03393  | 0.46449 | 0.00757  | 0.8704  | 0.015156 |
| -0.12097 | 0.00888  | -0.17867 | 0.0001   | -0.08474 | 0.06731 | -0.13423 | 0.00366 | -0.16843 |
| 0.316299 | 2.61E-12 | 0.206248 | 7.01E-06 | 0.010663 | 0.81823 | -0.16484 | 0.00035 | 0.030867 |
| 0.165874 | 0.00032  | 0.238172 | 1.91E-07 | 0.068654 | 0.1385  | 0.059491 | 0.19939 | 0.091365 |
| -0.09827 | 0.03374  | -0.12834 | 0.00548  | -0.06022 | 0.19392 | -0.09241 | 0.04593 | -0.07563 |
| -0.12158 | 0.00853  | -0.23167 | 4.15E-07 | -0.07769 | 0.09356 | -0.16653 | 0.0003  | -0.13011 |
| 0.029842 | 0.52002  | -0.17928 | 9.80E-05 | -0.01972 | 0.67076 | -0.09933 | 0.03186 | -0.12453 |
| -0.04021 | 0.38592  | -0.25482 | 2.34E-08 | 0.006119 | 0.89509 | -0.05968 | 0.19794 | -0.04944 |
| 0.065636 | 0.15674  | -0.04032 | 0.38466  | 0.047913 | 0.3015  | 0.062402 | 0.17824 | 0.062235 |
| -0.00587 | 0.89924  | -0.06463 | 0.16323  | 0.020791 | 0.65406 | 0.042559 | 0.3588  | 8.42E-05 |
| 0.076697 | 0.09784  | -0.07386 | 0.11095  | 0.024066 | 0.60394 | -0.01675 | 0.71804 | 0.026047 |
| 0.226117 | 7.92E-07 | 0.127681 | 0.00572  | 0.03892  | 0.40139 | -0.00045 | 0.99223 | 0.033294 |
| 0.114792 | 0.01306  | 0.088241 | 0.05671  | 0.05304  | 0.25265 | 0.060726 | 0.1902  | 0.082672 |
| 0.203522 | 9.30E-06 | -0.00102 | 0.98248  | 0.006607 | 0.88677 | -0.05151 | 0.26661 | -0.02879 |
| 0.136127 | 0.0032   | -0.08619 | 0.06275  | 0.037574 | 0.41789 | -0.04629 | 0.31823 | 0.122137 |
| 0.203989 | 8.86E-06 | 0.396219 | 5.26E-19 | 0.041487 | 0.37105 | 0.062864 | 0.17503 | 0.22071  |
| -0.05438 | 0.24088  | -0.11665 | 0.01165  | -0.00164 | 0.97183 | 0.016376 | 0.72411 | 0.006222 |
| -0.25006 | 4.34E-08 | -0.43898 | 2.03E-23 | 0.013213 | 0.77581 | 0.004834 | 0.91702 | -0.03818 |
| 0.051334 | 0.26826  | 0.005394 | 0.90745  | -0.04009 | 0.3874  | -0.03513 | 0.44879 | -0.0057  |
| 0.166111 | 0.00031  | 0.111454 | 0.01597  | 0.025459 | 0.58315 | -0.04214 | 0.36359 | 0.065513 |
| 0.224841 | 9.16E-07 | 0.107164 | 0.02054  | 0.010525 | 0.82055 | -0.03049 | 0.51102 | 0.095759 |
| 0.365187 | 3.52E-16 | 0.185212 | 5.66E-05 | 0.042691 | 0.35731 | 0.036456 | 0.43189 | 0.091912 |
| 0.047982 | 0.3008   | 0.058    | 0.21091  | 0.003208 | 0.94489 | -0.09376 | 0.04285 | 0.076137 |
| 0.115881 | 0.01221  | -0.07517 | 0.10474  | 0.047669 | 0.30397 | 0.039431 | 0.39523 | 0.033235 |
| 0.18691  | 4.82E-05 | 0.127709 | 0.00571  | 0.028218 | 0.54301 | -0.0885  | 0.05599 | 0.08091  |
| 0.052825 | 0.25458  | -0.07245 | 0.11795  | 0.052086 | 0.26129 | 0.013251 | 0.77518 | -0.00557 |
| 0.025382 | 0.58429  | -0.0963  | 0.03751  | 0.065698 | 0.15634 | 0.084165 | 0.06919 | 0.116539 |
| 0.125249 | 0.00673  | -0.00916 | 0.84346  | 0.075405 | 0.10364 | -0.01767 | 0.70327 | 0.0094   |
| 0.052952 | 0.25344  | -0.03709 | 0.42388  | 0.050674 | 0.27447 | 0.017238 | 0.71023 | 0.049573 |
| 0.009756 | 0.83345  | -0.15202 | 0.00098  | -0.00727 | 0.87543 | -0.0208  | 0.65398 | -0.01489 |
| 0.121552 | 0.00855  | 0.14573  | 0.00159  | 0.023788 | 0.60812 | -0.03044 | 0.51173 | 0.122681 |
| 0.162445 | 0.00042  | 0.177566 | 0.00011  | 0.055219 | 0.23366 | -0.02155 | 0.64235 | 0.054991 |
| 0.176136 | 0.00013  | 0.0682   | 0.14114  | 0.032082 | 0.48917 | -0.05861 | 0.20615 | 0.036769 |
| 0.051077 | 0.27066  | -0.09496 | 0.04025  | 0.025201 | 0.58698 | -0.0417  | 0.36862 | -0.02107 |
| 0.019267 | 0.67793  | -0.09162 | 0.04784  | 0.014795 | 0.74982 | 0.035041 | 0.44998 | 0.065428 |
| 0.103729 | 0.02498  | -0.06685 | 0.14921  | 0.045269 | 0.329   | -0.0197  | 0.67118 | 0.07448  |
| -0.04603 | 0.32093  | -0.11871 | 0.01024  | 0.056857 | 0.22005 | -0.00336 | 0.94224 | -0.03133 |
| 0.015636 | 0.7361   | -0.3334  | 1.38E-13 | -0.03237 | 0.48531 | -0.10195 | 0.0276  | -0.05975 |
| 0.119385 | 0.00982  | 0.074502 | 0.10785  | 0.017788 | 0.70142 | 0.05188  | 0.26319 | 0.057308 |
| 0.017364 | 0.70821  | -0.02596 | 0.57583  | -0.02024 | 0.66266 | -0.03882 | 0.40265 | -0.04687 |

|          |          |          |          |          |          |          |          |          |
|----------|----------|----------|----------|----------|----------|----------|----------|----------|
| -0.08065 | 0.08169  | -0.03442 | 0.45807  | 0.007095 | 0.87847  | -0.09077 | 0.04996  | -0.07954 |
| 0.017102 | 0.71242  | -0.13638 | 0.00315  | 0.059516 | 0.1992   | 0.034025 | 0.46323  | 0.121145 |
| 0.068597 | 0.13883  | -0.04046 | 0.38298  | 0.044796 | 0.33407  | 0.026339 | 0.57019  | 0.046966 |
| 0.195283 | 2.14E-05 | 0.042946 | 0.35444  | -0.00054 | 0.99072  | -0.09208 | 0.04673  | -0.03954 |
| -0.01818 | 0.69522  | -0.0904  | 0.05091  | -0.02073 | 0.65494  | -0.05788 | 0.21182  | -0.10511 |
| 0.195162 | 2.17E-05 | 0.148517 | 0.00129  | 0.065601 | 0.15696  | 0.076129 | 0.10035  | 0.213259 |
| 0.024192 | 0.60203  | -0.01407 | 0.76171  | -0.00537 | 0.90782  | -0.02882 | 0.5344   | -0.01607 |
| -0.1188  | 0.01019  | -0.11008 | 0.01733  | -0.06023 | 0.19383  | -0.09502 | 0.04012  | -0.08083 |
| -0.09824 | 0.0338   | 0.00762  | 0.86955  | 0.161432 | 0.00046  | 0.289723 | 1.75E-10 | 0.423636 |
| 0.024576 | 0.59629  | -0.19181 | 3.01E-05 | 0.010904 | 0.8142   | -0.08022 | 0.08332  | -0.00986 |
| 0.202367 | 1.05E-05 | -0.06131 | 0.18598  | 0.058413 | 0.20767  | -0.05562 | 0.23023  | 0.037039 |
| -0.00709 | 0.87848  | -0.11638 | 0.01184  | 0.014341 | 0.75724  | -0.04    | 0.38844  | -0.12141 |
| -0.09696 | 0.03619  | -0.22699 | 7.16E-07 | -0.00715 | 0.8776   | -0.08176 | 0.07755  | -0.04527 |
| -0.04622 | 0.31894  | -0.11332 | 0.01428  | 0.014493 | 0.75475  | -0.02131 | 0.64593  | -0.03613 |
| -0.11013 | 0.01728  | -0.20578 | 7.35E-06 | 0.205344 | 7.70E-06 | 0.289004 | 1.95E-10 | 0.120288 |
| -0.01392 | 0.76413  | -0.22109 | 1.40E-06 | -0.00619 | 0.89382  | -0.04935 | 0.28723  | -0.0088  |
| -0.03979 | 0.391    | 0.02791  | 0.54742  | 0.092164 | 0.04653  | 0.078711 | 0.08931  | 0.03641  |
| -0.05102 | 0.27121  | -0.12692 | 0.00602  | 0.026102 | 0.57367  | 0.012558 | 0.78664  | 0.042967 |
| -0.02085 | 0.6531   | -0.09164 | 0.04779  | 0.060985 | 0.18831  | -0.0584  | 0.20778  | -0.00204 |
| -0.05423 | 0.24218  | -0.27227 | 2.21E-09 | -0.00429 | 0.92626  | -0.08558 | 0.06463  | -0.00979 |
| 0.059645 | 0.19823  | -0.09678 | 0.03655  | 0.06718  | 0.14719  | 0.044854 | 0.33345  | 0.171588 |
| -0.06931 | 0.13476  | 0.01333  | 0.77388  | 0.033148 | 0.47485  | 0.119507 | 0.00974  | 0.098314 |
| -0.04936 | 0.28716  | -0.27034 | 2.90E-09 | 0.007239 | 0.87601  | -0.03532 | 0.44644  | -0.06965 |
| 0.105585 | 0.02249  | 0.026229 | 0.57181  | 0.036957 | 0.42558  | 0.06736  | 0.14611  | 0.146862 |
| 0.171844 | 0.00019  | -0.07003 | 0.13077  | 0.002218 | 0.96188  | -0.04702 | 0.31056  | -0.01978 |
| -0.01327 | 0.77479  | -0.05761 | 0.21401  | 0.051116 | 0.2703   | -0.03862 | 0.40509  | -0.02256 |
| -0.00032 | 0.99447  | -0.15909 | 0.00056  | 0.0021   | 0.9639   | -0.02788 | 0.54782  | -0.03424 |
| -0.04443 | 0.33806  | -0.09958 | 0.03143  | 0.06815  | 0.14143  | 0.043599 | 0.34716  | 0.233669 |
| -0.08642 | 0.06202  | -0.21077 | 4.34E-06 | 0.014759 | 0.7504   | -0.01525 | 0.74245  | -0.00981 |
| -0.00039 | 0.99321  | -0.06128 | 0.18616  | 0.13445  | 0.0036   | 0.29737  | 5.46E-11 | 0.070253 |
| 0.016252 | 0.72611  | -0.07748 | 0.09443  | 0.010638 | 0.81866  | 0.023808 | 0.60781  | -0.02696 |
| -0.04683 | 0.31259  | -0.10901 | 0.01845  | 0.089066 | 0.05443  | 0.110252 | 0.01715  | 0.067375 |
| 0.272159 | 2.25E-09 | -0.02056 | 0.65762  | 0.04313  | 0.35238  | -0.02466 | 0.59503  | -0.03347 |
| 0.041534 | 0.3705   | 0.03864  | 0.40479  | 0.108352 | 0.01917  | 0.152131 | 0.00097  | 0.386379 |
| -0.01315 | 0.7768   | -0.09103 | 0.04929  | 0.016154 | 0.7277   | -0.00943 | 0.839    | -0.01541 |
| -0.03873 | 0.40372  | -0.21856 | 1.86E-06 | 0.007417 | 0.873    | -0.02406 | 0.60397  | -0.01944 |
| 0.193722 | 2.50E-05 | -0.05472 | 0.23791  | 0.003557 | 0.93889  | -0.01927 | 0.67791  | 0.059076 |
| -0.00321 | 0.9448   | -0.03723 | 0.42213  | -0.01029 | 0.82456  | -0.04085 | 0.37849  | -0.01505 |
| -0.05907 | 0.20256  | -0.07786 | 0.09282  | 0.066304 | 0.15255  | 0.060178 | 0.19423  | 0.11738  |
| 0.100331 | 0.03017  | 0.052351 | 0.25888  | 0.008129 | 0.86092  | -0.03552 | 0.44381  | 0.084413 |
| -0.01337 | 0.77314  | -0.05434 | 0.24121  | 0.020103 | 0.66479  | -0.02582 | 0.57776  | 0.009475 |
| -0.02404 | 0.6043   | -0.0578  | 0.21249  | -0.0037  | 0.93637  | -0.0268  | 0.56349  | 0.001475 |
| 0.08072  | 0.08141  | -0.05107 | 0.27068  | -0.03668 | 0.42911  | -0.06757 | 0.14487  | -0.10742 |
| 0.042236 | 0.36246  | -0.03601 | 0.43754  | -0.02282 | 0.62276  | -0.05742 | 0.21547  | -0.04525 |
| -0.01164 | 0.80183  | -0.04756 | 0.30506  | 0.030507 | 0.51076  | 0.004194 | 0.92797  | 0.00136  |



|          |          |          |          |          |          |          |          |          |
|----------|----------|----------|----------|----------|----------|----------|----------|----------|
| -0.05392 | 0.24483  | -0.23503 | 2.78E-07 | 0.039014 | 0.40026  | 0.00013  | 0.99776  | 0.070363 |
| -0.11649 | 0.01176  | -0.16874 | 0.00025  | 0.093529 | 0.04336  | 0.034369 | 0.45872  | 0.182549 |
| 0.118739 | 0.01022  | -0.12018 | 0.00933  | -0.00236 | 0.95936  | -0.05277 | 0.25509  | -0.03711 |
| -0.09282 | 0.04498  | -0.20213 | 1.07E-05 | -0.00054 | 0.9907   | 0.035135 | 0.44876  | -0.02086 |
| -0.01406 | 0.76192  | -0.03779 | 0.41527  | 0.077152 | 0.09586  | 0.036086 | 0.43658  | 0.154869 |
| -0.05157 | 0.26605  | -0.06063 | 0.19092  | 0.162867 | 0.00041  | 0.185048 | 5.75E-05 | 0.181461 |
| -0.03459 | 0.4558   | -0.24293 | 1.06E-07 | 0.042412 | 0.36046  | -0.02927 | 0.52811  | 0.083703 |
| -0.08241 | 0.0752   | -0.32641 | 4.69E-13 | -0.00457 | 0.92146  | -0.04296 | 0.35427  | -0.04246 |
| -0.02434 | 0.59982  | -0.08306 | 0.07292  | 0.097432 | 0.0353   | 0.017989 | 0.69822  | 0.175917 |
| 0.005372 | 0.90783  | -0.07319 | 0.1142   | 0.104777 | 0.02355  | 0.013746 | 0.76703  | 0.133287 |
| -0.0567  | 0.22131  | -0.1169  | 0.01147  | 0.060516 | 0.19174  | 0.000204 | 0.99648  | 0.130281 |
| 0.120835 | 0.00895  | -0.02169 | 0.64016  | 0.050434 | 0.27674  | -0.01512 | 0.74453  | 0.036339 |
| -0.04195 | 0.36572  | -0.0806  | 0.08186  | 0.016714 | 0.71866  | -0.01322 | 0.77571  | 0.008785 |
| -0.10846 | 0.01906  | -0.10461 | 0.02378  | 0.009283 | 0.84142  | -0.01581 | 0.73332  | -0.08796 |
| -0.06818 | 0.14122  | -0.10784 | 0.01975  | -0.00593 | 0.89833  | 0.002195 | 0.96226  | -0.02345 |
| -0.02833 | 0.54134  | -0.20696 | 6.50E-06 | 0.043666 | 0.34642  | -0.01466 | 0.75195  | 0.125412 |
| -0.02522 | 0.58664  | -0.08435 | 0.06858  | 0.045149 | 0.33027  | -0.00468 | 0.91966  | 0.056019 |
| -0.06874 | 0.13801  | -0.2833  | 4.55E-10 | -0.00847 | 0.85512  | -0.047   | 0.31085  | 0.008356 |
| -0.09619 | 0.03772  | 0.002402 | 0.95871  | 0.19634  | 1.93E-05 | 0.167717 | 0.00027  | 0.083167 |
| -0.00899 | 0.84643  | 0.007144 | 0.87763  | 0.095001 | 0.04016  | 0.093225 | 0.04405  | 0.137938 |
| 0.180857 | 8.48E-05 | -0.12042 | 0.00919  | 0.003968 | 0.93185  | -0.0652  | 0.15953  | -0.01032 |
| 0.232756 | 3.65E-07 | -0.01209 | 0.79443  | 0.035599 | 0.44279  | -0.05014 | 0.27951  | 0.041596 |
| -0.06343 | 0.17119  | -0.05092 | 0.27218  | -0.00603 | 0.89663  | 0.016291 | 0.72548  | 0.064358 |
| -0.04516 | 0.33018  | -0.05555 | 0.23087  | -0.00854 | 0.85403  | -0.02404 | 0.60432  | 0.004505 |
| -0.02856 | 0.53817  | -0.18027 | 8.95E-05 | 0.038701 | 0.40405  | -0.0286  | 0.53751  | -0.02151 |
| -0.04824 | 0.29823  | -0.07673 | 0.09767  | 0.061477 | 0.18476  | 0.089328 | 0.05372  | 0.187023 |
| -0.08224 | 0.07581  | -0.14908 | 0.00123  | -0.02049 | 0.65869  | -0.04155 | 0.37026  | -0.04295 |
| 0.020111 | 0.66467  | -0.05086 | 0.27271  | 0.03618  | 0.43539  | -0.0162  | 0.72701  | -0.00442 |
| -0.06418 | 0.16616  | -0.11668 | 0.01162  | -0.00827 | 0.85855  | 0.020051 | 0.66561  | -0.05365 |
| 0.015658 | 0.73574  | -0.06354 | 0.17043  | 0.033307 | 0.47273  | -0.04565 | 0.32497  | -0.01127 |
| 0.239949 | 1.53E-07 | 0.002132 | 0.96335  | 0.058319 | 0.2084   | -0.01064 | 0.8187   | 0.085686 |
| 0.000269 | 0.99538  | -0.09915 | 0.03218  | -0.00811 | 0.86131  | -0.02595 | 0.57594  | -0.03962 |
| -0.0829  | 0.07348  | -0.14386 | 0.00183  | 0.143252 | 0.00191  | 0.193645 | 2.52E-05 | 0.028176 |
| -0.13117 | 0.00452  | -0.27438 | 1.64E-09 | 0.071508 | 0.1228   | 0.153059 | 0.00091  | 0.05947  |
| -0.10138 | 0.02848  | -0.12104 | 0.00884  | 0.076318 | 0.09951  | 0.073476 | 0.1128   | 0.381675 |
| -0.09676 | 0.03659  | -0.07254 | 0.11746  | 0.013395 | 0.77281  | 0.012087 | 0.79447  | 0.14229  |
| -0.1041  | 0.02446  | -0.08493 | 0.06669  | 0.075687 | 0.10235  | 0.071458 | 0.12306  | 0.361004 |
| -0.00478 | 0.91797  | -0.09602 | 0.03806  | 0.047908 | 0.30155  | 0.014782 | 0.75004  | -0.01652 |
| -0.05122 | 0.26932  | -0.08155 | 0.0783   | 0.005493 | 0.90576  | -0.01384 | 0.76555  | -0.00777 |
| 0.07298  | 0.11526  | -0.08995 | 0.05207  | 0.0754   | 0.10366  | -0.02351 | 0.6123   | 0.121979 |
| -0.04527 | 0.32893  | -0.11121 | 0.0162   | 0.021438 | 0.64401  | -0.02613 | 0.57324  | 0.001695 |
| -0.02421 | 0.60175  | -0.06301 | 0.17407  | 0.047164 | 0.30913  | 0.018275 | 0.69366  | 0.061082 |
| -0.00489 | 0.91599  | -0.14678 | 0.00147  | 0.052524 | 0.2573   | -0.02898 | 0.5321   | -0.04908 |
| -0.07005 | 0.13064  | -0.06656 | 0.15095  | 0.070906 | 0.12599  | 0.034811 | 0.45296  | 0.071531 |
| -0.05944 | 0.19975  | -0.16053 | 0.0005   | 0.026202 | 0.57221  | -0.0014  | 0.97598  | 0.022719 |

|          |          |          |          |          |         |          |          |          |
|----------|----------|----------|----------|----------|---------|----------|----------|----------|
| -0.02874 | 0.53555  | -0.06674 | 0.14986  | 0.04616  | 0.31955 | -0.00663 | 0.88643  | -0.01753 |
| 0.021013 | 0.6506   | -0.09554 | 0.03904  | 0.107356 | 0.02032 | -0.02718 | 0.55799  | 0.014156 |
| 0.04411  | 0.34154  | -0.1115  | 0.01593  | 0.041422 | 0.37179 | 0.020281 | 0.662    | 0.093251 |
| -0.1077  | 0.01991  | -0.17619 | 0.00013  | 0.00877  | 0.85008 | 0.044931 | 0.33262  | 0.041853 |
| -0.03844 | 0.40724  | -0.08111 | 0.07996  | 0.0323   | 0.48622 | 0.043086 | 0.35287  | 0.13804  |
| -0.0399  | 0.38962  | -0.08308 | 0.07288  | 0.029924 | 0.51888 | 0.041905 | 0.36623  | 0.147165 |
| -0.16719 | 0.00028  | -0.30104 | 3.08E-11 | 0.030967 | 0.5044  | 0.037291 | 0.42141  | 0.119586 |
| -0.08795 | 0.05755  | -0.12082 | 0.00896  | -0.00857 | 0.85354 | -0.02861 | 0.53744  | -0.05239 |
| -0.00747 | 0.87204  | -0.13512 | 0.00344  | 0.030589 | 0.50963 | 0.002259 | 0.96117  | 0.023016 |
| -0.03524 | 0.44738  | -0.0242  | 0.60185  | 0.044998 | 0.3319  | 0.053902 | 0.24501  | 0.24282  |
| -0.00497 | 0.91477  | -0.07837 | 0.0907   | 0.055894 | 0.22797 | -0.02767 | 0.55085  | -0.01305 |
| -0.0507  | 0.27426  | 0.089556 | 0.05311  | 0.045527 | 0.32624 | 0.054264 | 0.24185  | 0.129779 |
| -0.1161  | 0.01205  | -0.1457  | 0.00159  | 0.011828 | 0.79877 | -0.04377 | 0.34522  | 0.037472 |
| -0.03569 | 0.44165  | -0.05213 | 0.26088  | 0.021866 | 0.63741 | 0.030055 | 0.51705  | 0.002979 |
| -0.07419 | 0.10934  | -0.23646 | 2.34E-07 | 0.027549 | 0.55261 | -0.02245 | 0.62851  | 0.049608 |
| 0.008601 | 0.85294  | -0.00471 | 0.91921  | 0.022663 | 0.6252  | -0.01406 | 0.76183  | 0.184083 |
| 0.012977 | 0.77971  | -0.05333 | 0.25004  | -0.00957 | 0.83651 | 0.016561 | 0.72113  | -0.02769 |
| -0.0985  | 0.03333  | -0.27914 | 8.32E-10 | -0.00872 | 0.85094 | -0.0489  | 0.2916   | -0.08159 |
| -0.05997 | 0.19576  | -0.28025 | 7.10E-10 | 0.004377 | 0.92485 | -0.01024 | 0.82536  | 0.07374  |
| -0.01638 | 0.7241   | -0.12145 | 0.00861  | 0.008445 | 0.85557 | -0.00592 | 0.89849  | -0.03405 |
| -0.0217  | 0.63997  | -0.07434 | 0.10864  | 0.144894 | 0.00169 | 0.071235 | 0.12424  | 0.047329 |
| 0.030534 | 0.51038  | -0.02692 | 0.56167  | -0.0413  | 0.37315 | -0.08418 | 0.06913  | 0.019997 |
| 0.164936 | 0.00034  | 0.1617   | 0.00045  | 0.075334 | 0.10397 | -0.03381 | 0.46603  | -0.01341 |
| 0.179447 | 9.65E-05 | 0.177323 | 0.00012  | -0.00172 | 0.97051 | -0.07088 | 0.12615  | 0.145846 |
| -0.12403 | 0.00729  | -0.18674 | 4.90E-05 | -0.04299 | 0.35389 | -0.11552 | 0.01249  | 0.013173 |
| 0.130568 | 0.00471  | 0.124062 | 0.00727  | 0.0356   | 0.44278 | 0.066435 | 0.15174  | 0.171602 |
| -0.00832 | 0.85773  | -0.06429 | 0.16542  | 0.033533 | 0.46974 | -0.00932 | 0.84086  | -0.00707 |
| 0.082621 | 0.07447  | -0.06803 | 0.14212  | -0.0502  | 0.27899 | -0.21383 | 3.12E-06 | 0.020574 |
| 0.056647 | 0.22176  | -0.04117 | 0.37474  | -0.00894 | 0.84728 | -0.12189 | 0.00837  | 0.094837 |
| 0.094572 | 0.04107  | -0.08383 | 0.0703   | 0.031636 | 0.49525 | 0.055865 | 0.22822  | -0.04027 |
| 0.013535 | 0.7705   | -0.1484  | 0.0013   | -0.03171 | 0.4943  | -0.07363 | 0.11206  | -0.00037 |
| -0.09653 | 0.03704  | -0.05011 | 0.27985  | -0.03416 | 0.46148 | 0.001765 | 0.96965  | 0.085799 |
| -0.07247 | 0.11784  | -0.26481 | 6.19E-09 | -0.06086 | 0.18922 | -0.03212 | 0.48869  | -0.11022 |
| -0.0473  | 0.3077   | -0.15067 | 0.00109  | 0.008567 | 0.8535  | 0.065118 | 0.16004  | -0.11607 |
| 0.075865 | 0.10154  | 0.107596 | 0.02003  | 0.009576 | 0.83649 | -0.06526 | 0.15916  | 0.120577 |
| -0.06635 | 0.15225  | 0.011977 | 0.79629  | -0.02854 | 0.53846 | -0.00197 | 0.96608  | 0.099909 |
| -0.20955 | 4.95E-06 | -0.35614 | 2.07E-15 | -0.08094 | 0.08059 | -0.04868 | 0.29377  | -0.08052 |
| -0.11309 | 0.01447  | -0.08925 | 0.05393  | -0.01841 | 0.6915  | 0.025151 | 0.58772  | -0.01427 |
| -0.03909 | 0.39939  | -0.01125 | 0.80849  | -0.01571 | 0.73496 | -0.0306  | 0.50953  | 0.019274 |
| 0.036796 | 0.4276   | 0.04625  | 0.31861  | -0.00077 | 0.98677 | -0.02169 | 0.64012  | 0.109795 |
| 0.116278 | 0.01192  | 0.175348 | 0.00014  | -0.04786 | 0.30206 | -0.07808 | 0.09193  | 0.070468 |
| 0.038746 | 0.4035   | 0.16465  | 0.00035  | 0.010206 | 0.82589 | -0.01365 | 0.76856  | 0.115544 |
| 0.071291 | 0.12394  | 0.094784 | 0.04062  | 0.001846 | 0.96826 | -0.01833 | 0.6927   | 0.189514 |
| 0.008469 | 0.85516  | 0.097915 | 0.0344   | 0.013674 | 0.76821 | 0.010312 | 0.82412  | 0.061129 |
| 0.240523 | 1.43E-07 | 0.120019 | 0.00943  | -0.01189 | 0.79768 | -0.08973 | 0.05265  | 0.117858 |

|          |          |          |          |          |         |          |          |          |
|----------|----------|----------|----------|----------|---------|----------|----------|----------|
| -0.10195 | 0.0276   | -0.15493 | 0.00078  | -0.04551 | 0.32646 | -0.04712 | 0.30954  | 0.004611 |
| -0.02665 | 0.56558  | -0.31594 | 2.77E-12 | -0.02245 | 0.6285  | -0.15237 | 0.00096  | 0.012625 |
| -0.08928 | 0.05386  | 0.127946 | 0.00562  | 0.102808 | 0.02631 | 0.37369  | 6.35E-17 | 0.043356 |
| 0.096327 | 0.03744  | -0.02073 | 0.65507  | -0.05418 | 0.24256 | -0.14641 | 0.00151  | -0.03873 |
| 0.187896 | 4.39E-05 | 0.202886 | 9.93E-06 | -0.06001 | 0.19547 | -0.09037 | 0.05098  | -0.03323 |
| 0.043901 | 0.34383  | 0.061745 | 0.18285  | -0.05201 | 0.262   | -0.08261 | 0.07449  | 0.021107 |
| -0.13284 | 0.00403  | -0.05853 | 0.20678  | -0.08061 | 0.08182 | -0.07605 | 0.1007   | -0.04514 |
| -0.11533 | 0.01263  | -0.00803 | 0.86262  | 0.034524 | 0.45671 | 0.212672 | 3.54E-06 | -0.03257 |
| -0.16746 | 0.00028  | -0.0475  | 0.30564  | 0.045739 | 0.32399 | 0.15296  | 0.00091  | 0.03023  |
| 0.125388 | 0.00667  | 0.201662 | 1.13E-05 | -0.04092 | 0.37765 | 0.00529  | 0.90924  | 0.102672 |
| 0.051192 | 0.26958  | -0.00584 | 0.89976  | -0.04622 | 0.31896 | -0.14406 | 0.0018   | -0.01598 |
| -0.18565 | 5.43E-05 | -0.19968 | 1.38E-05 | -0.05313 | 0.25184 | -0.08954 | 0.05315  | -0.07868 |
| -0.19995 | 1.34E-05 | 0.031493 | 0.49719  | 0.037092 | 0.42389 | 0.068754 | 0.13792  | 0.091187 |
| -0.32494 | 6.04E-13 | -0.31639 | 2.57E-12 | 0.089964 | 0.05203 | 0.234882 | 2.83E-07 | 0.109454 |
| 0.164555 | 0.00036  | 0.11756  | 0.01101  | -0.00923 | 0.84226 | -0.05422 | 0.24227  | 0.107547 |
| 0.010264 | 0.82492  | 0.146926 | 0.00145  | -0.00378 | 0.93503 | 0.009931 | 0.83052  | 0.120676 |
| -0.21991 | 1.60E-06 | -0.24694 | 6.44E-08 | -0.04486 | 0.33342 | -0.15169 | 0.00101  | -0.0059  |
| -0.03295 | 0.47745  | 0.26417  | 6.76E-09 | 0.140448 | 0.00235 | 0.274339 | 1.65E-09 | 0.300088 |
| -0.18842 | 4.17E-05 | -0.20395 | 8.90E-06 | -0.0455  | 0.32654 | -0.11282 | 0.01472  | -0.087   |
| -0.13954 | 0.00251  | -0.19539 | 2.12E-05 | -0.00689 | 0.88199 | -0.13164 | 0.00438  | 0.031586 |
| -0.14611 | 0.00155  | -0.38202 | 1.13E-17 | -0.04267 | 0.35759 | -0.1726  | 0.00018  | -0.01997 |
| 0.016162 | 0.72758  | 0.070896 | 0.12604  | 0.045121 | 0.33058 | 0.102657 | 0.02653  | 0.333931 |
| -0.00979 | 0.83292  | 0.060549 | 0.1915   | -0.04182 | 0.36719 | -0.0479  | 0.30161  | 0.088914 |
| 0.015877 | 0.7322   | 0.081498 | 0.07851  | -0.02615 | 0.57298 | -0.06912 | 0.13583  | 0.033768 |
| 0.018393 | 0.69178  | 0.00951  | 0.83759  | -0.03983 | 0.39047 | -0.04193 | 0.366    | 0.045631 |
| 0.056188 | 0.22553  | 0.035679 | 0.44176  | -0.04207 | 0.36433 | -0.12989 | 0.00493  | 0.009305 |
| 0.065471 | 0.15779  | 0.155412 | 0.00075  | 0.014804 | 0.74966 | -0.00537 | 0.90788  | 0.126705 |
| 0.08289  | 0.07353  | 0.228904 | 5.73E-07 | -0.01159 | 0.80266 | -0.01511 | 0.74472  | 0.090878 |
| 0.021567 | 0.64202  | 0.016837 | 0.71668  | -0.04972 | 0.28364 | -0.09    | 0.05195  | -0.01586 |
| 0.000211 | 0.99638  | 0.014573 | 0.75344  | -0.05562 | 0.23027 | -0.12273 | 0.00793  | 5.98E-05 |
| 0.128686 | 0.00535  | 0.152811 | 0.00092  | -0.01462 | 0.75272 | -0.08118 | 0.07968  | 0.103635 |
| 0.000421 | 0.99276  | -0.14605 | 0.00155  | -0.02914 | 0.52993 | -0.06083 | 0.18947  | 0.010584 |
| 0.013141 | 0.77699  | 0.156583 | 0.00068  | -0.01461 | 0.75287 | -0.03934 | 0.39635  | 0.042719 |
| -0.06673 | 0.14995  | -0.1222  | 0.0082   | -0.03873 | 0.40371 | -0.1048  | 0.02351  | -0.05154 |
| -0.01076 | 0.81666  | 0.002359 | 0.95946  | -0.02069 | 0.65565 | -0.05505 | 0.23511  | 0.010682 |
| -0.04646 | 0.31637  | -0.17992 | 9.24E-05 | -0.0655  | 0.15763 | -0.12089 | 0.00892  | -0.08529 |
| 0.059276 | 0.20102  | -0.12455 | 0.00704  | -0.07145 | 0.12312 | -0.15553 | 0.00074  | -0.06219 |
| 0.00298  | 0.94878  | 0.073107 | 0.11463  | 0.008274 | 0.85847 | 0.033887 | 0.46506  | -0.031   |
| 0.007642 | 0.86917  | -0.03281 | 0.47942  | -0.02708 | 0.55937 | -0.06281 | 0.17543  | 0.056433 |
| -0.04848 | 0.2958   | -0.06794 | 0.14266  | -0.06169 | 0.18321 | -0.05748 | 0.215    | -0.05858 |
| -0.0505  | 0.27613  | -0.12948 | 0.00507  | -0.08091 | 0.08071 | -0.12899 | 0.00524  | -0.08924 |
| -0.01461 | 0.75288  | -0.03681 | 0.42748  | -0.05047 | 0.27639 | -0.06852 | 0.1393   | 0.002611 |
| -0.0793  | 0.08693  | 0.042246 | 0.36234  | -0.04156 | 0.37021 | -0.04291 | 0.35483  | 0.016701 |
| 0.024891 | 0.59158  | 0.02253  | 0.62723  | -0.04541 | 0.32745 | -0.08597 | 0.06341  | -0.02206 |
| -0.07219 | 0.11925  | 0.103588 | 0.02518  | 0.003385 | 0.94185 | -0.00631 | 0.8919   | 0.027789 |

|          |         |          |          |          |         |          |         |          |
|----------|---------|----------|----------|----------|---------|----------|---------|----------|
| 0.03367  | 0.46792 | 0.179652 | 9.47E-05 | -0.02515 | 0.58774 | -0.06724 | 0.1468  | 0.019786 |
| 0.094586 | 0.04104 | 0.223517 | 1.07E-06 | -0.00253 | 0.95644 | -0.00482 | 0.91719 | 0.132364 |
| -0.07175 | 0.12155 | -0.15396 | 0.00084  | -0.08263 | 0.07443 | -0.16215 | 0.00043 | -0.11097 |
| 0.048187 | 0.29874 | -0.01886 | 0.68437  | -0.05179 | 0.26406 | -0.07989 | 0.0846  | 0.041234 |
| -0.01299 | 0.77957 | 0.007423 | 0.8729   | -0.04209 | 0.36407 | -0.12334 | 0.00762 | 0.005925 |
| 0.121959 | 0.00833 | 0.15668  | 0.00068  | -0.03012 | 0.51609 | -0.10866 | 0.01884 | 0.023531 |
| -0.07697 | 0.09665 | -0.04383 | 0.34459  | -0.03144 | 0.49787 | -0.05133 | 0.26825 | -0.02209 |
| -0.07043 | 0.12856 | -0.23637 | 2.37E-07 | -0.07523 | 0.10446 | -0.16655 | 0.0003  | -0.11173 |
| -0.02366 | 0.61011 | 0.177026 | 0.00012  | -0.03099 | 0.50407 | -0.03602 | 0.43747 | 0.018322 |
| -0.03645 | 0.4319  | -0.12273 | 0.00793  | -0.04021 | 0.38598 | -0.11164 | 0.01579 | -0.00544 |
| -0.09302 | 0.04453 | -0.19373 | 2.49E-05 | -0.07573 | 0.10218 | -0.13655 | 0.00311 | -0.12528 |
| 0.022095 | 0.63389 | 0.125915 | 0.00644  | -0.08443 | 0.06832 | -0.07672 | 0.09775 | -0.04189 |
| -0.06053 | 0.19162 | -0.07026 | 0.12948  | -0.05021 | 0.27888 | -0.1266  | 0.00615 | 0.012086 |
| -0.10039 | 0.03008 | -0.12701 | 0.00599  | -0.04508 | 0.33099 | -0.04502 | 0.3317  | 0.01771  |
| -0.10336 | 0.02551 | -0.16057 | 0.0005   | -0.05368 | 0.24693 | -0.10132 | 0.02857 | -0.06698 |
| -0.03647 | 0.43174 | -0.18215 | 7.53E-05 | -0.07155 | 0.1226  | -0.09176 | 0.0475  | -0.05516 |
| 0.073343 | 0.11346 | 0.064316 | 0.16526  | -0.03126 | 0.50042 | -0.058   | 0.2109  | 0.055256 |
| -0.10839 | 0.01914 | -0.20616 | 7.07E-06 | -0.08312 | 0.07273 | -0.07695 | 0.09674 | -0.11224 |
| 0.013796 | 0.76621 | -0.07659 | 0.09829  | -0.04013 | 0.38693 | -0.12179 | 0.00842 | 0.061503 |
| 0.039114 | 0.39905 | -0.0583  | 0.20854  | -0.0432  | 0.35163 | -0.08149 | 0.07855 | 0.018966 |
| -0.04738 | 0.30694 | -0.15548 | 0.00075  | -0.04988 | 0.2821  | -0.07649 | 0.09876 | -0.00799 |
| 0.10598  | 0.02199 | 0.245843 | 7.40E-08 | 0.025165 | 0.58751 | 0.033476 | 0.47049 | 0.180167 |
| 0.092987 | 0.0446  | 0.016163 | 0.72755  | -0.04237 | 0.3609  | -0.13633 | 0.00316 | 0.011444 |
| 0.052332 | 0.25905 | 0.199061 | 1.47E-05 | 0.017043 | 0.71337 | 0.04253  | 0.35913 | 0.141954 |
| -0.02557 | 0.58144 | 0.153093 | 0.0009   | 0.006589 | 0.88708 | 0.004279 | 0.92652 | 0.109394 |
| -0.07217 | 0.11937 | 0.056924 | 0.21951  | -0.03699 | 0.42516 | -0.06926 | 0.13505 | -0.05078 |
| -0.10961 | 0.01782 | -0.17559 | 0.00014  | -0.06188 | 0.18192 | -0.10696 | 0.02078 | -0.11868 |
| -0.01057 | 0.81987 | 0.108474 | 0.01904  | -0.04783 | 0.30236 | -0.10812 | 0.01943 | 0.011831 |
| -0.13906 | 0.0026  | -0.1554  | 0.00075  | -0.06932 | 0.13472 | -0.09845 | 0.03342 | -0.07583 |
| 0.014808 | 0.7496  | 0.057862 | 0.21199  | -0.04152 | 0.37065 | -0.09003 | 0.05185 | 0.04233  |
| 0.037018 | 0.42481 | 0.124834 | 0.00691  | -0.00857 | 0.85347 | -0.04299 | 0.35393 | 0.067195 |
| -0.07819 | 0.09147 | -0.18393 | 6.38E-05 | -0.05395 | 0.24459 | -0.08679 | 0.06093 | -0.04607 |
| 0.006231 | 0.89317 | -0.01926 | 0.67809  | -0.04643 | 0.31669 | -0.0575  | 0.21484 | 0.049227 |
| -0.06045 | 0.19221 | 0.000987 | 0.98303  | -0.03501 | 0.45044 | -0.08106 | 0.08012 | 0.026158 |
| -0.11393 | 0.01376 | -0.11551 | 0.0125   | -0.05421 | 0.24229 | -0.08176 | 0.07756 | -0.08072 |
| -0.02059 | 0.65715 | 0.221044 | 1.41E-06 | 0.024798 | 0.59297 | 0.05311  | 0.25202 | 0.153156 |
| -0.05412 | 0.24306 | -0.20825 | 5.67E-06 | -0.06796 | 0.14252 | -0.12291 | 0.00784 | -0.08281 |
| 0.019312 | 0.67723 | -0.09132 | 0.04858  | -0.04229 | 0.36183 | -0.07599 | 0.10096 | 0.030219 |
| -0.02432 | 0.60005 | -0.09629 | 0.03752  | -0.06289 | 0.17487 | -0.09381 | 0.04274 | 0.003491 |
| 0.064747 | 0.16244 | -0.0746  | 0.10737  | -0.0757  | 0.1023  | -0.12022 | 0.00931 | -0.02754 |
| -0.01624 | 0.72632 | 0.033788 | 0.46635  | -0.04888 | 0.29187 | 0.008544 | 0.85391 | -0.00101 |
| -0.10816 | 0.01939 | -0.13276 | 0.00405  | -0.0592  | 0.20159 | -0.0951  | 0.03995 | -0.04746 |
| -0.04166 | 0.36899 | -0.19827 | 1.59E-05 | -0.0748  | 0.10643 | -0.14727 | 0.00142 | -0.12275 |
| 0.055471 | 0.23153 | 0.275516 | 1.40E-09 | -0.00074 | 0.98734 | -0.0076  | 0.86982 | 0.066332 |
| -0.11563 | 0.0124  | -0.11802 | 0.01069  | -0.04956 | 0.28512 | -0.07427 | 0.10894 | -0.02601 |

|          |          |          |          |          |         |          |         |          |
|----------|----------|----------|----------|----------|---------|----------|---------|----------|
| -0.03697 | 0.42545  | 0.007513 | 0.87136  | -0.02921 | 0.52889 | -0.0713  | 0.1239  | 0.066507 |
| 0.019521 | 0.67393  | -0.08852 | 0.05592  | -0.05929 | 0.20088 | -0.11375 | 0.01391 | 0.004228 |
| 0.055692 | 0.22966  | 0.149386 | 0.0012   | -0.00855 | 0.85379 | -0.00718 | 0.87697 | 0.155721 |
| -0.07672 | 0.09776  | 0.020952 | 0.65156  | -0.02444 | 0.59837 | -0.03762 | 0.41737 | 0.012288 |
| 0.069102 | 0.13594  | 0.099783 | 0.03109  | -0.02089 | 0.6525  | -0.06257 | 0.17708 | 0.115402 |
| -0.03021 | 0.51483  | -0.09568 | 0.03874  | -0.06314 | 0.17317 | -0.08496 | 0.0666  | -0.00954 |
| 0.049014 | 0.29051  | 0.036551 | 0.43068  | -0.05449 | 0.23988 | -0.14944 | 0.0012  | -0.00993 |
| 0.013453 | 0.77184  | 0.090161 | 0.05152  | -0.03524 | 0.44739 | -0.04409 | 0.34181 | 0.02287  |
| 0.016255 | 0.72607  | 0.077923 | 0.09257  | -0.02769 | 0.55056 | -0.08534 | 0.0654  | -0.0441  |
| 0.078247 | 0.09122  | 0.191675 | 3.05E-05 | -0.03805 | 0.41199 | -0.06943 | 0.1341  | 0.071144 |
| 0.101972 | 0.02756  | 0.103912 | 0.02473  | -0.01316 | 0.77671 | -0.03455 | 0.45636 | -0.03467 |
| -0.07515 | 0.10481  | 0.220302 | 1.53E-06 | 0.008289 | 0.85821 | 0.122335 | 0.00813 | -0.13542 |
| 0.191012 | 3.25E-05 | 0.087712 | 0.05822  | 0.054376 | 0.24088 | -0.0142  | 0.7596  | 0.188533 |
| 0.143746 | 0.00184  | 0.113953 | 0.01374  | -0.05655 | 0.22257 | -0.14518 | 0.00166 | 0.111679 |
| 0.062434 | 0.17801  | 0.09559  | 0.03893  | -0.06924 | 0.13518 | -0.11568 | 0.01237 | -0.05882 |
| -0.11667 | 0.01163  | 0.12991  | 0.00493  | 0.03627  | 0.43424 | 0.163372 | 0.00039 | 0.031195 |
| -0.00415 | 0.92877  | -0.02274 | 0.62395  | -0.0679  | 0.14289 | -0.08677 | 0.06098 | -0.04667 |
| 0.20989  | 4.77E-06 | 0.249991 | 4.37E-08 | 0.006438 | 0.88965 | -0.00024 | 0.99594 | 0.101949 |
| -0.15585 | 0.00073  | -0.05213 | 0.26091  | -0.03704 | 0.4245  | -0.07928 | 0.08701 | -0.07515 |
| 0.030861 | 0.50587  | 0.054085 | 0.24341  | -0.05484 | 0.23691 | -0.10791 | 0.01967 | -0.01353 |
| -0.03502 | 0.45025  | -0.20378 | 9.06E-06 | -0.02896 | 0.53243 | -0.11327 | 0.01432 | -0.15319 |
| 0.199637 | 1.38E-05 | 0.184449 | 6.08E-05 | -0.02745 | 0.55408 | -0.0678  | 0.14351 | 0.038039 |
| 0.002219 | 0.96185  | -0.05272 | 0.25553  | -0.07304 | 0.11497 | -0.08277 | 0.07395 | 0.000957 |
| -0.12534 | 0.00669  | -0.11243 | 0.01507  | -0.0329  | 0.47814 | -0.02632 | 0.57044 | -0.02134 |
| 0.036959 | 0.42555  | -0.1674  | 0.00028  | -0.04842 | 0.29637 | -0.16311 | 0.0004  | 0.03348  |
| -0.07519 | 0.10465  | -0.17853 | 0.0001   | -0.06298 | 0.17424 | -0.07388 | 0.11083 | -0.21946 |
| -0.05659 | 0.22224  | 0.08691  | 0.06057  | -0.02315 | 0.61777 | -0.01753 | 0.70547 | -0.05175 |
| -0.21569 | 2.55E-06 | -0.15531 | 0.00076  | -0.0176  | 0.70449 | -0.03691 | 0.42619 | -0.15985 |
| -0.2845  | 3.81E-10 | -0.26293 | 7.99E-09 | -0.04221 | 0.36276 | -0.07782 | 0.09301 | -0.15815 |
| 0.483266 | 1.06E-28 | 0.079262 | 0.08709  | -0.02603 | 0.57476 | -0.02559 | 0.58121 | -0.03524 |
| -0.10092 | 0.02921  | 0.044272 | 0.33977  | -0.04811 | 0.29953 | -0.01954 | 0.67368 | -0.13289 |
| -0.30534 | 1.56E-11 | -0.17073 | 0.00021  | -0.00372 | 0.93607 | 0.053642 | 0.2473  | -0.05579 |
| -0.26224 | 8.78E-09 | -0.11649 | 0.01176  | -0.05508 | 0.23482 | -0.03092 | 0.50511 | -0.06932 |
| 0.278756 | 8.80E-10 | 0.265318 | 5.78E-09 | 0.049705 | 0.28376 | 0.060644 | 0.1908  | 0.159966 |
| -0.14325 | 0.00191  | 0.010153 | 0.82678  | 0.000898 | 0.98456 | 0.05548  | 0.23145 | -0.13978 |
| -0.09642 | 0.03726  | 0.038634 | 0.40486  | -0.0554  | 0.23212 | -0.0072  | 0.87664 | -0.07204 |
| -0.04963 | 0.28446  | 0.057552 | 0.21446  | 0.005935 | 0.89821 | -0.02903 | 0.53149 | 0.022804 |
| -0.21416 | 3.01E-06 | -0.05235 | 0.25891  | -0.05487 | 0.23659 | -0.05995 | 0.19594 | -0.16568 |
| -0.14591 | 0.00157  | -0.16407 | 0.00037  | -0.04159 | 0.36985 | -0.03203 | 0.48991 | -0.10255 |
| -0.14066 | 0.00231  | 0.037884 | 0.41405  | -0.01504 | 0.74574 | -0.00345 | 0.94069 | -0.09863 |
| -0.18986 | 3.64E-05 | -0.08778 | 0.05803  | -0.04549 | 0.32668 | -0.02259 | 0.62632 | -0.17422 |
| -0.26658 | 4.87E-09 | -0.15316 | 0.0009   | -0.00496 | 0.91478 | 0.01869  | 0.68706 | -0.13811 |
| -0.07135 | 0.12365  | 0.018637 | 0.68791  | -0.02592 | 0.57633 | -0.05283 | 0.25452 | -0.06337 |
| -0.19831 | 1.58E-05 | -0.20808 | 5.78E-06 | -0.03597 | 0.43806 | 0.012139 | 0.79361 | -0.10684 |
| -0.15846 | 0.00059  | 0.081072 | 0.08009  | 0.023139 | 0.61795 | 0.15979  | 0.00053 | -0.12456 |

|          |          |          |          |          |         |          |         |          |
|----------|----------|----------|----------|----------|---------|----------|---------|----------|
| -0.15554 | 0.00074  | 0.041633 | 0.36936  | 0.000513 | 0.99119 | 0.061613 | 0.18379 | -0.05059 |
| 0.092192 | 0.04646  | 0.141779 | 0.00213  | -0.04932 | 0.28748 | -0.09823 | 0.03382 | 0.063555 |
| -0.05134 | 0.26823  | -0.14349 | 0.00188  | -0.01957 | 0.67314 | -0.05534 | 0.23262 | 0.02316  |
| -0.11514 | 0.01278  | 0.060812 | 0.18957  | -0.04029 | 0.385   | -0.01062 | 0.8189  | -0.09384 |
| -0.00345 | 0.94066  | -0.03875 | 0.40351  | -0.00976 | 0.83342 | -0.02547 | 0.58298 | 0.02401  |
| -0.21292 | 3.45E-06 | -0.06114 | 0.18721  | -0.01396 | 0.76349 | 0.053324 | 0.25012 | -0.00133 |
| 0.159119 | 0.00056  | 0.106605 | 0.02121  | -0.023   | 0.62012 | -0.05636 | 0.22415 | -0.0424  |
| -0.01226 | 0.79153  | 0.014121 | 0.76086  | -0.03979 | 0.39089 | -0.0434  | 0.34939 | -0.1702  |
| 0.021186 | 0.64792  | 0.2133   | 3.31E-06 | 0.029159 | 0.52963 | -0.01097 | 0.81302 | -0.01342 |
| -0.14037 | 0.00236  | -0.13435 | 0.00363  | -0.0376  | 0.41755 | -0.04014 | 0.38674 | -0.18587 |
| -0.12009 | 0.00939  | 0.068305 | 0.14052  | -0.02338 | 0.61435 | -0.0099  | 0.831   | -0.08009 |
| -0.17278 | 0.00018  | -0.1709  | 0.00021  | -0.04826 | 0.29802 | -0.04454 | 0.33684 | -0.12921 |
| -0.26729 | 4.42E-09 | -0.32723 | 4.07E-13 | -0.01582 | 0.73314 | -0.09629 | 0.03752 | -0.13247 |
| -0.26612 | 5.18E-09 | -0.05577 | 0.22902  | -0.04763 | 0.30435 | -0.01653 | 0.72158 | -0.11063 |
| -0.11898 | 0.01007  | -0.03572 | 0.44118  | 0.007705 | 0.86811 | 0.087074 | 0.06008 | -0.0062  |
| 0.167472 | 0.00028  | 0.086425 | 0.06202  | 0.027445 | 0.5541  | 0.057281 | 0.21663 | 0.036211 |
| -0.08723 | 0.05962  | -0.00561 | 0.90371  | -0.02407 | 0.60387 | 0.056514 | 0.22285 | -0.08243 |
| -0.10252 | 0.02674  | -0.14745 | 0.0014   | -0.06277 | 0.17567 | -0.06611 | 0.15377 | -0.12934 |
| -0.11499 | 0.0129   | -0.05568 | 0.22977  | -0.04979 | 0.28291 | -0.00575 | 0.90134 | 0.027501 |
| -0.22039 | 1.52E-06 | -0.22322 | 1.10E-06 | -0.0752  | 0.10457 | -0.11322 | 0.01437 | -0.16338 |
| -0.14897 | 0.00124  | 0.035576 | 0.44309  | -0.04999 | 0.28103 | -0.03574 | 0.44097 | -0.14862 |
| -0.08905 | 0.05448  | -0.04149 | 0.37104  | -0.00693 | 0.88131 | 0.009861 | 0.83169 | 0.037682 |
| -0.05139 | 0.26775  | 0.076578 | 0.09836  | -0.01822 | 0.69454 | 0.085611 | 0.06453 | -0.00555 |
| 0.081125 | 0.07989  | 0.204037 | 8.82E-06 | 0.032249 | 0.48691 | 0.076037 | 0.10077 | 0.023569 |
| -0.107   | 0.02074  | -0.06506 | 0.16039  | 0.019869 | 0.66846 | 0.025286 | 0.58572 | 0.004516 |
| -0.07547 | 0.10334  | 0.046585 | 0.31511  | -0.0516  | 0.26581 | -0.10803 | 0.01953 | -0.2415  |
| -0.03259 | 0.48229  | -0.31874 | 1.73E-12 | 0.010864 | 0.81486 | -0.13227 | 0.00419 | -0.03672 |
| -0.21077 | 4.34E-06 | -0.1155  | 0.0125   | -0.07392 | 0.11065 | -0.11252 | 0.01498 | -0.21484 |
| -0.06874 | 0.138    | 0.136333 | 0.00316  | -0.03007 | 0.5168  | 0.011644 | 0.80184 | -0.08103 |
| 0.019741 | 0.67046  | 0.004497 | 0.92278  | -0.00975 | 0.8336  | 0.016499 | 0.72213 | -0.08615 |
| -0.07635 | 0.09938  | -0.10556 | 0.02252  | -0.05562 | 0.23028 | -0.02501 | 0.58975 | -0.10091 |
| -0.15693 | 0.00067  | -0.11466 | 0.01316  | -0.06615 | 0.15349 | -0.05544 | 0.2318  | -0.17446 |
| 0.233048 | 3.52E-07 | 0.06737  | 0.14605  | -0.05749 | 0.21496 | -0.0742  | 0.10929 | -0.14199 |
| -0.13701 | 0.00301  | -0.07746 | 0.09451  | -0.04325 | 0.35106 | -0.03564 | 0.44227 | -0.01511 |
| -0.11588 | 0.01221  | -0.21656 | 2.32E-06 | -0.02119 | 0.64793 | -0.02332 | 0.61513 | -0.13227 |
| -0.00481 | 0.91748  | 0.036695 | 0.42887  | -0.00783 | 0.86601 | 0.039418 | 0.3954  | -0.09752 |
| -0.21768 | 2.05E-06 | -0.12839 | 0.00546  | -0.01209 | 0.79447 | 0.069074 | 0.1361  | -0.11483 |
| 0.177025 | 0.00012  | -0.28487 | 3.61E-10 | -0.06526 | 0.15916 | -0.14042 | 0.00235 | -0.2031  |
| 0.235806 | 2.54E-07 | 0.193321 | 2.60E-05 | 0.02195  | 0.63613 | 0.088171 | 0.05691 | -0.0025  |
| -0.09731 | 0.03554  | -0.10938 | 0.01806  | -0.03052 | 0.51053 | -0.09483 | 0.04052 | -0.00027 |
| -0.164   | 0.00037  | -0.14407 | 0.0018   | -0.00232 | 0.96015 | 0.090266 | 0.05125 | -0.00902 |
| -0.26646 | 4.95E-09 | -0.08197 | 0.07678  | -0.03475 | 0.45378 | -0.03519 | 0.44802 | -0.14307 |
| -0.08707 | 0.0601   | 0.049252 | 0.28817  | -0.01237 | 0.78981 | -0.02181 | 0.63822 | -0.06434 |
| -0.08989 | 0.05224  | -0.18124 | 8.19E-05 | -0.00582 | 0.90024 | -0.00712 | 0.87806 | -0.1055  |
| -0.06074 | 0.19013  | 0.147775 | 0.00136  | 0.022456 | 0.62836 | -0.00639 | 0.89041 | 0.021642 |

|          |          |          |          |          |         |          |          |          |
|----------|----------|----------|----------|----------|---------|----------|----------|----------|
| -0.15364 | 0.00086  | -0.03787 | 0.41421  | -0.01914 | 0.67999 | 0.020048 | 0.66565  | -0.09678 |
| 0.181047 | 8.34E-05 | -0.16444 | 0.00036  | -0.05678 | 0.22067 | -0.1194  | 0.00981  | -0.21195 |
| -0.23458 | 2.94E-07 | 0.045799 | 0.32335  | 0.025169 | 0.58745 | 0.127451 | 0.00581  | -0.00968 |
| -0.116   | 0.01212  | -0.22718 | 7.00E-07 | -0.05986 | 0.19663 | -0.13578 | 0.00328  | -0.10769 |
| -0.30384 | 1.98E-11 | -0.26219 | 8.84E-09 | -0.04617 | 0.31942 | -0.00015 | 0.99744  | -0.13186 |
| 0.047017 | 0.31063  | 0.234227 | 3.06E-07 | 0.006187 | 0.89391 | 0.091396 | 0.04839  | -0.00487 |
| -0.32383 | 7.31E-13 | -0.30709 | 1.18E-11 | -0.04713 | 0.30944 | -0.00569 | 0.90241  | -0.08136 |
| -0.08059 | 0.0819   | -0.13226 | 0.0042   | -0.01091 | 0.8141  | -0.06677 | 0.1497   | 0.028345 |
| 0.018335 | 0.69269  | -0.06107 | 0.18773  | -0.00042 | 0.99282 | 0.033819 | 0.46594  | -0.04363 |
| 0.074749 | 0.10669  | -0.20237 | 1.05E-05 | -0.04438 | 0.33861 | -0.15357 | 0.00087  | 0.001247 |
| -0.1574  | 0.00064  | 0.131354 | 0.00446  | -0.00811 | 0.86128 | 0.090682 | 0.05018  | -0.03494 |
| -0.14183 | 0.00212  | 0.038779 | 0.40311  | -0.00151 | 0.97409 | 0.10073  | 0.02952  | -0.05511 |
| -0.27782 | 1.01E-09 | -0.09832 | 0.03365  | 0.011569 | 0.80309 | 0.09404  | 0.04223  | -0.04522 |
| -0.00468 | 0.91959  | 0.097518 | 0.03514  | -0.04351 | 0.34819 | -0.03458 | 0.45591  | -0.05251 |
| -0.03625 | 0.43453  | -0.0255  | 0.58261  | 0.069732 | 0.1324  | 0.075206 | 0.10456  | 0.006779 |
| -0.11293 | 0.01462  | -0.05728 | 0.21663  | 0.011757 | 0.79996 | 0.016816 | 0.71702  | -0.01133 |
| -0.05056 | 0.27551  | -0.29916 | 4.13E-11 | 0.015028 | 0.746   | 0.026663 | 0.56546  | 0.003906 |
| -0.0292  | 0.52902  | -0.17935 | 9.74E-05 | -0.02721 | 0.55754 | -0.02651 | 0.56771  | 0.050845 |
| -0.22936 | 5.44E-07 | -0.35027 | 6.32E-15 | -0.0936  | 0.0432  | -0.08348 | 0.07149  | -0.09539 |
| -0.1802  | 9.01E-05 | -0.33312 | 1.45E-13 | -0.02358 | 0.61133 | -0.01476 | 0.75033  | -0.10958 |
| -0.16198 | 0.00044  | -0.00403 | 0.93073  | -0.03692 | 0.426   | -0.01189 | 0.79782  | -0.05137 |
| -0.06983 | 0.13184  | 0.009611 | 0.83589  | -0.04758 | 0.30483 | 0.003882 | 0.93332  | -0.11529 |
| -0.07914 | 0.08757  | 0.192914 | 2.70E-05 | -0.00202 | 0.96522 | 0.0403   | 0.3849   | -0.02659 |
| -0.00138 | 0.97636  | 0.109819 | 0.01759  | -0.03202 | 0.48999 | -0.0319  | 0.49165  | -0.08633 |
| -0.12343 | 0.00757  | 0.171395 | 0.0002   | 0.006077 | 0.8958  | 0.054045 | 0.24376  | -0.05872 |
| -0.08131 | 0.07921  | -0.0739  | 0.11074  | -0.01307 | 0.77813 | -0.04702 | 0.31063  | -0.08919 |
| -0.0788  | 0.08896  | 0.124044 | 0.00728  | 0.054806 | 0.23717 | 0.116305 | 0.0119   | 0.076168 |
| -0.0557  | 0.22959  | 0.067311 | 0.1464   | 0.142905 | 0.00196 | 0.18105  | 8.33E-05 | 0.540422 |
| -0.14558 | 0.00161  | 0.088813 | 0.05512  | -0.02144 | 0.64392 | 0.003566 | 0.93874  | -0.02333 |
| -0.07994 | 0.08441  | 0.073343 | 0.11346  | -0.00367 | 0.93689 | 0.027778 | 0.54931  | 0.025633 |
| -0.17165 | 0.00019  | 0.006651 | 0.88602  | -0.01999 | 0.66655 | 0.001541 | 0.97351  | -0.01634 |
| -0.17676 | 0.00012  | 0.016719 | 0.71859  | 0.01708  | 0.71277 | 0.077598 | 0.09395  | 0.017918 |
| -0.08827 | 0.05664  | -0.02088 | 0.65274  | -0.02559 | 0.58121 | -0.04003 | 0.38814  | -0.18403 |
| 0.029918 | 0.51897  | 0.137342 | 0.00294  | 0.018343 | 0.69257 | 0.060573 | 0.19132  | -0.01574 |
| -0.01374 | 0.76705  | 0.095846 | 0.03841  | 0.027598 | 0.5519  | 0.042566 | 0.35872  | 0.000933 |
| -0.15594 | 0.00072  | 0.011511 | 0.80407  | 0.011096 | 0.81099 | -0.03374 | 0.46705  | 0.065197 |
| -0.17594 | 0.00013  | -0.02538 | 0.58427  | -0.03672 | 0.42854 | 0.001974 | 0.96606  | -0.00336 |
| 0.115061 | 0.01284  | 0.211942 | 3.83E-06 | -0.01081 | 0.81577 | 0.020538 | 0.65799  | -0.01297 |
| -0.01564 | 0.73596  | 0.025144 | 0.58782  | -0.04551 | 0.32641 | -0.03179 | 0.49314  | -0.0011  |
| 0.055046 | 0.23512  | 0.208948 | 5.27E-06 | -0.0319  | 0.49162 | 0.006555 | 0.88765  | -0.06483 |
| 0.004266 | 0.92675  | -0.10537 | 0.02276  | -0.08064 | 0.08172 | -0.05491 | 0.23632  | -0.0184  |
| -0.27566 | 1.37E-09 | -0.03821 | 0.41003  | -0.00586 | 0.89945 | 0.097649 | 0.03489  | -0.08554 |
| -0.1096  | 0.01782  | -0.02169 | 0.64006  | -0.06486 | 0.16168 | -0.108   | 0.01957  | -0.19892 |
| -0.17385 | 0.00016  | -0.1249  | 0.00688  | -0.00358 | 0.93843 | -0.06534 | 0.15863  | -0.08176 |
| -0.15264 | 0.00094  | 0.040615 | 0.38119  | -0.05035 | 0.27751 | 0.018575 | 0.68888  | -0.1677  |

|          |          |          |          |          |         |          |         |          |
|----------|----------|----------|----------|----------|---------|----------|---------|----------|
| -0.14764 | 0.00138  | 0.070172 | 0.12997  | -0.05946 | 0.19959 | -0.01862 | 0.68821 | -0.145   |
| -0.14585 | 0.00158  | -0.11549 | 0.01251  | -0.08637 | 0.06219 | -0.09229 | 0.04624 | -0.07353 |
| -0.13324 | 0.00392  | 0.106917 | 0.02084  | 0.002455 | 0.9578  | 0.012007 | 0.7958  | 0.006778 |
| -0.21693 | 2.23E-06 | -0.13924 | 0.00256  | -0.01955 | 0.67355 | -0.04479 | 0.33418 | -0.09712 |
| -0.04263 | 0.35805  | -0.04258 | 0.35859  | -0.01977 | 0.67009 | -0.07167 | 0.12195 | -0.03199 |
| 0.148963 | 0.00124  | 0.134537 | 0.00358  | -0.04071 | 0.38006 | -0.06661 | 0.15063 | -0.0815  |
| -0.04718 | 0.30892  | 0.216294 | 2.39E-06 | -0.01896 | 0.68273 | 0.002115 | 0.96364 | -0.05993 |
| -0.23652 | 2.33E-07 | 0.068097 | 0.14174  | -0.02249 | 0.62791 | 0.045278 | 0.32889 | -0.04105 |
| -0.09751 | 0.03516  | 0.069047 | 0.13625  | -0.04416 | 0.34103 | -0.00898 | 0.84654 | -0.01944 |
| 0.060665 | 0.19064  | -0.14193 | 0.00211  | -0.04399 | 0.34284 | -0.15157 | 0.00102 | -0.11807 |
| -0.07087 | 0.12616  | -0.08033 | 0.08291  | -0.01214 | 0.79355 | -0.04863 | 0.29431 | 0.008181 |
| -0.09931 | 0.03191  | 0.050869 | 0.27262  | -0.01384 | 0.76553 | -0.01457 | 0.75353 | -0.04389 |
| 0.054042 | 0.24378  | 0.120843 | 0.00895  | -0.03411 | 0.4621  | -0.04087 | 0.37824 | -0.0391  |
| -0.06673 | 0.14993  | 0.01712  | 0.71213  | -0.00653 | 0.88804 | -0.02859 | 0.53774 | -0.02143 |
| -0.19539 | 2.12E-05 | -0.0032  | 0.94502  | -0.00746 | 0.87221 | -0.00192 | 0.96706 | -0.11078 |
| -0.10609 | 0.02186  | 0.169965 | 0.00022  | -0.05386 | 0.24538 | 0.013648 | 0.76864 | -0.00973 |
| -0.14614 | 0.00154  | -0.09654 | 0.03702  | 0.005711 | 0.90203 | 0.012793 | 0.78276 | -0.05711 |
| 0.122986 | 0.0078   | 0.256919 | 1.78E-08 | 0.030949 | 0.50466 | 0.06241  | 0.17817 | 0.055748 |
| -0.10985 | 0.01757  | 0.067811 | 0.14342  | -0.01205 | 0.79513 | 0.077491 | 0.0944  | 0.000979 |
| -0.02565 | 0.58032  | 0.316302 | 2.61E-12 | 0.002379 | 0.95911 | 0.161428 | 0.00046 | 0.066367 |
| -0.11374 | 0.01392  | 0.068522 | 0.13926  | 0.00728  | 0.87532 | 0.073922 | 0.11063 | 0.006721 |
| 0.353502 | 3.42E-15 | 0.105698 | 0.02235  | -0.03725 | 0.42188 | -0.09292 | 0.04475 | -0.10366 |
| -0.21486 | 2.79E-06 | -0.23643 | 2.35E-07 | -0.07553 | 0.10307 | -0.06671 | 0.15006 | -0.13391 |
| -0.06159 | 0.18398  | -0.03532 | 0.44633  | -0.07283 | 0.116   | -0.11114 | 0.01627 | -0.22933 |
| -0.00904 | 0.84546  | -0.08857 | 0.0558   | -0.06433 | 0.16514 | -0.04731 | 0.30763 | -0.14996 |
| -0.02714 | 0.55857  | 0.033472 | 0.47054  | 0.005634 | 0.90336 | -0.02539 | 0.58414 | -0.02015 |
| -0.10074 | 0.0295   | 0.173863 | 0.00016  | -0.01836 | 0.69228 | 0.001296 | 0.97771 | -0.04475 |
| 0.23856  | 1.82E-07 | 0.293756 | 9.51E-11 | 0.008989 | 0.84639 | 0.072485 | 0.11775 | 0.130723 |
| -0.24942 | 4.71E-08 | 0.023355 | 0.61466  | -0.01208 | 0.79452 | -0.0075  | 0.87158 | -0.02701 |
| -0.12574 | 0.00651  | 0.060029 | 0.19534  | -0.02758 | 0.55212 | 0.011262 | 0.80821 | -0.05186 |
| -0.11697 | 0.01141  | 0.089897 | 0.05221  | -0.03492 | 0.45156 | 0.034853 | 0.45242 | -0.04082 |
| -0.11613 | 0.01203  | -0.01995 | 0.6672   | -0.03727 | 0.42169 | -0.04135 | 0.37259 | -0.09934 |
| -0.03496 | 0.45108  | 0.141079 | 0.00224  | -0.01913 | 0.68003 | 0.01868  | 0.68722 | -0.01418 |
| -0.21608 | 2.44E-06 | -0.18231 | 7.42E-05 | -0.04999 | 0.28103 | -0.02961 | 0.52324 | -0.17036 |
| -0.0214  | 0.64453  | 0.115412 | 0.01257  | -0.03841 | 0.40754 | -0.07277 | 0.11634 | -0.04447 |
| -0.11391 | 0.01378  | 0.193315 | 2.60E-05 | -0.04186 | 0.36678 | 0.034343 | 0.45907 | -0.05616 |
| -0.07728 | 0.0953   | 0.005457 | 0.90637  | -0.04535 | 0.32814 | -0.08729 | 0.05944 | -0.03653 |
| 0.070189 | 0.12987  | 0.100696 | 0.02957  | 0.017575 | 0.70482 | 0.10233  | 0.02702 | 0.08017  |
| 0.050389 | 0.27717  | 0.139012 | 0.00261  | -0.05346 | 0.24887 | -0.04772 | 0.30346 | -0.14802 |
| 0.152413 | 0.00095  | -0.1112  | 0.01621  | -0.0526  | 0.25665 | -0.11021 | 0.0172  | -0.02832 |
| -0.27584 | 1.34E-09 | -0.07594 | 0.10121  | -0.07633 | 0.09946 | -0.07605 | 0.10071 | -0.08841 |
| -0.12666 | 0.00613  | 0.09811  | 0.03404  | -0.04694 | 0.31148 | -0.03063 | 0.50903 | -0.06197 |
| -0.05747 | 0.21513  | -0.00935 | 0.84032  | -0.05982 | 0.19691 | -0.07745 | 0.09456 | -0.14403 |
| 0.016405 | 0.72365  | 0.311793 | 5.49E-12 | -0.0023  | 0.96043 | 0.051598 | 0.26579 | 0.044686 |
| -0.12792 | 0.00563  | -0.03401 | 0.4635   | -0.01078 | 0.81621 | 0.004106 | 0.92948 | -0.0791  |



|          |          |          |          |          |         |          |          |          |
|----------|----------|----------|----------|----------|---------|----------|----------|----------|
| -0.16166 | 0.00045  | -0.10831 | 0.01922  | -0.01724 | 0.71016 | 0.036309 | 0.43374  | 0.010432 |
| -0.20081 | 1.23E-05 | -0.02947 | 0.52526  | -0.07046 | 0.12841 | -0.04371 | 0.3459   | -0.16778 |
| -0.05734 | 0.21614  | 0.168077 | 0.00026  | -0.02185 | 0.63774 | 0.046714 | 0.31377  | 0.002016 |
| -0.04199 | 0.36523  | 0.058031 | 0.21066  | -0.02799 | 0.54623 | 0.0107   | 0.81761  | -0.03435 |
| -0.01351 | 0.77095  | 0.045581 | 0.32567  | 0.0154   | 0.73995 | 0.046892 | 0.31193  | 0.018262 |
| -0.17073 | 0.00021  | 0.043464 | 0.34866  | -0.00557 | 0.90447 | 0.076119 | 0.1004   | -0.0033  |
| 0.248616 | 5.21E-08 | -0.10478 | 0.02354  | -0.00356 | 0.93886 | -0.08704 | 0.06018  | 0.106718 |
| 0.014381 | 0.75659  | 0.218815 | 1.81E-06 | -0.02565 | 0.58034 | -0.0017  | 0.9708   | 0.024204 |
| 0.165068 | 0.00034  | 0.1401   | 0.00241  | -0.02183 | 0.63798 | -0.07086 | 0.12623  | -0.07034 |
| -0.26179 | 9.32E-09 | 0.008847 | 0.84877  | -0.01253 | 0.78707 | 0.058698 | 0.20546  | -0.06369 |
| -0.06129 | 0.1861   | 0.00083  | 0.98573  | -0.08045 | 0.08243 | 0.008208 | 0.85959  | -0.08721 |
| 0.009787 | 0.83293  | 0.106399 | 0.02147  | -0.0118  | 0.79924 | 0.051688 | 0.26496  | -0.00386 |
| -0.07772 | 0.09342  | 0.122192 | 0.00821  | 0.005473 | 0.90611 | -0.00316 | 0.94565  | 0.038048 |
| 0.147022 | 0.00144  | 0.102934 | 0.02612  | -0.01674 | 0.71824 | -0.03149 | 0.49726  | -0.02591 |
| -0.15941 | 0.00054  | 0.026355 | 0.56995  | -0.01864 | 0.68793 | 0.050225 | 0.27874  | -0.06261 |
| -0.08712 | 0.05995  | 0.15067  | 0.00109  | -0.0511  | 0.27046 | -0.01019 | 0.82613  | -0.09734 |
| -0.1685  | 0.00025  | 0.017748 | 0.70206  | -0.01704 | 0.71348 | 0.06254  | 0.17727  | -0.09779 |
| -0.0714  | 0.12336  | 0.093819 | 0.04271  | 0.010123 | 0.82729 | 0.103656 | 0.02509  | -0.0272  |
| -0.14966 | 0.00118  | 0.060887 | 0.18902  | 0.025881 | 0.57692 | 0.052584 | 0.25676  | -0.02174 |
| -0.12735 | 0.00585  | -0.07169 | 0.12187  | -0.04752 | 0.30548 | -0.07876 | 0.08909  | -0.10574 |
| -0.13774 | 0.00286  | -0.02494 | 0.5909   | -0.03497 | 0.45093 | -0.02069 | 0.65564  | -0.08847 |
| -0.22417 | 9.89E-07 | -0.20171 | 1.12E-05 | -0.0236  | 0.61098 | 0.009296 | 0.84121  | -0.13942 |
| -0.12327 | 0.00766  | 0.038346 | 0.40838  | -0.00498 | 0.91455 | 0.056977 | 0.21908  | -0.02657 |
| 0.051639 | 0.26541  | 0.076305 | 0.09957  | -0.00716 | 0.87744 | -0.05039 | 0.27717  | -0.02318 |
| 0.117144 | 0.01129  | 0.38509  | 5.88E-18 | 0.011818 | 0.79894 | 0.079681 | 0.08543  | 0.004968 |
| -0.09263 | 0.04543  | -0.09343 | 0.04358  | -0.04785 | 0.30217 | -0.08217 | 0.07606  | -0.06756 |
| 0.049617 | 0.28461  | 0.327403 | 3.95E-13 | 0.003944 | 0.93225 | 0.042215 | 0.3627   | 0.021842 |
| -0.08896 | 0.05472  | 0.098286 | 0.03372  | -0.04671 | 0.31383 | 0.008647 | 0.85216  | -0.12226 |
| -0.22307 | 1.12E-06 | -0.07134 | 0.1237   | 0.001442 | 0.97522 | 0.015405 | 0.73987  | -0.11189 |
| 0.287906 | 2.30E-10 | 0.171417 | 0.0002   | -0.03247 | 0.48391 | -0.06993 | 0.13128  | -0.09766 |
| -0.26983 | 3.11E-09 | -0.09542 | 0.03928  | -0.04827 | 0.2979  | -0.0258  | 0.57813  | -0.07718 |
| -0.0603  | 0.19331  | -0.0523  | 0.25937  | -0.04376 | 0.34536 | -0.06154 | 0.18429  | -0.09944 |
| -0.00421 | 0.92763  | 0.090685 | 0.05017  | -0.04481 | 0.3339  | 0.036229 | 0.43476  | 0.014277 |
| -0.11849 | 0.01038  | 0.211267 | 4.12E-06 | 0.001784 | 0.96932 | 0.010871 | 0.81476  | -0.02464 |
| -0.02679 | 0.5636   | 0.124785 | 0.00693  | -0.0363  | 0.43381 | -0.02444 | 0.59829  | -0.08851 |
| 0.068982 | 0.13662  | 0.101246 | 0.02869  | -0.00024 | 0.99595 | 0.018407 | 0.69156  | -0.08818 |
| -0.10305 | 0.02596  | 0.001668 | 0.97132  | -0.00998 | 0.82968 | -0.04412 | 0.34144  | -0.05026 |
| 0.058639 | 0.20591  | 0.250615 | 4.04E-08 | 0.009334 | 0.84056 | 0.060022 | 0.1954   | -0.04924 |
| -0.1157  | 0.01235  | 0.086772 | 0.06098  | -0.01292 | 0.78072 | 0.056065 | 0.22655  | -0.10098 |
| -0.22285 | 1.15E-06 | 0.098389 | 0.03353  | 0.075148 | 0.10482 | 0.230602 | 4.70E-07 | 0.110249 |
| 0.149207 | 0.00122  | 0.172135 | 0.00019  | -0.02158 | 0.64178 | 0.000772 | 0.98672  | 0.070602 |
| -0.1129  | 0.01465  | 0.196576 | 1.88E-05 | -0.04154 | 0.37044 | -0.00119 | 0.97947  | -0.04698 |
| 0.026739 | 0.56435  | 0.08786  | 0.0578   | -0.04303 | 0.35347 | -0.02408 | 0.6037   | 0.053787 |
| -0.09927 | 0.03197  | -0.00537 | 0.90795  | -0.03934 | 0.39632 | -0.05973 | 0.19757  | -0.0103  |
| -0.30184 | 2.71E-11 | -0.08659 | 0.06153  | 0.003852 | 0.93384 | -0.02558 | 0.58132  | -0.03703 |

|          |          |          |          |          |         |          |         |          |
|----------|----------|----------|----------|----------|---------|----------|---------|----------|
| -0.15176 | 0.001    | 0.215387 | 2.64E-06 | 0.010776 | 0.81634 | 0.099674 | 0.03127 | 0.1599   |
| -0.046   | 0.32119  | -0.1852  | 5.66E-05 | -0.06426 | 0.16563 | -0.01298 | 0.77958 | -0.03176 |
| -0.14966 | 0.00118  | -0.00492 | 0.91548  | -0.00955 | 0.83697 | 0.027136 | 0.55858 | -0.06612 |
| -0.04309 | 0.35278  | 0.199748 | 1.37E-05 | 0.005366 | 0.90792 | 0.071781 | 0.12137 | 0.084995 |
| -0.10148 | 0.02832  | -0.02001 | 0.66623  | -0.0386  | 0.40533 | -0.06128 | 0.18619 | -0.10273 |
| -0.20941 | 5.02E-06 | -0.02632 | 0.57048  | -0.01238 | 0.78955 | 0.029868 | 0.51966 | -0.04784 |
| -0.0159  | 0.73178  | 0.202263 | 1.06E-05 | -0.02414 | 0.60285 | -0.02601 | 0.57509 | -0.02437 |
| -0.18573 | 5.39E-05 | -0.06462 | 0.16328  | 0.007607 | 0.86977 | -0.00793 | 0.8643  | 0.017637 |
| -0.15738 | 0.00064  | 0.003541 | 0.93917  | -0.05538 | 0.23229 | -0.02441 | 0.59875 | -0.09446 |
| -0.14458 | 0.00173  | 0.068842 | 0.13742  | -0.02606 | 0.57426 | -0.05213 | 0.26092 | 0.001393 |
| -0.0813  | 0.07922  | 0.010461 | 0.82162  | -0.01176 | 0.79989 | 0.021663 | 0.64054 | -0.07018 |
| -0.18618 | 5.17E-05 | -0.09398 | 0.04236  | -0.03742 | 0.41978 | 0.002522 | 0.95665 | -0.04355 |
| -0.01503 | 0.74603  | 0.214173 | 3.01E-06 | -0.01777 | 0.70165 | -0.02553 | 0.58206 | -0.06355 |
| -0.06087 | 0.18913  | 0.089899 | 0.0522   | -0.02629 | 0.57087 | 0.001989 | 0.9658  | -0.0754  |
| -0.06078 | 0.18978  | -0.05078 | 0.2735   | -0.02828 | 0.54207 | -0.04691 | 0.31175 | -0.11127 |
| -0.1241  | 0.00725  | 0.118059 | 0.01067  | 0.003671 | 0.93694 | 0.030297 | 0.51369 | 0.008798 |
| -0.08751 | 0.05882  | 0.07064  | 0.12742  | 0.00802  | 0.86276 | 0.05388  | 0.2452  | -0.02037 |
| -0.00256 | 0.95598  | 0.079444 | 0.08636  | -0.05737 | 0.21593 | -0.04021 | 0.38591 | 0.017915 |
| 0.205947 | 7.23E-06 | 0.167955 | 0.00027  | -0.07034 | 0.12904 | -0.1347  | 0.00354 | -0.01302 |
| -0.28508 | 3.50E-10 | -0.12095 | 0.00889  | -0.03473 | 0.45403 | 0.041243 | 0.37387 | -0.04315 |
| 0.013295 | 0.77446  | -0.0413  | 0.37322  | -0.04886 | 0.29206 | -0.04473 | 0.3348  | -0.06057 |
| 0.041882 | 0.3665   | -0.00646 | 0.88932  | -0.10386 | 0.0248  | -0.13772 | 0.00286 | -0.14492 |
| 0.304096 | 1.90E-11 | 0.17778  | 0.00011  | -0.0423  | 0.36176 | -0.02188 | 0.63717 | -0.08692 |
| 0.071066 | 0.12513  | -0.02277 | 0.62359  | -0.042   | 0.36514 | -0.10283 | 0.02628 | -0.04803 |
| 0.103001 | 0.02603  | 0.09542  | 0.03928  | 0.008254 | 0.85881 | 0.009205 | 0.84274 | 0.00974  |
| -0.09476 | 0.04067  | -0.1918  | 3.01E-05 | -0.03773 | 0.41598 | -0.02363 | 0.61055 | -0.12541 |
| 0.089126 | 0.05427  | 0.323092 | 8.30E-13 | 0.042447 | 0.36006 | 0.085643 | 0.06443 | 0.112125 |
| -0.02659 | 0.56651  | -0.11919 | 0.00994  | -0.04583 | 0.32298 | -0.02673 | 0.5645  | -0.05234 |
| 0.237319 | 2.11E-07 | -0.0346  | 0.45576  | -0.09211 | 0.04665 | -0.14293 | 0.00196 | -0.15862 |
| 0.13109  | 0.00455  | -0.12389 | 0.00735  | -0.06    | 0.19558 | -0.07223 | 0.11903 | -0.10532 |
| 0.077755 | 0.09328  | 0.109431 | 0.018    | -0.03978 | 0.39103 | -0.03856 | 0.40579 | -0.11303 |
| -0.11835 | 0.01048  | -0.19493 | 2.22E-05 | -0.07619 | 0.10009 | -0.12529 | 0.00671 | -0.11698 |
| -0.06605 | 0.15415  | 0.164425 | 0.00036  | 0.089228 | 0.05399 | 0.154437 | 0.00081 | 0.093765 |
| 0.015344 | 0.74086  | -0.13781 | 0.00284  | -0.08612 | 0.06296 | -0.10885 | 0.01862 | -0.07795 |
| -0.0703  | 0.12929  | -0.08546 | 0.065    | -0.03373 | 0.46716 | 0.004336 | 0.92555 | -0.02571 |
| -0.02378 | 0.60829  | -0.20675 | 6.65E-06 | -0.06987 | 0.1316  | -0.12245 | 0.00807 | -0.15341 |
| -0.1848  | 5.88E-05 | -0.3402  | 4.07E-14 | -0.0628  | 0.17548 | -0.0999  | 0.0309  | -0.14537 |
| -0.02367 | 0.60989  | 0.011923 | 0.7972   | -0.04207 | 0.36434 | -0.02247 | 0.6282  | -0.08294 |
| 0.07619  | 0.10008  | -0.14124 | 0.00222  | -0.05623 | 0.22517 | -0.13357 | 0.00383 | -0.13402 |
| 0.036295 | 0.43392  | -0.15788 | 0.00062  | -0.07018 | 0.1299  | -0.08658 | 0.06156 | -0.11378 |
| -0.04701 | 0.31076  | -0.18339 | 6.71E-05 | -0.0507  | 0.2742  | -0.07934 | 0.08677 | -0.00168 |
| -0.08463 | 0.06766  | -0.15961 | 0.00054  | -0.05688 | 0.21991 | -0.04192 | 0.36612 | -0.09612 |
| -0.00552 | 0.90532  | 0.077221 | 0.09556  | -0.02932 | 0.52729 | -0.03082 | 0.50644 | 0.084074 |
| -0.04801 | 0.30047  | -0.18242 | 7.35E-05 | -0.05357 | 0.24797 | -0.12383 | 0.00738 | -0.03046 |
| -0.01808 | 0.69681  | -0.05763 | 0.21381  | -0.07343 | 0.11301 | -0.10621 | 0.0217  | 0.008717 |

|          |          |          |          |          |         |          |          |          |
|----------|----------|----------|----------|----------|---------|----------|----------|----------|
| -0.07022 | 0.12972  | -0.11429 | 0.01346  | -0.08593 | 0.06353 | -0.11259 | 0.01492  | -0.13119 |
| 0.102676 | 0.0265   | 0.018952 | 0.6829   | 0.017799 | 0.70125 | 0.027194 | 0.55775  | 0.034367 |
| -0.06889 | 0.13712  | -0.20917 | 5.15E-06 | -0.05428 | 0.24174 | -0.10161 | 0.02811  | -0.08132 |
| -0.15299 | 0.00091  | -0.37901 | 2.11E-17 | -0.08071 | 0.08147 | -0.20689 | 6.55E-06 | -0.19414 |
| -0.11146 | 0.01597  | -0.19574 | 2.05E-05 | 0.013495 | 0.77116 | 0.004399 | 0.92447  | -0.03411 |
| -0.12515 | 0.00677  | -0.26442 | 6.54E-09 | -0.01083 | 0.8155  | 0.017595 | 0.70451  | -0.00875 |
| -0.01291 | 0.78083  | -0.40084 | 1.88E-19 | -0.07911 | 0.0877  | -0.15602 | 0.00072  | -0.10795 |
| 0.02968  | 0.5223   | -0.01292 | 0.78064  | -0.01486 | 0.74869 | -0.00158 | 0.97281  | -0.04715 |
| -0.11094 | 0.01646  | -0.23295 | 3.56E-07 | -0.06716 | 0.14732 | -0.11197 | 0.01549  | -0.1592  |
| -0.16365 | 0.00038  | -0.3133  | 4.28E-12 | -0.0759  | 0.10138 | -0.12135 | 0.00866  | -0.1103  |
| -0.06462 | 0.16326  | -0.1477  | 0.00137  | -0.03971 | 0.39186 | -0.04998 | 0.28109  | -0.08739 |
| 0.021582 | 0.64179  | -0.05461 | 0.23888  | -0.04114 | 0.37512 | -0.02362 | 0.61071  | -0.02423 |
| -0.06372 | 0.16923  | -0.25403 | 2.60E-08 | -0.04723 | 0.30848 | -0.14968 | 0.00118  | -0.13313 |
| 0.096419 | 0.03726  | -0.00771 | 0.86809  | -0.07472 | 0.10682 | -0.09804 | 0.03416  | -0.07363 |
| -0.14345 | 0.00188  | -0.11854 | 0.01035  | -0.07623 | 0.0999  | -0.11312 | 0.01445  | -0.14459 |
| -0.17372 | 0.00016  | -0.41596 | 5.78E-21 | -0.08137 | 0.07898 | -0.18864 | 4.09E-05 | -0.16268 |
| -0.06594 | 0.15483  | -0.07203 | 0.12009  | -0.0674  | 0.14586 | -0.07467 | 0.10706  | -0.12813 |
| -0.02099 | 0.6509   | -0.01608 | 0.7289   | -0.03588 | 0.43919 | -0.04655 | 0.31545  | -0.05499 |
| -0.00747 | 0.87203  | -0.10423 | 0.02428  | -0.0648  | 0.16213 | -0.07179 | 0.12131  | -0.08658 |
| 0.023253 | 0.61622  | -0.05678 | 0.22071  | -0.03649 | 0.43143 | -0.02549 | 0.58273  | -0.02082 |
| -0.24552 | 7.70E-08 | -0.45308 | 5.11E-25 | -0.06674 | 0.14988 | -0.13528 | 0.0034   | -0.14666 |
| 0.130396 | 0.00477  | -0.2314  | 4.28E-07 | -0.0655  | 0.15758 | -0.16065 | 0.00049  | -0.10567 |
| 0.038579 | 0.40554  | 0.087052 | 0.06014  | -0.05724 | 0.21695 | -0.068   | 0.14228  | -0.08169 |
| 0.098744 | 0.03289  | 0.063928 | 0.16783  | -0.04105 | 0.37616 | -0.05642 | 0.22365  | 0.019682 |
| 0.142083 | 0.00209  | 0.185179 | 5.68E-05 | -0.05509 | 0.23474 | -0.04481 | 0.33394  | -0.02357 |
| -0.04298 | 0.35403  | -0.0818  | 0.07742  | -0.07029 | 0.12935 | -0.05716 | 0.2176   | -0.12564 |
| -0.09577 | 0.03857  | -0.13543 | 0.00337  | -0.07642 | 0.09904 | -0.14457 | 0.00173  | -0.18334 |
| 0.012174 | 0.79303  | -0.14967 | 0.00118  | -0.0941  | 0.04211 | -0.18226 | 7.45E-05 | -0.13591 |
| 0.171648 | 0.00019  | 0.282625 | 5.02E-10 | 0.063138 | 0.17316 | 0.078044 | 0.09206  | 0.140763 |
| -0.01888 | 0.68401  | -0.28576 | 3.17E-10 | -0.0535  | 0.24854 | -0.09761 | 0.03497  | -0.123   |
| 0.058235 | 0.20905  | -0.05105 | 0.27089  | 0.04307  | 0.35305 | -0.01189 | 0.79775  | 0.149164 |
| 0.120033 | 0.00942  | -0.04339 | 0.34947  | -0.02677 | 0.56385 | -0.06892 | 0.137    | -0.01654 |
| -0.23921 | 1.68E-07 | -0.52599 | 1.38E-34 | -0.05944 | 0.19976 | -0.16241 | 0.00043  | -0.14771 |
| 0.030474 | 0.51123  | -0.12311 | 0.00774  | -0.08682 | 0.06084 | -0.13502 | 0.00346  | -0.02144 |
| 0.027295 | 0.55628  | -0.09146 | 0.04823  | -0.07728 | 0.09529 | -0.15488 | 0.00078  | -0.11976 |
| -0.09717 | 0.0358   | -0.20197 | 1.09E-05 | -0.069   | 0.13654 | -0.07944 | 0.08637  | -0.17814 |
| 0.014278 | 0.75828  | 0.098351 | 0.0336   | -0.02238 | 0.62951 | -0.06245 | 0.17789  | 0.017781 |
| -0.17545 | 0.00014  | -0.198   | 1.63E-05 | -0.10828 | 0.01926 | -0.06886 | 0.13729  | -0.18903 |
| 0.078842 | 0.08878  | 0.222634 | 1.18E-06 | -0.01601 | 0.73004 | -0.01521 | 0.74311  | 0.088508 |
| -0.05549 | 0.2314   | -0.2233  | 1.09E-06 | -0.01957 | 0.67311 | -0.02067 | 0.65596  | -0.07838 |
| -0.04872 | 0.29339  | -0.12523 | 0.00673  | -0.04034 | 0.38448 | -0.04668 | 0.31417  | -0.04702 |
| -0.01513 | 0.74434  | -0.16105 | 0.00048  | -0.05814 | 0.20979 | -0.10763 | 0.01999  | -0.09141 |
| 0.036263 | 0.43432  | 0.01213  | 0.79376  | 0.010717 | 0.81732 | 0.061198 | 0.18677  | 0.011841 |
| -0.08302 | 0.07306  | -0.15852 | 0.00059  | -0.05985 | 0.19672 | -0.138   | 0.0028   | -0.05163 |
| -0.02508 | 0.58878  | -0.2183  | 1.91E-06 | -0.05985 | 0.19666 | -0.10665 | 0.02116  | -0.15034 |

|          |          |          |          |          |         |          |          |          |
|----------|----------|----------|----------|----------|---------|----------|----------|----------|
| 0.317813 | 2.03E-12 | -0.03577 | 0.44058  | -0.06772 | 0.14393 | -0.12798 | 0.00561  | -0.16726 |
| -0.13137 | 0.00446  | -0.31701 | 2.32E-12 | -0.08251 | 0.07487 | -0.06612 | 0.15369  | -0.20601 |
| 0.047927 | 0.30135  | 0.08108  | 0.08006  | -0.05352 | 0.24842 | -0.04576 | 0.32381  | -0.12831 |
| -0.12463 | 0.00701  | -0.27956 | 7.83E-10 | -0.03974 | 0.3915  | -0.10397 | 0.02465  | -0.12608 |
| 0.143966 | 0.00181  | 0.425212 | 6.28E-22 | 0.060298 | 0.19334 | 0.113512 | 0.01411  | 0.243619 |
| -0.02003 | 0.66586  | -0.16793 | 0.00027  | -0.01382 | 0.76585 | -0.04835 | 0.29713  | 0.008989 |
| -0.03515 | 0.44859  | -0.25927 | 1.31E-08 | -0.08098 | 0.08045 | -0.15402 | 0.00084  | -0.12309 |
| -0.165   | 0.00034  | -0.18722 | 4.68E-05 | -0.05021 | 0.27888 | -0.08015 | 0.08359  | -0.11353 |
| 0.042497 | 0.3595   | 0.06079  | 0.18973  | -0.02063 | 0.6566  | -0.01167 | 0.80133  | -0.07276 |
| -0.02851 | 0.5388   | -0.02971 | 0.52188  | -0.05858 | 0.20635 | -0.12117 | 0.00876  | -0.02024 |
| -0.12096 | 0.00888  | -0.20298 | 9.83E-06 | -0.05288 | 0.25411 | -0.0928  | 0.04503  | -0.04504 |
| 0.181141 | 8.26E-05 | 0.16555  | 0.00033  | -0.05116 | 0.26992 | -0.02331 | 0.61529  | -0.05465 |
| -0.17607 | 0.00013  | -0.30204 | 2.63E-11 | -0.06087 | 0.18918 | -0.13475 | 0.00353  | -0.16468 |
| -0.07728 | 0.09532  | -0.14034 | 0.00237  | -0.03288 | 0.47844 | 0.000117 | 0.99799  | 0.02046  |
| -0.09394 | 0.04245  | -0.1957  | 2.05E-05 | -0.08409 | 0.06944 | -0.08646 | 0.06192  | -0.10393 |
| -0.14993 | 0.00116  | -0.2319  | 4.04E-07 | -0.06668 | 0.15025 | -0.04874 | 0.29323  | -0.0477  |
| -0.0014  | 0.976    | 0.057197 | 0.2173   | -0.02735 | 0.55549 | -0.15064 | 0.00109  | -0.12641 |
| 0.068923 | 0.13696  | -0.13003 | 0.00489  | -0.06506 | 0.16042 | -0.09295 | 0.04469  | -0.14744 |
| -0.06761 | 0.14462  | -0.28742 | 2.48E-10 | -0.07763 | 0.09382 | -0.21128 | 4.11E-06 | -0.13642 |
| -0.00806 | 0.86202  | -0.07724 | 0.09548  | -0.06558 | 0.15711 | -0.05357 | 0.2479   | -0.06883 |
| 0.009923 | 0.83065  | -0.00364 | 0.93752  | -0.03198 | 0.4906  | -0.05354 | 0.24819  | -0.08237 |
| -0.03818 | 0.41044  | -0.19548 | 2.10E-05 | -0.08097 | 0.08046 | -0.11585 | 0.01224  | -0.14885 |
| 0.074566 | 0.10755  | -0.2939  | 9.31E-11 | -0.07909 | 0.0878  | -0.1864  | 5.06E-05 | -0.17994 |
| 0.033905 | 0.46482  | 0.20056  | 1.26E-05 | -0.02747 | 0.55371 | 0.060471 | 0.19207  | -0.04977 |
| -0.16911 | 0.00024  | -0.36054 | 8.81E-16 | -0.06476 | 0.16238 | -0.08927 | 0.05386  | -0.14695 |
| -0.12419 | 0.00721  | -0.22645 | 7.62E-07 | -0.01549 | 0.73844 | 0.029897 | 0.51926  | -0.02223 |
| -0.1488  | 0.00126  | -0.2407  | 1.40E-07 | -0.0655  | 0.15757 | -0.13335 | 0.00389  | -0.15701 |
| -0.04859 | 0.29473  | -0.13641 | 0.00314  | -0.04701 | 0.31072 | -0.01449 | 0.75488  | -0.12376 |
| -0.09908 | 0.0323   | -0.17563 | 0.00014  | -0.04853 | 0.29529 | -0.08969 | 0.05275  | -0.08822 |
| -0.0793  | 0.08695  | -0.08092 | 0.08065  | -0.03726 | 0.42176 | -0.05517 | 0.23407  | -0.05823 |
| -0.17513 | 0.00014  | -0.38073 | 1.48E-17 | -0.08192 | 0.07696 | -0.10944 | 0.01799  | -0.08679 |
| -0.15269 | 0.00093  | -0.05202 | 0.26188  | -0.02548 | 0.58289 | 0.037606 | 0.41749  | -0.11959 |
| 0.122734 | 0.00793  | 0.139126 | 0.00259  | -0.01938 | 0.67614 | 0.010846 | 0.81518  | 0.017687 |
| -0.06804 | 0.14209  | -0.07733 | 0.09511  | 0.016887 | 0.71587 | 0.060942 | 0.18863  | 0.095207 |
| -0.10841 | 0.01911  | -0.27392 | 1.75E-09 | -0.06245 | 0.1779  | -0.10274 | 0.02641  | -0.08864 |
| 0.209951 | 4.74E-06 | 0.135218 | 0.00341  | -0.08446 | 0.06821 | -0.15275 | 0.00093  | -0.20497 |
| 0.008686 | 0.8515   | 0.188003 | 4.34E-05 | -0.04926 | 0.28811 | -0.03892 | 0.40144  | -0.11531 |
| 0.122249 | 0.00818  | -0.02817 | 0.54367  | -0.03411 | 0.46208 | -0.00794 | 0.86411  | 0.015028 |
| 0.038694 | 0.40414  | -0.17847 | 0.00011  | -0.02677 | 0.56397 | 0.027414 | 0.55455  | -0.04791 |
| 0.055089 | 0.23475  | 0.037895 | 0.41392  | -0.0178  | 0.70124 | -0.00697 | 0.88058  | -0.0047  |
| -0.0954  | 0.03933  | -0.10856 | 0.01894  | -0.02676 | 0.56404 | -0.05004 | 0.28053  | 0.11625  |
| 0.031643 | 0.49515  | 0.034242 | 0.46038  | -0.03981 | 0.39065 | -0.09715 | 0.03583  | 0.001322 |
| 0.094054 | 0.0422   | -0.17904 | 0.0001   | -0.06961 | 0.1331  | -0.13522 | 0.00341  | -0.11065 |
| -0.05123 | 0.2692   | -0.22489 | 9.11E-07 | -0.05989 | 0.19636 | -0.08984 | 0.05235  | -0.10149 |
| 0.037682 | 0.41655  | -0.11154 | 0.01589  | -0.0517  | 0.26485 | -0.08192 | 0.07698  | -0.11458 |

|          |          |          |          |          |         |          |         |          |
|----------|----------|----------|----------|----------|---------|----------|---------|----------|
| 0.342575 | 2.64E-14 | -0.04406 | 0.34211  | -0.06973 | 0.13243 | -0.1404  | 0.00236 | -0.09039 |
| 0.011932 | 0.79704  | -0.03131 | 0.49966  | -0.01735 | 0.70847 | -0.02792 | 0.54732 | 0.041849 |
| -0.00644 | 0.88959  | -0.16122 | 0.00047  | -0.04951 | 0.28567 | -0.05749 | 0.21498 | -0.03312 |
| -0.01612 | 0.72828  | -0.05912 | 0.20217  | -0.04964 | 0.28443 | -0.06911 | 0.1359  | 0.011549 |
| -0.10072 | 0.02954  | -0.21431 | 2.96E-06 | -0.05331 | 0.25024 | -0.08476 | 0.06722 | -0.09766 |
| -0.09871 | 0.03296  | -0.21571 | 2.54E-06 | -0.06852 | 0.13925 | -0.10765 | 0.01998 | -0.07349 |
| 0.110827 | 0.01658  | -0.00412 | 0.92932  | -0.03862 | 0.40505 | -0.05542 | 0.23196 | -0.11565 |
| -0.03489 | 0.45199  | -0.08308 | 0.07287  | -0.01634 | 0.72473 | -0.01172 | 0.80051 | 0.043504 |
| -0.06234 | 0.17864  | -0.08531 | 0.06547  | -0.01117 | 0.80974 | 0.005916 | 0.89855 | -0.1072  |
| 0.160467 | 0.0005   | -0.1692  | 0.00024  | -0.09151 | 0.0481  | -0.16111 | 0.00047 | -0.15295 |
| -0.07519 | 0.10463  | -0.077   | 0.09654  | -0.07458 | 0.10747 | -0.07112 | 0.12485 | -0.15382 |
| -0.13377 | 0.00378  | -0.178   | 0.00011  | -0.05802 | 0.21074 | -0.01341 | 0.77249 | -0.11264 |
| 0.085453 | 0.06503  | 0.04155  | 0.37032  | -0.05096 | 0.2718  | -0.10384 | 0.02483 | -0.02095 |
| -0.00426 | 0.92692  | -0.27224 | 2.22E-09 | -0.01212 | 0.79394 | -0.09361 | 0.04318 | -0.11761 |
| 0.204291 | 8.59E-06 | -0.0617  | 0.18319  | -0.11691 | 0.01146 | -0.14176 | 0.00214 | -0.18841 |
| -0.28554 | 3.27E-10 | -0.48157 | 1.74E-28 | -0.09913 | 0.03222 | -0.13617 | 0.00319 | -0.19002 |
| 0.163687 | 0.00038  | 0.000701 | 0.98795  | -0.02103 | 0.6503  | -0.09346 | 0.04353 | 0.003047 |
| -0.00713 | 0.87795  | -0.12877 | 0.00532  | -0.06407 | 0.16691 | -0.10054 | 0.02982 | -0.029   |
| -0.15287 | 0.00092  | -0.29048 | 1.57E-10 | -0.06228 | 0.17908 | -0.06356 | 0.17027 | -0.155   |
| -0.0329  | 0.47811  | -0.0497  | 0.28385  | -0.04716 | 0.30919 | 0.007122 | 0.87801 | -0.13317 |
| -0.15124 | 0.00104  | -0.14735 | 0.00141  | -0.06736 | 0.1461  | -0.11892 | 0.01011 | -0.18343 |
| -0.10678 | 0.021    | -0.24859 | 5.23E-08 | -0.03875 | 0.40349 | -0.09145 | 0.04825 | -0.1014  |
| -0.02744 | 0.55416  | -0.30742 | 1.12E-11 | -0.0876  | 0.05854 | -0.12386 | 0.00737 | -0.09937 |
| -0.09861 | 0.03313  | -0.25614 | 1.97E-08 | -0.05674 | 0.22098 | -0.08412 | 0.06935 | -0.0948  |
| -0.24922 | 4.83E-08 | -0.34401 | 2.03E-14 | -0.04269 | 0.35726 | -0.03761 | 0.41746 | -0.04464 |
| -0.11069 | 0.01671  | -0.11891 | 0.01012  | -0.03327 | 0.47326 | -0.08008 | 0.08385 | -0.04129 |
| -0.07453 | 0.10773  | -0.04672 | 0.31367  | -0.01916 | 0.67964 | -0.00071 | 0.98782 | -0.09145 |
| 0.124957 | 0.00686  | 0.188732 | 4.05E-05 | 0.04982  | 0.28264 | 0.093984 | 0.04235 | 0.047368 |
| 0.034032 | 0.46315  | -0.13371 | 0.0038   | -0.0327  | 0.4808  | -0.03671 | 0.42867 | -0.02688 |
| -0.10238 | 0.02694  | -0.36777 | 2.11E-16 | -0.04195 | 0.36573 | -0.03622 | 0.4349  | -0.07761 |
| -0.00107 | 0.98163  | 0.007871 | 0.86529  | -0.02118 | 0.64797 | -0.03835 | 0.40832 | -0.0087  |
| -0.19503 | 2.19E-05 | -0.14053 | 0.00234  | -0.05004 | 0.28051 | 0.00672  | 0.88484 | -0.03145 |
| 0.089049 | 0.05448  | 0.247574 | 5.95E-08 | 0.029533 | 0.52436 | 0.081489 | 0.07854 | 0.090505 |
| -0.02642 | 0.56904  | -0.1506  | 0.0011   | -0.02132 | 0.64577 | -0.11071 | 0.0167  | -0.00785 |
| -0.04008 | 0.38746  | 0.030312 | 0.51347  | 0.020533 | 0.65808 | 0.024072 | 0.60384 | -0.03824 |
| 0.233684 | 3.27E-07 | 0.119409 | 0.0098   | -0.03192 | 0.49131 | -0.07197 | 0.12041 | -0.06753 |
| -0.04767 | 0.304    | -0.0984  | 0.03351  | -0.06216 | 0.17995 | -0.08845 | 0.05612 | -0.02711 |
| -0.00836 | 0.85697  | -0.16639 | 0.0003   | -0.03239 | 0.48505 | 0.0047   | 0.91932 | -0.03263 |
| -0.03463 | 0.45538  | -0.02437 | 0.59935  | -0.04651 | 0.3159  | -0.10551 | 0.02258 | -0.05995 |
| 0.06898  | 0.13663  | 0.078238 | 0.09126  | -0.07532 | 0.10405 | -0.11309 | 0.01447 | -0.15417 |
| 0.020768 | 0.65441  | -0.09444 | 0.04136  | -0.04054 | 0.38209 | -0.06928 | 0.13495 | -0.02535 |
| -0.1033  | 0.02559  | -0.2824  | 5.19E-10 | -0.0826  | 0.07455 | -0.14777 | 0.00136 | -0.1901  |
| -0.00018 | 0.9969   | -0.08597 | 0.06342  | -0.04581 | 0.32321 | -0.05661 | 0.22209 | -0.1143  |
| -0.00761 | 0.86965  | 0.004197 | 0.92792  | -0.0531  | 0.25212 | -0.08782 | 0.0579  | -0.07263 |
| -0.09375 | 0.04287  | -0.22172 | 1.31E-06 | -0.05429 | 0.24161 | -0.08569 | 0.0643  | -0.18528 |

|          |          |          |          |          |         |          |          |          |
|----------|----------|----------|----------|----------|---------|----------|----------|----------|
| -0.19289 | 2.71E-05 | -0.22368 | 1.05E-06 | -0.07982 | 0.08488 | -0.06287 | 0.17497  | -0.13795 |
| -0.04146 | 0.37138  | -0.11128 | 0.01614  | -0.05298 | 0.25315 | -0.0282  | 0.54321  | -0.12551 |
| -0.00797 | 0.86369  | -0.20344 | 9.38E-06 | -0.07936 | 0.08668 | -0.11189 | 0.01556  | -0.10976 |
| -0.07627 | 0.09974  | -0.22087 | 1.44E-06 | -0.06663 | 0.15053 | -0.07719 | 0.09571  | -0.15547 |
| -0.15493 | 0.00078  | -0.3258  | 5.21E-13 | -0.0689  | 0.13706 | -0.1689  | 0.00025  | -0.22058 |
| 0.224173 | 9.89E-07 | -0.09959 | 0.03142  | -0.04098 | 0.37693 | -0.15144 | 0.00103  | -0.0625  |
| 0.101197 | 0.02877  | -0.02979 | 0.5207   | -0.00588 | 0.89917 | -0.01998 | 0.66673  | 0.037953 |
| -0.12659 | 0.00615  | -0.39197 | 1.34E-18 | -0.04255 | 0.35889 | -0.11643 | 0.01181  | -0.15214 |
| 0.023868 | 0.60691  | -0.20222 | 1.06E-05 | -0.07507 | 0.10517 | -0.08539 | 0.06522  | -0.09062 |
| -0.07221 | 0.11917  | -0.10884 | 0.01863  | -0.03635 | 0.43326 | -0.0601  | 0.19482  | -0.05745 |
| 0.134039 | 0.00371  | -0.07517 | 0.10472  | -0.06082 | 0.1895  | -0.09396 | 0.0424   | -0.08976 |
| -0.01094 | 0.81365  | 0.014265 | 0.75849  | 0.04341  | 0.34926 | 0.07731  | 0.09518  | 0.066304 |
| 0.014006 | 0.76274  | -0.02076 | 0.65461  | -0.06362 | 0.1699  | -0.04664 | 0.3145   | -0.02716 |
| -0.08832 | 0.0565   | -0.10553 | 0.02256  | -0.05193 | 0.26269 | -0.02713 | 0.55873  | -0.17957 |
| -0.20261 | 1.02E-05 | -0.29282 | 1.10E-10 | -0.05259 | 0.25669 | -0.14415 | 0.00179  | -0.11137 |
| -0.07655 | 0.09849  | -0.09961 | 0.03138  | -0.05435 | 0.24112 | -0.00054 | 0.99066  | -0.12451 |
| -0.11945 | 0.00977  | -0.10176 | 0.02789  | -0.07522 | 0.1045  | -0.07588 | 0.10147  | -0.1035  |
| 0.070778 | 0.12668  | 0.047038 | 0.31042  | -0.04577 | 0.32362 | -0.07085 | 0.12631  | -0.07189 |
| 0.03991  | 0.38951  | -0.00606 | 0.89607  | -0.03696 | 0.42549 | -0.01574 | 0.73438  | -0.04036 |
| -0.17393 | 0.00016  | -0.4227  | 1.16E-21 | -0.07459 | 0.10744 | -0.19139 | 3.13E-05 | -0.16153 |
| -0.1251  | 0.00679  | -0.29262 | 1.13E-10 | -0.05332 | 0.25013 | -0.06197 | 0.18127  | -0.07845 |
| 0.032769 | 0.47992  | -0.19868 | 1.52E-05 | -0.07298 | 0.11525 | -0.12359 | 0.0075   | -0.15839 |
| -0.23367 | 3.27E-07 | -0.31113 | 6.11E-12 | -0.07163 | 0.12216 | -0.05634 | 0.22429  | -0.17175 |
| -0.16741 | 0.00028  | -0.30695 | 1.20E-11 | -0.0877  | 0.05827 | -0.1159  | 0.0122   | -0.14926 |
| -0.17055 | 0.00021  | -0.26249 | 8.48E-09 | -0.06523 | 0.15935 | -0.06755 | 0.14498  | -0.10798 |
| 0.053641 | 0.24731  | 0.000984 | 0.98308  | -0.01662 | 0.72017 | 0.014613 | 0.75279  | 0.029686 |
| 0.029428 | 0.52583  | -0.02863 | 0.53713  | -0.05824 | 0.209   | -0.09529 | 0.03955  | 0.001245 |
| 0.156011 | 0.00072  | -0.1637  | 0.00038  | -0.07969 | 0.08538 | -0.16115 | 0.00047  | -0.05345 |
| 0.069918 | 0.13136  | 0.042956 | 0.35433  | -0.0744  | 0.10832 | -0.05415 | 0.24286  | -0.09745 |
| -0.04819 | 0.29867  | -0.2771  | 1.12E-09 | -0.04654 | 0.3156  | -0.10106 | 0.02899  | -0.07459 |
| -0.01074 | 0.81693  | -0.10253 | 0.02671  | -0.01672 | 0.71859 | -0.04304 | 0.35336  | -0.04239 |
| -0.12751 | 0.00579  | -0.0498  | 0.28287  | -0.0601  | 0.19481 | -0.00767 | 0.86863  | -0.03899 |
| 0.004818 | 0.9173   | 0.019245 | 0.67828  | -0.04582 | 0.32311 | -0.01907 | 0.68105  | -0.12156 |
| -0.03998 | 0.38865  | -0.05617 | 0.22571  | -0.09437 | 0.04151 | -0.09606 | 0.03797  | -0.16573 |
| -0.25299 | 2.98E-08 | -0.53026 | 3.21E-35 | -0.06185 | 0.18209 | -0.10271 | 0.02646  | -0.09981 |
| -0.10943 | 0.018    | 0.049852 | 0.28233  | -0.01045 | 0.82173 | 0.05112  | 0.27025  | 0.092504 |
| -0.0156  | 0.73675  | 0.225353 | 8.64E-07 | 0.052609 | 0.25653 | 0.103064 | 0.02593  | 0.146722 |
| -0.08339 | 0.07179  | -0.12522 | 0.00674  | -0.01698 | 0.71435 | -0.03585 | 0.43955  | 0.052273 |
| -0.10668 | 0.02112  | -0.15195 | 0.00099  | 0.068466 | 0.13959 | 0.158582 | 0.00058  | 0.020107 |
| -0.00059 | 0.98984  | -0.03987 | 0.39004  | -0.04605 | 0.32075 | -0.00654 | 0.88785  | -0.03341 |
| 0.200602 | 1.25E-05 | 0.281003 | 6.36E-10 | 0.018723 | 0.68654 | 0.131416 | 0.00445  | -0.06228 |
| -0.14491 | 0.00169  | -0.24156 | 1.26E-07 | -0.01227 | 0.79148 | 0.012804 | 0.78258  | -0.00514 |
| -0.10161 | 0.02812  | -0.06371 | 0.16926  | -0.01533 | 0.74109 | 0.021636 | 0.64097  | -0.06499 |
| 0.124593 | 0.00702  | 0.318908 | 1.69E-12 | -0.01319 | 0.77613 | 0.073265 | 0.11384  | 0.015535 |
| 0.055228 | 0.23358  | 0.138116 | 0.00278  | -0.05666 | 0.22163 | -0.01514 | 0.74422  | -0.11291 |

|          |          |          |          |          |         |          |          |          |
|----------|----------|----------|----------|----------|---------|----------|----------|----------|
| -0.24583 | 7.41E-08 | -0.54659 | 9.83E-38 | -0.01251 | 0.7875  | -0.06501 | 0.16075  | -0.0057  |
| -0.02517 | 0.58738  | 0.030127 | 0.51604  | -0.05708 | 0.21822 | -0.01745 | 0.70681  | -0.20416 |
| -0.10229 | 0.02708  | -0.26994 | 3.06E-09 | -0.05289 | 0.25397 | -0.10128 | 0.02864  | -0.08409 |
| -0.14165 | 0.00215  | -0.17096 | 0.00021  | -0.0412  | 0.37442 | -0.05699 | 0.21895  | -0.08161 |
| -0.06187 | 0.18198  | -0.21812 | 1.95E-06 | -0.04754 | 0.30531 | -0.08039 | 0.08265  | -0.12959 |
| -0.02105 | 0.65     | -0.00891 | 0.84776  | -0.02814 | 0.54416 | -0.01804 | 0.69747  | -0.05854 |
| -0.08126 | 0.07939  | -0.06996 | 0.13112  | -0.04507 | 0.33115 | -0.03727 | 0.42164  | -0.11707 |
| 0.002094 | 0.964    | -0.11905 | 0.01003  | -0.03804 | 0.41209 | -0.03744 | 0.41959  | -0.06688 |
| -0.0301  | 0.51641  | -0.02159 | 0.64165  | 0.008389 | 0.85653 | 0.016129 | 0.72811  | -0.02481 |
| -0.11464 | 0.01318  | 0.026747 | 0.56423  | -0.05615 | 0.22585 | -0.1234  | 0.00759  | -0.05085 |
| 0.036598 | 0.43009  | -0.09035 | 0.05103  | -0.05435 | 0.24113 | -0.12198 | 0.00832  | -0.12049 |
| 0.132696 | 0.00407  | 0.213235 | 3.33E-06 | -0.03313 | 0.47508 | 0.006756 | 0.88422  | 0.019025 |
| 0.055141 | 0.23431  | -0.07736 | 0.09495  | -0.06392 | 0.16791 | -0.1476  | 0.00138  | -0.12046 |
| -0.09163 | 0.04781  | -0.18329 | 6.78E-05 | -0.01729 | 0.70944 | 0.010014 | 0.82912  | -0.09769 |
| -0.13203 | 0.00426  | -0.34386 | 2.08E-14 | -0.10498 | 0.02328 | -0.2016  | 1.13E-05 | -0.1337  |
| -0.09939 | 0.03175  | -0.15345 | 0.00088  | -0.0434  | 0.34933 | 0.010193 | 0.82612  | -0.07547 |
| -0.08776 | 0.05809  | -0.10403 | 0.02457  | -0.05124 | 0.26912 | -0.13375 | 0.00378  | 0.035538 |
| 0.119054 | 0.01002  | -0.13903 | 0.0026   | -0.09331 | 0.04385 | -0.13692 | 0.00303  | -0.12827 |
| -0.01252 | 0.78721  | -0.01118 | 0.80951  | -0.03805 | 0.41198 | -0.13474 | 0.00353  | 0.089477 |
| -0.00385 | 0.9338   | -0.20432 | 8.57E-06 | -0.0671  | 0.1477  | -0.18819 | 4.27E-05 | -0.06614 |
| -0.11054 | 0.01686  | -0.29774 | 5.15E-11 | -0.0619  | 0.18175 | -0.14022 | 0.00239  | -0.05714 |
| -0.10723 | 0.02046  | -0.08902 | 0.05457  | -0.02795 | 0.54689 | -0.02855 | 0.53825  | -0.124   |
| -0.08134 | 0.0791   | -0.22523 | 8.76E-07 | -0.05158 | 0.26598 | -0.08561 | 0.06454  | 0.01267  |
| -0.06381 | 0.16862  | -0.30827 | 9.73E-12 | -0.04872 | 0.29339 | -0.06284 | 0.17521  | -0.12017 |
| -0.17096 | 0.00021  | -0.21502 | 2.74E-06 | -0.08911 | 0.05431 | -0.14652 | 0.0015   | -0.17634 |
| -0.02771 | 0.55025  | -0.19264 | 2.78E-05 | -0.06854 | 0.13916 | -0.12842 | 0.00545  | -0.06146 |
| -0.01473 | 0.75088  | -0.17303 | 0.00017  | -0.05941 | 0.20004 | -0.10692 | 0.02083  | -0.14822 |
| -0.19785 | 1.66E-05 | -0.49719 | 1.57E-30 | -0.0707  | 0.12709 | -0.14753 | 0.00139  | -0.17043 |
| -0.16854 | 0.00025  | -0.10919 | 0.01826  | -0.09227 | 0.04627 | -0.16262 | 0.00042  | -0.10569 |
| -0.11457 | 0.01324  | -0.05378 | 0.24607  | 0.004094 | 0.92968 | 0.001547 | 0.97341  | 0.152456 |
| -0.03731 | 0.42117  | 0.114556 | 0.01325  | -0.04818 | 0.29879 | -0.01161 | 0.80238  | -0.05044 |
| -0.14437 | 0.00176  | -0.27567 | 1.37E-09 | -0.07548 | 0.1033  | -0.08244 | 0.07511  | -0.13151 |
| 0.085812 | 0.0639   | -0.06462 | 0.16325  | -0.01415 | 0.76038 | -0.07436 | 0.10855  | 0.040111 |
| 0.060577 | 0.19129  | 0.069777 | 0.13215  | -0.06089 | 0.18902 | -0.13007 | 0.00488  | -0.31228 |
| -0.15667 | 0.00068  | -0.29378 | 9.47E-11 | -0.07339 | 0.1132  | -0.10445 | 0.02399  | -0.15353 |
| 0.049693 | 0.28388  | -0.10931 | 0.01813  | -0.06577 | 0.15592 | -0.15377 | 0.00086  | -0.14091 |
| 0.083401 | 0.07176  | -0.0647  | 0.16275  | -0.02022 | 0.66302 | -0.07533 | 0.10399  | 0.026968 |
| -0.03801 | 0.41251  | 0.150993 | 0.00106  | 0.023568 | 0.61144 | 0.034784 | 0.45331  | 0.03592  |
| -0.0856  | 0.06457  | -0.27118 | 2.58E-09 | -0.05525 | 0.23342 | -0.08133 | 0.07914  | -0.08589 |
| -0.20768 | 6.03E-06 | -0.43158 | 1.31E-22 | -0.05001 | 0.28083 | -0.10379 | 0.02489  | -0.1205  |
| -0.1113  | 0.01611  | -0.13998 | 0.00243  | -0.05977 | 0.19728 | -0.05784 | 0.21219  | -0.04221 |
| -0.11996 | 0.00946  | -0.14255 | 0.00201  | -0.06236 | 0.17854 | -0.0091  | 0.84447  | -0.07629 |
| 0.023411 | 0.61381  | 0.023554 | 0.61165  | -0.10453 | 0.02389 | -0.17559 | 0.00014  | -0.2435  |
| 0.146191 | 0.00154  | 0.158906 | 0.00057  | -0.03044 | 0.51163 | -0.01862 | 0.68819  | -0.00908 |
| 0.147003 | 0.00144  | 0.138363 | 0.00273  | -0.02457 | 0.59641 | -0.08882 | 0.05511  | -0.03585 |

|          |          |          |          |          |         |          |         |          |
|----------|----------|----------|----------|----------|---------|----------|---------|----------|
| 0.031195 | 0.50127  | -0.11069 | 0.01671  | -0.01976 | 0.67021 | -0.02655 | 0.56717 | -0.03654 |
| -0.01689 | 0.71591  | -0.20203 | 1.08E-05 | -0.04902 | 0.29046 | -0.07551 | 0.10317 | -0.05433 |
| -0.08378 | 0.07047  | -0.25779 | 1.59E-08 | -0.07979 | 0.08502 | -0.10845 | 0.01906 | -0.11231 |
| 0.055459 | 0.23163  | -0.08851 | 0.05595  | -0.07932 | 0.08685 | -0.14516 | 0.00166 | -0.05839 |
| 0.017761 | 0.70185  | -0.28499 | 3.55E-10 | -0.07561 | 0.10272 | -0.10057 | 0.02979 | -0.13045 |
| -0.11122 | 0.0162   | -0.02972 | 0.52173  | -0.02702 | 0.56029 | -0.00494 | 0.91522 | -0.04454 |
| 0.013155 | 0.77677  | -0.06096 | 0.18848  | -0.05228 | 0.25952 | -0.10908 | 0.01837 | -0.07579 |
| -0.05699 | 0.21896  | -0.1297  | 0.005    | -0.14987 | 0.00116 | -0.15573 | 0.00073 | -0.29012 |
| -0.03914 | 0.39877  | -0.31664 | 2.46E-12 | -0.067   | 0.14829 | -0.08648 | 0.06185 | -0.14608 |
| -0.10688 | 0.02088  | -0.35705 | 1.73E-15 | -0.07453 | 0.10774 | -0.09325 | 0.04399 | -0.1432  |
| -0.17762 | 0.00011  | -0.26664 | 4.83E-09 | -0.05611 | 0.22619 | -0.11067 | 0.01674 | -0.09138 |
| -0.07041 | 0.12865  | -0.27843 | 9.22E-10 | -0.03844 | 0.40722 | -0.08569 | 0.06427 | -0.0704  |
| 0.009466 | 0.83835  | -0.11726 | 0.01121  | -0.06631 | 0.15251 | -0.06771 | 0.14401 | -0.04503 |
| 0.050646 | 0.27473  | -0.08827 | 0.05662  | -0.0683  | 0.14054 | -0.12898 | 0.00525 | -0.1518  |
| 0.086011 | 0.06329  | 0.098172 | 0.03392  | 0.084415 | 0.06837 | 0.113385 | 0.01422 | 0.191073 |
| -0.07132 | 0.12379  | -0.31159 | 5.67E-12 | -0.07433 | 0.10867 | -0.14913 | 0.00123 | -0.14203 |
| 0.084907 | 0.06677  | 0.10763  | 0.02     | -0.05044 | 0.27671 | -0.07853 | 0.09006 | -0.04681 |
| -0.0421  | 0.36403  | -0.08763 | 0.05846  | -0.08154 | 0.07836 | -0.15697 | 0.00066 | -0.04442 |
| 0.039305 | 0.39675  | -0.14447 | 0.00175  | -0.05807 | 0.21035 | -0.04467 | 0.33548 | -0.13033 |
| -0.01009 | 0.82792  | -0.04479 | 0.33414  | -0.07573 | 0.10215 | -0.08214 | 0.07619 | -0.09022 |
| 0.042485 | 0.35963  | 0.124017 | 0.00729  | -0.04548 | 0.32669 | -0.0762  | 0.10002 | -0.04761 |
| 0.097858 | 0.0345   | -0.17994 | 9.23E-05 | -0.08073 | 0.08139 | -0.16565 | 0.00032 | -0.18778 |
| -0.13047 | 0.00474  | -0.28672 | 2.74E-10 | -0.06449 | 0.16415 | -0.09218 | 0.04648 | -0.11021 |
| -0.04425 | 0.34005  | -0.28241 | 5.18E-10 | -0.02746 | 0.55396 | -0.03192 | 0.4914  | -0.10425 |
| 0.048881 | 0.29182  | -0.09925 | 0.03201  | -0.05297 | 0.25331 | -0.11765 | 0.01095 | -0.06564 |
| 0.01842  | 0.69135  | -0.00198 | 0.96593  | -0.0309  | 0.50535 | -0.05075 | 0.27377 | 0.073438 |
| -0.20089 | 1.22E-05 | -0.20375 | 9.08E-06 | -0.04213 | 0.36369 | -0.05229 | 0.2594  | -0.1306  |
| -0.19872 | 1.52E-05 | -0.32967 | 2.66E-13 | -0.03691 | 0.42614 | -0.01724 | 0.71017 | -0.03378 |
| 0.055036 | 0.23521  | -0.14707 | 0.00144  | -0.05838 | 0.20796 | -0.15415 | 0.00083 | -0.06316 |
| -0.05018 | 0.2792   | -0.04932 | 0.28755  | -0.02941 | 0.52615 | 0.007457 | 0.87232 | -0.07167 |
| 0.142003 | 0.0021   | -0.30056 | 3.32E-11 | -0.08668 | 0.06124 | -0.1333  | 0.00391 | -0.11612 |
| -0.07154 | 0.12263  | -0.32237 | 9.39E-13 | -0.06938 | 0.13438 | -0.11985 | 0.00953 | -0.2107  |
| 0.08621  | 0.06267  | 0.273003 | 2.00E-09 | 0.013363 | 0.77334 | -0.01221 | 0.79242 | -0.00078 |
| -0.15682 | 0.00067  | -0.16616 | 0.00031  | -0.04245 | 0.35999 | -0.04097 | 0.37706 | -0.13804 |
| -0.0136  | 0.76946  | -0.05871 | 0.20533  | -0.03985 | 0.39021 | -0.08114 | 0.07985 | -0.06382 |
| -0.08793 | 0.05758  | -0.35347 | 3.44E-15 | -0.05776 | 0.2128  | -0.13963 | 0.00249 | -0.16503 |
| 0.099208 | 0.03208  | 0.064795 | 0.16213  | -0.02098 | 0.65106 | -0.08277 | 0.07395 | 0.01814  |
| 0.019494 | 0.67436  | -0.19125 | 3.18E-05 | -0.02122 | 0.6474  | 0.007583 | 0.87018 | -0.03708 |
| -0.05998 | 0.19572  | -0.1656  | 0.00033  | -0.03599 | 0.43782 | -0.10845 | 0.01907 | 0.015096 |
| -0.00243 | 0.95816  | -0.08151 | 0.07845  | -0.08801 | 0.05738 | -0.15493 | 0.00078 | -0.06151 |
| -0.13098 | 0.00458  | -0.18182 | 7.76E-05 | -0.05212 | 0.26096 | -0.06979 | 0.13209 | 0.015442 |
| -0.18232 | 7.41E-05 | -0.25154 | 3.59E-08 | -0.01705 | 0.71323 | 0.017256 | 0.70994 | 0.043286 |
| -0.07411 | 0.10972  | -0.1825  | 7.29E-05 | -0.03929 | 0.39691 | -0.04668 | 0.31415 | -0.0768  |
| -0.08844 | 0.05615  | -0.15597 | 0.00072  | -0.05419 | 0.24245 | -0.08782 | 0.05791 | -0.10856 |
| -0.0419  | 0.36635  | -0.26433 | 6.62E-09 | -0.02182 | 0.63812 | -0.03878 | 0.40307 | -0.02713 |



|          |          |          |          |          |         |          |          |          |
|----------|----------|----------|----------|----------|---------|----------|----------|----------|
| 0.081307 | 0.07921  | -0.00329 | 0.94344  | -0.01412 | 0.76093 | -0.0511  | 0.27049  | 0.133877 |
| 0.141669 | 0.00215  | 0.410801 | 1.93E-20 | 0.048109 | 0.29953 | 0.071082 | 0.12505  | 0.144407 |
| 0.152923 | 0.00092  | 0.040723 | 0.37992  | 0.014688 | 0.75156 | -0.06857 | 0.13901  | 0.1737   |
| 0.179294 | 9.79E-05 | 0.104615 | 0.02377  | 0.007578 | 0.87026 | -0.06072 | 0.19025  | 0.043246 |
| 0.018318 | 0.69297  | -0.08426 | 0.06889  | 0.014606 | 0.7529  | -0.06944 | 0.13404  | 0.027215 |
| 0.068843 | 0.13742  | -0.11029 | 0.01711  | 0.011808 | 0.79911 | -0.07898 | 0.08824  | 0.045404 |
| 0.043534 | 0.34788  | -0.03267 | 0.48125  | -0.01694 | 0.71502 | -0.08985 | 0.05233  | 0.014738 |
| -0.02352 | 0.61218  | 0.110356 | 0.01705  | 0.084758 | 0.06725 | 0.180963 | 8.40E-05 | 0.091394 |
| 0.007908 | 0.86466  | -0.10554 | 0.02254  | -0.02162 | 0.64115 | -0.10449 | 0.02393  | -0.0083  |
| 0.170767 | 0.00021  | -0.12115 | 0.00878  | -0.02185 | 0.63773 | -0.14316 | 0.00193  | -0.07328 |
| 0.068144 | 0.14146  | 0.08631  | 0.06237  | -0.0577  | 0.21331 | 0.017058 | 0.71312  | -0.24433 |
| 0.209287 | 5.09E-06 | 0.468671 | 7.09E-27 | 0.016996 | 0.71411 | 0.22991  | 5.10E-07 | 0.086937 |
| 0.125989 | 0.00641  | -0.11195 | 0.0155   | -0.05958 | 0.19868 | -0.196   | 1.99E-05 | -0.10762 |
| -0.17984 | 9.31E-05 | -0.2684  | 3.79E-09 | 0.050361 | 0.27744 | 0.070344 | 0.12903  | 0.084772 |
| 0.052616 | 0.25647  | 0.321046 | 1.17E-12 | -0.00823 | 0.85926 | 0.071122 | 0.12484  | -0.03518 |
| -0.11303 | 0.01453  | -0.3833  | 8.59E-18 | -0.05836 | 0.20804 | -0.15334 | 0.00089  | -0.08786 |
| -0.00205 | 0.9648   | -0.15768 | 0.00063  | -0.01117 | 0.80982 | -0.05987 | 0.1965   | -0.10163 |
| -0.04224 | 0.36239  | -0.07127 | 0.12404  | 0.009649 | 0.83525 | 0.080068 | 0.08391  | 0.063712 |
| -0.06951 | 0.13362  | -0.1518  | 0.001    | 0.042017 | 0.36496 | 0.054592 | 0.23902  | 0.36457  |
| -0.08794 | 0.05756  | -0.03859 | 0.40536  | -0.00964 | 0.83545 | -0.01126 | 0.80829  | 0.084418 |
| -0.12852 | 0.00541  | -0.17275 | 0.00018  | 0.010654 | 0.81838 | -0.00807 | 0.86193  | 0.056048 |
| -0.08406 | 0.06955  | -0.06221 | 0.17956  | -0.02185 | 0.63761 | -0.03196 | 0.49088  | 0.020126 |
| -0.12672 | 0.0061   | -0.08149 | 0.07853  | 0.058679 | 0.2056  | 0.093125 | 0.04428  | 0.162172 |
| 0.162858 | 0.00041  | 0.104992 | 0.02326  | 0.008474 | 0.85508 | -0.01095 | 0.81339  | 0.057434 |
| -0.03414 | 0.46167  | 0.073494 | 0.11272  | -0.0257  | 0.5796  | 0.045697 | 0.32443  | -0.05851 |
| -0.16433 | 0.00036  | -0.36581 | 3.11E-16 | -0.00501 | 0.91399 | -0.11438 | 0.01338  | -0.03278 |
| -0.07358 | 0.11227  | -0.19636 | 1.92E-05 | 0.007109 | 0.87822 | -0.02715 | 0.55833  | 0.080641 |
| -0.07948 | 0.08623  | -0.38249 | 1.02E-17 | -0.04981 | 0.28274 | -0.14817 | 0.00132  | -0.13511 |
| -0.09415 | 0.04199  | -0.29564 | 7.12E-11 | -0.02686 | 0.56258 | -0.09059 | 0.05041  | -0.1148  |
| -0.04876 | 0.29306  | -0.13767 | 0.00287  | 0.047052 | 0.31028 | 0.053554 | 0.24808  | 0.163986 |
| -0.04749 | 0.30583  | -0.16775 | 0.00027  | -0.01228 | 0.79131 | -0.10254 | 0.0267   | -0.01273 |
| 0.147276 | 0.00142  | 0.097353 | 0.03545  | -0.03637 | 0.43296 | -0.10903 | 0.01842  | 0.058292 |
| 0.196917 | 1.82E-05 | 0.045023 | 0.33163  | -0.04825 | 0.29814 | -0.15663 | 0.00068  | -0.12377 |
| -0.08702 | 0.06025  | -0.40766 | 3.99E-20 | -0.01923 | 0.67851 | -0.0928  | 0.04502  | -0.12259 |
| -0.10882 | 0.01866  | -0.18744 | 4.58E-05 | -0.04555 | 0.326   | -0.1297  | 0.005    | -0.10688 |
| -0.08573 | 0.06416  | -0.39139 | 1.52E-18 | -0.02903 | 0.5314  | -0.19093 | 3.28E-05 | -0.10488 |
| -0.02285 | 0.62235  | -0.18055 | 8.73E-05 | 0.007605 | 0.8698  | -0.05783 | 0.21224  | 4.86E-05 |
| -0.26956 | 3.23E-09 | -0.36004 | 9.71E-16 | 0.003936 | 0.93239 | 0.010988 | 0.81279  | 0.055148 |
| -0.10751 | 0.02014  | -0.35457 | 2.79E-15 | -0.08457 | 0.06784 | -0.22605 | 7.97E-07 | -0.27439 |
| -0.15926 | 0.00055  | -0.3891  | 2.49E-18 | -0.06617 | 0.15339 | -0.17157 | 0.0002   | -0.21997 |
| -0.0247  | 0.59447  | -0.0945  | 0.04123  | 0.002836 | 0.95126 | -0.03791 | 0.41375  | -0.00152 |
| 0.034591 | 0.45582  | -0.12248 | 0.00806  | -0.05361 | 0.24757 | -0.13268 | 0.00407  | -0.02843 |
| 0.14178  | 0.00213  | -0.18166 | 7.87E-05 | -0.02185 | 0.63773 | -0.20691 | 6.54E-06 | -0.04927 |
| -0.23449 | 2.97E-07 | 0.089499 | 0.05326  | -0.01276 | 0.78334 | 0.092767 | 0.04511  | -0.09974 |
| -0.0742  | 0.10927  | -0.32088 | 1.21E-12 | -0.00725 | 0.8759  | -0.12555 | 0.00659  | -0.04727 |

|          |          |          |          |          |         |          |          |          |
|----------|----------|----------|----------|----------|---------|----------|----------|----------|
| 0.216111 | 2.43E-06 | 0.43888  | 2.08E-23 | 0.031465 | 0.49757 | -0.02396 | 0.60557  | 0.188809 |
| 0.009167 | 0.84338  | -0.15875 | 0.00057  | 0.06121  | 0.18668 | 0.063001 | 0.1741   | 0.186979 |
| 0.060901 | 0.18892  | -0.17053 | 0.00021  | 0.083286 | 0.07216 | 0.023304 | 0.61544  | 0.052801 |
| -0.0105  | 0.82091  | -0.26359 | 7.31E-09 | 0.114417 | 0.01336 | 0.056785 | 0.22064  | 0.222745 |
| 0.177944 | 0.00011  | 0.247095 | 6.32E-08 | 0.065758 | 0.15596 | -0.06895 | 0.1368   | 0.264425 |
| 0.030601 | 0.50946  | 0.319812 | 1.45E-12 | -0.00801 | 0.863   | -0.08087 | 0.08083  | -0.12171 |
| 0.040473 | 0.38285  | -0.06512 | 0.16002  | -0.00668 | 0.8855  | 0.051191 | 0.26959  | -0.17419 |
| -0.10604 | 0.02191  | -0.07234 | 0.11851  | -0.0399  | 0.38958 | -0.02758 | 0.55221  | -0.08797 |
| 0.037637 | 0.4171   | -0.19589 | 2.01E-05 | -0.01345 | 0.77183 | 0.005987 | 0.89734  | -0.17829 |
| 0.274427 | 1.63E-09 | 0.233775 | 3.23E-07 | -0.05378 | 0.24608 | -0.17371 | 0.00016  | -0.20304 |
| -0.06361 | 0.16994  | -0.19759 | 1.70E-05 | -0.00147 | 0.97466 | -0.05084 | 0.27291  | 0.001453 |
| 0.011097 | 0.81096  | -0.12479 | 0.00693  | 0.118209 | 0.01057 | 0.025571 | 0.58149  | 0.117266 |
| -0.02522 | 0.58664  | -0.17641 | 0.00013  | -0.0008  | 0.9862  | -0.0733  | 0.11366  | 0.095678 |
| 0.196228 | 1.95E-05 | 0.529096 | 4.79E-35 | 0.024479 | 0.59773 | 0.099755 | 0.03114  | 0.119687 |
| 0.082573 | 0.07464  | -0.02863 | 0.53717  | -0.00113 | 0.98059 | 0.017681 | 0.70314  | 0.159053 |
| 0.176539 | 0.00013  | -0.08127 | 0.07936  | -0.03594 | 0.43838 | -0.17028 | 0.00022  | -0.03965 |
| 0.208395 | 5.59E-06 | 0.172466 | 0.00018  | 0.105652 | 0.02241 | 0.198674 | 1.52E-05 | 0.313578 |
| -0.23129 | 4.34E-07 | -0.17976 | 9.38E-05 | -0.03884 | 0.40241 | -0.10071 | 0.02955  | -0.03013 |
| -0.21349 | 3.24E-06 | -0.0574  | 0.21564  | -0.02599 | 0.57538 | 0.099831 | 0.03101  | -0.16436 |
| -0.03418 | 0.46117  | -0.16253 | 0.00042  | -0.05101 | 0.27133 | -0.13822 | 0.00276  | -0.00714 |
| 0.306051 | 1.39E-11 | 0.072276 | 0.11882  | 0.00942  | 0.83911 | -0.07324 | 0.11397  | 0.043754 |
| 0.291298 | 1.38E-10 | 0.459308 | 9.49E-26 | -0.04485 | 0.3335  | -0.09844 | 0.03344  | 0.068845 |
| -0.15044 | 0.00111  | -0.17775 | 0.00011  | 0.045699 | 0.32442 | 0.002801 | 0.95185  | 0.107887 |
| -0.14736 | 0.00141  | -0.14091 | 0.00227  | 0.050345 | 0.2776  | 0.022109 | 0.63368  | 0.17352  |
| 0.252021 | 3.37E-08 | -0.0048  | 0.91767  | -0.01866 | 0.68761 | -0.15213 | 0.00097  | -0.08055 |
| 0.019451 | 0.67503  | -0.28837 | 2.15E-10 | -0.00625 | 0.89284 | -0.14332 | 0.0019   | -0.05631 |
| 0.064145 | 0.16639  | -0.11876 | 0.01021  | 0.03378  | 0.46647 | -0.03256 | 0.48268  | 0.122345 |
| -0.16223 | 0.00043  | -0.53338 | 1.09E-35 | -0.05928 | 0.20097 | -0.21819 | 1.94E-06 | -0.2063  |
| 0.059279 | 0.201    | 0.101558 | 0.0282   | 0.043175 | 0.35187 | -0.02055 | 0.65777  | 0.177326 |
| 0.278432 | 9.22E-10 | 0.191765 | 3.02E-05 | -0.06097 | 0.18843 | -0.06625 | 0.15286  | -0.11059 |
| 0.161177 | 0.00047  | 0.061425 | 0.18514  | 0.016076 | 0.72898 | -0.09367 | 0.04305  | 0.020986 |
| 0.035519 | 0.44383  | -0.26462 | 6.36E-09 | -0.01969 | 0.67131 | -0.17892 | 0.0001   | -0.06331 |
| 0.038494 | 0.40657  | 0.166542 | 0.0003   | -0.00956 | 0.83669 | -0.03952 | 0.39413  | -0.0717  |
| -0.00205 | 0.96476  | 0.049832 | 0.28253  | 0.02726  | 0.55678 | -0.00647 | 0.88918  | 0.171799 |
| 0.032934 | 0.4777   | -0.14246 | 0.00203  | -0.06604 | 0.15419 | -0.19159 | 3.07E-05 | -0.10371 |
| -0.00512 | 0.91214  | -0.07144 | 0.12316  | -0.01638 | 0.72402 | -0.10291 | 0.02616  | 0.019908 |
| 0.028855 | 0.53393  | -0.19162 | 3.07E-05 | -0.00921 | 0.8426  | -0.10476 | 0.02357  | 0.06351  |
| -0.10883 | 0.01865  | 0.136195 | 0.00319  | 0.014066 | 0.76176 | 0.151457 | 0.00103  | 0.078024 |
| 0.037971 | 0.41298  | -0.2265  | 7.58E-07 | -0.02007 | 0.66525 | -0.11671 | 0.0116   | -0.01696 |
| 0.046145 | 0.31971  | -0.02898 | 0.53219  | 0.020576 | 0.65739 | 0.023964 | 0.60547  | 0.047452 |
| -0.05357 | 0.24789  | -0.42964 | 2.11E-22 | -0.03984 | 0.39031 | -0.14622 | 0.00153  | -0.03542 |
| -0.12067 | 0.00905  | 0.028172 | 0.54366  | -0.00042 | 0.99272 | 0.067683 | 0.14418  | -0.027   |
| -0.04641 | 0.31689  | 0.189917 | 3.62E-05 | 0.017929 | 0.69917 | 0.075449 | 0.10344  | -0.05632 |
| 0.213788 | 3.14E-06 | 0.157861 | 0.00062  | 0.016462 | 0.72273 | -0.12727 | 0.00588  | 0.119355 |
| -0.10655 | 0.02128  | -0.23138 | 4.29E-07 | -0.01138 | 0.80624 | -0.07029 | 0.12934  | 0.036385 |

|          |          |          |          |          |         |          |          |          |
|----------|----------|----------|----------|----------|---------|----------|----------|----------|
| -0.02008 | 0.6652   | -0.0608  | 0.18964  | 0.041818 | 0.36723 | -0.09533 | 0.03948  | -0.01354 |
| 0.401599 | 1.59E-19 | 0.285502 | 3.29E-10 | -0.05296 | 0.25341 | -0.21992 | 1.60E-06 | -0.02896 |
| 0.123699 | 0.00744  | 0.032898 | 0.47819  | -0.02239 | 0.62944 | -0.11405 | 0.01366  | -0.09609 |
| 0.106262 | 0.02164  | -0.10991 | 0.0175   | -0.03905 | 0.39979 | -0.17289 | 0.00017  | -0.03084 |
| -0.11212 | 0.01534  | -0.55078 | 2.11E-38 | 0.027251 | 0.55692 | -0.00805 | 0.86221  | -0.00938 |
| -0.12011 | 0.00937  | -0.23045 | 4.79E-07 | 0.007769 | 0.86702 | -0.04248 | 0.35972  | -0.00169 |
| -0.08519 | 0.06585  | -0.27259 | 2.12E-09 | -0.03006 | 0.51693 | -0.14247 | 0.00203  | -0.03595 |
| -0.03674 | 0.42824  | -0.06447 | 0.16423  | -0.03886 | 0.40212 | -0.06614 | 0.15355  | 0.05444  |
| 0.014507 | 0.75452  | -0.23819 | 1.90E-07 | -0.01241 | 0.78918 | -0.10718 | 0.02052  | -0.07021 |
| 0.129963 | 0.00491  | 0.291396 | 1.36E-10 | 0.03763  | 0.41719 | 0.085121 | 0.06608  | 0.111389 |
| -0.14484 | 0.0017   | -0.35829 | 1.36E-15 | -0.03738 | 0.4203  | -0.16249 | 0.00042  | 0.011373 |
| 0.0815   | 0.0785   | -0.06897 | 0.13667  | -0.01936 | 0.67646 | -0.12648 | 0.0062   | -0.08908 |
| 0.091242 | 0.04877  | -0.13555 | 0.00334  | 0.06691  | 0.14883 | 0.050108 | 0.27987  | 0.205696 |
| -0.01478 | 0.75007  | 0.067081 | 0.14779  | 0.021194 | 0.64779 | 0.147185 | 0.00142  | -0.05815 |
| -0.14596 | 0.00156  | -0.4838  | 9.03E-29 | 0.050937 | 0.27198 | -0.06665 | 0.15045  | 0.096025 |
| 0.343537 | 2.21E-14 | -0.09055 | 0.05052  | -0.00564 | 0.90334 | -0.04809 | 0.29975  | 0.048315 |
| -0.06446 | 0.16433  | -0.36137 | 7.49E-16 | 0.004578 | 0.92141 | -0.16506 | 0.00034  | -0.04147 |
| -0.03999 | 0.38854  | -0.31216 | 5.16E-12 | 0.013807 | 0.76602 | -0.13639 | 0.00314  | 0.027615 |
| -0.13083 | 0.00463  | -0.2651  | 5.96E-09 | -0.05091 | 0.2722  | -0.15703 | 0.00066  | -0.20492 |
| -0.3469  | 1.19E-14 | -0.43039 | 1.76E-22 | 0.058136 | 0.20983 | 0.138674 | 0.00267  | 0.115416 |
| 0.02082  | 0.6536   | -0.15616 | 0.00071  | 0.002658 | 0.95431 | -0.07589 | 0.10144  | 0.008576 |
| -0.06496 | 0.16107  | 0.286066 | 3.03E-10 | 0.032728 | 0.48047 | 0.211109 | 4.19E-06 | 0.158234 |
| 0.016456 | 0.72282  | 0.202886 | 9.93E-06 | 0.030113 | 0.51624 | 0.072177 | 0.11933  | 0.11035  |
| -0.22743 | 6.81E-07 | -0.51478 | 5.84E-33 | 0.005246 | 0.90998 | -0.00372 | 0.93603  | 0.045604 |
| 0.060561 | 0.19141  | 0.014918 | 0.7478   | -0.05731 | 0.21637 | -0.16359 | 0.00039  | -0.10445 |
| -0.03749 | 0.41894  | -0.0822  | 0.07597  | 0.031183 | 0.50143 | -0.07265 | 0.11693  | 0.014386 |
| -0.0152  | 0.74324  | -0.17509 | 0.00014  | -0.03919 | 0.39817 | -0.15314 | 0.0009   | -0.05762 |
| 0.05739  | 0.21575  | 0.08473  | 0.06734  | -0.01312 | 0.77732 | -0.05026 | 0.27842  | 0.07073  |
| -0.21961 | 1.65E-06 | -0.13261 | 0.00409  | 0.015067 | 0.74537 | 0.127058 | 0.00597  | 0.068199 |
| 0.049106 | 0.28961  | -0.05071 | 0.27409  | 0.091421 | 0.04833 | 0.137299 | 0.00295  | 0.24547  |
| -0.05796 | 0.2112   | -0.223   | 1.13E-06 | 0.01432  | 0.7576  | -0.03313 | 0.4751   | 0.195255 |
| 0.058376 | 0.20796  | 0.212109 | 3.76E-06 | 0.042396 | 0.36065 | 0.030025 | 0.51747  | 0.050926 |
| -0.08048 | 0.08231  | 0.30377  | 2.00E-11 | 0.055138 | 0.23434 | 0.174999 | 0.00014  | 0.199744 |
| 0.090426 | 0.05083  | -0.17373 | 0.00016  | 0.023508 | 0.61235 | -0.09271 | 0.04524  | 0.079372 |
| -0.09117 | 0.04894  | 0.10835  | 0.01918  | 0.04537  | 0.32791 | 0.105449 | 0.02267  | 0.113629 |
| -0.08143 | 0.07876  | 0.14127  | 0.00221  | 0.044681 | 0.33531 | 0.079903 | 0.08455  | 0.117136 |
| -0.12454 | 0.00705  | -0.39972 | 2.42E-19 | -0.02839 | 0.54056 | -0.1811  | 8.29E-05 | -0.08652 |
| -0.05675 | 0.22094  | -0.40241 | 1.32E-19 | 0.010035 | 0.82878 | -0.09955 | 0.03148  | 0.023771 |
| 0.093928 | 0.04247  | -0.10136 | 0.02851  | -0.01371 | 0.7677  | -0.1152  | 0.01274  | -0.0282  |
| -0.06019 | 0.19412  | -0.14831 | 0.00131  | -0.01742 | 0.70727 | -0.12274 | 0.00792  | -0.0015  |
| 0.035219 | 0.44768  | -0.13862 | 0.00268  | -0.03241 | 0.48471 | -0.11599 | 0.01213  | -0.03361 |
| -0.1213  | 0.00869  | -0.40285 | 1.20E-19 | -0.0446  | 0.33618 | -0.09858 | 0.03318  | -0.14316 |
| -0.06986 | 0.13169  | 0.187967 | 4.36E-05 | 0.017969 | 0.69854 | 0.121903 | 0.00836  | 0.089732 |
| -0.05001 | 0.28084  | -0.24315 | 1.04E-07 | 0.012154 | 0.79335 | -0.05657 | 0.22236  | 0.020616 |
| 0.140219 | 0.00239  | 0.100796 | 0.02941  | -0.03603 | 0.43732 | -0.15112 | 0.00105  | 0.025515 |

|          |          |          |          |          |         |          |          |          |
|----------|----------|----------|----------|----------|---------|----------|----------|----------|
| -0.10857 | 0.01893  | -0.03956 | 0.39366  | 0.029298 | 0.52766 | 0.153286 | 0.00089  | -0.01379 |
| -0.13859 | 0.00269  | -0.2814  | 6.01E-10 | -0.06772 | 0.14397 | -0.12968 | 0.005    | 0.042426 |
| -0.15418 | 0.00083  | -0.41001 | 2.33E-20 | -0.02019 | 0.66337 | -0.07199 | 0.12029  | 0.029729 |
| -0.07665 | 0.09804  | -0.06914 | 0.13574  | -0.02111 | 0.64915 | -0.05101 | 0.2713   | 0.065661 |
| -0.06005 | 0.1952   | -0.24351 | 9.90E-08 | -0.03257 | 0.48262 | -0.13187 | 0.00431  | -0.02065 |
| 0.110844 | 0.01656  | 0.249182 | 4.85E-08 | 0.018329 | 0.6928  | 0.198192 | 1.60E-05 | -0.06738 |
| -0.05547 | 0.23152  | -0.12883 | 0.0053   | -0.0243  | 0.60049 | -0.07265 | 0.11691  | -0.03438 |
| -0.03819 | 0.41031  | -0.26214 | 8.89E-09 | -0.04448 | 0.33745 | -0.14557 | 0.00161  | -0.05083 |
| 0.105412 | 0.02271  | 0.105325 | 0.02283  | 0.022567 | 0.62666 | 0.016159 | 0.72763  | 0.239457 |
| 0.096398 | 0.0373   | 0.178365 | 0.00011  | -0.01656 | 0.7212  | -0.01816 | 0.69542  | -0.16922 |
| -0.11164 | 0.01579  | -0.28698 | 2.64E-10 | -0.01009 | 0.82782 | 0.027799 | 0.54901  | -0.02486 |
| -0.16221 | 0.00043  | -0.37682 | 3.34E-17 | 0.004215 | 0.92762 | -0.08439 | 0.06844  | -0.01341 |
| -0.01877 | 0.68587  | -0.22341 | 1.08E-06 | -0.03496 | 0.45105 | -0.14279 | 0.00198  | -0.0673  |
| 0.206336 | 6.94E-06 | -0.0382  | 0.41021  | 0.032197 | 0.48763 | -0.06688 | 0.14904  | 0.009086 |
| -0.1167  | 0.01161  | -0.36343 | 4.99E-16 | -0.03647 | 0.43166 | -0.169   | 0.00024  | -0.13606 |
| 0.249782 | 4.49E-08 | 0.232108 | 3.94E-07 | -0.0033  | 0.94327 | 0.077061 | 0.09625  | -0.02596 |
| 0.032155 | 0.48819  | -0.15153 | 0.00102  | 0.047321 | 0.30751 | 0.017771 | 0.7017   | 0.151333 |
| -0.06254 | 0.17729  | -0.29454 | 8.44E-11 | -0.0247  | 0.59448 | -0.10552 | 0.02257  | -0.04083 |
| 0.075621 | 0.10265  | -0.24947 | 4.67E-08 | -0.05266 | 0.25607 | -0.06112 | 0.18734  | -0.14149 |
| -0.04861 | 0.2945   | -0.11996 | 0.00947  | 0.013021 | 0.77899 | -0.04065 | 0.38072  | -0.00504 |
| 0.003126 | 0.94628  | -0.19754 | 1.71E-05 | 0.044855 | 0.33343 | -0.13434 | 0.00363  | -0.11928 |
| 0.026093 | 0.57381  | -0.32165 | 1.06E-12 | -0.00319 | 0.94514 | -0.0666  | 0.15071  | -0.02238 |
| 0.114115 | 0.01361  | 0.110557 | 0.01684  | 0.057808 | 0.21242 | 0.086828 | 0.06081  | 0.197219 |
| -0.12258 | 0.00801  | -0.19459 | 2.29E-05 | -0.03051 | 0.51068 | -0.04422 | 0.34036  | 0.027968 |
| -0.11931 | 0.00986  | -0.39947 | 2.56E-19 | 0.026351 | 0.57001 | -0.00069 | 0.98819  | 0.104591 |
| -0.06558 | 0.15706  | -0.06358 | 0.17014  | 0.019717 | 0.67084 | -0.00775 | 0.8674   | 0.105835 |
| 0.093623 | 0.04315  | 0.0442   | 0.34055  | -0.03829 | 0.40908 | -0.09194 | 0.04707  | 0.050932 |
| -0.04497 | 0.33223  | -0.20995 | 4.74E-06 | 0.083556 | 0.07123 | 0.135889 | 0.00326  | 0.033301 |
| -0.02661 | 0.5663   | -0.19718 | 1.77E-05 | 0.035646 | 0.44219 | -0.02452 | 0.59711  | 0.066029 |
| 0.005557 | 0.90467  | -0.16134 | 0.00047  | -0.03745 | 0.41944 | -0.11021 | 0.01719  | 0.021062 |
| -0.15092 | 0.00107  | -0.38321 | 8.76E-18 | -0.02981 | 0.52041 | -0.14005 | 0.00242  | 0.051268 |
| -0.07315 | 0.11441  | -0.07261 | 0.11711  | -0.01963 | 0.67228 | -0.04236 | 0.36101  | 0.024995 |
| 0.060582 | 0.19125  | 0.211873 | 3.86E-06 | 0.025655 | 0.58025 | -0.01981 | 0.66934  | 0.029984 |
| 0.078718 | 0.08928  | 0.108623 | 0.01887  | -0.005   | 0.91425 | -0.00802 | 0.86273  | -0.05228 |
| 0.082182 | 0.07603  | 0.136697 | 0.00308  | -0.03738 | 0.42032 | -0.15316 | 0.0009   | 0.063007 |
| 0.014258 | 0.75861  | 0.029769 | 0.52105  | -0.02827 | 0.5422  | -0.02822 | 0.54292  | -0.12365 |
| -0.13455 | 0.00358  | -0.19422 | 2.38E-05 | 0.010303 | 0.82426 | 0.074541 | 0.10767  | 0.087512 |
| -0.11668 | 0.01163  | -0.17852 | 0.00011  | -0.02358 | 0.61122 | -0.10909 | 0.01837  | 0.036796 |
| -0.03269 | 0.48098  | -0.11148 | 0.01595  | -0.02124 | 0.64715 | -0.10034 | 0.03015  | 0.042763 |
| 0.097307 | 0.03554  | -0.0408  | 0.37905  | -0.00614 | 0.89469 | -0.11567 | 0.01237  | 0.035822 |
| -0.1178  | 0.01084  | -0.26792 | 4.05E-09 | -0.01891 | 0.6835  | -0.13271 | 0.00407  | -0.04408 |
| -0.06639 | 0.15203  | -0.23187 | 4.05E-07 | -0.02333 | 0.615   | -0.13752 | 0.0029   | -0.08312 |
| 0.034691 | 0.45453  | -0.12355 | 0.00752  | 0.015165 | 0.74378 | -0.04256 | 0.35879  | 0.033379 |
| 0.214948 | 2.77E-06 | -0.02516 | 0.58757  | -0.00498 | 0.91461 | 0.021211 | 0.64753  | -0.00202 |
| 0.17667  | 0.00012  | -0.18597 | 5.27E-05 | 0.012684 | 0.78456 | -0.11323 | 0.01436  | 0.016374 |

|          |          |          |          |          |         |          |          |          |
|----------|----------|----------|----------|----------|---------|----------|----------|----------|
| 0.097354 | 0.03545  | -0.29596 | 6.78E-11 | 3.01E-06 | 0.99995 | -0.118   | 0.01071  | -0.04468 |
| -0.02792 | 0.54723  | -0.2082  | 5.70E-06 | -0.07053 | 0.12801 | -0.246   | 7.25E-08 | -0.07673 |
| -0.11248 | 0.01502  | -0.20339 | 9.43E-06 | -0.01687 | 0.71609 | -0.09152 | 0.0481   | 0.000129 |
| -0.10787 | 0.01972  | 0.09375  | 0.04287  | 0.014487 | 0.75486 | 0.018687 | 0.6871   | 0.040571 |
| -0.03356 | 0.46943  | -0.19409 | 2.41E-05 | -0.03507 | 0.44962 | -0.11365 | 0.01399  | 0.015764 |
| 0.012828 | 0.78218  | -0.42499 | 6.63E-22 | -0.06225 | 0.17926 | -0.24119 | 1.32E-07 | -0.12675 |
| 0.066488 | 0.15142  | -0.21226 | 3.70E-06 | 0.001875 | 0.96776 | -0.15718 | 0.00065  | -0.0354  |
| -0.14965 | 0.00118  | -0.38984 | 2.12E-18 | -0.04877 | 0.29292 | -0.16244 | 0.00042  | -0.05438 |
| 0.01468  | 0.7517   | -0.27454 | 1.61E-09 | 0.03563  | 0.44239 | -0.01401 | 0.7627   | 0.198446 |
| -0.16123 | 0.00047  | -0.30857 | 9.27E-12 | -0.01721 | 0.7107  | -0.0384  | 0.4077   | 0.026661 |
| 0.057271 | 0.21671  | -0.20596 | 7.22E-06 | -0.0165  | 0.72215 | -0.11132 | 0.0161   | -0.03611 |
| 0.173062 | 0.00017  | -0.01912 | 0.68022  | 0.010766 | 0.81651 | 0.007109 | 0.87822  | -0.00018 |
| 0.040004 | 0.38839  | -0.11089 | 0.01651  | 0.029474 | 0.52519 | -0.09238 | 0.04601  | 0.07858  |
| 0.057232 | 0.21702  | -0.0288  | 0.53474  | 0.045229 | 0.32942 | 0.027958 | 0.54673  | 0.138841 |
| -0.01496 | 0.74712  | -0.12246 | 0.00807  | 0.040526 | 0.38223 | -0.00427 | 0.92662  | 0.064712 |
| -0.04157 | 0.37006  | -0.07614 | 0.10029  | -0.00144 | 0.97528 | -0.05369 | 0.24691  | 0.062021 |
| -0.04116 | 0.37488  | -0.29447 | 8.53E-11 | -0.0369  | 0.42625 | -0.12525 | 0.00672  | -0.00517 |
| -0.0188  | 0.68538  | -0.19109 | 3.23E-05 | -0.02182 | 0.63809 | -0.14213 | 0.00208  | 0.016857 |
| -0.06407 | 0.16688  | -0.19689 | 1.82E-05 | -0.00177 | 0.96949 | 0.015489 | 0.7385   | 0.085113 |
| 0.147847 | 0.00136  | -0.12297 | 0.00781  | 0.01514  | 0.74418 | 0.018532 | 0.68957  | 0.068725 |
| -0.08774 | 0.05813  | -0.0962  | 0.03769  | 0.018799 | 0.68533 | 0.020235 | 0.66272  | 0.141057 |
| -0.12068 | 0.00904  | -0.226   | 8.02E-07 | -0.00917 | 0.84326 | -0.02938 | 0.5265   | 0.034419 |
| -0.08077 | 0.08124  | 0.017311 | 0.70905  | -0.01368 | 0.76804 | -0.00873 | 0.85077  | -0.04418 |
| -0.069   | 0.13649  | -0.18148 | 8.01E-05 | -0.01822 | 0.69452 | -0.11102 | 0.01639  | -0.00115 |
| -0.17527 | 0.00014  | -0.23755 | 2.05E-07 | -0.02267 | 0.62504 | -0.01843 | 0.69114  | -0.01728 |
| 0.176944 | 0.00012  | 0.147746 | 0.00137  | -0.03646 | 0.43187 | -0.10455 | 0.02385  | -0.12082 |
| -0.06425 | 0.16571  | -0.35455 | 2.80E-15 | -0.06107 | 0.1877  | -0.18735 | 4.62E-05 | -0.15812 |
| -0.11042 | 0.01698  | 0.149886 | 0.00116  | 0.022574 | 0.62656 | 0.138675 | 0.00267  | 0.054477 |
| -0.17112 | 0.0002   | -0.27884 | 8.70E-10 | -0.03882 | 0.40259 | -0.00955 | 0.83696  | -0.07439 |
| 0.176042 | 0.00013  | 0.380039 | 1.71E-17 | 0.01456  | 0.75365 | 0.026986 | 0.56076  | 0.017837 |
| 0.002386 | 0.95898  | -0.10035 | 0.03014  | -0.03636 | 0.43312 | -0.08458 | 0.06781  | -0.05728 |
| -0.04473 | 0.33476  | -0.17996 | 9.21E-05 | -0.02014 | 0.66426 | -0.08495 | 0.06664  | 0.006728 |
| -0.10049 | 0.02991  | -0.20504 | 7.95E-06 | 0.008899 | 0.84789 | -0.03034 | 0.51313  | -0.00121 |
| 0.003653 | 0.93725  | -0.0414  | 0.37203  | -0.04752 | 0.30545 | -0.14701 | 0.00144  | -0.02577 |
| 0.106885 | 0.02087  | -0.05385 | 0.2455   | -0.01315 | 0.7768  | -0.14378 | 0.00184  | 0.006598 |
| -0.30844 | 9.47E-12 | -0.53071 | 2.75E-35 | 0.018752 | 0.68607 | -0.01425 | 0.75879  | 0.047619 |
| -0.00797 | 0.86365  | -0.15911 | 0.00056  | -0.06338 | 0.17149 | -0.15236 | 0.00096  | -0.07095 |
| 0.154107 | 0.00083  | 0.021702 | 0.63993  | -0.04879 | 0.29271 | -0.02819 | 0.54338  | -0.07121 |
| 0.071747 | 0.12155  | -0.0848  | 0.06711  | 0.092619 | 0.04545 | -0.05111 | 0.27031  | 0.278472 |
| -0.04183 | 0.36712  | 0.006168 | 0.89425  | -0.02137 | 0.64501 | 0.010145 | 0.82692  | -0.06576 |
| -0.05647 | 0.22319  | -0.25298 | 2.98E-08 | -0.04592 | 0.32203 | -0.17325 | 0.00017  | -0.06559 |
| 0.028919 | 0.53302  | -0.14323 | 0.00192  | 0.02523  | 0.58654 | -0.04719 | 0.30886  | -0.04652 |
| 0.27425  | 1.67E-09 | 0.344427 | 1.88E-14 | -0.06127 | 0.18625 | -0.11465 | 0.01317  | 0.013924 |
| 0.009265 | 0.84172  | -0.2212  | 1.38E-06 | -0.03616 | 0.43566 | -0.14404 | 0.0018   | -0.10902 |
| 0.209118 | 5.18E-06 | -0.26675 | 4.76E-09 | -0.01648 | 0.72237 | -0.10453 | 0.02387  | -0.01068 |

|          |          |          |          |          |         |           |          |          |
|----------|----------|----------|----------|----------|---------|-----------|----------|----------|
| 0.105489 | 0.02261  | -0.13961 | 0.0025   | -0.00483 | 0.91714 | -0.03528  | 0.44696  | 0.069355 |
| -0.05311 | 0.252    | -0.33178 | 1.84E-13 | -0.01682 | 0.71689 | -0.04071  | 0.38004  | -0.02662 |
| -0.02143 | 0.64413  | -0.23599 | 2.48E-07 | 0.022524 | 0.62732 | -0.12313  | 0.00773  | -0.04321 |
| 0.045357 | 0.32805  | 0.150641 | 0.00109  | 0.106615 | 0.0212  | 0.181396  | 8.07E-05 | 0.216254 |
| -0.06435 | 0.16502  | -0.1474  | 0.0014   | 0.021417 | 0.64434 | -0.05429  | 0.24159  | 0.056956 |
| -0.0595  | 0.19932  | -0.02276 | 0.62371  | -0.02351 | 0.61231 | -0.01576  | 0.73409  | 0.065793 |
| -0.15099 | 0.00106  | -0.34329 | 2.32E-14 | 0.030137 | 0.5159  | -0.09624  | 0.03761  | -0.04972 |
| -0.04838 | 0.29677  | -0.14932 | 0.00121  | -0.03799 | 0.4128  | -0.12391  | 0.00734  | -0.02472 |
| -0.04056 | 0.38181  | -0.10767 | 0.01995  | -0.00068 | 0.98824 | -0.10215  | 0.0273   | 0.002567 |
| 0.174969 | 0.00014  | 0.094089 | 0.04212  | 0.004907 | 0.91577 | -0.06707  | 0.14783  | 0.06852  |
| -0.06774 | 0.14387  | -0.18179 | 7.78E-05 | -0.05763 | 0.21386 | -0.14677  | 0.00147  | -0.07157 |
| 0.030357 | 0.51285  | -0.11056 | 0.01684  | 0.030512 | 0.5107  | -0.07411  | 0.10971  | 0.09729  |
| 0.299496 | 3.92E-11 | 0.14892  | 0.00125  | 0.012011 | 0.79573 | -0.18767  | 4.48E-05 | 0.071676 |
| 0.006774 | 0.88392  | -0.13317 | 0.00394  | -0.0065  | 0.88853 | -0.10866  | 0.01883  | -0.0337  |
| 0.046811 | 0.31277  | -0.09864 | 0.03307  | -0.02956 | 0.52398 | -0.15489  | 0.00078  | -0.06563 |
| -0.04823 | 0.29831  | -0.21342 | 3.26E-06 | -0.08059 | 0.08192 | -0.20361  | 9.22E-06 | -0.05578 |
| -0.01878 | 0.68562  | -0.11153 | 0.0159   | 0.053393 | 0.2495  | 0.043335  | 0.35009  | 0.266614 |
| -0.04786 | 0.30207  | -0.24753 | 5.98E-08 | -0.06548 | 0.15775 | -5.04E-05 | 0.99913  | -0.05937 |
| -0.10056 | 0.0298   | -0.03918 | 0.39823  | 0.010458 | 0.82166 | 0.002845  | 0.95112  | 0.144202 |
| 0.049522 | 0.28553  | -0.24725 | 6.20E-08 | 0.008116 | 0.86114 | -0.11447  | 0.01331  | -0.09247 |
| -0.20044 | 1.27E-05 | -0.38057 | 1.53E-17 | -0.06385 | 0.16832 | -0.1644   | 0.00036  | -0.1183  |
| 0.103582 | 0.02519  | -0.10264 | 0.02655  | -0.02629 | 0.57088 | -0.08189  | 0.07708  | 0.059182 |
| -0.13083 | 0.00463  | -0.45307 | 5.12E-25 | -0.03675 | 0.42812 | -0.08546  | 0.065    | -0.06317 |
| 0.029778 | 0.52092  | 0.078216 | 0.09135  | 0.036427 | 0.43225 | 0.048095  | 0.29966  | 0.235929 |
| 0.303221 | 2.18E-11 | -0.20536 | 7.69E-06 | 0.046232 | 0.3188  | -0.02602  | 0.57495  | 0.177134 |
| 0.01124  | 0.80859  | -0.11195 | 0.0155   | -0.02201 | 0.63524 | 0.0321    | 0.48893  | 0.041253 |
| -0.09927 | 0.03197  | -0.26688 | 4.67E-09 | -0.09228 | 0.04626 | -0.2576   | 1.63E-08 | -0.16273 |
| 0.220355 | 1.52E-06 | 0.364364 | 4.15E-16 | 0.023683 | 0.60971 | -0.05685  | 0.22008  | 0.195446 |
| 0.058535 | 0.20672  | 0.162907 | 0.00041  | 0.017629 | 0.70396 | -0.04594  | 0.32186  | 0.068097 |
| -0.12914 | 0.00519  | 0.206723 | 6.67E-06 | 0.089003 | 0.0546  | 0.211698  | 3.93E-06 | 0.19577  |
| 0.011807 | 0.79912  | -0.19048 | 3.42E-05 | -0.01929 | 0.67762 | -0.0647   | 0.16277  | 0.005798 |
| -0.11705 | 0.01136  | -0.1928  | 2.73E-05 | 0.015369 | 0.74045 | -0.04766  | 0.30404  | -0.01499 |
| -0.07732 | 0.09513  | -0.1937  | 2.50E-05 | -0.05011 | 0.27982 | -0.1465   | 0.0015   | -0.03666 |
| -0.12719 | 0.00591  | -0.11261 | 0.0149   | -0.03044 | 0.51164 | -0.06008  | 0.19498  | -0.03632 |
| -0.11928 | 0.00988  | -0.19668 | 1.86E-05 | 0.085439 | 0.06507 | 0.006638  | 0.88623  | 0.181866 |
| 0.078506 | 0.09015  | -0.11592 | 0.01218  | -0.03484 | 0.45254 | -0.12067  | 0.00905  | -0.07951 |
| 0.140515 | 0.00234  | -0.1501  | 0.00114  | -0.03214 | 0.48834 | -0.11323  | 0.01435  | -0.0536  |
| -0.20168 | 1.12E-05 | -0.31824 | 1.89E-12 | -0.0017  | 0.97082 | -0.00396  | 0.93195  | 0.191175 |
| 0.000608 | 0.98954  | -0.13394 | 0.00373  | 0.015753 | 0.7342  | 0.001911  | 0.96714  | -0.01659 |
| 0.024131 | 0.60296  | -0.14395 | 0.00182  | 0.017242 | 0.71017 | -0.10122  | 0.02873  | -0.03215 |
| -0.3289  | 3.04E-13 | -0.48134 | 1.86E-28 | 0.032618 | 0.48194 | 0.011386  | 0.80614  | -0.0195  |
| -0.05504 | 0.23514  | -0.27502 | 1.50E-09 | -0.00611 | 0.8953  | -0.10946  | 0.01797  | 0.030749 |
| -0.06784 | 0.14328  | -0.15283 | 0.00092  | 0.007392 | 0.87343 | -0.03119  | 0.50132  | 0.059141 |
| -0.10208 | 0.0274   | -0.2627  | 8.24E-09 | 0.065956 | 0.15472 | 0.005493  | 0.90576  | 0.136212 |
| -0.00044 | 0.99242  | -0.07877 | 0.08906  | -0.01326 | 0.77503 | -0.06874  | 0.13798  | -0.0248  |

|          |          |          |          |          |         |          |          |          |
|----------|----------|----------|----------|----------|---------|----------|----------|----------|
| -0.06179 | 0.18256  | -0.18978 | 3.66E-05 | -0.00753 | 0.87109 | -0.08067 | 0.0816   | -0.04755 |
| -0.08272 | 0.07413  | -0.26764 | 4.21E-09 | 0.039763 | 0.39127 | 0.06364  | 0.16976  | 0.135059 |
| -0.08551 | 0.06485  | -0.30654 | 1.28E-11 | -0.01882 | 0.68508 | -0.07699 | 0.09654  | -0.04288 |
| -0.07065 | 0.12734  | -0.15086 | 0.00108  | -0.02193 | 0.63645 | -0.09087 | 0.04969  | -0.09112 |
| 0.003885 | 0.93327  | -0.12439 | 0.00712  | -0.02922 | 0.5288  | -0.05227 | 0.2596   | -0.01401 |
| -0.08133 | 0.07913  | -0.26604 | 5.24E-09 | -0.01838 | 0.69195 | -0.11599 | 0.01213  | -0.03312 |
| 0.066724 | 0.14996  | 0.042102 | 0.36399  | 0.087642 | 0.05842 | 0.046409 | 0.31695  | 0.453778 |
| 0.015172 | 0.74367  | -0.07116 | 0.12465  | -0.01153 | 0.80375 | -0.10651 | 0.02133  | 0.077162 |
| -0.00292 | 0.94983  | 0.126495 | 0.0062   | 0.16467  | 0.00035 | 0.145866 | 0.00157  | 0.199817 |
| 0.032143 | 0.48835  | -0.02765 | 0.55121  | 0.02745  | 0.55404 | -0.00415 | 0.92869  | 0.136016 |
| 0.012021 | 0.79556  | -0.17872 | 0.0001   | -0.03344 | 0.47103 | -0.12359 | 0.0075   | -0.00552 |
| 0.153151 | 0.0009   | 0.255931 | 2.03E-08 | 0.025473 | 0.58295 | -0.0207  | 0.65549  | 0.085705 |
| 0.042664 | 0.35762  | 0.074804 | 0.10643  | -0.02562 | 0.58072 | -0.162   | 0.00044  | -0.00481 |
| -0.06963 | 0.13295  | -0.1613  | 0.00047  | 0.004236 | 0.92727 | -0.00118 | 0.97973  | 0.08204  |
| -0.01721 | 0.71075  | -0.19389 | 2.45E-05 | -0.01472 | 0.75111 | -0.04742 | 0.30649  | 0.094219 |
| -0.1592  | 0.00055  | -0.27384 | 1.77E-09 | 0.006302 | 0.89196 | -0.04104 | 0.37617  | 0.057233 |
| 0.144595 | 0.00173  | 0.387267 | 3.70E-18 | 0.022084 | 0.63405 | 0.013939 | 0.76385  | -0.0203  |
| 0.160128 | 0.00051  | 0.285159 | 3.46E-10 | -0.02236 | 0.62988 | -0.05052 | 0.2759   | -0.07047 |
| -0.19557 | 2.08E-05 | -0.30279 | 2.34E-11 | -0.0365  | 0.4313  | -0.12906 | 0.00522  | -0.03272 |
| 0.220703 | 1.46E-06 | 0.359291 | 1.12E-15 | 0.009332 | 0.8406  | 0.052272 | 0.25959  | 0.001715 |
| 0.266645 | 4.82E-09 | -0.21493 | 2.77E-06 | 0.01987  | 0.66844 | -0.06947 | 0.13385  | 0.007514 |
| -0.16541 | 0.00033  | -0.34402 | 2.03E-14 | 0.01242  | 0.78894 | -0.03739 | 0.42016  | 0.05391  |
| 0.011597 | 0.80263  | 0.191223 | 3.19E-05 | -0.04051 | 0.38243 | 0.035712 | 0.44135  | -0.05533 |
| -0.03519 | 0.44807  | -0.08397 | 0.06983  | -0.00018 | 0.99683 | -0.07636 | 0.09932  | 0.108277 |
| -0.05216 | 0.26063  | -0.08152 | 0.07843  | 0.077499 | 0.09437 | -0.01095 | 0.81351  | 0.066729 |
| -0.0683  | 0.14056  | -0.27985 | 7.52E-10 | 0.029603 | 0.52338 | 0.000197 | 0.99661  | 0.084704 |
| 0.065416 | 0.15813  | -0.30775 | 1.06E-11 | -0.02199 | 0.63555 | -0.14527 | 0.00165  | -0.0416  |
| 0.06984  | 0.1318   | -0.02009 | 0.66497  | 0.023018 | 0.61979 | -0.05528 | 0.2331   | 0.170382 |
| 0.086847 | 0.06075  | 0.01152  | 0.80391  | -0.03257 | 0.48255 | -0.13915 | 0.00258  | 0.005074 |
| 0.029306 | 0.52756  | -0.15509 | 0.00077  | 0.023131 | 0.61806 | -0.08378 | 0.07046  | 0.066686 |
| 0.110204 | 0.0172   | 0.050071 | 0.28022  | 0.016735 | 0.71832 | -0.04913 | 0.2894   | 0.046707 |
| 0.046817 | 0.3127   | -0.24503 | 8.19E-08 | -0.02846 | 0.53953 | -0.13808 | 0.00279  | -0.06712 |
| -0.09584 | 0.03841  | -0.22707 | 7.09E-07 | -0.03122 | 0.5009  | -0.12395 | 0.00732  | -0.02435 |
| 0.037093 | 0.42387  | -0.22877 | 5.82E-07 | -0.0133  | 0.77433 | -0.10176 | 0.02789  | -0.07133 |
| -0.12472 | 0.00696  | -0.1349  | 0.00349  | 0.029013 | 0.53169 | -0.00109 | 0.98118  | 0.048987 |
| -0.106   | 0.02197  | -0.33637 | 8.12E-14 | 0.085689 | 0.06428 | -0.03379 | 0.46631  | 0.150423 |
| -0.06946 | 0.13392  | -0.02236 | 0.62988  | -0.02286 | 0.62218 | -0.10792 | 0.01966  | 0.089977 |
| -0.05202 | 0.26192  | -0.19419 | 2.38E-05 | 0.01426  | 0.75858 | -0.03335 | 0.47215  | 0.031377 |
| 0.011325 | 0.80717  | -0.01096 | 0.81321  | 0.160869 | 0.00048 | 0.229828 | 5.15E-07 | 0.315607 |
| 0.159442 | 0.00054  | 0.185672 | 5.42E-05 | -0.01506 | 0.74553 | -0.09026 | 0.05126  | -0.10843 |
| -0.08788 | 0.05775  | -0.01744 | 0.70696  | -0.03437 | 0.45866 | 0.005182 | 0.91107  | 0.00546  |
| -0.03801 | 0.41252  | 0.158937 | 0.00057  | -0.00609 | 0.8955  | 0.206855 | 6.57E-06 | -0.17429 |
| 0.002913 | 0.94994  | -0.05301 | 0.2529   | 0.014765 | 0.75031 | -0.08141 | 0.07883  | 0.007474 |
| -0.11236 | 0.01513  | -0.10692 | 0.02083  | -0.01225 | 0.79177 | -0.11468 | 0.01315  | -0.04651 |
| 0.106246 | 0.02166  | 0.051896 | 0.26304  | -0.03667 | 0.42923 | -0.03134 | 0.49926  | -0.01384 |

|          |          |          |          |          |         |          |          |          |
|----------|----------|----------|----------|----------|---------|----------|----------|----------|
| 0.110314 | 0.01709  | 0.032644 | 0.4816   | 0.001483 | 0.9745  | -0.03947 | 0.39482  | 0.065953 |
| -0.11077 | 0.01663  | -0.071   | 0.12549  | 0.04282  | 0.35585 | 0.122746 | 0.00792  | 0.182046 |
| -0.08269 | 0.07423  | -0.24133 | 1.30E-07 | -0.02187 | 0.6374  | -0.13389 | 0.00375  | -0.03277 |
| -0.09551 | 0.0391   | -0.29956 | 3.88E-11 | -0.03577 | 0.44055 | -0.18277 | 7.11E-05 | 0.01948  |
| -0.09963 | 0.03135  | -0.19466 | 2.27E-05 | 0.007065 | 0.87897 | -0.10842 | 0.0191   | -0.03421 |
| -0.0564  | 0.22376  | -0.03861 | 0.4051   | -0.01091 | 0.81402 | -0.03692 | 0.4261   | 0.049821 |
| 0.237459 | 2.08E-07 | 0.05524  | 0.23347  | 0.032727 | 0.48048 | -0.01243 | 0.78876  | 0.11146  |
| -0.02209 | 0.634    | -0.06399 | 0.16739  | 0.032992 | 0.47694 | 0.106403 | 0.02146  | 0.141308 |
| -0.01309 | 0.77783  | -0.11012 | 0.01729  | -0.02357 | 0.61139 | -0.12109 | 0.00881  | 0.047344 |
| -0.00587 | 0.89928  | -0.28777 | 2.35E-10 | -0.02537 | 0.58449 | -0.06764 | 0.14441  | -0.02972 |
| 0.04248  | 0.3597   | -0.25659 | 1.86E-08 | -0.0502  | 0.27902 | -0.08083 | 0.08101  | 0.00102  |
| 0.065409 | 0.15818  | -0.17595 | 0.00013  | -0.03126 | 0.50034 | -0.11868 | 0.01026  | -0.07109 |
| 0.217645 | 2.06E-06 | 0.017519 | 0.70573  | -0.01346 | 0.77175 | -0.12617 | 0.00633  | 0.037308 |
| -0.10125 | 0.02869  | -0.14563 | 0.0016   | -0.03287 | 0.47855 | -0.05942 | 0.19991  | -0.02583 |
| -0.20304 | 9.78E-06 | -0.40525 | 6.94E-20 | -0.03433 | 0.45929 | -0.09839 | 0.03354  | -0.14975 |
| -0.10294 | 0.02612  | -0.3059  | 1.42E-11 | 0.064657 | 0.16303 | 0.024258 | 0.60105  | 0.248235 |
| -0.11617 | 0.01199  | -0.06618 | 0.1533   | 0.076451 | 0.09892 | 0.149028 | 0.00124  | 0.326204 |
| 0.250207 | 4.25E-08 | 0.088817 | 0.05511  | 0.002303 | 0.96041 | -0.14731 | 0.00141  | 0.041505 |
| 0.038221 | 0.40992  | 0.090295 | 0.05117  | 0.105047 | 0.02319 | 0.136979 | 0.00302  | 0.501257 |
| -0.11533 | 0.01263  | -0.24457 | 8.68E-08 | -0.01384 | 0.76546 | -0.05174 | 0.26444  | 0.05807  |
| -0.0932  | 0.0441   | -0.03667 | 0.42925  | 0.005279 | 0.90942 | 0.070449 | 0.12846  | -0.03712 |
| -0.18365 | 6.55E-05 | 0.092287 | 0.04623  | 0.023207 | 0.61691 | 0.169547 | 0.00023  | 5.95E-05 |
| 0.101664 | 0.02804  | 0.236872 | 2.23E-07 | 0.011208 | 0.80912 | 0.094595 | 0.04102  | 0.028384 |
| -0.03068 | 0.50841  | -0.25087 | 3.91E-08 | -0.06834 | 0.14034 | -0.13796 | 0.00281  | -0.17203 |
| 0.078594 | 0.08979  | -0.2086  | 5.47E-06 | -0.04213 | 0.36364 | -0.11942 | 0.0098   | -0.03973 |
| -0.10389 | 0.02475  | -0.1779  | 0.00011  | 0.022428 | 0.62879 | 0.022029 | 0.63491  | 0.143475 |
| -0.02514 | 0.58794  | -0.19363 | 2.52E-05 | 0.003112 | 0.94652 | 0.077361 | 0.09496  | 0.013176 |
| -0.10614 | 0.02178  | -0.33861 | 5.43E-14 | -0.00794 | 0.86412 | -0.02322 | 0.61664  | 0.006765 |
| 0.0876   | 0.05854  | -0.03043 | 0.51178  | 0.005962 | 0.89776 | -0.07088 | 0.12611  | 0.086805 |
| 0.162542 | 0.00042  | -0.104   | 0.02461  | 0.005285 | 0.90932 | -0.06253 | 0.17733  | 0.096953 |
| -0.06076 | 0.18992  | -0.23145 | 4.25E-07 | 0.010299 | 0.82434 | -0.02325 | 0.6162   | 0.03539  |
| -0.11977 | 0.00958  | -0.05021 | 0.2789   | -0.04719 | 0.3089  | 0.014814 | 0.74951  | -0.15066 |
| 0.345208 | 1.62E-14 | -0.08811 | 0.05708  | -0.00777 | 0.86698 | -0.13711 | 0.00299  | -0.05623 |
| -0.06826 | 0.14077  | -0.20284 | 9.97E-06 | 0.009652 | 0.83521 | -0.09489 | 0.04039  | 0.002023 |
| 0.254339 | 2.50E-08 | 0.203467 | 9.35E-06 | -0.02844 | 0.53987 | -0.09695 | 0.03623  | -0.25939 |
| -0.08366 | 0.07087  | -0.22906 | 5.63E-07 | -0.0499  | 0.28188 | -0.05923 | 0.20136  | -0.08823 |
| 0.275105 | 1.48E-09 | 0.061598 | 0.1839   | -0.00473 | 0.91873 | -0.11237 | 0.01512  | 0.025395 |
| -0.11298 | 0.01458  | -0.35377 | 3.25E-15 | 0.000686 | 0.9882  | -0.09471 | 0.04077  | -0.02365 |
| -0.05283 | 0.25456  | -0.17003 | 0.00022  | -0.01919 | 0.67909 | -0.09388 | 0.04259  | -0.00474 |
| 0.015796 | 0.73351  | -0.05063 | 0.27491  | -0.0189  | 0.68368 | -0.03754 | 0.41836  | -0.0181  |
| -0.04902 | 0.29048  | -0.20929 | 5.08E-06 | 0.000742 | 0.98725 | -0.06947 | 0.13386  | 0.012724 |
| -0.08418 | 0.06914  | -0.17275 | 0.00018  | -0.02112 | 0.6489  | -0.08739 | 0.05915  | -0.00835 |
| 0.202043 | 1.08E-05 | -0.12251 | 0.00804  | -0.02858 | 0.53786 | -0.10815 | 0.0194   | -0.00877 |
| 0.069206 | 0.13535  | 0.121122 | 0.00879  | 0.073606 | 0.11217 | 0.046333 | 0.31774  | 0.249175 |
| -0.03862 | 0.40505  | -0.14078 | 0.00229  | 0.073253 | 0.1139  | 0.04913  | 0.28937  | 0.191749 |



|          |          |          |          |          |         |          |          |          |
|----------|----------|----------|----------|----------|---------|----------|----------|----------|
| -0.04447 | 0.33762  | 0.01636  | 0.72437  | 0.036073 | 0.43674 | 0.113843 | 0.01383  | 0.187031 |
| 0.133919 | 0.00374  | -0.08718 | 0.05977  | -0.00072 | 0.9877  | -0.05712 | 0.21796  | 0.06943  |
| 0.012219 | 0.79227  | -0.11349 | 0.01414  | -0.00994 | 0.83037 | -0.02188 | 0.63722  | 0.157416 |
| -0.22635 | 7.70E-07 | -0.35145 | 5.05E-15 | 0.018871 | 0.68419 | -0.06176 | 0.18277  | -0.04466 |
| -0.08602 | 0.06325  | -0.37254 | 8.03E-17 | 0.011988 | 0.79612 | -0.06146 | 0.18485  | 0.149649 |
| 0.004306 | 0.92605  | -0.08177 | 0.07753  | 0.011712 | 0.80071 | -0.09118 | 0.04893  | -0.01241 |
| 0.101667 | 0.02803  | -0.00459 | 0.92117  | 0.078256 | 0.09119 | -0.01337 | 0.77329  | 0.192363 |
| -0.04932 | 0.28746  | 0.141871 | 0.00212  | 0.040788 | 0.37917 | 0.154866 | 0.00079  | -0.01122 |
| 0.027376 | 0.55511  | -0.04834 | 0.29723  | -0.02561 | 0.58085 | -0.07239 | 0.11822  | 0.068906 |
| -0.03868 | 0.40436  | -0.13864 | 0.00268  | 0.014082 | 0.7615  | -0.06616 | 0.15346  | 0.080863 |
| -0.07387 | 0.11089  | -0.18437 | 6.12E-05 | -0.00584 | 0.8999  | -0.03936 | 0.39607  | 0.046787 |
| -0.05596 | 0.22743  | -0.19337 | 2.58E-05 | 0.003357 | 0.94233 | -0.02544 | 0.58336  | 0.126641 |
| -0.10339 | 0.02547  | 0.02219  | 0.63244  | 0.057997 | 0.21093 | 0.115782 | 0.01229  | 0.314898 |
| -0.08084 | 0.08095  | -0.17898 | 0.0001   | 0.043099 | 0.35273 | -0.04508 | 0.33098  | 0.105929 |
| -0.1536  | 0.00087  | -0.29824 | 4.77E-11 | 0.014606 | 0.7529  | -0.1075  | 0.02014  | -0.01253 |
| -0.06197 | 0.18126  | -0.44912 | 1.46E-24 | -0.0209  | 0.65243 | -0.06764 | 0.14442  | -0.14469 |
| -0.07094 | 0.1258   | -0.36602 | 2.99E-16 | -0.01055 | 0.82021 | -0.13755 | 0.00289  | -0.0475  |
| 0.08504  | 0.06634  | 0.117071 | 0.01135  | 0.099758 | 0.03113 | 0.347337 | 1.09E-14 | 0.119442 |
| 0.033468 | 0.47059  | -0.02784 | 0.5484   | -0.00704 | 0.87944 | 0.003955 | 0.93207  | 0.02768  |
| -0.00413 | 0.92904  | -0.48464 | 7.03E-29 | -0.02186 | 0.63746 | -0.12798 | 0.00561  | -0.02309 |
| 0.208067 | 5.79E-06 | 0.531102 | 2.40E-35 | 0.053632 | 0.24739 | 0.124571 | 0.00703  | 0.160112 |
| 0.012018 | 0.79561  | -0.05969 | 0.19792  | -0.03391 | 0.4648  | -0.04745 | 0.30617  | -0.09398 |
| -0.17522 | 0.00014  | -0.18526 | 5.63E-05 | -0.03127 | 0.5002  | -0.03291 | 0.47801  | -0.15402 |
| 0.122472 | 0.00806  | -0.37626 | 3.74E-17 | 0.021369 | 0.64508 | -0.09229 | 0.04622  | 0.01141  |
| 0.112156 | 0.01531  | 0.010782 | 0.81624  | 0.006083 | 0.8957  | -0.09239 | 0.046    | 0.002358 |
| -0.08038 | 0.08273  | -0.20323 | 9.58E-06 | 0.019643 | 0.67201 | -0.04016 | 0.38654  | -0.00301 |
| -0.00885 | 0.84868  | -0.27346 | 1.87E-09 | -0.00802 | 0.86271 | -0.11874 | 0.01022  | -0.023   |
| -0.04584 | 0.32296  | -0.31002 | 7.33E-12 | -0.02122 | 0.64743 | -0.17476 | 0.00015  | -0.03158 |
| 0.090955 | 0.04949  | -0.00824 | 0.85899  | -0.00201 | 0.9654  | -0.1094  | 0.01804  | 0.059548 |
| 0.116112 | 0.01204  | 0.020215 | 0.66304  | 0.02675  | 0.56419 | 0.033917 | 0.46466  | 0.15029  |
| 0.035837 | 0.43976  | 0.159556 | 0.00054  | 0.019604 | 0.67262 | 0.017571 | 0.7049   | 0.110994 |
| -0.00586 | 0.89958  | 0.009015 | 0.84595  | 0.058443 | 0.20743 | -0.0056  | 0.90393  | 0.228449 |
| -0.01514 | 0.74411  | -0.05161 | 0.26565  | 0.055689 | 0.22969 | -0.00379 | 0.93497  | 0.149485 |
| -0.04162 | 0.36948  | -0.06275 | 0.1758   | 0.019701 | 0.6711  | -0.06977 | 0.1322   | 0.120435 |
| 0.066972 | 0.14845  | 0.065436 | 0.15801  | 0.041613 | 0.36959 | -0.09051 | 0.05062  | 0.152732 |
| -0.04985 | 0.28232  | -0.27768 | 1.03E-09 | -0.03049 | 0.51096 | -0.08769 | 0.05828  | 0.003365 |
| -0.09141 | 0.04835  | -0.29449 | 8.50E-11 | 0.009484 | 0.83804 | -0.10258 | 0.02665  | 0.044311 |
| -0.0426  | 0.35833  | -0.08317 | 0.07255  | 0.10157  | 0.02818 | 0.024535 | 0.5969   | 0.264916 |
| -0.07488 | 0.10608  | -0.03928 | 0.3971   | 0.08169  | 0.07781 | 0.209997 | 4.72E-06 | 0.069578 |
| -0.00227 | 0.96098  | 0.192934 | 2.70E-05 | 0.05956  | 0.19886 | 0.15639  | 0.0007   | 0.200431 |
| -0.11559 | 0.01243  | -0.29911 | 4.16E-11 | -0.00744 | 0.87263 | 0.015065 | 0.74541  | 0.004592 |
| -0.04912 | 0.28945  | -0.11527 | 0.01268  | -0.03658 | 0.43033 | 0.012132 | 0.79373  | -0.04919 |
| -0.12074 | 0.00901  | -0.1941  | 2.40E-05 | 0.053429 | 0.24918 | 0.015912 | 0.73163  | 0.165108 |
| -0.23307 | 3.51E-07 | -0.2278  | 6.52E-07 | -0.04359 | 0.34727 | 0.016734 | 0.71833  | -0.08506 |
| -0.11136 | 0.01606  | -0.13638 | 0.00315  | 0.009821 | 0.83237 | 0.000223 | 0.99617  | 0.042623 |

|          |          |          |          |          |         |          |          |          |
|----------|----------|----------|----------|----------|---------|----------|----------|----------|
| 0.141503 | 0.00218  | -0.31303 | 4.48E-12 | -0.03847 | 0.40692 | -0.24278 | 1.08E-07 | -0.08939 |
| 0.080239 | 0.08325  | -0.17485 | 0.00015  | 0.053396 | 0.24947 | 0.122812 | 0.00789  | 0.095308 |
| -0.01762 | 0.70404  | -0.14601 | 0.00156  | 0.022282 | 0.63103 | 0.105295 | 0.02287  | 0.034414 |
| -0.12745 | 0.00581  | -0.11164 | 0.0158   | 0.028416 | 0.54017 | 0.030889 | 0.50548  | 0.202526 |
| -0.0049  | 0.91588  | -0.16616 | 0.00031  | 0.031339 | 0.4993  | 0.004957 | 0.91492  | 0.111986 |
| 0.301261 | 2.97E-11 | -0.20673 | 6.66E-06 | 0.004209 | 0.92772 | -0.12997 | 0.00491  | -0.05716 |
| -0.21714 | 2.18E-06 | -0.26138 | 9.85E-09 | 0.00481  | 0.91743 | -0.0709  | 0.12604  | 0.017836 |
| -0.17146 | 0.0002   | -0.06112 | 0.18733  | -0.04289 | 0.35509 | 0.038227 | 0.40984  | -0.15996 |
| -0.1566  | 0.00068  | -0.37681 | 3.34E-17 | 0.059001 | 0.20312 | -0.02467 | 0.59493  | 0.123198 |
| -0.01133 | 0.80703  | -0.11222 | 0.01526  | -0.02462 | 0.59567 | -0.12986 | 0.00494  | -0.0388  |
| -0.12079 | 0.00898  | -0.06833 | 0.14036  | 0.005756 | 0.90127 | -0.03161 | 0.49566  | 0.03534  |
| -0.06774 | 0.14387  | 0.227088 | 7.08E-07 | -0.01365 | 0.76866 | 0.058075 | 0.21032  | -0.06054 |
| 0.082989 | 0.07318  | -0.15437 | 0.00082  | 0.003015 | 0.9482  | -0.13348 | 0.00386  | 0.003506 |
| 0.275612 | 1.38E-09 | 0.176734 | 0.00012  | 0.020429 | 0.6597  | -0.15974 | 0.00053  | 0.13249  |
| 0.040515 | 0.38237  | 0.098704 | 0.03297  | 0.023253 | 0.61621 | 0.028241 | 0.54267  | 0.168792 |
| -0.00407 | 0.93008  | -0.106   | 0.02196  | 0.00329  | 0.94346 | -0.09572 | 0.03867  | 0.040507 |
| -0.04903 | 0.29033  | -0.34097 | 3.54E-14 | -0.0336  | 0.46887 | -0.13163 | 0.00438  | -0.09401 |
| 0.058179 | 0.2095   | -0.26364 | 7.26E-09 | -0.02299 | 0.62026 | -0.17269 | 0.00018  | 0.051905 |
| -0.05885 | 0.20426  | 0.035105 | 0.44915  | -0.02443 | 0.59844 | -0.07971 | 0.0853   | -0.02897 |
| 0.226645 | 7.45E-07 | 0.217188 | 2.16E-06 | -0.03805 | 0.41198 | -0.04413 | 0.34131  | -0.23716 |
| -0.04027 | 0.38523  | 0.100674 | 0.02961  | -0.07149 | 0.12291 | 0.03073  | 0.50768  | -0.1444  |
| -0.05929 | 0.20091  | -0.34131 | 3.33E-14 | 0.017628 | 0.70398 | -0.11168 | 0.01576  | 0.084571 |
| -0.10853 | 0.01897  | -0.34935 | 7.50E-15 | -0.01902 | 0.68186 | -0.10508 | 0.02314  | -0.07488 |
| 0.11969  | 0.00963  | -0.08333 | 0.072    | -0.03112 | 0.50233 | -0.12611 | 0.00635  | -0.01257 |
| 0.12987  | 0.00494  | -0.00741 | 0.87313  | -0.03566 | 0.44207 | 0.106779 | 0.021    | -0.32723 |
| 0.115355 | 0.01261  | -0.15634 | 0.0007   | -0.0204  | 0.66019 | -0.18649 | 5.02E-05 | -0.03954 |
| -0.1963  | 1.93E-05 | 0.036083 | 0.43661  | 0.015677 | 0.73544 | 0.093041 | 0.04447  | 0.058082 |
| 0.158736 | 0.00058  | 0.086438 | 0.06198  | 0.127868 | 0.00565 | 0.007936 | 0.86419  | 0.215982 |
| -0.03311 | 0.47536  | -0.18221 | 7.49E-05 | -0.01479 | 0.7499  | -0.08035 | 0.08284  | 0.020121 |
| 0.241652 | 1.25E-07 | 0.136698 | 0.00308  | -0.02959 | 0.52357 | -0.02842 | 0.5401   | -0.07689 |
| -0.28607 | 3.02E-10 | -0.22528 | 8.72E-07 | 0.045045 | 0.33139 | 0.037263 | 0.42175  | 0.164418 |
| -0.06126 | 0.18634  | 0.294728 | 8.20E-11 | 0.042612 | 0.3582  | 0.260438 | 1.12E-08 | 0.070447 |
| -0.08786 | 0.0578   | -0.5709  | 9.65E-42 | 0.00687  | 0.8823  | -0.12425 | 0.00718  | -0.08483 |
| 0.03329  | 0.47296  | 0.214863 | 2.79E-06 | 0.030555 | 0.5101  | 0.021073 | 0.64967  | 0.055061 |
| -0.00481 | 0.91739  | -0.25851 | 1.44E-08 | -0.005   | 0.91427 | -0.16466 | 0.00035  | 0.006473 |
| -0.03069 | 0.50828  | 0.126189 | 0.00632  | 0.004428 | 0.92397 | -0.03185 | 0.49236  | 0.071347 |
| -0.06987 | 0.13162  | -0.14112 | 0.00224  | -0.01208 | 0.79458 | -0.07827 | 0.09114  | 0.002455 |
| 0.359867 | 1.00E-15 | 0.234242 | 3.06E-07 | -0.04531 | 0.32859 | -0.1082  | 0.01934  | 0.036346 |
| -0.01758 | 0.70469  | -0.26828 | 3.86E-09 | -0.06315 | 0.1731  | -0.17884 | 0.0001   | -0.11547 |
| -0.11869 | 0.01026  | -0.15658 | 0.00068  | -0.02181 | 0.63823 | -0.05817 | 0.20953  | -0.01429 |
| 0.016754 | 0.71801  | -0.17426 | 0.00015  | 0.024948 | 0.59074 | -0.09259 | 0.04552  | -0.03397 |
| 0.277677 | 1.03E-09 | 0.021923 | 0.63654  | -0.0817  | 0.07776 | -0.18412 | 6.27E-05 | -0.1334  |
| 0.155349 | 0.00076  | 0.310926 | 6.32E-12 | 0.035591 | 0.44289 | -0.00168 | 0.97111  | 0.228456 |
| 0.020783 | 0.65417  | -0.0601  | 0.19479  | 0.083531 | 0.07132 | 0.05537  | 0.23237  | 0.273978 |
| 0.054956 | 0.23589  | -0.01215 | 0.79341  | -0.03225 | 0.48694 | -0.00075 | 0.98715  | 0.045018 |

|          |          |          |          |          |         |          |          |          |
|----------|----------|----------|----------|----------|---------|----------|----------|----------|
| -0.34434 | 1.91E-14 | -0.39128 | 1.56E-18 | -0.0152  | 0.74322 | -0.06804 | 0.14206  | 0.004901 |
| 0.263923 | 6.99E-09 | -0.07258 | 0.11727  | -0.03211 | 0.48878 | -0.13528 | 0.0034   | 0.057161 |
| -0.16171 | 0.00045  | -0.18275 | 7.12E-05 | -0.00096 | 0.98341 | -0.04853 | 0.29529  | 0.063027 |
| -0.22124 | 1.38E-06 | -0.23059 | 4.71E-07 | 0.107317 | 0.02036 | 0.259023 | 1.35E-08 | 0.246837 |
| -0.07754 | 0.09419  | -0.29711 | 5.68E-11 | 0.015822 | 0.73309 | -0.0538  | 0.24591  | -0.09006 |
| -0.11212 | 0.01535  | -0.03169 | 0.49446  | -0.01549 | 0.73856 | -0.12124 | 0.00872  | -0.01117 |
| 0.255046 | 2.28E-08 | -0.09844 | 0.03345  | -0.04611 | 0.32009 | -0.15341 | 0.00088  | -0.07256 |
| -0.04683 | 0.31257  | -0.2961  | 6.64E-11 | 0.035396 | 0.4454  | -0.08782 | 0.0579   | -0.01499 |
| -0.03638 | 0.43285  | -0.35135 | 5.15E-15 | -0.00172 | 0.97049 | -0.09941 | 0.03172  | -0.02207 |
| 0.033923 | 0.46458  | -0.19445 | 2.32E-05 | 0.00809  | 0.86158 | -0.03503 | 0.45015  | -0.01515 |
| -0.01996 | 0.66704  | 0.050695 | 0.27426  | 0.082027 | 0.07658 | 0.020126 | 0.66443  | 0.30529  |
| -0.18571 | 5.40E-05 | 0.034329 | 0.45925  | 0.048041 | 0.30021 | 0.15146  | 0.00103  | -0.00131 |
| -0.17287 | 0.00017  | -0.39013 | 1.99E-18 | 0.024705 | 0.59436 | -0.06394 | 0.16775  | 0.103995 |
| -0.01557 | 0.73711  | -0.03187 | 0.4921   | 0.05029  | 0.27812 | -0.073   | 0.11517  | 0.12026  |
| 0.223604 | 1.05E-06 | -0.16216 | 0.00043  | -0.03333 | 0.47248 | -0.1506  | 0.0011   | -0.03183 |
| 0.040149 | 0.38669  | -0.15619 | 0.00071  | 0.017594 | 0.70452 | -0.06802 | 0.14221  | -0.03321 |
| -0.02448 | 0.59775  | -0.07154 | 0.12263  | -0.05906 | 0.20263 | -0.13869 | 0.00267  | -0.04354 |
| 0.189391 | 3.80E-05 | 0.108294 | 0.01924  | 0.037635 | 0.41714 | -0.10954 | 0.01788  | 0.151926 |
| -0.24404 | 9.27E-08 | -0.6388  | 6.53E-55 | -0.05979 | 0.19716 | -0.15443 | 0.00081  | -0.18239 |
| -0.06924 | 0.13514  | -0.15631 | 0.0007   | -0.00314 | 0.94602 | 0.025668 | 0.58006  | -0.03476 |
| -0.23069 | 4.65E-07 | -0.32759 | 3.82E-13 | -0.02667 | 0.56536 | -0.05701 | 0.21882  | -0.036   |
| 0.014362 | 0.7569   | -0.21381 | 3.13E-06 | -0.05623 | 0.22518 | -0.17061 | 0.00021  | -0.01508 |
| -0.07222 | 0.11908  | -0.16113 | 0.00047  | -0.00198 | 0.96595 | -0.09223 | 0.04636  | 0.049504 |
| 0.148289 | 0.00131  | 0.023288 | 0.61569  | 0.009672 | 0.83488 | -0.07219 | 0.11926  | 0.011473 |
| -0.02685 | 0.56278  | -0.1326  | 0.0041   | 0.011206 | 0.80916 | -0.03562 | 0.44253  | 0.016099 |
| -0.07979 | 0.08499  | -0.00924 | 0.84209  | 0.047507 | 0.30562 | 0.047262 | 0.30812  | 0.336536 |
| -0.01114 | 0.81019  | -0.20683 | 6.59E-06 | -0.02345 | 0.61328 | -0.05551 | 0.23123  | -0.03436 |
| -0.00534 | 0.90837  | -0.11225 | 0.01522  | -0.03844 | 0.40722 | -0.08744 | 0.05902  | -0.02125 |
| 0.048095 | 0.29966  | -0.22621 | 7.83E-07 | -0.01981 | 0.66937 | -0.13157 | 0.0044   | -0.00228 |
| -0.32178 | 1.04E-12 | -0.29829 | 4.73E-11 | 0.002409 | 0.95859 | 0.007505 | 0.87151  | 0.217363 |
| -0.05738 | 0.21582  | -0.08103 | 0.08025  | -0.02125 | 0.64688 | -0.0765  | 0.09872  | 0.027429 |
| -0.08333 | 0.07201  | -0.14004 | 0.00242  | 0.0286   | 0.53755 | 0.085901 | 0.06363  | 0.086459 |
| -0.06219 | 0.1797   | -0.10703 | 0.0207   | -0.03057 | 0.50996 | -0.10656 | 0.02127  | 0.003768 |
| 0.250518 | 4.09E-08 | 0.029745 | 0.52138  | -0.02891 | 0.53315 | -0.20254 | 1.03E-05 | -0.0296  |
| -0.08478 | 0.06718  | -0.10779 | 0.01981  | 0.070106 | 0.13033 | 0.043286 | 0.35064  | 0.219896 |
| -0.07631 | 0.09955  | -0.17891 | 0.0001   | 0.02735  | 0.55549 | -0.03345 | 0.47087  | 0.229192 |
| -0.03152 | 0.4968   | 0.149107 | 0.00123  | 0.005949 | 0.89797 | 0.090727 | 0.05006  | 0.025968 |
| -0.2579  | 1.57E-08 | -0.34348 | 2.23E-14 | -0.0127  | 0.78427 | 0.007948 | 0.86398  | -0.03703 |
| -0.098   | 0.03424  | -0.2938  | 9.45E-11 | -0.03455 | 0.45632 | -0.07314 | 0.11447  | -0.0596  |
| 0.038689 | 0.4042   | -0.12158 | 0.00854  | 0.029886 | 0.51941 | -0.02528 | 0.58577  | 0.101388 |
| -0.16538 | 0.00033  | -0.38113 | 1.36E-17 | -0.00745 | 0.87246 | -0.12836 | 0.00547  | 0.001739 |
| 0.00937  | 0.83996  | -0.1091  | 0.01836  | -0.00553 | 0.90508 | -0.08531 | 0.06548  | -0.07283 |
| 0.093498 | 0.04343  | 0.179493 | 9.61E-05 | 0.021614 | 0.64131 | 0.036464 | 0.43178  | 0.179213 |
| 0.097412 | 0.03534  | -0.32772 | 3.74E-13 | -0.04004 | 0.388   | -0.21368 | 3.17E-06 | -0.27989 |
| -0.09472 | 0.04076  | -0.33196 | 1.78E-13 | -0.06048 | 0.192   | -0.15419 | 0.00083  | -0.07443 |

|          |          |          |          |          |         |          |         |          |
|----------|----------|----------|----------|----------|---------|----------|---------|----------|
| 0.054857 | 0.23673  | 0.014615 | 0.75276  | -0.02872 | 0.53585 | 0.006099 | 0.89541 | -0.02988 |
| -0.04519 | 0.3298   | -0.13829 | 0.00275  | -0.04303 | 0.35353 | -0.00813 | 0.86093 | -0.0211  |
| -0.06698 | 0.14838  | -0.19077 | 3.33E-05 | 0.044852 | 0.33347 | 0.047169 | 0.30907 | -0.01476 |
| -0.05766 | 0.21361  | -0.12151 | 0.00858  | 0.034587 | 0.45587 | -0.04142 | 0.37176 | 0.000911 |
| -0.16698 | 0.00029  | -0.09365 | 0.04309  | -0.02352 | 0.61221 | -0.04011 | 0.38719 | 0.072414 |
| 0.11793  | 0.01075  | -0.00769 | 0.86839  | -0.00312 | 0.94642 | -0.10045 | 0.02997 | 0.041436 |
| 0.12306  | 0.00776  | 0.006017 | 0.89683  | 0.017049 | 0.71326 | -0.08115 | 0.07979 | 0.050078 |
| 0.002533 | 0.95646  | -0.0538  | 0.24591  | -0.00858 | 0.85333 | -0.08188 | 0.07713 | -0.03973 |
| -0.01852 | 0.68976  | -0.04014 | 0.3868   | 0.003463 | 0.94051 | -0.04344 | 0.34895 | -0.07804 |
| 0.071731 | 0.12163  | -0.13088 | 0.00461  | -0.03822 | 0.40992 | -0.11568 | 0.01236 | -0.00136 |
| 0.303777 | 2.00E-11 | 0.213886 | 3.10E-06 | 0.007448 | 0.87247 | -0.09969 | 0.03125 | 0.082259 |
| -0.01873 | 0.68642  | -0.12208 | 0.00827  | -0.04232 | 0.36152 | -0.14778 | 0.00136 | -0.02419 |
| 0.143113 | 0.00193  | 0.200343 | 1.29E-05 | -0.03555 | 0.44345 | -0.00182 | 0.96865 | -0.01711 |
| 0.118563 | 0.01034  | -0.0535  | 0.24852  | -0.01593 | 0.73141 | -0.1189  | 0.01012 | 0.001265 |
| 0.050172 | 0.27925  | -0.17635 | 0.00013  | -0.02876 | 0.53531 | -0.09854 | 0.03326 | -0.12145 |
| -0.14358 | 0.00187  | -0.09523 | 0.03968  | 0.077713 | 0.09346 | 0.167587 | 0.00028 | 0.21781  |
| -0.12323 | 0.00768  | -0.17305 | 0.00017  | -0.02905 | 0.53117 | -0.11203 | 0.01543 | -0.04555 |
| 0.164741 | 0.00035  | -0.06922 | 0.13529  | 0.026624 | 0.56603 | -0.07807 | 0.09194 | 0.089391 |
| -0.06336 | 0.17168  | -0.20448 | 8.43E-06 | 0.059081 | 0.20251 | 0.117906 | 0.01077 | 0.123675 |
| -0.30553 | 1.51E-11 | -0.46329 | 3.18E-26 | -0.02316 | 0.61759 | -0.04637 | 0.3174  | -0.1575  |
| -0.00338 | 0.94191  | -0.33882 | 5.23E-14 | -0.05654 | 0.22261 | -0.15355 | 0.00087 | -0.10289 |
| -0.23538 | 2.67E-07 | -0.49092 | 1.07E-29 | -0.05835 | 0.20816 | -0.10367 | 0.02506 | -0.01876 |
| 0.034825 | 0.45278  | 0.065663 | 0.15656  | 0.049128 | 0.28939 | 0.093607 | 0.04319 | 0.102128 |
| -0.09675 | 0.03661  | -0.34998 | 6.68E-15 | 0.075115 | 0.10498 | 0.126411 | 0.00623 | 0.313019 |
| -0.0034  | 0.94161  | -0.24606 | 7.20E-08 | -0.04737 | 0.30705 | -0.11395 | 0.01374 | -0.11505 |
| -0.23109 | 4.44E-07 | -0.44486 | 4.46E-24 | 0.017226 | 0.71043 | 0.068756 | 0.13792 | 0.122071 |
| -0.05831 | 0.20849  | -0.29345 | 9.97E-11 | -0.00616 | 0.89436 | -0.04437 | 0.33867 | 0.029992 |
| -0.12825 | 0.00551  | -0.18838 | 4.19E-05 | -0.00648 | 0.88899 | 0.002239 | 0.96151 | 0.01258  |
| -0.06443 | 0.16448  | -0.31867 | 1.76E-12 | -0.02599 | 0.57526 | -0.13689 | 0.00303 | -0.01096 |
| 0.088679 | 0.05549  | -0.16432 | 0.00036  | -0.02828 | 0.54212 | -0.11652 | 0.01174 | 0.034679 |
| -0.03041 | 0.51206  | 0.232568 | 3.73E-07 | 0.02008  | 0.66516 | 0.149276 | 0.00121 | -0.02512 |
| -0.13707 | 0.00299  | -0.18967 | 3.70E-05 | -0.01708 | 0.71272 | -0.01447 | 0.75514 | -0.02584 |
| -0.09032 | 0.05111  | -0.27856 | 9.05E-10 | -0.06003 | 0.19532 | -0.03056 | 0.51007 | -0.11948 |
| 0.188635 | 4.09E-05 | 0.367222 | 2.35E-16 | 0.037923 | 0.41357 | 0.087012 | 0.06026 | 0.048407 |
| -0.22597 | 8.05E-07 | 0.077531 | 0.09423  | 0.008169 | 0.86025 | 0.150629 | 0.00109 | 0.022491 |
| 0.015552 | 0.73748  | -0.20556 | 7.53E-06 | -0.01389 | 0.76464 | -0.11702 | 0.01138 | 0.005025 |
| -0.03862 | 0.40507  | -0.2555  | 2.14E-08 | -0.05781 | 0.2124  | -0.09317 | 0.04417 | -0.07797 |
| 0.154718 | 0.00079  | -0.18347 | 6.66E-05 | -0.05667 | 0.22159 | -0.16865 | 0.00025 | -0.0865  |
| 0.218041 | 1.97E-06 | -0.02623 | 0.57181  | 0.029176 | 0.52939 | -0.14473 | 0.00171 | 0.067307 |
| -0.00533 | 0.90859  | -0.28175 | 5.71E-10 | -0.03255 | 0.48279 | -0.08513 | 0.06604 | -0.01301 |
| -0.00146 | 0.97482  | -0.10349 | 0.02532  | 0.035633 | 0.44235 | 0.083788 | 0.07045 | 0.109768 |
| -0.03373 | 0.46718  | -0.15991 | 0.00052  | 0.045041 | 0.33143 | -0.07257 | 0.11733 | 0.019844 |
| -0.02309 | 0.61872  | -0.20535 | 7.70E-06 | 0.057272 | 0.2167  | -0.07942 | 0.08644 | 0.031706 |
| -0.06942 | 0.13413  | -0.10539 | 0.02274  | -0.01011 | 0.82755 | 0.038013 | 0.41246 | 0.182013 |
| -0.02022 | 0.66292  | 0.270319 | 2.90E-09 | -0.02143 | 0.64411 | 0.139842 | 0.00246 | -0.04542 |

|          |          |          |          |          |         |          |          |          |
|----------|----------|----------|----------|----------|---------|----------|----------|----------|
| 0.08446  | 0.06822  | 0.042715 | 0.35704  | -0.00491 | 0.91581 | -0.09294 | 0.04471  | 0.076178 |
| -0.04104 | 0.37627  | -0.05609 | 0.22638  | 0.031407 | 0.49837 | 0.045111 | 0.33069  | 0.119218 |
| -0.18859 | 4.11E-05 | -0.31718 | 2.25E-12 | 0.014669 | 0.75187 | 0.012343 | 0.79022  | -0.01683 |
| -0.03374 | 0.46703  | -0.31784 | 2.01E-12 | -0.03674 | 0.42825 | -0.06681 | 0.14942  | 0.005746 |
| -0.07386 | 0.11094  | -0.02565 | 0.58035  | 0.078943 | 0.08837 | 0.053719 | 0.24661  | 0.126129 |
| -0.00893 | 0.84737  | -0.21547 | 2.61E-06 | -0.01892 | 0.6834  | -0.11523 | 0.01271  | -0.01985 |
| -0.07205 | 0.11997  | -0.08385 | 0.07026  | 0.007509 | 0.87143 | 0.16562  | 0.00033  | -0.13268 |
| -0.1694  | 0.00024  | -0.22293 | 1.14E-06 | -0.0049  | 0.91594 | -0.05492 | 0.23621  | 0.032123 |
| -0.15438 | 0.00082  | -0.24353 | 9.87E-08 | -0.02042 | 0.65983 | 0.115825 | 0.01225  | 0.096744 |
| 0.109146 | 0.0183   | 0.121006 | 0.00886  | 0.005244 | 0.91002 | -0.0256  | 0.58111  | 0.128398 |
| -0.08357 | 0.07118  | -0.22515 | 8.85E-07 | 0.016181 | 0.72727 | -0.03361 | 0.46874  | 0.104085 |
| -0.05998 | 0.19568  | -0.37805 | 2.58E-17 | -0.01527 | 0.74205 | -0.07845 | 0.09039  | 0.011699 |
| -0.07511 | 0.10501  | -0.17126 | 0.0002   | 0.05273  | 0.25543 | 0.016334 | 0.72479  | 0.06307  |
| 0.279853 | 7.51E-10 | -0.03373 | 0.46713  | -0.03542 | 0.44507 | -0.12725 | 0.00589  | -0.05133 |
| 0.106193 | 0.02172  | -0.10754 | 0.0201   | -0.02984 | 0.52009 | -0.15971 | 0.00053  | -0.07949 |
| -0.04665 | 0.31446  | -0.22194 | 1.27E-06 | 0.068248 | 0.14085 | 0.031782 | 0.49325  | 0.132776 |
| -0.05404 | 0.24378  | -0.13308 | 0.00396  | 0.086978 | 0.06036 | -0.03307 | 0.47592  | 0.040885 |
| -0.09906 | 0.03233  | -0.1905  | 3.42E-05 | -0.02232 | 0.63037 | -0.0948  | 0.04057  | -0.05241 |
| -0.09884 | 0.03272  | -0.22655 | 7.53E-07 | 0.007978 | 0.86348 | -0.06915 | 0.13565  | 0.052629 |
| -0.06781 | 0.14345  | -0.23194 | 4.02E-07 | 0.04148  | 0.37112 | 0.037381 | 0.42028  | 0.115693 |
| 0.210264 | 4.58E-06 | 0.506053 | 9.76E-32 | -0.02046 | 0.65918 | 0.015384 | 0.74021  | -0.02376 |
| -0.032   | 0.49027  | 0.274671 | 1.58E-09 | 0.042307 | 0.36166 | 0.096561 | 0.03698  | 0.045763 |
| 0.249951 | 4.40E-08 | 0.214362 | 2.95E-06 | 0.012024 | 0.79552 | -0.03979 | 0.39092  | 0.022636 |
| -0.1442  | 0.00178  | -0.33054 | 2.28E-13 | 0.021583 | 0.64178 | -0.13655 | 0.00311  | 0.071816 |
| 0.014255 | 0.75866  | -0.12268 | 0.00795  | -0.01031 | 0.82412 | -0.10543 | 0.02269  | 0.035535 |
| 0.026559 | 0.56698  | -0.38784 | 3.27E-18 | -0.01432 | 0.75761 | -0.15992 | 0.00052  | -0.04847 |
| 0.135559 | 0.00333  | 0.072891 | 0.1157   | -0.0546  | 0.23894 | -0.15222 | 0.00097  | 0.020731 |
| -0.12931 | 0.00513  | -0.1791  | 9.96E-05 | 0.089429 | 0.05345 | 0.053083 | 0.25227  | 0.249233 |
| -0.06476 | 0.16233  | -0.21215 | 3.75E-06 | -0.05431 | 0.24141 | -0.18261 | 7.22E-05 | -0.06956 |
| 0.102704 | 0.02646  | 0.416347 | 5.27E-21 | 0.053411 | 0.24934 | 0.066767 | 0.1497   | 0.114107 |
| -0.08091 | 0.0807   | 0.082548 | 0.07473  | -0.06872 | 0.13812 | -0.00517 | 0.91128  | -0.14091 |
| -0.24595 | 7.30E-08 | -0.07026 | 0.12948  | 0.004739 | 0.91865 | 0.085535 | 0.06477  | -0.06765 |
| -0.01819 | 0.69504  | -0.18922 | 3.87E-05 | -0.04865 | 0.29407 | -0.14074 | 0.0023   | -0.01988 |
| -0.07255 | 0.1174   | -0.18376 | 6.48E-05 | -0.00951 | 0.83752 | -0.11444 | 0.01334  | 0.045928 |
| -0.05916 | 0.20188  | -0.22053 | 1.49E-06 | 0.076648 | 0.09805 | 0.04609  | 0.32028  | 0.066982 |
| 0.003173 | 0.94548  | -0.00249 | 0.95726  | 0.038347 | 0.40836 | 0.025448 | 0.58332  | 0.164568 |
| 0.069424 | 0.13412  | -0.11942 | 0.00979  | -0.04523 | 0.32936 | -0.15782 | 0.00062  | -0.0001  |
| -0.07415 | 0.10951  | -0.2047  | 8.23E-06 | 0.048806 | 0.29257 | -0.01255 | 0.78684  | -0.01834 |
| 0.077285 | 0.09528  | 0.126017 | 0.00639  | -0.02106 | 0.64985 | -0.05066 | 0.27464  | 0.074237 |
| -0.24699 | 6.41E-08 | -0.43737 | 3.05E-23 | 0.07094  | 0.12581 | 0.162315 | 0.00043  | 0.147044 |
| -0.19788 | 1.65E-05 | -0.33663 | 7.76E-14 | 0.038504 | 0.40645 | 0.048395 | 0.29665  | 0.198653 |
| -0.01238 | 0.78954  | -0.20683 | 6.59E-06 | -0.00124 | 0.97862 | -0.02961 | 0.52334  | -0.01302 |
| -0.07827 | 0.09111  | -0.53257 | 1.44E-35 | -0.01984 | 0.66889 | -0.12356 | 0.00751  | -0.03488 |
| -0.1193  | 0.00987  | -0.2409  | 1.37E-07 | -0.00387 | 0.93358 | -0.05501 | 0.23545  | 0.004026 |
| -0.02165 | 0.6408   | -0.1598  | 0.00053  | -0.00798 | 0.86337 | -0.10117 | 0.02882  | 0.021432 |

|          |          |          |          |          |         |          |          |          |
|----------|----------|----------|----------|----------|---------|----------|----------|----------|
| -0.12672 | 0.0061   | -0.27482 | 1.54E-09 | -0.02856 | 0.53816 | -0.03374 | 0.46703  | -0.02598 |
| 0.106271 | 0.02163  | -0.09491 | 0.04035  | 0.026572 | 0.56679 | -0.01816 | 0.69542  | -0.03438 |
| 0.089885 | 0.05224  | -0.09643 | 0.03724  | -0.027   | 0.5605  | -0.13368 | 0.0038   | 0.051786 |
| -0.00616 | 0.89443  | -0.23791 | 1.97E-07 | -0.01905 | 0.6813  | -0.10302 | 0.026    | 0.048252 |
| 0.045892 | 0.32237  | 0.365629 | 3.23E-16 | -0.00965 | 0.83521 | 0.009436 | 0.83884  | -0.03133 |
| -0.21971 | 1.63E-06 | -0.43425 | 6.71E-23 | -0.05064 | 0.27481 | -0.08217 | 0.07606  | 0.046575 |
| -0.16031 | 0.00051  | -0.15834 | 0.00059  | -0.00188 | 0.96775 | 0.037018 | 0.42481  | 0.025208 |
| -0.04669 | 0.31398  | -0.22384 | 1.03E-06 | 0.005547 | 0.90484 | -0.06588 | 0.15523  | 0.001668 |
| -0.04566 | 0.32484  | -0.16477 | 0.00035  | -0.00166 | 0.97145 | -0.07824 | 0.09125  | 0.067192 |
| -0.14955 | 0.00119  | -0.18966 | 3.71E-05 | -0.00296 | 0.94914 | -0.03069 | 0.50821  | 0.036755 |
| 0.046495 | 0.31604  | -0.08127 | 0.07937  | 0.019497 | 0.6743  | -0.08362 | 0.071    | 0.017856 |
| 0.067019 | 0.14816  | -0.18983 | 3.64E-05 | -0.02223 | 0.63188 | 0.039882 | 0.38985  | -0.02457 |
| 0.045551 | 0.32599  | 0.020035 | 0.66585  | 0.009915 | 0.83079 | 0.092256 | 0.04631  | 0.044521 |
| -0.06641 | 0.15187  | -0.39851 | 3.17E-19 | -0.00221 | 0.96198 | -0.13221 | 0.00421  | -0.07712 |
| 0.029482 | 0.52508  | 0.22743  | 6.80E-07 | 0.042006 | 0.36508 | 0.089572 | 0.05307  | 0.1196   |
| 0.082301 | 0.0756   | -0.30485 | 1.68E-11 | -0.08212 | 0.07625 | -0.24347 | 9.95E-08 | -0.12973 |
| 0.034095 | 0.46232  | -0.13494 | 0.00348  | -0.04581 | 0.32321 | -0.16261 | 0.00042  | -0.01513 |
| 0.345079 | 1.66E-14 | 0.072639 | 0.11697  | -0.05228 | 0.25951 | -0.12259 | 0.008    | -0.0455  |
| 0.131693 | 0.00436  | -0.06678 | 0.14963  | -0.01246 | 0.78829 | -0.13005 | 0.00488  | 0.003033 |
| 0.030032 | 0.51737  | -0.11882 | 0.01017  | -0.0008  | 0.98633 | -0.02366 | 0.61006  | -0.0758  |
| -0.12413 | 0.00724  | 0.122607 | 0.00799  | 0.000954 | 0.9836  | 0.099733 | 0.03117  | -0.05361 |
| -0.02632 | 0.57047  | -0.04659 | 0.31504  | 0.017052 | 0.71322 | 0.046917 | 0.31167  | 0.047988 |
| -0.01748 | 0.70631  | -0.14168 | 0.00215  | 0.039322 | 0.39655 | -0.10771 | 0.0199   | 0.139763 |
| -0.15132 | 0.00104  | -0.20155 | 1.14E-05 | 0.062799 | 0.17548 | 0.097335 | 0.03549  | 0.416483 |
| 0.078552 | 0.08996  | -0.07979 | 0.085    | -0.01776 | 0.7019  | -0.13051 | 0.00473  | 0.017338 |
| -0.04075 | 0.37956  | -0.13824 | 0.00276  | 0.003036 | 0.94782 | -0.09938 | 0.03179  | 0.030878 |
| -0.14827 | 0.00131  | -0.21216 | 3.74E-06 | 0.015305 | 0.7415  | 0.00831  | 0.85785  | 0.021242 |
| -0.10467 | 0.0237   | -0.05018 | 0.27918  | 0.05776  | 0.2128  | 0.013016 | 0.77906  | -0.07864 |
| -0.05901 | 0.20306  | -0.274   | 1.73E-09 | -0.04938 | 0.28688 | -0.06094 | 0.18864  | -0.06779 |
| -0.05731 | 0.21643  | -0.0704  | 0.1287   | 0.065454 | 0.15789 | 0.08748  | 0.05889  | 0.144431 |
| 0.297427 | 5.41E-11 | 0.488922 | 1.96E-29 | 0.0314   | 0.49846 | 0.035652 | 0.44212  | 0.205876 |
| 0.001576 | 0.97291  | -0.07496 | 0.10569  | -0.02011 | 0.66472 | -0.08537 | 0.0653   | 0.025132 |
| -0.19746 | 1.72E-05 | -0.26934 | 3.33E-09 | -0.01589 | 0.73202 | -0.08631 | 0.06238  | -0.01399 |
| -0.01658 | 0.72087  | 0.01414  | 0.76055  | 0.001281 | 0.97797 | -0.0585  | 0.20695  | 0.124684 |
| 0.032165 | 0.48805  | 0.276043 | 1.30E-09 | -0.01433 | 0.75749 | 0.082107 | 0.0763   | -0.05387 |
| 0.074597 | 0.1074   | 0.336228 | 8.34E-14 | 0.060244 | 0.19375 | 0.152448 | 0.00095  | 0.081346 |
| -0.01957 | 0.67317  | 0.159655 | 0.00053  | 0.038739 | 0.40359 | 0.209125 | 5.17E-06 | -0.00353 |
| -0.03517 | 0.44826  | -0.21264 | 3.55E-06 | -0.04989 | 0.282   | -0.13716 | 0.00298  | -0.05795 |
| -0.06595 | 0.15477  | -0.15445 | 0.00081  | -0.03716 | 0.42302 | -0.12164 | 0.0085   | -0.05975 |
| 0.428343 | 2.92E-22 | 0.405814 | 6.10E-20 | -0.03464 | 0.45516 | 0.014771 | 0.75021  | -0.07597 |
| 0.218315 | 1.91E-06 | 0.225094 | 8.90E-07 | -0.02528 | 0.58579 | -0.21901 | 1.77E-06 | -0.0557  |
| 0.054634 | 0.23865  | 0.097238 | 0.03567  | -0.03076 | 0.50731 | 0.001787 | 0.96927  | -0.04887 |
| -0.10846 | 0.01905  | -0.18002 | 9.16E-05 | 0.055803 | 0.22874 | 0.133041 | 0.00397  | 0.016897 |
| -0.09938 | 0.03178  | 0.093132 | 0.04426  | -0.0179  | 0.69962 | 0.058371 | 0.20799  | 0.019134 |
| -0.01336 | 0.77337  | 0.212624 | 3.56E-06 | 0.001537 | 0.97357 | 0.04486  | 0.33338  | 0.064855 |

|          |          |          |          |          |         |          |          |          |
|----------|----------|----------|----------|----------|---------|----------|----------|----------|
| -0.22273 | 1.17E-06 | -0.18396 | 6.36E-05 | 0.02444  | 0.59832 | 0.072088 | 0.11978  | 0.044554 |
| 0.22483  | 9.17E-07 | -0.00637 | 0.89081  | -0.04231 | 0.36162 | -0.14513 | 0.00166  | -0.04479 |
| 0.067065 | 0.14789  | -0.05773 | 0.21303  | -0.02978 | 0.52084 | -0.15059 | 0.0011   | -0.0334  |
| 0.033188 | 0.47432  | -0.04059 | 0.38145  | -0.03624 | 0.43458 | -0.10664 | 0.02117  | 0.063716 |
| -0.02049 | 0.65871  | -0.18527 | 5.63E-05 | -0.02121 | 0.6476  | -0.06802 | 0.1422   | -0.08723 |
| 0.063556 | 0.17032  | -0.07188 | 0.12087  | -0.00423 | 0.92742 | 0.057234 | 0.21701  | -0.02814 |
| 0.041327 | 0.37289  | 0.088292 | 0.05657  | 0.083744 | 0.0706  | 0.028495 | 0.53905  | 0.122946 |
| -0.00114 | 0.98032  | -0.21481 | 2.81E-06 | -0.06084 | 0.18936 | -0.16509 | 0.00034  | 0.027741 |
| -0.07465 | 0.10713  | -0.215   | 2.75E-06 | -0.03908 | 0.39945 | -0.12747 | 0.00581  | -0.04189 |
| -0.16772 | 0.00027  | -0.22538 | 8.62E-07 | -0.03477 | 0.45345 | -0.09176 | 0.0475   | -0.0416  |
| -0.11274 | 0.01478  | -0.21118 | 4.16E-06 | -0.03826 | 0.40944 | -0.0828  | 0.07385  | 0.015484 |
| -0.14961 | 0.00118  | -0.38513 | 5.84E-18 | -0.04102 | 0.37645 | -0.12754 | 0.00578  | -0.0757  |
| 0.013772 | 0.7666   | -0.15473 | 0.00079  | -0.03986 | 0.39011 | -0.10522 | 0.02296  | -0.06409 |
| -0.13553 | 0.00334  | -0.24153 | 1.26E-07 | 0.060653 | 0.19073 | -0.02041 | 0.66001  | -0.01773 |
| -0.01629 | 0.72558  | -0.25214 | 3.32E-08 | -0.09629 | 0.03751 | -0.22722 | 6.97E-07 | -0.08496 |
| -0.06252 | 0.17739  | -0.16734 | 0.00028  | -0.06025 | 0.1937  | -0.08037 | 0.08274  | -0.02198 |
| 0.127287 | 0.00588  | 0.063746 | 0.16905  | 0.049787 | 0.28296 | 0.037029 | 0.42468  | 0.042227 |
| -0.06088 | 0.18908  | -0.13933 | 0.00255  | 0.03967  | 0.39238 | 0.072398 | 0.1182   | 0.12186  |
| -0.12349 | 0.00754  | -0.14707 | 0.00144  | 0.005223 | 0.91037 | -0.04098 | 0.37692  | 0.148887 |
| 0.02737  | 0.55519  | -0.02139 | 0.6447   | 0.009358 | 0.84016 | -0.07358 | 0.11228  | 0.043531 |
| -0.08189 | 0.07709  | 0.120664 | 0.00905  | 0.048514 | 0.29547 | 0.156905 | 0.00067  | 0.300327 |
| -0.09708 | 0.03596  | -0.03778 | 0.41534  | 0.019123 | 0.6802  | -0.02347 | 0.61286  | 0.09531  |
| 0.166155 | 0.00031  | 0.391688 | 1.42E-18 | 0.045046 | 0.33138 | 0.162521 | 0.00042  | 0.064326 |
| -0.09899 | 0.03246  | -0.30247 | 2.46E-11 | 0.063752 | 0.16901 | -0.01167 | 0.80147  | 0.095274 |
| 0.043491 | 0.34836  | -0.26755 | 4.26E-09 | -0.00716 | 0.87734 | -0.07721 | 0.09562  | -0.02682 |
| 0.034445 | 0.45773  | -0.06779 | 0.14355  | 0.01685  | 0.71647 | -0.00216 | 0.96282  | 0.005051 |
| -0.13526 | 0.0034   | -0.42251 | 1.21E-21 | -0.01365 | 0.7686  | -0.04686 | 0.31223  | 0.018488 |
| 0.00714  | 0.87771  | -0.10713 | 0.02058  | 0.043383 | 0.34956 | -0.01905 | 0.68132  | 0.173419 |
| 0.106114 | 0.02182  | 0.076139 | 0.10031  | 0.011808 | 0.79911 | -0.04636 | 0.31749  | 0.066719 |
| -0.03222 | 0.48725  | 0.224348 | 9.69E-07 | 0.066029 | 0.15427 | 0.153999 | 0.00084  | 0.336811 |
| 0.094055 | 0.04219  | 0.037711 | 0.4162   | 0.050345 | 0.2776  | 0.211849 | 3.87E-06 | 0.13042  |
| -0.0249  | 0.5915   | -0.3029  | 2.30E-11 | -0.03347 | 0.47061 | -0.11659 | 0.01169  | -0.07869 |
| 0.091566 | 0.04797  | 0.198747 | 1.51E-05 | 0.031725 | 0.49403 | 0.097538 | 0.0351   | -0.08894 |
| -0.1137  | 0.01395  | -0.41055 | 2.05E-20 | -0.02585 | 0.57741 | -0.11068 | 0.01672  | -0.02383 |
| -0.01357 | 0.7699   | -0.24324 | 1.02E-07 | -0.05957 | 0.19881 | -0.17465 | 0.00015  | -0.0497  |
| -0.04475 | 0.33454  | -0.05336 | 0.24982  | 0.036245 | 0.43455 | -0.05955 | 0.19896  | 0.137122 |
| -0.09409 | 0.04213  | -0.13006 | 0.00488  | -0.014   | 0.76283 | -0.08388 | 0.07012  | -0.01336 |
| -0.13639 | 0.00314  | -0.33101 | 2.10E-13 | -0.04624 | 0.31873 | -0.06751 | 0.1452   | -0.06489 |
| -0.04515 | 0.3303   | -0.09057 | 0.05046  | 0.012719 | 0.78398 | 0.083301 | 0.07211  | 0.121714 |
| -0.02463 | 0.59542  | -0.45525 | 2.85E-25 | -0.03607 | 0.43681 | -0.15174 | 0.001    | -0.08584 |
| 0.125637 | 0.00656  | -0.02421 | 0.60181  | 0.074662 | 0.10709 | 0.090689 | 0.05016  | 0.295932 |
| -0.18325 | 6.80E-05 | -0.54681 | 9.06E-38 | -0.05878 | 0.20478 | -0.1002  | 0.03038  | -0.0379  |
| -0.07678 | 0.09748  | -0.09719 | 0.03577  | 0.001169 | 0.97991 | -0.01738 | 0.70801  | 0.112859 |
| 0.022938 | 0.621    | -0.22362 | 1.05E-06 | -0.06467 | 0.16297 | -0.18253 | 7.27E-05 | -0.12711 |
| -0.18331 | 6.76E-05 | 0.031359 | 0.49903  | 0.067429 | 0.1457  | 0.069706 | 0.13254  | 0.20189  |

|          |          |          |          |          |         |          |          |          |
|----------|----------|----------|----------|----------|---------|----------|----------|----------|
| -0.1048  | 0.02351  | -0.44828 | 1.82E-24 | -0.02936 | 0.52681 | -0.10642 | 0.02145  | -0.09091 |
| -0.0527  | 0.2557   | -0.05237 | 0.25873  | 0.045552 | 0.32597 | -0.02253 | 0.62727  | 0.1464   |
| 0.087649 | 0.0584   | 0.145085 | 0.00167  | 0.050834 | 0.27295 | 0.032687 | 0.48102  | 0.144704 |
| -0.14091 | 0.00227  | -0.20501 | 7.97E-06 | -0.02911 | 0.53028 | -0.13691 | 0.00303  | -0.04636 |
| -0.06625 | 0.1529   | 0.022613 | 0.62596  | 0.020445 | 0.65945 | 0.114715 | 0.01312  | 0.224033 |
| -0.02849 | 0.53912  | -0.17431 | 0.00015  | -0.03449 | 0.45709 | -0.13937 | 0.00254  | -0.08157 |
| 0.067826 | 0.14333  | 0.21457  | 2.88E-06 | 0.032075 | 0.48928 | 0.060289 | 0.19341  | 0.173553 |
| 0.038399 | 0.40773  | -0.02447 | 0.59793  | -0.01818 | 0.69513 | -0.07287 | 0.11579  | -0.02345 |
| -0.11822 | 0.01056  | -0.08069 | 0.08153  | 0.04945  | 0.28624 | 0.180294 | 8.93E-05 | 0.226974 |
| -0.12938 | 0.00511  | -0.19297 | 2.69E-05 | 0.018939 | 0.68311 | -0.01488 | 0.74836  | -0.00956 |
| 0.046426 | 0.31677  | -0.01995 | 0.66723  | -0.0491  | 0.28966 | -0.13614 | 0.0032   | 0.023479 |
| -0.10492 | 0.02336  | -0.21166 | 3.95E-06 | -0.00295 | 0.94923 | -0.09176 | 0.04749  | 0.08855  |
| 0.257822 | 1.58E-08 | 0.152039 | 0.00098  | -0.06997 | 0.13109 | -0.2175  | 2.09E-06 | -0.10314 |
| -0.11159 | 0.01584  | -0.25334 | 2.84E-08 | -0.04425 | 0.33995 | -0.10397 | 0.02465  | -0.06528 |
| -0.0433  | 0.3505   | -0.17786 | 0.00011  | -0.02747 | 0.55379 | -0.11387 | 0.01381  | 0.05139  |
| -0.08124 | 0.07948  | -0.16415 | 0.00037  | -0.00161 | 0.97227 | -0.05064 | 0.27479  | 0.048565 |
| 0.192647 | 2.77E-05 | -0.21245 | 3.62E-06 | -0.03017 | 0.51544 | -0.13237 | 0.00416  | 0.011168 |
| 0.044809 | 0.33393  | -0.09392 | 0.04249  | 0.004243 | 0.92713 | -0.0654  | 0.15821  | 0.002196 |
| -0.00577 | 0.90095  | -0.21383 | 3.12E-06 | 0.032083 | 0.48916 | -0.04526 | 0.32911  | 0.009731 |
| -0.03253 | 0.48315  | -0.13105 | 0.00456  | 0.018315 | 0.69302 | -0.07222 | 0.1191   | 0.103741 |
| -0.10112 | 0.02889  | -0.27126 | 2.55E-09 | 0.02435  | 0.59968 | -0.01069 | 0.81778  | 0.065542 |
| 0.088913 | 0.05485  | -0.05955 | 0.19891  | -0.00315 | 0.94585 | -0.09707 | 0.03599  | 0.008691 |
| -0.00829 | 0.85819  | -0.04827 | 0.29794  | -0.01901 | 0.68207 | -0.1254  | 0.00666  | 0.050153 |
| 0.201582 | 1.14E-05 | -0.10827 | 0.01927  | -0.02913 | 0.53001 | -0.14488 | 0.00169  | -0.0238  |
| 0.064596 | 0.16342  | -0.18734 | 4.63E-05 | -0.01725 | 0.71012 | -0.09944 | 0.03168  | -0.07435 |
| 0.102748 | 0.0264   | 0.078588 | 0.08981  | -0.0151  | 0.74488 | -0.03516 | 0.44838  | 0.077017 |
| -0.00463 | 0.92049  | 0.045713 | 0.32427  | 0.016116 | 0.72833 | -0.02811 | 0.54459  | 0.175782 |
| -0.12488 | 0.00689  | -0.32458 | 6.43E-13 | -0.02953 | 0.52435 | -0.1437  | 0.00185  | -0.03134 |
| -0.10267 | 0.02652  | -0.16007 | 0.00052  | -0.02436 | 0.5995  | -0.0818  | 0.07741  | 0.047606 |
| -0.16821 | 0.00026  | -0.26891 | 3.53E-09 | 0.029695 | 0.52209 | 0.031088 | 0.50275  | 0.063018 |
| -0.01449 | 0.75487  | -0.0584  | 0.20775  | 0.02779  | 0.54913 | 0.01909  | 0.68073  | 0.117553 |
| -0.11879 | 0.01019  | -0.13713 | 0.00298  | -0.02202 | 0.635   | -0.03724 | 0.42202  | 0.011032 |
| -0.08527 | 0.06559  | 0.11421  | 0.01353  | 0.013144 | 0.77694 | -0.0245  | 0.59744  | 0.039974 |
| -0.19116 | 3.21E-05 | -0.27402 | 1.73E-09 | 0.079925 | 0.08447 | 0.15769  | 0.00063  | 0.143959 |
| 0.089643 | 0.05288  | -0.31814 | 1.92E-12 | -0.03647 | 0.43172 | -0.15346 | 0.00088  | -0.08563 |
| -0.14357 | 0.00187  | -0.30072 | 3.24E-11 | 0.010377 | 0.82302 | -0.05311 | 0.25198  | 0.014704 |
| -0.24454 | 8.71E-08 | -0.48986 | 1.48E-29 | -0.02202 | 0.635   | -0.08231 | 0.07558  | -0.01068 |
| 0.009575 | 0.8365   | -0.20028 | 1.30E-05 | -0.01338 | 0.77312 | -0.15656 | 0.00069  | 0.027761 |
| -0.04765 | 0.30415  | -0.15036 | 0.00112  | -0.03142 | 0.49823 | -0.12543 | 0.00665  | -0.02425 |
| 0.149161 | 0.00123  | -0.0714  | 0.12336  | -0.00923 | 0.84228 | -0.11069 | 0.01671  | -0.02602 |
| -0.01956 | 0.67333  | -0.1318  | 0.00433  | 0.012101 | 0.79423 | 0.006657 | 0.88591  | 0.128185 |
| -0.00987 | 0.83148  | 0.102042 | 0.02746  | 3.71E-05 | 0.99936 | -0.07745 | 0.09456  | 0.077846 |
| -0.05465 | 0.23848  | -0.07894 | 0.0884   | -0.0065  | 0.88856 | -0.07627 | 0.09973  | -0.00658 |
| 0.011905 | 0.7975   | 0.026095 | 0.57378  | 0.033496 | 0.47022 | -0.02687 | 0.5624   | 0.191119 |
| -0.1194  | 0.0098   | -0.23116 | 4.40E-07 | 0.095546 | 0.03902 | 0.177526 | 0.00011  | 0.178589 |



|          |          |          |          |          |         |          |          |          |
|----------|----------|----------|----------|----------|---------|----------|----------|----------|
| -0.09429 | 0.04168  | -0.05298 | 0.25323  | 0.160974 | 0.00048 | 0.159965 | 0.00052  | 0.459696 |
| -0.03538 | 0.44556  | -0.11884 | 0.01016  | 0.025073 | 0.58888 | -0.09497 | 0.04021  | -0.03089 |
| 0.06067  | 0.19061  | 0.001314 | 0.9774   | -0.02062 | 0.65673 | -0.05577 | 0.22897  | -0.00408 |
| 0.048909 | 0.29155  | 0.094671 | 0.04086  | 0.042308 | 0.36164 | 0.238916 | 1.74E-07 | 0.149526 |
| -0.0872  | 0.05972  | -0.19034 | 3.47E-05 | 0.05588  | 0.22809 | 0.027037 | 0.56002  | 0.169357 |
| 0.089879 | 0.05226  | -0.02253 | 0.62719  | -0.00908 | 0.84493 | -0.06932 | 0.13469  | 0.067631 |
| 0.239865 | 1.55E-07 | -0.01848 | 0.69044  | -0.02478 | 0.59318 | -0.12626 | 0.00629  | 0.055568 |
| 0.309806 | 7.59E-12 | 0.074309 | 0.10877  | -0.05923 | 0.20134 | -0.22157 | 1.33E-06 | -0.09701 |
| -0.05384 | 0.24554  | -0.14949 | 0.00119  | -0.02456 | 0.59659 | -0.05466 | 0.23843  | -0.12764 |
| 0.013781 | 0.76644  | -0.08613 | 0.06293  | 0.051898 | 0.26303 | -0.08107 | 0.08011  | -0.00372 |
| 0.010521 | 0.82061  | -0.10965 | 0.01777  | -0.0443  | 0.33944 | -0.12281 | 0.00789  | -0.04722 |
| -0.10081 | 0.02938  | -0.23657 | 2.31E-07 | -0.04507 | 0.33108 | -0.13163 | 0.00438  | -0.03873 |
| -0.10333 | 0.02555  | -0.09268 | 0.04532  | 0.087224 | 0.05964 | 0.026021 | 0.57486  | 0.032603 |
| -0.11287 | 0.01467  | -0.21344 | 3.26E-06 | -0.02909 | 0.5306  | 0.075283 | 0.1042   | -0.26107 |
| 0.078681 | 0.08943  | -0.204   | 8.85E-06 | 0.000531 | 0.99087 | -0.03401 | 0.46342  | -0.01369 |
| 0.063943 | 0.16773  | -0.1409  | 0.00227  | -0.02654 | 0.56729 | -0.10052 | 0.02987  | -0.05534 |
| 0.017238 | 0.71023  | -0.15085 | 0.00108  | 0.083723 | 0.07067 | 0.039646 | 0.39266  | 0.229366 |
| -0.14098 | 0.00226  | -0.10272 | 0.02644  | 0.040876 | 0.37814 | 0.080231 | 0.08328  | 0.143745 |
| -0.01793 | 0.69923  | 0.065136 | 0.15993  | -0.00489 | 0.91602 | -0.00614 | 0.89466  | -0.02705 |
| -0.13011 | 0.00486  | -0.34537 | 1.58E-14 | -0.02238 | 0.6295  | -0.07984 | 0.08482  | -0.12877 |
| -0.04174 | 0.36814  | -0.364   | 4.46E-16 | -0.01582 | 0.73317 | -0.10679 | 0.02099  | -0.01662 |
| -0.02485 | 0.5922   | -0.21523 | 2.68E-06 | 0.021546 | 0.64234 | -0.02025 | 0.66249  | 0.005278 |
| -0.06523 | 0.15935  | -0.16983 | 0.00023  | -0.02208 | 0.6341  | -0.07789 | 0.0927   | -0.01979 |
| -0.08624 | 0.06259  | -0.14638 | 0.00151  | -0.04535 | 0.32808 | -0.09476 | 0.04066  | -0.03422 |
| 0.074519 | 0.10777  | 0.022132 | 0.63332  | 0.002098 | 0.96393 | -0.07643 | 0.09904  | 0.198453 |
| -0.06292 | 0.17463  | -0.04336 | 0.3498   | 0.013598 | 0.76946 | -0.02467 | 0.59483  | -0.01297 |
| 0.049225 | 0.28843  | -0.0422  | 0.36288  | -0.02564 | 0.58054 | -0.12897 | 0.00525  | -0.05763 |
| 0.301036 | 3.08E-11 | 0.168248 | 0.00026  | 0.051651 | 0.26531 | 0.042025 | 0.36486  | 0.170441 |
| -0.07622 | 0.09993  | -0.07529 | 0.10415  | -0.03138 | 0.49874 | -0.03292 | 0.47796  | -0.04926 |
| 0.035394 | 0.44543  | -0.17795 | 0.00011  | -0.06595 | 0.15476 | -0.12312 | 0.00773  | -0.03813 |
| -0.16391 | 0.00038  | -0.40952 | 2.60E-20 | 0.008557 | 0.85367 | -0.09652 | 0.03706  | 0.011909 |
| 0.05976  | 0.19736  | -0.17026 | 0.00022  | 0.03613  | 0.43601 | -0.085   | 0.06648  | -0.06213 |
| -0.02384 | 0.60734  | -0.15052 | 0.0011   | -0.03201 | 0.49009 | -0.10368 | 0.02505  | -0.01752 |
| -0.07665 | 0.09804  | -0.13869 | 0.00267  | 0.003903 | 0.93297 | -0.01364 | 0.76874  | 0.154021 |
| 0.088741 | 0.05532  | -0.1777  | 0.00011  | -0.03103 | 0.50357 | -0.13477 | 0.00352  | -0.03738 |
| -0.02278 | 0.62334  | -0.0717  | 0.1218   | -0.02217 | 0.6328  | -0.12223 | 0.00819  | -0.00182 |
| -0.10571 | 0.02233  | -0.02218 | 0.63261  | 0.160897 | 0.00048 | 0.083593 | 0.07111  | 0.448905 |
| -0.16501 | 0.00034  | -0.29509 | 7.76E-11 | -0.00704 | 0.87944 | -0.06517 | 0.15971  | 0.032001 |
| 0.05492  | 0.2362   | 0.037802 | 0.41506  | -0.0081  | 0.86134 | -0.12707 | 0.00596  | 0.066091 |
| 0.044022 | 0.3425   | -0.16523 | 0.00034  | -0.0408  | 0.37908 | -0.16075 | 0.00049  | -0.08377 |
| -0.01891 | 0.68355  | -0.09596 | 0.03818  | -0.04508 | 0.33101 | -0.07467 | 0.10705  | -0.00985 |
| 0.140041 | 0.00242  | -0.27982 | 7.55E-10 | -0.05631 | 0.22453 | -0.22393 | 1.02E-06 | -0.02384 |
| 0.151744 | 0.001    | -0.05307 | 0.25234  | -0.03115 | 0.50191 | -0.16807 | 0.00026  | -0.02742 |
| -0.00756 | 0.87058  | -0.27372 | 1.80E-09 | -0.01607 | 0.72911 | -0.00686 | 0.8825   | -0.00267 |
| 0.195025 | 2.20E-05 | 0.371777 | 9.37E-17 | 0.077298 | 0.09523 | 0.09589  | 0.03832  | 0.215668 |

|          |          |          |          |          |         |          |          |          |
|----------|----------|----------|----------|----------|---------|----------|----------|----------|
| 0.092498 | 0.04574  | 0.234981 | 2.80E-07 | 0.00397  | 0.93182 | 0.026509 | 0.56771  | 0.014173 |
| -0.07927 | 0.08704  | -0.27289 | 2.03E-09 | 0.016517 | 0.72184 | -0.08572 | 0.06419  | -0.00266 |
| 0.189933 | 3.61E-05 | 0.153203 | 0.0009   | 0.079635 | 0.08561 | 0.09873  | 0.03292  | 0.312355 |
| -0.02072 | 0.65516  | -0.02951 | 0.52467  | -0.01625 | 0.72613 | -0.06844 | 0.13971  | -0.03002 |
| -0.09222 | 0.04638  | -0.42609 | 5.06E-22 | -0.0282  | 0.54325 | -0.13009 | 0.00487  | -0.07721 |
| 0.085612 | 0.06453  | -0.2666  | 4.86E-09 | -0.03056 | 0.51004 | -0.10711 | 0.02061  | -0.06063 |
| -0.08164 | 0.07798  | -0.14814 | 0.00133  | 0.042382 | 0.3608  | 0.051365 | 0.26796  | 0.153937 |
| -0.01701 | 0.71393  | 0.094916 | 0.04034  | 0.065717 | 0.15623 | 0.074508 | 0.10783  | 0.299482 |
| -0.13689 | 0.00304  | -0.15708 | 0.00066  | 0.047802 | 0.30262 | 0.03626  | 0.43436  | 0.165841 |
| 0.001534 | 0.97362  | -0.08768 | 0.05831  | -0.00398 | 0.93168 | -0.09229 | 0.04622  | 0.060429 |
| 0.049953 | 0.28136  | -0.09696 | 0.0362   | -0.01072 | 0.81722 | -0.09555 | 0.039    | -0.01398 |
| -0.17842 | 0.00011  | -0.29836 | 4.68E-11 | -0.02848 | 0.5392  | -0.07523 | 0.10442  | -0.05069 |
| -0.00884 | 0.84892  | -0.25364 | 2.73E-08 | -0.01911 | 0.68035 | -0.07996 | 0.08433  | -0.05099 |
| 0.064567 | 0.16361  | -0.00986 | 0.83173  | 0.009716 | 0.83414 | -0.0669  | 0.14887  | 0.122064 |
| -0.05572 | 0.22941  | -0.22077 | 1.45E-06 | 0.089019 | 0.05456 | 0.07136  | 0.12357  | 0.280488 |
| -0.05977 | 0.19729  | -0.18009 | 9.10E-05 | 0.007224 | 0.87628 | -0.03335 | 0.47217  | -0.03474 |
| -0.14162 | 0.00216  | -0.19726 | 1.76E-05 | 0.087803 | 0.05796 | 0.16583  | 0.00032  | 0.209862 |
| 0.036543 | 0.43079  | -0.12264 | 0.00797  | -0.0137  | 0.76786 | -0.10121 | 0.02876  | 0.005182 |
| 0.108262 | 0.01927  | -0.11899 | 0.01006  | -0.0607  | 0.19037 | -0.13737 | 0.00293  | -0.09304 |
| -0.10995 | 0.01746  | -0.35382 | 3.22E-15 | -0.05517 | 0.23406 | -0.11546 | 0.01253  | -0.14452 |
| 0.114507 | 0.01328  | 0.006683 | 0.88547  | -0.00656 | 0.88753 | 0.073674 | 0.11184  | -0.12268 |
| 0.05907  | 0.20259  | -0.11112 | 0.01629  | -0.06994 | 0.13124 | -0.16169 | 0.00045  | -0.05432 |
| -0.16886 | 0.00025  | -0.28724 | 2.54E-10 | -0.04898 | 0.29086 | -0.03156 | 0.49624  | 0.013201 |
| -0.04789 | 0.30175  | -0.21796 | 1.99E-06 | -0.01472 | 0.75101 | -0.08689 | 0.06061  | -0.01809 |
| -0.04347 | 0.34855  | -0.1192  | 0.00993  | 0.016573 | 0.72094 | 0.022695 | 0.6247   | 0.164872 |
| -0.08514 | 0.06601  | -0.41384 | 9.51E-21 | -0.0137  | 0.76772 | -0.07163 | 0.12217  | -0.01711 |
| -0.0259  | 0.57666  | -0.23708 | 2.18E-07 | -0.00879 | 0.84975 | -0.07037 | 0.12891  | -0.03063 |
| -0.08342 | 0.0717   | -0.47046 | 4.29E-27 | -0.04331 | 0.35042 | -0.1723  | 0.00018  | -0.08049 |
| -0.04488 | 0.33314  | -0.35617 | 2.05E-15 | -0.01539 | 0.74017 | -0.08362 | 0.07102  | -0.01062 |
| 0.154297 | 0.00082  | -0.30026 | 3.48E-11 | -0.02527 | 0.58591 | -0.17522 | 0.00014  | -0.09308 |
| 0.016566 | 0.72104  | -0.18091 | 8.45E-05 | -0.04445 | 0.33784 | -0.12815 | 0.00555  | -0.0206  |
| 0.020117 | 0.66457  | -0.21621 | 2.41E-06 | -0.05426 | 0.24188 | -0.15905 | 0.00056  | -0.13704 |
| 0.197822 | 1.66E-05 | 0.11915  | 0.00996  | 0.117544 | 0.01102 | 0.095654 | 0.0388   | 0.320865 |
| 0.005358 | 0.90807  | 0.12872  | 0.00534  | 0.009473 | 0.83822 | -0.09333 | 0.04381  | 0.097776 |
| 0.071887 | 0.12082  | 0.173474 | 0.00016  | 0.017105 | 0.71237 | 0.053799 | 0.24592  | 0.106511 |
| 0.300778 | 3.21E-11 | 0.126072 | 0.00637  | 0.066212 | 0.15312 | 0.02108  | 0.64956  | 0.229138 |
| -0.07771 | 0.09346  | -0.27588 | 1.33E-09 | 0.025965 | 0.57568 | -0.13486 | 0.0035   | -0.09068 |
| 0.200151 | 1.31E-05 | 0.11005  | 0.01736  | 0.086573 | 0.06157 | 0.07917  | 0.08746  | 0.331308 |
| 0.020273 | 0.66212  | 0.208302 | 5.64E-06 | -0.01089 | 0.81443 | 0.13084  | 0.00462  | -0.14533 |
| -0.01944 | 0.67514  | -0.38867 | 2.73E-18 | 0.014524 | 0.75425 | -0.06709 | 0.14772  | 0.048402 |
| -0.01922 | 0.67874  | -0.2716  | 2.43E-09 | -0.04156 | 0.37024 | -0.12299 | 0.00779  | -0.01283 |
| 0.023208 | 0.6169   | -0.11757 | 0.011    | -0.00271 | 0.95336 | -0.1272  | 0.00591  | 0.055872 |
| -0.05776 | 0.21279  | -0.50599 | 9.96E-32 | -0.04931 | 0.28763 | -0.21744 | 2.10E-06 | -0.16193 |
| 0.312512 | 4.88E-12 | -0.10999 | 0.01742  | -0.03788 | 0.41415 | -0.15271 | 0.00093  | -0.06259 |
| -0.03246 | 0.4841   | -0.26632 | 5.04E-09 | -0.07748 | 0.09445 | -0.05296 | 0.25335  | -0.14865 |

|          |          |          |          |          |         |          |         |          |
|----------|----------|----------|----------|----------|---------|----------|---------|----------|
| -0.23321 | 3.46E-07 | -0.12474 | 0.00696  | 0.002477 | 0.95742 | 0.076403 | 0.09913 | -0.0717  |
| 0.25389  | 2.65E-08 | 0.143917 | 0.00182  | 0.002933 | 0.9496  | 0.003278 | 0.94367 | 0.07617  |
| -0.15261 | 0.00094  | -0.0451  | 0.33075  | 0.055787 | 0.22887 | 0.077298 | 0.09523 | 0.249681 |
| 0.0495   | 0.28575  | 0.284025 | 4.09E-10 | 0.038023 | 0.41234 | 0.049212 | 0.28856 | 0.151378 |
| -0.22284 | 1.15E-06 | -0.30327 | 2.17E-11 | -0.00704 | 0.87948 | 0.001251 | 0.97849 | 0.047664 |
| 0.014613 | 0.75279  | -0.14399 | 0.00181  | 0.037766 | 0.41551 | -0.09408 | 0.04215 | -0.01436 |
| -0.0533  | 0.25032  | -0.14111 | 0.00224  | 0.00262  | 0.95496 | -0.07296 | 0.11538 | -0.03187 |
| -0.01017 | 0.8265   | -0.07699 | 0.09654  | -0.03769 | 0.41647 | -0.08372 | 0.07069 | -0.01846 |
| 0.390836 | 1.71E-18 | 0.437147 | 3.23E-23 | 0.032171 | 0.48797 | 0.016294 | 0.72545 | 0.136108 |
| 0.132866 | 0.00402  | 0.099022 | 0.0324   | 0.078909 | 0.08851 | -0.08396 | 0.06988 | 0.142132 |
| -0.14457 | 0.00173  | 0.048269 | 0.29792  | 0.014261 | 0.75856 | 0.106992 | 0.02075 | 0.020307 |
| -0.17806 | 0.00011  | -0.21781 | 2.02E-06 | 0.011842 | 0.79854 | 0.040126 | 0.38695 | 0.060007 |
| 0.065412 | 0.15816  | -0.03768 | 0.4166   | 0.010892 | 0.81439 | -0.09894 | 0.03255 | 0.056512 |
| -0.1494  | 0.0012   | -0.37026 | 1.27E-16 | -0.0367  | 0.42885 | -0.08952 | 0.05321 | -0.07425 |
| -0.01167 | 0.80141  | -0.28603 | 3.04E-10 | -0.03657 | 0.43039 | -0.1172  | 0.01125 | -0.0048  |
| -0.16599 | 0.00032  | -0.21252 | 3.60E-06 | -0.00441 | 0.92423 | 0.005843 | 0.89978 | 0.020518 |
| 0.032705 | 0.48078  | -0.10298 | 0.02606  | -0.01793 | 0.69921 | -0.1219  | 0.00836 | 0.026449 |
| -0.17565 | 0.00014  | -0.08364 | 0.07096  | 0.003903 | 0.93297 | 0.067205 | 0.14704 | 0.041817 |
| 0.323859 | 7.28E-13 | 0.188241 | 4.25E-05 | -0.02711 | 0.55897 | -0.14199 | 0.0021  | -0.0426  |
| -0.10204 | 0.02746  | -0.14747 | 0.00139  | -0.00187 | 0.96779 | -0.05577 | 0.22903 | 0.061178 |
| -0.20318 | 9.63E-06 | -0.48099 | 2.07E-28 | -0.0521  | 0.26116 | -0.07353 | 0.11256 | -0.15361 |
| -0.08997 | 0.05202  | -0.22622 | 7.82E-07 | -0.03593 | 0.43856 | -0.06157 | 0.18409 | -0.01742 |
| 0.215872 | 2.50E-06 | 0.171077 | 0.0002   | -0.02827 | 0.54229 | -0.05375 | 0.24636 | -0.09099 |
| -0.01206 | 0.79498  | 0.049008 | 0.29057  | 0.033628 | 0.46847 | 0.060351 | 0.19296 | 0.242636 |
| -0.06461 | 0.16336  | -0.23543 | 2.65E-07 | -0.00426 | 0.92686 | 0.003115 | 0.94647 | 0.055427 |
| -0.06341 | 0.17131  | -0.23413 | 3.10E-07 | -0.05855 | 0.20661 | -0.14069 | 0.00231 | -0.18212 |
| 0.006911 | 0.88159  | -0.03577 | 0.44064  | -0.01438 | 0.7566  | -0.13203 | 0.00426 | 0.007159 |
| -0.14749 | 0.00139  | -0.05501 | 0.23542  | -0.0054  | 0.90728 | 0.067708 | 0.14404 | -0.0761  |
| -0.10597 | 0.022    | -0.09992 | 0.03086  | 0.031781 | 0.49327 | 0.110367 | 0.01703 | 0.128036 |
| -0.13946 | 0.00252  | -0.02126 | 0.6468   | 0.024238 | 0.60135 | 0.101543 | 0.02822 | 0.028754 |
| 0.186839 | 4.85E-05 | 0.02595  | 0.57591  | 0.045793 | 0.32341 | -0.00745 | 0.87239 | 0.280689 |
| 0.00911  | 0.84434  | 0.01706  | 0.7131   | 0.001983 | 0.9659  | -0.07671 | 0.0978  | 0.098591 |
| 0.081613 | 0.07809  | -0.0157  | 0.73513  | 0.105944 | 0.02203 | 0.076396 | 0.09917 | 0.357584 |
| -0.09254 | 0.04565  | 0.073658 | 0.11191  | 0.012099 | 0.79427 | 0.074432 | 0.10819 | -0.1255  |
| -0.07062 | 0.12753  | -0.19985 | 1.35E-05 | 0.071362 | 0.12357 | 0.025096 | 0.58854 | 0.182999 |
| -0.17698 | 0.00012  | -0.24815 | 5.53E-08 | 0.026018 | 0.5749  | -0.03756 | 0.41806 | 0.035384 |
| 0.036425 | 0.43228  | -0.16824 | 0.00026  | 0.007251 | 0.87582 | -0.1309  | 0.00461 | -0.00857 |
| 0.066623 | 0.15058  | -0.12416 | 0.00722  | -0.02446 | 0.59803 | -0.02984 | 0.52007 | 0.037131 |
| 0.030606 | 0.50939  | -0.1912  | 3.19E-05 | -0.00354 | 0.93923 | -0.02834 | 0.5412  | -0.00177 |
| -0.04406 | 0.3421   | -0.27855 | 9.07E-10 | -0.0595  | 0.19933 | -0.08887 | 0.05496 | -0.15163 |
| -0.01304 | 0.77864  | 0.242102 | 1.18E-07 | 0.020979 | 0.65113 | 0.091501 | 0.04813 | 0.150716 |
| -0.04189 | 0.36641  | -0.04984 | 0.2824   | -0.01567 | 0.73555 | -0.01224 | 0.7919  | -0.12188 |
| -0.08768 | 0.0583   | -0.18166 | 7.88E-05 | 0.010571 | 0.81978 | 0.010744 | 0.81688 | 0.131389 |
| -0.26417 | 6.76E-09 | -0.41947 | 2.51E-21 | 0.015074 | 0.74526 | -0.01292 | 0.78065 | -0.00467 |
| -0.19997 | 1.34E-05 | -0.30797 | 1.02E-11 | 0.106645 | 0.02117 | 0.10441  | 0.02404 | 0.166348 |

|          |          |          |          |          |         |          |          |          |
|----------|----------|----------|----------|----------|---------|----------|----------|----------|
| 0.155898 | 0.00072  | 0.24061  | 1.42E-07 | 0.05847  | 0.20723 | 0.163982 | 0.00037  | 0.005343 |
| 0.024257 | 0.60106  | -0.08303 | 0.07305  | -0.02122 | 0.64732 | -0.07274 | 0.11645  | -0.0237  |
| 0.015526 | 0.7379   | -0.12013 | 0.00936  | -0.05343 | 0.24916 | -0.12578 | 0.0065   | -0.04888 |
| -0.00599 | 0.89725  | -0.00759 | 0.86998  | -0.00204 | 0.96495 | -0.06487 | 0.16162  | 0.075715 |
| -0.05213 | 0.26088  | -0.12076 | 0.00899  | 0.020284 | 0.66195 | -0.07021 | 0.12975  | 0.035048 |
| -0.08445 | 0.06824  | 0.026335 | 0.57025  | -0.00109 | 0.98134 | -0.00159 | 0.97264  | 0.150276 |
| -0.13135 | 0.00447  | -0.18905 | 3.93E-05 | 0.023571 | 0.61139 | 0.032343 | 0.48564  | 0.169262 |
| 0.033473 | 0.47053  | 0.233972 | 3.16E-07 | -0.01813 | 0.69601 | -0.05278 | 0.255    | 0.023252 |
| 0.077781 | 0.09317  | 0.129467 | 0.00508  | 0.005368 | 0.90789 | 0.041951 | 0.36571  | -0.02385 |
| -0.10633 | 0.02156  | 0.067336 | 0.14625  | -0.06337 | 0.17159 | -0.02777 | 0.54937  | -0.12383 |
| 0.228358 | 6.11E-07 | -0.06068 | 0.19054  | -0.02568 | 0.57982 | -0.06333 | 0.17184  | 0.010643 |
| -0.07078 | 0.12666  | -0.21073 | 4.36E-06 | 0.026297 | 0.57081 | 0.088274 | 0.05662  | 0.069623 |
| -0.01954 | 0.67362  | -0.14258 | 0.00201  | 0.036024 | 0.43737 | 0.010048 | 0.82854  | 0.261993 |
| 0.073701 | 0.1117   | 0.088884 | 0.05493  | -0.027   | 0.56061 | -0.03664 | 0.42961  | -0.09262 |
| 0.08203  | 0.07657  | 0.065503 | 0.15758  | -0.03675 | 0.42814 | -0.05197 | 0.26233  | 0.002397 |
| -0.04419 | 0.34061  | -0.23355 | 3.32E-07 | -0.00708 | 0.87873 | -0.01    | 0.82935  | -0.01816 |
| 0.131397 | 0.00445  | -0.02854 | 0.53834  | -0.03405 | 0.46287 | -0.09018 | 0.05146  | 0.024734 |
| 0.261643 | 9.51E-09 | -0.12268 | 0.00795  | -0.03487 | 0.45226 | -0.08314 | 0.07264  | 0.045619 |
| -0.10868 | 0.01881  | -0.21195 | 3.82E-06 | -0.00901 | 0.84595 | -0.09225 | 0.04632  | -0.02543 |
| 0.020126 | 0.66443  | -0.02547 | 0.583    | -0.02547 | 0.58296 | -0.13503 | 0.00346  | -0.0761  |
| 0.011326 | 0.80714  | -0.03241 | 0.48475  | -0.02576 | 0.57873 | -0.05676 | 0.22088  | 0.009933 |
| -0.10693 | 0.02082  | -0.1939  | 2.45E-05 | 0.071677 | 0.12191 | 0.11545  | 0.01254  | 0.115723 |
| -0.18656 | 4.98E-05 | -0.31032 | 6.97E-12 | -0.02726 | 0.55673 | -0.05434 | 0.24119  | -0.01744 |
| 0.041082 | 0.37573  | -0.11602 | 0.01211  | -0.0209  | 0.65231 | -0.1037  | 0.02503  | -0.01446 |
| 0.021269 | 0.64663  | 0.23122  | 4.37E-07 | 0.099785 | 0.03109 | 0.190199 | 3.52E-05 | 0.238725 |
| -0.05515 | 0.23427  | -0.11591 | 0.01219  | -0.03197 | 0.49073 | -0.1103  | 0.0171   | -0.02428 |
| -0.03522 | 0.4477   | -0.26966 | 3.19E-09 | -0.04451 | 0.33722 | -0.16783 | 0.00027  | -0.12361 |
| 0.080838 | 0.08097  | -0.01094 | 0.81363  | -0.00136 | 0.97663 | -0.07824 | 0.09127  | 0.054619 |
| -0.07118 | 0.12451  | -0.13632 | 0.00316  | -0.03385 | 0.4655  | -0.12359 | 0.0075   | -0.05497 |
| -0.14179 | 0.00213  | -0.36091 | 8.19E-16 | 0.012331 | 0.79042 | -0.05433 | 0.24127  | 0.044625 |
| 0.025678 | 0.57991  | -0.0823  | 0.07559  | -0.01185 | 0.79836 | -0.01989 | 0.6681   | 0.01047  |
| 0.150587 | 0.0011   | -0.17546 | 0.00014  | -0.06953 | 0.13352 | -0.23398 | 3.16E-07 | -0.01573 |
| 0.012752 | 0.78344  | -0.30229 | 2.53E-11 | -0.03556 | 0.4433  | -0.13602 | 0.00323  | -0.04108 |
| -0.07883 | 0.08883  | -0.27596 | 1.31E-09 | -0.00822 | 0.85946 | -0.0931  | 0.04435  | 0.005233 |
| -0.19185 | 3.00E-05 | -0.46327 | 3.20E-26 | 0.005022 | 0.9138  | -0.03562 | 0.44253  | -0.01579 |
| -0.09199 | 0.04694  | -0.09476 | 0.04066  | 0.007685 | 0.86846 | 0.073732 | 0.11155  | -0.10856 |
| 0.132698 | 0.00407  | -0.03872 | 0.40383  | 0.007926 | 0.86436 | 0.015207 | 0.74309  | -0.0438  |
| 0.064831 | 0.1619   | -0.19227 | 2.88E-05 | -0.06143 | 0.18512 | -0.19328 | 2.61E-05 | -0.10394 |
| -0.02867 | 0.53651  | -0.3024  | 2.49E-11 | -0.02006 | 0.66539 | -0.11267 | 0.01485  | 0.011988 |
| 0.095949 | 0.0382   | 0.004517 | 0.92245  | -0.01743 | 0.70719 | -0.12621 | 0.00631  | -0.03485 |
| -0.08307 | 0.07291  | -0.18269 | 7.16E-05 | -0.02106 | 0.64985 | -0.06657 | 0.15088  | -0.07719 |
| -0.04236 | 0.36108  | -0.1924  | 2.84E-05 | 0.12829  | 0.0055  | 0.050964 | 0.27172  | 0.186152 |
| 0.023784 | 0.60819  | -0.2597  | 1.23E-08 | -0.02819 | 0.54343 | 0.003037 | 0.94781  | -0.03659 |
| 0.18946  | 3.78E-05 | 0.430027 | 1.92E-22 | 0.062982 | 0.17422 | 0.166395 | 0.0003   | 0.09364  |
| -0.05808 | 0.21027  | -0.2301  | 4.99E-07 | -0.00392 | 0.93272 | -0.01469 | 0.75157  | -0.00405 |

|          |          |          |          |          |         |          |          |           |
|----------|----------|----------|----------|----------|---------|----------|----------|-----------|
| -0.15546 | 0.00075  | -0.30943 | 8.07E-12 | -0.01559 | 0.73689 | -0.02853 | 0.53853  | 0.016313  |
| 0.000532 | 0.99085  | -0.48271 | 1.25E-28 | -0.01208 | 0.79458 | -0.07929 | 0.08699  | -0.19206  |
| 0.073776 | 0.11134  | -0.02202 | 0.63499  | -0.0096  | 0.836   | -0.08135 | 0.07907  | 0.071711  |
| 0.211236 | 4.13E-06 | 0.019923 | 0.66761  | 0.050094 | 0.28    | -0.0634  | 0.17138  | 0.10475   |
| 0.365383 | 3.39E-16 | 0.309845 | 7.54E-12 | -0.02658 | 0.56663 | -0.06601 | 0.15441  | 0.074833  |
| -0.20194 | 1.09E-05 | -0.42942 | 2.24E-22 | 0.054117 | 0.24313 | 0.033157 | 0.47473  | 0.022481  |
| -0.14751 | 0.00139  | -0.37134 | 1.02E-16 | -0.04746 | 0.30607 | -0.17281 | 0.00017  | -0.0688   |
| 0.002026 | 0.96517  | -0.13922 | 0.00257  | -0.04677 | 0.3132  | -0.07538 | 0.10376  | -0.12717  |
| -0.04994 | 0.28144  | -0.09683 | 0.03646  | -0.00334 | 0.94266 | -0.05723 | 0.21706  | 0.020572  |
| -0.1028  | 0.02633  | -0.11699 | 0.0114   | -0.01637 | 0.72429 | -0.0313  | 0.49981  | 0.040007  |
| 0.016032 | 0.72969  | -0.10486 | 0.02344  | -0.01025 | 0.82511 | -0.05998 | 0.19569  | 0.094063  |
| 0.114618 | 0.0132   | 0.441527 | 1.06E-23 | 0.04266  | 0.35766 | 0.054503 | 0.23978  | -0.09473  |
| -0.18434 | 6.14E-05 | -0.27596 | 1.31E-09 | 0.033062 | 0.476   | 0.071675 | 0.12192  | 0.203464  |
| -0.26622 | 5.11E-09 | 0.044611 | 0.33608  | -0.01705 | 0.71324 | 0.022024 | 0.63498  | -0.08503  |
| -0.18708 | 4.74E-05 | -0.44476 | 4.57E-24 | -0.0215  | 0.643   | -0.06997 | 0.13107  | -0.02757  |
| 0.025636 | 0.58053  | -0.02849 | 0.53914  | -0.01756 | 0.70505 | -0.03719 | 0.42267  | -0.01052  |
| -0.17702 | 0.00012  | -0.29788 | 5.04E-11 | -0.04031 | 0.3848  | -0.1241  | 0.00725  | -0.05371  |
| 0.286259 | 2.94E-10 | 0.099808 | 0.03105  | -0.03    | 0.51781 | -0.12875 | 0.00533  | 0.042866  |
| 0.121731 | 0.00845  | -0.1698  | 0.00023  | 0.037081 | 0.42403 | -0.05533 | 0.23268  | 0.047469  |
| -0.0211  | 0.64932  | -0.13041 | 0.00476  | 0.043653 | 0.34657 | -0.00297 | 0.94905  | 0.129067  |
| -0.0965  | 0.03709  | -0.18632 | 5.10E-05 | 0.012589 | 0.78614 | -0.04125 | 0.37373  | 0.151339  |
| -0.13274 | 0.00406  | -0.18949 | 3.77E-05 | 0.049861 | 0.28225 | 0.111325 | 0.01609  | 0.175364  |
| 0.257473 | 1.66E-08 | 0.143188 | 0.00192  | 0.006027 | 0.89665 | -0.0399  | 0.38969  | -0.10861  |
| -0.06698 | 0.14843  | -0.18702 | 4.77E-05 | -0.02462 | 0.5957  | -0.14113 | 0.00224  | -0.03578  |
| -0.02107 | 0.64969  | -0.3505  | 6.05E-15 | -0.0164  | 0.72366 | -0.13362 | 0.00382  | -0.10899  |
| -0.25243 | 3.20E-08 | -0.36947 | 1.49E-16 | -0.01682 | 0.71688 | -0.07556 | 0.10293  | -7.38E-05 |
| -0.01466 | 0.75203  | -0.22686 | 7.27E-07 | 0.007831 | 0.86597 | -0.06022 | 0.19396  | 0.039117  |
| 0.015404 | 0.73988  | -0.36397 | 4.49E-16 | -0.01083 | 0.81546 | -0.11298 | 0.01457  | -0.03209  |
| -0.16563 | 0.00032  | -0.44006 | 1.54E-23 | -0.09482 | 0.04053 | -0.24769 | 5.86E-08 | -0.10821  |
| 0.122474 | 0.00806  | -0.0868  | 0.06088  | 0.01505  | 0.74565 | -0.11738 | 0.01113  | 0.122693  |
| 0.088204 | 0.05682  | -0.12232 | 0.00814  | 0.047673 | 0.30393 | -0.05124 | 0.26917  | 0.058048  |
| 0.038936 | 0.4012   | 0.073097 | 0.11468  | 0.003623 | 0.93776 | -0.04459 | 0.33632  | 0.093046  |
| -0.01544 | 0.73924  | -0.40049 | 2.03E-19 | -0.0331  | 0.47545 | -0.18258 | 7.24E-05 | -0.04985  |
| -0.08284 | 0.0737   | -0.16007 | 0.00052  | -0.00012 | 0.99792 | -0.12127 | 0.00871  | -0.03066  |
| -0.0386  | 0.40525  | -0.51016 | 2.62E-32 | -0.0628  | 0.17549 | -0.19934 | 1.43E-05 | -0.24649  |
| 0.188394 | 4.18E-05 | -0.09953 | 0.03152  | -0.01725 | 0.71005 | -0.18146 | 8.02E-05 | 0.079792  |
| 0.173624 | 0.00016  | 0.030043 | 0.51721  | 0.045202 | 0.32971 | -0.00551 | 0.90548  | 0.066126  |
| 0.04016  | 0.38655  | -0.17664 | 0.00012  | 0.007125 | 0.87796 | -0.10512 | 0.0231   | -0.02959  |
| -0.03265 | 0.48147  | -0.18164 | 7.89E-05 | -0.00422 | 0.92746 | -0.07399 | 0.11028  | -0.02791  |
| 0.060127 | 0.19461  | -0.15427 | 0.00082  | 0.017802 | 0.7012  | -0.05603 | 0.22688  | 0.100429  |
| 0.090453 | 0.05076  | 0.041262 | 0.37364  | -0.04781 | 0.3025  | -0.18335 | 6.73E-05 | -0.01117  |
| -0.04918 | 0.28891  | -0.14596 | 0.00156  | -0.04567 | 0.32473 | -0.04362 | 0.34691  | -0.23106  |
| -0.08948 | 0.05333  | -0.41241 | 1.33E-20 | -0.04081 | 0.37888 | -0.1926  | 2.79E-05 | -0.15869  |
| 0.103234 | 0.02569  | -0.11291 | 0.01464  | -0.06181 | 0.18242 | -0.1308  | 0.00464  | -0.20348  |
| -0.08061 | 0.08184  | 0.034847 | 0.4525   | -0.03306 | 0.47603 | 0.032591 | 0.48231  | 0.030744  |

|          |          |          |          |          |         |          |          |          |
|----------|----------|----------|----------|----------|---------|----------|----------|----------|
| 0.257743 | 1.60E-08 | 0.262696 | 8.25E-09 | -0.00356 | 0.93884 | 0.048482 | 0.29579  | 0.018493 |
| -0.02785 | 0.54822  | -0.11399 | 0.01371  | -0.01661 | 0.72028 | 0.006942 | 0.88107  | 0.015083 |
| 0.13498  | 0.00347  | 0.115598 | 0.01243  | -0.00245 | 0.95794 | -0.10051 | 0.02988  | 0.116373 |
| -0.15931 | 0.00055  | -0.14028 | 0.00238  | 0.093048 | 0.04446 | 0.225142 | 8.85E-07 | 0.3099   |
| -0.05809 | 0.21022  | -0.18656 | 4.98E-05 | -0.00571 | 0.90199 | -0.12415 | 0.00723  | 0.006182 |
| -0.03266 | 0.48138  | -0.06684 | 0.14923  | -0.03049 | 0.51096 | -0.03839 | 0.40779  | -0.03204 |
| 0.198794 | 1.51E-05 | 0.520396 | 9.11E-34 | 0.075235 | 0.10442 | 0.067902 | 0.14288  | 0.189665 |
| -0.23271 | 3.67E-07 | -0.20673 | 6.66E-06 | -0.01581 | 0.73336 | -0.01673 | 0.7184   | 0.045932 |
| -0.05125 | 0.26906  | -0.1984  | 1.57E-05 | 0.002584 | 0.95559 | -0.13021 | 0.00483  | -0.01667 |
| -0.23985 | 1.55E-07 | -0.41722 | 4.28E-21 | 0.023298 | 0.61553 | -0.00485 | 0.91683  | 0.094011 |
| -0.02231 | 0.63057  | -0.22819 | 6.23E-07 | 0.013031 | 0.77882 | 0.013204 | 0.77597  | -0.0864  |
| -0.03592 | 0.43874  | -0.24946 | 4.68E-08 | 0.02062  | 0.65671 | -0.10573 | 0.02231  | 0.082652 |
| -0.10743 | 0.02023  | -0.37725 | 3.05E-17 | -0.03427 | 0.46001 | -0.14965 | 0.00118  | -0.03193 |
| 0.328505 | 3.26E-13 | 0.098633 | 0.03309  | -0.06074 | 0.19013 | -0.12541 | 0.00666  | -0.02577 |
| -0.03079 | 0.50681  | -0.17722 | 0.00012  | -0.00368 | 0.93681 | -0.06331 | 0.17202  | 0.052114 |
| -0.09221 | 0.04642  | -0.41669 | 4.87E-21 | -0.04379 | 0.34501 | -0.19298 | 2.68E-05 | -0.07032 |
| -0.00622 | 0.89342  | -0.13139 | 0.00445  | 0.015321 | 0.74124 | -0.02786 | 0.54817  | 0.256821 |
| -0.10674 | 0.02105  | -0.51988 | 1.08E-33 | -0.01766 | 0.70353 | -0.09246 | 0.04582  | -0.10126 |
| -0.08158 | 0.07819  | -0.12588 | 0.00645  | 0.022335 | 0.63021 | -0.03027 | 0.51405  | 0.154671 |
| 0.120521 | 0.00913  | 0.448464 | 1.74E-24 | 0.026822 | 0.56314 | 0.09243  | 0.0459   | 0.048808 |
| 0.133851 | 0.00376  | -0.02926 | 0.52816  | -0.03856 | 0.40576 | -0.15005 | 0.00114  | -0.01848 |
| -0.05314 | 0.25173  | -0.11546 | 0.01254  | -0.02278 | 0.62338 | -0.06622 | 0.15305  | 0.067475 |
| -0.03601 | 0.4376   | -0.1569  | 0.00067  | 0.038012 | 0.41248 | -0.06489 | 0.16154  | 0.110798 |
| -0.09305 | 0.04446  | -0.06282 | 0.17536  | 0.073528 | 0.11255 | 0.058009 | 0.21083  | 0.194093 |
| 0.074497 | 0.10788  | 0.161657 | 0.00045  | 0.068199 | 0.14114 | 0.009446 | 0.83867  | 0.264478 |
| 0.082342 | 0.07546  | -0.08454 | 0.06796  | -0.02007 | 0.66525 | -0.12571 | 0.00653  | -0.02113 |
| -0.06455 | 0.1637   | -0.0047  | 0.91931  | 0.012724 | 0.7839  | -0.06225 | 0.17933  | 0.202491 |
| -0.10739 | 0.02028  | -0.23813 | 1.92E-07 | 0.04275  | 0.35664 | -0.02666 | 0.56555  | 0.076572 |
| -0.00969 | 0.83462  | -0.13633 | 0.00316  | -0.01102 | 0.81234 | -0.08992 | 0.05214  | -0.00803 |
| 0.023028 | 0.61964  | 0.170641 | 0.00021  | 0.037238 | 0.42207 | 0.140042 | 0.00242  | 0.000297 |
| 0.098123 | 0.03402  | -0.14162 | 0.00216  | -0.02787 | 0.54799 | -0.10971 | 0.0177   | -0.00613 |
| -0.05192 | 0.26281  | 0.037386 | 0.42022  | 0.092103 | 0.04667 | 0.223604 | 1.05E-06 | 0.205937 |
| 0.002837 | 0.95124  | 0.009021 | 0.84585  | -0.04096 | 0.37714 | -0.07158 | 0.12243  | 0.038293 |
| 0.069329 | 0.13466  | -0.17298 | 0.00017  | -0.05281 | 0.25476 | -0.15138 | 0.00103  | -0.00981 |
| -0.0792  | 0.08734  | -0.20254 | 1.03E-05 | -0.00533 | 0.90853 | -0.08174 | 0.07763  | -0.03587 |
| -0.13131 | 0.00448  | -0.14087 | 0.00228  | 0.043762 | 0.34536 | 0.09271  | 0.04524  | 0.005336 |
| -0.05295 | 0.25345  | -0.2481  | 5.56E-08 | 0.051393 | 0.2677  | -0.09355 | 0.04332  | 0.253086 |
| -0.16089 | 0.00048  | -0.19812 | 1.61E-05 | 0.073133 | 0.1145  | 0.319713 | 1.47E-12 | -0.10845 |
| 0.021806 | 0.63833  | -0.14313 | 0.00193  | 0.067382 | 0.14598 | -0.06706 | 0.1479   | 0.166863 |
| 0.199898 | 1.35E-05 | 0.353384 | 3.50E-15 | -0.02548 | 0.58284 | -0.05371 | 0.2467   | -0.05348 |
| 0.153861 | 0.00085  | 0.191039 | 3.24E-05 | 0.017035 | 0.71349 | -0.0697  | 0.13256  | 0.121822 |
| 0.187725 | 4.46E-05 | 0.160038 | 0.00052  | -0.00288 | 0.95055 | -0.1077  | 0.01991  | 0.019356 |
| -0.22178 | 1.30E-06 | -0.47742 | 5.83E-28 | 0.030844 | 0.5061  | 0.04413  | 0.34132  | -0.00784 |
| -0.27522 | 1.46E-09 | -0.34656 | 1.26E-14 | -0.01152 | 0.80385 | -0.04011 | 0.38717  | 0.039086 |
| 0.006694 | 0.88529  | -0.17483 | 0.00015  | -0.03344 | 0.47099 | -0.15086 | 0.00107  | -0.02557 |

|          |          |          |          |          |         |          |          |          |
|----------|----------|----------|----------|----------|---------|----------|----------|----------|
| 0.060996 | 0.18823  | 0.279774 | 7.60E-10 | -0.05451 | 0.23972 | -0.0256  | 0.58101  | -0.13012 |
| -0.01428 | 0.75828  | -0.16972 | 0.00023  | -0.05432 | 0.24137 | -0.14198 | 0.0021   | -0.02422 |
| 0.021409 | 0.64446  | -0.31858 | 1.78E-12 | -0.02529 | 0.58566 | -0.08376 | 0.07055  | -0.06557 |
| 0.048752 | 0.2931   | 0.307527 | 1.10E-11 | 0.028258 | 0.54242 | 0.069052 | 0.13622  | 0.169615 |
| -0.03789 | 0.41393  | -0.45587 | 2.42E-25 | -0.05444 | 0.24034 | -0.20269 | 1.01E-05 | -0.24908 |
| -0.13058 | 0.00471  | -0.18047 | 8.79E-05 | 0.027467 | 0.55379 | 0.012482 | 0.78791  | 0.048102 |
| -0.03886 | 0.40215  | -0.40166 | 1.56E-19 | 0.026218 | 0.57197 | -0.05086 | 0.27268  | -0.02085 |
| -0.06744 | 0.14563  | -0.1937  | 2.50E-05 | 0.015128 | 0.74437 | 0.019538 | 0.67367  | 0.010376 |
| 0.226729 | 7.38E-07 | 0.473455 | 1.83E-27 | 0.025582 | 0.58133 | 0.091211 | 0.04885  | 0.108917 |
| 0.271868 | 2.34E-09 | 0.060139 | 0.19452  | 0.003421 | 0.94122 | -0.05162 | 0.26558  | 0.019073 |
| 0.119867 | 0.00952  | 0.232341 | 3.83E-07 | 0.135525 | 0.00334 | 0.048588 | 0.29473  | 0.404403 |
| 0.167505 | 0.00028  | 0.169435 | 0.00023  | -0.01479 | 0.74995 | -0.10054 | 0.02982  | -0.04582 |
| 0.05984  | 0.19675  | 0.067404 | 0.14584  | -0.01292 | 0.78058 | -0.10562 | 0.02244  | -0.15936 |
| -0.17736 | 0.00012  | -0.40169 | 1.55E-19 | -0.03763 | 0.41722 | -0.10961 | 0.01781  | -0.11899 |
| 0.079559 | 0.08591  | 0.214038 | 3.05E-06 | -0.04618 | 0.31939 | -0.07201 | 0.12017  | 6.99E-05 |
| -0.09375 | 0.04288  | -0.21402 | 3.06E-06 | -0.04283 | 0.35575 | -0.13933 | 0.00255  | -0.03419 |
| 0.042438 | 0.36016  | 0.03745  | 0.41942  | 0.10383  | 0.02484 | 0.067071 | 0.14785  | 0.303256 |
| -0.14429 | 0.00177  | -0.1348  | 0.00352  | -0.01841 | 0.69157 | -0.04093 | 0.37756  | -0.09556 |
| 0.005102 | 0.91245  | -0.10345 | 0.02538  | 0.112953 | 0.0146  | 0.139097 | 0.00259  | 0.165161 |
| -0.00536 | 0.90797  | -0.03507 | 0.4496   | 0.111116 | 0.01629 | 0.203408 | 9.41E-06 | 0.172037 |
| -0.02178 | 0.63881  | -0.15871 | 0.00058  | 0.063459 | 0.17098 | 0.034206 | 0.46086  | 0.073874 |
| 0.059586 | 0.19867  | 0.032199 | 0.48759  | 0.044578 | 0.33643 | 0.058972 | 0.20334  | 0.142781 |
| -0.0308  | 0.50675  | -0.2262  | 7.84E-07 | 0.039129 | 0.39887 | -0.03073 | 0.50773  | 0.028183 |
| 0.005786 | 0.90077  | -0.15933 | 0.00055  | -0.00899 | 0.84634 | -0.08452 | 0.06801  | 0.015978 |
| -0.00123 | 0.97892  | -0.14585 | 0.00158  | -0.03081 | 0.50661 | -0.06332 | 0.17191  | -0.02067 |
| -0.13647 | 0.00313  | -0.17196 | 0.00019  | 0.000604 | 0.98961 | -0.01039 | 0.82275  | 0.022534 |
| 0.011347 | 0.8068   | -0.09496 | 0.04025  | 0.100582 | 0.02976 | 0.120058 | 0.00941  | 0.050565 |
| -0.06763 | 0.14448  | -0.14477 | 0.00171  | 0.028864 | 0.5338  | -0.00918 | 0.84321  | 0.11007  |
| -0.0698  | 0.13201  | -0.21783 | 2.02E-06 | -0.02304 | 0.61944 | -0.09643 | 0.03724  | -0.00362 |
| -0.04698 | 0.31102  | -0.20161 | 1.13E-05 | 0.004241 | 0.92718 | -0.07813 | 0.09172  | 0.000621 |
| 0.005916 | 0.89855  | -0.13566 | 0.00331  | -0.00532 | 0.90864 | -0.05509 | 0.23476  | 0.005003 |
| 0.037835 | 0.41466  | -0.13779 | 0.00285  | -0.01301 | 0.77924 | -0.06218 | 0.17976  | -0.01655 |
| 0.111472 | 0.01595  | -0.13241 | 0.00415  | -0.0007  | 0.98804 | -0.07374 | 0.11154  | -0.01993 |
| -0.01716 | 0.71147  | -0.06972 | 0.13246  | 0.000599 | 0.9897  | 0.042883 | 0.35515  | 0.092344 |
| 0.017157 | 0.71153  | -0.08104 | 0.08022  | 0.025924 | 0.57629 | 0.04507  | 0.33112  | 0.160055 |
| -0.03091 | 0.5052   | -0.09563 | 0.03886  | -0.01323 | 0.7756  | 0.063745 | 0.16906  | 0.051164 |
| 0.124    | 0.0073   | 0.125668 | 0.00654  | -0.01474 | 0.75065 | -0.06092 | 0.18879  | -0.07416 |
| -0.00347 | 0.94045  | -0.123   | 0.00779  | 0.014484 | 0.7549  | -0.04416 | 0.34097  | -0.00374 |
| 0.163303 | 0.0004   | -0.01945 | 0.67499  | 0.007948 | 0.86399 | -0.11972 | 0.00961  | 0.066757 |
| -0.10155 | 0.02821  | -0.27237 | 2.18E-09 | -0.03731 | 0.4212  | -0.12346 | 0.00756  | -0.07177 |
| -0.01914 | 0.67988  | -0.22509 | 8.91E-07 | -0.0025  | 0.9571  | -0.08131 | 0.07921  | -0.02212 |
| -0.04817 | 0.29892  | -0.13705 | 0.003    | 0.005016 | 0.9139  | -0.06645 | 0.15167  | 0.076089 |
| 0.151873 | 0.00099  | 0.013101 | 0.77767  | 0.117427 | 0.0111  | 0.086973 | 0.06038  | 0.283623 |
| -0.01945 | 0.67509  | -0.24781 | 5.77E-08 | 0.015095 | 0.74492 | -0.06657 | 0.15092  | 0.029034 |
| 0.199674 | 1.38E-05 | 0.021298 | 0.64618  | 0.06429  | 0.16543 | -0.02842 | 0.54008  | 0.16149  |

|          |          |          |          |          |         |          |          |          |
|----------|----------|----------|----------|----------|---------|----------|----------|----------|
| 0.317292 | 2.21E-12 | 0.136117 | 0.0032   | 0.036004 | 0.43762 | -0.04371 | 0.34599  | 0.125712 |
| 0.044245 | 0.34006  | 0.007303 | 0.87493  | 0.059074 | 0.20256 | 0.050667 | 0.27453  | 0.166466 |
| -0.09044 | 0.05079  | -0.16219 | 0.00043  | -0.08164 | 0.078   | -0.09254 | 0.04564  | -0.11256 |
| 0.100483 | 0.02992  | 0.240551 | 1.43E-07 | 0.026532 | 0.56738 | 0.084061 | 0.06954  | 0.056469 |
| 0.17158  | 0.00019  | -0.03019 | 0.51519  | -0.01848 | 0.69041 | -0.06615 | 0.15352  | -0.01494 |
| -0.22588 | 8.14E-07 | -0.07503 | 0.10538  | -0.00026 | 0.99548 | 0.003726 | 0.93599  | 0.144824 |
| -0.1065  | 0.02134  | -0.20291 | 9.91E-06 | -0.03725 | 0.42191 | -0.06142 | 0.18517  | 0.017125 |
| -0.38188 | 1.16E-17 | -0.44069 | 1.31E-23 | 0.015828 | 0.73299 | 0.008897 | 0.84794  | -0.00625 |
| -0.14081 | 0.00229  | -0.33068 | 2.23E-13 | 0.038928 | 0.4013  | -0.03343 | 0.47106  | 0.037745 |
| 0.024464 | 0.59796  | -0.28678 | 2.72E-10 | -0.02909 | 0.53057 | -0.12075 | 0.009    | -0.0056  |
| 0.090524 | 0.05058  | 0.235536 | 2.62E-07 | 0.028283 | 0.54206 | -0.07133 | 0.12373  | 0.230933 |
| -0.01768 | 0.70317  | -0.2288  | 5.81E-07 | -0.01428 | 0.75831 | -0.06824 | 0.14092  | 0.001795 |
| -0.04053 | 0.38218  | -0.01648 | 0.72239  | -0.00186 | 0.96809 | -0.03568 | 0.44174  | 0.053777 |
| -0.18737 | 4.61E-05 | -0.28066 | 6.69E-10 | 0.008596 | 0.85302 | -0.03018 | 0.51526  | -0.00097 |
| -0.00757 | 0.87045  | -0.18079 | 8.54E-05 | -0.0468  | 0.31293 | -0.14742 | 0.0014   | -0.03457 |
| -0.28601 | 3.05E-10 | -0.21692 | 2.23E-06 | -0.0761  | 0.1005  | -0.10233 | 0.02702  | -0.08533 |
| -0.0456  | 0.32545  | -0.13845 | 0.00271  | -0.00714 | 0.8777  | -0.06555 | 0.15727  | -0.03368 |
| -0.09019 | 0.05145  | -0.18235 | 7.39E-05 | -0.02462 | 0.59561 | -0.06195 | 0.18139  | -0.00874 |
| 0.014382 | 0.75658  | -0.18994 | 3.61E-05 | -0.06376 | 0.16893 | -0.24317 | 1.03E-07 | -0.10145 |
| -0.10521 | 0.02298  | 0.053231 | 0.25095  | 0.008447 | 0.85554 | 0.08557  | 0.06466  | 0.029705 |
| 0.131636 | 0.00438  | 0.337636 | 6.47E-14 | 0.028505 | 0.5389  | 0.122761 | 0.00791  | 0.108988 |
| -0.00569 | 0.90245  | 0.118081 | 0.01065  | 0.030485 | 0.51107 | 0.093697 | 0.04299  | 0.012267 |
| -0.02816 | 0.54383  | -0.15347 | 0.00088  | 0.005728 | 0.90175 | -0.09035 | 0.05102  | 0.049378 |
| -0.17687 | 0.00012  | -0.27309 | 1.97E-09 | -0.08793 | 0.05758 | -0.17499 | 0.00014  | -0.08568 |
| 0.109634 | 0.01779  | -0.04474 | 0.33466  | 0.036073 | 0.43674 | -0.1024  | 0.02691  | 0.203456 |
| -0.2786  | 9.01E-10 | 0.056136 | 0.22597  | 0.061286 | 0.18614 | 0.375509 | 4.37E-17 | -0.00976 |
| -0.20443 | 8.47E-06 | -0.16123 | 0.00047  | 0.115036 | 0.01286 | 0.247238 | 6.20E-08 | 0.293757 |
| 0.081062 | 0.08013  | -0.14534 | 0.00164  | -0.01101 | 0.81247 | -0.07066 | 0.12732  | 0.006686 |
| -0.05408 | 0.24342  | -0.23112 | 4.43E-07 | -0.00482 | 0.9172  | -0.03772 | 0.41614  | -0.07381 |
| -0.06631 | 0.15249  | -0.18712 | 4.72E-05 | -0.03964 | 0.39275 | -0.10821 | 0.01933  | -0.05649 |
| -0.05046 | 0.27649  | -0.18393 | 6.38E-05 | 0.026409 | 0.56917 | -0.03656 | 0.43063  | 0.090958 |
| -0.08296 | 0.07329  | -0.23324 | 3.44E-07 | -0.03335 | 0.4721  | -0.05604 | 0.22678  | -0.00368 |
| -0.04866 | 0.29402  | -0.09826 | 0.03376  | 0.133996 | 0.00372 | 0.106672 | 0.02113  | 0.363455 |
| -0.06046 | 0.19216  | -0.10196 | 0.02758  | -0.006   | 0.89708 | 0.025268 | 0.58598  | 0.079173 |
| 0.20793  | 5.87E-06 | -0.16859 | 0.00025  | -0.0216  | 0.64158 | -0.148   | 0.00134  | -0.02776 |
| -0.06154 | 0.18431  | 0.070739 | 0.12689  | 0.012842 | 0.78194 | 0.211136 | 4.18E-06 | -0.07068 |
| 0.109285 | 0.01816  | -0.00057 | 0.99015  | 0.08301  | 0.07311 | -0.02373 | 0.60898  | 0.296278 |
| -0.0085  | 0.85458  | 0.006262 | 0.89265  | 0.00206  | 0.96459 | -0.01662 | 0.72011  | 0.109257 |
| -0.05741 | 0.21562  | -0.15328 | 0.00089  | -0.03901 | 0.40028 | -0.0701  | 0.13039  | -0.04833 |
| 0.101352 | 0.02852  | -0.05747 | 0.21512  | 0.009458 | 0.83847 | -0.08751 | 0.05882  | 0.064839 |
| 0.401575 | 1.59E-19 | 0.069654 | 0.13283  | -0.01704 | 0.71335 | -0.14478 | 0.00171  | 0.040865 |
| -0.07485 | 0.10622  | 0.0694   | 0.13425  | 0.031514 | 0.4969  | 0.199828 | 1.36E-05 | -0.06309 |
| 0.075026 | 0.10539  | -0.21331 | 3.31E-06 | -0.02663 | 0.56591 | -0.13092 | 0.0046   | -0.02365 |
| 0.284635 | 3.74E-10 | 0.235801 | 2.54E-07 | -0.04786 | 0.30203 | -0.11916 | 0.00996  | -0.11657 |
| -0.02532 | 0.5852   | -0.21685 | 2.24E-06 | -0.02953 | 0.52434 | -0.09618 | 0.03773  | 0.034906 |



|          |          |          |          |          |         |          |          |          |
|----------|----------|----------|----------|----------|---------|----------|----------|----------|
| -0.02508 | 0.58882  | -0.10697 | 0.02077  | 0.146638 | 0.00149 | 0.218197 | 1.93E-06 | 0.316996 |
| -0.06329 | 0.17209  | -0.24046 | 1.44E-07 | -0.01695 | 0.71492 | -0.12118 | 0.00876  | 0.01215  |
| -0.09341 | 0.04362  | -0.15624 | 0.0007   | 0.003938 | 0.93237 | 0.224349 | 9.69E-07 | -0.08134 |
| 0.02676  | 0.56405  | -0.09966 | 0.0313   | -0.02941 | 0.5261  | -0.11394 | 0.01376  | 0.006196 |
| -0.01705 | 0.71319  | -0.05058 | 0.27535  | -0.05627 | 0.2249  | -0.1385  | 0.0027   | -0.16644 |
| 0.062993 | 0.17415  | -0.05748 | 0.215    | -0.0132  | 0.77599 | -0.1592  | 0.00055  | -0.03086 |
| -0.04645 | 0.3165   | -0.11463 | 0.01319  | -0.03274 | 0.48028 | -0.06357 | 0.17026  | -0.00395 |
| -0.19884 | 1.50E-05 | 0.114531 | 0.01327  | -0.00208 | 0.96431 | 0.066442 | 0.1517   | 0.020088 |
| -0.08257 | 0.07466  | -0.23999 | 1.53E-07 | -0.02262 | 0.62588 | -0.11532 | 0.01264  | -0.04717 |
| 0.098298 | 0.0337   | -0.2037  | 9.13E-06 | -0.0253  | 0.58553 | -0.09057 | 0.05046  | -0.0086  |
| -0.06033 | 0.19315  | -0.02908 | 0.53074  | 0.040354 | 0.38426 | 0.037667 | 0.41674  | 0.182762 |
| 0.278484 | 9.15E-10 | -0.07579 | 0.10188  | -0.01535 | 0.7408  | -0.07978 | 0.08505  | -0.04217 |
| -0.06229 | 0.17901  | -0.09815 | 0.03397  | 0.041474 | 0.37119 | -0.01653 | 0.7217   | 0.109135 |
| 0.06975  | 0.1323   | -0.04621 | 0.31905  | -0.00788 | 0.86511 | 0.028269 | 0.54227  | -0.18708 |
| -0.05408 | 0.24344  | -0.41292 | 1.18E-20 | -0.02839 | 0.5406  | -0.15266 | 0.00093  | -0.08974 |
| -0.11063 | 0.01678  | -0.23886 | 1.75E-07 | 0.016737 | 0.7183  | 0.027887 | 0.54774  | 0.129487 |
| 0.003454 | 0.94066  | 0.145853 | 0.00158  | 0.028458 | 0.53957 | 0.059316 | 0.20071  | 0.184906 |
| -0.1064  | 0.02146  | -0.06346 | 0.17099  | -0.03182 | 0.49271 | -0.02226 | 0.63141  | -0.14494 |
| 0.095879 | 0.03834  | -0.15438 | 0.00082  | -0.05    | 0.28094 | -0.18755 | 4.54E-05 | -0.11122 |
| -0.02197 | 0.63586  | -0.17528 | 0.00014  | -0.04214 | 0.36355 | -0.15037 | 0.00112  | -0.0321  |
| -0.00015 | 0.99743  | 0.056839 | 0.2202   | 0.02185  | 0.63766 | 0.213465 | 3.25E-06 | -0.00353 |
| -0.1401  | 0.00241  | -0.16802 | 0.00027  | 0.002735 | 0.953   | 0.043205 | 0.35154  | 0.127764 |
| 0.006505 | 0.8885   | -0.16275 | 0.00041  | -0.03608 | 0.43668 | -0.12255 | 0.00802  | 0.000665 |
| -0.11687 | 0.01149  | -0.28605 | 3.03E-10 | -0.00178 | 0.96942 | -0.10701 | 0.02073  | 0.063362 |
| 0.046989 | 0.31093  | 0.140958 | 0.00226  | -0.01467 | 0.75178 | -0.03383 | 0.46582  | 0.111917 |
| -0.24533 | 7.88E-08 | -0.31899 | 1.66E-12 | 0.009369 | 0.83998 | -0.01989 | 0.66816  | 0.085003 |
| 0.016754 | 0.71801  | -0.11358 | 0.01406  | -0.0469  | 0.31186 | -0.17944 | 9.66E-05 | -0.14516 |
| 0.04331  | 0.35038  | -0.04869 | 0.29368  | -0.04132 | 0.373   | -0.11578 | 0.01229  | -0.00759 |
| -0.17531 | 0.00014  | -0.26776 | 4.14E-09 | -0.07829 | 0.09103 | -0.18017 | 9.04E-05 | -0.09432 |
| -0.20513 | 7.87E-06 | -0.23881 | 1.76E-07 | -0.05557 | 0.23072 | -0.13022 | 0.00482  | -0.12226 |
| -0.36603 | 2.98E-16 | -0.34571 | 1.48E-14 | 0.010598 | 0.81932 | 0.061091 | 0.18754  | 0.048839 |
| -0.02401 | 0.60473  | -0.19973 | 1.37E-05 | -0.00079 | 0.9865  | -0.08054 | 0.08208  | 0.02054  |
| 0.150247 | 0.00113  | 0.223087 | 1.12E-06 | 0.03383  | 0.46581 | 0.07436  | 0.10853  | 0.154532 |
| 0.006314 | 0.89175  | -0.41489 | 7.44E-21 | -0.06461 | 0.1633  | -0.15125 | 0.00104  | -0.15121 |
| 0.1268   | 0.00607  | -0.16654 | 0.0003   | -0.00401 | 0.9312  | -0.17862 | 0.0001   | -0.0102  |
| -0.12706 | 0.00597  | -0.18747 | 4.57E-05 | -0.03301 | 0.47676 | -0.10985 | 0.01756  | -0.00535 |
| -0.04158 | 0.36998  | -0.13234 | 0.00417  | -0.02581 | 0.57797 | -0.02372 | 0.60908  | 0.049871 |
| -0.13874 | 0.00266  | -0.22317 | 1.11E-06 | 0.039459 | 0.3949  | 0.014121 | 0.76085  | 0.162742 |
| 0.181219 | 8.20E-05 | -0.05913 | 0.20214  | 0.019387 | 0.67605 | -0.02075 | 0.65469  | 0.150138 |
| -0.0625  | 0.17758  | -0.42454 | 7.39E-22 | -0.06516 | 0.15976 | -0.10946 | 0.01797  | -0.24296 |
| -0.00767 | 0.86867  | -0.30684 | 1.22E-11 | -0.02374 | 0.60891 | -0.06101 | 0.1881   | -0.10466 |
| -0.08927 | 0.05389  | -0.10012 | 0.03052  | 0.068311 | 0.14049 | 0.070856 | 0.12626  | 0.214441 |
| 0.297386 | 5.44E-11 | 0.275631 | 1.38E-09 | -0.05574 | 0.22923 | -0.07489 | 0.10604  | -0.28164 |
| -0.2488  | 5.09E-08 | -0.29556 | 7.22E-11 | -0.01123 | 0.80878 | 0.041293 | 0.37328  | 0.003837 |
| 0.175749 | 0.00013  | 0.196252 | 1.94E-05 | 0.025602 | 0.58103 | 0.09686  | 0.0364   | 0.066333 |

|          |          |          |          |          |         |          |          |          |
|----------|----------|----------|----------|----------|---------|----------|----------|----------|
| -0.05924 | 0.20132  | -0.21958 | 1.66E-06 | 0.014268 | 0.75844 | -0.12665 | 0.00613  | 0.095725 |
| -0.09008 | 0.05174  | -0.17012 | 0.00022  | -0.00464 | 0.92034 | -0.06712 | 0.14754  | 0.068569 |
| -0.04915 | 0.28917  | -0.06411 | 0.1666   | -0.03459 | 0.4559  | -0.08707 | 0.06009  | -0.01064 |
| 0.156186 | 0.00071  | 0.27325  | 1.93E-09 | 0.007496 | 0.87166 | -0.1154  | 0.01258  | -0.01832 |
| -0.12286 | 0.00786  | -0.17247 | 0.00018  | 0.048874 | 0.29189 | 0.097545 | 0.03509  | 0.059487 |
| -0.18736 | 4.62E-05 | -0.45837 | 1.23E-25 | -0.01874 | 0.68621 | -0.06898 | 0.13663  | 0.05383  |
| 0.252535 | 3.15E-08 | -0.01291 | 0.78084  | -0.05551 | 0.23122 | -0.11991 | 0.00949  | -0.01498 |
| -0.15492 | 0.00078  | -0.19985 | 1.35E-05 | -0.01243 | 0.7887  | -0.05723 | 0.21707  | 0.043825 |
| 0.022085 | 0.63405  | -0.31157 | 5.69E-12 | -0.00769 | 0.86835 | -0.0479  | 0.30165  | 0.005493 |
| 0.209389 | 5.03E-06 | 0.383598 | 8.07E-18 | -0.02914 | 0.52986 | -0.04547 | 0.3269   | -0.10607 |
| -0.08344 | 0.07164  | -0.21037 | 4.53E-06 | 0.017614 | 0.70421 | -0.00279 | 0.95205  | 0.015456 |
| -0.02568 | 0.57986  | 0.109389 | 0.01805  | -0.00172 | 0.97048 | -0.01783 | 0.70072  | 0.005533 |
| 0.106674 | 0.02113  | 0.32691  | 4.30E-13 | 0.040071 | 0.38761 | 0.084211 | 0.06904  | 0.152838 |
| 0.244083 | 9.22E-08 | 0.193627 | 2.52E-05 | -0.01094 | 0.81359 | -0.04002 | 0.38816  | 0.119392 |
| -0.05655 | 0.22259  | -0.28248 | 5.13E-10 | -0.00571 | 0.90202 | -0.10921 | 0.01824  | -0.0325  |
| 0.141735 | 0.00214  | -0.06863 | 0.13863  | -0.03322 | 0.47395 | -0.11619 | 0.01198  | -0.02557 |
| 0.20293  | 9.89E-06 | -0.11373 | 0.01392  | -0.03157 | 0.49619 | -0.14699 | 0.00145  | 0.00392  |
| -0.02119 | 0.6478   | 0.182252 | 7.46E-05 | 0.072352 | 0.11843 | 0.167753 | 0.00027  | 0.317639 |
| -0.13452 | 0.00358  | -0.05707 | 0.21832  | 0.113351 | 0.01425 | 0.208153 | 5.73E-06 | 0.442134 |
| -0.13132 | 0.00447  | -0.33536 | 9.74E-14 | -0.02241 | 0.62908 | -0.06261 | 0.17678  | 0.079041 |
| 0.155276 | 0.00076  | -0.15197 | 0.00099  | -0.04176 | 0.36785 | -0.12113 | 0.00879  | -0.08926 |
| -0.14837 | 0.0013   | -0.38904 | 2.52E-18 | -0.06481 | 0.16205 | -0.13328 | 0.00391  | -0.14077 |
| 0.047808 | 0.30256  | -0.25812 | 1.52E-08 | -0.03624 | 0.43463 | -0.14022 | 0.00239  | -0.02598 |
| 0.259661 | 1.24E-08 | 0.286054 | 3.03E-10 | 0.138099 | 0.00278 | 0.132117 | 0.00424  | 0.413703 |
| 0.272131 | 2.26E-09 | 0.163546 | 0.00039  | 0.022557 | 0.62682 | -0.03775 | 0.41571  | 0.107982 |
| -0.11261 | 0.0149   | -0.11567 | 0.01237  | -0.01439 | 0.75648 | -0.05319 | 0.2513   | -0.02095 |
| 0.063608 | 0.16998  | -0.07582 | 0.10176  | 0.052435 | 0.25811 | -0.04308 | 0.3529   | 0.084422 |
| -0.07295 | 0.11541  | -0.14479 | 0.00171  | 0.032384 | 0.48509 | -0.03558 | 0.44299  | 0.277902 |
| 0.172805 | 0.00018  | 0.006247 | 0.89291  | -0.05429 | 0.2416  | -0.24112 | 1.33E-07 | -0.11329 |
| 0.258655 | 1.42E-08 | 0.119842 | 0.00954  | 0.044321 | 0.33923 | 0.071372 | 0.12352  | 0.11596  |
| -0.14155 | 0.00217  | -0.14999 | 0.00115  | -0.04756 | 0.3051  | -0.11207 | 0.01539  | -0.04072 |
| 0.055229 | 0.23357  | -0.1234  | 0.00759  | 0.005769 | 0.90105 | -0.07093 | 0.12585  | -0.00043 |
| -0.04329 | 0.35055  | -0.15245 | 0.00095  | -0.03806 | 0.41191 | -0.11093 | 0.01648  | -0.03414 |
| -0.08314 | 0.07267  | -0.2775  | 1.05E-09 | -0.04296 | 0.35427 | -0.08306 | 0.07295  | 0.00607  |
| -0.02229 | 0.63097  | -0.20451 | 8.40E-06 | 0.030818 | 0.50647 | -0.02877 | 0.53518  | 0.078912 |
| 0.051586 | 0.26591  | 0.007463 | 0.87221  | -0.00223 | 0.96159 | 0.058786 | 0.20477  | 0.118015 |
| 0.091072 | 0.0492   | -0.0986  | 0.03315  | 0.010748 | 0.81681 | -0.03276 | 0.48     | 0.115999 |
| 0.09556  | 0.03899  | 0.235284 | 2.70E-07 | 0.005119 | 0.91215 | -0.00011 | 0.99817  | 0.004444 |
| -0.01887 | 0.68415  | -0.10403 | 0.02457  | -0.01145 | 0.80513 | -0.05731 | 0.21641  | 0.071369 |
| 0.158216 | 0.0006   | -0.08101 | 0.08031  | -0.05029 | 0.27815 | -0.15628 | 0.0007   | 0.041122 |
| -0.03209 | 0.48906  | -0.1733  | 0.00017  | 0.074939 | 0.1058  | -0.01321 | 0.77592  | 0.29317  |
| 0.107584 | 0.02005  | 0.164187 | 0.00037  | -0.0296  | 0.52339 | -0.11389 | 0.01379  | -0.05826 |
| -0.15471 | 0.00079  | -0.24968 | 4.55E-08 | -0.01676 | 0.71789 | -0.00112 | 0.98074  | 0.000721 |
| -0.06134 | 0.18573  | -0.31717 | 2.26E-12 | -0.02263 | 0.62567 | -0.13951 | 0.00251  | 0.003013 |
| -0.10142 | 0.02842  | 0.293819 | 9.42E-11 | 0.037816 | 0.41489 | 0.087241 | 0.05959  | 0.120513 |

|           |          |          |          |          |         |          |          |          |
|-----------|----------|----------|----------|----------|---------|----------|----------|----------|
| -0.05981  | 0.19698  | -0.26885 | 3.56E-09 | -0.02597 | 0.57561 | -0.1193  | 0.00987  | -0.0742  |
| 0.108506  | 0.019    | -0.08324 | 0.07233  | -0.04116 | 0.37485 | -0.04361 | 0.34704  | -0.20787 |
| -0.18622  | 5.14E-05 | -0.26235 | 8.65E-09 | -0.03738 | 0.42034 | -0.07601 | 0.10088  | -0.089   |
| 0.259221  | 1.31E-08 | 0.385049 | 5.93E-18 | -0.02657 | 0.56688 | -0.06929 | 0.13489  | -0.08978 |
| 0.257969  | 1.55E-08 | 0.369664 | 1.44E-16 | -0.06577 | 0.1559  | -0.12023 | 0.00931  | -0.21466 |
| -0.03638  | 0.43279  | -0.10983 | 0.01758  | -0.01283 | 0.78221 | -0.02901 | 0.53176  | 0.026384 |
| -0.09491  | 0.04036  | -0.27173 | 2.38E-09 | 0.044911 | 0.33283 | 0.008268 | 0.85857  | 0.068593 |
| -0.01728  | 0.70956  | -0.08488 | 0.06686  | -0.00389 | 0.93321 | -0.0311  | 0.50264  | 0.039032 |
| -0.0953   | 0.03954  | -0.23278 | 3.64E-07 | -0.0267  | 0.56485 | -0.16734 | 0.00028  | -0.07087 |
| 0.0289    | 0.53329  | -0.17257 | 0.00018  | -0.02322 | 0.61669 | -0.15763 | 0.00063  | -0.02365 |
| 0.070767  | 0.12673  | -0.02971 | 0.52185  | -0.0055  | 0.90558 | -0.09976 | 0.03113  | 0.027099 |
| -0.05548  | 0.23145  | -0.30005 | 3.60E-11 | -0.01419 | 0.75979 | -0.12869 | 0.00535  | 0.044168 |
| 0.092383  | 0.04601  | -0.28237 | 5.21E-10 | -0.0123  | 0.79092 | -0.13454 | 0.00358  | 0.00898  |
| 0.084815  | 0.06706  | 0.017169 | 0.71134  | 0.012951 | 0.78014 | -0.06634 | 0.15235  | 0.046149 |
| 0.116768  | 0.01156  | -0.02342 | 0.61371  | 0.037602 | 0.41754 | -0.03068 | 0.50842  | 0.132033 |
| -0.15439  | 0.00082  | -0.24756 | 5.95E-08 | 0.001271 | 0.97815 | -0.07128 | 0.124    | 0.041648 |
| 0.133441  | 0.00387  | -0.18509 | 5.72E-05 | -0.02007 | 0.66523 | -0.11867 | 0.01027  | 0.052305 |
| -0.0687   | 0.13826  | -0.22556 | 8.44E-07 | -0.0233  | 0.61549 | -0.09907 | 0.03232  | -0.02029 |
| -0.04629  | 0.31819  | -0.10817 | 0.01938  | -0.03516 | 0.44843 | -0.10897 | 0.01849  | -0.02801 |
| -0.01567  | 0.7356   | 0.026343 | 0.57014  | 0.023903 | 0.60639 | 0.052282 | 0.2595   | 0.087263 |
| -0.10486  | 0.02344  | 0.034409 | 0.4582   | 0.098797 | 0.0328  | 0.052773 | 0.25505  | 0.204806 |
| -0.00357  | 0.9387   | -0.04998 | 0.28105  | -0.01585 | 0.73261 | -0.07247 | 0.11785  | -0.06497 |
| -0.02534  | 0.58489  | -0.14077 | 0.00229  | -0.02736 | 0.5553  | -0.10683 | 0.02094  | -0.00061 |
| 0.207508  | 6.14E-06 | 0.01883  | 0.68484  | 0.055533 | 0.231   | -0.08123 | 0.07951  | 0.142631 |
| -0.07092  | 0.12592  | -0.26132 | 9.93E-09 | 0.060316 | 0.19321 | 0.046538 | 0.3156   | 0.186145 |
| -0.12134  | 0.00867  | -0.20982 | 4.80E-06 | 0.025808 | 0.57799 | 0.041721 | 0.36835  | 0.093126 |
| -0.12866  | 0.00536  | -0.21722 | 2.15E-06 | -0.03389 | 0.46506 | -0.11633 | 0.01188  | -0.04373 |
| 0.332001  | 1.77E-13 | 0.090764 | 0.04997  | 0.024418 | 0.59866 | -0.03833 | 0.40859  | 0.201321 |
| 0.516962  | 2.85E-33 | 0.258246 | 1.50E-08 | -0.03746 | 0.41933 | -0.19469 | 2.27E-05 | -0.04323 |
| 0.336331  | 8.18E-14 | 0.456343 | 2.12E-25 | -0.01328 | 0.77466 | 0.029092 | 0.53057  | -0.22189 |
| 0.078425  | 0.09049  | -0.17897 | 0.0001   | -0.00464 | 0.92026 | -0.1126  | 0.01491  | -0.01525 |
| -0.08991  | 0.05218  | -0.19062 | 3.38E-05 | -0.07399 | 0.11028 | -0.16259 | 0.00042  | -0.07096 |
| -0.11139  | 0.01603  | -0.09276 | 0.04512  | -0.05926 | 0.20114 | -0.12881 | 0.00531  | -0.10662 |
| 0.002581  | 0.95563  | -0.1636  | 0.00039  | 0.102309 | 0.02705 | 0.051115 | 0.27031  | 0.353311 |
| 0.013596  | 0.76949  | -0.30516 | 1.60E-11 | 0.014345 | 0.75718 | -0.08685 | 0.06074  | 0.018135 |
| -0.11558  | 0.01244  | -0.33228 | 1.68E-13 | -0.01741 | 0.70751 | -0.12635 | 0.00625  | 0.017585 |
| 0.318424  | 1.83E-12 | 0.012561 | 0.7866   | 0.007757 | 0.86723 | -0.1235  | 0.00754  | 0.010862 |
| 0.065012  | 0.16073  | -0.21389 | 3.10E-06 | -0.01836 | 0.69236 | -0.11513 | 0.01279  | 0.004269 |
| -0.06824  | 0.1409   | 0.010801 | 0.81592  | -0.07597 | 0.10107 | -0.03674 | 0.42834  | -0.213   |
| -8.82E-05 | 0.99848  | -0.22334 | 1.09E-06 | -0.03408 | 0.46248 | -0.09312 | 0.0443   | -0.02487 |
| 0.025297  | 0.58556  | -0.1073  | 0.02038  | -0.04059 | 0.38154 | -0.11629 | 0.01191  | -0.05254 |
| -0.0663   | 0.15255  | -0.1528  | 0.00092  | 0.006923 | 0.88138 | -0.08941 | 0.05349  | 0.077304 |
| 0.183051  | 6.93E-05 | -0.21549 | 2.61E-06 | -0.01283 | 0.78219 | -0.07557 | 0.10289  | 0.066635 |
| 0.219443  | 1.68E-06 | 0.327683 | 3.76E-13 | 0.090068 | 0.05176 | 0.076208 | 0.1      | 0.366472 |
| 0.006697  | 0.88523  | -0.18498 | 5.78E-05 | -0.06389 | 0.16809 | -0.15007 | 0.00114  | -0.08814 |

|          |          |          |          |          |         |          |          |          |
|----------|----------|----------|----------|----------|---------|----------|----------|----------|
| 0.032947 | 0.47753  | -0.23329 | 3.43E-07 | -0.033   | 0.47688 | -0.16312 | 0.0004   | -0.05468 |
| -0.16199 | 0.00044  | -0.20123 | 1.18E-05 | 0.039115 | 0.39904 | -0.0387  | 0.40409  | 0.098015 |
| -0.08664 | 0.06136  | -0.23367 | 3.27E-07 | 0.091102 | 0.04912 | 0.054496 | 0.23984  | 0.124169 |
| -0.0816  | 0.07815  | -0.46557 | 1.69E-26 | 0.014622 | 0.75265 | -0.11219 | 0.01529  | -0.04009 |
| 0.004596 | 0.9211   | 0.10731  | 0.02037  | 0.051059 | 0.27083 | 0.070428 | 0.12857  | 0.114988 |
| -0.22212 | 1.25E-06 | -0.16809 | 0.00026  | -0.02008 | 0.66511 | 0.077899 | 0.09267  | 0.063716 |
| 0.180166 | 9.04E-05 | 0.238366 | 1.86E-07 | 0.086886 | 0.06064 | 0.421477 | 1.55E-21 | -0.02964 |
| 0.2907   | 1.51E-10 | 0.154014 | 0.00084  | 0.019236 | 0.67842 | 0.005616 | 0.90367  | -0.09131 |
| 0.039314 | 0.39664  | -0.34545 | 1.55E-14 | -0.03661 | 0.42991 | -0.14465 | 0.00172  | -0.09704 |
| -0.09869 | 0.03299  | -0.19185 | 3.00E-05 | 0.004667 | 0.91988 | -0.10144 | 0.02838  | 0.084422 |
| -0.29289 | 1.09E-10 | -0.50101 | 4.80E-31 | 0.029623 | 0.52309 | 0.027515 | 0.5531   | -0.00064 |
| 0.152645 | 0.00094  | 0.03636  | 0.4331   | -0.05914 | 0.20209 | -0.04595 | 0.32176  | -0.23641 |
| 0.127575 | 0.00577  | 0.16309  | 0.0004   | -0.06367 | 0.16954 | -0.11655 | 0.01172  | -0.01502 |
| -0.201   | 1.20E-05 | -0.39014 | 1.99E-18 | -0.03467 | 0.45482 | -0.10133 | 0.02856  | -0.07575 |
| -0.14951 | 0.00119  | -0.33561 | 9.31E-14 | 0.000938 | 0.98386 | -0.03078 | 0.50705  | 0.013607 |
| 0.116109 | 0.01204  | -0.01855 | 0.68935  | -0.00493 | 0.91538 | -0.09708 | 0.03597  | 0.001981 |
| 0.154665 | 0.0008   | -0.07181 | 0.12123  | -0.0458  | 0.32333 | -0.14652 | 0.0015   | -0.13816 |
| -0.09853 | 0.03328  | -0.26505 | 6.00E-09 | -0.04065 | 0.38082 | -0.12619 | 0.00632  | -0.07538 |
| -0.07097 | 0.12566  | -0.09914 | 0.0322   | -0.03188 | 0.49194 | -0.06284 | 0.17518  | -0.0115  |
| -0.0006  | 0.98972  | -0.1498  | 0.00117  | -0.05186 | 0.26334 | -0.10066 | 0.02963  | -0.02779 |
| -0.01956 | 0.67332  | -0.06881 | 0.13763  | -0.04943 | 0.28641 | -0.08029 | 0.08304  | -0.05964 |
| -0.04994 | 0.28147  | -0.1158  | 0.01227  | -0.02712 | 0.55885 | -0.06612 | 0.1537   | 0.028286 |
| -0.0638  | 0.16869  | 0.021794 | 0.63853  | -0.00022 | 0.99614 | -0.02972 | 0.52171  | -0.11223 |
| -0.06079 | 0.1897   | -0.18397 | 6.35E-05 | -0.03139 | 0.49861 | -0.02608 | 0.57398  | 0.001003 |
| 0.221339 | 1.36E-06 | 0.511347 | 1.78E-32 | 0.005861 | 0.89948 | 0.125923 | 0.00643  | -0.06294 |
| 0.140238 | 0.00239  | 0.07745  | 0.09458  | -0.03555 | 0.44341 | -0.03246 | 0.48409  | -0.03759 |
| 0.08158  | 0.07821  | -0.37076 | 1.15E-16 | -0.03185 | 0.49236 | -0.13695 | 0.00302  | -0.08916 |
| 0.094171 | 0.04194  | -0.12031 | 0.00925  | -0.03637 | 0.433   | -0.13198 | 0.00428  | -0.05266 |
| -0.17346 | 0.00017  | -0.33612 | 8.50E-14 | -0.01512 | 0.74446 | -0.09901 | 0.03242  | -0.06452 |
| -0.06566 | 0.15656  | -0.00024 | 0.99581  | 0.033453 | 0.47079 | 0.173832 | 0.00016  | 0.076575 |
| -0.01954 | 0.6737   | 0.111808 | 0.01564  | -0.04439 | 0.33852 | 0.004132 | 0.92904  | -0.08738 |
| 0.24106  | 1.34E-07 | 0.166858 | 0.00029  | -0.05668 | 0.22153 | -0.20126 | 1.17E-05 | -0.03646 |
| 0.039109 | 0.39911  | -0.08636 | 0.06222  | -0.00436 | 0.92516 | -0.13173 | 0.00435  | 0.036331 |
| -0.07887 | 0.08868  | -0.22461 | 9.41E-07 | -0.00486 | 0.91658 | -0.13662 | 0.00309  | 0.006733 |
| -0.04239 | 0.36069  | -0.08687 | 0.06069  | -0.00771 | 0.86794 | -0.106   | 0.02196  | -0.05567 |
| 0.072762 | 0.11635  | -0.16973 | 0.00023  | 0.001155 | 0.98014 | -0.08707 | 0.0601   | -0.00397 |
| 0.110753 | 0.01665  | 0.34884  | 8.26E-15 | 0.080414 | 0.08258 | 0.288962 | 1.97E-10 | 0.052589 |
| -0.02355 | 0.61172  | -0.0192  | 0.67899  | 0.070359 | 0.12894 | 0.032205 | 0.48751  | 0.218261 |
| 0.050515 | 0.27597  | 0.132154 | 0.00423  | 0.01944  | 0.6752  | 0.044809 | 0.33394  | -0.0103  |
| -0.21889 | 1.79E-06 | -0.40625 | 5.52E-20 | 0.005513 | 0.90542 | -0.0695  | 0.13367  | -0.00344 |
| -0.02768 | 0.55074  | -0.30163 | 2.81E-11 | -0.03708 | 0.42398 | -0.08381 | 0.07039  | -0.07726 |
| 0.052438 | 0.25808  | -0.12974 | 0.00498  | -0.02842 | 0.54011 | -0.09288 | 0.04485  | 0.0896   |
| 0.328331 | 3.36E-13 | 0.176703 | 0.00012  | -0.01216 | 0.79332 | -0.08183 | 0.07732  | 0.158141 |
| 0.09547  | 0.03918  | 0.114031 | 0.01368  | 0.057851 | 0.21208 | 0.146114 | 0.00154  | 0.204594 |
| 0.11383  | 0.01384  | -0.00586 | 0.8995   | 0.015815 | 0.7332  | 0.033891 | 0.465    | 0.017806 |

|          |          |          |          |          |          |          |          |          |
|----------|----------|----------|----------|----------|----------|----------|----------|----------|
| -0.01338 | 0.77303  | -0.12643 | 0.00622  | -0.02566 | 0.58024  | -0.09613 | 0.03784  | -0.04339 |
| -0.01053 | 0.8205   | -0.25111 | 3.79E-08 | 0.022886 | 0.62179  | -0.04293 | 0.3546   | 0.090959 |
| -0.10626 | 0.02164  | -0.16432 | 0.00036  | -0.02833 | 0.54134  | -0.08003 | 0.08404  | -0.07706 |
| -0.03353 | 0.46975  | -0.37648 | 3.58E-17 | -0.02544 | 0.58336  | -0.10007 | 0.0306   | -0.0733  |
| -0.08408 | 0.06947  | -0.29594 | 6.81E-11 | 0.231145 | 4.41E-07 | 0.081024 | 0.08027  | 0.360905 |
| 0.183397 | 6.71E-05 | -0.09122 | 0.04884  | -0.04122 | 0.37412  | -0.03973 | 0.39172  | -0.04384 |
| -0.08992 | 0.05215  | -0.16199 | 0.00044  | -0.04057 | 0.38176  | -0.12241 | 0.00809  | -0.08031 |
| -0.02856 | 0.53817  | -0.18355 | 6.61E-05 | 0.009594 | 0.83619  | -0.06949 | 0.13377  | 0.004057 |
| -0.0374  | 0.42003  | 0.228067 | 6.32E-07 | 0.117069 | 0.01135  | 0.409338 | 2.72E-20 | 0.128688 |
| 0.002788 | 0.95208  | -0.22915 | 5.58E-07 | -0.0095  | 0.83773  | -0.12375 | 0.00742  | 0.049773 |
| 0.016737 | 0.7183   | 0.372323 | 8.39E-17 | 0.05063  | 0.27488  | 0.114954 | 0.01293  | 0.082943 |
| -0.06218 | 0.17978  | -0.14775 | 0.00137  | -0.01925 | 0.67814  | -0.11722 | 0.01124  | -0.04233 |
| -0.03699 | 0.42511  | -0.03318 | 0.47436  | 0.025121 | 0.58816  | 0.058414 | 0.20766  | 0.100207 |
| -0.13272 | 0.00406  | -0.06191 | 0.18171  | -0.07526 | 0.1043   | -0.14003 | 0.00242  | -0.10887 |
| 0.07454  | 0.10767  | 0.156244 | 0.0007   | -0.00243 | 0.95816  | 0.000724 | 0.98756  | -0.19707 |
| -0.00231 | 0.96033  | 0.058556 | 0.20655  | 0.152581 | 0.00094  | 0.199938 | 1.34E-05 | 0.414232 |
| -0.00435 | 0.92532  | 0.163319 | 0.00039  | -0.0074  | 0.87334  | 0.046198 | 0.31915  | -0.04727 |
| -0.17712 | 0.00012  | -0.03066 | 0.50861  | 0.057074 | 0.2183   | 0.058169 | 0.20958  | 0.250729 |
| 0.016349 | 0.72455  | -0.27698 | 1.14E-09 | -0.01159 | 0.80275  | -0.1075  | 0.02015  | 0.191147 |
| 0.019908 | 0.66785  | -0.015   | 0.74649  | 0.048748 | 0.29314  | -0.0217  | 0.63993  | 0.149409 |
| 0.001961 | 0.96629  | -0.25012 | 4.30E-08 | 0.033865 | 0.46534  | -0.02703 | 0.56015  | 0.090088 |
| 0.122353 | 0.00812  | 0.22841  | 6.07E-07 | 0.037104 | 0.42374  | 0.163829 | 0.00038  | 0.18182  |
| 0.072955 | 0.11538  | 0.085266 | 0.06562  | 0.032163 | 0.48808  | -0.05965 | 0.19818  | 0.05279  |
| 0.047116 | 0.30962  | -0.18049 | 8.77E-05 | 0.019626 | 0.67227  | -0.12795 | 0.00562  | 0.056192 |
| -0.09918 | 0.03212  | 0.023235 | 0.61648  | 0.026227 | 0.57184  | 0.067921 | 0.14277  | 0.118108 |
| -0.12555 | 0.00659  | 0.308751 | 9.00E-12 | 0.160355 | 0.0005   | 0.495803 | 2.41E-30 | 0.328682 |
| 0.083926 | 0.06999  | -0.10328 | 0.02563  | -0.00615 | 0.89462  | -0.12288 | 0.00785  | 0.036221 |
| 0.30188  | 2.70E-11 | 0.24398  | 9.34E-08 | -0.01715 | 0.71171  | -0.12132 | 0.00868  | 0.008561 |
| -0.11374 | 0.01392  | -0.13645 | 0.00313  | -0.01877 | 0.68587  | -0.05355 | 0.24814  | 0.018232 |
| -0.20125 | 1.17E-05 | -0.38964 | 2.22E-18 | -0.01654 | 0.72141  | -0.08125 | 0.07944  | 0.038965 |
| -0.04203 | 0.36479  | -0.13902 | 0.00261  | 0.042691 | 0.3573   | 0.02813  | 0.54427  | 0.090116 |
| 0.190543 | 3.40E-05 | 0.079845 | 0.08478  | -0.01729 | 0.70936  | -0.08317 | 0.07255  | -0.00944 |
| -0.00484 | 0.91684  | -0.11129 | 0.01612  | 0.032839 | 0.47898  | 0.05502  | 0.23534  | 0.023612 |
| -0.14667 | 0.00148  | -0.13458 | 0.00357  | 0.048401 | 0.29659  | 0.086037 | 0.06321  | 0.206685 |
| 0.076697 | 0.09784  | 0.033183 | 0.47438  | 0.0259   | 0.57664  | -0.05113 | 0.27016  | 0.122736 |
| 0.056102 | 0.22625  | -0.17214 | 0.00019  | 0.04843  | 0.2963   | 0.001141 | 0.98038  | 0.149171 |
| -0.02044 | 0.65949  | 0.149105 | 0.00123  | -0.05938 | 0.20026  | -0.04141 | 0.37192  | -0.09793 |
| 0.010517 | 0.82068  | -0.10539 | 0.02274  | 0.022994 | 0.62014  | 0.000945 | 0.98376  | 0.031837 |
| -0.01708 | 0.71281  | -0.15975 | 0.00053  | 0.076825 | 0.09728  | -0.03352 | 0.46991  | 0.074523 |
| 0.052866 | 0.25422  | -0.05446 | 0.24014  | 0.075426 | 0.10354  | 0.174887 | 0.00015  | 0.005587 |
| -0.11396 | 0.01374  | -0.18272 | 7.14E-05 | 0.036633 | 0.42965  | 0.0835   | 0.07143  | 0.097407 |
| 0.106154 | 0.02177  | 0.314806 | 3.34E-12 | 0.033398 | 0.47152  | -0.01989 | 0.66813  | -0.11501 |
| -0.03004 | 0.51727  | -0.19787 | 1.65E-05 | 0.042395 | 0.36065  | 0.040041 | 0.38796  | 0.173454 |
| -0.18914 | 3.90E-05 | -0.09122 | 0.04882  | 0.003042 | 0.94773  | 0.195381 | 2.12E-05 | -0.14624 |
| -0.07982 | 0.08486  | -0.20374 | 9.10E-06 | 0.009921 | 0.83069  | -0.04797 | 0.30089  | 0.075873 |

|          |          |          |          |          |         |          |          |          |
|----------|----------|----------|----------|----------|---------|----------|----------|----------|
| -0.12457 | 0.00703  | -0.23118 | 4.39E-07 | -0.00917 | 0.84339 | -0.07767 | 0.09362  | 0.03989  |
| -0.16115 | 0.00047  | -0.4012  | 1.73E-19 | 0.029464 | 0.52533 | -0.01013 | 0.82711  | 0.018891 |
| -0.08057 | 0.08198  | -0.25276 | 3.06E-08 | -0.05588 | 0.22813 | -0.14762 | 0.00138  | -0.08925 |
| 0.009199 | 0.84283  | -0.26676 | 4.75E-09 | 0.067258 | 0.14672 | -0.03518 | 0.44816  | 0.232639 |
| 0.012831 | 0.78213  | -0.04747 | 0.30598  | -0.02031 | 0.66161 | -0.05844 | 0.20743  | 0.053751 |
| -0.00276 | 0.95254  | 0.154332 | 0.00082  | -0.01532 | 0.74131 | 0.009268 | 0.84168  | -0.01755 |
| 0.031445 | 0.49785  | -0.22644 | 7.62E-07 | -0.06815 | 0.14141 | -0.22109 | 1.40E-06 | -0.15426 |
| -0.11572 | 0.01234  | -0.22681 | 7.31E-07 | 0.001575 | 0.97293 | -0.10328 | 0.02562  | 0.035548 |
| -0.14851 | 0.00129  | 0.231098 | 4.44E-07 | 0.056543 | 0.22261 | 0.046894 | 0.3119   | 0.274561 |
| -0.06755 | 0.14495  | -0.3567  | 1.85E-15 | -0.04198 | 0.3654  | -0.14817 | 0.00132  | -0.07003 |
| -0.13566 | 0.00331  | 0.015366 | 0.7405   | 0.061781 | 0.1826  | 0.05303  | 0.25274  | 0.040897 |
| -0.11445 | 0.01333  | -0.2551  | 2.26E-08 | -0.01494 | 0.74744 | -0.10594 | 0.02204  | 0.042834 |
| -0.1993  | 1.43E-05 | -0.35907 | 1.17E-15 | 0.009245 | 0.84207 | -0.01353 | 0.7706   | 0.015248 |
| 0.066133 | 0.15361  | 0.361799 | 6.88E-16 | 0.094823 | 0.04053 | 0.185282 | 5.62E-05 | 0.140786 |
| 0.127541 | 0.00578  | 0.346586 | 1.26E-14 | 0.029757 | 0.52121 | 0.130053 | 0.00488  | -0.02123 |
| -0.07262 | 0.11706  | -0.21312 | 3.37E-06 | -0.01485 | 0.74892 | -0.04964 | 0.28438  | 0.010458 |
| 0.007855 | 0.86556  | 0.181314 | 8.13E-05 | -0.07295 | 0.11539 | -0.07889 | 0.08859  | -0.21216 |
| 0.309748 | 7.66E-12 | 0.039805 | 0.39077  | -0.05734 | 0.21618 | -0.14476 | 0.00171  | -0.17277 |
| -0.07371 | 0.11168  | -0.03136 | 0.49896  | 0.02004  | 0.66578 | 0.005215 | 0.91051  | 0.143298 |
| -0.04157 | 0.37005  | -0.0689  | 0.13708  | -0.02017 | 0.66372 | -0.06273 | 0.17595  | 0.075905 |
| -0.10506 | 0.02317  | 0.260596 | 1.09E-08 | 0.112089 | 0.01538 | 0.263126 | 7.79E-09 | 0.228118 |
| -0.14994 | 0.00115  | -0.45021 | 1.10E-24 | -0.03444 | 0.45779 | -0.16553 | 0.00033  | -0.13012 |
| -0.18499 | 5.78E-05 | -0.23231 | 3.85E-07 | -0.02299 | 0.62026 | -0.08076 | 0.08127  | 0.011118 |
| 0.022336 | 0.63019  | -0.08065 | 0.08166  | -0.0202  | 0.66322 | -0.08201 | 0.07664  | 0.120364 |
| -0.02107 | 0.64975  | -0.12829 | 0.0055   | 0.006181 | 0.89402 | -0.01944 | 0.67515  | 0.111782 |
| 0.00895  | 0.84704  | -0.19326 | 2.61E-05 | -0.03437 | 0.45877 | -0.1215  | 0.00858  | -0.04109 |
| 0.289341 | 1.86E-10 | 0.467917 | 8.77E-27 | 0.023998 | 0.60495 | -0.05877 | 0.20489  | 0.249081 |
| 0.046023 | 0.32099  | 0.102058 | 0.02743  | 0.07401  | 0.11021 | 0.146117 | 0.00154  | 0.177996 |
| -0.05383 | 0.2456   | -0.36894 | 1.66E-16 | -0.05389 | 0.24509 | -0.18348 | 6.65E-05 | -0.01268 |
| -0.0062  | 0.89369  | -0.03599 | 0.43783  | 0.017579 | 0.70476 | -0.02762 | 0.55153  | 0.110836 |
| 0.073118 | 0.11457  | 0.032911 | 0.47802  | 0.032968 | 0.47726 | -0.09345 | 0.04353  | 0.028452 |
| -0.21137 | 4.07E-06 | -0.12819 | 0.00553  | -0.00767 | 0.86863 | -0.02984 | 0.52005  | 0.119407 |
| -0.04928 | 0.28788  | -0.04553 | 0.3262   | 0.078291 | 0.09104 | 0.088938 | 0.05478  | 0.225545 |
| -0.15702 | 0.00066  | -0.48748 | 3.02E-29 | -0.0218  | 0.63848 | -0.11664 | 0.01165  | 0.022385 |
| -0.13341 | 0.00387  | -0.34222 | 2.81E-14 | -0.03273 | 0.4805  | -0.08645 | 0.06194  | 0.010696 |
| 0.085123 | 0.06607  | 0.022621 | 0.62583  | 0.055999 | 0.2271  | 0.114698 | 0.01313  | 0.14115  |
| 0.081581 | 0.07821  | -0.10189 | 0.02769  | 0.050582 | 0.27534 | 0.037361 | 0.42053  | 0.150062 |
| -0.26958 | 3.22E-09 | -0.20787 | 5.91E-06 | 0.047437 | 0.30633 | 0.071654 | 0.12203  | 0.089566 |
| -0.12141 | 0.00863  | -0.2191  | 1.75E-06 | 0.001987 | 0.96584 | -0.00204 | 0.965    | -0.03279 |
| -0.09248 | 0.04577  | -0.20428 | 8.60E-06 | -0.08837 | 0.05636 | -0.11871 | 0.01024  | -0.14391 |
| 0.089389 | 0.05356  | 0.108349 | 0.01918  | 0.034808 | 0.453   | 0.114578 | 0.01323  | 0.032206 |
| -0.18097 | 8.40E-05 | -0.25748 | 1.65E-08 | -0.04361 | 0.34708 | -0.0365  | 0.43137  | -0.0164  |
| -0.03768 | 0.41653  | -0.16466 | 0.00035  | -0.00533 | 0.90858 | -0.03725 | 0.42195  | 0.044362 |
| -0.0482  | 0.29866  | -0.12082 | 0.00896  | 0.082023 | 0.0766  | 0.036617 | 0.42985  | 0.242258 |
| -0.09399 | 0.04235  | 0.001945 | 0.96656  | -0.03043 | 0.51181 | -0.07885 | 0.08876  | 0.102716 |

|          |          |          |          |          |         |          |          |          |
|----------|----------|----------|----------|----------|---------|----------|----------|----------|
| 0.160473 | 0.0005   | -0.04548 | 0.3267   | 0.003469 | 0.9404  | -0.04977 | 0.2831   | -0.03382 |
| -0.0671  | 0.14769  | -0.16615 | 0.00031  | -0.00315 | 0.94588 | 0.005602 | 0.9039   | -0.0095  |
| 0.018518 | 0.6898   | 0.007309 | 0.87483  | 0.006368 | 0.89083 | 0.091776 | 0.04746  | 0.076867 |
| 0.231392 | 4.29E-07 | 0.383725 | 7.86E-18 | -0.04298 | 0.35408 | -0.03953 | 0.3941   | -0.04097 |
| 0.078317 | 0.09093  | -0.08037 | 0.08274  | -0.05444 | 0.24035 | -0.12517 | 0.00676  | -0.05479 |
| -0.18724 | 4.67E-05 | -0.48118 | 1.95E-28 | -0.02074 | 0.65492 | -0.02975 | 0.52128  | -0.04714 |
| -0.01875 | 0.68618  | -0.01409 | 0.76144  | 0.027354 | 0.55543 | 0.039485 | 0.39458  | -0.06586 |
| 0.101192 | 0.02878  | -0.11346 | 0.01415  | 0.001044 | 0.98205 | -0.02116 | 0.64828  | -0.06217 |
| 0.00636  | 0.89098  | -0.00776 | 0.86718  | 0.040702 | 0.38017 | 0.225447 | 8.55E-07 | -0.00369 |
| -0.0384  | 0.40775  | -0.33254 | 1.61E-13 | -0.01369 | 0.76788 | -0.17467 | 0.00015  | -0.13861 |
| 0.112201 | 0.01527  | 0.493031 | 5.64E-30 | 0.024492 | 0.59754 | 0.146585 | 0.00149  | -0.00919 |
| -0.33817 | 5.88E-14 | -0.37668 | 3.43E-17 | -0.03022 | 0.5147  | -0.0225  | 0.62771  | -0.02067 |
| -0.10485 | 0.02345  | -0.26228 | 8.73E-09 | -0.03962 | 0.39296 | -0.10424 | 0.02428  | -0.09368 |
| 0.005307 | 0.90893  | 0.306663 | 1.26E-11 | 9.00E-05 | 0.99845 | 0.017908 | 0.69951  | 0.004971 |
| -0.12065 | 0.00906  | -0.3751  | 4.75E-17 | 0.010147 | 0.82688 | -0.03685 | 0.42697  | 0.035211 |
| 0.257542 | 1.64E-08 | -0.10998 | 0.01743  | -0.0573  | 0.21647 | -0.1649  | 0.00035  | -0.19102 |
| -0.1486  | 0.00128  | -0.13336 | 0.00389  | 0.01969  | 0.67127 | 0.069817 | 0.13193  | 0.139112 |
| 0.062711 | 0.17609  | -0.20745 | 6.18E-06 | -0.01884 | 0.68474 | -0.13487 | 0.0035   | -0.00896 |
| -0.14302 | 0.00195  | -0.22764 | 6.64E-07 | 0.073742 | 0.1115  | -0.0544  | 0.24065  | 0.030244 |
| -0.17845 | 0.00011  | -0.34747 | 1.07E-14 | -0.03753 | 0.41842 | -0.09483 | 0.04053  | -0.09481 |
| -0.1959  | 2.01E-05 | -0.35473 | 2.71E-15 | 0.0365   | 0.43133 | -0.00523 | 0.91025  | 0.124777 |
| -0.07977 | 0.08506  | -0.18988 | 3.63E-05 | -0.02353 | 0.61197 | -0.17202 | 0.00019  | 0.02428  |
| 0.068248 | 0.14086  | -0.03916 | 0.3985   | 0.010562 | 0.81993 | -0.09536 | 0.03941  | 0.181885 |
| 0.119556 | 0.00971  | -0.03865 | 0.40467  | 0.04649  | 0.3161  | 0.081413 | 0.07882  | 0.146627 |
| -0.0197  | 0.67111  | -0.15647 | 0.00069  | 0.118313 | 0.0105  | 0.136887 | 0.00303  | 0.404968 |
| -0.04131 | 0.37314  | -0.1776  | 0.00011  | 0.046761 | 0.31329 | -0.00629 | 0.89208  | 0.112531 |
| 0.058471 | 0.20721  | -0.27494 | 1.52E-09 | -0.09984 | 0.031   | -0.17266 | 0.00018  | -0.17794 |
| 0.173283 | 0.00017  | -0.16717 | 0.00029  | -0.00349 | 0.94001 | -0.1407  | 0.00231  | 0.018506 |
| 0.017978 | 0.69838  | -0.12495 | 0.00686  | 0.036646 | 0.42948 | -0.07983 | 0.08485  | -0.00621 |
| 0.166041 | 0.00031  | 0.150358 | 0.00112  | 0.000666 | 0.98855 | -0.08807 | 0.0572   | 0.027634 |
| 0.080433 | 0.08251  | 0.104509 | 0.02391  | 0.006777 | 0.88387 | -0.04971 | 0.2837   | 0.058194 |
| 0.110739 | 0.01666  | -0.14138 | 0.0022   | -0.00569 | 0.90244 | -0.11969 | 0.00963  | 0.078966 |
| 0.050852 | 0.27278  | -0.03716 | 0.42301  | -0.03549 | 0.44422 | -0.12798 | 0.00561  | 0.000769 |
| 0.002414 | 0.95851  | 0.206335 | 6.94E-06 | -0.0405  | 0.3826  | -0.0254  | 0.58396  | -0.03717 |
| 0.001093 | 0.98121  | -0.02581 | 0.57794  | 0.020286 | 0.66192 | 0.045543 | 0.32607  | 0.055217 |
| -0.22836 | 6.11E-07 | -0.44934 | 1.38E-24 | -0.03852 | 0.40624 | -0.04246 | 0.3599   | 0.001538 |
| -0.12789 | 0.00565  | -0.44517 | 4.11E-24 | -0.03198 | 0.49059 | -0.06815 | 0.14145  | -0.05131 |
| -0.12658 | 0.00616  | -0.2339  | 3.18E-07 | -0.0144  | 0.75625 | -0.05559 | 0.23054  | -0.04107 |
| -0.126   | 0.0064   | -0.32353 | 7.70E-13 | 0.012237 | 0.79198 | -0.09824 | 0.0338   | -0.07973 |
| 0.434148 | 6.89E-23 | -0.12969 | 0.005    | -0.03783 | 0.41466 | -0.23858 | 1.81E-07 | -0.01486 |
| -0.13881 | 0.00265  | -0.36857 | 1.79E-16 | 0.05451  | 0.23972 | 0.025313 | 0.58532  | 0.218428 |
| 0.053083 | 0.25226  | 0.019829 | 0.66909  | 0.024174 | 0.60231 | 0.104623 | 0.02375  | 0.1251   |
| -0.15269 | 0.00093  | -0.23865 | 1.80E-07 | -0.00567 | 0.9027  | -0.05774 | 0.21292  | 0.066233 |
| 0.099796 | 0.03107  | 0.085764 | 0.06405  | 0.072378 | 0.1183  | -0.04201 | 0.365    | 0.184233 |
| -0.0538  | 0.24586  | -0.20084 | 1.22E-05 | -0.00248 | 0.95732 | 0.034676 | 0.45472  | -0.02278 |

|          |          |          |          |          |         |          |          |          |
|----------|----------|----------|----------|----------|---------|----------|----------|----------|
| 0.24941  | 4.71E-08 | 0.350526 | 6.02E-15 | 0.040864 | 0.37827 | 0.080856 | 0.0809   | 0.286329 |
| -0.07901 | 0.08812  | -0.26482 | 6.19E-09 | -0.0337  | 0.46748 | -0.03996 | 0.38896  | -0.09595 |
| 0.221817 | 1.29E-06 | -0.14985 | 0.00116  | -0.01764 | 0.70385 | -0.1283  | 0.00549  | -0.00139 |
| 0.073313 | 0.11361  | -0.16349 | 0.00039  | 0.030537 | 0.51035 | -0.04706 | 0.31025  | 0.053055 |
| -0.16786 | 0.00027  | -0.24856 | 5.25E-08 | -0.02471 | 0.59435 | -0.06891 | 0.13702  | -0.00952 |
| -0.20528 | 7.75E-06 | -0.32523 | 5.75E-13 | 0.025255 | 0.58617 | 0.090366 | 0.05099  | 0.052263 |
| 0.013716 | 0.76751  | -0.04249 | 0.35956  | -0.0132  | 0.77605 | -0.09106 | 0.04924  | 0.030279 |
| -0.12506 | 0.00681  | -0.14226 | 0.00206  | -0.00226 | 0.96109 | -0.08424 | 0.06894  | 0.109106 |
| -0.12718 | 0.00592  | -0.12532 | 0.0067   | 0.154837 | 0.00079 | 0.122467 | 0.00806  | 0.560534 |
| -0.0693  | 0.13482  | -0.23089 | 4.55E-07 | -0.04138 | 0.37228 | -0.10573 | 0.0223   | -0.05798 |
| -0.06873 | 0.13807  | -0.22774 | 6.56E-07 | -0.0137  | 0.76777 | -0.09492 | 0.04034  | -0.00928 |
| 0.129134 | 0.00519  | 0.094487 | 0.04125  | -0.02802 | 0.54587 | -0.10479 | 0.02353  | -0.01844 |
| 0.082866 | 0.07361  | 0.069802 | 0.13201  | 0.111335 | 0.01608 | 0.074054 | 0.10999  | 0.167835 |
| 0.037867 | 0.41426  | -0.013   | 0.77941  | 0.002932 | 0.94962 | -0.04235 | 0.36113  | 0.12029  |
| 0.02524  | 0.58639  | -0.09684 | 0.03643  | -0.03911 | 0.39912 | -0.15515 | 0.00077  | -0.02253 |
| -0.13047 | 0.00474  | -0.15234 | 0.00096  | -0.01794 | 0.69898 | -0.00481 | 0.91739  | 0.042688 |
| -0.01936 | 0.6764   | -0.12611 | 0.00635  | -0.0404  | 0.38376 | -0.1076  | 0.02003  | 0.017494 |
| -0.04508 | 0.33104  | 0.202228 | 1.06E-05 | -0.0596  | 0.19855 | 0.038348 | 0.40836  | -0.14813 |
| -0.05448 | 0.23999  | -0.17296 | 0.00017  | -0.00083 | 0.98567 | -0.00552 | 0.90535  | -0.05435 |
| 0.185669 | 5.42E-05 | 0.136867 | 0.00304  | -0.05685 | 0.2201  | -0.18762 | 4.50E-05 | 0.03694  |
| -0.04501 | 0.33174  | -0.16386 | 0.00038  | -0.01087 | 0.8147  | -0.04303 | 0.35353  | 0.040767 |
| -0.12661 | 0.00615  | 0.119216 | 0.00992  | 0.091138 | 0.04903 | 0.185947 | 5.28E-05 | 0.190875 |
| -0.09276 | 0.04513  | -0.24292 | 1.07E-07 | -0.04193 | 0.3659  | -0.05791 | 0.21161  | -0.07431 |
| 0.032251 | 0.48689  | -0.18867 | 4.07E-05 | 0.067635 | 0.14447 | 0.059695 | 0.19785  | 0.207763 |
| 0.025331 | 0.58505  | -0.0018  | 0.96907  | 0.064129 | 0.16649 | 0.066281 | 0.1527   | 0.308658 |
| 0.005956 | 0.89785  | 0.105719 | 0.02232  | 0.07876  | 0.08911 | 0.104845 | 0.02346  | 0.109105 |
| 0.101061 | 0.02899  | -0.00823 | 0.85929  | -0.04097 | 0.37703 | -0.16686 | 0.00029  | 0.139751 |
| -0.13485 | 0.0035   | -0.25403 | 2.60E-08 | -0.04116 | 0.37483 | -0.08549 | 0.0649   | -0.02998 |
| 0.113735 | 0.01392  | 0.016827 | 0.71684  | -0.07599 | 0.10098 | -0.20351 | 9.31E-06 | 0.040981 |
| -0.0424  | 0.36057  | -0.11973 | 0.0096   | -0.05535 | 0.23252 | -0.16378 | 0.00038  | 0.032205 |
| -0.13086 | 0.00462  | -0.45002 | 1.15E-24 | -0.0306  | 0.50945 | -0.11312 | 0.01445  | -0.07281 |
| -0.05912 | 0.2022   | -0.16765 | 0.00027  | -0.04541 | 0.32751 | -0.12106 | 0.00883  | -0.03439 |
| -0.00205 | 0.96472  | -0.1104  | 0.017    | -0.01678 | 0.71763 | -0.09947 | 0.03163  | 0.039651 |
| -0.07061 | 0.1276   | -0.08239 | 0.07527  | -0.01103 | 0.8121  | -0.09038 | 0.05095  | 0.155659 |
| -0.04445 | 0.33781  | -0.19472 | 2.26E-05 | -0.05148 | 0.26689 | -0.13397 | 0.00373  | -0.05141 |
| 0.12965  | 0.00501  | 0.027365 | 0.55527  | 0.073756 | 0.11143 | 0.011882 | 0.79788  | 0.286734 |
| 0.001449 | 0.97509  | -0.17181 | 0.00019  | 0.039652 | 0.39259 | 0.052897 | 0.25394  | 0.113265 |
| -0.0736  | 0.11219  | -0.15918 | 0.00056  | 0.021522 | 0.64272 | -0.08729 | 0.05943  | 0.066131 |
| -0.07784 | 0.09292  | -0.16845 | 0.00026  | 0.011308 | 0.80745 | 0.104254 | 0.02426  | -0.02653 |
| -0.05076 | 0.27369  | -0.15314 | 0.0009   | -0.04105 | 0.37605 | -0.11425 | 0.01349  | 0.013349 |
| -0.13353 | 0.00384  | -0.25143 | 3.64E-08 | -0.02084 | 0.65326 | -0.09792 | 0.03439  | -0.03665 |
| 0.005901 | 0.8988   | 0.149103 | 0.00123  | 0.088194 | 0.05685 | 0.286251 | 2.94E-10 | 0.091756 |
| -0.10143 | 0.0284   | -0.15789 | 0.00062  | -0.00268 | 0.95386 | -0.00558 | 0.90427  | -0.03404 |
| -0.14161 | 0.00216  | -0.14461 | 0.00173  | 0.001642 | 0.97176 | -0.01492 | 0.74771  | 0.080675 |
| -0.07439 | 0.10841  | -0.02391 | 0.60634  | 0.089881 | 0.05225 | 0.043566 | 0.34753  | 0.170799 |



|          |          |          |          |          |         |          |          |          |
|----------|----------|----------|----------|----------|---------|----------|----------|----------|
| 0.076464 | 0.09886  | -0.22627 | 7.78E-07 | -0.07696 | 0.09668 | -0.21707 | 2.19E-06 | -0.12742 |
| -0.02805 | 0.54543  | -0.12896 | 0.00525  | 0.011106 | 0.81081 | 0.010105 | 0.82758  | -0.03215 |
| -0.12634 | 0.00626  | -0.12676 | 0.00609  | 0.049075 | 0.28991 | 0.054258 | 0.2419   | 0.228779 |
| -0.18246 | 7.32E-05 | -0.3653  | 3.45E-16 | 0.003346 | 0.9425  | -0.04283 | 0.35577  | -0.08814 |
| 0.042488 | 0.35961  | -0.1122  | 0.01527  | 0.007228 | 0.8762  | -0.01003 | 0.82887  | 0.17603  |
| -0.00604 | 0.89647  | -0.38568 | 5.19E-18 | -0.07354 | 0.11249 | -0.1648  | 0.00035  | -0.29167 |
| 0.15104  | 0.00106  | -0.24011 | 1.51E-07 | 0.061004 | 0.18817 | 0.002622 | 0.95494  | 0.062936 |
| -0.25942 | 1.28E-08 | -0.44448 | 4.92E-24 | 0.011445 | 0.80516 | 0.003865 | 0.93362  | -0.02629 |
| -0.16418 | 0.00037  | -0.26494 | 6.09E-09 | -0.01301 | 0.77921 | -0.00982 | 0.83233  | 0.033081 |
| 0.150148 | 0.00114  | 0.13719  | 0.00297  | 0.000778 | 0.98663 | 0.001053 | 0.98189  | 0.028079 |
| -0.01391 | 0.76426  | 0.132739 | 0.00406  | 0.015072 | 0.74529 | 0.032315 | 0.48603  | -0.04328 |
| 0.183811 | 6.45E-05 | 0.117976 | 0.01072  | -0.01947 | 0.67468 | 0.053042 | 0.25263  | -0.14351 |
| 0.178129 | 0.00011  | -0.24942 | 4.70E-08 | -0.01679 | 0.71743 | -0.11158 | 0.01585  | -0.05795 |
| -0.08297 | 0.07326  | -0.19267 | 2.77E-05 | -0.02422 | 0.60155 | -0.06689 | 0.14892  | -0.03343 |
| -0.13796 | 0.00281  | -0.14242 | 0.00203  | 0.011957 | 0.79663 | -0.02213 | 0.63335  | 0.049246 |
| -0.04223 | 0.36249  | 0.070021 | 0.1308   | 0.020089 | 0.66501 | 0.063664 | 0.1696   | 0.055157 |
| -0.14954 | 0.00119  | -0.18534 | 5.59E-05 | 0.043895 | 0.34389 | 0.211929 | 3.83E-06 | -0.08475 |
| 0.107144 | 0.02057  | 0.029608 | 0.52331  | -0.00796 | 0.86372 | -0.10762 | 0.02001  | 0.117477 |
| 0.130576 | 0.00471  | 0.460723 | 6.45E-26 | 0.06553  | 0.15741 | 0.17899  | 0.0001   | 0.158835 |
| 0.077368 | 0.09493  | -0.16666 | 0.0003   | -0.03677 | 0.42794 | -0.13173 | 0.00435  | 0.000443 |
| -0.21401 | 3.06E-06 | -0.05477 | 0.23747  | 0.156568 | 0.00069 | 0.2848   | 3.65E-10 | 0.438188 |
| -0.04646 | 0.31639  | -0.04253 | 0.35909  | 0.018016 | 0.69778 | 0.078686 | 0.08941  | 0.068644 |
| -0.01782 | 0.70086  | -0.08097 | 0.08045  | -0.01536 | 0.74064 | -0.08728 | 0.05947  | -0.01514 |
| 0.143906 | 0.00182  | -0.02998 | 0.51803  | -0.001   | 0.98279 | -0.11516 | 0.01276  | 0.040661 |
| -0.00689 | 0.88191  | -0.11774 | 0.01088  | -0.04238 | 0.36086 | -0.13058 | 0.00471  | -0.02384 |
| -0.0654  | 0.15823  | -0.03255 | 0.48287  | 0.012572 | 0.78641 | -0.00385 | 0.93393  | 0.050812 |
| 0.33893  | 5.13E-14 | 0.325967 | 5.06E-13 | -0.05521 | 0.23371 | -0.15049 | 0.00111  | -0.00821 |
| -0.01609 | 0.7287   | 0.272975 | 2.00E-09 | -0.04264 | 0.35783 | 0.101604 | 0.02813  | -0.02463 |
| -0.08868 | 0.0555   | -0.17404 | 0.00016  | -0.04116 | 0.37483 | -0.11147 | 0.01596  | 0.026615 |
| 0.117799 | 0.01084  | -0.24744 | 6.05E-08 | -0.01684 | 0.7167  | -0.1111  | 0.01631  | -0.06936 |
| -0.04781 | 0.30258  | -0.20267 | 1.01E-05 | -0.03286 | 0.47867 | -0.08719 | 0.05974  | -0.05176 |
| 0.096792 | 0.03653  | 0.018934 | 0.68319  | 0.013038 | 0.7787  | 0.014153 | 0.76033  | 0.156957 |
| -0.15234 | 0.00096  | -0.2903  | 1.61E-10 | 0.012629 | 0.78547 | 0.030972 | 0.50434  | 0.090203 |
| 0.2635   | 7.40E-09 | 0.038785 | 0.40303  | -0.04864 | 0.29424 | -0.18485 | 5.85E-05 | -0.1248  |
| -0.15174 | 0.001    | -0.34371 | 2.14E-14 | -0.04307 | 0.35306 | -0.08908 | 0.05439  | -0.04967 |
| -0.06137 | 0.18551  | 0.254549 | 2.43E-08 | 0.061619 | 0.18375 | 0.201208 | 1.18E-05 | 0.044848 |
| 0.019661 | 0.67173  | -0.01864 | 0.68791  | -0.02114 | 0.6486  | -0.09644 | 0.03721  | 0.081727 |
| -0.01962 | 0.67233  | 0.300924 | 3.13E-11 | 0.029086 | 0.53065 | 0.172168 | 0.00019  | 0.059312 |
| 0.127248 | 0.00589  | 0.05793  | 0.21145  | -0.006   | 0.89719 | -0.06874 | 0.13803  | 0.071485 |
| -0.04747 | 0.30603  | -0.15389 | 0.00085  | -0.06919 | 0.13543 | -0.07783 | 0.09296  | -0.17965 |
| -0.09474 | 0.04072  | -0.28316 | 4.65E-10 | 0.002115 | 0.96365 | -0.065   | 0.16082  | 0.022579 |
| -0.09381 | 0.04274  | 0.078364 | 0.09074  | 0.002583 | 0.9556  | 0.144033 | 0.00181  | -0.25663 |
| 0.187371 | 4.61E-05 | -0.01564 | 0.73607  | -0.01792 | 0.69939 | -0.06638 | 0.1521   | 0.130948 |
| -0.09623 | 0.03764  | -0.23388 | 3.19E-07 | -0.02881 | 0.53457 | -0.11659 | 0.01169  | 0.009604 |
| -0.05341 | 0.24936  | -0.18716 | 4.70E-05 | -0.01569 | 0.73525 | -0.06907 | 0.1361   | 0.005545 |

|          |          |          |          |          |         |          |          |          |
|----------|----------|----------|----------|----------|---------|----------|----------|----------|
| 0.076623 | 0.09816  | 0.088191 | 0.05685  | -0.00614 | 0.89477 | -0.07732 | 0.09512  | 0.032357 |
| 0.081756 | 0.07757  | -0.04993 | 0.28155  | -0.05258 | 0.25677 | -0.12762 | 0.00575  | -0.03277 |
| -0.1079  | 0.01968  | 0.13544  | 0.00336  | -0.04038 | 0.38397 | 0.025703 | 0.57955  | -0.11992 |
| -0.11929 | 0.00988  | -0.21257 | 3.58E-06 | -0.01778 | 0.70157 | -0.01226 | 0.79153  | -0.03915 |
| -0.23677 | 2.26E-07 | -0.28537 | 3.35E-10 | -0.05834 | 0.20823 | -0.06417 | 0.16625  | -0.06298 |
| 0.168959 | 0.00024  | -0.03006 | 0.51693  | -0.02659 | 0.56653 | -0.07585 | 0.1016   | -0.02469 |
| -0.1561  | 0.00071  | -0.00874 | 0.85066  | -0.03376 | 0.46673 | -0.01483 | 0.7493   | -0.09814 |
| -0.04638 | 0.31729  | -0.01486 | 0.74878  | 0.054226 | 0.24218 | -0.0142  | 0.7596   | 0.053283 |
| -0.06284 | 0.17522  | -0.08563 | 0.06447  | 0.068373 | 0.14013 | -0.00713 | 0.87783  | 0.053742 |
| -0.01453 | 0.75422  | -0.03996 | 0.38895  | 0.098571 | 0.0332  | -0.01392 | 0.76422  | 0.093757 |
| -0.06969 | 0.13261  | -0.15433 | 0.00082  | -0.03567 | 0.44187 | -0.10539 | 0.02275  | -0.0004  |
| 0.078212 | 0.09136  | 0.135227 | 0.00341  | 0.016964 | 0.71464 | 0.134933 | 0.00348  | -0.01897 |
| 0.170461 | 0.00021  | -0.00503 | 0.9136   | -0.01655 | 0.72134 | -0.07578 | 0.10193  | -0.01203 |
| 0.036305 | 0.43379  | -0.17952 | 9.59E-05 | -0.02043 | 0.65965 | -0.09955 | 0.03149  | -0.06908 |
| 0.039459 | 0.39491  | -0.31885 | 1.70E-12 | -0.04542 | 0.3274  | -0.12543 | 0.00665  | -0.13481 |
| 0.169557 | 0.00023  | 0.092833 | 0.04495  | -0.04772 | 0.30344 | -0.1259  | 0.00645  | 0.088584 |
| 0.051206 | 0.26945  | -0.11564 | 0.01239  | 0.042684 | 0.35739 | 0.007273 | 0.87543  | 0.116611 |
| 0.172061 | 0.00019  | -0.10283 | 0.02627  | -0.04861 | 0.29449 | -0.07228 | 0.1188   | -0.02993 |
| -0.07906 | 0.08788  | -0.19542 | 2.11E-05 | 0.006042 | 0.89638 | -0.0257  | 0.57957  | 0.02243  |
| -0.15571 | 0.00073  | -0.24644 | 6.86E-08 | -0.0252  | 0.58697 | -0.06482 | 0.16196  | 0.022922 |
| -0.10717 | 0.02054  | -0.19555 | 2.08E-05 | -0.02621 | 0.57203 | -0.02491 | 0.59137  | -0.07824 |
| -0.0921  | 0.04669  | -0.52597 | 1.39E-34 | 0.050169 | 0.27928 | -0.11741 | 0.01111  | -0.01559 |
| 0.01376  | 0.76679  | -0.2717  | 2.40E-09 | -0.05569 | 0.22969 | -0.1953  | 2.14E-05 | -0.07627 |
| -0.07711 | 0.09605  | -0.07236 | 0.1184   | 0.00641  | 0.89012 | -0.05491 | 0.23626  | 0.049615 |
| -0.04268 | 0.35746  | 0.188819 | 4.02E-05 | -0.00867 | 0.85178 | -0.00938 | 0.8398   | -0.16454 |
| -0.02125 | 0.64699  | -0.13493 | 0.00348  | 0.12082  | 0.00896 | 0.100026 | 0.03068  | 0.41612  |
| -0.00381 | 0.93459  | 0.119576 | 0.0097   | 0.026542 | 0.56722 | 0.066401 | 0.15195  | 0.042158 |
| 0.086954 | 0.06043  | 0.004726 | 0.91886  | 0.011384 | 0.80617 | -0.04744 | 0.30631  | -0.03289 |
| -0.13122 | 0.00451  | -0.38624 | 4.61E-18 | -0.01314 | 0.77708 | -0.05843 | 0.20755  | 0.004601 |
| -0.04756 | 0.3051   | -0.17447 | 0.00015  | -0.01922 | 0.67873 | -0.10909 | 0.01836  | -0.04915 |
| 0.001679 | 0.97113  | -0.07916 | 0.08748  | 0.096457 | 0.03719 | 0.040141 | 0.38678  | 0.285927 |
| 0.043689 | 0.34617  | -0.06215 | 0.17999  | 0.020192 | 0.66339 | -0.07237 | 0.11833  | 0.098992 |
| 0.05814  | 0.2098   | 0.016482 | 0.7224   | -0.01985 | 0.66871 | -0.05403 | 0.24389  | 0.126879 |
| -0.10377 | 0.02493  | -0.09625 | 0.03759  | -0.03464 | 0.45515 | 0.042525 | 0.35918  | -0.15565 |
| -0.15321 | 0.0009   | -0.35326 | 3.58E-15 | 0.009915 | 0.83078 | -0.00235 | 0.95959  | 0.052722 |
| 0.01007  | 0.82818  | -0.30485 | 1.68E-11 | -0.04888 | 0.29179 | -0.10568 | 0.02236  | -0.05092 |
| -0.04846 | 0.29596  | -0.02981 | 0.52046  | 0.02036  | 0.66077 | -0.05992 | 0.19618  | -0.00248 |
| -0.23302 | 3.53E-07 | -0.40036 | 2.10E-19 | -0.05519 | 0.23387 | -0.17444 | 0.00015  | -0.14339 |
| -0.03102 | 0.50368  | 0.207752 | 5.98E-06 | 0.126127 | 0.00635 | 0.199605 | 1.39E-05 | 0.543327 |
| 0.115212 | 0.01272  | -0.16458 | 0.00036  | -0.0022  | 0.96225 | -0.09223 | 0.04637  | 0.011132 |
| -0.04433 | 0.33914  | 0.129072 | 0.00521  | 0.027417 | 0.55452 | 0.035052 | 0.44984  | 0.0966   |
| 0.024128 | 0.60301  | -0.0405  | 0.38257  | -0.01832 | 0.69302 | -0.17584 | 0.00013  | 0.154423 |
| -0.00395 | 0.93214  | -0.3021  | 2.60E-11 | 0.006439 | 0.88963 | -0.10579 | 0.02223  | -0.05626 |
| 0.014476 | 0.75503  | 0.069339 | 0.1346   | 0.100077 | 0.03059 | 0.202971 | 9.84E-06 | 0.158668 |
| -0.09963 | 0.03134  | -0.38524 | 5.70E-18 | -0.03457 | 0.45605 | -0.15041 | 0.00111  | -0.0694  |

|          |          |          |          |          |         |          |          |          |
|----------|----------|----------|----------|----------|---------|----------|----------|----------|
| 0.183258 | 6.79E-05 | -0.28649 | 2.84E-10 | -0.05131 | 0.2685  | -0.1828  | 7.09E-05 | -0.09338 |
| -0.34694 | 1.18E-14 | -0.57334 | 3.65E-42 | -0.01256 | 0.78659 | -0.03257 | 0.48264  | -0.15925 |
| -0.05928 | 0.20099  | -0.13593 | 0.00325  | -0.01762 | 0.70404 | -0.03756 | 0.418    | 0.038241 |
| -0.05959 | 0.19864  | -0.19685 | 1.83E-05 | 0.015111 | 0.74466 | -0.08499 | 0.06649  | -0.00449 |
| 0.119421 | 0.00979  | -0.1041  | 0.02446  | -0.02143 | 0.64421 | -0.1303  | 0.0048   | -0.04543 |
| -0.10294 | 0.02611  | -0.11512 | 0.0128   | 0.11821  | 0.01057 | 0.123722 | 0.00743  | 0.358979 |
| -0.01698 | 0.71438  | -0.11198 | 0.01548  | 0.074801 | 0.10644 | 0.008935 | 0.8473   | 0.256261 |
| 0.335641 | 9.26E-14 | -0.07572 | 0.10221  | -0.05833 | 0.20829 | -0.14024 | 0.00238  | -0.10012 |
| 0.056665 | 0.22162  | 0.092944 | 0.0447   | -0.03612 | 0.43613 | -0.12604 | 0.00638  | 0.132003 |
| 0.18771  | 4.47E-05 | 0.156022 | 0.00072  | -0.06732 | 0.14633 | -0.09627 | 0.03756  | -0.0555  |
| -0.04661 | 0.31482  | 0.073332 | 0.11351  | -0.00298 | 0.94878 | -0.02404 | 0.60431  | -0.05287 |
| -0.00165 | 0.97169  | 0.068114 | 0.14164  | -0.00331 | 0.94314 | 0.12348  | 0.00755  | 0.130594 |
| -0.16767 | 0.00027  | -0.05694 | 0.2194   | 0.073763 | 0.1114  | 0.022301 | 0.63073  | 0.378302 |
| 0.299186 | 4.11E-11 | 0.374283 | 5.62E-17 | 0.011675 | 0.80132 | 0.014194 | 0.75966  | -0.02704 |
| 0.129817 | 0.00496  | 0.077731 | 0.09338  | -0.0437  | 0.34604 | 0.018226 | 0.69443  | -0.18135 |
| -0.01526 | 0.74221  | 0.118151 | 0.01061  | -0.03744 | 0.41954 | -0.03646 | 0.43179  | -0.01847 |
| -0.05994 | 0.19602  | -0.34779 | 1.01E-14 | -0.0567  | 0.2213  | -0.14094 | 0.00227  | -0.04166 |
| 0.116174 | 0.01199  | -0.40876 | 3.10E-20 | -0.05058 | 0.27535 | -0.16404 | 0.00037  | -0.06713 |
| -0.08276 | 0.07397  | -0.46409 | 2.55E-26 | -0.04148 | 0.37109 | -0.08828 | 0.05661  | -0.11039 |
| 0.048242 | 0.29818  | 0.100237 | 0.03033  | 0.005428 | 0.90688 | -0.04588 | 0.32247  | 0.065853 |
| -0.10895 | 0.01851  | -0.29873 | 4.42E-11 | 0.062891 | 0.17485 | 0.010672 | 0.81809  | 0.136365 |
| -0.19397 | 2.44E-05 | -0.25636 | 1.92E-08 | 0.021336 | 0.6456  | 0.034257 | 0.46019  | 0.132657 |
| 0.189843 | 3.64E-05 | 0.295567 | 7.21E-11 | -0.00013 | 0.99779 | 0.016807 | 0.71716  | -0.08765 |
| -0.10641 | 0.02146  | -0.1932  | 2.63E-05 | 0.001538 | 0.97356 | -0.08141 | 0.07884  | 0.093166 |
| -0.01833 | 0.69276  | -0.1138  | 0.01387  | -0.03089 | 0.50548 | -0.09431 | 0.04164  | -0.01301 |
| 0.071761 | 0.12148  | 0.049894 | 0.28193  | -0.01905 | 0.68129 | -0.11608 | 0.01206  | 0.006025 |
| 0.172128 | 0.00019  | 0.329801 | 2.60E-13 | 0.030246 | 0.51439 | 0.193461 | 2.56E-05 | -0.0135  |
| -0.01868 | 0.68724  | -0.07732 | 0.09513  | -0.02671 | 0.56475 | -0.08831 | 0.05652  | 0.054138 |
| -0.03849 | 0.40667  | -0.1418  | 0.00213  | -0.0279  | 0.54754 | -0.12537 | 0.00667  | -0.00964 |
| -0.03314 | 0.47491  | -0.2917  | 1.30E-10 | -0.01371 | 0.76754 | -0.11046 | 0.01694  | -0.05968 |
| 0.104572 | 0.02382  | -0.29967 | 3.81E-11 | -0.02815 | 0.54394 | -0.09904 | 0.03237  | -0.03319 |
| 0.225932 | 8.09E-07 | 0.394224 | 8.17E-19 | -0.04472 | 0.33489 | 0.014928 | 0.74763  | -0.06914 |
| 0.06028  | 0.19348  | -0.31044 | 6.84E-12 | -0.0896  | 0.053   | -0.22814 | 6.27E-07 | -0.16063 |
| -0.03869 | 0.40418  | -0.12267 | 0.00796  | -0.0441  | 0.3416  | -0.10976 | 0.01765  | -0.06237 |
| 0.091411 | 0.04835  | -0.18962 | 3.72E-05 | 0.027555 | 0.55252 | -0.06479 | 0.16218  | 0.030572 |
| 0.069552 | 0.1334   | -0.118   | 0.01071  | 0.035599 | 0.4428  | -0.04888 | 0.29185  | 0.046513 |
| -0.07168 | 0.12191  | -0.18222 | 7.48E-05 | -0.00598 | 0.89738 | -0.03248 | 0.48374  | 0.030589 |
| -0.15097 | 0.00107  | -0.28097 | 6.39E-10 | -0.02391 | 0.60626 | -0.0172  | 0.71091  | -0.01747 |
| -0.00799 | 0.86329  | -0.37854 | 2.33E-17 | -0.04898 | 0.29089 | -0.17412 | 0.00016  | -0.15746 |
| -0.09372 | 0.04294  | -0.23279 | 3.63E-07 | 0.118613 | 0.0103  | 0.207853 | 5.92E-06 | 0.287098 |
| -0.06918 | 0.13551  | -0.28178 | 5.68E-10 | -0.02372 | 0.60913 | -0.04966 | 0.28423  | -0.12163 |
| -0.08741 | 0.05909  | -0.16465 | 0.00035  | 0.003094 | 0.94683 | 0.041612 | 0.3696   | 0.136967 |
| -0.10765 | 0.01997  | -0.13652 | 0.00311  | 0.066202 | 0.15318 | -0.02644 | 0.56866  | 0.046951 |
| -0.07217 | 0.11936  | -0.20791 | 5.88E-06 | 0.045492 | 0.32661 | 0.038658 | 0.40457  | 0.145521 |
| 0.283996 | 4.11E-10 | 0.405816 | 6.10E-20 | -0.01498 | 0.74672 | 0.038863 | 0.40209  | 0.008585 |

|          |          |          |          |          |         |          |          |          |
|----------|----------|----------|----------|----------|---------|----------|----------|----------|
| -0.11524 | 0.0127   | -0.35271 | 3.98E-15 | -0.0163  | 0.72537 | -0.07025 | 0.12954  | -0.00295 |
| 0.130238 | 0.00482  | 0.211218 | 4.14E-06 | 0.016526 | 0.7217  | 0.019946 | 0.66726  | 0.055676 |
| -0.0291  | 0.53044  | -0.15137 | 0.00103  | -0.02223 | 0.63174 | -0.12233 | 0.00813  | -0.03397 |
| 0.065781 | 0.15582  | 0.041431 | 0.37169  | -0.02253 | 0.62719 | -0.01938 | 0.67615  | -0.00545 |
| -0.13091 | 0.0046   | -0.49223 | 7.21E-30 | 0.027749 | 0.54972 | -0.1114  | 0.01602  | -0.06706 |
| -0.07132 | 0.12381  | -0.10663 | 0.02118  | 0.006071 | 0.89589 | -0.0266  | 0.56636  | 0.031797 |
| 0.126928 | 0.00602  | -0.24946 | 4.68E-08 | -0.00402 | 0.93089 | -0.14294 | 0.00196  | 0.050528 |
| 0.073831 | 0.11107  | -0.03299 | 0.47699  | -0.0155  | 0.73825 | 0.045925 | 0.32202  | 0.202088 |
| -0.01795 | 0.69877  | -0.23798 | 1.95E-07 | -0.01346 | 0.77168 | -0.09584 | 0.03842  | 0.148894 |
| -0.06691 | 0.14882  | -0.19221 | 2.89E-05 | 0.010721 | 0.81727 | -0.06129 | 0.18612  | 0.100516 |
| -0.11114 | 0.01628  | -0.16592 | 0.00032  | 0.0001   | 0.99828 | -0.06673 | 0.14995  | -0.01592 |
| -0.06015 | 0.19445  | -0.43544 | 4.98E-23 | -0.02479 | 0.59307 | -0.13499 | 0.00347  | -0.11534 |
| -0.12361 | 0.00749  | -0.29443 | 8.58E-11 | -0.00922 | 0.84256 | -0.04889 | 0.29176  | 0.002055 |
| -0.01271 | 0.78409  | -0.30683 | 1.23E-11 | -0.04493 | 0.33261 | -0.1398  | 0.00246  | -0.05764 |
| 0.020078 | 0.66519  | 0.22722  | 6.97E-07 | 0.054667 | 0.23837 | 0.150962 | 0.00107  | 0.165588 |
| -0.04674 | 0.3135   | -0.1114  | 0.01602  | 0.031527 | 0.49673 | -0.04661 | 0.31484  | 0.134875 |
| -0.0125  | 0.78755  | -0.15517 | 0.00077  | 0.022766 | 0.62363 | -0.09983 | 0.03101  | 0.081846 |
| -0.01265 | 0.7852   | -0.33924 | 4.85E-14 | -0.02779 | 0.54907 | -0.16553 | 0.00033  | -0.04375 |
| 0.117227 | 0.01124  | 0.187941 | 4.37E-05 | 0.002982 | 0.94875 | -0.02565 | 0.58037  | 0.011104 |
| 0.062069 | 0.18057  | -0.12954 | 0.00505  | -0.05257 | 0.25688 | -0.11564 | 0.0124   | -0.14788 |
| 0.014993 | 0.74658  | -0.24166 | 1.24E-07 | -0.01105 | 0.81175 | -0.1207  | 0.00903  | -0.06804 |
| -0.01557 | 0.73717  | -0.3837  | 7.90E-18 | -0.0464  | 0.31708 | -0.16767 | 0.00027  | -0.12384 |
| 0.17611  | 0.00013  | -0.03412 | 0.46202  | -0.01297 | 0.77991 | -0.12431 | 0.00715  | 0.104672 |
| -0.1028  | 0.02632  | -0.29111 | 1.42E-10 | -0.04883 | 0.29233 | -0.19264 | 2.78E-05 | -0.03614 |
| -0.05427 | 0.24175  | -0.21866 | 1.84E-06 | 0.001288 | 0.97786 | -0.04964 | 0.28439  | -0.05092 |
| -0.06524 | 0.15926  | -0.08877 | 0.05524  | -0.06316 | 0.17304 | -0.16074 | 0.00049  | 0.054293 |
| 0.083039 | 0.07301  | -0.19143 | 3.12E-05 | -0.02171 | 0.63981 | -0.13296 | 0.004    | -0.06537 |
| -0.07043 | 0.12855  | -0.29175 | 1.29E-10 | -0.00261 | 0.95511 | -0.12571 | 0.00653  | -0.01366 |
| -0.01528 | 0.74186  | -0.26542 | 5.70E-09 | -0.04318 | 0.35179 | -0.09716 | 0.03582  | -0.00269 |
| 0.034749 | 0.45377  | -0.04877 | 0.29289  | 0.042603 | 0.3583  | -0.02122 | 0.64741  | 0.215602 |
| 0.140398 | 0.00236  | -0.03567 | 0.44192  | -0.02078 | 0.65419 | -0.13657 | 0.0031   | 0.023191 |
| 0.163204 | 0.0004   | -0.19227 | 2.88E-05 | -0.02197 | 0.63579 | -0.20177 | 1.11E-05 | -0.05044 |
| -0.09846 | 0.03341  | -0.0689  | 0.13709  | 0.00041  | 0.99294 | -0.01231 | 0.79072  | 0.075925 |
| 0.113935 | 0.01376  | -0.1268  | 0.00607  | -0.0015  | 0.97426 | -0.1382  | 0.00276  | 0.005193 |
| -0.00478 | 0.91796  | -0.33275 | 1.55E-13 | 0.035534 | 0.44363 | -0.15128 | 0.00104  | -0.0855  |
| 0.097383 | 0.03539  | 0.343324 | 2.30E-14 | -0.00844 | 0.8557  | 0.041275 | 0.37349  | 0.032183 |
| 0.056269 | 0.22487  | -0.18568 | 5.41E-05 | -0.01864 | 0.68779 | -0.11637 | 0.01185  | -0.06294 |
| 0.05635  | 0.2242   | -0.24241 | 1.13E-07 | -0.00388 | 0.93333 | -0.16486 | 0.00035  | -0.06998 |
| 0.0163   | 0.72534  | -0.24679 | 6.56E-08 | -0.01659 | 0.7206  | -0.11735 | 0.01115  | 0.00793  |
| -0.0348  | 0.45313  | -0.29561 | 7.16E-11 | -0.04136 | 0.37256 | -0.15958 | 0.00054  | -0.06774 |
| 0.076209 | 0.1      | -0.24271 | 1.09E-07 | 0.005276 | 0.90946 | -0.1306  | 0.0047   | -0.04995 |
| -0.23286 | 3.60E-07 | -0.14176 | 0.00214  | 0.024324 | 0.60007 | -0.01762 | 0.70411  | 0.006003 |
| 0.063295 | 0.17209  | -0.03212 | 0.48869  | 0.06535  | 0.15855 | -0.02079 | 0.65404  | 0.025386 |
| 0.156674 | 0.00068  | 0.05737  | 0.21591  | 0.075849 | 0.10161 | -0.0212  | 0.64768  | -0.02023 |
| 0.08855  | 0.05585  | -0.07878 | 0.08901  | 0.079833 | 0.08483 | -0.00782 | 0.8662   | 0.004142 |

|          |          |          |          |          |         |          |         |          |
|----------|----------|----------|----------|----------|---------|----------|---------|----------|
| 0.109589 | 0.01784  | -0.02276 | 0.62365  | 0.123535 | 0.00752 | 0.040039 | 0.38798 | 0.029841 |
| 0.044958 | 0.33233  | -0.03372 | 0.46725  | 0.054539 | 0.23946 | 0.003111 | 0.94654 | -0.01679 |
| 0.052117 | 0.26101  | -0.01195 | 0.79681  | 0.074453 | 0.10809 | 0.026356 | 0.56995 | 0.029021 |
| 0.048878 | 0.29186  | -0.05007 | 0.28027  | 0.145375 | 0.00163 | 0.042166 | 0.36325 | 0.186822 |
| -0.02063 | 0.65652  | -0.08299 | 0.07319  | 0.062158 | 0.17994 | -0.00583 | 0.9     | 0.004052 |
| 0.075147 | 0.10483  | -0.00961 | 0.83596  | 0.083436 | 0.07164 | 0.027019 | 0.56028 | 0.051657 |
| -0.01654 | 0.7214   | -0.14992 | 0.00116  | 0.060987 | 0.1883  | 0.011601 | 0.80256 | -0.03366 |
| 0.000261 | 0.99552  | -0.0979  | 0.03443  | -0.00242 | 0.95842 | -0.00463 | 0.92047 | -0.01564 |
| 0.077589 | 0.09398  | -0.02358 | 0.6113   | 0.094075 | 0.04215 | 0.00326  | 0.94399 | 0.02547  |
| 0.057696 | 0.21331  | -0.03139 | 0.49858  | 0.134002 | 0.00372 | -0.01785 | 0.70048 | 0.023568 |
| 0.020586 | 0.65724  | -0.11753 | 0.01103  | 0.065294 | 0.15891 | 0.006661 | 0.88584 | -0.02456 |
| 0.092626 | 0.04543  | -0.02987 | 0.51965  | 0.115761 | 0.0123  | 0.031984 | 0.4905  | 0.023037 |
| 0.060303 | 0.19331  | -0.06323 | 0.17253  | 0.060806 | 0.18961 | -0.02512 | 0.58815 | -0.03981 |
| 0.058132 | 0.20987  | -0.06278 | 0.17559  | 0.084778 | 0.06718 | 0.008713 | 0.85104 | 0.022957 |
| 0.187532 | 4.54E-05 | -0.09897 | 0.03249  | 0.043479 | 0.34849 | -0.03524 | 0.44739 | -0.00916 |
| -0.0058  | 0.90057  | -0.08883 | 0.05507  | 0.0522   | 0.26025 | 0.026784 | 0.56369 | 0.042544 |
| 0.067984 | 0.1424   | -0.00838 | 0.85672  | 0.087815 | 0.05792 | -0.00816 | 0.86034 | 0.009165 |
| 0.081476 | 0.07859  | 0.046811 | 0.31276  | 0.062317 | 0.17882 | -0.05608 | 0.22645 | 0.042335 |
| 0.096429 | 0.03724  | 0.014288 | 0.75812  | 0.137682 | 0.00287 | 0.032476 | 0.48385 | 0.044375 |
| 0.021642 | 0.64087  | -0.06777 | 0.14366  | 0.029312 | 0.52747 | 0.022558 | 0.6268  | 0.038556 |
| 0.027301 | 0.55619  | -0.03868 | 0.40437  | 0.036792 | 0.42765 | 0.053588 | 0.24777 | -0.00947 |
| 0.076567 | 0.09841  | -0.00801 | 0.86289  | 0.102051 | 0.02744 | 0.034284 | 0.45984 | 0.075891 |
| 0.074147 | 0.10955  | -0.0003  | 0.99486  | 0.092202 | 0.04644 | 0.036613 | 0.4299  | 0.063197 |
| 0.011083 | 0.81121  | -0.09978 | 0.0311   | 0.046292 | 0.31817 | -0.01369 | 0.768   | -0.0062  |
| 0.072015 | 0.12016  | -0.07054 | 0.12798  | 0.165987 | 0.00032 | 0.066097 | 0.15384 | 0.07488  |
| 0.073392 | 0.11322  | 0.01028  | 0.82466  | 0.053945 | 0.24463 | -0.01253 | 0.78708 | 0.037398 |
| 0.050444 | 0.27665  | -0.03185 | 0.49232  | 0.076591 | 0.0983  | 0.020083 | 0.6651  | 0.046966 |
| 0.0581   | 0.21012  | -0.03896 | 0.40088  | 0.115396 | 0.01258 | 0.039748 | 0.39145 | 0.039722 |
| 0.045218 | 0.32953  | -0.02783 | 0.54859  | 0.078416 | 0.09052 | 0.02041  | 0.66    | 0.041838 |
| 0.040636 | 0.38094  | 0.005519 | 0.90532  | 0.068576 | 0.13895 | -0.01069 | 0.81773 | 0.035574 |
| 0.013646 | 0.76867  | -0.11642 | 0.01181  | 0.046365 | 0.3174  | -0.01231 | 0.79073 | -0.01535 |
| 0.222848 | 1.15E-06 | 0.242915 | 1.07E-07 | 0.135802 | 0.00328 | 0.066838 | 0.14927 | 0.093398 |
| 0.071744 | 0.12156  | -0.01165 | 0.80179  | 0.086661 | 0.06131 | -0.00434 | 0.9255  | 0.06849  |
| 0.240624 | 1.41E-07 | -0.00876 | 0.85032  | 0.09541  | 0.0393  | -0.02098 | 0.65107 | 0.010611 |
| 0.110544 | 0.01686  | 0.043382 | 0.34957  | 0.10021  | 0.03037 | 0.023973 | 0.60534 | -0.00536 |
| 0.066006 | 0.15441  | -0.05395 | 0.2446   | 0.037156 | 0.42309 | -0.0135  | 0.77113 | -0.01848 |
| -0.00137 | 0.97647  | -0.0975  | 0.03517  | 0.061693 | 0.18322 | 0.011875 | 0.798   | 0.020258 |
| 0.080097 | 0.0838   | -0.04527 | 0.32894  | 0.068326 | 0.1404  | -0.03723 | 0.42213 | 0.013774 |
| -0.04467 | 0.33547  | -0.03181 | 0.49284  | 0.092586 | 0.04553 | 0.053057 | 0.2525  | 0.121487 |
| -0.00922 | 0.8424   | -0.08922 | 0.054    | 0.056394 | 0.22384 | -0.00617 | 0.89415 | 0.030799 |
| 0.064546 | 0.16375  | -0.03906 | 0.3997   | 0.082425 | 0.07516 | 0.015766 | 0.73399 | 0.047498 |
| 0.097105 | 0.03592  | 0.019834 | 0.669    | 0.080366 | 0.08276 | 0.023159 | 0.61764 | -0.01549 |
| 0.03447  | 0.4574   | -0.0151  | 0.74479  | 0.047318 | 0.30755 | 0.018734 | 0.68636 | 0.020552 |
| 0.048829 | 0.29234  | -0.02025 | 0.66254  | 0.07329  | 0.11372 | 0.022267 | 0.63125 | 0.038529 |
| 0.098398 | 0.03352  | 0.039079 | 0.39948  | 0.090663 | 0.05023 | 0.028523 | 0.53864 | -0.0077  |

|          |          |          |          |          |          |          |          |          |
|----------|----------|----------|----------|----------|----------|----------|----------|----------|
| 0.068213 | 0.14106  | -0.01071 | 0.81736  | 0.08282  | 0.07377  | 0.032178 | 0.48788  | 0.052439 |
| 0.055811 | 0.22867  | 0.00912  | 0.84418  | 0.188946 | 3.97E-05 | 0.054167 | 0.24269  | 0.084593 |
| 0.042734 | 0.35682  | -0.05496 | 0.23586  | 0.127227 | 0.0059   | 0.050919 | 0.27215  | 0.022137 |
| 0.244358 | 8.91E-08 | 0.008662 | 0.85191  | 0.084448 | 0.06826  | -0.00178 | 0.96939  | 0.022487 |
| 0.226852 | 7.27E-07 | -0.03558 | 0.44304  | 0.047423 | 0.30647  | -0.0274  | 0.55478  | -0.10647 |
| 0.04135  | 0.37262  | -0.04016 | 0.3865   | 0.085553 | 0.06471  | 0.005058 | 0.91319  | 0.074597 |
| 0.176027 | 0.00013  | -0.20124 | 1.18E-05 | 0.038149 | 0.4108   | -0.09334 | 0.04379  | -0.00651 |
| 0.198831 | 1.50E-05 | 0.17308  | 0.00017  | 0.109274 | 0.01817  | 0.005684 | 0.90251  | 0.101807 |
| 0.178461 | 0.00011  | 0.014753 | 0.75051  | 0.055108 | 0.23459  | -0.03449 | 0.45712  | 0.004117 |
| 0.140285 | 0.00238  | -0.05454 | 0.2395   | 0.057979 | 0.21107  | 0.001201 | 0.97935  | 0.009565 |
| 0.080211 | 0.08336  | 0.011171 | 0.80973  | 0.085801 | 0.06394  | 0.034184 | 0.46114  | -0.00064 |
| 0.113564 | 0.01407  | 0.054307 | 0.24147  | 0.147588 | 0.00138  | 0.014671 | 0.75184  | 0.027417 |
| 0.052028 | 0.26183  | -0.16506 | 0.00034  | 0.097328 | 0.0355   | -0.00482 | 0.91735  | -0.01706 |
| 0.115166 | 0.01276  | -0.06418 | 0.16616  | 0.065749 | 0.15602  | -0.00989 | 0.83123  | -0.00683 |
| 0.135121 | 0.00344  | 0.006932 | 0.88124  | 0.072267 | 0.11886  | -0.0266  | 0.56642  | 0.051045 |
| 0.175018 | 0.00014  | 0.106446 | 0.02141  | 0.156399 | 0.00069  | 0.04992  | 0.28167  | 0.123915 |
| 0.062622 | 0.1767   | -0.04827 | 0.29791  | 0.10481  | 0.0235   | 0.02825  | 0.54255  | 0.020962 |
| 0.09372  | 0.04294  | -0.03783 | 0.41474  | 0.086003 | 0.06331  | 0.014554 | 0.75376  | 0.042573 |
| 0.047633 | 0.30433  | -0.03459 | 0.45582  | 0.076729 | 0.0977   | -0.00419 | 0.92799  | 0.019367 |
| 0.12299  | 0.0078   | 0.068405 | 0.13994  | 0.084383 | 0.06847  | 0.028139 | 0.54414  | 0.057499 |
| 0.093739 | 0.04289  | -0.04477 | 0.33438  | 0.076662 | 0.09799  | 0.012506 | 0.78751  | 0.046347 |
| 0.045068 | 0.33115  | -0.12504 | 0.00682  | 0.083982 | 0.0698   | 0.007803 | 0.86645  | 0.012548 |
| 0.094796 | 0.04059  | -0.00345 | 0.94069  | 0.09893  | 0.03256  | 0.030368 | 0.51269  | 0.063628 |
| 0.102968 | 0.02607  | 0.01525  | 0.7424   | 0.105621 | 0.02244  | 0.042058 | 0.36449  | 0.065939 |
| 0.074891 | 0.10602  | 0.002114 | 0.96365  | 0.102098 | 0.02737  | 0.027982 | 0.54639  | 0.050212 |
| 0.076851 | 0.09716  | 0.012673 | 0.78474  | 0.091868 | 0.04724  | 0.029768 | 0.52106  | 0.046647 |
| 0.031701 | 0.49435  | -0.0215  | 0.64303  | 0.088774 | 0.05523  | 0.020972 | 0.65124  | 0.003265 |
| 0.0428   | 0.35608  | -0.02485 | 0.59222  | 0.105698 | 0.02235  | 0.028864 | 0.53381  | 0.043457 |
| 0.083581 | 0.07115  | 0.024406 | 0.59883  | 0.132846 | 0.00403  | 0.01592  | 0.73149  | 0.040234 |
| 0.071497 | 0.12286  | 0.018701 | 0.68688  | 0.103303 | 0.02559  | 0.032035 | 0.48981  | 0.054487 |
| 0.063596 | 0.17006  | 0.018808 | 0.68519  | 0.093473 | 0.04349  | 0.019539 | 0.67364  | 0.03082  |
| 0.102932 | 0.02613  | 0.06917  | 0.13555  | 0.084123 | 0.06933  | 0.007108 | 0.87825  | 0.014552 |
| 0.056779 | 0.22069  | 0.015731 | 0.73456  | 0.085559 | 0.06469  | 0.051167 | 0.26981  | 0.062079 |
| 0.12381  | 0.00739  | 0.005781 | 0.90085  | 0.100531 | 0.02984  | 0.033315 | 0.47262  | 0.064582 |
| 0.000946 | 0.98373  | -0.20146 | 1.15E-05 | 0.035163 | 0.4484   | -0.03548 | 0.44429  | -0.04338 |
| -0.03115 | 0.50189  | -0.02816 | 0.54379  | 0.284968 | 3.56E-10 | 0.181536 | 7.97E-05 | 0.156988 |
| 0.133899 | 0.00374  | 0.100264 | 0.03028  | 0.035529 | 0.4437   | 0.007054 | 0.87916  | 0.02486  |
| 0.012811 | 0.78246  | 0.002918 | 0.94986  | 0.175607 | 0.00014  | 0.170546 | 0.00021  | 0.078596 |
| 0.007856 | 0.86554  | -0.09034 | 0.05106  | 0.061482 | 0.18473  | -0.00072 | 0.9877   | -0.01648 |
| 0.078262 | 0.09116  | 0.032454 | 0.48415  | 0.042095 | 0.36407  | -0.03958 | 0.39345  | -0.04701 |
| 0.099023 | 0.0324   | 0.100986 | 0.0291   | 0.02932  | 0.52735  | -0.04019 | 0.38614  | -0.03336 |
| 0.012567 | 0.78649  | -0.02049 | 0.65879  | 0.072705 | 0.11664  | 0.023432 | 0.6135   | -0.02166 |
| 0.090636 | 0.0503   | 0.105768 | 0.02226  | 0.072693 | 0.1167   | -0.01929 | 0.67753  | -0.02257 |
| 0.084443 | 0.06827  | -0.06854 | 0.13915  | 0.08544  | 0.06507  | -0.00656 | 0.88761  | -0.00821 |
| 0.130571 | 0.00471  | -0.10394 | 0.02468  | 0.038897 | 0.40168  | -0.0668  | 0.14948  | -0.03641 |

|          |         |          |          |          |         |          |          |          |
|----------|---------|----------|----------|----------|---------|----------|----------|----------|
| -0.04813 | 0.29932 | -0.12287 | 0.00786  | 0.073513 | 0.11262 | -0.00239 | 0.95898  | -0.01069 |
| 0.068308 | 0.14051 | 0.01272  | 0.78396  | 0.111927 | 0.01552 | 0.042914 | 0.3548   | 0.048369 |
| 0.062602 | 0.17684 | 0.004105 | 0.9295   | 0.057789 | 0.21257 | 0.006662 | 0.88583  | 0.033245 |
| 0.079555 | 0.08592 | -0.04037 | 0.38408  | 0.096948 | 0.03623 | 0.020777 | 0.65427  | 0.046037 |
| 0.055885 | 0.22806 | 0.012668 | 0.78483  | 0.063223 | 0.17258 | -0.01403 | 0.76237  | 0.115844 |
| 0.019898 | 0.668   | -0.00909 | 0.84468  | 0.067242 | 0.14682 | 0.026013 | 0.57498  | 0.000798 |
| -0.00647 | 0.88906 | -0.1084  | 0.01912  | 0.056784 | 0.22065 | -0.03582 | 0.43998  | -0.005   |
| 0.012821 | 0.7823  | -0.14926 | 0.00122  | 0.069402 | 0.13424 | -0.03069 | 0.50819  | -0.01576 |
| 0.04639  | 0.31715 | -0.03112 | 0.50237  | 0.06785  | 0.14319 | 0.058039 | 0.21059  | 0.030773 |
| 0.044382 | 0.33856 | -0.08747 | 0.05892  | 0.093963 | 0.0424  | 0.039723 | 0.39174  | 0.04657  |
| 0.042949 | 0.35441 | -0.06469 | 0.16284  | 0.036265 | 0.4343  | -0.01778 | 0.70162  | -0.05171 |
| 0.056705 | 0.22129 | -0.02111 | 0.64911  | 0.107576 | 0.02006 | 0.019363 | 0.67641  | 0.033645 |
| 0.092074 | 0.04674 | 0.034116 | 0.46204  | 0.061895 | 0.18179 | -0.00423 | 0.92742  | 0.032869 |
| 0.073339 | 0.11348 | 0.020786 | 0.65413  | 0.11596  | 0.01215 | 0.027628 | 0.55147  | 0.055227 |
| 0.084984 | 0.06652 | 0.026064 | 0.57422  | 0.101603 | 0.02813 | 0.016494 | 0.72221  | 0.049536 |
| 0.045288 | 0.32878 | -0.10971 | 0.0177   | 0.08304  | 0.073   | 0.002836 | 0.95126  | -0.00432 |
| 0.088463 | 0.05609 | -0.00642 | 0.88996  | 0.100366 | 0.03011 | 0.018271 | 0.69372  | 0.035235 |
| 0.050045 | 0.28047 | -0.08356 | 0.07121  | 0.083193 | 0.07248 | -0.01133 | 0.80713  | 0.162159 |
| 0.060992 | 0.18826 | -0.04008 | 0.3875   | 0.08853  | 0.0559  | 0.026907 | 0.5619   | 0.048829 |
| -0.03909 | 0.39937 | -0.03402 | 0.46333  | 0.027936 | 0.54704 | -0.04935 | 0.28719  | -0.03259 |
| 0.13643  | 0.00313 | -0.05146 | 0.2671   | 0.067633 | 0.14448 | -0.03245 | 0.48426  | -0.03712 |
| 0.128397 | 0.00546 | 0.007349 | 0.87415  | 0.126444 | 0.00622 | 0.01739  | 0.7078   | 0.053296 |
| 0.048091 | 0.29971 | -0.04027 | 0.38529  | 0.076709 | 0.09778 | 0.025886 | 0.57685  | 0.01609  |
| 0.086287 | 0.06244 | -0.03667 | 0.42913  | 0.066728 | 0.14994 | 0.026826 | 0.56309  | 0.002877 |
| 0.097318 | 0.03552 | -0.04015 | 0.38666  | 0.094053 | 0.0422  | 0.000218 | 0.99626  | 0.002138 |
| 0.053255 | 0.25073 | -0.07307 | 0.11483  | 0.05688  | 0.21986 | 0.001108 | 0.98095  | 0.007754 |
| 0.142983 | 0.00195 | -0.10821 | 0.01933  | 0.026345 | 0.57011 | -0.05173 | 0.26457  | 0.008047 |
| 0.064032 | 0.16714 | -0.02601 | 0.57496  | 0.081127 | 0.07989 | 0.018298 | 0.69329  | 0.040054 |
| -0.02877 | 0.53518 | -0.14283 | 0.00197  | 0.075971 | 0.10106 | 0.020255 | 0.66241  | 0.036898 |
| 0.09496  | 0.04024 | 0.028237 | 0.54272  | 0.115183 | 0.01275 | 0.025469 | 0.58301  | 0.066551 |
| 0.150732 | 0.00109 | -0.01922 | 0.6787   | 0.078313 | 0.09095 | 0.001013 | 0.98257  | -0.01968 |
| 0.075529 | 0.10307 | -0.01399 | 0.76302  | 0.114127 | 0.0136  | 0.027792 | 0.54911  | 0.062841 |
| 0.004242 | 0.92715 | -0.10596 | 0.02201  | 0.08707  | 0.06009 | 0.013086 | 0.77791  | -0.00818 |
| 0.068261 | 0.14078 | 0.08746  | 0.05895  | 0.043542 | 0.3478  | -0.0357  | 0.44152  | -0.02817 |
| 0.045786 | 0.32349 | 0.079323 | 0.08684  | 0.055505 | 0.23123 | 0.024984 | 0.59019  | -0.00476 |
| 0.033841 | 0.46566 | -0.01495 | 0.74722  | 0.094588 | 0.04104 | 0.069533 | 0.13351  | 0.078761 |
| 0.058993 | 0.20318 | 0.165148 | 0.00034  | 0.166827 | 0.00029 | 0.285824 | 3.14E-10 | 0.418569 |
| 0.1188   | 0.01018 | -0.28291 | 4.82E-10 | 0.022717 | 0.62437 | -0.10952 | 0.01791  | -0.0518  |
| 0.113095 | 0.01447 | -0.10356 | 0.02522  | 0.078511 | 0.09013 | 0.072861 | 0.11585  | 0.027609 |
| 0.083985 | 0.06979 | 0.025549 | 0.58183  | 0.067774 | 0.14364 | 0.026972 | 0.56097  | 0.046752 |
| 0.08922  | 0.05401 | -0.03054 | 0.51031  | 0.025619 | 0.58079 | -0.03743 | 0.41965  | -0.02135 |
| 0.109756 | 0.01766 | -0.02246 | 0.62835  | 0.05089  | 0.27242 | -0.00255 | 0.95613  | 0.011094 |
| 0.133548 | 0.00384 | 0.03072  | 0.50781  | 0.036587 | 0.43023 | -0.01968 | 0.67149  | 0.005698 |
| 0.058376 | 0.20796 | -0.00577 | 0.90103  | 0.050633 | 0.27485 | 0.036586 | 0.43024  | 0.089361 |
| 0.055039 | 0.23518 | -0.01884 | 0.68466  | 0.027141 | 0.55851 | -0.03519 | 0.44809  | -0.00758 |

|          |          |          |          |          |          |          |          |          |
|----------|----------|----------|----------|----------|----------|----------|----------|----------|
| 0.019306 | 0.67732  | -0.08316 | 0.07259  | 0.084893 | 0.06681  | -0.00031 | 0.99465  | 0.026187 |
| 0.010999 | 0.81261  | -0.11035 | 0.01705  | 0.079202 | 0.08733  | -0.02044 | 0.65951  | -0.01628 |
| 0.101413 | 0.02843  | 0.024935 | 0.59093  | 0.094842 | 0.04049  | 0.04291  | 0.35484  | 0.080434 |
| -0.00187 | 0.96791  | -0.01466 | 0.75199  | 0.07006  | 0.13058  | 0.090193 | 0.05144  | 0.136045 |
| 0.151246 | 0.00104  | 0.000988 | 0.98301  | 0.007893 | 0.86493  | -0.07677 | 0.09751  | -0.02734 |
| 0.038732 | 0.40368  | -0.0285  | 0.539    | 0.019558 | 0.67335  | -0.05495 | 0.23596  | -0.0055  |
| 0.014358 | 0.75697  | -0.03272 | 0.48054  | 0.062828 | 0.17528  | -0.02774 | 0.54987  | -0.02283 |
| 0.136431 | 0.00313  | 0.075514 | 0.10314  | 0.073781 | 0.11131  | 0.02004  | 0.66577  | 0.096586 |
| 0.059501 | 0.19931  | -0.00887 | 0.84837  | 0.086042 | 0.06319  | -0.01555 | 0.73755  | 0.01489  |
| 0.117467 | 0.01107  | 0.021585 | 0.64175  | 0.127242 | 0.0059   | 0.017245 | 0.71012  | 0.026651 |
| 0.060982 | 0.18833  | 0.001557 | 0.97323  | 0.064312 | 0.16529  | -0.00681 | 0.88331  | 0.005264 |
| 0.126356 | 0.00625  | 0.017881 | 0.69994  | 0.089136 | 0.05424  | 0.000122 | 0.9979   | 0.029965 |
| 0.185638 | 5.44E-05 | -0.00683 | 0.88296  | 0.042698 | 0.35723  | -0.02713 | 0.55863  | -0.00166 |
| -0.01034 | 0.8237   | -0.15134 | 0.00104  | 0.246643 | 6.69E-08 | 0.192192 | 2.90E-05 | 0.112857 |
| 0.109273 | 0.01817  | -0.08731 | 0.05937  | 0.119581 | 0.00969  | 0.010244 | 0.82525  | 0.039065 |
| 0.097305 | 0.03554  | 0.004712 | 0.91911  | 0.129642 | 0.00502  | 0.015498 | 0.73835  | 0.029894 |
| 0.134156 | 0.00368  | 0.053183 | 0.25137  | 0.106982 | 0.02076  | 0.005995 | 0.8972   | 0.032488 |
| 0.034475 | 0.45734  | -0.12535 | 0.00668  | 0.053076 | 0.25232  | 0.019113 | 0.68037  | -0.03561 |
| 0.060878 | 0.18909  | 0.004458 | 0.92346  | 0.11036  | 0.01704  | 0.034004 | 0.46351  | 0.018141 |
| -0.06182 | 0.18234  | -0.29989 | 3.68E-11 | 0.040345 | 0.38437  | -0.04263 | 0.35802  | -0.03172 |
| -0.01216 | 0.79318  | -0.19559 | 2.08E-05 | 0.039985 | 0.38862  | -0.01545 | 0.73911  | -0.04028 |
| 0.14028  | 0.00238  | 0.157895 | 0.00062  | 0.084546 | 0.06794  | 0.006463 | 0.88922  | 0.06863  |
| 0.085065 | 0.06626  | 0.029946 | 0.51858  | 0.022876 | 0.62194  | 0.035303 | 0.4466   | 0.078533 |
| 0.057218 | 0.21713  | -0.01079 | 0.81604  | 0.115458 | 0.01253  | 0.031397 | 0.4985   | 0.04889  |
| 0.030625 | 0.50913  | -0.01075 | 0.81676  | 0.067383 | 0.14597  | 0.014401 | 0.75626  | 0.198303 |
| 0.083243 | 0.0723   | 0.019603 | 0.67264  | 0.102964 | 0.02608  | -0.00766 | 0.86881  | 0.027433 |
| 0.103166 | 0.02579  | 0.018382 | 0.69195  | 0.104645 | 0.02373  | 0.020652 | 0.65622  | 0.073355 |
| 0.071458 | 0.12306  | 0.015765 | 0.73402  | 0.152671 | 0.00093  | 0.030368 | 0.5127   | 0.07901  |
| -0.00514 | 0.91179  | -0.13586 | 0.00326  | 0.037716 | 0.41613  | -0.02506 | 0.58903  | -0.04149 |
| 0.175668 | 0.00014  | 0.066257 | 0.15284  | 0.053846 | 0.2455   | -0.03654 | 0.43087  | 0.025734 |
| 0.045379 | 0.32782  | -0.01646 | 0.72269  | 0.077039 | 0.09634  | 0.012221 | 0.79223  | 0.075891 |
| 0.180329 | 8.90E-05 | 0.148494 | 0.00129  | 0.045169 | 0.33006  | -0.02967 | 0.52244  | -0.00267 |
| 0.099481 | 0.0316   | 0.074582 | 0.10747  | 0.052634 | 0.2563   | 0.000248 | 0.99573  | 0.040001 |
| -0.00644 | 0.88954  | -0.04111 | 0.37538  | 0.062913 | 0.1747   | 0.017078 | 0.71281  | 0.017686 |
| 0.047102 | 0.30977  | -0.11845 | 0.01041  | 0.092013 | 0.04689  | -0.02277 | 0.6236   | -0.04586 |
| 0.099738 | 0.03117  | 0.012749 | 0.78349  | 0.10379  | 0.0249   | 0.038434 | 0.40731  | 0.081985 |
| 0.042482 | 0.35967  | -0.12276 | 0.00791  | 0.10865  | 0.01884  | 0.042447 | 0.36006  | 0.08603  |
| 0.096486 | 0.03713  | -0.02086 | 0.65297  | 0.104215 | 0.02431  | 0.019252 | 0.67818  | 0.04049  |
| 0.080263 | 0.08316  | 0.036807 | 0.42746  | 0.104948 | 0.02332  | 0.031064 | 0.50308  | 0.077375 |
| 0.041828 | 0.36712  | -0.01596 | 0.73085  | 0.082949 | 0.07332  | 0.028393 | 0.5405   | 0.053071 |
| -0.0357  | 0.44146  | -0.10764 | 0.01998  | 0.069832 | 0.13184  | 0.019508 | 0.67414  | -0.02688 |
| 0.101969 | 0.02757  | -0.01528 | 0.74188  | 0.101205 | 0.02876  | 0.017269 | 0.70973  | 0.043142 |
| 0.006966 | 0.88066  | -0.07152 | 0.12273  | 0.073985 | 0.11033  | 0.006623 | 0.88649  | 0.008486 |
| 0.147456 | 0.0014   | -0.01678 | 0.71757  | 0.106119 | 0.02181  | -0.00873 | 0.85079  | 0.023725 |
| 0.06165  | 0.18353  | -0.03779 | 0.41524  | 0.084117 | 0.06935  | 0.004591 | 0.92117  | 0.032837 |



|          |          |          |          |          |         |          |          |          |
|----------|----------|----------|----------|----------|---------|----------|----------|----------|
| -0.03772 | 0.41605  | -0.18331 | 6.76E-05 | 0.119453 | 0.00977 | 0.100303 | 0.03022  | 0.128722 |
| 0.150992 | 0.00106  | -0.06618 | 0.15331  | 0.0299   | 0.51921 | -0.0435  | 0.34828  | -0.00063 |
| 0.042069 | 0.36437  | -0.06122 | 0.1866   | 0.043374 | 0.34966 | -0.0332  | 0.47419  | 0.036086 |
| -0.04198 | 0.36537  | -0.07396 | 0.11044  | 0.063528 | 0.17051 | -0.00144 | 0.97531  | 0.082503 |
| -0.01283 | 0.78209  | -0.03419 | 0.46102  | 0.046875 | 0.3121  | 0.088222 | 0.05677  | 0.109183 |
| 0.071307 | 0.12386  | 0.006095 | 0.89548  | -0.00468 | 0.91963 | -0.03397 | 0.46394  | -0.01506 |
| 0.021406 | 0.64451  | -0.17452 | 0.00015  | 0.003853 | 0.93382 | -0.06886 | 0.1373   | -0.02647 |
| 0.043451 | 0.34881  | -0.0188  | 0.68531  | 0.080106 | 0.08376 | 0.006524 | 0.88818  | 0.043994 |
| 0.002772 | 0.95237  | -0.08886 | 0.055    | 0.07372  | 0.11161 | -0.01656 | 0.72119  | 0.009238 |
| 0.04821  | 0.2985   | 0.136075 | 0.00321  | 0.040402 | 0.38369 | -0.02452 | 0.59713  | -0.00261 |
| -0.06219 | 0.17969  | -0.2176  | 2.07E-06 | 0.018036 | 0.69746 | -0.01245 | 0.78836  | -0.01293 |
| 0.045803 | 0.32331  | 0.01838  | 0.69198  | 0.137783 | 0.00285 | 0.001291 | 0.97781  | 0.017721 |
| 0.078358 | 0.09076  | -0.05303 | 0.25275  | 0.039505 | 0.39435 | -0.03091 | 0.50519  | 0.000163 |
| 0.063337 | 0.17181  | 0.171962 | 0.00019  | 0.153467 | 0.00088 | 0.049713 | 0.28368  | 0.373583 |
| -0.0072  | 0.87665  | -0.14867 | 0.00127  | 0.09029  | 0.05118 | 0.018673 | 0.68733  | 0.055162 |
| -0.00421 | 0.92779  | -0.08362 | 0.071    | 0.043802 | 0.34492 | 0.143452 | 0.00188  | 0.028382 |
| 0.152625 | 0.00094  | 0.022073 | 0.63423  | 0.077992 | 0.09228 | 0.019326 | 0.677    | 0.02571  |
| 0.120836 | 0.00895  | 0.11062  | 0.01678  | 0.09118  | 0.04893 | 0.010277 | 0.82471  | 0.052849 |
| 0.095051 | 0.04005  | -0.03837 | 0.40807  | 0.158537 | 0.00058 | 0.111102 | 0.01631  | 0.162374 |
| 0.110791 | 0.01661  | 0.051847 | 0.2635   | 0.093275 | 0.04394 | 0.028851 | 0.53399  | 0.016254 |
| 0.049834 | 0.28251  | 0.038268 | 0.40934  | 0.036051 | 0.43702 | -0.03776 | 0.41553  | -0.03435 |
| -0.02604 | 0.57456  | -0.07457 | 0.10751  | 0.100224 | 0.03035 | 0.192154 | 2.91E-05 | 0.094141 |
| 0.152126 | 0.00097  | 0.068191 | 0.14119  | 0.039178 | 0.39828 | 0.012131 | 0.79373  | 0.091046 |
| 0.053835 | 0.2456   | -0.10814 | 0.01941  | 0.073502 | 0.11268 | -0.02626 | 0.57135  | 0.013335 |
| 0.075508 | 0.10316  | 0.034898 | 0.45184  | 0.064716 | 0.16264 | -0.00982 | 0.83241  | 0.087916 |
| 0.082971 | 0.07325  | 0.023122 | 0.6182   | 0.118393 | 0.01045 | 0.024553 | 0.59664  | 0.035418 |
| 0.033204 | 0.47411  | -0.03328 | 0.47314  | 0.078943 | 0.08837 | 0.038982 | 0.40065  | 0.091087 |
| 0.061321 | 0.18589  | -0.03748 | 0.41903  | 0.078991 | 0.08818 | 0.027202 | 0.55763  | 0.075728 |
| 0.036645 | 0.4295   | 0.015956 | 0.73092  | 0.047627 | 0.30439 | -0.02253 | 0.62721  | 0.02178  |
| 0.107318 | 0.02036  | -0.01711 | 0.71222  | 0.125381 | 0.00667 | 0.030126 | 0.51606  | 0.065589 |
| 0.081245 | 0.07944  | 0.038183 | 0.41038  | 0.083694 | 0.07077 | 0.046504 | 0.31595  | 0.052415 |
| 0.088904 | 0.05487  | -0.03604 | 0.43722  | 0.100785 | 0.02943 | 0.001715 | 0.97052  | 0.032569 |
| 0.056214 | 0.22532  | 0.063077 | 0.17357  | 0.078251 | 0.0912  | 0.058638 | 0.20592  | 0.050569 |
| 0.197471 | 1.72E-05 | -0.0044  | 0.9245   | 0.071973 | 0.12038 | -0.00876 | 0.85019  | 0.051644 |
| 0.110404 | 0.017    | 0.025568 | 0.58154  | 0.109897 | 0.01751 | 0.040639 | 0.38091  | 0.042267 |
| 0.055423 | 0.23193  | 0.025042 | 0.58934  | 0.069266 | 0.13501 | 0.040436 | 0.38329  | 0.0427   |
| 0.092157 | 0.04654  | 0.006118 | 0.8951   | 0.102851 | 0.02624 | 0.025267 | 0.586    | 0.050602 |
| 0.083375 | 0.07185  | 0.021324 | 0.64579  | 0.086477 | 0.06186 | 0.021415 | 0.64437  | 0.053136 |
| 0.099604 | 0.03139  | 0.031777 | 0.49332  | 0.112109 | 0.01536 | 0.013094 | 0.77777  | 0.043227 |
| 0.066048 | 0.15414  | 0.012105 | 0.79417  | 0.107504 | 0.02014 | 0.033902 | 0.46486  | 0.054528 |
| 0.039752 | 0.3914   | -0.04065 | 0.38079  | 0.071762 | 0.12147 | 0.022491 | 0.62782  | 0.039984 |
| 0.055599 | 0.23045  | -0.0086  | 0.85301  | 0.068699 | 0.13824 | 0.011106 | 0.81082  | 0.056398 |
| 0.086719 | 0.06114  | 0.037083 | 0.424    | 0.088143 | 0.05699 | 0.023771 | 0.60837  | 0.037712 |
| 0.08495  | 0.06663  | -0.00365 | 0.93734  | 0.111612 | 0.01582 | 0.021969 | 0.63583  | 0.054937 |
| 0.073528 | 0.11255  | -0.01215 | 0.79346  | 0.115795 | 0.01228 | 0.034574 | 0.45605  | 0.047508 |

|          |          |          |          |          |         |          |          |          |
|----------|----------|----------|----------|----------|---------|----------|----------|----------|
| 0.054373 | 0.24091  | -0.02383 | 0.60743  | 0.066771 | 0.14968 | 0.030049 | 0.51714  | 0.035687 |
| 0.095693 | 0.03872  | 0.020035 | 0.66585  | 0.101802 | 0.02782 | 0.017634 | 0.70389  | 0.036015 |
| 0.076714 | 0.09776  | 0.021782 | 0.6387   | 0.095184 | 0.03977 | 0.028694 | 0.53622  | 0.06519  |
| 0.091413 | 0.04835  | -0.01718 | 0.71109  | 0.106365 | 0.02151 | 0.010472 | 0.82144  | 0.05896  |
| 0.068471 | 0.13956  | 0.010587 | 0.81951  | 0.096892 | 0.03633 | 0.028993 | 0.53197  | 0.061176 |
| 0.091701 | 0.04764  | 0.044179 | 0.34078  | 0.09384  | 0.04267 | 0.023558 | 0.6116   | 0.057588 |
| -0.04395 | 0.34335  | -0.05695 | 0.21927  | 0.075302 | 0.10411 | 0.167263 | 0.00028  | -0.00027 |
| 0.072701 | 0.11666  | -0.05681 | 0.22044  | 0.015951 | 0.73099 | 0.025345 | 0.58484  | -0.0028  |
| 0.138135 | 0.00278  | -0.02612 | 0.57342  | 0.077206 | 0.09563 | 0.00236  | 0.95943  | 0.026811 |
| 0.043885 | 0.344    | 0.027828 | 0.54859  | 0.100996 | 0.02909 | 0.111422 | 0.016    | 0.342266 |
| 0.226313 | 7.74E-07 | 0.176802 | 0.00012  | 0.082725 | 0.0741  | 0.06087  | 0.18915  | 0.070361 |
| 0.03597  | 0.43805  | -0.06518 | 0.15965  | 0.007137 | 0.87775 | -0.08265 | 0.07435  | -0.04284 |
| 0.152441 | 0.00095  | -0.07481 | 0.10638  | 0.028421 | 0.5401  | -0.14544 | 0.00163  | -0.09403 |
| 0.138692 | 0.00267  | 0.047835 | 0.30228  | 0.102931 | 0.02613 | 0.021511 | 0.64289  | 0.056222 |
| 0.050476 | 0.27634  | -0.05908 | 0.20251  | 0.048863 | 0.292   | -0.02929 | 0.52775  | 0.020862 |
| 0.037534 | 0.41838  | -0.0396  | 0.39316  | 0.105599 | 0.02247 | -0.01601 | 0.73007  | 0.038733 |
| 0.024684 | 0.59468  | -0.03774 | 0.41579  | 0.007056 | 0.87913 | -0.07284 | 0.11595  | 0.021123 |
| 0.051921 | 0.26281  | 0.026321 | 0.57046  | 0.089282 | 0.05385 | 0.013633 | 0.76888  | 0.054113 |
| 0.104692 | 0.02366  | 0.07452  | 0.10777  | 0.140143 | 0.0024  | 0.375348 | 4.52E-17 | 0.188477 |
| 0.024587 | 0.59613  | 0.056146 | 0.22588  | -0.01635 | 0.72446 | -0.00223 | 0.96171  | 0.057386 |
| -0.00143 | 0.97548  | -0.06902 | 0.13642  | 0.066212 | 0.15312 | 0.05513  | 0.23441  | -0.01004 |
| 0.010882 | 0.81457  | -0.02036 | 0.66076  | 0.044385 | 0.33853 | 0.065742 | 0.15607  | 0.208592 |
| 0.053313 | 0.25021  | 0.026737 | 0.56438  | 0.095421 | 0.03928 | -0.00218 | 0.96245  | 0.056123 |
| 0.043443 | 0.34889  | -0.04181 | 0.36737  | 0.079086 | 0.08779 | 0.059504 | 0.19928  | 0.081709 |
| 0.03939  | 0.39573  | -0.05069 | 0.27435  | 0.090883 | 0.04967 | 0.016741 | 0.71822  | 0.029988 |
| 0.123852 | 0.00737  | 0.116033 | 0.0121   | 0.101622 | 0.0281  | 0.049693 | 0.28387  | 0.208822 |
| 0.087258 | 0.05954  | 0.084816 | 0.06706  | 0.031106 | 0.5025  | 0.002645 | 0.95454  | 0.080078 |
| 0.055878 | 0.22811  | 0.010652 | 0.81842  | 0.162946 | 0.00041 | 0.034912 | 0.45166  | 0.075191 |
| 0.118157 | 0.0106   | -0.08881 | 0.05513  | 0.068501 | 0.13938 | -0.01673 | 0.71844  | 0.0006   |
| 0.12791  | 0.00564  | 0.040894 | 0.37793  | 0.080651 | 0.08168 | -0.01888 | 0.68407  | 0.040278 |
| 0.109135 | 0.01832  | -0.08242 | 0.07518  | 0.056497 | 0.22299 | -0.02338 | 0.61435  | 0.015306 |
| 0.074167 | 0.10945  | 0.006023 | 0.89672  | 0.080557 | 0.08203 | 0.036377 | 0.43288  | 0.00709  |
| -0.03178 | 0.49324  | -0.16902 | 0.00024  | 0.062246 | 0.17932 | -0.01151 | 0.80412  | -0.04267 |
| 0.075946 | 0.10117  | -0.12356 | 0.00751  | 0.060494 | 0.1919  | -0.00991 | 0.83089  | -0.01613 |
| 0.322386 | 9.36E-13 | 0.100165 | 0.03045  | 0.057514 | 0.21476 | -0.06901 | 0.13645  | -0.01518 |
| -0.00427 | 0.92673  | -0.05095 | 0.27181  | 0.039696 | 0.39207 | -0.01465 | 0.75216  | 0.003076 |
| -0.06287 | 0.17502  | 0.033797 | 0.46624  | 0.059466 | 0.19958 | 0.07462  | 0.10729  | 0.123129 |
| 0.09497  | 0.04022  | 0.059541 | 0.199    | 0.124378 | 0.00712 | 0.043062 | 0.35314  | 0.051862 |
| 0.052843 | 0.25442  | -0.03215 | 0.48829  | 0.049894 | 0.28193 | -0.02061 | 0.65693  | 0.018082 |
| 0.109522 | 0.01791  | 0.025381 | 0.58431  | 0.114782 | 0.01306 | 0.014867 | 0.74864  | 0.068015 |
| -0.04392 | 0.3436   | -0.194   | 2.43E-05 | 0.044395 | 0.33843 | -0.03251 | 0.48336  | -0.02645 |
| 0.092844 | 0.04493  | -0.0289  | 0.53326  | 0.090729 | 0.05006 | -0.01562 | 0.73644  | -0.01621 |
| 0.051364 | 0.26797  | -0.05607 | 0.22648  | 0.082656 | 0.07434 | 0.023552 | 0.61169  | 0.02213  |
| 0.071864 | 0.12094  | -0.01015 | 0.82676  | 0.135289 | 0.0034  | 0.033725 | 0.4672   | 0.079658 |
| -0.04566 | 0.32481  | -0.14856 | 0.00128  | 0.041482 | 0.3711  | -0.02022 | 0.66295  | -0.07138 |

|          |          |          |          |          |         |          |         |          |
|----------|----------|----------|----------|----------|---------|----------|---------|----------|
| 0.073243 | 0.11395  | 0.018169 | 0.69534  | 0.095875 | 0.03835 | 0.015898 | 0.73185 | 0.051961 |
| 0.141792 | 0.00213  | -0.05739 | 0.21571  | 0.060597 | 0.19114 | -0.04547 | 0.32687 | -0.00418 |
| 0.089197 | 0.05408  | 0.020499 | 0.65861  | 0.126691 | 0.00612 | 0.025445 | 0.58336 | 0.060451 |
| 0.098742 | 0.0329   | 0.034621 | 0.45543  | -0.00112 | 0.98077 | 0.091282 | 0.04867 | 0.002641 |
| -0.02037 | 0.66056  | -0.15679 | 0.00067  | -0.02815 | 0.54398 | -0.04295 | 0.35441 | -0.047   |
| -0.04638 | 0.31726  | 0.007303 | 0.87493  | -0.03043 | 0.5118  | -0.00752 | 0.87118 | 0.003789 |
| -0.1797  | 9.43E-05 | -0.11272 | 0.01481  | -0.019   | 0.68212 | 0.040585 | 0.38154 | -0.05005 |
| 0.199384 | 1.42E-05 | 0.293449 | 9.97E-11 | 0.004927 | 0.91543 | -0.00887 | 0.84842 | 0.147805 |
| -0.11196 | 0.0155   | 0.122856 | 0.00786  | 0.019147 | 0.67983 | 0.091779 | 0.04745 | 0.135209 |
| 0.030621 | 0.50918  | 0.235961 | 2.49E-07 | -0.00934 | 0.84045 | 0.059672 | 0.19802 | -0.0564  |
| 0.115987 | 0.01213  | 0.11234  | 0.01515  | -0.00705 | 0.8792  | -0.00402 | 0.93088 | 0.027931 |
| 0.042058 | 0.36449  | 0.271371 | 2.51E-09 | -0.0108  | 0.816   | 0.012734 | 0.78374 | 0.068646 |
| 0.047398 | 0.30673  | 0.026743 | 0.56429  | 0.062583 | 0.17697 | 0.16655  | 0.0003  | 0.126838 |
| -0.07568 | 0.10236  | 0.049075 | 0.28992  | -0.06752 | 0.14518 | -0.05544 | 0.23177 | -0.06299 |
| -0.15567 | 0.00074  | -0.0763  | 0.09959  | -0.01262 | 0.78559 | -0.017   | 0.71407 | -0.01472 |
| -0.0357  | 0.44156  | 0.005303 | 0.909    | -0.01402 | 0.76259 | -0.00999 | 0.8296  | 0.052365 |
| 0.016285 | 0.72559  | -0.10064 | 0.02966  | -0.06072 | 0.19023 | -0.11918 | 0.00994 | -0.13445 |
| -0.20222 | 1.06E-05 | 0.033814 | 0.46601  | 0.028028 | 0.54572 | 0.038486 | 0.40667 | 0.062152 |
| 0.165686 | 0.00032  | 0.114116 | 0.0136   | -0.01119 | 0.80939 | -0.02102 | 0.65049 | -0.02056 |
| 0.010559 | 0.81997  | -0.02109 | 0.64937  | -0.01893 | 0.68331 | 0.030933 | 0.50488 | 0.111127 |
| -0.11098 | 0.01643  | -0.21089 | 4.29E-06 | -0.0521  | 0.2612  | -0.05433 | 0.24128 | -0.01982 |
| -0.06996 | 0.13116  | 0.006886 | 0.88201  | -0.0363  | 0.43384 | -0.02948 | 0.5251  | -0.03753 |
| 0.016569 | 0.721    | 0.142156 | 0.00207  | -0.05881 | 0.20459 | -0.04093 | 0.37755 | 0.033866 |
| -0.20485 | 8.11E-06 | -0.2179  | 2.00E-06 | -0.01309 | 0.77776 | -0.02759 | 0.55195 | 0.019724 |
| -0.05329 | 0.25041  | -0.03761 | 0.41739  | -0.05384 | 0.24558 | -0.02018 | 0.6636  | -0.05796 |
| -0.11048 | 0.01692  | 0.022119 | 0.63353  | -0.0367  | 0.42876 | -0.01426 | 0.75857 | -0.04196 |
| -0.26239 | 8.60E-09 | -0.22475 | 9.26E-07 | -0.01366 | 0.76842 | 0.019213 | 0.67878 | 0.063936 |
| -0.09454 | 0.04113  | 0.272069 | 2.28E-09 | -0.04798 | 0.30079 | -0.03283 | 0.47914 | -0.05619 |
| 0.059733 | 0.19756  | 0.160633 | 0.00049  | -0.00456 | 0.9217  | -0.0036  | 0.93815 | 0.117044 |
| -0.11039 | 0.01701  | -0.04877 | 0.29288  | 0.009421 | 0.83909 | 0.143169 | 0.00192 | 0.068998 |
| -0.17109 | 0.0002   | -0.00134 | 0.97704  | 0.021748 | 0.63922 | 0.120354 | 0.00923 | 0.063276 |
| 0.200468 | 1.27E-05 | 0.305457 | 1.53E-11 | 0.000967 | 0.98338 | -0.02431 | 0.60031 | 0.045849 |
| -0.24132 | 1.30E-07 | -0.28453 | 3.80E-10 | -0.01225 | 0.7918  | -0.01328 | 0.77477 | -0.05288 |
| -0.14078 | 0.00229  | 0.10526  | 0.02291  | -0.01473 | 0.75095 | 0.06204  | 0.18077 | 0.014387 |
| 0.306489 | 1.30E-11 | 0.336848 | 7.46E-14 | -0.03426 | 0.46015 | -0.08121 | 0.07959 | 0.068624 |
| -0.11428 | 0.01347  | 0.042586 | 0.35849  | -0.05085 | 0.27278 | -0.08294 | 0.07335 | -0.02791 |
| 0.093292 | 0.0439   | 0.282613 | 5.03E-10 | 0.024348 | 0.5997  | 0.03013  | 0.51601 | 0.071351 |
| 0.038981 | 0.40066  | 0.091769 | 0.04748  | -0.01419 | 0.75971 | 0.040917 | 0.37765 | -0.02219 |
| -0.01113 | 0.81049  | 0.150277 | 0.00112  | 0.00158  | 0.97283 | 0.025847 | 0.57742 | 0.007842 |
| -0.15933 | 0.00055  | -0.10629 | 0.0216   | -0.02365 | 0.61015 | 0.012221 | 0.79225 | -0.03145 |
| -0.02444 | 0.59835  | 0.210327 | 4.55E-06 | -0.07788 | 0.09276 | -0.06639 | 0.15204 | -0.08058 |
| -0.06996 | 0.13115  | 0.0491   | 0.28966  | -0.04137 | 0.37239 | -0.03208 | 0.48924 | 0.110102 |
| -0.07837 | 0.09069  | -0.21184 | 3.87E-06 | -0.01502 | 0.74607 | -0.07775 | 0.09331 | -0.05586 |
| 0.015968 | 0.73072  | 0.184535 | 6.03E-05 | -0.00058 | 0.99001 | -0.02299 | 0.62022 | 0.000573 |
| -0.04671 | 0.31377  | 0.073551 | 0.11244  | -0.0041  | 0.9295  | 0.058087 | 0.21022 | -0.02675 |

|          |          |          |          |          |         |          |          |          |
|----------|----------|----------|----------|----------|---------|----------|----------|----------|
| 0.042314 | 0.36157  | 0.001065 | 0.98169  | -0.04716 | 0.30917 | -0.10609 | 0.02185  | 0.018762 |
| 0.150583 | 0.0011   | 0.227673 | 6.62E-07 | -0.0512  | 0.2695  | -0.07527 | 0.10426  | -0.06499 |
| -0.19219 | 2.90E-05 | -0.23159 | 4.19E-07 | -0.06404 | 0.16707 | -0.04044 | 0.38326  | -0.07609 |
| 0.07021  | 0.12976  | 0.114889 | 0.01298  | -0.01508 | 0.74517 | -0.04581 | 0.32324  | 0.05783  |
| -0.03488 | 0.45211  | 0.16673  | 0.0003   | -0.04462 | 0.33603 | -0.0154  | 0.73987  | -0.12084 |
| -0.00306 | 0.94744  | -0.07469 | 0.10698  | -0.05349 | 0.24863 | -0.0968  | 0.03651  | 0.001117 |
| 0.229598 | 5.29E-07 | 0.454059 | 3.93E-25 | -0.00448 | 0.92316 | -0.02563 | 0.58067  | 0.247643 |
| -0.01406 | 0.76178  | -0.0575  | 0.2149   | -0.02158 | 0.64188 | -0.01018 | 0.82631  | -0.00857 |
| 0.058845 | 0.20432  | 0.073666 | 0.11187  | -0.02683 | 0.56302 | -0.04685 | 0.31241  | 0.006766 |
| -0.02891 | 0.53311  | 0.11646  | 0.01178  | -0.05999 | 0.19563 | -0.00591 | 0.89859  | -0.0562  |
| -0.12632 | 0.00627  | -0.0188  | 0.68527  | -0.03021 | 0.51489 | 0.015687 | 0.73528  | -0.01237 |
| 0.167482 | 0.00028  | 0.264859 | 6.16E-09 | -0.02766 | 0.55105 | 0.048155 | 0.29906  | 0.019108 |
| 0.021888 | 0.63708  | -0.08758 | 0.05859  | -0.03099 | 0.50412 | -0.06059 | 0.19121  | -0.07726 |
| 0.121684 | 0.00848  | 0.08253  | 0.07479  | -0.01842 | 0.69139 | -0.02608 | 0.57403  | 0.097057 |
| 0.108575 | 0.01893  | 0.204177 | 8.69E-06 | 0.018559 | 0.68914 | 0.049323 | 0.28748  | 0.204576 |
| -0.09812 | 0.03402  | -0.14423 | 0.00178  | -0.03999 | 0.38853 | -0.10896 | 0.0185   | -0.06235 |
| -0.09667 | 0.03678  | -0.13341 | 0.00387  | -0.0397  | 0.39199 | -0.04831 | 0.29755  | -0.05071 |
| 0.024642 | 0.5953   | -0.0884  | 0.05627  | -0.06257 | 0.17705 | -0.14561 | 0.0016   | -0.05034 |
| -0.05816 | 0.20961  | -0.03451 | 0.45684  | -0.03946 | 0.39487 | 0.018332 | 0.69275  | 0.036319 |
| 0.152682 | 0.00093  | 0.232564 | 3.73E-07 | -0.03679 | 0.42763 | -0.08971 | 0.0527   | -0.0605  |
| -0.06925 | 0.13509  | 0.243481 | 9.93E-08 | 0.02761  | 0.55172 | 0.163068 | 0.0004   | 0.139684 |
| -0.00807 | 0.86186  | 0.061486 | 0.1847   | 0.022635 | 0.62562 | 0.049439 | 0.28635  | 0.0677   |
| -0.01914 | 0.67997  | -0.05563 | 0.23018  | -0.01937 | 0.67631 | -0.01202 | 0.7956   | 0.004381 |
| 0.182585 | 7.23E-05 | 0.270561 | 2.81E-09 | -0.02713 | 0.55866 | 0.030334 | 0.51316  | -0.10314 |
| -0.05761 | 0.21398  | -0.08327 | 0.07221  | -0.01177 | 0.79971 | -0.01674 | 0.71826  | 0.05283  |
| -0.17317 | 0.00017  | 0.046284 | 0.31825  | -0.01755 | 0.70525 | 0.024728 | 0.59402  | 0.002487 |
| 0.203106 | 9.71E-06 | 0.128793 | 0.00531  | -0.03662 | 0.42984 | -0.06926 | 0.13503  | 0.024789 |
| 0.071029 | 0.12533  | -0.01028 | 0.82459  | -0.03503 | 0.45013 | -0.03521 | 0.44786  | -0.08723 |
| 0.130362 | 0.00478  | 0.191283 | 3.17E-05 | 0.00033  | 0.99433 | 0.090904 | 0.04962  | 0.067348 |
| -0.10087 | 0.0293   | 0.002617 | 0.95503  | 0.032824 | 0.47918 | 0.055028 | 0.23527  | 0.041242 |
| 0.282101 | 5.42E-10 | 0.405322 | 6.82E-20 | 0.032039 | 0.48976 | 0.180249 | 8.97E-05 | 0.392591 |
| -0.12519 | 0.00675  | -0.14196 | 0.0021   | -0.03316 | 0.4747  | -0.0627  | 0.17615  | -0.09051 |
| 0.009998 | 0.82939  | 0.028515 | 0.53876  | -0.06361 | 0.16999 | -0.02749 | 0.55348  | -0.05273 |
| 0.179685 | 9.44E-05 | 0.246857 | 6.51E-08 | -0.0138  | 0.76609 | 0.009418 | 0.83915  | -0.00369 |
| 0.193609 | 2.52E-05 | 0.511895 | 1.49E-32 | 0.036106 | 0.43632 | 0.090325 | 0.05109  | 0.13789  |
| -0.06881 | 0.1376   | -0.08325 | 0.07228  | -0.03181 | 0.49284 | -0.09406 | 0.04219  | -0.09586 |
| 0.220309 | 1.53E-06 | 0.221609 | 1.32E-06 | -0.05102 | 0.27116 | -0.09882 | 0.03276  | -0.00826 |
| -0.12067 | 0.00905  | -0.02267 | 0.6251   | 0.00262  | 0.95497 | 0.023329 | 0.61506  | 0.021755 |
| -0.00314 | 0.94611  | 0.002279 | 0.96082  | -0.03423 | 0.46053 | -0.04701 | 0.31074  | -0.07624 |
| -0.03329 | 0.47298  | 0.048509 | 0.29552  | -0.03434 | 0.45913 | -0.01902 | 0.68183  | -0.06196 |
| 0.038309 | 0.40884  | 0.037781 | 0.41532  | -0.05254 | 0.25716 | -0.08825 | 0.05668  | -0.02995 |
| 0.007238 | 0.87603  | 0.19162  | 3.07E-05 | -0.04178 | 0.36768 | 0.006587 | 0.88711  | 0.035887 |
| 0.074581 | 0.10748  | 0.094648 | 0.04091  | -0.0006  | 0.98964 | 0.000726 | 0.98752  | 0.098504 |
| 0.189757 | 3.67E-05 | 0.435354 | 5.08E-23 | -0.02603 | 0.57473 | -0.00359 | 0.93835  | 0.09143  |
| -0.02664 | 0.56575  | 0.078905 | 0.08852  | -0.00299 | 0.94857 | 0.028078 | 0.54501  | 0.017281 |

|          |          |          |          |          |         |          |         |          |
|----------|----------|----------|----------|----------|---------|----------|---------|----------|
| -0.09683 | 0.03646  | 0.094201 | 0.04187  | -0.04883 | 0.29234 | -0.01848 | 0.6904  | 0.099505 |
| 0.025138 | 0.58792  | -0.04799 | 0.30075  | -0.03505 | 0.44992 | -0.03299 | 0.47691 | -0.02383 |
| -0.00618 | 0.89396  | -0.00739 | 0.87348  | -0.03211 | 0.48885 | -0.02817 | 0.54373 | 0.06653  |
| -0.05568 | 0.22981  | -0.01992 | 0.66766  | -0.00123 | 0.97891 | 0.009357 | 0.84017 | 0.04623  |
| -0.25914 | 1.33E-08 | -0.27015 | 2.98E-09 | -0.02506 | 0.58911 | 0.036977 | 0.42532 | -0.02553 |
| -0.05594 | 0.22762  | 0.04304  | 0.35339  | -0.00921 | 0.84259 | 0.006343 | 0.89126 | 0.021539 |
| 0.243231 | 1.02E-07 | 0.081822 | 0.07733  | -0.02989 | 0.51934 | -0.07912 | 0.08767 | 0.081267 |
| 0.108007 | 0.01956  | 0.167085 | 0.00029  | 0.000978 | 0.98318 | -0.02793 | 0.5472  | 0.038383 |
| -0.15449 | 0.00081  | -0.16564 | 0.00032  | -0.0433  | 0.35048 | -0.00797 | 0.86365 | -0.00371 |

| p.MMdarl | MMgreen  | p.MMgree | MMlightg | p.MMligh | MMmagenta  | p.MMmag  | MMblack  | p.MMblac |
|----------|----------|----------|----------|----------|------------|----------|----------|----------|
| 0.43864  | 0.103923 | 0.02471  | -0.03285 | 0.47887  | 0.1142534  | 0.01349  | 0.237952 | 1.96E-07 |
| 0.59345  | -0.33115 | 2.05E-13 | -0.13522 | 0.00341  | 0.04910425 | 0.28962  | 0.064634 | 0.16317  |
| 0.98043  | -0.14879 | 0.00126  | -0.10537 | 0.02277  | -0.0020976 | 0.96394  | -0.01394 | 0.76375  |
| 0.47661  | -0.24562 | 7.61E-08 | -0.13444 | 0.00361  | 0.02010467 | 0.66476  | 0.081546 | 0.07834  |
| 0.91255  | -0.21719 | 2.16E-06 | -0.24495 | 8.27E-08 | -0.068258  | 0.1408   | -0.038   | 0.41262  |
| 0.49686  | -0.14909 | 0.00123  | -0.11408 | 0.01363  | 0.03423068 | 0.46054  | 0.095135 | 0.03988  |
| 0.12745  | -0.05018 | 0.27918  | -0.0339  | 0.46491  | 0.01984456 | 0.66884  | 0.088243 | 0.05671  |
| 0.62892  | -0.15389 | 0.00085  | -0.09248 | 0.04578  | 0.07280493 | 0.11614  | 0.127924 | 0.00563  |
| 0.42514  | -0.13063 | 0.00469  | -0.03816 | 0.41062  | 0.05029373 | 0.27809  | 0.06447  | 0.16425  |
| 0.02543  | -0.14705 | 0.00144  | -0.05016 | 0.27937  | 0.02903965 | 0.53131  | 0.022402 | 0.62918  |
| 0.4961   | -0.08394 | 0.06994  | -0.11741 | 0.01111  | 0.01910562 | 0.68048  | 0.0764   | 0.09915  |
| 0.30078  | -0.03532 | 0.44643  | -0.0136  | 0.76935  | 0.07586331 | 0.10155  | 0.100084 | 0.03058  |
| 0.52292  | -0.14828 | 0.00131  | -0.04769 | 0.30378  | 0.05049774 | 0.27614  | -0.00015 | 0.99748  |
| 3.86E-05 | -0.12633 | 0.00626  | -0.08859 | 0.05573  | 0.18076845 | 8.55E-05 | 0.27994  | 7.42E-10 |
| 0.47856  | -0.16105 | 0.00048  | -0.05293 | 0.25361  | 0.05972724 | 0.1976   | 0.084555 | 0.06791  |
| 0.77746  | -0.17279 | 0.00018  | -0.06126 | 0.18629  | 0.07039058 | 0.12877  | 0.073015 | 0.11509  |
| 0.01034  | -0.15167 | 0.00101  | -0.09849 | 0.03335  | 0.08580615 | 0.06392  | 0.077098 | 0.09609  |
| 0.98878  | -0.10038 | 0.03009  | -0.1625  | 0.00042  | -0.0129568 | 0.78005  | 0.083247 | 0.07229  |
| 0.18068  | 0.026318 | 0.5705   | 0.065144 | 0.15987  | 0.03831832 | 0.40872  | 0.004661 | 0.91998  |
| 0.38693  | -0.10648 | 0.02136  | -0.03614 | 0.43595  | 0.07619786 | 0.10005  | 0.090094 | 0.05169  |
| 0.60344  | 0.016068 | 0.7291   | 0.033491 | 0.47029  | 0.04884347 | 0.2922   | 0.057476 | 0.21506  |
| 0.53039  | -0.13664 | 0.00309  | -0.18773 | 4.46E-05 | -0.0457599 | 0.32377  | -0.09549 | 0.03913  |
| 0.06129  | -0.01144 | 0.80524  | -0.0119  | 0.7976   | 0.09078056 | 0.04993  | 0.174826 | 0.00015  |
| 0.60076  | -0.01568 | 0.73545  | -0.00519 | 0.91089  | 0.05600125 | 0.22708  | 0.082989 | 0.07318  |
| 0.76663  | 0.020905 | 0.65228  | 0.062008 | 0.18099  | -0.0254045 | 0.58396  | -0.03943 | 0.39529  |
| 0.28595  | -0.24323 | 1.03E-07 | -0.14881 | 0.00126  | 0.05266455 | 0.25603  | 0.139741 | 0.00247  |
| 0.92544  | -0.20653 | 6.80E-06 | -0.11208 | 0.01538  | 0.07815453 | 0.09161  | 0.117066 | 0.01135  |
| 0.96728  | -0.05537 | 0.23234  | -0.01458 | 0.75334  | 0.10818902 | 0.01936  | 0.123261 | 0.00766  |
| 0.62172  | -0.07139 | 0.12344  | 0.02819  | 0.5434   | 0.03189112 | 0.49177  | 0.00479  | 0.91777  |
| 0.45779  | -0.18058 | 8.70E-05 | -0.11211 | 0.01535  | -0.0610307 | 0.18798  | -0.113   | 0.01455  |
| 0.15736  | -0.29653 | 6.22E-11 | -0.14331 | 0.00191  | -0.0155652 | 0.73726  | 0.007937 | 0.86417  |
| 0.71211  | -0.2249  | 9.10E-07 | -0.09063 | 0.05031  | 0.06077787 | 0.18982  | 0.125905 | 0.00644  |
| 0.30265  | -0.32942 | 2.78E-13 | -0.14794 | 0.00135  | 0.02597567 | 0.57553  | 0.078848 | 0.08876  |
| 0.05929  | -0.17529 | 0.00014  | -0.09635 | 0.0374   | -0.0147837 | 0.75     | -0.01579 | 0.73358  |
| 0.16727  | -0.02158 | 0.64188  | 0.015507 | 0.7382   | 0.2163472  | 2.37E-06 | 0.266619 | 4.84E-09 |
| 3.69E-05 | -0.24469 | 8.55E-08 | -0.14091 | 0.00227  | 0.05535568 | 0.2325   | 0.034225 | 0.46061  |
| 0.30533  | -0.15519 | 0.00077  | -0.13464 | 0.00356  | 0.00801944 | 0.86278  | 0.079107 | 0.08771  |
| 0.11741  | -0.05315 | 0.25165  | 0.028316 | 0.5416   | -0.0300668 | 0.51689  | -0.06635 | 0.15229  |
| 0.36727  | -0.21703 | 2.20E-06 | -0.14447 | 0.00175  | 0.00465014 | 0.92017  | 0.021202 | 0.64767  |
| 0.09725  | -0.16325 | 0.0004   | -0.10547 | 0.02264  | 0.09495396 | 0.04026  | 0.221687 | 1.31E-06 |
| 0.97666  | -0.23664 | 2.29E-07 | -0.08002 | 0.0841   | 0.05940284 | 0.20005  | 0.067777 | 0.14362  |
| 0.42371  | -0.20999 | 4.72E-06 | -0.02823 | 0.54278  | 0.10796235 | 0.01961  | 0.101486 | 0.02831  |
| 0.40136  | 0.214764 | 2.82E-06 | 0.211533 | 4.00E-06 | 0.3750354  | 4.82E-17 | 0.492712 | 6.22E-30 |
| 0.00832  | 0.394958 | 6.95E-19 | 0.402627 | 1.26E-19 | 0.50035346 | 5.89E-31 | 0.516203 | 3.66E-33 |

|          |          |          |          |          |            |          |          |          |
|----------|----------|----------|----------|----------|------------|----------|----------|----------|
| 1.49E-22 | -0.10362 | 0.02514  | 0.18334  | 6.74E-05 | 0.51203061 | 1.43E-32 | 0.572351 | 5.42E-42 |
| 0.00102  | -0.1681  | 0.00026  | 0.019543 | 0.67358  | 0.58147827 | 1.36E-43 | 0.548615 | 4.68E-38 |
| 0.49079  | 0.072684 | 0.11675  | 0.203276 | 9.54E-06 | 0.45434011 | 3.64E-25 | 0.438512 | 2.28E-23 |
| 0.7869   | 0.138828 | 0.00264  | 0.140003 | 0.00243  | 0.27019539 | 2.96E-09 | 0.389493 | 2.29E-18 |
| 0.02595  | 0.016638 | 0.71989  | 0.051012 | 0.27127  | 0.39315939 | 1.03E-18 | 0.478191 | 4.67E-28 |
| 0.00033  | 0.066221 | 0.15307  | 0.268466 | 3.76E-09 | 0.44142057 | 1.09E-23 | 0.418268 | 3.34E-21 |
| 0.10811  | 0.485324 | 5.74E-29 | 0.397124 | 4.31E-19 | 0.46864482 | 7.15E-27 | 0.532557 | 1.45E-35 |
| 0.00024  | 0.077426 | 0.09468  | 0.222731 | 1.16E-06 | 0.5822923  | 9.73E-44 | 0.690571 | 2.00E-67 |
| 0.00174  | 0.097286 | 0.03558  | 0.242755 | 1.09E-07 | 0.40247549 | 1.30E-19 | 0.461018 | 5.95E-26 |
| 0.00025  | 0.131892 | 0.0043   | 0.119546 | 0.00972  | 0.3553005  | 2.43E-15 | 0.470013 | 4.86E-27 |
| 0.14986  | 0.401943 | 1.47E-19 | 0.44653  | 2.88E-24 | 0.42377703 | 8.90E-22 | 0.48974  | 1.53E-29 |
| 3.62E-08 | -0.08532 | 0.06546  | 0.146574 | 0.00149  | 0.56097323 | 4.58E-40 | 0.68908  | 4.99E-67 |
| 0.1923   | 0.417425 | 4.08E-21 | 0.401718 | 1.54E-19 | 0.6772027  | 6.00E-64 | 0.81355  | #####    |
| 0.83561  | 0.154719 | 0.00079  | 0.270162 | 2.97E-09 | 0.43183094 | 1.23E-22 | 0.613932 | 1.03E-49 |
| 0.11634  | 0.434767 | 5.89E-23 | 0.471544 | 3.15E-27 | 0.55686049 | 2.18E-39 | 0.596891 | 2.05E-46 |
| 0.00137  | 0.221656 | 1.31E-06 | 0.226004 | 8.02E-07 | 0.41938063 | 2.56E-21 | 0.509515 | 3.22E-32 |
| 0.75751  | -0.03686 | 0.42684  | 0.093357 | 0.04375  | 0.53258183 | 1.43E-35 | 0.458613 | 1.15E-25 |
| 0.75132  | 0.410321 | 2.16E-20 | 0.249535 | 4.64E-08 | 0.54339289 | 3.13E-37 | 0.719506 | 1.21E-75 |
| 0.16582  | -0.12779 | 0.00568  | 0.017498 | 0.70606  | 0.49913647 | 8.61E-31 | 0.575157 | 1.77E-42 |
| 0.84447  | -0.01163 | 0.80201  | -0.32334 | 7.96E-13 | -0.4035144 | 1.03E-19 | -0.45318 | 4.96E-25 |
| 0.03708  | 0.343503 | 2.23E-14 | 0.309182 | 8.39E-12 | 0.46005503 | 7.74E-26 | 0.679503 | 1.56E-64 |
| 0.00102  | 0.044471 | 0.33759  | 0.193671 | 2.51E-05 | 0.46768512 | 9.36E-27 | 0.554021 | 6.33E-39 |
| 0.031    | 0.044497 | 0.33731  | 0.114653 | 0.01317  | 0.51038524 | 2.44E-32 | 0.664141 | 1.01E-60 |
| 0.00154  | 0.037857 | 0.41439  | -0.17593 | 0.00013  | -0.2923236 | 1.18E-10 | -0.37369 | 6.34E-17 |
| 0.13093  | 0.311802 | 5.48E-12 | 0.373024 | 7.27E-17 | 0.44413649 | 5.38E-24 | 0.471482 | 3.20E-27 |
| 0.03093  | 0.02924  | 0.52849  | 0.143166 | 0.00193  | 0.32402568 | 7.07E-13 | 0.435391 | 5.04E-23 |
| 0.18529  | 0.137258 | 0.00296  | 0.359075 | 1.17E-15 | 0.48553752 | 5.39E-29 | 0.433253 | 8.62E-23 |
| 0.30549  | 0.188677 | 4.07E-05 | 0.181081 | 8.31E-05 | 0.45924985 | 9.65E-26 | 0.53546  | 5.25E-36 |
| 9.10E-05 | 0.251258 | 3.72E-08 | 0.171132 | 0.0002   | 0.54512861 | 1.67E-37 | 0.674621 | 2.68E-63 |
| 0.04973  | -0.04678 | 0.31311  | 0.12188  | 0.00837  | 0.53153544 | 2.06E-35 | 0.595691 | 3.45E-46 |
| 1.90E-05 | 0.106877 | 0.02088  | 0.126948 | 0.00601  | 0.48939794 | 1.70E-29 | 0.459172 | 9.85E-26 |
| 0.12221  | 0.196652 | 1.87E-05 | 0.138495 | 0.00271  | 0.63697879 | 1.63E-54 | 0.810103 | #####    |
| 0.56623  | 0.219015 | 1.77E-06 | 0.329967 | 2.53E-13 | 0.6375057  | 1.25E-54 | 0.687836 | 1.07E-66 |
| 0.72687  | -0.1844  | 6.11E-05 | -0.34025 | 4.03E-14 | -0.3484279 | 8.92E-15 | -0.51828 | 1.84E-33 |
| 0.66604  | -0.10476 | 0.02357  | 0.130347 | 0.00478  | 0.50975742 | 2.98E-32 | 0.681248 | 5.57E-65 |
| 0.49253  | 0.311111 | 6.13E-12 | 0.258276 | 1.49E-08 | 0.63855618 | 7.38E-55 | 0.824378 | #####    |
| 0.83127  | 0.122563 | 0.00801  | 0.248017 | 5.62E-08 | 0.39972569 | 2.41E-19 | 0.454561 | 3.43E-25 |
| 0.05862  | 0.085846 | 0.0638   | -0.10047 | 0.02994  | -0.5681938 | 2.80E-41 | -0.56794 | 3.09E-41 |
| 0.77341  | 0.520334 | 9.30E-34 | 0.392998 | 1.07E-18 | 0.56814443 | 2.85E-41 | 0.621383 | 3.18E-51 |
| 0.1876   | -0.02672 | 0.5646   | -0.04049 | 0.38266  | 0.32451219 | 6.51E-13 | 0.371441 | 1.00E-16 |
| 0.4081   | 0.126296 | 0.00628  | 0.209087 | 5.20E-06 | 0.71438597 | 4.09E-74 | 0.824276 | #####    |
| 0.61356  | 0.278982 | 8.52E-10 | 0.181407 | 8.06E-05 | 0.3346844  | 1.10E-13 | 0.307719 | 1.06E-11 |
| 0.87863  | 0.013276 | 0.77476  | 0.307192 | 1.16E-11 | 0.67410012 | 3.63E-63 | 0.763443 | 2.53E-90 |
| 0.35663  | -0.023   | 0.62012  | -0.03759 | 0.41768  | 0.39751357 | 3.95E-19 | 0.588309 | 7.98E-45 |
| 4.26E-05 | 0.179854 | 9.30E-05 | 0.191433 | 3.12E-05 | 0.45073056 | 9.54E-25 | 0.449332 | 1.38E-24 |

|          |          |          |          |          |            |          |          |          |
|----------|----------|----------|----------|----------|------------|----------|----------|----------|
| 0.56247  | 0.169472 | 0.00023  | 0.180051 | 9.13E-05 | 0.38329303 | 8.61E-18 | 0.416507 | 5.08E-21 |
| 1.88E-06 | 0.161899 | 0.00044  | 0.194343 | 2.35E-05 | 0.39829157 | 3.32E-19 | 0.472881 | 2.15E-27 |
| 0.20852  | 0.334175 | 1.20E-13 | 0.225617 | 8.38E-07 | 0.49082616 | 1.10E-29 | 0.688289 | 8.09E-67 |
| 0.06171  | 0.234856 | 2.84E-07 | 0.288223 | 2.19E-10 | 0.70868066 | 1.89E-72 | 0.779001 | 2.58E-96 |
| 0.63787  | 0.310973 | 6.27E-12 | 0.300722 | 3.24E-11 | 0.50230502 | 3.20E-31 | 0.708039 | 2.89E-72 |
| 0.44846  | 0.03772  | 0.41608  | 0.069852 | 0.13173  | 0.6067448  | 2.68E-48 | 0.820338 | #####    |
| 0.05908  | 0.188279 | 4.23E-05 | 0.209991 | 4.72E-06 | 0.45526153 | 2.84E-25 | 0.496697 | 1.83E-30 |
| 0.00011  | -0.14311 | 0.00193  | 0.018166 | 0.69539  | 0.38368545 | 7.93E-18 | 0.582189 | 1.02E-43 |
| 0.85004  | 0.356753 | 1.84E-15 | 0.372515 | 8.07E-17 | 0.61212419 | 2.35E-49 | 0.70363  | 5.20E-71 |
| 0.06309  | 0.134654 | 0.00355  | 0.181322 | 8.13E-05 | 0.43792258 | 2.65E-23 | 0.550126 | 2.69E-38 |
| 1.52E-09 | -0.24411 | 9.19E-08 | 0.033894 | 0.46496  | 0.4637287  | 2.82E-26 | 0.388457 | 2.86E-18 |
| 0.00522  | 0.461487 | 5.23E-26 | 0.482003 | 1.53E-28 | 0.52305347 | 3.74E-34 | 0.594332 | 6.19E-46 |
| 0.48532  | -0.00139 | 0.97612  | 0.119757 | 0.00959  | 0.40032637 | 2.11E-19 | 0.494182 | 3.97E-30 |
| 0.5792   | 0.201684 | 1.12E-05 | 0.265981 | 5.28E-09 | 0.47189894 | 2.85E-27 | 0.598428 | 1.05E-46 |
| 0.57801  | 0.411349 | 1.70E-20 | 0.468641 | 7.15E-27 | 0.4087741  | 3.09E-20 | 0.18493  | 5.81E-05 |
| 0.38407  | 0.072805 | 0.11614  | 0.354583 | 2.78E-15 | 0.55901185 | 9.67E-40 | 0.476621 | 7.36E-28 |
| 9.26E-06 | 0.417736 | 3.79E-21 | 0.284298 | 3.93E-10 | 0.41546792 | 6.49E-21 | 0.523512 | 3.20E-34 |
| 0.61378  | -0.04497 | 0.33222  | 0.233995 | 3.15E-07 | 0.51340384 | 9.14E-33 | 0.579091 | 3.60E-43 |
| 0.04797  | 0.149239 | 0.00122  | 0.151451 | 0.00103  | 0.4859571  | 4.76E-29 | 0.588262 | 8.14E-45 |
| 0.65657  | 0.233107 | 3.50E-07 | 0.232852 | 3.61E-07 | 0.40779675 | 3.87E-20 | 0.414601 | 7.96E-21 |
| 0.64189  | -0.09935 | 0.03184  | -0.25324 | 2.88E-08 | -0.3537496 | 3.26E-15 | -0.44657 | 2.85E-24 |
| 0.00059  | 0.030745 | 0.50748  | 0.149393 | 0.0012   | 0.56098614 | 4.56E-40 | 0.611147 | 3.67E-49 |
| 0.04269  | -0.11586 | 0.01223  | -0.25175 | 3.49E-08 | -0.6387937 | 6.55E-55 | -0.82859 | #####    |
| 0.623    | 0.252181 | 3.30E-08 | 0.273685 | 1.81E-09 | 0.65498595 | 1.47E-58 | 0.828397 | #####    |
| 0.00027  | -0.02151 | 0.64291  | 0.120922 | 0.0089   | 0.64137808 | 1.77E-55 | 0.603241 | 1.28E-47 |
| 0.78023  | 0.331581 | 1.90E-13 | 0.209475 | 4.99E-06 | 0.50715197 | 6.88E-32 | 0.400588 | 1.99E-19 |
| 0.02486  | -0.28941 | 1.84E-10 | 0.094783 | 0.04062  | 0.28020851 | 7.14E-10 | 0.329278 | 2.85E-13 |
| 0.00022  | -0.06699 | 0.14837  | 0.032748 | 0.4802   | 0.51322197 | 9.70E-33 | 0.611016 | 3.89E-49 |
| 0.46597  | 0.450673 | 9.69E-25 | 0.480356 | 2.48E-28 | 0.53821333 | 1.99E-36 | 0.591242 | 2.31E-45 |
| 0.84998  | 0.105933 | 0.02205  | -0.07751 | 0.09433  | -0.4651093 | 1.92E-26 | -0.63194 | 1.98E-53 |
| 0.01573  | -0.02712 | 0.55879  | 0.080441 | 0.08248  | 0.49368353 | 4.62E-30 | 0.394062 | 8.47E-19 |
| 0.29546  | -0.18383 | 6.44E-05 | -0.20469 | 8.24E-06 | -0.3995986 | 2.48E-19 | -0.41164 | 1.59E-20 |
| 0.03375  | 0.136349 | 0.00315  | 0.0113   | 0.80757  | -0.203103  | 9.71E-06 | -0.32895 | 3.02E-13 |
| 0.01597  | 0.099587 | 0.03142  | 0.02372  | 0.60914  | -0.3571969 | 1.68E-15 | -0.5502  | 2.61E-38 |
| 0.16114  | 0.236563 | 2.32E-07 | 0.153144 | 0.0009   | 0.56893201 | 2.09E-41 | 0.649635 | 2.50E-57 |
| 0.0983   | -0.01474 | 0.75067  | -0.34473 | 1.78E-14 | -0.3899216 | 2.09E-18 | -0.37004 | 1.33E-16 |
| 0.25945  | -0.07476 | 0.10664  | 0.190919 | 3.28E-05 | 0.39979617 | 2.38E-19 | 0.43442  | 6.43E-23 |
| 0.01421  | 0.037079 | 0.42406  | -0.14164 | 0.00215  | -0.290342  | 1.60E-10 | -0.35661 | 1.89E-15 |
| 0.00024  | 0.030739 | 0.50755  | -0.11524 | 0.0127   | -0.380871  | 1.43E-17 | -0.44992 | 1.18E-24 |
| 0.2917   | -0.05244 | 0.25802  | -0.17357 | 0.00016  | -0.3495094 | 7.29E-15 | -0.51049 | 2.35E-32 |
| 0.26395  | -0.01793 | 0.69911  | 0.063896 | 0.16805  | 0.40347952 | 1.04E-19 | 0.523698 | 3.01E-34 |
| 0.20159  | 0.054832 | 0.23695  | 0.234676 | 2.90E-07 | 0.45498944 | 3.06E-25 | 0.411055 | 1.82E-20 |
| 6.44E-06 | 0.352843 | 3.88E-15 | 0.320414 | 1.31E-12 | 0.48089798 | 2.12E-28 | 0.631538 | 2.41E-53 |
| 0.00597  | 0.484828 | 6.65E-29 | 0.257702 | 1.61E-08 | 0.49343349 | 4.99E-30 | 0.562709 | 2.35E-40 |
| 0.44662  | 0.271562 | 2.44E-09 | 0.267165 | 4.49E-09 | 0.5329809  | 1.25E-35 | 0.719618 | 1.12E-75 |



|          |          |          |          |          |            |          |          |          |
|----------|----------|----------|----------|----------|------------|----------|----------|----------|
| 0.40703  | -0.26503 | 6.01E-09 | -0.17077 | 0.00021  | -0.3020782 | 2.61E-11 | -0.52295 | 3.87E-34 |
| 0.96368  | 0.309342 | 8.18E-12 | 0.362621 | 5.85E-16 | 0.63481054 | 4.79E-54 | 0.784003 | 2.41E-98 |
| 0.06483  | -0.00838 | 0.85664  | -0.01792 | 0.69924  | -0.4930278 | 5.65E-30 | -0.73165 | 2.08E-79 |
| 0.3172   | -0.04972 | 0.28359  | -0.2674  | 4.35E-09 | -0.2615915 | 9.57E-09 | -0.38755 | 3.48E-18 |
| 0.43677  | -0.31322 | 4.34E-12 | -0.40013 | 2.21E-19 | -0.4408201 | 1.27E-23 | -0.4759  | 9.05E-28 |
| 0.08495  | 0.279087 | 8.39E-10 | 0.06773  | 0.1439   | -0.3224826 | 9.20E-13 | -0.39425 | 8.13E-19 |
| 0.77348  | -0.15948 | 0.00054  | -0.11584 | 0.01224  | -0.2141129 | 3.03E-06 | -0.40749 | 4.16E-20 |
| 0.95748  | 0.217414 | 2.11E-06 | 0.20368  | 9.15E-06 | 0.51157294 | 1.66E-32 | 0.634225 | 6.41E-54 |
| 0.53883  | -0.02904 | 0.53126  | -0.27569 | 1.36E-09 | -0.4163012 | 5.33E-21 | -0.49862 | 1.01E-30 |
| 0.85415  | -0.05256 | 0.25697  | 0.274232 | 1.68E-09 | 0.48779275 | 2.75E-29 | 0.653924 | 2.59E-58 |
| 0.9793   | 0.416959 | 4.56E-21 | 0.373921 | 6.05E-17 | 0.65275204 | 4.83E-58 | 0.830087 | #####    |
| 0.52477  | -0.03004 | 0.51725  | -0.0249  | 0.59141  | -0.4399059 | 1.60E-23 | -0.63131 | 2.69E-53 |
| 0.13581  | -0.10594 | 0.02204  | -0.18446 | 6.07E-05 | -0.2664067 | 4.98E-09 | -0.45099 | 8.90E-25 |
| 0.84646  | 0.373909 | 6.07E-17 | 0.33236  | 1.66E-13 | 0.49004451 | 1.40E-29 | 0.685588 | 4.16E-66 |
| 1.90E-42 | 0.246067 | 7.19E-08 | 0.216563 | 2.32E-06 | 0.40774849 | 3.92E-20 | 0.414659 | 7.85E-21 |
| 2.47E-12 | -0.00602 | 0.89669  | 0.207125 | 6.39E-06 | 0.35448908 | 2.83E-15 | 0.335905 | 8.83E-14 |
| 0.12743  | 0.268565 | 3.70E-09 | 0.437575 | 2.90E-23 | 0.64156927 | 1.61E-55 | 0.651687 | 8.49E-58 |
| 0.13763  | -0.21744 | 2.10E-06 | -0.22618 | 7.86E-07 | -0.2235294 | 1.06E-06 | -0.35416 | 3.02E-15 |
| 0.34396  | 0.248321 | 5.41E-08 | 0.358499 | 1.31E-15 | 0.54004042 | 1.04E-36 | 0.581214 | 1.51E-43 |
| 0.46162  | 0.030235 | 0.51454  | -0.19374 | 2.49E-05 | -0.6444015 | 3.78E-56 | -0.60554 | 4.59E-48 |
| 0.14566  | 0.189084 | 3.92E-05 | 0.372271 | 8.48E-17 | 0.5729994  | 4.19E-42 | 0.70062  | 3.63E-70 |
| 0.36484  | 0.402721 | 1.23E-19 | 0.505731 | 1.08E-31 | 0.51596255 | 3.96E-33 | 0.45278  | 5.53E-25 |
| 6.57E-08 | -0.14478 | 0.00171  | 0.200649 | 1.25E-05 | 0.42190999 | 1.40E-21 | 0.452091 | 6.64E-25 |
| 0.9579   | 0.126116 | 0.00635  | -0.07959 | 0.08579  | -0.1825821 | 7.23E-05 | -0.4215  | 1.54E-21 |
| 0.75555  | 0.221539 | 1.33E-06 | 0.220622 | 1.48E-06 | 0.45291588 | 5.33E-25 | 0.5189   | 1.50E-33 |
| 0.00013  | -0.02188 | 0.63726  | 0.155738 | 0.00073  | 0.4219561  | 1.38E-21 | 0.551669 | 1.52E-38 |
| 0.00126  | 0.342868 | 2.50E-14 | 0.394947 | 6.97E-19 | 0.60605268 | 3.65E-48 | 0.585097 | 3.05E-44 |
| 0.35114  | 0.253248 | 2.88E-08 | 0.495257 | 2.86E-30 | 0.77804444 | 6.24E-96 | 0.835159 | #####    |
| 0.0826   | 0.224077 | 1.00E-06 | 0.073782 | 0.11131  | -0.5829782 | 7.33E-44 | -0.58901 | 5.93E-45 |
| 0.40526  | 0.083431 | 0.07166  | 0.228885 | 5.75E-07 | 0.41021606 | 2.22E-20 | 0.487486 | 3.01E-29 |
| 0.5672   | -0.10845 | 0.01906  | -0.18319 | 6.83E-05 | -0.3688382 | 1.70E-16 | -0.55461 | 5.09E-39 |
| 0.63519  | 0.392533 | 1.18E-18 | 0.248413 | 5.35E-08 | 0.51074235 | 2.17E-32 | 0.527602 | 7.98E-35 |
| 0.25591  | -0.1196  | 0.00968  | 0.295137 | 7.70E-11 | 0.33792397 | 6.15E-14 | 0.382782 | 9.59E-18 |
| 0.02041  | -0.30495 | 1.66E-11 | -0.10199 | 0.02753  | 0.41236399 | 1.34E-20 | 0.576555 | 1.01E-42 |
| 1.08E-06 | 0.089024 | 0.05455  | 0.13151  | 0.00442  | 0.27450879 | 1.61E-09 | 0.394839 | 7.14E-19 |
| 6.25E-07 | -0.23978 | 1.57E-07 | -0.05789 | 0.21178  | 0.47548407 | 1.02E-27 | 0.541546 | 6.07E-37 |
| 0.01956  | -0.12782 | 0.00567  | -0.31463 | 3.44E-12 | -0.3636217 | 4.80E-16 | -0.39927 | 2.67E-19 |
| 0.82075  | 0.215527 | 2.60E-06 | 0.383772 | 7.78E-18 | 0.50100247 | 4.81E-31 | 0.686387 | 2.57E-66 |
| 0.20786  | 0.188159 | 4.28E-05 | 0.375064 | 4.79E-17 | 0.69737166 | 2.87E-69 | 0.838294 | #####    |
| 0.36012  | 0.327557 | 3.85E-13 | 0.329033 | 2.97E-13 | 0.46747732 | 9.92E-27 | 0.632471 | 1.52E-53 |
| 0.57224  | 0.342396 | 2.73E-14 | 0.305425 | 1.54E-11 | 0.41641955 | 5.18E-21 | 0.508448 | 4.54E-32 |
| 0.78177  | 0.026336 | 0.57025  | -0.06488 | 0.16159  | -0.4005301 | 2.02E-19 | -0.41989 | 2.27E-21 |
| 0.0572   | 0.164558 | 0.00036  | 0.175119 | 0.00014  | 0.40247738 | 1.30E-19 | 0.488787 | 2.04E-29 |
| 1.08E-07 | 0.175269 | 0.00014  | 0.469866 | 5.06E-27 | 0.69721424 | 3.17E-69 | 0.740488 | 2.79E-82 |
| 0.77861  | 0.155648 | 0.00074  | 0.215316 | 2.66E-06 | 0.63402737 | 7.06E-54 | 0.792748 | #####    |

|          |          |          |          |          |            |          |          |          |
|----------|----------|----------|----------|----------|------------|----------|----------|----------|
| 0.31551  | -0.00507 | 0.91305  | 0.087315 | 0.05937  | 0.43852653 | 2.28E-23 | 0.501425 | 4.21E-31 |
| 0.03946  | 0.220852 | 1.44E-06 | 0.223744 | 1.04E-06 | 0.49819942 | 1.15E-30 | 0.407052 | 4.59E-20 |
| 0.01298  | 0.06765  | 0.14438  | 0.364361 | 4.15E-16 | 0.49802676 | 1.21E-30 | 0.536367 | 3.82E-36 |
| 0.84675  | 0.177979 | 0.00011  | 0.226643 | 7.45E-07 | 0.46179536 | 4.80E-26 | 0.620871 | 4.05E-51 |
| 0.72264  | 0.138876 | 0.00263  | 0.468759 | 6.92E-27 | 0.54249081 | 4.33E-37 | 0.382847 | 9.46E-18 |
| 0.4329   | 0.167605 | 0.00027  | 0.291081 | 1.43E-10 | 0.48875377 | 2.06E-29 | 0.572298 | 5.53E-42 |
| 0.95368  | -0.07974 | 0.08519  | 0.057571 | 0.21431  | 0.54238164 | 4.50E-37 | 0.643893 | 4.91E-56 |
| 0.63464  | 0.109669 | 0.01775  | 0.110543 | 0.01686  | 0.49193824 | 7.87E-30 | 0.458655 | 1.13E-25 |
| 0.01518  | 0.12874  | 0.00533  | 0.065399 | 0.15824  | 0.43285359 | 9.52E-23 | 0.377652 | 2.81E-17 |
| 0.19513  | 0.404778 | 7.72E-20 | 0.29381  | 9.44E-11 | 0.53589357 | 4.51E-36 | 0.541254 | 6.74E-37 |
| 0.11774  | 0.431271 | 1.41E-22 | 0.465544 | 1.70E-26 | 0.58108018 | 1.60E-43 | 0.568919 | 2.10E-41 |
| 0.13973  | 0.138842 | 0.00264  | 0.229972 | 5.06E-07 | 0.64409194 | 4.43E-56 | 0.701348 | 2.27E-70 |
| 0.31241  | 0.393125 | 1.04E-18 | 0.310828 | 6.42E-12 | 0.61826614 | 1.38E-50 | 0.778887 | 2.87E-96 |
| 0.48348  | 0.072253 | 0.11894  | -0.05466 | 0.23844  | -0.3633078 | 5.11E-16 | -0.51463 | 6.13E-33 |
| 0.00361  | -0.14571 | 0.00159  | -0.06144 | 0.185    | 0.51697768 | 2.83E-33 | 0.618866 | 1.04E-50 |
| 0.33974  | 0.298806 | 4.37E-11 | 0.3766   | 3.49E-17 | 0.61218375 | 2.29E-49 | 0.825365 | #####    |
| 0.40564  | -0.09962 | 0.03136  | 0.050103 | 0.27992  | 0.59723815 | 1.77E-46 | 0.726018 | 1.23E-77 |
| 0.22788  | 0.248485 | 5.30E-08 | 0.143019 | 0.00195  | 0.43157961 | 1.31E-22 | 0.497948 | 1.24E-30 |
| 0.0022   | 0.230669 | 4.67E-07 | 0.363056 | 5.37E-16 | 0.41176015 | 1.55E-20 | 0.321679 | 1.06E-12 |
| 3.72E-06 | 0.189203 | 3.87E-05 | 0.286555 | 2.81E-10 | 0.48958696 | 1.60E-29 | 0.600774 | 3.78E-47 |
| 0.02336  | 0.121888 | 0.00837  | 0.258772 | 1.39E-08 | 0.49816169 | 1.16E-30 | 0.429584 | 2.15E-22 |
| 0.12145  | 0.268469 | 3.75E-09 | 0.4677   | 9.32E-27 | 0.58305251 | 7.11E-44 | 0.422026 | 1.36E-21 |
| 0.31693  | 0.077907 | 0.09264  | 0.281149 | 6.23E-10 | 0.3460651  | 1.39E-14 | 0.493869 | 4.37E-30 |
| 0.03669  | 0.156725 | 0.00068  | 0.347738 | 1.02E-14 | 0.59976192 | 5.89E-47 | 0.730927 | 3.53E-79 |
| 0.0027   | 0.025822 | 0.57779  | 0.180384 | 8.86E-05 | 0.65209748 | 6.83E-58 | 0.840874 | #####    |
| 0.64798  | 0.107203 | 0.0205   | 0.215472 | 2.61E-06 | 0.47576302 | 9.42E-28 | 0.646764 | 1.12E-56 |
| 1.87E-06 | 0.05556  | 0.23077  | 0.189986 | 3.59E-05 | 0.50566945 | 1.10E-31 | 0.549743 | 3.10E-38 |
| 0.29329  | -0.15358 | 0.00087  | 0.0047   | 0.91931  | 0.40110942 | 1.77E-19 | 0.537446 | 2.61E-36 |
| 0.53371  | 0.09957  | 0.03145  | 0.114726 | 0.01311  | 0.39361762 | 9.33E-19 | 0.509467 | 3.27E-32 |
| 0.00736  | 0.157608 | 0.00063  | 0.317011 | 2.32E-12 | 0.74466513 | 1.11E-83 | 0.604699 | 6.68E-48 |
| 0.68734  | 0.073566 | 0.11236  | 0.137717 | 0.00286  | 0.3919667  | 1.34E-18 | 0.417376 | 4.13E-21 |
| 0.59631  | 0.002741 | 0.95289  | 0.136556 | 0.00311  | 0.57052993 | 1.12E-41 | 0.764697 | 8.67E-91 |
| 0.36716  | 0.335462 | 9.56E-14 | 0.296396 | 6.34E-11 | 0.45907086 | 1.01E-25 | 0.477152 | 6.31E-28 |
| 0.44704  | 0.13157  | 0.0044   | 0.093276 | 0.04394  | 0.46246562 | 3.99E-26 | 0.509624 | 3.11E-32 |
| 0.0001   | 0.232456 | 3.78E-07 | 0.0896   | 0.05299  | -0.534652  | 6.97E-36 | -0.59102 | 2.55E-45 |
| 0.58981  | 0.007383 | 0.87356  | 0.077382 | 0.09487  | 0.23381146 | 3.22E-07 | 0.376597 | 3.49E-17 |
| 0.02113  | -0.09827 | 0.03375  | 0.184049 | 6.31E-05 | 0.30910821 | 8.49E-12 | 0.399894 | 2.32E-19 |
| 0.47946  | 0.059167 | 0.20185  | 0.211989 | 3.81E-06 | 0.47716127 | 6.29E-28 | 0.629039 | 8.14E-53 |
| 0.01222  | 0.368598 | 1.78E-16 | 0.248731 | 5.14E-08 | 0.43138799 | 1.37E-22 | 0.594507 | 5.74E-46 |
| 0.07636  | -0.03598 | 0.43795  | 0.035373 | 0.4457   | 0.2904693  | 1.57E-10 | 0.382752 | 9.65E-18 |
| 0.0045   | -0.16049 | 0.0005   | 0.023356 | 0.61465  | 0.39625839 | 5.22E-19 | 0.375278 | 4.58E-17 |
| 0.10979  | 0.008841 | 0.84888  | 0.244154 | 9.13E-08 | 0.38016891 | 1.66E-17 | 0.527418 | 8.50E-35 |
| 0.92031  | 0.198703 | 1.52E-05 | 0.319863 | 1.43E-12 | 0.70715191 | 5.19E-72 | 0.757598 | 3.44E-88 |
| 0.72699  | 0.469111 | 6.27E-27 | 0.513435 | 9.05E-33 | 0.64597934 | 1.68E-56 | 0.611165 | 3.64E-49 |
| 0.87111  | -0.07649 | 0.09874  | -0.26126 | 1.00E-08 | -0.5114063 | 1.75E-32 | -0.41067 | 1.99E-20 |

|          |          |          |          |          |            |          |          |          |
|----------|----------|----------|----------|----------|------------|----------|----------|----------|
| 0.4885   | 0.167691 | 0.00027  | 0.298918 | 4.29E-11 | 0.28137111 | 6.03E-10 | 0.355295 | 2.43E-15 |
| 1.55E-06 | 0.254667 | 2.39E-08 | 0.209092 | 5.19E-06 | 0.35236227 | 4.25E-15 | 0.480931 | 2.10E-28 |
| 0.07468  | 0.015201 | 0.74318  | 0.194196 | 2.38E-05 | 0.4956809  | 2.51E-30 | 0.674971 | 2.19E-63 |
| 0.00068  | -0.01657 | 0.72099  | -0.08455 | 0.06792  | -0.4541083 | 3.88E-25 | -0.58854 | 7.23E-45 |
| 2.33E-06 | 0.115538 | 0.01247  | 0.157194 | 0.00065  | 0.57815558 | 5.27E-43 | 0.761776 | 1.04E-89 |
| 0.1858   | -0.08791 | 0.05765  | 0.121009 | 0.00885  | 0.54093651 | 7.55E-37 | 0.574225 | 2.57E-42 |
| 0.30395  | 0.337672 | 6.43E-14 | 0.263488 | 7.42E-09 | 0.43623678 | 4.07E-23 | 0.542102 | 4.97E-37 |
| 0.15426  | 0.040241 | 0.38559  | 0.348892 | 8.18E-15 | 0.34194623 | 2.96E-14 | 0.405452 | 6.62E-20 |
| 0.05355  | 0.046896 | 0.31189  | 0.083972 | 0.06983  | 0.50970474 | 3.03E-32 | 0.72291  | 1.12E-76 |
| 0.00046  | 0.152998 | 0.00091  | -0.08197 | 0.07679  | -0.4101952 | 2.23E-20 | -0.42131 | 1.61E-21 |
| 0.75881  | 0.446054 | 3.27E-24 | 0.307976 | 1.02E-11 | 0.46374893 | 2.80E-26 | 0.603146 | 1.33E-47 |
| 0.25323  | 0.185806 | 5.35E-05 | 0.175178 | 0.00014  | 0.5183697  | 1.79E-33 | 0.607169 | 2.21E-48 |
| 3.66E-05 | 0.004153 | 0.92868  | -0.04642 | 0.31686  | 0.46701644 | 1.13E-26 | 0.380318 | 1.61E-17 |
| 0.98409  | -0.0881  | 0.05711  | -0.39176 | 1.40E-18 | -0.3176671 | 2.08E-12 | -0.41109 | 1.81E-20 |
| 7.22E-06 | 0.16375  | 0.00038  | 0.064019 | 0.16722  | 0.41164104 | 1.59E-20 | 0.406603 | 5.09E-20 |
| 0.07798  | 0.153641 | 0.00086  | 0.205622 | 7.48E-06 | 0.5514712  | 1.64E-38 | 0.698703 | 1.23E-69 |
| 0.093    | 0.26653  | 4.90E-09 | 0.241107 | 1.33E-07 | 0.57008808 | 1.33E-41 | 0.643053 | 7.55E-56 |
| 0.32769  | 0.349877 | 6.80E-15 | 0.31287  | 4.60E-12 | 0.65226045 | 6.27E-58 | 0.769085 | 1.93E-92 |
| 8.48E-07 | -0.00767 | 0.86862  | 0.049539 | 0.28537  | 0.39478796 | 7.22E-19 | 0.454073 | 3.91E-25 |
| 0.50202  | 0.040393 | 0.3838   | -0.20956 | 4.94E-06 | -0.3933638 | 9.86E-19 | -0.48885 | 2.00E-29 |
| 0.06237  | -0.06399 | 0.16744  | -0.03936 | 0.39606  | 0.4190154  | 2.80E-21 | 0.504773 | 1.47E-31 |
| 0.70164  | 0.232998 | 3.55E-07 | 0.227549 | 6.71E-07 | 0.65652644 | 6.43E-59 | 0.884251 | #####    |
| 0.0019   | -0.0608  | 0.18968  | 0.192652 | 2.77E-05 | 0.53484176 | 6.52E-36 | 0.556925 | 2.13E-39 |
| 0.04089  | 0.148778 | 0.00126  | 0.420705 | 1.87E-21 | 0.41158353 | 1.61E-20 | 0.430529 | 1.70E-22 |
| 0.53921  | 0.099944 | 0.03082  | 0.326177 | 4.88E-13 | 0.64407239 | 4.48E-56 | 0.801039 | #####    |
| 0.04645  | 0.034613 | 0.45554  | 0.164361 | 0.00036  | 0.44942749 | 1.35E-24 | 0.482309 | 1.40E-28 |
| 0.62473  | -0.07404 | 0.11006  | -0.06532 | 0.15875  | -0.6472024 | 8.89E-57 | -0.74641 | 2.85E-84 |
| 0.01229  | 0.256601 | 1.86E-08 | 0.438499 | 2.29E-23 | 0.52420082 | 2.54E-34 | 0.544126 | 2.40E-37 |
| 0.56627  | 0.064606 | 0.16336  | 0.141116 | 0.00224  | 0.44955453 | 1.30E-24 | 0.473301 | 1.91E-27 |
| 0.00026  | -0.18624 | 5.13E-05 | 0.042543 | 0.35898  | 0.40193282 | 1.47E-19 | 0.373247 | 6.95E-17 |
| 0.00028  | 0.160849 | 0.00048  | 0.309556 | 7.90E-12 | 0.4118162  | 1.53E-20 | 0.509665 | 3.07E-32 |
| 0.02803  | 0.212118 | 3.76E-06 | 0.253634 | 2.74E-08 | 0.68623973 | 2.81E-66 | 0.814074 | #####    |
| 2.42E-12 | 0.241264 | 1.31E-07 | 0.231938 | 4.02E-07 | 0.39335346 | 9.89E-19 | 0.475637 | 9.77E-28 |
| 0.94232  | 0.137027 | 0.003    | 0.254059 | 2.59E-08 | 0.3109977  | 6.25E-12 | 0.38472  | 6.36E-18 |
| 0.80202  | 0.271788 | 2.37E-09 | 0.301896 | 2.69E-11 | 0.61302545 | 1.55E-49 | 0.717247 | 5.78E-75 |
| 8.98E-14 | -0.17437 | 0.00015  | 0.084435 | 0.0683   | 0.46715597 | 1.09E-26 | 0.457112 | 1.72E-25 |
| 2.90E-08 | 0.40546  | 6.61E-20 | 0.298501 | 4.58E-11 | 0.39030967 | 1.92E-18 | 0.437322 | 3.09E-23 |
| 0.04654  | -0.04151 | 0.37083  | 0.172303 | 0.00018  | 0.40681537 | 4.85E-20 | 0.530585 | 2.87E-35 |
| 0.40985  | -0.0199  | 0.668    | 0.123222 | 0.00768  | 0.3822447  | 1.07E-17 | 0.408977 | 2.95E-20 |
| 0.01854  | 0.21518  | 2.70E-06 | 0.123764 | 0.00741  | 0.55483311 | 4.68E-39 | 0.671288 | 1.82E-62 |
| 0.34991  | 0.333445 | 1.37E-13 | 0.374412 | 5.47E-17 | 0.34781027 | 1.00E-14 | 0.418179 | 3.41E-21 |
| 0.07761  | 0.00163  | 0.97198  | 0.179111 | 9.95E-05 | 0.50797105 | 5.29E-32 | 0.558182 | 1.32E-39 |
| 0.22358  | 0.179426 | 9.67E-05 | 0.291347 | 1.37E-10 | 0.6119286  | 2.57E-49 | 0.77329  | 4.65E-94 |
| 5.43E-34 | 0.147928 | 0.00135  | 0.204689 | 8.24E-06 | 0.37771015 | 2.77E-17 | 0.533878 | 9.14E-36 |
| 0.3772   | -0.16322 | 0.0004   | -0.01553 | 0.73786  | 0.54271536 | 3.99E-37 | 0.716787 | 7.94E-75 |

|          |          |          |          |          |            |          |          |          |
|----------|----------|----------|----------|----------|------------|----------|----------|----------|
| 0.30552  | 0.179159 | 9.91E-05 | 0.185046 | 5.75E-05 | 0.3074681  | 1.11E-11 | 0.397966 | 3.57E-19 |
| 0.00295  | 0.379644 | 1.85E-17 | 0.342152 | 2.85E-14 | 0.50802866 | 5.20E-32 | 0.504766 | 1.47E-31 |
| 0.03894  | 0.297275 | 5.54E-11 | 0.474598 | 1.32E-27 | 0.59644043 | 2.50E-46 | 0.526452 | 1.18E-34 |
| 0.1274   | -0.0913  | 0.04862  | 0.078822 | 0.08886  | 0.40925485 | 2.77E-20 | 0.46219  | 4.31E-26 |
| 0.63051  | -0.07742 | 0.09468  | 0.124524 | 0.00705  | 0.30018255 | 3.52E-11 | 0.485989 | 4.71E-29 |
| 0.00058  | -0.04103 | 0.37634  | 0.017562 | 0.70504  | 0.40481737 | 7.65E-20 | 0.408651 | 3.18E-20 |
| 0.00689  | 0.116021 | 0.01211  | 0.154193 | 0.00083  | 0.73501479 | 1.73E-80 | 0.827153 | #####    |
| 0.03583  | 0.205821 | 7.33E-06 | 0.271455 | 2.48E-09 | 0.47647614 | 7.67E-28 | 0.495461 | 2.68E-30 |
| 0.05234  | 0.031924 | 0.49133  | 0.071732 | 0.12163  | 0.23256809 | 3.73E-07 | 0.372791 | 7.63E-17 |
| 0.36373  | 0.04636  | 0.31745  | 0.020441 | 0.6595   | -0.5113031 | 1.81E-32 | -0.50737 | 6.42E-32 |
| 0.31695  | 0.320509 | 1.29E-12 | 0.435044 | 5.50E-23 | 0.74537623 | 6.39E-84 | 0.881055 | #####    |
| 0.90711  | 0.006581 | 0.88722  | 0.268888 | 3.54E-09 | 0.58316991 | 6.78E-44 | 0.452901 | 5.35E-25 |
| 3.91E-08 | 0.021946 | 0.63618  | -0.07003 | 0.13072  | -0.2564403 | 1.90E-08 | -0.41058 | 2.04E-20 |
| 0.20945  | -0.06033 | 0.19313  | 0.218427 | 1.89E-06 | 0.66001974 | 9.69E-60 | 0.822733 | #####    |
| 9.83E-05 | -0.22457 | 9.45E-07 | -0.31977 | 1.46E-12 | -0.4476763 | 2.14E-24 | -0.61317 | 1.46E-49 |
| 0.62801  | -0.19333 | 2.60E-05 | -0.28637 | 2.89E-10 | -0.3410819 | 3.47E-14 | -0.53434 | 7.76E-36 |
| 2.08E-11 | -0.01031 | 0.8242   | 0.069343 | 0.13458  | 0.41193669 | 1.49E-20 | 0.457001 | 1.78E-25 |
| 0.38274  | 0.151467 | 0.00103  | 0.303896 | 1.96E-11 | 0.55082791 | 2.07E-38 | 0.700822 | 3.19E-70 |
| 0.82984  | 0.434416 | 6.44E-23 | 0.34697  | 1.17E-14 | 0.58249716 | 8.94E-44 | 0.757453 | 3.88E-88 |
| 0.27636  | 0.212804 | 3.49E-06 | 0.206759 | 6.64E-06 | 0.60145671 | 2.80E-47 | 0.791026 | #####    |
| 0.23337  | 0.071287 | 0.12396  | 0.212056 | 3.78E-06 | 0.48998835 | 1.42E-29 | 0.525817 | 1.47E-34 |
| 0.00045  | 0.157216 | 0.00065  | 0.145934 | 0.00157  | 0.48715162 | 3.33E-29 | 0.550447 | 2.39E-38 |
| 0.00928  | -0.05195 | 0.26251  | 0.044262 | 0.33987  | 0.54498744 | 1.76E-37 | 0.71549  | 1.93E-74 |
| 0.15378  | -0.03098 | 0.50427  | -0.32552 | 5.47E-13 | -0.4660146 | 1.49E-26 | -0.40716 | 4.48E-20 |
| 0.07986  | 0.177224 | 0.00012  | 0.330627 | 2.25E-13 | 0.72214707 | 1.91E-76 | 0.866324 | #####    |
| 0.0229   | -0.23931 | 1.66E-07 | -0.24385 | 9.49E-08 | -0.2732173 | 1.94E-09 | -0.3745  | 5.37E-17 |
| 0.00064  | 0.087152 | 0.05985  | -0.00208 | 0.96426  | -0.2886606 | 2.06E-10 | -0.38655 | 4.31E-18 |
| 0.16065  | -0.11211 | 0.01536  | 0.117413 | 0.01111  | 0.7034766  | 5.74E-71 | 0.658153 | 2.67E-59 |
| 0.00546  | 0.444845 | 4.48E-24 | 0.634767 | 4.90E-54 | 0.66536448 | 5.10E-61 | 0.631272 | 2.74E-53 |
| 0.84809  | 0.357612 | 1.55E-15 | 0.486819 | 3.68E-29 | 0.50036238 | 5.87E-31 | 0.47886  | 3.84E-28 |
| 0.04736  | 0.314891 | 3.29E-12 | 0.169097 | 0.00024  | 0.33824104 | 5.80E-14 | 0.411367 | 1.70E-20 |
| 0.86886  | -0.30746 | 1.11E-11 | -0.32102 | 1.18E-12 | -0.4818956 | 1.58E-28 | -0.66267 | 2.27E-60 |
| 0.71296  | -0.0343  | 0.45957  | -0.20057 | 1.26E-05 | -0.5243522 | 2.41E-34 | -0.63766 | 1.16E-54 |
| 0.51515  | 0.146701 | 0.00148  | 0.307845 | 1.04E-11 | 0.5078893  | 5.43E-32 | 0.541352 | 6.51E-37 |
| 0.04177  | 0.552519 | 1.11E-38 | 0.413972 | 9.23E-21 | 0.55819762 | 1.32E-39 | 0.602171 | 2.05E-47 |
| 0.68431  | 0.204337 | 8.55E-06 | 0.237285 | 2.12E-07 | 0.51200789 | 1.44E-32 | 0.659757 | 1.12E-59 |
| 0.1947   | -0.01726 | 0.70985  | 0.166366 | 0.00031  | 0.535829   | 4.61E-36 | 0.73113  | 3.04E-79 |
| 7.87E-07 | 0.284173 | 4.00E-10 | 0.055233 | 0.23353  | -0.4833896 | 1.02E-28 | -0.47152 | 3.17E-27 |
| 4.56E-08 | -0.05525 | 0.23335  | 0.02917  | 0.52948  | 0.33991375 | 4.29E-14 | 0.499265 | 8.27E-31 |
| 0.0002   | -0.12176 | 0.00844  | 0.062196 | 0.17967  | 0.3376777  | 6.43E-14 | 0.488782 | 2.04E-29 |
| 0.11703  | 0.109864 | 0.01755  | 0.318873 | 1.70E-12 | 0.65383543 | 2.72E-58 | 0.819162 | #####    |
| 0.67702  | 0.264961 | 6.07E-09 | 0.282093 | 5.43E-10 | 0.61221845 | 2.25E-49 | 0.538093 | 2.08E-36 |
| 0.02132  | 0.067814 | 0.1434   | 0.27188  | 2.34E-09 | 0.68607329 | 3.10E-66 | 0.757507 | 3.71E-88 |
| 0.00338  | -0.22421 | 9.85E-07 | -0.12314 | 0.00772  | 0.28657637 | 2.81E-10 | 0.386148 | 4.69E-18 |
| 0.50235  | -0.11857 | 0.01033  | 0.068611 | 0.13875  | 0.39323489 | 1.01E-18 | 0.535668 | 4.88E-36 |

|          |          |          |          |          |            |          |          |          |
|----------|----------|----------|----------|----------|------------|----------|----------|----------|
| 2.25E-07 | 0.401661 | 1.56E-19 | 0.233676 | 3.27E-07 | 0.39437715 | 7.90E-19 | 0.480721 | 2.23E-28 |
| 0.73723  | 0.276379 | 1.24E-09 | 0.449372 | 1.37E-24 | 0.52560377 | 1.58E-34 | 0.566244 | 5.99E-41 |
| 0.00035  | -0.15741 | 0.00064  | -0.25179 | 3.47E-08 | -0.3654006 | 3.38E-16 | -0.43885 | 2.10E-23 |
| 1.45E-14 | -0.13934 | 0.00255  | 0.010968 | 0.81312  | 0.41745097 | 4.06E-21 | 0.484623 | 7.07E-29 |
| 0.01567  | 0.027905 | 0.54748  | 0.009064 | 0.84511  | 0.64645326 | 1.31E-56 | 0.742115 | 8.01E-83 |
| 0.26887  | 0.088721 | 0.05538  | 0.048714 | 0.29348  | 0.49724573 | 1.55E-30 | 0.641214 | 1.93E-55 |
| 0.63501  | 0.121464 | 0.0086   | 0.26305  | 7.87E-09 | 0.62156481 | 2.92E-51 | 0.739467 | 6.07E-82 |
| 0.04549  | 0.067493 | 0.14531  | 0.257329 | 1.69E-08 | 0.57216249 | 5.84E-42 | 0.696136 | 6.26E-69 |
| 0.44282  | 0.218983 | 1.77E-06 | 0.282794 | 4.90E-10 | 0.56892835 | 2.10E-41 | 0.735667 | 1.06E-80 |
| 0.00175  | 0.385722 | 5.14E-18 | 0.30672  | 1.25E-11 | 0.58708395 | 1.33E-44 | 0.633517 | 9.09E-54 |
| 0.00954  | 0.378485 | 2.36E-17 | 0.367668 | 2.15E-16 | 0.55578153 | 3.28E-39 | 0.477424 | 5.83E-28 |
| 0.768    | 0.439776 | 1.65E-23 | 0.524252 | 2.49E-34 | 0.64748522 | 7.68E-57 | 0.649991 | 2.07E-57 |
| 0.55119  | 0.188639 | 4.09E-05 | 0.301184 | 3.01E-11 | 0.66303479 | 1.86E-60 | 0.819859 | #####    |
| 9.50E-07 | -0.03826 | 0.40944  | 0.002641 | 0.95461  | 0.53203898 | 1.73E-35 | 0.465763 | 1.60E-26 |
| 0.37393  | 0.27821  | 9.52E-10 | 0.453691 | 4.33E-25 | 0.60063329 | 4.02E-47 | 0.573486 | 3.45E-42 |
| 0.22717  | 0.20553  | 7.55E-06 | 0.245174 | 8.04E-08 | 0.32650186 | 4.62E-13 | 0.399103 | 2.77E-19 |
| 0.03741  | 0.196017 | 1.99E-05 | 0.200461 | 1.27E-05 | 0.44182728 | 9.77E-24 | 0.602204 | 2.02E-47 |
| 3.06E-05 | 0.255793 | 2.07E-08 | 0.275986 | 1.31E-09 | 0.53968889 | 1.18E-36 | 0.642744 | 8.84E-56 |
| 0.00012  | 0.233144 | 3.48E-07 | 0.099337 | 0.03185  | 0.37338583 | 6.75E-17 | 0.47587  | 9.13E-28 |
| 0.5673   | 0.183999 | 6.34E-05 | 0.250539 | 4.08E-08 | 0.32199292 | 1.00E-12 | 0.418071 | 3.50E-21 |
| 0.01005  | 0.306411 | 1.31E-11 | 0.291862 | 1.27E-10 | 0.5822924  | 9.73E-44 | 0.643762 | 5.25E-56 |
| 0.06406  | 0.021567 | 0.64202  | 0.159195 | 0.00055  | 0.53612412 | 4.16E-36 | 0.659197 | 1.52E-59 |
| 0.10158  | 0.261382 | 9.85E-09 | 0.183514 | 6.63E-05 | 0.47865883 | 4.07E-28 | 0.655331 | 1.22E-58 |
| 0.03021  | 0.14556  | 0.00161  | 0.146245 | 0.00153  | 0.57190385 | 6.47E-42 | 0.788136 | #####    |
| 0.57075  | -0.07095 | 0.12573  | 0.11647  | 0.01178  | 0.53760371 | 2.47E-36 | 0.681996 | 3.57E-65 |
| 0.69606  | -0.14247 | 0.00203  | 0.042988 | 0.35397  | 0.38792024 | 3.21E-18 | 0.376462 | 3.59E-17 |
| 0.81501  | 0.260978 | 1.04E-08 | 0.195157 | 2.17E-05 | 0.51674356 | 3.06E-33 | 0.702258 | 1.26E-70 |
| 0.0648   | 0.321761 | 1.04E-12 | 0.338552 | 5.49E-14 | 0.42898387 | 2.49E-22 | 0.433196 | 8.74E-23 |
| 0.91036  | -0.0783  | 0.091    | 0.125389 | 0.00667  | 0.50501518 | 1.36E-31 | 0.641868 | 1.38E-55 |
| 0.05911  | 0.065657 | 0.1566   | 0.267312 | 4.40E-09 | 0.58488551 | 3.33E-44 | 0.677421 | 5.29E-64 |
| 0.10684  | 0.351479 | 5.03E-15 | 0.227712 | 6.59E-07 | 0.48888747 | 1.98E-29 | 0.525114 | 1.86E-34 |
| 0.01737  | -0.00475 | 0.91852  | 0.127468 | 0.00581  | 0.53030854 | 3.15E-35 | 0.70451  | 2.93E-71 |
| 0.00032  | -0.02136 | 0.64522  | -0.12759 | 0.00576  | 0.5252055  | 1.81E-34 | 0.704489 | 2.97E-71 |
| 0.58245  | 0.047536 | 0.30532  | -0.11745 | 0.01108  | -0.5155205 | 4.57E-33 | -0.61969 | 7.08E-51 |
| 0.50343  | 0.292548 | 1.14E-10 | 0.231467 | 4.25E-07 | 0.3155707  | 2.94E-12 | 0.414635 | 7.90E-21 |
| 0.20112  | 0.175364 | 0.00014  | 0.299701 | 3.80E-11 | 0.52585507 | 1.45E-34 | 0.741615 | 1.18E-82 |
| 0.00127  | -0.18304 | 6.93E-05 | 0.061306 | 0.18599  | 0.46868832 | 7.06E-27 | 0.490555 | 1.20E-29 |
| 4.04E-07 | 0.211242 | 4.13E-06 | 0.383869 | 7.62E-18 | 0.48787278 | 2.68E-29 | 0.417837 | 3.70E-21 |
| 0.35762  | 0.091894 | 0.04717  | 0.146821 | 0.00146  | 0.3899229  | 2.09E-18 | 0.401923 | 1.47E-19 |
| 0.03733  | -0.13158 | 0.0044   | -0.15678 | 0.00067  | 0.42843279 | 2.85E-22 | 0.34448  | 1.86E-14 |
| 0.71318  | 0.252066 | 3.35E-08 | 0.216226 | 2.40E-06 | 0.53976363 | 1.15E-36 | 0.587984 | 9.14E-45 |
| 0.00121  | -0.11369 | 0.01396  | -0.17967 | 9.46E-05 | -0.3249817 | 6.00E-13 | -0.49415 | 4.01E-30 |
| 3.52E-07 | 0.227939 | 6.42E-07 | 0.138455 | 0.00271  | 0.31099225 | 6.25E-12 | 0.387068 | 3.86E-18 |
| 0.35005  | 0.318385 | 1.84E-12 | 0.277423 | 1.07E-09 | 0.66271225 | 2.22E-60 | 0.739208 | 7.39E-82 |
| 0.12621  | 0.347371 | 1.09E-14 | 0.383425 | 8.38E-18 | 0.53216937 | 1.66E-35 | 0.697509 | 2.63E-69 |

|          |          |          |          |          |            |          |          |          |
|----------|----------|----------|----------|----------|------------|----------|----------|----------|
| 0.11124  | 0.25822  | 1.50E-08 | 0.234586 | 2.93E-07 | 0.44761592 | 2.17E-24 | 0.545352 | 1.54E-37 |
| 0.00391  | 0.148842 | 0.00126  | 0.119833 | 0.00954  | 0.43956671 | 1.75E-23 | 0.609397 | 8.11E-49 |
| 0.07958  | 0.003704 | 0.93637  | 0.197243 | 1.76E-05 | 0.57468586 | 2.13E-42 | 0.634496 | 5.60E-54 |
| 0.46115  | -0.20396 | 8.89E-06 | 0.258951 | 1.36E-08 | 0.52236023 | 4.72E-34 | 0.364116 | 4.36E-16 |
| 0.72076  | 0.347098 | 1.14E-14 | 0.280672 | 6.67E-10 | 0.45109783 | 8.65E-25 | 0.527481 | 8.32E-35 |
| 2.71E-06 | -0.14975 | 0.00117  | 0.129655 | 0.00501  | 0.57343183 | 3.52E-42 | 0.454472 | 3.52E-25 |
| 0.5737   | 0.183107 | 6.89E-05 | 0.3131   | 4.43E-12 | 0.56454811 | 1.16E-40 | 0.520299 | 9.41E-34 |
| 0.01177  | -0.10398 | 0.02463  | 0.01791  | 0.69947  | 0.31373546 | 3.99E-12 | 0.392468 | 1.20E-18 |
| 0.07913  | -0.02358 | 0.61133  | -0.36804 | 1.99E-16 | -0.3831559 | 8.87E-18 | -0.35999 | 9.80E-16 |
| 0.51502  | 0.104824 | 0.02349  | 0.173423 | 0.00017  | 0.55335603 | 8.12E-39 | 0.710198 | 6.88E-73 |
| 0.3816   | 0.288349 | 2.15E-10 | 0.224286 | 9.76E-07 | 0.15874787 | 0.00057  | 0.248448 | 5.32E-08 |
| 0.93313  | -0.16644 | 0.0003   | 0.108264 | 0.01927  | 0.50627384 | 9.10E-32 | 0.437396 | 3.03E-23 |
| 0.00192  | -0.04383 | 0.34464  | -0.24023 | 1.48E-07 | -0.3975254 | 3.94E-19 | -0.49293 | 5.81E-30 |
| 0.10281  | 0.019366 | 0.67638  | 0.102846 | 0.02625  | 0.51745657 | 2.42E-33 | 0.692179 | 7.41E-68 |
| 1.61E-10 | -0.30332 | 2.15E-11 | -0.0162  | 0.72698  | 0.46256216 | 3.89E-26 | 0.505254 | 1.26E-31 |
| 0.09369  | -0.26114 | 1.02E-08 | -0.28345 | 4.45E-10 | -0.3360011 | 8.68E-14 | -0.42858 | 2.75E-22 |
| 0.46597  | 0.209654 | 4.89E-06 | 0.161462 | 0.00046  | 0.25722979 | 1.71E-08 | 0.374861 | 4.99E-17 |
| 0.26308  | 0.034425 | 0.45799  | 0.44248  | 8.26E-24 | 0.34824679 | 9.23E-15 | 0.342235 | 2.81E-14 |
| 0.23932  | 0.020954 | 0.65152  | 0.251317 | 3.69E-08 | 0.48604264 | 4.64E-29 | 0.48038  | 2.47E-28 |
| 0.03571  | 0.355247 | 2.45E-15 | 0.172969 | 0.00017  | 0.34688016 | 1.19E-14 | 0.482043 | 1.51E-28 |
| 0.52352  | 0.197204 | 1.77E-05 | 0.315924 | 2.78E-12 | 0.70130554 | 2.34E-70 | 0.831925 | #####    |
| 0.16825  | -0.09392 | 0.04249  | 0.150645 | 0.00109  | 0.47482351 | 1.23E-27 | 0.519699 | 1.15E-33 |
| 0.42918  | 0.375957 | 3.98E-17 | 0.316655 | 2.46E-12 | 0.52335805 | 3.37E-34 | 0.419709 | 2.37E-21 |
| 0.20611  | 0.055946 | 0.22754  | 0.087608 | 0.05852  | 0.61825945 | 1.38E-50 | 0.540061 | 1.03E-36 |
| 0.06295  | -0.07593 | 0.10124  | -0.03076 | 0.5073   | -0.3400309 | 4.20E-14 | -0.50957 | 3.17E-32 |
| 0.31339  | 0.050504 | 0.27608  | 0.071588 | 0.12238  | 0.53557202 | 5.05E-36 | 0.582711 | 8.19E-44 |
| 0.00041  | -0.08398 | 0.06982  | 0.049756 | 0.28326  | 0.35387461 | 3.19E-15 | 0.437657 | 2.84E-23 |
| 0.55303  | 0.331885 | 1.80E-13 | 0.440585 | 1.34E-23 | 0.58306124 | 7.09E-44 | 0.708035 | 2.90E-72 |
| 0.72698  | 0.419398 | 2.55E-21 | 0.278742 | 8.82E-10 | 0.56039041 | 5.72E-40 | 0.716451 | 1.00E-74 |
| 0.00131  | 0.117164 | 0.01128  | 0.17203  | 0.00019  | 0.3220784  | 9.86E-13 | 0.397007 | 4.42E-19 |
| 0.06324  | 0.400426 | 2.06E-19 | 0.36071  | 8.51E-16 | 0.5039293  | 1.92E-31 | 0.453041 | 5.16E-25 |
| 0.18338  | 0.203902 | 8.94E-06 | 0.298816 | 4.36E-11 | 0.6752046  | 1.92E-63 | 0.88156  | #####    |
| 0.00524  | 0.276453 | 1.22E-09 | 0.519979 | 1.05E-33 | 0.73115979 | 2.98E-79 | 0.62779  | 1.49E-52 |
| 1.29E-06 | 0.280126 | 7.22E-10 | 0.203815 | 9.02E-06 | -0.352034  | 4.52E-15 | -0.3663  | 2.83E-16 |
| 0.00017  | 0.46462  | 2.20E-26 | 0.391465 | 1.49E-18 | 0.46528699 | 1.83E-26 | 0.543001 | 3.60E-37 |
| 0.58415  | -0.08852 | 0.05594  | -0.05053 | 0.2758   | -0.3591027 | 1.16E-15 | -0.49137 | 9.34E-30 |
| 0.34442  | 0.21925  | 1.72E-06 | 0.07763  | 0.09381  | -0.3803577 | 1.60E-17 | -0.60158 | 2.65E-47 |
| 0.00051  | 0.078082 | 0.09191  | -0.02999 | 0.51794  | -0.5575719 | 1.67E-39 | -0.48103 | 2.04E-28 |
| 0.00082  | 0.196133 | 1.97E-05 | 0.298971 | 4.25E-11 | 0.48700853 | 3.48E-29 | 0.39644  | 5.01E-19 |
| 0.01566  | 0.029919 | 0.51895  | 0.245733 | 7.50E-08 | 0.43067177 | 1.64E-22 | 0.422864 | 1.11E-21 |
| 0.61153  | 0.011278 | 0.80794  | -0.14959 | 0.00119  | -0.4244982 | 7.47E-22 | -0.44216 | 8.98E-24 |
| 5.60E-12 | -0.24762 | 5.91E-08 | -0.14924 | 0.00122  | -0.3446627 | 1.80E-14 | -0.4636  | 2.92E-26 |
| 0.05777  | 0.033708 | 0.46742  | 0.251336 | 3.68E-08 | 0.33588846 | 8.86E-14 | 0.33542  | 9.63E-14 |
| 0.21084  | 0.077757 | 0.09327  | 0.229738 | 5.20E-07 | 0.55420765 | 5.91E-39 | 0.667902 | 1.23E-61 |
| 0.81068  | 0.305783 | 1.45E-11 | 0.139702 | 0.00248  | 0.00957456 | 0.83651  | -0.08832 | 0.0565   |

|          |          |          |          |          |            |          |          |          |
|----------|----------|----------|----------|----------|------------|----------|----------|----------|
| 0.87274  | 0.359834 | 1.01E-15 | 0.268463 | 3.76E-09 | 0.5871195  | 1.31E-44 | 0.656399 | 6.89E-59 |
| 5.71E-05 | 0.202819 | 1.00E-05 | 0.247273 | 6.18E-08 | 0.49902105 | 8.92E-31 | 0.650427 | 1.65E-57 |
| 2.87E-06 | 0.335883 | 8.87E-14 | 0.288227 | 2.19E-10 | 0.57489741 | 1.96E-42 | 0.592931 | 1.13E-45 |
| 0.11459  | 0.16967  | 0.00023  | 0.402137 | 1.40E-19 | 0.40925442 | 2.77E-20 | 0.403775 | 9.70E-20 |
| 0.61022  | 0.204642 | 8.28E-06 | 0.298969 | 4.26E-11 | 0.5740698  | 2.73E-42 | 0.607305 | 2.08E-48 |
| 0.18976  | -0.08725 | 0.05957  | 0.185498 | 5.51E-05 | 0.66446582 | 8.41E-61 | 0.575718 | 1.41E-42 |
| 0.16013  | -0.02348 | 0.61284  | -0.10589 | 0.02211  | -0.3981911 | 3.40E-19 | -0.48563 | 5.24E-29 |
| 0.02031  | -0.13446 | 0.0036   | -0.01399 | 0.763    | 0.40108782 | 1.78E-19 | 0.512939 | 1.06E-32 |
| 0.35016  | -0.20286 | 9.96E-06 | -0.0145  | 0.75461  | 0.42320999 | 1.02E-21 | 0.54377  | 2.73E-37 |
| 0.36838  | -0.29047 | 1.57E-10 | 0.027631 | 0.55142  | 0.45393141 | 4.06E-25 | 0.390392 | 1.88E-18 |
| 5.23E-16 | 0.183277 | 6.78E-05 | 0.127591 | 0.00576  | 0.35180161 | 4.73E-15 | 0.425514 | 5.83E-22 |
| 3.81E-12 | -0.00189 | 0.96756  | 0.225114 | 8.88E-07 | 0.38279755 | 9.56E-18 | 0.490105 | 1.37E-29 |
| 0.36083  | 0.156779 | 0.00067  | 0.243357 | 1.01E-07 | 0.52662495 | 1.11E-34 | 0.63242  | 1.56E-53 |
| 0.07923  | -0.06488 | 0.16158  | -0.02332 | 0.61513  | 0.51345124 | 9.00E-33 | 0.656308 | 7.23E-59 |
| 0.77772  | 0.011033 | 0.81203  | 0.210398 | 4.52E-06 | 0.4733462  | 1.88E-27 | 0.666094 | 3.40E-61 |
| 0.2775   | 0.40953  | 2.60E-20 | 0.303129 | 2.21E-11 | 0.68625219 | 2.79E-66 | 0.726115 | 1.15E-77 |
| 0.02601  | 0.035143 | 0.44866  | 0.077449 | 0.09458  | 0.50499445 | 1.37E-31 | 0.650377 | 1.69E-57 |
| 0.00636  | -0.13762 | 0.00288  | 0.0706   | 0.12764  | 0.51720704 | 2.63E-33 | 0.559229 | 8.90E-40 |
| 0.34938  | 0.093808 | 0.04274  | -0.12511 | 0.00679  | -0.6329    | 1.23E-53 | -0.65101 | 1.22E-57 |
| 0.79012  | 0.088455 | 0.05611  | -0.13743 | 0.00292  | -0.6542915 | 2.13E-58 | -0.70474 | 2.52E-71 |
| 0.63258  | 0.011061 | 0.81157  | -0.1966  | 1.88E-05 | -0.6760604 | 1.17E-63 | -0.74882 | 4.25E-85 |
| 0.00045  | 0.204349 | 8.54E-06 | -0.10707 | 0.02065  | -0.6842769 | 9.15E-66 | -0.55202 | 1.33E-38 |
| 0.04265  | 0.091874 | 0.04722  | 0.093757 | 0.04285  | 0.32531488 | 5.67E-13 | 0.421303 | 1.62E-21 |
| 0.2557   | -0.20634 | 6.94E-06 | -0.24152 | 1.27E-07 | -0.4946289 | 3.46E-30 | -0.55084 | 2.07E-38 |
| 0.03828  | 0.011102 | 0.81089  | 0.154069 | 0.00084  | 0.36137563 | 7.47E-16 | 0.409654 | 2.52E-20 |
| 0.00041  | 0.108442 | 0.01907  | 0.275454 | 1.41E-09 | 0.70050363 | 3.91E-70 | 0.730914 | 3.57E-79 |
| 0.3467   | -0.02492 | 0.5911   | 0.315018 | 3.23E-12 | 0.64262884 | 9.37E-56 | 0.694799 | 1.45E-68 |
| 0.31386  | 0.136613 | 0.00309  | 0.233627 | 3.29E-07 | 0.57777156 | 6.16E-43 | 0.497022 | 1.66E-30 |
| 0.43227  | 0.118829 | 0.01017  | 0.130802 | 0.00464  | 0.42584773 | 5.38E-22 | 0.498552 | 1.03E-30 |
| 0.11893  | 0.207349 | 6.24E-06 | 0.323726 | 7.44E-13 | 0.42130784 | 1.62E-21 | 0.516606 | 3.20E-33 |
| 0.62397  | -0.05221 | 0.26016  | 0.085614 | 0.06452  | 0.42484528 | 6.86E-22 | 0.471811 | 2.92E-27 |
| 0.87748  | -0.31881 | 1.71E-12 | -0.24926 | 4.80E-08 | -0.3483301 | 9.09E-15 | -0.54495 | 1.78E-37 |
| 0.71491  | 0.368924 | 1.67E-16 | 0.463764 | 2.79E-26 | 0.601523   | 2.72E-47 | 0.428387 | 2.88E-22 |
| 0.08658  | 0.366833 | 2.54E-16 | 0.319427 | 1.54E-12 | 0.51606404 | 3.83E-33 | 0.558021 | 1.41E-39 |
| 0.36675  | 0.029269 | 0.52807  | 0.20658  | 6.77E-06 | 0.66301168 | 1.88E-60 | 0.770888 | 3.95E-93 |
| 0.03319  | 0.180415 | 8.83E-05 | 0.159218 | 0.00055  | 0.52714634 | 9.33E-35 | 0.444581 | 4.79E-24 |
| 0.90534  | -0.0824  | 0.07526  | -0.3083  | 9.68E-12 | -0.4266729 | 4.39E-22 | -0.53609 | 4.22E-36 |
| 0.49322  | -0.12446 | 0.00708  | 0.200883 | 1.22E-05 | 0.51958259 | 1.19E-33 | 0.625495 | 4.50E-52 |
| 0.19631  | 0.396801 | 4.63E-19 | 0.246001 | 7.25E-08 | 0.61271738 | 1.79E-49 | 0.730572 | 4.58E-79 |
| 0.10403  | 0.16215  | 0.00043  | 0.218093 | 1.96E-06 | 0.69090229 | 1.63E-67 | 0.84938  | #####    |
| 0.33379  | -0.14278 | 0.00198  | -0.16634 | 0.00031  | 0.42326586 | 1.01E-21 | 0.534866 | 6.47E-36 |
| 0.01025  | 0.489612 | 1.59E-29 | 0.420894 | 1.78E-21 | 0.64099331 | 2.16E-55 | 0.811672 | #####    |
| 0.64188  | 0.437308 | 3.10E-23 | 0.349498 | 7.30E-15 | 0.62200931 | 2.37E-51 | 0.788546 | #####    |
| 2.05E-05 | 0.343631 | 2.17E-14 | 0.3037   | 2.02E-11 | 0.54561197 | 1.40E-37 | 0.395029 | 6.84E-19 |
| 0.12105  | 0.129199 | 0.00517  | 0.178676 | 0.0001   | 0.5448857  | 1.82E-37 | 0.457721 | 1.46E-25 |

|          |          |          |          |          |            |          |          |          |
|----------|----------|----------|----------|----------|------------|----------|----------|----------|
| 0.86558  | 0.3397   | 4.46E-14 | 0.352749 | 3.95E-15 | 0.66870303 | 7.86E-62 | 0.774238 | 1.98E-94 |
| 0.00096  | -0.25926 | 1.31E-08 | -0.21046 | 4.49E-06 | -0.3703497 | 1.25E-16 | -0.43868 | 2.19E-23 |
| 4.77E-06 | -0.0845  | 0.0681   | -0.14651 | 0.0015   | -0.4053842 | 6.73E-20 | -0.4921  | 7.49E-30 |
| 0.05781  | 0.365386 | 3.39E-16 | 0.391553 | 1.46E-18 | 0.55275244 | 1.02E-38 | 0.628737 | 9.43E-53 |
| 5.07E-05 | 0.127158 | 0.00593  | 0.102703 | 0.02646  | -0.2333053 | 3.42E-07 | -0.45613 | 2.25E-25 |
| 0.38554  | -0.30274 | 2.35E-11 | -0.37185 | 9.23E-17 | -0.3779496 | 2.64E-17 | -0.43499 | 5.57E-23 |
| 2.89E-05 | 0.300504 | 3.35E-11 | 0.308633 | 9.17E-12 | 0.32007753 | 1.38E-12 | 0.40843  | 3.35E-20 |
| 0.01613  | -0.07363 | 0.11204  | -0.19107 | 3.23E-05 | -0.3257515 | 5.26E-13 | -0.47076 | 3.93E-27 |
| 0.73742  | 0.285841 | 3.13E-10 | -0.13347 | 0.00386  | -0.4876888 | 2.84E-29 | -0.44319 | 6.87E-24 |
| 2.78E-05 | 0.250201 | 4.26E-08 | 0.41282  | 1.21E-20 | 0.46238611 | 4.08E-26 | 0.531759 | 1.91E-35 |
| 0.10347  | 0.170747 | 0.00021  | 0.274742 | 1.56E-09 | 0.53685622 | 3.21E-36 | 0.673575 | 4.90E-63 |
| 0.56942  | 0.443186 | 6.88E-24 | 0.269792 | 3.13E-09 | 0.58246624 | 9.06E-44 | 0.646426 | 1.33E-56 |
| 1.53E-07 | -0.02644 | 0.56865  | 0.06353  | 0.1705   | 0.3277815  | 3.70E-13 | 0.404444 | 8.33E-20 |
| 0.5313   | 0.131246 | 0.0045   | 0.165982 | 0.00032  | 0.37165696 | 9.61E-17 | 0.404953 | 7.42E-20 |
| 0.12823  | -0.06313 | 0.17324  | 0.067558 | 0.14492  | 0.32530974 | 5.67E-13 | 0.385395 | 5.51E-18 |
| 4.42E-07 | -0.21298 | 3.43E-06 | 0.110963 | 0.01644  | 0.61837856 | 1.31E-50 | 0.653799 | 2.77E-58 |
| 2.46E-05 | 0.079599 | 0.08575  | -0.12589 | 0.00645  | 0.26866021 | 3.66E-09 | 0.254715 | 2.38E-08 |
| 0.4673   | -0.26181 | 9.29E-09 | -0.36181 | 6.86E-16 | -0.3824414 | 1.03E-17 | -0.45187 | 7.04E-25 |
| 0.178    | -0.08069 | 0.08153  | 0.344927 | 1.71E-14 | 0.64409312 | 4.43E-56 | 0.459448 | 9.14E-26 |
| 0.75947  | 0.150708 | 0.00109  | 0.200135 | 1.32E-05 | 0.41858765 | 3.10E-21 | 0.50965  | 3.09E-32 |
| 0.00781  | -0.00902 | 0.84589  | -0.28802 | 2.26E-10 | -0.4519885 | 6.83E-25 | -0.45903 | 1.02E-25 |
| 0.44952  | 0.045847 | 0.32285  | -0.06711 | 0.14762  | -0.6859922 | 3.26E-66 | -0.72531 | 2.04E-77 |
| 0.16886  | 0.313394 | 4.22E-12 | 0.294196 | 8.89E-11 | 0.51329616 | 9.47E-33 | 0.507739 | 5.70E-32 |
| 0.15498  | 0.25257  | 3.14E-08 | 0.56049  | 5.51E-40 | 0.56985601 | 1.46E-41 | 0.46854  | 7.36E-27 |
| 0.06457  | 0.378937 | 2.15E-17 | 0.298716 | 4.43E-11 | 0.567412   | 3.80E-41 | 0.465267 | 1.84E-26 |
| 0.86473  | 0.082717 | 0.07413  | 0.289773 | 1.74E-10 | 0.4005159  | 2.02E-19 | 0.410471 | 2.09E-20 |
| 0.31046  | 0.321777 | 1.04E-12 | 0.263328 | 7.58E-09 | 0.45743136 | 1.58E-25 | 0.377821 | 2.71E-17 |
| 0.65266  | 0.345791 | 1.46E-14 | 0.227207 | 6.98E-07 | 0.52137103 | 6.57E-34 | 0.588877 | 6.28E-45 |
| 7.38E-05 | 0.051504 | 0.26667  | 0.043709 | 0.34594  | 0.50980003 | 2.94E-32 | 0.553821 | 6.82E-39 |
| 0.9031   | 0.133573 | 0.00383  | 0.045806 | 0.32328  | 0.51702923 | 2.78E-33 | 0.516135 | 3.74E-33 |
| 5.23E-07 | -0.14365 | 0.00186  | -0.01217 | 0.79315  | 0.59744416 | 1.62E-46 | 0.617043 | 2.43E-50 |
| 0.04487  | 0.255704 | 2.09E-08 | 0.231959 | 4.01E-07 | 0.50804323 | 5.17E-32 | 0.528345 | 6.19E-35 |
| 0.67728  | 0.261036 | 1.03E-08 | 0.254358 | 2.49E-08 | 0.36750191 | 2.22E-16 | 0.448902 | 1.55E-24 |
| 0.03977  | 0.197872 | 1.65E-05 | -0.14368 | 0.00185  | -0.4425169 | 8.18E-24 | -0.56215 | 2.92E-40 |
| 0.42886  | 0.009478 | 0.83813  | 0.094439 | 0.04136  | 0.52742329 | 8.49E-35 | 0.557908 | 1.47E-39 |
| 0.22899  | 0.336966 | 7.30E-14 | 0.426617 | 4.45E-22 | 0.6254168  | 4.67E-52 | 0.43643  | 3.87E-23 |
| 0.13589  | 0.1284   | 0.00546  | 0.30746  | 1.11E-11 | 0.38177032 | 1.19E-17 | 0.29543  | 7.36E-11 |
| 0.04888  | 0.07596  | 0.10111  | 0.035042 | 0.44997  | 0.45351331 | 4.55E-25 | 0.502825 | 2.71E-31 |
| 0.00191  | 0.127366 | 0.00585  | 0.174443 | 0.00015  | 0.49264771 | 6.34E-30 | 0.465216 | 1.86E-26 |
| 0.20657  | 0.348461 | 8.87E-15 | 0.615174 | 5.79E-50 | 0.69906714 | 9.79E-70 | 0.560351 | 5.81E-40 |
| 0.67389  | -0.03359 | 0.46904  | 0.123134 | 0.00772  | 0.4388281  | 2.11E-23 | 0.439107 | 1.96E-23 |
| 0.01397  | 0.052826 | 0.25458  | -0.25131 | 3.69E-08 | -0.5831681 | 6.78E-44 | -0.63084 | 3.39E-53 |
| 0.01227  | 0.370437 | 1.23E-16 | 0.404286 | 8.64E-20 | 0.63150278 | 2.45E-53 | 0.785396 | 6.40E-99 |
| 0.84231  | 0.354086 | 3.06E-15 | 0.472919 | 2.13E-27 | 0.64676661 | 1.11E-56 | 0.632108 | 1.82E-53 |
| 2.77E-05 | -0.12246 | 0.00807  | 0.077934 | 0.09253  | 0.30927234 | 8.27E-12 | 0.381691 | 1.21E-17 |



|          |          |          |          |          |            |          |          |          |
|----------|----------|----------|----------|----------|------------|----------|----------|----------|
| 0.00174  | -0.07639 | 0.09918  | 0.271888 | 2.33E-09 | 0.52077406 | 8.03E-34 | 0.443175 | 6.90E-24 |
| 0.02797  | -0.1053  | 0.02286  | 0.137346 | 0.00294  | 0.47584814 | 9.19E-28 | 0.435796 | 4.55E-23 |
| 0.72452  | 0.219556 | 1.66E-06 | 0.273534 | 1.85E-09 | 0.41501294 | 7.23E-21 | 0.476153 | 8.42E-28 |
| 0.94943  | 0.439877 | 1.61E-23 | 0.40052  | 2.02E-19 | 0.50530827 | 1.24E-31 | 0.510484 | 2.36E-32 |
| 1.59E-09 | 0.138293 | 0.00275  | 0.08341  | 0.07173  | 0.46022298 | 7.39E-26 | 0.398252 | 3.35E-19 |
| 0.16695  | 0.177446 | 0.00012  | 0.309016 | 8.62E-12 | 0.66396257 | 1.11E-60 | 0.660369 | 8.01E-60 |
| 0.00025  | 0.351037 | 5.46E-15 | 0.408596 | 3.22E-20 | 0.47113758 | 3.53E-27 | 0.562569 | 2.48E-40 |
| 2.07E-12 | -0.04835 | 0.29707  | 0.039611 | 0.39309  | 0.23334024 | 3.40E-07 | 0.33829  | 5.75E-14 |
| 0.81923  | 0.036582 | 0.4303   | 0.258271 | 1.49E-08 | 0.42684904 | 4.21E-22 | 0.427248 | 3.82E-22 |
| 0.02938  | 0.40636  | 5.38E-20 | 0.414693 | 7.79E-21 | 0.3800723  | 1.70E-17 | 0.400955 | 1.83E-19 |
| 0.00059  | -0.13268 | 0.00408  | 0.022437 | 0.62864  | -0.2143521 | 2.95E-06 | -0.35746 | 1.60E-15 |
| 0.01913  | 0.468932 | 6.59E-27 | 0.407951 | 3.74E-20 | 0.62976213 | 5.73E-53 | 0.690295 | 2.37E-67 |
| 0.08542  | -0.09664 | 0.03682  | 0.125646 | 0.00655  | 0.44777703 | 2.08E-24 | 0.539029 | 1.49E-36 |
| 0.26979  | 0.300698 | 3.25E-11 | 0.11703  | 0.01137  | 0.53134402 | 2.20E-35 | 0.676404 | 9.56E-64 |
| 0.05599  | 0.332801 | 1.53E-13 | 0.389055 | 2.52E-18 | 0.55930215 | 8.66E-40 | 0.452114 | 6.60E-25 |
| 0.43824  | 0.268742 | 3.62E-09 | 0.164325 | 0.00036  | 0.57094052 | 9.48E-42 | 0.782993 | 6.25E-98 |
| 2.15E-09 | 0.382112 | 1.10E-17 | 0.41956  | 2.46E-21 | 0.50999054 | 2.77E-32 | 0.487413 | 3.08E-29 |
| 0.13278  | 0.508227 | 4.88E-32 | 0.277559 | 1.05E-09 | 0.52098732 | 7.47E-34 | 0.595855 | 3.21E-46 |
| 0.46893  | 0.293457 | 9.96E-11 | 0.233672 | 3.27E-07 | 0.62000117 | 6.11E-51 | 0.576224 | 1.15E-42 |
| 0.51029  | 0.046866 | 0.3122   | 0.061643 | 0.18358  | 0.48384349 | 8.91E-29 | 0.458505 | 1.18E-25 |
| 0.23069  | 0.36247  | 6.03E-16 | 0.297212 | 5.59E-11 | 0.65540161 | 1.18E-58 | 0.762487 | 5.71E-90 |
| 0.64008  | -0.04385 | 0.3444   | -0.27152 | 2.46E-09 | -0.4098143 | 2.43E-20 | -0.51338 | 9.23E-33 |
| 0.19167  | -0.12612 | 0.00635  | -0.23284 | 3.61E-07 | -0.3447816 | 1.76E-14 | -0.48612 | 4.53E-29 |
| 0.91417  | 0.365481 | 3.32E-16 | 0.318038 | 1.95E-12 | 0.61604124 | 3.87E-50 | 0.464433 | 2.32E-26 |
| 0.1577   | 0.293933 | 9.26E-11 | 0.244675 | 8.56E-08 | 0.38542777 | 5.47E-18 | 0.452361 | 6.18E-25 |
| 0.18295  | 0.418653 | 3.05E-21 | 0.618064 | 1.51E-50 | 0.59825088 | 1.14E-46 | 0.631792 | 2.12E-53 |
| 0.22483  | 0.232041 | 3.97E-07 | 0.285194 | 3.44E-10 | 0.64271949 | 8.95E-56 | 0.644576 | 3.46E-56 |
| 0.37615  | 0.19269  | 2.76E-05 | 0.362296 | 6.24E-16 | 0.55407582 | 6.21E-39 | 0.542121 | 4.94E-37 |
| 0.51932  | 0.251819 | 3.46E-08 | 0.250647 | 4.02E-08 | 0.2995472  | 3.89E-11 | 0.379911 | 1.75E-17 |
| 0.00224  | 0.206537 | 6.80E-06 | 0.207145 | 6.38E-06 | 0.43977819 | 1.65E-23 | 0.599355 | 7.04E-47 |
| 0.4856   | 0.133839 | 0.00376  | 0.019746 | 0.67039  | 0.57625959 | 1.13E-42 | 0.701354 | 2.26E-70 |
| 0.21895  | 0.137655 | 0.00287  | 0.197533 | 1.71E-05 | 0.49991097 | 6.76E-31 | 0.589281 | 5.30E-45 |
| 0.39079  | -0.20558 | 7.51E-06 | -0.45332 | 4.79E-25 | -0.5228941 | 3.94E-34 | -0.63276 | 1.32E-53 |
| 0.38315  | 0.324377 | 6.66E-13 | 0.268501 | 3.74E-09 | 0.59022495 | 3.56E-45 | 0.609949 | 6.32E-49 |
| 8.58E-09 | -0.20198 | 1.09E-05 | -0.18787 | 4.40E-05 | -0.4438592 | 5.78E-24 | -0.47895 | 3.74E-28 |
| 0.06614  | 0.300655 | 3.27E-11 | 0.221991 | 1.27E-06 | 0.37115275 | 1.06E-16 | 0.424351 | 7.74E-22 |
| 0.05893  | 0.077471 | 0.09449  | 0.236249 | 2.40E-07 | 0.65371627 | 2.89E-58 | 0.851585 | #####    |
| 0.32051  | -0.09375 | 0.04286  | 0.094303 | 0.04165  | 0.60905494 | 9.47E-49 | 0.778432 | 4.37E-96 |
| 0.21507  | 0.068819 | 0.13755  | 0.228404 | 6.08E-07 | 0.53619005 | 4.06E-36 | 0.605346 | 5.01E-48 |
| 0.09948  | 0.295456 | 7.33E-11 | 0.322361 | 9.40E-13 | 0.4909806  | 1.05E-29 | 0.724268 | 4.28E-77 |
| 0.37686  | -0.10102 | 0.02906  | -0.1244  | 0.00711  | -0.2887473 | 2.03E-10 | -0.40463 | 7.98E-20 |
| 0.33037  | 0.481939 | 1.56E-28 | 0.339496 | 4.63E-14 | 0.56277148 | 2.30E-40 | 0.686337 | 2.65E-66 |
| 0.25096  | 0.31668  | 2.45E-12 | 0.338067 | 5.99E-14 | 0.49557907 | 2.59E-30 | 0.653333 | 3.55E-58 |
| 0.02894  | -0.05434 | 0.24123  | 0.028765 | 0.53521  | 0.52089322 | 7.71E-34 | 0.539367 | 1.32E-36 |
| 0.30247  | -0.08777 | 0.05804  | 0.086495 | 0.06181  | 0.37188306 | 9.17E-17 | 0.516904 | 2.90E-33 |

|          |          |          |          |          |            |          |          |          |
|----------|----------|----------|----------|----------|------------|----------|----------|----------|
| 1.76E-09 | -0.08679 | 0.06092  | -0.00691 | 0.88156  | -0.2616251 | 9.53E-09 | -0.3976  | 3.88E-19 |
| 0.25624  | -0.00426 | 0.92691  | 0.162249 | 0.00043  | 0.4669431  | 1.15E-26 | 0.584117 | 4.58E-44 |
| 0.42634  | 0.072682 | 0.11676  | 0.176263 | 0.00013  | 0.39361882 | 9.33E-19 | 0.406318 | 5.43E-20 |
| 0.15411  | 0.083885 | 0.07012  | 0.08841  | 0.05624  | -0.3996756 | 2.44E-19 | -0.58555 | 2.53E-44 |
| 0.17341  | -0.08369 | 0.07079  | -0.24434 | 8.93E-08 | -0.4864219 | 4.14E-29 | -0.48645 | 4.11E-29 |
| 0.35944  | 0.036294 | 0.43394  | 0.184369 | 6.12E-05 | 0.69571969 | 8.14E-69 | 0.846826 | #####    |
| 0.02642  | 0.355529 | 2.32E-15 | 0.30975  | 7.65E-12 | 0.58587133 | 2.21E-44 | 0.624214 | 8.31E-52 |
| 0.4571   | -0.01531 | 0.74139  | 0.14956  | 0.00119  | 0.62705012 | 2.13E-52 | 0.788489 | #####    |
| 0.33599  | 0.339912 | 4.29E-14 | 0.404752 | 7.77E-20 | 0.64941878 | 2.80E-57 | 0.780353 | 7.40E-97 |
| 5.80E-17 | 0.080913 | 0.08069  | 0.109364 | 0.01807  | 0.39403383 | 8.52E-19 | 0.473724 | 1.69E-27 |
| 0.46662  | -0.03603 | 0.43731  | -0.17574 | 0.00013  | -0.5389734 | 1.52E-36 | -0.54485 | 1.85E-37 |
| 0.0453   | 0.172627 | 0.00018  | 0.218958 | 1.78E-06 | 0.42445972 | 7.54E-22 | 0.434117 | 6.94E-23 |
| 0.4246   | 0.030994 | 0.50403  | 0.136879 | 0.00304  | 0.25104107 | 3.82E-08 | 0.335711 | 9.14E-14 |
| 0.70253  | 0.165111 | 0.00034  | 0.10364  | 0.02511  | 0.50539885 | 1.20E-31 | 0.620515 | 4.80E-51 |
| 0.76323  | 0.039437 | 0.39516  | -0.07796 | 0.0924   | 0.45134838 | 8.10E-25 | 0.545202 | 1.63E-37 |
| 1.30E-10 | 0.096407 | 0.03728  | 0.049442 | 0.28632  | -0.1741425 | 0.00016  | -0.19294 | 2.70E-05 |
| 2.23E-08 | 0.020837 | 0.65333  | 0.02349  | 0.61263  | -0.4708647 | 3.82E-27 | -0.50465 | 1.52E-31 |
| 0.03812  | -0.10145 | 0.02837  | -0.05729 | 0.21652  | 0.25406335 | 2.59E-08 | 0.350159 | 6.45E-15 |
| 0.18485  | 0.187535 | 4.54E-05 | 0.408772 | 3.09E-20 | 0.54194596 | 5.26E-37 | 0.508496 | 4.47E-32 |
| 0.09131  | -0.03953 | 0.39402  | -0.28703 | 2.62E-10 | -0.4114075 | 1.68E-20 | -0.43351 | 8.07E-23 |
| 0.70183  | -0.19073 | 3.34E-05 | 0.039518 | 0.3942   | 0.47312934 | 2.00E-27 | 0.46667  | 1.24E-26 |
| 0.01024  | 0.269687 | 3.17E-09 | -0.00079 | 0.98634  | -0.4272056 | 3.86E-22 | -0.51612 | 3.76E-33 |
| 0.99618  | 0.386661 | 4.21E-18 | 0.320827 | 1.22E-12 | 0.56082055 | 4.85E-40 | 0.734893 | 1.89E-80 |
| 0.02337  | 0.437897 | 2.67E-23 | 0.297449 | 5.39E-11 | 0.58001994 | 2.47E-43 | 0.583704 | 5.43E-44 |
| 0.46904  | 0.162805 | 0.00041  | 0.295823 | 6.93E-11 | 0.43023071 | 1.83E-22 | 0.417283 | 4.22E-21 |
| 0.5868   | -0.16819 | 0.00026  | -0.29443 | 8.58E-11 | -0.352362  | 4.25E-15 | -0.42432 | 7.80E-22 |
| 0.02809  | 0.021703 | 0.63992  | 0.152813 | 0.00092  | 0.4427427  | 7.72E-24 | 0.409111 | 2.86E-20 |
| 0.03935  | 0.392649 | 1.15E-18 | 0.616369 | 3.33E-50 | 0.60286062 | 1.51E-47 | 0.591533 | 2.04E-45 |
| 0.15175  | 0.082125 | 0.07623  | 0.174663 | 0.00015  | 0.61370434 | 1.14E-49 | 0.822504 | #####    |
| 0.05346  | -0.0062  | 0.89375  | 0.178075 | 0.00011  | 0.54587385 | 1.27E-37 | 0.683201 | 1.74E-65 |
| 0.26579  | -0.03686 | 0.42676  | -0.18797 | 4.36E-05 | -0.4579278 | 1.38E-25 | -0.42823 | 3.00E-22 |
| 4.68E-15 | -0.22303 | 1.13E-06 | -0.17473 | 0.00015  | -0.310443  | 6.84E-12 | -0.34305 | 2.42E-14 |
| 0.69199  | 0.245526 | 7.70E-08 | 0.171179 | 0.0002   | 0.62120325 | 3.47E-51 | 0.794427 | #####    |
| 0.22987  | 0.293818 | 9.42E-11 | 0.109926 | 0.01748  | 0.57566169 | 1.44E-42 | 0.707022 | 5.65E-72 |
| 0.52554  | 0.384308 | 6.95E-18 | 0.303202 | 2.19E-11 | 0.47288297 | 2.15E-27 | 0.505764 | 1.07E-31 |
| 0.82376  | 0.316878 | 2.37E-12 | 0.32539  | 5.59E-13 | 0.42159015 | 1.51E-21 | 0.419789 | 2.33E-21 |
| 0.8367   | 0.457164 | 1.70E-25 | 0.63084  | 3.39E-53 | 0.65206244 | 6.96E-58 | 0.567089 | 4.31E-41 |
| 0.07823  | 0.286954 | 2.65E-10 | 0.144074 | 0.0018   | -0.3741078 | 5.83E-17 | -0.36547 | 3.33E-16 |
| 2.73E-05 | 0.337189 | 7.02E-14 | 0.271001 | 2.64E-09 | 0.47702248 | 6.55E-28 | 0.51142  | 1.74E-32 |
| 1.77E-07 | -0.0307  | 0.50803  | 0.06014  | 0.19452  | 0.4060881  | 5.73E-20 | 0.413586 | 1.01E-20 |
| 1.08E-08 | -0.1179  | 0.01078  | -0.01084 | 0.81528  | 0.445375   | 3.90E-24 | 0.481053 | 2.03E-28 |
| 0.09779  | 0.2156   | 2.58E-06 | 0.230638 | 4.68E-07 | 0.49698922 | 1.67E-30 | 0.614119 | 9.41E-50 |
| 8.04E-06 | 0.180881 | 8.46E-05 | 0.194441 | 2.33E-05 | 0.38802582 | 3.14E-18 | 0.471073 | 3.60E-27 |
| 0.26694  | 0.106707 | 0.02109  | 0.310991 | 6.25E-12 | 0.73104224 | 3.25E-79 | 0.786558 | 2.11E-99 |
| 0.79298  | -0.0162  | 0.72694  | -0.09804 | 0.03417  | 0.37983543 | 1.78E-17 | 0.297525 | 5.33E-11 |

|          |          |          |          |          |            |          |          |          |
|----------|----------|----------|----------|----------|------------|----------|----------|----------|
| 0.18663  | 0.295219 | 7.60E-11 | 0.256373 | 1.91E-08 | 0.59933594 | 7.10E-47 | 0.528324 | 6.24E-35 |
| 0.00309  | -0.03082 | 0.50646  | 0.050939 | 0.27196  | 0.61805727 | 1.52E-50 | 0.61531  | 5.43E-50 |
| 0.00011  | 0.111404 | 0.01602  | 0.216345 | 2.37E-06 | 0.41838843 | 3.25E-21 | 0.542885 | 3.75E-37 |
| 0.00361  | -0.12971 | 0.005    | -0.00795 | 0.86399  | 0.53631178 | 3.89E-36 | 0.687551 | 1.27E-66 |
| 0.00229  | -0.11014 | 0.01726  | 0.175123 | 0.00014  | 0.6008857  | 3.60E-47 | 0.649319 | 2.95E-57 |
| 0.11976  | 0.422274 | 1.28E-21 | 0.434048 | 7.06E-23 | 0.5756376  | 1.46E-42 | 0.595525 | 3.71E-46 |
| 0.56407  | -0.16645 | 0.0003   | -0.24359 | 9.80E-08 | -0.3519292 | 4.62E-15 | -0.51042 | 2.41E-32 |
| 0.03271  | 0.372758 | 7.68E-17 | 0.305102 | 1.62E-11 | 0.44743232 | 2.28E-24 | 0.535269 | 5.62E-36 |
| 0.02855  | 0.098803 | 0.03279  | 0.182692 | 7.16E-05 | 0.33662567 | 7.76E-14 | 0.406998 | 4.65E-20 |
| 0.28167  | 0.096947 | 0.03623  | 0.033092 | 0.47559  | -0.1617254 | 0.00045  | -0.3095  | 7.97E-12 |
| 0.00333  | 0.385861 | 4.99E-18 | 0.455524 | 2.65E-25 | 0.56330035 | 1.87E-40 | 0.572717 | 4.69E-42 |
| 0.01183  | 0.024329 | 0.59998  | 0.025768 | 0.57858  | 0.54058808 | 8.55E-37 | 0.559117 | 9.29E-40 |
| 0.00234  | 0.412645 | 1.26E-20 | 0.266089 | 5.21E-09 | 0.45061947 | 9.82E-25 | 0.490616 | 1.17E-29 |
| 0.79229  | 0.319644 | 1.49E-12 | 0.495052 | 3.04E-30 | 0.3956205  | 6.01E-19 | 0.315748 | 2.86E-12 |
| 0.34123  | 0.226961 | 7.18E-07 | 0.280889 | 6.47E-10 | 0.38326746 | 8.66E-18 | 0.480481 | 2.39E-28 |
| 0.0496   | 0.016672 | 0.71933  | 0.277616 | 1.04E-09 | 0.49862729 | 1.01E-30 | 0.592174 | 1.56E-45 |
| 0.5417   | 0.130189 | 0.00483  | 0.276623 | 1.20E-09 | 0.50987391 | 2.87E-32 | 0.560294 | 5.93E-40 |
| 0.00098  | 0.266234 | 5.10E-09 | 0.242162 | 1.17E-07 | 0.4394106  | 1.82E-23 | 0.458875 | 1.07E-25 |
| 0.94528  | 0.300953 | 3.12E-11 | 0.515696 | 4.32E-33 | 0.54916377 | 3.83E-38 | 0.569962 | 1.40E-41 |
| 0.00051  | 0.063119 | 0.17328  | 0.287389 | 2.49E-10 | 0.69458404 | 1.66E-68 | 0.823015 | #####    |
| 0.00014  | -0.02622 | 0.57187  | 0.108593 | 0.01891  | 0.42086487 | 1.80E-21 | 0.452371 | 6.17E-25 |
| 0.00598  | 0.551661 | 1.52E-38 | 0.461359 | 5.42E-26 | 0.55522631 | 4.03E-39 | 0.668038 | 1.14E-61 |
| 0.34212  | 0.1387   | 0.00267  | 0.389924 | 2.09E-18 | 0.7513793  | 5.49E-86 | 0.776402 | 2.80E-95 |
| 0.78852  | -0.37376 | 6.26E-17 | -0.22415 | 9.91E-07 | -0.3183855 | 1.84E-12 | -0.41677 | 4.77E-21 |
| 0.51367  | -0.20598 | 7.21E-06 | -0.27432 | 1.66E-09 | -0.3487785 | 8.36E-15 | -0.40045 | 2.05E-19 |
| 0.00227  | 0.151995 | 0.00098  | 0.15851  | 0.00059  | 0.4485265  | 1.71E-24 | 0.564116 | 1.37E-40 |
| 0.08218  | 0.347877 | 9.89E-15 | 0.438709 | 2.17E-23 | 0.44970833 | 1.25E-24 | 0.428344 | 2.91E-22 |
| 0.66101  | -0.06009 | 0.19491  | -0.09811 | 0.03404  | -0.5550038 | 4.39E-39 | -0.64785 | 6.34E-57 |
| 0.07217  | -0.13561 | 0.00332  | 0.166172 | 0.00031  | 0.47993281 | 2.81E-28 | 0.542354 | 4.54E-37 |
| 0.10228  | -0.0754  | 0.10367  | 0.144473 | 0.00175  | 0.47005418 | 4.80E-27 | 0.611146 | 3.67E-49 |
| 0.02602  | -0.01207 | 0.7948   | 0.197486 | 1.72E-05 | 0.56748483 | 3.69E-41 | 0.708584 | 2.01E-72 |
| 0.09211  | 0.080287 | 0.08307  | -0.09695 | 0.03622  | -0.3439647 | 2.04E-14 | -0.40619 | 5.59E-20 |
| 0.06918  | 0.190853 | 3.30E-05 | 0.115108 | 0.01281  | 0.53118025 | 2.33E-35 | 0.641217 | 1.92E-55 |
| 0.00679  | -0.12246 | 0.00807  | 0.066247 | 0.1529   | 0.47807805 | 4.82E-28 | 0.545546 | 1.44E-37 |
| 8.85E-07 | -0.10532 | 0.02283  | 0.046788 | 0.313    | 0.3982088  | 3.39E-19 | 0.575218 | 1.72E-42 |
| 0.276    | 0.194221 | 2.38E-05 | 0.232322 | 3.84E-07 | 0.54394482 | 2.56E-37 | 0.748216 | 6.85E-85 |
| 0.04589  | 0.090589 | 0.05042  | 0.193899 | 2.45E-05 | 0.35656898 | 1.90E-15 | 0.453848 | 4.16E-25 |
| 0.11381  | 0.220181 | 1.55E-06 | 0.330762 | 2.20E-13 | 0.46226929 | 4.22E-26 | 0.486725 | 3.78E-29 |
| 0.01218  | -0.06731 | 0.14643  | -0.00972 | 0.83405  | 0.50057656 | 5.49E-31 | 0.642892 | 8.20E-56 |
| 0.00489  | -0.15609 | 0.00071  | -0.09259 | 0.04553  | 0.02457561 | 0.59629  | -0.17281 | 0.00017  |
| 0.59014  | 0.225639 | 8.36E-07 | 0.32443  | 6.60E-13 | 0.51562836 | 4.42E-33 | 0.592751 | 1.22E-45 |
| 8.74E-06 | 0.171379 | 0.0002   | 0.127956 | 0.00562  | 0.54633899 | 1.08E-37 | 0.679151 | 1.92E-64 |
| 0.55706  | 0.043798 | 0.34496  | -0.11848 | 0.01039  | -0.4245848 | 7.31E-22 | -0.53095 | 2.53E-35 |
| 0.03427  | -0.12223 | 0.00819  | -0.00613 | 0.89486  | 0.29159717 | 1.32E-10 | 0.389918 | 2.09E-18 |
| 4.56E-09 | -0.04732 | 0.30755  | 0.13916  | 0.00258  | 0.37350893 | 6.59E-17 | 0.38351  | 8.22E-18 |

|          |          |          |          |          |            |          |          |          |
|----------|----------|----------|----------|----------|------------|----------|----------|----------|
| 0.00066  | 0.040031 | 0.38809  | 0.109729 | 0.01769  | -0.1905015 | 3.42E-05 | -0.37161 | 9.70E-17 |
| 4.07E-05 | -0.19867 | 1.52E-05 | 0.037392 | 0.42015  | 0.57075035 | 1.02E-41 | 0.655911 | 8.95E-59 |
| 0.7845   | 0.130206 | 0.00483  | 0.106722 | 0.02107  | 0.54956794 | 3.30E-38 | 0.446174 | 3.17E-24 |
| 0.01936  | 0.110197 | 0.01721  | 0.268141 | 3.93E-09 | 0.53799212 | 2.15E-36 | 0.415235 | 6.86E-21 |
| 4.82E-05 | 0.014397 | 0.75632  | 0.198059 | 1.62E-05 | 0.45265961 | 5.71E-25 | 0.353369 | 3.51E-15 |
| 0.12332  | -0.01543 | 0.73946  | 0.116191 | 0.01198  | 0.65233166 | 6.04E-58 | 0.721545 | 2.92E-76 |
| 0.03535  | 0.163473 | 0.00039  | -0.22454 | 9.48E-07 | -0.493586  | 4.76E-30 | -0.39398 | 8.62E-19 |
| 0.33691  | 0.249617 | 4.59E-08 | 0.294538 | 8.44E-11 | 0.66764153 | 1.43E-61 | 0.85066  | #####    |
| 0.82407  | -0.03961 | 0.39309  | 0.15421  | 0.00083  | 0.49557268 | 2.59E-30 | 0.542774 | 3.91E-37 |
| 0.22177  | -0.26798 | 4.02E-09 | 0.032485 | 0.48374  | 0.44764937 | 2.15E-24 | 0.406847 | 4.82E-20 |
| 0.02332  | 0.457587 | 1.52E-25 | 0.329277 | 2.85E-13 | 0.61698345 | 2.50E-50 | 0.585052 | 3.11E-44 |
| 0.25074  | 0.095759 | 0.03858  | 0.432562 | 1.02E-22 | 0.53088612 | 2.58E-35 | 0.402813 | 1.21E-19 |
| 0.16756  | 0.115617 | 0.01241  | 0.134798 | 0.00352  | 0.44003267 | 1.55E-23 | 0.491877 | 8.02E-30 |
| 0.0036   | 0.236704 | 2.28E-07 | 0.458576 | 1.16E-25 | 0.47486074 | 1.22E-27 | 0.499264 | 8.27E-31 |
| 1.36E-05 | -0.08256 | 0.0747   | 0.030617 | 0.50924  | 0.43456903 | 6.19E-23 | 0.409464 | 2.64E-20 |
| 0.00896  | 0.025989 | 0.57533  | 0.471933 | 2.82E-27 | 0.42243761 | 1.23E-21 | 0.381359 | 1.29E-17 |
| 0.33303  | 0.059413 | 0.19998  | 0.306663 | 1.26E-11 | 0.52568357 | 1.54E-34 | 0.381357 | 1.29E-17 |
| 0.00082  | 0.233805 | 3.22E-07 | 0.275864 | 1.33E-09 | 0.42038269 | 2.02E-21 | 0.517325 | 2.52E-33 |
| 0.18986  | 0.19621  | 1.95E-05 | 0.177119 | 0.00012  | 0.4526881  | 5.67E-25 | 0.577284 | 7.50E-43 |
| 0.0246   | 0.047983 | 0.30079  | 0.163318 | 0.00039  | 0.31985504 | 1.44E-12 | 0.431209 | 1.43E-22 |
| 0.07769  | -0.0485  | 0.29565  | 0.107318 | 0.02036  | 0.38258762 | 1.00E-17 | 0.428433 | 2.85E-22 |
| 0.30324  | 0.155576 | 0.00074  | 0.181018 | 8.36E-05 | 0.66662667 | 2.52E-61 | 0.83016  | #####    |
| 0.41067  | 0.444009 | 5.56E-24 | 0.42765  | 3.46E-22 | 0.50201428 | 3.50E-31 | 0.48786  | 2.69E-29 |
| 0.00041  | 0.022533 | 0.62718  | 0.334063 | 1.23E-13 | 0.41994589 | 2.24E-21 | 0.420258 | 2.08E-21 |
| 0.00295  | -0.0553  | 0.23299  | -0.11025 | 0.01716  | -0.4185908 | 3.10E-21 | -0.36617 | 2.89E-16 |
| 0.36331  | -0.00743 | 0.87286  | -0.23608 | 2.45E-07 | -0.3923532 | 1.23E-18 | -0.53197 | 1.77E-35 |
| 0.24167  | 0.21518  | 2.70E-06 | 0.412619 | 1.27E-20 | 0.81251147 | #####    | 0.857349 | #####    |
| 0.51544  | 0.06046  | 0.19215  | 0.150007 | 0.00115  | 0.58864451 | 6.93E-45 | 0.738526 | 1.24E-81 |
| 0.84897  | 0.173555 | 0.00016  | -0.00631 | 0.89187  | -0.2978866 | 5.04E-11 | -0.34899 | 8.03E-15 |
| 0.00089  | 0.350827 | 5.69E-15 | 0.27532  | 1.44E-09 | 0.60746397 | 1.94E-48 | 0.661154 | 5.22E-60 |
| 0.13138  | 0.242428 | 1.13E-07 | 0.230667 | 4.67E-07 | 0.41845887 | 3.19E-21 | 0.435342 | 5.10E-23 |
| 0.05217  | 0.533196 | 1.16E-35 | 0.290925 | 1.46E-10 | 0.57704372 | 8.27E-43 | 0.708652 | 1.93E-72 |
| 0.07968  | 0.100173 | 0.03043  | 0.286811 | 2.71E-10 | 0.52591427 | 1.42E-34 | 0.633383 | 9.71E-54 |
| 0.64147  | 0.244805 | 8.42E-08 | 0.399398 | 2.60E-19 | 0.49217979 | 7.31E-30 | 0.438358 | 2.38E-23 |
| 0.11965  | 0.028343 | 0.54122  | 0.255804 | 2.06E-08 | 0.52537419 | 1.71E-34 | 0.488773 | 2.05E-29 |
| 2.47E-15 | -0.13639 | 0.00314  | -0.00552 | 0.90527  | 0.22326584 | 1.10E-06 | 0.35255  | 4.10E-15 |
| 0.81378  | 0.265885 | 5.35E-09 | 0.427595 | 3.50E-22 | 0.72171178 | 2.60E-76 | 0.753158 | 1.31E-86 |
| 0.53317  | 0.058161 | 0.20964  | 0.319089 | 1.63E-12 | 0.57713564 | 7.96E-43 | 0.723249 | 8.80E-77 |
| 0.09925  | 0.268175 | 3.91E-09 | 0.25879  | 1.39E-08 | 0.50100133 | 4.81E-31 | 0.669426 | 5.22E-62 |
| 0.00025  | -0.33558 | 9.36E-14 | -0.36576 | 3.14E-16 | -0.4042819 | 8.65E-20 | -0.48871 | 2.08E-29 |
| 5.67E-05 | -0.11362 | 0.01402  | 0.138459 | 0.00271  | 0.54663924 | 9.64E-38 | 0.557407 | 1.78E-39 |
| 0.08298  | -0.0916  | 0.0479   | -0.00327 | 0.94384  | 0.51921501 | 1.35E-33 | 0.683638 | 1.34E-65 |
| 0.068    | 0.202746 | 1.01E-05 | 0.292826 | 1.10E-10 | 0.42728778 | 3.78E-22 | 0.503517 | 2.18E-31 |
| 0.1474   | 0.35826  | 1.37E-15 | 0.370002 | 1.34E-16 | 0.55353136 | 7.60E-39 | 0.494522 | 3.58E-30 |
| 0.01583  | 0.021693 | 0.64008  | 0.374944 | 4.91E-17 | 0.63432455 | 6.10E-54 | 0.64304  | 7.60E-56 |

|          |          |          |          |          |            |          |          |          |
|----------|----------|----------|----------|----------|------------|----------|----------|----------|
| 0.91918  | 0.263727 | 7.18E-09 | 0.36339  | 5.03E-16 | 0.38771407 | 3.36E-18 | 0.409675 | 2.51E-20 |
| 0.77015  | 0.39923  | 2.70E-19 | 0.338468 | 5.57E-14 | 0.36898149 | 1.65E-16 | 0.404669 | 7.92E-20 |
| 0.54891  | 0.069433 | 0.13407  | 0.148761 | 0.00126  | 0.54264777 | 4.09E-37 | 0.685056 | 5.73E-66 |
| 0.90232  | -0.01303 | 0.77891  | 0.325812 | 5.20E-13 | 0.44414171 | 5.37E-24 | 0.457519 | 1.54E-25 |
| 0.83067  | 0.391252 | 1.56E-18 | 0.487213 | 3.27E-29 | 0.65295529 | 4.34E-58 | 0.642768 | 8.73E-56 |
| 0.05887  | -0.26412 | 6.81E-09 | -0.19141 | 3.13E-05 | -0.5160478 | 3.85E-33 | -0.63592 | 2.76E-54 |
| 6.44E-06 | 0.330386 | 2.35E-13 | 0.250692 | 4.00E-08 | 0.3268355  | 4.36E-13 | 0.372944 | 7.39E-17 |
| 0.10325  | -0.02655 | 0.56704  | 0.166227 | 0.00031  | 0.49796407 | 1.24E-30 | 0.575957 | 1.28E-42 |
| 0.06373  | -0.08998 | 0.05198  | -0.35652 | 1.92E-15 | -0.5478598 | 6.18E-38 | -0.65283 | 4.64E-58 |
| 0.04277  | -0.37385 | 6.14E-17 | -0.37765 | 2.81E-17 | -0.3580296 | 1.43E-15 | -0.46077 | 6.37E-26 |
| 0.32433  | 0.174361 | 0.00015  | -0.01541 | 0.73977  | -0.6021748 | 2.04E-47 | -0.64798 | 5.94E-57 |
| 0.21702  | 0.167801 | 0.00027  | 0.274897 | 1.53E-09 | 0.43803193 | 2.58E-23 | 0.428178 | 3.04E-22 |
| 0.00409  | 0.153953 | 0.00084  | 0.23496  | 2.81E-07 | 0.3297954  | 2.60E-13 | 0.367266 | 2.33E-16 |
| 7.24E-07 | 0.250341 | 4.18E-08 | 0.098006 | 0.03423  | -0.3458004 | 1.46E-14 | -0.40844 | 3.34E-20 |
| 0.16513  | -0.06916 | 0.13561  | 0.147711 | 0.00137  | 0.56416549 | 1.34E-40 | 0.565291 | 8.68E-41 |
| 0.00047  | 0.149389 | 0.0012   | 0.315905 | 2.78E-12 | 0.75784948 | 2.79E-88 | 0.858321 | #####    |
| 0.00997  | -0.10502 | 0.02323  | 0.117544 | 0.01102  | 0.47039664 | 4.36E-27 | 0.443754 | 5.94E-24 |
| 0.0008   | 0.326127 | 4.93E-13 | 0.264694 | 6.30E-09 | 0.62138407 | 3.18E-51 | 0.753186 | 1.28E-86 |
| 0.01105  | 0.255736 | 2.08E-08 | 0.120747 | 0.009    | 0.43847478 | 2.31E-23 | 0.451334 | 8.13E-25 |
| 0.25507  | 0.274717 | 1.57E-09 | 0.312706 | 4.72E-12 | 0.73708232 | 3.68E-81 | 0.79481  | #####    |
| 0.0396   | 0.078837 | 0.0888   | 0.019937 | 0.66739  | -0.4260101 | 5.17E-22 | -0.40575 | 6.19E-20 |
| 0.0262   | -0.04101 | 0.37656  | 0.195551 | 2.08E-05 | 0.62679153 | 2.41E-52 | 0.591308 | 2.25E-45 |
| 0.01689  | -0.13254 | 0.00411  | 0.105975 | 0.02199  | 0.42975683 | 2.06E-22 | 0.444377 | 5.05E-24 |
| 0.53164  | 0.281243 | 6.14E-10 | 0.324753 | 6.24E-13 | 0.48996445 | 1.43E-29 | 0.737929 | 1.95E-81 |
| 0.85525  | 0.332255 | 1.69E-13 | 0.339328 | 4.77E-14 | 0.79320705 | #####    | 0.813434 | #####    |
| 2.00E-16 | -0.18896 | 3.96E-05 | 0.086858 | 0.06072  | 0.37579437 | 4.12E-17 | 0.484413 | 7.53E-29 |
| 0.70046  | -0.00242 | 0.95848  | 0.058811 | 0.20458  | 0.36437946 | 4.14E-16 | 0.404396 | 8.42E-20 |
| 0.27091  | 0.080198 | 0.08341  | 0.344566 | 1.83E-14 | 0.51657298 | 3.24E-33 | 0.650248 | 1.81E-57 |
| 0.03153  | 0.016129 | 0.72811  | 0.193916 | 2.45E-05 | 0.75032761 | 1.28E-85 | 0.855712 | #####    |
| 0.33715  | 0.199524 | 1.40E-05 | 0.292615 | 1.13E-10 | 0.53484179 | 6.52E-36 | 0.617806 | 1.71E-50 |
| 0.00678  | 0.078044 | 0.09207  | 0.086031 | 0.06323  | 0.37319222 | 7.03E-17 | 0.370483 | 1.22E-16 |
| 0.08436  | 0.240298 | 1.47E-07 | 0.262763 | 8.18E-09 | 0.46018054 | 7.48E-26 | 0.505175 | 1.29E-31 |
| 0.09364  | -0.03517 | 0.44831  | 0.041527 | 0.37058  | 0.5071793  | 6.82E-32 | 0.469429 | 5.73E-27 |
| 0.30254  | 0.246645 | 6.69E-08 | 0.317456 | 2.15E-12 | 0.46537396 | 1.78E-26 | 0.385867 | 4.98E-18 |
| 0.00014  | 0.053783 | 0.24606  | -0.16309 | 0.0004   | -0.353166  | 3.65E-15 | -0.45799 | 1.36E-25 |
| 0.03257  | 0.402172 | 1.39E-19 | 0.258195 | 1.51E-08 | 0.59093451 | 2.63E-45 | 0.555187 | 4.09E-39 |
| 0.4914   | 0.264919 | 6.11E-09 | 0.330693 | 2.22E-13 | 0.55027592 | 2.54E-38 | 0.691362 | 1.23E-67 |
| 0.98595  | 0.141288 | 0.00221  | 0.349688 | 7.05E-15 | 0.60388273 | 9.60E-48 | 0.753395 | 1.08E-86 |
| 0.98461  | 0.154407 | 0.00081  | 0.284275 | 3.94E-10 | 0.78308163 | 5.75E-98 | 0.821681 | #####    |
| 0.94996  | -0.21887 | 1.80E-06 | -0.30926 | 8.29E-12 | -0.3255469 | 5.44E-13 | -0.43358 | 7.93E-23 |
| 2.59E-08 | 0.395886 | 5.67E-19 | 0.344501 | 1.85E-14 | 0.43285927 | 9.51E-23 | 0.561571 | 3.64E-40 |
| 0.08445  | 0.549183 | 3.80E-38 | 0.380565 | 1.53E-17 | 0.52243485 | 4.60E-34 | 0.65896  | 1.73E-59 |
| 0.35942  | 0.362096 | 6.49E-16 | 0.403568 | 1.02E-19 | 0.59452863 | 5.69E-46 | 0.572827 | 4.49E-42 |
| 0.01353  | 0.106372 | 0.0215   | 0.240663 | 1.41E-07 | 0.51834949 | 1.80E-33 | 0.497083 | 1.63E-30 |
| 1.52E-20 | 0.050256 | 0.27845  | 0.199885 | 1.35E-05 | 0.47928398 | 3.40E-28 | 0.442084 | 9.15E-24 |

|          |          |          |          |          |            |          |          |          |
|----------|----------|----------|----------|----------|------------|----------|----------|----------|
| 0.55788  | 0.00023  | 0.99605  | 0.181413 | 8.06E-05 | 0.59790294 | 1.32E-46 | 0.491558 | 8.83E-30 |
| 0.8032   | 0.301409 | 2.90E-11 | 0.381572 | 1.24E-17 | 0.60248423 | 1.78E-47 | 0.428622 | 2.72E-22 |
| 0.21222  | 0.549896 | 2.93E-38 | 0.482618 | 1.28E-28 | 0.6207632  | 4.27E-51 | 0.659149 | 1.56E-59 |
| 0.22814  | 0.282127 | 5.40E-10 | -0.01639 | 0.72385  | -0.5836436 | 5.57E-44 | -0.49007 | 1.39E-29 |
| 0.59953  | 0.317129 | 2.27E-12 | 0.494358 | 3.76E-30 | 0.61781583 | 1.70E-50 | 0.664461 | 8.43E-61 |
| 0.92499  | 0.079234 | 0.0872   | 0.217658 | 2.05E-06 | 0.5484937  | 4.90E-38 | 0.587967 | 9.21E-45 |
| 0.79686  | 0.264822 | 6.19E-09 | 0.271307 | 2.53E-09 | 0.48570956 | 5.12E-29 | 0.438735 | 2.16E-23 |
| 1.58E-14 | 0.036429 | 0.43223  | 0.006312 | 0.89179  | 0.4268584  | 4.20E-22 | 0.4953   | 2.82E-30 |
| 5.08E-22 | 0.171231 | 0.0002   | 0.089369 | 0.05361  | 0.43396472 | 7.21E-23 | 0.591995 | 1.68E-45 |
| 0.01626  | 0.292669 | 1.12E-10 | 0.281603 | 5.83E-10 | 0.51696479 | 2.84E-33 | 0.695219 | 1.11E-68 |
| 0.61909  | 0.158926 | 0.00057  | 0.325444 | 5.54E-13 | 0.61411241 | 9.44E-50 | 0.811083 | #####    |
| 0.23662  | 0.302676 | 2.38E-11 | 0.30968  | 7.74E-12 | 0.47150734 | 3.18E-27 | 0.557176 | 1.94E-39 |
| 0.02492  | 0.013791 | 0.76627  | 0.119478 | 0.00976  | 0.49214957 | 7.38E-30 | 0.649267 | 3.03E-57 |
| 0.44212  | 0.035622 | 0.44249  | 0.235837 | 2.53E-07 | 0.59007434 | 3.79E-45 | 0.71909  | 1.62E-75 |
| 3.85E-05 | 0.086729 | 0.0611   | 0.378643 | 2.28E-17 | 0.81667506 | #####    | 0.858957 | #####    |
| 0.65548  | 0.423265 | 1.01E-21 | 0.420578 | 1.92E-21 | 0.6740621  | 3.71E-63 | 0.728691 | 1.80E-78 |
| 0.55899  | -0.20208 | 1.08E-05 | 0.053485 | 0.24869  | 0.51542785 | 4.72E-33 | 0.368513 | 1.81E-16 |
| 0.02281  | -0.02446 | 0.5981   | 0.043031 | 0.35349  | 0.54528834 | 1.58E-37 | 0.555096 | 4.24E-39 |
| 0.53073  | 0.253892 | 2.65E-08 | 0.313928 | 3.86E-12 | 0.42317101 | 1.03E-21 | 0.442324 | 8.60E-24 |
| 0.01565  | 0.155926 | 0.00072  | 0.14761  | 0.00138  | 0.49214597 | 7.39E-30 | 0.55784  | 1.51E-39 |
| 0.04593  | 0.043856 | 0.34433  | -0.05278 | 0.25501  | -0.3715196 | 9.88E-17 | -0.5834  | 6.17E-44 |
| 0.47475  | 0.104142 | 0.02441  | 0.075955 | 0.10114  | 0.38900729 | 2.54E-18 | 0.468836 | 6.77E-27 |
| 0.00041  | 0.123709 | 0.00744  | 0.199747 | 1.37E-05 | 0.36835848 | 1.87E-16 | 0.418712 | 3.01E-21 |
| 0.06116  | 0.097072 | 0.03599  | 0.099927 | 0.03085  | 0.58884217 | 6.38E-45 | 0.738025 | 1.81E-81 |
| 0.00837  | 0.259791 | 1.22E-08 | 0.405372 | 6.75E-20 | 0.72361266 | 6.80E-77 | 0.820015 | #####    |
| 0.25377  | 0.096103 | 0.03789  | 0.088269 | 0.05664  | 0.4292208  | 2.35E-22 | 0.455776 | 2.47E-25 |
| 5.35E-06 | 0.308618 | 9.20E-12 | 0.281473 | 5.94E-10 | 0.60025343 | 4.75E-47 | 0.591476 | 2.09E-45 |
| 0.00195  | -0.001   | 0.98281  | 0.019793 | 0.66965  | 0.54904981 | 3.99E-38 | 0.581459 | 1.37E-43 |
| 0.46738  | -0.09622 | 0.03766  | -0.20334 | 9.48E-06 | -0.3011809 | 3.01E-11 | -0.51079 | 2.14E-32 |
| 0.01337  | 0.164944 | 0.00034  | 0.262861 | 8.07E-09 | 0.44581508 | 3.48E-24 | 0.430912 | 1.54E-22 |
| 0.23422  | 0.064714 | 0.16265  | -0.08488 | 0.06687  | -0.4253756 | 6.03E-22 | -0.43046 | 1.73E-22 |
| 0.00429  | 0.229702 | 5.23E-07 | 0.213687 | 3.17E-06 | 0.57545863 | 1.57E-42 | 0.673619 | 4.78E-63 |
| 0.00036  | 0.273874 | 1.77E-09 | 0.227945 | 6.41E-07 | 0.50038909 | 5.82E-31 | 0.650841 | 1.33E-57 |
| 0.03255  | 0.232455 | 3.78E-07 | 0.361211 | 7.72E-16 | 0.43438688 | 6.48E-23 | 0.420791 | 1.83E-21 |
| 0.81459  | 0.33023  | 2.41E-13 | 0.363856 | 4.59E-16 | 0.48366981 | 9.38E-29 | 0.495752 | 2.45E-30 |
| 0.00401  | -0.0741  | 0.10975  | 0.156432 | 0.00069  | 0.4000801  | 2.23E-19 | 0.375689 | 4.21E-17 |
| 0.00773  | 0.319901 | 1.43E-12 | 0.305099 | 1.62E-11 | 0.4844823  | 7.37E-29 | 0.454567 | 3.43E-25 |
| 0.02303  | -0.16721 | 0.00028  | -0.0444  | 0.33839  | 0.39118605 | 1.59E-18 | 0.515098 | 5.25E-33 |
| 0.99598  | 0.295955 | 6.79E-11 | 0.265233 | 5.85E-09 | 0.6367842  | 1.79E-54 | 0.84317  | #####    |
| 0.01593  | -0.12792 | 0.00563  | 0.198042 | 1.62E-05 | 0.5834572  | 6.02E-44 | 0.491367 | 9.36E-30 |
| 0.87534  | 0.146879 | 0.00146  | 0.281629 | 5.81E-10 | 0.59913107 | 7.76E-47 | 0.728709 | 1.77E-78 |
| 0.53748  | -0.00403 | 0.93078  | -0.26834 | 3.82E-09 | -0.4499237 | 1.18E-24 | -0.52154 | 6.21E-34 |
| 0.00208  | 0.305623 | 1.49E-11 | -0.02023 | 0.66287  | -0.446781  | 2.70E-24 | -0.44695 | 2.58E-24 |
| 0.14428  | -0.04564 | 0.32506  | 0.212075 | 3.78E-06 | 0.44749435 | 2.24E-24 | 0.477206 | 6.21E-28 |
| 0.17241  | -0.10145 | 0.02837  | 0.047615 | 0.30452  | 0.59875564 | 9.14E-47 | 0.631843 | 2.07E-53 |

|          |          |          |          |          |            |          |          |          |
|----------|----------|----------|----------|----------|------------|----------|----------|----------|
| 0.43482  | 0.380821 | 1.45E-17 | 0.369211 | 1.58E-16 | 0.56557879 | 7.76E-41 | 0.491263 | 9.66E-30 |
| 0.02433  | 0.150465 | 0.00111  | 0.060152 | 0.19443  | 0.56199092 | 3.10E-40 | 0.400019 | 2.26E-19 |
| 0.07957  | 0.163138 | 0.0004   | 0.254811 | 2.35E-08 | 0.64125372 | 1.89E-55 | 0.741002 | 1.88E-82 |
| 0.23171  | 0.412982 | 1.16E-20 | 0.352524 | 4.12E-15 | 0.58028654 | 2.21E-43 | 0.717795 | 3.97E-75 |
| 0.43504  | 0.274988 | 1.51E-09 | 0.221022 | 1.41E-06 | 0.36215665 | 6.41E-16 | 0.394396 | 7.87E-19 |
| 0.4158   | 0.339834 | 4.35E-14 | 0.271194 | 2.57E-09 | 0.62221928 | 2.14E-51 | 0.732787 | 9.02E-80 |
| 0.0015   | 0.182232 | 7.47E-05 | 0.278225 | 9.50E-10 | 0.45329253 | 4.82E-25 | 0.527847 | 7.34E-35 |
| 0.01687  | -0.0981  | 0.03406  | 0.144784 | 0.00171  | 0.445926   | 3.38E-24 | 0.426271 | 4.85E-22 |
| 0.11086  | 0.389824 | 2.13E-18 | 0.294745 | 8.18E-11 | 0.51961879 | 1.18E-33 | 0.620146 | 5.71E-51 |
| 0.36692  | 0.133095 | 0.00396  | 0.064336 | 0.16513  | -0.4329632 | 9.27E-23 | -0.57631 | 1.11E-42 |
| 0.00057  | 0.375877 | 4.05E-17 | 0.364547 | 4.00E-16 | 0.5696089  | 1.60E-41 | 0.43029  | 1.80E-22 |
| 0.0031   | -0.05132 | 0.26839  | 0.005011 | 0.91399  | 0.51054637 | 2.31E-32 | 0.642668 | 9.19E-56 |
| 0.42771  | 0.228233 | 6.20E-07 | 0.171869 | 0.00019  | 0.38370629 | 7.89E-18 | 0.481523 | 1.76E-28 |
| 3.19E-05 | 0.021822 | 0.6381   | 0.111065 | 0.01634  | 0.65271711 | 4.92E-58 | 0.745224 | 7.20E-84 |
| 6.77E-05 | 0.198976 | 1.48E-05 | 0.114235 | 0.01351  | 0.49154346 | 8.87E-30 | 0.484474 | 7.39E-29 |
| 0.85912  | 0.263861 | 7.05E-09 | 0.309411 | 8.09E-12 | 0.55373025 | 7.06E-39 | 0.65929  | 1.44E-59 |
| 0.79903  | 0.333875 | 1.27E-13 | 0.452762 | 5.56E-25 | 0.68355133 | 1.41E-65 | 0.569275 | 1.83E-41 |
| 0.35955  | -0.31873 | 1.74E-12 | -0.25984 | 1.21E-08 | -0.329701  | 2.65E-13 | -0.494   | 4.20E-30 |
| 0.05063  | 0.18258  | 7.23E-05 | 0.336872 | 7.43E-14 | 0.51652246 | 3.29E-33 | 0.483748 | 9.16E-29 |
| 0.70692  | 0.026758 | 0.56407  | -0.27853 | 9.09E-10 | -0.3963007 | 5.17E-19 | -0.4722  | 2.61E-27 |
| 0.00226  | 0.229787 | 5.17E-07 | 0.261189 | 1.01E-08 | 0.6793808  | 1.68E-64 | 0.655331 | 1.22E-58 |
| 0.90666  | 0.263823 | 7.09E-09 | 0.292934 | 1.08E-10 | 0.64668746 | 1.16E-56 | 0.870601 | #####    |
| 3.37E-15 | -0.27552 | 1.40E-09 | -0.23343 | 3.37E-07 | -0.2624578 | 8.52E-09 | -0.40961 | 2.55E-20 |
| 0.05746  | 0.265103 | 5.96E-09 | 0.316086 | 2.70E-12 | 0.57970376 | 2.81E-43 | 0.478134 | 4.75E-28 |
| 0.00146  | -0.00189 | 0.96745  | 0.134847 | 0.0035   | 0.38412574 | 7.22E-18 | 0.355268 | 2.44E-15 |
| 0.03723  | 0.032587 | 0.48237  | 0.157334 | 0.00064  | 0.47125917 | 3.41E-27 | 0.580526 | 2.01E-43 |
| 2.57E-05 | 0.163001 | 0.00041  | 0.370333 | 1.26E-16 | 0.51875498 | 1.57E-33 | 0.493545 | 4.82E-30 |
| 0.00102  | 0.241183 | 1.32E-07 | 0.15729  | 0.00065  | 0.32377419 | 7.38E-13 | 0.434046 | 7.06E-23 |
| 0.32005  | 0.17107  | 0.0002   | 0.327674 | 3.77E-13 | 0.71785205 | 3.81E-75 | 0.850051 | #####    |
| 0.74416  | -0.10571 | 0.02234  | -0.24151 | 1.27E-07 | -0.4171365 | 4.37E-21 | -0.38231 | 1.06E-17 |
| 0.18309  | 0.311205 | 6.04E-12 | 0.360291 | 9.24E-16 | 0.51458268 | 6.22E-33 | 0.432306 | 1.09E-22 |
| 0.19892  | 0.130158 | 0.00484  | 0.183698 | 6.52E-05 | 0.58073928 | 1.84E-43 | 0.611067 | 3.80E-49 |
| 0.36841  | 0.208277 | 5.66E-06 | 0.142375 | 0.00204  | 0.48993726 | 1.44E-29 | 0.500387 | 5.83E-31 |
| 0.49725  | -0.09079 | 0.04991  | -0.00959 | 0.83619  | 0.12984233 | 0.00495  | 0.293112 | 1.05E-10 |
| 0.77495  | 0.142698 | 0.00199  | 0.212301 | 3.68E-06 | 0.37756456 | 2.86E-17 | 0.569189 | 1.89E-41 |
| 0.32551  | -0.09171 | 0.04763  | -0.2969  | 5.87E-11 | -0.071811  | 0.12122  | 0.14364  | 0.00186  |
| 0.21756  | 0.187583 | 4.52E-05 | 0.175126 | 0.00014  | 0.41881837 | 2.93E-21 | 0.646035 | 1.63E-56 |
| 0.81413  | 0.007183 | 0.87698  | -0.11782 | 0.01083  | 0.11253194 | 0.01497  | 0.301113 | 3.04E-11 |
| 0.10082  | 0.145208 | 0.00165  | 0.024453 | 0.59813  | 0.19113887 | 3.21E-05 | 0.44741  | 2.29E-24 |
| 0.06942  | 0.005002 | 0.91414  | 0.039652 | 0.39259  | 0.2397095  | 1.58E-07 | 0.423948 | 8.54E-22 |
| 0.00874  | 0.25331  | 2.85E-08 | 0.097103 | 0.03593  | 0.33003707 | 2.50E-13 | 0.631154 | 2.90E-53 |
| 1.85E-05 | 0.099101 | 0.03226  | -0.17572 | 0.00014  | 0.0323235  | 0.48591  | 0.26331  | 7.60E-09 |
| 0.00178  | 0.160442 | 0.0005   | 0.186201 | 5.15E-05 | -0.1871646 | 4.70E-05 | -0.41404 | 9.08E-21 |
| 0.00482  | 0.185979 | 5.26E-05 | 0.294618 | 8.34E-11 | 0.14055691 | 0.00233  | -0.07743 | 0.09466  |
| 0.07397  | -0.01605 | 0.72943  | -0.03432 | 0.45939  | 0.16192382 | 0.00044  | 0.316864 | 2.37E-12 |

|          |          |          |          |          |            |          |          |          |
|----------|----------|----------|----------|----------|------------|----------|----------|----------|
| 1.79E-12 | -0.10277 | 0.02637  | -0.13763 | 0.00288  | 0.0728594  | 0.11586  | 0.287484 | 2.45E-10 |
| 0.76191  | -0.02197 | 0.63577  | 0.018405 | 0.69159  | -0.2366063 | 2.30E-07 | -0.37761 | 2.83E-17 |
| 0.77297  | 0.168353 | 0.00026  | 0.100527 | 0.02985  | 0.28634784 | 2.90E-10 | 0.519037 | 1.43E-33 |
| 0.17067  | 0.230774 | 4.61E-07 | 0.115177 | 0.01275  | 0.32243095 | 9.29E-13 | 0.49002  | 1.41E-29 |
| 0.17767  | -0.03057 | 0.50992  | -0.05668 | 0.22152  | 0.1210169  | 0.00885  | 0.274834 | 1.54E-09 |
| 0.82244  | 0.055737 | 0.22929  | 0.084568 | 0.06787  | 0.07413455 | 0.10961  | -0.14985 | 0.00116  |
| 3.88E-11 | 0.073635 | 0.11202  | 0.092749 | 0.04515  | 0.30065986 | 3.27E-11 | 0.496498 | 1.95E-30 |
| 0.00417  | -0.12976 | 0.00498  | -0.07288 | 0.11574  | 0.23262732 | 3.70E-07 | 0.365916 | 3.05E-16 |
| 0.01595  | 0.360638 | 8.63E-16 | 0.399281 | 2.67E-19 | -0.1146521 | 0.01317  | -0.41662 | 4.95E-21 |
| 0.81637  | -0.09971 | 0.03121  | -0.03336 | 0.47203  | 0.39137597 | 1.52E-18 | 0.626219 | 3.18E-52 |
| 0.57482  | 0.116707 | 0.0116   | 0.093468 | 0.0435   | 0.51835605 | 1.79E-33 | 0.813453 | #####    |
| 0.45222  | -0.07124 | 0.12422  | 0.087945 | 0.05755  | 0.04437884 | 0.3386   | -0.23339 | 3.38E-07 |
| 0.41042  | 0.282086 | 5.43E-10 | -0.00806 | 0.86212  | 0.22603609 | 7.99E-07 | 0.392133 | 1.29E-18 |
| 0.6616   | 0.047873 | 0.30191  | -0.09329 | 0.0439   | 0.34315143 | 2.37E-14 | 0.533539 | 1.03E-35 |
| 5.10E-09 | -0.01949 | 0.67446  | -0.08926 | 0.0539   | -0.2745467 | 1.61E-09 | -0.43078 | 1.60E-22 |
| 0.67404  | 0.361154 | 7.81E-16 | 0.157197 | 0.00065  | 0.33550905 | 9.48E-14 | 0.564369 | 1.24E-40 |
| 7.58E-06 | 0.002095 | 0.96399  | 0.015439 | 0.73931  | -0.1958685 | 2.02E-05 | -0.37724 | 3.05E-17 |
| 0.08335  | -0.00476 | 0.91825  | -0.04345 | 0.34884  | 0.26132971 | 9.92E-09 | 0.4531   | 5.08E-25 |
| 0.05633  | -0.15472 | 0.00079  | 0.045126 | 0.33052  | -0.1284842 | 0.00542  | -0.44478 | 4.55E-24 |
| 0.32185  | 0.051956 | 0.26249  | 0.110123 | 0.01728  | 0.47693343 | 6.72E-28 | 0.649523 | 2.65E-57 |
| 0.53952  | -0.07595 | 0.10118  | -0.05497 | 0.23576  | 0.40520072 | 7.01E-20 | 0.706738 | 6.82E-72 |
| 0.27038  | 0.199535 | 1.40E-05 | 0.024975 | 0.59034  | 0.14836511 | 0.0013   | 0.326048 | 4.99E-13 |
| 0.62683  | 0.071459 | 0.12306  | 0.045102 | 0.33078  | 0.43951182 | 1.77E-23 | 0.703813 | 4.62E-71 |
| 0.95894  | -0.01677 | 0.71771  | 0.061982 | 0.18118  | 0.2016124  | 1.13E-05 | 0.305585 | 1.50E-11 |
| 0.35804  | 0.260242 | 1.15E-08 | 0.115659 | 0.01238  | 0.18088655 | 8.46E-05 | 0.451899 | 6.99E-25 |
| 0.12308  | 0.247492 | 6.01E-08 | 0.188658 | 4.08E-05 | 0.45014355 | 1.11E-24 | 0.680784 | 7.33E-65 |
| 0.00096  | 0.179702 | 9.43E-05 | 0.118296 | 0.01051  | 0.24989247 | 4.43E-08 | 0.431826 | 1.23E-22 |
| 0.8439   | 0.0594   | 0.20008  | 0.13056  | 0.00471  | 0.2967685  | 5.99E-11 | 0.519396 | 1.27E-33 |
| 0.56429  | 0.237018 | 2.19E-07 | 0.147156 | 0.00143  | 0.41294499 | 1.17E-20 | 0.670211 | 3.35E-62 |
| 0.16103  | 0.368412 | 1.85E-16 | 0.20263  | 1.02E-05 | 0.48426726 | 7.86E-29 | 0.712973 | 1.07E-73 |
| 0.04769  | 0.061836 | 0.18221  | 0.287661 | 2.39E-10 | 0.11608543 | 0.01206  | -0.1896  | 3.73E-05 |
| 0.60696  | 0.108411 | 0.01911  | 0.156883 | 0.00067  | 0.25412373 | 2.57E-08 | 0.351756 | 4.77E-15 |
| 0.97389  | -0.04732 | 0.30756  | -0.01506 | 0.7455   | 0.32072633 | 1.24E-12 | 0.504766 | 1.47E-31 |
| 0.03128  | 0.239881 | 1.55E-07 | 0.072138 | 0.11953  | 0.48958593 | 1.60E-29 | 0.733627 | 4.85E-80 |
| 0.25395  | 0.026094 | 0.57378  | 0.203779 | 9.06E-06 | 0.33163268 | 1.89E-13 | 0.473785 | 1.66E-27 |
| 0.56544  | -0.00942 | 0.83905  | -0.14798 | 0.00134  | 0.16952288 | 0.00023  | 0.468517 | 7.41E-27 |
| 7.77E-09 | 0.101918 | 0.02764  | -0.06967 | 0.13277  | 0.09333135 | 0.04381  | 0.256243 | 1.95E-08 |
| 0.66059  | 0.210527 | 4.46E-06 | 0.064285 | 0.16546  | 0.26708718 | 4.54E-09 | 0.584882 | 3.34E-44 |
| 0.00553  | 0.280549 | 6.79E-10 | 0.163326 | 0.00039  | 0.43433058 | 6.58E-23 | 0.693586 | 3.09E-68 |
| 0.0477   | 0.13063  | 0.00469  | 0.219633 | 1.65E-06 | 0.46864151 | 7.15E-27 | 0.616727 | 2.82E-50 |
| 0.68815  | 0.110772 | 0.01663  | 0.101525 | 0.02825  | 0.44547905 | 3.79E-24 | 0.689838 | 3.14E-67 |
| 0.49777  | -0.15968 | 0.00053  | -0.12379 | 0.0074   | 0.09005515 | 0.05179  | 0.23561  | 2.60E-07 |
| 0.29776  | 0.150589 | 0.0011   | 0.127631 | 0.00574  | 0.40403306 | 9.15E-20 | 0.62618  | 3.24E-52 |
| 0.54972  | 0.101745 | 0.02791  | 0.129231 | 0.00516  | 0.05791267 | 0.21159  | -0.2122  | 3.72E-06 |
| 3.24E-05 | 0.016282 | 0.72564  | -0.08167 | 0.07787  | 0.26854118 | 3.72E-09 | 0.41792  | 3.63E-21 |



|          |          |          |          |          |            |          |          |          |
|----------|----------|----------|----------|----------|------------|----------|----------|----------|
| 0.04663  | 0.16894  | 0.00024  | 0.148265 | 0.00131  | 0.52913254 | 4.73E-35 | 0.799049 | #####    |
| 0.33402  | -0.29293 | 1.08E-10 | -0.11149 | 0.01593  | 0.15994093 | 0.00052  | 0.294006 | 9.16E-11 |
| 0.31706  | 0.25965  | 1.24E-08 | 0.231569 | 4.20E-07 | 0.48567749 | 5.17E-29 | 0.722629 | 1.36E-76 |
| 0.9549   | 0.096392 | 0.03731  | 0.182089 | 7.57E-05 | 0.45792353 | 1.38E-25 | 0.703911 | 4.33E-71 |
| 0.44421  | 0.248886 | 5.04E-08 | 0.223514 | 1.07E-06 | 0.36841331 | 1.85E-16 | 0.647586 | 7.29E-57 |
| 0.58148  | 0.129213 | 0.00516  | 0.23971  | 1.58E-07 | 0.4968868  | 1.73E-30 | 0.612733 | 1.78E-49 |
| 0.14182  | 0.226528 | 7.55E-07 | 0.115174 | 0.01275  | 0.45424668 | 3.73E-25 | 0.659221 | 1.50E-59 |
| 0.00875  | 0.024445 | 0.59824  | -0.11641 | 0.01182  | 0.08679632 | 0.0609   | 0.33774  | 6.35E-14 |
| 0.13812  | 0.045696 | 0.32445  | -0.04342 | 0.34912  | -0.2710445 | 2.63E-09 | -0.5245  | 2.30E-34 |
| 0.01795  | -0.07271 | 0.11663  | 0.122993 | 0.00779  | -0.1814368 | 8.04E-05 | -0.40541 | 6.69E-20 |
| 0.00061  | 0.049087 | 0.28979  | -0.10616 | 0.02176  | 0.21830051 | 1.91E-06 | 0.502817 | 2.72E-31 |
| 0.45084  | 0.055965 | 0.22739  | 0.002034 | 0.96504  | 0.3866628  | 4.21E-18 | 0.615972 | 4.00E-50 |
| 0.11022  | 0.052843 | 0.25442  | -0.02658 | 0.56668  | 0.1121954  | 0.01528  | 0.275876 | 1.33E-09 |
| 0.38807  | 0.053199 | 0.25123  | 0.048915 | 0.29149  | 0.3733711  | 6.77E-17 | 0.589178 | 5.53E-45 |
| 0.87502  | 0.115199 | 0.01274  | 0.004305 | 0.92608  | 0.32226384 | 9.55E-13 | 0.645981 | 1.67E-56 |
| 0.04423  | 0.029132 | 0.53     | 0.045714 | 0.32425  | 0.53349609 | 1.04E-35 | 0.791876 | #####    |
| 0.67033  | -0.0219  | 0.63686  | -0.15125 | 0.00104  | 0.37681812 | 3.34E-17 | 0.475258 | 1.09E-27 |
| 0.004    | -0.21909 | 1.75E-06 | -0.17171 | 0.00019  | 0.16706994 | 0.00029  | 0.270887 | 2.68E-09 |
| 0.72991  | 0.307369 | 1.12E-11 | 0.02648  | 0.56813  | 0.38668442 | 4.19E-18 | 0.639108 | 5.59E-55 |
| 0.15686  | -0.03404 | 0.46298  | -0.10598 | 0.02199  | 0.26816404 | 3.92E-09 | 0.541413 | 6.37E-37 |
| 0.16637  | -0.06433 | 0.1652   | -0.07745 | 0.0946   | 0.29373739 | 9.54E-11 | 0.501946 | 3.58E-31 |
| 0.00014  | 0.057942 | 0.21136  | 0.06342  | 0.17125  | 0.46289966 | 3.54E-26 | 0.738568 | 1.20E-81 |
| 0.05984  | 0.066474 | 0.1515   | 0.004806 | 0.91751  | 0.29263228 | 1.13E-10 | 0.542188 | 4.82E-37 |
| 0.32615  | -0.03771 | 0.41625  | 0.114959 | 0.01292  | -0.2328011 | 3.63E-07 | -0.48352 | 9.79E-29 |
| 0.53611  | 0.039003 | 0.40039  | -0.00486 | 0.91651  | 0.11147965 | 0.01595  | 0.380814 | 1.45E-17 |
| 0.08657  | -0.07559 | 0.10277  | 0.105651 | 0.02241  | -0.1452445 | 0.00165  | -0.37894 | 2.15E-17 |
| 0.20736  | -0.08464 | 0.06764  | -0.00051 | 0.99119  | 0.21178583 | 3.89E-06 | 0.436963 | 3.39E-23 |
| 0.40869  | -0.09248 | 0.04579  | -0.00903 | 0.84562  | 0.38214155 | 1.10E-17 | 0.527046 | 9.66E-35 |
| 7.96E-05 | 0.170934 | 0.00021  | 0.267206 | 4.47E-09 | -0.0324944 | 0.48361  | -0.19949 | 1.40E-05 |
| 0.09718  | -0.13952 | 0.00251  | -0.03209 | 0.48911  | 0.33636092 | 8.14E-14 | 0.411925 | 1.49E-20 |
| 0.16681  | 0.18369  | 6.53E-05 | 0.16042  | 0.0005   | 0.33321141 | 1.43E-13 | 0.600597 | 4.09E-47 |
| 0.48459  | 0.063895 | 0.16805  | -0.06038 | 0.19271  | -0.08665   | 0.06134  | -0.31629 | 2.61E-12 |
| 0.38701  | -0.01515 | 0.7441   | 0.036772 | 0.4279   | 0.33429331 | 1.18E-13 | 0.575409 | 1.60E-42 |
| 0.80227  | 0.175363 | 0.00014  | 0.12572  | 0.00652  | 0.39889652 | 2.91E-19 | 0.605367 | 4.96E-48 |
| 0.05105  | 0.040453 | 0.38309  | 0.170691 | 0.00021  | 0.28148442 | 5.93E-10 | 0.415862 | 5.91E-21 |
| 0.42738  | 0.339702 | 4.46E-14 | 0.008152 | 0.86053  | 0.26607677 | 5.21E-09 | 0.591604 | 1.98E-45 |
| 0.82799  | 0.105118 | 0.0231   | 0.113833 | 0.01384  | 0.38603948 | 4.80E-18 | 0.637244 | 1.43E-54 |
| 0.59135  | 0.114111 | 0.01361  | -0.02101 | 0.65061  | 0.39699443 | 4.43E-19 | 0.671336 | 1.77E-62 |
| 8.23E-06 | -0.17445 | 0.00015  | -0.11879 | 0.01019  | 0.42272411 | 1.15E-21 | 0.56091  | 4.69E-40 |
| 0.83751  | 0.150969 | 0.00107  | -0.06677 | 0.14965  | 0.35778454 | 1.50E-15 | 0.587519 | 1.11E-44 |
| 0.83388  | -0.07873 | 0.08924  | -0.20601 | 7.18E-06 | 0.33320227 | 1.43E-13 | 0.582868 | 7.68E-44 |
| 0.86597  | 0.190053 | 3.57E-05 | 0.099351 | 0.03183  | 0.00879561 | 0.84965  | -0.25688 | 1.79E-08 |
| 0.02481  | 0.104353 | 0.02412  | 0.055203 | 0.23378  | 0.20076563 | 1.23E-05 | 0.455821 | 2.44E-25 |
| 0.00125  | -0.02832 | 0.54159  | -0.15559 | 0.00074  | 0.29570112 | 7.06E-11 | 0.595246 | 4.18E-46 |
| 0.41471  | 0.12895  | 0.00526  | 0.097249 | 0.03565  | 0.3001191  | 3.56E-11 | 0.472706 | 2.26E-27 |

|          |          |          |          |          |            |          |          |          |
|----------|----------|----------|----------|----------|------------|----------|----------|----------|
| 0.11359  | 0.217185 | 2.16E-06 | 0.227926 | 6.42E-07 | 0.33720416 | 7.00E-14 | 0.602649 | 1.66E-47 |
| 0.97248  | 0.239558 | 1.61E-07 | 0.149308 | 0.00121  | 0.2978963  | 5.03E-11 | 0.535487 | 5.20E-36 |
| 0.08099  | -0.19414 | 2.39E-05 | -0.09204 | 0.04682  | 0.25156205 | 3.58E-08 | 0.41512  | 7.05E-21 |
| 0.17982  | 0.07433  | 0.10867  | 0.060988 | 0.18829  | 0.40354763 | 1.02E-19 | 0.6766   | 8.53E-64 |
| 0.06581  | -0.13915 | 0.00258  | -0.20106 | 1.20E-05 | 0.03988716 | 0.38979  | 0.221681 | 1.31E-06 |
| 0.51797  | 0.263462 | 7.44E-09 | -0.01161 | 0.80236  | 0.29317655 | 1.04E-10 | 0.532761 | 1.35E-35 |
| 0.02082  | 0.078241 | 0.09125  | -0.06985 | 0.13176  | 0.30090232 | 3.14E-11 | 0.641825 | 1.41E-55 |
| 3.11E-07 | -0.24942 | 4.70E-08 | -0.17462 | 0.00015  | 0.34887166 | 8.21E-15 | 0.574391 | 2.40E-42 |
| 0.18736  | 0.074373 | 0.10847  | -0.0735  | 0.11268  | 0.36119845 | 7.74E-16 | 0.61809  | 1.49E-50 |
| 0.61667  | 0.243547 | 9.85E-08 | 0.106302 | 0.02159  | 0.2550731  | 2.27E-08 | 0.496759 | 1.80E-30 |
| 0.83251  | 0.149402 | 0.0012   | 0.030037 | 0.51731  | 0.11606146 | 0.01208  | 0.291859 | 1.27E-10 |
| 0.31871  | -0.03445 | 0.45761  | 0.045754 | 0.32383  | -0.1809381 | 8.42E-05 | -0.46191 | 4.65E-26 |
| 0.26735  | 0.127463 | 0.00581  | 0.069896 | 0.13149  | 0.34468182 | 1.79E-14 | 0.624492 | 7.28E-52 |
| 0.03157  | -0.08005 | 0.08396  | -0.24755 | 5.96E-08 | 0.22966549 | 5.25E-07 | 0.557955 | 1.44E-39 |
| 0.00253  | -0.16156 | 0.00046  | -0.29568 | 7.09E-11 | -0.0922701 | 0.04627  | 0.182928 | 7.01E-05 |
| 0.12446  | 0.11305  | 0.01451  | 0.078941 | 0.08838  | 0.31490265 | 3.29E-12 | 0.541844 | 5.46E-37 |
| 0.04251  | -0.07931 | 0.08691  | 0.034397 | 0.45836  | 0.33687507 | 7.42E-14 | 0.51977  | 1.12E-33 |
| 0.1511   | 0.114056 | 0.01365  | 0.091864 | 0.04725  | 0.49635082 | 2.04E-30 | 0.762355 | 6.39E-90 |
| 0.6203   | -0.16175 | 0.00045  | -0.15979 | 0.00053  | -0.1179951 | 0.01071  | 0.13063  | 0.00469  |
| 0.122    | 0.150457 | 0.00111  | 0.314552 | 3.48E-12 | -0.1754531 | 0.00014  | -0.42424 | 7.96E-22 |
| 0.19589  | 0.154938 | 0.00078  | 0.015164 | 0.7438   | 0.38995317 | 2.07E-18 | 0.702781 | 9.02E-71 |
| 0.04451  | -0.00321 | 0.94482  | -0.00053 | 0.99087  | 0.13746031 | 0.00291  | 0.235575 | 2.61E-07 |
| 0.1787   | 0.072913 | 0.11559  | 0.113499 | 0.01412  | 0.32861741 | 3.20E-13 | 0.526528 | 1.15E-34 |
| 0.75734  | 0.139532 | 0.00251  | 0.006317 | 0.8917   | 0.18946427 | 3.78E-05 | 0.353614 | 3.35E-15 |
| 0.627    | 0.016781 | 0.71758  | -0.09202 | 0.04688  | -0.0603337 | 0.19308  | 0.107852 | 0.01974  |
| 0.33722  | 0.101815 | 0.0278   | 0.199218 | 1.44E-05 | 0.3169368  | 2.34E-12 | 0.586208 | 1.92E-44 |
| 1.14E-10 | -0.03946 | 0.39485  | 0.167728 | 0.00027  | -0.0276791 | 0.55073  | -0.28261 | 5.04E-10 |
| 1.55E-05 | 0.007054 | 0.87916  | 0.000423 | 0.99273  | 0.2559266  | 2.03E-08 | 0.498705 | 9.84E-31 |
| 0.03881  | -0.00924 | 0.84213  | 0.020415 | 0.65991  | 0.44271478 | 7.77E-24 | 0.732831 | 8.73E-80 |
| 0.00044  | -0.1217  | 0.00847  | -0.10456 | 0.02383  | 0.17662371 | 0.00012  | 0.476956 | 6.68E-28 |
| 0.32225  | 0.105359 | 0.02278  | -0.04482 | 0.33383  | -0.3602368 | 9.34E-16 | -0.56803 | 2.98E-41 |
| 0.44219  | 0.124935 | 0.00687  | 0.007202 | 0.87664  | 0.31317575 | 4.37E-12 | 0.624015 | 9.13E-52 |
| 6.34E-05 | 0.155969 | 0.00072  | 0.305203 | 1.59E-11 | -0.1704471 | 0.00022  | -0.30971 | 7.71E-12 |
| 0.12985  | 0.313412 | 4.21E-12 | 0.082858 | 0.07364  | 0.32393842 | 7.18E-13 | 0.628201 | 1.22E-52 |
| 0.09168  | 0.082668 | 0.0743   | -0.08452 | 0.06803  | 0.43167134 | 1.28E-22 | 0.653591 | 3.09E-58 |
| 0.81263  | 0.172166 | 0.00019  | 0.070528 | 0.12802  | 0.39889859 | 2.90E-19 | 0.539072 | 1.47E-36 |
| 0.25042  | 0.06477  | 0.16229  | -0.07614 | 0.10032  | 0.44640551 | 2.98E-24 | 0.662118 | 3.07E-60 |
| 0.20784  | -0.04441 | 0.33827  | -0.05306 | 0.25243  | 0.08602205 | 0.06325  | 0.274655 | 1.58E-09 |
| 0.00519  | -0.28287 | 4.84E-10 | -0.12569 | 0.00653  | 0.17458224 | 0.00015  | 0.287204 | 2.56E-10 |
| 0.00684  | 0.057344 | 0.21612  | 0.072599 | 0.11717  | 0.07922726 | 0.08723  | -0.13925 | 0.00256  |
| 0.0071   | 0.227373 | 6.85E-07 | 0.073706 | 0.11168  | 0.46464598 | 2.18E-26 | 0.654303 | 2.12E-58 |
| 0.29049  | 0.052914 | 0.25378  | 0.037621 | 0.4173   | 0.15574511 | 0.00073  | 0.375241 | 4.62E-17 |
| 0.56788  | -0.25824 | 1.50E-08 | 0.015873 | 0.73226  | -0.3030505 | 2.24E-11 | -0.53652 | 3.62E-36 |
| 0.3793   | 0.173575 | 0.00016  | 0.173045 | 0.00017  | 0.27736132 | 1.08E-09 | 0.412115 | 1.42E-20 |
| 3.71E-05 | 0.016078 | 0.72894  | -0.12059 | 0.00909  | 0.09202028 | 0.04687  | 0.301617 | 2.81E-11 |

|          |          |          |          |          |            |          |          |          |
|----------|----------|----------|----------|----------|------------|----------|----------|----------|
| 0.09985  | -0.10622 | 0.02169  | -0.22019 | 1.55E-06 | -0.1433871 | 0.00189  | -0.0785  | 0.09019  |
| 0.70101  | 0.268103 | 3.95E-09 | 0.244112 | 9.18E-08 | 0.41021646 | 2.22E-20 | 0.479202 | 3.48E-28 |
| 0.00188  | 0.041372 | 0.37237  | -0.06241 | 0.17816  | 0.3342613  | 1.18E-13 | 0.465736 | 1.61E-26 |
| 0.00447  | 0.33242  | 1.64E-13 | 0.203272 | 9.54E-06 | 0.42536147 | 6.05E-22 | 0.651695 | 8.45E-58 |
| 0.09731  | -0.22891 | 5.73E-07 | -0.2327  | 3.67E-07 | 0.26719677 | 4.47E-09 | 0.423055 | 1.06E-21 |
| 0.33813  | 0.277629 | 1.03E-09 | 0.145094 | 0.00167  | 0.24692975 | 6.45E-08 | 0.506621 | 8.15E-32 |
| 0.63     | -0.07086 | 0.12621  | -0.0342  | 0.4609   | 0.08884598 | 0.05503  | 0.239841 | 1.56E-07 |
| 0.00038  | 0.134513 | 0.00359  | 0.157183 | 0.00065  | 0.22436716 | 9.67E-07 | 0.388909 | 2.60E-18 |
| 0.13129  | 0.145507 | 0.00162  | -0.12448 | 0.00707  | 0.09856701 | 0.03321  | 0.351743 | 4.78E-15 |
| 0.03394  | 0.024664 | 0.59497  | -0.08791 | 0.05766  | -0.2092417 | 5.11E-06 | -0.43815 | 2.50E-23 |
| 0.63813  | 0.199061 | 1.47E-05 | 0.12548  | 0.00663  | 0.38157355 | 1.24E-17 | 0.659631 | 1.20E-59 |
| 0.00796  | -0.16289 | 0.00041  | -0.14079 | 0.00229  | -0.2808518 | 6.50E-10 | -0.51321 | 9.74E-33 |
| 0.05218  | 0.269453 | 3.28E-09 | 0.284634 | 3.74E-10 | 0.3762727  | 3.73E-17 | 0.514763 | 5.87E-33 |
| 0.72028  | 0.07943  | 0.08642  | 0.027932 | 0.54709  | 0.20153907 | 1.14E-05 | 0.501223 | 4.49E-31 |
| 0.02859  | 0.043943 | 0.34337  | -0.00037 | 0.99357  | 0.30717312 | 1.16E-11 | 0.478206 | 4.65E-28 |
| 0.82837  | -0.04131 | 0.37304  | -0.16112 | 0.00047  | 0.10961743 | 0.0178   | 0.377021 | 3.20E-17 |
| 0.00343  | -0.18316 | 6.86E-05 | -0.10243 | 0.02687  | -0.0429743 | 0.35412  | -0.21834 | 1.90E-06 |
| 0.39627  | 0.043367 | 0.34974  | -0.10573 | 0.02231  | 0.07239481 | 0.11821  | 0.285141 | 3.47E-10 |
| 0.50573  | 0.060307 | 0.19328  | 0.178769 | 0.0001   | -0.0019418 | 0.96662  | -0.24015 | 1.50E-07 |
| 0.24448  | -0.18821 | 4.26E-05 | 0.042098 | 0.36404  | 0.2346478  | 2.91E-07 | 0.34736  | 1.09E-14 |
| 0.00015  | -0.08617 | 0.06281  | -0.00238 | 0.95909  | 0.26517757 | 5.90E-09 | 0.446346 | 3.03E-24 |
| 1.28E-05 | -0.08174 | 0.07764  | -0.01249 | 0.7878   | 0.3281025  | 3.50E-13 | 0.473339 | 1.89E-27 |
| 0.68354  | -0.27555 | 1.39E-09 | -0.06794 | 0.14268  | 0.23430742 | 3.03E-07 | 0.320775 | 1.23E-12 |
| 0.86443  | 0.213803 | 3.13E-06 | 0.169069 | 0.00024  | 0.37378737 | 6.22E-17 | 0.64681  | 1.09E-56 |
| 0.38799  | -0.06545 | 0.15792  | -0.02741 | 0.55458  | -0.1057723 | 0.02225  | -0.36348 | 4.94E-16 |
| 0.06314  | -0.08017 | 0.08351  | -0.07871 | 0.08931  | 0.22766922 | 6.62E-07 | 0.499501 | 7.68E-31 |
| 0.4313   | -0.07296 | 0.11537  | -0.09472 | 0.04075  | 0.25995743 | 1.19E-08 | 0.521733 | 5.82E-34 |
| 0.93452  | 0.396079 | 5.43E-19 | 0.122634 | 0.00798  | 0.45030147 | 1.07E-24 | 0.711375 | 3.13E-73 |
| 0.24505  | 0.064827 | 0.16192  | -0.1199  | 0.0095   | 0.24487609 | 8.35E-08 | 0.463555 | 2.96E-26 |
| 0.31991  | -0.00383 | 0.93426  | 0.129436 | 0.00509  | 0.29535948 | 7.44E-11 | 0.504186 | 1.77E-31 |
| 0.04439  | -0.0481  | 0.29966  | -0.11208 | 0.01539  | 0.07774939 | 0.0933   | 0.356899 | 1.78E-15 |
| 0.03245  | 0.254465 | 2.46E-08 | 0.248356 | 5.39E-08 | -0.1483674 | 0.0013   | -0.47216 | 2.64E-27 |
| 0.82054  | 0.17644  | 0.00013  | 0.102216 | 0.02719  | 0.36078783 | 8.38E-16 | 0.609737 | 6.96E-49 |
| 0.00012  | 0.167229 | 0.00028  | -0.002   | 0.96555  | 0.07873493 | 0.08921  | 0.311438 | 5.81E-12 |
| 0.47345  | -0.06904 | 0.13627  | -0.13327 | 0.00391  | 0.12127222 | 0.00871  | 0.343454 | 2.25E-14 |
| 5.32E-07 | 0.053989 | 0.24425  | 0.031469 | 0.49752  | 0.35905812 | 1.17E-15 | 0.659756 | 1.12E-59 |
| 0.08601  | -0.03924 | 0.39748  | -0.0736  | 0.11221  | 0.1222734  | 0.00816  | 0.373828 | 6.17E-17 |
| 0.55238  | -0.03291 | 0.47802  | 0.035201 | 0.44792  | 0.20937877 | 5.04E-06 | 0.308849 | 8.86E-12 |
| 0.89353  | -0.0133  | 0.77432  | 0.051603 | 0.26575  | 0.12572857 | 0.00652  | 0.310586 | 6.68E-12 |
| 0.25117  | 0.038804 | 0.4028   | -0.10294 | 0.02611  | 0.14537575 | 0.00163  | 0.451171 | 8.49E-25 |
| 0.94929  | -0.09738 | 0.03539  | -0.01702 | 0.71376  | -0.3252942 | 5.69E-13 | -0.52404 | 2.68E-34 |
| 0.56014  | 0.117633 | 0.01096  | -0.04928 | 0.28791  | 0.09468938 | 0.04082  | 0.295987 | 6.76E-11 |
| 0.43724  | 0.041644 | 0.36923  | -0.01845 | 0.69093  | 0.1034325  | 0.0254   | 0.395688 | 5.92E-19 |
| 0.46055  | 0.228081 | 6.31E-07 | 0.211554 | 3.99E-06 | -0.1245165 | 0.00706  | -0.36648 | 2.72E-16 |
| 0.08153  | 0.210265 | 4.58E-06 | 0.056619 | 0.22199  | 0.27171174 | 2.39E-09 | 0.554792 | 4.75E-39 |

|          |          |          |          |          |            |          |          |          |
|----------|----------|----------|----------|----------|------------|----------|----------|----------|
| 0.47911  | 0.318829 | 1.71E-12 | 0.262436 | 8.55E-09 | 0.48585835 | 4.90E-29 | 0.736198 | 7.15E-81 |
| 0.16607  | 0.133613 | 0.00382  | 0.102279 | 0.02709  | 0.3521339  | 4.44E-15 | 0.578967 | 3.79E-43 |
| 0.00845  | -0.0991  | 0.03227  | -0.08769 | 0.05828  | 0.25116686 | 3.76E-08 | 0.49972  | 7.18E-31 |
| 0.82718  | -0.14299 | 0.00195  | -0.01637 | 0.72423  | 0.16806489 | 0.00026  | 0.317226 | 2.23E-12 |
| 0.17761  | -0.20766 | 6.04E-06 | 0.019806 | 0.66945  | -0.0188289 | 0.68486  | -0.27094 | 2.67E-09 |
| 0.15109  | -0.07237 | 0.11833  | -0.08469 | 0.06746  | 0.22997644 | 5.06E-07 | 0.449503 | 1.32E-24 |
| 2.41E-13 | 0.04135  | 0.37262  | 0.083709 | 0.07072  | 0.3822374  | 1.08E-17 | 0.559597 | 7.74E-40 |
| 0.45158  | 0.186549 | 4.99E-05 | -0.00267 | 0.95403  | 0.48139798 | 1.83E-28 | 0.690012 | 2.82E-67 |
| 0.67288  | -0.04589 | 0.32244  | 0.030343 | 0.51304  | 0.2631796  | 7.73E-09 | 0.398039 | 3.52E-19 |
| 0.04489  | -0.0898  | 0.05247  | -0.13978 | 0.00247  | 0.23351836 | 3.33E-07 | 0.534268 | 7.97E-36 |
| 0.45148  | 0.308683 | 9.10E-12 | 0.075388 | 0.10372  | 0.2965529  | 6.19E-11 | 0.543837 | 2.66E-37 |
| 0.0022   | 0.075789 | 0.10189  | -0.07514 | 0.10485  | -0.2862274 | 2.95E-10 | -0.46457 | 2.23E-26 |
| 0.14221  | -0.02589 | 0.57676  | 0.051666 | 0.26517  | 0.37068429 | 1.17E-16 | 0.475265 | 1.09E-27 |
| 0.09074  | -0.01785 | 0.70042  | 0.168304 | 0.00026  | 0.02913953 | 0.5299   | -0.27151 | 2.46E-09 |
| 0.60435  | 0.057494 | 0.21492  | 0.040388 | 0.38386  | 0.33329606 | 1.41E-13 | 0.590871 | 2.71E-45 |
| 0.0115   | -0.11699 | 0.01141  | -0.05605 | 0.22667  | 0.21229012 | 3.69E-06 | 0.4706   | 4.11E-27 |
| 0.21532  | 0.469261 | 6.01E-27 | 0.17363  | 0.00016  | 0.26007486 | 1.17E-08 | 0.492353 | 6.94E-30 |
| 0.83465  | 0.162849 | 0.00041  | -0.10215 | 0.02729  | 0.2112655  | 4.12E-06 | 0.496516 | 1.94E-30 |
| 8.17E-19 | 0.275936 | 1.32E-09 | -0.10921 | 0.01823  | -0.0377739 | 0.41541  | 0.148302 | 0.00131  |
| 0.36269  | 0.368102 | 1.97E-16 | 0.169124 | 0.00024  | 0.47243581 | 2.44E-27 | 0.678655 | 2.57E-64 |
| 0.24679  | 0.441354 | 1.10E-23 | 0.094506 | 0.04121  | 0.29035938 | 1.59E-10 | 0.573958 | 2.86E-42 |
| 0.02089  | 0.023795 | 0.60802  | -0.2073  | 6.28E-06 | -0.0305081 | 0.51075  | 0.143076 | 0.00194  |
| 0.00414  | -0.11837 | 0.01046  | 0.082131 | 0.07621  | 0.39621271 | 5.27E-19 | 0.561804 | 3.33E-40 |
| 0.00261  | -0.18965 | 3.71E-05 | -0.23623 | 2.41E-07 | 0.06910196 | 0.13594  | 0.341976 | 2.95E-14 |
| 0.82909  | 0.232094 | 3.95E-07 | 0.055929 | 0.22769  | 0.38287239 | 9.41E-18 | 0.620476 | 4.88E-51 |
| 0.17711  | 0.1441   | 0.0018   | 0.170126 | 0.00022  | 0.44959781 | 1.29E-24 | 0.720998 | 4.29E-76 |
| 0.22679  | 0.076632 | 0.09812  | 0.10678  | 0.021    | 0.34004289 | 4.19E-14 | 0.618325 | 1.34E-50 |
| 0.00257  | -0.16059 | 0.00049  | -0.25708 | 1.74E-08 | 0.07606326 | 0.10065  | 0.291453 | 1.35E-10 |
| 0.12477  | 0.152582 | 0.00094  | 0.087118 | 0.05995  | 0.28044206 | 6.90E-10 | 0.553391 | 8.01E-39 |
| 0.66998  | 0.140113 | 0.00241  | -0.11344 | 0.01417  | 0.16496148 | 0.00034  | 0.473021 | 2.07E-27 |
| 0.83626  | -0.04814 | 0.29922  | -0.14429 | 0.00177  | 0.43868516 | 2.19E-23 | 0.608904 | 1.01E-48 |
| 0.0517   | 0.03794  | 0.41337  | -0.1014  | 0.02845  | 0.44878846 | 1.59E-24 | 0.639541 | 4.49E-55 |
| 0.18195  | -0.15464 | 0.0008   | -0.13836 | 0.00273  | 0.28664259 | 2.78E-10 | 0.585693 | 2.38E-44 |
| 0.28818  | -0.12213 | 0.00824  | -0.19732 | 1.75E-05 | 0.08874926 | 0.0553   | 0.399232 | 2.70E-19 |
| 0.05269  | 0.008734 | 0.85069  | 0.322422 | 9.30E-13 | 0.04015612 | 0.3866   | -0.18426 | 6.19E-05 |
| 0.63503  | 0.131961 | 0.00428  | 0.164661 | 0.00035  | 0.47060572 | 4.11E-27 | 0.716366 | 1.06E-74 |
| 0.03814  | 0.250025 | 4.35E-08 | 0.418304 | 3.31E-21 | -0.1250738 | 0.0068   | -0.29542 | 7.38E-11 |
| 0.11746  | 0.300777 | 3.21E-11 | 0.003732 | 0.9359   | 0.07012351 | 0.13023  | 0.351313 | 5.19E-15 |
| 1.96E-11 | -0.16707 | 0.00029  | 0.056527 | 0.22274  | 0.07117098 | 0.12458  | -0.11515 | 0.01277  |
| 0.00299  | 0.194574 | 2.30E-05 | 0.135492 | 0.00335  | 0.39300789 | 1.07E-18 | 0.593186 | 1.01E-45 |
| 0.17314  | -0.10183 | 0.02778  | 0.133725 | 0.00379  | 0.28240861 | 5.18E-10 | 0.473293 | 1.91E-27 |
| 0.0124   | -0.12464 | 0.007    | 0.000112 | 0.99808  | -0.1911188 | 3.22E-05 | -0.35944 | 1.09E-15 |
| 0.00558  | 0.083369 | 0.07187  | -0.09196 | 0.04703  | 0.31010896 | 7.22E-12 | 0.600052 | 5.19E-47 |
| 0.73101  | 0.185944 | 5.28E-05 | -0.06574 | 0.15605  | 0.14269733 | 0.00199  | 0.346944 | 1.18E-14 |
| 0.09084  | -0.01487 | 0.74852  | -0.04835 | 0.29711  | 0.37832335 | 2.44E-17 | 0.412029 | 1.45E-20 |

|          |          |          |          |          |            |          |          |          |
|----------|----------|----------|----------|----------|------------|----------|----------|----------|
| 0.00016  | 0.110915 | 0.01649  | 0.182783 | 7.10E-05 | 0.360477   | 8.91E-16 | 0.56658  | 5.26E-41 |
| 0.04526  | 0.10853  | 0.01898  | -0.01766 | 0.70344  | 0.20482639 | 8.12E-06 | 0.451107 | 8.63E-25 |
| 0.94092  | 0.052705 | 0.25566  | 0.065644 | 0.15669  | 0.24108249 | 1.34E-07 | 0.512113 | 1.39E-32 |
| 0.50919  | -0.07745 | 0.09458  | -0.0835  | 0.07144  | 0.38033238 | 1.61E-17 | 0.615947 | 4.05E-50 |
| 2.51E-05 | -0.10341 | 0.02544  | -0.06255 | 0.17723  | 0.13035433 | 0.00478  | 0.30542  | 1.54E-11 |
| 0.27495  | 0.042567 | 0.35871  | -0.02818 | 0.54358  | 0.3647062  | 3.88E-16 | 0.662236 | 2.88E-60 |
| 0.12799  | -0.23265 | 3.69E-07 | -0.11237 | 0.01512  | -0.33255   | 1.60E-13 | -0.59263 | 1.28E-45 |
| 0.36804  | 0.055628 | 0.2302   | 0.081807 | 0.07738  | 0.34049627 | 3.86E-14 | 0.548151 | 5.55E-38 |
| 0.17242  | 0.006035 | 0.89651  | -0.07543 | 0.10353  | -0.2053436 | 7.70E-06 | -0.32601 | 5.03E-13 |
| 0.0107   | 0.101904 | 0.02767  | -0.01933 | 0.6769   | 0.1898676  | 3.63E-05 | 0.360784 | 8.39E-16 |
| 0.84796  | 0.25778  | 1.59E-08 | 0.01042  | 0.8223   | 0.15142047 | 0.00103  | 0.415945 | 5.80E-21 |
| 0.27742  | 0.089281 | 0.05385  | -0.08723 | 0.05961  | 0.24601737 | 7.24E-08 | 0.53063  | 2.82E-35 |
| 0.767    | -0.01545 | 0.73911  | -0.0074  | 0.87322  | 0.26792701 | 4.05E-09 | 0.55142  | 1.67E-38 |
| 0.89475  | 0.090605 | 0.05037  | 0.022203 | 0.63223  | 0.15453698 | 0.00081  | 0.3469   | 1.19E-14 |
| 0.90748  | 0.127473 | 0.0058   | 0.117875 | 0.01079  | 0.36362461 | 4.80E-16 | 0.514866 | 5.67E-33 |
| 0.00558  | 0.084323 | 0.06867  | 0.137714 | 0.00286  | 0.46907597 | 6.33E-27 | 0.740232 | 3.39E-82 |
| 0.00321  | 0.107691 | 0.01992  | 0.197742 | 1.67E-05 | 0.38351535 | 8.22E-18 | 0.551606 | 1.56E-38 |
| 5.50E-08 | -0.13794 | 0.00282  | -0.16053 | 0.0005   | 0.18725269 | 4.67E-05 | 0.346564 | 1.26E-14 |
| 0.01043  | -0.18773 | 4.46E-05 | 0.087521 | 0.05877  | 0.14214507 | 0.00208  | -0.13004 | 0.00488  |
| 0.51865  | 0.129117 | 0.0052   | 0.125759 | 0.0065   | -0.151376  | 0.00103  | -0.45803 | 1.34E-25 |
| 0.20234  | -0.0278  | 0.54896  | 0.077799 | 0.09309  | 0.18270516 | 7.15E-05 | -0.1416  | 0.00216  |
| 0.28836  | -0.2442  | 9.09E-08 | -0.31847 | 1.81E-12 | 0.04955409 | 0.28522  | 0.333261 | 1.41E-13 |
| 0.11456  | -0.15192 | 0.00099  | -0.18612 | 5.19E-05 | 0.10799432 | 0.01958  | 0.294747 | 8.17E-11 |
| 0.02204  | -0.2602  | 1.15E-08 | -0.24624 | 7.03E-08 | 0.22813808 | 6.27E-07 | 0.509092 | 3.69E-32 |
| 3.58E-05 | -0.00273 | 0.95309  | -0.12001 | 0.00943  | -0.0103385 | 0.82367  | 0.160652 | 0.00049  |
| 0.02136  | -0.05069 | 0.27435  | -0.00326 | 0.94392  | -0.0694112 | 0.13419  | -0.38743 | 3.57E-18 |
| 0.00469  | -0.00881 | 0.84935  | -0.04932 | 0.28748  | -0.1616142 | 0.00045  | -0.41912 | 2.73E-21 |
| 0.1049   | 0.095286 | 0.03956  | -0.02708 | 0.55934  | 0.3869907  | 3.92E-18 | 0.406461 | 5.26E-20 |
| 0.82407  | -0.03583 | 0.43983  | -0.12379 | 0.0074   | 0.06148428 | 0.18471  | 0.33105  | 2.09E-13 |
| 0.66162  | 0.256374 | 1.91E-08 | 0.210954 | 4.26E-06 | 0.43578882 | 4.56E-23 | 0.751184 | 6.43E-86 |
| 0.65977  | -0.01131 | 0.80736  | -0.0939  | 0.04254  | 0.1703311  | 0.00022  | 0.367205 | 2.36E-16 |
| 0.7317   | -0.17561 | 0.00014  | 0.055503 | 0.23126  | 0.25622436 | 1.95E-08 | 0.450111 | 1.12E-24 |
| 0.70258  | 0.232369 | 3.82E-07 | 0.125679 | 0.00654  | 0.42387566 | 8.69E-22 | 0.630141 | 4.76E-53 |
| 0.00926  | -0.09435 | 0.04154  | 0.047109 | 0.30969  | 0.03282517 | 0.47916  | -0.17692 | 0.00012  |
| 0.47148  | 0.068005 | 0.14228  | 0.028875 | 0.53364  | 0.21147864 | 4.03E-06 | 0.344912 | 1.72E-14 |
| 0.43759  | 0.282541 | 5.08E-10 | 0.008869 | 0.8484   | 0.17916072 | 9.91E-05 | 0.410172 | 2.24E-20 |
| 0.00275  | -0.12652 | 0.00619  | 0.005547 | 0.90484  | 0.27245884 | 2.15E-09 | 0.409789 | 2.45E-20 |
| 0.01802  | 0.034024 | 0.46325  | 0.053562 | 0.248    | 0.30889155 | 8.80E-12 | 0.564345 | 1.25E-40 |
| 3.20E-05 | 0.16525  | 0.00034  | 0.046721 | 0.3137   | 0.26677216 | 4.74E-09 | 0.57303  | 4.14E-42 |
| 0.00594  | 0.29507  | 7.78E-11 | -0.00776 | 0.8671   | 0.32325024 | 8.07E-13 | 0.497752 | 1.32E-30 |
| 0.00485  | -0.08461 | 0.06772  | -0.13601 | 0.00323  | 0.20396212 | 8.89E-06 | 0.44313  | 6.98E-24 |
| 0.00412  | -0.06039 | 0.19268  | -0.01656 | 0.72119  | 0.07972369 | 0.08526  | 0.317249 | 2.23E-12 |
| 0.41672  | 0.104141 | 0.02441  | 0.018165 | 0.69541  | 0.12417852 | 0.00722  | 0.259325 | 1.30E-08 |
| 0.95483  | 0.303582 | 2.06E-11 | 0.144083 | 0.0018   | 0.31920338 | 1.60E-12 | 0.621176 | 3.51E-51 |
| 0.17915  | 0.143813 | 0.00184  | 0.081445 | 0.07871  | 0.43683122 | 3.50E-23 | 0.696878 | 3.92E-69 |

|          |          |          |          |          |            |          |          |          |
|----------|----------|----------|----------|----------|------------|----------|----------|----------|
| 0.75865  | 0.149275 | 0.00121  | 0.049099 | 0.28968  | 0.14549653 | 0.00162  | 0.436046 | 4.27E-23 |
| 0.65237  | 0.216797 | 2.26E-06 | 0.359561 | 1.07E-15 | -0.1736445 | 0.00016  | -0.38482 | 6.22E-18 |
| 0.113    | 0.093906 | 0.04252  | 0.108121 | 0.01943  | 0.10967555 | 0.01774  | 0.373715 | 6.31E-17 |
| 0.16581  | 0.080054 | 0.08397  | 0.179014 | 0.0001   | 0.09851122 | 0.03331  | -0.23521 | 2.72E-07 |
| 0.00393  | 0.126289 | 0.00628  | 0.298209 | 4.79E-11 | 0.03411583 | 0.46204  | -0.19958 | 1.39E-05 |
| 0.1363   | 0.002717 | 0.9533   | 0.000582 | 0.98999  | -0.2207692 | 1.45E-06 | -0.42343 | 9.68E-22 |
| 0.43894  | -0.08046 | 0.08241  | -0.19444 | 2.33E-05 | 0.1271468  | 0.00593  | 0.294423 | 8.59E-11 |
| 5.84E-25 | -0.20673 | 6.66E-06 | -0.07713 | 0.09597  | 0.12078802 | 0.00898  | 0.268512 | 3.73E-09 |
| 0.65741  | 0.048619 | 0.29442  | -0.1038  | 0.02488  | 0.10825009 | 0.01929  | 0.368297 | 1.89E-16 |
| 4.21E-15 | 0.021791 | 0.63857  | 0.006911 | 0.8816   | 0.20205635 | 1.08E-05 | 0.335952 | 8.76E-14 |
| 0.64502  | 0.280335 | 7.01E-10 | 0.136837 | 0.00305  | 0.32237539 | 9.37E-13 | 0.582772 | 7.99E-44 |
| 0.23764  | 0.238823 | 1.76E-07 | 0.203247 | 9.57E-06 | 0.41634381 | 5.28E-21 | 0.582986 | 7.31E-44 |
| 0.56018  | 0.243111 | 1.04E-07 | 0.155228 | 0.00076  | 0.44146101 | 1.07E-23 | 0.734328 | 2.88E-80 |
| 0.15036  | 0.03477  | 0.4535   | -0.01032 | 0.82405  | 0.41947373 | 2.51E-21 | 0.533774 | 9.48E-36 |
| 0.33225  | 0.098491 | 0.03335  | 0.005941 | 0.89812  | 0.11287057 | 0.01467  | 0.272124 | 2.26E-09 |
| 0.90447  | 0.389946 | 2.08E-18 | 0.177795 | 0.00011  | 0.23968126 | 1.59E-07 | 0.520704 | 8.22E-34 |
| 0.16852  | 0.11453  | 0.01327  | 0.052484 | 0.25766  | 0.2765915  | 1.20E-09 | 0.536164 | 4.10E-36 |
| 2.03E-20 | -0.21243 | 3.63E-06 | -0.23554 | 2.62E-07 | 0.18288695 | 7.03E-05 | 0.355686 | 2.25E-15 |
| 0.87522  | 0.088651 | 0.05557  | -0.09958 | 0.03144  | 0.16200295 | 0.00044  | 0.441794 | 9.86E-24 |
| 0.00094  | 0.066121 | 0.15369  | 0.101075 | 0.02896  | -0.0647391 | 0.16249  | -0.26546 | 5.68E-09 |
| 0.00095  | 0.146493 | 0.0015   | -0.15687 | 0.00067  | 0.1429251  | 0.00196  | 0.411968 | 1.47E-20 |
| 0.13869  | 0.263689 | 7.22E-09 | 0.127688 | 0.00572  | 0.28983549 | 1.72E-10 | 0.536915 | 3.15E-36 |
| 0.33742  | 0.23145  | 4.26E-07 | 0.547912 | 6.06E-38 | 0.0479322  | 0.3013   | -0.18363 | 6.56E-05 |
| 0.004    | 0.281501 | 5.92E-10 | 0.331718 | 1.86E-13 | 0.09032948 | 0.05108  | -0.25091 | 3.89E-08 |
| 0.10996  | 0.361797 | 6.88E-16 | 0.275903 | 1.32E-09 | -0.099745  | 0.03115  | -0.36316 | 5.27E-16 |
| 0.00498  | 0.177446 | 0.00012  | 0.186423 | 5.05E-05 | 0.41126504 | 1.74E-20 | 0.541041 | 7.27E-37 |
| 0.05984  | 0.173709 | 0.00016  | 0.111463 | 0.01596  | 0.41014154 | 2.25E-20 | 0.694038 | 2.33E-68 |
| 0.32976  | -0.03159 | 0.49588  | 0.121485 | 0.00859  | 0.14827775 | 0.00131  | -0.10814 | 0.01941  |
| 0.87809  | -0.07531 | 0.10407  | -0.18422 | 6.21E-05 | -0.2709808 | 2.65E-09 | -0.46601 | 1.49E-26 |
| 0.08322  | -0.09367 | 0.04304  | -0.14927 | 0.00122  | 0.11617644 | 0.01199  | 0.316603 | 2.48E-12 |
| 0.12994  | -0.27574 | 1.35E-09 | -0.21421 | 3.00E-06 | 0.18128078 | 8.16E-05 | 0.462629 | 3.82E-26 |
| 0.86747  | 0.010676 | 0.81801  | 0.118151 | 0.01061  | 0.51486917 | 5.66E-33 | 0.7556   | 1.78E-87 |
| 0.00104  | 0.13652  | 0.00311  | 0.076105 | 0.10046  | 0.23007822 | 5.00E-07 | 0.387434 | 3.57E-18 |
| 0.88293  | 0.101341 | 0.02854  | 0.057268 | 0.21673  | 0.29877177 | 4.39E-11 | 0.534403 | 7.60E-36 |
| 0.44337  | -0.14976 | 0.00117  | -0.16958 | 0.00023  | 0.06029852 | 0.19334  | 0.235426 | 2.65E-07 |
| 0.10939  | 0.246258 | 7.02E-08 | 0.232322 | 3.84E-07 | 0.16907131 | 0.00024  | -0.12135 | 0.00866  |
| 0.0752   | -0.22155 | 1.33E-06 | -0.01488 | 0.74849  | 0.29220053 | 1.21E-10 | 0.423822 | 8.80E-22 |
| 0.92727  | 0.169354 | 0.00024  | 0.246884 | 6.49E-08 | -0.0083916 | 0.85648  | -0.263   | 7.92E-09 |
| 0.03331  | -0.07622 | 0.09997  | 0.022771 | 0.62355  | 0.02264551 | 0.62546  | -0.21327 | 3.32E-06 |
| 0.14395  | 0.038751 | 0.40344  | 0.328124 | 3.49E-13 | 0.07240435 | 0.11816  | -0.1627  | 0.00042  |
| 1.80E-06 | 0.082857 | 0.07364  | 0.026004 | 0.57511  | 0.28512926 | 3.48E-10 | 0.409656 | 2.52E-20 |
| 0.00318  | -0.09568 | 0.03874  | -0.07301 | 0.11509  | 0.06971406 | 0.1325   | 0.295684 | 7.08E-11 |
| 0.52187  | 0.158152 | 0.0006   | -0.04993 | 0.28161  | 0.31279574 | 4.65E-12 | 0.614944 | 6.43E-50 |
| 0.03445  | 0.111565 | 0.01586  | 0.172247 | 0.00018  | 0.36800312 | 2.01E-16 | 0.454807 | 3.21E-25 |
| 0.96027  | -0.02617 | 0.57272  | -0.13143 | 0.00444  | 0.33880842 | 5.24E-14 | 0.646856 | 1.06E-56 |

|          |          |          |          |          |            |          |          |          |
|----------|----------|----------|----------|----------|------------|----------|----------|----------|
| 0.94984  | 0.001786 | 0.9693   | -0.05741 | 0.21563  | 0.19126834 | 3.17E-05 | 0.542982 | 3.63E-37 |
| 0.05706  | -0.1622  | 0.00043  | 0.065767 | 0.15591  | -0.2455396 | 7.68E-08 | -0.41246 | 1.32E-20 |
| 0.09432  | -0.22404 | 1.00E-06 | -0.14013 | 0.0024   | 0.11857005 | 0.01033  | 0.356147 | 2.06E-15 |
| 0.46681  | 0.067328 | 0.1463   | 0.148496 | 0.00129  | 0.251404   | 3.65E-08 | 0.42447  | 7.52E-22 |
| 0.26474  | 0.193207 | 2.63E-05 | 0.079369 | 0.08666  | 0.45435436 | 3.63E-25 | 0.691541 | 1.10E-67 |
| 0.86027  | 0.22039  | 1.52E-06 | 0.152506 | 0.00095  | 0.40908842 | 2.88E-20 | 0.60998  | 6.23E-49 |
| 0.12524  | 0.187341 | 4.63E-05 | 0.0671   | 0.14768  | 0.36396242 | 4.49E-16 | 0.645089 | 2.65E-56 |
| 0.79901  | -0.12212 | 0.00824  | -0.06898 | 0.13661  | 0.33934508 | 4.75E-14 | 0.584122 | 4.57E-44 |
| 0.10293  | -0.27104 | 2.63E-09 | -0.26506 | 5.99E-09 | -0.2966818 | 6.07E-11 | -0.48271 | 1.25E-28 |
| 0.53209  | 0.023939 | 0.60585  | -0.08302 | 0.07308  | -0.1782497 | 0.00011  | -0.34258 | 2.64E-14 |
| 1.30E-23 | -0.07115 | 0.12471  | 0.002344 | 0.9597   | 0.19472733 | 2.26E-05 | 0.352204 | 4.38E-15 |
| 0.09673  | -0.01636 | 0.72442  | -0.11095 | 0.01645  | 0.40841905 | 3.36E-20 | 0.65404  | 2.44E-58 |
| 0.827    | 0.065097 | 0.16018  | -0.03943 | 0.39525  | 0.04736053 | 0.30711  | 0.25691  | 1.78E-08 |
| 0.06791  | -0.18658 | 4.97E-05 | -0.17453 | 0.00015  | -0.3311975 | 2.04E-13 | -0.57918 | 3.48E-43 |
| 0.54847  | -0.217   | 2.21E-06 | -0.09944 | 0.03168  | -0.2512123 | 3.74E-08 | -0.44737 | 2.31E-24 |
| 0.62852  | -0.0279  | 0.54754  | -0.0504  | 0.27702  | 0.31387007 | 3.90E-12 | 0.605651 | 4.37E-48 |
| 0.40845  | -0.17928 | 9.80E-05 | -0.11359 | 0.01405  | 0.22412993 | 9.94E-07 | 0.394283 | 8.06E-19 |
| 0.05396  | -0.02271 | 0.6245   | -0.01275 | 0.78348  | 0.32321795 | 8.12E-13 | 0.514343 | 6.73E-33 |
| 0.0721   | -0.26005 | 1.18E-08 | -0.19417 | 2.39E-05 | -0.046332  | 0.31775  | 0.188061 | 4.32E-05 |
| 0.18034  | 0.19471  | 2.26E-05 | 0.111748 | 0.01569  | 0.34249788 | 2.68E-14 | 0.590985 | 2.58E-45 |
| 0.10616  | -0.11771 | 0.0109   | -0.06921 | 0.1353   | -0.0741137 | 0.10971  | -0.25908 | 1.34E-08 |
| 0.02336  | 0.073174 | 0.11429  | 0.051926 | 0.26277  | 0.04377012 | 0.34527  | -0.22445 | 9.58E-07 |
| 0.45498  | 0.112572 | 0.01494  | 0.036359 | 0.43311  | 0.5347663  | 6.70E-36 | 0.725779 | 1.46E-77 |
| 2.40E-05 | 0.116397 | 0.01183  | 0.309304 | 8.23E-12 | -0.0333302 | 0.47242  | -0.27104 | 2.63E-09 |
| 7.42E-08 | 0.218493 | 1.87E-06 | -0.01966 | 0.67176  | 0.1614928  | 0.00046  | 0.346633 | 1.25E-14 |
| 0.35667  | -0.09242 | 0.04592  | -0.12964 | 0.00502  | 0.20939354 | 5.03E-06 | 0.535996 | 4.35E-36 |
| 0.18475  | 0.148948 | 0.00125  | 0.286334 | 2.91E-10 | 0.06839153 | 0.14002  | -0.23348 | 3.35E-07 |
| 6.64E-06 | -0.01892 | 0.68336  | 0.067457 | 0.14553  | 0.46418873 | 2.48E-26 | 0.682772 | 2.25E-65 |
| 0.19559  | 0.123282 | 0.00765  | 0.085619 | 0.06451  | 0.27560522 | 1.38E-09 | 0.507116 | 6.96E-32 |
| 0.00014  | 0.0564   | 0.22379  | -0.01383 | 0.76572  | 0.24593841 | 7.31E-08 | 0.489443 | 1.67E-29 |
| 0.20563  | -0.11391 | 0.01378  | 0.00438  | 0.92479  | 0.34679188 | 1.21E-14 | 0.557897 | 1.48E-39 |
| 0.01855  | -0.156   | 0.00072  | 0.028422 | 0.54009  | 0.14618718 | 0.00154  | 0.312192 | 5.14E-12 |
| 0.1317   | 0.19266  | 2.77E-05 | 0.219445 | 1.68E-06 | 0.49452901 | 3.57E-30 | 0.637132 | 1.51E-54 |
| 0.09988  | 0.202083 | 1.08E-05 | 0.208773 | 5.37E-06 | -0.158132  | 0.0006   | -0.40024 | 2.15E-19 |
| 0.96892  | 0.017089 | 0.71263  | 0.318526 | 1.80E-12 | -0.0258859 | 0.57685  | -0.29604 | 6.70E-11 |
| 3.82E-05 | 0.147451 | 0.0014   | 0.326333 | 4.75E-13 | -0.2334573 | 3.36E-07 | -0.43984 | 1.63E-23 |
| 0.75419  | 0.266386 | 5.00E-09 | 0.139077 | 0.00259  | 0.30093259 | 3.13E-11 | 0.437064 | 3.30E-23 |
| 0.02982  | 0.029796 | 0.52066  | 0.068286 | 0.14063  | 0.26702609 | 4.58E-09 | 0.435595 | 4.78E-23 |
| 0.02205  | -0.13377 | 0.00378  | -0.08905 | 0.05448  | 0.14499963 | 0.00168  | 0.323872 | 7.26E-13 |
| 0.04887  | 0.165227 | 0.00034  | -0.00231 | 0.96022  | 0.30288076 | 2.30E-11 | 0.554615 | 5.07E-39 |
| 0.00426  | 0.274591 | 1.60E-09 | 0.41512  | 7.05E-21 | -0.2073161 | 6.26E-06 | -0.47517 | 1.12E-27 |
| 0.23106  | 0.005902 | 0.89878  | -0.04198 | 0.36542  | 0.39657744 | 4.86E-19 | 0.631075 | 3.02E-53 |
| 0.92364  | 0.06831  | 0.14049  | -0.15078 | 0.00108  | 0.20624381 | 7.01E-06 | 0.498609 | 1.01E-30 |
| 0.11996  | 0.10277  | 0.02636  | 0.041098 | 0.37554  | -0.2488159 | 5.08E-08 | -0.50168 | 3.89E-31 |
| 0.69007  | -0.09625 | 0.0376   | 0.019348 | 0.67666  | 0.16801154 | 0.00027  | 0.303783 | 2.00E-11 |

|          |          |          |          |          |            |          |          |          |
|----------|----------|----------|----------|----------|------------|----------|----------|----------|
| 4.89E-05 | 0.075572 | 0.10287  | 0.218372 | 1.90E-06 | 0.01064301 | 0.81857  | -0.19223 | 2.89E-05 |
| 0.08722  | 0.406685 | 5.00E-20 | 0.117511 | 0.01104  | 0.25642047 | 1.90E-08 | 0.470847 | 3.84E-27 |
| 0.39498  | 0.254811 | 2.35E-08 | 0.060348 | 0.19298  | 0.30829709 | 9.69E-12 | 0.436108 | 4.20E-23 |
| 8.84E-09 | -0.19414 | 2.40E-05 | -0.13088 | 0.00461  | 0.16693963 | 0.00029  | 0.353096 | 3.70E-15 |
| 0.37759  | -0.01825 | 0.69398  | -0.02653 | 0.56734  | 0.18861437 | 4.10E-05 | 0.328089 | 3.51E-13 |
| 0.13627  | 0.314857 | 3.31E-12 | 0.089539 | 0.05316  | 0.28377286 | 4.24E-10 | 0.495843 | 2.38E-30 |
| 0.06031  | -0.06257 | 0.17708  | -0.11969 | 0.00963  | 0.31102847 | 6.22E-12 | 0.534773 | 6.68E-36 |
| 0.16934  | -0.0936  | 0.04321  | -0.15765 | 0.00063  | 0.07421969 | 0.1092   | 0.206333 | 6.94E-06 |
| 0.28294  | 0.112375 | 0.01511  | 0.156452 | 0.00069  | 0.06912969 | 0.13578  | -0.26041 | 1.12E-08 |
| 0.00079  | 0.074712 | 0.10686  | -0.01227 | 0.79145  | 0.26550984 | 5.63E-09 | 0.588104 | 8.70E-45 |
| 0.00054  | -0.24091 | 1.36E-07 | -0.08758 | 0.0586   | 0.35238145 | 4.24E-15 | 0.522602 | 4.35E-34 |
| 0.56911  | 0.274137 | 1.70E-09 | 0.313254 | 4.32E-12 | 0.07078352 | 0.12665  | -0.18795 | 4.37E-05 |
| 0.84425  | 0.10903  | 0.01843  | 0.199259 | 1.44E-05 | 0.46479313 | 2.10E-26 | 0.654142 | 2.31E-58 |
| 0.04326  | 0.069979 | 0.13103  | -0.03071 | 0.50789  | 0.27292064 | 2.02E-09 | 0.538263 | 1.96E-36 |
| 0.00027  | -0.00977 | 0.8333   | 0.026406 | 0.56921  | 0.40799452 | 3.70E-20 | 0.661913 | 3.44E-60 |
| 0.34861  | 0.032572 | 0.48256  | 0.254199 | 2.54E-08 | -0.0026338 | 0.95473  | -0.26118 | 1.01E-08 |
| 0.21193  | -0.11962 | 0.00967  | 0.039832 | 0.39045  | 0.35758484 | 1.56E-15 | 0.465202 | 1.87E-26 |
| 4.35E-05 | -0.32001 | 1.40E-12 | -0.23118 | 4.39E-07 | 0.25188895 | 3.43E-08 | 0.413511 | 1.03E-20 |
| 0.09284  | -0.08496 | 0.06658  | -0.08    | 0.08417  | 0.20415936 | 8.71E-06 | 0.363256 | 5.16E-16 |
| 3.35E-05 | 0.132417 | 0.00415  | 0.094308 | 0.04164  | 0.3590074  | 1.19E-15 | 0.509287 | 3.47E-32 |
| 0.54435  | 0.10375  | 0.02495  | 0.039841 | 0.39034  | 0.07357102 | 0.11234  | 0.308126 | 9.96E-12 |
| 0.00994  | -0.00936 | 0.84016  | 0.158703 | 0.00058  | -0.4083302 | 3.43E-20 | -0.65002 | 2.04E-57 |
| 0.83546  | -0.05026 | 0.27844  | -0.02463 | 0.5955   | 0.37837509 | 2.42E-17 | 0.668753 | 7.64E-62 |
| 0.31904  | 0.10057  | 0.02978  | 0.010326 | 0.82387  | 0.18702688 | 4.77E-05 | 0.429095 | 2.42E-22 |
| 4.85E-11 | 0.121589 | 0.00853  | -0.0874  | 0.05912  | 0.13636533 | 0.00315  | 0.337665 | 6.44E-14 |
| 0.02168  | 0.121735 | 0.00845  | 0.095036 | 0.04008  | 0.20685586 | 6.57E-06 | 0.41539  | 6.61E-21 |
| 0.57752  | 0.188559 | 4.12E-05 | 0.162198 | 0.00043  | 0.35466863 | 2.74E-15 | 0.566849 | 4.73E-41 |
| 0.01615  | -0.02642 | 0.56902  | 0.085741 | 0.06412  | 0.48576337 | 5.04E-29 | 0.63639  | 2.19E-54 |
| 0.63586  | 0.104464 | 0.02397  | -0.04078 | 0.37931  | 0.09374804 | 0.04287  | 0.290287 | 1.61E-10 |
| 0.0168   | -0.24566 | 7.57E-08 | 0.013867 | 0.76503  | 0.39133221 | 1.54E-18 | 0.513885 | 7.82E-33 |
| 0.20104  | 0.350595 | 5.94E-15 | 0.102609 | 0.0266   | 0.25941703 | 1.28E-08 | 0.42035  | 2.03E-21 |
| 0.758    | -0.00452 | 0.92236  | -0.08084 | 0.08096  | 0.0414286  | 0.37172  | 0.171739 | 0.00019  |
| 0.41675  | 0.01361  | 0.76927  | -0.09345 | 0.04353  | 0.14024002 | 0.00239  | 0.419314 | 2.60E-21 |
| 0.30143  | 0.111009 | 0.0164   | -0.11741 | 0.01111  | 0.15859053 | 0.00058  | 0.47315  | 1.99E-27 |
| 0.00186  | -0.07531 | 0.1041   | 0.021792 | 0.63855  | 0.2525415  | 3.15E-08 | 0.396861 | 4.57E-19 |
| 0.00749  | -0.07304 | 0.11494  | -0.05531 | 0.23288  | 0.38095096 | 1.41E-17 | 0.603877 | 9.62E-48 |
| 0.70828  | -0.20829 | 5.65E-06 | -0.31954 | 1.51E-12 | 0.08975174 | 0.05259  | 0.370513 | 1.21E-16 |
| 0.30103  | 0.278685 | 8.89E-10 | 0.12004  | 0.00942  | 0.24294367 | 1.06E-07 | 0.426443 | 4.65E-22 |
| 0.08982  | 0.039312 | 0.39666  | 0.038552 | 0.40586  | 0.23926741 | 1.67E-07 | 0.391027 | 1.64E-18 |
| 0.15737  | -0.08419 | 0.06912  | 0.009334 | 0.84056  | 0.243826   | 9.52E-08 | 0.478574 | 4.18E-28 |
| 0.25254  | -0.1825  | 7.29E-05 | -0.02101 | 0.65057  | 0.23128947 | 4.34E-07 | 0.438587 | 2.24E-23 |
| 0.2453   | 0.012603 | 0.7859   | -0.12921 | 0.00517  | 0.21128575 | 4.11E-06 | 0.447599 | 2.18E-24 |
| 0.48259  | 0.058064 | 0.2104   | 0.010987 | 0.8128   | 0.10815712 | 0.01939  | 0.235422 | 2.66E-07 |
| 0.07932  | -0.00191 | 0.96722  | -0.0174  | 0.70764  | 0.18094349 | 8.42E-05 | 0.43237  | 1.07E-22 |
| 0.01139  | -0.07286 | 0.11588  | -0.11876 | 0.01021  | 0.07746773 | 0.0945   | 0.256984 | 1.77E-08 |



|          |          |          |          |          |            |          |          |          |
|----------|----------|----------|----------|----------|------------|----------|----------|----------|
| 3.97E-05 | 0.342667 | 2.60E-14 | 0.478543 | 4.21E-28 | -0.161987  | 0.00044  | -0.41543 | 6.54E-21 |
| 0.76653  | 0.187093 | 4.74E-05 | 0.088711 | 0.0554   | 0.40246185 | 1.31E-19 | 0.656232 | 7.54E-59 |
| 0.24955  | 0.328606 | 3.20E-13 | 0.142778 | 0.00198  | 0.50988519 | 2.86E-32 | 0.752126 | 3.01E-86 |
| 0.00391  | -0.2504  | 4.15E-08 | -0.31033 | 6.97E-12 | 0.14996119 | 0.00115  | 0.374951 | 4.90E-17 |
| 0.2162   | 0.130171 | 0.00484  | 0.098085 | 0.03408  | 0.16296454 | 0.00041  | 0.373538 | 6.55E-17 |
| 0.01636  | -0.17953 | 9.58E-05 | -0.09198 | 0.04697  | 0.05439257 | 0.24073  | 0.260569 | 1.10E-08 |
| 0.27471  | -0.07304 | 0.11496  | 0.042627 | 0.35803  | -0.1785262 | 0.0001   | -0.43865 | 2.21E-23 |
| 0.00017  | 0.26626  | 5.09E-09 | 0.238433 | 1.85E-07 | -0.2335254 | 3.33E-07 | -0.47591 | 9.04E-28 |
| 0.24486  | -0.10335 | 0.02553  | -0.13001 | 0.00489  | 0.22213661 | 1.25E-06 | 0.494422 | 3.69E-30 |
| 0.0004   | 0.024404 | 0.59886  | -0.08029 | 0.08306  | 0.16657154 | 0.0003   | 0.470924 | 3.75E-27 |
| 0.64624  | 0.063875 | 0.16818  | -0.04863 | 0.29435  | 0.06912309 | 0.13582  | 0.319637 | 1.49E-12 |
| 0.77268  | -0.12474 | 0.00696  | -0.09395 | 0.04243  | 0.25452319 | 2.44E-08 | 0.502122 | 3.38E-31 |
| 0.03931  | -0.05372 | 0.24665  | 0.082442 | 0.0751   | 0.22572459 | 8.28E-07 | 0.389335 | 2.37E-18 |
| 0.03419  | 0.301597 | 2.82E-11 | 0.36572  | 3.17E-16 | -0.0918888 | 0.04719  | -0.31498 | 3.24E-12 |
| 0.32073  | -0.13666 | 0.00308  | 0.131224 | 0.0045   | -0.1116352 | 0.0158   | -0.46223 | 4.26E-26 |
| 0.64519  | -0.07152 | 0.12271  | 0.060519 | 0.19172  | 0.25704311 | 1.75E-08 | 0.511717 | 1.58E-32 |
| 0.00929  | -0.08434 | 0.06862  | 0.118993 | 0.01006  | 0.41533848 | 6.69E-21 | 0.625188 | 5.21E-52 |
| 0.91057  | 0.184978 | 5.78E-05 | 0.132549 | 0.00411  | 0.38354226 | 8.17E-18 | 0.644355 | 3.87E-56 |
| 0.50422  | -0.16816 | 0.00026  | -0.01735 | 0.70838  | 0.269953   | 3.06E-09 | 0.486329 | 4.26E-29 |
| 0.09798  | -0.01104 | 0.81185  | 0.027659 | 0.55102  | 0.2881786  | 2.21E-10 | 0.552417 | 1.15E-38 |
| 0.8911   | 0.049226 | 0.28843  | -0.03261 | 0.48211  | 0.33294888 | 1.49E-13 | 0.638207 | 8.80E-55 |
| 0.0185   | 0.064672 | 0.16293  | 0.145896 | 0.00157  | 0.55185244 | 1.42E-38 | 0.756589 | 7.91E-88 |
| 0.88773  | 0.181905 | 7.70E-05 | 0.083658 | 0.07089  | 0.29681596 | 5.94E-11 | 0.359344 | 1.11E-15 |
| 0.01779  | -0.02706 | 0.55968  | -0.01954 | 0.67366  | -0.1173164 | 0.01117  | -0.31102 | 6.22E-12 |
| 0.16173  | 0.223543 | 1.06E-06 | -0.00571 | 0.9021   | 0.01057686 | 0.81968  | 0.206176 | 7.06E-06 |
| 0.06727  | -0.15159 | 0.00102  | -0.07304 | 0.11494  | 0.12658272 | 0.00616  | 0.266103 | 5.20E-09 |
| 0.27459  | 0.093801 | 0.04275  | 0.093757 | 0.04285  | 0.30002048 | 3.61E-11 | 0.434586 | 6.17E-23 |
| 0.14162  | -0.09173 | 0.04756  | 0.179285 | 9.80E-05 | 0.19529444 | 2.14E-05 | -0.12533 | 0.00669  |
| 0.1174   | -0.11006 | 0.01735  | -0.11999 | 0.00945  | 0.23811807 | 1.92E-07 | 0.514168 | 7.12E-33 |
| 5.74E-07 | 0.171933 | 0.00019  | 0.13239  | 0.00416  | 0.30278949 | 2.34E-11 | 0.47885  | 3.85E-28 |
| 0.91691  | -0.00876 | 0.85026  | 0.091602 | 0.04788  | 0.41108399 | 1.81E-20 | 0.645785 | 1.85E-56 |
| 0.51195  | 0.135463 | 0.00336  | -0.02925 | 0.5284   | 0.22365293 | 1.05E-06 | 0.540662 | 8.33E-37 |
| 0.96524  | 0.029326 | 0.52727  | -0.00166 | 0.9714   | 0.35435138 | 2.91E-15 | 0.620209 | 5.54E-51 |
| 0.00131  | -0.04844 | 0.29622  | 0.064454 | 0.16435  | 0.14098417 | 0.00226  | 0.396201 | 5.29E-19 |
| 2.64E-05 | 0.249272 | 4.79E-08 | 0.072845 | 0.11594  | 0.2676165  | 4.22E-09 | 0.48096  | 2.08E-28 |
| 0.012    | 0.053123 | 0.25191  | -0.13902 | 0.00261  | 0.26452112 | 6.45E-09 | 0.509605 | 3.13E-32 |
| 0.07715  | -0.07886 | 0.0887   | 0.353788 | 3.24E-15 | -0.065569  | 0.15716  | -0.3403  | 3.99E-14 |
| 0.39251  | 0.100222 | 0.03035  | -0.03639 | 0.43274  | 0.01170356 | 0.80085  | -0.2111  | 4.19E-06 |
| 8.76E-11 | 0.063365 | 0.17162  | -0.04618 | 0.31929  | 0.16876427 | 0.00025  | 0.382282 | 1.07E-17 |
| 0.14651  | -0.0728  | 0.11616  | 0.03769  | 0.41645  | -0.0699471 | 0.1312   | -0.41418 | 8.79E-21 |
| 0.03402  | 0.205981 | 7.20E-06 | 0.135358 | 0.00338  | 0.31833498 | 1.86E-12 | 0.604189 | 8.37E-48 |
| 0.10301  | 0.031869 | 0.49207  | 0.110453 | 0.01695  | -0.1065475 | 0.02128  | -0.34265 | 2.60E-14 |
| 0.00058  | 0.073604 | 0.11218  | 0.177098 | 0.00012  | 0.12063218 | 0.00907  | -0.10626 | 0.02164  |
| 0.1202   | 0.156311 | 0.0007   | -0.07082 | 0.12644  | 0.21809052 | 1.96E-06 | 0.438226 | 2.46E-23 |
| 9.65E-18 | -0.09909 | 0.03228  | -0.05241 | 0.2583   | 0.38936131 | 2.35E-18 | 0.604978 | 5.90E-48 |

|          |          |          |          |          |            |          |          |          |
|----------|----------|----------|----------|----------|------------|----------|----------|----------|
| 0.054    | 0.124885 | 0.00689  | -0.03719 | 0.42262  | 0.22269899 | 1.17E-06 | 0.481985 | 1.54E-28 |
| 0.75618  | 0.090612 | 0.05036  | 0.019156 | 0.67969  | 0.36783224 | 2.08E-16 | 0.669726 | 4.41E-62 |
| 0.72769  | -0.06789 | 0.14293  | -0.13535 | 0.00338  | 0.2241311  | 9.94E-07 | 0.475494 | 1.02E-27 |
| 0.51906  | 0.293852 | 9.38E-11 | 0.042576 | 0.3586   | 0.24098935 | 1.35E-07 | 0.576297 | 1.12E-42 |
| 0.8725   | 0.029023 | 0.53154  | -0.00719 | 0.87692  | 0.38484667 | 6.19E-18 | 0.619553 | 7.54E-51 |
| 0.98003  | 0.018975 | 0.68254  | 0.183878 | 6.41E-05 | -0.0193732 | 0.67626  | -0.27871 | 8.86E-10 |
| 0.00167  | -0.02435 | 0.59965  | -0.1148  | 0.01305  | 0.24421243 | 9.07E-08 | 0.451181 | 8.46E-25 |
| 0.8371   | 0.076317 | 0.09952  | 0.028107 | 0.54459  | 0.44531651 | 3.96E-24 | 0.725185 | 2.23E-77 |
| 0.18242  | 0.08265  | 0.07437  | -0.10576 | 0.02227  | 0.26511511 | 5.95E-09 | 0.514634 | 6.12E-33 |
| 5.74E-05 | 0.070042 | 0.13068  | 0.061381 | 0.18545  | 0.26006356 | 1.17E-08 | 0.37627  | 3.74E-17 |
| 0.28109  | 0.147809 | 0.00136  | 0.113483 | 0.01414  | 0.34835209 | 9.05E-15 | 0.543723 | 2.78E-37 |
| 0.00053  | -0.01738 | 0.70788  | 0.032917 | 0.47793  | 0.03976206 | 0.39128  | -0.23485 | 2.84E-07 |
| 0.68846  | -0.19481 | 2.24E-05 | -0.12968 | 0.005    | 0.30620524 | 1.36E-11 | 0.548133 | 5.59E-38 |
| 0.93051  | -0.16059 | 0.00049  | -0.28405 | 4.08E-10 | 0.16284431 | 0.00041  | 0.314119 | 3.74E-12 |
| 0.53508  | 0.031353 | 0.49911  | 0.058416 | 0.20764  | 0.28530161 | 3.39E-10 | 0.374973 | 4.88E-17 |
| 0.00407  | -0.04137 | 0.37234  | -0.04859 | 0.2947   | 0.32270624 | 8.86E-13 | 0.439916 | 1.60E-23 |
| 0.23384  | 0.173807 | 0.00016  | 0.143884 | 0.00183  | 0.47800038 | 4.93E-28 | 0.687567 | 1.26E-66 |
| 2.61E-08 | 0.112009 | 0.01545  | 0.014158 | 0.76025  | 0.15026185 | 0.00113  | 0.311435 | 5.82E-12 |
| 0.05566  | 0.006055 | 0.89616  | -0.1058  | 0.02221  | 0.14172319 | 0.00214  | 0.330127 | 2.46E-13 |
| 0.7807   | -0.02267 | 0.62503  | -0.03133 | 0.49936  | 0.31667044 | 2.45E-12 | 0.631562 | 2.38E-53 |
| 0.0243   | 0.053583 | 0.24781  | 0.143213 | 0.00192  | 0.23832296 | 1.87E-07 | 0.33325  | 1.42E-13 |
| 0.00072  | 0.098515 | 0.0333   | 0.125285 | 0.00671  | 0.22590298 | 8.11E-07 | 0.323741 | 7.42E-13 |
| 0.82843  | 0.332311 | 1.67E-13 | 0.10664  | 0.02117  | 0.31177942 | 5.50E-12 | 0.618988 | 9.82E-51 |
| 0.00527  | 0.116416 | 0.01182  | -0.16714 | 0.00029  | 0.09937686 | 0.03178  | 0.323383 | 7.89E-13 |
| 0.14152  | 0.146679 | 0.00148  | -0.06177 | 0.18265  | 0.15441422 | 0.00081  | 0.301299 | 2.95E-11 |
| 0.01696  | 0.148692 | 0.00127  | 0.019742 | 0.67045  | 0.12665271 | 0.00613  | 0.35039  | 6.17E-15 |
| 0.07089  | 0.264638 | 6.34E-09 | 0.192775 | 2.74E-05 | 0.38529775 | 5.63E-18 | 0.644112 | 4.39E-56 |
| 1.61E-07 | 0.03607  | 0.43677  | 0.045735 | 0.32403  | 0.24016584 | 1.49E-07 | 0.364939 | 3.70E-16 |
| 0.21244  | -0.14524 | 0.00165  | -0.17391 | 0.00016  | 0.12354649 | 0.00752  | 0.372617 | 7.90E-17 |
| 0.0167   | 0.198941 | 1.48E-05 | 0.197033 | 1.80E-05 | 0.05544664 | 0.23173  | -0.17728 | 0.00012  |
| 0.13934  | -0.19533 | 2.13E-05 | -0.09666 | 0.03678  | 0.24488599 | 8.34E-08 | 0.50045  | 5.71E-31 |
| 0.00188  | -0.02841 | 0.54029  | -0.04149 | 0.37099  | 0.21512423 | 2.71E-06 | 0.459811 | 8.28E-26 |
| 0.54997  | 0.090987 | 0.04941  | 0.029008 | 0.53176  | 0.28023129 | 7.11E-10 | 0.420393 | 2.01E-21 |
| 1.36E-05 | -0.08535 | 0.06537  | 0.052156 | 0.26065  | 0.40438377 | 8.45E-20 | 0.436173 | 4.13E-23 |
| 0.78825  | -0.22959 | 5.30E-07 | -0.24494 | 8.28E-08 | -0.1090345 | 0.01842  | 0.076011 | 0.10088  |
| 0.10139  | -0.18493 | 5.81E-05 | -0.07962 | 0.08566  | 0.19870061 | 1.52E-05 | 0.275743 | 1.35E-09 |
| 0.79582  | -0.02989 | 0.51936  | -0.04844 | 0.29625  | 0.28969311 | 1.76E-10 | 0.533093 | 1.20E-35 |
| 1.46E-08 | 0.18183  | 7.76E-05 | 0.094454 | 0.04133  | 0.27764297 | 1.03E-09 | 0.399879 | 2.33E-19 |
| 0.0222   | 0.198299 | 1.58E-05 | 0.230162 | 4.95E-07 | 0.4069413  | 4.71E-20 | 0.587114 | 1.32E-44 |
| 0.55418  | 0.146092 | 0.00155  | 0.070939 | 0.12581  | 0.22468923 | 9.32E-07 | 0.447092 | 2.49E-24 |
| 4.44E-12 | -0.0176  | 0.70438  | 0.038813 | 0.40269  | 0.20841448 | 5.58E-06 | 0.351063 | 5.44E-15 |
| 0.42371  | -0.10184 | 0.02777  | 0.033809 | 0.46609  | 0.23730495 | 2.12E-07 | 0.354931 | 2.60E-15 |
| 0.55207  | 0.150902 | 0.00107  | 0.056277 | 0.2248   | 0.15737002 | 0.00064  | 0.327987 | 3.57E-13 |
| 0.73635  | 0.194761 | 2.25E-05 | 0.125671 | 0.00654  | 0.37276103 | 7.67E-17 | 0.501119 | 4.64E-31 |
| 0.02464  | 0.159327 | 0.00055  | 0.030936 | 0.50484  | 0.09550679 | 0.0391   | 0.283959 | 4.13E-10 |

|          |          |          |          |          |            |          |          |          |
|----------|----------|----------|----------|----------|------------|----------|----------|----------|
| 0.00985  | 0.082363 | 0.07538  | 0.146158 | 0.00154  | -0.2178429 | 2.01E-06 | -0.44181 | 9.82E-24 |
| 0.62466  | 0.001653 | 0.97158  | 0.038431 | 0.40734  | 0.16389435 | 0.00038  | 0.302743 | 2.35E-11 |
| 0.64518  | 0.218806 | 1.81E-06 | 0.082916 | 0.07343  | 0.33193181 | 1.79E-13 | 0.488142 | 2.48E-29 |
| 0.82146  | 0.135392 | 0.00337  | 0.419542 | 2.47E-21 | 0.28105689 | 6.31E-10 | 0.026465 | 0.56835  |
| 5.18E-05 | 0.026405 | 0.56924  | 0.136954 | 0.00302  | -0.1685147 | 0.00025  | -0.40988 | 2.40E-20 |
| 1.81E-05 | 0.222959 | 1.13E-06 | 0.188411 | 4.18E-05 | -0.0955726 | 0.03897  | -0.32734 | 4.00E-13 |
| 0.85296  | 0.370457 | 1.23E-16 | 0.190984 | 3.26E-05 | 0.3041011  | 1.90E-11 | 0.53601  | 4.33E-36 |
| 0.00131  | 0.180611 | 8.68E-05 | 0.23911  | 1.70E-07 | 0.02418302 | 0.60218  | -0.18556 | 5.48E-05 |
| 0.45062  | 0.000488 | 0.99161  | 0.31284  | 4.62E-12 | 0.21008519 | 4.67E-06 | -0.15913 | 0.00056  |
| 0.19477  | -0.07728 | 0.09532  | 0.052671 | 0.25597  | -0.2321037 | 3.94E-07 | -0.51507 | 5.30E-33 |
| 0.95743  | -0.21754 | 2.08E-06 | -0.12185 | 0.00839  | 0.14230763 | 0.00205  | 0.349198 | 7.73E-15 |
| 0.93295  | 0.204238 | 8.64E-06 | 0.116631 | 0.01166  | 0.28115411 | 6.22E-10 | 0.370742 | 1.16E-16 |
| 0.02838  | 0.062439 | 0.17798  | -0.00888 | 0.84819  | 0.1497486  | 0.00117  | 0.317095 | 2.28E-12 |
| 0.35379  | 0.235661 | 2.58E-07 | 0.2247   | 9.31E-07 | 0.39883926 | 2.94E-19 | 0.532337 | 1.56E-35 |
| 0.68682  | 0.127506 | 0.00579  | -0.04331 | 0.35043  | 0.30501457 | 1.64E-11 | 0.565297 | 8.65E-41 |
| 0.16604  | -0.22154 | 1.33E-06 | -0.1113  | 0.01612  | 0.30782666 | 1.04E-11 | 0.535053 | 6.06E-36 |
| 0.00143  | 0.055641 | 0.23009  | 0.087344 | 0.05928  | 0.2139595  | 3.08E-06 | 0.431434 | 1.36E-22 |
| 0.29065  | 0.052944 | 0.25351  | 0.029197 | 0.5291   | 0.17208651 | 0.00019  | 0.335904 | 8.83E-14 |
| 0.111    | 0.087274 | 0.05949  | 0.075757 | 0.10203  | 0.33855861 | 5.48E-14 | 0.56393  | 1.47E-40 |
| 0.16404  | 0.061776 | 0.18263  | 0.0266   | 0.56637  | 0.5314791  | 2.10E-35 | 0.73301  | 7.65E-80 |
| 0.69154  | 0.278367 | 9.31E-10 | 0.184076 | 6.29E-05 | 0.41872716 | 3.00E-21 | 0.492452 | 6.73E-30 |
| 0.31719  | -0.07    | 0.13093  | -0.06703 | 0.14808  | 0.26756901 | 4.25E-09 | 0.531449 | 2.13E-35 |
| 0.48456  | -0.11735 | 0.01115  | -0.24669 | 6.65E-08 | 0.14432883 | 0.00177  | 0.412073 | 1.44E-20 |
| 0.8511   | 0.153567 | 0.00087  | 0.053436 | 0.24912  | 0.51363995 | 8.47E-33 | 0.770202 | 7.23E-93 |
| 0.16974  | -0.03061 | 0.50938  | 0.055051 | 0.23508  | 0.39184309 | 1.37E-18 | 0.572984 | 4.21E-42 |
| 0.27015  | 0.20017  | 1.31E-05 | -0.05122 | 0.26931  | 0.08657121 | 0.06158  | 0.427597 | 3.50E-22 |
| 0.5185   | -0.01439 | 0.75645  | 0.027546 | 0.55265  | 0.34603088 | 1.40E-14 | 0.545512 | 1.45E-37 |
| 0.39202  | 0.039034 | 0.40002  | -0.06092 | 0.18879  | 0.10021374 | 0.03037  | 0.236213 | 2.42E-07 |
| 0.04074  | 0.136221 | 0.00318  | 0.115988 | 0.01213  | 0.26142333 | 9.79E-09 | 0.40679  | 4.88E-20 |
| 0.00082  | -0.20942 | 5.01E-06 | -0.19846 | 1.56E-05 | 0.23741994 | 2.09E-07 | 0.519938 | 1.06E-33 |
| 0.01164  | 0.164802 | 0.00035  | 0.199029 | 1.47E-05 | -0.2092891 | 5.08E-06 | -0.37203 | 8.90E-17 |
| 0.0017   | -0.05519 | 0.23394  | -0.30389 | 1.96E-11 | 0.11364918 | 0.014    | 0.392693 | 1.14E-18 |
| 0.39784  | 0.274929 | 1.52E-09 | 0.103937 | 0.02469  | 0.33454548 | 1.13E-13 | 0.5694   | 1.74E-41 |
| 0.36503  | 0.182728 | 7.14E-05 | 0.059357 | 0.2004   | 0.32244254 | 9.27E-13 | 0.55002  | 2.79E-38 |
| 0.0942   | 0.014009 | 0.7627   | 0.121378 | 0.00865  | 0.24154056 | 1.26E-07 | 0.337951 | 6.12E-14 |
| 0.04158  | 0.087808 | 0.05794  | 0.310883 | 6.37E-12 | 0.06291411 | 0.17469  | -0.18968 | 3.70E-05 |
| 0.01498  | -0.28112 | 6.26E-10 | -0.15893 | 0.00057  | -0.2736134 | 1.83E-09 | -0.46653 | 1.29E-26 |
| 1.19E-07 | -0.11346 | 0.01416  | 0.06507  | 0.16035  | 0.12658577 | 0.00616  | -0.10253 | 0.02671  |
| 0.31388  | 0.118161 | 0.0106   | -0.00898 | 0.84657  | 0.1422853  | 0.00205  | 0.443409 | 6.50E-24 |
| 0.0521   | 0.157335 | 0.00064  | 0.097005 | 0.03612  | 0.26486461 | 6.15E-09 | 0.5228   | 4.07E-34 |
| 6.90E-06 | 0.096657 | 0.03679  | 0.101986 | 0.02754  | 0.41147196 | 1.66E-20 | 0.637876 | 1.04E-54 |
| 0.14652  | -0.21163 | 3.96E-06 | -0.15432 | 0.00082  | 0.2642077  | 6.73E-09 | 0.476429 | 7.77E-28 |
| 0.0435   | 0.047404 | 0.30667  | 0.078268 | 0.09113  | 0.12024206 | 0.0093   | 0.348831 | 8.28E-15 |
| 0.39965  | -0.15534 | 0.00076  | -0.04619 | 0.31921  | 0.20562636 | 7.48E-06 | 0.416484 | 5.11E-21 |
| 0.64545  | 0.087268 | 0.05951  | -0.0919  | 0.04715  | 0.17043868 | 0.00022  | 0.460705 | 6.48E-26 |

|          |          |          |          |          |            |          |          |          |
|----------|----------|----------|----------|----------|------------|----------|----------|----------|
| 0.15404  | -0.0457  | 0.32439  | -0.12025 | 0.00929  | 0.34067949 | 3.73E-14 | 0.415098 | 7.08E-21 |
| 0.6805   | -0.04274 | 0.35678  | -0.09405 | 0.04221  | 0.21669298 | 2.28E-06 | 0.506602 | 8.20E-32 |
| 0.66086  | -0.32605 | 4.99E-13 | -0.2199  | 1.60E-06 | 0.16850711 | 0.00025  | 0.324483 | 6.54E-13 |
| 3.44E-06 | 0.235217 | 2.72E-07 | 0.143781 | 0.00184  | 0.27406588 | 1.72E-09 | 0.499897 | 6.79E-31 |
| 0.28331  | -0.34021 | 4.06E-14 | -0.28848 | 2.11E-10 | 0.20662992 | 6.73E-06 | 0.481714 | 1.67E-28 |
| 0.00082  | 0.227831 | 6.50E-07 | 0.150887 | 0.00107  | -0.01694   | 0.71502  | -0.18561 | 5.45E-05 |
| 3.56E-07 | 0.247019 | 6.38E-08 | 0.09819  | 0.03389  | 0.33391212 | 1.26E-13 | 0.514861 | 5.68E-33 |
| 0.07543  | 0.143952 | 0.00182  | 0.156781 | 0.00067  | 0.3394708  | 4.65E-14 | 0.55617  | 2.83E-39 |
| 0.62465  | 0.031961 | 0.49082  | -0.16343 | 0.00039  | 0.28251977 | 5.10E-10 | 0.615734 | 4.47E-50 |
| 0.86032  | -0.19644 | 1.91E-05 | -0.16052 | 0.0005   | 0.15025801 | 0.00113  | 0.353647 | 3.33E-15 |
| 0.03306  | -0.04955 | 0.28526  | -0.00118 | 0.97972  | 0.3408281  | 3.63E-14 | 0.54241  | 4.45E-37 |
| 0.92742  | 0.243337 | 1.01E-07 | -0.04908 | 0.28982  | 0.15552589 | 0.00074  | 0.501955 | 3.57E-31 |
| 0.00056  | 0.182856 | 7.05E-05 | 0.051883 | 0.26316  | 0.36072859 | 8.48E-16 | 0.522988 | 3.82E-34 |
| 0.02731  | 0.048929 | 0.29135  | 0.034399 | 0.45833  | 0.20783806 | 5.93E-06 | 0.411199 | 1.76E-20 |
| 0.00169  | -0.08407 | 0.0695   | -0.1649  | 0.00035  | 0.09252718 | 0.04567  | 0.249423 | 4.70E-08 |
| 0.0161   | 0.347486 | 1.06E-14 | 0.21616  | 2.42E-06 | 0.33499657 | 1.04E-13 | 0.639549 | 4.48E-55 |
| 0.36886  | -0.0304  | 0.51232  | -0.07934 | 0.08679  | -0.2604951 | 1.11E-08 | -0.51238 | 1.27E-32 |
| 0.08964  | 0.085554 | 0.06471  | 0.127504 | 0.00579  | 0.3489808  | 8.05E-15 | 0.630304 | 4.40E-53 |
| 7.79E-07 | 0.191404 | 3.13E-05 | 0.008481 | 0.85497  | 0.22449603 | 9.53E-07 | 0.450007 | 1.16E-24 |
| 3.76E-18 | -0.00964 | 0.83533  | 0.001843 | 0.96831  | 0.24745591 | 6.04E-08 | 0.43357  | 7.96E-23 |
| 0.52489  | 0.161958 | 0.00044  | 0.090268 | 0.05124  | 0.42415175 | 8.12E-22 | 0.600539 | 4.19E-47 |
| 0.00359  | 0.029118 | 0.5302   | -0.13528 | 0.0034   | 0.1961996  | 1.95E-05 | 0.451341 | 8.11E-25 |
| 0.28545  | -0.18093 | 8.42E-05 | -0.15032 | 0.00112  | 0.15558537 | 0.00074  | 0.411643 | 1.59E-20 |
| 0.29902  | 0.030013 | 0.51764  | 0.00754  | 0.87091  | 0.46860616 | 7.22E-27 | 0.743786 | 2.20E-83 |
| 0.0001   | -0.00662 | 0.88649  | -0.03959 | 0.39332  | 0.37223531 | 8.54E-17 | 0.393506 | 9.56E-19 |
| 0.14886  | -0.10403 | 0.02456  | 0.154359 | 0.00082  | -0.0090419 | 0.84549  | -0.29258 | 1.14E-10 |
| 0.86962  | -0.0033  | 0.9433   | -0.05319 | 0.25128  | 0.30198751 | 2.65E-11 | 0.548731 | 4.49E-38 |
| 0.73715  | -0.21175 | 3.91E-06 | 0.035345 | 0.44605  | -0.1971931 | 1.77E-05 | -0.45338 | 4.71E-25 |
| 0.34048  | 0.108591 | 0.01891  | 0.120802 | 0.00897  | 0.3996046  | 2.48E-19 | 0.622858 | 1.58E-51 |
| 0.25773  | 0.011343 | 0.80686  | -0.12617 | 0.00633  | 0.25421195 | 2.54E-08 | 0.555457 | 3.70E-39 |
| 0.66154  | 0.125573 | 0.00658  | -0.03749 | 0.41888  | 0.31438901 | 3.58E-12 | 0.404713 | 7.84E-20 |
| 0.00125  | -0.06878 | 0.13775  | -0.05292 | 0.25371  | 0.14209932 | 0.00208  | 0.345979 | 1.41E-14 |
| 0.0606   | 0.198606 | 1.54E-05 | 0.031354 | 0.49909  | 0.32185817 | 1.02E-12 | 0.54093  | 7.57E-37 |
| 0.13936  | -0.17028 | 0.00022  | -0.07712 | 0.09599  | -0.0383942 | 0.40779  | 0.204409 | 8.48E-06 |
| 0.56139  | -0.04008 | 0.38747  | -0.13396 | 0.00373  | -0.0277216 | 0.55012  | 0.118062 | 0.01067  |
| 0.11632  | 0.022236 | 0.63173  | 0.068051 | 0.14201  | 0.27485184 | 1.54E-09 | 0.447719 | 2.11E-24 |
| 0.42979  | -0.0528  | 0.25481  | -0.07365 | 0.11196  | 0.11778828 | 0.01085  | 0.313254 | 4.32E-12 |
| 0.71797  | 0.001991 | 0.96577  | -0.08006 | 0.08395  | 0.07279815 | 0.11617  | 0.243853 | 9.48E-08 |
| 0.00314  | 0.139204 | 0.00257  | -0.01528 | 0.74188  | 0.05493616 | 0.23606  | 0.223808 | 1.03E-06 |
| 0.01302  | 0.047469 | 0.306    | 0.13105  | 0.00456  | 0.29552749 | 7.25E-11 | 0.468929 | 6.60E-27 |
| 0.16115  | 0.354711 | 2.72E-15 | 0.22768  | 6.61E-07 | 0.45227578 | 6.33E-25 | 0.65156  | 9.08E-58 |
| 0.83285  | -0.02833 | 0.54143  | -0.06571 | 0.15628  | 0.21547828 | 2.61E-06 | 0.391887 | 1.36E-18 |
| 4.67E-05 | -0.03592 | 0.43874  | -0.12355 | 0.00752  | 0.24170239 | 1.24E-07 | 0.463787 | 2.77E-26 |
| 0.36828  | -0.06158 | 0.18405  | 0.09153  | 0.04806  | 0.40795394 | 3.74E-20 | 0.607185 | 2.20E-48 |
| 7.59E-06 | 0.280077 | 7.27E-10 | 0.119441 | 0.00978  | 0.26452751 | 6.44E-09 | 0.435378 | 5.05E-23 |

|          |          |          |          |          |            |          |          |          |
|----------|----------|----------|----------|----------|------------|----------|----------|----------|
| 0.24672  | -0.21051 | 4.46E-06 | -0.0128  | 0.78262  | 0.42206333 | 1.35E-21 | 0.57379  | 3.05E-42 |
| 0.00332  | 0.234176 | 3.08E-07 | 0.130157 | 0.00484  | 0.45195981 | 6.88E-25 | 0.637317 | 1.37E-54 |
| 0.19586  | 0.194859 | 2.23E-05 | 0.134338 | 0.00363  | 0.36960417 | 1.46E-16 | 0.513069 | 1.02E-32 |
| 0.52268  | 0.226645 | 7.45E-07 | 0.070692 | 0.12714  | 0.26635619 | 5.02E-09 | 0.474716 | 1.27E-27 |
| 0.00101  | 0.185274 | 5.63E-05 | -0.09262 | 0.04546  | 0.0939441  | 0.04244  | 0.234248 | 3.06E-07 |
| 0.63548  | 0.065714 | 0.15624  | -0.12168 | 0.00848  | 0.17342543 | 0.00017  | 0.510294 | 2.51E-32 |
| 0.07029  | -0.09354 | 0.04334  | -0.0694  | 0.13425  | 0.48107442 | 2.01E-28 | 0.739336 | 6.71E-82 |
| 1.65E-05 | 0.119748 | 0.00959  | 0.069332 | 0.13464  | 0.19773802 | 1.68E-05 | 0.30342  | 2.11E-11 |
| 0.50157  | -0.0255  | 0.58248  | 0.003295 | 0.94338  | 0.23343965 | 3.36E-07 | 0.417505 | 4.01E-21 |
| 0.8586   | 0.167757 | 0.00027  | -0.03754 | 0.41829  | 0.30691876 | 1.21E-11 | 0.532063 | 1.72E-35 |
| 5.75E-07 | 0.160999 | 0.00048  | 0.009202 | 0.84278  | 0.14095071 | 0.00227  | 0.350519 | 6.03E-15 |
| 0.94299  | 0.245976 | 7.27E-08 | 0.428099 | 3.10E-22 | 0.13878034 | 0.00265  | -0.14677 | 0.00147  |
| 0.00426  | -0.04053 | 0.38221  | -0.15289 | 0.00092  | 0.39004415 | 2.03E-18 | 0.648361 | 4.86E-57 |
| 0.12033  | -0.10155 | 0.02821  | -0.04632 | 0.31787  | 0.44402847 | 5.53E-24 | 0.613594 | 1.20E-49 |
| 0.02339  | 0.177596 | 0.00011  | 0.170896 | 0.00021  | 0.33258119 | 1.60E-13 | 0.503585 | 2.14E-31 |
| 0.85453  | 0.06353  | 0.1705   | -0.01689 | 0.71578  | 0.31271843 | 4.71E-12 | 0.545672 | 1.37E-37 |
| 0.00013  | -0.05681 | 0.22047  | -0.07631 | 0.09955  | 0.14126951 | 0.00221  | 0.341362 | 3.29E-14 |
| 1.75E-07 | 0.084545 | 0.06794  | -0.00041 | 0.993    | 0.29107075 | 1.43E-10 | 0.477692 | 5.39E-28 |
| 0.00022  | -0.07474 | 0.10675  | 0.035816 | 0.44002  | 0.47278543 | 2.21E-27 | 0.667123 | 1.91E-61 |
| 0.81222  | -0.11508 | 0.01282  | -0.02384 | 0.60727  | 0.16630851 | 0.00031  | 0.366729 | 2.59E-16 |
| 4.18E-05 | 0.001534 | 0.97362  | -0.12641 | 0.00623  | 0.05859756 | 0.20623  | 0.241644 | 1.25E-07 |
| 0.00181  | 0.118983 | 0.01007  | 0.064174 | 0.1662   | 0.39854555 | 3.14E-19 | 0.545582 | 1.42E-37 |
| 0.00225  | 0.332169 | 1.72E-13 | 0.318703 | 1.74E-12 | -0.0637544 | 0.16899  | -0.33308 | 1.46E-13 |
| 0.20743  | 0.177493 | 0.00012  | 0.070525 | 0.12804  | 0.25605855 | 1.99E-08 | 0.530471 | 2.98E-35 |
| 0.33221  | 0.038722 | 0.4038   | 0.059716 | 0.19769  | 0.42682081 | 4.24E-22 | 0.724358 | 4.01E-77 |
| 5.08E-06 | 0.097469 | 0.03523  | 0.076649 | 0.09805  | 0.33321632 | 1.43E-13 | 0.490804 | 1.11E-29 |
| 0.30601  | 0.099985 | 0.03075  | 0.111741 | 0.0157   | 0.33402122 | 1.24E-13 | 0.529093 | 4.79E-35 |
| 0.28226  | 0.068854 | 0.13735  | 0.149602 | 0.00118  | 0.48258617 | 1.29E-28 | 0.696361 | 5.44E-69 |
| 0.8273   | 0.007068 | 0.87892  | -0.03296 | 0.47733  | 0.47943481 | 3.25E-28 | 0.713461 | 7.67E-74 |
| 0.24722  | -0.126   | 0.0064   | -0.24225 | 1.16E-07 | -0.0352973 | 0.44667  | 0.275622 | 1.38E-09 |
| 0.47352  | 0.086954 | 0.06043  | -0.11372 | 0.01393  | -0.0421223 | 0.36375  | 0.150374 | 0.00112  |
| 0.52     | 0.198182 | 1.60E-05 | 0.092764 | 0.04511  | 0.44104092 | 1.20E-23 | 0.680784 | 7.33E-65 |
| 3.34E-08 | -0.08066 | 0.08166  | -0.05493 | 0.2361   | 0.17867623 | 0.0001   | 0.353941 | 3.15E-15 |
| 0.00023  | -0.06003 | 0.19535  | -0.04981 | 0.28278  | 0.14933768 | 0.00121  | 0.276025 | 1.30E-09 |
| 0.24995  | 0.223371 | 1.08E-06 | -0.01971 | 0.67101  | 0.01610719 | 0.72846  | 0.263061 | 7.86E-09 |
| 0.66752  | -0.14533 | 0.00164  | 0.167096 | 0.00029  | 0.33060161 | 2.26E-13 | 0.427752 | 3.37E-22 |
| 0.03712  | 0.408102 | 3.61E-20 | 0.209721 | 4.86E-06 | 0.20647485 | 6.84E-06 | 0.526163 | 1.30E-34 |
| 0.75586  | 0.119627 | 0.00967  | 0.031861 | 0.49217  | 0.49356289 | 4.80E-30 | 0.781912 | 1.73E-97 |
| 0.00805  | 0.124497 | 0.00707  | 0.227777 | 6.54E-07 | -0.1347272 | 0.00353  | -0.28738 | 2.49E-10 |
| 0.05151  | 0.237544 | 2.06E-07 | 0.031926 | 0.4913   | 0.28618672 | 2.97E-10 | 0.580246 | 2.25E-43 |
| 6.08E-08 | 0.201523 | 1.14E-05 | 0.095188 | 0.03976  | 0.25024837 | 4.23E-08 | 0.394839 | 7.14E-19 |
| 0.00629  | 0.205816 | 7.33E-06 | 0.109022 | 0.01844  | 0.38308637 | 9.00E-18 | 0.652379 | 5.89E-58 |
| 0.44349  | -0.27194 | 2.32E-09 | -0.13107 | 0.00455  | 0.26472549 | 6.27E-09 | 0.487628 | 2.89E-29 |
| 0.01792  | -0.03164 | 0.49523  | 0.092125 | 0.04662  | 0.31006828 | 7.27E-12 | 0.480987 | 2.07E-28 |
| 0.07675  | 0.024813 | 0.59275  | -0.11554 | 0.01247  | 0.19547878 | 2.10E-05 | 0.446608 | 2.83E-24 |

|          |          |          |          |          |            |          |          |          |
|----------|----------|----------|----------|----------|------------|----------|----------|----------|
| 0.04371  | 0.009796 | 0.83279  | 0.112402 | 0.01509  | 0.35816285 | 1.40E-15 | 0.565142 | 9.19E-41 |
| 0.00814  | 0.126242 | 0.0063   | 0.091639 | 0.04779  | 0.32574376 | 5.26E-13 | 0.485887 | 4.86E-29 |
| 5.28E-08 | -0.00304 | 0.94777  | -0.04877 | 0.29292  | 0.20001957 | 1.33E-05 | 0.42222  | 1.30E-21 |
| 0.45216  | 0.079951 | 0.08437  | -0.05695 | 0.21934  | 0.11176206 | 0.01568  | 0.291833 | 1.27E-10 |
| 0.17355  | 0.121183 | 0.00876  | 0.366831 | 2.54E-16 | -0.0177956 | 0.7013   | -0.29104 | 1.44E-10 |
| 0.15128  | 0.231498 | 4.23E-07 | 0.150897 | 0.00107  | 0.31896985 | 1.67E-12 | 0.586616 | 1.62E-44 |
| 0.06227  | 0.055335 | 0.23267  | 0.008355 | 0.8571   | 0.35009056 | 6.53E-15 | 0.603073 | 1.37E-47 |
| 0.89633  | -0.03786 | 0.41433  | 0.079768 | 0.08508  | 0.49031293 | 1.29E-29 | 0.604792 | 6.41E-48 |
| 0.00016  | 0.063325 | 0.17189  | -0.00398 | 0.93168  | 0.22376354 | 1.04E-06 | 0.369494 | 1.49E-16 |
| 0.45905  | -0.25457 | 2.42E-08 | -0.07665 | 0.09806  | 0.41565197 | 6.21E-21 | 0.60396  | 9.27E-48 |
| 0.65715  | 0.145759 | 0.00159  | -0.1202  | 0.00932  | 0.21506642 | 2.73E-06 | 0.397804 | 3.71E-19 |
| 0.60986  | 0.062544 | 0.17725  | -0.18003 | 9.15E-05 | 0.30953737 | 7.92E-12 | 0.510685 | 2.21E-32 |
| 0.06468  | 0.079751 | 0.08515  | 0.043069 | 0.35306  | 0.36916827 | 1.59E-16 | 0.596052 | 2.95E-46 |
| 0.86377  | 0.217265 | 2.14E-06 | 0.165659 | 0.00032  | 0.47286792 | 2.16E-27 | 0.711858 | 2.26E-73 |
| 0.61049  | 0.120214 | 0.00931  | -0.02349 | 0.61262  | 0.19613552 | 1.97E-05 | 0.316053 | 2.72E-12 |
| 1.48E-06 | -0.13763 | 0.00288  | -0.11279 | 0.01474  | 0.16864075 | 0.00025  | 0.412503 | 1.30E-20 |
| 0.06125  | 0.016064 | 0.72917  | -0.08746 | 0.05895  | -0.0121979 | 0.79263  | 0.224827 | 9.18E-07 |
| 0.54751  | 0.07025  | 0.12954  | 0.093758 | 0.04285  | 0.26740086 | 4.35E-09 | 0.443465 | 6.40E-24 |
| 0.75788  | 0.1129   | 0.01464  | -0.00624 | 0.89309  | 0.332276   | 1.68E-13 | 0.655445 | 1.15E-58 |
| 0.7986   | 0.00359  | 0.93832  | -0.03969 | 0.39217  | 0.06244238 | 0.17795  | 0.316078 | 2.70E-12 |
| 0.6571   | 0.00247  | 0.95755  | 0.036686 | 0.42899  | 0.28537385 | 3.35E-10 | 0.573548 | 3.36E-42 |
| 0.01812  | -0.19864 | 1.53E-05 | -0.21592 | 2.49E-06 | 0.19049682 | 3.42E-05 | 0.456292 | 2.15E-25 |
| 0.84431  | -0.08734 | 0.05931  | -0.08375 | 0.07059  | -0.1589845 | 0.00056  | -0.35539 | 2.38E-15 |
| 0.03749  | 0.093273 | 0.04394  | 0.109907 | 0.0175   | -0.0934682 | 0.0435   | -0.34521 | 1.62E-14 |
| 0.24107  | 0.188093 | 4.31E-05 | 0.123433 | 0.00757  | 0.45561151 | 2.59E-25 | 0.701251 | 2.42E-70 |
| 2.54E-23 | 0.188662 | 4.08E-05 | 0.084691 | 0.06747  | 0.25105805 | 3.82E-08 | 0.415701 | 6.14E-21 |
| 0.48282  | 0.150288 | 0.00112  | 0.073524 | 0.11257  | 0.33175084 | 1.85E-13 | 0.640188 | 3.24E-55 |
| 0.77466  | 0.084467 | 0.06819  | 0.306911 | 1.21E-11 | -0.1054326 | 0.02269  | -0.30564 | 1.48E-11 |
| 6.11E-08 | 0.012272 | 0.79139  | 0.042575 | 0.35861  | 0.28959365 | 1.79E-10 | 0.500331 | 5.93E-31 |
| 0.18604  | 0.215356 | 2.64E-06 | 0.15927  | 0.00055  | 0.39402658 | 8.53E-19 | 0.676645 | 8.31E-64 |
| 0.41493  | 0.180822 | 8.51E-05 | 0.22462  | 9.40E-07 | 0.26951794 | 3.25E-09 | -0.01907 | 0.68101  |
| 0.00126  | 0.101631 | 0.02809  | 0.066535 | 0.15112  | 0.35865116 | 1.27E-15 | 0.558567 | 1.14E-39 |
| 0.06284  | 0.101632 | 0.02809  | -0.03963 | 0.39284  | 0.27602124 | 1.30E-09 | 0.491156 | 9.98E-30 |
| 0.18131  | 0.103799 | 0.02489  | -0.02661 | 0.56624  | 0.30704758 | 1.18E-11 | 0.66123  | 5.00E-60 |
| 0.57173  | 0.024995 | 0.59004  | -0.00076 | 0.98694  | 0.31046019 | 6.82E-12 | 0.412759 | 1.23E-20 |
| 0.2178   | -0.25118 | 3.75E-08 | -0.12205 | 0.00828  | 0.19003281 | 3.57E-05 | 0.309429 | 8.06E-12 |
| 0.03924  | 0.32239  | 9.35E-13 | 0.086522 | 0.06173  | 0.26946051 | 3.27E-09 | 0.499936 | 6.71E-31 |
| 0.00522  | 0.140039 | 0.00242  | -0.02641 | 0.56917  | 0.2958585  | 6.89E-11 | 0.594951 | 4.74E-46 |
| 0.14235  | 0.065725 | 0.15617  | -0.03464 | 0.45517  | 0.27481081 | 1.55E-09 | 0.555195 | 4.08E-39 |
| 0.39323  | 0.079901 | 0.08456  | -0.03213 | 0.48849  | 0.14088037 | 0.00228  | 0.440498 | 1.38E-23 |
| 0.43779  | 0.199833 | 1.36E-05 | 0.2566   | 1.86E-08 | 0.47417186 | 1.49E-27 | 0.64575  | 1.89E-56 |
| 1.02E-05 | 0.20196  | 1.09E-05 | 0.043392 | 0.34946  | 0.30065017 | 3.27E-11 | 0.540822 | 7.87E-37 |
| 0.04718  | -0.08509 | 0.06618  | 0.07459  | 0.10743  | 0.39010788 | 2.00E-18 | 0.553777 | 6.94E-39 |
| 0.76298  | -0.13689 | 0.00303  | -0.17462 | 0.00015  | 0.17291576 | 0.00017  | 0.452689 | 5.66E-25 |
| 0.68154  | -0.29936 | 4.01E-11 | -0.24898 | 4.98E-08 | 0.16794555 | 0.00027  | 0.417306 | 4.20E-21 |

|          |          |          |          |          |            |          |          |          |
|----------|----------|----------|----------|----------|------------|----------|----------|----------|
| 0.00161  | 0.184736 | 5.92E-05 | 0.107967 | 0.01961  | 0.28571025 | 3.19E-10 | 0.52061  | 8.48E-34 |
| 0.78065  | 0.246579 | 6.74E-08 | 0.327612 | 3.81E-13 | 0.46758909 | 9.61E-27 | 0.677745 | 4.37E-64 |
| 2.03E-06 | -0.25117 | 3.76E-08 | -0.18479 | 5.89E-05 | 0.19863909 | 1.53E-05 | 0.33301  | 1.48E-13 |
| 0.02411  | 0.306004 | 1.40E-11 | 0.135485 | 0.00335  | 0.40762738 | 4.03E-20 | 0.627043 | 2.14E-52 |
| 0.6892   | 0.195129 | 2.17E-05 | 0.214772 | 2.82E-06 | -0.0077559 | 0.86725  | -0.16812 | 0.00026  |
| 0.56921  | 0.215676 | 2.55E-06 | 0.077387 | 0.09484  | 0.52234738 | 4.74E-34 | 0.701099 | 2.67E-70 |
| 0.00219  | 0.258362 | 1.47E-08 | 0.049516 | 0.2856   | 0.17340377 | 0.00017  | 0.310989 | 6.26E-12 |
| 0.00134  | 0.239337 | 1.65E-07 | 0.195928 | 2.01E-05 | 0.49252952 | 6.57E-30 | 0.756323 | 9.85E-88 |
| 0.07632  | -0.13865 | 0.00268  | -0.09257 | 0.04557  | 0.47131297 | 3.36E-27 | 0.683155 | 1.79E-65 |
| 0.93054  | 0.136731 | 0.00307  | -0.02026 | 0.66235  | 0.39276672 | 1.12E-18 | 0.647991 | 5.90E-57 |
| 0.24705  | 0.278416 | 9.24E-10 | 0.283659 | 4.32E-10 | 0.36382445 | 4.62E-16 | 0.504592 | 1.55E-31 |
| 0.04485  | 0.20992  | 4.75E-06 | 0.141372 | 0.0022   | 0.36389258 | 4.55E-16 | 0.471116 | 3.56E-27 |
| 0.45535  | 0.023296 | 0.61557  | -0.0178  | 0.7012   | 0.05044919 | 0.2766   | 0.319871 | 1.43E-12 |
| 0.5521   | -0.13378 | 0.00377  | 0.148903 | 0.00125  | 0.39882229 | 2.95E-19 | 0.49744  | 1.46E-30 |
| 0.10657  | 0.030301 | 0.51362  | 0.019958 | 0.66706  | 0.06650876 | 0.15129  | 0.289177 | 1.90E-10 |
| 0.40713  | 0.282084 | 5.43E-10 | 0.19569  | 2.06E-05 | 0.52908867 | 4.80E-35 | 0.741293 | 1.51E-82 |
| 0.29196  | 0.033785 | 0.46639  | 0.105922 | 0.02206  | 0.02363321 | 0.61046  | -0.26174 | 9.38E-09 |
| 0.00245  | 0.109886 | 0.01753  | 0.27824  | 9.48E-10 | -0.1073165 | 0.02036  | -0.32742 | 3.94E-13 |
| 0.11243  | 0.144895 | 0.00169  | 0.014502 | 0.75462  | 0.12258909 | 0.008    | 0.381138 | 1.36E-17 |
| 0.7725   | 0.257876 | 1.57E-08 | 0.122129 | 0.00824  | 0.45837243 | 1.23E-25 | 0.745348 | 6.53E-84 |
| 0.22372  | 0.114342 | 0.01342  | -0.12581 | 0.00648  | 0.02526318 | 0.58605  | 0.279995 | 7.36E-10 |
| 0.71847  | 0.222845 | 1.15E-06 | 0.179473 | 9.63E-05 | 0.47865189 | 4.08E-28 | 0.752231 | 2.76E-86 |
| 0.00132  | -0.00856 | 0.85368  | -0.06188 | 0.18189  | 0.27406357 | 1.72E-09 | 0.443554 | 6.26E-24 |
| 0.09111  | 0.177004 | 0.00012  | 0.049895 | 0.28192  | 0.27057656 | 2.80E-09 | 0.568355 | 2.63E-41 |
| 0.14664  | 0.183364 | 6.73E-05 | 0.09976  | 0.03113  | 0.3582803  | 1.37E-15 | 0.629491 | 6.54E-53 |
| 0.86128  | 0.222399 | 1.21E-06 | 0.350041 | 6.59E-15 | -0.0458027 | 0.32331  | -0.33827 | 5.77E-14 |
| 0.08843  | 0.194751 | 2.26E-05 | 0.107455 | 0.0202   | 0.35134533 | 5.15E-15 | 0.646297 | 1.42E-56 |
| 0.9743   | 0.135256 | 0.00341  | -0.02204 | 0.63467  | 0.27915835 | 8.31E-10 | 0.484712 | 6.89E-29 |
| 0.43501  | 0.140243 | 0.00238  | 0.091569 | 0.04797  | 0.49309642 | 5.53E-30 | 0.650898 | 1.29E-57 |
| 0.05037  | 0.004346 | 0.92538  | -0.08979 | 0.05249  | 0.3624776  | 6.02E-16 | 0.52985  | 3.69E-35 |
| 0.14663  | 0.168137 | 0.00026  | -0.02186 | 0.63745  | 0.11242228 | 0.01507  | 0.423496 | 9.53E-22 |
| 0.96498  | -0.33689 | 7.40E-14 | 0.030891 | 0.50546  | -0.1708249 | 0.00021  | -0.40033 | 2.11E-19 |
| 0.0106   | 0.009121 | 0.84416  | 0.097142 | 0.03585  | 0.32244094 | 9.27E-13 | 0.435854 | 4.48E-23 |
| 0.45621  | 0.083181 | 0.07252  | 0.218154 | 1.94E-06 | 0.05004097 | 0.28051  | -0.20853 | 5.51E-06 |
| 0.59703  | -0.06515 | 0.15985  | -0.26383 | 7.08E-09 | 0.19845477 | 1.56E-05 | 0.507316 | 6.53E-32 |
| 0.10093  | -0.03014 | 0.51585  | -0.07709 | 0.09614  | 0.35373156 | 3.28E-15 | 0.640008 | 3.55E-55 |
| 9.77E-05 | -0.1483  | 0.00131  | -0.11286 | 0.01468  | -0.0583214 | 0.20838  | 0.178375 | 0.00011  |
| 0.91296  | 0.11475  | 0.01309  | 0.092094 | 0.04669  | 0.35802606 | 1.44E-15 | 0.58708  | 1.34E-44 |
| 0.00353  | -0.24167 | 1.24E-07 | -0.12578 | 0.00649  | 0.35352549 | 3.41E-15 | 0.565542 | 7.87E-41 |
| 0.86967  | -0.16147 | 0.00046  | -0.05061 | 0.2751   | 0.2263312  | 7.72E-07 | 0.333889 | 1.27E-13 |
| 0.47592  | -0.05871 | 0.20535  | 0.082645 | 0.07438  | 0.27183307 | 2.35E-09 | 0.390131 | 1.99E-18 |
| 0.22004  | -0.21978 | 1.62E-06 | -0.18141 | 8.06E-05 | -0.3262809 | 4.80E-13 | -0.53875 | 1.64E-36 |
| 2.10E-06 | 0.361468 | 7.34E-16 | 0.345966 | 1.41E-14 | -0.1865594 | 4.98E-05 | -0.47632 | 8.02E-28 |
| 0.92713  | -0.04692 | 0.3116   | 0.127242 | 0.0059   | -0.0220202 | 0.63504  | -0.28062 | 6.72E-10 |
| 0.95943  | -0.03078 | 0.50701  | -0.08036 | 0.08278  | -0.2822427 | 5.31E-10 | -0.58647 | 1.72E-44 |

|          |          |          |          |          |            |          |          |          |
|----------|----------|----------|----------|----------|------------|----------|----------|----------|
| 0.26269  | 0.13352  | 0.00384  | 0.428925 | 2.53E-22 | 0.10077203 | 0.02945  | -0.23274 | 3.66E-07 |
| 0.25494  | -0.0151  | 0.74486  | 0.049333 | 0.28738  | 0.22110926 | 1.40E-06 | 0.354589 | 2.78E-15 |
| 3.14E-09 | 0.00562  | 0.9036   | 0.012935 | 0.7804   | 0.20386323 | 8.98E-06 | 0.416104 | 5.59E-21 |
| 0.00011  | 0.183555 | 6.61E-05 | 0.160665 | 0.00049  | 0.41208901 | 1.43E-20 | 0.598183 | 1.17E-46 |
| 0.00622  | 0.261785 | 9.33E-09 | 0.163843 | 0.00038  | 0.33901754 | 5.04E-14 | 0.572881 | 4.39E-42 |
| 0.33616  | -0.0213  | 0.64613  | -0.00862 | 0.85258  | -0.1604163 | 0.0005   | -0.36137 | 7.48E-16 |
| 0.00103  | 0.199325 | 1.43E-05 | 0.207597 | 6.08E-06 | -0.2608372 | 1.06E-08 | -0.31169 | 5.58E-12 |
| 0.10202  | 0.098766 | 0.03285  | 0.119349 | 0.00984  | -0.2331024 | 3.50E-07 | -0.36255 | 5.93E-16 |
| 0.57477  | 0.228017 | 6.36E-07 | 0.042764 | 0.35649  | 0.02523797 | 0.58643  | 0.166342 | 0.00031  |
| 0.07216  | -0.04868 | 0.29386  | 0.153135 | 0.0009   | 0.46551615 | 1.72E-26 | 0.644429 | 3.73E-56 |
| 0.13354  | -0.11531 | 0.01265  | -0.14602 | 0.00156  | 0.03789453 | 0.41392  | 0.213244 | 3.33E-06 |
| 0.00062  | -0.25624 | 1.95E-08 | -0.15457 | 0.0008   | 0.28590752 | 3.10E-10 | 0.392042 | 1.32E-18 |
| 0.09137  | -0.02219 | 0.6325   | 0.107057 | 0.02067  | 0.36663845 | 2.64E-16 | 0.613787 | 1.10E-49 |
| 0.3509   | -0.06981 | 0.13197  | -0.07209 | 0.11975  | 0.38023335 | 1.64E-17 | 0.580858 | 1.75E-43 |
| 0.00302  | 0.138766 | 0.00265  | 0.012827 | 0.78219  | 0.26781243 | 4.11E-09 | 0.499618 | 7.41E-31 |
| 0.01566  | -0.23609 | 2.45E-07 | -0.08881 | 0.05514  | 0.13782008 | 0.00284  | 0.263315 | 7.59E-09 |
| 0.1601   | -0.19473 | 2.26E-05 | -0.08373 | 0.07064  | 0.31329317 | 4.29E-12 | 0.475467 | 1.03E-27 |
| 0.92698  | 0.202803 | 1.00E-05 | 0.159693 | 0.00053  | 0.34807209 | 9.54E-15 | 0.581807 | 1.19E-43 |
| 0.04894  | 0.14678  | 0.00147  | 0.002666 | 0.95418  | 0.16421942 | 0.00037  | 0.371379 | 1.02E-16 |
| 0.63128  | -0.0758  | 0.10182  | 0.006359 | 0.89098  | 0.24691482 | 6.46E-08 | 0.410117 | 2.27E-20 |
| 7.26E-05 | 0.285172 | 3.45E-10 | 0.069135 | 0.13575  | 0.1759319  | 0.00013  | 0.386914 | 3.99E-18 |
| 0.00513  | -0.24756 | 5.96E-08 | -0.04995 | 0.28143  | 0.38366257 | 7.96E-18 | 0.484625 | 7.07E-29 |
| 0.95762  | 0.24287  | 1.07E-07 | -0.03981 | 0.39067  | 0.20092116 | 1.21E-05 | 0.412692 | 1.25E-20 |
| 0.07527  | -0.13261 | 0.00409  | -0.16689 | 0.00029  | 0.27501466 | 1.50E-09 | 0.549105 | 3.91E-38 |
| 0.08072  | -0.19753 | 1.71E-05 | -0.07813 | 0.0917   | 0.1990668  | 1.47E-05 | 0.300581 | 3.31E-11 |
| 0.0524   | 0.333757 | 1.30E-13 | 0.178298 | 0.00011  | 0.37860664 | 2.30E-17 | 0.661677 | 3.92E-60 |
| 0.70258  | -0.0912  | 0.04887  | 0.01915  | 0.67978  | 0.22419628 | 9.86E-07 | 0.298792 | 4.37E-11 |
| 0.97006  | -0.15188 | 0.00099  | -0.09282 | 0.04499  | -0.1908211 | 3.31E-05 | -0.46182 | 4.78E-26 |
| 0.6759   | -0.02551 | 0.58244  | -0.08589 | 0.06368  | 0.07915505 | 0.08752  | 0.339717 | 4.44E-14 |
| 0.11587  | 0.215324 | 2.65E-06 | 0.034609 | 0.45559  | 0.19006553 | 3.56E-05 | 0.433843 | 7.43E-23 |
| 0.05994  | -0.15787 | 0.00062  | 0.160212 | 0.00051  | -0.034     | 0.46357  | -0.2745  | 1.62E-09 |
| 0.82008  | 0.003991 | 0.93145  | 0.131728 | 0.00435  | -0.0270788 | 0.55941  | -0.31655 | 2.50E-12 |
| 0.68252  | 0.017977 | 0.69841  | 0.023721 | 0.60913  | 0.29287139 | 1.09E-10 | 0.520555 | 8.64E-34 |
| 0.0167   | 0.190642 | 3.37E-05 | 0.051862 | 0.26336  | 0.17787461 | 0.00011  | 0.453373 | 4.72E-25 |
| 0.34407  | 0.1729   | 0.00017  | 0.207429 | 6.19E-06 | 0.41561443 | 6.27E-21 | 0.563755 | 1.57E-40 |
| 0.35659  | -0.10692 | 0.02084  | 0.13887  | 0.00263  | 0.45853292 | 1.17E-25 | 0.550203 | 2.61E-38 |
| 0.07562  | -0.02672 | 0.56462  | -0.2348  | 2.86E-07 | 0.08886514 | 0.05498  | 0.223876 | 1.02E-06 |
| 0.74844  | 0.046946 | 0.31137  | -0.04668 | 0.31415  | 0.32457095 | 6.44E-13 | 0.499787 | 7.03E-31 |
| 0.19707  | 0.002179 | 0.96254  | 0.22154  | 1.33E-06 | 0.24937241 | 4.73E-08 | 0.264229 | 6.71E-09 |
| 2.23E-07 | -0.12606 | 0.00638  | -0.06524 | 0.15928  | 0.2873014  | 2.52E-10 | 0.365334 | 3.42E-16 |
| 0.24724  | -0.09743 | 0.03531  | -0.07848 | 0.09025  | 0.21550406 | 2.60E-06 | 0.41148  | 1.65E-20 |
| 0.00197  | 0.165574 | 0.00033  | 0.036775 | 0.42786  | 0.15044861 | 0.00111  | 0.30434  | 1.83E-11 |
| 0.6216   | -0.14449 | 0.00174  | 0.140863 | 0.00228  | 0.45457896 | 3.42E-25 | 0.581338 | 1.44E-43 |
| 0.0998   | 0.283748 | 4.26E-10 | 0.196256 | 1.94E-05 | 0.49351824 | 4.86E-30 | 0.762814 | 4.33E-90 |
| 0.00216  | 0.176674 | 0.00012  | 0.080913 | 0.08068  | 0.18762793 | 4.50E-05 | 0.367977 | 2.02E-16 |



|          |          |          |          |          |            |          |          |          |
|----------|----------|----------|----------|----------|------------|----------|----------|----------|
| 0.00016  | 0.260455 | 1.11E-08 | 0.146257 | 0.00153  | 0.30939923 | 8.10E-12 | 0.538197 | 2.00E-36 |
| 0.00294  | 0.004281 | 0.92648  | -0.10652 | 0.02132  | 0.0927499  | 0.04515  | 0.264016 | 6.90E-09 |
| 0.30396  | -0.11769 | 0.01092  | -0.16843 | 0.00026  | -0.239032  | 1.72E-07 | -0.50093 | 4.92E-31 |
| 0.57342  | -0.12816 | 0.00554  | 0.018534 | 0.68953  | 0.33110385 | 2.07E-13 | 0.5733   | 3.72E-42 |
| 0.06184  | -0.04243 | 0.36031  | -0.07538 | 0.10377  | 0.26120507 | 1.01E-08 | 0.531359 | 2.19E-35 |
| 0.13704  | -0.11092 | 0.01648  | -0.00274 | 0.95289  | 0.3181167  | 1.92E-12 | 0.392538 | 1.18E-18 |
| 0.98504  | 0.225837 | 8.17E-07 | 0.102302 | 0.02706  | 0.41950548 | 2.49E-21 | 0.660601 | 7.06E-60 |
| 0.24858  | 0.303476 | 2.10E-11 | 0.0709   | 0.12602  | 0.2395574  | 1.61E-07 | 0.314086 | 3.76E-12 |
| 0.16761  | 0.090422 | 0.05084  | 0.000832 | 0.98569  | 0.43152037 | 1.33E-22 | 0.692236 | 7.16E-68 |
| 0.78425  | 0.06194  | 0.18148  | 0.171258 | 0.0002   | 0.44737843 | 2.31E-24 | 0.672577 | 8.70E-63 |
| 0.58497  | -0.09427 | 0.04173  | -0.1285  | 0.00542  | 0.09250417 | 0.04572  | 0.233179 | 3.47E-07 |
| 0.00477  | -0.06185 | 0.18208  | -0.13784 | 0.00283  | -0.1893653 | 3.81E-05 | -0.34539 | 1.57E-14 |
| 0.0282   | 0.224297 | 9.75E-07 | 0.212285 | 3.69E-06 | -0.1638369 | 0.00038  | -0.41039 | 2.13E-20 |
| 3.84E-07 | 0.275194 | 1.46E-09 | 0.170556 | 0.00021  | 0.43951078 | 1.77E-23 | 0.597915 | 1.32E-46 |
| 0.0769   | 0.035886 | 0.43912  | -0.10771 | 0.0199   | 0.29836648 | 4.67E-11 | 0.591906 | 1.74E-45 |
| 0.71373  | 0.099697 | 0.03123  | -0.00023 | 0.9961   | 0.18569241 | 5.41E-05 | 0.446887 | 2.63E-24 |
| 4.76E-09 | -0.10162 | 0.0281   | -0.18604 | 5.23E-05 | 0.11523392 | 0.01271  | 0.272391 | 2.17E-09 |
| 1.57E-11 | 0.159657 | 0.00053  | 0.066092 | 0.15387  | 0.32533919 | 5.64E-13 | 0.54474  | 1.92E-37 |
| 0.39121  | 0.230956 | 4.51E-07 | 0.115074 | 0.01283  | 0.24176104 | 1.23E-07 | 0.429582 | 2.15E-22 |
| 0.48449  | 0.290019 | 1.68E-10 | 0.125542 | 0.0066   | 0.42466825 | 7.17E-22 | 0.706518 | 7.88E-72 |
| 0.02204  | -0.07993 | 0.08447  | -0.07296 | 0.11537  | -0.1170472 | 0.01136  | -0.31078 | 6.48E-12 |
| 0.32501  | 0.277551 | 1.05E-09 | 0.162975 | 0.00041  | 0.4718444  | 2.89E-27 | 0.764998 | 6.69E-91 |
| 4.24E-05 | 0.350871 | 5.64E-15 | 0.406828 | 4.84E-20 | -0.0852653 | 0.06562  | -0.30109 | 3.05E-11 |
| 0.15068  | 0.004729 | 0.91882  | 0.102098 | 0.02737  | 0.22736439 | 6.86E-07 | -0.06354 | 0.17043  |
| 0.88201  | -0.10719 | 0.02051  | -0.02376 | 0.60853  | 0.235368   | 2.67E-07 | 0.471049 | 3.62E-27 |
| 0.0261   | 0.088925 | 0.05481  | -0.06929 | 0.13489  | 0.53038368 | 3.07E-35 | 0.723973 | 5.27E-77 |
| 0.37624  | 0.122249 | 0.00818  | 0.064765 | 0.16233  | 0.30003349 | 3.60E-11 | 0.389258 | 2.41E-18 |
| 0.27639  | -0.03205 | 0.48956  | 0.009333 | 0.84059  | 0.37739306 | 2.96E-17 | 0.621297 | 3.32E-51 |
| 0.45185  | 0.330235 | 2.41E-13 | 0.531175 | 2.34E-35 | 0.09912431 | 0.03222  | -0.12502 | 0.00683  |
| 0.13074  | 0.179222 | 9.85E-05 | 0.083243 | 0.0723   | 0.36447271 | 4.06E-16 | 0.513594 | 8.59E-33 |
| 0.53929  | -0.06724 | 0.14686  | 0.095039 | 0.04008  | -0.3215245 | 1.08E-12 | -0.5422  | 4.81E-37 |
| 0.16159  | 0.179542 | 9.57E-05 | 0.068572 | 0.13897  | 0.33923047 | 4.85E-14 | 0.626067 | 3.42E-52 |
| 0.46595  | 0.117328 | 0.01117  | 0.175698 | 0.00014  | 0.21532042 | 2.66E-06 | 0.397352 | 4.10E-19 |
| 0.00115  | 0.125048 | 0.00682  | 0.036522 | 0.43106  | -0.31249   | 4.89E-12 | -0.52176 | 5.78E-34 |
| 0.9007   | 0.17713  | 0.00012  | 0.432511 | 1.04E-22 | 0.09252153 | 0.04568  | -0.20923 | 5.12E-06 |
| 0.00047  | 0.022249 | 0.63152  | -0.04974 | 0.28345  | -0.2406162 | 1.41E-07 | -0.45182 | 7.14E-25 |
| 0.15567  | 0.31145  | 5.80E-12 | 0.092546 | 0.04562  | 0.24153297 | 1.26E-07 | 0.548206 | 5.44E-38 |
| 0.52364  | 0.048789 | 0.29274  | 0.117956 | 0.01074  | 0.27239121 | 2.17E-09 | 0.401195 | 1.74E-19 |
| 0.03605  | 0.144173 | 0.00179  | 0.213934 | 3.09E-06 | 0.49061912 | 1.17E-29 | 0.677423 | 5.28E-64 |
| 0.34193  | -0.00316 | 0.94568  | 0.250088 | 4.32E-08 | 0.07435261 | 0.10856  | -0.1999  | 1.35E-05 |
| 0.70054  | -0.04161 | 0.36963  | -0.11995 | 0.00947  | -0.002134  | 0.96332  | 0.290656 | 1.52E-10 |
| 0.12719  | -0.02821 | 0.54306  | 0.005242 | 0.91005  | 0.35974002 | 1.03E-15 | 0.570267 | 1.24E-41 |
| 0.21057  | 0.011345 | 0.80683  | -0.05303 | 0.25272  | 0.13266795 | 0.00408  | 0.281628 | 5.81E-10 |
| 0.10665  | 0.102377 | 0.02695  | 0.048018 | 0.30044  | 0.38313544 | 8.90E-18 | 0.697754 | 2.25E-69 |
| 0.11015  | 0.183678 | 6.53E-05 | 0.078763 | 0.0891   | 0.3868024  | 4.08E-18 | 0.612211 | 2.26E-49 |

|          |          |          |          |          |            |          |          |          |
|----------|----------|----------|----------|----------|------------|----------|----------|----------|
| 0.39526  | 0.166256 | 0.00031  | 0.271784 | 2.37E-09 | -0.1630889 | 0.0004   | -0.3801  | 1.69E-17 |
| 0.76875  | -0.08714 | 0.05989  | -0.06756 | 0.14491  | 0.08672459 | 0.06112  | 0.315775 | 2.84E-12 |
| 0.02334  | -0.10744 | 0.02022  | -0.00939 | 0.83964  | 0.15952882 | 0.00054  | 0.287729 | 2.36E-10 |
| 0.35157  | 0.268244 | 3.87E-09 | 0.064856 | 0.16173  | 0.34999349 | 6.65E-15 | 0.540378 | 9.22E-37 |
| 0.01553  | 0.110212 | 0.01719  | -0.0087  | 0.85121  | 0.3881433  | 3.06E-18 | 0.656324 | 7.17E-59 |
| 0.00384  | -0.044   | 0.34275  | -0.02694 | 0.56138  | 0.26664132 | 4.83E-09 | 0.521929 | 5.45E-34 |
| 0.17714  | 0.247944 | 5.67E-08 | 0.313485 | 4.15E-12 | -0.0338684 | 0.4653   | -0.182   | 7.63E-05 |
| 0.19057  | 0.094702 | 0.04079  | 0.049732 | 0.2835   | 0.21100334 | 4.24E-06 | 0.358246 | 1.38E-15 |
| 0.52111  | 0.100949 | 0.02917  | 0.14997  | 0.00115  | 0.17982195 | 9.33E-05 | 0.324052 | 7.04E-13 |
| 0.3332   | 0.05923  | 0.20137  | -0.016   | 0.73018  | 0.24454615 | 8.70E-08 | 0.514953 | 5.51E-33 |
| 0.57181  | 0.280683 | 6.66E-10 | 0.100598 | 0.02973  | 0.37845666 | 2.37E-17 | 0.665154 | 5.73E-61 |
| 0.56425  | 0.172505 | 0.00018  | 0.092254 | 0.04631  | 0.3065637  | 1.28E-11 | 0.605193 | 5.36E-48 |
| 0.0713   | 0.087839 | 0.05785  | 0.156352 | 0.0007   | 0.33935655 | 4.74E-14 | 0.417937 | 3.62E-21 |
| 0.14174  | -0.00246 | 0.95771  | 0.060898 | 0.18894  | -0.0036335 | 0.93758  | -0.23722 | 2.14E-07 |
| 0.52965  | -0.04624 | 0.31867  | 8.91E-05 | 0.99847  | 0.18515079 | 5.69E-05 | 0.354842 | 2.65E-15 |
| 0.02762  | 0.032386 | 0.48507  | 0.003952 | 0.93212  | 0.24788012 | 5.72E-08 | 0.393311 | 9.98E-19 |
| 0.94075  | 0.028559 | 0.53813  | -0.09038 | 0.05096  | 0.18054989 | 8.73E-05 | 0.479908 | 2.83E-28 |
| 0.72799  | -0.13349 | 0.00385  | 0.047279 | 0.30795  | 0.35214171 | 4.43E-15 | 0.525023 | 1.92E-34 |
| 0.51787  | 0.177551 | 0.00011  | 0.034097 | 0.4623   | 0.0612626  | 0.1863   | 0.234581 | 2.94E-07 |
| 0.17717  | 0.208468 | 5.55E-06 | 0.105564 | 0.02252  | -0.1102743 | 0.01713  | -0.25306 | 2.95E-08 |
| 0.00034  | 0.02607  | 0.57414  | 0.000461 | 0.99207  | 0.19553661 | 2.09E-05 | 0.427876 | 3.27E-22 |
| 0.16149  | 0.06926  | 0.13505  | 1.88E-05 | 0.99968  | 0.38510305 | 5.87E-18 | 0.640457 | 2.83E-55 |
| 0.84452  | 0.143976 | 0.00181  | 0.242299 | 1.15E-07 | 0.44168385 | 1.01E-23 | 0.65253  | 5.43E-58 |
| 0.14887  | -0.30481 | 1.70E-11 | -0.10577 | 0.02225  | 0.0606455  | 0.19079  | 0.24424  | 9.04E-08 |
| 0.15991  | 0.095899 | 0.0383   | 0.148557 | 0.00128  | 0.43741406 | 3.02E-23 | 0.644206 | 4.18E-56 |
| 0.73394  | -0.01295 | 0.78008  | -0.00603 | 0.89664  | 0.22001602 | 1.58E-06 | 0.333436 | 1.37E-13 |
| 1.13E-16 | -0.14888 | 0.00125  | -0.09114 | 0.04903  | 0.14737564 | 0.0014   | 0.312313 | 5.04E-12 |
| 0.73701  | -0.10052 | 0.02986  | -0.27576 | 1.35E-09 | 0.09488053 | 0.04041  | 0.253613 | 2.74E-08 |
| 0.02402  | -0.02857 | 0.53801  | 0.155767 | 0.00073  | 0.36383884 | 4.60E-16 | 0.53571  | 4.81E-36 |
| 0.88756  | -0.3425  | 2.67E-14 | -0.25982 | 1.21E-08 | 0.17678782 | 0.00012  | 0.369165 | 1.59E-16 |
| 2.46E-05 | 0.065047 | 0.1605   | -0.06117 | 0.18697  | 0.22753921 | 6.72E-07 | 0.434022 | 7.11E-23 |
| 0.69738  | 0.020683 | 0.65574  | 0.127388 | 0.00584  | 0.56887145 | 2.14E-41 | 0.690789 | 1.75E-67 |
| 0.00781  | -0.18336 | 6.73E-05 | -0.18324 | 6.81E-05 | 0.20343418 | 9.38E-06 | 0.284781 | 3.66E-10 |
| 0.69953  | 0.05957  | 0.19879  | 0.088347 | 0.05642  | 0.38260621 | 9.96E-18 | 0.642305 | 1.11E-55 |
| 7.38E-05 | 0.178912 | 0.0001   | 0.168894 | 0.00025  | 0.04397901 | 0.34297  | -0.13436 | 0.00363  |
| 0.59143  | 0.119974 | 0.00946  | -0.02764 | 0.55126  | 0.29155441 | 1.33E-10 | 0.528783 | 5.33E-35 |
| 4.19E-07 | 0.10633  | 0.02155  | 0.056497 | 0.22299  | 0.22413134 | 9.93E-07 | 0.384027 | 7.37E-18 |
| 0.30321  | 0.231326 | 4.32E-07 | 0.234225 | 3.06E-07 | 0.42948287 | 2.20E-22 | 0.623749 | 1.04E-51 |
| 0.2091   | -0.11938 | 0.00982  | 0.226266 | 7.78E-07 | 0.41506883 | 7.13E-21 | 0.477499 | 5.71E-28 |
| 0.82647  | 0.102899 | 0.02617  | 0.19871  | 1.52E-05 | 0.19151656 | 3.10E-05 | -0.13262 | 0.00409  |
| 0.99863  | -0.05287 | 0.25418  | 0.095188 | 0.03976  | -0.2151761 | 2.70E-06 | -0.52632 | 1.24E-34 |
| 0.07624  | 0.192283 | 2.87E-05 | 0.349705 | 7.02E-15 | 0.30639569 | 1.32E-11 | -0.00789 | 0.86498  |
| 0.12854  | 0.21152  | 4.01E-06 | 0.32428  | 6.77E-13 | -0.0511095 | 0.27035  | -0.36222 | 6.33E-16 |
| 0.14526  | 0.063952 | 0.16767  | -0.04253 | 0.35908  | 0.19067294 | 3.36E-05 | 0.426227 | 4.90E-22 |
| 0.0816   | -0.10142 | 0.02841  | -0.14671 | 0.00148  | 0.10985841 | 0.01755  | 0.205991 | 7.20E-06 |

|          |          |          |          |          |            |          |          |          |
|----------|----------|----------|----------|----------|------------|----------|----------|----------|
| 0.01172  | 0.102304 | 0.02706  | -0.01371 | 0.76765  | 0.16524747 | 0.00034  | 0.392223 | 1.27E-18 |
| 0.05748  | 0.014922 | 0.74774  | -0.08401 | 0.0697   | 0.27815823 | 9.59E-10 | 0.552072 | 1.31E-38 |
| 0.66077  | 0.302078 | 2.61E-11 | 0.033456 | 0.47075  | 0.21356696 | 3.21E-06 | 0.515845 | 4.11E-33 |
| 0.01508  | -0.13806 | 0.00279  | -0.14321 | 0.00192  | 0.33166258 | 1.88E-13 | 0.423104 | 1.05E-21 |
| 0.73436  | 0.170188 | 0.00022  | 0.121417 | 0.00863  | 0.43125544 | 1.42E-22 | 0.71532  | 2.17E-74 |
| 0.14489  | 0.244161 | 9.13E-08 | -0.08687 | 0.0607   | 0.15936029 | 0.00055  | 0.487205 | 3.28E-29 |
| 0.04908  | -0.13813 | 0.00278  | -0.00242 | 0.95835  | 0.2547296  | 2.37E-08 | 0.426099 | 5.06E-22 |
| 0.47086  | -0.06138 | 0.18547  | -0.04299 | 0.354    | 0.43910684 | 1.96E-23 | 0.6301   | 4.86E-53 |
| 0.42509  | 0.081807 | 0.07738  | 0.005298 | 0.9091   | 0.32937317 | 2.80E-13 | 0.619479 | 7.80E-51 |
| 0.10905  | -0.04748 | 0.30587  | 0.049976 | 0.28114  | 0.00751163 | 0.87139  | -0.27251 | 2.14E-09 |
| 0.42414  | 0.095636 | 0.03884  | -0.03268 | 0.48106  | 0.37433829 | 5.56E-17 | 0.70463  | 2.71E-71 |
| 0.79267  | 0.123802 | 0.00739  | 0.192257 | 2.88E-05 | 0.38520085 | 5.75E-18 | 0.60783  | 1.65E-48 |
| 0.14174  | 0.168683 | 0.00025  | -0.03982 | 0.39064  | 0.38804388 | 3.13E-18 | 0.689355 | 4.22E-67 |
| 0.91639  | 0.210073 | 4.68E-06 | 0.404577 | 8.08E-20 | -0.031624  | 0.4954   | -0.2392  | 1.68E-07 |
| 0.80084  | -0.13781 | 0.00284  | 0.03948  | 0.39465  | 0.45054561 | 1.00E-24 | 0.697112 | 3.38E-69 |
| 0.0991   | 0.225074 | 8.92E-07 | 0.085881 | 0.06369  | 0.35426793 | 2.96E-15 | 0.64918  | 3.17E-57 |
| 0.01785  | 0.043665 | 0.34643  | -0.07306 | 0.11488  | 0.11580187 | 0.01227  | 0.161294 | 0.00047  |
| 0.89807  | 0.003122 | 0.94635  | -0.15858 | 0.00058  | 0.17917594 | 9.89E-05 | 0.350035 | 6.60E-15 |
| 0.00058  | -0.01855 | 0.6892   | -0.09461 | 0.041    | 0.11637683 | 0.01184  | 0.33459  | 1.12E-13 |
| 2.89E-06 | -0.08908 | 0.0544   | -0.16395 | 0.00037  | 0.0587182  | 0.2053   | 0.252866 | 3.02E-08 |
| 0.74133  | -0.2002  | 1.31E-05 | -0.11433 | 0.01343  | 0.20626952 | 6.99E-06 | 0.312437 | 4.94E-12 |
| 0.93721  | -0.16104 | 0.00048  | -0.05735 | 0.21609  | 0.17364961 | 0.00016  | 0.262793 | 8.14E-09 |
| 0.35388  | -0.13402 | 0.00371  | -0.17265 | 0.00018  | 0.05970483 | 0.19777  | 0.224026 | 1.01E-06 |
| 0.00038  | 0.167929 | 0.00027  | 0.053716 | 0.24664  | 0.29450583 | 8.48E-11 | 0.529629 | 3.98E-35 |
| 0.1462   | 0.077878 | 0.09276  | -0.00434 | 0.92556  | 0.27350045 | 1.86E-09 | 0.613743 | 1.12E-49 |
| 4.73E-06 | -0.09045 | 0.05076  | -0.1355  | 0.00335  | 0.23826524 | 1.88E-07 | 0.408357 | 3.40E-20 |
| 1.45E-05 | -0.07269 | 0.11669  | -0.04881 | 0.29255  | -0.1783259 | 0.00011  | -0.33287 | 1.52E-13 |
| 0.15749  | 0.171173 | 0.0002   | 0.064551 | 0.16372  | 0.32919841 | 2.89E-13 | 0.527791 | 7.48E-35 |
| 2.04E-08 | 0.078273 | 0.09111  | 0.295988 | 6.75E-11 | 0.25688809 | 1.79E-08 | 0.016747 | 0.71813  |
| 0.00085  | 0.245268 | 7.95E-08 | 0.177564 | 0.00011  | 0.23693994 | 2.21E-07 | 0.442673 | 7.86E-24 |
| 0.00737  | -0.15913 | 0.00056  | -0.12307 | 0.00775  | 0.10840288 | 0.01912  | 0.340876 | 3.60E-14 |
| 0.00385  | 0.177998 | 0.00011  | 0.013343 | 0.77367  | 0.15051219 | 0.0011   | 0.350465 | 6.09E-15 |
| 0.25213  | -0.00604 | 0.89638  | -0.04511 | 0.33065  | 0.27395683 | 1.74E-09 | 0.576587 | 9.94E-43 |
| 0.3588   | -0.15725 | 0.00065  | -0.06406 | 0.16698  | 0.06359329 | 0.17007  | 0.324815 | 6.18E-13 |
| 0.29358  | 0.348945 | 8.10E-15 | 0.004523 | 0.92235  | 0.22248024 | 1.20E-06 | 0.491266 | 9.65E-30 |
| 0.00649  | -0.01477 | 0.75025  | -0.09769 | 0.03482  | -0.210262  | 4.58E-06 | -0.46069 | 6.50E-26 |
| 0.63057  | 0.086311 | 0.06237  | 0.014847 | 0.74897  | 0.27420889 | 1.68E-09 | 0.463961 | 2.64E-26 |
| 0.48405  | 0.213251 | 3.33E-06 | 0.048725 | 0.29337  | 0.30922828 | 8.33E-12 | 0.621503 | 3.01E-51 |
| 0.69149  | 0.079284 | 0.087    | 0.1215   | 0.00858  | 0.40796316 | 3.73E-20 | 0.674478 | 2.92E-63 |
| 0.15374  | 0.16987  | 0.00023  | 0.268522 | 3.73E-09 | 0.50861146 | 4.31E-32 | 0.635018 | 4.32E-54 |
| 0.16734  | -0.14793 | 0.00135  | -0.0961  | 0.0379   | 0.18081938 | 8.51E-05 | 0.349477 | 7.33E-15 |
| 0.44381  | -0.01082 | 0.81569  | -0.00575 | 0.90137  | 0.38719398 | 3.75E-18 | 0.650846 | 1.32E-57 |
| 0.16939  | 0.086226 | 0.06263  | 0.102079 | 0.0274   | 0.29543402 | 7.36E-11 | 0.494902 | 3.18E-30 |
| 0.55419  | -0.22344 | 1.07E-06 | -0.17435 | 0.00015  | 0.12934974 | 0.00512  | 0.256865 | 1.79E-08 |
| 0.2576   | -0.08356 | 0.07121  | 0.020875 | 0.65275  | 0.34738521 | 1.08E-14 | 0.493837 | 4.41E-30 |

|          |          |          |          |          |            |          |          |          |
|----------|----------|----------|----------|----------|------------|----------|----------|----------|
| 0.00058  | 0.046535 | 0.31563  | -0.06915 | 0.13565  | 0.26834868 | 3.82E-09 | 0.479379 | 3.30E-28 |
| 0.14502  | 0.094146 | 0.04199  | 0.302663 | 2.38E-11 | 0.15467845 | 0.0008   | -0.1543  | 0.00082  |
| 0.0014   | 0.135136 | 0.00343  | -0.02792 | 0.54732  | 0.19303568 | 2.67E-05 | 0.449982 | 1.16E-24 |
| 0.29007  | 0.246086 | 7.17E-08 | 0.102448 | 0.02684  | -0.0878797 | 0.05774  | -0.33241 | 1.64E-13 |
| 0.02364  | -0.00557 | 0.90452  | 0.000107 | 0.99816  | 0.19505864 | 2.19E-05 | 0.452355 | 6.19E-25 |
| 0.68319  | 0.016086 | 0.72881  | 0.047528 | 0.3054   | 0.22804069 | 6.34E-07 | 0.470149 | 4.67E-27 |
| 0.41172  | 0.288326 | 2.16E-10 | 0.26646  | 4.95E-09 | 0.42516537 | 6.35E-22 | 0.548657 | 4.61E-38 |
| 0.86555  | 0.200559 | 1.26E-05 | 0.00931  | 0.84096  | 0.29389149 | 9.32E-11 | 0.485057 | 6.22E-29 |
| 5.17E-11 | -0.15169 | 0.00101  | -0.00233 | 0.95992  | 0.17955733 | 9.56E-05 | 0.278863 | 8.67E-10 |
| 0.91945  | 0.030001 | 0.5178   | 0.01192  | 0.79725  | 0.42281187 | 1.12E-21 | 0.662395 | 2.64E-60 |
| 0.00076  | 0.181096 | 8.30E-05 | 0.178918 | 0.0001   | 0.39932443 | 2.64E-19 | 0.657313 | 4.21E-59 |
| 0.56218  | 0.015707 | 0.73495  | -0.13976 | 0.00247  | 0.14852112 | 0.00129  | 0.301364 | 2.92E-11 |
| 0.05662  | 0.035535 | 0.44361  | -0.04313 | 0.35234  | 0.24247472 | 1.13E-07 | 0.550473 | 2.36E-38 |
| 0.62328  | 0.079638 | 0.08559  | -0.0424  | 0.36055  | 0.16088764 | 0.00048  | 0.421263 | 1.63E-21 |
| 0.77823  | 0.067088 | 0.14775  | 0.095614 | 0.03888  | 0.27354017 | 1.85E-09 | 0.473174 | 1.98E-27 |
| 8.04E-06 | -0.05173 | 0.26461  | 0.029452 | 0.5255   | 0.27209176 | 2.27E-09 | 0.49135  | 9.40E-30 |
| 0.13642  | -0.06349 | 0.17078  | 0.126837 | 0.00606  | 0.37943589 | 1.94E-17 | 0.616925 | 2.57E-50 |
| 0.3002   | 0.293834 | 9.40E-11 | 0.324324 | 6.72E-13 | 0.07325445 | 0.1139   | -0.18386 | 6.42E-05 |
| 0.30182  | 0.065935 | 0.15485  | 0.213895 | 3.10E-06 | 0.23224958 | 3.87E-07 | -0.04941 | 0.28661  |
| 0.00211  | 0.201521 | 1.14E-05 | 0.15477  | 0.00079  | 0.41193626 | 1.49E-20 | 0.646272 | 1.44E-56 |
| 0.13271  | 0.370258 | 1.28E-16 | 0.277693 | 1.03E-09 | 0.15484574 | 0.00079  | 0.357749 | 1.51E-15 |
| 0.40792  | 0.270747 | 2.74E-09 | 0.452519 | 5.93E-25 | 0.28148212 | 5.93E-10 | -0.05631 | 0.22454  |
| 0.11701  | 0.201262 | 1.17E-05 | 0.072947 | 0.11543  | 0.29246307 | 1.16E-10 | 0.490494 | 1.22E-29 |
| 0.08547  | 0.344821 | 1.75E-14 | 0.147443 | 0.0014   | 0.36088301 | 8.23E-16 | 0.624095 | 8.79E-52 |
| 0.0011   | 0.132403 | 0.00415  | 0.403783 | 9.68E-20 | 0.10213029 | 0.02732  | -0.19086 | 3.30E-05 |
| 5.78E-05 | 0.051921 | 0.26282  | -0.04413 | 0.34131  | 0.08779444 | 0.05798  | 0.327604 | 3.81E-13 |
| 0.27633  | -0.10614 | 0.02179  | -0.12012 | 0.00937  | 0.13950844 | 0.00252  | 0.360795 | 8.37E-16 |
| 0.00498  | 0.003994 | 0.93141  | 0.017724 | 0.70245  | 0.32596301 | 5.07E-13 | 0.49637  | 2.03E-30 |
| 0.00145  | -0.0466  | 0.31498  | -0.09729 | 0.03557  | 0.295921   | 6.82E-11 | 0.61419  | 9.11E-50 |
| 0.47669  | 0.216203 | 2.41E-06 | 0.103427 | 0.02541  | -0.1711632 | 0.0002   | -0.43263 | 1.01E-22 |
| 0.00574  | -0.01588 | 0.73215  | 0.073975 | 0.11038  | -0.0440116 | 0.34262  | -0.3158  | 2.83E-12 |
| 0.34604  | -0.14239 | 0.00204  | -0.12176 | 0.00844  | 0.08506951 | 0.06624  | 0.331006 | 2.11E-13 |
| 0.02596  | 0.223541 | 1.06E-06 | -0.03263 | 0.48181  | 0.18359994 | 6.58E-05 | 0.398386 | 3.26E-19 |
| 0.16479  | 0.195558 | 2.08E-05 | 0.009129 | 0.84402  | 0.26460116 | 6.38E-09 | 0.548012 | 5.84E-38 |
| 0.10791  | -0.00151 | 0.97398  | 0.019928 | 0.66753  | 0.33405298 | 1.23E-13 | 0.483811 | 8.99E-29 |
| 0.07251  | 0.089104 | 0.05433  | -0.05321 | 0.25115  | 0.25037602 | 4.16E-08 | 0.577022 | 8.34E-43 |
| 0.00262  | 0.127354 | 0.00585  | 0.095621 | 0.03887  | 0.40858166 | 3.23E-20 | 0.632282 | 1.67E-53 |
| 0.39598  | 0.170753 | 0.00021  | 0.014966 | 0.74702  | 0.39329559 | 1.00E-18 | 0.667149 | 1.88E-61 |
| 0.427    | -0.14727 | 0.00142  | -0.20344 | 9.38E-06 | 0.19491489 | 2.22E-05 | 0.461379 | 5.39E-26 |
| 0.23478  | 0.320469 | 1.30E-12 | 0.169639 | 0.00023  | -0.1207901 | 0.00898  | -0.41087 | 1.91E-20 |
| 0.14417  | 0.271451 | 2.48E-09 | 0.058421 | 0.2076   | 0.25013529 | 4.29E-08 | 0.566563 | 5.29E-41 |
| 3.42E-08 | 0.231026 | 4.47E-07 | 0.103004 | 0.02602  | -0.2446444 | 8.59E-08 | -0.47817 | 4.70E-28 |
| 0.04276  | 0.128261 | 0.00551  | 0.180349 | 8.89E-05 | 0.06808826 | 0.14179  | -0.09847 | 0.03338  |
| 0.71518  | 0.200854 | 1.22E-05 | 0.063044 | 0.1738   | 0.24697713 | 6.41E-08 | 0.526428 | 1.19E-34 |
| 0.03031  | 0.016861 | 0.71629  | 0.243654 | 9.72E-08 | 0.10037044 | 0.03011  | -0.13873 | 0.00266  |

|          |           |          |          |          |            |          |          |          |
|----------|-----------|----------|----------|----------|------------|----------|----------|----------|
| 0.07178  | -0.06009  | 0.19491  | -0.02005 | 0.66563  | 0.33057885 | 2.27E-13 | 0.493093 | 5.54E-30 |
| 0.37469  | -0.05257  | 0.25684  | -0.06836 | 0.14022  | 0.18457651 | 6.01E-05 | 0.389297 | 2.39E-18 |
| 0.03306  | 0.108221  | 0.01932  | 0.154043 | 0.00084  | -0.0652672 | 0.15908  | -0.29214 | 1.22E-10 |
| 0.57581  | -0.01313  | 0.77718  | -0.01308 | 0.77798  | 0.30318674 | 2.19E-11 | 0.576806 | 9.10E-43 |
| 0.64343  | 0.379138  | 2.06E-17 | 0.21346  | 3.25E-06 | 0.42398777 | 8.45E-22 | 0.692102 | 7.77E-68 |
| 0.58633  | 0.041143  | 0.37503  | -0.0352  | 0.44793  | -0.235063  | 2.77E-07 | -0.51213 | 1.39E-32 |
| 0.07318  | 0.045761  | 0.32375  | -0.16298 | 0.00041  | 0.18123891 | 8.19E-05 | 0.34607  | 1.39E-14 |
| 6.90E-05 | -0.01588  | 0.73216  | 0.044535 | 0.3369   | 0.29911247 | 4.16E-11 | 0.533407 | 1.08E-35 |
| 0.00465  | 0.03525   | 0.44729  | -0.10046 | 0.02995  | 0.35650672 | 1.92E-15 | 0.508941 | 3.88E-32 |
| 2.32E-10 | -0.11196  | 0.01549  | -0.0995  | 0.03157  | 0.20932803 | 5.06E-06 | 0.442578 | 8.05E-24 |
| 0.80564  | -0.17786  | 0.00011  | -0.1791  | 9.97E-05 | 0.1707671  | 0.00021  | 0.466241 | 1.40E-26 |
| 0.69582  | 0.083742  | 0.0706   | 0.144515 | 0.00174  | 0.45029888 | 1.07E-24 | 0.682575 | 2.53E-65 |
| 0.65159  | -0.19092  | 3.28E-05 | -0.13567 | 0.00331  | 0.12173749 | 0.00845  | 0.383739 | 7.84E-18 |
| 0.18403  | -0.22662  | 7.47E-07 | -0.0507  | 0.27424  | -0.2224271 | 1.21E-06 | -0.49384 | 4.40E-30 |
| 0.00244  | 0.008009  | 0.86295  | 0.041988 | 0.36528  | 0.29212595 | 1.22E-10 | 0.460904 | 6.14E-26 |
| 0.00256  | -0.0228   | 0.62307  | 0.040449 | 0.38314  | 0.44696284 | 2.58E-24 | 0.593771 | 7.87E-46 |
| 0.26423  | -0.01271  | 0.7841   | 0.069485 | 0.13378  | -0.0333737 | 0.47185  | -0.3702  | 1.29E-16 |
| 0.11403  | 0.182246  | 7.46E-05 | 0.224742 | 9.27E-07 | 0.44547478 | 3.80E-24 | 0.629069 | 8.02E-53 |
| 0.4049   | 0.006839  | 0.88281  | -0.01496 | 0.74711  | 0.17214844 | 0.00019  | 0.362654 | 5.81E-16 |
| 0.00352  | 0.133722  | 0.00379  | 0.011114 | 0.81069  | 0.11221255 | 0.01526  | 0.237405 | 2.09E-07 |
| 0.00102  | 0.035363  | 0.44582  | 0.021064 | 0.64981  | 0.23755116 | 2.05E-07 | 0.422211 | 1.30E-21 |
| 0.00181  | 0.047884  | 0.30179  | -0.00021 | 0.99646  | 0.17549894 | 0.00014  | 0.37869  | 2.26E-17 |
| 0.01075  | -8.70E-05 | 0.9985   | -0.15793 | 0.00061  | 0.205505   | 7.57E-06 | 0.504157 | 1.78E-31 |
| 0.08175  | 0.011091  | 0.81107  | -0.02357 | 0.61147  | 0.07804543 | 0.09206  | 0.222385 | 1.21E-06 |
| 0.44613  | 0.288136  | 2.22E-10 | 0.207    | 6.47E-06 | -0.1718941 | 0.00019  | -0.45609 | 2.27E-25 |
| 0.00134  | 0.159939  | 0.00052  | 0.05238  | 0.25861  | 0.26853228 | 3.72E-09 | 0.564837 | 1.03E-40 |
| 0.00298  | 0.133502  | 0.00385  | 0.087057 | 0.06013  | 0.36116837 | 7.78E-16 | 0.607983 | 1.54E-48 |
| 0.05312  | 0.048361  | 0.29699  | -0.00167 | 0.97128  | 0.09479549 | 0.04059  | 0.405789 | 6.13E-20 |
| 0.01335  | 0.039927  | 0.38932  | -0.01379 | 0.76628  | 0.17393361 | 0.00016  | 0.437774 | 2.76E-23 |
| 0.00472  | -0.12375  | 0.00742  | -0.15976 | 0.00053  | 0.43174529 | 1.26E-22 | 0.682431 | 2.76E-65 |
| 0.00601  | 0.025443  | 0.58339  | 0.033359 | 0.47203  | 0.35256551 | 4.09E-15 | 0.536485 | 3.66E-36 |
| 0.02269  | 0.185922  | 5.29E-05 | -0.11137 | 0.01605  | -0.0216906 | 0.64012  | 0.272611 | 2.11E-09 |
| 0.62041  | -0.05298  | 0.25315  | -0.03904 | 0.39992  | 0.19836362 | 1.57E-05 | 0.354961 | 2.59E-15 |
| 4.18E-06 | 0.027477  | 0.55365  | 0.051368 | 0.26794  | 0.18026984 | 8.95E-05 | 0.346077 | 1.38E-14 |
| 6.74E-05 | 0.064894  | 0.16149  | 0.096693 | 0.03672  | 0.23113314 | 4.42E-07 | 0.375443 | 4.43E-17 |
| 6.94E-05 | 0.182099  | 7.56E-05 | 0.045695 | 0.32445  | 0.2303262  | 4.86E-07 | 0.389456 | 2.31E-18 |
| 0.67198  | 0.365425  | 3.36E-16 | 0.178708 | 0.0001   | 0.3640032  | 4.45E-16 | 0.625073 | 5.51E-52 |
| 0.15738  | 0.008369  | 0.85686  | -0.01262 | 0.78558  | -0.1065778 | 0.02125  | -0.36172 | 6.98E-16 |
| 0.92303  | 0.236761  | 2.26E-07 | 0.327414 | 3.94E-13 | 0.04382282 | 0.34469  | -0.2551  | 2.26E-08 |
| 0.17359  | 0.34572   | 1.48E-14 | 0.004758 | 0.91832  | 0.24815195 | 5.53E-08 | 0.542246 | 4.72E-37 |
| 0.93182  | 0.105895  | 0.0221   | -0.17993 | 9.23E-05 | 0.09226343 | 0.04629  | 0.339974 | 4.24E-14 |
| 0.1622   | 0.261558  | 9.62E-09 | 0.010966 | 0.81316  | 0.23336633 | 3.39E-07 | 0.535929 | 4.45E-36 |
| 0.00265  | 0.181071  | 8.32E-05 | 0.215528 | 2.60E-06 | -0.2402896 | 1.47E-07 | -0.51678 | 3.03E-33 |
| 0.17128  | -0.20702  | 6.46E-06 | -0.04818 | 0.29885  | 0.21417065 | 3.01E-06 | 0.432154 | 1.13E-22 |
| 0.90874  | 0.100849  | 0.02933  | 0.109111 | 0.01834  | 0.20307422 | 9.74E-06 | 0.406598 | 5.10E-20 |

|          |          |          |          |          |            |          |          |          |
|----------|----------|----------|----------|----------|------------|----------|----------|----------|
| 0.00201  | -0.0694  | 0.13423  | -0.13409 | 0.0037   | 0.09886562 | 0.03268  | 0.351448 | 5.06E-15 |
| 0.18097  | 0.261522 | 9.66E-09 | 0.210089 | 4.67E-06 | 0.34911076 | 7.85E-15 | 0.561781 | 3.36E-40 |
| 0.00022  | -0.06639 | 0.15203  | -0.19667 | 1.86E-05 | -0.10785   | 0.01974  | 0.156063 | 0.00071  |
| 0.60262  | 0.115901 | 0.0122   | 0.128911 | 0.00527  | 0.48840513 | 2.29E-29 | 0.633011 | 1.17E-53 |
| 0.74694  | 0.185336 | 5.59E-05 | 0.20186  | 1.10E-05 | 0.3873954  | 3.59E-18 | 0.623895 | 9.67E-52 |
| 0.12615  | 0.065779 | 0.15584  | 0.009577 | 0.83646  | 0.43989716 | 1.60E-23 | 0.674099 | 3.63E-63 |
| 0.0041   | 0.085626 | 0.06448  | 0.049663 | 0.28416  | 0.44506025 | 4.23E-24 | 0.699954 | 5.55E-70 |
| 0.02085  | 0.200442 | 1.27E-05 | 0.17951  | 9.60E-05 | 0.4959066  | 2.34E-30 | 0.724285 | 4.23E-77 |
| 0.00718  | 0.260237 | 1.15E-08 | 0.218956 | 1.78E-06 | -0.3000271 | 3.61E-11 | -0.51538 | 4.79E-33 |
| 0.03261  | 0.004494 | 0.92284  | 0.099828 | 0.03101  | 0.05271683 | 0.25556  | -0.17925 | 9.83E-05 |
| 0.00113  | -0.07255 | 0.1174   | 0.029666 | 0.52249  | 0.29776243 | 5.13E-11 | 0.428097 | 3.10E-22 |
| 3.36E-17 | 0.035063 | 0.4497   | -0.00957 | 0.83658  | 0.21430837 | 2.96E-06 | 0.352068 | 4.50E-15 |
| 0.93949  | -0.19152 | 3.10E-05 | 0.054249 | 0.24198  | 0.00384193 | 0.93401  | -0.30037 | 3.42E-11 |
| 0.21409  | 0.043065 | 0.35311  | 0.046639 | 0.31455  | 0.09515019 | 0.03984  | 0.344532 | 1.84E-14 |
| 0.47247  | -0.10088 | 0.02928  | 0.024    | 0.60493  | 0.15625894 | 0.0007   | 0.309856 | 7.52E-12 |
| 0.14996  | 0.110057 | 0.01735  | 0.059787 | 0.19715  | 0.47357686 | 1.76E-27 | 0.738566 | 1.20E-81 |
| 0.894    | 0.092881 | 0.04484  | 0.047102 | 0.30976  | 0.34793973 | 9.78E-15 | 0.529391 | 4.32E-35 |
| 0.36973  | 0.009266 | 0.84171  | -0.1549  | 0.00078  | 0.17225582 | 0.00018  | 0.483396 | 1.02E-28 |
| 0.20772  | 0.367596 | 2.18E-16 | 0.170722 | 0.00021  | 0.34908937 | 7.88E-15 | 0.670946 | 2.21E-62 |
| 0.81071  | 0.226508 | 7.57E-07 | -0.02502 | 0.58964  | 0.07865314 | 0.08955  | 0.309899 | 7.47E-12 |
| 0.29505  | 0.394962 | 6.95E-19 | 0.221169 | 1.39E-06 | 0.47419332 | 1.48E-27 | 0.718327 | 2.75E-75 |
| 0.13603  | 0.275507 | 1.40E-09 | 0.122231 | 0.00819  | 0.39129185 | 1.55E-18 | 0.693352 | 3.58E-68 |
| 0.12947  | -0.12978 | 0.00497  | -0.11984 | 0.00954  | 0.09668383 | 0.03674  | 0.339207 | 4.87E-14 |
| 0.77099  | 0.336598 | 7.80E-14 | 0.217325 | 2.13E-06 | 0.46680295 | 1.20E-26 | 0.676581 | 8.63E-64 |
| 0.2661   | -0.32238 | 9.37E-13 | -0.13614 | 0.0032   | 0.21828941 | 1.92E-06 | 0.372612 | 7.91E-17 |
| 0.76316  | 0.065957 | 0.15472  | -0.00476 | 0.91823  | 0.13704197 | 0.003    | 0.349116 | 7.84E-15 |
| 0.97245  | -0.24799 | 5.64E-08 | -0.25076 | 3.96E-08 | 0.07196085 | 0.12044  | 0.316409 | 2.56E-12 |
| 0.44851  | -0.01294 | 0.78029  | 0.063103 | 0.1734   | 0.30125779 | 2.97E-11 | 0.58545  | 2.64E-44 |
| 0.00218  | -0.2016  | 1.13E-05 | -0.06306 | 0.17372  | 0.17798151 | 0.00011  | 0.314563 | 3.48E-12 |
| 0.54323  | 0.044553 | 0.33671  | 0.083134 | 0.07268  | 0.31642688 | 2.55E-12 | 0.558066 | 1.38E-39 |
| 0.01113  | 0.095058 | 0.04004  | 0.177385 | 0.00012  | 0.3016095  | 2.81E-11 | 0.526366 | 1.22E-34 |
| 0.04199  | -0.07344 | 0.11298  | -0.08357 | 0.07117  | 0.28632302 | 2.91E-10 | 0.491225 | 9.77E-30 |
| 0.00172  | -0.14076 | 0.0023   | -0.04416 | 0.341    | 0.2107656  | 4.34E-06 | 0.33343  | 1.37E-13 |
| 0.02433  | 0.104162 | 0.02438  | 0.077439 | 0.09463  | 0.19831727 | 1.58E-05 | 0.377998 | 2.61E-17 |
| 0.49209  | -0.20334 | 9.48E-06 | -0.16746 | 0.00028  | 0.04800109 | 0.30061  | 0.242581 | 1.11E-07 |
| 0.27367  | 0.236525 | 2.33E-07 | 0.40172  | 1.54E-19 | 0.12139688 | 0.00864  | -0.09953 | 0.03152  |
| 0.03355  | -0.03716 | 0.423    | -0.08943 | 0.05345  | 0.36350108 | 4.92E-16 | 0.579615 | 2.91E-43 |
| 0.3605   | -0.01138 | 0.80629  | -0.01594 | 0.73113  | -0.0070511 | 0.87921  | -0.27757 | 1.04E-09 |
| 0.01482  | -0.04377 | 0.34525  | -0.1831  | 6.89E-05 | 0.04958474 | 0.28492  | 0.306779 | 1.24E-11 |
| 0.79045  | -0.11244 | 0.01505  | -0.03588 | 0.43916  | 0.00113745 | 0.98044  | -0.28892 | 1.98E-10 |
| 0.97465  | 0.129714 | 0.00499  | 0.151331 | 0.00104  | 0.50200225 | 3.51E-31 | 0.766347 | 2.09E-91 |
| 0.95323  | 0.004675 | 0.91975  | -0.02314 | 0.61794  | 0.34085825 | 3.61E-14 | 0.641064 | 2.08E-55 |
| 3.08E-05 | -0.10696 | 0.02079  | -0.01688 | 0.71597  | 0.22984891 | 5.14E-07 | 0.35604  | 2.11E-15 |
| 4.76E-08 | -0.27847 | 9.17E-10 | -0.25348 | 2.79E-08 | 0.0801717  | 0.08351  | 0.307259 | 1.15E-11 |
| 6.49E-09 | 0.120088 | 0.00939  | 0.061225 | 0.18658  | 0.2264475  | 7.62E-07 | 0.325752 | 5.26E-13 |

|          |          |          |          |          |            |          |          |          |
|----------|----------|----------|----------|----------|------------|----------|----------|----------|
| 0.28665  | 0.210136 | 4.65E-06 | 0.051672 | 0.26511  | 0.34177339 | 3.06E-14 | 0.616353 | 3.35E-50 |
| 0.66108  | 0.424367 | 7.71E-22 | 0.166535 | 0.0003   | 0.29884054 | 4.34E-11 | 0.57214  | 5.90E-42 |
| 0.50403  | 0.019126 | 0.68016  | 0.177741 | 0.00011  | -0.2700645 | 3.01E-09 | -0.51684 | 2.96E-33 |
| 0.17977  | 0.273835 | 1.78E-09 | 0.164133 | 0.00037  | 0.26667286 | 4.81E-09 | 0.446071 | 3.25E-24 |
| 0.03756  | 0.296251 | 6.49E-11 | 0.379987 | 1.73E-17 | 0.51518213 | 5.11E-33 | 0.647763 | 6.65E-57 |
| 0.09486  | 0.050872 | 0.27259  | 0.23704  | 2.19E-07 | -0.2517098 | 3.51E-08 | -0.48414 | 8.17E-29 |
| 0.07983  | 0.018689 | 0.68707  | 0.079816 | 0.08489  | 0.43478556 | 5.87E-23 | 0.64398  | 4.69E-56 |
| 0.00101  | 0.15242  | 0.00095  | 0.264571 | 6.40E-09 | 0.15471199 | 0.00079  | -0.1048  | 0.02352  |
| 0.30484  | -0.16601 | 0.00031  | -0.202   | 1.09E-05 | 0.08828034 | 0.0566   | 0.279078 | 8.40E-10 |
| 0.32071  | 0.001709 | 0.97062  | 0.154612 | 0.0008   | 0.32650684 | 4.61E-13 | 0.437742 | 2.78E-23 |
| 0.30715  | 0.364874 | 3.75E-16 | 0.375947 | 3.99E-17 | -0.0925952 | 0.04551  | -0.36363 | 4.80E-16 |
| 0.57083  | 0.101247 | 0.02869  | 0.049942 | 0.28147  | 0.34352377 | 2.22E-14 | 0.652125 | 6.73E-58 |
| 0.95604  | 0.162069 | 0.00044  | 0.062518 | 0.17742  | 0.40070214 | 1.94E-19 | 0.607529 | 1.88E-48 |
| 0.93979  | 0.247223 | 6.22E-08 | 0.133698 | 0.0038   | 0.39168048 | 1.42E-18 | 0.654463 | 1.94E-58 |
| 0.47962  | 0.122569 | 0.00801  | 0.130222 | 0.00482  | 0.40092367 | 1.85E-19 | 0.599137 | 7.74E-47 |
| 0.79543  | -0.04879 | 0.29274  | 0.034334 | 0.45919  | 0.20729576 | 6.28E-06 | 0.408539 | 3.26E-20 |
| 0.27864  | 0.3532   | 3.63E-15 | 0.154267 | 0.00082  | 0.36918546 | 1.58E-16 | 0.557624 | 1.64E-39 |
| 0.1501   | -0.02379 | 0.60802  | -0.18094 | 8.42E-05 | 0.13738517 | 0.00293  | 0.457532 | 1.54E-25 |
| 0.0551   | 0.017666 | 0.70337  | -0.13542 | 0.00337  | 0.09266324 | 0.04535  | 0.333469 | 1.36E-13 |
| 0.9833   | 0.134487 | 0.00359  | 0.108937 | 0.01853  | 0.29480043 | 8.11E-11 | 0.581565 | 1.31E-43 |
| 0.44731  | 0.208384 | 5.60E-06 | 0.200706 | 1.24E-05 | 0.37212304 | 8.74E-17 | 0.622747 | 1.67E-51 |
| 0.66206  | 0.246432 | 6.87E-08 | 0.097355 | 0.03545  | 0.33334987 | 1.39E-13 | 0.537035 | 3.02E-36 |
| 0.52796  | 0.128425 | 0.00545  | 0.051578 | 0.26598  | 0.29304252 | 1.06E-10 | 0.578948 | 3.82E-43 |
| 0.00014  | 0.143393 | 0.00189  | 0.016392 | 0.72385  | 0.27925647 | 8.19E-10 | 0.511372 | 1.77E-32 |
| 0.78024  | 0.086044 | 0.06318  | 0.013901 | 0.76447  | 0.280632   | 6.71E-10 | 0.558664 | 1.10E-39 |
| 0.09493  | 0.152474 | 0.00095  | 0.259167 | 1.32E-08 | -0.1323907 | 0.00416  | -0.45369 | 4.34E-25 |
| 0.00063  | -0.0227  | 0.62468  | -0.01962 | 0.67232  | 0.36956351 | 1.47E-16 | 0.571211 | 8.52E-42 |
| 0.22593  | -0.10029 | 0.03024  | -0.07639 | 0.09918  | 0.47127083 | 3.40E-27 | 0.72254  | 1.45E-76 |
| 0.12975  | 0.269824 | 3.11E-09 | 0.146263 | 0.00153  | 0.39520858 | 6.58E-19 | 0.696116 | 6.34E-69 |
| 0.10722  | 0.238065 | 1.93E-07 | 0.074747 | 0.1067   | 0.43250976 | 1.04E-22 | 0.727321 | 4.83E-78 |
| 0.20643  | 0.143954 | 0.00182  | 0.005072 | 0.91296  | 0.23177841 | 4.10E-07 | 0.501186 | 4.54E-31 |
| 0.73056  | 0.070079 | 0.13047  | 0.062922 | 0.17464  | 0.21511881 | 2.71E-06 | 0.502618 | 2.90E-31 |
| 5.22E-06 | 0.013729 | 0.7673   | 0.110037 | 0.01737  | 0.41588633 | 5.88E-21 | 0.609806 | 6.74E-49 |
| 0.15124  | 0.008927 | 0.84742  | 0.027875 | 0.54791  | -0.2543606 | 2.49E-08 | -0.53127 | 2.26E-35 |
| 0.1673   | 0.055963 | 0.2274   | 0.078395 | 0.09061  | 0.32641152 | 4.69E-13 | 0.545806 | 1.31E-37 |
| 0.01087  | -0.05069 | 0.27428  | 0.025283 | 0.58575  | 0.13809433 | 0.00278  | 0.26492  | 6.11E-09 |
| 6.11E-05 | 0.099975 | 0.03076  | 0.208542 | 5.50E-06 | -0.2064444 | 6.86E-06 | -0.38186 | 1.16E-17 |
| 0.68458  | 0.083713 | 0.0707   | 0.140164 | 0.0024   | 0.3828978  | 9.36E-18 | 0.585885 | 2.20E-44 |
| 0.07088  | 0.224259 | 9.79E-07 | 0.156396 | 0.00069  | 0.37933958 | 1.98E-17 | 0.642181 | 1.18E-55 |
| 0.05716  | -0.14373 | 0.00185  | -0.18969 | 3.69E-05 | 0.32201201 | 9.97E-13 | 0.494256 | 3.88E-30 |
| 0.0079   | 0.058134 | 0.20985  | 0.178123 | 0.00011  | 0.39141211 | 1.51E-18 | 0.508224 | 4.88E-32 |
| 0.00018  | -0.21182 | 3.88E-06 | -0.21709 | 2.19E-06 | 0.28015385 | 7.19E-10 | 0.561958 | 3.14E-40 |
| 0.7582   | 0.120006 | 0.00944  | 0.145658 | 0.0016   | 0.44569691 | 3.58E-24 | 0.707072 | 5.47E-72 |
| 3.11E-10 | -0.09064 | 0.05028  | 0.001612 | 0.97228  | 0.23604855 | 2.46E-07 | 0.411135 | 1.79E-20 |
| 0.42363  | 0.057474 | 0.21508  | 0.110943 | 0.01646  | 0.25708109 | 1.74E-08 | 0.431927 | 1.20E-22 |

|          |          |          |          |          |            |          |          |          |
|----------|----------|----------|----------|----------|------------|----------|----------|----------|
| 0.00141  | -0.146   | 0.00156  | 0.092814 | 0.045    | 0.19629584 | 1.94E-05 | 0.371739 | 9.45E-17 |
| 0.31529  | 0.038913 | 0.40149  | 0.155339 | 0.00076  | 0.38959227 | 2.24E-18 | 0.604176 | 8.43E-48 |
| 0.81729  | 0.202224 | 1.06E-05 | 0.189721 | 3.68E-05 | 0.42672036 | 4.34E-22 | 0.619627 | 7.28E-51 |
| 0.11771  | 0.160797 | 0.00049  | 0.210519 | 4.46E-06 | 0.49242216 | 6.79E-30 | 0.701607 | 1.92E-70 |
| 0.23275  | 0.279526 | 7.88E-10 | 0.087248 | 0.05957  | 0.28019715 | 7.15E-10 | 0.512326 | 1.30E-32 |
| 0.85956  | -0.10871 | 0.01877  | 0.155438 | 0.00075  | 0.4966264  | 1.87E-30 | 0.669256 | 5.75E-62 |
| 0.45036  | -0.12428 | 0.00717  | 0.04526  | 0.32908  | 0.3316371  | 1.88E-13 | 0.511182 | 1.88E-32 |
| 0.0009   | -0.11361 | 0.01403  | 0.098492 | 0.03335  | -0.1956908 | 2.06E-05 | -0.31562 | 2.92E-12 |
| 0.00058  | 0.229698 | 5.23E-07 | 0.20955  | 4.95E-06 | 0.35780538 | 1.50E-15 | 0.546644 | 9.63E-38 |
| 0.35564  | -0.2905  | 1.56E-10 | -0.13145 | 0.00444  | 0.12255832 | 0.00802  | 0.29509  | 7.75E-11 |
| 2.09E-12 | -0.05602 | 0.22694  | -0.02579 | 0.57826  | 0.2629024  | 8.03E-09 | 0.478413 | 4.38E-28 |
| 0.53259  | 0.16732  | 0.00028  | 0.037026 | 0.42471  | 0.31428805 | 3.64E-12 | 0.540104 | 1.02E-36 |
| 0.65886  | -0.11416 | 0.01357  | -0.14458 | 0.00173  | 0.03554688 | 0.44346  | 0.264617 | 6.36E-09 |
| 0.02867  | -0.04306 | 0.3532   | 0.004808 | 0.91747  | 0.04013716 | 0.38682  | 0.157645 | 0.00063  |
| 0.25635  | 0.028617 | 0.53731  | 0.105213 | 0.02297  | 0.4800864  | 2.69E-28 | 0.707369 | 4.50E-72 |
| 0.16081  | 0.236559 | 2.32E-07 | 0.02774  | 0.54985  | 0.44050837 | 1.37E-23 | 0.663313 | 1.59E-60 |
| 0.20235  | 0.184369 | 6.12E-05 | 0.147977 | 0.00134  | 0.45456223 | 3.43E-25 | 0.651973 | 7.30E-58 |
| 0.18337  | 0.233104 | 3.50E-07 | -0.11862 | 0.0103   | 0.13969524 | 0.00248  | 0.27151  | 2.46E-09 |
| 9.07E-06 | 0.044519 | 0.33707  | 0.116727 | 0.01159  | 0.26863587 | 3.67E-09 | 0.494202 | 3.95E-30 |
| 0.1248   | -0.15119 | 0.00105  | -0.04298 | 0.35411  | 0.24763472 | 5.90E-08 | 0.486979 | 3.51E-29 |
| 0.23346  | -0.08911 | 0.05431  | -0.10791 | 0.01967  | 0.02027471 | 0.6621   | 0.21114  | 4.17E-06 |
| 0.00748  | 0.064991 | 0.16086  | 0.054326 | 0.24131  | 0.21803101 | 1.97E-06 | 0.454506 | 3.48E-25 |
| 0.03342  | 0.211703 | 3.93E-06 | 0.092968 | 0.04464  | 0.01360187 | 0.7694   | -0.16795 | 0.00027  |
| 0.74175  | -0.11552 | 0.01249  | -0.00425 | 0.9271   | 0.20457515 | 8.34E-06 | 0.365312 | 3.44E-16 |
| 0.01789  | -0.21404 | 3.05E-06 | -0.08009 | 0.08383  | 0.30721809 | 1.15E-11 | 0.538522 | 1.78E-36 |
| 2.77E-09 | -0.00888 | 0.8483   | -0.00232 | 0.96021  | -0.1677369 | 0.00027  | -0.2947  | 8.23E-11 |
| 0.89289  | 0.043428 | 0.34906  | 0.279616 | 7.78E-10 | 0.2953526  | 7.45E-11 | 0.045879 | 0.32251  |
| 0.00109  | 0.316316 | 2.60E-12 | 0.259491 | 1.27E-08 | 0.11915336 | 0.00996  | -0.12511 | 0.00679  |
| 0.13567  | -0.03224 | 0.48698  | -0.1367  | 0.00307  | 0.11928738 | 0.00988  | 0.44415  | 5.36E-24 |
| 0.03597  | -0.06271 | 0.17608  | -0.11402 | 0.01369  | -0.2490278 | 4.95E-08 | -0.45504 | 3.01E-25 |
| 0.04525  | 0.123501 | 0.00754  | 0.065544 | 0.15732  | 0.2284181  | 6.07E-07 | 0.270812 | 2.71E-09 |
| 0.00852  | -0.05425 | 0.242    | -0.10384 | 0.02483  | -0.2775596 | 1.05E-09 | -0.49595 | 2.31E-30 |
| 0.37579  | 0.121296 | 0.00869  | 0.11594  | 0.01217  | 0.40781211 | 3.86E-20 | 0.666724 | 2.39E-61 |
| 0.31638  | 0.245327 | 7.89E-08 | -0.15784 | 0.00062  | -0.0173634 | 0.70822  | 0.296593 | 6.15E-11 |
| 0.98564  | -0.06097 | 0.18845  | 0.03391  | 0.46474  | 0.42100274 | 1.74E-21 | 0.634372 | 5.96E-54 |
| 0.87984  | 0.032208 | 0.48747  | -0.07782 | 0.09302  | 0.23702805 | 2.19E-07 | 0.523838 | 2.87E-34 |
| 0.01399  | 0.009263 | 0.84176  | 0.123916 | 0.00734  | 0.45090577 | 9.11E-25 | 0.533332 | 1.11E-35 |
| 0.29407  | -0.11771 | 0.01091  | -0.12951 | 0.00506  | 0.12549547 | 0.00662  | 0.293168 | 1.04E-10 |
| 0.38271  | 0.24206  | 1.18E-07 | 0.061311 | 0.18596  | 0.26941756 | 3.29E-09 | 0.518909 | 1.49E-33 |
| 0.00969  | 0.11141  | 0.01601  | 0.103232 | 0.02569  | 0.01486691 | 0.74864  | -0.26573 | 5.46E-09 |
| 0.4601   | 0.213349 | 3.29E-06 | 0.433353 | 8.40E-23 | 0.04501254 | 0.33174  | -0.26422 | 6.71E-09 |
| 0.65605  | 0.062959 | 0.17438  | -0.05867 | 0.20564  | 0.10904295 | 0.01842  | 0.249764 | 4.50E-08 |
| 0.42853  | 0.050193 | 0.27905  | -0.28946 | 1.82E-10 | -0.0409021 | 0.37783  | 0.169101 | 0.00024  |
| 0.55956  | 0.116172 | 0.012    | 0.096024 | 0.03805  | 0.35427036 | 2.96E-15 | 0.595466 | 3.80E-46 |
| 0.11221  | 0.044057 | 0.34211  | 0.056554 | 0.22253  | 0.30579546 | 1.45E-11 | 0.538867 | 1.58E-36 |



|          |          |          |          |          |            |          |          |          |
|----------|----------|----------|----------|----------|------------|----------|----------|----------|
| 0.12263  | -0.03571 | 0.44142  | 0.319546 | 1.51E-12 | 0.22290108 | 1.14E-06 | -0.07086 | 0.12625  |
| 0.26863  | -0.04242 | 0.36036  | 0.046354 | 0.31751  | -0.2319479 | 4.01E-07 | -0.41739 | 4.11E-21 |
| 0.93072  | -0.08352 | 0.07136  | -0.16364 | 0.00038  | 0.10513381 | 0.02308  | 0.338334 | 5.71E-14 |
| 1.36E-07 | 0.141092 | 0.00224  | -0.04627 | 0.31838  | -0.1700294 | 0.00022  | -0.37915 | 2.05E-17 |
| 0.97     | -0.1636  | 0.00039  | -0.16367 | 0.00038  | 0.21187526 | 3.86E-06 | 0.461426 | 5.32E-26 |
| 0.50339  | 0.231635 | 4.17E-07 | 0.032954 | 0.47744  | 0.19011875 | 3.55E-05 | 0.519262 | 1.33E-33 |
| 0.00019  | 0.148452 | 0.00129  | 0.088686 | 0.05547  | 0.3340716  | 1.22E-13 | 0.447884 | 2.02E-24 |
| 0.98777  | 0.223991 | 1.01E-06 | 0.261964 | 9.11E-09 | 0.55166211 | 1.52E-38 | 0.729764 | 8.24E-79 |
| 0.35124  | 0.279036 | 8.45E-10 | 0.072092 | 0.11976  | 0.16677274 | 0.00029  | 0.39852  | 3.16E-19 |
| 0.35326  | 0.211732 | 3.92E-06 | 0.048094 | 0.29967  | 0.12307413 | 0.00775  | 0.313839 | 3.92E-12 |
| 0.36513  | -0.05098 | 0.27155  | -0.07372 | 0.11159  | 0.33057845 | 2.27E-13 | 0.499596 | 7.46E-31 |
| 5.58E-05 | 0.22455  | 9.47E-07 | 0.066874 | 0.14905  | 0.18933415 | 3.82E-05 | 0.411959 | 1.48E-20 |
| 0.07993  | 0.321351 | 1.12E-12 | 0.07307  | 0.11481  | 0.14939982 | 0.0012   | 0.379116 | 2.07E-17 |
| 0.04142  | 0.282089 | 5.43E-10 | 0.169889 | 0.00023  | 0.37756397 | 2.86E-17 | 0.589029 | 5.89E-45 |
| 0.44036  | 0.280895 | 6.46E-10 | -0.02799 | 0.54629  | 0.21185638 | 3.86E-06 | 0.524297 | 2.46E-34 |
| 0.14707  | 0.279502 | 7.90E-10 | 0.169981 | 0.00022  | 0.33988333 | 4.31E-14 | 0.561735 | 3.42E-40 |
| 0.961    | 0.249138 | 4.88E-08 | 0.085806 | 0.06392  | 0.32329073 | 8.02E-13 | 0.534645 | 6.99E-36 |
| 0.0067   | -0.15089 | 0.00107  | -0.18821 | 4.26E-05 | 0.03046601 | 0.51133  | 0.195538 | 2.09E-05 |
| 0.07787  | 0.144982 | 0.00168  | 0.102271 | 0.02711  | 0.21704944 | 2.20E-06 | 0.427648 | 3.46E-22 |
| 0.15034  | -0.00886 | 0.84852  | 0.103776 | 0.02492  | 0.36470712 | 3.88E-16 | 0.592502 | 1.35E-45 |
| 0.80223  | -0.15853 | 0.00058  | -0.01327 | 0.77494  | 0.37338816 | 6.75E-17 | 0.612463 | 2.01E-49 |
| 0.01831  | 0.2397   | 1.58E-07 | 0.134059 | 0.0037   | 0.34358819 | 2.19E-14 | 0.521238 | 6.87E-34 |
| 0.46358  | 0.221535 | 1.33E-06 | 0.165239 | 0.00034  | 0.40800643 | 3.69E-20 | 0.67753  | 4.96E-64 |
| 0.93399  | -0.04652 | 0.31582  | 0.113783 | 0.01388  | 0.40634289 | 5.40E-20 | 0.617758 | 1.74E-50 |
| 0.07593  | 0.050645 | 0.27474  | 0.056977 | 0.21908  | 0.40517638 | 7.05E-20 | 0.666793 | 2.30E-61 |
| 0.64745  | -0.26372 | 7.19E-09 | 0.013521 | 0.77072  | 0.36387725 | 4.57E-16 | 0.472697 | 2.27E-27 |
| 0.02993  | 0.225335 | 8.66E-07 | 0.09535  | 0.03943  | 0.44041468 | 1.40E-23 | 0.706591 | 7.51E-72 |
| 0.27601  | 0.156124 | 0.00071  | 0.110884 | 0.01652  | 0.290262   | 1.62E-10 | 0.571195 | 8.57E-42 |
| 0.35153  | 0.265008 | 6.03E-09 | 0.089916 | 0.05216  | 0.33895551 | 5.10E-14 | 0.638385 | 8.05E-55 |
| 0.25231  | 0.24438  | 8.88E-08 | 0.098629 | 0.0331   | 0.47118416 | 3.49E-27 | 0.721662 | 2.69E-76 |
| 0.08741  | 0.131268 | 0.00449  | 0.006119 | 0.89508  | 0.2232719  | 1.10E-06 | 0.377704 | 2.78E-17 |
| 0.03999  | 0.105159 | 0.02304  | 0.051339 | 0.26821  | 0.37211278 | 8.76E-17 | 0.621982 | 2.40E-51 |
| 0.01821  | -0.25322 | 2.89E-08 | -0.26033 | 1.13E-08 | 0.19738951 | 1.73E-05 | 0.446685 | 2.77E-24 |
| 0.03101  | -0.03369 | 0.46761  | 0.011128 | 0.81045  | 0.33282225 | 1.53E-13 | 0.522886 | 3.95E-34 |
| 0.83528  | 0.077106 | 0.09606  | 0.016635 | 0.71993  | 0.29594216 | 6.80E-11 | 0.607373 | 2.02E-48 |
| 0.73641  | 0.066884 | 0.14899  | -0.13565 | 0.00331  | 0.07053148 | 0.12801  | 0.382568 | 1.00E-17 |
| 0.09582  | 0.221142 | 1.39E-06 | 0.31666  | 2.46E-12 | 0.12732989 | 0.00586  | -0.1331  | 0.00396  |
| 0.38363  | -0.04946 | 0.28613  | -0.02794 | 0.54704  | 0.37084572 | 1.13E-16 | 0.510208 | 2.58E-32 |
| 0.94999  | 0.048725 | 0.29337  | 0.1017   | 0.02798  | 0.41919022 | 2.68E-21 | 0.691122 | 1.42E-67 |
| 0.68568  | 0.03674  | 0.4283   | 0.085576 | 0.06464  | 0.3908078  | 1.72E-18 | 0.61323  | 1.42E-49 |
| 0.17338  | 0.218899 | 1.79E-06 | 0.058264 | 0.20883  | 0.46111158 | 5.80E-26 | 0.708972 | 1.56E-72 |
| 0.78824  | 0.046645 | 0.31448  | 0.065405 | 0.1582   | 0.42857427 | 2.75E-22 | 0.701519 | 2.04E-70 |
| 0.43008  | 0.124278 | 0.00717  | 0.161731 | 0.00045  | 0.27969901 | 7.68E-10 | 0.432811 | 9.62E-23 |
| 0.01477  | -0.06589 | 0.15512  | -0.13463 | 0.00356  | 0.13783223 | 0.00284  | 0.323764 | 7.40E-13 |
| 0.93793  | 0.017512 | 0.70584  | -0.03457 | 0.4561   | 0.48633982 | 4.24E-29 | 0.689006 | 5.22E-67 |

|          |          |          |          |          |            |          |          |          |
|----------|----------|----------|----------|----------|------------|----------|----------|----------|
| 0.26642  | 0.296994 | 5.78E-11 | 0.22428  | 9.77E-07 | 0.48470945 | 6.89E-29 | 0.761373 | 1.46E-89 |
| 0.12972  | 0.204667 | 8.26E-06 | 0.162706 | 0.00042  | 0.41820925 | 3.39E-21 | 0.669422 | 5.24E-62 |
| 0.05561  | 0.019844 | 0.66885  | 0.118257 | 0.01054  | 0.45994463 | 7.98E-26 | 0.676756 | 7.79E-64 |
| 2.86E-06 | -0.21697 | 2.22E-06 | -0.21514 | 2.71E-06 | 0.23919778 | 1.68E-07 | 0.4094   | 2.68E-20 |
| 0.81931  | 0.411726 | 1.56E-20 | 0.24836  | 5.38E-08 | 0.38714436 | 3.79E-18 | 0.626711 | 2.51E-52 |
| 0.76732  | -0.15572 | 0.00073  | -0.00481 | 0.91738  | 0.21569821 | 2.55E-06 | 0.415612 | 6.27E-21 |
| 0.04834  | 0.362839 | 5.61E-16 | 0.11538  | 0.01259  | 0.29474241 | 8.18E-11 | 0.547438 | 7.21E-38 |
| 0.01795  | 0.031913 | 0.49147  | -0.01409 | 0.7614   | 0.45796263 | 1.37E-25 | 0.646168 | 1.52E-56 |
| 0.25534  | 0.146029 | 0.00155  | 0.10205  | 0.02744  | 0.35253483 | 4.11E-15 | 0.50308  | 2.50E-31 |
| 0.01446  | 0.225241 | 8.75E-07 | 0.21022  | 4.61E-06 | 0.40337358 | 1.06E-19 | 0.681185 | 5.78E-65 |
| 7.15E-05 | -0.09306 | 0.04444  | -0.04897 | 0.29099  | 0.27241678 | 2.17E-09 | 0.540044 | 1.04E-36 |
| 0.00097  | 0.076681 | 0.09791  | 0.059346 | 0.20048  | 0.17270306 | 0.00018  | 0.330382 | 2.35E-13 |
| 0.75059  | 0.16823  | 0.00026  | 0.116305 | 0.0119   | 0.20404833 | 8.81E-06 | 0.429103 | 2.42E-22 |
| 0.13351  | -0.20523 | 7.79E-06 | -0.10288 | 0.0262   | 0.15077246 | 0.00108  | 0.257545 | 1.64E-08 |
| 0.03005  | 0.271299 | 2.53E-09 | 0.154231 | 0.00083  | 0.27992311 | 7.44E-10 | 0.436366 | 3.94E-23 |
| 0.81254  | 0.422119 | 1.33E-21 | 0.031994 | 0.49037  | 0.23183872 | 4.07E-07 | 0.319533 | 1.52E-12 |
| 0.54636  | 0.023234 | 0.6165   | 0.02548  | 0.58283  | 0.29340468 | 1.00E-10 | 0.471708 | 3.01E-27 |
| 0.28824  | 0.341018 | 3.51E-14 | 0.123875 | 0.00736  | 0.2783462  | 9.34E-10 | 0.424968 | 6.66E-22 |
| 0.50194  | 0.1903   | 3.48E-05 | 0.114147 | 0.01358  | 0.39493225 | 6.99E-19 | 0.674839 | 2.37E-63 |
| 0.0147   | -0.08895 | 0.05475  | -0.03364 | 0.46827  | -0.1443336 | 0.00177  | -0.27377 | 1.79E-09 |
| 0.37764  | -0.05433 | 0.24125  | 0.009467 | 0.83833  | -0.1471568 | 0.00143  | -0.37052 | 1.21E-16 |
| 0.06303  | 0.052043 | 0.26169  | 0.121654 | 0.0085   | 0.36582129 | 3.11E-16 | 0.423644 | 9.19E-22 |
| 0.22711  | 0.090399 | 0.0509   | 0.094528 | 0.04117  | 0.174648   | 0.00015  | 0.371472 | 9.97E-17 |
| 0.75234  | 0.320018 | 1.40E-12 | 0.032829 | 0.47912  | 0.2475189  | 5.99E-08 | 0.50375  | 2.03E-31 |
| 0.35023  | -0.00953 | 0.83732  | -0.07841 | 0.09054  | 0.20552232 | 7.56E-06 | 0.412635 | 1.26E-20 |
| 0.8815   | 0.303319 | 2.15E-11 | 0.153273 | 0.00089  | 0.4247235  | 7.07E-22 | 0.718763 | 2.03E-75 |
| 0.35129  | 0.228653 | 5.90E-07 | 0.122295 | 0.00815  | 0.38417988 | 7.14E-18 | 0.649214 | 3.12E-57 |
| 0.00064  | 0.188959 | 3.96E-05 | 0.10851  | 0.019    | 0.41826567 | 3.34E-21 | 0.670483 | 2.87E-62 |
| 0.3831   | -0.00802 | 0.86281  | 0.044472 | 0.33759  | -0.2244959 | 9.53E-07 | -0.43881 | 2.12E-23 |
| 0.12542  | -0.00571 | 0.902    | 0.326116 | 4.94E-13 | 0.09135439 | 0.04849  | -0.1105  | 0.0169   |
| 0.33439  | -0.00997 | 0.82979  | -0.042   | 0.3651   | 0.19280119 | 2.73E-05 | 0.448899 | 1.55E-24 |
| 0.27793  | 0.066067 | 0.15403  | -0.03001 | 0.51769  | 0.25461202 | 2.41E-08 | 0.513581 | 8.63E-33 |
| 0.20472  | 0.105047 | 0.02319  | -0.05639 | 0.22384  | 0.16566105 | 0.00032  | 0.42881  | 2.60E-22 |
| 0.61051  | 0.238649 | 1.80E-07 | 0.152189 | 0.00097  | -0.1076968 | 0.01992  | -0.37376 | 6.25E-17 |
| 5.62E-11 | -0.13852 | 0.0027   | -0.05633 | 0.22438  | 0.2652546  | 5.83E-09 | 0.415023 | 7.21E-21 |
| 0.40164  | 0.025568 | 0.58155  | 0.033319 | 0.47258  | 0.45798317 | 1.36E-25 | 0.576952 | 8.58E-43 |
| 0.77658  | 0.072991 | 0.1152   | -0.08198 | 0.07675  | 0.18417492 | 6.24E-05 | 0.402752 | 1.22E-19 |
| 0.00319  | -0.08776 | 0.05808  | 0.056677 | 0.22152  | 0.3687508  | 1.73E-16 | 0.561174 | 4.24E-40 |
| 4.84E-05 | 0.037149 | 0.42317  | 0.301577 | 2.83E-11 | -0.1348793 | 0.0035   | -0.32608 | 4.97E-13 |
| 0.0777   | 0.131674 | 0.00437  | 0.106547 | 0.02129  | -0.0455673 | 0.32581  | -0.29841 | 4.64E-11 |
| 0.77102  | -0.07103 | 0.12533  | -0.15753 | 0.00063  | 0.31695679 | 2.34E-12 | 0.548107 | 5.64E-38 |
| 0.0208   | 0.107627 | 0.02     | 0.068332 | 0.14036  | 0.31992544 | 1.42E-12 | 0.574455 | 2.34E-42 |
| 2.08E-10 | -0.06389 | 0.16809  | -0.14824 | 0.00132  | 0.14710115 | 0.00143  | 0.327409 | 3.95E-13 |
| 0.11857  | 0.252224 | 3.28E-08 | 0.250221 | 4.25E-08 | 0.52115907 | 7.06E-34 | 0.751968 | 3.42E-86 |
| 0.90246  | -0.08782 | 0.05792  | -0.06619 | 0.15326  | 0.3799577  | 1.74E-17 | 0.650179 | 1.88E-57 |

|          |          |          |          |          |            |          |          |          |
|----------|----------|----------|----------|----------|------------|----------|----------|----------|
| 0.00931  | 0.444772 | 4.56E-24 | 0.180669 | 8.63E-05 | 0.47208879 | 2.70E-27 | 0.532905 | 1.28E-35 |
| 0.66957  | 0.051244 | 0.26909  | 0.028645 | 0.53692  | 0.21196073 | 3.82E-06 | 0.411491 | 1.65E-20 |
| 0.12545  | 0.166574 | 0.0003   | 0.029636 | 0.52291  | 0.45218377 | 6.48E-25 | 0.752738 | 1.84E-86 |
| 0.15682  | -0.09342 | 0.04361  | -0.01715 | 0.71163  | 0.25947518 | 1.27E-08 | 0.37578  | 4.13E-17 |
| 0.00268  | -0.17805 | 0.00011  | -0.15384 | 0.00085  | 0.06941853 | 0.13415  | 0.225526 | 8.47E-07 |
| 0.01641  | -0.09917 | 0.03214  | -0.04563 | 0.32518  | 0.03945783 | 0.39492  | 0.202535 | 1.03E-05 |
| 0.22671  | -0.07742 | 0.09469  | -0.22393 | 1.02E-06 | 0.155742   | 0.00073  | 0.293544 | 9.83E-11 |
| 0.57282  | 0.125196 | 0.00675  | 0.117659 | 0.01094  | 0.37600266 | 3.95E-17 | 0.582402 | 9.30E-44 |
| 0.22881  | 0.02679  | 0.56361  | -0.04731 | 0.30759  | 0.34620203 | 1.35E-14 | 0.591394 | 2.17E-45 |
| 0.00255  | 0.109955 | 0.01745  | 0.148763 | 0.00126  | 0.24248535 | 1.12E-07 | 0.496603 | 1.89E-30 |
| 0.68419  | 0.033081 | 0.47574  | 0.011889 | 0.79776  | 0.22515738 | 8.84E-07 | 0.514966 | 5.49E-33 |
| 0.00014  | 0.206959 | 6.50E-06 | 0.05316  | 0.25157  | 0.24936509 | 4.74E-08 | 0.547435 | 7.22E-38 |
| 0.00491  | -0.1642  | 0.00037  | -0.1405  | 0.00234  | 0.17260613 | 0.00018  | 0.339611 | 4.53E-14 |
| 0.0594   | -0.13944 | 0.00253  | -0.1266  | 0.00615  | 0.15032647 | 0.00112  | 0.346232 | 1.34E-14 |
| 0.722    | 0.220956 | 1.42E-06 | 0.199398 | 1.42E-05 | -0.109374  | 0.01806  | -0.37671 | 3.41E-17 |
| 0.84745  | 0.126689 | 0.00612  | 0.063909 | 0.16796  | 0.33621763 | 8.35E-14 | 0.622928 | 1.53E-51 |
| 3.08E-09 | 0.028198 | 0.54328  | -0.13267 | 0.00408  | 0.24331303 | 1.01E-07 | 0.493457 | 4.95E-30 |
| 0.00257  | -0.06175 | 0.18281  | 0.042542 | 0.35899  | 0.31419538 | 3.70E-12 | 0.511201 | 1.87E-32 |
| 0.04228  | 0.060813 | 0.18956  | 0.018084 | 0.69669  | 0.08696011 | 0.06042  | 0.218107 | 1.95E-06 |
| 0.04453  | 0.227843 | 6.49E-07 | 0.255176 | 2.24E-08 | 0.42857944 | 2.75E-22 | 0.496227 | 2.12E-30 |
| 1.05E-11 | 0.083237 | 0.07232  | 0.149835 | 0.00116  | 0.56921904 | 1.87E-41 | 0.728675 | 1.82E-78 |
| 0.19414  | -0.06197 | 0.18125  | -0.21425 | 2.99E-06 | -0.156723  | 0.00068  | 0.068803 | 0.13764  |
| 1.94E-05 | 0.072884 | 0.11574  | 0.256819 | 1.80E-08 | 0.35450717 | 2.83E-15 | 0.435757 | 4.59E-23 |
| 0.97131  | 0.094091 | 0.04211  | 0.152369 | 0.00096  | 0.54442519 | 2.15E-37 | 0.760442 | 3.21E-89 |
| 0.09016  | 0.190113 | 3.55E-05 | 0.105131 | 0.02308  | -0.1352218 | 0.00341  | -0.36142 | 7.41E-16 |
| 4.50E-09 | 0.012948 | 0.78019  | -0.11202 | 0.01544  | 0.35274066 | 3.96E-15 | 0.629664 | 6.01E-53 |
| 0.00254  | 0.062704 | 0.17614  | 0.038151 | 0.41077  | 0.33694809 | 7.33E-14 | 0.611232 | 3.53E-49 |
| 0.40247  | 0.081037 | 0.08022  | 0.043951 | 0.34329  | 0.11075414 | 0.01665  | 0.328812 | 3.09E-13 |
| 0.29182  | 0.231897 | 4.04E-07 | 0.485086 | 6.16E-29 | 0.17042548 | 0.00022  | -0.11688 | 0.01148  |
| 0.26954  | 0.022665 | 0.62516  | -0.0965  | 0.03711  | 0.13822505 | 0.00276  | 0.436303 | 4.00E-23 |
| 0.07374  | 0.206351 | 6.93E-06 | 0.192785 | 2.74E-05 | 0.00190493 | 0.96725  | -0.14538 | 0.00163  |
| 0.49774  | -0.13306 | 0.00397  | -0.08698 | 0.06036  | 0.1534999  | 0.00087  | 0.341737 | 3.08E-14 |
| 0.40912  | -0.01554 | 0.73764  | -0.03491 | 0.45167  | 0.17850028 | 0.00011  | 0.422318 | 1.27E-21 |
| 0.00047  | 0.025283 | 0.58575  | -0.11729 | 0.01119  | -0.0950004 | 0.04016  | 0.088267 | 0.05664  |
| 0.94215  | -0.24724 | 6.20E-08 | -0.1277  | 0.00572  | 0.18893583 | 3.97E-05 | 0.440413 | 1.41E-23 |
| 0.15553  | 0.201804 | 1.11E-05 | 0.059009 | 0.20306  | 0.38905771 | 2.51E-18 | 0.593414 | 9.17E-46 |
| 3.60E-08 | 0.007798 | 0.86653  | 0.000984 | 0.98308  | 0.22821418 | 6.21E-07 | 0.378243 | 2.48E-17 |
| 0.10762  | 0.156666 | 0.00068  | 0.070073 | 0.13051  | 0.39996544 | 2.29E-19 | 0.647027 | 9.74E-57 |
| 0.51179  | 0.277802 | 1.01E-09 | 0.424086 | 8.25E-22 | -0.0763578 | 0.09933  | -0.27552 | 1.40E-09 |
| 0.23344  | 0.039445 | 0.39507  | 0.064862 | 0.16169  | 0.23632833 | 2.38E-07 | 0.541663 | 5.82E-37 |
| 0.06615  | -0.25009 | 4.32E-08 | 0.012146 | 0.79349  | -0.09561   | 0.03889  | -0.33053 | 2.29E-13 |
| 0.00741  | -0.08429 | 0.06879  | 0.00977  | 0.83322  | 0.35401093 | 3.11E-15 | 0.510839 | 2.10E-32 |
| 0.24769  | 0.205916 | 7.25E-06 | 0.307501 | 1.10E-11 | 0.06637065 | 0.15214  | -0.21672 | 2.28E-06 |
| 0.99568  | 0.23875  | 1.78E-07 | 0.084529 | 0.06799  | 0.27498519 | 1.51E-09 | 0.558689 | 1.09E-39 |
| 0.3413   | -0.01481 | 0.74949  | -0.10167 | 0.02802  | 0.13820638 | 0.00276  | 0.431811 | 1.24E-22 |

|          |          |          |          |          |            |          |          |          |
|----------|----------|----------|----------|----------|------------|----------|----------|----------|
| 0.57771  | 0.160227 | 0.00051  | 0.041205 | 0.3743   | 0.23385516 | 3.20E-07 | 0.458073 | 1.33E-25 |
| 0.57517  | 0.024621 | 0.59561  | -0.1002  | 0.03039  | 0.14938179 | 0.0012   | 0.395546 | 6.11E-19 |
| 0.47596  | -0.04565 | 0.32493  | 0.272932 | 2.02E-09 | 0.14571054 | 0.00159  | -0.08084 | 0.08095  |
| 0.2082   | 0.05316  | 0.25158  | 0.115454 | 0.01254  | 0.30474687 | 1.71E-11 | 0.432457 | 1.05E-22 |
| 0.06789  | 0.06909  | 0.13601  | 0.216884 | 2.24E-06 | -0.1540184 | 0.00084  | -0.37401 | 5.95E-17 |
| 0.6854   | -0.16561 | 0.00033  | 0.042968 | 0.3542   | -0.0252286 | 0.58657  | -0.32888 | 3.05E-13 |
| 0.1498   | -0.13224 | 0.0042   | 0.035031 | 0.45011  | 0.35709036 | 1.72E-15 | 0.568206 | 2.78E-41 |
| 0.43737  | 0.08872  | 0.05538  | 0.027921 | 0.54725  | 0.23922989 | 1.68E-07 | 0.514588 | 6.21E-33 |
| 0.47289  | 0.203296 | 9.52E-06 | 0.107619 | 0.02001  | 0.42556928 | 5.75E-22 | 0.599713 | 6.02E-47 |
| 0.00052  | 0.018739 | 0.68629  | 0.12417  | 0.00722  | 0.1646905  | 0.00035  | 0.279883 | 7.48E-10 |
| 0.00543  | -0.08376 | 0.07056  | 0.153547 | 0.00087  | 0.0887468  | 0.0553   | -0.11091 | 0.0165   |
| 0.021    | -0.00241 | 0.95859  | 0.053504 | 0.24851  | -0.0863246 | 0.06233  | -0.24618 | 7.09E-08 |
| 0.00451  | 0.027427 | 0.55437  | -0.05268 | 0.2559   | 0.05674599 | 0.22096  | 0.298403 | 4.65E-11 |
| 0.41598  | 0.116907 | 0.01146  | 0.023656 | 0.61012  | 0.12616688 | 0.00633  | 0.395372 | 6.35E-19 |
| 0.00783  | -0.01254 | 0.78688  | 0.079655 | 0.08553  | 0.24988595 | 4.43E-08 | 0.433071 | 9.02E-23 |
| 0.0002   | 0.088494 | 0.056    | 0.193538 | 2.54E-05 | -0.0115265 | 0.8038   | -0.2011  | 1.19E-05 |
| 0.45621  | 0.067004 | 0.14826  | 0.037626 | 0.41725  | 0.33999524 | 4.23E-14 | 0.622215 | 2.15E-51 |
| 0.05036  | 0.03014  | 0.51586  | 0.051792 | 0.264    | 0.20274361 | 1.01E-05 | 0.322695 | 8.88E-13 |
| 4.80E-05 | 0.070703 | 0.12708  | 0.051613 | 0.26565  | 0.33315708 | 1.44E-13 | 0.515046 | 5.35E-33 |
| 0.00063  | 0.062835 | 0.17523  | -0.07006 | 0.1306   | 0.13141247 | 0.00445  | 0.431203 | 1.44E-22 |
| 0.1323   | 0.009914 | 0.8308   | 0.104672 | 0.02369  | 0.0328739  | 0.47851  | -0.2143  | 2.97E-06 |
| 0.02642  | 0.061586 | 0.18398  | 0.052526 | 0.25728  | 0.50806188 | 5.14E-32 | 0.747339 | 1.37E-84 |
| 0.76211  | -0.13176 | 0.00434  | -0.32806 | 3.52E-13 | 0.24521314 | 8.00E-08 | 0.400728 | 1.93E-19 |
| 0.78522  | 0.256472 | 1.89E-08 | 0.266323 | 5.04E-09 | -0.0993123 | 0.0319   | -0.2364  | 2.36E-07 |
| 0.72678  | 0.276813 | 1.16E-09 | 0.268452 | 3.76E-09 | 0.44233317 | 8.58E-24 | 0.654957 | 1.49E-58 |
| 0.32191  | 0.103032 | 0.02598  | 0.176605 | 0.00012  | 0.06701268 | 0.1482   | -0.1956  | 2.07E-05 |
| 0.75843  | 0.061301 | 0.18603  | -0.11112 | 0.01629  | 0.15052328 | 0.0011   | 0.373116 | 7.14E-17 |
| 0.81287  | 0.282922 | 4.81E-10 | 0.092024 | 0.04686  | 0.35590599 | 2.16E-15 | 0.609303 | 8.46E-49 |
| 0.00012  | 0.047713 | 0.30352  | 0.101924 | 0.02764  | -0.1311842 | 0.00452  | -0.4165  | 5.09E-21 |
| 0.00837  | 0.099374 | 0.03179  | 0.176954 | 0.00012  | 0.243439   | 9.98E-08 | 0.331352 | 1.98E-13 |
| 0.9505   | 0.080426 | 0.08253  | 0.155438 | 0.00075  | 0.06477029 | 0.16229  | -0.25856 | 1.43E-08 |
| 0.00073  | 0.275497 | 1.40E-09 | 0.232393 | 3.81E-07 | -0.1816661 | 7.87E-05 | -0.42305 | 1.06E-21 |
| 0.01898  | -0.00429 | 0.92636  | -0.00976 | 0.83338  | 0.47916608 | 3.52E-28 | 0.709986 | 7.92E-73 |
| 0.00206  | -0.0049  | 0.91587  | -0.07489 | 0.10603  | 0.28496977 | 3.56E-10 | 0.486691 | 3.82E-29 |
| 0.22637  | 0.235328 | 2.69E-07 | 0.247992 | 5.64E-08 | 0.50434618 | 1.68E-31 | 0.753696 | 8.44E-87 |
| 0.65616  | 0.157007 | 0.00066  | 0.086837 | 0.06078  | 0.46549831 | 1.72E-26 | 0.720937 | 4.47E-76 |
| 0.07279  | 0.067279 | 0.1466   | -0.0335  | 0.47021  | 0.10499317 | 0.02326  | 0.316572 | 2.49E-12 |
| 7.14E-05 | -0.05569 | 0.22965  | -0.19928 | 1.43E-05 | 0.00304533 | 0.94767  | 0.286017 | 3.05E-10 |
| 0.90403  | -0.06668 | 0.15024  | 0.00633  | 0.89148  | 0.33013313 | 2.45E-13 | 0.575423 | 1.59E-42 |
| 0.51497  | 0.33252  | 1.61E-13 | 0.466629 | 1.26E-26 | 0.27815362 | 9.60E-10 | -0.04689 | 0.31192  |
| 0.6864   | 0.230873 | 4.56E-07 | 0.014944 | 0.74738  | 0.23726549 | 2.13E-07 | 0.555706 | 3.37E-39 |
| 0.0492   | 0.277836 | 1.00E-09 | 0.27157  | 2.44E-09 | 0.38805191 | 3.12E-18 | 0.579512 | 3.04E-43 |
| 0.04755  | 0.046138 | 0.31978  | 0.079717 | 0.08528  | 0.28508495 | 3.50E-10 | 0.451921 | 6.95E-25 |
| 0.53686  | -0.06229 | 0.17899  | -0.01149 | 0.80444  | 0.16505218 | 0.00034  | 0.342947 | 2.47E-14 |
| 0.00895  | -0.02814 | 0.54406  | -0.07277 | 0.11629  | 0.29503684 | 7.82E-11 | 0.375579 | 4.31E-17 |

|         |          |          |          |          |            |          |          |          |
|---------|----------|----------|----------|----------|------------|----------|----------|----------|
| 0.99592 | 0.127856 | 0.00566  | 0.162673 | 0.00042  | 0.42898566 | 2.49E-22 | 0.699565 | 7.12E-70 |
| 0.22616 | -0.14789 | 0.00135  | -0.19891 | 1.49E-05 | 0.02903875 | 0.53133  | 0.289992 | 1.68E-10 |
| 0.01592 | 0.201174 | 1.18E-05 | -0.02086 | 0.65294  | -0.207841  | 5.93E-06 | -0.41162 | 1.60E-20 |
| 0.35567 | 0.311791 | 5.49E-12 | 0.089461 | 0.05336  | 0.26840571 | 3.79E-09 | 0.475107 | 1.14E-27 |
| 0.01177 | 0.030531 | 0.51043  | 0.190085 | 3.56E-05 | -0.0476108 | 0.30456  | -0.36834 | 1.88E-16 |
| 0.11067 | 0.126274 | 0.00629  | 0.036505 | 0.43126  | 0.37727779 | 3.03E-17 | 0.663058 | 1.83E-60 |
| 0.04138 | 0.133217 | 0.00393  | 0.047465 | 0.30604  | 0.25266166 | 3.10E-08 | 0.455365 | 2.76E-25 |
| 0.30882 | 0.069898 | 0.13148  | -0.04352 | 0.34809  | -0.2611968 | 1.01E-08 | -0.49309 | 5.54E-30 |
| 0.00116 | -0.13609 | 0.00321  | -0.2436  | 9.79E-08 | 0.25009754 | 4.31E-08 | 0.352388 | 4.23E-15 |
| 0.22227 | 0.135381 | 0.00338  | -0.06982 | 0.13191  | 0.3182667  | 1.88E-12 | 0.546662 | 9.56E-38 |
| 0.02482 | -0.08995 | 0.05207  | 0.067971 | 0.14248  | -0.1649668 | 0.00034  | -0.40149 | 1.62E-19 |
| 0.14558 | 0.017219 | 0.71053  | 0.120956 | 0.00888  | 0.49215328 | 7.37E-30 | 0.634939 | 4.50E-54 |
| 0.0434  | -0.00523 | 0.9102   | 0.275474 | 1.41E-09 | -0.1447124 | 0.00172  | -0.47267 | 2.28E-27 |
| 0.66657 | -0.20536 | 7.68E-06 | -0.04408 | 0.34189  | -0.2170298 | 2.20E-06 | -0.41395 | 9.28E-21 |
| 0.01128 | -0.27092 | 2.67E-09 | -0.27404 | 1.72E-09 | 0.18738936 | 4.61E-05 | 0.443162 | 6.92E-24 |
| 0.21722 | 0.030119 | 0.51615  | -0.09494 | 0.04028  | 0.24068527 | 1.40E-07 | 0.40789  | 3.79E-20 |
| 0.39527 | 0.100664 | 0.02962  | 0.03356  | 0.46937  | 0.26566709 | 5.52E-09 | 0.514951 | 5.51E-33 |
| 0.0664  | 0.029768 | 0.52106  | -0.01747 | 0.70645  | 0.29915477 | 4.13E-11 | 0.525446 | 1.66E-34 |
| 0.15755 | 0.084198 | 0.06908  | 0.090614 | 0.05035  | 0.26941168 | 3.30E-09 | 0.550604 | 2.25E-38 |
| 0.00065 | 0.0865   | 0.0618   | 0.06461  | 0.16333  | 0.46574778 | 1.61E-26 | 0.685349 | 4.80E-66 |
| 0.23171 | -0.0979  | 0.03442  | -0.26642 | 4.98E-09 | -0.0409772 | 0.37695  | 0.172651 | 0.00018  |
| 0.01342 | 0.278502 | 9.13E-10 | 0.242732 | 1.09E-07 | 0.52236163 | 4.72E-34 | 0.621918 | 2.47E-51 |
| 0.2947  | 0.11607  | 0.01207  | 0.351695 | 4.82E-15 | -0.0797502 | 0.08515  | -0.32051 | 1.29E-12 |
| 0.64596 | 0.064287 | 0.16545  | 0.092612 | 0.04547  | 0.27094856 | 2.66E-09 | 0.476011 | 8.77E-28 |
| 0.02816 | 0.045887 | 0.32243  | 0.021211 | 0.64753  | -0.2653966 | 5.72E-09 | -0.46715 | 1.09E-26 |
| 0.04153 | -0.00247 | 0.95751  | -0.21171 | 3.93E-06 | -0.0414333 | 0.37166  | 0.178984 | 0.0001   |
| 0.83395 | 0.333372 | 1.39E-13 | 0.018921 | 0.6834   | 0.15945648 | 0.00054  | 0.486367 | 4.21E-29 |
| 0.71717 | -0.10928 | 0.01816  | -0.01394 | 0.76382  | 0.02359275 | 0.61107  | -0.30445 | 1.80E-11 |
| 0.25925 | 0.187004 | 4.78E-05 | 0.147089 | 0.00144  | -0.1890777 | 3.92E-05 | -0.39892 | 2.89E-19 |
| 0.06278 | 0.187885 | 4.39E-05 | 0.031316 | 0.49961  | 0.08821443 | 0.05679  | 0.221277 | 1.37E-06 |
| 0.80418 | 0.186271 | 5.12E-05 | 0.173671 | 0.00016  | 0.2681789  | 3.91E-09 | 0.556043 | 2.97E-39 |
| 0.42383 | 0.18626  | 5.13E-05 | 0.085023 | 0.06639  | 0.37577504 | 4.14E-17 | 0.635899 | 2.79E-54 |
| 0.59918 | -0.31233 | 5.03E-12 | -0.13899 | 0.00261  | 0.25069637 | 4.00E-08 | 0.503295 | 2.34E-31 |
| 0.00079 | -0.06368 | 0.16949  | 0.030288 | 0.51381  | 0.44785814 | 2.04E-24 | 0.697167 | 3.27E-69 |
| 0.16143 | 0.197604 | 1.70E-05 | 0.022549 | 0.62693  | 0.37185526 | 9.23E-17 | 0.620228 | 5.49E-51 |
| 0.39271 | 0.160203 | 0.00051  | 0.062763 | 0.17573  | 0.3987291  | 3.02E-19 | 0.705728 | 1.32E-71 |
| 0.06635 | 0.002841 | 0.95117  | 0.121608 | 0.00852  | 0.02600668 | 0.57507  | -0.17264 | 0.00018  |
| 0.31414 | 0.026676 | 0.56526  | 0.081606 | 0.07812  | 0.31156221 | 5.70E-12 | 0.574678 | 2.14E-42 |
| 0.22809 | 0.116929 | 0.01145  | 0.23679  | 2.25E-07 | -0.1240392 | 0.00728  | -0.34679 | 1.21E-14 |
| 0.19176 | 0.228402 | 6.08E-07 | -0.04799 | 0.30068  | 0.06991918 | 0.13136  | 0.363945 | 4.51E-16 |
| 0.25479 | 0.255687 | 2.09E-08 | 0.234038 | 3.13E-07 | 0.42650599 | 4.58E-22 | 0.658522 | 2.19E-59 |
| 0.39052 | 0.202271 | 1.06E-05 | 0.083739 | 0.07061  | 0.3605086  | 8.85E-16 | 0.604263 | 8.10E-48 |
| 0.00685 | -0.12549 | 0.00662  | -0.03611 | 0.43624  | 0.31039572 | 6.89E-12 | 0.398194 | 3.40E-19 |
| 0.45473 | 0.266199 | 5.13E-09 | 0.356398 | 1.97E-15 | 0.00604281 | 0.89638  | -0.33369 | 1.31E-13 |
| 0.01    | 0.029173 | 0.52942  | 0.292386 | 1.17E-10 | 0.00376294 | 0.93536  | -0.31319 | 4.36E-12 |

|          |          |          |          |          |            |          |          |          |
|----------|----------|----------|----------|----------|------------|----------|----------|----------|
| 0.18661  | 0.106812 | 0.02096  | 0.17422  | 0.00015  | -0.076196  | 0.10005  | -0.34309 | 2.40E-14 |
| 0.8304   | 0.141048 | 0.00225  | 0.06529  | 0.15894  | 0.22641567 | 7.65E-07 | 0.520284 | 9.45E-34 |
| 0.04629  | 0.222275 | 1.23E-06 | 0.172833 | 0.00017  | 0.22133169 | 1.36E-06 | 0.344196 | 1.96E-14 |
| 0.08155  | 0.236869 | 2.23E-07 | 0.016323 | 0.72497  | 0.17017713 | 0.00022  | 0.45668  | 1.94E-25 |
| 0.00996  | 0.05063  | 0.27488  | -0.04061 | 0.38128  | 0.27501914 | 1.50E-09 | 0.552941 | 9.48E-39 |
| 1.41E-06 | -0.02112 | 0.64899  | -0.04846 | 0.29602  | 0.19652334 | 1.89E-05 | 0.371478 | 9.96E-17 |
| 0.05686  | 0.276147 | 1.28E-09 | 0.037784 | 0.41528  | 0.23395644 | 3.16E-07 | 0.544144 | 2.38E-37 |
| 0.11388  | 0.015653 | 0.73584  | -0.08752 | 0.05878  | 0.24313568 | 1.04E-07 | 0.308075 | 1.00E-11 |
| 0.02074  | 0.280918 | 6.44E-10 | 0.262893 | 8.04E-09 | 0.47469702 | 1.28E-27 | 0.689437 | 4.01E-67 |
| 0.50576  | 0.114533 | 0.01326  | 0.030713 | 0.50791  | 0.26924664 | 3.37E-09 | 0.53107  | 2.42E-35 |
| 0.40915  | 0.373845 | 6.15E-17 | 0.145648 | 0.0016   | 0.35066801 | 5.86E-15 | 0.506717 | 7.90E-32 |
| 0.08719  | -0.1923  | 2.87E-05 | -0.24261 | 1.11E-07 | 0.10272666 | 0.02643  | 0.337147 | 7.07E-14 |
| 0.9584   | 0.087171 | 0.05979  | 0.112492 | 0.01501  | 0.31082179 | 6.43E-12 | 0.610316 | 5.35E-49 |
| 0.75805  | 0.221167 | 1.39E-06 | 0.183133 | 6.87E-05 | 0.33775504 | 6.34E-14 | 0.488081 | 2.52E-29 |
| 0.0048   | -0.18735 | 4.62E-05 | -0.1946  | 2.29E-05 | 0.30694804 | 1.20E-11 | 0.556985 | 2.08E-39 |
| 0.00196  | 0.178622 | 0.0001   | 0.119038 | 0.01003  | 0.32471514 | 6.28E-13 | 0.440197 | 1.49E-23 |
| 0.13701  | 0.043741 | 0.34559  | -0.17367 | 0.00016  | 0.20704095 | 6.45E-06 | 0.254646 | 2.40E-08 |
| 0.249    | -0.03133 | 0.49943  | 0.194614 | 2.29E-05 | 0.22815473 | 6.26E-07 | 0.370376 | 1.25E-16 |
| 0.13218  | 0.307633 | 1.08E-11 | 0.057267 | 0.21674  | -0.1949741 | 2.21E-05 | -0.30474 | 1.71E-11 |
| 0.05863  | 0.200622 | 1.25E-05 | 0.006178 | 0.89407  | 0.29414638 | 8.96E-11 | 0.605237 | 5.25E-48 |
| 0.00197  | -0.00497 | 0.91468  | 0.157926 | 0.00061  | -0.0482144 | 0.29846  | -0.24342 | 1.00E-07 |
| 0.75642  | 0.169568 | 0.00023  | -0.17322 | 0.00017  | -0.1817189 | 7.84E-05 | 0.054233 | 0.24212  |
| 0.81962  | 0.058196 | 0.20936  | -0.15716 | 0.00065  | 0.21011284 | 4.66E-06 | 0.511403 | 1.75E-32 |
| 0.43783  | -0.15812 | 0.0006   | -0.16405 | 0.00037  | 0.28206544 | 5.45E-10 | 0.568559 | 2.42E-41 |
| 0.26761  | -0.07152 | 0.12275  | -0.03791 | 0.41371  | 0.40178107 | 1.52E-19 | 0.602806 | 1.55E-47 |
| 0.94592  | 0.148785 | 0.00126  | 0.162101 | 0.00044  | -0.0485724 | 0.29489  | -0.26538 | 5.73E-09 |
| 0.48476  | 0.045492 | 0.32661  | 0.03029  | 0.51378  | 0.33111769 | 2.06E-13 | 0.556229 | 2.77E-39 |
| 0.90583  | 0.112703 | 0.01482  | 0.168861 | 0.00025  | 0.41601539 | 5.70E-21 | 0.614618 | 7.48E-50 |
| 0.02633  | 0.247834 | 5.75E-08 | 0.104448 | 0.02399  | 0.23890264 | 1.74E-07 | 0.533826 | 9.30E-36 |
| 0.54121  | 0.201127 | 1.19E-05 | -0.13779 | 0.00285  | 0.13926119 | 0.00256  | 0.373038 | 7.25E-17 |
| 0.00737  | -0.13448 | 0.0036   | -0.15462 | 0.0008   | 0.25794056 | 1.56E-08 | 0.44719  | 2.43E-24 |
| 0.49777  | 0.16609  | 0.00031  | 0.034758 | 0.45365  | 0.08900849 | 0.05459  | 0.239935 | 1.54E-07 |
| 0.99861  | -0.16265 | 0.00042  | -0.09345 | 0.04355  | 0.1857076  | 5.40E-05 | 0.311934 | 5.36E-12 |
| 0.60963  | -0.00994 | 0.83033  | 0.056996 | 0.21892  | 0.43097015 | 1.52E-22 | 0.664911 | 6.57E-61 |
| 0.81275  | 0.094993 | 0.04017  | 0.139521 | 0.00251  | 0.39644752 | 5.01E-19 | 0.65539  | 1.18E-58 |
| 0.00387  | -0.07878 | 0.08905  | -0.18441 | 6.10E-05 | 0.16609716 | 0.00031  | 0.288757 | 2.03E-10 |
| 0.84911  | 0.030191 | 0.51516  | -0.07986 | 0.08471  | 0.44716354 | 2.44E-24 | 0.685686 | 3.92E-66 |
| 0.0634   | 0.131008 | 0.00457  | 0.134081 | 0.0037   | 0.52089282 | 7.71E-34 | 0.727354 | 4.71E-78 |
| 0.50958  | 0.182782 | 7.10E-05 | 0.112632 | 0.01488  | 0.44501371 | 4.28E-24 | 0.57899  | 3.76E-43 |
| 0.01258  | -0.04879 | 0.29271  | -0.00718 | 0.877    | 0.32909321 | 2.94E-13 | 0.494782 | 3.30E-30 |
| 0.37922  | 0.283005 | 4.75E-10 | 0.167529 | 0.00028  | 0.35128046 | 5.22E-15 | 0.639125 | 5.54E-55 |
| 0.37219  | 0.022107 | 0.63371  | 0.135409 | 0.00337  | 0.41883024 | 2.92E-21 | 0.678558 | 2.72E-64 |
| 0.29403  | 0.059077 | 0.20254  | 0.153708 | 0.00086  | 0.50997608 | 2.78E-32 | 0.699553 | 7.18E-70 |
| 0.54479  | 0.070593 | 0.12768  | 0.006904 | 0.8817   | 0.25617118 | 1.97E-08 | 0.441258 | 1.13E-23 |
| 0.59251  | 0.23891  | 1.74E-07 | 0.229796 | 5.17E-07 | 0.39369675 | 9.17E-19 | 0.521108 | 7.18E-34 |

|          |          |          |          |          |            |          |          |          |
|----------|----------|----------|----------|----------|------------|----------|----------|----------|
| 0.18242  | 0.099522 | 0.03153  | 0.224498 | 9.53E-07 | -0.2306379 | 4.68E-07 | -0.45632 | 2.14E-25 |
| 6.97E-05 | 0.015005 | 0.74639  | 0.014307 | 0.75781  | 0.27974976 | 7.63E-10 | 0.302567 | 2.42E-11 |
| 0.06473  | 0.208997 | 5.24E-06 | 0.11766  | 0.01094  | 0.41192569 | 1.49E-20 | 0.651486 | 9.44E-58 |
| 0.00308  | 0.07599  | 0.10098  | 0.005735 | 0.90162  | 0.27746923 | 1.06E-09 | 0.486247 | 4.36E-29 |
| 0.0002   | 0.104709 | 0.02364  | 0.096222 | 0.03765  | 0.31793857 | 1.98E-12 | 0.575703 | 1.42E-42 |
| 0.58792  | 0.081028 | 0.08026  | -0.04404 | 0.34232  | 0.33844257 | 5.60E-14 | 0.581934 | 1.13E-43 |
| 0.53694  | 0.308893 | 8.80E-12 | 0.181746 | 7.82E-05 | 0.445389   | 3.88E-24 | 0.705676 | 1.37E-71 |
| 0.23208  | 0.123866 | 0.00736  | -0.08599 | 0.06335  | 0.25317346 | 2.90E-08 | 0.579135 | 3.54E-43 |
| 0.49834  | 0.041401 | 0.37204  | 0.149687 | 0.00118  | 0.52575043 | 1.50E-34 | 0.736885 | 4.27E-81 |
| 0.22304  | -0.15245 | 0.00095  | -0.06702 | 0.14818  | 0.26990618 | 3.08E-09 | 0.453606 | 4.43E-25 |
| 0.19882  | -0.20991 | 4.76E-06 | -0.0835  | 0.07143  | 0.10565934 | 0.0224   | 0.309053 | 8.57E-12 |
| 0.9511   | 0.135981 | 0.00324  | 0.142653 | 0.002    | 0.48559667 | 5.29E-29 | 0.662557 | 2.41E-60 |
| 0.08475  | 0.195154 | 2.17E-05 | 0.032969 | 0.47724  | 0.2361006  | 2.45E-07 | 0.46297  | 3.48E-26 |
| 0.16822  | 0.19131  | 3.16E-05 | 0.089515 | 0.05322  | 0.32927351 | 2.85E-13 | 0.626375 | 2.95E-52 |
| 0.15654  | 0.210165 | 4.63E-06 | 0.062684 | 0.17628  | 0.31001186 | 7.34E-12 | 0.436508 | 3.80E-23 |
| 0.0716   | 0.163326 | 0.00039  | 0.090563 | 0.05048  | 0.48811597 | 2.49E-29 | 0.703278 | 6.53E-71 |
| 0.07031  | 0.216726 | 2.28E-06 | 0.040846 | 0.37849  | 0.31129753 | 5.95E-12 | 0.627306 | 1.88E-52 |
| 0.31974  | 0.194844 | 2.23E-05 | 0.235868 | 2.52E-07 | 0.47410684 | 1.52E-27 | 0.612753 | 1.76E-49 |
| 0.6871   | 0.104083 | 0.02449  | 0.192262 | 2.88E-05 | 0.17208757 | 0.00019  | -0.13553 | 0.00334  |
| 0.37481  | 0.106909 | 0.02085  | 0.063076 | 0.17358  | 0.35900792 | 1.19E-15 | 0.630544 | 3.91E-53 |
| 0.02608  | 0.044566 | 0.33657  | 0.088833 | 0.05507  | 0.34422023 | 1.95E-14 | 0.572467 | 5.18E-42 |
| 0.78202  | 0.159974 | 0.00052  | 0.047937 | 0.30126  | 0.41457757 | 8.00E-21 | 0.613204 | 1.43E-49 |
| 0.06275  | 0.093821 | 0.04271  | -0.057   | 0.21888  | 0.4482221  | 1.85E-24 | 0.666287 | 3.05E-61 |
| 0.04421  | 0.173623 | 0.00016  | 0.054501 | 0.2398   | 0.29051579 | 1.56E-10 | 0.57411  | 2.69E-42 |
| 0.08902  | 0.031426 | 0.49811  | 0.352759 | 3.94E-15 | 0.46658125 | 1.27E-26 | 0.135819 | 0.00327  |
| 0.56735  | -0.10603 | 0.02193  | -0.23977 | 1.57E-07 | 0.04381607 | 0.34477  | 0.270715 | 2.75E-09 |
| 0.31005  | -0.11333 | 0.01427  | -0.12705 | 0.00597  | 0.16835402 | 0.00026  | 0.432453 | 1.05E-22 |
| 0.83397  | -0.11738 | 0.01113  | -0.12672 | 0.0061   | 0.17880834 | 0.0001   | 0.437527 | 2.93E-23 |
| 0.00707  | 0.085446 | 0.06505  | 0.049681 | 0.28399  | 0.47912008 | 3.56E-28 | 0.651945 | 7.40E-58 |
| 0.07757  | -0.26361 | 7.30E-09 | -0.27759 | 1.04E-09 | 0.16125021 | 0.00047  | 0.424755 | 7.02E-22 |
| 0.72138  | 0.13973  | 0.00248  | 0.205364 | 7.68E-06 | 0.52981953 | 3.73E-35 | 0.698195 | 1.70E-69 |
| 0.24673  | 0.151865 | 0.00099  | 0.143939 | 0.00182  | 0.37681476 | 3.34E-17 | 0.555304 | 3.92E-39 |
| 0.04658  | 0.046064 | 0.32056  | -0.00117 | 0.9798   | 0.29445933 | 8.54E-11 | 0.492906 | 5.86E-30 |
| 0.01822  | 0.015665 | 0.73564  | -0.13058 | 0.00471  | 0.17983232 | 9.32E-05 | 0.44479  | 4.54E-24 |
| 0.86848  | -0.24634 | 6.95E-08 | -0.21928 | 1.71E-06 | -0.0327968 | 0.47954  | 0.223704 | 1.04E-06 |
| 0.02743  | 0.173034 | 0.00017  | 0.159231 | 0.00055  | -0.0861701 | 0.0628   | -0.36594 | 3.03E-16 |
| 2.60E-11 | -0.08772 | 0.0582   | -0.0444  | 0.33833  | 0.13965245 | 0.00249  | 0.303169 | 2.20E-11 |
| 0.07058  | 0.224361 | 9.68E-07 | -0.01381 | 0.76601  | 0.17107169 | 0.0002   | 0.502728 | 2.80E-31 |
| 0.27977  | -0.06874 | 0.13802  | -0.01066 | 0.81829  | -0.0127131 | 0.78408  | -0.27172 | 2.39E-09 |
| 0.28208  | 0.023269 | 0.61598  | 0.095611 | 0.03889  | -0.3425598 | 2.65E-14 | -0.54681 | 9.07E-38 |
| 0.69204  | 0.175986 | 0.00013  | 0.086863 | 0.0607   | 0.23094065 | 4.52E-07 | 0.431898 | 1.21E-22 |
| 0.49312  | -0.04189 | 0.36636  | -0.19881 | 1.50E-05 | 0.12548017 | 0.00663  | 0.382689 | 9.78E-18 |
| 0.27728  | 0.130929 | 0.0046   | 0.055566 | 0.23072  | 0.16439417 | 0.00036  | 0.418921 | 2.86E-21 |
| 0.21232  | -0.30858 | 9.25E-12 | -0.33748 | 6.65E-14 | -0.0165119 | 0.72192  | 0.139052 | 0.0026   |
| 0.65836  | -0.05789 | 0.21176  | -0.09854 | 0.03326  | 0.15233444 | 0.00096  | 0.241757 | 1.23E-07 |

|          |          |          |          |          |            |          |          |          |
|----------|----------|----------|----------|----------|------------|----------|----------|----------|
| 0.35191  | -0.18843 | 4.17E-05 | -0.16576 | 0.00032  | 0.11230568 | 0.01518  | 0.271562 | 2.44E-09 |
| 2.26E-05 | -0.0484  | 0.2966   | -0.01988 | 0.66823  | 0.2068278  | 6.59E-06 | 0.386921 | 3.98E-18 |
| 0.00081  | -0.09729 | 0.03557  | -0.04996 | 0.28133  | 0.27962238 | 7.77E-10 | 0.37286  | 7.52E-17 |
| 0.19772  | 0.056522 | 0.22279  | 0.019315 | 0.67717  | 0.47758678 | 5.56E-28 | 0.702025 | 1.47E-70 |
| 0.26373  | 0.016023 | 0.72982  | -0.13073 | 0.00466  | 0.1793998  | 9.69E-05 | 0.510671 | 2.22E-32 |
| 0.02405  | 0.112329 | 0.01516  | 0.099708 | 0.03122  | 0.29977778 | 3.75E-11 | 0.533105 | 1.20E-35 |
| 2.17E-05 | -0.055   | 0.23552  | -0.23848 | 1.84E-07 | 0.13240679 | 0.00415  | 0.379575 | 1.88E-17 |
| 0.09473  | 0.256791 | 1.81E-08 | 0.145971 | 0.00156  | 0.36319886 | 5.22E-16 | 0.478198 | 4.66E-28 |
| 0.26633  | 0.046006 | 0.32117  | -0.02454 | 0.59686  | 0.15504904 | 0.00077  | 0.265822 | 5.40E-09 |
| 0.20125  | 0.148574 | 0.00128  | 0.019192 | 0.67912  | 0.43012789 | 1.88E-22 | 0.660638 | 6.92E-60 |
| 0.13586  | -0.1539  | 0.00085  | -0.07341 | 0.11312  | 0.22800707 | 6.36E-07 | 0.460766 | 6.37E-26 |
| 0.05031  | 0.312858 | 4.61E-12 | 0.105671 | 0.02238  | 0.35994624 | 9.88E-16 | 0.598555 | 9.98E-47 |
| 0.0102   | 0.181394 | 8.07E-05 | -0.10237 | 0.02696  | 0.20987068 | 4.78E-06 | 0.500588 | 5.47E-31 |
| 0.79864  | 0.346757 | 1.22E-14 | 0.159594 | 0.00054  | 0.37796171 | 2.63E-17 | 0.634718 | 5.02E-54 |
| 0.27275  | 0.011104 | 0.81085  | 0.1723   | 0.00018  | 0.53630068 | 3.91E-36 | 0.742754 | 4.90E-83 |
| 0.20048  | 0.335874 | 8.88E-14 | -0.06501 | 0.16075  | 0.1588992  | 0.00057  | 0.426408 | 4.69E-22 |
| 0.01984  | 0.036378 | 0.43288  | -0.33572 | 9.13E-14 | -0.1496917 | 0.00118  | 0.089566 | 0.05308  |
| 0.75178  | 0.19306  | 2.66E-05 | 0.132429 | 0.00415  | 0.45370917 | 4.31E-25 | 0.697319 | 2.97E-69 |
| 0.2652   | 0.326982 | 4.25E-13 | -0.1022  | 0.02721  | 0.04718688 | 0.30889  | 0.231976 | 4.00E-07 |
| 0.76886  | 0.399965 | 2.29E-19 | 0.140307 | 0.00237  | 0.2450293  | 8.19E-08 | 0.487515 | 2.99E-29 |
| 0.0809   | 0.231748 | 4.11E-07 | 0.114937 | 0.01294  | 0.33512934 | 1.01E-13 | 0.550963 | 1.97E-38 |
| 0.00124  | 0.210349 | 4.54E-06 | 0.12257  | 0.00801  | 0.39493794 | 6.98E-19 | 0.698042 | 1.88E-69 |
| 0.85154  | 0.01023  | 0.82549  | -0.2133  | 3.31E-06 | 0.19079238 | 3.32E-05 | 0.382931 | 9.30E-18 |
| 0.61889  | 0.0422   | 0.36287  | -0.09008 | 0.05172  | 0.299406   | 3.98E-11 | 0.380417 | 1.58E-17 |
| 0.03468  | -0.12822 | 0.00552  | -0.0407  | 0.38018  | 0.2988049  | 4.37E-11 | 0.402359 | 1.34E-19 |
| 0.08453  | 0.180916 | 8.44E-05 | -0.1063  | 0.02158  | 0.04919773 | 0.28871  | 0.289459 | 1.82E-10 |
| 0.00221  | -0.06284 | 0.17521  | -0.10345 | 0.02538  | 0.19796815 | 1.64E-05 | 0.435097 | 5.42E-23 |
| 0.11409  | 0.235386 | 2.67E-07 | 0.04808  | 0.29982  | 0.17250594 | 0.00018  | 0.422871 | 1.11E-21 |
| 0.07896  | 0.307397 | 1.12E-11 | 0.227246 | 6.95E-07 | 0.36233319 | 6.19E-16 | 0.447732 | 2.10E-24 |
| 0.51311  | 0.354883 | 2.63E-15 | 0.149443 | 0.0012   | 0.26723803 | 4.45E-09 | 0.418317 | 3.30E-21 |
| 0.02031  | -0.08501 | 0.06643  | -0.03697 | 0.42538  | -0.1157932 | 0.01228  | -0.44808 | 1.92E-24 |
| 0.24854  | -0.15142 | 0.00103  | -0.07957 | 0.08587  | 0.14761555 | 0.00138  | 0.258879 | 1.37E-08 |
| 0.00787  | 0.290082 | 1.66E-10 | 0.089351 | 0.05366  | 0.33788126 | 6.19E-14 | 0.50669  | 7.97E-32 |
| 0.06828  | 0.012074 | 0.79469  | -0.03765 | 0.41694  | 0.38587443 | 4.98E-18 | 0.536459 | 3.70E-36 |
| 0.68292  | 0.173117 | 0.00017  | 0.042871 | 0.35528  | 0.22467164 | 9.34E-07 | 0.520467 | 8.89E-34 |
| 0.91389  | 0.025529 | 0.58211  | -0.17583 | 0.00013  | 0.04967943 | 0.284    | 0.218182 | 1.94E-06 |
| 0.01938  | 0.218112 | 1.95E-06 | -0.00301 | 0.9482   | 0.14442606 | 0.00175  | 0.4401   | 1.52E-23 |
| 0.00586  | 0.139513 | 0.00251  | 0.007512 | 0.87139  | 0.24806874 | 5.59E-08 | 0.316707 | 2.44E-12 |
| 0.19688  | 0.428808 | 2.60E-22 | 0.120614 | 0.00908  | 0.34032696 | 3.98E-14 | 0.612551 | 1.93E-49 |
| 0.00014  | -0.19876 | 1.51E-05 | -0.23965 | 1.59E-07 | 0.11747731 | 0.01106  | 0.405723 | 6.23E-20 |
| 0.0007   | 0.303597 | 2.06E-11 | 0.160473 | 0.0005   | 0.20998278 | 4.72E-06 | 0.409666 | 2.52E-20 |
| 0.0043   | 0.146584 | 0.00149  | 0.00091  | 0.98435  | 0.06813013 | 0.14154  | 0.257816 | 1.58E-08 |
| 0.03614  | 0.07208  | 0.11983  | 0.163626 | 0.00038  | 0.31711193 | 2.28E-12 | 0.431195 | 1.44E-22 |
| 0.40406  | 0.171671 | 0.00019  | -0.09476 | 0.04067  | 0.28475462 | 3.67E-10 | 0.607993 | 1.53E-48 |
| 0.64953  | 0.18705  | 4.76E-05 | -0.04935 | 0.28721  | 0.13144454 | 0.00444  | 0.248597 | 5.22E-08 |



|          |          |          |          |          |            |          |          |          |
|----------|----------|----------|----------|----------|------------|----------|----------|----------|
| 0.6459   | -0.08637 | 0.06219  | -0.214   | 3.06E-06 | 0.22171537 | 1.31E-06 | 0.345069 | 1.67E-14 |
| 0.06953  | -0.0213  | 0.6462   | -0.16137 | 0.00046  | 0.31693253 | 2.35E-12 | 0.412558 | 1.28E-20 |
| 0.23482  | 0.138782 | 0.00265  | 0.037107 | 0.4237   | 0.25745504 | 1.66E-08 | 0.527993 | 6.99E-35 |
| 0.01726  | -0.07882 | 0.08886  | -0.03918 | 0.39826  | 0.20257679 | 1.03E-05 | 0.423817 | 8.81E-22 |
| 0.79251  | 0.108662 | 0.01883  | 0.109847 | 0.01757  | 0.25907973 | 1.34E-08 | 0.425919 | 5.28E-22 |
| 0.18781  | 0.179963 | 9.21E-05 | 0.032627 | 0.48182  | 0.4161819  | 5.48E-21 | 0.630801 | 3.45E-53 |
| 0.12164  | 0.106738 | 0.02105  | 0.021057 | 0.64991  | 0.28064648 | 6.70E-10 | 0.453057 | 5.14E-25 |
| 0.23605  | 0.110285 | 0.01712  | 0.241228 | 1.31E-07 | -0.0041138 | 0.92935  | -0.30298 | 2.27E-11 |
| 0.96673  | 0.20062  | 1.25E-05 | 0.025448 | 0.58331  | 0.40127675 | 1.70E-19 | 0.65356  | 3.14E-58 |
| 0.19002  | 0.176658 | 0.00012  | 0.182923 | 7.01E-05 | 0.33259698 | 1.59E-13 | 0.520468 | 8.89E-34 |
| 4.77E-05 | 0.032137 | 0.48843  | 0.038342 | 0.40843  | 0.42078524 | 1.83E-21 | 0.549307 | 3.63E-38 |
| 0.05758  | -0.00136 | 0.97661  | -0.13466 | 0.00355  | 0.18098729 | 8.38E-05 | 0.388275 | 2.98E-18 |
| 0.0845   | -0.02359 | 0.61115  | -0.12182 | 0.00841  | 0.1173337  | 0.01116  | 0.275731 | 1.36E-09 |
| 0.02556  | 0.257977 | 1.55E-08 | 0.136947 | 0.00302  | 0.51736817 | 2.49E-33 | 0.64305  | 7.56E-56 |
| 0.75451  | 0.204983 | 7.99E-06 | -0.13876 | 0.00265  | 0.12661753 | 0.00615  | 0.488937 | 1.95E-29 |
| 0.03897  | 0.03656  | 0.43057  | -0.14382 | 0.00183  | 0.27146367 | 2.48E-09 | 0.543836 | 2.66E-37 |
| 0.03602  | 0.007149 | 0.87755  | -0.0378  | 0.41513  | 0.24006199 | 1.51E-07 | 0.355145 | 2.50E-15 |
| 0.00936  | 0.019876 | 0.66834  | 0.033044 | 0.47623  | 0.42970496 | 2.08E-22 | 0.660378 | 7.97E-60 |
| 0.0311   | 0.026343 | 0.57013  | -0.24539 | 7.83E-08 | 0.13597136 | 0.00324  | 0.429947 | 1.96E-22 |
| 0.37742  | 0.249248 | 4.81E-08 | 0.079397 | 0.08655  | 0.25592961 | 2.03E-08 | 0.503367 | 2.29E-31 |
| 0.16714  | 0.262546 | 8.42E-09 | 0.025605 | 0.581    | 0.18769183 | 4.47E-05 | 0.423112 | 1.05E-21 |
| 0.13033  | 0.463135 | 3.32E-26 | 0.232087 | 3.95E-07 | 0.29213005 | 1.22E-10 | 0.435119 | 5.39E-23 |
| 0.00388  | -0.05614 | 0.22597  | 0.035988 | 0.43782  | 0.37157275 | 9.77E-17 | 0.535679 | 4.86E-36 |
| 0.32179  | 0.178204 | 0.00011  | -0.00683 | 0.883    | 0.22608254 | 7.95E-07 | 0.347061 | 1.15E-14 |
| 0.25478  | 0.084014 | 0.06969  | 0.08697  | 0.06039  | 0.36773022 | 2.12E-16 | 0.523999 | 2.72E-34 |
| 0.17985  | 0.250108 | 4.31E-08 | 0.003985 | 0.93156  | 0.12717444 | 0.00592  | 0.346209 | 1.35E-14 |
| 0.23152  | 0.066948 | 0.1486   | -0.07795 | 0.09246  | -0.2880482 | 2.25E-10 | -0.51017 | 2.61E-32 |
| 0.16921  | -0.1908  | 3.32E-05 | -0.10684 | 0.02093  | -0.2124045 | 3.64E-06 | -0.46648 | 1.31E-26 |
| 0.10148  | 0.169753 | 0.00023  | 0.077635 | 0.09379  | 0.33235163 | 1.66E-13 | 0.487611 | 2.90E-29 |
| 0.09851  | 0.119906 | 0.0095   | -0.03773 | 0.41598  | 0.12337436 | 0.0076   | 0.298551 | 4.54E-11 |
| 0.37292  | 0.034557 | 0.45627  | 0.042812 | 0.35594  | 0.23314922 | 3.48E-07 | 0.348649 | 8.56E-15 |
| 0.00019  | 0.071923 | 0.12064  | -0.12822 | 0.00552  | 0.37075021 | 1.15E-16 | 0.553575 | 7.48E-39 |
| 0.1792   | -0.09356 | 0.0433   | -0.17304 | 0.00017  | 0.15808544 | 0.00061  | 0.384289 | 6.97E-18 |
| 0.95764  | 0.281212 | 6.17E-10 | 0.199238 | 1.44E-05 | 0.44196101 | 9.44E-24 | 0.606951 | 2.44E-48 |
| 0.34268  | 0.116108 | 0.01204  | 0.277104 | 1.12E-09 | 0.27080308 | 2.72E-09 | -0.08239 | 0.07529  |
| 0.02585  | -0.06621 | 0.15316  | -0.26938 | 3.31E-09 | 0.02839591 | 0.54046  | 0.229928 | 5.09E-07 |
| 0.00032  | -0.07389 | 0.1108   | -0.08323 | 0.07236  | 0.31319116 | 4.36E-12 | 0.538651 | 1.70E-36 |
| 0.19779  | 0.293105 | 1.05E-10 | 0.134857 | 0.0035   | 0.3510631  | 5.44E-15 | 0.667344 | 1.69E-61 |
| 0.45665  | -0.01579 | 0.73368  | -0.04063 | 0.38101  | 0.32894838 | 3.02E-13 | 0.45529  | 2.82E-25 |
| 0.90964  | 0.023699 | 0.60946  | 0.094696 | 0.0408   | 0.02940744 | 0.52612  | -0.23695 | 2.21E-07 |
| 0.39254  | 0.156213 | 0.00071  | 0.072806 | 0.11613  | 0.28757372 | 2.42E-10 | 0.597125 | 1.86E-46 |
| 0.03401  | 0.015291 | 0.74171  | 0.004308 | 0.92603  | 0.30622564 | 1.35E-11 | 0.476675 | 7.24E-28 |
| 0.3289   | -0.11089 | 0.01652  | 0.055859 | 0.22827  | 0.23251014 | 3.76E-07 | 0.343722 | 2.14E-14 |
| 0.00574  | 0.091554 | 0.048    | -0.05169 | 0.26493  | 0.12785086 | 0.00566  | 0.27758  | 1.04E-09 |
| 0.33472  | 0.22367  | 1.05E-06 | -0.07396 | 0.11046  | 0.09015925 | 0.05152  | 0.371941 | 9.07E-17 |

|          |          |          |          |          |            |          |          |          |
|----------|----------|----------|----------|----------|------------|----------|----------|----------|
| 2.96E-10 | 0.188448 | 4.16E-05 | 0.142281 | 0.00206  | 0.34973453 | 6.98E-15 | 0.544134 | 2.39E-37 |
| 0.00037  | 0.322226 | 9.61E-13 | 0.071111 | 0.1249   | 0.29754948 | 5.31E-11 | 0.480571 | 2.33E-28 |
| 2.04E-16 | -0.13425 | 0.00366  | -0.07978 | 0.08504  | 0.24986579 | 4.44E-08 | 0.387047 | 3.87E-18 |
| 0.00497  | 0.11487  | 0.01299  | -0.00428 | 0.92659  | 0.18276858 | 7.11E-05 | 0.36001  | 9.76E-16 |
| 0.00254  | 0.152852 | 0.00092  | -0.04372 | 0.3458   | 0.22776637 | 6.54E-07 | 0.417507 | 4.01E-21 |
| 0.75682  | -0.01814 | 0.69573  | -0.0265  | 0.56782  | 0.10451561 | 0.0239   | 0.250365 | 4.17E-08 |
| 0.72617  | 0.143122 | 0.00193  | 0.05294  | 0.25355  | 0.24550588 | 7.72E-08 | 0.422035 | 1.36E-21 |
| 0.17525  | 0.210885 | 4.29E-06 | -0.00809 | 0.8616   | 0.20819634 | 5.71E-06 | 0.516201 | 3.66E-33 |
| 0.48639  | 0.329801 | 2.60E-13 | 0.016946 | 0.71492  | 0.13931627 | 0.00255  | 0.291413 | 1.36E-10 |
| 0.35831  | 0.105079 | 0.02315  | 0.023417 | 0.61373  | 0.30776175 | 1.06E-11 | 0.481462 | 1.80E-28 |
| 0.27713  | 0.028258 | 0.54242  | -0.10643 | 0.02142  | 0.16469599 | 0.00035  | 0.354438 | 2.86E-15 |
| 0.47279  | 0.263953 | 6.96E-09 | -0.03569 | 0.44169  | 0.27416617 | 1.69E-09 | 0.400298 | 2.12E-19 |
| 0.34256  | 0.136301 | 0.00316  | 0.084217 | 0.06902  | 0.20731742 | 6.26E-06 | 0.338378 | 5.66E-14 |
| 0.86171  | 0.073486 | 0.11275  | -0.00694 | 0.88115  | 0.18640822 | 5.05E-05 | 0.334747 | 1.09E-13 |
| 0.98874  | 0.126505 | 0.00619  | -0.10999 | 0.01742  | 0.13987249 | 0.00245  | 0.343284 | 2.32E-14 |
| 0.5047   | 0.032328 | 0.48584  | -0.09917 | 0.03215  | 0.27786986 | 1.00E-09 | 0.585154 | 2.98E-44 |
| 0.7398   | 0.12577  | 0.0065   | 0.021158 | 0.64835  | 0.18208298 | 7.58E-05 | 0.295406 | 7.39E-11 |
| 0.85394  | 0.259579 | 1.25E-08 | 0.207222 | 6.33E-06 | 0.35774558 | 1.52E-15 | 0.384697 | 6.40E-18 |
| 0.06375  | -0.08253 | 0.07477  | -0.40351 | 1.03E-19 | 0.1116026  | 0.01583  | 0.25538  | 2.18E-08 |
| 0.1497   | 0.077109 | 0.09604  | 0.108562 | 0.01894  | 0.37569628 | 4.20E-17 | 0.476154 | 8.41E-28 |
| 0.95539  | -0.13731 | 0.00294  | -0.2641  | 6.82E-09 | -0.0719923 | 0.12028  | 0.115044 | 0.01286  |
| 0.74427  | -0.04278 | 0.35625  | 0.001484 | 0.97448  | 0.05588792 | 0.22803  | -0.2624  | 8.59E-09 |
| 0.81787  | 0.074532 | 0.10771  | -0.20583 | 7.32E-06 | 0.16838323 | 0.00026  | 0.46232  | 4.16E-26 |
| 0.01536  | 0.169305 | 0.00024  | 0.196946 | 1.81E-05 | -0.1205503 | 0.00912  | -0.24496 | 8.26E-08 |
| 0.42622  | 0.1095   | 0.01793  | 0.065797 | 0.15572  | 0.21448258 | 2.91E-06 | 0.402463 | 1.31E-19 |
| 0.00737  | 0.149788 | 0.00117  | 0.057833 | 0.21222  | 0.14441816 | 0.00175  | 0.24755  | 5.96E-08 |
| 0.39549  | 0.018737 | 0.68632  | -0.04961 | 0.28466  | 0.15526543 | 0.00076  | 0.291334 | 1.37E-10 |
| 0.00266  | 0.189955 | 3.60E-05 | 0.067952 | 0.14259  | 0.41594169 | 5.80E-21 | 0.56556  | 7.82E-41 |
| 0.46141  | 0.191051 | 3.24E-05 | 0.214127 | 3.02E-06 | 0.36725553 | 2.33E-16 | 0.538875 | 1.57E-36 |
| 0.04734  | -0.01801 | 0.69795  | -0.1783  | 0.00011  | 0.32936828 | 2.81E-13 | 0.528056 | 6.84E-35 |
| 0.08155  | -0.08359 | 0.07112  | 0.104624 | 0.02375  | 0.42648609 | 4.60E-22 | 0.60341  | 1.18E-47 |
| 0.35585  | 0.061799 | 0.18247  | 0.100257 | 0.03029  | 0.3881118  | 3.08E-18 | 0.652356 | 5.96E-58 |
| 0.11773  | 0.157539 | 0.00063  | 0.127295 | 0.00587  | 0.40695623 | 4.70E-20 | 0.681767 | 4.09E-65 |
| 0.73502  | 0.26889  | 3.54E-09 | 0.113583 | 0.01405  | 0.39211542 | 1.30E-18 | 0.665955 | 3.67E-61 |
| 0.00988  | -0.10023 | 0.03034  | 0.003493 | 0.93999  | 0.24283387 | 1.08E-07 | 0.26207  | 8.98E-09 |
| 0.2518   | -0.11854 | 0.01035  | -0.14265 | 0.002    | 0.04509653 | 0.33084  | 0.142062 | 0.00209  |
| 0.63965  | -0.23257 | 3.73E-07 | -0.09718 | 0.03577  | 0.05578391 | 0.2289   | 0.085359 | 0.06532  |
| 0.00056  | -0.03788 | 0.41406  | -0.08475 | 0.06728  | -0.0028795 | 0.95052  | -0.06223 | 0.17946  |
| 0.5719   | 0.036056 | 0.43696  | -0.00321 | 0.9449   | 0.04664216 | 0.31452  | -0.1381  | 0.00278  |
| 3.99E-16 | -0.30708 | 1.18E-11 | -0.11731 | 0.01118  | 0.13369907 | 0.0038   | 0.166151 | 0.00031  |
| 0.80102  | -0.09007 | 0.05177  | 0.024131 | 0.60296  | 0.05741982 | 0.21551  | -0.01071 | 0.81745  |
| 0.35757  | 0.097979 | 0.03428  | 0.205499 | 7.58E-06 | -0.0377077 | 0.41623  | -0.05163 | 0.26551  |
| 0.78691  | -0.2651  | 5.96E-09 | -0.25767 | 1.61E-08 | -0.141197  | 0.00222  | -0.16944 | 0.00023  |
| 0.01014  | -0.26759 | 4.24E-09 | -0.23316 | 3.48E-07 | -0.0795781 | 0.08583  | 0.00709  | 0.87855  |
| 0.46102  | -0.12616 | 0.00634  | -0.0133  | 0.7743   | 0.12614998 | 0.00634  | 0.15366  | 0.00086  |

|          |          |          |          |          |            |          |          |          |
|----------|----------|----------|----------|----------|------------|----------|----------|----------|
| 0.29989  | -0.12233 | 0.00813  | -0.14942 | 0.0012   | 0.0189879  | 0.68234  | 0.09945  | 0.03166  |
| 0.12734  | -0.10612 | 0.02182  | 0.203763 | 9.07E-06 | 0.06584239 | 0.15543  | -0.04826 | 0.29802  |
| 0.57365  | -0.29833 | 4.70E-11 | -0.21218 | 3.73E-06 | -0.0421522 | 0.36341  | -0.04938 | 0.28691  |
| 9.05E-07 | -0.13571 | 0.0033   | -0.17467 | 0.00015  | 0.04466924 | 0.33545  | 0.069435 | 0.13406  |
| 0.54194  | -0.07543 | 0.10351  | -0.04574 | 0.32396  | -0.2265486 | 7.53E-07 | -0.31181 | 5.47E-12 |
| 0.22956  | -0.01615 | 0.7278   | -0.03015 | 0.51567  | 0.07132506 | 0.12376  | -0.02319 | 0.61719  |
| 0.05487  | -0.11089 | 0.01651  | -0.24091 | 1.36E-07 | -0.0372533 | 0.42188  | 0.062566 | 0.17709  |
| 0.17883  | -0.30462 | 1.75E-11 | -0.3721  | 8.78E-17 | -0.2055028 | 7.57E-06 | -0.23535 | 2.68E-07 |
| 0.27355  | 0.520352 | 9.24E-34 | 0.515511 | 4.59E-33 | 0.14428593 | 0.00177  | -0.05855 | 0.20663  |
| 0.23067  | -0.12205 | 0.00828  | -0.07404 | 0.11008  | 0.04195367 | 0.36568  | 0.029219 | 0.52878  |
| 0.82285  | -0.31831 | 1.86E-12 | -0.20946 | 5.00E-06 | -0.0328338 | 0.47905  | 0.015038 | 0.74585  |
| 8.64E-08 | -0.0811  | 0.08     | 0.08269  | 0.07423  | 0.04988887 | 0.28198  | -0.03261 | 0.48211  |
| 0.30707  | -0.18548 | 5.52E-05 | -0.217   | 2.21E-06 | -0.2719353 | 2.32E-09 | -0.18033 | 8.90E-05 |
| 0.00519  | -0.16652 | 0.0003   | -0.26652 | 4.91E-09 | -0.0679414 | 0.14265  | -0.0124  | 0.78923  |
| 0.00041  | -0.34904 | 7.96E-15 | -0.19124 | 3.18E-05 | 0.0399711  | 0.38879  | 0.029251 | 0.52833  |
| 0.66373  | -0.31091 | 6.34E-12 | -0.1195  | 0.00974  | 0.07390453 | 0.11071  | 0.114225 | 0.01351  |
| 0.27708  | -0.25857 | 1.43E-08 | -0.21866 | 1.84E-06 | -0.036172  | 0.43548  | 0.044203 | 0.34052  |
| 0.01555  | -0.24887 | 5.05E-08 | -0.13272 | 0.00406  | -0.0189833 | 0.68241  | -0.01056 | 0.81989  |
| 0.78905  | -0.28603 | 3.04E-10 | -0.23714 | 2.16E-07 | -0.0588585 | 0.20421  | 0.011446 | 0.80515  |
| 0.58159  | -0.03528 | 0.44685  | -0.01297 | 0.77979  | 0.01531476 | 0.74133  | 0.007169 | 0.87721  |
| 0.12821  | 0.005862 | 0.89946  | 0.091844 | 0.04729  | 0.10581619 | 0.0222   | 0.030594 | 0.50956  |
| 0.9525   | -0.28552 | 3.28E-10 | -0.27382 | 1.78E-09 | -0.0436679 | 0.3464   | -0.00518 | 0.91106  |
| 0.81462  | -0.0586  | 0.20619  | -0.09818 | 0.03391  | 0.0963443  | 0.03741  | 0.196529 | 1.89E-05 |
| 0.63147  | 0.161379 | 0.00046  | 0.188738 | 4.05E-05 | 0.07211238 | 0.11966  | -0.02589 | 0.57674  |
| 0.17118  | -0.09941 | 0.03173  | 0.049012 | 0.29053  | 0.00450628 | 0.92263  | -0.00822 | 0.85944  |
| 0.00644  | -0.18782 | 4.42E-05 | -0.11154 | 0.01589  | -0.1096763 | 0.01774  | -0.04104 | 0.37618  |
| 0.21868  | -0.13375 | 0.00378  | -0.03086 | 0.50585  | 0.09445808 | 0.04132  | 0.134625 | 0.00356  |
| 0.00194  | -0.3319  | 1.80E-13 | -0.12509 | 0.0068   | 0.00876587 | 0.85015  | -0.0307  | 0.50807  |
| 0.43334  | -0.05561 | 0.23032  | -0.11303 | 0.01453  | 0.10716207 | 0.02054  | 0.283281 | 4.56E-10 |
| 0.27507  | -0.24668 | 6.65E-08 | -0.14049 | 0.00234  | -0.0528104 | 0.25471  | -0.02502 | 0.58959  |
| 0.27829  | -0.49524 | 2.87E-30 | -0.2461  | 7.16E-08 | 0.21397054 | 3.08E-06 | 0.183139 | 6.87E-05 |
| 0.00495  | -0.12822 | 0.00552  | -0.05909 | 0.20248  | -0.0231934 | 0.61712  | 0.01424  | 0.7589   |
| 0.35335  | -0.06688 | 0.14899  | -0.02772 | 0.55014  | 0.0192011  | 0.67897  | 0.027247 | 0.55697  |
| 0.01105  | -0.0663  | 0.15257  | 0.070718 | 0.127    | 0.05578281 | 0.22891  | -0.06775 | 0.14376  |
| 1.52E-09 | -0.22492 | 9.08E-07 | -0.07919 | 0.08738  | 0.00052699 | 0.99094  | -0.08422 | 0.06901  |
| 0.43186  | 0.138997 | 0.00261  | 0.258714 | 1.41E-08 | 0.15033793 | 0.00112  | 0.050978 | 0.27159  |
| 0.53528  | 0.066469 | 0.15153  | 0.078236 | 0.09127  | -0.0476773 | 0.30389  | -0.01613 | 0.72804  |
| 0.00264  | -0.07395 | 0.1105   | -0.0178  | 0.70123  | -0.1492351 | 0.00122  | -0.21367 | 3.18E-06 |
| 0.02381  | -0.07177 | 0.12145  | -0.00096 | 0.98341  | 0.1147992  | 0.01305  | 0.065431 | 0.15804  |
| 0.14521  | -0.23364 | 3.28E-07 | -0.39652 | 4.92E-19 | -0.066249  | 0.15289  | 0.130271 | 0.00481  |
| 0.00044  | -0.04346 | 0.34869  | -0.00063 | 0.9891   | -0.0377268 | 0.416    | -0.05296 | 0.25339  |
| 0.09286  | -0.18324 | 6.81E-05 | -0.16036 | 0.0005   | -0.0164519 | 0.72289  | 0.101007 | 0.02907  |
| 0.00219  | -0.19953 | 1.40E-05 | -0.15278 | 0.00093  | 0.1535723  | 0.00087  | 0.261314 | 9.94E-09 |
| 0.00091  | -0.32243 | 9.29E-13 | -0.22957 | 5.31E-07 | -0.0054844 | 0.90591  | -0.03794 | 0.4134   |
| 0.00221  | -0.28642 | 2.87E-10 | -0.38072 | 1.48E-17 | -0.1996227 | 1.39E-05 | -0.08892 | 0.05482  |

|          |          |          |          |          |            |          |          |          |
|----------|----------|----------|----------|----------|------------|----------|----------|----------|
| 0.1619   | -0.27419 | 1.69E-09 | -0.29133 | 1.38E-10 | -0.0624011 | 0.17824  | 0.040374 | 0.38402  |
| 2.12E-06 | -0.38541 | 5.50E-18 | -0.27184 | 2.35E-09 | -0.0224125 | 0.62902  | 0.003004 | 0.94838  |
| 0.06505  | -0.36254 | 5.95E-16 | -0.33468 | 1.10E-13 | -0.1067848 | 0.021    | -0.16291 | 0.00041  |
| 0.72892  | -0.27021 | 2.95E-09 | -0.14437 | 0.00176  | 0.05983591 | 0.19679  | 0.01178  | 0.79957  |
| 0.93486  | 0.002081 | 0.96423  | -0.00106 | 0.98179  | 0.16585177 | 0.00032  | 0.338538 | 5.50E-14 |
| 0.61388  | -0.35548 | 2.35E-15 | -0.29044 | 1.57E-10 | -0.0426371 | 0.35792  | -0.05895 | 0.2035   |
| 0.4366   | -0.03401 | 0.46339  | 0.087037 | 0.06019  | 0.06524639 | 0.15922  | 0.084181 | 0.06914  |
| 0.61242  | -0.12678 | 0.00608  | -0.05892 | 0.20373  | 0.21648622 | 2.34E-06 | 0.366696 | 2.61E-16 |
| 0.57733  | -0.00876 | 0.85026  | -0.01805 | 0.69728  | 0.08976376 | 0.05256  | 0.233886 | 3.19E-07 |
| 0.43443  | -0.20576 | 7.38E-06 | -0.12133 | 0.00868  | 0.01686314 | 0.71626  | -0.01204 | 0.79523  |
| 0.06413  | -0.10444 | 0.024    | -0.07563 | 0.10262  | -0.0981169 | 0.03403  | -0.27934 | 8.09E-10 |
| 0.13373  | -0.18579 | 5.36E-05 | -0.11603 | 0.0121   | -0.0880145 | 0.05735  | -0.10869 | 0.0188   |
| 0.34108  | -0.28407 | 4.06E-10 | -0.13874 | 0.00266  | 0.00041858 | 0.9928   | 0.025274 | 0.58589  |
| 0.00195  | 0.006341 | 0.8913   | -0.03006 | 0.51692  | 0.02840683 | 0.5403   | 0.000558 | 0.99041  |
| 0.348    | -0.29829 | 4.73E-11 | -0.1994  | 1.42E-05 | 0.0004432  | 0.99238  | 0.079273 | 0.08704  |
| 0.06959  | -0.31374 | 3.98E-12 | -0.1132  | 0.01439  | 0.02159143 | 0.64165  | 0.020743 | 0.6548   |
| 0.21281  | -0.18825 | 4.24E-05 | -0.10918 | 0.01827  | 0.02151174 | 0.64288  | 0.001602 | 0.97245  |
| 0.12462  | -0.18987 | 3.63E-05 | -0.11813 | 0.01062  | 0.02422508 | 0.60154  | 0.025633 | 0.58058  |
| 0.00231  | 0.248885 | 5.04E-08 | 0.255724 | 2.08E-08 | 0.11751066 | 0.01104  | 0.133573 | 0.00383  |
| 0.78028  | -0.28869 | 2.05E-10 | -0.18874 | 4.05E-05 | -0.0045676 | 0.92158  | 0.046907 | 0.31177  |
| 0.52176  | 0.306825 | 1.23E-11 | 0.129078 | 0.00521  | -0.2141427 | 3.02E-06 | -0.17604 | 0.00013  |
| 0.40385  | -0.25608 | 1.99E-08 | -0.13793 | 0.00282  | 0.04627168 | 0.31838  | 0.07174  | 0.12158  |
| 5.27E-06 | -0.15655 | 0.00069  | -0.03497 | 0.45089  | 0.14713999 | 0.00143  | 0.081919 | 0.07698  |
| 0.0074   | -0.41161 | 1.60E-20 | -0.23013 | 4.97E-07 | -0.0073333 | 0.87442  | -0.01836 | 0.69238  |
| 0.00152  | -0.1829  | 7.02E-05 | -0.14148 | 0.00218  | 0.01179675 | 0.7993   | 0.241582 | 1.26E-07 |
| 0.63601  | -0.22532 | 8.68E-07 | -0.18585 | 5.33E-05 | 0.09358145 | 0.04325  | 0.18061  | 8.68E-05 |
| 0.40297  | -0.1704  | 0.00022  | -0.08869 | 0.05546  | 0.15769855 | 0.00063  | 0.198889 | 1.49E-05 |
| 0.4503   | -0.14565 | 0.0016   | -0.26345 | 7.45E-09 | -0.1011842 | 0.02879  | 0.010091 | 0.82783  |
| 1.40E-10 | -0.16654 | 0.0003   | -0.25338 | 2.83E-08 | -0.03859   | 0.4054   | 0.101035 | 0.02903  |
| 0.00094  | 0.021132 | 0.64876  | 0.321284 | 1.13E-12 | 0.06283208 | 0.17525  | 0.060518 | 0.19172  |
| 0.38777  | 0.045617 | 0.32528  | -0.0503  | 0.27804  | 0.08843838 | 0.05616  | 0.332899 | 1.51E-13 |
| 0.15074  | -0.08062 | 0.08179  | -0.14697 | 0.00145  | 0.04545688 | 0.32698  | 0.164368 | 0.00036  |
| 0.9454   | -0.16798 | 0.00027  | -0.08803 | 0.0573   | 0.04174132 | 0.36811  | 0.100974 | 0.02912  |
| 0.85979  | -0.24354 | 9.87E-08 | -0.03212 | 0.48863  | 0.11964444 | 0.00966  | 0.167473 | 0.00028  |
| 1.56E-07 | -0.13348 | 0.00386  | -0.15748 | 0.00064  | -0.097271  | 0.03561  | -0.00975 | 0.8336   |
| 0.26378  | -0.27544 | 1.41E-09 | -0.32667 | 4.49E-13 | -0.0961844 | 0.03773  | -0.1065  | 0.02135  |
| 0.49544  | -0.02968 | 0.52223  | -0.03232 | 0.48595  | -0.0082456 | 0.85895  | -0.02563 | 0.5806   |
| 0.00054  | -0.15484 | 0.00079  | 0.055286 | 0.23308  | 0.14218607 | 0.00207  | 0.10588  | 0.02211  |
| 0.79858  | -0.05454 | 0.23944  | -0.27686 | 1.15E-09 | -0.2096668 | 4.88E-06 | -0.10758 | 0.02005  |
| 0.20876  | -0.02853 | 0.53855  | -0.16987 | 0.00023  | -0.1708937 | 0.00021  | -0.21089 | 4.29E-06 |
| 0.2093   | 0.026866 | 0.56251  | 0.07882  | 0.08887  | 0.03937384 | 0.39592  | 0.010778 | 0.8163   |
| 0.17837  | -0.20809 | 5.77E-06 | -0.08181 | 0.07737  | 0.09048744 | 0.05068  | 0.120599 | 0.00909  |
| 0.12947  | -0.24795 | 5.67E-08 | -0.1661  | 0.00031  | 0.06208916 | 0.18042  | 0.209066 | 5.21E-06 |
| 0.09888  | -0.06945 | 0.13399  | -0.23961 | 1.60E-07 | -0.1200441 | 0.00941  | -0.06818 | 0.14126  |
| 0.88841  | -0.15471 | 0.00079  | -0.15273 | 0.00093  | 0.21274687 | 3.51E-06 | 0.331957 | 1.78E-13 |

|          |          |          |          |          |            |          |          |          |
|----------|----------|----------|----------|----------|------------|----------|----------|----------|
| 0.00069  | -0.04342 | 0.34916  | 0.097045 | 0.03604  | 0.02762436 | 0.55152  | -0.0736  | 0.11221  |
| 0.07057  | -0.04381 | 0.34483  | -0.15525 | 0.00076  | -0.1206051 | 0.00908  | -0.04242 | 0.36042  |
| 0.73829  | -0.22577 | 8.24E-07 | -0.18819 | 4.27E-05 | -0.0948654 | 0.04044  | -0.13665 | 0.00309  |
| 0.0245   | -0.12817 | 0.00554  | -0.12317 | 0.00771  | 0.03621734 | 0.43491  | 0.058638 | 0.20592  |
| 0.79278  | -0.03597 | 0.43808  | -0.10721 | 0.02048  | -0.0360374 | 0.43719  | -0.13454 | 0.00358  |
| 0.24911  | -0.12616 | 0.00634  | 0.000784 | 0.98652  | -0.0581356 | 0.20984  | -0.18845 | 4.16E-05 |
| 0.15646  | -0.14998 | 0.00115  | 0.049832 | 0.28252  | -0.0255112 | 0.58238  | -0.24132 | 1.30E-07 |
| 0.18125  | -0.28567 | 3.21E-10 | -0.1543  | 0.00082  | 0.01302403 | 0.77893  | -0.05124 | 0.26909  |
| 0.10158  | 0.259549 | 1.26E-08 | 0.123377 | 0.0076   | -0.067997  | 0.14232  | -0.13342 | 0.00387  |
| 2.65E-05 | 0.0134   | 0.77273  | 0.058179 | 0.20949  | 0.10632443 | 0.02156  | 0.185978 | 5.26E-05 |
| 0.35751  | -0.18971 | 3.69E-05 | 0.009222 | 0.84246  | 0.29104384 | 1.44E-10 | 0.434652 | 6.07E-23 |
| 0.20907  | -0.06702 | 0.14814  | 0.037991 | 0.41274  | 0.28882154 | 2.01E-10 | 0.377599 | 2.84E-17 |
| 0.83153  | -0.16362 | 0.00038  | -0.0793  | 0.08692  | 0.1428221  | 0.00197  | 0.132416 | 0.00415  |
| 0.09067  | -0.21622 | 2.41E-06 | -0.13202 | 0.00427  | 0.01693411 | 0.71512  | 0.022043 | 0.6347   |
| 0.03586  | -0.1412  | 0.00222  | 0.154669 | 0.0008   | 0.41640879 | 5.20E-21 | 0.396716 | 4.72E-19 |
| 0.01158  | -0.30076 | 3.21E-11 | -0.33408 | 1.22E-13 | -0.0938975 | 0.04254  | 0.052342 | 0.25895  |
| 0.48387  | -0.18832 | 4.21E-05 | -0.14335 | 0.0019   | -0.0527038 | 0.25567  | -0.12059 | 0.0091   |
| 3.97E-06 | -0.09119 | 0.04891  | -0.06555 | 0.1573   | -0.0787408 | 0.08919  | -0.12598 | 0.00641  |
| 0.75114  | -0.09882 | 0.03276  | -0.03849 | 0.40668  | 0.09753431 | 0.03511  | 0.177684 | 0.00011  |
| 0.05507  | 0.073136 | 0.11448  | 0.1264   | 0.00623  | 0.1863781  | 5.07E-05 | 0.232138 | 3.93E-07 |
| 0.94605  | -0.08601 | 0.06328  | -0.10158 | 0.02816  | 0.01684789 | 0.7165   | 0.125983 | 0.00641  |
| 0.76422  | -0.08116 | 0.07975  | 0.042361 | 0.36104  | 0.49368185 | 4.63E-30 | 0.514842 | 5.72E-33 |
| 0.32025  | -0.21114 | 4.17E-06 | -0.11945 | 0.00977  | -0.0075481 | 0.87077  | 0.041426 | 0.37174  |
| 0.03744  | -0.33631 | 8.21E-14 | -0.23837 | 1.86E-07 | -0.0961871 | 0.03772  | -0.01023 | 0.82553  |
| 0.7885   | -0.1251  | 0.00679  | -0.15518 | 0.00077  | -0.0329264 | 0.47781  | -0.01499 | 0.74659  |
| 0.4818   | -0.14312 | 0.00193  | -0.11828 | 0.01052  | -0.0321989 | 0.48759  | 0.020316 | 0.66145  |
| 0.10337  | -0.24062 | 1.41E-07 | -0.16506 | 0.00034  | -0.0610126 | 0.18811  | -0.03972 | 0.39176  |
| 4.33E-05 | 0.116251 | 0.01194  | 0.155658 | 0.00074  | 0.10750094 | 0.02015  | 0.041435 | 0.37165  |
| 0.03042  | -0.12629 | 0.00628  | -0.02732 | 0.55585  | 0.03758153 | 0.41779  | 0.062184 | 0.17976  |
| 5.54E-09 | -0.18401 | 6.33E-05 | -0.07437 | 0.1085   | 0.11318823 | 0.01439  | 0.206712 | 6.67E-06 |
| 0.83791  | -0.22389 | 1.02E-06 | -0.1747  | 0.00015  | -0.0983625 | 0.03358  | 0.014839 | 0.7491   |
| 0.63151  | -0.09938 | 0.03178  | -0.05993 | 0.19609  | -0.2237437 | 1.04E-06 | -0.12452 | 0.00706  |
| 0.40196  | -0.27931 | 8.13E-10 | -0.20558 | 7.51E-06 | -0.093822  | 0.04271  | -0.05338 | 0.24966  |
| 0.46275  | -0.06816 | 0.14136  | -0.04929 | 0.28781  | 0.02863928 | 0.53699  | 0.02079  | 0.65407  |
| 0.45102  | 0.232762 | 3.65E-07 | 0.049552 | 0.28525  | -0.1179222 | 0.01076  | 0.001292 | 0.97779  |
| 0.8835   | -0.12394 | 0.00733  | -0.12446 | 0.00708  | 0.12398981 | 0.0073   | 0.276977 | 1.14E-09 |
| 0.62738  | 0.134449 | 0.0036   | 0.159308 | 0.00055  | 0.17401396 | 0.00016  | 0.248438 | 5.33E-08 |
| 0.00483  | -0.17297 | 0.00017  | -0.19201 | 2.95E-05 | -0.0674904 | 0.14533  | -0.00405 | 0.93037  |
| 0.00381  | 0.132429 | 0.00415  | 0.129848 | 0.00495  | -0.0420209 | 0.36491  | 0.029196 | 0.5291   |
| 0.76394  | -0.21354 | 3.22E-06 | -0.03008 | 0.51669  | 0.19169952 | 3.04E-05 | 0.099372 | 0.03179  |
| 0.82773  | -0.01141 | 0.80572  | -0.03047 | 0.51127  | -0.17477   | 0.00015  | -0.2414  | 1.28E-07 |
| 0.00297  | -0.20122 | 1.18E-05 | -0.18188 | 7.72E-05 | -0.03482   | 0.45285  | -0.12511 | 0.00679  |
| 0.739    | -0.25464 | 2.40E-08 | -0.17578 | 0.00013  | -0.009839  | 0.83206  | 0.036459 | 0.43185  |
| 0.57716  | -0.21391 | 3.09E-06 | -0.22277 | 1.16E-06 | -0.177913  | 0.00011  | -0.09232 | 0.04616  |
| 0.01564  | -0.03952 | 0.39416  | 0.145839 | 0.00158  | 0.26443882 | 6.52E-09 | 0.344009 | 2.03E-14 |

|          |          |          |          |          |            |          |          |          |
|----------|----------|----------|----------|----------|------------|----------|----------|----------|
| 0.58693  | -0.29749 | 5.35E-11 | -0.16614 | 0.00031  | -0.0042319 | 0.92733  | -0.03101 | 0.5038   |
| 0.82662  | -0.0117  | 0.80087  | 0.030506 | 0.51078  | 0.05006406 | 0.28029  | -0.09029 | 0.05117  |
| 0.06677  | -0.21555 | 2.59E-06 | -0.14088 | 0.00228  | -0.0861754 | 0.06278  | -0.1339  | 0.00375  |
| 0.50935  | -0.13363 | 0.00382  | -0.15291 | 0.00092  | -0.0492209 | 0.28848  | -0.06507 | 0.16037  |
| 1.10E-05 | -0.12569 | 0.00653  | -0.0282  | 0.54319  | 0.14405307 | 0.0018   | 0.213021 | 3.41E-06 |
| 0.32196  | -0.27052 | 2.82E-09 | -0.42427 | 7.90E-22 | -0.4143378 | 8.47E-21 | -0.38473 | 6.35E-18 |
| 0.06983  | 0.255718 | 2.09E-08 | 0.202232 | 1.06E-05 | 0.23099088 | 4.49E-07 | 0.105347 | 0.0228   |
| 0.04107  | -0.04883 | 0.29229  | -0.00869 | 0.85141  | 0.00269994 | 0.9536   | -0.09648 | 0.03714  |
| 0.13258  | -0.20374 | 9.09E-06 | -0.36971 | 1.43E-16 | -0.0997155 | 0.0312   | 0.098826 | 0.03275  |
| 0.74671  | -0.08659 | 0.06154  | -0.05257 | 0.25685  | 0.03907658 | 0.3995   | 0.055019 | 0.23536  |
| 0.68309  | -0.04744 | 0.30632  | -0.11643 | 0.01181  | -0.0801824 | 0.08347  | -0.06069 | 0.19048  |
| 0.26257  | -0.28936 | 1.85E-10 | -0.21241 | 3.64E-06 | -0.0729716 | 0.1153   | -0.07604 | 0.10076  |
| 0.10122  | -0.223   | 1.13E-06 | -0.19612 | 1.97E-05 | 0.04710962 | 0.30968  | 0.177003 | 0.00012  |
| 0.15625  | -0.03373 | 0.46709  | -0.27172 | 2.39E-09 | -0.2182764 | 1.92E-06 | -0.16916 | 0.00024  |
| 0.84141  | -0.29179 | 1.28E-10 | -0.17128 | 0.0002   | -0.0363018 | 0.43384  | -0.01172 | 0.80064  |
| 0.78098  | -0.30281 | 2.33E-11 | -0.27398 | 1.74E-09 | -0.1532706 | 0.00089  | -0.13287 | 0.00402  |
| 0.24682  | -0.28551 | 3.29E-10 | -0.32549 | 5.50E-13 | -0.1913982 | 3.13E-05 | -0.26486 | 6.15E-09 |
| 0.07442  | -0.2688  | 3.59E-09 | -0.14194 | 0.00211  | 0.01606636 | 0.72913  | 0.05568  | 0.22977  |
| 0.72252  | 0.170508 | 0.00021  | 0.128575 | 0.00539  | 0.06580382 | 0.15568  | -0.01446 | 0.75534  |
| 0.98098  | -0.17906 | 1.00E-04 | -0.15784 | 0.00062  | -0.0895695 | 0.05307  | -0.12168 | 0.00848  |
| 0.00164  | -0.02058 | 0.65728  | 0.023866 | 0.60695  | 0.13081513 | 0.00463  | 0.064098 | 0.1667   |
| 0.11785  | -0.32023 | 1.35E-12 | -0.20465 | 8.27E-06 | -0.0760068 | 0.1009   | -0.0835  | 0.07143  |
| 0.12605  | 0.131073 | 0.00455  | 0.042384 | 0.36078  | -0.0098936 | 0.83114  | -0.02806 | 0.54521  |
| 0.46868  | 0.083387 | 0.07181  | -0.02959 | 0.52354  | 0.00099616 | 0.98287  | -0.07139 | 0.1234   |
| 0.04046  | 0.066378 | 0.15209  | -0.12034 | 0.00924  | -0.4081451 | 3.57E-20 | -0.3638  | 4.64E-16 |
| 0.72191  | -0.28869 | 2.05E-10 | -0.21302 | 3.41E-06 | -0.0570274 | 0.21867  | -0.0716  | 0.12233  |
| 0.03655  | -0.27246 | 2.16E-09 | 0.049351 | 0.2872   | 0.35327951 | 3.57E-15 | 0.350023 | 6.62E-15 |
| 0.48566  | -0.04203 | 0.36486  | -0.02339 | 0.61412  | -0.0110812 | 0.81124  | -0.00779 | 0.86673  |
| 0.31551  | 0.035676 | 0.44181  | 0.092658 | 0.04536  | 0.20547349 | 7.60E-06 | 0.104562 | 0.02384  |
| 0.00225  | -0.17256 | 0.00018  | -0.08233 | 0.07551  | -0.0264618 | 0.5684   | -0.01217 | 0.79309  |
| 0.04831  | -0.0853  | 0.0655   | -0.08021 | 0.08335  | -0.068139  | 0.14149  | -0.11539 | 0.01259  |
| 0.33827  | -0.27884 | 8.69E-10 | -0.187   | 4.78E-05 | -0.066107  | 0.15378  | -0.01537 | 0.74047  |
| 0.01722  | -0.26732 | 4.40E-09 | -0.18326 | 6.79E-05 | -0.0538725 | 0.24527  | -0.16203 | 0.00044  |
| 0.85441  | -0.0373  | 0.42126  | -0.0785  | 0.0902   | 0.01589266 | 0.73194  | 0.095323 | 0.03948  |
| 0.1703   | -0.20495 | 8.02E-06 | -0.11466 | 0.01316  | -0.0421146 | 0.36384  | 0.019828 | 0.66911  |
| 0.08413  | 0.106829 | 0.02094  | -0.02176 | 0.63909  | -0.0353686 | 0.44575  | 0.138216 | 0.00276  |
| 0.9243   | -0.1188  | 0.01018  | -0.16981 | 0.00023  | -0.1201852 | 0.00933  | -0.04127 | 0.37351  |
| 0.08208  | -0.26857 | 3.70E-09 | -0.1777  | 0.00011  | -0.0875436 | 0.05871  | -0.08086 | 0.0809   |
| 0.70208  | -0.20172 | 1.12E-05 | -0.21964 | 1.65E-06 | -0.1060756 | 0.02187  | -0.05873 | 0.20523  |
| 0.20378  | -0.33991 | 4.29E-14 | -0.16808 | 0.00026  | 0.04109342 | 0.3756   | 0.078086 | 0.09189  |
| 0.30131  | -0.20953 | 4.95E-06 | -0.10083 | 0.02935  | 0.02903565 | 0.53137  | 0.062728 | 0.17597  |
| 0.08669  | -0.11721 | 0.01125  | -0.17584 | 0.00013  | -0.0804007 | 0.08263  | 0.081069 | 0.0801   |
| 0.33322  | -0.23765 | 2.03E-07 | -0.26586 | 5.37E-09 | 0.0251577  | 0.58762  | 0.167067 | 0.00029  |
| 2.03E-06 | 0.29632  | 6.42E-11 | 0.238144 | 1.91E-07 | 0.12459074 | 0.00702  | 0.064388 | 0.16478  |
| 0.07498  | -0.16057 | 0.0005   | -0.10671 | 0.02108  | 0.00111174 | 0.98088  | 0.05528  | 0.23314  |

|         |          |          |          |          |            |          |          |          |
|---------|----------|----------|----------|----------|------------|----------|----------|----------|
| 0.3788  | 0.069203 | 0.13536  | 0.066626 | 0.15056  | -0.0845615 | 0.06789  | -0.08467 | 0.06753  |
| 0.09686 | 0.129039 | 0.00523  | 0.082891 | 0.07352  | -0.1770391 | 0.00012  | -0.15224 | 0.00097  |
| 0.12676 | -0.18849 | 4.15E-05 | -0.10732 | 0.02036  | 0.03976094 | 0.39129  | 0.098707 | 0.03296  |
| 0.10646 | -0.23289 | 3.59E-07 | -0.17464 | 0.00015  | -0.0605116 | 0.19177  | -0.02888 | 0.5336   |
| 0.19351 | -0.00855 | 0.85383  | -0.04539 | 0.32775  | 0.08052726 | 0.08215  | 0.238613 | 1.81E-07 |
| 0.68758 | -0.1257  | 0.00653  | -0.08507 | 0.06624  | 0.01278444 | 0.7829   | 0.087907 | 0.05766  |
| 0.53292 | -0.12234 | 0.00813  | -0.04707 | 0.31005  | -0.0897099 | 0.0527   | -0.14659 | 0.00149  |
| 0.4901  | -0.24946 | 4.68E-08 | -0.17624 | 0.00013  | 0.023186   | 0.61723  | -0.01913 | 0.68011  |
| 0.01214 | -0.1642  | 0.00037  | -0.06158 | 0.18402  | -0.0209825 | 0.65107  | 0.002143 | 0.96317  |
| 0.60639 | -0.25141 | 3.65E-08 | -0.14134 | 0.0022   | -0.0305071 | 0.51076  | -0.03832 | 0.40866  |
| 0.70661 | -0.31988 | 1.43E-12 | -0.16541 | 0.00033  | -0.0300038 | 0.51776  | -0.06475 | 0.16244  |
| 0.18466 | 0.18873  | 4.05E-05 | 0.054986 | 0.23563  | -0.0866241 | 0.06142  | -0.05039 | 0.27712  |
| 0.19104 | -0.11434 | 0.01342  | -0.10172 | 0.02795  | -0.1540582 | 0.00084  | -0.17158 | 0.00019  |
| 0.00387 | -0.41921 | 2.67E-21 | -0.17138 | 0.0002   | 0.01881696 | 0.68505  | -0.04623 | 0.31881  |
| 0.6713  | 0.269782 | 3.13E-09 | 0.102577 | 0.02665  | 0.05167283 | 0.2651   | 0.080374 | 0.08273  |
| 0.90871 | 0.17004  | 0.00022  | 0.11325  | 0.01434  | 0.1576103  | 0.00063  | 0.107451 | 0.0202   |
| 0.03206 | -0.002   | 0.96555  | 0.027762 | 0.54954  | 0.02669599 | 0.56498  | 0.047172 | 0.30904  |
| 0.00085 | 0.100314 | 0.0302   | 0.113698 | 0.01395  | 0.11334593 | 0.01426  | 0.158938 | 0.00057  |
| 0.00143 | 0.004617 | 0.92074  | 0.122851 | 0.00787  | 0.10290747 | 0.02616  | 0.111171 | 0.01624  |
| 0.95862 | -0.07261 | 0.1171   | -0.11531 | 0.01265  | -0.0234838 | 0.61272  | 0.008858 | 0.84859  |
| 0.21665 | 0.002202 | 0.96215  | 0.001904 | 0.96728  | -0.0465327 | 0.31565  | -0.07365 | 0.11195  |
| 0.79604 | -0.25933 | 1.30E-08 | -0.17147 | 0.0002   | -0.1373286 | 0.00294  | -0.21865 | 1.84E-06 |
| 0.99113 | -0.27114 | 2.59E-09 | -0.21788 | 2.00E-06 | 0.04268604 | 0.35736  | 0.230427 | 4.80E-07 |
| 0.46812 | -0.22336 | 1.08E-06 | -0.15368 | 0.00086  | -0.0827913 | 0.07387  | -0.03283 | 0.47907  |
| 0.6132  | -0.19442 | 2.33E-05 | -0.07834 | 0.09082  | 0.22927346 | 5.49E-07 | 0.067756 | 0.14375  |
| 0.11764 | -0.16196 | 0.00044  | -0.11294 | 0.01461  | -0.0028096 | 0.95172  | 0.084842 | 0.06697  |
| 0.3669  | -0.107   | 0.02074  | -0.24363 | 9.75E-08 | -0.1191592 | 0.00996  | -0.06215 | 0.18     |
| 0.05978 | -0.30063 | 3.28E-11 | -0.18292 | 7.01E-05 | -0.0915089 | 0.04811  | -0.12355 | 0.00752  |
| 0.4304  | -0.37459 | 5.28E-17 | -0.23386 | 3.20E-07 | -0.0623545 | 0.17856  | -0.07295 | 0.11542  |
| 0.68621 | -0.12066 | 0.00905  | -0.13732 | 0.00294  | -0.3143803 | 3.58E-12 | -0.33297 | 1.49E-13 |
| 0.86225 | -0.29569 | 7.07E-11 | -0.15451 | 0.00081  | 0.11876826 | 0.0102   | 0.274888 | 1.53E-09 |
| 0.13944 | 0.048569 | 0.29492  | 0.107118 | 0.0206   | 0.07377762 | 0.11133  | 0.103459 | 0.02537  |
| 0.84149 | -0.36647 | 2.73E-16 | -0.21919 | 1.73E-06 | -0.0148048 | 0.74966  | -0.02095 | 0.65153  |
| 0.98299 | -0.15188 | 0.00099  | 0.012743 | 0.78359  | 0.18204978 | 7.60E-05 | 0.224208 | 9.85E-07 |
| 0.04459 | -0.21159 | 3.98E-06 | -0.1536  | 0.00087  | -0.0288938 | 0.53338  | -0.08059 | 0.08192  |
| 0.16849 | 0.07241  | 0.11813  | 0.038162 | 0.41063  | 0.06513123 | 0.15996  | 0.143116 | 0.00193  |
| 0.04345 | -0.24533 | 7.88E-08 | -0.17013 | 0.00022  | -0.0242617 | 0.60099  | -0.00805 | 0.86222  |
| 0.47097 | 0.428822 | 2.59E-22 | 0.213351 | 3.29E-06 | 0.20381584 | 9.02E-06 | 0.3788   | 2.21E-17 |
| 0.87688 | -0.03263 | 0.48179  | -0.02912 | 0.53019  | 0.06267945 | 0.17631  | 0.151441 | 0.00103  |
| 0.00012 | -0.10104 | 0.02902  | -0.17349 | 0.00016  | 0.02027489 | 0.6621   | 0.248845 | 5.06E-08 |
| 0.09061 | -0.16905 | 0.00024  | -0.13411 | 0.00369  | -0.0783627 | 0.09074  | -0.1444  | 0.00176  |
| 0.0016  | -0.18695 | 4.80E-05 | -0.21292 | 3.45E-06 | -0.2460345 | 7.22E-08 | -0.26562 | 5.55E-09 |
| 0.7434  | -0.01386 | 0.76521  | -0.08044 | 0.08248  | -0.0878258 | 0.05789  | -0.15666 | 0.00068  |
| 0.00133 | -0.08497 | 0.06655  | -0.11895 | 0.01009  | -0.1760114 | 0.00013  | -0.06239 | 0.17835  |
| 0.50382 | -0.36069 | 8.54E-16 | -0.29846 | 4.61E-11 | -0.0736125 | 0.11213  | -0.07349 | 0.11272  |

|          |          |          |          |          |            |          |          |          |
|----------|----------|----------|----------|----------|------------|----------|----------|----------|
| 0.00158  | -0.35754 | 1.58E-15 | -0.2215  | 1.34E-06 | -0.014096  | 0.76127  | 0.054501 | 0.2398   |
| 0.09302  | -0.10927 | 0.01817  | -0.10365 | 0.0251   | -0.015115  | 0.74459  | 0.078502 | 0.09017  |
| 0.84301  | -0.22026 | 1.54E-06 | -0.1721  | 0.00019  | 0.04025331 | 0.38545  | 0.178438 | 0.00011  |
| 0.66285  | -0.24244 | 1.13E-07 | -0.32049 | 1.29E-12 | -0.0729489 | 0.11542  | 0.028965 | 0.53237  |
| 0.09683  | -0.07918 | 0.08742  | -0.23714 | 2.16E-07 | -0.3105333 | 6.74E-12 | -0.42031 | 2.05E-21 |
| 0.00017  | -0.10403 | 0.02456  | 0.05534  | 0.23263  | -0.0291165 | 0.53023  | 0.030204 | 0.51498  |
| 0.93307  | -0.10081 | 0.02938  | -0.23344 | 3.36E-07 | -0.0050665 | 0.91305  | 0.174569 | 0.00015  |
| 0.2029   | -0.27901 | 8.49E-10 | -0.16161 | 0.00045  | -0.0469829 | 0.31099  | -0.03928 | 0.39701  |
| 0.15297  | -0.23642 | 2.35E-07 | -0.20896 | 5.26E-06 | -0.1182081 | 0.01057  | -0.10005 | 0.03064  |
| 0.15096  | -0.21516 | 2.70E-06 | -0.18799 | 4.35E-05 | 0.0385361  | 0.40606  | 0.194238 | 2.37E-05 |
| 0.40111  | -0.19219 | 2.90E-05 | -0.15106 | 0.00106  | 0.07453234 | 0.10771  | 0.03394  | 0.46436  |
| 0.40272  | -0.28831 | 2.17E-10 | -0.14484 | 0.0017   | -0.0520272 | 0.26184  | -0.10818 | 0.01937  |
| 0.65627  | -0.15223 | 0.00097  | -0.3563  | 2.00E-15 | -0.2356406 | 2.59E-07 | -0.29777 | 5.13E-11 |
| 0.21198  | -0.35167 | 4.84E-15 | -0.24999 | 4.38E-08 | -0.0609587 | 0.1885   | -0.04259 | 0.35849  |
| 0.90403  | -0.17766 | 0.00011  | -0.17882 | 0.0001   | -0.0048457 | 0.91682  | 0.078729 | 0.08924  |
| 0.02998  | 0.013517 | 0.7708   | -0.04069 | 0.38028  | -0.0208517 | 0.65311  | 0.063772 | 0.16888  |
| 0.60253  | -0.15831 | 0.0006   | -0.15672 | 0.00068  | -0.1300811 | 0.00487  | -0.14583 | 0.00158  |
| 0.12467  | -0.18797 | 4.36E-05 | -0.10404 | 0.02455  | 0.00143164 | 0.97539  | -0.01488 | 0.74848  |
| 0.08468  | -0.24664 | 6.69E-08 | -0.22396 | 1.01E-06 | -0.1572836 | 0.00065  | -0.19682 | 1.84E-05 |
| 0.05411  | -0.30599 | 1.40E-11 | -0.17702 | 0.00012  | 0.012751   | 0.78345  | 0.075754 | 0.10204  |
| 0.40217  | 0.11467  | 0.01315  | 0.162894 | 0.00041  | 0.2033365  | 9.48E-06 | 0.194366 | 2.34E-05 |
| 0.06287  | 0.171001 | 0.0002   | 0.126261 | 0.00629  | 0.39119    | 1.58E-18 | 0.358845 | 1.22E-15 |
| 0.00986  | -0.27936 | 8.07E-10 | -0.02762 | 0.55155  | 0.15532584 | 0.00076  | 0.17552  | 0.00014  |
| 0.50666  | -0.25375 | 2.70E-08 | -0.12534 | 0.00669  | -0.1072027 | 0.0205   | -0.13472 | 0.00354  |
| 0.05001  | -0.25993 | 1.20E-08 | -0.17198 | 0.00019  | -0.0581899 | 0.20941  | -0.04278 | 0.35629  |
| 0.18561  | -0.27319 | 1.95E-09 | -0.11122 | 0.0162   | 0.00101698 | 0.98251  | -0.02294 | 0.62097  |
| 0.39073  | -0.07434 | 0.10864  | -0.09473 | 0.04074  | -0.0607549 | 0.18999  | 0.005854 | 0.89961  |
| 0.36888  | 0.101469 | 0.02834  | 0.019837 | 0.66896  | 0.00676104 | 0.88414  | 0.069348 | 0.13455  |
| 0.65281  | -0.03712 | 0.42351  | -0.0221  | 0.63377  | -0.0097654 | 0.8333   | -0.1226  | 0.00799  |
| 3.06E-05 | -0.05908 | 0.20252  | 0.047536 | 0.30532  | 0.01419504 | 0.75964  | 0.077585 | 0.094    |
| 0.02107  | -0.22145 | 1.35E-06 | -0.13325 | 0.00392  | -0.1465235 | 0.0015   | -0.18058 | 8.70E-05 |
| 0.93585  | -0.08709 | 0.06003  | -0.05772 | 0.21316  | 0.03052106 | 0.51057  | 0.056214 | 0.22532  |
| 0.93758  | 0.570745 | 1.02E-41 | 0.344407 | 1.88E-14 | 0.06946765 | 0.13387  | -0.02017 | 0.66371  |
| 0.21164  | -0.14346 | 0.00188  | -0.11657 | 0.0117   | 0.07226137 | 0.11889  | 0.005308 | 0.90892  |
| 0.27293  | -0.31962 | 1.50E-12 | -0.20559 | 7.51E-06 | -0.0185808 | 0.68879  | 0.007455 | 0.87235  |
| 0.9837   | -0.34918 | 7.75E-15 | -0.24052 | 1.43E-07 | -0.0269567 | 0.56118  | -0.03562 | 0.4425   |
| 0.17193  | -0.18821 | 4.26E-05 | 0.024775 | 0.59331  | 0.32902952 | 2.98E-13 | 0.252754 | 3.07E-08 |
| 0.00435  | -0.40373 | 9.81E-20 | -0.20698 | 6.49E-06 | 0.18926913 | 3.85E-05 | 0.277181 | 1.10E-09 |
| 3.37E-06 | -0.25776 | 1.60E-08 | -0.00774 | 0.8675   | 0.1381895  | 0.00277  | 0.100039 | 0.03066  |
| 0.11138  | -0.20462 | 8.30E-06 | -0.05431 | 0.24144  | 0.08964565 | 0.05287  | 0.15463  | 0.0008   |
| 0.10606  | -0.02055 | 0.65783  | -0.08466 | 0.06757  | 0.00285329 | 0.95097  | -0.00201 | 0.9654   |
| 0.65143  | 0.065282 | 0.15899  | 0.033296 | 0.47288  | 0.14012439 | 0.00241  | 0.256417 | 1.90E-08 |
| 0.00839  | -0.30008 | 3.58E-11 | -0.23104 | 4.47E-07 | -0.0883453 | 0.05642  | -0.09719 | 0.03577  |
| 0.00508  | -0.12945 | 0.00508  | -0.09119 | 0.04891  | -9.44E-05  | 0.99838  | -0.03719 | 0.4227   |
| 9.76E-06 | -0.06177 | 0.1827   | -0.13569 | 0.0033   | -0.0462791 | 0.3183   | -0.09    | 0.05194  |



|          |          |          |          |          |            |          |          |          |
|----------|----------|----------|----------|----------|------------|----------|----------|----------|
| 0.44271  | 0.013239 | 0.77538  | -0.07898 | 0.08824  | 0.10913257 | 0.01832  | 0.137237 | 0.00296  |
| 0.06848  | 0.199962 | 1.34E-05 | 0.161678 | 0.00045  | 0.21462908 | 2.86E-06 | 0.308412 | 9.51E-12 |
| 0.02164  | 0.112943 | 0.01461  | 0.142946 | 0.00196  | 0.16418805 | 0.00037  | 0.277929 | 9.91E-10 |
| 0.67516  | 0.093281 | 0.04392  | -0.17201 | 0.00019  | -0.0330339 | 0.47637  | 0.189849 | 3.64E-05 |
| 0.83882  | 0.088663 | 0.05553  | 0.06164  | 0.1836   | -0.0476489 | 0.30417  | -0.1295  | 0.00506  |
| 0.5738   | -0.06451 | 0.164    | -0.05693 | 0.21946  | 0.03097316 | 0.50432  | 0.162442 | 0.00042  |
| 0.65677  | -0.24007 | 1.51E-07 | -0.19956 | 1.39E-05 | 0.0275831  | 0.55212  | 0.024886 | 0.59167  |
| 0.02899  | -0.12023 | 0.00931  | -0.03108 | 0.5028   | -0.1606166 | 0.00049  | -0.08162 | 0.07805  |
| 0.23369  | -0.23176 | 4.10E-07 | -0.19669 | 1.86E-05 | 0.00119258 | 0.97949  | 0.072883 | 0.11574  |
| 0.73392  | 0.071174 | 0.12456  | 0.092156 | 0.04655  | -0.1889487 | 3.97E-05 | -0.02671 | 0.56481  |
| 0.80771  | -0.25486 | 2.33E-08 | -0.19543 | 2.11E-05 | -0.0128239 | 0.78224  | 0.073192 | 0.11421  |
| 0.3283   | -0.21228 | 3.69E-06 | -0.13063 | 0.00469  | -0.1259067 | 0.00644  | -0.11257 | 0.01493  |
| 0.53392  | -0.23627 | 2.40E-07 | -0.12329 | 0.00764  | 0.05949166 | 0.19938  | 0.047387 | 0.30684  |
| 0.20024  | -0.28327 | 4.57E-10 | -0.11992 | 0.00949  | 0.02349079 | 0.61261  | 0.017108 | 0.71232  |
| 0.4272   | -0.22272 | 1.17E-06 | -0.11184 | 0.0156   | -0.0257467 | 0.5789   | -0.00786 | 0.86553  |
| 0.06084  | -0.13304 | 0.00398  | -0.19323 | 2.62E-05 | 0.01478059 | 0.75005  | 0.192085 | 2.93E-05 |
| 0.57555  | -0.28625 | 2.94E-10 | -0.18442 | 6.09E-05 | -0.0410427 | 0.37619  | -0.01738 | 0.70799  |
| 0.33012  | -0.42555 | 5.78E-22 | -0.20752 | 6.13E-06 | 0.01947381 | 0.67467  | 0.08996  | 0.05204  |
| 0.68754  | -0.255   | 2.29E-08 | -0.11829 | 0.01051  | 0.08124947 | 0.07943  | 0.109749 | 0.01767  |
| 0.43359  | -0.26919 | 3.40E-09 | -0.33018 | 2.43E-13 | -0.037749  | 0.41572  | 0.12172  | 0.00846  |
| 0.96192  | -0.23029 | 4.88E-07 | -0.27226 | 2.21E-09 | -0.0462528 | 0.31858  | 0.062765 | 0.17571  |
| 0.80639  | -0.29463 | 8.32E-11 | -0.20527 | 7.75E-06 | -0.0501499 | 0.27946  | -0.05908 | 0.20248  |
| 0.29984  | -0.27982 | 7.55E-10 | -0.16263 | 0.00042  | -0.0095419 | 0.83706  | -0.05807 | 0.21037  |
| 2.94E-05 | -0.17905 | 0.0001   | -0.08308 | 0.07286  | 0.09432332 | 0.04161  | 0.171823 | 0.00019  |
| 0.16977  | -0.25818 | 1.51E-08 | -0.23092 | 4.53E-07 | -0.1910949 | 3.23E-05 | -0.23969 | 1.58E-07 |
| 0.8508   | -0.18897 | 3.96E-05 | -0.08224 | 0.0758   | 0.06079833 | 0.18967  | 0.045884 | 0.32246  |
| 0.20214  | -0.04382 | 0.34474  | 0.008957 | 0.84692  | -0.0777369 | 0.09336  | -0.12006 | 0.0094   |
| 0.2091   | -0.11642 | 0.01181  | -0.10422 | 0.02431  | -0.0258185 | 0.57784  | -0.04421 | 0.34041  |
| 4.88E-15 | -0.20928 | 5.09E-06 | -0.11695 | 0.01143  | 0.10179006 | 0.02784  | 0.186216 | 5.15E-05 |
| 0.64636  | 0.014007 | 0.76273  | 0.158249 | 0.0006   | 0.31397806 | 3.83E-12 | 0.218924 | 1.78E-06 |
| 0.00098  | -0.06266 | 0.17643  | 0.063087 | 0.17351  | 0.15380888 | 0.00085  | 0.166448 | 0.0003   |
| 0.31194  | -0.10523 | 0.02295  | -0.18193 | 7.68E-05 | -0.0576917 | 0.21334  | -0.0422  | 0.36287  |
| 0.00885  | -0.12071 | 0.00903  | -0.02058 | 0.6573   | 0.11353498 | 0.01409  | 0.078815 | 0.08889  |
| 0.55102  | -0.04828 | 0.29783  | -0.02725 | 0.55692  | 0.13378859 | 0.00377  | 0.150605 | 0.0011   |
| 0.32292  | -0.0992  | 0.03209  | -0.23037 | 4.83E-07 | -0.0315667 | 0.49619  | 0.106727 | 0.02107  |
| 0.03099  | 0.061383 | 0.18544  | 0.094627 | 0.04095  | 0.0183662  | 0.6922   | 0.086811 | 0.06086  |
| 0.02465  | -0.05902 | 0.20298  | -0.29137 | 1.37E-10 | -0.0187056 | 0.68681  | 0.185183 | 5.67E-05 |
| 0.06396  | -0.20867 | 5.43E-06 | -0.14519 | 0.00166  | 0.03570418 | 0.44145  | 0.016052 | 0.72936  |
| 0.32795  | 0.043602 | 0.34713  | 0.10362  | 0.02514  | 0.32698689 | 4.25E-13 | 0.450389 | 1.04E-24 |
| 0.24976  | -0.18441 | 6.10E-05 | 0.019845 | 0.66883  | 0.02112164 | 0.64891  | 0.113988 | 0.01371  |
| 0.96892  | -0.35034 | 6.23E-15 | -0.18536 | 5.58E-05 | 0.05208498 | 0.2613   | 0.041012 | 0.37655  |
| 0.31376  | 0.201788 | 1.11E-05 | 0.053824 | 0.2457   | 0.03198952 | 0.49043  | -0.01871 | 0.68682  |
| 0.11192  | -0.15376 | 0.00086  | -0.24156 | 1.26E-07 | -0.1018447 | 0.02776  | -0.04952 | 0.28553  |
| 0.2968   | -0.02519 | 0.58708  | -0.04321 | 0.35145  | 0.15265621 | 0.00093  | 0.318915 | 1.68E-12 |
| 0.05243  | -0.09664 | 0.03682  | -0.09674 | 0.03664  | 0.11102674 | 0.01638  | 0.224463 | 9.57E-07 |

|          |          |          |          |          |            |          |          |          |
|----------|----------|----------|----------|----------|------------|----------|----------|----------|
| 0.10786  | 0.035234 | 0.44748  | 0.023892 | 0.60656  | 0.13014174 | 0.00485  | 0.210917 | 4.27E-06 |
| 0.56827  | -0.09151 | 0.04811  | -0.10922 | 0.01823  | 0.00379139 | 0.93487  | 0.104961 | 0.0233   |
| 0.1692   | -0.1734  | 0.00017  | -0.17033 | 0.00022  | -0.1232533 | 0.00766  | -0.08139 | 0.07891  |
| 0.94498  | -0.08022 | 0.08332  | 0.055427 | 0.2319   | 0.24415759 | 9.13E-08 | 0.237579 | 2.05E-07 |
| 0.88339  | -0.17518 | 0.00014  | -0.01191 | 0.7974   | 0.28268805 | 4.98E-10 | 0.159495 | 0.00054  |
| 0.34572  | -0.18455 | 6.02E-05 | -0.16623 | 0.00031  | 0.05663415 | 0.22187  | 0.168776 | 0.00025  |
| 0.00094  | -0.33282 | 1.53E-13 | -0.40062 | 1.98E-19 | -0.0636436 | 0.16973  | 0.02275  | 0.62387  |
| 0.00395  | -0.32505 | 5.93E-13 | -0.22987 | 5.13E-07 | 0.02973206 | 0.52156  | 0.016242 | 0.72628  |
| 0.87397  | -0.27913 | 8.34E-10 | -0.37571 | 4.19E-17 | -0.1029652 | 0.02608  | -0.09145 | 0.04825  |
| 0.00022  | 0.013354 | 0.77348  | 0.007179 | 0.87704  | -0.0322182 | 0.48733  | -0.06605 | 0.15416  |
| 0.20858  | -0.2168  | 2.26E-06 | -0.10751 | 0.02013  | -0.1769386 | 0.00012  | -0.38807 | 3.11E-18 |
| 0.11402  | 0.013445 | 0.77198  | -0.1026  | 0.02661  | -0.1766628 | 0.00012  | -0.22726 | 6.94E-07 |
| 0.53987  | -0.17165 | 0.00019  | -0.25016 | 4.28E-08 | -0.1197993 | 0.00956  | -0.05523 | 0.23357  |
| 0.66147  | -0.10267 | 0.02652  | 0.022107 | 0.63371  | 0.2008684  | 1.22E-05 | 0.110948 | 0.01646  |
| 0.39117  | -0.12664 | 0.00613  | -0.0984  | 0.03351  | -0.0007234 | 0.98756  | 0.067902 | 0.14288  |
| 0.00382  | 0.037025 | 0.42473  | -0.04922 | 0.28845  | -0.0929744 | 0.04463  | -0.04033 | 0.3846   |
| 0.11475  | -0.21786 | 2.01E-06 | -0.11963 | 0.00967  | 0.01836936 | 0.69215  | 0.032723 | 0.48054  |
| 0.15598  | -0.28244 | 5.16E-10 | -0.08179 | 0.07745  | 0.07280001 | 0.11616  | 0.110906 | 0.0165   |
| 0.73439  | -0.04601 | 0.32112  | -0.04707 | 0.31005  | 0.00247855 | 0.9574   | -0.0072  | 0.87668  |
| 0.75327  | -0.26603 | 5.25E-09 | -0.12584 | 0.00647  | 0.01633963 | 0.7247   | -0.11073 | 0.01667  |
| 0.01568  | 0.125999 | 0.0064   | -0.0526  | 0.25664  | 0.1875455  | 4.54E-05 | 0.393229 | 1.02E-18 |
| 0.84092  | -0.12867 | 0.00536  | -0.13445 | 0.0036   | -0.0708812 | 0.12612  | -0.04418 | 0.34075  |
| 0.32332  | -0.19727 | 1.76E-05 | -0.15495 | 0.00078  | -0.0394177 | 0.3954   | -0.02003 | 0.66589  |
| 1.43E-13 | -0.09617 | 0.03775  | -0.06948 | 0.13382  | -0.0067492 | 0.88435  | 0.008288 | 0.85822  |
| 0.52245  | 0.009027 | 0.84575  | 0.124195 | 0.00721  | 0.0782656  | 0.09114  | -0.11402 | 0.01369  |
| 1.73E-06 | -0.40732 | 4.32E-20 | -0.47476 | 1.26E-27 | -0.0711844 | 0.12451  | 0.030608 | 0.50936  |
| 0.22527  | -0.00431 | 0.92597  | 0.173183 | 0.00017  | 0.18998132 | 3.59E-05 | 0.095347 | 0.03943  |
| 0.77602  | -0.15057 | 0.0011   | -0.07731 | 0.09518  | -0.0020626 | 0.96454  | 0.050279 | 0.27822  |
| 0.39683  | 0.018242 | 0.69419  | -0.01896 | 0.68283  | -0.0062681 | 0.89254  | 0.041541 | 0.37042  |
| 0.19053  | -0.14694 | 0.00145  | -0.17019 | 0.00022  | -0.1636655 | 0.00038  | -0.16245 | 0.00042  |
| 0.21371  | -0.29472 | 8.20E-11 | -0.27657 | 1.20E-09 | -0.1011768 | 0.0288   | -0.00243 | 0.95819  |
| 0.26634  | -0.10806 | 0.0195   | -0.18424 | 6.20E-05 | -0.0608016 | 0.18965  | 0.026776 | 0.56381  |
| 0.00183  | -0.05623 | 0.22517  | -0.04308 | 0.35293  | 0.07201166 | 0.12018  | 0.157819 | 0.00062  |
| 0.28478  | -0.17645 | 0.00013  | -0.13918 | 0.00258  | 0.03269346 | 0.48093  | 0.109021 | 0.01844  |
| 0.0106   | -0.1016  | 0.02814  | -0.23589 | 2.51E-07 | -0.0470882 | 0.30991  | 0.132368 | 0.00416  |
| 0.33934  | -0.08041 | 0.08261  | -0.16052 | 0.0005   | -0.0198321 | 0.66904  | 0.150559 | 0.0011   |
| 0.05852  | -0.15251 | 0.00095  | -0.14914 | 0.00123  | 0.02300621 | 0.61996  | 0.150528 | 0.0011   |
| 0.28563  | -0.16446 | 0.00036  | -0.31743 | 2.16E-12 | -0.1458182 | 0.00158  | -0.09387 | 0.0426   |
| 8.71E-05 | -0.17215 | 0.00019  | -0.00822 | 0.85936  | 0.07947317 | 0.08625  | 0.059029 | 0.2029   |
| 8.30E-05 | -0.09228 | 0.04625  | -0.04834 | 0.29719  | -0.1158825 | 0.01221  | -0.18958 | 3.74E-05 |
| 0.09733  | 0.042105 | 0.36395  | 0.042983 | 0.35402  | 0.22681964 | 7.30E-07 | 0.245329 | 7.89E-08 |
| 0.27322  | -0.20239 | 1.05E-05 | -0.05803 | 0.21065  | 0.05338652 | 0.24956  | 0.055121 | 0.23448  |
| 0.00019  | -0.08572 | 0.06417  | 0.068098 | 0.14173  | 0.38022463 | 1.64E-17 | 0.242536 | 1.12E-07 |
| 0.52933  | -0.14742 | 0.0014   | -0.17902 | 0.0001   | 0.04500307 | 0.33184  | 0.218286 | 1.92E-06 |
| 4.05E-06 | 0.167249 | 0.00028  | 0.049627 | 0.28452  | 0.02577834 | 0.57843  | 0.114811 | 0.01304  |

|          |          |          |          |          |            |          |          |          |
|----------|----------|----------|----------|----------|------------|----------|----------|----------|
| 0.54114  | -0.27657 | 1.20E-09 | -0.18016 | 9.04E-05 | 0.07736192 | 0.09495  | 0.155667 | 0.00074  |
| 6.08E-05 | -0.23986 | 1.55E-07 | -0.03404 | 0.463    | 0.04427732 | 0.33971  | 0.084394 | 0.06844  |
| 0.52371  | -0.33885 | 5.20E-14 | -0.30421 | 1.87E-11 | -0.1935812 | 2.53E-05 | -0.32958 | 2.70E-13 |
| 4.50E-05 | -0.34717 | 1.13E-14 | -0.26147 | 9.74E-09 | 0.17507187 | 0.00014  | 0.129455 | 0.00508  |
| 0.00775  | -0.1838  | 6.46E-05 | -0.10529 | 0.02287  | -0.0907402 | 0.05003  | -0.17094 | 0.00021  |
| 0.23873  | -0.20091 | 1.22E-05 | -0.14002 | 0.00242  | -0.1441598 | 0.00179  | -0.26766 | 4.20E-09 |
| 0.00353  | -0.08035 | 0.08282  | -0.14059 | 0.00233  | -0.0303582 | 0.51283  | 0.046202 | 0.31911  |
| 0.07015  | -0.15025 | 0.00113  | -0.21272 | 3.52E-06 | -0.0490324 | 0.29033  | -0.13011 | 0.00486  |
| 0.81402  | -0.3298  | 2.60E-13 | -0.28239 | 5.19E-10 | -0.0496278 | 0.28451  | -0.05209 | 0.26129  |
| 1.11E-12 | -0.26203 | 9.03E-09 | -0.1009  | 0.02925  | 0.07154216 | 0.12262  | 0.046454 | 0.31647  |
| 0.45789  | -0.31389 | 3.89E-12 | -0.25929 | 1.30E-08 | -0.0580973 | 0.21014  | -0.05676 | 0.22088  |
| 0.59779  | -0.09942 | 0.03172  | -0.07397 | 0.11039  | -0.0882014 | 0.05682  | -0.13091 | 0.0046   |
| 0.56307  | -0.24953 | 4.64E-08 | -0.13288 | 0.00402  | 0.07015124 | 0.13008  | 0.115702 | 0.01235  |
| 0.39305  | -0.13018 | 0.00484  | -0.1411  | 0.00224  | 0.08458424 | 0.06781  | 0.2306   | 4.70E-07 |
| 0.27533  | -0.25184 | 3.45E-08 | -0.22867 | 5.90E-07 | -0.0652562 | 0.15916  | 0.012873 | 0.78143  |
| 0.04401  | -0.14048 | 0.00234  | -0.06212 | 0.18024  | 0.06446964 | 0.16425  | 0.060839 | 0.18938  |
| 0.28964  | -0.25411 | 2.57E-08 | -0.14459 | 0.00173  | 0.07960133 | 0.08574  | 0.116537 | 0.01173  |
| 0.03853  | -0.20836 | 5.61E-06 | -0.15841 | 0.00059  | 0.06815398 | 0.1414   | 0.192859 | 2.72E-05 |
| 0.56185  | -0.23124 | 4.36E-07 | -0.22173 | 1.30E-06 | -0.0153828 | 0.74023  | 0.102931 | 0.02613  |
| 0.35875  | -0.16247 | 0.00042  | -0.18247 | 7.31E-05 | 0.07786478 | 0.09282  | 0.256292 | 1.93E-08 |
| 0.33002  | -0.30751 | 1.10E-11 | -0.14054 | 0.00233  | 0.08068454 | 0.08155  | 0.112264 | 0.01522  |
| 0.28754  | -0.30239 | 2.49E-11 | -0.22032 | 1.53E-06 | -0.0518548 | 0.26342  | -0.04441 | 0.33825  |
| 0.9343   | -0.30752 | 1.10E-11 | -0.19742 | 1.73E-05 | -0.0140248 | 0.76244  | -0.02048 | 0.65897  |
| 0.70681  | -0.09217 | 0.04652  | -0.0715  | 0.12285  | 0.14165654 | 0.00215  | 0.191756 | 3.03E-05 |
| 0.40212  | -0.17522 | 0.00014  | -0.10464 | 0.02374  | -0.0245994 | 0.59594  | -0.04021 | 0.38596  |
| 0.00721  | -0.06111 | 0.18737  | -0.15821 | 0.0006   | 0.00925949 | 0.84182  | 0.205728 | 7.40E-06 |
| 0.19002  | -0.04394 | 0.34343  | 0.008076 | 0.86182  | 0.23753545 | 2.06E-07 | 0.414725 | 7.73E-21 |
| 0.79695  | -0.03554 | 0.44354  | 0.142781 | 0.00198  | 0.14015457 | 0.0024   | 0.019725 | 0.67073  |
| 0.07727  | -0.12228 | 0.00816  | -0.07138 | 0.12349  | -0.0976245 | 0.03494  | -0.12203 | 0.00829  |
| 0.09131  | -0.03936 | 0.3961   | -0.17034 | 0.00022  | -0.1260587 | 0.00638  | -0.15234 | 0.00096  |
| 0.04295  | 0.055663 | 0.22991  | 0.134461 | 0.0036   | -0.1755502 | 0.00014  | -0.27776 | 1.02E-09 |
| 0.02779  | 0.087486 | 0.05887  | -0.0124  | 0.78925  | -0.0225025 | 0.62765  | 0.070563 | 0.12784  |
| 0.36169  | -0.22373 | 1.04E-06 | -0.11617 | 0.012    | -0.0487466 | 0.29316  | -0.03274 | 0.48036  |
| 0.25822  | -0.26834 | 3.82E-09 | -0.13719 | 0.00297  | -0.0056499 | 0.90308  | -0.03699 | 0.42511  |
| 0.63055  | -0.19278 | 2.74E-05 | -0.44025 | 1.47E-23 | -0.249758  | 4.51E-08 | -0.254   | 2.61E-08 |
| 0.21675  | -0.28403 | 4.09E-10 | -0.19802 | 1.63E-05 | 0.00480692 | 0.91749  | 0.091567 | 0.04797  |
| 0.00429  | -0.28843 | 2.13E-10 | -0.2379  | 1.97E-07 | 0.07376241 | 0.1114   | 0.060962 | 0.18848  |
| 0.04307  | -0.16598 | 0.00032  | -0.1927  | 2.76E-05 | 0.06258062 | 0.17699  | 0.056647 | 0.22176  |
| 0.00217  | -0.2231  | 1.12E-06 | -0.20358 | 9.24E-06 | 0.06495295 | 0.16111  | 0.068399 | 0.13997  |
| 0.60129  | -0.09975 | 0.03114  | -0.05916 | 0.20191  | 0.08814549 | 0.05698  | 0.044298 | 0.33948  |
| 0.06483  | 0.113635 | 0.01401  | 0.187369 | 4.61E-05 | 0.25924677 | 1.31E-08 | 0.203982 | 8.87E-06 |
| 0.33464  | -0.19867 | 1.53E-05 | -0.19482 | 2.24E-05 | 0.11695085 | 0.01143  | 0.148077 | 0.00133  |
| 0.97558  | -0.22183 | 1.29E-06 | -0.10547 | 0.02263  | 0.20215072 | 1.07E-05 | 0.368411 | 1.85E-16 |
| 0.02866  | -0.04534 | 0.32825  | -0.05637 | 0.22403  | 0.03035365 | 0.51289  | 0.098328 | 0.03364  |
| 0.31742  | -0.16917 | 0.00024  | -0.11616 | 0.012    | -0.0971306 | 0.03587  | -0.04717 | 0.30906  |

|          |          |          |          |          |            |          |          |          |
|----------|----------|----------|----------|----------|------------|----------|----------|----------|
| 0.0953   | -0.16469 | 0.00035  | -0.12725 | 0.00589  | -0.1150647 | 0.01284  | -0.06816 | 0.14138  |
| 0.66453  | -0.24358 | 9.81E-08 | -0.13981 | 0.00246  | 0.24312022 | 1.04E-07 | 0.435441 | 4.97E-23 |
| 0.11728  | -0.00789 | 0.86505  | 0.074832 | 0.1063   | 0.06214448 | 0.18003  | 0.281855 | 5.62E-10 |
| 0.06161  | 0.271446 | 2.48E-09 | 0.347666 | 1.03E-14 | -0.081603  | 0.07813  | -0.15654 | 0.00069  |
| 0.24735  | -0.35146 | 5.04E-15 | -0.20305 | 9.77E-06 | -0.0855553 | 0.0647   | -0.06103 | 0.18797  |
| 0.56616  | 0.075657 | 0.10248  | 0.060746 | 0.19005  | -0.1414788 | 0.00218  | -0.19793 | 1.64E-05 |
| 0.74845  | -0.10613 | 0.02181  | -0.14364 | 0.00186  | 0.1019113  | 0.02765  | 0.272142 | 2.25E-09 |
| 0.65868  | -0.07369 | 0.11177  | -0.11514 | 0.01278  | -0.1883793 | 4.19E-05 | -0.09135 | 0.04851  |
| 0.43518  | -0.04459 | 0.33628  | -0.13167 | 0.00437  | 0.19930502 | 1.43E-05 | 0.297713 | 5.17E-11 |
| 0.14934  | -0.35103 | 5.47E-15 | -0.26302 | 7.90E-09 | 0.02787972 | 0.54785  | 0.080779 | 0.08119  |
| 0.53715  | -0.10037 | 0.0301   | -0.04201 | 0.36505  | 0.18322616 | 6.81E-05 | 0.329401 | 2.79E-13 |
| 0.00133  | -0.0574  | 0.21564  | 0.064642 | 0.16312  | 0.08507536 | 0.06622  | 0.005803 | 0.90047  |
| 0.04115  | -0.23786 | 1.98E-07 | -0.29227 | 1.19E-10 | -0.2323896 | 3.81E-07 | -0.21877 | 1.82E-06 |
| 0.08629  | -0.13028 | 0.00481  | 0.019982 | 0.66669  | -0.1373178 | 0.00294  | -0.12166 | 0.00849  |
| 0.05852  | -0.26962 | 3.20E-09 | -0.19655 | 1.89E-05 | 0.02111133 | 0.64907  | 0.125925 | 0.00643  |
| 0.00012  | -0.05235 | 0.25887  | 0.035849 | 0.4396   | 0.13938807 | 0.00254  | 0.084468 | 0.06819  |
| 0.57077  | -0.34198 | 2.94E-14 | -0.19187 | 2.99E-05 | -0.0203877 | 0.66034  | 0.019731 | 0.67063  |
| 0.3223   | -0.18247 | 7.31E-05 | -0.18732 | 4.64E-05 | -0.0882001 | 0.05683  | 0.026626 | 0.566    |
| 0.0206   | 0.174895 | 0.00015  | 0.086975 | 0.06037  | 0.01662033 | 0.72017  | 0.10095  | 0.02916  |
| 0.39411  | -0.27496 | 1.51E-09 | -0.21889 | 1.79E-06 | -0.0332582 | 0.47338  | -0.04265 | 0.35776  |
| 0.79631  | -0.17168 | 0.00019  | -0.18902 | 3.94E-05 | -0.0284919 | 0.53909  | 0.053031 | 0.25273  |
| 0.65946  | -0.26682 | 4.71E-09 | -0.17715 | 0.00012  | 0.09090821 | 0.04961  | 0.18094  | 8.42E-05 |
| 0.14373  | -0.18795 | 4.37E-05 | -0.08565 | 0.06442  | 0.03228212 | 0.48647  | 0.094891 | 0.04039  |
| 0.95218  | -0.19924 | 1.44E-05 | -0.22943 | 5.39E-07 | -0.0125269 | 0.78716  | 0.07394  | 0.11054  |
| 0.0005   | -0.10124 | 0.0287   | -0.087   | 0.06029  | 0.09246504 | 0.04581  | 0.238705 | 1.79E-07 |
| 0.42961  | 0.059159 | 0.20191  | 0.05848  | 0.20715  | 0.02779132 | 0.54912  | 0.066168 | 0.1534   |
| 0.00022  | -0.20351 | 9.31E-06 | -0.03343 | 0.47116  | -0.1851117 | 5.71E-05 | -0.26818 | 3.91E-09 |
| 0.17982  | 0.181386 | 8.08E-05 | 0.211324 | 4.09E-06 | 0.11791277 | 0.01077  | 0.088258 | 0.05666  |
| 0.62576  | -0.24413 | 9.16E-08 | -0.15961 | 0.00054  | 0.02347924 | 0.61279  | 0.092691 | 0.04528  |
| 0.08084  | -0.09713 | 0.03588  | -0.08738 | 0.05919  | -0.0255221 | 0.58222  | 0.019753 | 0.67029  |
| 0.41609  | -0.35359 | 3.37E-15 | -0.26359 | 7.32E-09 | -0.3165793 | 2.49E-12 | -0.44732 | 2.35E-24 |
| 0.55303  | -0.23834 | 1.87E-07 | -0.15289 | 0.00092  | -0.0321246 | 0.4886   | 0.021733 | 0.63946  |
| 0.92994  | -0.21121 | 4.14E-06 | -0.0809  | 0.08072  | 0.13596428 | 0.00324  | 0.171826 | 0.00019  |
| 0.11529  | 0.05082  | 0.27308  | 0.069502 | 0.13368  | 0.15088547 | 0.00107  | 0.28455  | 3.79E-10 |
| 0.00011  | -0.28288 | 4.83E-10 | -0.30079 | 3.20E-11 | -0.045714  | 0.32425  | 0.034446 | 0.45772  |
| 0.92077  | -0.12244 | 0.00808  | 0.005798 | 0.90056  | 0.24723996 | 6.20E-08 | 0.267204 | 4.47E-09 |
| 1.49E-07 | -0.16504 | 0.00034  | -0.15716 | 0.00065  | -0.2628922 | 8.04E-09 | -0.19463 | 2.28E-05 |
| 0.00017  | -0.37709 | 3.15E-17 | -0.19271 | 2.76E-05 | 0.04545623 | 0.32699  | 0.101467 | 0.02834  |
| 5.63E-10 | 0.11898  | 0.01007  | 0.065237 | 0.15928  | 0.00214973 | 0.96305  | -0.01939 | 0.67605  |
| 0.70608  | -0.15135 | 0.00104  | -0.32906 | 2.96E-13 | -0.1533622 | 0.00088  | -0.21822 | 1.93E-06 |
| 0.00115  | -0.00368 | 0.9368   | -0.07152 | 0.12274  | 0.00869653 | 0.85132  | 0.05653  | 0.22272  |
| 1.28E-10 | 0.263268 | 7.64E-09 | 0.256279 | 1.94E-08 | 0.07466307 | 0.10709  | 0.018208 | 0.69472  |
| 3.75E-12 | 0.12008  | 0.00939  | 0.162446 | 0.00042  | 0.15259984 | 0.00094  | 0.194512 | 2.31E-05 |
| 0.99801  | -0.06184 | 0.18217  | -0.03509 | 0.44937  | -0.0117367 | 0.8003   | -0.01282 | 0.78227  |
| 0.99676  | -0.20201 | 1.09E-05 | -0.08302 | 0.07307  | 0.1182199  | 0.01056  | 0.001012 | 0.9826   |

|          |          |          |          |          |            |          |           |          |
|----------|----------|----------|----------|----------|------------|----------|-----------|----------|
| 0.00141  | -0.00644 | 0.88969  | -0.08002 | 0.0841   | -0.2375017 | 2.07E-07 | -0.25272  | 3.08E-08 |
| 0.86553  | 0.126171 | 0.00633  | 0.135294 | 0.0034   | 0.06716932 | 0.14726  | 0.195693  | 2.05E-05 |
| 0.24522  | -0.12621 | 0.00631  | -0.00186 | 0.9681   | 0.05473195 | 0.23781  | -5.04E-05 | 0.99913  |
| 0.30196  | -0.33438 | 1.16E-13 | -0.02203 | 0.63484  | 0.33846981 | 5.57E-14 | 0.255477  | 2.15E-08 |
| 0.38394  | 0.006712 | 0.88498  | -0.1029  | 0.02617  | -0.3204372 | 1.30E-12 | -0.20773  | 6.00E-06 |
| 0.01474  | -0.04223 | 0.36251  | -0.13977 | 0.00247  | -0.0682907 | 0.14061  | 0.041333  | 0.37282  |
| 0.09905  | -0.23896 | 1.73E-07 | -0.2474  | 6.08E-08 | -0.0486372 | 0.29424  | -0.05453  | 0.23952  |
| 0.24876  | -0.23711 | 2.17E-07 | -0.17374 | 0.00016  | -0.0104651 | 0.82155  | 0.080145  | 0.08361  |
| 0.3444   | 0.037352 | 0.42065  | -0.18744 | 4.58E-05 | -0.0349197 | 0.45155  | 0.121431  | 0.00862  |
| 3.83E-05 | -0.09328 | 0.04392  | -0.07421 | 0.10926  | 0.10807592 | 0.01948  | 0.156468  | 0.00069  |
| 0.91436  | -0.26294 | 7.99E-09 | -0.15065 | 0.00109  | 0.04025101 | 0.38548  | 0.100133  | 0.0305   |
| 0.03305  | -0.12924 | 0.00516  | -0.06258 | 0.17701  | 0.3028299  | 2.32E-11 | 0.254755  | 2.37E-08 |
| 0.26643  | -0.21472 | 2.83E-06 | 0.061881 | 0.18189  | 0.38273257 | 9.69E-18 | 0.425053  | 6.52E-22 |
| 0.97221  | 0.007899 | 0.86482  | 0.049361 | 0.28711  | 0.15104185 | 0.00106  | 0.143026  | 0.00195  |
| 0.84145  | -0.31845 | 1.82E-12 | -0.20762 | 6.07E-06 | -0.059218  | 0.20146  | -0.06421  | 0.16599  |
| 0.84968  | -0.16565 | 0.00032  | -0.24811 | 5.55E-08 | -0.1695308 | 0.00023  | -0.19323  | 2.62E-05 |
| 0.77974  | -0.15669 | 0.00068  | 0.139227 | 0.00257  | 0.22011412 | 1.56E-06 | 0.202802  | 1.00E-05 |
| 0.6741   | -0.32931 | 2.84E-13 | -0.21858 | 1.85E-06 | -0.0143795 | 0.75662  | -0.02508  | 0.5888   |
| 0.94927  | -0.15347 | 0.00088  | -0.13764 | 0.00288  | 0.21515694 | 2.70E-06 | 0.448098  | 1.91E-24 |
| 0.01008  | -0.01323 | 0.77554  | 0.054472 | 0.24005  | -0.0356184 | 0.44255  | -0.09129  | 0.04865  |
| 5.91E-09 | -0.21783 | 2.01E-06 | -0.14285 | 0.00197  | -0.0607808 | 0.1898   | -0.0916   | 0.04789  |
| 0.26154  | -0.08659 | 0.06154  | -0.00343 | 0.94102  | 0.15866213 | 0.00058  | 0.185413  | 5.55E-05 |
| 0.89185  | -0.27732 | 1.08E-09 | -0.22076 | 1.45E-06 | -0.1461557 | 0.00154  | -0.14342  | 0.00189  |
| 0.04464  | -0.25845 | 1.46E-08 | -0.28916 | 1.91E-10 | -0.3459258 | 1.42E-14 | -0.2825   | 5.11E-10 |
| 0.33165  | 0.084926 | 0.0667   | 0.049736 | 0.28345  | 0.17175108 | 0.00019  | 0.339005  | 5.06E-14 |
| 0.83785  | -0.31591 | 2.78E-12 | -0.18654 | 4.99E-05 | 0.00131627 | 0.97737  | 0.055225  | 0.2336   |
| 0.22325  | 0.135607 | 0.00332  | -0.09573 | 0.03865  | 0.09107954 | 0.04918  | 0.23788   | 1.97E-07 |
| 1.18E-12 | 0.282046 | 5.46E-10 | 0.210177 | 4.63E-06 | 0.19110176 | 3.22E-05 | 0.112841  | 0.0147   |
| 0.40835  | 0.01674  | 0.71824  | -0.15917 | 0.00056  | 0.100976   | 0.02912  | 0.215306  | 2.66E-06 |
| 0.91284  | -0.28608 | 3.02E-10 | -0.19922 | 1.44E-05 | -0.1893773 | 3.81E-05 | -0.12842  | 0.00545  |
| 0.0075   | 0.133538 | 0.00384  | 0.232509 | 3.76E-07 | -0.110526  | 0.01688  | -0.15333  | 0.00089  |
| 0.86762  | -0.27129 | 2.54E-09 | -0.22273 | 1.16E-06 | -0.0833485 | 0.07194  | 0.028857  | 0.5339   |
| 0.707    | -0.27752 | 1.05E-09 | -0.16724 | 0.00028  | -0.0725656 | 0.11734  | -0.02029  | 0.66184  |
| 0.1381   | -0.2345  | 2.97E-07 | -0.15105 | 0.00106  | -0.0661842 | 0.1533   | -0.01085  | 0.81511  |
| 0.15556  | -0.00465 | 0.92017  | -0.05368 | 0.24692  | 0.0287955  | 0.53477  | -0.00732  | 0.87472  |
| 0.23283  | -0.08521 | 0.06579  | -0.02232 | 0.63051  | 0.02476079 | 0.59353  | 0.001367  | 0.9765   |
| 0.03929  | -0.09688 | 0.03635  | 0.040996 | 0.37674  | 0.24224226 | 1.16E-07 | 0.210975  | 4.25E-06 |
| 0.71258  | -0.31144 | 5.81E-12 | -0.1757  | 0.00014  | -0.0461314 | 0.31985  | -0.05072  | 0.27398  |
| 0.00018  | 0.036401 | 0.43257  | -0.00906 | 0.84524  | 0.04339003 | 0.34948  | 0.182806  | 7.08E-05 |
| 0.17865  | -0.24297 | 1.06E-07 | -0.22457 | 9.45E-07 | -0.106892  | 0.02087  | -0.05194  | 0.26262  |
| 0.78647  | -0.06003 | 0.19535  | -0.11411 | 0.01361  | 0.1387103  | 0.00266  | 0.375281  | 4.58E-17 |
| 0.01103  | 0.021329 | 0.64571  | -0.07336 | 0.11339  | 0.14096494 | 0.00226  | 0.29593   | 6.81E-11 |
| 0.17926  | -0.17486 | 0.00015  | -0.03752 | 0.4186   | 0.06761168 | 0.14461  | 0.082773  | 0.07394  |
| 0.0679   | 0.178958 | 0.0001   | 0.027602 | 0.55184  | -0.1227217 | 0.00793  | -0.04924  | 0.28833  |
| 0.52308  | -0.10208 | 0.0274   | 0.00704  | 0.87939  | 0.26260836 | 8.35E-09 | 0.341472  | 3.23E-14 |

|          |          |          |          |          |            |          |          |          |
|----------|----------|----------|----------|----------|------------|----------|----------|----------|
| 0.30826  | -0.10068 | 0.02961  | -0.16823 | 0.00026  | -0.0918647 | 0.04725  | -0.09042 | 0.05085  |
| 0.26984  | 0.196089 | 1.98E-05 | 0.437539 | 2.93E-23 | 0.22689054 | 7.24E-07 | 0.027176 | 0.55799  |
| 0.83556  | -0.29192 | 1.26E-10 | -0.08288 | 0.07355  | 0.05557869 | 0.23062  | -0.02397 | 0.60536  |
| 0.7736   | -0.11434 | 0.01342  | -0.05472 | 0.23793  | 0.19131911 | 3.16E-05 | 0.230417 | 4.81E-07 |
| 0.17734  | -0.15015 | 0.00114  | -0.01305 | 0.77843  | 0.0029915  | 0.94859  | -0.04286 | 0.35538  |
| 0.90434  | -0.22597 | 8.05E-07 | -0.11024 | 0.01716  | 0.0593526  | 0.20044  | 0.06775  | 0.14378  |
| 0.17471  | 0.131592 | 0.00439  | -0.19842 | 1.56E-05 | -0.1980618 | 1.62E-05 | 0.014062 | 0.76183  |
| 2.18E-12 | -0.11297 | 0.01458  | 0.088373 | 0.05634  | 0.02605004 | 0.57443  | 0.093415 | 0.04362  |
| 0.02045  | -0.1863  | 5.11E-05 | -0.12394 | 0.00733  | -0.0058    | 0.90052  | 0.063141 | 0.17314  |
| 0.49302  | -0.08783 | 0.05788  | -0.25652 | 1.88E-08 | -0.2974092 | 5.42E-11 | -0.21233 | 3.67E-06 |
| 2.91E-13 | -0.22264 | 1.18E-06 | -0.06343 | 0.17115  | 0.27645758 | 1.22E-09 | 0.307828 | 1.04E-11 |
| 0.29168  | -0.11566 | 0.01238  | -0.13832 | 0.00274  | -0.023246  | 0.61632  | -0.01779 | 0.70139  |
| 0.00083  | -0.01436 | 0.75694  | 0.021965 | 0.63589  | 0.29689928 | 5.87E-11 | 0.465692 | 1.63E-26 |
| 0.02282  | -0.27132 | 2.53E-09 | -0.1735  | 0.00016  | 0.07042693 | 0.12857  | 0.185702 | 5.40E-05 |
| 0.43658  | -0.1817  | 7.85E-05 | -0.26176 | 9.35E-09 | 0.03314077 | 0.47495  | 0.192407 | 2.84E-05 |
| 0.69343  | -0.09219 | 0.04647  | -0.1839  | 6.40E-05 | -0.0841846 | 0.06913  | -0.03019 | 0.5152   |
| 0.06428  | 0.119397 | 0.00981  | -0.014   | 0.76289  | -0.0895509 | 0.05312  | -0.06979 | 0.13206  |
| 0.00385  | 0.115112 | 0.0128   | 0.06941  | 0.1342   | 0.11399897 | 0.0137   | 0.106918 | 0.02084  |
| 0.76975  | -0.08289 | 0.07352  | -0.09398 | 0.04236  | -0.0881736 | 0.0569   | -0.11548 | 0.01252  |
| 0.99313  | -0.12619 | 0.00632  | -0.05867 | 0.20569  | 0.1378993  | 0.00282  | 0.056186 | 0.22556  |
| 0.28532  | -0.03576 | 0.44079  | -0.05698 | 0.21902  | 0.02318292 | 0.61728  | 0.064972 | 0.16098  |
| 0.14101  | -0.08392 | 0.07001  | -0.04695 | 0.31134  | -0.0417412 | 0.36811  | -0.09712 | 0.03589  |
| 0.08044  | -0.00833 | 0.85754  | -0.09097 | 0.04946  | -0.0422486 | 0.36232  | -0.06867 | 0.13838  |
| 0.11615  | -0.0404  | 0.38378  | 0.183675 | 6.53E-05 | 0.05599835 | 0.22711  | -0.04364 | 0.34669  |
| 0.25521  | -0.20806 | 5.79E-06 | -0.09155 | 0.04801  | 0.10491086 | 0.02337  | 0.165585 | 0.00033  |
| 0.84453  | -0.02307 | 0.61906  | -0.1589  | 0.00057  | 0.05825809 | 0.20888  | 0.286454 | 2.86E-10 |
| 0.16657  | -0.04447 | 0.33762  | 0.025337 | 0.58495  | 0.04938241 | 0.2869   | 0.209313 | 5.07E-06 |
| 0.00666  | 0.004032 | 0.93076  | 0.023146 | 0.61784  | -0.0481993 | 0.29861  | -0.04127 | 0.37356  |
| 0.25268  | -0.20631 | 6.96E-06 | 0.013766 | 0.76669  | 0.04777685 | 0.30287  | 0.064275 | 0.16553  |
| 0.16645  | -0.04165 | 0.36916  | 0.087735 | 0.05815  | 0.05031729 | 0.27786  | -0.07809 | 0.09186  |
| 0.65962  | -0.24125 | 1.31E-07 | -0.21602 | 2.46E-06 | 0.03389802 | 0.46491  | 0.050882 | 0.27249  |
| 0.30265  | -0.15504 | 0.00077  | -0.05498 | 0.23565  | 0.19717241 | 1.77E-05 | 0.355601 | 2.29E-15 |
| 0.97409  | 0.110197 | 0.01721  | 0.190644 | 3.37E-05 | 0.29130154 | 1.38E-10 | 0.182391 | 7.36E-05 |
| 0.10414  | -0.06425 | 0.1657   | -0.01071 | 0.81752  | -0.0750452 | 0.1053   | -0.16954 | 0.00023  |
| 0.50402  | -0.31861 | 1.77E-12 | -0.16872 | 0.00025  | 0.01321709 | 0.77574  | -0.00973 | 0.83393  |
| 0.95501  | -0.15123 | 0.00104  | -0.05648 | 0.22312  | 0.09097442 | 0.04944  | -0.01618 | 0.72723  |
| 0.02517  | -0.21826 | 1.92E-06 | -0.12504 | 0.00682  | 0.09621196 | 0.03767  | 0.08108  | 0.08006  |
| 0.20079  | -0.20319 | 9.63E-06 | -0.1187  | 0.01025  | -0.0559199 | 0.22776  | -0.08754 | 0.05871  |
| 3.62E-05 | -0.0717  | 0.12177  | 0.14769  | 0.00137  | 0.34072538 | 3.70E-14 | 0.2332   | 3.46E-07 |
| 0.02024  | -0.26556 | 5.59E-09 | -0.23001 | 5.04E-07 | -0.1041917 | 0.02434  | -0.12128 | 0.0087   |
| 0.06358  | -0.03855 | 0.40589  | -0.09968 | 0.03126  | -0.0379691 | 0.41301  | 0.035287 | 0.4468   |
| 0.26234  | 0.061385 | 0.18542  | -0.05179 | 0.26405  | 0.02019221 | 0.66339  | 0.217704 | 2.04E-06 |
| 0.2985   | -0.21626 | 2.40E-06 | -0.13832 | 0.00274  | -0.0153328 | 0.74104  | -0.01603 | 0.72966  |
| 1.48E-06 | -0.08944 | 0.05343  | -0.01825 | 0.69401  | 0.03776438 | 0.41553  | -0.027   | 0.56051  |
| 5.32E-09 | 0.032511 | 0.48339  | -0.06221 | 0.17957  | 0.04361098 | 0.34703  | 0.122476 | 0.00806  |

|          |          |          |          |          |            |          |          |          |
|----------|----------|----------|----------|----------|------------|----------|----------|----------|
| 0.254    | -0.01411 | 0.76109  | 0.065184 | 0.15961  | 0.18871411 | 4.06E-05 | 0.288503 | 2.10E-10 |
| 0.01838  | 0.041004 | 0.37664  | 0.138401 | 0.00272  | 0.13979224 | 0.00246  | 0.187475 | 4.57E-05 |
| 0.18073  | -0.11958 | 0.0097   | -0.15729 | 0.00065  | -0.0427838 | 0.35626  | 0.026709 | 0.56479  |
| 0.19153  | -0.00018 | 0.99684  | -0.05427 | 0.24183  | -0.0293879 | 0.5264   | -0.14825 | 0.00131  |
| 0.07957  | 0.000396 | 0.99319  | -0.02936 | 0.52673  | 0.00393331 | 0.93244  | 0.097237 | 0.03567  |
| 0.1031   | -0.16672 | 0.0003   | 0.029492 | 0.52494  | -0.0056163 | 0.90366  | -0.10365 | 0.0251   |
| 0.00716  | 0.194761 | 2.25E-05 | 0.362524 | 5.96E-16 | -0.0555845 | 0.23057  | -0.17617 | 0.00013  |
| 0.89769  | -0.13868 | 0.00267  | -0.21998 | 1.59E-06 | -0.1238281 | 0.00738  | -0.21854 | 1.86E-06 |
| 0.85152  | -0.11501 | 0.01288  | -0.10028 | 0.03026  | 0.06629532 | 0.15261  | 0.165201 | 0.00034  |
| 0.46382  | -0.01314 | 0.77707  | -0.01009 | 0.82777  | 0.05593759 | 0.22761  | 0.127083 | 0.00596  |
| 0.97771  | -0.07501 | 0.10545  | -0.05749 | 0.21497  | 0.0845522  | 0.06792  | 0.167186 | 0.00028  |
| 0.66681  | -0.08219 | 0.07601  | -0.04845 | 0.29615  | 0.14928055 | 0.00121  | 0.179886 | 9.27E-05 |
| 0.45682  | -0.04648 | 0.31622  | 0.014133 | 0.76065  | 0.03298955 | 0.47696  | 0.099349 | 0.03183  |
| 0.58255  | -0.01308 | 0.77807  | 0.032703 | 0.48081  | 0.08203386 | 0.07656  | 0.112676 | 0.01484  |
| 0.42517  | -0.01868 | 0.68722  | 0.058988 | 0.20322  | 0.34950491 | 7.29E-15 | 0.288191 | 2.21E-10 |
| 0.75051  | -0.23014 | 4.96E-07 | -0.09673 | 0.03666  | 0.01460648 | 0.7529   | -0.00465 | 0.92024  |
| 0.00602  | -0.09805 | 0.03414  | -0.21056 | 4.44E-06 | -0.0805323 | 0.08213  | -0.04936 | 0.28712  |
| 0.36285  | 0.161637 | 0.00045  | 0.163113 | 0.0004   | 0.17599056 | 0.00013  | 0.049776 | 0.28307  |
| 0.65119  | -0.16204 | 0.00044  | -0.07006 | 0.13058  | 0.02721561 | 0.55743  | 0.00812  | 0.86108  |
| 0.16667  | -0.34739 | 1.08E-14 | -0.20598 | 7.21E-06 | 0.10466402 | 0.0237   | 0.187479 | 4.57E-05 |
| 0.49591  | -0.24405 | 9.25E-08 | -0.14046 | 0.00235  | -0.0493474 | 0.28724  | -0.0754  | 0.10366  |
| 0.00791  | 0.316008 | 2.74E-12 | 0.147157 | 0.00143  | 0.06629838 | 0.15259  | 0.025848 | 0.5774   |
| 0.0362   | -0.35179 | 4.74E-15 | -0.27326 | 1.93E-09 | -0.0966184 | 0.03687  | -0.0882  | 0.05684  |
| 7.65E-05 | -0.13239 | 0.00416  | -0.19231 | 2.87E-05 | -0.0187364 | 0.68633  | 0.120297 | 0.00926  |
| 0.31869  | 0.010924 | 0.81387  | -0.00887 | 0.84831  | 0.07299294 | 0.1152   | 0.052404 | 0.25839  |
| 0.00441  | -0.11535 | 0.01262  | -0.18542 | 5.55E-05 | -0.019187  | 0.6792   | 0.062449 | 0.17791  |
| 0.91885  | -0.00123 | 0.97889  | 0.005857 | 0.89955  | 0.07238707 | 0.11825  | 0.035461 | 0.44457  |
| 0.08758  | -0.28762 | 2.40E-10 | -0.12539 | 0.00666  | 0.03509331 | 0.44931  | -0.0047  | 0.91937  |
| 0.2093   | 0.062929 | 0.17459  | 0.055856 | 0.22829  | 0.1567428  | 0.00068  | 0.135556 | 0.00333  |
| 0.0216   | -0.32319 | 8.16E-13 | -0.37503 | 4.82E-17 | -0.0638435 | 0.1684   | 0.073099 | 0.11467  |
| 0.00015  | 0.004235 | 0.92727  | 0.044306 | 0.33939  | -0.0109453 | 0.81351  | 0.034404 | 0.45827  |
| 0.18344  | -0.32683 | 4.36E-13 | -0.16264 | 0.00042  | -0.038667  | 0.40446  | -0.01199 | 0.79603  |
| 0.99319  | -0.36397 | 4.48E-16 | -0.31942 | 1.55E-12 | -0.1649315 | 0.00034  | -0.0816  | 0.07815  |
| 0.70614  | -0.14456 | 0.00174  | -0.20089 | 1.22E-05 | 0.01764596 | 0.70369  | 0.180337 | 8.90E-05 |
| 0.6733   | -0.06454 | 0.16379  | -0.13058 | 0.00471  | -0.0828609 | 0.07363  | -0.0908  | 0.04989  |
| 0.0905   | -0.15772 | 0.00062  | -0.12506 | 0.00681  | 0.00744442 | 0.87253  | 0.001828 | 0.96857  |
| 0.64213  | -0.03602 | 0.43737  | -0.05616 | 0.22574  | 0.07843869 | 0.09043  | 0.09787  | 0.03448  |
| 0.29579  | -0.06192 | 0.18162  | -0.2524  | 3.21E-08 | -0.1020157 | 0.02749  | -0.02586 | 0.57721  |
| 1.95E-06 | -0.23829 | 1.88E-07 | -0.20064 | 1.25E-05 | -0.1182074 | 0.01057  | -0.11623 | 0.01195  |
| 0.00146  | -0.22048 | 1.50E-06 | -0.22272 | 1.17E-06 | -0.000327  | 0.99438  | 0.015258 | 0.74225  |
| 3.41E-07 | -0.22251 | 1.19E-06 | -0.01118 | 0.80957  | 0.29479225 | 8.12E-11 | 0.402018 | 1.44E-19 |
| 0.24616  | -0.27782 | 1.01E-09 | -0.16991 | 0.00023  | -0.0125574 | 0.78666  | -0.03253 | 0.48313  |
| 0.00169  | -0.1948  | 2.24E-05 | -0.1995  | 1.40E-05 | -0.0620666 | 0.18058  | -0.02799 | 0.54631  |
| 6.73E-06 | 0.014032 | 0.76233  | -0.04851 | 0.29552  | 0.19348586 | 2.55E-05 | 0.235918 | 2.50E-07 |
| 1.67E-05 | -0.02907 | 0.53084  | -0.22351 | 1.07E-06 | 0.12238623 | 0.00811  | 0.079333 | 0.0868   |

|          |          |          |          |          |            |          |          |          |
|----------|----------|----------|----------|----------|------------|----------|----------|----------|
| 0.8732   | -0.06679 | 0.14954  | 0.043094 | 0.35278  | 0.22431614 | 9.73E-07 | 0.101669 | 0.02803  |
| 2.03E-05 | -0.03234 | 0.48572  | -0.02195 | 0.63606  | 0.08615091 | 0.06286  | 0.117554 | 0.01101  |
| 0.21327  | -0.1741  | 0.00016  | -0.23663 | 2.30E-07 | -0.0813795 | 0.07895  | -0.07973 | 0.08524  |
| 0.12217  | 0.054433 | 0.24039  | 0.029404 | 0.52618  | 0.02643746 | 0.56875  | 0.03839  | 0.40785  |
| 0.28458  | -0.08365 | 0.07093  | -0.28436 | 3.89E-10 | -0.0426123 | 0.3582   | 0.011446 | 0.80514  |
| 0.7675   | -0.0675  | 0.14527  | -0.13254 | 0.00412  | -0.0072254 | 0.87625  | 0.002722 | 0.95322  |
| 0.36514  | -0.06693 | 0.1487   | -0.17309 | 0.00017  | -0.0933873 | 0.04368  | -0.11665 | 0.01164  |
| 0.87903  | -0.03995 | 0.38901  | -0.11127 | 0.01614  | -0.0343721 | 0.45868  | -0.07304 | 0.11496  |
| 1.84E-08 | -0.0883  | 0.05655  | -0.04343 | 0.34909  | -0.0483779 | 0.29683  | -0.07923 | 0.08721  |
| 0.50064  | -0.04729 | 0.3078   | 0.005565 | 0.90454  | -0.0017319 | 0.97022  | -0.08771 | 0.05822  |
| 0.04535  | 0.017434 | 0.70709  | 0.152714 | 0.00093  | -0.1112827 | 0.01613  | -0.11322 | 0.01436  |
| 0.22697  | -0.20894 | 5.28E-06 | -0.4058  | 6.12E-20 | -0.3007302 | 3.23E-11 | -0.31187 | 5.42E-12 |
| 0.23809  | -0.37207 | 8.83E-17 | -0.05314 | 0.25177  | 0.20855394 | 5.50E-06 | 0.192045 | 2.94E-05 |
| 0.54282  | -0.21615 | 2.42E-06 | -0.14307 | 0.00194  | 0.06779702 | 0.1435   | 0.13466  | 0.00355  |
| 0.24844  | -0.22714 | 7.04E-07 | -0.32509 | 5.89E-13 | -0.0473235 | 0.30749  | 0.120568 | 0.00911  |
| 0.5238   | -0.18472 | 5.93E-05 | -0.14409 | 0.0018   | -0.1076075 | 0.02002  | -0.08793 | 0.0576   |
| 0.61651  | -0.1414  | 0.00219  | -0.05934 | 0.20053  | 0.17428583 | 0.00015  | 0.060958 | 0.18851  |
| 0.08055  | -0.27886 | 8.67E-10 | -0.0962  | 0.03769  | 0.30968245 | 7.74E-12 | 0.193988 | 2.43E-05 |
| 0.03401  | -0.14762 | 0.00138  | -0.18405 | 6.31E-05 | 0.07367165 | 0.11185  | 0.049301 | 0.28769  |
| 0.67643  | 0.05171  | 0.26476  | 0.173515 | 0.00016  | 0.05065375 | 0.27466  | 0.005163 | 0.9114   |
| 0.4338   | -0.18555 | 5.48E-05 | -0.20601 | 7.18E-06 | -0.2990227 | 4.22E-11 | -0.30393 | 1.95E-11 |
| 0.83991  | -0.12786 | 0.00566  | -0.13925 | 0.00256  | -0.3423237 | 2.76E-14 | -0.45419 | 3.79E-25 |
| 0.0332   | -0.19536 | 2.12E-05 | -0.0047  | 0.9193   | 0.07717573 | 0.09575  | 0.082658 | 0.07434  |
| 0.53568  | 0.17747  | 0.00012  | 0.253911 | 2.64E-08 | 0.23026866 | 4.89E-07 | 0.320343 | 1.32E-12 |
| 0.14278  | 0.028229 | 0.54285  | -0.04752 | 0.30546  | -0.0295189 | 0.52456  | 0.171494 | 0.0002   |
| 0.15517  | -0.16339 | 0.00039  | -0.14718 | 0.00143  | 0.06483938 | 0.16184  | 0.251683 | 3.52E-08 |
| 0.14987  | -0.17931 | 9.77E-05 | -0.1588  | 0.00057  | 0.02299179 | 0.62018  | 0.073652 | 0.11194  |
| 0.03605  | 0.081816 | 0.07735  | 0.318517 | 1.80E-12 | 0.08882158 | 0.0551   | 0.04539  | 0.3277   |
| 0.0001   | 0.051626 | 0.26554  | 0.072203 | 0.11919  | 0.07651297 | 0.09865  | 0.104293 | 0.0242   |
| 0.50217  | -0.0929  | 0.04479  | -0.11188 | 0.01557  | 0.05697263 | 0.21911  | 0.174617 | 0.00015  |
| 0.10653  | -0.07457 | 0.10751  | -0.03767 | 0.41665  | -0.0820463 | 0.07652  | -0.08223 | 0.07584  |
| 0.92091  | -0.1308  | 0.00464  | -0.15395 | 0.00084  | -0.1117094 | 0.01573  | -0.06956 | 0.13336  |
| 0.81414  | -0.22874 | 5.85E-07 | -0.33609 | 8.55E-14 | -0.2454159 | 7.80E-08 | -0.1726  | 0.00018  |
| 0.16188  | -0.28108 | 6.29E-10 | -0.16594 | 0.00032  | 0.0142511  | 0.75872  | 0.061623 | 0.18372  |
| 0.86625  | -0.20708 | 6.42E-06 | -0.12915 | 0.00519  | 0.10361101 | 0.02515  | 0.245243 | 7.97E-08 |
| 0.61294  | -0.04852 | 0.29538  | -0.03237 | 0.48533  | 0.28384044 | 4.20E-10 | 0.131312 | 0.00448  |
| 0.20541  | -0.12594 | 0.00643  | -0.21528 | 2.67E-06 | -0.2268393 | 7.28E-07 | -0.22305 | 1.12E-06 |
| 0.02959  | -0.04215 | 0.36345  | -0.17361 | 0.00016  | 0.18690927 | 4.82E-05 | 0.425927 | 5.27E-22 |
| 0.01247  | -0.22251 | 1.19E-06 | -0.24337 | 1.01E-07 | -0.0492221 | 0.28847  | 0.087001 | 0.06029  |
| 0.00662  | 0.403981 | 9.26E-20 | 0.271966 | 2.31E-09 | -0.0199643 | 0.66696  | -0.01656 | 0.7211   |
| 0.00027  | -0.04015 | 0.38672  | 0.03643  | 0.43221  | -0.1000524 | 0.03063  | -0.11887 | 0.01014  |
| 0.10598  | -0.08456 | 0.0679   | 0.031288 | 0.49999  | 0.29618987 | 6.55E-11 | 0.200984 | 1.21E-05 |
| 0.12135  | -0.01254 | 0.7869   | 0.056641 | 0.22181  | 0.03992675 | 0.38932  | 0.113095 | 0.01447  |
| 3.38E-21 | -0.06765 | 0.14438  | -0.06345 | 0.17102  | 0.10196245 | 0.02758  | 0.225172 | 8.82E-07 |
| 0.64382  | -0.05087 | 0.27258  | 0.055631 | 0.23017  | 0.30273636 | 2.36E-11 | 0.369076 | 1.62E-16 |



|          |          |          |          |          |            |          |          |          |
|----------|----------|----------|----------|----------|------------|----------|----------|----------|
| 0.42446  | 0.067466 | 0.14548  | 0.066453 | 0.15163  | 0.24687291 | 6.50E-08 | 0.375484 | 4.39E-17 |
| 0.09474  | -0.16857 | 0.00025  | -0.12647 | 0.0062   | 0.01383689 | 0.76553  | 0.13165  | 0.00438  |
| 0.00016  | -0.1536  | 0.00087  | -0.05582 | 0.22858  | 0.00981214 | 0.83251  | -0.04949 | 0.28581  |
| 0.15983  | -0.10346 | 0.02536  | -0.09767 | 0.03486  | -0.0870373 | 0.06019  | -0.04582 | 0.32317  |
| 0.85078  | -0.16632 | 0.00031  | -0.4244  | 7.66E-22 | -0.2702474 | 2.93E-09 | -0.22428 | 9.76E-07 |
| 0.01221  | 0.111775 | 0.01567  | -0.02999 | 0.51798  | -0.0162922 | 0.72547  | 0.070165 | 0.13     |
| 0.16735  | 0.03054  | 0.51031  | 0.29924  | 4.08E-11 | 0.37250343 | 8.09E-17 | 0.141089 | 0.00224  |
| 0.49593  | -0.18645 | 5.03E-05 | -0.22832 | 6.14E-07 | -0.0103995 | 0.82265  | -0.03422 | 0.46063  |
| 0.07353  | -0.22376 | 1.04E-06 | -0.12031 | 0.00926  | 0.06366939 | 0.16956  | 0.110676 | 0.01673  |
| 0.01381  | 0.133511 | 0.00385  | 0.078986 | 0.08819  | 0.10613279 | 0.0218   | 0.036528 | 0.43097  |
| 0.02178  | -0.07369 | 0.11176  | -0.11234 | 0.01515  | -0.0226646 | 0.62517  | -0.03963 | 0.39291  |
| 0.32103  | -0.25294 | 3.00E-08 | -0.16605 | 0.00031  | -0.0001838 | 0.99684  | 0.144036 | 0.0018   |
| 0.55384  | -0.41422 | 8.70E-21 | -0.18418 | 6.23E-05 | 0.13993533 | 0.00244  | 0.200529 | 1.26E-05 |
| 0.36062  | -0.28289 | 4.83E-10 | -0.24086 | 1.37E-07 | -0.0458183 | 0.32315  | 0.009564 | 0.83669  |
| 0.06265  | 0.187795 | 4.43E-05 | 0.378743 | 2.24E-17 | 0.11799359 | 0.01071  | 0.007626 | 0.86945  |
| 1.67E-12 | -0.26478 | 6.22E-09 | -0.1965  | 1.90E-05 | 0.01606711 | 0.72911  | 0.108974 | 0.01849  |
| 0.87571  | 0.015403 | 0.73991  | -0.01159 | 0.80266  | 0.04731108 | 0.30762  | 0.081838 | 0.07727  |
| 0.11819  | -0.1673  | 0.00028  | -0.02781 | 0.54884  | 0.43394223 | 7.25E-23 | 0.399655 | 2.45E-19 |
| 0.52691  | -0.09343 | 0.04359  | -0.12616 | 0.00634  | 0.19524142 | 2.15E-05 | 0.45832  | 1.24E-25 |
| 0.00037  | -0.10008 | 0.03059  | -0.0233  | 0.61557  | 0.09401996 | 0.04227  | 0.093518 | 0.04339  |
| 0.76225  | 0.060829 | 0.18945  | 0.018272 | 0.69371  | -0.0554561 | 0.23165  | -0.0455  | 0.32651  |
| 0.30303  | -0.39274 | 1.13E-18 | -0.24966 | 4.56E-08 | 0.05352632 | 0.24832  | 0.188176 | 4.27E-05 |
| 0.41712  | -0.24723 | 6.21E-08 | -0.27256 | 2.12E-09 | 0.04497604 | 0.33213  | 0.152958 | 0.00091  |
| 4.81E-11 | -0.27932 | 8.11E-10 | -0.32768 | 3.77E-13 | -0.0677539 | 0.14376  | 0.081465 | 0.07863  |
| 0.00135  | 0.289735 | 1.75E-10 | 0.003623 | 0.93777  | 0.03200287 | 0.49025  | 0.200628 | 1.25E-05 |
| 0.66115  | -0.00054 | 0.99065  | -0.18552 | 5.50E-05 | -0.1022764 | 0.0271   | -0.17799 | 0.00011  |
| 0.64626  | -0.27468 | 1.58E-09 | -0.18324 | 6.81E-05 | 0.01019827 | 0.82603  | 0.060045 | 0.19523  |
| 0.01692  | -0.28135 | 6.05E-10 | -0.13369 | 0.0038   | 0.0465119  | 0.31587  | 0.026626 | 0.566    |
| 0.28522  | -0.26372 | 7.19E-09 | -0.14648 | 0.0015   | -0.0304308 | 0.51182  | -0.05043 | 0.27679  |
| 0.4513   | 0.387798 | 3.30E-18 | 0.13227  | 0.00419  | 0.26657094 | 4.87E-09 | 0.312872 | 4.60E-12 |
| 0.402    | 0.084514 | 0.06804  | 0.0229   | 0.62158  | 0.28906149 | 1.94E-10 | 0.501025 | 4.77E-31 |
| 0.09692  | -0.18339 | 6.71E-05 | -0.09819 | 0.0339   | 0.08592951 | 0.06354  | 0.14774  | 0.00137  |
| 0.92213  | 0.013939 | 0.76385  | 0.145981 | 0.00156  | -0.0238415 | 0.60731  | -0.02797 | 0.54661  |
| 0.0173   | 0.013737 | 0.76718  | -0.0426  | 0.35833  | 0.03917296 | 0.39834  | 0.139657 | 0.00249  |
| 0.08608  | -0.0988  | 0.03279  | -0.12641 | 0.00623  | -0.1540526 | 0.00084  | -0.2252  | 8.79E-07 |
| 0.0079   | -0.29872 | 4.43E-11 | -0.3389  | 5.15E-14 | 0.08900062 | 0.05461  | 0.155935 | 0.00072  |
| 0.03631  | -0.11717 | 0.01128  | -0.03553 | 0.44368  | 0.10810126 | 0.01946  | 0.167686 | 0.00027  |
| 0.1523   | -0.08392 | 0.07002  | -0.16934 | 0.00024  | -0.0453442 | 0.32819  | 0.071606 | 0.12229  |
| 0.15563  | -0.22504 | 8.96E-07 | -0.15919 | 0.00055  | 0.04593258 | 0.32194  | 0.104828 | 0.02348  |
| 0.23419  | -0.21924 | 1.72E-06 | -0.09402 | 0.04226  | -0.0091612 | 0.84348  | -0.05615 | 0.22586  |
| 0.10738  | -0.00904 | 0.84556  | 0.115761 | 0.0123   | 0.33571175 | 9.14E-14 | 0.402828 | 1.20E-19 |
| 0.20701  | -0.22159 | 1.33E-06 | -0.195   | 2.20E-05 | -0.0644981 | 0.16406  | -0.05567 | 0.22987  |
| 0.08638  | -0.47041 | 4.35E-27 | -0.2072  | 6.34E-06 | 0.03005616 | 0.51703  | 0.026788 | 0.56364  |
| 0.0083   | -0.17516 | 0.00014  | -0.14615 | 0.00154  | 0.00209605 | 0.96397  | 0.024516 | 0.59718  |
| 0.45829  | -0.04812 | 0.29938  | -0.19505 | 2.19E-05 | -0.0599463 | 0.19596  | 0.027112 | 0.55893  |

|          |          |          |          |          |            |          |          |          |
|----------|----------|----------|----------|----------|------------|----------|----------|----------|
| 0.74579  | 0.086483 | 0.06184  | -0.06023 | 0.19382  | -0.1461485 | 0.00154  | -0.11864 | 0.01028  |
| 0.64174  | -0.24608 | 7.18E-08 | -0.1349  | 0.00349  | 0.1766366  | 0.00012  | 0.378511 | 2.35E-17 |
| 0.92953  | -0.1304  | 0.00477  | -0.17517 | 0.00014  | -0.0456268 | 0.32518  | 0.133757 | 0.00378  |
| 0.13506  | -0.26684 | 4.70E-09 | -0.10124 | 0.0287   | 0.04875632 | 0.29306  | 0.023495 | 0.61255  |
| 0.18835  | -0.02784 | 0.54842  | -0.11592 | 0.01218  | -0.0013711 | 0.97643  | 0.167673 | 0.00027  |
| 0.22834  | 0.214287 | 2.97E-06 | 0.19048  | 3.42E-05 | 0.15849331 | 0.00059  | 0.052709 | 0.25563  |
| 0.11157  | -0.10305 | 0.02596  | -0.14982 | 0.00116  | -0.1556256 | 0.00074  | -0.21166 | 3.95E-06 |
| 0.22191  | 0.092579 | 0.04555  | -0.12002 | 0.00943  | 0.21089022 | 4.29E-06 | 0.307445 | 1.11E-11 |
| 0.10042  | -0.24076 | 1.39E-07 | -0.11749 | 0.01106  | 0.0952763  | 0.03958  | 0.174276 | 0.00015  |
| 0.41701  | -0.02128 | 0.6464   | -0.04023 | 0.38577  | -0.01362   | 0.7691   | -0.00852 | 0.85427  |
| 0.65756  | -0.15789 | 0.00062  | -0.13422 | 0.00366  | -0.0187795 | 0.68564  | -0.02347 | 0.61285  |
| 0.00023  | 0.06943  | 0.13408  | 0.077077 | 0.09618  | 0.09329022 | 0.0439   | 0.132184 | 0.00422  |
| 0.74921  | -0.24158 | 1.26E-07 | -0.07151 | 0.12278  | 0.10991715 | 0.01749  | 0.020368 | 0.66065  |
| 0.08927  | -0.15573 | 0.00073  | -0.25066 | 4.01E-08 | -0.0535468 | 0.24814  | 0.038178 | 0.41044  |
| 0.09071  | -0.02163 | 0.64109  | -0.00395 | 0.93222  | 0.18217042 | 7.51E-05 | 0.224055 | 1.00E-06 |
| 0.00536  | 0.006314 | 0.89176  | 0.006628 | 0.88641  | 0.13037427 | 0.00477  | 0.225761 | 8.25E-07 |
| 0.59565  | -0.27467 | 1.58E-09 | -0.34376 | 2.12E-14 | -0.0845405 | 0.06795  | 0.056032 | 0.22683  |
| 0.02462  | -0.30227 | 2.53E-11 | -0.19267 | 2.77E-05 | -0.0529271 | 0.25366  | -0.07984 | 0.08479  |
| 0.00139  | -0.10822 | 0.01932  | -0.02611 | 0.57349  | 0.12921564 | 0.00516  | 0.187357 | 4.62E-05 |
| 0.90207  | -0.29326 | 1.03E-10 | -0.20395 | 8.90E-06 | -0.0508686 | 0.27262  | -0.01661 | 0.72028  |
| 0.31591  | -0.30212 | 2.60E-11 | -0.141   | 0.00226  | -0.1431613 | 0.00193  | -0.18219 | 7.50E-05 |
| 0.37727  | -0.18479 | 5.89E-05 | -0.10785 | 0.01974  | -0.1300474 | 0.00488  | -0.13289 | 0.00402  |
| 0.02756  | -0.04744 | 0.30626  | -0.03993 | 0.38927  | 0.08253337 | 0.07478  | 0.210072 | 4.68E-06 |
| 0.01728  | -0.31348 | 4.16E-12 | -0.25935 | 1.29E-08 | -0.1079049 | 0.01968  | -0.08634 | 0.06228  |
| 1.86E-08 | -0.0089  | 0.84788  | 0.042574 | 0.35862  | 0.10288376 | 0.0262   | 0.117524 | 0.01103  |
| 0.06586  | -0.17172 | 0.00019  | -0.03663 | 0.42973  | 0.0625332  | 0.17732  | 0.029237 | 0.52852  |
| 0.88004  | -0.31206 | 5.25E-12 | -0.22358 | 1.06E-06 | -0.0970823 | 0.03597  | -0.11999 | 0.00944  |
| 0.42305  | -0.3995  | 2.54E-19 | -0.27119 | 2.57E-09 | 0.02756446 | 0.55239  | 0.006772 | 0.88396  |
| 7.68E-06 | -0.18169 | 7.85E-05 | -0.06611 | 0.15376  | 0.16125147 | 0.00047  | 0.326085 | 4.96E-13 |
| 0.48255  | -0.08173 | 0.07765  | -0.08107 | 0.08008  | 0.01787768 | 0.69999  | -0.06826 | 0.14079  |
| 0.799    | -0.1467  | 0.00148  | -0.1599  | 0.00052  | -0.0138313 | 0.76562  | 0.088023 | 0.05733  |
| 0.30172  | -0.19381 | 2.47E-05 | -0.13575 | 0.00329  | 0.01964409 | 0.67199  | 0.116709 | 0.0116   |
| 0.70802  | -0.30758 | 1.09E-11 | -0.22515 | 8.85E-07 | -0.0799295 | 0.08445  | -0.09366 | 0.04308  |
| 0.00919  | -0.07202 | 0.12014  | 0.070279 | 0.12938  | -0.0717304 | 0.12164  | -0.16663 | 0.0003   |
| 0.99796  | -0.29117 | 1.41E-10 | -0.23772 | 2.01E-07 | -0.0771147 | 0.09602  | -0.07796 | 0.09241  |
| 0.34811  | -0.06919 | 0.13544  | -0.10535 | 0.02279  | 0.06750538 | 0.14524  | 0.229772 | 5.18E-07 |
| 0.5727   | 0.006473 | 0.88906  | 0.020232 | 0.66278  | 0.07850057 | 0.09017  | 0.213882 | 3.11E-06 |
| 0.34284  | -0.2077  | 6.01E-06 | -0.07803 | 0.09214  | 0.05850012 | 0.20699  | 0.062807 | 0.17543  |
| 0.39465  | 0.136565 | 0.0031   | 0.287676 | 2.38E-10 | 0.20727592 | 6.29E-06 | -0.00462 | 0.9207   |
| 0.55457  | -0.20899 | 5.25E-06 | -0.13661 | 0.0031   | -0.0257982 | 0.57814  | -0.00948 | 0.83809  |
| 1.67E-07 | -0.21235 | 3.67E-06 | -0.16915 | 0.00024  | -0.147406  | 0.0014   | -0.23486 | 2.84E-07 |
| 9.17E-10 | -0.01344 | 0.77204  | -0.08119 | 0.07966  | -0.0405506 | 0.38195  | 0.057247 | 0.2169   |
| 0.72583  | -0.00137 | 0.97651  | 0.05677  | 0.22076  | 0.18028626 | 8.94E-05 | 0.410058 | 2.30E-20 |
| 0.01144  | -0.19494 | 2.21E-05 | -0.19812 | 1.61E-05 | -0.0078509 | 0.86563  | 0.095193 | 0.03975  |
| 0.00012  | -0.17016 | 0.00022  | -0.19027 | 3.50E-05 | 0.1769282  | 0.00012  | 0.291359 | 1.37E-10 |

|          |          |          |          |          |            |          |          |          |
|----------|----------|----------|----------|----------|------------|----------|----------|----------|
| 0.27631  | -0.09382 | 0.04271  | -0.12155 | 0.00855  | 0.08518428 | 0.06588  | 0.245478 | 7.74E-08 |
| 0.17409  | -0.35634 | 1.99E-15 | -0.18185 | 7.74E-05 | 0.12438568 | 0.00712  | 0.167898 | 0.00027  |
| 0.222    | -0.26253 | 8.44E-09 | -0.14548 | 0.00162  | 0.03992453 | 0.38934  | 0.095502 | 0.03911  |
| 0.11007  | -0.45569 | 2.53E-25 | -0.28422 | 3.98E-10 | -0.0016832 | 0.97106  | 0.031137 | 0.50207  |
| 0.06112  | 0.063198 | 0.17275  | 0.10639  | 0.02148  | 0.01097322 | 0.81304  | -0.07669 | 0.09787  |
| 0.26976  | 0.026411 | 0.56914  | -0.05053 | 0.27587  | -0.0868421 | 0.06077  | -0.15565 | 0.00074  |
| 0.44945  | 0.137105 | 0.00299  | 0.250021 | 4.36E-08 | 0.15494899 | 0.00078  | 0.05833  | 0.20831  |
| 0.09819  | -0.47388 | 1.62E-27 | -0.27852 | 9.10E-10 | 0.02901256 | 0.5317   | 0.013742 | 0.76708  |
| 0.43196  | -0.27157 | 2.44E-09 | -0.1827  | 7.15E-05 | -0.0783269 | 0.09089  | -0.0885  | 0.05598  |
| 0.04106  | -0.0543  | 0.24156  | -0.03127 | 0.50026  | -0.0356851 | 0.44169  | -0.04849 | 0.29574  |
| 0.91775  | 0.239979 | 1.53E-07 | 0.120096 | 0.00938  | 0.16453556 | 0.00036  | 0.052667 | 0.25601  |
| 7.31E-05 | 0.1382   | 0.00276  | -0.06692 | 0.1488   | 0.20669049 | 6.69E-06 | 0.08497  | 0.06656  |
| 0.60623  | -0.21406 | 3.05E-06 | -0.07557 | 0.10288  | -0.0087704 | 0.85007  | -0.04224 | 0.36239  |
| 0.42537  | -0.24551 | 7.71E-08 | -0.17177 | 0.00019  | -0.1290152 | 0.00523  | -0.12354 | 0.00752  |
| 0.56145  | -0.03034 | 0.51306  | -0.00224 | 0.96156  | 0.1171348  | 0.0113   | 0.173593 | 0.00016  |
| 0.03671  | 0.059908 | 0.19625  | -0.01984 | 0.66892  | 0.05573075 | 0.22934  | 0.05079  | 0.27337  |
| 0.97466  | -0.09565 | 0.0388   | -0.08004 | 0.08401  | 0.04081659 | 0.37883  | 0.117326 | 0.01117  |
| 0.43237  | 0.047849 | 0.30214  | 0.01956  | 0.67332  | 0.18508918 | 5.72E-05 | 0.3719   | 9.14E-17 |
| 0.73024  | 0.020695 | 0.65555  | -0.03734 | 0.42078  | 0.12794119 | 0.00563  | 0.298002 | 4.95E-11 |
| 0.01531  | 0.063164 | 0.17298  | -0.04601 | 0.32116  | 0.0918343  | 0.04732  | -0.10981 | 0.0176   |
| 0.76904  | -0.01713 | 0.71204  | -0.03125 | 0.50051  | -0.1084386 | 0.01908  | -0.05496 | 0.23588  |
| 0.08902  | -0.05522 | 0.23364  | -0.08985 | 0.05234  | 0.06650964 | 0.15128  | 0.116198 | 0.01198  |
| 0.33422  | -0.22281 | 1.15E-06 | -0.21683 | 2.25E-06 | 0.04058116 | 0.38159  | 0.189423 | 3.79E-05 |
| 0.016    | -0.07116 | 0.12463  | -0.14857 | 0.00128  | -0.0625983 | 0.17687  | 0.044766 | 0.3344   |
| 0.01516  | -0.23338 | 3.39E-07 | -0.12315 | 0.00771  | 0.03110513 | 0.50251  | 0.024058 | 0.60405  |
| 0.84463  | -0.0403  | 0.38495  | -0.10681 | 0.02096  | -0.3657962 | 3.12E-16 | -0.27816 | 9.59E-10 |
| 0.88839  | 0.019097 | 0.68062  | 0.307064 | 1.18E-11 | 0.43179504 | 1.24E-22 | 0.267971 | 4.02E-09 |
| 0.00536  | 0.182773 | 7.11E-05 | 0.36952  | 1.48E-16 | 0.35191731 | 4.63E-15 | 0.329852 | 2.58E-13 |
| 0.49066  | 0.10219  | 0.02723  | 0.195156 | 2.17E-05 | 0.14662686 | 0.00149  | 0.060793 | 0.18971  |
| 0.05401  | 0.023564 | 0.6115   | 0.062684 | 0.17627  | 0.12541843 | 0.00665  | 0.211842 | 3.87E-06 |
| 0.83122  | 0.231737 | 4.12E-07 | 0.101542 | 0.02823  | 0.03515036 | 0.44857  | 0.083049 | 0.07297  |
| 0.05161  | 0.171038 | 0.0002   | 0.122327 | 0.00814  | 0.07220057 | 0.1192   | 0.193255 | 2.61E-05 |
| 0.71329  | -0.09323 | 0.04405  | -0.13361 | 0.00382  | -0.0011402 | 0.98039  | 0.033803 | 0.46616  |
| 0.39827  | -0.13449 | 0.00359  | -0.20227 | 1.06E-05 | -0.0754318 | 0.10352  | -0.05969 | 0.19786  |
| 0.02313  | -0.21222 | 3.72E-06 | -0.12489 | 0.00689  | 0.02347495 | 0.61285  | -0.06253 | 0.17734  |
| 0.7489   | -0.0133  | 0.77437  | -0.06265 | 0.1765   | -0.2195711 | 1.66E-06 | -0.14219 | 0.00207  |
| 0.05749  | -0.15764 | 0.00063  | -0.11544 | 0.01255  | -0.1335948 | 0.00382  | -0.16302 | 0.0004   |
| 2.74E-05 | -0.00231 | 0.96028  | 0.079049 | 0.08794  | 0.14609032 | 0.00155  | 0.145257 | 0.00165  |
| 0.35715  | -0.37157 | 9.78E-17 | -0.23427 | 3.05E-07 | -0.1063364 | 0.02154  | -0.10308 | 0.02591  |
| 0.01185  | -0.08443 | 0.06833  | -0.08092 | 0.08065  | 0.09118464 | 0.04891  | 0.190097 | 3.55E-05 |
| 0.12915  | -0.19269 | 2.76E-05 | -0.10934 | 0.0181   | -0.0387452 | 0.40351  | -0.01496 | 0.7471   |
| 0.81717  | -0.21147 | 4.03E-06 | -0.14983 | 0.00116  | 0.03114308 | 0.50199  | 0.13262  | 0.00409  |
| 0.39742  | -0.34106 | 3.48E-14 | -0.1716  | 0.00019  | 0.04496657 | 0.33223  | 0.045577 | 0.32571  |
| 0.05486  | -0.05621 | 0.22534  | -0.13411 | 0.00369  | -0.3610642 | 7.94E-16 | -0.34026 | 4.02E-14 |
| 0.7526   | -0.17906 | 1.00E-04 | -0.12416 | 0.00723  | -0.0944818 | 0.04126  | -0.11716 | 0.01129  |

|          |          |          |          |          |            |          |          |          |
|----------|----------|----------|----------|----------|------------|----------|----------|----------|
| 3.65E-06 | -0.1912  | 3.19E-05 | -0.24939 | 4.72E-08 | -0.1312802 | 0.00449  | -0.10995 | 0.01746  |
| 0.37484  | -0.18876 | 4.04E-05 | -0.17502 | 0.00014  | -0.0357869 | 0.44039  | -0.07788 | 0.09275  |
| 0.65673  | -0.0877  | 0.05825  | -0.10395 | 0.02468  | 0.08190417 | 0.07703  | 0.221235 | 1.38E-06 |
| 0.23293  | -0.24202 | 1.19E-07 | -0.15127 | 0.00104  | 0.00561158 | 0.90374  | 0.002213 | 0.96195  |
| 0.00156  | -0.08397 | 0.06983  | -0.08832 | 0.05649  | 0.14730937 | 0.00141  | 0.0947   | 0.0408   |
| 0.18619  | 0.129548 | 0.00505  | 0.068528 | 0.13923  | 0.04262158 | 0.35809  | 0.100768 | 0.02946  |
| 0.02649  | 0.294752 | 8.17E-11 | 0.295884 | 6.86E-11 | 0.12799098 | 0.00561  | 0.216424 | 2.35E-06 |
| 0.59667  | -0.27545 | 1.41E-09 | -0.19681 | 1.84E-05 | -0.0085222 | 0.85427  | 0.00719  | 0.87685  |
| 0.35203  | -0.1923  | 2.87E-05 | -0.10769 | 0.01992  | 0.04097042 | 0.37703  | 0.114377 | 0.01339  |
| 0.01789  | 0.25735  | 1.68E-08 | 0.198878 | 1.49E-05 | -0.0421938 | 0.36294  | -0.11647 | 0.01177  |
| 0.89546  | -0.21422 | 2.99E-06 | -0.16304 | 0.0004   | -0.2619551 | 9.12E-09 | -0.24232 | 1.15E-07 |
| 0.16479  | -0.21341 | 3.27E-06 | -0.13244 | 0.00414  | 0.01498918 | 0.74664  | 0.040307 | 0.38481  |
| 0.00121  | 0.002084 | 0.96418  | -0.1045  | 0.02392  | 0.18693302 | 4.81E-05 | 0.094975 | 0.04021  |
| 2.64E-05 | 0.119464 | 0.00977  | 0.244755 | 8.48E-08 | 0.22006557 | 1.57E-06 | 0.219827 | 1.61E-06 |
| 0.00033  | -0.38424 | 7.04E-18 | -0.43294 | 9.31E-23 | -0.180635  | 8.66E-05 | -0.21067 | 4.39E-06 |
| 0.29101  | -0.19486 | 2.23E-05 | -0.21528 | 2.67E-06 | -0.0059321 | 0.89827  | 0.126059 | 0.00638  |
| 0.12667  | -0.12604 | 0.00638  | -0.07115 | 0.12469  | 0.0932322  | 0.04404  | 0.19094  | 3.27E-05 |
| 0.08317  | -0.2687  | 3.64E-09 | -0.2909  | 1.47E-10 | -0.0761503 | 0.10026  | 0.038585 | 0.40546  |
| 0.21667  | -0.03079 | 0.50678  | 0.00459  | 0.92121  | -0.0175858 | 0.70466  | -0.04371 | 0.34593  |
| 0.28876  | -0.35934 | 1.11E-15 | -0.09575 | 0.03859  | 0.00574763 | 0.90141  | -0.02582 | 0.57783  |
| 0.00975  | -0.09062 | 0.05033  | 0.039166 | 0.39842  | 0.2177545  | 2.03E-06 | 0.099499 | 0.03157  |
| 0.39476  | -0.13693 | 0.00303  | -0.03759 | 0.41767  | 0.1452813  | 0.00164  | 0.257668 | 1.61E-08 |
| 0.29036  | -0.25031 | 4.20E-08 | -0.1858  | 5.35E-05 | -0.0660068 | 0.1544   | 0.033992 | 0.46367  |
| 0.54483  | 0.057487 | 0.21497  | 0.26641  | 4.98E-09 | 0.24600188 | 7.25E-08 | 0.401308 | 1.69E-19 |
| 0.71657  | -0.26517 | 5.90E-09 | -0.22529 | 8.71E-07 | -0.041993  | 0.36523  | 0.008234 | 0.85914  |
| 0.00157  | -0.30341 | 2.12E-11 | -0.28776 | 2.35E-10 | -0.0085126 | 0.85443  | -0.02404 | 0.6044   |
| 0.56481  | -0.02668 | 0.56519  | -0.19114 | 3.21E-05 | 0.04763412 | 0.30432  | 0.21843  | 1.89E-06 |
| 0.56616  | -0.13159 | 0.00439  | -0.221   | 1.42E-06 | -0.0961747 | 0.03775  | -0.02797 | 0.54652  |
| 0.53106  | -0.17336 | 0.00017  | -0.25015 | 4.28E-08 | -0.0797153 | 0.08529  | 0.060688 | 0.19048  |
| 0.08158  | 0.095655 | 0.0388   | 0.257493 | 1.65E-08 | 0.6018452  | 2.36E-47 | 0.500361 | 5.88E-31 |
| 0.0673   | 0.011649 | 0.80176  | 0.0525   | 0.25752  | -0.0547066 | 0.23803  | -0.03797 | 0.41302  |
| 0.29052  | -0.01929 | 0.67751  | -0.20313 | 9.69E-06 | -0.0827187 | 0.07413  | -0.0342  | 0.46089  |
| 0.10622  | 0.005732 | 0.90167  | 0.10217  | 0.02726  | 0.20384251 | 9.00E-06 | 0.112408 | 0.01508  |
| 0.00028  | 0.147698 | 0.00137  | 0.027047 | 0.55987  | -0.0214713 | 0.6435   | 0.081391 | 0.07891  |
| 0.81057  | 0.321259 | 1.13E-12 | 0.124043 | 0.00728  | -0.0620926 | 0.1804   | -0.20959 | 4.93E-06 |
| 0.00954  | -0.00617 | 0.8942   | 0.024592 | 0.59604  | -0.0096834 | 0.83468  | -0.12213 | 0.00824  |
| 0.89042  | 0.089453 | 0.05339  | -0.04271 | 0.35704  | 0.14718964 | 0.00142  | 0.232919 | 3.58E-07 |
| 0.01298  | -0.25201 | 3.37E-08 | -0.02509 | 0.58868  | 0.26483567 | 6.18E-09 | 0.242181 | 1.17E-07 |
| 0.03869  | -0.21776 | 2.03E-06 | -0.19051 | 3.41E-05 | -0.2573326 | 1.69E-08 | -0.13089 | 0.00461  |
| 0.7873   | 0.03433  | 0.45923  | -0.0118  | 0.79924  | 0.12857269 | 0.00539  | 0.233853 | 3.20E-07 |
| 0.02903  | -0.23775 | 2.01E-07 | -0.12795 | 0.00562  | 0.10541559 | 0.02271  | 0.118902 | 0.01012  |
| 0.82212  | -0.33202 | 1.76E-13 | -0.1935  | 2.55E-05 | -0.0365738 | 0.4304   | -0.05302 | 0.25286  |
| 0.03962  | -0.30175 | 2.75E-11 | -0.16993 | 0.00022  | -0.0297252 | 0.52166  | -0.02937 | 0.52666  |
| 0.0146   | 0.254449 | 2.46E-08 | 0.242924 | 1.06E-07 | 0.26858416 | 3.69E-09 | 0.248193 | 5.50E-08 |
| 0.5762   | -0.00776 | 0.86713  | -0.28578 | 3.16E-10 | -0.1246629 | 0.00699  | 0.135421 | 0.00337  |

|          |          |          |          |          |            |          |          |          |
|----------|----------|----------|----------|----------|------------|----------|----------|----------|
| 0.05543  | -0.33834 | 5.70E-14 | -0.27816 | 9.59E-10 | -0.2549068 | 2.32E-08 | -0.34129 | 3.34E-14 |
| 0.011    | -0.30375 | 2.01E-11 | -0.27695 | 1.14E-09 | -0.0201718 | 0.66371  | -0.03105 | 0.50333  |
| 0.66245  | -0.1355  | 0.00335  | -0.0547  | 0.23805  | 0.01495696 | 0.74717  | 0.003437 | 0.94096  |
| 0.99283  | -0.2687  | 3.64E-09 | -0.2251  | 8.89E-07 | -0.0406821 | 0.3804   | 0.047186 | 0.3089   |
| 0.48584  | -0.23294 | 3.57E-07 | -0.15665 | 0.00068  | 0.14840573 | 0.0013   | 0.155077 | 0.00077  |
| 0.92888  | -0.00366 | 0.93712  | -0.01983 | 0.66901  | 0.08111412 | 0.07993  | 0.110412 | 0.01699  |
| 0.53982  | -0.20118 | 1.18E-05 | -0.0161  | 0.72856  | 0.02365395 | 0.61014  | 0.024587 | 0.59612  |
| 0.0195   | 0.046233 | 0.31879  | 0.092359 | 0.04606  | 0.23570734 | 2.57E-07 | 0.250917 | 3.89E-08 |
| 0.34579  | -0.33538 | 9.70E-14 | -0.26456 | 6.41E-09 | -0.1424681 | 0.00203  | -0.12915 | 0.00519  |
| 0.00858  | -0.09831 | 0.03368  | -0.12161 | 0.00852  | -0.0214304 | 0.64413  | 0.077672 | 0.09363  |
| 0.81241  | -0.09705 | 0.03602  | -0.14837 | 0.0013   | -0.0546047 | 0.2389   | -0.0606  | 0.19114  |
| 0.02265  | -0.19706 | 1.79E-05 | -0.07966 | 0.08549  | 0.09852032 | 0.03329  | -0.08868 | 0.05549  |
| 0.02207  | -0.34167 | 3.12E-14 | -0.16744 | 0.00028  | 0.01429062 | 0.75807  | 0.04479  | 0.33414  |
| 0.01742  | 0.024261 | 0.601    | -0.00333 | 0.94284  | 0.03688425 | 0.42649  | 0.098404 | 0.0335   |
| 0.92705  | -0.3614  | 7.44E-16 | -0.22389 | 1.02E-06 | -0.0224519 | 0.62842  | 0.114827 | 0.01303  |
| 2.97E-06 | -0.25517 | 2.24E-08 | -0.14502 | 0.00168  | 0.22135187 | 1.36E-06 | 0.33346  | 1.37E-13 |
| 1.23E-05 | -0.12704 | 0.00598  | -0.01152 | 0.80391  | 0.28284875 | 4.86E-10 | 0.307681 | 1.07E-11 |
| 0.17667  | -0.16596 | 0.00032  | -0.13935 | 0.00254  | 0.11134444 | 0.01607  | 0.239544 | 1.61E-07 |
| 0.00267  | 0.036509 | 0.43122  | -0.1114  | 0.01602  | -0.0292502 | 0.52834  | 0.07713  | 0.09595  |
| 0.1539   | -0.19952 | 1.40E-05 | -0.19615 | 1.96E-05 | -0.1126971 | 0.01482  | -0.27939 | 8.03E-10 |
| 0.00015  | 0.020463 | 0.65917  | 0.023948 | 0.60571  | 0.08172848 | 0.07767  | 0.078292 | 0.09103  |
| 0.00035  | -0.11738 | 0.01113  | -0.04725 | 0.30829  | 0.11779055 | 0.01085  | 0.181324 | 8.13E-05 |
| 0.0487   | -0.11923 | 0.00991  | -0.01883 | 0.68492  | -0.0223098 | 0.6306   | -0.04896 | 0.291    |
| 0.09142  | -0.04221 | 0.36272  | 0.073377 | 0.11329  | 0.1530763  | 0.0009   | 0.191027 | 3.25E-05 |
| 0.6319   | -0.11441 | 0.01336  | 0.080037 | 0.08403  | 0.00877188 | 0.85005  | -0.15785 | 0.00062  |
| 0.05467  | -0.01914 | 0.67992  | -0.02898 | 0.53211  | 0.0012424  | 0.97864  | 0.023481 | 0.61276  |
| 0.03434  | 0.089587 | 0.05303  | -0.06812 | 0.14159  | -0.1785113 | 0.00011  | -0.1271  | 0.00595  |
| 0.15457  | 0.205793 | 7.35E-06 | 0.282219 | 5.33E-10 | 0.23295722 | 3.56E-07 | 0.098758 | 0.03287  |
| 0.7307   | -0.0766  | 0.09828  | -0.09944 | 0.03168  | 0.05409318 | 0.24334  | 0.047511 | 0.30558  |
| 0.21655  | 0.327374 | 3.97E-13 | 0.197294 | 1.75E-05 | 0.1930287  | 2.67E-05 | 0.363316 | 5.10E-16 |
| 0.22127  | -0.01655 | 0.72132  | -0.07482 | 0.10636  | 0.01850476 | 0.69     | 0.066522 | 0.15121  |
| 0.29621  | -0.24968 | 4.55E-08 | -0.15402 | 0.00084  | -0.0433119 | 0.35035  | 0.002834 | 0.9513   |
| 0.65071  | -0.11441 | 0.01336  | -0.09299 | 0.0446   | -0.0617736 | 0.18265  | 0.043671 | 0.34637  |
| 0.29172  | -0.26668 | 4.80E-09 | -0.1615  | 0.00046  | -0.070907  | 0.12598  | -0.01825 | 0.69404  |
| 0.21931  | -0.21458 | 2.88E-06 | -0.15247 | 0.00095  | 0.17158581 | 0.00019  | 0.289472 | 1.82E-10 |
| 0.56927  | 0.01529  | 0.74173  | -0.03685 | 0.42692  | 0.13538818 | 0.00337  | 0.279483 | 7.93E-10 |
| 0.00125  | 0.159764 | 0.00053  | 0.286978 | 2.64E-10 | 0.41169976 | 1.57E-20 | 0.243398 | 1.00E-07 |
| 0.48969  | -0.08577 | 0.06402  | -0.12344 | 0.00757  | 0.00886303 | 0.84851  | 0.072557 | 0.11739  |
| 1.06E-08 | 0.120912 | 0.00891  | 0.017206 | 0.71075  | 0.17334877 | 0.00017  | 0.291657 | 1.31E-10 |
| 0.1689   | -0.21948 | 1.68E-06 | -0.22289 | 1.14E-06 | -0.1298133 | 0.00496  | -0.19936 | 1.42E-05 |
| 0.00018  | -0.14486 | 0.0017   | -0.07385 | 0.11099  | -0.0683557 | 0.14023  | -0.05284 | 0.25447  |
| 0.67811  | 0.304341 | 1.83E-11 | 0.253018 | 2.96E-08 | 0.19272452 | 2.75E-05 | 0.006919 | 0.88145  |
| 0.37792  | 0.090551 | 0.05051  | -0.05883 | 0.20442  | 0.16585878 | 0.00032  | 0.262737 | 8.21E-09 |
| 0.11645  | 0.059869 | 0.19654  | 0.081746 | 0.0776   | 0.06767062 | 0.14425  | 0.024292 | 0.60054  |
| 0.20956  | -0.32686 | 4.34E-13 | -0.4111  | 1.80E-20 | -0.1989628 | 1.48E-05 | -0.0765  | 0.09869  |

|          |          |          |          |          |            |          |          |          |
|----------|----------|----------|----------|----------|------------|----------|----------|----------|
| 0.00048  | 0.073022 | 0.11505  | -0.13948 | 0.00252  | 0.21245159 | 3.63E-06 | 0.266382 | 5.00E-09 |
| 0.04799  | -0.30878 | 8.95E-12 | -0.27008 | 3.00E-09 | -0.046198  | 0.31915  | -0.0147  | 0.75129  |
| 0.08043  | -0.203   | 9.82E-06 | -0.04142 | 0.37185  | 0.06676911 | 0.14969  | 0.041212 | 0.37422  |
| 2.21E-05 | 0.189796 | 3.66E-05 | 0.247342 | 6.12E-08 | 0.15025359 | 0.00113  | 0.174069 | 0.00016  |
| 0.03844  | -0.03603 | 0.4373   | -0.21682 | 2.25E-06 | 0.04461402 | 0.33604  | -0.07488 | 0.10606  |
| 0.04064  | 0.006428 | 0.88981  | -0.0992  | 0.0321   | -0.06515   | 0.15984  | -0.02032 | 0.66141  |
| 0.11324  | -0.22454 | 9.48E-07 | -0.02576 | 0.57865  | 0.26845826 | 3.76E-09 | 0.31879  | 1.72E-12 |
| 0.29363  | -0.03304 | 0.47633  | -0.05892 | 0.20373  | 0.29006786 | 1.66E-10 | 0.194763 | 2.25E-05 |
| 0.00094  | 0.020709 | 0.65532  | -0.11628 | 0.01192  | -0.0445365 | 0.33688  | 0.028612 | 0.53738  |
| 0.16529  | -0.19432 | 2.35E-05 | -0.09169 | 0.04767  | 0.067894   | 0.14293  | 0.136886 | 0.00304  |
| 0.15637  | -0.06191 | 0.18165  | -0.02122 | 0.64744  | 0.12461251 | 0.00701  | 0.215639 | 2.56E-06 |
| 0.85517  | -0.14201 | 0.0021   | -0.19612 | 1.97E-05 | -0.1740647 | 0.00016  | -0.27067 | 2.77E-09 |
| 0.00041  | 0.019129 | 0.68011  | -0.01941 | 0.6757   | 0.31435659 | 3.60E-12 | 0.231925 | 4.02E-07 |
| 0.10333  | 0.174505 | 0.00015  | 0.122664 | 0.00796  | 0.05021166 | 0.27887  | 0.084963 | 0.06658  |
| 0.61933  | -0.34017 | 4.09E-14 | -0.23819 | 1.90E-07 | -0.082185  | 0.07602  | -0.11521 | 0.01273  |
| 0.59753  | -0.30228 | 2.53E-11 | -0.22066 | 1.47E-06 | -0.0692784 | 0.13494  | -0.02399 | 0.60503  |
| 0.202    | -0.17808 | 0.00011  | -0.1296  | 0.00503  | -0.0939489 | 0.04243  | -0.00367 | 0.93702  |
| 0.37267  | -0.20951 | 4.97E-06 | -0.26933 | 3.33E-09 | -0.1047975 | 0.02352  | -0.05751 | 0.21478  |
| 0.00056  | -0.18284 | 7.06E-05 | -0.08418 | 0.06915  | 0.01860047 | 0.68848  | -0.00204 | 0.96487  |
| 0.01963  | -0.02923 | 0.52861  | -0.08004 | 0.08402  | -0.0705255 | 0.12804  | -0.1506  | 0.0011   |
| 0.00376  | -0.11104 | 0.01637  | -0.04775 | 0.30318  | 0.01033709 | 0.8237   | 0.014848 | 0.74896  |
| 0.16603  | -0.2876  | 2.41E-10 | -0.1175  | 0.01105  | -0.0201492 | 0.66407  | -0.04056 | 0.38178  |
| 0.73617  | -0.02669 | 0.56512  | 0.007636 | 0.86927  | 0.04394656 | 0.34333  | 0.04923  | 0.28839  |
| 0.00034  | 0.008751 | 0.8504   | -0.07256 | 0.11736  | -0.203348  | 9.47E-06 | -0.26709 | 4.54E-09 |
| 0.00364  | -0.11329 | 0.01431  | -0.04404 | 0.34229  | 0.05445541 | 0.24019  | 0.112789 | 0.01474  |
| 0.00046  | 0.034142 | 0.4617   | -0.12637 | 0.00625  | -0.4961476 | 2.17E-30 | -0.48097 | 2.08E-28 |
| 0.46684  | 0.085062 | 0.06627  | -0.04435 | 0.33891  | -0.1119832 | 0.01547  | -0.0268  | 0.56345  |
| 0.16035  | -0.19357 | 2.53E-05 | -0.14028 | 0.00238  | 0.07012369 | 0.13023  | 0.273778 | 1.79E-09 |
| 0.58986  | -0.13638 | 0.00315  | -0.13492 | 0.00349  | 0.04279982 | 0.35608  | 0.148266 | 0.00131  |
| 0.04129  | -0.04492 | 0.33273  | -0.01298 | 0.77962  | 0.09240981 | 0.04594  | 0.109642 | 0.01778  |
| 0.78417  | -0.14525 | 0.00165  | -0.28034 | 7.00E-10 | -0.2116049 | 3.97E-06 | -0.24624 | 7.03E-08 |
| 0.32694  | -0.25037 | 4.17E-08 | -0.18744 | 4.58E-05 | -0.0194294 | 0.67537  | 0.044502 | 0.33726  |
| 0.09762  | 0.0166   | 0.7205   | -0.14287 | 0.00197  | 0.08330878 | 0.07208  | -0.02612 | 0.57338  |
| 0.28918  | -0.18625 | 5.13E-05 | -0.058   | 0.21091  | 0.15944482 | 0.00054  | 0.120099 | 0.00938  |
| 0.52126  | -0.37156 | 9.81E-17 | -0.25152 | 3.60E-08 | 0.00786473 | 0.8654   | 0.044627 | 0.3359   |
| 0.12616  | -0.07852 | 0.09009  | -0.09726 | 0.03563  | 0.04754527 | 0.30523  | 0.115006 | 0.01289  |
| 0.3027   | -0.12721 | 0.00591  | 0.013006 | 0.77923  | 0.21929524 | 1.71E-06 | 0.214562 | 2.88E-06 |
| 0.00438  | -0.24798 | 5.65E-08 | -0.22164 | 1.32E-06 | -0.0244009 | 0.59891  | 0.045327 | 0.32837  |
| 0.10235  | 0.074944 | 0.10577  | 0.036147 | 0.4358   | 0.3561327  | 2.07E-15 | 0.423644 | 9.19E-22 |
| 5.57E-06 | 0.212578 | 3.58E-06 | 0.135959 | 0.00324  | 0.0545939  | 0.239    | 0.036186 | 0.4353   |
| 0.00037  | -0.18542 | 5.55E-05 | -0.04673 | 0.31365  | -0.0564325 | 0.22352  | -0.03691 | 0.42622  |
| 0.54314  | 0.187304 | 4.64E-05 | 0.015236 | 0.74262  | 0.1522036  | 0.00097  | 0.305817 | 1.44E-11 |
| 0.77997  | -0.0076  | 0.86993  | -0.09371 | 0.04296  | -0.0835275 | 0.07133  | -0.08732 | 0.05937  |
| 0.15351  | 0.088555 | 0.05584  | -0.01858 | 0.68879  | -0.0925709 | 0.04556  | -0.131   | 0.00457  |
| 0.0095   | -0.39727 | 4.17E-19 | -0.20022 | 1.30E-05 | 0.08443306 | 0.06831  | 0.065624 | 0.15681  |

|          |          |          |          |          |            |          |          |          |
|----------|----------|----------|----------|----------|------------|----------|----------|----------|
| 0.7932   | 0.01211  | 0.79409  | -0.01006 | 0.82834  | 0.27821983 | 9.51E-10 | 0.480077 | 2.69E-28 |
| 0.27434  | -0.07042 | 0.12861  | 0.056063 | 0.22657  | 0.20398921 | 8.86E-06 | 0.133127 | 0.00395  |
| 0.17494  | -0.32375 | 7.42E-13 | -0.22488 | 9.12E-07 | -0.0282983 | 0.54185  | 0.094944 | 0.04028  |
| 0.00311  | -0.20718 | 6.35E-06 | -0.19159 | 3.08E-05 | 0.01082217 | 0.81557  | 0.072849 | 0.11592  |
| 0.05746  | -0.24167 | 1.24E-07 | -0.11506 | 0.01285  | 0.16627213 | 0.00031  | 0.288576 | 2.08E-10 |
| 0.16259  | 0.220172 | 1.55E-06 | 0.155918 | 0.00072  | -0.032596  | 0.48224  | -0.10867 | 0.01882  |
| 0.97216  | -0.19574 | 2.05E-05 | -0.10579 | 0.02223  | -0.0258883 | 0.57681  | -0.06521 | 0.15946  |
| 0.48671  | 0.098401 | 0.03351  | 0.073165 | 0.11434  | 0.00158846 | 0.97269  | -0.04793 | 0.30136  |
| 0.61375  | -0.29455 | 8.42E-11 | -0.26371 | 7.19E-09 | -0.1895646 | 3.74E-05 | -0.15495 | 0.00078  |
| 0.84077  | -0.39218 | 1.28E-18 | -0.08323 | 0.07237  | -0.0506263 | 0.27492  | -0.08054 | 0.08208  |
| 3.60E-05 | -0.08421 | 0.06903  | -0.01324 | 0.77539  | 0.1748816  | 0.00015  | 0.094568 | 0.04108  |
| 0.19861  | -0.15316 | 0.0009   | -0.05069 | 0.27427  | -0.0266723 | 0.56532  | -0.07787 | 0.09278  |
| 0.20437  | 0.048632 | 0.29429  | -0.12415 | 0.00723  | -0.0579842 | 0.21103  | 0.107614 | 0.02001  |
| 2.59E-06 | 0.006131 | 0.89487  | -0.08039 | 0.08268  | 0.09434918 | 0.04155  | 0.18735  | 4.62E-05 |
| 0.48544  | -0.04072 | 0.37993  | -0.04323 | 0.35132  | 0.02740001 | 0.55476  | 0.059942 | 0.196    |
| 0.43627  | -0.24229 | 1.15E-07 | -0.14505 | 0.00167  | -0.0567741 | 0.22073  | -0.04478 | 0.33424  |
| 0.22838  | -0.14895 | 0.00125  | -0.17071 | 0.00021  | 0.04711523 | 0.30963  | 0.188459 | 4.16E-05 |
| 0.00286  | -0.06647 | 0.15153  | -0.00035 | 0.99395  | 0.14957374 | 0.00119  | 0.117164 | 0.01128  |
| 0.58623  | -0.06851 | 0.13934  | 0.011042 | 0.8119   | 0.19420015 | 2.38E-05 | 0.252586 | 3.13E-08 |
| 0.71257  | -0.05413 | 0.24299  | -0.16816 | 0.00026  | 0.05124191 | 0.26911  | 0.140834 | 0.00228  |
| 0.18617  | -0.19792 | 1.65E-05 | -0.20917 | 5.15E-06 | -0.0483839 | 0.29677  | -0.01919 | 0.67916  |
| 0.00016  | -0.23308 | 3.51E-07 | -0.22624 | 7.80E-07 | 0.03883241 | 0.40246  | 0.121131 | 0.00878  |
| 0.01499  | 0.069264 | 0.13502  | -0.0082  | 0.8598   | -0.1222323 | 0.00819  | -0.03876 | 0.40332  |
| 0.14687  | -0.21045 | 4.49E-06 | -0.14642 | 0.00151  | 0.06902149 | 0.1364   | 0.079009 | 0.0881   |
| 0.00079  | 0.039056 | 0.39975  | 0.039284 | 0.397    | 0.07027256 | 0.12942  | 0.126081 | 0.00637  |
| 0.15865  | -0.02905 | 0.53123  | -0.1462  | 0.00153  | -0.1585317 | 0.00058  | -0.03912 | 0.39901  |
| 0.01844  | -0.17962 | 9.50E-05 | 0.095598 | 0.03891  | 0.24127958 | 1.30E-07 | 0.253742 | 2.70E-08 |
| 0.75276  | -0.18537 | 5.57E-05 | -0.38366 | 7.97E-18 | -0.1128387 | 0.0147   | -0.12897 | 0.00525  |
| 0.1483   | -0.07625 | 0.09983  | -0.12375 | 0.00742  | 0.08446444 | 0.0682   | 0.280679 | 6.67E-10 |
| 0.38904  | 0.042416 | 0.36041  | 0.006369 | 0.89082  | 0.23662561 | 2.30E-07 | 0.419794 | 2.32E-21 |
| 0.00124  | -0.47948 | 3.20E-28 | -0.26121 | 1.01E-08 | -0.0748386 | 0.10627  | -0.12684 | 0.00606  |
| 0.718    | -0.25583 | 2.05E-08 | -0.113   | 0.01456  | -0.0212775 | 0.6465   | -0.03863 | 0.40486  |
| 0.16924  | -0.22289 | 1.14E-06 | -0.16977 | 0.00023  | -0.0564671 | 0.22324  | -0.02845 | 0.53962  |
| 0.20236  | -0.16653 | 0.0003   | -0.11699 | 0.0114   | 0.00133785 | 0.977    | 0.057761 | 0.2128   |
| 0.77212  | -0.24955 | 4.63E-08 | -0.13124 | 0.0045   | -0.0135431 | 0.77037  | -0.07434 | 0.10861  |
| 0.09332  | -0.1325  | 0.00413  | -0.11316 | 0.01442  | 0.18570128 | 5.40E-05 | 0.358574 | 1.29E-15 |
| 0.22262  | -0.20959 | 4.92E-06 | -0.13587 | 0.00326  | 0.02749988 | 0.55332  | 0.104513 | 0.0239   |
| 0.01908  | -0.25016 | 4.28E-08 | -0.1598  | 0.00053  | -0.0535709 | 0.24792  | -0.0332  | 0.47409  |
| 0.00198  | -0.10326 | 0.02565  | 0.070696 | 0.12712  | 0.18970272 | 3.69E-05 | 0.20628  | 6.98E-06 |
| 0.13196  | 0.030176 | 0.51536  | 0.179359 | 9.73E-05 | 0.19522767 | 2.15E-05 | 0.094539 | 0.04114  |
| 0.73547  | -0.0695  | 0.1337   | 0.130338 | 0.00479  | 0.42108767 | 1.70E-21 | 0.399031 | 2.82E-19 |
| 0.5798   | 0.06168  | 0.18332  | 0.074989 | 0.10556  | 0.22552619 | 8.47E-07 | 0.318059 | 1.94E-12 |
| 0.0001   | -0.10217 | 0.02727  | -0.17966 | 9.47E-05 | -0.2487336 | 5.13E-08 | -0.19606 | 1.98E-05 |
| 0.16195  | -0.174   | 0.00016  | 0.043212 | 0.35146  | 0.26953284 | 3.24E-09 | 0.091147 | 0.04901  |
| 0.01445  | -0.11793 | 0.01076  | -0.04332 | 0.35032  | -0.05883   | 0.20443  | -0.1094  | 0.01803  |

|          |          |          |          |          |            |          |          |          |
|----------|----------|----------|----------|----------|------------|----------|----------|----------|
| 0.41093  | -0.23889 | 1.75E-07 | -0.19076 | 3.33E-05 | -0.1376365 | 0.00288  | -0.16776 | 0.00027  |
| 0.00088  | -0.32171 | 1.05E-12 | -0.25897 | 1.36E-08 | -0.1328329 | 0.00403  | -0.1261  | 0.00636  |
| 0.00129  | -0.2377  | 2.02E-07 | -0.20767 | 6.03E-06 | -0.1376877 | 0.00287  | -0.14911 | 0.00123  |
| 0.00119  | -0.39618 | 5.31E-19 | -0.33313 | 1.45E-13 | -0.1853422 | 5.59E-05 | -0.20985 | 4.79E-06 |
| 0.7699   | -0.1338  | 0.00377  | -0.15286 | 0.00092  | 0.02994716 | 0.51856  | 0.113428 | 0.01418  |
| 0.78438  | -0.22564 | 8.36E-07 | -0.1462  | 0.00154  | -0.0265997 | 0.56638  | -0.04437 | 0.33874  |
| 0.59016  | -0.21471 | 2.84E-06 | -0.18832 | 4.22E-05 | -0.0191366 | 0.67999  | 0.009973 | 0.82981  |
| 0.00514  | 0.074091 | 0.10981  | 0.053444 | 0.24905  | 0.06486341 | 0.16168  | 0.019902 | 0.66793  |
| 0.01802  | -0.32745 | 3.92E-13 | -0.27907 | 8.42E-10 | -0.0750954 | 0.10507  | -0.12732 | 0.00587  |
| 0.0607   | -0.11706 | 0.01136  | -0.08744 | 0.059    | 0.02400249 | 0.60489  | 0.045296 | 0.3287   |
| 0.00018  | -0.05548 | 0.23142  | 0.004891 | 0.91604  | 0.09688086 | 0.03636  | 0.038364 | 0.40816  |
| 0.86327  | -0.08805 | 0.05726  | -0.05741 | 0.2156   | 0.06354822 | 0.17038  | 0.181589 | 7.93E-05 |
| 0.10819  | -0.0206  | 0.65695  | -0.0093  | 0.8412   | 0.02833492 | 0.54133  | 0.084079 | 0.06948  |
| 5.75E-07 | -0.26682 | 4.71E-09 | -0.16624 | 0.00031  | -0.0495326 | 0.28543  | -0.02766 | 0.55105  |
| 0.22996  | -0.26838 | 3.80E-09 | -0.19923 | 1.44E-05 | -0.11856   | 0.01034  | -0.17891 | 0.0001   |
| 0.79806  | -0.3655  | 3.31E-16 | -0.21435 | 2.95E-06 | -0.0487076 | 0.29354  | -0.06612 | 0.15372  |
| 0.00295  | -0.09038 | 0.05096  | 0.00747  | 0.8721   | 0.05810976 | 0.21004  | 0.094155 | 0.04197  |
| 0.26286  | 0.230914 | 4.53E-07 | 0.22142  | 1.35E-06 | 0.11624272 | 0.01194  | 0.005673 | 0.90269  |
| 0.03707  | -0.08348 | 0.07148  | -0.20206 | 1.08E-05 | -0.1533237 | 0.00089  | -0.05705 | 0.21848  |
| 0.19111  | 0.031283 | 0.50007  | -0.08777 | 0.05805  | 0.06375784 | 0.16897  | -0.06791 | 0.14282  |
| 0.63336  | -0.07318 | 0.11428  | -0.23389 | 3.19E-07 | -0.1182216 | 0.01056  | 0.080053 | 0.08397  |
| 0.00043  | 0.304635 | 1.74E-11 | 0.18268  | 7.17E-05 | 0.07449555 | 0.10788  | 0.076654 | 0.09803  |
| 0.97977  | -0.09011 | 0.05164  | -0.09951 | 0.03155  | -0.1322898 | 0.00419  | -0.05628 | 0.22481  |
| 0.1812   | 0.418922 | 2.86E-21 | 0.308821 | 8.90E-12 | 0.163844   | 0.00038  | -0.01274 | 0.78371  |
| 0.32691  | -0.03958 | 0.39344  | -0.02216 | 0.63283  | 0.02828435 | 0.54205  | 0.03755  | 0.41819  |
| 0.04577  | -0.02642 | 0.56904  | -0.07364 | 0.112    | 0.01921663 | 0.67873  | 0.039761 | 0.39129  |
| 2.69E-15 | -0.37425 | 5.66E-17 | -0.23742 | 2.09E-07 | 0.06979622 | 0.13204  | 0.06343  | 0.17118  |
| 0.17596  | 0.036672 | 0.42916  | -0.10641 | 0.02146  | 0.00591593 | 0.89854  | 0.191695 | 3.04E-05 |
| 0.79493  | -0.08517 | 0.06591  | -0.18657 | 4.98E-05 | 0.19946102 | 1.41E-05 | 0.275853 | 1.33E-09 |
| 8.89E-05 | -0.10675 | 0.02104  | -0.10607 | 0.02188  | -0.1518739 | 0.00099  | -0.23112 | 4.42E-07 |
| 0.90554  | -0.13201 | 0.00427  | -0.03783 | 0.41475  | 0.18602447 | 5.24E-05 | 0.21412  | 3.03E-06 |
| 0.20216  | -0.24899 | 4.97E-08 | -0.18364 | 6.56E-05 | 0.04592891 | 0.32198  | 0.050569 | 0.27546  |
| 0.00046  | 0.158913 | 0.00057  | 0.048953 | 0.29111  | 0.33171419 | 1.86E-13 | 0.367291 | 2.32E-16 |
| 0.28166  | -0.01874 | 0.6862   | -0.03259 | 0.48235  | 0.16466795 | 0.00035  | 0.268548 | 3.71E-09 |
| 0.01767  | -0.18178 | 7.79E-05 | -0.14138 | 0.0022   | 0.06467671 | 0.1629   | 0.149281 | 0.00121  |
| 0.94495  | -0.126   | 0.0064   | -0.06673 | 0.1499   | 0.06556375 | 0.15719  | 0.085728 | 0.06416  |
| 1.40E-10 | -0.08896 | 0.05471  | -0.02633 | 0.5703   | 0.31495677 | 3.26E-12 | 0.271738 | 2.38E-09 |
| 0.03614  | -0.33695 | 7.32E-14 | -0.21243 | 3.63E-06 | 0.04690186 | 0.31183  | 0.118733 | 0.01023  |
| 0.50049  | -0.14141 | 0.00219  | -0.19121 | 3.19E-05 | 0.11566278 | 0.01238  | 0.152923 | 0.00092  |
| 0.02177  | -0.27001 | 3.03E-09 | -0.10355 | 0.02524  | 0.11176949 | 0.01567  | 0.07946  | 0.0863   |
| 0.02586  | 0.163802 | 0.00038  | -0.00086 | 0.98527  | -0.1063808 | 0.02149  | 0.008829 | 0.84908  |
| 0.00674  | 0.120737 | 0.00901  | 0.223644 | 1.05E-06 | 0.14096593 | 0.00226  | 0.129073 | 0.00521  |
| 0.36496  | -0.19546 | 2.10E-05 | -0.02484 | 0.59236  | 0.11251764 | 0.01499  | 0.218984 | 1.77E-06 |
| 0.08031  | -0.11849 | 0.01039  | -0.17424 | 0.00015  | -0.0143281 | 0.75746  | 0.093181 | 0.04415  |
| 0.92915  | 0.062519 | 0.17742  | 0.072512 | 0.11761  | 0.12196667 | 0.00833  | 0.094184 | 0.04191  |



|          |          |          |          |          |            |          |          |          |
|----------|----------|----------|----------|----------|------------|----------|----------|----------|
| 0.62286  | -0.02538 | 0.58436  | -0.05457 | 0.2392   | -0.0229826 | 0.62032  | 0.012822 | 0.78228  |
| 0.05187  | 0.085366 | 0.0653   | 0.039587 | 0.39337  | 0.06727347 | 0.14663  | 0.037911 | 0.41372  |
| 0.00094  | 0.370872 | 1.13E-16 | 0.409587 | 2.56E-20 | 0.11641494 | 0.01182  | -0.02104 | 0.6502   |
| 0.01048  | -0.3309  | 2.15E-13 | -0.20723 | 6.32E-06 | 0.0987716  | 0.03285  | 0.20056  | 1.26E-05 |
| 0.02165  | -0.25256 | 3.15E-08 | -0.17177 | 0.00019  | 0.02286415 | 0.62213  | -0.00753 | 0.87105  |
| 0.01581  | -0.18538 | 5.57E-05 | -0.05579 | 0.22881  | 0.11535892 | 0.01261  | 0.1186   | 0.01031  |
| 1.02E-05 | -0.33259 | 1.59E-13 | -0.15406 | 0.00084  | 0.05679486 | 0.22056  | 0.064247 | 0.16572  |
| 0.0749   | -0.17943 | 9.66E-05 | -0.06472 | 0.16261  | 0.02713551 | 0.55859  | 0.031648 | 0.49508  |
| 0.02925  | 0.09564  | 0.03883  | 0.143523 | 0.00187  | 0.15213588 | 0.00097  | 0.066734 | 0.1499   |
| 0.2073   | -0.05701 | 0.21879  | -0.00306 | 0.94741  | 0.15494886 | 0.00078  | 0.227206 | 6.98E-07 |
| 3.05E-05 | -0.05298 | 0.25322  | -0.13733 | 0.00294  | 0.08553827 | 0.06476  | 0.159675 | 0.00053  |
| 0.01675  | -0.01062 | 0.81899  | -0.10717 | 0.02054  | -0.0310625 | 0.50309  | -0.01785 | 0.7004   |
| 0.00071  | -0.1318  | 0.00433  | -0.10324 | 0.02568  | -0.0462642 | 0.31846  | -0.13466 | 0.00355  |
| 0.00263  | -0.16266 | 0.00042  | -0.32735 | 3.99E-13 | 0.00846286 | 0.85527  | 0.036065 | 0.43684  |
| 1.60E-05 | 0.053736 | 0.24647  | 0.19228  | 2.87E-05 | 0.11340495 | 0.0142   | 0.005054 | 0.91326  |
| 0.38664  | -0.11142 | 0.01601  | -0.26517 | 5.90E-09 | -0.0802565 | 0.08318  | 0.076838 | 0.09722  |
| 0.00011  | 0.128915 | 0.00527  | 0.073695 | 0.11173  | 0.02085037 | 0.65313  | -0.02976 | 0.52117  |
| 0.25159  | -0.07516 | 0.10477  | -0.06437 | 0.16492  | 0.05516221 | 0.23413  | 0.124504 | 0.00706  |
| 0.02264  | -0.23064 | 4.68E-07 | -0.22638 | 7.68E-07 | -0.0344704 | 0.4574   | -0.07901 | 0.08808  |
| 0.84917  | -0.26396 | 6.96E-09 | -0.2256  | 8.40E-07 | -0.1497991 | 0.00117  | -0.15628 | 0.0007   |
| 0.0081   | 0.203946 | 8.90E-06 | 0.172359 | 0.00018  | -0.1021372 | 0.02731  | -0.12533 | 0.00669  |
| 0.71172  | -0.21955 | 1.66E-06 | -0.0799  | 0.08456  | 0.0632884  | 0.17213  | 0.051864 | 0.26334  |
| 0.06306  | 0.012396 | 0.78933  | 0.107006 | 0.02073  | 0.14278575 | 0.00198  | 0.007006 | 0.87998  |
| 0.00859  | 0.033997 | 0.4636   | -0.0398  | 0.39081  | -0.2340845 | 3.12E-07 | -0.36715 | 2.38E-16 |
| 0.0024   | -0.2406  | 1.42E-07 | -0.09877 | 0.03284  | 0.12378596 | 0.0074   | 0.07772  | 0.09343  |
| 0.74614  | 0.148322 | 0.00131  | 0.229376 | 5.43E-07 | 0.16836462 | 0.00026  | -0.04655 | 0.31547  |
| 0.43844  | -0.32492 | 6.07E-13 | -0.18519 | 5.67E-05 | -0.0361494 | 0.43577  | 0.013393 | 0.77283  |
| 0.59308  | -0.02652 | 0.56759  | -0.05099 | 0.27145  | 0.01133923 | 0.80693  | 0.108027 | 0.01954  |
| 2.16E-13 | -0.25532 | 2.20E-08 | -0.13144 | 0.00444  | 0.1918812  | 2.99E-05 | 0.310048 | 7.29E-12 |
| 0.0002   | 0.160668 | 0.00049  | 0.172293 | 0.00018  | 0.15863841 | 0.00058  | 0.115815 | 0.01226  |
| 0.51912  | 0.031001 | 0.50394  | -0.03438 | 0.45854  | -0.1050309 | 0.02321  | -0.08752 | 0.05879  |
| 0.28925  | -0.19617 | 1.96E-05 | -0.03336 | 0.47203  | 0.01384939 | 0.76532  | 0.00291  | 0.95     |
| 0.71268  | 0.044201 | 0.34054  | 0.06042  | 0.19244  | 0.14389879 | 0.00182  | 0.152083 | 0.00098  |
| 0.78613  | -0.07156 | 0.12253  | -0.01231 | 0.79085  | -0.0750731 | 0.10517  | -0.01144 | 0.80521  |
| 0.35402  | 0.0191   | 0.68056  | -0.1023  | 0.02707  | 0.04841658 | 0.29644  | 0.249379 | 4.73E-08 |
| 0.39806  | -0.14955 | 0.00119  | -0.06809 | 0.14175  | 0.03417158 | 0.46131  | 0.183749 | 6.49E-05 |
| 0.49969  | -0.12688 | 0.00604  | -0.19961 | 1.39E-05 | -0.0107007 | 0.8176   | 0.128462 | 0.00543  |
| 0.43402  | -0.1135  | 0.01413  | -0.03337 | 0.47188  | 0.07413413 | 0.10961  | 0.085517 | 0.06482  |
| 0.73588  | -0.26996 | 3.05E-09 | -0.18594 | 5.28E-05 | -0.0422327 | 0.3625   | -0.04119 | 0.37453  |
| 0.52881  | -0.09485 | 0.04048  | -0.06322 | 0.1726   | -0.0395274 | 0.39408  | 0.058976 | 0.20331  |
| 0.06606  | -0.36591 | 3.05E-16 | -0.21152 | 4.01E-06 | 0.05098924 | 0.27148  | 0.114685 | 0.01314  |
| 0.29167  | 0.051461 | 0.26707  | 0.030012 | 0.51764  | -0.2402057 | 1.49E-07 | -0.21327 | 3.32E-06 |
| 0.02064  | 0.039566 | 0.39362  | 0.01443  | 0.75579  | -0.0961495 | 0.0378   | -0.1879  | 4.39E-05 |
| 0.10746  | -0.25858 | 1.43E-08 | -0.0922  | 0.04645  | 0.04654025 | 0.31558  | 0.088751 | 0.05529  |
| 0.57337  | -0.1889  | 3.98E-05 | -0.13847 | 0.00271  | 0.14608608 | 0.00155  | 0.339754 | 4.41E-14 |

|          |          |          |          |          |            |          |          |          |
|----------|----------|----------|----------|----------|------------|----------|----------|----------|
| 0.65359  | -0.15126 | 0.00104  | -0.26947 | 3.27E-09 | -0.1166354 | 0.01166  | 0.046828 | 0.31259  |
| 0.00476  | -0.20839 | 5.59E-06 | -0.18103 | 8.35E-05 | -0.0617838 | 0.18258  | 0.13173  | 0.00435  |
| 0.35607  | -0.24329 | 1.02E-07 | -0.08729 | 0.05943  | 0.03687811 | 0.42657  | 0.026376 | 0.56965  |
| 0.64928  | -0.19553 | 2.09E-05 | -0.21081 | 4.33E-06 | -0.0714844 | 0.12292  | 0.005844 | 0.89977  |
| 0.21009  | -0.18747 | 4.57E-05 | -0.08889 | 0.05491  | -0.0560948 | 0.22631  | -0.1111  | 0.01631  |
| 0.58474  | -0.25457 | 2.42E-08 | -0.27892 | 8.59E-10 | -0.0541268 | 0.24304  | 0.08667  | 0.06128  |
| 0.05164  | 0.044797 | 0.33407  | -0.03189 | 0.49177  | -0.0459678 | 0.32157  | -0.16629 | 0.00031  |
| 0.53621  | -0.26694 | 4.64E-09 | -0.16453 | 0.00036  | -0.1610468 | 0.00048  | -0.25582 | 2.06E-08 |
| 3.41E-06 | -0.17799 | 0.00011  | -0.20831 | 5.64E-06 | -0.1172627 | 0.01121  | -0.33722 | 6.98E-14 |
| 0.74805  | -0.07877 | 0.08906  | -0.1884  | 4.18E-05 | 0.08760534 | 0.05853  | 0.282795 | 4.90E-10 |
| 0.72279  | -0.00894 | 0.84719  | -0.07917 | 0.08746  | 0.04645765 | 0.31644  | 0.013954 | 0.7636   |
| 0.25972  | -0.31148 | 5.77E-12 | -0.16535 | 0.00033  | 0.02441777 | 0.59865  | 0.075293 | 0.10415  |
| 0.01552  | -0.06599 | 0.15451  | -0.08251 | 0.07485  | 0.16543943 | 0.00033  | 0.224559 | 9.46E-07 |
| 0.34096  | -0.10309 | 0.0259   | -0.15924 | 0.00055  | 0.00069914 | 0.98798  | 0.05513  | 0.23441  |
| 1.36E-07 | -0.07937 | 0.08666  | -0.18083 | 8.50E-05 | -0.0896654 | 0.05282  | 0.015138 | 0.74422  |
| 0.02456  | -0.13454 | 0.00358  | -0.07775 | 0.09329  | 0.01367416 | 0.76821  | 0.021238 | 0.64711  |
| 0.90048  | -0.01415 | 0.76045  | -0.08315 | 0.07263  | 0.11044737 | 0.01695  | 0.187421 | 4.59E-05 |
| 0.83013  | -0.19268 | 2.76E-05 | -0.19966 | 1.38E-05 | -0.0112326 | 0.80871  | 0.140573 | 0.00233  |
| 0.01208  | 0.040288 | 0.38503  | -0.22759 | 6.68E-07 | 0.1378826  | 0.00283  | 0.174213 | 0.00015  |
| 0.25636  | -0.23006 | 5.01E-07 | -0.12683 | 0.00606  | -0.0280384 | 0.54557  | 0.015552 | 0.73747  |
| 0.61857  | -0.32459 | 6.42E-13 | -0.15904 | 0.00056  | -0.0119766 | 0.7963   | -0.0033  | 0.94326  |
| 0.10937  | 0.130048 | 0.00488  | 0.08834  | 0.05644  | 0.13293153 | 0.00401  | 0.222474 | 1.20E-06 |
| 0.787    | -0.13906 | 0.0026   | -0.04103 | 0.37636  | 0.14044008 | 0.00235  | 0.149776 | 0.00117  |
| 0.43288  | -0.16237 | 0.00043  | -0.13224 | 0.0042   | 0.00411988 | 0.92925  | 0.002891 | 0.95032  |
| 0.21153  | 0.173705 | 0.00016  | 0.084113 | 0.06936  | -0.0290798 | 0.53075  | 0.021838 | 0.63784  |
| 0.00162  | -0.01512 | 0.74447  | -0.01438 | 0.75653  | -0.1422023 | 0.00207  | -0.21085 | 4.30E-06 |
| 0.91478  | -0.06192 | 0.18163  | -0.01557 | 0.73712  | 0.18020962 | 9.00E-05 | 0.025974 | 0.57555  |
| 9.20E-07 | -0.00985 | 0.83188  | -0.07291 | 0.11563  | 0.02903735 | 0.53135  | 0.084606 | 0.06774  |
| 0.00099  | 0.018776 | 0.6857   | 0.007725 | 0.86776  | 0.10121794 | 0.02874  | 0.145366 | 0.00163  |
| 2.09E-08 | 0.0437   | 0.34604  | 0.204255 | 8.62E-06 | 0.04835597 | 0.29705  | 0.084284 | 0.0688   |
| 0.95053  | 0.034936 | 0.45135  | -0.06992 | 0.13135  | -0.1284963 | 0.00542  | -0.17382 | 0.00016  |
| 0.00019  | -0.0898  | 0.05246  | -0.05398 | 0.24429  | -0.0040996 | 0.92959  | -0.05326 | 0.25068  |
| 0.53102  | -0.05327 | 0.25058  | -0.01003 | 0.82893  | 0.0587688  | 0.20491  | 0.083884 | 0.07013  |
| 0.26785  | -0.16125 | 0.00047  | -0.02578 | 0.57842  | 0.1043637  | 0.02411  | 0.128487 | 0.00542  |
| 0.00854  | -0.37963 | 1.86E-17 | -0.20774 | 5.99E-06 | 0.08076457 | 0.08124  | 0.166459 | 0.0003   |
| 0.00265  | -0.1206  | 0.00909  | -0.1722  | 0.00018  | -0.0458641 | 0.32266  | 0.035024 | 0.4502   |
| 0.39658  | -0.11046 | 0.01694  | -0.16137 | 0.00046  | 0.28250353 | 5.11E-10 | 0.337159 | 7.05E-14 |
| 2.15E-43 | -0.07524 | 0.1044   | -0.07165 | 0.12205  | 0.09905781 | 0.03234  | 0.103583 | 0.02519  |
| 0.00036  | -0.00276 | 0.95254  | -0.16145 | 0.00046  | -0.2871435 | 2.58E-10 | -0.24812 | 5.55E-08 |
| 0.44659  | -0.34277 | 2.54E-14 | -0.15303 | 0.00091  | 0.08148236 | 0.07857  | 0.047327 | 0.30746  |
| 0.19434  | -0.24195 | 1.20E-07 | -0.11956 | 0.00971  | -0.0018173 | 0.96876  | 0.075759 | 0.10202  |
| 0.69884  | 0.138741 | 0.00266  | 0.097901 | 0.03442  | -0.210509  | 4.47E-06 | -0.1836  | 6.58E-05 |
| 0.94965  | -0.31834 | 1.86E-12 | -0.18325 | 6.80E-05 | -0.0314482 | 0.4978   | -0.08942 | 0.05348  |
| 0.03855  | -0.24756 | 5.95E-08 | -0.1763  | 0.00013  | 0.05148983 | 0.2668   | 0.116218 | 0.01196  |
| 0.01616  | -0.00759 | 0.87006  | 0.129304 | 0.00513  | 0.33256026 | 1.60E-13 | 0.317676 | 2.07E-12 |

|          |          |          |          |          |            |          |          |          |
|----------|----------|----------|----------|----------|------------|----------|----------|----------|
| 0.79011  | -0.1791  | 9.96E-05 | -0.22762 | 6.66E-07 | -0.0548211 | 0.23704  | 0.084709 | 0.06741  |
| 0.58554  | -0.29937 | 4.00E-11 | -0.15464 | 0.0008   | -0.0236292 | 0.61052  | -0.01732 | 0.70897  |
| 0.20504  | -0.15401 | 0.00084  | -0.06801 | 0.14225  | -0.0153872 | 0.74015  | -0.09377 | 0.04283  |
| 0.99212  | -0.39507 | 6.79E-19 | -0.30426 | 1.85E-11 | -0.1108717 | 0.01653  | -0.10989 | 0.01753  |
| 0.45904  | -0.30934 | 8.19E-12 | -0.20605 | 7.15E-06 | -0.068034  | 0.14211  | -0.111   | 0.0164   |
| 0.08199  | -0.04804 | 0.30021  | -0.0511  | 0.27047  | -0.0041381 | 0.92893  | 0.029849 | 0.51993  |
| 0.08237  | -0.04797 | 0.3009   | -0.05982 | 0.19689  | 0.10074162 | 0.0295   | 0.315222 | 3.12E-12 |
| 0.07248  | -0.15528 | 0.00076  | -0.11458 | 0.01323  | -0.1212196 | 0.00874  | -0.17722 | 0.00012  |
| 3.91E-05 | -0.14871 | 0.00127  | -0.0649  | 0.16145  | 0.02000338 | 0.66635  | -0.03132 | 0.49955  |
| 0.24731  | -0.08257 | 0.07466  | 0.00729  | 0.87516  | 0.15430308 | 0.00082  | 0.198572 | 1.54E-05 |
| 0.0416   | -0.11277 | 0.01476  | -0.11239 | 0.0151   | 0.12744586 | 0.00582  | 0.281473 | 5.94E-10 |
| 0.10357  | -0.01776 | 0.70182  | -0.06237 | 0.17843  | -0.0124046 | 0.78919  | 0.067096 | 0.1477   |
| 0.62108  | -0.16506 | 0.00034  | -0.17058 | 0.00021  | -0.0065782 | 0.88726  | 0.064205 | 0.16599  |
| 0.17762  | -0.1406  | 0.00232  | -0.16644 | 0.0003   | -0.107624  | 0.02     | -0.03489 | 0.45198  |
| 0.01257  | -0.24021 | 1.49E-07 | -0.13764 | 0.00288  | -0.0303744 | 0.5126   | -0.00451 | 0.92265  |
| 0.0244   | -0.3838  | 7.74E-18 | -0.3316  | 1.90E-13 | -0.1277499 | 0.0057   | -0.16271 | 0.00042  |
| 0.06459  | 0.030531 | 0.51044  | 0.118731 | 0.01023  | 0.14803421 | 0.00134  | 0.139954 | 0.00244  |
| 0.00288  | -0.03019 | 0.51512  | 0.073918 | 0.11065  | -0.1182918 | 0.01051  | -0.19216 | 2.91E-05 |
| 0.85902  | -0.20891 | 5.29E-06 | -0.35371 | 3.29E-15 | -0.1251494 | 0.00677  | -0.06348 | 0.17085  |
| 0.04313  | -0.18791 | 4.38E-05 | -0.25326 | 2.87E-08 | -0.110016  | 0.01739  | -0.19159 | 3.07E-05 |
| 0.01211  | 0.192828 | 2.72E-05 | 0.041777 | 0.36771  | -0.0556918 | 0.22967  | -0.09349 | 0.04345  |
| 0.01436  | -0.17927 | 9.81E-05 | -0.21873 | 1.82E-06 | 0.03643509 | 0.43215  | 0.199361 | 1.42E-05 |
| 0.28786  | -0.00105 | 0.98198  | 0.157764 | 0.00062  | 0.19468109 | 2.27E-05 | 0.332263 | 1.69E-13 |
| 0.00123  | 0.265581 | 5.58E-09 | 0.133246 | 0.00392  | 0.00724602 | 0.8759   | -0.04575 | 0.3239   |
| 0.00813  | -0.03551 | 0.44388  | -0.11221 | 0.01526  | -0.084731  | 0.06733  | -0.06121 | 0.18669  |
| 0.44653  | -0.28667 | 2.77E-10 | -0.20563 | 7.47E-06 | -0.1489128 | 0.00125  | -0.15731 | 0.00065  |
| 0.06698  | -0.02593 | 0.57615  | 0.007525 | 0.87116  | 0.11802322 | 0.01069  | 0.144384 | 0.00176  |
| 0.11557  | -0.26848 | 3.75E-09 | -0.13883 | 0.00264  | 0.00180005 | 0.96905  | 0.045002 | 0.33186  |
| 0.46639  | -0.24788 | 5.72E-08 | -0.03817 | 0.41058  | 0.10676493 | 0.02102  | 0.11939  | 0.00981  |
| 0.38064  | -0.23549 | 2.63E-07 | -0.1701  | 0.00022  | -0.0192068 | 0.67888  | 0.095055 | 0.04004  |
| 0.19528  | 0.056333 | 0.22434  | -0.13767 | 0.00287  | -0.2633849 | 7.52E-09 | -0.33393 | 1.26E-13 |
| 0.00038  | 0.097933 | 0.03437  | 0.143318 | 0.0019   | 0.0807359  | 0.08135  | 0.171272 | 0.0002   |
| 0.01465  | 0.205469 | 7.60E-06 | 0.089233 | 0.05398  | 0.16331849 | 0.00039  | 0.130412 | 0.00476  |
| 0.27033  | -0.07498 | 0.1056   | -0.19183 | 3.00E-05 | -0.140326  | 0.00237  | -0.13097 | 0.00458  |
| 0.68265  | -0.133   | 0.00399  | -0.08821 | 0.0568   | -0.00936   | 0.84013  | -0.00811 | 0.86131  |
| 3.57E-05 | -0.01842 | 0.69138  | 0.107912 | 0.01967  | 0.15220764 | 0.00097  | 0.125298 | 0.0067   |
| 0.99283  | 0.038274 | 0.40927  | -0.08857 | 0.0558   | 0.16606075 | 0.00031  | 0.400029 | 2.26E-19 |
| 0.03564  | 0.007647 | 0.86909  | 0.033386 | 0.47168  | 0.1402201  | 0.00239  | 0.130512 | 0.00473  |
| 0.17716  | 0.017826 | 0.70081  | 0.080056 | 0.08396  | 0.09870754 | 0.03296  | 0.054523 | 0.23961  |
| 0.01486  | -0.0577  | 0.21326  | -0.06439 | 0.16479  | 0.02796093 | 0.54668  | 0.079052 | 0.08793  |
| 0.00012  | -0.08558 | 0.06463  | 0.051803 | 0.2639   | 0.02867596 | 0.53647  | -0.02633 | 0.57033  |
| 0.17465  | -0.20752 | 6.13E-06 | -0.16922 | 0.00024  | -0.2299211 | 5.09E-07 | -0.28744 | 2.47E-10 |
| 0.00012  | -0.03672 | 0.42854  | -0.12288 | 0.00785  | -0.2298241 | 5.15E-07 | -0.31247 | 4.91E-12 |
| 0.05521  | -0.10689 | 0.02088  | -0.10882 | 0.01866  | -0.0979916 | 0.03426  | -0.07068 | 0.12721  |
| 0.55512  | -0.08355 | 0.07127  | 0.012087 | 0.79447  | 0.15987534 | 0.00052  | 0.092993 | 0.04458  |

|          |          |          |          |          |            |          |          |          |
|----------|----------|----------|----------|----------|------------|----------|----------|----------|
| 0.03084  | 0.105013 | 0.02324  | -0.02329 | 0.61568  | 0.20176711 | 1.11E-05 | 0.105898 | 0.02209  |
| 0.00042  | -0.32009 | 1.38E-12 | -0.11672 | 0.0116   | 0.12282113 | 0.00788  | 0.127374 | 0.00584  |
| 0.56251  | -0.40637 | 5.37E-20 | -0.22141 | 1.35E-06 | -0.0852232 | 0.06575  | -0.11161 | 0.01582  |
| 0.67704  | 0.163708 | 0.00038  | 0.06674  | 0.14986  | 0.08031901 | 0.08294  | 0.102552 | 0.02669  |
| 0.07836  | 0.032201 | 0.48757  | 0.102236 | 0.02716  | 0.33833921 | 5.70E-14 | 0.483329 | 1.04E-28 |
| 0.15608  | -0.16231 | 0.00043  | -0.1861  | 5.20E-05 | -0.0914718 | 0.0482   | -0.10205 | 0.02745  |
| 6.48E-08 | 0.373985 | 5.97E-17 | 0.288293 | 2.17E-10 | 0.01703471 | 0.7135   | -0.05895 | 0.20355  |
| 0.05028  | 0.083513 | 0.07138  | -0.01932 | 0.67715  | 0.03515678 | 0.44849  | 0.045168 | 0.33007  |
| 0.51312  | 0.049853 | 0.28232  | -0.00374 | 0.93576  | -0.0527766 | 0.25502  | -0.08794 | 0.05757  |
| 0.00013  | -0.12524 | 0.00673  | -0.11638 | 0.01184  | -0.066809  | 0.14944  | -0.09147 | 0.04821  |
| 0.18611  | 0.120793 | 0.00898  | 0.117456 | 0.01108  | 0.21395869 | 3.08E-06 | 0.06295  | 0.17444  |
| 0.02258  | -0.27334 | 1.90E-09 | -0.17568 | 0.00014  | -0.0271316 | 0.55865  | 0.034226 | 0.4606   |
| 0.08787  | -0.12883 | 0.0053   | -0.10504 | 0.0232   | 0.01855973 | 0.68913  | -0.06269 | 0.17622  |
| 0.79012  | -0.10153 | 0.02825  | -0.03048 | 0.51114  | -0.1460011 | 0.00156  | -0.20211 | 1.08E-05 |
| 0.59129  | -0.00169 | 0.97094  | -0.07905 | 0.08793  | 0.06795649 | 0.14256  | 0.229971 | 5.06E-07 |
| 0.60013  | -0.25975 | 1.22E-08 | -0.20164 | 1.13E-05 | -0.1213208 | 0.00868  | -0.15397 | 0.00084  |
| 4.61E-08 | -0.14476 | 0.00171  | -0.00529 | 0.90915  | -0.0429371 | 0.35454  | -0.10311 | 0.02587  |
| 0.15511  | -0.07759 | 0.09397  | -0.0952  | 0.03974  | -0.0031732 | 0.94548  | 0.089858 | 0.05231  |
| 0.63858  | 0.019603 | 0.67264  | 0.178455 | 0.00011  | 0.26546038 | 5.67E-09 | 0.297009 | 5.77E-11 |
| 0.16399  | -0.0542  | 0.24244  | 0.131723 | 0.00435  | 0.19563244 | 2.07E-05 | 0.192227 | 2.89E-05 |
| 0.31104  | -0.30809 | 1.00E-11 | -0.18161 | 7.92E-05 | 0.00018897 | 0.99675  | -0.02482 | 0.59271  |
| 0.43134  | -0.2968  | 5.96E-11 | -0.3373  | 6.88E-14 | -0.1699404 | 0.00022  | -0.15617 | 0.00071  |
| 0.08059  | -0.13765 | 0.00287  | -0.13865 | 0.00268  | -5.50E-07  | 0.99999  | 0.113422 | 0.01419  |
| 0.60424  | -0.30014 | 3.54E-11 | -0.19062 | 3.38E-05 | -0.0746013 | 0.10738  | -0.05548 | 0.23147  |
| 0.19246  | 0.079178 | 0.08742  | 0.100607 | 0.02972  | 0.23661713 | 2.30E-07 | 0.393337 | 9.92E-19 |
| 0.64963  | -0.28069 | 6.65E-10 | -0.16521 | 0.00034  | -0.0189848 | 0.68239  | 0.035263 | 0.44712  |
| 0.98736  | 0.08566  | 0.06437  | 0.099147 | 0.03218  | 0.19452618 | 2.31E-05 | 0.34066  | 3.74E-14 |
| 0.93837  | -0.00579 | 0.9007   | 0.032646 | 0.48157  | 0.15790694 | 0.00062  | 0.28177  | 5.69E-10 |
| 0.0473   | -0.2079  | 5.89E-06 | -0.15361 | 0.00087  | 0.03033342 | 0.51317  | 0.053001 | 0.253    |
| 0.05679  | 0.172249 | 0.00018  | 0.00898  | 0.84653  | 0.00308178 | 0.94704  | 0.174162 | 0.00016  |
| 0.04755  | 0.007953 | 0.8639   | -0.20847 | 5.54E-06 | -0.1015606 | 0.0282   | -0.0256  | 0.58104  |
| 1.13E-13 | -0.18875 | 4.05E-05 | -0.0891  | 0.05433  | 0.29630225 | 6.44E-11 | 0.356337 | 1.99E-15 |
| 0.00889  | -0.15819 | 0.0006   | 0.160706 | 0.00049  | 0.25094616 | 3.87E-08 | 0.075467 | 0.10335  |
| 0.28542  | -0.28991 | 1.70E-10 | -0.22481 | 9.19E-07 | -0.0121148 | 0.79401  | -0.0299  | 0.51923  |
| 0.00414  | 0.20632  | 6.95E-06 | 0.116047 | 0.01209  | 0.44286349 | 7.48E-24 | 0.526859 | 1.03E-34 |
| 0.14977  | -0.23271 | 3.67E-07 | -0.2007  | 1.24E-05 | -0.0489891 | 0.29076  | -0.02784 | 0.54836  |
| 1.69E-11 | -0.172   | 0.00019  | -0.17955 | 9.56E-05 | 0.09060565 | 0.05037  | 0.269149 | 3.42E-09 |
| 0.11865  | -0.1972  | 1.77E-05 | -0.16506 | 0.00034  | 0.01523686 | 0.7426   | 0.053859 | 0.24539  |
| 0.59231  | 0.083299 | 0.07211  | 0.161594 | 0.00046  | 0.06653489 | 0.15113  | -0.07867 | 0.0895   |
| 0.14976  | 0.131003 | 0.00457  | -0.06268 | 0.17629  | -0.0040244 | 0.93088  | 0.189633 | 3.72E-05 |
| 0.75564  | -0.29804 | 4.92E-11 | -0.10058 | 0.02977  | 0.08624602 | 0.06257  | 0.138749 | 0.00266  |
| 0.21138  | -0.03786 | 0.41434  | -0.11965 | 0.00965  | -0.1863423 | 5.09E-05 | -0.33149 | 1.93E-13 |
| 0.25556  | -0.10619 | 0.02172  | -0.03407 | 0.46258  | -0.0115185 | 0.80394  | -0.04339 | 0.34947  |
| 0.3691   | -0.08521 | 0.06579  | 0.024171 | 0.60236  | -0.1514784 | 0.00102  | -0.15587 | 0.00072  |
| 0.00635  | -0.02131 | 0.64604  | -0.12085 | 0.00894  | -0.1310156 | 0.00457  | -0.07226 | 0.11889  |

|          |          |          |          |          |            |          |          |          |
|----------|----------|----------|----------|----------|------------|----------|----------|----------|
| 0.46655  | 0.185093 | 5.72E-05 | 0.197945 | 1.64E-05 | 0.12277123 | 0.00791  | 0.076178 | 0.10014  |
| 0.0253   | -0.0997  | 0.03124  | -0.10192 | 0.02764  | 0.04655879 | 0.31538  | 0.193862 | 2.46E-05 |
| 0.0019   | -0.04849 | 0.29573  | -0.04546 | 0.32695  | 0.01427168 | 0.75838  | 0.014901 | 0.74809  |
| 0.04381  | 0.029427 | 0.52585  | -0.04268 | 0.35743  | 0.13182771 | 0.00432  | 0.213561 | 3.22E-06 |
| 0.91215  | -0.05764 | 0.21379  | -0.03323 | 0.47381  | 0.03534898 | 0.44601  | 0.024587 | 0.59613  |
| 0.01681  | -0.01607 | 0.72905  | -0.05816 | 0.20964  | -0.0541953 | 0.24245  | -0.05618 | 0.22557  |
| 0.20714  | -0.01032 | 0.82394  | -0.0424  | 0.36064  | -0.046767  | 0.31322  | -0.0787  | 0.08935  |
| 0.03382  | 0.005018 | 0.91388  | 0.142134 | 0.00208  | 0.21149326 | 4.02E-06 | 0.116144 | 0.01202  |
| 0.00511  | -0.16752 | 0.00028  | -0.04085 | 0.37845  | 0.08733341 | 0.05932  | 0.109256 | 0.01819  |
| 0.04165  | -0.04028 | 0.38515  | -0.07431 | 0.10879  | 0.19743874 | 1.73E-05 | 0.162125 | 0.00044  |
| 0.00212  | 0.115478 | 0.01252  | -0.0215  | 0.64313  | 0.03551529 | 0.44387  | 0.124938 | 0.00687  |
| 4.00E-10 | 0.166696 | 0.0003   | 0.12328  | 0.00765  | -0.0121993 | 0.7926   | -0.03704 | 0.42453  |
| 0.00037  | -0.15274 | 0.00093  | -0.23488 | 2.83E-07 | -0.1419072 | 0.00211  | -0.06496 | 0.16103  |
| 0.00085  | 0.140394 | 0.00236  | 0.396006 | 5.52E-19 | 0.1833642  | 6.73E-05 | 0.100778 | 0.02944  |
| 0.73523  | 0.084857 | 0.06693  | 0.107429 | 0.02023  | 0.08826457 | 0.05665  | 0.061699 | 0.18318  |
| 0.01018  | -0.39355 | 9.47E-19 | -0.33736 | 6.80E-14 | -0.1125135 | 0.01499  | -0.10921 | 0.01824  |
| 0.12018  | -0.31805 | 1.95E-12 | -0.15811 | 0.00061  | 0.0338236  | 0.46589  | 0.045503 | 0.32649  |
| 0.11692  | -0.00387 | 0.93349  | -0.02811 | 0.54451  | 0.12139351 | 0.00864  | 0.154737 | 0.00079  |
| 0.25097  | -0.19609 | 1.97E-05 | -0.22561 | 8.39E-07 | -0.0928886 | 0.04482  | -0.13561 | 0.00332  |
| 0.00927  | -0.28462 | 3.75E-10 | -0.04361 | 0.34699  | 0.30522428 | 1.59E-11 | 0.274673 | 1.58E-09 |
| 0.00201  | -0.21116 | 4.16E-06 | -0.0883  | 0.05654  | -0.1379643 | 0.00281  | -0.24919 | 4.85E-08 |
| 1.29E-06 | 0.058971 | 0.20335  | 0.000789 | 0.98643  | -0.1416119 | 0.00216  | -0.2203  | 1.53E-06 |
| 0.1538   | -0.12115 | 0.00877  | -0.06022 | 0.19394  | 0.3457926  | 1.46E-14 | 0.45661  | 1.98E-25 |
| 0.00203  | -0.17359 | 0.00016  | 0.00249  | 0.95721  | 0.34479882 | 1.75E-14 | 0.38322  | 8.75E-18 |
| 0.86626  | -0.32518 | 5.80E-13 | -0.20721 | 6.33E-06 | -0.0392917 | 0.39691  | -0.06084 | 0.18933  |
| 0.04924  | -0.16237 | 0.00043  | -0.13025 | 0.00481  | -0.022755  | 0.62379  | 0.082956 | 0.0733   |
| 0.84189  | 0.032184 | 0.48779  | 0.144689 | 0.00172  | 0.00588642 | 0.89905  | -0.15337 | 0.00088  |
| 0.24575  | 0.042344 | 0.36123  | -0.00524 | 0.91009  | 0.21889953 | 1.79E-06 | 0.322591 | 9.04E-13 |
| 0.15994  | -0.17091 | 0.00021  | -0.17101 | 0.0002   | 0.26862102 | 3.68E-09 | 0.380168 | 1.66E-17 |
| 0.51045  | -0.20059 | 1.26E-05 | -0.13528 | 0.0034   | -0.0016631 | 0.97141  | 0.083808 | 0.07038  |
| 0.46682  | -0.22491 | 9.09E-07 | -0.16358 | 0.00039  | -0.0264026 | 0.56926  | 0.025803 | 0.57807  |
| 0.33944  | 0.071693 | 0.12183  | 0.109326 | 0.01811  | 0.0512502  | 0.26904  | -0.02768 | 0.55067  |
| 0.64302  | -0.22768 | 6.61E-07 | -0.18549 | 5.51E-05 | -0.0114803 | 0.80457  | 0.122507 | 0.00804  |
| 0.65274  | 0.077725 | 0.09341  | -0.05492 | 0.23621  | 0.23844603 | 1.84E-07 | 0.043322 | 0.35024  |
| 0.19607  | 0.086296 | 0.06241  | -0.14345 | 0.00188  | -0.4112305 | 1.75E-20 | -0.19572 | 2.05E-05 |
| 0.1612   | -0.21867 | 1.84E-06 | -0.22793 | 6.42E-07 | -0.1277818 | 0.00569  | -0.07407 | 0.10993  |
| 0.05875  | -0.10379 | 0.0249   | -0.08656 | 0.06162  | -0.2715461 | 2.45E-09 | -0.2728  | 2.05E-09 |
| 0.02312  | -0.32015 | 1.37E-12 | -0.29148 | 1.35E-10 | -0.0960397 | 0.03802  | -0.05425 | 0.24194  |
| 9.54E-07 | -0.30182 | 2.72E-11 | -0.03978 | 0.39108  | 0.32527183 | 5.71E-13 | 0.252677 | 3.10E-08 |
| 0.49036  | -0.08721 | 0.05968  | 0.077726 | 0.0934   | 0.15199256 | 0.00098  | 0.241339 | 1.29E-07 |
| 2.34E-14 | -0.20161 | 1.13E-05 | -0.15903 | 0.00056  | -0.0197388 | 0.6705   | -0.00505 | 0.91336  |
| 0.89938  | 0.137759 | 0.00285  | 0.016977 | 0.71443  | 0.26306579 | 7.85E-09 | 0.371427 | 1.01E-16 |
| 0.07814  | -0.18604 | 5.24E-05 | -0.1879  | 4.39E-05 | -0.080193  | 0.08343  | 0.018264 | 0.69382  |
| 1.79E-05 | -0.27805 | 9.74E-10 | -0.25892 | 1.37E-08 | 0.04283163 | 0.35572  | 0.132192 | 0.00421  |
| 0.0743   | -0.06782 | 0.14337  | -0.04885 | 0.29213  | -0.0665599 | 0.15097  | -0.04366 | 0.34651  |

|          |          |          |          |          |            |          |          |          |
|----------|----------|----------|----------|----------|------------|----------|----------|----------|
| 0.21863  | -0.20348 | 9.34E-06 | -0.11583 | 0.01225  | -0.1142173 | 0.01352  | -0.06204 | 0.1808   |
| 0.02576  | -0.49674 | 1.81E-30 | -0.23172 | 4.12E-07 | 0.08503239 | 0.06636  | -0.01258 | 0.78621  |
| 0.02085  | 0.013686 | 0.768    | -0.13024 | 0.00482  | -0.080319  | 0.08294  | -0.09281 | 0.04502  |
| 0.01362  | -0.11652 | 0.01174  | -0.09643 | 0.03724  | 0.01924354 | 0.6783   | 0.003868 | 0.93357  |
| 0.00036  | 0.282829 | 4.87E-10 | 0.220878 | 1.44E-06 | 0.23597391 | 2.49E-07 | 0.113808 | 0.01386  |
| 0.20523  | -0.09567 | 0.03876  | -0.22866 | 5.90E-07 | 0.10273117 | 0.02642  | 0.07612  | 0.10039  |
| 0.02052  | 0.043714 | 0.3459   | 0.140522 | 0.00234  | 0.16011306 | 0.00051  | 0.106602 | 0.02122  |
| 0.50274  | -0.36132 | 7.55E-16 | -0.27253 | 2.13E-09 | 0.07596605 | 0.10109  | -0.00099 | 0.98293  |
| 0.32277  | -0.20353 | 9.29E-06 | -0.08457 | 0.06785  | -0.0480562 | 0.30005  | -0.10215 | 0.02729  |
| 0.62686  | -0.25648 | 1.89E-08 | -0.18654 | 4.99E-05 | -0.0536283 | 0.24742  | 0.006899 | 0.88179  |
| 0.81152  | -0.20491 | 8.05E-06 | -0.08603 | 0.06324  | 0.28457955 | 3.77E-10 | 0.367641 | 2.16E-16 |
| 0.07191  | -0.26212 | 8.92E-09 | -0.1837  | 6.52E-05 | -0.0136296 | 0.76894  | 0.111552 | 0.01588  |
| 0.06201  | 0.119655 | 0.00965  | -0.1328  | 0.00404  | -0.2052888 | 7.74E-06 | -0.04966 | 0.2842   |
| 0.16373  | 0.0586   | 0.20621  | -0.02226 | 0.63132  | -0.0511568 | 0.26991  | 0.06464  | 0.16314  |
| 0.59384  | 0.001475 | 0.97465  | -0.04245 | 0.36007  | 0.15602817 | 0.00072  | 0.333006 | 1.48E-13 |
| 0.63789  | -0.06514 | 0.1599   | -0.06292 | 0.17466  | 0.12683397 | 0.00606  | 0.250679 | 4.01E-08 |
| 0.03074  | 0.104836 | 0.02347  | -0.02221 | 0.63214  | 0.2074927  | 6.15E-06 | 0.336033 | 8.63E-14 |
| 0.24744  | -0.24636 | 6.93E-08 | -0.06287 | 0.17497  | -0.1071518 | 0.02056  | -0.28339 | 4.49E-10 |
| 0.02971  | 0.307162 | 1.16E-11 | 0.206971 | 6.49E-06 | 0.20196406 | 1.09E-05 | 0.214862 | 2.79E-06 |
| 0.77157  | -0.22096 | 1.42E-06 | -0.12608 | 0.00637  | 0.05532578 | 0.23275  | 0.111603 | 0.01583  |
| 0.20603  | -0.15898 | 0.00056  | -0.21446 | 2.91E-06 | -0.1151334 | 0.01279  | 0.011478 | 0.80462  |
| 0.00609  | -0.13615 | 0.0032   | -0.01372 | 0.76739  | 0.22824641 | 6.19E-07 | 0.038385 | 0.40791  |
| 0.16196  | 0.062712 | 0.17608  | 0.208282 | 5.66E-06 | 0.37590554 | 4.03E-17 | 0.269952 | 3.06E-09 |
| 0.2646   | 0.026756 | 0.56411  | 0.050365 | 0.2774   | 0.12659492 | 0.00615  | 0.198963 | 1.48E-05 |
| 0.51066  | -0.23137 | 4.30E-07 | -0.17678 | 0.00012  | 0.01652056 | 0.72178  | 0.022125 | 0.63343  |
| 0.52163  | 0.039154 | 0.39857  | -0.16041 | 0.0005   | 0.03230484 | 0.48616  | 0.108106 | 0.01945  |
| 0.70309  | -0.16995 | 0.00022  | -0.16109 | 0.00047  | -0.0045144 | 0.92249  | 0.078813 | 0.0889   |
| 0.90752  | -0.13696 | 0.00302  | -0.1595  | 0.00054  | 0.00555595 | 0.90469  | 0.038491 | 0.40661  |
| 0.00428  | 0.162198 | 0.00043  | 0.040373 | 0.38403  | 0.00898089 | 0.84652  | 0.045519 | 0.32632  |
| 0.00649  | 0.404248 | 8.71E-20 | 0.371726 | 9.47E-17 | 0.43073247 | 1.62E-22 | 0.597994 | 1.27E-46 |
| 0.45986  | 0.033878 | 0.46517  | 0.189709 | 3.69E-05 | 0.33712806 | 7.09E-14 | 0.458214 | 1.28E-25 |
| 0.28825  | 0.205103 | 7.89E-06 | 0.323769 | 7.39E-13 | 0.25272395 | 3.08E-08 | 0.364241 | 4.25E-16 |
| 0.00461  | 0.225248 | 8.75E-07 | 0.242837 | 1.08E-07 | 0.22670015 | 7.40E-07 | 0.296077 | 6.66E-11 |
| 0.32867  | 0.284435 | 3.85E-10 | 0.143376 | 0.0019   | 0.26824509 | 3.87E-09 | 0.524646 | 2.18E-34 |
| 0.00018  | 0.022667 | 0.62513  | 0.217671 | 2.05E-06 | 0.33389517 | 1.26E-13 | 0.275706 | 1.36E-09 |
| 0.00637  | -0.0063  | 0.89204  | 0.073157 | 0.11438  | 0.20363733 | 9.19E-06 | 0.390216 | 1.96E-18 |
| 5.50E-09 | 0.209919 | 4.76E-06 | 0.34628  | 1.33E-14 | 0.16712198 | 0.00029  | 0.081758 | 0.07756  |
| 0.09787  | 0.155323 | 0.00076  | 0.294118 | 9.00E-11 | 0.21286291 | 3.47E-06 | 0.315277 | 3.09E-12 |
| 0.12962  | 0.12439  | 0.00712  | 0.345039 | 1.68E-14 | 0.12249167 | 0.00805  | 0.101938 | 0.02761  |
| 0.02607  | -0.01805 | 0.69718  | 0.04613  | 0.31987  | 0.3096674  | 7.76E-12 | 0.349478 | 7.33E-15 |
| 0.05427  | 0.353035 | 3.74E-15 | 0.318652 | 1.76E-12 | 0.32598137 | 5.05E-13 | 0.536802 | 3.28E-36 |
| 0.02169  | 0.109289 | 0.01815  | 0.165824 | 0.00032  | 0.11049194 | 0.01691  | 0.267277 | 4.42E-09 |
| 0.03997  | 0.140021 | 0.00242  | 0.03671  | 0.42867  | 0.28696784 | 2.65E-10 | 0.527463 | 8.37E-35 |
| 6.20E-07 | 0.098318 | 0.03366  | -0.03581 | 0.44013  | 0.23268053 | 3.68E-07 | 0.423076 | 1.05E-21 |
| 0.5847   | 0.157568 | 0.00063  | 0.141559 | 0.00217  | 0.29615142 | 6.59E-11 | 0.362314 | 6.22E-16 |

|          |          |          |          |          |            |          |          |          |
|----------|----------|----------|----------|----------|------------|----------|----------|----------|
| 0.06614  | 0.009591 | 0.83623  | 0.142706 | 0.00199  | 0.36791542 | 2.04E-16 | 0.486423 | 4.14E-29 |
| 0.95888  | -0.02656 | 0.567    | 0.057728 | 0.21306  | 0.05417635 | 0.24261  | 0.163405 | 0.00039  |
| 0.04979  | 0.23698  | 2.20E-07 | 0.36252  | 5.97E-16 | 0.24212999 | 1.17E-07 | 0.205486 | 7.59E-06 |
| 0.06802  | 0.251258 | 3.72E-08 | 0.277177 | 1.10E-09 | 0.40997927 | 2.34E-20 | 0.546566 | 9.91E-38 |
| 0.17146  | 0.334747 | 1.09E-13 | 0.245426 | 7.79E-08 | -0.1097711 | 0.01764  | -0.05515 | 0.23421  |
| 3.46E-06 | -0.05708 | 0.21828  | -0.21828 | 1.92E-06 | 0.14350736 | 0.00188  | 0.317698 | 2.06E-12 |
| 0.00045  | 0.028562 | 0.53809  | -0.01897 | 0.68257  | -0.0393991 | 0.39562  | 0.028966 | 0.53235  |
| 0.00037  | 0.161905 | 0.00044  | 0.235534 | 2.62E-07 | 0.24998195 | 4.38E-08 | 0.191451 | 3.12E-05 |
| 0.6626   | 0.176431 | 0.00013  | 0.125181 | 0.00676  | 0.23568834 | 2.57E-07 | 0.475085 | 1.14E-27 |
| 0.01746  | 0.045366 | 0.32796  | 0.063462 | 0.17096  | -0.0016171 | 0.9722   | 0.161959 | 0.00044  |
| 0.00201  | 0.040561 | 0.38182  | 0.01233  | 0.79043  | 0.25326818 | 2.87E-08 | 0.464821 | 2.08E-26 |
| 0.62756  | 0.390114 | 2.00E-18 | 0.507256 | 6.65E-32 | 0.22612612 | 7.91E-07 | 0.260042 | 1.18E-08 |
| 0.92418  | 0.425879 | 5.33E-22 | 0.251769 | 3.48E-08 | 0.20708183 | 6.42E-06 | 0.399903 | 2.32E-19 |
| 0.00026  | 0.098461 | 0.0334   | 0.096916 | 0.03629  | 0.22741612 | 6.82E-07 | 0.403213 | 1.10E-19 |
| 0.11611  | 0.073999 | 0.11026  | -0.04275 | 0.3566   | 0.25157007 | 3.57E-08 | 0.489724 | 1.54E-29 |
| 0.04564  | 0.010545 | 0.8202   | 0.331112 | 2.07E-13 | 0.22327358 | 1.10E-06 | 0.142658 | 0.002    |
| 0.0946   | 0.059057 | 0.20269  | 0.074367 | 0.10849  | 0.30244343 | 2.47E-11 | 0.515937 | 3.99E-33 |
| 1.17E-05 | 0.012528 | 0.78714  | 0.01935  | 0.67663  | 0.24160299 | 1.25E-07 | 0.44015  | 1.50E-23 |
| 8.85E-05 | 0.337213 | 6.99E-14 | 0.524927 | 1.98E-34 | 0.49161436 | 8.68E-30 | 0.409825 | 2.43E-20 |
| 0.96502  | -0.08525 | 0.06566  | 0.181576 | 7.94E-05 | 0.37516611 | 4.69E-17 | 0.511542 | 1.68E-32 |
| 0.39136  | 0.230695 | 4.65E-07 | 0.269427 | 3.29E-09 | 0.37276316 | 7.67E-17 | 0.558126 | 1.35E-39 |
| 0.0024   | -0.0113  | 0.80755  | -0.00745 | 0.87239  | 0.08030615 | 0.08299  | 0.164451 | 0.00036  |
| 0.22564  | 0.186122 | 5.19E-05 | 0.20568  | 7.43E-06 | 0.22081243 | 1.45E-06 | 0.348802 | 8.32E-15 |
| 0.00035  | -0.27486 | 1.54E-09 | 0.096933 | 0.03626  | 0.2026267  | 1.02E-05 | 0.319338 | 1.57E-12 |
| 0.06518  | 0.188214 | 4.26E-05 | 0.389646 | 2.21E-18 | 0.12535063 | 0.00668  | 0.213021 | 3.41E-06 |
| 4.63E-06 | 0.090172 | 0.05149  | -0.01625 | 0.72615  | 0.19759488 | 1.70E-05 | 0.241757 | 1.23E-07 |
| 0.00076  | 0.049194 | 0.28875  | 0.015593 | 0.73681  | 0.39329295 | 1.00E-18 | 0.589206 | 5.47E-45 |
| 0.05165  | 0.340929 | 3.57E-14 | 0.507247 | 6.67E-32 | 0.46975604 | 5.22E-27 | 0.450405 | 1.04E-24 |
| 0.14319  | 0.112851 | 0.01469  | 0.190759 | 3.33E-05 | 0.09038008 | 0.05095  | 0.202165 | 1.07E-05 |
| 0.05041  | 0.126292 | 0.00628  | 0.06422  | 0.1659   | 0.28065524 | 6.69E-10 | 0.522254 | 4.89E-34 |
| 0.6757   | 0.171275 | 0.0002   | -0.04388 | 0.34407  | 0.25162986 | 3.55E-08 | 0.518451 | 1.74E-33 |
| 0.03827  | 0.233225 | 3.45E-07 | 0.223972 | 1.01E-06 | 0.50661415 | 8.17E-32 | 0.570859 | 9.79E-42 |
| 0.83159  | 0.071236 | 0.12423  | 0.242838 | 1.08E-07 | 0.31923484 | 1.60E-12 | 0.322918 | 8.55E-13 |
| 0.8148   | 0.016504 | 0.72204  | -0.16818 | 0.00026  | -0.071206  | 0.12439  | 0.125825 | 0.00648  |
| 0.92715  | 0.065141 | 0.15989  | -0.06095 | 0.18856  | -0.042192  | 0.36296  | 0.069311 | 0.13476  |
| 0.6164   | 0.076063 | 0.10065  | -0.09148 | 0.04819  | -0.0598082 | 0.197    | 0.091158 | 0.04898  |
| 0.70025  | 0.105698 | 0.02235  | 0.034243 | 0.46037  | -0.0834961 | 0.07144  | -0.00954 | 0.83707  |
| 0.35265  | 0.022489 | 0.62785  | -0.12667 | 0.00613  | -0.0834256 | 0.07168  | 0.036752 | 0.42815  |
| 0.2825   | 0.03676  | 0.42806  | -0.12303 | 0.00777  | -0.0730064 | 0.11513  | 0.056065 | 0.22655  |
| 0.59975  | -0.17007 | 0.00022  | -0.21922 | 1.73E-06 | -0.0319743 | 0.49064  | 0.119926 | 0.00949  |
| 0.7122   | 0.06855  | 0.1391   | -0.07926 | 0.0871   | 0.00750552 | 0.87149  | 0.145203 | 0.00165  |
| 0.75528  | 0.019273 | 0.67785  | -0.11585 | 0.01223  | -0.0626944 | 0.1762   | 0.097031 | 0.03607  |
| 0.58796  | 0.027932 | 0.54709  | -0.11588 | 0.01221  | -0.0585788 | 0.20638  | 0.095272 | 0.03959  |
| 0.44301  | -0.15906 | 0.00056  | -0.08357 | 0.07119  | -0.0356096 | 0.44266  | 0.007691 | 0.86835  |
| 0.78895  | 0.044628 | 0.3359   | -0.05606 | 0.22659  | -0.0384706 | 0.40686  | 0.091556 | 0.048    |

|         |          |         |          |          |            |         |          |          |
|---------|----------|---------|----------|----------|------------|---------|----------|----------|
| 0.60325 | -0.01133 | 0.80715 | -0.21995 | 1.59E-06 | -0.1059736 | 0.022   | 0.059187 | 0.20169  |
| 0.75354 | 0.021296 | 0.64622 | -0.09506 | 0.04004  | -0.0877194 | 0.0582  | 0.020601 | 0.65701  |
| 0.78647 | 0.043121 | 0.35248 | -0.11494 | 0.01294  | -0.0613944 | 0.18536 | 0.107648 | 0.01997  |
| 0.10607 | 0.129989 | 0.0049  | -0.01369 | 0.76802  | -0.0138788 | 0.76484 | 0.105542 | 0.02255  |
| 0.3402  | 0.107002 | 0.02074 | -0.05656 | 0.2225   | 0.04149022 | 0.371   | 0.247258 | 6.19E-08 |
| 0.48997 | 0.044114 | 0.3415  | -0.17865 | 0.0001   | -0.1061454 | 0.02178 | 0.080554 | 0.08204  |
| 0.63559 | 0.044708 | 0.33503 | -0.05846 | 0.20732  | -0.0429292 | 0.35463 | 0.053054 | 0.25253  |
| 0.50585 | 0.042783 | 0.35627 | -0.12865 | 0.00536  | -0.0904343 | 0.05081 | 0.011614 | 0.80234  |
| 0.68743 | -0.01564 | 0.73607 | -0.13621 | 0.00318  | -0.0443649 | 0.33875 | 0.036667 | 0.42922  |
| 0.7045  | 0.043583 | 0.34734 | -0.12064 | 0.00907  | -0.0276923 | 0.55054 | 0.085797 | 0.06395  |
| 0.05558 | 0.090555 | 0.0505  | -0.1573  | 0.00065  | -0.0984798 | 0.03337 | 0.003764 | 0.93535  |
| 0.64816 | -0.02275 | 0.6239  | -0.18329 | 6.78E-05 | -0.0907691 | 0.04996 | 0.048579 | 0.29482  |
| 0.32217 | 0.031655 | 0.49499 | -0.0832  | 0.07246  | 0.08997441 | 0.052   | 0.14884  | 0.00126  |
| 0.93593 | 0.06395  | 0.16769 | -0.12543 | 0.00665  | -0.0482644 | 0.29796 | 0.141158 | 0.00223  |
| 0.75457 | 0.051997 | 0.26211 | -0.11508 | 0.01283  | -0.0543447 | 0.24115 | 0.096625 | 0.03686  |
| 0.28424 | 0.017156 | 0.71155 | -0.05894 | 0.20359  | -0.0559829 | 0.22724 | 0.142046 | 0.00209  |
| 0.59597 | 0.08122  | 0.07954 | -0.1187  | 0.01025  | -0.0709311 | 0.12586 | 0.087573 | 0.05862  |
| 0.99416 | -0.0026  | 0.95526 | -0.1307  | 0.00467  | -0.1540336 | 0.00084 | -0.06307 | 0.1736   |
| 0.00011 | 0.077182 | 0.09573 | -0.05402 | 0.24402  | 0.02412887 | 0.60299 | 0.068964 | 0.13672  |
| 0.58027 | -0.03791 | 0.41374 | -0.16007 | 0.00052  | -0.0821355 | 0.0762  | 0.055604 | 0.2304   |
| 0.11552 | 0.103156 | 0.0258  | -0.03442 | 0.45808  | -0.0221395 | 0.63321 | 0.015981 | 0.73051  |
| 0.82565 | 0.024179 | 0.60224 | -0.17761 | 0.00011  | -0.1287797 | 0.00532 | 0.065323 | 0.15873  |
| 0.21551 | -0.14108 | 0.00224 | -0.14327 | 0.00191  | 0.01028527 | 0.82457 | 0.158399 | 0.00059  |
| 0.81175 | 0.035989 | 0.43781 | -0.04764 | 0.30429  | -0.0113088 | 0.80743 | 0.071095 | 0.12498  |
| 0.55489 | 0.039283 | 0.39701 | -0.14087 | 0.00228  | -0.0539319 | 0.24475 | 0.119613 | 0.00968  |
| 0.47116 | -0.00146 | 0.97483 | -0.14625 | 0.00153  | -0.1585031 | 0.00059 | 0.008734 | 0.8507   |
| 0.51641 | 0.023499 | 0.61249 | -0.14018 | 0.0024   | -0.0313827 | 0.4987  | 0.127378 | 0.00584  |
| 0.12326 | 0.169636 | 0.00023 | 0.072546 | 0.11744  | 0.00742606 | 0.87284 | 0.120759 | 0.009    |
| 0.718   | 0.050288 | 0.27814 | -0.12232 | 0.00814  | -0.0451984 | 0.32975 | 0.140352 | 0.00237  |
| 0.73482 | 0.044827 | 0.33374 | -0.12223 | 0.00819  | -0.0598357 | 0.19679 | 0.109559 | 0.01787  |
| 0.06847 | 0.017399 | 0.70765 | -0.09001 | 0.05192  | -0.0366388 | 0.42958 | 0.060651 | 0.19075  |
| 0.72897 | 0.044301 | 0.33945 | -0.10342 | 0.02542  | -0.0610493 | 0.18785 | 0.101541 | 0.02823  |
| 0.66386 | 0.039998 | 0.38847 | -0.16156 | 0.00046  | -0.0861941 | 0.06272 | 0.051823 | 0.26371  |
| 0.41739 | 0.036637 | 0.4296  | -0.1244  | 0.00711  | -0.0644315 | 0.1645  | 0.029269 | 0.52807  |
| 0.63346 | -0.00749 | 0.87175 | -0.14909 | 0.00123  | -0.0651453 | 0.15987 | 0.062519 | 0.17742  |
| 0.84473 | -0.01552 | 0.73805 | -0.21039 | 4.52E-06 | -0.0965648 | 0.03697 | 0.048319 | 0.29742  |
| 0.17466 | 0.097655 | 0.03488 | 0.012595 | 0.78604  | 0.00303831 | 0.94779 | 0.079987 | 0.08423  |
| 0.30226 | 0.090113 | 0.05164 | 0.020849 | 0.65314  | -0.0072124 | 0.87647 | 0.021941 | 0.63625  |
| 0.95798 | 0.122393 | 0.0081  | -0.11955 | 0.00971  | -0.0831514 | 0.07262 | 0.0458   | 0.32335  |
| 0.45539 | 0.084208 | 0.06905 | -0.10479 | 0.02353  | -0.0817313 | 0.07766 | 0.05401  | 0.24406  |
| 0.69058 | -0.04636 | 0.31741 | -0.18121 | 8.21E-05 | -0.1531008 | 0.0009  | -0.00974 | 0.83368  |
| 0.76862 | 0.110008 | 0.0174  | -0.07825 | 0.09121  | 0.06143577 | 0.18506 | 0.251473 | 3.62E-08 |
| 0.12071 | -0.03613 | 0.43605 | -0.12566 | 0.00655  | -0.0225185 | 0.6274  | 0.01827  | 0.69374  |
| 0.92308 | -0.0133  | 0.77443 | -0.15325 | 0.00089  | -0.0664699 | 0.15153 | 0.032721 | 0.48056  |
| 0.56844 | 0.009534 | 0.83719 | -0.15717 | 0.00065  | -0.0475529 | 0.30515 | 0.027515 | 0.5531   |



|          |          |         |          |          |            |          |          |         |
|----------|----------|---------|----------|----------|------------|----------|----------|---------|
| 0.44534  | 0.024163 | 0.60248 | -0.19301 | 2.68E-05 | -0.0593481 | 0.20047  | 0.167018 | 0.00029 |
| 0.66979  | -0.00376 | 0.9355  | -0.24268 | 1.10E-07 | -0.0999691 | 0.03077  | 0.074705 | 0.1069  |
| 0.14553  | 0.039673 | 0.39234 | -0.12457 | 0.00704  | -0.1118078 | 0.01564  | 0.006066 | 0.89599 |
| 0.30777  | -0.03878 | 0.40313 | -0.01842 | 0.6914   | -0.0201137 | 0.66462  | 0.002228 | 0.9617  |
| 0.78308  | -0.00534 | 0.9084  | 0.104622 | 0.02376  | 0.20082673 | 1.23E-05 | 0.124893 | 0.00689 |
| 0.82237  | 0.021903 | 0.63684 | -0.18721 | 4.68E-05 | -0.1130717 | 0.01449  | 0.040177 | 0.38636 |
| 0.33895  | 0.025228 | 0.58658 | -0.19811 | 1.61E-05 | -0.0667821 | 0.14961  | 0.130089 | 0.00487 |
| 0.63058  | 0.02567  | 0.58003 | -0.07952 | 0.08607  | -0.0306879 | 0.50826  | 0.091619 | 0.04784 |
| 0.4832   | 0.049831 | 0.28254 | -0.00315 | 0.9459   | -0.0608689 | 0.18916  | -0.04426 | 0.33994 |
| 0.74895  | 0.076244 | 0.09984 | -0.03038 | 0.51254  | 0.04521457 | 0.32957  | 0.089908 | 0.05218 |
| 0.97529  | 0.09491  | 0.04035 | -0.15517 | 0.00077  | -0.0646364 | 0.16316  | 0.109458 | 0.01797 |
| 0.91888  | 0.052953 | 0.25343 | -0.08888 | 0.05492  | -0.0001026 | 0.99824  | 0.043915 | 0.34368 |
| 0.52997  | 0.034751 | 0.45374 | -0.06048 | 0.19198  | -0.007016  | 0.87981  | 0.108686 | 0.0188  |
| 0.0199   | -0.02615 | 0.57296 | -0.06499 | 0.16088  | -0.0796    | 0.08574  | 0.009353 | 0.84024 |
| 0.86391  | 0.052563 | 0.25694 | -0.14203 | 0.00209  | -0.062631  | 0.17664  | 0.1126   | 0.01491 |
| 4.66E-07 | 0.016608 | 0.72037 | -0.11738 | 0.01113  | -0.0044842 | 0.92301  | 0.040972 | 0.37701 |
| 4.63E-05 | 0.037109 | 0.42368 | -0.14107 | 0.00225  | -0.0602579 | 0.19364  | 0.03434  | 0.4591  |
| 0.98758  | 0.043435 | 0.34898 | -0.1306  | 0.0047   | -0.0746146 | 0.10732  | 0.086537 | 0.06168 |
| 0.68942  | 0.020959 | 0.65143 | -0.16156 | 0.00046  | -0.0585353 | 0.20671  | 0.142554 | 0.00201 |
| 0.64843  | 0.033424 | 0.47118 | -0.14    | 0.00243  | -0.0550963 | 0.23469  | 0.132657 | 0.00408 |
| 0.86125  | -0.01403 | 0.76229 | -0.06417 | 0.16623  | -0.0044282 | 0.92397  | 0.066919 | 0.14877 |
| 0.52601  | 0.015303 | 0.74153 | -0.11932 | 0.00986  | -0.0612807 | 0.18617  | 0.06115  | 0.18712 |
| 0.05762  | 0.040479 | 0.38278 | -0.1192  | 0.00993  | -0.0480603 | 0.30001  | 0.089299 | 0.0538  |
| 0.91874  | 0.024717 | 0.59419 | -0.12828 | 0.0055   | -0.0390458 | 0.39987  | 0.070149 | 0.13009 |
| 0.11413  | 0.03004  | 0.51726 | -0.06916 | 0.13561  | -0.029132  | 0.53001  | 0.090161 | 0.05152 |
| 0.7482   | 0.03214  | 0.48839 | -0.11273 | 0.01479  | -0.044479  | 0.33751  | 0.067257 | 0.14673 |
| 9.71E-08 | 0.003231 | 0.94448 | -0.10446 | 0.02398  | -0.0248477 | 0.59223  | 0.077811 | 0.09305 |
| 0.1598   | 0.111271 | 0.01614 | -0.01055 | 0.82015  | 0.02712704 | 0.55871  | 0.147691 | 0.00137 |
| 0.03399  | -0.05737 | 0.21592 | -0.13899 | 0.00261  | -0.0908737 | 0.04969  | 0.035098 | 0.44925 |
| 0.18369  | 0.143576 | 0.00187 | -0.01086 | 0.81487  | -0.0473909 | 0.3068   | 0.077504 | 0.09435 |
| 0.93158  | 0.024794 | 0.59302 | -0.12553 | 0.0066   | -0.0534595 | 0.24891  | 0.027648 | 0.55119 |
| 0.79285  | 0.002625 | 0.95489 | -0.00322 | 0.94469  | 0.02724383 | 0.55702  | 0.042136 | 0.3636  |
| 0.61085  | -0.07951 | 0.08611 | -0.22117 | 1.39E-06 | -0.0975474 | 0.03508  | -0.01739 | 0.70777 |
| 0.81128  | 0.026983 | 0.56081 | -0.11496 | 0.01292  | -0.0057267 | 0.90177  | 0.108738 | 0.01875 |
| 0.86963  | 0.007627 | 0.86942 | -0.14683 | 0.00146  | -0.0637633 | 0.16893  | 0.105982 | 0.02199 |
| 4.43E-05 | 0.01042  | 0.82231 | -0.1139  | 0.01378  | -0.0209514 | 0.65156  | 0.111208 | 0.01621 |
| 0.7592   | -0.00656 | 0.88752 | -0.10365 | 0.02509  | -0.0420588 | 0.36448  | 0.002235 | 0.96158 |
| 0.19158  | -0.00873 | 0.8507  | 0.031092 | 0.50269  | 0.08957233 | 0.05307  | 0.07044  | 0.1285  |
| 0.81334  | 0.007048 | 0.87926 | -0.1478  | 0.00136  | -0.0993885 | 0.03176  | 0.045005 | 0.33182 |
| 0.99425  | -0.03073 | 0.5077  | -0.13739 | 0.00293  | -0.0406999 | 0.38019  | 0.039696 | 0.39206 |
| 0.39945  | 0.012274 | 0.79137 | -0.11643 | 0.01181  | -0.0421863 | 0.36303  | 0.090619 | 0.05034 |
| 0.90914  | 0.018876 | 0.68411 | -0.1045  | 0.02392  | -0.0551502 | 0.23424  | 0.008041 | 0.86241 |
| 0.44418  | 0.021845 | 0.63774 | -0.05858 | 0.20633  | 0.01577978 | 0.73377  | 0.098006 | 0.03423 |
| 0.28243  | -0.01339 | 0.77296 | -0.12673 | 0.0061   | -0.2017646 | 1.11E-05 | -0.09573 | 0.03865 |
| 0.16742  | 0.051149 | 0.26999 | -0.07778 | 0.09317  | -0.004972  | 0.91466  | 0.111469 | 0.01596 |

|         |          |         |          |          |            |          |          |          |
|---------|----------|---------|----------|----------|------------|----------|----------|----------|
| 0.64346 | 0.012988 | 0.77953 | -0.19227 | 2.88E-05 | -0.09016   | 0.05152  | 0.046408 | 0.31696  |
| 0.31731 | -0.01742 | 0.70726 | -0.21368 | 3.17E-06 | -0.1153393 | 0.01263  | 0.002936 | 0.94955  |
| 0.94739 | 0.007616 | 0.86962 | -0.16934 | 0.00024  | -0.1018581 | 0.02774  | 0.079924 | 0.08447  |
| 0.79881 | 0.08     | 0.08418 | -0.05973 | 0.19761  | -0.0561104 | 0.22618  | 0.083489 | 0.07146  |
| 0.69639 | 0.004434 | 0.92387 | -0.17256 | 0.00018  | -0.0774083 | 0.09475  | 0.028915 | 0.53308  |
| 0.7555  | -0.01444 | 0.75567 | -0.17006 | 0.00022  | -0.0976176 | 0.03495  | 0.012689 | 0.78449  |
| 0.38015 | 0.050074 | 0.28019 | -0.06001 | 0.1955   | -0.0225594 | 0.62678  | 0.103993 | 0.02462  |
| 0.31092 | 0.081972 | 0.07678 | -0.05486 | 0.23667  | 0.03967199 | 0.39235  | 0.147499 | 0.00139  |
| 0.35513 | -0.11705 | 0.01136 | -0.30095 | 3.12E-11 | -0.2354762 | 2.64E-07 | -0.15997 | 0.00052  |
| 0.59558 | 0.047645 | 0.30421 | -0.16007 | 0.00052  | -0.0529212 | 0.25372  | 0.120039 | 0.00942  |
| 0.77164 | 0.026314 | 0.57057 | -0.10191 | 0.02765  | -0.0396105 | 0.39309  | 0.098365 | 0.03358  |
| 0.4063  | 0.130822 | 0.00463 | 0.09345  | 0.04354  | 0.11460555 | 0.01321  | 0.175223 | 0.00014  |
| 0.75424 | -0.00293 | 0.94958 | -0.12806 | 0.00558  | -0.1155584 | 0.01246  | 0.018809 | 0.68517  |
| 0.84329 | 0.019632 | 0.67218 | -0.16926 | 0.00024  | -0.0791432 | 0.08756  | 0.055025 | 0.2353   |
| 0.83518 | 0.040299 | 0.38491 | -0.12776 | 0.0057   | -0.0697953 | 0.13205  | 0.104273 | 0.02423  |
| 0.9425  | -0.03217 | 0.48799 | -0.05425 | 0.24196  | -0.01101   | 0.81243  | -0.05069 | 0.27428  |
| 0.72621 | 0.031964 | 0.49078 | -0.12656 | 0.00617  | -0.0645027 | 0.16403  | 0.089305 | 0.05378  |
| 0.88605 | -0.00558 | 0.90422 | -0.11579 | 0.01228  | -0.0410288 | 0.37635  | 0.046607 | 0.31488  |
| 0.7495  | -0.01916 | 0.67956 | -0.19985 | 1.35E-05 | -0.1206961 | 0.00903  | 0.028888 | 0.53346  |
| 0.65804 | -0.0047  | 0.91938 | -0.2011  | 1.19E-05 | -0.1102844 | 0.01712  | -0.00865 | 0.85207  |
| 0.41863 | -0.02683 | 0.5631  | -0.18891 | 3.98E-05 | -0.1069188 | 0.02083  | -0.00253 | 0.95647  |
| 0.68331 | 0.029556 | 0.52403 | -0.1332  | 0.00393  | -0.0837447 | 0.0706   | 0.061097 | 0.1875   |
| 0.85033 | 0.062093 | 0.1804  | -0.15624 | 0.0007   | -0.0593628 | 0.20036  | 0.152012 | 0.00098  |
| 0.25445 | 0.08242  | 0.07518 | 0.053392 | 0.24951  | 0.10662776 | 0.02119  | 0.186112 | 5.20E-05 |
| 0.76907 | 0.020197 | 0.66332 | -0.17806 | 0.00011  | -0.0935446 | 0.04333  | 0.106105 | 0.02183  |
| 0.45759 | 0.007257 | 0.87571 | -0.12795 | 0.00562  | -0.042896  | 0.355    | 0.095735 | 0.03863  |
| 0.29327 | -0.0505  | 0.27611 | -0.16577 | 0.00032  | -0.1480225 | 0.00134  | -0.08077 | 0.08122  |
| 0.70969 | 0.077258 | 0.0954  | -0.13019 | 0.00483  | -0.0057623 | 0.90116  | 0.143117 | 0.00193  |
| 0.46222 | -0.02091 | 0.65222 | -0.17937 | 9.72E-05 | -0.0433225 | 0.35023  | 0.087657 | 0.05838  |
| 0.056   | 0.000896 | 0.9846  | -0.04939 | 0.28686  | 0.09359491 | 0.04322  | 0.150231 | 0.00113  |
| 0.34879 | 0.00834  | 0.85735 | -0.1552  | 0.00076  | -0.0750811 | 0.10513  | -0.02851 | 0.53881  |
| 0.68896 | 0.02888  | 0.53357 | -0.19337 | 2.58E-05 | -0.0622459 | 0.17932  | 0.056022 | 0.22691  |
| 0.71398 | 0.014447 | 0.75551 | -0.18187 | 7.72E-05 | -0.0961808 | 0.03773  | 0.000872 | 0.98501  |
| 0.00323 | -0.01099 | 0.81282 | -0.19372 | 2.50E-05 | -0.0183815 | 0.69196  | 0.167179 | 0.00028  |
| 0.70426 | -0.07772 | 0.09342 | -0.21219 | 3.73E-06 | 0.00389532 | 0.93309  | 0.096916 | 0.03629  |
| 0.21886 | -0.11751 | 0.01104 | -0.19418 | 2.39E-05 | -0.0773732 | 0.0949   | 0.02037  | 0.66062  |
| 0.72109 | 0.003235 | 0.94442 | -0.17492 | 0.00015  | -0.1037534 | 0.02495  | 0.086553 | 0.06163  |
| 0.60566 | -0.02577 | 0.57862 | -0.09963 | 0.03134  | -0.0014662 | 0.97479  | 0.085474 | 0.06496  |
| 0.91027 | -0.02499 | 0.59008 | -0.11165 | 0.01579  | -0.0476148 | 0.30452  | 0.022151 | 0.63303  |
| 0.38107 | 0.010887 | 0.81448 | -0.11508 | 0.01283  | -0.0722333 | 0.11904  | 0.01789  | 0.69979  |
| 0.92444 | 0.03937  | 0.39597 | -0.14297 | 0.00195  | -0.0325079 | 0.48343  | 0.063113 | 0.17333  |
| 0.91239 | -0.10659 | 0.02123 | -0.16649 | 0.0003   | -0.0237179 | 0.60918  | 0.054796 | 0.23726  |
| 0.95008 | -0.05356 | 0.24803 | -0.17028 | 0.00022  | -0.0431238 | 0.35245  | 0.018384 | 0.69191  |
| 0.97929 | 0.031693 | 0.49446 | -0.14639 | 0.00151  | -0.0435122 | 0.34813  | 0.158713 | 0.00058  |
| 0.94335 | 0.042196 | 0.36291 | -0.08744 | 0.05899  | -0.04702   | 0.31061  | 0.063314 | 0.17196  |

|         |          |         |          |          |            |         |          |         |
|---------|----------|---------|----------|----------|------------|---------|----------|---------|
| 0.65481 | 0.051925 | 0.26278 | -0.0736  | 0.11219  | -0.0366525 | 0.42941 | 0.048372 | 0.29689 |
| 0.94607 | -0.04616 | 0.31957 | -0.11684 | 0.01151  | -0.0080377 | 0.86247 | 0.002508 | 0.95689 |
| 0.66458 | 0.035049 | 0.44988 | -0.09504 | 0.04007  | -0.0212322 | 0.6472  | 0.073555 | 0.11242 |
| 0.62907 | 0.023739 | 0.60886 | -0.11495 | 0.01293  | -0.0553292 | 0.23272 | 0.08479  | 0.06714 |
| 0.51926 | 0.059997 | 0.19558 | -0.06975 | 0.13229  | -0.0545832 | 0.23909 | 0.064599 | 0.16341 |
| 0.67063 | 0.006865 | 0.88237 | -0.14178 | 0.00213  | -0.0934163 | 0.04362 | 0.061383 | 0.18544 |
| 0.89584 | 0.02531  | 0.58535 | -0.16686 | 0.00029  | -0.0821114 | 0.07628 | 0.1092   | 0.01825 |
| 0.98016 | 0.016914 | 0.71543 | -0.13773 | 0.00286  | -0.0215469 | 0.64233 | 0.030124 | 0.51609 |
| 0.72304 | 0.019381 | 0.67613 | -0.17664 | 0.00012  | -0.0788022 | 0.08894 | 0.082094 | 0.07635 |
| 0.82022 | 0.00714  | 0.8777  | -0.14277 | 0.00198  | -0.0256539 | 0.58027 | 0.07526  | 0.10431 |
| 0.72247 | 0.035223 | 0.44763 | -0.05443 | 0.24038  | 0.03164654 | 0.4951  | 0.100863 | 0.0293  |
| 0.69948 | 0.03004  | 0.51725 | -0.11492 | 0.01295  | -0.0563519 | 0.22418 | 0.110178 | 0.01723 |
| 0.74771 | 0.007194 | 0.87678 | -0.19997 | 1.34E-05 | -0.1011309 | 0.02887 | 0.033061 | 0.47601 |
| 0.00196 | 0.037696 | 0.41637 | -0.09378 | 0.0428   | -0.0306883 | 0.50825 | 0.112556 | 0.01495 |
| 0.6027  | 0.002813 | 0.95166 | -0.00082 | 0.98593  | 0.01068883 | 0.8178  | 0.012606 | 0.78586 |
| 0.67873 | 0.001234 | 0.97879 | -0.13681 | 0.00305  | -0.0414789 | 0.37114 | 0.147852 | 0.00135 |
| 0.89079 | 0.003311 | 0.94311 | -0.15695 | 0.00066  | -0.123062  | 0.00776 | -0.04175 | 0.36801 |
| 0.82688 | 0.035877 | 0.43923 | -0.10036 | 0.03013  | -0.0247921 | 0.59306 | 0.121428 | 0.00862 |
| 0.65908 | 0.023656 | 0.61011 | -0.13112 | 0.00454  | -0.0613226 | 0.18587 | 0.09705  | 0.03603 |
| 0.45331 | 0.022857 | 0.62224 | -0.12324 | 0.00767  | -0.0638933 | 0.16806 | 0.104586 | 0.0238  |
| 0.97581 | 0.032089 | 0.48908 | -0.13423 | 0.00366  | -0.0812825 | 0.07931 | 0.041312 | 0.37307 |
| 0.56509 | 0.053097 | 0.25214 | -0.1544  | 0.00081  | -0.0413535 | 0.37258 | 0.159054 | 0.00056 |
| 0.99072 | -0.01585 | 0.73263 | -0.15193 | 0.00099  | -0.0679088 | 0.14284 | 0.039444 | 0.39509 |
| 0.72708 | 0.013586 | 0.76966 | -0.21169 | 3.93E-06 | -0.0534698 | 0.24882 | 0.124458 | 0.00709 |
| 0.60061 | -0.00953 | 0.83733 | -0.15053 | 0.0011   | -0.0944229 | 0.04139 | 0.045111 | 0.33069 |
| 0.84743 | 0.000179 | 0.99692 | -0.15355 | 0.00087  | -0.0573236 | 0.21628 | 0.042765 | 0.35647 |
| 0.66854 | 0.016078 | 0.72894 | -0.19593 | 2.01E-05 | -0.0730735 | 0.11479 | 0.10088  | 0.02928 |
| 0.75689 | 0.031205 | 0.50114 | -0.12939 | 0.0051   | 0.00338547 | 0.94183 | 0.097492 | 0.03519 |
| 0.79254 | -0.16799 | 0.00027 | -0.25406 | 2.59E-08 | -0.0163589 | 0.72439 | 0.124951 | 0.00686 |
| 0.8964  | 0.049114 | 0.28952 | -0.17161 | 0.00019  | -0.0864876 | 0.06183 | 0.094274 | 0.04172 |
| 0.88323 | 0.04369  | 0.34616 | -0.12225 | 0.00817  | -0.0703516 | 0.12898 | 0.07812  | 0.09175 |
| 0.94176 | -0.05116 | 0.26989 | -0.2201  | 1.57E-06 | -0.1223383 | 0.00813 | -0.01322 | 0.77574 |
| 0.53522 | 0.009684 | 0.83466 | -0.14374 | 0.00184  | -0.0447339 | 0.33475 | 0.035285 | 0.44683 |
| 0.52267 | 0.041018 | 0.37648 | -0.15301 | 0.00091  | -0.0843464 | 0.06859 | 0.088196 | 0.05684 |
| 0.83278 | 0.039792 | 0.39092 | -0.15909 | 0.00056  | -0.0674132 | 0.14579 | 0.063933 | 0.1678  |
| 0.75614 | 0.047886 | 0.30177 | -0.12694 | 0.00601  | -0.0544186 | 0.24051 | 0.116758 | 0.01157 |
| 0.92348 | -0.00246 | 0.95774 | -0.13953 | 0.00251  | -0.0586395 | 0.20591 | 0.06752  | 0.14515 |
| 0.82288 | 0.025262 | 0.58607 | -0.16881 | 0.00025  | -0.0642098 | 0.16596 | 0.114853 | 0.01301 |
| 0.92686 | 0.023081 | 0.61882 | -0.15328 | 0.00089  | -0.0855572 | 0.0647  | 0.042541 | 0.35901 |
| 0.72758 | 0.022761 | 0.6237  | -0.16635 | 0.00031  | -0.070356  | 0.12896 | 0.14516  | 0.00166 |
| 0.49506 | 0.047881 | 0.30182 | -0.04685 | 0.31241  | -0.0543423 | 0.24117 | 0.055871 | 0.22817 |
| 0.89018 | -0.004   | 0.93136 | -0.14939 | 0.0012   | -0.0721488 | 0.11947 | 0.066257 | 0.15284 |
| 0.84196 | 0.002153 | 0.96298 | -0.19779 | 1.67E-05 | -0.1200412 | 0.00942 | -0.00838 | 0.8566  |
| 0.49872 | -0.01282 | 0.78227 | -0.00453 | 0.92222  | 0.02269261 | 0.62474 | 0.035644 | 0.44222 |
| 0.90011 | 0.026228 | 0.57182 | -0.09483 | 0.04052  | -0.1163815 | 0.01184 | 0.002937 | 0.94952 |

|         |           |         |          |          |            |         |          |          |
|---------|-----------|---------|----------|----------|------------|---------|----------|----------|
| 0.78552 | 0.015231  | 0.7427  | -0.17125 | 0.0002   | -0.0878019 | 0.05796 | 0.074246 | 0.10907  |
| 0.72295 | 0.012889  | 0.78116 | -0.13094 | 0.00459  | -0.0235302 | 0.61201 | 0.138052 | 0.00279  |
| 0.69081 | -0.01823  | 0.6943  | -0.13777 | 0.00285  | -0.0561879 | 0.22554 | 0.053349 | 0.24989  |
| 0.58089 | 0.044697  | 0.33515 | -0.10911 | 0.01835  | -0.0618899 | 0.18183 | 0.032472 | 0.48391  |
| 0.82735 | 0.025028  | 0.58955 | -0.14354 | 0.00187  | -0.0456714 | 0.3247  | 0.093382 | 0.04369  |
| 0.83267 | -0.01928  | 0.6777  | -0.16891 | 0.00025  | -0.0951924 | 0.03976 | -0.01561 | 0.73645  |
| 0.44991 | -0.01866  | 0.6875  | -0.20459 | 8.33E-06 | -0.0897279 | 0.05265 | 0.032992 | 0.47693  |
| 0.93857 | 0.021493  | 0.64317 | -0.13702 | 0.00301  | -0.0733528 | 0.11341 | 0.081752 | 0.07758  |
| 0.2577  | 0.004432  | 0.92391 | -0.14958 | 0.00119  | -0.0405094 | 0.38243 | 0.13766  | 0.00287  |
| 0.65794 | 0.048304  | 0.29756 | -0.10882 | 0.01866  | -0.0460708 | 0.32049 | 0.07017  | 0.12998  |
| 0.91672 | 0.030152  | 0.5157  | -0.13    | 0.0049   | -0.0693089 | 0.13477 | 0.097613 | 0.03496  |
| 0.68579 | 0.066009  | 0.15439 | -0.0998  | 0.03106  | -0.0908197 | 0.04983 | 0.003204 | 0.94495  |
| 0.68226 | 0.033472  | 0.47055 | -0.17323 | 0.00017  | -0.1004663 | 0.02995 | 0.072834 | 0.11599  |
| 0.71815 | 0.047387  | 0.30685 | -0.13012 | 0.00486  | -0.0713585 | 0.12358 | 0.107277 | 0.02041  |
| 0.68364 | 0.036627  | 0.42973 | -0.12431 | 0.00715  | -0.0666532 | 0.1504  | 0.104882 | 0.02341  |
| 0.45461 | 0.120929  | 0.0089  | -0.0038  | 0.93478  | -0.0260577 | 0.57432 | 0.068446 | 0.1397   |
| 0.85197 | 0.004398  | 0.92448 | -0.1421  | 0.00208  | -0.0708827 | 0.12611 | 0.08286  | 0.07363  |
| 0.95593 | -0.01311  | 0.77753 | -0.12719 | 0.00591  | -0.0968967 | 0.03632 | -0.00797 | 0.86359  |
| 0.96455 | 0.025581  | 0.58135 | -0.15076 | 0.00108  | -0.0608123 | 0.18957 | 0.112262 | 0.01522  |
| 0.92524 | 0.039413  | 0.39545 | -0.15694 | 0.00066  | -0.0771685 | 0.09578 | 0.085177 | 0.0659   |
| 0.82987 | 0.028117  | 0.54444 | -0.11007 | 0.01734  | -0.0511243 | 0.27022 | 0.069876 | 0.1316   |
| 0.87902 | -0.02276  | 0.62364 | -0.16189 | 0.00044  | -0.0750149 | 0.10544 | 0.010072 | 0.82815  |
| 0.96426 | 0.004275  | 0.92659 | -0.14824 | 0.00132  | -0.1392192 | 0.00257 | -0.04221 | 0.36277  |
| 0.65989 | 0.004017  | 0.93102 | -0.1392  | 0.00257  | -0.0472502 | 0.30824 | 0.04305  | 0.35328  |
| 0.46048 | 0.07274   | 0.11646 | -0.06741 | 0.14584  | -0.0405775 | 0.38163 | 0.092153 | 0.04655  |
| 0.3615  | 0.040859  | 0.37833 | -0.12434 | 0.00714  | -0.1154219 | 0.01256 | 0.008772 | 0.85005  |
| 0.16711 | -0.01367  | 0.76833 | -0.16759 | 0.00028  | -0.0756682 | 0.10243 | 0.096173 | 0.03775  |
| 0.60241 | -0.13201  | 0.00427 | -0.13487 | 0.0035   | -0.053537  | 0.24822 | -0.00334 | 0.94267  |
| 0.86847 | 0.032744  | 0.48025 | -0.12967 | 0.00501  | -0.1208274 | 0.00896 | 0.040643 | 0.38086  |
| 0.56042 | 0.046176  | 0.31938 | -0.09287 | 0.04486  | -0.0187582 | 0.68598 | 0.077729 | 0.09339  |
| 0.79562 | 0.091264  | 0.04872 | 0.016212 | 0.72676  | -0.091194  | 0.04889 | 0.009531 | 0.83725  |
| 0.74664 | -0.00526  | 0.90982 | -0.20972 | 4.86E-06 | -0.1006997 | 0.02957 | 0.056229 | 0.2252   |
| 0.94823 | 0.007255  | 0.87575 | -0.18325 | 6.80E-05 | -0.0580461 | 0.21054 | 0.070037 | 0.13071  |
| 0.49793 | 0.056599  | 0.22215 | -0.15789 | 0.00062  | -0.0621813 | 0.17978 | 0.137655 | 0.00287  |
| 0.89135 | 0.061237  | 0.18649 | -0.03433 | 0.45924  | -0.0116685 | 0.80143 | 0.086434 | 0.06199  |
| 0.87728 | 0.021007  | 0.65069 | -0.1426  | 0.00201  | -0.0746671 | 0.10707 | 0.081691 | 0.0778   |
| 0.80166 | -0.01069  | 0.81774 | -0.11556 | 0.01246  | 0.03730153 | 0.42127 | 0.069273 | 0.13497  |
| 0.47881 | -9.21E-05 | 0.99842 | -0.21274 | 3.52E-06 | -0.1221144 | 0.00825 | 0.051038 | 0.27102  |
| 0.19453 | 0.086186  | 0.06275 | -0.07657 | 0.0984   | -0.0954241 | 0.03927 | -0.01341 | 0.77254  |
| 0.87261 | 0.010731  | 0.8171  | -0.09156 | 0.04798  | -0.0769279 | 0.09683 | 0.067025 | 0.14813  |
| 0.74421 | -0.01223  | 0.7921  | -0.14863 | 0.00128  | -0.0513829 | 0.2678  | 0.003129 | 0.94623  |
| 0.78455 | 0.149549  | 0.00119 | -0.0006  | 0.98971  | 0.11871603 | 0.01024 | 0.237565 | 2.05E-07 |
| 0.71455 | 0.01993   | 0.6675  | -0.14617 | 0.00154  | -0.0533347 | 0.25002 | 0.124956 | 0.00686  |
| 0.61972 | 0.00225   | 0.96133 | 0.001523 | 0.97381  | 0.00619427 | 0.8938  | 0.010393 | 0.82276  |
| 0.60594 | 0.101764  | 0.02788 | 0.04811  | 0.29951  | 0.04182728 | 0.36713 | 0.077217 | 0.09558  |

|          |          |          |          |          |            |          |          |          |
|----------|----------|----------|----------|----------|------------|----------|----------|----------|
| 0.13642  | 0.037392 | 0.42015  | -0.12977 | 0.00497  | -0.0377519 | 0.41569  | 0.065714 | 0.15625  |
| 0.16325  | 0.0414   | 0.37204  | -0.11519 | 0.01274  | -0.0203212 | 0.66138  | 0.108672 | 0.01882  |
| 0.78137  | 0.022983 | 0.62032  | -0.07466 | 0.10712  | 0.02973875 | 0.52147  | 0.105168 | 0.02303  |
| 0.44046  | 0.023758 | 0.60857  | -0.16805 | 0.00026  | -0.0544937 | 0.23986  | 0.08517  | 0.06592  |
| 0.633    | 0.008167 | 0.86027  | -0.1071  | 0.02062  | -0.0341374 | 0.46176  | 0.03928  | 0.39705  |
| 0.98767  | 0.10725  | 0.02044  | -0.07066 | 0.12729  | -0.0571237 | 0.21789  | 0.081654 | 0.07794  |
| 0.3597   | 0.03577  | 0.4406   | -0.04435 | 0.33892  | 0.02901854 | 0.53161  | 0.162956 | 0.00041  |
| 0.83004  | -0.01262 | 0.78557  | -0.22463 | 9.38E-07 | -0.0996384 | 0.03133  | 0.062413 | 0.17815  |
| 0.51506  | -0.03093 | 0.50492  | -0.15803 | 0.00061  | -0.1186275 | 0.0103   | 0.020719 | 0.65518  |
| 0.7508   | 0.115337 | 0.01263  | -0.02536 | 0.58463  | 0.02173486 | 0.63943  | 0.115244 | 0.0127   |
| 0.50633  | -0.00335 | 0.94241  | -0.14486 | 0.0017   | -0.0369434 | 0.42575  | 0.077476 | 0.09447  |
| 0.91107  | 0.024028 | 0.6045   | -0.07076 | 0.12676  | -0.0550907 | 0.23474  | -0.03353 | 0.46979  |
| 0.47704  | -0.03526 | 0.44714  | -0.18755 | 4.53E-05 | -0.0524614 | 0.25787  | 0.055737 | 0.22929  |
| 0.8824   | 0.070478 | 0.1283   | -0.05755 | 0.21446  | -0.0513762 | 0.26786  | 0.03826  | 0.40943  |
| 0.44299  | 0.045069 | 0.33114  | -0.00576 | 0.9012   | -0.0150076 | 0.74634  | -0.01854 | 0.6894   |
| 0.6027   | 0.002813 | 0.95166  | -0.00082 | 0.98593  | 0.01068883 | 0.8178   | 0.012606 | 0.78586  |
| 0.95736  | 0.047739 | 0.30326  | -0.117   | 0.0114   | -0.0688946 | 0.13712  | 0.081265 | 0.07937  |
| 0.72642  | 0.111339 | 0.01608  | -0.08185 | 0.07721  | -0.0525012 | 0.25751  | 0.050387 | 0.27719  |
| 0.01527  | 0.016098 | 0.72861  | -0.13695 | 0.00302  | -0.0594004 | 0.20007  | 0.105567 | 0.02251  |
| 0.81261  | -0.10656 | 0.02127  | -0.20783 | 5.93E-06 | -0.0415714 | 0.37007  | 0.146974 | 0.00145  |
| 0.42249  | -0.03536 | 0.44592  | -0.15147 | 0.00102  | -0.2225194 | 1.19E-06 | -0.08945 | 0.0534   |
| 0.80006  | 0.052986 | 0.25313  | -0.08005 | 0.08398  | -0.0421633 | 0.36329  | 0.089552 | 0.05312  |
| 0.62644  | 0.102618 | 0.02659  | -0.04666 | 0.31435  | 0.00980537 | 0.83263  | 0.13728  | 0.00295  |
| 0.74759  | 0.074588 | 0.10745  | -0.02497 | 0.59037  | -0.0212635 | 0.64672  | 0.039479 | 0.39466  |
| 0.82473  | -0.0262  | 0.57218  | -0.16789 | 0.00027  | -0.071847  | 0.12103  | 0.068484 | 0.13948  |
| 0.92336  | 0.065189 | 0.15958  | -0.06443 | 0.16449  | -0.0814093 | 0.07884  | 0.070683 | 0.12719  |
| 0.73779  | 0.03393  | 0.46448  | -0.1309  | 0.00461  | -0.0740661 | 0.10993  | 0.087213 | 0.05967  |
| 0.06967  | -0.45118 | 8.48E-25 | -0.18324 | 6.81E-05 | 0.05657588 | 0.22235  | 0.100402 | 0.03005  |
| 0.78492  | -0.45696 | 1.80E-25 | -0.26159 | 9.58E-09 | 0.09925046 | 0.032    | 0.165263 | 0.00034  |
| 0.3068   | -0.52055 | 8.66E-34 | -0.26417 | 6.76E-09 | 0.06726797 | 0.14666  | 0.151432 | 0.00103  |
| 0.6553   | -0.11875 | 0.01022  | -0.08876 | 0.05527  | 0.10511283 | 0.0231   | 0.175384 | 0.00014  |
| 0.74671  | -0.60431 | 7.95E-48 | -0.37629 | 3.72E-17 | -0.1188734 | 0.01014  | -0.15381 | 0.00085  |
| 0.28172  | -0.50058 | 5.48E-31 | -0.29233 | 1.18E-10 | -0.0732516 | 0.11391  | -0.12478 | 0.00694  |
| 0.04532  | -0.08796 | 0.0575   | -0.13324 | 0.00392  | 0.07135838 | 0.12359  | 0.130304 | 0.0048   |
| 0.27231  | -0.54041 | 9.11E-37 | -0.40145 | 1.64E-19 | -0.0503469 | 0.27758  | -0.07424 | 0.10911  |
| 0.14742  | -0.1962  | 1.95E-05 | -0.05533 | 0.23274  | 0.08491987 | 0.06672  | 0.153103 | 0.0009   |
| 0.35863  | -0.3987  | 3.04E-19 | -0.192   | 2.96E-05 | 0.0120569  | 0.79497  | 0.055842 | 0.22841  |
| 4.56E-07 | -0.27201 | 2.29E-09 | -0.09142 | 0.04833  | 0.11145738 | 0.01597  | 0.073107 | 0.11463  |
| 0.08806  | -0.57313 | 3.98E-42 | -0.32334 | 7.95E-13 | -0.0180933 | 0.69655  | -0.00639 | 0.89042  |
| 0.0356   | -0.43358 | 7.95E-23 | -0.27614 | 1.28E-09 | 0.16984669 | 0.00023  | 0.305388 | 1.55E-11 |
| 0.62982  | -0.57057 | 1.10E-41 | -0.35358 | 3.38E-15 | -0.003892  | 0.93315  | 0.009301 | 0.84112  |
| 0.9099   | -0.37553 | 4.35E-17 | -0.18346 | 6.67E-05 | 0.18480062 | 5.88E-05 | 0.308671 | 9.12E-12 |
| 0.62946  | -0.17354 | 0.00016  | -0.21194 | 3.83E-06 | -0.1907019 | 3.35E-05 | -0.24418 | 9.11E-08 |
| 8.74E-05 | -0.28008 | 7.28E-10 | -0.25774 | 1.60E-08 | 0.0994982  | 0.03158  | 0.312066 | 5.25E-12 |
| 0.71138  | -0.39532 | 6.42E-19 | -0.22387 | 1.02E-06 | 0.00274743 | 0.95278  | 0.077641 | 0.09376  |

|          |          |          |          |          |            |          |          |          |
|----------|----------|----------|----------|----------|------------|----------|----------|----------|
| 0.51495  | -0.20416 | 8.71E-06 | -0.08863 | 0.05563  | 0.1868617  | 4.84E-05 | 0.198285 | 1.59E-05 |
| 1.30E-08 | -0.24174 | 1.23E-07 | -0.06013 | 0.1946   | 0.39321326 | 1.02E-18 | 0.275766 | 1.35E-09 |
| 0.05886  | -0.39654 | 4.90E-19 | -0.23775 | 2.01E-07 | -0.0960604 | 0.03798  | -0.03948 | 0.39462  |
| 0.06549  | -0.34381 | 2.10E-14 | -0.13435 | 0.00363  | -0.0281875 | 0.54344  | 0.012232 | 0.79205  |
| 0.00093  | -0.43416 | 6.86E-23 | -0.07858 | 0.08987  | 0.10655963 | 0.02127  | -0.0023  | 0.96051  |
| 0.54716  | -0.27084 | 2.70E-09 | -0.21614 | 2.43E-06 | 0.10319921 | 0.02574  | 0.268074 | 3.96E-09 |
| 0.02566  | -0.27169 | 2.40E-09 | -0.23109 | 4.44E-07 | -0.0372132 | 0.42238  | -0.02247 | 0.6281   |
| 0.32992  | -0.33236 | 1.66E-13 | -0.17701 | 0.00012  | 0.00771869 | 0.86788  | -0.04921 | 0.28856  |
| 0.07403  | -0.59059 | 3.04E-45 | -0.32672 | 4.45E-13 | -0.0843868 | 0.06846  | -0.06813 | 0.14157  |
| 0.09882  | -0.36824 | 1.91E-16 | -0.25156 | 3.58E-08 | -0.1100925 | 0.01731  | -0.144   | 0.00181  |
| 0.6891   | -0.41585 | 5.93E-21 | -0.15068 | 0.00109  | 0.08345685 | 0.07157  | 0.107051 | 0.02068  |
| 0.05594  | -0.4002  | 2.17E-19 | -0.2043  | 8.58E-06 | 0.20714012 | 6.38E-06 | 0.331296 | 2.00E-13 |
| 1.57E-06 | -0.25489 | 2.32E-08 | 0.101051 | 0.029    | 0.18544846 | 5.53E-05 | 0.073906 | 0.11071  |
| 0.00032  | -0.40434 | 8.54E-20 | -0.21924 | 1.72E-06 | 0.26958004 | 3.22E-09 | 0.279966 | 7.39E-10 |
| 0.72703  | -0.22916 | 5.57E-07 | -0.17089 | 0.00021  | 0.06295179 | 0.17443  | -0.03014 | 0.5159   |
| 0.15676  | -0.51936 | 1.29E-33 | -0.33524 | 9.95E-14 | -0.1980741 | 1.62E-05 | -0.2739  | 1.76E-09 |
| 0.46833  | -0.46018 | 7.48E-26 | -0.17368 | 0.00016  | 0.02336812 | 0.61447  | 0.030833 | 0.50626  |
| 0.85606  | -0.49483 | 3.25E-30 | -0.3647  | 3.88E-16 | -0.0338035 | 0.46615  | 0.074371 | 0.10847  |
| 0.46329  | -0.40246 | 1.31E-19 | -0.26276 | 8.19E-09 | -0.2735455 | 1.85E-09 | -0.1777  | 0.00011  |
| 0.60029  | -0.58805 | 8.90E-45 | -0.30745 | 1.11E-11 | -0.1367217 | 0.00307  | -0.14337 | 0.0019   |
| 0.86154  | -0.41563 | 6.24E-21 | -0.30814 | 9.93E-12 | -0.1107838 | 0.01662  | -0.02275 | 0.62385  |
| 0.31411  | -0.46673 | 1.22E-26 | -0.36303 | 5.40E-16 | -0.0986122 | 0.03313  | 0.062144 | 0.18004  |
| 0.96823  | -0.04541 | 0.32747  | -0.02151 | 0.64289  | 0.14278218 | 0.00198  | 0.160224 | 0.00051  |
| 3.15E-06 | -0.28032 | 7.02E-10 | -0.15235 | 0.00096  | 0.12311285 | 0.00773  | 0.086858 | 0.06072  |
| 0.7812   | -0.58036 | 2.15E-43 | -0.35633 | 1.99E-15 | -0.0214251 | 0.64422  | 0.031591 | 0.49585  |
| 2.76E-14 | -0.37534 | 4.52E-17 | -0.21334 | 3.29E-06 | -0.0797445 | 0.08518  | -0.13631 | 0.00316  |
| 0.79707  | -0.38893 | 2.58E-18 | -0.28046 | 6.88E-10 | 0.01977916 | 0.66987  | 0.129626 | 0.00502  |
| 0.00655  | -0.46266 | 3.79E-26 | -0.25509 | 2.27E-08 | 0.00418253 | 0.92817  | -0.05104 | 0.27101  |
| 0.00543  | -0.34745 | 1.07E-14 | -0.17546 | 0.00014  | 0.19007952 | 3.56E-05 | 0.147541 | 0.00139  |
| 0.21997  | -0.1614  | 0.00046  | -0.00928 | 0.8414   | 0.18725149 | 4.67E-05 | 0.17133  | 0.0002   |
| 0.82288  | -0.45392 | 4.07E-25 | -0.26261 | 8.34E-09 | -0.3337111 | 1.31E-13 | -0.29303 | 1.06E-10 |
| 0.59948  | -0.13759 | 0.00289  | -0.14622 | 0.00153  | 0.0638253  | 0.16852  | 0.199754 | 1.37E-05 |
| 0.02256  | -0.3447  | 1.79E-14 | -0.24816 | 5.52E-08 | -0.2372574 | 2.13E-07 | -0.31184 | 5.44E-12 |
| 0.08888  | -0.30003 | 3.60E-11 | -0.15344 | 0.00088  | 0.04222982 | 0.36253  | -0.03984 | 0.3904   |
| 1.96E-12 | -0.17783 | 0.00011  | -0.13646 | 0.00313  | 0.13239239 | 0.00416  | 0.174854 | 0.00015  |
| 0.51312  | -0.39731 | 4.13E-19 | -0.28612 | 3.00E-10 | -0.0426298 | 0.358    | 0.144186 | 0.00178  |
| 0.77472  | -0.55918 | 9.06E-40 | -0.37269 | 7.78E-17 | -0.0888353 | 0.05506  | 0.036963 | 0.42551  |
| 0.00021  | -0.53181 | 1.87E-35 | -0.31141 | 5.84E-12 | -0.0314353 | 0.49798  | -0.12517 | 0.00676  |
| 0.03441  | -0.39999 | 2.28E-19 | -0.20022 | 1.30E-05 | 0.11504008 | 0.01286  | 0.198047 | 1.62E-05 |
| 2.73E-11 | -0.23664 | 2.29E-07 | -0.16383 | 0.00038  | 0.06988557 | 0.13155  | 0.234743 | 2.88E-07 |
| 0.65926  | -0.37055 | 1.20E-16 | -0.15511 | 0.00077  | 0.30332637 | 2.15E-11 | 0.386997 | 3.92E-18 |
| 0.59931  | -0.48294 | 1.16E-28 | -0.36206 | 6.53E-16 | 0.03129982 | 0.49984  | 0.134137 | 0.00368  |
| 0.04108  | -0.42231 | 1.27E-21 | -0.17549 | 0.00014  | 0.10105175 | 0.029    | 0.079319 | 0.08686  |
| 0.58046  | -0.15549 | 0.00075  | -0.07426 | 0.10899  | 0.25797203 | 1.55E-08 | 0.437418 | 3.02E-23 |
| 0.18107  | -0.29711 | 5.68E-11 | -0.04077 | 0.37932  | 0.02730291 | 0.55616  | -0.1418  | 0.00213  |

|          |          |          |          |          |            |          |          |          |
|----------|----------|----------|----------|----------|------------|----------|----------|----------|
| 0.00826  | -0.34984 | 6.85E-15 | -0.27152 | 2.46E-09 | -0.0332984 | 0.47285  | -0.07896 | 0.08828  |
| 0.50344  | -0.52816 | 6.60E-35 | -0.27649 | 1.22E-09 | -0.0974012 | 0.03536  | -0.10349 | 0.02533  |
| 2.63E-15 | -0.24943 | 4.70E-08 | -0.14109 | 0.00224  | 0.07286754 | 0.11582  | 0.156495 | 0.00069  |
| 0.56259  | -0.37052 | 1.21E-16 | -0.26686 | 4.69E-09 | -0.3597358 | 1.03E-15 | -0.47667 | 7.25E-28 |
| 0.12472  | -0.39864 | 3.08E-19 | -0.268   | 4.00E-09 | -0.209631  | 4.90E-06 | -0.31073 | 6.53E-12 |
| 0.01558  | -0.40256 | 1.28E-19 | -0.17939 | 9.70E-05 | 0.14531288 | 0.00164  | 0.166855 | 0.00029  |
| 0.404    | -0.44415 | 5.36E-24 | -0.24489 | 8.34E-08 | 0.06505988 | 0.16042  | 0.137117 | 0.00299  |
| 0.01737  | -0.09361 | 0.04317  | -0.08255 | 0.07474  | 0.18699364 | 4.78E-05 | 0.405688 | 6.28E-20 |
| 0.01248  | -0.52246 | 4.57E-34 | -0.28598 | 3.07E-10 | 0.08484291 | 0.06697  | 0.045622 | 0.32523  |
| 1.44E-11 | -0.42229 | 1.27E-21 | -0.37946 | 1.93E-17 | -0.0996093 | 0.03138  | -0.02971 | 0.52187  |
| 1.22E-07 | -0.38232 | 1.06E-17 | -0.3377  | 6.40E-14 | -0.2341467 | 3.09E-07 | -0.34113 | 3.44E-14 |
| 0.34332  | -0.50849 | 4.49E-32 | -0.24399 | 9.33E-08 | -0.1047047 | 0.02365  | -0.11676 | 0.01157  |
| 0.99053  | -0.39634 | 5.12E-19 | -0.19812 | 1.61E-05 | 0.07662506 | 0.09815  | 0.127499 | 0.00579  |
| 0.35555  | -0.33144 | 1.95E-13 | -0.18095 | 8.41E-05 | -0.0897806 | 0.05251  | -0.0236  | 0.6109   |
| 0.51121  | -0.32215 | 9.74E-13 | -0.1977  | 1.68E-05 | 0.05931628 | 0.20071  | 0.195973 | 2.00E-05 |
| 0.9139   | -0.45555 | 2.63E-25 | -0.19494 | 2.21E-05 | 0.12027519 | 0.00928  | 0.169817 | 0.00023  |
| 0.86796  | -0.39328 | 1.01E-18 | -0.2144  | 2.93E-06 | -0.0015239 | 0.9738   | 0.01405  | 0.76202  |
| 0.86718  | -0.4943  | 3.83E-30 | -0.25825 | 1.49E-08 | 0.00764394 | 0.86914  | 0.068741 | 0.138    |
| 5.63E-05 | -0.36366 | 4.77E-16 | -0.34404 | 2.02E-14 | -0.1261391 | 0.00634  | -0.09915 | 0.03219  |
| 1.03E-05 | -0.36926 | 1.56E-16 | -0.08834 | 0.05642  | -0.0249903 | 0.59011  | -0.09645 | 0.03721  |
| 0.01248  | -0.34705 | 1.16E-14 | -0.23469 | 2.90E-07 | -0.0286917 | 0.53625  | 0.023917 | 0.60617  |
| 0.06583  | -0.24349 | 9.92E-08 | 0.073899 | 0.11074  | 0.26017423 | 1.16E-08 | 0.045156 | 0.3302   |
| 0.36771  | -0.35029 | 6.29E-15 | -0.20566 | 7.45E-06 | 0.17988078 | 9.28E-05 | 0.360108 | 9.57E-16 |
| 0.00063  | -0.20453 | 8.38E-06 | -0.18228 | 7.44E-05 | 0.0517574  | 0.26432  | 0.025719 | 0.5793   |
| 0.74337  | -0.32754 | 3.86E-13 | -0.39472 | 7.33E-19 | -0.155391  | 0.00075  | -0.01929 | 0.67757  |
| 5.97E-05 | -0.20958 | 4.93E-06 | 0.106604 | 0.02121  | 0.05635196 | 0.22418  | 0.071927 | 0.12061  |
| 0.00117  | -0.30674 | 1.25E-11 | -0.23928 | 1.67E-07 | 0.16901846 | 0.00024  | 0.332927 | 1.50E-13 |
| 0.71656  | -0.57365 | 3.23E-42 | -0.28521 | 3.43E-10 | -0.0650872 | 0.16024  | -0.15422 | 0.00083  |
| 0.10613  | -0.33951 | 4.61E-14 | -0.18758 | 4.52E-05 | 0.3106328  | 6.63E-12 | 0.434495 | 6.31E-23 |
| 1.13E-05 | -0.34879 | 8.34E-15 | -0.13219 | 0.00422  | 0.14880653 | 0.00126  | 0.137523 | 0.0029   |
| 0.38001  | -0.11183 | 0.01562  | -0.02018 | 0.66363  | -0.0166479 | 0.71973  | 0.049294 | 0.28776  |
| 0.97212  | -0.48175 | 1.65E-28 | -0.31805 | 1.95E-12 | -0.2145555 | 2.89E-06 | -0.193   | 2.68E-05 |
| 0.02916  | 0.135218 | 0.00341  | 0.112283 | 0.0152   | 0.09135003 | 0.0485   | 0.105491 | 0.02261  |
| 0.16512  | -0.2573  | 1.69E-08 | -0.24741 | 6.08E-08 | -0.0196842 | 0.67136  | 0.083399 | 0.07177  |
| 0.08922  | -0.16616 | 0.00031  | -0.15969 | 0.00053  | -0.0512176 | 0.26934  | 0.006326 | 0.89156  |
| 0.09645  | -0.19129 | 3.17E-05 | -0.16046 | 0.0005   | -0.0393623 | 0.39606  | 0.079825 | 0.08486  |
| 0.05404  | -0.1175  | 0.01104  | -0.10627 | 0.02162  | -0.0271471 | 0.55842  | 0.03103  | 0.50354  |
| 0.68324  | -0.17241 | 0.00018  | -0.11677 | 0.01156  | -0.0289138 | 0.5331   | 0.058454 | 0.20734  |
| 0.27046  | -0.30955 | 7.91E-12 | -0.29688 | 5.88E-11 | -0.174404  | 0.00015  | -0.16336 | 0.00039  |
| 0.35348  | -0.29514 | 7.70E-11 | -0.10128 | 0.02863  | 0.07038929 | 0.12878  | -0.06485 | 0.16178  |
| 0.27409  | -0.37319 | 7.04E-17 | -0.23084 | 4.57E-07 | -0.0440193 | 0.34253  | -0.05112 | 0.27025  |
| 0.32177  | -0.34145 | 3.24E-14 | -0.21697 | 2.22E-06 | -0.0712018 | 0.12441  | -0.11315 | 0.01443  |
| 0.06921  | -0.12747 | 0.00581  | 0.088067 | 0.05721  | 0.04122287 | 0.3741   | 0.017569 | 0.70493  |
| 0.57005  | -0.53975 | 1.15E-36 | -0.3231  | 8.28E-13 | -0.0450339 | 0.33151  | -0.11181 | 0.01564  |
| 0.00318  | -0.49591 | 2.34E-30 | -0.34407 | 2.00E-14 | -0.0554872 | 0.23139  | -0.01826 | 0.69381  |

|          |          |          |          |          |            |          |          |          |
|----------|----------|----------|----------|----------|------------|----------|----------|----------|
| 0.38533  | -0.48324 | 1.07E-28 | -0.33735 | 6.81E-14 | 0.01602616 | 0.72978  | 0.1877   | 4.47E-05 |
| 0.12633  | -0.36399 | 4.46E-16 | -0.16856 | 0.00025  | -0.0919111 | 0.04713  | -0.17428 | 0.00015  |
| 0.30308  | -0.52847 | 5.92E-35 | -0.35073 | 5.79E-15 | -0.3305124 | 2.30E-13 | -0.37763 | 2.82E-17 |
| 0.36056  | -0.45707 | 1.75E-25 | -0.34087 | 3.60E-14 | 0.15090266 | 0.00107  | 0.213455 | 3.25E-06 |
| 0.26276  | -0.26419 | 6.75E-09 | -0.26433 | 6.62E-09 | -0.0061672 | 0.89426  | 0.171024 | 0.0002   |
| 4.19E-31 | -0.2291  | 5.60E-07 | -0.24187 | 1.21E-07 | 0.05332656 | 0.25009  | 0.248638 | 5.20E-08 |
| 0.16324  | -0.15249 | 0.00095  | -0.1081  | 0.01946  | 0.09966456 | 0.03129  | 0.154362 | 0.00082  |
| 0.85895  | -0.57705 | 8.24E-43 | -0.23341 | 3.38E-07 | 0.0210264  | 0.65039  | -0.0752  | 0.10459  |
| 0.00644  | -0.37322 | 6.98E-17 | -0.12899 | 0.00524  | 0.2904257  | 1.58E-10 | 0.391023 | 1.64E-18 |
| 0.00061  | -0.3857  | 5.16E-18 | -0.21509 | 2.72E-06 | 0.10655612 | 0.02127  | 0.223205 | 1.10E-06 |
| 0.88741  | -0.20505 | 7.94E-06 | -0.07129 | 0.12392  | 0.13543945 | 0.00336  | 0.144435 | 0.00175  |
| 0.28165  | -0.41516 | 6.97E-21 | -0.25764 | 1.62E-08 | -0.2405642 | 1.42E-07 | -0.35512 | 2.51E-15 |
| 0.17021  | -0.31655 | 2.50E-12 | -0.11142 | 0.016    | -0.132663  | 0.00408  | -0.23767 | 2.03E-07 |
| 0.00866  | -0.08381 | 0.07037  | 0.036265 | 0.4343   | 0.27191138 | 2.33E-09 | 0.297208 | 5.59E-11 |
| 0.18401  | -0.3681  | 1.97E-16 | -0.17581 | 0.00013  | -0.1117789 | 0.01566  | -0.17698 | 0.00012  |
| 0.40976  | -0.49733 | 1.51E-30 | -0.3168  | 2.40E-12 | 0.02589829 | 0.57667  | 0.16168  | 0.00045  |
| 0.52425  | -0.48705 | 3.43E-29 | -0.21712 | 2.18E-06 | 0.13146193 | 0.00443  | 0.144672 | 0.00172  |
| 0.79338  | -0.51452 | 6.35E-33 | -0.31961 | 1.50E-12 | -0.0151159 | 0.74457  | 0.131344 | 0.00447  |
| 0.43921  | -0.19699 | 1.80E-05 | -0.03512 | 0.44901  | 0.17833456 | 0.00011  | 0.126839 | 0.00606  |
| 0.00305  | -0.45197 | 6.87E-25 | -0.29825 | 4.76E-11 | 0.14046398 | 0.00235  | 0.134748 | 0.00353  |
| 0.80306  | -0.39269 | 1.14E-18 | -0.34014 | 4.11E-14 | -0.0329772 | 0.47713  | -0.01177 | 0.79966  |
| 0.10441  | -0.25051 | 4.10E-08 | -0.15747 | 0.00064  | 0.13174001 | 0.00435  | 0.272498 | 2.14E-09 |
| 5.65E-11 | -0.18402 | 6.33E-05 | -0.20143 | 1.15E-05 | -0.0497959 | 0.28288  | -0.01757 | 0.70497  |
| 2.31E-08 | -0.30741 | 1.12E-11 | -0.17962 | 9.50E-05 | 0.05375618 | 0.24629  | 0.097702 | 0.03479  |
| 0.36552  | -0.36003 | 9.73E-16 | -0.20735 | 6.24E-06 | 0.08678129 | 0.06095  | 0.142963 | 0.00195  |
| 0.00019  | -0.3292  | 2.89E-13 | -0.13951 | 0.00251  | 0.07691606 | 0.09688  | 0.096805 | 0.0365   |
| 0.04617  | -0.26701 | 4.59E-09 | -0.15457 | 0.0008   | 0.22029737 | 1.53E-06 | 0.351863 | 4.67E-15 |
| 0.32179  | -0.36549 | 3.32E-16 | -0.17145 | 0.0002   | 0.01811578 | 0.69619  | 0.081012 | 0.08031  |
| 0.62164  | -0.40669 | 5.00E-20 | -0.20927 | 5.10E-06 | -0.0694387 | 0.13404  | -0.03831 | 0.40879  |
| 7.54E-05 | -0.28369 | 4.30E-10 | -0.17014 | 0.00022  | 0.11634867 | 0.01187  | -0.05073 | 0.27396  |
| 0.16875  | -0.17685 | 0.00012  | 0.018691 | 0.68705  | 0.23066517 | 4.67E-07 | 0.146519 | 0.0015   |
| 0.00019  | -0.37697 | 3.23E-17 | -0.17748 | 0.00012  | 0.16502368 | 0.00034  | 0.205395 | 7.66E-06 |
| 0.75329  | -0.30905 | 8.58E-12 | -0.1806  | 8.69E-05 | -0.0136749 | 0.76819  | -0.12624 | 0.0063   |
| 0.28764  | -0.38759 | 3.45E-18 | -0.13149 | 0.00442  | 0.18685681 | 4.84E-05 | 0.167835 | 0.00027  |
| 0.69192  | -0.30993 | 7.43E-12 | -0.08624 | 0.06258  | 0.26779396 | 4.12E-09 | 0.358749 | 1.25E-15 |
| 0.659    | -0.14783 | 0.00136  | -0.09995 | 0.0308   | -0.0925745 | 0.04556  | -0.14965 | 0.00118  |
| 0.05042  | -0.48763 | 2.88E-29 | -0.35782 | 1.49E-15 | 0.10065242 | 0.02964  | 0.252516 | 3.16E-08 |
| 0.42784  | -0.48924 | 1.78E-29 | -0.39676 | 4.67E-19 | -0.1962269 | 1.95E-05 | -0.26197 | 9.09E-09 |
| 0.13575  | -0.40113 | 1.76E-19 | -0.25088 | 3.90E-08 | -0.2474819 | 6.02E-08 | -0.31674 | 2.42E-12 |
| 0.16353  | -0.48649 | 4.05E-29 | -0.29083 | 1.48E-10 | -0.0934584 | 0.04352  | -0.15494 | 0.00078  |
| 0.02374  | -0.2078  | 5.95E-06 | -0.04103 | 0.37636  | -0.0593431 | 0.20051  | -0.15734 | 0.00064  |
| 0.06856  | -0.33381 | 1.28E-13 | -0.23302 | 3.53E-07 | -0.0908423 | 0.04977  | -0.1019  | 0.02767  |
| 0.30723  | -0.38145 | 1.27E-17 | -0.1968  | 1.84E-05 | 0.09664275 | 0.03682  | 0.113373 | 0.01423  |
| 0.04681  | -0.17326 | 0.00017  | -0.15163 | 0.00101  | -0.145613  | 0.0016   | -0.01186 | 0.7982   |
| 1.34E-06 | -0.31116 | 6.09E-12 | -0.32474 | 6.25E-13 | 0.03971882 | 0.39179  | 0.232605 | 3.71E-07 |



|          |          |          |          |          |            |          |          |          |
|----------|----------|----------|----------|----------|------------|----------|----------|----------|
| 0.12702  | -0.5248  | 2.07E-34 | -0.37087 | 1.13E-16 | 0.03004817 | 0.51715  | 0.101944 | 0.0276   |
| 0.04647  | -0.54461 | 2.02E-37 | -0.30789 | 1.03E-11 | 0.03487355 | 0.45215  | 0.042412 | 0.36046  |
| 0.1488   | -0.45638 | 2.10E-25 | -0.21567 | 2.55E-06 | 0.16849695 | 0.00025  | 0.280209 | 7.14E-10 |
| 0.47602  | -0.45552 | 2.65E-25 | -0.14793 | 0.00135  | 0.19793008 | 1.64E-05 | 0.177032 | 0.00012  |
| 0.46317  | -0.52753 | 8.19E-35 | -0.27666 | 1.19E-09 | 0.03265758 | 0.48141  | 0.085756 | 0.06408  |
| 0.72818  | -0.28989 | 1.71E-10 | -0.16873 | 0.00025  | 0.0027274  | 0.95313  | 0.004874 | 0.91634  |
| 0.89909  | -0.25351 | 2.78E-08 | -0.07404 | 0.11007  | 0.02861544 | 0.53733  | -0.07281 | 0.1161   |
| 0.00277  | -0.09462 | 0.04097  | -0.10718 | 0.02052  | 0.07910926 | 0.0877   | 0.168149 | 0.00026  |
| 0.4489   | -0.36558 | 3.26E-16 | -0.21802 | 1.97E-06 | 0.10007194 | 0.0306   | 0.209702 | 4.87E-06 |
| 0.12147  | -0.16025 | 0.00051  | 0.0054   | 0.90735  | 0.40954871 | 2.59E-20 | 0.495966 | 2.30E-30 |
| 0.31251  | -0.54518 | 1.64E-37 | -0.36979 | 1.40E-16 | 0.03940565 | 0.39554  | -0.0657  | 0.15634  |
| 0.43499  | -0.46905 | 6.37E-27 | -0.2438  | 9.54E-08 | 0.10529855 | 0.02286  | 0.194918 | 2.22E-05 |
| 0.16874  | 0.025643 | 0.58044  | 0.059531 | 0.19908  | 0.24269216 | 1.10E-07 | 0.313947 | 3.85E-12 |
| 0.06622  | 0.414478 | 8.19E-21 | 0.428312 | 2.94E-22 | 0.37676434 | 3.37E-17 | 0.336212 | 8.36E-14 |
| 0.21052  | -0.39748 | 3.98E-19 | -0.16808 | 0.00026  | 0.07964906 | 0.08555  | 0.156641 | 0.00068  |
| 0.23736  | -0.3879  | 3.23E-18 | -0.24766 | 5.88E-08 | -0.1425244 | 0.00202  | -0.24075 | 1.39E-07 |
| 0.66452  | -0.37236 | 8.32E-17 | -0.15379 | 0.00085  | 0.23726764 | 2.13E-07 | 0.256857 | 1.80E-08 |
| 0.00014  | -0.39639 | 5.07E-19 | -0.2465  | 6.81E-08 | -0.0048618 | 0.91655  | 0.154409 | 0.00081  |
| 0.01537  | -0.27879 | 8.76E-10 | -0.35145 | 5.05E-15 | -0.0975193 | 0.03514  | 0.10112  | 0.02889  |
| 0.06826  | -0.3574  | 1.62E-15 | -0.17277 | 0.00018  | 0.1141077  | 0.01361  | 0.181656 | 7.88E-05 |
| 0.00299  | -0.41234 | 1.35E-20 | -0.23115 | 4.41E-07 | -0.0255238 | 0.58219  | -0.08676 | 0.061    |
| 0.05503  | -0.50118 | 4.54E-31 | -0.249   | 4.96E-08 | 0.19350147 | 2.55E-05 | 0.292113 | 1.22E-10 |
| 0.00024  | -0.21855 | 1.86E-06 | 0.005056 | 0.91323  | 0.20812663 | 5.75E-06 | 0.076556 | 0.09846  |
| 0.56819  | -0.25786 | 1.57E-08 | 0.032179 | 0.48787  | 0.42925912 | 2.33E-22 | 0.563255 | 1.91E-40 |
| 8.22E-07 | -0.41963 | 2.42E-21 | -0.20146 | 1.15E-05 | 0.13219082 | 0.00422  | 0.205944 | 7.23E-06 |
| 0.27287  | -0.52109 | 7.21E-34 | -0.33184 | 1.82E-13 | 0.0595764  | 0.19874  | 0.07608  | 0.10058  |
| 0.68654  | -0.48214 | 1.47E-28 | -0.28336 | 4.51E-10 | 0.09507764 | 0.04     | 0.067129 | 0.1475   |
| 2.16E-24 | -0.24202 | 1.19E-07 | -0.09096 | 0.04947  | 0.13526446 | 0.0034   | 0.282164 | 5.37E-10 |
| 0.51263  | -0.35834 | 1.35E-15 | -0.21227 | 3.70E-06 | 0.03875395 | 0.40341  | 0.182078 | 7.58E-05 |
| 4.24E-10 | -0.51532 | 4.89E-33 | -0.25611 | 1.98E-08 | 0.15051129 | 0.0011   | 0.068398 | 0.13998  |
| 0.77864  | -0.54428 | 2.27E-37 | -0.4448  | 4.53E-24 | -0.2221599 | 1.24E-06 | -0.23891 | 1.74E-07 |
| 7.86E-06 | -0.22887 | 5.75E-07 | -0.12082 | 0.00896  | 0.24869954 | 5.16E-08 | 0.312433 | 4.94E-12 |
| 0.78225  | -0.3454  | 1.57E-14 | -0.2839  | 4.17E-10 | -0.1636646 | 0.00038  | -0.1916  | 3.07E-05 |
| 0.25195  | -0.31089 | 6.36E-12 | -0.21567 | 2.55E-06 | -0.0479127 | 0.3015   | 0.052288 | 0.25945  |
| 0.00437  | -0.37413 | 5.80E-17 | -0.02222 | 0.63204  | 0.28649545 | 2.84E-10 | 0.22391  | 1.02E-06 |
| 0.00521  | -0.34263 | 2.61E-14 | -0.30271 | 2.36E-11 | -0.1770413 | 0.00012  | -0.1907  | 3.35E-05 |
| 0.28436  | -0.44801 | 1.95E-24 | -0.17743 | 0.00012  | 0.27943374 | 7.98E-10 | 0.332377 | 1.65E-13 |
| 0.43737  | 0.362095 | 6.49E-16 | 0.535055 | 6.05E-36 | 0.46603709 | 1.48E-26 | 0.579341 | 3.26E-43 |
| 0.04176  | 0.210279 | 4.58E-06 | 0.355306 | 2.42E-15 | 0.52872313 | 5.44E-35 | 0.678992 | 2.11E-64 |
| 0.12301  | 0.437253 | 3.15E-23 | 0.407505 | 4.14E-20 | 0.59333518 | 9.48E-46 | 0.725592 | 1.67E-77 |
| 0.13808  | 0.529873 | 3.66E-35 | 0.378902 | 2.16E-17 | 0.38050361 | 1.55E-17 | 0.602597 | 1.69E-47 |
| 0.80766  | 0.468462 | 7.52E-27 | 0.483334 | 1.04E-28 | 0.6131067  | 1.50E-49 | 0.698207 | 1.69E-69 |
| 0.64461  | 0.390533 | 1.83E-18 | 0.397996 | 3.55E-19 | 0.47893584 | 3.76E-28 | 0.398848 | 2.94E-19 |
| 0.00018  | 0.278999 | 8.50E-10 | 0.345455 | 1.55E-14 | 0.72131437 | 3.43E-76 | 0.807108 | #####    |
| 0.00838  | 0.443875 | 5.76E-24 | 0.486079 | 4.59E-29 | 0.38624792 | 4.60E-18 | 0.350726 | 5.79E-15 |

|         |          |          |          |          |            |          |          |          |
|---------|----------|----------|----------|----------|------------|----------|----------|----------|
| 0.86401 | 0.363537 | 4.89E-16 | 0.292047 | 1.23E-10 | 0.4151128  | 7.06E-21 | 0.37943  | 1.94E-17 |
| 0.86758 | 0.469345 | 5.87E-27 | 0.498504 | 1.05E-30 | 0.63778686 | 1.09E-54 | 0.682677 | 2.38E-65 |
| 0.01098 | 0.229634 | 5.27E-07 | 0.34714  | 1.14E-14 | 0.68609321 | 3.07E-66 | 0.740579 | 2.60E-82 |
| 0.16319 | 0.489561 | 1.62E-29 | 0.482034 | 1.52E-28 | 0.56504136 | 9.56E-41 | 0.775821 | 4.75E-95 |
| 0.46774 | 0.446188 | 3.15E-24 | 0.449205 | 1.43E-24 | 0.55011626 | 2.70E-38 | 0.755545 | 1.87E-87 |
| 0.09848 | 0.244033 | 9.27E-08 | 0.461312 | 5.49E-26 | 0.52737562 | 8.63E-35 | 0.33716  | 7.05E-14 |
| 0.2958  | 0.568631 | 2.36E-41 | 0.431268 | 1.41E-22 | 0.45967049 | 8.60E-26 | 0.603501 | 1.14E-47 |
| 0.01766 | 0.393462 | 9.66E-19 | 0.415093 | 7.09E-21 | 0.53999259 | 1.06E-36 | 0.749797 | 1.95E-85 |
| 0.00304 | 0.31788  | 2.00E-12 | 0.333909 | 1.26E-13 | 0.33968392 | 4.47E-14 | 0.39702  | 4.41E-19 |
| 0.8212  | 0.388913 | 2.59E-18 | 0.458576 | 1.16E-25 | 0.64713784 | 9.20E-57 | 0.762108 | 7.87E-90 |
| 0.62331 | 0.458594 | 1.15E-25 | 0.485866 | 4.89E-29 | 0.43530757 | 5.14E-23 | 0.418648 | 3.05E-21 |
| 0.00861 | 0.508043 | 5.17E-32 | 0.579413 | 3.16E-43 | 0.64241634 | 1.04E-55 | 0.508358 | 4.68E-32 |
| 0.01738 | 0.295599 | 7.17E-11 | 0.440615 | 1.33E-23 | 0.58822198 | 8.27E-45 | 0.746063 | 3.73E-84 |
| 0.83787 | 0.561768 | 3.38E-40 | 0.472315 | 2.53E-27 | 0.56913508 | 1.93E-41 | 0.736682 | 4.97E-81 |
| 0.0554  | 0.492912 | 5.85E-30 | 0.555802 | 3.25E-39 | 0.55252237 | 1.11E-38 | 0.535569 | 5.05E-36 |
| 0.50304 | 0.283586 | 4.36E-10 | 0.38678  | 4.10E-18 | 0.63240179 | 1.57E-53 | 0.701429 | 2.16E-70 |
| 0.41751 | 0.361695 | 7.02E-16 | 0.460047 | 7.76E-26 | 0.56426898 | 1.29E-40 | 0.764306 | 1.21E-90 |
| 0.30568 | 0.537038 | 3.01E-36 | 0.489177 | 1.81E-29 | 0.61519719 | 5.73E-50 | 0.658169 | 2.65E-59 |
| 0.03327 | 0.435374 | 5.06E-23 | 0.440747 | 1.29E-23 | 0.681692   | 4.28E-65 | 0.719938 | 8.98E-76 |
| 0.01583 | 0.454776 | 3.24E-25 | 0.435931 | 4.40E-23 | 0.30164473 | 2.80E-11 | 0.312496 | 4.89E-12 |
| 0.97227 | 0.512622 | 1.18E-32 | 0.476535 | 7.54E-28 | 0.61935351 | 8.28E-51 | 0.758719 | 1.35E-88 |
| 0.0112  | 0.472859 | 2.17E-27 | 0.296101 | 6.64E-11 | 0.3863119  | 4.53E-18 | 0.440324 | 1.44E-23 |
| 0.37062 | 0.535645 | 4.92E-36 | 0.681388 | 5.13E-65 | 0.76295753 | 3.83E-90 | 0.812169 | #####    |
| 0.7736  | 0.509752 | 2.99E-32 | 0.632391 | 1.58E-53 | 0.55707099 | 2.02E-39 | 0.609146 | 9.09E-49 |
| 0.12211 | 0.519322 | 1.30E-33 | 0.64737  | 8.15E-57 | 0.715023   | 2.65E-74 | 0.692551 | 5.88E-68 |
| 0.48528 | 0.373399 | 6.74E-17 | 0.564412 | 1.22E-40 | 0.7814705  | 2.61E-97 | 0.803469 | #####    |
| 0.00819 | 0.349808 | 6.89E-15 | 0.457733 | 1.46E-25 | 0.512734   | 1.14E-32 | 0.61786  | 1.66E-50 |
| 0.02195 | 0.269316 | 3.34E-09 | 0.459732 | 8.46E-26 | 0.71507905 | 2.55E-74 | 0.821514 | #####    |
| 0.54285 | 0.345692 | 1.49E-14 | 0.336749 | 7.59E-14 | 0.57852891 | 4.53E-43 | 0.686116 | 3.02E-66 |
| 0.03591 | 0.377057 | 3.17E-17 | 0.386181 | 4.66E-18 | 0.4171493  | 4.36E-21 | 0.380919 | 1.42E-17 |
| 0.02068 | 0.320665 | 1.25E-12 | 0.321438 | 1.10E-12 | 0.48126268 | 1.90E-28 | 0.577141 | 7.95E-43 |
| 0.69137 | 0.468922 | 6.61E-27 | 0.431909 | 1.21E-22 | 0.5566627  | 2.35E-39 | 0.638855 | 6.35E-55 |
| 0.12047 | 0.159778 | 0.00053  | 0.34626  | 1.34E-14 | 0.65144168 | 9.66E-58 | 0.767351 | 8.77E-92 |
| 0.006   | 0.373556 | 6.52E-17 | 0.569483 | 1.69E-41 | 0.59149727 | 2.07E-45 | 0.667685 | 1.39E-61 |
| 0.81787 | 0.492869 | 5.93E-30 | 0.555193 | 4.08E-39 | 0.56362684 | 1.65E-40 | 0.667271 | 1.76E-61 |
| 0.37325 | 0.551565 | 1.58E-38 | 0.428408 | 2.87E-22 | 0.56919273 | 1.89E-41 | 0.739145 | 7.75E-82 |
| 0.52872 | 0.227797 | 6.52E-07 | 0.343733 | 2.13E-14 | 0.62525196 | 5.06E-52 | 0.763181 | 3.17E-90 |
| 0.04764 | 0.387687 | 3.38E-18 | 0.611104 | 3.74E-49 | 0.53338313 | 1.09E-35 | 0.368979 | 1.65E-16 |
| 0.25875 | 0.481009 | 2.05E-28 | 0.535845 | 4.59E-36 | 0.56577343 | 7.19E-41 | 0.645434 | 2.22E-56 |
| 0.06081 | 0.314789 | 3.35E-12 | 0.345502 | 1.54E-14 | 0.23574691 | 2.55E-07 | 0.247324 | 6.14E-08 |
| 0.68436 | 0.401787 | 1.52E-19 | 0.554837 | 4.67E-39 | 0.39573949 | 5.85E-19 | 0.365769 | 3.14E-16 |
| 0.22361 | 0.509052 | 3.74E-32 | 0.463462 | 3.03E-26 | 0.41368368 | 9.87E-21 | 0.62229  | 2.07E-51 |
| 0.37846 | 0.154816 | 0.00079  | 0.395457 | 6.23E-19 | 0.62736881 | 1.83E-52 | 0.670333 | 3.12E-62 |
| 0.00088 | 0.369807 | 1.40E-16 | 0.595178 | 4.30E-46 | 0.4679187  | 8.76E-27 | 0.411483 | 1.65E-20 |
| 0.56268 | 0.489089 | 1.86E-29 | 0.375548 | 4.33E-17 | 0.48990123 | 1.46E-29 | 0.687124 | 1.64E-66 |

|         |          |          |          |          |            |          |          |          |
|---------|----------|----------|----------|----------|------------|----------|----------|----------|
| 0.00904 | 0.373131 | 7.12E-17 | 0.448068 | 1.93E-24 | 0.49570599 | 2.49E-30 | 0.588487 | 7.40E-45 |
| 0.16426 | 0.426376 | 4.72E-22 | 0.507472 | 6.21E-32 | 0.61940147 | 8.09E-51 | 0.757428 | 3.96E-88 |
| 0.6461  | 0.288066 | 2.25E-10 | 0.500669 | 5.34E-31 | 0.61799603 | 1.56E-50 | 0.708237 | 2.53E-72 |
| 0.66937 | 0.400137 | 2.20E-19 | 0.280519 | 6.82E-10 | 0.55590795 | 3.12E-39 | 0.739802 | 4.71E-82 |
| 0.10696 | 0.388436 | 2.87E-18 | 0.589795 | 4.27E-45 | 0.55709177 | 2.00E-39 | 0.476117 | 8.51E-28 |
| 0.45935 | 0.348059 | 9.56E-15 | 0.52311  | 3.67E-34 | 0.54523997 | 1.60E-37 | 0.521481 | 6.34E-34 |
| 0.51964 | 0.469826 | 5.12E-27 | 0.460742 | 6.42E-26 | 0.40390886 | 9.41E-20 | 0.568061 | 2.95E-41 |
| 0.7326  | 0.410368 | 2.14E-20 | 0.345972 | 1.41E-14 | 0.52246894 | 4.55E-34 | 0.440328 | 1.44E-23 |
| 0.63426 | 0.435301 | 5.15E-23 | 0.545018 | 1.74E-37 | 0.64822385 | 5.23E-57 | 0.738064 | 1.76E-81 |
| 0.94184 | 0.189376 | 3.81E-05 | 0.435432 | 4.98E-23 | 0.66704113 | 2.00E-61 | 0.728735 | 1.74E-78 |
| 0.00102 | 0.185048 | 5.75E-05 | 0.263217 | 7.69E-09 | 0.49296736 | 5.75E-30 | 0.599976 | 5.37E-47 |
| 0.16902 | 0.263017 | 7.90E-09 | 0.36741  | 2.26E-16 | 0.4981885  | 1.16E-30 | 0.650096 | 1.96E-57 |
| 0.29706 | 0.342908 | 2.48E-14 | 0.382307 | 1.06E-17 | 0.59272661 | 1.23E-45 | 0.757235 | 4.64E-88 |
| 0.12462 | 0.384232 | 7.06E-18 | 0.361538 | 7.24E-16 | 0.49148595 | 9.03E-30 | 0.664094 | 1.03E-60 |
| 0.34073 | 0.237861 | 1.98E-07 | 0.370608 | 1.19E-16 | 0.74306309 | 3.86E-83 | 0.845285 | #####    |
| 0.71928 | 0.35185  | 4.68E-15 | 0.387131 | 3.80E-18 | 0.41041176 | 2.12E-20 | 0.397323 | 4.12E-19 |
| 0.31355 | 0.446689 | 2.77E-24 | 0.509676 | 3.06E-32 | 0.54724464 | 7.73E-38 | 0.457427 | 1.58E-25 |
| 0.31975 | 0.41381  | 9.59E-21 | 0.503153 | 2.45E-31 | 0.62829746 | 1.17E-52 | 0.764447 | 1.07E-90 |
| 0.31771 | -0.01267 | 0.78478  | 0.166561 | 0.0003   | 0.29276073 | 1.11E-10 | 0.445891 | 3.41E-24 |
| 0.01035 | 0.388916 | 2.59E-18 | 0.461262 | 5.56E-26 | 0.5597843  | 7.21E-40 | 0.725529 | 1.74E-77 |
| 0.06434 | 0.364234 | 4.26E-16 | 0.442733 | 7.74E-24 | 0.58463244 | 3.70E-44 | 0.727113 | 5.60E-78 |
| 0.5671  | 0.428643 | 2.71E-22 | 0.468306 | 7.86E-27 | 0.70619468 | 9.74E-72 | 0.682293 | 2.99E-65 |
| 0.35645 | 0.496113 | 2.19E-30 | 0.491976 | 7.78E-30 | 0.5471993  | 7.86E-38 | 0.482626 | 1.28E-28 |
| 0.35639 | 0.332586 | 1.59E-13 | 0.379655 | 1.85E-17 | 0.75183219 | 3.81E-86 | 0.79583  | #####    |
| 0.58986 | 0.318697 | 1.75E-12 | 0.53664  | 3.47E-36 | 0.42399532 | 8.44E-22 | 0.384271 | 7.00E-18 |
| 0.72045 | 0.522768 | 4.11E-34 | 0.517792 | 2.16E-33 | 0.638575   | 7.31E-55 | 0.683627 | 1.35E-65 |
| 0.9004  | 0.37416  | 5.76E-17 | 0.516219 | 3.64E-33 | 0.76665601 | 1.60E-91 | 0.782222 | 1.29E-97 |
| 0.8401  | 0.47256  | 2.36E-27 | 0.497981 | 1.23E-30 | 0.57607325 | 1.22E-42 | 0.679915 | 1.22E-64 |
| 0.98151 | 0.400964 | 1.83E-19 | 0.55922  | 8.93E-40 | 0.65307997 | 4.06E-58 | 0.619472 | 7.83E-51 |
| 0.28157 | 0.412388 | 1.34E-20 | 0.36395  | 4.50E-16 | 0.50904203 | 3.75E-32 | 0.566363 | 5.72E-41 |
| 0.3282  | 0.410337 | 2.15E-20 | 0.426727 | 4.34E-22 | 0.45109439 | 8.66E-25 | 0.612911 | 1.64E-49 |
| 0.02219 | 0.474617 | 1.31E-27 | 0.4179   | 3.65E-21 | 0.47443008 | 1.38E-27 | 0.63731  | 1.38E-54 |
| 0.00365 | 0.458165 | 1.30E-25 | 0.459495 | 9.02E-26 | 0.54736956 | 7.39E-38 | 0.526633 | 1.11E-34 |
| 0.24916 | 0.3239   | 7.23E-13 | 0.322284 | 9.52E-13 | 0.50474215 | 1.48E-31 | 0.665723 | 4.18E-61 |
| 0.94465 | 0.329097 | 2.94E-13 | 0.35985  | 1.01E-15 | 0.62717029 | 2.01E-52 | 0.790154 | #####    |
| 0.49115 | 0.516718 | 3.08E-33 | 0.314985 | 3.24E-12 | 0.50627286 | 9.10E-32 | 0.631302 | 2.70E-53 |
| 0.69817 | 0.469514 | 5.59E-27 | 0.603109 | 1.35E-47 | 0.66273606 | 2.19E-60 | 0.765013 | 6.61E-91 |
| 0.76738 | 0.413464 | 1.04E-20 | 0.363951 | 4.50E-16 | 0.51072033 | 2.19E-32 | 0.592764 | 1.21E-45 |
| 0.0583  | 0.510221 | 2.57E-32 | 0.598227 | 1.15E-46 | 0.53291751 | 1.28E-35 | 0.513755 | 8.16E-33 |
| 0.98154 | 0.63352  | 9.08E-54 | 0.537623 | 2.45E-36 | 0.59999553 | 5.32E-47 | 0.721277 | 3.52E-76 |
| 0.17577 | 0.542667 | 4.06E-37 | 0.440342 | 1.43E-23 | 0.51038936 | 2.43E-32 | 0.617124 | 2.34E-50 |
| 0.18298 | 0.454834 | 3.19E-25 | 0.529342 | 4.40E-35 | 0.51932321 | 1.30E-33 | 0.668928 | 6.92E-62 |
| 0.02319 | 0.460377 | 7.09E-26 | 0.394662 | 7.42E-19 | 0.5955209  | 3.71E-46 | 0.64717  | 9.04E-57 |
| 0.10201 | 0.220871 | 1.44E-06 | 0.280191 | 7.15E-10 | 0.33302012 | 1.48E-13 | 0.512124 | 1.39E-32 |
| 0.39652 | 0.456618 | 1.97E-25 | 0.444924 | 4.38E-24 | 0.59137397 | 2.19E-45 | 0.694537 | 1.71E-68 |

|         |          |          |          |          |            |          |          |          |
|---------|----------|----------|----------|----------|------------|----------|----------|----------|
| 0.17549 | 0.530261 | 3.20E-35 | 0.438714 | 2.17E-23 | 0.55915519 | 9.15E-40 | 0.661067 | 5.47E-60 |
| 0.95105 | 0.433586 | 7.93E-23 | 0.561008 | 4.52E-40 | 0.71952656 | 1.20E-75 | 0.816277 | #####    |
| 0.15403 | 0.411255 | 1.74E-20 | 0.5091   | 3.68E-32 | 0.52805976 | 6.83E-35 | 0.551508 | 1.61E-38 |
| 0.16212 | 0.460161 | 7.52E-26 | 0.492888 | 5.89E-30 | 0.47038771 | 4.37E-27 | 0.552472 | 1.13E-38 |
| 0.14095 | 0.141292 | 0.00221  | 0.206705 | 6.68E-06 | 0.26663568 | 4.83E-09 | 0.458884 | 1.07E-25 |
| 0.88123 | 0.549566 | 3.30E-38 | 0.498932 | 9.17E-31 | 0.56468472 | 1.10E-40 | 0.695062 | 1.23E-68 |
| 0.07499 | 0.509247 | 3.51E-32 | 0.685936 | 3.37E-66 | 0.57054221 | 1.11E-41 | 0.607705 | 1.74E-48 |
| 0.35348 | 0.175533 | 0.00014  | 0.16429  | 0.00036  | 0.31135662 | 5.89E-12 | 0.487996 | 2.59E-29 |
| 0.73782 | 0.089571 | 0.05307  | 0.313651 | 4.04E-12 | 0.39374822 | 9.07E-19 | 0.596329 | 2.62E-46 |
| 0.64422 | 0.362935 | 5.50E-16 | 0.44505  | 4.24E-24 | 0.4410957  | 1.18E-23 | 0.611061 | 3.81E-49 |
| 0.07038 | 0.343311 | 2.31E-14 | 0.527429 | 8.47E-35 | 0.63443174 | 5.78E-54 | 0.663336 | 1.57E-60 |
| 0.25177 | 0.526226 | 1.28E-34 | 0.453876 | 4.12E-25 | 0.532571   | 1.44E-35 | 0.663464 | 1.46E-60 |
| 0.82769 | 0.465158 | 1.90E-26 | 0.511899 | 1.49E-32 | 0.58470735 | 3.59E-44 | 0.789473 | #####    |
| 0.00478 | 0.068154 | 0.1414   | 0.256061 | 1.99E-08 | 0.4127306  | 1.23E-20 | 0.59804  | 1.25E-46 |
| 0.09061 | 0.419502 | 2.49E-21 | 0.496013 | 2.26E-30 | 0.52359079 | 3.12E-34 | 0.676789 | 7.64E-64 |
| 0.02877 | 0.098087 | 0.03408  | 0.426923 | 4.13E-22 | 0.5316684  | 1.97E-35 | 0.615588 | 4.78E-50 |
| 0.48197 | 0.376033 | 3.92E-17 | 0.525328 | 1.73E-34 | 0.72513447 | 2.31E-77 | 0.71088  | 4.36E-73 |
| 0.69732 | 0.34093  | 3.56E-14 | 0.418433 | 3.21E-21 | 0.59248554 | 1.36E-45 | 0.623809 | 1.01E-51 |
| 0.28749 | 0.406506 | 5.21E-20 | 0.676722 | 7.95E-64 | 0.69110912 | 1.44E-67 | 0.623001 | 1.48E-51 |
| 0.99556 | 0.44904  | 1.49E-24 | 0.587859 | 9.63E-45 | 0.73394953 | 3.82E-80 | 0.719677 | 1.08E-75 |
| 0.90958 | 0.354707 | 2.72E-15 | 0.479105 | 3.58E-28 | 0.57770516 | 6.33E-43 | 0.747176 | 1.56E-84 |
| 0.89915 | 0.332262 | 1.69E-13 | 0.470705 | 3.99E-27 | 0.46782972 | 8.98E-27 | 0.335491 | 9.51E-14 |
| 0.46873 | 0.403296 | 1.08E-19 | 0.518521 | 1.70E-33 | 0.41506547 | 7.14E-21 | 0.489052 | 1.88E-29 |
| 0.66344 | 0.557893 | 1.48E-39 | 0.505258 | 1.26E-31 | 0.64378306 | 5.19E-56 | 0.701507 | 2.05E-70 |
| 0.99281 | 0.424325 | 7.79E-22 | 0.423208 | 1.02E-21 | 0.54396057 | 2.55E-37 | 0.700999 | 2.84E-70 |
| 0.86334 | 0.373902 | 6.08E-17 | 0.592308 | 1.47E-45 | 0.67936771 | 1.69E-64 | 0.759208 | 9.02E-89 |
| 0.31766 | 0.208454 | 5.56E-06 | 0.406212 | 5.57E-20 | 0.67155186 | 1.56E-62 | 0.808238 | #####    |
| 0.58576 | 0.466271 | 1.39E-26 | 0.491898 | 7.96E-30 | 0.4553729  | 2.76E-25 | 0.583209 | 6.67E-44 |
| 0.50524 | 0.336242 | 8.32E-14 | 0.489839 | 1.49E-29 | 0.71864525 | 2.20E-75 | 0.808686 | #####    |
| 0.13109 | 0.576578 | 9.98E-43 | 0.575165 | 1.76E-42 | 0.62512664 | 5.37E-52 | 0.626551 | 2.71E-52 |
| 0.22799 | 0.575734 | 1.40E-42 | 0.445389 | 3.88E-24 | 0.50184803 | 3.69E-31 | 0.638323 | 8.30E-55 |
| 0.30337 | 0.433912 | 7.31E-23 | 0.59258  | 1.31E-45 | 0.60604179 | 3.67E-48 | 0.708869 | 1.67E-72 |
| 0.00446 | 0.418812 | 2.94E-21 | 0.443118 | 7.00E-24 | 0.42118592 | 1.66E-21 | 0.403719 | 9.82E-20 |
| 0.01817 | 0.432437 | 1.06E-22 | 0.391236 | 1.57E-18 | 0.48895474 | 1.94E-29 | 0.640235 | 3.16E-55 |
| 0.85688 | 0.459093 | 1.01E-25 | 0.465765 | 1.60E-26 | 0.55078923 | 2.10E-38 | 0.600919 | 3.55E-47 |
| 0.0142  | 0.318104 | 1.93E-12 | 0.501482 | 4.14E-31 | 0.3814368  | 1.27E-17 | 0.334416 | 1.15E-13 |
| 0.02171 | 0.196262 | 1.94E-05 | 0.337341 | 6.83E-14 | 0.41074583 | 1.96E-20 | 0.400154 | 2.19E-19 |
| 0.08299 | -0.06929 | 0.1349   | 0.272734 | 2.07E-09 | 0.66332343 | 1.58E-60 | 0.702476 | 1.10E-70 |
| 0.81846 | 0.386667 | 4.20E-18 | 0.474767 | 1.25E-27 | 0.54253635 | 4.26E-37 | 0.68859  | 6.73E-67 |
| 0.36963 | 0.436159 | 4.15E-23 | 0.535948 | 4.42E-36 | 0.563191   | 1.95E-40 | 0.674878 | 2.32E-63 |
| 0.75399 | 0.466806 | 1.20E-26 | 0.558189 | 1.32E-39 | 0.57340853 | 3.56E-42 | 0.589229 | 5.42E-45 |
| 0.2115  | 0.276854 | 1.16E-09 | 0.402268 | 1.36E-19 | 0.70055004 | 3.79E-70 | 0.803409 | #####    |
| 0.35924 | 0.445523 | 3.75E-24 | 0.53159  | 2.02E-35 | 0.55246193 | 1.13E-38 | 0.622382 | 1.99E-51 |
| 0.40663 | 0.326854 | 4.34E-13 | 0.398445 | 3.21E-19 | 0.50769992 | 5.77E-32 | 0.695426 | 9.78E-69 |
| 0.31459 | 0.505384 | 1.21E-31 | 0.405402 | 6.70E-20 | 0.47614743 | 8.43E-28 | 0.703013 | 7.76E-71 |

|          |          |          |          |          |            |          |          |          |
|----------|----------|----------|----------|----------|------------|----------|----------|----------|
| 0.12703  | 0.384221 | 7.08E-18 | 0.366459 | 2.74E-16 | 0.46207437 | 4.45E-26 | 0.613433 | 1.29E-49 |
| 0.58573  | 0.40279  | 1.21E-19 | 0.331485 | 1.94E-13 | 0.60307797 | 1.37E-47 | 0.729404 | 1.07E-78 |
| 0.17884  | 0.514287 | 6.85E-33 | 0.605282 | 5.15E-48 | 0.59844616 | 1.05E-46 | 0.635455 | 3.48E-54 |
| 0.90834  | 0.356151 | 2.06E-15 | 0.324968 | 6.02E-13 | 0.47767348 | 5.42E-28 | 0.383284 | 8.63E-18 |
| 0.32235  | 0.413928 | 9.32E-21 | 0.532346 | 1.56E-35 | 0.63261459 | 1.42E-53 | 0.783719 | 3.15E-98 |
| 0.38807  | 0.487429 | 3.06E-29 | 0.416434 | 5.17E-21 | 0.47780072 | 5.23E-28 | 0.62734  | 1.85E-52 |
| 0.17379  | 0.480323 | 2.51E-28 | 0.554074 | 6.21E-39 | 0.5099362  | 2.81E-32 | 0.661113 | 5.33E-60 |
| 0.05896  | 0.430695 | 1.63E-22 | 0.485702 | 5.13E-29 | 0.60807078 | 1.48E-48 | 0.677052 | 6.56E-64 |
| 0.17444  | 0.157291 | 0.00065  | 0.196282 | 1.94E-05 | 0.29704308 | 5.74E-11 | 0.575375 | 1.62E-42 |
| 0.26769  | 0.317912 | 1.99E-12 | 0.472348 | 2.50E-27 | 0.52898911 | 4.96E-35 | 0.400618 | 1.98E-19 |
| 0.08636  | 0.43009  | 1.89E-22 | 0.305428 | 1.54E-11 | 0.5540195  | 6.34E-39 | 0.652041 | 7.04E-58 |
| 0.00304  | -0.02991 | 0.51913  | 0.024023 | 0.60457  | 0.15982003 | 0.00053  | 0.157013 | 0.00066  |
| 7.40E-13 | -0.04542 | 0.32733  | -0.00397 | 0.93176  | 0.08202349 | 0.0766   | 0.060173 | 0.19427  |
| 6.81E-22 | -0.14332 | 0.0019   | -0.13332 | 0.0039   | -0.0091586 | 0.84352  | 0.042978 | 0.35408  |
| 0.2189   | -0.01732 | 0.70897  | -0.04505 | 0.33129  | 0.00333775 | 0.94265  | -0.01763 | 0.70393  |
| 1.27E-35 | -0.04512 | 0.33059  | 0.046166 | 0.31948  | 0.03114186 | 0.502    | 0.00696  | 0.88075  |
| 3.96E-19 | 0.025034 | 0.58945  | 0.048888 | 0.29175  | 0.00141822 | 0.97562  | -0.04615 | 0.31961  |
| 5.38E-18 | -0.1106  | 0.0168   | 0.012591 | 0.7861   | 0.10536964 | 0.02277  | 0.07043  | 0.12856  |
| 4.46E-20 | -0.03239 | 0.48495  | -0.08681 | 0.06087  | -0.0213931 | 0.64471  | 0.048171 | 0.2989   |
| 1.05E-11 | 0.008862 | 0.84853  | 0.035353 | 0.44596  | 0.07402427 | 0.11014  | 0.092759 | 0.04512  |
| 2.23E-06 | -0.03318 | 0.47445  | 0.011975 | 0.79632  | 0.01974726 | 0.67037  | 0.000788 | 0.98644  |
| 2.22E-07 | -0.13589 | 0.00326  | -0.03437 | 0.45878  | 0.07473504 | 0.10675  | 0.007767 | 0.86705  |
| 0.0001   | 0.048583 | 0.29478  | 0.045151 | 0.33026  | 0.05101975 | 0.2712   | 0.054749 | 0.23766  |
| 5.70E-08 | -0.00523 | 0.91031  | 0.042183 | 0.36306  | 0.09286688 | 0.04487  | 0.084759 | 0.06724  |
| 9.63E-40 | 0.011745 | 0.80017  | 0.048836 | 0.29227  | 0.10397059 | 0.02465  | 0.12978  | 0.00497  |
| 1.23E-47 | -0.11581 | 0.01227  | -0.08193 | 0.07695  | 0.01896873 | 0.68265  | 0.037459 | 0.41932  |
| 6.21E-34 | -0.18412 | 6.27E-05 | -0.05413 | 0.24306  | 0.03014455 | 0.5158   | 0.061265 | 0.18629  |
| 4.53E-16 | 0.068896 | 0.13711  | 0.028347 | 0.54116  | 0.07003232 | 0.13073  | 0.158896 | 0.00057  |
| 0.01435  | -0.02569 | 0.57971  | -0.01298 | 0.77972  | -0.1275936 | 0.00576  | -0.11404 | 0.01367  |
| 0.19149  | -0.01261 | 0.78578  | 0.083046 | 0.07298  | 0.06177192 | 0.18266  | 0.081345 | 0.07907  |
| 1.04E-06 | -0.0126  | 0.78599  | 0.022528 | 0.62726  | 0.14785676 | 0.00135  | 0.198599 | 1.54E-05 |
| 6.48E-07 | 0.056544 | 0.2226   | 0.095996 | 0.03811  | 0.14471168 | 0.00172  | 0.18168  | 7.86E-05 |
| 0.00124  | -0.01536 | 0.74064  | -0.0346  | 0.4557   | 0.09803283 | 0.03418  | 0.1351   | 0.00344  |
| 4.77E-07 | 0.264431 | 6.53E-09 | 0.235445 | 2.65E-07 | 0.34218134 | 2.84E-14 | 0.297405 | 5.43E-11 |
| 0.02021  | 0.150433 | 0.00111  | 0.150519 | 0.0011   | 0.03637371 | 0.43293  | 0.029364 | 0.52673  |
| 0.00697  | 0.008329 | 0.85754  | 0.033154 | 0.47477  | 0.05641712 | 0.22365  | 0.065522 | 0.15746  |
| 1.41E-24 | -0.05586 | 0.22828  | 0.029011 | 0.53171  | 0.10509019 | 0.02313  | 0.077307 | 0.09519  |
| 0.02325  | 0.031285 | 0.50004  | -0.00373 | 0.936    | 0.02159294 | 0.64162  | 0.064868 | 0.16165  |
| 1.20E-07 | -0.1578  | 0.00062  | -0.15223 | 0.00097  | 0.00885051 | 0.84872  | 0.015171 | 0.74367  |
| 0.48914  | -0.06398 | 0.16749  | -0.0125  | 0.78768  | 0.07980062 | 0.08496  | 0.039954 | 0.38899  |
| 0.02114  | -0.01211 | 0.79404  | 0.011017 | 0.81231  | 0.04870131 | 0.2936   | -0.02161 | 0.6414   |
| 1.24E-07 | 0.001336 | 0.97703  | 0.037465 | 0.41924  | 0.04305574 | 0.35321  | -0.01069 | 0.81783  |
| 0.38012  | 0.112638 | 0.01488  | 0.093956 | 0.04241  | 0.03833294 | 0.40854  | -0.0513  | 0.26861  |
| 3.39E-07 | 0.018567 | 0.68902  | 0.01403  | 0.76235  | 0.02015814 | 0.66393  | 0.033826 | 0.46586  |
| 1.10E-30 | -0.01082 | 0.81563  | 0.020172 | 0.66372  | 0.07330658 | 0.11364  | 0.070467 | 0.12836  |

|          |          |         |          |         |            |          |          |          |
|----------|----------|---------|----------|---------|------------|----------|----------|----------|
| 9.99E-40 | 0.071837 | 0.12108 | 0.059572 | 0.19877 | 0.08769397 | 0.05827  | 0.101872 | 0.02771  |
| 8.09E-21 | 0.06948  | 0.1338  | 0.101053 | 0.029   | 0.17290222 | 0.00017  | 0.104533 | 0.02388  |
| 5.01E-13 | -0.01237 | 0.78977 | 0.054346 | 0.24113 | 0.18311972 | 6.88E-05 | 0.113889 | 0.01379  |
| 9.62E-09 | -0.02592 | 0.5763  | 7.81E-05 | 0.99866 | 0.09291769 | 0.04476  | 0.025337 | 0.58496  |
| 5.92E-07 | -0.04811 | 0.29954 | -0.03583 | 0.43988 | 0.07085244 | 0.12628  | 0.02625  | 0.57149  |
| 6.70E-13 | 0.043725 | 0.34577 | 0.051531 | 0.26642 | 0.04787054 | 0.30193  | 0.037957 | 0.41315  |
| 6.39E-08 | -0.04884 | 0.29219 | -0.0458  | 0.3233  | 0.03206177 | 0.48945  | 0.047406 | 0.30665  |
| 0.00149  | 0.007458 | 0.87231 | 0.030284 | 0.51387 | 0.03449865 | 0.45703  | -0.00685 | 0.88256  |
| 4.09E-06 | 0.022749 | 0.62389 | 0.068234 | 0.14094 | 0.05088414 | 0.27248  | 0.043101 | 0.3527   |
| 1.04E-25 | 0.030872 | 0.50571 | 0.032505 | 0.48347 | 0.05450236 | 0.23979  | 0.023049 | 0.61931  |
| 0.65651  | 0.04673  | 0.3136  | 0.040168 | 0.38646 | 0.03565816 | 0.44204  | 0.048365 | 0.29695  |
| 0.89309  | 0.062111 | 0.18027 | -0.013   | 0.7793  | -0.0106424 | 0.81858  | 0.050549 | 0.27565  |
| 0.01459  | 0.014205 | 0.75947 | 0.022695 | 0.6247  | 0.03484036 | 0.45258  | 0.025549 | 0.58181  |
| 0.01821  | 0.014361 | 0.75692 | 0.039929 | 0.38929 | 0.00985285 | 0.83183  | 0.023668 | 0.60993  |
| 1.24E-05 | -0.00958 | 0.83639 | 0.03923  | 0.39765 | 0.09861764 | 0.03312  | 0.120427 | 0.00919  |
| 0.51078  | -0.02369 | 0.60957 | -0.00266 | 0.95424 | 0.01250701 | 0.78749  | -0.03577 | 0.44058  |
| 1.37E-08 | 0.023527 | 0.61206 | 0.1133   | 0.0143  | 0.1270121  | 0.00599  | 0.059494 | 0.19936  |
| 1.15E-13 | 0.063926 | 0.16784 | -0.01145 | 0.80502 | 0.00200722 | 0.96549  | 0.045576 | 0.32572  |
| 5.00E-74 | -0.05107 | 0.27072 | 0.007326 | 0.87454 | 0.00824886 | 0.85889  | 0.001823 | 0.96866  |
| 0.66916  | 0.069332 | 0.13464 | 0.000768 | 0.9868  | -0.0094189 | 0.83913  | -0.0261  | 0.5737   |
| 1.36E-16 | -0.05641 | 0.2237  | -0.00186 | 0.96804 | 0.11232574 | 0.01516  | 0.100227 | 0.03034  |
| 0.0013   | -0.02253 | 0.62723 | -0.03103 | 0.50355 | 0.03492388 | 0.4515   | 0.036727 | 0.42847  |
| 0.28015  | 0.031866 | 0.4921  | -0.0335  | 0.47012 | -0.1079249 | 0.01966  | -0.15535 | 0.00076  |
| 6.98E-19 | 0.128845 | 0.00529 | 0.137437 | 0.00292 | 0.17849137 | 0.00011  | 0.148984 | 0.00124  |
| 0.00981  | -0.14311 | 0.00193 | -0.17363 | 0.00016 | -0.0135462 | 0.77031  | -0.01271 | 0.78411  |
| 0.00488  | -0.09779 | 0.03463 | -0.0698  | 0.13202 | 0.02813783 | 0.54415  | -0.0772  | 0.09566  |
| 6.76E-45 | 0.003148 | 0.9459  | 0.031925 | 0.4913  | 0.06495108 | 0.16112  | 0.052078 | 0.26137  |
| 5.18E-06 | 0.09402  | 0.04227 | 0.130704 | 0.00467 | 0.15197913 | 0.00099  | 0.15831  | 0.0006   |
| 1.35E-05 | 0.097721 | 0.03476 | 0.074416 | 0.10826 | 0.02001674 | 0.66614  | -0.00609 | 0.89555  |
| 0.00745  | -0.11068 | 0.01673 | -0.0252  | 0.58705 | 0.08563172 | 0.06446  | 0.080485 | 0.08231  |
| 1.66E-33 | -0.07048 | 0.1283  | 0.017541 | 0.70537 | 0.09412615 | 0.04204  | 0.085108 | 0.06612  |
| 0.00301  | -0.12539 | 0.00667 | -0.15719 | 0.00065 | -0.1183494 | 0.01048  | -0.07093 | 0.12586  |
| 0.00556  | 0.172168 | 0.00019 | 0.166066 | 0.00031 | -0.0517616 | 0.26428  | -0.12542 | 0.00665  |
| 7.75E-43 | -0.03043 | 0.51177 | -0.00767 | 0.86868 | -0.0458936 | 0.32235  | -0.09207 | 0.04676  |
| 0.00053  | -0.08296 | 0.07329 | -0.11993 | 0.00948 | -0.0764106 | 0.0991   | -0.07941 | 0.08649  |
| 0.76728  | -0.05463 | 0.23873 | -0.05621 | 0.22533 | 0.02184147 | 0.63779  | 0.025033 | 0.58947  |
| 0.01955  | -0.04698 | 0.31099 | -0.06921 | 0.1353  | -0.1507205 | 0.00109  | -0.14449 | 0.00174  |
| 0.20661  | 0.05291  | 0.25381 | 0.088922 | 0.05482 | -0.0101153 | 0.82742  | -0.05157 | 0.2661   |
| 0.77933  | -0.00656 | 0.88762 | 0.056433 | 0.22351 | -0.0346393 | 0.4552   | -0.09628 | 0.03753  |
| 1.37E-17 | -0.0285  | 0.53903 | -0.00447 | 0.92332 | 0.03753655 | 0.41835  | -0.0094  | 0.83943  |
| 1.34E-11 | -0.06246 | 0.17785 | -0.01611 | 0.72848 | 0.05961684 | 0.19844  | 0.089665 | 0.05282  |
| 2.82E-11 | -0.00227 | 0.96102 | 0.023983 | 0.60517 | 0.11441557 | 0.01336  | 0.146385 | 0.00151  |
| 2.30E-19 | -0.03193 | 0.49124 | -0.03528 | 0.44694 | 0.06454944 | 0.16373  | 0.092006 | 0.04691  |
| 6.54E-07 | 0.021545 | 0.64237 | 0.030776 | 0.50704 | 0.17613983 | 0.00013  | 0.193598 | 2.53E-05 |
| 0.00032  | 0.126967 | 0.006   | 0.15159  | 0.00102 | 0.14797237 | 0.00134  | 0.197565 | 1.70E-05 |

|          |          |          |          |          |            |          |          |          |
|----------|----------|----------|----------|----------|------------|----------|----------|----------|
| 1.05E-07 | -0.0814  | 0.07887  | -0.05598 | 0.22727  | 0.04311026 | 0.3526   | 0.11319  | 0.01439  |
| 0.00887  | -0.08198 | 0.07677  | -0.08902 | 0.05456  | -0.0785995 | 0.08977  | -0.10429 | 0.0242   |
| 3.73E-14 | -0.07899 | 0.0882   | -0.09357 | 0.04328  | -0.0419601 | 0.36561  | 0.010583 | 0.81957  |
| 1.16E-10 | -0.07015 | 0.13009  | -0.08673 | 0.06111  | -0.0171397 | 0.71181  | 0.019144 | 0.67988  |
| 3.75E-38 | -0.0552  | 0.23385  | 0.008327 | 0.85758  | 0.04559946 | 0.32547  | 0.071889 | 0.12081  |
| 2.47E-29 | -0.08432 | 0.06868  | -0.01978 | 0.66991  | 0.04849635 | 0.29564  | 0.064652 | 0.16306  |
| 1.22E-21 | -0.05109 | 0.27051  | -0.02892 | 0.53294  | 0.02157333 | 0.64193  | 0.072275 | 0.11882  |
| 2.16E-09 | -0.01751 | 0.7059   | 0.024696 | 0.59449  | 0.04774578 | 0.30319  | 0.013278 | 0.77474  |
| 3.20E-11 | -0.03214 | 0.48835  | 0.019855 | 0.66868  | 0.04765313 | 0.30413  | 0.017618 | 0.70414  |
| 4.63E-10 | -0.04181 | 0.36732  | -0.00486 | 0.91655  | 0.02577547 | 0.57848  | 0.03417  | 0.46133  |
| 2.33E-05 | -0.05132 | 0.26839  | -0.00195 | 0.96654  | 0.00565251 | 0.90304  | 0.027487 | 0.5535   |
| 1.88E-15 | -0.05985 | 0.19668  | 0.000314 | 0.99459  | 0.02737914 | 0.55506  | 0.030164 | 0.51553  |
| 6.27E-15 | -0.07785 | 0.09288  | -0.02368 | 0.60969  | 0.0334614  | 0.47068  | 0.026946 | 0.56134  |
| 7.48E-14 | -0.1146  | 0.01321  | -0.01462 | 0.75268  | 0.0619804  | 0.18119  | 0.06615  | 0.15351  |
| 2.50E-19 | -0.02213 | 0.63335  | -0.03308 | 0.47579  | 0.04839485 | 0.29666  | 0.03828  | 0.40919  |
| 9.69E-10 | -0.06164 | 0.18364  | -0.0067  | 0.88517  | 0.04978457 | 0.28299  | 0.048133 | 0.29928  |
| 1.13E-15 | -0.10691 | 0.02084  | -0.09523 | 0.03967  | -0.0130387 | 0.77869  | 0.032399 | 0.48489  |
| 1.85E-22 | 0.074804 | 0.10643  | 0.047743 | 0.30321  | 0.11907336 | 0.01001  | 0.114416 | 0.01336  |
| 1.26E-21 | 0.039879 | 0.38988  | 0.057954 | 0.21127  | 0.11498534 | 0.0129   | 0.131099 | 0.00454  |
| 1.35E-36 | -0.0851  | 0.06615  | -0.06679 | 0.14953  | 0.06011971 | 0.19467  | 0.033672 | 0.46789  |
| 2.54E-16 | -0.02586 | 0.5772   | 0.009603 | 0.83604  | 0.08023467 | 0.08327  | 0.113072 | 0.01449  |
| 5.16E-19 | -0.1392  | 0.00257  | -0.10447 | 0.02397  | 0.03709903 | 0.4238   | -0.00167 | 0.97122  |
| 0.93259  | 0.002044 | 0.96487  | 0.08399  | 0.06977  | 0.15532381 | 0.00076  | 0.092752 | 0.04514  |
| 8.01E-43 | -0.06649 | 0.15141  | -0.03695 | 0.42563  | 0.03634474 | 0.43329  | 0.029914 | 0.51902  |
| 1.16E-25 | -0.05704 | 0.21859  | -0.09407 | 0.04216  | 0.02660253 | 0.56634  | 0.066507 | 0.15129  |
| 1.80E-10 | 0.014096 | 0.76127  | 0.066838 | 0.14927  | 0.21162345 | 3.96E-06 | 0.25069  | 4.00E-08 |
| 0.60974  | 0.208482 | 5.54E-06 | 0.195324 | 2.13E-05 | 0.32181459 | 1.03E-12 | 0.525292 | 1.75E-34 |
| 0.1043   | 0.100198 | 0.03039  | -0.15955 | 0.00054  | 0.23519897 | 2.73E-07 | 0.466139 | 1.44E-26 |
| 0.15554  | 0.178776 | 0.0001   | 0.226429 | 7.64E-07 | 0.36454935 | 4.00E-16 | 0.607863 | 1.62E-48 |
| 2.48E-08 | 0.161516 | 0.00046  | 0.132743 | 0.00406  | 0.22520723 | 8.79E-07 | 0.303879 | 1.97E-11 |
| 0.40574  | 0.039785 | 0.391    | 0.181252 | 8.18E-05 | 0.27762644 | 1.04E-09 | 0.389565 | 2.25E-18 |
| 0.48578  | 0.092309 | 0.04618  | -0.12935 | 0.00512  | 0.13105121 | 0.00456  | 0.398503 | 3.17E-19 |
| 0.00016  | 0.118073 | 0.01066  | 0.079159 | 0.0875   | 0.63995789 | 3.64E-55 | 0.635492 | 3.42E-54 |
| 0.53283  | 0.184054 | 6.31E-05 | 0.254703 | 2.38E-08 | 0.34679526 | 1.21E-14 | 0.34578  | 1.46E-14 |
| 0.2866   | 0.023748 | 0.60872  | -0.1861  | 5.20E-05 | 0.14947746 | 0.0012   | 0.454383 | 3.60E-25 |
| 0.30469  | 0.183193 | 6.83E-05 | 0.340179 | 4.09E-14 | 0.41851184 | 3.15E-21 | 0.625256 | 5.05E-52 |
| 0.06654  | 0.090099 | 0.05168  | 0.023757 | 0.60859  | 0.14484514 | 0.0017   | 0.265943 | 5.31E-09 |
| 0.87533  | 0.216456 | 2.34E-06 | 0.05211  | 0.26107  | 0.13745585 | 0.00291  | 0.433406 | 8.29E-23 |
| 0.71966  | 0.196495 | 1.90E-05 | 0.06789  | 0.14296  | 0.18955839 | 3.74E-05 | 0.457855 | 1.41E-25 |
| 0.03771  | 0.077817 | 0.09302  | 0.037196 | 0.42259  | 0.30861825 | 9.20E-12 | 0.377402 | 2.96E-17 |
| 0.50297  | 0.204426 | 8.47E-06 | -0.05234 | 0.25898  | 0.04748325 | 0.30586  | 0.317392 | 2.17E-12 |
| 0.03924  | 0.069973 | 0.13106  | -0.10477 | 0.02356  | 0.14209119 | 0.00208  | 0.467051 | 1.12E-26 |
| 0.00152  | 0.020814 | 0.65369  | -0.01494 | 0.74751  | 0.29423304 | 8.84E-11 | 0.528641 | 5.60E-35 |
| 0.5754   | -0.11261 | 0.0149   | -0.10052 | 0.02986  | 0.28841389 | 2.13E-10 | 0.466882 | 1.17E-26 |
| 0.17695  | 0.430244 | 1.82E-22 | 0.299477 | 3.93E-11 | 0.38772504 | 3.35E-18 | 0.531183 | 2.33E-35 |

|          |          |          |          |          |            |          |          |          |
|----------|----------|----------|----------|----------|------------|----------|----------|----------|
| 0.20216  | 0.350237 | 6.35E-15 | 0.307994 | 1.02E-11 | 0.39893442 | 2.88E-19 | 0.658286 | 2.49E-59 |
| 4.02E-05 | 0.175772 | 0.00013  | 0.052922 | 0.25371  | 0.28442245 | 3.86E-10 | 0.556036 | 2.98E-39 |
| 0.43401  | 0.161047 | 0.00048  | -0.03485 | 0.4525   | 0.31456258 | 3.48E-12 | 0.629069 | 8.03E-53 |
| 0.49656  | 0.028612 | 0.53739  | 0.047645 | 0.30421  | 0.38344093 | 8.35E-18 | 0.590121 | 3.72E-45 |
| 0.13077  | 0.142847 | 0.00197  | 0.071907 | 0.12072  | 0.46706035 | 1.11E-26 | 0.564835 | 1.04E-40 |
| 0.01647  | 0.11956  | 0.00971  | 0.102757 | 0.02638  | 0.15118145 | 0.00105  | 0.390048 | 2.03E-18 |
| 0.54544  | -0.06777 | 0.14369  | -0.28399 | 4.11E-10 | -0.1422405 | 0.00206  | 0.001751 | 0.9699   |
| 0.44069  | 0.122869 | 0.00786  | 0.100052 | 0.03064  | 0.2898667  | 1.72E-10 | 0.487252 | 3.23E-29 |
| 0.44851  | 0.127623 | 0.00575  | -0.11503 | 0.01287  | 0.06250275 | 0.17753  | 0.329633 | 2.68E-13 |
| 0.07454  | 0.397805 | 3.70E-19 | 0.286744 | 2.74E-10 | 0.38192953 | 1.15E-17 | 0.612812 | 1.71E-49 |
| 0.88573  | 0.283985 | 4.11E-10 | 0.377964 | 2.63E-17 | 0.48483634 | 6.64E-29 | 0.632193 | 1.75E-53 |
| 2.35E-15 | 0.019505 | 0.67418  | -0.01262 | 0.78565  | 0.28176962 | 5.69E-10 | 0.39408  | 8.43E-19 |
| 0.33442  | -0.09237 | 0.04603  | -0.03068 | 0.50836  | 0.30808341 | 1.00E-11 | 0.337552 | 6.57E-14 |
| 0.12554  | 0.153967 | 0.00084  | 0.057744 | 0.21293  | 0.28689633 | 2.67E-10 | 0.575912 | 1.30E-42 |
| 0.44224  | 0.180437 | 8.82E-05 | 0.225933 | 8.09E-07 | 0.394246   | 8.13E-19 | 0.588206 | 8.33E-45 |
| 0.08929  | 0.207244 | 6.31E-06 | 0.134023 | 0.00371  | 0.32726743 | 4.04E-13 | 0.568998 | 2.04E-41 |
| 0.10006  | 0.136898 | 0.00303  | -0.01505 | 0.74563  | 0.15447378 | 0.00081  | 0.331101 | 2.07E-13 |
| 0.01495  | 0.072497 | 0.11769  | -0.07927 | 0.08706  | 0.11850611 | 0.01037  | 0.25131  | 3.69E-08 |
| 0.69287  | 0.115522 | 0.01248  | 0.087328 | 0.05933  | 0.32724028 | 4.06E-13 | 0.612446 | 2.03E-49 |
| 0.20634  | 0.157503 | 0.00064  | 0.165899 | 0.00032  | 0.33531198 | 9.82E-14 | 0.525545 | 1.61E-34 |
| 0.02425  | 0.211322 | 4.09E-06 | 0.0953   | 0.03953  | 0.23161225 | 4.18E-07 | 0.513805 | 8.02E-33 |
| 0.18318  | -0.19666 | 1.87E-05 | -0.21557 | 2.58E-06 | 0.0445093  | 0.33718  | 0.156058 | 0.00071  |
| 2.11E-05 | -0.18886 | 4.00E-05 | -0.02121 | 0.64748  | 0.26013996 | 1.16E-08 | 0.383174 | 8.83E-18 |
| 0.01994  | 0.107127 | 0.02059  | 0.049766 | 0.28317  | 0.11746497 | 0.01107  | 0.321087 | 1.17E-12 |
| 0.72095  | 0.288766 | 2.02E-10 | 0.155557 | 0.00074  | 0.45264656 | 5.73E-25 | 0.602699 | 1.62E-47 |
| 0.00037  | 0.132066 | 0.00425  | -0.00972 | 0.83406  | 0.20047199 | 1.27E-05 | 0.41603  | 5.68E-21 |
| 0.28481  | 0.224052 | 1.00E-06 | -0.04914 | 0.28928  | 0.13533581 | 0.00339  | 0.434138 | 6.90E-23 |
| 0.20578  | 0.039686 | 0.39219  | -0.02725 | 0.55693  | 0.4806094  | 2.31E-28 | 0.508066 | 5.13E-32 |
| 0.27143  | -0.06995 | 0.1312   | -0.04991 | 0.2818   | 0.20398907 | 8.86E-06 | 0.391033 | 1.64E-18 |
| 2.28E-21 | 0.17766  | 0.00011  | 0.00842  | 0.85599  | 0.1447679  | 0.00171  | 0.29767  | 5.21E-11 |
| 0.49725  | 0.085492 | 0.0649   | 0.063064 | 0.17367  | 0.35875845 | 1.25E-15 | 0.539853 | 1.11E-36 |
| 0.00132  | 0.295809 | 6.94E-11 | 0.22819  | 6.23E-07 | 0.45222316 | 6.41E-25 | 0.626156 | 3.28E-52 |
| 1.31E-05 | -0.01081 | 0.81585  | 0.096772 | 0.03657  | 0.27211469 | 2.26E-09 | 0.419758 | 2.34E-21 |
| 3.50E-05 | 0.290221 | 1.63E-10 | 0.317432 | 2.16E-12 | 0.43775928 | 2.77E-23 | 0.499166 | 8.53E-31 |
| 0.00291  | -0.07499 | 0.10558  | -0.16971 | 0.00023  | 0.1111123  | 0.0163   | 0.277118 | 1.11E-09 |
| 0.45517  | 0.185536 | 5.49E-05 | 0.094404 | 0.04143  | 0.16279091 | 0.00041  | 0.414911 | 7.40E-21 |
| 1.60E-07 | -0.09821 | 0.03385  | -0.14036 | 0.00236  | 0.13321824 | 0.00393  | 0.275674 | 1.37E-09 |
| 0.06659  | 0.046614 | 0.31481  | -0.29288 | 1.09E-10 | 0.13953972 | 0.00251  | 0.348469 | 8.86E-15 |
| 0.0036   | 0.12296  | 0.00781  | 0.070035 | 0.13072  | 0.32154426 | 1.08E-12 | 0.532154 | 1.66E-35 |
| 9.32E-08 | 0.089629 | 0.05292  | 0.171148 | 0.0002   | 0.30001076 | 3.62E-11 | 0.417445 | 4.07E-21 |
| 0.32386  | -0.2773  | 1.08E-09 | -0.05024 | 0.27858  | 0.26209125 | 8.95E-09 | 0.38267  | 9.82E-18 |
| 5.70E-07 | 0.136215 | 0.00318  | 0.000643 | 0.98895  | 0.2675847  | 4.24E-09 | 0.397844 | 3.67E-19 |
| 0.00709  | 0.13573  | 0.00329  | 0.066684 | 0.15021  | 0.36640885 | 2.76E-16 | 0.4679   | 8.81E-27 |
| 0.00145  | 0.160614 | 0.00049  | 0.052249 | 0.25981  | 0.34456142 | 1.83E-14 | 0.363202 | 5.22E-16 |
| 0.11757  | 0.337414 | 6.74E-14 | 0.133386 | 0.00388  | 0.07131996 | 0.12379  | 0.305924 | 1.42E-11 |



|          |          |          |          |          |            |          |          |          |
|----------|----------|----------|----------|----------|------------|----------|----------|----------|
| 0.58468  | -0.09852 | 0.03329  | -0.13493 | 0.00349  | 0.1746263  | 0.00015  | 0.353966 | 3.13E-15 |
| 4.41E-07 | -0.02878 | 0.53492  | -0.24529 | 7.92E-08 | 0.10173666 | 0.02792  | 0.203318 | 9.50E-06 |
| 0.10792  | 0.015278 | 0.74193  | 0.008379 | 0.85668  | 0.02811508 | 0.54447  | 0.137159 | 0.00298  |
| 1.09E-05 | 0.005822 | 0.90015  | -0.10231 | 0.02704  | 0.16619447 | 0.00031  | 0.286233 | 2.95E-10 |
| 0.23929  | -0.0428  | 0.35612  | -0.08973 | 0.05264  | 0.31192573 | 5.37E-12 | 0.324762 | 6.23E-13 |
| 0.46937  | 0.367913 | 2.04E-16 | 0.144331 | 0.00177  | 0.42698892 | 4.07E-22 | 0.582085 | 1.06E-43 |
| 0.00859  | 0.435431 | 4.99E-23 | 0.236782 | 2.26E-07 | 0.412513   | 1.30E-20 | 0.577459 | 6.99E-43 |
| 0.36594  | 0.052057 | 0.26156  | -0.16248 | 0.00042  | 0.31862961 | 1.77E-12 | 0.430583 | 1.68E-22 |
| 0.32487  | 0.292958 | 1.07E-10 | 0.235621 | 2.59E-07 | 0.42854565 | 2.77E-22 | 0.68681  | 1.99E-66 |
| 2.21E-06 | 0.095541 | 0.03903  | 0.028864 | 0.5338   | 0.02866522 | 0.53662  | 0.237145 | 2.16E-07 |
| 0.06704  | 0.255207 | 2.23E-08 | 0.269201 | 3.39E-09 | 0.23615371 | 2.43E-07 | 0.350769 | 5.75E-15 |
| 1.16E-05 | 0.128527 | 0.00541  | -0.01047 | 0.82144  | 0.29782337 | 5.09E-11 | 0.587312 | 1.21E-44 |
| 0.08532  | -0.0718  | 0.12128  | -0.14273 | 0.00199  | 0.09885259 | 0.0327   | 0.336707 | 7.65E-14 |
| 4.27E-06 | 0.050086 | 0.28008  | -0.02009 | 0.66504  | 0.40308209 | 1.13E-19 | 0.659369 | 1.38E-59 |
| 0.18961  | 0.35471  | 2.72E-15 | 0.146454 | 0.00151  | 0.22893032 | 5.72E-07 | 0.450364 | 1.05E-24 |
| 0.13776  | 0.057067 | 0.21835  | -0.12819 | 0.00553  | 0.24568709 | 7.54E-08 | 0.589045 | 5.85E-45 |
| 0.16978  | -0.02167 | 0.64039  | -0.20704 | 6.45E-06 | 0.18280932 | 7.08E-05 | 0.415944 | 5.80E-21 |
| 0.61161  | 0.247741 | 5.82E-08 | 0.035734 | 0.44106  | 0.16103737 | 0.00048  | 0.365453 | 3.34E-16 |
| 0.13288  | 0.071843 | 0.12105  | -0.06664 | 0.1505   | 0.05430873 | 0.24146  | 0.275771 | 1.35E-09 |
| 0.97732  | 0.342902 | 2.49E-14 | 0.203295 | 9.52E-06 | 0.31727701 | 2.22E-12 | 0.573459 | 3.49E-42 |
| 0.05636  | 0.176615 | 0.00012  | 0.121238 | 0.00873  | 0.31441201 | 3.57E-12 | 0.560436 | 5.62E-40 |
| 0.00013  | -0.04431 | 0.33931  | -0.11063 | 0.01677  | 0.21549626 | 2.60E-06 | 0.41028  | 2.18E-20 |
| 0.1081   | 0.059234 | 0.20134  | 0.104516 | 0.0239   | 0.15757648 | 0.00063  | 0.321781 | 1.04E-12 |
| 0.55246  | 0.199781 | 1.36E-05 | 0.149915 | 0.00116  | 0.44235831 | 8.52E-24 | 0.695141 | 1.17E-68 |
| 0.09242  | 0.012069 | 0.79478  | 0.082986 | 0.07319  | 0.32192128 | 1.01E-12 | 0.364206 | 4.28E-16 |
| 1.48E-12 | -0.00779 | 0.86673  | -0.05202 | 0.26194  | 0.22040878 | 1.51E-06 | 0.343433 | 2.25E-14 |
| 0.00548  | -0.05043 | 0.27683  | -0.00286 | 0.95081  | 0.30949357 | 7.98E-12 | 0.53386  | 9.19E-36 |
| 0.31773  | 0.400957 | 1.83E-19 | 0.271146 | 2.59E-09 | 0.3328187  | 1.53E-13 | 0.457351 | 1.62E-25 |
| 0.12703  | 0.335404 | 9.66E-14 | 0.133206 | 0.00393  | 0.3053828  | 1.55E-11 | 0.542403 | 4.46E-37 |
| 1.98E-05 | 0.279744 | 7.63E-10 | 0.139956 | 0.00243  | 0.33380311 | 1.28E-13 | 0.382406 | 1.04E-17 |
| 0.03658  | 0.182026 | 7.62E-05 | 0.012147 | 0.79347  | 0.10578019 | 0.02224  | 0.390672 | 1.77E-18 |
| 0.00094  | 0.074503 | 0.10785  | -0.02387 | 0.60691  | 0.23215911 | 3.92E-07 | 0.496229 | 2.12E-30 |
| 0.76241  | 0.306361 | 1.32E-11 | 0.216868 | 2.24E-06 | 0.36978682 | 1.40E-16 | 0.574165 | 2.63E-42 |
| 0.18872  | 0.298765 | 4.39E-11 | 0.329818 | 2.59E-13 | 0.55650173 | 2.50E-39 | 0.613195 | 1.44E-49 |
| 0.1375   | -0.09511 | 0.03994  | -0.00412 | 0.92927  | 0.30470736 | 1.72E-11 | 0.555977 | 3.04E-39 |
| 0.80326  | 0.281641 | 5.80E-10 | -0.00221 | 0.96194  | 0.11062441 | 0.01678  | 0.305826 | 1.44E-11 |
| 0.62019  | 0.392738 | 1.13E-18 | 0.314766 | 3.36E-12 | 0.54164896 | 5.85E-37 | 0.693884 | 2.57E-68 |
| 1.10E-05 | -0.23725 | 2.13E-07 | -0.43665 | 3.67E-23 | -0.0952143 | 0.03971  | 0.036336 | 0.4334   |
| 0.0494   | 0.148662 | 0.00127  | 0.049349 | 0.28722  | 0.39812461 | 3.45E-19 | 0.702491 | 1.09E-70 |
| 0.95822  | 0.405836 | 6.07E-20 | 0.254342 | 2.50E-08 | 0.2237582  | 1.04E-06 | 0.31895  | 1.67E-12 |
| 0.94212  | 0.109302 | 0.01814  | 0.08258  | 0.07461  | 0.08086958 | 0.08085  | 0.238606 | 1.81E-07 |
| 0.06757  | 0.347508 | 1.06E-14 | 0.189248 | 3.86E-05 | 0.52700278 | 9.80E-35 | 0.483315 | 1.04E-28 |
| 0.40601  | 0.229034 | 5.65E-07 | 0.021501 | 0.64305  | 0.13334271 | 0.00389  | 0.415329 | 6.71E-21 |
| 0.07593  | -0.05643 | 0.22355  | -0.16035 | 0.0005   | 0.05876579 | 0.20493  | 0.354048 | 3.08E-15 |
| 0.20091  | 0.174066 | 0.00016  | 0.083726 | 0.07066  | 0.41925139 | 2.64E-21 | 0.663143 | 1.75E-60 |

|          |          |          |          |          |            |          |          |          |
|----------|----------|----------|----------|----------|------------|----------|----------|----------|
| 0.21749  | 0.279756 | 7.62E-10 | 0.117836 | 0.01082  | 0.18748949 | 4.56E-05 | 0.386364 | 4.48E-18 |
| 0.08631  | 0.181595 | 7.93E-05 | -0.0795  | 0.08614  | 0.11521794 | 0.01272  | 0.417848 | 3.69E-21 |
| 0.63783  | 0.216485 | 2.34E-06 | 0.256156 | 1.97E-08 | 0.26143661 | 9.78E-09 | 0.323945 | 7.17E-13 |
| 0.01303  | 0.035174 | 0.44826  | -0.1942  | 2.38E-05 | 0.18354574 | 6.61E-05 | 0.472786 | 2.21E-27 |
| 0.75795  | 0.167772 | 0.00027  | 0.092495 | 0.04574  | 0.31537524 | 3.04E-12 | 0.618525 | 1.22E-50 |
| 0.00504  | 0.085101 | 0.06614  | -0.01206 | 0.79488  | 0.34272295 | 2.57E-14 | 0.609778 | 6.83E-49 |
| 0.03358  | 0.263364 | 7.54E-09 | -0.05345 | 0.24899  | 0.18803683 | 4.33E-05 | 0.447865 | 2.03E-24 |
| 0.20315  | 0.359902 | 9.97E-16 | 0.163167 | 0.0004   | 0.36741166 | 2.26E-16 | 0.637456 | 1.28E-54 |
| 0.17527  | 0.379059 | 2.09E-17 | 0.334054 | 1.23E-13 | 0.47019978 | 4.61E-27 | 0.579348 | 3.25E-43 |
| 0.98345  | 0.215431 | 2.62E-06 | -0.09137 | 0.04846  | 0.07525419 | 0.10433  | 0.400122 | 2.21E-19 |
| 0.14092  | 0.023434 | 0.61347  | -0.01688 | 0.71605  | 0.07171159 | 0.12173  | 0.019667 | 0.67163  |
| 0.30559  | 0.307068 | 1.18E-11 | 0.181105 | 8.29E-05 | -0.0247342 | 0.59392  | -0.12952 | 0.00506  |
| 0.0189   | 0.000604 | 0.98961  | -0.05523 | 0.23352  | 0.17949924 | 9.61E-05 | 0.057734 | 0.21301  |
| 0.50306  | 0.289076 | 1.93E-10 | 0.194664 | 2.27E-05 | 0.03784856 | 0.41449  | -0.1047  | 0.02365  |
| 0.07565  | 0.167045 | 0.00029  | 0.349282 | 7.60E-15 | 0.3829912  | 9.18E-18 | 0.186514 | 5.00E-05 |
| 0.08166  | 0.187426 | 4.59E-05 | 0.220198 | 1.55E-06 | 0.104756   | 0.02358  | 0.021709 | 0.63983  |
| 2.46E-11 | 0.280087 | 7.26E-10 | 0.243112 | 1.04E-07 | 0.25112492 | 3.78E-08 | 0.199146 | 1.45E-05 |
| 3.14E-05 | 0.381498 | 1.26E-17 | 0.335802 | 9.00E-14 | 0.15827727 | 0.0006   | 0.080979 | 0.08044  |
| 5.89E-06 | 0.338989 | 5.07E-14 | 0.230581 | 4.71E-07 | 0.16323091 | 0.0004   | 0.129496 | 0.00507  |
| 0.26685  | 0.18842  | 4.17E-05 | 0.159857 | 0.00053  | 0.04930636 | 0.28764  | -0.12007 | 0.0094   |
| 0.00043  | 0.16678  | 0.00029  | 0.4113   | 1.72E-20 | 0.52849525 | 5.88E-35 | 0.312854 | 4.61E-12 |
| 0.00171  | 0.206456 | 6.86E-06 | 0.033662 | 0.46802  | -0.1917731 | 3.02E-05 | -0.28311 | 4.67E-10 |
| 0.50904  | -0.05783 | 0.21227  | -0.16923 | 0.00024  | -0.1194027 | 0.0098   | -0.21023 | 4.60E-06 |
| 0.80806  | 0.334331 | 1.17E-13 | 0.08594  | 0.0635   | -0.0319816 | 0.49054  | 0.092623 | 0.04544  |
| 8.97E-10 | -0.06677 | 0.14966  | 0.188322 | 4.21E-05 | 0.13984666 | 0.00245  | 0.034264 | 0.4601   |
| 0.21844  | 0.19987  | 1.35E-05 | 0.374206 | 5.71E-17 | 0.30382874 | 1.98E-11 | 0.295473 | 7.31E-11 |
| 0.88503  | 0.210203 | 4.61E-06 | 0.24351  | 9.90E-08 | 0.28565121 | 3.22E-10 | 0.16468  | 0.00035  |
| 0.15044  | 0.248422 | 5.34E-08 | 0.20729  | 6.28E-06 | 0.23877733 | 1.77E-07 | 0.248874 | 5.04E-08 |
| 0.47215  | 0.311515 | 5.74E-12 | 0.298823 | 4.35E-11 | 0.25242632 | 3.20E-08 | 0.243099 | 1.04E-07 |
| 0.17284  | 0.188429 | 4.17E-05 | 0.194307 | 2.36E-05 | 0.43435531 | 6.54E-23 | 0.371567 | 9.78E-17 |
| 0.69491  | 0.271689 | 2.40E-09 | 0.282633 | 5.02E-10 | 0.4991781  | 8.50E-31 | 0.41887  | 2.90E-21 |
| 2.95E-07 | 0.340393 | 3.93E-14 | 0.211913 | 3.84E-06 | 0.2287963  | 5.81E-07 | 0.217665 | 2.05E-06 |
| 0.3254   | 0.424077 | 8.27E-22 | 0.311248 | 6.00E-12 | 0.11397552 | 0.01372  | 0.192091 | 2.93E-05 |
| 6.90E-05 | 0.117089 | 0.01133  | 0.081154 | 0.07978  | -0.0121842 | 0.79285  | -0.18595 | 5.28E-05 |
| 0.00311  | 0.250066 | 4.33E-08 | 0.269879 | 3.09E-09 | 0.17133574 | 0.0002   | 0.075034 | 0.10536  |
| 0.06484  | 0.365193 | 3.52E-16 | 0.332458 | 1.63E-13 | 0.08417916 | 0.06914  | -0.01727 | 0.70965  |
| 0.97174  | 0.037416 | 0.41985  | 0.235751 | 2.55E-07 | 0.27579081 | 1.35E-09 | 0.175948 | 0.00013  |
| 0.49538  | 0.126162 | 0.00633  | -0.07959 | 0.08578  | -0.0914544 | 0.04825  | -0.2199  | 1.60E-06 |
| 0.00807  | 0.083068 | 0.07291  | 0.167067 | 0.00029  | 0.24411818 | 9.18E-08 | 0.252415 | 3.20E-08 |
| 0.76608  | 0.230973 | 4.50E-07 | 0.177473 | 0.00012  | -0.0543009 | 0.24153  | -0.18326 | 6.79E-05 |
| 0.51645  | 0.167865 | 0.00027  | 0.279164 | 8.30E-10 | 0.44262724 | 7.95E-24 | 0.341708 | 3.09E-14 |
| 0.50498  | -0.07191 | 0.12071  | -0.13229 | 0.00419  | -0.0738494 | 0.11098  | -0.11565 | 0.01239  |
| 0.04537  | 0.187362 | 4.62E-05 | 0.015927 | 0.73139  | -0.055203  | 0.23379  | -0.07366 | 0.11192  |
| 0.00135  | -0.0689  | 0.13708  | -0.02745 | 0.55405  | -0.0740091 | 0.11021  | -0.23341 | 3.38E-07 |
| 0.17465  | 0.391194 | 1.58E-18 | 0.200346 | 1.29E-05 | -0.0593407 | 0.20053  | -0.03739 | 0.42012  |

|          |          |          |          |          |            |          |          |          |
|----------|----------|----------|----------|----------|------------|----------|----------|----------|
| 0.5578   | 0.15995  | 0.00052  | 0.142248 | 0.00206  | 0.21883975 | 1.80E-06 | 0.091471 | 0.04821  |
| 0.18004  | 0.125617 | 0.00657  | 0.180114 | 9.08E-05 | 0.18662949 | 4.95E-05 | 0.052894 | 0.25396  |
| 1.73E-10 | 0.01348  | 0.7714   | -0.07045 | 0.12846  | -0.1992673 | 1.44E-05 | -0.30556 | 1.50E-11 |
| 0.00104  | 0.105872 | 0.02213  | 0.037555 | 0.41812  | 0.03232309 | 0.48592  | -0.12796 | 0.00562  |
| 0.01235  | 0.230361 | 4.84E-07 | -0.02413 | 0.60296  | -0.0866891 | 0.06122  | -0.08153 | 0.0784   |
| 0.62074  | 0.447218 | 2.41E-24 | 0.175759 | 0.00013  | 0.03231418 | 0.48604  | 0.11192  | 0.01553  |
| 0.41466  | 0.323521 | 7.71E-13 | 0.17828  | 0.00011  | 0.18994778 | 3.60E-05 | 0.087537 | 0.05872  |
| 0.79897  | 0.141173 | 0.00223  | 0.104369 | 0.0241   | 0.13818207 | 0.00277  | -0.02494 | 0.59091  |
| 0.31661  | 0.202329 | 1.05E-05 | 0.071511 | 0.12278  | -0.0745497 | 0.10763  | -0.01311 | 0.77754  |
| 0.95739  | 0.282486 | 5.12E-10 | 0.24344  | 9.98E-08 | 0.25537458 | 2.18E-08 | 0.292152 | 1.21E-10 |
| 0.22503  | 0.068194 | 0.14117  | 0.368462 | 1.83E-16 | 0.4412253  | 1.14E-23 | 0.27022  | 2.95E-09 |
| 0.65505  | -0.2181  | 1.96E-06 | -0.08222 | 0.0759   | 0.05253346 | 0.25722  | -0.05229 | 0.25944  |
| 0.11983  | 0.403766 | 9.72E-20 | 0.183235 | 6.81E-05 | 0.0466373  | 0.31457  | -0.09038 | 0.05096  |
| 0.06168  | -0.05823 | 0.20911  | -0.0638  | 0.16871  | 0.04257957 | 0.35857  | 0.015714 | 0.73483  |
| 0.13669  | -0.10713 | 0.02058  | -0.09826 | 0.03377  | -0.1601402 | 0.00051  | -0.20644 | 6.87E-06 |
| 0.00396  | 0.079392 | 0.08657  | 0.076478 | 0.0988   | 0.04893199 | 0.29132  | -0.05059 | 0.27527  |
| 0.00446  | 0.01088  | 0.81461  | 0.042907 | 0.35488  | 0.03671863 | 0.42857  | -0.04177 | 0.36784  |
| 0.3031   | 0.112291 | 0.01519  | 0.202306 | 1.05E-05 | 0.2801945  | 7.15E-10 | 0.191061 | 3.24E-05 |
| 0.69247  | 0.284782 | 3.66E-10 | 0.119304 | 0.00987  | 0.25440269 | 2.48E-08 | 0.28089  | 6.47E-10 |
| 7.72E-14 | 0.152309 | 0.00096  | 0.058655 | 0.20579  | 0.10903702 | 0.01842  | 0.011424 | 0.80551  |
| 1.66E-07 | 0.01383  | 0.76564  | -0.08242 | 0.07517  | -0.0663961 | 0.15198  | -0.01523 | 0.7427   |
| 0.17847  | 0.028938 | 0.53275  | 0.126063 | 0.00638  | 0.29542961 | 7.36E-11 | 0.228666 | 5.90E-07 |
| 0.19612  | 0.073599 | 0.1122   | 0.057698 | 0.2133   | 0.17572002 | 0.00014  | 0.233896 | 3.19E-07 |
| 0.00039  | -0.08069 | 0.08151  | 0.032047 | 0.48966  | 0.15082361 | 0.00108  | 0.080506 | 0.08223  |
| 0.01479  | 0.175271 | 0.00014  | 0.324505 | 6.51E-13 | 0.29572534 | 7.03E-11 | 0.111485 | 0.01594  |
| 0.69704  | 0.333809 | 1.28E-13 | 0.273499 | 1.86E-09 | 0.17806371 | 0.00011  | 0.029971 | 0.51822  |
| 6.63E-08 | 0.346453 | 1.29E-14 | 0.290412 | 1.58E-10 | 0.30486809 | 1.68E-11 | 0.192083 | 2.93E-05 |
| 0.65242  | 0.232325 | 3.84E-07 | 0.065579 | 0.1571   | 0.1290406  | 0.00523  | 0.231886 | 4.04E-07 |
| 0.31567  | 0.200361 | 1.29E-05 | 0.064625 | 0.16324  | -0.291692  | 1.30E-10 | -0.42861 | 2.73E-22 |
| 0.07441  | 0.090363 | 0.05099  | 0.153927 | 0.00085  | -0.050767  | 0.27358  | -0.16122 | 0.00047  |
| 0.64789  | 0.298951 | 4.27E-11 | 0.190876 | 3.30E-05 | -0.1497306 | 0.00117  | -0.28574 | 3.18E-10 |
| 0.00012  | 0.076288 | 0.09964  | 0.109202 | 0.01825  | 0.2115601  | 3.99E-06 | 0.186171 | 5.17E-05 |
| 0.1797   | 0.13249  | 0.00413  | 0.082911 | 0.07345  | -0.1661468 | 0.00031  | -0.30628 | 1.34E-11 |
| 0.22146  | 0.11831  | 0.0105   | 0.021936 | 0.63634  | -0.0532486 | 0.25079  | -0.13262 | 0.00409  |
| 1.84E-05 | 0.041828 | 0.36711  | 0.147017 | 0.00144  | 0.17194087 | 0.00019  | 0.098927 | 0.03257  |
| 0.00507  | -0.02427 | 0.60089  | 0.063507 | 0.17065  | 0.1530943  | 0.0009   | 0.19508  | 2.18E-05 |
| 0.595    | -0.18039 | 8.86E-05 | -0.18258 | 7.24E-05 | -0.132908  | 0.00401  | -0.17266 | 0.00018  |
| 0.19782  | 0.214104 | 3.03E-06 | 0.07678  | 0.09747  | 0.08392644 | 0.06999  | -0.09243 | 0.04591  |
| 0.02384  | -0.17953 | 9.58E-05 | -0.0917  | 0.04763  | -0.1431627 | 0.00193  | -0.16742 | 0.00028  |
| 0.46145  | 0.312324 | 5.03E-12 | 0.280067 | 7.28E-10 | 0.10079262 | 0.02942  | -0.08339 | 0.07179  |
| 9.55E-05 | 0.055507 | 0.23122  | 0.009437 | 0.83882  | 0.17664115 | 0.00012  | 0.124438 | 0.00709  |
| 0.00405  | 0.473489 | 1.81E-27 | 0.252888 | 3.01E-08 | 0.01910506 | 0.68049  | 0.121932 | 0.00835  |
| 0.75634  | 0.478105 | 4.79E-28 | 0.282304 | 5.26E-10 | 0.22653076 | 7.55E-07 | 0.341888 | 2.99E-14 |
| 0.16463  | 0.286576 | 2.81E-10 | 0.21184  | 3.87E-06 | 0.18432853 | 6.15E-05 | 0.137551 | 0.00289  |
| 0.03831  | 0.279529 | 7.87E-10 | 0.211028 | 4.22E-06 | 0.24439808 | 8.86E-08 | 0.312834 | 4.62E-12 |

|          |          |          |          |          |            |          |          |          |
|----------|----------|----------|----------|----------|------------|----------|----------|----------|
| 0.31235  | 0.298667 | 4.46E-11 | 0.182547 | 7.26E-05 | 0.05779698 | 0.21251  | 0.078652 | 0.08955  |
| 0.00018  | 0.198725 | 1.52E-05 | 0.174641 | 0.00015  | -0.0222161 | 0.63203  | -0.11798 | 0.01072  |
| 0.00251  | 0.145372 | 0.00163  | -0.03391 | 0.46479  | 0.07524378 | 0.10438  | 0.246999 | 6.40E-08 |
| 0.2231   | -0.04086 | 0.37829  | -0.05002 | 0.28068  | -0.1036173 | 0.02514  | -0.16421 | 0.00037  |
| 1.82E-07 | 0.004733 | 0.91876  | -0.01778 | 0.70152  | -0.0304837 | 0.51109  | -0.06541 | 0.15815  |
| 6.04E-06 | 0.266439 | 4.96E-09 | 0.27301  | 1.99E-09 | 0.22606631 | 7.96E-07 | 0.117995 | 0.01071  |
| 0.08097  | 0.241132 | 1.33E-07 | 0.263485 | 7.42E-09 | 0.43192657 | 1.20E-22 | 0.469478 | 5.65E-27 |
| 0.94725  | 0.149543 | 0.00119  | 0.114481 | 0.01331  | -0.0232678 | 0.61599  | -0.10595 | 0.02202  |
| 0.0168   | -0.17011 | 0.00022  | -0.13943 | 0.00253  | -0.1606782 | 0.00049  | -0.2226  | 1.18E-06 |
| 0.96093  | 0.143873 | 0.00183  | 0.173484 | 0.00016  | 0.15964404 | 0.00053  | 0.23237  | 3.82E-07 |
| 0.07599  | 0.28912  | 1.92E-10 | 0.225049 | 8.95E-07 | 0.01180882 | 0.7991   | -0.12138 | 0.00865  |
| 0.67682  | 0.071024 | 0.12536  | 0.208488 | 5.54E-06 | 0.43487484 | 5.74E-23 | 0.379341 | 1.97E-17 |
| 0.08596  | 0.035736 | 0.44104  | -0.01934 | 0.67684  | 0.17077865 | 0.00021  | 0.010773 | 0.81639  |
| 0.39118  | 0.071143 | 0.12473  | 0.039242 | 0.39751  | 0.13999159 | 0.00243  | 0.109684 | 0.01774  |
| 0.00038  | 0.078538 | 0.09002  | 0.039935 | 0.38923  | -0.0030469 | 0.94764  | 0.020069 | 0.66533  |
| 0.00308  | 0.137133 | 0.00298  | 0.151604 | 0.00101  | 0.10329335 | 0.0256   | 0.030604 | 0.50943  |
| 0.52755  | 0.090794 | 0.04989  | 0.106187 | 0.02173  | -0.1067564 | 0.02103  | -0.23293 | 3.58E-07 |
| 0.01345  | -0.03512 | 0.44901  | -0.06391 | 0.16797  | 0.04199692 | 0.36519  | -0.00133 | 0.97708  |
| 0.2338   | 0.202971 | 9.84E-06 | 0.166474 | 0.0003   | -0.0532439 | 0.25083  | -0.13359 | 0.00383  |
| 0.31709  | 0.189998 | 3.59E-05 | 0.099157 | 0.03217  | 0.15206576 | 0.00098  | 0.052572 | 0.25686  |
| 0.00315  | -0.01866 | 0.68754  | 0.014191 | 0.7597   | 0.21820849 | 1.93E-06 | 0.241286 | 1.30E-07 |
| 0.69061  | 0.307638 | 1.08E-11 | 0.456145 | 2.24E-25 | 0.62324391 | 1.32E-51 | 0.514555 | 6.28E-33 |
| 0.02464  | 0.12111  | 0.0088   | 0.023223 | 0.61668  | 0.05309064 | 0.2522   | 0.046259 | 0.31851  |
| 0.11586  | 0.101206 | 0.02875  | 0.059262 | 0.20113  | -0.0099521 | 0.83016  | -0.08674 | 0.06109  |
| 4.14E-07 | 0.242609 | 1.11E-07 | 0.270012 | 3.03E-09 | 0.39305149 | 1.06E-18 | 0.370553 | 1.20E-16 |
| 0.00158  | 0.040036 | 0.38802  | -0.01577 | 0.73393  | 0.06784417 | 0.14323  | -0.00531 | 0.90896  |
| 0.84865  | 0.058987 | 0.20323  | -0.15687 | 0.00067  | -0.2495374 | 4.63E-08 | -0.34549 | 1.54E-14 |
| 0.01577  | 0.282099 | 5.42E-10 | 0.30865  | 9.15E-12 | 0.43111197 | 1.47E-22 | 0.323194 | 8.15E-13 |
| 0.00036  | 0.161474 | 0.00046  | 0.105239 | 0.02294  | 0.09924817 | 0.03201  | 0.04192  | 0.36606  |
| 0.00084  | 0.235487 | 2.63E-07 | 0.268329 | 3.83E-09 | 0.32545308 | 5.53E-13 | 0.347007 | 1.16E-14 |
| 0.25765  | 0.097176 | 0.03579  | 0.206803 | 6.61E-06 | 0.36567286 | 3.20E-16 | 0.234197 | 3.07E-07 |
| 0.34271  | 0.177238 | 0.00012  | 0.257127 | 1.73E-08 | 0.45085443 | 9.23E-25 | 0.462573 | 3.88E-26 |
| 9.61E-06 | 0.154765 | 0.00079  | 0.087473 | 0.05891  | -0.1156872 | 0.01236  | -0.19253 | 2.81E-05 |
| 0.23528  | -0.0172  | 0.71089  | 0.0334   | 0.4715   | 0.17251454 | 0.00018  | 0.157323 | 0.00065  |
| 8.12E-05 | 0.084323 | 0.06867  | 0.137315 | 0.00294  | 0.29588069 | 6.87E-11 | 0.226595 | 7.49E-07 |
| 0.00043  | -0.04248 | 0.35971  | -0.07123 | 0.12428  | 0.09393649 | 0.04245  | 0.083492 | 0.07145  |
| 4.79E-06 | -0.10459 | 0.02381  | -0.09978 | 0.0311   | -0.2274075 | 6.82E-07 | -0.25678 | 1.82E-08 |
| 0.08711  | 0.298777 | 4.39E-11 | 0.252097 | 3.34E-08 | 0.10883717 | 0.01864  | -0.00119 | 0.97962  |
| 0.33317  | -0.28545 | 3.31E-10 | -0.33105 | 2.09E-13 | -0.1396617 | 0.00249  | -0.18983 | 3.64E-05 |
| 0.03636  | 0.238159 | 1.91E-07 | 0.303593 | 2.06E-11 | 0.11455316 | 0.01325  | 0.007061 | 0.87904  |
| 0.24727  | 0.338756 | 5.29E-14 | 0.324491 | 6.53E-13 | -0.0267742 | 0.56384  | -0.1197  | 0.00962  |
| 0.20371  | 0.318885 | 1.69E-12 | 0.30058  | 3.31E-11 | 0.11123323 | 0.01618  | -0.01603 | 0.72978  |
| 0.55769  | 0.110221 | 0.01718  | 0.120068 | 0.0094   | -0.1568496 | 0.00067  | -0.38621 | 4.63E-18 |
| 0.54522  | 0.212893 | 3.46E-06 | 0.020485 | 0.65882  | -0.2675402 | 4.27E-09 | -0.37125 | 1.04E-16 |
| 0.10082  | -0.01284 | 0.78204  | 0.149378 | 0.00121  | 0.0351735  | 0.44827  | -0.17768 | 0.00011  |

|          |          |          |          |          |            |          |          |          |
|----------|----------|----------|----------|----------|------------|----------|----------|----------|
| 0.33353  | -0.08049 | 0.08228  | -0.1048  | 0.02352  | -0.1816748 | 7.87E-05 | -0.3175  | 2.13E-12 |
| 1.59E-07 | 0.061427 | 0.18513  | -0.03605 | 0.43699  | 0.00913168 | 0.84397  | 0.038908 | 0.40154  |
| 0.07798  | 0.157974 | 0.00061  | 0.258685 | 1.41E-08 | 0.01382028 | 0.7658   | -0.08471 | 0.06739  |
| 0.16433  | 0.014318 | 0.75762  | 0.043499 | 0.34827  | 0.05376303 | 0.24623  | -0.09116 | 0.04898  |
| 0.91133  | -0.09191 | 0.04714  | -0.03116 | 0.50182  | -0.0497367 | 0.28345  | -0.13864 | 0.00268  |
| 0.8491   | 0.296266 | 6.47E-11 | 0.491007 | 1.04E-29 | 0.33760822 | 6.51E-14 | 0.141537 | 0.00217  |
| 0.0152   | 0.109432 | 0.018    | 0.116075 | 0.01207  | -0.0007352 | 0.98736  | -0.1229  | 0.00784  |
| 1.34E-05 | 0.085642 | 0.06443  | 0.039719 | 0.39179  | -0.0975322 | 0.03511  | -0.11641 | 0.01182  |
| 0.68276  | -0.00777 | 0.86697  | -0.13186 | 0.00431  | 0.00054949 | 0.99055  | -0.09295 | 0.04469  |
| 0.17483  | 0.016586 | 0.72073  | 0.021365 | 0.64515  | 0.23951091 | 1.62E-07 | 0.265492 | 5.65E-09 |
| 0.07456  | 0.150981 | 0.00107  | 0.193817 | 2.47E-05 | 0.2585042  | 1.44E-08 | 0.128819 | 0.0053   |
| 0.02907  | -0.0097  | 0.83435  | 0.099338 | 0.03185  | 0.10349032 | 0.02532  | 0.011663 | 0.80152  |
| 0.37649  | 0.104059 | 0.02452  | 0.068899 | 0.13709  | -0.2225677 | 1.19E-06 | -0.31801 | 1.96E-12 |
| 0.00121  | -0.04911 | 0.28957  | -0.08608 | 0.06307  | 0.10325301 | 0.02566  | 0.1129   | 0.01464  |
| 0.02434  | 0.174956 | 0.00014  | 0.133083 | 0.00396  | -0.3151179 | 3.17E-12 | -0.40975 | 2.47E-20 |
| 2.14E-06 | 0.150704 | 0.00109  | 0.06598  | 0.15457  | 0.04763006 | 0.30436  | 0.116394 | 0.01183  |
| 0.95227  | -0.09676 | 0.03658  | -0.11506 | 0.01284  | -0.1345269 | 0.00358  | -0.17893 | 0.0001   |
| 0.03077  | 0.31127  | 5.98E-12 | 0.24987  | 4.44E-08 | 0.21998611 | 1.59E-06 | 0.162059 | 0.00044  |
| 0.86789  | 0.067045 | 0.14801  | 0.221727 | 1.30E-06 | 0.26807656 | 3.96E-09 | 0.028354 | 0.54106  |
| 0.04796  | 0.169734 | 0.00023  | 0.304929 | 1.66E-11 | 0.24828835 | 5.43E-08 | 0.066782 | 0.14961  |
| 0.34736  | 0.138597 | 0.00269  | 0.131018 | 0.00457  | 0.27175937 | 2.38E-09 | 0.168901 | 0.00025  |
| 0.2406   | -0.06883 | 0.13747  | -0.12667 | 0.00612  | 0.18342384 | 6.69E-05 | 0.366089 | 2.94E-16 |
| 0.63891  | 0.080204 | 0.08339  | 0.137109 | 0.00299  | 0.37655387 | 3.52E-17 | 0.52883  | 5.24E-35 |
| 0.85866  | 0.174555 | 0.00015  | 0.200835 | 1.23E-05 | 0.40961657 | 2.55E-20 | 0.531832 | 1.86E-35 |
| 0.07037  | 0.114837 | 0.01302  | 0.093943 | 0.04244  | 0.48007266 | 2.70E-28 | 0.613023 | 1.56E-49 |
| 0.29192  | 0.161503 | 0.00046  | 0.115499 | 0.0125   | 0.34272877 | 2.57E-14 | 0.531417 | 2.15E-35 |
| 0.02563  | 0.302016 | 2.64E-11 | 0.131731 | 0.00435  | 0.20663964 | 6.72E-06 | 0.402287 | 1.36E-19 |
| 0.25117  | -0.12222 | 0.00819  | -0.2974  | 5.43E-11 | 0.12665396 | 0.00613  | 0.194946 | 2.21E-05 |
| 0.20798  | 0.235383 | 2.67E-07 | 0.222649 | 1.18E-06 | 0.12854855 | 0.0054   | 0.260356 | 1.13E-08 |
| 0.01215  | 0.032452 | 0.48417  | -0.00459 | 0.92119  | 0.22802841 | 6.35E-07 | 0.331434 | 1.95E-13 |
| 0.08196  | 0.057558 | 0.21441  | -0.01063 | 0.81876  | 0.23988502 | 1.55E-07 | 0.412047 | 1.45E-20 |
| 0.98059  | 0.021544 | 0.64238  | -0.08421 | 0.06903  | 0.00594    | 0.89813  | 0.151135 | 0.00105  |
| 0.87292  | 0.281092 | 6.28E-10 | 0.250252 | 4.23E-08 | 0.2844019  | 3.87E-10 | 0.453946 | 4.05E-25 |
| 0.73657  | 0.081484 | 0.07856  | 0.040862 | 0.3783   | 0.21427895 | 2.97E-06 | 0.347695 | 1.02E-14 |
| 0.48277  | 0.196445 | 1.91E-05 | 0.128817 | 0.0053   | 0.4545844  | 3.41E-25 | 0.627696 | 1.56E-52 |
| 0.63595  | 0.131041 | 0.00456  | -0.01167 | 0.80142  | 0.24322533 | 1.03E-07 | 0.456643 | 1.96E-25 |
| 0.01797  | 0.270313 | 2.91E-09 | 0.111845 | 0.0156   | 0.13859672 | 0.00269  | 0.22754  | 6.72E-07 |
| 0.79748  | 0.273573 | 1.84E-09 | 0.107843 | 0.01975  | 0.22562497 | 8.38E-07 | 0.450426 | 1.03E-24 |
| 0.07108  | 0.103265 | 0.02564  | -0.04925 | 0.28819  | 0.01335817 | 0.77341  | 0.071475 | 0.12297  |
| 0.58885  | 0.129915 | 0.00493  | 0.131675 | 0.00437  | 0.46785326 | 8.93E-27 | 0.569382 | 1.75E-41 |
| 0.58303  | 0.153902 | 0.00085  | 0.359797 | 1.02E-15 | 0.43700119 | 3.35E-23 | 0.458463 | 1.20E-25 |
| 0.57796  | 0.155192 | 0.00077  | 0.05601  | 0.22701  | 0.43464531 | 6.08E-23 | 0.636845 | 1.74E-54 |
| 0.06354  | 0.067773 | 0.14365  | -0.03067 | 0.50848  | 0.0800713  | 0.0839   | 0.223946 | 1.01E-06 |
| 0.56493  | -0.10909 | 0.01837  | -0.19268 | 2.77E-05 | 0.07701559 | 0.09645  | 0.216502 | 2.33E-06 |
| 0.39916  | 0.245044 | 8.17E-08 | 0.387488 | 3.52E-18 | 0.36786123 | 2.07E-16 | 0.395379 | 6.34E-19 |

|          |          |          |          |          |            |          |          |          |
|----------|----------|----------|----------|----------|------------|----------|----------|----------|
| 0.5137   | 0.152992 | 0.00091  | -0.13369 | 0.0038   | -0.1048582 | 0.02344  | 0.027473 | 0.55371  |
| 0.51013  | 0.244735 | 8.50E-08 | 0.261718 | 9.41E-09 | 0.50119933 | 4.52E-31 | 0.626665 | 2.57E-52 |
| 0.13473  | 0.117645 | 0.01095  | 0.026449 | 0.56859  | 0.2719705  | 2.31E-09 | 0.434623 | 6.11E-23 |
| 0.44942  | -0.27296 | 2.01E-09 | -0.32578 | 5.23E-13 | 0.06296225 | 0.17436  | 0.227113 | 7.06E-07 |
| 0.31937  | -0.06769 | 0.14417  | -0.22466 | 9.35E-07 | 0.11967327 | 0.00964  | 0.223376 | 1.08E-06 |
| 0.00906  | -0.11948 | 0.00976  | -0.29953 | 3.90E-11 | -0.1064902 | 0.02135  | -0.07599 | 0.10099  |
| 0.80847  | 0.047787 | 0.30277  | -0.04109 | 0.3756   | 0.29391371 | 9.29E-11 | 0.48584  | 4.93E-29 |
| 0.43915  | 0.126335 | 0.00626  | 0.041559 | 0.37021  | 0.26574555 | 5.46E-09 | 0.350829 | 5.68E-15 |
| 0.64714  | 0.176313 | 0.00013  | 0.196672 | 1.86E-05 | 0.46469477 | 2.16E-26 | 0.60926  | 8.63E-49 |
| 0.10482  | 0.043372 | 0.34968  | 0.01463  | 0.75252  | 0.20741854 | 6.20E-06 | 0.371638 | 9.64E-17 |
| 0.09561  | 0.191898 | 2.98E-05 | -0.03615 | 0.4358   | 0.06071091 | 0.19031  | 0.202901 | 9.92E-06 |
| 0.62974  | 0.159853 | 0.00053  | -0.0235  | 0.61243  | 0.12659826 | 0.00615  | 0.271197 | 2.57E-09 |
| 0.76249  | 0.186924 | 4.81E-05 | 0.058575 | 0.20641  | 0.17158023 | 0.00019  | 0.306389 | 1.32E-11 |
| 0.42166  | 0.156876 | 0.00067  | 0.075715 | 0.10222  | 0.3728796  | 7.49E-17 | 0.597621 | 1.50E-46 |
| 0.12846  | -0.03834 | 0.40849  | -0.09988 | 0.03093  | 0.28968873 | 1.76E-10 | 0.474077 | 1.53E-27 |
| 0.04783  | 0.250525 | 4.09E-08 | 0.229229 | 5.52E-07 | 0.44444825 | 4.96E-24 | 0.573    | 4.19E-42 |
| 0.72367  | 0.192585 | 2.79E-05 | 0.206516 | 6.81E-06 | 0.36192237 | 6.71E-16 | 0.490542 | 1.20E-29 |
| 0.2225   | 0.03826  | 0.40944  | 0.0278   | 0.549    | 0.25501365 | 2.29E-08 | 0.36047  | 8.92E-16 |
| 0.41521  | 0.298492 | 4.58E-11 | 0.322135 | 9.77E-13 | 0.27085205 | 2.70E-09 | 0.385767 | 5.09E-18 |
| 0.09536  | 0.228668 | 5.89E-07 | 0.149324 | 0.00121  | 0.12001934 | 0.00943  | 0.196958 | 1.81E-05 |
| 0.63638  | 0.232071 | 3.96E-07 | 0.163928 | 0.00037  | 0.49655597 | 1.91E-30 | 0.667926 | 1.22E-61 |
| 0.35128  | -0.03502 | 0.45023  | -0.39636 | 5.11E-19 | -0.3184682 | 1.81E-12 | -0.2244  | 9.63E-07 |
| 0.23915  | 0.036764 | 0.428    | -0.00856 | 0.85362  | 0.06029329 | 0.19338  | 0.213669 | 3.18E-06 |
| 0.99552  | 0.038256 | 0.40948  | -0.01123 | 0.80882  | 0.15158688 | 0.00102  | 0.267682 | 4.18E-09 |
| 0.03868  | -0.17051 | 0.00021  | -0.0466  | 0.31493  | -0.0038789 | 0.93337  | 0.012636 | 0.78536  |
| 7.68E-09 | 0.007802 | 0.86646  | -0.0962  | 0.0377   | -0.0086153 | 0.85269  | 0.137167 | 0.00297  |
| 1.31E-09 | -0.05054 | 0.27572  | 0.085164 | 0.06594  | 0.18654699 | 4.99E-05 | 0.24831  | 5.42E-08 |
| 0.28729  | -0.05485 | 0.2368   | 0.049421 | 0.28652  | 0.24849764 | 5.29E-08 | 0.346533 | 1.27E-14 |
| 0.01683  | -0.16542 | 0.00033  | -0.00438 | 0.92478  | 0.18453692 | 6.03E-05 | 0.284861 | 3.62E-10 |
| 0.01934  | -0.16272 | 0.00041  | -0.04872 | 0.29342  | 0.33039198 | 2.35E-13 | 0.455037 | 3.02E-25 |
| 0.00531  | -0.22208 | 1.25E-06 | -0.00083 | 0.98577  | 0.15959269 | 0.00054  | 0.258575 | 1.43E-08 |
| 0.81444  | 0.135647 | 0.00331  | 0.146803 | 0.00147  | 0.38725424 | 3.71E-18 | 0.581868 | 1.16E-43 |
| 8.50E-05 | -0.05002 | 0.28072  | -0.03474 | 0.45387  | 0.1359681  | 0.00324  | 0.250705 | 3.99E-08 |
| 0.59785  | -0.00045 | 0.99224  | 0.00722  | 0.87634  | 0.16365886 | 0.00038  | 0.428758 | 2.63E-22 |
| 8.35E-13 | -0.25669 | 1.84E-08 | -0.09881 | 0.03278  | 0.14193908 | 0.00211  | 0.251238 | 3.73E-08 |
| 0.40828  | -0.03101 | 0.50378  | 0.074755 | 0.10666  | 0.14673681 | 0.00147  | 0.341217 | 3.38E-14 |
| 0.05123  | -0.17374 | 0.00016  | 0.069998 | 0.13092  | 0.13845995 | 0.00271  | 0.2735   | 1.86E-09 |
| 0.67348  | -0.31713 | 2.27E-12 | -0.14008 | 0.00241  | 0.09654927 | 0.037    | 0.203651 | 9.18E-06 |
| 0.47178  | 0.173394 | 0.00017  | 0.158432 | 0.00059  | 0.07459932 | 0.10739  | 0.197108 | 1.78E-05 |
| 0.17604  | -0.03545 | 0.44475  | 0.083072 | 0.07289  | 0.38039364 | 1.59E-17 | 0.484295 | 7.79E-29 |
| 0.18054  | 0.025156 | 0.58765  | -0.00019 | 0.99676  | 0.12289412 | 0.00784  | 0.283357 | 4.51E-10 |
| 0.9093   | -0.04974 | 0.2834   | -0.05997 | 0.19581  | 0.22217205 | 1.24E-06 | 0.336682 | 7.68E-14 |
| 0.17556  | -0.308   | 1.02E-11 | -0.16028 | 0.00051  | -0.1216242 | 0.00851  | 0.089752 | 0.05259  |
| 0.3512   | -0.00651 | 0.88845  | 0.204057 | 8.80E-06 | 0.33492985 | 1.05E-13 | 0.454052 | 3.93E-25 |
| 0.00542  | 0.182465 | 7.31E-05 | 0.29614  | 6.60E-11 | 0.03365441 | 0.46812  | -0.18545 | 5.53E-05 |

|         |          |          |          |          |            |          |          |          |
|---------|----------|----------|----------|----------|------------|----------|----------|----------|
| 0.37621 | -0.07195 | 0.12051  | 0.215436 | 2.62E-06 | 0.22372858 | 1.04E-06 | 0.211096 | 4.19E-06 |
| 0.00702 | -0.30905 | 8.57E-12 | -0.18049 | 8.77E-05 | 0.12152198 | 0.00857  | 0.244771 | 8.46E-08 |
| 0.89121 | -0.06566 | 0.15659  | 0.052707 | 0.25565  | 0.35863359 | 1.28E-15 | 0.605418 | 4.85E-48 |
| 0.00027 | 0.105457 | 0.02265  | 0.209294 | 5.08E-06 | 0.31752107 | 2.13E-12 | 0.394519 | 7.66E-19 |
| 0.00156 | -0.05693 | 0.21944  | 0.232267 | 3.87E-07 | 0.42055638 | 1.93E-21 | 0.504514 | 1.59E-31 |
| 0.25788 | -0.17955 | 9.56E-05 | 0.171038 | 0.0002   | 0.30475022 | 1.71E-11 | 0.383897 | 7.58E-18 |
| 0.84874 | -0.23008 | 5.00E-07 | -0.19214 | 2.91E-05 | -0.0432782 | 0.35073  | 0.220805 | 1.45E-06 |
| 0.53315 | 0.037125 | 0.42347  | 0.037865 | 0.41429  | 0.2790498  | 8.44E-10 | 0.461041 | 5.91E-26 |
| 0.00537 | 0.238546 | 1.82E-07 | 0.085074 | 0.06623  | -0.0811069 | 0.07996  | 0.071525 | 0.12271  |
| 0.00019 | -0.08855 | 0.05586  | -0.02806 | 0.54521  | 0.17727141 | 0.00012  | 0.311565 | 5.69E-12 |
| 0.01371 | 0.086333 | 0.0623   | 0.111191 | 0.01622  | 0.24791278 | 5.70E-08 | 0.317898 | 2.00E-12 |
| 0.00033 | 0.065697 | 0.15635  | 0.1163   | 0.0119   | 0.45250517 | 5.95E-25 | 0.648532 | 4.45E-57 |
| 0.07452 | 0.152613 | 0.00094  | 0.090674 | 0.0502   | 0.06029167 | 0.19339  | 0.321428 | 1.10E-12 |
| 0.96663 | 0.089323 | 0.05373  | 0.089727 | 0.05266  | 0.23174572 | 4.11E-07 | 0.402416 | 1.32E-19 |
| 0.10213 | -0.09738 | 0.0354   | -0.10958 | 0.01784  | 0.33903983 | 5.02E-14 | 0.522309 | 4.80E-34 |
| 0.24623 | 0.092211 | 0.04642  | 0.087771 | 0.05805  | 0.41679207 | 4.75E-21 | 0.674436 | 2.99E-63 |
| 0.08275 | 0.225348 | 8.65E-07 | 0.157237 | 0.00065  | 0.23277487 | 3.64E-07 | 0.336105 | 8.52E-14 |
| 0.07664 | 0.037832 | 0.41469  | 0.082652 | 0.07436  | 0.26814413 | 3.93E-09 | 0.461483 | 5.23E-26 |
| 0.3525  | 0.192786 | 2.74E-05 | 0.124773 | 0.00694  | -0.0054739 | 0.90609  | -0.18107 | 8.32E-05 |
| 0.2614  | -0.09227 | 0.04628  | -0.10781 | 0.01979  | 0.03146479 | 0.49758  | 0.207836 | 5.93E-06 |
| 0.06795 | -0.05152 | 0.26652  | -0.19181 | 3.01E-05 | -0.209498  | 4.97E-06 | -0.0308  | 0.50674  |
| 0.05308 | -0.27273 | 2.07E-09 | -0.21926 | 1.72E-06 | 0.00989992 | 0.83104  | 0.123852 | 0.00737  |
| 0.00057 | 0.063636 | 0.16978  | -0.00756 | 0.87064  | 0.14145762 | 0.00218  | 0.248827 | 5.07E-08 |
| 0.09197 | 0.060705 | 0.19035  | 0.019595 | 0.67276  | 0.10437939 | 0.02408  | 0.321613 | 1.07E-12 |
| 0.00088 | -0.18599 | 5.26E-05 | 0.070691 | 0.12714  | 0.22888817 | 5.75E-07 | 0.445568 | 3.71E-24 |
| 0.193   | -0.03462 | 0.45548  | 0.131985 | 0.00428  | 0.348614   | 8.62E-15 | 0.554735 | 4.85E-39 |
| 0.00787 | 0.022671 | 0.62507  | -0.01268 | 0.78466  | -0.0899    | 0.0522   | 0.09261  | 0.04547  |
| 0.0056  | -0.09678 | 0.03655  | -0.06885 | 0.13738  | 0.06289552 | 0.17482  | 0.339351 | 4.75E-14 |
| 0.40873 | 0.374302 | 5.60E-17 | 0.382938 | 9.28E-18 | 0.27203129 | 2.29E-09 | 0.002032 | 0.96506  |
| 0.57594 | -0.14914 | 0.00123  | -0.10664 | 0.02118  | 0.05396186 | 0.24449  | 0.205323 | 7.72E-06 |
| 0.07508 | 0.130185 | 0.00484  | 0.187247 | 4.67E-05 | 0.31593723 | 2.77E-12 | 0.465774 | 1.60E-26 |
| 0.8505  | 0.113203 | 0.01438  | 0.096222 | 0.03765  | 0.20971873 | 4.86E-06 | 0.406471 | 5.25E-20 |
| 0.3287  | 0.118557 | 0.01034  | -0.02356 | 0.6116   | 0.35283296 | 3.89E-15 | 0.633376 | 9.75E-54 |
| 0.14584 | 0.025939 | 0.57607  | 0.193223 | 2.62E-05 | 0.22089098 | 1.43E-06 | 0.438384 | 2.36E-23 |
| 0.011   | 0.216392 | 2.36E-06 | -0.01215 | 0.79338  | -0.0152685 | 0.74209  | 0.150134 | 0.00114  |
| 0.03661 | 0.011957 | 0.79664  | 0.043358 | 0.34984  | 0.12737144 | 0.00584  | 0.249439 | 4.69E-08 |
| 0.92143 | -0.04697 | 0.31114  | -0.07374 | 0.11153  | 0.15192804 | 0.00099  | 0.344927 | 1.71E-14 |
| 0.32405 | 0.003333 | 0.94274  | 0.114046 | 0.01366  | 0.2215507  | 1.33E-06 | 0.433045 | 9.08E-23 |
| 0.5139  | 0.040395 | 0.38378  | 0.127399 | 0.00583  | 0.34795509 | 9.75E-15 | 0.440418 | 1.40E-23 |
| 0.23032 | 0.127816 | 0.00567  | 0.164268 | 0.00036  | 0.1226257  | 0.00798  | 0.245313 | 7.90E-08 |
| 0.71642 | 0.1522   | 0.00097  | 0.095812 | 0.03848  | 0.13232218 | 0.00418  | 0.394113 | 8.37E-19 |
| 0.7079  | -0.16671 | 0.0003   | 0.175872 | 0.00013  | 0.09810156 | 0.03405  | 0.18095  | 8.41E-05 |
| 0.11167 | 0.207453 | 6.17E-06 | 0.136076 | 0.00321  | 0.23285693 | 3.61E-07 | 0.388119 | 3.08E-18 |
| 0.38834 | 0.146303 | 0.00152  | 0.091088 | 0.04916  | 0.20260028 | 1.02E-05 | 0.395726 | 5.87E-19 |
| 0.01305 | 0.142217 | 0.00206  | 0.072409 | 0.11814  | 0.22934799 | 5.45E-07 | 0.445257 | 4.02E-24 |

|          |          |          |          |          |            |          |          |          |
|----------|----------|----------|----------|----------|------------|----------|----------|----------|
| 0.09898  | -0.23524 | 2.71E-07 | -0.14616 | 0.00154  | 0.08943095 | 0.05344  | 0.263778 | 7.13E-09 |
| 0.07024  | -0.21424 | 2.99E-06 | -0.01591 | 0.7316   | 0.09882813 | 0.03274  | 0.157566 | 0.00063  |
| 0.03799  | -0.1075  | 0.02014  | -0.12466 | 0.00699  | 0.20188235 | 1.10E-05 | 0.282837 | 4.87E-10 |
| 0.41205  | 0.13408  | 0.0037   | 0.038795 | 0.40291  | 0.2453219  | 7.89E-08 | 0.423392 | 9.77E-22 |
| 0.8719   | 0.115932 | 0.01217  | 0.050605 | 0.27511  | 0.36360726 | 4.82E-16 | 0.586334 | 1.82E-44 |
| 0.4173   | 0.073576 | 0.11231  | 0.032914 | 0.47798  | 0.15293012 | 0.00091  | 0.254582 | 2.42E-08 |
| 0.02804  | 0.161756 | 0.00045  | 0.260779 | 1.07E-08 | 0.42164868 | 1.49E-21 | 0.551018 | 1.93E-38 |
| 0.30256  | -0.13376 | 0.00378  | -0.08594 | 0.06352  | 0.04102442 | 0.3764   | 0.167839 | 0.00027  |
| 0.68916  | 0.326578 | 4.56E-13 | 0.242014 | 1.19E-07 | 0.19531592 | 2.13E-05 | 0.279544 | 7.86E-10 |
| 0.00467  | 0.202309 | 1.05E-05 | 0.354449 | 2.86E-15 | 0.12484196 | 0.00691  | -0.09439 | 0.04147  |
| 0.75916  | -0.06419 | 0.1661   | 0.13022  | 0.00482  | 0.2879553  | 2.28E-10 | 0.395307 | 6.44E-19 |
| 0.05481  | -0.06465 | 0.16305  | 0.158695 | 0.00058  | 0.28020554 | 7.14E-10 | 0.327203 | 4.09E-13 |
| 2.38E-05 | 0.217419 | 2.11E-06 | 0.225084 | 8.91E-07 | 0.11154213 | 0.01589  | -0.11033 | 0.01707  |
| 0.22296  | -0.29258 | 1.14E-10 | -0.22524 | 8.75E-07 | -0.0182928 | 0.69337  | 0.156313 | 0.0007   |
| 0.75668  | 0.170897 | 0.00021  | 0.200952 | 1.21E-05 | 0.04450879 | 0.33719  | 0.164121 | 0.00037  |
| 0.00507  | -0.10971 | 0.01771  | 0.100361 | 0.03012  | 0.34928106 | 7.61E-15 | 0.329751 | 2.62E-13 |
| 0.15079  | -0.00281 | 0.95176  | -0.01887 | 0.68422  | 0.28005705 | 7.30E-10 | 0.36462  | 3.94E-16 |
| 0.00646  | -0.06428 | 0.16549  | 0.026771 | 0.56388  | 0.29450517 | 8.48E-11 | 0.456798 | 1.88E-25 |
| 3.30E-05 | -0.04017 | 0.38638  | -0.10042 | 0.03002  | 0.10253856 | 0.02671  | 0.373626 | 6.43E-17 |
| 0.32871  | 0.073262 | 0.11386  | 0.06281  | 0.17541  | 0.16833877 | 0.00026  | 0.393328 | 9.94E-19 |
| 0.23329  | 0.182532 | 7.27E-05 | 0.045578 | 0.32569  | 0.12597889 | 0.00641  | 0.430081 | 1.90E-22 |
| 0.11696  | -0.0586  | 0.20618  | 0.125917 | 0.00644  | 0.23427688 | 3.05E-07 | 0.402992 | 1.16E-19 |
| 0.22158  | 0.145681 | 0.0016   | 0.166413 | 0.0003   | 0.36881502 | 1.71E-16 | 0.60189  | 2.32E-47 |
| 0.04413  | -0.05951 | 0.19923  | 0.077513 | 0.09431  | 0.26728294 | 4.42E-09 | 0.495798 | 2.42E-30 |
| 4.11E-07 | -0.07886 | 0.08871  | 0.055356 | 0.23249  | 0.34465243 | 1.80E-14 | 0.388948 | 2.57E-18 |
| 1.95E-10 | -0.29598 | 6.76E-11 | -0.12564 | 0.00655  | 0.14460452 | 0.00173  | 0.313071 | 4.45E-12 |
| 0.00581  | -0.1315  | 0.00442  | 0.020915 | 0.65212  | 0.09786283 | 0.03449  | 0.247065 | 6.34E-08 |
| 0.02085  | 0.21479  | 2.81E-06 | 0.095325 | 0.03948  | 0.30994695 | 7.41E-12 | 0.563269 | 1.90E-40 |
| 0.29414  | 0.237553 | 2.05E-07 | 0.167248 | 0.00028  | 0.2878356  | 2.33E-10 | 0.322593 | 9.03E-13 |
| 0.17291  | -0.00896 | 0.84689  | -0.03106 | 0.5031   | -0.0393528 | 0.39618  | 0.107253 | 0.02044  |
| 0.03481  | -0.06546 | 0.15784  | 0.094169 | 0.04194  | 0.40526161 | 6.92E-20 | 0.54719  | 7.89E-38 |
| 0.0016   | 0.219607 | 1.65E-06 | 0.115663 | 0.01238  | 0.29551847 | 7.26E-11 | 0.430763 | 1.60E-22 |
| 0.09374  | 0.001484 | 0.97449  | 0.157176 | 0.00065  | 0.34474954 | 1.77E-14 | 0.442888 | 7.43E-24 |
| 0.05097  | 0.057214 | 0.21716  | 0.118152 | 0.01061  | 0.20073538 | 1.24E-05 | 0.266874 | 4.68E-09 |
| 0.01986  | 0.023547 | 0.61176  | -0.15829 | 0.0006   | -0.0238735 | 0.60683  | 0.165285 | 0.00033  |
| 0.0006   | -0.03915 | 0.39862  | -0.12076 | 0.009    | -0.049447  | 0.28627  | 0.067434 | 0.14567  |
| 8.14E-06 | -0.02925 | 0.52836  | -0.02993 | 0.51886  | 0.14603049 | 0.00155  | 0.296589 | 6.16E-11 |
| 0.03242  | 0.155481 | 0.00075  | -0.05444 | 0.24035  | 0.05808348 | 0.21025  | 0.118901 | 0.01012  |
| 0.06214  | 0.049792 | 0.28291  | -0.05904 | 0.20284  | -0.1751099 | 0.00014  | -0.27414 | 1.70E-09 |
| 0.14183  | -0.01578 | 0.7337   | 0.022181 | 0.63258  | 0.35689467 | 1.79E-15 | 0.455679 | 2.54E-25 |
| 0.02558  | -0.00837 | 0.85681  | 0.117693 | 0.01092  | -0.1793231 | 9.76E-05 | -0.27496 | 1.51E-09 |
| 0.94521  | 0.11826  | 0.01054  | 0.184366 | 6.13E-05 | 0.21828655 | 1.92E-06 | 0.347258 | 1.11E-14 |
| 0.94768  | -0.05774 | 0.213    | -0.10034 | 0.03015  | 0.01354409 | 0.77035  | 0.187781 | 4.44E-05 |
| 0.80735  | 0.081104 | 0.07997  | 0.140433 | 0.00235  | 0.07682388 | 0.09728  | 0.139981 | 0.00243  |
| 0.03114  | 0.086772 | 0.06098  | 0.033033 | 0.47639  | -0.0112936 | 0.80769  | 0.201675 | 1.12E-05 |



|          |          |          |          |          |            |          |          |          |
|----------|----------|----------|----------|----------|------------|----------|----------|----------|
| 0.46634  | 0.147143 | 0.00143  | 0.129738 | 0.00498  | 0.25675337 | 1.82E-08 | -0.00182 | 0.96873  |
| 0.9997   | 0.015034 | 0.74591  | 0.089032 | 0.05452  | 0.23047084 | 4.78E-07 | 0.296868 | 5.90E-11 |
| 0.22798  | 0.017475 | 0.70644  | -0.07661 | 0.09821  | -0.0878408 | 0.05785  | -0.26892 | 3.53E-09 |
| 0.41159  | 0.106494 | 0.02135  | 0.238039 | 1.94E-07 | 0.13403042 | 0.00371  | 0.228182 | 6.24E-07 |
| 0.05681  | 0.076753 | 0.09759  | 0.026868 | 0.56248  | 0.12277893 | 0.0079   | 0.427979 | 3.19E-22 |
| 0.50147  | 0.061858 | 0.18205  | 0.002005 | 0.96553  | 0.19423911 | 2.37E-05 | 0.46318  | 3.28E-26 |
| 0.2996   | 0.06916  | 0.13561  | -0.00568 | 0.9026   | 0.18635033 | 5.08E-05 | 0.416176 | 5.49E-21 |
| 2.26E-06 | -0.10641 | 0.02146  | 0.173044 | 0.00017  | 0.34780044 | 1.00E-14 | 0.348296 | 9.15E-15 |
| 0.00086  | 0.242155 | 1.17E-07 | 0.336661 | 7.71E-14 | 0.0386894  | 0.40419  | -0.18107 | 8.32E-05 |
| 0.36619  | 0.047862 | 0.30201  | 0.044114 | 0.34149  | 0.31886678 | 1.70E-12 | 0.594924 | 4.80E-46 |
| 0.29872  | 0.054025 | 0.24393  | 0.035664 | 0.44196  | 0.10473897 | 0.0236   | 0.30564  | 1.48E-11 |
| 0.25724  | 0.041783 | 0.36764  | -0.04503 | 0.33155  | 0.10990197 | 0.01751  | 0.149013 | 0.00124  |
| 9.33E-10 | 0.039738 | 0.39157  | -0.01283 | 0.78218  | 0.20966377 | 4.89E-06 | 0.30123  | 2.99E-11 |
| 0.00041  | -0.04191 | 0.36617  | -0.03891 | 0.4015   | 0.11159597 | 0.01584  | 0.261339 | 9.90E-09 |
| 0.40073  | 0.195886 | 2.02E-05 | 0.181759 | 7.81E-05 | 0.46082248 | 6.27E-26 | 0.698188 | 1.71E-69 |
| 0.00074  | 0.0801   | 0.08379  | -0.02604 | 0.57459  | 0.09154947 | 0.04801  | 0.227993 | 6.37E-07 |
| 0.17762  | 0.0814   | 0.07887  | -0.0514  | 0.26766  | -0.0978341 | 0.03455  | 0.159587 | 0.00054  |
| 0.0101   | 0.08642  | 0.06203  | 0.161203 | 0.00047  | 0.13914743 | 0.00258  | 0.311412 | 5.84E-12 |
| 0.54026  | 0.204918 | 8.05E-06 | 0.129747 | 0.00498  | 0.30979575 | 7.60E-12 | 0.477414 | 5.85E-28 |
| 9.90E-09 | 0.108572 | 0.01893  | 0.011747 | 0.80012  | 0.11870089 | 0.01025  | 0.199803 | 1.36E-05 |
| 0.37585  | 0.108233 | 0.01931  | 0.063221 | 0.17259  | 0.3102758  | 7.03E-12 | 0.568867 | 2.15E-41 |
| 0.07413  | -0.18455 | 6.02E-05 | -0.06328 | 0.17216  | -0.1842547 | 6.19E-05 | -0.09122 | 0.04881  |
| 0.04979  | -0.04747 | 0.30596  | -0.07367 | 0.11187  | 0.1041011  | 0.02447  | 0.273614 | 1.83E-09 |
| 0.79418  | 0.144352 | 0.00176  | 0.369069 | 1.62E-16 | 0.29571907 | 7.04E-11 | 0.260031 | 1.18E-08 |
| 0.26976  | 0.100275 | 0.03026  | 0.050935 | 0.272    | 0.3650177  | 3.64E-16 | 0.577653 | 6.46E-43 |
| 0.29482  | -0.02408 | 0.60374  | -0.07234 | 0.1185   | 0.16243879 | 0.00042  | 0.301652 | 2.80E-11 |
| 0.12478  | 0.072964 | 0.11534  | 0.10693  | 0.02082  | 0.17574123 | 0.00013  | 0.391406 | 1.51E-18 |
| 1.53E-06 | 0.122649 | 0.00797  | 0.163937 | 0.00037  | 0.37567106 | 4.23E-17 | 0.481281 | 1.89E-28 |
| 0.00338  | -0.14586 | 0.00157  | 0.035451 | 0.44469  | 0.20298453 | 9.83E-06 | 0.372513 | 8.07E-17 |
| 3.09E-05 | -0.06188 | 0.18191  | 0.023136 | 0.61799  | 0.31963339 | 1.49E-12 | 0.571908 | 6.46E-42 |
| 0.55476  | -0.0654  | 0.15823  | 0.076742 | 0.09764  | 0.19044523 | 3.44E-05 | 0.272459 | 2.15E-09 |
| 0.00172  | 0.048845 | 0.29218  | -0.00707 | 0.8789   | 0.29303617 | 1.06E-10 | 0.405382 | 6.73E-20 |
| 0.80773  | 0.1679   | 0.00027  | 0.029226 | 0.52869  | 0.06455834 | 0.16367  | 0.239698 | 1.58E-07 |
| 0.00622  | -0.04346 | 0.34867  | -0.1195  | 0.00974  | 0.0919846  | 0.04696  | 0.249664 | 4.56E-08 |
| 0.5564   | 0.15983  | 0.00053  | 0.284784 | 3.66E-10 | 0.40148226 | 1.63E-19 | 0.589046 | 5.85E-45 |
| 0.00294  | 0.14626  | 0.00153  | 0.041164 | 0.37478  | 0.22962338 | 5.27E-07 | 0.501374 | 4.28E-31 |
| 0.72662  | 0.088095 | 0.05713  | -0.0778  | 0.0931   | 0.04159098 | 0.36984  | 0.244157 | 9.13E-08 |
| 0.00778  | 0.031159 | 0.50176  | -0.00065 | 0.98885  | 0.15600012 | 0.00072  | 0.36591  | 3.05E-16 |
| 0.00047  | -0.09052 | 0.05058  | -0.00305 | 0.94766  | 0.28213649 | 5.39E-10 | 0.480252 | 2.56E-28 |
| 0.21042  | -0.2596  | 1.25E-08 | -0.1495  | 0.00119  | 0.16396805 | 0.00037  | 0.327414 | 3.94E-13 |
| 0.46741  | 0.261353 | 9.89E-09 | 0.115957 | 0.01216  | 0.05336552 | 0.24975  | 0.284326 | 3.91E-10 |
| 0.82604  | -0.12826 | 0.00551  | -0.00101 | 0.98257  | 0.25835723 | 1.47E-08 | 0.479599 | 3.10E-28 |
| 0.06445  | 0.051061 | 0.27081  | 0.032782 | 0.47974  | 0.16678663 | 0.00029  | 0.326052 | 4.99E-13 |
| 0.00027  | 0.008122 | 0.86104  | -0.00806 | 0.86216  | 0.07619945 | 0.10004  | 0.351861 | 4.68E-15 |
| 0.27312  | 0.023252 | 0.61623  | 0.072698 | 0.11668  | 0.25018801 | 4.27E-08 | 0.486751 | 3.75E-29 |

|          |          |          |          |          |            |          |          |          |
|----------|----------|----------|----------|----------|------------|----------|----------|----------|
| 0.07184  | 0.128237 | 0.00552  | 0.12388  | 0.00736  | -0.0035775 | 0.93854  | 0.118145 | 0.01061  |
| 0.47083  | -0.10993 | 0.01748  | -0.07461 | 0.10734  | 0.33770593 | 6.39E-14 | 0.617743 | 1.76E-50 |
| 0.00028  | -0.22345 | 1.07E-06 | -0.14385 | 0.00183  | 0.12928846 | 0.00514  | 0.269648 | 3.19E-09 |
| 0.01042  | -0.15411 | 0.00083  | 0.007856 | 0.86555  | 0.21929857 | 1.71E-06 | 0.323342 | 7.95E-13 |
| 0.0979   | -0.17667 | 0.00012  | -0.06932 | 0.13468  | 0.1465172  | 0.0015   | 0.402495 | 1.30E-19 |
| 2.58E-06 | 0.054374 | 0.24089  | 0.198674 | 1.52E-05 | 0.07338503 | 0.11325  | 0.248499 | 5.29E-08 |
| 0.27233  | 0.130361 | 0.00478  | 0.045737 | 0.324    | -0.0311881 | 0.50137  | 0.164379 | 0.00036  |
| 0.00063  | 0.263542 | 7.36E-09 | 0.123196 | 0.00769  | -0.0309414 | 0.50476  | 0.106397 | 0.02147  |
| 0.50124  | -0.08489 | 0.06683  | 0.089055 | 0.05446  | 0.35767927 | 1.53E-15 | 0.337222 | 6.97E-14 |
| 0.57142  | 0.057268 | 0.21673  | -0.03187 | 0.49199  | 0.20339636 | 9.42E-06 | 0.470932 | 3.75E-27 |
| 0.00039  | -0.03949 | 0.39452  | -0.04433 | 0.33912  | 0.15894243 | 0.00057  | 0.380143 | 1.67E-17 |
| 0.0332   | -0.08253 | 0.07481  | -0.05994 | 0.19604  | -0.1284758 | 0.00543  | -0.31903 | 1.65E-12 |
| 0.03914  | -0.17562 | 0.00014  | 0.002543 | 0.9563   | 0.06071693 | 0.19026  | 0.148163 | 0.00132  |
| 0.10258  | -0.18988 | 3.63E-05 | -0.07484 | 0.10626  | 0.13481341 | 0.00351  | 0.255208 | 2.23E-08 |
| 0.00616  | 0.124539 | 0.00705  | 0.292955 | 1.07E-10 | 0.21656749 | 2.32E-06 | 0.280493 | 6.85E-10 |
| 2.80E-05 | 0.046257 | 0.31853  | 0.220307 | 1.53E-06 | 0.36310964 | 5.31E-16 | 0.497439 | 1.46E-30 |
| 0.49822  | 0.067458 | 0.14552  | 0.066635 | 0.15051  | 0.18612099 | 5.19E-05 | 0.487427 | 3.07E-29 |
| 0.05425  | -0.07982 | 0.08487  | -0.08767 | 0.05835  | 0.10821148 | 0.01933  | 0.295588 | 7.18E-11 |
| 0.12862  | -0.02486 | 0.59204  | -0.04092 | 0.37768  | 0.12934427 | 0.00512  | 0.310846 | 6.40E-12 |
| 0.11451  | 0.216209 | 2.41E-06 | -0.00582 | 0.90018  | -0.0409029 | 0.37782  | 0.176545 | 0.00013  |
| 0.22115  | -0.06175 | 0.18283  | -0.01131 | 0.80744  | 0.03059834 | 0.5095   | 0.304782 | 1.70E-11 |
| 0.30532  | 0.11773  | 0.01089  | 0.112205 | 0.01527  | 0.34773375 | 1.02E-14 | 0.5264   | 1.20E-34 |
| 5.84E-31 | -0.00503 | 0.91367  | -0.04002 | 0.38818  | 0.20313127 | 9.68E-06 | 0.301817 | 2.72E-11 |
| 0.54026  | 0.138524 | 0.0027   | 0.202728 | 1.01E-05 | 0.21336798 | 3.28E-06 | -0.03326 | 0.47341  |
| 0.78851  | 0.287592 | 2.41E-10 | -0.02081 | 0.65377  | -0.0867593 | 0.06101  | 0.136585 | 0.0031   |
| 0.89095  | 0.087088 | 0.06004  | -0.00752 | 0.87132  | -0.0896397 | 0.05289  | 0.051539 | 0.26634  |
| 0.84315  | -0.15469 | 0.0008   | 0.178237 | 0.00011  | 0.17279822 | 0.00018  | 0.282362 | 5.22E-10 |
| 0.07423  | 0.02164  | 0.6409   | 0.165081 | 0.00034  | 0.21941353 | 1.69E-06 | 0.401129 | 1.76E-19 |
| 0.22058  | 0.092522 | 0.04568  | 0.010462 | 0.82161  | 0.21327187 | 3.32E-06 | 0.472373 | 2.49E-27 |
| 0.58058  | 0.030072 | 0.51681  | 0.122584 | 0.008    | 0.07821842 | 0.09134  | 0.203043 | 9.77E-06 |
| 0.10844  | 0.124821 | 0.00692  | 0.125323 | 0.00669  | 0.37613092 | 3.84E-17 | 0.619146 | 9.12E-51 |
| 1.79E-12 | -0.27308 | 1.98E-09 | -0.093   | 0.04457  | 0.12859273 | 0.00539  | 0.287437 | 2.47E-10 |
| 1.35E-06 | 0.051957 | 0.26248  | 0.103474 | 0.02535  | 0.3241467  | 6.93E-13 | 0.402605 | 1.26E-19 |
| 0.84306  | 0.033265 | 0.47329  | 0.004227 | 0.92742  | 0.26510866 | 5.95E-09 | 0.475437 | 1.03E-27 |
| 0.83039  | 0.126528 | 0.00618  | 0.043359 | 0.34983  | 0.00258307 | 0.9556   | 0.128125 | 0.00556  |
| 0.72178  | 0.04364  | 0.34671  | 0.15779  | 0.00062  | 0.24209886 | 1.18E-07 | 0.436625 | 3.69E-23 |
| 0.41327  | 0.208773 | 5.37E-06 | 0.120038 | 0.00942  | 0.15675306 | 0.00068  | 0.429732 | 2.07E-22 |
| 0.00329  | 0.032213 | 0.4874   | -0.03404 | 0.46302  | 0.13450186 | 0.00359  | 0.408171 | 3.55E-20 |
| 0.09488  | 0.261253 | 1.00E-08 | 0.088251 | 0.05668  | 0.31348769 | 4.15E-12 | 0.612961 | 1.60E-49 |
| 0.07759  | 0.272849 | 2.04E-09 | 0.319961 | 1.41E-12 | 0.21910428 | 1.75E-06 | -0.07556 | 0.10295  |
| 0.82212  | 0.097817 | 0.03458  | 0.025672 | 0.58     | 0.25464645 | 2.40E-08 | 0.557995 | 1.42E-39 |
| 0.00018  | -0.15975 | 0.00053  | -0.31295 | 4.54E-12 | -0.0774856 | 0.09442  | 0.153368 | 0.00088  |
| 0.01178  | 0.208875 | 5.31E-06 | 0.183403 | 6.70E-05 | 0.25333148 | 2.85E-08 | 0.386657 | 4.21E-18 |
| 0.15948  | 0.154202 | 0.00083  | 0.170523 | 0.00021  | 0.375018   | 4.83E-17 | 0.635907 | 2.78E-54 |
| 0.28394  | 0.17106  | 0.0002   | 0.070807 | 0.12652  | 0.13595804 | 0.00324  | -0.04983 | 0.28258  |

|          |          |          |          |          |            |          |          |          |
|----------|----------|----------|----------|----------|------------|----------|----------|----------|
| 0.01263  | 0.097301 | 0.03555  | -0.04418 | 0.3408   | 0.15216425 | 0.00097  | 0.383436 | 8.35E-18 |
| 0.98637  | -0.04237 | 0.36094  | 0.007986 | 0.86335  | -0.0683268 | 0.1404   | -0.05257 | 0.25691  |
| 0.47821  | -0.03299 | 0.47701  | -0.21754 | 2.08E-06 | 0.01821223 | 0.69465  | 0.09182  | 0.04735  |
| 0.14964  | 0.016878 | 0.71602  | -0.04551 | 0.32638  | 0.29730255 | 5.51E-11 | 0.514204 | 7.04E-33 |
| 0.8039   | 0.321533 | 1.08E-12 | 0.135824 | 0.00327  | 0.36699731 | 2.46E-16 | 0.589429 | 4.98E-45 |
| 0.00058  | 0.148135 | 0.00133  | -0.00061 | 0.98948  | -0.0248532 | 0.59215  | 0.101977 | 0.02755  |
| 0.21916  | 0.022053 | 0.63454  | 0.055704 | 0.22956  | 0.20536069 | 7.69E-06 | 0.410047 | 2.30E-20 |
| 0.91163  | 0.359375 | 1.10E-15 | 0.125664 | 0.00655  | 0.25407794 | 2.58E-08 | 0.508221 | 4.89E-32 |
| 0.57226  | 0.180389 | 8.86E-05 | 0.086308 | 0.06238  | 0.15869499 | 0.00058  | 0.213456 | 3.25E-06 |
| 0.04492  | 0.041369 | 0.37241  | -0.0977  | 0.0348   | 0.02642665 | 0.56891  | 0.195329 | 2.13E-05 |
| 0.00798  | 0.047575 | 0.30493  | -0.01016 | 0.82663  | 0.06432399 | 0.16521  | 0.120882 | 0.00893  |
| 0.01196  | -0.03444 | 0.45783  | -0.0728  | 0.11617  | 0.03872496 | 0.40376  | 0.1333   | 0.0039   |
| 0.29566  | 0.034035 | 0.46311  | -0.2051  | 7.90E-06 | 0.12077907 | 0.00898  | 0.296478 | 6.26E-11 |
| 0.86201  | 0.15424  | 0.00083  | -0.05492 | 0.23619  | 0.13117472 | 0.00452  | 0.278921 | 8.60E-10 |
| 0.39976  | -0.04265 | 0.35778  | -0.12392 | 0.00734  | 0.15270049 | 0.00093  | 0.335805 | 8.99E-14 |
| 0.08519  | -0.14941 | 0.0012   | -0.30185 | 2.71E-11 | -0.2140459 | 3.05E-06 | -0.0997  | 0.03123  |
| 0.85703  | 0.185395 | 5.56E-05 | 0.158656 | 0.00058  | 0.16674031 | 0.0003   | 0.375851 | 4.07E-17 |
| 0.42772  | 0.150427 | 0.00111  | -0.07549 | 0.10325  | 0.18107781 | 8.31E-05 | 0.391877 | 1.36E-18 |
| 0.13676  | 0.199296 | 1.43E-05 | -0.00909 | 0.84471  | 0.21486065 | 2.79E-06 | 0.452656 | 5.72E-25 |
| 0.12756  | 0.138925 | 0.00262  | -0.07188 | 0.12086  | 0.07991283 | 0.08452  | 0.285171 | 3.45E-10 |
| 0.52478  | 0.046397 | 0.31707  | -0.28006 | 7.29E-10 | 0.01390377 | 0.76443  | 0.226429 | 7.64E-07 |
| 0.37841  | -0.12433 | 0.00714  | -0.35819 | 1.39E-15 | -0.0628224 | 0.17532  | 0.133901 | 0.00374  |
| 0.23133  | 0.135342 | 0.00339  | -0.10076 | 0.02947  | 0.0795931  | 0.08577  | 0.184102 | 6.28E-05 |
| 0.80579  | 0.168551 | 0.00025  | -0.06582 | 0.1556   | 0.14168926 | 0.00215  | 0.396572 | 4.87E-19 |
| 0.2773   | 0.323245 | 8.08E-13 | 0.055114 | 0.23454  | 0.27767834 | 1.03E-09 | 0.514653 | 6.08E-33 |
| 0.67767  | 0.033822 | 0.4659   | -0.09703 | 0.03606  | 0.10806417 | 0.0195   | 0.258655 | 1.42E-08 |
| 0.30753  | 0.269428 | 3.29E-09 | 0.181778 | 7.79E-05 | 0.17569081 | 0.00014  | 0.354322 | 2.93E-15 |
| 0.65281  | 0.150696 | 0.00109  | 0.044981 | 0.33208  | 0.25534454 | 2.19E-08 | 0.471371 | 3.31E-27 |
| 0.45665  | 0.031486 | 0.49729  | -0.22509 | 8.91E-07 | 0.05351865 | 0.24839  | 0.314155 | 3.72E-12 |
| 0.79462  | 0.157836 | 0.00062  | 0.048974 | 0.29091  | 0.30635425 | 1.32E-11 | 0.520173 | 9.81E-34 |
| 0.73594  | 0.029524 | 0.52449  | -0.07843 | 0.09047  | 0.32104728 | 1.17E-12 | 0.42963  | 2.12E-22 |
| 0.24261  | 0.219782 | 1.62E-06 | 0.136929 | 0.00303  | 0.29541529 | 7.38E-11 | 0.27346  | 1.87E-09 |
| 0.02946  | 0.004524 | 0.92233  | -0.11735 | 0.01115  | -0.0103873 | 0.82285  | 0.063522 | 0.17055  |
| 0.97229  | 0.079728 | 0.08524  | -0.07118 | 0.12455  | 0.12244123 | 0.00808  | 0.346233 | 1.34E-14 |
| 0.36811  | 0.044683 | 0.3353   | -0.13521 | 0.00342  | 0.22322852 | 1.10E-06 | 0.430261 | 1.82E-22 |
| 0.80133  | 0.157702 | 0.00063  | -0.03751 | 0.41871  | 0.12018544 | 0.00933  | 0.36524  | 3.49E-16 |
| 0.7322   | 0.197948 | 1.64E-05 | -0.08857 | 0.05579  | 0.1533585  | 0.00088  | 0.349636 | 7.11E-15 |
| 0.03614  | 0.216607 | 2.31E-06 | 0.012593 | 0.78607  | 0.11441471 | 0.01336  | 0.258435 | 1.46E-08 |
| 0.02199  | 0.478064 | 4.84E-28 | 0.143573 | 0.00187  | 0.21372761 | 3.16E-06 | 0.317173 | 2.25E-12 |
| 0.0055   | 0.184371 | 6.12E-05 | -0.03424 | 0.46044  | 0.03131361 | 0.49965  | 0.155225 | 0.00076  |
| 1.98E-28 | -0.141   | 0.00226  | -0.12331 | 0.00764  | 0.03596356 | 0.43813  | 0.108975 | 0.01849  |
| #####    | -0.11492 | 0.01296  | -0.10074 | 0.0295   | -0.0053898 | 0.90752  | 0.011607 | 0.80246  |
| 1.40E-41 | -0.01314 | 0.77705  | 0.032214 | 0.48738  | 0.13733951 | 0.00294  | 0.151889 | 0.00099  |
| 3.54E-47 | 0.056764 | 0.22081  | 0.043719 | 0.34584  | 0.14038733 | 0.00236  | 0.199086 | 1.46E-05 |
| 2.37E-53 | -0.17202 | 0.00019  | -0.10205 | 0.02744  | 0.06326405 | 0.1723   | 0.118303 | 0.01051  |

|          |          |          |          |          |            |          |          |          |
|----------|----------|----------|----------|----------|------------|----------|----------|----------|
| #####    | -0.20183 | 1.11E-05 | -0.12309 | 0.00775  | 0.02330782 | 0.61538  | -0.0461  | 0.32016  |
| 1.30E-64 | 0.037584 | 0.41777  | 0.019146 | 0.67985  | 0.07080196 | 0.12655  | 0.057923 | 0.21151  |
| 1.34E-38 | -0.126   | 0.0064   | 0.02896  | 0.53243  | 0.31277792 | 4.67E-12 | 0.383824 | 7.70E-18 |
| 1.27E-37 | -0.10975 | 0.01767  | -0.14225 | 0.00206  | -0.0242853 | 0.60064  | -0.01353 | 0.77058  |
| 1.49E-79 | -0.25551 | 2.14E-08 | -0.14481 | 0.0017   | 0.10388198 | 0.02477  | 0.089051 | 0.05447  |
| #####    | -0.04427 | 0.33974  | -0.0277  | 0.55041  | 0.0099682  | 0.82989  | -0.03159 | 0.49585  |
| 2.35E-90 | -0.19876 | 1.51E-05 | -0.03385 | 0.46559  | 0.25087109 | 3.91E-08 | 0.271232 | 2.56E-09 |
| 5.20E-60 | -0.12149 | 0.00858  | 0.022051 | 0.63457  | 0.17093906 | 0.00021  | 0.158525 | 0.00059  |
| #####    | -0.048   | 0.30061  | -0.06063 | 0.19089  | 0.01633069 | 0.72485  | 0.021046 | 0.65009  |
| #####    | -0.23152 | 4.22E-07 | -0.10311 | 0.02586  | 0.12597503 | 0.00641  | 0.083716 | 0.07069  |
| 1.33E-73 | 0.010033 | 0.8288   | -0.00044 | 0.99246  | 0.06234246 | 0.17865  | 0.047091 | 0.30987  |
| 7.67E-40 | 0.088014 | 0.05736  | 0.044468 | 0.33763  | 0.07404197 | 0.11005  | 0.115537 | 0.01247  |
| 4.74E-53 | -0.26155 | 9.62E-09 | -0.25264 | 3.11E-08 | -0.0331252 | 0.47515  | -0.01614 | 0.72786  |
| 2.66E-54 | -0.1378  | 0.00284  | -0.10044 | 0.02998  | -0.0618968 | 0.18178  | -0.04247 | 0.3598   |
| 1.42E-78 | -0.05921 | 0.20155  | -0.06767 | 0.14428  | 0.0496448  | 0.28434  | 0.042383 | 0.36079  |
| 5.23E-58 | -0.17498 | 0.00014  | -0.1514  | 0.00103  | -0.0322606 | 0.48676  | -0.07956 | 0.08591  |
| #####    | -0.10851 | 0.019    | -0.08498 | 0.06653  | -0.0089665 | 0.84676  | -0.06558 | 0.15712  |
| 2.79E-28 | -0.15147 | 0.00103  | -0.05711 | 0.21801  | 0.03304518 | 0.47622  | 0.100437 | 0.03     |
| 1.56E-98 | -0.03463 | 0.45528  | -0.00553 | 0.90513  | -0.0131705 | 0.77651  | -0.04567 | 0.32468  |
| 1.20E-38 | -0.0441  | 0.34163  | 0.053113 | 0.252    | 0.26283613 | 8.10E-09 | 0.288323 | 2.16E-10 |
| 1.55E-46 | -0.07144 | 0.12313  | -0.04208 | 0.3642   | 0.05693546 | 0.21942  | 0.024559 | 0.59654  |
| 4.61E-36 | -0.08904 | 0.05451  | -0.10444 | 0.02401  | 0.00388688 | 0.93324  | 0.065384 | 0.15834  |
| 3.71E-31 | -0.02181 | 0.63835  | -0.06742 | 0.14573  | -0.0734716 | 0.11282  | -0.12395 | 0.00732  |
| 7.75E-48 | -0.0936  | 0.04321  | -0.07001 | 0.13085  | -0.0529401 | 0.25355  | -0.09054 | 0.05053  |
| 3.21E-39 | -0.06984 | 0.13182  | 0.021087 | 0.64945  | 0.02597437 | 0.57555  | -0.02962 | 0.5232   |
| 4.18E-72 | -0.17559 | 0.00014  | -0.17576 | 0.00013  | -0.0956042 | 0.0389   | -0.11614 | 0.01202  |
| 2.01E-67 | -0.16305 | 0.0004   | -0.19022 | 3.51E-05 | -0.0856031 | 0.06455  | -0.10917 | 0.01827  |
| 2.28E-22 | -0.13018 | 0.00484  | -0.17304 | 0.00017  | -0.1533342 | 0.00089  | -0.14248 | 0.00202  |
| 3.51E-29 | -0.0551  | 0.23466  | -0.0475  | 0.30567  | -0.0284907 | 0.53911  | -0.07653 | 0.09856  |
| 1.83E-39 | -0.1932  | 2.63E-05 | -0.1422  | 0.00207  | 0.10768555 | 0.01993  | -0.01322 | 0.77578  |
| 3.17E-31 | -0.16167 | 0.00045  | -0.20049 | 1.27E-05 | -0.1121574 | 0.01531  | -0.11388 | 0.0138   |
| 2.90E-94 | -0.15999 | 0.00052  | -0.09412 | 0.04204  | -0.0006523 | 0.98878  | -0.05095 | 0.27185  |
| 6.84E-21 | -0.2704  | 2.87E-09 | -0.21791 | 2.00E-06 | 0.01365209 | 0.76857  | 0.105481 | 0.02262  |
| 1.15E-66 | -0.11784 | 0.01082  | -0.14343 | 0.00189  | -0.0574957 | 0.21491  | -0.08058 | 0.08195  |
| 1.82E-57 | -0.08773 | 0.05818  | -0.06684 | 0.14925  | 0.00344366 | 0.94084  | -0.02155 | 0.64224  |
| 1.06E-07 | 0.068718 | 0.13813  | -0.01581 | 0.73336  | 0.0252114  | 0.58682  | 0.080855 | 0.0809   |
| 1.03E-58 | 0.157477 | 0.00064  | 0.049693 | 0.28388  | -0.023593  | 0.61106  | 0.049101 | 0.28965  |
| 3.74E-52 | -0.00818 | 0.86011  | -0.03104 | 0.50339  | 0.05246075 | 0.25788  | 0.074655 | 0.10713  |
| #####    | -0.13247 | 0.00414  | -0.06699 | 0.14833  | 0.02636726 | 0.56978  | -0.00663 | 0.88629  |
| 2.42E-26 | 0.277013 | 1.13E-09 | 0.194326 | 2.35E-05 | 0.08864944 | 0.05557  | 0.053401 | 0.24943  |
| 2.59E-67 | -0.24048 | 1.44E-07 | -0.17182 | 0.00019  | -0.0446139 | 0.33605  | -0.11472 | 0.01311  |
| 2.96E-38 | 0.127532 | 0.00578  | 0.083687 | 0.07079  | 0.13033512 | 0.00479  | 0.138313 | 0.00274  |
| 1.01E-44 | -0.01973 | 0.67061  | 0.040832 | 0.37865  | 0.1156238  | 0.01241  | 0.18465  | 5.97E-05 |
| 2.43E-58 | -0.02062 | 0.65673  | 0.012512 | 0.78742  | 0.19983187 | 1.36E-05 | 0.207479 | 6.16E-06 |
| 4.50E-36 | -0.25959 | 1.25E-08 | -0.16275 | 0.00041  | -0.0279644 | 0.54663  | -0.01769 | 0.703    |

|          |          |          |           |          |            |          |          |          |
|----------|----------|----------|-----------|----------|------------|----------|----------|----------|
| 2.56E-43 | 0.08899  | 0.05464  | -1.25E-05 | 0.99979  | 0.11843365 | 0.01042  | 0.19452  | 2.31E-05 |
| 1.24E-90 | 0.08236  | 0.07539  | 0.019711  | 0.67095  | 0.05730355 | 0.21644  | 0.091351 | 0.0485   |
| 9.15E-46 | -0.01879 | 0.68543  | 0.011881  | 0.79789  | 0.03522985 | 0.44754  | 0.013313 | 0.77415  |
| 5.19E-25 | -0.02685 | 0.56268  | -0.02388  | 0.60677  | -0.0059723 | 0.89758  | -0.04875 | 0.29313  |
| 2.34E-57 | -0.0151  | 0.74475  | 0.015268  | 0.7421   | 0.04456865 | 0.33654  | -0.00334 | 0.94262  |
| 1.32E-38 | -0.03282 | 0.4793   | -0.02989  | 0.51933  | -0.0144009 | 0.75627  | -0.06218 | 0.17977  |
| 8.84E-38 | 0.046003 | 0.3212   | 0.04895   | 0.29114  | 0.12559886 | 0.00657  | 0.164293 | 0.00036  |
| #####    | -0.05294 | 0.25352  | -0.03094  | 0.5048   | 0.03610976 | 0.43627  | 0.018037 | 0.69745  |
| #####    | -0.09894 | 0.03254  | -0.10319  | 0.02575  | -0.0394029 | 0.39557  | -0.03662 | 0.42985  |
| #####    | -0.0824  | 0.07527  | -0.02866  | 0.53669  | 0.02151512 | 0.64282  | -0.03258 | 0.48245  |
| 1.02E-61 | -0.06793 | 0.14271  | -0.1019   | 0.02767  | -0.0393785 | 0.39587  | -0.04332 | 0.35032  |
| 3.05E-80 | -0.02424 | 0.60128  | -0.03258  | 0.48249  | -0.0442426 | 0.34009  | -0.08689 | 0.06063  |
| 1.55E-27 | -0.08867 | 0.0555   | -0.13108  | 0.00455  | -0.1381034 | 0.00278  | -0.12264 | 0.00797  |
| 1.38E-72 | 0.016969 | 0.71455  | -0.00404  | 0.93055  | 0.06384741 | 0.16837  | 0.038373 | 0.40806  |
| 1.62E-29 | 0.084875 | 0.06687  | 0.057703  | 0.21325  | 0.02741498 | 0.55454  | -0.01306 | 0.7783   |
| 2.98E-42 | -0.10049 | 0.02991  | -0.02216  | 0.63295  | 0.13478027 | 0.00352  | 0.121003 | 0.00886  |
| 5.38E-75 | -0.07385 | 0.11098  | -0.13117  | 0.00452  | -0.0400229 | 0.38818  | -0.0276  | 0.55187  |
| 6.29E-35 | -0.20975 | 4.84E-06 | -0.15886  | 0.00057  | -0.0041241 | 0.92917  | -0.01736 | 0.70823  |
| 5.49E-19 | -0.09888 | 0.03265  | -0.07294  | 0.11545  | -0.036653  | 0.4294   | -0.00281 | 0.95175  |
| 4.18E-23 | 0.061824 | 0.18229  | 0.028532  | 0.53852  | 0.05855482 | 0.20656  | 0.053345 | 0.24993  |
| 1.80E-54 | -0.05004 | 0.28048  | -0.03548  | 0.44429  | 0.03402014 | 0.4633   | 0.015574 | 0.73711  |
| 6.53E-37 | -0.16974 | 0.00023  | -0.31662  | 2.47E-12 | -0.0423929 | 0.36068  | 0.07406  | 0.10996  |
| 8.07E-38 | -0.08572 | 0.06418  | -0.13249  | 0.00413  | -0.015101  | 0.74482  | 0.093989 | 0.04234  |
| 1.16E-57 | -0.0296  | 0.52346  | -0.06462  | 0.16327  | 0.02709266 | 0.55921  | 0.038871 | 0.40199  |
| 5.76E-30 | -0.15254 | 0.00094  | -0.0984   | 0.03351  | -0.006876  | 0.88219  | -0.05707 | 0.21832  |
| 3.79E-18 | -0.30193 | 2.68E-11 | -0.18568  | 5.42E-05 | 0.02276004 | 0.62371  | 0.069172 | 0.13554  |
| 2.52E-26 | -0.04791 | 0.30155  | -0.05303  | 0.25277  | 0.06821674 | 0.14104  | 0.095745 | 0.03861  |
| 4.26E-77 | 0.00945  | 0.8386   | -0.03103  | 0.50357  | 0.07819104 | 0.09145  | 0.084839 | 0.06699  |
| 3.24E-35 | -0.07052 | 0.12804  | -0.08623  | 0.06261  | -0.0486321 | 0.29429  | -0.03041 | 0.51207  |
| 8.10E-40 | -0.08848 | 0.05604  | -0.10401  | 0.02459  | -0.0027976 | 0.95192  | 0.045107 | 0.33072  |
| 2.78E-60 | -0.02791 | 0.5474   | 0.007311  | 0.8748   | 0.29674723 | 6.01E-11 | 0.306757 | 1.24E-11 |
| 8.79E-26 | -0.26394 | 6.98E-09 | -0.22275  | 1.16E-06 | 0.00063888 | 0.98901  | 0.059402 | 0.20006  |
| 8.34E-39 | 0.125217 | 0.00674  | 0.172252  | 0.00018  | 0.29705545 | 5.73E-11 | 0.319947 | 1.41E-12 |
| 1.52E-49 | 0.090005 | 0.05193  | 0.105237  | 0.02294  | 0.14565164 | 0.0016   | 0.144351 | 0.00176  |
| 1.46E-32 | 0.017987 | 0.69824  | -0.10145  | 0.02837  | -0.0319691 | 0.49071  | -0.00509 | 0.91261  |
| 5.20E-32 | 0.061064 | 0.18774  | 0.026887  | 0.5622   | 0.0594186  | 0.19993  | 0.111516 | 0.01591  |
| 1.22E-32 | -0.03851 | 0.40634  | 0.081284  | 0.0793   | 0.25314117 | 2.92E-08 | 0.329067 | 2.96E-13 |
| 1.57E-27 | 0.202488 | 1.03E-05 | 0.144483  | 0.00175  | 0.06659101 | 0.15078  | 0.061803 | 0.18245  |
| 3.51E-25 | -0.01139 | 0.80601  | -0.07936  | 0.08671  | 0.00484204 | 0.91689  | 0.051861 | 0.26337  |
| 4.39E-46 | -0.03432 | 0.45937  | -0.06397  | 0.16755  | 0.02064153 | 0.65638  | 0.039497 | 0.39445  |
| 7.51E-43 | -0.00048 | 0.99181  | -0.06975  | 0.13229  | 0.0549107  | 0.23628  | 0.067041 | 0.14803  |
| 3.83E-31 | 0.066271 | 0.15276  | 0.085087  | 0.06619  | 0.32494124 | 6.04E-13 | 0.349728 | 6.99E-15 |
| 2.97E-18 | -0.17837 | 0.00011  | -0.1721   | 0.00019  | -0.1556653 | 0.00074  | -0.10389 | 0.02476  |
| 1.59E-31 | -0.32544 | 5.54E-13 | -0.26376  | 7.15E-09 | -0.0802516 | 0.0832   | -0.08573 | 0.06417  |
| 2.02E-96 | -0.04848 | 0.29585  | -0.01873  | 0.68636  | 0.04540235 | 0.32757  | 0.035834 | 0.43979  |

|          |          |          |          |          |            |          |          |          |
|----------|----------|----------|----------|----------|------------|----------|----------|----------|
| 1.19E-43 | -0.05042 | 0.27691  | -0.05416 | 0.24272  | 0.01043979 | 0.82197  | -0.00682 | 0.88318  |
| 2.69E-37 | -0.27112 | 2.60E-09 | -0.14085 | 0.00228  | -0.0047335 | 0.91874  | -0.03072 | 0.50783  |
| 1.10E-34 | -0.04875 | 0.29312  | -0.06126 | 0.18635  | 0.0725193  | 0.11758  | 0.115464 | 0.01253  |
| 3.26E-43 | 0.158734 | 0.00058  | 0.169437 | 0.00023  | 0.26174708 | 9.38E-09 | 0.257656 | 1.62E-08 |
| 1.49E-41 | -0.11049 | 0.01691  | -0.05053 | 0.27579  | 0.09189268 | 0.04718  | 0.116131 | 0.01203  |
| 1.07E-89 | -0.10632 | 0.02157  | -0.04071 | 0.38003  | 0.02570905 | 0.57946  | -0.01569 | 0.73528  |
| 7.01E-64 | 0.040792 | 0.37911  | 0.058508 | 0.20693  | 0.04153201 | 0.37052  | 0.030928 | 0.50495  |
| 1.25E-41 | -0.04961 | 0.28467  | -0.05549 | 0.23139  | 0.05017934 | 0.27918  | 0.064918 | 0.16133  |
| 6.53E-50 | -0.20263 | 1.02E-05 | -0.11717 | 0.01127  | -0.0425727 | 0.35864  | -0.09093 | 0.04954  |
| #####    | -0.18471 | 5.93E-05 | -0.22387 | 1.02E-06 | -0.0757095 | 0.10225  | -0.10976 | 0.01765  |
| 2.12E-30 | 0.035861 | 0.43944  | -0.0446  | 0.33623  | -0.0087518 | 0.85039  | 0.009199 | 0.84284  |
| #####    | -0.15936 | 0.00055  | -0.09884 | 0.03272  | 0.08241057 | 0.07521  | 0.087096 | 0.06002  |
| 9.56E-40 | 0.073202 | 0.11415  | 0.00199  | 0.96579  | 0.01577467 | 0.73386  | -0.10137 | 0.0285   |
| 4.72E-47 | 0.026223 | 0.57189  | -0.00176 | 0.96974  | 0.0875741  | 0.05862  | 0.100554 | 0.0298   |
| #####    | -0.04981 | 0.28275  | 0.007087 | 0.8786   | 0.02876361 | 0.53523  | -0.02707 | 0.55951  |
| 5.40E-22 | 0.047626 | 0.30441  | -0.00203 | 0.96514  | 0.02839739 | 0.54044  | 0.042123 | 0.36375  |
| 1.56E-32 | 0.051252 | 0.26902  | -0.05446 | 0.24013  | 0.05084608 | 0.27283  | 0.11539  | 0.01259  |
| 7.04E-23 | -0.05918 | 0.20173  | -0.08056 | 0.082    | -0.0454857 | 0.32668  | -0.09498 | 0.04019  |
| 2.75E-64 | -0.01514 | 0.74417  | -0.04316 | 0.35205  | 0.02589667 | 0.57669  | 0.048577 | 0.29484  |
| 7.19E-47 | -0.09723 | 0.03568  | -0.04641 | 0.31696  | 0.09640314 | 0.03729  | 0.145807 | 0.00158  |
| 1.53E-49 | 0.008935 | 0.84729  | 0.035006 | 0.45043  | 0.10440138 | 0.02405  | 0.099828 | 0.03101  |
| 7.49E-20 | -0.07032 | 0.12913  | -0.0453  | 0.32861  | -0.1082252 | 0.01932  | -0.08109 | 0.08002  |
| 1.86E-83 | -0.19011 | 3.55E-05 | -0.10761 | 0.02002  | 0.1062517  | 0.02165  | 0.184724 | 5.92E-05 |
| #####    | -0.09229 | 0.04623  | -0.03732 | 0.4211   | 0.03932787 | 0.39648  | 0.026684 | 0.56515  |
| 1.39E-44 | -0.10498 | 0.02327  | -0.10912 | 0.01833  | 0.17876939 | 0.0001   | 0.238041 | 1.94E-07 |
| 1.32E-77 | -0.29991 | 3.67E-11 | -0.21733 | 2.13E-06 | -0.0558984 | 0.22794  | -0.04895 | 0.29115  |
| 3.09E-76 | -0.13597 | 0.00324  | -0.03458 | 0.45591  | 0.11129448 | 0.01612  | 0.121259 | 0.00871  |
| 2.60E-54 | 0.183179 | 6.84E-05 | 0.221703 | 1.31E-06 | 0.27229598 | 2.20E-09 | 0.260056 | 1.18E-08 |
| 1.44E-36 | -0.07535 | 0.10391  | -0.06084 | 0.18934  | 0.02968998 | 0.52215  | -0.03903 | 0.40004  |
| 2.62E-94 | -0.02562 | 0.5808   | -0.08484 | 0.06698  | 0.10125631 | 0.02867  | 0.179695 | 9.44E-05 |
| 5.68E-38 | -0.11626 | 0.01193  | -0.25656 | 1.87E-08 | -0.0435779 | 0.3474   | 0.076741 | 0.09764  |
| 5.44E-67 | -0.01018 | 0.82633  | 0.016064 | 0.72917  | 0.06109218 | 0.18754  | 0.026721 | 0.56461  |
| 1.94E-40 | -0.28853 | 2.10E-10 | -0.19126 | 3.17E-05 | 0.02113369 | 0.64873  | 0.051766 | 0.26424  |
| 6.30E-61 | -0.14906 | 0.00123  | -0.18108 | 8.31E-05 | -0.071882  | 0.12085  | -0.03004 | 0.51729  |
| 9.53E-29 | 0.094529 | 0.04116  | 0.0564   | 0.22379  | 0.08026711 | 0.08314  | 0.060742 | 0.19008  |
| 5.78E-33 | -0.27876 | 8.80E-10 | -0.09647 | 0.03717  | 0.04071066 | 0.38007  | 0.062807 | 0.17542  |
| 4.42E-40 | 0.010434 | 0.82206  | -0.01469 | 0.75156  | 0.06296349 | 0.17435  | 0.070351 | 0.12899  |
| 6.66E-29 | -0.45077 | 9.44E-25 | -0.28188 | 5.60E-10 | 0.12897415 | 0.00525  | 0.136167 | 0.00319  |
| 1.88E-27 | 0.100609 | 0.02971  | 0.037259 | 0.42181  | 0.07133598 | 0.1237   | 0.133836 | 0.00376  |
| 3.44E-34 | -0.09813 | 0.034    | -0.07988 | 0.08464  | -0.0496502 | 0.28429  | 0.025249 | 0.58626  |
| 6.96E-61 | -0.03467 | 0.45479  | -0.04002 | 0.38825  | 0.01799033 | 0.69819  | 0.015267 | 0.74211  |
| 1.24E-95 | -0.16351 | 0.00039  | -0.08721 | 0.05969  | 0.01606356 | 0.72917  | -0.02446 | 0.598    |
| 5.63E-39 | 0.12785  | 0.00566  | 0.155562 | 0.00074  | 0.12402533 | 0.00729  | 0.079593 | 0.08577  |
| 2.08E-55 | 0.024863 | 0.592    | 0.003454 | 0.94066  | 0.04623443 | 0.31877  | 0.059105 | 0.20232  |
| 4.07E-43 | -0.05643 | 0.22356  | -0.07339 | 0.11325  | 0.04460112 | 0.33618  | 0.068689 | 0.1383   |

|          |          |          |          |          |            |          |          |          |
|----------|----------|----------|----------|----------|------------|----------|----------|----------|
| 3.31E-58 | 0.206103 | 7.11E-06 | 0.051214 | 0.26937  | 0.12725787 | 0.00589  | 0.132243 | 0.0042   |
| 2.64E-32 | -0.0806  | 0.08187  | -0.08102 | 0.08027  | 0.01717557 | 0.71123  | 0.017868 | 0.70015  |
| 8.15E-32 | -0.10534 | 0.0228   | -0.03416 | 0.46141  | 0.0758436  | 0.10164  | 0.090049 | 0.05181  |
| 9.86E-27 | -0.05983 | 0.19683  | -0.09821 | 0.03385  | 0.00047629 | 0.99181  | -0.00075 | 0.98716  |
| 4.97E-30 | -0.15921 | 0.00055  | -0.24207 | 1.18E-07 | -0.1648471 | 0.00035  | -0.24491 | 8.31E-08 |
| 7.01E-41 | -0.0569  | 0.21967  | -0.00833 | 0.85759  | 0.21659242 | 2.31E-06 | 0.282339 | 5.24E-10 |
| 2.41E-79 | -0.10943 | 0.01801  | -0.11208 | 0.01539  | -0.0179526 | 0.69879  | -0.00753 | 0.87111  |
| 1.42E-28 | -0.29941 | 3.97E-11 | -0.03844 | 0.4072   | 0.15675894 | 0.00067  | 0.102751 | 0.02639  |
| 2.57E-24 | -0.1893  | 3.83E-05 | -0.08663 | 0.0614   | 0.13294553 | 0.004    | 0.195763 | 2.04E-05 |
| 3.15E-47 | -0.24574 | 7.49E-08 | -0.10763 | 0.02     | 0.1671549  | 0.00029  | 0.149654 | 0.00118  |
| 3.47E-31 | -0.01579 | 0.73368  | 0.133492 | 0.00385  | 0.27600294 | 1.31E-09 | 0.247103 | 6.31E-08 |
| 3.26E-38 | 0.041107 | 0.37545  | 0.100348 | 0.03014  | 0.06829875 | 0.14056  | 0.052208 | 0.26018  |
| 1.30E-41 | -0.02535 | 0.58478  | 0.165362 | 0.00033  | 0.41550436 | 6.44E-21 | 0.384125 | 7.22E-18 |
| 3.63E-57 | -0.11791 | 0.01077  | -0.01897 | 0.68263  | 0.10494192 | 0.02333  | 0.103453 | 0.02538  |
| 4.96E-46 | -0.0386  | 0.40532  | -0.08595 | 0.06348  | 0.05525871 | 0.23332  | 0.073738 | 0.11152  |
| 6.89E-48 | -0.14154 | 0.00217  | -0.0468  | 0.31283  | 0.02218152 | 0.63256  | -0.05729 | 0.21655  |
| 2.96E-69 | -0.02672 | 0.56462  | -0.01144 | 0.80525  | -0.0480423 | 0.30019  | -0.0665  | 0.15137  |
| 0.96805  | 0.17034  | 0.00022  | -0.12386 | 0.00737  | -0.1511966 | 0.00105  | 0.032178 | 0.48787  |
| 1.43E-08 | 0.177015 | 0.00012  | -0.02018 | 0.66359  | -0.3720678 | 8.84E-17 | -0.31867 | 1.75E-12 |
| 0.89082  | 0.180649 | 8.65E-05 | -0.11271 | 0.01482  | -0.0911946 | 0.04889  | 0.12826  | 0.00551  |
| 0.98741  | 0.191322 | 3.16E-05 | -0.12368 | 0.00746  | -0.1582773 | 0.0006   | 0.031468 | 0.49753  |
| 0.00183  | 0.137068 | 0.003    | -0.01967 | 0.67164  | 0.03907845 | 0.39948  | 0.152267 | 0.00096  |
| 0.23368  | 0.198162 | 1.61E-05 | -0.10682 | 0.02095  | -0.0831283 | 0.0727   | 0.076807 | 0.09736  |
| 0.00411  | 0.094955 | 0.04025  | 0.109013 | 0.01845  | 0.0265552  | 0.56703  | 0.09662  | 0.03686  |
| 0.0041   | 0.22241  | 1.21E-06 | 0.00691  | 0.88161  | 0.01316285 | 0.77664  | 0.130499 | 0.00473  |
| 0.81004  | 0.003481 | 0.94019  | -0.15692 | 0.00067  | -0.2375258 | 2.06E-07 | -0.21057 | 4.44E-06 |
| 0.02264  | 0.312161 | 5.17E-12 | 0.141552 | 0.00217  | 0.12582177 | 0.00648  | 0.24259  | 1.11E-07 |
| 0.83412  | 0.191192 | 3.20E-05 | -0.07168 | 0.12188  | -0.0518318 | 0.26363  | 0.077047 | 0.09631  |
| 0.01343  | 0.284977 | 3.55E-10 | 0.064011 | 0.16728  | 0.0451713  | 0.33004  | 0.193398 | 2.58E-05 |
| 0.52745  | 0.246299 | 6.98E-08 | -0.00054 | 0.99077  | -0.0918505 | 0.04728  | 0.015228 | 0.74275  |
| 0.53856  | 0.153339 | 0.00089  | -0.04688 | 0.31208  | 0.00604845 | 0.89628  | 0.07916  | 0.0875   |
| 0.01368  | 0.253022 | 2.96E-08 | -0.02367 | 0.6099   | -0.1879362 | 4.37E-05 | -0.06816 | 0.14134  |
| 2.70E-06 | 0.131384 | 0.00446  | 0.012038 | 0.79528  | -0.0160743 | 0.729    | 0.05974  | 0.19751  |
| 0.00629  | 0.058718 | 0.2053   | -0.10945 | 0.01798  | -0.1381741 | 0.00277  | -0.12429 | 0.00716  |
| 0.04243  | 0.006401 | 0.89027  | -0.17725 | 0.00012  | -0.0843431 | 0.0686   | -0.00361 | 0.93797  |
| 0.49698  | 0.129026 | 0.00523  | -0.09483 | 0.04051  | 0.05302338 | 0.2528   | 0.199726 | 1.37E-05 |
| 0.88599  | 0.096184 | 0.03773  | -0.02965 | 0.52268  | 0.02825289 | 0.5425   | 0.108785 | 0.0187   |
| 0.9996   | 0.249551 | 4.63E-08 | -0.01324 | 0.77538  | -0.0224905 | 0.62783  | -0.02063 | 0.65651  |
| 0.56865  | 0.14249  | 0.00202  | -0.12359 | 0.0075   | 0.00213132 | 0.96336  | 0.173779 | 0.00016  |
| 1.90E-05 | 0.327989 | 3.57E-13 | 0.195025 | 2.20E-05 | -0.0008509 | 0.98537  | 0.050343 | 0.27762  |
| 0.06291  | 0.161247 | 0.00047  | 0.289658 | 1.77E-10 | 0.21400377 | 3.06E-06 | 0.166665 | 0.0003   |
| 0.03772  | 0.332395 | 1.65E-13 | 0.028869 | 0.53373  | 0.02376893 | 0.60841  | 0.125872 | 0.00646  |
| 0.61277  | 0.137054 | 0.003    | -0.11434 | 0.01342  | -0.0192759 | 0.67779  | 0.110237 | 0.01717  |
| 0.00245  | 0.236105 | 2.45E-07 | 0.061939 | 0.18148  | 0.04079964 | 0.37903  | 0.189433 | 3.79E-05 |
| 0.00474  | 0.414896 | 7.43E-21 | 0.106916 | 0.02084  | 0.06303228 | 0.17388  | 0.163588 | 0.00039  |

|          |          |          |          |          |            |          |          |          |
|----------|----------|----------|----------|----------|------------|----------|----------|----------|
| 0.74156  | 0.136312 | 0.00316  | -0.06011 | 0.19475  | -0.0375424 | 0.41828  | 0.091806 | 0.04739  |
| 0.23136  | 0.309958 | 7.40E-12 | -0.034   | 0.46353  | -0.0637432 | 0.16907  | 0.088198 | 0.05684  |
| 0.31892  | 0.164145 | 0.00037  | -0.08208 | 0.07638  | -0.0987417 | 0.0329   | -0.00324 | 0.94432  |
| 0.00374  | 0.124763 | 0.00694  | -0.12012 | 0.00937  | -0.1522621 | 0.00096  | -0.12994 | 0.00492  |
| 0.66169  | 0.224284 | 9.76E-07 | -0.10649 | 0.02136  | -0.105403  | 0.02273  | -0.00301 | 0.94824  |
| 0.01299  | 0.263014 | 7.91E-09 | 0.025948 | 0.57593  | -0.0835306 | 0.07132  | 0.008766 | 0.85014  |
| 0.00027  | 0.322882 | 8.60E-13 | 0.122888 | 0.00785  | -0.0503443 | 0.2776   | -0.01894 | 0.68305  |
| 0.39463  | 0.117349 | 0.01115  | -0.17016 | 0.00022  | -0.1004939 | 0.0299   | 0.017243 | 0.71015  |
| 0.31293  | 0.285863 | 3.12E-10 | -0.01407 | 0.76173  | -0.0355536 | 0.44338  | 0.100877 | 0.02928  |
| 0.27099  | 0.150297 | 0.00112  | -0.16355 | 0.00039  | 0.00347249 | 0.94034  | 0.117508 | 0.01104  |
| 0.85074  | 0.096851 | 0.03641  | -0.17048 | 0.00021  | -0.0596035 | 0.19854  | 0.081107 | 0.07996  |
| 0.89519  | 0.209708 | 4.86E-06 | -0.10748 | 0.02017  | -0.0750017 | 0.1055   | 0.121638 | 0.0085   |
| 0.19359  | 0.165748 | 0.00032  | -0.13913 | 0.00258  | -0.0892827 | 0.05384  | 0.07186  | 0.12096  |
| 0.40701  | 0.144128 | 0.00179  | -0.10297 | 0.02607  | -0.0203988 | 0.66016  | 0.105506 | 0.02259  |
| 0.06598  | 0.061152 | 0.18711  | -0.12593 | 0.00643  | 0.04959198 | 0.28485  | 0.180655 | 8.64E-05 |
| 0.04051  | 0.222652 | 1.18E-06 | 0.139991 | 0.00243  | 0.17688341 | 0.00012  | 0.212882 | 3.46E-06 |
| 0.01728  | 0.150834 | 0.00108  | 0.113442 | 0.01417  | -0.0564278 | 0.22356  | -0.01939 | 0.67603  |
| 0.02213  | 0.164976 | 0.00034  | 0.027583 | 0.55211  | -0.1199508 | 0.00947  | -0.00743 | 0.87273  |
| 0.36728  | 0.104485 | 0.02394  | -0.13884 | 0.00264  | -0.0289427 | 0.53269  | 0.132555 | 0.00411  |
| 0.60384  | 0.160394 | 0.0005   | -0.13561 | 0.00332  | -0.0726247 | 0.11705  | 0.117329 | 0.01117  |
| 0.0091   | 0.271791 | 2.37E-09 | -0.08527 | 0.06562  | -0.3137636 | 3.97E-12 | -0.29035 | 1.59E-10 |
| 0.81712  | -0.04137 | 0.37243  | -0.08657 | 0.06159  | -0.0138875 | 0.76469  | 0.083344 | 0.07196  |
| 0.4998   | 0.014494 | 0.75474  | -0.16994 | 0.00022  | -0.0548596 | 0.23671  | 0.150676 | 0.00109  |
| 0.19819  | 0.126744 | 0.00609  | -0.06123 | 0.18651  | -0.0357042 | 0.44145  | 0.116211 | 0.01197  |
| 0.00033  | 0.12303  | 0.00778  | 0.015721 | 0.73473  | 0.02266495 | 0.62516  | 0.093125 | 0.04428  |
| 2.29E-05 | 0.342143 | 2.86E-14 | 0.063061 | 0.17368  | -0.198511  | 1.55E-05 | -0.16441 | 0.00036  |
| 0.41769  | 0.524055 | 2.67E-34 | 0.517835 | 2.13E-33 | 0.2506648  | 4.01E-08 | 0.324211 | 6.85E-13 |
| 0.00119  | 0.500331 | 5.93E-31 | 0.393508 | 9.56E-19 | 0.41311268 | 1.13E-20 | 0.270257 | 2.93E-09 |
| 4.93E-05 | 0.429927 | 1.97E-22 | 0.15725  | 0.00065  | 0.1030922  | 0.02589  | 0.204578 | 8.34E-06 |
| 0.18126  | -0.37001 | 1.34E-16 | -0.16304 | 0.0004   | -0.059583  | 0.19869  | -0.21971 | 1.63E-06 |
| 0.06568  | 0.372152 | 8.69E-17 | 0.240281 | 1.47E-07 | -0.0099979 | 0.82939  | -0.02195 | 0.63613  |
| 2.48E-05 | 0.378867 | 2.18E-17 | 0.401321 | 1.69E-19 | 0.23633672 | 2.38E-07 | 0.02459  | 0.59608  |
| 0.91316  | 0.611778 | 2.75E-49 | 0.552759 | 1.01E-38 | 0.18160004 | 7.92E-05 | 0.152322 | 0.00096  |
| 0.23586  | 0.35706  | 1.73E-15 | 0.14553  | 0.00161  | 0.03977385 | 0.39114  | 0.079645 | 0.08557  |
| 0.00976  | 0.57778  | 6.14E-43 | 0.448736 | 1.62E-24 | 0.07923834 | 0.08718  | 0.208956 | 5.27E-06 |
| 0.31394  | 0.675246 | 1.87E-63 | 0.471801 | 2.93E-27 | 0.32427749 | 6.77E-13 | 0.418769 | 2.97E-21 |
| 7.76E-05 | 0.343505 | 2.22E-14 | 0.144278 | 0.00177  | -0.114359  | 0.01341  | -0.15419 | 0.00083  |
| 0.12026  | 0.364603 | 3.96E-16 | 0.258508 | 1.44E-08 | 0.1611898  | 0.00047  | 0.168119 | 0.00026  |
| 0.00632  | -0.39057 | 1.81E-18 | -0.10721 | 0.02049  | 0.00282249 | 0.95149  | -0.0484  | 0.2966   |
| 1.55E-13 | 0.549128 | 3.88E-38 | 0.397246 | 4.19E-19 | -0.0434817 | 0.34846  | -0.03596 | 0.43819  |
| 0.7284   | 0.483825 | 8.96E-29 | 0.181806 | 7.77E-05 | -0.0231018 | 0.61851  | 0.086625 | 0.06142  |
| 0.00267  | 0.674234 | 3.36E-63 | 0.793003 | #####    | 0.13496644 | 0.00348  | -0.03094 | 0.50475  |
| 0.86755  | 0.343492 | 2.23E-14 | 0.293028 | 1.06E-10 | 0.22588841 | 8.13E-07 | 0.16115  | 0.00047  |
| 0.00227  | 0.455102 | 2.97E-25 | 0.220121 | 1.56E-06 | 0.14254309 | 0.00202  | 0.115678 | 0.01237  |
| 0.32576  | -0.36598 | 3.01E-16 | -0.29407 | 9.06E-11 | -0.1597747 | 0.00053  | -0.24679 | 6.57E-08 |



|          |          |          |          |          |            |          |          |          |
|----------|----------|----------|----------|----------|------------|----------|----------|----------|
| 0.0711   | 0.343368 | 2.28E-14 | 0.185654 | 5.43E-05 | 0.17893395 | 0.0001   | -0.01488 | 0.7485   |
| 0.00321  | 0.839688 | #####    | 0.429536 | 2.17E-22 | 0.26207816 | 8.97E-09 | 0.38419  | 7.12E-18 |
| 3.88E-07 | 0.352592 | 4.07E-15 | 0.452846 | 5.43E-25 | 0.42421781 | 7.99E-22 | 0.285074 | 3.50E-10 |
| 0.21624  | 0.480933 | 2.10E-28 | 0.646288 | 1.43E-56 | 0.42477916 | 6.98E-22 | 0.33674  | 7.60E-14 |
| 0.00026  | 0.409311 | 2.73E-20 | 0.205556 | 7.53E-06 | 0.00739458 | 0.87338  | -0.03275 | 0.48018  |
| 0.0002   | 0.573672 | 3.20E-42 | 0.43112  | 1.47E-22 | 0.16230599 | 0.00043  | 0.080617 | 0.08181  |
| 0.03377  | 0.886433 | #####    | 0.448525 | 1.71E-24 | 0.18057233 | 8.71E-05 | 0.304933 | 1.66E-11 |
| 0.54429  | 0.705899 | 1.18E-71 | 0.206801 | 6.61E-06 | 0.16919315 | 0.00024  | 0.248314 | 5.41E-08 |
| 0.05876  | 0.289459 | 1.82E-10 | -0.07605 | 0.10071  | 0.00602236 | 0.89673  | -0.06982 | 0.1319   |
| 0.12469  | -0.32194 | 1.01E-12 | -0.09186 | 0.04725  | 0.21329825 | 3.31E-06 | 0.240772 | 1.39E-07 |
| 0.12612  | 0.682764 | 2.26E-65 | 0.27191  | 2.33E-09 | -0.0292898 | 0.52778  | -0.12062 | 0.00908  |
| 0.00195  | 0.385781 | 5.08E-18 | 0.188104 | 4.30E-05 | 0.355315   | 2.42E-15 | 0.317998 | 1.96E-12 |
| 0.21998  | 0.342017 | 2.92E-14 | 0.312895 | 4.58E-12 | 0.19389775 | 2.45E-05 | 0.22045  | 1.51E-06 |
| 0.06742  | 0.676357 | 9.82E-64 | 0.359748 | 1.03E-15 | 0.14741181 | 0.0014   | 0.287788 | 2.34E-10 |
| 0.18738  | 0.397112 | 4.32E-19 | 0.222641 | 1.18E-06 | 0.16046478 | 0.0005   | 0.250895 | 3.90E-08 |
| 0.02426  | 0.828268 | #####    | 0.440116 | 1.52E-23 | 0.09103102 | 0.0493   | -0.00937 | 0.84001  |
| 0.06275  | 0.379474 | 1.92E-17 | 0.568994 | 2.04E-41 | 0.25643058 | 1.90E-08 | -0.02724 | 0.55703  |
| 0.00252  | 0.522497 | 4.51E-34 | 0.310645 | 6.62E-12 | -0.0502875 | 0.27814  | -0.03778 | 0.41535  |
| 0.06086  | 0.836459 | #####    | 0.378692 | 2.26E-17 | 0.23524146 | 2.71E-07 | 0.396574 | 4.87E-19 |
| 0.00089  | 0.795497 | #####    | 0.40172  | 1.54E-19 | 0.26533621 | 5.77E-09 | 0.378921 | 2.16E-17 |
| 0.27718  | 0.683864 | 1.17E-65 | 0.22234  | 1.22E-06 | 0.19298589 | 2.68E-05 | 0.410359 | 2.14E-20 |
| 0.0007   | 0.356641 | 1.88E-15 | 0.087351 | 0.05927  | 0.14555183 | 0.00161  | 0.096787 | 0.03654  |
| 1.74E-05 | 0.353505 | 3.42E-15 | 0.278967 | 8.54E-10 | -0.0620238 | 0.18088  | -0.17951 | 9.60E-05 |
| 0.57808  | 0.405323 | 6.82E-20 | 0.384742 | 6.33E-18 | 0.33032026 | 2.38E-13 | 0.07899  | 0.08818  |
| 0.24238  | 0.385465 | 5.43E-18 | 0.272588 | 2.12E-09 | 0.09816441 | 0.03394  | 0.146046 | 0.00155  |
| 0.00828  | 0.463942 | 2.66E-26 | 0.328061 | 3.52E-13 | -0.2399821 | 1.53E-07 | -0.23171 | 4.13E-07 |
| 0.57007  | 0.435458 | 4.95E-23 | 0.238278 | 1.88E-07 | -0.0006732 | 0.98842  | 0.050771 | 0.27354  |
| 1.90E-05 | 0.87287  | #####    | 0.493032 | 5.64E-30 | 0.07938856 | 0.08658  | 0.088813 | 0.05512  |
| 2.61E-05 | 0.907396 | #####    | 0.48547  | 5.50E-29 | 0.06052793 | 0.19165  | 0.06831  | 0.14049  |
| 0.20402  | 0.777936 | 6.89E-96 | 0.411097 | 1.81E-20 | -0.0345223 | 0.45672  | -0.18384 | 6.43E-05 |
| 8.12E-07 | 0.557242 | 1.89E-39 | 0.536576 | 3.55E-36 | 0.09551993 | 0.03908  | -0.00738 | 0.87358  |
| 0.32846  | 0.611351 | 3.34E-49 | 0.283718 | 4.28E-10 | 0.35084896 | 5.66E-15 | 0.559197 | 9.01E-40 |
| 0.0007   | 0.623147 | 1.38E-51 | 0.469675 | 5.34E-27 | -0.1124677 | 0.01503  | -0.31857 | 1.78E-12 |
| 0.13023  | -0.32353 | 7.69E-13 | -0.29215 | 1.22E-10 | 0.09724345 | 0.03566  | 0.184831 | 5.86E-05 |
| 0.56584  | 0.639602 | 4.36E-55 | 0.407704 | 3.96E-20 | 0.48907762 | 1.87E-29 | 0.462069 | 4.46E-26 |
| 0.00321  | 0.880288 | #####    | 0.543214 | 3.34E-37 | -0.0275549 | 0.55252  | -0.08595 | 0.06348  |
| 0.14582  | 0.867259 | #####    | 0.389765 | 2.16E-18 | 0.10183605 | 0.02777  | 0.186143 | 5.18E-05 |
| 0.00295  | 0.433024 | 9.13E-23 | 0.326128 | 4.93E-13 | 0.00590469 | 0.89873  | 0.101944 | 0.0276   |
| 0.011    | 0.572583 | 4.94E-42 | 0.284449 | 3.84E-10 | -0.2859297 | 3.09E-10 | -0.28038 | 6.96E-10 |
| 0.07023  | 0.75647  | 8.72E-88 | 0.426373 | 4.73E-22 | 0.37313169 | 7.11E-17 | 0.47325  | 1.94E-27 |
| 0.48306  | 0.724536 | 3.54E-77 | 0.472746 | 2.24E-27 | 0.35437682 | 2.90E-15 | 0.43235  | 1.08E-22 |
| 0.03246  | 0.667486 | 1.56E-61 | 0.284828 | 3.63E-10 | 0.24914315 | 4.87E-08 | 0.445849 | 3.45E-24 |
| 0.05022  | 0.643718 | 5.37E-56 | 0.47625  | 8.19E-28 | 0.30413016 | 1.89E-11 | 0.306727 | 1.25E-11 |
| 0.99978  | 0.776464 | 2.65E-95 | 0.383211 | 8.76E-18 | 0.24805521 | 5.60E-08 | 0.393675 | 9.21E-19 |
| 0.00045  | 0.920209 | #####    | 0.530782 | 2.68E-35 | 0.23784602 | 1.98E-07 | 0.315175 | 3.14E-12 |

|          |          |          |          |          |            |          |          |          |
|----------|----------|----------|----------|----------|------------|----------|----------|----------|
| 0.10613  | 0.90397  | #####    | 0.506616 | 8.16E-32 | 0.26261483 | 8.34E-09 | 0.335823 | 8.96E-14 |
| 0.0038   | 0.585549 | 2.53E-44 | 0.414667 | 7.84E-21 | 0.27924333 | 8.21E-10 | 0.329239 | 2.87E-13 |
| 0.07582  | 0.664358 | 8.92E-61 | 0.688095 | 9.11E-67 | 0.20822936 | 5.69E-06 | 0.022781 | 0.6234   |
| 0.1293   | 0.642557 | 9.73E-56 | 0.540758 | 8.05E-37 | 0.15243569 | 0.00095  | 0.25129  | 3.70E-08 |
| 0.52037  | 0.547314 | 7.54E-38 | 0.464229 | 2.45E-26 | 0.05719316 | 0.21733  | -0.08097 | 0.08047  |
| 0.02741  | 0.59844  | 1.05E-46 | 0.425295 | 6.15E-22 | 0.25808287 | 1.53E-08 | 0.089992 | 0.05196  |
| 0.42373  | 0.498927 | 9.19E-31 | 0.2415   | 1.27E-07 | -0.2357922 | 2.54E-07 | -0.22701 | 7.14E-07 |
| 0.14331  | 0.756554 | 8.14E-88 | 0.46702  | 1.13E-26 | -0.0340811 | 0.4625   | -0.2121  | 3.77E-06 |
| 0.96855  | -0.32599 | 5.05E-13 | -0.14814 | 0.00133  | -0.0791531 | 0.08752  | -0.11907 | 0.01001  |
| 3.92E-06 | 0.791153 | #####    | 0.431797 | 1.24E-22 | 0.06529339 | 0.15892  | -0.01852 | 0.68981  |
| 0.45289  | 0.494105 | 4.06E-30 | 0.343472 | 2.24E-14 | -0.0952115 | 0.03972  | -0.16695 | 0.00029  |
| 0.14287  | 0.560295 | 5.93E-40 | 0.26137  | 9.86E-09 | 0.20482188 | 8.13E-06 | 0.393416 | 9.75E-19 |
| 0.00046  | 0.628411 | 1.10E-52 | 0.446773 | 2.71E-24 | 0.05790909 | 0.21162  | 0.014728 | 0.75092  |
| 0.00504  | 0.378566 | 2.32E-17 | 0.285253 | 3.41E-10 | -0.03732   | 0.42104  | -0.15111 | 0.00105  |
| 0.01711  | 0.462509 | 3.95E-26 | 0.283336 | 4.53E-10 | 0.06554218 | 0.15733  | 0.000305 | 0.99476  |
| 0.61599  | 0.740511 | 2.74E-82 | 0.458942 | 1.05E-25 | 0.37393736 | 6.03E-17 | 0.50013  | 6.32E-31 |
| 0.00279  | -0.32079 | 1.23E-12 | -0.18553 | 5.49E-05 | 0.06620017 | 0.1532   | 0.095545 | 0.03902  |
| 9.19E-06 | 0.523741 | 2.96E-34 | 0.612411 | 2.06E-49 | 0.02050957 | 0.65844  | -0.02608 | 0.57405  |
| 0.02348  | 0.486272 | 4.33E-29 | 0.180069 | 9.12E-05 | -0.0190165 | 0.68189  | -0.0288  | 0.5347   |
| 0.83548  | 0.639978 | 3.60E-55 | 0.337467 | 6.67E-14 | 0.24779934 | 5.78E-08 | 0.420363 | 2.03E-21 |
| 0.00013  | 0.699081 | 9.70E-70 | 0.223094 | 1.12E-06 | 0.00694748 | 0.88097  | 0.178248 | 0.00011  |
| 0.29776  | 0.520575 | 8.58E-34 | 0.425795 | 5.44E-22 | 0.11718575 | 0.01127  | 0.143651 | 0.00186  |
| 0.3237   | 0.569189 | 1.89E-41 | 0.330415 | 2.34E-13 | 0.31209497 | 5.22E-12 | 0.246948 | 6.44E-08 |
| 0.02472  | 0.328893 | 3.05E-13 | 0.276888 | 1.15E-09 | 0.14676174 | 0.00147  | 0.061764 | 0.18272  |
| 0.01538  | -0.33275 | 1.55E-13 | -0.25497 | 2.30E-08 | -0.0550493 | 0.23509  | 0.04795  | 0.30113  |
| 0.01966  | 0.476134 | 8.47E-28 | 0.4144   | 8.35E-21 | 0.06747142 | 0.14544  | 0.088595 | 0.05572  |
| 0.21336  | 0.795999 | #####    | 0.387476 | 3.53E-18 | 0.27404094 | 1.72E-09 | 0.423159 | 1.03E-21 |
| 1.69E-06 | 0.432028 | 1.17E-22 | 0.397214 | 4.22E-19 | 0.24043116 | 1.45E-07 | 0.168514 | 0.00025  |
| 0.82305  | 0.542271 | 4.68E-37 | 0.401318 | 1.69E-19 | 0.20345248 | 9.37E-06 | 0.139782 | 0.00247  |
| 0.47387  | 0.509692 | 3.04E-32 | 0.305528 | 1.51E-11 | 0.453145   | 5.02E-25 | 0.581277 | 1.48E-43 |
| 0.38197  | 0.304101 | 1.90E-11 | 0.041124 | 0.37525  | 0.24893732 | 5.00E-08 | 0.246762 | 6.59E-08 |
| 0.849    | 0.412236 | 1.39E-20 | 0.293977 | 9.20E-11 | 0.34321617 | 2.35E-14 | 0.302115 | 2.60E-11 |
| 0.00137  | 0.588013 | 9.03E-45 | 0.070745 | 0.12686  | -0.1061817 | 0.02174  | 0.027973 | 0.54651  |
| 0.05188  | 0.647465 | 7.76E-57 | 0.122577 | 0.00801  | 0.0100337  | 0.82879  | 0.233617 | 3.29E-07 |
| 0.82879  | 0.387125 | 3.81E-18 | 0.290533 | 1.55E-10 | -0.0821505 | 0.07614  | -0.04764 | 0.30426  |
| 0.03394  | 0.676811 | 7.54E-64 | 0.429184 | 2.37E-22 | 0.02028325 | 0.66197  | 0.075199 | 0.10459  |
| 0.01444  | 0.913199 | #####    | 0.530731 | 2.72E-35 | 0.15575656 | 0.00073  | 0.202996 | 9.82E-06 |
| 0.04198  | 0.904699 | #####    | 0.578331 | 4.91E-43 | 0.1261014  | 0.00636  | 0.078088 | 0.09188  |
| 0.02208  | 0.893836 | #####    | 0.561259 | 4.10E-40 | 0.10974129 | 0.01768  | 0.065927 | 0.15491  |
| 1.15E-08 | 0.676263 | 1.04E-63 | 0.363028 | 5.40E-16 | -0.0466586 | 0.31434  | -0.07797 | 0.09236  |
| 0.6768   | 0.52246  | 4.56E-34 | 0.169125 | 0.00024  | 0.17244684 | 0.00018  | 0.288292 | 2.17E-10 |
| 0.01178  | 0.823772 | #####    | 0.534236 | 8.06E-36 | 0.21751927 | 2.09E-06 | 0.095148 | 0.03985  |
| 0.25418  | 0.576019 | 1.25E-42 | 0.578822 | 4.02E-43 | 0.06947265 | 0.13385  | -0.00378 | 0.93502  |
| 0.63668  | 0.68455  | 7.77E-66 | 0.563665 | 1.63E-40 | 0.24313356 | 1.04E-07 | 0.344299 | 1.92E-14 |
| 0.0197   | 0.505432 | 1.19E-31 | 0.220339 | 1.52E-06 | -0.0139645 | 0.76343  | -0.09228 | 0.04624  |

|          |          |          |          |          |            |          |          |          |
|----------|----------|----------|----------|----------|------------|----------|----------|----------|
| 0.53638  | -0.41734 | 4.17E-21 | -0.05843 | 0.20757  | 0.02479828 | 0.59297  | 0.124329 | 0.00714  |
| 0.00658  | -0.35447 | 2.85E-15 | 0.040763 | 0.37945  | 0.07079774 | 0.12657  | -0.11174 | 0.0157   |
| 0.50407  | 0.654417 | 1.99E-58 | 0.577123 | 8.01E-43 | 0.11157133 | 0.01586  | 0.113083 | 0.01448  |
| 0.00031  | 0.803833 | #####    | 0.439954 | 1.58E-23 | -0.0249853 | 0.59018  | -0.14982 | 0.00117  |
| 0.25702  | 0.860799 | #####    | 0.491792 | 8.23E-30 | 0.08970975 | 0.0527   | 0.085348 | 0.06536  |
| 0.00169  | 0.85588  | #####    | 0.409528 | 2.60E-20 | -0.0710311 | 0.12532  | -0.08875 | 0.05531  |
| 0.15788  | 0.854747 | #####    | 0.558999 | 9.71E-40 | 0.13780476 | 0.00284  | 0.020654 | 0.65618  |
| 0.41382  | 0.84332  | #####    | 0.537222 | 2.82E-36 | 0.13234255 | 0.00417  | 0.107355 | 0.02032  |
| 0.07753  | 0.857781 | #####    | 0.484914 | 6.49E-29 | 0.1660664  | 0.00031  | 0.245439 | 7.78E-08 |
| 0.02982  | 0.853414 | #####    | 0.455829 | 2.44E-25 | 0.11223967 | 0.01524  | 0.183246 | 6.80E-05 |
| 0.01054  | 0.817212 | #####    | 0.377784 | 2.73E-17 | -0.0721591 | 0.11942  | -0.17261 | 0.00018  |
| 0.13933  | 0.762732 | 4.64E-90 | 0.470854 | 3.83E-27 | 0.20811262 | 5.76E-06 | 0.084401 | 0.06841  |
| 0.00101  | 0.897133 | #####    | 0.629779 | 5.68E-53 | 0.06862279 | 0.13868  | -0.00032 | 0.99443  |
| 0.06323  | 0.462478 | 3.98E-26 | 0.220066 | 1.57E-06 | 0.16413212 | 0.00037  | 0.216426 | 2.35E-06 |
| 0.00473  | 0.909544 | #####    | 0.584312 | 4.23E-44 | 0.26922588 | 3.38E-09 | 0.183021 | 6.94E-05 |
| 5.21E-05 | 0.315321 | 3.07E-12 | 0.134377 | 0.00362  | 0.15133412 | 0.00104  | 0.041388 | 0.37219  |
| 0.01834  | 0.846214 | #####    | 0.380489 | 1.55E-17 | -0.0520848 | 0.26131  | 0.072553 | 0.11741  |
| 7.88E-05 | 0.49031  | 1.29E-29 | 0.266117 | 5.19E-09 | 0.14141411 | 0.00219  | -0.00406 | 0.93024  |
| 0.16217  | 0.74669  | 2.28E-84 | 0.454481 | 3.51E-25 | 0.33056097 | 2.28E-13 | 0.418663 | 3.04E-21 |
| 0.02242  | 0.493616 | 4.72E-30 | 0.285896 | 3.10E-10 | -0.1519628 | 0.00099  | -0.23032 | 4.86E-07 |
| 0.00018  | 0.370119 | 1.31E-16 | 0.173057 | 0.00017  | -0.0864793 | 0.06186  | -0.14508 | 0.00167  |
| 0.17482  | 0.86594  | #####    | 0.477023 | 6.55E-28 | -0.0103916 | 0.82278  | -0.01482 | 0.74936  |
| 6.29E-10 | 0.348601 | 8.64E-15 | 0.283153 | 4.65E-10 | 0.22406239 | 1.00E-06 | 0.132855 | 0.00403  |
| 0.0503   | 0.681975 | 3.62E-65 | 0.468251 | 7.98E-27 | 0.08045842 | 0.08241  | -0.13677 | 0.00306  |
| 0.0077   | 0.430678 | 1.64E-22 | 0.256424 | 1.90E-08 | 0.18984512 | 3.64E-05 | 0.112119 | 0.01535  |
| 0.00032  | 0.890892 | #####    | 0.448837 | 1.57E-24 | -0.0442873 | 0.3396   | -0.01926 | 0.67803  |
| 0.07329  | 0.838537 | #####    | 0.341559 | 3.18E-14 | 0.16491086 | 0.00035  | 0.330786 | 2.19E-13 |
| 0.25112  | 0.872325 | #####    | 0.404545 | 8.14E-20 | 0.21747262 | 2.10E-06 | 0.327076 | 4.18E-13 |
| 0.70517  | 0.731417 | 2.47E-79 | 0.410413 | 2.12E-20 | -0.0325742 | 0.48253  | -0.0296  | 0.52336  |
| 0.00604  | 0.81871  | #####    | 0.399859 | 2.34E-19 | 0.26198547 | 9.08E-09 | 0.392836 | 1.11E-18 |
| 0.3792   | 0.699112 | 9.51E-70 | 0.309918 | 7.45E-12 | 0.1279912  | 0.00561  | 0.281087 | 6.28E-10 |
| 0.0204   | 0.781376 | 2.85E-97 | 0.351925 | 4.62E-15 | 0.17155739 | 0.0002   | 0.30608  | 1.38E-11 |
| 0.06646  | 0.800061 | #####    | 0.515701 | 4.31E-33 | 0.07349596 | 0.11271  | 0.115215 | 0.01272  |
| 0.17761  | 0.844222 | #####    | 0.577759 | 6.19E-43 | 0.27462269 | 1.59E-09 | 0.208594 | 5.47E-06 |
| 0.6289   | 0.530608 | 2.84E-35 | 0.315764 | 2.85E-12 | 0.27465972 | 1.58E-09 | 0.360603 | 8.69E-16 |
| 0.34972  | 0.797063 | #####    | 0.351975 | 4.58E-15 | 0.0080368  | 0.86248  | 0.0831   | 0.0728   |
| 1.87E-05 | 0.605937 | 3.85E-48 | 0.280119 | 7.23E-10 | -0.2386855 | 1.79E-07 | -0.2388  | 1.77E-07 |
| 0.00682  | 0.854921 | #####    | 0.36907  | 1.62E-16 | 0.03240084 | 0.48487  | 0.115513 | 0.01249  |
| 0.0485   | 0.662011 | 3.26E-60 | 0.413503 | 1.03E-20 | 0.27933613 | 8.10E-10 | 0.266269 | 5.08E-09 |
| 0.15644  | 0.717149 | 6.19E-75 | 0.527256 | 8.99E-35 | 0.50881917 | 4.03E-32 | 0.544213 | 2.33E-37 |
| 0.38208  | 0.341224 | 3.38E-14 | 0.31643  | 2.55E-12 | 0.13057958 | 0.00471  | 0.096008 | 0.03808  |
| 0.36994  | 0.372238 | 8.54E-17 | 0.303878 | 1.97E-11 | -0.0681161 | 0.14163  | -0.1552  | 0.00076  |
| 1.03E-17 | -0.34149 | 3.22E-14 | -0.20181 | 1.11E-05 | -0.0033617 | 0.94224  | 0.015082 | 0.74512  |
| 0.04701  | 0.72217  | 1.88E-76 | 0.419257 | 2.64E-21 | 0.07117035 | 0.12458  | 0.22756  | 6.70E-07 |
| 0.70297  | 0.756911 | 6.07E-88 | 0.622867 | 1.58E-51 | 0.29527476 | 7.54E-11 | 0.130764 | 0.00465  |

|          |          |          |          |          |            |          |          |          |
|----------|----------|----------|----------|----------|------------|----------|----------|----------|
| 0.0046   | 0.74019  | 3.50E-82 | 0.526368 | 1.22E-34 | 0.13363071 | 0.00382  | 0.058538 | 0.20669  |
| 0.44627  | 0.871105 | #####    | 0.540602 | 8.51E-37 | 0.14754553 | 0.00139  | 0.235562 | 2.61E-07 |
| 0.00043  | 0.747877 | 8.95E-85 | 0.373023 | 7.27E-17 | -0.0967983 | 0.03652  | -0.02769 | 0.5506   |
| 0.00448  | 0.442648 | 7.91E-24 | 0.122786 | 0.0079   | -0.0038539 | 0.9338   | 0.037077 | 0.42408  |
| 0.0516   | 0.511574 | 1.66E-32 | 0.344884 | 1.73E-14 | 0.06735981 | 0.14611  | 0.099941 | 0.03082  |
| 0.00095  | 0.572225 | 5.70E-42 | 0.480146 | 2.64E-28 | 0.43257762 | 1.02E-22 | 0.421975 | 1.38E-21 |
| 0.00899  | 0.392779 | 1.12E-18 | 0.318783 | 1.72E-12 | 0.09836155 | 0.03358  | 0.031284 | 0.50005  |
| 0.00143  | -0.45511 | 2.96E-25 | -0.1555  | 0.00075  | -0.0925699 | 0.04557  | -0.15668 | 0.00068  |
| 0.22396  | 0.702552 | 1.05E-70 | 0.304839 | 1.69E-11 | 0.26667237 | 4.81E-09 | 0.243908 | 9.42E-08 |
| 0.3741   | 0.826159 | #####    | 0.494799 | 3.29E-30 | 0.28529859 | 3.39E-10 | 0.426193 | 4.94E-22 |
| 0.00574  | 0.878092 | #####    | 0.467526 | 9.78E-27 | 0.25597548 | 2.02E-08 | 0.345133 | 1.65E-14 |
| 0.40309  | 0.706224 | 9.56E-72 | 0.549423 | 3.48E-38 | 0.58032206 | 2.18E-43 | 0.636545 | 2.02E-54 |
| 7.92E-05 | 0.749837 | 1.89E-85 | 0.708756 | 1.80E-72 | 0.07817329 | 0.09153  | 0.028207 | 0.54316  |
| 0.42006  | 0.790251 | #####    | 0.439003 | 2.02E-23 | -0.100704  | 0.02956  | -0.12738 | 0.00584  |
| 0.00028  | 0.518774 | 1.56E-33 | 0.228597 | 5.94E-07 | 0.11087196 | 0.01653  | -0.00571 | 0.90202  |
| 0.37819  | 0.367249 | 2.34E-16 | 0.508804 | 4.05E-32 | -0.0720641 | 0.11991  | -0.18426 | 6.19E-05 |
| 0.98752  | 0.415316 | 6.73E-21 | 0.338594 | 5.45E-14 | 0.30440738 | 1.81E-11 | 0.170082 | 0.00022  |
| 0.06659  | 0.465085 | 1.93E-26 | 0.51867  | 1.62E-33 | 0.23905848 | 1.71E-07 | 0.075022 | 0.10541  |
| 0.97334  | 0.756149 | 1.14E-87 | 0.500758 | 5.19E-31 | 0.45064538 | 9.76E-25 | 0.493058 | 5.59E-30 |
| 0.91217  | -0.38199 | 1.13E-17 | -0.10854 | 0.01897  | -0.0042351 | 0.92727  | -0.01839 | 0.69177  |
| 0.99419  | 0.527148 | 9.33E-35 | 0.31802  | 1.96E-12 | -0.1817871 | 7.79E-05 | -0.10817 | 0.01937  |
| 0.06013  | 0.470668 | 4.04E-27 | 0.23715  | 2.16E-07 | 0.00414625 | 0.92879  | 0.118733 | 0.01023  |
| 0.0413   | 0.506474 | 8.54E-32 | 0.400022 | 2.26E-19 | 0.20111154 | 1.19E-05 | 0.064708 | 0.16269  |
| 0.83895  | 0.487967 | 2.61E-29 | 0.546058 | 1.19E-37 | 0.12390797 | 0.00734  | 0.161076 | 0.00048  |
| 0.65394  | 0.422667 | 1.16E-21 | 0.366167 | 2.90E-16 | 0.23291194 | 3.58E-07 | 0.10278  | 0.02635  |
| 0.06834  | 0.436372 | 3.93E-23 | 0.351257 | 5.24E-15 | -0.0214808 | 0.64335  | 0.075207 | 0.10455  |
| 2.73E-05 | 0.504266 | 1.72E-31 | 0.254877 | 2.33E-08 | -0.2824974 | 5.12E-10 | -0.23139 | 4.29E-07 |
| 0.6117   | 0.711659 | 2.59E-73 | 0.485151 | 6.04E-29 | -0.0053275 | 0.90859  | 0.027503 | 0.55328  |
| 0.97422  | 0.530293 | 3.17E-35 | 0.556558 | 2.45E-39 | 0.13963724 | 0.00249  | -0.02653 | 0.56739  |
| 0.80091  | -0.47165 | 3.05E-27 | -0.0145  | 0.75458  | 0.38879523 | 2.66E-18 | 0.350163 | 6.44E-15 |
| 0.00038  | 0.774801 | 1.19E-94 | 0.493174 | 5.40E-30 | 0.10135879 | 0.02851  | 0.222478 | 1.20E-06 |
| 0.20107  | 0.393955 | 8.67E-19 | 0.385036 | 5.95E-18 | 0.26870114 | 3.64E-09 | 0.227972 | 6.39E-07 |
| 0.00027  | 0.55761  | 1.64E-39 | 0.403491 | 1.03E-19 | 0.13050968 | 0.00473  | 0.083708 | 0.07072  |
| 0.54241  | 0.675051 | 2.09E-63 | 0.66674  | 2.37E-61 | 0.37656232 | 3.52E-17 | 0.345396 | 1.57E-14 |
| 0.10872  | 0.550545 | 2.30E-38 | 0.485583 | 5.32E-29 | 0.28027167 | 7.07E-10 | 0.316694 | 2.44E-12 |
| 0.89725  | 0.386079 | 4.76E-18 | 0.391505 | 1.48E-18 | 0.387109   | 3.82E-18 | 0.466094 | 1.46E-26 |
| 0.05138  | 0.466289 | 1.38E-26 | 0.28782  | 2.33E-10 | 0.02887108 | 0.5337   | 0.068213 | 0.14106  |
| 0.76111  | -0.42773 | 3.39E-22 | -0.09896 | 0.03251  | 0.22652236 | 7.56E-07 | 0.258661 | 1.42E-08 |
| 2.90E-05 | -0.3785  | 2.36E-17 | -0.06548 | 0.15774  | 0.09467501 | 0.04085  | 0.013555 | 0.77016  |
| 0.00575  | -0.35308 | 3.71E-15 | -0.15462 | 0.0008   | 0.02971775 | 0.52177  | -0.02112 | 0.64901  |
| 0.78619  | 0.688481 | 7.19E-67 | 0.501821 | 3.72E-31 | 0.31249996 | 4.89E-12 | 0.421616 | 1.50E-21 |
| 0.02808  | 0.511527 | 1.68E-32 | 0.576338 | 1.10E-42 | 0.19795911 | 1.64E-05 | -0.01752 | 0.70565  |
| 0.5028   | 0.540705 | 8.20E-37 | 0.302165 | 2.58E-11 | -0.081594  | 0.07816  | -0.19696 | 1.81E-05 |
| 0.01663  | 0.759854 | 5.25E-89 | 0.38634  | 4.51E-18 | 0.05386922 | 0.2453   | 0.204163 | 8.70E-06 |
| 0.26579  | 0.617435 | 2.03E-50 | 0.299354 | 4.01E-11 | 0.30150612 | 2.86E-11 | 0.212985 | 3.42E-06 |

|          |          |          |          |          |            |          |          |          |
|----------|----------|----------|----------|----------|------------|----------|----------|----------|
| 0.02561  | 0.412316 | 1.36E-20 | 0.421611 | 1.50E-21 | 0.2814426  | 5.97E-10 | 0.122097 | 0.00826  |
| 0.52542  | 0.335817 | 8.97E-14 | 0.194655 | 2.28E-05 | 0.23248862 | 3.77E-07 | -0.02128 | 0.64639  |
| 0.56201  | 0.680236 | 1.01E-64 | 0.624769 | 6.37E-52 | 0.58345167 | 6.03E-44 | 0.605953 | 3.82E-48 |
| 0.15796  | 0.65845  | 2.28E-59 | 0.560428 | 5.64E-40 | 0.04455891 | 0.33664  | 0.130191 | 0.00483  |
| 0.19897  | 0.768172 | 4.29E-92 | 0.406677 | 5.01E-20 | 0.22225891 | 1.23E-06 | 0.371627 | 9.66E-17 |
| 0.55119  | 0.540842 | 7.81E-37 | 0.200194 | 1.31E-05 | -0.0187188 | 0.6866   | -0.10906 | 0.01839  |
| 0.00062  | 0.521956 | 5.40E-34 | 0.505351 | 1.22E-31 | 0.12303331 | 0.00777  | 0.059116 | 0.20224  |
| 0.0006   | 0.889018 | #####    | 0.479432 | 3.25E-28 | 0.1879605  | 4.36E-05 | 0.322083 | 9.85E-13 |
| 0.0039   | 0.866636 | #####    | 0.444122 | 5.40E-24 | 0.14571738 | 0.00159  | 0.241715 | 1.24E-07 |
| 0.12697  | 0.448207 | 1.86E-24 | 0.414917 | 7.39E-21 | 0.31214716 | 5.18E-12 | 0.296503 | 6.24E-11 |
| 0.00291  | 0.389523 | 2.27E-18 | 0.221712 | 1.31E-06 | 0.03168322 | 0.4946   | -0.00128 | 0.97796  |
| 5.57E-08 | 0.469563 | 5.52E-27 | 0.435248 | 5.22E-23 | 0.24051953 | 1.43E-07 | 0.182201 | 7.49E-05 |
| 0.01572  | 0.47408  | 1.53E-27 | 0.403515 | 1.03E-19 | 0.24805092 | 5.60E-08 | 0.08419  | 0.06911  |
| 0.39413  | 0.720934 | 4.48E-76 | 0.519197 | 1.36E-33 | 0.3380557  | 6.00E-14 | 0.400826 | 1.89E-19 |
| 0.25373  | -0.38913 | 2.47E-18 | -0.30844 | 9.46E-12 | -0.2236687 | 1.05E-06 | -0.25102 | 3.84E-08 |
| 0.14415  | 0.509152 | 3.62E-32 | 0.610406 | 5.14E-49 | 0.46865374 | 7.13E-27 | 0.214779 | 2.82E-06 |
| 0.0074   | 0.790765 | #####    | 0.466673 | 1.24E-26 | 0.25774488 | 1.60E-08 | 0.386256 | 4.59E-18 |
| 0.00271  | 0.934842 | #####    | 0.56833  | 2.65E-41 | 0.16264389 | 0.00042  | 0.225697 | 8.31E-07 |
| 0.26984  | 0.792601 | #####    | 0.323921 | 7.20E-13 | 0.20941639 | 5.02E-06 | 0.380953 | 1.41E-17 |
| 0.41227  | 0.566752 | 4.91E-41 | 0.273033 | 1.99E-09 | -0.2794606 | 7.95E-10 | -0.17488 | 0.00015  |
| 0.00015  | 0.407152 | 4.49E-20 | 0.1806   | 8.69E-05 | -0.2279018 | 6.44E-07 | -0.11723 | 0.01123  |
| 0.41806  | 0.678223 | 3.31E-64 | 0.693809 | 2.69E-68 | 0.56591548 | 6.81E-41 | 0.527842 | 7.36E-35 |
| 0.01871  | 0.344172 | 1.97E-14 | 0.383481 | 8.28E-18 | -0.0176855 | 0.70306  | -0.13971 | 0.00248  |
| 0.3852   | 0.632964 | 1.19E-53 | 0.518377 | 1.78E-33 | 0.55583616 | 3.21E-39 | 0.452814 | 5.48E-25 |
| 0.9433   | 0.559131 | 9.24E-40 | 0.33442  | 1.15E-13 | 0.3078767  | 1.04E-11 | 0.335852 | 8.92E-14 |
| 0.07479  | 0.668008 | 1.16E-61 | 0.238375 | 1.86E-07 | 0.13353332 | 0.00384  | 0.181777 | 7.79E-05 |
| 0.85884  | 0.68479  | 6.73E-66 | 0.234334 | 3.02E-07 | 0.03674011 | 0.4283   | 0.104597 | 0.02379  |
| 0.03267  | 0.404573 | 8.09E-20 | 0.281383 | 6.02E-10 | 0.06396911 | 0.16756  | 0.002916 | 0.94988  |
| 0.15681  | 0.662672 | 2.27E-60 | 0.639264 | 5.17E-55 | 0.43032543 | 1.79E-22 | 0.292943 | 1.08E-10 |
| 0.0039   | 0.444123 | 5.40E-24 | 0.432727 | 9.83E-23 | -0.0863559 | 0.06223  | -0.16866 | 0.00025  |
| 0.99869  | 0.541769 | 5.60E-37 | 0.336118 | 8.50E-14 | 0.32497945 | 6.00E-13 | 0.43443  | 6.41E-23 |
| 0.06067  | 0.819661 | #####    | 0.483047 | 1.13E-28 | 0.06661106 | 0.15066  | 0.154891 | 0.00078  |
| 0.00118  | 0.807451 | #####    | 0.429018 | 2.47E-22 | -0.0707815 | 0.12666  | -0.02934 | 0.52714  |
| 0.00237  | 0.475302 | 1.08E-27 | 0.511922 | 1.48E-32 | 0.07775874 | 0.09327  | 0.015957 | 0.73089  |
| 0.43553  | 0.854233 | #####    | 0.476987 | 6.62E-28 | 0.19465286 | 2.28E-05 | 0.271721 | 2.39E-09 |
| 0.08498  | 0.677868 | 4.07E-64 | 0.537644 | 2.43E-36 | -0.0979516 | 0.03433  | -0.22165 | 1.32E-06 |
| 0.00031  | 0.383664 | 7.96E-18 | 0.260764 | 1.07E-08 | 0.00774682 | 0.8674   | -0.0147  | 0.75141  |
| 0.00048  | 0.800911 | #####    | 0.518266 | 1.85E-33 | 0.01826088 | 0.69388  | -0.11709 | 0.01133  |
| 0.19327  | 0.824113 | #####    | 0.483421 | 1.01E-28 | 0.17102001 | 0.0002   | 0.10187  | 0.02772  |
| 0.975    | 0.692376 | 6.56E-68 | 0.235975 | 2.49E-07 | 0.2299744  | 5.06E-07 | 0.373935 | 6.04E-17 |
| 0.64888  | 0.517066 | 2.75E-33 | 0.283233 | 4.59E-10 | 0.29166778 | 1.31E-10 | 0.376247 | 3.75E-17 |
| 0.00014  | 0.771812 | 1.74E-93 | 0.521373 | 6.57E-34 | 0.42671154 | 4.35E-22 | 0.45874  | 1.11E-25 |
| 0.00195  | 0.464793 | 2.10E-26 | 0.248957 | 4.99E-08 | -0.229457  | 5.38E-07 | -0.33899 | 5.07E-14 |
| 0.0015   | 0.819346 | #####    | 0.441056 | 1.19E-23 | 0.20466636 | 8.26E-06 | 0.365468 | 3.33E-16 |
| 0.0742   | 0.491542 | 8.87E-30 | 0.316969 | 2.33E-12 | 0.11180772 | 0.01564  | 0.049874 | 0.28212  |

|          |          |          |          |          |            |          |          |          |
|----------|----------|----------|----------|----------|------------|----------|----------|----------|
| 0.15739  | 0.507519 | 6.12E-32 | 0.237735 | 2.01E-07 | 0.1038951  | 0.02475  | 0.108015 | 0.01955  |
| 1.37E-05 | 0.632903 | 1.23E-53 | 0.625194 | 5.20E-52 | -0.0690035 | 0.1365   | -0.02543 | 0.58356  |
| 0.43694  | 0.567356 | 3.88E-41 | 0.540589 | 8.55E-37 | 0.45573563 | 2.50E-25 | 0.449713 | 1.25E-24 |
| 0.00576  | 0.560803 | 4.89E-40 | 0.363828 | 4.61E-16 | 0.19828563 | 1.59E-05 | 0.268438 | 3.77E-09 |
| 0.71432  | 0.567763 | 3.31E-41 | 0.570122 | 1.31E-41 | 0.42427435 | 7.89E-22 | 0.450087 | 1.13E-24 |
| 0.00081  | 0.818369 | #####    | 0.422901 | 1.10E-21 | 0.07936634 | 0.08667  | 0.037336 | 0.42085  |
| 0.81704  | -0.11949 | 0.00975  | -0.08564 | 0.06444  | 0.00082059 | 0.98589  | -0.10764 | 0.01998  |
| 0.12989  | -0.30887 | 8.83E-12 | -0.0652  | 0.1595   | 0.10090596 | 0.02923  | 0.104086 | 0.02449  |
| 0.47244  | 0.68118  | 5.80E-65 | 0.414067 | 9.03E-21 | 0.29022945 | 1.62E-10 | 0.461241 | 5.59E-26 |
| 0.0561   | 0.515984 | 3.93E-33 | 0.568074 | 2.93E-41 | 0.16257761 | 0.00042  | -0.05002 | 0.28069  |
| 0.00099  | 0.871673 | #####    | 0.497137 | 1.60E-30 | 0.21960361 | 1.65E-06 | 0.31798  | 1.97E-12 |
| 0.98971  | 0.516567 | 3.24E-33 | 0.234239 | 3.06E-07 | -0.0950986 | 0.03995  | -0.07416 | 0.1095   |
| 0.42927  | 0.756187 | 1.10E-87 | 0.454734 | 3.28E-25 | 0.28070741 | 6.64E-10 | 0.41061  | 2.02E-20 |
| 0.08846  | 0.398033 | 3.52E-19 | 0.151877 | 0.00099  | 0.00671033 | 0.88501  | 0.121238 | 0.00873  |
| 0.00791  | 0.8477   | #####    | 0.465433 | 1.76E-26 | 0.28294324 | 4.79E-10 | 0.210708 | 4.37E-06 |
| 0.02782  | -0.52455 | 2.26E-34 | -0.28646 | 2.85E-10 | -0.1249874 | 0.00684  | -0.10042 | 0.03002  |
| 0.56191  | 0.49363  | 4.70E-30 | 0.487394 | 3.10E-29 | 0.22926539 | 5.50E-07 | 0.168119 | 0.00026  |
| 0.20115  | 0.895065 | #####    | 0.547113 | 8.11E-38 | 0.16777987 | 0.00027  | 0.216529 | 2.33E-06 |
| 0.00046  | 0.538799 | 1.62E-36 | 0.509187 | 3.58E-32 | 0.27591062 | 1.32E-09 | 0.282377 | 5.21E-10 |
| 0.8532   | 0.491177 | 9.91E-30 | 0.436773 | 3.55E-23 | 0.15760862 | 0.00063  | 0.091668 | 0.04772  |
| 0.23414  | 0.680277 | 9.89E-65 | 0.545797 | 1.31E-37 | 0.11755031 | 0.01101  | 0.19864  | 1.53E-05 |
| 0.88546  | 0.840595 | #####    | 0.435377 | 5.05E-23 | 0.08641366 | 0.06206  | 0.091867 | 0.04724  |
| 4.17E-05 | 0.35596  | 2.14E-15 | 0.27573  | 1.36E-09 | 0.07246537 | 0.11785  | 0.057882 | 0.21183  |
| 0.25932  | 0.468057 | 8.43E-27 | 0.333427 | 1.37E-13 | 0.27649844 | 1.22E-09 | 0.314003 | 3.81E-12 |
| 0.01427  | 0.296566 | 6.18E-11 | 0.319539 | 1.52E-12 | 0.27930086 | 8.14E-10 | 0.204547 | 8.36E-06 |
| 0.0001   | 0.464082 | 2.55E-26 | 0.37728  | 3.03E-17 | 0.06485393 | 0.16175  | 0.103917 | 0.02472  |
| 0.07687  | 0.622926 | 1.53E-51 | 0.316769 | 2.41E-12 | 0.23023594 | 4.91E-07 | 0.27763  | 1.03E-09 |
| 7.57E-10 | 0.339222 | 4.86E-14 | 0.17841  | 0.00011  | 0.09354048 | 0.04334  | 0.070615 | 0.12756  |
| 0.96073  | 0.757199 | 4.78E-88 | 0.464785 | 2.10E-26 | -0.0697323 | 0.1324   | -0.06391 | 0.16796  |
| 0.00171  | 0.478047 | 4.87E-28 | 0.42478  | 6.97E-22 | -0.0642608 | 0.16562  | -0.10408 | 0.0245   |
| 0.00388  | -0.30584 | 1.44E-11 | 0.038669 | 0.40444  | 0.37516423 | 4.69E-17 | 0.338879 | 5.17E-14 |
| 0.53735  | 0.879123 | #####    | 0.606137 | 3.52E-48 | 0.1803027  | 8.93E-05 | 0.106493 | 0.02135  |
| 0.15527  | 0.696889 | 3.90E-69 | 0.378889 | 2.17E-17 | 0.11767703 | 0.01093  | 0.219703 | 1.64E-06 |
| 0.04617  | 0.765947 | 2.96E-91 | 0.463146 | 3.31E-26 | 0.19329036 | 2.60E-05 | 0.283369 | 4.50E-10 |
| 0.01149  | 0.55176  | 1.47E-38 | 0.121258 | 0.00871  | -0.2607894 | 1.07E-08 | -0.16451 | 0.00036  |
| 0.00395  | 0.586834 | 1.48E-44 | 0.131337 | 0.00447  | -0.2940255 | 9.13E-11 | -0.18294 | 7.00E-05 |
| 0.00263  | 0.895513 | #####    | 0.618704 | 1.12E-50 | 0.37237933 | 8.29E-17 | 0.342603 | 2.63E-14 |
| 0.5541   | 0.739478 | 6.02E-82 | 0.395924 | 5.62E-19 | 0.29503745 | 7.82E-11 | 0.216721 | 2.28E-06 |
| 0.01622  | 0.70108  | 2.70E-70 | 0.280675 | 6.67E-10 | 0.12317107 | 0.0077   | 0.337714 | 6.38E-14 |
| 0.00014  | 0.573365 | 3.62E-42 | 0.451231 | 8.35E-25 | 0.39980376 | 2.37E-19 | 0.398692 | 3.04E-19 |
| 0.02396  | 0.856386 | #####    | 0.47271  | 2.26E-27 | 0.26840516 | 3.79E-09 | 0.321474 | 1.09E-12 |
| 0.15861  | 0.556948 | 2.11E-39 | 0.52895  | 5.03E-35 | 0.36256782 | 5.91E-16 | 0.267112 | 4.53E-09 |
| 0.3961   | 0.727539 | 4.13E-78 | 0.535321 | 5.51E-36 | 0.19078484 | 3.32E-05 | 0.056233 | 0.22516  |
| 0.2922   | 0.865113 | #####    | 0.482353 | 1.38E-28 | 0.18400759 | 6.33E-05 | 0.240922 | 1.36E-07 |
| 0.02052  | 0.508109 | 5.06E-32 | 0.584328 | 4.20E-44 | 0.19910978 | 1.46E-05 | -0.06915 | 0.13569  |

|          |          |          |          |          |            |          |          |          |
|----------|----------|----------|----------|----------|------------|----------|----------|----------|
| 0.61464  | 0.490278 | 1.30E-29 | 0.304215 | 1.86E-11 | -0.1503217 | 0.00112  | -0.08709 | 0.06003  |
| 0.8529   | 0.517729 | 2.21E-33 | 0.472437 | 2.44E-27 | 0.54397472 | 2.54E-37 | 0.358325 | 1.35E-15 |
| 0.50702  | 0.558111 | 1.36E-39 | 0.107147 | 0.02056  | -0.1052552 | 0.02292  | 0.099012 | 0.03242  |
| 0.01019  | 0.350087 | 6.54E-15 | 0.279259 | 8.19E-10 | 0.29954995 | 3.89E-11 | 0.325396 | 5.59E-13 |
| 0.71284  | 0.492709 | 6.22E-30 | 0.396977 | 4.45E-19 | 0.30767832 | 1.07E-11 | 0.14035  | 0.00237  |
| 0.00185  | -0.46429 | 2.41E-26 | -0.0367  | 0.42875  | 0.23741917 | 2.09E-07 | 0.118294 | 0.01051  |
| 0.06146  | 0.38418  | 7.14E-18 | 0.183819 | 6.45E-05 | 0.26308959 | 7.83E-09 | 0.201297 | 1.17E-05 |
| 0.2023   | 0.418281 | 3.33E-21 | 0.11041  | 0.01699  | -0.0861211 | 0.06295  | -0.03628 | 0.43416  |
| 0.05672  | 0.736803 | 4.54E-81 | 0.495044 | 3.05E-30 | 0.22442156 | 9.61E-07 | 0.372643 | 7.86E-17 |
| 0.01932  | 0.791568 | #####    | 0.555555 | 3.57E-39 | 0.32704023 | 4.21E-13 | 0.461169 | 5.71E-26 |
| 0.21918  | 0.827704 | #####    | 0.704329 | 3.30E-71 | 0.16844974 | 0.00026  | 0.030227 | 0.51465  |
| 0.5666   | 0.611169 | 3.63E-49 | 0.319171 | 1.61E-12 | 0.31818153 | 1.90E-12 | 0.517116 | 2.71E-33 |
| 0.00215  | 0.463594 | 2.92E-26 | 0.510296 | 2.51E-32 | -0.0197645 | 0.6701   | -0.11194 | 0.01552  |
| 0.54997  | 0.500919 | 4.94E-31 | 0.349736 | 6.98E-15 | 0.37629944 | 3.71E-17 | 0.246599 | 6.73E-08 |
| 0.14072  | 0.882596 | #####    | 0.619205 | 8.87E-51 | 0.42757074 | 3.53E-22 | 0.345709 | 1.48E-14 |
| 0.78697  | 0.442346 | 8.55E-24 | 0.279674 | 7.71E-10 | 0.39764692 | 3.84E-19 | 0.298318 | 4.71E-11 |
| 0.05144  | 0.383196 | 8.79E-18 | 0.296506 | 6.24E-11 | 0.08260337 | 0.07453  | 0.070583 | 0.12773  |
| 0.12281  | 0.450383 | 1.05E-24 | 0.445925 | 3.38E-24 | 0.31317031 | 4.38E-12 | 0.199772 | 1.36E-05 |
| 0.42521  | -0.40655 | 5.16E-20 | -0.24134 | 1.29E-07 | -0.1541884 | 0.00083  | -0.18877 | 4.04E-05 |
| 0.00017  | -0.49131 | 9.53E-30 | -0.24133 | 1.30E-07 | -0.1535267 | 0.00087  | -0.28306 | 4.71E-10 |
| 0.04915  | 0.635272 | 3.81E-54 | 0.518255 | 1.86E-33 | 0.06179754 | 0.18248  | 0.074404 | 0.10832  |
| 0.01336  | 0.738298 | 1.47E-81 | 0.283441 | 4.46E-10 | 0.08951456 | 0.05322  | 0.246495 | 6.81E-08 |
| 0.85491  | 0.535778 | 4.70E-36 | 0.437595 | 2.88E-23 | 0.51339776 | 9.16E-33 | 0.435472 | 4.93E-23 |
| 0.42595  | 0.345296 | 1.60E-14 | 0.35101  | 5.49E-15 | 0.10940604 | 0.01803  | 0.012165 | 0.79317  |
| 0.06213  | 0.637637 | 1.17E-54 | 0.354618 | 2.77E-15 | -0.0897539 | 0.05259  | 0.015186 | 0.74343  |
| 0.00147  | 0.4403   | 1.45E-23 | 0.465222 | 1.86E-26 | 0.07244974 | 0.11793  | -0.12879 | 0.00532  |
| 0.01829  | 0.684244 | 9.33E-66 | 0.583939 | 4.93E-44 | 0.1442845  | 0.00177  | 0.199806 | 1.36E-05 |
| 0.44909  | 0.608352 | 1.30E-48 | 0.019612 | 0.67249  | -0.0695898 | 0.13319  | 0.148545 | 0.00128  |
| 7.41E-09 | 0.649986 | 2.08E-57 | 0.383532 | 8.19E-18 | 0.02122989 | 0.64724  | 0.091435 | 0.04829  |
| 0.00056  | 0.538931 | 1.54E-36 | 0.581077 | 1.60E-43 | 0.3894601  | 2.31E-18 | 0.322848 | 8.65E-13 |
| 0.07075  | 0.918831 | #####    | 0.531862 | 1.84E-35 | 0.22475888 | 9.25E-07 | 0.250356 | 4.17E-08 |
| 0.86077  | 0.734781 | 2.06E-80 | 0.53979  | 1.14E-36 | -0.0067019 | 0.88515  | -0.09778 | 0.03464  |
| 0.23457  | 0.5976   | 1.51E-46 | 0.404619 | 8.01E-20 | 0.1783461  | 0.00011  | 0.213254 | 3.32E-06 |
| 0.03526  | 0.760985 | 2.03E-89 | 0.499359 | 8.03E-31 | 0.43795897 | 2.63E-23 | 0.448141 | 1.89E-24 |
| 0.07816  | 0.419482 | 2.50E-21 | 0.303842 | 1.98E-11 | -0.1212921 | 0.0087   | -0.12957 | 0.00504  |
| 3.94E-05 | 0.452095 | 6.64E-25 | 0.287614 | 2.40E-10 | 0.12141709 | 0.00863  | 0.127115 | 0.00595  |
| 5.99E-07 | 0.37191  | 9.12E-17 | 0.248159 | 5.52E-08 | 0.22952153 | 5.34E-07 | 0.055459 | 0.23162  |
| 0.00042  | 0.803468 | #####    | 0.610416 | 5.11E-49 | 0.06627271 | 0.15275  | 0.076337 | 0.09943  |
| 0.02002  | 0.669135 | 6.16E-62 | 0.49066  | 1.16E-29 | 0.38898439 | 2.55E-18 | 0.542013 | 5.14E-37 |
| 0.01312  | 0.496711 | 1.82E-30 | 0.491181 | 9.90E-30 | 0.30867056 | 9.12E-12 | 0.238217 | 1.90E-07 |
| 9.49E-05 | 0.471484 | 3.20E-27 | 0.237559 | 2.05E-07 | 0.14130172 | 0.00221  | 0.146714 | 0.00148  |
| 6.95E-13 | -0.42393 | 8.57E-22 | -0.23412 | 3.10E-07 | 0.08512531 | 0.06607  | -0.00547 | 0.90623  |
| 0.02655  | 0.442997 | 7.23E-24 | 0.180558 | 8.72E-05 | 0.04172937 | 0.36825  | 0.033745 | 0.46693  |
| 0.01114  | 0.513934 | 7.69E-33 | 0.352627 | 4.04E-15 | 0.19241549 | 2.84E-05 | 0.154478 | 0.00081  |
| 0.08193  | 0.672266 | 1.04E-62 | 0.376697 | 3.42E-17 | 0.31786027 | 2.01E-12 | 0.462298 | 4.18E-26 |

|          |          |          |          |          |            |          |          |          |
|----------|----------|----------|----------|----------|------------|----------|----------|----------|
| 0.00194  | 0.453282 | 4.84E-25 | 0.439678 | 1.70E-23 | 0.19949271 | 1.40E-05 | -0.07621 | 0.09999  |
| 0.15666  | 0.809288 | #####    | 0.614516 | 7.84E-50 | 0.45471554 | 3.29E-25 | 0.421897 | 1.40E-21 |
| 8.86E-05 | 0.474363 | 1.41E-27 | 0.366025 | 2.98E-16 | 0.39389076 | 8.79E-19 | 0.285792 | 3.15E-10 |
| 0.05412  | 0.555638 | 3.46E-39 | 0.367227 | 2.35E-16 | 0.4738712  | 1.62E-27 | 0.445846 | 3.45E-24 |
| 0.36195  | 0.402953 | 1.17E-19 | 0.267467 | 4.31E-09 | 0.42852136 | 2.79E-22 | 0.292458 | 1.16E-10 |
| 0.00203  | 0.552108 | 1.29E-38 | 0.374487 | 5.39E-17 | 0.12403877 | 0.00728  | -0.02533 | 0.585    |
| 0.01658  | 0.702899 | 8.35E-71 | 0.6457   | 1.94E-56 | 0.32233988 | 9.43E-13 | 0.369516 | 1.48E-16 |
| 0.04181  | 0.864205 | #####    | 0.456999 | 1.78E-25 | 0.20373651 | 9.10E-06 | 0.142415 | 0.00203  |
| 0.01138  | 0.533626 | 9.98E-36 | 0.472006 | 2.76E-27 | 0.19460425 | 2.29E-05 | 0.23536  | 2.68E-07 |
| 0.28768  | 0.647004 | 9.86E-57 | 0.334405 | 1.15E-13 | -0.1040201 | 0.02458  | -0.25796 | 1.55E-08 |
| 0.0034   | 0.677627 | 4.69E-64 | 0.495826 | 2.40E-30 | 0.26221712 | 8.80E-09 | 0.271505 | 2.46E-09 |
| 0.0066   | 0.735368 | 1.33E-80 | 0.642466 | 1.02E-55 | 0.09722885 | 0.03569  | 0.059081 | 0.2025   |
| 0.00512  | 0.324824 | 6.17E-13 | 0.068387 | 0.14005  | 0.01635492 | 0.72446  | 0.131168 | 0.00452  |
| 0.71808  | 0.485729 | 5.09E-29 | 0.262081 | 8.97E-09 | 0.12972579 | 0.00499  | 0.010168 | 0.82654  |
| 4.33E-05 | 0.739077 | 8.16E-82 | 0.398445 | 3.21E-19 | -0.1137777 | 0.01389  | -0.19656 | 1.88E-05 |
| 0.02251  | 0.480302 | 2.52E-28 | 0.415479 | 6.47E-21 | 0.18596577 | 5.27E-05 | 0.098504 | 0.03332  |
| 0.03435  | 0.33994  | 4.27E-14 | 0.028864 | 0.5338   | -0.2098098 | 4.81E-06 | -0.08904 | 0.0545   |
| 1.92E-06 | 0.671847 | 1.32E-62 | 0.534617 | 7.06E-36 | 0.04595053 | 0.32175  | 0.070251 | 0.12953  |
| 0.7749   | 0.692568 | 5.82E-68 | 0.239375 | 1.65E-07 | 0.19811871 | 1.61E-05 | 0.354594 | 2.78E-15 |
| 0.00016  | 0.33858  | 5.46E-14 | 0.175469 | 0.00014  | -0.0486486 | 0.29413  | -0.03787 | 0.41419  |
| 0.07913  | 0.389594 | 2.24E-18 | 0.313675 | 4.03E-12 | 0.30985497 | 7.52E-12 | 0.255999 | 2.01E-08 |
| 0.0133   | 0.881995 | #####    | 0.377862 | 2.69E-17 | 0.03268621 | 0.48103  | 0.025567 | 0.58156  |
| 8.49E-05 | 0.47747  | 5.75E-28 | 0.453045 | 5.15E-25 | 0.01571452 | 0.73483  | -0.11099 | 0.01641  |
| 0.00017  | 0.631785 | 2.13E-53 | 0.538897 | 1.56E-36 | 0.16210989 | 0.00044  | 0.044348 | 0.33894  |
| 0.00027  | 0.72911  | 1.33E-78 | 0.459475 | 9.07E-26 | 0.08231828 | 0.07554  | 0.06905  | 0.13623  |
| 0.98927  | 0.718421 | 2.57E-75 | 0.406393 | 5.34E-20 | -0.0699675 | 0.13109  | -0.07574 | 0.10209  |
| 0.0513   | 0.818232 | #####    | 0.476223 | 8.25E-28 | 0.1852208  | 5.65E-05 | 0.285661 | 3.21E-10 |
| 0.0892   | 0.629913 | 5.32E-53 | 0.306066 | 1.39E-11 | -0.2342109 | 3.07E-07 | -0.3109  | 6.35E-12 |
| 0.85694  | 0.641261 | 1.88E-55 | 0.45404  | 3.95E-25 | 0.08973384 | 0.05264  | 0.007414 | 0.87304  |
| 0.00121  | 0.420661 | 1.89E-21 | 0.267362 | 4.37E-09 | 0.03907249 | 0.39955  | -0.0492  | 0.28867  |
| 0.00132  | 0.517111 | 2.71E-33 | 0.18217  | 7.52E-05 | -0.1354525 | 0.00336  | 0.0209   | 0.65236  |
| 0.10975  | 0.464967 | 2.00E-26 | 0.38971  | 2.18E-18 | 0.23858585 | 1.81E-07 | 0.258736 | 1.40E-08 |
| 0.6065   | 0.679645 | 1.44E-64 | 0.470302 | 4.48E-27 | 0.34572381 | 1.48E-14 | 0.499715 | 7.19E-31 |
| 0.00039  | 0.617697 | 1.80E-50 | 0.579555 | 2.98E-43 | 0.33050578 | 2.30E-13 | 0.368178 | 1.94E-16 |
| 0.00127  | 0.670488 | 2.86E-62 | 0.572326 | 5.47E-42 | 0.1194085  | 0.0098   | 0.205169 | 7.84E-06 |
| 0.35749  | 0.26517  | 5.90E-09 | 0.344543 | 1.84E-14 | 0.52911988 | 4.75E-35 | 0.435978 | 4.34E-23 |
| 0.03556  | 0.427402 | 3.67E-22 | 0.55533  | 3.88E-39 | 0.40098786 | 1.82E-19 | 0.145515 | 0.00162  |
| 4.02E-06 | -0.61506 | 6.10E-50 | -0.37658 | 3.51E-17 | -0.1619301 | 0.00044  | -0.18573 | 5.39E-05 |
| 0.62549  | 0.68607  | 3.11E-66 | 0.706027 | 1.09E-71 | 0.30599562 | 1.40E-11 | 0.278155 | 9.60E-10 |
| 0.78049  | 0.55181  | 1.44E-38 | 0.285072 | 3.51E-10 | 0.2906013  | 1.54E-10 | 0.23857  | 1.82E-07 |
| 0.01101  | 0.383072 | 9.02E-18 | 0.308412 | 9.51E-12 | -0.159847  | 0.00053  | -0.27805 | 9.74E-10 |
| 1.06E-08 | 0.46098  | 6.01E-26 | 0.441322 | 1.11E-23 | 0.24336602 | 1.01E-07 | 0.1611   | 0.00047  |
| 0.01271  | 0.4007   | 1.94E-19 | 0.193063 | 2.66E-05 | 0.11833164 | 0.01049  | 0.130653 | 0.00468  |
| 0.12806  | 0.720028 | 8.43E-76 | 0.584664 | 3.65E-44 | 0.62504965 | 5.57E-52 | 0.542939 | 3.68E-37 |
| 0.60549  | 0.423171 | 1.03E-21 | 0.04498  | 0.3321   | 0.02735315 | 0.55544  | 0.223292 | 1.09E-06 |



|          |          |          |          |          |            |          |          |          |
|----------|----------|----------|----------|----------|------------|----------|----------|----------|
| 0.09448  | 0.741725 | 1.08E-82 | 0.236006 | 2.48E-07 | 0.2050552  | 7.93E-06 | 0.164685 | 0.00035  |
| 0.00212  | 0.545301 | 1.57E-37 | 0.648461 | 4.62E-57 | 0.35485637 | 2.64E-15 | 0.218305 | 1.91E-06 |
| 0.32563  | -0.33783 | 6.25E-14 | -0.26662 | 4.84E-09 | 0.04194501 | 0.36578  | 0.045425 | 0.32732  |
| 0.06008  | -0.56505 | 9.52E-41 | -0.45954 | 8.92E-26 | -0.2421527 | 1.17E-07 | -0.24423 | 9.05E-08 |
| 1.23E-06 | 0.375639 | 4.25E-17 | 0.197798 | 1.67E-05 | 0.08822705 | 0.05675  | 0.15266  | 0.00093  |
| 0.01391  | 0.611339 | 3.36E-49 | 0.576992 | 8.44E-43 | 0.35184187 | 4.69E-15 | 0.342324 | 2.76E-14 |
| 0.10932  | 0.71403  | 5.21E-74 | 0.284703 | 3.70E-10 | -0.1337303 | 0.00379  | -0.11469 | 0.01313  |
| 0.00154  | 0.855471 | #####    | 0.481688 | 1.68E-28 | 0.27976887 | 7.61E-10 | 0.420583 | 1.92E-21 |
| 0.52826  | -0.26839 | 3.80E-09 | -0.32072 | 1.24E-12 | 0.02769901 | 0.55045  | -0.02325 | 0.61633  |
| 0.19161  | 0.909374 | #####    | 0.503614 | 2.12E-31 | 0.16375047 | 0.00038  | 0.249719 | 4.53E-08 |
| 0.06991  | 0.802379 | #####    | 0.339499 | 4.62E-14 | 0.26017547 | 1.16E-08 | 0.428296 | 2.95E-22 |
| 0.05853  | 0.904296 | #####    | 0.500569 | 5.51E-31 | 0.25306878 | 2.94E-08 | 0.340981 | 3.53E-14 |
| 0.24451  | 0.8645   | #####    | 0.474716 | 1.27E-27 | 0.22182106 | 1.29E-06 | 0.351933 | 4.61E-15 |
| 0.01405  | 0.876822 | #####    | 0.50005  | 6.48E-31 | 0.27297488 | 2.00E-09 | 0.159425 | 0.00054  |
| 0.61505  | 0.470915 | 3.76E-27 | 0.26759  | 4.24E-09 | 0.13536263 | 0.00338  | 0.119214 | 0.00992  |
| 0.01936  | 0.842108 | #####    | 0.385601 | 5.28E-18 | 0.2084233  | 5.57E-06 | 0.176561 | 0.00013  |
| 0.328    | 0.722525 | 1.47E-76 | 0.325312 | 5.67E-13 | 0.24339156 | 1.00E-07 | 0.459637 | 8.68E-26 |
| 0.00022  | 0.752779 | 1.78E-86 | 0.474853 | 1.22E-27 | -0.0861918 | 0.06273  | -0.21434 | 2.95E-06 |
| 0.00695  | 0.892854 | #####    | 0.489009 | 1.91E-29 | 0.26289438 | 8.03E-09 | 0.30249  | 2.45E-11 |
| 9.68E-05 | 0.917173 | #####    | 0.540441 | 9.01E-37 | 0.0327044  | 0.48078  | -0.02053 | 0.65808  |
| 0.00166  | 0.923937 | #####    | 0.597063 | 1.91E-46 | 0.21299078 | 3.42E-06 | 0.199917 | 1.34E-05 |
| 0.65821  | 0.319933 | 1.42E-12 | 0.160772 | 0.00049  | 0.18794007 | 4.37E-05 | 0.225005 | 8.99E-07 |
| 0.00538  | 0.878632 | #####    | 0.534317 | 7.84E-36 | 0.15900733 | 0.00056  | 0.028654 | 0.53679  |
| 0.00011  | 0.41067  | 1.99E-20 | 0.235038 | 2.78E-07 | 0.02798103 | 0.54639  | -0.04037 | 0.38406  |
| 0.00157  | 0.400254 | 2.14E-19 | 0.277395 | 1.07E-09 | 0.18485507 | 5.85E-05 | 0.260405 | 1.12E-08 |
| 9.67E-06 | 0.390907 | 1.69E-18 | 0.210527 | 4.46E-06 | 0.0415853  | 0.36991  | 0.037445 | 0.41948  |
| 0.33454  | 0.647754 | 6.68E-57 | 0.493315 | 5.17E-30 | 0.1280533  | 0.00558  | 0.127633 | 0.00574  |
| 0.04185  | 0.854974 | #####    | 0.422717 | 1.15E-21 | 0.06681818 | 0.14939  | 0.104627 | 0.02375  |
| 0.60807  | 0.679512 | 1.55E-64 | 0.130973 | 0.00458  | 0.11145565 | 0.01597  | 0.228695 | 5.88E-07 |
| 0.0126   | 0.830665 | #####    | 0.615748 | 4.44E-50 | 0.20206595 | 1.08E-05 | 0.210744 | 4.35E-06 |
| 0.00876  | 0.447298 | 2.36E-24 | 0.292726 | 1.11E-10 | -0.0077701 | 0.867    | -0.16642 | 0.0003   |
| 0.03313  | 0.352418 | 4.21E-15 | 0.418224 | 3.38E-21 | -0.0227922 | 0.62322  | -0.18846 | 4.16E-05 |
| 0.08278  | 0.62062  | 4.56E-51 | 0.450058 | 1.14E-24 | 0.40872802 | 3.13E-20 | 0.528941 | 5.05E-35 |
| 0.00095  | 0.363032 | 5.40E-16 | 0.389736 | 2.17E-18 | 0.30628271 | 1.34E-11 | 0.305577 | 1.50E-11 |
| 0.6535   | 0.492468 | 6.70E-30 | 0.374799 | 5.06E-17 | 0.12343734 | 0.00757  | 0.14672  | 0.00148  |
| 0.0074   | 0.464329 | 2.39E-26 | 0.318234 | 1.89E-12 | 0.01765791 | 0.7035   | -0.10833 | 0.0192   |
| 0.47995  | 0.481919 | 1.57E-28 | 0.374048 | 5.90E-17 | 0.32779092 | 3.69E-13 | 0.156051 | 0.00071  |
| 0.20642  | 0.706769 | 6.68E-72 | 0.507421 | 6.31E-32 | 0.24835412 | 5.39E-08 | 0.063945 | 0.16772  |
| 0.37381  | 0.333358 | 1.39E-13 | 0.251031 | 3.83E-08 | 0.37960664 | 1.87E-17 | 0.222014 | 1.26E-06 |
| 0.13936  | 0.344691 | 1.79E-14 | 0.145001 | 0.00168  | 0.1497812  | 0.00117  | 0.25517  | 2.24E-08 |
| 0.33006  | 0.882188 | #####    | 0.563901 | 1.49E-40 | 0.32729489 | 4.03E-13 | 0.317748 | 2.05E-12 |
| 0.62362  | 0.718406 | 2.60E-75 | 0.702853 | 8.60E-71 | 0.42628203 | 4.83E-22 | 0.241563 | 1.26E-07 |
| 0.00501  | 0.430118 | 1.88E-22 | 0.321203 | 1.14E-12 | 0.05574594 | 0.22921  | 0.047675 | 0.30391  |
| 0.22028  | 0.504847 | 1.43E-31 | 0.330413 | 2.34E-13 | 0.29523249 | 7.59E-11 | 0.330077 | 2.48E-13 |
| 0.00079  | 0.756219 | 1.07E-87 | 0.509891 | 2.86E-32 | -0.0086873 | 0.85148  | 0.079961 | 0.08433  |

|          |          |          |          |          |            |          |          |          |
|----------|----------|----------|----------|----------|------------|----------|----------|----------|
| 0.02127  | 0.426623 | 4.45E-22 | 0.224627 | 9.39E-07 | 0.17232339 | 0.00018  | 0.27714  | 1.11E-09 |
| 0.01506  | 0.344528 | 1.84E-14 | 0.293505 | 9.88E-11 | 0.2456661  | 7.56E-08 | 0.216653 | 2.29E-06 |
| 0.11834  | 0.305864 | 1.43E-11 | 0.418258 | 3.35E-21 | 0.2418786  | 1.21E-07 | 0.12764  | 0.00574  |
| 0.28351  | -0.48148 | 1.79E-28 | -0.39896 | 2.86E-19 | -0.1669342 | 0.00029  | -0.3348  | 1.08E-13 |
| 5.97E-07 | 0.566213 | 6.06E-41 | 0.354651 | 2.75E-15 | 0.24197537 | 1.20E-07 | 0.337507 | 6.63E-14 |
| 0.048    | 0.607972 | 1.54E-48 | 0.43663  | 3.68E-23 | 0.32866993 | 3.17E-13 | 0.346298 | 1.33E-14 |
| 0.02157  | 0.542684 | 4.04E-37 | 0.552265 | 1.22E-38 | -0.0827145 | 0.07414  | -0.24953 | 4.64E-08 |
| 0.00044  | 0.623483 | 1.18E-51 | 0.438901 | 2.07E-23 | -0.2178819 | 2.00E-06 | -0.34655 | 1.27E-14 |
| 0.22695  | 0.488187 | 2.44E-29 | 0.217647 | 2.06E-06 | -0.2703915 | 2.88E-09 | -0.16624 | 0.00031  |
| 0.01558  | 0.281369 | 6.03E-10 | 0.333906 | 1.26E-13 | 0.40186594 | 1.49E-19 | 0.219568 | 1.66E-06 |
| 0.07392  | -0.3296  | 2.69E-13 | -0.12108 | 0.00881  | 0.06094858 | 0.18858  | -0.02303 | 0.61963  |
| 0.82663  | -0.45098 | 8.92E-25 | -0.28767 | 2.39E-10 | -0.1627838 | 0.00041  | -0.19929 | 1.43E-05 |
| 0.00294  | 0.874683 | #####    | 0.647486 | 7.67E-57 | 0.2177626  | 2.03E-06 | 0.29382  | 9.42E-11 |
| 8.54E-06 | 0.433871 | 7.38E-23 | 0.370132 | 1.31E-16 | -0.0038124 | 0.93451  | -0.17711 | 0.00012  |
| 0.05682  | 0.463331 | 3.14E-26 | 0.425638 | 5.66E-22 | 0.13322007 | 0.00393  | 0.091508 | 0.04811  |
| 0.00848  | 0.553374 | 8.06E-39 | 0.337218 | 6.98E-14 | -0.1545369 | 0.00081  | -0.19402 | 2.43E-05 |
| 0.25235  | 0.339972 | 4.24E-14 | 0.131495 | 0.00442  | 0.1321115  | 0.00424  | 0.021151 | 0.64846  |
| 0.00037  | 0.475655 | 9.72E-28 | 0.221138 | 1.39E-06 | -0.1423086 | 0.00205  | -0.20922 | 5.12E-06 |
| 0.17574  | 0.357241 | 1.67E-15 | 0.180684 | 8.62E-05 | 0.09554167 | 0.03903  | 0.114197 | 0.01354  |
| 0.22199  | 0.688521 | 7.02E-67 | 0.603089 | 1.36E-47 | 0.32794995 | 3.59E-13 | 0.212571 | 3.58E-06 |
| 0.04801  | 0.479396 | 3.29E-28 | 0.268965 | 3.51E-09 | 0.12248726 | 0.00805  | 0.030185 | 0.51523  |
| 0.01922  | 0.775817 | 4.76E-95 | 0.373912 | 6.06E-17 | 0.22522918 | 8.76E-07 | 0.382383 | 1.04E-17 |
| 0.05821  | 0.925999 | #####    | 0.596143 | 2.84E-46 | 0.28303541 | 4.73E-10 | 0.316536 | 2.51E-12 |
| 0.01171  | 0.810036 | #####    | 0.726692 | 7.59E-78 | 0.46986956 | 5.06E-27 | 0.310014 | 7.33E-12 |
| 0.08838  | 0.761198 | 1.70E-89 | 0.706329 | 8.92E-72 | 0.40518014 | 7.05E-20 | 0.277132 | 1.11E-09 |
| 0.09411  | 0.880145 | #####    | 0.633537 | 9.00E-54 | 0.37361996 | 6.44E-17 | 0.340108 | 4.14E-14 |
| 0.09263  | 0.542913 | 3.72E-37 | 0.47217  | 2.64E-27 | 0.33269005 | 1.56E-13 | 0.07315  | 0.11441  |
| 0.08569  | 0.83636  | #####    | 0.65372  | 2.89E-58 | 0.32182323 | 1.03E-12 | 0.317286 | 2.21E-12 |
| 0.45448  | 0.687021 | 1.75E-66 | 0.611519 | 3.10E-49 | 0.21007973 | 4.67E-06 | 0.015588 | 0.7369   |
| 0.16884  | 0.780391 | 7.14E-97 | 0.401258 | 1.71E-19 | 0.29335687 | 1.01E-10 | 0.429888 | 1.99E-22 |
| 0.00097  | 0.557753 | 1.56E-39 | 0.28705  | 2.61E-10 | 0.12854356 | 0.0054   | 0.256004 | 2.01E-08 |
| 0.85839  | 0.596302 | 2.65E-46 | 0.484519 | 7.29E-29 | 0.47946388 | 3.22E-28 | 0.471896 | 2.85E-27 |
| 0.05989  | 0.439477 | 1.79E-23 | 0.327825 | 3.67E-13 | 0.31949751 | 1.53E-12 | 0.243834 | 9.51E-08 |
| 0.00014  | 0.510924 | 2.05E-32 | 0.451341 | 8.11E-25 | 0.04055612 | 0.38188  | -0.0558  | 0.22874  |
| 0.00941  | 0.920665 | #####    | 0.519471 | 1.24E-33 | 0.18121777 | 8.21E-05 | 0.215419 | 2.63E-06 |
| 0.04756  | 0.453017 | 5.19E-25 | 0.245319 | 7.90E-08 | 0.02177451 | 0.63882  | 0.070219 | 0.12971  |
| 0.07943  | 0.446872 | 2.64E-24 | 0.264024 | 6.90E-09 | 0.01674498 | 0.71816  | -0.09702 | 0.03608  |
| 0.3047   | 0.364183 | 4.30E-16 | 0.122756 | 0.00791  | -0.1332976 | 0.0039   | -0.05714 | 0.21778  |
| 3.74E-06 | 0.54001  | 1.05E-36 | 0.260751 | 1.07E-08 | 0.21779983 | 2.02E-06 | 0.240624 | 1.41E-07 |
| 0.00132  | 0.290877 | 1.47E-10 | 0.420321 | 2.05E-21 | 0.54899479 | 4.07E-38 | 0.441526 | 1.06E-23 |
| 0.16591  | -0.3843  | 6.96E-18 | -0.24054 | 1.43E-07 | 0.0653833  | 0.15834  | 0.084105 | 0.06939  |
| 0.87038  | 0.770794 | 4.29E-93 | 0.382521 | 1.01E-17 | 0.13070193 | 0.00467  | 0.196893 | 1.82E-05 |
| 0.01502  | 0.37375  | 6.27E-17 | 0.153568 | 0.00087  | 0.10447949 | 0.02395  | 0.134893 | 0.00349  |
| 5.94E-05 | 0.821109 | #####    | 0.541212 | 6.84E-37 | 0.09271971 | 0.04522  | 0.134497 | 0.00359  |
| 0.27772  | 0.853711 | #####    | 0.434613 | 6.13E-23 | 0.21918691 | 1.73E-06 | 0.222969 | 1.13E-06 |

|          |          |          |          |          |            |          |          |          |
|----------|----------|----------|----------|----------|------------|----------|----------|----------|
| 0.16813  | 0.508043 | 5.17E-32 | 0.258903 | 1.37E-08 | 0.18875488 | 4.04E-05 | 0.197466 | 1.72E-05 |
| 0.43116  | 0.542585 | 4.18E-37 | 0.160043 | 0.00052  | 0.22411519 | 9.95E-07 | 0.442484 | 8.25E-24 |
| 0.07588  | 0.767852 | 5.67E-92 | 0.429382 | 2.26E-22 | -0.1361198 | 0.0032   | -0.08654 | 0.06168  |
| 0.59582  | 0.470277 | 4.51E-27 | 0.397471 | 3.99E-19 | 0.41836682 | 3.27E-21 | 0.374972 | 4.88E-17 |
| 3.10E-07 | 0.595498 | 3.75E-46 | 0.420842 | 1.81E-21 | -0.0241531 | 0.60263  | -0.12912 | 0.0052   |
| 8.13E-06 | 0.528525 | 5.82E-35 | 0.594741 | 5.19E-46 | -0.1174686 | 0.01107  | -0.24503 | 8.19E-08 |
| 3.39E-05 | 0.686504 | 2.39E-66 | 0.501883 | 3.65E-31 | -0.0313501 | 0.49915  | -0.01357 | 0.76993  |
| 0.00055  | 0.684835 | 6.54E-66 | 0.455197 | 2.89E-25 | 0.27195138 | 2.31E-09 | 0.400618 | 1.98E-19 |
| 0.00324  | 0.628419 | 1.10E-52 | 0.736379 | 6.24E-81 | 0.13051476 | 0.00473  | -0.01085 | 0.81515  |
| 3.81E-06 | 0.556965 | 2.10E-39 | 0.195443 | 2.11E-05 | -0.4464323 | 2.96E-24 | -0.34459 | 1.82E-14 |
| 0.95593  | 0.440443 | 1.39E-23 | 0.277118 | 1.11E-09 | -0.2890722 | 1.93E-10 | -0.28799 | 2.27E-10 |
| 0.06451  | 0.583064 | 7.08E-44 | 0.596804 | 2.13E-46 | 0.0882708  | 0.05663  | 0.06722  | 0.14695  |
| 0.00026  | 0.541681 | 5.79E-37 | 0.667053 | 1.99E-61 | 0.08564816 | 0.06441  | -0.09351 | 0.04341  |
| 0.00026  | 0.551276 | 1.76E-38 | 0.429298 | 2.30E-22 | -0.1745594 | 0.00015  | -0.30931 | 8.22E-12 |
| 0.73619  | 0.753208 | 1.25E-86 | 0.586411 | 1.77E-44 | 0.44258232 | 8.04E-24 | 0.563954 | 1.46E-40 |
| 0.32616  | 0.365014 | 3.65E-16 | 0.184096 | 6.28E-05 | 0.14441661 | 0.00175  | 0.095138 | 0.03987  |
| 0.4483   | 0.57781  | 6.06E-43 | 0.566804 | 4.82E-41 | 0.26560781 | 5.56E-09 | 0.111251 | 0.01616  |
| 0.07051  | 0.642389 | 1.06E-55 | 0.196653 | 1.87E-05 | 0.16186413 | 0.00045  | 0.36519  | 3.52E-16 |
| 0.31895  | 0.623405 | 1.22E-51 | 0.560094 | 6.40E-40 | 0.17331954 | 0.00017  | 0.189072 | 3.92E-05 |
| 2.01E-07 | 0.844722 | #####    | 0.416188 | 5.48E-21 | -0.0344831 | 0.45723  | 0.009903 | 0.83099  |
| 0.65715  | 0.697222 | 3.16E-69 | 0.586852 | 1.47E-44 | 0.39691998 | 4.51E-19 | 0.349694 | 7.04E-15 |
| 0.01277  | 0.633515 | 9.10E-54 | 0.508267 | 4.81E-32 | 0.20804377 | 5.80E-06 | 0.195845 | 2.02E-05 |
| 0.0077   | 0.688727 | 6.19E-67 | 0.530104 | 3.38E-35 | 0.21536798 | 2.64E-06 | 0.288608 | 2.07E-10 |
| 2.83E-05 | 0.633652 | 8.50E-54 | 0.397275 | 4.17E-19 | -0.0497434 | 0.28338  | 0.081374 | 0.07897  |
| 0.31078  | 0.549129 | 3.88E-38 | 0.179997 | 9.18E-05 | 0.11961201 | 0.00968  | 0.247841 | 5.75E-08 |
| 0.01029  | 0.82697  | #####    | 0.453857 | 4.15E-25 | 0.0292438  | 0.52843  | -0.09422 | 0.04182  |
| 0.40888  | 0.380467 | 1.56E-17 | 0.326473 | 4.64E-13 | 0.13249199 | 0.00413  | 0.126873 | 0.00604  |
| 0.70795  | 0.512389 | 1.27E-32 | 0.213484 | 3.24E-06 | 0.26469926 | 6.29E-09 | 0.2039   | 8.94E-06 |
| 0.24758  | 0.32723  | 4.07E-13 | 0.213511 | 3.23E-06 | 0.29707013 | 5.72E-11 | 0.176339 | 0.00013  |
| 0.61391  | 0.486683 | 3.83E-29 | 0.162523 | 0.00042  | 0.26016388 | 1.16E-08 | 0.256197 | 1.96E-08 |
| 0.71935  | 0.530542 | 2.91E-35 | 0.366727 | 2.59E-16 | 0.34398135 | 2.04E-14 | 0.494952 | 3.14E-30 |
| 0.29478  | 0.387346 | 3.63E-18 | 0.250283 | 4.21E-08 | 0.01575534 | 0.73417  | 0.006874 | 0.88221  |
| 0.39521  | 0.662536 | 2.44E-60 | 0.294342 | 8.70E-11 | -0.1327467 | 0.00406  | -0.1262  | 0.00632  |
| 0.03498  | 0.546262 | 1.11E-37 | 0.496176 | 2.15E-30 | 0.33279218 | 1.54E-13 | 0.25447  | 2.45E-08 |
| 0.01478  | 0.83538  | #####    | 0.663097 | 1.79E-60 | 0.46827842 | 7.92E-27 | 0.42182  | 1.43E-21 |
| 0.56344  | 0.707603 | 3.85E-72 | 0.576074 | 1.22E-42 | 0.59968724 | 6.09E-47 | 0.593685 | 8.16E-46 |
| 0.00247  | 0.911358 | #####    | 0.480793 | 2.19E-28 | 0.09067082 | 0.05021  | 0.139562 | 0.00251  |
| 0.17152  | 0.82649  | #####    | 0.55046  | 2.38E-38 | 0.43643382 | 3.87E-23 | 0.515674 | 4.35E-33 |
| 0.00651  | 0.933461 | #####    | 0.547152 | 8.00E-38 | 0.25984038 | 1.21E-08 | 0.245574 | 7.65E-08 |
| 6.32E-05 | 0.519579 | 1.20E-33 | 0.2984   | 4.65E-11 | -0.0350696 | 0.44961  | 0.109499 | 0.01793  |
| 0.02086  | 0.825807 | #####    | 0.582378 | 9.39E-44 | 0.30107163 | 3.06E-11 | 0.451102 | 8.64E-25 |
| 3.31E-05 | 0.843412 | #####    | 0.401967 | 1.46E-19 | -0.0452523 | 0.32917  | 0.031659 | 0.49493  |
| 0.60338  | 0.339435 | 4.68E-14 | 0.267067 | 4.55E-09 | 0.44688495 | 2.63E-24 | 0.195755 | 2.04E-05 |
| 0.36346  | -0.48353 | 9.78E-29 | -0.20007 | 1.32E-05 | 0.11050753 | 0.01689  | 0.089085 | 0.05438  |
| 0.83161  | 0.473401 | 1.85E-27 | 0.113093 | 0.01447  | -0.2325162 | 3.75E-07 | -0.08792 | 0.05763  |

|          |          |          |          |          |            |          |          |          |
|----------|----------|----------|----------|----------|------------|----------|----------|----------|
| 4.44E-07 | 0.413142 | 1.12E-20 | 0.320699 | 1.25E-12 | -0.2119064 | 3.84E-06 | -0.0354  | 0.44529  |
| 0.02596  | 0.847859 | #####    | 0.434245 | 6.72E-23 | 0.19150371 | 3.10E-05 | 0.268842 | 3.57E-09 |
| 0.00553  | 0.832816 | #####    | 0.503768 | 2.01E-31 | 0.1823532  | 7.39E-05 | 0.234306 | 3.03E-07 |
| 0.56467  | 0.580319 | 2.18E-43 | 0.423191 | 1.03E-21 | 0.26776357 | 4.14E-09 | 0.144206 | 0.00178  |
| 0.83161  | 0.489984 | 1.42E-29 | 0.298154 | 4.83E-11 | 0.16444831 | 0.00036  | 0.200829 | 1.23E-05 |
| 0.0748   | -0.43676 | 3.57E-23 | -0.3839  | 7.57E-18 | 0.05738136 | 0.21582  | 0.036232 | 0.43472  |
| 0.20432  | 0.38238  | 1.04E-17 | 0.149698 | 0.00118  | 0.27167373 | 2.40E-09 | 0.296557 | 6.19E-11 |
| 0.00291  | 0.688146 | 8.83E-67 | 0.646121 | 1.56E-56 | 0.45582564 | 2.44E-25 | 0.468332 | 7.80E-27 |
| 0.54246  | 0.602944 | 1.45E-47 | 0.653495 | 3.26E-58 | 0.30872633 | 9.04E-12 | 0.239434 | 1.63E-07 |
| 3.13E-05 | 0.308436 | 9.47E-12 | 0.198349 | 1.58E-05 | 0.14413936 | 0.00179  | 0.016478 | 0.72247  |
| 0.05841  | 0.599159 | 7.67E-47 | 0.32391  | 7.21E-13 | -0.1193703 | 0.00982  | -0.11527 | 0.01268  |
| 0.15034  | 0.402867 | 1.19E-19 | 0.496348 | 2.04E-30 | 0.15701166 | 0.00066  | 0.057856 | 0.21204  |
| 0.04188  | 0.575287 | 1.68E-42 | 0.257404 | 1.67E-08 | -0.0747425 | 0.10672  | -0.20661 | 6.75E-06 |
| 0.00074  | 0.62506  | 5.54E-52 | 0.601213 | 3.12E-47 | 0.06029509 | 0.19337  | -0.02716 | 0.55821  |
| 0.01966  | -0.52292 | 3.91E-34 | -0.36946 | 1.50E-16 | -0.1895252 | 3.75E-05 | -0.29009 | 1.66E-10 |
| 0.10928  | 0.317738 | 2.05E-12 | 0.17675  | 0.00012  | 0.24257401 | 1.11E-07 | 0.139756 | 0.00247  |
| 0.02175  | -0.47416 | 1.49E-27 | -0.15969 | 0.00053  | 0.17677626 | 0.00012  | 0.073133 | 0.1145   |
| 0.03713  | 0.370421 | 1.23E-16 | 0.229148 | 5.57E-07 | -0.2476549 | 5.89E-08 | -0.37538 | 4.49E-17 |
| 0.15433  | 0.322928 | 8.53E-13 | 0.078533 | 0.09004  | 0.10720147 | 0.0205   | 0.145146 | 0.00166  |
| 0.08904  | 0.553823 | 6.82E-39 | 0.20696  | 6.50E-06 | 0.07127687 | 0.12402  | 0.216166 | 2.42E-06 |
| 0.22144  | 0.620755 | 4.28E-51 | 0.527359 | 8.68E-35 | 0.41651566 | 5.07E-21 | 0.483067 | 1.12E-28 |
| 0.00883  | 0.476075 | 8.61E-28 | 0.411765 | 1.55E-20 | 0.29886787 | 4.32E-11 | 0.34567  | 1.49E-14 |
| 0.2229   | 0.463132 | 3.32E-26 | 0.367375 | 2.28E-16 | 0.18540717 | 5.56E-05 | -0.04052 | 0.38232  |
| 5.94E-05 | 0.552729 | 1.03E-38 | 0.296156 | 6.58E-11 | 0.07967774 | 0.08544  | 0.199405 | 1.42E-05 |
| 4.90E-06 | 0.446016 | 3.30E-24 | 0.213725 | 3.16E-06 | 0.10149603 | 0.0283   | 0.166706 | 0.0003   |
| 7.03E-05 | 0.450586 | 9.91E-25 | 0.095674 | 0.03876  | -0.1633425 | 0.00039  | -0.04569 | 0.32451  |
| 0.34708  | 0.613846 | 1.07E-49 | 0.328528 | 3.25E-13 | -0.1246641 | 0.00699  | -0.11003 | 0.01738  |
| 0.00714  | 0.86602  | #####    | 0.373349 | 6.81E-17 | -0.007146  | 0.8776   | 0.076408 | 0.09911  |
| 0.10409  | 0.692759 | 5.17E-68 | 0.428628 | 2.72E-22 | 0.32143064 | 1.10E-12 | 0.435091 | 5.43E-23 |
| 0.07606  | 0.676984 | 6.82E-64 | 0.486087 | 4.58E-29 | 0.46637761 | 1.35E-26 | 0.59691  | 2.04E-46 |
| 0.36635  | 0.659382 | 1.37E-59 | 0.41752  | 3.99E-21 | 0.33261725 | 1.59E-13 | 0.223543 | 1.06E-06 |
| 0.01617  | 0.645628 | 2.01E-56 | 0.24678  | 6.57E-08 | 0.10708995 | 0.02063  | 0.249594 | 4.60E-08 |
| 0.89605  | 0.521771 | 5.75E-34 | 0.516095 | 3.79E-33 | 0.537014   | 3.04E-36 | 0.328302 | 3.38E-13 |
| 0.02795  | 0.643703 | 5.41E-56 | 0.4915   | 8.99E-30 | 0.16148241 | 0.00046  | 0.071185 | 0.1245   |
| 0.10349  | 0.57229  | 5.55E-42 | 0.501033 | 4.76E-31 | 0.33453107 | 1.13E-13 | 0.307527 | 1.10E-11 |
| 0.87192  | 0.589906 | 4.07E-45 | 0.580584 | 1.96E-43 | 0.37895756 | 2.14E-17 | 0.280118 | 7.23E-10 |
| 0.23576  | 0.896728 | #####    | 0.432531 | 1.03E-22 | 0.11227515 | 0.0152   | 0.167064 | 0.00029  |
| 0.00744  | 0.40036  | 2.09E-19 | 0.292806 | 1.10E-10 | 0.13411268 | 0.00369  | 0.057023 | 0.2187   |
| 0.09326  | 0.386952 | 3.95E-18 | 0.375504 | 4.37E-17 | -0.1491792 | 0.00122  | -0.28327 | 4.57E-10 |
| 0.88011  | 0.605327 | 5.05E-48 | 0.613326 | 1.35E-49 | 0.36174045 | 6.96E-16 | 0.368494 | 1.82E-16 |
| 0.02135  | 0.874448 | #####    | 0.650107 | 1.95E-57 | 0.2335641  | 3.31E-07 | 0.205424 | 7.64E-06 |
| 0.02756  | 0.881266 | #####    | 0.650521 | 1.57E-57 | 0.2993321  | 4.02E-11 | 0.223196 | 1.10E-06 |
| 0.2967   | 0.825476 | #####    | 0.346334 | 1.32E-14 | 0.05694201 | 0.21936  | 0.085083 | 0.0662   |
| 2.96E-06 | 0.440196 | 1.49E-23 | 0.319077 | 1.64E-12 | 0.2156653  | 2.56E-06 | 0.106938 | 0.02081  |
| 0.0008   | 0.498244 | 1.14E-30 | 0.267644 | 4.21E-09 | 0.04991257 | 0.28175  | 0.167409 | 0.00028  |

|          |          |          |          |          |            |          |          |          |
|----------|----------|----------|----------|----------|------------|----------|----------|----------|
| 0.00462  | 0.531699 | 1.95E-35 | 0.254485 | 2.45E-08 | -0.3078212 | 1.05E-11 | -0.39597 | 5.57E-19 |
| 0.05254  | 0.681169 | 5.84E-65 | 0.465283 | 1.83E-26 | 0.25358297 | 2.75E-08 | 0.305763 | 1.46E-11 |
| 1.11E-07 | 0.403429 | 1.05E-19 | 0.250445 | 4.13E-08 | -0.320726  | 1.24E-12 | -0.32172 | 1.05E-12 |
| 0.1068   | 0.631124 | 2.95E-53 | 0.473003 | 2.08E-27 | 0.25444624 | 2.46E-08 | 0.217699 | 2.04E-06 |
| 0.32807  | 0.841752 | #####    | 0.44892  | 1.54E-24 | 0.12067168 | 0.00905  | 0.287324 | 2.51E-10 |
| 0.23741  | 0.442127 | 9.05E-24 | 0.170322 | 0.00022  | 0.30536765 | 1.55E-11 | 0.248303 | 5.42E-08 |
| 0.10291  | 0.843552 | #####    | 0.470327 | 4.45E-27 | 0.05270993 | 0.25562  | 0.107735 | 0.01987  |
| 0.0042   | -0.35955 | 1.07E-15 | -0.07989 | 0.08459  | 0.00441342 | 0.92422  | -0.01117 | 0.80978  |
| 3.68E-05 | 0.592521 | 1.34E-45 | 0.66927  | 5.71E-62 | 0.31057919 | 6.69E-12 | 0.162472 | 0.00042  |
| 0.6992   | 0.470098 | 4.74E-27 | 0.438912 | 2.06E-23 | 0.14593962 | 0.00157  | -0.03781 | 0.41491  |
| 0.44543  | 0.829319 | #####    | 0.684976 | 6.01E-66 | 0.28648372 | 2.84E-10 | 0.209214 | 5.13E-06 |
| 0.00024  | 0.539867 | 1.11E-36 | 0.363058 | 5.37E-16 | 0.48593854 | 4.78E-29 | 0.446463 | 2.93E-24 |
| 0.01813  | 0.41315  | 1.12E-20 | 0.461015 | 5.95E-26 | 0.42092672 | 1.77E-21 | 0.208172 | 5.72E-06 |
| 0.14203  | 0.53266  | 1.40E-35 | 0.439917 | 1.60E-23 | -0.0972175 | 0.03571  | -0.19446 | 2.32E-05 |
| 0.00067  | 0.486625 | 3.90E-29 | 0.146385 | 0.00151  | -0.4155502 | 6.37E-21 | -0.37317 | 7.06E-17 |
| 0.20317  | 0.47313  | 2.00E-27 | 0.105669 | 0.02238  | 0.16558468 | 0.00033  | 0.313162 | 4.38E-12 |
| 0.03017  | 0.385484 | 5.41E-18 | 0.195104 | 2.18E-05 | -0.0368284 | 0.42719  | -0.12388 | 0.00736  |
| 0.00073  | 0.429929 | 1.97E-22 | 0.252914 | 3.00E-08 | 0.11042134 | 0.01698  | 0.155326 | 0.00076  |
| 0.00317  | -0.43575 | 4.60E-23 | -0.30569 | 1.47E-11 | -0.0310481 | 0.50329  | -0.12256 | 0.00801  |
| 0.00017  | 0.513091 | 1.01E-32 | 0.513765 | 8.13E-33 | -0.1021439 | 0.0273   | -0.23707 | 2.18E-07 |
| 0.02487  | 0.73608  | 7.81E-81 | 0.445658 | 3.62E-24 | 0.15055412 | 0.0011   | 0.188007 | 4.34E-05 |
| 0.01689  | 0.661911 | 3.44E-60 | 0.61409  | 9.54E-50 | 0.39247007 | 1.20E-18 | 0.24185  | 1.22E-07 |
| 0.3664   | 0.531872 | 1.84E-35 | 0.544942 | 1.79E-37 | 0.30305229 | 2.24E-11 | 0.238062 | 1.93E-07 |
| 0.0011   | 0.465555 | 1.70E-26 | 0.392205 | 1.27E-18 | 0.14389809 | 0.00182  | 0.042758 | 0.35655  |
| 0.00289  | 0.713043 | 1.02E-73 | 0.229086 | 5.61E-07 | -0.1080564 | 0.01951  | -0.18119 | 8.23E-05 |
| 0.03618  | 0.471135 | 3.54E-27 | 0.141453 | 0.00218  | -0.1364202 | 0.00314  | 0.041289 | 0.37333  |
| 0.02323  | 0.765436 | 4.60E-91 | 0.543032 | 3.56E-37 | 0.19412469 | 2.40E-05 | -0.01178 | 0.7995   |
| 0.06138  | 0.289126 | 1.92E-10 | 0.237271 | 2.13E-07 | 0.08958426 | 0.05304  | -0.09521 | 0.03971  |
| 0.03589  | 0.305476 | 1.52E-11 | 0.274382 | 1.64E-09 | 0.17002785 | 0.00022  | 0.122323 | 0.00814  |
| 0.50552  | -0.28364 | 4.33E-10 | -0.01847 | 0.69052  | 0.24411113 | 9.18E-08 | 0.102517 | 0.02674  |
| 0.00019  | 0.480762 | 2.21E-28 | 0.274959 | 1.51E-09 | 0.17340682 | 0.00017  | 0.035968 | 0.43808  |
| 0.01115  | 0.829192 | #####    | 0.609634 | 7.29E-49 | 0.30287339 | 2.31E-11 | 0.1332   | 0.00393  |
| 0.00518  | 0.751194 | 6.37E-86 | 0.380917 | 1.42E-17 | 0.20735316 | 6.24E-06 | 0.322426 | 9.29E-13 |
| 0.73828  | 0.516457 | 3.36E-33 | 0.466697 | 1.23E-26 | 0.1381999  | 0.00276  | 0.107609 | 0.02002  |
| 0.95761  | -0.53403 | 8.66E-36 | -0.43013 | 1.88E-22 | -0.0788633 | 0.08869  | -0.17066 | 0.00021  |
| 3.29E-05 | 0.749936 | 1.74E-85 | 0.554836 | 4.67E-39 | 0.01900341 | 0.6821   | -0.10455 | 0.02386  |
| 0.19497  | 0.549246 | 3.72E-38 | 0.417575 | 3.94E-21 | 0.47776971 | 5.27E-28 | 0.630453 | 4.09E-53 |
| 0.01319  | 0.652879 | 4.52E-58 | 0.503902 | 1.93E-31 | 0.08709704 | 0.06001  | -0.06837 | 0.14014  |
| 0.15405  | 0.602873 | 1.50E-47 | 0.547447 | 7.18E-38 | 0.30325648 | 2.17E-11 | 0.012403 | 0.78923  |
| 0.22631  | 0.49478  | 3.31E-30 | 0.383155 | 8.87E-18 | 0.33386496 | 1.27E-13 | 0.482295 | 1.41E-28 |
| 0.96749  | 0.664705 | 7.36E-61 | 0.32603  | 5.01E-13 | 0.23634474 | 2.38E-07 | 0.100529 | 0.02985  |
| 0.14946  | 0.737046 | 3.78E-81 | 0.276347 | 1.24E-09 | -0.0088248 | 0.84915  | 0.088545 | 0.05586  |
| 0.00039  | 0.801105 | #####    | 0.27952  | 7.88E-10 | 0.15061222 | 0.0011   | 0.284048 | 4.08E-10 |
| 0.43955  | 0.733894 | 3.98E-80 | 0.566739 | 4.94E-41 | 0.27696691 | 1.14E-09 | 0.351524 | 4.98E-15 |
| 0.00221  | 0.350849 | 5.66E-15 | 0.280189 | 7.16E-10 | 0.29398505 | 9.19E-11 | 0.195111 | 2.18E-05 |

|          |          |          |          |          |            |          |          |          |
|----------|----------|----------|----------|----------|------------|----------|----------|----------|
| 0.42836  | 0.679864 | 1.26E-64 | 0.38351  | 8.23E-18 | 0.20570695 | 7.41E-06 | 0.255162 | 2.24E-08 |
| 1.92E-06 | 0.382592 | 9.99E-18 | 0.267356 | 4.38E-09 | -0.1641832 | 0.00037  | -0.18584 | 5.33E-05 |
| 0.13555  | 0.532417 | 1.52E-35 | 0.427868 | 3.28E-22 | -0.0802714 | 0.08313  | -0.17069 | 0.00021  |
| 0.0037   | 0.540675 | 8.29E-37 | 0.55866  | 1.10E-39 | 0.18546783 | 5.52E-05 | 0.026619 | 0.5661   |
| 0.00413  | 0.614244 | 8.88E-50 | 0.394219 | 8.18E-19 | -0.2896398 | 1.77E-10 | -0.33866 | 5.38E-14 |
| 0.6664   | 0.564189 | 1.33E-40 | 0.5958   | 3.29E-46 | 0.14054808 | 0.00233  | -0.11333 | 0.01427  |
| 0.26035  | 0.886872 | #####    | 0.561302 | 4.04E-40 | 0.33801477 | 6.05E-14 | 0.317668 | 2.07E-12 |
| 0.24696  | 0.428455 | 2.84E-22 | 0.58618  | 1.94E-44 | 0.17076319 | 0.00021  | -0.02572 | 0.57922  |
| 0.00063  | 0.520303 | 9.39E-34 | 0.634351 | 6.02E-54 | 0.04955124 | 0.28525  | -0.19725 | 1.76E-05 |
| 0.00122  | 0.338978 | 5.08E-14 | 0.234372 | 3.01E-07 | 0.3853852  | 5.52E-18 | 0.258465 | 1.45E-08 |
| 0.10504  | 0.717335 | 5.44E-75 | 0.658453 | 2.27E-59 | 0.32754786 | 3.85E-13 | 0.349342 | 7.52E-15 |
| 0.00128  | 0.681877 | 3.83E-65 | 0.432028 | 1.17E-22 | 0.22535519 | 8.64E-07 | 0.376459 | 3.59E-17 |
| 0.26244  | 0.475437 | 1.03E-27 | 0.470575 | 4.14E-27 | 0.31240671 | 4.96E-12 | 0.307601 | 1.08E-11 |
| 0.04261  | 0.48801  | 2.58E-29 | 0.490392 | 1.26E-29 | 0.27073486 | 2.74E-09 | 0.290163 | 1.64E-10 |
| 0.00655  | 0.850651 | #####    | 0.479297 | 3.38E-28 | 0.12458443 | 0.00703  | 0.165442 | 0.00033  |
| 0.00035  | 0.430963 | 1.53E-22 | 0.31328  | 4.30E-12 | 0.02012704 | 0.66441  | -0.10924 | 0.01821  |
| 0.05351  | 0.602325 | 1.91E-47 | 0.397706 | 3.79E-19 | 0.13835401 | 0.00273  | 0.147035 | 0.00144  |
| 0.00189  | 0.534675 | 6.91E-36 | 0.619419 | 8.03E-51 | -0.0254541 | 0.58322  | -0.06479 | 0.16213  |
| 0.00907  | 0.560143 | 6.29E-40 | 0.72204  | 2.06E-76 | 0.15219005 | 0.00097  | -0.02866 | 0.5367   |
| 0.00057  | 0.619021 | 9.67E-51 | 0.536877 | 3.19E-36 | 0.03803193 | 0.41223  | -0.05643 | 0.22358  |
| 0.30935  | 0.547562 | 6.89E-38 | 0.531042 | 2.45E-35 | 0.14997905 | 0.00115  | 0.187482 | 4.56E-05 |
| 0.54689  | 0.620877 | 4.04E-51 | 0.605131 | 5.51E-48 | 0.44072344 | 1.30E-23 | 0.34763  | 1.04E-14 |
| 0.33965  | 0.644393 | 3.80E-56 | 0.543416 | 3.10E-37 | 0.21615694 | 2.42E-06 | 0.267029 | 4.58E-09 |
| 0.83191  | 0.761481 | 1.34E-89 | 0.560713 | 5.06E-40 | 0.19893186 | 1.49E-05 | 0.277273 | 1.09E-09 |
| 0.00026  | 0.620748 | 4.30E-51 | 0.714597 | 3.55E-74 | 0.38023239 | 1.64E-17 | 0.233309 | 3.42E-07 |
| 0.05666  | 0.834611 | #####    | 0.535166 | 5.82E-36 | 0.08467597 | 0.06751  | 0.004547 | 0.92194  |
| 0.43565  | 0.530997 | 2.49E-35 | 0.429489 | 2.20E-22 | 0.40911315 | 2.86E-20 | 0.254974 | 2.30E-08 |
| 0.00624  | 0.488818 | 2.02E-29 | 0.530802 | 2.66E-35 | 0.39870415 | 3.03E-19 | 0.35579  | 2.21E-15 |
| 0.56325  | 0.460197 | 7.45E-26 | 0.370306 | 1.26E-16 | 0.04391269 | 0.3437   | -0.03086 | 0.50583  |
| 0.00809  | 0.775285 | 7.71E-95 | 0.347323 | 1.10E-14 | -0.2582375 | 1.50E-08 | -0.29631 | 6.43E-11 |
| 0.4762   | 0.554254 | 5.81E-39 | 0.297531 | 5.32E-11 | 0.25965041 | 1.24E-08 | 0.424883 | 6.80E-22 |
| 0.00512  | 0.34506  | 1.67E-14 | 0.269597 | 3.21E-09 | 0.06933691 | 0.13461  | 0.050668 | 0.27452  |
| 1.69E-07 | 0.370008 | 1.34E-16 | 0.281627 | 5.81E-10 | 0.31016528 | 7.15E-12 | 0.208554 | 5.50E-06 |
| 0.14014  | 0.540955 | 7.50E-37 | 0.644012 | 4.62E-56 | 0.05716587 | 0.21755  | -0.00694 | 0.88109  |
| 5.65E-06 | 0.609755 | 6.90E-49 | 0.342138 | 2.86E-14 | 0.38257183 | 1.00E-17 | 0.510827 | 2.11E-32 |
| 1.95E-05 | 0.331875 | 1.81E-13 | 0.203879 | 8.96E-06 | 0.25285863 | 3.03E-08 | 0.210785 | 4.34E-06 |
| 4.82E-05 | 0.500978 | 4.84E-31 | 0.455908 | 2.39E-25 | 0.3131935  | 4.36E-12 | 0.26442  | 6.54E-09 |
| 0.15368  | 0.585257 | 2.86E-44 | 0.452529 | 5.91E-25 | 0.04097826 | 0.37694  | -0.13217 | 0.00422  |
| 0.06632  | 0.920502 | #####    | 0.630999 | 3.13E-53 | 0.33044654 | 2.32E-13 | 0.351006 | 5.50E-15 |
| 0.03355  | 0.695805 | 7.72E-69 | 0.328161 | 3.46E-13 | 0.17061848 | 0.00021  | 0.362517 | 5.97E-16 |
| 0.00129  | 0.446444 | 2.95E-24 | 0.567659 | 3.45E-41 | 0.36302779 | 5.40E-16 | 0.205976 | 7.21E-06 |
| 0.00233  | 0.856322 | #####    | 0.606474 | 3.02E-48 | 0.09498634 | 0.04019  | 0.036346 | 0.43328  |
| 0.00462  | 0.891404 | #####    | 0.50558  | 1.14E-31 | 0.20868474 | 5.42E-06 | 0.327964 | 3.58E-13 |
| 0.01859  | 0.448924 | 1.54E-24 | 0.008939 | 0.84723  | -0.0968751 | 0.03637  | 0.061171 | 0.18696  |
| 0.00078  | 0.907038 | #####    | 0.577155 | 7.90E-43 | 0.26493622 | 6.09E-09 | 0.227655 | 6.63E-07 |

|          |          |          |          |          |            |          |          |          |
|----------|----------|----------|----------|----------|------------|----------|----------|----------|
| 0.00483  | 0.65978  | 1.10E-59 | 0.62018  | 5.61E-51 | 0.18286066 | 7.05E-05 | 0.173485 | 0.00016  |
| 0.00438  | 0.723917 | 5.49E-77 | 0.641801 | 1.43E-55 | -0.0301582 | 0.51561  | -0.09313 | 0.04426  |
| 0.01785  | -0.39495 | 6.97E-19 | -0.16898 | 0.00024  | 0.19653732 | 1.89E-05 | 0.078204 | 0.0914   |
| 0.54106  | -0.36778 | 2.10E-16 | -0.29252 | 1.15E-10 | -0.0408072 | 0.37894  | -0.03215 | 0.48831  |
| 0.05382  | 0.623007 | 1.48E-51 | 0.226127 | 7.91E-07 | 0.07210817 | 0.11968  | 0.260903 | 1.05E-08 |
| 0.00367  | 0.504427 | 1.64E-31 | 0.198002 | 1.63E-05 | 0.07666733 | 0.09797  | 0.300048 | 3.60E-11 |
| 0.03497  | 0.599818 | 5.75E-47 | 0.446466 | 2.93E-24 | 0.3691608  | 1.59E-16 | 0.433677 | 7.75E-23 |
| 0.28354  | -0.56662 | 5.18E-41 | -0.47184 | 2.90E-27 | -0.0779895 | 0.09229  | -0.03233 | 0.4858   |
| 0.17696  | 0.707788 | 3.41E-72 | 0.555156 | 4.14E-39 | 0.26177453 | 9.34E-09 | 0.139771 | 0.00247  |
| 0.401    | 0.689348 | 4.24E-67 | 0.442216 | 8.84E-24 | 0.27805636 | 9.73E-10 | 0.221737 | 1.30E-06 |
| 0.70307  | 0.408937 | 2.98E-20 | 0.253885 | 2.65E-08 | 0.05479101 | 0.2373   | -0.07067 | 0.12723  |
| 0.03146  | 0.488262 | 2.39E-29 | 0.585699 | 2.38E-44 | 0.21332895 | 3.30E-06 | 0.037706 | 0.41625  |
| 0.13688  | 0.499623 | 7.40E-31 | 0.417642 | 3.88E-21 | 0.20882268 | 5.34E-06 | 0.143099 | 0.00193  |
| 6.63E-05 | 0.62442  | 7.53E-52 | 0.33727  | 6.91E-14 | -0.1068669 | 0.0209   | -0.15477 | 0.00079  |
| 0.00544  | 0.672531 | 8.93E-63 | 0.318757 | 1.73E-12 | -0.0723695 | 0.11834  | -0.25981 | 1.21E-08 |
| 0.35594  | 0.583723 | 5.39E-44 | 0.398127 | 3.45E-19 | 0.03760323 | 0.41753  | -0.17811 | 0.00011  |
| 0.64317  | 0.575221 | 1.72E-42 | 0.3641   | 4.37E-16 | 0.18778384 | 4.44E-05 | 0.110196 | 0.01721  |
| 0.17234  | 0.734485 | 2.57E-80 | 0.592205 | 1.54E-45 | 0.08636178 | 0.06221  | -0.0626  | 0.17686  |
| 0.00856  | 0.739102 | 8.01E-82 | 0.512774 | 1.12E-32 | 0.36074816 | 8.45E-16 | 0.497344 | 1.50E-30 |
| 1.29E-05 | 0.817115 | #####    | 0.474698 | 1.28E-27 | -0.0299183 | 0.51896  | -0.01502 | 0.74615  |
| 0.27142  | 0.777111 | 1.47E-95 | 0.482956 | 1.16E-28 | 0.21592796 | 2.48E-06 | 0.268081 | 3.96E-09 |
| 0.00109  | 0.509616 | 3.12E-32 | 0.504922 | 1.40E-31 | 0.13343355 | 0.00387  | 0.069001 | 0.13651  |
| 0.20043  | 0.641847 | 1.40E-55 | 0.469591 | 5.47E-27 | 0.48903062 | 1.90E-29 | 0.543402 | 3.12E-37 |
| 0.26665  | 0.631268 | 2.75E-53 | 0.319536 | 1.52E-12 | 0.06773766 | 0.14386  | 0.107206 | 0.02049  |
| 0.02966  | 0.76686  | 1.34E-91 | 0.435554 | 4.83E-23 | -0.0181876 | 0.69505  | -0.05435 | 0.24111  |
| 0.21529  | 0.64896  | 3.56E-57 | 0.557261 | 1.88E-39 | 0.23771085 | 2.02E-07 | 0.26797  | 4.02E-09 |
| 0.05747  | 0.7144   | 4.06E-74 | 0.483593 | 9.59E-29 | 0.00960204 | 0.83605  | -0.19    | 3.59E-05 |
| 0.26598  | 0.41924  | 2.65E-21 | 0.378279 | 2.46E-17 | 0.49793586 | 1.25E-30 | 0.414779 | 7.63E-21 |
| 9.60E-10 | 0.393871 | 8.83E-19 | 0.310406 | 6.88E-12 | 0.08876018 | 0.05527  | 0.149881 | 0.00116  |
| 0.03699  | 0.56083  | 4.84E-40 | 0.270423 | 2.86E-09 | 0.12923037 | 0.00516  | 0.029335 | 0.52714  |
| 0.8384   | 0.510388 | 2.43E-32 | 0.510824 | 2.11E-32 | 0.12785569 | 0.00566  | -0.02858 | 0.53778  |
| 0.51552  | 0.371794 | 9.34E-17 | 0.366541 | 2.69E-16 | -0.0120226 | 0.79554  | -0.05048 | 0.27634  |
| 0.04474  | 0.55339  | 8.01E-39 | 0.484153 | 8.13E-29 | -0.1479434 | 0.00135  | -0.11131 | 0.01611  |
| 5.13E-06 | 0.351989 | 4.56E-15 | 0.429748 | 2.06E-22 | 0.24354413 | 9.85E-08 | 0.200269 | 1.30E-05 |
| 0.25489  | 0.515109 | 5.24E-33 | 0.365434 | 3.35E-16 | 0.14349453 | 0.00188  | 0.132519 | 0.00412  |
| 5.06E-06 | 0.463504 | 3.00E-26 | 0.402618 | 1.26E-19 | -0.0717437 | 0.12157  | -0.10276 | 0.02637  |
| 0.13956  | 0.335017 | 1.04E-13 | 0.309821 | 7.57E-12 | -0.136287  | 0.00317  | -0.16192 | 0.00044  |
| 8.77E-05 | 0.577541 | 6.76E-43 | 0.323678 | 7.50E-13 | -0.117156  | 0.01129  | -0.07711 | 0.09604  |
| 0.46129  | 0.620108 | 5.81E-51 | 0.297468 | 5.37E-11 | 0.30966567 | 7.76E-12 | 0.391944 | 1.34E-18 |
| 0.53264  | 0.68565  | 4.01E-66 | 0.703325 | 6.34E-71 | 0.44417319 | 5.33E-24 | 0.482808 | 1.21E-28 |
| 0.05622  | 0.827597 | #####    | 0.497797 | 1.30E-30 | 0.1138667  | 0.01381  | 0.11261  | 0.0149   |
| 0.03236  | 0.680538 | 8.48E-65 | 0.615184 | 5.76E-50 | -0.0182801 | 0.69357  | -0.06816 | 0.14135  |
| 0.4447   | 0.505064 | 1.34E-31 | 0.498377 | 1.09E-30 | 0.16778901 | 0.00027  | 0.058177 | 0.20951  |
| 0.31143  | 0.753711 | 8.34E-87 | 0.312422 | 4.95E-12 | 0.12061496 | 0.00908  | 0.289466 | 1.82E-10 |
| 0.0223   | 0.549909 | 2.91E-38 | 0.605225 | 5.28E-48 | 0.26529069 | 5.81E-09 | 0.11576  | 0.0123   |

|          |          |          |          |          |            |          |          |          |
|----------|----------|----------|----------|----------|------------|----------|----------|----------|
| 0.02543  | 0.617541 | 1.93E-50 | 0.343296 | 2.31E-14 | 0.03369058 | 0.46765  | -0.08476 | 0.06724  |
| 0.0017   | 0.71473  | 3.24E-74 | 0.285019 | 3.53E-10 | 0.14741513 | 0.0014   | 0.382422 | 1.04E-17 |
| 0.03428  | 0.504796 | 1.46E-31 | 0.311628 | 5.64E-12 | 0.15478784 | 0.00079  | 0.166745 | 0.0003   |
| 0.04999  | 0.423997 | 8.44E-22 | 0.410281 | 2.18E-20 | 0.09734015 | 0.03547  | -0.0632  | 0.17271  |
| 0.71225  | 0.487421 | 3.07E-29 | 0.083004 | 0.07313  | 0.1151685  | 0.01276  | 0.24258  | 1.11E-07 |
| 0.77939  | 0.344568 | 1.83E-14 | 0.233265 | 3.43E-07 | 0.35671251 | 1.85E-15 | 0.300203 | 3.51E-11 |
| 0.2281   | 0.53615  | 4.12E-36 | 0.317551 | 2.12E-12 | 0.42929128 | 2.31E-22 | 0.637742 | 1.11E-54 |
| 0.58933  | 0.566511 | 5.40E-41 | 0.441159 | 1.16E-23 | 0.21238669 | 3.65E-06 | 0.183946 | 6.37E-05 |
| 0.08736  | 0.444592 | 4.78E-24 | 0.214545 | 2.89E-06 | 0.1414233  | 0.00219  | 0.145147 | 0.00166  |
| 0.0814   | -0.32927 | 2.85E-13 | -0.09557 | 0.03898  | -0.2012119 | 1.18E-05 | -0.22044 | 1.51E-06 |
| 0.01305  | 0.456502 | 2.03E-25 | 0.382337 | 1.05E-17 | 0.15741222 | 0.00064  | 0.130736 | 0.00466  |
| 1.36E-07 | 0.554496 | 5.30E-39 | 0.336086 | 8.55E-14 | 0.18599022 | 5.26E-05 | 0.254119 | 2.57E-08 |
| 0.21528  | 0.625973 | 3.58E-52 | 0.443913 | 5.70E-24 | 0.24106706 | 1.34E-07 | 0.306558 | 1.28E-11 |
| 0.00017  | -0.402   | 1.45E-19 | -0.22964 | 5.27E-07 | 0.14298073 | 0.00195  | 0.13137  | 0.00446  |
| 0.00697  | 0.399327 | 2.64E-19 | 0.311898 | 5.39E-12 | 0.07729711 | 0.09523  | 0.002966 | 0.94903  |
| 0.00071  | 0.877819 | #####    | 0.402116 | 1.41E-19 | 0.05636259 | 0.2241   | 0.16805  | 0.00026  |
| 0.00539  | 0.82563  | #####    | 0.461955 | 4.60E-26 | 0.19566973 | 2.06E-05 | 0.379465 | 1.92E-17 |
| 0.00065  | 0.716574 | 9.18E-75 | 0.345307 | 1.60E-14 | 0.12066165 | 0.00905  | 0.158084 | 0.00061  |
| 0.00881  | 0.647739 | 6.73E-57 | 0.642118 | 1.22E-55 | 0.23242981 | 3.79E-07 | 0.067373 | 0.14603  |
| 0.07881  | 0.290405 | 1.58E-10 | 0.271071 | 2.62E-09 | 0.24366592 | 9.71E-08 | 0.029549 | 0.52413  |
| 0.01258  | 0.870632 | #####    | 0.41039  | 2.13E-20 | 0.0109042  | 0.8142   | 0.018285 | 0.69349  |
| 0.0028   | 0.870191 | #####    | 0.386153 | 4.69E-18 | 0.01130936 | 0.80742  | 0.036867 | 0.4267   |
| 0.16936  | 0.759095 | 9.90E-89 | 0.442962 | 7.29E-24 | 0.27792093 | 9.92E-10 | 0.413767 | 9.68E-21 |
| 0.05747  | 0.667615 | 1.45E-61 | 0.487264 | 3.22E-29 | 0.18204566 | 7.60E-05 | 0.249528 | 4.64E-08 |
| 0.40425  | 0.406981 | 4.67E-20 | 0.101523 | 0.02825  | 0.02829643 | 0.54188  | 0.171095 | 0.0002   |
| 0.97237  | -0.29179 | 1.28E-10 | -0.08908 | 0.05438  | 0.01257717 | 0.78633  | -0.04964 | 0.28434  |
| 0.02812  | 0.386047 | 4.80E-18 | 0.080243 | 0.08323  | 0.04297744 | 0.35409  | 0.180178 | 9.03E-05 |
| 6.46E-07 | 0.557321 | 1.83E-39 | 0.4761   | 8.55E-28 | 0.25086731 | 3.91E-08 | 0.155895 | 0.00072  |
| 0.00634  | 0.514094 | 7.30E-33 | 0.287766 | 2.35E-10 | -0.1718674 | 0.00019  | -0.06972 | 0.13248  |
| 0.03349  | -0.41347 | 1.04E-20 | -0.23833 | 1.87E-07 | -0.0235016 | 0.61245  | -0.13266 | 0.00408  |
| 0.00119  | 0.521806 | 5.68E-34 | 0.293426 | 1.00E-10 | 0.04314812 | 0.35218  | -0.07098 | 0.12561  |
| 0.0066   | 0.393651 | 9.26E-19 | 0.474305 | 1.43E-27 | 0.43018715 | 1.85E-22 | 0.366291 | 2.83E-16 |
| 0.00037  | 0.326401 | 4.70E-13 | 0.264447 | 6.51E-09 | 0.17580098 | 0.00013  | 0.092797 | 0.04504  |
| 3.01E-14 | 0.496741 | 1.81E-30 | 0.349778 | 6.93E-15 | 0.23455297 | 2.95E-07 | 0.125752 | 0.00651  |
| 6.88E-07 | 0.433272 | 8.58E-23 | 0.232683 | 3.68E-07 | 0.08612553 | 0.06293  | 0.050866 | 0.27264  |
| 0.00065  | 0.301669 | 2.79E-11 | 0.119917 | 0.00949  | 0.42870142 | 2.67E-22 | 0.302169 | 2.58E-11 |
| 0.0679   | 0.58051  | 2.02E-43 | 0.405131 | 7.13E-20 | 0.39255942 | 1.18E-18 | 0.377481 | 2.91E-17 |
| 0.00677  | 0.375304 | 4.56E-17 | 0.091841 | 0.0473   | -0.0344475 | 0.4577   | -0.0213  | 0.64608  |
| 0.33355  | 0.652562 | 5.34E-58 | 0.529335 | 4.41E-35 | 0.44201623 | 9.31E-24 | 0.566965 | 4.52E-41 |
| 0.09179  | 0.706492 | 8.01E-72 | 0.34846  | 8.87E-15 | 0.36452891 | 4.01E-16 | 0.545785 | 1.32E-37 |
| 0.00053  | 0.499139 | 8.60E-31 | 0.451573 | 7.63E-25 | 0.30279996 | 2.33E-11 | 0.173998 | 0.00016  |
| 0.33791  | 0.605578 | 4.51E-48 | 0.534716 | 6.82E-36 | 0.57648067 | 1.04E-42 | 0.446007 | 3.31E-24 |
| 0.05372  | 0.610015 | 6.13E-49 | 0.409191 | 2.81E-20 | -0.1674005 | 0.00028  | -0.14783 | 0.00136  |
| 0.08091  | 0.566099 | 6.34E-41 | 0.39899  | 2.85E-19 | -0.1946185 | 2.29E-05 | -0.37294 | 7.40E-17 |
| 0.0007   | 0.608003 | 1.52E-48 | 0.566569 | 5.28E-41 | -0.1367431 | 0.00307  | -0.30253 | 2.43E-11 |



|          |          |          |          |          |            |          |          |          |
|----------|----------|----------|----------|----------|------------|----------|----------|----------|
| 0.0012   | 0.707561 | 3.96E-72 | 0.527296 | 8.87E-35 | -0.2047791 | 8.16E-06 | -0.21163 | 3.96E-06 |
| 0.0322   | 0.515633 | 4.41E-33 | 0.43431  | 6.61E-23 | -0.2056623 | 7.45E-06 | -0.31101 | 6.23E-12 |
| 0.00902  | -0.45538 | 2.76E-25 | -0.22593 | 8.09E-07 | -0.0470401 | 0.3104   | -0.09075 | 0.05001  |
| 0.08159  | 0.406484 | 5.23E-20 | 0.304299 | 1.84E-11 | 0.11759797 | 0.01098  | -0.02385 | 0.60712  |
| 0.00518  | 0.882779 | #####    | 0.451581 | 7.61E-25 | 0.05357863 | 0.24786  | 0.050834 | 0.27295  |
| 0.00078  | 0.715006 | 2.68E-74 | 0.262943 | 7.98E-09 | -0.1851669 | 5.68E-05 | -0.26186 | 9.24E-09 |
| 0.10635  | 0.909929 | #####    | 0.521275 | 6.79E-34 | 0.04129956 | 0.37321  | 0.072232 | 0.11905  |
| 0.00014  | 0.793334 | #####    | 0.446088 | 3.24E-24 | 0.14854915 | 0.00128  | 0.261728 | 9.40E-09 |
| 0.04847  | -0.47739 | 5.88E-28 | 0.073259 | 0.11387  | 0.33442692 | 1.15E-13 | 0.16567  | 0.00032  |
| 0.09904  | 0.47351  | 1.80E-27 | 0.389421 | 2.32E-18 | 0.23317646 | 3.47E-07 | 0.295243 | 7.58E-11 |
| 0.46679  | 0.609409 | 8.07E-49 | 0.503537 | 2.17E-31 | 0.15620308 | 0.00071  | -0.09916 | 0.03217  |
| 0.00043  | 0.774006 | 2.44E-94 | 0.334986 | 1.04E-13 | 0.28395359 | 4.13E-10 | 0.388827 | 2.64E-18 |
| 0.00011  | 0.625438 | 4.63E-52 | 0.643384 | 6.37E-56 | 0.25505958 | 2.27E-08 | 0.137674 | 0.00287  |
| 0.59228  | 0.730843 | 3.75E-79 | 0.385943 | 4.90E-18 | -0.0520818 | 0.26133  | 0.039788 | 0.39096  |
| 2.23E-07 | 0.440351 | 1.43E-23 | 0.494926 | 3.16E-30 | 0.28086453 | 6.49E-10 | 0.20713  | 6.39E-06 |
| 7.10E-05 | 0.598933 | 8.46E-47 | 0.376098 | 3.87E-17 | 0.04048325 | 0.38274  | -0.10903 | 0.01843  |
| 0.82817  | 0.818496 | #####    | 0.568822 | 2.19E-41 | 0.27879988 | 8.75E-10 | 0.419224 | 2.66E-21 |
| 0.00623  | 0.432335 | 1.08E-22 | 0.139227 | 0.00257  | -0.1538205 | 0.00085  | -0.20372 | 9.11E-06 |
| 0.00231  | 0.354607 | 2.77E-15 | 0.242249 | 1.16E-07 | 0.02316668 | 0.61752  | -0.1006  | 0.02973  |
| 5.57E-05 | 0.373758 | 6.26E-17 | 0.183732 | 6.50E-05 | 0.03348302 | 0.47039  | 0.08586  | 0.06375  |
| 0.00385  | 0.815742 | #####    | 0.452233 | 6.40E-25 | -0.0546831 | 0.23823  | -0.16502 | 0.00034  |
| 0.0661   | 0.646732 | 1.13E-56 | 0.370022 | 1.34E-16 | -0.0481708 | 0.2989   | 0.039265 | 0.39724  |
| 0.04956  | 0.628157 | 1.25E-52 | 0.319437 | 1.54E-12 | 0.15569155 | 0.00074  | 0.292362 | 1.18E-10 |
| 0.08694  | 0.679497 | 1.57E-64 | 0.547592 | 6.81E-38 | 0.23575664 | 2.55E-07 | 0.369017 | 1.64E-16 |
| 0.42233  | 0.348042 | 9.59E-15 | 0.194344 | 2.35E-05 | -0.1321153 | 0.00424  | -0.20682 | 6.60E-06 |
| 0.00117  | 0.693287 | 3.73E-68 | 0.367529 | 2.21E-16 | 0.13693852 | 0.00302  | 0.271739 | 2.38E-09 |
| 3.47E-05 | 0.67247  | 9.25E-63 | 0.482025 | 1.52E-28 | 0.2399621  | 1.53E-07 | 0.174554 | 0.00015  |
| 3.16E-07 | 0.409622 | 2.54E-20 | 0.370343 | 1.25E-16 | 0.39345555 | 9.67E-19 | 0.228989 | 5.68E-07 |
| 0.02239  | 0.614485 | 7.95E-50 | 0.433745 | 7.62E-23 | -0.0477765 | 0.30288  | -0.15833 | 0.00059  |
| 0.63754  | 0.663824 | 1.20E-60 | 0.466598 | 1.27E-26 | 0.2955407  | 7.24E-11 | 0.358218 | 1.38E-15 |
| 0.74512  | 0.499955 | 6.67E-31 | 0.310316 | 6.98E-12 | 0.23076031 | 4.62E-07 | 0.274933 | 1.52E-09 |
| 0.85561  | 0.388223 | 3.01E-18 | 0.302543 | 2.43E-11 | 0.22812777 | 6.28E-07 | 0.216903 | 2.23E-06 |
| 0.00118  | 0.384225 | 7.07E-18 | 0.355044 | 2.55E-15 | 0.0374678  | 0.41921  | -0.11601 | 0.01212  |
| 0.46305  | 0.3696   | 1.46E-16 | 0.197273 | 1.76E-05 | 0.05508816 | 0.23476  | -0.06207 | 0.18057  |
| 0.05869  | 0.417505 | 4.01E-21 | 0.335942 | 8.77E-14 | 0.19145653 | 3.11E-05 | 0.068028 | 0.14214  |
| 0.00021  | 0.493198 | 5.36E-30 | 0.345681 | 1.49E-14 | 0.32872447 | 3.14E-13 | 0.376711 | 3.41E-17 |
| 0.00769  | 0.605474 | 4.73E-48 | 0.496848 | 1.75E-30 | 0.29128951 | 1.38E-10 | 0.398812 | 2.96E-19 |
| 0.00012  | 0.565548 | 7.85E-41 | 0.456388 | 2.10E-25 | 0.01226784 | 0.79146  | -0.04658 | 0.31514  |
| 0.81707  | 0.340009 | 4.21E-14 | 0.425705 | 5.57E-22 | 0.31029739 | 7.00E-12 | 0.21275  | 3.51E-06 |
| 0.00741  | 0.849003 | #####    | 0.3976   | 3.88E-19 | 0.18668563 | 4.92E-05 | 0.181076 | 8.31E-05 |
| 0.61807  | 0.414054 | 9.05E-21 | 0.311131 | 5.94E-12 | 0.01485351 | 0.74886  | -0.12295 | 0.00782  |
| 0.20584  | 0.897877 | #####    | 0.638135 | 9.12E-55 | 0.35467687 | 2.73E-15 | 0.317481 | 2.14E-12 |
| 0.22363  | 0.446429 | 2.96E-24 | 0.188904 | 3.98E-05 | -0.2569827 | 1.77E-08 | -0.23745 | 2.08E-07 |
| 6.19E-05 | 0.633392 | 9.67E-54 | 0.536626 | 3.48E-36 | -0.1057873 | 0.02223  | -0.02903 | 0.53149  |
| 0.7245   | 0.587067 | 1.34E-44 | 0.406613 | 5.08E-20 | 0.0159647  | 0.73077  | 0.017735 | 0.70227  |

|          |          |          |          |          |            |          |          |          |
|----------|----------|----------|----------|----------|------------|----------|----------|----------|
| 0.00076  | 0.705346 | 1.70E-71 | 0.383591 | 8.09E-18 | -0.0442699 | 0.33979  | -0.21354 | 3.22E-06 |
| 0.80392  | 0.371255 | 1.04E-16 | 0.459805 | 8.29E-26 | 0.45577692 | 2.47E-25 | 0.244227 | 9.05E-08 |
| 0.45194  | 0.459312 | 9.48E-26 | 0.48249  | 1.33E-28 | 0.17103927 | 0.0002   | 0.100608 | 0.02972  |
| 0.48857  | -0.39737 | 4.08E-19 | -0.17114 | 0.0002   | 0.06012084 | 0.19466  | 0.024909 | 0.59132  |
| 0.03082  | 0.29717  | 5.63E-11 | 0.155725 | 0.00073  | 0.07058102 | 0.12774  | -0.06883 | 0.13749  |
| 0.0133   | 0.350657 | 5.87E-15 | 0.014314 | 0.75769  | -0.2850416 | 3.52E-10 | -0.30617 | 1.36E-11 |
| 0.06235  | 0.673076 | 6.53E-63 | 0.376779 | 3.36E-17 | 0.44183083 | 9.76E-24 | 0.596429 | 2.51E-46 |
| 0.56448  | 0.464618 | 2.20E-26 | 0.288301 | 2.17E-10 | 0.31070276 | 6.56E-12 | 0.116063 | 0.01208  |
| 1.50E-07 | 0.614025 | 9.83E-50 | 0.41231  | 1.36E-20 | 0.21779042 | 2.02E-06 | 0.283019 | 4.74E-10 |
| 0.00041  | 0.410341 | 2.15E-20 | 0.374082 | 5.86E-17 | 0.09259575 | 0.04551  | 0.012622 | 0.78558  |
| 1.61E-05 | 0.426712 | 4.35E-22 | 0.255136 | 2.25E-08 | -0.0366602 | 0.42931  | 0.008511 | 0.85446  |
| 0.27253  | 0.641279 | 1.86E-55 | 0.524941 | 1.97E-34 | 0.26652379 | 4.91E-09 | 0.254342 | 2.50E-08 |
| 0.01008  | 0.699857 | 5.91E-70 | 0.382283 | 1.07E-17 | 0.27609099 | 1.29E-09 | 0.440176 | 1.49E-23 |
| 0.11168  | 0.41642  | 5.18E-21 | 0.215364 | 2.64E-06 | 0.07929685 | 0.08695  | 0.117961 | 0.01073  |
| 0.45155  | -0.56796 | 3.07E-41 | -0.3943  | 8.03E-19 | -0.202627  | 1.02E-05 | -0.27776 | 1.02E-09 |
| 0.77098  | 0.285558 | 3.26E-10 | 0.199133 | 1.46E-05 | 0.40461216 | 8.02E-20 | 0.323909 | 7.21E-13 |
| 0.05522  | -0.49486 | 3.22E-30 | -0.33199 | 1.77E-13 | 0.23610055 | 2.45E-07 | 0.163725 | 0.00038  |
| 0.49035  | 0.52303  | 3.77E-34 | 0.566112 | 6.31E-41 | 0.22215457 | 1.24E-06 | 0.135741 | 0.00329  |
| 0.01202  | 0.571217 | 8.50E-42 | 0.392409 | 1.22E-18 | -0.1168348 | 0.01151  | -0.34223 | 2.81E-14 |
| 0.29593  | 0.577162 | 7.88E-43 | 0.587347 | 1.19E-44 | -0.0113873 | 0.80612  | -0.04963 | 0.28452  |
| 0.03066  | 0.758439 | 1.71E-88 | 0.523115 | 3.66E-34 | 0.22459299 | 9.43E-07 | 0.04306  | 0.35317  |
| 0.26465  | 0.886507 | #####    | 0.454039 | 3.95E-25 | 0.20430118 | 8.58E-06 | 0.279754 | 7.62E-10 |
| 0.2466   | 0.443524 | 6.30E-24 | 0.338267 | 5.78E-14 | 0.33924692 | 4.84E-14 | 0.276847 | 1.16E-09 |
| 0.03256  | 0.731    | 3.35E-79 | 0.418091 | 3.49E-21 | 0.42363061 | 9.22E-22 | 0.574635 | 2.18E-42 |
| 0.01328  | -0.36429 | 4.21E-16 | -0.29425 | 8.81E-11 | 0.11735972 | 0.01114  | 0.038896 | 0.40169  |
| 0.0306   | 0.482548 | 1.31E-28 | 0.427374 | 3.70E-22 | 0.34328171 | 2.32E-14 | 0.377934 | 2.65E-17 |
| 0.05882  | 0.460566 | 6.73E-26 | 0.20887  | 5.32E-06 | 0.05719586 | 0.21731  | 0.171475 | 0.0002   |
| 0.3202   | -0.30725 | 1.15E-11 | 0.242754 | 1.09E-07 | 0.30238594 | 2.49E-11 | 0.211605 | 3.97E-06 |
| 0.00217  | 0.921442 | #####    | 0.495345 | 2.78E-30 | 0.06860614 | 0.13878  | 0.064495 | 0.16409  |
| 0.02682  | 0.679334 | 1.72E-64 | 0.43809  | 2.54E-23 | 0.27337564 | 1.89E-09 | 0.490454 | 1.23E-29 |
| 0.00013  | 0.740438 | 2.90E-82 | 0.430347 | 1.78E-22 | -0.0224167 | 0.62896  | -0.14549 | 0.00162  |
| 0.09511  | 0.492157 | 7.36E-30 | 0.123396 | 0.00759  | 0.06671458 | 0.15002  | 0.225114 | 8.88E-07 |
| 0.00458  | 0.833257 | #####    | 0.509203 | 3.56E-32 | 0.18231672 | 7.41E-05 | 0.187855 | 4.41E-05 |
| 0.00314  | 0.813998 | #####    | 0.29387  | 9.35E-11 | -0.0977224 | 0.03476  | -0.17373 | 0.00016  |
| 0.85895  | 0.427258 | 3.81E-22 | 0.551411 | 1.67E-38 | 0.43189874 | 1.21E-22 | 0.254889 | 2.32E-08 |
| 0.51927  | 0.357263 | 1.66E-15 | 0.097265 | 0.03562  | 0.22356872 | 1.06E-06 | 0.21586  | 2.50E-06 |
| 0.04112  | 0.697983 | 1.95E-69 | 0.405565 | 6.46E-20 | 0.50427012 | 1.72E-31 | 0.584602 | 3.75E-44 |
| 0.33766  | 0.572076 | 6.05E-42 | 0.360568 | 8.75E-16 | 0.49027032 | 1.30E-29 | 0.461345 | 5.44E-26 |
| 4.98E-05 | 0.896533 | #####    | 0.402769 | 1.22E-19 | 0.10714089 | 0.02057  | 0.226124 | 7.91E-07 |
| 0.02327  | 0.465375 | 1.78E-26 | 0.33122  | 2.03E-13 | 0.31040105 | 6.89E-12 | 0.362215 | 6.34E-16 |
| 0.55177  | 0.490462 | 1.23E-29 | 0.2543   | 2.51E-08 | 0.3366563  | 7.72E-14 | 0.364665 | 3.91E-16 |
| 0.00133  | 0.421733 | 1.46E-21 | 0.315821 | 2.82E-12 | 0.48691339 | 3.58E-29 | 0.365706 | 3.18E-16 |
| 0.00902  | 0.742117 | 8.00E-83 | 0.755745 | 1.58E-87 | 0.38150079 | 1.26E-17 | 0.263015 | 7.90E-09 |
| 0.03934  | 0.658809 | 1.87E-59 | 0.524712 | 2.13E-34 | 0.17590874 | 0.00013  | 0.027146 | 0.55844  |
| 2.17E-15 | 0.336337 | 8.18E-14 | 0.314087 | 3.76E-12 | 0.27124554 | 2.55E-09 | 0.242304 | 1.15E-07 |

|          |          |          |          |          |            |          |          |          |
|----------|----------|----------|----------|----------|------------|----------|----------|----------|
| 0.0067   | 0.856576 | #####    | 0.646372 | 1.37E-56 | 0.1817914  | 7.78E-05 | 0.141351 | 0.0022   |
| 0.56917  | 0.512503 | 1.23E-32 | 0.550723 | 2.16E-38 | 0.51137987 | 1.77E-32 | 0.268605 | 3.68E-09 |
| 0.00243  | 0.341347 | 3.30E-14 | 0.295568 | 7.21E-11 | 0.34407073 | 2.00E-14 | 0.179992 | 9.18E-05 |
| 0.00228  | 0.824562 | #####    | 0.302453 | 2.46E-11 | -0.1686786 | 0.00025  | -0.19674 | 1.85E-05 |
| 0.85699  | 0.420339 | 2.04E-21 | 0.468216 | 8.06E-27 | 0.53579268 | 4.67E-36 | 0.338071 | 5.99E-14 |
| 0.07189  | 0.67157  | 1.55E-62 | 0.475178 | 1.11E-27 | -0.1858916 | 5.31E-05 | -0.32365 | 7.54E-13 |
| 0.70127  | 0.836269 | #####    | 0.485862 | 4.89E-29 | 0.03629199 | 0.43396  | 0.024391 | 0.59906  |
| 0.00058  | 0.369706 | 1.43E-16 | 0.529408 | 4.30E-35 | 0.12353624 | 0.00752  | -0.07037 | 0.12888  |
| 0.13665  | 0.429304 | 2.30E-22 | 0.336169 | 8.42E-14 | 0.10568071 | 0.02237  | 0.103341 | 0.02553  |
| 3.78E-16 | 0.429346 | 2.28E-22 | 0.299721 | 3.78E-11 | 0.14790153 | 0.00135  | 0.0942   | 0.04188  |
| 0.5561   | 0.423711 | 9.04E-22 | 0.254662 | 2.39E-08 | -0.1572617 | 0.00065  | -0.219   | 1.77E-06 |
| 0.62616  | 0.672058 | 1.17E-62 | 0.518134 | 1.93E-33 | 0.3982771  | 3.34E-19 | 0.291718 | 1.30E-10 |
| 0.27018  | 0.385645 | 5.23E-18 | 0.233059 | 3.52E-07 | 0.07926484 | 0.08708  | 0.147082 | 0.00144  |
| 3.09E-05 | 0.718581 | 2.30E-75 | 0.709098 | 1.43E-72 | 0.36157933 | 7.18E-16 | 0.346262 | 1.34E-14 |
| 0.15116  | 0.427404 | 3.67E-22 | 0.263065 | 7.85E-09 | 0.09497596 | 0.04021  | 0.022498 | 0.62771  |
| 0.12645  | 0.740505 | 2.75E-82 | 0.604529 | 7.20E-48 | 0.28463411 | 3.74E-10 | 0.267952 | 4.03E-09 |
| 0.57352  | 0.761921 | 9.23E-90 | 0.539585 | 1.22E-36 | 0.3504447  | 6.11E-15 | 0.348846 | 8.25E-15 |
| 0.94915  | 0.598236 | 1.15E-46 | 0.52049  | 8.82E-34 | 0.14013115 | 0.0024   | 0.170562 | 0.00021  |
| 0.0414   | 0.452956 | 5.28E-25 | 0.341126 | 3.44E-14 | 0.08448379 | 0.06814  | 0.055027 | 0.23528  |
| 0.00035  | 0.762313 | 6.62E-90 | 0.511364 | 1.77E-32 | 0.05369216 | 0.24685  | 0.189596 | 3.73E-05 |
| 0.88421  | -0.29397 | 9.21E-11 | -0.19495 | 2.21E-05 | -0.0816319 | 0.07802  | -0.06884 | 0.13745  |
| 1.60E-08 | -0.32342 | 7.85E-13 | 0.029593 | 0.52351  | 0.33462665 | 1.11E-13 | 0.31295  | 4.54E-12 |
| 0.28281  | 0.852447 | #####    | 0.549942 | 2.88E-38 | 0.33721065 | 6.99E-14 | 0.441121 | 1.17E-23 |
| 0.00139  | 0.593927 | 7.36E-46 | 0.319729 | 1.47E-12 | -0.0824018 | 0.07524  | -0.04088 | 0.37807  |
| 0.06448  | 0.701932 | 1.56E-70 | 0.405943 | 5.92E-20 | 0.17881335 | 0.0001   | 0.013606 | 0.76933  |
| 0.0286   | 0.457933 | 1.38E-25 | 0.393333 | 9.93E-19 | 0.01581981 | 0.73312  | 0.111958 | 0.0155   |
| 0.40026  | 0.730544 | 4.67E-79 | 0.512146 | 1.38E-32 | 0.27205849 | 2.28E-09 | 0.30177  | 2.74E-11 |
| 5.02E-27 | -0.45209 | 6.65E-25 | -0.05151 | 0.26664  | 0.22698741 | 7.16E-07 | 0.092869 | 0.04487  |
| 0.47812  | 0.706364 | 8.72E-72 | 0.375261 | 4.60E-17 | 0.46653701 | 1.29E-26 | 0.463369 | 3.11E-26 |
| 0.75631  | 0.48305  | 1.13E-28 | 0.463122 | 3.33E-26 | 0.27496006 | 1.51E-09 | 0.055661 | 0.22992  |
| 0.11473  | 0.498452 | 1.06E-30 | 0.443543 | 6.28E-24 | 0.41549301 | 6.45E-21 | 0.306822 | 1.23E-11 |
| 0.26339  | 0.767421 | 8.25E-92 | 0.601181 | 3.16E-47 | 0.36753277 | 2.21E-16 | 0.379946 | 1.74E-17 |
| 0.03226  | 0.805154 | #####    | 0.325536 | 5.45E-13 | 0.19162855 | 3.06E-05 | 0.326957 | 4.27E-13 |
| 0.00215  | 0.602452 | 1.81E-47 | 0.302688 | 2.37E-11 | 0.08590301 | 0.06362  | -0.09446 | 0.04131  |
| 0.08891  | 0.599698 | 6.06E-47 | 0.365424 | 3.36E-16 | 0.18445392 | 6.08E-05 | 0.180495 | 8.77E-05 |
| 0.07931  | 0.410737 | 1.96E-20 | 0.228775 | 5.82E-07 | 0.1608132  | 0.00049  | 0.192342 | 2.86E-05 |
| 4.81E-05 | 0.6708   | 2.40E-62 | 0.588372 | 7.77E-45 | 0.16137016 | 0.00046  | 0.108806 | 0.01867  |
| 0.01766  | 0.558657 | 1.11E-39 | 0.482165 | 1.46E-28 | 0.14048393 | 0.00234  | 0.188516 | 4.14E-05 |
| 0.09203  | 0.577844 | 5.98E-43 | 0.59355  | 8.65E-46 | 0.23900491 | 1.72E-07 | 0.182336 | 7.40E-05 |
| 7.31E-05 | 0.43297  | 9.25E-23 | 0.158224 | 0.0006   | 0.02070675 | 0.65536  | -0.03553 | 0.44363  |
| 0.12449  | 0.570962 | 9.40E-42 | 0.598002 | 1.27E-46 | 0.19349923 | 2.55E-05 | 0.077072 | 0.0962   |
| 0.72502  | 0.608173 | 1.41E-48 | 0.575744 | 1.40E-42 | 0.35675503 | 1.83E-15 | 0.369422 | 1.51E-16 |
| 3.26E-05 | 0.484596 | 7.13E-29 | 0.319258 | 1.59E-12 | 0.21250252 | 3.61E-06 | 0.180416 | 8.83E-05 |
| 1.50E-06 | 0.517256 | 2.58E-33 | 0.198666 | 1.53E-05 | 0.14654036 | 0.0015   | 0.352143 | 4.43E-15 |
| 0.57166  | -0.47456 | 1.33E-27 | -0.2734  | 1.89E-09 | 0.08762511 | 0.05847  | -0.00538 | 0.90773  |

|          |          |          |          |          |            |          |          |          |
|----------|----------|----------|----------|----------|------------|----------|----------|----------|
| 0.90234  | 0.454142 | 3.84E-25 | 0.377557 | 2.86E-17 | 0.00203906 | 0.96495  | -0.0859  | 0.06362  |
| 0.10169  | 0.426546 | 4.53E-22 | 0.437348 | 3.07E-23 | 0.04037898 | 0.38397  | -0.04262 | 0.35812  |
| 0.85591  | -0.39321 | 1.02E-18 | -0.0819  | 0.07705  | 0.165036   | 0.00034  | -0.00664 | 0.88617  |
| 0.52715  | 0.550344 | 2.48E-38 | 0.268689 | 3.64E-09 | 0.28034907 | 6.99E-10 | 0.45307  | 5.12E-25 |
| 0.08884  | 0.542182 | 4.83E-37 | -0.01471 | 0.75123  | 0.060073   | 0.19502  | 0.281429 | 5.98E-10 |
| 0.61298  | 0.74501  | 8.51E-84 | 0.460925 | 6.10E-26 | 0.2612791  | 9.98E-09 | 0.371356 | 1.02E-16 |
| 0.17167  | 0.437911 | 2.66E-23 | 0.489493 | 1.65E-29 | 0.23787104 | 1.98E-07 | 0.072859 | 0.11586  |
| 0.0033   | 0.419264 | 2.64E-21 | 0.088566 | 0.0558   | 0.02986484 | 0.51971  | 0.125758 | 0.0065   |
| 0.00297  | 0.52761  | 7.96E-35 | 0.247586 | 5.94E-08 | 0.06699594 | 0.14831  | 0.108185 | 0.01936  |
| 0.12778  | 0.566246 | 5.98E-41 | 0.341895 | 2.99E-14 | 0.36107045 | 7.93E-16 | 0.410657 | 2.00E-20 |
| 0.44058  | 0.305822 | 1.44E-11 | 0.361092 | 7.90E-16 | 0.22690889 | 7.23E-07 | 0.161851 | 0.00045  |
| 0.00242  | 0.74488  | 9.42E-84 | 0.350737 | 5.78E-15 | 0.11493048 | 0.01295  | 0.259215 | 1.31E-08 |
| 0.10282  | 0.365068 | 3.61E-16 | 0.021562 | 0.6421   | -0.0330774 | 0.47579  | 0.060329 | 0.19312  |
| 6.03E-07 | -0.35701 | 1.75E-15 | -0.44833 | 1.80E-24 | 0.04078554 | 0.37919  | 0.033421 | 0.47122  |
| 0.33695  | 0.575281 | 1.68E-42 | 0.629243 | 7.38E-53 | 0.23686872 | 2.23E-07 | 0.219982 | 1.59E-06 |
| 0.20713  | 0.477609 | 5.53E-28 | 0.162792 | 0.00041  | -0.1269911 | 0.00599  | -0.0694  | 0.13428  |
| 0.6445   | 0.740668 | 2.43E-82 | 0.361959 | 6.67E-16 | 0.12176501 | 0.00844  | 0.285604 | 3.24E-10 |
| 0.5907   | 0.873408 | #####    | 0.497522 | 1.42E-30 | 0.09469662 | 0.0408   | 0.064781 | 0.16222  |
| 0.00425  | 0.37645  | 3.60E-17 | 0.054568 | 0.23922  | -0.0815046 | 0.07849  | -0.00524 | 0.91002  |
| 0.10095  | 0.196956 | 1.81E-05 | -0.10644 | 0.02141  | 0.00752265 | 0.8712   | 0.090163 | 0.05151  |
| 0.08412  | 0.294441 | 8.57E-11 | 0.074804 | 0.10643  | 0.22108421 | 1.40E-06 | 0.15074  | 0.00109  |
| 0.78293  | -0.05727 | 0.2167   | 0.115633 | 0.0124   | 0.23240987 | 3.80E-07 | 0.019002 | 0.68212  |
| 0.02522  | 0.251238 | 3.73E-08 | -0.1763  | 0.00013  | -0.1393729 | 0.00254  | 0.017707 | 0.70271  |
| 0.20585  | -0.13921 | 0.00257  | -0.39044 | 1.87E-18 | -0.0638159 | 0.16858  | -0.1002  | 0.03039  |
| 0.03399  | 0.068002 | 0.1423   | -0.09192 | 0.04711  | 0.03454554 | 0.45642  | 0.076031 | 0.10079  |
| 0.03286  | -0.02734 | 0.5556   | -0.43978 | 1.65E-23 | -0.2229483 | 1.14E-06 | -0.19674 | 1.85E-05 |
| 0.0326   | -0.02483 | 0.59247  | -0.28756 | 2.42E-10 | 0.03262745 | 0.48182  | 0.315459 | 3.00E-12 |
| 0.00438  | 0.01255  | 0.78677  | -0.35324 | 3.60E-15 | -0.1222515 | 0.00818  | -0.03226 | 0.48681  |
| 0.00541  | -0.10778 | 0.01982  | -0.30725 | 1.15E-11 | -0.0673604 | 0.14611  | 0.145029 | 0.00168  |
| 0.12616  | -0.07766 | 0.09367  | -0.35962 | 1.05E-15 | -0.0678806 | 0.14301  | 0.0501   | 0.27994  |
| 0.03284  | 0.145672 | 0.0016   | -0.12866 | 0.00536  | 0.13201588 | 0.00427  | 0.421101 | 1.70E-21 |
| 0.6099   | 0.101278 | 0.02864  | -0.23232 | 3.84E-07 | 0.02926114 | 0.52818  | 0.202999 | 9.81E-06 |
| 0.55213  | 0.029059 | 0.53103  | -0.11367 | 0.01398  | 0.00693931 | 0.88111  | 0.151598 | 0.00102  |
| 0.01208  | 0.247797 | 5.78E-08 | 0.654704 | 1.71E-58 | 0.25683573 | 1.80E-08 | -0.02081 | 0.65374  |
| 0.52829  | -0.01928 | 0.67771  | -0.19575 | 2.04E-05 | 0.11758093 | 0.01099  | 0.338722 | 5.32E-14 |
| 0.61678  | -0.18355 | 6.61E-05 | -0.3996  | 2.48E-19 | -0.1633556 | 0.00039  | -0.2387  | 1.79E-07 |
| 0.75175  | 0.192478 | 2.82E-05 | 0.436319 | 3.98E-23 | 0.44403888 | 5.52E-24 | 0.185791 | 5.36E-05 |
| 0.40072  | -0.07454 | 0.1077   | 0.37126  | 1.04E-16 | 0.34380974 | 2.10E-14 | 0.119981 | 0.00945  |
| 0.4441   | 0.003211 | 0.94483  | -0.28401 | 4.10E-10 | -0.0205741 | 0.65743  | 0.25422  | 2.54E-08 |
| 0.73126  | 0.16887  | 0.00025  | -0.12041 | 0.0092   | 0.17414875 | 0.00016  | 0.494136 | 4.03E-30 |
| 0.03788  | 0.28239  | 5.20E-10 | 0.108555 | 0.01895  | 0.04278329 | 0.35627  | 0.32099  | 1.19E-12 |
| 0.147    | -0.1245  | 0.00707  | -0.16764 | 0.00027  | 0.1457381  | 0.00159  | 0.427469 | 3.61E-22 |
| 0.21896  | 0.30071  | 3.24E-11 | -0.01076 | 0.81667  | -0.0589526 | 0.20349  | 0.13833  | 0.00274  |
| 0.20345  | 0.108922 | 0.01855  | -0.06343 | 0.1712   | 0.19301574 | 2.68E-05 | 0.413476 | 1.04E-20 |
| 2.49E-05 | 0.223628 | 1.05E-06 | -0.04686 | 0.31222  | -0.0079774 | 0.86349  | 0.263204 | 7.71E-09 |

|          |          |          |          |          |            |          |          |          |
|----------|----------|----------|----------|----------|------------|----------|----------|----------|
| 0.97132  | -0.00708 | 0.87865  | -0.04412 | 0.34137  | 0.25191309 | 3.42E-08 | 0.23258  | 3.73E-07 |
| 0.00663  | 0.06539  | 0.1583   | -0.16734 | 0.00028  | -0.1684092 | 0.00026  | -0.0367  | 0.42878  |
| 0.16131  | 0.200861 | 1.22E-05 | -0.01958 | 0.67304  | -0.0365515 | 0.43068  | 0.210909 | 4.28E-06 |
| 0.30182  | 0.201939 | 1.09E-05 | -0.19442 | 2.33E-05 | -0.257872  | 1.57E-08 | -0.09808 | 0.03409  |
| 0.0004   | -0.21429 | 2.97E-06 | -0.2532  | 2.89E-08 | 0.01622721 | 0.72652  | 0.096741 | 0.03663  |
| 0.03095  | 0.079035 | 0.088    | -0.23137 | 4.30E-07 | 0.02407797 | 0.60375  | 0.18029  | 8.94E-05 |
| 0.20964  | -0.11188 | 0.01557  | -0.34049 | 3.86E-14 | -0.0071187 | 0.87806  | 0.218537 | 1.86E-06 |
| 0.87147  | -0.13663 | 0.00309  | -0.45064 | 9.76E-25 | -0.2613698 | 9.86E-09 | -0.15717 | 0.00065  |
| 0.63379  | 0.216685 | 2.29E-06 | -0.13544 | 0.00336  | -0.2185106 | 1.87E-06 | -0.07494 | 0.10578  |
| 0.37994  | 0.495948 | 2.31E-30 | 0.102699 | 0.02647  | 0.12488212 | 0.00689  | 0.345436 | 1.56E-14 |
| 0.71783  | 0.252609 | 3.12E-08 | -0.24567 | 7.55E-08 | 0.00217911 | 0.96254  | 0.198922 | 1.49E-05 |
| 0.8822   | 0.081927 | 0.07695  | -0.19976 | 1.37E-05 | 0.01459796 | 0.75304  | 0.27567  | 1.37E-09 |
| 0.00689  | 0.096023 | 0.03805  | -0.33484 | 1.07E-13 | -0.2217797 | 1.30E-06 | -0.14622 | 0.00153  |
| 0.13313  | 0.121597 | 0.00853  | -0.2183  | 1.91E-06 | 0.04135928 | 0.37252  | 0.252216 | 3.29E-08 |
| 0.39397  | 0.05354  | 0.2482   | -0.30549 | 1.52E-11 | -0.1231299 | 0.00772  | -0.11142 | 0.016    |
| 0.37176  | 0.074614 | 0.10732  | -0.27899 | 8.51E-10 | 0.17449088 | 0.00015  | 0.454815 | 3.21E-25 |
| 0.38369  | -0.0367  | 0.42882  | -0.20204 | 1.08E-05 | -0.0805882 | 0.08191  | -0.00788 | 0.8652   |
| 0.08072  | 0.1136   | 0.01404  | -0.20263 | 1.02E-05 | -0.3138382 | 3.92E-12 | -0.1158  | 0.01227  |
| 0.40606  | 0.338216 | 5.83E-14 | -0.01778 | 0.70153  | 0.0742109  | 0.10924  | 0.200586 | 1.26E-05 |
| 0.22044  | 0.099899 | 0.03089  | -0.19824 | 1.59E-05 | 0.024333   | 0.59992  | 0.298195 | 4.80E-11 |
| 0.4417   | -0.02997 | 0.51827  | -0.17964 | 9.48E-05 | 0.10803938 | 0.01953  | 0.378625 | 2.29E-17 |
| 0.03546  | 0.486351 | 4.23E-29 | 0.074651 | 0.10715  | -0.0434887 | 0.34839  | 0.249712 | 4.53E-08 |
| 0.41249  | 0.16841  | 0.00026  | -0.11043 | 0.01697  | -0.0055854 | 0.90418  | 0.184723 | 5.92E-05 |
| 0.19426  | -0.15577 | 0.00073  | -0.45143 | 7.92E-25 | -0.092779  | 0.04508  | 0.081735 | 0.07764  |
| 0.3615   | -0.22195 | 1.27E-06 | -0.47467 | 1.29E-27 | -0.1005692 | 0.02978  | 0.100659 | 0.02963  |
| 0.96447  | -0.22448 | 9.55E-07 | -0.40956 | 2.58E-20 | -0.0834814 | 0.07149  | 0.12969  | 0.005    |
| 0.36301  | -0.06558 | 0.15711  | -0.345   | 1.69E-14 | -0.0761236 | 0.10038  | -0.08429 | 0.06877  |
| 8.40E-06 | -0.0584  | 0.2078   | -0.28058 | 6.76E-10 | 0.05688935 | 0.21979  | 0.333332 | 1.40E-13 |
| 0.61316  | 0.051597 | 0.2658   | 0.365154 | 3.55E-16 | 0.19995025 | 1.34E-05 | -0.03104 | 0.50347  |
| 0.11543  | -0.02075 | 0.65465  | -0.13089 | 0.00461  | 0.33060143 | 2.26E-13 | 0.541095 | 7.13E-37 |
| 0.13829  | 0.462886 | 3.56E-26 | 0.264599 | 6.38E-09 | 0.25307527 | 2.94E-08 | 0.45979  | 8.32E-26 |
| 0.45641  | 0.015203 | 0.74316  | -0.21422 | 2.99E-06 | 0.07398945 | 0.1103   | 0.27639  | 1.24E-09 |
| 0.50823  | 0.279613 | 7.78E-10 | 0.000557 | 0.99043  | 0.30414985 | 1.88E-11 | 0.362434 | 6.07E-16 |
| 0.46553  | 0.181782 | 7.79E-05 | -0.17074 | 0.00021  | 0.02278091 | 0.6234   | 0.281806 | 5.66E-10 |
| 0.00071  | -0.22293 | 1.14E-06 | -0.36989 | 1.37E-16 | -0.250057  | 4.34E-08 | -0.19239 | 2.84E-05 |
| 7.63E-05 | 0.047099 | 0.3098   | -0.25464 | 2.40E-08 | 0.22595353 | 8.07E-07 | 0.43105  | 1.49E-22 |
| 0.60378  | 0.128414 | 0.00545  | -0.14356 | 0.00187  | 0.19595581 | 2.00E-05 | 0.452366 | 6.18E-25 |
| 0.69343  | -0.15045 | 0.00111  | -0.30704 | 1.19E-11 | -0.052524  | 0.2573   | 0.072464 | 0.11786  |
| 0.25393  | -0.05196 | 0.26247  | -0.18043 | 8.82E-05 | -0.0520785 | 0.26136  | -0.04142 | 0.37184  |
| 4.93E-06 | -0.04561 | 0.3254   | 0.152284 | 0.00096  | 0.20817083 | 5.72E-06 | -0.00608 | 0.89574  |
| 0.61432  | 0.045879 | 0.32251  | -0.23677 | 2.26E-07 | 0.01996341 | 0.66698  | 0.074143 | 0.10956  |
| 0.06407  | 0.11154  | 0.01589  | -0.30261 | 2.40E-11 | -0.0433935 | 0.34944  | -0.01637 | 0.72415  |
| 0.71843  | 0.397296 | 4.15E-19 | 0.243093 | 1.04E-07 | 0.24580582 | 7.43E-08 | 0.479187 | 3.49E-28 |
| 0.98265  | 0.085298 | 0.06552  | 0.338547 | 5.49E-14 | 0.1680308  | 0.00026  | -0.0583  | 0.20858  |
| 0.01529  | 0.201545 | 1.14E-05 | 0.016367 | 0.72425  | 0.21842    | 1.89E-06 | 0.50063  | 5.40E-31 |

|         |          |          |          |          |            |          |          |          |
|---------|----------|----------|----------|----------|------------|----------|----------|----------|
| 0.09936 | 0.21406  | 3.05E-06 | -0.11293 | 0.01462  | 0.00747408 | 0.87203  | 0.162162 | 0.00043  |
| 0.11286 | 0.205101 | 7.90E-06 | -0.19097 | 3.26E-05 | -0.0436147 | 0.34699  | 0.100899 | 0.02924  |
| 0.01696 | 0.152987 | 0.00091  | -0.14747 | 0.00139  | 0.09769565 | 0.03481  | 0.446425 | 2.96E-24 |
| 0.83442 | 0.266791 | 4.73E-09 | 0.05628  | 0.22478  | 0.05006195 | 0.28031  | 0.350655 | 5.87E-15 |
| 0.4593  | 0.228207 | 6.22E-07 | -0.00977 | 0.83326  | 0.21715497 | 2.17E-06 | 0.496058 | 2.23E-30 |
| 0.32752 | 0.214336 | 2.96E-06 | -0.10352 | 0.02528  | -0.1397884 | 0.00246  | 0.115427 | 0.01256  |
| 0.07579 | 0.314634 | 3.44E-12 | 0.109564 | 0.01786  | 0.05036747 | 0.27738  | 0.249132 | 4.88E-08 |
| 0.01175 | 0.398674 | 3.05E-19 | 0.154807 | 0.00079  | 0.125553   | 0.00659  | 0.339315 | 4.78E-14 |
| 0.09087 | -0.01038 | 0.82297  | -0.30299 | 2.26E-11 | 0.0122834  | 0.79121  | 0.283287 | 4.56E-10 |
| 0.09432 | 0.103858 | 0.0248   | -0.28301 | 4.74E-10 | 0.14306208 | 0.00194  | 0.335832 | 8.95E-14 |
| 0.06134 | 0.290024 | 1.68E-10 | 0.023609 | 0.61082  | -0.0420787 | 0.36425  | 0.252603 | 3.13E-08 |
| 0.18782 | 0.015653 | 0.73584  | 0.069011 | 0.13646  | 0.14067175 | 0.00231  | 0.35918  | 1.15E-15 |
| 0.60896 | 0.497101 | 1.62E-30 | 0.089547 | 0.05313  | -0.1598549 | 0.00053  | 0.079071 | 0.08785  |
| 0.82252 | -0.03953 | 0.39407  | -0.37259 | 7.95E-17 | -0.2651891 | 5.89E-09 | -0.10916 | 0.01829  |
| 0.04789 | 0.003649 | 0.93732  | -0.3444  | 1.89E-14 | -0.1533688 | 0.00088  | 0.030215 | 0.51482  |
| 0.95862 | -0.03917 | 0.39832  | -0.37435 | 5.54E-17 | -0.2299976 | 5.05E-07 | -0.11246 | 0.01504  |
| 0.48281 | -0.107   | 0.02074  | -0.43721 | 3.18E-23 | -0.2940203 | 9.14E-11 | -0.21575 | 2.53E-06 |
| 0.33932 | 0.074014 | 0.11019  | -0.07095 | 0.12573  | 0.25666112 | 1.84E-08 | 0.546857 | 8.91E-38 |
| 0.47726 | 0.098892 | 0.03263  | -0.21803 | 1.97E-06 | -0.2903841 | 1.59E-10 | -0.03956 | 0.39371  |
| 0.0885  | 0.177783 | 0.00011  | -0.10017 | 0.03043  | -0.0160918 | 0.72871  | 0.251797 | 3.47E-08 |
| 0.55133 | 0.438964 | 2.04E-23 | 0.204066 | 8.79E-06 | 0.17501205 | 0.00014  | 0.416582 | 4.99E-21 |
| 0.87798 | 0.083509 | 0.07139  | 0.048643 | 0.29419  | -0.031862  | 0.49216  | 0.01039  | 0.8228   |
| 0.08963 | 0.362418 | 6.09E-16 | 0.228136 | 6.27E-07 | 0.4107175  | 1.97E-20 | 0.544468 | 2.12E-37 |
| 0.06438 | 0.244659 | 8.58E-08 | -0.1362  | 0.00319  | -0.1246891 | 0.00698  | 0.005305 | 0.90897  |
| 0.91718 | 0.058202 | 0.20932  | -0.25638 | 1.91E-08 | -0.0737011 | 0.1117   | 0.185679 | 5.41E-05 |
| 0.09921 | 0.33941  | 4.70E-14 | 0.148669 | 0.00127  | 0.18979028 | 3.66E-05 | 0.381957 | 1.14E-17 |
| 0.76739 | 0.160947 | 0.00048  | -0.13991 | 0.00244  | -0.1092402 | 0.0182   | 0.19178  | 3.02E-05 |
| 0.95626 | 0.301138 | 3.03E-11 | -0.10075 | 0.02948  | 0.05756369 | 0.21436  | 0.221657 | 1.31E-06 |
| 0.97103 | -0.12612 | 0.00635  | -0.23624 | 2.41E-07 | 0.14720965 | 0.00142  | 0.362758 | 5.70E-16 |
| 0.5045  | 0.309411 | 8.09E-12 | 0.084303 | 0.06873  | -0.0396374 | 0.39277  | 0.196455 | 1.90E-05 |
| 0.00027 | -0.08065 | 0.08169  | -0.22281 | 1.15E-06 | 0.00704549 | 0.87931  | 0.125139 | 0.00678  |
| 0.24794 | -0.16105 | 0.00048  | -0.22942 | 5.40E-07 | 0.07081348 | 0.12649  | 0.14388  | 0.00183  |
| 0.15463 | 0.105103 | 0.02312  | -0.16216 | 0.00043  | 0.066397   | 0.15198  | 0.115864 | 0.01223  |
| 0.54839 | 0.29268  | 1.12E-10 | -0.03038 | 0.51251  | 0.12599237 | 0.00641  | 0.449379 | 1.36E-24 |
| 0.02197 | 0.046312 | 0.31796  | -0.06956 | 0.13336  | -0.0886661 | 0.05553  | 0.095991 | 0.03811  |
| 0.30701 | 0.147766 | 0.00136  | -0.26112 | 1.02E-08 | -0.1769157 | 0.00012  | -0.03271 | 0.4807   |
| 0.65692 | 0.157527 | 0.00063  | -0.14022 | 0.00239  | -0.156785  | 0.00067  | 0.045342 | 0.32821  |
| 0.66973 | 0.238717 | 1.78E-07 | -0.04947 | 0.28605  | 0.2956932  | 7.07E-11 | 0.51622  | 3.63E-33 |
| 0.60521 | 0.325654 | 5.35E-13 | -0.02449 | 0.59753  | 0.17415307 | 0.00016  | 0.228966 | 5.69E-07 |
| 0.17981 | -0.08619 | 0.06272  | -0.13738 | 0.00293  | -0.0607408 | 0.19009  | -0.02468 | 0.59479  |
| 0.66016 | 0.062658 | 0.17646  | -0.11808 | 0.01066  | 0.07539019 | 0.10371  | 0.353947 | 3.14E-15 |
| 0.19512 | 0.297806 | 5.10E-11 | -0.06446 | 0.16429  | -0.2363356 | 2.38E-07 | -0.01597 | 0.73062  |
| 0.12165 | 0.000461 | 0.99207  | -0.31654 | 2.50E-12 | -0.0188677 | 0.68424  | 0.176014 | 0.00013  |
| 0.15886 | 0.365845 | 3.09E-16 | -0.01274 | 0.7837   | 0.18658172 | 4.97E-05 | 0.228582 | 5.95E-07 |
| 0.4589  | -0.05409 | 0.24339  | -0.41787 | 3.68E-21 | -0.1764393 | 0.00013  | -0.05314 | 0.25173  |

|          |          |          |          |          |            |          |          |          |
|----------|----------|----------|----------|----------|------------|----------|----------|----------|
| 0.41054  | 0.264439 | 6.52E-09 | 0.031788 | 0.49317  | 0.03761389 | 0.41739  | 0.25811  | 1.52E-08 |
| 0.85452  | 0.043358 | 0.34984  | -0.18469 | 5.94E-05 | -0.2268229 | 7.30E-07 | -0.07896 | 0.08832  |
| 0.40282  | 0.462017 | 4.52E-26 | 0.029811 | 0.52045  | 0.07300111 | 0.11515  | 0.358869 | 1.22E-15 |
| 0.04432  | 0.084747 | 0.06728  | -0.21941 | 1.69E-06 | 0.04970085 | 0.2838   | 0.177412 | 0.00012  |
| 0.34132  | 0.114931 | 0.01295  | -0.15586 | 0.00073  | 0.25595331 | 2.02E-08 | 0.566847 | 4.74E-41 |
| 0.20678  | -0.20112 | 1.19E-05 | -0.37045 | 1.23E-16 | -0.0175772 | 0.70479  | 0.284163 | 4.01E-10 |
| 0.78174  | 0.11662  | 0.01167  | -0.1372  | 0.00297  | 0.19542036 | 2.11E-05 | 0.430103 | 1.89E-22 |
| 0.42579  | 0.050224 | 0.27875  | -0.19416 | 2.39E-05 | 0.0694372  | 0.13405  | 0.304353 | 1.82E-11 |
| 0.74045  | 0.12471  | 0.00697  | -0.0672  | 0.14709  | 0.01983459 | 0.669    | 0.121168 | 0.00876  |
| 0.03866  | 0.341183 | 3.40E-14 | -0.00452 | 0.92242  | 0.14865851 | 0.00127  | 0.211251 | 4.12E-06 |
| 0.28297  | -0.21505 | 2.73E-06 | -0.22301 | 1.13E-06 | -0.0343753 | 0.45864  | 0.118819 | 0.01017  |
| 0.11089  | -0.00664 | 0.88615  | -0.37738 | 2.97E-17 | 0.08769143 | 0.05828  | 0.338113 | 5.94E-14 |
| 0.33104  | -0.18029 | 8.94E-05 | -0.49392 | 4.30E-30 | -0.2086841 | 5.42E-06 | 0.013933 | 0.76395  |
| 0.77003  | 0.140853 | 0.00228  | -0.14339 | 0.00189  | -0.0165482 | 0.72133  | 0.165896 | 0.00032  |
| 0.00795  | 0.240151 | 1.50E-07 | 0.044897 | 0.33298  | 0.01518097 | 0.74351  | 0.166574 | 0.0003   |
| 0.66451  | 0.313327 | 4.26E-12 | 0.054749 | 0.23766  | 0.02117295 | 0.64812  | 0.200761 | 1.23E-05 |
| 0.20888  | 0.113713 | 0.01394  | -0.25143 | 3.64E-08 | -0.2682223 | 3.88E-09 | -0.09135 | 0.04851  |
| 0.78567  | 0.055332 | 0.23269  | -0.21381 | 3.13E-06 | 0.15540043 | 0.00075  | 0.325855 | 5.16E-13 |
| 0.19043  | 0.088214 | 0.05679  | 0.395906 | 5.64E-19 | 0.15532313 | 0.00076  | -0.13621 | 0.00318  |
| 0.3086   | 0.441146 | 1.16E-23 | 0.187893 | 4.39E-05 | 0.17202086 | 0.00019  | 0.367369 | 2.28E-16 |
| 0.7121   | 0.272638 | 2.10E-09 | -0.09425 | 0.04176  | -0.1094129 | 0.01802  | 0.112241 | 0.01524  |
| 0.33617  | 0.339216 | 4.87E-14 | 0.090666 | 0.05022  | 0.07189255 | 0.12079  | 0.254465 | 2.46E-08 |
| 0.0502   | -0.03135 | 0.49917  | -0.28091 | 6.45E-10 | 0.14177392 | 0.00213  | 0.410969 | 1.86E-20 |
| 0.19841  | 0.214287 | 2.97E-06 | -0.17614 | 0.00013  | 0.03817928 | 0.41042  | 0.287548 | 2.43E-10 |
| 0.41628  | 0.065404 | 0.15821  | -0.03963 | 0.39282  | 0.31639138 | 2.57E-12 | 0.533883 | 9.12E-36 |
| 0.41094  | -0.15872 | 0.00058  | -0.33378 | 1.29E-13 | -0.003068  | 0.94728  | 0.305896 | 1.42E-11 |
| 0.00142  | 0.038026 | 0.4123   | -0.09531 | 0.03952  | 0.22275732 | 1.16E-06 | 0.458334 | 1.24E-25 |
| 0.05307  | -0.20559 | 7.50E-06 | -0.35933 | 1.11E-15 | 0.0108266  | 0.81549  | 0.006087 | 0.89563  |
| 0.62979  | 0.282953 | 4.79E-10 | -0.05223 | 0.25997  | 0.09270694 | 0.04525  | 0.357591 | 1.56E-15 |
| 0.49715  | 0.003238 | 0.94437  | -0.24897 | 4.98E-08 | 0.00545636 | 0.90639  | 0.086914 | 0.06055  |
| 0.64277  | 0.379297 | 1.99E-17 | 0.11141  | 0.01601  | 0.12091821 | 0.00891  | 0.382498 | 1.02E-17 |
| 0.30761  | 0.074988 | 0.10557  | -0.24773 | 5.83E-08 | 0.05517847 | 0.234    | 0.285209 | 3.43E-10 |
| 0.89558  | 0.172824 | 0.00017  | 0.034909 | 0.4517   | 0.1197101  | 0.00962  | 0.252654 | 3.11E-08 |
| 0.00616  | 0.323741 | 7.42E-13 | 0.113729 | 0.01393  | -0.0115888 | 0.80276  | 0.118182 | 0.01059  |
| 0.0338   | -0.10841 | 0.01911  | -0.26135 | 9.89E-09 | 0.06594021 | 0.15482  | 0.272701 | 2.08E-09 |
| 0.02081  | 0.129095 | 0.00521  | 0.088507 | 0.05597  | 0.27472819 | 1.56E-09 | 0.435534 | 4.86E-23 |
| 0.56334  | 0.308649 | 9.15E-12 | -0.02378 | 0.60824  | 0.12475514 | 0.00695  | 0.364731 | 3.86E-16 |
| 0.72592  | 0.154309 | 0.00082  | -0.2003  | 1.29E-05 | -0.0402433 | 0.38557  | 0.173128 | 0.00017  |
| 0.06601  | 0.144201 | 0.00178  | -0.15112 | 0.00105  | -0.0040378 | 0.93065  | 0.214593 | 2.87E-06 |
| 0.30368  | 0.1177   | 0.01091  | -0.13212 | 0.00424  | 0.04005307 | 0.38782  | 0.377555 | 2.86E-17 |
| 0.62901  | 0.084903 | 0.06678  | -0.20962 | 4.91E-06 | 0.07016596 | 0.13     | 0.126685 | 0.00612  |
| 3.06E-05 | -0.03786 | 0.41437  | -0.38606 | 4.79E-18 | -0.0912472 | 0.04876  | 0.022354 | 0.62993  |
| 0.52604  | 0.056765 | 0.2208   | -0.24216 | 1.17E-07 | 0.08976825 | 0.05255  | 0.404101 | 9.01E-20 |
| 0.57179  | 0.271111 | 2.60E-09 | 0.078129 | 0.09171  | 0.25397458 | 2.62E-08 | 0.494191 | 3.96E-30 |
| 0.50497  | 0.238125 | 1.92E-07 | -0.17158 | 0.00019  | 0.0152842  | 0.74183  | 0.269378 | 3.31E-09 |

|          |          |          |          |          |            |          |          |          |
|----------|----------|----------|----------|----------|------------|----------|----------|----------|
| 0.50548  | 0.238351 | 1.86E-07 | -0.0738  | 0.1112   | 0.03319539 | 0.47422  | 0.26375  | 7.16E-09 |
| 0.00151  | -0.20593 | 7.24E-06 | -0.29834 | 4.69E-11 | 0.06826879 | 0.14073  | 0.12986  | 0.00494  |
| 0.04247  | 0.006058 | 0.89612  | -0.26552 | 5.63E-09 | -0.3049765 | 1.65E-11 | -0.19801 | 1.63E-05 |
| 0.00213  | -0.08564 | 0.06445  | -0.29597 | 6.77E-11 | -0.0722298 | 0.11905  | 0.05553  | 0.23102  |
| 0.05138  | 0.173593 | 0.00016  | 0.015156 | 0.74392  | 0.14702502 | 0.00144  | 0.387052 | 3.87E-18 |
| 0.15451  | 0.192203 | 2.90E-05 | -0.21185 | 3.87E-06 | -0.1370659 | 0.003    | -0.04236 | 0.36108  |
| 0.50457  | 0.340964 | 3.54E-14 | 0.133041 | 0.00397  | 0.1895329  | 3.75E-05 | 0.436241 | 4.06E-23 |
| 0.25377  | -0.02996 | 0.51838  | -0.33695 | 7.32E-14 | -0.0831043 | 0.07278  | 0.03398  | 0.46383  |
| 0.31128  | 0.457074 | 1.74E-25 | 0.049835 | 0.2825   | 0.01925468 | 0.67813  | 0.313185 | 4.37E-12 |
| 0.65045  | 0.189873 | 3.63E-05 | -0.02397 | 0.60535  | 0.2319559  | 4.01E-07 | 0.547779 | 6.36E-38 |
| 0.76119  | -0.0635  | 0.17068  | -0.18356 | 6.61E-05 | 0.18399362 | 6.34E-05 | 0.457699 | 1.47E-25 |
| 0.2583   | 0.012086 | 0.79449  | -0.08999 | 0.05197  | 0.14045949 | 0.00235  | 0.347268 | 1.11E-14 |
| 0.03522  | 0.225913 | 8.10E-07 | -0.10564 | 0.02242  | -0.0800285 | 0.08407  | 0.01954  | 0.67362  |
| 8.47E-06 | -0.23662 | 2.30E-07 | -0.40025 | 2.15E-19 | -0.12831   | 0.00549  | -0.02857 | 0.53792  |
| 0.11031  | 0.080321 | 0.08293  | -0.21098 | 4.24E-06 | 0.04698455 | 0.31097  | 0.327467 | 3.91E-13 |
| 0.05842  | -0.03634 | 0.4333   | -0.19564 | 2.06E-05 | -0.2049137 | 8.05E-06 | -0.01153 | 0.80373  |
| 0.02748  | 0.261711 | 9.42E-09 | -0.12236 | 0.00812  | 0.10758969 | 0.02004  | 0.34455  | 1.84E-14 |
| 0.19936  | 0.114476 | 0.01331  | -0.11596 | 0.01215  | -0.1677535 | 0.00027  | 0.068916 | 0.137    |
| 0.81398  | 0.122465 | 0.00806  | -0.08449 | 0.06814  | 0.12469351 | 0.00698  | 0.21682  | 2.25E-06 |
| 0.59353  | 0.022594 | 0.62626  | -0.26919 | 3.40E-09 | 0.03264326 | 0.4816   | 0.334821 | 1.07E-13 |
| 0.77502  | 0.211277 | 4.11E-06 | -0.21145 | 4.04E-06 | -0.0341288 | 0.46187  | 0.033853 | 0.4655   |
| 0.52922  | 0.423265 | 1.01E-21 | 0.163669 | 0.00038  | 0.31433797 | 3.61E-12 | 0.58996  | 3.98E-45 |
| 0.7995   | 0.228878 | 5.75E-07 | -0.1524  | 0.00095  | 0.06077011 | 0.18988  | 0.324098 | 6.98E-13 |
| 0.34421  | 0.014007 | 0.76274  | 0.05268  | 0.25588  | 0.12993689 | 0.00492  | 0.188564 | 4.12E-05 |
| 0.3952   | 0.30495  | 1.66E-11 | 0.021153 | 0.64842  | 0.10896047 | 0.0185   | 0.211288 | 4.11E-06 |
| 0.56795  | 0.037994 | 0.41269  | -0.30925 | 8.31E-12 | -0.1019102 | 0.02766  | 0.011029 | 0.81212  |
| 0.10946  | 0.141064 | 0.00225  | -0.11391 | 0.01378  | 0.28744517 | 2.47E-10 | 0.45037  | 1.05E-24 |
| 0.59205  | 0.314316 | 3.62E-12 | 0.033092 | 0.47559  | 0.17229841 | 0.00018  | 0.227706 | 6.59E-07 |
| 0.017    | 0.121833 | 0.0084   | -0.22387 | 1.02E-06 | -0.0026745 | 0.95403  | 0.115857 | 0.01223  |
| 0.97931  | 0.124779 | 0.00694  | -0.11862 | 0.0103   | 0.13058532 | 0.00471  | 0.399141 | 2.75E-19 |
| 0.69524  | 0.075396 | 0.10368  | -0.2259  | 8.12E-07 | -0.0205542 | 0.65774  | 0.148252 | 0.00131  |
| 0.90613  | 0.34629  | 1.33E-14 | -0.07805 | 0.09202  | 0.17055263 | 0.00021  | 0.370153 | 1.30E-16 |
| 0.60019  | 0.248771 | 5.11E-08 | -0.11237 | 0.01512  | -0.1729826 | 0.00017  | 0.035395 | 0.44542  |
| 0.47052  | 0.242902 | 1.07E-07 | -0.05243 | 0.25812  | 0.11040988 | 0.01699  | 0.375274 | 4.59E-17 |
| 0.54875  | 0.330588 | 2.27E-13 | -0.11786 | 0.0108   | -0.2368144 | 2.25E-07 | -0.04447 | 0.33764  |
| 0.86207  | 0.318212 | 1.89E-12 | 0.070201 | 0.12981  | 0.2397735  | 1.57E-07 | 0.535811 | 4.64E-36 |
| 0.24111  | 0.302431 | 2.47E-11 | -0.07389 | 0.1108   | -0.1690964 | 0.00024  | 0.041618 | 0.36953  |
| 0.03316  | 0.149057 | 0.00124  | -0.21878 | 1.81E-06 | -0.005436  | 0.90673  | 0.242372 | 1.14E-07 |
| 0.96953  | 0.18016  | 9.04E-05 | -0.03546 | 0.44459  | 0.12667745 | 0.00612  | 0.360568 | 8.75E-16 |
| 0.031    | 0.259843 | 1.21E-08 | -0.0768  | 0.0974   | -0.1504328 | 0.00111  | -0.08892 | 0.05483  |
| 0.03563  | 0.084081 | 0.06947  | -0.20299 | 9.82E-06 | -0.0899815 | 0.05199  | 0.156872 | 0.00067  |
| 0.03902  | 0.057067 | 0.21835  | -0.17937 | 9.72E-05 | -0.0602429 | 0.19375  | 0.101371 | 0.02849  |
| 0.16045  | 0.164598 | 0.00035  | -0.09574 | 0.03863  | 0.070921   | 0.12591  | 0.109769 | 0.01765  |
| 0.13589  | -0.13654 | 0.00311  | -0.31238 | 4.98E-12 | 0.00646828 | 0.88913  | 0.157883 | 0.00062  |
| 0.05387  | -0.07994 | 0.08441  | -0.21636 | 2.37E-06 | 0.05912837 | 0.20214  | 0.183169 | 6.85E-05 |



|         |          |          |          |          |            |          |          |          |
|---------|----------|----------|----------|----------|------------|----------|----------|----------|
| 0.81237 | 0.169374 | 0.00024  | -0.10909 | 0.01836  | 0.04954194 | 0.28534  | 0.312978 | 4.52E-12 |
| 0.97033 | 0.196939 | 1.81E-05 | -0.04038 | 0.38392  | 0.11159593 | 0.01584  | 0.215346 | 2.65E-06 |
| 0.39866 | 0.065519 | 0.15748  | -0.134   | 0.00372  | 0.03976516 | 0.39124  | 0.250981 | 3.85E-08 |
| 0.05155 | -0.28705 | 2.61E-10 | -0.4476  | 2.18E-24 | -0.0415747 | 0.37003  | -0.03874 | 0.40362  |
| 0.34289 | 0.002951 | 0.9493   | -0.1678  | 0.00027  | 0.12356844 | 0.00751  | 0.399311 | 2.65E-19 |
| 0.66959 | -0.07641 | 0.0991   | -0.3113  | 5.95E-12 | -0.1218951 | 0.00837  | 0.030334 | 0.51316  |
| 0.9665  | 0.370556 | 1.20E-16 | 0.062489 | 0.17763  | 0.12159835 | 0.00853  | 0.44862  | 1.67E-24 |
| 0.01456 | 0.428143 | 3.06E-22 | 0.062742 | 0.17588  | 0.07016929 | 0.12998  | 0.354288 | 2.95E-15 |
| 0.23489 | 0.029414 | 0.52603  | -0.25431 | 2.51E-08 | 0.16646483 | 0.0003   | 0.455705 | 2.52E-25 |
| 0.5852  | 0.157    | 0.00066  | 0.039599 | 0.39322  | -0.04213   | 0.36367  | 0.040562 | 0.38182  |
| 0.04989 | 0.215646 | 2.56E-06 | -0.13045 | 0.00475  | 0.05096251 | 0.27174  | 0.375373 | 4.49E-17 |
| 0.66152 | -0.025   | 0.58997  | -0.16419 | 0.00037  | 0.13042916 | 0.00476  | 0.344083 | 2.00E-14 |
| 0.35003 | 0.234924 | 2.82E-07 | -0.11985 | 0.00953  | -0.177076  | 0.00012  | 0.052792 | 0.25487  |
| 0.9535  | -0.02964 | 0.52289  | 0.388131 | 3.07E-18 | 0.3031197  | 2.22E-11 | 0.072598 | 0.11718  |
| 0.26981 | -0.05756 | 0.2144   | -0.4003  | 2.12E-19 | -0.0480796 | 0.29982  | 0.028112 | 0.54452  |
| 0.11215 | 0.385521 | 5.37E-18 | 0.010055 | 0.82843  | -0.1247625 | 0.00695  | 0.095177 | 0.03979  |
| 0.44891 | 0.057564 | 0.21436  | -0.20118 | 1.18E-05 | 0.11435807 | 0.01341  | 0.312785 | 4.66E-12 |
| 0.18197 | 0.099688 | 0.03125  | -0.14466 | 0.00172  | -0.017103  | 0.7124   | 0.333014 | 1.48E-13 |
| 0.07592 | 0.053017 | 0.25286  | -0.10815 | 0.0194   | 0.06445728 | 0.16433  | 0.278277 | 9.43E-10 |
| 0.16163 | 0.009895 | 0.83112  | 0.000302 | 0.9948   | 0.09497182 | 0.04022  | 0.240162 | 1.50E-07 |
| 0.27066 | 0.079375 | 0.08663  | -0.19335 | 2.59E-05 | 0.14808973 | 0.00133  | 0.359062 | 1.17E-15 |
| 0.03218 | 0.225618 | 8.38E-07 | -0.12149 | 0.00859  | 0.11694177 | 0.01144  | 0.289663 | 1.77E-10 |
| 0.47215 | -0.08813 | 0.05702  | -0.24717 | 6.26E-08 | 0.20170193 | 1.12E-05 | 0.48425  | 7.90E-29 |
| 0.97843 | 0.196742 | 1.85E-05 | -0.03344 | 0.47095  | 0.25083531 | 3.93E-08 | 0.539491 | 1.26E-36 |
| 0.23962 | 0.372966 | 7.36E-17 | 0.164143 | 0.00037  | 0.23500606 | 2.79E-07 | 0.443311 | 6.66E-24 |
| 0.01098 | -0.28793 | 2.29E-10 | -0.39261 | 1.16E-18 | -0.0547593 | 0.23757  | 0.115757 | 0.01231  |
| 0.52082 | 0.073565 | 0.11236  | -0.13844 | 0.00272  | 0.20084572 | 1.22E-05 | 0.45653  | 2.02E-25 |
| 0.04359 | 0.083445 | 0.07161  | -0.22078 | 1.45E-06 | -0.1162975 | 0.0119   | 0.175529 | 0.00014  |
| 0.01032 | -0.16246 | 0.00042  | -0.41273 | 1.23E-20 | -0.0778158 | 0.09302  | 0.106191 | 0.02172  |
| 0.0186  | 0.389122 | 2.48E-18 | 0.005502 | 0.9056   | 0.11994263 | 0.00948  | 0.381106 | 1.37E-17 |
| 0.83313 | 0.416381 | 5.23E-21 | 0.048254 | 0.29807  | -0.0309001 | 0.50533  | 0.230525 | 4.75E-07 |
| 0.20484 | 0.113404 | 0.01421  | 0.035928 | 0.43859  | 0.37354751 | 6.53E-17 | 0.575061 | 1.84E-42 |
| 0.75565 | 0.128542 | 0.0054   | -0.26511 | 5.95E-09 | -0.0040853 | 0.92984  | 0.223341 | 1.09E-06 |
| 0.45567 | 0.052211 | 0.26015  | -0.12606 | 0.00638  | -0.226802  | 7.32E-07 | -0.11694 | 0.01144  |
| 0.00664 | 0.387628 | 3.42E-18 | -0.04503 | 0.33152  | -0.0435801 | 0.34737  | 0.200992 | 1.21E-05 |
| 0.20457 | 0.146339 | 0.00152  | -0.06659 | 0.15079  | 0.13037935 | 0.00477  | 0.244512 | 8.74E-08 |
| 0.41263 | -0.08832 | 0.05649  | -0.3904  | 1.88E-18 | -0.2173303 | 2.13E-06 | -0.05492 | 0.23622  |
| 0.6665  | 0.144904 | 0.00169  | -0.13067 | 0.00468  | 0.05894556 | 0.20354  | 0.154476 | 0.00081  |
| 0.71159 | 0.223097 | 1.12E-06 | -0.09097 | 0.04946  | 0.16664527 | 0.0003   | 0.496473 | 1.96E-30 |
| 0.64556 | 0.1385   | 0.0027   | -0.27843 | 9.22E-10 | -0.0605504 | 0.19149  | 0.162941 | 0.00041  |
| 0.71906 | 0.044498 | 0.3373   | -0.24151 | 1.27E-07 | -0.1145173 | 0.01328  | -0.0148  | 0.74968  |
| 0.94866 | 0.094601 | 0.04101  | -0.00641 | 0.89004  | 0.14736403 | 0.00141  | 0.352075 | 4.49E-15 |
| 0.03032 | 0.324983 | 6.00E-13 | -0.00321 | 0.94493  | 0.06227119 | 0.17915  | 0.292099 | 1.22E-10 |
| 0.8318  | 0.33796  | 6.11E-14 | 0.153712 | 0.00086  | 0.24424444 | 9.03E-08 | 0.526824 | 1.04E-34 |
| 0.25075 | 0.090571 | 0.05046  | -0.17348 | 0.00016  | 0.10301862 | 0.026    | 0.194324 | 2.35E-05 |

|         |          |          |          |          |            |          |          |          |
|---------|----------|----------|----------|----------|------------|----------|----------|----------|
| 0.02585 | 0.349196 | 7.73E-15 | -0.06969 | 0.13264  | -0.1708072 | 0.00021  | 0.038381 | 0.40796  |
| 0.87092 | 0.169983 | 0.00022  | -0.19839 | 1.57E-05 | 0.02623951 | 0.57165  | 0.248648 | 5.19E-08 |
| 0.85605 | -0.00263 | 0.95474  | -0.19573 | 2.05E-05 | 0.03376836 | 0.46662  | 0.247549 | 5.97E-08 |
| 0.48803 | 0.290479 | 1.56E-10 | -0.04512 | 0.33063  | 0.13079158 | 0.00464  | 0.303944 | 1.95E-11 |
| 0.28422 | 0.271731 | 2.39E-09 | 0.077847 | 0.09289  | 0.28562743 | 3.23E-10 | 0.546248 | 1.11E-37 |
| 0.73126 | 0.258157 | 1.51E-08 | -0.10604 | 0.02192  | 0.14557047 | 0.00161  | 0.400945 | 1.84E-19 |
| 0.07431 | 0.003413 | 0.94136  | -0.33906 | 5.01E-14 | 0.05408023 | 0.24345  | 0.188139 | 4.29E-05 |
| 0.0091  | 0.25423  | 2.53E-08 | -0.05696 | 0.21923  | -0.0135478 | 0.77029  | 0.143888 | 0.00182  |
| 0.29029 | 0.213454 | 3.25E-06 | -0.05823 | 0.20909  | 0.03131942 | 0.49957  | 0.203338 | 9.48E-06 |
| 0.27512 | 0.036861 | 0.42678  | -0.29647 | 6.27E-11 | -0.0884787 | 0.05605  | 0.118036 | 0.01068  |
| 0.0138  | 0.175818 | 0.00013  | -0.15714 | 0.00065  | 0.03184584 | 0.49238  | 0.23304  | 3.53E-07 |
| 0.99346 | -0.02747 | 0.55374  | -0.21805 | 1.97E-06 | 0.04966337 | 0.28416  | 0.339583 | 4.55E-14 |
| 0.43885 | 0.017715 | 0.70259  | -0.26782 | 4.10E-09 | 0.00424074 | 0.92718  | 0.271158 | 2.58E-09 |
| 0.07334 | 0.006022 | 0.89673  | -0.22569 | 8.32E-07 | -0.0036112 | 0.93796  | 0.173331 | 0.00017  |
| 0.40484 | -0.11629 | 0.01191  | -0.36776 | 2.11E-16 | -0.1126126 | 0.0149   | 0.009239 | 0.84217  |
| 0.17978 | -0.06648 | 0.15145  | -0.20969 | 4.87E-06 | 0.04949797 | 0.28577  | 0.184816 | 5.87E-05 |
| 0.03186 | 0.174073 | 0.00016  | -0.21195 | 3.82E-06 | -0.1482805 | 0.00131  | -0.0161  | 0.72858  |
| 0.13089 | 0.131796 | 0.00433  | -0.08708 | 0.06006  | 0.14044748 | 0.00235  | 0.31284  | 4.62E-12 |
| 0.8694  | 0.278252 | 9.46E-10 | -0.0051  | 0.9125   | 0.08005173 | 0.08398  | 0.392748 | 1.13E-18 |
| 0.77028 | 0.224677 | 9.34E-07 | -0.10537 | 0.02277  | 0.1240046  | 0.0073   | 0.347749 | 1.01E-14 |
| 0.02836 | 0.456713 | 1.92E-25 | 0.137769 | 0.00285  | 0.23452363 | 2.96E-07 | 0.493678 | 4.63E-30 |
| 0.222   | 0.371774 | 9.38E-17 | 0.097212 | 0.03572  | 0.1779836  | 0.00011  | 0.477951 | 5.00E-28 |
| 0.47475 | 0.3185   | 1.80E-12 | 0.009121 | 0.84416  | 0.09276519 | 0.04511  | 0.322503 | 9.17E-13 |
| 0.03142 | 0.349212 | 7.71E-15 | -0.07187 | 0.12093  | -0.0988681 | 0.03267  | 0.058062 | 0.21042  |
| 0.02121 | 0.242002 | 1.19E-07 | -0.0224  | 0.62929  | 0.04370165 | 0.34603  | 0.213972 | 3.08E-06 |
| 0.12344 | 0.282674 | 4.99E-10 | -0.11538 | 0.01259  | 0.07457436 | 0.10751  | 0.257696 | 1.61E-08 |
| 0.38272 | 0.222489 | 1.20E-06 | -0.02941 | 0.52613  | 0.28234702 | 5.23E-10 | 0.523121 | 3.65E-34 |
| 0.20426 | 0.111829 | 0.01562  | -0.17038 | 0.00022  | -0.1462658 | 0.00153  | -0.04188 | 0.36652  |
| 0.94381 | 0.242214 | 1.16E-07 | -0.01022 | 0.8256   | 0.15021396 | 0.00113  | 0.388497 | 2.84E-18 |
| 0.93117 | 0.345726 | 1.48E-14 | 0.062317 | 0.17883  | 0.288083   | 2.24E-10 | 0.498717 | 9.81E-31 |
| 0.80287 | 0.433947 | 7.24E-23 | 0.055212 | 0.23371  | 0.10007186 | 0.0306   | 0.241052 | 1.34E-07 |
| 0.07563 | 0.120409 | 0.0092   | -0.22531 | 8.68E-07 | -0.1302766 | 0.00481  | 0.035318 | 0.44641  |
| 0.0621  | 0.024134 | 0.6029   | -0.14173 | 0.00214  | -0.1450224 | 0.00168  | -0.08206 | 0.07646  |
| 0.20317 | 0.049425 | 0.28648  | -0.21805 | 1.97E-06 | 0.11720164 | 0.01125  | 0.398966 | 2.86E-19 |
| 0.42166 | 0.216545 | 2.32E-06 | -0.23882 | 1.76E-07 | -0.0857175 | 0.0642   | 0.067448 | 0.14558  |
| 0.11518 | -0.0541  | 0.24325  | -0.34931 | 7.57E-15 | -0.0680941 | 0.14175  | 0.143194 | 0.00192  |
| 0.16822 | 0.257967 | 1.55E-08 | -0.03658 | 0.43034  | 0.13747799 | 0.00291  | 0.299321 | 4.03E-11 |
| 0.35603 | -0.15548 | 0.00075  | -0.46094 | 6.08E-26 | -0.1109042 | 0.0165   | 0.01349  | 0.77124  |
| 0.00836 | 0.107919 | 0.01966  | -0.14506 | 0.00167  | 0.06297933 | 0.17424  | 0.282741 | 4.94E-10 |
| 0.15872 | 0.296206 | 6.53E-11 | -0.0412  | 0.37439  | -0.0549209 | 0.23619  | 0.135597 | 0.00332  |
| 0.3252  | 0.514875 | 5.65E-33 | 0.195772 | 2.04E-05 | 0.21020516 | 4.61E-06 | 0.477034 | 6.53E-28 |
| 0.82444 | 0.433097 | 8.96E-23 | 0.056115 | 0.22614  | 0.0615477  | 0.18426  | 0.174753 | 0.00015  |
| 0.20717 | 0.215905 | 2.49E-06 | -0.01668 | 0.7192   | 0.02289485 | 0.62166  | 0.324858 | 6.13E-13 |
| 0.07025 | 0.0728   | 0.11616  | -0.11513 | 0.01279  | 0.25978784 | 1.22E-08 | 0.458412 | 1.21E-25 |
| 0.00022 | 0.211835 | 3.87E-06 | -0.14433 | 0.00177  | -0.0464342 | 0.31668  | 0.080174 | 0.0835   |

|          |          |          |          |          |            |          |          |          |
|----------|----------|----------|----------|----------|------------|----------|----------|----------|
| 0.50454  | -0.01836 | 0.69229  | -0.20133 | 1.16E-05 | -0.0689837 | 0.13661  | -0.07514 | 0.10485  |
| 0.05123  | -0.34461 | 1.81E-14 | -0.16952 | 0.00023  | -0.0541013 | 0.24327  | -0.12853 | 0.00541  |
| 0.06657  | 0.043672 | 0.34636  | -0.05398 | 0.24429  | -0.0517662 | 0.26424  | 0.00969  | 0.83457  |
| 0.45782  | -0.03975 | 0.39141  | -0.11405 | 0.01366  | -0.0095901 | 0.83625  | 0.018371 | 0.69213  |
| 0.00012  | 0.081752 | 0.07758  | -0.05698 | 0.21903  | 0.04649306 | 0.31607  | 0.152618 | 0.00094  |
| 0.08398  | 0.100763 | 0.02946  | -0.09612 | 0.03786  | -0.1865521 | 4.99E-05 | -0.22994 | 5.08E-07 |
| 0.00331  | 0.211316 | 4.10E-06 | 0.114494 | 0.0133   | 0.00934952 | 0.8403   | 0.075947 | 0.10117  |
| 0.25006  | 0.298673 | 4.46E-11 | 0.366899 | 2.51E-16 | 0.00501608 | 0.91391  | -0.09794 | 0.03435  |
| 0.0023   | 0.203627 | 9.20E-06 | 0.135841 | 0.00327  | 0.15528301 | 0.00076  | 0.093583 | 0.04324  |
| 0.00388  | -0.08696 | 0.06043  | -0.02928 | 0.52795  | 0.29094057 | 1.46E-10 | 0.112922 | 0.01462  |
| 0.00016  | 0.027163 | 0.55819  | 0.063697 | 0.16938  | 0.04429441 | 0.33952  | -0.03662 | 0.42977  |
| 0.00056  | 0.167812 | 0.00027  | 0.057126 | 0.21787  | 0.09222422 | 0.04638  | 0.105309 | 0.02285  |
| 0.41054  | 0.0206   | 0.65703  | -0.03193 | 0.49128  | -0.0263958 | 0.56936  | 0.053058 | 0.25249  |
| 0.1277   | 0.308941 | 8.73E-12 | 0.375277 | 4.58E-17 | 0.17574192 | 0.00013  | 0.003052 | 0.94756  |
| 0.61062  | 0.119716 | 0.00961  | 0.072323 | 0.11858  | 0.0313917  | 0.49858  | -0.09424 | 0.04179  |
| 0.70553  | -0.10514 | 0.02307  | -0.26753 | 4.28E-09 | -0.1338658 | 0.00375  | -0.09781 | 0.03458  |
| 3.05E-09 | -0.03274 | 0.48034  | -0.03378 | 0.46642  | 0.04452309 | 0.33703  | 0.078185 | 0.09148  |
| 0.3225   | -0.09237 | 0.04603  | -0.08005 | 0.08398  | 0.05305858 | 0.25248  | -0.01519 | 0.74338  |
| 0.0003   | -0.14816 | 0.00132  | -0.07052 | 0.12805  | 0.03927485 | 0.39711  | 0.006733 | 0.88463  |
| 0.2208   | 0.069955 | 0.13116  | 0.128864 | 0.00529  | 0.17003489 | 0.00022  | 0.058421 | 0.2076   |
| 0.59908  | -0.03154 | 0.49657  | 0.021067 | 0.64976  | 0.13296498 | 0.004    | 0.071609 | 0.12227  |
| 0.92294  | 0.097373 | 0.03541  | 0.000411 | 0.99293  | 0.11402849 | 0.01368  | 0.112808 | 0.01473  |
| 0.41435  | 0.051702 | 0.26483  | -0.15275 | 0.00093  | -0.1632397 | 0.0004   | -0.12455 | 0.00704  |
| 0.22738  | 0.085609 | 0.06453  | -0.04354 | 0.34777  | -0.2356443 | 2.59E-07 | -0.1325  | 0.00413  |
| 0.12254  | 0.180929 | 8.43E-05 | 0.218777 | 1.81E-06 | 0.16881239 | 0.00025  | 0.103749 | 0.02496  |
| 0.02393  | 0.109305 | 0.01813  | 0.250409 | 4.15E-08 | 0.24073353 | 1.39E-07 | 0.150177 | 0.00113  |
| 0.00082  | -0.11544 | 0.01255  | 0.02821  | 0.54311  | 0.29254758 | 1.14E-10 | 0.210027 | 4.70E-06 |
| 0.29626  | 0.189886 | 3.63E-05 | 0.224831 | 9.17E-07 | 0.16832956 | 0.00026  | -0.07511 | 0.10498  |
| 0.0493   | -0.09495 | 0.04027  | 0.008651 | 0.85209  | 0.270517   | 2.83E-09 | 0.353925 | 3.16E-15 |
| 0.51963  | -0.19081 | 3.31E-05 | -0.1024  | 0.02691  | 0.08245953 | 0.07504  | 0.064883 | 0.16156  |
| 1.92E-05 | -0.2163  | 2.39E-06 | 0.103902 | 0.02474  | 0.42147411 | 1.55E-21 | 0.323435 | 7.82E-13 |
| 0.82684  | 0.012941 | 0.78031  | 0.014728 | 0.75091  | 0.06294521 | 0.17448  | 0.079918 | 0.0845   |
| 0.93086  | 0.125702 | 0.00653  | 0.185256 | 5.63E-05 | -0.0441421 | 0.34118  | -0.10842 | 0.0191   |
| 0.40742  | 0.076455 | 0.0989   | 0.154938 | 0.00078  | 0.18259852 | 7.22E-05 | 0.197124 | 1.78E-05 |
| 0.39675  | 0.15659  | 0.00068  | 0.185213 | 5.66E-05 | 0.28110674 | 6.27E-10 | 0.326077 | 4.97E-13 |
| 0.24101  | 0.094002 | 0.04231  | 0.012211 | 0.7924   | 0.21550223 | 2.60E-06 | 0.294637 | 8.31E-11 |
| 0.68865  | 0.098187 | 0.0339   | 0.060421 | 0.19244  | 0.14868986 | 0.00127  | 0.204745 | 8.19E-06 |
| 0.72131  | 0.041247 | 0.37381  | -0.07014 | 0.13016  | -0.2091576 | 5.16E-06 | -0.10059 | 0.02974  |
| 0.0221   | -0.10344 | 0.0254   | -0.23171 | 4.13E-07 | -0.2885201 | 2.10E-10 | -0.3501  | 6.52E-15 |
| 0.09454  | 0.06968  | 0.13269  | -0.03432 | 0.45934  | -0.0580952 | 0.21015  | -0.04434 | 0.33898  |
| 0.61728  | 0.041194 | 0.37443  | -0.09954 | 0.0315   | -0.0455275 | 0.32623  | 0.026787 | 0.56366  |
| 0.14424  | -0.027   | 0.56049  | 0.109406 | 0.01803  | -0.1940409 | 2.42E-05 | -0.1988  | 1.51E-05 |
| 0.34174  | 0.078652 | 0.08955  | 0.123941 | 0.00733  | 0.07695478 | 0.09671  | 0.057075 | 0.21829  |
| 0.98503  | -0.05009 | 0.28006  | -0.00118 | 0.97964  | 0.06189388 | 0.1818   | 0.069537 | 0.13349  |
| 0.34376  | 0.118441 | 0.01042  | 0.076465 | 0.09886  | -0.0019534 | 0.96642  | -0.01554 | 0.73765  |

|          |          |         |          |          |            |          |          |          |
|----------|----------|---------|----------|----------|------------|----------|----------|----------|
| 0.0856   | 0.159972 | 0.00052 | 0.144956 | 0.00169  | 0.05855493 | 0.20656  | 0.05817  | 0.20957  |
| 0.3327   | 0.144182 | 0.00179 | 0.045896 | 0.32233  | 0.05773531 | 0.213    | 0.051103 | 0.27042  |
| 0.47951  | 0.076395 | 0.09917 | -0.13478 | 0.00352  | 0.09386522 | 0.04261  | 0.1804   | 8.85E-05 |
| 0.99269  | 0.042838 | 0.35565 | 0.018766 | 0.68585  | -0.2577926 | 1.59E-08 | -0.24536 | 7.86E-08 |
| 0.54537  | 0.084039 | 0.06961 | -0.00987 | 0.83157  | 0.02602236 | 0.57484  | 0.02206  | 0.63444  |
| 0.10656  | 0.08099  | 0.0804  | -0.01515 | 0.74398  | -0.1657237 | 0.00032  | -0.11398 | 0.01372  |
| 0.17475  | 0.010354 | 0.82342 | 0.003248 | 0.94419  | -0.0879097 | 0.05765  | -0.07874 | 0.08918  |
| 0.66197  | -0.0396  | 0.39325 | 0.023912 | 0.60625  | 0.0373099  | 0.42117  | 0.026674 | 0.56531  |
| 0.78335  | -0.0191  | 0.68063 | -0.07616 | 0.10021  | -0.0786679 | 0.08949  | -0.05021 | 0.27886  |
| 0.40365  | -0.00455 | 0.92181 | -0.05702 | 0.21876  | -0.0337013 | 0.4675   | -0.04488 | 0.33314  |
| 0.51427  | -0.02938 | 0.52651 | -0.09509 | 0.03997  | -0.0476869 | 0.30379  | -0.05961 | 0.19848  |
| 0.4463   | 0.109066 | 0.01839 | 0.110078 | 0.01733  | 0.00998092 | 0.82968  | 0.027104 | 0.55904  |
| 0.46179  | -0.0686  | 0.13883 | 0.018137 | 0.69585  | 0.10633279 | 0.02155  | 0.045399 | 0.3276   |
| 0.41429  | -0.0852  | 0.06581 | -0.0922  | 0.04645  | 0.09035504 | 0.05102  | 0.048459 | 0.29602  |
| 0.18699  | 0.088457 | 0.05611 | 0.049444 | 0.2863   | -0.0425036 | 0.35942  | -0.05269 | 0.25579  |
| 0.78866  | 0.043329 | 0.35016 | -0.02466 | 0.59508  | -0.1998239 | 1.36E-05 | -0.18623 | 5.14E-05 |
| 0.98941  | 0.100988 | 0.0291  | 0.085947 | 0.06348  | -0.0256476 | 0.58036  | -0.04588 | 0.32252  |
| 0.41342  | -0.06851 | 0.13934 | -0.20604 | 7.16E-06 | -0.2204485 | 1.51E-06 | -0.18287 | 7.04E-05 |
| 0.55057  | -0.0506  | 0.27516 | -0.10785 | 0.01974  | 0.01994388 | 0.66728  | 0.057339 | 0.21616  |
| 0.00608  | 0.036546 | 0.43075 | -0.11636 | 0.01186  | -0.079227  | 0.08723  | -0.06277 | 0.17567  |
| 0.24429  | 0.109137 | 0.01831 | 0.017008 | 0.71393  | 0.19624262 | 1.95E-05 | 0.174859 | 0.00015  |
| 0.28925  | 0.090372 | 0.05097 | 0.040623 | 0.38109  | -0.0066986 | 0.88521  | 0.002244 | 0.96143  |
| 0.73981  | 0.07267  | 0.11681 | 0.075099 | 0.10505  | 0.00984211 | 0.83201  | 0.045093 | 0.33087  |
| 1.04E-06 | -0.08675 | 0.06103 | -0.00206 | 0.96458  | 0.12532766 | 0.00669  | 0.143044 | 0.00194  |
| 0.90009  | 0.10674  | 0.02105 | -0.05736 | 0.21599  | -0.2188824 | 1.79E-06 | -0.14964 | 0.00118  |
| 0.87816  | 0.089823 | 0.0524  | 0.095471 | 0.03918  | 0.226254   | 7.79E-07 | 0.242354 | 1.14E-07 |
| 0.4168   | -0.00883 | 0.84911 | -0.05678 | 0.22069  | -0.0466715 | 0.31421  | -0.03114 | 0.502    |
| 0.39385  | 0.134673 | 0.00355 | 0.167869 | 0.00027  | 0.20185622 | 1.10E-05 | 0.287312 | 2.51E-10 |
| 0.89228  | -0.01499 | 0.74655 | -0.1177  | 0.01091  | 0.00800746 | 0.86298  | -0.03549 | 0.44421  |
| 0.40372  | 0.066104 | 0.15379 | 0.065184 | 0.15962  | 0.03430654 | 0.45954  | 0.037521 | 0.41854  |
| 0.46618  | 0.048497 | 0.29564 | 0.059419 | 0.19993  | 0.05386277 | 0.24535  | 0.041633 | 0.36936  |
| 0.75376  | 0.003318 | 0.94299 | 0.028815 | 0.5345   | 0.02081197 | 0.65372  | -0.03462 | 0.45545  |
| 0.07674  | -0.07337 | 0.11331 | -0.12583 | 0.00647  | 0.01791059 | 0.69946  | -0.04364 | 0.34671  |
| 0.35599  | -0.00516 | 0.91139 | -0.15779 | 0.00062  | -0.1532515 | 0.00089  | -0.08046 | 0.08239  |
| 0.54496  | -0.0177  | 0.70288 | 0.05081  | 0.27318  | 0.09385172 | 0.04264  | 0.067368 | 0.14606  |
| 0.68783  | -0.02092 | 0.65204 | -0.04887 | 0.29192  | -0.0298931 | 0.51931  | -0.05962 | 0.19839  |
| 0.5429   | -0.05452 | 0.23962 | -0.12465 | 0.007    | -0.1098204 | 0.01759  | -0.06346 | 0.17097  |
| 0.64212  | 0.019681 | 0.67141 | 0.055189 | 0.23391  | 0.03149342 | 0.49719  | 0.029545 | 0.52419  |
| 0.32806  | 0.006505 | 0.88851 | -0.08663 | 0.0614   | -0.0491406 | 0.28927  | -0.03821 | 0.41006  |
| 0.51272  | 0.032277 | 0.48654 | 0.055447 | 0.23173  | -0.0182165 | 0.69459  | -0.01541 | 0.7398   |
| 0.73881  | 0.025242 | 0.58636 | 0.007542 | 0.87087  | -0.0515981 | 0.2658   | -0.02874 | 0.5356   |
| 0.49165  | 0.171809 | 0.00019 | 0.193776 | 2.48E-05 | 0.09655102 | 0.037    | 0.045964 | 0.32161  |
| 0.48268  | -0.09955 | 0.03149 | -0.21949 | 1.68E-06 | -0.1447843 | 0.00171  | -0.04439 | 0.33853  |
| 0.11754  | 0.163213 | 0.0004  | 0.099749 | 0.03115  | -0.087071  | 0.06009  | -0.06834 | 0.14033  |
| 0.10418  | 0.090803 | 0.04987 | -0.09697 | 0.03619  | -0.2229526 | 1.14E-06 | -0.17526 | 0.00014  |

|          |          |          |          |          |            |          |          |          |
|----------|----------|----------|----------|----------|------------|----------|----------|----------|
| 0.13082  | 0.13813  | 0.00278  | -0.13464 | 0.00356  | -0.2760658 | 1.29E-09 | -0.20971 | 4.86E-06 |
| 0.83174  | 0.123771 | 0.00741  | -0.04204 | 0.36466  | -0.0191661 | 0.67953  | 0.111991 | 0.01547  |
| 0.01582  | -0.02101 | 0.65071  | -0.18504 | 5.75E-05 | 0.09505153 | 0.04005  | 0.052753 | 0.25523  |
| 0.97572  | 0.04592  | 0.32207  | 0.169919 | 0.00023  | 0.38256747 | 1.00E-17 | 0.269854 | 3.10E-09 |
| 0.63954  | 0.027016 | 0.56032  | 0.015497 | 0.73837  | 0.07525515 | 0.10433  | 0.071337 | 0.1237   |
| 0.11883  | 0.055963 | 0.2274   | 0.112398 | 0.01509  | 0.06812539 | 0.14157  | -0.02128 | 0.64641  |
| 0.39872  | 0.018498 | 0.69011  | 0.145509 | 0.00162  | 0.01911772 | 0.68029  | -0.14044 | 0.00235  |
| 0.31463  | 0.137657 | 0.00287  | 0.046074 | 0.32045  | -0.052009  | 0.262    | -0.01596 | 0.73091  |
| 0.20765  | -0.06661 | 0.15066  | -0.28321 | 4.61E-10 | -0.0780424 | 0.09207  | -0.082   | 0.07669  |
| 0.72467  | 0.023674 | 0.60984  | 0.091586 | 0.04792  | 0.20584358 | 7.31E-06 | 0.136185 | 0.00319  |
| 0.94613  | 0.084998 | 0.06647  | 0.226457 | 7.61E-07 | 0.17299963 | 0.00017  | -0.04684 | 0.31244  |
| 2.02E-08 | 0.049134 | 0.28933  | -0.06319 | 0.17278  | 0.0048066  | 0.91749  | 0.019343 | 0.67673  |
| 0.79366  | -0.14621 | 0.00153  | -0.24862 | 5.21E-08 | -0.0685305 | 0.13921  | -0.20833 | 5.63E-06 |
| 0.16812  | -0.23327 | 3.43E-07 | -0.07188 | 0.12088  | -0.1843744 | 6.12E-05 | -0.33131 | 2.00E-13 |
| 0.1142   | -0.25437 | 2.49E-08 | -0.1955  | 2.09E-05 | 0.05237827 | 0.25863  | -0.02287 | 0.62211  |
| 0.20601  | -0.0349  | 0.45183  | -0.00438 | 0.92474  | 0.0101477  | 0.82687  | 0.073851 | 0.11097  |
| 0.02099  | -0.16024 | 0.00051  | -0.11952 | 0.00973  | -0.0144068 | 0.75617  | -0.06621 | 0.15311  |
| 0.86815  | -0.00036 | 0.99386  | 0.077215 | 0.09558  | 0.28223663 | 5.31E-10 | 0.245898 | 7.35E-08 |
| 0.22146  | 0.030853 | 0.50599  | 0.219284 | 1.71E-06 | 0.16336561 | 0.00039  | 0.067948 | 0.14261  |
| 0.55823  | 0.15326  | 0.00089  | 0.127206 | 0.00591  | 0.25586479 | 2.05E-08 | 0.236839 | 2.24E-07 |
| 0.9747   | 0.07902  | 0.08806  | 0.238618 | 1.81E-07 | 0.15159915 | 0.00102  | 0.058812 | 0.20457  |
| 0.45511  | 0.194434 | 2.33E-05 | 0.094121 | 0.04205  | -0.095079  | 0.03999  | -0.11826 | 0.01053  |
| 0.00362  | 0.138838 | 0.00264  | 0.01089  | 0.81443  | -0.1281622 | 0.00554  | -0.01948 | 0.6746   |
| 4.03E-05 | 0.032099 | 0.48895  | 0.062939 | 0.17452  | 0.11007379 | 0.01733  | 0.065479 | 0.15774  |
| 0.0286   | 0.056117 | 0.22613  | -0.06008 | 0.19493  | -0.0477045 | 0.30361  | 0.008909 | 0.84773  |
| 0.00258  | 0.179604 | 9.51E-05 | 0.1487   | 0.00127  | 0.1787371  | 0.0001   | 0.231925 | 4.03E-07 |
| 0.04701  | -0.15262 | 0.00094  | -0.05712 | 0.21789  | 0.15375911 | 0.00086  | 0.105543 | 0.02254  |
| 0.67999  | 0.131462 | 0.00443  | 0.129781 | 0.00497  | 0.02974302 | 0.52141  | -0.0552  | 0.23379  |
| 0.68493  | -0.05974 | 0.19751  | -0.33112 | 2.06E-13 | -0.172959  | 0.00017  | -0.08666 | 0.06131  |
| 2.71E-06 | 0.191292 | 3.16E-05 | 0.208078 | 5.78E-06 | -0.037739  | 0.41584  | -0.13093 | 0.0046   |
| 0.00042  | -0.15145 | 0.00103  | -0.07082 | 0.12647  | 0.10324791 | 0.02567  | 0.169421 | 0.00024  |
| 0.89303  | 0.109523 | 0.0179   | -0.05509 | 0.23478  | -0.0354783 | 0.44434  | 0.046194 | 0.31919  |
| 0.37117  | -0.02709 | 0.55919  | -0.02651 | 0.56768  | 0.05395318 | 0.24456  | -0.0388  | 0.40286  |
| 0.01458  | -0.02089 | 0.65245  | -0.04837 | 0.29688  | 0.07040487 | 0.12869  | -0.06083 | 0.18941  |
| 0.20165  | -0.04729 | 0.30779  | 0.031299 | 0.49984  | 0.07845934 | 0.09034  | 0.085121 | 0.06608  |
| 0.68262  | 0.186709 | 4.91E-05 | 0.409134 | 2.85E-20 | 0.38335548 | 8.50E-18 | 0.213874 | 3.11E-06 |
| 0.00167  | 0.31597  | 2.75E-12 | 0.147532 | 0.00139  | -0.022604  | 0.6261   | -0.05572 | 0.2294   |
| 0.32614  | 0.006443 | 0.88956  | -0.06944 | 0.13405  | -0.092523  | 0.04568  | -0.08794 | 0.05756  |
| 0.18807  | -0.04127 | 0.37353  | 0.200434 | 1.28E-05 | 0.52616667 | 1.30E-34 | 0.373926 | 6.05E-17 |
| 6.46E-05 | 0.061307 | 0.18598  | 0.162483 | 0.00042  | 0.05684918 | 0.22012  | -0.08699 | 0.06031  |
| 0.97474  | 0.292516 | 1.15E-10 | 0.129662 | 0.00501  | -0.1445486 | 0.00174  | -0.25762 | 1.62E-08 |
| 0.60891  | 0.006711 | 0.885    | -0.03097 | 0.50441  | -0.0424898 | 0.35958  | -0.03076 | 0.50725  |
| 0.1038   | 0.247661 | 5.88E-08 | 0.265807 | 5.41E-09 | 0.11431512 | 0.01344  | 0.157692 | 0.00063  |
| 0.56699  | 0.345407 | 1.57E-14 | 0.076398 | 0.09915  | -0.068191  | 0.14119  | -0.0571  | 0.21807  |
| 0.49294  | 0.02796  | 0.5467   | 0.011077 | 0.81131  | -0.0023584 | 0.95946  | -0.01788 | 0.6999   |

|          |          |          |          |          |            |          |          |          |
|----------|----------|----------|----------|----------|------------|----------|----------|----------|
| 0.96779  | -0.04165 | 0.36918  | -0.00538 | 0.90767  | -0.0509202 | 0.27214  | -0.06514 | 0.15991  |
| 0.46861  | 0.210155 | 4.64E-06 | 0.133026 | 0.00398  | 0.08932994 | 0.05372  | 0.179731 | 9.40E-05 |
| 0.21676  | -0.01435 | 0.75707  | -0.00016 | 0.99724  | 0.03114845 | 0.50191  | -0.10906 | 0.0184   |
| 0.18868  | 0.275596 | 1.38E-09 | 0.157444 | 0.00064  | 0.13140337 | 0.00445  | 0.212476 | 3.62E-06 |
| 0.00069  | -0.12801 | 0.0056   | -0.20151 | 1.14E-05 | -0.0010106 | 0.98262  | -0.12617 | 0.00633  |
| 6.48E-21 | 0.044608 | 0.33611  | -0.13669 | 0.00308  | -0.0483017 | 0.29759  | -0.06295 | 0.17447  |
| 5.34E-06 | 0.222041 | 1.26E-06 | 0.07844  | 0.09042  | 0.04264357 | 0.35784  | 0.054473 | 0.24004  |
| 0.25735  | 0.056347 | 0.22423  | -0.01363 | 0.76887  | 0.06712827 | 0.14751  | 0.112822 | 0.01471  |
| 3.60E-05 | -0.03912 | 0.39898  | -0.03356 | 0.46941  | 0.13465441 | 0.00355  | 0.115774 | 0.01229  |
| 0.01782  | 0.101251 | 0.02868  | -0.07224 | 0.11901  | -0.0244739 | 0.59781  | 0.05963  | 0.19834  |
| 1.51E-07 | 0.099968 | 0.03078  | 0.102653 | 0.02654  | 0.26993712 | 3.06E-09 | 0.200646 | 1.25E-05 |
| 0.51845  | 0.017887 | 0.69984  | -0.0812  | 0.07963  | 0.10748295 | 0.02017  | 0.221733 | 1.30E-06 |
| 0.03793  | -0.17863 | 0.0001   | -0.08028 | 0.08308  | 0.06639821 | 0.15197  | 0.022365 | 0.62975  |
| 0.25429  | 0.113174 | 0.0144   | 0.488513 | 2.21E-29 | 0.32697031 | 4.26E-13 | 0.118614 | 0.0103   |
| 0.09339  | -0.13257 | 0.00411  | 0.097197 | 0.03575  | 0.07850304 | 0.09016  | -0.00804 | 0.86235  |
| 0.09742  | 0.152995 | 0.00091  | 0.246989 | 6.40E-08 | 0.11504008 | 0.01286  | -0.09353 | 0.04337  |
| 0.03956  | -0.03118 | 0.50155  | -0.0125  | 0.78767  | 0.01916164 | 0.6796   | 0.005366 | 0.90793  |
| 0.21086  | -0.20366 | 9.17E-06 | -0.04079 | 0.37914  | 0.06256107 | 0.17713  | 0.055802 | 0.22875  |
| 0.19661  | 0.33056  | 2.28E-13 | 0.381531 | 1.25E-17 | -0.0350247 | 0.45019  | -0.01432 | 0.75761  |
| 0.77489  | 0.101522 | 0.02826  | -0.0636  | 0.17001  | -0.0684901 | 0.13945  | -0.00073 | 0.98744  |
| 0.65345  | -0.07221 | 0.11915  | -0.12633 | 0.00626  | -0.0927855 | 0.04506  | -0.07222 | 0.11911  |
| 0.31071  | -0.00607 | 0.89594  | 0.031093 | 0.50268  | 0.02573323 | 0.5791   | 0.007734 | 0.86761  |
| 0.45833  | 0.171735 | 0.00019  | 0.042929 | 0.35463  | -0.0437173 | 0.34586  | -0.0053  | 0.9091   |
| 0.06268  | -0.08904 | 0.0545   | -0.22947 | 5.37E-07 | -0.1992734 | 1.44E-05 | -0.32522 | 5.76E-13 |
| 0.00154  | 0.168792 | 0.00025  | 0.202618 | 1.02E-05 | 0.0641781  | 0.16617  | -0.00547 | 0.90613  |
| 0.65587  | -0.04018 | 0.38637  | 0.132575 | 0.00411  | 0.27535249 | 1.43E-09 | 0.256515 | 1.88E-08 |
| 0.00288  | 0.078358 | 0.09076  | 0.103648 | 0.0251   | 0.16998694 | 0.00022  | 0.157753 | 0.00062  |
| 0.01761  | 0.14964  | 0.00118  | 0.12268  | 0.00795  | -0.0642594 | 0.16563  | -0.09506 | 0.04004  |
| 0.1613   | 0.021461 | 0.64367  | 0.051698 | 0.26487  | 0.19180126 | 3.01E-05 | 0.160852 | 0.00048  |
| 0.33554  | 0.034801 | 0.45309  | 0.051489 | 0.26681  | 0.08575847 | 0.06407  | 0.006639 | 0.88622  |
| 3.97E-15 | 0.127501 | 0.00579  | 0.235638 | 2.59E-07 | 0.2530605  | 2.95E-08 | 0.151897 | 0.00099  |
| 0.01218  | 0.090395 | 0.05091  | -0.03154 | 0.4965   | -0.0542417 | 0.24204  | -0.05486 | 0.23668  |
| 0.4489   | 0.038773 | 0.40318  | 0.079753 | 0.08514  | 0.0194624  | 0.67485  | 0.013754 | 0.76689  |
| 0.05933  | 0.140863 | 0.00228  | 0.055348 | 0.23256  | 0.13657003 | 0.0031   | 0.257348 | 1.68E-08 |
| 0.29492  | -0.05074 | 0.27381  | -0.04584 | 0.32296  | 0.01032315 | 0.82393  | 0.048759 | 0.29303  |
| 0.98473  | 0.151019 | 0.00106  | 0.154986 | 0.00078  | 0.07069833 | 0.1271   | 0.023472 | 0.61289  |
| 4.68E-07 | 0.030593 | 0.50957  | 0.06953  | 0.13353  | 0.06987724 | 0.13159  | 0.161391 | 0.00046  |
| 0.54215  | 0.168387 | 0.00026  | 0.116916 | 0.01146  | 0.05353412 | 0.24825  | 0.065087 | 0.16024  |
| 0.00703  | 0.246557 | 6.76E-08 | 0.233585 | 3.31E-07 | 0.46333394 | 3.14E-26 | 0.351586 | 4.92E-15 |
| 3.46E-07 | -0.10182 | 0.0278   | 0.027068 | 0.55957  | 0.0943835  | 0.04148  | 0.16053  | 0.0005   |
| 1.07E-07 | -0.17509 | 0.00014  | -0.11214 | 0.01533  | 0.0029292  | 0.94966  | 0.01206  | 0.79491  |
| 0.07987  | 0.002536 | 0.95641  | -0.01161 | 0.80246  | 0.0682502  | 0.14084  | 0.130784 | 0.00464  |
| 0.00022  | -0.10475 | 0.02359  | 0.033496 | 0.47022  | 0.42784942 | 3.29E-22 | 0.322322 | 9.46E-13 |
| 0.00015  | -0.08254 | 0.07476  | 0.022793 | 0.62321  | 0.25832505 | 1.48E-08 | 0.301975 | 2.66E-11 |
| 0.0603   | -0.00718 | 0.87702  | -0.0947  | 0.04079  | 0.11740418 | 0.01111  | 0.11781  | 0.01084  |

|          |          |          |          |          |            |          |          |          |
|----------|----------|----------|----------|----------|------------|----------|----------|----------|
| 0.00081  | 0.314826 | 3.33E-12 | 0.261747 | 9.38E-09 | 0.01251869 | 0.7873   | -0.01771 | 0.70271  |
| 0.00195  | 0.127589 | 0.00576  | 0.13377  | 0.00378  | -0.0233645 | 0.61452  | -0.12253 | 0.00803  |
| 0.01842  | 0.091517 | 0.04809  | -0.07639 | 0.09918  | -0.2171744 | 2.17E-06 | -0.08301 | 0.07309  |
| 2.09E-07 | 0.015009 | 0.74633  | -0.06302 | 0.17395  | 0.1087427  | 0.01874  | 0.21215  | 3.74E-06 |
| 0.25575  | 0.218255 | 1.92E-06 | 0.144376 | 0.00176  | 0.07972027 | 0.08527  | 0.015778 | 0.7338   |
| 0.34312  | -0.014   | 0.76283  | -0.19549 | 2.10E-05 | -0.0884429 | 0.05615  | -0.06867 | 0.13842  |
| 0.83278  | 0.039709 | 0.39191  | 0.016885 | 0.7159   | 0.0345115  | 0.45686  | 0.062728 | 0.17597  |
| 0.14563  | -0.0274  | 0.55478  | -0.01388 | 0.76482  | 0.00808697 | 0.86163  | 0.020027 | 0.66599  |
| 0.04182  | 0.061629 | 0.18368  | -0.00152 | 0.9738   | -0.0141257 | 0.76078  | 0.019821 | 0.66921  |
| 0.04222  | -0.02867 | 0.53659  | 0.034688 | 0.45457  | 0.2364416  | 2.35E-07 | 0.076157 | 0.10023  |
| 0.82852  | 0.057412 | 0.21557  | 0.164872 | 0.00035  | 0.23954854 | 1.61E-07 | 0.229016 | 5.66E-07 |
| 0.52596  | -0.12405 | 0.00728  | -0.06816 | 0.14135  | 0.10549966 | 0.0226   | 0.242516 | 1.12E-07 |
| 0.11962  | 0.343688 | 2.15E-14 | 0.225575 | 8.42E-07 | 0.21955544 | 1.66E-06 | 0.204976 | 8.00E-06 |
| 0.01842  | 0.277104 | 1.12E-09 | 0.092007 | 0.0469   | -0.1743966 | 0.00015  | -0.26972 | 3.16E-09 |
| 0.55148  | 0.095582 | 0.03895  | 0.230931 | 4.52E-07 | 0.1157578  | 0.01231  | 0.098697 | 0.03298  |
| 0.00415  | 0.322387 | 9.36E-13 | 0.286383 | 2.89E-10 | 0.06565716 | 0.1566   | 0.020682 | 0.65575  |
| 0.00784  | 0.059785 | 0.19717  | 0.053742 | 0.24642  | 0.01501405 | 0.74624  | 0.029216 | 0.52882  |
| 0.00382  | 0.06449  | 0.16412  | 0.008506 | 0.85455  | -0.0418207 | 0.3672   | 0.020665 | 0.65602  |
| 0.21744  | 0.035582 | 0.44301  | 0.065359 | 0.1585   | 0.01925068 | 0.67819  | 0.037942 | 0.41334  |
| 0.07146  | 0.026315 | 0.57054  | 0.05626  | 0.22494  | 0.02350808 | 0.61235  | 0.033992 | 0.46367  |
| 0.31912  | 0.148788 | 0.00126  | -0.00047 | 0.99197  | 0.0142905  | 0.75808  | 0.097872 | 0.03448  |
| 0.33598  | 0.115988 | 0.01213  | 0.48554  | 5.38E-29 | 0.23085343 | 4.57E-07 | 0.037821 | 0.41483  |
| 0.13647  | 0.081336 | 0.07911  | -0.17462 | 0.00015  | -0.1766074 | 0.00012  | -0.26387 | 7.04E-09 |
| 0.40822  | 0.191651 | 3.06E-05 | 0.235369 | 2.67E-07 | 0.43178567 | 1.24E-22 | 0.248069 | 5.59E-08 |
| 0.29111  | 0.092343 | 0.0461   | 0.008642 | 0.85225  | -0.0202026 | 0.66323  | -0.0402  | 0.38611  |
| 0.45063  | 0.06774  | 0.14384  | 0.210536 | 4.45E-06 | 0.21554643 | 2.59E-06 | 0.114272 | 0.01348  |
| 0.77484  | 0.085482 | 0.06493  | 0.085766 | 0.06404  | -0.0646749 | 0.16291  | -0.07104 | 0.12528  |
| 0.29347  | -0.00876 | 0.85028  | -0.18234 | 7.40E-05 | 0.01499548 | 0.74654  | 0.110755 | 0.01665  |
| 0.8448   | -0.08642 | 0.06204  | -0.11502 | 0.01288  | -0.1169823 | 0.01141  | -0.0759  | 0.10139  |
| 0.34633  | -0.18407 | 6.30E-05 | -0.09503 | 0.0401   | -0.1832562 | 6.79E-05 | -0.19248 | 2.82E-05 |
| 0.00568  | 0.245201 | 8.02E-08 | 0.117678 | 0.01093  | -0.0332053 | 0.47409  | -0.06644 | 0.15169  |
| 0.12178  | -0.07418 | 0.10938  | -0.28402 | 4.09E-10 | -0.250469  | 4.11E-08 | -0.20044 | 1.27E-05 |
| 0.33091  | -0.06243 | 0.17806  | -0.17455 | 0.00015  | -0.0359895 | 0.4378   | -0.01847 | 0.6905   |
| 0.6623   | 0.064127 | 0.16651  | 0.010509 | 0.82081  | 0.03944249 | 0.3951   | 0.04247  | 0.35981  |
| 0.13037  | -0.22918 | 5.55E-07 | 0.015125 | 0.74443  | 0.4038719  | 9.49E-20 | 0.310936 | 6.31E-12 |
| 0.11429  | -0.00367 | 0.93702  | -0.0488  | 0.29262  | -0.0436574 | 0.34652  | 0.020432 | 0.65965  |
| 0.00034  | -0.01484 | 0.7491   | 0.023361 | 0.61458  | 0.11882817 | 0.01017  | 0.228319 | 6.14E-07 |
| 0.03934  | -0.21269 | 3.53E-06 | -0.04294 | 0.35452  | 0.07684738 | 0.09718  | 0.046454 | 0.31647  |
| 0.04965  | 0.231484 | 4.24E-07 | 0.112637 | 0.01488  | 0.16848077 | 0.00025  | 0.257072 | 1.75E-08 |
| 0.58303  | -0.24082 | 1.38E-07 | -0.16479 | 0.00035  | -0.1654309 | 0.00033  | -0.2215  | 1.34E-06 |
| 0.70888  | 0.14645  | 0.00151  | 0.242982 | 1.06E-07 | 0.07643076 | 0.09901  | -0.07845 | 0.09039  |
| 0.20407  | 0.29925  | 4.07E-11 | 0.362963 | 5.47E-16 | 0.15810707 | 0.00061  | 0.106479 | 0.02137  |
| 0.17036  | -0.04487 | 0.33324  | -0.30465 | 1.74E-11 | -0.1779428 | 0.00011  | -0.18844 | 4.17E-05 |
| 0.26285  | -0.00466 | 0.91998  | -0.04397 | 0.34305  | -0.142845  | 0.00197  | -0.13394 | 0.00374  |
| 0.23156  | 0.181824 | 7.76E-05 | 0.063554 | 0.17034  | 0.09302605 | 0.04451  | 0.13644  | 0.00313  |

|          |          |          |          |          |            |          |          |          |
|----------|----------|----------|----------|----------|------------|----------|----------|----------|
| 0.73961  | -0.02145 | 0.64385  | 0.093302 | 0.04388  | -0.1019775 | 0.02755  | -0.09775 | 0.0347   |
| 0.19141  | 0.259535 | 1.26E-08 | -0.10404 | 0.02455  | -0.3716032 | 9.71E-17 | -0.33058 | 2.27E-13 |
| 1.72E-05 | -0.03816 | 0.4107   | -0.09693 | 0.03626  | -0.0806078 | 0.08184  | -0.05786 | 0.21198  |
| 0.48015  | -0.03749 | 0.41892  | -0.1196  | 0.00968  | 0.10110671 | 0.02891  | 0.144499 | 0.00174  |
| 0.24742  | 0.081349 | 0.07906  | 0.06884  | 0.13743  | 0.02419863 | 0.60194  | 0.000492 | 0.99154  |
| 0.19199  | 0.006427 | 0.88983  | 0.022543 | 0.62702  | 0.02678565 | 0.56367  | -0.01605 | 0.72947  |
| 0.00619  | 0.111534 | 0.01589  | -0.02953 | 0.52436  | -0.0073603 | 0.87396  | 0.056578 | 0.22233  |
| 0.00712  | 0.006904 | 0.88172  | -0.06616 | 0.15347  | 0.07879814 | 0.08896  | 0.080799 | 0.08112  |
| 0.00469  | 0.108349 | 0.01918  | 0.015367 | 0.74048  | -0.003725  | 0.93601  | -0.0187  | 0.68694  |
| 0.0003   | -0.0178  | 0.70129  | -0.01392 | 0.7642   | -0.0417868 | 0.36759  | -0.06556 | 0.15723  |
| 9.04E-05 | -0.13331 | 0.0039   | -0.28817 | 2.21E-10 | -0.1097469 | 0.01767  | -0.14131 | 0.00221  |
| 0.06118  | 0.212562 | 3.58E-06 | -0.03251 | 0.48341  | -0.0158563 | 0.73253  | 0.103732 | 0.02498  |
| 0.00063  | 0.066029 | 0.15426  | -0.03196 | 0.49084  | 0.00628745 | 0.89221  | 0.062965 | 0.17434  |
| 0.38148  | 0.21067  | 4.39E-06 | 0.140473 | 0.00235  | 0.09653381 | 0.03703  | 0.082252 | 0.07578  |
| 1.58E-05 | -0.03327 | 0.47318  | -0.04363 | 0.34685  | -0.0136055 | 0.76934  | -0.01849 | 0.69022  |
| 1.78E-17 | 0.090161 | 0.05152  | 0.201205 | 1.18E-05 | 0.25341901 | 2.81E-08 | 0.309001 | 8.64E-12 |
| 0.02573  | -0.01617 | 0.72744  | 0.058832 | 0.20442  | -0.0258951 | 0.57671  | -0.09624 | 0.03761  |
| 7.80E-05 | 0.101921 | 0.02764  | 0.11898  | 0.01007  | 0.07885582 | 0.08872  | 0.061862 | 0.18203  |
| 0.02925  | 0.109026 | 0.01843  | 0.030931 | 0.5049   | 0.01169998 | 0.80091  | 0.0815   | 0.0785   |
| 0.75226  | 0.050219 | 0.2788   | 0.02087  | 0.65282  | -0.0278639 | 0.54808  | -0.00118 | 0.9797   |
| 0.63987  | -0.01858 | 0.68873  | 0.029223 | 0.52872  | 0.05163081 | 0.26549  | 0.066833 | 0.1493   |
| 0.8708   | 0.013509 | 0.77093  | -0.04962 | 0.28458  | -0.0372257 | 0.42222  | -0.06157 | 0.18408  |
| 0.13667  | 0.092483 | 0.04577  | -0.02407 | 0.60384  | 0.04896338 | 0.29101  | -0.0408  | 0.37898  |
| 0.79985  | -0.05407 | 0.24354  | -0.23595 | 2.49E-07 | -0.4140731 | 9.01E-21 | -0.34733 | 1.10E-14 |
| 6.78E-08 | 0.135949 | 0.00324  | 0.020139 | 0.66423  | -0.0327589 | 0.48005  | -0.14761 | 0.00138  |
| 0.07906  | 0.092261 | 0.0463   | 0.162342 | 0.00043  | 0.24284712 | 1.07E-07 | 0.086662 | 0.06131  |
| 0.17023  | 0.071189 | 0.12448  | 0.019731 | 0.67063  | 0.08898448 | 0.05465  | 0.090941 | 0.04952  |
| 0.10431  | 0.050981 | 0.27156  | -0.01034 | 0.82368  | 0.04502282 | 0.33163  | 0.117227 | 0.01124  |
| 0.14486  | 0.044526 | 0.33699  | 0.021406 | 0.64452  | 0.06696344 | 0.1485   | 0.144542 | 0.00174  |
| 0.5585   | 0.016574 | 0.72091  | -0.0241  | 0.60349  | -0.1302912 | 0.0048   | -0.07368 | 0.1118   |
| 0.05828  | -0.22082 | 1.44E-06 | -0.34592 | 1.42E-14 | -0.2019221 | 1.10E-05 | -0.17199 | 0.00019  |
| 0.99494  | 0.312242 | 5.10E-12 | -0.03228 | 0.48652  | -0.1952323 | 2.15E-05 | -0.24766 | 5.89E-08 |
| 0.00203  | 0.055469 | 0.23154  | -0.1347  | 0.00354  | -0.0190071 | 0.68204  | 0.184142 | 6.26E-05 |
| 0.02711  | -0.1487  | 0.00127  | -0.06702 | 0.14817  | -0.0154937 | 0.73842  | 0.023905 | 0.60635  |
| 0.16966  | 0.011502 | 0.80421  | 0.050183 | 0.27915  | -0.0532852 | 0.25046  | -0.06471 | 0.16268  |
| 0.77024  | 0.049425 | 0.28648  | 0.013868 | 0.76502  | -0.0138178 | 0.76584  | -0.01824 | 0.6942   |
| 0.54851  | 0.124416 | 0.0071   | 0.099413 | 0.03172  | 0.09679136 | 0.03653  | 0.027825 | 0.54863  |
| 7.92E-07 | -0.07955 | 0.08593  | 0.000148 | 0.99745  | 0.32531767 | 5.66E-13 | 0.362887 | 5.55E-16 |
| 2.26E-10 | 0.095292 | 0.03955  | 0.048501 | 0.29559  | 0.0534988  | 0.24856  | 0.117918 | 0.01076  |
| 0.00433  | 0.122068 | 0.00827  | 0.118781 | 0.0102   | 0.17511973 | 0.00014  | 0.081322 | 0.07916  |
| 0.1579   | 0.202846 | 9.97E-06 | 0.275754 | 1.35E-09 | 0.10883071 | 0.01865  | -0.06849 | 0.13947  |
| 0.39841  | 0.091947 | 0.04705  | -0.10225 | 0.02714  | -0.0826774 | 0.07427  | 0.011123 | 0.81054  |
| 0.00227  | 0.194101 | 2.40E-05 | 0.037886 | 0.41403  | -0.1057705 | 0.02225  | -0.1184  | 0.01044  |
| 0.69016  | 0.029795 | 0.52069  | -0.00112 | 0.98082  | 0.10091804 | 0.02921  | 0.111837 | 0.01561  |
| 0.91889  | -0.00368 | 0.93675  | -0.0574  | 0.21565  | -0.0386183 | 0.40506  | 0.028632 | 0.53709  |



|          |          |          |          |          |            |          |          |          |
|----------|----------|----------|----------|----------|------------|----------|----------|----------|
| 0.20867  | 0.092738 | 0.04517  | -0.03901 | 0.40026  | 0.00962914 | 0.83559  | 0.106303 | 0.02158  |
| 0.0256   | 0.125876 | 0.00645  | 0.002759 | 0.95258  | -0.0127689 | 0.78315  | -0.00331 | 0.94316  |
| 4.45E-06 | 0.166603 | 0.0003   | 0.036963 | 0.42551  | 0.05151989 | 0.26652  | 0.110002 | 0.01741  |
| 0.27519  | -0.0566  | 0.22215  | 0.053051 | 0.25255  | 0.10288594 | 0.02619  | 0.070402 | 0.12871  |
| 0.28366  | 0.1778   | 0.00011  | 0.066837 | 0.14927  | 0.00900865 | 0.84605  | 0.082078 | 0.0764   |
| 0.29648  | 0.16285  | 0.00041  | 0.212867 | 3.47E-06 | 0.25082135 | 3.93E-08 | 0.154001 | 0.00084  |
| 1.14E-05 | -0.09319 | 0.04413  | -0.05768 | 0.21344  | 0.05477063 | 0.23748  | 0.047983 | 0.30079  |
| 0.43901  | -0.0692  | 0.13536  | -0.07548 | 0.10328  | 0.0511574  | 0.26991  | 0.117198 | 0.01126  |
| 0.20424  | 0.030789 | 0.50686  | -0.05454 | 0.23949  | 0.06628689 | 0.15266  | 0.202368 | 1.05E-05 |
| 0.19742  | 0.14361  | 0.00186  | 0.030891 | 0.50545  | 0.03559281 | 0.44287  | 0.002925 | 0.94973  |
| 0.00507  | 0.20191  | 1.10E-05 | -0.02833 | 0.54136  | 0.3009627  | 3.12E-11 | 0.210516 | 4.46E-06 |
| 0.66961  | 0.128352 | 0.00547  | 0.091781 | 0.04745  | 0.16813184 | 0.00026  | 0.156174 | 0.00071  |
| 3.05E-05 | 0.069152 | 0.13566  | -0.00464 | 0.9204   | -0.0423395 | 0.36128  | -0.09519 | 0.03975  |
| 0.05521  | 0.09831  | 0.03367  | 0.050797 | 0.2733   | 0.00223789 | 0.96153  | -0.01285 | 0.78182  |
| 0.80612  | -0.03139 | 0.4986   | 0.105992 | 0.02197  | 0.1464972  | 0.0015   | 0.198513 | 1.55E-05 |
| 1.42E-11 | 0.000159 | 0.99727  | 0.091067 | 0.04921  | 0.01801702 | 0.69777  | -0.06622 | 0.1531   |
| 0.60799  | -0.00189 | 0.96759  | 0.133672 | 0.0038   | -0.0127105 | 0.78412  | -0.06052 | 0.19174  |
| 0.98756  | -0.1827  | 7.15E-05 | -0.28509 | 3.49E-10 | -0.2724251 | 2.16E-09 | -0.25991 | 1.20E-08 |
| 0.13165  | 0.117807 | 0.01084  | 0.065788 | 0.15578  | 0.06204241 | 0.18075  | 0.180645 | 8.65E-05 |
| 0.00818  | -0.02543 | 0.58355  | -0.01444 | 0.75568  | 0.059178   | 0.20177  | 0.07381  | 0.11117  |
| 0.52025  | -0.18825 | 4.24E-05 | 0.039683 | 0.39222  | 0.22126721 | 1.37E-06 | 0.186514 | 5.00E-05 |
| 0.00022  | 0.085737 | 0.06413  | -0.03672 | 0.42851  | -0.083387  | 0.07181  | -0.11134 | 0.01608  |
| 0.09696  | 0.087478 | 0.0589   | -0.07492 | 0.1059   | 0.08681049 | 0.06086  | 0.086885 | 0.06064  |
| 0.00035  | 0.162345 | 0.00043  | 0.200913 | 1.22E-05 | -0.0960763 | 0.03794  | -0.08829 | 0.05657  |
| 0.14119  | -0.03385 | 0.46554  | 0.09966  | 0.0313   | 0.13181924 | 0.00432  | 0.176913 | 0.00012  |
| 0.83603  | 0.144075 | 0.0018   | 0.190889 | 3.29E-05 | 0.06301144 | 0.17402  | 0.032522 | 0.48324  |
| 0.34228  | 0.035918 | 0.43872  | 0.004438 | 0.9238   | -0.0073543 | 0.87406  | 0.000313 | 0.99461  |
| 0.12414  | 0.163423 | 0.00039  | 0.18343  | 6.69E-05 | -0.0694243 | 0.13412  | -0.143   | 0.00195  |
| 0.77145  | 0.030406 | 0.51216  | 0.031719 | 0.49411  | 0.10227958 | 0.02709  | 0.00521  | 0.9106   |
| 0.01002  | 0.104811 | 0.0235   | 0.157741 | 0.00062  | 0.01588138 | 0.73212  | -0.00121 | 0.97927  |
| 0.32095  | -0.04518 | 0.32992  | -0.42555 | 5.78E-22 | -0.372633  | 7.88E-17 | -0.30126 | 2.97E-11 |
| 0.80076  | 0.175629 | 0.00014  | 0.358721 | 1.25E-15 | 0.38378365 | 7.76E-18 | 0.152445 | 0.00095  |
| 0.07292  | 0.057874 | 0.2119   | -0.00315 | 0.94585  | 0.19124839 | 3.18E-05 | 0.011013 | 0.81237  |
| 0.44848  | 0.101669 | 0.02803  | 0.209737 | 4.85E-06 | 0.23342566 | 3.37E-07 | -0.01915 | 0.67974  |
| 0.29472  | -0.0616  | 0.18389  | 0.105424 | 0.0227   | 0.26502952 | 6.02E-09 | 0.063681 | 0.16948  |
| 0.69145  | 0.153439 | 0.00088  | 0.099804 | 0.03105  | 0.04333767 | 0.35006  | 0.010854 | 0.81504  |
| 0.12446  | -0.15336 | 0.00088  | 0.010212 | 0.82579  | 0.17169758 | 0.00019  | 0.171713 | 0.00019  |
| 0.00027  | -0.03631 | 0.43368  | -0.21306 | 3.40E-06 | -0.2801279 | 7.22E-10 | -0.27447 | 1.62E-09 |
| 0.1053   | 0.241353 | 1.29E-07 | 0.303011 | 2.26E-11 | 0.30227424 | 2.53E-11 | 0.152995 | 0.00091  |
| 0.62912  | 0.17972  | 9.41E-05 | 0.123139 | 0.00772  | 0.07169124 | 0.12184  | -0.01955 | 0.67345  |
| 2.43E-05 | -0.15541 | 0.00075  | -0.36161 | 7.14E-16 | -0.0134886 | 0.77126  | -0.12691 | 0.00603  |
| 0.08467  | -0.06919 | 0.13545  | 0.080888 | 0.08078  | 0.28681299 | 2.71E-10 | 0.225486 | 8.51E-07 |
| 0.00298  | 0.094759 | 0.04067  | 0.038672 | 0.4044   | 0.12726647 | 0.00589  | 0.176202 | 0.00013  |
| 0.32814  | -0.00842 | 0.85595  | -0.04328 | 0.35066  | -0.0818631 | 0.07718  | -0.08319 | 0.07249  |
| 0.71353  | 0.108719 | 0.01877  | 0.012464 | 0.78821  | -0.0332914 | 0.47294  | -0.00053 | 0.99082  |

|          |          |          |          |          |            |          |          |          |
|----------|----------|----------|----------|----------|------------|----------|----------|----------|
| 1.36E-05 | 0.042494 | 0.35953  | 0.020448 | 0.6594   | -0.1563555 | 0.0007   | -0.19613 | 1.97E-05 |
| 0.86752  | 0.043026 | 0.35354  | 0.052157 | 0.26065  | -0.011289  | 0.80776  | -0.03011 | 0.51634  |
| 0.00013  | -0.08957 | 0.05309  | -0.00955 | 0.83693  | -0.0557328 | 0.22932  | -0.12324 | 0.00767  |
| 0.01203  | 0.031607 | 0.49564  | 0.041849 | 0.36688  | 0.11501499 | 0.01288  | 0.145577 | 0.00161  |
| 0.69376  | 0.041747 | 0.36805  | -0.10348 | 0.02534  | -0.2804471 | 6.89E-10 | -0.30616 | 1.37E-11 |
| 0.20166  | 0.31483  | 3.33E-12 | 0.160814 | 0.00049  | -0.1716038 | 0.00019  | -0.15958 | 0.00054  |
| 0.39994  | 0.272351 | 2.19E-09 | 0.193723 | 2.50E-05 | 0.26455288 | 6.42E-09 | 0.29241  | 1.17E-10 |
| 0.42711  | -0.07518 | 0.10469  | -0.09919 | 0.03211  | -0.0593971 | 0.2001   | -0.05963 | 0.1983   |
| 0.67463  | -0.03859 | 0.40535  | -0.04705 | 0.31031  | -0.0213912 | 0.64474  | -0.04596 | 0.3216   |
| 0.1786   | -0.01404 | 0.76213  | -0.01993 | 0.6675   | 0.03370227 | 0.46749  | 0.012743 | 0.78359  |
| 0.97481  | -0.03464 | 0.45515  | 0.018581 | 0.68879  | 0.06523748 | 0.15927  | 0.073978 | 0.11036  |
| 0.27167  | 0.004199 | 0.92789  | -0.09715 | 0.03583  | -0.068743  | 0.13799  | -0.08083 | 0.081    |
| 0.00472  | 0.040525 | 0.38225  | 0.342073 | 2.89E-14 | 0.25244193 | 3.19E-08 | 0.115702 | 0.01235  |
| 3.37E-05 | -0.08734 | 0.0593   | 0.250464 | 4.12E-08 | 0.41328959 | 1.08E-20 | 0.229901 | 5.11E-07 |
| 0.2222   | -0.15217 | 0.00097  | -0.15984 | 0.00053  | 0.08206817 | 0.07644  | 0.086567 | 0.06159  |
| 0.41549  | -0.10203 | 0.02748  | -0.06806 | 0.14193  | 0.02884392 | 0.53409  | 0.045982 | 0.32142  |
| 1.07E-11 | 0.08258  | 0.07461  | 0.044959 | 0.33231  | 0.06842485 | 0.13983  | 0.138146 | 0.00277  |
| 0.00856  | 0.210734 | 4.36E-06 | 0.161004 | 0.00048  | 0.2998157  | 3.73E-11 | 0.302087 | 2.61E-11 |
| 0.34369  | 0.069036 | 0.13632  | 0.29613  | 6.61E-11 | 0.0148031  | 0.74968  | -0.19845 | 1.56E-05 |
| 6.52E-15 | 0.162439 | 0.00042  | 0.156109 | 0.00071  | 0.18477069 | 5.90E-05 | 0.227697 | 6.60E-07 |
| 0.00469  | -0.29332 | 1.02E-10 | 0.037334 | 0.42087  | 0.48526283 | 5.85E-29 | 0.356863 | 1.80E-15 |
| 0.26481  | 0.121576 | 0.00854  | 0.113123 | 0.01445  | -0.0652812 | 0.15899  | -0.12966 | 0.00501  |
| 0.72678  | 0.094301 | 0.04166  | 0.020395 | 0.66023  | 0.01203526 | 0.79533  | 0.034768 | 0.45352  |
| 6.71E-07 | 0.04591  | 0.32218  | -0.17199 | 0.00019  | -0.2055728 | 7.52E-06 | -0.19077 | 3.33E-05 |
| 0.13739  | 0.164925 | 0.00034  | 0.098758 | 0.03287  | -0.134098  | 0.00369  | -0.19221 | 2.90E-05 |
| 0.13873  | -0.16733 | 0.00028  | -0.10963 | 0.01779  | 0.24585333 | 7.39E-08 | 0.094985 | 0.04019  |
| 0.02782  | -0.18087 | 8.48E-05 | -0.09427 | 0.04173  | 0.15778898 | 0.00062  | 0.241864 | 1.21E-07 |
| 0.12041  | 0.283042 | 4.72E-10 | 0.264776 | 6.23E-09 | 0.02792645 | 0.54718  | 0.113821 | 0.01385  |
| 0.34527  | -0.05384 | 0.24556  | -0.0619  | 0.18177  | 0.12572334 | 0.00652  | 0.087323 | 0.05935  |
| 0.00626  | 0.27645  | 1.22E-09 | 0.065411 | 0.15817  | 0.07507151 | 0.10518  | 0.077953 | 0.09245  |
| 0.02584  | 0.227887 | 6.45E-07 | 0.1513   | 0.00104  | 0.06795246 | 0.14259  | 0.044652 | 0.33563  |
| 0.01412  | -0.16693 | 0.00029  | -0.13515 | 0.00343  | -0.1972713 | 1.76E-05 | -0.29541 | 7.38E-11 |
| 0.007    | 0.051315 | 0.26843  | -0.0481  | 0.29963  | -0.104511  | 0.02391  | -0.03303 | 0.47642  |
| 0.00517  | 0.149948 | 0.00115  | 0.017874 | 0.70006  | -0.0109658 | 0.81316  | 0.084579 | 0.06783  |
| 0.39191  | -0.05352 | 0.24838  | -0.03774 | 0.41581  | 0.05601749 | 0.22695  | 0.070823 | 0.12644  |
| 0.0001   | 0.008592 | 0.85308  | 0.116705 | 0.01161  | -0.0725339 | 0.11751  | 0.054798 | 0.23724  |
| 0.31632  | -0.23086 | 4.56E-07 | -0.04262 | 0.35807  | -0.0589851 | 0.20324  | -0.1252  | 0.00675  |
| 0.17298  | 0.178635 | 0.0001   | 0.250743 | 3.97E-08 | 0.25685684 | 1.80E-08 | 0.154674 | 0.0008   |
| 0.51213  | 0.15696  | 0.00066  | 0.121063 | 0.00882  | -0.1089102 | 0.01856  | -0.07755 | 0.09413  |
| 0.0076   | 0.020144 | 0.66415  | -0.07723 | 0.09554  | -0.0739787 | 0.11036  | -0.1084  | 0.01912  |
| 4.31E-05 | 0.291096 | 1.43E-10 | 0.428995 | 2.48E-22 | 0.12680675 | 0.00607  | -0.07554 | 0.10303  |
| 0.55518  | 0.051327 | 0.26832  | 0.034125 | 0.46193  | 0.06248291 | 0.17767  | 0.198842 | 1.50E-05 |
| 0.26537  | -0.08882 | 0.0551   | -0.14064 | 0.00232  | -0.064062  | 0.16694  | -0.0844  | 0.0684   |
| 0.00439  | 0.337904 | 6.17E-14 | 0.430356 | 1.77E-22 | 0.1706148  | 0.00021  | 0.038785 | 0.40303  |
| 0.00024  | -0.17407 | 0.00016  | -0.0919  | 0.04715  | 0.0196909  | 0.67126  | -0.05402 | 0.24401  |

|          |          |          |          |          |            |          |          |          |
|----------|----------|----------|----------|----------|------------|----------|----------|----------|
| 2.29E-07 | -0.04397 | 0.34303  | -0.02676 | 0.56398  | 0.06457008 | 0.16359  | 0.068466 | 0.13958  |
| 0.39668  | -0.22933 | 5.46E-07 | -0.10442 | 0.02403  | 0.1401958  | 0.00239  | 0.219933 | 1.60E-06 |
| 0.00945  | 0.145821 | 0.00158  | 0.181397 | 8.07E-05 | 0.21960746 | 1.65E-06 | 0.22861  | 5.93E-07 |
| 1.66E-16 | -0.06135 | 0.18569  | -0.03974 | 0.39148  | 0.24016021 | 1.50E-07 | 0.343649 | 2.17E-14 |
| 0.004    | 0.029009 | 0.53175  | 0.083666 | 0.07086  | -0.0056439 | 0.90318  | -0.01842 | 0.6913   |
| 0.28369  | 0.059331 | 0.2006   | 0.09808  | 0.03409  | 0.14373067 | 0.00185  | 0.157138 | 0.00065  |
| 0.00166  | 0.05217  | 0.26053  | 0.257602 | 1.63E-08 | 0.37946811 | 1.92E-17 | 0.279725 | 7.65E-10 |
| 0.58091  | -0.06532 | 0.15872  | -0.02421 | 0.60183  | 0.24346219 | 9.96E-08 | 0.259939 | 1.19E-08 |
| 0.18138  | 0.078909 | 0.08851  | 0.018999 | 0.68217  | -0.0347379 | 0.45391  | -0.02735 | 0.55543  |
| 2.34E-05 | -0.13985 | 0.00245  | 0.126818 | 0.00606  | 0.13480476 | 0.00352  | 0.024136 | 0.60288  |
| 0.43203  | -0.0926  | 0.0455   | -0.0537  | 0.24678  | 0.42154698 | 1.52E-21 | 0.3371   | 7.13E-14 |
| 1.73E-07 | 0.008125 | 0.86098  | 0.060323 | 0.19316  | 0.0574671  | 0.21513  | 0.05806  | 0.21043  |
| 0.00701  | 0.15602  | 0.00072  | 0.155448 | 0.00075  | 0.01158059 | 0.8029   | -0.16896 | 0.00024  |
| 0.06968  | 0.20864  | 5.45E-06 | 0.247095 | 6.32E-08 | 0.13608537 | 0.00321  | 0.168926 | 0.00025  |
| 0.02549  | 0.025897 | 0.57669  | -0.03465 | 0.45511  | -0.0553081 | 0.2329   | -0.07063 | 0.12748  |
| 6.93E-18 | 0.114552 | 0.01325  | -0.03177 | 0.4934   | -0.1640281 | 0.00037  | -0.24555 | 7.67E-08 |
| 0.72336  | -0.02901 | 0.53173  | -0.1524  | 0.00095  | 0.00710044 | 0.87837  | 0.074828 | 0.10632  |
| 5.76E-22 | -0.06773 | 0.14391  | -0.09611 | 0.03787  | -0.0429752 | 0.35411  | -0.04791 | 0.30149  |
| 0.22154  | 0.030223 | 0.51471  | -0.01307 | 0.77819  | -0.1854908 | 5.51E-05 | -0.27804 | 9.75E-10 |
| 5.06E-05 | 0.040974 | 0.37699  | 0.091791 | 0.04742  | 0.1284313  | 0.00544  | 0.062009 | 0.18098  |
| 0.00013  | -0.1121  | 0.01536  | 0.025887 | 0.57684  | 0.12482152 | 0.00692  | 0.122865 | 0.00786  |
| 0.7519   | -0.17786 | 0.00011  | -0.28528 | 3.40E-10 | -0.1774515 | 0.00012  | -0.28721 | 2.55E-10 |
| 2.76E-07 | 0.18291  | 7.02E-05 | 0.349515 | 7.28E-15 | 0.05877683 | 0.20484  | -0.11888 | 0.01013  |
| 0.02972  | -0.12066 | 0.00905  | 0.22799  | 6.38E-07 | 0.18422226 | 6.21E-05 | -0.03718 | 0.42275  |
| 0.48668  | -0.19084 | 3.31E-05 | -0.20234 | 1.05E-05 | -0.0681439 | 0.14146  | -0.09831 | 0.03367  |
| 0.05558  | 0.133323 | 0.0039   | 0.06552  | 0.15747  | -0.2097426 | 4.85E-06 | -0.24981 | 4.48E-08 |
| 0.00233  | 0.132995 | 0.00399  | 0.186745 | 4.90E-05 | 0.16760525 | 0.00027  | 0.101992 | 0.02753  |
| 0.05058  | -0.14756 | 0.00139  | -0.08241 | 0.07523  | -0.0132196 | 0.7757   | -0.01808 | 0.6967   |
| 4.07E-14 | 0.014618 | 0.7527   | 0.073545 | 0.11247  | -0.0507831 | 0.27343  | -0.10071 | 0.02954  |
| 0.86428  | 0.223694 | 1.04E-06 | 0.141337 | 0.0022   | 0.11976408 | 0.00958  | 0.130246 | 0.00482  |
| 9.05E-16 | -0.20735 | 6.24E-06 | -0.09686 | 0.0364   | 0.08862588 | 0.05564  | 0.13361  | 0.00382  |
| 0.75408  | -0.02299 | 0.62021  | -0.01866 | 0.68757  | 0.11730004 | 0.01119  | 0.19385  | 2.47E-05 |
| 0.04539  | -0.08897 | 0.05468  | -0.27817 | 9.58E-10 | -0.2886259 | 2.07E-10 | -0.2804  | 6.95E-10 |
| 0.37542  | 0.031264 | 0.50032  | -0.02072 | 0.65523  | -0.0251626 | 0.58754  | -0.05419 | 0.24247  |
| 0.028    | -0.15644 | 0.00069  | -0.13918 | 0.00257  | 0.01729265 | 0.70935  | 0.163567 | 0.00039  |
| 0.21171  | 0.162419 | 0.00043  | 0.128935 | 0.00526  | -0.2357937 | 2.54E-07 | -0.27891 | 8.61E-10 |
| 0.06009  | 0.238198 | 1.90E-07 | 0.062323 | 0.17878  | -0.0867374 | 0.06108  | 0.018107 | 0.69633  |
| 0.01674  | 0.095654 | 0.0388   | 0.230208 | 4.93E-07 | 0.16230345 | 0.00043  | 0.072379 | 0.11829  |
| 0.01279  | 0.087694 | 0.05827  | 0.245968 | 7.28E-08 | 0.1139776  | 0.01372  | 0.137194 | 0.00297  |
| 0.08807  | 0.006499 | 0.88861  | -0.23958 | 1.61E-07 | -0.1826598 | 7.18E-05 | -0.23551 | 2.63E-07 |
| 0.68249  | 0.177463 | 0.00012  | 0.092265 | 0.04629  | 0.05746079 | 0.21518  | 0.052566 | 0.25692  |
| 0.14791  | 0.204013 | 8.84E-06 | 0.069227 | 0.13523  | -0.0657204 | 0.1562   | -0.07695 | 0.09674  |
| 0.85617  | -0.03232 | 0.48595  | 0.004292 | 0.9263   | 0.03717094 | 0.4229   | -0.02137 | 0.6451   |
| 0.0528   | 0.109367 | 0.01807  | 0.04199  | 0.36526  | 0.13342149 | 0.00387  | 0.193779 | 2.48E-05 |
| 0.61195  | 0.11722  | 0.01124  | 0.057413 | 0.21557  | 0.06528446 | 0.15897  | 0.048233 | 0.29828  |

|          |          |          |          |          |            |          |          |          |
|----------|----------|----------|----------|----------|------------|----------|----------|----------|
| 0.27775  | -0.07517 | 0.10471  | -0.07231 | 0.11866  | 0.12895818 | 0.00525  | 0.179647 | 9.48E-05 |
| 0.35193  | 0.03644  | 0.43209  | -0.01422 | 0.75931  | 0.02200813 | 0.63523  | 0.076455 | 0.0989   |
| 2.66E-09 | 0.270378 | 2.88E-09 | 0.429133 | 2.40E-22 | 0.44020638 | 1.48E-23 | 0.363045 | 5.38E-16 |
| 0.01091  | -0.12772 | 0.00571  | 0.025893 | 0.57675  | 0.16507607 | 0.00034  | 0.175949 | 0.00013  |
| 0.04083  | 0.14015  | 0.0024   | 0.027698 | 0.55046  | -0.0604881 | 0.19194  | -0.14304 | 0.00194  |
| 0.01396  | 0.075954 | 0.10114  | 0.079649 | 0.08555  | 0.12523439 | 0.00673  | 0.112236 | 0.01524  |
| 8.04E-07 | -0.02645 | 0.56856  | -0.07727 | 0.09533  | 0.03259558 | 0.48225  | 0.084597 | 0.06777  |
| 0.00038  | 0.193593 | 2.53E-05 | 0.070138 | 0.13015  | -0.0077178 | 0.86789  | -0.02401 | 0.60479  |
| 0.70424  | 0.019711 | 0.67094  | -0.16826 | 0.00026  | -0.1841273 | 6.26E-05 | -0.2282  | 6.22E-07 |
| 0.79161  | 0.022446 | 0.62851  | -0.0265  | 0.56782  | -0.0672005 | 0.14707  | -0.17197 | 0.00019  |
| 0.95689  | 0.09149  | 0.04816  | 0.223612 | 1.05E-06 | 0.34463791 | 1.81E-14 | 0.068042 | 0.14206  |
| 2.08E-08 | -0.22046 | 1.50E-06 | 0.007964 | 0.86371  | 0.24719857 | 6.24E-08 | 0.120678 | 0.00904  |
| 0.12644  | -0.07345 | 0.11292  | -0.08566 | 0.06439  | 0.04033662 | 0.38446  | 0.042462 | 0.35989  |
| 0.02521  | -0.06576 | 0.15597  | 0.187363 | 4.62E-05 | -0.1381499 | 0.00277  | -0.20175 | 1.12E-05 |
| 8.31E-09 | 0.142137 | 0.00208  | 0.21746  | 2.10E-06 | 0.01388798 | 0.76469  | -0.1054  | 0.02273  |
| 4.82E-05 | 0.147336 | 0.00141  | 0.022981 | 0.62035  | -0.0379018 | 0.41383  | -0.1265  | 0.00619  |
| 0.01301  | -0.02523 | 0.58652  | -0.15824 | 0.0006   | -0.1251359 | 0.00678  | -0.09495 | 0.04026  |
| 0.30666  | 0.019982 | 0.66669  | 0.280194 | 7.15E-10 | 0.07274066 | 0.11646  | 0.035927 | 0.43861  |
| 0.17023  | 0.319613 | 1.50E-12 | 0.294711 | 8.22E-11 | 0.2193306  | 1.71E-06 | 0.261081 | 1.03E-08 |
| 0.18003  | -0.05363 | 0.24741  | -0.00311 | 0.94657  | 0.10672234 | 0.02107  | 0.121988 | 0.00832  |
| 0.98327  | 0.11745  | 0.01108  | 0.020531 | 0.6581   | -0.0441287 | 0.34133  | 0.025642 | 0.58044  |
| 0.00906  | 0.21912  | 1.75E-06 | 0.198224 | 1.60E-05 | 0.40108494 | 1.78E-19 | 0.370863 | 1.13E-16 |
| 0.60583  | -0.20262 | 1.02E-05 | -0.12356 | 0.00751  | -0.064472  | 0.16424  | -0.12936 | 0.00511  |
| 0.27585  | 0.240117 | 1.50E-07 | -0.03419 | 0.46106  | -0.0168389 | 0.71665  | -0.10163 | 0.02809  |
| 2.01E-05 | 0.16064  | 0.00049  | 0.085199 | 0.06583  | 0.34171665 | 3.09E-14 | 0.361397 | 7.44E-16 |
| 2.56E-05 | 0.060058 | 0.19513  | 0.14495  | 0.00169  | -0.2256338 | 8.37E-07 | -0.14544 | 0.00163  |
| 0.38469  | 0.102607 | 0.0266   | 0.080481 | 0.08232  | 0.03590246 | 0.43891  | 0.014691 | 0.75152  |
| 0.68176  | -0.04869 | 0.29371  | -0.15889 | 0.00057  | 0.05765294 | 0.21365  | 0.074437 | 0.10816  |
| 0.82792  | 0.012732 | 0.78377  | -0.09958 | 0.03143  | -0.0476376 | 0.30429  | 0.013364 | 0.77332  |
| 0.00458  | -0.15513 | 0.00077  | -0.12732 | 0.00586  | -0.1052228 | 0.02296  | -0.11675 | 0.01157  |
| 0.04109  | -0.20957 | 4.93E-06 | -0.07176 | 0.12146  | 0.12612172 | 0.00635  | 0.066046 | 0.15416  |
| 0.72373  | 0.228836 | 5.78E-07 | 0.108997 | 0.01847  | 0.12067178 | 0.00905  | 0.174679 | 0.00015  |
| 4.13E-05 | -0.18562 | 5.45E-05 | 0.008234 | 0.85915  | -0.0517266 | 0.2646   | -0.15278 | 0.00093  |
| 0.0284   | -0.05134 | 0.26819  | -0.0477  | 0.30363  | 0.03776583 | 0.41551  | 0.017453 | 0.70678  |
| 2.58E-08 | 0.181859 | 7.73E-05 | 0.124359 | 0.00713  | 0.0424054  | 0.36054  | -0.00851 | 0.85451  |
| 0.69938  | 0.004916 | 0.91562  | -0.04489 | 0.33311  | 0.04299577 | 0.35388  | 0.025096 | 0.58853  |
| 0.00019  | 0.084672 | 0.06753  | 0.077071 | 0.09621  | 0.15255979 | 0.00094  | 0.148767 | 0.00126  |
| 0.43144  | -0.04863 | 0.29435  | 0.000102 | 0.99825  | 0.01744449 | 0.70692  | -0.0335  | 0.47024  |
| 0.96845  | 0.142725 | 0.00199  | 0.134802 | 0.00352  | 0.07839841 | 0.09059  | 0.079542 | 0.08597  |
| 0.11617  | 0.235693 | 2.57E-07 | 0.196907 | 1.82E-05 | 0.08788818 | 0.05771  | 0.01131  | 0.80741  |
| 0.60144  | 0.138701 | 0.00267  | 0.175404 | 0.00014  | 0.24712182 | 6.30E-08 | 0.287179 | 2.56E-10 |
| 0.34199  | -0.07425 | 0.10904  | -0.00739 | 0.87347  | 0.09485409 | 0.04047  | 0.151568 | 0.00102  |
| 0.81481  | -0.00317 | 0.94547  | 0.02199  | 0.63551  | 0.00605799 | 0.89612  | 0.020795 | 0.65398  |
| 0.2046   | 0.114232 | 0.01351  | 0.356629 | 1.88E-15 | -0.0960556 | 0.03798  | -0.16982 | 0.00023  |
| 0.07029  | -0.06857 | 0.13896  | 0.103759 | 0.02494  | 0.29474384 | 8.18E-11 | 0.314659 | 3.42E-12 |

|          |          |          |          |          |            |          |          |          |
|----------|----------|----------|----------|----------|------------|----------|----------|----------|
| 0.63267  | -0.15628 | 0.0007   | -0.07929 | 0.08697  | 0.21200184 | 3.81E-06 | 0.167431 | 0.00028  |
| 0.00083  | -0.0753  | 0.10412  | -0.03306 | 0.47598  | 0.05847547 | 0.20718  | -0.00923 | 0.84238  |
| 0.06942  | 0.065652 | 0.15663  | 0.026899 | 0.56203  | 0.09470151 | 0.04079  | 0.010488 | 0.82117  |
| 2.11E-11 | -0.03763 | 0.41718  | 0.115698 | 0.01235  | 0.11244968 | 0.01505  | -0.00372 | 0.9361   |
| 0.0001   | -0.04705 | 0.31031  | -0.17933 | 9.75E-05 | -0.1791316 | 9.93E-05 | -0.23913 | 1.70E-07 |
| 5.08E-19 | 0.046019 | 0.32104  | 0.004535 | 0.92214  | 0.04795122 | 0.30111  | 0.039769 | 0.3912   |
| 0.80815  | 0.111225 | 0.01619  | 0.013443 | 0.77202  | -0.0083416 | 0.85732  | -0.01515 | 0.74398  |
| 0.00507  | 0.074177 | 0.1094   | 0.124191 | 0.00721  | 0.08767431 | 0.05833  | 0.076967 | 0.09666  |
| 2.09E-10 | 0.112642 | 0.01487  | -0.0213  | 0.64619  | -0.0286946 | 0.53621  | 0.112968 | 0.01458  |
| 0.0547   | 0.007416 | 0.87302  | -0.09325 | 0.044    | -0.2630514 | 7.87E-09 | -0.26394 | 6.97E-09 |
| 0.08136  | 0.057885 | 0.21181  | 0.20048  | 1.27E-05 | 0.00848265 | 0.85494  | -0.10898 | 0.01849  |
| 4.07E-10 | -0.00018 | 0.9969   | 0.033132 | 0.47507  | 0.03314502 | 0.47489  | -0.06279 | 0.17557  |
| 0.00907  | 0.06884  | 0.13743  | 0.237    | 2.20E-07 | 0.33429187 | 1.18E-13 | 0.359204 | 1.14E-15 |
| 0.08253  | 0.122526 | 0.00803  | 0.064868 | 0.16165  | 0.07275046 | 0.11641  | 0.182551 | 7.25E-05 |
| 0.00079  | 0.252404 | 3.21E-08 | 0.09953  | 0.03152  | 0.0997095  | 0.03121  | 0.120537 | 0.00912  |
| 0.44948  | 0.20519  | 7.82E-06 | 0.232667 | 3.69E-07 | 0.0753305  | 0.10398  | -0.06873 | 0.13804  |
| 0.64606  | -0.14522 | 0.00165  | -0.17965 | 9.47E-05 | -0.184568  | 6.01E-05 | -0.16929 | 0.00024  |
| 4.99E-07 | -0.14995 | 0.00115  | -0.17098 | 0.00021  | -0.0728231 | 0.11605  | -0.03437 | 0.45874  |
| 5.51E-05 | 0.050665 | 0.27454  | 0.006981 | 0.8804   | 0.05164834 | 0.26533  | 0.014059 | 0.76188  |
| 0.68892  | -0.08702 | 0.06023  | -0.15567 | 0.00074  | -0.0735034 | 0.11267  | -0.0421  | 0.36399  |
| 1.77E-24 | 0.025404 | 0.58397  | -0.01103 | 0.81201  | 0.0447582  | 0.33448  | 0.104549 | 0.02385  |
| 3.90E-05 | -0.16379 | 0.00038  | -0.13209 | 0.00424  | 0.10031409 | 0.0302   | 0.096556 | 0.03699  |
| 0.83778  | 0.091609 | 0.04787  | 0.046105 | 0.32013  | 0.06345403 | 0.17101  | 0.096202 | 0.03769  |
| 0.45243  | 0.037174 | 0.42286  | 0.064745 | 0.16245  | 0.02733433 | 0.55571  | 0.023278 | 0.61584  |
| 0.08587  | -0.22239 | 1.21E-06 | 0.083212 | 0.07241  | 0.30721658 | 1.15E-11 | 0.138251 | 0.00275  |
| 7.70E-09 | 0.092969 | 0.04464  | 0.153053 | 0.00091  | 0.10286932 | 0.02622  | 0.07824  | 0.09125  |
| 0.9772   | 0.103211 | 0.02572  | 0.118534 | 0.01036  | 0.02529258 | 0.58562  | 0.031405 | 0.4984   |
| 0.32342  | -0.0501  | 0.27994  | -0.07134 | 0.12369  | -0.0648081 | 0.16204  | 0.01668  | 0.71921  |
| 1.32E-09 | 0.073827 | 0.11109  | 0.080634 | 0.08174  | -0.0197675 | 0.67005  | 0.003735 | 0.93585  |
| 0.00122  | -0.02621 | 0.57201  | 0.036286 | 0.43403  | -0.0587758 | 0.20485  | -0.03319 | 0.47435  |
| 0.00613  | 0.122748 | 0.00792  | 0.279641 | 7.75E-10 | 0.37622522 | 3.77E-17 | 0.289707 | 1.76E-10 |
| 0.27616  | -0.12    | 0.00944  | 0.021589 | 0.64169  | -0.0083406 | 0.85734  | -0.07112 | 0.12487  |
| 0.32267  | -0.0057  | 0.90228  | -0.0624  | 0.17825  | -0.06771   | 0.14402  | -0.0239  | 0.60642  |
| 6.06E-06 | 0.075532 | 0.10306  | 0.046254 | 0.31857  | 0.02774953 | 0.54972  | 0.018988 | 0.68234  |
| 0.32702  | 0.047831 | 0.30232  | -0.17061 | 0.00021  | -0.0851099 | 0.06611  | -0.00025 | 0.99574  |
| 0.09952  | -0.12416 | 0.00723  | -0.11256 | 0.01494  | 0.08449321 | 0.06811  | 0.19266  | 2.77E-05 |
| 0.34939  | 0.336611 | 7.78E-14 | 0.298758 | 4.40E-11 | 0.17745278 | 0.00012  | 0.074592 | 0.10742  |
| 4.88E-05 | -0.19403 | 2.42E-05 | -0.07396 | 0.11046  | -0.0949512 | 0.04026  | -0.2103  | 4.57E-06 |
| 0.07596  | 0.023437 | 0.61343  | -0.10818 | 0.01937  | -0.1997817 | 1.36E-05 | -0.24501 | 8.20E-08 |
| 0.92198  | 0.032023 | 0.48997  | 0.002574 | 0.95575  | 0.07302392 | 0.11504  | 0.143545 | 0.00187  |
| 0.07611  | -0.06894 | 0.13686  | -0.2014  | 1.16E-05 | -0.0966382 | 0.03683  | -0.09083 | 0.0498   |
| 0.4615   | 0.288781 | 2.02E-10 | 0.333772 | 1.29E-13 | 0.14748803 | 0.00139  | 0.152912 | 0.00092  |
| 0.05403  | 0.007187 | 0.8769   | -0.13663 | 0.00309  | -0.0805668 | 0.082    | -0.00862 | 0.85267  |
| 0.00363  | 0.276916 | 1.15E-09 | 0.155119 | 0.00077  | 0.05392961 | 0.24477  | -0.1028  | 0.02632  |
| 0.5505   | 0.197682 | 1.68E-05 | 0.445109 | 4.18E-24 | 0.23427832 | 3.04E-07 | 0.012507 | 0.78749  |

|          |          |          |          |          |            |          |          |          |
|----------|----------|----------|----------|----------|------------|----------|----------|----------|
| 0.40494  | -0.14423 | 0.00178  | -0.17855 | 0.0001   | -0.2573871 | 1.67E-08 | -0.20408 | 8.78E-06 |
| 0.00032  | 0.029609 | 0.5233   | 0.167587 | 0.00028  | -0.1243683 | 0.00713  | -0.16952 | 0.00023  |
| 0.67545  | 0.074858 | 0.10617  | 0.004236 | 0.92725  | 0.20982418 | 4.80E-06 | 0.225609 | 8.39E-07 |
| 6.01E-05 | 0.008194 | 0.85982  | -0.04909 | 0.28973  | 0.04668796 | 0.31404  | -0.02886 | 0.53387  |
| 0.90116  | 0.108483 | 0.01903  | 0.047203 | 0.30872  | 0.08976221 | 0.05256  | 0.156579 | 0.00068  |
| 1.19E-10 | 0.143641 | 0.00186  | 0.092575 | 0.04555  | 0.08091918 | 0.08066  | 0.097407 | 0.03535  |
| 6.58E-05 | 0.286615 | 2.79E-10 | 0.229499 | 5.35E-07 | 0.0743933  | 0.10837  | 0.000254 | 0.99563  |
| 0.6607   | 0.260639 | 1.09E-08 | 0.144827 | 0.0017   | 0.21591628 | 2.49E-06 | 0.18466  | 5.96E-05 |
| 5.23E-07 | -0.0832  | 0.07245  | -0.06012 | 0.19466  | 0.02711176 | 0.55893  | 0.09934  | 0.03185  |
| 0.89686  | 0.088313 | 0.05651  | 0.024959 | 0.59057  | -0.0027145 | 0.95335  | 0.048797 | 0.29266  |
| 0.96742  | 0.113236 | 0.01435  | 0.04035  | 0.38431  | 0.01216758 | 0.79313  | 0.040483 | 0.38273  |
| 0.62699  | -0.04686 | 0.31231  | 0.009652 | 0.83521  | -0.1263846 | 0.00624  | -0.24681 | 6.55E-08 |
| 0.62927  | -0.09527 | 0.03958  | -0.05766 | 0.21357  | 0.04586531 | 0.32265  | 0.023759 | 0.60856  |
| 0.05955  | 0.02725  | 0.55692  | 0.033157 | 0.47473  | 0.05183686 | 0.26359  | 0.002929 | 0.94967  |
| 0.03154  | -0.14388 | 0.00183  | -0.04144 | 0.37158  | 0.07832816 | 0.09088  | 0.017867 | 0.70016  |
| 2.81E-12 | -0.23036 | 4.84E-07 | -0.12886 | 0.00529  | -0.0107198 | 0.81728  | -0.0195  | 0.67424  |
| 0.36888  | 0.024543 | 0.59678  | 0.031553 | 0.49638  | 0.05095194 | 0.27184  | 0.047256 | 0.30819  |
| 0.83675  | -0.02172 | 0.6396   | -0.01554 | 0.73759  | 0.01514105 | 0.74417  | 0.014774 | 0.75016  |
| 0.0293   | -0.01516 | 0.74381  | -0.01014 | 0.82692  | 0.04098543 | 0.37686  | 0.008671 | 0.85175  |
| 0.67013  | 0.308379 | 9.56E-12 | 0.184667 | 5.96E-05 | 0.21372898 | 3.16E-06 | 0.094833 | 0.04051  |
| 8.69E-09 | 0.044201 | 0.34054  | -0.05249 | 0.25765  | 0.01858645 | 0.6887   | 0.054978 | 0.2357   |
| 0.48414  | 0.021053 | 0.64999  | -0.01701 | 0.71393  | -0.0151219 | 0.74448  | 0.018968 | 0.68266  |
| 3.03E-20 | -0.05437 | 0.2409   | -0.04691 | 0.31175  | 0.04928747 | 0.28783  | 0.088939 | 0.05478  |
| 0.22324  | -0.07583 | 0.10172  | -0.0439  | 0.34384  | 0.03593983 | 0.43844  | 0.065581 | 0.15709  |
| 0.00152  | 0.204564 | 8.35E-06 | 0.072195 | 0.11923  | 0.11648802 | 0.01176  | 0.069931 | 0.13129  |
| 0.34921  | 0.095909 | 0.03828  | 0.045074 | 0.33108  | 0.01974437 | 0.67042  | -0.00082 | 0.98593  |
| 0.27454  | 0.101687 | 0.028    | 0.341211 | 3.39E-14 | 0.34731071 | 1.10E-14 | 0.21271  | 3.53E-06 |
| 0.0268   | 0.252228 | 3.28E-08 | 0.133815 | 0.00377  | 0.27038001 | 2.88E-09 | 0.251228 | 3.73E-08 |
| 0.3164   | 0.045858 | 0.32273  | -0.094   | 0.04231  | -0.0416346 | 0.36934  | 0.027719 | 0.55016  |
| 0.69039  | -0.02725 | 0.55698  | -0.00896 | 0.84686  | -0.0091582 | 0.84353  | 0.027531 | 0.55287  |
| 0.52464  | 0.009066 | 0.84508  | -0.10096 | 0.02914  | -0.1064213 | 0.02144  | -0.08539 | 0.06521  |
| 0.9053   | 0.122331 | 0.00813  | 0.087837 | 0.05786  | -0.0005374 | 0.99076  | -0.01874 | 0.68619  |
| 0.57206  | -0.0645  | 0.16403  | -0.08889 | 0.05492  | -0.0741154 | 0.1097   | -0.04915 | 0.28921  |
| 0.42355  | -0.02003 | 0.66591  | -0.02382 | 0.60763  | 0.02275074 | 0.62386  | 0.013691 | 0.76792  |
| 0.0008   | -0.1512  | 0.00105  | -0.13668 | 0.00308  | 0.11179708 | 0.01565  | 0.086306 | 0.06238  |
| 0.92535  | -0.18594 | 5.28E-05 | -0.26285 | 8.08E-09 | -0.3266744 | 4.48E-13 | -0.26871 | 3.63E-09 |
| 0.24264  | -0.12409 | 0.00726  | -0.16138 | 0.00046  | -0.0943829 | 0.04148  | -0.07139 | 0.1234   |
| 0.97433  | 0.001561 | 0.97316  | -0.06477 | 0.1623   | 0.10915821 | 0.01829  | 0.180452 | 8.80E-05 |
| 0.08761  | 0.131498 | 0.00442  | 0.144787 | 0.00171  | 0.12618645 | 0.00632  | 0.12917  | 0.00518  |
| 3.19E-08 | 0.152566 | 0.00094  | 0.055943 | 0.22757  | -0.0206631 | 0.65604  | -0.0059  | 0.8989   |
| 0.01088  | 0.026273 | 0.57116  | -0.06013 | 0.19463  | -0.0154954 | 0.73839  | 0.001165 | 0.97997  |
| 0.23356  | -0.00342 | 0.94116  | -0.16329 | 0.0004   | -0.1519928 | 0.00098  | -0.16591 | 0.00032  |
| 0.00068  | 0.172559 | 0.00018  | 0.14817  | 0.00132  | 0.14439341 | 0.00176  | 0.146077 | 0.00155  |
| 0.01933  | 0.020326 | 0.6613   | -0.06198 | 0.18122  | -0.1462812 | 0.00153  | -0.03491 | 0.45169  |
| 0.06816  | 0.300025 | 3.61E-11 | 0.03232  | 0.48596  | -0.0655887 | 0.15704  | -0.01757 | 0.70494  |

|          |          |          |          |          |            |          |          |          |
|----------|----------|----------|----------|----------|------------|----------|----------|----------|
| 0.00035  | 0.193017 | 2.67E-05 | 0.04673  | 0.3136   | -0.0600649 | 0.19508  | -0.05643 | 0.22358  |
| 0.01176  | 0.125258 | 0.00672  | 0.121728 | 0.00846  | -0.0537318 | 0.2465   | -0.09875 | 0.03288  |
| 0.13068  | 0.146498 | 0.0015   | 0.099271 | 0.03197  | -0.0620106 | 0.18098  | -0.10894 | 0.01852  |
| 0.04474  | 0.217453 | 2.10E-06 | 0.246208 | 7.06E-08 | -0.1213384 | 0.00867  | -0.21969 | 1.64E-06 |
| 0.06755  | -0.29494 | 7.93E-11 | -0.42816 | 3.05E-22 | -0.2745946 | 1.59E-09 | -0.18583 | 5.34E-05 |
| 0.23545  | 0.264028 | 6.89E-09 | -0.00245 | 0.95787  | -0.0995769 | 0.03144  | -0.02665 | 0.56562  |
| 0.90147  | 0.144943 | 0.00169  | -0.04102 | 0.37646  | -0.0927647 | 0.04511  | -0.12806 | 0.00558  |
| 0.00176  | 0.147192 | 0.00142  | 0.01024  | 0.82533  | -0.0274733 | 0.5537   | 0.043773 | 0.34524  |
| 0.783    | 0.339317 | 4.78E-14 | 0.473785 | 1.66E-27 | 0.04111222 | 0.37538  | -0.06103 | 0.18795  |
| 0.36438  | 0.232411 | 3.80E-07 | 0.165667 | 0.00032  | 0.07925894 | 0.0871   | 0.019316 | 0.67716  |
| 0.47689  | -0.1029  | 0.02618  | -0.23964 | 1.59E-07 | -0.2198643 | 1.61E-06 | -0.19413 | 2.40E-05 |
| 0.44658  | -0.19417 | 2.39E-05 | -0.06675 | 0.14982  | 0.00732016 | 0.87464  | 0.03843  | 0.40736  |
| 0.03152  | 0.229479 | 5.36E-07 | 0.06732  | 0.14635  | -0.0194755 | 0.67465  | -0.01122 | 0.80886  |
| 0.80344  | 0.097745 | 0.03471  | 0.327415 | 3.94E-13 | 0.29782369 | 5.09E-11 | 0.3115   | 5.75E-12 |
| 0.62102  | 0.037977 | 0.41291  | 0.066851 | 0.14919  | -0.0141194 | 0.76088  | 0.042933 | 0.35458  |
| 0.00065  | -0.26857 | 3.70E-09 | -0.09818 | 0.03391  | 0.10196439 | 0.02757  | 0.05979  | 0.19714  |
| 0.19514  | 0.186615 | 4.96E-05 | 0.276345 | 1.24E-09 | 0.07783962 | 0.09292  | -0.08461 | 0.06774  |
| 0.56666  | 0.050512 | 0.276    | 0.157555 | 0.00063  | 0.31532857 | 3.06E-12 | 0.327182 | 4.10E-13 |
| 3.00E-06 | 0.107561 | 0.02008  | 0.038989 | 0.40056  | -0.1532123 | 0.00089  | -0.19827 | 1.59E-05 |
| 0.56971  | -0.01719 | 0.71092  | -0.10469 | 0.02367  | -0.1443265 | 0.00177  | -0.12347 | 0.00756  |
| 0.62148  | -0.18078 | 8.54E-05 | 0.008029 | 0.86262  | 0.01633566 | 0.72477  | -0.01513 | 0.74435  |
| 0.83875  | -0.05078 | 0.27345  | 0.009696 | 0.83448  | -0.226418  | 7.65E-07 | -0.27974 | 7.63E-10 |
| 9.61E-10 | -0.0132  | 0.77597  | 0.056572 | 0.22238  | -0.0063529 | 0.89109  | 0.032449 | 0.48422  |
| 0.40781  | 0.099849 | 0.03098  | -0.06812 | 0.14158  | -0.0432399 | 0.35115  | -0.073   | 0.11514  |
| 0.00257  | 0.10451  | 0.02391  | 0.079041 | 0.08797  | 0.0542852  | 0.24167  | 0.013131 | 0.77717  |
| 7.03E-07 | 0.189085 | 3.92E-05 | 0.043756 | 0.34543  | -0.0949141 | 0.04034  | -0.03686 | 0.42679  |
| 2.83E-10 | 0.035044 | 0.44994  | -0.00917 | 0.84328  | -0.3131055 | 4.42E-12 | -0.34612 | 1.37E-14 |
| 4.70E-13 | 0.039416 | 0.39542  | -0.09701 | 0.0361   | -0.1797962 | 9.35E-05 | -0.22212 | 1.25E-06 |
| 0.24841  | 0.318255 | 1.88E-12 | 0.142692 | 0.00199  | 0.08765535 | 0.05838  | -0.11559 | 0.01243  |
| 0.75261  | 0.04392  | 0.34362  | 0.316334 | 2.59E-12 | 0.11674108 | 0.01158  | -0.06308 | 0.17352  |
| 0.67777  | -0.03228 | 0.48656  | -0.05657 | 0.22238  | -0.2527256 | 3.08E-08 | -0.34247 | 2.69E-14 |
| 0.0953   | 0.071766 | 0.12145  | -0.02117 | 0.64822  | -0.2628989 | 8.03E-09 | -0.27775 | 1.02E-09 |
| 0.00047  | 0.241472 | 1.27E-07 | 0.074705 | 0.10689  | -0.0754451 | 0.10345  | -0.10479 | 0.02353  |
| 0.02626  | -0.034   | 0.4635   | -0.00304 | 0.94775  | 0.15565797 | 0.00074  | 0.149704 | 0.00118  |
| 4.67E-10 | 0.072957 | 0.11537  | -0.06036 | 0.1929   | -0.042434  | 0.36021  | -0.08832 | 0.05649  |
| 0.00748  | 0.132431 | 0.00415  | -0.13103 | 0.00456  | -0.0703389 | 0.12905  | -0.03005 | 0.5171   |
| 0.94044  | 0.141952 | 0.00211  | 0.40346  | 1.04E-19 | 0.30086841 | 3.16E-11 | 0.205153 | 7.85E-06 |
| 0.00494  | 0.226938 | 7.20E-07 | 0.141424 | 0.00219  | 0.29333726 | 1.01E-10 | 0.252535 | 3.15E-08 |
| 0.90113  | 0.046152 | 0.31964  | -0.14907 | 0.00123  | -0.1501633 | 0.00113  | -0.1059  | 0.02209  |
| 9.04E-05 | -0.06733 | 0.14629  | -0.02765 | 0.55112  | -0.0487699 | 0.29292  | -0.08893 | 0.05479  |
| 0.34617  | 0.032551 | 0.48284  | -0.1455  | 0.00162  | -0.1607883 | 0.00049  | -0.11669 | 0.01161  |
| 0.99103  | 0.030798 | 0.50673  | -0.03573 | 0.44109  | -0.0495963 | 0.28481  | -0.02224 | 0.63169  |
| 0.00527  | -0.00968 | 0.83479  | -0.10957 | 0.01786  | 0.03897164 | 0.40077  | 0.07692  | 0.09686  |
| 0.20459  | 0.068708 | 0.13819  | 0.037962 | 0.4131   | -0.0182058 | 0.69476  | -0.03611 | 0.43633  |
| 0.00174  | 0.246583 | 6.74E-08 | 0.083461 | 0.07156  | -0.0790353 | 0.088    | -0.09601 | 0.03809  |

|          |          |          |          |          |            |          |          |          |
|----------|----------|----------|----------|----------|------------|----------|----------|----------|
| 0.80151  | -0.13013 | 0.00485  | -0.33078 | 2.19E-13 | -0.1432063 | 0.00192  | 0.040116 | 0.38707  |
| 2.73E-09 | -0.1479  | 0.00135  | -0.12567 | 0.00654  | -0.0711675 | 0.12459  | -0.13379 | 0.00377  |
| 0.20476  | -0.15315 | 0.0009   | -0.10338 | 0.02547  | -0.1325247 | 0.00412  | -0.07779 | 0.09315  |
| 0.93224  | 0.077739 | 0.09335  | -0.01018 | 0.82641  | -0.0604041 | 0.19256  | -0.08582 | 0.06388  |
| 0.05249  | -0.15715 | 0.00065  | -0.07833 | 0.0909   | 0.18898084 | 3.96E-05 | 0.189527 | 3.75E-05 |
| 0.22733  | -0.15105 | 0.00106  | -0.12972 | 0.00499  | -0.1243027 | 0.00716  | -0.12513 | 0.00678  |
| 1.58E-12 | 0.163407 | 0.00039  | 0.1268   | 0.00607  | -0.1058483 | 0.02215  | -0.10259 | 0.02662  |
| 0.05125  | -0.03058 | 0.50975  | -0.00321 | 0.94478  | -0.0200555 | 0.66553  | 0.020646 | 0.65631  |
| 0.95066  | 0.070702 | 0.12709  | 0.083464 | 0.07155  | 0.02459363 | 0.59602  | 0.005529 | 0.90514  |
| 0.71129  | 0.050222 | 0.27877  | 0.051296 | 0.26861  | -0.1339271 | 0.00374  | -0.20159 | 1.13E-05 |
| 1.62E-09 | 0.167055 | 0.00029  | 0.277672 | 1.03E-09 | 0.46640463 | 1.34E-26 | 0.35317  | 3.65E-15 |
| 0.65732  | -0.13283 | 0.00403  | 0.086505 | 0.06178  | 0.19844305 | 1.56E-05 | 0.07121  | 0.12437  |
| 0.0036   | -0.09037 | 0.05099  | -0.07383 | 0.1111   | 0.12018734 | 0.00933  | 0.056154 | 0.22582  |
| 0.0393   | -0.13648 | 0.00312  | -0.12506 | 0.00681  | 0.11307404 | 0.01449  | 0.179328 | 9.76E-05 |
| 0.54588  | 0.028766 | 0.5352   | -0.05553 | 0.23103  | -0.0650563 | 0.16044  | -0.0383  | 0.40893  |
| 0.80615  | -0.2422  | 1.16E-07 | -0.29436 | 8.68E-11 | -0.1440893 | 0.0018   | -0.19242 | 2.84E-05 |
| 0.17828  | 0.030929 | 0.50493  | -0.09821 | 0.03386  | -0.0819367 | 0.07691  | -0.14822 | 0.00132  |
| 0.91228  | 0.08757  | 0.05863  | 0.057874 | 0.2119   | 0.10191128 | 0.02765  | 0.154601 | 0.0008   |
| 0.05511  | 0.094932 | 0.0403   | 0.099851 | 0.03097  | 0.06692492 | 0.14874  | -0.00743 | 0.87283  |
| 0.6166   | 0.038598 | 0.4053   | -0.16576 | 0.00032  | -0.052081  | 0.26134  | 0.03413  | 0.46186  |
| 0.00577  | 0.235476 | 2.64E-07 | 0.143011 | 0.00195  | 0.03496659 | 0.45095  | -0.03283 | 0.47916  |
| 0.88571  | 0.08294  | 0.07335  | -0.00024 | 0.9958   | -0.0581934 | 0.20938  | -0.02383 | 0.60756  |
| 1.29E-05 | 0.085867 | 0.06373  | -0.09777 | 0.03467  | -0.2621577 | 8.87E-09 | -0.34286 | 2.50E-14 |
| 0.01324  | -0.08034 | 0.08286  | -0.18675 | 4.89E-05 | -0.1446282 | 0.00173  | -0.04548 | 0.32679  |
| 0.93185  | 0.077279 | 0.09531  | 0.017745 | 0.70211  | -0.0459176 | 0.3221   | 0.039846 | 0.39028  |
| 3.77E-06 | 0.224852 | 9.15E-07 | 0.087507 | 0.05881  | 0.09747149 | 0.03523  | 0.235155 | 2.74E-07 |
| 0.3386   | -0.03677 | 0.42793  | -0.04805 | 0.30009  | -0.0446509 | 0.33564  | -0.02639 | 0.56945  |
| 0.16194  | 0.28717  | 2.57E-10 | 0.114498 | 0.01329  | 0.07838976 | 0.09063  | 0.170778 | 0.00021  |
| 0.78291  | -0.23248 | 3.77E-07 | 0.042261 | 0.36217  | 0.26056122 | 1.10E-08 | 0.201957 | 1.09E-05 |
| 0.28328  | -0.24146 | 1.27E-07 | 0.044135 | 0.34126  | 0.2435651  | 9.83E-08 | 0.168238 | 0.00026  |
| 0.9307   | -0.2806  | 6.74E-10 | -0.21111 | 4.19E-06 | -0.0754339 | 0.10351  | -0.08479 | 0.06714  |
| 0.74653  | -0.10815 | 0.0194   | -0.12657 | 0.00616  | 0.03738589 | 0.42022  | 0.13961  | 0.0025   |
| 0.78421  | -0.08402 | 0.06966  | -0.10296 | 0.02609  | 0.05070538 | 0.27417  | 0.192667 | 2.77E-05 |
| 0.00786  | -0.10152 | 0.02825  | -0.05879 | 0.20477  | 0.15091282 | 0.00107  | 0.226649 | 7.45E-07 |
| 0.97035  | 0.037651 | 0.41693  | -0.05559 | 0.23048  | -0.1305542 | 0.00472  | -0.13909 | 0.00259  |
| 0.05142  | 0.064312 | 0.16529  | -0.00418 | 0.92827  | -0.086207  | 0.06268  | -0.09567 | 0.03876  |
| 0.1386   | -0.11684 | 0.01151  | -0.19637 | 1.92E-05 | -0.1182843 | 0.01052  | -0.09851 | 0.03331  |
| 0.27273  | 0.136024 | 0.00323  | 0.016695 | 0.71897  | 0.03780278 | 0.41506  | 0.095803 | 0.0385   |
| 0.01584  | 0.028596 | 0.5376   | -0.03098 | 0.50428  | -0.0092345 | 0.84224  | -0.009   | 0.84618  |
| 1.80E-09 | -0.04159 | 0.36983  | -0.07603 | 0.1008   | 0.09660251 | 0.0369   | 0.16522  | 0.00034  |
| 1.06E-06 | -0.07879 | 0.08897  | -0.06366 | 0.16963  | -0.0086886 | 0.85145  | 0.080296 | 0.08303  |
| 0.00019  | 0.196742 | 1.85E-05 | 0.05249  | 0.25761  | 0.08494858 | 0.06663  | -0.09537 | 0.03938  |
| 0.66502  | 0.062452 | 0.17788  | 0.001784 | 0.96932  | 0.02800208 | 0.54609  | 0.054379 | 0.24085  |
| 0.38998  | -0.12307 | 0.00775  | -0.22704 | 7.12E-07 | -0.0831305 | 0.07269  | 0.078343 | 0.09082  |
| 1.11E-12 | -0.10527 | 0.0229   | -0.1257  | 0.00653  | -0.2084979 | 5.53E-06 | -0.2103  | 4.57E-06 |



|          |          |          |          |          |            |          |          |          |
|----------|----------|----------|----------|----------|------------|----------|----------|----------|
| 0.87069  | -0.0056  | 0.90401  | -0.12292 | 0.00783  | -0.0543191 | 0.24137  | -0.01965 | 0.67198  |
| 0.8466   | -0.18301 | 6.95E-05 | -0.22195 | 1.27E-06 | -0.1769891 | 0.00012  | -0.10125 | 0.02868  |
| 0.39449  | -0.0121  | 0.79429  | -0.12458 | 0.00703  | -0.1189956 | 0.01006  | -0.07209 | 0.11978  |
| 0.84999  | -0.07163 | 0.12214  | -0.03462 | 0.45547  | 0.17489927 | 0.00015  | 0.140765 | 0.0023   |
| 0.02305  | -0.07228 | 0.11881  | 0.056548 | 0.22257  | 0.05720587 | 0.21723  | -0.12056 | 0.00911  |
| 0.79965  | 0.096707 | 0.03669  | -0.01989 | 0.66819  | -0.0557704 | 0.22901  | -0.12825 | 0.00551  |
| 0.00033  | 0.214519 | 2.90E-06 | 0.020483 | 0.65885  | -0.0230269 | 0.61965  | 0.026028 | 0.57475  |
| 0.70601  | 0.157745 | 0.00062  | 0.227859 | 6.47E-07 | -0.0386704 | 0.40442  | -0.04828 | 0.29778  |
| 0.00164  | -0.10525 | 0.02293  | 0.00478  | 0.91794  | 0.18109622 | 8.30E-05 | 0.245345 | 7.87E-08 |
| 0.03015  | -0.10904 | 0.01842  | -0.10583 | 0.02218  | -0.0965724 | 0.03696  | -0.01661 | 0.72038  |
| 0.95398  | -0.04032 | 0.38466  | -0.03831 | 0.40882  | -0.0073013 | 0.87496  | -0.00374 | 0.93577  |
| 0.09438  | -0.2656  | 5.57E-09 | -0.18964 | 3.71E-05 | 0.03046027 | 0.51141  | 0.075242 | 0.10439  |
| 0.66852  | 0.159295 | 0.00055  | 0.136173 | 0.00319  | 0.11428631 | 0.01346  | 0.151452 | 0.00103  |
| 0.01393  | 0.3049   | 1.67E-11 | 0.218973 | 1.78E-06 | 0.15385837 | 0.00085  | 0.175014 | 0.00014  |
| 0.53914  | -0.09488 | 0.04041  | -0.0213  | 0.64617  | -0.0031964 | 0.94508  | -0.01377 | 0.76658  |
| 0.10288  | 0.15499  | 0.00078  | 0.142804 | 0.00198  | -0.0064861 | 0.88882  | -0.07232 | 0.11858  |
| 0.01245  | 0.01828  | 0.69358  | 0.099958 | 0.03079  | 0.50949587 | 3.24E-32 | 0.362202 | 6.35E-16 |
| 0.02837  | 0.087767 | 0.05806  | 0.134942 | 0.00348  | 0.09289793 | 0.0448   | 0.079097 | 0.08775  |
| 0.10142  | -0.12314 | 0.00772  | -0.19659 | 1.88E-05 | -0.1168201 | 0.01152  | -0.10323 | 0.0257   |
| 0.06322  | 0.184508 | 6.04E-05 | 0.084516 | 0.06804  | 0.0035802  | 0.93849  | -0.02755 | 0.5526   |
| 0.15057  | 0.12358  | 0.0075   | -0.08709 | 0.06004  | -0.2030588 | 9.75E-06 | -0.19812 | 1.61E-05 |
| 0.29995  | 0.164675 | 0.00035  | 0.108785 | 0.0187   | 0.07662837 | 0.09814  | 0.044723 | 0.33487  |
| 0.4502   | -0.1878  | 4.43E-05 | -0.21638 | 2.36E-06 | 0.15569754 | 0.00073  | 0.213591 | 3.20E-06 |
| 0.30391  | -0.04782 | 0.30241  | -0.12576 | 0.00651  | -0.1405006 | 0.00234  | -0.17544 | 0.00014  |
| 3.23E-11 | -0.04997 | 0.2812   | -0.18925 | 3.85E-05 | -0.111992  | 0.01546  | -0.12998 | 0.0049   |
| 0.00147  | 0.099485 | 0.0316   | 0.038278 | 0.40921  | 0.02818933 | 0.54341  | 0.053563 | 0.248    |
| 0.00283  | -0.10806 | 0.0195   | -0.17669 | 0.00012  | 0.02165309 | 0.64069  | -0.05215 | 0.26068  |
| 0.12963  | -0.19054 | 3.40E-05 | -0.14759 | 0.00138  | 0.15119442 | 0.00105  | 0.101798 | 0.02783  |
| 0.0331   | -0.00135 | 0.97684  | 0.004118 | 0.92928  | -0.0068321 | 0.88294  | -0.02381 | 0.60785  |
| 0.53065  | 0.04054  | 0.38207  | -0.0712  | 0.12443  | -0.0368602 | 0.42679  | -0.03694 | 0.42584  |
| 0.58724  | 0.199793 | 1.36E-05 | 0.165581 | 0.00033  | 0.10597853 | 0.02199  | 0.060357 | 0.19291  |
| 2.31E-06 | 0.136585 | 0.0031   | 0.163752 | 0.00038  | 0.14416225 | 0.00179  | 0.103397 | 0.02545  |
| 0.32785  | 0.079106 | 0.08771  | -0.00105 | 0.98188  | -0.0554892 | 0.23137  | -0.06869 | 0.13827  |
| 0.16319  | 0.004404 | 0.92438  | -0.05366 | 0.24713  | 0.00195137 | 0.96645  | 0.005673 | 0.90268  |
| 3.82E-23 | 0.009506 | 0.83767  | -0.00175 | 0.96984  | 0.18663387 | 4.95E-05 | 0.257489 | 1.65E-08 |
| 0.33251  | -0.03312 | 0.47521  | -0.04273 | 0.35683  | -0.033877  | 0.46519  | -0.00633 | 0.89156  |
| 4.73E-06 | -0.04234 | 0.36123  | -0.12599 | 0.00641  | 0.0325707  | 0.48258  | 0.099188 | 0.03211  |
| 0.02023  | 0.154901 | 0.00078  | 0.018879 | 0.68407  | -0.0280268 | 0.54574  | 0.075128 | 0.10492  |
| 0.78764  | 0.220822 | 1.44E-06 | 0.075891 | 0.10142  | 0.03076538 | 0.50719  | 0.075973 | 0.10105  |
| 0.04957  | 0.103875 | 0.02478  | 0.134862 | 0.0035   | -0.0181801 | 0.69517  | -0.04394 | 0.34339  |
| 0.12842  | 0.21313  | 3.37E-06 | 0.105408 | 0.02272  | 0.00787857 | 0.86516  | 0.026349 | 0.57005  |
| 0.60558  | 0.216654 | 2.29E-06 | 0.110817 | 0.01659  | 0.06798124 | 0.14242  | 0.098885 | 0.03264  |
| 0.22947  | 0.167028 | 0.00029  | 0.12943  | 0.00509  | 0.03594402 | 0.43838  | -0.00767 | 0.86862  |
| 0.03081  | 0.016741 | 0.71822  | -0.25235 | 3.23E-08 | -0.2795138 | 7.89E-10 | -0.3341  | 1.22E-13 |
| 0.8347   | 0.01112  | 0.81058  | 0.029517 | 0.52458  | -0.0101474 | 0.82688  | -0.09479 | 0.0406   |

|          |          |          |          |          |            |          |          |          |
|----------|----------|----------|----------|----------|------------|----------|----------|----------|
| 0.8256   | 0.103097 | 0.02589  | 0.078683 | 0.08942  | 0.20040756 | 1.28E-05 | 0.242591 | 1.11E-07 |
| 0.00033  | -0.1579  | 0.00062  | -0.08366 | 0.07087  | 0.08506387 | 0.06626  | 0.094121 | 0.04205  |
| 0.96944  | 0.131052 | 0.00456  | 0.022899 | 0.62159  | -0.0704838 | 0.12827  | -0.12361 | 0.00749  |
| 0.05988  | 0.300641 | 3.28E-11 | 0.196842 | 1.83E-05 | 0.00108499 | 0.98134  | -0.09916 | 0.03216  |
| 9.94E-16 | 0.065285 | 0.15897  | -0.01328 | 0.77471  | 0.1054788  | 0.02263  | 0.18853  | 4.13E-05 |
| 0.13638  | -0.09418 | 0.04193  | 0.006195 | 0.89378  | 0.11098785 | 0.01642  | 0.061591 | 0.18395  |
| 0.43975  | 0.203952 | 8.90E-06 | 0.131202 | 0.00451  | 0.10741245 | 0.02025  | 0.064768 | 0.1623   |
| 0.22373  | 0.029053 | 0.53112  | 0.023145 | 0.61785  | -0.0874128 | 0.05909  | -0.12997 | 0.00491  |
| 0.17145  | 0.174915 | 0.00015  | 0.435763 | 4.59E-23 | 0.4470932  | 2.49E-24 | 0.368313 | 1.89E-16 |
| 0.36989  | 0.157754 | 0.00062  | -0.02353 | 0.61206  | -0.0781005 | 0.09183  | -0.24008 | 1.51E-07 |
| 0.60999  | -0.11106 | 0.01635  | -0.27565 | 1.37E-09 | -0.1325436 | 0.00411  | -0.16615 | 0.00031  |
| 0.06164  | 0.05503  | 0.23525  | -0.0129  | 0.78106  | 0.00489646 | 0.91595  | 0.019187 | 0.6792   |
| 0.03443  | 0.005871 | 0.8993   | -0.09109 | 0.04915  | 0.00215891 | 0.96289  | 0.039114 | 0.39905  |
| 0.00063  | -0.06123 | 0.18657  | 0.00493  | 0.91539  | 0.22297928 | 1.13E-06 | 0.119255 | 0.0099   |
| 0.41195  | -0.14505 | 0.00167  | -0.15359 | 0.00087  | -0.0695385 | 0.13348  | -0.09564 | 0.03884  |
| 1.87E-06 | -0.10775 | 0.01986  | -0.12521 | 0.00675  | -0.0564457 | 0.22341  | -0.01705 | 0.71329  |
| 0.96559  | -0.06136 | 0.18563  | -0.1902  | 3.52E-05 | -0.131831  | 0.00432  | -0.13733 | 0.00294  |
| 0.30875  | -0.15955 | 0.00054  | 0.059715 | 0.19769  | 0.22203907 | 1.26E-06 | 0.101868 | 0.02772  |
| 0.62544  | 0.0625   | 0.17755  | -0.06758 | 0.14478  | 0.03189505 | 0.49171  | 0.004455 | 0.92351  |
| 0.24138  | -0.31013 | 7.20E-12 | -0.20819 | 5.71E-06 | 0.06766437 | 0.14429  | 0.185802 | 5.35E-05 |
| 0.00152  | -0.00012 | 0.99787  | -0.12337 | 0.00761  | -0.0652079 | 0.15946  | -0.09138 | 0.04842  |
| 0.69435  | 0.114734 | 0.0131   | 0.047331 | 0.30741  | -0.0224096 | 0.62907  | -0.06172 | 0.18302  |
| 0.53981  | 0.092488 | 0.04576  | 0.096624 | 0.03686  | 0.03551201 | 0.44391  | 0.032143 | 0.48836  |
| 0.04826  | 0.297978 | 4.97E-11 | 0.13635  | 0.00315  | 0.31035231 | 6.94E-12 | 0.22022  | 1.54E-06 |
| 0.51078  | -0.02228 | 0.63099  | -0.01375 | 0.76703  | 0.0741581  | 0.10949  | 0.091232 | 0.0488   |
| 0.04532  | -0.0142  | 0.75953  | 0.073056 | 0.11488  | 0.23960033 | 1.60E-07 | 0.159647 | 0.00053  |
| 0.30166  | 0.095237 | 0.03966  | 0.120041 | 0.00942  | 0.14514941 | 0.00166  | 0.149338 | 0.00121  |
| 0.67798  | 0.10475  | 0.02358  | 0.009045 | 0.84544  | 0.0352013  | 0.44791  | 0.055031 | 0.23525  |
| 0.00025  | -0.0583  | 0.20851  | -0.04531 | 0.32855  | 0.36365323 | 4.77E-16 | 0.3508   | 5.71E-15 |
| 0.00014  | 0.00504  | 0.9135   | -0.20664 | 6.73E-06 | -0.3332277 | 1.42E-13 | -0.35109 | 5.41E-15 |
| 0.00448  | -0.18525 | 5.64E-05 | -0.37923 | 2.02E-17 | -0.2263308 | 7.72E-07 | -0.12062 | 0.00908  |
| 0.00188  | 0.111739 | 0.0157   | -0.0808  | 0.08112  | -0.0168222 | 0.71692  | 0.006041 | 0.89641  |
| 0.23847  | 0.114824 | 0.01303  | 0.067267 | 0.14667  | 0.05623281 | 0.22517  | 0.068308 | 0.1405   |
| 0.0007   | -0.06464 | 0.16315  | 0.018661 | 0.68752  | 0.1142841  | 0.01347  | 0.03028  | 0.51391  |
| 1.03E-06 | 0.227166 | 7.01E-07 | 0.339301 | 4.79E-14 | 0.05287689 | 0.25411  | -0.01442 | 0.75592  |
| 0.02165  | -0.24536 | 7.86E-08 | -0.07822 | 0.09133  | -0.2468171 | 6.54E-08 | -0.27995 | 7.41E-10 |
| 0.01318  | 0.19639  | 1.92E-05 | 0.186809 | 4.87E-05 | 0.23751552 | 2.06E-07 | 0.135908 | 0.00325  |
| 0.96222  | -0.02358 | 0.61126  | 0.103819 | 0.02486  | 0.27238452 | 2.18E-09 | 0.144445 | 0.00175  |
| 0.78569  | 0.25119  | 3.75E-08 | 0.036874 | 0.42663  | 0.01777668 | 0.7016   | -0.12022 | 0.00931  |
| 0.00093  | -0.18539 | 5.56E-05 | -0.10461 | 0.02377  | 0.0483533  | 0.29707  | -0.05517 | 0.2341   |
| 0.2037   | -0.21449 | 2.91E-06 | 0.057247 | 0.2169   | 0.11900597 | 0.01005  | -0.00327 | 0.94389  |
| 3.52E-05 | 0.213274 | 3.32E-06 | 0.175373 | 0.00014  | 0.00020777 | 0.99643  | 0.073068 | 0.11482  |
| 0.7618   | -0.03192 | 0.49143  | 0.007722 | 0.86783  | 0.04059473 | 0.38143  | 0.188623 | 4.09E-05 |
| 0.78596  | -0.17104 | 0.0002   | -0.22928 | 5.49E-07 | -0.169856  | 0.00023  | -0.22284 | 1.15E-06 |
| 0.00795  | 0.115233 | 0.01271  | 0.241835 | 1.22E-07 | 0.10593255 | 0.02205  | 0.113916 | 0.01377  |

|          |          |          |          |          |            |          |          |          |
|----------|----------|----------|----------|----------|------------|----------|----------|----------|
| 0.01717  | 0.121549 | 0.00855  | 0.052776 | 0.25503  | 0.01501565 | 0.74621  | 0.033384 | 0.47171  |
| 0.38572  | -0.10206 | 0.02743  | -0.21291 | 3.45E-06 | -0.3130779 | 4.44E-12 | -0.37933 | 1.98E-17 |
| 0.95984  | 0.134267 | 0.00365  | 0.064613 | 0.16331  | -0.0533698 | 0.24971  | -0.10408 | 0.02449  |
| 0.45404  | 0.217904 | 2.00E-06 | 0.105027 | 0.02322  | 0.15710689 | 0.00066  | 0.089576 | 0.05306  |
| 0.16378  | 0.155814 | 0.00073  | 0.011837 | 0.79863  | 0.02086688 | 0.65287  | -0.01897 | 0.68259  |
| 0.03158  | 0.089487 | 0.05329  | 0.058681 | 0.20559  | 0.09325974 | 0.04397  | 0.222091 | 1.25E-06 |
| 0.15906  | -0.07955 | 0.08596  | -0.23149 | 4.24E-07 | -0.1640557 | 0.00037  | -0.07816 | 0.09159  |
| 0.4196   | -0.11408 | 0.01363  | -0.09256 | 0.04558  | -0.0031935 | 0.94513  | 0.052938 | 0.25356  |
| 0.78795  | 0.062305 | 0.17891  | -0.02607 | 0.57413  | -0.2527891 | 3.05E-08 | -0.32396 | 7.16E-13 |
| 0.10567  | 0.174246 | 0.00015  | 0.161301 | 0.00047  | 0.10226813 | 0.02711  | 0.08964  | 0.05289  |
| 0.04134  | 0.022978 | 0.6204   | -0.01671 | 0.7188   | -0.1318783 | 0.00431  | -0.1623  | 0.00043  |
| 1.13E-08 | -0.14115 | 0.00223  | -0.10294 | 0.02611  | -0.2207882 | 1.45E-06 | -0.13512 | 0.00344  |
| 0.00012  | 0.074632 | 0.10724  | 0.213055 | 3.40E-06 | 0.11271026 | 0.01481  | 0.062048 | 0.18071  |
| 8.78E-13 | -0.27155 | 2.45E-09 | -0.24332 | 1.01E-07 | 0.18406428 | 6.30E-05 | 0.049283 | 0.28787  |
| 0.4739   | 0.146741 | 0.00147  | 0.133679 | 0.0038   | -0.0135153 | 0.77082  | -0.04575 | 0.32387  |
| 0.00503  | 0.14265  | 0.002    | 0.077948 | 0.09247  | 0.0871313  | 0.05991  | 0.04534  | 0.32823  |
| 0.60611  | -0.0236  | 0.61103  | -0.03683 | 0.42714  | -0.0819968 | 0.07669  | -0.03426 | 0.4602   |
| 0.06559  | -0.16199 | 0.00044  | -0.08538 | 0.06526  | -0.0200662 | 0.66537  | -0.06282 | 0.17532  |
| 0.27748  | -0.16239 | 0.00043  | -0.09598 | 0.03814  | -0.0782938 | 0.09103  | -0.05267 | 0.25594  |
| 0.92623  | 0.02774  | 0.54986  | 0.065999 | 0.15445  | 0.07084184 | 0.12633  | 0.052137 | 0.26083  |
| 1.67E-05 | 0.147869 | 0.00135  | -0.0218  | 0.63849  | 0.0398785  | 0.38989  | 0.165261 | 0.00034  |
| 0.12407  | 0.259569 | 1.25E-08 | 0.078307 | 0.09097  | 0.14940591 | 0.0012   | 0.240084 | 1.51E-07 |
| 5.27E-08 | 0.003361 | 0.94225  | 0.085532 | 0.06478  | 0.20024672 | 1.30E-05 | 0.189973 | 3.60E-05 |
| 0.04366  | -0.02147 | 0.64351  | 0.137164 | 0.00298  | 0.07534557 | 0.10391  | -0.08039 | 0.08267  |
| 0.1761   | 0.193876 | 2.46E-05 | 0.071961 | 0.12044  | 0.01999977 | 0.66641  | -0.00081 | 0.98599  |
| 0.84705  | 0.257379 | 1.68E-08 | 0.228089 | 6.30E-07 | 0.15632601 | 0.0007   | 0.150177 | 0.00113  |
| 0.12341  | -0.10742 | 0.02023  | 0.089488 | 0.05329  | 0.05422073 | 0.24223  | -0.08645 | 0.06193  |
| 0.29778  | -0.11796 | 0.01073  | -0.06907 | 0.13612  | 0.08346937 | 0.07153  | 0.146117 | 0.00154  |
| 0.33911  | -0.00378 | 0.93499  | -0.01804 | 0.69745  | -0.0569416 | 0.21937  | -0.07246 | 0.1179   |
| 0.38816  | -0.08083 | 0.08101  | -0.01627 | 0.72585  | 0.052532   | 0.25723  | 0.025853 | 0.57733  |
| 0.44019  | -0.11513 | 0.01278  | -0.03633 | 0.43345  | 0.07510609 | 0.10502  | 0.066091 | 0.15388  |
| 0.00741  | -0.20985 | 4.79E-06 | -0.11858 | 0.01033  | 0.026628   | 0.56597  | -0.00284 | 0.95127  |
| 0.01382  | 0.220529 | 1.49E-06 | 0.408981 | 2.95E-20 | 0.36099884 | 8.05E-16 | 0.226463 | 7.61E-07 |
| 0.17203  | 0.095957 | 0.03818  | 0.300713 | 3.24E-11 | -0.1692363 | 0.00024  | -0.28471 | 3.70E-10 |
| 0.00175  | -0.25462 | 2.41E-08 | -0.06877 | 0.13783  | 0.10838314 | 0.01914  | 0.185232 | 5.65E-05 |
| 0.00098  | -0.09298 | 0.04461  | -0.03673 | 0.42848  | 0.0893399  | 0.05369  | 0.237917 | 1.97E-07 |
| 0.00013  | -0.0099  | 0.83098  | -0.15561 | 0.00074  | -0.1717012 | 0.00019  | 0.020473 | 0.65901  |
| 0.38316  | 0.003189 | 0.94521  | -0.07295 | 0.11539  | -0.0372699 | 0.42167  | -0.04198 | 0.3654   |
| 0.43405  | 0.102564 | 0.02667  | 0.04386  | 0.34428  | -0.0313796 | 0.49874  | 0.047842 | 0.30222  |
| 0.05985  | -0.31458 | 3.47E-12 | -0.10959 | 0.01783  | -0.0908069 | 0.04986  | -0.12037 | 0.00922  |
| 0.52718  | -0.25408 | 2.58E-08 | -0.30526 | 1.58E-11 | -0.2274968 | 6.75E-07 | -0.27178 | 2.37E-09 |
| 0.13505  | 0.248825 | 5.07E-08 | 0.108591 | 0.01891  | 0.15136162 | 0.00103  | 0.073163 | 0.11435  |
| 0.93244  | -0.13081 | 0.00463  | 0.153021 | 0.00091  | 0.23814865 | 1.91E-07 | 0.094873 | 0.04043  |
| 0.00787  | -0.0529  | 0.25389  | 0.293014 | 1.07E-10 | 0.35387733 | 3.19E-15 | 0.30658  | 1.28E-11 |
| 0.64339  | 0.171336 | 0.0002   | 0.060259 | 0.19364  | 0.08144005 | 0.07872  | 0.13977  | 0.00247  |

|          |          |          |          |          |            |          |          |          |
|----------|----------|----------|----------|----------|------------|----------|----------|----------|
| 0.22656  | -0.04188 | 0.36649  | -0.03255 | 0.48284  | 0.07788185 | 0.09275  | 0.127579 | 0.00576  |
| 0.07082  | -0.02916 | 0.5296   | -0.07573 | 0.10215  | -0.2248311 | 9.17E-07 | -0.24725 | 6.19E-08 |
| 2.73E-07 | 0.065009 | 0.16074  | 0.01057  | 0.8198   | 0.04796624 | 0.30096  | -0.03001 | 0.51761  |
| 0.0752   | 0.077094 | 0.09611  | 0.005253 | 0.90987  | 0.01489931 | 0.74811  | 0.039445 | 0.39506  |
| 0.00068  | 0.258838 | 1.38E-08 | 0.084045 | 0.06959  | -0.0197749 | 0.66994  | 0.034957 | 0.45107  |
| 0.17532  | -0.01688 | 0.71598  | -0.08063 | 0.08175  | -0.0048058 | 0.91751  | 0.094233 | 0.0418   |
| 1.92E-13 | 0.10986  | 0.01755  | 0.147942 | 0.00135  | 0.2123525  | 3.66E-06 | 0.258086 | 1.53E-08 |
| 0.8503   | 0.069707 | 0.13254  | 0.068357 | 0.14022  | 0.08622214 | 0.06264  | 0.078013 | 0.0922   |
| 4.07E-07 | -0.15355 | 0.00087  | -0.04692 | 0.31167  | 0.02455363 | 0.59662  | -0.03091 | 0.50514  |
| 0.06131  | -0.12958 | 0.00504  | -0.18912 | 3.90E-05 | -0.0642004 | 0.16602  | 0.036601 | 0.43005  |
| 0.01075  | 0.175581 | 0.00014  | 0.240011 | 1.52E-07 | 0.28593774 | 3.08E-10 | 0.224345 | 9.70E-07 |
| 0.84444  | -0.18143 | 8.05E-05 | -0.07998 | 0.08427  | 0.04631461 | 0.31793  | 0.026194 | 0.57232  |
| 0.00072  | 0.238252 | 1.89E-07 | 0.1356   | 0.00332  | 0.12361503 | 0.00749  | 0.173863 | 0.00016  |
| 0.00071  | -0.07572 | 0.10221  | -0.18006 | 9.13E-05 | -0.0710648 | 0.12514  | -0.10009 | 0.03057  |
| 0.16128  | 0.075198 | 0.10459  | 0.017803 | 0.70119  | 0.05927971 | 0.20099  | 0.045478 | 0.32676  |
| 0.13004  | -0.13279 | 0.00404  | 0.134426 | 0.00361  | 0.18827258 | 4.23E-05 | -0.01945 | 0.67504  |
| 0.39031  | 0.090671 | 0.05021  | -0.07627 | 0.09974  | -0.0938545 | 0.04264  | -0.16467 | 0.00035  |
| 0.52293  | 0.252347 | 3.23E-08 | 0.370755 | 1.15E-16 | 0.31179158 | 5.49E-12 | 0.116023 | 0.01211  |
| 0.24532  | 0.075075 | 0.10516  | 3.37E-05 | 0.99942  | 0.16327153 | 0.0004   | 0.054654 | 0.23848  |
| 0.08746  | 0.136046 | 0.00322  | -0.01349 | 0.77123  | 0.04382439 | 0.34467  | 0.042647 | 0.35781  |
| 2.70E-07 | 0.206404 | 6.89E-06 | 0.099756 | 0.03114  | 0.029695   | 0.52208  | -0.00199 | 0.96584  |
| 0.00056  | -0.13405 | 0.00371  | -0.12852 | 0.00541  | -0.0642427 | 0.16574  | -0.07169 | 0.12185  |
| 0.01507  | 0.108628 | 0.01887  | -0.02518 | 0.58733  | 0.06604723 | 0.15415  | 0.178823 | 0.0001   |
| 7.11E-06 | 0.194802 | 2.24E-05 | 0.162564 | 0.00042  | -0.0023584 | 0.95946  | -0.08366 | 0.07089  |
| 0.09159  | 0.071326 | 0.12376  | -0.08186 | 0.07719  | -0.002668  | 0.95415  | -0.03139 | 0.49866  |
| 0.83658  | -0.0529  | 0.25389  | -0.09086 | 0.04973  | -0.0748304 | 0.1063   | -0.08359 | 0.07113  |
| 0.66782  | -0.02527 | 0.58597  | -0.03713 | 0.42341  | -0.0225057 | 0.6276   | 0.019054 | 0.68129  |
| 0.40309  | 0.021479 | 0.64339  | 0.014357 | 0.75699  | -0.0073188 | 0.87466  | 0.006641 | 0.8862   |
| 0.8858   | -0.10415 | 0.0244   | -0.26133 | 9.92E-09 | -0.1784678 | 0.00011  | -0.22875 | 5.84E-07 |
| 0.44197  | -0.02582 | 0.5778   | -0.08012 | 0.0837   | -0.0065626 | 0.88752  | -0.02753 | 0.55288  |
| 0.37444  | -0.05314 | 0.2518   | 0.03773  | 0.41596  | 0.12562863 | 0.00656  | 0.084817 | 0.06705  |
| 0.1612   | -0.05441 | 0.24061  | 0.052755 | 0.25521  | 0.12443243 | 0.0071   | 0.109563 | 0.01786  |
| 0.00786  | -0.0886  | 0.05571  | -0.03286 | 0.47869  | 0.0611848  | 0.18687  | 0.043051 | 0.35326  |
| 4.49E-08 | 0.105396 | 0.02273  | 0.170329 | 0.00022  | 0.04458253 | 0.33638  | -0.02832 | 0.54148  |
| 1.59E-09 | -0.01462 | 0.75275  | -0.04595 | 0.32171  | -0.1694676 | 0.00023  | -0.18356 | 6.61E-05 |
| 0.08083  | -0.26811 | 3.95E-09 | -0.27474 | 1.56E-09 | -0.199808  | 1.36E-05 | -0.16789 | 0.00027  |
| 0.0365   | 0.022213 | 0.63208  | 0.046577 | 0.31519  | 0.02306023 | 0.61914  | -0.00531 | 0.90881  |
| 0.62023  | -0.00968 | 0.83477  | -0.06575 | 0.15602  | -0.0470827 | 0.30996  | -0.09273 | 0.0452   |
| 0.86435  | -0.06691 | 0.14886  | -0.10904 | 0.01842  | -0.0780716 | 0.09195  | -0.12354 | 0.00752  |
| 2.48E-05 | 0.198615 | 1.53E-05 | 0.02235  | 0.62999  | -0.0099704 | 0.82985  | 0.016355 | 0.72445  |
| 0.00823  | -0.00044 | 0.99243  | -0.03288 | 0.47846  | -0.0528427 | 0.25442  | -0.08135 | 0.07905  |
| 0.63051  | 0.051803 | 0.2639   | 0.012268 | 0.79146  | -0.0809664 | 0.08048  | -0.1281  | 0.00556  |
| 0.1707   | 0.211147 | 4.17E-06 | 0.293278 | 1.02E-10 | 0.09227568 | 0.04626  | 0.010218 | 0.8257   |
| 0.18825  | 0.27393  | 1.75E-09 | 0.171492 | 0.0002   | 0.23085576 | 4.56E-07 | 0.112516 | 0.01499  |
| 0.16504  | 0.106113 | 0.02182  | -0.02792 | 0.54722  | 0.05145576 | 0.26712  | 0.105449 | 0.02267  |

|          |          |          |          |          |            |          |          |          |
|----------|----------|----------|----------|----------|------------|----------|----------|----------|
| 2.47E-07 | 0.095948 | 0.0382   | 0.101713 | 0.02796  | -0.0176703 | 0.7033   | -0.08881 | 0.05513  |
| 0.66637  | 0.116737 | 0.01158  | -0.04114 | 0.37511  | -0.1638878 | 0.00038  | -0.13116 | 0.00452  |
| 0.21798  | -0.16503 | 0.00034  | -0.22076 | 1.45E-06 | -0.2182692 | 1.92E-06 | -0.26306 | 7.86E-09 |
| 0.70943  | -0.12218 | 0.00821  | -0.06457 | 0.16357  | -0.0618686 | 0.18198  | -0.05723 | 0.21704  |
| 0.47573  | -0.08591 | 0.0636   | -0.05507 | 0.23495  | -0.0306022 | 0.50945  | 0.005455 | 0.9064   |
| 4.93E-09 | -0.26392 | 6.99E-09 | -0.11401 | 0.01369  | 0.0868054  | 0.06088  | 0.1522   | 0.00097  |
| 1.81E-05 | -0.10037 | 0.03011  | -0.1283  | 0.00549  | -0.1616074 | 0.00045  | -0.07552 | 0.1031   |
| 1.63E-12 | -0.12884 | 0.00529  | -0.09154 | 0.04803  | -0.0489843 | 0.29081  | 0.005869 | 0.89935  |
| 0.74964  | 0.025515 | 0.58232  | -0.09001 | 0.05192  | -0.0413913 | 0.37215  | 0.126365 | 0.00625  |
| 1.40E-12 | -0.06972 | 0.13248  | -0.13157 | 0.0044   | -0.0748945 | 0.106    | 0.034415 | 0.45812  |
| 0.01845  | -0.06544 | 0.15801  | -0.13744 | 0.00292  | -0.0684592 | 0.13963  | -0.01999 | 0.66661  |
| 0.99549  | 0.030039 | 0.51728  | 0.00197  | 0.96614  | -0.0313886 | 0.49862  | -0.00261 | 0.95509  |
| 0.71939  | 0.026755 | 0.56413  | -0.09761 | 0.03497  | -0.0488783 | 0.29185  | -0.07943 | 0.0864   |
| 0.90291  | 0.061982 | 0.18118  | -0.04056 | 0.38179  | -0.0865279 | 0.06171  | -0.09824 | 0.03381  |
| 0.46338  | 0.151339 | 0.00104  | 0.087471 | 0.05892  | -0.1232227 | 0.00768  | -0.15145 | 0.00103  |
| 0.76288  | -0.04842 | 0.29639  | -0.05165 | 0.26528  | 0.01782031 | 0.70091  | -0.01809 | 0.69657  |
| 0.45511  | -0.07277 | 0.11631  | -0.06986 | 0.13169  | -0.0205331 | 0.65807  | -0.03869 | 0.40421  |
| 1.83E-05 | 0.040954 | 0.37722  | 0.100751 | 0.02948  | -0.0165183 | 0.72182  | -0.04749 | 0.30574  |
| 0.49382  | 0.072917 | 0.11558  | 0.085461 | 0.065    | 0.10970244 | 0.01772  | 0.152565 | 0.00094  |
| 0.95422  | -0.09562 | 0.03886  | 0.005718 | 0.90192  | 0.07693363 | 0.0968   | 0.076843 | 0.0972   |
| 0.87196  | -0.01289 | 0.78122  | -0.0834  | 0.07178  | -0.0803435 | 0.08285  | -0.06441 | 0.16462  |
| 0.00179  | -0.19638 | 1.92E-05 | -0.13915 | 0.00258  | 0.01556886 | 0.7372   | 0.107445 | 0.02021  |
| 0.93455  | 0.059515 | 0.1992   | 0.062914 | 0.17469  | -0.0136975 | 0.76782  | -0.01973 | 0.67066  |
| 0.88146  | 0.035724 | 0.4412   | 0.257709 | 1.61E-08 | 0.23257119 | 3.73E-07 | 0.035593 | 0.44287  |
| 0.40256  | 0.190536 | 3.41E-05 | 0.25532  | 2.20E-08 | 0.12574824 | 0.00651  | 0.096436 | 0.03723  |
| 0.21767  | 0.271509 | 2.46E-09 | 0.366427 | 2.75E-16 | 0.26287238 | 8.06E-09 | 0.22695  | 7.19E-07 |
| 0.05118  | 0.025429 | 0.58359  | -0.20363 | 9.19E-06 | -0.3854384 | 5.46E-18 | -0.25588 | 2.04E-08 |
| 0.00862  | 0.225922 | 8.10E-07 | 0.136265 | 0.00317  | 0.03402258 | 0.46327  | -0.07111 | 0.12489  |
| 0.91988  | 0.078057 | 0.09201  | -0.00896 | 0.84694  | 0.14234119 | 0.00205  | 0.178789 | 0.0001   |
| 0.73552  | 0.048599 | 0.29462  | 0.048397 | 0.29664  | 0.076715   | 0.09776  | 0.101658 | 0.02805  |
| 0.73177  | -0.08807 | 0.05718  | 0.028064 | 0.5452   | -0.0530715 | 0.25237  | -0.19505 | 2.19E-05 |
| 0.37333  | -0.06148 | 0.18476  | 0.060673 | 0.19059  | 0.39334546 | 9.90E-19 | 0.300969 | 3.11E-11 |
| 0.88132  | 0.008611 | 0.85277  | -0.11899 | 0.01006  | -0.073495  | 0.11271  | -0.07543 | 0.10351  |
| 0.01772  | 0.143137 | 0.00193  | -0.03381 | 0.46608  | 0.23419134 | 3.08E-07 | 0.152018 | 0.00098  |
| 1.16E-13 | -0.0376  | 0.41755  | 0.08481  | 0.06708  | 0.1207551  | 0.009    | 0.087222 | 0.05964  |
| 0.15134  | -0.0392  | 0.39804  | -0.03813 | 0.411    | 0.00891075 | 0.8477   | -0.01559 | 0.73678  |
| 0.24259  | -0.2237  | 1.04E-06 | -0.19162 | 3.07E-05 | -0.1811361 | 8.27E-05 | -0.14522 | 0.00165  |
| 0.0062   | 0.065443 | 0.15796  | -0.13733 | 0.00294  | 0.05608092 | 0.22642  | 0.060137 | 0.19454  |
| 0.7539   | 0.050693 | 0.27428  | -0.00082 | 0.98585  | 0.08998587 | 0.05197  | 0.18219  | 7.50E-05 |
| 0.0039   | 0.044987 | 0.33202  | 0.436066 | 4.25E-23 | 0.07075322 | 0.12681  | -0.15591 | 0.00072  |
| 0.14762  | 0.2563   | 1.93E-08 | 0.153023 | 0.00091  | -0.0056147 | 0.90368  | 0.024569 | 0.59638  |
| 0.01211  | 0.005706 | 0.90213  | -0.02713 | 0.55869  | -0.0215585 | 0.64215  | -0.05973 | 0.19757  |
| 0.70079  | 0.12423  | 0.00719  | 0.076158 | 0.10022  | 0.16420133 | 0.00037  | 0.193321 | 2.60E-05 |
| 0.16412  | -0.01112 | 0.81066  | -0.07193 | 0.12059  | 0.00873988 | 0.85059  | -0.02679 | 0.56361  |
| 0.04985  | -0.10281 | 0.02631  | -0.14113 | 0.00224  | 0.01617513 | 0.72736  | 0.075456 | 0.1034   |

|          |          |          |          |          |            |          |          |          |
|----------|----------|----------|----------|----------|------------|----------|----------|----------|
| 3.71E-17 | -0.00796 | 0.86382  | 0.042384 | 0.36077  | 0.15580985 | 0.00073  | 0.221174 | 1.39E-06 |
| 2.07E-16 | 0.104118 | 0.02444  | 0.054959 | 0.23586  | 0.06023889 | 0.19378  | 0.05814  | 0.2098   |
| 0.01134  | -0.16376 | 0.00038  | -0.43517 | 5.33E-23 | -0.2115967 | 3.97E-06 | -0.27791 | 9.94E-10 |
| 3.95E-11 | -0.00313 | 0.94618  | -0.02467 | 0.59484  | 0.03658784 | 0.43022  | 0.021064 | 0.64982  |
| 0.15434  | -0.11059 | 0.01681  | 0.013317 | 0.7741   | 0.08156137 | 0.07828  | 0.053018 | 0.25284  |
| 0.01763  | -0.05538 | 0.23229  | -0.10402 | 0.02458  | 0.11520857 | 0.01273  | 0.150723 | 0.00109  |
| 0.14931  | 0.128011 | 0.0056   | 0.126746 | 0.00609  | 0.20880727 | 5.35E-06 | 0.200264 | 1.30E-05 |
| 0.96775  | 0.128722 | 0.00534  | 0.119774 | 0.00958  | 0.10012243 | 0.03052  | 0.130755 | 0.00465  |
| 0.94614  | 0.180959 | 8.40E-05 | 0.129952 | 0.00491  | 0.14859311 | 0.00128  | 0.08507  | 0.06624  |
| 9.96E-12 | 0.177995 | 0.00011  | 0.121162 | 0.00877  | 0.16447916 | 0.00036  | 0.182275 | 7.44E-05 |
| 0.2898   | 0.127251 | 0.00589  | 0.136343 | 0.00315  | 0.16404222 | 0.00037  | 0.109102 | 0.01835  |
| 0.07065  | -0.01783 | 0.7007   | -0.08772 | 0.05819  | -0.0200968 | 0.66489  | -0.02095 | 0.65161  |
| 0.06025  | -0.09785 | 0.03451  | -0.0798  | 0.08494  | -0.0153571 | 0.74064  | -0.05338 | 0.24963  |
| 0.56572  | -0.17566 | 0.00014  | -0.04523 | 0.32938  | 0.11673961 | 0.01158  | 0.070429 | 0.12856  |
| 0.00339  | -0.02062 | 0.6567   | -0.01505 | 0.7456   | -0.0063787 | 0.89065  | -0.01859 | 0.68871  |
| 0.0182   | 0.150452 | 0.00111  | 0.05076  | 0.27365  | -0.0892639 | 0.05389  | -0.16087 | 0.00048  |
| 2.10E-09 | -0.00363 | 0.93763  | 0.166426 | 0.0003   | 0.24910287 | 4.90E-08 | 0.142993 | 0.00195  |
| 5.56E-09 | -0.0175  | 0.70595  | 0.070573 | 0.12778  | 0.28614154 | 2.99E-10 | 0.350075 | 6.55E-15 |
| 0.49975  | -0.00575 | 0.9013   | 0.059052 | 0.20273  | 0.12012563 | 0.00937  | 0.123101 | 0.00774  |
| 0.83696  | -0.24253 | 1.12E-07 | -0.04364 | 0.34674  | 0.30591367 | 1.42E-11 | 0.283154 | 4.65E-10 |
| 0.89078  | -0.11842 | 0.01043  | 0.0946   | 0.04101  | 0.10968577 | 0.01773  | 0.087423 | 0.05906  |
| 0.40019  | -0.06488 | 0.16156  | 0.011564 | 0.80317  | -0.069387  | 0.13433  | -0.10614 | 0.02179  |
| 0.88962  | 0.048322 | 0.29739  | 0.190362 | 3.46E-05 | 0.2028456  | 9.97E-06 | 0.280694 | 6.65E-10 |
| 0.01388  | 0.224214 | 9.84E-07 | 0.135811 | 0.00328  | 0.07724059 | 0.09547  | 0.071343 | 0.12367  |
| 0.53968  | 0.233027 | 3.53E-07 | 0.404614 | 8.02E-20 | 0.1846479  | 5.97E-05 | 0.090797 | 0.04989  |
| 0.7269   | -0.06003 | 0.19535  | -0.13603 | 0.00323  | -0.0970099 | 0.03611  | -0.09899 | 0.03245  |
| 0.21855  | 0.03831  | 0.40882  | 0.098113 | 0.03403  | 0.00905092 | 0.84534  | -0.03492 | 0.4516   |
| 3.92E-08 | 0.222962 | 1.13E-06 | 0.306023 | 1.40E-11 | 0.08954078 | 0.05315  | 0.09735  | 0.03546  |
| 0.20443  | -0.09782 | 0.03457  | 0.124745 | 0.00695  | 0.10913972 | 0.01831  | -0.04268 | 0.35742  |
| 0.019    | 0.114826 | 0.01303  | 0.061754 | 0.18279  | -0.0693027 | 0.1348   | -0.17563 | 0.00014  |
| 0.00091  | 0.228825 | 5.79E-07 | 0.102907 | 0.02616  | -0.1942918 | 2.36E-05 | -0.27265 | 2.10E-09 |
| 7.35E-05 | 0.228575 | 5.96E-07 | 0.060468 | 0.19209  | -0.2456678 | 7.56E-08 | -0.29346 | 9.95E-11 |
| 0.07205  | -0.17074 | 0.00021  | -0.10494 | 0.02333  | -0.0024634 | 0.95766  | 0.051004 | 0.27134  |
| 0.58878  | 0.03908  | 0.39946  | -0.06924 | 0.13514  | -0.0836911 | 0.07078  | -0.05496 | 0.23586  |
| 0.00508  | -0.06415 | 0.16635  | -0.03974 | 0.39158  | 0.04493092 | 0.33262  | 0.118096 | 0.01064  |
| 1.25E-06 | 0.009619 | 0.83577  | -0.09922 | 0.03205  | 0.11841486 | 0.01043  | 0.115224 | 0.01272  |
| 0.04669  | 0.255037 | 2.28E-08 | 0.168561 | 0.00025  | 0.20077739 | 1.23E-05 | 0.256261 | 1.94E-08 |
| 0.1681   | -0.03788 | 0.41411  | -0.162   | 0.00044  | -0.142567  | 0.00201  | -0.12458 | 0.00703  |
| 3.04E-05 | 0.198518 | 1.55E-05 | 0.115183 | 0.01275  | 0.0102515  | 0.82513  | -0.01765 | 0.70361  |
| 0.05751  | -0.01577 | 0.73392  | 0.055676 | 0.2298   | 0.17959264 | 9.52E-05 | 0.261724 | 9.41E-09 |
| 0.23847  | -0.15346 | 0.00088  | -0.05027 | 0.27833  | 0.03705399 | 0.42436  | 0.017444 | 0.70693  |
| 0.67245  | 0.052438 | 0.25808  | -0.06483 | 0.16189  | -0.0642575 | 0.16565  | -0.10733 | 0.02035  |
| 1.60E-07 | 0.184746 | 5.91E-05 | 0.109724 | 0.01769  | 0.01793104 | 0.69914  | 0.082919 | 0.07342  |
| 5.08E-06 | 0.055548 | 0.23088  | 0.06698  | 0.1484   | 0.07674803 | 0.09761  | 0.094126 | 0.04204  |
| 0.02012  | 0.169508 | 0.00023  | 0.027284 | 0.55644  | -0.0313043 | 0.49978  | -0.00588 | 0.89924  |

|          |          |          |          |          |            |          |          |          |
|----------|----------|----------|----------|----------|------------|----------|----------|----------|
| 3.08E-10 | -0.09611 | 0.03788  | -0.05947 | 0.19955  | 0.00769105 | 0.86834  | -0.02599 | 0.57533  |
| 0.00767  | 0.045732 | 0.32406  | 0.051564 | 0.26611  | 0.11550395 | 0.0125   | 0.106007 | 0.02195  |
| 0.181    | 0.110597 | 0.0168   | -0.05189 | 0.26311  | -0.050411  | 0.27697  | 0.037137 | 0.42332  |
| 0.57482  | -0.07731 | 0.09519  | -0.03361 | 0.46874  | 0.03212622 | 0.48858  | 0.110391 | 0.01701  |
| 0.00206  | 0.202483 | 1.03E-05 | 0.112183 | 0.01529  | 0.02006977 | 0.66531  | -0.03644 | 0.43209  |
| 0.48723  | 0.009732 | 0.83385  | -0.14523 | 0.00165  | -0.1596957 | 0.00053  | -0.16054 | 0.0005   |
| 0.00642  | 0.117605 | 0.01098  | 0.045403 | 0.32756  | -0.0548242 | 0.23702  | -0.06051 | 0.19181  |
| 0.97821  | 0.044544 | 0.33681  | -0.06122 | 0.1866   | -0.0935544 | 0.04331  | -0.11453 | 0.01326  |
| 6.38E-07 | 0.007602 | 0.86985  | -0.01949 | 0.67441  | 0.0140836  | 0.76147  | 0.040947 | 0.37731  |
| 0.5913   | 0.150165 | 0.00113  | 0.044961 | 0.3323   | -0.0153397 | 0.74093  | 0.031179 | 0.50149  |
| 6.16E-06 | -0.00485 | 0.9167   | -0.00696 | 0.88072  | 0.02197932 | 0.63567  | 0.042416 | 0.36041  |
| 0.31618  | -0.06578 | 0.15583  | -0.21257 | 3.58E-06 | -0.1014659 | 0.02834  | -0.10072 | 0.02953  |
| 0.83309  | -0.06028 | 0.19351  | -0.04326 | 0.35092  | -0.0592222 | 0.20143  | -0.20112 | 1.19E-05 |
| 1.13E-06 | -0.08224 | 0.07583  | -0.00853 | 0.85415  | 0.14064667 | 0.00232  | 0.181788 | 7.79E-05 |
| 0.05708  | 0.190145 | 3.54E-05 | -0.09899 | 0.03246  | 0.1241155  | 0.00725  | 0.053462 | 0.24889  |
| 0.04562  | -0.084   | 0.06973  | -0.16167 | 0.00045  | 0.07614093 | 0.1003   | -0.02178 | 0.63872  |
| 0.12151  | -0.06863 | 0.13866  | -0.18576 | 5.37E-05 | -0.1272388 | 0.0059   | -0.05141 | 0.26755  |
| 0.2179   | 0.041001 | 0.37668  | -0.05772 | 0.21315  | -0.0171176 | 0.71216  | -0.02164 | 0.64084  |
| 0.18589  | 0.07511  | 0.105    | 0.037103 | 0.42375  | -0.113169  | 0.01441  | -0.12629 | 0.00628  |
| 0.20526  | 0.140956 | 0.00226  | 0.042209 | 0.36277  | -0.1148869 | 0.01298  | -0.14879 | 0.00126  |
| 0.47065  | 0.176497 | 0.00013  | 0.264515 | 6.45E-09 | 0.40604192 | 5.79E-20 | 0.120082 | 0.00939  |
| 0.67953  | 0.008516 | 0.85437  | 0.008851 | 0.84871  | -0.0010188 | 0.98248  | -0.05896 | 0.20346  |
| 0.03731  | -0.09067 | 0.05022  | 0.156672 | 0.00068  | 0.42741173 | 3.67E-22 | 0.31873  | 1.74E-12 |
| 0.00897  | 0.214112 | 3.03E-06 | 0.211132 | 4.18E-06 | 0.36313087 | 5.29E-16 | 0.275629 | 1.38E-09 |
| 0.76748  | 0.18939  | 3.80E-05 | 0.067673 | 0.14424  | 0.20430306 | 8.58E-06 | 0.158528 | 0.00059  |
| 0.20385  | 0.082333 | 0.07549  | 0.031397 | 0.4985   | 0.07744831 | 0.09458  | 0.130381 | 0.00477  |
| 0.00029  | -0.04066 | 0.38068  | 0.001067 | 0.98165  | -0.1510343 | 0.00106  | -0.15495 | 0.00078  |
| 0.00485  | 0.107215 | 0.02048  | 0.168825 | 0.00025  | 0.12118677 | 0.00875  | 0.128688 | 0.00535  |
| 0.3853   | -0.00851 | 0.85455  | 0.025353 | 0.58472  | 0.09948402 | 0.0316   | 0.016372 | 0.72417  |
| 0.55713  | -0.13223 | 0.0042   | -0.28694 | 2.66E-10 | -0.261308  | 9.95E-09 | -0.23832 | 1.87E-07 |
| 0.0016   | 0.14356  | 0.00187  | 0.019792 | 0.66967  | -0.1426558 | 0.002    | -0.16749 | 0.00028  |
| 1.99E-06 | 0.172657 | 0.00018  | 0.20461  | 8.31E-06 | 0.25367835 | 2.72E-08 | 0.24383  | 9.51E-08 |
| 0.18002  | -0.17393 | 0.00016  | -0.20358 | 9.24E-06 | -0.0580594 | 0.21044  | 0.051555 | 0.26619  |
| 0.32472  | 0.094081 | 0.04214  | 0.060182 | 0.1942   | 0.10222673 | 0.02717  | 0.094209 | 0.04186  |
| 0.02262  | 0.094909 | 0.04035  | -0.00572 | 0.90181  | -0.0566994 | 0.22134  | -0.02974 | 0.52145  |
| 0.04967  | 0.013094 | 0.77778  | -0.01075 | 0.8168   | 0.10176896 | 0.02787  | 0.198758 | 1.51E-05 |
| 0.00307  | -0.02343 | 0.61357  | 0.003289 | 0.94349  | 0.19639604 | 1.92E-05 | 0.166438 | 0.0003   |
| 0.00066  | -0.13499 | 0.00347  | -0.00337 | 0.94204  | 0.32100403 | 1.18E-12 | 0.34661  | 1.25E-14 |
| 4.90E-12 | 0.106083 | 0.02186  | 0.059253 | 0.2012   | 0.06120515 | 0.18672  | 0.065091 | 0.16021  |
| 0.16032  | 0.023776 | 0.6083   | -0.00681 | 0.88329  | 0.09447656 | 0.04128  | 0.155346 | 0.00076  |
| 0.10021  | 0.024284 | 0.60066  | 0.033074 | 0.47584  | -0.0482189 | 0.29842  | -0.12352 | 0.00753  |
| 0.77701  | 0.017735 | 0.70227  | 0.035689 | 0.44164  | 0.07478404 | 0.10652  | 0.071484 | 0.12292  |
| 0.36297  | 0.022933 | 0.62107  | -0.05458 | 0.23909  | 0.03840191 | 0.4077   | 0.10639  | 0.02148  |
| 0.00049  | 0.157429 | 0.00064  | 0.081708 | 0.07774  | 0.01192998 | 0.79708  | 0.065566 | 0.15718  |
| 9.00E-08 | 0.107996 | 0.01958  | -0.02848 | 0.53933  | 0.00797936 | 0.86346  | 0.076755 | 0.09758  |

|          |          |          |          |          |            |          |          |          |
|----------|----------|----------|----------|----------|------------|----------|----------|----------|
| 0.36724  | 0.131547 | 0.00441  | 0.164382 | 0.00036  | 0.09102736 | 0.04931  | -0.0653  | 0.15888  |
| 3.54E-06 | 0.328323 | 3.37E-13 | 0.163502 | 0.00039  | -0.0189407 | 0.68309  | 0.004581 | 0.92136  |
| 0.31476  | -0.02464 | 0.59532  | 0.128808 | 0.00531  | 0.39271774 | 1.14E-18 | 0.32974  | 2.63E-13 |
| 0.73115  | 0.170644 | 0.00021  | 0.083987 | 0.06978  | 0.08642622 | 0.06202  | 0.139075 | 0.00259  |
| 0.00092  | 0.267015 | 4.59E-09 | 0.071335 | 0.12371  | 0.06261069 | 0.17678  | 0.050586 | 0.2753   |
| 2.14E-05 | -0.01258 | 0.78622  | 0.022148 | 0.63308  | 0.00187473 | 0.96777  | 0.034946 | 0.45121  |
| 0.00064  | -0.10905 | 0.01841  | -0.02545 | 0.58332  | 0.10442538 | 0.02402  | 0.10378  | 0.02491  |
| 0.29002  | 0.074371 | 0.10848  | 0.10864  | 0.01885  | 0.16799994 | 0.00027  | 0.060013 | 0.19547  |
| 0.20853  | 0.050235 | 0.27864  | -0.06556 | 0.1572   | 0.01084939 | 0.81511  | 0.107656 | 0.01996  |
| 0.42987  | 0.090516 | 0.0506   | -0.02131 | 0.64599  | -0.0053083 | 0.90891  | 0.042579 | 0.35857  |
| 2.61E-08 | 0.172649 | 0.00018  | 0.080603 | 0.08186  | -0.0618306 | 0.18225  | -0.06143 | 0.18509  |
| 0.00716  | 0.230969 | 4.50E-07 | 0.106415 | 0.02145  | 0.10183669 | 0.02777  | 0.163294 | 0.0004   |
| 0.17728  | 0.293098 | 1.05E-10 | 0.172429 | 0.00018  | -0.0173463 | 0.70849  | -0.07135 | 0.12365  |
| 0.01062  | -0.29016 | 1.64E-10 | -0.42932 | 2.29E-22 | -0.1331103 | 0.00396  | -0.08893 | 0.0548   |
| 0.17365  | 0.089856 | 0.05232  | 0.064559 | 0.16367  | 0.0555293  | 0.23103  | 0.011908 | 0.79745  |
| 0.01345  | -0.00283 | 0.95129  | -0.1692  | 0.00024  | -0.0621215 | 0.1802   | 0.054918 | 0.23622  |
| 0.01166  | -0.0247  | 0.5944   | -0.12698 | 0.006    | -0.0083853 | 0.85658  | 0.097533 | 0.03511  |
| 0.0944   | 0.004795 | 0.91768  | -0.11375 | 0.01391  | 0.00433007 | 0.92565  | -0.01313 | 0.77723  |
| 0.48957  | -0.0141  | 0.76119  | 0.034194 | 0.46101  | 0.09135744 | 0.04849  | 0.105638 | 0.02242  |
| 0.00122  | 0.231431 | 4.27E-07 | 0.066381 | 0.15208  | 0.00036084 | 0.99379  | 0.063331 | 0.17185  |
| 0.73977  | 0.175897 | 0.00013  | -0.02173 | 0.63947  | -0.0673788 | 0.146    | -0.09439 | 0.04145  |
| 0.0003   | 0.189844 | 3.64E-05 | 0.152388 | 0.00095  | 0.06684555 | 0.14922  | 0.044687 | 0.33525  |
| 0.00174  | -0.00932 | 0.84086  | -0.0709  | 0.12602  | -0.0251464 | 0.58779  | 0.039848 | 0.39025  |
| 6.86E-08 | -0.18322 | 6.82E-05 | -0.16479 | 0.00035  | -0.0686166 | 0.13872  | -0.11183 | 0.01561  |
| 2.18E-15 | -0.09961 | 0.03138  | -0.06731 | 0.14642  | 0.01077139 | 0.81642  | 0.033273 | 0.47319  |
| 0.84704  | 0.045306 | 0.3286   | 0.069892 | 0.13151  | 0.06567869 | 0.15647  | 0.107056 | 0.02067  |
| 0.49739  | 0.101216 | 0.02874  | 0.014683 | 0.75164  | -0.0235249 | 0.6121   | -0.07182 | 0.12119  |
| 0.02955  | 0.288989 | 1.96E-10 | 0.320482 | 1.29E-12 | 0.01393288 | 0.76395  | -0.02269 | 0.62483  |
| 0.11994  | 0.232848 | 3.61E-07 | 0.072599 | 0.11718  | -0.0602197 | 0.19393  | -0.1549  | 0.00078  |
| 5.04E-05 | 0.051774 | 0.26417  | -0.13578 | 0.00328  | -0.1690905 | 0.00024  | -0.18524 | 5.64E-05 |
| 0.39992  | -0.11865 | 0.01028  | -0.04328 | 0.35067  | -0.1644224 | 0.00036  | -0.24879 | 5.10E-08 |
| 0.6852   | 0.125188 | 0.00675  | -0.09694 | 0.03623  | -0.1527629 | 0.00093  | -0.23151 | 4.23E-07 |
| 0.00568  | 0.077407 | 0.09476  | -0.03857 | 0.40563  | -0.0779005 | 0.09267  | -0.11595 | 0.01216  |
| 0.50771  | -0.00548 | 0.90606  | -0.10905 | 0.01841  | -0.0675843 | 0.14477  | -0.07901 | 0.0881   |
| 0.04014  | 0.17621  | 0.00013  | 0.06588  | 0.1552   | -0.0429014 | 0.35494  | -0.01558 | 0.73698  |
| 0.07902  | 0.093493 | 0.04345  | 0.019601 | 0.67267  | 0.00163715 | 0.97185  | 0.000914 | 0.98429  |
| 1.45E-07 | 0.097114 | 0.03591  | 0.070273 | 0.12942  | 0.11384217 | 0.01383  | 0.183542 | 6.62E-05 |
| 0.93695  | 0.021801 | 0.63841  | -0.00651 | 0.88843  | 0.04455365 | 0.3367   | 0.018219 | 0.69454  |
| 0.00079  | 0.116523 | 0.01174  | 0.032505 | 0.48346  | -0.0205958 | 0.65709  | -0.02733 | 0.55573  |
| 0.66276  | 0.072404 | 0.11816  | 0.022252 | 0.63148  | 0.05182699 | 0.26368  | 0.040585 | 0.38154  |
| 6.83E-10 | -0.01675 | 0.71811  | -0.05889 | 0.20397  | -0.0789506 | 0.08834  | -0.14451 | 0.00174  |
| 0.62159  | 0.143643 | 0.00186  | 0.080969 | 0.08047  | 0.03742697 | 0.41971  | 0.097865 | 0.03449  |
| 3.72E-07 | -0.0217  | 0.64003  | -0.10957 | 0.01786  | 0.02980406 | 0.52056  | 0.009564 | 0.83668  |
| 1.90E-05 | -0.01305 | 0.77843  | -0.11499 | 0.0129   | -0.0593628 | 0.20036  | 0.037853 | 0.41443  |
| 0.43831  | -0.27887 | 8.66E-10 | -0.29607 | 6.67E-11 | -0.1080194 | 0.01955  | -0.19104 | 3.24E-05 |



|          |          |          |          |          |            |          |          |          |
|----------|----------|----------|----------|----------|------------|----------|----------|----------|
| 3.85E-15 | 0.180343 | 8.89E-05 | 0.14667  | 0.00148  | 0.0804882  | 0.08229  | 0.048492 | 0.29568  |
| 0.73754  | -0.09723 | 0.03569  | -0.14753 | 0.00139  | -0.1783493 | 0.00011  | -0.15679 | 0.00067  |
| 0.27383  | 0.084995 | 0.06648  | 0.027703 | 0.55038  | 0.08410454 | 0.06939  | 0.068638 | 0.13859  |
| 0.25932  | 0.111204 | 0.01621  | 0.041971 | 0.36548  | 0.06877296 | 0.13782  | 0.135176 | 0.00342  |
| 0.01372  | -0.07477 | 0.10659  | -0.17562 | 0.00014  | -0.2243903 | 9.65E-07 | -0.319   | 1.66E-12 |
| 0.80376  | -0.12887 | 0.00529  | -0.19371 | 2.50E-05 | -0.0585136 | 0.20688  | -0.02563 | 0.5806   |
| 0.02185  | -0.01246 | 0.78819  | 0.034001 | 0.46355  | 0.10135351 | 0.02852  | 0.137048 | 0.003    |
| 0.0048   | 0.100972 | 0.02913  | 0.098443 | 0.03343  | 0.10646451 | 0.02139  | 0.136976 | 0.00302  |
| 0.00345  | 0.034439 | 0.45781  | -0.02231 | 0.63061  | -0.0220729 | 0.63423  | 0.040866 | 0.37825  |
| 0.0011   | 0.011721 | 0.80055  | 0.108655 | 0.01884  | 0.37954169 | 1.89E-17 | 0.357636 | 1.55E-15 |
| 0.12604  | 0.009056 | 0.84525  | -0.2597  | 1.23E-08 | -0.2500177 | 4.36E-08 | -0.31149 | 5.77E-12 |
| 0.93227  | 0.107476 | 0.02017  | 0.08574  | 0.06412  | -0.0065444 | 0.88783  | -0.03682 | 0.42733  |
| 0.46926  | -0.08659 | 0.06151  | 0.011447 | 0.80513  | 0.07256419 | 0.11735  | 0.112551 | 0.01496  |
| 0.35104  | 0.217757 | 2.03E-06 | 0.158257 | 0.0006   | 0.16870327 | 0.00025  | 0.197786 | 1.67E-05 |
| 0.8354   | 0.298723 | 4.42E-11 | 0.175482 | 0.00014  | -0.0182354 | 0.69428  | -0.03912 | 0.399    |
| 0.00159  | 0.159763 | 0.00053  | 0.120177 | 0.00934  | 0.02809104 | 0.54482  | -0.03768 | 0.41655  |
| 0.00038  | -0.10066 | 0.02963  | -0.06464 | 0.16311  | 0.08762762 | 0.05846  | 0.085419 | 0.06513  |
| 1.94E-21 | -0.26571 | 5.48E-09 | 0.058851 | 0.20427  | 0.21243711 | 3.63E-06 | 0.067263 | 0.14669  |
| 0.4104   | -0.0329  | 0.47815  | 0.043158 | 0.35206  | 0.1422824  | 0.00205  | 0.100917 | 0.02922  |
| 0.01494  | 0.037698 | 0.41635  | 0.085026 | 0.06638  | 0.08418725 | 0.06912  | 0.146375 | 0.00151  |
| 0.04651  | -0.13203 | 0.00426  | 0.120011 | 0.00943  | 0.04221011 | 0.36275  | -0.11571 | 0.01234  |
| 9.26E-13 | 0.023468 | 0.61295  | 0.040124 | 0.38698  | 0.05364529 | 0.24727  | 0.048017 | 0.30045  |
| 0.03976  | -0.1622  | 0.00043  | -0.03185 | 0.49228  | 0.11942824 | 0.00979  | 0.093486 | 0.04346  |
| 0.50599  | 0.23155  | 4.21E-07 | 0.039757 | 0.39133  | -0.0785589 | 0.08993  | -0.13595 | 0.00324  |
| 0.9117   | -0.02888 | 0.5336   | -0.08048 | 0.08233  | 0.02571082 | 0.57943  | 0.023042 | 0.61942  |
| 0.03337  | 0.036979 | 0.4253   | 0.012036 | 0.79532  | 0.05704056 | 0.21856  | 0.042912 | 0.35483  |
| 0.18377  | -0.09134 | 0.04853  | -0.10987 | 0.01755  | -0.1096018 | 0.01782  | -0.10562 | 0.02244  |
| 0.36398  | -0.00856 | 0.85365  | 0.066055 | 0.1541   | 0.10864587 | 0.01885  | 0.08275  | 0.07402  |
| 0.76766  | 0.016901 | 0.71565  | 0.02532  | 0.58521  | 0.26295828 | 7.97E-09 | 0.059211 | 0.20151  |
| 0.74207  | 0.070422 | 0.1286   | 0.041175 | 0.37465  | 0.13667773 | 0.00308  | -0.03788 | 0.41405  |
| 0.00082  | -0.10851 | 0.019    | -0.05377 | 0.24618  | -0.0342786 | 0.45991  | 0.002073 | 0.96437  |
| 1.20E-10 | 0.076093 | 0.10052  | -0.00781 | 0.86635  | -0.0346365 | 0.45523  | -0.06308 | 0.17358  |
| 0.18925  | -0.07734 | 0.09504  | -0.20264 | 1.02E-05 | -0.1709234 | 0.00021  | -0.23649 | 2.34E-07 |
| 0.03143  | 0.106922 | 0.02083  | -0.00645 | 0.88936  | -0.0294883 | 0.52499  | -0.02813 | 0.5443   |
| 0.02188  | 0.105836 | 0.02217  | 0.036004 | 0.43761  | -0.0680078 | 0.14226  | -0.05898 | 0.20327  |
| 0.03966  | -0.15179 | 0.001    | -0.16515 | 0.00034  | -0.1326739 | 0.00408  | -0.09805 | 0.03415  |
| 0.03867  | -0.15906 | 0.00056  | -0.4427  | 7.81E-24 | -0.4001103 | 2.22E-19 | -0.36693 | 2.49E-16 |
| 0.04204  | 0.048051 | 0.30011  | 0.013754 | 0.76689  | 0.02819174 | 0.54338  | -0.01758 | 0.70467  |
| 0.01269  | 0.172513 | 0.00018  | 0.066682 | 0.15022  | -0.0133997 | 0.77273  | -0.01266 | 0.78503  |
| 0.81764  | 0.004025 | 0.93088  | 0.012854 | 0.78174  | 0.02441317 | 0.59872  | 0.009262 | 0.84178  |
| 0.00176  | -0.27287 | 2.03E-09 | -0.24604 | 7.21E-08 | -0.1223715 | 0.00811  | -0.08403 | 0.06965  |
| 0.32658  | 0.030267 | 0.5141   | -0.05304 | 0.25268  | -0.0834504 | 0.07159  | -0.08691 | 0.06055  |
| 0.07031  | 0.060272 | 0.19354  | -0.07439 | 0.10837  | -0.0849865 | 0.06651  | -0.10988 | 0.01753  |
| 0.5525   | 0.007919 | 0.86448  | -0.08197 | 0.07678  | -0.0274972 | 0.55336  | -0.05638 | 0.22399  |
| 5.02E-15 | -0.03969 | 0.39216  | -0.04582 | 0.32314  | -0.036813  | 0.42739  | -0.01499 | 0.74671  |

|          |          |          |          |          |            |          |          |          |
|----------|----------|----------|----------|----------|------------|----------|----------|----------|
| 0.40039  | 0.065719 | 0.15621  | 4.27E-05 | 0.99927  | 0.024871   | 0.59188  | 0.061944 | 0.18144  |
| 0.00013  | 0.16306  | 0.0004   | 0.182097 | 7.57E-05 | 0.09253024 | 0.04566  | 0.154048 | 0.00084  |
| 0.28554  | 0.241014 | 1.35E-07 | 0.346377 | 1.31E-14 | 0.26938927 | 3.31E-09 | 0.267809 | 4.11E-09 |
| 0.0633   | 0.156853 | 0.00067  | 0.042734 | 0.35682  | -0.0520824 | 0.26133  | 0.044277 | 0.33971  |
| 0.58436  | -0.13448 | 0.0036   | -0.03094 | 0.50481  | -0.0599235 | 0.19613  | -0.14087 | 0.00228  |
| 0.2613   | 0.066811 | 0.14943  | 0.00265  | 0.95445  | -0.0412752 | 0.37349  | -0.00371 | 0.93632  |
| 0.01578  | -0.00323 | 0.94446  | 0.015609 | 0.73654  | 0.013533   | 0.77053  | 0.037855 | 0.41442  |
| 0.08374  | 0.19161  | 3.07E-05 | 0.152716 | 0.00093  | -0.0098089 | 0.83257  | -0.02747 | 0.5538   |
| 0.02876  | 0.128359 | 0.00547  | 0.109994 | 0.01741  | -0.0580162 | 0.21078  | -0.03295 | 0.47748  |
| 0.18164  | 0.191691 | 3.04E-05 | 0.131045 | 0.00456  | -0.0115911 | 0.80272  | 0.001176 | 0.97977  |
| 0.18843  | 0.11828  | 0.01052  | 0.099791 | 0.03108  | 0.05064718 | 0.27472  | 0.042063 | 0.36443  |
| 0.77141  | 0.046888 | 0.31197  | 0.067417 | 0.14577  | -0.0613332 | 0.1858   | -0.08599 | 0.06335  |
| 0.57237  | 0.034757 | 0.45367  | 0.02642  | 0.56901  | 0.03156645 | 0.49619  | 0.03594  | 0.43843  |
| 0.48365  | 0.156352 | 0.0007   | 0.0739   | 0.11074  | 0.03445721 | 0.45757  | 0.040575 | 0.38166  |
| 0.5294   | 0.130272 | 0.00481  | 0.056657 | 0.22169  | 0.02862811 | 0.53715  | 0.017585 | 0.70467  |
| 0.34728  | 0.107389 | 0.02028  | 0.100109 | 0.03054  | 0.02961903 | 0.52315  | 0.038994 | 0.4005   |
| 0.29025  | 0.087352 | 0.05926  | 0.114049 | 0.01366  | 0.01387135 | 0.76496  | -0.00712 | 0.87797  |
| 0.13253  | 0.090335 | 0.05107  | 0.08404  | 0.0696   | 0.01275141 | 0.78344  | 0.003985 | 0.93155  |
| 0.45933  | 0.052532 | 0.25723  | -0.08574 | 0.06413  | -0.065498  | 0.15761  | -0.00382 | 0.93439  |
| 0.39923  | -0.07871 | 0.08933  | -0.31625 | 2.63E-12 | -0.1820171 | 7.62E-05 | -0.16002 | 0.00052  |
| 0.15147  | 0.133163 | 0.00394  | 0.08124  | 0.07947  | -0.1296737 | 0.00501  | -0.10231 | 0.02705  |
| 0.02032  | -0.05167 | 0.26517  | -0.11689 | 0.01148  | 0.11806273 | 0.01067  | 0.192562 | 2.80E-05 |
| 0.86186  | 0.065403 | 0.15822  | 0.130576 | 0.00471  | 0.15426193 | 0.00082  | 0.122132 | 0.00824  |
| 0.63567  | 0.07248  | 0.11778  | 0.092817 | 0.04499  | -0.0069153 | 0.88152  | -0.0183  | 0.69326  |
| 0.53108  | 0.064356 | 0.165    | 0.076766 | 0.09753  | -0.0402182 | 0.38586  | -0.06967 | 0.13275  |
| 1.71E-05 | 0.320188 | 1.36E-12 | 0.271784 | 2.37E-09 | -0.1991522 | 1.45E-05 | -0.28337 | 4.50E-10 |
| 0.99033  | 0.00633  | 0.89148  | 0.026705 | 0.56484  | 0.04731516 | 0.30758  | 0.028921 | 0.53299  |
| 0.56788  | -0.01297 | 0.77989  | 0.002092 | 0.96403  | 0.00390567 | 0.93292  | 0.003897 | 0.93307  |
| 0.36708  | 0.05079  | 0.27337  | -0.0603  | 0.19333  | -0.0185879 | 0.68868  | -0.01495 | 0.7472   |
| 0.03559  | 0.134034 | 0.00371  | 0.159742 | 0.00053  | 0.07304901 | 0.11492  | 0.061932 | 0.18153  |
| 0.28589  | 0.202929 | 9.89E-06 | 0.12105  | 0.00883  | 0.14066412 | 0.00231  | 0.133362 | 0.00389  |
| 0.06429  | -0.10302 | 0.02601  | -0.0835  | 0.07142  | -0.016722  | 0.71853  | 0.064522 | 0.16391  |
| 0.1129   | -0.00023 | 0.99604  | 0.035656 | 0.44206  | 0.05136549 | 0.26796  | 0.035122 | 0.44894  |
| 0.76236  | 0.003155 | 0.94579  | 0.027256 | 0.55684  | 0.01000782 | 0.82922  | 0.030325 | 0.51329  |
| 0.00059  | -0.21186 | 3.86E-06 | -0.17063 | 0.00021  | 0.19023024 | 3.51E-05 | 0.143029 | 0.00194  |
| 0.01973  | 0.336695 | 7.67E-14 | 0.234049 | 3.13E-07 | 0.10864549 | 0.01885  | 0.104231 | 0.02429  |
| 0.03304  | 0.200388 | 1.28E-05 | 0.141948 | 0.00211  | -0.1196798 | 0.00963  | -0.13571 | 0.0033   |
| 0.60373  | -0.02699 | 0.56065  | -0.10762 | 0.02     | 0.1331948  | 0.00393  | 0.214114 | 3.03E-06 |
| 0.68898  | 0.019008 | 0.68203  | -0.08358 | 0.07114  | -0.1127206 | 0.0148   | -0.1286  | 0.00538  |
| 0.39763  | -0.09209 | 0.0467   | -0.02559 | 0.58121  | 0.05518809 | 0.23391  | 0.026687 | 0.56512  |
| 0.82965  | 0.065182 | 0.15963  | 0.114918 | 0.01296  | 0.1223181  | 0.00814  | 0.19008  | 3.56E-05 |
| 0.02139  | -0.12093 | 0.0089   | -0.04434 | 0.33906  | 0.02572388 | 0.57924  | -0.02135 | 0.64543  |
| 0.08564  | -0.05698 | 0.21906  | -0.0251  | 0.58852  | 0.21794489 | 1.99E-06 | 0.122874 | 0.00785  |
| 0.93059  | 0.027293 | 0.55631  | 0.079807 | 0.08493  | 0.15041891 | 0.00111  | 0.077474 | 0.09447  |
| 0.45764  | 0.045526 | 0.32625  | 0.08429  | 0.06878  | 0.00606416 | 0.89601  | 0.001574 | 0.97294  |

|          |          |          |          |          |            |          |          |          |
|----------|----------|----------|----------|----------|------------|----------|----------|----------|
| 0.06098  | 0.11382  | 0.01385  | 0.135893 | 0.00326  | 0.09177298 | 0.04747  | 0.112397 | 0.01509  |
| 0.84133  | 0.0778   | 0.09309  | 0.063389 | 0.17145  | 0.04494191 | 0.3325   | 0.050706 | 0.27416  |
| 0.00411  | -0.09958 | 0.03144  | -0.03549 | 0.44426  | 0.0808827  | 0.0808   | 0.050615 | 0.27502  |
| 0.11541  | 0.144245 | 0.00178  | 0.052193 | 0.26032  | -0.011323  | 0.8072   | -0.05513 | 0.23444  |
| 0.28589  | 0.082808 | 0.07381  | -0.0393  | 0.39679  | -0.2221602 | 1.24E-06 | -0.26696 | 4.62E-09 |
| 0.09901  | 0.209616 | 4.91E-06 | 0.275656 | 1.37E-09 | 0.15343318 | 0.00088  | 0.146264 | 0.00153  |
| 0.39877  | -0.03409 | 0.46242  | 0.019014 | 0.68193  | 0.06585414 | 0.15536  | 0.044523 | 0.33703  |
| 0.72035  | 0.005497 | 0.90569  | 0.054184 | 0.24255  | 0.13691845 | 0.00303  | 0.083877 | 0.07015  |
| 0.46622  | 0.062571 | 0.17706  | 0.035878 | 0.43923  | 0.0767886  | 0.09744  | 0.060538 | 0.19158  |
| 0.81212  | 0.073627 | 0.11206  | 0.173021 | 0.00017  | 0.17434657 | 0.00015  | 0.182651 | 7.19E-05 |
| 0.26215  | 0.100042 | 0.03065  | 0.205646 | 7.46E-06 | -0.0074216 | 0.87292  | -0.06818 | 0.14127  |
| 0.37056  | 0.015419 | 0.73964  | 0.077113 | 0.09602  | -0.1216003 | 0.00853  | -0.1635  | 0.00039  |
| 0.13187  | -0.07883 | 0.08883  | 0.17065  | 0.00021  | -0.1319462 | 0.00429  | -0.24249 | 1.12E-07 |
| 0.53855  | 0.12412  | 0.00724  | 0.161816 | 0.00045  | 0.09656087 | 0.03698  | 0.108402 | 0.01912  |
| 0.40539  | 0.081916 | 0.07698  | 0.055967 | 0.22737  | 0.11680179 | 0.01154  | 0.08035  | 0.08282  |
| 0.00041  | -0.073   | 0.11515  | -0.04315 | 0.35217  | -0.0316217 | 0.49543  | -0.04101 | 0.37653  |
| 0.55097  | -0.02834 | 0.54131  | -0.16678 | 0.00029  | -0.0905499 | 0.05052  | -0.03681 | 0.42742  |
| 0.99166  | 0.142307 | 0.00205  | 0.353328 | 3.54E-15 | 0.39657486 | 4.87E-19 | 0.166939 | 0.00029  |
| 0.82819  | -0.0824  | 0.07526  | 0.038442 | 0.40721  | 0.13572417 | 0.0033   | 0.157515 | 0.00064  |
| 0.00251  | 0.165192 | 0.00034  | 0.151777 | 0.001    | 0.15760767 | 0.00063  | 0.222654 | 1.17E-06 |
| 1.17E-10 | 0.28403  | 4.09E-10 | 0.166053 | 0.00031  | 0.07144834 | 0.12311  | 0.159772 | 0.00053  |
| 0.21585  | 0.167846 | 0.00027  | 0.140773 | 0.00229  | 0.21882769 | 1.80E-06 | 0.216222 | 2.41E-06 |
| 0.05847  | 0.063991 | 0.16741  | 0.177802 | 0.00011  | 0.28535401 | 3.36E-10 | 0.178848 | 0.0001   |
| 0.48869  | 0.07487  | 0.10612  | 0.039562 | 0.39367  | -0.0287961 | 0.53476  | -0.02125 | 0.64698  |
| 0.73278  | 0.070675 | 0.12723  | -0.03773 | 0.41594  | -0.0351495 | 0.44858  | -0.04008 | 0.38754  |
| 0.06781  | 0.194487 | 2.31E-05 | 0.199995 | 1.33E-05 | -0.0125412 | 0.78693  | -0.15448 | 0.00081  |
| 0.07347  | -0.06656 | 0.15096  | -0.01372 | 0.76739  | 0.05452307 | 0.23961  | 0.032504 | 0.48348  |
| 6.02E-13 | -0.28498 | 3.55E-10 | -0.14345 | 0.00189  | -0.1083794 | 0.01914  | -0.15584 | 0.00073  |
| 0.00156  | 0.213862 | 3.11E-06 | 0.132561 | 0.00411  | -0.022431  | 0.62874  | -0.04002 | 0.38818  |
| 0.12999  | -0.07306 | 0.11485  | -0.00984 | 0.83203  | 0.17857179 | 0.0001   | 0.067319 | 0.14636  |
| 0.29524  | 0.000907 | 0.9844   | -0.01523 | 0.74264  | 0.20177178 | 1.11E-05 | 0.263614 | 7.29E-09 |
| 0.26447  | -0.02967 | 0.52244  | 0.003779 | 0.93509  | 0.04843044 | 0.2963   | 0.099327 | 0.03187  |
| 0.40279  | 0.053742 | 0.24641  | 0.071136 | 0.12476  | 0.24056404 | 1.42E-07 | 0.08409  | 0.06944  |
| 3.94E-12 | 0.005596 | 0.90401  | -0.07665 | 0.09805  | 0.02628934 | 0.57092  | 0.023406 | 0.6139   |
| 0.03403  | 0.108597 | 0.0189   | -0.14475 | 0.00171  | -0.1019645 | 0.02757  | -0.04797 | 0.30089  |
| 0.08905  | 0.08274  | 0.07405  | -0.02428 | 0.60071  | 0.01482044 | 0.7494   | 0.06522  | 0.15938  |
| 0.19588  | -0.16873 | 0.00025  | 0.022798 | 0.62313  | 0.14265054 | 0.002    | 0.117515 | 0.01104  |
| 0.56163  | 0.006114 | 0.89517  | -0.02754 | 0.55276  | -0.0002455 | 0.99578  | 0.12624  | 0.0063   |
| 0.8311   | 0.039682 | 0.39224  | -0.03832 | 0.40871  | -0.0059161 | 0.89854  | 0.164779 | 0.00035  |
| 0.86029  | -0.19819 | 1.60E-05 | -0.11281 | 0.01472  | -0.0008679 | 0.98508  | 0.02467  | 0.59488  |
| 7.47E-10 | 0.153327 | 0.00089  | 0.128856 | 0.00529  | 0.06513525 | 0.15993  | 0.075293 | 0.10416  |
| 1.67E-08 | 0.263633 | 7.27E-09 | 0.135218 | 0.00341  | 0.08619618 | 0.06272  | 0.149197 | 0.00122  |
| 0.50678  | 0.055845 | 0.22839  | 0.055852 | 0.22833  | -0.0808791 | 0.08081  | -0.05703 | 0.21861  |
| 0.55144  | 0.068377 | 0.1401   | 0.052788 | 0.25491  | -0.0708898 | 0.12608  | -0.09108 | 0.04917  |
| 0.07765  | 0.126022 | 0.00639  | 0.082551 | 0.07472  | 0.01502275 | 0.74609  | -0.02954 | 0.52422  |

|          |          |          |          |          |            |          |          |          |
|----------|----------|----------|----------|----------|------------|----------|----------|----------|
| 0.06848  | 0.174129 | 0.00016  | 0.111823 | 0.01562  | 0.02700619 | 0.56047  | -0.02507 | 0.58895  |
| 0.08803  | -0.02677 | 0.56396  | 0.076642 | 0.09808  | 0.33955359 | 4.58E-14 | 0.250077 | 4.33E-08 |
| 0.45536  | 0.139723 | 0.00248  | 0.301606 | 2.82E-11 | 0.26005242 | 1.18E-08 | 0.284633 | 3.74E-10 |
| 0.13369  | 0.166724 | 0.0003   | 0.08942  | 0.05347  | 0.03102152 | 0.50366  | 0.117746 | 0.01088  |
| 0.88796  | -0.01008 | 0.82798  | 0.007406 | 0.87318  | -0.0775782 | 0.09403  | -0.08251 | 0.07487  |
| 0.5438   | -0.22699 | 7.16E-07 | 0.092163 | 0.04653  | 0.43209122 | 1.15E-22 | 0.245121 | 8.10E-08 |
| 0.08182  | 0.223006 | 1.13E-06 | 0.234825 | 2.85E-07 | 0.29734509 | 5.48E-11 | 0.2645   | 6.46E-09 |
| 0.00956  | -0.09542 | 0.03928  | -0.02571 | 0.5794   | 0.06213916 | 0.18007  | 0.022915 | 0.62135  |
| 0.07789  | 0.083052 | 0.07296  | 0.060337 | 0.19306  | -0.0038891 | 0.9332   | 0.019172 | 0.67944  |
| 0.53324  | 0.09434  | 0.04157  | 0.012907 | 0.78086  | 0.01932195 | 0.67707  | 0.015632 | 0.73617  |
| 0.70149  | -0.09202 | 0.04687  | -0.10246 | 0.02683  | -0.0771155 | 0.09601  | -0.1184  | 0.01044  |
| 5.29E-13 | -0.1424  | 0.00204  | -0.06865 | 0.13853  | 0.11501913 | 0.01288  | 0.191254 | 3.18E-05 |
| 0.16202  | 0.16303  | 0.0004   | 0.081952 | 0.07686  | 0.07587659 | 0.10149  | 0.057495 | 0.21491  |
| 8.48E-12 | -0.04463 | 0.33591  | 0.063745 | 0.16905  | 0.23864568 | 1.80E-07 | 0.227907 | 6.44E-07 |
| 0.26318  | 0.143752 | 0.00184  | 0.071979 | 0.12035  | 0.13436695 | 0.00362  | 0.101995 | 0.02753  |
| 0.16702  | 0.199686 | 1.38E-05 | 0.056574 | 0.22236  | 0.09543659 | 0.03925  | 0.049759 | 0.28324  |
| 0.50755  | -0.01463 | 0.75246  | -0.02842 | 0.54015  | 0.08055638 | 0.08203  | 0.108285 | 0.01925  |
| 0.07945  | -0.13049 | 0.00474  | -0.10795 | 0.01962  | -0.022405  | 0.62914  | -0.00456 | 0.92173  |
| 0.8693   | 0.11619  | 0.01198  | -0.00828 | 0.8583   | 0.0045195  | 0.9224   | -0.03427 | 0.46007  |
| 9.47E-05 | 0.062043 | 0.18075  | -0.02644 | 0.56868  | -0.0568322 | 0.22025  | -0.06469 | 0.16278  |
| 0.001    | 0.011677 | 0.8013   | -0.12636 | 0.00625  | -0.1093288 | 0.01811  | -0.12882 | 0.0053   |
| 0.29507  | -0.03093 | 0.50497  | -0.17062 | 0.00021  | -0.0331719 | 0.47453  | -0.15563 | 0.00074  |
| 0.18362  | -0.11053 | 0.01687  | -0.3362  | 8.37E-14 | -0.1467815 | 0.00147  | -0.1293  | 0.00513  |
| 0.33998  | 0.105635 | 0.02243  | -0.06725 | 0.1468   | -0.1189599 | 0.01008  | -0.01414 | 0.76048  |
| 1.23E-05 | 0.055452 | 0.23168  | 0.002999 | 0.94847  | -0.0457586 | 0.32378  | -0.12203 | 0.0083   |
| 0.05393  | 0.113758 | 0.0139   | 0.049942 | 0.28146  | 0.04229365 | 0.3618   | -0.00587 | 0.8993   |
| 1.67E-12 | -0.29945 | 3.95E-11 | -0.28239 | 5.20E-10 | -0.0867109 | 0.06116  | -0.0317  | 0.49431  |
| 3.80E-19 | 0.003649 | 0.93731  | -0.04777 | 0.30296  | 0.05666146 | 0.22165  | 0.146494 | 0.0015   |
| 0.38637  | 0.046213 | 0.319    | 0.033003 | 0.47678  | 0.05153068 | 0.26642  | 0.050376 | 0.2773   |
| 1.66E-05 | 0.143454 | 0.00188  | 0.148334 | 0.00131  | 0.0639956  | 0.16738  | 0.0156   | 0.7367   |
| 0.06556  | -0.14807 | 0.00133  | -0.03431 | 0.45947  | 0.05805489 | 0.21047  | 0.035726 | 0.44116  |
| 0.00112  | 0.082695 | 0.07421  | 0.121256 | 0.00872  | 0.11195158 | 0.0155   | 0.07417  | 0.10944  |
| 0.29727  | 0.03718  | 0.42279  | -0.01749 | 0.70624  | -0.041732  | 0.36822  | -0.02296 | 0.62064  |
| 0.00261  | 0.035426 | 0.44501  | -0.05865 | 0.20585  | 0.04025368 | 0.38544  | 0.102859 | 0.02623  |
| 0.72715  | -0.24098 | 1.35E-07 | -0.09286 | 0.04488  | 0.08890399 | 0.05487  | 0.129179 | 0.00518  |
| 0.06748  | 0.018453 | 0.69083  | -0.00749 | 0.87182  | -0.0991413 | 0.03219  | -0.2619  | 9.19E-09 |
| 0.00023  | 0.03868  | 0.40431  | -0.13894 | 0.00262  | -0.1798702 | 9.29E-05 | -0.24718 | 6.25E-08 |
| 2.36E-05 | 0.068604 | 0.13879  | 0.153823 | 0.00085  | 0.20067813 | 1.24E-05 | 0.20238  | 1.05E-05 |
| 0.67814  | 0.128443 | 0.00544  | 0.052075 | 0.26139  | 0.09481089 | 0.04056  | 0.164594 | 0.00035  |
| 0.46253  | -0.17367 | 0.00016  | 0.035788 | 0.44037  | 0.4606435  | 6.59E-26 | 0.338852 | 5.20E-14 |
| 0.9929   | -0.05789 | 0.21178  | 0.007707 | 0.86807  | 0.06300455 | 0.17407  | 0.091638 | 0.0478   |
| 0.00626  | 0.056325 | 0.22441  | 0.30708  | 1.18E-11 | 0.43176124 | 1.25E-22 | 0.376088 | 3.88E-17 |
| 0.01699  | -0.09255 | 0.04561  | -0.08976 | 0.05258  | 0.32859852 | 3.21E-13 | 0.31778  | 2.04E-12 |
| 0.03787  | -0.04506 | 0.33119  | -0.12953 | 0.00506  | -0.0964267 | 0.03724  | -0.05733 | 0.21625  |
| 0.49734  | 0.098611 | 0.03313  | 0.059904 | 0.19628  | -0.0760205 | 0.10084  | -0.07834 | 0.09082  |

|          |          |          |          |          |            |          |          |          |
|----------|----------|----------|----------|----------|------------|----------|----------|----------|
| 0.61861  | 0.005178 | 0.91114  | -0.03991 | 0.38948  | -0.0675365 | 0.14505  | -0.03527 | 0.44703  |
| 0.6026   | -0.01415 | 0.76041  | -0.05498 | 0.23569  | -0.0813512 | 0.07905  | -0.05045 | 0.27663  |
| 0.00223  | 0.0613   | 0.18604  | 0.121692 | 0.00848  | -0.1129767 | 0.01458  | -0.2624  | 8.58E-09 |
| 2.30E-05 | 0.088398 | 0.05627  | 0.046696 | 0.31395  | 0.0691157  | 0.13586  | 0.066881 | 0.14901  |
| 0.4027   | -0.02873 | 0.53566  | -0.07288 | 0.11575  | 0.00684856 | 0.88266  | 0.069716 | 0.13249  |
| 0.00658  | 0.131791 | 0.00433  | 0.09574  | 0.03862  | 0.12336325 | 0.00761  | 0.136557 | 0.00311  |
| 0.03498  | 0.327982 | 3.57E-13 | 0.338512 | 5.53E-14 | 0.25500333 | 2.29E-08 | 0.241886 | 1.21E-07 |
| 0.26356  | 0.094428 | 0.04138  | 0.023721 | 0.60913  | -0.0799286 | 0.08445  | -0.0703  | 0.12924  |
| 0.5029   | 0.099635 | 0.03134  | -0.09036 | 0.05101  | -0.0631001 | 0.17342  | 0.00535  | 0.90821  |
| 0.57112  | -0.00838 | 0.85662  | -0.00716 | 0.87736  | -0.0024956 | 0.95711  | 0.002496 | 0.9571   |
| 4.03E-08 | 0.133117 | 0.00395  | -0.00286 | 0.95082  | 0.15339638 | 0.00088  | 0.263217 | 7.69E-09 |
| 0.51615  | 0.10017  | 0.03044  | 0.01103  | 0.81209  | 0.0561394  | 0.22594  | 0.098708 | 0.03296  |
| 0.43255  | -0.01523 | 0.74275  | -0.08865 | 0.05558  | -0.0562411 | 0.2251   | -0.05334 | 0.25     |
| 0.54151  | 0.091573 | 0.04795  | 0.003094 | 0.94683  | 0.02904764 | 0.5312   | 0.085689 | 0.06429  |
| 0.47085  | 0.185643 | 5.43E-05 | 0.172521 | 0.00018  | 0.0497348  | 0.28347  | -0.14136 | 0.0022   |
| 0.00185  | -0.25521 | 2.23E-08 | -0.15302 | 0.00091  | -0.0215862 | 0.64173  | 0.022715 | 0.6244   |
| 0.00396  | 0.00406  | 0.93028  | 0.226177 | 7.86E-07 | 0.37954041 | 1.89E-17 | 0.327465 | 3.91E-13 |
| 0.03955  | 0.082052 | 0.07649  | -0.2321  | 3.94E-07 | -0.1043126 | 0.02418  | -0.07921 | 0.0873   |
| 0.71824  | -0.08925 | 0.05392  | -0.0317  | 0.49435  | 0.12219824 | 0.0082   | 0.157113 | 0.00066  |
| 0.1607   | 0.3153   | 3.08E-12 | 0.168587 | 0.00025  | 0.04390141 | 0.34383  | -0.11194 | 0.01551  |
| 0.00757  | -0.0434  | 0.34942  | 0.1563   | 0.0007   | 0.12611891 | 0.00635  | -0.02301 | 0.61991  |
| 0.1791   | 0.177885 | 0.00011  | 0.116246 | 0.01194  | 0.06352168 | 0.17056  | 0.041854 | 0.36682  |
| 1.42E-09 | 0.209502 | 4.97E-06 | 0.117774 | 0.01086  | -0.3365959 | 7.80E-14 | -0.32812 | 3.49E-13 |
| 0.01302  | 0.12343  | 0.00758  | 0.257009 | 1.76E-08 | 0.21540705 | 2.63E-06 | 0.166083 | 0.00031  |
| 5.13E-19 | -0.05176 | 0.26429  | -0.01383 | 0.76565  | 0.12294004 | 0.00782  | 0.223668 | 1.05E-06 |
| 0.64793  | 0.327445 | 3.92E-13 | 0.248665 | 5.18E-08 | 0.06977607 | 0.13215  | 0.037247 | 0.42195  |
| 0.01157  | 0.097953 | 0.03433  | -0.13871 | 0.00266  | -0.2544534 | 2.46E-08 | -0.27817 | 9.58E-10 |
| 0.35585  | -0.02262 | 0.6259   | -0.00673 | 0.88461  | -0.2191764 | 1.74E-06 | -0.2475  | 6.00E-08 |
| 0.1677   | 0.114779 | 0.01307  | 0.113156 | 0.01442  | 0.09936728 | 0.0318   | 0.125443 | 0.00664  |
| 0.38599  | 0.022612 | 0.62598  | -0.09661 | 0.03688  | -0.1060552 | 0.02189  | -0.01737 | 0.70815  |
| 3.36E-05 | -0.15171 | 0.00101  | -0.16149 | 0.00046  | -0.0936932 | 0.043    | -0.02019 | 0.66335  |
| 0.0513   | 0.038892 | 0.40174  | 0.145731 | 0.00159  | 0.03842153 | 0.40746  | -0.18156 | 7.95E-05 |
| 0.36825  | -0.02018 | 0.66356  | 0.00756  | 0.87057  | 0.06074371 | 0.19007  | -0.08035 | 0.08281  |
| 0.42217  | -0.12295 | 0.00782  | -0.14662 | 0.00149  | -0.1429677 | 0.00195  | -0.13538 | 0.00338  |
| 0.19551  | -0.1013  | 0.0286   | -0.11568 | 0.01237  | -0.057082  | 0.21823  | -0.06932 | 0.13469  |
| 0.69023  | -0.19045 | 3.43E-05 | -0.15128 | 0.00104  | -0.1671712 | 0.00029  | -0.17908 | 9.98E-05 |
| 0.68958  | 0.043217 | 0.35141  | -0.01822 | 0.6945   | -0.0334371 | 0.471    | -0.00224 | 0.96141  |
| 0.55902  | 0.025024 | 0.5896   | 0.000586 | 0.98992  | -0.024809  | 0.59281  | -0.00138 | 0.97624  |
| 0.98575  | 0.034756 | 0.45367  | 0.014039 | 0.7622   | -0.0334733 | 0.47052  | -0.00483 | 0.91702  |
| 0.06911  | -0.09783 | 0.03455  | -0.03116 | 0.50176  | -0.0106183 | 0.81898  | 0.020835 | 0.65337  |
| 0.0075   | -0.01719 | 0.71106  | -0.01615 | 0.72771  | -0.0069999 | 0.88008  | 0.021309 | 0.64601  |
| 0.4577   | 0.017946 | 0.69889  | 0.031226 | 0.50084  | 0.01082425 | 0.81553  | 0.0056   | 0.90393  |
| 0.96784  | 0.037965 | 0.41305  | 0.03557  | 0.44317  | 0.02971034 | 0.52187  | 0.057904 | 0.21166  |
| 0.45765  | 0.0432   | 0.3516   | 0.061318 | 0.18591  | -0.0791909 | 0.08737  | -0.06349 | 0.17075  |
| 0.21753  | 0.078848 | 0.08875  | -0.1019  | 0.02768  | -0.2712962 | 2.54E-09 | -0.26978 | 3.13E-09 |

|          |          |          |          |          |            |          |          |          |
|----------|----------|----------|----------|----------|------------|----------|----------|----------|
| 0.82828  | -0.00201 | 0.96541  | -0.03957 | 0.39359  | -0.012461  | 0.78826  | 0.051866 | 0.26332  |
| 0.63179  | 0.056288 | 0.22471  | -0.03206 | 0.48946  | 0.02886006 | 0.53386  | 0.043049 | 0.35328  |
| 0.00195  | -0.13195 | 0.00429  | -0.12283 | 0.00788  | -0.1253085 | 0.0067   | -0.08347 | 0.07152  |
| 0.18696  | -0.08057 | 0.08197  | -0.12715 | 0.00593  | -0.1123504 | 0.01514  | -0.0713  | 0.1239   |
| 0.05801  | -0.13689 | 0.00303  | -0.04498 | 0.33206  | -0.0154853 | 0.73856  | -0.16626 | 0.00031  |
| 0.02112  | 0.092999 | 0.04457  | 0.336841 | 7.47E-14 | 0.40487863 | 7.55E-20 | 0.308693 | 9.08E-12 |
| 0.02158  | 0.24171  | 1.24E-07 | 0.034537 | 0.45653  | 0.3670628  | 2.42E-16 | 0.254813 | 2.35E-08 |
| 0.45415  | 0.089573 | 0.05306  | -0.08756 | 0.05867  | 0.01293439 | 0.78042  | 0.022468 | 0.62818  |
| 0.00087  | 0.263732 | 7.17E-09 | 0.234431 | 2.99E-07 | -0.0036212 | 0.93779  | -0.06882 | 0.13757  |
| 0.19132  | 0.197811 | 1.66E-05 | 0.122209 | 0.0082   | 0.38587454 | 4.98E-18 | 0.229933 | 5.09E-07 |
| 5.90E-05 | -0.22803 | 6.35E-07 | -0.35196 | 4.59E-15 | -0.0628592 | 0.17507  | -0.07171 | 0.12172  |
| 0.05999  | -0.01674 | 0.71816  | 0.031644 | 0.49513  | 0.07632435 | 0.09948  | 0.106437 | 0.02142  |
| 0.36909  | 0.11417  | 0.01356  | -0.01797 | 0.69858  | 0.03271424 | 0.48065  | 0.085622 | 0.0645   |
| 0.10897  | 0.034525 | 0.45668  | 0.062527 | 0.17736  | 0.30395934 | 1.94E-11 | 0.077152 | 0.09586  |
| 0.00144  | 0.23461  | 2.93E-07 | 0.394322 | 8.00E-19 | 0.37207014 | 8.83E-17 | 0.310857 | 6.39E-12 |
| 0.00755  | 0.301076 | 3.06E-11 | 0.159751 | 0.00053  | -0.1191956 | 0.00993  | -0.20088 | 1.22E-05 |
| 0.27084  | 0.107011 | 0.02072  | 0.181656 | 7.88E-05 | 0.02662281 | 0.56605  | -0.08332 | 0.07204  |
| 0.93552  | 0.188638 | 4.09E-05 | 0.189778 | 3.66E-05 | 0.14444553 | 0.00175  | -0.02989 | 0.51942  |
| 0.28123  | 0.190672 | 3.36E-05 | 0.149709 | 0.00117  | 0.03673327 | 0.42839  | -0.05901 | 0.20307  |
| 4.25E-05 | -0.09907 | 0.03232  | 0.178099 | 0.00011  | 0.19164729 | 3.06E-05 | 0.169608 | 0.00023  |
| 0.00132  | -0.11317 | 0.0144   | 0.007676 | 0.86859  | 0.05209445 | 0.26122  | 0.061717 | 0.18306  |
| 0.00081  | 0.000947 | 0.98372  | 0.194317 | 2.35E-05 | 0.17357637 | 0.00016  | 0.069039 | 0.1363   |
| 0.53906  | 0.09947  | 0.03162  | 0.056398 | 0.22381  | 0.19138894 | 3.14E-05 | 0.299943 | 3.66E-11 |
| 1.25E-11 | 0.050498 | 0.27613  | 0.048134 | 0.29927  | 0.12657872 | 0.00616  | 0.178067 | 0.00011  |
| 0.03289  | 0.037702 | 0.4163   | 0.001848 | 0.96823  | 0.05956381 | 0.19884  | 0.178389 | 0.00011  |
| 0.27563  | 0.199155 | 1.45E-05 | 0.177887 | 0.00011  | 0.17905956 | 1.00E-04 | 0.088384 | 0.05631  |
| 0.27431  | 0.102779 | 0.02635  | -0.11076 | 0.01664  | 0.05828438 | 0.20867  | 0.174431 | 0.00015  |
| 1.59E-13 | -0.07204 | 0.12003  | -0.08936 | 0.05363  | 0.04049732 | 0.38257  | 0.092633 | 0.04542  |
| 0.64134  | 0.104153 | 0.02439  | -0.00038 | 0.99348  | -0.0795968 | 0.08576  | -0.13569 | 0.0033   |
| 0.44994  | 0.187416 | 4.59E-05 | 0.233807 | 3.22E-07 | 0.1285636  | 0.0054   | 0.060539 | 0.19157  |
| 2.96E-14 | 0.065306 | 0.15884  | 0.020592 | 0.65715  | 0.07017557 | 0.12995  | 0.155299 | 0.00076  |
| 7.55E-08 | -0.0631  | 0.17339  | -0.05467 | 0.23837  | 0.03069647 | 0.50814  | 0.044723 | 0.33487  |
| 0.00185  | 0.256623 | 1.85E-08 | 0.093954 | 0.04242  | -0.0191607 | 0.67961  | -0.02546 | 0.58318  |
| 0.18212  | 0.093781 | 0.0428   | -0.0328  | 0.47949  | 0.09961411 | 0.03138  | 0.092983 | 0.04461  |
| 0.26725  | 0.032885 | 0.47837  | 0.061178 | 0.18691  | 0.03534985 | 0.446    | 0.006798 | 0.88351  |
| 0.14474  | 0.252397 | 3.21E-08 | 0.167244 | 0.00028  | 0.10447685 | 0.02395  | -0.00728 | 0.87531  |
| 0.57876  | 0.298723 | 4.42E-11 | 0.152506 | 0.00095  | -0.0910086 | 0.04935  | -0.15301 | 0.00091  |
| 3.16E-05 | 0.198686 | 1.52E-05 | 0.149943 | 0.00115  | 0.09700639 | 0.03611  | 0.07974  | 0.08519  |
| 0.00061  | 0.202943 | 9.87E-06 | 0.158729 | 0.00058  | 0.10314511 | 0.02582  | 0.087751 | 0.05811  |
| 0.00021  | 0.319349 | 1.56E-12 | 0.202793 | 1.00E-05 | 0.08243278 | 0.07513  | 0.04812  | 0.29941  |
| 6.44E-13 | 0.073384 | 0.11325  | -0.04324 | 0.3511   | 0.06559634 | 0.15699  | 0.07015  | 0.13009  |
| 3.13E-09 | 0.156727 | 0.00068  | 0.029024 | 0.53153  | 0.12601407 | 0.0064   | 0.153691 | 0.00086  |
| 2.10E-05 | 0.285372 | 3.35E-10 | 0.172802 | 0.00018  | 0.07852613 | 0.09007  | 0.056291 | 0.22468  |
| 0.09937  | 0.25987  | 1.21E-08 | 0.068974 | 0.13667  | -0.0081658 | 0.8603   | 0.01434  | 0.75727  |
| 0.04119  | -0.08899 | 0.05465  | -0.12798 | 0.00561  | 0.03222465 | 0.48725  | 0.156762 | 0.00067  |

|          |          |          |          |          |            |          |          |          |
|----------|----------|----------|----------|----------|------------|----------|----------|----------|
| 0.10059  | 0.017726 | 0.70241  | 0.004656 | 0.92008  | -0.2031545 | 9.66E-06 | -0.2425  | 1.12E-07 |
| 0.01954  | 0.334507 | 1.13E-13 | 0.180835 | 8.50E-05 | 0.06963841 | 0.13292  | 0.108769 | 0.01871  |
| 0.58751  | 0.227478 | 6.77E-07 | 0.13877  | 0.00265  | 0.07933872 | 0.08678  | 0.044078 | 0.34189  |
| 0.02161  | 0.295034 | 7.82E-11 | 0.16525  | 0.00034  | 0.1028454  | 0.02625  | 0.082958 | 0.07329  |
| 0.3604   | 0.030768 | 0.50715  | 0.00576  | 0.9012   | 0.04517744 | 0.32997  | 0.108157 | 0.01939  |
| 0.19267  | 0.237479 | 2.07E-07 | 0.190905 | 3.29E-05 | -0.03819   | 0.41029  | -0.09186 | 0.04725  |
| 0.05473  | 0.060818 | 0.18953  | 0.037146 | 0.42321  | 0.01725084 | 0.71003  | 0.016572 | 0.72095  |
| 0.21677  | -0.02643 | 0.5689   | -0.074   | 0.11023  | -0.0080261 | 0.86266  | -0.0349  | 0.45185  |
| 0.54446  | -0.0911  | 0.04912  | 0.015296 | 0.74165  | 0.08513376 | 0.06604  | 0.088372 | 0.05635  |
| 0.00124  | -0.0797  | 0.08535  | -0.06534 | 0.15861  | 0.15679521 | 0.00067  | 0.068559 | 0.13905  |
| 0.46903  | 0.060817 | 0.18953  | 0.124552 | 0.00704  | 0.20569861 | 7.42E-06 | 0.085678 | 0.06432  |
| 0.88697  | -0.26814 | 3.93E-09 | -0.46502 | 1.97E-26 | 0.05262607 | 0.25638  | 0.035951 | 0.43829  |
| 0.00236  | 0.210079 | 4.67E-06 | 0.20408  | 8.78E-06 | 0.35541385 | 2.37E-15 | 0.370657 | 1.18E-16 |
| 0.83317  | 0.212045 | 3.79E-06 | 0.252767 | 3.06E-08 | 0.08259829 | 0.07455  | 0.079908 | 0.08454  |
| 0.59824  | 0.026011 | 0.57501  | 0.117408 | 0.01111  | -0.0087348 | 0.85067  | -0.11146 | 0.01596  |
| 0.02184  | 0.085543 | 0.06474  | 0.188492 | 4.15E-05 | -0.0964102 | 0.03728  | -0.04364 | 0.34667  |
| 1.18E-08 | -0.19299 | 2.68E-05 | -0.10105 | 0.02901  | -0.0466822 | 0.3141   | 0.036165 | 0.43557  |
| 2.84E-05 | 0.024723 | 0.59408  | -0.13867 | 0.00267  | -0.2122891 | 3.69E-06 | -0.13021 | 0.00483  |
| 0.38916  | 0.123515 | 0.00753  | 0.125554 | 0.00659  | 0.0339883  | 0.46372  | 0.038257 | 0.40947  |
| 0.28412  | 0.074689 | 0.10697  | 0.150944 | 0.00107  | -0.176666  | 0.00012  | -0.25411 | 2.57E-08 |
| 0.03277  | -0.03423 | 0.46055  | -0.30223 | 2.55E-11 | -0.0609448 | 0.1886   | -0.12167 | 0.00849  |
| 0.3605   | 0.019695 | 0.67119  | 0.000824 | 0.98583  | 0.02057941 | 0.65735  | 0.064081 | 0.16681  |
| 0.04524  | 0.063346 | 0.17174  | -0.11339 | 0.01422  | -0.2271971 | 6.99E-07 | -0.24943 | 4.70E-08 |
| 0.00717  | -0.06391 | 0.16798  | -0.14017 | 0.0024   | 0.09097155 | 0.04945  | 0.025734 | 0.57909  |
| 4.51E-06 | -0.20345 | 9.37E-06 | -0.14049 | 0.00234  | 0.17871969 | 0.0001   | 0.251724 | 3.50E-08 |
| 0.01824  | -0.07979 | 0.08501  | -0.01494 | 0.74745  | 0.13730668 | 0.00295  | 0.145728 | 0.00159  |
| 0.05018  | 0.160946 | 0.00048  | 0.013137 | 0.77707  | 0.04158624 | 0.3699   | 0.069702 | 0.13256  |
| 0.32352  | -0.16356 | 0.00039  | -0.09932 | 0.03188  | 0.32307042 | 8.33E-13 | 0.20059  | 1.26E-05 |
| 0.52991  | -0.02271 | 0.62453  | 0.108848 | 0.01863  | 0.15662881 | 0.00068  | 0.080769 | 0.08123  |
| 0.0107   | 0.027776 | 0.54934  | 0.033944 | 0.4643   | 0.0206824  | 0.65574  | 0.04648  | 0.3162   |
| 0.05811  | -0.05128 | 0.26876  | 0.003291 | 0.94345  | -0.0311003 | 0.50257  | -0.11064 | 0.01676  |
| 0.40784  | 0.008381 | 0.85666  | -0.06193 | 0.18153  | -0.033431  | 0.47108  | 0.040287 | 0.38505  |
| 0.93981  | 0.10688  | 0.02088  | 0.097196 | 0.03575  | 0.03026681 | 0.5141   | 0.021026 | 0.65039  |
| 0.04721  | -0.05105 | 0.2709   | 0.01655  | 0.7213   | 0.08337388 | 0.07186  | 0.145445 | 0.00162  |
| 0.00291  | 0.144643 | 0.00173  | 0.033032 | 0.4764   | -0.0950201 | 0.04012  | -0.10107 | 0.02897  |
| 0.52998  | 0.070062 | 0.13057  | -0.06533 | 0.15867  | -0.127211  | 0.00591  | -0.13217 | 0.00422  |
| 0.54042  | 0.018631 | 0.688    | -0.11555 | 0.01247  | -0.0660709 | 0.154    | -0.02643 | 0.56881  |
| 0.74657  | 0.002843 | 0.95114  | -0.10522 | 0.02297  | -0.1369992 | 0.00301  | -0.11367 | 0.01398  |
| 0.68983  | -0.00887 | 0.84833  | -0.10448 | 0.02395  | -0.0415435 | 0.37039  | -0.0463  | 0.31812  |
| 0.31524  | -0.06417 | 0.16622  | -0.15883 | 0.00057  | -0.0991616 | 0.03216  | -0.04469 | 0.33517  |
| 0.60708  | 0.209167 | 5.15E-06 | 0.095153 | 0.03984  | 0.03214158 | 0.48837  | 0.023797 | 0.60799  |
| 0.01424  | 0.130207 | 0.00483  | -0.01325 | 0.77513  | -0.0517449 | 0.26444  | -0.07622 | 0.09996  |
| 1.08E-05 | -0.01992 | 0.66761  | 0.01649  | 0.72228  | 0.05171858 | 0.26468  | 0.093349 | 0.04377  |
| 2.89E-08 | -0.17053 | 0.00021  | -0.13801 | 0.0028   | 0.04391066 | 0.34372  | -0.01665 | 0.71972  |
| 0.81586  | 0.083774 | 0.0705   | 0.066831 | 0.14931  | 0.04522625 | 0.32945  | 0.038301 | 0.40893  |

|          |          |          |          |          |            |          |          |          |
|----------|----------|----------|----------|----------|------------|----------|----------|----------|
| 0.4083   | -0.02625 | 0.57147  | -0.01447 | 0.75508  | 0.00296571 | 0.94904  | -0.01597 | 0.73065  |
| 0.05745  | 0.089372 | 0.0536   | 0.050603 | 0.27514  | 0.05380538 | 0.24586  | 0.090901 | 0.04962  |
| 0.00053  | 0.165283 | 0.00033  | 0.112731 | 0.01479  | 0.0793415  | 0.08677  | 0.097684 | 0.03483  |
| 0.32467  | 0.211703 | 3.93E-06 | 0.004295 | 0.92624  | 0.01226131 | 0.79157  | 0.095726 | 0.03865  |
| 0.05081  | 0.248594 | 5.23E-08 | 0.091457 | 0.04824  | -0.0130842 | 0.77794  | 0.007825 | 0.86607  |
| 0.82164  | 0.304179 | 1.87E-11 | 0.464476 | 2.29E-26 | 0.00904651 | 0.84541  | -0.10247 | 0.02681  |
| 0.02192  | -0.20638 | 6.91E-06 | -0.10117 | 0.02881  | 0.02655474 | 0.56704  | -0.06326 | 0.17236  |
| 1.11E-05 | -0.23997 | 1.53E-07 | -0.24689 | 6.48E-08 | 0.0366729  | 0.42915  | -0.03616 | 0.43565  |
| 0.6384   | -0.08102 | 0.0803   | -0.04106 | 0.37599  | 0.17542839 | 0.00014  | 0.17996  | 9.21E-05 |
| 0.58842  | -0.02989 | 0.5193   | -0.02676 | 0.56411  | -0.0928906 | 0.04482  | -0.12455 | 0.00704  |
| 0.13949  | -0.01575 | 0.73431  | 0.026393 | 0.5694   | 0.14746843 | 0.00139  | 0.2259   | 8.12E-07 |
| 0.016    | 0.068768 | 0.13785  | 0.038276 | 0.40924  | -0.0395321 | 0.39403  | -0.06101 | 0.18815  |
| 0.05038  | 0.109738 | 0.01768  | 0.023278 | 0.61583  | -0.0739496 | 0.1105   | -0.14913 | 0.00123  |
| 0.72092  | 0.086652 | 0.06134  | 0.043747 | 0.34553  | -0.0355393 | 0.44356  | -0.03742 | 0.41985  |
| 0.01454  | -0.24645 | 6.85E-08 | -0.15015 | 0.00114  | -0.0547051 | 0.23804  | 0.003561 | 0.93882  |
| 0.11319  | 0.054532 | 0.23953  | 0.011719 | 0.80059  | -0.0045873 | 0.92124  | -0.01649 | 0.7222   |
| 0.27277  | 0.200185 | 1.31E-05 | -0.07559 | 0.10277  | -0.1581034 | 0.00061  | -0.13509 | 0.00345  |
| 2.44E-08 | -0.09976 | 0.03114  | 0.019187 | 0.67919  | 0.18762705 | 4.50E-05 | 0.179066 | 9.99E-05 |
| 9.82E-05 | -0.01141 | 0.80582  | -0.05036 | 0.27742  | 0.04819985 | 0.29861  | 0.163021 | 0.0004   |
| 0.03996  | -0.14489 | 0.00169  | -0.10587 | 0.02212  | 0.16872306 | 0.00025  | 0.132674 | 0.00408  |
| 0.47312  | 0.098107 | 0.03404  | -0.01278 | 0.7829   | 0.07058006 | 0.12774  | 0.181654 | 7.88E-05 |
| 0.13487  | 0.226503 | 7.57E-07 | 0.427686 | 3.43E-22 | 0.28151123 | 5.91E-10 | 0.232211 | 3.89E-07 |
| 0.26637  | 0.025678 | 0.57991  | -0.07644 | 0.09896  | 0.0192944  | 0.6775   | -0.1421  | 0.00208  |
| 0.96309  | 0.25138  | 3.66E-08 | 0.401092 | 1.78E-19 | 0.41541757 | 6.57E-21 | 0.191586 | 3.08E-05 |
| 0.76428  | -0.07649 | 0.09877  | 0.064098 | 0.1667   | 0.27588324 | 1.33E-09 | 0.200859 | 1.22E-05 |
| 0.00536  | 0.053464 | 0.24887  | 0.115838 | 0.01224  | 0.12897885 | 0.00525  | 0.058145 | 0.20976  |
| 0.56027  | 0.07284  | 0.11596  | 0.052229 | 0.25999  | 0.0904157  | 0.05086  | 0.152057 | 0.00098  |
| 0.01037  | 0.245597 | 7.63E-08 | 0.17624  | 0.00013  | 0.04418195 | 0.34075  | 0.004414 | 0.92422  |
| 0.14981  | 0.297964 | 4.98E-11 | 0.282127 | 5.40E-10 | 0.27396448 | 1.74E-09 | 0.169674 | 0.00023  |
| 0.47793  | 0.054042 | 0.24379  | -0.08819 | 0.05685  | -0.0658934 | 0.15511  | 0.024871 | 0.59188  |
| 0.15518  | 0.190017 | 3.58E-05 | 0.087259 | 0.05953  | 0.04205538 | 0.36452  | 0.018585 | 0.68872  |
| 0.0013   | 0.096852 | 0.03641  | 0.030251 | 0.51432  | -0.1145288 | 0.01327  | -0.1648  | 0.00035  |
| 0.28163  | -0.07406 | 0.10996  | -0.00124 | 0.97874  | 0.0434294  | 0.34904  | 0.079393 | 0.08656  |
| 0.50521  | 0.156303 | 0.0007   | 0.073692 | 0.11174  | 0.01494468 | 0.74737  | -0.01263 | 0.78547  |
| 3.47E-05 | 0.188985 | 3.95E-05 | 0.069509 | 0.13364  | 0.04681875 | 0.31269  | 0.082987 | 0.07319  |
| 0.86961  | 0.144464 | 0.00175  | 0.11486  | 0.013    | 0.1484282  | 0.0013   | 0.077402 | 0.09478  |
| 0.7757   | 0.06059  | 0.19119  | 0.052643 | 0.25622  | 0.22442561 | 9.61E-07 | 0.298843 | 4.34E-11 |
| 0.80726  | 0.12002  | 0.00943  | 0.203607 | 9.22E-06 | 0.23880519 | 1.76E-07 | 0.215653 | 2.56E-06 |
| 0.00023  | 0.284778 | 3.66E-10 | 0.205013 | 7.97E-06 | 0.36706528 | 2.42E-16 | 0.331752 | 1.85E-13 |
| 0.01622  | 0.077975 | 0.09235  | 0.01609  | 0.72874  | 0.06661021 | 0.15066  | 0.149224 | 0.00122  |
| 5.44E-08 | 0.357872 | 1.48E-15 | 0.200816 | 1.23E-05 | 0.11285203 | 0.01469  | 0.186019 | 5.24E-05 |
| 0.00285  | 0.04403  | 0.34241  | 0.067518 | 0.14516  | 0.15466524 | 0.0008   | 0.229456 | 5.38E-07 |
| 0.63093  | -0.21476 | 2.82E-06 | -0.1678  | 0.00027  | 0.09125319 | 0.04874  | 0.196751 | 1.85E-05 |
| 0.52076  | 0.075265 | 0.10428  | -0.00175 | 0.9699   | -0.0481864 | 0.29874  | -0.02064 | 0.65644  |
| 0.00339  | -0.13103 | 0.00457  | 0.003024 | 0.94803  | 0.33649578 | 7.95E-14 | 0.315115 | 3.17E-12 |



|          |          |          |          |          |            |          |          |          |
|----------|----------|----------|----------|----------|------------|----------|----------|----------|
| 0.00026  | -0.15466 | 0.0008   | 0.103942 | 0.02469  | 0.28629771 | 2.92E-10 | 0.293847 | 9.38E-11 |
| 0.0019   | -0.04031 | 0.38475  | -0.11172 | 0.01572  | -0.0655897 | 0.15703  | -0.03133 | 0.49941  |
| 0.0333   | -0.21105 | 4.21E-06 | -0.08599 | 0.06336  | 0.05953356 | 0.19906  | 0.085551 | 0.06472  |
| 0.54352  | 0.097135 | 0.03587  | 0.112417 | 0.01508  | -0.0744695 | 0.10801  | -0.07743 | 0.09465  |
| 4.27E-21 | -0.10413 | 0.02443  | -0.15087 | 0.00107  | -0.0497315 | 0.2835   | 0.10256  | 0.02668  |
| 0.01532  | 0.129809 | 0.00496  | -0.06552 | 0.15749  | -0.2342174 | 3.07E-07 | -0.2311  | 4.44E-07 |
| 0.15826  | 0.248794 | 5.09E-08 | 0.369741 | 1.42E-16 | 0.32771403 | 3.74E-13 | 0.112014 | 0.01544  |
| 0.29357  | -0.21328 | 3.32E-06 | -0.22846 | 6.04E-07 | -0.0677355 | 0.14387  | -0.13329 | 0.00391  |
| 0.19785  | -0.02659 | 0.56654  | -0.09711 | 0.03591  | 0.02270863 | 0.6245   | 0.101065 | 0.02898  |
| 0.214    | 0.094164 | 0.04195  | -0.04721 | 0.30865  | -0.0109733 | 0.81304  | -0.0294  | 0.52628  |
| 0.00226  | 0.108131 | 0.01942  | 0.029467 | 0.52528  | 0.01644936 | 0.72293  | 0.033514 | 0.46998  |
| 0.00014  | 0.144312 | 0.00177  | 0.129296 | 0.00514  | 0.38760808 | 3.43E-18 | 0.35219  | 4.39E-15 |
| 0.00019  | 0.071602 | 0.12231  | -0.00731 | 0.87477  | 0.02296917 | 0.62053  | 0.069205 | 0.13536  |
| 0.00122  | 0.12315  | 0.00771  | 0.049631 | 0.28448  | 0.01533068 | 0.74107  | -0.007   | 0.88008  |
| 0.71423  | 0.004778 | 0.91799  | -0.14922 | 0.00122  | -0.0545788 | 0.23913  | -0.0559  | 0.22795  |
| 0.66803  | 0.250997 | 3.85E-08 | 0.1068   | 0.02098  | 0.07641305 | 0.09909  | 0.137178 | 0.00297  |
| 0.01004  | 0.312959 | 4.53E-12 | 0.12595  | 0.00642  | -0.0594307 | 0.19984  | -0.07895 | 0.08833  |
| 0.20753  | 0.109495 | 0.01793  | 0.025711 | 0.57943  | -0.0193885 | 0.67602  | 0.076231 | 0.0999   |
| 0.74479  | 0.035825 | 0.4399   | -0.06619 | 0.15329  | -0.0455996 | 0.32547  | -0.00498 | 0.91451  |
| 0.45356  | 0.200792 | 1.23E-05 | 0.276136 | 1.28E-09 | 0.05119648 | 0.26954  | 0.026279 | 0.57108  |
| 0.00294  | 0.052073 | 0.26141  | 0.134998 | 0.00347  | -0.1723202 | 0.00018  | -0.1638  | 0.00038  |
| 0.00034  | -0.00619 | 0.89386  | -0.29326 | 1.03E-10 | -0.2004122 | 1.28E-05 | -0.28019 | 7.15E-10 |
| 8.90E-07 | 0.069801 | 0.13202  | 0.134439 | 0.00361  | -0.0107836 | 0.81621  | -0.06198 | 0.18118  |
| 0.39988  | -0.08766 | 0.05837  | 0.034765 | 0.45356  | -0.0182531 | 0.694    | -0.02602 | 0.57489  |
| 0.00094  | -0.07417 | 0.10944  | 0.020287 | 0.66191  | 0.07186461 | 0.12094  | -0.09371 | 0.04296  |
| 0.34373  | -0.26295 | 7.98E-09 | -0.10452 | 0.02389  | 0.05174292 | 0.26445  | -0.17304 | 0.00017  |
| 7.53E-05 | -0.06932 | 0.13469  | -0.08194 | 0.07689  | 0.08184757 | 0.07723  | 0.074006 | 0.11022  |
| 0.34841  | 0.122291 | 0.00815  | 0.0811   | 0.07999  | 0.04044001 | 0.38325  | -0.01906 | 0.68115  |
| 8.31E-06 | -0.13827 | 0.00275  | -0.12291 | 0.00783  | 0.06270492 | 0.17613  | 0.103862 | 0.0248   |
| 0.98733  | 0.17443  | 0.00015  | 0.101173 | 0.02881  | -0.0142126 | 0.75935  | -0.05402 | 0.24399  |
| 7.08E-09 | -0.03806 | 0.4119   | -0.04012 | 0.38698  | 0.05972094 | 0.19765  | 0.04965  | 0.28429  |
| 3.46E-06 | 0.272153 | 2.25E-09 | 0.204831 | 8.12E-06 | 0.25371543 | 2.71E-08 | 0.314119 | 3.74E-12 |
| 0.10216  | -0.17371 | 0.00016  | -0.11208 | 0.01538  | -0.1206576 | 0.00905  | -0.22529 | 8.71E-07 |
| 0.09894  | -0.05293 | 0.25365  | -0.13598 | 0.00324  | -0.0087303 | 0.85075  | -0.08229 | 0.07565  |
| 0.05808  | 0.262848 | 8.08E-09 | 0.214247 | 2.98E-06 | -0.0321933 | 0.48767  | -0.09153 | 0.04807  |
| 0.07663  | 0.231281 | 4.34E-07 | 0.215186 | 2.69E-06 | 0.12903804 | 0.00523  | 0.045652 | 0.32491  |
| 1.96E-20 | -0.27972 | 7.66E-10 | -0.27154 | 2.45E-09 | -0.0475032 | 0.30566  | 0.02296  | 0.62066  |
| 0.49004  | 0.02228  | 0.63105  | -0.01221 | 0.79238  | 0.04697098 | 0.31111  | 0.028089 | 0.54485  |
| 0.40201  | 0.103765 | 0.02493  | -0.02857 | 0.53798  | -0.0721811 | 0.1193   | -0.03176 | 0.49348  |
| 5.61E-12 | -0.09337 | 0.04373  | 0.012567 | 0.78649  | 0.03219416 | 0.48766  | -0.10284 | 0.02626  |
| 2.75E-11 | 0.077291 | 0.09526  | 0.064935 | 0.16122  | 0.23174436 | 4.11E-07 | 0.230023 | 5.03E-07 |
| 0.00496  | 0.034216 | 0.46072  | 0.049693 | 0.28388  | 0.02739967 | 0.55476  | -0.03659 | 0.43018  |
| 1.34E-05 | 0.116557 | 0.01171  | 0.192686 | 2.76E-05 | 0.41564739 | 6.22E-21 | 0.350832 | 5.68E-15 |
| 0.17514  | 0.178655 | 0.0001   | 0.166499 | 0.0003   | 0.03356256 | 0.46934  | -0.00723 | 0.87621  |
| 0.02523  | 0.13041  | 0.00476  | 0.158738 | 0.00058  | 0.16405094 | 0.00037  | 0.200039 | 1.33E-05 |

|          |          |          |          |          |            |          |          |          |
|----------|----------|----------|----------|----------|------------|----------|----------|----------|
| 4.15E-14 | -0.0421  | 0.36405  | 0.013844 | 0.76541  | 0.07533362 | 0.10397  | 0.012355 | 0.79002  |
| 0.00068  | 0.051111 | 0.27034  | 0.37729  | 3.03E-17 | 0.43885065 | 2.10E-23 | 0.333258 | 1.42E-13 |
| 0.61448  | 0.117676 | 0.01093  | 0.090244 | 0.0513   | 0.11753941 | 0.01102  | 0.06176  | 0.18275  |
| 0.7485   | 0.316466 | 2.54E-12 | 0.227103 | 7.07E-07 | 0.09899606 | 0.03245  | 0.179594 | 9.52E-05 |
| 0.75251  | 0.045019 | 0.33167  | -0.22937 | 5.43E-07 | -0.0941169 | 0.04206  | -0.14759 | 0.00138  |
| 8.30E-05 | 0.209082 | 5.20E-06 | 0.066605 | 0.15069  | 0.1915215  | 3.10E-05 | 0.186552 | 4.99E-05 |
| 0.00105  | -0.08105 | 0.08018  | -0.13288 | 0.00402  | -0.0490348 | 0.29031  | -0.09587 | 0.03835  |
| 0.22142  | 0.126634 | 0.00614  | 0.019151 | 0.67976  | 0.02535765 | 0.58465  | 0.085433 | 0.06509  |
| 0.33465  | -0.07094 | 0.12579  | -0.1613  | 0.00047  | -0.1601378 | 0.00051  | -0.09002 | 0.05187  |
| 0.26077  | 0.071059 | 0.12517  | -0.028   | 0.54605  | -0.0574516 | 0.21526  | -0.08892 | 0.05482  |
| 1.64E-05 | 0.190127 | 3.54E-05 | 0.259669 | 1.24E-08 | 0.22368364 | 1.05E-06 | 0.143662 | 0.00186  |
| 0.95003  | 0.169726 | 0.00023  | 0.020383 | 0.66041  | 0.0384855  | 0.40668  | 0.137688 | 0.00287  |
| 0.25709  | -0.08394 | 0.06993  | -0.09333 | 0.0438   | 0.07172153 | 0.12168  | 0.070731 | 0.12693  |
| 0.06976  | -0.05931 | 0.20076  | -0.01733 | 0.7088   | 0.00861331 | 0.85273  | -0.07967 | 0.08545  |
| 0.0724   | -0.0094  | 0.83952  | -0.04861 | 0.29455  | 0.05714985 | 0.21768  | 0.179584 | 9.53E-05 |
| 0.0847   | 0.121431 | 0.00862  | 0.008517 | 0.85435  | -0.028516  | 0.53875  | 0.024022 | 0.6046   |
| 0.01009  | 0.04026  | 0.38536  | 0.033929 | 0.4645   | -0.0182607 | 0.69388  | -0.03221 | 0.48748  |
| 0.01935  | 0.174473 | 0.00015  | 0.099472 | 0.03162  | 0.10320074 | 0.02574  | 0.076342 | 0.0994   |
| 0.79977  | 0.099065 | 0.03233  | 0.020411 | 0.65997  | -0.0091534 | 0.84361  | 0.003526 | 0.93943  |
| 0.98455  | 0.047555 | 0.30513  | 0.154774 | 0.00079  | 0.10689972 | 0.02086  | 0.092599 | 0.0455   |
| 0.9715   | 0.012452 | 0.78841  | -0.0383  | 0.409    | -0.0468438 | 0.31243  | -0.01575 | 0.73434  |
| 4.77E-11 | -0.16322 | 0.0004   | -0.13133 | 0.00447  | 0.16773792 | 0.00027  | 0.227634 | 6.65E-07 |
| 0.2174   | 0.068853 | 0.13736  | 0.062262 | 0.17921  | 0.05147408 | 0.26695  | 0.155742 | 0.00073  |
| 0.04496  | -0.0656  | 0.15698  | 0.092845 | 0.04493  | 0.23827582 | 1.88E-07 | 0.038971 | 0.40078  |
| 1.66E-05 | -0.07359 | 0.11224  | -0.13085 | 0.00462  | 0.06765785 | 0.14433  | 0.012216 | 0.79232  |
| 0.0059   | 0.154734 | 0.00079  | 0.110085 | 0.01732  | -0.0013992 | 0.97594  | -0.02739 | 0.55495  |
| 0.05016  | -0.04157 | 0.37013  | 0.24999  | 4.37E-08 | 0.29904841 | 4.20E-11 | 0.055191 | 0.23389  |
| 3.79E-06 | 0.089448 | 0.0534   | 0.062076 | 0.18051  | -0.0887143 | 0.05539  | -0.17677 | 0.00012  |
| 0.53165  | 0.125465 | 0.00663  | 0.06021  | 0.194    | -0.0223525 | 0.62994  | 0.061983 | 0.18117  |
| 1.64E-17 | -0.05687 | 0.21994  | 0.086544 | 0.06166  | 0.25141275 | 3.65E-08 | 0.199279 | 1.43E-05 |
| 0.37741  | 0.080626 | 0.08177  | 0.001505 | 0.97413  | 0.07102036 | 0.12538  | 0.122117 | 0.00825  |
| 0.00321  | 0.117518 | 0.01103  | 0.098129 | 0.03401  | 0.10135996 | 0.02851  | 0.101163 | 0.02882  |
| 2.53E-06 | -0.02102 | 0.65053  | -0.1086  | 0.0189   | 0.07261474 | 0.1171   | 0.158456 | 0.00059  |
| 0.55629  | -0.03719 | 0.4227   | -0.11343 | 0.01418  | -0.2029016 | 9.91E-06 | -0.2404  | 1.45E-07 |
| 0.35725  | -0.12689 | 0.00603  | -0.17547 | 0.00014  | 0.05726578 | 0.21675  | 0.176418 | 0.00013  |
| 0.56288  | -0.06179 | 0.18253  | 0.00927  | 0.84165  | 0.10675882 | 0.02103  | 0.127357 | 0.00585  |
| 0.32567  | -0.01122 | 0.80885  | -0.14051 | 0.00234  | -0.1212725 | 0.00871  | -0.17607 | 0.00013  |
| 0.8185   | 0.001839 | 0.96838  | 0.058139 | 0.20981  | 0.0869728  | 0.06038  | 0.041263 | 0.37363  |
| 0.52033  | -0.06301 | 0.17405  | -0.09355 | 0.04331  | -0.0786214 | 0.08968  | -0.04016 | 0.3866   |
| 0.00062  | 0.117737 | 0.01089  | 0.102828 | 0.02628  | 0.08934102 | 0.05369  | -0.01933 | 0.67687  |
| 0.16701  | 0.061324 | 0.18586  | 0.047497 | 0.30571  | -0.0541631 | 0.24273  | -0.05796 | 0.21123  |
| 0.47293  | -0.00427 | 0.92676  | -0.0415  | 0.37093  | 0.03545643 | 0.44462  | 0.120236 | 0.0093   |
| 1.88E-10 | -0.04492 | 0.33278  | -0.0044  | 0.92441  | -0.0341561 | 0.46151  | -0.05798 | 0.21107  |
| 0.99352  | 0.097452 | 0.03526  | 0.040989 | 0.37682  | -0.0221385 | 0.63322  | -0.02205 | 0.63464  |
| 4.66E-07 | 0.167997 | 0.00027  | 0.052904 | 0.25387  | -0.0799393 | 0.08441  | -0.21045 | 4.49E-06 |

|          |          |          |          |          |            |          |          |          |
|----------|----------|----------|----------|----------|------------|----------|----------|----------|
| 0.22421  | 0.137269 | 0.00295  | 0.134042 | 0.00371  | 0.05646593 | 0.22325  | 0.018829 | 0.68486  |
| 0.66929  | -0.0261  | 0.57376  | 0.163481 | 0.00039  | -0.0508269 | 0.27302  | -0.1735  | 0.00016  |
| 0.08952  | 0.310773 | 6.48E-12 | 0.402599 | 1.27E-19 | 0.13023936 | 0.00482  | 0.032975 | 0.47716  |
| 0.60011  | 0.233849 | 3.20E-07 | 0.30259  | 2.41E-11 | 0.05514191 | 0.23431  | -0.07564 | 0.10255  |
| 3.80E-09 | 0.001217 | 0.97907  | 0.156714 | 0.00068  | -0.06359   | 0.1701   | -0.12184 | 0.0084   |
| 1.76E-08 | -0.2881  | 2.23E-10 | -0.16615 | 0.00031  | -0.0421861 | 0.36303  | -0.06868 | 0.13835  |
| 9.41E-10 | -0.05685 | 0.22011  | 0.036625 | 0.42975  | 0.13569599 | 0.0033   | 0.172007 | 0.00019  |
| 0.69084  | -0.08511 | 0.06611  | -0.00243 | 0.9582   | -0.0833028 | 0.0721   | -0.26004 | 1.18E-08 |
| 0.63378  | -0.10646 | 0.02139  | -0.09727 | 0.0356   | -0.0446309 | 0.33586  | -0.09094 | 0.04952  |
| 0.55133  | -0.14837 | 0.0013   | -0.22558 | 8.42E-07 | -0.1198684 | 0.00952  | -0.0705  | 0.12819  |
| 0.75321  | 0.003359 | 0.94228  | -0.04522 | 0.32947  | 0.06634323 | 0.15231  | 0.081665 | 0.0779   |
| 0.52969  | -0.06789 | 0.14294  | -0.04037 | 0.38406  | 0.0656008  | 0.15696  | 0.041832 | 0.36707  |
| 0.0017   | 0.274871 | 1.53E-09 | 0.188654 | 4.08E-05 | -0.0004601 | 0.99209  | -0.06859 | 0.13887  |
| 1.04E-05 | 0.190261 | 3.50E-05 | 0.041416 | 0.37187  | -0.1801266 | 9.07E-05 | -0.25922 | 1.31E-08 |
| 0.01818  | 0.157789 | 0.00062  | 0.039101 | 0.39921  | -0.0095376 | 0.83713  | 0.052091 | 0.26125  |
| 0.56997  | 0.09913  | 0.03221  | 0.49673  | 1.81E-30 | 0.47126966 | 3.40E-27 | 0.282488 | 5.12E-10 |
| 0.18776  | -0.04995 | 0.2814   | -0.08119 | 0.07965  | -0.0175166 | 0.70576  | 0.171536 | 0.0002   |
| 0.10866  | -0.10141 | 0.02843  | 0.120667 | 0.00905  | -0.0365483 | 0.43072  | -0.10672 | 0.02107  |
| 0.00234  | -0.00686 | 0.88249  | -0.07785 | 0.09288  | 0.0154299  | 0.73946  | 0.058242 | 0.209    |
| 0.01639  | -0.04326 | 0.35097  | -0.15522 | 0.00076  | -0.0475692 | 0.30498  | -0.02324 | 0.61645  |
| 0.10953  | -0.10192 | 0.02765  | -0.17271 | 0.00018  | -0.0227444 | 0.62395  | 0.014942 | 0.74741  |
| 3.96E-07 | -0.19224 | 2.89E-05 | -0.22599 | 8.03E-07 | -0.0804578 | 0.08241  | 0.002073 | 0.96437  |
| 0.07362  | 0.162462 | 0.00042  | 0.186578 | 4.97E-05 | 0.13973626 | 0.00247  | 0.081934 | 0.07692  |
| 0.32442  | 0.087725 | 0.05818  | 0.007651 | 0.86902  | 0.03448535 | 0.4572   | 0.009387 | 0.83967  |
| 0.0045   | -0.22973 | 5.21E-07 | -0.20972 | 4.86E-06 | 0.06196132 | 0.18132  | -0.0914  | 0.04839  |
| 0.11582  | 0.013619 | 0.76911  | -0.2369  | 2.22E-07 | -0.1171131 | 0.01132  | -0.17674 | 0.00012  |
| 0.00022  | 0.144782 | 0.00171  | 0.148039 | 0.00134  | 0.23228086 | 3.86E-07 | 0.202054 | 1.08E-05 |
| 0.4448   | -0.10874 | 0.01874  | -0.09545 | 0.03922  | -0.1643418 | 0.00036  | -0.09412 | 0.04206  |
| 0.33264  | 0.044925 | 0.33269  | 0.0406   | 0.38136  | 0.23534858 | 2.68E-07 | 0.256286 | 1.94E-08 |
| 0.14022  | 0.257894 | 1.57E-08 | 0.275194 | 1.46E-09 | 0.34807571 | 9.53E-15 | 0.174709 | 0.00015  |
| 0.0401   | -0.09851 | 0.03332  | -0.11841 | 0.01044  | -0.3689685 | 1.65E-16 | -0.31892 | 1.68E-12 |
| 0.05385  | -0.01639 | 0.72396  | -0.12853 | 0.00541  | -0.1475775 | 0.00138  | -0.13989 | 0.00245  |
| 7.15E-20 | -0.113   | 0.01455  | 0.008586 | 0.85318  | 0.08523176 | 0.06573  | 0.000844 | 0.98548  |
| 0.4457   | 0.154947 | 0.00078  | 0.094617 | 0.04097  | -0.0509574 | 0.27178  | -0.03653 | 0.43097  |
| 0.79225  | -0.03722 | 0.42229  | -0.06048 | 0.19203  | -0.0221945 | 0.63236  | 0.042757 | 0.35656  |
| 0.12191  | 0.062226 | 0.17946  | 0.01219  | 0.79275  | -0.0033422 | 0.94258  | -0.05623 | 0.22519  |
| 0.23948  | 0.139272 | 0.00256  | 0.061331 | 0.18581  | -0.0099949 | 0.82944  | -0.0006  | 0.98968  |
| 0.05675  | 0.00653  | 0.88808  | -0.18731 | 4.64E-05 | -0.1834292 | 6.69E-05 | -0.20193 | 1.09E-05 |
| 0.0156   | 0.0092   | 0.84282  | -0.1621  | 0.00044  | -0.3860632 | 4.78E-18 | -0.37283 | 7.56E-17 |
| 1.04E-05 | -0.0924  | 0.04597  | -0.10164 | 0.02807  | -0.0174298 | 0.70715  | 0.005477 | 0.90604  |
| 0.1624   | -0.00271 | 0.95337  | 0.069086 | 0.13603  | 0.06034939 | 0.19297  | -0.05879 | 0.20478  |
| 4.49E-07 | -0.14982 | 0.00116  | -0.12101 | 0.00885  | -0.0212378 | 0.64711  | 0.07513  | 0.10491  |
| 0.55672  | 0.229209 | 5.53E-07 | 0.107545 | 0.02009  | -0.0721071 | 0.11968  | 0.036237 | 0.43465  |
| 5.47E-12 | 0.168133 | 0.00026  | 0.138539 | 0.0027   | 0.00698516 | 0.88033  | -0.11011 | 0.01729  |
| 8.97E-06 | -0.10032 | 0.03018  | -0.1455  | 0.00162  | -0.031823  | 0.49269  | -0.09224 | 0.04635  |

|          |          |          |          |          |            |          |          |          |
|----------|----------|----------|----------|----------|------------|----------|----------|----------|
| 0.06954  | 0.026914 | 0.5618   | -0.05363 | 0.24744  | -0.0115612 | 0.80322  | -0.03189 | 0.49181  |
| 0.00141  | 0.038954 | 0.40099  | -0.11925 | 0.0099   | -0.058724  | 0.20525  | 0.054059 | 0.24363  |
| 0.0117   | -0.21759 | 2.07E-06 | -0.23112 | 4.43E-07 | -0.0972407 | 0.03566  | 0.024251 | 0.60116  |
| 0.36888  | -0.05951 | 0.19926  | -0.10047 | 0.02995  | -0.117244  | 0.01122  | -0.09134 | 0.04853  |
| 0.0074   | -0.00871 | 0.85103  | -0.01494 | 0.74745  | -0.0312441 | 0.5006   | -0.00422 | 0.92758  |
| 0.85787  | -0.03351 | 0.47004  | -0.13597 | 0.00324  | -0.0608692 | 0.18915  | -0.02261 | 0.62607  |
| 0.00073  | 0.217711 | 2.04E-06 | 0.064364 | 0.16495  | -0.0883154 | 0.0565   | -0.07428 | 0.10889  |
| 0.22426  | -0.00849 | 0.85481  | -0.07298 | 0.11526  | -0.059158  | 0.20192  | -0.06573 | 0.15612  |
| 0.51822  | 0.067411 | 0.1458   | -0.02309 | 0.61875  | -0.0771551 | 0.09584  | -0.08082 | 0.08105  |
| 9.21E-05 | -0.18385 | 6.43E-05 | -0.13165 | 0.00437  | -0.0566024 | 0.22213  | -0.07684 | 0.09721  |
| 6.38E-10 | -0.15352 | 0.00087  | -0.14723 | 0.00142  | -0.1621556 | 0.00043  | -0.17061 | 0.00021  |
| 0.24692  | -0.23781 | 1.99E-07 | -0.23952 | 1.62E-07 | -0.0102723 | 0.82478  | 0.151484 | 0.00102  |
| 0.00032  | -0.02367 | 0.60995  | 0.080566 | 0.082    | 0.10446212 | 0.02397  | 0.062112 | 0.18026  |
| 0.83255  | -0.22418 | 9.88E-07 | 0.041499 | 0.37091  | 0.07457519 | 0.10751  | 0.046364 | 0.31741  |
| 0.25265  | -0.08289 | 0.07354  | 0.18177  | 7.80E-05 | 0.210903   | 4.28E-06 | 0.119349 | 0.00984  |
| 0.69348  | 0.181553 | 7.96E-05 | 0.045444 | 0.32712  | 0.08667771 | 0.06126  | -0.02578 | 0.57847  |
| 0.32309  | -0.08133 | 0.07911  | 0.051118 | 0.27027  | 0.23005671 | 5.01E-07 | 0.112117 | 0.01535  |
| 0.42936  | 0.18379  | 6.46E-05 | 0.315525 | 2.97E-12 | 0.30309411 | 2.23E-11 | 0.168557 | 0.00025  |
| 0.6263   | 0.160982 | 0.00048  | 0.044314 | 0.33931  | 0.07303345 | 0.11499  | -0.00361 | 0.93795  |
| 0.31011  | -0.02455 | 0.59675  | -0.05773 | 0.21302  | -0.0135453 | 0.77033  | -0.12843 | 0.00544  |
| 0.09124  | -0.1042  | 0.02433  | -0.04516 | 0.33017  | 0.09839874 | 0.03351  | 0.014615 | 0.75276  |
| 0.22083  | -0.00017 | 0.99701  | -0.13995 | 0.00244  | -0.0069313 | 0.88125  | 0.01364  | 0.76877  |
| 0.49131  | -0.00958 | 0.8365   | -0.23711 | 2.17E-07 | -0.1477797 | 0.00136  | -0.13607 | 0.00322  |
| 0.33467  | -0.08919 | 0.05409  | -0.37393 | 6.04E-17 | -0.1366402 | 0.00309  | -0.06878 | 0.1378   |
| 0.0245   | 0.06583  | 0.15551  | 0.144917 | 0.00169  | 0.08910458 | 0.05433  | 0.035546 | 0.44347  |
| 0.0369   | 0.151801 | 0.001    | 0.119647 | 0.00965  | 0.05397017 | 0.24441  | 0.018195 | 0.69493  |
| 0.46859  | 0.299901 | 3.68E-11 | 0.335606 | 9.32E-14 | 0.13552083 | 0.00334  | -0.02014 | 0.66423  |
| 0.00127  | 0.237017 | 2.19E-07 | 0.149131 | 0.00123  | -0.0355361 | 0.4436   | -0.06631 | 0.15255  |
| 0.73767  | 0.051671 | 0.26512  | 0.018447 | 0.69092  | -0.0454893 | 0.32664  | 0.033241 | 0.47361  |
| 3.24E-05 | 0.039409 | 0.3955   | 0.064828 | 0.16192  | -0.1130287 | 0.01453  | -0.27723 | 1.10E-09 |
| 0.3005   | 0.075493 | 0.10323  | 0.062945 | 0.17447  | -0.0538828 | 0.24518  | -0.07207 | 0.11986  |
| 0.2461   | 0.147583 | 0.00138  | 0.164456 | 0.00036  | 0.23417954 | 3.08E-07 | 0.276558 | 1.21E-09 |
| 1.91E-05 | 0.077364 | 0.09494  | -0.0238  | 0.60791  | -0.1507401 | 0.00109  | -0.1801  | 9.10E-05 |
| 0.02502  | 0.145253 | 0.00165  | 0.083982 | 0.0698   | 0.05982598 | 0.19686  | 0.144427 | 0.00175  |
| 4.92E-07 | -0.14045 | 0.00235  | -0.14201 | 0.0021   | 0.20364656 | 9.18E-06 | 0.186164 | 5.17E-05 |
| 0.00114  | 0.01193  | 0.79708  | 0.032458 | 0.48409  | 0.01357274 | 0.76988  | -0.10831 | 0.01922  |
| 0.70519  | -0.02438 | 0.59918  | 0.034971 | 0.45088  | 0.23433579 | 3.02E-07 | 0.152763 | 0.00093  |
| 0.14693  | -0.17413 | 0.00016  | -0.02711 | 0.55898  | 0.1142428  | 0.0135   | 0.080861 | 0.08088  |
| 0.09234  | 0.287624 | 2.40E-10 | 0.21424  | 2.99E-06 | 0.19902906 | 1.47E-05 | 0.141414 | 0.00219  |
| 0.38507  | 0.026101 | 0.57368  | -0.08555 | 0.06473  | -0.0199074 | 0.66786  | 0.022299 | 0.63076  |
| 0.79809  | -0.00224 | 0.96155  | -0.13384 | 0.00376  | 0.08117303 | 0.07971  | 0.032903 | 0.47812  |
| 6.59E-07 | 0.037692 | 0.41643  | 0.071661 | 0.122    | 0.09747523 | 0.03522  | 0.006541 | 0.88789  |
| 6.50E-06 | 0.09197  | 0.04699  | 0.031825 | 0.49267  | 0.09262263 | 0.04544  | -0.01836 | 0.69227  |
| 0.00011  | 0.156128 | 0.00071  | 0.064332 | 0.16515  | -0.1403255 | 0.00237  | -0.22925 | 5.51E-07 |
| 0.50134  | -0.1627  | 0.00042  | -0.20903 | 5.23E-06 | -0.1952247 | 2.15E-05 | -0.22233 | 1.22E-06 |

|          |          |          |          |          |            |          |          |          |
|----------|----------|----------|----------|----------|------------|----------|----------|----------|
| 1.43E-11 | 0.231408 | 4.28E-07 | 0.131081 | 0.00455  | 0.02465007 | 0.59518  | -0.00537 | 0.90781  |
| 0.36379  | 0.307009 | 1.19E-11 | 0.104528 | 0.02388  | 0.1661818  | 0.00031  | 0.007267 | 0.87553  |
| 0.10776  | -0.08248 | 0.07496  | -0.09075 | 0.05     | -0.0135311 | 0.77056  | 0.096828 | 0.03646  |
| 0.57168  | -0.22923 | 5.52E-07 | -0.01121 | 0.80917  | -0.0012204 | 0.97902  | -0.16459 | 0.00035  |
| 0.1062   | -0.00624 | 0.89302  | -0.09328 | 0.04394  | -0.00725   | 0.87583  | -0.07845 | 0.09039  |
| 0.1537   | -0.06497 | 0.16097  | -0.02056 | 0.65771  | 0.02109523 | 0.64932  | -0.02353 | 0.61208  |
| 1.23E-05 | -0.1239  | 0.00735  | -0.21191 | 3.84E-06 | -0.2529967 | 2.97E-08 | -0.33019 | 2.43E-13 |
| 0.14633  | -0.10647 | 0.02138  | -0.1597  | 0.00053  | -0.0610386 | 0.18792  | -0.03497 | 0.4509   |
| 0.01998  | -0.11251 | 0.015    | -0.01972 | 0.67082  | 0.04745504 | 0.30615  | 0.031587 | 0.49591  |
| 0.64937  | -0.05638 | 0.22392  | -0.06326 | 0.1723   | -0.0055581 | 0.90465  | 0.040235 | 0.38567  |
| 0.11218  | 0.17101  | 0.0002   | 0.008153 | 0.86052  | -0.0670362 | 0.14806  | -0.02951 | 0.52473  |
| 0.83018  | -0.00124 | 0.97873  | 0.030215 | 0.51482  | 0.27027073 | 2.92E-09 | 0.136402 | 0.00314  |
| 0.14584  | 0.104136 | 0.02442  | -0.03998 | 0.38873  | 0.02561401 | 0.58086  | 0.072248 | 0.11896  |
| 0.66346  | -0.05387 | 0.24525  | -0.09319 | 0.04413  | -0.1722681 | 0.00018  | -0.15877 | 0.00057  |
| 6.32E-18 | 0.008256 | 0.85878  | 0.083837 | 0.07029  | 0.18229133 | 7.43E-05 | 0.2435   | 9.91E-08 |
| 0.9968   | -0.07345 | 0.11291  | -0.14528 | 0.00165  | -0.1010498 | 0.029    | -0.02181 | 0.63829  |
| 0.15959  | -0.04099 | 0.37684  | -0.04714 | 0.30939  | -0.0452345 | 0.32936  | -0.05858 | 0.20633  |
| 0.17874  | 0.004169 | 0.9284   | -0.02201 | 0.63518  | -0.0279379 | 0.54701  | -0.04444 | 0.33793  |
| 0.99043  | 0.095664 | 0.03878  | -0.05586 | 0.22823  | 0.0322199  | 0.48731  | 0.079591 | 0.08578  |
| 0.08284  | -0.10631 | 0.02158  | -0.12547 | 0.00663  | -0.0372628 | 0.42176  | -0.02184 | 0.63782  |
| 0.00041  | 0.272762 | 2.06E-09 | 0.150147 | 0.00114  | 0.31818223 | 1.90E-12 | 0.281826 | 5.64E-10 |
| 0.25595  | 0.2393   | 1.66E-07 | 0.193777 | 2.48E-05 | 0.13199685 | 0.00427  | 0.165441 | 0.00033  |
| 0.04745  | 0.228909 | 5.73E-07 | 0.097945 | 0.03434  | 0.07049669 | 0.1282   | 0.142605 | 0.00201  |
| 0.21735  | -0.10996 | 0.01745  | -0.06596 | 0.1547   | -0.0085172 | 0.85435  | 0.010909 | 0.81411  |
| 9.20E-08 | -0.00516 | 0.91149  | -0.04165 | 0.36915  | -0.0663525 | 0.15225  | -0.1042  | 0.02434  |
| 0.57141  | 0.328915 | 3.04E-13 | 0.08039  | 0.08267  | -0.0075474 | 0.87078  | -0.01091 | 0.81408  |
| 0.17062  | 0.211554 | 3.99E-06 | 0.096794 | 0.03652  | -0.063523  | 0.17055  | -0.07031 | 0.12922  |
| 5.54E-23 | -0.04655 | 0.31546  | 0.041684 | 0.36878  | 0.1153841  | 0.01259  | 0.083575 | 0.07117  |
| 3.12E-06 | 0.0929   | 0.0448   | 0.015257 | 0.74227  | 0.05635124 | 0.22419  | 0.058996 | 0.20316  |
| 0.92359  | 0.035904 | 0.43889  | -0.00615 | 0.89455  | 0.07994361 | 0.0844   | 0.13785  | 0.00283  |
| 2.20E-20 | 0.090431 | 0.05082  | 0.027169 | 0.55811  | 0.09415389 | 0.04198  | 0.172279 | 0.00018  |
| 0.54846  | -0.01757 | 0.70486  | -0.02153 | 0.64256  | -0.0618849 | 0.18186  | -0.05545 | 0.23168  |
| 0.00131  | 0.192398 | 2.84E-05 | 0.11765  | 0.01094  | -0.0853995 | 0.06519  | -0.09094 | 0.04953  |
| 2.01E-05 | -0.03008 | 0.51674  | 0.027072 | 0.55951  | 0.28915923 | 1.91E-10 | 0.314002 | 3.82E-12 |
| 0.00193  | -0.02182 | 0.63813  | -0.04514 | 0.33038  | 0.17630419 | 0.00013  | 0.251883 | 3.43E-08 |
| 1.09E-05 | 0.072617 | 0.11709  | -0.0303  | 0.5137   | -0.0050741 | 0.91292  | -0.05644 | 0.22349  |
| 0.00354  | 0.237778 | 2.00E-07 | 0.085245 | 0.06569  | -0.0446887 | 0.33523  | -0.14715 | 0.00143  |
| 9.35E-08 | 0.028372 | 0.5408   | 0.126885 | 0.00604  | 0.37715056 | 3.11E-17 | 0.226108 | 7.92E-07 |
| 0.00772  | -0.09839 | 0.03352  | -0.08117 | 0.07971  | -0.0424735 | 0.35976  | 0.01268  | 0.78463  |
| 0.0003   | 0.193979 | 2.43E-05 | 0.075223 | 0.10448  | 0.24825077 | 5.46E-08 | 0.286162 | 2.98E-10 |
| 0.00954  | -0.30937 | 8.15E-12 | -0.1404  | 0.00236  | 0.0856469  | 0.06442  | 0.125115 | 0.00679  |
| 0.02369  | -0.08073 | 0.08136  | -0.13759 | 0.00289  | -0.0295462 | 0.52417  | -0.21006 | 4.69E-06 |
| 0.15246  | 0.035482 | 0.4443   | 0.075335 | 0.10396  | 0.0424753  | 0.35974  | -0.00542 | 0.90705  |
| 0.00061  | -0.26593 | 5.32E-09 | -0.01909 | 0.68077  | 0.30525774 | 1.58E-11 | 0.280793 | 6.56E-10 |
| 0.12147  | -0.0112  | 0.80933  | -0.13635 | 0.00315  | -0.1938621 | 2.46E-05 | -0.16772 | 0.00027  |

|          |          |          |          |          |            |          |          |          |
|----------|----------|----------|----------|----------|------------|----------|----------|----------|
| 0.00642  | 0.085237 | 0.06571  | 0.131346 | 0.00447  | 0.09464098 | 0.04092  | 0.072237 | 0.11902  |
| 7.75E-05 | 0.123603 | 0.00749  | 0.151786 | 0.001    | 0.08900687 | 0.05459  | 0.023685 | 0.60967  |
| 1.61E-07 | -0.07682 | 0.09731  | -0.17147 | 0.0002   | -0.2732969 | 1.91E-09 | -0.29639 | 6.35E-11 |
| 0.41966  | 0.171688 | 0.00019  | 0.127524 | 0.00579  | -0.0494586 | 0.28615  | -0.12109 | 0.00881  |
| 0.00012  | 0.154259 | 0.00082  | 0.196147 | 1.96E-05 | 0.07588959 | 0.10143  | 0.137865 | 0.00283  |
| 0.0436   | 0.014413 | 0.75607  | 0.106854 | 0.02091  | 0.17579274 | 0.00013  | 0.237127 | 2.16E-07 |
| 0.01608  | 0.124956 | 0.00686  | 0.104138 | 0.02441  | 0.38977117 | 2.16E-18 | 0.30683  | 1.23E-11 |
| 0.02771  | 0.161038 | 0.00048  | -0.00651 | 0.88842  | -0.1334556 | 0.00386  | -0.12117 | 0.00876  |
| 0.20753  | 0.133065 | 0.00397  | 0.005545 | 0.90487  | -0.1003823 | 0.03009  | -0.01154 | 0.80363  |
| 0.05383  | 0.076238 | 0.09987  | -0.10874 | 0.01874  | -0.3579653 | 1.45E-15 | -0.28604 | 3.04E-10 |
| 0.88698  | -0.0128  | 0.78263  | -0.1947  | 2.27E-05 | -0.1306596 | 0.00468  | -0.06308 | 0.17353  |
| 0.38353  | 0.026083 | 0.57395  | -0.0015  | 0.97416  | -0.011583  | 0.80286  | 0.041016 | 0.37651  |
| 0.38723  | 0.078563 | 0.08992  | -0.03505 | 0.44984  | -0.1075911 | 0.02004  | -0.04939 | 0.28679  |
| 0.25725  | 0.109568 | 0.01786  | 0.103172 | 0.02578  | -0.1986967 | 1.52E-05 | -0.13666 | 0.00308  |
| 0.06858  | 0.142205 | 0.00207  | 0.037106 | 0.42371  | -0.1209109 | 0.00891  | -0.01256 | 0.78669  |
| 0.20911  | 0.008631 | 0.85243  | 0.014691 | 0.75151  | 0.13415246 | 0.00368  | 0.156126 | 0.00071  |
| 0.79603  | -0.06228 | 0.17908  | 0.033335 | 0.47236  | 0.24790063 | 5.71E-08 | 0.224914 | 9.09E-07 |
| 0.10551  | 0.074637 | 0.10721  | 0.035553 | 0.44338  | 0.12240619 | 0.00809  | 0.240446 | 1.44E-07 |
| 0.30527  | -0.30633 | 1.33E-11 | -0.14012 | 0.00241  | 0.16501347 | 0.00034  | -0.02843 | 0.53996  |
| 7.90E-06 | -0.11581 | 0.01227  | -0.04959 | 0.28487  | 0.03697331 | 0.42537  | 0.081616 | 0.07808  |
| 0.7244   | -0.00497 | 0.91469  | -0.11535 | 0.01262  | -0.091134  | 0.04904  | -0.04932 | 0.2875   |
| 0.18609  | 0.033302 | 0.4728   | -0.09409 | 0.04213  | -0.0823638 | 0.07538  | -0.03816 | 0.41063  |
| 0.88641  | -0.01263 | 0.78544  | 0.102316 | 0.02704  | 0.14173835 | 0.00214  | -0.04851 | 0.29554  |
| 0.23172  | -0.064   | 0.16736  | -0.01018 | 0.82625  | 0.03008135 | 0.51668  | 0.029482 | 0.52508  |
| 0.86074  | 0.168266 | 0.00026  | 0.219602 | 1.66E-06 | 0.2702139  | 2.95E-09 | 0.281166 | 6.21E-10 |
| 0.1922   | 0.148916 | 0.00125  | 0.041242 | 0.37387  | 0.02126648 | 0.64667  | -0.10962 | 0.0178   |
| 0.68996  | 0.038582 | 0.40549  | -0.02283 | 0.62261  | -0.013381  | 0.77304  | 0.011    | 0.8126   |
| 0.49552  | 0.067239 | 0.14684  | 0.028721 | 0.53583  | 0.07525241 | 0.10434  | 0.065586 | 0.15706  |
| 3.07E-07 | -0.01926 | 0.67807  | -0.03113 | 0.50211  | -0.077845  | 0.0929   | -0.13221 | 0.00421  |
| 8.64E-06 | 0.163673 | 0.00038  | 0.034225 | 0.46061  | -0.1876375 | 4.50E-05 | -0.21592 | 2.49E-06 |
| 0.72872  | 0.094405 | 0.04143  | 0.080971 | 0.08047  | -0.0151933 | 0.74331  | -0.07941 | 0.0865   |
| 0.19477  | 0.030153 | 0.51568  | 0.020403 | 0.6601   | 0.09207868 | 0.04673  | 0.143236 | 0.00192  |
| 2.05E-07 | -0.02986 | 0.51971  | 0.022532 | 0.6272   | 0.06859695 | 0.13883  | 0.058091 | 0.21018  |
| 0.54419  | 0.082656 | 0.07435  | 0.108913 | 0.01856  | 0.09677366 | 0.03656  | 0.043879 | 0.34407  |
| 0.1174   | 0.07134  | 0.12368  | 0.089832 | 0.05238  | 0.03703185 | 0.42464  | -0.02523 | 0.58653  |
| 0.10512  | 0.219834 | 1.61E-06 | 0.222139 | 1.25E-06 | 0.02050506 | 0.65851  | -0.0489  | 0.29163  |
| 0.0584   | 0.175643 | 0.00014  | 0.043472 | 0.34857  | -0.0428153 | 0.35591  | -0.09229 | 0.04623  |
| 0.89565  | 0.071012 | 0.12542  | -0.11232 | 0.01516  | -0.0691521 | 0.13565  | -0.09774 | 0.03473  |
| 0.0002   | 0.103077 | 0.02592  | 0.06297  | 0.17431  | 0.08790263 | 0.05767  | 0.063652 | 0.16968  |
| 0.6912   | 0.035852 | 0.43956  | 0.066805 | 0.14947  | -0.015974  | 0.73062  | -0.0638  | 0.16866  |
| 0.30678  | 0.132618 | 0.00409  | 0.075809 | 0.1018   | 0.04386004 | 0.34428  | 0.049537 | 0.28539  |
| 3.47E-15 | 0.113953 | 0.01374  | 0.016292 | 0.72547  | -0.0160462 | 0.72945  | -0.04234 | 0.36125  |
| 0.00995  | 0.253812 | 2.67E-08 | 0.089005 | 0.0546   | 0.03413272 | 0.46182  | 0.009656 | 0.83514  |
| 0.20271  | 0.244243 | 9.03E-08 | 0.139853 | 0.00245  | 0.0567911  | 0.22059  | -0.00297 | 0.94894  |
| 0.97938  | 0.041598 | 0.36976  | 0.053365 | 0.24975  | 0.0390154  | 0.40024  | 0.010216 | 0.82572  |

|          |          |          |          |          |            |          |          |          |
|----------|----------|----------|----------|----------|------------|----------|----------|----------|
| 0.72079  | 0.230857 | 4.56E-07 | 0.112764 | 0.01476  | 0.06085033 | 0.18929  | 0.041275 | 0.37349  |
| 0.11347  | 0.057586 | 0.21418  | 0.024668 | 0.59492  | 0.02986255 | 0.51974  | 0.016466 | 0.72266  |
| 0.18002  | 0.171655 | 0.00019  | 0.103801 | 0.02488  | 0.19271481 | 2.76E-05 | 0.103571 | 0.02521  |
| 6.20E-24 | 0.042536 | 0.35906  | 0.106961 | 0.02078  | 0.24108185 | 1.34E-07 | 0.204279 | 8.60E-06 |
| 0.26785  | 0.097433 | 0.0353   | 0.081995 | 0.0767   | -0.0005715 | 0.99017  | -0.00028 | 0.99511  |
| 0.20783  | 0.116469 | 0.01178  | 0.022985 | 0.62028  | 0.00709467 | 0.87847  | 0.071779 | 0.12138  |
| 0.67967  | 0.021483 | 0.64332  | 0.016291 | 0.72549  | 0.0646405  | 0.16313  | 0.101116 | 0.0289   |
| 0.60112  | 0.04055  | 0.38195  | 0.029188 | 0.52922  | 0.07081223 | 0.12649  | 0.102305 | 0.02706  |
| 0.15344  | 0.024421 | 0.59861  | -0.07552 | 0.10311  | -0.0245902 | 0.59607  | -0.02836 | 0.541    |
| 0.07309  | -0.06474 | 0.16246  | -0.12731 | 0.00587  | 0.18968657 | 3.70E-05 | 0.252337 | 3.24E-08 |
| 2.03E-13 | 0.239094 | 1.70E-07 | 0.191657 | 3.05E-05 | 0.16885923 | 0.00025  | 0.192769 | 2.74E-05 |
| 0.63049  | 0.058076 | 0.2103   | -0.07418 | 0.1094   | -0.0206261 | 0.65662  | 0.041921 | 0.36605  |
| 0.80432  | -0.15288 | 0.00092  | -0.05142 | 0.26744  | 0.09034199 | 0.05105  | 0.190795 | 3.32E-05 |
| 0.31173  | 0.073213 | 0.1141   | 0.033833 | 0.46577  | 0.0751345  | 0.10489  | -0.10394 | 0.0247   |
| 0.58048  | -0.0957  | 0.03871  | -0.05642 | 0.2236   | 0.07006271 | 0.13057  | 0.109861 | 0.01755  |
| 7.79E-06 | 0.174642 | 0.00015  | 0.217746 | 2.03E-06 | 0.22757681 | 6.69E-07 | 0.087779 | 0.05803  |
| 0.00011  | -0.05109 | 0.27055  | -0.03235 | 0.48553  | 0.06017248 | 0.19428  | -0.04724 | 0.30832  |
| 0.6293   | -0.02116 | 0.64831  | -0.16156 | 0.00046  | 0.01674545 | 0.71815  | 0.067491 | 0.14532  |
| 0.03167  | 0.286951 | 2.65E-10 | 0.114319 | 0.01344  | -0.1316869 | 0.00436  | -0.18861 | 4.10E-05 |
| 0.33861  | 0.102908 | 0.02616  | -0.03899 | 0.40054  | -0.0429826 | 0.35403  | 0.064493 | 0.1641   |
| 0.63892  | 0.035179 | 0.4482   | -0.17688 | 0.00012  | -0.171857  | 0.00019  | -0.21495 | 2.77E-06 |
| 0.26559  | 0.171562 | 0.0002   | 0.088767 | 0.05525  | -0.044558  | 0.33665  | 0.064143 | 0.1664   |
| 0.18482  | 0.082784 | 0.0739   | 0.068296 | 0.14057  | -0.0351161 | 0.44901  | -0.06098 | 0.18838  |
| 0.20836  | 0.049878 | 0.28208  | -0.01185 | 0.79846  | -0.0109922 | 0.81272  | -0.01238 | 0.78954  |
| 0.00017  | -0.08231 | 0.07559  | 0.05745  | 0.21527  | 0.26355102 | 7.35E-09 | 0.141613 | 0.00216  |
| 0.006    | 0.340389 | 3.93E-14 | 0.326132 | 4.92E-13 | 0.1520941  | 0.00098  | 0.104139 | 0.02441  |
| 0.98511  | -0.16406 | 0.00037  | -0.10001 | 0.03071  | -0.0247381 | 0.59386  | -0.05854 | 0.20666  |
| 0.00626  | 0.089139 | 0.05423  | 0.136912 | 0.00303  | 0.19902816 | 1.47E-05 | 0.263284 | 7.62E-09 |
| 0.41471  | -0.0495  | 0.28571  | -0.02975 | 0.52136  | -0.1088254 | 0.01865  | -0.16805 | 0.00026  |
| 0.34848  | -0.24118 | 1.32E-07 | -0.1137  | 0.01395  | -0.0185359 | 0.68951  | -0.0682  | 0.14115  |
| 0.00189  | 0.039969 | 0.38881  | -0.01452 | 0.75439  | -0.102545  | 0.0267   | -0.11477 | 0.01308  |
| 0.00036  | 0.07445  | 0.1081   | -0.10865 | 0.01884  | -0.2843086 | 3.92E-10 | -0.29576 | 7.00E-11 |
| 0.05642  | 0.05386  | 0.24538  | -0.045   | 0.33186  | -0.1515395 | 0.00102  | -0.15789 | 0.00062  |
| 0.02058  | 0.159695 | 0.00053  | 0.162652 | 0.00042  | 0.1554692  | 0.00075  | -0.03491 | 0.45166  |
| 6.90E-12 | 0.01962  | 0.67237  | 0.107618 | 0.02001  | 0.27982283 | 7.55E-10 | 0.22192  | 1.28E-06 |
| 0.75349  | 0.301833 | 2.72E-11 | 0.22497  | 9.03E-07 | 0.05190301 | 0.26298  | -0.07058 | 0.12777  |
| 0.58516  | -0.33158 | 1.90E-13 | -0.26547 | 5.67E-09 | -0.130317  | 0.00479  | -0.1395  | 0.00252  |
| 0.96868  | 0.200255 | 1.30E-05 | 0.249693 | 4.54E-08 | 0.1192803  | 0.00988  | -0.07141 | 0.1233   |
| 0.81464  | -0.03905 | 0.3998   | 0.078389 | 0.09063  | 0.04922714 | 0.28842  | -0.07609 | 0.10053  |
| 0.52225  | 0.070052 | 0.13062  | 0.088537 | 0.05589  | 0.08364666 | 0.07093  | 0.037879 | 0.41411  |
| 9.60E-05 | 0.053784 | 0.24605  | -0.01805 | 0.69728  | 0.04638198 | 0.31723  | 0.090662 | 0.05023  |
| 2.04E-07 | 0.172656 | 0.00018  | 0.077767 | 0.09323  | 0.04874757 | 0.29315  | 0.0893   | 0.0538   |
| 0.72228  | 0.094566 | 0.04108  | 0.046248 | 0.31863  | 0.00847746 | 0.85502  | 0.017608 | 0.70429  |
| 2.05E-06 | -0.06009 | 0.1949   | -0.04421 | 0.34047  | -0.1049978 | 0.02326  | -0.22215 | 1.24E-06 |
| 0.06044  | -0.0532  | 0.25124  | -0.2075  | 6.15E-06 | -0.0218637 | 0.63745  | 0.047771 | 0.30293  |

|          |          |          |          |          |            |          |          |          |
|----------|----------|----------|----------|----------|------------|----------|----------|----------|
| 0.30996  | -0.02083 | 0.65345  | -0.03977 | 0.39118  | -0.0008372 | 0.9856   | 0.058724 | 0.20525  |
| 0.55414  | 0.13944  | 0.00253  | 0.020662 | 0.65606  | -0.0024726 | 0.9575   | 0.034824 | 0.4528   |
| 0.13533  | 0.205305 | 7.73E-06 | 0.131275 | 0.00449  | 0.08292222 | 0.07341  | 0.110558 | 0.01684  |
| 0.28442  | 0.085949 | 0.06348  | -0.01886 | 0.68432  | 0.07085773 | 0.12625  | 0.149129 | 0.00123  |
| 0.38598  | 0.15223  | 0.00097  | -0.03124 | 0.50059  | 0.03098907 | 0.5041   | 0.059307 | 0.20078  |
| 0.53466  | 0.111759 | 0.01568  | 0.063256 | 0.17235  | 0.03229519 | 0.48629  | 0.031966 | 0.49075  |
| 1.59E-08 | -0.09446 | 0.04131  | 0.067771 | 0.14366  | 0.1768518  | 0.00012  | 0.192731 | 2.75E-05 |
| 0.36799  | 0.054676 | 0.23829  | -0.0704  | 0.1287   | -0.0367345 | 0.42837  | 0.00198  | 0.96596  |
| 0.84658  | 0.137754 | 0.00285  | 0.048611 | 0.29451  | 0.05244507 | 0.25802  | 0.117545 | 0.01102  |
| 0.38957  | 0.122124 | 0.00824  | 0.103463 | 0.02536  | 0.07342036 | 0.11308  | 0.064075 | 0.16685  |
| 0.2984   | 0.095322 | 0.03948  | 0.101505 | 0.02828  | 0.03873795 | 0.4036   | 0.021076 | 0.64963  |
| 0.2253   | 0.242097 | 1.18E-07 | 0.177978 | 0.00011  | 0.05138415 | 0.26779  | 0.06706  | 0.14792  |
| 0.65318  | 0.026707 | 0.56481  | 0.128013 | 0.0056   | 0.31646015 | 2.54E-12 | 0.080425 | 0.08254  |
| 0.34375  | 0.29902  | 4.22E-11 | 0.17637  | 0.00013  | -0.1399519 | 0.00244  | -0.16368 | 0.00038  |
| 0.12113  | -0.03883 | 0.40255  | -0.1325  | 0.00413  | -0.005989  | 0.8973   | -0.13391 | 0.00374  |
| 0.0259   | 0.018052 | 0.6972   | 0.085763 | 0.06405  | 0.29314512 | 1.04E-10 | 0.185531 | 5.49E-05 |
| 0.01074  | 0.070035 | 0.13072  | 0.054728 | 0.23784  | 0.06753565 | 0.14506  | 0.073986 | 0.11032  |
| 0.05412  | -0.03319 | 0.47425  | -0.04882 | 0.29244  | 0.02249487 | 0.62776  | 0.117461 | 0.01107  |
| 0.00346  | 0.210006 | 4.71E-06 | 0.152242 | 0.00097  | -0.011203  | 0.8092   | -0.04674 | 0.31354  |
| 2.38E-16 | -0.16197 | 0.00044  | -0.05796 | 0.21122  | 0.0880306  | 0.05731  | 0.083522 | 0.07135  |
| 0.02357  | -0.09453 | 0.04116  | -0.04339 | 0.34945  | 0.09343386 | 0.04358  | 0.173933 | 0.00016  |
| 4.85E-07 | 0.087112 | 0.05997  | 0.01554  | 0.73768  | 0.00160939 | 0.97233  | 0.031599 | 0.49575  |
| 0.61854  | -0.10047 | 0.02993  | -0.03874 | 0.40352  | 0.04002189 | 0.38819  | -0.02753 | 0.55286  |
| 0.87469  | 0.151799 | 0.001    | 0.033172 | 0.47453  | -0.0623969 | 0.17827  | -0.04526 | 0.3291   |
| 0.83813  | -0.00748 | 0.872    | -0.00756 | 0.87055  | 0.05912278 | 0.20219  | 0.078783 | 0.08902  |
| 0.38875  | 0.078076 | 0.09193  | -0.00888 | 0.84824  | 0.06153443 | 0.18435  | -0.08838 | 0.05632  |
| 0.02139  | 0.060603 | 0.1911   | 0.131324 | 0.00447  | -0.067419  | 0.14576  | -0.25569 | 2.09E-08 |
| 0.09952  | -0.15706 | 0.00066  | -0.10873 | 0.01876  | -0.165965  | 0.00032  | -0.28231 | 5.26E-10 |
| 4.31E-05 | 0.081404 | 0.07886  | -0.01729 | 0.70943  | -0.0304907 | 0.51099  | 0.003697 | 0.93649  |
| 0.94229  | 0.327744 | 3.72E-13 | 0.254758 | 2.36E-08 | 0.18202494 | 7.62E-05 | 0.12634  | 0.00626  |
| 1.21E-05 | -0.09507 | 0.04001  | -0.02022 | 0.6629   | 0.08182953 | 0.0773   | 0.18838  | 4.19E-05 |
| 0.01089  | 0.060311 | 0.19325  | 0.17405  | 0.00016  | 0.16589273 | 0.00032  | -0.04964 | 0.28435  |
| 0.27246  | -0.06106 | 0.18777  | -0.10999 | 0.01742  | -0.1890807 | 3.92E-05 | -0.20804 | 5.81E-06 |
| 0.00678  | -0.18048 | 8.78E-05 | -0.09817 | 0.03394  | 0.14635322 | 0.00152  | 0.128049 | 0.00559  |
| 0.86873  | -0.03521 | 0.44774  | -0.09086 | 0.04973  | -0.0318589 | 0.4922   | -0.03722 | 0.42224  |
| 0.80577  | -0.26148 | 9.72E-09 | -0.07993 | 0.08444  | -0.0645274 | 0.16387  | -0.12339 | 0.0076   |
| 0.05892  | -0.12287 | 0.00786  | -0.04763 | 0.30441  | 0.16613967 | 0.00031  | 0.242415 | 1.13E-07 |
| 0.02202  | -0.15418 | 0.00083  | -0.16634 | 0.00031  | -0.2273404 | 6.88E-07 | -0.27516 | 1.47E-09 |
| 0.01579  | -0.21516 | 2.70E-06 | -0.1525  | 0.00095  | -0.0916951 | 0.04766  | -0.10144 | 0.02839  |
| 3.17E-10 | -0.01773 | 0.70239  | -0.0445  | 0.33729  | 0.09029947 | 0.05116  | 0.159322 | 0.00055  |
| 0.18817  | 0.266338 | 5.03E-09 | 0.1705   | 0.00021  | 0.09295944 | 0.04466  | 0.045336 | 0.32827  |
| 0.99064  | 0.070717 | 0.12701  | 0.035419 | 0.4451   | -0.0434099 | 0.34926  | -0.01135 | 0.80669  |
| 0.09568  | 0.161922 | 0.00044  | 0.043746 | 0.34554  | -0.0406281 | 0.38104  | -0.04893 | 0.29135  |
| 0.24329  | 0.059469 | 0.19955  | 0.077462 | 0.09453  | 0.0819453  | 0.07688  | 0.068768 | 0.13785  |
| 0.01288  | 0.010695 | 0.8177   | -0.21335 | 3.29E-06 | -0.1510882 | 0.00106  | -0.14736 | 0.00141  |



|          |          |          |          |          |            |          |          |          |
|----------|----------|----------|----------|----------|------------|----------|----------|----------|
| 0.0015   | -0.14156 | 0.00217  | -0.11251 | 0.01499  | 0.08823652 | 0.05673  | 0.204865 | 8.09E-06 |
| 6.69E-05 | 0.086534 | 0.06169  | 0.02522  | 0.5867   | 0.03092571 | 0.50498  | 0.10576  | 0.02227  |
| 2.25E-08 | 0.16243  | 0.00042  | 0.032561 | 0.48271  | 0.04199614 | 0.36519  | 0.096502 | 0.0371   |
| 0.48078  | -0.1738  | 0.00016  | -0.24418 | 9.11E-08 | -0.1769557 | 0.00012  | -0.16457 | 0.00036  |
| 0.64148  | -0.04959 | 0.28489  | -0.20409 | 8.77E-06 | -0.1457792 | 0.00158  | -0.13813 | 0.00278  |
| 0.24433  | 0.011088 | 0.81113  | 0.018059 | 0.69709  | 0.08112782 | 0.07988  | 0.134347 | 0.00363  |
| 0.89935  | 0.200557 | 1.26E-05 | 0.007794 | 0.86659  | 0.07117749 | 0.12454  | 0.105618 | 0.02245  |
| 0.00641  | 0.111062 | 0.01635  | 0.101453 | 0.02837  | -0.0782298 | 0.09129  | -0.09221 | 0.04642  |
| 0.47664  | -0.14131 | 0.00221  | -0.17063 | 0.00021  | -0.1483706 | 0.0013   | -0.21366 | 3.18E-06 |
| 0.64399  | 0.01778  | 0.70154  | -0.03072 | 0.50783  | 0.01937049 | 0.6763   | -0.06055 | 0.19148  |
| 0.93983  | -0.03698 | 0.42529  | -0.18691 | 4.82E-05 | 0.01195937 | 0.79659  | -0.0817  | 0.07776  |
| 0.48878  | 0.020781 | 0.6542   | 0.017538 | 0.70542  | -0.0373612 | 0.42053  | -0.05038 | 0.27726  |
| 3.99E-05 | 0.054936 | 0.23606  | -0.05409 | 0.24335  | 0.01423527 | 0.75898  | 0.046211 | 0.31901  |
| 0.67335  | -0.10514 | 0.02306  | -0.01495 | 0.74728  | 0.03872548 | 0.40375  | 0.028215 | 0.54305  |
| 2.25E-13 | 0.047045 | 0.31035  | -0.0155  | 0.73838  | -0.0395073 | 0.39432  | -0.09747 | 0.03522  |
| 0.32422  | 0.04011  | 0.38714  | 0.025424 | 0.58366  | -0.0012518 | 0.97848  | -0.0091  | 0.84445  |
| 0.73726  | 0.223873 | 1.02E-06 | 0.177917 | 0.00011  | 0.01693742 | 0.71506  | -0.02955 | 0.52406  |
| 0.02402  | 0.225999 | 8.02E-07 | 0.201991 | 1.09E-05 | 0.35869928 | 1.26E-15 | 0.304576 | 1.76E-11 |
| 0.0739   | 0.243597 | 9.79E-08 | 0.204861 | 8.10E-06 | 0.46711642 | 1.10E-26 | 0.337159 | 7.05E-14 |
| 0.11672  | 0.221262 | 1.37E-06 | 0.364315 | 4.19E-16 | 0.18094316 | 8.42E-05 | 0.166283 | 0.00031  |
| 0.31877  | 0.040284 | 0.38508  | -0.08783 | 0.05788  | 0.02523403 | 0.58648  | -0.02672 | 0.56466  |
| 0.96568  | -0.11536 | 0.01261  | -0.10613 | 0.0218   | -0.1093371 | 0.0181   | -0.17975 | 9.39E-05 |
| 0.20816  | -0.05641 | 0.2237   | -0.13394 | 0.00373  | -0.1293544 | 0.00512  | -0.13711 | 0.00299  |
| 0.03499  | 0.157397 | 0.00064  | 0.282243 | 5.31E-10 | 0.26118898 | 1.01E-08 | 0.192513 | 2.81E-05 |
| 0.46058  | -0.07952 | 0.08604  | -0.11522 | 0.01272  | -0.1596897 | 0.00053  | -0.15609 | 0.00071  |
| 0.51029  | -0.09804 | 0.03418  | -0.11917 | 0.00995  | -0.116932  | 0.01144  | -0.1072  | 0.0205   |
| 0.33164  | 0.014074 | 0.76163  | -0.04987 | 0.28213  | -0.0997073 | 0.03122  | -0.08608 | 0.06307  |
| 0.30797  | 0.15213  | 0.00097  | 0.055229 | 0.23357  | 0.03422791 | 0.46057  | -0.00282 | 0.95156  |
| 0.54145  | -0.02179 | 0.63865  | -0.03025 | 0.51428  | 0.00485506 | 0.91666  | 0.052022 | 0.26189  |
| 0.87893  | -0.14547 | 0.00162  | -0.27706 | 1.12E-09 | -0.041034  | 0.37629  | -0.11792 | 0.01076  |
| 0.86016  | -0.05143 | 0.26733  | 0.03568  | 0.44176  | 0.0238142  | 0.60773  | 0.017395 | 0.70771  |
| 0.0521   | -0.17213 | 0.00019  | -0.15479 | 0.00079  | 0.01088768 | 0.81447  | 0.144842 | 0.0017   |
| 0.10579  | 0.230748 | 4.62E-07 | 0.254929 | 2.31E-08 | 0.21244293 | 3.63E-06 | -0.01502 | 0.74608  |
| 0.00108  | 0.008022 | 0.86273  | 0.014961 | 0.7471   | 0.04708007 | 0.30999  | 0.045995 | 0.32128  |
| 0.00907  | -0.16743 | 0.00028  | -0.05467 | 0.23836  | 0.01835366 | 0.6924   | -0.07375 | 0.11148  |
| 0.02601  | 0.122541 | 0.00802  | 0.08652  | 0.06173  | 0.01930186 | 0.67738  | -0.05611 | 0.22614  |
| 0.40734  | -0.0225  | 0.62773  | 0.028167 | 0.54372  | 0.07164282 | 0.12209  | -0.00394 | 0.93228  |
| 0.28453  | -0.00536 | 0.90795  | 0.071328 | 0.12375  | 0.04865363 | 0.29408  | -0.00501 | 0.91405  |
| 2.43E-17 | -0.06198 | 0.18118  | -0.07525 | 0.10437  | 0.03281928 | 0.47924  | 0.041972 | 0.36547  |
| 0.06219  | 0.282834 | 4.87E-10 | 0.44244  | 8.34E-24 | 0.41267327 | 1.25E-20 | 0.371833 | 9.27E-17 |
| 0.0779   | 0.190858 | 3.30E-05 | 0.062084 | 0.18046  | 0.03484985 | 0.45246  | 0.1013   | 0.02861  |
| 0.00071  | 0.055158 | 0.23417  | -0.01346 | 0.77169  | -0.2163439 | 2.37E-06 | -0.20329 | 9.52E-06 |
| 0.52765  | 0.177706 | 0.00011  | 0.107386 | 0.02028  | 0.06046062 | 0.19215  | 0.076804 | 0.09737  |
| 0.29101  | 0.057978 | 0.21108  | -0.07601 | 0.10089  | -0.1408735 | 0.00228  | -0.09008 | 0.05172  |
| 0.16545  | 0.183504 | 6.64E-05 | 0.207178 | 6.36E-06 | 0.37728499 | 3.03E-17 | 0.356198 | 2.04E-15 |

|          |          |          |          |          |            |          |          |          |
|----------|----------|----------|----------|----------|------------|----------|----------|----------|
| 0.68281  | 0.096661 | 0.03678  | 0.073065 | 0.11484  | -0.0228015 | 0.62308  | 0.002812 | 0.95167  |
| 0.00674  | -0.0611  | 0.18749  | 0.15313  | 0.0009   | 0.20531927 | 7.72E-06 | 0.083018 | 0.07308  |
| 0.39874  | 0.039779 | 0.39107  | 0.070519 | 0.12807  | 0.12831418 | 0.00549  | 0.09673  | 0.03665  |
| 0.83477  | -0.00814 | 0.86067  | -0.06682 | 0.14936  | 0.00700504 | 0.87999  | 0.034901 | 0.45179  |
| 0.00015  | 0.08243  | 0.07514  | -0.14825 | 0.00131  | 0.01218315 | 0.79287  | -0.08071 | 0.08144  |
| 0.16456  | 0.032082 | 0.48918  | 0.055837 | 0.22845  | -0.0072338 | 0.87611  | -0.01791 | 0.6995   |
| 0.03664  | 0.047018 | 0.31063  | -0.04754 | 0.30523  | 0.0810541  | 0.08016  | 0.041734 | 0.36819  |
| 0.60435  | 0.314559 | 3.48E-12 | 0.115124 | 0.01279  | 0.05449206 | 0.23987  | 0.074972 | 0.10564  |
| 7.69E-14 | -0.01045 | 0.82186  | 0.078508 | 0.09014  | 0.1656777  | 0.00032  | 0.167749 | 0.00027  |
| 0.28095  | -0.16343 | 0.00039  | -0.23009 | 4.99E-07 | -0.3187831 | 1.72E-12 | -0.36943 | 1.51E-16 |
| 0.75137  | 0.296812 | 5.95E-11 | 0.092616 | 0.04546  | 0.05444912 | 0.24025  | 0.123247 | 0.00767  |
| 5.52E-05 | 0.068727 | 0.13808  | -0.13987 | 0.00245  | -0.056265  | 0.2249   | -0.09313 | 0.04427  |
| 0.61588  | 0.01124  | 0.80858  | -0.13286 | 0.00403  | -0.0336464 | 0.46823  | -0.0527  | 0.25568  |
| 0.58424  | 0.032316 | 0.48601  | -0.00956 | 0.83682  | -0.0303194 | 0.51337  | -0.05194 | 0.26263  |
| 0.02358  | -0.04875 | 0.29309  | -0.20125 | 1.17E-05 | 0.12871636 | 0.00534  | 0.152719 | 0.00093  |
| 0.33908  | 0.045014 | 0.33172  | -0.01863 | 0.68795  | -0.0997079 | 0.03122  | -0.07111 | 0.12492  |
| 0.37664  | -0.17717 | 0.00012  | -0.16375 | 0.00038  | 0.03755337 | 0.41814  | -0.00884 | 0.84892  |
| 0.14795  | -0.12032 | 0.00925  | -0.06672 | 0.15001  | 0.07206636 | 0.11989  | 0.103585 | 0.02519  |
| 0.00028  | -0.00335 | 0.94245  | -0.05781 | 0.21237  | 0.02874799 | 0.53545  | 0.098525 | 0.03329  |
| 0.81908  | 0.144701 | 0.00172  | 0.301493 | 2.87E-11 | 0.20254934 | 1.03E-05 | 0.103194 | 0.02575  |
| 0.00094  | -0.17056 | 0.00021  | -0.05121 | 0.26943  | 0.15724014 | 0.00065  | 0.180469 | 8.79E-05 |
| 0.53053  | -0.11491 | 0.01296  | -0.16114 | 0.00047  | -0.1591316 | 0.00056  | -0.17771 | 0.00011  |
| 0.72558  | -0.00257 | 0.9559   | -0.00404 | 0.93055  | 0.0817687  | 0.07752  | 0.023443 | 0.61333  |
| 0.1296   | 0.011212 | 0.80905  | 0.012749 | 0.78348  | -0.0012837 | 0.97793  | -0.02108 | 0.64961  |
| 0.0144   | -0.0359  | 0.43899  | -0.11333 | 0.01427  | -0.181907  | 7.70E-05 | -0.24923 | 4.82E-08 |
| 0.0718   | 0.03079  | 0.50684  | 0.106404 | 0.02146  | 0.07049515 | 0.1282   | 0.08988  | 0.05225  |
| 0.01515  | 0.008997 | 0.84624  | 0.083374 | 0.07186  | 0.14193495 | 0.00211  | 0.16727  | 0.00028  |
| 0.15776  | 0.008613 | 0.85273  | -0.08572 | 0.06418  | -0.0581124 | 0.21002  | -0.07502 | 0.10542  |
| 0.00516  | 0.098742 | 0.0329   | 0.033787 | 0.46637  | -0.0572356 | 0.21699  | -0.12311 | 0.00773  |
| 1.86E-07 | -0.05981 | 0.19699  | -0.09077 | 0.04996  | -0.0075545 | 0.87066  | -0.02097 | 0.65122  |
| 0.27641  | 0.148772 | 0.00126  | 0.325074 | 5.91E-13 | 0.30893648 | 8.73E-12 | 0.093186 | 0.04414  |
| 3.44E-05 | 0.021088 | 0.64944  | -0.03042 | 0.51191  | 0.04676039 | 0.31329  | 0.117352 | 0.01115  |
| 0.00022  | 0.090383 | 0.05094  | -0.02614 | 0.57308  | 0.0238276  | 0.60752  | 0.052335 | 0.25902  |
| 0.00043  | 0.066007 | 0.1544   | -0.01423 | 0.75904  | 0.01477117 | 0.7502   | 0.03352  | 0.46991  |
| 0.90457  | -0.13221 | 0.00421  | -0.21229 | 3.69E-06 | 0.02939241 | 0.52634  | -0.02677 | 0.56387  |
| 0.96466  | -0.13813 | 0.00278  | -0.13992 | 0.00244  | -0.0131137 | 0.77745  | 0.050634 | 0.27485  |
| 0.34952  | 0.069694 | 0.13261  | -0.01008 | 0.82801  | 0.00669895 | 0.8852   | 0.01151  | 0.80408  |
| 0.00156  | 0.069604 | 0.13311  | 0.037471 | 0.41917  | -0.0034698 | 0.94039  | -0.02828 | 0.5421   |
| 1.70E-06 | -0.03571 | 0.44142  | -0.12672 | 0.0061   | 0.10782225 | 0.01977  | 0.166446 | 0.0003   |
| 0.87237  | -0.05349 | 0.24861  | -0.10172 | 0.02795  | 0.02313952 | 0.61794  | 0.038494 | 0.40657  |
| 0.00055  | 0.228514 | 6.00E-07 | 0.12357  | 0.00751  | 0.1342024  | 0.00367  | 0.181698 | 7.85E-05 |
| 0.28286  | 0.195504 | 2.09E-05 | 0.181416 | 8.06E-05 | 0.183107   | 6.89E-05 | 0.216601 | 2.31E-06 |
| 0.00863  | 0.296631 | 6.12E-11 | 0.082179 | 0.07604  | 0.02072119 | 0.65514  | 0.109476 | 0.01795  |
| 7.94E-05 | 0.26945  | 3.28E-09 | -0.02351 | 0.61237  | -0.0424898 | 0.35958  | 0.106146 | 0.02178  |
| 0.00592  | 0.162118 | 0.00044  | 0.218329 | 1.91E-06 | 0.23113254 | 4.42E-07 | 0.273554 | 1.85E-09 |

|          |          |          |          |          |            |          |          |          |
|----------|----------|----------|----------|----------|------------|----------|----------|----------|
| 0.03939  | -0.00945 | 0.83869  | 0.068012 | 0.14224  | 0.12170091 | 0.00847  | 0.106469 | 0.02138  |
| 0.01592  | -0.08707 | 0.0601   | -0.16101 | 0.00048  | -0.1163537 | 0.01186  | -0.21343 | 3.26E-06 |
| 0.00015  | 0.066991 | 0.14834  | 0.158891 | 0.00057  | 0.29535559 | 7.45E-11 | 0.306335 | 1.33E-11 |
| 0.00978  | 0.054822 | 0.23703  | -0.03009 | 0.51655  | -0.0585801 | 0.20637  | -0.07128 | 0.12402  |
| 0.92158  | 0.113937 | 0.01375  | 0.027763 | 0.54953  | 0.12598434 | 0.00641  | 0.130157 | 0.00484  |
| 2.33E-09 | 0.06383  | 0.16849  | 0.064061 | 0.16694  | 0.09893286 | 0.03256  | 0.064467 | 0.16427  |
| 0.94391  | -0.08823 | 0.05675  | -0.00603 | 0.89655  | 0.05506718 | 0.23494  | 0.018669 | 0.6874   |
| 0.13795  | 0.115952 | 0.01216  | 0.086613 | 0.06145  | 0.01664088 | 0.71984  | -0.01886 | 0.68438  |
| 0.06386  | 0.062215 | 0.17954  | 0.124211 | 0.0072   | 0.07616776 | 0.10018  | 0.011985 | 0.79617  |
| 0.1788   | 0.219203 | 1.73E-06 | 0.078945 | 0.08836  | 0.06449534 | 0.16408  | 0.133515 | 0.00385  |
| 2.63E-25 | 0.015848 | 0.73267  | 0.002142 | 0.96318  | 0.15568769 | 0.00074  | 0.217014 | 2.20E-06 |
| 0.29687  | 0.207998 | 5.83E-06 | -0.17071 | 0.00021  | -0.3760432 | 3.91E-17 | -0.25442 | 2.47E-08 |
| 0.59289  | 0.124117 | 0.00724  | -0.29983 | 3.72E-11 | -0.3575223 | 1.58E-15 | -0.19984 | 1.36E-05 |
| 0.05174  | 0.164228 | 0.00037  | 0.028232 | 0.5428   | 0.09925761 | 0.03199  | 0.182883 | 7.03E-05 |
| 0.54937  | 0.035575 | 0.44311  | -0.01634 | 0.72473  | 0.10679399 | 0.02098  | 0.150909 | 0.00107  |
| 0.00029  | 0.122225 | 0.00819  | 0.264053 | 6.87E-09 | 0.19815503 | 1.61E-05 | 0.181614 | 7.91E-05 |
| 6.07E-07 | 0.001553 | 0.97329  | 0.045852 | 0.3228   | 0.02412534 | 0.60304  | -0.07442 | 0.10823  |
| 0.00211  | 0.302048 | 2.63E-11 | 0.185376 | 5.57E-05 | 0.02469148 | 0.59456  | -0.02705 | 0.55977  |
| 0.08094  | -0.00775 | 0.86729  | -0.27541 | 1.42E-09 | -0.0961063 | 0.03788  | -0.20431 | 8.57E-06 |
| 0.20287  | -0.02731 | 0.55605  | 0.025233 | 0.58651  | 0.11352904 | 0.0141   | 0.023085 | 0.61876  |
| 0.0003   | -0.17866 | 0.0001   | -0.15791 | 0.00062  | -0.0979657 | 0.0343   | -0.13122 | 0.00451  |
| 0.00014  | 0.301003 | 3.10E-11 | 0.194621 | 2.28E-05 | 0.14139353 | 0.00219  | 0.117693 | 0.01091  |
| 0.37264  | 0.083688 | 0.07079  | -0.00349 | 0.94008  | 0.20392793 | 8.92E-06 | 0.057217 | 0.21714  |
| 0.02045  | 0.025302 | 0.58547  | 0.009622 | 0.83571  | 0.1229608  | 0.00781  | 0.124225 | 0.00719  |
| 0.24131  | 0.078171 | 0.09154  | 0.159543 | 0.00054  | 0.31511487 | 3.17E-12 | 0.262829 | 8.11E-09 |
| 0.00026  | -0.21115 | 4.17E-06 | -0.02178 | 0.63881  | -0.0037495 | 0.93559  | 0.044852 | 0.33347  |
| 0.61707  | 0.16298  | 0.00041  | -0.10367 | 0.02507  | -0.1524382 | 0.00095  | -0.1049  | 0.02338  |
| 0.02075  | 0.303615 | 2.05E-11 | 0.266543 | 4.89E-09 | 0.12651817 | 0.00619  | 0.054657 | 0.23845  |
| 0.80229  | 0.265909 | 5.34E-09 | 0.087081 | 0.06006  | 0.20570866 | 7.41E-06 | 0.313283 | 4.30E-12 |
| 0.00064  | -0.14208 | 0.00209  | -0.10674 | 0.02105  | 0.0098962  | 0.8311   | 0.037599 | 0.41758  |
| 0.10136  | 0.139527 | 0.00251  | 0.027052 | 0.5598   | 0.00644879 | 0.88946  | 0.114038 | 0.01367  |
| 0.22903  | 0.235371 | 2.67E-07 | 0.131503 | 0.00442  | 0.14244903 | 0.00203  | 0.099672 | 0.03128  |
| 0.56365  | 0.109622 | 0.0178   | -0.03942 | 0.39534  | -0.0645964 | 0.16342  | -0.00897 | 0.84664  |
| 8.59E-07 | -0.01948 | 0.67452  | -0.00915 | 0.84374  | 0.15562327 | 0.00074  | 0.091555 | 0.048    |
| 0.00218  | 0.071483 | 0.12293  | 0.076212 | 0.09998  | 0.07636458 | 0.0993   | 0.086542 | 0.06167  |
| 0.71875  | -0.19697 | 1.81E-05 | -0.07641 | 0.09909  | 0.08967677 | 0.05279  | 0.133542 | 0.00384  |
| 0.81152  | 0.164578 | 0.00036  | 0.096519 | 0.03706  | 0.09524953 | 0.03964  | 0.034215 | 0.46074  |
| 0.95116  | 0.086015 | 0.06328  | -0.08136 | 0.07901  | -0.1370244 | 0.00301  | -0.21435 | 2.95E-06 |
| 0.36683  | 0.073147 | 0.11443  | 0.069335 | 0.13462  | 0.09296417 | 0.04465  | 0.156149 | 0.00071  |
| 0.40444  | 0.334127 | 1.21E-13 | 0.350133 | 6.48E-15 | 0.30524599 | 1.58E-11 | 0.256917 | 1.78E-08 |
| 0.41538  | 0.124054 | 0.00727  | 0.025994 | 0.57526  | 0.07557    | 0.10288  | 0.067335 | 0.14626  |
| 0.00305  | 0.041176 | 0.37464  | -0.06119 | 0.18683  | -0.0224914 | 0.62782  | 0.049865 | 0.28221  |
| 0.09058  | 0.079901 | 0.08456  | 0.022109 | 0.63368  | 0.1091844  | 0.01826  | 0.164545 | 0.00036  |
| 0.00162  | -0.01294 | 0.78028  | -0.15182 | 0.001    | 0.01041639 | 0.82237  | -0.03891 | 0.40153  |
| 0.07671  | 0.181916 | 7.69E-05 | 0.10462  | 0.02376  | 0.13788564 | 0.00283  | 0.100502 | 0.02989  |

|          |          |          |          |          |            |          |          |          |
|----------|----------|----------|----------|----------|------------|----------|----------|----------|
| 0.25303  | -0.05008 | 0.28012  | -0.25857 | 1.43E-08 | -0.1396576 | 0.00249  | -0.1054  | 0.02272  |
| 0.01619  | 0.127953 | 0.00562  | -0.01038 | 0.82296  | -0.0914992 | 0.04814  | -0.06994 | 0.13123  |
| 0.67957  | 0.17559  | 0.00014  | 0.17753  | 0.00011  | 0.34216125 | 2.85E-14 | 0.386718 | 4.16E-18 |
| 7.33E-11 | 0.307182 | 1.16E-11 | 0.17573  | 0.00014  | 0.08935941 | 0.05364  | 0.091937 | 0.04707  |
| 8.21E-07 | 0.02662  | 0.56609  | -0.07192 | 0.12063  | -0.1414874 | 0.00218  | -0.21435 | 2.95E-06 |
| 0.27701  | 0.059267 | 0.20108  | -0.21198 | 3.81E-06 | -0.2375566 | 2.05E-07 | -0.2084  | 5.59E-06 |
| 0.02166  | 0.102504 | 0.02676  | 0.005651 | 0.90306  | 0.05236336 | 0.25876  | 0.090004 | 0.05193  |
| 0.84279  | 0.058515 | 0.20687  | 0.051078 | 0.27065  | 0.00057134 | 0.99018  | -0.02565 | 0.58032  |
| 0.01769  | 0.149034 | 0.00124  | 0.205468 | 7.60E-06 | 0.21567335 | 2.55E-06 | 0.213984 | 3.07E-06 |
| 0.00943  | -0.01127 | 0.80813  | 0.097664 | 0.03486  | 0.03214387 | 0.48834  | 0.05145  | 0.26717  |
| 0.47427  | -0.13841 | 0.00272  | -0.05283 | 0.25453  | -0.0445547 | 0.33669  | -0.04599 | 0.32133  |
| 0.00386  | -0.03161 | 0.49562  | 0.041506 | 0.37082  | -0.080007  | 0.08415  | -0.12163 | 0.00851  |
| 1.37E-05 | -0.01097 | 0.81303  | -0.03616 | 0.43561  | -0.099949  | 0.03081  | -0.17174 | 0.00019  |
| 0.47722  | 0.055477 | 0.23147  | -0.03532 | 0.4464   | -0.0697429 | 0.13234  | -0.05081 | 0.27314  |
| 0.17915  | 0.152749 | 0.00093  | 0.163256 | 0.0004   | 0.05144923 | 0.26718  | -0.03644 | 0.43205  |
| 1.47E-13 | 0.057109 | 0.21801  | 0.031891 | 0.49177  | 0.03496077 | 0.45102  | 0.0352   | 0.44793  |
| 0.64419  | 0.079867 | 0.08469  | 0.04293  | 0.35462  | 0.02126363 | 0.64671  | -0.02322 | 0.61677  |
| 0.23115  | -0.07577 | 0.10196  | -0.15894 | 0.00057  | -0.153109  | 0.0009   | -0.04313 | 0.35242  |
| 0.02178  | 0.216933 | 2.22E-06 | 0.148811 | 0.00126  | 0.06069588 | 0.19042  | 0.124187 | 0.00721  |
| 0.0645   | 0.148485 | 0.00129  | 0.036216 | 0.43493  | -0.0545106 | 0.23971  | -0.03563 | 0.44238  |
| 0.00059  | 0.121616 | 0.00852  | -0.09317 | 0.04418  | -0.2322641 | 3.87E-07 | -0.21716 | 2.17E-06 |
| 0.21064  | -0.17031 | 0.00022  | -0.13281 | 0.00404  | 0.12711882 | 0.00594  | 0.059991 | 0.19562  |
| 0.405    | 0.046358 | 0.31747  | -0.03643 | 0.43226  | -0.0602071 | 0.19402  | -0.05331 | 0.25024  |
| 0.54421  | 0.101816 | 0.0278   | -0.00526 | 0.90967  | -0.0627527 | 0.1758   | -0.06592 | 0.15494  |
| 0.06524  | 0.089895 | 0.05221  | -0.01206 | 0.79494  | -0.0578687 | 0.21194  | -0.10184 | 0.02776  |
| 0.07818  | 0.242813 | 1.08E-07 | 0.326826 | 4.37E-13 | 0.43628704 | 4.02E-23 | 0.236033 | 2.47E-07 |
| 0.0093   | 0.05503  | 0.23526  | -0.05541 | 0.23206  | -0.2703237 | 2.90E-09 | -0.27731 | 1.08E-09 |
| 0.22303  | 0.17929  | 9.79E-05 | 0.268624 | 3.67E-09 | 0.06238213 | 0.17837  | -0.12882 | 0.0053   |
| 0.89872  | 0.098766 | 0.03285  | 0.153702 | 0.00086  | 0.17061644 | 0.00021  | 0.150085 | 0.00114  |
| 0.01441  | -0.09669 | 0.03672  | -0.21138 | 4.07E-06 | -0.0480501 | 0.30012  | 0.057903 | 0.21167  |
| 0.26054  | 0.159202 | 0.00055  | 0.235575 | 2.61E-07 | 0.15829172 | 0.0006   | 0.173742 | 0.00016  |
| 0.59455  | -0.0063  | 0.89195  | -0.12222 | 0.00819  | -0.0827745 | 0.07393  | -0.08353 | 0.07131  |
| 0.10806  | -0.04304 | 0.35333  | -0.01943 | 0.67532  | 0.00571488 | 0.90197  | -0.04981 | 0.28278  |
| 0.43201  | 0.009674 | 0.83484  | 0.068789 | 0.13773  | -0.0525259 | 0.25728  | -0.07769 | 0.09356  |
| 0.01088  | -0.21259 | 3.57E-06 | -0.17516 | 0.00014  | -0.3038275 | 1.98E-11 | -0.37154 | 9.84E-17 |
| 9.65E-07 | 0.123043 | 0.00777  | 0.156068 | 0.00071  | 0.08088043 | 0.08081  | 0.051409 | 0.26755  |
| 0.76251  | 0.181522 | 7.98E-05 | 0.019081 | 0.68088  | -0.0857961 | 0.06395  | -0.042   | 0.36512  |
| 0.04106  | 0.048778 | 0.29284  | 0.086998 | 0.0603   | -0.0178178 | 0.70094  | -0.00793 | 0.86422  |
| 0.41817  | 0.188408 | 4.18E-05 | 0.012583 | 0.78623  | -0.0939354 | 0.04246  | -0.10561 | 0.02246  |
| 0.91474  | 0.036812 | 0.4274   | 0.002887 | 0.95038  | 0.2086013  | 5.47E-06 | 0.184451 | 6.08E-05 |
| 0.67635  | 0.099319 | 0.03188  | 0.44759  | 2.18E-24 | 0.22052266 | 1.49E-06 | 0.154073 | 0.00084  |
| 0.5233   | 0.075734 | 0.10214  | -0.04857 | 0.29495  | -0.0541571 | 0.24278  | 0.005432 | 0.9068   |
| 0.36514  | 0.072711 | 0.11661  | 0.015764 | 0.73403  | 0.04379857 | 0.34496  | 0.013967 | 0.76339  |
| 0.00068  | -0.05936 | 0.20037  | -0.05104 | 0.27104  | -0.0840303 | 0.06964  | -0.03146 | 0.4977   |
| 0.95107  | -0.02894 | 0.53276  | -0.03798 | 0.41291  | 0.01457449 | 0.75342  | -0.01767 | 0.70324  |

|          |          |          |          |          |            |          |          |          |
|----------|----------|----------|----------|----------|------------|----------|----------|----------|
| 0.20749  | 0.240049 | 1.52E-07 | 0.189466 | 3.78E-05 | 0.00995414 | 0.83013  | -0.06907 | 0.13613  |
| 0.7956   | 0.069667 | 0.13276  | 0.095172 | 0.0398   | 0.13853321 | 0.0027   | 0.133832 | 0.00376  |
| 0.02211  | 0.227862 | 6.47E-07 | 0.36665  | 2.63E-16 | 0.17318377 | 0.00017  | 0.005324 | 0.90864  |
| 1.33E-26 | -0.03749 | 0.41889  | -0.05354 | 0.24818  | 0.1170328  | 0.01137  | 0.21644  | 2.35E-06 |
| 2.91E-09 | 0.168021 | 0.00027  | 0.172046 | 0.00019  | 0.21476722 | 2.82E-06 | 0.211238 | 4.13E-06 |
| 0.00082  | 0.083836 | 0.07029  | 0.003881 | 0.93333  | 0.05991987 | 0.19616  | 0.048325 | 0.29735  |
| 0.03463  | -0.25647 | 1.89E-08 | -0.35066 | 5.87E-15 | -0.0699184 | 0.13136  | -0.09306 | 0.04444  |
| 0.52359  | -0.32845 | 3.29E-13 | -0.28801 | 2.26E-10 | -0.2757776 | 1.35E-09 | -0.29935 | 4.01E-11 |
| 0.17402  | -0.24659 | 6.73E-08 | -0.095   | 0.04016  | -0.0259932 | 0.57527  | 0.001384 | 0.97621  |
| 0.75835  | -0.16128 | 0.00047  | -0.0421  | 0.36397  | 0.00081415 | 0.986    | -0.0151  | 0.7448   |
| 0.33845  | 0.014202 | 0.75953  | -0.0796  | 0.08576  | -0.0653889 | 0.15831  | -0.07085 | 0.1263   |
| 0.44818  | -0.0261  | 0.57368  | -0.00387 | 0.93344  | -0.1311496 | 0.00453  | -0.12791 | 0.00564  |
| 0.26279  | 0.296841 | 5.92E-11 | 0.220098 | 1.57E-06 | -0.0857047 | 0.06424  | -0.18145 | 8.03E-05 |
| 0.81131  | 0.019651 | 0.67189  | -0.03624 | 0.43463  | 0.00508313 | 0.91276  | -0.00056 | 0.99037  |
| 0.1658   | 0.068396 | 0.13999  | 0.0685   | 0.13939  | 0.17261169 | 0.00018  | 0.189071 | 3.92E-05 |
| 0.00101  | -0.01563 | 0.73619  | 0.009895 | 0.83112  | 0.10298987 | 0.02604  | 0.106464 | 0.02139  |
| 0.13572  | -0.05551 | 0.23118  | -0.03299 | 0.47691  | 0.14246912 | 0.00203  | 0.163168 | 0.0004   |
| 0.02319  | -0.0201  | 0.66491  | -0.2958  | 6.95E-11 | -0.1637079 | 0.00038  | -0.11227 | 0.01521  |
| 1.98E-13 | -0.1458  | 0.00158  | -0.11925 | 0.0099   | 0.03497584 | 0.45083  | 0.077219 | 0.09557  |
| 3.27E-06 | 0.138385 | 0.00273  | 0.154424 | 0.00081  | 0.15894266 | 0.00057  | 0.027047 | 0.55988  |
| 7.68E-06 | 0.125134 | 0.00678  | -0.14032 | 0.00237  | 0.08759306 | 0.05856  | -0.01677 | 0.7177   |
| 0.46371  | 0.091052 | 0.04925  | -0.01278 | 0.7829   | 0.04574505 | 0.32392  | 0.092352 | 0.04608  |
| 1.92E-07 | 0.008663 | 0.85189  | 0.10514  | 0.02307  | -0.0102094 | 0.82584  | -0.13144 | 0.00444  |
| 0.77101  | 0.249345 | 4.75E-08 | 0.037899 | 0.41387  | 0.25405344 | 2.59E-08 | 0.204951 | 8.02E-06 |
| 0.00041  | 0.076373 | 0.09927  | 0.033351 | 0.47214  | 0.07092668 | 0.12588  | -0.00217 | 0.96275  |
| 1.22E-05 | -0.08169 | 0.07782  | -0.05905 | 0.20278  | 0.05797722 | 0.21108  | 0.130205 | 0.00483  |
| 0.61697  | 0.246746 | 6.60E-08 | 0.472756 | 2.23E-27 | -0.0022112 | 0.96199  | -0.1785  | 0.00011  |
| 0.24738  | 0.059393 | 0.20013  | 0.034322 | 0.45934  | 0.06281611 | 0.17536  | 0.03029  | 0.51378  |
| 0.00012  | 0.163426 | 0.00039  | 0.269119 | 3.43E-09 | 0.19913697 | 1.46E-05 | 0.137924 | 0.00282  |
| 0.01605  | 0.036201 | 0.43511  | 0.310505 | 6.77E-12 | 0.47475073 | 1.26E-27 | 0.369696 | 1.43E-16 |
| 4.18E-06 | 0.08038  | 0.08271  | 0.298906 | 4.30E-11 | 0.12287396 | 0.00785  | 0.099765 | 0.03112  |
| 0.4139   | -0.00023 | 0.99599  | 0.194443 | 2.33E-05 | 0.42165901 | 1.48E-21 | 0.151554 | 0.00102  |
| 0.0033   | -0.01118 | 0.80952  | 0.002163 | 0.96281  | 0.1485887  | 0.00128  | 0.20491  | 8.05E-06 |
| 0.58706  | 0.110689 | 0.01671  | 0.002423 | 0.95835  | -0.0636671 | 0.16958  | -0.05656 | 0.22248  |
| 0.83831  | -0.15663 | 0.00068  | -0.16522 | 0.00034  | -0.1521062 | 0.00098  | -0.19858 | 1.54E-05 |
| 0.8649   | -0.04965 | 0.28433  | -0.09128 | 0.04868  | 0.01828545 | 0.69349  | 0.014676 | 0.75176  |
| 0.12496  | 0.020327 | 0.66128  | 0.050153 | 0.27944  | 0.06256843 | 0.17708  | 0.02466  | 0.59503  |
| 0.36045  | 0.040057 | 0.38777  | -0.00375 | 0.93555  | -0.1297094 | 0.00499  | -0.14306 | 0.00194  |
| 3.34E-05 | -0.18162 | 7.91E-05 | -0.07625 | 0.09982  | -0.2397012 | 1.58E-07 | -0.28575 | 3.17E-10 |
| 0.01065  | 0.212113 | 3.76E-06 | 0.276294 | 1.25E-09 | 0.16192829 | 0.00044  | 0.113241 | 0.01435  |
| 0.78479  | 0.138743 | 0.00266  | 0.274928 | 1.52E-09 | 0.07082966 | 0.1264   | -0.05265 | 0.25614  |
| 0.00012  | -0.01779 | 0.70132  | -0.02002 | 0.66603  | 0.00739038 | 0.87345  | 0.015508 | 0.7382   |
| 0.76158  | 0.029647 | 0.52275  | -0.18127 | 8.16E-05 | -0.1113812 | 0.01604  | -0.18328 | 6.78E-05 |
| 1.05E-07 | -0.06746 | 0.14549  | -0.13461 | 0.00356  | -0.00023   | 0.99605  | 0.072613 | 0.1171   |
| 0.00206  | 0.233072 | 3.51E-07 | 0.379981 | 1.73E-17 | 0.03928152 | 0.39703  | -0.14243 | 0.00203  |

|          |          |          |          |          |            |          |          |          |
|----------|----------|----------|----------|----------|------------|----------|----------|----------|
| 0.10211  | 0.048522 | 0.29539  | 0.125219 | 0.00674  | 0.23083319 | 4.58E-07 | 0.257326 | 1.69E-08 |
| 0.03322  | -0.13059 | 0.0047   | -0.14216 | 0.00207  | -0.2525451 | 3.15E-08 | -0.24743 | 6.06E-08 |
| 0.75374  | 0.096998 | 0.03613  | 0.072038 | 0.12004  | -0.0171869 | 0.71105  | 0.025367 | 0.58451  |
| 0.10143  | -0.02574 | 0.57901  | -0.09968 | 0.03127  | -0.2489907 | 4.97E-08 | -0.20755 | 6.11E-06 |
| 0.44357  | -0.06524 | 0.15927  | -0.05018 | 0.27915  | -0.0110234 | 0.8122   | -0.03186 | 0.49217  |
| 0.00339  | 0.116751 | 0.01157  | 0.133973 | 0.00373  | -0.0404448 | 0.38319  | -0.03558 | 0.44306  |
| 0.38861  | -0.00091 | 0.98428  | -0.01372 | 0.76745  | -0.0281766 | 0.54359  | 0.003692 | 0.93657  |
| 0.83416  | 0.100257 | 0.03029  | 0.03144  | 0.49791  | -0.0647781 | 0.16224  | -0.13017 | 0.00484  |
| 0.38804  | 0.039561 | 0.39368  | 0.303321 | 2.15E-11 | 0.35937003 | 1.11E-15 | 0.242363 | 1.14E-07 |
| 0.0092   | 0.021129 | 0.6488   | 0.034791 | 0.45322  | 0.0967801  | 0.03655  | 0.084588 | 0.0678   |
| 0.32669  | 0.332958 | 1.49E-13 | 0.265986 | 5.28E-09 | 0.27141656 | 2.49E-09 | 0.330548 | 2.28E-13 |
| 0.60963  | -0.06847 | 0.13958  | -0.05911 | 0.20226  | 0.03683808 | 0.42707  | 0.152148 | 0.00097  |
| 0.38768  | -0.00954 | 0.8371   | 0.015765 | 0.73401  | 0.0027158  | 0.95333  | -0.03522 | 0.44761  |
| 0.45597  | 0.06244  | 0.17797  | 0.035119 | 0.44897  | -0.0639743 | 0.16752  | 0.060731 | 0.19016  |
| 0.67691  | 0.001139 | 0.98042  | -0.18605 | 5.23E-05 | -0.2312588 | 4.35E-07 | -0.18726 | 4.66E-05 |
| 3.34E-15 | 0.100585 | 0.02975  | 0.035483 | 0.44428  | 0.04365806 | 0.34651  | 0.023493 | 0.61258  |
| 0.08604  | 0.216826 | 2.25E-06 | 0.118376 | 0.01046  | -0.0558867 | 0.22804  | -0.08245 | 0.07507  |
| 0.00574  | 0.149735 | 0.00117  | 0.079561 | 0.0859   | -0.0138176 | 0.76584  | -0.03275 | 0.48017  |
| 0.05081  | 0.164991 | 0.00034  | 0.174899 | 0.00015  | 0.07105003 | 0.12522  | -0.02113 | 0.64886  |
| 0.10793  | 0.152766 | 0.00093  | 0.16676  | 0.0003   | 0.11253866 | 0.01497  | 0.064197 | 0.16605  |
| 0.77956  | -0.06859 | 0.13886  | -0.163   | 0.00041  | -0.0143208 | 0.75758  | -0.0326  | 0.48221  |
| 0.04121  | 0.054081 | 0.24345  | 0.023802 | 0.6079   | 0.06114263 | 0.18717  | 0.007482 | 0.87189  |
| 0.38696  | 0.198489 | 1.55E-05 | 0.122323 | 0.00814  | 0.02920354 | 0.529    | 0.04967  | 0.2841   |
| 0.12774  | 0.049418 | 0.28655  | 0.138762 | 0.00265  | 0.02618387 | 0.57247  | 0.026244 | 0.57158  |
| 0.00031  | 0.111778 | 0.01566  | -0.00432 | 0.92574  | -0.0292821 | 0.52789  | -0.01056 | 0.82002  |
| 0.06151  | 0.168275 | 0.00026  | 0.175774 | 0.00013  | -0.0699316 | 0.13129  | -0.19507 | 2.19E-05 |
| 0.72901  | 0.136647 | 0.00309  | 0.178597 | 0.0001   | 0.17894917 | 0.0001   | 0.122029 | 0.00829  |
| 0.17486  | 0.263475 | 7.43E-09 | 0.023802 | 0.60791  | -0.0099508 | 0.83018  | 0.10859  | 0.01891  |
| 0.00273  | 0.225362 | 8.63E-07 | 0.112278 | 0.0152   | 0.03525063 | 0.44727  | 0.062871 | 0.17499  |
| 0.9715   | 0.104347 | 0.02413  | 0.150543 | 0.0011   | 0.11926501 | 0.00989  | 0.167193 | 0.00028  |
| 3.33E-05 | 0.152064 | 0.00098  | 0.007619 | 0.86957  | -0.0548933 | 0.23643  | -0.02586 | 0.57729  |
| 6.65E-07 | 0.076368 | 0.09929  | 0.037245 | 0.42198  | 0.01547491 | 0.73873  | 0.015698 | 0.7351   |
| 3.32E-05 | 0.067054 | 0.14795  | 0.042967 | 0.3542   | 0.03208614 | 0.48912  | 0.036456 | 0.43189  |
| 0.00828  | 0.060834 | 0.18941  | 0.110048 | 0.01736  | 0.3167201  | 2.43E-12 | 0.304733 | 1.72E-11 |
| 0.50186  | 0.137242 | 0.00296  | 0.180376 | 8.87E-05 | 0.21140249 | 4.06E-06 | 0.175851 | 0.00013  |
| 0.29326  | 0.128319 | 0.00549  | 0.06915  | 0.13567  | 0.04282789 | 0.35577  | 0.071159 | 0.12464  |
| 0.96783  | 0.146961 | 0.00145  | 0.02733  | 0.55577  | -0.0619673 | 0.18128  | -0.05295 | 0.25343  |
| 0.54174  | 0.042995 | 0.35389  | -0.10341 | 0.02544  | -0.2295956 | 5.29E-07 | -0.22883 | 5.78E-07 |
| 0.17625  | 0.09905  | 0.03235  | -0.01715 | 0.71168  | -0.0091004 | 0.8445   | -0.02222 | 0.63193  |
| 0.96864  | 0.291573 | 1.33E-10 | 0.136923 | 0.00303  | 0.04306052 | 0.35316  | 0.03062  | 0.5092   |
| 0.17286  | 0.14464  | 0.00173  | 0.14315  | 0.00193  | 0.06200176 | 0.18104  | 0.009628 | 0.83562  |
| 0.86191  | 0.148208 | 0.00132  | 0.105371 | 0.02277  | -0.0105543 | 0.82005  | -0.05473 | 0.23782  |
| 0.11098  | 0.167735 | 0.00027  | 0.11044  | 0.01696  | 0.06103316 | 0.18796  | 0.0435   | 0.34827  |
| 0.00571  | 0.214977 | 2.76E-06 | 0.168408 | 0.00026  | 0.02599705 | 0.57521  | -0.01284 | 0.78193  |
| 0.00862  | 0.065627 | 0.15679  | 0.116363 | 0.01185  | 0.00830528 | 0.85794  | -0.02771 | 0.55025  |

|          |          |          |          |          |            |          |          |          |
|----------|----------|----------|----------|----------|------------|----------|----------|----------|
| 0.95141  | 0.019456 | 0.67495  | 0.05404  | 0.2438   | 0.04892738 | 0.29137  | 0.012    | 0.79592  |
| 0.75145  | -0.00844 | 0.8556   | 0.017651 | 0.70361  | -0.0172811 | 0.70954  | -0.03972 | 0.39173  |
| 0.61473  | 0.105856 | 0.02215  | 0.079354 | 0.08672  | -0.0456034 | 0.32543  | -0.08395 | 0.06991  |
| 0.00954  | 0.089173 | 0.05414  | 0.073717 | 0.11162  | 0.05065171 | 0.27467  | 0.066237 | 0.15297  |
| 0.11404  | 0.252694 | 3.09E-08 | 0.155905 | 0.00072  | 0.02011809 | 0.66455  | 0.033963 | 0.46405  |
| 1.04E-05 | -0.25904 | 1.35E-08 | -0.17497 | 0.00014  | -0.1391778 | 0.00258  | -0.12742 | 0.00583  |
| 0.00017  | -0.05362 | 0.24747  | 0.05326  | 0.25068  | -0.0437715 | 0.34526  | -0.06921 | 0.13534  |
| 0.00163  | -0.12623 | 0.0063   | -0.05801 | 0.21079  | -0.0499234 | 0.28164  | 0.003803 | 0.93467  |
| 0.023    | -0.05428 | 0.2417   | -0.10508 | 0.02314  | -0.0912964 | 0.04864  | -0.10761 | 0.02002  |
| 0.02711  | -0.15996 | 0.00052  | -0.12233 | 0.00813  | -0.0606597 | 0.19068  | -0.01106 | 0.81164  |
| 0.09706  | -0.19048 | 3.42E-05 | -0.00181 | 0.96881  | 0.16111936 | 0.00047  | -0.02895 | 0.53262  |
| 0.45914  | 0.052568 | 0.2569   | 0.328245 | 3.41E-13 | 0.27124466 | 2.55E-09 | 0.030223 | 0.5147   |
| 1.74E-05 | 0.118273 | 0.01053  | 0.151257 | 0.00104  | 0.10760868 | 0.02002  | 0.144227 | 0.00178  |
| 0.03908  | 0.048485 | 0.29576  | 0.079951 | 0.08437  | 0.18703914 | 4.76E-05 | 0.108811 | 0.01867  |
| 8.97E-05 | 0.306284 | 1.34E-11 | 0.181195 | 8.22E-05 | 0.00434406 | 0.92541  | 0.044937 | 0.33256  |
| 0.00801  | -0.16266 | 0.00042  | -0.07241 | 0.11813  | 0.0156034  | 0.73664  | 0.078755 | 0.08913  |
| 0.969    | -0.16505 | 0.00034  | -0.07098 | 0.1256   | 0.13730148 | 0.00295  | 0.206732 | 6.66E-06 |
| 0.08758  | 0.137039 | 0.003    | 0.079845 | 0.08478  | 0.04527499 | 0.32893  | 0.02782  | 0.54871  |
| 0.03576  | 0.068428 | 0.1398   | 0.022701 | 0.62462  | 0.0322474  | 0.48694  | 0.049641 | 0.28437  |
| 0.00183  | -0.10143 | 0.02839  | -0.02799 | 0.54634  | -0.0289729 | 0.53226  | -0.09728 | 0.03558  |
| 1.44E-08 | -0.13753 | 0.0029   | -0.0337  | 0.46754  | 0.11743445 | 0.01109  | 0.130195 | 0.00483  |
| 2.11E-07 | -0.0342  | 0.46092  | 0.023264 | 0.61604  | 0.04929646 | 0.28774  | 0.053016 | 0.25286  |
| 1.91E-25 | -0.02676 | 0.56401  | 0.06643  | 0.15177  | 0.20170328 | 1.12E-05 | 0.228578 | 5.96E-07 |
| 2.58E-12 | 0.028792 | 0.53482  | -0.00297 | 0.94898  | 0.00609723 | 0.89545  | 0.022555 | 0.62684  |
| 0.00087  | 0.107313 | 0.02037  | 0.002135 | 0.96329  | -0.0930173 | 0.04453  | -0.01663 | 0.72002  |
| 7.35E-05 | 0.083904 | 0.07006  | -0.16567 | 0.00032  | -0.3690614 | 1.62E-16 | -0.31453 | 3.50E-12 |
| 0.18061  | -0.01457 | 0.75354  | 0.018688 | 0.68709  | 0.04763323 | 0.30433  | -0.04709 | 0.30991  |
| 0.02019  | -0.01256 | 0.78658  | 0.130883 | 0.00461  | -0.1074076 | 0.02025  | -0.22602 | 8.01E-07 |
| 0.01757  | -0.1527  | 0.00093  | -0.15102 | 0.00106  | -0.2023728 | 1.05E-05 | -0.24426 | 9.02E-08 |
| 0.00015  | -0.07955 | 0.08594  | -0.07787 | 0.09279  | -0.1249815 | 0.00685  | -0.14382 | 0.00183  |
| 2.08E-07 | -0.16643 | 0.0003   | -0.18214 | 7.54E-05 | -0.0343508 | 0.45896  | -0.01122 | 0.80897  |
| 1.64E-14 | 0.063467 | 0.17093  | 0.108971 | 0.01849  | 0.07457905 | 0.10749  | 0.162171 | 0.00043  |
| 0.15774  | -0.14678 | 0.00147  | -0.35031 | 6.26E-15 | -0.304377  | 1.82E-11 | -0.36496 | 3.69E-16 |
| 0.3492   | -0.08712 | 0.05995  | 0.008585 | 0.8532   | 0.21538924 | 2.64E-06 | 0.216024 | 2.46E-06 |
| 0.69047  | -0.12696 | 0.00601  | -0.01688 | 0.71591  | 0.1130602  | 0.0145   | 0.07253  | 0.11753  |
| 0.24687  | 0.045418 | 0.3274   | 0.020506 | 0.6585   | -0.0153006 | 0.74156  | 0.021975 | 0.63574  |
| 0.38194  | -0.01316 | 0.77662  | 0.008604 | 0.85289  | 0.03126808 | 0.50027  | 0.032934 | 0.47771  |
| 0.02639  | -0.14334 | 0.0019   | -0.07862 | 0.0897   | -0.1045199 | 0.02389  | -0.09465 | 0.0409   |
| 7.53E-06 | 0.179011 | 0.0001   | 0.174279 | 0.00015  | -0.0512187 | 0.26933  | -0.03244 | 0.48431  |
| 2.58E-08 | -0.1988  | 1.51E-05 | -0.08714 | 0.05989  | 0.16119918 | 0.00047  | 0.15078  | 0.00108  |
| 0.18382  | 0.141004 | 0.00226  | 0.112214 | 0.01526  | -0.09899   | 0.03246  | -0.08047 | 0.08238  |
| 0.34779  | 0.098807 | 0.03278  | -0.07572 | 0.10222  | -0.1635018 | 0.00039  | -0.26273 | 8.22E-09 |
| 0.05447  | 0.30058  | 3.31E-11 | 0.306121 | 1.37E-11 | -0.0151315 | 0.74432  | 0.022664 | 0.62518  |
| 0.88354  | -0.04309 | 0.35281  | -0.05912 | 0.20219  | -0.0353193 | 0.44639  | 0.002491 | 0.95719  |
| 0.13998  | -0.0619  | 0.18179  | -0.10209 | 0.02739  | -0.0358032 | 0.44018  | 0.011264 | 0.80819  |

|          |          |          |          |          |            |          |          |          |
|----------|----------|----------|----------|----------|------------|----------|----------|----------|
| 5.14E-18 | 0.071178 | 0.12454  | 0.061864 | 0.18201  | 0.12144971 | 0.00861  | 0.071666 | 0.12197  |
| 0.46263  | 0.175305 | 0.00014  | 0.024057 | 0.60406  | 0.02706998 | 0.55954  | 0.10418  | 0.02436  |
| 0.00287  | 0.154585 | 0.0008   | 0.097583 | 0.03502  | -0.0114744 | 0.80467  | -0.01916 | 0.67963  |
| 0.31423  | 0.051441 | 0.26726  | -0.08999 | 0.05197  | -0.0609103 | 0.18885  | -0.03105 | 0.50323  |
| 1.09E-08 | 0.023309 | 0.61536  | -0.0132  | 0.77604  | 0.03242752 | 0.48451  | 0.025217 | 0.58674  |
| 0.20796  | 0.151096 | 0.00106  | 0.118843 | 0.01016  | 0.16833517 | 0.00026  | 0.12379  | 0.0074   |
| 0.00087  | -0.05488 | 0.23657  | 0.005196 | 0.91084  | 0.15215129 | 0.00097  | 0.200527 | 1.26E-05 |
| 0.72549  | 0.037915 | 0.41367  | -0.21547 | 2.61E-06 | -0.1616535 | 0.00045  | -0.1741  | 0.00016  |
| 0.01334  | 0.300946 | 3.12E-11 | 0.250504 | 4.10E-08 | -0.0074533 | 0.87238  | -0.10602 | 0.02194  |
| 0.95316  | 0.019583 | 0.67296  | -0.04269 | 0.35729  | 0.03139474 | 0.49854  | 0.070899 | 0.12602  |
| 0.92754  | -0.03217 | 0.488    | 0.031802 | 0.49297  | 0.0054647  | 0.90624  | -0.10833 | 0.01919  |
| 0.78848  | 0.067137 | 0.14745  | -0.05311 | 0.25204  | -0.0694136 | 0.13418  | 0.012081 | 0.79457  |
| 0.02999  | -0.00878 | 0.84983  | -0.24517 | 8.05E-08 | -0.2113805 | 4.07E-06 | -0.11843 | 0.01042  |
| 0.71715  | -0.03733 | 0.4209   | -0.119   | 0.01006  | -0.2145328 | 2.89E-06 | -0.19159 | 3.08E-05 |
| 0.98354  | 0.03223  | 0.48717  | 0.080219 | 0.08333  | -0.0168111 | 0.7171   | -0.00165 | 0.97156  |
| 0.00551  | 0.202632 | 1.02E-05 | 0.316223 | 2.64E-12 | 0.27040606 | 2.87E-09 | 0.269895 | 3.08E-09 |
| 0.00012  | 0.136832 | 0.00305  | 0.006081 | 0.89573  | -0.0122494 | 0.79177  | 0.039993 | 0.38853  |
| 0.00187  | 0.204168 | 8.70E-06 | 0.166559 | 0.0003   | 0.09703846 | 0.03605  | 0.039855 | 0.39018  |
| 2.23E-09 | 0.295442 | 7.35E-11 | 0.228505 | 6.01E-07 | 0.02389366 | 0.60653  | 0.007453 | 0.87238  |
| 9.66E-05 | -0.2718  | 2.36E-09 | -0.16211 | 0.00044  | -0.0717843 | 0.12135  | -0.1331  | 0.00396  |
| 0.00056  | -0.09913 | 0.03221  | -0.05594 | 0.22757  | 0.10373889 | 0.02497  | 0.197007 | 1.80E-05 |
| 2.14E-13 | -0.26647 | 4.94E-09 | -0.02728 | 0.55644  | 0.11390462 | 0.01378  | 0.064092 | 0.16674  |
| 0.00846  | -0.14526 | 0.00165  | -0.09147 | 0.04821  | -0.0441334 | 0.34128  | 0.073604 | 0.11218  |
| 0.04381  | -0.00845 | 0.85551  | -0.16026 | 0.00051  | -0.1252893 | 0.00671  | -0.08288 | 0.07357  |
| 0.00011  | -0.0547  | 0.23811  | 0.019242 | 0.67833  | -0.2125908 | 3.57E-06 | -0.24524 | 7.98E-08 |
| 0.25492  | -0.00819 | 0.85994  | -0.04627 | 0.31842  | -0.0201149 | 0.6646   | -0.00151 | 0.97402  |
| 0.01653  | -0.05883 | 0.20443  | 0.03371  | 0.46739  | 0.08013469 | 0.08365  | 0.09493  | 0.04031  |
| 0.13893  | 0.024971 | 0.5904   | -0.02816 | 0.54376  | -0.1326279 | 0.00409  | -0.25248 | 3.18E-08 |
| 0.51718  | -0.16211 | 0.00044  | -0.09697 | 0.03619  | 0.14368338 | 0.00185  | 0.183586 | 6.59E-05 |
| 0.00438  | 0.016925 | 0.71527  | 0.024681 | 0.59471  | -0.1105585 | 0.01684  | -0.2093  | 5.08E-06 |
| 4.95E-07 | 0.056354 | 0.22417  | -0.11714 | 0.0113   | -0.0015374 | 0.97357  | 0.03626  | 0.43436  |
| 0.77927  | 0.048378 | 0.29683  | -0.09145 | 0.04825  | -0.0046075 | 0.9209   | 0.042839 | 0.35564  |
| 0.89246  | 0.03343  | 0.4711   | -0.1981  | 1.62E-05 | -0.1131746 | 0.0144   | -0.05384 | 0.2456   |
| 0.05511  | 0.160391 | 0.0005   | 0.127421 | 0.00583  | 0.01683885 | 0.71665  | 0.070414 | 0.12865  |
| 2.54E-11 | 0.304595 | 1.75E-11 | 0.15318  | 0.0009   | 0.34520836 | 1.62E-14 | 0.361076 | 7.92E-16 |
| 0.01761  | 0.083138 | 0.07266  | 0.013068 | 0.7782   | 0.08093447 | 0.0806   | 0.098817 | 0.03276  |
| 4.30E-05 | -0.21155 | 3.99E-06 | -0.19231 | 2.87E-05 | -0.162353  | 0.00043  | -0.15552 | 0.00075  |
| 0.11335  | 0.269407 | 3.30E-09 | 0.125696 | 0.00653  | 0.00752548 | 0.87115  | 0.020189 | 0.66344  |
| 0.00754  | 0.031346 | 0.4992   | -0.02119 | 0.64785  | -0.0481854 | 0.29875  | -0.14304 | 0.00194  |
| 0.01364  | -0.18408 | 6.29E-05 | -0.15978 | 0.00053  | -0.114584  | 0.01322  | -0.10073 | 0.02952  |
| 0.03686  | 0.28383  | 4.21E-10 | 0.312606 | 4.80E-12 | 0.08272295 | 0.07411  | 0.043672 | 0.34636  |
| 0.50908  | -0.15615 | 0.00071  | -0.16431 | 0.00036  | -0.049615  | 0.28463  | 0.017684 | 0.70308  |
| 0.00012  | 0.024456 | 0.59808  | -0.00227 | 0.96106  | 0.03091233 | 0.50516  | 0.013693 | 0.76789  |
| 0.00013  | 0.074752 | 0.10667  | 0.060082 | 0.19495  | 0.02201286 | 0.63515  | -0.00619 | 0.89387  |
| 0.09943  | -0.01263 | 0.78549  | -0.05607 | 0.22654  | -0.0850772 | 0.06622  | -0.07771 | 0.09347  |



|          |          |          |          |          |            |          |          |          |
|----------|----------|----------|----------|----------|------------|----------|----------|----------|
| 0.28949  | 0.109043 | 0.01842  | 0.145695 | 0.00159  | 0.25719965 | 1.72E-08 | 0.100099 | 0.03056  |
| 0.05664  | 0.123998 | 0.0073   | 0.012932 | 0.78045  | -0.0153025 | 0.74153  | -0.01614 | 0.72786  |
| 0.15842  | 0.081719 | 0.0777   | 0.090815 | 0.04984  | 0.14954151 | 0.00119  | 0.194952 | 2.21E-05 |
| 0.02994  | -0.13648 | 0.00312  | -0.05802 | 0.21078  | 0.203844   | 9.00E-06 | 0.28717  | 2.57E-10 |
| 0.87239  | 0.00045  | 0.99227  | -0.02754 | 0.55273  | 0.11610684 | 0.01204  | 0.165337 | 0.00033  |
| 0.61089  | -0.23761 | 2.04E-07 | -0.1814  | 8.07E-05 | -0.1167577 | 0.01157  | -0.16685 | 0.00029  |
| 6.18E-06 | 0.221257 | 1.38E-06 | 0.048919 | 0.29145  | -0.1142724 | 0.01348  | -0.1242  | 0.00721  |
| 0.04506  | 0.031052 | 0.50324  | -0.1172  | 0.01126  | 0.17961146 | 9.51E-05 | 0.204398 | 8.49E-06 |
| 5.11E-05 | 0.010504 | 0.82089  | 0.084438 | 0.06829  | -0.0659584 | 0.15471  | -0.10449 | 0.02393  |
| 0.30142  | 0.116499 | 0.01176  | -0.02966 | 0.52257  | 0.00947284 | 0.83822  | 0.057851 | 0.21208  |
| 0.09674  | 0.260466 | 1.11E-08 | 0.156504 | 0.00069  | 0.06475328 | 0.1624   | 0.068466 | 0.13959  |
| 0.62492  | 0.076984 | 0.09659  | 0.012204 | 0.79253  | -0.1038862 | 0.02476  | -0.03908 | 0.3994   |
| 0.14436  | -0.01809 | 0.69661  | -0.06021 | 0.19401  | -0.089046  | 0.05448  | -0.05513 | 0.23442  |
| 0.80346  | -0.26257 | 8.40E-09 | -0.17436 | 0.00015  | -0.1038495 | 0.02482  | -0.13986 | 0.00245  |
| 5.84E-05 | -0.11257 | 0.01494  | -0.0617  | 0.18319  | 0.02275023 | 0.62386  | -0.0071  | 0.87835  |
| 0.60706  | -0.08534 | 0.06537  | 0.046834 | 0.31253  | 0.36941613 | 1.51E-16 | 0.282284 | 5.28E-10 |
| 0.02829  | 0.144041 | 0.0018   | -0.03808 | 0.41167  | 0.05874866 | 0.20506  | 0.085433 | 0.06509  |
| 0.15319  | -0.17258 | 0.00018  | -0.08668 | 0.06126  | 0.06277888 | 0.17562  | -0.13594 | 0.00325  |
| 6.21E-06 | 0.175361 | 0.00014  | 0.177282 | 0.00012  | -0.0106597 | 0.81829  | -0.11843 | 0.01043  |
| 0.44695  | 0.02195  | 0.63611  | -0.04194 | 0.36583  | 0.12813096 | 0.00556  | 0.163076 | 0.0004   |
| 0.65389  | -0.10418 | 0.02435  | -0.11955 | 0.00971  | -0.0483637 | 0.29697  | -0.03018 | 0.51531  |
| 0.27798  | -0.03781 | 0.41495  | -0.07169 | 0.12182  | -0.0234028 | 0.61394  | 0.096438 | 0.03722  |
| 0.00981  | 0.024658 | 0.59507  | 0.014951 | 0.74727  | 0.01530457 | 0.7415   | -0.00448 | 0.92314  |
| 0.0044   | -0.17867 | 0.0001   | -0.18124 | 8.19E-05 | -0.0531459 | 0.2517   | 0.029818 | 0.52037  |
| 0.00043  | 0.009635 | 0.83549  | -0.19089 | 3.29E-05 | -0.1816822 | 7.86E-05 | -0.20035 | 1.29E-05 |
| 0.15751  | 0.257148 | 1.73E-08 | 0.218885 | 1.79E-06 | 0.17023361 | 0.00022  | 0.107785 | 0.01982  |
| 0.47577  | 0.025457 | 0.58317  | -0.03935 | 0.39618  | 0.00095497 | 0.98358  | 0.062884 | 0.1749   |
| 0.10904  | 0.144479 | 0.00175  | 0.147793 | 0.00136  | -0.0109996 | 0.8126   | -0.08953 | 0.05318  |
| 0.62713  | 0.038711 | 0.40393  | 0.031409 | 0.49834  | 0.06725908 | 0.14672  | 0.096006 | 0.03808  |
| 0.88455  | 0.093123 | 0.04428  | 0.052948 | 0.25348  | -0.0044766 | 0.92314  | 0.027319 | 0.55593  |
| 0.00264  | -0.11745 | 0.01108  | -0.15193 | 0.00099  | -0.0632556 | 0.17236  | 0.029332 | 0.52718  |
| 0.19411  | -0.13426 | 0.00365  | -0.01259 | 0.7862   | 0.20905378 | 5.21E-06 | 0.286363 | 2.90E-10 |
| 1.28E-13 | 0.02217  | 0.63274  | -0.04723 | 0.30842  | 0.04723233 | 0.30843  | 0.126295 | 0.00628  |
| 0.02057  | -0.03704 | 0.42455  | -0.00335 | 0.94242  | 0.09199611 | 0.04693  | 0.131142 | 0.00453  |
| 0.98025  | -0.02121 | 0.64749  | 0.107189 | 0.02051  | 0.28017651 | 7.17E-10 | 0.278025 | 9.78E-10 |
| 2.68E-10 | 0.127271 | 0.00588  | 0.04998  | 0.2811   | 0.0087303  | 0.85075  | -0.16513 | 0.00034  |
| 0.5973   | 0.144778 | 0.00171  | 0.126277 | 0.00629  | 0.27941878 | 8.00E-10 | 0.250423 | 4.14E-08 |
| 0.61522  | 0.113331 | 0.01427  | 0.335291 | 9.86E-14 | 0.12554025 | 0.0066   | 0.034921 | 0.45153  |
| 0.96599  | 0.182385 | 7.37E-05 | 0.121027 | 0.00884  | 0.16211279 | 0.00044  | 0.056394 | 0.22384  |
| 6.35E-10 | -0.09145 | 0.04827  | -0.00655 | 0.88768  | 0.09298963 | 0.04459  | 0.082322 | 0.07553  |
| 0.02461  | 0.270179 | 2.96E-09 | 0.238434 | 1.85E-07 | 0.10257689 | 0.02665  | 0.0752   | 0.10458  |
| 0.27764  | 0.176386 | 0.00013  | 0.260668 | 1.08E-08 | 0.09699113 | 0.03614  | 0.032906 | 0.47808  |
| 0.34962  | 0.065192 | 0.15957  | 0.027492 | 0.55343  | 0.01678291 | 0.71755  | -0.20565 | 7.46E-06 |
| 0.02155  | -0.09674 | 0.03664  | -0.09526 | 0.03962  | -0.0185538 | 0.68922  | 0.053486 | 0.24868  |
| 0.68082  | 0.080557 | 0.08203  | 0.058711 | 0.20535  | 0.14240514 | 0.00204  | 0.028634 | 0.53707  |

|          |          |          |          |          |            |          |          |          |
|----------|----------|----------|----------|----------|------------|----------|----------|----------|
| 0.93133  | -0.24843 | 5.34E-08 | -0.04863 | 0.29431  | 0.06058104 | 0.19126  | -0.14307 | 0.00194  |
| 0.42549  | 0.303701 | 2.02E-11 | 0.133256 | 0.00392  | 0.3146146  | 3.45E-12 | 0.175652 | 0.00014  |
| 0.57516  | 0.029428 | 0.52583  | 0.024028 | 0.6045   | 0.00468252 | 0.91961  | -0.02138 | 0.64488  |
| 0.9024   | 0.050577 | 0.27538  | 0.018194 | 0.69494  | 0.05487193 | 0.23661  | 0.042528 | 0.35914  |
| 0.00122  | 0.047204 | 0.30871  | 0.012485 | 0.78786  | 0.03635368 | 0.43318  | 0.051209 | 0.26943  |
| 0.84206  | 0.040252 | 0.38547  | 0.048346 | 0.29715  | 0.06646455 | 0.15156  | 0.063721 | 0.16922  |
| 3.75E-05 | 0.126813 | 0.00607  | 0.04506  | 0.33123  | 0.06200636 | 0.18101  | 0.034037 | 0.46308  |
| 0.79579  | 0.108738 | 0.01875  | 0.035682 | 0.44173  | -0.0443128 | 0.33932  | -0.02667 | 0.5654   |
| 0.82966  | -0.0543  | 0.24155  | -0.15574 | 0.00073  | -0.028715  | 0.53592  | -0.01746 | 0.70666  |
| 0.55324  | 0.1282   | 0.00553  | 0.497315 | 1.51E-30 | 0.40567924 | 6.29E-20 | 0.150781 | 0.00108  |
| 0.00204  | 0.112472 | 0.01503  | 0.034251 | 0.46027  | 0.0962459  | 0.0376   | -0.05147 | 0.26697  |
| 0.10276  | -0.13165 | 0.00437  | -0.05009 | 0.28007  | 0.05468312 | 0.23823  | 0.07129  | 0.12394  |
| 0.29636  | -0.00941 | 0.83933  | -0.03037 | 0.51269  | 0.03604456 | 0.4371   | 0.081067 | 0.08011  |
| 0.61837  | 0.003987 | 0.93153  | -0.04786 | 0.30206  | -0.0462163 | 0.31896  | -0.05054 | 0.2757   |
| 0.05107  | -0.1239  | 0.00735  | -0.10386 | 0.02479  | 0.14079133 | 0.00229  | 0.082941 | 0.07335  |
| 0.0261   | 0.082555 | 0.0747   | 0.12021  | 0.00932  | 0.21305891 | 3.40E-06 | 0.245914 | 7.33E-08 |
| 1.92E-07 | 0.262704 | 8.24E-09 | 0.20091  | 1.22E-05 | 0.32213861 | 9.76E-13 | 0.300422 | 3.39E-11 |
| 0.9872   | 0.096344 | 0.03741  | -0.00739 | 0.8734   | -0.046177  | 0.31937  | -0.03359 | 0.46895  |
| 0.972    | 0.090633 | 0.0503   | 0.041908 | 0.36621  | -0.1637136 | 0.00038  | -0.16782 | 0.00027  |
| 0.11713  | 0.119827 | 0.00955  | 0.047163 | 0.30914  | 0.0703443  | 0.12902  | 0.054106 | 0.24322  |
| 0.0206   | -0.0175  | 0.70611  | -0.09281 | 0.04501  | -0.155834  | 0.00073  | -0.19602 | 1.99E-05 |
| 0.00666  | 0.040856 | 0.37837  | 0.061225 | 0.18658  | 0.05757371 | 0.21428  | 0.046977 | 0.31106  |
| 0.78794  | 0.133087 | 0.00396  | 0.019529 | 0.6738   | 0.00642091 | 0.88993  | -0.04527 | 0.32893  |
| 0.01888  | -0.04597 | 0.32157  | 0.055854 | 0.22831  | 0.21105173 | 4.21E-06 | 0.201519 | 1.14E-05 |
| 2.20E-20 | 0.030375 | 0.5126   | -0.01038 | 0.82297  | 0.21358275 | 3.21E-06 | 0.232884 | 3.59E-07 |
| 0.96883  | 0.011842 | 0.79854  | 0.095071 | 0.04001  | 0.11385342 | 0.01382  | 0.112065 | 0.0154   |
| 0.90181  | 0.039526 | 0.3941   | 0.209592 | 4.92E-06 | 0.17258992 | 0.00018  | 0.139401 | 0.00253  |
| 0.83958  | -0.05421 | 0.2423   | -0.02326 | 0.61606  | 0.20129086 | 1.17E-05 | 0.137956 | 0.00281  |
| 7.43E-09 | -0.34842 | 8.93E-15 | -0.3786  | 2.30E-17 | 0.00812003 | 0.86107  | 0.037957 | 0.41316  |
| 0.02526  | 0.107434 | 0.02022  | 0.012058 | 0.79495  | -0.0351377 | 0.44873  | -0.16241 | 0.00043  |
| 0.12512  | -0.12916 | 0.00518  | -0.12635 | 0.00626  | -0.0309954 | 0.50402  | -0.02412 | 0.60307  |
| 7.95E-05 | -0.12399 | 0.00731  | 0.003526 | 0.93943  | 0.21789126 | 2.00E-06 | 0.291445 | 1.35E-10 |
| 0.04316  | -0.17883 | 0.0001   | 0.008493 | 0.85476  | 0.26935067 | 3.32E-09 | 0.148151 | 0.00132  |
| 0.78616  | -0.08746 | 0.05895  | 0.145363 | 0.00163  | 0.26280742 | 8.13E-09 | 0.202651 | 1.02E-05 |
| 0.56158  | 0.112792 | 0.01474  | 0.044472 | 0.33758  | 0.16291714 | 0.00041  | 0.278447 | 9.20E-10 |
| 0.25587  | -0.29487 | 8.02E-11 | -0.08147 | 0.07862  | 0.11321336 | 0.01437  | 0.170045 | 0.00022  |
| 0.57418  | -0.09431 | 0.04163  | -0.08672 | 0.06113  | -0.1184764 | 0.01039  | -0.11644 | 0.0118   |
| 2.84E-17 | -0.10268 | 0.0265   | -0.15446 | 0.00081  | -0.101985  | 0.02754  | -0.10797 | 0.01961  |
| 0.00121  | 0.204447 | 8.45E-06 | 0.138031 | 0.0028   | -0.0280679 | 0.54515  | -0.16131 | 0.00047  |
| 0.00027  | -0.03349 | 0.47028  | -0.04009 | 0.38739  | -0.0827576 | 0.07399  | -0.15224 | 0.00097  |
| 0.91348  | 0.331451 | 1.95E-13 | 0.214654 | 2.86E-06 | 0.0893929  | 0.05355  | 0.064764 | 0.16233  |
| 0.0474   | 0.028158 | 0.54386  | 0.264009 | 6.91E-09 | 0.21482369 | 2.80E-06 | 0.048752 | 0.2931   |
| 0.00342  | 0.001949 | 0.96649  | 0.024265 | 0.60094  | 0.0948935  | 0.04038  | 0.108295 | 0.01924  |
| 0.15856  | 0.106776 | 0.02101  | -0.00848 | 0.8549   | -0.0346463 | 0.45511  | -0.04597 | 0.32152  |
| 3.96E-07 | 0.043983 | 0.34293  | -0.10169 | 0.02799  | 0.06506123 | 0.16041  | 0.154904 | 0.00078  |

|          |          |          |          |          |            |          |          |          |
|----------|----------|----------|----------|----------|------------|----------|----------|----------|
| 0.00443  | 0.047292 | 0.30781  | 0.051008 | 0.27131  | 0.20759406 | 6.08E-06 | 0.019589 | 0.67285  |
| 0.00397  | 0.027846 | 0.54834  | -0.05161 | 0.26571  | -0.0174492 | 0.70684  | 0.063251 | 0.17239  |
| 0.00046  | -0.05705 | 0.21852  | -0.03031 | 0.51344  | 0.0926358  | 0.04541  | 0.132543 | 0.00411  |
| 0.08726  | 0.246854 | 6.51E-08 | 0.342394 | 2.73E-14 | 0.32880535 | 3.10E-13 | 0.318322 | 1.86E-12 |
| 0.02951  | 0.274268 | 1.67E-09 | 0.431129 | 1.46E-22 | 0.0444526  | 0.3378   | -0.07845 | 0.09037  |
| 9.43E-05 | 0.195592 | 2.08E-05 | 0.148273 | 0.00131  | 0.18827411 | 4.23E-05 | 0.288535 | 2.09E-10 |
| 0.50748  | 0.04765  | 0.30417  | -0.0156  | 0.73665  | -0.0612369 | 0.18649  | -0.0464  | 0.31705  |
| 0.05957  | -0.19354 | 2.54E-05 | -0.04288 | 0.35514  | 0.27324272 | 1.93E-09 | 0.270175 | 2.96E-09 |
| 0.04948  | -0.27624 | 1.26E-09 | -0.07524 | 0.10438  | 0.07280065 | 0.11616  | 0.02481  | 0.59279  |
| 6.95E-06 | 0.225171 | 8.82E-07 | -0.01247 | 0.78807  | -0.2327555 | 3.65E-07 | -0.2001  | 1.32E-05 |
| 1.64E-05 | 0.131406 | 0.00445  | 0.079586 | 0.0858   | 0.0863628  | 0.06221  | 0.176499 | 0.00013  |
| 0.00025  | 0.30188  | 2.70E-11 | 0.261239 | 1.00E-08 | 0.2939116  | 9.29E-11 | 0.296767 | 5.99E-11 |
| 0.41906  | 0.318426 | 1.83E-12 | 0.390981 | 1.66E-18 | -0.0317544 | 0.49363  | -0.08889 | 0.05492  |
| 0.14392  | -0.03306 | 0.47597  | -0.09104 | 0.04928  | -0.0341573 | 0.4615   | -0.13114 | 0.00453  |
| 0.56689  | 0.006781 | 0.8838   | -0.04139 | 0.37211  | -0.217948  | 1.99E-06 | -0.27631 | 1.25E-09 |
| 2.17E-07 | 0.152077 | 0.00098  | 0.206831 | 6.59E-06 | 0.25820066 | 1.50E-08 | 0.262329 | 8.67E-09 |
| 0.29268  | -0.0556  | 0.23043  | 0.073914 | 0.11067  | 0.15860534 | 0.00058  | 0.191972 | 2.96E-05 |
| 0.14474  | -0.01142 | 0.8055   | -0.12365 | 0.00747  | -0.0282657 | 0.54232  | -0.06296 | 0.17438  |
| 0.5466   | 0.16902  | 0.00024  | 0.095245 | 0.03964  | 0.07781498 | 0.09303  | 0.071211 | 0.12436  |
| 0.6227   | -0.02556 | 0.5816   | -0.08379 | 0.07044  | -0.0436027 | 0.34712  | 0.007853 | 0.8656   |
| 0.6282   | 0.013344 | 0.77365  | -0.03552 | 0.44378  | 0.11274449 | 0.01478  | 0.121186 | 0.00875  |
| 0.00171  | 0.24618  | 7.09E-08 | 0.0852   | 0.06583  | -0.2177214 | 2.04E-06 | -0.21172 | 3.92E-06 |
| 0.01054  | 0.072718 | 0.11657  | -0.00482 | 0.91725  | -0.0134097 | 0.77256  | 0.027824 | 0.54865  |
| 6.27E-05 | 0.024631 | 0.59547  | -0.09017 | 0.05149  | -0.0318367 | 0.49251  | -0.03493 | 0.45138  |
| 0.17929  | -0.06637 | 0.15215  | 0.024468 | 0.59791  | 0.00810597 | 0.86131  | -0.04305 | 0.35322  |
| 0.43706  | -0.02755 | 0.55253  | 0.034957 | 0.45107  | 0.09133086 | 0.04855  | 0.027825 | 0.54863  |
| 0.47405  | 0.021955 | 0.63604  | -0.01549 | 0.73846  | 0.06379231 | 0.16874  | 0.0385   | 0.4065   |
| 0.59077  | 0.013629 | 0.76894  | 0.000985 | 0.98306  | 0.08121333 | 0.07956  | 0.093002 | 0.04456  |
| 0.03942  | -0.04415 | 0.34112  | -0.28743 | 2.47E-10 | -0.1031191 | 0.02585  | -0.04795 | 0.30111  |
| 8.48E-05 | 0.021306 | 0.64606  | 0.024463 | 0.59798  | 0.01518748 | 0.74341  | -0.02595 | 0.57593  |
| 0.01096  | 0.072038 | 0.12004  | 0.017701 | 0.70281  | -0.015973  | 0.73064  | 0.032096 | 0.48899  |
| 0.54123  | 0.261267 | 1.00E-08 | 0.300257 | 3.48E-11 | 0.1541844  | 0.00083  | -0.00604 | 0.89635  |
| 0.43404  | 0.124593 | 0.00702  | 0.216112 | 2.43E-06 | 0.16667171 | 0.0003   | 0.104551 | 0.02385  |
| 0.34211  | -0.02585 | 0.57735  | -0.23281 | 3.62E-07 | -0.2044713 | 8.43E-06 | -0.27069 | 2.76E-09 |
| 0.096    | -0.09105 | 0.04924  | -0.1754  | 0.00014  | 0.0007872  | 0.98646  | 0.045249 | 0.32921  |
| 0.00381  | 0.071464 | 0.12303  | 0.006957 | 0.88081  | 0.03979752 | 0.39086  | 0.105358 | 0.02278  |
| 0.69854  | 0.003422 | 0.9412   | 0.041167 | 0.37474  | 0.03628121 | 0.4341   | -0.015   | 0.74653  |
| 2.30E-05 | -0.13805 | 0.00279  | -0.17749 | 0.00012  | 0.08703958 | 0.06018  | 0.228169 | 6.25E-07 |
| 0.06981  | 0.053513 | 0.24843  | 0.062431 | 0.17803  | 0.04702664 | 0.31054  | 0.055976 | 0.2273   |
| 0.0277   | 0.115593 | 0.01243  | 0.117752 | 0.01088  | 0.09146796 | 0.04821  | 0.047723 | 0.30342  |
| 7.51E-22 | -0.0567  | 0.22134  | 0.056071 | 0.2265   | 0.08603178 | 0.06322  | 0.054655 | 0.23847  |
| 0.1899   | 0.046985 | 0.31097  | 0.074819 | 0.10636  | 0.20573779 | 7.39E-06 | 0.26194  | 9.14E-09 |
| 0.31465  | 0.02834  | 0.54126  | -0.06181 | 0.18238  | -0.0168542 | 0.7164   | 0.004425 | 0.92402  |
| 0.29864  | -0.05948 | 0.19949  | 0.062023 | 0.18089  | 0.06574565 | 0.15604  | 0.009292 | 0.84127  |
| 0.24676  | 0.053765 | 0.24622  | 0.016219 | 0.72665  | 0.00114635 | 0.98029  | 0.035644 | 0.44222  |

|          |          |          |          |          |            |          |          |          |
|----------|----------|----------|----------|----------|------------|----------|----------|----------|
| 0.00363  | -0.04507 | 0.33116  | -0.07405 | 0.11001  | -0.0468825 | 0.31203  | -0.05751 | 0.21478  |
| 0.91569  | 0.072359 | 0.1184   | -0.05534 | 0.23259  | -0.0088294 | 0.84908  | 0.101085 | 0.02895  |
| 0.04127  | 0.150417 | 0.00111  | 0.094517 | 0.04119  | 0.0677402  | 0.14384  | 0.085068 | 0.06625  |
| 5.33E-05 | 0.179796 | 9.35E-05 | 0.181042 | 8.34E-05 | 0.13638835 | 0.00314  | 0.081495 | 0.07852  |
| 0.50518  | 0.013763 | 0.76674  | -0.05667 | 0.22156  | -0.2044562 | 8.44E-06 | -0.30808 | 1.00E-11 |
| 0.00626  | 0.257328 | 1.69E-08 | 0.128562 | 0.0054   | 0.02221444 | 0.63206  | -0.00233 | 0.95992  |
| 1.80E-05 | 0.049223 | 0.28846  | 0.059318 | 0.2007   | 0.12341973 | 0.00758  | 0.123791 | 0.0074   |
| 0.02057  | 0.150271 | 0.00113  | 0.110847 | 0.01656  | 0.06142274 | 0.18515  | 0.012517 | 0.78733  |
| 8.97E-11 | -0.2259  | 8.12E-07 | -0.13286 | 0.00402  | -0.0980354 | 0.03418  | -0.16046 | 0.0005   |
| 0.0051   | -0.24892 | 5.01E-08 | -0.11813 | 0.01062  | 0.0684551  | 0.13965  | -0.0071  | 0.87845  |
| 0.01024  | 0.11477  | 0.01307  | 0.028587 | 0.53773  | -0.1020075 | 0.02751  | -0.13225 | 0.0042   |
| 0.54435  | 0.166479 | 0.0003   | 0.028546 | 0.53832  | 0.15763844 | 0.00063  | 0.266362 | 5.02E-09 |
| 1.99E-07 | -0.07179 | 0.12135  | -0.01264 | 0.78534  | 0.14145687 | 0.00218  | 0.072456 | 0.1179   |
| 0.00016  | 0.319152 | 1.62E-12 | 0.203293 | 9.52E-06 | 0.1068206  | 0.02095  | 0.086958 | 0.06042  |
| 0.01829  | -0.06073 | 0.19014  | -0.04    | 0.38839  | 0.05406761 | 0.24356  | 0.078834 | 0.08881  |
| 0.0065   | 0.152455 | 0.00095  | 0.118813 | 0.01018  | -0.0316644 | 0.49485  | -0.07557 | 0.10289  |
| 0.36219  | 0.033316 | 0.47261  | -0.06759 | 0.14472  | -0.0592308 | 0.20136  | -0.01051 | 0.82077  |
| 0.1849   | 0.146167 | 0.00154  | 0.008071 | 0.86191  | 0.02379387 | 0.60803  | 0.094154 | 0.04198  |
| 1.38E-06 | 0.113442 | 0.01417  | -0.03905 | 0.39986  | 0.00143067 | 0.9754   | -0.05829 | 0.20864  |
| 0.05439  | -0.14128 | 0.00221  | 0.221375 | 1.36E-06 | 0.25237162 | 3.22E-08 | 0.165495 | 0.00033  |
| 0.00046  | -0.01708 | 0.71271  | -0.13629 | 0.00317  | 0.07206655 | 0.11989  | -0.04347 | 0.34864  |
| 4.94E-05 | 0.168078 | 0.00026  | 0.337615 | 6.50E-14 | 0.18476568 | 5.90E-05 | 0.159983 | 0.00052  |
| 0.35012  | -0.08295 | 0.07333  | -0.11201 | 0.01545  | 0.05403015 | 0.24389  | 0.147697 | 0.00137  |
| 0.13862  | 0.03662  | 0.42981  | 0.280367 | 6.98E-10 | 0.21889958 | 1.79E-06 | 0.131329 | 0.00447  |
| 0.89295  | -0.02738 | 0.55512  | 0.069396 | 0.13428  | 0.20604568 | 7.16E-06 | 0.241384 | 1.29E-07 |
| 0.14865  | 0.006858 | 0.88249  | -0.1763  | 0.00013  | -0.1098843 | 0.01753  | -0.0164  | 0.72379  |
| 0.06365  | -0.09588 | 0.03833  | -0.18989 | 3.62E-05 | -0.1797157 | 9.42E-05 | -0.12651 | 0.00619  |
| 0.35571  | -0.06501 | 0.16072  | 0.053957 | 0.24453  | 0.10537378 | 0.02276  | -0.05185 | 0.26347  |
| 0.0615   | 0.247629 | 5.91E-08 | 0.491418 | 9.21E-30 | 0.31261979 | 4.79E-12 | 0.035901 | 0.43893  |
| 0.00683  | 0.069917 | 0.13137  | -0.03026 | 0.51418  | -0.0243559 | 0.59958  | -0.08531 | 0.06549  |
| 0.00041  | -0.1059  | 0.02209  | -0.06691 | 0.1488   | 0.06635553 | 0.15223  | 0.103618 | 0.02514  |
| 0.00593  | 0.176127 | 0.00013  | 0.044534 | 0.33691  | -0.0223467 | 0.63003  | -0.0586  | 0.20624  |
| 0.32488  | 0.036346 | 0.43327  | -0.0442  | 0.34055  | 0.02076986 | 0.65438  | 0.130405 | 0.00476  |
| 0.41218  | 0.20231  | 1.05E-05 | 0.126801 | 0.00607  | 0.04902807 | 0.29037  | 0.13535  | 0.00338  |
| 9.34E-08 | -0.11851 | 0.01037  | -0.05825 | 0.20893  | 0.11360768 | 0.01403  | 0.194469 | 2.32E-05 |
| 0.39924  | 0.037298 | 0.42132  | 0.195312 | 2.13E-05 | 0.31149812 | 5.76E-12 | 0.280678 | 6.67E-10 |
| 0.00037  | -0.02868 | 0.5364   | -0.15914 | 0.00056  | 0.05138009 | 0.26782  | -0.07615 | 0.10027  |
| 0.12485  | -0.10263 | 0.02657  | -0.01682 | 0.71697  | 0.00014212 | 0.99756  | -0.15602 | 0.00072  |
| 0.28441  | 0.007791 | 0.86665  | 0.057509 | 0.2148   | 0.04931871 | 0.28752  | 0.056853 | 0.22009  |
| 0.09951  | 0.158862 | 0.00057  | 0.329939 | 2.54E-13 | 0.38512723 | 5.84E-18 | 0.335725 | 9.12E-14 |
| 0.91376  | 0.315346 | 3.05E-12 | 0.231241 | 4.36E-07 | 0.21455364 | 2.89E-06 | 0.237452 | 2.08E-07 |
| 0.03207  | 0.029084 | 0.53068  | 0.058034 | 0.21064  | 0.18419281 | 6.23E-05 | 0.298034 | 4.92E-11 |
| 0.19695  | -0.16901 | 0.00024  | -0.22412 | 9.95E-07 | -0.1157832 | 0.01229  | -0.19531 | 2.13E-05 |
| 0.45845  | 0.072316 | 0.11861  | 0.361201 | 7.73E-16 | 0.47916417 | 3.52E-28 | 0.344431 | 1.88E-14 |
| 0.78383  | 0.03769  | 0.41645  | -0.15273 | 0.00093  | -0.1491443 | 0.00123  | -0.16255 | 0.00042  |

|          |          |          |          |          |            |          |          |          |
|----------|----------|----------|----------|----------|------------|----------|----------|----------|
| 0.91826  | 0.064424 | 0.16455  | -0.00174 | 0.97009  | 0.10039645 | 0.03006  | 0.145978 | 0.00156  |
| 0.0345   | 0.246048 | 7.21E-08 | 0.150236 | 0.00113  | 0.14103805 | 0.00225  | 0.222938 | 1.14E-06 |
| 0.06737  | 0.114537 | 0.01326  | 0.09212  | 0.04663  | 0.16138281 | 0.00046  | 0.105611 | 0.02246  |
| 0.46527  | -0.14952 | 0.00119  | -0.04753 | 0.30536  | 0.12023521 | 0.0093   | 0.041585 | 0.36991  |
| 0.21541  | -0.089   | 0.05461  | -0.09773 | 0.03474  | -0.0293366 | 0.52712  | -0.02392 | 0.60618  |
| 0.15165  | -0.11938 | 0.00982  | -0.13979 | 0.00246  | -0.0608731 | 0.18913  | -0.0552  | 0.23384  |
| 0.32991  | -0.06002 | 0.19544  | -0.06189 | 0.18184  | -0.030749  | 0.50742  | -0.03292 | 0.47795  |
| 0.21234  | 0.012589 | 0.78614  | -0.05968 | 0.198    | -0.0048516 | 0.91672  | -0.03247 | 0.48398  |
| 0.11895  | 0.195776 | 2.04E-05 | 0.084893 | 0.06681  | -0.0854779 | 0.06495  | -0.08293 | 0.07338  |
| 0.28566  | 0.141394 | 0.00219  | 0.084498 | 0.06809  | 0.15651178 | 0.00069  | 0.134012 | 0.00372  |
| 0.1461   | -0.04445 | 0.33782  | -0.13934 | 0.00255  | -0.3028203 | 2.32E-11 | -0.30029 | 3.46E-11 |
| 0.00098  | 0.169682 | 0.00023  | 0.190757 | 3.33E-05 | 0.10934908 | 0.01809  | 0.011925 | 0.79717  |
| 0.06663  | 0.172306 | 0.00018  | 0.228934 | 5.71E-07 | 0.45812083 | 1.31E-25 | 0.234925 | 2.82E-07 |
| 0.03525  | 0.031416 | 0.49824  | 0.275864 | 1.33E-09 | 0.2285469  | 5.98E-07 | 0.028734 | 0.53565  |
| 0.02369  | 0.274989 | 1.51E-09 | 0.182035 | 7.61E-05 | -0.0981308 | 0.034    | -0.18566 | 5.42E-05 |
| 0.6465   | 0.087229 | 0.05962  | 0.125104 | 0.00679  | 0.0985451  | 0.03325  | 0.074778 | 0.10655  |
| 0.46465  | -0.24167 | 1.24E-07 | -0.13843 | 0.00272  | 0.08683482 | 0.06079  | 0.083199 | 0.07246  |
| 0.83461  | -0.00913 | 0.84401  | 0.087614 | 0.0585   | 0.15165464 | 0.00101  | 0.081066 | 0.08011  |
| 0.43166  | -0.10629 | 0.02161  | -0.00491 | 0.9157   | 0.10657472 | 0.02125  | 0.077714 | 0.09345  |
| 4.10E-07 | -0.14339 | 0.00189  | 0.104836 | 0.02347  | 0.0341799  | 0.4612   | -0.04912 | 0.28945  |
| 0.09823  | 0.159096 | 0.00056  | 0.075069 | 0.10519  | 0.03765225 | 0.41692  | 0.069837 | 0.13181  |
| 0.19196  | 0.118201 | 0.01057  | -0.13132 | 0.00447  | -0.0552449 | 0.23343  | -0.22726 | 6.94E-07 |
| 0.1464   | -0.07198 | 0.12033  | 0.171725 | 0.00019  | 0.32535683 | 5.63E-13 | 0.077061 | 0.09625  |
| 6.39E-12 | 0.11265  | 0.01487  | 0.254077 | 2.58E-08 | 0.21782071 | 2.02E-06 | 0.074504 | 0.10784  |
| 3.42E-09 | -0.02566 | 0.58022  | -0.03068 | 0.50839  | 0.21403588 | 3.05E-06 | 0.259202 | 1.32E-08 |
| 3.72E-09 | 0.070141 | 0.13013  | 0.103681 | 0.02505  | 0.12605555 | 0.00638  | 0.11295  | 0.0146   |
| 0.38065  | -0.02747 | 0.55369  | -0.08555 | 0.06472  | 0.09066926 | 0.05021  | 0.044799 | 0.33404  |
| 0.0004   | 0.253957 | 2.62E-08 | 0.091191 | 0.0489   | -0.0239897 | 0.60508  | -0.12547 | 0.00663  |
| 0.75562  | 0.054794 | 0.23727  | 0.048027 | 0.30035  | 0.03625147 | 0.43447  | 0.023986 | 0.60514  |
| 7.66E-05 | -0.2163  | 2.38E-06 | -0.11222 | 0.01525  | -0.0572719 | 0.2167   | -0.08897 | 0.05468  |
| 9.45E-05 | -0.09969 | 0.03125  | 0.002185 | 0.96245  | -0.0238807 | 0.60672  | -0.07037 | 0.12889  |
| 3.18E-10 | -0.14328 | 0.00191  | -0.11539 | 0.01259  | -0.0439136 | 0.34369  | -0.06428 | 0.16548  |
| 0.00224  | 0.080779 | 0.08119  | 0.040643 | 0.38086  | 0.02351289 | 0.61228  | -0.0159  | 0.73181  |
| 1.96E-12 | -0.15352 | 0.00087  | -0.14511 | 0.00167  | 0.00060631 | 0.98957  | -0.06659 | 0.15076  |
| 8.84E-18 | -0.00429 | 0.92632  | -0.07757 | 0.09405  | -0.0823466 | 0.07544  | -0.07296 | 0.11537  |
| 1.19E-09 | -0.22282 | 1.15E-06 | -0.16347 | 0.00039  | -0.049069  | 0.28997  | -0.04748 | 0.30592  |
| 1.20E-07 | -0.11248 | 0.01502  | -0.13526 | 0.0034   | -0.0587541 | 0.20502  | -0.07765 | 0.09371  |
| 0.02732  | 0.167152 | 0.00029  | 0.123051 | 0.00776  | 0.00689494 | 0.88187  | 0.001847 | 0.96824  |
| 0.09193  | 0.011041 | 0.81191  | 0.063098 | 0.17343  | -0.0138853 | 0.76473  | -0.04599 | 0.32136  |
| 0.00384  | 0.108159 | 0.01939  | 0.099161 | 0.03216  | 0.00863131 | 0.85242  | -0.00411 | 0.92945  |
| 5.30E-06 | 0.108962 | 0.0185   | 0.058541 | 0.20667  | -0.1141655 | 0.01356  | -0.13346 | 0.00386  |
| 0.37099  | 0.013848 | 0.76534  | 0.002293 | 0.96058  | -0.0163453 | 0.72461  | -0.04362 | 0.34697  |
| 0.43687  | -0.26221 | 8.81E-09 | -0.42223 | 1.29E-21 | -0.3013617 | 2.93E-11 | -0.29361 | 9.72E-11 |
| 0.00952  | -0.07335 | 0.11342  | -0.10044 | 0.03     | -0.0520047 | 0.26204  | 0.056689 | 0.22142  |
| 0.38208  | -0.13936 | 0.00254  | -0.19906 | 1.47E-05 | -0.0870103 | 0.06027  | 0.011189 | 0.80943  |

|          |          |          |          |          |            |          |          |          |
|----------|----------|----------|----------|----------|------------|----------|----------|----------|
| 0.81997  | 0.213591 | 3.21E-06 | 0.173738 | 0.00016  | 0.16230887 | 0.00043  | 0.0669   | 0.14889  |
| 0.23947  | 0.288536 | 2.09E-10 | 0.260716 | 1.08E-08 | -0.0185171 | 0.68981  | -0.13668 | 0.00308  |
| 0.0588   | 0.029473 | 0.5252   | -0.08886 | 0.05499  | -0.2980212 | 4.93E-11 | -0.25762 | 1.62E-08 |
| 0.46008  | 0.154843 | 0.00079  | 0.159923 | 0.00052  | 0.12553115 | 0.0066   | 0.064693 | 0.16279  |
| 0.172    | 0.119486 | 0.00975  | 0.086848 | 0.06075  | 0.03858508 | 0.40546  | 0.038938 | 0.40118  |
| 3.13E-19 | -0.06242 | 0.17808  | -0.02949 | 0.52491  | 0.0473155  | 0.30757  | 0.061808 | 0.18241  |
| 0.31171  | -0.05396 | 0.24449  | -0.04455 | 0.33671  | -0.0291445 | 0.52983  | -0.01416 | 0.76017  |
| 6.80E-05 | 0.013435 | 0.77214  | 0.001441 | 0.97523  | 0.01674034 | 0.71824  | 0.028853 | 0.53396  |
| 0.21101  | 0.117728 | 0.01089  | 0.080603 | 0.08186  | -0.0142335 | 0.75901  | -0.04389 | 0.34399  |
| 0.00197  | 0.073156 | 0.11438  | 0.130953 | 0.00459  | 0.1302937  | 0.0048   | 0.072846 | 0.11593  |
| 2.28E-08 | 0.026159 | 0.57284  | 0.028959 | 0.53246  | 0.12697231 | 0.006    | 0.092959 | 0.04466  |
| 7.96E-06 | 0.013942 | 0.76381  | 0.008536 | 0.85404  | 0.01571179 | 0.73488  | -0.01079 | 0.81615  |
| 2.86E-05 | 0.022011 | 0.63518  | 0.008115 | 0.86116  | 0.02415702 | 0.60257  | 0.023432 | 0.6135   |
| 1.53E-05 | 0.111399 | 0.01602  | 0.108018 | 0.01955  | 0.16984042 | 0.00023  | 0.129895 | 0.00493  |
| 0.97566  | 0.017806 | 0.70113  | -0.06194 | 0.18147  | -0.0223167 | 0.63049  | 0.002798 | 0.95191  |
| 0.45955  | 0.104433 | 0.02401  | 0.134506 | 0.00359  | -0.0212639 | 0.64671  | -0.06546 | 0.15785  |
| 0.01662  | 0.019679 | 0.67144  | 0.026447 | 0.56862  | -0.1003429 | 0.03015  | -0.14478 | 0.00171  |
| 0.46588  | 0.011276 | 0.80798  | 0.015527 | 0.73788  | -0.1085863 | 0.01891  | -0.17024 | 0.00022  |
| 0.67184  | -0.0415  | 0.37092  | -0.06277 | 0.17571  | 0.0429048  | 0.3549   | -0.00076 | 0.98685  |
| 0.7637   | 0.192836 | 2.72E-05 | 0.036313 | 0.4337   | -0.0630271 | 0.17392  | -0.02578 | 0.57848  |
| 0.50371  | 0.071745 | 0.12156  | 0.057589 | 0.21416  | 0.09391039 | 0.04251  | 0.067879 | 0.14302  |
| 0.6733   | -0.03371 | 0.46735  | -0.1236  | 0.00749  | -0.0661123 | 0.15374  | -0.05743 | 0.21546  |
| 0.01211  | 0.064148 | 0.16637  | -0.05917 | 0.20181  | -0.0237199 | 0.60915  | 0.0413   | 0.37321  |
| 0.80109  | 0.062015 | 0.18094  | -0.00282 | 0.95158  | -0.08625   | 0.06255  | -0.05413 | 0.24304  |
| 0.00856  | -0.03515 | 0.44864  | -0.29593 | 6.81E-11 | -0.0119005 | 0.79757  | -0.0488  | 0.29258  |
| 0.25572  | -0.05898 | 0.20329  | -0.29438 | 8.65E-11 | -0.2800482 | 7.30E-10 | -0.32592 | 5.11E-13 |
| 0.77737  | 0.054593 | 0.239    | -0.00179 | 0.96927  | 0.01189886 | 0.7976   | -0.05495 | 0.23598  |
| 0.70888  | -0.06865 | 0.13854  | -0.35233 | 4.27E-15 | -0.2557687 | 2.07E-08 | -0.2786  | 9.00E-10 |
| 0.00202  | -0.11702 | 0.01138  | -0.23751 | 2.06E-07 | -0.2077968 | 5.95E-06 | -0.26244 | 8.55E-09 |
| 3.70E-06 | 0.210513 | 4.46E-06 | 0.0534   | 0.24944  | 0.22230654 | 1.22E-06 | 0.25217  | 3.31E-08 |
| 0.82314  | 0.050819 | 0.27309  | -0.01544 | 0.73929  | 0.03370796 | 0.46742  | 0.067317 | 0.14637  |
| 0.31631  | 0.080683 | 0.08155  | 0.09673  | 0.03665  | 0.08567292 | 0.06434  | 0.082781 | 0.07391  |
| 0.67168  | 0.034694 | 0.45448  | 0.310616 | 6.65E-12 | 0.29337156 | 1.01E-10 | 0.098312 | 0.03367  |
| 0.43446  | -0.22318 | 1.11E-06 | 0.026423 | 0.56897  | 0.05428105 | 0.2417   | 0.03963  | 0.39286  |
| 0.04835  | 0.217402 | 2.11E-06 | 0.092512 | 0.0457   | 0.10545194 | 0.02266  | 0.164647 | 0.00035  |
| 0.23413  | -0.1081  | 0.01945  | -0.00371 | 0.93625  | 0.21576569 | 2.53E-06 | 0.272747 | 2.07E-09 |
| 0.3227   | 0.198893 | 1.49E-05 | 0.158037 | 0.00061  | 0.37828915 | 2.46E-17 | 0.26115  | 1.02E-08 |
| 0.66624  | -0.22389 | 1.02E-06 | 0.118083 | 0.01065  | 0.30621669 | 1.35E-11 | 0.167531 | 0.00028  |
| 0.0167   | -0.10558 | 0.0225   | -0.07757 | 0.09408  | 0.0308609  | 0.50587  | -0.03982 | 0.39058  |
| 0.02366  | 0.117656 | 0.01094  | 0.396899 | 4.53E-19 | 0.34340623 | 2.27E-14 | 0.237391 | 2.10E-07 |
| 0.10134  | 0.098916 | 0.03259  | 0.158066 | 0.00061  | 0.24452599 | 8.72E-08 | 0.266693 | 4.79E-09 |
| 0.11688  | -0.11468 | 0.01315  | 0.028716 | 0.5359   | 0.1256686  | 0.00654  | 0.11341  | 0.0142   |
| 0.00097  | -0.03588 | 0.4392   | -0.10589 | 0.0221   | -0.1353016 | 0.00339  | -0.14112 | 0.00224  |
| 0.12928  | 0.088595 | 0.05572  | 0.088073 | 0.05719  | -0.01631   | 0.72518  | -0.0432  | 0.35159  |
| 0.05684  | 0.143732 | 0.00185  | 0.085988 | 0.06336  | -0.0289091 | 0.53316  | -0.12814 | 0.00555  |

|          |          |          |          |          |            |          |          |          |
|----------|----------|----------|----------|----------|------------|----------|----------|----------|
| 0.87659  | 0.073243 | 0.11395  | -0.0075  | 0.87162  | -0.0113342 | 0.80701  | 0.036962 | 0.42551  |
| 0.37688  | -0.05076 | 0.27368  | -0.11313 | 0.01444  | -0.0943285 | 0.0416   | -0.04334 | 0.35004  |
| 0.09618  | 0.013368 | 0.77325  | 0.029421 | 0.52594  | 0.08565591 | 0.06439  | 0.095943 | 0.03821  |
| 0.61168  | 0.048066 | 0.29995  | 0.020046 | 0.66569  | 0.00434466 | 0.9254   | 0.022466 | 0.6282   |
| 0.51324  | 0.030495 | 0.51093  | -0.05093 | 0.272    | -0.0327054 | 0.48077  | 0.031946 | 0.49102  |
| 0.64535  | 0.004825 | 0.91717  | -0.03839 | 0.40786  | -0.0012291 | 0.97887  | 0.03243  | 0.48447  |
| 0.30328  | 0.003053 | 0.94753  | -0.08292 | 0.07342  | -0.0507084 | 0.27414  | -0.05209 | 0.26129  |
| 0.98721  | 0.135019 | 0.00346  | 0.014281 | 0.75823  | -0.0426794 | 0.35744  | -0.00737 | 0.87379  |
| 0.39922  | 0.154436 | 0.00081  | 0.236736 | 2.27E-07 | 0.27473337 | 1.56E-09 | 0.284149 | 4.02E-10 |
| 0.69472  | -0.09771 | 0.03478  | -0.05018 | 0.27922  | -0.0823293 | 0.0755   | -0.07841 | 0.09055  |
| 0.00199  | -0.13322 | 0.00393  | -0.18629 | 5.11E-05 | -0.13049   | 0.00474  | -0.21896 | 1.78E-06 |
| 6.17E-18 | -0.00224 | 0.96151  | 0.019908 | 0.66785  | -0.0531006 | 0.25211  | -0.08707 | 0.0601   |
| 0.00463  | -0.04082 | 0.37875  | -0.06115 | 0.1871   | -0.067714  | 0.144    | -0.09133 | 0.04855  |
| 0.75727  | -0.0476  | 0.30467  | -0.08914 | 0.05423  | -0.0255654 | 0.58158  | -0.01479 | 0.7499   |
| 0.00833  | 0.011814 | 0.79901  | -0.04204 | 0.36472  | 0.02275986 | 0.62372  | 0.004611 | 0.92083  |
| 0.50017  | 0.15735  | 0.00064  | 0.07308  | 0.11476  | -0.0639969 | 0.16737  | -0.04091 | 0.37779  |
| 0.00258  | -0.2461  | 7.16E-08 | -0.04933 | 0.28743  | -0.0539234 | 0.24482  | -0.16103 | 0.00048  |
| 0.0607   | 0.108505 | 0.019    | 0.153723 | 0.00086  | 0.11928187 | 0.00988  | -0.02809 | 0.54486  |
| 0.05118  | -0.12507 | 0.00681  | -0.04967 | 0.28411  | 0.02786329 | 0.54808  | 0.026784 | 0.5637   |
| 0.00342  | 0.035726 | 0.44117  | -0.23223 | 3.88E-07 | -0.120941  | 0.00889  | -0.08951 | 0.05323  |
| 0.05209  | 0.086516 | 0.06174  | 0.03565  | 0.44215  | 0.0144966  | 0.7547   | 0.029    | 0.53188  |
| 8.48E-08 | 0.051675 | 0.26508  | -0.0097  | 0.83448  | -0.0515313 | 0.26642  | -0.07449 | 0.10792  |
| 0.02559  | 0.168517 | 0.00025  | 0.224297 | 9.75E-07 | 0.11603283 | 0.0121   | 0.120266 | 0.00928  |
| 0.77483  | -0.05248 | 0.25767  | -0.27637 | 1.24E-09 | -0.1295546 | 0.00505  | 0.01492  | 0.74778  |
| 0.04896  | -0.16127 | 0.00047  | -0.10327 | 0.02564  | 0.07073961 | 0.12688  | 0.104568 | 0.02383  |
| 9.66E-13 | 0.008547 | 0.85384  | 0.003472 | 0.94035  | 0.01545596 | 0.73904  | -0.09453 | 0.04117  |
| 0.11807  | -0.0544  | 0.24063  | -0.01427 | 0.75833  | 0.00931705 | 0.84085  | -0.00617 | 0.89424  |
| 0.08378  | -0.00985 | 0.83181  | -0.08812 | 0.05706  | -0.1010758 | 0.02896  | -0.09176 | 0.04751  |
| 0.83671  | -0.25957 | 1.25E-08 | -0.11831 | 0.0105   | -0.1456709 | 0.0016   | -0.10376 | 0.02495  |
| 0.0305   | -0.01416 | 0.76015  | -0.05712 | 0.21795  | -0.0393359 | 0.39638  | -0.06435 | 0.16504  |
| 0.06728  | 0.143968 | 0.00181  | 0.098672 | 0.03302  | 0.00216251 | 0.96283  | -0.03279 | 0.4797   |
| 0.01907  | 0.273911 | 1.76E-09 | 0.186867 | 4.84E-05 | -0.0804248 | 0.08254  | -0.15503 | 0.00078  |
| 0.97283  | -0.00799 | 0.86333  | -0.01261 | 0.78585  | 0.02984843 | 0.51994  | -0.04147 | 0.37121  |
| 0.1161   | -0.06263 | 0.17662  | -0.04036 | 0.38414  | -0.1336213 | 0.00382  | -0.16271 | 0.00041  |
| 0.49875  | 0.009068 | 0.84505  | -0.03654 | 0.43083  | -0.0361363 | 0.43594  | -0.00488 | 0.91628  |
| 0.00056  | 0.214591 | 2.88E-06 | 0.073441 | 0.11297  | 0.18385132 | 6.43E-05 | 0.250154 | 4.28E-08 |
| 0.00617  | 0.082761 | 0.07398  | 0.128277 | 0.0055   | 0.10257059 | 0.02666  | 0.065225 | 0.15935  |
| 2.14E-15 | 0.026311 | 0.57061  | 0.005337 | 0.90843  | 0.08625612 | 0.06253  | 0.064506 | 0.16401  |
| 0.06646  | 0.109825 | 0.01759  | -0.06548 | 0.15772  | -0.0430705 | 0.35305  | 0.035848 | 0.43961  |
| 0.59105  | 0.053128 | 0.25186  | -0.03729 | 0.42141  | -0.0248771 | 0.59179  | -0.01512 | 0.74443  |
| 0.59003  | 0.13455  | 0.00358  | 0.051109 | 0.27035  | 0.06320609 | 0.17269  | 0.047321 | 0.30751  |
| 0.6344   | 0.270392 | 2.88E-09 | 0.164334 | 0.00036  | 0.04629842 | 0.3181   | -0.01221 | 0.79235  |
| 0.364    | 0.087626 | 0.05847  | 0.060459 | 0.19216  | 0.03563366 | 0.44235  | 0.029408 | 0.52611  |
| 0.40012  | 0.099318 | 0.03189  | 0.046565 | 0.31532  | -0.1754231 | 0.00014  | -0.17289 | 0.00017  |
| 0.03106  | 0.105987 | 0.02198  | 0.020699 | 0.65549  | 0.04569756 | 0.32443  | 0.080039 | 0.08403  |

|          |          |          |           |          |            |          |          |          |
|----------|----------|----------|-----------|----------|------------|----------|----------|----------|
| 0.24263  | 0.056934 | 0.21943  | 0.0453    | 0.32866  | 0.04709809 | 0.3098   | 0.057284 | 0.2166   |
| 0.76006  | 0.01166  | 0.80158  | -0.03995  | 0.38906  | 0.08990086 | 0.0522   | 0.137854 | 0.00283  |
| 0.84347  | 0.060501 | 0.19185  | -0.01849  | 0.69028  | 0.00643145 | 0.88976  | -0.00457 | 0.92147  |
| 0.52899  | 0.193977 | 2.43E-05 | -0.0885   | 0.05599  | -0.1234766 | 0.00755  | -0.27218 | 2.24E-09 |
| 0.00053  | 0.092667 | 0.04534  | 0.109182  | 0.01827  | 0.26715797 | 4.50E-09 | 0.240029 | 1.52E-07 |
| 0.05344  | -0.09541 | 0.03929  | -0.17342  | 0.00017  | -0.204099  | 8.76E-06 | -0.18958 | 3.73E-05 |
| 0.00655  | -0.12785 | 0.00566  | -0.17912  | 9.95E-05 | -0.2074129 | 6.20E-06 | -0.20015 | 1.31E-05 |
| 0.77777  | 0.100161 | 0.03045  | 0.051509  | 0.26663  | -0.0037815 | 0.93504  | 0.017743 | 0.70214  |
| 0.05625  | 0.129158 | 0.00518  | 0.014677  | 0.75174  | -0.278285  | 9.42E-10 | -0.31608 | 2.70E-12 |
| 0.74862  | -0.22982 | 5.15E-07 | -0.30137  | 2.92E-11 | -0.2484252 | 5.34E-08 | -0.29352 | 9.86E-11 |
| 5.64E-15 | 0.063702 | 0.16934  | 0.084515  | 0.06804  | 0.17217599 | 0.00018  | 0.063696 | 0.16939  |
| 0.19044  | 0.039498 | 0.39443  | 0.019589  | 0.67287  | -0.0120026 | 0.79587  | -0.1163  | 0.0119   |
| 0.2931   | -0.22421 | 9.85E-07 | -0.21437  | 2.95E-06 | 0.01984091 | 0.6689   | -0.01219 | 0.79278  |
| 0.69134  | -0.0089  | 0.84795  | -0.01218  | 0.79291  | -0.0090566 | 0.84524  | -0.02855 | 0.5383   |
| 0.7903   | 0.016679 | 0.71922  | 0.087826  | 0.05789  | 0.2697456  | 3.15E-09 | 0.125094 | 0.0068   |
| 0.17347  | 0.077049 | 0.0963   | 0.052904  | 0.25387  | 0.04054711 | 0.38199  | 0.060332 | 0.1931   |
| 0.0818   | 0.071597 | 0.12233  | 0.068957  | 0.13676  | 0.03136783 | 0.4989   | 0.029975 | 0.51816  |
| 0.00033  | 0.018681 | 0.68721  | 0.026659  | 0.56552  | -0.0070437 | 0.87934  | -0.02254 | 0.62703  |
| 2.68E-11 | 0.135196 | 0.00342  | 0.05212   | 0.26099  | 0.07418426 | 0.10937  | 0.106783 | 0.021    |
| 0.35484  | 0.0599   | 0.19631  | 0.040493  | 0.38262  | 0.05682656 | 0.2203   | 0.029929 | 0.51882  |
| 0.63638  | -0.02078 | 0.65419  | -0.02591  | 0.57653  | 0.02598022 | 0.57546  | 0.041284 | 0.37339  |
| 0.24212  | 0.269761 | 3.14E-09 | 0.346367  | 1.31E-14 | 0.19462708 | 2.28E-05 | 0.19975  | 1.37E-05 |
| 0.00016  | -0.21413 | 3.02E-06 | -0.24532  | 7.90E-08 | 0.05055808 | 0.27556  | -0.0473  | 0.30775  |
| 0.01665  | -0.20626 | 7.00E-06 | 0.059     | 0.20313  | -0.0224791 | 0.628    | -0.16479 | 0.00035  |
| 0.28918  | 0.044119 | 0.34144  | -0.06882  | 0.13753  | -0.0914211 | 0.04833  | -0.22284 | 1.15E-06 |
| 0.02045  | 0.286641 | 2.78E-10 | 0.172828  | 0.00017  | 0.03859984 | 0.40528  | -0.00374 | 0.93573  |
| 3.33E-18 | -0.2282  | 6.23E-07 | -0.14354  | 0.00187  | -0.0587425 | 0.20511  | -0.02714 | 0.5585   |
| 0.00138  | 0.047473 | 0.30596  | 0.0114    | 0.80591  | 0.03129417 | 0.49991  | 0.085892 | 0.06366  |
| 0.41247  | 0.186233 | 5.14E-05 | 0.117718  | 0.0109   | 0.02504275 | 0.58933  | 0.052131 | 0.26088  |
| 0.30517  | 0.015627 | 0.73626  | -0.10981  | 0.0176   | -0.0397095 | 0.39191  | -0.01013 | 0.82715  |
| 0.00237  | 0.011316 | 0.80731  | -0.12727  | 0.00589  | -0.2147644 | 2.82E-06 | -0.28964 | 1.78E-10 |
| 0.63911  | 0.105428 | 0.02269  | 0.101655  | 0.02805  | 0.05339306 | 0.2495   | -0.0028  | 0.95191  |
| 0.67231  | 0.362752 | 5.70E-16 | 0.431235  | 1.43E-22 | 0.22678718 | 7.33E-07 | 0.237994 | 1.95E-07 |
| 0.64932  | 0.058563 | 0.2065   | 0.050662  | 0.27458  | 0.17770814 | 0.00011  | 0.306404 | 1.31E-11 |
| 0.00545  | 0.076749 | 0.09761  | 0.022247  | 0.63156  | 0.119483   | 0.00976  | -0.0042  | 0.92785  |
| 0.92668  | 0.248228 | 5.47E-08 | 0.263978  | 6.94E-09 | 0.25540682 | 2.17E-08 | 0.210901 | 4.28E-06 |
| 0.07006  | -0.02348 | 0.61279  | 0.138765  | 0.00265  | 0.15169028 | 0.00101  | -0.00276 | 0.95257  |
| 0.01152  | 0.075972 | 0.10106  | 1.04E-05  | 0.99982  | 0.03021684 | 0.51479  | -0.06918 | 0.13551  |
| 0.00012  | 0.056922 | 0.21952  | 0.087962  | 0.0575   | 0.22191084 | 1.28E-06 | 0.32032  | 1.33E-12 |
| 0.0605   | 0.189091 | 3.91E-05 | 0.100788  | 0.02942  | 0.27204703 | 2.28E-09 | 0.208627 | 5.45E-06 |
| 1.11E-07 | -0.19697 | 1.81E-05 | -0.19083  | 3.31E-05 | -0.0169464 | 0.71492  | 0.050048 | 0.28044  |
| 0.09837  | 0.010858 | 0.81496  | -8.32E-05 | 0.99857  | -0.0182343 | 0.6943   | 0.006842 | 0.88277  |
| 0.96163  | -0.19647 | 1.90E-05 | -0.15179  | 0.001    | 0.00549928 | 0.90565  | -0.10765 | 0.01997  |
| 1.89E-14 | -0.03258 | 0.48249  | -0.06719  | 0.14716  | 0.13967027 | 0.00249  | 0.259392 | 1.28E-08 |
| 2.68E-10 | 0.007311 | 0.8748   | -0.05309  | 0.25224  | -0.0272849 | 0.55642  | 0.008565 | 0.85354  |



|          |          |          |          |          |            |          |          |          |
|----------|----------|----------|----------|----------|------------|----------|----------|----------|
| 0.7666   | 0.077644 | 0.09375  | 0.004551 | 0.92187  | 0.02584794 | 0.57741  | 0.11207  | 0.01539  |
| 1.67E-09 | -0.2116  | 3.97E-06 | -0.18585 | 5.33E-05 | -0.1206604 | 0.00905  | -0.19567 | 2.06E-05 |
| 3.58E-08 | 0.232634 | 3.70E-07 | 0.074514 | 0.10779  | -0.0876092 | 0.05852  | -0.1503  | 0.00112  |
| 0.69196  | -0.03098 | 0.50419  | -0.00318 | 0.94534  | 0.02615677 | 0.57287  | -0.03212 | 0.48861  |
| 0.02413  | -0.04309 | 0.35288  | -0.13714 | 0.00298  | -0.082073  | 0.07642  | -0.07019 | 0.12989  |
| 0.01965  | 0.167003 | 0.00029  | 0.143892 | 0.00182  | 0.15279089 | 0.00092  | 0.174032 | 0.00016  |
| 0.00125  | 0.095372 | 0.03938  | 0.48073  | 2.23E-28 | 0.24417074 | 9.12E-08 | 0.074509 | 0.10782  |
| 2.66E-07 | 0.275225 | 1.46E-09 | 0.033638 | 0.46834  | 0.02829383 | 0.54192  | 0.005603 | 0.90388  |
| 0.74206  | 0.035781 | 0.44046  | 0.162514 | 0.00042  | 0.13887301 | 0.00263  | 0.070044 | 0.13067  |
| 0.24247  | 0.01396  | 0.7635   | 0.04572  | 0.32419  | 0.03424007 | 0.46041  | 0.120258 | 0.00929  |
| 0.00103  | 0.076708 | 0.09779  | -0.03046 | 0.51147  | 0.05889174 | 0.20396  | 0.104899 | 0.02339  |
| 0.20326  | 0.043626 | 0.34686  | -0.14908 | 0.00123  | -0.0491796 | 0.28888  | 0.007789 | 0.86668  |
| 0.65766  | 0.019058 | 0.68123  | 0.035742 | 0.44096  | -0.1003263 | 0.03018  | -0.10073 | 0.02953  |
| 1.05E-09 | -0.04625 | 0.31858  | 0.075622 | 0.10265  | 0.32919053 | 2.89E-13 | 0.313566 | 4.10E-12 |
| 0.23308  | 0.117692 | 0.01092  | 0.100578 | 0.02977  | 0.28779933 | 2.34E-10 | 0.292087 | 1.23E-10 |
| 1.86E-20 | -0.05639 | 0.22386  | -0.07387 | 0.11086  | 0.06407981 | 0.16682  | 0.076447 | 0.09894  |
| 0.61188  | 0.11991  | 0.0095   | 0.043182 | 0.3518   | -0.0001398 | 0.9976   | 0.022761 | 0.62369  |
| 0.90507  | 0.022981 | 0.62035  | -0.00618 | 0.89412  | 0.06081188 | 0.18957  | 0.093992 | 0.04233  |
| 2.76E-11 | -0.18144 | 8.04E-05 | -0.01182 | 0.79891  | 0.07213    | 0.11957  | 0.073198 | 0.11418  |
| 0.02266  | 0.102642 | 0.02655  | 0.237771 | 2.00E-07 | 0.17432243 | 0.00015  | 0.032068 | 0.48937  |
| 5.35E-05 | -0.18062 | 8.67E-05 | -0.37869 | 2.26E-17 | -0.1579049 | 0.00062  | -0.11871 | 0.01024  |
| 0.79958  | 0.197273 | 1.76E-05 | -0.00759 | 0.87014  | 0.00433137 | 0.92562  | 0.073525 | 0.11256  |
| 0.17954  | -0.22456 | 9.46E-07 | -0.1426  | 0.00201  | 0.19387536 | 2.46E-05 | 0.20483  | 8.12E-06 |
| 0.57041  | 0.127301 | 0.00587  | 0.103746 | 0.02496  | 0.18502457 | 5.76E-05 | 0.260394 | 1.12E-08 |
| 0.0209   | 0.18272  | 7.14E-05 | 0.19286  | 2.72E-05 | 0.13202829 | 0.00426  | 0.09238  | 0.04601  |
| 0.38611  | 0.107404 | 0.02026  | 0.074106 | 0.10974  | 0.07538182 | 0.10374  | 0.042901 | 0.35495  |
| 1.24E-16 | 0.1884   | 4.18E-05 | 0.182705 | 7.15E-05 | 0.16356843 | 0.00039  | 0.124576 | 0.00703  |
| 9.36E-21 | -0.04014 | 0.38678  | -0.12991 | 0.00493  | -0.0268751 | 0.56237  | 0.018114 | 0.69622  |
| 0.10826  | 0.050841 | 0.27288  | 0.077618 | 0.09386  | 0.10387568 | 0.02478  | 0.094644 | 0.04092  |
| 0.27884  | -0.08004 | 0.08403  | -0.29779 | 5.11E-11 | -0.1139263 | 0.01376  | -0.21626 | 2.40E-06 |
| 0.96777  | -0.15753 | 0.00063  | 0.102369 | 0.02696  | 0.40629859 | 5.46E-20 | 0.263363 | 7.54E-09 |
| 0.75306  | 0.033847 | 0.46558  | -0.07972 | 0.08526  | -0.1050046 | 0.02325  | -0.15618 | 0.00071  |
| 0.98935  | 0.14708  | 0.00144  | 0.018271 | 0.69372  | -0.0356014 | 0.44276  | -0.09465 | 0.0409   |
| 0.26681  | 0.060891 | 0.189    | 0.167499 | 0.00028  | 0.12867106 | 0.00536  | 0.13769  | 0.00287  |
| 0.05956  | -0.13969 | 0.00248  | -0.12088 | 0.00893  | 0.10902169 | 0.01844  | 0.141853 | 0.00212  |
| 0.32197  | 0.086674 | 0.06127  | -0.01399 | 0.76303  | 0.04736174 | 0.3071   | 0.106283 | 0.02161  |
| 0.24522  | -0.24556 | 7.67E-08 | -0.2391  | 1.70E-07 | -0.0546141 | 0.23882  | 0.105098 | 0.02312  |
| 0.00264  | -0.13225 | 0.0042   | -0.06629 | 0.15264  | -0.0690945 | 0.13598  | -0.11083 | 0.01657  |
| 0.0079   | 0.255276 | 2.21E-08 | 0.213922 | 3.09E-06 | -0.0128419 | 0.78195  | -0.08447 | 0.0682   |
| 0.00061  | 0.017302 | 0.7092   | 0.109822 | 0.01759  | 0.0313675  | 0.49891  | 0.052556 | 0.25701  |
| 0.03801  | 0.13876  | 0.00265  | -0.1988  | 1.51E-05 | -0.3107301 | 6.53E-12 | -0.32369 | 7.49E-13 |
| 1.33E-09 | 0.086861 | 0.06071  | 0.08526  | 0.06564  | -0.0584072 | 0.20771  | -0.06229 | 0.17904  |
| 0.21063  | 0.022604 | 0.6261   | 0.005216 | 0.91049  | 0.0352952  | 0.4467   | -0.0462  | 0.31918  |
| 0.88831  | -0.03568 | 0.44178  | 0.001913 | 0.96712  | -0.022438  | 0.62863  | -0.08225 | 0.07578  |
| 0.02764  | 0.21915  | 1.74E-06 | 0.19688  | 1.83E-05 | 0.05256591 | 0.25692  | 0.028304 | 0.54176  |

|          |          |          |          |          |            |          |          |          |
|----------|----------|----------|----------|----------|------------|----------|----------|----------|
| 0.05134  | 0.203609 | 9.22E-06 | 0.097399 | 0.03536  | -0.0584536 | 0.20735  | -0.02661 | 0.5663   |
| 1.22E-08 | -0.26429 | 6.65E-09 | -0.17332 | 0.00017  | -0.1647534 | 0.00035  | -0.01428 | 0.75825  |
| 0.00014  | 0.114943 | 0.01294  | 0.060258 | 0.19365  | -0.0017474 | 0.96996  | -0.03351 | 0.46999  |
| 0.01128  | -0.08603 | 0.06323  | -0.14158 | 0.00216  | 0.16455708 | 0.00036  | -0.03419 | 0.46111  |
| 0.11294  | 0.151137 | 0.00105  | 0.060831 | 0.18943  | 0.16088876 | 0.00048  | 0.144612 | 0.00173  |
| 0.27465  | 0.10683  | 0.02094  | 0.007384 | 0.87356  | 0.02521169 | 0.58682  | -0.00588 | 0.89918  |
| 3.29E-08 | 0.125967 | 0.00642  | -0.01159 | 0.80272  | -0.0101709 | 0.82649  | 0.111704 | 0.01573  |
| 0.96953  | -0.12709 | 0.00596  | -0.24666 | 6.67E-08 | -0.1816868 | 7.86E-05 | -0.2405  | 1.43E-07 |
| 0.00025  | -0.06515 | 0.15981  | 0.185402 | 5.56E-05 | 0.46738165 | 1.02E-26 | 0.33507  | 1.03E-13 |
| 0.00057  | 0.045554 | 0.32596  | -0.01095 | 0.81338  | 0.01397276 | 0.76329  | -0.00362 | 0.93779  |
| 0.06147  | 0.205627 | 7.48E-06 | 0.132255 | 0.0042   | -0.0247513 | 0.59367  | -0.07078 | 0.12669  |
| 0.29301  | -0.217   | 2.21E-06 | -0.12203 | 0.00829  | 0.01636755 | 0.72425  | 0.094596 | 0.04102  |
| 0.01358  | -0.14389 | 0.00182  | -0.03164 | 0.49517  | 0.06034753 | 0.19298  | 0.024288 | 0.60059  |
| 0.36144  | 0.19517  | 2.16E-05 | 0.093893 | 0.04255  | 0.01660482 | 0.72042  | 0.045893 | 0.32236  |
| 0.96251  | 0.221104 | 1.40E-06 | 0.089338 | 0.05369  | 0.04146287 | 0.37132  | 0.08296  | 0.07328  |
| 0.01647  | 0.268348 | 3.82E-09 | 0.096063 | 0.03797  | -0.0310557 | 0.50319  | 0.025327 | 0.5851   |
| 0.00209  | 0.13883  | 0.00264  | 0.061964 | 0.1813   | 0.03849152 | 0.4066   | 0.038356 | 0.40826  |
| 0.00994  | 0.179617 | 9.50E-05 | 0.10572  | 0.02232  | 0.03509257 | 0.44931  | 0.069144 | 0.1357   |
| 0.04219  | 0.238734 | 1.78E-07 | 0.104808 | 0.02351  | 0.04993539 | 0.28153  | 0.052107 | 0.2611   |
| 0.01043  | 0.185183 | 5.67E-05 | 0.115888 | 0.01221  | 0.05316513 | 0.25153  | 0.085944 | 0.06349  |
| 0.34812  | 0.100248 | 0.03031  | 0.035902 | 0.43892  | -0.0272777 | 0.55653  | -0.00536 | 0.90811  |
| 0.23803  | 0.154602 | 0.0008   | 0.013161 | 0.77667  | -0.0804296 | 0.08252  | 0.019528 | 0.67382  |
| 0.16751  | 0.101023 | 0.02905  | 0.077635 | 0.09379  | 0.04923486 | 0.28834  | 0.035499 | 0.44408  |
| 0.7326   | 0.171774 | 0.00019  | 0.057303 | 0.21645  | 0.02418426 | 0.60216  | 0.086416 | 0.06205  |
| 0.63168  | -0.00017 | 0.99707  | -0.01064 | 0.81865  | 0.05365446 | 0.24719  | 0.085379 | 0.06526  |
| 0.5407   | 0.245067 | 8.15E-08 | 0.118181 | 0.01059  | 0.08317712 | 0.07253  | 0.137066 | 0.003    |
| 0.3397   | 0.089595 | 0.05301  | 0.02919  | 0.5292   | -0.0546195 | 0.23878  | -0.01121 | 0.80904  |
| 0.36073  | 0.106414 | 0.02145  | 0.088667 | 0.05553  | 0.0187708  | 0.68578  | 0.02014  | 0.66422  |
| 0.85706  | 0.042204 | 0.36283  | 0.006469 | 0.88911  | -0.0439266 | 0.34355  | -0.01355 | 0.77026  |
| 0.25487  | 0.168385 | 0.00026  | 0.083114 | 0.07275  | -0.0010492 | 0.98196  | 0.034309 | 0.4595   |
| 0.28769  | 0.16898  | 0.00024  | 0.124576 | 0.00703  | 0.05060882 | 0.27508  | 0.047552 | 0.30515  |
| 0.06255  | 0.164662 | 0.00035  | 0.101706 | 0.02797  | 0.06883211 | 0.13748  | 0.06351  | 0.17063  |
| 0.38433  | 0.042478 | 0.35971  | -0.06224 | 0.17938  | -0.013776  | 0.76653  | 0.049117 | 0.2895   |
| 0.9998   | 0.240543 | 1.43E-07 | 0.370856 | 1.13E-16 | 0.19367742 | 2.51E-05 | 0.183005 | 6.96E-05 |
| 0.75297  | 0.10093  | 0.0292   | 0.225494 | 8.50E-07 | 0.13107358 | 0.00455  | 0.114908 | 0.01296  |
| 0.68788  | 0.104017 | 0.02458  | 0.127973 | 0.00561  | 0.16720302 | 0.00028  | 0.120536 | 0.00913  |
| 0.60253  | 0.122853 | 0.00786  | 0.08709  | 0.06003  | 0.04973018 | 0.28351  | 0.027156 | 0.55829  |
| 0.01727  | 0.220335 | 1.52E-06 | 0.308543 | 9.31E-12 | -0.0603071 | 0.19328  | -0.13379 | 0.00377  |
| 0.63363  | 0.043433 | 0.34901  | -0.08067 | 0.08162  | 0.02039924 | 0.66016  | -0.10953 | 0.01789  |
| 0.00205  | 0.049776 | 0.28307  | 0.096126 | 0.03784  | -0.0552623 | 0.23329  | -0.12228 | 0.00816  |
| 0.51942  | 0.300914 | 3.14E-11 | 0.357893 | 1.47E-15 | 0.39726362 | 4.18E-19 | 0.247225 | 6.22E-08 |
| 0.07712  | -0.16918 | 0.00024  | 0.083064 | 0.07292  | 0.39240577 | 1.22E-18 | 0.316657 | 2.46E-12 |
| 0.06406  | -0.07414 | 0.1096   | 0.023583 | 0.61121  | 0.43049676 | 1.71E-22 | 0.294425 | 8.59E-11 |
| 0.2794   | -0.08885 | 0.05503  | 0.219312 | 1.71E-06 | 0.03201149 | 0.49013  | -0.14382 | 0.00183  |
| 0.00646  | 0.149559 | 0.00119  | 0.215689 | 2.55E-06 | 0.11885187 | 0.01015  | 0.040285 | 0.38507  |

|          |          |          |          |          |            |          |          |          |
|----------|----------|----------|----------|----------|------------|----------|----------|----------|
| 0.02381  | -0.30187 | 2.70E-11 | -0.11865 | 0.01028  | 0.08953562 | 0.05316  | 0.181679 | 7.86E-05 |
| 0.18804  | 0.01822  | 0.69453  | 0.093592 | 0.04322  | -0.2177972 | 2.02E-06 | -0.10462 | 0.02376  |
| 0.00376  | 0.145001 | 0.00168  | 0.073553 | 0.11243  | 0.05450246 | 0.23978  | 0.113851 | 0.01383  |
| 0.1285   | -0.02376 | 0.60851  | -0.02809 | 0.54478  | -0.0153473 | 0.7408   | -0.12472 | 0.00697  |
| 1.56E-05 | 0.052766 | 0.25512  | -0.029   | 0.53193  | 0.12458708 | 0.00703  | -0.03383 | 0.46586  |
| 0.00278  | -0.14214 | 0.00208  | 0.068203 | 0.14112  | 0.33974005 | 4.43E-14 | 0.203193 | 9.62E-06 |
| 0.00294  | 0.170102 | 0.00022  | 0.038889 | 0.40177  | 0.05267863 | 0.2559   | 0.064183 | 0.16614  |
| 0.00768  | -0.09566 | 0.03879  | -0.07738 | 0.09488  | -0.0189296 | 0.68326  | -0.14068 | 0.00231  |
| 1.68E-06 | -0.10987 | 0.01754  | -0.18205 | 7.60E-05 | 0.06985712 | 0.1317   | 0.216078 | 2.44E-06 |
| 0.02401  | 0.110157 | 0.01725  | 0.114253 | 0.01349  | 0.23154736 | 4.21E-07 | 0.24263  | 1.10E-07 |
| 0.03711  | 0.010223 | 0.8256   | 0.119375 | 0.00982  | 0.09264316 | 0.0454   | -0.01855 | 0.6892   |
| 0.10967  | -0.1797  | 9.43E-05 | -0.42909 | 2.43E-22 | -0.0258528 | 0.57734  | -0.16115 | 0.00047  |
| 0.05579  | 0.077565 | 0.09409  | 0.082053 | 0.07649  | 0.1716334  | 0.00019  | 0.094002 | 0.04231  |
| 0.64288  | -0.05134 | 0.26816  | -0.00975 | 0.83349  | 0.09171712 | 0.0476   | 0.081444 | 0.07871  |
| 0.13877  | -0.15551 | 0.00075  | -0.12251 | 0.00804  | 0.05123508 | 0.26918  | 0.115382 | 0.01259  |
| 0.34682  | 0.109166 | 0.01828  | 0.013479 | 0.77143  | -0.0624011 | 0.17824  | -0.04776 | 0.30305  |
| 0.98501  | -0.03047 | 0.51126  | 0.025463 | 0.58308  | 0.17383138 | 0.00016  | 0.185545 | 5.48E-05 |
| 0.00036  | 0.059762 | 0.19734  | 0.064505 | 0.16402  | 0.40812763 | 3.59E-20 | 0.297216 | 5.59E-11 |
| 6.83E-05 | 0.174908 | 0.00015  | 0.142446 | 0.00203  | 0.03345458 | 0.47077  | 0.009208 | 0.84269  |
| 0.00108  | -0.20208 | 1.08E-05 | -0.20176 | 1.11E-05 | -0.091963  | 0.04701  | -0.14653 | 0.0015   |
| 4.05E-07 | 0.115965 | 0.01215  | 0.041183 | 0.37456  | 0.05730629 | 0.21642  | 0.091324 | 0.04857  |
| 0.01745  | 0.143541 | 0.00187  | 0.062359 | 0.17854  | -0.0396593 | 0.3925   | -0.09494 | 0.04029  |
| 0.00266  | 0.093635 | 0.04312  | -0.08839 | 0.05629  | 0.26276362 | 8.18E-09 | 0.269317 | 3.34E-09 |
| 0.09893  | 0.006883 | 0.88208  | -0.19378 | 2.48E-05 | 0.12862012 | 0.00538  | 0.073019 | 0.11507  |
| 0.36567  | -0.01556 | 0.73728  | 0.019681 | 0.67141  | 0.03821207 | 0.41002  | 0.023903 | 0.60639  |
| 0.96145  | 0.110496 | 0.0169   | 0.047856 | 0.30207  | 0.09800865 | 0.03423  | 0.117511 | 0.01104  |
| 0.00084  | 0.035671 | 0.44187  | -0.12959 | 0.00503  | -0.1360006 | 0.00323  | -0.12655 | 0.00617  |
| 0.0004   | 0.049669 | 0.28411  | -0.0567  | 0.22136  | 0.09786975 | 0.03448  | 0.170372 | 0.00022  |
| 0.00764  | -0.12656 | 0.00617  | -0.13532 | 0.00339  | 0.07990624 | 0.08454  | 0.185005 | 5.77E-05 |
| 4.73E-13 | 0.043949 | 0.3433   | 0.022338 | 0.63017  | 0.03912817 | 0.39888  | -0.05068 | 0.27444  |
| 0.18965  | 0.177157 | 0.00012  | 0.468215 | 8.06E-27 | 0.13609758 | 0.00321  | -0.01168 | 0.80128  |
| 0.3039   | 0.127765 | 0.00569  | 0.145536 | 0.00161  | 0.10735274 | 0.02032  | 0.206293 | 6.97E-06 |
| 8.92E-05 | -0.24726 | 6.19E-08 | -0.25339 | 2.82E-08 | -0.0599024 | 0.19629  | -0.09018 | 0.05146  |
| 0.47216  | 0.114965 | 0.01292  | 0.173364 | 0.00017  | -0.0426008 | 0.35833  | -0.1731  | 0.00017  |
| 0.1174   | 0.291535 | 1.33E-10 | 0.317495 | 2.14E-12 | 0.05456129 | 0.23928  | 0.009452 | 0.83857  |
| 0.45627  | 0.212953 | 3.43E-06 | 0.068592 | 0.13886  | 0.14449698 | 0.00174  | 0.173686 | 0.00016  |
| 0.11494  | 0.128591 | 0.00539  | 0.149835 | 0.00116  | -0.0832375 | 0.07232  | -0.17082 | 0.00021  |
| 0.02216  | 0.074834 | 0.10629  | 0.076098 | 0.10049  | 0.05601994 | 0.22693  | -0.08104 | 0.08019  |
| 0.19174  | 0.116145 | 0.01202  | 0.194192 | 2.38E-05 | 0.05503597 | 0.23521  | 0.021179 | 0.64802  |
| 0.52445  | 0.005856 | 0.89957  | -0.15659 | 0.00068  | -0.1947097 | 2.26E-05 | -0.30398 | 1.93E-11 |
| 0.06965  | 0.107009 | 0.02073  | 0.228181 | 6.24E-07 | 0.01061336 | 0.81906  | 0.031716 | 0.49415  |
| 0.13729  | -0.06199 | 0.18109  | -0.02676 | 0.56402  | 0.12883928 | 0.0053   | 0.192612 | 2.78E-05 |
| 1.14E-05 | -0.05306 | 0.25246  | -0.05634 | 0.22426  | 0.05703418 | 0.21862  | 0.105005 | 0.02325  |
| 0.04215  | 0.082909 | 0.07346  | 0.099526 | 0.03153  | 0.16359444 | 0.00039  | 0.09208  | 0.04673  |
| 0.00469  | 0.078785 | 0.08901  | 0.279318 | 8.12E-10 | 0.4321779  | 1.13E-22 | 0.29363  | 9.70E-11 |

|          |          |          |          |          |            |          |          |          |
|----------|----------|----------|----------|----------|------------|----------|----------|----------|
| 0.24325  | 0.186633 | 4.95E-05 | 0.039292 | 0.3969   | 0.04619255 | 0.31921  | 0.143209 | 0.00192  |
| 0.00937  | 0.187826 | 4.42E-05 | 0.382011 | 1.13E-17 | 0.17429197 | 0.00015  | -0.02417 | 0.60243  |
| 5.86E-07 | 0.000477 | 0.99181  | -0.03655 | 0.4307   | 0.18845863 | 4.16E-05 | 0.11899  | 0.01006  |
| 0.00023  | 0.158834 | 0.00057  | 0.020424 | 0.65977  | -0.1404555 | 0.00235  | -0.18693 | 4.81E-05 |
| 0.02766  | 0.066553 | 0.15101  | -0.02093 | 0.65182  | 0.06154128 | 0.18431  | 0.180865 | 8.48E-05 |
| 1.66E-10 | -0.20587 | 7.29E-06 | -0.11373 | 0.01393  | -0.1710914 | 0.0002   | -0.30811 | 9.98E-12 |
| 0.01404  | 0.021895 | 0.63696  | 0.157155 | 0.00065  | 0.12119501 | 0.00875  | -0.02111 | 0.64904  |
| 0.44799  | -0.06632 | 0.15243  | 0.010793 | 0.81606  | 0.12021326 | 0.00931  | 0.139652 | 0.00249  |
| 0.89557  | 0.115114 | 0.0128   | -0.01896 | 0.68276  | 0.00585759 | 0.89954  | -0.1155  | 0.0125   |
| 1.88E-06 | 0.248458 | 5.32E-08 | 0.145894 | 0.00157  | -0.0815187 | 0.07843  | -0.16468 | 0.00035  |
| 3.42E-07 | 0.296404 | 6.33E-11 | 0.267592 | 4.24E-09 | 0.23168261 | 4.14E-07 | 0.161309 | 0.00047  |
| 0.2363   | -0.12678 | 0.00608  | 0.125292 | 0.00671  | 0.25292094 | 3.00E-08 | 0.199636 | 1.38E-05 |
| 0.00152  | 0.182309 | 7.42E-05 | 0.115551 | 0.01246  | -0.0256601 | 0.58018  | -0.13182 | 0.00433  |
| 0.79982  | -0.13374 | 0.00379  | -0.06202 | 0.18089  | -0.1179752 | 0.01072  | -0.11238 | 0.01511  |
| 1.06E-14 | -0.03043 | 0.5118   | -0.02797 | 0.54658  | 0.03484908 | 0.45247  | -0.0075  | 0.87165  |
| 0.0011   | -0.22363 | 1.05E-06 | -0.12348 | 0.00755  | 0.08153551 | 0.07837  | 0.120206 | 0.00932  |
| 0.00126  | 0.251647 | 3.54E-08 | 0.191448 | 3.12E-05 | 0.02373302 | 0.60895  | -0.03518 | 0.44821  |
| 0.12092  | -0.0604  | 0.19259  | -0.05449 | 0.2399   | -0.1208993 | 0.00892  | -0.23753 | 2.06E-07 |
| 0.00424  | 0.025097 | 0.58852  | 0.286926 | 2.66E-10 | 0.11235979 | 0.01513  | -0.05512 | 0.23449  |
| 0.07375  | 0.022384 | 0.62947  | 0.121656 | 0.00849  | 0.26292973 | 8.00E-09 | 0.206328 | 6.95E-06 |
| 1.02E-18 | 0.145334 | 0.00164  | 0.157399 | 0.00064  | 0.15554349 | 0.00074  | 0.137255 | 0.00296  |
| 0.00012  | 0.263313 | 7.59E-09 | 0.242582 | 1.11E-07 | 0.05214967 | 0.26071  | 0.110412 | 0.01699  |
| 0.02777  | 0.096224 | 0.03765  | 0.117878 | 0.01079  | -0.0772775 | 0.09532  | -0.06444 | 0.16445  |
| 0.12721  | -0.07064 | 0.12741  | -0.0593  | 0.20084  | -0.1601302 | 0.00051  | -0.18678 | 4.88E-05 |
| 0.77774  | 0.066425 | 0.1518   | 0.03741  | 0.41992  | -0.0206294 | 0.65657  | -0.06267 | 0.17637  |
| 0.07076  | -0.07616 | 0.10021  | -0.03038 | 0.51254  | -0.0372234 | 0.42225  | -0.10489 | 0.02339  |
| 0.00517  | 0.102828 | 0.02628  | 0.280787 | 6.56E-10 | 0.4430558  | 7.12E-24 | 0.305928 | 1.42E-11 |
| 0.16923  | -0.01216 | 0.79321  | 0.007786 | 0.86673  | 0.06531963 | 0.15875  | 0.052781 | 0.25498  |
| 0.00036  | -0.07009 | 0.13039  | 0.219899 | 1.60E-06 | 0.31866579 | 1.76E-12 | 0.137008 | 0.00301  |
| 0.28943  | 0.071906 | 0.12072  | 0.483613 | 9.53E-29 | 0.38281819 | 9.52E-18 | 0.171335 | 0.0002   |
| 0.43459  | 0.01854  | 0.68945  | 0.013939 | 0.76384  | 0.008603   | 0.8529   | 0.027583 | 0.55212  |
| 0.00436  | 0.063291 | 0.17212  | -0.07683 | 0.09724  | -0.0997033 | 0.03122  | -0.18202 | 7.62E-05 |
| 0.17713  | 0.215494 | 2.61E-06 | 0.061964 | 0.18131  | -0.0072099 | 0.87651  | -0.03102 | 0.50368  |
| 0.05371  | 0.147678 | 0.00137  | -0.05349 | 0.24868  | 0.1482274  | 0.00132  | 0.112625 | 0.01489  |
| 0.07578  | 0.007572 | 0.87036  | 0.105509 | 0.02259  | 0.17941857 | 9.68E-05 | 0.103601 | 0.02516  |
| 0.03943  | -0.07942 | 0.08646  | -0.04631 | 0.31802  | 0.00439832 | 0.92448  | -0.03396 | 0.46413  |
| 0.78162  | 0.294733 | 8.19E-11 | 0.118725 | 0.01023  | 0.09290785 | 0.04478  | 0.146366 | 0.00152  |
| 0.54471  | -0.12043 | 0.00919  | -0.00503 | 0.91363  | -0.0049932 | 0.9143   | -0.04787 | 0.30189  |
| 1.40E-17 | 0.158986 | 0.00056  | 0.175172 | 0.00014  | 0.13380099 | 0.00377  | 0.127934 | 0.00563  |
| 2.34E-08 | 0.173634 | 0.00016  | 0.081349 | 0.07906  | -0.057767  | 0.21275  | 0.024938 | 0.59089  |
| 0.05036  | 0.046705 | 0.31387  | 0.108633 | 0.01886  | 0.14984651 | 0.00116  | 0.188592 | 4.11E-05 |
| 0.41546  | -0.00103 | 0.98221  | 0.283521 | 4.40E-10 | 0.42505034 | 6.53E-22 | 0.276569 | 1.20E-09 |
| 1.89E-09 | -0.01741 | 0.70742  | -0.02777 | 0.54945  | 0.0779695  | 0.09238  | 0.213027 | 3.41E-06 |
| 2.15E-06 | -0.10705 | 0.02068  | -0.04272 | 0.35698  | 0.31263354 | 4.78E-12 | 0.219596 | 1.66E-06 |
| 0.57507  | 0.003772 | 0.93521  | -0.00179 | 0.96928  | 0.16908419 | 0.00024  | 0.130729 | 0.00466  |

|          |          |          |          |          |            |          |          |          |
|----------|----------|----------|----------|----------|------------|----------|----------|----------|
| 0.88607  | -0.09504 | 0.04007  | -0.01778 | 0.70156  | 0.33760832 | 6.51E-14 | 0.281952 | 5.54E-10 |
| 0.18371  | 0.073556 | 0.11241  | -0.06944 | 0.13403  | -0.1602432 | 0.00051  | -0.26159 | 9.58E-09 |
| 5.54E-08 | -0.08556 | 0.06468  | -0.01403 | 0.76228  | -0.0103235 | 0.82392  | -0.12151 | 0.00858  |
| 0.51274  | 0.116789 | 0.01155  | 0.086679 | 0.06125  | 0.14675804 | 0.00147  | 0.160342 | 0.0005   |
| 0.00898  | 0.033276 | 0.47314  | -0.0712  | 0.12442  | 0.04320562 | 0.35154  | 0.140235 | 0.00239  |
| 0.00056  | -0.12935 | 0.00512  | -0.05575 | 0.22921  | -0.0034241 | 0.94117  | -0.11083 | 0.01658  |
| 0.85351  | 0.063817 | 0.16857  | -0.04631 | 0.31799  | -0.0075573 | 0.87061  | 0.077136 | 0.09593  |
| 0.90027  | -0.14555 | 0.00161  | -0.05091 | 0.27222  | -0.0207508 | 0.65468  | -0.07917 | 0.08744  |
| 0.50455  | -0.0105  | 0.82099  | -0.05462 | 0.23878  | -0.0024762 | 0.95744  | 0.027229 | 0.55724  |
| 0.95694  | 0.074536 | 0.10769  | 0.003413 | 0.94135  | 0.07554465 | 0.103    | 0.116987 | 0.01141  |
| 1.78E-05 | -0.02593 | 0.57618  | -0.03489 | 0.45192  | 0.0241347  | 0.6029   | 0.072651 | 0.11691  |
| 0.25438  | 0.03609  | 0.43653  | -0.04797 | 0.30093  | 0.004343   | 0.92543  | 0.066086 | 0.15391  |
| 0.03064  | 0.080589 | 0.08191  | -0.03757 | 0.418    | -0.1003749 | 0.0301   | -0.16239 | 0.00043  |
| 0.38013  | 0.073342 | 0.11346  | 0.103942 | 0.02469  | 0.1678079  | 0.00027  | 0.149598 | 0.00119  |
| 0.03255  | 0.023396 | 0.61405  | 0.064761 | 0.16235  | 0.13350986 | 0.00385  | 0.124834 | 0.00691  |
| 0.95645  | 0.011756 | 0.79998  | -0.19019 | 3.52E-05 | -0.0937516 | 0.04287  | 0.037292 | 0.42139  |
| 0.00671  | -0.07195 | 0.1205   | -0.05131 | 0.26844  | 0.05965405 | 0.19815  | 0.025011 | 0.5898   |
| 3.29E-06 | -0.10779 | 0.01981  | 0.079354 | 0.08672  | 0.31033415 | 6.96E-12 | 0.26937  | 3.31E-09 |
| 2.87E-10 | 0.073082 | 0.11475  | 0.189667 | 3.70E-05 | 0.28341681 | 4.47E-10 | 0.345178 | 1.63E-14 |
| 0.61462  | 0.116659 | 0.01164  | 0.053556 | 0.24806  | -0.0993931 | 0.03176  | -0.08421 | 0.06905  |
| 0.77016  | -0.2372  | 2.14E-07 | -0.26972 | 3.16E-09 | -0.1115433 | 0.01589  | -0.10945 | 0.01799  |
| 1.27E-14 | 0.032299 | 0.48624  | -0.0447  | 0.33512  | -0.1541489 | 0.00083  | -0.06072 | 0.19027  |
| 0.20798  | 0.134439 | 0.00361  | 0.337209 | 6.99E-14 | 0.19665613 | 1.87E-05 | 0.034789 | 0.45326  |
| 0.00066  | 0.093952 | 0.04242  | 0.09224  | 0.04635  | 0.1013253  | 0.02857  | 0.054432 | 0.24039  |
| 3.87E-07 | 0.148257 | 0.00131  | 0.191497 | 3.10E-05 | 0.28556641 | 3.26E-10 | 0.22791  | 6.44E-07 |
| 0.00176  | 0.056604 | 0.22212  | -0.01339 | 0.7729   | 0.06047877 | 0.19201  | 0.065312 | 0.1588   |
| 0.03044  | -0.16824 | 0.00026  | -0.13298 | 0.00399  | 0.01026297 | 0.82494  | 0.027826 | 0.54862  |
| 0.02298  | -0.06366 | 0.16962  | -0.18137 | 8.09E-05 | 0.10870827 | 0.01878  | -0.00921 | 0.84264  |
| 0.00011  | -0.12349 | 0.00755  | -0.15003 | 0.00115  | -0.0410426 | 0.37619  | -0.02995 | 0.51849  |
| 0.77321  | -0.02465 | 0.59517  | 0.001611 | 0.9723   | 0.00929177 | 0.84127  | -0.00661 | 0.88671  |
| 0.19907  | -0.00739 | 0.8735   | 0.072514 | 0.11761  | 0.1250169  | 0.00683  | 0.144385 | 0.00176  |
| 2.73E-05 | 0.01954  | 0.67363  | 0.067888 | 0.14297  | 0.09824354 | 0.0338   | 0.065134 | 0.15994  |
| 0.75814  | 0.328843 | 3.08E-13 | 0.267643 | 4.21E-09 | 0.36842319 | 1.85E-16 | 0.301038 | 3.08E-11 |
| 0.9023   | 0.191738 | 3.03E-05 | 0.358472 | 1.32E-15 | 0.03260396 | 0.48213  | -0.15467 | 0.0008   |
| 0.69061  | 0.077818 | 0.09302  | 0.035811 | 0.44008  | 0.0418781  | 0.36654  | 0.134916 | 0.00349  |
| 0.87765  | 0.124774 | 0.00694  | 0.04543  | 0.32727  | 0.0306681  | 0.50853  | 0.033293 | 0.47292  |
| 5.07E-09 | 0.18995  | 3.60E-05 | 0.045106 | 0.33074  | -0.089194  | 0.05408  | -0.21667 | 2.29E-06 |
| 0.62615  | -0.08313 | 0.07271  | -0.14128 | 0.00221  | -0.0329443 | 0.47757  | 0.035279 | 0.4469   |
| 0.01648  | -0.13387 | 0.00375  | -0.03423 | 0.46051  | 0.07252664 | 0.11754  | 0.081379 | 0.07895  |
| 0.03639  | 0.317978 | 1.97E-12 | 0.360341 | 9.15E-16 | 0.02564792 | 0.58036  | -0.15243 | 0.00095  |
| 0.02379  | 0.20234  | 1.05E-05 | 0.064018 | 0.16723  | -0.0655586 | 0.15723  | -0.06875 | 0.13794  |
| 0.94562  | 0.021197 | 0.64775  | -0.06843 | 0.13977  | -0.0542014 | 0.24239  | 0.05246  | 0.25788  |
| 0.00355  | -0.03028 | 0.51389  | -0.06801 | 0.14222  | -0.0429857 | 0.35399  | -0.01752 | 0.70568  |
| 0.01056  | 0.088377 | 0.05633  | -0.03496 | 0.45103  | 0.02690185 | 0.56198  | 0.068973 | 0.13667  |
| 2.97E-05 | -0.06466 | 0.16303  | 0.005334 | 0.90848  | -0.0062437 | 0.89295  | -0.07787 | 0.0928   |

|          |          |          |          |          |            |          |          |          |
|----------|----------|----------|----------|----------|------------|----------|----------|----------|
| 3.17E-06 | 0.094601 | 0.04101  | -0.03042 | 0.51196  | -0.0594013 | 0.20007  | -0.12183 | 0.0084   |
| 7.60E-07 | -0.26115 | 1.02E-08 | -0.07849 | 0.09024  | -0.0892729 | 0.05387  | -0.09513 | 0.03988  |
| 0.36097  | 0.033996 | 0.46361  | -0.14736 | 0.00141  | -0.2426194 | 1.11E-07 | -0.35381 | 3.23E-15 |
| 0.57739  | 0.079309 | 0.0869   | -0.04253 | 0.35914  | 0.02790958 | 0.54742  | -0.06469 | 0.1628   |
| 0.44338  | -0.14217 | 0.00207  | -0.14499 | 0.00168  | 0.01842107 | 0.69133  | 0.072396 | 0.1182   |
| 0.10847  | 0.164103 | 0.00037  | 0.035509 | 0.44395  | -0.2100135 | 4.71E-06 | -0.20094 | 1.21E-05 |
| 0.00625  | 0.04395  | 0.34329  | -0.03661 | 0.42997  | -0.1721467 | 0.00019  | -0.16241 | 0.00043  |
| 0.21344  | 0.013453 | 0.77185  | -0.02319 | 0.61716  | -0.1812114 | 8.21E-05 | -0.2456  | 7.63E-08 |
| 0.28563  | 0.302355 | 2.50E-11 | 0.144078 | 0.0018   | -0.1337261 | 0.00379  | -0.20035 | 1.29E-05 |
| 0.00913  | 0.275909 | 1.32E-09 | 0.178124 | 0.00011  | -0.1055817 | 0.02249  | -0.1613  | 0.00047  |
| 0.34385  | 0.012066 | 0.79481  | -0.03403 | 0.46312  | 0.07140389 | 0.12335  | 0.022919 | 0.62129  |
| 0.16787  | 0.107827 | 0.01977  | 0.108973 | 0.01849  | -0.0746556 | 0.10713  | -0.12751 | 0.00579  |
| 1.59E-18 | 0.048051 | 0.30011  | 0.015242 | 0.74252  | -0.1359715 | 0.00324  | -0.19148 | 3.11E-05 |
| 0.18369  | 0.207128 | 6.39E-06 | 0.101315 | 0.02858  | 0.33529762 | 9.85E-14 | 0.119611 | 0.00968  |
| 1.46E-10 | -0.10362 | 0.02513  | -0.09993 | 0.03084  | 0.06317921 | 0.17288  | 0.087468 | 0.05893  |
| 0.48279  | -0.25943 | 1.28E-08 | -0.17446 | 0.00015  | -0.0798031 | 0.08495  | -0.12162 | 0.00852  |
| 0.77029  | -0.10985 | 0.01756  | -0.06913 | 0.13578  | 0.13189869 | 0.0043   | 0.080961 | 0.08051  |
| 0.48878  | -0.05248 | 0.25766  | -0.1326  | 0.0041   | -0.2200426 | 1.58E-06 | -0.13859 | 0.00269  |
| 0.00647  | -0.17781 | 0.00011  | -0.39259 | 1.17E-18 | -0.4416798 | 1.02E-23 | -0.34968 | 7.06E-15 |
| 0.08883  | -0.1242  | 0.0072   | -0.39904 | 2.82E-19 | -0.2847731 | 3.66E-10 | -0.20263 | 1.02E-05 |
| 0.05663  | -0.16133 | 0.00047  | -0.41471 | 7.76E-21 | -0.3400506 | 4.18E-14 | -0.2512  | 3.75E-08 |
| 0.96742  | -0.19517 | 2.16E-05 | -0.33815 | 5.90E-14 | -0.2662452 | 5.10E-09 | -0.20835 | 5.61E-06 |
| 0.02838  | -0.16918 | 0.00024  | -0.46709 | 1.10E-26 | -0.3769064 | 3.28E-17 | -0.27577 | 1.35E-09 |
| 0.61561  | -0.1429  | 0.00196  | -0.29246 | 1.16E-10 | -0.1527778 | 0.00093  | -0.10397 | 0.02464  |
| 0.00619  | -0.17992 | 9.24E-05 | -0.35278 | 3.93E-15 | -0.3746241 | 5.24E-17 | -0.26969 | 3.17E-09 |
| 8.34E-07 | 0.012844 | 0.78192  | -0.073   | 0.11518  | 0.16639219 | 0.0003   | 0.280846 | 6.51E-10 |
| 2.67E-08 | -0.24963 | 4.58E-08 | -0.04158 | 0.36992  | 0.32174078 | 1.04E-12 | 0.250869 | 3.91E-08 |
| 0.37276  | -0.16343 | 0.00039  | -0.21084 | 4.31E-06 | -0.2225805 | 1.18E-06 | -0.22176 | 1.30E-06 |
| 0.00026  | 0.091685 | 0.04768  | 0.03544  | 0.44484  | 0.09286234 | 0.04489  | 0.196397 | 1.92E-05 |
| 8.19E-06 | 0.011907 | 0.79746  | -0.03211 | 0.48877  | 0.09922486 | 0.03205  | 0.13517  | 0.00343  |
| 0.45969  | -0.03739 | 0.42019  | 0.01152  | 0.8039   | 0.07269963 | 0.11667  | 0.03767  | 0.4167   |
| 0.03805  | 0.013485 | 0.77133  | -0.05645 | 0.22341  | -0.0329528 | 0.47746  | -0.06028 | 0.1935   |
| 2.80E-06 | -0.26313 | 7.79E-09 | -0.19954 | 1.40E-05 | -0.014486  | 0.75487  | -0.04629 | 0.3182   |
| 4.06E-09 | -0.08957 | 0.05308  | -0.0258  | 0.57815  | 0.07448137 | 0.10795  | 0.080081 | 0.08386  |
| 0.47162  | 0.325778 | 5.23E-13 | 0.305456 | 1.53E-11 | 0.22991811 | 5.10E-07 | 0.06475  | 0.16242  |
| 0.00671  | -0.29167 | 1.31E-10 | -0.0022  | 0.9621   | 0.21086804 | 4.30E-06 | -0.03519 | 0.44812  |
| 0.83955  | 0.029108 | 0.53035  | 0.032364 | 0.48536  | 0.26145091 | 9.76E-09 | 0.342725 | 2.57E-14 |
| 0.0013   | 0.126292 | 0.00628  | 0.036395 | 0.43266  | 0.03768486 | 0.41651  | -0.01291 | 0.78086  |
| 0.45437  | -0.0006  | 0.98966  | -0.01322 | 0.77573  | -0.0421255 | 0.36372  | -0.02411 | 0.60333  |
| 0.09629  | -0.01876 | 0.68592  | -0.00027 | 0.99529  | 0.03228673 | 0.48641  | 0.016485 | 0.72235  |
| 0.35045  | 0.009313 | 0.84092  | -0.03617 | 0.43556  | -0.1090898 | 0.01837  | -0.143   | 0.00195  |
| 0.82499  | -0.04188 | 0.36653  | -0.09447 | 0.0413   | -0.1232671 | 0.00766  | -0.10396 | 0.02466  |
| 0.09898  | 0.147662 | 0.00137  | 0.029594 | 0.5235   | -0.0039979 | 0.93134  | 0.015833 | 0.73291  |
| 2.26E-10 | 0.091883 | 0.0472   | 0.012508 | 0.78748  | 0.09430223 | 0.04165  | 0.080701 | 0.08148  |
| 0.02868  | 0.102419 | 0.02688  | 0.113727 | 0.01393  | 0.03108436 | 0.50279  | -0.00134 | 0.97699  |

|          |          |          |          |          |            |          |          |          |
|----------|----------|----------|----------|----------|------------|----------|----------|----------|
| 2.57E-08 | 0.045928 | 0.32199  | 0.006907 | 0.88166  | -0.01889   | 0.68389  | -0.02168 | 0.6403   |
| 0.59234  | 0.211925 | 3.84E-06 | 0.029108 | 0.53034  | -0.0016257 | 0.97205  | 0.029397 | 0.52627  |
| 0.41279  | -0.25728 | 1.70E-08 | -0.34606 | 1.39E-14 | -0.2361621 | 2.43E-07 | -0.24262 | 1.10E-07 |
| 0.24908  | 0.103569 | 0.02521  | 0.050444 | 0.27665  | -0.0378514 | 0.41446  | -0.06035 | 0.19294  |
| 0.16097  | 0.09726  | 0.03563  | 0.037671 | 0.41669  | -0.0663247 | 0.15242  | -0.07725 | 0.09544  |
| 0.40752  | 0.092148 | 0.04656  | -0.02503 | 0.5895   | -0.025531  | 0.58209  | 0.067901 | 0.14289  |
| 0.45507  | 0.099936 | 0.03083  | 0.010118 | 0.82737  | -0.0067344 | 0.8846   | 0.018211 | 0.69467  |
| 0.10528  | -0.00862 | 0.85269  | -0.0342  | 0.46091  | 0.00853439 | 0.85406  | -0.02268 | 0.62498  |
| 0.38212  | 0.231785 | 4.09E-07 | 0.326701 | 4.46E-13 | 0.12542578 | 0.00665  | 0.165384 | 0.00033  |
| 3.89E-05 | 0.219363 | 1.70E-06 | 0.155868 | 0.00072  | -0.2139897 | 3.07E-06 | -0.20203 | 1.08E-05 |
| 0.85787  | -0.04332 | 0.35025  | -0.07555 | 0.10297  | -0.12897   | 0.00525  | -0.14315 | 0.00193  |
| 0.28244  | 0.055093 | 0.23473  | 0.020331 | 0.66123  | -0.1908706 | 3.30E-05 | -0.23334 | 3.40E-07 |
| 0.01379  | 0.147691 | 0.00137  | -0.06822 | 0.14104  | -0.1892314 | 3.86E-05 | -0.23305 | 3.53E-07 |
| 0.33905  | 0.027877 | 0.54789  | -0.11898 | 0.01007  | 0.08320066 | 0.07245  | 0.145859 | 0.00157  |
| 0.43506  | -0.04407 | 0.34196  | -0.13741 | 0.00292  | 0.01574396 | 0.73435  | -0.01274 | 0.78369  |
| 0.03591  | 0.055424 | 0.23192  | -0.07006 | 0.13058  | -0.0419533 | 0.36568  | -0.07265 | 0.11691  |
| 0.11996  | 0.101669 | 0.02803  | 0.064372 | 0.1649   | 0.06030571 | 0.19329  | 0.014358 | 0.75697  |
| 0.00357  | -0.27709 | 1.12E-09 | -0.07149 | 0.12289  | 0.24090008 | 1.37E-07 | 0.128195 | 0.00553  |
| 0.21019  | 0.073525 | 0.11256  | 0.038591 | 0.40539  | 0.04496499 | 0.33225  | 0.039553 | 0.39378  |
| 5.23E-13 | 0.043007 | 0.35375  | -0.01669 | 0.71901  | 0.13380217 | 0.00377  | 0.260051 | 1.18E-08 |
| 0.00149  | 0.098824 | 0.03275  | 0.027741 | 0.54984  | 0.05808044 | 0.21027  | 0.01199  | 0.79608  |
| 0.06279  | -0.27083 | 2.71E-09 | -0.17926 | 9.82E-05 | 0.02643371 | 0.56881  | 0.053873 | 0.24527  |
| 0.07302  | 0.263666 | 7.24E-09 | 0.133775 | 0.00378  | 0.01565841 | 0.73574  | 0.019853 | 0.66871  |
| 0.5835   | 0.103508 | 0.0253   | -0.02984 | 0.52012  | -0.0301221 | 0.51611  | 0.002688 | 0.95381  |
| 0.19059  | 0.071869 | 0.12091  | 0.030197 | 0.51507  | 0.08106967 | 0.0801   | 0.076387 | 0.0992   |
| 4.04E-07 | -0.14202 | 0.00209  | -0.21771 | 2.04E-06 | -0.0358823 | 0.43917  | 0.067295 | 0.1465   |
| 0.68856  | 0.109063 | 0.01839  | 0.115969 | 0.01215  | -0.0308521 | 0.50599  | -0.03011 | 0.51631  |
| 0.83235  | 0.178543 | 0.0001   | 0.060556 | 0.19145  | 0.00388259 | 0.93331  | -0.17992 | 9.24E-05 |
| 9.95E-06 | 0.026102 | 0.57367  | -0.00032 | 0.99452  | 0.07104717 | 0.12524  | 0.013902 | 0.76445  |
| 0.01318  | -0.01659 | 0.72069  | -0.29123 | 1.40E-10 | -0.1839895 | 6.35E-05 | -0.12255 | 0.00802  |
| 0.00078  | 0.214265 | 2.98E-06 | 0.076535 | 0.09855  | 0.03697264 | 0.42538  | 0.032219 | 0.48732  |
| 0.00022  | 0.008891 | 0.84803  | -0.07043 | 0.12857  | -0.0476183 | 0.30448  | -0.02692 | 0.56177  |
| 0.00331  | 0.054517 | 0.23966  | 0.102937 | 0.02612  | 0.14903838 | 0.00124  | 0.086856 | 0.06073  |
| 0.17463  | -0.03806 | 0.41186  | -0.13466 | 0.00355  | 0.08101761 | 0.08029  | 0.046365 | 0.3174   |
| 0.40983  | 0.09908  | 0.0323   | 0.182498 | 7.29E-05 | 0.32278087 | 8.75E-13 | 0.204633 | 8.29E-06 |
| 0.41071  | -0.00079 | 0.98646  | -0.02368 | 0.60982  | 0.12960871 | 0.00503  | 0.061695 | 0.18321  |
| 0.58853  | 0.071278 | 0.12401  | 0.384017 | 7.39E-18 | 0.34221807 | 2.82E-14 | 0.11326  | 0.01433  |
| 0.28484  | -0.2356  | 2.60E-07 | -0.19131 | 3.16E-05 | -0.0106687 | 0.81814  | 0.034848 | 0.45248  |
| 9.89E-12 | 0.109231 | 0.01821  | 0.102698 | 0.02647  | 0.11091829 | 0.01649  | 0.193183 | 2.63E-05 |
| 0.00841  | 0.089064 | 0.05444  | -0.01463 | 0.75253  | -0.2341048 | 3.11E-07 | -0.30853 | 9.32E-12 |
| 0.12581  | 0.046272 | 0.31838  | -0.03446 | 0.45757  | -0.0131948 | 0.77611  | 0.020262 | 0.6623   |
| 0.00068  | -0.01671 | 0.71868  | -0.10572 | 0.02232  | -0.097228  | 0.03569  | -0.09062 | 0.05033  |
| 0.982    | 0.001967 | 0.96618  | -0.02538 | 0.58428  | 0.07631939 | 0.0995   | 0.164953 | 0.00034  |
| 0.05183  | -0.14339 | 0.00189  | -0.05787 | 0.21191  | -0.013516  | 0.77081  | -0.16498 | 0.00034  |
| 0.46062  | 0.167142 | 0.00029  | 0.023745 | 0.60877  | -0.0188756 | 0.68412  | -0.01208 | 0.79459  |

|          |          |          |          |          |            |          |          |          |
|----------|----------|----------|----------|----------|------------|----------|----------|----------|
| 0.26922  | 0.236994 | 2.20E-07 | 0.076465 | 0.09886  | 0.00340459 | 0.94151  | 0.024444 | 0.59826  |
| 0.25716  | 0.059839 | 0.19677  | 0.041736 | 0.36817  | 0.06699402 | 0.14832  | 0.173672 | 0.00016  |
| 0.15505  | -0.02605 | 0.57447  | -0.02643 | 0.56881  | 0.01977293 | 0.66997  | 0.139043 | 0.0026   |
| 0.55299  | 0.085657 | 0.06439  | -0.0443  | 0.33942  | -0.09848   | 0.03337  | -0.07654 | 0.09854  |
| 0.47113  | 0.071061 | 0.12516  | 0.169107 | 0.00024  | 0.31193652 | 5.36E-12 | 0.19598  | 2.00E-05 |
| 0.07607  | 0.272141 | 2.25E-09 | 0.086506 | 0.06177  | 0.14573391 | 0.00159  | 0.2599   | 1.20E-08 |
| 0.6087   | 0.158766 | 0.00057  | 0.304241 | 1.86E-11 | 0.28576721 | 3.16E-10 | 0.018204 | 0.69479  |
| 0.35416  | 0.024377 | 0.59927  | 0.040337 | 0.38446  | 0.04980293 | 0.28281  | 0.055414 | 0.232    |
| 0.15361  | 0.273542 | 1.85E-09 | 0.304844 | 1.69E-11 | 0.21267002 | 3.54E-06 | 0.251971 | 3.39E-08 |
| 0.99079  | -0.01297 | 0.77976  | -0.04197 | 0.36549  | 0.06741554 | 0.14578  | 0.125992 | 0.00641  |
| 0.05867  | 0.297084 | 5.70E-11 | 0.429388 | 2.25E-22 | 0.08305751 | 0.07294  | 0.006688 | 0.88539  |
| 0.20075  | 0.135404 | 0.00337  | 0.052291 | 0.25942  | -0.0235106 | 0.61231  | -0.12222 | 0.00819  |
| 0.05135  | 0.053395 | 0.24948  | -0.02979 | 0.52078  | 0.09354063 | 0.04334  | 0.201125 | 1.19E-05 |
| 0.23335  | 0.116028 | 0.0121   | 0.057675 | 0.21348  | -0.0380707 | 0.41176  | -0.07244 | 0.11798  |
| 0.1123   | 0.25085  | 3.92E-08 | 0.156465 | 0.00069  | 0.20976923 | 4.83E-06 | 0.325078 | 5.90E-13 |
| 0.03331  | 0.133214 | 0.00393  | 0.282892 | 4.83E-10 | 0.06359959 | 0.17003  | -0.01346 | 0.77175  |
| 0.82909  | 0.196493 | 1.90E-05 | 0.12312  | 0.00773  | 0.05619979 | 0.22544  | 0.052175 | 0.26048  |
| 0.02677  | 0.038248 | 0.40958  | 0.014534 | 0.75408  | 0.00053259 | 0.99084  | -0.02833 | 0.5414   |
| 0.91511  | -0.01578 | 0.73382  | -0.12077 | 0.00899  | -0.1414317 | 0.00219  | -0.27819 | 9.54E-10 |
| 0.45209  | 0.05464  | 0.2386   | 0.053834 | 0.24561  | 0.04108216 | 0.37573  | 0.051878 | 0.26321  |
| 5.37E-18 | 0.039002 | 0.4004   | 0.119264 | 0.00989  | 0.19139225 | 3.13E-05 | 0.222052 | 1.26E-06 |
| 0.00011  | 0.067972 | 0.14247  | -0.02869 | 0.53623  | 0.02879737 | 0.53475  | 0.076853 | 0.09715  |
| 0.63171  | -0.0092  | 0.84288  | -0.00342 | 0.94123  | 0.03544065 | 0.44483  | -0.06491 | 0.1614   |
| 0.46163  | 0.118802 | 0.01018  | 0.03123  | 0.50079  | 0.04478903 | 0.33415  | 0.042961 | 0.35427  |
| 0.43738  | 0.119749 | 0.00959  | 0.061515 | 0.1845   | 0.03578319 | 0.44044  | 0.033459 | 0.47071  |
| 0.48061  | 0.090548 | 0.05052  | 0.026104 | 0.57364  | -0.0071416 | 0.87767  | -0.01874 | 0.6863   |
| 0.36288  | 0.004156 | 0.92863  | -0.03377 | 0.46656  | 0.01107516 | 0.81134  | 0.021301 | 0.64614  |
| 0.30506  | 0.062939 | 0.17452  | -0.01978 | 0.66978  | -0.0356093 | 0.44266  | -0.02434 | 0.59986  |
| 0.05388  | 0.231773 | 4.10E-07 | 0.156496 | 0.00069  | 0.24456866 | 8.67E-08 | 0.170703 | 0.00021  |
| 0.00253  | -0.14637 | 0.00152  | 0.022365 | 0.62975  | 0.12904477 | 0.00522  | 0.072579 | 0.11728  |
| 2.79E-17 | 0.056292 | 0.22468  | 0.01145  | 0.80507  | -0.1102036 | 0.0172   | -0.14036 | 0.00237  |
| 2.14E-08 | 0.33277  | 1.54E-13 | 0.180392 | 8.85E-05 | 0.13383089 | 0.00376  | 0.244786 | 8.44E-08 |
| 0.13596  | 0.043857 | 0.34431  | 0.063015 | 0.174    | 0.17209921 | 0.00019  | 0.255479 | 2.15E-08 |
| 0.01604  | -0.1665  | 0.0003   | -0.04417 | 0.34084  | 0.28410535 | 4.04E-10 | 0.279975 | 7.38E-10 |
| 0.00617  | -0.0932  | 0.04411  | -0.01433 | 0.75747  | 0.05493122 | 0.2361   | 0.08552  | 0.06482  |
| 0.03006  | 0.080343 | 0.08285  | -0.23917 | 1.69E-07 | -0.2236365 | 1.05E-06 | -0.21739 | 2.12E-06 |
| 0.90284  | -0.18131 | 8.13E-05 | -0.3044  | 1.81E-11 | -0.0056715 | 0.90271  | 0.1484   | 0.0013   |
| 0.0178   | 0.319512 | 1.52E-12 | 0.225803 | 8.21E-07 | 0.04131385 | 0.37304  | -0.02555 | 0.58185  |
| 0.00576  | 0.028518 | 0.53872  | 0.112389 | 0.0151   | 0.04910017 | 0.28966  | -0.00116 | 0.98002  |
| 0.50128  | 0.233443 | 3.36E-07 | 0.324962 | 6.02E-13 | 0.08234218 | 0.07546  | 0.063192 | 0.17279  |
| 0.98899  | 0.108741 | 0.01874  | -0.15278 | 0.00093  | -0.0778943 | 0.09269  | -0.08141 | 0.07884  |
| 9.54E-05 | 0.035868 | 0.43936  | 0.041319 | 0.37299  | 0.08573272 | 0.06415  | 0.053921 | 0.24484  |
| 0.04177  | 0.260883 | 1.05E-08 | 0.243175 | 1.03E-07 | 0.22345303 | 1.07E-06 | 0.150187 | 0.00113  |
| 1.42E-11 | -0.01084 | 0.81532  | -0.13493 | 0.00349  | -0.0229454 | 0.62089  | -0.00483 | 0.91715  |
| 0.11061  | -0.028   | 0.54616  | 0.046279 | 0.3183   | 0.11520938 | 0.01273  | 0.016498 | 0.72215  |



|          |          |          |          |          |            |          |          |          |
|----------|----------|----------|----------|----------|------------|----------|----------|----------|
| 0.00813  | 0.120225 | 0.00931  | 0.155209 | 0.00076  | 0.29857952 | 4.52E-11 | 0.298705 | 4.43E-11 |
| 0.39888  | -0.07245 | 0.11791  | -0.128   | 0.0056   | -0.0125154 | 0.78736  | 0.058594 | 0.20626  |
| 0.00563  | 0.031109 | 0.50245  | 0.01578  | 0.73376  | 0.06575184 | 0.156    | -0.11212 | 0.01535  |
| 0.13806  | 0.325952 | 5.08E-13 | 0.24963  | 4.58E-08 | 0.10479829 | 0.02352  | 0.070781 | 0.12666  |
| 0.91008  | 0.136291 | 0.00317  | 0.109973 | 0.01744  | 0.0852698  | 0.06561  | 0.090091 | 0.0517   |
| 0.16088  | 0.063492 | 0.17075  | 0.001756 | 0.96981  | 0.01577566 | 0.73384  | 0.038435 | 0.40729  |
| 0.0196   | 0.111525 | 0.0159   | -0.02482 | 0.59259  | -0.0866984 | 0.0612   | -0.09283 | 0.04497  |
| 1.20E-05 | 0.145578 | 0.00161  | 0.058603 | 0.20619  | 0.09729634 | 0.03556  | 0.007992 | 0.86324  |
| 0.14948  | -0.01725 | 0.71003  | -0.0938  | 0.04275  | -0.1616691 | 0.00045  | -0.14703 | 0.00144  |
| 0.79083  | 0.182982 | 6.97E-05 | 0.109066 | 0.01839  | 0.0785519  | 0.08996  | 0.118268 | 0.01053  |
| 0.95239  | 0.117341 | 0.01116  | 0.130091 | 0.00487  | 0.08189124 | 0.07708  | 0.082767 | 0.07396  |
| 0.8448   | 0.057253 | 0.21685  | 0.036614 | 0.42989  | 0.00161333 | 0.97226  | -0.01688 | 0.71592  |
| 0.96298  | 0.087842 | 0.05785  | 0.014766 | 0.7503   | -0.1017564 | 0.02789  | -0.09163 | 0.04781  |
| 0.50651  | 0.076594 | 0.09829  | 0.019816 | 0.66929  | -0.003528  | 0.93939  | -0.00872 | 0.85087  |
| 0.36006  | 0.215414 | 2.63E-06 | 0.14525  | 0.00165  | -0.0200961 | 0.6649   | -0.08217 | 0.07609  |
| 0.00027  | 0.256199 | 1.96E-08 | 0.178438 | 0.00011  | 0.00751157 | 0.87139  | -0.04956 | 0.28517  |
| 0.4148   | -0.1147  | 0.01313  | -0.09542 | 0.03929  | -0.006855  | 0.88255  | 0.072187 | 0.11927  |
| 0.00159  | 0.038264 | 0.40938  | -0.01713 | 0.71191  | 0.0379041  | 0.41381  | 0.056628 | 0.22192  |
| 0.17031  | 0.206652 | 6.72E-06 | 0.15201  | 0.00098  | 0.02197069 | 0.6358   | -0.00511 | 0.91233  |
| 0.59123  | 0.012788 | 0.78283  | 0.003769 | 0.93525  | 0.02357592 | 0.61132  | 0.043451 | 0.34881  |
| 0.85972  | 0.071312 | 0.12383  | 0.00172  | 0.97044  | -0.0247235 | 0.59408  | -0.03816 | 0.4107   |
| 0.29312  | 0.272593 | 2.11E-09 | 0.498549 | 1.03E-30 | 0.23840668 | 1.85E-07 | 0.034121 | 0.46197  |
| 0.00023  | 0.037129 | 0.42343  | 0.044174 | 0.34084  | 0.18938678 | 3.80E-05 | 0.281539 | 5.88E-10 |
| 0.45188  | 0.021085 | 0.64948  | -0.02227 | 0.63124  | 0.04048063 | 0.38277  | 0.065575 | 0.15713  |
| 4.43E-06 | 0.026589 | 0.56653  | -0.03349 | 0.47032  | -0.0225418 | 0.62705  | -0.03882 | 0.40261  |
| 0.04364  | 0.193295 | 2.60E-05 | 0.145695 | 0.00159  | -0.014818  | 0.74944  | -0.02619 | 0.57238  |
| 0.26901  | 0.082115 | 0.07627  | 0.050111 | 0.27984  | -0.0361562 | 0.43568  | -0.04355 | 0.34774  |
| 0.02006  | 0.227455 | 6.78E-07 | 0.10283  | 0.02628  | 0.00489962 | 0.9159   | -0.00597 | 0.89765  |
| 0.13013  | -0.16976 | 0.00023  | 0.255347 | 2.19E-08 | 0.44268859 | 7.83E-24 | 0.228532 | 5.99E-07 |
| 0.07826  | 0.282646 | 5.01E-10 | 0.310694 | 6.56E-12 | -0.1111939 | 0.01622  | -0.19448 | 2.32E-05 |
| 0.09411  | 0.265666 | 5.52E-09 | 0.405873 | 6.02E-20 | -0.0369574 | 0.42557  | -0.14659 | 0.00149  |
| 0.06839  | 0.276339 | 1.24E-09 | 0.180228 | 8.99E-05 | 0.1739353  | 0.00016  | 0.188389 | 4.19E-05 |
| 0.22325  | -0.06213 | 0.18012  | 0.065777 | 0.15585  | 0.19252321 | 2.81E-05 | 0.205611 | 7.49E-06 |
| 5.20E-07 | -0.0957  | 0.0387   | -0.0074  | 0.87326  | 0.10405082 | 0.02454  | 0.107345 | 0.02033  |
| 0.01215  | -0.28349 | 4.42E-10 | -0.24626 | 7.02E-08 | -0.2238964 | 1.02E-06 | -0.14702 | 0.00144  |
| 2.79E-11 | -0.08748 | 0.05888  | -0.17591 | 0.00013  | -0.0337218 | 0.46723  | -0.01588 | 0.73218  |
| 0.00526  | -0.2733  | 1.91E-09 | -0.24629 | 6.99E-08 | -0.2520254 | 3.37E-08 | -0.25639 | 1.91E-08 |
| 0.00011  | 0.032052 | 0.48958  | -0.01988 | 0.66825  | 0.01292864 | 0.78051  | 0.015515 | 0.73807  |
| 0.14228  | -0.04795 | 0.3011   | -0.08621 | 0.06268  | -0.17068   | 0.00021  | -0.23598 | 2.48E-07 |
| 0.52243  | 0.220034 | 1.58E-06 | 0.115325 | 0.01264  | 0.10956716 | 0.01786  | 0.157103 | 0.00066  |
| 0.50929  | 0.147542 | 0.00139  | 0.032031 | 0.48986  | 0.27368968 | 1.81E-09 | 0.291426 | 1.36E-10 |
| 0.0278   | 0.040307 | 0.38482  | -0.06626 | 0.15284  | -0.0267009 | 0.56491  | -0.02111 | 0.64903  |
| 0.94584  | -0.05164 | 0.26541  | 0.003476 | 0.94027  | 0.065689   | 0.1564   | 0.027835 | 0.54849  |
| 0.14819  | -0.0683  | 0.14056  | -0.01412 | 0.76088  | 0.08000534 | 0.08416  | 0.141249 | 0.00222  |
| 0.65699  | 0.014665 | 0.75194  | -0.06985 | 0.13174  | -0.0317527 | 0.49365  | 0.10865  | 0.01884  |

|          |          |          |          |          |            |          |          |          |
|----------|----------|----------|----------|----------|------------|----------|----------|----------|
| 0.31167  | 0.06482  | 0.16197  | 0.088316 | 0.0565   | 0.18229142 | 7.43E-05 | 0.118975 | 0.01007  |
| 0.20385  | 0.153664 | 0.00086  | 0.085767 | 0.06404  | -0.0713771 | 0.12349  | -0.17667 | 0.00012  |
| 0.5756   | -0.03242 | 0.48456  | -0.03006 | 0.51692  | -0.1504604 | 0.00111  | -0.12279 | 0.0079   |
| 0.16695  | 0.125345 | 0.00668  | 0.071568 | 0.12248  | 0.00056128 | 0.99035  | -0.0009  | 0.98456  |
| 0.1182   | -0.01027 | 0.82478  | -0.07385 | 0.111    | -0.0195946 | 0.67277  | -0.05427 | 0.24179  |
| 0.48209  | 0.08906  | 0.05445  | 0.036403 | 0.43255  | 0.06481559 | 0.16199  | 0.059456 | 0.19965  |
| 0.8736   | -0.06118 | 0.18693  | -0.26755 | 4.26E-09 | -0.219063  | 1.76E-06 | -0.25874 | 1.40E-08 |
| 0.67243  | -0.05557 | 0.23072  | -0.04891 | 0.29158  | -0.0331366 | 0.475    | -0.04615 | 0.31962  |
| 0.85962  | -0.16332 | 0.00039  | -0.39978 | 2.39E-19 | -0.2365318 | 2.32E-07 | -0.26279 | 8.15E-09 |
| 0.70389  | -0.18614 | 5.19E-05 | -0.30834 | 9.62E-12 | -0.1246606 | 0.00699  | -0.15299 | 0.00091  |
| 0.90954  | -0.05268 | 0.25588  | -0.07711 | 0.09604  | -0.0679576 | 0.14256  | -0.07623 | 0.09989  |
| 0.72807  | 0.005799 | 0.90053  | -0.07223 | 0.11904  | 0.04908423 | 0.28982  | 0.005342 | 0.90833  |
| 0.60706  | -0.10397 | 0.02465  | -0.38046 | 1.56E-17 | -0.1918125 | 3.01E-05 | -0.2334  | 3.38E-07 |
| 0.4439   | -0.12591 | 0.00644  | -0.30434 | 1.83E-11 | -0.2935799 | 9.77E-11 | -0.29276 | 1.11E-10 |
| 0.77138  | -0.03048 | 0.51118  | -0.2259  | 8.12E-07 | -0.2461775 | 7.09E-08 | -0.27644 | 1.23E-09 |
| 0.04884  | -0.03015 | 0.5157   | -0.18566 | 5.42E-05 | -0.0171149 | 0.71221  | -0.02812 | 0.54438  |
| 0.04548  | 0.123627 | 0.00748  | 0.064254 | 0.16567  | -0.0413126 | 0.37306  | -0.00857 | 0.8534   |
| 0.02908  | -0.09385 | 0.04264  | -0.0677  | 0.14407  | -0.0567591 | 0.22085  | -0.13963 | 0.00249  |
| 9.28E-09 | -0.11637 | 0.01185  | -0.00621 | 0.89354  | 0.17233219 | 0.00018  | 0.226416 | 7.65E-07 |
| 0.48855  | 0.033303 | 0.47279  | -0.13204 | 0.00426  | -0.0077396 | 0.86752  | -0.02459 | 0.59604  |
| 0.81034  | 0.091765 | 0.04749  | 0.056723 | 0.22114  | 0.01758058 | 0.70474  | -0.01139 | 0.80605  |
| 0.08068  | 0.112987 | 0.01457  | 0.111982 | 0.01547  | 0.01155264 | 0.80337  | -0.00579 | 0.90072  |
| 0.81623  | 0.031224 | 0.50087  | 0.000548 | 0.99058  | 0.00075009 | 0.9871   | 0.060665 | 0.19064  |
| 0.44622  | 0.030788 | 0.50688  | -0.01336 | 0.7734   | 0.01465819 | 0.75205  | 0.008753 | 0.85037  |
| 1.43E-09 | -0.07703 | 0.09639  | 0.023559 | 0.61158  | 0.10754258 | 0.0201   | 0.069712 | 0.13251  |
| 0.51583  | 0.114425 | 0.01335  | 0.05627  | 0.22486  | 0.01503172 | 0.74595  | 0.009495 | 0.83786  |
| 0.00014  | -0.13153 | 0.00441  | -0.03476 | 0.45358  | 0.1207796  | 0.00898  | 0.079541 | 0.08598  |
| 0.81537  | 0.059341 | 0.20052  | -0.02237 | 0.6297   | -0.0059336 | 0.89824  | 0.027381 | 0.55503  |
| 6.83E-05 | 0.213889 | 3.10E-06 | 0.134135 | 0.00368  | -0.0719402 | 0.12055  | -0.19465 | 2.28E-05 |
| 0.40006  | 0.1197   | 0.00962  | 0.010569 | 0.8198   | 0.02724013 | 0.55707  | 0.026926 | 0.56163  |
| 0.02539  | 0.028579 | 0.53785  | -0.0759  | 0.1014   | -0.25221   | 3.29E-08 | -0.31504 | 3.21E-12 |
| 0.1325   | 0.055684 | 0.22973  | 0.044694 | 0.33518  | 0.06651694 | 0.15124  | 0.037167 | 0.42296  |
| 0.09324  | 0.166665 | 0.0003   | 0.144955 | 0.00169  | -0.0015846 | 0.97276  | -0.06314 | 0.17317  |
| 0.05976  | -0.07588 | 0.10148  | -0.06744 | 0.14562  | -0.045879  | 0.32251  | -0.05638 | 0.22393  |
| 0.77008  | 0.133176 | 0.00394  | 0.051768 | 0.26423  | 0.01293815 | 0.78035  | 0.014728 | 0.75091  |
| 0.81772  | -0.22906 | 5.63E-07 | -0.16869 | 0.00025  | 0.04733083 | 0.30742  | 0.120192 | 0.00933  |
| 2.32E-07 | -0.02402 | 0.60457  | -0.00761 | 0.8697   | 0.04483903 | 0.33361  | 0.031002 | 0.50392  |
| 0.03994  | 0.173473 | 0.00016  | 0.234236 | 3.06E-07 | 0.3470776  | 1.15E-14 | 0.259268 | 1.31E-08 |
| 0.09925  | 0.241219 | 1.31E-07 | 0.44636  | 3.02E-24 | 0.355032   | 2.55E-15 | 0.206898 | 6.54E-06 |
| 0.26745  | 0.131042 | 0.00456  | -0.074   | 0.11026  | 0.17575641 | 0.00013  | 0.177431 | 0.00012  |
| 0.00112  | 0.326822 | 4.37E-13 | 0.195856 | 2.02E-05 | 0.17892877 | 0.0001   | 0.28904  | 1.94E-10 |
| 0.63317  | -0.05239 | 0.25853  | -0.09635 | 0.03739  | 0.05168564 | 0.26498  | 0.156322 | 0.0007   |
| 0.50907  | -0.28798 | 2.28E-10 | -0.1136  | 0.01404  | 0.02976462 | 0.52111  | 0.00297  | 0.94896  |
| 0.39133  | -0.01314 | 0.77704  | 0.04217  | 0.36321  | 0.08601989 | 0.06326  | 0.086537 | 0.06168  |
| 0.80656  | -0.14026 | 0.00238  | -0.11616 | 0.012    | -0.0757096 | 0.10225  | -0.20659 | 6.76E-06 |

|          |          |          |          |          |            |          |          |          |
|----------|----------|----------|----------|----------|------------|----------|----------|----------|
| 0.09938  | 0.199261 | 1.44E-05 | 0.118985 | 0.01007  | 0.10672144 | 0.02107  | 0.213472 | 3.25E-06 |
| 0.00438  | 0.163553 | 0.00039  | 0.080119 | 0.08371  | -0.1122381 | 0.01524  | -0.19285 | 2.72E-05 |
| 1.21E-05 | -0.06202 | 0.18093  | 0.009879 | 0.83139  | 0.02209362 | 0.63391  | 0.042234 | 0.36248  |
| 0.05871  | 0.077544 | 0.09418  | 0.032749 | 0.48018  | 0.07517553 | 0.1047   | -0.08785 | 0.05782  |
| 0.84378  | 0.005575 | 0.90436  | -0.01392 | 0.76421  | 0.03852529 | 0.40619  | 0.052448 | 0.25799  |
| 2.30E-06 | 0.022618 | 0.62588  | -0.02159 | 0.6416   | 0.03463945 | 0.45519  | 0.109339 | 0.0181   |
| 0.0031   | 0.275898 | 1.33E-09 | 0.307104 | 1.17E-11 | -0.0349313 | 0.4514   | -0.12121 | 0.00874  |
| 0.01974  | 0.116105 | 0.01205  | 0.059453 | 0.19968  | 0.16478832 | 0.00035  | 0.029933 | 0.51875  |
| 0.00511  | 0.014234 | 0.75901  | 0.067181 | 0.14719  | 0.1260839  | 0.00637  | 0.083809 | 0.07038  |
| 0.01727  | 0.247818 | 5.77E-08 | 0.213427 | 3.26E-06 | -0.0673603 | 0.14611  | -0.1954  | 2.12E-05 |
| 0.09531  | 0.116174 | 0.01199  | 0.079316 | 0.08687  | -0.0561451 | 0.22589  | -0.16377 | 0.00038  |
| 0.84494  | 0.01689  | 0.71582  | -0.02612 | 0.57344  | -0.005403  | 0.9073   | 0.018187 | 0.69505  |
| 0.00149  | 0.121756 | 0.00844  | 0.065    | 0.1608   | 0.02189489 | 0.63697  | 0.009471 | 0.83825  |
| 0.46878  | 0.195898 | 2.01E-05 | 0.115607 | 0.01242  | 0.28916911 | 1.90E-10 | 0.266517 | 4.91E-09 |
| 0.92891  | -0.21002 | 4.70E-06 | -0.32093 | 1.20E-12 | -0.1358743 | 0.00326  | -0.19991 | 1.35E-05 |
| 0.61213  | 0.136901 | 0.00303  | 0.073703 | 0.11169  | 0.11742388 | 0.0111   | 0.192548 | 2.80E-05 |
| 0.65335  | -0.0771  | 0.09608  | -0.17039 | 0.00022  | -0.0665312 | 0.15115  | -0.0754  | 0.10366  |
| 0.54648  | -0.09506 | 0.04003  | -0.02771 | 0.55022  | 0.13484475 | 0.00351  | 0.207012 | 6.47E-06 |
| 0.01853  | 0.153797 | 0.00085  | 0.149178 | 0.00122  | 0.0202577  | 0.66237  | 0.009022 | 0.84583  |
| 0.11132  | 0.129453 | 0.00508  | 0.103296 | 0.0256   | 0.04749465 | 0.30574  | 0.029657 | 0.52262  |
| 0.54701  | 0.033918 | 0.46465  | 0.368764 | 1.72E-16 | 0.32569518 | 5.31E-13 | 0.179268 | 9.81E-05 |
| 0.86381  | -0.12277 | 0.00791  | 0.23403  | 3.14E-07 | 0.37294169 | 7.40E-17 | 0.243353 | 1.01E-07 |
| 0.00033  | 0.041694 | 0.36865  | 0.231811 | 4.08E-07 | 0.19122874 | 3.18E-05 | 0.119893 | 0.00951  |
| 0.19305  | 0.194294 | 2.36E-05 | 0.136892 | 0.00303  | 0.2035147  | 9.31E-06 | 0.201821 | 1.11E-05 |
| 0.32712  | 0.082177 | 0.07605  | 0.156424 | 0.00069  | 0.24494996 | 8.27E-08 | 0.271073 | 2.62E-09 |
| 0.01103  | 0.188599 | 4.10E-05 | 0.035406 | 0.44527  | -0.0592843 | 0.20095  | -0.05095 | 0.27186  |
| 0.4506   | 0.129747 | 0.00498  | 0.10447  | 0.02396  | -0.0390154 | 0.40024  | -0.00131 | 0.97751  |
| 0.18404  | 0.031184 | 0.50143  | 0.1243   | 0.00716  | 0.26595117 | 5.31E-09 | 0.314435 | 3.55E-12 |
| 0.39179  | 0.055423 | 0.23193  | 0.03685  | 0.42693  | -0.0169629 | 0.71465  | -0.02359 | 0.61115  |
| 0.89838  | -0.05151 | 0.26662  | -0.06662 | 0.15063  | 0.06112835 | 0.18727  | 0.044256 | 0.33994  |
| 1.03E-08 | -0.02629 | 0.57084  | -0.07156 | 0.12252  | 0.02761446 | 0.55166  | 0.088557 | 0.05583  |
| 2.27E-05 | -0.00617 | 0.8942   | 0.150117 | 0.00114  | 0.39140392 | 1.51E-18 | 0.280721 | 6.63E-10 |
| 0.10872  | 0.116847 | 0.0115   | 0.066036 | 0.15422  | 0.0883135  | 0.05651  | 0.121256 | 0.00872  |
| 0.02747  | -0.04726 | 0.3081   | 0.130933 | 0.0046   | 0.18786404 | 4.40E-05 | 0.163735 | 0.00038  |
| 1.74E-17 | -0.10896 | 0.0185   | -0.05566 | 0.22995  | 0.08340841 | 0.07174  | 0.146994 | 0.00145  |
| 0.74891  | 0.010021 | 0.829    | -0.07275 | 0.11643  | 0.005684   | 0.9025   | 0.023165 | 0.61755  |
| 0.59229  | 0.000962 | 0.98345  | -0.06216 | 0.17996  | 0.10038402 | 0.03008  | 0.186308 | 5.10E-05 |
| 0.34737  | -0.01511 | 0.74463  | 0.136465 | 0.00313  | 0.35628894 | 2.01E-15 | 0.327521 | 3.87E-13 |
| 0.01599  | 0.090018 | 0.05189  | -0.0114  | 0.80587  | -0.0290825 | 0.53071  | -0.06602 | 0.15435  |
| 0.33692  | -0.01171 | 0.80068  | 0.15722  | 0.00065  | 0.13916258 | 0.00258  | 0.177666 | 0.00011  |
| 0.00605  | -0.04855 | 0.2951   | -0.16738 | 0.00028  | -0.1958559 | 2.02E-05 | -0.24064 | 1.41E-07 |
| 0.01493  | -0.10668 | 0.02112  | 0.148505 | 0.00129  | 0.0450555  | 0.33128  | 0.017801 | 0.70121  |
| 1.47E-10 | -0.17301 | 0.00017  | -0.13041 | 0.00476  | -0.0996596 | 0.0313   | -0.09588 | 0.03835  |
| 5.93E-21 | -0.16253 | 0.00042  | -0.1556  | 0.00074  | -0.1066176 | 0.0212   | -0.07947 | 0.08624  |
| 6.88E-05 | 0.073877 | 0.11085  | -0.10383 | 0.02484  | 0.05145794 | 0.2671   | 0.019825 | 0.66916  |

|          |          |          |          |          |            |          |          |          |
|----------|----------|----------|----------|----------|------------|----------|----------|----------|
| 0.06669  | -0.09556 | 0.039    | 0.015702 | 0.73504  | 0.18528261 | 5.62E-05 | 0.039976 | 0.38873  |
| 6.31E-06 | 0.056915 | 0.21958  | 0.015119 | 0.74452  | 0.07740776 | 0.09476  | 0.113938 | 0.01375  |
| 0.17352  | 0.205082 | 7.91E-06 | 0.180963 | 8.40E-05 | 0.1746897  | 0.00015  | 0.161031 | 0.00048  |
| 9.02E-19 | -0.08512 | 0.06608  | -0.10278 | 0.02635  | -0.0098073 | 0.8326   | -0.0148  | 0.74979  |
| 0.65068  | 0.022433 | 0.62871  | -0.08847 | 0.05606  | -0.1272042 | 0.00591  | -0.16261 | 0.00042  |
| 0.29348  | 0.123098 | 0.00774  | 0.057357 | 0.21602  | -0.014698  | 0.7514   | -0.07842 | 0.0905   |
| 0.04696  | 0.105364 | 0.02278  | 0.10779  | 0.01981  | 0.18903516 | 3.94E-05 | 0.168458 | 0.00026  |
| 0.02853  | 0.120949 | 0.00889  | 0.073126 | 0.11453  | 0.10633114 | 0.02155  | 0.125162 | 0.00677  |
| 0.35454  | 0.050768 | 0.27357  | 0.017161 | 0.71146  | -0.1003941 | 0.03007  | -0.11125 | 0.01617  |
| 0.03238  | 0.064751 | 0.16241  | 0.010149 | 0.82686  | -0.041116  | 0.37534  | -0.07192 | 0.12066  |
| 0.01975  | 0.172839 | 0.00017  | 0.142293 | 0.00205  | 0.24437096 | 8.89E-08 | 0.164134 | 0.00037  |
| 0.69754  | 0.050785 | 0.27341  | 0.034842 | 0.45256  | 0.03290902 | 0.47804  | 0.029025 | 0.53152  |
| 0.21271  | 0.204463 | 8.44E-06 | 0.121658 | 0.00849  | 0.09726326 | 0.03562  | 0.132937 | 0.004    |
| 0.73391  | -0.00687 | 0.88234  | -0.0202  | 0.66322  | -0.0312371 | 0.5007   | -0.07076 | 0.12677  |
| 0.27984  | 0.053106 | 0.25206  | -0.03333 | 0.47245  | -0.1130296 | 0.01453  | -0.09683 | 0.03646  |
| 2.03E-05 | 0.218491 | 1.87E-06 | 0.253123 | 2.92E-08 | 0.19855848 | 1.54E-05 | 0.044805 | 0.33398  |
| 0.00445  | -0.03713 | 0.42344  | -0.07285 | 0.11589  | 0.00787574 | 0.86521  | -0.00676 | 0.88414  |
| 0.00867  | 0.137065 | 0.003    | -0.0109  | 0.81425  | -0.0309532 | 0.5046   | 0.0064   | 0.89029  |
| 0.81979  | 0.28769  | 2.38E-10 | 0.167479 | 0.00028  | 0.17064126 | 0.00021  | 0.219479 | 1.68E-06 |
| 0.04167  | 0.026641 | 0.56578  | 0.120714 | 0.00902  | 0.15403295 | 0.00084  | 0.066278 | 0.15271  |
| 1.40E-05 | -0.04608 | 0.32044  | -0.1012  | 0.02876  | 0.01313198 | 0.77715  | 0.051331 | 0.26828  |
| 0.65668  | 0.054382 | 0.24083  | -0.02347 | 0.6129   | -0.010619  | 0.81897  | 0.05522  | 0.23364  |
| 0.36563  | -0.05973 | 0.19757  | -0.00829 | 0.85823  | 0.0733213  | 0.11356  | 0.041397 | 0.37209  |
| 0.88497  | 0.032269 | 0.48665  | 0.042396 | 0.36065  | -0.0028993 | 0.95018  | 0.004508 | 0.9226   |
| 0.61612  | 0.03598  | 0.43792  | -0.00977 | 0.83318  | 0.02043446 | 0.65961  | -0.00163 | 0.97194  |
| 0.31841  | -0.0499  | 0.28188  | -0.03897 | 0.40078  | 0.06196305 | 0.18131  | 0.015873 | 0.73226  |
| 0.83535  | 0.028065 | 0.54518  | 0.006358 | 0.891    | 0.03564411 | 0.44222  | 0.086806 | 0.06087  |
| 0.67945  | 0.122418 | 0.00809  | 0.021663 | 0.64054  | -0.0010821 | 0.98139  | 0.027824 | 0.54864  |
| 0.51535  | 0.010259 | 0.82501  | -0.05531 | 0.23285  | 0.0428929  | 0.35504  | 0.132089 | 0.00425  |
| 0.91069  | -0.0674  | 0.14586  | -0.21624 | 2.40E-06 | -0.0953739 | 0.03938  | -0.01168 | 0.80119  |
| 0.07339  | -0.0037  | 0.93647  | 0.021719 | 0.63968  | 0.0809206  | 0.08066  | 0.092824 | 0.04497  |
| 0.36288  | 0.0055   | 0.90565  | -0.10128 | 0.02863  | -0.0568004 | 0.22051  | 0.041163 | 0.37479  |
| 0.7969   | -0.03314 | 0.47491  | -0.03055 | 0.51013  | 0.14561198 | 0.0016   | 0.112153 | 0.01532  |
| 0.138    | -0.03764 | 0.41704  | -0.13496 | 0.00348  | -0.0479606 | 0.30102  | -0.06029 | 0.19339  |
| 0.32612  | -0.07413 | 0.10963  | -0.22545 | 8.55E-07 | -0.0567885 | 0.22061  | -0.03791 | 0.41371  |
| 0.37257  | -0.05783 | 0.21226  | -0.04488 | 0.33321  | 0.13703206 | 0.003    | 0.180969 | 8.40E-05 |
| 0.12919  | -0.20472 | 8.22E-06 | -0.10118 | 0.02879  | 0.00675511 | 0.88425  | 0.042339 | 0.36129  |
| 0.19592  | -0.01544 | 0.73931  | -0.04853 | 0.29535  | -0.0108785 | 0.81463  | 0.008591 | 0.85311  |
| 0.97791  | -0.02895 | 0.53262  | -0.13135 | 0.00447  | -0.0792955 | 0.08695  | -0.07037 | 0.1289   |
| 0.41781  | -0.01448 | 0.75497  | -0.05948 | 0.19944  | 0.06108861 | 0.18756  | 0.075658 | 0.10248  |
| 0.84082  | 0.006446 | 0.88952  | 0.011479 | 0.80459  | -0.0049429 | 0.91516  | -0.01392 | 0.76419  |
| 0.11099  | 0.002904 | 0.9501   | 0.02207  | 0.63427  | 0.05054376 | 0.2757   | 0.055405 | 0.23208  |
| 0.72345  | -0.01411 | 0.76101  | 0.026925 | 0.56165  | 0.0997896  | 0.03108  | 0.070764 | 0.12675  |
| 0.21786  | -0.01652 | 0.72178  | -0.04632 | 0.31791  | -0.0125976 | 0.78599  | 0.019651 | 0.67188  |
| 0.57561  | -0.05592 | 0.22776  | -0.09024 | 0.05132  | 0.00397743 | 0.93169  | 0.012195 | 0.79268  |

|          |          |          |          |          |            |          |          |          |
|----------|----------|----------|----------|----------|------------|----------|----------|----------|
| 0.34746  | -0.0362  | 0.43508  | -0.15121 | 0.00105  | -0.0725532 | 0.11741  | -0.05918 | 0.20173  |
| 0.68197  | 0.09059  | 0.05041  | -0.00652 | 0.88832  | 0.0333746  | 0.47183  | 0.049551 | 0.28526  |
| 0.38193  | 0.058952 | 0.2035   | 0.074268 | 0.10897  | -0.0457853 | 0.3235   | -0.07209 | 0.11975  |
| 0.52576  | 0.08233  | 0.0755   | 0.081471 | 0.07861  | 0.07268768 | 0.11673  | 0.066414 | 0.15187  |
| 0.94593  | 0.060677 | 0.19056  | 0.011093 | 0.81103  | 0.02195101 | 0.63611  | 0.076153 | 0.10024  |
| 0.84693  | 0.016148 | 0.7278   | -0.06334 | 0.17176  | -0.0061065 | 0.89529  | 0.018271 | 0.69373  |
| 0.02585  | -0.02338 | 0.61427  | 0.0041   | 0.92959  | 0.03004196 | 0.51723  | 0.034231 | 0.46052  |
| 0.50572  | -0.07173 | 0.12161  | -0.06977 | 0.1322   | -0.0062132 | 0.89347  | 0.01329  | 0.77454  |
| 0.06819  | 0.15549  | 0.00075  | -0.02508 | 0.58874  | 0.02433764 | 0.59986  | 0.087991 | 0.05742  |
| 0.99616  | -0.0331  | 0.47552  | -0.09648 | 0.03714  | 0.00181213 | 0.96885  | 0.067378 | 0.146    |
| 0.00012  | -0.04933 | 0.28738  | -0.07532 | 0.10403  | -0.0627181 | 0.17604  | -0.08151 | 0.07848  |
| 0.56805  | -0.03817 | 0.41057  | -0.10176 | 0.02788  | -0.0270938 | 0.55919  | -0.00073 | 0.98738  |
| 0.65504  | 0.05701  | 0.21881  | -0.08143 | 0.07875  | -0.0548598 | 0.23671  | -0.05363 | 0.24741  |
| 0.55193  | 0.05694  | 0.21938  | 0.018467 | 0.6906   | 0.00938949 | 0.83963  | 0.055451 | 0.23169  |
| 0.00083  | 0.013144 | 0.77695  | -0.02285 | 0.62238  | 0.02452514 | 0.59705  | 0.038537 | 0.40604  |
| 0.00201  | -0.07371 | 0.11167  | -0.15263 | 0.00094  | -0.0924188 | 0.04592  | -0.07277 | 0.11629  |
| 0.9796   | -0.02739 | 0.55489  | -0.09199 | 0.04695  | -0.0397451 | 0.39148  | -0.04325 | 0.35108  |
| 0.65943  | 0.033577 | 0.46915  | -0.00465 | 0.9202   | 0.00239948 | 0.95876  | 0.027355 | 0.55541  |
| 0.49306  | -0.01382 | 0.76582  | -0.09303 | 0.04449  | -0.0268146 | 0.56325  | -0.0086  | 0.85296  |
| 0.12953  | 0.079994 | 0.0842   | 0.087061 | 0.06012  | 0.13916408 | 0.00258  | 0.086576 | 0.06156  |
| 0.33918  | 0.200407 | 1.28E-05 | -0.07778 | 0.09316  | -0.019535  | 0.67371  | -0.05817 | 0.20954  |
| 0.68882  | -0.25603 | 2.00E-08 | -0.20202 | 1.08E-05 | -0.1567427 | 0.00068  | -0.14983 | 0.00116  |
| 0.67225  | -0.25646 | 1.89E-08 | -0.21525 | 2.67E-06 | -0.2004725 | 1.27E-05 | -0.1732  | 0.00017  |
| 0.00435  | 0.087566 | 0.05864  | 0.248423 | 5.34E-08 | 0.13701902 | 0.00301  | 0.075815 | 0.10177  |
| 0.00569  | 0.342555 | 2.65E-14 | 0.29239  | 1.17E-10 | 0.42108757 | 1.70E-21 | 0.375102 | 4.75E-17 |
| 0.0039   | 0.22868  | 5.89E-07 | 0.20638  | 6.91E-06 | 0.29745222 | 5.39E-11 | 0.267825 | 4.10E-09 |
| 0.01628  | -0.27401 | 1.73E-09 | -0.22818 | 6.24E-07 | 0.04108971 | 0.37564  | -0.08942 | 0.05347  |
| 0.53664  | 0.16975  | 0.00023  | 0.058697 | 0.20546  | -0.0837415 | 0.07061  | -0.24524 | 7.98E-08 |
| 0.12012  | -0.05276 | 0.2552   | 0.090628 | 0.05032  | -0.0483612 | 0.29699  | -0.15402 | 0.00084  |
| 0.06589  | 0.069593 | 0.13317  | 0.097877 | 0.03447  | -0.0193898 | 0.676    | 0.026799 | 0.56348  |
| 0.20233  | -0.07194 | 0.12053  | -0.09043 | 0.05082  | -0.0786098 | 0.08973  | -0.01355 | 0.77018  |
| 0.88997  | -0.02324 | 0.61634  | -0.02437 | 0.5993   | -0.0388215 | 0.40259  | -0.04835 | 0.29712  |
| 0.16221  | 0.188234 | 4.25E-05 | 0.138634 | 0.00268  | 0.04714847 | 0.30929  | 0.01451  | 0.75448  |
| 6.24E-18 | 0.065823 | 0.15555  | 0.043857 | 0.34431  | 0.06658872 | 0.15079  | 0.051356 | 0.26805  |
| 5.57E-06 | 0.150192 | 0.00113  | 0.132964 | 0.004    | 0.11970263 | 0.00962  | 0.108434 | 0.01908  |
| 0.0348   | 0.093634 | 0.04313  | 0.056364 | 0.22408  | 0.00910562 | 0.84441  | 0.029184 | 0.52927  |
| 0.38823  | 0.054744 | 0.2377   | 0.049386 | 0.28686  | -0.0045904 | 0.92119  | -0.00817 | 0.86015  |
| 0.83225  | 0.157776 | 0.00062  | 0.061959 | 0.18134  | 0.03185196 | 0.4923   | 0.022746 | 0.62393  |
| 0.18381  | 0.087177 | 0.05978  | 0.360267 | 9.28E-16 | 0.22160137 | 1.32E-06 | 0.026315 | 0.57055  |
| 0.56374  | 0.174009 | 0.00016  | 0.10905  | 0.01841  | -0.0121782 | 0.79295  | -0.02501 | 0.58977  |
| 0.22763  | -0.00996 | 0.83002  | -0.13758 | 0.00289  | -0.0586293 | 0.20598  | 0.010153 | 0.82678  |
| 5.09E-05 | 0.178803 | 0.0001   | -0.08385 | 0.07023  | -0.0673812 | 0.14598  | -0.14437 | 0.00176  |
| 0.61369  | 0.087761 | 0.05808  | 0.175642 | 0.00014  | 0.00937734 | 0.83983  | -0.15065 | 0.00109  |
| 0.08438  | 0.007328 | 0.87451  | -0.05812 | 0.20997  | -0.2193554 | 1.70E-06 | -0.24583 | 7.41E-08 |
| 0.0001   | 0.200033 | 1.33E-05 | 0.095691 | 0.03872  | 0.1519002  | 0.00099  | 0.217745 | 2.03E-06 |

|          |          |          |          |          |            |          |          |          |
|----------|----------|----------|----------|----------|------------|----------|----------|----------|
| 0.98582  | -0.10433 | 0.02415  | -0.21004 | 4.70E-06 | -0.152966  | 0.00091  | -0.17672 | 0.00012  |
| 0.10207  | 0.258273 | 1.49E-08 | 0.207298 | 6.28E-06 | 0.21879312 | 1.81E-06 | 0.22363  | 1.05E-06 |
| 2.67E-11 | 0.101666 | 0.02803  | 0.126277 | 0.00629  | 0.13761932 | 0.00288  | 0.094794 | 0.0406   |
| 6.99E-07 | 0.155398 | 0.00075  | 0.078767 | 0.08908  | -0.0360232 | 0.43738  | -0.16384 | 0.00038  |
| 0.00019  | 0.240051 | 1.52E-07 | 0.252837 | 3.03E-08 | -0.0400016 | 0.38843  | -0.19302 | 2.68E-05 |
| 0.08025  | 0.002161 | 0.96286  | 0.219376 | 1.70E-06 | 0.27232389 | 2.20E-09 | 0.219554 | 1.66E-06 |
| 0.01662  | 0.212232 | 3.71E-06 | 0.270979 | 2.65E-09 | 0.12832459 | 0.00548  | 0.061499 | 0.18461  |
| 0.77113  | 0.29827  | 4.74E-11 | -0.12868 | 0.00535  | -0.0884011 | 0.05626  | -0.11838 | 0.01045  |
| 0.48703  | 0.104905 | 0.02338  | 0.026886 | 0.56222  | 0.01177497 | 0.79966  | 0.062778 | 0.17563  |
| 0.39896  | 0.043837 | 0.34453  | -0.01649 | 0.72223  | -0.0474021 | 0.30669  | -0.00786 | 0.86541  |
| 0.03958  | 0.083931 | 0.06997  | 0.032778 | 0.4798   | 0.27776025 | 1.02E-09 | 0.299469 | 3.94E-11 |
| 0.90483  | 0.315039 | 3.21E-12 | 0.273238 | 1.93E-09 | 0.26413878 | 6.79E-09 | 0.270135 | 2.98E-09 |
| 0.43008  | 0.021498 | 0.64309  | -0.00889 | 0.84801  | -0.0650247 | 0.16064  | -0.06617 | 0.15337  |
| 0.01109  | -0.17933 | 9.75E-05 | -0.11986 | 0.00952  | 0.23662667 | 2.30E-07 | 0.114142 | 0.01358  |
| 0.00194  | 0.018734 | 0.68636  | 0.272956 | 2.01E-09 | 0.41898342 | 2.82E-21 | 0.348197 | 9.32E-15 |
| 0.85997  | 0.146928 | 0.00145  | 0.239388 | 1.64E-07 | -0.0670208 | 0.14816  | -0.22441 | 9.62E-07 |
| 0.10301  | -0.0521  | 0.26116  | -0.04746 | 0.30613  | -0.0101594 | 0.82668  | -0.03477 | 0.45348  |
| 0.25694  | 0.085101 | 0.06614  | 0.09005  | 0.05181  | 0.09830924 | 0.03368  | 0.087243 | 0.05958  |
| 0.11122  | 0.198611 | 1.53E-05 | 0.106561 | 0.02127  | 0.04189622 | 0.36634  | 0.031918 | 0.49141  |
| 0.53547  | -0.21399 | 3.07E-06 | -0.1726  | 0.00018  | -0.088074  | 0.05719  | -0.08396 | 0.06987  |
| 0.16031  | 0.144513 | 0.00174  | 0.36198  | 6.64E-16 | 0.01994097 | 0.66733  | -0.24651 | 6.80E-08 |
| 0.25452  | 0.137596 | 0.00289  | -0.02281 | 0.623    | -0.1341927 | 0.00367  | -0.10144 | 0.02839  |
| 0.02126  | 0.224488 | 9.54E-07 | 0.075753 | 0.10205  | -0.0768176 | 0.09731  | -0.0505  | 0.2761   |
| 0.20842  | 0.155075 | 0.00077  | 0.00163  | 0.97197  | -0.0599713 | 0.19578  | -0.02282 | 0.62273  |
| 0.3515   | 0.137931 | 0.00282  | 0.042209 | 0.36277  | 0.00047916 | 0.99176  | 0.063806 | 0.16864  |
| 0.20363  | 0.047964 | 0.30098  | -0.00764 | 0.86919  | -0.1183529 | 0.01047  | -0.1209  | 0.00892  |
| 0.27488  | 0.267067 | 4.55E-09 | 0.399404 | 2.59E-19 | 0.06027615 | 0.19351  | -0.03093 | 0.50487  |
| 0.01252  | 0.270218 | 2.95E-09 | 0.259064 | 1.34E-08 | 0.27348566 | 1.86E-09 | 0.320863 | 1.21E-12 |
| 0.00694  | 0.252162 | 3.31E-08 | 0.254461 | 2.46E-08 | 0.33833936 | 5.70E-14 | 0.110375 | 0.01703  |
| 5.55E-21 | -0.04233 | 0.36134  | 0.090661 | 0.05023  | 0.23148556 | 4.24E-07 | 0.156614 | 0.00068  |
| 0.01275  | 0.1187   | 0.01025  | -0.0274  | 0.55477  | -0.1296146 | 0.00503  | -0.19518 | 2.16E-05 |
| 0.157    | 0.126109 | 0.00636  | -0.00543 | 0.9069   | 0.26780222 | 4.12E-09 | 0.241258 | 1.31E-07 |
| 0.00334  | 0.283634 | 4.33E-10 | 0.452797 | 5.50E-25 | 0.51925626 | 1.33E-33 | 0.2949   | 7.98E-11 |
| 1.79E-05 | 0.019477 | 0.67462  | 0.06295  | 0.17445  | 0.1019124  | 0.02765  | -0.02081 | 0.65373  |
| 0.00055  | -0.07385 | 0.11098  | 0.151055 | 0.00106  | 0.05841603 | 0.20764  | -0.12331 | 0.00763  |
| 0.3409   | 0.155736 | 0.00073  | 0.043758 | 0.34541  | 0.00976128 | 0.83337  | 0.027779 | 0.5493   |
| 0.89452  | -0.01322 | 0.77565  | 0.0357   | 0.4415   | 0.11408774 | 0.01363  | 0.119936 | 0.00948  |
| 0.0145   | -0.03041 | 0.51205  | 0.053638 | 0.24733  | 0.20219854 | 1.07E-05 | 0.301171 | 3.01E-11 |
| 0.76363  | 0.252385 | 3.22E-08 | 0.10025  | 0.0303   | 0.12661896 | 0.00614  | 0.232593 | 3.72E-07 |
| 0.22794  | 0.058514 | 0.20688  | -0.14485 | 0.0017   | -0.1664276 | 0.0003   | -0.26144 | 9.77E-09 |
| 0.00029  | -0.12257 | 0.00801  | -0.00827 | 0.85853  | -0.0101827 | 0.82629  | -0.10388 | 0.02477  |
| 7.08E-07 | -0.09986 | 0.03096  | -0.00916 | 0.84352  | 0.15915953 | 0.00056  | 0.215051 | 2.73E-06 |
| 0.7349   | 0.26036  | 1.13E-08 | 0.36346  | 4.96E-16 | 0.34118587 | 3.40E-14 | 0.223796 | 1.03E-06 |
| 0.02184  | -0.1099  | 0.01751  | 0.095544 | 0.03903  | 0.24147776 | 1.27E-07 | 0.108173 | 0.01937  |
| 0.4847   | 0.124886 | 0.00689  | -0.16219 | 0.00043  | 0.00785755 | 0.86552  | -0.04147 | 0.37128  |

|          |          |          |          |          |            |          |          |          |
|----------|----------|----------|----------|----------|------------|----------|----------|----------|
| 0.00024  | -0.10318 | 0.02576  | 0.025371 | 0.58446  | -0.0812344 | 0.07948  | -0.1741  | 0.00016  |
| 0.15542  | 0.127693 | 0.00572  | 0.111582 | 0.01585  | 0.05823002 | 0.2091   | 0.061004 | 0.18817  |
| 0.18441  | 0.211018 | 4.23E-06 | 0.263549 | 7.35E-09 | 0.36623958 | 2.86E-16 | 0.251652 | 3.54E-08 |
| 0.95347  | -0.08345 | 0.0716   | -0.1029  | 0.02618  | 0.06374262 | 0.16907  | 0.06362  | 0.1699   |
| 0.01622  | 0.132508 | 0.00412  | 0.051237 | 0.26916  | 0.0268914  | 0.56213  | 0.045036 | 0.33149  |
| 0.18191  | 0.06092  | 0.18879  | -0.00221 | 0.96197  | 0.03185444 | 0.49227  | 0.058553 | 0.20658  |
| 0.30508  | 0.098872 | 0.03267  | -0.00249 | 0.95728  | 0.00173589 | 0.97016  | -0.02301 | 0.61986  |
| 0.05879  | 0.144499 | 0.00174  | 0.077579 | 0.09403  | 0.01707184 | 0.7129   | 0.056741 | 0.221    |
| 0.0043   | 0.072924 | 0.11554  | -0.01311 | 0.77747  | 0.0224283  | 0.62878  | 0.021084 | 0.64949  |
| 0.8006   | -0.03838 | 0.40802  | 0.032423 | 0.48456  | 0.11505994 | 0.01284  | 0.045379 | 0.32781  |
| 0.80622  | 0.191247 | 3.18E-05 | -0.12075 | 0.009    | -0.1893987 | 3.80E-05 | -0.29863 | 4.49E-11 |
| 0.00164  | 0.300824 | 3.18E-11 | 0.372542 | 8.02E-17 | 0.2818172  | 5.65E-10 | 0.102909 | 0.02616  |
| 1.37E-22 | -0.01138 | 0.80625  | 0.17901  | 0.0001   | 0.26064666 | 1.09E-08 | 0.306505 | 1.29E-11 |
| 0.00186  | -0.04589 | 0.32238  | 0.154766 | 0.00079  | 0.33794385 | 6.12E-14 | 0.24743  | 6.06E-08 |
| 0.13744  | 0.068036 | 0.14209  | 0.074852 | 0.1062   | 0.13402144 | 0.00371  | 0.154078 | 0.00084  |
| 0.29077  | 0.106721 | 0.02107  | -0.00672 | 0.88486  | 0.1007848  | 0.02943  | 0.224121 | 9.95E-07 |
| 0.6511   | 0.086401 | 0.06209  | -0.04149 | 0.37103  | 0.04234549 | 0.36122  | 0.142354 | 0.00204  |
| 0.48061  | 0.105228 | 0.02295  | 0.019712 | 0.67093  | 0.0014399  | 0.97524  | 0.030109 | 0.51629  |
| 4.55E-20 | 0.153786 | 0.00086  | 0.130602 | 0.0047   | 0.20841248 | 5.58E-06 | 0.278727 | 8.84E-10 |
| 0.97343  | 0.086926 | 0.06052  | 0.081186 | 0.07966  | 0.14382783 | 0.00183  | 0.105588 | 0.02249  |
| 0.28048  | 0.029928 | 0.51882  | 0.006613 | 0.88666  | 0.17754748 | 0.00011  | 0.11204  | 0.01542  |
| 0.52426  | 0.090186 | 0.05145  | 0.067122 | 0.14754  | 0.20827113 | 5.66E-06 | 0.23894  | 1.74E-07 |
| 0.08017  | 0.090221 | 0.05136  | 0.122962 | 0.00781  | 0.23145485 | 4.25E-07 | 0.191526 | 3.09E-05 |
| 0.35634  | -0.02644 | 0.56878  | -0.01221 | 0.79242  | 0.17067133 | 0.00021  | 0.186719 | 4.91E-05 |
| 0.0381   | -0.02495 | 0.59069  | 0.0354   | 0.44535  | 0.28257659 | 5.06E-10 | 0.223662 | 1.05E-06 |
| 0.54861  | -0.14566 | 0.0016   | -0.01199 | 0.79601  | 0.20915419 | 5.16E-06 | 0.210192 | 4.62E-06 |
| 0.30893  | 0.031232 | 0.50077  | 0.088851 | 0.05502  | 0.3161739  | 2.66E-12 | 0.332546 | 1.61E-13 |
| 0.60491  | 0.011032 | 0.81206  | 0.035149 | 0.44858  | 0.25567578 | 2.10E-08 | 0.272088 | 2.27E-09 |
| 0.05939  | -0.05811 | 0.21006  | -0.10129 | 0.02863  | 0.13670394 | 0.00307  | 0.100974 | 0.02912  |
| 0.02522  | -0.02269 | 0.62474  | -0.10045 | 0.02998  | 0.21132647 | 4.09E-06 | 0.294734 | 8.19E-11 |
| 0.621    | -0.07416 | 0.10948  | -0.10662 | 0.0212   | 0.04917216 | 0.28896  | 0.130929 | 0.0046   |
| 0.01034  | 0.122236 | 0.00818  | 0.113356 | 0.01425  | 0.16152864 | 0.00046  | 0.207297 | 6.28E-06 |
| 0.81237  | 0.109593 | 0.01783  | 0.086078 | 0.06308  | 0.18923922 | 3.86E-05 | 0.272304 | 2.20E-09 |
| 0.04648  | -0.00054 | 0.99075  | -0.02514 | 0.5879   | 0.05773497 | 0.213    | 0.115381 | 0.01259  |
| 0.84351  | 0.151121 | 0.00105  | 0.149568 | 0.00119  | 0.28032822 | 7.01E-10 | 0.239885 | 1.55E-07 |
| 0.45725  | 0.143726 | 0.00185  | 0.060472 | 0.19207  | 0.1505611  | 0.0011   | 0.2087   | 5.41E-06 |
| 0.00294  | 0.054856 | 0.23675  | 0.08442  | 0.06835  | 0.25705133 | 1.75E-08 | 0.34006  | 4.18E-14 |
| 0.13273  | 0.105607 | 0.02246  | 0.140784 | 0.00229  | 0.34175615 | 3.07E-14 | 0.359978 | 9.82E-16 |
| 0.11891  | -0.07951 | 0.0861   | 0.013389 | 0.77291  | 0.21838979 | 1.89E-06 | 0.267928 | 4.05E-09 |
| 0.21333  | -0.14159 | 0.00216  | 0.055332 | 0.2327   | 0.32587412 | 5.15E-13 | 0.325745 | 5.26E-13 |
| 0.00572  | 0.035131 | 0.44882  | -0.09336 | 0.04374  | 0.11153154 | 0.0159   | -0.09199 | 0.04694  |
| 0.02143  | 0.128363 | 0.00547  | 0.132425 | 0.00415  | 0.09876574 | 0.03286  | 0.087077 | 0.06007  |
| 0.72398  | -0.00957 | 0.83663  | 0.004044 | 0.93055  | 0.01948993 | 0.67442  | 0.066875 | 0.14904  |
| 1.42E-06 | -0.07691 | 0.09691  | 0.025011 | 0.5898   | 0.06569874 | 0.15634  | 0.078642 | 0.08959  |
| 0.0955   | -0.10022 | 0.03035  | 9.88E-05 | 0.9983   | 0.09222564 | 0.04638  | 0.136906 | 0.00303  |

|          |          |          |          |          |            |          |          |          |
|----------|----------|----------|----------|----------|------------|----------|----------|----------|
| 0.01224  | 0.150973 | 0.00107  | 0.07089  | 0.12608  | 0.03214458 | 0.48833  | 0.061716 | 0.18306  |
| 0.65395  | 0.037544 | 0.41827  | -0.03655 | 0.43076  | -0.129688  | 0.005    | -0.21059 | 4.43E-06 |
| 0.04589  | -0.12    | 0.00944  | -0.08725 | 0.05955  | 0.11068644 | 0.01672  | 0.199841 | 1.36E-05 |
| 0.03529  | -0.01628 | 0.72565  | 0.074452 | 0.10809  | 0.23885258 | 1.75E-07 | 0.224442 | 9.59E-07 |
| 0.46102  | 0.150703 | 0.00109  | 0.137492 | 0.00291  | 0.1242566  | 0.00718  | 0.03688  | 0.42655  |
| 0.00162  | 0.138322 | 0.00274  | 0.252302 | 3.25E-08 | 0.19062466 | 3.38E-05 | 0.219627 | 1.65E-06 |
| 0.0023   | 0.277927 | 9.92E-10 | 0.072116 | 0.11964  | -0.1434017 | 0.00189  | -0.09936 | 0.03182  |
| 0.00116  | -0.0166  | 0.72043  | -0.11745 | 0.01108  | -0.1077513 | 0.01986  | -0.03921 | 0.39789  |
| 0.4338   | 0.279634 | 7.76E-10 | 0.102514 | 0.02674  | 0.11097513 | 0.01643  | 0.242217 | 1.16E-07 |
| 0.00154  | -0.256   | 2.01E-08 | -0.21561 | 2.57E-06 | 0.00823894 | 0.85906  | -0.03055 | 0.51016  |
| 2.60E-08 | -0.10706 | 0.02066  | -0.04607 | 0.32052  | -0.0613409 | 0.18574  | -0.07168 | 0.12187  |
| 0.7458   | 0.000782 | 0.98656  | -0.09442 | 0.04139  | -0.0547833 | 0.23737  | -0.04458 | 0.33643  |
| 0.00159  | 0.143964 | 0.00181  | 0.127059 | 0.00597  | 0.04055656 | 0.38188  | -0.02352 | 0.61217  |
| 0.0028   | 0.312184 | 5.15E-12 | 0.165993 | 0.00032  | 0.12237683 | 0.00811  | 0.142237 | 0.00206  |
| 0.03516  | 0.194282 | 2.36E-05 | 0.084422 | 0.06834  | -0.0339198 | 0.46462  | -0.0824  | 0.07525  |
| 0.43152  | 0.03044  | 0.51169  | 0.015263 | 0.74218  | -0.0571337 | 0.21781  | -0.10031 | 0.0302   |
| 4.76E-11 | -0.16715 | 0.00029  | -0.12594 | 0.00643  | 0.0510745  | 0.27068  | 0.040799 | 0.37903  |
| 0.8088   | 0.057227 | 0.21706  | 0.060481 | 0.192    | -0.0737712 | 0.11136  | -0.12014 | 0.00936  |
| 3.07E-09 | 0.116237 | 0.01195  | 0.200461 | 1.27E-05 | 0.15104209 | 0.00106  | 0.125036 | 0.00682  |
| 0.57834  | 0.037451 | 0.41942  | -0.0167  | 0.71894  | -0.0008036 | 0.98618  | 0.024391 | 0.59906  |
| 0.71571  | 0.112259 | 0.01522  | 0.029386 | 0.52642  | -0.0377972 | 0.41513  | -0.11483 | 0.01302  |
| 0.45341  | 0.099823 | 0.03102  | 0.049421 | 0.28652  | 0.03315863 | 0.47471  | 0.014213 | 0.75934  |
| 0.15225  | 0.026881 | 0.56228  | -0.03572 | 0.4412   | -0.0363679 | 0.433    | -0.06721 | 0.14699  |
| 8.84E-07 | 0.015135 | 0.74427  | -0.05986 | 0.19663  | -0.0547702 | 0.23748  | 0.017073 | 0.71287  |
| 0.46679  | -0.03945 | 0.39503  | -0.02481 | 0.59274  | 0.02771081 | 0.55028  | 0.075217 | 0.1045   |
| 0.47329  | -0.29316 | 1.04E-10 | -0.17421 | 0.00015  | -0.1165807 | 0.0117   | -0.08847 | 0.05608  |
| 0.00015  | 0.198669 | 1.53E-05 | 0.151858 | 0.00099  | 0.09265735 | 0.04536  | 0.14139  | 0.00219  |
| 0.00502  | 0.174816 | 0.00015  | 0.413297 | 1.08E-20 | 0.41585708 | 5.92E-21 | 0.229077 | 5.62E-07 |
| 0.13318  | -0.02973 | 0.52154  | -0.09894 | 0.03255  | -0.146769  | 0.00147  | -0.14615 | 0.00154  |
| 0.81248  | -0.07498 | 0.10559  | 0.040046 | 0.3879   | 0.28308323 | 4.70E-10 | 0.338005 | 6.06E-14 |
| 0.16678  | 0.100677 | 0.0296   | 0.293213 | 1.03E-10 | 0.31080048 | 6.45E-12 | 0.205794 | 7.35E-06 |
| 0.26441  | 0.121463 | 0.0086   | 0.084574 | 0.06784  | 0.00698186 | 0.88039  | -0.01572 | 0.73482  |
| 0.30126  | -0.05259 | 0.25673  | 0.038929 | 0.40128  | 0.09084984 | 0.04975  | 0.066425 | 0.1518   |
| 0.00922  | -0.03414 | 0.46176  | 0.049659 | 0.28421  | 0.0345756  | 0.45603  | 0.00149  | 0.97438  |
| 0.20361  | -0.08503 | 0.06637  | 0.08012  | 0.08371  | 0.05284892 | 0.25437  | -0.0844  | 0.06843  |
| 0.08626  | -0.01396 | 0.76348  | 0.008948 | 0.84708  | 0.03342987 | 0.4711   | 0.019007 | 0.68204  |
| 0.07672  | -0.06447 | 0.16424  | -0.07144 | 0.12315  | -0.1442045 | 0.00178  | -0.2006  | 1.25E-05 |
| 0.10383  | -0.07578 | 0.10195  | -0.21394 | 3.09E-06 | -0.1144952 | 0.01329  | -0.09371 | 0.04296  |
| 0.53769  | -0.11045 | 0.01696  | -0.05622 | 0.22529  | 0.07149094 | 0.12289  | 0.037588 | 0.41771  |
| 0.27642  | 0.010996 | 0.81266  | -0.10721 | 0.02049  | -0.0472888 | 0.30785  | -0.02981 | 0.5205   |
| 6.47E-18 | 0.160733 | 0.00049  | 0.066457 | 0.15161  | 0.23856245 | 1.82E-07 | 0.290144 | 1.65E-10 |
| 0.48967  | -0.03816 | 0.41064  | -0.08091 | 0.0807   | -0.0085491 | 0.85381  | 0.038813 | 0.40269  |
| 0.22607  | 0.089307 | 0.05378  | 0.261298 | 9.96E-09 | 0.18439274 | 6.11E-05 | 0.065204 | 0.15949  |
| 0.42692  | -0.09319 | 0.04413  | -0.04021 | 0.38602  | 0.06428853 | 0.16544  | 0.176747 | 0.00012  |
| 0.4172   | -0.14655 | 0.0015   | -0.33122 | 2.03E-13 | -0.2505031 | 4.10E-08 | -0.0991  | 0.03227  |



|          |          |          |          |          |            |          |          |          |
|----------|----------|----------|----------|----------|------------|----------|----------|----------|
| 0.37176  | 0.079954 | 0.08435  | 0.020335 | 0.66117  | -0.0172148 | 0.7106   | -0.00657 | 0.88743  |
| 0.77637  | 0.059467 | 0.19956  | -0.00091 | 0.98429  | 0.16773219 | 0.00027  | 0.115821 | 0.01226  |
| 4.56E-05 | -0.27665 | 1.19E-09 | -0.0907  | 0.05014  | -0.0754362 | 0.10349  | -0.18519 | 5.67E-05 |
| 7.04E-11 | -0.13722 | 0.00296  | -0.11592 | 0.01218  | -0.0764199 | 0.09906  | -0.21003 | 4.70E-06 |
| 4.63E-08 | -0.01899 | 0.68233  | 0.042451 | 0.36002  | 0.38113892 | 1.36E-17 | 0.35878  | 1.24E-15 |
| 0.11713  | 0.11151  | 0.01592  | 0.066205 | 0.15317  | -0.0577262 | 0.21307  | -0.06152 | 0.18445  |
| 0.40818  | 0.170989 | 0.00021  | 0.070943 | 0.12579  | -0.0314837 | 0.49732  | -0.03804 | 0.41216  |
| 0.60749  | 0.092211 | 0.04641  | 0.004264 | 0.92677  | 0.02449546 | 0.59749  | 0.023324 | 0.61514  |
| 0.01403  | 0.244936 | 8.29E-08 | 0.182493 | 7.29E-05 | -0.0468882 | 0.31197  | 0.044977 | 0.33213  |
| 0.26571  | -0.30591 | 1.42E-11 | -0.27098 | 2.65E-09 | -0.1799831 | 9.19E-05 | -0.22625 | 7.79E-07 |
| 0.30126  | 0.125782 | 0.00649  | 0.196543 | 1.89E-05 | 0.12096799 | 0.00888  | 0.023204 | 0.61695  |
| 0.00399  | -0.11039 | 0.01701  | 0.004445 | 0.92367  | 0.21268198 | 3.54E-06 | 0.081809 | 0.07738  |
| 0.23095  | -0.06317 | 0.17291  | -0.03364 | 0.46826  | -0.2971946 | 5.61E-11 | -0.30152 | 2.85E-11 |
| 4.31E-07 | 0.008825 | 0.84915  | 0.184266 | 6.18E-05 | 0.14686686 | 0.00146  | 0.182547 | 7.26E-05 |
| 0.00866  | -0.05183 | 0.26367  | -0.182   | 7.63E-05 | -0.1587901 | 0.00057  | -0.20983 | 4.80E-06 |
| 0.42376  | -0.03185 | 0.49239  | -0.05135 | 0.2681   | 0.04958391 | 0.28493  | 0.082207 | 0.07594  |
| 0.65678  | 0.135907 | 0.00325  | -0.18454 | 6.03E-05 | 0.000997   | 0.98286  | 0.045198 | 0.32975  |
| 0.00879  | -0.01163 | 0.802    | -0.03444 | 0.45773  | -0.0264085 | 0.56918  | 0.016006 | 0.7301   |
| 0.32417  | -0.18593 | 5.29E-05 | -0.14033 | 0.00237  | 0.01446581 | 0.7552   | -0.1024  | 0.02691  |
| 0.46687  | -0.31225 | 5.09E-12 | -0.22422 | 9.83E-07 | -0.0735969 | 0.11221  | -0.04578 | 0.32355  |
| 7.35E-07 | -0.07847 | 0.09028  | 0.019781 | 0.66983  | 0.25187129 | 3.44E-08 | 0.235587 | 2.60E-07 |
| 9.34E-08 | 0.21406  | 3.05E-06 | 0.136111 | 0.00321  | -0.012754  | 0.7834   | -0.07018 | 0.12993  |
| 0.00492  | -0.10612 | 0.02181  | 0.065749 | 0.15602  | 0.07585221 | 0.1016   | 0.057633 | 0.21381  |
| 0.05906  | 0.153488 | 0.00088  | 0.186516 | 5.00E-05 | -0.0677974 | 0.1435   | -0.02514 | 0.58787  |
| 0.04252  | 0.251592 | 3.56E-08 | 0.205787 | 7.35E-06 | 0.27212983 | 2.26E-09 | 0.173139 | 0.00017  |
| 3.98E-07 | 0.022769 | 0.62358  | 0.089247 | 0.05394  | 0.03911117 | 0.39908  | 0.108291 | 0.01924  |
| 0.61848  | -0.25991 | 1.20E-08 | -0.22116 | 1.39E-06 | 0.20747233 | 6.16E-06 | 0.137698 | 0.00286  |
| 0.26254  | 0.218775 | 1.81E-06 | 0.199835 | 1.36E-05 | 0.09558565 | 0.03894  | 0.089976 | 0.052    |
| 0.30533  | 0.218356 | 1.90E-06 | 0.026528 | 0.56742  | -0.0133001 | 0.77437  | -0.0173  | 0.70929  |
| 0.54711  | 0.214989 | 2.75E-06 | 0.105748 | 0.02228  | -0.0744566 | 0.10807  | -0.09902 | 0.0324   |
| 0.0075   | 0.071379 | 0.12348  | 0.023012 | 0.61987  | 0.05366785 | 0.24707  | 0.030617 | 0.50925  |
| 0.01551  | -0.13176 | 0.00434  | -0.23712 | 2.17E-07 | -0.022829  | 0.62266  | 0.056606 | 0.2221   |
| 0.80888  | 0.040923 | 0.37758  | -0.02681 | 0.56327  | 0.05630633 | 0.22456  | 0.068482 | 0.1395   |
| 2.09E-05 | -0.27352 | 1.86E-09 | -0.13151 | 0.00442  | 0.02388458 | 0.60666  | -0.01531 | 0.74137  |
| 0.47202  | -0.03073 | 0.50766  | -0.13424 | 0.00366  | 0.15436791 | 0.00082  | 0.236564 | 2.32E-07 |
| 0.61137  | 0.119171 | 0.00995  | 0.111908 | 0.01554  | 0.15454038 | 0.00081  | 0.223911 | 1.02E-06 |
| 0.00814  | -0.0351  | 0.44926  | 0.002166 | 0.96276  | -0.0905315 | 0.05056  | -0.00405 | 0.93042  |
| 0.02364  | 0.13397  | 0.00373  | 0.073186 | 0.11423  | 0.24414279 | 9.15E-08 | 0.242884 | 1.07E-07 |
| 0.008    | -0.27478 | 1.55E-09 | -0.23808 | 1.93E-07 | -0.0758055 | 0.10181  | -0.07767 | 0.09363  |
| 0.46629  | 0.1554   | 0.00075  | 0.30473  | 1.72E-11 | 0.02903292 | 0.53141  | -0.10875 | 0.01873  |
| 1.05E-11 | -0.18208 | 7.58E-05 | -0.06543 | 0.15803  | -0.1841636 | 6.24E-05 | -0.25336 | 2.83E-08 |
| 0.97339  | -0.20194 | 1.09E-05 | -0.13003 | 0.00489  | -0.054727  | 0.23785  | -0.04263 | 0.35798  |
| 1.16E-08 | -0.31119 | 6.06E-12 | -0.40875 | 3.11E-20 | -0.2299829 | 5.06E-07 | -0.16541 | 0.00033  |
| 3.65E-24 | -0.0646  | 0.16341  | 0.091811 | 0.04738  | 0.2273956  | 6.83E-07 | 0.302156 | 2.58E-11 |
| 1.68E-05 | 0.092905 | 0.04479  | -0.00896 | 0.84683  | 0.03948456 | 0.3946   | 0.022865 | 0.62212  |

|          |          |          |          |          |            |          |          |          |
|----------|----------|----------|----------|----------|------------|----------|----------|----------|
| 0.03016  | -0.24587 | 7.37E-08 | -0.37316 | 7.08E-17 | -0.110455  | 0.01695  | -0.21167 | 3.94E-06 |
| 0.03807  | 0.230934 | 4.52E-07 | 0.131902 | 0.0043   | -0.0767892 | 0.09743  | -0.0502  | 0.27898  |
| 0.0446   | 0.075429 | 0.10353  | -0.1739  | 0.00016  | -0.2907787 | 1.50E-10 | -0.32479 | 6.21E-13 |
| 0.01013  | 0.03384  | 0.46567  | 0.031782 | 0.49325  | 0.06252544 | 0.17737  | 0.084465 | 0.0682   |
| 0.03608  | -0.0262  | 0.57218  | 0.022389 | 0.62938  | 0.01300998 | 0.77917  | -0.00851 | 0.85448  |
| 7.62E-21 | -0.18144 | 8.04E-05 | -0.2212  | 1.38E-06 | -0.0460698 | 0.3205   | -0.0005  | 0.99148  |
| 1.86E-05 | 0.150883 | 0.00107  | 0.120822 | 0.00896  | 0.04151888 | 0.37067  | 0.070447 | 0.12846  |
| 0.01833  | -0.01703 | 0.71363  | 0.017533 | 0.70551  | 0.06498261 | 0.16091  | -0.0486  | 0.29457  |
| 0.39602  | 0.145776 | 0.00158  | 0.026879 | 0.56231  | 0.14473466 | 0.00171  | 0.206553 | 6.79E-06 |
| 0.16883  | -0.04715 | 0.30924  | 0.024378 | 0.59924  | 0.21124614 | 4.13E-06 | 0.246114 | 7.15E-08 |
| 8.64E-05 | -0.00558 | 0.90436  | -0.04024 | 0.38565  | 0.03462422 | 0.45539  | -0.03053 | 0.51048  |
| 0.88918  | 0.112831 | 0.01471  | 0.009315 | 0.84089  | 0.02210319 | 0.63377  | 0.072581 | 0.11726  |
| 0.45139  | 0.089789 | 0.05249  | 0.152533 | 0.00094  | 0.11562675 | 0.0124   | -0.03606 | 0.43696  |
| 0.05283  | -0.10779 | 0.01981  | -0.08943 | 0.05345  | 0.0591215  | 0.2022   | 0.125049 | 0.00682  |
| 0.5666   | 0.143554 | 0.00187  | 0.226334 | 7.72E-07 | 0.20218442 | 1.07E-05 | 0.157362 | 0.00064  |
| 0.11783  | 0.200306 | 1.29E-05 | 0.055508 | 0.23121  | -0.0894202 | 0.05347  | -0.12398 | 0.00731  |
| 0.00014  | 0.035762 | 0.44071  | 0.100205 | 0.03038  | 0.00178349 | 0.96934  | -0.06243 | 0.17806  |
| 0.11381  | -0.07816 | 0.09159  | -0.0582  | 0.20931  | 0.18059863 | 8.69E-05 | 0.156613 | 0.00068  |
| 0.05966  | 0.158767 | 0.00057  | 0.011789 | 0.79944  | 0.0739065  | 0.1107   | 0.075765 | 0.10199  |
| 0.4598   | 0.207088 | 6.42E-06 | -0.02463 | 0.59554  | 0.12098485 | 0.00887  | 0.125083 | 0.0068   |
| 0.3214   | 0.012123 | 0.79387  | 0.146713 | 0.00148  | 0.42298363 | 1.08E-21 | 0.371542 | 9.83E-17 |
| 0.52901  | 0.299938 | 3.66E-11 | 0.152626 | 0.00094  | 0.16408218 | 0.00037  | 0.095937 | 0.03822  |
| 0.10398  | 0.233996 | 3.15E-07 | 0.047604 | 0.30463  | 0.02057556 | 0.65741  | 0.008052 | 0.86223  |
| 0.13994  | 0.104237 | 0.02428  | 0.091496 | 0.04814  | 0.34123258 | 3.37E-14 | 0.228677 | 5.89E-07 |
| 0.67197  | 0.02528  | 0.58581  | 0.239879 | 1.55E-07 | 0.31653198 | 2.51E-12 | 0.127677 | 0.00573  |
| 0.52437  | -0.21459 | 2.88E-06 | 0.056437 | 0.22348  | 0.39407805 | 8.44E-19 | 0.243397 | 1.00E-07 |
| 0.13559  | 0.109338 | 0.0181   | -0.06289 | 0.17486  | -0.0324571 | 0.48411  | -0.09282 | 0.04499  |
| 0.00132  | -0.06109 | 0.18757  | -0.29601 | 6.73E-11 | -0.1930646 | 2.66E-05 | -0.07379 | 0.11125  |
| 0.40993  | 0.12289  | 0.00785  | 0.119206 | 0.00993  | 0.06890208 | 0.13708  | 0.150963 | 0.00107  |
| 0.14012  | -0.14418 | 0.00179  | -0.22206 | 1.26E-06 | -0.0491998 | 0.28868  | -0.05039 | 0.27721  |
| 0.87663  | -0.04325 | 0.35103  | 0.34286  | 2.50E-14 | 0.3537957  | 3.24E-15 | 0.217192 | 2.16E-06 |
| 4.52E-05 | -0.20134 | 1.16E-05 | -0.3092  | 8.37E-12 | -0.2585579 | 1.43E-08 | -0.25635 | 1.92E-08 |
| 0.69849  | -0.17747 | 0.00012  | -0.07289 | 0.11573  | 0.15073288 | 0.00109  | 0.093636 | 0.04312  |
| 0.00123  | 0.234192 | 3.08E-07 | 0.184223 | 6.21E-05 | -0.0898756 | 0.05226  | -0.15045 | 0.00111  |
| 0.02885  | -0.0406  | 0.38138  | 0.004275 | 0.92659  | -0.0036476 | 0.93734  | -0.08355 | 0.07124  |
| 0.00027  | -0.15455 | 0.00081  | -0.05061 | 0.27503  | 0.2950994  | 7.74E-11 | 0.272677 | 2.09E-09 |
| 0.54225  | 0.108298 | 0.01923  | 0.053873 | 0.24526  | 0.13270863 | 0.00407  | 0.163537 | 0.00039  |
| 6.02E-10 | -0.18944 | 3.79E-05 | -0.10306 | 0.02594  | 0.20178424 | 1.11E-05 | 0.16353  | 0.00039  |
| 9.04E-11 | 0.156256 | 0.0007   | 0.024692 | 0.59456  | 0.00978975 | 0.83289  | 0.155675 | 0.00074  |
| 0.06148  | -0.06632 | 0.15244  | -0.02935 | 0.52689  | 0.03775252 | 0.41568  | -0.00535 | 0.90825  |
| 0.01027  | 0.111496 | 0.01593  | -0.20191 | 1.10E-05 | -0.0356395 | 0.44228  | -0.00805 | 0.8623   |
| 0.00591  | 0.080353 | 0.08281  | 0.040297 | 0.38493  | -0.0785272 | 0.09006  | -0.13525 | 0.00341  |
| 0.05175  | 0.049083 | 0.28983  | 0.095628 | 0.03885  | 0.13170383 | 0.00436  | 0.148511 | 0.00129  |
| 0.27718  | 0.24266  | 1.10E-07 | 0.105341 | 0.02281  | -0.0447577 | 0.33449  | -0.0551  | 0.23465  |
| 2.35E-06 | 0.060183 | 0.1942   | 0.006025 | 0.89668  | -0.2019674 | 1.09E-05 | -0.24235 | 1.14E-07 |

|          |          |          |          |          |            |          |          |          |
|----------|----------|----------|----------|----------|------------|----------|----------|----------|
| 1.35E-05 | 0.109966 | 0.01744  | 0.187514 | 4.55E-05 | 0.23468313 | 2.90E-07 | 0.265766 | 5.44E-09 |
| 2.51E-17 | -0.02145 | 0.6439   | 0.045522 | 0.32629  | 0.01929966 | 0.67742  | -0.04656 | 0.31534  |
| 0.00678  | 0.187363 | 4.62E-05 | 0.130575 | 0.00471  | 0.03240681 | 0.48479  | 0.035434 | 0.44491  |
| 0.53147  | 0.254206 | 2.54E-08 | 0.157458 | 0.00064  | 0.20891406 | 5.29E-06 | 0.226306 | 7.75E-07 |
| 0.30099  | -0.11815 | 0.01061  | 0.163345 | 0.00039  | 0.15660296 | 0.00068  | 0.098404 | 0.0335   |
| 0.00434  | 0.227338 | 6.88E-07 | 0.103186 | 0.02576  | -0.0610286 | 0.188    | -0.05249 | 0.25764  |
| 0.00042  | -0.12021 | 0.00932  | -0.1025  | 0.02676  | -0.1128476 | 0.01469  | -0.1926  | 2.79E-05 |
| 0.14619  | 0.086643 | 0.06136  | 0.046889 | 0.31196  | 0.10052084 | 0.02986  | 0.172818 | 0.00017  |
| 0.35376  | 0.057727 | 0.21307  | -0.0846  | 0.06777  | 0.08954191 | 0.05315  | -0.05553 | 0.23099  |
| 0.0001   | -0.04291 | 0.35489  | -0.20384 | 9.00E-06 | -0.0255647 | 0.58159  | -0.02735 | 0.55552  |
| 0.53999  | -0.1343  | 0.00364  | -0.08199 | 0.07672  | -0.0259368 | 0.5761   | -0.02127 | 0.64658  |
| 0.99096  | 0.027349 | 0.55549  | 0.116681 | 0.01162  | 0.02996066 | 0.51837  | 0.039971 | 0.38879  |
| 0.69914  | 0.070063 | 0.13057  | -0.18502 | 5.76E-05 | -0.1612839 | 0.00047  | -0.11046 | 0.01694  |
| 0.93795  | -0.10021 | 0.03037  | -0.05647 | 0.22322  | -0.0699645 | 0.13111  | -0.06977 | 0.1322   |
| 0.10061  | 0.058507 | 0.20693  | 0.005042 | 0.91347  | 0.07819321 | 0.09144  | 0.06229  | 0.17902  |
| 0.46741  | 0.023008 | 0.61993  | -0.00718 | 0.87696  | 0.01596011 | 0.73085  | 0.07736  | 0.09496  |
| 5.53E-22 | -0.01398 | 0.76314  | -0.00373 | 0.93599  | -0.0412734 | 0.37351  | -0.11178 | 0.01567  |
| 0.01689  | 0.221446 | 1.35E-06 | 0.233664 | 3.28E-07 | 0.01558525 | 0.73693  | -0.09799 | 0.03426  |
| 0.43619  | 0.050091 | 0.28003  | 0.260222 | 1.15E-08 | 0.17850437 | 0.00011  | -0.07098 | 0.1256   |
| 0.84446  | 0.028545 | 0.53834  | 0.112151 | 0.01532  | -0.1073484 | 0.02032  | -0.14726 | 0.00142  |
| 9.37E-15 | -0.06554 | 0.15736  | -0.09744 | 0.03528  | -0.0449553 | 0.33236  | 0.005495 | 0.90573  |
| 0.65815  | 0.084474 | 0.06817  | 0.066282 | 0.15269  | 0.04457516 | 0.33646  | 0.085114 | 0.0661   |
| 0.94095  | 0.058019 | 0.21076  | 0.036405 | 0.43254  | 0.0038496  | 0.93388  | 0.024907 | 0.59135  |
| 4.67E-07 | 0.180927 | 8.43E-05 | 0.088757 | 0.05528  | 0.07967298 | 0.08546  | 0.092346 | 0.04609  |
| 0.27151  | 0.201751 | 1.12E-05 | 0.131009 | 0.00457  | 0.06116105 | 0.18704  | 0.059606 | 0.19852  |
| 0.68754  | -0.07885 | 0.08873  | -0.0753  | 0.10412  | -0.0316318 | 0.4953   | 0.018893 | 0.68385  |
| 0.60355  | 0.030129 | 0.51602  | 0.029728 | 0.52163  | -0.0316921 | 0.49447  | -0.01884 | 0.68474  |
| 0.8922   | 0.104644 | 0.02373  | 0.111419 | 0.016    | 0.23278891 | 3.63E-07 | 0.153388 | 0.00088  |
| 0.02467  | 0.028272 | 0.54223  | -0.23186 | 4.06E-07 | -0.2195764 | 1.66E-06 | -0.18112 | 8.28E-05 |
| 4.15E-06 | -0.16321 | 0.0004   | -0.27358 | 1.84E-09 | -0.1359557 | 0.00324  | -0.07493 | 0.10585  |
| 0.55544  | 0.043191 | 0.3517   | 0.189587 | 3.73E-05 | 0.08480886 | 0.06708  | 0.053585 | 0.2478   |
| 0.38787  | 0.273945 | 1.75E-09 | 0.148347 | 0.0013   | -0.0261964 | 0.57228  | -0.04994 | 0.28148  |
| 0.71799  | -0.02672 | 0.56462  | -0.06846 | 0.13964  | -0.0038696 | 0.93353  | 0.036143 | 0.43585  |
| 0.30097  | 0.072006 | 0.12021  | -0.04037 | 0.3841   | 0.03591982 | 0.43869  | 0.125224 | 0.00674  |
| 1.18E-09 | -0.01701 | 0.71382  | -0.00993 | 0.83056  | 0.20416226 | 8.70E-06 | 0.253246 | 2.88E-08 |
| 0.428    | -0.03992 | 0.38941  | -0.05483 | 0.23693  | -0.0586277 | 0.206    | -0.0268  | 0.56341  |
| 0.35503  | 0.003133 | 0.94617  | -0.01433 | 0.75735  | 0.08064848 | 0.08168  | 0.120594 | 0.00909  |
| 0.02748  | -0.00846 | 0.85539  | 0.113729 | 0.01393  | 0.25272175 | 3.08E-08 | 0.179558 | 9.55E-05 |
| 0.02919  | 0.181823 | 7.76E-05 | 0.123539 | 0.00752  | -0.0107569 | 0.81666  | -0.00042 | 0.99276  |
| 0.11685  | -0.10435 | 0.02413  | -0.28236 | 5.22E-10 | -0.2695221 | 3.25E-09 | -0.25314 | 2.92E-08 |
| 0.04801  | 0.076195 | 0.10006  | 0.073856 | 0.11095  | -0.1372496 | 0.00296  | -0.07759 | 0.09397  |
| 0.20205  | 0.031535 | 0.49661  | 0.060758 | 0.18996  | -0.0935286 | 0.04336  | -0.10069 | 0.02958  |
| 0.47552  | -0.01748 | 0.70636  | 0.055429 | 0.23187  | 0.04666521 | 0.31428  | 0.013173 | 0.77647  |
| 0.02138  | 0.064346 | 0.16507  | -0.05867 | 0.20568  | 0.05215519 | 0.26066  | 0.142132 | 0.00208  |
| 0.32776  | -0.04288 | 0.35514  | -0.05844 | 0.20744  | -0.1711164 | 0.0002   | -0.17667 | 0.00012  |

|          |          |          |          |          |            |          |          |          |
|----------|----------|----------|----------|----------|------------|----------|----------|----------|
| 0.00016  | 0.102722 | 0.02643  | 0.062297 | 0.17897  | -0.1757661 | 0.00013  | -0.21656 | 2.32E-06 |
| 0.02169  | 0.203712 | 9.12E-06 | 0.124844 | 0.00691  | 0.32499978 | 5.98E-13 | 0.25618  | 1.96E-08 |
| 3.60E-08 | -0.00562 | 0.90357  | -0.00262 | 0.955    | 0.23189557 | 4.04E-07 | 0.11342  | 0.01419  |
| 0.67401  | 0.088904 | 0.05487  | 0.042517 | 0.35927  | 0.12919942 | 0.00517  | 0.162413 | 0.00043  |
| 0.25978  | 0.095907 | 0.03829  | 0.032875 | 0.4785   | -0.1651132 | 0.00034  | -0.19987 | 1.35E-05 |
| 0.02293  | -0.23091 | 4.54E-07 | -0.09505 | 0.04005  | 0.03887838 | 0.4019   | 0.046486 | 0.31614  |
| 0.55618  | -0.02719 | 0.55784  | -0.08763 | 0.05846  | 0.03214219 | 0.48836  | 0.092701 | 0.04526  |
| 7.35E-05 | 0.080352 | 0.08282  | 0.051434 | 0.26732  | -0.0608424 | 0.18935  | -0.08465 | 0.0676   |
| 0.00058  | -0.15719 | 0.00065  | -0.06349 | 0.17076  | -0.011624  | 0.80218  | -0.05577 | 0.22901  |
| 0.90756  | 0.146884 | 0.00146  | -0.01918 | 0.67937  | -0.0634661 | 0.17093  | 0.008717 | 0.85098  |
| 0.89007  | 0.115292 | 0.01266  | 0.214563 | 2.88E-06 | 0.45131335 | 8.17E-25 | 0.303321 | 2.15E-11 |
| 0.11433  | 0.226475 | 7.60E-07 | 0.249829 | 4.47E-08 | 0.18153121 | 7.97E-05 | -0.09667 | 0.03677  |
| 0.46221  | -0.10967 | 0.01775  | -0.21858 | 1.85E-06 | -0.0826508 | 0.07436  | -0.06853 | 0.13923  |
| 0.6578   | -0.11236 | 0.01513  | 0.023733 | 0.60894  | 0.00363753 | 0.93751  | -0.02161 | 0.64136  |
| 0.1013   | -0.01492 | 0.74785  | 0.047408 | 0.30663  | 0.054115   | 0.24315  | 0.050258 | 0.27843  |
| 0.03542  | 0.015965 | 0.73077  | 0.110389 | 0.01701  | 0.36386991 | 4.57E-16 | 0.176317 | 0.00013  |
| 0.02592  | 0.031557 | 0.49631  | 0.060864 | 0.18919  | 0.08062824 | 0.08176  | 0.096223 | 0.03765  |
| 1.77E-08 | -0.31086 | 6.39E-12 | -0.11066 | 0.01674  | 0.05630664 | 0.22456  | 0.061176 | 0.18693  |
| 0.22376  | 0.210477 | 4.48E-06 | 0.007713 | 0.86797  | 0.02032769 | 0.66128  | -0.04437 | 0.33866  |
| 0.00098  | -0.04964 | 0.28434  | -0.091   | 0.04938  | 0.17129926 | 0.0002   | 0.104816 | 0.0235   |
| 0.16466  | -0.18409 | 6.28E-05 | -0.08037 | 0.08276  | 0.06223362 | 0.17941  | 0.151637 | 0.00101  |
| 0.00181  | -0.05959 | 0.19865  | 0.111912 | 0.01554  | 0.17767135 | 0.00011  | -0.05949 | 0.19936  |
| 0.89208  | 0.166422 | 0.0003   | 0.151284 | 0.00104  | 0.19176328 | 3.02E-05 | 0.218288 | 1.92E-06 |
| 0.73751  | 0.000726 | 0.98751  | -0.07543 | 0.10352  | -0.1614435 | 0.00046  | -0.17308 | 0.00017  |
| 0.00048  | 0.269808 | 3.12E-09 | 0.056081 | 0.22642  | -0.0634026 | 0.17136  | 0.002022 | 0.96524  |
| 0.73085  | 0.132666 | 0.00408  | 0.049288 | 0.28782  | 0.02190748 | 0.63678  | 0.026024 | 0.57481  |
| 0.30747  | 0.11545  | 0.01254  | -0.04691 | 0.31172  | -0.1178433 | 0.01081  | -0.10446 | 0.02397  |
| 0.33792  | 0.024117 | 0.60316  | -0.07763 | 0.09382  | -0.1029169 | 0.02615  | -0.08858 | 0.05577  |
| 0.00122  | 0.198026 | 1.63E-05 | 0.073246 | 0.11394  | -0.1144822 | 0.01331  | -0.14775 | 0.00137  |
| 0.38385  | -0.10118 | 0.02879  | -0.07428 | 0.1089   | -0.0210635 | 0.64982  | 0.002228 | 0.9617   |
| 0.86737  | 0.157962 | 0.00061  | 0.042281 | 0.36195  | -0.1130689 | 0.0145   | -0.13616 | 0.0032   |
| 6.09E-07 | -0.01497 | 0.74703  | -0.00365 | 0.93729  | -0.0427187 | 0.357    | -0.06159 | 0.18396  |
| 0.11537  | 0.27512  | 1.48E-09 | 0.076673 | 0.09794  | 0.23406635 | 3.12E-07 | 0.166748 | 0.0003   |
| 0.28186  | -0.13763 | 0.00288  | -0.0529  | 0.25392  | 0.08345389 | 0.07158  | 0.085318 | 0.06545  |
| 0.09811  | -0.11724 | 0.01123  | -0.19802 | 1.63E-05 | -0.0420483 | 0.3646   | 0.035376 | 0.44566  |
| 0.20991  | -0.01611 | 0.72836  | -0.09423 | 0.04182  | -0.0971203 | 0.03589  | -0.05626 | 0.22497  |
| 0.65514  | -0.17945 | 9.65E-05 | -0.26747 | 4.31E-09 | -0.1521342 | 0.00097  | -0.0637  | 0.16936  |
| 0.65409  | 0.112971 | 0.01458  | 0.153002 | 0.00091  | 0.02140535 | 0.64452  | 0.061904 | 0.18173  |
| 0.84253  | -0.04433 | 0.33912  | -0.04264 | 0.35787  | 0.10268564 | 0.02649  | 0.061977 | 0.18121  |
| 0.01912  | -0.15578 | 0.00073  | -0.06974 | 0.13238  | 0.10467511 | 0.02368  | 0.071254 | 0.12414  |
| 0.10473  | 0.14593  | 0.00157  | 0.00052  | 0.99106  | 0.19201856 | 2.95E-05 | 0.128855 | 0.00529  |
| 0.15995  | -0.0204  | 0.66022  | 0.16866  | 0.00025  | 0.0826504  | 0.07437  | -0.11829 | 0.01052  |
| 0.72864  | 0.073009 | 0.11512  | -0.00407 | 0.93013  | -0.0624352 | 0.178    | -0.08274 | 0.07404  |
| 4.11E-16 | 0.063177 | 0.17289  | 0.057055 | 0.21845  | 0.08165269 | 0.07794  | 0.086056 | 0.06315  |
| 0.32441  | 0.095032 | 0.04009  | 0.043828 | 0.34464  | 0.13994882 | 0.00244  | 0.277299 | 1.08E-09 |

|          |          |          |          |          |            |          |          |          |
|----------|----------|----------|----------|----------|------------|----------|----------|----------|
| 0.13005  | 0.319402 | 1.55E-12 | 0.297395 | 5.43E-11 | 0.30746969 | 1.11E-11 | 0.320053 | 1.39E-12 |
| 0.84977  | -0.00438 | 0.92473  | -0.05427 | 0.24179  | -0.0078771 | 0.86519  | 0.007341 | 0.87428  |
| 0.53357  | -0.09477 | 0.04066  | -0.13716 | 0.00298  | -0.2504418 | 4.13E-08 | -0.31695 | 2.34E-12 |
| 0.72241  | -0.11335 | 0.01425  | -0.17447 | 0.00015  | -0.0838082 | 0.07038  | -0.04743 | 0.3064   |
| 0.03266  | -0.14118 | 0.00223  | 0.201578 | 1.14E-05 | 0.3698128  | 1.40E-16 | 0.182469 | 7.31E-05 |
| 0.21789  | 0.168544 | 0.00025  | 0.088598 | 0.05571  | -0.0559869 | 0.2272   | -0.11685 | 0.01151  |
| 0.00013  | 0.157526 | 0.00063  | 0.147515 | 0.00139  | 0.09448817 | 0.04125  | 0.011588 | 0.80278  |
| 0.10145  | 0.129564 | 0.00504  | 0.010577 | 0.81967  | 0.0233569  | 0.61464  | 0.072405 | 0.11816  |
| 0.35966  | 0.106092 | 0.02185  | -0.03032 | 0.51335  | 0.03843003 | 0.40735  | 0.073724 | 0.11159  |
| 0.85212  | 0.144653 | 0.00172  | 0.09939  | 0.03176  | 0.0908313  | 0.0498   | 0.056484 | 0.2231   |
| 0.36908  | 0.026153 | 0.57292  | 0.006162 | 0.89434  | 0.03973375 | 0.39162  | 0.035804 | 0.44017  |
| 0.00169  | 0.065572 | 0.15714  | 0.017085 | 0.71268  | 0.13447271 | 0.0036   | 0.201482 | 1.15E-05 |
| 0.31068  | -0.00383 | 0.93422  | 0.00083  | 0.98573  | 0.01609323 | 0.72869  | -0.01464 | 0.75229  |
| 0.43008  | 0.000623 | 0.98928  | -0.19374 | 2.49E-05 | -0.0627278 | 0.17597  | -0.08786 | 0.05781  |
| 0.01316  | 0.123201 | 0.00769  | 0.09666  | 0.03679  | -0.0088229 | 0.84919  | 0.002995 | 0.94853  |
| 0.91813  | 0.055089 | 0.23476  | -0.01503 | 0.746    | 0.07330072 | 0.11367  | 0.030003 | 0.51778  |
| 0.51688  | 0.150073 | 0.00114  | 0.010003 | 0.8293   | -0.0269842 | 0.56078  | -0.15855 | 0.00058  |
| 0.6112   | -0.03095 | 0.50466  | -0.05662 | 0.22195  | -0.0122274 | 0.79214  | -0.03323 | 0.47382  |
| 0.45116  | -0.02733 | 0.55584  | -0.05675 | 0.22089  | -0.0319296 | 0.49124  | -0.03288 | 0.47841  |
| 0.08671  | 0.042314 | 0.36158  | 0.018409 | 0.69153  | 0.08425431 | 0.0689   | 0.059216 | 0.20148  |
| 0.20613  | 0.044617 | 0.33601  | 0.017788 | 0.70143  | -0.0136306 | 0.76892  | -0.0257  | 0.57964  |
| 0.00738  | -0.07519 | 0.10465  | -0.04906 | 0.29008  | 0.05784585 | 0.21212  | 0.074244 | 0.10908  |
| 0.60238  | 0.211872 | 3.86E-06 | 0.240474 | 1.44E-07 | 0.17638697 | 0.00013  | 0.057162 | 0.21758  |
| 0.05071  | 0.062557 | 0.17715  | 0.043929 | 0.34352  | 0.04489766 | 0.33298  | 0.031483 | 0.49732  |
| 0.00012  | 0.257484 | 1.65E-08 | 0.174064 | 0.00016  | -0.0298102 | 0.52047  | -0.04187 | 0.36666  |
| 0.00165  | 0.094324 | 0.04161  | 0.096467 | 0.03717  | 0.10419086 | 0.02434  | 0.117703 | 0.01091  |
| 0.77828  | 0.182269 | 7.45E-05 | 0.100751 | 0.02948  | -0.0129281 | 0.78052  | -0.05152 | 0.26652  |
| 0.00025  | 0.054634 | 0.23865  | 0.022307 | 0.63065  | -0.0093319 | 0.8406   | -0.06631 | 0.15254  |
| 0.00083  | -0.1641  | 0.00037  | -0.0632  | 0.17275  | -0.0090774 | 0.84489  | -0.05689 | 0.21975  |
| 0.00899  | 0.091362 | 0.04848  | 0.050777 | 0.27348  | -0.1920667 | 2.94E-05 | -0.31594 | 2.77E-12 |
| 0.85584  | 0.075095 | 0.10507  | -0.13515 | 0.00343  | -0.1448905 | 0.00169  | -0.11994 | 0.00948  |
| 0.44705  | 0.185533 | 5.49E-05 | -0.0322  | 0.48764  | -0.1298481 | 0.00495  | -0.14929 | 0.00121  |
| 8.63E-06 | 0.120898 | 0.00892  | -0.07854 | 0.09001  | 0.11286411 | 0.01468  | 0.141701 | 0.00214  |
| 1.00E-22 | -0.07058 | 0.12777  | -0.03258 | 0.48245  | -0.0095392 | 0.83711  | -0.03123 | 0.50086  |
| 0.01461  | -0.12414 | 0.00723  | -0.0671  | 0.14767  | -0.0633155 | 0.17195  | -0.10122 | 0.02873  |
| 0.15272  | 0.006281 | 0.89232  | -0.03821 | 0.41     | -0.04734   | 0.30732  | -0.10779 | 0.01982  |
| 0.93702  | -0.03684 | 0.4271   | -0.10456 | 0.02385  | -0.0817748 | 0.0775   | -0.04582 | 0.32309  |
| 0.68854  | -0.04222 | 0.36265  | 0.374617 | 5.25E-17 | 0.30201798 | 2.64E-11 | 0.214099 | 3.03E-06 |
| 0.48413  | 0.058899 | 0.20391  | -0.02419 | 0.60206  | -0.0542641 | 0.24185  | -0.04899 | 0.29071  |
| 0.09703  | -0.06622 | 0.15307  | -0.02092 | 0.65202  | 0.00653274 | 0.88803  | -0.04636 | 0.3174   |
| 0.00016  | 0.050854 | 0.27276  | -0.02931 | 0.52751  | 0.09121682 | 0.04883  | 0.094558 | 0.0411   |
| 6.71E-20 | -0.13534 | 0.00339  | 0.046936 | 0.31147  | 0.15833908 | 0.00059  | 0.038813 | 0.40269  |
| 0.72278  | 0.035821 | 0.43995  | -0.13609 | 0.00321  | -0.1399292 | 0.00244  | -0.08448 | 0.06816  |
| 0.2261   | 0.256593 | 1.86E-08 | 0.236172 | 2.43E-07 | 0.14198188 | 0.0021   | 0.028808 | 0.5346   |
| 0.37913  | -0.09751 | 0.03514  | -0.12493 | 0.00687  | -0.1741571 | 0.00016  | -0.17065 | 0.00021  |

|          |          |          |          |          |            |          |          |          |
|----------|----------|----------|----------|----------|------------|----------|----------|----------|
| 0.17718  | -0.10209 | 0.02739  | 0.07829  | 0.09104  | 0.04368801 | 0.34618  | -0.0549  | 0.23636  |
| 0.03742  | 0.303311 | 2.15E-11 | 0.027079 | 0.55941  | -0.1633265 | 0.00039  | -0.02109 | 0.6494   |
| 8.80E-17 | 0.157836 | 0.00062  | -0.01408 | 0.76161  | 0.02822591 | 0.54289  | 0.155354 | 0.00076  |
| 2.80E-09 | -0.01618 | 0.72723  | -0.01272 | 0.78396  | 0.05049153 | 0.2762   | -0.0106  | 0.81923  |
| 1.52E-18 | -0.22742 | 6.82E-07 | -0.08932 | 0.05375  | 0.04742531 | 0.30645  | 0.100904 | 0.02924  |
| 1.34E-12 | -0.10659 | 0.02123  | -0.06111 | 0.1874   | 0.00370479 | 0.93636  | 0.019364 | 0.6764   |
| 0.03619  | 0.089613 | 0.05296  | 0.046787 | 0.31301  | -0.0373134 | 0.42113  | -0.12603 | 0.00639  |
| 0.58836  | -0.13581 | 0.00328  | -0.09863 | 0.0331   | -0.0334315 | 0.47108  | -0.06169 | 0.18323  |
| 0.40745  | -0.04134 | 0.37278  | 0.077908 | 0.09264  | 0.02801825 | 0.54586  | 0.038968 | 0.40081  |
| 0.47366  | 0.194986 | 2.20E-05 | 0.382503 | 1.02E-17 | 0.20292101 | 9.89E-06 | 0.214371 | 2.94E-06 |
| 4.36E-10 | 0.132216 | 0.00421  | 0.152921 | 0.00092  | 0.02652155 | 0.56753  | 0.019082 | 0.68085  |
| 1.98E-11 | -0.09377 | 0.04284  | -0.03051 | 0.51075  | 0.0684457  | 0.1397   | 0.190374 | 3.46E-05 |
| 0.57476  | 0.128131 | 0.00555  | 0.02727  | 0.55664  | -0.0830031 | 0.07313  | 0.027121 | 0.55879  |
| 0.41367  | 0.090408 | 0.05088  | 0.103342 | 0.02553  | -0.1697241 | 0.00023  | -0.20291 | 9.91E-06 |
| 0.64029  | 0.142587 | 0.00201  | -0.01143 | 0.80543  | -0.0011766 | 0.97977  | 0.059853 | 0.19666  |
| 9.62E-09 | -0.03739 | 0.4202   | -0.05109 | 0.27058  | 0.01443209 | 0.75575  | 0.085841 | 0.06381  |
| 0.0051   | -0.00541 | 0.90716  | -0.06575 | 0.15604  | -0.0810032 | 0.08035  | -0.12611 | 0.00636  |
| 8.31E-13 | 0.123886 | 0.00735  | 0.280496 | 6.85E-10 | 0.51068235 | 2.21E-32 | 0.411486 | 1.65E-20 |
| 0.6856   | 0.015836 | 0.73285  | -0.03877 | 0.40322  | -0.0589345 | 0.20363  | -0.13059 | 0.0047   |
| 0.17989  | -0.11892 | 0.01011  | -0.0416  | 0.36975  | -0.0596327 | 0.19832  | -0.02802 | 0.54588  |
| 0.07674  | -0.14439 | 0.00176  | -0.21395 | 3.08E-06 | -0.1876228 | 4.50E-05 | -0.27642 | 1.23E-09 |
| 0.01234  | 0.037931 | 0.41347  | -0.06929 | 0.13488  | 0.03683885 | 0.42706  | 0.130563 | 0.00471  |
| 0.09025  | -0.02945 | 0.5255   | -0.03235 | 0.4856   | -0.0030902 | 0.9469   | 0.001288 | 0.97786  |
| 0.0008   | -0.05314 | 0.25179  | 0.001582 | 0.9728   | 0.00572557 | 0.90179  | -0.04026 | 0.38542  |
| 0.20065  | -0.23841 | 1.85E-07 | -0.22136 | 1.36E-06 | 0.10741663 | 0.02024  | 0.17201  | 0.00019  |
| 0.0011   | 0.094455 | 0.04132  | 0.086027 | 0.06324  | 0.09437367 | 0.0415   | 0.096539 | 0.03702  |
| 0.55651  | 0.013023 | 0.77895  | 0.076762 | 0.09755  | 0.26936692 | 3.32E-09 | 0.16982  | 0.00023  |
| 0.44746  | -0.15354 | 0.00087  | -0.00152 | 0.97394  | 0.28706411 | 2.61E-10 | 0.188811 | 4.02E-05 |
| 9.62E-08 | 0.099686 | 0.03125  | 0.075119 | 0.10496  | 0.04939575 | 0.28677  | 0.043213 | 0.35146  |
| 0.00491  | 0.00042  | 0.99278  | 0.045951 | 0.32175  | 0.14840577 | 0.0013   | 0.105172 | 0.02303  |
| 0.62051  | -0.00266 | 0.95422  | 0.038718 | 0.40384  | 0.03263127 | 0.48177  | 0.110768 | 0.01664  |
| 0.11315  | 0.221484 | 1.34E-06 | 0.18749  | 4.56E-05 | 0.06885688 | 0.13734  | 0.12649  | 0.0062   |
| 0.04619  | 0.103281 | 0.02562  | 0.004929 | 0.91539  | -0.1185556 | 0.01034  | -0.1165  | 0.01175  |
| 0.08211  | 0.281064 | 6.30E-10 | 0.275551 | 1.39E-09 | 0.07020302 | 0.1298   | 0.044838 | 0.33362  |
| 5.16E-05 | -0.02513 | 0.58808  | -0.0544  | 0.24066  | -0.0187094 | 0.68675  | -0.00678 | 0.88379  |
| 0.27166  | 0.18274  | 7.13E-05 | 0.073583 | 0.11228  | 0.18560322 | 5.45E-05 | 0.258252 | 1.49E-08 |
| 0.28144  | -0.00864 | 0.85226  | 0.090281 | 0.05121  | -0.0116602 | 0.80157  | -0.01965 | 0.67189  |
| 1.51E-10 | -0.08915 | 0.0542   | 0.089107 | 0.05432  | 0.16820935 | 0.00026  | 0.140853 | 0.00228  |
| 0.17816  | 0.026104 | 0.57364  | 0.053746 | 0.24638  | -0.0923714 | 0.04603  | -0.22188 | 1.28E-06 |
| 0.05902  | 0.038597 | 0.40532  | -0.03033 | 0.5132   | -0.0991425 | 0.03219  | -0.12737 | 0.00584  |
| 0.00023  | 0.049927 | 0.28161  | 0.208951 | 5.27E-06 | 0.19435236 | 2.35E-05 | 0.023545 | 0.61179  |
| 0.21775  | 0.224322 | 9.72E-07 | 0.222202 | 1.24E-06 | 0.08519244 | 0.06585  | 0.133444 | 0.00387  |
| 0.02983  | -0.30576 | 1.46E-11 | -0.22669 | 7.41E-07 | -0.0300787 | 0.51672  | -0.08704 | 0.06019  |
| 0.00361  | 0.14604  | 0.00155  | 0.297468 | 5.37E-11 | 0.1119702  | 0.01549  | 0.022177 | 0.63263  |
| 2.18E-26 | -0.10162 | 0.0281   | -0.04899 | 0.29073  | 0.06233084 | 0.17873  | 0.119889 | 0.00951  |

|          |          |          |          |          |            |          |          |          |
|----------|----------|----------|----------|----------|------------|----------|----------|----------|
| 0.00172  | -0.0503  | 0.27801  | -0.02604 | 0.57451  | -0.0954874 | 0.03914  | -0.14361 | 0.00186  |
| 0.11858  | 0.173966 | 0.00016  | 0.105505 | 0.02259  | 0.11470588 | 0.01312  | 0.074385 | 0.10841  |
| 0.78162  | 0.079483 | 0.08621  | 0.279091 | 8.39E-10 | 0.19642479 | 1.91E-05 | 0.148259 | 0.00131  |
| 1.33E-13 | 0.305755 | 1.46E-11 | 0.329937 | 2.54E-13 | 0.32659866 | 4.54E-13 | 0.288684 | 2.05E-10 |
| 0.15584  | -0.08301 | 0.0731   | -0.00058 | 0.99008  | 0.25384523 | 2.66E-08 | 0.095716 | 0.03867  |
| 0.00018  | 0.105354 | 0.02279  | 0.262312 | 8.69E-09 | 0.01348576 | 0.77131  | -0.12755 | 0.00578  |
| 0.35274  | 0.23145  | 4.26E-07 | 0.231384 | 4.29E-07 | 0.21306899 | 3.39E-06 | 0.290366 | 1.59E-10 |
| 0.15913  | 0.097335 | 0.03548  | 0.159334 | 0.00055  | 0.26517716 | 5.90E-09 | 0.116228 | 0.01195  |
| 0.001    | 0.245452 | 7.77E-08 | 0.189789 | 3.66E-05 | 0.19746014 | 1.72E-05 | 0.207602 | 6.08E-06 |
| 0.01766  | 0.018378 | 0.69202  | 0.058599 | 0.20622  | 0.14839134 | 0.0013   | 0.11319  | 0.01439  |
| 0.08254  | -0.03583 | 0.43988  | -0.06102 | 0.18808  | -0.0295852 | 0.52363  | -0.06585 | 0.15541  |
| 0.03803  | 0.008633 | 0.85239  | 0.120951 | 0.00889  | 0.19698663 | 1.81E-05 | 0.147342 | 0.00141  |
| 0.21608  | -0.12127 | 0.00871  | -0.07335 | 0.1134   | -0.0344442 | 0.45774  | -0.01651 | 0.72198  |
| 0.92586  | 0.111069 | 0.01634  | 0.213093 | 3.38E-06 | 0.02226962 | 0.63121  | -0.01527 | 0.74206  |
| 0.05185  | 0.092457 | 0.04583  | 0.149849 | 0.00116  | -0.110858  | 0.01655  | -0.08165 | 0.07795  |
| 1.45E-16 | -0.05249 | 0.25759  | -0.14274 | 0.00199  | -0.0758056 | 0.10181  | -0.02944 | 0.52566  |
| 0.01019  | 0.110099 | 0.01731  | 0.066426 | 0.1518   | 0.19028068 | 3.49E-05 | 0.130316 | 0.00479  |
| 0.34356  | 0.031395 | 0.49853  | 0.130835 | 0.00463  | 0.15038669 | 0.00112  | 0.094376 | 0.04149  |
| 0.09494  | -0.16075 | 0.00049  | -0.06582 | 0.1556   | 0.03689291 | 0.42638  | -0.05726 | 0.2168   |
| 0.60183  | 0.034005 | 0.46349  | -0.029   | 0.53194  | -0.0318976 | 0.49168  | 0.03537  | 0.44574  |
| 0.3341   | -0.29418 | 8.92E-11 | -0.16025 | 0.00051  | 0.11814518 | 0.01061  | 0.169244 | 0.00024  |
| 8.11E-06 | -0.11378 | 0.01388  | 0.019039 | 0.68153  | 0.42988281 | 1.99E-22 | 0.303532 | 2.08E-11 |
| 0.02712  | 0.096487 | 0.03713  | 0.061215 | 0.18664  | 0.03046827 | 0.5113   | 0.069195 | 0.13541  |
| 0.05926  | 0.136161 | 0.0032   | 0.121668 | 0.00849  | 0.30064446 | 3.27E-11 | 0.218818 | 1.81E-06 |
| 3.67E-05 | -0.18298 | 6.97E-05 | -0.14699 | 0.00145  | -0.0826837 | 0.07425  | -0.10937 | 0.01807  |
| 0.30527  | 0.03496  | 0.45103  | -0.04619 | 0.31922  | 0.05416761 | 0.24269  | -0.05563 | 0.23021  |
| 0.14957  | 0.116579 | 0.0117   | -0.04728 | 0.30798  | -0.1003484 | 0.03014  | -0.15115 | 0.00105  |
| 0.00029  | 0.11814  | 0.01061  | 0.189668 | 3.70E-05 | 0.27598589 | 1.31E-09 | 0.197733 | 1.68E-05 |
| 0.01412  | -0.06709 | 0.14776  | -0.07742 | 0.09472  | 0.04871808 | 0.29344  | 0.098756 | 0.03287  |
| 8.65E-09 | 0.233529 | 3.33E-07 | 0.171937 | 0.00019  | 0.06287687 | 0.17495  | -0.02964 | 0.52282  |
| 0.00027  | 0.013978 | 0.7632   | -0.18303 | 6.94E-05 | -0.0857608 | 0.06406  | 0.109807 | 0.01761  |
| 0.01074  | 0.103471 | 0.02535  | 0.025735 | 0.57908  | -0.0172128 | 0.71064  | -0.07253 | 0.11751  |
| 0.26631  | 0.054589 | 0.23904  | -0.12838 | 0.00546  | -0.23031   | 4.87E-07 | -0.30125 | 2.98E-11 |
| 0.89203  | 0.245309 | 7.91E-08 | 0.244952 | 8.27E-08 | 0.13694673 | 0.00302  | 0.09778  | 0.03465  |
| 0.19247  | 0.082495 | 0.07491  | 0.168089 | 0.00026  | -0.0207246 | 0.65508  | -0.17522 | 0.00014  |
| 0.74804  | 0.149755 | 0.00117  | 0.173135 | 0.00017  | 0.17129127 | 0.0002   | 0.114934 | 0.01294  |
| 0.60936  | 0.171681 | 0.00019  | 0.089532 | 0.05317  | 0.07058586 | 0.12771  | 0.038386 | 0.4079   |
| 0.05895  | -0.12947 | 0.00507  | 0.009457 | 0.83849  | -0.0605093 | 0.19179  | -0.08173 | 0.07766  |
| 0.15585  | -0.04771 | 0.30353  | 0.084628 | 0.06767  | 0.03240075 | 0.48487  | 0.066494 | 0.15138  |
| 0.70649  | 0.197122 | 1.78E-05 | 0.358792 | 1.24E-15 | -0.0075474 | 0.87078  | -0.13592 | 0.00325  |
| 0.18285  | 0.016201 | 0.72694  | -0.00694 | 0.88112  | 0.04472743 | 0.33482  | 0.159624 | 0.00054  |
| 0.00393  | 0.297977 | 4.97E-11 | 0.302645 | 2.39E-11 | 0.25536958 | 2.18E-08 | 0.127736 | 0.0057   |
| 0.13131  | 0.133655 | 0.00381  | 0.028295 | 0.5419   | -0.0888567 | 0.055    | 0.028425 | 0.54004  |
| 0.01542  | 0.074701 | 0.10691  | 0.024541 | 0.5968   | 0.24703108 | 6.37E-08 | 0.247005 | 6.39E-08 |
| 4.71E-18 | -0.14863 | 0.00128  | -0.0196  | 0.67274  | -0.06178   | 0.18261  | -0.15426 | 0.00082  |

|          |          |          |          |          |            |          |          |          |
|----------|----------|----------|----------|----------|------------|----------|----------|----------|
| 0.09386  | 0.165265 | 0.00034  | 0.055402 | 0.2321   | -0.0171805 | 0.71115  | 0.069235 | 0.13518  |
| 0.40937  | 0.032877 | 0.47847  | 0.041741 | 0.36811  | -0.0303552 | 0.51287  | -0.07159 | 0.12234  |
| 0.55868  | -0.16348 | 0.00039  | -0.06701 | 0.14825  | 0.10190693 | 0.02766  | 0.200983 | 1.21E-05 |
| 0.18297  | -0.22798 | 6.39E-07 | -0.2442  | 9.08E-08 | -0.118398  | 0.01044  | -0.09633 | 0.03743  |
| 0.04493  | 0.244722 | 8.51E-08 | 0.111187 | 0.01623  | 0.06989339 | 0.1315   | 0.094562 | 0.04109  |
| 0.13215  | 0.158231 | 0.0006   | -0.03397 | 0.4639   | 0.05915099 | 0.20197  | 0.177261 | 0.00012  |
| 5.37E-05 | 0.189994 | 3.59E-05 | 0.075617 | 0.10267  | -0.0067016 | 0.88516  | 0.124496 | 0.00707  |
| 7.29E-08 | 0.180228 | 8.99E-05 | 0.065574 | 0.15713  | -0.0487128 | 0.29349  | -0.12569 | 0.00653  |
| 0.97859  | -0.04093 | 0.37751  | -0.25751 | 1.65E-08 | -0.1522222 | 0.00097  | -0.14651 | 0.0015   |
| 0.00382  | -0.08987 | 0.05227  | 0.01018  | 0.82634  | 0.09744272 | 0.03528  | 0.054305 | 0.2415   |
| 0.10466  | 0.196124 | 1.97E-05 | 0.088903 | 0.05487  | 0.01577539 | 0.73384  | -0.05538 | 0.23226  |
| 0.02308  | 0.148396 | 0.0013   | 0.00952  | 0.83744  | -0.1282428 | 0.00551  | -0.26396 | 6.96E-09 |
| 0.84991  | 0.230326 | 4.86E-07 | 0.170103 | 0.00022  | -0.018422  | 0.69132  | -0.08479 | 0.06715  |
| 0.96445  | -0.08438 | 0.06848  | -0.09991 | 0.03088  | -0.0495356 | 0.2854   | -0.06197 | 0.18125  |
| 0.27708  | 0.037785 | 0.41528  | 0.013071 | 0.77816  | 0.03407387 | 0.46259  | 0.031099 | 0.50259  |
| 0.02428  | -0.08643 | 0.06202  | -0.13274 | 0.00406  | -0.0917913 | 0.04742  | -0.07872 | 0.08927  |
| 0.92733  | -0.01563 | 0.73613  | -0.02828 | 0.54207  | -0.0434442 | 0.34888  | -0.04977 | 0.28315  |
| 0.19422  | 0.01136  | 0.80658  | 0.016008 | 0.73007  | -0.0296132 | 0.52323  | -0.02184 | 0.63786  |
| 0.02133  | 0.112805 | 0.01473  | 0.209005 | 5.24E-06 | 0.28982237 | 1.73E-10 | 0.210187 | 4.62E-06 |
| 0.00293  | 0.296143 | 6.60E-11 | 0.325159 | 5.82E-13 | 0.29862783 | 4.49E-11 | 0.171032 | 0.0002   |
| 0.71622  | -0.13134 | 0.00447  | -0.01935 | 0.67667  | 0.12493709 | 0.00687  | 0.141052 | 0.00225  |
| 0.49502  | -0.16982 | 0.00023  | -0.16651 | 0.0003   | -0.166425  | 0.0003   | -0.18633 | 5.09E-05 |
| 0.01905  | 0.097438 | 0.03529  | -0.12494 | 0.00686  | -0.2891507 | 1.91E-10 | -0.16999 | 0.00022  |
| 9.14E-05 | 0.243367 | 1.01E-07 | 0.396038 | 5.48E-19 | 0.47748412 | 5.73E-28 | 0.27122  | 2.56E-09 |
| 0.69521  | 0.028285 | 0.54205  | 0.052189 | 0.26035  | 0.11749653 | 0.01105  | 0.071742 | 0.12157  |
| 0.00098  | -0.01756 | 0.705    | 0.095109 | 0.03993  | 0.52697834 | 9.88E-35 | 0.243006 | 1.05E-07 |
| 0.06069  | 0.121026 | 0.00884  | 0.03487  | 0.45219  | -0.0456384 | 0.32505  | -0.03588 | 0.43924  |
| 0.50257  | 0.01562  | 0.73637  | -0.09336 | 0.04374  | -0.0226578 | 0.62527  | -0.022   | 0.63532  |
| 0.70433  | 0.055977 | 0.22728  | -0.18245 | 7.32E-05 | -0.2189082 | 1.79E-06 | -0.19889 | 1.49E-05 |
| 0.06113  | 0.154513 | 0.00081  | -0.00187 | 0.96783  | -0.0323702 | 0.48528  | 0.004205 | 0.92779  |
| 0.00044  | -0.02544 | 0.58347  | -0.18869 | 4.07E-05 | -0.1123941 | 0.0151   | 0.003872 | 0.93349  |
| 0.1991   | 0.074195 | 0.10932  | -0.03698 | 0.42528  | 0.02801511 | 0.5459   | -0.03443 | 0.45792  |
| 0.64533  | 0.181518 | 7.98E-05 | -0.16469 | 0.00035  | -0.1298819 | 0.00494  | -0.14025 | 0.00238  |
| 0.44261  | -0.02106 | 0.64985  | -0.14964 | 0.00118  | -0.037368  | 0.42045  | 0.023022 | 0.61973  |
| 3.67E-22 | 0.034961 | 0.45102  | -0.05941 | 0.19998  | 0.03464318 | 0.45515  | 0.068192 | 0.14118  |
| 5.25E-05 | 0.039219 | 0.39779  | -0.00688 | 0.88213  | 0.04340212 | 0.34935  | 0.080626 | 0.08177  |
| 0.1508   | 0.021445 | 0.6439   | -0.05159 | 0.26585  | -0.069939  | 0.13125  | -0.06751 | 0.14521  |
| 0.00017  | 0.069061 | 0.13617  | -0.10411 | 0.02445  | -0.4061579 | 5.64E-20 | -0.32622 | 4.85E-13 |
| 0.01459  | -0.11684 | 0.01151  | -0.22161 | 1.32E-06 | -0.1632251 | 0.0004   | -0.19494 | 2.21E-05 |
| 0.40086  | 0.059786 | 0.19717  | 0.052921 | 0.25372  | -0.0235816 | 0.61124  | -0.18377 | 6.48E-05 |
| 0.18849  | 0.068417 | 0.13987  | 0.022283 | 0.631    | 0.04899997 | 0.29065  | 0.136229 | 0.00318  |
| 0.06702  | 0.086134 | 0.06291  | -0.05604 | 0.22676  | -0.0915121 | 0.0481   | -0.01168 | 0.80125  |
| 0.75772  | -0.05581 | 0.22866  | 0.044277 | 0.33971  | 0.14721026 | 0.00142  | 0.081922 | 0.07696  |
| 0.63443  | 0.014772 | 0.75018  | 0.00571  | 0.90205  | 0.04057955 | 0.38161  | 0.060224 | 0.1939   |
| 0.70805  | -0.01132 | 0.80723  | -0.07192 | 0.12067  | -0.183075  | 6.91E-05 | -0.15917 | 0.00056  |



|          |          |          |          |          |            |          |          |          |
|----------|----------|----------|----------|----------|------------|----------|----------|----------|
| 0.04632  | 0.199383 | 1.42E-05 | 0.053894 | 0.24508  | -0.0551929 | 0.23387  | -0.04878 | 0.29285  |
| 0.2391   | -0.24349 | 9.92E-08 | -0.15749 | 0.00064  | 0.24999718 | 4.37E-08 | 0.092798 | 0.04503  |
| 0.50474  | 0.2241   | 9.97E-07 | 0.16644  | 0.0003   | 0.26095386 | 1.04E-08 | 0.106652 | 0.02116  |
| 0.04564  | 0.1028   | 0.02632  | 0.036518 | 0.4311   | 0.06211038 | 0.18027  | 0.142997 | 0.00195  |
| 6.17E-08 | -0.02032 | 0.66143  | 0.100682 | 0.0296   | 0.17980785 | 9.34E-05 | 0.133451 | 0.00386  |
| 0.14351  | 0.028781 | 0.53498  | -0.12433 | 0.00715  | -0.0940533 | 0.0422   | -0.06806 | 0.14193  |
| 0.04351  | 0.124759 | 0.00695  | 0.087502 | 0.05883  | 0.04907358 | 0.28993  | 0.035221 | 0.44766  |
| 0.18295  | 0.030164 | 0.51553  | -0.11355 | 0.01408  | -0.0311083 | 0.50247  | -0.02771 | 0.55027  |
| 4.16E-05 | 0.083809 | 0.07038  | 0.062227 | 0.17946  | -0.0974108 | 0.03534  | -0.24211 | 1.18E-07 |
| 7.64E-08 | 0.143254 | 0.00191  | 0.242988 | 1.06E-07 | 0.2156204  | 2.57E-06 | 0.078109 | 0.0918   |
| 0.10154  | -0.0056  | 0.90387  | -0.14321 | 0.00192  | -0.1174699 | 0.01107  | -0.09125 | 0.04874  |
| 0.32386  | 0.052213 | 0.26013  | -0.00249 | 0.95716  | -0.0142171 | 0.75928  | -0.02155 | 0.64226  |
| 0.48032  | 0.056595 | 0.22219  | 0.042538 | 0.35904  | 0.08643624 | 0.06199  | 0.070386 | 0.1288   |
| 0.06781  | 0.200706 | 1.24E-05 | 0.435716 | 4.64E-23 | 0.52684229 | 1.03E-34 | 0.336607 | 7.79E-14 |
| 0.00013  | -0.27305 | 1.98E-09 | -0.14274 | 0.00199  | 0.08484973 | 0.06695  | 0.069668 | 0.13275  |
| 0.83906  | 0.025483 | 0.5828   | 0.154922 | 0.00078  | 0.26418375 | 6.75E-09 | 0.197504 | 1.72E-05 |
| 0.43328  | 0.003413 | 0.94136  | 0.011958 | 0.79661  | 0.06778973 | 0.14355  | 0.095906 | 0.03829  |
| 0.63512  | -0.02962 | 0.52315  | -0.02988 | 0.51944  | -0.1201657 | 0.00934  | -0.13704 | 0.003    |
| 3.56E-15 | 0.259828 | 1.21E-08 | 0.232556 | 3.74E-07 | 0.18941603 | 3.79E-05 | 0.156756 | 0.00068  |
| 0.07069  | 0.029522 | 0.52452  | -0.1212  | 0.00875  | -0.0155769 | 0.73707  | 0.056667 | 0.2216   |
| 9.74E-07 | -0.01694 | 0.71508  | -0.06176 | 0.18276  | 0.03189135 | 0.49176  | 0.097871 | 0.03448  |
| 0.29831  | 0.115694 | 0.01235  | 0.175435 | 0.00014  | 0.19467364 | 2.27E-05 | 0.189201 | 3.87E-05 |
| 0.0023   | 0.196134 | 1.97E-05 | 0.066088 | 0.15389  | -0.0863564 | 0.06223  | -0.11337 | 0.01423  |
| 0.24763  | 0.202375 | 1.05E-05 | -0.01422 | 0.75922  | -0.0198373 | 0.66896  | 0.069711 | 0.13251  |
| 0.09109  | -0.04837 | 0.29695  | -0.11533 | 0.01263  | -0.0688724 | 0.13725  | -0.12532 | 0.0067   |
| 0.50058  | -0.00583 | 0.89997  | -0.04756 | 0.30513  | -0.0314613 | 0.49763  | -0.04461 | 0.33612  |
| 0.45201  | 0.0313   | 0.49984  | 0.089312 | 0.05376  | -0.0185296 | 0.68961  | -0.04309 | 0.35279  |
| 0.12244  | 0.247178 | 6.25E-08 | -0.01138 | 0.80622  | -0.1486183 | 0.00128  | -0.13475 | 0.00353  |
| 2.15E-09 | 0.046169 | 0.31945  | -0.0189  | 0.6838   | -0.0448073 | 0.33395  | -0.00887 | 0.84845  |
| 0.42952  | 0.162839 | 0.00041  | 0.081369 | 0.07898  | -0.0212147 | 0.64747  | 0.024556 | 0.59659  |
| 0.02174  | 0.187499 | 4.56E-05 | 0.154071 | 0.00084  | 0.03601891 | 0.43743  | 0.079867 | 0.08469  |
| 0.72094  | 0.175547 | 0.00014  | 0.279801 | 7.57E-10 | 0.30220089 | 2.56E-11 | 0.061538 | 0.18433  |
| 0.72215  | -0.231   | 4.49E-07 | -0.06513 | 0.15999  | -0.1408609 | 0.00228  | -0.17972 | 9.42E-05 |
| 0.03286  | 0.148123 | 0.00133  | 0.087038 | 0.06019  | -0.0637576 | 0.16897  | -0.06409 | 0.16675  |
| 0.69442  | -0.08333 | 0.07199  | -0.17048 | 0.00021  | -0.0366277 | 0.42972  | -0.01431 | 0.75768  |
| 0.82969  | 0.055664 | 0.2299   | 0.220559 | 1.49E-06 | 0.03755318 | 0.41815  | -0.11919 | 0.00994  |
| 0.01166  | -0.1204  | 0.0092   | -0.0341  | 0.46228  | -0.097102  | 0.03593  | -0.22339 | 1.08E-06 |
| 0.85926  | -0.05084 | 0.27292  | -0.01133 | 0.80705  | -0.0718917 | 0.1208   | -0.06471 | 0.16271  |
| 2.85E-05 | 0.200559 | 1.26E-05 | 0.226073 | 7.96E-07 | 0.05995916 | 0.19587  | 0.016968 | 0.71457  |
| 0.26453  | 0.144699 | 0.00172  | 0.144213 | 0.00178  | 0.16191875 | 0.00044  | 0.104729 | 0.02361  |
| 0.56242  | 0.123025 | 0.00778  | 0.093843 | 0.04266  | -0.0566824 | 0.22147  | 0.0028   | 0.95189  |
| 0.69872  | 0.047142 | 0.30935  | 0.04495  | 0.33241  | 0.02873417 | 0.53564  | 0.056689 | 0.22142  |
| 0.80865  | -0.11826 | 0.01053  | 0.032473 | 0.4839   | 0.04614046 | 0.31975  | 0.066632 | 0.15053  |
| 0.00024  | 0.122555 | 0.00802  | 0.067378 | 0.146    | 0.15500495 | 0.00078  | 0.298553 | 4.54E-11 |
| 0.01772  | 0.023506 | 0.61238  | -0.16312 | 0.0004   | -0.1937224 | 2.50E-05 | -0.18122 | 8.20E-05 |

|          |          |          |          |          |            |          |          |          |
|----------|----------|----------|----------|----------|------------|----------|----------|----------|
| 0.77121  | 0.217133 | 2.18E-06 | 0.133858 | 0.00376  | 0.18103906 | 8.34E-05 | 0.154344 | 0.00082  |
| 0.00556  | 0.174873 | 0.00015  | 0.115396 | 0.01258  | 0.14735378 | 0.00141  | 0.179108 | 9.95E-05 |
| 0.00365  | 0.007305 | 0.8749   | -0.04663 | 0.31465  | 0.03078098 | 0.50697  | 0.096926 | 0.03627  |
| 0.85586  | 0.146774 | 0.00147  | -0.04703 | 0.31047  | -0.1359755 | 0.00324  | -0.0694  | 0.13424  |
| 5.53E-05 | 0.1769   | 0.00012  | 0.024276 | 0.60077  | 0.03399112 | 0.46368  | 0.079835 | 0.08482  |
| 0.40804  | -0.07129 | 0.12395  | -0.07461 | 0.10735  | 0.0159672  | 0.73073  | -0.04341 | 0.34926  |
| 0.01855  | -0.04388 | 0.34401  | -0.28117 | 6.21E-10 | -0.0470201 | 0.31061  | -0.05813 | 0.2099   |
| 0.06295  | 0.196692 | 1.86E-05 | 0.115597 | 0.01243  | 0.04344482 | 0.34887  | 0.00574  | 0.90155  |
| 0.62901  | 0.056742 | 0.22099  | -0.05801 | 0.21079  | -0.1028425 | 0.02626  | -0.18477 | 5.90E-05 |
| 0.20829  | -0.03272 | 0.48058  | -0.09774 | 0.03472  | -0.1222002 | 0.0082   | -0.16415 | 0.00037  |
| 0.00516  | -0.01635 | 0.72458  | -0.01561 | 0.73647  | -0.0244968 | 0.59747  | -0.11895 | 0.01009  |
| 0.15934  | 0.024469 | 0.59788  | 0.08059  | 0.08191  | 0.19142667 | 3.12E-05 | 0.152741 | 0.00093  |
| 4.75E-05 | 0.145699 | 0.00159  | 0.02698  | 0.56085  | 0.26842718 | 3.78E-09 | 0.352601 | 4.06E-15 |
| 0.2933   | -0.22532 | 8.68E-07 | -0.14969 | 0.00118  | 0.06023446 | 0.19382  | 0.101119 | 0.02889  |
| 0.18678  | -0.07047 | 0.12833  | -0.00911 | 0.84437  | 0.10500415 | 0.02325  | 0.197605 | 1.70E-05 |
| 0.01478  | -0.08394 | 0.06995  | -0.02887 | 0.53376  | -0.075478  | 0.1033   | -0.11519 | 0.01274  |
| 0.71013  | -0.22669 | 7.41E-07 | -0.00641 | 0.89014  | -0.2204656 | 1.50E-06 | -0.3068  | 1.23E-11 |
| 0.85085  | 0.024952 | 0.59067  | 0.008833 | 0.84901  | -0.0260536 | 0.57438  | 0.000134 | 0.99769  |
| 2.02E-05 | -0.28089 | 6.47E-10 | -0.08249 | 0.07493  | 0.27008502 | 3.00E-09 | 0.264188 | 6.74E-09 |
| 0.5547   | -0.19167 | 3.05E-05 | -0.13787 | 0.00283  | 0.01320021 | 0.77602  | 0.003736 | 0.93582  |
| 0.1326   | 0.041654 | 0.36911  | 0.020789 | 0.65408  | 0.04900815 | 0.29057  | 0.122899 | 0.00784  |
| 0.0532   | -0.07289 | 0.11572  | -0.05777 | 0.21275  | -0.0221039 | 0.63376  | -0.05097 | 0.27168  |
| 0.45101  | 0.101732 | 0.02793  | 0.080617 | 0.0818   | 0.09084871 | 0.04976  | 0.138695 | 0.00267  |
| 0.90956  | 0.042016 | 0.36497  | 0.041419 | 0.37183  | -0.0117362 | 0.80031  | -0.00299 | 0.9487   |
| 0.20701  | -0.00564 | 0.90317  | 0.058645 | 0.20586  | 0.18117334 | 8.24E-05 | 0.140463 | 0.00235  |
| 0.96078  | 0.019634 | 0.67215  | 0.062901 | 0.17478  | 0.12205853 | 0.00828  | 0.093497 | 0.04343  |
| 0.97241  | -0.06333 | 0.17183  | -0.02523 | 0.5866   | 0.06041051 | 0.19252  | 0.067374 | 0.14603  |
| 0.94676  | -0.00746 | 0.87227  | 0.011973 | 0.79637  | 0.04208062 | 0.36423  | 0.057274 | 0.21668  |
| 0.00018  | -0.28202 | 5.49E-10 | -0.2183  | 1.91E-06 | 0.1982803  | 1.59E-05 | 0.084469 | 0.06819  |
| 0.84818  | 0.097411 | 0.03534  | -0.01064 | 0.8187   | -0.0178939 | 0.69973  | -0.06994 | 0.13123  |
| 0.44517  | 0.035119 | 0.44898  | 0.042778 | 0.35633  | 0.08838716 | 0.0563   | 0.088516 | 0.05594  |
| 0.02701  | 0.062743 | 0.17587  | -0.0062  | 0.89364  | 0.06872027 | 0.13812  | 0.053384 | 0.24958  |
| 0.88465  | -0.01215 | 0.79349  | -0.14765 | 0.00138  | 0.00276939 | 0.95241  | -0.03861 | 0.4051   |
| 0.35796  | -0.00741 | 0.87306  | -0.02728 | 0.55651  | 0.11196504 | 0.01549  | 0.135846 | 0.00327  |
| 0.8836   | 0.037838 | 0.41462  | 0.117618 | 0.01097  | 0.06939613 | 0.13428  | 0.021196 | 0.64777  |
| 0.00413  | -0.01451 | 0.75443  | -0.05922 | 0.20147  | -0.0240814 | 0.6037   | 0.03249  | 0.48367  |
| 0.38401  | 0.045453 | 0.32702  | 0.038537 | 0.40605  | 0.05938402 | 0.2002   | 0.055592 | 0.23051  |
| 0.81539  | 0.053297 | 0.25035  | 0.061953 | 0.18138  | 0.04309808 | 0.35274  | 0.021911 | 0.63672  |
| 0.77728  | 0.123612 | 0.00749  | 0.201345 | 1.16E-05 | 0.16777041 | 0.00027  | 0.130474 | 0.00474  |
| 0.54184  | 0.000128 | 0.9978   | -0.00257 | 0.95575  | -0.009393  | 0.83957  | 0.010255 | 0.82507  |
| 0.05338  | -0.11289 | 0.01466  | -0.34067 | 3.74E-14 | -0.3170043 | 2.32E-12 | -0.2821  | 5.42E-10 |
| 0.59476  | -0.04574 | 0.32396  | 0.092434 | 0.04589  | 0.18121597 | 8.21E-05 | 0.158404 | 0.00059  |
| 0.60896  | -0.09449 | 0.04124  | -0.14731 | 0.00141  | -0.1235596 | 0.00751  | -0.1371  | 0.00299  |
| 0.23296  | -0.08068 | 0.08156  | -0.02804 | 0.54554  | -0.1648755 | 0.00035  | -0.10766 | 0.01997  |
| 0.43095  | 0.059255 | 0.20118  | 0.012383 | 0.78955  | -0.09394   | 0.04245  | -0.07686 | 0.09713  |

|          |          |          |          |          |            |          |          |          |
|----------|----------|----------|----------|----------|------------|----------|----------|----------|
| 0.47271  | 0.103639 | 0.02511  | 0.30581  | 1.44E-11 | 0.09026091 | 0.05126  | 0.012893 | 0.78111  |
| 0.17842  | 0.135851 | 0.00327  | -0.13356 | 0.00383  | -0.1722988 | 0.00018  | -0.21526 | 2.67E-06 |
| 0.22602  | -0.17504 | 0.00014  | -0.0362  | 0.4351   | 0.01514311 | 0.74413  | 0.040414 | 0.38355  |
| 0.22925  | 0.077245 | 0.09545  | 0.135404 | 0.00337  | -0.1960057 | 1.99E-05 | -0.27498 | 1.51E-09 |
| 0.04606  | 0.052596 | 0.25665  | 0.244691 | 8.54E-08 | 0.25259741 | 3.13E-08 | 0.216223 | 2.41E-06 |
| 0.10069  | 0.101034 | 0.02903  | 0.022316 | 0.6305   | -0.0365617 | 0.43055  | -0.07171 | 0.12175  |
| 0.00316  | 0.01792  | 0.69932  | 0.025807 | 0.57801  | -0.0973263 | 0.0355   | -0.12303 | 0.00777  |
| 0.51631  | 0.114701 | 0.01313  | 0.171937 | 0.00019  | 0.04974063 | 0.28341  | 0.017586 | 0.70464  |
| 0.20479  | 0.135803 | 0.00328  | 0.06966  | 0.1328   | 7.17E-05   | 0.99877  | 0.097742 | 0.03472  |
| 0.66969  | 0.198527 | 1.55E-05 | 0.183107 | 6.89E-05 | -0.2214732 | 1.34E-06 | -0.21984 | 1.61E-06 |
| 0.57472  | -0.06525 | 0.15918  | -0.06125 | 0.18642  | -0.0266274 | 0.56598  | -0.02023 | 0.66279  |
| 0.02148  | -0.06287 | 0.17499  | 0.10844  | 0.01908  | -0.0116094 | 0.80242  | -0.05674 | 0.22099  |
| 0.05658  | -0.11736 | 0.01114  | -0.18913 | 3.90E-05 | -0.0600463 | 0.19522  | -0.058   | 0.21094  |
| 0.06082  | 0.13324  | 0.00392  | 0.19048  | 3.42E-05 | -0.1193843 | 0.00982  | -0.12809 | 0.00557  |
| 0.00023  | 0.088982 | 0.05466  | 0.050028 | 0.28064  | 0.05679519 | 0.22055  | 0.065703 | 0.15631  |
| 0.25713  | 0.126906 | 0.00603  | 0.058943 | 0.20357  | -0.0287825 | 0.53496  | -0.0473  | 0.30772  |
| 0.03224  | 0.055483 | 0.23142  | 0.029783 | 0.52085  | -0.0984309 | 0.03346  | -0.11959 | 0.00969  |
| 0.00684  | 0.239918 | 1.54E-07 | 0.198814 | 1.50E-05 | -0.0034055 | 0.94149  | 0.099153 | 0.03217  |
| 0.29154  | -0.02233 | 0.63029  | 0.0208   | 0.65391  | 0.01114019 | 0.81025  | 0.012097 | 0.7943   |
| 0.00837  | 0.12034  | 0.00924  | 0.275115 | 1.48E-09 | 0.14735001 | 0.00141  | 0.085623 | 0.06449  |
| 0.54951  | -0.0049  | 0.91597  | -0.00372 | 0.93618  | -0.0059083 | 0.89867  | 0.019945 | 0.66727  |
| 0.38838  | 0.114692 | 0.01314  | -0.05211 | 0.26111  | -0.0946226 | 0.04096  | -0.07791 | 0.09262  |
| 0.84212  | 0.087237 | 0.0596   | 0.089833 | 0.05238  | 0.07087552 | 0.12615  | 0.082015 | 0.07663  |
| 0.49185  | 0.246951 | 6.43E-08 | 0.276554 | 1.21E-09 | 0.02738195 | 0.55502  | -0.01803 | 0.69748  |
| 0.78413  | 0.020598 | 0.65705  | 0.010205 | 0.82591  | -0.0247448 | 0.59377  | -0.02866 | 0.53671  |
| 0.06483  | 0.222793 | 1.16E-06 | 0.257661 | 1.62E-08 | -0.1853887 | 5.56E-05 | -0.22151 | 1.34E-06 |
| 0.71171  | -0.00288 | 0.95051  | 0.089465 | 0.05335  | 0.20594175 | 7.23E-06 | 0.20022  | 1.30E-05 |
| 0.81379  | 0.090805 | 0.04987  | 0.187725 | 4.46E-05 | 0.20470991 | 8.22E-06 | 0.192361 | 2.85E-05 |
| 0.59951  | 0.037755 | 0.41565  | 0.141556 | 0.00217  | 0.14072919 | 0.0023   | 0.11395  | 0.01374  |
| 0.18353  | -0.01373 | 0.76726  | 0.02842  | 0.54011  | 0.05494504 | 0.23598  | 0.04132  | 0.37297  |
| 1.84E-05 | -0.11497 | 0.01291  | 0.001749 | 0.96992  | 0.01172808 | 0.80044  | -0.072   | 0.12026  |
| 0.42822  | -0.02705 | 0.55985  | 0.027468 | 0.55378  | -0.0241203 | 0.60312  | -0.02188 | 0.6372   |
| 1.22E-12 | -0.0299  | 0.51919  | -0.01158 | 0.80289  | 0.06553251 | 0.15739  | 0.106118 | 0.02182  |
| 0.23161  | 0.160901 | 0.00048  | -0.01909 | 0.68075  | -0.270993  | 2.64E-09 | -0.12223 | 0.00819  |
| 0.10862  | -0.26686 | 4.69E-09 | -0.38898 | 2.56E-18 | -0.2778023 | 1.01E-09 | -0.32006 | 1.39E-12 |
| 0.42122  | -0.02271 | 0.62447  | -0.04955 | 0.28526  | 0.09117586 | 0.04894  | 0.186891 | 4.83E-05 |
| 0.01891  | 0.02236  | 0.62983  | 0.083582 | 0.07115  | 0.07996571 | 0.08431  | 0.058964 | 0.2034   |
| 0.01923  | -0.02952 | 0.52452  | 0.01078  | 0.81628  | 0.09374477 | 0.04288  | 0.208123 | 5.75E-06 |
| 0.72086  | 0.082171 | 0.07607  | 0.085263 | 0.06563  | -0.0392015 | 0.398    | 0.018668 | 0.68742  |
| 0.74039  | 0.093348 | 0.04377  | 0.072402 | 0.11817  | 0.00219053 | 0.96235  | 0.026177 | 0.57257  |
| 0.1372   | 0.093982 | 0.04236  | 0.012093 | 0.79437  | -0.1158678 | 0.01222  | -0.09946 | 0.03165  |
| 0.57546  | 0.033456 | 0.47076  | 0.055376 | 0.23232  | 0.08794093 | 0.05756  | 0.09281  | 0.04501  |
| 0.30043  | 0.098576 | 0.03319  | 0.10781  | 0.01979  | 0.07740024 | 0.09479  | 0.098209 | 0.03386  |
| 0.41158  | -0.02856 | 0.53809  | -0.00636 | 0.89098  | 0.15369889 | 0.00086  | 0.163387 | 0.00039  |
| 0.47602  | -0.02166 | 0.64058  | -0.0779  | 0.09267  | -0.0267192 | 0.56464  | -0.01187 | 0.7981   |

|          |          |          |          |          |            |          |          |          |
|----------|----------|----------|----------|----------|------------|----------|----------|----------|
| 0.95104  | 0.047879 | 0.30185  | 0.183699 | 6.52E-05 | 0.04721121 | 0.30864  | 0.014586 | 0.75324  |
| 0.79489  | 0.033186 | 0.47435  | -0.0641  | 0.1667   | -0.0363791 | 0.43286  | 0.079748 | 0.08516  |
| 0.72867  | 0.109511 | 0.01792  | 0.250048 | 4.34E-08 | 0.20007995 | 1.32E-05 | 0.119678 | 0.00964  |
| 0.25593  | 0.081993 | 0.07671  | 0.180381 | 8.86E-05 | 0.36837081 | 1.87E-16 | 0.316556 | 2.50E-12 |
| 0.89403  | -0.05439 | 0.24074  | 0.007343 | 0.87425  | -0.0072764 | 0.87538  | -0.00273 | 0.95307  |
| 0.61348  | 0.220376 | 1.52E-06 | 0.16882  | 0.00025  | 0.05034717 | 0.27757  | 0.05165  | 0.26531  |
| 0.9279   | 0.01864  | 0.68785  | 0.085267 | 0.06562  | 0.09412567 | 0.04204  | 0.110218 | 0.01719  |
| 0.18435  | -0.05566 | 0.22996  | -0.0611  | 0.1875   | 0.17573143 | 0.00013  | 0.07562  | 0.10265  |
| 0.97634  | -0.00766 | 0.86884  | -0.03275 | 0.48014  | 0.00511369 | 0.91224  | 0.003846 | 0.93393  |
| 0.26774  | -0.06117 | 0.18696  | 0.044721 | 0.33488  | 0.06251361 | 0.17746  | 0.04957  | 0.28507  |
| 0.11716  | 0.119425 | 0.00979  | 0.211559 | 3.99E-06 | 0.17238965 | 0.00018  | 0.162768 | 0.00041  |
| 0.41807  | 0.117199 | 0.01126  | 0.089807 | 0.05244  | -0.0270968 | 0.55915  | -0.07749 | 0.09441  |
| 0.37137  | 0.017855 | 0.70034  | 0.032935 | 0.47769  | -0.0026779 | 0.95398  | 0.02057  | 0.65749  |
| 0.03468  | -0.06853 | 0.13924  | 0.006912 | 0.88158  | -0.1832491 | 6.80E-05 | -0.1658  | 0.00032  |
| 4.61E-05 | 0.062726 | 0.17599  | -0.05502 | 0.2353   | -0.1132624 | 0.01433  | -0.11299 | 0.01456  |
| 0.51841  | 0.192414 | 2.84E-05 | 0.234201 | 3.07E-07 | 0.1329099  | 0.00401  | 0.156439 | 0.00069  |
| 0.45383  | -0.06002 | 0.19542  | -0.06739 | 0.14591  | 0.03373226 | 0.4671   | 0.128074 | 0.00558  |
| 0.81817  | 0.073574 | 0.11232  | 0.040869 | 0.37822  | 0.09680506 | 0.0365   | 0.100769 | 0.02946  |
| 0.35523  | 0.014644 | 0.75228  | 0.038367 | 0.40812  | 0.00453675 | 0.92211  | -0.00095 | 0.98373  |
| 0.96944  | 0.0561   | 0.22627  | 0.098183 | 0.0339   | 0.02932556 | 0.52728  | 0.034648 | 0.45509  |
| 0.53325  | 0.228786 | 5.81E-07 | 0.257164 | 1.72E-08 | 0.28758271 | 2.42E-10 | 0.333489 | 1.36E-13 |
| 0.55181  | 0.105009 | 0.02324  | 0.161246 | 0.00047  | 0.11307443 | 0.01449  | 0.102556 | 0.02668  |
| 0.12245  | 0.154741 | 0.00079  | 0.207549 | 6.11E-06 | -0.0148662 | 0.74865  | -0.01278 | 0.78302  |
| 0.03849  | -0.03025 | 0.51435  | -0.00717 | 0.87727  | 0.02181243 | 0.63824  | -0.0576  | 0.21409  |
| 0.55531  | 0.166144 | 0.00031  | 0.075559 | 0.10293  | 0.00889463 | 0.84797  | -0.03731 | 0.42112  |
| 0.20639  | 0.055235 | 0.23351  | 0.083142 | 0.07265  | 0.01968846 | 0.67129  | 0.00944  | 0.83878  |
| 0.6007   | 0.080302 | 0.08301  | 0.100689 | 0.02959  | 0.08717079 | 0.05979  | 0.12691  | 0.00603  |
| 0.81075  | 0.019725 | 0.67073  | 0.048136 | 0.29926  | -0.038405  | 0.40766  | -0.03009 | 0.51654  |
| 0.21542  | 0.316194 | 2.65E-12 | 0.21745  | 2.10E-06 | -0.0587471 | 0.20507  | -0.04914 | 0.28925  |
| 0.00688  | 0.155582 | 0.00074  | 0.214403 | 2.93E-06 | -0.0117247 | 0.8005   | -0.0401  | 0.38723  |
| 0.00193  | -0.29416 | 8.94E-11 | -0.36546 | 3.34E-16 | -0.3075379 | 1.09E-11 | -0.35426 | 2.96E-15 |
| 0.27319  | -0.13451 | 0.00359  | -0.30412 | 1.89E-11 | -0.1566321 | 0.00068  | -0.13043 | 0.00476  |
| 0.98928  | 0.097505 | 0.03516  | 0.064487 | 0.16413  | 0.0039     | 0.93301  | 0.026752 | 0.56416  |
| 0.51952  | 0.074465 | 0.10803  | 0.107001 | 0.02074  | -0.0659633 | 0.15468  | -0.0687  | 0.13822  |
| 0.79488  | -0.03474 | 0.4539   | 0.060681 | 0.19053  | -0.1707016 | 0.00021  | -0.26977 | 3.14E-09 |
| 0.01842  | 0.036611 | 0.42993  | 0.017506 | 0.70594  | 0.02935348 | 0.52688  | 0.103389 | 0.02547  |
| 0.6668   | 0.056189 | 0.22553  | -0.28402 | 4.09E-10 | -0.3512469 | 5.25E-15 | -0.31524 | 3.11E-12 |
| 0.05108  | 0.126353 | 0.00625  | 0.202125 | 1.07E-05 | 0.15894286 | 0.00057  | 0.147937 | 0.00135  |
| 0.86754  | -0.03203 | 0.48984  | -0.00091 | 0.98442  | -0.0151934 | 0.74331  | -0.03422 | 0.46065  |
| 0.95287  | -0.088   | 0.05738  | -0.01369 | 0.76802  | 0.03283233 | 0.47907  | 0.030489 | 0.51102  |
| 0.66825  | 0.050197 | 0.27901  | 0.042422 | 0.36035  | 0.07381869 | 0.11113  | 0.096461 | 0.03718  |
| 0.77517  | 0.249803 | 4.48E-08 | 0.267402 | 4.35E-09 | 0.30669437 | 1.25E-11 | 0.285679 | 3.20E-10 |
| 0.6085   | 0.016476 | 0.72249  | -0.00043 | 0.99264  | 0.04463884 | 0.33577  | 0.024199 | 0.60194  |
| 0.17661  | 0.159399 | 0.00055  | 0.209484 | 4.98E-06 | -0.2409311 | 1.36E-07 | -0.26499 | 6.05E-09 |
| 0.31633  | -0.06121 | 0.18671  | -0.1746  | 0.00015  | -0.1848526 | 5.85E-05 | -0.11042 | 0.01698  |

|          |          |          |          |          |            |          |          |          |
|----------|----------|----------|----------|----------|------------|----------|----------|----------|
| 0.76105  | -0.03453 | 0.45665  | -0.02088 | 0.65261  | 0.02923272 | 0.52859  | 0.017216 | 0.71058  |
| 0.07181  | -0.01794 | 0.69895  | 0.119123 | 0.00998  | 0.08033082 | 0.0829   | 0.062693 | 0.17622  |
| 0.6609   | -0.03068 | 0.5083   | 0.008081 | 0.86174  | 0.07380055 | 0.11122  | 0.078445 | 0.0904   |
| 0.01752  | -0.03612 | 0.43613  | -0.12236 | 0.00812  | -0.011999  | 0.79593  | -0.06725 | 0.14677  |
| 0.5003   | 0.269637 | 3.19E-09 | 0.244924 | 8.30E-08 | 0.0548102  | 0.23714  | -0.03077 | 0.50709  |
| 0.03406  | 0.203417 | 9.40E-06 | 0.162158 | 0.00043  | 0.02876923 | 0.53515  | 0.09878  | 0.03283  |
| 0.99986  | 0.144167 | 0.00179  | 0.207091 | 6.41E-06 | -0.0343576 | 0.45887  | -0.00096 | 0.98345  |
| 0.16875  | -0.0752  | 0.10458  | -0.11663 | 0.01166  | -0.1397763 | 0.00247  | -0.14649 | 0.0015   |
| 0.21043  | 0.15059  | 0.0011   | 0.124822 | 0.00692  | -0.0758922 | 0.10142  | -0.03404 | 0.4631   |
| 0.01419  | 0.077296 | 0.09523  | 0.102746 | 0.0264   | 0.24770849 | 5.85E-08 | 0.289702 | 1.76E-10 |
| 0.42347  | 0.009984 | 0.82963  | -0.12837 | 0.00547  | -0.1018227 | 0.02779  | -0.09063 | 0.05032  |
| 0.63546  | 0.113789 | 0.01388  | -0.03365 | 0.46815  | -0.0236005 | 0.61095  | 0.055393 | 0.23218  |
| 0.97403  | -0.18082 | 8.51E-05 | -0.00918 | 0.8431   | 0.06375865 | 0.16896  | 0.004592 | 0.92117  |
| 0.75345  | -0.10921 | 0.01824  | -0.24063 | 1.41E-07 | -0.1732465 | 0.00017  | -0.16246 | 0.00042  |
| 0.85824  | -0.013   | 0.77934  | 0.091401 | 0.04838  | 0.03989711 | 0.38967  | 0.047567 | 0.30501  |
| 0.31489  | 0.027414 | 0.55456  | 0.043423 | 0.34911  | 0.06309205 | 0.17347  | -0.01689 | 0.71581  |
| 0.00386  | 0.265571 | 5.59E-09 | 0.287715 | 2.37E-10 | -0.1011673 | 0.02882  | -0.16222 | 0.00043  |
| 0.18459  | -0.08232 | 0.07555  | -0.07288 | 0.11578  | -0.077428  | 0.09467  | -0.13183 | 0.00432  |
| 0.51993  | -0.00702 | 0.8797   | 0.022083 | 0.63408  | -0.0102968 | 0.82437  | -0.01272 | 0.78393  |
| 0.07192  | 0.213911 | 3.10E-06 | 0.056505 | 0.22293  | -0.0499218 | 0.28166  | -0.12794 | 0.00563  |
| 1.19E-05 | -0.11473 | 0.0131   | 0.143445 | 0.00189  | 0.26141925 | 9.80E-09 | 0.23671  | 2.27E-07 |
| 0.00306  | 0.130972 | 0.00458  | 0.095789 | 0.03852  | 0.04194481 | 0.36578  | 0.150458 | 0.00111  |
| 3.51E-05 | 0.07423  | 0.10915  | 0.072841 | 0.11595  | 0.12446853 | 0.00708  | 0.023604 | 0.61089  |
| 0.05279  | -0.09856 | 0.03322  | 0.010293 | 0.82443  | -0.0273523 | 0.55545  | -0.19161 | 3.07E-05 |
| 0.00244  | 0.095209 | 0.03972  | 0.166761 | 0.0003   | -0.1349594 | 0.00348  | -0.07666 | 0.09798  |
| 0.9045   | 0.057745 | 0.21292  | 0.023656 | 0.61012  | -0.0143971 | 0.75633  | 0.005069 | 0.91301  |
| 0.17274  | -0.07345 | 0.11295  | 0.324326 | 6.72E-13 | 0.49620346 | 2.13E-30 | 0.30589  | 1.43E-11 |
| 2.05E-11 | 0.107035 | 0.0207   | 0.08095  | 0.08055  | 0.11999147 | 0.00945  | 0.117394 | 0.01112  |
| 0.05143  | 0.219349 | 1.70E-06 | 0.123975 | 0.00731  | -0.0157718 | 0.7339   | -0.07266 | 0.11689  |
| 0.22416  | 0.092074 | 0.04674  | -0.11522 | 0.01272  | 0.1887291  | 4.05E-05 | 0.14459  | 0.00173  |
| 0.02027  | 0.100859 | 0.02931  | 0.085637 | 0.06445  | 0.12395269 | 0.00732  | 0.114711 | 0.01312  |
| 0.08283  | 0.014288 | 0.75811  | 0.085946 | 0.06349  | -0.0171007 | 0.71244  | -0.11406 | 0.01365  |
| 0.00081  | 0.180879 | 8.47E-05 | 0.296671 | 6.08E-11 | 0.35349657 | 3.43E-15 | 0.144037 | 0.0018   |
| 0.67198  | -0.12439 | 0.00712  | 0.031771 | 0.4934   | 0.14422355 | 0.00178  | 0.044817 | 0.33385  |
| 0.00178  | -0.00073 | 0.98748  | 0.03918  | 0.39826  | 0.11246021 | 0.01504  | 0.054832 | 0.23695  |
| 0.2336   | 0.021205 | 0.64763  | 0.013528 | 0.77061  | 0.00163684 | 0.97186  | 0.029888 | 0.51938  |
| 0.68152  | 0.123171 | 0.0077   | 0.096858 | 0.0364   | 0.00952018 | 0.83743  | 0.008251 | 0.85885  |
| 0.2578   | 0.096358 | 0.03738  | 0.077884 | 0.09274  | -0.0143562 | 0.757    | -0.06132 | 0.18591  |
| 4.66E-17 | -0.03443 | 0.4579   | -0.10325 | 0.02567  | 0.1519993  | 0.00098  | 0.21958  | 1.66E-06 |
| 0.10638  | 0.078388 | 0.09064  | 0.084942 | 0.06665  | 0.09601437 | 0.03807  | 0.023477 | 0.61282  |
| 0.74768  | 0.241456 | 1.28E-07 | 0.184978 | 5.78E-05 | 0.15192075 | 0.00099  | 0.030792 | 0.50682  |
| 0.46423  | 0.133233 | 0.00392  | 0.150235 | 0.00113  | -0.0441934 | 0.34062  | 0.006484 | 0.88887  |
| 0.08604  | -0.17723 | 0.00012  | -0.24916 | 4.86E-08 | -0.1098    | 0.01761  | 0.004299 | 0.92618  |
| 1.67E-07 | 0.069503 | 0.13368  | 0.028116 | 0.54446  | 0.06621658 | 0.15309  | 0.082713 | 0.07414  |
| 0.28472  | 0.105064 | 0.02317  | 0.090068 | 0.05176  | 0.03375023 | 0.46686  | -0.02841 | 0.54026  |

|          |          |          |          |          |            |          |          |          |
|----------|----------|----------|----------|----------|------------|----------|----------|----------|
| 2.10E-05 | -0.19692 | 1.82E-05 | 0.055915 | 0.2278   | 0.30758384 | 1.09E-11 | 0.171233 | 0.0002   |
| 0.01401  | 0.091513 | 0.0481   | 0.321266 | 1.13E-12 | 0.31842665 | 1.83E-12 | 0.142152 | 0.00207  |
| 0.00206  | -0.04773 | 0.30331  | 0.031479 | 0.49739  | 0.07072307 | 0.12697  | 0.077315 | 0.09516  |
| 0.00023  | 0.30668  | 1.26E-11 | 0.180884 | 8.46E-05 | -0.0048968 | 0.91595  | -0.04249 | 0.35958  |
| 0.51347  | 0.08474  | 0.0673   | 0.030889 | 0.50548  | -0.135549  | 0.00334  | -0.09867 | 0.03302  |
| 2.39E-06 | 0.183017 | 6.95E-05 | 0.152784 | 0.00093  | -0.0988671 | 0.03268  | -0.1333  | 0.0039   |
| 0.00285  | -0.10525 | 0.02293  | -0.05972 | 0.19767  | -0.1310073 | 0.00457  | -0.18453 | 6.03E-05 |
| 4.08E-05 | 0.012576 | 0.78636  | 0.061269 | 0.18626  | -0.2432092 | 1.03E-07 | -0.28131 | 6.08E-10 |
| 4.48E-05 | 0.168866 | 0.00025  | 0.109918 | 0.01749  | -0.1382776 | 0.00275  | -0.18459 | 6.00E-05 |
| 1.79E-07 | -0.08705 | 0.06015  | -0.00811 | 0.86118  | -0.2607166 | 1.08E-08 | -0.33031 | 2.38E-13 |
| 0.0358   | 0.056586 | 0.22227  | 0.067568 | 0.14486  | 0.04408258 | 0.34184  | -0.02183 | 0.63797  |
| 0.47772  | 0.163492 | 0.00039  | 0.106601 | 0.02122  | -0.0512895 | 0.26867  | -0.11505 | 0.01285  |
| 0.25884  | -0.16533 | 0.00033  | -0.17221 | 0.00018  | -0.2571274 | 1.73E-08 | -0.27102 | 2.63E-09 |
| 0.26155  | -0.17523 | 0.00014  | -0.16501 | 0.00034  | -0.1958089 | 2.03E-05 | -0.17634 | 0.00013  |
| 0.28509  | -0.1555  | 0.00075  | -0.12762 | 0.00575  | -0.2005426 | 1.26E-05 | -0.20122 | 1.18E-05 |
| 0.12017  | -0.20241 | 1.04E-05 | -0.24429 | 8.98E-08 | -0.3140168 | 3.81E-12 | -0.27147 | 2.48E-09 |
| 0.05472  | 0.282071 | 5.44E-10 | 0.453581 | 4.46E-25 | 0.15120469 | 0.00105  | -0.04715 | 0.30929  |
| 0.53154  | -0.0348  | 0.45305  | 0.049475 | 0.28599  | -0.004343  | 0.92543  | -0.18385 | 6.43E-05 |
| 0.09421  | 0.07802  | 0.09217  | 0.006498 | 0.88862  | -0.0218765 | 0.63725  | 0.023647 | 0.61024  |
| 0.12679  | 0.02299  | 0.62021  | 0.03469  | 0.45454  | 0.01864223 | 0.68782  | 0.011123 | 0.81053  |
| 0.88614  | 0.27713  | 1.11E-09 | 0.065836 | 0.15547  | 0.15310827 | 0.0009   | 0.112006 | 0.01545  |
| 0.51109  | 0.003458 | 0.94058  | 0.072795 | 0.11619  | 0.02583095 | 0.57766  | -0.00561 | 0.90379  |
| 0.89129  | -0.00732 | 0.87464  | 0.135812 | 0.00327  | 0.04480437 | 0.33398  | 0.144461 | 0.00175  |
| 1.61E-06 | -0.07533 | 0.10399  | -0.02289 | 0.62166  | 0.06994706 | 0.13121  | 0.046059 | 0.32061  |
| 0.7286   | 0.249565 | 4.62E-08 | 0.151612 | 0.00101  | 0.40697496 | 4.68E-20 | 0.339782 | 4.39E-14 |
| 3.30E-05 | 0.086298 | 0.06241  | 0.346916 | 1.18E-14 | 0.10984808 | 0.01756  | 0.016064 | 0.72916  |
| 0.19063  | 0.256579 | 1.86E-08 | 0.24362  | 9.76E-08 | -0.1197074 | 0.00962  | -0.25782 | 1.58E-08 |
| 0.1384   | 0.147322 | 0.00141  | -0.10119 | 0.02878  | -0.1901598 | 3.53E-05 | -0.30385 | 1.97E-11 |
| 9.00E-11 | -0.18019 | 9.02E-05 | -0.11584 | 0.01224  | 0.00256727 | 0.95588  | -0.08771 | 0.05823  |
| 2.12E-08 | 0.091682 | 0.04769  | -0.04495 | 0.33239  | 0.10364539 | 0.0251   | 0.15944  | 0.00054  |
| 0.00022  | 0.14351  | 0.00188  | -0.0247  | 0.59448  | -0.1843911 | 6.11E-05 | -0.16073 | 0.00049  |
| 0.4429   | 0.022822 | 0.62277  | 0.032699 | 0.48085  | 0.04154648 | 0.37036  | -0.00044 | 0.9924   |
| 0.22385  | -0.09485 | 0.04048  | 0.014038 | 0.76221  | 0.3185058  | 1.80E-12 | 0.158159 | 0.0006   |
| 3.53E-20 | -0.02985 | 0.51989  | -0.02773 | 0.55002  | 0.06073784 | 0.19011  | 0.120548 | 0.00912  |
| 0.52274  | 0.006591 | 0.88703  | 0.244783 | 8.45E-08 | 0.32834264 | 3.36E-13 | 0.130011 | 0.00489  |
| 0.73141  | 0.210869 | 4.30E-06 | 0.190088 | 3.56E-05 | 0.06144838 | 0.18497  | -0.01315 | 0.77677  |
| 0.10762  | 0.054601 | 0.23893  | 0.14752  | 0.00139  | 0.12329585 | 0.00764  | -0.02106 | 0.64993  |
| 0.09916  | -0.05203 | 0.26185  | 0.070481 | 0.12828  | 0.23110208 | 4.43E-07 | 0.292171 | 1.21E-10 |
| 0.13245  | 0.158792 | 0.00057  | 0.066105 | 0.15379  | 0.08435722 | 0.06856  | 0.180044 | 9.14E-05 |
| 0.00029  | 0.092257 | 0.0463   | -0.02023 | 0.66286  | 0.01599637 | 0.73026  | 0.04513  | 0.33048  |
| 9.81E-07 | 0.134872 | 0.0035   | 0.106007 | 0.02195  | 0.0655645  | 0.15719  | 0.074177 | 0.1094   |
| 0.06926  | 0.027596 | 0.55193  | -0.03217 | 0.48795  | -0.0875882 | 0.05858  | -0.01493 | 0.74759  |
| 0.10127  | 0.022038 | 0.63477  | -0.0387  | 0.40402  | -0.0913025 | 0.04862  | -0.09939 | 0.03176  |
| 0.034    | 0.027996 | 0.54617  | -0.01489 | 0.7483   | -0.106465  | 0.02139  | -0.11818 | 0.01059  |
| 0.27112  | -0.00011 | 0.99818  | -0.01563 | 0.73627  | -0.0575836 | 0.2142   | -0.05116 | 0.2699   |

|          |          |          |          |          |            |          |          |          |
|----------|----------|----------|----------|----------|------------|----------|----------|----------|
| 0.21     | 0.128868 | 0.00529  | 0.049654 | 0.28426  | -0.0003202 | 0.99449  | 0.023169 | 0.61749  |
| 2.19E-07 | 0.046451 | 0.3165   | 0.003332 | 0.94276  | 0.00967082 | 0.83489  | 0.017324 | 0.70884  |
| 0.00906  | -0.02489 | 0.59159  | -0.10071 | 0.02955  | -0.0142026 | 0.75952  | 0.069648 | 0.13287  |
| 0.50298  | -0.159   | 0.00056  | -0.22905 | 5.64E-07 | 0.17114072 | 0.0002   | 0.193156 | 2.64E-05 |
| 0.04201  | 0.161424 | 0.00046  | 0.086575 | 0.06157  | 0.03947496 | 0.39471  | 0.050964 | 0.27172  |
| 7.07E-09 | -0.04254 | 0.35903  | -0.11008 | 0.01732  | 0.02606731 | 0.57418  | 0.006836 | 0.88286  |
| 0.08126  | 0.236524 | 2.33E-07 | 0.017484 | 0.70629  | 0.07080746 | 0.12652  | 0.105068 | 0.02316  |
| 0.01241  | 0.144402 | 0.00176  | 0.067191 | 0.14713  | 0.11847445 | 0.01039  | 0.220305 | 1.53E-06 |
| 0.01412  | -0.08541 | 0.06515  | -0.16422 | 0.00037  | -0.1671036 | 0.00029  | -0.29375 | 9.52E-11 |
| 1.98E-05 | 0.087978 | 0.05746  | 0.210972 | 4.25E-06 | 0.20376956 | 9.07E-06 | 0.267927 | 4.05E-09 |
| 0.00537  | 0.160709 | 0.00049  | 0.079937 | 0.08442  | -0.018612  | 0.6883   | -0.03144 | 0.49787  |
| 0.01371  | 0.045775 | 0.32361  | -0.03604 | 0.43711  | -0.0007541 | 0.98703  | 0.036421 | 0.43233  |
| 0.67866  | 0.013383 | 0.773    | -0.04293 | 0.35464  | 0.02023614 | 0.66271  | 0.022993 | 0.62017  |
| 0.21523  | -0.13402 | 0.00371  | 0.009615 | 0.83583  | 0.14220887 | 0.00207  | 0.156114 | 0.00071  |
| 0.05885  | 0.165001 | 0.00034  | -0.01968 | 0.67143  | 0.13785343 | 0.00283  | 0.216353 | 2.37E-06 |
| 0.20875  | 0.212552 | 3.59E-06 | 0.030956 | 0.50456  | -0.1280353 | 0.00559  | -0.22994 | 5.08E-07 |
| 1.49E-19 | 0.118498 | 0.01038  | 0.03165  | 0.49506  | -0.1106592 | 0.01674  | -0.09466 | 0.04089  |
| 0.05215  | -0.13204 | 0.00426  | -0.00668 | 0.88552  | 0.01278697 | 0.78286  | -0.03883 | 0.40252  |
| 0.01713  | 0.137383 | 0.00293  | 0.433997 | 7.15E-23 | 0.17434428 | 0.00015  | 0.022212 | 0.6321   |
| 6.53E-16 | -0.01064 | 0.81869  | 0.024215 | 0.60169  | 0.19675631 | 1.85E-05 | 0.203732 | 9.10E-06 |
| 0.01598  | -0.04371 | 0.34599  | -0.01871 | 0.68667  | 0.13203513 | 0.00426  | 0.11291  | 0.01464  |
| 1.10E-09 | 0.193152 | 2.64E-05 | 0.132803 | 0.00404  | 0.02660111 | 0.56636  | 0.040287 | 0.38505  |
| 0.20402  | 0.057245 | 0.21692  | 0.026198 | 0.57227  | 0.14169027 | 0.00215  | 0.220687 | 1.47E-06 |
| 0.00467  | 0.082983 | 0.0732   | 0.22148  | 1.34E-06 | -0.1266829 | 0.00612  | -0.06428 | 0.16547  |
| 0.02098  | -0.01503 | 0.74596  | -0.1268  | 0.00607  | -0.1001212 | 0.03052  | -0.08353 | 0.07134  |
| 0.99785  | 0.138517 | 0.0027   | 0.10303  | 0.02598  | 0.11893654 | 0.0101   | 0.096106 | 0.03788  |
| 0.02194  | -0.18443 | 6.09E-05 | -0.14945 | 0.0012   | 0.07694369 | 0.09676  | 0.091141 | 0.04902  |
| 0.00023  | -0.19705 | 1.79E-05 | -0.33015 | 2.45E-13 | -0.0701411 | 0.13014  | -0.08952 | 0.0532   |
| 0.55227  | 0.174492 | 0.00015  | 0.040632 | 0.38099  | -0.0624776 | 0.17771  | -0.04805 | 0.30012  |
| 1.41E-07 | 0.125122 | 0.00678  | 0.121578 | 0.00854  | 0.0885541  | 0.05584  | 0.167907 | 0.00027  |
| 0.80498  | -0.25484 | 2.34E-08 | -0.13186 | 0.00431  | -0.0218557 | 0.63757  | -0.14056 | 0.00233  |
| 0.00252  | 0.031568 | 0.49616  | 0.082615 | 0.07449  | 0.19740359 | 1.73E-05 | 0.068022 | 0.14218  |
| 0.11422  | 0.33621  | 8.36E-14 | 0.349545 | 7.24E-15 | 0.25948057 | 1.27E-08 | 0.230133 | 4.97E-07 |
| 0.00998  | 0.166695 | 0.0003   | 0.139655 | 0.00249  | 0.29841914 | 4.64E-11 | 0.215514 | 2.60E-06 |
| 7.15E-10 | 0.05751  | 0.21479  | 0.032222 | 0.48728  | 0.13142342 | 0.00444  | 0.103334 | 0.02555  |
| 0.03906  | 0.025448 | 0.58331  | -0.0693  | 0.13482  | 0.15724509 | 0.00065  | 0.238386 | 1.86E-07 |
| 0.31969  | 0.0561   | 0.22627  | -0.01646 | 0.72284  | 0.06386244 | 0.16827  | 0.038255 | 0.40949  |
| 0.00438  | -0.05444 | 0.24034  | -0.02328 | 0.61579  | 0.0902594  | 0.05126  | 0.156261 | 0.0007   |
| 1.22E-06 | 0.081584 | 0.0782   | 0.057413 | 0.21557  | 0.12011167 | 0.00937  | 0.098342 | 0.03362  |
| 0.73168  | 0.006146 | 0.89462  | -0.00473 | 0.91885  | -0.0530187 | 0.25284  | -0.01335 | 0.77347  |
| 0.25654  | 0.059092 | 0.20242  | 0.008479 | 0.85499  | -0.0211778 | 0.64804  | 0.00709  | 0.87855  |
| 0.85194  | 0.304449 | 1.80E-11 | 0.22009  | 1.57E-06 | 0.15787897 | 0.00062  | 0.190037 | 3.57E-05 |
| 2.45E-06 | -0.06689 | 0.14895  | 0.040114 | 0.38709  | 0.34990205 | 6.77E-15 | 0.243891 | 9.44E-08 |
| 0.40764  | 0.128021 | 0.0056   | 0.019328 | 0.67698  | -0.019209  | 0.67885  | 0.038378 | 0.40799  |
| 0.96769  | -0.08504 | 0.06633  | 0.091071 | 0.0492   | 0.28778272 | 2.34E-10 | 0.188629 | 4.09E-05 |

|          |           |          |          |          |            |          |          |          |
|----------|-----------|----------|----------|----------|------------|----------|----------|----------|
| 0.97466  | 0.130363  | 0.00478  | 0.028574 | 0.53792  | 0.10157511 | 0.02817  | 0.104724 | 0.02362  |
| 0.48146  | 0.116151  | 0.01201  | 0.172104 | 0.00019  | 0.08516355 | 0.06594  | 0.077468 | 0.0945   |
| 0.03329  | 0.078112  | 0.09178  | 0.022104 | 0.63376  | 0.0537177  | 0.24663  | 0.032858 | 0.47872  |
| 0.59358  | 0.085628  | 0.06448  | 0.073196 | 0.11418  | -0.0253153 | 0.58528  | -0.00796 | 0.86373  |
| 8.45E-05 | -0.31947  | 1.53E-12 | -0.17773 | 0.00011  | -0.0952609 | 0.03961  | -0.1234  | 0.00759  |
| 5.38E-14 | -0.20399  | 8.86E-06 | -0.16051 | 0.0005   | -0.0218706 | 0.63734  | -0.00523 | 0.91029  |
| 3.25E-07 | -0.32579  | 5.22E-13 | -0.25108 | 3.80E-08 | -0.1314423 | 0.00444  | -0.07634 | 0.09943  |
| 0.00016  | -0.29637  | 6.37E-11 | -0.10361 | 0.02516  | 0.05288057 | 0.25408  | 0.084556 | 0.0679   |
| 0.00452  | -0.16857  | 0.00025  | -0.13384 | 0.00376  | 0.0253825  | 0.58428  | -0.00078 | 0.98652  |
| 0.7819   | -0.12949  | 0.00507  | -0.01542 | 0.73954  | -0.0381094 | 0.41128  | -0.01117 | 0.80976  |
| 0.74468  | -0.00193  | 0.96689  | -0.05365 | 0.24724  | -0.0230828 | 0.6188   | 0.07185  | 0.12101  |
| 0.03208  | -0.07675  | 0.09759  | -0.01048 | 0.82135  | 0.09453158 | 0.04116  | 0.096259 | 0.03758  |
| 0.9089   | -6.61E-05 | 0.99886  | -0.01682 | 0.7169   | 0.01774443 | 0.70212  | 0.025906 | 0.57656  |
| 0.00063  | -0.01367  | 0.76819  | 0.020122 | 0.66449  | 0.10790752 | 0.01968  | 0.107274 | 0.02041  |
| 1.34E-05 | -0.03191  | 0.49154  | 0.09423  | 0.04181  | 0.15397557 | 0.00084  | 0.256209 | 1.96E-08 |
| 0.00352  | -0.19032  | 3.48E-05 | -0.10814 | 0.01942  | -0.0841183 | 0.06935  | -0.18837 | 4.19E-05 |
| 2.15E-17 | -0.00018  | 0.99699  | 0.006807 | 0.88336  | 0.04631066 | 0.31797  | 0.146702 | 0.00148  |
| 0.00234  | -0.04874  | 0.29325  | -0.18828 | 4.23E-05 | -0.3716655 | 9.59E-17 | -0.35831 | 1.36E-15 |
| 1.71E-07 | 0.151002  | 0.00106  | 0.253558 | 2.76E-08 | 0.14864679 | 0.00127  | 0.097157 | 0.03582  |
| 0.13512  | 0.275426  | 1.42E-09 | 0.155321 | 0.00076  | 0.15430385 | 0.00082  | 0.150005 | 0.00115  |
| 4.26E-11 | 0.117184  | 0.01127  | 0.000931 | 0.984    | 0.06966906 | 0.13275  | 0.072036 | 0.12005  |
| 0.02755  | -0.02188  | 0.63722  | -0.02237 | 0.62963  | -0.0340981 | 0.46228  | -0.09269 | 0.04528  |
| 0.81171  | 0.280733  | 6.61E-10 | 0.104325 | 0.02416  | 0.1878157  | 4.42E-05 | 0.047924 | 0.30139  |
| 0.17621  | 0.08063   | 0.08176  | 0.048974 | 0.29091  | 0.08768045 | 0.05831  | 0.092312 | 0.04618  |
| 1.41E-10 | -0.06968  | 0.13268  | 0.003225 | 0.94458  | 0.11443427 | 0.01334  | 0.07222  | 0.1191   |
| 0.77444  | 0.121423  | 0.00862  | -0.13891 | 0.00263  | 0.02579224 | 0.57823  | -0.06318 | 0.17284  |
| 0.00481  | -0.13883  | 0.00264  | -0.2056  | 7.50E-06 | -0.2055167 | 7.56E-06 | -0.26253 | 8.44E-09 |
| 0.99406  | 0.051769  | 0.26422  | 0.068445 | 0.13971  | 0.06337635 | 0.17154  | 0.066334 | 0.15236  |
| 0.47435  | 0.065519  | 0.15748  | -0.0427  | 0.35717  | -0.00389   | 0.93318  | 0.05699  | 0.21898  |
| 5.38E-05 | -0.07781  | 0.09303  | -0.10736 | 0.02031  | -0.0173979 | 0.70767  | 0.015986 | 0.73043  |
| 0.14965  | 0.062505  | 0.17751  | 0.027314 | 0.55601  | 0.06708141 | 0.14779  | 0.082323 | 0.07552  |
| 0.85997  | 0.065499  | 0.1576   | 0.018292 | 0.69339  | 0.05499498 | 0.23556  | 0.072601 | 0.11717  |
| 0.08571  | -0.0288   | 0.53476  | 0.073049 | 0.11492  | -0.0698181 | 0.13192  | -0.07729 | 0.09526  |
| 0.00143  | 0.138284  | 0.00275  | 0.091076 | 0.04919  | 0.11393929 | 0.01375  | 0.164154 | 0.00037  |
| 0.03574  | -0.16926  | 0.00024  | -0.11172 | 0.01572  | 0.12857175 | 0.00539  | 0.256979 | 1.77E-08 |
| 0.65076  | 0.079214  | 0.08728  | 0.047297 | 0.30776  | 0.03227728 | 0.48654  | 0.042684 | 0.35738  |
| 0.01116  | -0.16926  | 0.00024  | -0.18006 | 9.12E-05 | 0.06713851 | 0.14744  | 0.194525 | 2.31E-05 |
| 2.67E-06 | 0.105257  | 0.02292  | -0.06641 | 0.15189  | -0.0457214 | 0.32417  | -0.07947 | 0.08624  |
| 1.59E-07 | 0.034893  | 0.45189  | 0.180607 | 8.68E-05 | 0.44575442 | 3.53E-24 | 0.322813 | 8.70E-13 |
| 0.02715  | -0.11593  | 0.01218  | -0.05695 | 0.21932  | 0.1510764  | 0.00106  | -0.03652 | 0.43109  |
| 0.00755  | -0.08146  | 0.07864  | -0.05475 | 0.23767  | 0.11932611 | 0.00985  | 0.149992 | 0.00115  |
| 0.0377   | -0.17693  | 0.00012  | -0.23308 | 3.51E-07 | 0.15323075 | 0.00089  | -0.04148 | 0.37116  |
| 0.04757  | -0.13701  | 0.00301  | -0.17317 | 0.00017  | 0.04550463 | 0.32648  | -0.11945 | 0.00978  |
| 0.22011  | 0.19447   | 2.32E-05 | -0.03482 | 0.45286  | 0.09184252 | 0.0473   | 0.015199 | 0.74322  |
| 0.08973  | 0.27998   | 7.38E-10 | 0.091026 | 0.04931  | 0.00914131 | 0.84381  | -0.01804 | 0.69743  |



|          |          |          |          |          |            |          |          |          |
|----------|----------|----------|----------|----------|------------|----------|----------|----------|
| 0.02364  | -0.03919 | 0.39819  | 0.050438 | 0.27671  | 0.04252629 | 0.35917  | 0.050221 | 0.27878  |
| 6.03E-06 | 0.220883 | 1.43E-06 | 0.154085 | 0.00084  | 0.08635988 | 0.06222  | 0.149634 | 0.00118  |
| 0.02922  | -0.12583 | 0.00647  | -0.08767 | 0.05833  | 0.02841056 | 0.54025  | -0.11177 | 0.01568  |
| 0.02299  | -0.18589 | 5.31E-05 | -0.1526  | 0.00094  | 0.03696468 | 0.42548  | 0.104735 | 0.0236   |
| 0.00041  | -0.1151  | 0.01281  | -0.01914 | 0.67995  | 0.11977308 | 0.00958  | 0.097369 | 0.03542  |
| 0.76709  | -0.08074 | 0.08132  | -0.1412  | 0.00222  | -0.1795363 | 9.57E-05 | -0.20833 | 5.63E-06 |
| 8.72E-05 | -0.09355 | 0.04331  | -0.04196 | 0.36566  | 0.07032319 | 0.12914  | 0.11519  | 0.01274  |
| 0.05635  | -0.00728 | 0.87535  | 0.024134 | 0.60291  | 0.10952784 | 0.0179   | 0.16128  | 0.00047  |
| 0.05326  | 0.161275 | 0.00047  | 0.025761 | 0.57869  | -0.1328394 | 0.00403  | -0.14602 | 0.00156  |
| 1.39E-05 | -0.11596 | 0.01215  | -0.09709 | 0.03596  | -0.0488675 | 0.29196  | -0.05526 | 0.23332  |
| 2.41E-09 | 0.018533 | 0.68955  | -0.10743 | 0.02023  | 0.02235719 | 0.62987  | 0.082642 | 0.07439  |
| 0.64837  | 0.036586 | 0.43024  | 0.045733 | 0.32405  | 0.0819974  | 0.07669  | 0.086648 | 0.06135  |
| 0.85341  | 0.042469 | 0.35981  | 0.176276 | 0.00013  | 0.14139034 | 0.00219  | 0.07044  | 0.1285   |
| 0.26788  | 0.234252 | 3.05E-07 | 0.097053 | 0.03602  | 0.04455348 | 0.3367   | 0.116407 | 0.01182  |
| 0.03675  | 0.181887 | 7.71E-05 | 0.045062 | 0.3312   | 0.02055093 | 0.65779  | 0.079373 | 0.08664  |
| 0.18609  | 0.130308 | 0.0048   | 0.009171 | 0.84331  | -0.277821  | 1.01E-09 | -0.30585 | 1.44E-11 |
| 0.02501  | -0.26127 | 1.00E-08 | -0.31474 | 3.38E-12 | -0.1378763 | 0.00283  | -0.2119  | 3.85E-06 |
| 3.98E-09 | 0.045867 | 0.32263  | 0.076713 | 0.09776  | 0.40176281 | 1.53E-19 | 0.414307 | 8.53E-21 |
| 0.78916  | 0.015981 | 0.73051  | 0.124746 | 0.00695  | 0.16079726 | 0.00049  | 0.156405 | 0.00069  |
| 0.00316  | 0.089595 | 0.05301  | 0.101665 | 0.02803  | 0.16706708 | 0.00029  | 0.161633 | 0.00045  |
| 0.57221  | -0.07968 | 0.08544  | 0.040984 | 0.37687  | 0.07654821 | 0.09849  | 0.109757 | 0.01766  |
| 0.63301  | 0.055801 | 0.22875  | 0.004527 | 0.92228  | 0.04064785 | 0.3808   | 0.023658 | 0.61008  |
| 0.9725   | 0.255325 | 2.20E-08 | 0.109481 | 0.01795  | 0.06730712 | 0.14643  | 0.052728 | 0.25545  |
| 6.15E-05 | -0.09878 | 0.03283  | 0.001024 | 0.98239  | -0.0170252 | 0.71365  | -0.09186 | 0.04726  |
| 0.05098  | -0.11151 | 0.01592  | 0.022987 | 0.62026  | 0.07621538 | 0.09997  | -0.05184 | 0.26354  |
| 0.00064  | -0.04548 | 0.3267   | 0.039071 | 0.39957  | -0.1060439 | 0.02191  | -0.14388 | 0.00183  |
| 0.08546  | 0.311901 | 5.39E-12 | 0.192715 | 2.76E-05 | 0.13180872 | 0.00433  | 0.15527  | 0.00076  |
| 0.08364  | 0.212057 | 3.78E-06 | 0.125375 | 0.00667  | 0.06254683 | 0.17723  | 0.009726 | 0.83397  |
| 0.00037  | 0.173654 | 0.00016  | 0.097224 | 0.0357   | 0.02581023 | 0.57796  | 0.01661  | 0.72033  |
| 0.67609  | -0.26185 | 9.25E-09 | -0.24075 | 1.39E-07 | -0.2027419 | 1.01E-05 | -0.21165 | 3.95E-06 |
| 0.27141  | 0.031671 | 0.49477  | 0.02611  | 0.57355  | 0.07146093 | 0.12305  | 0.08272  | 0.07412  |
| 0.01575  | -0.19676 | 1.85E-05 | -0.15382 | 0.00085  | 0.06641426 | 0.15187  | -0.00323 | 0.94443  |
| 0.00354  | 0.16791  | 0.00027  | 0.146314 | 0.00152  | -0.0567646 | 0.2208   | -0.06867 | 0.13839  |
| 0.4652   | 0.046487 | 0.31613  | -0.04157 | 0.37005  | -0.0339879 | 0.46372  | -0.00703 | 0.87956  |
| 0.8002   | 0.191302 | 3.16E-05 | 0.095227 | 0.03968  | 0.06882932 | 0.13749  | 0.036356 | 0.43316  |
| 0.89618  | 0.103394 | 0.02546  | 0.030315 | 0.51343  | 0.06117529 | 0.18693  | 0.11875  | 0.01022  |
| 0.07579  | 0.096118 | 0.03786  | 0.015481 | 0.73864  | -0.0109378 | 0.81363  | 0.009849 | 0.8319   |
| 0.98691  | 0.258889 | 1.37E-08 | 0.016805 | 0.71719  | -0.2082102 | 5.70E-06 | -0.28118 | 6.20E-10 |
| 0.753    | 0.10708  | 0.02064  | 0.161502 | 0.00046  | 0.09065123 | 0.05026  | -0.15037 | 0.00112  |
| 0.21563  | -0.03069 | 0.50827  | -0.07441 | 0.10831  | -0.0036821 | 0.93675  | -0.04191 | 0.36614  |
| 0.01395  | -0.086   | 0.06331  | -0.05921 | 0.20148  | 0.00995709 | 0.83008  | 0.045259 | 0.32909  |
| 0.00023  | -0.15549 | 0.00075  | -0.03264 | 0.48171  | 0.05938873 | 0.20016  | 0.021432 | 0.64411  |
| 0.00013  | 0.034677 | 0.45471  | -0.00976 | 0.83346  | 0.06452893 | 0.16386  | 0.112166 | 0.0153   |
| 0.10908  | 0.087106 | 0.05999  | -0.01056 | 0.81995  | 0.04912715 | 0.2894   | 0.088212 | 0.05679  |
| 0.00213  | -0.00368 | 0.93677  | -0.19345 | 2.56E-05 | -0.143059  | 0.00194  | -0.11396 | 0.01373  |

|          |          |          |          |          |            |          |          |          |
|----------|----------|----------|----------|----------|------------|----------|----------|----------|
| 5.10E-11 | -0.04071 | 0.38011  | 0.078909 | 0.08851  | 0.23073047 | 4.63E-07 | 0.291496 | 1.34E-10 |
| 1.74E-06 | 0.169623 | 0.00023  | 0.277289 | 1.09E-09 | 0.40701184 | 4.64E-20 | 0.289812 | 1.73E-10 |
| 6.28E-09 | -0.03921 | 0.39785  | -0.00303 | 0.94786  | 0.11861211 | 0.01031  | 0.037496 | 0.41885  |
| 0.03777  | -0.00684 | 0.88276  | -0.1183  | 0.01051  | -0.0121807 | 0.79291  | 0.11279  | 0.01474  |
| 0.02903  | 0.041368 | 0.37242  | -0.01397 | 0.76338  | 0.16362945 | 0.00038  | 0.117605 | 0.01097  |
| 0.01282  | -0.07223 | 0.11907  | 0.023361 | 0.61458  | 0.16140898 | 0.00046  | 0.238276 | 1.88E-07 |
| 0.25291  | -0.02734 | 0.55561  | -0.13346 | 0.00386  | -0.1376177 | 0.00288  | -0.07449 | 0.10789  |
| 0.62437  | -0.00148 | 0.97457  | -0.0131  | 0.77774  | -0.0073868 | 0.87351  | 0.033337 | 0.47233  |
| 0.00268  | 0.074252 | 0.10904  | 0.070286 | 0.12934  | -0.0893537 | 0.05365  | -0.08383 | 0.07032  |
| 0.05255  | 0.139376 | 0.00254  | -0.0713  | 0.12388  | -0.130361  | 0.00478  | -0.18265 | 7.19E-05 |
| 1.42E-11 | 0.075693 | 0.10232  | 0.019915 | 0.66774  | 0.05867917 | 0.2056   | 0.02362  | 0.61066  |
| 4.92E-06 | -0.02479 | 0.59308  | -0.02795 | 0.54684  | 0.18094109 | 8.42E-05 | 0.207526 | 6.13E-06 |
| 0.12412  | 0.081811 | 0.07737  | 0.061755 | 0.18279  | 0.08523457 | 0.06572  | 0.086628 | 0.06141  |
| 0.00016  | 0.012083 | 0.79453  | -0.10243 | 0.02687  | -0.1206705 | 0.00905  | -0.08097 | 0.08047  |
| 6.21E-06 | -0.21843 | 1.89E-06 | -0.08018 | 0.0835   | 0.17453475 | 0.00015  | 0.258829 | 1.38E-08 |
| 0.23457  | 0.157804 | 0.00062  | 0.15899  | 0.00056  | 0.15586472 | 0.00073  | 0.22961  | 5.28E-07 |
| 5.09E-05 | -0.05576 | 0.22914  | 0.063295 | 0.17209  | 0.13966807 | 0.00249  | 0.132963 | 0.004    |
| 3.28E-14 | 0.017659 | 0.70349  | 0.102544 | 0.0267   | -0.0220751 | 0.6342   | -0.16789 | 0.00027  |
| 0.18507  | 0.035804 | 0.44017  | -0.01949 | 0.67448  | -0.0365943 | 0.43014  | -0.05112 | 0.2703   |
| 2.44E-11 | 0.041008 | 0.3766   | 0.092955 | 0.04467  | 0.36934338 | 1.53E-16 | 0.339059 | 5.01E-14 |
| 0.79812  | -0.00966 | 0.83508  | -0.2572  | 1.72E-08 | -0.2673819 | 4.36E-09 | -0.20029 | 1.29E-05 |
| 0.29555  | 0.069304 | 0.1348   | -0.16922 | 0.00024  | -0.1418766 | 0.00212  | -0.147   | 0.00145  |
| 0.03164  | 0.290836 | 1.48E-10 | 0.132197 | 0.00421  | -0.009181  | 0.84314  | 0.041896 | 0.36634  |
| 0.2325   | -0.13438 | 0.00362  | -0.10546 | 0.02265  | -0.0298499 | 0.51992  | -0.16785 | 0.00027  |
| 8.34E-05 | 0.061678 | 0.18333  | -0.00819 | 0.85982  | -0.1665537 | 0.0003   | -0.20602 | 7.18E-06 |
| 0.9712   | 0.028183 | 0.5435   | -0.0619  | 0.18174  | -0.0333915 | 0.47161  | 0.001295 | 0.97774  |
| 0.9862   | -0.01901 | 0.68201  | -0.35042 | 6.14E-15 | -0.3028926 | 2.30E-11 | -0.24216 | 1.17E-07 |
| 0.31365  | -0.081   | 0.08035  | -0.10177 | 0.02787  | 0.02910782 | 0.53035  | 0.051712 | 0.26474  |
| 0.10633  | -0.04444 | 0.33789  | -0.06926 | 0.13505  | -0.1376756 | 0.00287  | -0.14407 | 0.0018   |
| 0.48132  | -0.11769 | 0.01092  | 0.148375 | 0.0013   | 0.1973443  | 1.74E-05 | 0.133184 | 0.00394  |
| 2.38E-05 | 0.093984 | 0.04235  | 0.105477 | 0.02263  | 0.08036848 | 0.08275  | 0.153253 | 0.00089  |
| 1.62E-06 | 0.059306 | 0.20079  | 0.185462 | 5.53E-05 | 0.32458817 | 6.42E-13 | 0.245787 | 7.45E-08 |
| 0.83052  | 0.144194 | 0.00178  | 0.350225 | 6.37E-15 | 0.00878961 | 0.84975  | 0.038125 | 0.41109  |
| 0.00709  | -0.02553 | 0.58212  | -0.22352 | 1.06E-06 | -0.0654637 | 0.15783  | -0.16196 | 0.00044  |
| 0.41581  | -0.21085 | 4.31E-06 | -0.45281 | 5.49E-25 | -0.2269532 | 7.19E-07 | -0.22937 | 5.43E-07 |
| 0.00202  | -0.19263 | 2.78E-05 | -0.41285 | 1.20E-20 | -0.0920573 | 0.04678  | -0.01865 | 0.68774  |
| 0.00134  | 0.16008  | 0.00052  | 0.136621 | 0.00309  | -0.1191871 | 0.00994  | -0.13347 | 0.00386  |
| 0.00031  | 0.020149 | 0.66407  | -0.0743  | 0.10882  | -0.2364223 | 2.35E-07 | -0.28527 | 3.41E-10 |
| 0.74831  | 0.023614 | 0.61074  | -0.1258  | 0.00648  | -0.0432864 | 0.35064  | -0.14402 | 0.00181  |
| 0.07185  | 0.063884 | 0.16813  | 0.011726 | 0.80048  | -0.1191536 | 0.00996  | -0.18478 | 5.89E-05 |
| 0.01683  | -0.01098 | 0.81285  | 0.027825 | 0.54863  | 0.02238093 | 0.62951  | -0.02359 | 0.61105  |
| 0.95652  | -0.00698 | 0.88037  | 0.003583 | 0.93844  | 0.30311171 | 2.22E-11 | 0.159884 | 0.00052  |
| 4.27E-06 | 0.246235 | 7.04E-08 | 0.25064  | 4.03E-08 | 0.36265532 | 5.81E-16 | 0.263635 | 7.27E-09 |
| 0.19639  | -0.01428 | 0.75831  | -0.06319 | 0.17282  | 0.03236624 | 0.48533  | 0.055932 | 0.22766  |
| 0.28917  | -0.27698 | 1.13E-09 | -0.19577 | 2.04E-05 | -0.0264284 | 0.56889  | 0.066557 | 0.15099  |

|          |          |          |          |          |            |          |          |          |
|----------|----------|----------|----------|----------|------------|----------|----------|----------|
| 0.00413  | 0.146228 | 0.00153  | 0.001697 | 0.97082  | 0.04126518 | 0.37361  | 0.167807 | 0.00027  |
| 0.47221  | -0.03693 | 0.42588  | -0.07493 | 0.10585  | 0.04337383 | 0.34966  | 0.046752 | 0.31338  |
| 0.01054  | 0.124925 | 0.00687  | 0.14858  | 0.00128  | -0.0286822 | 0.53638  | -0.20784 | 5.92E-06 |
| 0.8767   | -0.00664 | 0.88615  | -0.07941 | 0.08651  | 0.01188385 | 0.79785  | 0.046338 | 0.31769  |
| 0.02627  | 0.019595 | 0.67276  | 0.288456 | 2.12E-10 | 0.24073763 | 1.39E-07 | 0.121931 | 0.00835  |
| 0.16271  | 0.156508 | 0.00069  | 0.043818 | 0.34474  | 0.05838699 | 0.20787  | -0.0635  | 0.17067  |
| 0.04975  | -0.06944 | 0.134    | -0.06281 | 0.17541  | 0.29123699 | 1.40E-10 | 0.363656 | 4.77E-16 |
| 0.00443  | -0.06441 | 0.16465  | -0.15599 | 0.00072  | -0.0834141 | 0.07172  | -0.10159 | 0.02815  |
| 0.00032  | 0.055293 | 0.23303  | -0.09217 | 0.04651  | -0.0300558 | 0.51704  | 0.036005 | 0.43761  |
| 0.14023  | -0.01566 | 0.73569  | 0.094818 | 0.04055  | 0.22942105 | 5.40E-07 | 0.262515 | 8.46E-09 |
| 7.50E-08 | 0.169369 | 0.00024  | 0.098284 | 0.03372  | -0.0579414 | 0.21137  | -0.09764 | 0.0349   |
| 2.52E-05 | 0.099226 | 0.03205  | 0.050461 | 0.27649  | 0.0628998  | 0.17479  | 0.044633 | 0.33584  |
| 0.26171  | -0.07005 | 0.13064  | -0.06277 | 0.1757   | 0.01662381 | 0.72011  | 0.083122 | 0.07272  |
| 0.10754  | 0.0212   | 0.6477   | -0.0273  | 0.5562   | -0.0308308 | 0.50629  | -0.08489 | 0.06683  |
| 0.21569  | 0.053561 | 0.24801  | 0.318996 | 1.66E-12 | 0.39476668 | 7.25E-19 | 0.224793 | 9.21E-07 |
| 0.00334  | 0.014115 | 0.76096  | 0.141379 | 0.0022   | -0.0132055 | 0.77593  | 0.065203 | 0.1595   |
| 0.15166  | 0.070384 | 0.12881  | -0.03261 | 0.48199  | 0.01784271 | 0.70055  | 0.058182 | 0.20947  |
| 0.02533  | 0.165335 | 0.00033  | 0.235369 | 2.67E-07 | 0.2153443  | 2.65E-06 | 0.094057 | 0.04219  |
| 3.84E-07 | 0.230523 | 4.75E-07 | 0.158626 | 0.00058  | 0.18683799 | 4.85E-05 | 0.272182 | 2.24E-09 |
| 0.61932  | 0.096302 | 0.03749  | 0.173088 | 0.00017  | 0.25143898 | 3.63E-08 | 0.12819  | 0.00553  |
| 0.70316  | -0.07063 | 0.12747  | -0.29993 | 3.66E-11 | -0.2123113 | 3.68E-06 | -0.21686 | 2.24E-06 |
| 0.28504  | 0.135477 | 0.00335  | -0.01232 | 0.79062  | 0.02828176 | 0.54209  | 0.054986 | 0.23563  |
| 0.08674  | -0.12424 | 0.00719  | 0.082077 | 0.07641  | 0.11507312 | 0.01283  | -0.10992 | 0.0175   |
| 1.12E-07 | -0.0501  | 0.27995  | -0.13126 | 0.00449  | 0.01020894 | 0.82585  | 0.078616 | 0.0897   |
| 0.06773  | -0.12823 | 0.00552  | -0.02741 | 0.55459  | -0.0034592 | 0.94057  | -0.06048 | 0.19198  |
| 0.06903  | 0.17211  | 0.00019  | 0.151279 | 0.00104  | 0.04947906 | 0.28595  | 0.015321 | 0.74123  |
| 0.39366  | -0.16661 | 0.0003   | -0.08803 | 0.05731  | 0.04547612 | 0.32678  | -0.16995 | 0.00022  |
| 0.49059  | 0.02948  | 0.52511  | -0.06081 | 0.18957  | 0.02592477 | 0.57628  | 0.008369 | 0.85685  |
| 0.00733  | 0.144497 | 0.00174  | 0.042108 | 0.36392  | -0.0481806 | 0.2988   | -0.09485 | 0.04047  |
| 0.05695  | 0.104277 | 0.02422  | 0.066393 | 0.152    | 0.08171443 | 0.07772  | 0.207864 | 5.91E-06 |
| 2.15E-07 | 0.102693 | 0.02648  | 0.024249 | 0.60118  | 0.07089648 | 0.12604  | 0.06351  | 0.17063  |
| 0.94236  | -0.2295  | 5.35E-07 | 0.105746 | 0.02228  | 0.36739992 | 2.27E-16 | 0.233435 | 3.37E-07 |
| 0.13366  | -0.00275 | 0.9527   | 0.156795 | 0.00067  | 0.26424074 | 6.70E-09 | 0.04806  | 0.30002  |
| 1.47E-08 | 0.150594 | 0.0011   | 0.083508 | 0.0714   | -0.1138566 | 0.01382  | -0.09166 | 0.04774  |
| 0.01212  | 0.138655 | 0.00267  | 0.038341 | 0.40844  | 0.0604657  | 0.19211  | 0.122878 | 0.00785  |
| 7.77E-16 | -0.0425  | 0.35943  | -0.22559 | 8.41E-07 | -0.0906521 | 0.05025  | -0.03796 | 0.41308  |
| 0.96573  | -0.02292 | 0.62121  | -0.01445 | 0.75546  | 0.17212578 | 0.00019  | 0.152388 | 0.00095  |
| 1.77E-05 | 0.12238  | 0.00811  | 0.050302 | 0.278    | 0.07738425 | 0.09486  | -0.05103 | 0.27111  |
| 0.61712  | -0.05538 | 0.23228  | -0.06839 | 0.14004  | 0.02117487 | 0.64809  | -0.01716 | 0.71142  |
| 0.00063  | 0.077757 | 0.09327  | 0.051016 | 0.27123  | 0.01796931 | 0.69853  | -0.09356 | 0.0433   |
| 0.00816  | -0.08052 | 0.08219  | -0.08968 | 0.05278  | -0.0427076 | 0.35712  | -0.07004 | 0.13072  |
| 0.47314  | -0.04911 | 0.28954  | -0.09924 | 0.03202  | -0.0187723 | 0.68576  | 0.036155 | 0.4357   |
| 0.21184  | -0.02143 | 0.64411  | -0.05895 | 0.20352  | -0.1140919 | 0.01363  | -0.10433 | 0.02415  |
| 0.01119  | 0.224333 | 9.71E-07 | 0.137485 | 0.00291  | 0.04556278 | 0.32586  | 0.028945 | 0.53265  |
| 0.00019  | 0.059167 | 0.20185  | 0.004483 | 0.92303  | -0.0351746 | 0.44826  | -0.06041 | 0.19253  |

|          |          |          |          |          |            |          |          |          |
|----------|----------|----------|----------|----------|------------|----------|----------|----------|
| 0.01304  | 0.262071 | 8.98E-09 | 0.145405 | 0.00163  | 0.07046474 | 0.12837  | 0.135971 | 0.00324  |
| 0.90578  | 0.054439 | 0.24033  | -0.02586 | 0.57723  | 9.55E-05   | 0.99836  | 0.056719 | 0.22118  |
| 0.01015  | -0.04201 | 0.36505  | 0.011128 | 0.81046  | 0.13418459 | 0.00367  | 0.140307 | 0.00237  |
| 0.45711  | -0.08784 | 0.05786  | -0.06168 | 0.18334  | -0.0459249 | 0.32202  | -0.07227 | 0.11885  |
| 0.12466  | -0.06446 | 0.16434  | -0.07237 | 0.11834  | 0.07892609 | 0.08844  | 0.132069 | 0.00425  |
| 0.14918  | 0.266867 | 4.68E-09 | 0.189343 | 3.82E-05 | 0.1239635  | 0.00732  | 0.005661 | 0.90289  |
| 1.05E-07 | 0.144381 | 0.00176  | 0.188925 | 3.98E-05 | 0.27385312 | 1.77E-09 | 0.177451 | 0.00012  |
| 0.07359  | 0.1682   | 0.00026  | 0.019755 | 0.67024  | -0.0567126 | 0.22123  | -0.02919 | 0.52918  |
| 2.78E-20 | 0.195387 | 2.12E-05 | 0.202974 | 9.84E-06 | 0.2121344  | 3.75E-06 | 0.298714 | 4.43E-11 |
| 0.7859   | 0.016412 | 0.72354  | -0.03314 | 0.47494  | -0.0126451 | 0.78521  | 0.004911 | 0.91571  |
| 0.0008   | -0.17727 | 0.00012  | -0.10836 | 0.01916  | 0.04958435 | 0.28493  | 0.143469 | 0.00188  |
| 0.48112  | 0.017661 | 0.70346  | -0.04547 | 0.32683  | 0.0732858  | 0.11374  | 0.071993 | 0.12027  |
| 1.83E-17 | 0.124776 | 0.00694  | 0.019398 | 0.67586  | 0.16512773 | 0.00034  | 0.271138 | 2.59E-09 |
| 2.75E-07 | -0.18718 | 4.70E-05 | -0.05723 | 0.21701  | 0.14350386 | 0.00188  | 0.131714 | 0.00436  |
| 0.03427  | 0.002954 | 0.94924  | -0.25687 | 1.79E-08 | -0.1511645 | 0.00105  | -0.0986  | 0.03316  |
| 5.57E-09 | -0.03406 | 0.46283  | -0.06116 | 0.18701  | -0.0310437 | 0.50335  | -0.14159 | 0.00216  |
| 0.04092  | 0.220326 | 1.53E-06 | 0.093372 | 0.04372  | 0.08774925 | 0.05811  | 0.169901 | 0.00023  |
| 0.10779  | 0.072215 | 0.11913  | 0.061067 | 0.18772  | 0.16285641 | 0.00041  | 0.168034 | 0.00026  |
| 0.01366  | 0.158012 | 0.00061  | 0.103626 | 0.02513  | 0.14965661 | 0.00118  | 0.199272 | 1.44E-05 |
| 0.00481  | 0.019337 | 0.67682  | -0.21112 | 4.18E-06 | -0.0655764 | 0.15711  | -0.11989 | 0.00951  |
| 0.33026  | -0.06665 | 0.15039  | -0.09013 | 0.0516   | 0.34545766 | 1.55E-14 | 0.293097 | 1.05E-10 |
| 0.09171  | -0.02164 | 0.64084  | -0.02498 | 0.59027  | -0.0349586 | 0.45105  | -0.02296 | 0.6207   |
| 0.00263  | 0.071128 | 0.12481  | 0.016062 | 0.7292   | 0.03945686 | 0.39493  | 0.072378 | 0.1183   |
| 0.1963   | 0.261913 | 9.17E-09 | 0.065875 | 0.15523  | 0.05996707 | 0.19581  | 0.143747 | 0.00184  |
| 0.63437  | 0.059034 | 0.20287  | 0.050194 | 0.27904  | 0.14710681 | 0.00143  | 0.255337 | 2.19E-08 |
| 0.29287  | 0.108683 | 0.01881  | -0.05446 | 0.24018  | -0.0127397 | 0.78364  | 0.029803 | 0.52058  |
| 0.92639  | 0.112195 | 0.01528  | 0.097824 | 0.03457  | 0.11081736 | 0.01659  | 0.035127 | 0.44886  |
| 0.01086  | 0.081762 | 0.07755  | 0.068071 | 0.14189  | 0.08767771 | 0.05832  | 0.146322 | 0.00152  |
| 0.99472  | -0.05833 | 0.20833  | -0.15816 | 0.0006   | -0.0821186 | 0.07626  | 0.01178  | 0.79958  |
| 1.95E-11 | -0.00026 | 0.99554  | 0.004876 | 0.91631  | 0.07737216 | 0.09491  | 0.128537 | 0.00541  |
| 0.48969  | 0.09427  | 0.04172  | 0.008283 | 0.85831  | -0.1123126 | 0.01517  | -0.10264 | 0.02656  |
| 0.18621  | 0.074714 | 0.10685  | -0.09893 | 0.03256  | -0.1846922 | 5.94E-05 | -0.21821 | 1.93E-06 |
| 0.21656  | 0.22953  | 5.33E-07 | 0.123729 | 0.00743  | 0.02374508 | 0.60877  | 0.11095  | 0.01646  |
| 0.00681  | 0.125909 | 0.00644  | 0.093305 | 0.04387  | 0.33117162 | 2.05E-13 | 0.276611 | 1.20E-09 |
| 0.48625  | 0.250093 | 4.32E-08 | 0.320489 | 1.29E-12 | 0.1529275  | 0.00091  | 0.112881 | 0.01466  |
| 0.00058  | -0.08457 | 0.06785  | -0.03612 | 0.43614  | -0.0894223 | 0.05347  | -0.11692 | 0.01145  |
| 0.04246  | 0.118436 | 0.01042  | -0.05387 | 0.24529  | -0.1070901 | 0.02063  | -0.10762 | 0.02     |
| 0.19722  | 0.004582 | 0.92133  | -0.07221 | 0.11916  | -0.2460165 | 7.24E-08 | -0.21219 | 3.73E-06 |
| 0.28538  | 0.05779  | 0.21256  | 0.045572 | 0.32576  | -0.1755059 | 0.00014  | -0.1064  | 0.02146  |
| 0.2567   | 0.053977 | 0.24435  | -0.07723 | 0.09553  | -0.0549448 | 0.23599  | 0.02647  | 0.56827  |
| 0.2246   | -0.02501 | 0.5898   | -0.21034 | 4.54E-06 | -0.1658747 | 0.00032  | -0.19469 | 2.27E-05 |
| 0.02126  | 0.195289 | 2.14E-05 | 0.094434 | 0.04137  | -0.072507  | 0.11764  | -0.14558 | 0.00161  |
| 1.06E-10 | -0.04977 | 0.28316  | 0.106799 | 0.02098  | 0.22581014 | 8.20E-07 | 0.23669  | 2.28E-07 |
| 0.79387  | 0.13891  | 0.00263  | -0.05352 | 0.2484   | -0.1884678 | 4.15E-05 | -0.06987 | 0.13163  |
| 0.4975   | 0.150403 | 0.00111  | 0.180892 | 8.46E-05 | 0.33798871 | 6.07E-14 | 0.247673 | 5.87E-08 |

|          |          |          |          |          |            |          |          |          |
|----------|----------|----------|----------|----------|------------|----------|----------|----------|
| 0.00319  | -0.19882 | 1.50E-05 | 0.126951 | 0.00601  | 0.10319065 | 0.02575  | -0.02026 | 0.66235  |
| 2.98E-07 | -0.12106 | 0.00882  | -0.12946 | 0.00508  | -0.0535012 | 0.24854  | -0.02571 | 0.57942  |
| 0.13492  | 0.049296 | 0.28774  | -0.00245 | 0.95789  | -0.0139187 | 0.76418  | 0.009344 | 0.84039  |
| 0.11745  | 0.048536 | 0.29525  | 0.046068 | 0.32051  | -0.0048967 | 0.91595  | -0.05363 | 0.24742  |
| 0.01446  | 0.012367 | 0.78981  | -0.06851 | 0.13933  | -0.0453416 | 0.32821  | 0.00112  | 0.98074  |
| 4.04E-05 | 0.212755 | 3.51E-06 | 0.032042 | 0.48971  | -0.2620361 | 9.02E-09 | -0.16232 | 0.00043  |
| 0.18347  | -0.06898 | 0.13664  | -0.03969 | 0.39217  | 0.09317105 | 0.04417  | 0.08025  | 0.08321  |
| 0.29449  | 0.116466 | 0.01178  | 0.226221 | 7.82E-07 | 0.18695294 | 4.80E-05 | 0.201939 | 1.09E-05 |
| 8.11E-18 | -0.13353 | 0.00384  | -0.12729 | 0.00588  | 0.00503999 | 0.9135   | 0.029589 | 0.52358  |
| 0.00013  | 0.114351 | 0.01341  | 0.174949 | 0.00014  | -0.179303  | 9.78E-05 | -0.18994 | 3.61E-05 |
| 0.00985  | 0.132621 | 0.00409  | 0.024718 | 0.59416  | -0.0829359 | 0.07337  | -0.12714 | 0.00593  |
| 0.00012  | -0.20697 | 6.50E-06 | -0.02997 | 0.51819  | -0.1279759 | 0.00561  | -0.21318 | 3.35E-06 |
| 1.99E-05 | -0.04363 | 0.34681  | 0.334352 | 1.17E-13 | 0.40440618 | 8.40E-20 | 0.258154 | 1.51E-08 |
| 0.39757  | -0.08413 | 0.0693   | 0.095037 | 0.04008  | -0.0761677 | 0.10018  | -0.12002 | 0.00943  |
| 0.00166  | 0.176945 | 0.00012  | 0.153096 | 0.0009   | -0.0737389 | 0.11152  | -0.20113 | 1.19E-05 |
| 1.67E-16 | 0.082847 | 0.07368  | -0.01796 | 0.69869  | 0.15884223 | 0.00057  | 0.269594 | 3.21E-09 |
| 0.6576   | 0.026671 | 0.56534  | -0.04527 | 0.329    | 0.02200551 | 0.63527  | 0.023884 | 0.60667  |
| 0.42172  | 0.161914 | 0.00044  | 0.276453 | 1.22E-09 | -0.0082973 | 0.85807  | -0.1119  | 0.01555  |
| 0.128    | 0.05504  | 0.23518  | -0.13954 | 0.00251  | -0.0734749 | 0.11281  | -0.00905 | 0.84531  |
| 0.02668  | -0.05547 | 0.23157  | -0.05967 | 0.19806  | 0.07474608 | 0.1067   | 0.124054 | 0.00727  |
| 0.15491  | 0.180639 | 8.65E-05 | 0.100194 | 0.0304   | 0.00321146 | 0.94482  | -0.00723 | 0.87624  |
| 0.01595  | 0.042273 | 0.36204  | -0.18267 | 7.18E-05 | -0.1448107 | 0.0017   | -0.04065 | 0.38076  |
| 0.04129  | -0.11818 | 0.01059  | -0.01685 | 0.71643  | 0.14182175 | 0.00213  | 0.150852 | 0.00108  |
| 0.04825  | -0.02523 | 0.58649  | -0.07028 | 0.12939  | 0.10227509 | 0.0271   | 0.178422 | 0.00011  |
| 0.79596  | 0.124884 | 0.00689  | 0.213771 | 3.14E-06 | 0.19002766 | 3.58E-05 | 0.18811  | 4.30E-05 |
| 0.60289  | 0.117473 | 0.01107  | 0.070948 | 0.12576  | 0.00284316 | 0.95114  | 0.031691 | 0.49449  |
| 0.69076  | 0.221912 | 1.28E-06 | 0.221415 | 1.35E-06 | 0.15420606 | 0.00083  | 0.199046 | 1.47E-05 |
| 0.70258  | 0.089085 | 0.05438  | -0.0249  | 0.59146  | -0.1255187 | 0.00661  | -0.0939  | 0.04253  |
| 0.26426  | 0.221662 | 1.31E-06 | 0.090795 | 0.04989  | -0.0011071 | 0.98096  | 0.017085 | 0.7127   |
| 1.02E-07 | -0.06467 | 0.16295  | 0.048318 | 0.29743  | 0.34107707 | 3.47E-14 | 0.307195 | 1.16E-11 |
| 0.78024  | 0.171358 | 0.0002   | 0.168667 | 0.00025  | 0.13098336 | 0.00458  | 0.089661 | 0.05283  |
| 0.31357  | 0.197535 | 1.71E-05 | 0.05838  | 0.20792  | -0.0562101 | 0.22535  | -0.03532 | 0.44637  |
| 0.35822  | -0.07577 | 0.10199  | -0.05943 | 0.19984  | -0.0803183 | 0.08295  | -0.10152 | 0.02826  |
| 2.05E-07 | -0.00384 | 0.93404  | -0.05437 | 0.2409   | 0.15460819 | 0.0008   | 0.178952 | 0.0001   |
| 0.35027  | 0.244946 | 8.28E-08 | 0.153637 | 0.00087  | 0.09520586 | 0.03973  | 0.126537 | 0.00618  |
| 4.86E-14 | 0.161962 | 0.00044  | 0.137008 | 0.00301  | 0.11464966 | 0.01317  | 0.107373 | 0.02029  |
| 0.50324  | -0.12855 | 0.0054   | -0.11423 | 0.01351  | 0.02823452 | 0.54276  | 0.019329 | 0.67695  |
| 6.41E-09 | 0.005249 | 0.90994  | -0.01207 | 0.79479  | 0.01292356 | 0.7806   | 0.010393 | 0.82275  |
| 1.97E-09 | 0.010824 | 0.81553  | 0.023338 | 0.61492  | 0.03670379 | 0.42876  | 0.03964  | 0.39274  |
| 0.46062  | 0.041342 | 0.37272  | 0.051121 | 0.27025  | 0.02989659 | 0.51926  | 0.025394 | 0.58411  |
| 0.44128  | 0.068464 | 0.1396   | -0.04737 | 0.30705  | -0.0215322 | 0.64256  | -0.00103 | 0.98229  |
| 0.00344  | 0.046798 | 0.3129   | -0.02238 | 0.6295   | -0.0528143 | 0.25468  | -0.01593 | 0.73131  |
| 0.27479  | 0.073546 | 0.11246  | -0.02448 | 0.59775  | 0.04633414 | 0.31773  | 0.086979 | 0.06036  |
| 0.33514  | 0.071578 | 0.12243  | -0.01465 | 0.75216  | -0.0125757 | 0.78636  | 0.029521 | 0.52453  |
| 0.8311   | 0.050798 | 0.27329  | 0.012364 | 0.78987  | -0.029032  | 0.53142  | 0.02433  | 0.59997  |

|          |          |          |          |          |            |          |          |          |
|----------|----------|----------|----------|----------|------------|----------|----------|----------|
| 0.01514  | -0.03925 | 0.39738  | -0.10385 | 0.02481  | -0.1124919 | 0.01501  | -0.04514 | 0.33042  |
| 0.13348  | -0.16    | 0.00052  | -0.08146 | 0.07864  | 0.03965831 | 0.39252  | -0.15751 | 0.00064  |
| 0.23328  | 0.005117 | 0.91218  | -0.07911 | 0.08771  | -0.0404614 | 0.38299  | 0.025065 | 0.58899  |
| 0.82785  | 0.057875 | 0.21189  | 0.084739 | 0.06731  | 0.26007369 | 1.17E-08 | 0.258755 | 1.40E-08 |
| 0.80137  | 0.111828 | 0.01562  | 0.021124 | 0.64889  | -0.0167462 | 0.71814  | 0.050782 | 0.27344  |
| 0.85072  | 0.024332 | 0.59994  | 0.018614 | 0.68827  | 0.02010276 | 0.66479  | 0.032486 | 0.48373  |
| 0.30882  | 0.069221 | 0.13526  | -0.02636 | 0.56994  | -0.0274369 | 0.55423  | -0.0351  | 0.44926  |
| 0.80657  | 0.000558 | 0.9904   | 0.00737  | 0.87379  | 0.01694342 | 0.71497  | 0.031781 | 0.49326  |
| 0.22628  | -0.01974 | 0.67043  | -0.218   | 1.98E-06 | -0.1646244 | 0.00035  | -0.11119 | 0.01623  |
| 0.00151  | -0.05307 | 0.2524   | -0.16997 | 0.00022  | -0.0990388 | 0.03237  | -0.08149 | 0.07855  |
| 0.22444  | 0.077979 | 0.09234  | 0.035754 | 0.44081  | -0.0299446 | 0.51859  | -0.18322 | 6.82E-05 |
| 3.50E-05 | -0.04544 | 0.32716  | -0.01343 | 0.77219  | 0.07522801 | 0.10445  | 0.18638  | 5.07E-05 |
| 0.01413  | 0.140775 | 0.00229  | 0.08403  | 0.06964  | -0.115488  | 0.01251  | -0.1677  | 0.00027  |
| 0.17292  | 0.349762 | 6.95E-15 | 0.197168 | 1.77E-05 | 0.04556835 | 0.3258   | 0.110786 | 0.01662  |
| 0.50407  | 0.004626 | 0.92058  | -0.01189 | 0.79783  | 0.02715958 | 0.55824  | 0.066271 | 0.15276  |
| 3.53E-06 | -0.02635 | 0.57004  | 0.236367 | 2.37E-07 | 0.38202722 | 1.12E-17 | 0.297871 | 5.05E-11 |
| 0.99471  | 0.152326 | 0.00096  | 0.025693 | 0.57969  | 0.00026248 | 0.99549  | -0.01905 | 0.68137  |
| 0.07937  | 0.053146 | 0.2517   | 0.005776 | 0.90092  | -0.0024734 | 0.95749  | -0.05113 | 0.27018  |
| 0.4967   | -0.06267 | 0.1764   | -0.03252 | 0.48325  | 0.01510674 | 0.74472  | 0.038979 | 0.40068  |
| 0.12561  | 0.322748 | 8.80E-13 | 0.499611 | 7.42E-31 | 0.58160794 | 1.29E-43 | 0.335673 | 9.21E-14 |
| 2.23E-06 | -0.00639 | 0.89054  | 0.136148 | 0.0032   | 0.27519389 | 1.46E-09 | 0.165426 | 0.00033  |
| 0.07772  | -0.0013  | 0.97761  | -0.04878 | 0.29285  | -0.072141  | 0.11951  | -0.09477 | 0.04064  |
| 0.52797  | 0.079132 | 0.08761  | 0.040604 | 0.38132  | -0.1270389 | 0.00598  | -0.12343 | 0.00758  |
| 0.57055  | 0.012443 | 0.78856  | -0.11562 | 0.01241  | -0.131286  | 0.00449  | -0.04387 | 0.34419  |
| 0.26227  | -0.12692 | 0.00602  | -0.01219 | 0.79282  | 0.13064684 | 0.00469  | 0.081773 | 0.07751  |
| 0.01549  | -0.00439 | 0.92461  | -0.08412 | 0.06934  | -0.0750159 | 0.10544  | -0.06571 | 0.15625  |
| 0.93693  | 0.080508 | 0.08222  | 0.071146 | 0.12471  | 0.14041646 | 0.00236  | 0.216627 | 2.30E-06 |
| 3.25E-05 | 0.074417 | 0.10825  | 0.1549   | 0.00078  | 0.22250853 | 1.19E-06 | 0.261595 | 9.57E-09 |
| 0.09882  | 0.045129 | 0.33049  | -0.0098  | 0.83272  | -0.0218739 | 0.63729  | 0.018528 | 0.68963  |
| 0.00704  | -0.02051 | 0.65845  | 0.07644  | 0.09897  | -0.153149  | 0.0009   | -0.27001 | 3.03E-09 |
| 0.19796  | 0.198355 | 1.57E-05 | 0.103539 | 0.02525  | 0.19644884 | 1.91E-05 | 0.286413 | 2.87E-10 |
| 4.23E-18 | 0.113403 | 0.01421  | 0.108228 | 0.01931  | 0.33058988 | 2.27E-13 | 0.355569 | 2.31E-15 |
| 0.93853  | 0.26669  | 4.80E-09 | 0.162147 | 0.00043  | 0.02803594 | 0.54561  | 0.047453 | 0.30617  |
| 0.15763  | 0.319773 | 1.46E-12 | 0.183668 | 6.54E-05 | 0.11825027 | 0.01054  | 0.106486 | 0.02136  |
| 0.00822  | 0.103165 | 0.02579  | -0.08659 | 0.06151  | -0.0092209 | 0.84247  | -0.08101 | 0.08031  |
| 0.00055  | -0.03826 | 0.40946  | -0.07791 | 0.09263  | -0.0293572 | 0.52683  | 0.080161 | 0.08355  |
| 4.90E-06 | 0.05061  | 0.27507  | 0.305422 | 1.54E-11 | 0.26841151 | 3.78E-09 | 0.218581 | 1.85E-06 |
| 0.14805  | 0.12893  | 0.00526  | 0.103066 | 0.02593  | 0.33479756 | 1.08E-13 | 0.212329 | 3.67E-06 |
| 0.74481  | 0.121482 | 0.00859  | 0.178357 | 0.00011  | 0.24014245 | 1.50E-07 | 0.129497 | 0.00507  |
| 0.00619  | -0.21413 | 3.02E-06 | -0.29515 | 7.68E-11 | -0.2023015 | 1.05E-05 | -0.18997 | 3.60E-05 |
| 0.04406  | 0.024978 | 0.5903   | 0.173264 | 0.00017  | 0.21469956 | 2.84E-06 | 0.214447 | 2.92E-06 |
| 4.15E-06 | -0.18849 | 4.15E-05 | -0.11683 | 0.01152  | -0.0628039 | 0.17545  | -0.09979 | 0.03109  |
| 0.08385  | -0.03919 | 0.39812  | -0.11813 | 0.01062  | -0.0553742 | 0.23234  | -0.01956 | 0.6733   |
| 0.13667  | 0.186042 | 5.23E-05 | 0.375079 | 4.77E-17 | 0.34474867 | 1.77E-14 | 0.298402 | 4.65E-11 |
| 0.86143  | -0.00078 | 0.98656  | -0.01447 | 0.75518  | -0.0382876 | 0.40909  | -0.03635 | 0.43318  |

|          |          |          |          |          |            |          |          |          |
|----------|----------|----------|----------|----------|------------|----------|----------|----------|
| 0.16344  | 0.122268 | 0.00817  | 0.056368 | 0.22405  | 0.12132348 | 0.00868  | 0.087031 | 0.0602   |
| 0.01111  | 0.276178 | 1.27E-09 | 0.141257 | 0.00222  | 0.01649809 | 0.72214  | 0.000307 | 0.99473  |
| 0.00103  | -0.13636 | 0.00315  | -0.07925 | 0.08713  | 0.26819226 | 3.90E-09 | 0.068256 | 0.14081  |
| 0.26597  | -0.05392 | 0.24485  | -0.14816 | 0.00132  | 0.03506791 | 0.44963  | -0.01592 | 0.73151  |
| 0.00033  | 0.193836 | 2.47E-05 | 0.036096 | 0.43645  | -0.0989777 | 0.03248  | -0.11958 | 0.0097   |
| 1.07E-07 | -0.03129 | 0.50003  | -0.01744 | 0.70703  | 0.02416057 | 0.60251  | 0.036632 | 0.42967  |
| 0.19245  | 0.061409 | 0.18525  | 0.073864 | 0.11091  | 0.07344104 | 0.11297  | 0.010674 | 0.81805  |
| 0.55106  | 0.109197 | 0.01825  | 0.066013 | 0.15437  | 0.06403024 | 0.16715  | 0.059712 | 0.19772  |
| 0.51465  | 0.042731 | 0.35686  | -0.07302 | 0.11507  | -0.0302221 | 0.51472  | 0.036009 | 0.43756  |
| 0.33135  | 0.100391 | 0.03007  | 0.058452 | 0.20736  | 0.0215328  | 0.64255  | 0.045823 | 0.3231   |
| 0.78181  | 0.075333 | 0.10397  | 0.035136 | 0.44875  | 0.02446708 | 0.59792  | 0.03388  | 0.46515  |
| 0.19346  | 0.209546 | 4.95E-06 | 0.275753 | 1.35E-09 | -0.0146518 | 0.75216  | -0.02967 | 0.52238  |
| 0.6899   | -0.07688 | 0.09704  | -0.04645 | 0.31648  | 0.11716247 | 0.01128  | 0.173067 | 0.00017  |
| 0.91902  | 0.057757 | 0.21283  | 0.122612 | 0.00799  | 0.0727655  | 0.11634  | 0.011555 | 0.80333  |
| 0.00435  | -0.00115 | 0.98019  | 0.112316 | 0.01517  | 0.31792924 | 1.99E-12 | 0.354968 | 2.59E-15 |
| 0.00186  | -0.07834 | 0.09082  | 0.248708 | 5.15E-08 | 0.16088597 | 0.00048  | -0.0492  | 0.28871  |
| 0.02645  | 0.133643 | 0.00381  | 0.098964 | 0.0325   | 0.0903756  | 0.05096  | 0.119284 | 0.00988  |
| 0.0001   | 0.099123 | 0.03222  | 0.061164 | 0.18702  | 0.00109793 | 0.98112  | 0.067528 | 0.1451   |
| 8.79E-09 | 0.202579 | 1.02E-05 | 0.089697 | 0.05274  | 0.12165724 | 0.00849  | 0.10925  | 0.01819  |
| 0.06047  | 0.198947 | 1.48E-05 | 0.034272 | 0.45999  | 0.01329259 | 0.7745   | 0.01139  | 0.80608  |
| 0.1398   | 0.032277 | 0.48654  | 0.05095  | 0.27185  | 0.16131107 | 0.00047  | 0.226088 | 7.94E-07 |
| 0.06702  | -0.01053 | 0.82042  | 0.015059 | 0.74551  | 0.02040963 | 0.66     | 0.065224 | 0.15936  |
| 0.01204  | 0.002239 | 0.96151  | 0.080029 | 0.08406  | 0.11580485 | 0.01227  | 0.104724 | 0.02362  |
| 0.87154  | -0.02821 | 0.54307  | -0.39426 | 8.11E-19 | -0.417839  | 3.70E-21 | -0.3517  | 4.82E-15 |
| 2.38E-06 | 0.021541 | 0.64242  | 0.18142  | 8.05E-05 | 0.10895715 | 0.01851  | -0.06026 | 0.19364  |
| 0.2434   | 0.237044 | 2.18E-07 | 0.038854 | 0.40219  | 0.01497677 | 0.74685  | 0.07371  | 0.11166  |
| 0.0299   | -0.29899 | 4.24E-11 | -0.17163 | 0.00019  | 0.24179049 | 1.22E-07 | 0.183058 | 6.92E-05 |
| 0.64385  | -0.0431  | 0.35267  | -0.08632 | 0.06234  | -0.0292193 | 0.52878  | 0.022136 | 0.63326  |
| 0.00018  | 0.116205 | 0.01197  | 0.082675 | 0.07428  | 0.16900487 | 0.00024  | 0.251964 | 3.40E-08 |
| 0.00979  | 0.301436 | 2.89E-11 | 0.201425 | 1.15E-05 | 0.034965   | 0.45097  | 0.080887 | 0.08078  |
| 0.95367  | -0.08506 | 0.06627  | 0.049698 | 0.28383  | 0.15098202 | 0.00106  | 0.095285 | 0.03956  |
| 0.74338  | 0.182001 | 7.63E-05 | 0.375156 | 4.70E-17 | 0.31807256 | 1.94E-12 | 0.127145 | 0.00593  |
| 0.21155  | 0.067718 | 0.14398  | 0.501395 | 4.25E-31 | 0.32461188 | 6.39E-13 | 0.093383 | 0.04369  |
| 0.53353  | 0.29377  | 9.49E-11 | 0.40166  | 1.56E-19 | 0.29769612 | 5.19E-11 | 0.026903 | 0.56196  |
| 0.09343  | -0.00835 | 0.85716  | -0.04107 | 0.3759   | 0.0902455  | 0.0513   | 0.171926 | 0.00019  |
| 6.45E-09 | -0.02584 | 0.57753  | 0.041173 | 0.37467  | 0.11022751 | 0.01718  | 0.128222 | 0.00552  |
| 4.17E-06 | 0.188883 | 3.99E-05 | 0.227835 | 6.49E-07 | -0.0919467 | 0.04705  | -0.24158 | 1.26E-07 |
| 0.2126   | 0.139085 | 0.00259  | 0.067508 | 0.14522  | 0.04606549 | 0.32054  | 0.195934 | 2.01E-05 |
| 0.20067  | -0.02054 | 0.65798  | -0.14012 | 0.00241  | -0.1387414 | 0.00266  | -0.10624 | 0.02166  |
| 2.33E-06 | -0.04149 | 0.37096  | -0.11529 | 0.01266  | -0.0434525 | 0.34879  | 0.01512  | 0.74451  |
| 0.02997  | 0.061086 | 0.18758  | 0.016145 | 0.72785  | 0.01612349 | 0.7282   | 0.013561 | 0.77007  |
| 0.80702  | -0.18793 | 4.37E-05 | 0.000111 | 0.99809  | -0.0658603 | 0.15532  | -0.23389 | 3.19E-07 |
| 0.00366  | 0.358231 | 1.38E-15 | 0.120923 | 0.0089   | 0.16365283 | 0.00038  | 0.2443   | 8.97E-08 |
| 4.34E-13 | -0.01146 | 0.80487  | -0.00175 | 0.96999  | 0.08737372 | 0.0592   | 0.050043 | 0.28049  |
| 0.26419  | 0.109546 | 0.01788  | -0.07188 | 0.12087  | -0.1005606 | 0.02979  | -0.08202 | 0.07663  |

|          |          |          |          |          |            |          |          |          |
|----------|----------|----------|----------|----------|------------|----------|----------|----------|
| 0.01514  | 0.036532 | 0.43092  | -0.22335 | 1.09E-06 | -0.2061912 | 7.05E-06 | -0.21428 | 2.97E-06 |
| 0.02627  | 0.118087 | 0.01065  | -0.04495 | 0.33238  | 0.20671526 | 6.67E-06 | 0.226383 | 7.68E-07 |
| 0.8736   | 0.236207 | 2.42E-07 | 0.125772 | 0.0065   | 0.12455925 | 0.00704  | -0.04952 | 0.2856   |
| 0.02073  | 0.133959 | 0.00373  | 0.033532 | 0.46974  | 0.0453454  | 0.32817  | 0.13664  | 0.00309  |
| 0.00063  | 0.04714  | 0.30937  | -0.04613 | 0.31985  | -0.0847035 | 0.06742  | -0.15051 | 0.0011   |
| 0.8148   | 0.056994 | 0.21894  | -0.22447 | 9.56E-07 | -0.1718783 | 0.00019  | -0.13018 | 0.00484  |
| 0.31489  | 0.062825 | 0.1753   | -0.01794 | 0.699    | -0.1320427 | 0.00426  | -0.12784 | 0.00567  |
| 0.04942  | 0.065323 | 0.15873  | -0.16678 | 0.00029  | -0.0853949 | 0.06521  | 0.025555 | 0.58173  |
| 0.46085  | 0.105705 | 0.02234  | 0.041724 | 0.36831  | 0.04871391 | 0.29348  | 0.072319 | 0.1186   |
| 0.0266   | -0.10863 | 0.01886  | -0.16091 | 0.00048  | -0.1279846 | 0.00561  | -0.20371 | 9.12E-06 |
| 0.00012  | 0.091548 | 0.04802  | -0.10858 | 0.01892  | -0.0974294 | 0.03531  | -0.09775 | 0.03471  |
| 0.11917  | 0.026102 | 0.57367  | 0.03537  | 0.44574  | 0.05585906 | 0.22827  | 0.112708 | 0.01481  |
| 0.00651  | 0.079721 | 0.08527  | 0.004611 | 0.92084  | -0.0485493 | 0.29512  | 0.011447 | 0.80513  |
| 0.10586  | 0.177591 | 0.00011  | 0.21087  | 4.30E-06 | 0.14047185 | 0.00235  | -0.0918  | 0.0474   |
| 0.03636  | -0.20775 | 5.98E-06 | -0.16751 | 0.00028  | -0.0550208 | 0.23534  | -0.09994 | 0.03082  |
| 4.44E-07 | -0.15053 | 0.0011   | 0.043749 | 0.34551  | 0.05805916 | 0.21044  | -0.01741 | 0.70751  |
| 0.00241  | 0.138318 | 0.00274  | 0.114717 | 0.01312  | 0.11185288 | 0.01559  | 0.071233 | 0.12425  |
| 6.60E-10 | 0.083665 | 0.07086  | 0.050911 | 0.27222  | 0.15781298 | 0.00062  | 0.162969 | 0.00041  |
| 0.46148  | -0.0552  | 0.23386  | -0.06022 | 0.19394  | 0.00880739 | 0.84945  | 0.050365 | 0.2774   |
| 0.02658  | 0.04959  | 0.28488  | -0.03052 | 0.51063  | 0.05230885 | 0.25926  | 0.122377 | 0.00811  |
| 0.56086  | 0.061756 | 0.18278  | -0.0157  | 0.73505  | -0.1377309 | 0.00286  | -0.12595 | 0.00642  |
| 0.44314  | 0.027062 | 0.55966  | -0.05533 | 0.23272  | -0.012303  | 0.79088  | 0.010233 | 0.82543  |
| 0.59309  | 0.005143 | 0.91174  | 0.079826 | 0.08486  | -0.1258233 | 0.00648  | -0.20599 | 7.20E-06 |
| 0.8633   | 0.070726 | 0.12695  | 0.014527 | 0.75421  | -0.0006393 | 0.98901  | -0.02546 | 0.58312  |
| 4.35E-16 | -0.07406 | 0.10996  | 0.000371 | 0.99363  | 0.05084945 | 0.2728   | 0.065854 | 0.15536  |
| 0.78612  | 0.026108 | 0.57358  | 0.09274  | 0.04517  | 0.0018141  | 0.96881  | -0.00095 | 0.9837   |
| 0.00974  | -0.00435 | 0.92533  | -0.08507 | 0.06625  | -0.0321243 | 0.4886   | -0.03719 | 0.42261  |
| 0.42211  | -0.25107 | 3.81E-08 | -0.0112  | 0.80925  | 0.17092169 | 0.00021  | 0.086099 | 0.06302  |
| 0.82314  | 0.229978 | 5.06E-07 | 0.087595 | 0.05856  | -0.0587312 | 0.2052   | -0.12076 | 0.00899  |
| 0.43094  | 0.073547 | 0.11245  | 0.183332 | 6.75E-05 | -0.0366587 | 0.42933  | -0.0341  | 0.46219  |
| 0.00056  | 0.176391 | 0.00013  | 0.140329 | 0.00237  | -0.0032464 | 0.94422  | -0.05036 | 0.27742  |
| 0.04202  | 0.121024 | 0.00885  | 0.276262 | 1.26E-09 | 0.17102383 | 0.0002   | 0.225236 | 8.76E-07 |
| 7.15E-06 | 0.086092 | 0.06304  | 0.142761 | 0.00198  | 0.04795888 | 0.30103  | -0.02937 | 0.52667  |
| 0.10855  | 0.082268 | 0.07572  | -0.10421 | 0.02432  | -0.020031  | 0.66592  | 0.080417 | 0.08257  |
| 2.88E-06 | 0.184292 | 6.17E-05 | 0.125794 | 0.00649  | 0.11361707 | 0.01402  | 0.070604 | 0.12761  |
| 0.92754  | 0.082644 | 0.07439  | 0.059885 | 0.19642  | 0.15003188 | 0.00115  | 0.178128 | 0.00011  |
| 0.1635   | 0.021093 | 0.64935  | 0.008622 | 0.85258  | -0.0632081 | 0.17268  | -0.10297 | 0.02607  |
| 0.09236  | 0.088555 | 0.05584  | 0.068492 | 0.13943  | 0.02867491 | 0.53649  | 0.019908 | 0.66785  |
| 3.43E-06 | 0.054487 | 0.23992  | 0.016566 | 0.72104  | 0.12046249 | 0.00917  | 0.119846 | 0.00953  |
| 0.06744  | -0.10086 | 0.0293   | -0.1032  | 0.02574  | 0.20787692 | 5.90E-06 | 0.052866 | 0.25421  |
| 0.00172  | 0.11035  | 0.01705  | 0.059498 | 0.19933  | 0.02067606 | 0.65584  | -0.00922 | 0.84251  |
| 0.06548  | 0.040913 | 0.3777   | -0.02682 | 0.56323  | -0.0653302 | 0.15868  | -0.03933 | 0.39649  |
| 0.00028  | 0.043564 | 0.34755  | -0.01844 | 0.69096  | 0.01488617 | 0.74833  | 0.108015 | 0.01955  |
| 1.61E-14 | 0.021526 | 0.64266  | -0.11399 | 0.01371  | -0.0980024 | 0.03424  | -0.11782 | 0.01083  |
| 0.82244  | 0.310058 | 7.28E-12 | 0.133965 | 0.00373  | 0.06593829 | 0.15483  | 0.073273 | 0.1138   |



|          |          |          |          |          |            |          |          |          |
|----------|----------|----------|----------|----------|------------|----------|----------|----------|
| 0.00031  | 0.20391  | 8.93E-06 | 0.380503 | 1.55E-17 | 0.22703431 | 7.12E-07 | 0.131614 | 0.00439  |
| 0.10216  | -0.08066 | 0.08166  | -0.15893 | 0.00057  | 0.07208494 | 0.1198   | -0.08919 | 0.0541   |
| 0.53629  | 0.217524 | 2.08E-06 | 0.204036 | 8.82E-06 | 0.15997317 | 0.00052  | -0.07929 | 0.08697  |
| 0.11301  | 0.188407 | 4.18E-05 | 0.02336  | 0.61459  | -0.0065122 | 0.88838  | 0.026385 | 0.56952  |
| 4.79E-08 | 0.181081 | 8.31E-05 | 0.106809 | 0.02097  | 0.08757739 | 0.05861  | 0.056311 | 0.22453  |
| 0.47587  | 0.117278 | 0.0112   | -0.01215 | 0.79342  | 0.00218296 | 0.96248  | 0.028268 | 0.54228  |
| 0.13237  | 0.28153  | 5.89E-10 | 0.162474 | 0.00042  | 0.02599069 | 0.57531  | 0.08847  | 0.05607  |
| 0.05875  | 0.033917 | 0.46465  | -0.03836 | 0.40824  | -0.0987359 | 0.03291  | -0.14417 | 0.00179  |
| 0.63203  | 0.056133 | 0.22599  | 0.00266  | 0.95428  | 0.01345935 | 0.77175  | -0.06106 | 0.18776  |
| 0.48691  | 0.040874 | 0.37816  | 0.032307 | 0.48613  | 0.00676846 | 0.88402  | 0.005345 | 0.90829  |
| 0.00871  | -0.03256 | 0.48275  | 0.280515 | 6.83E-10 | 0.28121248 | 6.17E-10 | 0.217553 | 2.08E-06 |
| 0.83273  | 0.195635 | 2.07E-05 | 0.189538 | 3.75E-05 | 0.16457387 | 0.00036  | -0.07629 | 0.09964  |
| 0.2974   | -0.06341 | 0.17131  | 0.122952 | 0.00781  | 0.19276201 | 2.74E-05 | 0.040357 | 0.38422  |
| 0.01584  | 0.117369 | 0.01114  | 0.095288 | 0.03956  | 0.38202843 | 1.12E-17 | 0.295384 | 7.41E-11 |
| 0.1016   | -0.18959 | 3.73E-05 | 0.030566 | 0.50994  | 0.2344358  | 2.99E-07 | 0.108885 | 0.01859  |
| 0.00217  | -0.05941 | 0.19998  | 0.015617 | 0.73641  | 0.37512459 | 4.73E-17 | 0.379016 | 2.11E-17 |
| 0.68636  | -0.22156 | 1.33E-06 | 0.18027  | 8.95E-05 | 0.18059955 | 8.69E-05 | -0.01532 | 0.74126  |
| 0.02118  | 0.34658  | 1.26E-14 | 0.113233 | 0.01435  | 0.11723014 | 0.01123  | 0.081924 | 0.07696  |
| 0.11581  | -0.02753 | 0.55292  | 0.112806 | 0.01473  | 0.32486777 | 6.12E-13 | 0.202401 | 1.04E-05 |
| 0.29393  | 0.179399 | 9.69E-05 | 0.049675 | 0.28405  | 0.08844765 | 0.05613  | 0.097889 | 0.03445  |
| 0.87432  | 0.05356  | 0.24803  | -0.11962 | 0.00967  | -0.0729711 | 0.1153   | -0.0235  | 0.61242  |
| 0.40951  | 0.069056 | 0.1362   | 0.052946 | 0.25349  | -0.0393311 | 0.39644  | -0.0539  | 0.24506  |
| 0.73342  | 0.047393 | 0.30678  | 0.004468 | 0.92328  | 0.00157247 | 0.97296  | -0.01422 | 0.75915  |
| 0.62482  | -0.06389 | 0.16807  | -0.09769 | 0.03481  | -0.2284426 | 6.05E-07 | -0.23719 | 2.15E-07 |
| 0.75155  | 0.010084 | 0.82795  | 0.022817 | 0.62284  | -0.2123356 | 3.67E-06 | -0.20341 | 9.41E-06 |
| 0.72123  | 0.080776 | 0.0812   | 0.028774 | 0.53508  | -0.0327318 | 0.48042  | -0.05191 | 0.2629   |
| 0.5703   | 0.030911 | 0.50518  | -0.07827 | 0.09113  | -0.0854415 | 0.06506  | -0.0201  | 0.66491  |
| 0.62286  | 0.023842 | 0.6073   | 0.012183 | 0.79288  | -0.0533335 | 0.25003  | -0.05579 | 0.22886  |
| 0.59249  | 0.048731 | 0.29331  | -0.02145 | 0.6439   | -0.0007872 | 0.98646  | -0.00362 | 0.93777  |
| 0.18591  | 0.068254 | 0.14082  | -0.00153 | 0.97366  | 0.01498075 | 0.74678  | -0.0367  | 0.42881  |
| 0.561    | 0.067503 | 0.14525  | 0.068202 | 0.14112  | 0.0351725  | 0.44828  | 0.0486   | 0.29461  |
| 0.01893  | -0.00752 | 0.87117  | -0.01524 | 0.74263  | -0.2607983 | 1.06E-08 | -0.24053 | 1.43E-07 |
| 0.0241   | 0.334848 | 1.07E-13 | 0.215478 | 2.61E-06 | 0.05929643 | 0.20086  | -0.03764 | 0.41704  |
| 0.22006  | -0.07502 | 0.10542  | -0.0814  | 0.07889  | -0.0224873 | 0.62788  | -0.12231 | 0.00815  |
| 0.52231  | 0.116814 | 0.01153  | 0.036539 | 0.43084  | 0.01964076 | 0.67204  | 0.023595 | 0.61104  |
| 0.11827  | -0.05819 | 0.20938  | -0.0034  | 0.94162  | 0.08974517 | 0.05261  | 0.025492 | 0.58267  |
| 0.14041  | 0.059025 | 0.20294  | 0.03591  | 0.43881  | -0.0224575 | 0.62834  | -0.04754 | 0.30532  |
| 1.60E-07 | 0.163875 | 0.00038  | 0.054541 | 0.23945  | 0.06857722 | 0.13894  | 0.091767 | 0.04748  |
| 0.03289  | 0.120409 | 0.0092   | 0.029214 | 0.52886  | 0.13876413 | 0.00265  | 0.206515 | 6.81E-06 |
| 0.00135  | -0.08529 | 0.06556  | -0.29679 | 5.97E-11 | -0.018673  | 0.68733  | 0.037465 | 0.41924  |
| 0.16521  | 0.200529 | 1.26E-05 | 0.097156 | 0.03582  | 0.27202883 | 2.29E-09 | 0.352792 | 3.92E-15 |
| 0.98821  | 0.172418 | 0.00018  | 0.022074 | 0.63422  | 0.02710967 | 0.55896  | 0.076452 | 0.09892  |
| 0.01578  | 0.166774 | 0.00029  | 0.152276 | 0.00096  | 0.12352422 | 0.00753  | 0.117061 | 0.01135  |
| 0.65222  | 0.031192 | 0.50132  | 0.058023 | 0.21073  | 0.06801551 | 0.14222  | 0.003169 | 0.94554  |
| 0.20067  | -0.02143 | 0.6442   | -0.10846 | 0.01906  | -0.0201237 | 0.66447  | -0.11968 | 0.00963  |

|          |          |          |          |          |            |          |          |          |
|----------|----------|----------|----------|----------|------------|----------|----------|----------|
| 7.74E-07 | -0.03029 | 0.51383  | -0.02666 | 0.56549  | -0.1215583 | 0.00855  | -0.15481 | 0.00079  |
| 0.04756  | -0.16757 | 0.00028  | -0.08211 | 0.0763   | -0.0595278 | 0.19911  | -0.09434 | 0.04158  |
| 0.64264  | 0.003124 | 0.94632  | -0.05726 | 0.21681  | 0.00277789 | 0.95226  | 0.015901 | 0.7318   |
| 0.67077  | 0.009448 | 0.83863  | 0.018251 | 0.69403  | 0.06252057 | 0.17741  | 0.079542 | 0.08597  |
| 0.43882  | 0.219609 | 1.65E-06 | 0.072489 | 0.11773  | 0.00206545 | 0.96449  | 0.075881 | 0.10147  |
| 0.2977   | 0.156071 | 0.00071  | 0.151227 | 0.00104  | 0.25979505 | 1.22E-08 | 0.245392 | 7.83E-08 |
| 0.19212  | 0.147126 | 0.00143  | 0.08296  | 0.07328  | 0.00638054 | 0.89062  | -0.00792 | 0.86443  |
| 0.31623  | -0.2662  | 5.12E-09 | -0.14991 | 0.00116  | -0.0220275 | 0.63493  | 0.003223 | 0.94462  |
| 0.00334  | -0.01719 | 0.71093  | 0.216618 | 2.30E-06 | 0.12526885 | 0.00672  | 0.066897 | 0.14891  |
| 0.24012  | 0.022634 | 0.62564  | 0.027525 | 0.55296  | 0.09762597 | 0.03494  | 0.146204 | 0.00153  |
| 0.95459  | 0.041196 | 0.37441  | 0.02012  | 0.66452  | 0.09427531 | 0.04171  | 0.047562 | 0.30506  |
| 0.21532  | 0.090133 | 0.05159  | 0.001193 | 0.97949  | 0.07790328 | 0.09266  | 0.141971 | 0.0021   |
| 0.70952  | -0.08856 | 0.05583  | 0.129429 | 0.00509  | 0.28048703 | 6.85E-10 | 0.126173 | 0.00633  |
| 0.02517  | 0.099611 | 0.03138  | 0.003542 | 0.93915  | -0.027647  | 0.55119  | 0.04168  | 0.36882  |
| 0.20639  | 0.100553 | 0.02981  | 0.036274 | 0.43419  | 0.03721531 | 0.42235  | 0.102394 | 0.02692  |
| 6.26E-05 | 0.318079 | 1.94E-12 | 0.137886 | 0.00283  | 0.09617988 | 0.03774  | 0.170935 | 0.00021  |
| 0.49963  | 0.084116 | 0.06935  | 0.029226 | 0.52867  | 0.03395069 | 0.46421  | 0.022036 | 0.63479  |
| 0.58073  | 0.134431 | 0.00361  | -0.04435 | 0.33892  | 0.01171251 | 0.8007   | 0.111703 | 0.01573  |
| 0.02682  | -0.15677 | 0.00067  | -0.04957 | 0.28504  | 0.07774926 | 0.09331  | -0.11842 | 0.01043  |
| 0.46542  | 0.100475 | 0.02993  | -0.06392 | 0.1679   | 0.15593719 | 0.00072  | 0.233812 | 3.22E-07 |
| 0.14663  | -0.08008 | 0.08386  | -0.09543 | 0.03926  | -0.0335046 | 0.47011  | -0.00545 | 0.90656  |
| 0.5093   | -0.01909 | 0.6808   | -0.08161 | 0.07812  | -0.1545613 | 0.0008   | -0.25115 | 3.77E-08 |
| 0.01339  | 0.197204 | 1.77E-05 | 0.171635 | 0.00019  | 0.04068008 | 0.38043  | 0.107938 | 0.01964  |
| 0.53687  | 0.195485 | 2.10E-05 | 0.038875 | 0.40194  | 0.08693644 | 0.06049  | 0.057512 | 0.21477  |
| 0.08807  | 0.127941 | 0.00563  | 0.004708 | 0.91919  | 0.06450925 | 0.16399  | 0.179117 | 9.95E-05 |
| 0.1902   | 0.092112 | 0.04665  | 0.049379 | 0.28693  | 0.09573268 | 0.03864  | 0.10908  | 0.01838  |
| 0.61061  | 0.046925 | 0.31158  | 0.090668 | 0.05021  | 0.17267445 | 0.00018  | 0.193899 | 2.45E-05 |
| 0.08582  | 0.022094 | 0.63391  | 0.036804 | 0.4275   | 0.24611584 | 7.15E-08 | 0.261856 | 9.24E-09 |
| 0.01186  | -0.17264 | 0.00018  | -0.1619  | 0.00044  | -0.1390434 | 0.0026   | -0.12601 | 0.0064   |
| 1.06E-17 | -0.29705 | 5.74E-11 | -0.18143 | 8.05E-05 | -0.1174677 | 0.01107  | -0.18834 | 4.21E-05 |
| 0.30498  | 0.078774 | 0.08906  | 0.152227 | 0.00097  | 0.45547884 | 2.68E-25 | 0.231752 | 4.11E-07 |
| 0.03477  | 0.160281 | 0.00051  | 0.159262 | 0.00055  | 0.27589955 | 1.32E-09 | 0.307188 | 1.16E-11 |
| 0.96419  | 0.075946 | 0.10117  | -0.0082  | 0.85972  | 0.0490447  | 0.29021  | 0.112834 | 0.0147   |
| 0.08862  | 0.166575 | 0.0003   | 0.170749 | 0.00021  | -0.004943  | 0.91516  | -0.06171 | 0.18311  |
| 0.19375  | 0.025035 | 0.58945  | -0.10073 | 0.02953  | -0.1290878 | 0.00521  | -0.18748 | 4.56E-05 |
| 0.9945   | -0.04494 | 0.3325   | -0.23937 | 1.65E-07 | -0.325514  | 5.48E-13 | -0.35233 | 4.28E-15 |
| 0.74138  | 0.053294 | 0.25038  | -0.0396  | 0.39325  | -0.0082324 | 0.85917  | 0.040142 | 0.38677  |
| 0.15298  | 0.067792 | 0.14354  | 0.025546 | 0.58186  | 0.10674544 | 0.02104  | 0.166217 | 0.00031  |
| 0.66755  | 0.053514 | 0.24843  | -0.11792 | 0.01076  | -0.094697  | 0.0408   | -0.01461 | 0.75281  |
| 0.85209  | 0.030317 | 0.5134   | -0.08587 | 0.06372  | -0.0447436 | 0.33464  | 0.047473 | 0.30597  |
| 0.33734  | 0.117324 | 0.01117  | -0.06084 | 0.18938  | -0.1839757 | 6.35E-05 | -0.20072 | 1.24E-05 |
| 0.10879  | 0.25718  | 1.72E-08 | 0.06934  | 0.13459  | -0.1273876 | 0.00584  | -0.05424 | 0.24206  |
| 0.01291  | 0.228672 | 5.89E-07 | 0.047022 | 0.31058  | 0.14306657 | 0.00194  | 0.186836 | 4.85E-05 |
| 0.66444  | 0.045749 | 0.32388  | 0.06159  | 0.18396  | 0.02650005 | 0.56784  | 0.005202 | 0.91074  |
| 0.48982  | -0.07336 | 0.11335  | -0.09718 | 0.03579  | -0.0857225 | 0.06418  | 0.001696 | 0.97084  |

|          |          |          |          |          |            |          |          |          |
|----------|----------|----------|----------|----------|------------|----------|----------|----------|
| 0.33411  | -0.04896 | 0.29109  | 0.010698 | 0.81765  | 0.04329353 | 0.35056  | 0.088704 | 0.05542  |
| 4.87E-10 | 0.110384 | 0.01702  | 0.128235 | 0.00552  | 0.22170806 | 1.31E-06 | 0.312133 | 5.19E-12 |
| 0.00742  | -0.09428 | 0.04169  | -0.04916 | 0.28904  | -0.2079672 | 5.85E-06 | -0.26904 | 3.47E-09 |
| 6.19E-10 | 0.138891 | 0.00263  | -0.11361 | 0.01403  | 0.02510082 | 0.58846  | 0.142577 | 0.00201  |
| 1.17E-06 | 0.372494 | 8.10E-17 | 0.429974 | 1.95E-22 | 0.22194197 | 1.27E-06 | 0.206667 | 6.70E-06 |
| 0.00097  | 0.275868 | 1.33E-09 | 0.399116 | 2.77E-19 | 0.21498673 | 2.75E-06 | 0.205512 | 7.57E-06 |
| 0.84556  | 0.045393 | 0.32766  | 0.059599 | 0.19857  | 0.00524438 | 0.91001  | 0.004126 | 0.92913  |
| 0.28834  | 0.006156 | 0.89444  | 0.01703  | 0.71357  | 0.0498228  | 0.28262  | -0.03034 | 0.5131   |
| 0.46171  | 0.029179 | 0.52934  | -0.02274 | 0.62405  | -0.0220344 | 0.63482  | 0.021422 | 0.64426  |
| 0.00223  | 0.127399 | 0.00583  | 0.026758 | 0.56407  | -0.11521   | 0.01273  | -0.1407  | 0.00231  |
| 0.74071  | 0.027499 | 0.55333  | 0.024399 | 0.59894  | -0.0481506 | 0.2991   | -0.10081 | 0.02939  |
| 0.56228  | -0.01602 | 0.72981  | -0.03138 | 0.4988   | -0.033935  | 0.46442  | 0.074309 | 0.10877  |
| 0.14368  | -0.04959 | 0.28485  | -0.0771  | 0.09609  | 0.0293861  | 0.52642  | -0.01694 | 0.71501  |
| 0.01136  | -0.2004  | 1.28E-05 | -0.1033  | 0.02559  | 0.040139   | 0.3868   | 0.067435 | 0.14566  |
| 0.92412  | 0.046788 | 0.313    | -0.22152 | 1.34E-06 | -0.1826284 | 7.20E-05 | -0.07758 | 0.094    |
| 0.90344  | -0.01714 | 0.71183  | -0.02051 | 0.6584   | -0.0088295 | 0.84907  | -0.01305 | 0.77851  |
| 0.41111  | -0.18675 | 4.89E-05 | -0.1521  | 0.00098  | -0.0535331 | 0.24826  | -0.07899 | 0.08818  |
| 0.04592  | 0.073671 | 0.11185  | 0.06833  | 0.14037  | -0.0055659 | 0.90452  | -0.03004 | 0.51732  |
| 0.92897  | 0.056065 | 0.22656  | 0.009629 | 0.8356   | 0.16854688 | 0.00025  | 0.255441 | 2.16E-08 |
| 0.11259  | -0.05092 | 0.27214  | 0.181637 | 7.89E-05 | 0.35306604 | 3.72E-15 | 0.171481 | 0.0002   |
| 0.1365   | -0.06698 | 0.14842  | 0.048517 | 0.29544  | 0.19499443 | 2.20E-05 | 0.15579  | 0.00073  |
| 0.80061  | -0.29244 | 1.16E-10 | -0.0862  | 0.0627   | 0.06278728 | 0.17556  | 0.047115 | 0.30963  |
| 0.12479  | 0.034784 | 0.45331  | -0.02014 | 0.66416  | -0.0594891 | 0.1994   | -0.03423 | 0.46057  |
| 0.96739  | -0.29899 | 4.24E-11 | -0.23128 | 4.34E-07 | 0.02246266 | 0.62826  | -0.01921 | 0.67883  |
| 0.04211  | 0.206555 | 6.78E-06 | 0.048079 | 0.29982  | 0.2662902  | 5.06E-09 | 0.145153 | 0.00166  |
| 0.02986  | 0.173863 | 0.00016  | 0.138745 | 0.00266  | 0.02100218 | 0.65077  | -0.0131  | 0.77767  |
| 0.00036  | -0.02273 | 0.62421  | 0.056948 | 0.21931  | 0.20384213 | 9.00E-06 | 0.180911 | 8.44E-05 |
| 0.98914  | 0.033058 | 0.47606  | 0.13361  | 0.00382  | 0.30454846 | 1.77E-11 | 0.338338 | 5.70E-14 |
| 0.00277  | 0.187797 | 4.43E-05 | -0.00264 | 0.95456  | -0.0566571 | 0.22168  | 0.04181  | 0.36733  |
| 0.23248  | 0.02831  | 0.54168  | 0.090407 | 0.05088  | 0.28142125 | 5.99E-10 | 0.231982 | 4.00E-07 |
| 5.49E-17 | 0.128451 | 0.00544  | 0.114574 | 0.01323  | 0.22225417 | 1.23E-06 | 0.122355 | 0.00812  |
| 0.04369  | 0.028025 | 0.54576  | 0.054414 | 0.24055  | -0.0890826 | 0.05438  | -0.17908 | 9.98E-05 |
| 0.31995  | 0.141468 | 0.00218  | 0.10029  | 0.03024  | -0.0187978 | 0.68535  | 0.006723 | 0.88479  |
| 0.00585  | 0.057981 | 0.21105  | 0.10902  | 0.01844  | 0.33388178 | 1.27E-13 | 0.341938 | 2.97E-14 |
| 0.10515  | -0.29374 | 9.53E-11 | -0.18095 | 8.41E-05 | 0.11658339 | 0.01169  | 0.185715 | 5.40E-05 |
| 0.1025   | 0.03577  | 0.4406   | 0.028693 | 0.53623  | -0.0169145 | 0.71543  | -0.05858 | 0.20638  |
| 0.64997  | 0.038869 | 0.40201  | -0.01678 | 0.71752  | -0.0501042 | 0.2799   | -0.05298 | 0.25318  |
| 0.89247  | 0.220998 | 1.42E-06 | 0.090391 | 0.05092  | -0.0481178 | 0.29943  | -0.09501 | 0.04015  |
| 0.03971  | 0.242721 | 1.09E-07 | 0.123782 | 0.0074   | 0.00872649 | 0.85081  | -0.03803 | 0.41222  |
| 0.98039  | -0.27029 | 2.92E-09 | -0.14477 | 0.00171  | -0.0838776 | 0.07015  | -0.03474 | 0.45395  |
| 0.34551  | 0.111143 | 0.01627  | -0.01623 | 0.72652  | -0.1448283 | 0.0017   | -0.13236 | 0.00417  |
| 0.34542  | 0.004093 | 0.9297   | -0.02017 | 0.6637   | -0.0048643 | 0.9165   | 0.00576  | 0.9012   |
| 0.01277  | -0.01386 | 0.76519  | 0.013686 | 0.76801  | -0.0211918 | 0.64783  | -0.02137 | 0.64513  |
| 0.26987  | 0.118159 | 0.0106   | -0.07876 | 0.08909  | -0.1825673 | 7.24E-05 | -0.2203  | 1.53E-06 |
| 0.00113  | -0.09704 | 0.03605  | 0.194714 | 2.26E-05 | 0.22857728 | 5.96E-07 | 0.203053 | 9.76E-06 |

|          |          |          |          |          |            |          |          |          |
|----------|----------|----------|----------|----------|------------|----------|----------|----------|
| 0.45697  | 0.227301 | 6.91E-07 | 0.031086 | 0.50277  | 0.1047419  | 0.0236   | 0.191425 | 3.12E-05 |
| 0.70454  | -0.09848 | 0.03337  | 0.042574 | 0.35863  | 0.20693475 | 6.52E-06 | 0.12708  | 0.00596  |
| 0.07755  | 0.069453 | 0.13396  | 0.050515 | 0.27597  | 0.01708723 | 0.71265  | 0.130656 | 0.00468  |
| 0.00469  | -0.19596 | 2.00E-05 | -0.09815 | 0.03396  | 0.12902715 | 0.00523  | 0.026168 | 0.57271  |
| 0.88439  | 0.178725 | 0.0001   | 0.104157 | 0.02439  | 0.12427241 | 0.00717  | -0.03395 | 0.46425  |
| 0.18235  | -0.05538 | 0.23228  | 0.025885 | 0.57687  | 0.12254919 | 0.00802  | 0.182012 | 7.63E-05 |
| 0.10737  | 0.065192 | 0.15957  | 0.042445 | 0.36009  | -0.0894986 | 0.05326  | -0.09908 | 0.03231  |
| 0.0004   | 0.243635 | 9.74E-08 | 0.158992 | 0.00056  | 0.17534876 | 0.00014  | 0.190844 | 3.31E-05 |
| 1.86E-15 | -0.21558 | 2.58E-06 | -0.19374 | 2.49E-05 | -0.0977037 | 0.03479  | -0.17374 | 0.00016  |
| 0.9306   | 0.144401 | 0.00176  | 0.089998 | 0.05194  | 0.10020204 | 0.03039  | 0.145564 | 0.00161  |
| 0.00857  | -0.03186 | 0.49215  | 0.132615 | 0.00409  | 0.14209057 | 0.00208  | -0.03846 | 0.40697  |
| 0.76408  | -0.00135 | 0.97677  | 0.336115 | 8.51E-14 | 0.23407486 | 3.12E-07 | -0.03845 | 0.40715  |
| 0.70467  | -0.05534 | 0.2326   | -0.10717 | 0.02054  | -0.0540819 | 0.24344  | -0.04481 | 0.33394  |
| 0.6038   | 0.03504  | 0.45     | -0.02324 | 0.61635  | 0.02412542 | 0.60304  | 0.078919 | 0.08847  |
| 0.01302  | -0.01971 | 0.67102  | -0.07608 | 0.10055  | -0.0300261 | 0.51745  | -0.02026 | 0.66226  |
| 1.69E-10 | -0.10819 | 0.01936  | -0.09215 | 0.04656  | 0.04026347 | 0.38533  | -0.00073 | 0.98737  |
| 0.02751  | 0.021647 | 0.64078  | -0.06594 | 0.1548   | 0.12425685 | 0.00718  | -0.03452 | 0.45677  |
| 0.0013   | 0.218495 | 1.87E-06 | 0.160237 | 0.00051  | 0.00662287 | 0.8865   | -0.08766 | 0.05838  |
| 0.09623  | -0.14802 | 0.00134  | -0.03877 | 0.40324  | 0.09428388 | 0.04169  | -0.09319 | 0.04412  |
| 5.48E-11 | -0.28229 | 5.27E-10 | -0.20108 | 1.19E-05 | 0.06729518 | 0.1465   | 0.141349 | 0.0022   |
| 0.26177  | 0.105725 | 0.02231  | 0.029233 | 0.52858  | -0.1051153 | 0.0231   | -0.14356 | 0.00187  |
| 0.34456  | 0.180951 | 8.41E-05 | 0.099232 | 0.03203  | 0.13734383 | 0.00294  | 0.121305 | 0.00869  |
| 0.48705  | 0.183564 | 6.60E-05 | 0.101797 | 0.02783  | -0.0463601 | 0.31745  | -0.04489 | 0.33307  |
| 0.80881  | -0.27224 | 2.22E-09 | -0.04693 | 0.31157  | 0.06511813 | 0.16004  | 0.120607 | 0.00908  |
| 0.07561  | 0.167112 | 0.00029  | 0.09596  | 0.03818  | 0.10966156 | 0.01776  | 0.170636 | 0.00021  |
| 0.2328   | -0.04709 | 0.30991  | -0.05235 | 0.25892  | -0.100231  | 0.03034  | -0.15106 | 0.00106  |
| 0.00084  | -0.00191 | 0.9672   | -0.02599 | 0.57537  | 0.04666747 | 0.31425  | 0.105484 | 0.02262  |
| 0.60533  | 0.077229 | 0.09552  | 0.190614 | 3.38E-05 | 0.13447399 | 0.0036   | 0.126717 | 0.0061   |
| 0.36732  | 0.079318 | 0.08686  | 0.108391 | 0.01913  | -0.0575371 | 0.21457  | -0.17998 | 9.19E-05 |
| 3.20E-08 | 0.128238 | 0.00552  | 0.156074 | 0.00071  | 0.04916661 | 0.28901  | -0.01374 | 0.76708  |
| 0.08711  | 0.243913 | 9.41E-08 | 0.46829  | 7.89E-27 | -0.0220247 | 0.63497  | -0.12404 | 0.00728  |
| 0.71151  | 0.049031 | 0.29034  | 0.003649 | 0.93731  | -0.0269389 | 0.56144  | -0.01389 | 0.76473  |
| 0.02883  | -0.10967 | 0.01775  | -0.10864 | 0.01885  | 0.01641956 | 0.72341  | 0.015058 | 0.74551  |
| 0.07361  | 0.063543 | 0.17041  | 0.118843 | 0.01016  | 0.11625401 | 0.01193  | -0.00496 | 0.91485  |
| 0.03233  | 0.108211 | 0.01933  | -0.00668 | 0.88555  | 0.05408927 | 0.24337  | 0.10588  | 0.02212  |
| 0.12291  | 0.001183 | 0.97966  | 0.067082 | 0.14779  | 0.00706948 | 0.8789   | -0.00446 | 0.92345  |
| 0.00693  | -0.12319 | 0.0077   | -0.01826 | 0.69386  | 0.09689461 | 0.03633  | 0.107912 | 0.01967  |
| 0.08597  | -0.25139 | 3.66E-08 | -0.08859 | 0.05573  | 0.04987129 | 0.28215  | -0.0144  | 0.75622  |
| 1.03E-13 | -0.1332  | 0.00393  | -0.11714 | 0.01129  | 0.00174201 | 0.97005  | 0.057334 | 0.2162   |
| 0.26051  | -0.00361 | 0.938    | -0.0614  | 0.18532  | 0.08435259 | 0.06857  | 0.163305 | 0.00039  |
| 0.71045  | 0.063115 | 0.17332  | 0.137609 | 0.00288  | 0.27735729 | 1.08E-09 | 0.219268 | 1.72E-06 |
| 0.00017  | -0.13364 | 0.00381  | -0.00657 | 0.88735  | 0.14561343 | 0.0016   | 0.194306 | 2.36E-05 |
| 0.06177  | -0.04881 | 0.29254  | -0.07148 | 0.12295  | 0.10354108 | 0.02525  | 0.128185 | 0.00553  |
| 6.74E-06 | -0.16336 | 0.00039  | -0.16285 | 0.00041  | -0.0395343 | 0.394    | 0.077991 | 0.09229  |
| 0.07417  | 0.181941 | 7.68E-05 | 0.457387 | 1.60E-25 | 0.21077149 | 4.34E-06 | 0.049143 | 0.28924  |

|          |          |          |          |          |            |          |          |          |
|----------|----------|----------|----------|----------|------------|----------|----------|----------|
| 0.52984  | 0.095435 | 0.03925  | -0.14817 | 0.00132  | -0.0071848 | 0.87694  | -0.03536 | 0.44586  |
| 0.85571  | -0.04061 | 0.38126  | -0.0488  | 0.29267  | -0.0850294 | 0.06637  | -0.0012  | 0.9794   |
| 0.14027  | -0.04699 | 0.31088  | -0.06804 | 0.14207  | -0.1157768 | 0.01229  | -0.12761 | 0.00575  |
| 0.84199  | -0.04269 | 0.35735  | 0.004749 | 0.91847  | -0.1187983 | 0.01019  | -0.23547 | 2.64E-07 |
| 0.11812  | 0.194599 | 2.29E-05 | -0.03112 | 0.5023   | -0.0945023 | 0.04122  | -0.14749 | 0.00139  |
| 0.48187  | 0.082847 | 0.07368  | 0.022726 | 0.62423  | -0.0434121 | 0.34924  | -0.09432 | 0.04162  |
| 0.32727  | 0.029104 | 0.5304   | -0.02937 | 0.52665  | 0.00356134 | 0.93882  | -0.00518 | 0.91115  |
| 0.13147  | 0.052732 | 0.25542  | 0.141855 | 0.00212  | 0.10608351 | 0.02186  | 0.026107 | 0.5736   |
| 4.31E-06 | 0.215735 | 2.54E-06 | 0.081154 | 0.07978  | 0.05741844 | 0.21552  | 0.022194 | 0.63237  |
| 0.0099   | 0.10985  | 0.01756  | -0.02453 | 0.59705  | 0.02548076 | 0.58283  | 0.040345 | 0.38436  |
| 5.81E-09 | 0.146917 | 0.00145  | 0.083864 | 0.07019  | 0.09121704 | 0.04883  | 0.105217 | 0.02297  |
| 0.48582  | 0.104498 | 0.02392  | -0.0158  | 0.73343  | -0.1149633 | 0.01292  | -0.15856 | 0.00058  |
| 0.02755  | 0.257538 | 1.64E-08 | 0.180539 | 8.73E-05 | 0.17663396 | 0.00012  | 0.090876 | 0.04969  |
| 0.26842  | -0.07522 | 0.10449  | 0.024201 | 0.6019   | 0.18213949 | 7.54E-05 | 0.129857 | 0.00494  |
| 0.03729  | 0.252763 | 3.06E-08 | 0.064484 | 0.16416  | -0.1097494 | 0.01767  | -0.11722 | 0.01124  |
| 0.00552  | 0.10251  | 0.02675  | 0.032332 | 0.4858   | -0.0432353 | 0.3512   | -0.09589 | 0.03831  |
| 0.78796  | 0.158231 | 0.0006   | 0.115154 | 0.01277  | 0.10470202 | 0.02365  | 0.068534 | 0.1392   |
| 4.73E-05 | 0.005586 | 0.90417  | -0.04251 | 0.35932  | -0.0687213 | 0.13811  | -0.08842 | 0.05622  |
| 2.28E-05 | -0.0191  | 0.68062  | -0.02663 | 0.566    | -0.1319341 | 0.00429  | -0.12696 | 0.00601  |
| 1.29E-05 | -0.14064 | 0.00232  | 0.105683 | 0.02236  | 0.25979634 | 1.22E-08 | 0.257862 | 1.57E-08 |
| 0.10233  | 0.104763 | 0.02357  | 0.244457 | 8.80E-08 | 0.06193445 | 0.18151  | 0.063363 | 0.17163  |
| 1.91E-06 | 0.068416 | 0.13988  | 0.016402 | 0.7237   | -0.1342909 | 0.00364  | -0.16622 | 0.00031  |
| 0.91931  | 0.035252 | 0.44726  | -0.1167  | 0.01161  | -0.0719332 | 0.12058  | -0.03531 | 0.44655  |
| 0.77268  | -0.01427 | 0.75849  | 0.001902 | 0.9673   | -0.0275806 | 0.55215  | -0.03386 | 0.46542  |
| 0.00109  | -0.07335 | 0.11344  | -0.0741  | 0.10976  | 0.00916178 | 0.84347  | 0.053285 | 0.25046  |
| 2.90E-05 | 0.025248 | 0.58627  | -0.05314 | 0.25171  | -0.0893715 | 0.0536   | -0.10172 | 0.02795  |
| 0.07278  | 0.076364 | 0.09931  | 0.055102 | 0.23465  | -0.0265641 | 0.5669   | -0.05633 | 0.2244   |
| 0.33114  | 0.099447 | 0.03166  | 0.139334 | 0.00255  | -0.1388446 | 0.00264  | -0.17085 | 0.00021  |
| 0.11025  | 0.037926 | 0.41354  | 0.09106  | 0.04922  | -0.0823849 | 0.0753   | -0.07729 | 0.09527  |
| 0.00457  | -0.13071 | 0.00467  | 0.000588 | 0.98989  | 0.23970811 | 1.58E-07 | 0.075623 | 0.10264  |
| 0.79858  | -0.05869 | 0.20551  | 0.05231  | 0.25925  | 0.12424525 | 0.00718  | 0.169492 | 0.00023  |
| 0.00277  | 0.172853 | 0.00017  | 0.016914 | 0.71544  | -0.0368425 | 0.42702  | -0.00343 | 0.94107  |
| 9.57E-06 | 0.125049 | 0.00682  | -0.00403 | 0.93082  | 0.07226693 | 0.11886  | 0.039171 | 0.39837  |
| 0.19707  | -0.08179 | 0.07744  | -0.09094 | 0.04953  | 0.21267741 | 3.54E-06 | 0.342948 | 2.46E-14 |
| 0.89229  | 0.232801 | 3.63E-07 | 0.077579 | 0.09403  | 0.03726714 | 0.4217   | 0.179577 | 9.54E-05 |
| 0.11134  | -0.10535 | 0.0228   | -0.01384 | 0.76546  | 0.04301675 | 0.35365  | 0.007575 | 0.87032  |
| 0.003    | 0.007138 | 0.87773  | 0.067971 | 0.14248  | 0.2209891  | 1.42E-06 | 0.299234 | 4.08E-11 |
| 0.03429  | -0.05286 | 0.25424  | -0.09588 | 0.03835  | 0.08692762 | 0.06051  | 0.140271 | 0.00238  |
| 4.79E-20 | -0.02198 | 0.63567  | 0.001779 | 0.96941  | 0.15980642 | 0.00053  | 0.23152  | 4.22E-07 |
| 0.00659  | 0.253395 | 2.82E-08 | 0.199727 | 1.37E-05 | -0.0735334 | 0.11252  | -0.09237 | 0.04605  |
| 0.85143  | 0.298029 | 4.93E-11 | 0.088785 | 0.0552   | 0.06022549 | 0.19388  | -0.00026 | 0.99545  |
| 0.05367  | 0.065274 | 0.15904  | -0.00058 | 0.99011  | -0.1777203 | 0.00011  | -0.29328 | 1.02E-10 |
| 0.34681  | -0.29802 | 4.93E-11 | -0.06469 | 0.1628   | 0.08182526 | 0.07731  | -0.02651 | 0.56775  |
| 0.00108  | 0.100562 | 0.02979  | 0.062389 | 0.17832  | 0.24439882 | 8.86E-08 | 0.28463  | 3.74E-10 |
| 0.24342  | 0.076402 | 0.09914  | -0.20564 | 7.47E-06 | -0.1662399 | 0.00031  | -0.27093 | 2.67E-09 |

|          |          |          |          |          |            |          |          |          |
|----------|----------|----------|----------|----------|------------|----------|----------|----------|
| 2.85E-12 | 0.03446  | 0.45753  | -0.05482 | 0.23701  | -0.0174855 | 0.70626  | 0.021114 | 0.64903  |
| 0.84358  | 0.071869 | 0.12092  | 0.17958  | 9.54E-05 | 0.05289204 | 0.25398  | 0.025735 | 0.57907  |
| 0.9874   | -0.05446 | 0.24015  | -0.12558 | 0.00658  | 0.06202946 | 0.18084  | 0.18398  | 6.35E-05 |
| 0.0014   | 0.129915 | 0.00493  | 0.012345 | 0.79019  | 0.02070425 | 0.6554   | 0.143498 | 0.00188  |
| 0.00016  | 0.065801 | 0.15569  | -0.03823 | 0.40982  | -0.024787  | 0.59313  | 0.091812 | 0.04737  |
| 0.00461  | 0.094117 | 0.04206  | 0.110826 | 0.01658  | -0.1177072 | 0.01091  | -0.16102 | 0.00048  |
| 0.4176   | 0.042464 | 0.35987  | -0.00267 | 0.95417  | 0.11667286 | 0.01163  | 0.217352 | 2.12E-06 |
| 0.00693  | -0.12308 | 0.00775  | 0.107175 | 0.02053  | 0.03815207 | 0.41076  | -0.1155  | 0.0125   |
| 0.01374  | 0.041574 | 0.37004  | -0.1257  | 0.00653  | -0.0779677 | 0.09239  | -0.21135 | 4.08E-06 |
| 0.09889  | -0.06007 | 0.19505  | 0.247767 | 5.80E-08 | 0.45408726 | 3.90E-25 | 0.356736 | 1.84E-15 |
| 0.28676  | 0.030302 | 0.5136   | -0.03573 | 0.44118  | -0.0056851 | 0.90248  | 0.050741 | 0.27383  |
| 1.17E-09 | 0.046761 | 0.31328  | 0.010852 | 0.81507  | 0.11127946 | 0.01614  | 0.10184  | 0.02776  |
| 5.70E-05 | 0.123232 | 0.00767  | 0.065    | 0.1608   | -0.1702344 | 0.00022  | -0.22922 | 5.53E-07 |
| 0.00303  | 0.149774 | 0.00117  | 0.05253  | 0.25724  | 0.07607696 | 0.10059  | 0.072359 | 0.1184   |
| 0.45083  | -0.23927 | 1.67E-07 | -0.32244 | 9.27E-13 | -0.1614073 | 0.00046  | -0.03997 | 0.38881  |
| 0.83892  | -0.01927 | 0.67782  | -0.18607 | 5.22E-05 | -0.2183562 | 1.90E-06 | -0.2388  | 1.77E-07 |
| 0.02818  | -0.17147 | 0.0002   | -0.05446 | 0.24017  | 0.00689079 | 0.88194  | 0.015742 | 0.73438  |
| 0.00013  | 0.19047  | 3.43E-05 | 0.259718 | 1.23E-08 | 0.071468   | 0.12301  | 0.0723   | 0.1187   |
| 0.56366  | -0.03009 | 0.5165   | 0.129406 | 0.0051   | 0.19274156 | 2.75E-05 | 0.092551 | 0.04561  |
| 0.48156  | 0.096726 | 0.03666  | 0.120778 | 0.00899  | 0.18704822 | 4.76E-05 | 0.216047 | 2.45E-06 |
| 0.02821  | 0.052029 | 0.26182  | 0.000607 | 0.98956  | 0.00807002 | 0.86192  | -0.03602 | 0.4374   |
| 0.00138  | -0.02203 | 0.63488  | -0.03451 | 0.45684  | 0.18098856 | 8.38E-05 | 0.200024 | 1.33E-05 |
| 0.00782  | 0.143801 | 0.00184  | 0.157967 | 0.00061  | 0.29554499 | 7.23E-11 | 0.203167 | 9.65E-06 |
| 2.14E-07 | 0.20697  | 6.50E-06 | 0.165799 | 0.00032  | -0.070878  | 0.12614  | -0.16564 | 0.00032  |
| 0.3405   | 0.059063 | 0.20265  | 0.019217 | 0.67872  | 0.04320846 | 0.3515   | 0.115053 | 0.01285  |
| 0.75359  | 0.032692 | 0.48095  | 0.010894 | 0.81437  | 0.02704506 | 0.5599   | 0.023396 | 0.61404  |
| 0.13771  | 0.105389 | 0.02274  | 0.085489 | 0.06491  | 0.07806924 | 0.09196  | 0.123829 | 0.00738  |
| 5.21E-05 | 0.060481 | 0.192    | 0.054362 | 0.241    | 0.18524428 | 5.64E-05 | 0.215136 | 2.71E-06 |
| 8.03E-05 | -0.04276 | 0.3565   | 0.014505 | 0.75457  | 0.27177224 | 2.37E-09 | 0.353524 | 3.41E-15 |
| 0.01043  | 0.11145  | 0.01597  | 0.070135 | 0.13017  | 0.05836087 | 0.20807  | -0.02172 | 0.63974  |
| 0.32836  | 0.194956 | 2.21E-05 | 0.101451 | 0.02837  | 0.00759097 | 0.87004  | 0.081698 | 0.07778  |
| 1.83E-07 | 0.275489 | 1.40E-09 | 0.286274 | 2.93E-10 | 0.02206465 | 0.63436  | -0.0944  | 0.04144  |
| 8.44E-06 | 0.238186 | 1.90E-07 | 0.119454 | 0.00977  | 0.05189106 | 0.26309  | 0.098109 | 0.03404  |
| 0.42751  | -0.04108 | 0.37571  | 0.022714 | 0.62442  | 0.12010514 | 0.00938  | 0.130523 | 0.00473  |
| 0.41967  | -0.10172 | 0.02794  | -0.10436 | 0.02411  | -0.0852097 | 0.0658   | 0.029836 | 0.52011  |
| 0.60247  | 0.16089  | 0.00048  | 0.030192 | 0.51514  | 0.01248134 | 0.78792  | 0.073665 | 0.11188  |
| 0.16545  | 0.016014 | 0.72998  | -0.19959 | 1.39E-05 | -0.2390792 | 1.71E-07 | -0.13771 | 0.00286  |
| 5.43E-06 | -0.08539 | 0.06524  | -0.09989 | 0.0309   | -0.0625784 | 0.17701  | -0.06293 | 0.1746   |
| 0.00736  | -0.01603 | 0.72968  | -0.04792 | 0.30148  | 0.03592945 | 0.43857  | 0.02777  | 0.54943  |
| 0.5972   | 0.057273 | 0.21669  | 0.022613 | 0.62596  | 0.03871489 | 0.40388  | 0.083116 | 0.07274  |
| 0.24835  | -0.05377 | 0.24619  | -0.0663  | 0.15255  | -0.090078  | 0.05173  | -0.18458 | 6.00E-05 |
| 0.02332  | 0.034878 | 0.4521   | 0.054666 | 0.23838  | -0.0817568 | 0.07756  | -0.01774 | 0.70219  |
| 0.50315  | 0.191979 | 2.96E-05 | 0.160846 | 0.00048  | 0.08779708 | 0.05797  | 0.113487 | 0.01413  |
| 0.44275  | 0.225949 | 8.07E-07 | 0.125554 | 0.00659  | 0.0443531  | 0.33888  | 0.074595 | 0.10741  |
| 0.08093  | 0.068274 | 0.1407   | 0.013022 | 0.77897  | -0.1496186 | 0.00118  | -0.24344 | 9.98E-08 |

|          |          |          |          |          |            |          |          |          |
|----------|----------|----------|----------|----------|------------|----------|----------|----------|
| 0.00148  | 0.113813 | 0.01386  | 0.026546 | 0.56716  | 0.02123591 | 0.64714  | 0.118181 | 0.01059  |
| 0.00059  | 0.046165 | 0.3195   | -0.0333  | 0.47287  | 0.0698204  | 0.13191  | 0.189511 | 3.76E-05 |
| 0.00146  | -0.05664 | 0.22184  | 0.011491 | 0.80439  | 0.16145615 | 0.00046  | 0.21215  | 3.74E-06 |
| 1.53E-08 | 0.023796 | 0.60799  | 0.150893 | 0.00107  | 0.23731002 | 2.12E-07 | 0.224167 | 9.89E-07 |
| 0.28847  | 0.234549 | 2.95E-07 | 0.063315 | 0.17195  | -0.1593066 | 0.00055  | -0.20362 | 9.20E-06 |
| 0.00031  | 0.071576 | 0.12244  | 0.226061 | 7.97E-07 | 0.11566679 | 0.01237  | 0.113546 | 0.01408  |
| 0.21747  | 0.1329   | 0.00401  | 0.255139 | 2.25E-08 | 0.1362719  | 0.00317  | 0.110105 | 0.0173   |
| 0.0974   | 0.122387 | 0.0081   | 0.004303 | 0.92611  | -0.0212818 | 0.64643  | -0.0179  | 0.69969  |
| 0.1303   | 0.161844 | 0.00045  | 0.149904 | 0.00116  | 0.29028861 | 1.61E-10 | 0.299152 | 4.14E-11 |
| 0.17147  | 0.200633 | 1.25E-05 | 0.20933  | 5.06E-06 | 0.38930685 | 2.38E-18 | 0.264444 | 6.51E-09 |
| 0.82453  | 0.25111  | 3.79E-08 | 0.32522  | 5.76E-13 | 0.29817938 | 4.81E-11 | 0.228504 | 6.01E-07 |
| 0.54093  | 0.2564   | 1.91E-08 | 0.120968 | 0.00888  | 0.12703571 | 0.00598  | 0.185608 | 5.45E-05 |
| 0.00102  | 0.054032 | 0.24387  | 0.037436 | 0.4196   | 0.02906707 | 0.53093  | 0.047607 | 0.3046   |
| 0.48803  | 0.196284 | 1.94E-05 | 0.251504 | 3.60E-08 | -0.0297639 | 0.52112  | -0.07757 | 0.09408  |
| 0.68598  | 0.163221 | 0.0004   | 0.046383 | 0.31721  | 0.07579156 | 0.10187  | 0.055422 | 0.23193  |
| 2.91E-07 | -0.04102 | 0.37643  | 0.09551  | 0.0391   | -0.0058536 | 0.8996   | -0.09063 | 0.05032  |
| 0.88191  | 0.040263 | 0.38533  | -0.01345 | 0.77192  | -0.0032214 | 0.94465  | 0.018865 | 0.68428  |
| 0.00127  | 0.094649 | 0.0409   | 0.047844 | 0.3022   | -0.0357099 | 0.44137  | -0.06612 | 0.15368  |
| 0.15869  | 0.041847 | 0.3669   | 0.049419 | 0.28654  | -0.105247  | 0.02293  | -0.17264 | 0.00018  |
| 0.71311  | 0.059388 | 0.20016  | 0.094818 | 0.04054  | 0.17361838 | 0.00016  | 0.209527 | 4.96E-06 |
| 0.61445  | -0.02295 | 0.62082  | -0.00603 | 0.89655  | 0.07463192 | 0.10724  | 0.132482 | 0.00413  |
| 0.09224  | 0.294672 | 8.27E-11 | 0.200193 | 1.31E-05 | 0.4543812  | 3.60E-25 | 0.38685  | 4.04E-18 |
| 0.62903  | 0.013866 | 0.76505  | 0.023416 | 0.61374  | 0.00709266 | 0.8785   | 0.00608  | 0.89574  |
| 0.41227  | 0.290898 | 1.47E-10 | 0.341755 | 3.07E-14 | 0.09043697 | 0.0508   | -0.00135 | 0.97687  |
| 0.17486  | -0.00412 | 0.9293   | -0.02526 | 0.58616  | -0.0127287 | 0.78382  | -0.03671 | 0.42874  |
| 0.01428  | -0.22192 | 1.28E-06 | -0.02289 | 0.6217   | 0.23875251 | 1.78E-07 | 0.16193  | 0.00044  |
| 0.00562  | -0.19994 | 1.34E-05 | -0.17087 | 0.00021  | -0.1643659 | 0.00036  | -0.25353 | 2.77E-08 |
| 0.11812  | -0.06773 | 0.1439   | 0.176154 | 0.00013  | 0.136694   | 0.00308  | -0.00595 | 0.89792  |
| 2.39E-05 | -0.06432 | 0.16521  | -0.01525 | 0.74233  | 0.11575779 | 0.01231  | 0.098563 | 0.03322  |
| 0.04977  | -0.01193 | 0.79707  | -0.05129 | 0.26868  | -0.1127257 | 0.0148   | -0.14368 | 0.00185  |
| 1.04E-13 | -0.08294 | 0.07334  | -0.05176 | 0.26433  | 0.06023242 | 0.19383  | 0.088054 | 0.05724  |
| 0.74148  | -0.13183 | 0.00432  | -0.12377 | 0.00741  | 0.0360894  | 0.43653  | 0.180234 | 8.98E-05 |
| 0.36457  | 0.133903 | 0.00374  | 0.053757 | 0.24628  | 0.02936081 | 0.52678  | 0.030176 | 0.51536  |
| 0.00195  | 0.065569 | 0.15716  | -0.03695 | 0.42569  | -0.0510997 | 0.27045  | -0.025   | 0.58999  |
| 0.50417  | 0.003885 | 0.93326  | -0.06344 | 0.17109  | 0.07042316 | 0.12859  | 0.160486 | 0.0005   |
| 0.15508  | -0.0609  | 0.1889   | -0.03508 | 0.44952  | 0.00188221 | 0.96764  | 0.039683 | 0.39222  |
| 0.00021  | 0.10957  | 0.01785  | -0.10042 | 0.03002  | 0.02529447 | 0.58559  | 0.07529  | 0.10417  |
| 0.96712  | -0.0241  | 0.60335  | 0.002328 | 0.95998  | 0.16221005 | 0.00043  | 0.040145 | 0.38673  |
| 0.26368  | 0.114363 | 0.0134   | 0.048879 | 0.29185  | 0.06324092 | 0.17246  | 0.041141 | 0.37504  |
| 0.0037   | -0.06844 | 0.13975  | 0.086097 | 0.06302  | 0.07826727 | 0.09114  | -0.10252 | 0.02674  |
| 0.58503  | 0.063936 | 0.16778  | -0.05143 | 0.26738  | 0.03623473 | 0.43469  | 0.132004 | 0.00427  |
| 0.00868  | -0.08583 | 0.06386  | -0.16894 | 0.00024  | -0.2363972 | 2.36E-07 | -0.25694 | 1.78E-08 |
| 0.20968  | 0.123088 | 0.00775  | -0.01998 | 0.66677  | -0.0796725 | 0.08546  | -0.14724 | 0.00142  |
| 0.77334  | 0.081608 | 0.07811  | 0.050847 | 0.27283  | 0.16210093 | 0.00044  | 0.254322 | 2.50E-08 |
| 0.62001  | 0.149041 | 0.00124  | 0.136073 | 0.00322  | 0.33266908 | 1.57E-13 | 0.295344 | 7.46E-11 |

|          |          |          |          |          |            |          |          |          |
|----------|----------|----------|----------|----------|------------|----------|----------|----------|
| 0.28222  | 0.224403 | 9.63E-07 | 0.102766 | 0.02637  | 0.10635405 | 0.02152  | 0.107145 | 0.02056  |
| 0.39973  | 0.003284 | 0.94358  | 0.053642 | 0.2473   | -0.0197002 | 0.67111  | -0.04364 | 0.34666  |
| 0.62874  | -0.02713 | 0.55867  | 0.02101  | 0.65065  | 0.0896791  | 0.05278  | 0.043719 | 0.34584  |
| 0.00073  | 0.294207 | 8.88E-11 | 0.336713 | 7.64E-14 | -0.1500671 | 0.00114  | -0.23999 | 1.53E-07 |
| 0.55945  | 0.168305 | 0.00026  | 0.027474 | 0.5537   | 0.05078601 | 0.2734   | -0.02938 | 0.52658  |
| 1.18E-05 | 0.020019 | 0.6661   | -0.00813 | 0.86087  | 0.0800095  | 0.08414  | 0.016058 | 0.72926  |
| 0.21624  | -0.24913 | 4.88E-08 | -0.08379 | 0.07046  | 0.15892404 | 0.00057  | 0.153629 | 0.00087  |
| 0.78886  | 0.116689 | 0.01162  | 0.092724 | 0.04521  | 0.22493163 | 9.07E-07 | 0.204869 | 8.09E-06 |
| 0.5807   | -0.10103 | 0.02903  | 0.062824 | 0.17531  | 0.12733592 | 0.00586  | -0.03219 | 0.48777  |
| 0.00288  | 0.086707 | 0.06117  | 0.066665 | 0.15032  | 0.07957321 | 0.08585  | 0.060128 | 0.19461  |
| 0.00147  | 0.002856 | 0.95091  | 0.11075  | 0.01665  | 0.17430167 | 0.00015  | 0.031387 | 0.49864  |
| 0.00072  | -0.01058 | 0.81963  | -0.16638 | 0.0003   | -0.2401761 | 1.49E-07 | -0.31613 | 2.68E-12 |
| 0.93705  | -0.26398 | 6.94E-09 | 0.091163 | 0.04897  | 0.29645144 | 6.29E-11 | 0.316646 | 2.46E-12 |
| 6.62E-10 | -0.07424 | 0.10912  | -0.11751 | 0.01104  | 0.02278625 | 0.62331  | 0.068213 | 0.14106  |
| 3.41E-11 | 0.237547 | 2.06E-07 | 0.065572 | 0.15714  | 0.07719134 | 0.09569  | 0.145221 | 0.00165  |
| 0.34213  | -0.18087 | 8.47E-05 | -0.0403  | 0.38485  | 0.06590745 | 0.15503  | -0.00039 | 0.99323  |
| 7.75E-05 | -0.14812 | 0.00133  | 0.150212 | 0.00113  | 0.18074555 | 8.57E-05 | 0.135376 | 0.00338  |
| 0.626    | -0.01533 | 0.74112  | 0.001516 | 0.97393  | -0.0438407 | 0.3445   | -0.0687  | 0.13821  |
| 6.14E-06 | -0.28008 | 7.27E-10 | -0.13733 | 0.00294  | -0.0674368 | 0.14565  | -0.11973 | 0.0096   |
| 3.86E-05 | -0.04775 | 0.3031   | 0.075771 | 0.10197  | 0.04469171 | 0.3352   | -0.00819 | 0.85996  |
| 1.61E-14 | 0.17074  | 0.00021  | 0.117459 | 0.01108  | 0.04685961 | 0.31226  | 0.047223 | 0.30852  |
| 0.04919  | 0.017384 | 0.70789  | -0.14296 | 0.00196  | -0.0802853 | 0.08307  | -0.11551 | 0.01249  |
| 0.00412  | -0.28171 | 5.74E-10 | -0.3105  | 6.78E-12 | 0.17968426 | 9.44E-05 | 0.001323 | 0.97726  |
| 0.8818   | 0.176694 | 0.00012  | 0.090108 | 0.05166  | 0.12834819 | 0.00547  | 0.126556 | 0.00617  |
| 0.00012  | -0.02154 | 0.64244  | 0.02813  | 0.54426  | 0.204074   | 8.78E-06 | 0.296674 | 6.08E-11 |
| 0.3312   | -0.01352 | 0.77079  | 0.138444 | 0.00272  | 0.04333452 | 0.3501   | -0.05169 | 0.26496  |
| 0.0001   | 0.091488 | 0.04816  | 0.22894  | 5.71E-07 | 0.07013003 | 0.1302   | 0.055068 | 0.23494  |
| 0.00454  | 0.237672 | 2.02E-07 | 0.239909 | 1.54E-07 | 0.09006508 | 0.05177  | 0.132742 | 0.00406  |
| 0.03134  | -0.03693 | 0.42593  | 0.115618 | 0.01241  | 0.25129018 | 3.70E-08 | 0.200948 | 1.21E-05 |
| 0.78357  | 0.075814 | 0.10177  | -0.02459 | 0.59612  | -0.0106005 | 0.81928  | 0.032159 | 0.48813  |
| 0.2583   | 0.118857 | 0.01015  | 0.09992  | 0.03086  | 0.10684199 | 0.02093  | 0.152346 | 0.00096  |
| 0.00096  | 0.111544 | 0.01588  | 0.006655 | 0.88596  | 0.08440605 | 0.0684   | -0.00583 | 0.90002  |
| 0.00157  | 0.218458 | 1.88E-06 | 0.409786 | 2.45E-20 | 0.07499918 | 0.10552  | -0.08006 | 0.08392  |
| 0.04527  | 0.202265 | 1.06E-05 | 0.307271 | 1.14E-11 | 0.03476082 | 0.45362  | -0.0969  | 0.03631  |
| 0.0009   | 0.156388 | 0.0007   | 0.14403  | 0.00181  | 0.16374521 | 0.00038  | 0.221924 | 1.28E-06 |
| 0.00601  | -0.2012  | 1.18E-05 | 0.043833 | 0.34458  | 0.00291748 | 0.94986  | -0.0371  | 0.42375  |
| 0.00355  | -0.14822 | 0.00132  | -0.026   | 0.57515  | 0.09793758 | 0.03436  | -0.00551 | 0.9055   |
| 0.79053  | -0.05848 | 0.20713  | 0.15075  | 0.00108  | 0.29938328 | 3.99E-11 | 0.099413 | 0.03172  |
| 0.01437  | 0.139219 | 0.00257  | -0.00595 | 0.89801  | -0.0270318 | 0.56009  | 0.062816 | 0.17536  |
| 0.04347  | 0.048086 | 0.29976  | -0.14846 | 0.00129  | -0.2583536 | 1.47E-08 | -0.20124 | 1.18E-05 |
| 0.00064  | 0.01282  | 0.78232  | -0.02427 | 0.60085  | -0.056849  | 0.22012  | 0.053807 | 0.24584  |
| 0.13358  | 0.176181 | 0.00013  | 0.293129 | 1.05E-10 | 0.08949957 | 0.05326  | -0.0011  | 0.98114  |
| 0.10208  | 0.203815 | 9.02E-06 | 0.12577  | 0.0065   | -0.2022883 | 1.06E-05 | -0.2447  | 8.53E-08 |
| 0.77786  | 0.017045 | 0.71334  | -0.12521 | 0.00674  | -0.1995003 | 1.40E-05 | -0.10876 | 0.01872  |
| 0.66823  | 0.210387 | 4.52E-06 | -0.00838 | 0.85671  | -0.1049804 | 0.02328  | -0.00644 | 0.88955  |



|          |          |          |          |          |            |          |          |          |
|----------|----------|----------|----------|----------|------------|----------|----------|----------|
| 0.0008   | 0.191324 | 3.16E-05 | 0.415904 | 5.86E-21 | 0.47021861 | 4.58E-27 | 0.349993 | 6.65E-15 |
| 0.05837  | -0.0211  | 0.64932  | 0.036841 | 0.42704  | 0.0011491  | 0.98024  | -0.09857 | 0.03321  |
| 0.00619  | -0.2668  | 4.72E-09 | -0.44463 | 4.74E-24 | -0.1934104 | 2.57E-05 | -0.13769 | 0.00287  |
| 0.03371  | 0.071086 | 0.12503  | -0.01297 | 0.77984  | -0.0505493 | 0.27565  | -0.03793 | 0.41346  |
| 0.0026   | -0.04479 | 0.33414  | -0.18491 | 5.82E-05 | -0.0514627 | 0.26705  | -0.07122 | 0.12433  |
| 0.48583  | 0.165089 | 0.00034  | 0.124026 | 0.00729  | 0.10958727 | 0.01784  | 0.14806  | 0.00133  |
| 0.87468  | -0.00159 | 0.9727   | -0.30658 | 1.28E-11 | -0.0668897 | 0.14895  | -0.09551 | 0.0391   |
| 0.84773  | -0.01471 | 0.75115  | -0.00077 | 0.98682  | -0.0061586 | 0.8944   | 0.008747 | 0.85047  |
| 0.09599  | 0.043089 | 0.35284  | 0.052939 | 0.25355  | 0.05505078 | 0.23508  | 0.048551 | 0.2951   |
| 0.8683   | -0.02284 | 0.62253  | -0.00134 | 0.97693  | 0.00195104 | 0.96646  | 0.021456 | 0.64374  |
| 0.78067  | 0.02989  | 0.51935  | -0.01964 | 0.6721   | -0.0800018 | 0.08417  | -0.04314 | 0.35226  |
| 0.40384  | 0.056548 | 0.22257  | -0.01282 | 0.78237  | -0.0214826 | 0.64333  | -0.05904 | 0.20285  |
| 0.19831  | 0.037403 | 0.42001  | -0.00949 | 0.83791  | -0.0715103 | 0.12279  | -0.05237 | 0.25873  |
| 0.0371   | -0.08976 | 0.05257  | -0.0314  | 0.49841  | 0.01472469 | 0.75096  | 0.06642  | 0.15184  |
| 0.07728  | -0.02743 | 0.55438  | -0.06635 | 0.15228  | -0.0035152 | 0.93961  | 0.042612 | 0.3582   |
| 0.0006   | 0.045249 | 0.32921  | -0.01042 | 0.82232  | -0.0049352 | 0.91529  | 0.038132 | 0.411    |
| 6.72E-19 | -0.04533 | 0.32837  | -0.07905 | 0.08794  | -0.0654432 | 0.15796  | -0.00944 | 0.83874  |
| 0.13151  | 0.115715 | 0.01234  | -0.02294 | 0.62103  | -0.0152041 | 0.74314  | 0.037338 | 0.42082  |
| 0.9298   | 0.241299 | 1.30E-07 | 0.151874 | 0.00099  | 0.07937629 | 0.08663  | 0.088856 | 0.055    |
| 0.05991  | 0.12275  | 0.00792  | 0.087144 | 0.05987  | 0.15671131 | 0.00068  | 0.25921  | 1.32E-08 |
| 0.04345  | 0.128499 | 0.00542  | -0.01142 | 0.80563  | 0.05424866 | 0.24198  | -0.09525 | 0.03964  |
| 0.4373   | 0.195512 | 2.09E-05 | 0.159473 | 0.00054  | 0.03118236 | 0.50145  | -0.01793 | 0.6991   |
| 0.74843  | 0.022932 | 0.6211   | -0.01569 | 0.73529  | -0.0514289 | 0.26737  | -0.06385 | 0.16833  |
| 4.57E-05 | -0.04782 | 0.30246  | 0.029288 | 0.52781  | 0.06674676 | 0.14982  | -0.02573 | 0.57911  |
| 0.43461  | -0.03144 | 0.49793  | -0.02413 | 0.60291  | 0.12849784 | 0.00542  | 0.21452  | 2.90E-06 |
| 1.27E-06 | -0.05678 | 0.22071  | -0.15866 | 0.00058  | -0.0920993 | 0.04668  | -0.07602 | 0.10085  |
| 0.03205  | -0.10499 | 0.02326  | -0.08739 | 0.05916  | 0.07268273 | 0.11675  | 0.149111 | 0.00123  |
| 7.85E-12 | -0.00749 | 0.87176  | 0.110719 | 0.01668  | 0.21782841 | 2.02E-06 | 0.212881 | 3.46E-06 |
| 0.80501  | 0.019451 | 0.67504  | -0.01665 | 0.71966  | 0.02824602 | 0.5426   | 0.009404 | 0.83938  |
| 0.43197  | 0.140237 | 0.00239  | 0.105473 | 0.02263  | 0.42418657 | 8.06E-22 | 0.332503 | 1.62E-13 |
| 0.14981  | 0.163766 | 0.00038  | 0.127134 | 0.00594  | 0.12553965 | 0.0066   | 0.058498 | 0.20701  |
| 0.6452   | 0.167968 | 0.00027  | 0.02115  | 0.64847  | 0.02239798 | 0.62925  | 0.001676 | 0.97118  |
| 0.77266  | 0.004251 | 0.92701  | -0.02332 | 0.61519  | -0.111803  | 0.01564  | -0.16829 | 0.00026  |
| 7.03E-06 | 0.162073 | 0.00044  | 0.120935 | 0.0089   | 0.02648891 | 0.568    | -0.03976 | 0.39128  |
| 0.55888  | 0.014712 | 0.75118  | -0.11555 | 0.01246  | -0.3182562 | 1.88E-12 | -0.31662 | 2.47E-12 |
| 0.00019  | 0.059795 | 0.1971   | -0.01476 | 0.75043  | -0.2340135 | 3.14E-07 | -0.25341 | 2.82E-08 |
| 0.00113  | 0.362024 | 6.58E-16 | 0.211596 | 3.97E-06 | 0.04286732 | 0.35532  | 0.089785 | 0.0525   |
| 0.13139  | 0.088853 | 0.05501  | 0.151924 | 0.00099  | -0.1540054 | 0.00084  | -0.13654 | 0.00311  |
| 0.07819  | 0.170286 | 0.00022  | 0.186989 | 4.78E-05 | 0.02738509 | 0.55498  | -0.03782 | 0.41487  |
| 0.85424  | 0.011557 | 0.8033   | -0.11651 | 0.01175  | -0.060615  | 0.19101  | -0.03509 | 0.44929  |
| 0.52057  | -0.09677 | 0.03657  | -0.05915 | 0.202    | 0.19867176 | 1.53E-05 | 0.119756 | 0.00959  |
| 0.04339  | 0.152796 | 0.00092  | 0.322499 | 9.18E-13 | 0.01288799 | 0.78118  | -0.06889 | 0.13715  |
| 0.2122   | 0.215626 | 2.57E-06 | 0.243658 | 9.72E-08 | 0.29596034 | 6.78E-11 | 0.210236 | 4.60E-06 |
| 0.40979  | 0.023793 | 0.60804  | -0.0355  | 0.44413  | 0.0189584  | 0.68281  | 0.070124 | 0.13023  |
| 0.4197   | 0.096537 | 0.03703  | 0.18486  | 5.85E-05 | 0.38819985 | 3.02E-18 | 0.285594 | 3.24E-10 |

|          |          |          |          |          |            |          |          |          |
|----------|----------|----------|----------|----------|------------|----------|----------|----------|
| 0.57614  | -0.05526 | 0.23326  | -0.04478 | 0.33426  | -0.0065589 | 0.88759  | 0.000743 | 0.98722  |
| 0.50218  | 0.042598 | 0.35836  | 0.068502 | 0.13938  | 0.00053116 | 0.99087  | -0.00656 | 0.88757  |
| 0.82954  | 0.022909 | 0.62145  | 0.04266  | 0.35766  | 0.04009105 | 0.38737  | 0.068427 | 0.13981  |
| 0.36392  | 0.012686 | 0.78452  | -0.08904 | 0.05449  | 0.03138004 | 0.49874  | 0.105945 | 0.02203  |
| 5.53E-06 | -0.22934 | 5.45E-07 | 0.053004 | 0.25297  | 0.22232212 | 1.22E-06 | -0.00359 | 0.93839  |
| 0.55405  | 0.112862 | 0.01468  | -0.09382 | 0.04272  | 0.18497198 | 5.79E-05 | 0.168208 | 0.00026  |
| 0.77684  | 0.093555 | 0.04331  | -0.00422 | 0.92749  | 0.06906142 | 0.13617  | 0.189224 | 3.86E-05 |
| 0.5086   | 0.108468 | 0.01904  | -0.06898 | 0.13665  | -0.0097086 | 0.83425  | 0.096065 | 0.03797  |
| 0.7634   | -0.04556 | 0.32593  | 0.029102 | 0.53043  | -0.1086083 | 0.01889  | -0.13031 | 0.00479  |
| 0.30185  | -0.03884 | 0.40234  | -0.11752 | 0.01103  | -0.1952654 | 2.14E-05 | -0.20186 | 1.10E-05 |
| 0.04537  | 0.110245 | 0.01716  | 0.088644 | 0.05559  | 0.16151449 | 0.00046  | 0.087399 | 0.05912  |
| 0.28902  | 0.05535  | 0.23254  | -0.05335 | 0.2499   | 0.09049312 | 0.05066  | 0.082329 | 0.0755   |
| 0.00013  | 0.226396 | 7.67E-07 | 0.131014 | 0.00457  | 0.31311507 | 4.42E-12 | 0.344431 | 1.88E-14 |
| 0.08888  | -0.02605 | 0.5745   | 0.090119 | 0.05163  | 0.13247126 | 0.00413  | 0.008148 | 0.8606   |
| 7.08E-06 | 0.057568 | 0.21433  | 0.018291 | 0.69339  | -0.1471354 | 0.00143  | -0.2032  | 9.61E-06 |
| 0.12899  | -0.08046 | 0.08241  | 0.223546 | 1.06E-06 | 0.3560772  | 2.09E-15 | 0.209341 | 5.06E-06 |
| 0.09951  | 0.199022 | 1.47E-05 | 0.326708 | 4.46E-13 | 0.37300921 | 7.29E-17 | 0.273714 | 1.81E-09 |
| 0.28881  | 0.148123 | 0.00133  | 0.105567 | 0.02251  | 0.01424403 | 0.75884  | -0.00654 | 0.88785  |
| 0.54     | 0.04304  | 0.35338  | 0.052856 | 0.2543   | -0.0416915 | 0.36869  | -0.04024 | 0.38556  |
| 0.53702  | 0.063963 | 0.1676   | 0.054816 | 0.23709  | -0.0208256 | 0.65351  | -0.02192 | 0.63656  |
| 0.00049  | 0.099819 | 0.03103  | 0.111995 | 0.01546  | 0.16173132 | 0.00045  | 0.139625 | 0.00249  |
| 0.63025  | 0.307355 | 1.13E-11 | 0.080182 | 0.08347  | 0.21835758 | 1.90E-06 | 0.288536 | 2.09E-10 |
| 1.85E-05 | 0.184191 | 6.23E-05 | 0.088522 | 0.05593  | 0.03042043 | 0.51197  | 0.033914 | 0.4647   |
| 0.96481  | 0.059956 | 0.19589  | -0.05458 | 0.23911  | -0.0704214 | 0.1286   | -0.03956 | 0.3937   |
| 0.20612  | 0.151364 | 0.00103  | 0.087636 | 0.05844  | 0.10131036 | 0.02859  | 0.072772 | 0.1163   |
| 0.02159  | -0.23447 | 2.98E-07 | -0.11678 | 0.01155  | 0.03834832 | 0.40835  | -0.07495 | 0.10574  |
| 0.00161  | 0.094652 | 0.0409   | 0.306351 | 1.32E-11 | -0.0335897 | 0.46898  | -0.05332 | 0.25019  |
| 9.77E-10 | -0.0588  | 0.2047   | -0.0905  | 0.05065  | 0.01402334 | 0.76246  | -0.03289 | 0.47825  |
| 1.26E-09 | -0.14541 | 0.00163  | -0.01441 | 0.75616  | 0.26694266 | 4.63E-09 | 0.357019 | 1.74E-15 |
| 0.11864  | -0.11953 | 0.00972  | -0.20457 | 8.34E-06 | -0.1102468 | 0.01716  | -0.05699 | 0.21897  |
| 0.00537  | 0.133363 | 0.00389  | 0.155721 | 0.00073  | -0.2242697 | 9.78E-07 | -0.13546 | 0.00336  |
| 3.85E-06 | -0.17604 | 0.00013  | -0.18056 | 8.71E-05 | -0.0532995 | 0.25033  | -0.10176 | 0.02789  |
| 0.14797  | 0.006189 | 0.89389  | 0.2509   | 3.89E-08 | 0.40563726 | 6.35E-20 | 0.294135 | 8.98E-11 |
| 0.79718  | 0.206289 | 6.98E-06 | 0.328657 | 3.18E-13 | 0.28128281 | 6.11E-10 | 0.139429 | 0.00253  |
| 9.15E-06 | 0.160154 | 0.00051  | 0.248245 | 5.46E-08 | 0.10806953 | 0.01949  | -0.04835 | 0.29709  |
| 0.00031  | -0.24832 | 5.41E-08 | -0.06558 | 0.15708  | 0.43138026 | 1.37E-22 | 0.334339 | 1.17E-13 |
| 0.11393  | 0.059352 | 0.20044  | 0.026417 | 0.56906  | 0.36320527 | 5.22E-16 | 0.3075   | 1.10E-11 |
| 0.28841  | 0.099275 | 0.03196  | -0.03447 | 0.45746  | -0.0015662 | 0.97307  | 0.073745 | 0.11149  |
| 0.00049  | 0.147982 | 0.00134  | -0.0008  | 0.98629  | 0.05931195 | 0.20074  | 0.13376  | 0.00378  |
| 0.08683  | -0.07676 | 0.09755  | -0.08566 | 0.06439  | -0.1446137 | 0.00173  | -0.10634 | 0.02154  |
| 0.02541  | 0.008457 | 0.85538  | -0.05888 | 0.20404  | -0.0146405 | 0.75234  | -0.01508 | 0.74513  |
| 0.34269  | 0.135825 | 0.00327  | 0.069646 | 0.13288  | -0.0021171 | 0.96361  | 0.00867  | 0.85176  |
| 0.03215  | -0.13844 | 0.00272  | 0.005812 | 0.90032  | 0.06062072 | 0.19097  | -0.00958 | 0.83642  |
| 0.38885  | 0.118262 | 0.01053  | 0.044742 | 0.33466  | 0.10814032 | 0.01941  | 0.134078 | 0.0037   |
| 0.58693  | -0.18401 | 6.33E-05 | -0.10306 | 0.02593  | 0.0021369  | 0.96327  | 0.047098 | 0.3098   |

|          |          |          |          |          |            |          |          |          |
|----------|----------|----------|----------|----------|------------|----------|----------|----------|
| 0.84416  | 0.050449 | 0.2766   | 0.025465 | 0.58306  | -0.0354728 | 0.44441  | -0.03718 | 0.42273  |
| 0.00033  | -0.25233 | 3.24E-08 | -0.05935 | 0.20049  | 0.17980867 | 9.34E-05 | 0.246787 | 6.57E-08 |
| 0.04101  | 0.004993 | 0.9143   | 0.038914 | 0.40146  | 0.07935043 | 0.08673  | 0.017947 | 0.69888  |
| 0.00016  | 0.045287 | 0.32879  | 0.212154 | 3.74E-06 | 0.25282045 | 3.04E-08 | 0.135579 | 0.00333  |
| 7.44E-05 | -0.08419 | 0.06912  | 0.169399 | 0.00024  | -0.02478   | 0.59324  | -0.19508 | 2.18E-05 |
| 0.01916  | -0.0262  | 0.57229  | 0.039326 | 0.3965   | 0.25544316 | 2.16E-08 | 0.19622  | 1.95E-05 |
| 0.5511   | 0.074934 | 0.10582  | 0.037031 | 0.42465  | 0.06075249 | 0.19     | 0.12699  | 0.006    |
| 3.42E-06 | -0.26805 | 3.98E-09 | -0.14692 | 0.00145  | 0.09441276 | 0.04141  | 0.024798 | 0.59298  |
| 0.01239  | 0.084577 | 0.06784  | -0.08207 | 0.07642  | 0.08765616 | 0.05838  | 0.073815 | 0.11115  |
| 0.15929  | -0.23692 | 2.22E-07 | -0.29786 | 5.06E-11 | -0.2567145 | 1.83E-08 | -0.25934 | 1.29E-08 |
| 0.35908  | -0.1354  | 0.00337  | -0.23415 | 3.09E-07 | -0.0179467 | 0.69889  | -0.13965 | 0.00249  |
| 3.78E-08 | -0.01968 | 0.67138  | 0.109912 | 0.0175   | 0.32181767 | 1.03E-12 | 0.361794 | 6.88E-16 |
| 0.55737  | 0.284745 | 3.68E-10 | 0.443067 | 7.10E-24 | 0.28887489 | 1.99E-10 | 0.170609 | 0.00021  |
| 0.00072  | 0.081706 | 0.07775  | 0.024989 | 0.59013  | -0.056358  | 0.22413  | -0.03531 | 0.44653  |
| 0.54186  | 0.036126 | 0.43607  | 0.090431 | 0.05082  | 0.3130969  | 4.43E-12 | 0.22794  | 6.41E-07 |
| 0.00146  | -0.07378 | 0.11131  | -0.07251 | 0.11761  | 0.02365404 | 0.61014  | -0.01822 | 0.69454  |
| 0.87759  | -0.00444 | 0.92369  | -0.01672 | 0.7186   | 0.06785989 | 0.14313  | 0.054356 | 0.24105  |
| 0.00097  | 0.147169 | 0.00143  | 0.102579 | 0.02665  | 0.05457571 | 0.23915  | 0.001121 | 0.98073  |
| 0.00068  | -0.01745 | 0.70682  | -0.11697 | 0.01142  | -0.1085024 | 0.01901  | -0.13255 | 0.00411  |
| 3.21E-17 | 0.100454 | 0.02997  | 0.100355 | 0.03013  | 0.05447642 | 0.24001  | 0.002223 | 0.96178  |
| 0.32319  | 0.263659 | 7.25E-09 | 0.17323  | 0.00017  | 0.17661857 | 0.00012  | 0.141628 | 0.00216  |
| 0.03375  | 0.00069  | 0.98814  | -0.05976 | 0.19738  | -0.1571293 | 0.00066  | -0.18191 | 7.70E-05 |
| 0.00539  | -0.08063 | 0.08175  | -0.03046 | 0.51143  | 0.01218267 | 0.79288  | -0.0226  | 0.62608  |
| 0.00189  | 0.229775 | 5.18E-07 | 0.140115 | 0.00241  | 0.08158332 | 0.0782   | 0.058468 | 0.20724  |
| 0.62392  | -0.09094 | 0.04954  | -0.07753 | 0.09424  | -0.0173665 | 0.70817  | -0.09552 | 0.03908  |
| 0.23052  | 0.26737  | 4.37E-09 | 0.256145 | 1.97E-08 | 0.29581963 | 6.93E-11 | 0.284881 | 3.61E-10 |
| 0.72608  | -0.02198 | 0.63559  | 0.091521 | 0.04808  | 0.06260804 | 0.1768   | 0.014281 | 0.75823  |
| 6.75E-06 | -0.02145 | 0.64376  | 0.051099 | 0.27045  | 0.08021922 | 0.08333  | 0.024835 | 0.59243  |
| 0.02253  | -0.09628 | 0.03753  | 0.090836 | 0.04979  | 0.2775124  | 1.05E-09 | 0.270838 | 2.70E-09 |
| 0.36544  | 0.116827 | 0.01152  | 0.066844 | 0.14923  | 0.06593979 | 0.15482  | 0.078939 | 0.08839  |
| 0.15595  | 0.127258 | 0.00589  | 0.06363  | 0.16983  | 0.01516513 | 0.74377  | 0.021696 | 0.64004  |
| 0.10595  | 0.226377 | 7.68E-07 | 0.051442 | 0.26725  | -0.0911443 | 0.04901  | -0.04423 | 0.34018  |
| 0.04455  | 0.097057 | 0.03602  | 0.014567 | 0.75355  | -0.0559927 | 0.22716  | -0.07068 | 0.12719  |
| 0.53376  | 0.150056 | 0.00114  | 0.095794 | 0.03851  | 0.01043898 | 0.82199  | 0.017451 | 0.70682  |
| 0.20727  | -0.03899 | 0.40059  | -0.21462 | 2.87E-06 | -0.1551278 | 0.00077  | -0.13855 | 0.00269  |
| 0.03673  | 0.011522 | 0.80387  | -0.04942 | 0.28649  | 0.00875116 | 0.8504   | 0.056784 | 0.22064  |
| 0.87816  | 0.03361  | 0.46871  | -0.0662  | 0.1532   | -0.0191704 | 0.67946  | 0.016213 | 0.72675  |
| 0.01009  | 0.188871 | 4.00E-05 | 0.139893 | 0.00245  | 0.14245576 | 0.00203  | 0.253599 | 2.75E-08 |
| 0.00681  | 0.125199 | 0.00675  | 0.070696 | 0.12712  | 0.11764758 | 0.01095  | 0.213349 | 3.29E-06 |
| 6.35E-06 | 0.168819 | 0.00025  | 0.078298 | 0.09101  | 0.09100678 | 0.04936  | 0.104336 | 0.02414  |
| 0.00647  | -0.02803 | 0.54573  | -0.03947 | 0.39477  | 0.07303147 | 0.115    | -0.1197  | 0.00962  |
| 0.05623  | 0.309537 | 7.92E-12 | 0.136633 | 0.00309  | 0.03342884 | 0.47111  | 0.137884 | 0.00283  |
| 0.00917  | 0.328843 | 3.08E-13 | 0.088524 | 0.05592  | -0.0662697 | 0.15276  | -0.01669 | 0.7191   |
| 0.02808  | 0.074986 | 0.10558  | 0.110786 | 0.01662  | 0.13042524 | 0.00476  | 0.127112 | 0.00595  |
| 0.66404  | -0.04039 | 0.38387  | 0.098225 | 0.03383  | 0.28769891 | 2.37E-10 | 0.236985 | 2.20E-07 |

|          |          |          |          |          |            |          |          |          |
|----------|----------|----------|----------|----------|------------|----------|----------|----------|
| 0.17097  | 0.12373  | 0.00743  | 0.226992 | 7.16E-07 | 0.08703653 | 0.06019  | 0.049769 | 0.28314  |
| 0.26485  | -0.05686 | 0.22004  | 0.057837 | 0.21219  | -0.0254308 | 0.58357  | -0.03923 | 0.39771  |
| 0.21874  | 0.030129 | 0.51602  | 0.257724 | 1.60E-08 | 0.18083751 | 8.50E-05 | -0.01234 | 0.79021  |
| 0.5943   | -0.09786 | 0.0345   | -0.02165 | 0.64068  | -0.0067168 | 0.8849   | 0.064294 | 0.16541  |
| 0.26374  | -0.16672 | 0.0003   | -0.27896 | 8.54E-10 | -0.1351107 | 0.00344  | -0.06627 | 0.15275  |
| 0.87565  | 0.130668 | 0.00468  | -0.11704 | 0.01137  | -0.1537523 | 0.00086  | -0.21837 | 1.90E-06 |
| 0.00654  | 0.308034 | 1.01E-11 | 0.253675 | 2.72E-08 | 0.29759928 | 5.27E-11 | 0.311845 | 5.44E-12 |
| 0.00209  | 0.242519 | 1.12E-07 | 0.355016 | 2.56E-15 | 0.26681858 | 4.71E-09 | 0.268981 | 3.50E-09 |
| 0.25388  | 0.052511 | 0.25742  | -0.05689 | 0.21979  | -0.0906241 | 0.05033  | -0.10489 | 0.0234   |
| 0.00393  | -0.0214  | 0.64463  | 0.188481 | 4.15E-05 | 0.413655   | 9.94E-21 | 0.31939  | 1.55E-12 |
| 0.7644   | 0.250329 | 4.19E-08 | 0.284335 | 3.91E-10 | 0.36152844 | 7.25E-16 | 0.323861 | 7.27E-13 |
| 0.01779  | 0.294786 | 8.13E-11 | 0.468045 | 8.46E-27 | 0.54947317 | 3.42E-38 | 0.376417 | 3.62E-17 |
| 0.37043  | -0.01622 | 0.72661  | 0.316625 | 2.47E-12 | 0.34583851 | 1.45E-14 | 0.199448 | 1.41E-05 |
| 0.57172  | -0.09808 | 0.0341   | -0.07953 | 0.08603  | 0.23331019 | 3.42E-07 | 0.108612 | 0.01889  |
| 0.28108  | -0.02965 | 0.52278  | 0.165034 | 0.00034  | 0.23698041 | 2.20E-07 | 0.200288 | 1.30E-05 |
| 0.79827  | 0.305083 | 1.62E-11 | 0.146901 | 0.00146  | 0.13394654 | 0.00373  | 0.172408 | 0.00018  |
| 0.40867  | 0.132638 | 0.00409  | 0.335404 | 9.66E-14 | 0.25740176 | 1.67E-08 | 0.187657 | 4.49E-05 |
| 0.00371  | -0.18975 | 3.67E-05 | -0.22604 | 7.98E-07 | 0.03351644 | 0.46995  | 0.020321 | 0.66139  |
| 0.02485  | -0.05254 | 0.25719  | -0.03138 | 0.4988   | 0.08993039 | 0.05212  | 0.172008 | 0.00019  |
| 0.00082  | 0.169177 | 0.00024  | 0.002152 | 0.96301  | -0.1681275 | 0.00026  | -0.22003 | 1.58E-06 |
| 1.83E-22 | 0.162298 | 0.00043  | 0.168907 | 0.00025  | 0.2135703  | 3.21E-06 | 0.30806  | 1.01E-11 |
| 0.95028  | 0.04735  | 0.30722  | 0.12123  | 0.00873  | -0.2022031 | 1.07E-05 | -0.27    | 3.04E-09 |
| 0.01907  | 0.142816 | 0.00198  | 0.076929 | 0.09682  | 0.12909425 | 0.00521  | 0.21121  | 4.14E-06 |
| 0.87109  | -0.34656 | 1.26E-14 | -0.23603 | 2.47E-07 | 0.15463398 | 0.0008   | 0.211965 | 3.82E-06 |
| 0.29707  | 0.271025 | 2.63E-09 | 0.235965 | 2.49E-07 | 0.18853165 | 4.13E-05 | 0.194277 | 2.36E-05 |
| 0.00155  | 0.007875 | 0.86523  | 0.066362 | 0.15219  | 0.1995261  | 1.40E-05 | 0.198724 | 1.52E-05 |
| 0.09345  | 0.149008 | 0.00124  | 0.106095 | 0.02184  | 0.02939835 | 0.52625  | -0.04839 | 0.2967   |
| 0.64076  | -0.00098 | 0.98323  | -0.08169 | 0.07781  | -0.0251141 | 0.58827  | 0.029919 | 0.51895  |
| 0.00332  | 0.306579 | 1.28E-11 | 0.369001 | 1.64E-16 | 0.27849439 | 9.14E-10 | 0.074937 | 0.10581  |
| 1.37E-08 | 0.189164 | 3.89E-05 | 0.109162 | 0.01829  | 0.08474229 | 0.0673   | 0.069173 | 0.13554  |
| 0.33236  | 0.248574 | 5.24E-08 | 0.207658 | 6.04E-06 | 0.12317462 | 0.0077   | 0.082658 | 0.07434  |
| 0.62533  | 0.125965 | 0.00642  | 0.056839 | 0.2202   | 0.02713075 | 0.55866  | 0.067945 | 0.14263  |
| 0.00015  | 0.137977 | 0.00281  | 0.030372 | 0.51264  | 0.00726666 | 0.87555  | 0.057722 | 0.2131   |
| 0.25868  | 0.23027  | 4.89E-07 | 0.201336 | 1.16E-05 | 0.1366301  | 0.00309  | 0.129208 | 0.00517  |
| 0.18681  | -0.03965 | 0.39263  | 0.026805 | 0.56339  | 0.1551087  | 0.00077  | 0.202606 | 1.02E-05 |
| 0.00297  | 0.105888 | 0.0221   | 0.242634 | 1.10E-07 | 0.28076524 | 6.58E-10 | 0.289107 | 1.92E-10 |
| 0.00108  | 0.128035 | 0.00559  | 0.009598 | 0.83612  | 0.31665835 | 2.46E-12 | 0.142882 | 0.00197  |
| 0.01073  | 0.068031 | 0.14213  | -0.18437 | 6.13E-05 | 0.00285302 | 0.95097  | 0.058298 | 0.20856  |
| 0.00365  | 0.276215 | 1.27E-09 | 0.132821 | 0.00404  | -0.0348531 | 0.45242  | -0.04351 | 0.34812  |
| 0.42004  | 0.059231 | 0.20136  | -0.19548 | 2.10E-05 | -0.1486974 | 0.00127  | -0.15772 | 0.00062  |
| 0.30745  | -0.0785  | 0.09019  | -0.05272 | 0.25554  | 0.07207739 | 0.11984  | 0.079946 | 0.08439  |
| 0.00019  | -0.07773 | 0.09338  | 0.091495 | 0.04815  | 0.27621503 | 1.27E-09 | 0.305886 | 1.43E-11 |
| 0.78307  | 0.096159 | 0.03778  | 0.210761 | 4.35E-06 | 0.16368275 | 0.00038  | 0.069474 | 0.13384  |
| 0.66785  | 0.049056 | 0.2901   | -0.06384 | 0.16842  | 0.05457264 | 0.23918  | 0.18295  | 6.99E-05 |
| 6.91E-06 | 0.001543 | 0.97348  | 0.240161 | 1.50E-07 | 0.33683033 | 7.48E-14 | 0.161786 | 0.00045  |

|          |          |          |          |          |            |          |          |          |
|----------|----------|----------|----------|----------|------------|----------|----------|----------|
| 0.51117  | 0.318598 | 1.78E-12 | 0.219403 | 1.69E-06 | 0.06346664 | 0.17093  | 0.067757 | 0.14374  |
| 0.73717  | 0.136255 | 0.00317  | -0.04404 | 0.34235  | 0.03959532 | 0.39327  | 0.158293 | 0.0006   |
| 0.2775   | 0.118436 | 0.01042  | 0.241218 | 1.31E-07 | 0.06196635 | 0.18129  | 0.095632 | 0.03884  |
| 0.0085   | -0.05138 | 0.26785  | -0.13208 | 0.00425  | 0.05359182 | 0.24774  | -0.07274 | 0.11645  |
| 1.36E-07 | 0.306771 | 1.24E-11 | 0.192575 | 2.79E-05 | 0.12809758 | 0.00557  | 0.168488 | 0.00025  |
| 0.00237  | -0.04295 | 0.35436  | 0.125063 | 0.00681  | 0.25237856 | 3.22E-08 | 0.053832 | 0.24562  |
| 0.01943  | -0.04202 | 0.36489  | -0.08232 | 0.07553  | -0.0394999 | 0.39441  | 0.016253 | 0.72611  |
| 0.78889  | 0.044122 | 0.3414   | -0.10179 | 0.02784  | -0.0008723 | 0.985    | 0.103706 | 0.02502  |
| 0.35981  | 0.05349  | 0.24864  | 0.183891 | 6.40E-05 | 0.08952779 | 0.05319  | 0.115534 | 0.01248  |
| 0.56627  | 0.143982 | 0.00181  | 0.227895 | 6.45E-07 | 0.34782839 | 9.98E-15 | 0.187835 | 4.41E-05 |
| 0.53354  | 0.113894 | 0.01379  | 0.326492 | 4.63E-13 | 0.52984664 | 3.70E-35 | 0.339143 | 4.93E-14 |
| 0.31362  | 0.041894 | 0.36636  | -0.17335 | 0.00017  | 0.17135494 | 0.0002   | -0.01269 | 0.78442  |
| 0.18356  | 0.214048 | 3.05E-06 | 0.209667 | 4.88E-06 | 0.14710459 | 0.00143  | 0.057473 | 0.21509  |
| 0.02724  | 0.102133 | 0.02732  | 0.051986 | 0.26222  | 0.31804022 | 1.95E-12 | 0.22953  | 5.33E-07 |
| 1.85E-10 | 0.084142 | 0.06927  | -0.07148 | 0.12297  | 0.04746353 | 0.30606  | 0.185409 | 5.55E-05 |
| 2.99E-12 | 0.045797 | 0.32337  | -0.02855 | 0.53824  | -0.0324395 | 0.48435  | -0.13995 | 0.00244  |
| 7.17E-12 | 0.029683 | 0.52226  | -0.0181  | 0.69642  | 0.09336203 | 0.04374  | 0.15872  | 0.00058  |
| 4.49E-09 | 0.016286 | 0.72557  | -0.02932 | 0.52729  | 0.02290888 | 0.62145  | -0.00591 | 0.89864  |
| 0.01642  | 0.012636 | 0.78535  | -0.09033 | 0.05108  | -0.3689435 | 1.66E-16 | -0.30162 | 2.81E-11 |
| 0.09835  | -0.01311 | 0.77756  | -0.10921 | 0.01823  | 0.02074879 | 0.65471  | 0.100759 | 0.02947  |
| 0.63777  | -0.03823 | 0.4098   | 0.105359 | 0.02278  | 0.34960046 | 7.16E-15 | 0.313429 | 4.19E-12 |
| 5.24E-07 | -0.04841 | 0.29655  | -0.0973  | 0.03555  | -0.0710787 | 0.12507  | -0.16875 | 0.00025  |
| 0.01902  | -0.09548 | 0.03916  | -0.08389 | 0.07011  | 0.00050108 | 0.99138  | 0.052305 | 0.2593   |
| 0.03249  | 0.196771 | 1.85E-05 | 0.1886   | 4.10E-05 | 0.1452755  | 0.00165  | 0.11495  | 0.01293  |
| 0.00117  | -0.03707 | 0.42421  | 0.022294 | 0.63083  | 0.18807194 | 4.32E-05 | 0.141247 | 0.00222  |
| 0.01977  | 0.117279 | 0.0112   | -0.01214 | 0.79365  | 0.09907673 | 0.03231  | -0.0719  | 0.12075  |
| 0.81471  | 0.228406 | 6.08E-07 | 0.320831 | 1.22E-12 | 0.31295193 | 4.54E-12 | 0.096382 | 0.03733  |
| 0.32751  | 0.063199 | 0.17274  | -0.0102  | 0.82605  | 0.02347444 | 0.61286  | 0.047206 | 0.3087   |
| 0.14518  | 0.081809 | 0.07737  | -0.03099 | 0.50404  | 0.0160743  | 0.729    | -0.03548 | 0.44435  |
| 0.00051  | 0.206823 | 6.60E-06 | 0.058953 | 0.20349  | -0.029927  | 0.51884  | 0.00109  | 0.98125  |
| 0.27632  | 0.123204 | 0.00769  | 0.062243 | 0.17935  | 0.20279212 | 1.00E-05 | 0.283053 | 4.72E-10 |
| 0.0501   | 0.024535 | 0.5969   | -0.0387  | 0.40403  | 0.04974541 | 0.28337  | 0.075799 | 0.10184  |
| 0.05966  | 0.083263 | 0.07223  | 0.138753 | 0.00266  | 0.09409051 | 0.04212  | 0.076716 | 0.09775  |
| 0.07558  | 0.022753 | 0.62382  | 0.039697 | 0.39206  | 0.07196534 | 0.12042  | 0.152468 | 0.00095  |
| 0.91152  | 0.157828 | 0.00062  | 0.236867 | 2.23E-07 | 0.37083918 | 1.13E-16 | 0.053151 | 0.25165  |
| 0.02798  | 0.226997 | 7.15E-07 | 0.493674 | 4.64E-30 | 0.17951673 | 9.59E-05 | -0.02859 | 0.53763  |
| 0.54107  | 0.034562 | 0.4562   | -0.05296 | 0.25336  | 0.07321628 | 0.11408  | 0.197932 | 1.64E-05 |
| 0.00155  | 0.116279 | 0.01192  | -0.0453  | 0.3287   | -0.0217234 | 0.63961  | 0.031383 | 0.4987   |
| 0.05337  | 0.321179 | 1.15E-12 | 0.299964 | 3.64E-11 | 0.1683694  | 0.00026  | 0.214021 | 3.06E-06 |
| 0.03286  | -0.08434 | 0.06861  | -0.12644 | 0.00622  | -0.0846746 | 0.06752  | 0.014921 | 0.74776  |
| 0.45051  | 0.138854 | 0.00264  | 0.015226 | 0.74279  | 0.02808524 | 0.5449   | 0.092668 | 0.04534  |
| 0.23695  | 0.247042 | 6.36E-08 | 0.107089 | 0.02063  | 0.13020595 | 0.00483  | 0.226008 | 8.02E-07 |
| 2.52E-21 | -0.23728 | 2.12E-07 | -0.11715 | 0.01129  | 0.01164975 | 0.80175  | -0.05124 | 0.26918  |
| 0.00096  | 0.216656 | 2.29E-06 | 0.354147 | 3.03E-15 | 0.35011756 | 6.50E-15 | 0.202981 | 9.83E-06 |
| 0.05146  | -0.02732 | 0.55591  | -0.0355  | 0.44408  | -0.0633984 | 0.17139  | -0.08073 | 0.08139  |

|          |          |          |          |          |            |          |          |          |
|----------|----------|----------|----------|----------|------------|----------|----------|----------|
| 0.19482  | 0.118923 | 0.01011  | -0.03405 | 0.46291  | 0.14083591 | 0.00228  | -0.05347 | 0.24886  |
| 0.04888  | 0.113591 | 0.01405  | 0.037304 | 0.42124  | 0.18882213 | 4.02E-05 | 0.154599 | 0.0008   |
| 0.23483  | 0.184361 | 6.13E-05 | 0.201738 | 1.12E-05 | 0.08361627 | 0.07103  | -0.1403  | 0.00238  |
| 0.11039  | 0.267052 | 4.56E-09 | 0.219222 | 1.73E-06 | 0.36257977 | 5.90E-16 | 0.348069 | 9.54E-15 |
| 0.56096  | 0.072074 | 0.11985  | 0.14291  | 0.00196  | -0.0276977 | 0.55046  | -0.18166 | 7.88E-05 |
| 0.97695  | 0.11165  | 0.01578  | -0.08022 | 0.08332  | -0.0576648 | 0.21356  | -0.09008 | 0.05172  |
| 0.01268  | 0.023464 | 0.61302  | -0.06182 | 0.18234  | 0.08743013 | 0.05903  | 0.186572 | 4.98E-05 |
| 0.23107  | 0.187437 | 4.58E-05 | 0.097474 | 0.03522  | 0.11910728 | 0.00999  | 0.192868 | 2.71E-05 |
| 0.47447  | 0.131307 | 0.00448  | 0.040098 | 0.38729  | 0.02756925 | 0.55232  | 0.088421 | 0.05621  |
| 0.96304  | 0.034156 | 0.46152  | 0.361216 | 7.71E-16 | 0.39597205 | 5.56E-19 | 0.278797 | 8.75E-10 |
| 0.00145  | 0.178589 | 0.0001   | -0.07936 | 0.08671  | -0.1292648 | 0.00515  | -0.07464 | 0.10722  |
| 0.0268   | 0.20274  | 1.01E-05 | 0.2549   | 2.32E-08 | 0.00253337 | 0.95646  | -0.10486 | 0.02343  |
| 0.47339  | -0.13954 | 0.00251  | -0.16945 | 0.00023  | -0.0638248 | 0.16852  | -0.01217 | 0.79311  |
| 0.05439  | 0.03468  | 0.45467  | -0.04144 | 0.37159  | -0.0166553 | 0.71961  | -0.00471 | 0.9192   |
| 0.71184  | -0.00983 | 0.83218  | -0.06816 | 0.14139  | -0.1544139 | 0.00081  | -0.24185 | 1.22E-07 |
| 0.10603  | 0.082983 | 0.0732   | 0.01087  | 0.81476  | -0.0282864 | 0.54202  | -0.07763 | 0.09382  |
| 0.1508   | 0.317022 | 2.31E-12 | 0.448528 | 1.71E-24 | 0.34048778 | 3.86E-14 | 0.290562 | 1.54E-10 |
| 0.05642  | 0.017954 | 0.69877  | 0.00061  | 0.98951  | 0.10818011 | 0.01937  | 0.233977 | 3.16E-07 |
| 0.14161  | 0.050613 | 0.27504  | -0.07734 | 0.09503  | -0.031042  | 0.50338  | -0.04617 | 0.31944  |
| 0.01995  | 0.098997 | 0.03245  | 0.154548 | 0.00081  | 0.15503476 | 0.00077  | 0.072822 | 0.11605  |
| 0.36876  | 0.255305 | 2.20E-08 | 0.097923 | 0.03438  | 0.26776964 | 4.13E-09 | 0.23501  | 2.79E-07 |
| 4.18E-26 | -0.25807 | 1.53E-08 | -0.0549  | 0.23638  | 0.33493132 | 1.05E-13 | 0.302486 | 2.45E-11 |
| 0.30748  | -0.25898 | 1.36E-08 | -0.26112 | 1.02E-08 | -0.2936884 | 9.61E-11 | -0.39416 | 8.29E-19 |
| 0.51482  | -0.14461 | 0.00173  | -0.1128  | 0.01473  | -0.1071168 | 0.0206   | -0.20345 | 9.37E-06 |
| 0.07924  | -0.11747 | 0.01107  | -0.02065 | 0.65622  | 0.1643892  | 0.00036  | 0.208668 | 5.43E-06 |
| 0.97044  | -0.13135 | 0.00447  | -0.17048 | 0.00021  | -0.081605  | 0.07812  | -0.0715  | 0.12282  |
| 0.02197  | 0.009007 | 0.84607  | -0.0733  | 0.11366  | -0.1848309 | 5.86E-05 | -0.1582  | 0.0006   |
| 0.00281  | -0.30778 | 1.05E-11 | -0.1282  | 0.00553  | -0.0286955 | 0.53619  | -0.05529 | 0.23309  |
| 0.34035  | -0.17941 | 9.68E-05 | -0.17314 | 0.00017  | -0.1757779 | 0.00013  | -0.21097 | 4.25E-06 |
| 0.0257   | -0.10927 | 0.01817  | -0.03812 | 0.4112   | -0.0608194 | 0.18952  | -0.10738 | 0.02028  |
| 0.74258  | -0.04592 | 0.32205  | -0.10616 | 0.02177  | -0.1483097 | 0.00131  | -0.19382 | 2.47E-05 |
| 0.13846  | -0.1728  | 0.00018  | -0.17621 | 0.00013  | -0.1768119 | 0.00012  | -0.10036 | 0.03013  |
| 0.0587   | -0.13856 | 0.00269  | -0.11503 | 0.01287  | -0.110904  | 0.0165   | -0.19007 | 3.56E-05 |
| 0.53454  | -0.24394 | 9.38E-08 | -0.21943 | 1.69E-06 | -0.1319343 | 0.00429  | -0.18221 | 7.49E-05 |
| 0.98733  | -0.04502 | 0.33171  | -0.122   | 0.00831  | -0.0381521 | 0.41076  | -0.24303 | 1.05E-07 |
| 0.70886  | -0.16886 | 0.00025  | -0.24028 | 1.47E-07 | -0.0733529 | 0.11341  | -0.15663 | 0.00068  |
| 0.83847  | -0.14445 | 0.00175  | -0.03033 | 0.51323  | 0.10231524 | 0.02704  | -0.03416 | 0.4615   |
| 0.09806  | -0.05905 | 0.20273  | -0.13257 | 0.00411  | -0.2979381 | 5.00E-11 | -0.39906 | 2.80E-19 |
| 0.92788  | 0.047479 | 0.30591  | -0.01864 | 0.68791  | 0.09078104 | 0.04993  | 0.134841 | 0.00351  |
| 0.00117  | 0.067805 | 0.14346  | -0.0554  | 0.2321   | -0.2120762 | 3.77E-06 | -0.21956 | 1.66E-06 |
| 0.33232  | -0.08084 | 0.08095  | -0.12813 | 0.00556  | -0.0819195 | 0.07697  | -0.07529 | 0.10417  |
| 0.48269  | -0.02791 | 0.54742  | -0.05641 | 0.22367  | -0.0249224 | 0.59112  | -0.09401 | 0.04229  |
| 0.41386  | -0.10252 | 0.02673  | -0.12741 | 0.00583  | -0.1202162 | 0.00931  | -0.1576  | 0.00063  |
| 0.38763  | -0.14378 | 0.00184  | -0.18188 | 7.72E-05 | -0.0232265 | 0.61662  | -0.06294 | 0.17449  |
| 0.0023   | -0.14824 | 0.00132  | -0.22044 | 1.51E-06 | -0.2809036 | 6.45E-10 | -0.28352 | 4.40E-10 |

|          |          |          |          |          |            |          |          |          |
|----------|----------|----------|----------|----------|------------|----------|----------|----------|
| 0.00707  | -0.22473 | 9.28E-07 | -0.17724 | 0.00012  | -0.111493  | 0.01593  | -0.18639 | 5.06E-05 |
| 0.00065  | -0.10181 | 0.02782  | -0.06965 | 0.13283  | -0.2260887 | 7.94E-07 | -0.31114 | 6.10E-12 |
| 0.81239  | -0.12309 | 0.00774  | -0.03201 | 0.49009  | 0.00698813 | 0.88028  | -0.00037 | 0.99371  |
| 0.12955  | -0.05255 | 0.25709  | 0.029657 | 0.52261  | -0.0067176 | 0.88488  | -0.04086 | 0.37827  |
| 0.07731  | -0.10971 | 0.01771  | -0.07258 | 0.11729  | 0.0210248  | 0.65042  | -0.0717  | 0.12177  |
| 0.78847  | 0.15616  | 0.00071  | -0.02258 | 0.62645  | -0.0016502 | 0.97163  | -0.02    | 0.66634  |
| 0.00371  | 0.018445 | 0.69094  | -0.04947 | 0.28607  | -0.1489797 | 0.00124  | -0.24274 | 1.09E-07 |
| 0.25449  | -0.1022  | 0.02721  | -0.10325 | 0.02566  | -0.1862591 | 5.13E-05 | -0.22466 | 9.35E-07 |
| 0.11732  | -0.15799 | 0.00061  | -0.1373  | 0.00295  | -0.1251505 | 0.00677  | -0.14467 | 0.00172  |
| 0.06656  | -0.11616 | 0.01201  | -0.06444 | 0.16442  | -0.084457  | 0.06823  | -0.16321 | 0.0004   |
| 0.53011  | -0.10468 | 0.02368  | -0.03726 | 0.4218   | -0.0871213 | 0.05994  | -0.2145  | 2.90E-06 |
| 0.67822  | -0.02243 | 0.62883  | -0.13734 | 0.00294  | -0.0906584 | 0.05024  | 0.007898 | 0.86484  |
| 0.56647  | -0.17239 | 0.00018  | -0.14147 | 0.00218  | 0.02278545 | 0.62333  | -0.07093 | 0.12586  |
| 0.00419  | 0.040528 | 0.38221  | 0.024632 | 0.59545  | -0.0205729 | 0.65745  | -0.01664 | 0.71981  |
| 0.88204  | -0.12706 | 0.00597  | -0.078   | 0.09225  | -0.1942015 | 2.38E-05 | -0.29873 | 4.42E-11 |
| 0.69296  | -0.16725 | 0.00028  | -0.13731 | 0.00295  | -0.0777711 | 0.09321  | -0.16666 | 0.0003   |
| 0.20934  | -0.04126 | 0.37363  | -0.03887 | 0.40195  | 0.00872512 | 0.85084  | 0.00185  | 0.96819  |
| 0.78248  | -0.26872 | 3.62E-09 | -0.27361 | 1.83E-09 | -0.070231  | 0.12964  | -0.06289 | 0.17488  |
| 0.03538  | -0.07381 | 0.11118  | -0.02534 | 0.58492  | -0.1219955 | 0.00831  | -0.14637 | 0.00152  |
| 1.72E-17 | -0.14952 | 0.00119  | -0.14584 | 0.00158  | -0.0231673 | 0.61752  | -0.05272 | 0.25554  |
| 0.23605  | -0.11954 | 0.00972  | -0.03424 | 0.46046  | -0.1599649 | 0.00052  | -0.25167 | 3.53E-08 |
| 0.03031  | -0.07239 | 0.11826  | -0.09904 | 0.03237  | -0.1854905 | 5.51E-05 | -0.26149 | 9.71E-09 |
| 0.53528  | -0.12876 | 0.00532  | -0.11761 | 0.01097  | -0.1229443 | 0.00782  | -0.28612 | 3.00E-10 |
| 0.2657   | 0.026376 | 0.56965  | 0.02724  | 0.55708  | -0.1107538 | 0.01665  | -0.21655 | 2.32E-06 |
| 0.23098  | -0.03565 | 0.4422   | -0.0786  | 0.08977  | -0.0733678 | 0.11334  | -0.15371 | 0.00086  |
| 0.15978  | -0.24217 | 1.17E-07 | -0.11168 | 0.01576  | -0.1943001 | 2.36E-05 | -0.27931 | 8.12E-10 |
| 0.26043  | -0.06491 | 0.16138  | -0.03332 | 0.47261  | -0.0192643 | 0.67798  | -0.07489 | 0.10601  |
| 3.71E-22 | -0.05991 | 0.19622  | -0.01    | 0.82933  | -0.0455376 | 0.32613  | -0.13309 | 0.00396  |
| 0.20631  | -0.1409  | 0.00227  | -0.24745 | 6.04E-08 | -0.1471186 | 0.00143  | -0.10073 | 0.02951  |
| 0.31457  | -0.14823 | 0.00132  | -0.37601 | 3.94E-17 | -0.1546037 | 0.0008   | -0.0435  | 0.3483   |
| 0.14557  | -0.10454 | 0.02387  | -0.24535 | 7.86E-08 | -0.0600095 | 0.19549  | -0.07678 | 0.09746  |
| 0.22352  | -0.08273 | 0.07408  | 0.044569 | 0.33653  | -0.0597296 | 0.19759  | -0.24715 | 6.27E-08 |
| 0.25464  | -0.30368 | 2.03E-11 | -0.12902 | 0.00523  | 0.0839007  | 0.07007  | 0.007124 | 0.87797  |
| 0.13379  | -0.01006 | 0.82842  | 0.002874 | 0.95061  | -0.0555526 | 0.23084  | -0.05823 | 0.20909  |
| 2.03E-06 | -0.20105 | 1.20E-05 | -0.11165 | 0.01579  | -0.1211672 | 0.00876  | -0.21249 | 3.61E-06 |
| 8.40E-10 | 0.001344 | 0.97689  | -0.05288 | 0.25406  | -0.1220768 | 0.00827  | -0.15487 | 0.00079  |
| 0.0007   | -0.16273 | 0.00041  | -0.10455 | 0.02386  | -0.1711178 | 0.0002   | -0.25502 | 2.29E-08 |
| 0.09918  | 0.110229 | 0.01717  | 0.019471 | 0.67472  | -0.1039227 | 0.02471  | -0.1087  | 0.01879  |
| 0.19048  | 0.168298 | 0.00026  | 0.124305 | 0.00716  | 0.02722975 | 0.55722  | 0.007366 | 0.87385  |
| 0.64772  | -0.09873 | 0.03292  | -0.08677 | 0.06097  | -0.048436  | 0.29625  | -0.19008 | 3.56E-05 |
| 0.50725  | -0.05306 | 0.25251  | -0.02169 | 0.64018  | 0.05722482 | 0.21708  | -0.01433 | 0.75746  |
| 0.84623  | -0.06128 | 0.18621  | -0.01486 | 0.74882  | 0.00329839 | 0.94333  | -0.00982 | 0.83232  |
| 0.14688  | -0.02881 | 0.53457  | -0.26322 | 7.69E-09 | -0.3364791 | 7.97E-14 | -0.35026 | 6.33E-15 |
| 0.31194  | -0.03459 | 0.45586  | -0.12186 | 0.00838  | -0.0681813 | 0.14124  | 0.011137 | 0.8103   |
| 0.06045  | 0.104074 | 0.0245   | -0.02434 | 0.5998   | -0.2293519 | 5.44E-07 | -0.39494 | 6.98E-19 |

|          |          |          |          |          |            |          |          |          |
|----------|----------|----------|----------|----------|------------|----------|----------|----------|
| 0.09121  | 0.232849 | 3.61E-07 | 0.241488 | 1.27E-07 | 0.17939962 | 9.69E-05 | 0.123697 | 0.00745  |
| 0.10419  | -0.02688 | 0.56228  | -0.09053 | 0.05056  | -0.16363   | 0.00038  | -0.25629 | 1.93E-08 |
| 0.96831  | 0.010378 | 0.82301  | -0.07272 | 0.11657  | 0.01904567 | 0.68143  | -0.10844 | 0.01907  |
| 0.13471  | 0.222645 | 1.18E-06 | 0.023892 | 0.60655  | -0.1645082 | 0.00036  | -0.1221  | 0.00826  |
| 0.1928   | 0.013856 | 0.76522  | -0.05846 | 0.20728  | -0.049157  | 0.28911  | -0.06114 | 0.18722  |
| 0.42405  | -0.19928 | 1.43E-05 | -0.05629 | 0.22467  | 0.11131972 | 0.0161   | 0.046274 | 0.31836  |
| 0.40243  | -0.16151 | 0.00046  | -0.23938 | 1.65E-07 | -0.2909603 | 1.45E-10 | -0.35872 | 1.25E-15 |
| 0.1153   | -0.12601 | 0.0064   | -0.08613 | 0.06292  | -0.0366462 | 0.42948  | -0.12898 | 0.00525  |
| 1.05E-05 | -0.05866 | 0.20576  | -0.04555 | 0.32595  | -0.0457408 | 0.32397  | -0.08663 | 0.06141  |
| 0.00032  | 0.018519 | 0.68977  | 0.000552 | 0.99051  | -0.122753  | 0.00792  | -0.2479  | 5.71E-08 |
| 0.16117  | -0.17016 | 0.00022  | -0.21825 | 1.92E-06 | -0.1047657 | 0.02356  | -0.15404 | 0.00084  |
| 0.33785  | -0.11339 | 0.01421  | -0.20808 | 5.78E-06 | -0.0386027 | 0.40525  | -0.03585 | 0.43962  |
| 0.71462  | -0.01338 | 0.773    | -0.08457 | 0.06787  | -0.0796215 | 0.08566  | -0.07757 | 0.09405  |
| 0.28291  | -0.05622 | 0.22526  | -0.14702 | 0.00144  | -0.1172275 | 0.01124  | -0.09261 | 0.04546  |
| 0.85931  | 0.006605 | 0.88679  | -0.08971 | 0.0527   | -0.0628436 | 0.17517  | -0.07504 | 0.10533  |
| 0.00017  | -0.22569 | 8.32E-07 | -0.218   | 1.98E-06 | -0.0503618 | 0.27743  | -0.03318 | 0.47447  |
| 0.12355  | -0.05278 | 0.25498  | -0.09024 | 0.05132  | -0.0766824 | 0.0979   | -0.11511 | 0.0128   |
| 0.00525  | 0.018904 | 0.68368  | 0.01962  | 0.67237  | 0.04294883 | 0.35441  | -0.12187 | 0.00838  |
| 0.82633  | 0.093202 | 0.0441   | -0.03903 | 0.40011  | -0.017418  | 0.70734  | -0.11346 | 0.01416  |
| 0.01906  | 0.179861 | 9.29E-05 | 0.083076 | 0.07288  | -0.0050135 | 0.91395  | 0.026062 | 0.57427  |
| 0.58762  | -0.03011 | 0.51624  | -0.06931 | 0.13475  | 0.05174926 | 0.2644   | -0.01086 | 0.81488  |
| 0.58694  | -0.25042 | 4.14E-08 | -0.17152 | 0.0002   | -0.4201896 | 2.11E-21 | -0.46742 | 1.01E-26 |
| 0.02973  | -0.16141 | 0.00046  | -0.09239 | 0.04598  | -0.3218602 | 1.02E-12 | -0.38241 | 1.04E-17 |
| 0.10623  | -0.1067  | 0.0211   | -0.10695 | 0.0208   | -0.2565986 | 1.86E-08 | -0.2986  | 4.51E-11 |
| 0.15407  | 0.104066 | 0.02451  | 0.104523 | 0.02389  | 0.08417084 | 0.06917  | -0.02623 | 0.57186  |
| 0.59079  | -0.04121 | 0.37421  | -0.20685 | 6.58E-06 | -0.102549  | 0.02669  | -0.01108 | 0.81124  |
| 0.25634  | -0.01497 | 0.74695  | -0.04194 | 0.36586  | 0.15210025 | 0.00098  | 0.240849 | 1.37E-07 |
| 0.08833  | -0.04758 | 0.30486  | 0.053044 | 0.25262  | 0.12114285 | 0.00878  | -0.0528  | 0.2548   |
| 0.01204  | -0.20032 | 1.29E-05 | -0.06308 | 0.17357  | 0.15153856 | 0.00102  | 0.010448 | 0.82183  |
| 0.10716  | -0.10074 | 0.0295   | -0.06828 | 0.14067  | -0.1537344 | 0.00086  | -0.25486 | 2.33E-08 |
| 0.69209  | -0.1751  | 0.00014  | -0.08268 | 0.07425  | 0.00296187 | 0.9491   | -0.0321  | 0.489    |
| 0.81981  | -0.11821 | 0.01057  | -0.10917 | 0.01828  | -0.214847  | 2.80E-06 | -0.22955 | 5.32E-07 |
| 0.0034   | 0.068463 | 0.1396   | -0.00793 | 0.86421  | -0.2050581 | 7.93E-06 | -0.26616 | 5.16E-09 |
| 0.06608  | -0.0871  | 0.06001  | -0.04889 | 0.29178  | -0.2549452 | 2.31E-08 | -0.32013 | 1.37E-12 |
| 0.71764  | -0.129   | 0.00524  | -0.09615 | 0.03779  | -0.1035743 | 0.0252   | -0.09614 | 0.03782  |
| 0.6653   | -0.22174 | 1.30E-06 | -0.12469 | 0.00698  | -0.2188257 | 1.80E-06 | -0.34357 | 2.20E-14 |
| 0.00058  | -0.14002 | 0.00242  | -0.10498 | 0.02328  | -0.3305898 | 2.27E-13 | -0.49807 | 1.20E-30 |
| 0.0411   | -0.12191 | 0.00835  | -0.17129 | 0.0002   | -0.1527113 | 0.00093  | -0.14801 | 0.00134  |
| 0.66837  | -0.01518 | 0.74357  | 0.064819 | 0.16197  | 0.07643076 | 0.09901  | -0.00543 | 0.90682  |
| 0.20856  | 0.078114 | 0.09178  | -0.00504 | 0.91353  | -0.0421185 | 0.3638   | -0.01031 | 0.82414  |
| 0.25083  | 0.136109 | 0.00321  | 0.074709 | 0.10687  | -0.109903  | 0.01751  | -0.14966 | 0.00118  |
| 0.44331  | -0.14355 | 0.00187  | -0.15362 | 0.00087  | -0.0932266 | 0.04405  | -0.05981 | 0.19698  |
| 0.3013   | -0.04474 | 0.3347   | -0.12911 | 0.0052   | -0.0910891 | 0.04915  | -0.13319 | 0.00393  |
| 0.49551  | -0.01006 | 0.82832  | -0.02683 | 0.56308  | -0.0427237 | 0.35694  | -0.1287  | 0.00535  |
| 0.94434  | 0.141888 | 0.00212  | -0.00219 | 0.96243  | 0.05706411 | 0.21837  | 0.100037 | 0.03066  |



|          |          |          |          |          |            |          |          |          |
|----------|----------|----------|----------|----------|------------|----------|----------|----------|
| 0.39873  | -0.01118 | 0.80957  | 0.017497 | 0.70607  | -0.03126   | 0.50038  | -0.13502 | 0.00346  |
| 0.82887  | -0.34114 | 3.43E-14 | -0.20712 | 6.39E-06 | -0.0074798 | 0.87193  | -0.05204 | 0.26171  |
| 0.70144  | -0.10585 | 0.02215  | -0.06563 | 0.15679  | 0.08066011 | 0.08164  | -0.01797 | 0.69851  |
| 0.37739  | -0.07378 | 0.11133  | -0.21945 | 1.68E-06 | -0.2007643 | 1.23E-05 | -0.16761 | 0.00027  |
| 0.76447  | 0.05886  | 0.2042   | 0.080122 | 0.0837   | -0.0186931 | 0.68701  | -0.08834 | 0.05644  |
| 0.62396  | -0.12596 | 0.00642  | -0.02675 | 0.56425  | 0.15812336 | 0.0006   | 0.093977 | 0.04236  |
| 0.01519  | -0.04901 | 0.29055  | -0.08091 | 0.0807   | -0.1959832 | 2.00E-05 | -0.25251 | 3.17E-08 |
| 0.23578  | -0.01523 | 0.74271  | -0.03422 | 0.46066  | 0.06114519 | 0.18715  | 0.009653 | 0.83519  |
| 0.50186  | -0.05644 | 0.22342  | -0.08708 | 0.06005  | -0.0177355 | 0.70226  | -0.02413 | 0.60296  |
| 0.4497   | 0.05426  | 0.24189  | 0.045616 | 0.32529  | -0.2207633 | 1.45E-06 | -0.3318  | 1.83E-13 |
| 0.39117  | 0.264897 | 6.13E-09 | 0.195363 | 2.12E-05 | -0.1585646 | 0.00058  | -0.22509 | 8.91E-07 |
| 0.10331  | -0.17411 | 0.00016  | -0.14503 | 0.00168  | -0.0414653 | 0.37129  | -0.11011 | 0.01729  |
| 0.53105  | -0.08242 | 0.07519  | -0.1902  | 3.52E-05 | -0.0145807 | 0.75332  | 0.077672 | 0.09363  |
| 0.38822  | 0.093538 | 0.04334  | 0.053167 | 0.25151  | -0.0692445 | 0.13513  | -0.12905 | 0.00522  |
| 6.92E-05 | 0.019711 | 0.67094  | -0.0516  | 0.2658   | 0.17891879 | 0.0001   | 0.145545 | 0.00161  |
| 0.04117  | -0.04049 | 0.38266  | -0.06653 | 0.15115  | -0.0546453 | 0.23855  | -0.08135 | 0.07905  |
| 0.32796  | -0.29336 | 1.01E-10 | -0.27137 | 2.51E-09 | -0.2856673 | 3.21E-10 | -0.23754 | 2.06E-07 |
| 0.07644  | -0.11434 | 0.01342  | -0.09363 | 0.04313  | -0.0708521 | 0.12628  | -0.02598 | 0.57547  |
| 0.71572  | -0.04699 | 0.31096  | -0.12767 | 0.00573  | -0.1342005 | 0.00367  | -0.06746 | 0.14554  |
| 0.03184  | -0.0835  | 0.07142  | -0.13922 | 0.00257  | -0.082266  | 0.07573  | -0.0094  | 0.83943  |
| 0.59241  | -0.05884 | 0.20437  | -0.06831 | 0.1405   | 0.01476255 | 0.75035  | 0.093325 | 0.04382  |
| 0.01949  | 0.018519 | 0.68977  | 0.017832 | 0.70071  | -0.172606  | 0.00018  | -0.26708 | 4.54E-09 |
| 0.16869  | -0.00231 | 0.96033  | -0.04283 | 0.3558   | -0.1504263 | 0.00111  | -0.17471 | 0.00015  |
| 0.63237  | 0.021867 | 0.6374   | -0.2924  | 1.17E-10 | -0.177583  | 0.00011  | -0.20834 | 5.62E-06 |
| 0.7661   | -0.00364 | 0.93752  | -0.04815 | 0.29911  | 0.06177864 | 0.18262  | 0.059837 | 0.19678  |
| 0.24513  | -0.03452 | 0.45669  | 0.058772 | 0.20488  | 0.04676548 | 0.31324  | -0.08099 | 0.0804   |
| 0.63138  | -0.12534 | 0.00669  | -0.12177 | 0.00844  | 0.00377375 | 0.93518  | 0.017313 | 0.70903  |
| 0.01901  | 0.001083 | 0.98137  | 0.019209 | 0.67884  | -0.1176269 | 0.01096  | -0.22406 | 1.00E-06 |
| 0.53345  | -0.13299 | 0.00399  | -0.18687 | 4.84E-05 | -0.0843189 | 0.06868  | -0.13839 | 0.00273  |
| 0.00062  | 0.171815 | 0.00019  | -0.00347 | 0.94039  | -0.2002735 | 1.30E-05 | -0.29712 | 5.68E-11 |
| 0.00215  | -0.14707 | 0.00144  | -0.03989 | 0.38973  | -0.2107304 | 4.36E-06 | -0.3266  | 4.54E-13 |
| 0.46466  | -0.05531 | 0.23287  | -0.12495 | 0.00686  | -0.1339896 | 0.00372  | -0.21472 | 2.83E-06 |
| 0.90529  | -0.15576 | 0.00073  | -0.20689 | 6.55E-06 | -0.1097638 | 0.01765  | -0.16443 | 0.00036  |
| 0.0461   | -0.17983 | 9.32E-05 | -0.23356 | 3.31E-07 | -0.2211741 | 1.39E-06 | -0.17271 | 0.00018  |
| 0.10707  | -0.09501 | 0.04013  | -0.15276 | 0.00093  | -0.0753663 | 0.10382  | -0.07154 | 0.12261  |
| 0.77862  | -0.03873 | 0.40373  | 0.04942  | 0.28653  | 0.04813402 | 0.29927  | -0.07631 | 0.09953  |
| 0.62988  | 0.11404  | 0.01367  | -0.00588 | 0.89915  | 0.04579899 | 0.32335  | -0.03519 | 0.44812  |
| 0.52878  | -0.07424 | 0.10909  | -0.07584 | 0.10164  | -0.179452  | 9.65E-05 | -0.27122 | 2.56E-09 |
| 0.21842  | -0.09724 | 0.03566  | -0.20225 | 1.06E-05 | -0.0568586 | 0.22004  | -0.07585 | 0.10161  |
| 0.00084  | -0.13439 | 0.00362  | -0.04855 | 0.2951   | -0.0972188 | 0.03571  | -0.22431 | 9.74E-07 |
| 0.05238  | -0.08957 | 0.05308  | -0.02733 | 0.55574  | -0.1577661 | 0.00062  | -0.2693  | 3.35E-09 |
| 0.94742  | -0.31713 | 2.27E-12 | -0.30689 | 1.21E-11 | 0.02493539 | 0.59092  | 0.068755 | 0.13792  |
| 0.82038  | -0.04349 | 0.34836  | -0.02753 | 0.55291  | 0.06485706 | 0.16173  | -0.00871 | 0.85104  |
| 0.71236  | -0.04183 | 0.3671   | -0.09459 | 0.04103  | -0.0058824 | 0.89911  | -0.03595 | 0.43827  |
| 0.46601  | -0.3106  | 6.66E-12 | -0.25912 | 1.33E-08 | -0.0814507 | 0.07868  | -0.11764 | 0.01095  |

|         |          |          |          |          |            |          |          |          |
|---------|----------|----------|----------|----------|------------|----------|----------|----------|
| 0.01358 | 0.128374 | 0.00547  | 0.027526 | 0.55295  | -0.1388289 | 0.00264  | -0.20348 | 9.34E-06 |
| 0.74333 | -0.03617 | 0.43552  | -0.04706 | 0.3102   | 0.08760527 | 0.05853  | 0.12721  | 0.00591  |
| 0.75307 | -0.08848 | 0.05605  | -0.04331 | 0.35042  | -0.0078888 | 0.86499  | -0.08376 | 0.07056  |
| 0.81346 | -0.15292 | 0.00092  | -0.2742  | 1.69E-09 | -0.041438  | 0.37161  | 0.031353 | 0.49911  |
| 0.04285 | -0.32581 | 5.21E-13 | -0.24657 | 6.75E-08 | -0.0753049 | 0.1041   | -0.1402  | 0.00239  |
| 0.00039 | 0.006252 | 0.89281  | -0.03463 | 0.45527  | -0.1262755 | 0.00629  | -0.23957 | 1.61E-07 |
| 0.09695 | 0.173296 | 0.00017  | 0.104298 | 0.0242   | -0.0194839 | 0.67451  | -0.04993 | 0.28159  |
| 0.00286 | 0.008555 | 0.85371  | 0.017733 | 0.7023   | -0.0750984 | 0.10505  | -0.16522 | 0.00034  |
| 0.5077  | -0.09564 | 0.03882  | -0.11716 | 0.01128  | -0.039188  | 0.39816  | -0.09571 | 0.03868  |
| 0.72045 | -0.06668 | 0.1502   | 0.066098 | 0.15383  | 0.01450776 | 0.75451  | -0.06559 | 0.15702  |
| 0.6145  | -0.09583 | 0.03845  | -0.11398 | 0.01372  | -0.2487602 | 5.12E-08 | -0.36198 | 6.64E-16 |
| 0.04437 | -0.03005 | 0.51708  | -0.079   | 0.08814  | -0.1534879 | 0.00088  | -0.22789 | 6.45E-07 |
| 0.07555 | -0.05614 | 0.22593  | -0.15345 | 0.00088  | -0.107528  | 0.02011  | -0.07772 | 0.09341  |
| 0.12739 | -0.02393 | 0.60604  | 0.112707 | 0.01482  | 0.0354444  | 0.44478  | -0.07079 | 0.1266   |
| 0.00046 | -0.24284 | 1.08E-07 | -0.07596 | 0.10112  | -0.0274073 | 0.55465  | -0.08938 | 0.05358  |
| 0.04605 | -0.06431 | 0.16529  | -0.03962 | 0.39298  | -0.0545388 | 0.23947  | -0.16806 | 0.00026  |
| 0.33291 | -0.20052 | 1.26E-05 | -0.15935 | 0.00055  | -0.1487616 | 0.00126  | -0.27236 | 2.18E-09 |
| 0.62266 | -0.09214 | 0.04658  | -0.08206 | 0.07645  | -0.0353845 | 0.44555  | -0.04054 | 0.38208  |
| 0.04274 | 0.187551 | 4.53E-05 | 0.032514 | 0.48334  | -0.1070362 | 0.02069  | -0.2034  | 9.42E-06 |
| 0.51219 | -0.04781 | 0.30258  | -0.0387  | 0.40406  | 0.00144052 | 0.97523  | -0.03742 | 0.41985  |
| 0.40317 | -0.0258  | 0.57807  | -0.15003 | 0.00115  | -0.1283472 | 0.00548  | -0.17444 | 0.00015  |
| 0.22235 | -0.20414 | 8.73E-06 | -0.13436 | 0.00363  | -0.1882242 | 4.25E-05 | -0.33503 | 1.03E-13 |
| 0.70469 | -0.11936 | 0.00983  | 0.008959 | 0.84689  | -0.0168576 | 0.71635  | -0.11002 | 0.01739  |
| 0.80178 | -0.09717 | 0.0358   | -0.22246 | 1.20E-06 | -0.182598  | 7.22E-05 | -0.14968 | 0.00118  |
| 0.72841 | -0.06018 | 0.19421  | -0.12042 | 0.00919  | -0.1072387 | 0.02045  | -0.04649 | 0.31605  |
| 0.06085 | -0.2126  | 3.57E-06 | -0.03599 | 0.43774  | -0.021344  | 0.64547  | -0.16153 | 0.00046  |
| 0.49997 | -0.24809 | 5.57E-08 | -0.20327 | 9.55E-06 | -0.2060939 | 7.12E-06 | -0.34315 | 2.37E-14 |
| 0.16699 | -0.03217 | 0.48797  | -0.10059 | 0.02975  | -0.1197093 | 0.00962  | -0.09891 | 0.0326   |
| 0.01682 | -0.15138 | 0.00103  | -0.14305 | 0.00194  | 0.01846712 | 0.6906   | 0.104388 | 0.02407  |
| 0.00457 | 0.240687 | 1.40E-07 | 0.000361 | 0.9938   | -0.2842737 | 3.94E-10 | -0.33516 | 1.01E-13 |
| 0.22    | -0.00143 | 0.97545  | -0.03781 | 0.41496  | -0.1020947 | 0.02737  | -0.19189 | 2.99E-05 |
| 0.54067 | -0.04765 | 0.30412  | -0.02559 | 0.58119  | -0.0985406 | 0.03326  | -0.19878 | 1.51E-05 |
| 0.06826 | -0.0761  | 0.10048  | -0.1274  | 0.00583  | -0.080307  | 0.08299  | -0.12007 | 0.0094   |
| 0.55189 | -0.0546  | 0.23891  | -0.11643 | 0.01181  | -0.1166964 | 0.01161  | -0.1227  | 0.00794  |
| 0.29745 | -0.05281 | 0.25475  | -0.14136 | 0.0022   | -0.1138532 | 0.01382  | -0.10641 | 0.02145  |
| 0.16082 | 0.069609 | 0.13308  | 0.048058 | 0.30003  | -0.056662  | 0.22164  | -0.10193 | 0.02762  |
| 0.05075 | -0.16825 | 0.00026  | -0.0537  | 0.24679  | -0.0377107 | 0.41619  | -0.19621 | 1.95E-05 |
| 0.01343 | -0.04643 | 0.31667  | -0.00622 | 0.89333  | -0.1185738 | 0.01033  | -0.16727 | 0.00028  |
| 0.31778 | -0.21546 | 2.61E-06 | -0.2649  | 6.12E-09 | -0.1728747 | 0.00017  | -0.29886 | 4.33E-11 |
| 0.01297 | 0.047992 | 0.3007   | -0.06183 | 0.18223  | -0.1574683 | 0.00064  | -0.15685 | 0.00067  |
| 0.13552 | -0.10515 | 0.02305  | -0.05138 | 0.26778  | 0.07381686 | 0.11114  | 0.006524 | 0.88819  |
| 0.59293 | 0.060403 | 0.19257  | 0.081282 | 0.07931  | 0.00841104 | 0.85615  | -0.09793 | 0.03437  |
| 0.65063 | -0.14698 | 0.00145  | -0.26949 | 3.26E-09 | -0.173508  | 0.00016  | -0.071   | 0.12547  |
| 0.00218 | -0.07464 | 0.10722  | -0.10908 | 0.01837  | -0.1790561 | 0.0001   | -0.29615 | 6.58E-11 |
| 0.03463 | -0.05678 | 0.22066  | -0.03909 | 0.39936  | -0.1454031 | 0.00163  | -0.21696 | 2.22E-06 |

|          |          |          |          |          |            |          |          |          |
|----------|----------|----------|----------|----------|------------|----------|----------|----------|
| 0.15011  | 0.025075 | 0.58884  | -0.04901 | 0.29052  | -0.0595989 | 0.19857  | -0.11633 | 0.01188  |
| 0.30696  | -0.3124  | 4.97E-12 | -0.23868 | 1.79E-07 | -0.0728876 | 0.11572  | -0.06261 | 0.17679  |
| 0.00033  | -0.08097 | 0.08046  | -0.09902 | 0.03241  | 0.00938527 | 0.8397   | 0.111574 | 0.01586  |
| 0.03561  | 0.064825 | 0.16193  | 0.009193 | 0.84294  | -0.0829878 | 0.07319  | -0.09365 | 0.0431   |
| 0.22155  | -0.1311  | 0.00454  | -0.16873 | 0.00025  | -0.1529743 | 0.00091  | -0.25648 | 1.89E-08 |
| 0.1095   | -0.1359  | 0.00325  | -0.23009 | 4.99E-07 | -0.205882  | 7.28E-06 | -0.16365 | 0.00038  |
| 0.00451  | -0.11863 | 0.01029  | -0.08686 | 0.06071  | -0.1888027 | 4.02E-05 | -0.23285 | 3.61E-07 |
| 0.98454  | -0.11379 | 0.01388  | -0.14107 | 0.00225  | -0.120026  | 0.00943  | -0.19194 | 2.97E-05 |
| 0.65829  | 0.008392 | 0.85647  | -0.04185 | 0.36682  | -0.1117462 | 0.01569  | -0.15263 | 0.00094  |
| 0.0428   | -0.12621 | 0.00631  | 0.000946 | 0.98373  | -0.0084487 | 0.85551  | -0.06381 | 0.16859  |
| 0.02282  | 0.102297 | 0.02707  | -0.00842 | 0.85598  | 0.00404139 | 0.93059  | 0.050291 | 0.27811  |
| 0.03257  | -0.31725 | 2.22E-12 | -0.32506 | 5.92E-13 | -0.0234941 | 0.61256  | -0.09344 | 0.04357  |
| 0.09281  | -0.03421 | 0.46077  | -0.05852 | 0.2068   | -0.0530398 | 0.25265  | -0.01225 | 0.79179  |
| 0.13844  | -0.03297 | 0.4772   | -0.14775 | 0.00137  | -0.0993154 | 0.03189  | -0.01395 | 0.76359  |
| 0.70789  | -0.20401 | 8.84E-06 | -0.14012 | 0.00241  | -0.0846479 | 0.0676   | -0.14142 | 0.00219  |
| 0.145    | 0.06195  | 0.1814   | -0.01968 | 0.67146  | 0.01397525 | 0.76325  | -0.00548 | 0.90598  |
| 0.1806   | -0.14121 | 0.00222  | -0.09683 | 0.03646  | -0.0593481 | 0.20047  | -0.14643 | 0.00151  |
| 0.22767  | 0.042917 | 0.35477  | -0.06891 | 0.13706  | -0.1168002 | 0.01154  | -0.25189 | 3.43E-08 |
| 0.16249  | -0.07434 | 0.10862  | -0.07271 | 0.1166   | -0.1412999 | 0.00221  | -0.27047 | 2.85E-09 |
| 0.01595  | -0.192   | 2.95E-05 | -0.20003 | 1.33E-05 | -0.1392378 | 0.00256  | -0.13068 | 0.00468  |
| 8.03E-12 | -0.16183 | 0.00045  | -0.14392 | 0.00182  | -0.0581026 | 0.2101   | -0.19835 | 1.58E-05 |
| 0.1259   | 0.019713 | 0.67092  | 0.087416 | 0.05908  | 0.02536402 | 0.58456  | -0.03648 | 0.43164  |
| 0.36292  | 0.141671 | 0.00215  | 0.048651 | 0.2941   | -0.13162   | 0.00438  | -0.17896 | 0.0001   |
| 0.72153  | 0.1101   | 0.01731  | 0.028597 | 0.53759  | -0.0529824 | 0.25317  | -0.07017 | 0.12998  |
| 0.46467  | -0.08358 | 0.07117  | -0.18759 | 4.52E-05 | -0.0100622 | 0.82831  | -0.01643 | 0.72322  |
| 0.00957  | -0.14261 | 0.00201  | -0.08673 | 0.0611   | -0.1000139 | 0.0307   | -0.20462 | 8.30E-06 |
| 0.03698  | -0.16409 | 0.00037  | -0.19075 | 3.34E-05 | -0.0111399 | 0.81025  | 0.01394  | 0.76383  |
| 0.10248  | 0.078568 | 0.0899   | -0.01488 | 0.74834  | -0.0232402 | 0.61641  | -0.01844 | 0.69103  |
| 0.58466  | 0.002412 | 0.95855  | 0.029509 | 0.52469  | 0.05189451 | 0.26306  | 0.089143 | 0.05422  |
| 0.28043  | -0.20117 | 1.18E-05 | -0.05199 | 0.2622   | 0.10972622 | 0.01769  | 0.183409 | 6.70E-05 |
| 0.23449  | -0.02736 | 0.55527  | 0.015395 | 0.74002  | 0.04482221 | 0.33379  | 0.040607 | 0.38129  |
| 0.07339  | -0.12641 | 0.00623  | -0.04212 | 0.36375  | 0.06939013 | 0.13431  | 0.125819 | 0.00648  |
| 0.65482  | 0.114288 | 0.01346  | 0.030207 | 0.51493  | 0.03405563 | 0.46283  | 0.053715 | 0.24665  |
| 0.77406  | 0.046799 | 0.31289  | -0.11767 | 0.01093  | -0.0361763 | 0.43543  | 0.048119 | 0.29942  |
| 0.27338  | -0.06514 | 0.15987  | -0.14212 | 0.00208  | 0.01291394 | 0.78075  | 0.130526 | 0.00472  |
| 0.67071  | 0.08498  | 0.06653  | 0.081823 | 0.07732  | 0.03069848 | 0.50811  | 0.030829 | 0.50631  |
| 0.03679  | 0.023762 | 0.60851  | -0.07935 | 0.08672  | 0.06207274 | 0.18054  | 0.224871 | 9.13E-07 |
| 0.78715  | 0.056434 | 0.22351  | -0.14665 | 0.00148  | 0.01404848 | 0.76205  | 0.123701 | 0.00744  |
| 0.13207  | 0.129103 | 0.0052   | 0.134616 | 0.00356  | 0.02666271 | 0.56546  | 0.016623 | 0.72013  |
| 5.23E-08 | 0.145749 | 0.00159  | 0.073325 | 0.11354  | -0.0650442 | 0.16052  | -0.0683  | 0.14053  |
| 0.64689  | 0.05519  | 0.2339   | -0.09848 | 0.03337  | -0.0908437 | 0.04977  | 0.047801 | 0.30263  |
| 0.91681  | 0.027676 | 0.55077  | -0.04409 | 0.34174  | 0.0551042  | 0.23463  | 0.108824 | 0.01865  |
| 0.13218  | 0.152056 | 0.00098  | -0.01137 | 0.80635  | -0.1127699 | 0.01476  | -0.08187 | 0.07714  |
| 0.88709  | 0.10237  | 0.02696  | 0.078827 | 0.08884  | 0.09879623 | 0.0328   | 0.089552 | 0.05312  |
| 0.00339  | -0.01218 | 0.79287  | -0.10367 | 0.02507  | -0.019128  | 0.68013  | -0.0124  | 0.7893   |

|          |          |          |          |          |            |          |          |          |
|----------|----------|----------|----------|----------|------------|----------|----------|----------|
| 0.37908  | 0.072943 | 0.11545  | -0.0554  | 0.23216  | -0.0191719 | 0.67943  | -0.0123  | 0.79088  |
| 0.3344   | 0.105959 | 0.02201  | 0.04888  | 0.29184  | -0.0135254 | 0.77066  | 0.001995 | 0.96571  |
| 0.24078  | 0.128136 | 0.00555  | 0.076809 | 0.09735  | -0.0165673 | 0.72103  | 0.009931 | 0.83052  |
| 0.29718  | 0.046791 | 0.31297  | -0.00705 | 0.87922  | -0.0018279 | 0.96857  | 0.045961 | 0.32164  |
| 0.10462  | -0.04511 | 0.33073  | 0.009038 | 0.84555  | 0.07211182 | 0.11966  | 0.02671  | 0.56478  |
| 0.73523  | 0.082234 | 0.07584  | 0.062052 | 0.18069  | 0.0205981  | 0.65705  | 0.043581 | 0.34736  |
| 0.10508  | 0.157088 | 0.00066  | 0.053933 | 0.24473  | -0.0164903 | 0.72227  | 0.091355 | 0.04849  |
| 0.00929  | 0.115294 | 0.01266  | 0.071622 | 0.1222   | -0.0186048 | 0.68841  | 0.003048 | 0.94763  |
| 0.5388   | -0.01946 | 0.67497  | -0.06401 | 0.16727  | -0.0515948 | 0.26583  | 0.051443 | 0.26724  |
| 0.36392  | 0.078988 | 0.08819  | 0.011795 | 0.79933  | 0.06000978 | 0.19549  | 0.067054 | 0.14796  |
| 0.10027  | 0.075478 | 0.1033   | 0.030873 | 0.5057   | -0.0006349 | 0.98908  | -0.02016 | 0.66394  |
| 0.4245   | 0.09911  | 0.03225  | -0.03548 | 0.44429  | -0.0321492 | 0.48827  | 0.04749  | 0.30579  |
| 0.29062  | 0.08905  | 0.05447  | 0.024602 | 0.5959   | 0.07105734 | 0.12518  | 0.05641  | 0.22371  |
| 0.54992  | 0.111184 | 0.01623  | 0.014122 | 0.76084  | 0.00573713 | 0.90159  | 0.035945 | 0.43837  |
| 0.35916  | 0.086897 | 0.0606   | 0.023458 | 0.6131   | 0.04635091 | 0.31755  | 0.056556 | 0.22251  |
| 0.27033  | 0.110811 | 0.01659  | 0.058801 | 0.20466  | -0.0943468 | 0.04156  | -0.09599 | 0.03811  |
| 0.30425  | 0.100848 | 0.02933  | 0.030053 | 0.51708  | -0.0018964 | 0.9674   | 0.017836 | 0.70065  |
| 0.20778  | 0.082978 | 0.07322  | -0.01135 | 0.80675  | -0.0783841 | 0.09065  | -0.07284 | 0.11596  |
| 0.29977  | 0.089564 | 0.05309  | 0.028139 | 0.54413  | 0.01270311 | 0.78424  | 0.015273 | 0.74201  |
| 0.5872   | 0.071854 | 0.12099  | -0.00775 | 0.86743  | 0.03576209 | 0.44071  | 0.052757 | 0.25519  |
| 0.5334   | 0.081251 | 0.07942  | 0.01943  | 0.67536  | 0.02294945 | 0.62083  | 0.033938 | 0.46438  |
| 0.36072  | 0.097718 | 0.03476  | 0.009949 | 0.83021  | 0.00572678 | 0.90177  | 0.066837 | 0.14927  |
| 0.44236  | 0.106436 | 0.02142  | 0.058577 | 0.20639  | 0.02045811 | 0.65924  | 0.053718 | 0.24663  |
| 0.72177  | 0.047058 | 0.31022  | -0.0067  | 0.88521  | 0.04864349 | 0.29418  | 0.049907 | 0.2818   |
| 0.96979  | 0.057047 | 0.21851  | 0.011959 | 0.7966   | 0.05621636 | 0.2253   | 0.069076 | 0.13609  |
| 0.88763  | -0.04382 | 0.34478  | -0.21875 | 1.82E-06 | -0.0589914 | 0.20319  | 0.033195 | 0.47422  |
| 0.02413  | 0.224398 | 9.64E-07 | 0.17387  | 0.00016  | 0.07555564 | 0.10295  | 0.116419 | 0.01181  |
| 0.00722  | 0.083995 | 0.06976  | 0.057669 | 0.21353  | 0.04324557 | 0.35109  | 0.031841 | 0.49244  |
| 0.41134  | 0.115595 | 0.01243  | 0.067867 | 0.14309  | 0.03728604 | 0.42147  | 0.052314 | 0.25921  |
| 0.61079  | 0.093624 | 0.04315  | 0.015801 | 0.73343  | 0.04545562 | 0.327    | 0.058171 | 0.20956  |
| 0.82781  | 0.122653 | 0.00797  | 0.036955 | 0.42561  | 0.03559155 | 0.44289  | 0.063623 | 0.16988  |
| 0.05662  | 0.105198 | 0.02299  | 0.031372 | 0.49885  | 0.05167789 | 0.26506  | 0.104606 | 0.02378  |
| 0.9761   | 0.130954 | 0.00459  | 0.050322 | 0.27782  | 0.03916642 | 0.39842  | 0.083549 | 0.07126  |
| 0.71883  | 0.045222 | 0.32949  | 0.04214  | 0.36355  | 0.07768089 | 0.09359  | 0.04415  | 0.3411   |
| 0.28044  | 0.161319 | 0.00047  | 0.10077  | 0.02945  | 0.01477533 | 0.75014  | 0.042243 | 0.36238  |
| 0.00759  | 0.065233 | 0.15931  | 0.059108 | 0.2023   | 0.0589203  | 0.20374  | 0.01901  | 0.68199  |
| 0.29084  | 0.038055 | 0.41195  | -0.104   | 0.02461  | -0.0890305 | 0.05453  | 0.019981 | 0.66671  |
| 0.49811  | 0.099328 | 0.03187  | 0.014181 | 0.75986  | 0.01959971 | 0.67269  | 0.087818 | 0.05791  |
| 0.02589  | -0.23164 | 4.16E-07 | -0.13608 | 0.00321  | -0.0721447 | 0.11949  | -0.04249 | 0.35954  |
| 3.89E-30 | -0.10044 | 0.03     | -0.07182 | 0.12116  | 0.23515935 | 2.74E-07 | 0.288614 | 2.07E-10 |
| 0.01632  | 0.248514 | 5.28E-08 | 0.179166 | 9.90E-05 | 0.05873236 | 0.20519  | 0.117988 | 0.01072  |
| 0.65332  | 0.02512  | 0.58818  | -0.18277 | 7.11E-05 | -0.0753128 | 0.10406  | 0.077297 | 0.09523  |
| 0.00643  | 0.127291 | 0.00588  | 0.058398 | 0.20778  | -0.0897659 | 0.05255  | -0.08037 | 0.08274  |
| 0.32184  | -0.2262  | 7.84E-07 | -0.23434 | 3.02E-07 | 0.07686268 | 0.09711  | 0.25771  | 1.61E-08 |
| 0.06762  | -0.00718 | 0.87697  | 0.060542 | 0.19155  | -0.0455663 | 0.32582  | -0.03413 | 0.46189  |

|          |          |          |          |          |            |          |          |          |
|----------|----------|----------|----------|----------|------------|----------|----------|----------|
| 0.0781   | -0.15466 | 0.0008   | -0.0894  | 0.05352  | -0.029126  | 0.53009  | -0.03719 | 0.4226   |
| 0.00195  | -0.29146 | 1.35E-10 | -0.04095 | 0.37731  | -0.0096181 | 0.83578  | -0.04335 | 0.34989  |
| 0.21431  | -0.02482 | 0.59259  | 0.066197 | 0.15321  | 0.04325869 | 0.35094  | 0.130457 | 0.00475  |
| 0.87834  | -0.25213 | 3.32E-08 | -0.18498 | 5.78E-05 | -0.0279867 | 0.54631  | -0.00825 | 0.85892  |
| 0.25932  | -0.0524  | 0.25841  | 0.034634 | 0.45526  | 0.07093277 | 0.12585  | 0.022224 | 0.63191  |
| 0.00144  | 0.125461 | 0.00663  | 0.074112 | 0.10971  | -0.0590695 | 0.20259  | -0.04993 | 0.28159  |
| 0.00952  | 0.015956 | 0.73092  | -0.04181 | 0.36728  | -0.0514956 | 0.26675  | -0.0057  | 0.90226  |
| 0.01228  | -0.08468 | 0.0675   | -0.13168 | 0.00437  | -0.0546852 | 0.23821  | 0.101297 | 0.02861  |
| 0.03617  | -0.01807 | 0.69699  | -0.0133  | 0.77441  | -0.0896354 | 0.0529   | -0.05299 | 0.25312  |
| 0.19246  | 0.050302 | 0.27801  | -0.07457 | 0.10754  | -0.026466  | 0.56834  | 0.070276 | 0.1294   |
| 0.48749  | -0.06415 | 0.16636  | 0.104038 | 0.02455  | 0.04451037 | 0.33717  | 0.059317 | 0.20071  |
| 0.16767  | -0.19123 | 3.18E-05 | -0.2819  | 5.58E-10 | -0.1516275 | 0.00101  | -0.03536 | 0.44581  |
| 0.3877   | 0.154243 | 0.00082  | -0.02273 | 0.62424  | -0.0777182 | 0.09344  | 0.037437 | 0.41959  |
| 0.00239  | -0.07095 | 0.12574  | -0.16149 | 0.00046  | 0.02129826 | 0.64618  | 0.102441 | 0.02685  |
| 0.93871  | -0.17576 | 0.00013  | -0.09111 | 0.04911  | -0.0126567 | 0.78501  | 0.045972 | 0.32152  |
| 0.18272  | 0.100193 | 0.0304   | 0.071951 | 0.12049  | -0.0586598 | 0.20575  | -0.02536 | 0.5846   |
| 0.41679  | -0.03648 | 0.43156  | -0.02876 | 0.53534  | 0.14348232 | 0.00188  | 0.198983 | 1.48E-05 |
| 0.00725  | 0.101512 | 0.02827  | 0.149031 | 0.00124  | -0.0602261 | 0.19388  | -0.07592 | 0.10128  |
| 0.54398  | 0.120732 | 0.00901  | 0.094868 | 0.04044  | 0.10806511 | 0.0195   | 0.189782 | 3.66E-05 |
| 0.79242  | -0.04564 | 0.32507  | -0.06905 | 0.13621  | 0.1306314  | 0.00469  | 0.178585 | 0.0001   |
| 0.15612  | 0.13939  | 0.00254  | 0.083111 | 0.07276  | 0.21217088 | 3.74E-06 | 0.248456 | 5.32E-08 |
| 0.0236   | -0.19018 | 3.52E-05 | -0.10331 | 0.02558  | -0.1120134 | 0.01545  | -0.08325 | 0.07227  |
| 0.94474  | 0.161583 | 0.00046  | 0.241593 | 1.25E-07 | 0.09263474 | 0.04541  | 0.135656 | 0.00331  |
| 0.40248  | 0.046632 | 0.31462  | -0.03099 | 0.50413  | -0.090595  | 0.0504   | -0.03402 | 0.46333  |
| 0.14063  | -0.06913 | 0.13578  | -0.00791 | 0.8646   | -0.0028226 | 0.95149  | 0.022105 | 0.63374  |
| 0.09416  | -0.14613 | 0.00154  | -0.09405 | 0.0422   | -0.0773132 | 0.09516  | -0.09799 | 0.03426  |
| 0.05547  | -0.03596 | 0.43816  | -0.19713 | 1.78E-05 | -0.0311967 | 0.50125  | 0.164182 | 0.00037  |
| 0.34965  | 0.035622 | 0.4425   | 0.073851 | 0.11097  | 0.01196846 | 0.79644  | 0.02159  | 0.64167  |
| 1.78E-05 | -0.12814 | 0.00555  | -0.25495 | 2.31E-08 | -0.0523605 | 0.25879  | 0.149558 | 0.00119  |
| 0.34957  | 0.00844  | 0.85566  | 0.042789 | 0.35621  | 0.07606009 | 0.10066  | 0.14849  | 0.00129  |
| 0.50424  | -0.15405 | 0.00084  | -0.06613 | 0.15365  | -0.0187025 | 0.68686  | -0.04244 | 0.36013  |
| 0.39588  | -0.08706 | 0.06012  | -0.00874 | 0.85051  | 0.07147196 | 0.12299  | 0.078079 | 0.09192  |
| 0.64489  | -0.00239 | 0.95897  | -0.03585 | 0.43963  | -0.0011207 | 0.98073  | 0.115103 | 0.01281  |
| 0.08612  | 0.188075 | 4.31E-05 | 0.062532 | 0.17733  | 0.00892323 | 0.84749  | 0.132925 | 0.00401  |
| 0.17868  | 0.049748 | 0.28334  | -0.03769 | 0.41649  | 0.02277182 | 0.62353  | 0.133043 | 0.00397  |
| 0.06956  | 0.081916 | 0.07699  | 0.04221  | 0.36276  | -0.1195169 | 0.00973  | -0.05501 | 0.23546  |
| 0.00892  | -0.24969 | 4.55E-08 | -0.16903 | 0.00024  | -0.0029353 | 0.94956  | 0.025139 | 0.58789  |
| 0.0621   | 0.028215 | 0.54304  | 0.018775 | 0.68571  | -0.0856989 | 0.06425  | -0.06569 | 0.15639  |
| 0.58915  | 0.023422 | 0.61365  | -0.16814 | 0.00026  | -0.0916774 | 0.0477   | 0.048311 | 0.29749  |
| 0.02223  | -0.02153 | 0.64266  | 0.007975 | 0.86353  | -0.0870401 | 0.06018  | -0.00015 | 0.99733  |
| 0.01287  | -0.00026 | 0.99551  | -0.11243 | 0.01506  | -0.1435567 | 0.00187  | -0.05194 | 0.26263  |
| 0.00012  | 0.145883 | 0.00157  | 0.064451 | 0.16437  | 0.02864484 | 0.53691  | 0.134668 | 0.00355  |
| 0.11254  | 0.036068 | 0.4368   | -0.02897 | 0.53235  | 0.05377858 | 0.24609  | 0.167692 | 0.00027  |
| 0.02227  | 0.125407 | 0.00666  | 0.106706 | 0.02109  | 0.07086164 | 0.12623  | 0.206535 | 6.80E-06 |
| 0.00431  | -0.0635  | 0.17072  | -0.1248  | 0.00693  | -0.2392216 | 1.68E-07 | -0.1914  | 3.13E-05 |

|          |           |          |          |          |            |          |          |          |
|----------|-----------|----------|----------|----------|------------|----------|----------|----------|
| 0.51788  | -0.21586  | 2.50E-06 | -0.01677 | 0.71775  | -0.0225518 | 0.62689  | -0.03024 | 0.5145   |
| 0.55139  | -0.05965  | 0.19818  | -0.08811 | 0.05707  | 0.11454318 | 0.01326  | 0.232718 | 3.66E-07 |
| 0.00356  | -0.14752  | 0.00139  | -0.07281 | 0.11614  | -0.0391841 | 0.39821  | -0.03661 | 0.42997  |
| 0.27604  | -0.14647  | 0.0015   | -0.0767  | 0.09782  | 0.0831419  | 0.07265  | 0.151982 | 0.00099  |
| 0.2817   | 0.232563  | 3.73E-07 | 0.133506 | 0.00385  | -0.0298005 | 0.52061  | 0.042451 | 0.36002  |
| 0.00586  | -0.02136  | 0.64527  | 0.330249 | 2.40E-13 | 0.1013205  | 0.02857  | 0.052428 | 0.25817  |
| 0.75175  | -0.10687  | 0.02089  | -0.02877 | 0.5351   | 0.03162316 | 0.49542  | 0.093259 | 0.04397  |
| 0.01413  | 0.300235  | 3.49E-11 | 0.23792  | 1.97E-07 | 0.01609488 | 0.72866  | 0.039676 | 0.39231  |
| 0.00428  | 0.229276  | 5.49E-07 | 0.180021 | 9.16E-05 | -0.0197045 | 0.67104  | 0.010674 | 0.81805  |
| 0.00603  | 0.028636  | 0.53703  | 0.030039 | 0.51727  | -0.0140297 | 0.76236  | 0.071701 | 0.12179  |
| 0.00783  | 0.024552  | 0.59664  | 0.129183 | 0.00518  | 0.07313805 | 0.11447  | 0.175057 | 0.00014  |
| 0.44426  | -0.2051   | 7.90E-06 | -0.08781 | 0.05795  | 0.23266319 | 3.69E-07 | 0.409411 | 2.67E-20 |
| 0.28174  | -0.15135  | 0.00104  | -0.16096 | 0.00048  | -7.73E-05  | 0.99867  | 0.144053 | 0.0018   |
| 2.64E-06 | -0.12805  | 0.00559  | -0.00345 | 0.94068  | 0.11176022 | 0.01568  | 0.24129  | 1.30E-07 |
| 0.00193  | -0.26173  | 9.39E-09 | -0.25181 | 3.46E-08 | 0.00978865 | 0.83291  | 0.029794 | 0.5207   |
| 1.38E-05 | 0.114518  | 0.01328  | 0.055297 | 0.23299  | -0.0394887 | 0.39454  | -0.04705 | 0.31027  |
| 0.95546  | -0.10746  | 0.02019  | -0.09346 | 0.04353  | 0.20352415 | 9.30E-06 | 0.353875 | 3.19E-15 |
| 0.35203  | -0.03924  | 0.39755  | 0.054263 | 0.24186  | 0.19763481 | 1.69E-05 | 0.221091 | 1.40E-06 |
| 0.00923  | 0.081517  | 0.07844  | 0.004669 | 0.91985  | 0.21363081 | 3.19E-06 | 0.294785 | 8.13E-11 |
| 0.82399  | -0.18109  | 8.30E-05 | -0.13648 | 0.00312  | -0.0197156 | 0.67087  | -0.00669 | 0.88537  |
| 0.00372  | -0.03021  | 0.51492  | -0.08152 | 0.07843  | -0.0067916 | 0.88362  | 0.122862 | 0.00786  |
| 0.07587  | 0.013921  | 0.76414  | -0.04689 | 0.31194  | 0.11111551 | 0.0163   | 0.19938  | 1.42E-05 |
| 0.60778  | -0.10485  | 0.02345  | -0.15782 | 0.00062  | 0.05367484 | 0.24701  | 0.147033 | 0.00144  |
| 0.07885  | -0.08226  | 0.07574  | -0.19843 | 1.56E-05 | -0.1591878 | 0.00055  | 0.024557 | 0.59657  |
| 0.10397  | -0.10966  | 0.01776  | -0.1401  | 0.00241  | -0.0577922 | 0.21255  | 0.040864 | 0.37827  |
| 0.37983  | 0.077101  | 0.09607  | 0.133445 | 0.00387  | 0.17179569 | 0.00019  | 0.264618 | 6.36E-09 |
| 0.2123   | 0.00507   | 0.91299  | -0.12478 | 0.00694  | 0.06225636 | 0.17925  | 0.182038 | 7.61E-05 |
| 0.51607  | 0.04025   | 0.38549  | 0.085698 | 0.06426  | -0.0197081 | 0.67099  | 0.0724   | 0.11818  |
| 0.84777  | 0.204293  | 8.59E-06 | 0.209879 | 4.78E-06 | -0.0754861 | 0.10327  | -0.03383 | 0.46576  |
| 0.00674  | 0.001041  | 0.98209  | 0.001074 | 0.98154  | 0.07771608 | 0.09345  | 0.035961 | 0.43816  |
| 0.00244  | -0.25224  | 3.28E-08 | -0.05502 | 0.23533  | 0.06180724 | 0.18241  | 0.191442 | 3.12E-05 |
| 0.14294  | -0.33588  | 8.88E-14 | -0.20411 | 8.75E-06 | 0.00823625 | 0.85911  | -0.01506 | 0.74547  |
| 0.39412  | -0.03225  | 0.48692  | -0.08451 | 0.06804  | -0.0256803 | 0.57988  | 0.003684 | 0.93672  |
| 0.0006   | 0.079585  | 0.0858   | 0.116505 | 0.01175  | 0.06831513 | 0.14046  | 0.085712 | 0.06421  |
| 0.32503  | 0.020603  | 0.65698  | -0.04288 | 0.35521  | 0.0384786  | 0.40676  | 0.163453 | 0.00039  |
| 0.0158   | 0.239442  | 1.63E-07 | 0.239211 | 1.68E-07 | 0.10955461 | 0.01787  | 0.198617 | 1.53E-05 |
| 0.21472  | -4.18E-05 | 0.99928  | -0.07477 | 0.1066   | 5.69E-05   | 0.99902  | 0.134692 | 0.00354  |
| 0.25139  | -0.30324  | 2.17E-11 | -0.28735 | 2.50E-10 | -0.0813271 | 0.07914  | 0.010514 | 0.82073  |
| 0.03944  | -0.28862  | 2.07E-10 | -0.28407 | 4.06E-10 | -0.1008721 | 0.02929  | 0.015328 | 0.74112  |
| 5.00E-05 | 0.186081  | 5.21E-05 | 0.15995  | 0.00052  | 0.06767572 | 0.14422  | 0.149692 | 0.00118  |
| 0.12848  | -0.27567  | 1.37E-09 | -0.13762 | 0.00288  | -0.1402576 | 0.00238  | -0.11047 | 0.01693  |
| 0.16996  | -0.07876  | 0.08911  | -0.0015  | 0.97423  | 0.0505058  | 0.27606  | 0.101817 | 0.0278   |
| 0.92475  | -0.00934  | 0.84042  | -0.12729 | 0.00588  | -0.013243  | 0.77532  | 0.188263 | 4.24E-05 |
| 0.93518  | -0.05552  | 0.23114  | 0.008999 | 0.84621  | 0.13797649 | 0.00281  | 0.216615 | 2.30E-06 |
| 0.57034  | -0.13277  | 0.00405  | -0.22132 | 1.37E-06 | -0.0844172 | 0.06836  | 0.124757 | 0.00695  |

|          |          |          |          |          |            |          |          |          |
|----------|----------|----------|----------|----------|------------|----------|----------|----------|
| 0.99016  | -0.23459 | 2.93E-07 | -0.12966 | 0.00501  | 0.06695908 | 0.14853  | 0.267956 | 4.03E-09 |
| 0.07867  | -0.05407 | 0.24356  | -0.07951 | 0.0861   | -0.0804552 | 0.08242  | 0.010399 | 0.82266  |
| 0.11902  | -0.09437 | 0.04151  | -0.19599 | 2.00E-05 | 0.03439079 | 0.45844  | 0.23225  | 3.87E-07 |
| 0.00161  | 0.011177 | 0.80964  | -0.02986 | 0.51971  | -0.1370619 | 0.003    | -0.12765 | 0.00574  |
| 0.36779  | -0.10695 | 0.02079  | -0.04399 | 0.34289  | 0.23958914 | 1.60E-07 | 0.259787 | 1.22E-08 |
| 0.08585  | -0.13053 | 0.00472  | -0.04259 | 0.35847  | 0.02515749 | 0.58762  | 0.041897 | 0.36633  |
| 0.78067  | -0.05097 | 0.27163  | -0.19454 | 2.30E-05 | -0.1501524 | 0.00114  | -0.13366 | 0.00381  |
| 0.515    | 0.068781 | 0.13777  | 0.200596 | 1.26E-05 | 0.31425629 | 3.66E-12 | 0.297899 | 5.03E-11 |
| 0.30495  | -0.10921 | 0.01824  | -0.12823 | 0.00552  | 0.05233393 | 0.25903  | 0.092857 | 0.0449   |
| 0.15029  | -0.09924 | 0.03202  | -0.04364 | 0.3467   | 0.00964228 | 0.83537  | 0.000821 | 0.98589  |
| 0.63285  | -0.02656 | 0.56694  | -0.11584 | 0.01224  | -0.0510607 | 0.27081  | 0.021474 | 0.64346  |
| 0.00037  | -0.08292 | 0.07344  | -0.1587  | 0.00058  | -0.0887334 | 0.05534  | 0.057659 | 0.21361  |
| 0.1082   | -0.22974 | 5.21E-07 | -0.07399 | 0.1103   | -0.0927975 | 0.04504  | -0.1337  | 0.0038   |
| 0.19083  | -0.05166 | 0.26525  | 0.012038 | 0.79529  | 0.03493521 | 0.45135  | 0.132802 | 0.00404  |
| 0.12044  | 0.105995 | 0.02197  | 0.009627 | 0.83562  | 0.07621185 | 0.09998  | 0.170637 | 0.00021  |
| 0.03597  | -0.04145 | 0.37148  | -0.10911 | 0.01835  | -0.0538099 | 0.24582  | 0.018621 | 0.68815  |
| 0.43488  | 0.116633 | 0.01166  | 0.083391 | 0.0718   | -0.0255738 | 0.58145  | 0.008794 | 0.84968  |
| 0.4536   | -0.28862 | 2.07E-10 | -0.18843 | 4.17E-05 | 0.04111506 | 0.37535  | 0.016634 | 0.71996  |
| 0.01404  | -0.10843 | 0.01909  | -0.17826 | 0.00011  | 0.03640102 | 0.43258  | 0.179386 | 9.71E-05 |
| 0.33169  | -0.27466 | 1.58E-09 | -0.10984 | 0.01758  | 0.03507899 | 0.44949  | 0.009151 | 0.84365  |
| 0.00207  | -0.07692 | 0.09685  | 0.095742 | 0.03862  | 0.08966734 | 0.05281  | 0.079272 | 0.08705  |
| 0.31021  | 0.109522 | 0.0179   | -0.01276 | 0.78335  | -0.0567764 | 0.22071  | 0.011268 | 0.80812  |
| 0.37678  | 0.031053 | 0.50322  | 0.24865  | 5.19E-08 | 0.41361788 | 1.00E-20 | 0.282102 | 5.42E-10 |
| 0.96136  | 0.306104 | 1.38E-11 | 0.098559 | 0.03323  | 0.11088043 | 0.01652  | 0.270555 | 2.81E-09 |
| 0.00163  | -0.1081  | 0.01946  | -0.09597 | 0.03815  | 0.12897675 | 0.00525  | 0.155053 | 0.00077  |
| 0.00025  | 0.100378 | 0.03009  | -0.01671 | 0.71879  | -0.0918881 | 0.04719  | -0.08696 | 0.06043  |
| 1.79E-05 | -0.30442 | 1.80E-11 | -0.20551 | 7.57E-06 | 0.10590966 | 0.02208  | 0.080196 | 0.08342  |
| 0.96771  | -0.06698 | 0.14842  | -0.15293 | 0.00092  | -0.0091216 | 0.84414  | 0.069185 | 0.13547  |
| 0.74509  | -0.02612 | 0.5734   | -0.15333 | 0.00089  | 0.0070106  | 0.8799   | 0.174031 | 0.00016  |
| 0.56596  | -0.06836 | 0.14023  | -0.17829 | 0.00011  | -0.0312732 | 0.5002   | 0.12879  | 0.00531  |
| 0.88899  | 0.108195 | 0.01935  | 0.02823  | 0.54282  | 0.02311728 | 0.61828  | 0.156796 | 0.00067  |
| 0.40574  | -0.15047 | 0.00111  | -0.25831 | 1.48E-08 | -0.0718888 | 0.12081  | 0.018952 | 0.68291  |
| 0.87543  | -0.06898 | 0.13665  | -0.11856 | 0.01034  | -0.075309  | 0.10408  | 0.039717 | 0.39182  |
| 0.39612  | 0.221437 | 1.35E-06 | 0.209875 | 4.78E-06 | 0.03936473 | 0.39603  | 0.152168 | 0.00097  |
| 0.12075  | 0.000435 | 0.99253  | -0.01377 | 0.76657  | 0.00228916 | 0.96065  | 0.069739 | 0.13236  |
| 0.54831  | -0.09371 | 0.04296  | -0.12885 | 0.00529  | -0.026484  | 0.56807  | 0.04396  | 0.34318  |
| 0.35398  | 0.041303 | 0.37317  | 0.04555  | 0.32599  | -0.0802349 | 0.08327  | -0.0999  | 0.03089  |
| 1.44E-05 | -0.22161 | 1.32E-06 | 0.008863 | 0.8485   | 0.17531547 | 0.00014  | 0.257942 | 1.56E-08 |
| 0.21335  | -0.20561 | 7.49E-06 | -0.16352 | 0.00039  | -0.3511875 | 5.31E-15 | -0.22696 | 7.19E-07 |
| 0.00463  | 0.173983 | 0.00016  | 0.107803 | 0.0198   | 0.09677911 | 0.03655  | 0.230738 | 4.63E-07 |
| 0.00141  | -0.13362 | 0.00382  | 0.002031 | 0.96509  | -0.0519363 | 0.26267  | 0.028445 | 0.53976  |
| 0.23582  | 0.075509 | 0.10316  | 0.209339 | 5.06E-06 | 0.17699241 | 0.00012  | 0.201861 | 1.10E-05 |
| 0.2165   | 0.077941 | 0.0925   | 0.192921 | 2.70E-05 | 0.24930448 | 4.77E-08 | 0.283859 | 4.19E-10 |
| 0.21282  | 0.087356 | 0.05925  | -0.11607 | 0.01207  | -0.0133808 | 0.77304  | 0.244102 | 9.19E-08 |
| 3.40E-06 | 0.127941 | 0.00563  | 0.044251 | 0.34     | -0.0412461 | 0.37383  | 0.012672 | 0.78477  |

|          |          |          |          |          |            |          |          |          |
|----------|----------|----------|----------|----------|------------|----------|----------|----------|
| 0.40847  | -0.00795 | 0.86388  | -0.12463 | 0.007    | -0.0061446 | 0.89464  | 0.035154 | 0.44852  |
| 0.53013  | 0.363921 | 4.53E-16 | 0.27576  | 1.35E-09 | 0.09788273 | 0.03446  | 0.173223 | 0.00017  |
| 0.05269  | 0.027768 | 0.54945  | 0.157602 | 0.00063  | 0.04117187 | 0.37469  | 0.104312 | 0.02418  |
| 0.10121  | -0.10271 | 0.02646  | -0.01024 | 0.82537  | 0.01082171 | 0.81558  | 0.05638  | 0.22395  |
| 9.63E-09 | -0.11781 | 0.01083  | 0.052289 | 0.25944  | 0.07885204 | 0.08874  | 0.08218  | 0.07604  |
| 0.28505  | -0.15688 | 0.00067  | -0.04452 | 0.33701  | 0.04270857 | 0.35711  | 0.163278 | 0.0004   |
| 0.72648  | -0.11201 | 0.01545  | -0.38118 | 1.34E-17 | -0.1905638 | 3.40E-05 | -0.06126 | 0.18636  |
| 0.92431  | 0.026247 | 0.57154  | 0.106647 | 0.02116  | -0.0428415 | 0.35561  | 0.012462 | 0.78823  |
| 0.42188  | -0.09933 | 0.03187  | 0.00076  | 0.98693  | -0.0700858 | 0.13044  | -0.02416 | 0.60247  |
| 0.68672  | -0.0079  | 0.86478  | -0.0577  | 0.21326  | -0.0752746 | 0.10424  | 0.070384 | 0.12881  |
| 0.08223  | 0.165164 | 0.00034  | 0.094317 | 0.04162  | -0.0214582 | 0.6437   | 0.121016 | 0.00885  |
| 0.13568  | 0.042068 | 0.36437  | 0.102547 | 0.02669  | 0.05778393 | 0.21261  | 0.09628  | 0.03754  |
| 0.2147   | -0.0386  | 0.40533  | 0.012492 | 0.78774  | 0.06027204 | 0.19354  | 0.059929 | 0.19609  |
| 0.00021  | 0.127918 | 0.00563  | 0.390597 | 1.80E-18 | 0.1196236  | 0.00967  | 0.0924   | 0.04597  |
| 0.00552  | 0.143746 | 0.00184  | 0.015541 | 0.73766  | -0.0675987 | 0.14468  | 0.065987 | 0.15452  |
| 0.28676  | -0.24075 | 1.39E-07 | -0.12499 | 0.00684  | 0.09275853 | 0.04513  | 0.170314 | 0.00022  |
| 0.00396  | -0.11028 | 0.01712  | -0.10227 | 0.02711  | 0.03940544 | 0.39554  | 0.053023 | 0.2528   |
| 0.68154  | 0.161047 | 0.00048  | -0.01102 | 0.81233  | -0.1137936 | 0.01387  | -0.00912 | 0.84419  |
| 0.10848  | 0.014322 | 0.75756  | 0.166514 | 0.0003   | 0.23431842 | 3.03E-07 | 0.13387  | 0.00375  |
| 0.0126   | -0.02639 | 0.56948  | 0.188351 | 4.20E-05 | -0.0387312 | 0.40368  | -0.00662 | 0.88662  |
| 0.01592  | 0.093395 | 0.04367  | 0.004682 | 0.91962  | -0.0148228 | 0.74936  | 0.12581  | 0.00648  |
| 0.18835  | -0.34924 | 7.66E-15 | -0.17051 | 0.00021  | 0.06413814 | 0.16644  | 0.165118 | 0.00034  |
| 0.23993  | -0.26398 | 6.94E-09 | -0.15836 | 0.00059  | 0.01136855 | 0.80644  | 0.072047 | 0.11999  |
| 0.00268  | -0.05214 | 0.26082  | -0.13777 | 0.00285  | 0.12905584 | 0.00522  | 0.309869 | 7.51E-12 |
| 0.42123  | -0.05234 | 0.25896  | -0.21944 | 1.69E-06 | -0.1311678 | 0.00452  | -0.10768 | 0.01993  |
| 0.16674  | -0.03111 | 0.50242  | 0.01473  | 0.75088  | 0.02086821 | 0.65285  | 0.120447 | 0.00918  |
| 5.92E-09 | -0.11464 | 0.01317  | -0.10367 | 0.02507  | 0.17519817 | 0.00014  | 0.286186 | 2.97E-10 |
| 0.95015  | 0.23459  | 2.93E-07 | 0.15824  | 0.0006   | 0.14579436 | 0.00158  | 0.216682 | 2.29E-06 |
| 0.00088  | -0.17151 | 0.0002   | -0.12139 | 0.00864  | 0.04374373 | 0.34556  | -0.01811 | 0.69624  |
| 0.33967  | 0.004238 | 0.92723  | -0.00799 | 0.86331  | 0.01369526 | 0.76786  | -0.00634 | 0.8913   |
| 1.77E-05 | 0.089997 | 0.05195  | 0.011279 | 0.80793  | -0.0669324 | 0.14869  | 0.009908 | 0.8309   |
| 0.04524  | 0.061608 | 0.18383  | 0.07648  | 0.09879  | 0.02366621 | 0.60996  | 0.084636 | 0.06764  |
| 0.00836  | -0.23074 | 4.63E-07 | -0.16439 | 0.00036  | 0.1659802  | 0.00032  | 0.328629 | 3.19E-13 |
| 0.17694  | 0.112147 | 0.01532  | 0.11774  | 0.01088  | 0.27244877 | 2.16E-09 | 0.221109 | 1.40E-06 |
| 0.09103  | -0.24481 | 8.41E-08 | -0.12279 | 0.0079   | 0.03343666 | 0.47101  | 0.06851  | 0.13933  |
| 0.06552  | -0.2753  | 1.44E-09 | -0.08825 | 0.0567   | 0.05998814 | 0.19565  | 0.032876 | 0.47849  |
| 0.45899  | -0.07023 | 0.12963  | 0.066641 | 0.15048  | 0.23452759 | 2.96E-07 | 0.271281 | 2.54E-09 |
| 4.64E-05 | -0.08429 | 0.06878  | -0.2103  | 4.56E-06 | -0.0662289 | 0.15302  | 0.0711   | 0.12495  |
| 0.43343  | -0.04079 | 0.3791   | -0.02677 | 0.56391  | 0.12967403 | 0.00501  | 0.254388 | 2.48E-08 |
| 0.00029  | -0.05465 | 0.23855  | -0.01497 | 0.74697  | 0.02705692 | 0.55973  | 0.223978 | 1.01E-06 |
| 0.82799  | 0.042556 | 0.35883  | -0.0469  | 0.31183  | 0.09495896 | 0.04025  | 0.253996 | 2.61E-08 |
| 0.158    | -0.10484 | 0.02346  | -0.18439 | 6.11E-05 | 0.04051706 | 0.38234  | 0.208696 | 5.41E-06 |
| 0.7996   | -0.19566 | 2.06E-05 | -0.13309 | 0.00396  | 0.05758842 | 0.21417  | 0.093653 | 0.04308  |
| 0.00685  | -0.25321 | 2.89E-08 | -0.12682 | 0.00606  | 0.10212938 | 0.02732  | 0.146943 | 0.00145  |
| 0.74409  | 0.034494 | 0.45709  | -0.12452 | 0.00706  | -0.1060285 | 0.02193  | 0.076816 | 0.09732  |



|          |          |          |          |          |            |          |          |          |
|----------|----------|----------|----------|----------|------------|----------|----------|----------|
| 0.5762   | -0.13848 | 0.00271  | -0.16667 | 0.0003   | -0.052729  | 0.25545  | 0.154937 | 0.00078  |
| 0.28885  | -0.22777 | 6.54E-07 | -0.27454 | 1.61E-09 | -0.059294  | 0.20088  | 0.088302 | 0.05654  |
| 0.29243  | 0.028158 | 0.54385  | -0.0431  | 0.35272  | -0.0485608 | 0.295    | 0.113815 | 0.01386  |
| 0.04076  | -0.02587 | 0.57711  | 0.007722 | 0.86782  | -0.0010544 | 0.98187  | 0.013465 | 0.77165  |
| 0.70697  | 0.085685 | 0.0643   | -0.03038 | 0.51248  | 0.16960775 | 0.00023  | 0.2918   | 1.28E-10 |
| 0.12597  | 0.007538 | 0.87094  | -0.00275 | 0.95282  | -0.0447236 | 0.33486  | -0.03589 | 0.43909  |
| 0.10376  | -0.01543 | 0.73949  | 0.009461 | 0.83843  | 0.09344338 | 0.04356  | 0.124438 | 0.00709  |
| 0.40197  | 0.003858 | 0.93374  | -0.12143 | 0.00862  | -0.0556843 | 0.22973  | 0.026258 | 0.57138  |
| 0.71238  | -0.08892 | 0.05484  | -0.07201 | 0.1202   | 0.02369885 | 0.60947  | 0.069464 | 0.13389  |
| 0.17365  | -0.13583 | 0.00327  | -0.06559 | 0.15702  | -0.0275201 | 0.55303  | 0.107754 | 0.01985  |
| 0.68764  | -0.07902 | 0.08806  | 0.191286 | 3.17E-05 | 0.38457902 | 6.56E-18 | 0.342982 | 2.45E-14 |
| 0.05466  | -0.30993 | 7.43E-12 | -0.27672 | 1.18E-09 | 0.03445071 | 0.45766  | 0.153526 | 0.00087  |
| 0.78737  | -0.24096 | 1.36E-07 | 0.035031 | 0.45011  | 0.21412136 | 3.03E-06 | 0.225793 | 8.22E-07 |
| 0.10975  | -0.00705 | 0.87927  | -0.17753 | 0.00011  | -0.0448402 | 0.3336   | 0.086583 | 0.06154  |
| 0.16034  | -0.07314 | 0.11446  | -0.00429 | 0.92639  | 0.1718538  | 0.00019  | 0.132073 | 0.00425  |
| 0.00976  | 0.262683 | 8.27E-09 | 0.05863  | 0.20598  | -0.0248372 | 0.59239  | 0.098831 | 0.03274  |
| 0.00378  | -0.07299 | 0.11523  | -0.05725 | 0.2169   | 0.02209575 | 0.63388  | 0.139861 | 0.00245  |
| 0.08052  | -0.11113 | 0.01628  | -0.00986 | 0.83178  | -0.0587065 | 0.20539  | 0.087762 | 0.05808  |
| 0.24663  | 0.052156 | 0.26065  | 0.019866 | 0.66851  | 0.06750719 | 0.14523  | 0.225958 | 8.06E-07 |
| 0.00484  | -0.07582 | 0.10177  | -0.02304 | 0.61944  | 0.13761624 | 0.00288  | 0.235269 | 2.70E-07 |
| 0.02041  | -0.05093 | 0.27207  | -0.15961 | 0.00054  | -0.1971276 | 1.78E-05 | -0.149   | 0.00124  |
| 0.01204  | 0.009579 | 0.83644  | 0.212324 | 3.68E-06 | 0.26081787 | 1.06E-08 | 0.157494 | 0.00064  |
| 0.29335  | 0.145303 | 0.00164  | -0.04328 | 0.35073  | 0.10950908 | 0.01792  | 0.333455 | 1.37E-13 |
| 0.18402  | -0.09904 | 0.03238  | -0.00932 | 0.84088  | 0.16459017 | 0.00035  | 0.14934  | 0.00121  |
| 0.84622  | 0.116198 | 0.01198  | 0.041724 | 0.36832  | 0.00740931 | 0.87313  | 0.108015 | 0.01955  |
| 0.00244  | 0.137253 | 0.00296  | 0.004344 | 0.9254   | 0.00255092 | 0.95616  | 0.170281 | 0.00022  |
| 0.02675  | -0.17039 | 0.00022  | -0.0749  | 0.10599  | 0.14635999 | 0.00152  | 0.347127 | 1.14E-14 |
| 0.30655  | -0.20494 | 8.03E-06 | -0.24173 | 1.23E-07 | -0.0870276 | 0.06022  | -0.01075 | 0.81675  |
| 0.77753  | 0.017623 | 0.70406  | -0.04274 | 0.3567   | 0.0134533  | 0.77185  | 0.153427 | 0.00088  |
| 0.74204  | -0.05014 | 0.27957  | -0.12857 | 0.00539  | 0.03474897 | 0.45377  | 0.202665 | 1.02E-05 |
| 0.25358  | -0.04538 | 0.32781  | -0.00864 | 0.85226  | 0.02127942 | 0.64647  | 0.168562 | 0.00025  |
| 0.6337   | 0.093475 | 0.04349  | 0.074639 | 0.1072   | 0.0518603  | 0.26337  | 0.148837 | 0.00126  |
| 0.47788  | -0.25099 | 3.85E-08 | -0.09301 | 0.04455  | 0.222164   | 1.24E-06 | 0.383355 | 8.50E-18 |
| 0.09127  | -0.22422 | 9.83E-07 | -0.16707 | 0.00029  | -0.01234   | 0.79027  | 0.045609 | 0.32536  |
| 0.00619  | -0.11648 | 0.01177  | 0.103612 | 0.02515  | 0.32290328 | 8.57E-13 | 0.341307 | 3.33E-14 |
| 0.63738  | -0.28026 | 7.08E-10 | -0.2829  | 4.82E-10 | -0.0566534 | 0.22171  | 0.102182 | 0.02724  |
| 0.00014  | 0.000111 | 0.99809  | -0.01664 | 0.71988  | 0.0027946  | 0.95197  | 0.160137 | 0.00051  |
| 0.15478  | 0.061046 | 0.18787  | -0.06023 | 0.19385  | -0.2388051 | 1.76E-07 | -0.11895 | 0.01009  |
| 1.47E-23 | -0.09404 | 0.04223  | -0.05639 | 0.22385  | 0.04013233 | 0.38688  | 0.08533  | 0.06541  |
| 0.30879  | 0.002501 | 0.95702  | -0.02842 | 0.54005  | -0.0500659 | 0.28027  | 0.007526 | 0.87115  |
| 0.67188  | -0.11895 | 0.01009  | -0.04221 | 0.3627   | 0.08544979 | 0.06504  | 0.168693 | 0.00025  |
| 0.00049  | -0.04658 | 0.31515  | -0.02094 | 0.65178  | 0.00603049 | 0.89659  | 0.074142 | 0.10957  |
| 0.73656  | 0.036337 | 0.43339  | 0.189925 | 3.61E-05 | 0.09600976 | 0.03808  | 0.081639 | 0.07799  |
| 0.42227  | 0.006447 | 0.88949  | 0.018367 | 0.6922   | 0.11825566 | 0.01054  | 0.119294 | 0.00987  |
| 0.03791  | -0.23316 | 3.48E-07 | -0.23968 | 1.59E-07 | 0.00042055 | 0.99277  | 0.134156 | 0.00368  |

|          |          |          |          |          |            |          |          |          |
|----------|----------|----------|----------|----------|------------|----------|----------|----------|
| 0.07528  | -0.17833 | 0.00011  | -0.06762 | 0.14456  | 0.12958064 | 0.00504  | 0.120009 | 0.00944  |
| 0.77915  | 0.028649 | 0.53686  | -0.10462 | 0.02376  | 0.02483784 | 0.59238  | 0.073523 | 0.11257  |
| 0.54845  | -0.00978 | 0.83303  | -0.0446  | 0.33617  | 0.01350374 | 0.77101  | 0.063955 | 0.16765  |
| 0.94494  | -0.01806 | 0.69713  | -0.07421 | 0.10924  | -0.0121011 | 0.79423  | 0.06625  | 0.15289  |
| 0.67144  | 0.048434 | 0.29627  | -0.00298 | 0.94885  | 0.01859807 | 0.68852  | -0.02512 | 0.58812  |
| 0.48224  | -0.02013 | 0.66442  | -0.0126  | 0.7859   | -0.0254194 | 0.58374  | -0.02347 | 0.61291  |
| 0.22233  | -0.09904 | 0.03238  | -0.13256 | 0.00411  | -0.1219164 | 0.00835  | -0.07671 | 0.09779  |
| 0.69966  | -0.06114 | 0.18719  | -0.07018 | 0.1299   | -0.0722428 | 0.11899  | -0.06275 | 0.17583  |
| 0.87986  | 0.012136 | 0.79366  | -0.03386 | 0.46546  | -0.0429986 | 0.35385  | -0.04921 | 0.28859  |
| 0.70538  | -0.04666 | 0.31431  | -0.03408 | 0.46246  | 0.00236662 | 0.95932  | 0.025776 | 0.57846  |
| 0.28918  | -0.05957 | 0.19881  | -0.04278 | 0.35631  | -0.0718531 | 0.121    | -0.07315 | 0.1144   |
| 2.08E-07 | -0.17751 | 0.00012  | -0.09231 | 0.04618  | -0.0769082 | 0.09691  | -0.05071 | 0.27414  |
| 0.52491  | 0.081223 | 0.07953  | 0.002991 | 0.94861  | 0.02673578 | 0.5644   | 0.07925  | 0.08714  |
| 0.89377  | -0.11609 | 0.01206  | -0.13786 | 0.00283  | -0.1098993 | 0.01751  | -0.08751 | 0.05881  |
| 0.03037  | -0.05093 | 0.27207  | -0.05177 | 0.26424  | -0.0130818 | 0.77798  | -0.00391 | 0.93292  |
| 0.69443  | -0.0317  | 0.49443  | -0.11851 | 0.01037  | -0.0695561 | 0.13338  | -0.07882 | 0.08886  |
| 0.18555  | -0.01066 | 0.81832  | -0.03845 | 0.40707  | -0.0177907 | 0.70138  | 0.039847 | 0.39026  |
| 0.00028  | 0.00858  | 0.85329  | -0.11619 | 0.01199  | -0.0652529 | 0.15918  | 0.020825 | 0.65353  |
| 0.75226  | -0.01502 | 0.74622  | -0.05348 | 0.24873  | -0.0170589 | 0.71311  | 0.029846 | 0.51997  |
| 0.56902  | -0.02499 | 0.59009  | -0.12829 | 0.0055   | -0.0216616 | 0.64056  | 0.039676 | 0.39231  |
| 0.25287  | 0.031289 | 0.49999  | -0.0058  | 0.90059  | -0.0083213 | 0.85767  | -0.04598 | 0.32149  |
| 0.51967  | -0.13207 | 0.00425  | -0.08186 | 0.07721  | 0.04638437 | 0.3172   | -0.00157 | 0.97295  |
| 0.52459  | -0.12659 | 0.00616  | -0.08778 | 0.05802  | -0.0019831 | 0.96591  | 0.072251 | 0.11895  |
| 0.68711  | -0.09426 | 0.04175  | -0.06335 | 0.17169  | -0.0117685 | 0.79977  | -0.00475 | 0.91838  |
| 0.6449   | -0.07786 | 0.09285  | -0.07258 | 0.11729  | -0.0181829 | 0.69512  | -0.01053 | 0.82042  |
| 0.44229  | -0.06611 | 0.15379  | -0.03321 | 0.47401  | 0.01189231 | 0.79771  | 0.012467 | 0.78817  |
| 0.53394  | -0.11066 | 0.01674  | -0.11768 | 0.01093  | -0.0208745 | 0.65275  | -0.02265 | 0.62539  |
| 0.51513  | -0.02923 | 0.5286   | -0.05539 | 0.23224  | 0.23551425 | 2.63E-07 | 0.209557 | 4.94E-06 |
| 0.70412  | 0.017391 | 0.70778  | 0.029441 | 0.52565  | 0.00296244 | 0.94909  | -0.00409 | 0.92976  |
| 0.73087  | 0.106846 | 0.02092  | 0.08161  | 0.0781   | -0.0047546 | 0.91838  | -0.01845 | 0.69092  |
| 0.7705   | -0.10469 | 0.02367  | -0.17667 | 0.00012  | -0.1088093 | 0.01867  | -0.07698 | 0.09658  |
| 0.02723  | -0.06515 | 0.15986  | -0.10872 | 0.01877  | -0.1021731 | 0.02726  | -0.08058 | 0.08194  |
| 0.68177  | 0.000328 | 0.99435  | -0.03945 | 0.39504  | 0.00444501 | 0.92368  | 0.039044 | 0.3999   |
| 0.21239  | -0.08984 | 0.05236  | -0.08282 | 0.07377  | -0.0323947 | 0.48495  | -0.03665 | 0.42945  |
| 0.38782  | -0.36776 | 2.11E-16 | -0.29431 | 8.74E-11 | -0.1209052 | 0.00891  | -0.115   | 0.01289  |
| 0.05646  | -0.00641 | 0.89008  | -0.10693 | 0.02082  | -0.1100313 | 0.01738  | -0.08994 | 0.0521   |
| 0.62712  | 0.069436 | 0.13405  | -0.01118 | 0.80951  | -0.0416514 | 0.36915  | 0.022868 | 0.62207  |
| 0.05896  | 0.003648 | 0.93733  | -0.0047  | 0.91933  | 0.03573605 | 0.44104  | 0.0968   | 0.03651  |
| 0.19347  | -0.15288 | 0.00092  | -0.14376 | 0.00184  | -0.0012391 | 0.97869  | 0.024047 | 0.60422  |
| 0.84798  | 0.01272  | 0.78397  | -0.08109 | 0.08001  | -0.1049784 | 0.02328  | -0.08156 | 0.07828  |
| 0.03981  | -0.07374 | 0.11152  | -0.07063 | 0.12746  | -0.0046379 | 0.92038  | 0.036554 | 0.43065  |
| 0.99419  | -0.02233 | 0.63031  | -0.04283 | 0.35577  | -0.00211   | 0.96373  | 0.016485 | 0.72235  |
| 0.01082  | 0.001088 | 0.98129  | -0.09928 | 0.03194  | -0.0790165 | 0.08807  | -0.07768 | 0.0936   |
| 0.42114  | 0.006561 | 0.88754  | -0.09132 | 0.04857  | -0.0549728 | 0.23575  | -0.01138 | 0.80631  |
| 0.27101  | -0.02341 | 0.61382  | -0.15771 | 0.00063  | -0.0773647 | 0.09494  | -0.01653 | 0.7217   |

|          |          |          |          |          |            |          |          |          |
|----------|----------|----------|----------|----------|------------|----------|----------|----------|
| 0.55764  | -0.00574 | 0.90149  | -0.1521  | 0.00098  | -0.0380368 | 0.41217  | 0.075554 | 0.10296  |
| 0.36201  | -0.09892 | 0.03259  | -0.15022 | 0.00113  | -0.0299823 | 0.51806  | 0.102537 | 0.02671  |
| 0.50692  | -0.04732 | 0.30753  | -0.07902 | 0.08807  | -0.0583571 | 0.2081   | 0.004892 | 0.91603  |
| 0.35411  | -0.03351 | 0.47001  | -0.06662 | 0.15061  | -0.0961349 | 0.03783  | -0.05943 | 0.19987  |
| 7.29E-13 | -0.29604 | 6.70E-11 | -0.18942 | 3.79E-05 | 0.0393007  | 0.3968   | 0.105904 | 0.02208  |
| 0.79521  | -0.01437 | 0.7568   | -0.08296 | 0.07328  | -0.0447931 | 0.33411  | -0.01622 | 0.72672  |
| 0.84645  | -0.01648 | 0.72237  | -0.09613 | 0.03784  | -0.0181281 | 0.69599  | 0.079394 | 0.08656  |
| 0.7193   | 0.037951 | 0.41323  | 0.018106 | 0.69635  | 0.01862557 | 0.68808  | 0.021486 | 0.64327  |
| 0.80382  | -0.06421 | 0.16596  | -0.24288 | 1.07E-07 | -0.1201439 | 0.00936  | 0.045023 | 0.33163  |
| 0.68678  | -0.05874 | 0.20509  | -0.14537 | 0.00163  | -0.0894836 | 0.0533   | -0.06655 | 0.15102  |
| 0.16211  | -0.02527 | 0.58592  | -0.02186 | 0.63753  | 0.03177283 | 0.49338  | 0.006976 | 0.88048  |
| 0.22669  | 0.216766 | 2.27E-06 | 0.063897 | 0.16804  | 0.01530646 | 0.74147  | -0.04216 | 0.36328  |
| 0.13116  | 0.067738 | 0.14386  | 0.022204 | 0.63222  | -0.0214009 | 0.64459  | -0.07429 | 0.10886  |
| 0.41789  | -0.11199 | 0.01547  | -0.06075 | 0.19001  | -0.0254023 | 0.58399  | -0.01351 | 0.77097  |
| 0.40142  | -0.01084 | 0.8153   | -0.01567 | 0.73561  | -0.0075679 | 0.87043  | -0.00965 | 0.83518  |
| 0.43999  | 0.028858 | 0.53388  | 0.012085 | 0.7945   | -0.0270948 | 0.55918  | 0.004586 | 0.92126  |
| 0.03656  | 0.103191 | 0.02575  | -0.0033  | 0.94323  | -0.1091032 | 0.01835  | -0.11642 | 0.01181  |
| 0.23412  | 0.059322 | 0.20067  | -0.01114 | 0.81019  | -0.0984758 | 0.03337  | -0.11834 | 0.01048  |
| 0.16286  | 0.019772 | 0.66998  | -0.0691  | 0.13593  | -0.1145987 | 0.01321  | -0.13883 | 0.00264  |
| 0.30043  | -0.20427 | 8.61E-06 | -0.13715 | 0.00298  | -0.083046  | 0.07298  | -0.04921 | 0.28854  |
| 0.01751  | 0.395352 | 6.38E-19 | 0.67641  | 9.53E-64 | 0.44508525 | 4.20E-24 | 0.204004 | 8.85E-06 |
| 0.01458  | 0.365129 | 3.56E-16 | 0.59027  | 3.49E-45 | 0.35870067 | 1.26E-15 | 0.28697  | 2.65E-10 |
| 0.00053  | 0.352837 | 3.88E-15 | 0.562523 | 2.53E-40 | 0.40675298 | 4.92E-20 | 0.281265 | 6.12E-10 |
| 0.03002  | 0.530657 | 2.79E-35 | 0.677656 | 4.61E-64 | 0.3495631  | 7.21E-15 | 0.196832 | 1.83E-05 |
| 0.9171   | 0.533158 | 1.17E-35 | 0.691027 | 1.51E-67 | 0.51119229 | 1.88E-32 | 0.366624 | 2.65E-16 |
| 0.44384  | 0.46313  | 3.33E-26 | 0.548994 | 4.08E-38 | 0.28805475 | 2.25E-10 | 0.112425 | 0.01507  |
| 0.84052  | 0.439399 | 1.82E-23 | 0.615592 | 4.77E-50 | 0.33705255 | 7.19E-14 | 0.204365 | 8.52E-06 |
| 0.07359  | 0.433603 | 7.89E-23 | 0.495702 | 2.49E-30 | 0.38413824 | 7.20E-18 | 0.305874 | 1.43E-11 |
| 0.14529  | 0.159231 | 0.00055  | 0.542741 | 3.95E-37 | 0.50996158 | 2.79E-32 | 0.329645 | 2.67E-13 |
| 0.03473  | 0.374859 | 4.99E-17 | 0.50569  | 1.10E-31 | 0.17341573 | 0.00017  | -0.01492 | 0.74779  |
| 0.33365  | 0.650885 | 1.30E-57 | 0.830903 | #####    | 0.52210773 | 5.14E-34 | 0.387631 | 3.42E-18 |
| 0.04346  | 0.405469 | 6.60E-20 | 0.54207  | 5.03E-37 | 0.41619043 | 5.47E-21 | 0.335782 | 9.03E-14 |
| 0.26185  | 0.226231 | 7.81E-07 | 0.627743 | 1.53E-52 | 0.43893671 | 2.05E-23 | 0.239112 | 1.70E-07 |
| 1.39E-05 | -0.29055 | 1.55E-10 | -0.57296 | 4.26E-42 | -0.3842423 | 7.04E-18 | -0.38514 | 5.82E-18 |
| 0.61952  | 0.406872 | 4.79E-20 | 0.615475 | 5.04E-50 | 0.09401588 | 0.04228  | -0.0075  | 0.87159  |
| 0.02148  | 0.435851 | 4.49E-23 | 0.628506 | 1.05E-52 | 0.36373374 | 4.70E-16 | 0.217794 | 2.02E-06 |
| 0.4273   | 0.413557 | 1.02E-20 | 0.557998 | 1.42E-39 | 0.2805178  | 6.82E-10 | 0.249456 | 4.68E-08 |
| 0.00541  | 0.414738 | 7.71E-21 | 0.60438  | 7.69E-48 | 0.36025237 | 9.31E-16 | 0.394438 | 7.79E-19 |
| 0.45303  | 0.368511 | 1.81E-16 | 0.702975 | 7.95E-71 | 0.44392366 | 5.69E-24 | 0.29062  | 1.53E-10 |
| 0.00025  | 0.56782  | 3.24E-41 | 0.826449 | #####    | 0.41425221 | 8.64E-21 | 0.26841  | 3.79E-09 |
| 0.0018   | 0.474139 | 1.50E-27 | 0.71055  | 5.44E-73 | 0.27665962 | 1.19E-09 | 0.283681 | 4.30E-10 |
| 0.0025   | 0.496411 | 2.00E-30 | 0.584308 | 4.23E-44 | 0.0928371  | 0.04494  | 0.032843 | 0.47892  |
| 0.93652  | 0.213067 | 3.39E-06 | 0.570608 | 1.08E-41 | 0.4063364  | 5.41E-20 | 0.198613 | 1.53E-05 |
| 0.95477  | 0.520389 | 9.13E-34 | 0.60844  | 1.25E-48 | 0.36154062 | 7.24E-16 | 0.257747 | 1.60E-08 |
| 0.00123  | 0.403278 | 1.09E-19 | 0.677555 | 4.89E-64 | 0.18106814 | 8.32E-05 | -0.04685 | 0.31236  |

|          |          |          |          |          |            |          |          |          |
|----------|----------|----------|----------|----------|------------|----------|----------|----------|
| 0.98381  | 0.578385 | 4.80E-43 | 0.700756 | 3.32E-70 | 0.26904951 | 3.46E-09 | 0.15589  | 0.00072  |
| 1.87E-05 | 0.625428 | 4.65E-52 | 0.674358 | 3.12E-63 | 0.29577245 | 6.98E-11 | 0.352799 | 3.91E-15 |
| 2.78E-07 | 0.394623 | 7.48E-19 | 0.49935  | 8.05E-31 | 0.38985508 | 2.12E-18 | 0.318204 | 1.90E-12 |
| 0.49808  | 0.321359 | 1.11E-12 | 0.584335 | 4.19E-44 | 0.3037653  | 2.00E-11 | 0.169043 | 0.00024  |
| 0.00033  | 0.453568 | 4.48E-25 | 0.51195  | 1.47E-32 | 0.25098127 | 3.85E-08 | 0.247198 | 6.24E-08 |
| 0.03056  | 0.220772 | 1.45E-06 | 0.544528 | 2.08E-37 | 0.35386228 | 3.20E-15 | 0.104629 | 0.02375  |
| 0.00086  | 0.262789 | 8.15E-09 | 0.521787 | 5.72E-34 | 0.15512088 | 0.00077  | -0.03314 | 0.47491  |
| 0.00038  | 0.521592 | 6.10E-34 | 0.665819 | 3.96E-61 | 0.27485012 | 1.54E-09 | 0.108695 | 0.01879  |
| 0.70942  | 0.617845 | 1.68E-50 | 0.712625 | 1.35E-73 | 0.34811608 | 9.46E-15 | 0.220142 | 1.56E-06 |
| 0.83935  | 0.70343  | 5.92E-71 | 0.779923 | 1.10E-96 | 0.46583763 | 1.57E-26 | 0.436432 | 3.87E-23 |
| 0.23707  | 0.695827 | 7.61E-69 | 0.768697 | 2.71E-92 | 0.43321984 | 8.69E-23 | 0.371902 | 9.14E-17 |
| 0.52654  | 0.477738 | 5.32E-28 | 0.736761 | 4.69E-81 | 0.23504212 | 2.78E-07 | -0.00696 | 0.88069  |
| 0.77674  | 0.527973 | 7.03E-35 | 0.869186 | #####    | 0.60712704 | 2.26E-48 | 0.491163 | 9.96E-30 |
| 0.41871  | 0.408186 | 3.54E-20 | 0.638686 | 6.91E-55 | 0.41463868 | 7.89E-21 | 0.186406 | 5.06E-05 |
| 0.15194  | 0.413233 | 1.10E-20 | 0.666822 | 2.26E-61 | 0.01364209 | 0.76873  | -0.12285 | 0.00787  |
| 0.07885  | 0.569652 | 1.58E-41 | 0.725394 | 1.92E-77 | 0.378235   | 2.49E-17 | 0.406423 | 5.31E-20 |
| 0.37082  | 0.476239 | 8.21E-28 | 0.63498  | 4.41E-54 | 0.3136563  | 4.04E-12 | 0.196362 | 1.92E-05 |
| 0.07566  | 0.518732 | 1.58E-33 | 0.712918 | 1.11E-73 | 0.4757383  | 9.49E-28 | 0.420021 | 2.20E-21 |
| 0.59328  | 0.372086 | 8.80E-17 | 0.562123 | 2.95E-40 | 0.34031005 | 3.99E-14 | 0.15376  | 0.00086  |
| 0.04327  | 0.493826 | 4.43E-30 | 0.707583 | 3.90E-72 | 0.3610326  | 7.99E-16 | 0.289113 | 1.92E-10 |
| 0.08456  | 0.5508   | 2.10E-38 | 0.599207 | 7.51E-47 | 0.43086969 | 1.56E-22 | 0.371467 | 9.98E-17 |
| 0.81701  | -0.25093 | 3.88E-08 | -0.46066 | 6.57E-26 | -0.4304855 | 1.72E-22 | -0.3751  | 4.75E-17 |
| 0.03125  | 0.15918  | 0.00055  | 0.508458 | 4.53E-32 | 0.24827903 | 5.44E-08 | 0.142596 | 0.00201  |
| 0.03246  | 0.315072 | 3.20E-12 | 0.637697 | 1.14E-54 | 0.34923078 | 7.68E-15 | 0.267086 | 4.54E-09 |
| 0.10752  | 0.298207 | 4.79E-11 | 0.516405 | 3.42E-33 | 0.4368412  | 3.49E-23 | 0.252709 | 3.08E-08 |
| 0.02322  | 0.187908 | 4.38E-05 | 0.506996 | 7.23E-32 | 0.25616033 | 1.97E-08 | 0.095584 | 0.03894  |
| 0.76526  | 0.183177 | 6.85E-05 | 0.580774 | 1.81E-43 | 0.25600924 | 2.01E-08 | 0.039325 | 0.39651  |
| 0.04405  | 0.549813 | 3.02E-38 | 0.738015 | 1.82E-81 | 0.1665543  | 0.0003   | 0.067399 | 0.14588  |
| 0.00256  | 0.345344 | 1.58E-14 | 0.49915  | 8.57E-31 | 0.34260342 | 2.63E-14 | 0.206821 | 6.60E-06 |
| 0.19591  | 0.471464 | 3.22E-27 | 0.795592 | #####    | 0.62664146 | 2.60E-52 | 0.455653 | 2.56E-25 |
| 0.17185  | 0.449903 | 1.19E-24 | 0.622789 | 1.64E-51 | 0.5429476  | 3.67E-37 | 0.377538 | 2.87E-17 |
| 0.2988   | 0.414534 | 8.09E-21 | 0.516431 | 3.39E-33 | 0.5387206  | 1.66E-36 | 0.328854 | 3.07E-13 |
| 0.25696  | 0.755526 | 1.90E-87 | 0.706589 | 7.52E-72 | 0.38878643 | 2.67E-18 | 0.386779 | 4.10E-18 |
| 0.00162  | 0.186522 | 5.00E-05 | 0.471757 | 2.96E-27 | 0.34643946 | 1.29E-14 | 0.103667 | 0.02507  |
| 0.05795  | 0.42727  | 3.80E-22 | 0.558755 | 1.07E-39 | 0.35518385 | 2.48E-15 | 0.205843 | 7.31E-06 |
| 0.60885  | 0.267542 | 4.27E-09 | 0.563757 | 1.57E-40 | 0.29759077 | 5.27E-11 | 0.066779 | 0.14963  |
| 0.04872  | 0.422149 | 1.32E-21 | 0.493735 | 4.55E-30 | 0.37176153 | 9.40E-17 | 0.214843 | 2.80E-06 |
| 0.10456  | 0.429714 | 2.08E-22 | 0.59444  | 5.91E-46 | 0.35176064 | 4.76E-15 | 0.171866 | 0.00019  |
| 0.05977  | 0.42528  | 6.17E-22 | 0.540811 | 7.90E-37 | -0.0301585 | 0.51561  | -0.08281 | 0.07382  |
| 0.00497  | 0.603227 | 1.28E-47 | 0.808252 | #####    | 0.51535448 | 4.83E-33 | 0.382931 | 9.30E-18 |
| 0.00081  | 0.628694 | 9.63E-53 | 0.738826 | 9.87E-82 | 0.5947362  | 5.20E-46 | 0.487373 | 3.12E-29 |
| 0.47141  | 0.354583 | 2.78E-15 | 0.661667 | 3.94E-60 | 0.38574113 | 5.12E-18 | 0.160084 | 0.00052  |
| 0.65524  | 0.414389 | 8.37E-21 | 0.593566 | 8.59E-46 | 0.26714397 | 4.51E-09 | 0.076641 | 0.09808  |
| 0.01722  | 0.326239 | 4.83E-13 | 0.60191  | 2.30E-47 | 0.59276974 | 1.21E-45 | 0.501816 | 3.73E-31 |
| 0.14289  | 0.41826  | 3.35E-21 | 0.563895 | 1.49E-40 | 0.23676398 | 2.26E-07 | 0.2577   | 1.61E-08 |

|          |          |          |          |          |            |          |          |          |
|----------|----------|----------|----------|----------|------------|----------|----------|----------|
| 0.08312  | 0.286165 | 2.98E-10 | 0.67592  | 1.27E-63 | 0.40395112 | 9.32E-20 | 0.232339 | 3.83E-07 |
| 0.02377  | 0.253974 | 2.62E-08 | 0.570692 | 1.05E-41 | 0.2706346  | 2.78E-09 | 0.138764 | 0.00265  |
| 0.15444  | 0.528011 | 6.94E-35 | 0.70947  | 1.12E-72 | 0.30890031 | 8.79E-12 | 0.219939 | 1.59E-06 |
| 0.05242  | 0.336736 | 7.61E-14 | 0.503553 | 2.16E-31 | 0.29820762 | 4.79E-11 | 0.205777 | 7.36E-06 |
| 2.22E-05 | 0.258886 | 1.37E-08 | 0.566136 | 6.25E-41 | 0.1742413  | 0.00015  | 0.100664 | 0.02962  |
| 0.25132  | 0.366805 | 2.55E-16 | 0.682048 | 3.46E-65 | 0.34252972 | 2.66E-14 | 0.194051 | 2.42E-05 |
| 0.00961  | 0.299368 | 4.00E-11 | 0.564518 | 1.17E-40 | 0.4260041  | 5.17E-22 | 0.31647  | 2.53E-12 |
| 0.17037  | 0.493479 | 4.92E-30 | 0.643581 | 5.76E-56 | 0.62469583 | 6.60E-52 | 0.57016  | 1.29E-41 |
| 0.00102  | 0.410855 | 1.91E-20 | 0.543535 | 2.97E-37 | 0.32878193 | 3.11E-13 | 0.18803  | 4.33E-05 |
| 0.98581  | 0.225678 | 8.32E-07 | 0.480603 | 2.31E-28 | 0.27076967 | 2.73E-09 | 0.284966 | 3.56E-10 |
| 0.07181  | 0.510575 | 2.29E-32 | 0.673165 | 6.21E-63 | 0.23674103 | 2.27E-07 | 0.17424  | 0.00015  |
| 0.00018  | 0.352857 | 3.87E-15 | 0.60992  | 6.40E-49 | 0.24235389 | 1.14E-07 | 0.066081 | 0.15394  |
| 0.00099  | 0.641097 | 2.04E-55 | 0.658481 | 2.24E-59 | 0.21084712 | 4.31E-06 | 0.276997 | 1.13E-09 |
| 0.55445  | 0.175862 | 0.00013  | 0.566308 | 5.84E-41 | 0.32847016 | 3.28E-13 | 0.078376 | 0.09069  |
| 0.03864  | 0.513919 | 7.73E-33 | 0.576528 | 1.02E-42 | 0.23329949 | 3.42E-07 | 0.248277 | 5.44E-08 |
| 0.79897  | 0.471043 | 3.63E-27 | 0.743149 | 3.61E-83 | 0.42564988 | 5.64E-22 | 0.324472 | 6.55E-13 |
| 0.36434  | 0.262556 | 8.41E-09 | 0.580749 | 1.83E-43 | 0.18916408 | 3.89E-05 | 0.097988 | 0.03426  |
| 0.376    | 0.41381  | 9.59E-21 | 0.524676 | 2.16E-34 | 0.45169105 | 7.39E-25 | 0.230356 | 4.84E-07 |
| 6.17E-05 | 0.531493 | 2.09E-35 | 0.70019  | 4.78E-70 | 0.2790642  | 8.42E-10 | 0.249991 | 4.37E-08 |
| 0.9342   | 0.465915 | 1.53E-26 | 0.850473 | #####    | 0.58001389 | 2.47E-43 | 0.413368 | 1.06E-20 |
| 0.0254   | 0.43782  | 2.72E-23 | 0.699446 | 7.69E-70 | 0.45712502 | 1.72E-25 | 0.393801 | 8.96E-19 |
| 0.44672  | 0.372281 | 8.46E-17 | 0.59489  | 4.87E-46 | 0.18073628 | 8.58E-05 | 0.178614 | 0.0001   |
| 0.12312  | 0.424504 | 7.46E-22 | 0.787262 | 1.07E-99 | 0.55910731 | 9.32E-40 | 0.551545 | 1.59E-38 |
| 0.23779  | 0.340078 | 4.16E-14 | 0.64217  | 1.18E-55 | 0.41186479 | 1.51E-20 | 0.204402 | 8.49E-06 |
| 0.03855  | 0.640021 | 3.53E-55 | 0.73471  | 2.17E-80 | 0.30811982 | 9.97E-12 | 0.361464 | 7.34E-16 |
| 0.26826  | 0.422597 | 1.18E-21 | 0.577862 | 5.94E-43 | 0.22944245 | 5.39E-07 | 0.150075 | 0.00114  |
| 0.06346  | 0.441584 | 1.04E-23 | 0.547534 | 6.96E-38 | 0.12436747 | 0.00713  | 0.139711 | 0.00248  |
| 0.63929  | 0.33312  | 1.45E-13 | 0.486052 | 4.62E-29 | 0.24212067 | 1.18E-07 | 0.18225  | 7.46E-05 |
| 0.05946  | 0.617536 | 1.93E-50 | 0.790814 | #####    | 0.41318259 | 1.11E-20 | 0.410695 | 1.98E-20 |
| 0.00161  | 0.342962 | 2.46E-14 | 0.60036  | 4.54E-47 | 0.38958585 | 2.24E-18 | 0.220518 | 1.49E-06 |
| 0.00192  | 0.597951 | 1.30E-46 | 0.761835 | 9.92E-90 | 0.28405374 | 4.07E-10 | 0.141053 | 0.00225  |
| 0.59038  | 0.228106 | 6.29E-07 | 0.497718 | 1.34E-30 | 0.37370443 | 6.33E-17 | 0.207109 | 6.40E-06 |
| 0.17934  | 0.573922 | 2.90E-42 | 0.64811  | 5.54E-57 | 0.27516416 | 1.47E-09 | 0.301097 | 3.05E-11 |
| 0.01275  | 0.415133 | 7.02E-21 | 0.794896 | #####    | 0.35624744 | 2.02E-15 | 0.138043 | 0.00279  |
| 0.36961  | 0.168756 | 0.00025  | 0.563704 | 1.60E-40 | 0.47506864 | 1.15E-27 | 0.300332 | 3.44E-11 |
| 0.05571  | 0.140625 | 0.00232  | 0.223204 | 1.10E-06 | 0.3455437  | 1.53E-14 | 0.178911 | 0.0001   |
| 0.03307  | 0.371302 | 1.03E-16 | 0.482187 | 1.45E-28 | 0.44289015 | 7.43E-24 | 0.37476  | 5.10E-17 |
| 0.01028  | 0.407346 | 4.29E-20 | 0.653642 | 3.01E-58 | 0.18466317 | 5.96E-05 | -0.0802  | 0.08341  |
| 0.06786  | 0.516018 | 3.88E-33 | 0.743915 | 1.99E-83 | 0.29474415 | 8.18E-11 | 0.311711 | 5.56E-12 |
| 0.7197   | 0.29816  | 4.83E-11 | 0.587108 | 1.32E-44 | 0.27469952 | 1.57E-09 | 0.239498 | 1.62E-07 |
| 0.02737  | 0.423992 | 8.45E-22 | 0.763059 | 3.51E-90 | 0.62890329 | 8.70E-53 | 0.541556 | 6.05E-37 |
| 0.00013  | 0.447855 | 2.04E-24 | 0.786748 | 1.75E-99 | 0.41348225 | 1.04E-20 | 0.220529 | 1.49E-06 |
| 6.67E-06 | 0.381989 | 1.13E-17 | 0.610898 | 4.11E-49 | 0.11922372 | 0.00992  | -0.02768 | 0.5507   |
| 0.76671  | 0.216638 | 2.30E-06 | 0.641957 | 1.32E-55 | 0.31631701 | 2.60E-12 | 0.024448 | 0.5982   |
| 0.61502  | -0.33132 | 1.99E-13 | -0.61235 | 2.12E-49 | -0.2217176 | 1.31E-06 | -0.23092 | 4.53E-07 |

|          |          |          |          |          |            |          |          |          |
|----------|----------|----------|----------|----------|------------|----------|----------|----------|
| 0.15392  | -0.18995 | 3.60E-05 | -0.49869 | 9.87E-31 | 0.0184426  | 0.69099  | 0.118202 | 0.01057  |
| 0.3974   | -0.3943  | 8.03E-19 | -0.67194 | 1.25E-62 | -0.2409002 | 1.37E-07 | -0.18526 | 5.63E-05 |
| 0.48301  | -0.28347 | 4.44E-10 | -0.5996  | 6.31E-47 | -0.4387988 | 2.12E-23 | -0.46248 | 3.98E-26 |
| 0.45969  | -0.30122 | 2.99E-11 | -0.65832 | 2.44E-59 | -0.4112776 | 1.73E-20 | -0.35003 | 6.61E-15 |
| 0.02609  | -0.38913 | 2.47E-18 | -0.68218 | 3.21E-65 | -0.1941878 | 2.38E-05 | -0.16604 | 0.00031  |
| 0.73553  | -0.31173 | 5.54E-12 | -0.60897 | 9.84E-49 | -0.1939124 | 2.45E-05 | -0.17486 | 0.00015  |
| 0.74974  | -0.26471 | 6.28E-09 | -0.56853 | 2.45E-41 | -0.2710972 | 2.61E-09 | -0.24737 | 6.10E-08 |
| 0.74789  | -0.33407 | 1.23E-13 | -0.62948 | 6.57E-53 | -0.4545194 | 3.47E-25 | -0.3995  | 2.54E-19 |
| 0.38774  | -0.31487 | 3.31E-12 | -0.62818 | 1.24E-52 | -0.1649838 | 0.00034  | -0.14758 | 0.00138  |
| 0.0259   | -0.28266 | 5.00E-10 | -0.55357 | 7.49E-39 | 0.11295172 | 0.0146   | 0.119702 | 0.00962  |
| 0.29312  | -0.42007 | 2.17E-21 | -0.65901 | 1.68E-59 | -0.0483729 | 0.29688  | -0.01128 | 0.8079   |
| 0.89081  | -0.4414  | 1.09E-23 | -0.58988 | 4.12E-45 | -0.2231794 | 1.11E-06 | -0.1973  | 1.75E-05 |
| 9.29E-08 | 0.300513 | 3.34E-11 | 0.565747 | 7.27E-41 | 0.47880432 | 3.91E-28 | 0.288246 | 2.19E-10 |
| 0.17024  | 0.364912 | 3.72E-16 | 0.58712  | 1.31E-44 | 0.28448376 | 3.82E-10 | 0.165182 | 0.00034  |
| 2.11E-06 | 0.340032 | 4.20E-14 | 0.534775 | 6.68E-36 | 0.50631682 | 8.98E-32 | 0.343586 | 2.19E-14 |
| 0.24702  | 0.605653 | 4.36E-48 | 0.751952 | 3.46E-86 | 0.39032947 | 1.91E-18 | 0.35554  | 2.32E-15 |
| 0.04534  | 0.490288 | 1.30E-29 | 0.737442 | 2.81E-81 | 0.09719442 | 0.03575  | -0.06183 | 0.18226  |
| 0.13862  | 0.081787 | 0.07745  | 0.523901 | 2.81E-34 | 0.42267627 | 1.16E-21 | 0.230999 | 4.49E-07 |
| 0.00091  | 0.497395 | 1.48E-30 | 0.660243 | 8.58E-60 | 0.29533599 | 7.47E-11 | 0.051541 | 0.26633  |
| 0.56472  | 0.613825 | 1.08E-49 | 0.641616 | 1.57E-55 | 0.44571941 | 3.56E-24 | 0.49412  | 4.05E-30 |
| 0.99445  | 0.508395 | 4.62E-32 | 0.724282 | 4.24E-77 | 0.49321232 | 5.34E-30 | 0.42712  | 3.94E-22 |
| 0.06245  | 0.383858 | 7.64E-18 | 0.672895 | 7.25E-63 | 0.09971409 | 0.03121  | -0.07309 | 0.11469  |
| 0.91854  | 0.6394   | 4.83E-55 | 0.661506 | 4.30E-60 | 0.18268448 | 7.17E-05 | 0.203232 | 9.58E-06 |
| 0.62762  | 0.329941 | 2.54E-13 | 0.527429 | 8.47E-35 | 0.46667424 | 1.24E-26 | 0.285124 | 3.48E-10 |
| 0.00986  | 0.104377 | 0.02409  | 0.631394 | 2.58E-53 | 0.42497677 | 6.65E-22 | 0.318895 | 1.69E-12 |
| 0.04836  | 0.450197 | 1.10E-24 | 0.646645 | 1.19E-56 | 0.50541745 | 1.20E-31 | 0.38509  | 5.88E-18 |
| 0.85854  | 0.478429 | 4.36E-28 | 0.537139 | 2.91E-36 | 0.37789216 | 2.67E-17 | 0.331428 | 1.96E-13 |
| 0.00518  | 0.442631 | 7.94E-24 | 0.706747 | 6.78E-72 | 0.44799236 | 1.97E-24 | 0.238634 | 1.80E-07 |
| 0.91599  | 0.481224 | 1.93E-28 | 0.745749 | 4.77E-84 | 0.55110028 | 1.88E-38 | 0.556724 | 2.30E-39 |
| 0.24772  | 0.389006 | 2.54E-18 | 0.578887 | 3.92E-43 | 0.61322275 | 1.42E-49 | 0.423382 | 9.79E-22 |
| 0.00191  | 0.364788 | 3.81E-16 | 0.659077 | 1.62E-59 | 0.22377102 | 1.04E-06 | -0.01183 | 0.79879  |
| 0.32043  | 0.288904 | 1.98E-10 | 0.53251  | 1.47E-35 | 0.64452477 | 3.55E-56 | 0.43858  | 2.24E-23 |
| 0.68669  | 0.432389 | 1.07E-22 | 0.714406 | 4.04E-74 | 0.55157165 | 1.58E-38 | 0.534435 | 7.52E-36 |
| 0.01097  | 0.515849 | 4.11E-33 | 0.713622 | 6.87E-74 | 0.44591966 | 3.38E-24 | 0.468824 | 6.79E-27 |
| 0.16145  | 0.269321 | 3.34E-09 | 0.498593 | 1.02E-30 | 0.35092796 | 5.58E-15 | 0.302267 | 2.54E-11 |
| 0.05617  | 0.391439 | 1.50E-18 | 0.725714 | 1.53E-77 | 0.24997458 | 4.38E-08 | -0.03029 | 0.51379  |
| 0.2495   | 0.359265 | 1.13E-15 | 0.554442 | 5.41E-39 | 0.26146551 | 9.74E-09 | 0.118123 | 0.01063  |
| 0.39493  | 0.317045 | 2.30E-12 | 0.655855 | 9.23E-59 | 0.6028476  | 1.52E-47 | 0.507299 | 6.56E-32 |
| 0.40704  | 0.170938 | 0.00021  | 0.385851 | 5.00E-18 | 0.23095146 | 4.51E-07 | 0.092221 | 0.04639  |
| 0.00954  | 0.689182 | 4.69E-67 | 0.637176 | 1.48E-54 | 0.30330965 | 2.15E-11 | 0.404328 | 8.55E-20 |
| 0.01911  | 0.403789 | 9.67E-20 | 0.361384 | 7.46E-16 | 0.37296287 | 7.36E-17 | 0.387055 | 3.87E-18 |
| 0.11189  | 0.668809 | 7.40E-62 | 0.794581 | #####    | 0.32398451 | 7.12E-13 | 0.352142 | 4.43E-15 |
| 0.21745  | 0.573541 | 3.37E-42 | 0.726498 | 8.71E-78 | 0.59387728 | 7.52E-46 | 0.444468 | 4.94E-24 |
| 0.05592  | 0.465641 | 1.66E-26 | 0.536624 | 3.49E-36 | 0.59877049 | 9.08E-47 | 0.377433 | 2.94E-17 |
| 0.03037  | 0.288049 | 2.25E-10 | 0.517921 | 2.07E-33 | 0.02195049 | 0.63611  | -0.043   | 0.35386  |

|          |          |          |          |          |            |          |          |          |
|----------|----------|----------|----------|----------|------------|----------|----------|----------|
| 0.1987   | 0.360678 | 8.57E-16 | 0.549889 | 2.93E-38 | 0.34472507 | 1.78E-14 | 0.327418 | 3.94E-13 |
| 0.99633  | 0.480832 | 2.16E-28 | 0.691298 | 1.28E-67 | 0.17838167 | 0.00011  | -0.04003 | 0.38809  |
| 0.20378  | 0.590572 | 3.07E-45 | 0.705    | 2.13E-71 | 0.35671035 | 1.85E-15 | 0.389809 | 2.14E-18 |
| 0.54723  | 0.442132 | 9.03E-24 | 0.597339 | 1.69E-46 | 0.36040593 | 9.03E-16 | 0.202294 | 1.06E-05 |
| 0.55773  | 0.372756 | 7.68E-17 | 0.551458 | 1.64E-38 | 0.19546095 | 2.10E-05 | 0.17498  | 0.00014  |
| 0.0781   | 0.317473 | 2.14E-12 | 0.627203 | 1.98E-52 | 0.04090332 | 0.37782  | -0.11404 | 0.01367  |
| 0.5691   | 0.29338  | 1.01E-10 | 0.549729 | 3.11E-38 | 0.15528575 | 0.00076  | -0.04314 | 0.35229  |
| 0.34493  | 0.713027 | 1.03E-73 | 0.83017  | #####    | 0.38404883 | 7.34E-18 | 0.302388 | 2.49E-11 |
| 0.00547  | 0.435839 | 4.50E-23 | 0.618314 | 1.35E-50 | 0.61666499 | 2.90E-50 | 0.504076 | 1.83E-31 |
| 0.63745  | 0.286845 | 2.70E-10 | 0.56831  | 2.67E-41 | 0.45269501 | 5.66E-25 | 0.29939  | 3.98E-11 |
| 0.08309  | 0.488707 | 2.09E-29 | 0.735804 | 9.59E-81 | 0.59684157 | 2.10E-46 | 0.431415 | 1.36E-22 |
| 0.06627  | 0.469285 | 5.97E-27 | 0.58418  | 4.46E-44 | 0.30261631 | 2.40E-11 | 0.299098 | 4.17E-11 |
| 0.17631  | 0.510461 | 2.38E-32 | 0.663762 | 1.24E-60 | 0.29028322 | 1.61E-10 | 0.230618 | 4.69E-07 |
| 0.1195   | 0.252668 | 3.10E-08 | 0.485311 | 5.76E-29 | 0.38712561 | 3.81E-18 | 0.348703 | 8.48E-15 |
| 0.4609   | 0.39527  | 6.49E-19 | 0.48986  | 1.48E-29 | 0.20600026 | 7.19E-06 | 0.02309  | 0.61869  |
| 0.9952   | 0.26054  | 1.10E-08 | 0.707289 | 4.74E-72 | 0.51775631 | 2.19E-33 | 0.356103 | 2.08E-15 |
| 0.14959  | 0.609624 | 7.32E-49 | 0.740842 | 2.13E-82 | 0.43087017 | 1.56E-22 | 0.323919 | 7.20E-13 |
| 0.61331  | 0.386202 | 4.64E-18 | 0.465311 | 1.82E-26 | 0.15242319 | 0.00095  | 0.169044 | 0.00024  |
| 0.25216  | 0.208151 | 5.74E-06 | 0.645641 | 2.00E-56 | 0.27094211 | 2.66E-09 | 0.104584 | 0.02381  |
| 9.71E-05 | 0.295609 | 7.16E-11 | 0.535223 | 5.71E-36 | 0.35732464 | 1.64E-15 | 0.169537 | 0.00023  |
| 4.60E-05 | 0.513977 | 7.58E-33 | 0.607957 | 1.55E-48 | 0.09857341 | 0.0332   | 0.057093 | 0.21814  |
| 0.14953  | 0.465353 | 1.80E-26 | 0.646179 | 1.51E-56 | 0.11814082 | 0.01061  | 0.045549 | 0.326    |
| 0.36553  | 0.563963 | 1.45E-40 | 0.650017 | 2.05E-57 | 0.22557471 | 8.42E-07 | 0.195476 | 2.10E-05 |
| 0.00012  | 0.494148 | 4.01E-30 | 0.766846 | 1.36E-91 | 0.4111409  | 1.79E-20 | 0.29531  | 7.50E-11 |
| 0.14435  | 0.41869  | 3.02E-21 | 0.639997 | 3.57E-55 | 0.24557666 | 7.65E-08 | 0.205984 | 7.20E-06 |
| 0.77785  | 0.174572 | 0.00015  | 0.520046 | 1.02E-33 | 0.34591584 | 1.43E-14 | 0.236707 | 2.28E-07 |
| 0.02038  | 0.570817 | 9.96E-42 | 0.814121 | #####    | 0.43957838 | 1.74E-23 | 0.30597  | 1.41E-11 |
| 0.5816   | 0.237145 | 2.16E-07 | 0.500122 | 6.33E-31 | 0.50755839 | 6.04E-32 | 0.404222 | 8.76E-20 |
| 0.01483  | 0.412287 | 1.37E-20 | 0.631541 | 2.40E-53 | 0.26706587 | 4.55E-09 | 0.146286 | 0.00153  |
| 0.3361   | 0.37179  | 9.35E-17 | 0.699901 | 5.75E-70 | 0.27471177 | 1.57E-09 | 0.103935 | 0.0247   |
| 0.89259  | 0.313609 | 4.07E-12 | 0.588436 | 7.56E-45 | 0.63291133 | 1.23E-53 | 0.441134 | 1.17E-23 |
| 0.14114  | 0.267125 | 4.52E-09 | 0.513565 | 8.68E-33 | 0.40797551 | 3.72E-20 | 0.360192 | 9.42E-16 |
| 0.11435  | 0.376856 | 3.31E-17 | 0.574343 | 2.45E-42 | 0.40255876 | 1.28E-19 | 0.161481 | 0.00046  |
| 0.76392  | 0.437226 | 3.17E-23 | 0.665955 | 3.67E-61 | 0.29306982 | 1.06E-10 | 0.166162 | 0.00031  |
| 0.0297   | 0.390932 | 1.68E-18 | 0.579319 | 3.28E-43 | 0.05371213 | 0.24668  | -0.07438 | 0.10842  |
| 0.02496  | 0.63638  | 2.20E-54 | 0.84503  | #####    | 0.49087601 | 1.09E-29 | 0.467868 | 8.89E-27 |
| 0.01463  | 0.227488 | 6.76E-07 | 0.268818 | 3.58E-09 | 0.460793   | 6.33E-26 | 0.35018  | 6.42E-15 |
| 0.62627  | 0.0358   | 0.44022  | 0.291808 | 1.28E-10 | 0.27476285 | 1.56E-09 | 0.10752  | 0.02012  |
| 0.01819  | 0.347278 | 1.11E-14 | 0.591913 | 1.74E-45 | 0.37431096 | 5.59E-17 | 0.328203 | 3.44E-13 |
| 0.69845  | 0.530118 | 3.37E-35 | 0.840441 | #####    | 0.58560337 | 2.47E-44 | 0.42662  | 4.45E-22 |
| 0.80778  | 0.583325 | 6.36E-44 | 0.8394   | #####    | 0.57973517 | 2.77E-43 | 0.455534 | 2.64E-25 |
| 0.00051  | 0.604158 | 8.49E-48 | 0.639445 | 4.72E-55 | 0.34571762 | 1.48E-14 | 0.388403 | 2.89E-18 |
| 0.46602  | 0.305002 | 1.64E-11 | 0.615873 | 4.19E-50 | 0.36015018 | 9.50E-16 | 0.2176   | 2.07E-06 |
| 0.02641  | 0.552335 | 1.19E-38 | 0.749364 | 2.75E-85 | 0.16377476 | 0.00038  | -0.04969 | 0.28391  |
| 0.02931  | 0.175698 | 0.00014  | 0.563795 | 1.55E-40 | 0.60376249 | 1.01E-47 | 0.469275 | 5.98E-27 |

|          |          |          |          |          |            |          |          |          |
|----------|----------|----------|----------|----------|------------|----------|----------|----------|
| 0.56709  | 0.296275 | 6.46E-11 | 0.594559 | 5.61E-46 | 0.37018217 | 1.30E-16 | 0.269493 | 3.26E-09 |
| 0.69446  | 0.094455 | 0.04132  | 0.579556 | 2.98E-43 | 0.44842927 | 1.75E-24 | 0.208641 | 5.45E-06 |
| 0.16167  | 0.257572 | 1.63E-08 | 0.655158 | 1.34E-58 | 0.41397581 | 9.22E-21 | 0.208041 | 5.80E-06 |
| 0.1018   | 0.39141  | 1.51E-18 | 0.64282  | 8.50E-56 | 0.06934126 | 0.13459  | -0.0518  | 0.2639   |
| 0.01155  | 0.428212 | 3.01E-22 | 0.634631 | 5.24E-54 | 0.15569301 | 0.00074  | 0.20774  | 5.99E-06 |
| 0.68098  | 0.368947 | 1.66E-16 | 0.525361 | 1.71E-34 | 0.32544531 | 5.54E-13 | 0.097423 | 0.03532  |
| 0.30833  | 0.393222 | 1.02E-18 | 0.614783 | 6.93E-50 | 0.44944728 | 1.34E-24 | 0.363051 | 5.38E-16 |
| 0.28951  | 0.580921 | 1.71E-43 | 0.809286 | #####    | 0.71584152 | 1.52E-74 | 0.588247 | 8.19E-45 |
| 0.00064  | 0.263358 | 7.55E-09 | 0.513006 | 1.04E-32 | 0.32820514 | 3.44E-13 | 0.300543 | 3.33E-11 |
| 0.23859  | 0.334807 | 1.07E-13 | 0.525725 | 1.51E-34 | 0.32476108 | 6.23E-13 | 0.123549 | 0.00752  |
| 9.55E-07 | 0.453551 | 4.50E-25 | 0.572633 | 4.85E-42 | 0.02761609 | 0.55164  | 0.013914 | 0.76426  |
| 0.91354  | 0.46159  | 5.08E-26 | 0.719953 | 8.88E-76 | 0.34014952 | 4.11E-14 | 0.097708 | 0.03478  |
| 0.33057  | 0.34794  | 9.78E-15 | 0.680169 | 1.05E-64 | 0.51914291 | 1.38E-33 | 0.332716 | 1.56E-13 |
| 0.30876  | 0.538593 | 1.74E-36 | 0.667597 | 1.46E-61 | 0.33405904 | 1.23E-13 | 0.173885 | 0.00016  |
| 0.29254  | 0.252371 | 3.22E-08 | 0.519696 | 1.15E-33 | 0.37154426 | 9.83E-17 | 0.318953 | 1.67E-12 |
| 0.1433   | 0.432441 | 1.06E-22 | 0.686441 | 2.48E-66 | 0.1723137  | 0.00018  | 0.095278 | 0.03958  |
| 0.55334  | 0.269226 | 3.38E-09 | 0.677578 | 4.82E-64 | 0.53840489 | 1.86E-36 | 0.410027 | 2.32E-20 |
| 0.84408  | 0.2859   | 3.10E-10 | 0.628548 | 1.03E-52 | 0.60409293 | 8.74E-48 | 0.36202  | 6.59E-16 |
| 0.00034  | 0.309707 | 7.71E-12 | 0.626117 | 3.34E-52 | 0.1860905  | 5.21E-05 | 0.170925 | 0.00021  |
| 0.06281  | 0.255883 | 2.04E-08 | 0.599273 | 7.30E-47 | 0.04806966 | 0.29992  | -0.06494 | 0.16118  |
| 0.00307  | 0.1853   | 5.61E-05 | 0.121816 | 0.00841  | -0.0428972 | 0.35499  | -0.03786 | 0.41431  |
| 0.00704  | 0.180145 | 9.06E-05 | 0.25534  | 2.19E-08 | -0.1138047 | 0.01386  | -0.18103 | 8.35E-05 |
| 0.50387  | -0.14248 | 0.00202  | -0.19375 | 2.49E-05 | -0.1559935 | 0.00072  | -0.22743 | 6.80E-07 |
| 0.00084  | 0.259044 | 1.35E-08 | 0.247913 | 5.70E-08 | 0.17550822 | 0.00014  | 0.22379  | 1.03E-06 |
| 0.00023  | 0.315565 | 2.95E-12 | 0.285619 | 3.23E-10 | 0.17758206 | 0.00011  | 0.286997 | 2.64E-10 |
| 0.13398  | 0.167356 | 0.00028  | 0.188271 | 4.23E-05 | 0.28920685 | 1.89E-10 | 0.455102 | 2.97E-25 |
| 0.10654  | 0.042025 | 0.36486  | -0.14038 | 0.00236  | -0.0226344 | 0.62563  | 0.18186  | 7.73E-05 |
| 0.17567  | 0.308567 | 9.27E-12 | 0.18296  | 6.98E-05 | 0.08117634 | 0.0797   | 0.229606 | 5.28E-07 |
| 0.04389  | 0.430491 | 1.71E-22 | 0.242103 | 1.18E-07 | 0.3312689  | 2.01E-13 | 0.548049 | 5.76E-38 |
| 0.87229  | 0.231246 | 4.36E-07 | 0.192038 | 2.94E-05 | 0.03002004 | 0.51754  | 0.058119 | 0.20997  |
| 0.81527  | 0.053016 | 0.25286  | 0.01202  | 0.79559  | 0.00675063 | 0.88432  | 0.027687 | 0.55062  |
| 6.35E-05 | 0.317474 | 2.14E-12 | 0.3155   | 2.98E-12 | 0.37198521 | 8.99E-17 | 0.25277  | 3.06E-08 |
| 1.14E-07 | 0.20042  | 1.28E-05 | 0.189842 | 3.64E-05 | 0.04006678 | 0.38766  | 0.111842 | 0.0156   |
| 0.00147  | 0.180007 | 9.17E-05 | 0.163447 | 0.00039  | 0.09299779 | 0.04457  | 0.158931 | 0.00057  |
| 8.50E-05 | 0.110822 | 0.01658  | -0.08463 | 0.06767  | -0.2524796 | 3.18E-08 | -0.29631 | 6.42E-11 |
| 0.25529  | -0.10616 | 0.02177  | -0.07226 | 0.1189   | 0.05105674 | 0.27085  | 0.171038 | 0.0002   |
| 0.65763  | 0.105036 | 0.0232   | 0.093388 | 0.04368  | -0.1400342 | 0.00242  | -0.21443 | 2.93E-06 |
| 0.06334  | 0.276691 | 1.18E-09 | 0.180259 | 8.96E-05 | 0.00221446 | 0.96193  | 0.067135 | 0.14746  |
| 0.00013  | 0.236529 | 2.32E-07 | 0.155888 | 0.00072  | 0.00561793 | 0.90363  | 0.092695 | 0.04527  |
| 0.64731  | 0.182215 | 7.48E-05 | 0.086964 | 0.0604   | -0.178006  | 0.00011  | -0.21915 | 1.74E-06 |
| 0.12837  | 0.214453 | 2.92E-06 | 0.270725 | 2.75E-09 | 0.20088896 | 1.22E-05 | 0.305579 | 1.50E-11 |
| 2.29E-05 | 0.283536 | 4.39E-10 | 0.239814 | 1.56E-07 | 0.06128972 | 0.18611  | 0.110638 | 0.01676  |
| 1.21E-06 | 0.171549 | 0.0002   | 0.175334 | 0.00014  | 0.13089402 | 0.00461  | 0.227575 | 6.69E-07 |
| 0.00073  | 0.208558 | 5.49E-06 | 0.237005 | 2.20E-07 | 0.10783996 | 0.01975  | 0.150559 | 0.0011   |
| 0.02337  | 0.165517 | 0.00033  | 0.094486 | 0.04126  | 0.07364299 | 0.11199  | 0.266335 | 5.03E-09 |



|          |          |          |          |          |            |          |          |          |
|----------|----------|----------|----------|----------|------------|----------|----------|----------|
| 0.01256  | 0.197958 | 1.64E-05 | 0.101245 | 0.02869  | -0.0511159 | 0.27029  | 0.010146 | 0.82691  |
| 0.06651  | 0.205205 | 7.81E-06 | 0.031411 | 0.49831  | -0.1890665 | 3.92E-05 | -0.31686 | 2.37E-12 |
| 0.48627  | 0.244051 | 9.25E-08 | 0.040825 | 0.37873  | 0.1000129  | 0.0307   | 0.080224 | 0.08331  |
| 0.00239  | 0.278556 | 9.06E-10 | 0.13378  | 0.00378  | -0.2729503 | 2.01E-09 | -0.40439 | 8.43E-20 |
| 1.59E-05 | 0.408733 | 3.12E-20 | 0.26002  | 1.18E-08 | 0.08413401 | 0.06929  | 0.108715 | 0.01877  |
| 0.34252  | 0.312834 | 4.62E-12 | 0.564488 | 1.18E-40 | 0.36402167 | 4.44E-16 | 0.346936 | 1.18E-14 |
| 0.00991  | 0.133189 | 0.00393  | 0.264854 | 6.16E-09 | 0.05976404 | 0.19733  | -0.0987  | 0.03298  |
| 0.00256  | 0.246244 | 7.03E-08 | 0.228248 | 6.19E-07 | 0.05776981 | 0.21272  | 0.021369 | 0.64508  |
| 0.08583  | 0.286318 | 2.91E-10 | 0.101531 | 0.02824  | 0.01891392 | 0.68351  | 0.049286 | 0.28784  |
| 0.00029  | 0.283494 | 4.42E-10 | 0.253779 | 2.69E-08 | -0.0412797 | 0.37344  | 0.079352 | 0.08673  |
| 0.0059   | 0.282749 | 4.93E-10 | 0.240768 | 1.39E-07 | 0.0470019  | 0.31079  | 0.009321 | 0.84079  |
| 0.00262  | 0.205419 | 7.64E-06 | 0.131019 | 0.00457  | 0.000602   | 0.98965  | 0.028332 | 0.54137  |
| 0.22706  | 0.40525  | 6.94E-20 | 0.304358 | 1.82E-11 | 0.30669177 | 1.25E-11 | 0.296317 | 6.42E-11 |
| 4.02E-07 | 0.343499 | 2.23E-14 | 0.189406 | 3.80E-05 | -0.0911942 | 0.04889  | -0.13799 | 0.00281  |
| 8.19E-12 | 0.039338 | 0.39635  | 0.141554 | 0.00217  | -0.0705046 | 0.12815  | -0.02029 | 0.66194  |
| 0.00291  | 0.161128 | 0.00047  | 0.068056 | 0.14198  | -0.091476  | 0.04819  | -0.15463 | 0.0008   |
| 0.00177  | 0.281029 | 6.34E-10 | 0.091302 | 0.04862  | 0.15001737 | 0.00115  | 0.274491 | 1.62E-09 |
| 0.29964  | 0.247097 | 6.32E-08 | 0.197769 | 1.67E-05 | 0.23858045 | 1.81E-07 | 0.322116 | 9.80E-13 |
| 6.53E-07 | 0.303123 | 2.22E-11 | 0.203113 | 9.70E-06 | 0.14688468 | 0.00146  | 0.286894 | 2.68E-10 |
| 1.89E-05 | 0.239548 | 1.61E-07 | 0.106187 | 0.02173  | 0.21516716 | 2.70E-06 | 0.255442 | 2.16E-08 |
| 6.16E-05 | 0.271279 | 2.54E-09 | 0.243431 | 9.99E-08 | 0.10013652 | 0.03049  | 0.148461 | 0.00129  |
| 1.03E-05 | -0.02093 | 0.65191  | -0.01648 | 0.72244  | -0.1783579 | 0.00011  | -0.1764  | 0.00013  |
| 0.00208  | 0.122274 | 0.00816  | -0.06171 | 0.18313  | -0.1655002 | 0.00033  | -0.17803 | 0.00011  |
| 0.00955  | 0.200196 | 1.31E-05 | 0.140485 | 0.00234  | 0.19498118 | 2.20E-05 | 0.355567 | 2.31E-15 |
| 0.00165  | 0.033728 | 0.46715  | -0.0502  | 0.279    | 0.07982803 | 0.08485  | 0.218112 | 1.95E-06 |
| 0.06752  | 0.182663 | 7.18E-05 | 0.074558 | 0.10759  | 0.07680579 | 0.09736  | 0.077645 | 0.09375  |
| 0.00139  | -0.03842 | 0.40753  | -0.05441 | 0.24054  | 0.01368905 | 0.76796  | 0.198071 | 1.62E-05 |
| 1.26E-05 | 0.1397   | 0.00248  | 0.040165 | 0.3865   | -0.2426336 | 1.10E-07 | -0.15294 | 0.00091  |
| 1.75E-07 | 0.02188  | 0.6372   | -0.09128 | 0.04869  | -0.0942631 | 0.04174  | -0.04082 | 0.3788   |
| 0.02531  | 0.466671 | 1.24E-26 | 0.383972 | 7.46E-18 | 0.2217595  | 1.30E-06 | 0.310713 | 6.54E-12 |
| 0.26141  | 0.225159 | 8.84E-07 | 0.06047  | 0.19208  | 0.16468475 | 0.00035  | 0.195696 | 2.05E-05 |
| 1.28E-07 | 0.376507 | 3.56E-17 | 0.241538 | 1.26E-07 | 0.10188559 | 0.02769  | 0.072507 | 0.11764  |
| 1.51E-05 | -0.02915 | 0.52973  | -0.0089  | 0.84785  | -0.1083458 | 0.01918  | -0.04815 | 0.29909  |
| 0.00256  | 0.1633   | 0.0004   | 0.244696 | 8.54E-08 | 0.25560428 | 2.12E-08 | 0.238142 | 1.91E-07 |
| 0.17265  | 0.046835 | 0.31252  | 0.22631  | 7.74E-07 | 0.16510743 | 0.00034  | 0.108439 | 0.01908  |
| 0.05891  | 0.103763 | 0.02494  | -0.06573 | 0.15617  | -0.0040805 | 0.92992  | 0.19715  | 1.78E-05 |
| 0.03246  | 0.063374 | 0.17155  | 0.058839 | 0.20437  | 0.02609045 | 0.57384  | 0.07807  | 0.09196  |
| 0.0065   | 0.083941 | 0.06994  | 0.199618 | 1.39E-05 | 0.08197797 | 0.07676  | 0.010757 | 0.81665  |
| 0.02414  | 0.47688  | 6.82E-28 | 0.552489 | 1.12E-38 | 0.47718962 | 6.24E-28 | 0.394282 | 8.07E-19 |
| 0.05125  | 0.07793  | 0.09254  | -0.00485 | 0.91679  | 0.22086565 | 1.44E-06 | 0.285919 | 3.09E-10 |
| 0.0002   | -0.00948 | 0.83815  | 0.03642  | 0.43233  | 0.3532731  | 3.58E-15 | 0.374528 | 5.35E-17 |
| 0.83064  | 0.295095 | 7.75E-11 | 0.232835 | 3.61E-07 | 0.2802481  | 7.10E-10 | 0.547081 | 8.21E-38 |
| 0.18124  | -0.12825 | 0.00551  | -0.1946  | 2.29E-05 | -0.1047035 | 0.02365  | -0.252   | 3.38E-08 |
| 0.12855  | 0.252633 | 3.11E-08 | 0.158797 | 0.00057  | 0.30824613 | 9.77E-12 | 0.537446 | 2.61E-36 |
| 0.09329  | 0.501274 | 4.42E-31 | 0.336609 | 7.79E-14 | 0.22430506 | 9.74E-07 | 0.496389 | 2.02E-30 |

|          |          |          |          |          |            |          |          |          |
|----------|----------|----------|----------|----------|------------|----------|----------|----------|
| 0.37276  | 0.106302 | 0.02159  | 0.098746 | 0.03289  | 0.25176852 | 3.48E-08 | 0.554647 | 5.01E-39 |
| 0.392    | -0.26772 | 4.16E-09 | -0.29592 | 6.83E-11 | -0.315631  | 2.91E-12 | -0.54349 | 3.02E-37 |
| 0.35153  | 0.303535 | 2.08E-11 | 0.265805 | 5.41E-09 | 0.41394041 | 9.30E-21 | 0.51953  | 1.22E-33 |
| 0.94728  | 0.183435 | 6.68E-05 | 0.177769 | 0.00011  | 0.42192226 | 1.39E-21 | 0.655522 | 1.10E-58 |
| 0.07108  | 0.27025  | 2.93E-09 | 0.384751 | 6.32E-18 | 0.34510963 | 1.65E-14 | 0.529323 | 4.43E-35 |
| 0.0618   | 0.086364 | 0.06221  | 0.416578 | 4.99E-21 | 0.21734392 | 2.13E-06 | 0.25813  | 1.52E-08 |
| 0.21886  | 0.247009 | 6.39E-08 | 0.245314 | 7.90E-08 | 0.41344777 | 1.04E-20 | 0.58288  | 7.64E-44 |
| 0.15225  | 0.444486 | 4.91E-24 | 0.387333 | 3.64E-18 | 0.18376423 | 6.48E-05 | 0.264776 | 6.23E-09 |
| 0.62133  | 0.342815 | 2.53E-14 | 0.374219 | 5.70E-17 | 0.36561785 | 3.23E-16 | 0.569243 | 1.85E-41 |
| 0.12641  | 0.465599 | 1.68E-26 | 0.343499 | 2.23E-14 | 0.30692221 | 1.21E-11 | 0.590554 | 3.10E-45 |
| 0.23474  | 0.479345 | 3.34E-28 | 0.349746 | 6.97E-15 | 0.30064764 | 3.27E-11 | 0.495721 | 2.48E-30 |
| 0.03466  | 0.373006 | 7.30E-17 | 0.355566 | 2.31E-15 | 0.14174998 | 0.00214  | 0.337124 | 7.10E-14 |
| 0.31584  | 0.236445 | 2.35E-07 | 0.201873 | 1.10E-05 | 0.35468845 | 2.73E-15 | 0.590784 | 2.81E-45 |
| 0.7794   | 0.055252 | 0.23337  | 0.339221 | 4.86E-14 | 0.37868512 | 2.26E-17 | 0.454889 | 3.14E-25 |
| 0.76488  | 0.415528 | 6.40E-21 | 0.405238 | 6.95E-20 | 0.48084587 | 2.15E-28 | 0.52739  | 8.59E-35 |
| 0.92496  | 0.486995 | 3.49E-29 | 0.432174 | 1.13E-22 | 0.09117833 | 0.04893  | 0.212671 | 3.54E-06 |
| 0.02389  | 0.273404 | 1.89E-09 | 0.31402  | 3.80E-12 | 0.28165478 | 5.79E-10 | 0.415275 | 6.79E-21 |
| 0.20839  | 0.358908 | 1.21E-15 | 0.084334 | 0.06863  | 0.04414167 | 0.34119  | 0.178431 | 0.00011  |
| 0.01098  | 0.155888 | 0.00072  | 0.104309 | 0.02418  | 0.33790714 | 6.16E-14 | 0.622055 | 2.32E-51 |
| 5.28E-09 | 0.601202 | 3.13E-47 | 0.699518 | 7.34E-70 | 0.46219516 | 4.30E-26 | 0.501011 | 4.80E-31 |
| 0.00324  | 0.107838 | 0.01976  | -0.08432 | 0.06868  | -0.1139049 | 0.01378  | 0.204047 | 8.81E-06 |
| 0.20352  | 0.359301 | 1.12E-15 | 0.392083 | 1.30E-18 | 0.42090042 | 1.78E-21 | 0.61348  | 1.26E-49 |
| 0.46395  | 0.304798 | 1.70E-11 | 0.172761 | 0.00018  | 0.30118336 | 3.01E-11 | 0.567672 | 3.43E-41 |
| 0.27772  | 0.182666 | 7.18E-05 | 0.132001 | 0.00427  | 0.21186673 | 3.86E-06 | 0.462323 | 4.15E-26 |
| 0.50623  | 0.285234 | 3.42E-10 | 0.304877 | 1.68E-11 | 0.35711531 | 1.71E-15 | 0.588341 | 7.87E-45 |
| 0.00402  | 0.247343 | 6.12E-08 | 0.245692 | 7.54E-08 | 0.19986127 | 1.35E-05 | 0.315087 | 3.19E-12 |
| 0.54457  | 0.499544 | 7.58E-31 | 0.510757 | 2.16E-32 | 0.50192842 | 3.60E-31 | 0.663079 | 1.81E-60 |
| 0.00062  | 0.387099 | 3.83E-18 | 0.370226 | 1.28E-16 | 0.34161344 | 3.15E-14 | 0.423007 | 1.07E-21 |
| 0.63033  | -0.03724 | 0.42206  | 0.163802 | 0.00038  | 0.20638052 | 6.91E-06 | 0.371929 | 9.09E-17 |
| 0.0005   | 0.209862 | 4.78E-06 | 0.286058 | 3.03E-10 | 0.27424171 | 1.68E-09 | 0.303396 | 2.12E-11 |
| 0.00938  | 0.514893 | 5.62E-33 | 0.236339 | 2.38E-07 | -0.067489  | 0.14534  | 0.134898 | 0.00349  |
| 0.18384  | 0.415666 | 6.19E-21 | 0.455613 | 2.59E-25 | 0.4253538  | 6.06E-22 | 0.487697 | 2.83E-29 |
| 0.10533  | 0.447669 | 2.14E-24 | 0.284025 | 4.09E-10 | 0.15572528 | 0.00073  | 0.397231 | 4.21E-19 |
| 0.01169  | 0.439759 | 1.66E-23 | 0.161724 | 0.00045  | 0.22285073 | 1.15E-06 | 0.435421 | 5.00E-23 |
| 0.00959  | 0.269308 | 3.34E-09 | 0.22654  | 7.54E-07 | -0.0462458 | 0.31865  | 0.060425 | 0.19241  |
| 0.09286  | 0.345402 | 1.57E-14 | 0.259633 | 1.24E-08 | 0.35129378 | 5.21E-15 | 0.495053 | 3.04E-30 |
| 0.99835  | 0.009505 | 0.83769  | -0.23444 | 2.99E-07 | -0.178658  | 0.0001   | -0.39197 | 1.34E-18 |
| 0.90659  | 0.451178 | 8.47E-25 | 0.192301 | 2.87E-05 | 0.20971765 | 4.86E-06 | 0.402228 | 1.38E-19 |
| 0.52933  | 0.099687 | 0.03125  | 0.265793 | 5.42E-09 | 0.44164617 | 1.02E-23 | 0.542672 | 4.05E-37 |
| 0.8368   | 0.276541 | 1.21E-09 | 0.204923 | 8.04E-06 | 0.32187731 | 1.02E-12 | 0.586211 | 1.92E-44 |
| 0.25468  | 0.195685 | 2.06E-05 | 0.048959 | 0.29106  | 0.04338659 | 0.34952  | 0.240964 | 1.36E-07 |
| 0.45775  | 0.305543 | 1.51E-11 | 0.165122 | 0.00034  | 0.18969961 | 3.69E-05 | 0.301399 | 2.91E-11 |
| 0.12317  | 0.290627 | 1.53E-10 | 0.369895 | 1.37E-16 | 0.491533   | 8.90E-30 | 0.67227  | 1.04E-62 |
| 0.18215  | 0.346363 | 1.31E-14 | 0.417058 | 4.46E-21 | 0.53812968 | 2.05E-36 | 0.730184 | 6.07E-79 |
| 0.34522  | 0.314917 | 3.28E-12 | 0.139672 | 0.00249  | 0.27152325 | 2.46E-09 | 0.556733 | 2.29E-39 |

|          |          |          |          |          |            |          |          |          |
|----------|----------|----------|----------|----------|------------|----------|----------|----------|
| 0.13496  | 0.400739 | 1.92E-19 | 0.424686 | 7.14E-22 | 0.23731539 | 2.11E-07 | 0.479744 | 2.97E-28 |
| 0.49584  | 0.325166 | 5.81E-13 | 0.401072 | 1.79E-19 | 0.21624617 | 2.40E-06 | 0.345764 | 1.47E-14 |
| 0.27866  | 0.233121 | 3.49E-07 | 0.381856 | 1.17E-17 | 0.55219761 | 1.25E-38 | 0.723919 | 5.48E-77 |
| 0.5426   | 0.240282 | 1.47E-07 | 0.303034 | 2.25E-11 | 0.23245754 | 3.78E-07 | 0.425095 | 6.46E-22 |
| 0.00094  | 0.467737 | 9.22E-27 | 0.541943 | 5.27E-37 | 0.36834141 | 1.88E-16 | 0.47644  | 7.75E-28 |
| 0.76869  | 0.399275 | 2.67E-19 | 0.413163 | 1.12E-20 | 0.40393368 | 9.36E-20 | 0.47337  | 1.87E-27 |
| 0.28674  | 0.277128 | 1.11E-09 | 0.21107  | 4.21E-06 | 0.29104181 | 1.44E-10 | 0.630744 | 3.55E-53 |
| 0.17958  | 0.422829 | 1.12E-21 | 0.17886  | 0.0001   | 0.29025589 | 1.62E-10 | 0.596964 | 1.99E-46 |
| 0.78632  | 0.315402 | 3.03E-12 | 0.229152 | 5.57E-07 | -0.0641143 | 0.16659  | 0.153128 | 0.0009   |
| 0.09323  | 0.215243 | 2.68E-06 | 0.215294 | 2.66E-06 | 0.35838774 | 1.34E-15 | 0.538832 | 1.60E-36 |
| 0.73824  | 0.297766 | 5.13E-11 | 0.48563  | 5.24E-29 | 0.35538334 | 2.39E-15 | 0.413248 | 1.09E-20 |
| 0.4438   | 0.269871 | 3.09E-09 | 0.226218 | 7.82E-07 | 0.29412635 | 8.99E-11 | 0.491981 | 7.77E-30 |
| 0.00206  | 0.187592 | 4.52E-05 | 0.097768 | 0.03467  | -0.0979879 | 0.03426  | 0.084504 | 0.06807  |
| 0.35555  | 0.435636 | 4.73E-23 | 0.485787 | 5.00E-29 | 0.441373   | 1.10E-23 | 0.522215 | 4.95E-34 |
| 0.32061  | 0.358668 | 1.27E-15 | 0.469388 | 5.80E-27 | 0.24705163 | 6.35E-08 | 0.447579 | 2.19E-24 |
| 0.67473  | 0.151353 | 0.00103  | 0.172342 | 0.00018  | 0.27205238 | 2.28E-09 | 0.480549 | 2.35E-28 |
| 0.56611  | 0.633035 | 1.15E-53 | 0.45507  | 2.99E-25 | 0.15315719 | 0.0009   | 0.311993 | 5.31E-12 |
| 0.13321  | 0.172653 | 0.00018  | 0.152478 | 0.00095  | 0.16170092 | 0.00045  | 0.424298 | 7.84E-22 |
| 0.00032  | 0.295476 | 7.31E-11 | 0.3244   | 6.63E-13 | 0.41480422 | 7.59E-21 | 0.623309 | 1.28E-51 |
| 0.12231  | 0.420583 | 1.92E-21 | 0.472311 | 2.53E-27 | 0.25869197 | 1.41E-08 | 0.312696 | 4.73E-12 |
| 0.0022   | 0.333973 | 1.25E-13 | 0.323038 | 8.37E-13 | 0.23204893 | 3.97E-07 | 0.452528 | 5.91E-25 |
| 0.00141  | 0.225916 | 8.10E-07 | 0.276938 | 1.14E-09 | 0.34114969 | 3.42E-14 | 0.518456 | 1.74E-33 |
| 0.15986  | 0.299057 | 4.20E-11 | 0.150157 | 0.00114  | 0.31217426 | 5.15E-12 | 0.516777 | 3.03E-33 |
| 0.02288  | 0.218407 | 1.89E-06 | 0.227562 | 6.70E-07 | 0.10296743 | 0.02607  | 0.317186 | 2.25E-12 |
| 0.01176  | 0.317967 | 1.97E-12 | 0.283225 | 4.60E-10 | 0.39515268 | 6.66E-19 | 0.583631 | 5.60E-44 |
| 0.57113  | 0.202138 | 1.07E-05 | 0.325022 | 5.96E-13 | 0.067691   | 0.14413  | 0.192667 | 2.77E-05 |
| 0.19794  | 0.104521 | 0.02389  | 0.203671 | 9.16E-06 | 0.26772855 | 4.16E-09 | 0.393287 | 1.00E-18 |
| 0.63379  | 0.413748 | 9.73E-21 | 0.297174 | 5.62E-11 | 0.43749305 | 2.96E-23 | 0.650503 | 1.58E-57 |
| 0.53564  | 0.330179 | 2.43E-13 | 0.394946 | 6.97E-19 | 0.45776622 | 1.44E-25 | 0.660744 | 6.53E-60 |
| 1.09E-07 | 0.217283 | 2.14E-06 | 0.223208 | 1.10E-06 | 0.21260853 | 3.56E-06 | 0.371964 | 9.02E-17 |
| 0.83478  | 0.204459 | 8.44E-06 | 0.210228 | 4.60E-06 | 0.33200244 | 1.77E-13 | 0.552187 | 1.25E-38 |
| 0.27756  | 0.284506 | 3.81E-10 | 0.004373 | 0.9249   | 0.09259087 | 0.04552  | 0.302118 | 2.60E-11 |
| 0.59514  | 0.146208 | 0.00153  | 0.15464  | 0.0008   | 0.13602434 | 0.00323  | 0.384146 | 7.19E-18 |
| 0.07221  | 0.540521 | 8.76E-37 | 0.528664 | 5.55E-35 | 0.1808449  | 8.49E-05 | 0.347169 | 1.13E-14 |
| 0.66422  | 0.242254 | 1.16E-07 | 0.287483 | 2.45E-10 | 0.39751562 | 3.95E-19 | 0.589526 | 4.78E-45 |
| 0.00633  | 0.19669  | 1.86E-05 | 0.177153 | 0.00012  | 0.30085517 | 3.17E-11 | 0.536084 | 4.22E-36 |
| 0.31222  | 0.171316 | 0.0002   | 0.276171 | 1.27E-09 | 0.457078   | 1.74E-25 | 0.5352   | 5.75E-36 |
| 0.79975  | 0.348052 | 9.58E-15 | 0.217013 | 2.21E-06 | 0.10476    | 0.02357  | 0.198533 | 1.55E-05 |
| 0.582    | -0.14079 | 0.00229  | -0.15731 | 0.00065  | -0.0165075 | 0.72199  | -0.13786 | 0.00283  |
| 0.84133  | 0.278334 | 9.35E-10 | 0.148703 | 0.00127  | 0.21978998 | 1.62E-06 | 0.550218 | 2.60E-38 |
| 0.57416  | 0.324093 | 6.99E-13 | 0.330392 | 2.35E-13 | 0.16967808 | 0.00023  | 0.232607 | 3.71E-07 |
| 0.6892   | 0.229535 | 5.33E-07 | 0.178167 | 0.00011  | 0.30128272 | 2.96E-11 | 0.598235 | 1.15E-46 |
| 0.00924  | 0.3415   | 3.21E-14 | 0.322106 | 9.81E-13 | 0.2262056  | 7.84E-07 | 0.40023  | 2.16E-19 |
| 0.8198   | 0.182492 | 7.29E-05 | 0.089733 | 0.05264  | 0.16823318 | 0.00026  | 0.39019  | 1.97E-18 |
| 0.37333  | 0.545925 | 1.25E-37 | 0.606376 | 3.16E-48 | 0.22554967 | 8.45E-07 | 0.288874 | 1.99E-10 |

|          |          |          |          |          |            |          |          |          |
|----------|----------|----------|----------|----------|------------|----------|----------|----------|
| 0.7181   | 0.367919 | 2.04E-16 | 0.521233 | 6.88E-34 | 0.20825598 | 5.67E-06 | 0.230483 | 4.77E-07 |
| 0.88154  | 0.312388 | 4.98E-12 | 0.135052 | 0.00345  | 0.04671484 | 0.31376  | 0.171719 | 0.00019  |
| 0.10409  | 0.459421 | 9.21E-26 | 0.36986  | 1.38E-16 | 0.39514679 | 6.67E-19 | 0.536013 | 4.32E-36 |
| 1.11E-13 | 0.304541 | 1.77E-11 | 0.325221 | 5.76E-13 | 0.12512587 | 0.00678  | 0.224284 | 9.76E-07 |
| 0.19981  | 0.321337 | 1.12E-12 | 0.324598 | 6.41E-13 | 0.30456559 | 1.76E-11 | 0.4906   | 1.18E-29 |
| 0.02026  | 0.198051 | 1.62E-05 | 0.381448 | 1.27E-17 | 0.50175633 | 3.80E-31 | 0.548313 | 5.23E-38 |
| 0.36144  | 0.244818 | 8.41E-08 | 0.399349 | 2.63E-19 | 0.30936964 | 8.14E-12 | 0.520226 | 9.64E-34 |
| 0.85212  | 0.270425 | 2.86E-09 | 0.391542 | 1.47E-18 | 0.49061255 | 1.18E-29 | 0.627814 | 1.47E-52 |
| 0.38184  | 0.234884 | 2.83E-07 | 0.172441 | 0.00018  | 0.05937174 | 0.20029  | 0.224355 | 9.68E-07 |
| 0.47228  | 0.473288 | 1.92E-27 | 0.618285 | 1.36E-50 | 0.25645025 | 1.89E-08 | 0.264109 | 6.82E-09 |
| 0.77889  | 0.466027 | 1.49E-26 | 0.43268  | 9.95E-23 | 0.28016653 | 7.18E-10 | 0.527701 | 7.72E-35 |
| 0.00614  | 0.017959 | 0.69868  | 0.171189 | 0.0002   | 0.30055039 | 3.32E-11 | 0.37705  | 3.18E-17 |
| 0.61042  | 0.300018 | 3.61E-11 | 0.040496 | 0.38258  | -0.0104107 | 0.82246  | 0.226793 | 7.32E-07 |
| 0.88644  | 0.302394 | 2.49E-11 | 0.261366 | 9.87E-09 | 0.24784226 | 5.75E-08 | 0.479747 | 2.97E-28 |
| 0.61014  | 0.237753 | 2.01E-07 | 0.405209 | 7.00E-20 | 0.40899854 | 2.94E-20 | 0.628517 | 1.05E-52 |
| 0.32513  | 0.335436 | 9.60E-14 | 0.144314 | 0.00177  | 0.02415997 | 0.60252  | 0.264623 | 6.36E-09 |
| 0.31779  | 0.502506 | 3.00E-31 | 0.433852 | 7.42E-23 | 0.23588274 | 2.51E-07 | 0.369505 | 1.48E-16 |
| 0.10714  | 0.223317 | 1.09E-06 | 0.221237 | 1.38E-06 | 0.35682421 | 1.81E-15 | 0.494539 | 3.56E-30 |
| 0.2591   | 0.188431 | 4.17E-05 | 0.231975 | 4.00E-07 | 0.37934879 | 1.97E-17 | 0.626283 | 3.08E-52 |
| 0.68253  | 0.374392 | 5.50E-17 | 0.247983 | 5.65E-08 | 0.23102524 | 4.47E-07 | 0.443037 | 7.15E-24 |
| 0.73771  | 0.36354  | 4.88E-16 | 0.391526 | 1.47E-18 | 0.19833533 | 1.58E-05 | 0.254586 | 2.42E-08 |
| 0.669    | -0.09205 | 0.0468   | 0.09991  | 0.03087  | 0.17639709 | 0.00013  | 0.268132 | 3.93E-09 |
| 2.48E-05 | 0.336182 | 8.41E-14 | 0.424461 | 7.54E-22 | 0.09921133 | 0.03207  | 0.315152 | 3.15E-12 |
| 0.01725  | 0.287275 | 2.53E-10 | 0.079162 | 0.08749  | 0.11180787 | 0.01564  | 0.367918 | 2.04E-16 |
| 0.08588  | 0.259553 | 1.26E-08 | 0.463425 | 3.06E-26 | 0.21188161 | 3.85E-06 | 0.317244 | 2.23E-12 |
| 0.0076   | 0.573241 | 3.80E-42 | 0.532883 | 1.29E-35 | 0.40243146 | 1.31E-19 | 0.389019 | 2.54E-18 |
| 0.27026  | -0.24471 | 8.53E-08 | -0.03034 | 0.51301  | -0.1115353 | 0.01589  | -0.32833 | 3.36E-13 |
| 0.87785  | 0.254315 | 2.50E-08 | 0.207914 | 5.88E-06 | 0.32463285 | 6.37E-13 | 0.619815 | 6.66E-51 |
| 0.38033  | 0.423363 | 9.84E-22 | 0.214974 | 2.76E-06 | 0.22551426 | 8.48E-07 | 0.542278 | 4.67E-37 |
| 3.84E-05 | 0.216488 | 2.34E-06 | 0.294757 | 8.16E-11 | 0.0190893  | 0.68074  | 0.095617 | 0.03888  |
| 0.68698  | 0.35956  | 1.07E-15 | 0.2718   | 2.36E-09 | 0.25418318 | 2.55E-08 | 0.512315 | 1.30E-32 |
| 0.2029   | 0.020604 | 0.65696  | 0.35021  | 6.39E-15 | 0.16249712 | 0.00042  | 0.274379 | 1.64E-09 |
| 0.32465  | 0.30108  | 3.06E-11 | 0.353951 | 3.14E-15 | 0.24387903 | 9.45E-08 | 0.448707 | 1.63E-24 |
| 0.2088   | 0.573395 | 3.58E-42 | 0.415127 | 7.03E-21 | 0.35429179 | 2.94E-15 | 0.573416 | 3.55E-42 |
| 0.84014  | 0.349435 | 7.39E-15 | 0.168419 | 0.00026  | 0.35243388 | 4.19E-15 | 0.635708 | 3.07E-54 |
| 0.43528  | 0.330167 | 2.44E-13 | 0.286388 | 2.88E-10 | 0.2175228  | 2.08E-06 | 0.433961 | 7.22E-23 |
| 0.00046  | 0.363035 | 5.39E-16 | 0.467181 | 1.08E-26 | 0.30611315 | 1.38E-11 | 0.299475 | 3.93E-11 |
| 0.3187   | 0.192862 | 2.72E-05 | 0.076716 | 0.09775  | 0.13833568 | 0.00274  | 0.397573 | 3.90E-19 |
| 0.01435  | 0.045987 | 0.32137  | 0.205498 | 7.58E-06 | 0.24670926 | 6.63E-08 | 0.3688   | 1.71E-16 |
| 0.03377  | 0.142815 | 0.00198  | 0.309765 | 7.64E-12 | 0.47442214 | 1.38E-27 | 0.66767  | 1.41E-61 |
| 0.77291  | 0.288653 | 2.06E-10 | 0.232885 | 3.59E-07 | 0.32981592 | 2.59E-13 | 0.577576 | 6.67E-43 |
| 0.54445  | 0.281808 | 5.66E-10 | 0.381898 | 1.16E-17 | 0.41231906 | 1.36E-20 | 0.621461 | 3.07E-51 |
| 0.12354  | 0.153392 | 0.00088  | 0.157001 | 0.00066  | 0.27968807 | 7.70E-10 | 0.509558 | 3.18E-32 |
| 0.06304  | 0.232793 | 3.63E-07 | 0.393105 | 1.04E-18 | 0.38421528 | 7.08E-18 | 0.478188 | 4.67E-28 |
| 0.37181  | 0.471462 | 3.22E-27 | 0.15035  | 0.00112  | 0.19630196 | 1.93E-05 | 0.432462 | 1.05E-22 |

|          |          |          |          |          |            |          |          |          |
|----------|----------|----------|----------|----------|------------|----------|----------|----------|
| 3.53E-05 | 0.153439 | 0.00088  | 0.269354 | 3.32E-09 | 0.23007487 | 5.00E-07 | 0.453678 | 4.35E-25 |
| 0.34266  | 0.01909  | 0.68072  | 0.225712 | 8.29E-07 | 0.4589439  | 1.05E-25 | 0.449903 | 1.19E-24 |
| 0.91331  | 0.526264 | 1.26E-34 | 0.39244  | 1.21E-18 | 0.27984519 | 7.52E-10 | 0.427521 | 3.57E-22 |
| 0.10758  | 0.304071 | 1.91E-11 | 0.124463 | 0.00708  | 0.22768987 | 6.60E-07 | 0.412396 | 1.33E-20 |
| 0.49693  | -0.083   | 0.07314  | 0.044699 | 0.33513  | 0.16149958 | 0.00046  | 0.389293 | 2.39E-18 |
| 0.16554  | 0.310445 | 6.84E-12 | 0.138241 | 0.00276  | 0.21412833 | 3.02E-06 | 0.427514 | 3.57E-22 |
| 0.22151  | 0.491459 | 9.10E-30 | 0.423721 | 9.02E-22 | 0.18924645 | 3.86E-05 | 0.387631 | 3.42E-18 |
| 0.99176  | 0.385032 | 5.96E-18 | 0.259293 | 1.30E-08 | 0.07577853 | 0.10193  | 0.230654 | 4.67E-07 |
| 0.50956  | 0.497216 | 1.56E-30 | 0.510292 | 2.51E-32 | 0.34110647 | 3.45E-14 | 0.429211 | 2.35E-22 |
| 0.52172  | 0.126093 | 0.00636  | 0.164812 | 0.00035  | 0.07440888 | 0.10829  | 0.24049  | 1.44E-07 |
| 0.1682   | 0.011175 | 0.80967  | 0.224266 | 9.78E-07 | 0.31862229 | 1.77E-12 | 0.32374  | 7.43E-13 |
| 0.50679  | 0.114508 | 0.01328  | 0.168693 | 0.00025  | 0.31928081 | 1.58E-12 | 0.569648 | 1.58E-41 |
| 0.99755  | 0.402566 | 1.28E-19 | 0.248329 | 5.40E-08 | 0.23402954 | 3.14E-07 | 0.380429 | 1.57E-17 |
| 0.0155   | 0.372857 | 7.52E-17 | 0.509608 | 3.13E-32 | 0.47665501 | 7.28E-28 | 0.614105 | 9.47E-50 |
| 0.05902  | 0.463724 | 2.82E-26 | 0.274106 | 1.71E-09 | 0.0972492  | 0.03565  | 0.382288 | 1.06E-17 |
| 0.09267  | 0.047987 | 0.30075  | 0.157899 | 0.00062  | 0.25095862 | 3.86E-08 | 0.443987 | 5.59E-24 |
| 0.00018  | 0.390635 | 1.79E-18 | 0.163502 | 0.00039  | 0.33834722 | 5.69E-14 | 0.508183 | 4.95E-32 |
| 0.00969  | 0.367479 | 2.23E-16 | 0.412003 | 1.46E-20 | 0.3406652  | 3.74E-14 | 0.503559 | 2.15E-31 |
| 3.24E-05 | 0.441072 | 1.19E-23 | 0.254323 | 2.50E-08 | 0.32411045 | 6.97E-13 | 0.552805 | 9.96E-39 |
| 0.00954  | 0.505367 | 1.21E-31 | 0.790177 | #####    | 0.3053971  | 1.54E-11 | 0.34183  | 3.02E-14 |
| 0.08832  | 0.459425 | 9.20E-26 | 0.452426 | 6.08E-25 | 0.22671148 | 7.39E-07 | 0.335184 | 1.00E-13 |
| 0.46272  | 0.428985 | 2.49E-22 | 0.301326 | 2.94E-11 | 0.17360584 | 0.00016  | 0.350044 | 6.59E-15 |
| 0.00076  | 0.233394 | 3.38E-07 | 0.089179 | 0.05412  | 0.24051537 | 1.43E-07 | 0.489863 | 1.47E-29 |
| 0.00012  | 0.33589  | 8.86E-14 | 0.117893 | 0.01078  | 0.10242196 | 0.02688  | 0.352884 | 3.85E-15 |
| 0.37247  | 0.009352 | 0.84027  | 0.026224 | 0.57188  | -0.0674348 | 0.14566  | 0.0937   | 0.04298  |
| 0.06175  | 0.344013 | 2.03E-14 | 0.228913 | 5.73E-07 | 0.23080464 | 4.59E-07 | 0.494422 | 3.69E-30 |
| 0.00043  | -0.28729 | 2.52E-10 | -0.10254 | 0.0267   | -0.1274741 | 0.0058   | -0.24796 | 5.67E-08 |
| 0.64647  | 0.534357 | 7.73E-36 | 0.506953 | 7.33E-32 | 0.41861379 | 3.08E-21 | 0.622034 | 2.34E-51 |
| 0.13252  | 0.479949 | 2.80E-28 | 0.512529 | 1.22E-32 | 0.40710138 | 4.54E-20 | 0.483314 | 1.04E-28 |
| 0.02305  | 0.234721 | 2.89E-07 | 0.266791 | 4.73E-09 | 0.41634418 | 5.28E-21 | 0.425561 | 5.77E-22 |
| 7.48E-05 | 0.455989 | 2.34E-25 | 0.343914 | 2.06E-14 | 0.37140425 | 1.01E-16 | 0.501483 | 4.14E-31 |
| 0.60711  | -0.19464 | 2.28E-05 | -0.01314 | 0.77696  | 0.0150652  | 0.7454   | -0.26202 | 9.04E-09 |
| 0.00252  | 0.169881 | 0.00023  | 0.227889 | 6.45E-07 | 0.18287806 | 7.04E-05 | 0.284186 | 3.99E-10 |
| 0.02102  | 0.249272 | 4.79E-08 | 0.22991  | 5.10E-07 | 0.30455222 | 1.77E-11 | 0.512002 | 1.44E-32 |
| 0.11357  | 0.137681 | 0.00287  | 0.075336 | 0.10395  | 0.23988388 | 1.55E-07 | 0.332179 | 1.71E-13 |
| 0.00028  | 0.494713 | 3.37E-30 | 0.489592 | 1.60E-29 | 0.32741451 | 3.94E-13 | 0.530809 | 2.65E-35 |
| 0.01441  | 0.359296 | 1.12E-15 | 0.334801 | 1.08E-13 | 0.41467648 | 7.82E-21 | 0.579108 | 3.58E-43 |
| 0.01634  | 0.481259 | 1.91E-28 | 0.533666 | 9.84E-36 | 0.28807307 | 2.24E-10 | 0.481697 | 1.68E-28 |
| 0.12865  | 0.399675 | 2.44E-19 | 0.242287 | 1.15E-07 | 0.31890267 | 1.69E-12 | 0.552446 | 1.14E-38 |
| 0.02553  | 0.237315 | 2.11E-07 | 0.180708 | 8.60E-05 | 0.40007321 | 2.23E-19 | 0.455318 | 2.80E-25 |
| 0.54827  | 0.305132 | 1.61E-11 | 0.17458  | 0.00015  | 0.30341612 | 2.12E-11 | 0.574841 | 2.01E-42 |
| 0.37155  | 0.206053 | 7.15E-06 | 0.158687 | 0.00058  | 0.13743106 | 0.00292  | 0.352078 | 4.49E-15 |
| 0.20007  | 0.319134 | 1.62E-12 | 0.110631 | 0.01677  | -0.0119454 | 0.79682  | 0.215822 | 2.51E-06 |
| 0.01898  | 0.680737 | 7.54E-65 | 0.452647 | 5.73E-25 | 0.40032564 | 2.11E-19 | 0.529981 | 3.53E-35 |
| 0.89696  | 0.50947  | 3.27E-32 | 0.302105 | 2.60E-11 | 0.2486283  | 5.20E-08 | 0.433738 | 7.63E-23 |

|          |          |          |          |          |            |          |          |          |
|----------|----------|----------|----------|----------|------------|----------|----------|----------|
| 2.82E-13 | 0.354076 | 3.07E-15 | 0.291763 | 1.29E-10 | 0.34660771 | 1.25E-14 | 0.581629 | 1.28E-43 |
| 0.71639  | 0.236871 | 2.23E-07 | 0.486473 | 4.08E-29 | 0.45273053 | 5.60E-25 | 0.392582 | 1.17E-18 |
| 0.76727  | 0.091608 | 0.04787  | 0.041417 | 0.37185  | 0.03628904 | 0.434    | 0.218843 | 1.80E-06 |
| 0.18569  | 0.356198 | 2.04E-15 | 0.2005   | 1.27E-05 | 0.26449124 | 6.47E-09 | 0.526081 | 1.34E-34 |
| 0.0812   | 0.210609 | 4.42E-06 | 0.26557  | 5.59E-09 | 0.25200647 | 3.38E-08 | 0.528699 | 5.48E-35 |
| 0.51316  | 0.036507 | 0.43124  | 0.278611 | 8.99E-10 | 0.3846535  | 6.45E-18 | 0.585374 | 2.72E-44 |
| 0.00463  | 0.325159 | 5.82E-13 | 0.519082 | 1.41E-33 | 0.34543569 | 1.56E-14 | 0.439348 | 1.85E-23 |
| 0.01839  | -0.22315 | 1.11E-06 | -0.10373 | 0.02499  | 0.13071504 | 0.00466  | -0.09697 | 0.03618  |
| 0.52198  | 0.321517 | 1.08E-12 | 0.262933 | 7.99E-09 | 0.3708355  | 1.13E-16 | 0.60481  | 6.36E-48 |
| 0.63199  | 0.341607 | 3.15E-14 | 0.440236 | 1.47E-23 | 0.44153823 | 1.05E-23 | 0.557679 | 1.60E-39 |
| 0.00064  | -0.34711 | 1.14E-14 | -0.14987 | 0.00116  | -0.1603171 | 0.00051  | -0.34262 | 2.62E-14 |
| 9.23E-07 | 0.3112   | 6.04E-12 | 0.304952 | 1.66E-11 | 0.52219096 | 4.99E-34 | 0.660414 | 7.82E-60 |
| 0.46823  | -0.04494 | 0.33256  | 0.171503 | 0.0002   | 0.19381761 | 2.47E-05 | 0.282662 | 4.99E-10 |
| 0.94064  | 0.481059 | 2.02E-28 | 0.445881 | 3.42E-24 | 0.15761009 | 0.00063  | 0.238029 | 1.94E-07 |
| 0.528    | 0.277907 | 9.94E-10 | 0.413404 | 1.05E-20 | 0.51057973 | 2.29E-32 | 0.654185 | 2.25E-58 |
| 0.05642  | 0.276513 | 1.21E-09 | 0.254652 | 2.40E-08 | 0.1511909  | 0.00105  | 0.291339 | 1.37E-10 |
| 0.01078  | 0.245841 | 7.40E-08 | 0.291844 | 1.27E-10 | 0.19039715 | 3.45E-05 | 0.276262 | 1.26E-09 |
| 0.04749  | 0.08537  | 0.06529  | -0.07195 | 0.12052  | 0.15715811 | 0.00065  | 0.363976 | 4.48E-16 |
| 0.58233  | 0.186902 | 4.82E-05 | 0.321476 | 1.09E-12 | 0.2221125  | 1.25E-06 | 0.431194 | 1.44E-22 |
| 0.27227  | 0.348475 | 8.85E-15 | 0.14123  | 0.00222  | 0.01145849 | 0.80494  | 0.186964 | 4.79E-05 |
| 0.21816  | 0.466947 | 1.15E-26 | 0.220636 | 1.47E-06 | 0.38997511 | 2.06E-18 | 0.606875 | 2.53E-48 |
| 0.7984   | 0.322184 | 9.68E-13 | 0.408363 | 3.40E-20 | 0.4225443  | 1.20E-21 | 0.579083 | 3.62E-43 |
| 0.41345  | 0.511368 | 1.77E-32 | 0.325468 | 5.52E-13 | 0.1532141  | 0.00089  | 0.324916 | 6.07E-13 |
| 6.66E-05 | 0.693635 | 3.00E-68 | 0.587173 | 1.28E-44 | 0.34496275 | 1.70E-14 | 0.394149 | 8.31E-19 |
| 0.23876  | 0.08726  | 0.05953  | 0.378018 | 2.60E-17 | 0.53210012 | 1.70E-35 | 0.423552 | 9.40E-22 |
| 0.24497  | 0.37766  | 2.80E-17 | 0.286767 | 2.73E-10 | 0.16519933 | 0.00034  | 0.333609 | 1.33E-13 |
| 0.01112  | 0.349211 | 7.71E-15 | 0.306294 | 1.34E-11 | -0.0362621 | 0.43434  | 0.185407 | 5.56E-05 |
| 0.81377  | 0.301923 | 2.68E-11 | 0.341972 | 2.95E-14 | 0.52117133 | 7.03E-34 | 0.690119 | 2.64E-67 |
| 0.04433  | 0.365211 | 3.51E-16 | 0.348229 | 9.26E-15 | 0.44609863 | 3.23E-24 | 0.559371 | 8.43E-40 |
| 0.03874  | 0.245365 | 7.85E-08 | 0.385083 | 5.89E-18 | 0.44617478 | 3.16E-24 | 0.485791 | 5.00E-29 |
| 0.87367  | 0.233686 | 3.27E-07 | 0.573796 | 3.05E-42 | 0.37592438 | 4.01E-17 | 0.486379 | 4.19E-29 |
| 0.37845  | 0.315113 | 3.18E-12 | 0.321127 | 1.16E-12 | 0.18162379 | 7.90E-05 | 0.397352 | 4.10E-19 |
| 0.17694  | 0.120283 | 0.00927  | -0.03045 | 0.51156  | 0.06040197 | 0.19258  | 0.313069 | 4.45E-12 |
| 0.11287  | 0.320749 | 1.24E-12 | 0.401067 | 1.79E-19 | 0.35693394 | 1.77E-15 | 0.371993 | 8.97E-17 |
| 0.61697  | 0.306544 | 1.28E-11 | 0.305969 | 1.41E-11 | 0.24666426 | 6.67E-08 | 0.422791 | 1.13E-21 |
| 0.79466  | 0.216296 | 2.39E-06 | 0.330233 | 2.41E-13 | 0.26348344 | 7.42E-09 | 0.338912 | 5.14E-14 |
| 0.01825  | 0.387637 | 3.41E-18 | 0.264961 | 6.07E-09 | 0.20047935 | 1.27E-05 | 0.351703 | 4.82E-15 |
| 0.15084  | 0.471805 | 2.92E-27 | 0.341943 | 2.96E-14 | 0.35250657 | 4.14E-15 | 0.558238 | 1.30E-39 |
| 0.01231  | 0.353509 | 3.42E-15 | 0.291078 | 1.43E-10 | 0.28397495 | 4.12E-10 | 0.378978 | 2.13E-17 |
| 0.98927  | 0.110498 | 0.0169   | 0.027201 | 0.55764  | 0.00983121 | 0.83219  | 0.233594 | 3.30E-07 |
| 0.0038   | 0.392091 | 1.30E-18 | 0.374891 | 4.96E-17 | 0.08018294 | 0.08347  | 0.275978 | 1.31E-09 |
| 0.10732  | 0.263723 | 7.18E-09 | 0.232709 | 3.67E-07 | 0.38354602 | 8.16E-18 | 0.60131  | 2.99E-47 |
| 0.76613  | 0.525602 | 1.58E-34 | 0.479718 | 2.99E-28 | 0.43082081 | 1.58E-22 | 0.577056 | 8.23E-43 |
| 0.33406  | 0.188181 | 4.27E-05 | 0.207995 | 5.83E-06 | 0.27553338 | 1.40E-09 | 0.375469 | 4.41E-17 |
| 9.28E-07 | -0.39452 | 7.65E-19 | -0.24336 | 1.01E-07 | -0.2478857 | 5.72E-08 | -0.45765 | 1.49E-25 |

|          |          |          |          |          |            |          |          |          |
|----------|----------|----------|----------|----------|------------|----------|----------|----------|
| 0.00014  | 0.139813 | 0.00246  | 0.322861 | 8.63E-13 | 0.47222572 | 2.59E-27 | 0.55339  | 8.02E-39 |
| 0.77755  | 0.346285 | 1.33E-14 | 0.067927 | 0.14274  | -0.0068014 | 0.88346  | 0.165985 | 0.00032  |
| 0.59792  | 0.141949 | 0.00211  | 0.324835 | 6.15E-13 | 0.25581062 | 2.06E-08 | 0.422379 | 1.25E-21 |
| 0.14523  | 0.403291 | 1.08E-19 | 0.173342 | 0.00017  | 0.12108739 | 0.00881  | 0.275177 | 1.47E-09 |
| 0.00254  | 0.17757  | 0.00011  | 0.302572 | 2.42E-11 | 0.46704458 | 1.12E-26 | 0.646711 | 1.15E-56 |
| 0.3198   | 0.498861 | 9.38E-31 | 0.447691 | 2.13E-24 | 0.44805843 | 1.93E-24 | 0.604864 | 6.20E-48 |
| 0.02601  | 0.384109 | 7.25E-18 | 0.359176 | 1.15E-15 | 0.44108893 | 1.18E-23 | 0.571874 | 6.55E-42 |
| 0.58182  | 0.199367 | 1.42E-05 | 0.234772 | 2.87E-07 | 0.34631982 | 1.32E-14 | 0.6321   | 1.83E-53 |
| 0.0979   | 0.355491 | 2.34E-15 | 0.23929  | 1.66E-07 | 0.20541997 | 7.64E-06 | 0.462406 | 4.06E-26 |
| 0.27363  | 0.456942 | 1.81E-25 | 0.51434  | 6.74E-33 | 0.13529473 | 0.0034   | 0.264271 | 6.67E-09 |
| 6.91E-09 | 0.378712 | 2.25E-17 | 0.213056 | 3.40E-06 | 0.06350045 | 0.1707   | 0.248615 | 5.21E-08 |
| 0.00417  | 0.451231 | 8.35E-25 | 0.55406  | 6.24E-39 | 0.39587888 | 5.68E-19 | 0.483957 | 8.61E-29 |
| 0.86394  | 0.232218 | 3.89E-07 | 0.147149 | 0.00143  | 0.19365176 | 2.51E-05 | 0.432651 | 1.00E-22 |
| 0.16522  | -0.12008 | 0.0094   | -0.02306 | 0.61916  | -0.0019941 | 0.96572  | -0.26273 | 8.22E-09 |
| 0.15512  | 0.268005 | 4.00E-09 | 0.198344 | 1.58E-05 | 0.29451091 | 8.48E-11 | 0.543355 | 3.17E-37 |
| 0.95178  | 0.489754 | 1.52E-29 | 0.473832 | 1.64E-27 | 0.57140929 | 7.88E-42 | 0.667904 | 1.23E-61 |
| 0.17312  | 0.508828 | 4.02E-32 | 0.423669 | 9.13E-22 | 0.41439832 | 8.35E-21 | 0.623673 | 1.08E-51 |
| 0.01285  | 0.491112 | 1.01E-29 | 0.278852 | 8.68E-10 | 0.41103388 | 1.83E-20 | 0.57306  | 4.09E-42 |
| 0.12042  | 0.460194 | 7.45E-26 | 0.456125 | 2.25E-25 | 0.25517343 | 2.24E-08 | 0.369177 | 1.59E-16 |
| 0.66774  | 0.480822 | 2.17E-28 | 0.493548 | 4.82E-30 | 0.27395856 | 1.74E-09 | 0.443573 | 6.23E-24 |
| 0.02596  | 0.468996 | 6.47E-27 | 0.404574 | 8.09E-20 | 0.36974484 | 1.41E-16 | 0.605382 | 4.92E-48 |
| 0.04095  | 0.330367 | 2.36E-13 | 0.534382 | 7.66E-36 | 0.41389482 | 9.40E-21 | 0.410989 | 1.85E-20 |
| 0.50334  | 0.496143 | 2.17E-30 | 0.411608 | 1.60E-20 | 0.43598826 | 4.33E-23 | 0.657206 | 4.46E-59 |
| 0.5743   | 0.248276 | 5.44E-08 | 0.279449 | 7.97E-10 | 0.53845942 | 1.82E-36 | 0.777135 | 1.43E-95 |
| 0.94519  | 0.521133 | 7.12E-34 | 0.423359 | 9.85E-22 | 0.44396934 | 5.62E-24 | 0.632632 | 1.41E-53 |
| 0.71433  | 0.289141 | 1.91E-10 | 0.480006 | 2.75E-28 | 0.33238946 | 1.65E-13 | 0.42834  | 2.92E-22 |
| 0.4693   | 0.400157 | 2.19E-19 | 0.220482 | 1.50E-06 | 0.08413831 | 0.06928  | 0.2228   | 1.16E-06 |
| 0.04512  | 0.586387 | 1.78E-44 | 0.480004 | 2.75E-28 | 0.26880001 | 3.59E-09 | 0.468057 | 8.43E-27 |
| 0.84615  | 0.359904 | 9.96E-16 | 0.273661 | 1.82E-09 | 0.05323969 | 0.25087  | 0.215884 | 2.50E-06 |
| 0.07077  | 0.268066 | 3.97E-09 | 0.207778 | 5.97E-06 | 0.28158329 | 5.85E-10 | 0.231287 | 4.34E-07 |
| 0.09721  | 0.444475 | 4.93E-24 | 0.197971 | 1.64E-05 | 0.36223327 | 6.32E-16 | 0.436708 | 3.61E-23 |
| 0.29027  | 0.243595 | 9.79E-08 | 0.331509 | 1.93E-13 | 0.44553989 | 3.73E-24 | 0.641118 | 2.02E-55 |
| 2.40E-05 | 0.129437 | 0.00509  | 0.196495 | 1.90E-05 | 0.30808628 | 1.00E-11 | 0.404273 | 8.66E-20 |
| 0.93835  | 0.259792 | 1.22E-08 | 0.144087 | 0.0018   | 0.26289085 | 8.04E-09 | 0.534144 | 8.33E-36 |
| 0.14918  | 0.492301 | 7.05E-30 | 0.50193  | 3.60E-31 | 0.41954578 | 2.46E-21 | 0.594087 | 6.87E-46 |
| 0.01274  | 0.417066 | 4.45E-21 | 0.552594 | 1.08E-38 | 0.38562581 | 5.25E-18 | 0.531116 | 2.39E-35 |
| 0.74168  | 0.360583 | 8.73E-16 | 0.453047 | 5.15E-25 | 0.37841177 | 2.40E-17 | 0.455137 | 2.94E-25 |
| 9.88E-05 | 0.497549 | 1.41E-30 | 0.63425  | 6.33E-54 | 0.30633258 | 1.33E-11 | 0.339533 | 4.59E-14 |
| 0.01935  | 0.070418 | 0.12862  | 0.126161 | 0.00633  | 0.08541944 | 0.06513  | 0.261821 | 9.28E-09 |
| 0.15564  | 0.377758 | 2.75E-17 | 0.312852 | 4.61E-12 | 0.2368297  | 2.24E-07 | 0.46224  | 4.25E-26 |
| 0.97192  | 0.282071 | 5.44E-10 | 0.131242 | 0.0045   | -0.000519  | 0.99108  | 0.102997 | 0.02603  |
| 0.94948  | 0.497347 | 1.50E-30 | 0.15564  | 0.00074  | 0.12028648 | 0.00927  | 0.374982 | 4.87E-17 |
| 0.89214  | 0.263331 | 7.57E-09 | 0.30394  | 1.95E-11 | 0.16050627 | 0.0005   | 0.357807 | 1.50E-15 |
| 0.00339  | 0.546112 | 1.17E-37 | 0.515601 | 4.45E-33 | 0.19366448 | 2.51E-05 | 0.357262 | 1.66E-15 |
| 0.00127  | 0.087515 | 0.05879  | 0.111823 | 0.01562  | 0.28243864 | 5.16E-10 | 0.453261 | 4.86E-25 |

|          |          |          |          |          |            |          |          |          |
|----------|----------|----------|----------|----------|------------|----------|----------|----------|
| 0.23252  | 0.339477 | 4.64E-14 | 0.281937 | 5.55E-10 | 0.33913229 | 4.94E-14 | 0.62073  | 4.33E-51 |
| 0.28736  | -0.18604 | 5.23E-05 | -0.28661 | 2.79E-10 | -0.1097389 | 0.01768  | -0.25374 | 2.70E-08 |
| 3.16E-05 | 0.358963 | 1.20E-15 | 0.285938 | 3.08E-10 | 0.28301648 | 4.74E-10 | 0.366998 | 2.46E-16 |
| 0.10505  | 0.467023 | 1.13E-26 | 0.363353 | 5.07E-16 | 0.42952476 | 2.18E-22 | 0.546694 | 9.45E-38 |
| 0.86632  | 0.215897 | 2.49E-06 | 0.165985 | 0.00032  | 0.13107691 | 0.00455  | 0.340837 | 3.63E-14 |
| 0.5216   | 0.363194 | 5.23E-16 | 0.133394 | 0.00388  | 0.05569712 | 0.22962  | 0.28395  | 4.14E-10 |
| 1.55E-06 | -0.25749 | 1.65E-08 | -0.17018 | 0.00022  | -0.2065333 | 6.80E-06 | -0.35269 | 3.99E-15 |
| 0.31517  | 0.268347 | 3.82E-09 | 0.137165 | 0.00298  | -0.055294  | 0.23302  | 0.14563  | 0.0016   |
| 0.49902  | -0.02829 | 0.54201  | -0.09976 | 0.03112  | -0.0137212 | 0.76743  | -0.35405 | 3.08E-15 |
| 0.93227  | 0.476799 | 6.99E-28 | 0.441187 | 1.15E-23 | 0.4706046  | 4.11E-27 | 0.637382 | 1.33E-54 |
| 0.1384   | 0.394794 | 7.21E-19 | 0.325994 | 5.04E-13 | 0.32066616 | 1.25E-12 | 0.505389 | 1.21E-31 |
| 0.43813  | 0.275408 | 1.42E-09 | 0.170369 | 0.00022  | 0.00098955 | 0.98298  | 0.187187 | 4.69E-05 |
| 9.33E-05 | 0.355951 | 2.14E-15 | 0.562666 | 2.39E-40 | 0.49190498 | 7.95E-30 | 0.537599 | 2.47E-36 |
| 0.90273  | 0.399679 | 2.44E-19 | 0.446753 | 2.72E-24 | 0.14380782 | 0.00184  | 0.224774 | 9.23E-07 |
| 0.59965  | 0.292153 | 1.21E-10 | 0.214174 | 3.01E-06 | 0.39900842 | 2.83E-19 | 0.637577 | 1.21E-54 |
| 0.77091  | 0.585765 | 2.31E-44 | 0.565093 | 9.37E-41 | 0.29290853 | 1.08E-10 | 0.455028 | 3.03E-25 |
| 0.37846  | 0.213979 | 3.07E-06 | 0.210512 | 4.46E-06 | 0.17800392 | 0.00011  | 0.359031 | 1.18E-15 |
| 0.42371  | 0.456766 | 1.89E-25 | 0.389235 | 2.42E-18 | 0.08268888 | 0.07423  | 0.317366 | 2.18E-12 |
| 0.54977  | 0.343935 | 2.06E-14 | 0.273443 | 1.88E-09 | 0.10479833 | 0.02352  | 0.371259 | 1.04E-16 |
| 0.0018   | 0.27981  | 7.56E-10 | 0.302619 | 2.40E-11 | 0.3822232  | 1.08E-17 | 0.551223 | 1.79E-38 |
| 0.00545  | 0.273615 | 1.83E-09 | 0.353287 | 3.57E-15 | 0.56538341 | 8.37E-41 | 0.771464 | 2.37E-93 |
| 0.19531  | 0.383692 | 7.91E-18 | 0.439051 | 1.99E-23 | 0.41266309 | 1.25E-20 | 0.568305 | 2.68E-41 |
| 0.60029  | 0.256512 | 1.88E-08 | 0.341346 | 3.30E-14 | 0.10759423 | 0.02004  | 0.14965  | 0.00118  |
| 0.41614  | 0.395252 | 6.52E-19 | 0.287311 | 2.51E-10 | 0.32505641 | 5.92E-13 | 0.386158 | 4.68E-18 |
| 0.00182  | 0.223184 | 1.11E-06 | 0.19414  | 2.40E-05 | 0.21714996 | 2.17E-06 | 0.314788 | 3.35E-12 |
| 0.05325  | 0.360941 | 8.14E-16 | 0.211051 | 4.21E-06 | 0.20854234 | 5.50E-06 | 0.438611 | 2.23E-23 |
| 0.03284  | 0.340385 | 3.94E-14 | 0.218881 | 1.79E-06 | -0.0452864 | 0.3288   | 0.258721 | 1.40E-08 |
| 0.2734   | 0.30636  | 1.32E-11 | 0.091125 | 0.04906  | 0.11752373 | 0.01103  | 0.288592 | 2.08E-10 |
| 0.62656  | 0.398877 | 2.92E-19 | 0.263319 | 7.59E-09 | 0.2404015  | 1.45E-07 | 0.429768 | 2.05E-22 |
| 0.012    | 0.142761 | 0.00198  | 0.32475  | 6.24E-13 | 0.42308522 | 1.05E-21 | 0.503807 | 1.99E-31 |
| 0.07137  | 0.472249 | 2.58E-27 | 0.547759 | 6.41E-38 | 0.39249492 | 1.19E-18 | 0.563104 | 2.02E-40 |
| 0.20584  | -0.25935 | 1.29E-08 | -0.22989 | 5.11E-07 | -0.3096706 | 7.75E-12 | -0.46967 | 5.35E-27 |
| 0.06913  | 0.174521 | 0.00015  | 0.252727 | 3.08E-08 | 0.53760157 | 2.47E-36 | 0.649904 | 2.17E-57 |
| 0.03427  | -0.29382 | 9.42E-11 | -0.24945 | 4.69E-08 | -0.1788797 | 0.0001   | -0.34662 | 1.25E-14 |
| 0.84374  | 0.334747 | 1.09E-13 | 0.246952 | 6.43E-08 | 0.3026839  | 2.38E-11 | 0.60364  | 1.07E-47 |
| 0.03232  | 0.221851 | 1.29E-06 | 0.237924 | 1.96E-07 | 0.21595531 | 2.48E-06 | 0.430769 | 1.60E-22 |
| 0.1291   | 0.17781  | 0.00011  | 0.317478 | 2.14E-12 | 0.29850387 | 4.58E-11 | 0.362116 | 6.46E-16 |
| 0.92687  | 0.408808 | 3.07E-20 | 0.312681 | 4.74E-12 | 0.45560669 | 2.59E-25 | 0.596918 | 2.03E-46 |
| 0.17855  | 0.44778  | 2.08E-24 | 0.24853  | 5.27E-08 | 0.32928999 | 2.84E-13 | 0.533814 | 9.34E-36 |
| 0.07127  | 0.398    | 3.55E-19 | 0.467504 | 9.84E-27 | 0.31433758 | 3.61E-12 | 0.457964 | 1.37E-25 |
| 0.94044  | 0.152908 | 0.00092  | 0.255999 | 2.01E-08 | 0.28860568 | 2.07E-10 | 0.372991 | 7.32E-17 |
| 0.42921  | -0.15061 | 0.0011   | -0.08022 | 0.08333  | -0.0669049 | 0.14886  | -0.25495 | 2.31E-08 |
| 0.00619  | 0.221987 | 1.27E-06 | 0.039628 | 0.39288  | 0.12348504 | 0.00755  | 0.336608 | 7.79E-14 |
| 0.57823  | 0.316705 | 2.44E-12 | 0.148314 | 0.00131  | 0.07155515 | 0.12255  | 0.280363 | 6.98E-10 |
| 0.16854  | 0.361825 | 6.84E-16 | 0.290172 | 1.64E-10 | 0.3490619  | 7.93E-15 | 0.570641 | 1.07E-41 |



|          |          |          |          |          |            |          |          |          |
|----------|----------|----------|----------|----------|------------|----------|----------|----------|
| 0.16912  | 0.144317 | 0.00177  | 0.063031 | 0.17389  | -0.0285472 | 0.5383   | 0.122323 | 0.00814  |
| 0.07034  | 0.301853 | 2.71E-11 | 0.150249 | 0.00113  | 0.10516924 | 0.02303  | 0.304977 | 1.65E-11 |
| 0.36069  | 0.259953 | 1.19E-08 | 0.115167 | 0.01276  | 0.23023605 | 4.91E-07 | 0.52116  | 7.06E-34 |
| 0.01406  | 0.169318 | 0.00024  | 0.017282 | 0.70953  | 0.04786492 | 0.30198  | 0.162765 | 0.00041  |
| 0.95626  | 0.097989 | 0.03426  | -0.01362 | 0.76917  | -0.0472173 | 0.30858  | 0.134856 | 0.0035   |
| 0.35279  | 0.19459  | 2.29E-05 | 0.08583  | 0.06385  | -0.0375118 | 0.41866  | 0.183906 | 6.40E-05 |
| 0.00015  | 0.559186 | 9.05E-40 | 0.381622 | 1.22E-17 | 0.24694959 | 6.43E-08 | 0.420001 | 2.21E-21 |
| 0.68911  | 0.052266 | 0.25965  | 0.130294 | 0.0048   | -0.0206511 | 0.65623  | 0.087587 | 0.05858  |
| 0.43646  | 0.116283 | 0.01191  | 0.107645 | 0.01998  | -0.0281059 | 0.5446   | 0.116073 | 0.01207  |
| 0.91096  | 0.385541 | 5.34E-18 | 0.473128 | 2.01E-27 | 0.40533298 | 6.81E-20 | 0.537508 | 2.55E-36 |
| 0.10927  | 0.249132 | 4.88E-08 | 0.18954  | 3.75E-05 | 0.02939775 | 0.52626  | 0.234994 | 2.80E-07 |
| 0.1496   | 0.083345 | 0.07196  | 0.183269 | 6.79E-05 | 0.09797427 | 0.03429  | 0.337992 | 6.07E-14 |
| 0.01057  | 0.314265 | 3.65E-12 | 0.250858 | 3.91E-08 | -0.0442912 | 0.33956  | 0.127474 | 0.0058   |
| 0.00254  | 0.660124 | 9.16E-60 | 0.483011 | 1.14E-28 | 0.22392945 | 1.02E-06 | 0.375863 | 4.06E-17 |
| 0.14205  | 0.53803  | 2.12E-36 | 0.418463 | 3.19E-21 | 0.06298939 | 0.17417  | 0.212236 | 3.71E-06 |
| 0.37909  | 0.174721 | 0.00015  | 0.177147 | 0.00012  | 0.06024187 | 0.19376  | 0.194853 | 2.23E-05 |
| 0.27511  | 0.316086 | 2.70E-12 | 0.341832 | 3.02E-14 | 0.28124689 | 6.14E-10 | 0.493548 | 4.82E-30 |
| 0.04052  | 0.272277 | 2.21E-09 | 0.08475  | 0.06727  | 0.16488747 | 0.00035  | 0.446828 | 2.67E-24 |
| 0.04689  | 0.483209 | 1.07E-28 | 0.406902 | 4.76E-20 | 0.45231319 | 6.26E-25 | 0.51474  | 5.91E-33 |
| 0.40189  | 0.427144 | 3.91E-22 | 0.318209 | 1.90E-12 | 0.25430616 | 2.51E-08 | 0.369856 | 1.38E-16 |
| 0.35039  | 0.231561 | 4.20E-07 | 0.177592 | 0.00011  | 0.15936136 | 0.00055  | 0.357053 | 1.73E-15 |
| 0.27734  | 0.256917 | 1.78E-08 | 0.214676 | 2.85E-06 | 0.49270997 | 6.22E-30 | 0.629643 | 6.07E-53 |
| 0.00282  | 0.310057 | 7.28E-12 | 0.313492 | 4.15E-12 | -0.0156672 | 0.7356   | 0.126381 | 0.00624  |
| 0.11296  | 0.235826 | 2.53E-07 | 0.390405 | 1.88E-18 | 0.43214558 | 1.14E-22 | 0.495666 | 2.52E-30 |
| 0.39655  | 0.102409 | 0.0269   | -0.01136 | 0.80655  | 0.04445698 | 0.33775  | 0.345912 | 1.43E-14 |
| 0.37318  | 0.345903 | 1.43E-14 | 0.200066 | 1.32E-05 | 0.18192403 | 7.69E-05 | 0.310584 | 6.68E-12 |
| 0.72183  | -0.11473 | 0.01311  | -0.24623 | 7.05E-08 | -0.1696008 | 0.00023  | -0.34623 | 1.35E-14 |
| 0.15018  | 0.364263 | 4.23E-16 | 0.21715  | 2.17E-06 | 0.47280143 | 2.20E-27 | 0.686449 | 2.47E-66 |
| 1.11E-30 | 0.186148 | 5.18E-05 | 0.117618 | 0.01097  | 0.25548577 | 2.15E-08 | 0.369846 | 1.39E-16 |
| 0.00093  | 0.259994 | 1.19E-08 | 0.071257 | 0.12412  | 0.17583306 | 0.00013  | 0.384559 | 6.59E-18 |
| 0.74462  | 0.441679 | 1.02E-23 | 0.346592 | 1.26E-14 | 0.42944323 | 2.22E-22 | 0.66693  | 2.13E-61 |
| 0.63934  | 0.307063 | 1.18E-11 | 0.457099 | 1.73E-25 | 0.57535987 | 1.63E-42 | 0.786105 | 3.25E-99 |
| 0.15116  | 0.130685 | 0.00467  | 0.099963 | 0.03079  | 0.21459169 | 2.87E-06 | 0.510472 | 2.37E-32 |
| 0.27224  | 0.221734 | 1.30E-06 | 0.116633 | 0.01166  | 0.15051789 | 0.0011   | 0.36895  | 1.66E-16 |
| 0.94637  | 0.28011  | 7.24E-10 | 0.288157 | 2.22E-10 | 0.27032111 | 2.90E-09 | 0.483006 | 1.14E-28 |
| 0.02687  | 0.712543 | 1.43E-73 | 0.664718 | 7.31E-61 | 0.40412476 | 8.96E-20 | 0.493816 | 4.44E-30 |
| 0.06715  | 0.276988 | 1.13E-09 | 0.207204 | 6.34E-06 | 0.14831949 | 0.00131  | 0.356994 | 1.75E-15 |
| 0.25224  | 0.121643 | 0.0085   | 0.232899 | 3.59E-07 | 0.35130086 | 5.20E-15 | 0.513113 | 1.01E-32 |
| 0.02093  | 0.234688 | 2.90E-07 | 0.165048 | 0.00034  | 0.07608392 | 0.10056  | 0.259398 | 1.28E-08 |
| 0.9736   | 0.433038 | 9.09E-23 | 0.277095 | 1.12E-09 | 0.1304284  | 0.00476  | 0.265086 | 5.97E-09 |
| 3.90E-05 | 0.206939 | 6.52E-06 | 0.220489 | 1.50E-06 | 0.23593667 | 2.50E-07 | 0.415058 | 7.15E-21 |
| 0.00273  | 0.414035 | 9.09E-21 | 0.482549 | 1.31E-28 | 0.30859031 | 9.24E-12 | 0.369296 | 1.55E-16 |
| 0.46157  | 0.436581 | 3.73E-23 | 0.513852 | 7.90E-33 | 0.17536376 | 0.00014  | 0.329226 | 2.88E-13 |
| 0.34285  | 0.273037 | 1.99E-09 | 0.241929 | 1.20E-07 | 0.13829814 | 0.00274  | 0.273401 | 1.89E-09 |
| 0.09619  | 0.267333 | 4.39E-09 | 0.408492 | 3.30E-20 | 0.42202468 | 1.36E-21 | 0.533922 | 9.00E-36 |

|          |          |          |          |          |            |          |          |          |
|----------|----------|----------|----------|----------|------------|----------|----------|----------|
| 0.47066  | 0.253365 | 2.83E-08 | 0.295052 | 7.80E-11 | 0.43499756 | 5.56E-23 | 0.577381 | 7.21E-43 |
| 0.09167  | 0.277107 | 1.12E-09 | 0.467043 | 1.12E-26 | 0.29683871 | 5.92E-11 | 0.360483 | 8.90E-16 |
| 0.00015  | 0.083484 | 0.07148  | 0.117639 | 0.01095  | 0.05909814 | 0.20238  | 0.312882 | 4.59E-12 |
| 0.00097  | -0.02798 | 0.54637  | 0.057554 | 0.21444  | 0.03337796 | 0.47179  | 0.1585   | 0.00059  |
| 0.58052  | 0.422529 | 1.20E-21 | 0.265825 | 5.40E-09 | 0.33553997 | 9.43E-14 | 0.57492  | 1.94E-42 |
| 0.45987  | 0.467832 | 8.98E-27 | 0.299019 | 4.22E-11 | 0.2409147  | 1.36E-07 | 0.54058  | 8.58E-37 |
| 0.56444  | 0.198548 | 1.54E-05 | 0.438986 | 2.02E-23 | 0.26825897 | 3.86E-09 | 0.376285 | 3.72E-17 |
| 0.02994  | 0.378771 | 2.22E-17 | 0.358091 | 1.42E-15 | 0.27534724 | 1.43E-09 | 0.416319 | 5.31E-21 |
| 0.96532  | 0.267554 | 4.26E-09 | 0.213795 | 3.14E-06 | 0.37016858 | 1.30E-16 | 0.657272 | 4.30E-59 |
| 0.40734  | 0.248953 | 4.99E-08 | 0.220925 | 1.43E-06 | 0.24772905 | 5.83E-08 | 0.451668 | 7.44E-25 |
| 0.55778  | 0.295575 | 7.20E-11 | 0.163954 | 0.00037  | 0.13549732 | 0.00335  | 0.317199 | 2.24E-12 |
| 0.34104  | 0.259929 | 1.20E-08 | 0.178837 | 0.0001   | 0.42147457 | 1.55E-21 | 0.61488  | 6.63E-50 |
| 0.61276  | 0.347603 | 1.04E-14 | 0.171887 | 0.00019  | 0.01927917 | 0.67774  | 0.318968 | 1.67E-12 |
| 0.47651  | 0.205489 | 7.58E-06 | 0.156072 | 0.00071  | 0.255874   | 2.04E-08 | 0.515282 | 4.95E-33 |
| 6.75E-09 | 0.308665 | 9.13E-12 | 0.196436 | 1.91E-05 | 0.25683485 | 1.80E-08 | 0.447665 | 2.14E-24 |
| 0.00978  | 0.345424 | 1.56E-14 | 0.242965 | 1.06E-07 | 0.36672282 | 2.59E-16 | 0.590558 | 3.09E-45 |
| 0.00043  | 0.507343 | 6.47E-32 | 0.652571 | 5.32E-58 | 0.29786953 | 5.05E-11 | 0.383448 | 8.33E-18 |
| 0.04055  | 0.433172 | 8.79E-23 | 0.212528 | 3.60E-06 | 0.26689556 | 4.66E-09 | 0.523139 | 3.63E-34 |
| 0.05654  | 0.510671 | 2.22E-32 | 0.277354 | 1.08E-09 | 0.08800511 | 0.05738  | 0.337133 | 7.09E-14 |
| 0.08707  | 0.486868 | 3.62E-29 | 0.434234 | 6.74E-23 | 0.18262185 | 7.21E-05 | 0.371542 | 9.83E-17 |
| 0.07672  | 0.422934 | 1.09E-21 | 0.359466 | 1.09E-15 | 0.19171924 | 3.04E-05 | 0.359824 | 1.01E-15 |
| 0.8981   | 0.436599 | 3.71E-23 | 0.43901  | 2.01E-23 | 0.31707458 | 2.29E-12 | 0.502556 | 2.95E-31 |
| 0.00041  | 0.093733 | 0.04291  | 0.060841 | 0.18936  | 0.06397335 | 0.16753  | 0.193147 | 2.64E-05 |
| 0.5529   | 0.326486 | 4.63E-13 | 0.282158 | 5.38E-10 | 0.4635718  | 2.94E-26 | 0.712649 | 1.33E-73 |
| 0.01143  | 0.582999 | 7.27E-44 | 0.445245 | 4.03E-24 | 0.43086715 | 1.56E-22 | 0.576151 | 1.18E-42 |
| 0.16536  | 0.273432 | 1.88E-09 | 0.302586 | 2.41E-11 | 0.2692411  | 3.37E-09 | 0.499972 | 6.63E-31 |
| 0.05521  | 0.513677 | 8.37E-33 | 0.491057 | 1.03E-29 | 0.47897755 | 3.71E-28 | 0.621336 | 3.26E-51 |
| 0.9502   | 0.220797 | 1.45E-06 | 0.105681 | 0.02237  | 0.18781096 | 4.42E-05 | 0.463551 | 2.96E-26 |
| 0.00344  | 0.509363 | 3.39E-32 | 0.441125 | 1.17E-23 | 0.1023568  | 0.02698  | 0.305315 | 1.56E-11 |
| 0.92953  | 0.309813 | 7.58E-12 | 0.125511 | 0.00661  | 0.02901328 | 0.53169  | 0.206469 | 6.85E-06 |
| 0.59391  | 0.060657 | 0.19071  | 0.262946 | 7.98E-09 | 0.20884921 | 5.33E-06 | 0.27211  | 2.26E-09 |
| 0.02527  | 0.195978 | 2.00E-05 | 0.388146 | 3.06E-18 | 0.21380862 | 3.13E-06 | 0.248293 | 5.43E-08 |
| 0.17341  | 0.15597  | 0.00072  | 0.367839 | 2.08E-16 | 0.36252139 | 5.97E-16 | 0.419528 | 2.48E-21 |
| 0.05242  | 0.648727 | 4.02E-57 | 0.701194 | 2.51E-70 | 0.438024   | 2.59E-23 | 0.569717 | 1.54E-41 |
| 0.142    | 0.407801 | 3.87E-20 | 0.449887 | 1.19E-24 | 0.52810707 | 6.72E-35 | 0.668904 | 7.02E-62 |
| 0.58165  | 0.204978 | 8.00E-06 | 0.470701 | 4.00E-27 | 0.28493906 | 3.57E-10 | 0.283389 | 4.49E-10 |
| 0.94153  | 0.616121 | 3.73E-50 | 0.379035 | 2.11E-17 | 0.26648445 | 4.93E-09 | 0.485733 | 5.08E-29 |
| 0.30092  | 0.486011 | 4.68E-29 | 0.288105 | 2.23E-10 | 0.21029378 | 4.57E-06 | 0.488197 | 2.43E-29 |
| 0.69151  | 0.666771 | 2.33E-61 | 0.576887 | 8.80E-43 | 0.28423299 | 3.97E-10 | 0.440146 | 1.50E-23 |
| 0.53856  | 0.118247 | 0.01054  | 0.12437  | 0.00713  | 0.12646668 | 0.00621  | 0.283485 | 4.43E-10 |
| 0.23757  | 0.431085 | 1.48E-22 | 0.277133 | 1.11E-09 | 0.21657499 | 2.31E-06 | 0.274517 | 1.61E-09 |
| 0.17169  | 0.050649 | 0.2747   | 0.152264 | 0.00096  | 0.13745268 | 0.00292  | 0.34023  | 4.05E-14 |
| 0.01373  | 0.133808 | 0.00377  | 0.353276 | 3.57E-15 | 0.11880956 | 0.01018  | 0.179666 | 9.46E-05 |
| 0.25917  | -0.16616 | 0.00031  | -0.12365 | 0.00747  | -0.224531  | 9.49E-07 | -0.45362 | 4.42E-25 |
| 0.56352  | 0.243432 | 9.99E-08 | 0.325253 | 5.73E-13 | 0.5754048  | 1.60E-42 | 0.800813 | #####    |

|          |          |          |          |          |            |          |          |          |
|----------|----------|----------|----------|----------|------------|----------|----------|----------|
| 0.00205  | 0.046812 | 0.31276  | 0.235261 | 2.71E-07 | 0.33960247 | 4.54E-14 | 0.423557 | 9.39E-22 |
| 8.77E-05 | 0.238518 | 1.83E-07 | 0.119073 | 0.01001  | -0.1058374 | 0.02217  | 0.144717 | 0.00172  |
| 2.23E-08 | 0.379618 | 1.86E-17 | 0.248314 | 5.42E-08 | -0.0306878 | 0.50826  | 0.19023  | 3.51E-05 |
| 0.1114   | 0.117953 | 0.01074  | 0.103022 | 0.026    | 0.1791391  | 9.93E-05 | 0.426592 | 4.48E-22 |
| 0.92185  | -0.24155 | 1.26E-07 | -0.22345 | 1.07E-06 | -0.2189242 | 1.78E-06 | -0.3471  | 1.14E-14 |
| 0.55756  | 0.288549 | 2.09E-10 | 0.230369 | 4.83E-07 | 0.24658251 | 6.74E-08 | 0.324432 | 6.60E-13 |
| 0.93172  | 0.538289 | 1.94E-36 | 0.460444 | 6.96E-26 | 0.43420495 | 6.79E-23 | 0.604986 | 5.88E-48 |
| 0.22709  | 0.488014 | 2.57E-29 | 0.434311 | 6.61E-23 | 0.18220084 | 7.49E-05 | 0.363389 | 5.03E-16 |
| 0.00334  | 0.172509 | 0.00018  | 0.178274 | 0.00011  | 0.18643281 | 5.04E-05 | 0.329042 | 2.97E-13 |
| 0.97165  | 0.304087 | 1.90E-11 | 0.418449 | 3.20E-21 | 0.37566064 | 4.24E-17 | 0.53375  | 9.55E-36 |
| 0.82999  | 0.358178 | 1.39E-15 | 0.385259 | 5.67E-18 | 0.42684488 | 4.21E-22 | 0.489427 | 1.68E-29 |
| 0.65678  | 0.377534 | 2.88E-17 | 0.308399 | 9.53E-12 | 0.38872544 | 2.70E-18 | 0.649227 | 3.09E-57 |
| 0.83789  | 0.524983 | 1.95E-34 | 0.562289 | 2.76E-40 | 0.45270402 | 5.64E-25 | 0.643103 | 7.36E-56 |
| 0.59641  | 0.62017  | 5.64E-51 | 0.554297 | 5.71E-39 | 0.34116281 | 3.42E-14 | 0.536117 | 4.17E-36 |
| 0.07907  | 0.370887 | 1.12E-16 | 0.260905 | 1.05E-08 | 0.33815964 | 5.89E-14 | 0.570893 | 9.66E-42 |
| 0.00567  | 0.465029 | 1.96E-26 | 0.088756 | 0.05528  | 0.10504597 | 0.02319  | 0.292288 | 1.19E-10 |
| 5.07E-07 | 0.371963 | 9.03E-17 | 0.325948 | 5.08E-13 | 0.31372748 | 3.99E-12 | 0.577538 | 6.77E-43 |
| 0.02677  | 0.121817 | 0.00841  | 0.087063 | 0.06011  | 0.14390526 | 0.00182  | 0.420197 | 2.11E-21 |
| 0.57209  | 0.263483 | 7.42E-09 | 0.110863 | 0.01654  | 0.17257107 | 0.00018  | 0.367735 | 2.12E-16 |
| 0.00117  | 0.477462 | 5.77E-28 | 0.490894 | 1.08E-29 | 0.20359447 | 9.23E-06 | 0.26997  | 3.05E-09 |
| 0.22665  | 0.260995 | 1.04E-08 | 0.198175 | 1.60E-05 | 0.3307797  | 2.19E-13 | 0.585158 | 2.98E-44 |
| 0.35661  | 0.231196 | 4.39E-07 | 0.179144 | 9.92E-05 | 0.23074278 | 4.63E-07 | 0.34475  | 1.77E-14 |
| 0.2931   | 0.374423 | 5.46E-17 | 0.310357 | 6.93E-12 | 0.18283731 | 7.06E-05 | 0.371909 | 9.13E-17 |
| 0.37358  | 0.409328 | 2.72E-20 | 0.60745  | 1.95E-48 | 0.41507586 | 7.12E-21 | 0.461976 | 4.57E-26 |
| 0.167    | 0.459702 | 8.53E-26 | 0.232627 | 3.70E-07 | 0.22339548 | 1.08E-06 | 0.402064 | 1.43E-19 |
| 0.05043  | 0.249074 | 4.92E-08 | 0.176038 | 0.00013  | 0.21825478 | 1.92E-06 | 0.424994 | 6.62E-22 |
| 0.89224  | -0.14837 | 0.0013   | -0.03177 | 0.49337  | -0.0193782 | 0.67618  | -0.35149 | 5.02E-15 |
| 0.27168  | 0.465229 | 1.86E-26 | 0.479332 | 3.35E-28 | 0.18731235 | 4.64E-05 | 0.320196 | 1.36E-12 |
| 8.49E-06 | -0.42334 | 9.88E-22 | -0.40037 | 2.09E-19 | -0.1609399 | 0.00048  | -0.33609 | 8.54E-14 |
| 0.50971  | 0.293917 | 9.28E-11 | 0.023508 | 0.61235  | -0.0361015 | 0.43638  | 0.189291 | 3.84E-05 |
| 0.13026  | 0.171789 | 0.00019  | 0.309231 | 8.33E-12 | 0.11528308 | 0.01267  | 0.145359 | 0.00164  |
| 0.06088  | 0.33847  | 5.57E-14 | 0.456089 | 2.27E-25 | 0.35078067 | 5.74E-15 | 0.420724 | 1.86E-21 |
| 0.38743  | 0.193825 | 2.47E-05 | 0.199499 | 1.40E-05 | 0.34121707 | 3.38E-14 | 0.534861 | 6.48E-36 |
| 0.24016  | 0.21019  | 4.62E-06 | 0.109861 | 0.01755  | -0.0526505 | 0.25616  | 0.109206 | 0.01824  |
| 0.2834   | 0.071045 | 0.12525  | 0.142695 | 0.00199  | 0.1764854  | 0.00013  | 0.396294 | 5.18E-19 |
| 0.64001  | 0.003778 | 0.93511  | 0.049241 | 0.28828  | -0.0704144 | 0.12864  | 0.129845 | 0.00495  |
| 0.53126  | 0.149918 | 0.00116  | 0.232784 | 3.64E-07 | 0.37490071 | 4.95E-17 | 0.571858 | 6.59E-42 |
| 0.08066  | 0.464276 | 2.42E-26 | 0.545926 | 1.25E-37 | 0.154644   | 0.0008   | 0.18736  | 4.62E-05 |
| 0.04705  | 0.186106 | 5.20E-05 | 0.177738 | 0.00011  | 0.17215664 | 0.00019  | 0.273149 | 1.96E-09 |
| 0.0283   | 0.205047 | 7.94E-06 | 0.188935 | 3.97E-05 | 0.27900301 | 8.49E-10 | 0.480976 | 2.07E-28 |
| 0.00216  | 0.291648 | 1.31E-10 | 0.389707 | 2.19E-18 | 0.32952776 | 2.73E-13 | 0.446995 | 2.55E-24 |
| 0.93296  | 0.416904 | 4.62E-21 | 0.289574 | 1.79E-10 | 0.31693302 | 2.35E-12 | 0.368371 | 1.87E-16 |
| 0.2458   | 0.290277 | 1.61E-10 | 0.066851 | 0.14919  | 0.19789177 | 1.65E-05 | 0.494223 | 3.92E-30 |
| 0.0401   | 0.263712 | 7.19E-09 | 0.355063 | 2.54E-15 | 0.33931561 | 4.78E-14 | 0.559861 | 7.00E-40 |
| 0.81607  | 0.273549 | 1.85E-09 | 0.382694 | 9.77E-18 | 0.45477823 | 3.24E-25 | 0.578689 | 4.24E-43 |

|          |          |          |          |          |            |          |          |          |
|----------|----------|----------|----------|----------|------------|----------|----------|----------|
| 0.0903   | 0.24268  | 1.10E-07 | 0.25086  | 3.91E-08 | 0.44883462 | 1.57E-24 | 0.693154 | 4.05E-68 |
| 0.99405  | 0.264517 | 6.45E-09 | 0.299821 | 3.73E-11 | 0.4029346  | 1.17E-19 | 0.636866 | 1.72E-54 |
| 0.96007  | 0.359717 | 1.03E-15 | 0.362101 | 6.48E-16 | 0.55190835 | 1.39E-38 | 0.776944 | 1.71E-95 |
| 0.93824  | 0.121632 | 0.00851  | 0.377961 | 2.63E-17 | 0.45356979 | 4.48E-25 | 0.650566 | 1.53E-57 |
| 0.18029  | 0.545473 | 1.47E-37 | 0.474655 | 1.30E-27 | 0.30631118 | 1.33E-11 | 0.439699 | 1.69E-23 |
| 0.04051  | 0.094148 | 0.04199  | 0.275861 | 1.33E-09 | 0.42963923 | 2.12E-22 | 0.584075 | 4.66E-44 |
| 0.99621  | 0.414128 | 8.90E-21 | 0.338059 | 6.00E-14 | 0.42006865 | 2.17E-21 | 0.483299 | 1.05E-28 |
| 0.00033  | 0.45169  | 7.39E-25 | 0.548942 | 4.15E-38 | 0.25526573 | 2.21E-08 | 0.354434 | 2.86E-15 |
| 0.0952   | 0.545477 | 1.47E-37 | 0.383703 | 7.90E-18 | 0.28531982 | 3.38E-10 | 0.435618 | 4.76E-23 |
| 0.02836  | 0.234266 | 3.05E-07 | 0.230959 | 4.51E-07 | 0.18169139 | 7.86E-05 | 0.280646 | 6.70E-10 |
| 0.41307  | 0.034985 | 0.45071  | 0.1983   | 1.58E-05 | 0.24967755 | 4.55E-08 | 0.445368 | 3.91E-24 |
| 0.37849  | 0.507909 | 5.40E-32 | 0.486914 | 3.57E-29 | 0.20334757 | 9.47E-06 | 0.382967 | 9.23E-18 |
| 0.92864  | 0.555897 | 3.14E-39 | 0.473944 | 1.59E-27 | 0.15483605 | 0.00079  | 0.283643 | 4.33E-10 |
| 0.16426  | 0.123275 | 0.00765  | 0.13113  | 0.00453  | 0.26367142 | 7.23E-09 | 0.506752 | 7.82E-32 |
| 0.14532  | 0.103548 | 0.02524  | 0.210623 | 4.41E-06 | 0.41461776 | 7.93E-21 | 0.530544 | 2.91E-35 |
| 0.24449  | 0.337487 | 6.65E-14 | 0.444364 | 5.07E-24 | 0.45239885 | 6.12E-25 | 0.590816 | 2.77E-45 |
| 0.4665   | 0.288185 | 2.21E-10 | 0.141256 | 0.00222  | 0.1626161  | 0.00042  | 0.414275 | 8.60E-21 |
| 0.00086  | 0.325151 | 5.83E-13 | 0.134382 | 0.00362  | 0.15342841 | 0.00088  | 0.321773 | 1.04E-12 |
| 0.71817  | 0.255244 | 2.22E-08 | 0.189094 | 3.91E-05 | 0.33120973 | 2.03E-13 | 0.578394 | 4.79E-43 |
| 0.00816  | 0.189091 | 3.91E-05 | 0.111769 | 0.01567  | 0.25203285 | 3.37E-08 | 0.548689 | 4.56E-38 |
| 0.27089  | 0.323001 | 8.43E-13 | 0.209015 | 5.23E-06 | 0.33992674 | 4.28E-14 | 0.513247 | 9.62E-33 |
| 0.02743  | 0.22903  | 5.65E-07 | 0.210373 | 4.53E-06 | 0.38061742 | 1.51E-17 | 0.587745 | 1.01E-44 |
| 0.2259   | 0.260654 | 1.09E-08 | 0.213287 | 3.31E-06 | 0.32850595 | 3.26E-13 | 0.532007 | 1.75E-35 |
| 0.58391  | 0.316938 | 2.34E-12 | 0.253357 | 2.84E-08 | 0.39998296 | 2.28E-19 | 0.661707 | 3.85E-60 |
| 0.77162  | 0.622062 | 2.31E-51 | 0.593892 | 7.47E-46 | 0.46860952 | 7.22E-27 | 0.549895 | 2.93E-38 |
| 0.5004   | 0.467326 | 1.03E-26 | 0.317503 | 2.13E-12 | 0.34335359 | 2.29E-14 | 0.595313 | 4.06E-46 |
| 0.42773  | 0.001404 | 0.97586  | -0.03703 | 0.42471  | 0.04799453 | 0.30067  | 0.255042 | 2.28E-08 |
| 0.64353  | 0.31242  | 4.95E-12 | 0.217195 | 2.16E-06 | 0.19943277 | 1.41E-05 | 0.477921 | 5.05E-28 |
| 0.82559  | 0.327841 | 3.66E-13 | 0.312597 | 4.81E-12 | 0.30833201 | 9.63E-12 | 0.573324 | 3.68E-42 |
| 0.78321  | 0.20535  | 7.69E-06 | 0.252412 | 3.21E-08 | 0.29857808 | 4.52E-11 | 0.510258 | 2.54E-32 |
| 0.06041  | 0.296361 | 6.38E-11 | 0.031357 | 0.49906  | 0.06312941 | 0.17322  | 0.346556 | 1.27E-14 |
| 0.88764  | 0.285085 | 3.50E-10 | 0.231696 | 4.13E-07 | 0.23374219 | 3.25E-07 | 0.391628 | 1.44E-18 |
| 0.11639  | 0.384765 | 6.30E-18 | 0.220314 | 1.53E-06 | 0.18601097 | 5.25E-05 | 0.432917 | 9.37E-23 |
| 0.19119  | -0.33397 | 1.25E-13 | -0.41895 | 2.84E-21 | -0.1621545 | 0.00043  | -0.24573 | 7.50E-08 |
| 0.1086   | 0.394267 | 8.09E-19 | 0.502365 | 3.14E-31 | 0.32121076 | 1.14E-12 | 0.378422 | 2.39E-17 |
| 1.17E-30 | 0.164352 | 0.00036  | 0.11155  | 0.01588  | 0.15966843 | 0.00053  | 0.320948 | 1.19E-12 |
| 1.09E-08 | 0.300845 | 3.17E-11 | 0.236536 | 2.32E-07 | 0.39471789 | 7.33E-19 | 0.577419 | 7.10E-43 |
| 0.28689  | -0.08067 | 0.08159  | -0.16525 | 0.00034  | -0.177475  | 0.00012  | -0.33626 | 8.30E-14 |
| 0.04123  | -0.18537 | 5.58E-05 | -0.16589 | 0.00032  | -0.1411824 | 0.00223  | -0.27967 | 7.72E-10 |
| 0.07985  | 0.3269   | 4.31E-13 | 0.120347 | 0.00924  | 0.20493523 | 8.03E-06 | 0.353033 | 3.74E-15 |
| 5.38E-05 | 0.50522  | 1.27E-31 | 0.248862 | 5.05E-08 | 0.30235106 | 2.50E-11 | 0.526231 | 1.27E-34 |
| 1.18E-06 | 0.238591 | 1.81E-07 | 0.269957 | 3.05E-09 | 0.42961891 | 2.13E-22 | 0.66516  | 5.72E-61 |
| 1.38E-08 | -0.50536 | 1.22E-31 | -0.38958 | 2.24E-18 | -0.1347763 | 0.00352  | -0.2933  | 1.02E-10 |
| 0.03714  | 0.233394 | 3.38E-07 | 0.07578  | 0.10193  | 0.07417709 | 0.1094   | 0.272562 | 2.12E-09 |
| 0.00238  | 0.553364 | 8.10E-39 | 0.531953 | 1.79E-35 | 0.39008599 | 2.01E-18 | 0.558246 | 1.29E-39 |

|          |          |          |          |          |            |          |          |          |
|----------|----------|----------|----------|----------|------------|----------|----------|----------|
| 0.89725  | 0.428212 | 3.01E-22 | 0.183746 | 6.49E-05 | 0.27482524 | 1.54E-09 | 0.57045  | 1.15E-41 |
| 0.00031  | 0.212321 | 3.68E-06 | 0.220251 | 1.54E-06 | 0.44596802 | 3.34E-24 | 0.610015 | 6.13E-49 |
| 0.19019  | -0.22381 | 1.03E-06 | -0.288   | 2.27E-10 | -0.1619575 | 0.00044  | -0.29577 | 6.99E-11 |
| 0.15803  | 0.526469 | 1.18E-34 | 0.304884 | 1.67E-11 | 0.36880063 | 1.71E-16 | 0.59344  | 9.07E-46 |
| 0.91846  | 0.335022 | 1.03E-13 | 0.278898 | 8.62E-10 | 0.27378377 | 1.79E-09 | 0.48206  | 1.51E-28 |
| 9.90E-05 | -0.1752  | 0.00014  | -0.00701 | 0.87987  | -0.01493   | 0.74761  | -0.24256 | 1.11E-07 |
| 0.56473  | 0.168963 | 0.00024  | 0.410511 | 2.07E-20 | 0.17355982 | 0.00016  | 0.241204 | 1.32E-07 |
| 0.07727  | 0.382978 | 9.21E-18 | 0.331162 | 2.05E-13 | 0.13474288 | 0.00353  | 0.350458 | 6.09E-15 |
| 0.01129  | 0.420573 | 1.93E-21 | 0.414958 | 7.32E-21 | 0.22366235 | 1.05E-06 | 0.424027 | 8.37E-22 |
| 0.76592  | 0.302798 | 2.33E-11 | 0.370504 | 1.21E-16 | 0.41547525 | 6.48E-21 | 0.631814 | 2.10E-53 |
| 0.71259  | 0.161433 | 0.00046  | 0.34047  | 3.88E-14 | 0.2394061  | 1.64E-07 | 0.333548 | 1.34E-13 |
| 0.02839  | 0.356454 | 1.94E-15 | 0.404681 | 7.90E-20 | 0.4222544  | 1.29E-21 | 0.528249 | 6.40E-35 |
| 0.72339  | 0.344888 | 1.72E-14 | 0.241674 | 1.24E-07 | 0.40232893 | 1.35E-19 | 0.596147 | 2.83E-46 |
| 0.0495   | 0.204367 | 8.52E-06 | 0.211098 | 4.19E-06 | 0.43671663 | 3.60E-23 | 0.551786 | 1.46E-38 |
| 0.05805  | 0.556434 | 2.56E-39 | 0.553947 | 6.51E-39 | 0.27716995 | 1.11E-09 | 0.420173 | 2.12E-21 |
| 0.78352  | 0.416616 | 4.95E-21 | 0.353357 | 3.52E-15 | 0.31874094 | 1.73E-12 | 0.512046 | 1.42E-32 |
| 0.12257  | 0.236718 | 2.27E-07 | 0.07329  | 0.11372  | 0.19032472 | 3.48E-05 | 0.532355 | 1.55E-35 |
| 0.73007  | 0.211691 | 3.93E-06 | 0.139182 | 0.00258  | 0.02141586 | 0.64436  | 0.249788 | 4.49E-08 |
| 0.15287  | 0.142879 | 0.00197  | 0.356081 | 2.09E-15 | 0.48535785 | 5.68E-29 | 0.621872 | 2.53E-51 |
| 0.59259  | -0.07406 | 0.10998  | 0.0987   | 0.03297  | 0.2061612  | 7.07E-06 | 0.221245 | 1.38E-06 |
| 0.44437  | 0.290606 | 1.53E-10 | 0.129478 | 0.00507  | -0.0171034 | 0.71239  | 0.175352 | 0.00014  |
| 0.09713  | 0.26238  | 8.61E-09 | 0.202802 | 1.00E-05 | 0.18447542 | 6.06E-05 | 0.374021 | 5.93E-17 |
| 4.59E-07 | -0.17103 | 0.0002   | -0.21122 | 4.14E-06 | -0.0166417 | 0.71983  | -0.19439 | 2.34E-05 |
| 0.52036  | 0.176492 | 0.00013  | 0.397141 | 4.29E-19 | 0.47862769 | 4.11E-28 | 0.657044 | 4.87E-59 |
| 0.31131  | 0.174752 | 0.00015  | 0.117068 | 0.01135  | 0.19215498 | 2.91E-05 | 0.43483  | 5.80E-23 |
| 0.47909  | 0.039756 | 0.39135  | 0.250734 | 3.98E-08 | 0.22182631 | 1.29E-06 | -0.0768  | 0.09737  |
| 6.64E-06 | 0.298519 | 4.56E-11 | 0.097683 | 0.03483  | 0.15931662 | 0.00055  | 0.272195 | 2.24E-09 |
| 0.90238  | 0.33823  | 5.82E-14 | 0.205719 | 7.40E-06 | 0.28875531 | 2.03E-10 | 0.494573 | 3.52E-30 |
| 0.03471  | 0.333537 | 1.35E-13 | 0.342802 | 2.53E-14 | 0.56197137 | 3.12E-40 | 0.748312 | 6.35E-85 |
| 0.1753   | 0.255909 | 2.03E-08 | 0.179538 | 9.57E-05 | 0.14018395 | 0.0024   | 0.409511 | 2.61E-20 |
| 1.52E-06 | 0.311268 | 5.98E-12 | 0.355542 | 2.32E-15 | 0.07507876 | 0.10515  | 0.151901 | 0.00099  |
| 0.61139  | 0.443026 | 7.17E-24 | 0.491556 | 8.84E-30 | 0.29910655 | 4.17E-11 | 0.449918 | 1.18E-24 |
| 0.03106  | 0.238146 | 1.91E-07 | -0.02003 | 0.66598  | -0.1323259 | 0.00418  | 0.097342 | 0.03547  |
| 0.69854  | 0.121503 | 0.00858  | 0.257148 | 1.73E-08 | 0.38092574 | 1.42E-17 | 0.607055 | 2.33E-48 |
| 0.00732  | 0.51782  | 2.14E-33 | 0.238631 | 1.80E-07 | 0.01127341 | 0.80802  | 0.226075 | 7.95E-07 |
| 0.02647  | 0.600301 | 4.65E-47 | 0.550885 | 2.03E-38 | 0.19270269 | 2.76E-05 | 0.242621 | 1.10E-07 |
| 0.14644  | 0.549434 | 3.47E-38 | 0.417929 | 3.62E-21 | 0.16857673 | 0.00025  | 0.303613 | 2.05E-11 |
| 0.94847  | 0.477811 | 5.21E-28 | 0.254878 | 2.33E-08 | 0.19426582 | 2.37E-05 | 0.399107 | 2.77E-19 |
| 9.89E-05 | 0.160797 | 0.00049  | 0.26749  | 4.30E-09 | 0.15864514 | 0.00058  | 0.36566  | 3.21E-16 |
| 0.24807  | 0.358955 | 1.20E-15 | 0.694039 | 2.33E-68 | 0.40342149 | 1.05E-19 | 0.413188 | 1.11E-20 |
| 0.54301  | 0.304033 | 1.92E-11 | 0.255055 | 2.27E-08 | 0.27485878 | 1.54E-09 | 0.362981 | 5.45E-16 |
| 0.06584  | 0.110117 | 0.01729  | 0.232112 | 3.94E-07 | 0.23814985 | 1.91E-07 | 0.41889  | 2.88E-21 |
| 7.54E-07 | 0.112748 | 0.01478  | 0.130864 | 0.00462  | 0.17100835 | 0.0002   | 0.287876 | 2.31E-10 |
| 0.66131  | -0.15406 | 0.00084  | 0.011671 | 0.80139  | 0.24207442 | 1.18E-07 | -0.06626 | 0.15284  |
| 0.81938  | -0.18036 | 8.88E-05 | -0.23046 | 4.78E-07 | -0.1888003 | 4.02E-05 | -0.32866 | 3.17E-13 |

|          |          |          |          |          |            |          |          |          |
|----------|----------|----------|----------|----------|------------|----------|----------|----------|
| 0.22653  | 0.133781 | 0.00378  | 0.206986 | 6.48E-06 | 0.26291421 | 8.01E-09 | 0.290149 | 1.64E-10 |
| 7.11E-09 | 0.28304  | 4.73E-10 | 0.311043 | 6.20E-12 | 0.32580874 | 5.20E-13 | 0.457154 | 1.71E-25 |
| 0.02819  | 0.339117 | 4.95E-14 | 0.375923 | 4.01E-17 | 0.33883073 | 5.22E-14 | 0.439358 | 1.84E-23 |
| 0.00033  | 0.285537 | 3.27E-10 | 0.245911 | 7.33E-08 | 0.36165576 | 7.07E-16 | 0.529262 | 4.52E-35 |
| 0.82386  | 0.277292 | 1.09E-09 | 0.178698 | 0.0001   | 0.15730137 | 0.00065  | 0.300633 | 3.28E-11 |
| 0.90921  | 0.241418 | 1.28E-07 | 0.194061 | 2.41E-05 | 0.41159923 | 1.61E-20 | 0.557124 | 1.98E-39 |
| 3.06E-07 | 0.242066 | 1.18E-07 | 0.145516 | 0.00162  | 0.19454113 | 2.30E-05 | 0.30228  | 2.53E-11 |
| 0.25535  | 0.41273  | 1.23E-20 | 0.569098 | 1.96E-41 | 0.35520089 | 2.47E-15 | 0.548308 | 5.24E-38 |
| 0.01738  | 0.33471  | 1.09E-13 | 0.166079 | 0.00031  | 0.16416378 | 0.00037  | 0.348391 | 8.99E-15 |
| 0.09173  | 0.298723 | 4.42E-11 | 0.197019 | 1.80E-05 | 0.38583384 | 5.02E-18 | 0.641593 | 1.59E-55 |
| 0.04812  | 0.266438 | 4.96E-09 | 0.192985 | 2.68E-05 | -0.021148  | 0.64851  | 0.140682 | 0.00231  |
| 0.21244  | 0.491238 | 9.73E-30 | 0.29415  | 8.96E-11 | 0.41243221 | 1.32E-20 | 0.601979 | 2.23E-47 |
| 0.08244  | 0.325707 | 5.30E-13 | 0.349013 | 8.00E-15 | 0.4766009  | 7.40E-28 | 0.708036 | 2.89E-72 |
| 0.62636  | 0.239313 | 1.66E-07 | 0.536447 | 3.71E-36 | 0.25479231 | 2.35E-08 | 0.260287 | 1.14E-08 |
| 0.0567   | 0.622328 | 2.04E-51 | 0.340778 | 3.66E-14 | 0.08869048 | 0.05546  | 0.327114 | 4.15E-13 |
| 0.40373  | 0.430267 | 1.81E-22 | 0.361814 | 6.86E-16 | 0.15353822 | 0.00087  | 0.317586 | 2.10E-12 |
| 0.74317  | 0.41771  | 3.82E-21 | 0.191688 | 3.05E-05 | 0.16033323 | 0.00051  | 0.43352  | 8.06E-23 |
| 0.02877  | 0.536736 | 3.35E-36 | 0.682898 | 2.09E-65 | 0.15841427 | 0.00059  | 0.141251 | 0.00222  |
| 0.02108  | 0.17263  | 0.00018  | 0.413591 | 1.01E-20 | 0.35804746 | 1.43E-15 | 0.367956 | 2.03E-16 |
| 0.23203  | 0.414152 | 8.85E-21 | 0.279839 | 7.53E-10 | 0.08778104 | 0.05802  | 0.321984 | 1.00E-12 |
| 1.42E-06 | 0.528597 | 5.68E-35 | 0.516778 | 3.02E-33 | 0.10065148 | 0.02965  | 0.213497 | 3.24E-06 |
| 0.00494  | 0.671773 | 1.38E-62 | 0.405108 | 7.16E-20 | 0.1882757  | 4.23E-05 | 0.344052 | 2.01E-14 |
| 0.09486  | 0.212432 | 3.63E-06 | 0.234381 | 3.01E-07 | 0.36387635 | 4.57E-16 | 0.58018  | 2.31E-43 |
| 0.09902  | 0.495818 | 2.40E-30 | 0.499011 | 8.95E-31 | 0.3755861  | 4.30E-17 | 0.467502 | 9.85E-27 |
| 0.08464  | 0.242676 | 1.10E-07 | 0.224837 | 9.17E-07 | 0.33549866 | 9.50E-14 | 0.430767 | 1.60E-22 |
| 0.1718   | 0.401036 | 1.80E-19 | 0.242355 | 1.14E-07 | 0.14299827 | 0.00195  | 0.28307  | 4.70E-10 |
| 0.29652  | 0.270901 | 2.68E-09 | 0.195515 | 2.09E-05 | 0.04853222 | 0.29529  | 0.240633 | 1.41E-07 |
| 0.38768  | 0.429312 | 2.30E-22 | 0.298507 | 4.57E-11 | 0.24449193 | 8.76E-08 | 0.460519 | 6.82E-26 |
| 0.18129  | 0.238842 | 1.76E-07 | 0.31411  | 3.75E-12 | 0.113713   | 0.01394  | 0.181263 | 8.17E-05 |
| 0.1311   | 0.335397 | 9.67E-14 | 0.023082 | 0.61881  | -0.0972317 | 0.03568  | 0.15537  | 0.00075  |
| 0.21261  | 0.313358 | 4.24E-12 | 0.207582 | 6.09E-06 | 0.34971828 | 7.01E-15 | 0.59953  | 6.52E-47 |
| 0.17518  | 0.275902 | 1.32E-09 | 0.227464 | 6.78E-07 | 0.29464496 | 8.30E-11 | 0.446686 | 2.77E-24 |
| 0.09134  | 0.191363 | 3.14E-05 | 0.278565 | 9.05E-10 | 0.42666067 | 4.41E-22 | 0.66383  | 1.20E-60 |
| 0.28063  | 0.295963 | 6.78E-11 | 0.08613  | 0.06292  | -0.2181224 | 1.95E-06 | 0.048469 | 0.29592  |
| 0.01999  | 0.517937 | 2.06E-33 | 0.357296 | 1.65E-15 | 0.14923894 | 0.00122  | 0.294847 | 8.05E-11 |
| 0.3316   | 0.186303 | 5.10E-05 | 0.352541 | 4.11E-15 | 0.45907103 | 1.01E-25 | 0.580191 | 2.30E-43 |
| 0.03959  | 0.39954  | 2.52E-19 | 0.237551 | 2.05E-07 | 0.30631796 | 1.33E-11 | 0.53426  | 7.99E-36 |
| 0.00049  | -0.26235 | 8.65E-09 | -0.28461 | 3.75E-10 | 0.12736176 | 0.00585  | -0.06145 | 0.18499  |
| 0.1115   | 0.541273 | 6.69E-37 | 0.375739 | 4.17E-17 | 0.26046782 | 1.11E-08 | 0.532725 | 1.37E-35 |
| 0.36225  | 0.280811 | 6.54E-10 | 0.326392 | 4.71E-13 | 0.37939341 | 1.95E-17 | 0.616497 | 3.14E-50 |
| 2.70E-05 | 0.602556 | 1.73E-47 | 0.503045 | 2.53E-31 | 0.26485606 | 6.16E-09 | 0.478972 | 3.72E-28 |
| 0.00014  | 0.356724 | 1.85E-15 | 0.242779 | 1.08E-07 | 0.15401716 | 0.00084  | 0.367855 | 2.07E-16 |
| 0.12108  | -0.08436 | 0.06853  | -0.22965 | 5.26E-07 | -0.1147297 | 0.01311  | -0.24985 | 4.45E-08 |
| 0.94081  | 0.477421 | 5.84E-28 | 0.411916 | 1.49E-20 | 0.23263796 | 3.70E-07 | 0.375559 | 4.32E-17 |
| 0.22904  | 0.303556 | 2.07E-11 | 0.365328 | 3.43E-16 | 0.49677856 | 1.79E-30 | 0.701714 | 1.80E-70 |

|          |          |          |          |          |            |          |          |          |
|----------|----------|----------|----------|----------|------------|----------|----------|----------|
| 0.56445  | 0.139563 | 0.00251  | 0.085565 | 0.06467  | 0.16457053 | 0.00036  | 0.428771 | 2.62E-22 |
| 0.00116  | 0.393684 | 9.20E-19 | 0.342862 | 2.50E-14 | 0.41951235 | 2.48E-21 | 0.537549 | 2.52E-36 |
| 0.19659  | 0.516478 | 3.34E-33 | 0.411734 | 1.56E-20 | 0.37382188 | 6.18E-17 | 0.516746 | 3.06E-33 |
| 2.40E-05 | 0.172374 | 0.00018  | 0.240521 | 1.43E-07 | 0.42920631 | 2.36E-22 | 0.625331 | 4.87E-52 |
| 0.96649  | 0.41999  | 2.22E-21 | 0.448736 | 1.62E-24 | 0.39109281 | 1.62E-18 | 0.372997 | 7.31E-17 |
| 0.87874  | 0.276889 | 1.15E-09 | 0.254319 | 2.50E-08 | 0.3524829  | 4.15E-15 | 0.569925 | 1.42E-41 |
| 0.0597   | 0.262058 | 8.99E-09 | 0.389129 | 2.48E-18 | 0.28793961 | 2.29E-10 | 0.310631 | 6.63E-12 |
| 0.22293  | 0.139839 | 0.00246  | 0.233187 | 3.47E-07 | 0.44611901 | 3.21E-24 | 0.595819 | 3.26E-46 |
| 0.93247  | 0.399501 | 2.54E-19 | 0.270314 | 2.91E-09 | 0.37287175 | 7.50E-17 | 0.642946 | 7.97E-56 |
| 6.79E-08 | 0.034096 | 0.4623   | 0.16381  | 0.00038  | 0.31852462 | 1.80E-12 | 0.445875 | 3.42E-24 |
| 0.12941  | 0.080139 | 0.08364  | 0.167474 | 0.00028  | 0.22451334 | 9.51E-07 | 0.379286 | 2.00E-17 |
| 0.39692  | 0.415154 | 6.99E-21 | 0.324477 | 6.55E-13 | 0.15600635 | 0.00072  | 0.333452 | 1.37E-13 |
| 0.63337  | 0.155212 | 0.00076  | 0.36575  | 3.15E-16 | 0.51496464 | 5.49E-33 | 0.605014 | 5.80E-48 |
| 0.28358  | -0.24549 | 7.73E-08 | 0.024371 | 0.59936  | 0.10219117 | 0.02723  | -0.15764 | 0.00063  |
| 0.03015  | 0.455746 | 2.49E-25 | 0.458005 | 1.35E-25 | 0.17187969 | 0.00019  | 0.249221 | 4.83E-08 |
| 0.09224  | 0.047702 | 0.30363  | 0.09549  | 0.03914  | 0.08314163 | 0.07265  | 0.292931 | 1.08E-10 |
| 0.83307  | 0.430412 | 1.75E-22 | 0.098572 | 0.0332   | -0.0486153 | 0.29446  | 0.180376 | 8.87E-05 |
| 7.99E-07 | 0.295597 | 7.17E-11 | 0.067758 | 0.14374  | 0.12639642 | 0.00624  | 0.342257 | 2.80E-14 |
| 0.01214  | 0.548646 | 4.63E-38 | 0.472411 | 2.46E-27 | 0.35324674 | 3.59E-15 | 0.466081 | 1.47E-26 |
| 7.38E-06 | 0.260736 | 1.07E-08 | 0.168895 | 0.00025  | 0.12173536 | 0.00845  | 0.409227 | 2.79E-20 |
| 0.2397   | 0.153964 | 0.00084  | 0.312667 | 4.75E-12 | 0.26508072 | 5.97E-09 | 0.323369 | 7.91E-13 |
| 0.38371  | 0.337808 | 6.28E-14 | 0.246987 | 6.40E-08 | 0.38939842 | 2.34E-18 | 0.557234 | 1.90E-39 |
| 0.44441  | 0.438844 | 2.10E-23 | 0.326423 | 4.68E-13 | 0.24174093 | 1.23E-07 | 0.473951 | 1.59E-27 |
| 0.01741  | 0.625287 | 4.97E-52 | 0.5452   | 1.63E-37 | 0.23819761 | 1.90E-07 | 0.38702  | 3.90E-18 |
| 0.34183  | 0.321533 | 1.08E-12 | 0.422979 | 1.08E-21 | 0.47010841 | 4.73E-27 | 0.637951 | 1.00E-54 |
| 0.6463   | -0.16073 | 0.00049  | -0.41372 | 9.80E-21 | 0.02284663 | 0.62239  | -0.0338  | 0.4662   |
| 0.11765  | -0.21796 | 1.99E-06 | -0.52479 | 2.08E-34 | -0.1334627 | 0.00386  | -0.21286 | 3.47E-06 |
| 0.91741  | -0.392   | 1.33E-18 | -0.22733 | 6.88E-07 | -0.07153   | 0.12268  | -0.33919 | 4.89E-14 |
| 0.20571  | 0.604607 | 6.96E-48 | 0.368041 | 1.99E-16 | 0.27393636 | 1.75E-09 | 0.509145 | 3.63E-32 |
| 0.17183  | 0.304883 | 1.68E-11 | 0.309218 | 8.34E-12 | 0.14945215 | 0.0012   | 0.346497 | 1.28E-14 |
| 0.71829  | 0.110171 | 0.01723  | 0.069509 | 0.13364  | 0.16644724 | 0.0003   | 0.381996 | 1.13E-17 |
| 0.00178  | 0.223619 | 1.05E-06 | 0.197195 | 1.77E-05 | 0.17447716 | 0.00015  | 0.382764 | 9.63E-18 |
| 0.44503  | 0.3302   | 2.43E-13 | 0.402282 | 1.36E-19 | 0.43247276 | 1.05E-22 | 0.645787 | 1.85E-56 |
| 9.19E-14 | 0.114627 | 0.01319  | 0.163755 | 0.00038  | 0.20079052 | 1.23E-05 | 0.386789 | 4.09E-18 |
| 0.39963  | 0.470552 | 4.17E-27 | 0.362447 | 6.06E-16 | 0.25050919 | 4.09E-08 | 0.395056 | 6.80E-19 |
| 0.06109  | 0.39261  | 1.16E-18 | 0.175075 | 0.00014  | 0.18444572 | 6.08E-05 | 0.342739 | 2.56E-14 |
| 0.17059  | 0.404401 | 8.41E-20 | 0.373073 | 7.20E-17 | 0.31044923 | 6.83E-12 | 0.546267 | 1.10E-37 |
| 0.76372  | 0.38104  | 1.38E-17 | 0.166976 | 0.00029  | 0.35223324 | 4.36E-15 | 0.631502 | 2.45E-53 |
| 0.03752  | 0.329216 | 2.88E-13 | 0.268765 | 3.60E-09 | 0.19550263 | 2.09E-05 | 0.486358 | 4.22E-29 |
| 0.5279   | 0.392348 | 1.23E-18 | 0.23101  | 4.48E-07 | 0.14517163 | 0.00166  | 0.368526 | 1.81E-16 |
| 1.84E-10 | 0.195835 | 2.03E-05 | 0.183965 | 6.36E-05 | 0.20872779 | 5.40E-06 | 0.291933 | 1.26E-10 |
| 0.29369  | 0.622606 | 1.79E-51 | 0.416684 | 4.87E-21 | 0.05222254 | 0.26005  | 0.219565 | 1.66E-06 |
| 0.58861  | 0.51163  | 1.63E-32 | 0.434167 | 6.85E-23 | 0.15781525 | 0.00062  | 0.315146 | 3.16E-12 |
| 0.5391   | 0.157826 | 0.00062  | 0.304559 | 1.76E-11 | 0.52810949 | 6.71E-35 | 0.674038 | 3.76E-63 |
| 0.40573  | 0.262602 | 8.36E-09 | 0.079991 | 0.08421  | 0.17254597 | 0.00018  | 0.28299  | 4.76E-10 |

|          |          |          |          |          |            |          |          |          |
|----------|----------|----------|----------|----------|------------|----------|----------|----------|
| 0.1731   | 0.221273 | 1.37E-06 | 0.301372 | 2.92E-11 | 0.30912449 | 8.47E-12 | 0.414566 | 8.03E-21 |
| 0.57439  | 0.468851 | 6.74E-27 | 0.323671 | 7.51E-13 | 0.49793252 | 1.25E-30 | 0.673132 | 6.33E-63 |
| 0.00039  | -0.21279 | 3.50E-06 | -0.13447 | 0.0036   | -0.1080502 | 0.01951  | -0.24587 | 7.38E-08 |
| 0.30658  | 0.363695 | 4.73E-16 | 0.372388 | 8.28E-17 | 0.15383078 | 0.00085  | 0.341266 | 3.35E-14 |
| 0.67956  | 0.226465 | 7.61E-07 | 0.175696 | 0.00014  | 0.22533594 | 8.66E-07 | 0.448192 | 1.87E-24 |
| 0.01568  | 0.332809 | 1.53E-13 | 0.239216 | 1.68E-07 | 0.17410167 | 0.00016  | 0.417481 | 4.03E-21 |
| 0.27918  | 0.481318 | 1.87E-28 | 0.414532 | 8.09E-21 | 0.24690655 | 6.47E-08 | 0.496053 | 2.24E-30 |
| 0.51007  | 0.187041 | 4.76E-05 | 0.447049 | 2.52E-24 | 0.44888048 | 1.56E-24 | 0.562195 | 2.87E-40 |
| 0.00785  | 0.505597 | 1.13E-31 | 0.507004 | 7.21E-32 | 0.31565818 | 2.90E-12 | 0.424255 | 7.92E-22 |
| 0.66752  | 0.398034 | 3.52E-19 | 0.260025 | 1.18E-08 | 0.42513753 | 6.39E-22 | 0.717979 | 3.49E-75 |
| 0.21504  | 0.449813 | 1.22E-24 | 0.402553 | 1.28E-19 | 0.40235008 | 1.34E-19 | 0.568815 | 2.19E-41 |
| 0.00195  | 0.06113  | 0.18726  | -0.0128  | 0.78268  | 0.08251827 | 0.07483  | 0.348764 | 8.38E-15 |
| 0.01715  | 0.374725 | 5.13E-17 | 0.160058 | 0.00052  | 0.23066647 | 4.67E-07 | 0.489263 | 1.77E-29 |
| 0.28964  | -0.0246  | 0.59586  | 0.195456 | 2.10E-05 | 0.2659703  | 5.29E-09 | 0.254399 | 2.48E-08 |
| 0.39858  | 0.238952 | 1.73E-07 | 0.223613 | 1.05E-06 | 0.50491205 | 1.40E-31 | 0.754544 | 4.23E-87 |
| 0.40923  | 0.403181 | 1.11E-19 | 0.190322 | 3.48E-05 | 0.13754006 | 0.0029   | 0.335814 | 8.98E-14 |
| 0.04696  | 0.317232 | 2.23E-12 | 0.333121 | 1.45E-13 | 0.42137292 | 1.59E-21 | 0.454857 | 3.17E-25 |
| 1.22E-05 | 0.509728 | 3.01E-32 | 0.663764 | 1.24E-60 | 0.29185065 | 1.27E-10 | 0.377262 | 3.04E-17 |
| 0.00356  | 0.54584  | 1.29E-37 | 0.486126 | 4.52E-29 | 0.242888   | 1.07E-07 | 0.466204 | 1.42E-26 |
| 0.59995  | 0.280701 | 6.65E-10 | 0.278608 | 8.99E-10 | 0.30043744 | 3.38E-11 | 0.403608 | 1.01E-19 |
| 0.29808  | 0.374313 | 5.59E-17 | 0.35893  | 1.20E-15 | 0.44727486 | 2.37E-24 | 0.62562  | 4.24E-52 |
| 0.63243  | 0.464636 | 2.19E-26 | 0.35086  | 5.65E-15 | 0.2703689  | 2.89E-09 | 0.41704  | 4.48E-21 |
| 0.29348  | 0.336638 | 7.75E-14 | 0.258501 | 1.45E-08 | 0.23712663 | 2.16E-07 | 0.480495 | 2.38E-28 |
| 0.28089  | 0.474499 | 1.35E-27 | 0.261203 | 1.01E-08 | 0.20057014 | 1.26E-05 | 0.397852 | 3.67E-19 |
| 0.99199  | 0.400631 | 1.97E-19 | 0.232948 | 3.57E-07 | 0.39885188 | 2.93E-19 | 0.645615 | 2.02E-56 |
| 8.77E-05 | 0.277561 | 1.04E-09 | 0.356105 | 2.08E-15 | 0.32885351 | 3.07E-13 | 0.397895 | 3.63E-19 |
| 0.01076  | 0.278318 | 9.37E-10 | 0.249533 | 4.64E-08 | 0.3637737  | 4.66E-16 | 0.426473 | 4.61E-22 |
| 2.59E-10 | 0.130955 | 0.00459  | 0.175109 | 0.00014  | 0.40240904 | 1.32E-19 | 0.595286 | 4.11E-46 |
| 0.0028   | 0.39038  | 1.89E-18 | 0.192755 | 2.74E-05 | 0.20708526 | 6.42E-06 | 0.480758 | 2.21E-28 |
| 0.00069  | 0.319221 | 1.60E-12 | 0.316747 | 2.42E-12 | 0.33434007 | 1.17E-13 | 0.546957 | 8.59E-38 |
| 0.74866  | 0.297943 | 4.99E-11 | 0.323584 | 7.63E-13 | 0.31568157 | 2.89E-12 | 0.405413 | 6.68E-20 |
| 0.04089  | 0.264622 | 6.36E-09 | 0.390758 | 1.74E-18 | 0.4658239  | 1.57E-26 | 0.654319 | 2.10E-58 |
| 0.42607  | 0.280646 | 6.70E-10 | 0.113943 | 0.01375  | 0.17903592 | 0.0001   | 0.386566 | 4.29E-18 |
| 0.817    | 0.135522 | 0.00334  | 0.184008 | 6.33E-05 | 0.19679387 | 1.84E-05 | 0.382429 | 1.03E-17 |
| 0.00185  | 0.073253 | 0.1139   | 0.068407 | 0.13993  | -0.0844357 | 0.0683   | 0.127414 | 0.00583  |
| 0.04803  | 0.311909 | 5.38E-12 | 0.41672  | 4.83E-21 | 0.37263299 | 7.88E-17 | 0.516272 | 3.57E-33 |
| 0.56387  | 0.313558 | 4.11E-12 | 0.177357 | 0.00012  | 0.23936    | 1.65E-07 | 0.47694  | 6.71E-28 |
| 0.14088  | 0.348703 | 8.48E-15 | 0.337926 | 6.14E-14 | 0.36863993 | 1.77E-16 | 0.435022 | 5.53E-23 |
| 0.00925  | 0.313969 | 3.84E-12 | 0.157722 | 0.00062  | -0.0037847 | 0.93499  | 0.202284 | 1.06E-05 |
| 0.22578  | 0.356126 | 2.07E-15 | 0.256048 | 2.00E-08 | 0.30681676 | 1.23E-11 | 0.539318 | 1.34E-36 |
| 0.14345  | 0.297784 | 5.12E-11 | 0.3354   | 9.67E-14 | 0.04681595 | 0.31271  | 0.266975 | 4.61E-09 |
| 0.06564  | 0.426192 | 4.94E-22 | 0.169354 | 0.00024  | 0.15694861 | 0.00066  | 0.401725 | 1.54E-19 |
| 0.10106  | 0.298044 | 4.91E-11 | 0.193988 | 2.43E-05 | 0.08570104 | 0.06425  | 0.322373 | 9.38E-13 |
| 0.74437  | 0.295035 | 7.82E-11 | 0.100006 | 0.03071  | 0.10432238 | 0.02416  | 0.356056 | 2.10E-15 |
| 0.8209   | 0.506145 | 9.48E-32 | 0.615548 | 4.87E-50 | 0.39060656 | 1.80E-18 | 0.500971 | 4.86E-31 |



|          |          |          |          |          |            |          |          |          |
|----------|----------|----------|----------|----------|------------|----------|----------|----------|
| 0.78848  | 0.249028 | 4.95E-08 | 0.282469 | 5.14E-10 | 0.27791639 | 9.93E-10 | 0.536343 | 3.85E-36 |
| 0.00594  | 0.242581 | 1.11E-07 | 0.230985 | 4.50E-07 | 0.40016556 | 2.19E-19 | 0.620326 | 5.24E-51 |
| 0.5463   | 0.561001 | 4.53E-40 | 0.3861   | 4.74E-18 | 0.22064194 | 1.47E-06 | 0.348216 | 9.29E-15 |
| 1.66E-07 | 0.288241 | 2.19E-10 | 0.223215 | 1.10E-06 | 0.3153127  | 3.07E-12 | 0.516261 | 3.59E-33 |
| 0.53087  | 0.335129 | 1.01E-13 | 0.344925 | 1.71E-14 | 0.37006165 | 1.33E-16 | 0.488201 | 2.43E-29 |
| 0.47263  | 0.143387 | 0.00189  | 0.072463 | 0.11787  | 0.11846871 | 0.0104   | 0.291013 | 1.44E-10 |
| 0.68993  | 0.520846 | 7.84E-34 | 0.411109 | 1.80E-20 | 0.29671519 | 6.04E-11 | 0.486472 | 4.08E-29 |
| 0.00067  | 0.44066  | 1.32E-23 | 0.164796 | 0.00035  | 0.2413708  | 1.29E-07 | 0.503685 | 2.07E-31 |
| 0.82756  | 0.217791 | 2.02E-06 | 0.05103  | 0.2711   | 0.04742123 | 0.30649  | 0.261263 | 1.00E-08 |
| 0.53491  | 0.279158 | 8.31E-10 | 0.354214 | 2.99E-15 | 0.25400641 | 2.61E-08 | 0.417299 | 4.21E-21 |
| 0.02666  | 0.384665 | 6.44E-18 | 0.303912 | 1.96E-11 | 0.32645037 | 4.66E-13 | 0.451886 | 7.02E-25 |
| 0.73992  | -0.0098  | 0.83265  | 0.029698 | 0.52205  | 0.08678064 | 0.06095  | 0.254308 | 2.51E-08 |
| 0.9257   | 0.358201 | 1.39E-15 | 0.317371 | 2.18E-12 | 0.44428847 | 5.17E-24 | 0.579442 | 3.12E-43 |
| 0.0454   | 0.226511 | 7.57E-07 | 0.265672 | 5.51E-09 | 0.28407011 | 4.06E-10 | 0.345709 | 1.48E-14 |
| 0.07204  | 0.376914 | 3.27E-17 | 0.178171 | 0.00011  | 0.20917622 | 5.15E-06 | 0.327117 | 4.15E-13 |
| 0.0112   | -0.06067 | 0.19059  | 0.091427 | 0.04831  | 0.20085057 | 1.22E-05 | -0.06608 | 0.15394  |
| 0.57254  | -0.11646 | 0.01178  | 0.103915 | 0.02472  | 0.17165732 | 0.00019  | -0.12172 | 0.00846  |
| 0.0648   | 0.643163 | 7.13E-56 | 0.394741 | 7.29E-19 | 0.20996201 | 4.73E-06 | 0.375531 | 4.35E-17 |
| 0.16441  | 0.215093 | 2.72E-06 | 0.031291 | 0.49996  | 0.08627035 | 0.06249  | 0.324895 | 6.09E-13 |
| 0.44764  | 0.58461  | 3.74E-44 | 0.667354 | 1.68E-61 | 0.34774986 | 1.01E-14 | 0.377127 | 3.13E-17 |
| 0.99293  | 0.244992 | 8.23E-08 | 0.469401 | 5.77E-27 | 0.43344659 | 8.21E-23 | 0.412131 | 1.42E-20 |
| 0.43336  | 0.378787 | 2.22E-17 | 0.183162 | 6.85E-05 | -0.0604406 | 0.19229  | 0.170161 | 0.00022  |
| 0.75209  | 0.427049 | 4.01E-22 | 0.213497 | 3.24E-06 | 0.01904752 | 0.6814   | 0.138375 | 0.00273  |
| 1.96E-06 | 0.172293 | 0.00018  | 0.101871 | 0.02772  | 0.11353581 | 0.01409  | 0.274697 | 1.57E-09 |
| 0.1463   | 0.254351 | 2.49E-08 | 0.281196 | 6.18E-10 | 0.36430298 | 4.20E-16 | 0.566903 | 4.63E-41 |
| 0.83818  | 0.366745 | 2.58E-16 | 0.351144 | 5.35E-15 | 0.05640831 | 0.22372  | 0.127018 | 0.00598  |
| 4.33E-05 | 0.308109 | 9.98E-12 | 0.373872 | 6.12E-17 | 0.33406249 | 1.23E-13 | 0.434592 | 6.16E-23 |
| 0.09744  | 0.66362  | 1.34E-60 | 0.515344 | 4.85E-33 | 0.33707164 | 7.17E-14 | 0.520307 | 9.38E-34 |
| 0.28092  | 0.389956 | 2.07E-18 | 0.451577 | 7.62E-25 | 0.29691664 | 5.85E-11 | 0.462805 | 3.64E-26 |
| 0.14277  | 0.414864 | 7.48E-21 | 0.212124 | 3.76E-06 | 0.15380004 | 0.00085  | 0.431685 | 1.27E-22 |
| 0.07523  | 0.335843 | 8.93E-14 | 0.186314 | 5.10E-05 | 0.2460291  | 7.23E-08 | 0.529775 | 3.79E-35 |
| 0.96773  | 0.293322 | 1.02E-10 | 0.234445 | 2.98E-07 | 0.33307785 | 1.46E-13 | 0.522268 | 4.87E-34 |
| 0.88713  | 0.127689 | 0.00572  | 0.072678 | 0.11678  | 0.11032007 | 0.01708  | 0.41909  | 2.75E-21 |
| 0.09639  | 0.146572 | 0.00149  | 0.132172 | 0.00422  | 0.08607224 | 0.0631   | 0.352066 | 4.50E-15 |
| 1.39E-06 | 0.264586 | 6.39E-09 | 0.110538 | 0.01686  | 0.20613866 | 7.09E-06 | 0.382462 | 1.03E-17 |
| 0.11132  | 0.224478 | 9.55E-07 | 0.176309 | 0.00013  | 0.17266756 | 0.00018  | 0.413136 | 1.12E-20 |
| 0.18901  | 0.350277 | 6.31E-15 | 0.265822 | 5.40E-09 | 0.26090059 | 1.05E-08 | 0.545882 | 1.27E-37 |
| 0.79933  | 0.373336 | 6.82E-17 | 0.307834 | 1.04E-11 | 0.18136319 | 8.10E-05 | 0.431926 | 1.20E-22 |
| 0.0009   | 0.252196 | 3.30E-08 | 0.292844 | 1.09E-10 | 0.41637534 | 5.24E-21 | 0.629889 | 5.38E-53 |
| 0.01957  | 0.021368 | 0.64511  | 0.223194 | 1.11E-06 | 0.22906741 | 5.63E-07 | 0.344376 | 1.90E-14 |
| 0.01355  | 0.368029 | 2.00E-16 | 0.411607 | 1.60E-20 | 0.40538222 | 6.73E-20 | 0.520838 | 7.86E-34 |
| 0.63164  | 0.253078 | 2.94E-08 | 0.279211 | 8.24E-10 | 0.41031614 | 2.16E-20 | 0.561077 | 4.40E-40 |
| 0.21912  | 0.448198 | 1.86E-24 | 0.313237 | 4.33E-12 | 0.36038305 | 9.07E-16 | 0.565107 | 9.32E-41 |
| 0.85979  | 0.465607 | 1.67E-26 | 0.498512 | 1.04E-30 | 0.4768698  | 6.84E-28 | 0.499318 | 8.13E-31 |
| 0.00829  | 0.386648 | 4.22E-18 | 0.389227 | 2.42E-18 | -0.0176826 | 0.70311  | 0.216001 | 2.46E-06 |

|          |          |          |          |          |            |          |          |          |
|----------|----------|----------|----------|----------|------------|----------|----------|----------|
| 0.03565  | 0.537476 | 2.58E-36 | 0.506434 | 8.65E-32 | 0.22140347 | 1.35E-06 | 0.377318 | 3.01E-17 |
| 0.08861  | 0.603003 | 1.42E-47 | 0.450732 | 9.54E-25 | 0.35436309 | 2.90E-15 | 0.617687 | 1.80E-50 |
| 0.25925  | 0.222933 | 1.14E-06 | 0.216734 | 2.27E-06 | 0.30891779 | 8.76E-12 | 0.387398 | 3.59E-18 |
| 0.0823   | 0.460701 | 6.49E-26 | 0.516408 | 3.42E-33 | 0.27538054 | 1.43E-09 | 0.360662 | 8.59E-16 |
| 0.78676  | 0.251114 | 3.79E-08 | 0.161645 | 0.00045  | 0.34015142 | 4.11E-14 | 0.505485 | 1.17E-31 |
| 0.04143  | 0.50094  | 4.90E-31 | 0.563765 | 1.57E-40 | 0.22988949 | 5.11E-07 | 0.324966 | 6.02E-13 |
| 0.03972  | 0.361168 | 7.78E-16 | 0.474036 | 1.55E-27 | 0.43431697 | 6.60E-23 | 0.537599 | 2.47E-36 |
| 0.04839  | 0.573421 | 3.54E-42 | 0.305184 | 1.60E-11 | 0.13952799 | 0.00251  | 0.374714 | 5.15E-17 |
| 0.33559  | 0.448217 | 1.85E-24 | 0.227627 | 6.65E-07 | 0.14504452 | 0.00167  | 0.397408 | 4.05E-19 |
| 0.7266   | 0.045297 | 0.32869  | -0.09861 | 0.03313  | -0.19535   | 2.13E-05 | -0.38089 | 1.43E-17 |
| 0.58579  | 0.41924  | 2.65E-21 | 0.364965 | 3.68E-16 | 0.30024014 | 3.49E-11 | 0.35716  | 1.70E-15 |
| 0.45088  | 0.450321 | 1.06E-24 | 0.513739 | 8.20E-33 | 0.29663116 | 6.12E-11 | 0.317332 | 2.19E-12 |
| 0.00285  | 0.340825 | 3.63E-14 | 0.218868 | 1.80E-06 | 0.25907688 | 1.34E-08 | 0.533013 | 1.24E-35 |
| 0.0085   | 0.280586 | 6.76E-10 | 0.340752 | 3.68E-14 | 0.42251136 | 1.21E-21 | 0.553028 | 9.17E-39 |
| 0.00697  | 0.162806 | 0.00041  | 0.103248 | 0.02567  | 0.22663787 | 7.46E-07 | 0.423753 | 8.95E-22 |
| 3.34E-05 | 0.432096 | 1.15E-22 | 0.47684  | 6.90E-28 | 0.1218027  | 0.00842  | 0.31438  | 3.58E-12 |
| 0.16411  | 0.216249 | 2.40E-06 | 0.094065 | 0.04217  | 0.19790816 | 1.65E-05 | 0.463595 | 2.92E-26 |
| 3.64E-11 | 0.3297   | 2.65E-13 | 0.221201 | 1.38E-06 | 0.00998396 | 0.82963  | 0.190568 | 3.40E-05 |
| 0.00287  | 0.445541 | 3.73E-24 | 0.351035 | 5.47E-15 | 0.41377871 | 9.66E-21 | 0.622613 | 1.78E-51 |
| 0.58279  | 0.295754 | 7.00E-11 | 0.297482 | 5.36E-11 | 0.5662949  | 5.87E-41 | 0.78956  | #####    |
| 0.24956  | 0.420359 | 2.03E-21 | 0.523992 | 2.72E-34 | 0.21773832 | 2.04E-06 | 0.258478 | 1.45E-08 |
| 2.34E-05 | 0.286956 | 2.65E-10 | 0.13686  | 0.00304  | 0.19319249 | 2.63E-05 | 0.320696 | 1.25E-12 |
| 0.28173  | -0.22276 | 1.16E-06 | -0.20356 | 9.26E-06 | -0.3310803 | 2.08E-13 | -0.49033 | 1.28E-29 |
| 0.04454  | 0.457672 | 1.48E-25 | 0.228687 | 5.88E-07 | 0.09644236 | 0.03721  | 0.257968 | 1.55E-08 |
| 0.6903   | 0.319095 | 1.63E-12 | 0.389529 | 2.27E-18 | 0.3879742  | 3.17E-18 | 0.530483 | 2.97E-35 |
| 0.31192  | 0.418596 | 3.09E-21 | 0.33414  | 1.21E-13 | 0.34815277 | 9.40E-15 | 0.571405 | 7.89E-42 |
| 0.15064  | 0.069022 | 0.13639  | 0.079765 | 0.0851   | 0.09577225 | 0.03856  | 0.317798 | 2.03E-12 |
| 0.95558  | 0.108614 | 0.01888  | 0.138443 | 0.00272  | 0.29851284 | 4.57E-11 | 0.589505 | 4.82E-45 |
| 0.47408  | 0.339843 | 4.34E-14 | 0.455162 | 2.92E-25 | 0.42237015 | 1.25E-21 | 0.591939 | 1.72E-45 |
| 0.03361  | 0.141561 | 0.00217  | 0.01694  | 0.71502  | 0.15016825 | 0.00113  | 0.451585 | 7.60E-25 |
| 1.07E-07 | 0.093526 | 0.04337  | 0.125809 | 0.00648  | 0.22059468 | 1.48E-06 | 0.331255 | 2.02E-13 |
| 0.4748   | 0.137    | 0.00301  | 0.166298 | 0.00031  | 0.20577365 | 7.36E-06 | 0.427618 | 3.48E-22 |
| 0.00062  | 0.242589 | 1.11E-07 | 0.372738 | 7.71E-17 | 0.00598913 | 0.89729  | 0.05265  | 0.25616  |
| 4.54E-07 | 0.487076 | 3.41E-29 | 0.259026 | 1.35E-08 | 0.19905304 | 1.47E-05 | 0.363228 | 5.19E-16 |
| 0.39517  | 0.060006 | 0.19552  | 0.084076 | 0.06949  | 0.27229993 | 2.20E-09 | 0.398236 | 3.37E-19 |
| 4.44E-06 | 0.299577 | 3.87E-11 | 0.300929 | 3.13E-11 | 0.33314952 | 1.44E-13 | 0.565764 | 7.22E-41 |
| 0.00034  | 0.212807 | 3.49E-06 | 0.280985 | 6.38E-10 | 0.36481872 | 3.79E-16 | 0.399204 | 2.71E-19 |
| 3.99E-06 | 0.23049  | 4.77E-07 | 0.290993 | 1.45E-10 | 0.18310945 | 6.89E-05 | 0.290192 | 1.63E-10 |
| 0.73365  | 0.309808 | 7.58E-12 | 0.070989 | 0.12555  | -0.1355939 | 0.00333  | 0.111881 | 0.01557  |
| 0.00042  | 0.231983 | 4.00E-07 | 0.291972 | 1.25E-10 | 0.28106218 | 6.31E-10 | 0.514122 | 7.23E-33 |
| 0.94611  | 0.582645 | 8.41E-44 | 0.427019 | 4.04E-22 | 0.25388604 | 2.65E-08 | 0.438138 | 2.51E-23 |
| 0.11671  | 0.561399 | 3.89E-40 | 0.536179 | 4.08E-36 | 0.11511629 | 0.0128   | 0.169744 | 0.00023  |
| 0.97498  | 0.525527 | 1.62E-34 | 0.467513 | 9.82E-27 | 0.11486648 | 0.013    | 0.269798 | 3.12E-09 |
| 0.0282   | -0.01752 | 0.70566  | 0.189438 | 3.79E-05 | 0.18428673 | 6.17E-05 | 0.369876 | 1.38E-16 |
| 0.26597  | 0.325234 | 5.75E-13 | 0.2366   | 2.30E-07 | 0.4709822  | 3.69E-27 | 0.662587 | 2.37E-60 |

|          |          |          |          |          |            |          |          |          |
|----------|----------|----------|----------|----------|------------|----------|----------|----------|
| 0.00283  | 0.008826 | 0.84914  | 0.045332 | 0.32832  | 0.07647483 | 0.09882  | 0.359153 | 1.15E-15 |
| 0.10323  | 0.380184 | 1.66E-17 | 0.338562 | 5.48E-14 | 0.25787689 | 1.57E-08 | 0.415817 | 5.98E-21 |
| 0.00019  | 0.265063 | 5.99E-09 | 0.226607 | 7.48E-07 | 0.44545892 | 3.81E-24 | 0.684196 | 9.61E-66 |
| 0.37515  | 0.396763 | 4.67E-19 | 0.316359 | 2.58E-12 | 0.14619614 | 0.00154  | 0.355685 | 2.25E-15 |
| 0.56732  | 0.440313 | 1.44E-23 | 0.380666 | 1.50E-17 | 0.31096601 | 6.28E-12 | 0.483669 | 9.38E-29 |
| 1.68E-06 | 0.312834 | 4.62E-12 | 0.284781 | 3.66E-10 | 0.43978628 | 1.65E-23 | 0.615105 | 5.98E-50 |
| 0.00295  | 0.33221  | 1.70E-13 | 0.392035 | 1.32E-18 | 0.11025857 | 0.01714  | 0.203245 | 9.57E-06 |
| 0.20759  | 0.264031 | 6.89E-09 | 0.099046 | 0.03236  | 0.12511083 | 0.00679  | 0.436881 | 3.46E-23 |
| 0.91867  | 0.411748 | 1.55E-20 | 0.44728  | 2.37E-24 | 0.16798784 | 0.00027  | 0.316084 | 2.70E-12 |
| 0.00098  | 0.420615 | 1.91E-21 | 0.28525  | 3.41E-10 | 0.19138059 | 3.14E-05 | 0.351229 | 5.27E-15 |
| 0.00217  | 0.088217 | 0.05678  | 0.195459 | 2.10E-05 | 0.17770647 | 0.00011  | 0.432775 | 9.71E-23 |
| 0.16958  | 0.446504 | 2.90E-24 | 0.405806 | 6.11E-20 | 0.30286183 | 2.31E-11 | 0.460829 | 6.26E-26 |
| 0.47404  | 0.381311 | 1.31E-17 | 0.456682 | 1.94E-25 | 0.35158207 | 4.93E-15 | 0.409219 | 2.79E-20 |
| 1.01E-11 | 0.417195 | 4.31E-21 | 0.454731 | 3.28E-25 | 0.2815999  | 5.83E-10 | 0.459857 | 8.17E-26 |
| 0.02604  | 0.259668 | 1.24E-08 | 0.280438 | 6.90E-10 | 0.45052694 | 1.01E-24 | 0.692409 | 6.43E-68 |
| 0.90795  | 0.132833 | 0.00403  | 0.091772 | 0.04747  | 0.20232791 | 1.05E-05 | 0.471598 | 3.10E-27 |
| 1.75E-05 | 0.049278 | 0.28792  | 0.211858 | 3.86E-06 | 0.18006202 | 9.12E-05 | 0.308033 | 1.01E-11 |
| 2.40E-08 | 0.178068 | 0.00011  | 0.201268 | 1.17E-05 | 0.14570095 | 0.00159  | 0.338181 | 5.87E-14 |
| 0.68832  | 0.409702 | 2.50E-20 | 0.34559  | 1.51E-14 | 0.3967529  | 4.68E-19 | 0.471087 | 3.58E-27 |
| 0.29972  | 0.204256 | 8.62E-06 | 0.253616 | 2.74E-08 | 0.34023242 | 4.05E-14 | 0.503979 | 1.89E-31 |
| 0.44906  | -0.00319 | 0.94511  | 0.047102 | 0.30977  | 0.08311055 | 0.07276  | 0.209988 | 4.72E-06 |
| 1.17E-07 | 0.290506 | 1.56E-10 | 0.294564 | 8.41E-11 | 0.05761891 | 0.21392  | 0.222071 | 1.25E-06 |
| 0.02022  | 0.21542  | 2.63E-06 | 0.397741 | 3.76E-19 | 0.23342369 | 3.37E-07 | 0.32671  | 4.45E-13 |
| 0.34566  | 0.201396 | 1.16E-05 | 0.150075 | 0.00114  | 0.35002448 | 6.61E-15 | 0.578156 | 5.27E-43 |
| 0.00333  | 0.601239 | 3.08E-47 | 0.556128 | 2.88E-39 | 0.29797911 | 4.96E-11 | 0.402385 | 1.33E-19 |
| 0.00017  | 0.185233 | 5.65E-05 | 0.105775 | 0.02225  | 0.12262036 | 0.00798  | 0.387361 | 3.62E-18 |
| 0.70545  | 0.514545 | 6.30E-33 | 0.318519 | 1.80E-12 | 0.32496007 | 6.02E-13 | 0.49412  | 4.05E-30 |
| 0.00555  | 0.366061 | 2.96E-16 | 0.266746 | 4.76E-09 | 0.26607954 | 5.21E-09 | 0.527993 | 6.99E-35 |
| 3.06E-05 | 0.305986 | 1.40E-11 | 0.403514 | 1.03E-19 | 0.4070384  | 4.61E-20 | 0.521872 | 5.56E-34 |
| 0.29143  | 0.186985 | 4.79E-05 | -0.02865 | 0.5369   | -0.2129873 | 3.42E-06 | 0.041998 | 0.36518  |
| 0.01102  | 0.04867  | 0.29392  | 0.324314 | 6.73E-13 | 0.37418553 | 5.73E-17 | 0.40185  | 1.50E-19 |
| 0.20862  | 0.399345 | 2.63E-19 | 0.246766 | 6.59E-08 | 0.24307715 | 1.04E-07 | 0.462433 | 4.03E-26 |
| 0.0019   | 0.245118 | 8.10E-08 | 0.078861 | 0.0887   | 0.15122661 | 0.00104  | 0.344624 | 1.81E-14 |
| 0.58646  | 0.468523 | 7.39E-27 | 0.358893 | 1.21E-15 | 0.28513159 | 3.47E-10 | 0.541459 | 6.26E-37 |
| 0.03944  | -0.10792 | 0.01966  | 0.022264 | 0.6313   | 0.0220097  | 0.6352   | -0.24458 | 8.66E-08 |
| 0.96316  | -0.19813 | 1.61E-05 | -0.38236 | 1.05E-17 | -0.0486472 | 0.29414  | -0.14746 | 0.0014   |
| 0.4809   | 0.23926  | 1.67E-07 | 0.423908 | 8.62E-22 | 0.20492222 | 8.04E-06 | 0.189856 | 3.64E-05 |
| 0.00162  | 0.523682 | 3.02E-34 | 0.398705 | 3.03E-19 | 0.12997008 | 0.00491  | 0.371885 | 9.17E-17 |
| 0.00037  | 0.48488  | 6.55E-29 | 0.320408 | 1.31E-12 | 0.18592775 | 5.29E-05 | 0.468204 | 8.09E-27 |
| 0.0519   | 0.589175 | 5.54E-45 | 0.556845 | 2.19E-39 | 0.43622187 | 4.08E-23 | 0.499736 | 7.14E-31 |
| 0.72002  | 0.362089 | 6.50E-16 | 0.31385  | 3.91E-12 | 0.41576913 | 6.05E-21 | 0.627681 | 1.57E-52 |
| 0.34341  | 0.270978 | 2.65E-09 | 0.130595 | 0.0047   | 0.15971803 | 0.00053  | 0.409461 | 2.64E-20 |
| 0.00019  | 0.35958  | 1.06E-15 | 0.364725 | 3.86E-16 | 0.16847894 | 0.00025  | 0.315085 | 3.19E-12 |
| 0.00011  | -0.399   | 2.84E-19 | -0.25228 | 3.26E-08 | -0.2605537 | 1.10E-08 | -0.39704 | 4.39E-19 |
| 0.00014  | 0.319692 | 1.48E-12 | 0.24263  | 1.10E-07 | 0.10740564 | 0.02026  | 0.328128 | 3.48E-13 |

|          |          |          |          |          |            |          |          |          |
|----------|----------|----------|----------|----------|------------|----------|----------|----------|
| 0.0455   | 0.224665 | 9.35E-07 | 0.173749 | 0.00016  | 0.26158138 | 9.59E-09 | 0.51556  | 4.52E-33 |
| 0.49251  | 0.379079 | 2.09E-17 | 0.327854 | 3.65E-13 | 0.30364595 | 2.04E-11 | 0.471456 | 3.23E-27 |
| 0.38177  | 0.594554 | 5.62E-46 | 0.484441 | 7.46E-29 | 0.41080086 | 1.93E-20 | 0.481222 | 1.93E-28 |
| 0.00591  | 0.031785 | 0.49321  | 0.094493 | 0.04124  | 0.25992784 | 1.20E-08 | 0.378976 | 2.13E-17 |
| 0.36378  | 0.513631 | 8.49E-33 | 0.30304  | 2.24E-11 | 0.04526681 | 0.32901  | 0.228186 | 6.23E-07 |
| 0.09491  | 0.238889 | 1.75E-07 | 0.252346 | 3.23E-08 | 0.27079924 | 2.72E-09 | 0.374081 | 5.86E-17 |
| 0.00014  | 0.501023 | 4.78E-31 | 0.416459 | 5.14E-21 | 0.08789295 | 0.0577   | 0.226507 | 7.57E-07 |
| 0.0249   | 0.07286  | 0.11586  | 0.095176 | 0.03979  | 0.08954646 | 0.05314  | 0.207671 | 6.03E-06 |
| 0.183    | 0.218093 | 1.96E-06 | 0.193399 | 2.58E-05 | 0.01344674 | 0.77195  | 0.19718  | 1.77E-05 |
| 0.24655  | 0.308175 | 9.88E-12 | 0.226996 | 7.15E-07 | -0.005457  | 0.90638  | 0.234761 | 2.87E-07 |
| 0.93256  | 0.067005 | 0.14825  | 0.012526 | 0.78718  | 0.21153763 | 4.00E-06 | 0.455009 | 3.04E-25 |
| 0.04043  | 0.034327 | 0.45928  | 0.164894 | 0.00035  | 0.14395365 | 0.00182  | 0.301655 | 2.79E-11 |
| 0.05386  | 0.414802 | 7.59E-21 | 0.273667 | 1.82E-09 | 0.24594233 | 7.30E-08 | 0.474434 | 1.38E-27 |
| 8.02E-10 | -0.02327 | 0.61591  | 0.16338  | 0.00039  | 0.30882848 | 8.89E-12 | 0.522538 | 4.44E-34 |
| 0.83328  | 0.237696 | 2.02E-07 | 0.109266 | 0.01818  | 0.06901501 | 0.13643  | 0.316462 | 2.54E-12 |
| 0.02719  | 0.359967 | 9.84E-16 | 0.512242 | 1.33E-32 | 0.34513139 | 1.65E-14 | 0.407844 | 3.83E-20 |
| 0.38389  | 0.329508 | 2.74E-13 | 0.187853 | 4.41E-05 | 0.35523171 | 2.46E-15 | 0.658952 | 1.73E-59 |
| 0.28881  | 0.113488 | 0.01413  | 0.078205 | 0.09139  | 0.12776698 | 0.00569  | 0.405216 | 6.99E-20 |
| 0.23118  | 0.274863 | 1.53E-09 | 0.245782 | 7.45E-08 | 0.34969467 | 7.04E-15 | 0.584355 | 4.15E-44 |
| 0.00733  | 0.196433 | 1.91E-05 | 0.328153 | 3.47E-13 | 0.54800568 | 5.86E-38 | 0.663111 | 1.78E-60 |
| 0.59577  | 0.312717 | 4.71E-12 | 0.318474 | 1.81E-12 | 0.47403208 | 1.55E-27 | 0.69818  | 1.72E-69 |
| 0.00116  | -0.00697 | 0.88053  | -0.06821 | 0.14106  | -0.1201904 | 0.00933  | 0.140073 | 0.00241  |
| 0.92462  | 0.183824 | 6.44E-05 | 0.151841 | 0.001    | 0.23841547 | 1.85E-07 | 0.516492 | 3.32E-33 |
| 0.0001   | 0.636853 | 1.73E-54 | 0.395591 | 6.05E-19 | 0.21970043 | 1.64E-06 | 0.394359 | 7.93E-19 |
| 0.11694  | -0.18596 | 5.27E-05 | -0.13177 | 0.00434  | -0.1381462 | 0.00277  | -0.44467 | 4.68E-24 |
| 0.01994  | 0.256619 | 1.85E-08 | 0.261013 | 1.03E-08 | 0.22695042 | 7.19E-07 | 0.408324 | 3.43E-20 |
| 0.95582  | 0.141429 | 0.00219  | 0.186425 | 5.05E-05 | 0.30377005 | 2.00E-11 | 0.57503  | 1.86E-42 |
| 0.08644  | 0.584993 | 3.19E-44 | 0.596097 | 2.90E-46 | 0.26780611 | 4.11E-09 | 0.437286 | 3.12E-23 |
| 0.53902  | 0.240628 | 1.41E-07 | 0.381473 | 1.26E-17 | 0.29102274 | 1.44E-10 | 0.379983 | 1.73E-17 |
| 0.01684  | 0.169643 | 0.00023  | 0.090258 | 0.05127  | -0.1102771 | 0.01713  | 0.060362 | 0.19287  |
| 0.92716  | 0.592341 | 1.45E-45 | 0.613111 | 1.49E-49 | 0.29453213 | 8.45E-11 | 0.412717 | 1.24E-20 |
| 0.00013  | 0.118999 | 0.01006  | 0.180917 | 8.44E-05 | 0.15342831 | 0.00088  | 0.310125 | 7.20E-12 |
| 0.72244  | 0.245018 | 8.20E-08 | 0.200153 | 1.31E-05 | 0.20260782 | 1.02E-05 | 0.303631 | 2.04E-11 |
| 0.00654  | -0.15149 | 0.00102  | -0.11879 | 0.01019  | -0.0399525 | 0.38901  | -0.25615 | 1.97E-08 |
| 0.53169  | 0.293081 | 1.05E-10 | 0.169991 | 0.00022  | 0.33388272 | 1.27E-13 | 0.507399 | 6.36E-32 |
| 0.0677   | 0.375966 | 3.98E-17 | 0.13497  | 0.00347  | 0.21700986 | 2.21E-06 | 0.357537 | 1.58E-15 |
| 0.00012  | 0.195627 | 2.07E-05 | 0.20759  | 6.09E-06 | 0.22086927 | 1.44E-06 | 0.310954 | 6.29E-12 |
| 0.24915  | 0.269467 | 3.27E-09 | 0.296669 | 6.08E-11 | 0.39042508 | 1.87E-18 | 0.613516 | 1.24E-49 |
| 0.64263  | 0.268994 | 3.49E-09 | 0.327788 | 3.69E-13 | 0.41086139 | 1.91E-20 | 0.551603 | 1.56E-38 |
| 0.00882  | 0.557078 | 2.01E-39 | 0.452325 | 6.24E-25 | 0.35238793 | 4.23E-15 | 0.491887 | 7.99E-30 |
| 0.44339  | 0.264374 | 6.58E-09 | 0.223677 | 1.05E-06 | 0.19984728 | 1.35E-05 | 0.312168 | 5.16E-12 |
| 0.04534  | 0.27769  | 1.03E-09 | 0.357232 | 1.67E-15 | 0.42288187 | 1.11E-21 | 0.676677 | 8.16E-64 |
| 0.43813  | 0.254924 | 2.31E-08 | 0.174719 | 0.00015  | 0.29590153 | 6.85E-11 | 0.535791 | 4.68E-36 |
| 0.52545  | 0.349954 | 6.70E-15 | 0.391936 | 1.35E-18 | 0.35343833 | 3.46E-15 | 0.587028 | 1.36E-44 |
| 0.34369  | 0.157616 | 0.00063  | 0.063121 | 0.17327  | 0.16587225 | 0.00032  | 0.405344 | 6.79E-20 |

|          |          |          |          |          |            |          |          |          |
|----------|----------|----------|----------|----------|------------|----------|----------|----------|
| 0.09984  | 0.107183 | 0.02052  | 0.173732 | 0.00016  | 0.35806653 | 1.42E-15 | 0.607158 | 2.23E-48 |
| 0.4343   | 0.224541 | 9.48E-07 | 0.212579 | 3.58E-06 | 0.26821122 | 3.89E-09 | 0.44748  | 2.25E-24 |
| 0.00213  | 0.315349 | 3.05E-12 | 0.273143 | 1.96E-09 | 0.3198144  | 1.45E-12 | 0.448023 | 1.95E-24 |
| 0.01303  | 0.220015 | 1.58E-06 | 0.262795 | 8.14E-09 | 0.47406747 | 1.53E-27 | 0.613116 | 1.49E-49 |
| 0.01076  | 0.540937 | 7.55E-37 | 0.514761 | 5.87E-33 | 0.23006875 | 5.01E-07 | 0.365842 | 3.09E-16 |
| 3.59E-06 | -0.32152 | 1.08E-12 | -0.15577 | 0.00073  | -0.1605405 | 0.0005   | -0.36434 | 4.17E-16 |
| 0.00887  | 0.591601 | 1.99E-45 | 0.413832 | 9.54E-21 | 0.21665523 | 2.29E-06 | 0.417851 | 3.69E-21 |
| 0.31953  | 0.280406 | 6.94E-10 | 0.239463 | 1.63E-07 | 0.12049665 | 0.00915  | 0.258223 | 1.50E-08 |
| 0.06408  | 0.138719 | 0.00266  | 0.205564 | 7.52E-06 | 0.29846193 | 4.61E-11 | 0.490043 | 1.40E-29 |
| 0.93261  | 0.42434  | 7.76E-22 | 0.433985 | 7.17E-23 | 0.43713647 | 3.24E-23 | 0.675741 | 1.41E-63 |
| 0.03581  | 0.029724 | 0.52167  | 0.02167  | 0.64043  | 0.02396669 | 0.60543  | 0.206032 | 7.17E-06 |
| 0.03671  | 0.321128 | 1.16E-12 | 0.104461 | 0.02397  | 0.21464994 | 2.86E-06 | 0.482943 | 1.16E-28 |
| 0.21309  | 0.290112 | 1.65E-10 | 0.210062 | 4.68E-06 | 0.33030542 | 2.38E-13 | 0.625441 | 4.62E-52 |
| 0.03764  | -0.11515 | 0.01278  | -0.12223 | 0.00819  | -0.2052339 | 7.79E-06 | -0.35578 | 2.21E-15 |
| 0.73892  | 0.414101 | 8.95E-21 | 0.257819 | 1.58E-08 | 0.23203714 | 3.97E-07 | 0.491554 | 8.84E-30 |
| 0.02225  | 0.405329 | 6.81E-20 | 0.510845 | 2.10E-32 | 0.36415824 | 4.32E-16 | 0.433684 | 7.74E-23 |
| 0.04122  | 0.215941 | 2.48E-06 | 0.092099 | 0.04668  | 0.23618198 | 2.42E-07 | 0.492485 | 6.66E-30 |
| 0.6856   | 0.397794 | 3.71E-19 | 0.204313 | 8.57E-06 | 0.32414536 | 6.93E-13 | 0.536329 | 3.87E-36 |
| 0.58158  | 0.195788 | 2.04E-05 | 0.0911   | 0.04913  | 0.06687484 | 0.14904  | 0.311873 | 5.41E-12 |
| 6.53E-08 | 0.345788 | 1.46E-14 | 0.443879 | 5.75E-24 | 0.36185312 | 6.80E-16 | 0.496047 | 2.24E-30 |
| 0.0432   | 0.35879  | 1.24E-15 | 0.10954  | 0.01789  | -0.0292315 | 0.5286   | 0.153388 | 0.00088  |
| 2.82E-07 | 0.055738 | 0.22928  | 0.10366  | 0.02508  | 0.23239776 | 3.81E-07 | 0.409293 | 2.74E-20 |
| 0.00099  | 0.153492 | 0.00088  | 0.224375 | 9.66E-07 | 0.156454   | 0.00069  | 0.342069 | 2.90E-14 |
| 0.00087  | 0.433152 | 8.84E-23 | 0.285174 | 3.45E-10 | 0.3045595  | 1.76E-11 | 0.5164   | 3.43E-33 |
| 0.00044  | 0.502853 | 2.69E-31 | 0.270705 | 2.75E-09 | 0.10084389 | 0.02933  | 0.279158 | 8.31E-10 |
| 0.09921  | 0.385376 | 5.53E-18 | 0.407311 | 4.33E-20 | 0.37792152 | 2.65E-17 | 0.599762 | 5.89E-47 |
| 0.55371  | 0.166024 | 0.00031  | 0.388452 | 2.86E-18 | 0.27485274 | 1.54E-09 | 0.393578 | 9.41E-19 |
| 0.15668  | 0.314416 | 3.56E-12 | 0.05448  | 0.23998  | 0.24374735 | 9.61E-08 | 0.565175 | 9.07E-41 |
| 0.47967  | 0.331152 | 2.05E-13 | 0.270773 | 2.73E-09 | 0.29589709 | 6.85E-11 | 0.386327 | 4.52E-18 |
| 0.00046  | 0.308395 | 9.53E-12 | 0.062436 | 0.178    | 0.06612637 | 0.15366  | 0.234094 | 3.11E-07 |
| 0.24773  | 0.350211 | 6.39E-15 | 0.366747 | 2.58E-16 | 0.21596453 | 2.47E-06 | 0.273973 | 1.74E-09 |
| 0.04089  | 0.287525 | 2.44E-10 | 0.062412 | 0.17817  | 0.10102169 | 0.02905  | 0.217346 | 2.13E-06 |
| 0.68774  | 0.41108  | 1.81E-20 | 0.427889 | 3.26E-22 | 0.28342814 | 4.46E-10 | 0.379693 | 1.84E-17 |
| 0.94289  | 0.352734 | 3.96E-15 | 0.254434 | 2.47E-08 | 0.44936768 | 1.37E-24 | 0.600098 | 5.09E-47 |
| 0.23785  | -0.0626  | 0.17688  | 0.143415 | 0.00189  | 0.07101176 | 0.12542  | 0.228813 | 5.80E-07 |
| 0.5897   | 0.227366 | 6.85E-07 | 0.199018 | 1.47E-05 | 0.1118308  | 0.01561  | 0.172072 | 0.00019  |
| 0.00182  | 0.17466  | 0.00015  | 0.250432 | 4.13E-08 | 0.36601775 | 2.99E-16 | 0.471618 | 3.08E-27 |
| 0.36569  | 0.270281 | 2.92E-09 | 0.181997 | 7.64E-05 | 0.08744333 | 0.059    | 0.261633 | 9.52E-09 |
| 0.03834  | 0.30363  | 2.04E-11 | 0.409904 | 2.38E-20 | 0.47445993 | 1.37E-27 | 0.69755  | 2.56E-69 |
| 0.67402  | 0.322567 | 9.07E-13 | 0.353336 | 3.53E-15 | 0.46051663 | 6.82E-26 | 0.673942 | 3.97E-63 |
| 0.5898   | 0.373244 | 6.95E-17 | 0.296044 | 6.70E-11 | 0.39786459 | 3.66E-19 | 0.676901 | 7.16E-64 |
| 0.00224  | 0.169068 | 0.00024  | 0.445634 | 3.64E-24 | 0.12924608 | 0.00515  | 0.170038 | 0.00022  |
| 0.79399  | 0.452087 | 6.65E-25 | 0.524265 | 2.48E-34 | 0.40390499 | 9.42E-20 | 0.540871 | 7.73E-37 |
| 0.70477  | 0.354906 | 2.62E-15 | 0.377691 | 2.78E-17 | 0.32128898 | 1.13E-12 | 0.545403 | 1.51E-37 |
| 0.93652  | 0.714884 | 2.92E-74 | 0.489935 | 1.44E-29 | 0.32231252 | 9.47E-13 | 0.51928  | 1.32E-33 |

|          |          |          |          |          |            |          |          |          |
|----------|----------|----------|----------|----------|------------|----------|----------|----------|
| 0.3641   | 0.312426 | 4.95E-12 | 0.26524  | 5.85E-09 | 0.41048217 | 2.08E-20 | 0.621549 | 2.94E-51 |
| 0.32185  | 0.369518 | 1.48E-16 | 0.232474 | 3.77E-07 | 0.4416157  | 1.03E-23 | 0.634645 | 5.20E-54 |
| 0.90593  | 0.202733 | 1.01E-05 | 0.139165 | 0.00258  | 0.30616381 | 1.37E-11 | 0.330505 | 2.30E-13 |
| 0.95306  | 0.326137 | 4.92E-13 | 0.265468 | 5.67E-09 | 0.22456596 | 9.45E-07 | 0.460307 | 7.23E-26 |
| 0.58167  | 0.086403 | 0.06209  | 0.143673 | 0.00185  | -0.0701032 | 0.13034  | 0.151419 | 0.00103  |
| 0.64222  | 0.29298  | 1.07E-10 | 0.088563 | 0.05581  | -0.0383955 | 0.40777  | 0.208976 | 5.26E-06 |
| 0.44312  | 0.302229 | 2.55E-11 | 0.265961 | 5.30E-09 | 0.48194305 | 1.56E-28 | 0.691242 | 1.32E-67 |
| 0.07721  | 0.209662 | 4.89E-06 | 0.264558 | 6.41E-09 | 0.22989023 | 5.11E-07 | 0.459718 | 8.49E-26 |
| 0.17787  | 0.32799  | 3.57E-13 | 0.129906 | 0.00493  | 0.15893852 | 0.00057  | 0.391127 | 1.61E-18 |
| 0.00226  | 0.3843   | 6.96E-18 | 0.408311 | 3.44E-20 | 0.48421832 | 7.97E-29 | 0.60898  | 9.80E-49 |
| 0.19606  | 0.300015 | 3.61E-11 | 0.188647 | 4.08E-05 | 0.0778915  | 0.09271  | 0.310436 | 6.85E-12 |
| 0.00989  | 0.1825   | 7.29E-05 | 0.12871  | 0.00534  | 0.2582445  | 1.50E-08 | 0.528745 | 5.40E-35 |
| 0.12     | 0.33138  | 1.97E-13 | -0.01721 | 0.71075  | -0.0181263 | 0.69602  | 0.164978 | 0.00034  |
| 0.97796  | 0.568509 | 2.47E-41 | 0.615527 | 4.92E-50 | 0.30478518 | 1.70E-11 | 0.442496 | 8.23E-24 |
| 0.72142  | 0.484775 | 6.76E-29 | 0.297032 | 5.75E-11 | 0.19825464 | 1.59E-05 | 0.360084 | 9.62E-16 |
| 0.00885  | 0.32905  | 2.97E-13 | 0.351848 | 4.69E-15 | 0.29459095 | 8.37E-11 | 0.543706 | 2.79E-37 |
| 0.73762  | 0.36214  | 6.43E-16 | 0.188332 | 4.21E-05 | 0.16207399 | 0.00044  | 0.312245 | 5.09E-12 |
| 0.0209   | 0.164213 | 0.00037  | 0.032286 | 0.48642  | 0.16879156 | 0.00025  | 0.467293 | 1.04E-26 |
| 0.40037  | 0.326175 | 4.89E-13 | 0.140841 | 0.00228  | 0.12772482 | 0.00571  | 0.40401  | 9.20E-20 |
| 0.06351  | 0.255402 | 2.17E-08 | 0.392111 | 1.30E-18 | 0.44526744 | 4.01E-24 | 0.606394 | 3.13E-48 |
| 0.03678  | 0.259364 | 1.29E-08 | 0.103915 | 0.02472  | 0.24516308 | 8.05E-08 | 0.467872 | 8.88E-27 |
| 0.64164  | 0.487628 | 2.89E-29 | 0.425293 | 6.15E-22 | 0.49006078 | 1.39E-29 | 0.534375 | 7.68E-36 |
| 0.33459  | 0.14367  | 0.00185  | 0.074809 | 0.10641  | -0.030805  | 0.50664  | 0.21547  | 2.61E-06 |
| 0.03343  | 0.165614 | 0.00033  | 0.35203  | 4.53E-15 | 0.15509162 | 0.00077  | 0.076061 | 0.10066  |
| 0.29923  | 0.483376 | 1.02E-28 | 0.294245 | 8.83E-11 | 0.25607912 | 1.99E-08 | 0.514988 | 5.45E-33 |
| 0.23927  | 0.560787 | 4.92E-40 | 0.325325 | 5.66E-13 | 0.23442621 | 2.99E-07 | 0.504117 | 1.80E-31 |
| 0.13158  | 0.00456  | 0.92171  | 0.225843 | 8.17E-07 | 0.35253982 | 4.11E-15 | 0.554605 | 5.09E-39 |
| 0.00023  | 0.403301 | 1.08E-19 | 0.290258 | 1.62E-10 | -0.010314  | 0.82408  | 0.198063 | 1.62E-05 |
| 0.96837  | 0.43304  | 9.09E-23 | 0.344793 | 1.75E-14 | 0.37684725 | 3.32E-17 | 0.584465 | 3.97E-44 |
| 0.23334  | 0.254361 | 2.49E-08 | -0.09547 | 0.03917  | -0.2745548 | 1.60E-09 | 0.018742 | 0.68624  |
| 0.6115   | 0.125494 | 0.00662  | 0.080619 | 0.08179  | 0.11462809 | 0.01319  | 0.250935 | 3.88E-08 |
| 0.37762  | 0.090099 | 0.05168  | 0.325263 | 5.72E-13 | 0.31549136 | 2.98E-12 | 0.405802 | 6.12E-20 |
| 9.14E-06 | 0.008115 | 0.86117  | 0.129795 | 0.00497  | 0.14953982 | 0.00119  | -0.07248 | 0.1178   |
| 0.28132  | 0.106114 | 0.02182  | 0.139045 | 0.0026   | 0.26427506 | 6.67E-09 | 0.474339 | 1.42E-27 |
| 0.5847   | -0.31913 | 1.62E-12 | -0.18035 | 8.89E-05 | 0.0244042  | 0.59886  | -0.19413 | 2.40E-05 |
| 0.57212  | 0.306811 | 1.23E-11 | 0.154204 | 0.00083  | 0.21226902 | 3.70E-06 | 0.482311 | 1.40E-28 |
| 0.10128  | 0.461698 | 4.93E-26 | 0.475158 | 1.12E-27 | 0.51678879 | 3.01E-33 | 0.533958 | 8.88E-36 |
| 0.29816  | 0.393258 | 1.01E-18 | 0.28637  | 2.89E-10 | 0.10566911 | 0.02238  | 0.335256 | 9.92E-14 |
| 0.25488  | 0.058034 | 0.21063  | 0.073044 | 0.11494  | -0.0744656 | 0.10802  | 0.15551  | 0.00075  |
| 0.53871  | 0.498732 | 9.76E-31 | 0.360158 | 9.48E-16 | 0.25631222 | 1.93E-08 | 0.400996 | 1.82E-19 |
| 0.71723  | -0.23418 | 3.08E-07 | -0.25898 | 1.36E-08 | -0.2039821 | 8.87E-06 | -0.42171 | 1.47E-21 |
| 0.00083  | 0.560314 | 5.89E-40 | 0.579802 | 2.70E-43 | 0.2805707  | 6.77E-10 | 0.375156 | 4.70E-17 |
| 0.00014  | 0.138407 | 0.00272  | 0.315551 | 2.95E-12 | 0.27714623 | 1.11E-09 | 0.370673 | 1.17E-16 |
| 0.12152  | 0.54957  | 3.30E-38 | 0.220172 | 1.55E-06 | 0.20200983 | 1.09E-05 | 0.408805 | 3.07E-20 |
| 0.16453  | 0.49418  | 3.97E-30 | 0.322718 | 8.84E-13 | 0.09407874 | 0.04214  | 0.283316 | 4.54E-10 |

|         |          |          |          |          |            |          |          |          |
|---------|----------|----------|----------|----------|------------|----------|----------|----------|
| 0.06189 | 0.42823  | 3.00E-22 | 0.357921 | 1.46E-15 | 0.22351765 | 1.07E-06 | 0.404763 | 7.75E-20 |
| 0.15286 | 0.182841 | 7.06E-05 | 0.428573 | 2.75E-22 | 0.45363315 | 4.40E-25 | 0.466587 | 1.27E-26 |
| 0.01205 | 0.050862 | 0.27268  | 0.065496 | 0.15762  | 0.23022703 | 4.91E-07 | 0.37334  | 6.82E-17 |
| 0.04234 | 0.430135 | 1.87E-22 | 0.348384 | 9.00E-15 | 0.29655958 | 6.18E-11 | 0.438191 | 2.48E-23 |
| 0.54896 | 0.513855 | 7.89E-33 | 0.447988 | 1.97E-24 | 0.32816625 | 3.46E-13 | 0.537436 | 2.62E-36 |
| 0.30427 | 0.191745 | 3.03E-05 | 0.147426 | 0.0014   | 0.2268708  | 7.26E-07 | 0.346417 | 1.30E-14 |
| 0.35864 | 0.325249 | 5.73E-13 | 0.333491 | 1.36E-13 | 0.34608077 | 1.38E-14 | 0.532815 | 1.32E-35 |
| 0.01715 | 0.30079  | 3.20E-11 | 0.345562 | 1.52E-14 | 0.27136897 | 2.51E-09 | 0.489964 | 1.43E-29 |
| 0.5643  | 0.249621 | 4.59E-08 | 0.242949 | 1.06E-07 | 0.3488342  | 8.27E-15 | 0.501725 | 3.83E-31 |
| 0.84209 | 0.09222  | 0.04639  | 0.096867 | 0.03638  | 0.16007736 | 0.00052  | 0.444417 | 5.00E-24 |
| 0.91065 | 0.266589 | 4.86E-09 | 0.266307 | 5.05E-09 | 0.20968844 | 4.87E-06 | 0.341941 | 2.96E-14 |
| 0.29213 | 0.518872 | 1.51E-33 | 0.372545 | 8.02E-17 | 0.26216889 | 8.86E-09 | 0.402675 | 1.24E-19 |
| 0.21771 | 0.326738 | 4.43E-13 | 0.08329  | 0.07214  | 0.1061081  | 0.02183  | 0.329395 | 2.79E-13 |
| 0.84923 | 0.261138 | 1.02E-08 | 0.221632 | 1.32E-06 | 0.24150482 | 1.27E-07 | 0.40915  | 2.84E-20 |
| 0.07632 | 0.273965 | 1.74E-09 | 0.173862 | 0.00016  | 0.17055948 | 0.00021  | 0.318101 | 1.93E-12 |
| 0.70516 | -0.00559 | 0.90414  | 0.133769 | 0.00378  | 0.0770456  | 0.09632  | 0.272016 | 2.29E-09 |
| 0.25979 | 0.506718 | 7.90E-32 | 0.540046 | 1.04E-36 | 0.31831035 | 1.86E-12 | 0.400618 | 1.98E-19 |
| 0.97544 | 0.245001 | 8.22E-08 | 0.018202 | 0.69482  | 0.22310378 | 1.12E-06 | 0.571985 | 6.27E-42 |
| 0.46284 | 0.38564  | 5.23E-18 | 0.349239 | 7.67E-15 | 0.13745622 | 0.00291  | 0.339133 | 4.94E-14 |
| 0.10411 | 0.193429 | 2.57E-05 | 0.262869 | 8.06E-09 | 0.268172   | 3.91E-09 | 0.518945 | 1.48E-33 |
| 0.00404 | -0.01106 | 0.81151  | 0.151597 | 0.00102  | 0.21450064 | 2.90E-06 | 0.275977 | 1.31E-09 |
| 0.07708 | 0.337028 | 7.22E-14 | 0.460247 | 7.35E-26 | 0.44151587 | 1.06E-23 | 0.509781 | 2.96E-32 |
| 0.15077 | 0.252159 | 3.31E-08 | 0.412313 | 1.36E-20 | 0.36759599 | 2.18E-16 | 0.569625 | 1.59E-41 |
| 0.79755 | 0.081314 | 0.07919  | 0.085206 | 0.06581  | 0.15370245 | 0.00086  | 0.439153 | 1.94E-23 |
| 0.96404 | 0.348673 | 8.53E-15 | 0.351826 | 4.71E-15 | 0.16303304 | 0.0004   | 0.385715 | 5.15E-18 |
| 0.00196 | 0.337139 | 7.08E-14 | 0.294892 | 7.99E-11 | 0.20909827 | 5.19E-06 | 0.480414 | 2.44E-28 |
| 0.6181  | 0.177106 | 0.00012  | 0.1749   | 0.00015  | 0.11371579 | 0.01394  | 0.260356 | 1.13E-08 |
| 0.51201 | 0.143368 | 0.0019   | 0.154642 | 0.0008   | 0.29526179 | 7.55E-11 | 0.580768 | 1.82E-43 |
| 0.13217 | 0.256642 | 1.85E-08 | 0.000724 | 0.98755  | -0.1334936 | 0.00385  | 0.097009 | 0.03611  |
| 0.37215 | 0.203091 | 9.72E-06 | 0.354139 | 3.03E-15 | 0.37978426 | 1.80E-17 | 0.465298 | 1.82E-26 |
| 0.01286 | 0.207237 | 6.32E-06 | 0.058176 | 0.20952  | 0.1171632  | 0.01128  | 0.417973 | 3.59E-21 |
| 0.00278 | 0.419251 | 2.64E-21 | 0.473934 | 1.59E-27 | 0.24334223 | 1.01E-07 | 0.351918 | 4.62E-15 |
| 0.6146  | 0.353481 | 3.44E-15 | 0.215959 | 2.48E-06 | 0.17827794 | 0.00011  | 0.446358 | 3.02E-24 |
| 0.01378 | -0.22561 | 8.39E-07 | -0.19381 | 2.47E-05 | 0.13322724 | 0.00392  | -0.14122 | 0.00222  |
| 0.99545 | 0.368685 | 1.75E-16 | 0.273772 | 1.79E-09 | 0.26059815 | 1.09E-08 | 0.492792 | 6.07E-30 |
| 0.77061 | 0.248474 | 5.31E-08 | 0.293331 | 1.02E-10 | 0.59342249 | 9.13E-46 | 0.808791 | #####    |
| 0.73923 | 0.31264  | 4.77E-12 | 0.153629 | 0.00087  | 0.18898129 | 3.96E-05 | 0.340625 | 3.77E-14 |
| 0.03668 | 0.026498 | 0.56787  | 0.255665 | 2.10E-08 | 0.20838958 | 5.59E-06 | 0.298284 | 4.73E-11 |
| 0.42215 | -0.02942 | 0.52588  | 0.024694 | 0.59453  | 0.04483588 | 0.33364  | 0.181633 | 7.90E-05 |
| 0.00061 | 0.372781 | 7.64E-17 | 0.394575 | 7.56E-19 | -0.0495369 | 0.28539  | 0.061454 | 0.18493  |
| 0.33681 | 0.115539 | 0.01247  | 0.053955 | 0.24455  | 0.09019691 | 0.05142  | 0.346431 | 1.30E-14 |
| 0.70377 | 0.474683 | 1.28E-27 | 0.344567 | 1.83E-14 | 0.37457382 | 5.30E-17 | 0.598305 | 1.11E-46 |
| 0.70995 | 0.13153  | 0.00441  | 0.197107 | 1.78E-05 | 0.13714695 | 0.00298  | 0.241693 | 1.24E-07 |
| 0.19727 | 0.291884 | 1.26E-10 | 0.378499 | 2.35E-17 | 0.19665211 | 1.87E-05 | 0.307773 | 1.05E-11 |
| 0.04593 | 0.103477 | 0.02534  | 0.186667 | 4.93E-05 | 0.10742793 | 0.02023  | 0.290896 | 1.47E-10 |

|          |          |          |          |          |            |          |          |          |
|----------|----------|----------|----------|----------|------------|----------|----------|----------|
| 0.17844  | 0.241753 | 1.23E-07 | 0.118939 | 0.0101   | 0.08094099 | 0.08058  | 0.280114 | 7.24E-10 |
| 0.54625  | 0.471387 | 3.29E-27 | 0.211744 | 3.91E-06 | 0.04114608 | 0.37499  | 0.184729 | 5.92E-05 |
| 0.77796  | 0.272442 | 2.16E-09 | 0.403671 | 9.93E-20 | 0.46156555 | 5.12E-26 | 0.562427 | 2.62E-40 |
| 0.49003  | 0.24839  | 5.36E-08 | 0.06381  | 0.16862  | 0.23535514 | 2.68E-07 | 0.583521 | 5.86E-44 |
| 0.04442  | 0.225485 | 8.51E-07 | 0.169797 | 0.00023  | 0.36222504 | 6.33E-16 | 0.454168 | 3.81E-25 |
| 0.46167  | 0.428119 | 3.08E-22 | 0.449449 | 1.34E-24 | 0.31156775 | 5.69E-12 | 0.522515 | 4.48E-34 |
| 0.83041  | 0.330825 | 2.17E-13 | 0.305212 | 1.59E-11 | 0.47811926 | 4.77E-28 | 0.745444 | 6.06E-84 |
| 0.0021   | 0.34642  | 1.30E-14 | 0.24995  | 4.40E-08 | 0.09147628 | 0.04819  | 0.312595 | 4.81E-12 |
| 0.38116  | 0.532758 | 1.35E-35 | 0.40954  | 2.59E-20 | 0.45951762 | 8.97E-26 | 0.641154 | 1.99E-55 |
| 0.9824   | 0.433318 | 8.48E-23 | 0.427783 | 3.35E-22 | 0.42781901 | 3.32E-22 | 0.657447 | 3.92E-59 |
| 0.92193  | 0.169471 | 0.00023  | 0.128857 | 0.00529  | 0.22941207 | 5.41E-07 | 0.370829 | 1.14E-16 |
| 5.87E-06 | 0.146366 | 0.00152  | 0.045306 | 0.3286   | 0.00132918 | 0.97715  | 0.291837 | 1.27E-10 |
| 8.06E-11 | -0.2937  | 9.60E-11 | -0.32668 | 4.48E-13 | -0.1193188 | 0.00986  | -0.26849 | 3.74E-09 |
| 0.28463  | 0.237856 | 1.98E-07 | 0.148073 | 0.00133  | 0.20989061 | 4.77E-06 | 0.449444 | 1.34E-24 |
| 0.72265  | 0.173891 | 0.00016  | -0.02527 | 0.5859   | 0.04021666 | 0.38588  | 0.229733 | 5.21E-07 |
| 0.02587  | 0.210649 | 4.40E-06 | 0.042976 | 0.35411  | 0.0115352  | 0.80366  | 0.222582 | 1.18E-06 |
| 2.58E-05 | 0.391589 | 1.45E-18 | 0.155659 | 0.00074  | 0.22987187 | 5.12E-07 | 0.416992 | 4.53E-21 |
| 0.39848  | 0.184932 | 5.81E-05 | 0.25579  | 2.07E-08 | 0.05080171 | 0.27325  | 0.180069 | 9.12E-05 |
| 0.66485  | 0.263542 | 7.36E-09 | 0.166177 | 0.00031  | 0.16236377 | 0.00043  | 0.353796 | 3.24E-15 |
| 0.27119  | 0.116836 | 0.01151  | 0.139593 | 0.0025   | 0.27301029 | 1.99E-09 | 0.482281 | 1.41E-28 |
| 0.24016  | 0.341513 | 3.20E-14 | 0.226845 | 7.28E-07 | 0.22280475 | 1.15E-06 | 0.3471   | 1.14E-14 |
| 0.90307  | 0.641823 | 1.41E-55 | 0.47015  | 4.67E-27 | 0.17902958 | 0.0001   | 0.307408 | 1.12E-11 |
| 0.27972  | 0.333147 | 1.44E-13 | 0.285816 | 3.14E-10 | 0.40805724 | 3.65E-20 | 0.667824 | 1.29E-61 |
| 0.91503  | 0.254796 | 2.35E-08 | 0.546049 | 1.20E-37 | 0.40403541 | 9.14E-20 | 0.417127 | 4.38E-21 |
| 0.09648  | 0.535958 | 4.41E-36 | 0.449238 | 1.42E-24 | 0.18185359 | 7.74E-05 | 0.386284 | 4.56E-18 |
| 0.30802  | -0.10702 | 0.02071  | 0.162794 | 0.00041  | 0.18103149 | 8.35E-05 | 0.280702 | 6.64E-10 |
| 0.41364  | 0.279138 | 8.33E-10 | 0.249124 | 4.89E-08 | 0.17047069 | 0.00021  | 0.282101 | 5.42E-10 |
| 0.00318  | 0.151913 | 0.00099  | 0.257265 | 1.70E-08 | 0.22541946 | 8.58E-07 | 0.343984 | 2.04E-14 |
| 0.00403  | 0.412765 | 1.22E-20 | 0.466359 | 1.36E-26 | 0.12240574 | 0.00809  | 0.235591 | 2.60E-07 |
| 0.16264  | 0.188465 | 4.16E-05 | 0.00661  | 0.88672  | 0.01834561 | 0.69253  | 0.159211 | 0.00055  |
| 0.68034  | 0.373861 | 6.13E-17 | 0.385438 | 5.46E-18 | 0.23475214 | 2.88E-07 | 0.367125 | 2.39E-16 |
| 0.95537  | 0.401067 | 1.79E-19 | 0.295057 | 7.79E-11 | 0.14578652 | 0.00158  | 0.304767 | 1.71E-11 |
| 0.5401   | 0.468336 | 7.79E-27 | 0.329868 | 2.57E-13 | 0.43934644 | 1.85E-23 | 0.530529 | 2.92E-35 |
| 0.48897  | 0.089277 | 0.05386  | 0.287632 | 2.40E-10 | 0.22778939 | 6.53E-07 | 0.320473 | 1.29E-12 |
| 0.03258  | 0.189666 | 3.70E-05 | 0.136708 | 0.00307  | 0.22048474 | 1.50E-06 | 0.473039 | 2.06E-27 |
| 0.13325  | 0.377579 | 2.85E-17 | 0.268902 | 3.54E-09 | 0.30284512 | 2.32E-11 | 0.475625 | 9.80E-28 |
| 0.01723  | 0.324977 | 6.01E-13 | 0.205827 | 7.32E-06 | 0.34268209 | 2.59E-14 | 0.569881 | 1.44E-41 |
| 3.98E-06 | 0.314906 | 3.29E-12 | 0.379974 | 1.73E-17 | 0.41581177 | 5.98E-21 | 0.497411 | 1.47E-30 |
| 0.66873  | 0.279134 | 8.34E-10 | 0.415303 | 6.75E-21 | 0.44823339 | 1.84E-24 | 0.546568 | 9.90E-38 |
| 0.42284  | 0.130152 | 0.00485  | 0.280569 | 6.77E-10 | 0.25988953 | 1.20E-08 | 0.411763 | 1.55E-20 |
| 0.19397  | 0.306463 | 1.30E-11 | 0.043321 | 0.35025  | -0.0392429 | 0.3975   | 0.231402 | 4.28E-07 |
| 0.01338  | 0.257018 | 1.76E-08 | 0.410689 | 1.99E-20 | 0.44693568 | 2.59E-24 | 0.488803 | 2.03E-29 |
| 0.0598   | 0.310625 | 6.64E-12 | 0.166152 | 0.00031  | 0.07460617 | 0.10736  | 0.292715 | 1.11E-10 |
| 0.28473  | 0.28254  | 5.08E-10 | 0.192239 | 2.89E-05 | 0.17059287 | 0.00021  | 0.421193 | 1.66E-21 |
| 0.15209  | 0.21713  | 2.18E-06 | 0.275612 | 1.38E-09 | 0.16444068 | 0.00036  | 0.437659 | 2.84E-23 |



|          |          |          |          |          |            |          |          |          |
|----------|----------|----------|----------|----------|------------|----------|----------|----------|
| 0.03184  | 0.4443   | 5.16E-24 | 0.324319 | 6.72E-13 | 0.13390499 | 0.00374  | 0.36157  | 7.19E-16 |
| 0.60024  | 0.425064 | 6.51E-22 | 0.32684  | 4.36E-13 | 0.16105814 | 0.00048  | 0.306763 | 1.24E-11 |
| 0.64123  | 0.384448 | 6.74E-18 | 0.477183 | 6.25E-28 | 0.53478226 | 6.66E-36 | 0.690619 | 1.94E-67 |
| 0.00062  | 0.20696  | 6.50E-06 | 0.170511 | 0.00021  | 0.29581971 | 6.93E-11 | 0.416393 | 5.22E-21 |
| 0.53385  | 0.520505 | 8.78E-34 | 0.352858 | 3.87E-15 | 0.30906627 | 8.55E-12 | 0.505116 | 1.32E-31 |
| 0.13436  | 0.507702 | 5.77E-32 | 0.289646 | 1.77E-10 | 0.11190045 | 0.01555  | 0.286651 | 2.77E-10 |
| 0.48444  | 0.102716 | 0.02644  | 0.131375 | 0.00446  | 0.24495431 | 8.27E-08 | 0.504107 | 1.81E-31 |
| 0.3532   | 0.351465 | 5.04E-15 | 0.463166 | 3.29E-26 | 0.24507847 | 8.14E-08 | 0.284082 | 4.06E-10 |
| 0.492    | 0.456835 | 1.86E-25 | 0.387245 | 3.71E-18 | 0.46385654 | 2.72E-26 | 0.667097 | 1.94E-61 |
| 0.57141  | 0.406525 | 5.18E-20 | 0.372554 | 8.00E-17 | 0.42430241 | 7.83E-22 | 0.490507 | 1.21E-29 |
| 0.26475  | 0.382096 | 1.11E-17 | 0.301052 | 3.07E-11 | 0.33414362 | 1.21E-13 | 0.560604 | 5.27E-40 |
| 0.33751  | 0.49554  | 2.62E-30 | 0.386406 | 4.44E-18 | 0.38721597 | 3.74E-18 | 0.564788 | 1.05E-40 |
| 0.62725  | 0.039253 | 0.39738  | 0.40905  | 2.90E-20 | 0.23781517 | 1.99E-07 | 0.341327 | 3.32E-14 |
| 0.62745  | 0.315466 | 2.99E-12 | 0.453691 | 4.33E-25 | 0.39521182 | 6.57E-19 | 0.508292 | 4.78E-32 |
| 0.25463  | 0.33077  | 2.20E-13 | 0.285188 | 3.45E-10 | 0.36513315 | 3.56E-16 | 0.574406 | 2.39E-42 |
| 0.40199  | 0.091967 | 0.047    | 0.006857 | 0.88251  | 0.16676821 | 0.0003   | 0.38186  | 1.17E-17 |
| 0.00704  | 0.611173 | 3.62E-49 | 0.549199 | 3.78E-38 | 0.41545457 | 6.51E-21 | 0.59669  | 2.24E-46 |
| 0.20712  | 0.582304 | 9.68E-44 | 0.400606 | 1.98E-19 | 0.29617238 | 6.57E-11 | 0.480464 | 2.41E-28 |
| 0.15151  | 0.230852 | 4.57E-07 | 0.19673  | 1.85E-05 | 0.3085925  | 9.23E-12 | 0.559427 | 8.25E-40 |
| 0.10309  | 0.446239 | 3.11E-24 | 0.246348 | 6.94E-08 | 0.32627047 | 4.81E-13 | 0.520045 | 1.02E-33 |
| 0.90879  | 0.235303 | 2.69E-07 | 0.241603 | 1.25E-07 | 0.44265654 | 7.89E-24 | 0.702235 | 1.28E-70 |
| 0.03219  | 0.374011 | 5.94E-17 | 0.238839 | 1.76E-07 | 0.24879443 | 5.09E-08 | 0.44056  | 1.35E-23 |
| 0.00162  | 0.268711 | 3.63E-09 | 0.291052 | 1.43E-10 | 0.41514082 | 7.01E-21 | 0.497384 | 1.48E-30 |
| 0.46775  | 0.469388 | 5.80E-27 | 0.26213  | 8.91E-09 | 0.176806   | 0.00012  | 0.400184 | 2.18E-19 |
| 0.08807  | 0.550872 | 2.04E-38 | 0.61993  | 6.31E-51 | 0.22384134 | 1.03E-06 | 0.341983 | 2.94E-14 |
| 0.17551  | 0.297106 | 5.68E-11 | 0.495122 | 2.98E-30 | 0.27319819 | 1.94E-09 | 0.274087 | 1.71E-09 |
| 0.47137  | 0.443673 | 6.07E-24 | 0.354073 | 3.07E-15 | 0.02214111 | 0.63318  | 0.12077  | 0.00899  |
| 0.19054  | 0.348149 | 9.40E-15 | 0.422379 | 1.25E-21 | 0.3172073  | 2.24E-12 | 0.414832 | 7.54E-21 |
| 0.96332  | 0.17634  | 0.00013  | 0.152801 | 0.00092  | 0.30689306 | 1.21E-11 | 0.593646 | 8.30E-46 |
| 0.10322  | 0.316636 | 2.46E-12 | 0.300365 | 3.42E-11 | 0.41601271 | 5.71E-21 | 0.523635 | 3.07E-34 |
| 2.01E-06 | 0.336161 | 8.44E-14 | 0.134509 | 0.00359  | 0.22401629 | 1.01E-06 | 0.386686 | 4.19E-18 |
| 0.06746  | 0.431842 | 1.23E-22 | 0.500248 | 6.09E-31 | 0.16685701 | 0.00029  | 0.215856 | 2.50E-06 |
| 0.00993  | 0.21503  | 2.74E-06 | 0.153371 | 0.00088  | 0.36049004 | 8.89E-16 | 0.620651 | 4.50E-51 |
| 0.56944  | 0.271282 | 2.54E-09 | 0.373945 | 6.02E-17 | 0.48368169 | 9.34E-29 | 0.492559 | 6.51E-30 |
| 0.60949  | 0.501678 | 3.89E-31 | 0.468215 | 8.06E-27 | 0.35824363 | 1.38E-15 | 0.518942 | 1.48E-33 |
| 0.71498  | 0.307819 | 1.05E-11 | 0.151103 | 0.00105  | 0.24843193 | 5.33E-08 | 0.468517 | 7.41E-27 |
| 0.3394   | 0.437083 | 3.28E-23 | 0.370015 | 1.34E-16 | 0.16690257 | 0.00029  | 0.419334 | 2.59E-21 |
| 0.44225  | 0.226149 | 7.89E-07 | 0.257773 | 1.59E-08 | 0.25363564 | 2.74E-08 | 0.489993 | 1.42E-29 |
| 0.19116  | 0.22593  | 8.09E-07 | 0.364183 | 4.30E-16 | 0.4991363  | 8.61E-31 | 0.704078 | 3.88E-71 |
| 0.37751  | -0.2441  | 9.20E-08 | -0.23142 | 4.27E-07 | -0.2187971 | 1.81E-06 | -0.42226 | 1.28E-21 |
| 0.73097  | 0.444394 | 5.03E-24 | 0.351693 | 4.83E-15 | 0.33830321 | 5.74E-14 | 0.584729 | 3.56E-44 |
| 0.01362  | 0.569374 | 1.76E-41 | 0.424705 | 7.10E-22 | 0.30421635 | 1.86E-11 | 0.543253 | 3.29E-37 |
| 0.00529  | 0.473701 | 1.70E-27 | 0.248156 | 5.52E-08 | 0.17341658 | 0.00017  | 0.387676 | 3.39E-18 |
| 0.06529  | 0.337458 | 6.68E-14 | 0.458679 | 1.13E-25 | 0.11441044 | 0.01336  | 0.210156 | 4.64E-06 |
| 0.85426  | -0.24653 | 6.78E-08 | -0.21574 | 2.54E-06 | -0.1350873 | 0.00345  | -0.25073 | 3.98E-08 |

|          |          |          |          |          |            |          |          |          |
|----------|----------|----------|----------|----------|------------|----------|----------|----------|
| 0.42808  | 0.420673 | 1.88E-21 | 0.621989 | 2.39E-51 | 0.47580937 | 9.29E-28 | 0.48562  | 5.26E-29 |
| 0.27708  | 0.268722 | 3.63E-09 | 0.276164 | 1.28E-09 | 0.5302263  | 3.24E-35 | 0.754038 | 6.40E-87 |
| 0.96638  | 0.334929 | 1.05E-13 | 0.230153 | 4.96E-07 | 0.39370084 | 9.16E-19 | 0.621431 | 3.11E-51 |
| 0.38792  | 0.206009 | 7.18E-06 | 0.18692  | 4.82E-05 | 0.16075628 | 0.00049  | 0.288333 | 2.16E-10 |
| 0.80644  | 0.088725 | 0.05537  | 0.073032 | 0.115    | 0.08557944 | 0.06463  | 0.284503 | 3.81E-10 |
| 0.61907  | 0.189783 | 3.66E-05 | 0.116773 | 0.01156  | -0.0844984 | 0.06809  | 0.115803 | 0.01227  |
| 0.22909  | 0.634333 | 6.07E-54 | 0.490306 | 1.29E-29 | 0.35184806 | 4.69E-15 | 0.466664 | 1.25E-26 |
| 0.08192  | -0.28524 | 3.42E-10 | -0.18117 | 8.24E-05 | -0.1872277 | 4.68E-05 | -0.42813 | 3.07E-22 |
| 0.96062  | -0.09988 | 0.03093  | 0.086688 | 0.06123  | 0.17680787 | 0.00012  | -0.18403 | 6.32E-05 |
| 0.04158  | 0.581724 | 1.23E-43 | 0.577852 | 5.96E-43 | 0.49074754 | 1.13E-29 | 0.640145 | 3.31E-55 |
| 0.00115  | 0.156281 | 0.0007   | 0.218916 | 1.79E-06 | 0.23605603 | 2.46E-07 | 0.389476 | 2.30E-18 |
| 0.03267  | 0.570091 | 1.33E-41 | 0.420347 | 2.03E-21 | 0.27925348 | 8.19E-10 | 0.496942 | 1.70E-30 |
| 0.00052  | 0.293711 | 9.58E-11 | 0.262744 | 8.20E-09 | 0.35145664 | 5.05E-15 | 0.511499 | 1.70E-32 |
| 0.50026  | 0.497061 | 1.64E-30 | 0.491878 | 8.01E-30 | 0.14485754 | 0.0017   | 0.211424 | 4.05E-06 |
| 0.01408  | 0.245325 | 7.89E-08 | 0.178653 | 0.0001   | 0.32445824 | 6.57E-13 | 0.540292 | 9.50E-37 |
| 8.17E-05 | 0.413818 | 9.57E-21 | 0.297783 | 5.12E-11 | 0.28184263 | 5.63E-10 | 0.340708 | 3.71E-14 |
| 0.00073  | 0.338577 | 5.46E-14 | 0.208865 | 5.32E-06 | 0.09813563 | 0.03399  | 0.324248 | 6.81E-13 |
| 0.52683  | -0.17845 | 0.00011  | 0.089542 | 0.05315  | -0.0003938 | 0.99323  | -0.33525 | 9.93E-14 |
| 1.69E-07 | 0.296712 | 6.04E-11 | 0.391804 | 1.39E-18 | 0.33225961 | 1.69E-13 | 0.34738  | 1.09E-14 |
| 0.41651  | 0.593689 | 8.15E-46 | 0.402623 | 1.26E-19 | 0.33381387 | 1.28E-13 | 0.531333 | 2.21E-35 |
| 0.00216  | 0.523823 | 2.88E-34 | 0.515974 | 3.94E-33 | 0.16419995 | 0.00037  | 0.314739 | 3.38E-12 |
| 0.73109  | 0.572612 | 4.89E-42 | 0.554917 | 4.53E-39 | 0.35045776 | 6.10E-15 | 0.517223 | 2.61E-33 |
| 0.63455  | 0.573056 | 4.09E-42 | 0.586952 | 1.41E-44 | 0.31529811 | 3.08E-12 | 0.437172 | 3.21E-23 |
| 0.19703  | 0.454867 | 3.16E-25 | 0.262365 | 8.63E-09 | 0.27855528 | 9.06E-10 | 0.574512 | 2.29E-42 |
| 0.0134   | 0.112501 | 0.015    | -0.04133 | 0.3728   | -0.0909592 | 0.04948  | 0.212982 | 3.42E-06 |
| 0.29614  | 0.222664 | 1.17E-06 | 0.394543 | 7.62E-19 | 0.42623538 | 4.89E-22 | 0.632841 | 1.27E-53 |
| 0.58562  | 0.131416 | 0.00445  | 0.100166 | 0.03045  | 0.21775743 | 2.03E-06 | 0.518745 | 1.58E-33 |
| 0.43846  | 0.419533 | 2.47E-21 | 0.473567 | 1.77E-27 | 0.47495838 | 1.19E-27 | 0.685533 | 4.30E-66 |
| 0.1306   | -0.38436 | 6.88E-18 | -0.35511 | 2.52E-15 | -0.1951139 | 2.18E-05 | -0.35269 | 4.00E-15 |
| 0.88292  | 0.494608 | 3.48E-30 | 0.372408 | 8.25E-17 | 0.20050356 | 1.27E-05 | 0.350472 | 6.08E-15 |
| 0.01573  | 0.522645 | 4.29E-34 | 0.472362 | 2.50E-27 | 0.1963862  | 1.92E-05 | 0.388136 | 3.07E-18 |
| 0.6413   | 0.130938 | 0.00459  | 0.106559 | 0.02127  | 0.21870754 | 1.83E-06 | 0.311478 | 5.78E-12 |
| 0.60967  | 0.461698 | 4.93E-26 | 0.324706 | 6.29E-13 | 0.33998018 | 4.24E-14 | 0.500935 | 4.91E-31 |
| 0.02501  | 0.572597 | 4.91E-42 | 0.425696 | 5.58E-22 | 0.28303256 | 4.73E-10 | 0.505792 | 1.06E-31 |
| 0.51716  | 0.327717 | 3.74E-13 | 0.183635 | 6.56E-05 | 0.39980255 | 2.37E-19 | 0.67226  | 1.04E-62 |
| 3.65E-07 | 0.242593 | 1.11E-07 | 0.021408 | 0.64448  | 0.07164705 | 0.12207  | 0.230348 | 4.85E-07 |
| 0.63277  | 0.315713 | 2.87E-12 | 0.359238 | 1.13E-15 | 0.4644838  | 2.29E-26 | 0.723981 | 5.24E-77 |
| 4.42E-13 | -0.23047 | 4.78E-07 | -0.20452 | 8.39E-06 | -0.0415779 | 0.36999  | -0.27549 | 1.40E-09 |
| 0.01358  | 0.298954 | 4.27E-11 | 0.213539 | 3.22E-06 | 0.13702411 | 0.00301  | 0.409303 | 2.74E-20 |
| 0.0349   | -0.01578 | 0.7337   | 0.346876 | 1.19E-14 | 0.232826   | 3.62E-07 | 0.203501 | 9.32E-06 |
| 0.18539  | 0.042324 | 0.36146  | 0.148653 | 0.00127  | 0.50544421 | 1.19E-31 | 0.71746  | 5.00E-75 |
| 0.81269  | 0.353212 | 3.62E-15 | 0.134894 | 0.00349  | 0.17346393 | 0.00017  | 0.249511 | 4.65E-08 |
| 0.32741  | 0.220107 | 1.56E-06 | 0.120988 | 0.00887  | 0.18213074 | 7.54E-05 | 0.352611 | 4.06E-15 |
| 0.45146  | 0.082298 | 0.07561  | 0.409445 | 2.65E-20 | 0.35960636 | 1.06E-15 | 0.30511  | 1.62E-11 |
| 0.49302  | 0.403201 | 1.10E-19 | 0.342839 | 2.51E-14 | 0.44880512 | 1.59E-24 | 0.625874 | 3.75E-52 |

|          |          |          |          |          |            |          |          |          |
|----------|----------|----------|----------|----------|------------|----------|----------|----------|
| 0.16355  | 0.07208  | 0.11982  | 0.148886 | 0.00125  | 0.10041918 | 0.03003  | 0.339618 | 4.52E-14 |
| 0.00061  | 0.40332  | 1.08E-19 | 0.200691 | 1.24E-05 | 0.36126092 | 7.64E-16 | 0.549102 | 3.92E-38 |
| 0.46429  | 0.299959 | 3.65E-11 | 0.284773 | 3.66E-10 | 0.37717367 | 3.10E-17 | 0.631136 | 2.93E-53 |
| 0.16725  | 0.106571 | 0.02126  | 0.351986 | 4.57E-15 | 0.42691024 | 4.15E-22 | 0.490195 | 1.33E-29 |
| 0.30594  | 0.10034  | 0.03016  | -0.08277 | 0.07394  | 0.05138207 | 0.2678   | -0.15367 | 0.00086  |
| 0.01759  | 0.427836 | 3.30E-22 | 0.12221  | 0.0082   | 0.04802661 | 0.30035  | 0.244711 | 8.52E-08 |
| 0.65915  | 0.335982 | 8.71E-14 | -0.04433 | 0.33913  | -0.0963419 | 0.03741  | 0.128107 | 0.00556  |
| 0.25099  | 0.229374 | 5.43E-07 | 0.11649  | 0.01176  | 0.11661168 | 0.01167  | 0.211121 | 4.18E-06 |
| 0.05178  | 0.451605 | 7.56E-25 | 0.297899 | 5.03E-11 | 0.35879964 | 1.24E-15 | 0.565635 | 7.59E-41 |
| 0.31207  | 0.500572 | 5.50E-31 | 0.281601 | 5.83E-10 | 0.2276269  | 6.65E-07 | 0.459274 | 9.58E-26 |
| 0.10495  | 0.14493  | 0.00169  | 0.365126 | 3.57E-16 | 0.28563189 | 3.23E-10 | 0.307425 | 1.11E-11 |
| 0.12613  | -0.10791 | 0.01967  | -0.00384 | 0.934    | 0.05401383 | 0.24403  | -0.19901 | 1.47E-05 |
| 0.49426  | 0.392606 | 1.16E-18 | 0.521722 | 5.84E-34 | 0.1704434  | 0.00022  | 0.176343 | 0.00013  |
| 0.50877  | 0.300996 | 3.10E-11 | 0.24961  | 4.59E-08 | 0.39746134 | 4.00E-19 | 0.644007 | 4.63E-56 |
| 0.03805  | 0.267522 | 4.28E-09 | 0.064577 | 0.16355  | 0.03655302 | 0.43066  | 0.276808 | 1.16E-09 |
| 0.00426  | 0.415174 | 6.96E-21 | 0.244    | 9.31E-08 | 0.27209846 | 2.27E-09 | 0.497939 | 1.25E-30 |
| 0.20037  | 0.534528 | 7.28E-36 | 0.207885 | 5.90E-06 | 0.13419567 | 0.00367  | 0.370145 | 1.31E-16 |
| 0.68183  | 0.634697 | 5.07E-54 | 0.614049 | 9.72E-50 | 0.4131977  | 1.11E-20 | 0.578159 | 5.26E-43 |
| 0.08541  | 0.131555 | 0.0044   | 0.074268 | 0.10897  | 0.38195276 | 1.14E-17 | 0.208836 | 5.34E-06 |
| 0.76793  | 0.404679 | 7.90E-20 | 0.400887 | 1.86E-19 | 0.52904831 | 4.86E-35 | 0.53025  | 3.22E-35 |
| 0.25252  | 0.249838 | 4.46E-08 | 0.37093  | 1.11E-16 | 0.55958336 | 7.78E-40 | 0.558957 | 9.87E-40 |
| 0.89404  | 0.194256 | 2.37E-05 | 0.572687 | 4.74E-42 | 0.75557191 | 1.83E-87 | 0.59101  | 2.55E-45 |
| 0.43531  | 0.050964 | 0.27172  | 0.376289 | 3.72E-17 | 0.47474167 | 1.26E-27 | 0.209189 | 5.14E-06 |
| 0.71955  | 0.175953 | 0.00013  | 0.068853 | 0.13736  | 0.37146323 | 9.99E-17 | 0.308744 | 9.01E-12 |
| 0.45488  | 0.06302  | 0.17396  | 0.190585 | 3.39E-05 | 0.54633679 | 1.08E-37 | 0.481485 | 1.78E-28 |
| 0.03559  | -0.20472 | 8.21E-06 | 0.190702 | 3.35E-05 | 0.62215223 | 2.21E-51 | 0.577134 | 7.97E-43 |
| 0.01364  | 0.191391 | 3.13E-05 | 0.305143 | 1.61E-11 | 0.65212083 | 6.75E-58 | 0.674778 | 2.45E-63 |
| 0.11038  | 0.145553 | 0.00161  | 0.388026 | 3.14E-18 | 0.54404177 | 2.47E-37 | 0.462901 | 3.54E-26 |
| 0.69545  | 0.21103  | 4.22E-06 | 0.243635 | 9.74E-08 | 0.46079561 | 6.32E-26 | 0.252861 | 3.02E-08 |
| 0.98569  | 0.18872  | 4.06E-05 | 0.375409 | 4.46E-17 | 0.69316686 | 4.01E-68 | 0.633717 | 8.23E-54 |
| 3.66E-07 | -0.23121 | 4.38E-07 | 0.137015 | 0.00301  | 0.47834122 | 4.47E-28 | 0.427109 | 3.95E-22 |
| 0.37888  | 0.097238 | 0.03567  | 0.307934 | 1.03E-11 | 0.80979921 | #####    | 0.822056 | #####    |
| 0.21482  | -0.05864 | 0.20592  | 0.130568 | 0.00471  | 0.69418835 | 2.12E-68 | 0.5951   | 4.45E-46 |
| 0.00977  | 0.364893 | 3.73E-16 | 0.359758 | 1.03E-15 | 0.65091906 | 1.27E-57 | 0.574928 | 1.94E-42 |
| 0.95881  | 0.055747 | 0.22921  | 0.459983 | 7.90E-26 | 0.66881545 | 7.37E-62 | 0.399554 | 2.51E-19 |
| 0.13037  | 0.157365 | 0.00064  | 0.392432 | 1.21E-18 | 0.50727179 | 6.62E-32 | 0.51422  | 7.01E-33 |
| 8.22E-07 | 0.043099 | 0.35272  | 0.293983 | 9.19E-11 | 0.58577617 | 2.30E-44 | 0.599092 | 7.90E-47 |
| 0.64546  | 0.21072  | 4.37E-06 | 0.315319 | 3.07E-12 | 0.6463843  | 1.36E-56 | 0.634109 | 6.79E-54 |
| 0.80487  | 0.121379 | 0.00865  | 0.438837 | 2.10E-23 | 0.64080024 | 2.38E-55 | 0.571857 | 6.60E-42 |
| 0.65594  | 0.229151 | 5.57E-07 | 0.334004 | 1.24E-13 | 0.73320956 | 6.60E-80 | 0.719856 | 9.51E-76 |
| 0.32257  | 0.010799 | 0.81596  | -0.21723 | 2.15E-06 | -0.6117128 | 2.83E-49 | -0.71544 | 2.00E-74 |
| 0.14986  | 0.24359  | 9.80E-08 | 0.430258 | 1.82E-22 | 0.51584887 | 4.11E-33 | 0.413474 | 1.04E-20 |
| 0.33942  | 0.114496 | 0.01329  | 0.372402 | 8.26E-17 | 0.61853568 | 1.21E-50 | 0.350412 | 6.15E-15 |
| 0.24828  | -0.02668 | 0.56518  | 0.018282 | 0.69355  | 0.44321924 | 6.82E-24 | 0.251617 | 3.55E-08 |
| 0.60913  | -0.0077  | 0.86813  | 0.052268 | 0.25963  | 0.53589367 | 4.51E-36 | 0.515613 | 4.44E-33 |

|          |          |          |          |          |            |          |          |          |
|----------|----------|----------|----------|----------|------------|----------|----------|----------|
| 0.68165  | 0.195811 | 2.03E-05 | 0.241855 | 1.21E-07 | 0.70747202 | 4.20E-72 | 0.745982 | 3.98E-84 |
| 0.50425  | 0.083157 | 0.0726   | 0.157068 | 0.00066  | 0.53643913 | 3.72E-36 | 0.56569  | 7.43E-41 |
| 0.30614  | 0.233981 | 3.15E-07 | 0.524055 | 2.67E-34 | 0.48232332 | 1.39E-28 | 0.518804 | 1.55E-33 |
| 0.21935  | -0.03897 | 0.40078  | 0.149323 | 0.00121  | 0.72366108 | 6.58E-77 | 0.804443 | #####    |
| 0.30957  | 0.022853 | 0.6223   | -0.08025 | 0.08321  | 0.47181685 | 2.91E-27 | 0.488692 | 2.10E-29 |
| 0.06867  | 0.374669 | 5.19E-17 | 0.354261 | 2.96E-15 | 0.71670572 | 8.39E-75 | 0.550831 | 2.07E-38 |
| 0.00191  | 0.270468 | 2.85E-09 | 0.163944 | 0.00037  | 0.4641187  | 2.53E-26 | 0.342731 | 2.56E-14 |
| 0.45036  | 0.11372  | 0.01394  | 0.29159  | 1.32E-10 | 0.60917156 | 8.98E-49 | 0.378238 | 2.48E-17 |
| 0.08781  | 0.283075 | 4.70E-10 | 0.329882 | 2.56E-13 | 0.26331608 | 7.59E-09 | 0.028697 | 0.53618  |
| 0.86963  | 0.296263 | 6.47E-11 | 0.333108 | 1.45E-13 | 0.6929941  | 4.47E-68 | 0.710976 | 4.09E-73 |
| 9.25E-12 | -0.12235 | 0.00812  | 0.140127 | 0.00241  | 0.43816242 | 2.50E-23 | 0.505025 | 1.35E-31 |
| 0.01703  | 0.274623 | 1.59E-09 | 0.58095  | 1.69E-43 | 0.58709686 | 1.33E-44 | 0.505407 | 1.20E-31 |
| 0.00908  | 0.081571 | 0.07824  | -0.0751  | 0.10504  | -0.5385762 | 1.75E-36 | -0.63791 | 1.02E-54 |
| 0.06921  | 0.074996 | 0.10553  | 0.319863 | 1.43E-12 | 0.80824696 | #####    | 0.753705 | 8.39E-87 |
| 0.98372  | 0.160158 | 0.00051  | 0.557013 | 2.06E-39 | 0.72924421 | 1.20E-78 | 0.701396 | 2.20E-70 |
| 0.38291  | 0.336106 | 8.52E-14 | 0.470097 | 4.74E-27 | 0.68094373 | 6.67E-65 | 0.62693  | 2.26E-52 |
| 0.02206  | 0.152284 | 0.00096  | 0.352781 | 3.93E-15 | 0.77264806 | 8.25E-94 | 0.754975 | 2.98E-87 |
| 0.36352  | 0.210155 | 4.64E-06 | 0.587673 | 1.04E-44 | 0.69039132 | 2.23E-67 | 0.580863 | 1.75E-43 |
| 0.17466  | 0.313263 | 4.31E-12 | 0.381622 | 1.22E-17 | 0.67100641 | 2.13E-62 | 0.524152 | 2.58E-34 |
| 0.56765  | 0.233318 | 3.41E-07 | 0.334477 | 1.14E-13 | 0.73961387 | 5.43E-82 | 0.789897 | #####    |
| 0.53068  | 0.124758 | 0.00695  | 0.262296 | 8.71E-09 | 0.54744655 | 7.18E-38 | 0.529624 | 3.99E-35 |
| 3.59E-08 | 0.113184 | 0.0144   | 0.317894 | 2.00E-12 | 0.38077851 | 1.46E-17 | 0.186431 | 5.04E-05 |
| 0.09653  | 0.057065 | 0.21837  | 0.419036 | 2.78E-21 | 0.79433871 | #####    | 0.683769 | 1.24E-65 |
| 0.68127  | 0.172148 | 0.00019  | 0.356048 | 2.10E-15 | 0.70391708 | 4.31E-71 | 0.631023 | 3.10E-53 |
| 0.78343  | 0.151846 | 0.001    | 0.398986 | 2.85E-19 | 0.55080989 | 2.09E-38 | 0.556634 | 2.38E-39 |
| 0.56231  | 0.465519 | 1.71E-26 | 0.504199 | 1.76E-31 | 0.60660875 | 2.85E-48 | 0.415547 | 6.37E-21 |
| 0.09147  | 0.004046 | 0.93051  | 0.368874 | 1.69E-16 | 0.34633418 | 1.32E-14 | 0.265496 | 5.65E-09 |
| 0.0297   | -0.20931 | 5.07E-06 | -0.04751 | 0.30562  | 0.41221706 | 1.39E-20 | 0.232514 | 3.75E-07 |
| 0.11927  | 0.303458 | 2.10E-11 | 0.394239 | 8.14E-19 | 0.70721444 | 4.98E-72 | 0.548388 | 5.09E-38 |
| 0.59406  | 0.111189 | 0.01622  | 0.450317 | 1.06E-24 | 0.41549655 | 6.45E-21 | 0.113286 | 0.01431  |
| 0.00118  | 0.363728 | 4.70E-16 | 0.403435 | 1.05E-19 | 0.541254   | 6.74E-37 | 0.498421 | 1.07E-30 |
| 0.88495  | 0.073128 | 0.11452  | 0.29881  | 4.36E-11 | 0.75479316 | 3.45E-87 | 0.655802 | 9.49E-59 |
| 0.17555  | 0.186538 | 4.99E-05 | 0.476798 | 6.99E-28 | 0.60302532 | 1.40E-47 | 0.587207 | 1.27E-44 |
| 0.49725  | 0.217835 | 2.01E-06 | 0.22838  | 6.09E-07 | 0.50832294 | 4.73E-32 | 0.315886 | 2.79E-12 |
| 0.53458  | -0.11575 | 0.01231  | 0.279895 | 7.47E-10 | 0.50394566 | 1.91E-31 | 0.384513 | 6.65E-18 |
| 0.17669  | 0.309379 | 8.13E-12 | 0.386491 | 4.36E-18 | 0.71657974 | 9.15E-75 | 0.716994 | 6.89E-75 |
| 0.49936  | -0.10573 | 0.0223   | -0.36759 | 2.18E-16 | -0.5633121 | 1.86E-40 | -0.59325 | 9.82E-46 |
| 0.63227  | 0.217727 | 2.04E-06 | 0.589761 | 4.33E-45 | 0.5509009  | 2.02E-38 | 0.558541 | 1.16E-39 |
| 0.4082   | 0.151443 | 0.00103  | 0.269814 | 3.12E-09 | 0.65507366 | 1.40E-58 | 0.487335 | 3.15E-29 |
| 0.1143   | 0.063891 | 0.16808  | 0.335192 | 1.00E-13 | 0.51506618 | 5.31E-33 | 0.303652 | 2.04E-11 |
| 0.56002  | 0.171536 | 0.0002   | 0.229913 | 5.10E-07 | 0.38823733 | 3.00E-18 | 0.377145 | 3.12E-17 |
| 0.64654  | 0.085392 | 0.06522  | 0.292123 | 1.22E-10 | 0.56640586 | 5.62E-41 | 0.292699 | 1.12E-10 |
| 0.10728  | -0.036   | 0.43761  | -0.16052 | 0.0005   | -0.4303438 | 1.78E-22 | -0.47879 | 3.92E-28 |
| 0.01539  | -0.14495 | 0.00169  | 0.08994  | 0.05209  | 0.53439656 | 7.62E-36 | 0.578486 | 4.61E-43 |
| 0.02417  | 0.107987 | 0.01959  | 0.096403 | 0.03729  | 0.58590959 | 2.18E-44 | 0.588783 | 6.54E-45 |

|          |          |          |          |          |            |          |          |          |
|----------|----------|----------|----------|----------|------------|----------|----------|----------|
| 0.02442  | 0.141374 | 0.0022   | 0.492493 | 6.65E-30 | 0.63853432 | 7.46E-55 | 0.445302 | 3.97E-24 |
| 0.05729  | 0.281902 | 5.58E-10 | 0.367794 | 2.09E-16 | 0.61290131 | 1.65E-49 | 0.339221 | 4.86E-14 |
| 0.2124   | -0.05233 | 0.25906  | 0.088195 | 0.05684  | 0.72292428 | 1.11E-76 | 0.706433 | 8.33E-72 |
| 0.31756  | 0.279931 | 7.43E-10 | 0.290867 | 1.48E-10 | 0.67352224 | 5.06E-63 | 0.73455  | 2.44E-80 |
| 0.89684  | 0.115049 | 0.01285  | 0.305094 | 1.62E-11 | 0.50928336 | 3.47E-32 | 0.266983 | 4.61E-09 |
| 1.46E-08 | -0.05108 | 0.2706   | 0.005101 | 0.91246  | 0.35373336 | 3.27E-15 | 0.23777  | 2.00E-07 |
| 0.1248   | 0.094304 | 0.04165  | 0.124127 | 0.00724  | 0.21926413 | 1.72E-06 | -0.05006 | 0.2803   |
| 0.77731  | 0.221251 | 1.38E-06 | 0.323327 | 7.97E-13 | 0.62212229 | 2.25E-51 | 0.584473 | 3.95E-44 |
| 0.1916   | 0.052338 | 0.25899  | 0.265277 | 5.82E-09 | 0.61670604 | 2.85E-50 | 0.635471 | 3.45E-54 |
| 0.22019  | 0.235598 | 2.60E-07 | 0.449076 | 1.48E-24 | 0.60584201 | 4.01E-48 | 0.610973 | 3.97E-49 |
| 0.00101  | 0.164039 | 0.00037  | 0.297938 | 5.00E-11 | 0.4129759  | 1.17E-20 | 0.222642 | 1.18E-06 |
| 0.09034  | -0.03811 | 0.41125  | 0.374494 | 5.38E-17 | 0.60102103 | 3.39E-47 | 0.442756 | 7.69E-24 |
| 0.43306  | 0.010672 | 0.81809  | 0.297982 | 4.96E-11 | 0.55282878 | 9.88E-39 | 0.530687 | 2.77E-35 |
| 0.3531   | 0.103699 | 0.02503  | 0.366025 | 2.98E-16 | 0.65128784 | 1.05E-57 | 0.60476  | 6.50E-48 |
| 0.0289   | 0.198392 | 1.57E-05 | 0.408688 | 3.15E-20 | 0.64760367 | 7.22E-57 | 0.594063 | 6.94E-46 |
| 0.93114  | 0.387472 | 3.54E-18 | 0.519038 | 1.43E-33 | 0.67952628 | 1.54E-64 | 0.620425 | 5.00E-51 |
| 0.06972  | 0.081985 | 0.07674  | 0.435929 | 4.40E-23 | 0.46398956 | 2.62E-26 | 0.22883  | 5.78E-07 |
| 0.23716  | 0.350212 | 6.38E-15 | 0.408913 | 2.99E-20 | 0.33625589 | 8.29E-14 | 0.364076 | 4.39E-16 |
| 0.5041   | 0.335432 | 9.61E-14 | 0.603287 | 1.25E-47 | 0.67794624 | 3.89E-64 | 0.589161 | 5.57E-45 |
| 0.65949  | 0.077985 | 0.09231  | 0.468549 | 7.34E-27 | 0.47532241 | 1.07E-27 | 0.456419 | 2.08E-25 |
| 0.32186  | 0.0916   | 0.04789  | 0.339105 | 4.97E-14 | 0.50175115 | 3.80E-31 | 0.273892 | 1.76E-09 |
| 0.38878  | 0.27225  | 2.22E-09 | 0.468245 | 8.00E-27 | 0.51499921 | 5.43E-33 | 0.20989  | 4.77E-06 |
| 0.07539  | 0.037175 | 0.42285  | 0.463193 | 3.27E-26 | 0.69833111 | 1.56E-69 | 0.490572 | 1.19E-29 |
| 0.19244  | 0.321388 | 1.11E-12 | 0.571732 | 6.93E-42 | 0.6864945  | 2.41E-66 | 0.619921 | 6.34E-51 |
| 0.06736  | 0.035798 | 0.44025  | -0.13534 | 0.00338  | 0.48082034 | 2.17E-28 | 0.474873 | 1.22E-27 |
| 0.00029  | 0.031307 | 0.49973  | 0.178001 | 0.00011  | 0.71041086 | 5.97E-73 | 0.700843 | 3.14E-70 |
| 0.78676  | 0.279628 | 7.76E-10 | 0.536621 | 3.49E-36 | 0.67467676 | 2.60E-63 | 0.57808  | 5.44E-43 |
| 0.87992  | 0.32836  | 3.35E-13 | 0.489346 | 1.72E-29 | 0.66080899 | 6.30E-60 | 0.523429 | 3.29E-34 |
| 0.42342  | 0.426904 | 4.15E-22 | 0.557528 | 1.70E-39 | 0.57304827 | 4.11E-42 | 0.435287 | 5.17E-23 |
| 0.16568  | 0.020317 | 0.66145  | 0.294364 | 8.67E-11 | 0.58297617 | 7.34E-44 | 0.450061 | 1.14E-24 |
| 0.07836  | 0.276706 | 1.18E-09 | 0.221858 | 1.29E-06 | 0.44445058 | 4.96E-24 | 0.270365 | 2.89E-09 |
| 0.05826  | 0.185632 | 5.44E-05 | 0.424724 | 7.07E-22 | 0.55408523 | 6.18E-39 | 0.399225 | 2.70E-19 |
| 0.01082  | -0.00225 | 0.96127  | 0.308691 | 9.09E-12 | 0.67192008 | 1.27E-62 | 0.45368  | 4.35E-25 |
| 0.12915  | 0.003102 | 0.9467   | 0.191917 | 2.98E-05 | 0.39732124 | 4.12E-19 | 0.219475 | 1.68E-06 |
| 3.01E-05 | 0.114019 | 0.01369  | 0.296139 | 6.60E-11 | 0.64953388 | 2.64E-57 | 0.547928 | 6.03E-38 |
| 0.84183  | 0.34956  | 7.22E-15 | 0.487713 | 2.82E-29 | 0.39341592 | 9.75E-19 | 0.331591 | 1.90E-13 |
| 0.10928  | 0.184913 | 5.82E-05 | 0.453394 | 4.69E-25 | 0.87022057 | #####    | 0.716146 | 1.23E-74 |
| 0.2541   | -0.09045 | 0.05077  | 0.444289 | 5.17E-24 | 0.50636029 | 8.85E-32 | 0.471918 | 2.83E-27 |
| 0.03939  | -0.12546 | 0.00663  | -0.12209 | 0.00826  | -0.6370307 | 1.59E-54 | -0.61389 | 1.04E-49 |
| 0.35985  | 0.579852 | 2.64E-43 | 0.738277 | 1.50E-81 | 0.47236447 | 2.49E-27 | 0.316979 | 2.33E-12 |
| 0.00022  | 0.037422 | 0.41977  | -0.05674 | 0.22097  | -0.5559997 | 3.02E-39 | -0.62785 | 1.45E-52 |
| 0.62659  | 0.248208 | 5.49E-08 | 0.438523 | 2.28E-23 | 0.63569894 | 3.08E-54 | 0.616731 | 2.81E-50 |
| 0.05008  | 0.007547 | 0.87078  | 0.423152 | 1.04E-21 | 0.77675677 | 2.03E-95 | 0.750861 | 8.32E-86 |
| 0.41971  | -0.04046 | 0.38305  | 0.285342 | 3.37E-10 | 0.36431905 | 4.18E-16 | 0.498003 | 1.22E-30 |
| 0.80663  | 0.152221 | 0.00097  | 0.281999 | 5.50E-10 | 0.59817309 | 1.18E-46 | 0.563277 | 1.89E-40 |

|          |          |          |          |          |            |          |          |          |
|----------|----------|----------|----------|----------|------------|----------|----------|----------|
| 0.09512  | 0.340049 | 4.18E-14 | 0.664588 | 7.85E-61 | 0.64051598 | 2.75E-55 | 0.623335 | 1.26E-51 |
| 0.00368  | 0.11781  | 0.01084  | 0.192901 | 2.71E-05 | 0.35840572 | 1.33E-15 | 0.245316 | 7.90E-08 |
| 0.04832  | 0.109817 | 0.0176   | 0.149453 | 0.0012   | 0.7209555  | 4.41E-76 | 0.801088 | #####    |
| 0.06165  | 0.057983 | 0.21104  | 0.083383 | 0.07182  | 0.73648856 | 5.75E-81 | 0.813229 | #####    |
| 0.07616  | 0.093265 | 0.04396  | 0.147467 | 0.00139  | 0.70288145 | 8.45E-71 | 0.69185  | 9.08E-68 |
| 0.77514  | 0.241851 | 1.22E-07 | 0.307356 | 1.13E-11 | 0.50403437 | 1.85E-31 | 0.350513 | 6.03E-15 |
| 0.36481  | -0.01622 | 0.7266   | 0.212874 | 3.46E-06 | 0.70800405 | 2.96E-72 | 0.616402 | 3.28E-50 |
| 0.66367  | 0.2173   | 2.14E-06 | 0.421333 | 1.61E-21 | 0.70539148 | 1.65E-71 | 0.734217 | 3.13E-80 |
| 0.01425  | 0.05507  | 0.23492  | 0.300043 | 3.60E-11 | 0.65675314 | 5.69E-59 | 0.676288 | 1.02E-63 |
| 0.68731  | 0.033757 | 0.46677  | 0.067139 | 0.14744  | 0.41285191 | 1.20E-20 | 0.290378 | 1.59E-10 |
| 0.30842  | 0.149535 | 0.00119  | 0.456056 | 2.29E-25 | 0.81977264 | #####    | 0.688139 | 8.87E-67 |
| 0.05797  | 0.308784 | 8.95E-12 | 0.264366 | 6.58E-09 | 0.56912799 | 1.94E-41 | 0.516063 | 3.83E-33 |
| 0.07757  | 0.141373 | 0.0022   | 0.39215  | 1.29E-18 | 0.73302306 | 7.57E-80 | 0.733159 | 6.85E-80 |
| 0.40116  | 0.137282 | 0.00295  | 0.280449 | 6.89E-10 | 0.66395549 | 1.12E-60 | 0.651818 | 7.92E-58 |
| 0.04806  | 0.091569 | 0.04796  | 0.40524  | 6.95E-20 | 0.55230545 | 1.20E-38 | 0.522649 | 4.28E-34 |
| 0.87557  | 0.063839 | 0.16843  | 0.378435 | 2.39E-17 | 0.61508786 | 6.02E-50 | 0.383696 | 7.91E-18 |
| 0.17318  | 0.03954  | 0.39393  | -0.04903 | 0.29038  | -0.3754488 | 4.42E-17 | -0.48155 | 1.75E-28 |
| 0.95865  | 0.095778 | 0.03855  | 0.210217 | 4.61E-06 | 0.58176639 | 1.21E-43 | 0.556793 | 2.24E-39 |
| 0.41835  | 0.201308 | 1.17E-05 | 0.194265 | 2.37E-05 | 0.34357262 | 2.20E-14 | 0.209362 | 5.05E-06 |
| 0.03627  | 0.289006 | 1.95E-10 | 0.379513 | 1.91E-17 | 0.58684512 | 1.47E-44 | 0.414807 | 7.58E-21 |
| 0.00019  | -0.18057 | 8.71E-05 | 0.032715 | 0.48064  | 0.55880428 | 1.05E-39 | 0.633865 | 7.66E-54 |
| 0.04836  | 0.070573 | 0.12778  | 0.195558 | 2.08E-05 | 0.68575043 | 3.77E-66 | 0.619275 | 8.59E-51 |
| 0.21712  | 0.147779 | 0.00136  | 0.214882 | 2.79E-06 | 0.4032284  | 1.10E-19 | 0.222073 | 1.25E-06 |
| 0.00317  | -0.01937 | 0.67638  | 0.169953 | 0.00022  | 0.67734804 | 5.52E-64 | 0.591921 | 1.73E-45 |
| 0.51118  | 0.267814 | 4.11E-09 | 0.607361 | 2.03E-48 | 0.62744297 | 1.76E-52 | 0.623173 | 1.36E-51 |
| 0.01003  | 0.375    | 4.85E-17 | 0.53105  | 2.44E-35 | 0.57449014 | 2.31E-42 | 0.444203 | 5.29E-24 |
| 0.0049   | -0.04133 | 0.3729   | 0.338568 | 5.47E-14 | 0.52066274 | 8.33E-34 | 0.469901 | 5.01E-27 |
| 0.08925  | 0.033514 | 0.46998  | -0.12444 | 0.00709  | 0.2077886  | 5.96E-06 | 0.03481  | 0.45297  |
| 0.48219  | 0.189479 | 3.77E-05 | 0.327817 | 3.68E-13 | 0.64075063 | 2.44E-55 | 0.647109 | 9.33E-57 |
| 0.48252  | 0.106319 | 0.02157  | 0.486193 | 4.43E-29 | 0.42817895 | 3.04E-22 | 0.364285 | 4.21E-16 |
| 0.86632  | -0.13886 | 0.00264  | 0.390271 | 1.93E-18 | 0.56012078 | 6.34E-40 | 0.383855 | 7.65E-18 |
| 3.12E-07 | 0.031616 | 0.49551  | 0.39064  | 1.79E-18 | 0.72554269 | 1.73E-77 | 0.674814 | 2.40E-63 |
| 0.19296  | 0.300372 | 3.42E-11 | 0.319123 | 1.63E-12 | 0.67439872 | 3.05E-63 | 0.699615 | 6.90E-70 |
| 0.00929  | 0.279435 | 7.98E-10 | 0.439629 | 1.72E-23 | 0.63969771 | 4.15E-55 | 0.585924 | 2.16E-44 |
| 0.01259  | 0.182206 | 7.49E-05 | 0.15666  | 0.00068  | 0.52260123 | 4.35E-34 | 0.525054 | 1.90E-34 |
| 0.01789  | 0.217747 | 2.03E-06 | 0.336432 | 8.04E-14 | 0.51468244 | 6.02E-33 | 0.3772   | 3.08E-17 |
| 0.39605  | 0.350474 | 6.08E-15 | 0.423503 | 9.51E-22 | 0.38881987 | 2.65E-18 | 0.346682 | 1.24E-14 |
| 0.05284  | 0.09001  | 0.05191  | -0.10418 | 0.02435  | -0.6498665 | 2.21E-57 | -0.70747 | 4.20E-72 |
| 0.96529  | 0.331259 | 2.01E-13 | 0.543895 | 2.61E-37 | 0.82772188 | #####    | 0.647686 | 6.92E-57 |
| 0.0002   | -0.01438 | 0.75663  | -0.08049 | 0.08229  | 0.58591607 | 2.17E-44 | 0.668887 | 7.08E-62 |
| 0.01831  | 0.075554 | 0.10296  | 0.215882 | 2.50E-06 | 0.70936465 | 1.20E-72 | 0.636912 | 1.68E-54 |
| 0.89223  | 0.266752 | 4.75E-09 | 0.296518 | 6.22E-11 | 0.63206934 | 1.85E-53 | 0.432735 | 9.81E-23 |
| 0.55084  | 0.299266 | 4.06E-11 | 0.170107 | 0.00022  | 0.40058302 | 1.99E-19 | 0.375352 | 4.51E-17 |
| 0.79147  | 0.319236 | 1.59E-12 | 0.51522  | 5.05E-33 | 0.55251728 | 1.11E-38 | 0.480479 | 2.40E-28 |
| 0.67094  | 0.316672 | 2.45E-12 | 0.446979 | 2.56E-24 | 0.72443995 | 3.79E-77 | 0.787104 | 1.25E-99 |

|          |          |          |          |          |            |          |          |          |
|----------|----------|----------|----------|----------|------------|----------|----------|----------|
| 0.0004   | 0.2028   | 1.00E-05 | 0.300463 | 3.37E-11 | 0.68226902 | 3.04E-65 | 0.738008 | 1.83E-81 |
| 0.56649  | 0.203635 | 9.19E-06 | 0.545279 | 1.58E-37 | 0.53666467 | 3.44E-36 | 0.47446  | 1.37E-27 |
| 0.98499  | -0.11713 | 0.0113   | 0.382856 | 9.44E-18 | 0.55932998 | 8.57E-40 | 0.507325 | 6.51E-32 |
| 0.75749  | 0.085413 | 0.06515  | 0.271902 | 2.33E-09 | 0.70536368 | 1.68E-71 | 0.714598 | 3.55E-74 |
| 0.71345  | -0.03275 | 0.48024  | 0.181313 | 8.13E-05 | 0.54320472 | 3.35E-37 | 0.422977 | 1.08E-21 |
| 0.5786   | 0.257388 | 1.67E-08 | 0.440309 | 1.44E-23 | 0.74936453 | 2.75E-85 | 0.753207 | 1.26E-86 |
| 0.50365  | -0.15035 | 0.00112  | 0.03491  | 0.45168  | 0.46393785 | 2.66E-26 | 0.508239 | 4.86E-32 |
| 0.01981  | 0.203132 | 9.68E-06 | 0.334198 | 1.20E-13 | 0.55101021 | 1.94E-38 | 0.489601 | 1.60E-29 |
| 0.25294  | 0.09237  | 0.04604  | 0.503272 | 2.36E-31 | 0.76020607 | 3.91E-89 | 0.59652  | 2.41E-46 |
| 0.2627   | 0.060868 | 0.18916  | 0.424908 | 6.76E-22 | 0.81402006 | #####    | 0.752373 | 2.47E-86 |
| 0.01888  | 0.444306 | 5.15E-24 | 0.454229 | 3.75E-25 | 0.43851621 | 2.28E-23 | 0.372125 | 8.74E-17 |
| 0.00644  | 0.300458 | 3.37E-11 | 0.306556 | 1.28E-11 | 0.67555198 | 1.57E-63 | 0.576232 | 1.15E-42 |
| 0.79528  | 0.184977 | 5.78E-05 | 0.342648 | 2.60E-14 | 0.65141089 | 9.82E-58 | 0.631392 | 2.58E-53 |
| 0.00496  | 0.057126 | 0.21787  | 0.222077 | 1.25E-06 | 0.54436149 | 2.20E-37 | 0.342274 | 2.79E-14 |
| 0.1815   | 0.142997 | 0.00195  | 0.32385  | 7.29E-13 | 0.69963797 | 6.80E-70 | 0.673659 | 4.67E-63 |
| 0.76545  | 0.034849 | 0.45247  | 0.231778 | 4.10E-07 | 0.62514716 | 5.32E-52 | 0.653796 | 2.77E-58 |
| 0.05106  | 0.085337 | 0.06539  | 0.203692 | 9.14E-06 | 0.47198481 | 2.78E-27 | 0.308787 | 8.95E-12 |
| 0.12254  | -0.21524 | 2.68E-06 | -0.061   | 0.18818  | 0.4938657  | 4.37E-30 | 0.431519 | 1.33E-22 |
| 0.02502  | 0.195744 | 2.04E-05 | 0.122609 | 0.00799  | 0.56092981 | 4.65E-40 | 0.396757 | 4.67E-19 |
| 0.00243  | 0.075607 | 0.10271  | 0.01478  | 0.75007  | 0.69784876 | 2.12E-69 | 0.702901 | 8.34E-71 |
| 0.21508  | 0.447385 | 2.30E-24 | 0.606251 | 3.34E-48 | 0.68501031 | 5.89E-66 | 0.631518 | 2.43E-53 |
| 0.00764  | 0.095084 | 0.03998  | 0.348907 | 8.16E-15 | 0.74723705 | 1.48E-84 | 0.660657 | 6.85E-60 |
| 0.0013   | 0.151618 | 0.00101  | 0.487768 | 2.77E-29 | 0.78411888 | 2.16E-98 | 0.748461 | 5.64E-85 |
| 0.64606  | 0.35076  | 5.76E-15 | 0.472354 | 2.50E-27 | 0.5715973  | 7.31E-42 | 0.552177 | 1.26E-38 |
| 0.52582  | 0.259703 | 1.23E-08 | 0.52484  | 2.04E-34 | 0.77547627 | 6.49E-95 | 0.613615 | 1.19E-49 |
| 0.00667  | 0.216968 | 2.22E-06 | 0.397154 | 4.28E-19 | 0.68819645 | 8.56E-67 | 0.694824 | 1.43E-68 |
| 0.25247  | 0.036051 | 0.43702  | 0.15494  | 0.00078  | 0.64882095 | 3.83E-57 | 0.528443 | 5.99E-35 |
| 0.01471  | 0.04026  | 0.38537  | 0.297394 | 5.44E-11 | 0.46367619 | 2.86E-26 | 0.246119 | 7.14E-08 |
| 0.15277  | 0.039708 | 0.39192  | 0.249331 | 4.76E-08 | 0.42255506 | 1.20E-21 | 0.214462 | 2.92E-06 |
| 0.00186  | -0.03001 | 0.51762  | 0.210715 | 4.37E-06 | 0.60472567 | 6.60E-48 | 0.384458 | 6.73E-18 |
| 0.72297  | 0.428965 | 2.50E-22 | 0.522045 | 5.24E-34 | 0.37249059 | 8.11E-17 | 0.315288 | 3.08E-12 |
| 0.32938  | 0.299228 | 4.09E-11 | 0.581834 | 1.17E-43 | 0.79188783 | #####    | 0.80357  | #####    |
| 0.44363  | 0.170882 | 0.00021  | 0.398018 | 3.53E-19 | 0.62038182 | 5.11E-51 | 0.367214 | 2.35E-16 |
| 0.00084  | 0.135941 | 0.00324  | 0.280816 | 6.54E-10 | 0.53093815 | 2.54E-35 | 0.494827 | 3.26E-30 |
| 0.04786  | 0.210014 | 4.71E-06 | 0.226975 | 7.17E-07 | 0.67519962 | 1.92E-63 | 0.609142 | 9.10E-49 |
| 3.18E-05 | 0.034711 | 0.45426  | 0.119641 | 0.00966  | 0.53434289 | 7.77E-36 | 0.362573 | 5.91E-16 |
| 0.61643  | 0.397315 | 4.13E-19 | 0.650264 | 1.80E-57 | 0.780361   | 7.34E-97 | 0.562231 | 2.83E-40 |
| 0.74916  | 0.202131 | 1.07E-05 | 0.334227 | 1.19E-13 | 0.64756988 | 7.35E-57 | 0.581443 | 1.38E-43 |
| 0.00092  | -0.03712 | 0.42359  | 0.277599 | 1.04E-09 | 0.61146182 | 3.18E-49 | 0.599531 | 6.52E-47 |
| 0.33728  | 0.186708 | 4.91E-05 | 0.40639  | 5.35E-20 | 0.71340486 | 7.97E-74 | 0.668205 | 1.04E-61 |
| 0.04274  | 0.053789 | 0.246    | 0.06365  | 0.16969  | 0.69284371 | 4.91E-68 | 0.593412 | 9.18E-46 |
| 0.31484  | 0.181753 | 7.81E-05 | 0.526058 | 1.35E-34 | 0.63843153 | 7.86E-55 | 0.573366 | 3.62E-42 |
| 7.22E-17 | 0.163823 | 0.00038  | 0.314349 | 3.60E-12 | 0.5016039  | 3.98E-31 | 0.545317 | 1.56E-37 |
| 0.19576  | -0.01859 | 0.68858  | 0.327392 | 3.96E-13 | 0.70938057 | 1.19E-72 | 0.541432 | 6.32E-37 |
| 0.16619  | 0.270156 | 2.97E-09 | 0.487282 | 3.20E-29 | 0.43264597 | 1.00E-22 | 0.351557 | 4.95E-15 |

|          |          |          |          |          |            |          |          |          |
|----------|----------|----------|----------|----------|------------|----------|----------|----------|
| 0.32405  | -0.20626 | 7.00E-06 | 0.241948 | 1.20E-07 | 0.43324492 | 8.63E-23 | 0.351578 | 4.93E-15 |
| 0.96915  | 0.195214 | 2.15E-05 | 0.507374 | 6.41E-32 | 0.49638169 | 2.02E-30 | 0.65994  | 1.01E-59 |
| 0.32555  | -0.04564 | 0.32508  | 0.131222 | 0.00451  | 0.67743629 | 5.24E-64 | 0.510163 | 2.62E-32 |
| 0.01746  | 0.12497  | 0.00685  | 0.331808 | 1.83E-13 | 0.49704014 | 1.65E-30 | 0.487662 | 2.86E-29 |
| 0.07134  | 0.109615 | 0.01781  | 0.596946 | 2.01E-46 | 0.51529267 | 4.93E-33 | 0.4024   | 1.32E-19 |
| 0.01572  | 0.217973 | 1.98E-06 | 0.275191 | 1.47E-09 | 0.52920569 | 4.61E-35 | 0.4925   | 6.63E-30 |
| 0.24124  | 0.065433 | 0.15803  | 0.331795 | 1.83E-13 | 0.63855253 | 7.40E-55 | 0.573545 | 3.37E-42 |
| 0.00234  | 0.061204 | 0.18673  | 0.339768 | 4.40E-14 | 0.53691741 | 3.15E-36 | 0.54199  | 5.18E-37 |
| 0.01962  | -0.28038 | 6.96E-10 | -0.10494 | 0.02333  | 0.45268604 | 5.67E-25 | 0.462588 | 3.86E-26 |
| 0.57692  | -0.01182 | 0.79893  | 0.323176 | 8.18E-13 | 0.51702295 | 2.79E-33 | 0.320715 | 1.24E-12 |
| 0.00297  | 0.123128 | 0.00773  | 0.239085 | 1.71E-07 | 0.57578083 | 1.38E-42 | 0.529678 | 3.92E-35 |
| 0.91529  | 0.190887 | 3.29E-05 | 0.379175 | 2.04E-17 | 0.71557815 | 1.82E-74 | 0.676872 | 7.28E-64 |
| 0.031    | 0.226397 | 7.66E-07 | 0.305396 | 1.54E-11 | 0.45857108 | 1.16E-25 | 0.22379  | 1.03E-06 |
| 0.08936  | 0.028534 | 0.53848  | 0.184577 | 6.01E-05 | 0.45229477 | 6.29E-25 | 0.193108 | 2.65E-05 |
| 0.81135  | -0.17515 | 0.00014  | 0.293323 | 1.02E-10 | 0.55486789 | 4.61E-39 | 0.4758   | 9.32E-28 |
| 0.1194   | 0.213727 | 3.16E-06 | 0.168759 | 0.00025  | 0.3325507  | 1.60E-13 | 0.173174 | 0.00017  |
| 0.00987  | -0.19222 | 2.89E-05 | -0.06804 | 0.1421   | 0.35281177 | 3.90E-15 | 0.185644 | 5.43E-05 |
| 0.22992  | 0.276151 | 1.28E-09 | 0.464192 | 2.48E-26 | 0.45925262 | 9.64E-26 | 0.322261 | 9.56E-13 |
| 0.52194  | 0.189843 | 3.64E-05 | 0.485724 | 5.10E-29 | 0.48273252 | 1.24E-28 | 0.465052 | 1.95E-26 |
| 0.36065  | 0.280499 | 6.84E-10 | 0.48958  | 1.61E-29 | 0.65567498 | 1.02E-58 | 0.684507 | 7.97E-66 |
| 0.79221  | 0.216705 | 2.28E-06 | 0.332871 | 1.52E-13 | 0.52211114 | 5.13E-34 | 0.579414 | 3.16E-43 |
| 0.72301  | 0.401473 | 1.63E-19 | 0.670485 | 2.87E-62 | 0.56394046 | 1.46E-40 | 0.47894  | 3.75E-28 |
| 0.01754  | 0.064799 | 0.1621   | 0.23982  | 1.56E-07 | 0.62149153 | 3.03E-51 | 0.464116 | 2.53E-26 |
| 0.21511  | 0.291346 | 1.37E-10 | 0.396439 | 5.01E-19 | 0.44408189 | 5.46E-24 | 0.481981 | 1.54E-28 |
| 0.01582  | -0.06851 | 0.13936  | 0.130967 | 0.00458  | 0.68640684 | 2.54E-66 | 0.598931 | 8.47E-47 |
| 0.14644  | 0.017702 | 0.7028   | 0.205527 | 7.55E-06 | 0.59485659 | 4.94E-46 | 0.439436 | 1.80E-23 |
| 0.0106   | 0.212786 | 3.50E-06 | 0.324391 | 6.64E-13 | 0.33844894 | 5.59E-14 | 0.232851 | 3.61E-07 |
| 8.00E-07 | 0.128364 | 0.00547  | 0.289198 | 1.90E-10 | 0.55098386 | 1.96E-38 | 0.585919 | 2.17E-44 |
| 0.46984  | 0.059163 | 0.20188  | 0.337654 | 6.45E-14 | 0.58865428 | 6.90E-45 | 0.661825 | 3.61E-60 |
| 0.76542  | 0.224289 | 9.76E-07 | 0.534066 | 8.56E-36 | 0.78528909 | 7.09E-99 | 0.61532  | 5.41E-50 |
| 0.73085  | 0.066216 | 0.1531   | 0.331488 | 1.93E-13 | 0.41791361 | 3.64E-21 | 0.212408 | 3.64E-06 |
| 0.035    | 0.068034 | 0.14211  | 0.480241 | 2.57E-28 | 0.53615191 | 4.12E-36 | 0.516974 | 2.84E-33 |
| 0.90404  | 0.112434 | 0.01506  | 0.371516 | 9.88E-17 | 0.77824901 | 5.17E-96 | 0.704294 | 3.38E-71 |
| 0.24685  | -0.07943 | 0.0864   | 0.435376 | 5.06E-23 | 0.69202815 | 8.14E-68 | 0.575864 | 1.33E-42 |
| 0.73102  | 0.280568 | 6.78E-10 | 0.647692 | 6.89E-57 | 0.60338714 | 1.20E-47 | 0.55168  | 1.51E-38 |
| 0.58933  | -0.19295 | 2.69E-05 | 0.062002 | 0.18104  | 0.42841019 | 2.87E-22 | 0.279465 | 7.95E-10 |
| 0.02381  | 0.15927  | 0.00055  | 0.349605 | 7.16E-15 | 0.43426144 | 6.69E-23 | 0.175198 | 0.00014  |
| 0.83622  | 0.204255 | 8.62E-06 | 0.048896 | 0.29167  | 0.34649884 | 1.28E-14 | 0.209174 | 5.15E-06 |
| 0.21914  | 0.354668 | 2.74E-15 | 0.495603 | 2.57E-30 | 0.55599732 | 3.02E-39 | 0.546706 | 9.41E-38 |
| 0.52905  | 0.092737 | 0.04518  | 0.537597 | 2.47E-36 | 0.63231076 | 1.65E-53 | 0.516946 | 2.86E-33 |
| 0.24297  | 0.25146  | 3.62E-08 | 0.477654 | 5.45E-28 | 0.69196345 | 8.47E-68 | 0.57227  | 5.60E-42 |
| 6.24E-05 | 0.413354 | 1.07E-20 | 0.444488 | 4.91E-24 | 0.65505299 | 1.42E-58 | 0.596    | 3.02E-46 |
| 0.07261  | 0.188163 | 4.28E-05 | 0.409806 | 2.44E-20 | 0.80655778 | #####    | 0.699941 | 5.60E-70 |
| 0.34297  | 0.277534 | 1.05E-09 | 0.372185 | 8.63E-17 | 0.60656178 | 2.91E-48 | 0.478787 | 3.92E-28 |
| 0.03587  | 0.343714 | 2.14E-14 | 0.461021 | 5.94E-26 | 0.80096851 | #####    | 0.774702 | 1.31E-94 |



|          |          |          |          |          |            |          |          |          |
|----------|----------|----------|----------|----------|------------|----------|----------|----------|
| 0.0371   | 0.394058 | 8.47E-19 | 0.413761 | 9.70E-21 | 0.56164076 | 3.55E-40 | 0.498347 | 1.10E-30 |
| 0.96626  | 0.207839 | 5.93E-06 | 0.192419 | 2.84E-05 | 0.46338262 | 3.10E-26 | 0.28297  | 4.77E-10 |
| 0.10891  | 0.286908 | 2.67E-10 | 0.429478 | 2.20E-22 | 0.66002228 | 9.68E-60 | 0.460258 | 7.32E-26 |
| 2.94E-06 | 0.248699 | 5.16E-08 | 0.349833 | 6.86E-15 | 0.61908825 | 9.37E-51 | 0.690363 | 2.27E-67 |
| 0.74134  | 0.47582  | 9.26E-28 | 0.810636 | #####    | 0.74253467 | 5.80E-83 | 0.647716 | 6.81E-57 |
| 0.21728  | 0.123077 | 0.00775  | 0.42976  | 2.05E-22 | 0.76662067 | 1.65E-91 | 0.614996 | 6.28E-50 |
| 0.28399  | 0.417446 | 4.06E-21 | 0.689979 | 2.88E-67 | 0.50783702 | 5.53E-32 | 0.482252 | 1.42E-28 |
| 0.09726  | 0.123893 | 0.00735  | 0.210225 | 4.60E-06 | 0.689163   | 4.74E-67 | 0.5092   | 3.57E-32 |
| 0.36799  | 0.18285  | 7.06E-05 | 0.432309 | 1.09E-22 | 0.89170707 | #####    | 0.859165 | #####    |
| 0.24991  | -0.04509 | 0.33096  | 0.350812 | 5.70E-15 | 0.61233625 | 2.13E-49 | 0.430383 | 1.76E-22 |
| 0.11746  | 0.471157 | 3.51E-27 | 0.51064  | 2.24E-32 | 0.53847409 | 1.81E-36 | 0.514133 | 7.21E-33 |
| 0.08595  | 0.059967 | 0.19581  | 0.268354 | 3.81E-09 | 0.49150264 | 8.98E-30 | 0.563486 | 1.74E-40 |
| 0.31127  | 0.07145  | 0.1231   | 0.110931 | 0.01647  | 0.58250542 | 8.91E-44 | 0.366052 | 2.97E-16 |
| 0.00505  | 0.160009 | 0.00052  | 0.411686 | 1.57E-20 | 0.70627609 | 9.23E-72 | 0.711701 | 2.51E-73 |
| 0.66715  | 0.379672 | 1.84E-17 | 0.517348 | 2.51E-33 | 0.72547714 | 1.81E-77 | 0.725409 | 1.90E-77 |
| 0.18205  | 0.064403 | 0.16469  | 0.178908 | 0.0001   | 0.48717391 | 3.31E-29 | 0.414567 | 8.02E-21 |
| 0.38157  | 0.211561 | 3.99E-06 | 0.635571 | 3.29E-54 | 0.62107507 | 3.68E-51 | 0.423145 | 1.04E-21 |
| 0.58306  | 0.150179 | 0.00113  | 0.387054 | 3.87E-18 | 0.57252908 | 5.05E-42 | 0.478472 | 4.30E-28 |
| 0.03826  | 0.221763 | 1.30E-06 | 0.670317 | 3.15E-62 | 0.56181667 | 3.31E-40 | 0.414208 | 8.73E-21 |
| 0.27435  | 0.169781 | 0.00023  | 0.373634 | 6.42E-17 | 0.79065424 | #####    | 0.675395 | 1.72E-63 |
| 0.02986  | -0.20931 | 5.07E-06 | -0.05911 | 0.20226  | 0.46339383 | 3.09E-26 | 0.374328 | 5.57E-17 |
| 0.80159  | 0.052264 | 0.25967  | 0.306807 | 1.23E-11 | 0.72468721 | 3.18E-77 | 0.639123 | 5.55E-55 |
| 0.49443  | 0.272913 | 2.02E-09 | 0.456392 | 2.10E-25 | 0.83786843 | #####    | 0.688845 | 5.76E-67 |
| 0.90402  | 0.517543 | 2.35E-33 | 0.510964 | 2.02E-32 | 0.52575203 | 1.50E-34 | 0.424329 | 7.78E-22 |
| 0.88572  | 0.122549 | 0.00802  | 0.456697 | 1.93E-25 | 0.64090985 | 2.25E-55 | 0.530382 | 3.07E-35 |
| 0.46043  | 0.329801 | 2.60E-13 | 0.463981 | 2.63E-26 | 0.67419736 | 3.43E-63 | 0.819431 | #####    |
| 0.02176  | 0.012011 | 0.79573  | 0.31097  | 6.28E-12 | 0.53055829 | 2.89E-35 | 0.462903 | 3.54E-26 |
| 0.02226  | 0.201521 | 1.14E-05 | 0.333508 | 1.35E-13 | 0.62598623 | 3.56E-52 | 0.714026 | 5.23E-74 |
| 0.10756  | -0.04529 | 0.32875  | 0.0513   | 0.26857  | 0.50438114 | 1.66E-31 | 0.284442 | 3.85E-10 |
| 0.21905  | 0.263507 | 7.40E-09 | 0.489787 | 1.51E-29 | 0.63580592 | 2.92E-54 | 0.617709 | 1.79E-50 |
| 0.03741  | 0.15047  | 0.00111  | 0.369843 | 1.39E-16 | 0.8131422  | #####    | 0.67744  | 5.23E-64 |
| 0.00184  | 0.159777 | 0.00053  | 0.543842 | 2.66E-37 | 0.61266189 | 1.84E-49 | 0.532704 | 1.38E-35 |
| 0.14261  | 0.174832 | 0.00015  | 0.327837 | 3.66E-13 | 0.52125444 | 6.84E-34 | 0.474041 | 1.54E-27 |
| 0.78964  | 0.272575 | 2.12E-09 | 0.477115 | 6.38E-28 | 0.82630148 | #####    | 0.705111 | 1.98E-71 |
| 0.25871  | 0.298235 | 4.77E-11 | 0.560016 | 6.60E-40 | 0.82015242 | #####    | 0.713007 | 1.04E-73 |
| 0.13436  | 0.244788 | 8.44E-08 | 0.201902 | 1.10E-05 | 0.61916445 | 9.04E-51 | 0.541121 | 7.07E-37 |
| 0.00179  | 0.208312 | 5.64E-06 | 0.426581 | 4.49E-22 | 0.63955838 | 4.46E-55 | 0.465375 | 1.78E-26 |
| 0.59746  | 0.111598 | 0.01583  | 0.326936 | 4.28E-13 | 0.68186346 | 3.87E-65 | 0.496263 | 2.10E-30 |
| 0.00279  | 0.390926 | 1.68E-18 | 0.440376 | 1.42E-23 | 0.72492139 | 2.69E-77 | 0.656019 | 8.45E-59 |
| 0.00098  | 0.010765 | 0.81653  | 0.123042 | 0.00777  | 0.56931719 | 1.80E-41 | 0.352478 | 4.16E-15 |
| 0.79063  | 0.103583 | 0.02519  | 0.328896 | 3.05E-13 | 0.43187897 | 1.21E-22 | 0.116444 | 0.0118   |
| 0.00275  | 0.232274 | 3.86E-07 | 0.325607 | 5.39E-13 | 0.45330034 | 4.81E-25 | 0.494513 | 3.59E-30 |
| 4.07E-05 | -0.07202 | 0.12013  | 0.098923 | 0.03258  | 0.49312926 | 5.48E-30 | 0.508209 | 4.90E-32 |
| 0.04244  | 0.16986  | 0.00023  | 0.400621 | 1.98E-19 | 0.86704861 | #####    | 0.881419 | #####    |
| 4.28E-12 | 0.039364 | 0.39604  | 0.334223 | 1.19E-13 | 0.6355531  | 3.31E-54 | 0.527908 | 7.19E-35 |

|          |          |          |          |          |            |          |          |          |
|----------|----------|----------|----------|----------|------------|----------|----------|----------|
| 0.74574  | 0.297519 | 5.33E-11 | 0.243351 | 1.01E-07 | 0.59429469 | 6.29E-46 | 0.576251 | 1.14E-42 |
| 0.02912  | 0.158151 | 0.0006   | 0.449807 | 1.22E-24 | 0.5657252  | 7.33E-41 | 0.363403 | 5.02E-16 |
| 0.62046  | 0.153589 | 0.00087  | 0.159756 | 0.00053  | 0.4076284  | 4.03E-20 | 0.130749 | 0.00465  |
| 0.14446  | 0.007147 | 0.87758  | 0.057724 | 0.21309  | 0.62208588 | 2.28E-51 | 0.52451  | 2.29E-34 |
| 0.21093  | 0.229333 | 5.46E-07 | 0.399905 | 2.32E-19 | 0.65329562 | 3.62E-58 | 0.55474  | 4.84E-39 |
| 0.7083   | 0.2286   | 5.94E-07 | 0.558178 | 1.33E-39 | 0.81347537 | #####    | 0.745895 | 4.26E-84 |
| 0.90782  | -0.039   | 0.40048  | 0.288743 | 2.03E-10 | 0.62779227 | 1.49E-52 | 0.408662 | 3.17E-20 |
| 0.67023  | -0.1804  | 8.84E-05 | 0.260015 | 1.18E-08 | 0.59272653 | 1.23E-45 | 0.572454 | 5.20E-42 |
| 0.01891  | 0.401155 | 1.75E-19 | 0.434251 | 6.71E-23 | 0.05601115 | 0.227    | -0.02493 | 0.59096  |
| 0.00412  | 0.155481 | 0.00075  | 0.21399  | 3.07E-06 | 0.48001352 | 2.75E-28 | 0.500497 | 5.63E-31 |
| 0.01588  | 0.137789 | 0.00285  | 0.233044 | 3.53E-07 | 0.80431281 | #####    | 0.760891 | 2.20E-89 |
| 0.09338  | -0.0571  | 0.21804  | 0.290746 | 1.50E-10 | 0.81161389 | #####    | 0.810194 | #####    |
| 0.14351  | 0.069666 | 0.13277  | 0.170045 | 0.00022  | 0.54755383 | 6.91E-38 | 0.530879 | 2.59E-35 |
| 0.27826  | 0.394435 | 7.80E-19 | 0.518705 | 1.60E-33 | 0.79285639 | #####    | 0.686557 | 2.32E-66 |
| 0.30877  | 0.223816 | 1.03E-06 | 0.508218 | 4.89E-32 | 0.45037372 | 1.05E-24 | 0.491653 | 8.58E-30 |
| 0.03264  | 0.214764 | 2.82E-06 | 0.268333 | 3.83E-09 | 0.54989021 | 2.93E-38 | 0.569951 | 1.40E-41 |
| 0.01969  | 0.288372 | 2.15E-10 | 0.169714 | 0.00023  | 0.52343553 | 3.29E-34 | 0.516782 | 3.02E-33 |
| 0.13315  | 0.123865 | 0.00736  | 0.486863 | 3.63E-29 | 0.83414838 | #####    | 0.717899 | 3.69E-75 |
| 0.66691  | 0.131568 | 0.0044   | 0.202116 | 1.07E-05 | 0.78635481 | 2.56E-99 | 0.819052 | #####    |
| 0.98091  | 0.325427 | 5.56E-13 | 0.39062  | 1.79E-18 | 0.5777604  | 6.19E-43 | 0.44624  | 3.11E-24 |
| 0.00888  | -0.05015 | 0.27943  | 0.302639 | 2.39E-11 | 0.6046525  | 6.82E-48 | 0.526331 | 1.23E-34 |
| 9.00E-07 | 0.242647 | 1.10E-07 | 0.483719 | 9.24E-29 | 0.59329309 | 9.65E-46 | 0.615435 | 5.13E-50 |
| 0.00194  | 0.023514 | 0.61227  | 0.046116 | 0.32002  | 0.638701   | 6.86E-55 | 0.60291  | 1.48E-47 |
| 0.15395  | 0.152428 | 0.00095  | 0.333378 | 1.39E-13 | 0.66624683 | 3.12E-61 | 0.599759 | 5.90E-47 |
| 0.02695  | 0.203052 | 9.76E-06 | 0.104463 | 0.02397  | 0.37740253 | 2.96E-17 | 0.113696 | 0.01396  |
| 0.09741  | -0.08771 | 0.05824  | 0.342844 | 2.51E-14 | 0.60825183 | 1.36E-48 | 0.497363 | 1.49E-30 |
| 0.53203  | 0.54603  | 1.20E-37 | 0.541283 | 6.67E-37 | 0.44229925 | 8.65E-24 | 0.474846 | 1.23E-27 |
| 4.81E-06 | -0.1035  | 0.02531  | 0.119091 | 0.01     | 0.61858356 | 1.19E-50 | 0.638362 | 8.14E-55 |
| 0.08745  | 0.231679 | 4.14E-07 | 0.253952 | 2.63E-08 | 0.35654267 | 1.91E-15 | 0.173663 | 0.00016  |
| 0.01112  | 0.22732  | 6.89E-07 | 0.461827 | 4.76E-26 | 0.79270005 | #####    | 0.659896 | 1.04E-59 |
| 0.00514  | -0.05359 | 0.24778  | 0.086195 | 0.06272  | 0.46584083 | 1.57E-26 | 0.26714  | 4.51E-09 |
| 0.63925  | 0.071496 | 0.12286  | 0.328864 | 3.06E-13 | 0.706804   | 6.53E-72 | 0.512054 | 1.42E-32 |
| 0.49326  | 0.269759 | 3.14E-09 | 0.588357 | 7.82E-45 | 0.74007742 | 3.81E-82 | 0.684979 | 6.01E-66 |
| 0.60833  | 0.15205  | 0.00098  | 0.618519 | 1.22E-50 | 0.62890372 | 8.70E-53 | 0.505605 | 1.13E-31 |
| 0.00207  | 0.02862  | 0.53726  | -0.0637  | 0.16935  | 0.2066613  | 6.71E-06 | 0.260144 | 1.16E-08 |
| 0.41209  | 0.187279 | 4.65E-05 | 0.590576 | 3.07E-45 | 0.50057612 | 5.49E-31 | 0.42807  | 3.12E-22 |
| 0.5855   | 0.219206 | 1.73E-06 | 0.492868 | 5.93E-30 | 0.43729262 | 3.11E-23 | 0.358994 | 1.19E-15 |
| 0.18305  | -0.1023  | 0.02706  | 0.424717 | 7.08E-22 | 0.46655268 | 1.28E-26 | 0.35981  | 1.01E-15 |
| 0.96284  | 0.028959 | 0.53245  | 0.288563 | 2.09E-10 | 0.57097517 | 9.35E-42 | 0.498627 | 1.01E-30 |
| 0.03996  | 0.326583 | 4.55E-13 | 0.553883 | 6.67E-39 | 0.50599388 | 9.95E-32 | 0.325523 | 5.47E-13 |
| 0.41967  | -0.03234 | 0.4857   | 0.308408 | 9.51E-12 | 0.46423916 | 2.45E-26 | 0.360735 | 8.47E-16 |
| 0.00904  | 0.067388 | 0.14594  | 0.134529 | 0.00358  | 0.57786722 | 5.92E-43 | 0.444524 | 4.86E-24 |
| 0.00072  | -0.09844 | 0.03344  | 0.075484 | 0.10327  | 0.53489881 | 6.39E-36 | 0.563755 | 1.57E-40 |
| 0.9362   | 0.254361 | 2.49E-08 | 0.30188  | 2.70E-11 | 0.40632368 | 5.43E-20 | 0.521036 | 7.35E-34 |
| 0.80764  | 0.292571 | 1.14E-10 | 0.551996 | 1.35E-38 | 0.53733663 | 2.71E-36 | 0.529383 | 4.34E-35 |

|          |          |          |          |          |            |          |          |          |
|----------|----------|----------|----------|----------|------------|----------|----------|----------|
| 4.50E-05 | 0.168316 | 0.00026  | 0.21505  | 2.73E-06 | 0.36166438 | 7.06E-16 | 0.22646  | 7.61E-07 |
| 0.17829  | 0.177732 | 0.00011  | 0.196474 | 1.90E-05 | 0.56083995 | 4.82E-40 | 0.498222 | 1.14E-30 |
| 0.5245   | 0.253016 | 2.96E-08 | 0.435833 | 4.51E-23 | 0.61239739 | 2.07E-49 | 0.379684 | 1.84E-17 |
| 0.25345  | 0.222851 | 1.15E-06 | 0.27095  | 2.66E-09 | 0.50581158 | 1.05E-31 | 0.597185 | 1.81E-46 |
| 0.45421  | 0.309631 | 7.80E-12 | 0.546879 | 8.84E-38 | 0.5885111  | 7.33E-45 | 0.399932 | 2.31E-19 |
| 0.507    | 0.169693 | 0.00023  | 0.324226 | 6.83E-13 | 0.44060942 | 1.34E-23 | 0.212775 | 3.50E-06 |
| 0.00149  | 0.1971   | 1.79E-05 | 0.488256 | 2.39E-29 | 0.74036993 | 3.05E-82 | 0.684838 | 6.54E-66 |
| 0.9848   | 0.189718 | 3.68E-05 | 0.140376 | 0.00236  | 0.30886592 | 8.83E-12 | 0.094143 | 0.042    |
| 0.5058   | 0.047686 | 0.30379  | 0.081029 | 0.08025  | 0.60820852 | 1.39E-48 | 0.623758 | 1.03E-51 |
| 0.58012  | 0.420789 | 1.83E-21 | 0.505712 | 1.09E-31 | 0.65670633 | 5.84E-59 | 0.638398 | 7.99E-55 |
| 0.05548  | -0.04243 | 0.36022  | 0.047773 | 0.30291  | 0.41005223 | 2.30E-20 | 0.224495 | 9.53E-07 |
| 0.40486  | -0.06811 | 0.14165  | 0.213352 | 3.29E-06 | 0.45921704 | 9.73E-26 | 0.456334 | 2.13E-25 |
| 0.96524  | 0.179938 | 9.23E-05 | 0.511424 | 1.74E-32 | 0.48078329 | 2.19E-28 | 0.461106 | 5.80E-26 |
| 0.54133  | -0.15055 | 0.0011   | 0.08961  | 0.05297  | 0.59354697 | 8.66E-46 | 0.627025 | 2.16E-52 |
| 0.20345  | 0.133327 | 0.0039   | 0.476902 | 6.78E-28 | 0.72370831 | 6.36E-77 | 0.501672 | 3.90E-31 |
| 0.02331  | 0.138184 | 0.00277  | 0.412319 | 1.36E-20 | 0.70700203 | 5.73E-72 | 0.649482 | 2.71E-57 |
| 0.05114  | -0.06423 | 0.16581  | -0.0165  | 0.72214  | -0.4741009 | 1.52E-27 | -0.5486  | 4.71E-38 |
| 0.65436  | 0.389069 | 2.51E-18 | 0.524139 | 2.59E-34 | 0.76920314 | 1.74E-92 | 0.787082 | 1.27E-99 |
| 0.40041  | 0.11164  | 0.01579  | 0.176111 | 0.00013  | 0.37619922 | 3.79E-17 | 0.27479  | 1.55E-09 |
| 0.27334  | -0.09906 | 0.03234  | 0.420302 | 2.06E-21 | 0.53935456 | 1.33E-36 | 0.253498 | 2.78E-08 |
| 0.84874  | 0.314261 | 3.66E-12 | 0.439426 | 1.81E-23 | 0.69272633 | 5.28E-68 | 0.576271 | 1.13E-42 |
| 0.96922  | -0.01516 | 0.74385  | 0.156891 | 0.00067  | 0.59869442 | 9.39E-47 | 0.594158 | 6.67E-46 |
| 0.09868  | 0.016483 | 0.72239  | -0.04112 | 0.37527  | -0.4346547 | 6.06E-23 | -0.53919 | 1.41E-36 |
| 0.8372   | 0.02148  | 0.64337  | 0.424428 | 7.60E-22 | 0.56418669 | 1.33E-40 | 0.389133 | 2.47E-18 |
| 0.00071  | 0.047792 | 0.30272  | 0.323036 | 8.37E-13 | 0.69975076 | 6.33E-70 | 0.480452 | 2.41E-28 |
| 0.45432  | -0.16613 | 0.00031  | 0.303761 | 2.00E-11 | 0.59032948 | 3.40E-45 | 0.338784 | 5.26E-14 |
| 2.88E-05 | -0.14074 | 0.0023   | 0.005034 | 0.9136   | 0.51746754 | 2.41E-33 | 0.418681 | 3.03E-21 |
| 0.84483  | -0.1693  | 0.00024  | 0.269848 | 3.10E-09 | 0.5298968  | 3.63E-35 | 0.405586 | 6.42E-20 |
| 0.16142  | 0.042382 | 0.3608   | 0.450669 | 9.70E-25 | 0.67579444 | 1.36E-63 | 0.643318 | 6.59E-56 |
| 0.31824  | 0.282146 | 5.39E-10 | 0.377583 | 2.85E-17 | 0.42142058 | 1.57E-21 | 0.203091 | 9.72E-06 |
| 0.01933  | 0.398458 | 3.20E-19 | 0.35901  | 1.19E-15 | 0.62299651 | 1.48E-51 | 0.723775 | 6.06E-77 |
| 0.01814  | 0.093863 | 0.04262  | 0.063874 | 0.16819  | 0.62454451 | 7.09E-52 | 0.513385 | 9.20E-33 |
| 0.07214  | 0.016509 | 0.72196  | 0.327276 | 4.04E-13 | 0.78529265 | 7.07E-99 | 0.656964 | 5.08E-59 |
| 2.50E-05 | -0.05821 | 0.20927  | 0.046073 | 0.32047  | 0.59408358 | 6.88E-46 | 0.633416 | 9.56E-54 |
| 0.0374   | -0.03082 | 0.50644  | -0.01823 | 0.69437  | 0.39410537 | 8.38E-19 | 0.168632 | 0.00025  |
| 0.57833  | 0.223202 | 1.10E-06 | 0.39786  | 3.66E-19 | 0.71793733 | 3.59E-75 | 0.672583 | 8.67E-63 |
| 0.12611  | 0.447244 | 2.39E-24 | 0.60533  | 5.04E-48 | 0.74039623 | 2.99E-82 | 0.623208 | 1.34E-51 |
| 0.01122  | -0.15371 | 0.00086  | 0.208915 | 5.29E-06 | 0.68130548 | 5.38E-65 | 0.531653 | 1.98E-35 |
| 0.67758  | 0.234576 | 2.94E-07 | 0.363727 | 4.70E-16 | 0.80379057 | #####    | 0.752819 | 1.72E-86 |
| 0.00026  | 0.163069 | 0.0004   | 0.217985 | 1.98E-06 | 0.43476955 | 5.89E-23 | 0.407383 | 4.26E-20 |
| 0.76268  | -0.04097 | 0.37706  | 0.164082 | 0.00037  | 0.35109294 | 5.41E-15 | 0.196335 | 1.93E-05 |
| 0.99413  | 0.104335 | 0.02414  | 0.308566 | 9.27E-12 | 0.65996974 | 9.96E-60 | 0.571036 | 9.13E-42 |
| 0.02243  | 0.191903 | 2.98E-05 | 0.317702 | 2.06E-12 | 0.59581544 | 3.27E-46 | 0.487042 | 3.44E-29 |
| 0.0021   | 0.266496 | 4.92E-09 | 0.48663  | 3.89E-29 | 0.7488811  | 4.04E-85 | 0.506341 | 8.91E-32 |
| 5.04E-11 | 0.137067 | 0.003    | 0.263108 | 7.81E-09 | 0.68732376 | 1.46E-66 | 0.579732 | 2.78E-43 |

|          |          |          |          |          |            |          |          |          |
|----------|----------|----------|----------|----------|------------|----------|----------|----------|
| 0.00014  | 0.309676 | 7.75E-12 | 0.279119 | 8.35E-10 | 0.48601403 | 4.68E-29 | 0.33852  | 5.52E-14 |
| 0.22004  | 0.338418 | 5.62E-14 | 0.462207 | 4.29E-26 | 0.56654116 | 5.34E-41 | 0.549128 | 3.88E-38 |
| 0.76886  | 0.181297 | 8.15E-05 | 0.42698  | 4.08E-22 | 0.57289625 | 4.36E-42 | 0.262704 | 8.24E-09 |
| 4.53E-07 | -0.10061 | 0.02971  | 0.048906 | 0.29157  | 0.60946516 | 7.87E-49 | 0.469239 | 6.04E-27 |
| 0.3747   | -0.0972  | 0.03574  | 0.009343 | 0.84041  | 0.61158505 | 3.00E-49 | 0.575423 | 1.59E-42 |
| 0.08681  | -0.06269 | 0.17621  | -0.16331 | 0.00039  | 0.07027489 | 0.1294   | 0.182549 | 7.26E-05 |
| 0.00985  | 0.012222 | 0.79222  | -0.07525 | 0.10434  | 0.13460121 | 0.00357  | 0.285837 | 3.13E-10 |
| 6.47E-05 | -0.15809 | 0.00061  | -0.09769 | 0.03482  | 0.22883266 | 5.78E-07 | 0.229092 | 5.61E-07 |
| 0.00045  | -0.30434 | 1.83E-11 | -0.15261 | 0.00094  | 0.05359292 | 0.24773  | 0.004095 | 0.92967  |
| 0.00031  | -0.15899 | 0.00056  | -0.00693 | 0.88131  | 0.25491233 | 2.32E-08 | 0.288894 | 1.99E-10 |
| 1.43E-08 | -0.19245 | 2.83E-05 | -0.06877 | 0.13784  | 0.34501388 | 1.68E-14 | 0.485476 | 5.49E-29 |
| 3.51E-13 | -0.19653 | 1.89E-05 | -0.20654 | 6.79E-06 | -0.0437355 | 0.34565  | -0.10877 | 0.01871  |
| 0.1856   | 0.078694 | 0.08938  | 0.09686  | 0.0364   | 0.13279229 | 0.00404  | 0.173004 | 0.00017  |
| 5.91E-05 | -0.36063 | 8.65E-16 | -0.2265  | 7.57E-07 | 0.02589048 | 0.57678  | -0.03933 | 0.39644  |
| 4.47E-09 | -0.3381  | 5.95E-14 | -0.20905 | 5.21E-06 | 0.21021186 | 4.61E-06 | 0.310552 | 6.72E-12 |
| 8.28E-27 | -0.05108 | 0.2706   | 0.005748 | 0.9014   | 0.19307528 | 2.66E-05 | 0.215066 | 2.73E-06 |
| 0.11998  | 0.133596 | 0.00382  | 0.000508 | 0.99127  | 0.07959379 | 0.08577  | 0.21077  | 4.34E-06 |
| 0.00333  | -0.31969 | 1.48E-12 | -0.17118 | 0.0002   | 0.21628556 | 2.39E-06 | 0.294125 | 8.99E-11 |
| 1.22E-09 | -0.1419  | 0.00211  | -0.07927 | 0.08704  | 0.22581675 | 8.19E-07 | 0.164285 | 0.00036  |
| 1.14E-09 | -0.15535 | 0.00076  | -0.00941 | 0.83921  | 0.26761094 | 4.23E-09 | 0.284377 | 3.88E-10 |
| 1.73E-05 | -0.16605 | 0.00031  | -0.03571 | 0.44133  | 0.29309784 | 1.05E-10 | 0.344676 | 1.79E-14 |
| 0.0005   | 0.112969 | 0.01458  | -0.01833 | 0.69276  | 0.28254006 | 5.08E-10 | 0.389649 | 2.21E-18 |
| 0.01039  | -0.01673 | 0.71833  | -0.00961 | 0.83587  | 0.28311844 | 4.67E-10 | 0.269084 | 3.45E-09 |
| 3.10E-10 | -0.22508 | 8.91E-07 | -0.1636  | 0.00039  | 0.15184959 | 0.001    | 0.194982 | 2.20E-05 |
| 2.96E-05 | 0.003907 | 0.93289  | -0.07022 | 0.1297   | 0.15486193 | 0.00079  | 0.294047 | 9.10E-11 |
| 0.06803  | -0.30686 | 1.22E-11 | -0.19155 | 3.09E-05 | 0.1098064  | 0.01761  | 0.0382   | 0.41016  |
| 0.00289  | -0.36944 | 1.51E-16 | -0.16216 | 0.00043  | 0.13647422 | 0.00312  | 0.007013 | 0.87986  |
| 8.23E-07 | -0.24424 | 9.04E-08 | -0.13884 | 0.00264  | 0.23496348 | 2.81E-07 | 0.30886  | 8.84E-12 |
| 3.30E-08 | 0.059924 | 0.19613  | -0.01287 | 0.78141  | 0.11787654 | 0.01079  | 0.231666 | 4.15E-07 |
| 1.92E-18 | -0.16848 | 0.00025  | -0.18604 | 5.23E-05 | 0.05850039 | 0.20699  | 0.149339 | 0.00121  |
| 1.54E-20 | -0.24203 | 1.19E-07 | -0.06899 | 0.13656  | 0.1302343  | 0.00482  | 0.175456 | 0.00014  |
| 2.67E-17 | -0.4493  | 1.39E-24 | -0.30752 | 1.10E-11 | -0.0274856 | 0.55352  | -0.02835 | 0.54107  |
| 9.03E-40 | -0.06008 | 0.19496  | -0.05464 | 0.23863  | 0.15261532 | 0.00094  | 0.273021 | 1.99E-09 |
| 1.34E-08 | 0.011675 | 0.80133  | 0.030884 | 0.50555  | 0.30241627 | 2.48E-11 | 0.420859 | 1.80E-21 |
| 0.00893  | -0.21873 | 1.82E-06 | -0.14645 | 0.00151  | 0.12961276 | 0.00503  | 0.279893 | 7.47E-10 |
| 6.36E-10 | -0.30362 | 2.05E-11 | -0.13477 | 0.00352  | 0.25207408 | 3.35E-08 | 0.350987 | 5.52E-15 |
| 3.03E-09 | -0.06808 | 0.14182  | 0.043619 | 0.34695  | 0.32154028 | 1.08E-12 | 0.377788 | 2.73E-17 |
| 0.00317  | -0.11081 | 0.01659  | -0.01691 | 0.71556  | 0.33667747 | 7.69E-14 | 0.347832 | 9.98E-15 |
| 1.79E-10 | 0.002803 | 0.95183  | 0.069117 | 0.13585  | 0.17390294 | 0.00016  | 0.280077 | 7.27E-10 |
| 1.44E-11 | -0.11861 | 0.0103   | -0.1927  | 2.76E-05 | 0.07198249 | 0.12033  | 0.229938 | 5.08E-07 |
| 0.00011  | -0.46189 | 4.68E-26 | -0.2081  | 5.77E-06 | 0.02788085 | 0.54783  | -0.04416 | 0.34102  |
| 1.09E-08 | -0.04398 | 0.34292  | -0.03124 | 0.5007   | 0.2106426  | 4.40E-06 | 0.266317 | 5.05E-09 |
| 6.52E-17 | 0.059866 | 0.19656  | 0.097718 | 0.03476  | 0.24659653 | 6.73E-08 | 0.211165 | 4.16E-06 |
| 0.00045  | -0.25035 | 4.18E-08 | -0.15011 | 0.00114  | 0.11912879 | 0.00998  | 0.239362 | 1.65E-07 |
| 0.00864  | -0.02417 | 0.60236  | -0.05014 | 0.27961  | 0.0365289  | 0.43096  | -0.03929 | 0.39691  |

|          |          |          |          |          |            |          |          |          |
|----------|----------|----------|----------|----------|------------|----------|----------|----------|
| 2.90E-12 | -0.00133 | 0.97718  | 0.295387 | 7.41E-11 | 0.46257244 | 3.88E-26 | 0.382123 | 1.10E-17 |
| 7.58E-23 | -0.28925 | 1.88E-10 | -0.13991 | 0.00244  | 0.12783268 | 0.00567  | 0.155224 | 0.00076  |
| 4.33E-22 | -0.0889  | 0.05488  | 0.015091 | 0.74499  | 0.12743793 | 0.00582  | 0.181918 | 7.69E-05 |
| 0.08154  | -0.36803 | 2.00E-16 | -0.24984 | 4.46E-08 | -0.0201147 | 0.66461  | -0.05221 | 0.26015  |
| 1.21E-08 | -0.25597 | 2.02E-08 | -0.07674 | 0.09765  | 0.39165131 | 1.43E-18 | 0.446676 | 2.78E-24 |
| 0.0046   | -0.11294 | 0.01461  | 0.032335 | 0.48575  | 0.39343228 | 9.72E-19 | 0.397884 | 3.64E-19 |
| 7.58E-08 | 0.09514  | 0.03986  | -0.02438 | 0.59916  | 0.00749019 | 0.87175  | 0.061601 | 0.18388  |
| 5.46E-08 | -0.22821 | 6.22E-07 | -0.1036  | 0.02516  | 0.16125031 | 0.00047  | 0.13932  | 0.00255  |
| 0.00189  | -0.02084 | 0.65335  | -0.08895 | 0.05475  | -0.0030395 | 0.94777  | 0.062447 | 0.17792  |
| 0.26497  | -0.48642 | 4.15E-29 | -0.26305 | 7.87E-09 | 0.09084431 | 0.04977  | 0.099197 | 0.0321   |
| 1.15E-05 | -0.19292 | 2.70E-05 | -0.14861 | 0.00128  | -0.1026801 | 0.0265   | -0.16642 | 0.0003   |
| 0.00578  | -0.09949 | 0.03159  | -0.01847 | 0.69058  | 0.20047097 | 1.27E-05 | 0.195382 | 2.12E-05 |
| 5.20E-07 | -0.40855 | 3.26E-20 | -0.22166 | 1.31E-06 | 0.27108904 | 2.61E-09 | 0.284902 | 3.59E-10 |
| 1.25E-15 | -0.39198 | 1.33E-18 | -0.30327 | 2.17E-11 | 0.02035783 | 0.6608   | 0.057105 | 0.21804  |
| 3.17E-22 | -0.23693 | 2.22E-07 | -0.2206  | 1.48E-06 | 0.16446716 | 0.00036  | 0.300388 | 3.41E-11 |
| 0.00416  | 0.045222 | 0.32949  | 0.092614 | 0.04546  | 0.2735185  | 1.86E-09 | 0.301704 | 2.77E-11 |
| 7.77E-06 | -0.19208 | 2.93E-05 | -0.06565 | 0.15666  | 0.18506021 | 5.74E-05 | 0.243782 | 9.57E-08 |
| 4.82E-33 | -0.19335 | 2.59E-05 | -0.19374 | 2.49E-05 | 0.03739374 | 0.42013  | 0.114569 | 0.01323  |
| 3.19E-08 | -0.44454 | 4.85E-24 | -0.16994 | 0.00022  | 0.12760005 | 0.00576  | 0.043595 | 0.34721  |
| 9.50E-07 | -0.21664 | 2.30E-06 | -0.14618 | 0.00154  | 0.06030439 | 0.1933   | 0.089737 | 0.05263  |
| 6.08E-08 | 0.04342  | 0.34915  | 0.056075 | 0.22647  | 0.24567632 | 7.55E-08 | 0.343004 | 2.44E-14 |
| 0.00796  | -0.36249 | 6.00E-16 | -0.13127 | 0.00449  | 0.16082495 | 0.00049  | 0.111006 | 0.0164   |
| 1.09E-20 | -0.0528  | 0.25482  | 0.075714 | 0.10223  | 0.16565677 | 0.00032  | 0.174478 | 0.00015  |
| 0.03572  | -0.2971  | 5.69E-11 | -0.11939 | 0.00981  | 0.29669428 | 6.06E-11 | 0.387905 | 3.22E-18 |
| 0.00069  | -0.23351 | 3.34E-07 | -0.13783 | 0.00284  | 0.15443938 | 0.00081  | 0.208952 | 5.27E-06 |
| 0.38218  | -0.00358 | 0.93845  | -0.07294 | 0.11548  | -0.0997818 | 0.03109  | -0.12173 | 0.00846  |
| 1.74E-05 | -0.07372 | 0.1116   | 0.05931  | 0.20076  | 0.31767255 | 2.07E-12 | 0.365246 | 3.48E-16 |
| 8.85E-07 | 0.015183 | 0.74347  | -0.10445 | 0.02398  | 0.13774741 | 0.00285  | 0.266453 | 4.95E-09 |
| 0.00147  | -0.25835 | 1.48E-08 | -0.14729 | 0.00141  | 0.20605464 | 7.15E-06 | 0.331242 | 2.02E-13 |
| 0.52951  | -0.27739 | 1.07E-09 | -0.16426 | 0.00036  | 0.07522421 | 0.10447  | 0.106322 | 0.02156  |
| 1.95E-15 | -0.13377 | 0.00378  | -0.14347 | 0.00188  | 0.1980307  | 1.63E-05 | 0.365334 | 3.42E-16 |
| 4.58E-06 | -0.26241 | 8.57E-09 | -0.22986 | 5.13E-07 | 0.1663058  | 0.00031  | 0.180367 | 8.87E-05 |
| 0.52336  | -0.36336 | 5.06E-16 | -0.09889 | 0.03264  | -0.076494  | 0.09873  | -0.20713 | 6.39E-06 |
| 0.05134  | -0.02771 | 0.55033  | 0.015079 | 0.74517  | -0.1682886 | 0.00026  | -0.27422 | 1.68E-09 |
| 0.0257   | 0.047869 | 0.30194  | 0.075406 | 0.10364  | 0.09427579 | 0.04171  | -0.0486  | 0.29458  |
| 0.0438   | 0.053813 | 0.24579  | 0.03842  | 0.40748  | -0.1402965 | 0.00238  | -0.10064 | 0.02967  |
| 0.16403  | -0.04602 | 0.32098  | 0.033655 | 0.46812  | -0.090862  | 0.04972  | -0.1052  | 0.02299  |
| 0.21072  | -0.08749 | 0.05887  | 0.028624 | 0.53721  | -0.3018056 | 2.73E-11 | -0.2781  | 9.68E-10 |
| 0.00582  | 0.118786 | 0.01019  | 0.048429 | 0.29632  | -0.014978  | 0.74683  | -0.05337 | 0.24973  |
| 0.06691  | 0.018759 | 0.68597  | 0.13343  | 0.00387  | 0.20798745 | 5.84E-06 | 0.150072 | 0.00114  |
| 0.00561  | -0.18482 | 5.87E-05 | 0.117918 | 0.01076  | 0.14191177 | 0.00211  | 0.121426 | 0.00862  |
| 0.09179  | -0.20628 | 6.99E-06 | -0.14016 | 0.0024   | -0.2119738 | 3.82E-06 | -0.21872 | 1.83E-06 |
| 0.02546  | -0.16362 | 0.00038  | -0.04566 | 0.32479  | -0.1764569 | 0.00013  | -0.29912 | 4.16E-11 |
| 0.00254  | 0.177168 | 0.00012  | 0.064949 | 0.16113  | -0.3884732 | 2.85E-18 | -0.43048 | 1.72E-22 |
| 0.30952  | -0.04573 | 0.32408  | -0.10924 | 0.0182   | -0.2044351 | 8.46E-06 | -0.22988 | 5.12E-07 |

|          |          |          |          |          |            |          |          |          |
|----------|----------|----------|----------|----------|------------|----------|----------|----------|
| 0.12152  | 0.025628 | 0.58065  | -0.01831 | 0.69305  | -0.1280474 | 0.00559  | -0.11414 | 0.01358  |
| 0.038    | 0.092554 | 0.0456   | 0.102424 | 0.02688  | -0.1480787 | 0.00133  | -0.31399 | 3.83E-12 |
| 0.00025  | 0.107694 | 0.01992  | 0.024445 | 0.59825  | -0.2133553 | 3.29E-06 | -0.34696 | 1.17E-14 |
| 0.01285  | 0.243858 | 9.48E-08 | 0.285305 | 3.39E-10 | 0.08835685 | 0.05639  | -0.11573 | 0.01233  |
| 0.00015  | -0.21449 | 2.91E-06 | -0.22525 | 8.74E-07 | -0.2363122 | 2.39E-07 | -0.27549 | 1.40E-09 |
| 0.84572  | 0.008063 | 0.86204  | -0.12162 | 0.00851  | -0.2393927 | 1.64E-07 | -0.29642 | 6.31E-11 |
| 0.09662  | 0.041508 | 0.3708   | 0.008815 | 0.84932  | -0.1679165 | 0.00027  | -0.10915 | 0.0183   |
| 7.14E-06 | 0.151654 | 0.00101  | 0.068716 | 0.13814  | -0.1975852 | 1.70E-05 | -0.13339 | 0.00388  |
| 0.02709  | -0.23133 | 4.32E-07 | -0.21403 | 3.05E-06 | 0.01007227 | 0.82814  | -0.06235 | 0.17862  |
| 0.0016   | 0.008351 | 0.85716  | -0.0115  | 0.80432  | -0.2623374 | 8.66E-09 | -0.33985 | 4.34E-14 |
| 0.02131  | -0.15509 | 0.00077  | -0.16914 | 0.00024  | -0.3135091 | 4.14E-12 | -0.28928 | 1.87E-10 |
| 0.46661  | -0.24912 | 4.89E-08 | -0.17609 | 0.00013  | -0.3166043 | 2.48E-12 | -0.29676 | 6.00E-11 |
| 0.25907  | 0.007547 | 0.87079  | 0.106625 | 0.02119  | -0.2134728 | 3.25E-06 | -0.29033 | 1.60E-10 |
| 0.89381  | 0.036685 | 0.429    | 0.159801 | 0.00053  | -0.0452287 | 0.32942  | -0.15232 | 0.00096  |
| 0.97883  | 0.029208 | 0.52894  | 0.190667 | 3.36E-05 | 0.09066324 | 0.05023  | -0.04613 | 0.31988  |
| 0.07309  | 0.077826 | 0.09298  | -0.02583 | 0.57764  | -0.280289  | 7.05E-10 | -0.34401 | 2.03E-14 |
| 0.6566   | -0.33318 | 1.43E-13 | -0.15245 | 0.00095  | -0.015637  | 0.73609  | -0.04442 | 0.33817  |
| 0.00227  | -0.17505 | 0.00014  | -0.13858 | 0.00269  | 0.0298849  | 0.51943  | 0.0197   | 0.67111  |
| 0.19412  | -0.17505 | 0.00014  | -0.12047 | 0.00916  | 0.00393325 | 0.93244  | -0.02779 | 0.54911  |
| 2.86E-05 | 0.229082 | 5.62E-07 | 0.232858 | 3.60E-07 | -0.1144203 | 0.01336  | -0.25924 | 1.31E-08 |
| 1.97E-05 | 0.003946 | 0.93222  | 0.028966 | 0.53236  | 0.00329453 | 0.94339  | -0.09362 | 0.04315  |
| 0.06463  | -0.22512 | 8.87E-07 | -0.22096 | 1.42E-06 | -0.3938772 | 8.82E-19 | -0.39252 | 1.19E-18 |
| 0.00095  | 0.015452 | 0.7391   | 0.120698 | 0.00903  | -0.0272679 | 0.55667  | -0.20059 | 1.26E-05 |
| 0.02165  | -0.09644 | 0.03722  | 0.037638 | 0.4171   | -0.0438379 | 0.34453  | -0.01057 | 0.81982  |
| 0.00344  | -0.10969 | 0.01773  | -0.13803 | 0.0028   | -0.4621502 | 4.36E-26 | -0.56581 | 7.11E-41 |
| 0.09949  | 0.048487 | 0.29574  | 0.025018 | 0.58969  | -0.104038  | 0.02455  | -0.12156 | 0.00855  |
| 0.96351  | 0.226321 | 7.73E-07 | 0.146531 | 0.0015   | -0.0278881 | 0.54773  | -0.03969 | 0.3921   |
| 0.04787  | -0.13044 | 0.00475  | -0.09657 | 0.03696  | -0.1073413 | 0.02033  | -0.06445 | 0.16436  |
| 0.0197   | 0.12717  | 0.00592  | 0.093579 | 0.04325  | -0.1512363 | 0.00104  | -0.23818 | 1.90E-07 |
| 0.00014  | 0.098018 | 0.03421  | 0.148661 | 0.00127  | -0.1947867 | 2.25E-05 | -0.27615 | 1.28E-09 |
| 0.00251  | -0.01557 | 0.73726  | -0.01569 | 0.73529  | -0.2485927 | 5.23E-08 | -0.30341 | 2.12E-11 |
| 0.00363  | 0.010674 | 0.81805  | 0.06995  | 0.13119  | -0.055656  | 0.22997  | -0.09015 | 0.05154  |
| 0.01021  | 0.041407 | 0.37197  | 0.057817 | 0.21235  | -0.1283375 | 0.00548  | -0.16615 | 0.00031  |
| 0.80661  | 0.247358 | 6.11E-08 | 0.199718 | 1.37E-05 | -0.0192518 | 0.67817  | -0.00682 | 0.8831   |
| 0.00188  | 0.2657   | 5.49E-09 | 0.225657 | 8.35E-07 | -0.0727332 | 0.1165   | -0.07024 | 0.1296   |
| 0.92236  | -0.15112 | 0.00105  | 0.043129 | 0.35239  | -0.0967606 | 0.03659  | -0.21818 | 1.94E-06 |
| 0.00619  | -0.04304 | 0.35335  | 0.049941 | 0.28147  | 0.06471828 | 0.16263  | 0.051658 | 0.26524  |
| 0.12597  | -0.3665  | 2.71E-16 | -0.15292 | 0.00092  | 0.01734138 | 0.70857  | -0.01019 | 0.82619  |
| 0.01527  | -0.2021  | 1.08E-05 | -0.03064 | 0.50887  | 0.08023911 | 0.08325  | 0.103466 | 0.02536  |
| 0.06928  | -0.05355 | 0.24814  | 0.094917 | 0.04034  | -0.0988569 | 0.03269  | -0.14491 | 0.00169  |
| 0.10924  | 0.032859 | 0.47871  | 0.217336 | 2.13E-06 | 0.10712218 | 0.02059  | 0.011273 | 0.80803  |
| 0.93088  | 0.149644 | 0.00118  | 0.085673 | 0.06433  | -0.0373016 | 0.42127  | -0.0096  | 0.83603  |
| 0.15563  | -0.1221  | 0.00826  | -0.14419 | 0.00178  | -0.1548374 | 0.00079  | -0.14262 | 0.002    |
| 0.03338  | 0.033674 | 0.46786  | 0.039673 | 0.39234  | -0.1489432 | 0.00125  | -0.19816 | 1.61E-05 |
| 0.11777  | -0.06693 | 0.14872  | 0.007965 | 0.86371  | -0.0286664 | 0.53661  | -0.04133 | 0.3729   |

|          |          |          |          |          |            |          |          |          |
|----------|----------|----------|----------|----------|------------|----------|----------|----------|
| 0.00109  | 0.023127 | 0.61813  | 0.080253 | 0.0832   | -0.001009  | 0.98265  | -0.04699 | 0.31095  |
| 0.00114  | 0.135328 | 0.00339  | 0.240752 | 1.39E-07 | -0.1902584 | 3.50E-05 | -0.23847 | 1.84E-07 |
| 0.90056  | 0.063066 | 0.17365  | 0.00211  | 0.96373  | -0.2294252 | 5.40E-07 | -0.34296 | 2.46E-14 |
| 0.39959  | -0.3438  | 2.11E-14 | -0.18666 | 4.94E-05 | -0.1446583 | 0.00172  | -0.23762 | 2.04E-07 |
| 0.24811  | -0.10502 | 0.02322  | -0.08028 | 0.08309  | -0.053043  | 0.25262  | -0.05649 | 0.22302  |
| 0.00242  | -0.12642 | 0.00623  | -0.1604  | 0.0005   | -0.2107832 | 4.34E-06 | -0.24469 | 8.54E-08 |
| 0.00057  | -0.27757 | 1.04E-09 | -0.06032 | 0.1932   | -0.1250497 | 0.00682  | -0.30214 | 2.59E-11 |
| 0.21557  | 0.024779 | 0.59325  | 0.020475 | 0.65898  | -0.0544618 | 0.24014  | -0.07998 | 0.08424  |
| 0.11139  | -0.13141 | 0.00445  | -0.04186 | 0.36677  | 0.09045167 | 0.05077  | 0.070164 | 0.13001  |
| 0.06127  | -0.29373 | 9.55E-11 | -0.07263 | 0.11701  | -0.0149812 | 0.74677  | -0.06283 | 0.17528  |
| 7.41E-05 | 0.029943 | 0.51862  | -0.01749 | 0.7062   | -0.1421947 | 0.00207  | -0.10718 | 0.02052  |
| 0.0049   | 0.06581  | 0.15564  | 0.017995 | 0.69811  | -0.1851223 | 5.71E-05 | -0.18315 | 6.86E-05 |
| 0.0154   | 0.132942 | 0.004    | 0.171969 | 0.00019  | -0.0409686 | 0.37705  | -0.1     | 0.03073  |
| 0.00177  | -0.13057 | 0.00471  | 0.020328 | 0.66127  | 0.12545462 | 0.00664  | 0.109768 | 0.01765  |
| 0.72506  | -0.23978 | 1.57E-07 | 0.007212 | 0.87648  | 0.13054606 | 0.00472  | 0.06587  | 0.15526  |
| 0.00377  | -0.07657 | 0.09839  | -0.09346 | 0.04352  | -0.0781702 | 0.09154  | -0.06542 | 0.15809  |
| 0.35293  | 0.052106 | 0.26111  | -0.0173  | 0.70921  | -0.1700544 | 0.00022  | -0.14977 | 0.00117  |
| 0.19448  | -0.07782 | 0.09302  | -0.31164 | 5.62E-12 | -0.4595778 | 8.82E-26 | -0.49658 | 1.90E-30 |
| 2.89E-06 | -0.02707 | 0.55956  | 0.103527 | 0.02527  | 0.04834874 | 0.29712  | 0.002619 | 0.95498  |
| 0.00024  | 0.056519 | 0.22281  | 0.323132 | 8.24E-13 | -0.0300723 | 0.51681  | -0.23046 | 4.78E-07 |
| 0.00036  | 0.011266 | 0.80815  | 0.205981 | 7.20E-06 | -0.009341  | 0.84045  | -0.19388 | 2.46E-05 |
| 6.63E-09 | 0.087452 | 0.05897  | 0.146405 | 0.00151  | 0.12380683 | 0.00739  | 0.04117  | 0.37471  |
| 0.72256  | -0.16815 | 0.00026  | -0.08529 | 0.06553  | -0.1272867 | 0.00588  | -0.20337 | 9.45E-06 |
| 0.03172  | -0.0223  | 0.63077  | 0.102689 | 0.02648  | -0.1185393 | 0.01035  | -0.22705 | 7.11E-07 |
| 0.49262  | 0.071617 | 0.12223  | -0.10113 | 0.02887  | -0.0466616 | 0.31431  | -0.17109 | 0.0002   |
| 0.42064  | -0.32605 | 4.99E-13 | -0.16599 | 0.00032  | -0.1169877 | 0.0114   | -0.18583 | 5.34E-05 |
| 0.02381  | -0.07664 | 0.09809  | -0.02774 | 0.54981  | -0.0878138 | 0.05793  | -0.19286 | 2.72E-05 |
| 0.00022  | 0.073845 | 0.111    | 0.063711 | 0.16928  | -0.1668036 | 0.00029  | -0.3421  | 2.88E-14 |
| 0.57152  | -0.02223 | 0.63175  | -0.03303 | 0.47643  | -0.1535939 | 0.00087  | -0.14636 | 0.00152  |
| 0.00268  | 0.156623 | 0.00068  | 0.155462 | 0.00075  | -0.1377226 | 0.00286  | -0.19355 | 2.54E-05 |
| 0.01472  | -0.20121 | 1.18E-05 | -0.06963 | 0.13296  | -0.0226946 | 0.62471  | -0.13031 | 0.0048   |
| 0.95627  | -0.47337 | 1.87E-27 | -0.23069 | 4.66E-07 | 0.01496716 | 0.747    | 0.06493  | 0.16125  |
| 0.33259  | 0.016578 | 0.72085  | -0.00627 | 0.89247  | -0.1580133 | 0.00061  | -0.18074 | 8.58E-05 |
| 0.65314  | 0.054732 | 0.23781  | 0.018722 | 0.68655  | -0.2753248 | 1.44E-09 | -0.3092  | 8.37E-12 |
| 0.75569  | 0.031791 | 0.49313  | -0.0212  | 0.64766  | -0.2583994 | 1.47E-08 | -0.27654 | 1.21E-09 |
| 0.20056  | -0.02305 | 0.61929  | 0.01437  | 0.75678  | -0.0646831 | 0.16286  | -0.04582 | 0.32309  |
| 0.00011  | -0.02456 | 0.59646  | 0.066    | 0.15445  | -0.0598451 | 0.19672  | -0.10697 | 0.02077  |
| 0.15632  | -0.09456 | 0.0411   | 0.009591 | 0.83624  | -0.0704389 | 0.12851  | -0.22354 | 1.06E-06 |
| 0.04331  | -0.08423 | 0.06897  | -0.0928  | 0.04502  | -0.1103579 | 0.01704  | -0.09947 | 0.03162  |
| 0.12347  | 0.02058  | 0.65734  | 0.070219 | 0.12971  | -0.0334242 | 0.47118  | -0.19635 | 1.92E-05 |
| 0.45343  | -0.24896 | 4.99E-08 | -0.08632 | 0.06234  | -0.3253606 | 5.62E-13 | -0.40432 | 8.58E-20 |
| 0.00401  | -0.20956 | 4.94E-06 | 0.016518 | 0.72182  | -0.0759221 | 0.10128  | -0.15146 | 0.00103  |
| 0.51972  | -0.01543 | 0.73951  | 0.158198 | 0.0006   | 0.12435162 | 0.00713  | 0.121656 | 0.00849  |
| 0.00057  | 0.239903 | 1.54E-07 | 0.21642  | 2.35E-06 | -0.2331011 | 3.50E-07 | -0.28259 | 5.04E-10 |
| 0.00476  | -0.02379 | 0.60803  | 0.010036 | 0.82875  | -0.2836416 | 4.33E-10 | -0.39256 | 1.18E-18 |

|          |          |          |          |          |            |          |          |          |
|----------|----------|----------|----------|----------|------------|----------|----------|----------|
| 0.05671  | -0.33995 | 4.26E-14 | -0.25787 | 1.57E-08 | -0.288001  | 2.27E-10 | -0.37763 | 2.82E-17 |
| 0.002    | -0.11861 | 0.01031  | 0.066427 | 0.15179  | 0.14196585 | 0.0021   | 0.093964 | 0.04239  |
| 3.99E-11 | 0.045372 | 0.32789  | -0.01874 | 0.68626  | -0.1696271 | 0.00023  | -0.19377 | 2.49E-05 |
| 0.69787  | 0.122862 | 0.00786  | 0.236484 | 2.34E-07 | 0.01452956 | 0.75416  | -0.00105 | 0.98198  |
| 0.20663  | -0.12137 | 0.00865  | -0.04011 | 0.38711  | -0.0700601 | 0.13058  | -0.16846 | 0.00026  |
| 0.24173  | 0.016463 | 0.7227   | 0.093672 | 0.04304  | 0.05819315 | 0.20939  | -0.01539 | 0.74012  |
| 0.00133  | -0.25369 | 2.71E-08 | -0.13662 | 0.00309  | -0.1360804 | 0.00321  | -0.24185 | 1.22E-07 |
| 0.05033  | 0.07308  | 0.11476  | 0.081899 | 0.07705  | -0.0834772 | 0.0715   | -0.07559 | 0.10277  |
| 0.14491  | 0.060134 | 0.19457  | 0.117998 | 0.01071  | 0.00171692 | 0.97048  | -0.05584 | 0.22841  |
| 0.07177  | 0.181043 | 8.34E-05 | 0.183739 | 6.50E-05 | -0.0346091 | 0.45559  | -0.15821 | 0.0006   |
| 0.42123  | -0.26889 | 3.54E-09 | -0.11963 | 0.00967  | -0.217011  | 2.21E-06 | -0.26549 | 5.65E-09 |
| 0.73578  | -0.05045 | 0.27662  | 0.065797 | 0.15572  | -0.0020894 | 0.96408  | -0.00058 | 0.99004  |
| 0.03301  | -0.10082 | 0.02938  | 0.127619 | 0.00575  | 0.13709172 | 0.00299  | 0.110921 | 0.01649  |
| 0.73716  | -0.25995 | 1.19E-08 | -0.03872 | 0.40382  | 0.02591926 | 0.57636  | -0.00071 | 0.98785  |
| 0.71409  | -0.27512 | 1.48E-09 | 0.007431 | 0.87275  | -0.0767455 | 0.09762  | -0.15875 | 0.00057  |
| 0.05795  | -0.15958 | 0.00054  | 0.047651 | 0.30415  | -0.0060867 | 0.89563  | -0.06426 | 0.16564  |
| 0.28255  | -0.15926 | 0.00055  | -0.02739 | 0.55493  | -0.0014081 | 0.97579  | -0.0127  | 0.78433  |
| 0.64166  | -0.18217 | 7.51E-05 | -0.00578 | 0.90084  | -0.1056296 | 0.02243  | -0.20276 | 1.01E-05 |
| 0.94088  | -0.20178 | 1.11E-05 | -0.03655 | 0.43074  | 0.01475324 | 0.7505   | -0.02741 | 0.55468  |
| 0.97932  | -0.22158 | 1.33E-06 | 0.007316 | 0.87471  | 0.03439224 | 0.45842  | 0.012864 | 0.78158  |
| 0.49778  | -0.25136 | 3.67E-08 | 0.011791 | 0.7994   | -0.122394  | 0.0081   | -0.19525 | 2.15E-05 |
| 0.66427  | -0.19743 | 1.73E-05 | 0.059323 | 0.20066  | 0.02283867 | 0.62251  | -0.05028 | 0.2782   |
| 0.00176  | -0.09065 | 0.05025  | 0.01297  | 0.77983  | -0.0651434 | 0.15988  | -0.28481 | 3.64E-10 |
| 0.05055  | 0.066979 | 0.14841  | 0.092328 | 0.04614  | 0.01090503 | 0.81418  | -0.0189  | 0.68377  |
| 0.24116  | -0.02253 | 0.62716  | -0.06472 | 0.16264  | -0.0945567 | 0.0411   | -0.09778 | 0.03464  |
| 6.58E-05 | 0.268046 | 3.98E-09 | 0.060887 | 0.18902  | -0.1915077 | 3.10E-05 | -0.26138 | 9.85E-09 |
| 0.00817  | 0.079715 | 0.08529  | -0.08048 | 0.08233  | -0.3770562 | 3.18E-17 | -0.46521 | 1.87E-26 |
| 0.01687  | -0.12486 | 0.0069   | -0.23078 | 4.60E-07 | -0.2569746 | 1.77E-08 | -0.19128 | 3.17E-05 |
| 0.0281   | -0.05842 | 0.20764  | -0.14602 | 0.00156  | -0.2800414 | 7.31E-10 | -0.21824 | 1.93E-06 |
| 0.00281  | 0.129071 | 0.00521  | 0.004684 | 0.91958  | -0.1387418 | 0.00266  | -0.21422 | 2.99E-06 |
| 0.10495  | -0.07383 | 0.11109  | -0.14729 | 0.00141  | -0.2310409 | 4.47E-07 | -0.3254  | 5.59E-13 |
| 0.31603  | 0.058058 | 0.21045  | 0.001594 | 0.97259  | -0.0812729 | 0.07934  | -0.19116 | 3.20E-05 |
| 0.03354  | 0.052528 | 0.25727  | -0.05314 | 0.25177  | -0.0649775 | 0.16095  | -0.1398  | 0.00246  |
| 0.03331  | -0.0409  | 0.37788  | 0.025756 | 0.57876  | -0.0202578 | 0.66237  | -0.07308 | 0.11476  |
| 3.89E-13 | 0.098558 | 0.03323  | 0.006541 | 0.88789  | -0.0163911 | 0.72387  | -0.08949 | 0.0533   |
| 0.02191  | -0.17668 | 0.00012  | 0.021711 | 0.6398   | 0.16586779 | 0.00032  | 0.064068 | 0.1669   |
| 0.0457   | -0.09659 | 0.03691  | -0.17202 | 0.00019  | -0.0712119 | 0.12436  | -0.096   | 0.0381   |
| 0.05895  | -0.06477 | 0.16232  | 0.101737 | 0.02792  | 0.08952761 | 0.05319  | -0.02533 | 0.58507  |
| 0.11876  | -0.0209  | 0.65234  | -0.15491 | 0.00078  | -0.1605969 | 0.00049  | -0.18804 | 4.33E-05 |
| 0.13685  | -0.06982 | 0.13193  | -0.04769 | 0.30372  | -0.0139545 | 0.76359  | -0.11767 | 0.01093  |
| 0.06721  | 0.056325 | 0.2244   | 0.095067 | 0.04002  | 0.05012014 | 0.27975  | 0.034332 | 0.4592   |
| 0.00235  | 0.060959 | 0.1885   | 0.008443 | 0.85562  | 0.00776262 | 0.86713  | -0.09894 | 0.03256  |
| 0.62579  | -0.07066 | 0.12734  | -0.03782 | 0.41478  | -0.0955682 | 0.03898  | -0.12556 | 0.00659  |
| 0.282    | -0.10584 | 0.02217  | -0.07038 | 0.12882  | -0.1679033 | 0.00027  | -0.20281 | 1.00E-05 |
| 0.0174   | -0.12026 | 0.00928  | -0.07687 | 0.09706  | -0.1371838 | 0.00297  | -0.18478 | 5.89E-05 |



|          |          |          |          |          |            |          |          |          |
|----------|----------|----------|----------|----------|------------|----------|----------|----------|
| 0.00563  | -0.15085 | 0.00108  | -0.05628 | 0.22475  | -0.180881  | 8.46E-05 | -0.27028 | 2.92E-09 |
| 0.06173  | -0.18495 | 5.80E-05 | -0.04834 | 0.29723  | 0.0695273  | 0.13354  | 0.05127  | 0.26886  |
| 0.45245  | -0.18227 | 7.45E-05 | 0.006608 | 0.88676  | 0.05876859 | 0.20491  | -0.00137 | 0.97651  |
| 0.18673  | 0.05907  | 0.20259  | 0.069378 | 0.13438  | -0.0886423 | 0.05559  | -0.14716 | 0.00143  |
| 0.66705  | 0.063082 | 0.17354  | 0.119819 | 0.00955  | -0.156238  | 0.0007   | -0.17322 | 0.00017  |
| 0.18669  | 0.19269  | 2.76E-05 | 0.135604 | 0.00332  | -0.054781  | 0.23739  | -0.05365 | 0.24724  |
| 0.49794  | -0.02565 | 0.58034  | -0.04265 | 0.35779  | -0.0856935 | 0.06427  | -0.11602 | 0.01211  |
| 0.02623  | 0.044065 | 0.34203  | 0.038488 | 0.40665  | -0.0671451 | 0.1474   | -0.11346 | 0.01416  |
| 0.0762   | 0.01614  | 0.72793  | -0.09664 | 0.03683  | -0.2596491 | 1.24E-08 | -0.23186 | 4.06E-07 |
| 0.02803  | 0.144126 | 0.00179  | 0.192038 | 2.94E-05 | -0.0140281 | 0.76238  | -0.0771  | 0.09609  |
| 0.01778  | 0.180524 | 8.75E-05 | 0.009424 | 0.83905  | -0.1138859 | 0.0138   | -0.25498 | 2.30E-08 |
| 0.69928  | -0.11431 | 0.01344  | 0.031639 | 0.49519  | 0.12301644 | 0.00778  | 0.018744 | 0.68621  |
| 0.43512  | -0.07241 | 0.11815  | 0.006366 | 0.89087  | -0.0482494 | 0.29811  | -0.12336 | 0.00761  |
| 0.08758  | -0.26185 | 9.25E-09 | -0.10926 | 0.01818  | -0.1253814 | 0.00667  | -0.22895 | 5.70E-07 |
| 0.05626  | -0.19918 | 1.45E-05 | -0.16881 | 0.00025  | -0.3732017 | 7.01E-17 | -0.43929 | 1.87E-23 |
| 0.00011  | -0.02459 | 0.59603  | -0.07732 | 0.09514  | -0.3154431 | 3.01E-12 | -0.42524 | 6.24E-22 |
| 0.06171  | -0.1292  | 0.00517  | -0.05063 | 0.27488  | -0.270339  | 2.90E-09 | -0.25226 | 3.27E-08 |
| 0.42914  | 0.087213 | 0.05967  | 0.235249 | 2.71E-07 | -0.0005926 | 0.98981  | -0.08373 | 0.07064  |
| 0.64357  | -0.05323 | 0.25095  | 0.025692 | 0.57971  | 0.03861694 | 0.40507  | -0.03662 | 0.4298   |
| 0.04532  | -0.13718 | 0.00297  | -0.15898 | 0.00056  | -0.1478398 | 0.00136  | -0.09086 | 0.04973  |
| 0.01483  | -0.08242 | 0.07516  | -0.05771 | 0.21323  | -0.0676557 | 0.14434  | -0.12331 | 0.00764  |
| 0.04021  | 0.185749 | 5.38E-05 | 0.176798 | 0.00012  | -0.0514383 | 0.26728  | -0.14229 | 0.00205  |
| 0.47166  | -0.19174 | 3.03E-05 | -0.12744 | 0.00582  | -0.0864978 | 0.0618   | -0.189   | 3.95E-05 |
| 0.52662  | 0.125787 | 0.00649  | 0.195355 | 2.12E-05 | -0.0307752 | 0.50705  | -0.10851 | 0.01899  |
| 0.01769  | 0.020972 | 0.65124  | 0.111229 | 0.01619  | -0.0083884 | 0.85653  | -0.14658 | 0.00149  |
| 0.98664  | -0.15573 | 0.00073  | -0.12695 | 0.00601  | -0.2313279 | 4.32E-07 | -0.33359 | 1.33E-13 |
| 0.02134  | 0.131206 | 0.00451  | 0.095095 | 0.03996  | -0.0268305 | 0.56302  | -0.10859 | 0.01891  |
| 0.57184  | -0.038   | 0.41266  | 0.042301 | 0.36172  | 0.00910167 | 0.84448  | -0.08201 | 0.07664  |
| 2.49E-07 | 0.189028 | 3.94E-05 | 0.12947  | 0.00508  | -0.259699  | 1.23E-08 | -0.37937 | 1.96E-17 |
| 0.33915  | -0.06571 | 0.15627  | 0.028423 | 0.54007  | -0.1759145 | 0.00013  | -0.3205  | 1.29E-12 |
| 0.00147  | 0.013408 | 0.77259  | 0.075211 | 0.10453  | -0.1481338 | 0.00133  | -0.23553 | 2.62E-07 |
| 0.00081  | 0.034779 | 0.45338  | 0.012209 | 0.79244  | -0.0509399 | 0.27195  | -0.01682 | 0.71688  |
| 0.00232  | 0.029038 | 0.53134  | 0.017962 | 0.69865  | 0.01418237 | 0.75985  | -0.08066 | 0.08163  |
| 0.18573  | -0.01798 | 0.69842  | -0.0387  | 0.40401  | -0.0909028 | 0.04962  | -0.19429 | 2.36E-05 |
| 0.32198  | -0.2324  | 3.80E-07 | -0.18938 | 3.81E-05 | -0.0513061 | 0.26851  | -0.13212 | 0.00423  |
| 4.35E-05 | 0.065356 | 0.15852  | -0.02779 | 0.54913  | -0.1484564 | 0.00129  | -0.22314 | 1.11E-06 |
| 0.09188  | 0.099297 | 0.03192  | -0.01942 | 0.67557  | -0.2216542 | 1.32E-06 | -0.24929 | 4.78E-08 |
| 0.10548  | -0.11091 | 0.0165   | -0.09452 | 0.04118  | -0.0497876 | 0.28296  | -0.12131 | 0.00869  |
| 0.35677  | -0.34593 | 1.42E-14 | -0.08174 | 0.07764  | 0.08771856 | 0.0582   | -0.03061 | 0.50935  |
| 0.81292  | -0.02538 | 0.58439  | -0.09885 | 0.03271  | -0.3177001 | 2.06E-12 | -0.37128 | 1.04E-16 |
| 0.15387  | -0.2705  | 2.83E-09 | -0.05677 | 0.22077  | -0.0298977 | 0.51925  | -0.13174 | 0.00435  |
| 0.31373  | -0.07381 | 0.11116  | -0.19389 | 2.45E-05 | -0.2093217 | 5.07E-06 | -0.24259 | 1.11E-07 |
| 0.26302  | -0.27519 | 1.46E-09 | -0.25248 | 3.18E-08 | -0.2455806 | 7.64E-08 | -0.35071 | 5.81E-15 |
| 0.15471  | -0.21155 | 3.99E-06 | 0.043081 | 0.35293  | -0.0416551 | 0.3691   | -0.26435 | 6.60E-09 |
| 0.00099  | 0.201069 | 1.20E-05 | 0.301667 | 2.79E-11 | -0.2584084 | 1.46E-08 | -0.3962  | 5.29E-19 |

|          |          |          |          |          |            |          |          |          |
|----------|----------|----------|----------|----------|------------|----------|----------|----------|
| 0.0188   | 0.257386 | 1.67E-08 | 0.071802 | 0.12126  | -0.5048172 | 1.45E-31 | -0.60288 | 1.50E-47 |
| 3.98E-06 | 0.039738 | 0.39156  | 0.119454 | 0.00977  | 0.06568687 | 0.15642  | 0.028213 | 0.54307  |
| 0.487    | 0.046744 | 0.31346  | 0.016357 | 0.72443  | -0.1401835 | 0.0024   | -0.22767 | 6.61E-07 |
| 0.39298  | -0.32414 | 6.93E-13 | -0.08395 | 0.06991  | 0.17246262 | 0.00018  | 0.084769 | 0.06721  |
| 0.00339  | 0.225714 | 8.29E-07 | 0.119652 | 0.00965  | -0.0235458 | 0.61178  | -0.03732 | 0.42107  |
| 5.17E-06 | -0.20449 | 8.41E-06 | -0.08673 | 0.06109  | -0.2049285 | 8.04E-06 | -0.28119 | 6.19E-10 |
| 0.67161  | -0.23728 | 2.12E-07 | -0.08299 | 0.07318  | 0.13582977 | 0.00327  | 0.131799 | 0.00433  |
| 0.56277  | 0.02614  | 0.57311  | -0.10929 | 0.01815  | -0.1989442 | 1.48E-05 | -0.20322 | 9.59E-06 |
| 0.00018  | 0.112794 | 0.01474  | 0.224235 | 9.82E-07 | 0.08468714 | 0.06748  | -0.05233 | 0.25906  |
| 0.00187  | 0.141557 | 0.00217  | 0.166778 | 0.00029  | -0.1434792 | 0.00188  | -0.28155 | 5.87E-10 |
| 0.30845  | -0.05187 | 0.2633   | -0.00816 | 0.86043  | -0.1347806 | 0.00352  | -0.21408 | 3.04E-06 |
| 0.00026  | 0.264967 | 6.07E-09 | 0.219041 | 1.76E-06 | 0.16642626 | 0.0003   | -0.01432 | 0.75767  |
| 0.3321   | -0.29394 | 9.25E-11 | -0.19981 | 1.36E-05 | 0.05345398 | 0.24896  | -0.08014 | 0.08365  |
| 0.2032   | -0.02508 | 0.58873  | -0.11087 | 0.01653  | -0.0788738 | 0.08865  | -0.03795 | 0.41321  |
| 0.18219  | -0.16525 | 0.00034  | 0.044684 | 0.33529  | -0.1365026 | 0.00312  | -0.11767 | 0.01093  |
| 0.46853  | -0.03067 | 0.50852  | 0.145879 | 0.00157  | -0.0128889 | 0.78117  | -0.23923 | 1.68E-07 |
| 0.61892  | -0.13765 | 0.00287  | -0.04187 | 0.36669  | -0.1252574 | 0.00672  | -0.14308 | 0.00194  |
| 0.01369  | 0.071397 | 0.12338  | 0.063983 | 0.16747  | -0.0174932 | 0.70614  | -0.0065  | 0.88858  |
| 0.56901  | 0.231487 | 4.24E-07 | 0.136415 | 0.00314  | -0.0843504 | 0.06858  | -0.11452 | 0.01327  |
| 1.10E-05 | 0.190193 | 3.52E-05 | 0.102753 | 0.02639  | -0.0852869 | 0.06555  | -0.14354 | 0.00187  |
| 0.46949  | 0.045638 | 0.32505  | 0.030669 | 0.50853  | -0.0092818 | 0.84144  | -0.04161 | 0.36963  |
| 0.41315  | 0.022825 | 0.62272  | 0.046003 | 0.3212   | -0.0275676 | 0.55234  | -0.09001 | 0.05192  |
| 0.05385  | 0.044727 | 0.33482  | 0.10369  | 0.02504  | 0.11571712 | 0.01234  | 0.063644 | 0.16973  |
| 0.19958  | -0.08314 | 0.07265  | -0.03856 | 0.40575  | -0.0207912 | 0.65405  | -0.00086 | 0.9852   |
| 0.0729   | 0.124746 | 0.00695  | 0.271511 | 2.46E-09 | 0.12379107 | 0.0074   | 0.045588 | 0.32559  |
| 0.21609  | -0.06132 | 0.18592  | -0.00826 | 0.85876  | -0.1024064 | 0.0269   | -0.13303 | 0.00398  |
| 0.2101   | 0.026514 | 0.56764  | 0.098201 | 0.03387  | -0.0285979 | 0.53758  | -0.06759 | 0.14473  |
| 0.54478  | -0.14552 | 0.00162  | -0.0744  | 0.10834  | 0.02797211 | 0.54652  | 0.023132 | 0.61805  |
| 0.30016  | 0.061002 | 0.18819  | 0.066313 | 0.1525   | -0.058513  | 0.20689  | -0.12984 | 0.00495  |
| 0.08697  | 0.113796 | 0.01387  | 0.044623 | 0.33595  | -0.0767802 | 0.09747  | -0.14646 | 0.00151  |
| 3.41E-05 | 0.002856 | 0.95092  | 0.105556 | 0.02253  | -0.0271843 | 0.55788  | -0.12944 | 0.00509  |
| 0.11017  | 0.141408 | 0.00219  | 0.166511 | 0.0003   | 0.05219764 | 0.26027  | -0.01149 | 0.80435  |
| 0.00362  | 0.01033  | 0.82382  | 0.07533  | 0.10399  | 0.04575043 | 0.32387  | -0.01214 | 0.79358  |
| 0.03575  | 0.010181 | 0.82632  | 0.07456  | 0.10758  | -0.0327839 | 0.47972  | -0.05861 | 0.20613  |
| 6.24E-05 | 0.066548 | 0.15104  | 0.147994 | 0.00134  | -0.0387972 | 0.40288  | -0.13123 | 0.0045   |
| 0.64576  | 0.139858 | 0.00245  | 0.210105 | 4.66E-06 | -0.0158063 | 0.73334  | -0.20646 | 6.85E-06 |
| 0.30817  | -0.0105  | 0.82104  | -0.04961 | 0.28472  | 0.02389701 | 0.60648  | -0.07168 | 0.12189  |
| 0.11594  | 0.078623 | 0.08967  | 0.166756 | 0.0003   | 0.05303692 | 0.25268  | -0.05563 | 0.23021  |
| 0.56752  | -0.0994  | 0.03175  | -0.02939 | 0.52639  | -0.0490176 | 0.29048  | -0.19596 | 2.00E-05 |
| 0.00645  | 0.028699 | 0.53614  | -0.02096 | 0.65144  | -0.0818987 | 0.07705  | -0.11645 | 0.01179  |
| 0.08537  | -0.20897 | 5.26E-06 | -0.01445 | 0.75539  | -0.2074313 | 6.19E-06 | -0.26278 | 8.16E-09 |
| 0.24153  | -0.3549  | 2.62E-15 | -0.26992 | 3.07E-09 | -0.0887868 | 0.05519  | -0.16636 | 0.00031  |
| 0.35661  | 0.061499 | 0.18461  | -0.07226 | 0.11888  | -0.4083526 | 3.41E-20 | -0.50445 | 1.62E-31 |
| 0.00022  | -0.31299 | 4.51E-12 | 0.021318 | 0.64588  | -0.0054748 | 0.90607  | -0.08922 | 0.05401  |
| 0.31517  | -0.04962 | 0.28459  | -0.01653 | 0.72159  | -0.1350929 | 0.00344  | -0.12991 | 0.00493  |

|          |          |          |          |          |            |          |          |          |
|----------|----------|----------|----------|----------|------------|----------|----------|----------|
| 0.00703  | -0.2768  | 1.17E-09 | -0.10712 | 0.02059  | -0.0903259 | 0.05109  | -0.22908 | 5.62E-07 |
| 0.148    | 0.037585 | 0.41775  | 0.076135 | 0.10033  | 0.00345124 | 0.94071  | -0.0776  | 0.09395  |
| 2.11E-05 | 0.034462 | 0.45751  | -0.01051 | 0.82084  | -0.1515037 | 0.00102  | -0.19085 | 3.30E-05 |
| 0.00409  | 0.201616 | 1.13E-05 | 0.183184 | 6.84E-05 | 0.01863011 | 0.68801  | -0.09672 | 0.03667  |
| 0.35592  | -0.07914 | 0.08758  | 0.01502  | 0.74614  | -0.048001  | 0.30061  | -0.12367 | 0.00746  |
| 0.80883  | -0.14951 | 0.00119  | -0.09552 | 0.03907  | -0.0768267 | 0.09727  | -0.11196 | 0.01549  |
| 0.13697  | -0.15628 | 0.0007   | -0.1068  | 0.02098  | -0.2544447 | 2.46E-08 | -0.35049 | 6.06E-15 |
| 0.05686  | -0.35825 | 1.37E-15 | -0.28082 | 6.54E-10 | -0.275614  | 1.38E-09 | -0.37594 | 4.00E-17 |
| 0.59443  | -0.26255 | 8.42E-09 | -0.05529 | 0.23308  | -0.0671412 | 0.14743  | -0.12339 | 0.0076   |
| 0.41932  | -0.07074 | 0.12688  | -0.07379 | 0.11129  | -0.2384237 | 1.85E-07 | -0.41097 | 1.86E-20 |
| 0.2049   | -0.36578 | 3.13E-16 | -0.37389 | 6.09E-17 | -0.0833971 | 0.07178  | -0.12646 | 0.00621  |
| 0.25549  | -0.05232 | 0.2592   | 0.033262 | 0.47333  | -0.187434  | 4.59E-05 | -0.27368 | 1.81E-09 |
| 0.96723  | -0.19547 | 2.10E-05 | -0.25786 | 1.57E-08 | -0.0755106 | 0.10315  | -0.08927 | 0.05387  |
| 0.23546  | -0.16191 | 0.00044  | 0.019317 | 0.67714  | -0.0862542 | 0.06254  | -0.19585 | 2.02E-05 |
| 0.00084  | 0.006483 | 0.88887  | 0.048866 | 0.29197  | -0.1199507 | 0.00947  | -0.26906 | 3.46E-09 |
| 0.12076  | -0.07831 | 0.09097  | 0.006374 | 0.89073  | -0.1711971 | 0.0002   | -0.32389 | 7.23E-13 |
| 0.00169  | 0.078975 | 0.08824  | 0.119802 | 0.00956  | -0.0963172 | 0.03746  | -0.11071 | 0.01669  |
| 1.57E-05 | 0.0654   | 0.15824  | -0.02055 | 0.65782  | -0.1145177 | 0.01328  | -0.1862  | 5.15E-05 |
| 0.20127  | -0.42693 | 4.12E-22 | -0.11467 | 0.01315  | -0.2124233 | 3.64E-06 | -0.39148 | 1.49E-18 |
| 0.00024  | 0.05049  | 0.27621  | 0.076533 | 0.09856  | -0.13907   | 0.0026   | -0.20713 | 6.39E-06 |
| 0.14783  | -0.37261 | 7.91E-17 | -0.25121 | 3.74E-08 | -0.1952136 | 2.15E-05 | -0.22422 | 9.83E-07 |
| 0.05717  | -0.04075 | 0.37959  | 0.014027 | 0.7624   | -0.2482038 | 5.49E-08 | -0.37042 | 1.23E-16 |
| 0.35488  | -0.08812 | 0.05704  | -0.15696 | 0.00066  | -0.1440719 | 0.0018   | -0.1612  | 0.00047  |
| 4.97E-07 | 0.029608 | 0.5233   | 0.001418 | 0.97562  | -0.0396469 | 0.39265  | -0.14869 | 0.00127  |
| 0.47576  | 0.208582 | 5.48E-06 | 0.354915 | 2.61E-15 | 0.16849427 | 0.00025  | 0.365184 | 3.53E-16 |
| 0.01753  | 0.243466 | 9.95E-08 | 0.162594 | 0.00042  | -0.2505998 | 4.05E-08 | -0.04747 | 0.30599  |
| 0.03447  | 0.066481 | 0.15146  | 0.074712 | 0.10686  | 0.17029421 | 0.00022  | 0.408863 | 3.03E-20 |
| 0.15177  | 0.117276 | 0.0112   | 0.22066  | 1.47E-06 | -0.1167438 | 0.01158  | -0.03265 | 0.48151  |
| 0.22988  | 0.301961 | 2.66E-11 | 0.215853 | 2.50E-06 | 0.11499017 | 0.0129   | 0.379652 | 1.85E-17 |
| 0.90581  | 0.138938 | 0.00262  | 0.197891 | 1.65E-05 | 0.02136778 | 0.6451   | 0.158494 | 0.00059  |
| 0.19752  | -0.0582  | 0.20934  | -0.0709  | 0.12604  | -0.2576004 | 1.63E-08 | -0.06928 | 0.13495  |
| 0.18454  | 0.233837 | 3.21E-07 | 0.210681 | 4.38E-06 | 0.06070254 | 0.19037  | 0.283403 | 4.48E-10 |
| 0.23642  | 0.086564 | 0.0616   | 0.150093 | 0.00114  | 0.06399239 | 0.1674   | 0.312907 | 4.57E-12 |
| 0.74511  | 0.29083  | 1.48E-10 | -0.00494 | 0.91526  | -0.0330076 | 0.47672  | 0.219753 | 1.63E-06 |
| 0.54604  | 0.161976 | 0.00044  | -0.03179 | 0.49309  | -0.066603  | 0.15071  | 0.22812  | 6.28E-07 |
| 0.10074  | 0.251528 | 3.59E-08 | 0.235795 | 2.54E-07 | 0.10402065 | 0.02458  | 0.363509 | 4.91E-16 |
| 0.00096  | 0.095738 | 0.03863  | 0.053673 | 0.24703  | -0.1279446 | 0.00562  | 0.057706 | 0.21323  |
| 0.00642  | 0.106877 | 0.02089  | 0.111178 | 0.01623  | -0.0603577 | 0.19291  | 0.018477 | 0.69044  |
| 0.72158  | -0.08033 | 0.08291  | -0.01422 | 0.75927  | -0.0763904 | 0.09919  | 0.036057 | 0.43695  |
| 0.22772  | 0.08681  | 0.06086  | -0.03097 | 0.5043   | -0.1713681 | 0.0002   | 0.079572 | 0.08586  |
| 0.64089  | 0.11501  | 0.01288  | 0.401762 | 1.53E-19 | -0.0062305 | 0.89318  | 0.019872 | 0.66841  |
| 0.03867  | 0.18478  | 5.89E-05 | 0.085335 | 0.0654   | -0.1713036 | 0.0002   | 0.023499 | 0.61249  |
| 0.18505  | 0.332942 | 1.50E-13 | 0.184169 | 6.24E-05 | 0.09110883 | 0.0491   | 0.34862  | 8.61E-15 |
| 0.00049  | 0.216287 | 2.39E-06 | 0.228022 | 6.35E-07 | 0.01999165 | 0.66653  | 0.207287 | 6.28E-06 |
| 0.31834  | -0.06611 | 0.15374  | 0.040206 | 0.386    | -0.119235  | 0.00991  | 0.024173 | 0.60233  |

|         |          |          |          |          |            |          |          |          |
|---------|----------|----------|----------|----------|------------|----------|----------|----------|
| 0.07433 | 0.095801 | 0.0385   | 0.059597 | 0.19858  | 0.11707441 | 0.01134  | 0.322737 | 8.81E-13 |
| 0.42768 | 0.418016 | 3.55E-21 | 0.208986 | 5.25E-06 | 0.09012206 | 0.05162  | 0.321013 | 1.18E-12 |
| 0.00577 | 0.2106   | 4.42E-06 | 0.189406 | 3.80E-05 | 0.09148919 | 0.04816  | 0.312522 | 4.87E-12 |
| 0.01432 | 0.178862 | 0.0001   | 0.150378 | 0.00112  | 0.01384707 | 0.76536  | 0.242531 | 1.12E-07 |
| 0.42602 | 0.05134  | 0.26819  | 0.11076  | 0.01664  | 0.06529148 | 0.15893  | 0.309475 | 8.00E-12 |
| 0.00394 | 0.274659 | 1.58E-09 | 0.194741 | 2.26E-05 | -0.0118109 | 0.79906  | 0.237681 | 2.02E-07 |
| 0.99111 | 0.217563 | 2.08E-06 | 0.27538  | 1.43E-09 | 0.00803655 | 0.86249  | 0.148257 | 0.00131  |
| 0.63937 | 0.038778 | 0.40312  | 0.206982 | 6.49E-06 | 0.07659232 | 0.0983   | 0.252056 | 3.36E-08 |
| 0.0162  | -0.00325 | 0.94415  | -0.05895 | 0.20353  | -0.2678156 | 4.11E-09 | -0.07998 | 0.08425  |
| 0.93964 | 0.197217 | 1.77E-05 | 0.106949 | 0.0208   | 0.08606332 | 0.06313  | 0.34423  | 1.95E-14 |
| 0.44261 | 0.093662 | 0.04307  | 0.03157  | 0.49614  | 0.06654824 | 0.15104  | 0.356068 | 2.09E-15 |
| 0.00063 | 0.061493 | 0.18465  | 0.129959 | 0.00491  | 0.03246658 | 0.48398  | 0.108764 | 0.01872  |
| 0.04029 | 0.100115 | 0.03053  | 0.041995 | 0.36521  | -0.0473405 | 0.30732  | 0.155824 | 0.00073  |
| 0.56108 | 0.25893  | 1.37E-08 | 0.11816  | 0.0106   | 0.07478562 | 0.10651  | 0.304154 | 1.88E-11 |
| 0.96099 | 0.16794  | 0.00027  | -0.00567 | 0.90275  | -0.2489114 | 5.02E-08 | -0.10159 | 0.02815  |
| 0.76956 | 0.109031 | 0.01843  | 0.029714 | 0.52181  | -0.0774977 | 0.09437  | 0.100888 | 0.02926  |
| 0.1819  | 0.142254 | 0.00206  | 0.318079 | 1.94E-12 | 0.01991059 | 0.66781  | 0.09618  | 0.03774  |
| 0.06199 | 0.17281  | 0.00017  | 0.178339 | 0.00011  | 0.15654801 | 0.00069  | 0.36847  | 1.83E-16 |
| 0.96436 | 0.349658 | 7.09E-15 | 0.346403 | 1.30E-14 | -0.1417012 | 0.00214  | -0.06484 | 0.16183  |
| 0.08083 | 0.153285 | 0.00089  | 0.397591 | 3.88E-19 | 0.19491623 | 2.22E-05 | 0.212327 | 3.67E-06 |
| 0.22248 | 0.267276 | 4.42E-09 | 0.262816 | 8.12E-09 | 0.10103171 | 0.02903  | 0.305329 | 1.56E-11 |
| 0.01737 | 0.274717 | 1.57E-09 | 0.350974 | 5.53E-15 | 0.16008991 | 0.00052  | 0.29516  | 7.67E-11 |
| 0.9964  | 0.159374 | 0.00055  | 0.083941 | 0.06994  | 0.06112813 | 0.18728  | 0.30918  | 8.40E-12 |
| 0.839   | 0.096935 | 0.03625  | 0.056913 | 0.2196   | -0.08796   | 0.05751  | 0.141078 | 0.00224  |
| 0.02699 | 0.200946 | 1.21E-05 | 0.098368 | 0.03357  | -0.0114565 | 0.80497  | 0.259221 | 1.31E-08 |
| 0.72892 | 0.266792 | 4.73E-09 | 0.2532   | 2.89E-08 | 0.13456823 | 0.00357  | 0.28856  | 2.09E-10 |
| 0.00104 | 0.156951 | 0.00066  | 0.151419 | 0.00103  | -0.1155711 | 0.01245  | 0.053475 | 0.24877  |
| 0.0528  | 0.010475 | 0.82138  | 0.11698  | 0.01141  | -0.0089252 | 0.84746  | 0.142416 | 0.00203  |
| 0.19641 | 0.379522 | 1.90E-17 | 0.341069 | 3.48E-14 | 0.12946771 | 0.00508  | 0.328311 | 3.37E-13 |
| 0.02353 | 0.07688  | 0.09704  | -0.02041 | 0.65993  | -0.2770401 | 1.13E-09 | -0.06052 | 0.1917   |
| 0.78357 | 0.274238 | 1.68E-09 | 0.369706 | 1.43E-16 | 0.07526964 | 0.10426  | 0.089928 | 0.05213  |
| 0.91054 | 0.069464 | 0.1339   | -0.07511 | 0.10499  | -0.182579  | 7.24E-05 | -0.02497 | 0.59036  |
| 0.03227 | 0.202193 | 1.07E-05 | 0.169699 | 0.00023  | 0.14575196 | 0.00159  | 0.381991 | 1.13E-17 |
| 0.46962 | 0.304493 | 1.78E-11 | 0.389024 | 2.53E-18 | 0.1096828  | 0.01774  | 0.251685 | 3.52E-08 |
| 0.25338 | 0.308234 | 9.78E-12 | 0.132438 | 0.00414  | -0.2412989 | 1.30E-07 | -0.0319  | 0.49166  |
| 0.00784 | 0.11183  | 0.01562  | 0.262556 | 8.41E-09 | 0.15455597 | 0.0008   | 0.375632 | 4.26E-17 |
| 0.27039 | 0.286987 | 2.64E-10 | 0.188941 | 3.97E-05 | 0.00436283 | 0.92509  | 0.227558 | 6.70E-07 |
| 0.12828 | 0.040137 | 0.38682  | 0.151765 | 0.001    | -0.0441611 | 0.34098  | 0.003748 | 0.93562  |
| 0.99432 | 0.152482 | 0.00095  | 0.08127  | 0.07935  | -0.0309266 | 0.50497  | 0.214704 | 2.84E-06 |
| 0.49786 | 0.319239 | 1.59E-12 | 0.105193 | 0.023    | 0.01230741 | 0.79081  | 0.212981 | 3.42E-06 |
| 0.03379 | 0.313787 | 3.95E-12 | 0.196548 | 1.89E-05 | 0.07690706 | 0.09692  | 0.260532 | 1.10E-08 |
| 0.90111 | 0.248558 | 5.25E-08 | 0.288337 | 2.16E-10 | -0.0152326 | 0.74267  | 0.062947 | 0.17447  |
| 0.17287 | 0.07288  | 0.11576  | -0.03157 | 0.49617  | -0.2561315 | 1.98E-08 | -0.0663  | 0.15261  |
| 0.12241 | 0.233232 | 3.45E-07 | 0.043758 | 0.3454   | -0.0646487 | 0.16308  | 0.142362 | 0.00204  |
| 0.91053 | 0.223693 | 1.04E-06 | 0.206241 | 7.01E-06 | 0.17862469 | 0.0001   | 0.404967 | 7.40E-20 |

|          |          |          |          |          |            |          |          |          |
|----------|----------|----------|----------|----------|------------|----------|----------|----------|
| 0.10043  | 0.184539 | 6.03E-05 | 0.207204 | 6.34E-06 | 0.10643937 | 0.02142  | 0.400585 | 1.99E-19 |
| 0.58907  | 0.159211 | 0.00055  | 0.377653 | 2.81E-17 | 0.25426037 | 2.52E-08 | 0.453918 | 4.08E-25 |
| 0.71127  | 0.229285 | 5.49E-07 | 0.105237 | 0.02294  | 0.12289234 | 0.00784  | 0.376038 | 3.92E-17 |
| 0.01883  | 0.216896 | 2.23E-06 | 0.18415  | 6.25E-05 | 0.02689625 | 0.56206  | 0.217426 | 2.11E-06 |
| 0.32768  | 0.178942 | 0.0001   | 0.108094 | 0.01946  | -0.2631528 | 7.76E-09 | -0.18579 | 5.36E-05 |
| 0.01083  | 0.320816 | 1.22E-12 | 0.271256 | 2.55E-09 | 0.04717808 | 0.30898  | 0.212508 | 3.60E-06 |
| 0.08928  | 0.126888 | 0.00604  | 0.162782 | 0.00041  | -0.0883786 | 0.05633  | 0.112899 | 0.01465  |
| 0.63685  | 0.094876 | 0.04042  | 0.093446 | 0.04355  | 0.03137518 | 0.4988   | 0.272902 | 2.02E-09 |
| 1.02E-06 | -0.04697 | 0.31111  | 0.048931 | 0.29133  | 0.08478504 | 0.06716  | 0.125327 | 0.00669  |
| 0.0052   | 0.113301 | 0.01429  | -0.04516 | 0.33013  | -0.2857861 | 3.15E-10 | -0.02046 | 0.65928  |
| 0.82101  | 0.107283 | 0.0204   | 0.2907   | 1.51E-10 | -0.0372147 | 0.42236  | -0.03465 | 0.45509  |
| 0.02418  | 0.184083 | 6.29E-05 | 0.533395 | 1.08E-35 | 0.11950587 | 0.00974  | 0.126164 | 0.00633  |
| 0.20676  | 0.317026 | 2.31E-12 | 0.252197 | 3.30E-08 | 0.18086753 | 8.47E-05 | 0.349542 | 7.24E-15 |
| 0.13082  | 0.262648 | 8.31E-09 | 0.350039 | 6.60E-15 | -0.0171572 | 0.71153  | 0.092677 | 0.04532  |
| 0.24423  | 0.281683 | 5.76E-10 | 0.165571 | 0.00033  | 0.17816786 | 0.00011  | 0.40542  | 6.67E-20 |
| 0.41059  | 0.326748 | 4.43E-13 | 0.416092 | 5.60E-21 | -4.65E-05  | 0.9992   | 0.119477 | 0.00976  |
| 0.17659  | 0.040502 | 0.38252  | 0.223139 | 1.11E-06 | -0.0018438 | 0.9683   | 0.083148 | 0.07263  |
| 0.00474  | 0.285959 | 3.07E-10 | 0.128131 | 0.00556  | -0.0849537 | 0.06662  | 0.134485 | 0.00359  |
| 0.05159  | 0.436899 | 3.44E-23 | 0.471998 | 2.77E-27 | 0.114988   | 0.0129   | 0.238149 | 1.91E-07 |
| 0.45283  | 0.221321 | 1.37E-06 | 0.187236 | 4.67E-05 | 0.03816552 | 0.41059  | 0.237342 | 2.11E-07 |
| 0.22392  | 0.239063 | 1.71E-07 | 0.193137 | 2.64E-05 | -0.1657316 | 0.00032  | 0.037225 | 0.42223  |
| 0.00106  | 0.245291 | 7.93E-08 | 0.162173 | 0.00043  | 0.09171517 | 0.04761  | 0.387847 | 3.26E-18 |
| 0.20878  | 0.244339 | 8.93E-08 | 0.199033 | 1.47E-05 | -0.0307708 | 0.50711  | -0.05208 | 0.26133  |
| 0.11363  | 0.08575  | 0.06409  | 0.124532 | 0.00705  | 0.00228226 | 0.96077  | 0.11368  | 0.01397  |
| 0.48006  | -0.18469 | 5.94E-05 | 0.033491 | 0.47029  | -0.1215592 | 0.00855  | -0.09838 | 0.03356  |
| 0.94349  | 0.393648 | 9.27E-19 | 0.16636  | 0.00031  | 0.09434578 | 0.04156  | 0.343098 | 2.40E-14 |
| 0.17943  | 0.465136 | 1.91E-26 | 0.336221 | 8.35E-14 | 0.11059437 | 0.01681  | 0.337726 | 6.37E-14 |
| 0.37415  | 0.358486 | 1.31E-15 | 0.21213  | 3.75E-06 | 0.13851632 | 0.0027   | 0.310679 | 6.58E-12 |
| 0.5336   | 0.214619 | 2.87E-06 | 0.258848 | 1.38E-08 | -0.0035864 | 0.93839  | 0.201543 | 1.14E-05 |
| 0.48783  | 0.297367 | 5.46E-11 | 0.05728  | 0.21664  | 0.05645735 | 0.22332  | 0.376126 | 3.85E-17 |
| 0.65786  | 0.302777 | 2.34E-11 | 0.285797 | 3.15E-10 | 0.1409139  | 0.00227  | 0.282558 | 5.07E-10 |
| 0.09147  | 0.370631 | 1.18E-16 | 0.274772 | 1.55E-09 | 0.14316863 | 0.00192  | 0.331201 | 2.03E-13 |
| 0.0654   | 0.250335 | 4.19E-08 | 0.134622 | 0.00356  | -0.103002  | 0.02602  | 0.055452 | 0.23168  |
| 0.9374   | 0.194114 | 2.40E-05 | -0.09095 | 0.0495   | 0.04394002 | 0.3434   | 0.347389 | 1.08E-14 |
| 0.22011  | 0.307538 | 1.09E-11 | 0.288255 | 2.18E-10 | 0.29565262 | 7.11E-11 | 0.482203 | 1.44E-28 |
| 0.8215   | -0.01581 | 0.73333  | 0.005272 | 0.90954  | -0.1129643 | 0.01459  | 0.031516 | 0.49688  |
| 0.71357  | 0.243844 | 9.49E-08 | 0.264156 | 6.77E-09 | 0.09666917 | 0.03677  | 0.279329 | 8.10E-10 |
| 0.36439  | 0.084834 | 0.067    | 0.180946 | 8.41E-05 | 0.18072514 | 8.59E-05 | 0.390597 | 1.80E-18 |
| 0.003    | -0.17136 | 0.0002   | -0.0574  | 0.21569  | -0.2180001 | 1.98E-06 | -0.13854 | 0.0027   |
| 0.52844  | 0.224969 | 9.03E-07 | 0.316054 | 2.72E-12 | -0.0583162 | 0.20842  | 0.035601 | 0.44277  |
| 0.64897  | 0.034232 | 0.46052  | 0.066835 | 0.14929  | -0.1907562 | 3.33E-05 | 0.022164 | 0.63284  |
| 0.32687  | 0.332644 | 1.58E-13 | 0.233089 | 3.51E-07 | 0.00513576 | 0.91186  | 0.262651 | 8.30E-09 |
| 0.09572  | 0.184314 | 6.16E-05 | 0.089768 | 0.05255  | 0.03429156 | 0.45974  | 0.329882 | 2.56E-13 |
| 4.53E-06 | 0.265641 | 5.54E-09 | 0.278838 | 8.70E-10 | 0.04868564 | 0.29376  | 0.276052 | 1.30E-09 |
| 0.04399  | 0.189122 | 3.90E-05 | 0.265171 | 5.90E-09 | -0.046644  | 0.3145   | 0.026174 | 0.57261  |

|          |          |          |          |          |            |          |          |          |
|----------|----------|----------|----------|----------|------------|----------|----------|----------|
| 0.11979  | 0.246535 | 6.78E-08 | 0.395922 | 5.62E-19 | 0.15498942 | 0.00078  | 0.371019 | 1.09E-16 |
| 0.87613  | 0.220761 | 1.45E-06 | 0.041836 | 0.36703  | -0.1274282 | 0.00582  | 0.06684  | 0.14926  |
| 0.02133  | 0.057023 | 0.21871  | -0.06071 | 0.19034  | -0.0474762 | 0.30593  | 0.204425 | 8.47E-06 |
| 0.59281  | 0.188502 | 4.14E-05 | 0.452643 | 5.74E-25 | 0.08509983 | 0.06615  | 0.23792  | 1.97E-07 |
| 0.49193  | 0.176798 | 0.00012  | 0.254692 | 2.38E-08 | 0.11610835 | 0.01204  | 0.325594 | 5.40E-13 |
| 0.24902  | 0.181998 | 7.64E-05 | 0.364438 | 4.09E-16 | -0.0810899 | 0.08002  | 0.00124  | 0.97868  |
| 0.016    | 0.132996 | 0.00399  | 0.098923 | 0.03258  | -0.0623436 | 0.17864  | 0.120124 | 0.00937  |
| 0.23275  | 0.423506 | 9.50E-22 | 0.527529 | 8.19E-35 | 0.26808495 | 3.96E-09 | 0.384797 | 6.26E-18 |
| 0.99793  | 0.186028 | 5.24E-05 | 0.138197 | 0.00276  | -0.1730533 | 0.00017  | 0.003755 | 0.93549  |
| 0.6256   | -0.0785  | 0.09016  | -0.33951 | 4.62E-14 | -0.4278627 | 3.28E-22 | -0.21101 | 4.23E-06 |
| 0.89338  | 0.043852 | 0.34437  | 0.142422 | 0.00203  | -0.0876402 | 0.05843  | -0.08126 | 0.07938  |
| 0.36223  | 0.029266 | 0.52812  | 0.292646 | 1.13E-10 | 0.18250066 | 7.29E-05 | 0.351617 | 4.90E-15 |
| 0.02091  | 0.040913 | 0.37771  | 0.099004 | 0.03244  | -0.2413121 | 1.30E-07 | -0.08996 | 0.05205  |
| 0.4576   | 0.226963 | 7.18E-07 | 0.091696 | 0.04766  | -0.0645924 | 0.16345  | 0.015394 | 0.74005  |
| 0.51003  | 0.366157 | 2.91E-16 | 0.291836 | 1.27E-10 | 0.01043491 | 0.82206  | 0.095242 | 0.03965  |
| 0.9528   | 0.167823 | 0.00027  | -0.03587 | 0.43933  | 0.01216145 | 0.79323  | 0.254111 | 2.57E-08 |
| 0.31636  | 0.331258 | 2.01E-13 | 0.28525  | 3.41E-10 | -0.0480671 | 0.29994  | 0.180181 | 9.03E-05 |
| 0.07624  | -0.13337 | 0.00389  | -0.13597 | 0.00324  | -0.3070749 | 1.18E-11 | -0.09421 | 0.04185  |
| 0.56982  | 0.142683 | 0.002    | -0.0238  | 0.608    | -0.0044704 | 0.92324  | 0.194287 | 2.36E-05 |
| 0.80834  | 0.371462 | 9.99E-17 | 0.287653 | 2.39E-10 | 0.12923878 | 0.00516  | 0.29579  | 6.96E-11 |
| 0.01506  | 0.380849 | 1.44E-17 | 0.198105 | 1.61E-05 | 0.12363607 | 0.00747  | 0.382729 | 9.70E-18 |
| 0.64522  | 0.185322 | 5.60E-05 | 0.129487 | 0.00507  | -0.1127323 | 0.01479  | 0.053943 | 0.24465  |
| 4.41E-05 | 0.279534 | 7.87E-10 | 0.174563 | 0.00015  | 0.15911974 | 0.00056  | 0.41763  | 3.89E-21 |
| 0.15753  | 0.158617 | 0.00058  | 0.114592 | 0.01322  | -0.0729588 | 0.11537  | 0.189446 | 3.78E-05 |
| 0.20896  | 0.197718 | 1.68E-05 | 0.282805 | 4.89E-10 | 0.24461272 | 8.63E-08 | 0.495186 | 2.92E-30 |
| 0.95974  | 0.079106 | 0.08771  | 0.006741 | 0.88449  | 0.03598191 | 0.4379   | 0.312944 | 4.54E-12 |
| 0.00737  | 0.164272 | 0.00036  | 0.160503 | 0.0005   | -0.0080965 | 0.86147  | 0.277684 | 1.03E-09 |
| 0.95428  | 0.232247 | 3.87E-07 | 0.219666 | 1.64E-06 | 0.24211687 | 1.18E-07 | 0.374402 | 5.49E-17 |
| 0.01432  | 0.184714 | 5.93E-05 | 0.163084 | 0.0004   | 0.08007321 | 0.08389  | 0.361246 | 7.66E-16 |
| 0.10817  | 0.235048 | 2.78E-07 | 0.114017 | 0.01369  | -0.0786139 | 0.08971  | 0.139176 | 0.00258  |
| 0.26137  | -0.00325 | 0.94413  | 0.19367  | 2.51E-05 | -0.0967316 | 0.03665  | 0.023846 | 0.60724  |
| 0.57295  | 0.187054 | 4.75E-05 | 0.050034 | 0.28058  | -0.1234009 | 0.00759  | 0.117484 | 0.01106  |
| 0.94864  | 0.259944 | 1.19E-08 | 0.061245 | 0.18643  | 0.00413697 | 0.92895  | 0.270833 | 2.70E-09 |
| 0.74575  | 0.244797 | 8.43E-08 | 0.154914 | 0.00078  | 0.04434803 | 0.33894  | 0.228776 | 5.82E-07 |
| 0.02679  | 0.309256 | 8.29E-12 | 0.297561 | 5.30E-11 | -0.1144591 | 0.01332  | 0.036247 | 0.43453  |
| 0.00583  | 0.20295  | 9.87E-06 | 0.261555 | 9.62E-09 | 0.19127492 | 3.17E-05 | 0.42766  | 3.45E-22 |
| 0.99006  | 0.23832  | 1.87E-07 | 0.078397 | 0.0906   | -0.0685719 | 0.13897  | 0.107607 | 0.02002  |
| 0.00016  | 0.001527 | 0.97374  | -0.07499 | 0.10555  | -0.0044288 | 0.92396  | 0.044605 | 0.33614  |
| 4.85E-09 | -0.0718  | 0.12127  | -0.01696 | 0.71472  | 0.08467491 | 0.06752  | 0.091361 | 0.04848  |
| 0.00023  | 0.024627 | 0.59552  | 0.024873 | 0.59185  | 0.03733985 | 0.4208   | 0.058689 | 0.20552  |
| 7.91E-16 | 0.11845  | 0.01041  | -0.00039 | 0.99328  | 0.10355007 | 0.02524  | 0.110185 | 0.01722  |
| 2.02E-08 | -0.05986 | 0.19663  | -0.08903 | 0.05452  | -0.043273  | 0.35079  | -0.02321 | 0.61692  |
| 3.84E-05 | 0.04626  | 0.31851  | 0.027422 | 0.55445  | 0.05839272 | 0.20782  | 0.080827 | 0.08101  |
| 9.05E-11 | 0.045476 | 0.32678  | 0.079838 | 0.08481  | 0.07219612 | 0.11923  | 0.064182 | 0.16615  |
| 5.44E-21 | -0.04535 | 0.32809  | -0.02445 | 0.5981   | 0.03160956 | 0.4956   | 0.04307  | 0.35305  |

|          |          |         |          |         |            |         |          |         |
|----------|----------|---------|----------|---------|------------|---------|----------|---------|
| 1.39E-17 | -0.07892 | 0.08847 | -0.12691 | 0.00603 | -0.0141446 | 0.76047 | 0.032011 | 0.49013 |
| 1.69E-37 | -0.0843  | 0.06875 | -0.02931 | 0.52747 | 0.04888861 | 0.29175 | 0.037413 | 0.41989 |
| 4.04E-17 | -0.09086 | 0.04972 | -0.02134 | 0.64551 | 0.06479608 | 0.16212 | 0.06256  | 0.17713 |
| 8.37E-11 | 0.007339 | 0.87433 | 0.030233 | 0.51457 | 0.07085958 | 0.12624 | 0.069336 | 0.13461 |
| 3.15E-34 | 0.009472 | 0.83824 | -0.0206  | 0.65703 | 0.05011698 | 0.27978 | 0.071795 | 0.1213  |
| 1.26E-14 | -0.01268 | 0.7847  | -0.00625 | 0.89292 | 0.04930628 | 0.28764 | 0.062813 | 0.17538 |
| 1.21E-25 | 0.04835  | 0.29711 | 0.034033 | 0.46312 | -0.007841  | 0.8658  | -0.01074 | 0.81699 |
| 1.52E-05 | 0.009099 | 0.84453 | -0.00896 | 0.84694 | 0.03826003 | 0.40943 | 0.063219 | 0.17261 |
| 1.24E-17 | -0.05075 | 0.27372 | -0.02432 | 0.60013 | 0.03248813 | 0.48369 | 0.037641 | 0.41706 |
| 1.44E-09 | -0.05627 | 0.22489 | -0.09132 | 0.04857 | 0.02506574 | 0.58898 | -0.00256 | 0.95605 |
| 1.39E-09 | -0.03804 | 0.41215 | -0.03418 | 0.46123 | 0.02911435 | 0.53026 | 0.008131 | 0.86088 |
| 1.12E-11 | -0.13302 | 0.00398 | -0.1376  | 0.00288 | 0.02987143 | 0.51961 | 0.033419 | 0.47124 |
| 9.57E-06 | -0.0108  | 0.81588 | -0.09469 | 0.04083 | 0.01643305 | 0.72319 | -0.00812 | 0.86103 |
| 0.14102  | 0.077316 | 0.09515 | 0.012676 | 0.7847  | 0.0140193  | 0.76253 | 0.032447 | 0.48424 |
| 0.00052  | 0.030627 | 0.50911 | -0.08282 | 0.07376 | -0.010885  | 0.81452 | -0.00124 | 0.97873 |
| 9.54E-05 | -0.03784 | 0.41455 | -0.12429 | 0.00716 | -0.0352605 | 0.44715 | 0.005043 | 0.91346 |
| 7.85E-06 | -0.04572 | 0.32418 | -0.08914 | 0.05422 | 0.01399702 | 0.76289 | 0.040535 | 0.38213 |
| 2.38E-21 | -0.06936 | 0.13445 | -0.06038 | 0.19272 | 0.00447662 | 0.92314 | 0.0093   | 0.84114 |
| 2.41E-08 | -0.046   | 0.32119 | -0.05937 | 0.20033 | 0.01957313 | 0.67311 | 0.014238 | 0.75894 |
| 7.97E-09 | -0.03568 | 0.44179 | -0.02967 | 0.5224  | 0.02076934 | 0.65439 | 0.048514 | 0.29546 |
| 2.61E-07 | -0.02926 | 0.52822 | -0.03767 | 0.41675 | 0.04300588 | 0.35377 | 0.021728 | 0.63953 |
| 0.0046   | -0.06822 | 0.14103 | -0.05629 | 0.2247  | 0.03823871 | 0.40969 | 0.067389 | 0.14594 |
| 8.51E-09 | 0.0077   | 0.86819 | 0.01176  | 0.79992 | 0.03503246 | 0.45009 | 0.067543 | 0.14502 |
| 7.89E-08 | -0.0173  | 0.70917 | -0.03956 | 0.39372 | -0.0010239 | 0.98239 | 0.037495 | 0.41887 |
| 3.40E-12 | 0.029677 | 0.52233 | 0.038027 | 0.41229 | 0.04368596 | 0.3462  | 0.033106 | 0.47541 |
| 1.18E-06 | -0.02874 | 0.53562 | -0.0252  | 0.58699 | 0.01399843 | 0.76287 | 0.045333 | 0.3283  |
| 1.28E-11 | -0.02278 | 0.62337 | -0.00733 | 0.87455 | 0.03441018 | 0.45819 | 0.025712 | 0.57941 |
| 5.32E-11 | -0.02067 | 0.65588 | -0.03341 | 0.47139 | 0.00327819 | 0.94367 | 0.025563 | 0.58162 |
| 1.42E-11 | -0.01863 | 0.68806 | -0.01695 | 0.71487 | 0.01622696 | 0.72653 | 0.040678 | 0.38045 |
| 2.56E-08 | -0.01659 | 0.72061 | -0.0139  | 0.76455 | 0.03084049 | 0.50615 | 0.058239 | 0.20903 |
| 4.63E-06 | -0.01095 | 0.81348 | -0.02708 | 0.5594  | 0.01277831 | 0.783   | 0.023984 | 0.60517 |
| 0.05955  | -0.08649 | 0.06182 | -0.09254 | 0.04564 | 0.00168025 | 0.97111 | -0.04162 | 0.36955 |
| 3.70E-15 | -0.04606 | 0.32063 | -0.01294 | 0.78036 | 0.04409351 | 0.34172 | 0.042813 | 0.35594 |
| 2.00E-18 | -0.02624 | 0.57164 | 0.026526 | 0.56746 | 0.05012125 | 0.27974 | 0.040344 | 0.38438 |
| 1.59E-05 | 0.065838 | 0.15546 | 0.018959 | 0.6828  | 0.03537465 | 0.44568 | -0.02622 | 0.57187 |
| 6.65E-05 | 0.009418 | 0.83914 | -0.01094 | 0.81367 | 0.00021594 | 0.99629 | 0.002382 | 0.95905 |
| 4.17E-08 | -0.02637 | 0.56976 | -0.00861 | 0.85273 | 0.043529   | 0.34794 | 0.0308   | 0.50672 |
| 1.47E-08 | -0.02211 | 0.63365 | -0.00166 | 0.97145 | 0.03220923 | 0.48746 | 0.032801 | 0.47949 |
| 7.46E-07 | -0.01857 | 0.68892 | -0.02141 | 0.64443 | 0.01102965 | 0.8121  | 0.02388  | 0.60673 |
| 2.84E-11 | -0.01764 | 0.70384 | 0.003711 | 0.93626 | 0.04194621 | 0.36577 | 0.042417 | 0.36041 |
| 2.65E-07 | -0.02246 | 0.62825 | -0.01543 | 0.73947 | 0.01509709 | 0.74488 | 0.025943 | 0.57601 |
| 1.58E-11 | -0.04139 | 0.37221 | -0.01169 | 0.80114 | 0.05486791 | 0.23664 | 0.030614 | 0.50928 |
| 2.01E-07 | 0.004458 | 0.92346 | 0.027838 | 0.54845 | 0.0711556  | 0.12466 | 0.057507 | 0.21482 |
| 1.17E-06 | -0.02628 | 0.571   | -0.01019 | 0.82614 | 0.03231233 | 0.48606 | 0.018897 | 0.68379 |
| 5.31E-05 | 0.029794 | 0.5207  | 0.049421 | 0.28652 | 0.07306268 | 0.11485 | 0.064886 | 0.16154 |

|          |          |          |          |          |            |          |          |          |
|----------|----------|----------|----------|----------|------------|----------|----------|----------|
| 0.00608  | 0.027976 | 0.54646  | -0.06084 | 0.18935  | 0.00537181 | 0.90783  | 0.064277 | 0.16552  |
| 1.97E-05 | -0.03301 | 0.47663  | -0.07337 | 0.11332  | 0.03202934 | 0.48989  | 0.014246 | 0.75881  |
| 0.00013  | -0.0148  | 0.74967  | -0.17925 | 9.83E-05 | 0.00452534 | 0.9223   | 0.105739 | 0.02229  |
| 4.34E-08 | -0.02289 | 0.62178  | 0.009093 | 0.84464  | 0.04369527 | 0.3461   | 0.0541   | 0.24328  |
| 3.02E-11 | -0.05059 | 0.27528  | -0.02187 | 0.63741  | 0.029115   | 0.53025  | 0.044645 | 0.33571  |
| 4.69E-12 | -0.04478 | 0.33424  | -0.01473 | 0.75083  | 0.01816865 | 0.69535  | 0.029569 | 0.52385  |
| 1.41E-08 | -0.05751 | 0.21479  | -0.09269 | 0.04528  | -0.0138829 | 0.76477  | -0.02279 | 0.62333  |
| 2.94E-09 | -0.04035 | 0.38428  | -0.02403 | 0.60455  | 0.03174239 | 0.49379  | 0.024127 | 0.60301  |
| 1.97E-10 | -0.0562  | 0.22548  | -0.08366 | 0.07087  | 0.01915752 | 0.67966  | 0.014715 | 0.75113  |
| 0.05479  | -0.00918 | 0.84313  | -0.01348 | 0.77142  | -0.0064138 | 0.89006  | 0.016406 | 0.72363  |
| 1.05E-07 | 9.51E-05 | 0.99837  | 0.012046 | 0.79515  | 0.03653426 | 0.4309   | 0.04803  | 0.30032  |
| 7.18E-08 | -0.06241 | 0.17821  | -0.06715 | 0.14739  | 0.03676657 | 0.42797  | -0.00252 | 0.95661  |
| 2.65E-06 | -0.03612 | 0.43615  | -0.02527 | 0.58597  | 0.03231429 | 0.48604  | 0.016626 | 0.72008  |
| 1.98E-12 | -0.03203 | 0.48988  | -0.07705 | 0.09629  | -0.0166628 | 0.71949  | -0.03004 | 0.51732  |
| 4.74E-11 | -0.02727 | 0.55664  | -0.03814 | 0.41096  | 0.0459128  | 0.32215  | 0.054046 | 0.24375  |
| 3.45E-09 | -0.08511 | 0.06611  | -0.09428 | 0.04169  | -0.0042009 | 0.92786  | -0.0217  | 0.64002  |
| 0.00053  | 0.001321 | 0.97729  | -0.07959 | 0.0858   | -0.0698983 | 0.13147  | -0.03163 | 0.49537  |
| 0.00052  | -0.04193 | 0.36594  | -0.00193 | 0.96678  | 0.01926786 | 0.67792  | -0.00512 | 0.91213  |
| 5.63E-07 | -0.09366 | 0.04307  | -0.19546 | 2.10E-05 | -0.1499782 | 0.00115  | -0.06388 | 0.16813  |
| 0.66513  | 0.021435 | 0.64407  | 0.103092 | 0.02589  | 0.00858625 | 0.85318  | -0.24398 | 9.34E-08 |
| 0.00111  | -0.241   | 1.35E-07 | -0.01904 | 0.68148  | 0.05764649 | 0.2137   | -0.25458 | 2.42E-08 |
| 4.75E-06 | -0.06538 | 0.15839  | 0.148576 | 0.00128  | -0.0774989 | 0.09437  | -0.31076 | 6.49E-12 |
| 0.2079   | 0.018089 | 0.69662  | 0.227057 | 7.10E-07 | 0.11648044 | 0.01177  | -0.13347 | 0.00386  |
| 0.26624  | -0.16632 | 0.00031  | -0.06649 | 0.15142  | -0.0915872 | 0.04792  | -0.27673 | 1.18E-09 |
| 0.08828  | -0.0313  | 0.49982  | 0.179694 | 9.44E-05 | 0.27286926 | 2.03E-09 | -0.0156  | 0.73671  |
| 0.73337  | 0.098172 | 0.03393  | 0.177185 | 0.00012  | 0.35037332 | 6.19E-15 | 0.017081 | 0.71275  |
| 0.29715  | 0.097056 | 0.03602  | 0.196936 | 1.82E-05 | -0.0212446 | 0.64701  | -0.27133 | 2.52E-09 |
| 0.28432  | -0.12702 | 0.00598  | 0.132478 | 0.00413  | -0.2691829 | 3.40E-09 | -0.49123 | 9.75E-30 |
| 0.15401  | -0.04612 | 0.31995  | 0.164096 | 0.00037  | 0.2669119  | 4.65E-09 | -0.05863 | 0.20595  |
| 0.01093  | 0.087063 | 0.06011  | 0.372016 | 8.93E-17 | 0.59110375 | 2.45E-45 | 0.392824 | 1.11E-18 |
| 0.02442  | -0.05591 | 0.22787  | 0.136196 | 0.00319  | 0.33224786 | 1.69E-13 | 0.013794 | 0.76623  |
| 0.06384  | 0.052097 | 0.26119  | 0.131382 | 0.00446  | -0.3408143 | 3.64E-14 | -0.57679 | 9.17E-43 |
| 0.94003  | -0.1583  | 0.0006   | -0.16208 | 0.00044  | -0.4253558 | 6.06E-22 | -0.70172 | 1.79E-70 |
| 0.5889   | 0.095746 | 0.03861  | 0.114146 | 0.01358  | 0.00385393 | 0.9338   | -0.16539 | 0.00033  |
| 6.46E-06 | -0.00109 | 0.98124  | -0.01418 | 0.75994  | -0.2334148 | 3.37E-07 | -0.43423 | 6.75E-23 |
| 0.24746  | 0.006396 | 0.89036  | 0.156296 | 0.0007   | 0.30394723 | 1.94E-11 | -0.00745 | 0.87246  |
| 0.88777  | -0.1982  | 1.60E-05 | 0.078319 | 0.09092  | -0.2127352 | 3.52E-06 | -0.4192  | 2.68E-21 |
| 0.32196  | -0.05409 | 0.24335  | -0.00917 | 0.84338  | -0.367947  | 2.03E-16 | -0.62065 | 4.50E-51 |
| 0.7597   | -0.0597  | 0.19778  | 0.054667 | 0.23837  | -0.1783724 | 0.00011  | -0.36957 | 1.46E-16 |
| 0.86281  | -0.16593 | 0.00032  | -0.05144 | 0.2673   | -0.4382845 | 2.42E-23 | -0.66262 | 2.34E-60 |
| 0.04951  | 0.183424 | 6.69E-05 | 0.324002 | 7.10E-13 | 0.08004676 | 0.08399  | -0.18823 | 4.25E-05 |
| 0.83543  | 0.134348 | 0.00363  | 0.42397  | 8.49E-22 | 0.17024136 | 0.00022  | -0.10109 | 0.02893  |
| 0.2989   | -0.02286 | 0.6222   | 0.182735 | 7.13E-05 | 0.18199346 | 7.64E-05 | -0.11095 | 0.01645  |
| 0.89144  | -0.17441 | 0.00015  | -0.05798 | 0.21107  | -0.2562601 | 1.94E-08 | -0.53534 | 5.48E-36 |
| 0.08845  | 0.198933 | 1.49E-05 | 0.298535 | 4.55E-11 | -0.1482392 | 0.00132  | -0.37557 | 4.32E-17 |



|          |          |          |          |          |            |          |          |          |
|----------|----------|----------|----------|----------|------------|----------|----------|----------|
| 1.27E-05 | 0.168148 | 0.00026  | 0.292933 | 1.08E-10 | -0.1085246 | 0.01898  | -0.37267 | 7.81E-17 |
| 0.68558  | -0.02035 | 0.66091  | 0.236123 | 2.44E-07 | 0.12036808 | 0.00922  | -0.20105 | 1.20E-05 |
| 0.26813  | 0.139948 | 0.00244  | 0.415867 | 5.91E-21 | 0.09083748 | 0.04978  | -0.23348 | 3.35E-07 |
| 0.36585  | 0.001915 | 0.96707  | 0.080605 | 0.08185  | 0.04898516 | 0.2908   | -0.15659 | 0.00068  |
| 0.32159  | -0.13836 | 0.00273  | -0.02487 | 0.5919   | -0.439962  | 1.58E-23 | -0.68119 | 5.77E-65 |
| 0.00019  | -0.00953 | 0.83727  | 0.122326 | 0.00814  | -0.040929  | 0.37752  | -0.22992 | 5.10E-07 |
| 0.47821  | 0.25601  | 2.01E-08 | 0.35162  | 4.89E-15 | 0.22439453 | 9.64E-07 | -0.0607  | 0.19038  |
| 0.01642  | 0.201418 | 1.15E-05 | 0.362947 | 5.49E-16 | 0.35742811 | 1.61E-15 | 0.115599 | 0.01243  |
| 0.34713  | -0.00833 | 0.85748  | 0.290036 | 1.67E-10 | 0.142543   | 0.00202  | -0.14216 | 0.00207  |
| 0.57563  | 0.147134 | 0.00143  | 0.266097 | 5.20E-09 | -0.0521019 | 0.26115  | -0.3192  | 1.60E-12 |
| 0.02368  | 0.145507 | 0.00162  | 0.335295 | 9.85E-14 | 0.14139896 | 0.00219  | -0.10099 | 0.0291   |
| 0.52409  | -0.21019 | 4.62E-06 | 0.158357 | 0.00059  | 0.10822142 | 0.01932  | -0.17494 | 0.00014  |
| 0.04443  | 0.342031 | 2.92E-14 | 0.620806 | 4.18E-51 | 0.232422   | 3.80E-07 | 0.019669 | 0.6716   |
| 0.09329  | 0.109301 | 0.01814  | 0.301695 | 2.78E-11 | -0.0517791 | 0.26412  | -0.34556 | 1.52E-14 |
| 0.34077  | -0.01443 | 0.75571  | 0.219137 | 1.74E-06 | 0.00215358 | 0.96298  | -0.18125 | 8.18E-05 |
| 0.00349  | 0.278638 | 8.95E-10 | 0.220267 | 1.54E-06 | 0.45403163 | 3.96E-25 | 0.268073 | 3.96E-09 |
| 0.13216  | 0.234828 | 2.85E-07 | 0.390876 | 1.70E-18 | -0.0055045 | 0.90556  | -0.18777 | 4.44E-05 |
| 0.44573  | 0.019237 | 0.67841  | 0.213323 | 3.30E-06 | 0.10391909 | 0.02472  | -0.17394 | 0.00016  |
| 0.80859  | 0.181058 | 8.33E-05 | 0.256301 | 1.93E-08 | -0.0117897 | 0.79942  | -0.18794 | 4.37E-05 |
| 0.84295  | 0.000256 | 0.9956   | 0.142642 | 0.002    | -0.0971957 | 0.03575  | -0.41171 | 1.56E-20 |
| 0.63021  | -0.03334 | 0.47226  | -0.02642 | 0.56902  | -0.2901175 | 1.65E-10 | -0.57918 | 3.47E-43 |
| 0.7855   | -0.00635 | 0.89111  | 0.223031 | 1.13E-06 | -0.0283752 | 0.54075  | -0.23213 | 3.93E-07 |
| 0.8567   | -0.09534 | 0.03944  | 0.026879 | 0.56231  | 0.11556228 | 0.01245  | -0.0843  | 0.06874  |
| 0.19407  | 0.02825  | 0.54255  | 0.204213 | 8.66E-06 | 0.25277626 | 3.06E-08 | -0.07581 | 0.10178  |
| 0.44546  | 0.245601 | 7.62E-08 | 0.492938 | 5.80E-30 | 0.00727328 | 0.87544  | -0.12568 | 0.00654  |
| 0.88443  | -0.05792 | 0.21157  | 0.011923 | 0.7972   | -0.2616082 | 9.55E-09 | -0.49733 | 1.51E-30 |
| 0.97412  | 0.050105 | 0.27989  | 0.219279 | 1.72E-06 | 0.21264516 | 3.55E-06 | -0.00427 | 0.92662  |
| 0.01041  | -0.02221 | 0.63217  | -0.00705 | 0.87915  | -0.2340286 | 3.14E-07 | -0.49443 | 3.68E-30 |
| 0.05382  | -0.10765 | 0.01998  | 0.293051 | 1.06E-10 | 0.25022011 | 4.25E-08 | -0.03678 | 0.42779  |
| 0.9304   | -0.08529 | 0.06555  | -0.0506  | 0.27515  | -0.2166721 | 2.29E-06 | -0.39938 | 2.61E-19 |
| 0.13087  | -0.10458 | 0.02381  | 0.155987 | 0.00072  | -0.0264459 | 0.56863  | -0.179   | 0.0001   |
| 0.82299  | 0.166294 | 0.00031  | 0.163478 | 0.00039  | -0.1473409 | 0.00141  | -0.31327 | 4.31E-12 |
| 0.60119  | 0.046049 | 0.32071  | -0.01184 | 0.79858  | -0.296705  | 6.05E-11 | -0.46487 | 2.05E-26 |
| 0.02697  | 0.271172 | 2.58E-09 | 0.47357  | 1.77E-27 | 0.23653688 | 2.32E-07 | -0.08232 | 0.07552  |
| 0.01147  | 0.020227 | 0.66284  | 0.067032 | 0.14809  | -0.1995979 | 1.39E-05 | -0.49793 | 1.25E-30 |
| 0.01323  | -0.09974 | 0.03117  | 0.026949 | 0.56129  | -0.2170876 | 2.19E-06 | -0.53523 | 5.69E-36 |
| 0.34696  | 0.033331 | 0.47241  | 0.112111 | 0.01536  | -0.2000954 | 1.32E-05 | -0.4562  | 2.21E-25 |
| 0.00675  | 0.103991 | 0.02462  | 0.202418 | 1.04E-05 | -0.170308  | 0.00022  | -0.35395 | 3.14E-15 |
| 0.69331  | -0.09787 | 0.03449  | 0.229917 | 5.10E-07 | 0.24826124 | 5.45E-08 | -0.08751 | 0.05881  |
| 0.58102  | 0.023669 | 0.60992  | 0.158535 | 0.00058  | 0.07386509 | 0.11091  | -0.19006 | 3.57E-05 |
| 0.00013  | -0.27281 | 2.05E-09 | -0.15475 | 0.00079  | 0.04615049 | 0.31965  | -0.15527 | 0.00076  |
| 0.13408  | -0.31657 | 2.49E-12 | -0.08845 | 0.05613  | 0.08347673 | 0.0715   | -0.06484 | 0.16187  |
| 0.42009  | -0.0115  | 0.80432  | 0.175705 | 0.00014  | -0.1791372 | 9.93E-05 | -0.42118 | 1.66E-21 |
| 0.13722  | -0.13991 | 0.00244  | 0.050833 | 0.27296  | -0.4587804 | 1.10E-25 | -0.59261 | 1.29E-45 |
| 0.82615  | 0.079697 | 0.08536  | 0.219158 | 1.74E-06 | -0.1330241 | 0.00398  | -0.37766 | 2.80E-17 |

|          |          |          |          |          |            |          |          |          |
|----------|----------|----------|----------|----------|------------|----------|----------|----------|
| 0.00033  | -0.03351 | 0.47004  | 0.249039 | 4.94E-08 | -0.1901505 | 3.53E-05 | -0.34689 | 1.19E-14 |
| 0.65604  | 0.172062 | 0.00019  | 0.256363 | 1.92E-08 | 0.01149851 | 0.80427  | -0.2765  | 1.22E-09 |
| 0.31583  | -0.11132 | 0.0161   | -0.09009 | 0.0517   | -0.5324869 | 1.48E-35 | -0.72021 | 7.43E-76 |
| 0.05465  | -0.04277 | 0.35639  | 0.214339 | 2.96E-06 | -0.0855164 | 0.06483  | -0.42663 | 4.44E-22 |
| 0.70679  | 0.199108 | 1.46E-05 | 0.571898 | 6.49E-42 | 0.39391571 | 8.74E-19 | 0.03265  | 0.48151  |
| 0.69836  | 0.06815  | 0.14143  | 0.097387 | 0.03539  | -0.2206383 | 1.47E-06 | -0.41884 | 2.92E-21 |
| 0.32134  | -0.10125 | 0.02869  | 0.097808 | 0.0346   | -0.1339219 | 0.00374  | -0.30921 | 8.36E-12 |
| 0.67064  | 0.185355 | 5.58E-05 | 0.089234 | 0.05397  | -0.1822592 | 7.45E-05 | -0.40183 | 1.51E-19 |
| 0.13523  | 0.095298 | 0.03954  | 0.241909 | 1.21E-07 | -0.2886313 | 2.06E-10 | -0.44423 | 5.25E-24 |
| 0.05796  | 0.169715 | 0.00023  | 0.287901 | 2.30E-10 | 0.04680439 | 0.31283  | -0.14013 | 0.0024   |
| 0.7232   | -0.01236 | 0.7899   | 0.050598 | 0.27518  | 0.00631316 | 0.89177  | -0.15239 | 0.00095  |
| 0.00812  | -0.24902 | 4.95E-08 | -0.05352 | 0.24837  | -0.1132465 | 0.01434  | -0.30249 | 2.45E-11 |
| 0.00233  | 0.144922 | 0.00169  | 0.234952 | 2.81E-07 | 0.19885063 | 1.50E-05 | -0.0126  | 0.78599  |
| 0.16718  | 0.272198 | 2.23E-09 | 0.386601 | 4.26E-18 | -0.0480642 | 0.29997  | -0.27405 | 1.72E-09 |
| 0.29531  | 0.19174  | 3.03E-05 | 0.448696 | 1.63E-24 | 0.14854963 | 0.00128  | -0.17236 | 0.00018  |
| 0.27392  | 0.056879 | 0.21987  | 0.264249 | 6.69E-09 | 0.23321691 | 3.45E-07 | -0.01512 | 0.74458  |
| 0.12423  | 0.040091 | 0.38737  | 0.18624  | 5.14E-05 | 0.06994646 | 0.13121  | -0.26919 | 3.40E-09 |
| 0.01555  | -0.05265 | 0.25613  | 0.172244 | 0.00018  | -0.031693  | 0.49446  | -0.22351 | 1.07E-06 |
| 0.02775  | 0.073282 | 0.11376  | 0.391006 | 1.65E-18 | 0.19544773 | 2.11E-05 | -0.08222 | 0.07588  |
| 0.04348  | -0.05548 | 0.23142  | 0.031432 | 0.49803  | -0.0243635 | 0.59947  | -0.24991 | 4.42E-08 |
| 0.03156  | -0.02526 | 0.58615  | 0.26708  | 4.55E-09 | -0.017387  | 0.70784  | -0.17973 | 9.41E-05 |
| 0.94104  | -0.05859 | 0.20627  | -0.10142 | 0.02841  | -0.2169631 | 2.22E-06 | -0.3624  | 6.11E-16 |
| 0.39136  | -0.1121  | 0.01536  | 0.146407 | 0.00151  | 0.3193758  | 1.56E-12 | 0.007448 | 0.87247  |
| 0.00495  | -0.08526 | 0.06564  | 0.137799 | 0.00284  | 0.20985029 | 4.79E-06 | -0.02324 | 0.61646  |
| 0.14315  | 0.158997 | 0.00056  | 0.226188 | 7.85E-07 | 0.14912165 | 0.00123  | -0.17221 | 0.00018  |
| 0.01983  | -0.1952  | 2.16E-05 | -0.10487 | 0.02343  | -0.3141507 | 3.72E-12 | -0.55933 | 8.57E-40 |
| 0.05597  | 0.143394 | 0.00189  | 0.133109 | 0.00396  | -0.2939155 | 9.28E-11 | -0.46684 | 1.19E-26 |
| 0.01806  | 0.002709 | 0.95345  | 0.031475 | 0.49744  | -0.1745645 | 0.00015  | -0.44215 | 9.00E-24 |
| 0.20576  | -0.05052 | 0.27594  | -0.15939 | 0.00055  | -0.1402964 | 0.00238  | -0.35002 | 6.63E-15 |
| 0.5036   | -0.10795 | 0.01963  | 0.067888 | 0.14297  | 0.08210723 | 0.0763   | -0.14938 | 0.0012   |
| 0.21088  | 0.089037 | 0.05451  | 0.240027 | 1.52E-07 | 0.01736624 | 0.70817  | -0.2587  | 1.41E-08 |
| 0.08634  | 0.048701 | 0.2936   | 0.149488 | 0.0012   | 0.06575971 | 0.15596  | -0.19642 | 1.91E-05 |
| 0.02242  | -0.22953 | 5.33E-07 | -0.09941 | 0.03173  | -0.3618937 | 6.75E-16 | -0.56906 | 1.99E-41 |
| 0.18412  | -0.08709 | 0.06002  | -0.07339 | 0.11322  | -0.2695703 | 3.22E-09 | -0.53652 | 3.61E-36 |
| 0.00217  | 0.144765 | 0.00171  | 0.263111 | 7.80E-09 | -0.0302845 | 0.51385  | -0.2312  | 4.38E-07 |
| 0.0094   | -0.0029  | 0.95025  | 0.157764 | 0.00062  | -0.0355541 | 0.44337  | -0.3316  | 1.90E-13 |
| 0.15991  | 0.000942 | 0.98381  | 0.051694 | 0.26491  | -0.1499113 | 0.00116  | -0.40404 | 9.13E-20 |
| 1.65E-06 | -0.15711 | 0.00066  | -0.15623 | 0.0007   | -0.411446  | 1.67E-20 | -0.57097 | 9.39E-42 |
| 0.27388  | 0.012449 | 0.78845  | 0.271174 | 2.58E-09 | 0.28866129 | 2.06E-10 | -0.01795 | 0.69888  |
| 0.15426  | 0.145181 | 0.00166  | 0.322752 | 8.79E-13 | 0.32574171 | 5.27E-13 | 0.066834 | 0.14929  |
| 0.76069  | -0.15153 | 0.00102  | 0.28804  | 2.26E-10 | 0.12855144 | 0.0054   | -0.07633 | 0.09945  |
| 0.42289  | -0.15097 | 0.00107  | 0.024421 | 0.59861  | -0.2208651 | 1.44E-06 | -0.48429 | 7.80E-29 |
| 0.01743  | 0.281595 | 5.84E-10 | 0.325677 | 5.32E-13 | 0.09429966 | 0.04166  | -0.20865 | 5.44E-06 |
| 0.90363  | 0.186981 | 4.79E-05 | 0.32372  | 7.45E-13 | -0.1992383 | 1.44E-05 | -0.4737  | 1.70E-27 |
| 7.51E-07 | -0.02793 | 0.54716  | 0.122675 | 0.00796  | -0.1283779 | 0.00546  | -0.22414 | 9.92E-07 |

|          |          |          |          |          |            |          |          |          |
|----------|----------|----------|----------|----------|------------|----------|----------|----------|
| 0.28472  | -0.00698 | 0.88042  | 0.058391 | 0.20784  | -0.3898131 | 2.14E-18 | -0.60653 | 2.95E-48 |
| 0.01913  | -0.0454  | 0.32758  | 0.201211 | 1.18E-05 | 0.28798998 | 2.27E-10 | -0.0738  | 0.11124  |
| 0.34431  | 0.150705 | 0.00109  | 0.130235 | 0.00482  | -0.1526531 | 0.00093  | -0.42418 | 8.07E-22 |
| 0.1474   | -0.01191 | 0.7974   | 0.042036 | 0.36473  | -0.0220747 | 0.6342   | -0.30421 | 1.87E-11 |
| 0.00014  | -0.09686 | 0.0364   | 0.045538 | 0.32612  | 0.00313637 | 0.94611  | -0.19502 | 2.20E-05 |
| 0.17608  | -0.10739 | 0.02027  | 0.034645 | 0.45512  | -0.2974582 | 5.38E-11 | -0.55419 | 5.95E-39 |
| 0.08536  | 0.251305 | 3.70E-08 | 0.501204 | 4.51E-31 | 0.15111639 | 0.00105  | -0.01337 | 0.77317  |
| 0.23839  | 0.395554 | 6.10E-19 | 0.382263 | 1.07E-17 | 0.27134391 | 2.52E-09 | 0.014955 | 0.7472   |
| 0.5303   | 0.016788 | 0.71747  | 0.300066 | 3.59E-11 | 0.23600397 | 2.48E-07 | -0.03394 | 0.46442  |
| 0.08206  | 0.054625 | 0.23873  | 0.29652  | 6.22E-11 | -0.0844272 | 0.06833  | -0.36225 | 6.29E-16 |
| 0.96556  | -0.28327 | 4.57E-10 | 0.17205  | 0.00019  | 0.09761244 | 0.03496  | -0.1932  | 2.63E-05 |
| 0.64723  | -0.01536 | 0.74052  | 0.134128 | 0.00369  | -0.4274175 | 3.66E-22 | -0.58492 | 3.29E-44 |
| 0.77665  | 0.150039 | 0.00115  | 0.279145 | 8.32E-10 | 0.26361707 | 7.29E-09 | -0.00796 | 0.86387  |
| 0.96137  | -0.01073 | 0.81717  | 0.123443 | 0.00757  | -0.1935767 | 2.53E-05 | -0.34475 | 1.77E-14 |
| 0.84492  | 0.212453 | 3.62E-06 | 0.344671 | 1.79E-14 | 0.09288032 | 0.04484  | -0.25209 | 3.34E-08 |
| 0.03272  | -0.22147 | 1.34E-06 | -0.21682 | 2.25E-06 | -0.3632909 | 5.13E-16 | -0.56831 | 2.67E-41 |
| 0.38707  | -0.07475 | 0.1067   | 0.068701 | 0.13823  | 0.11492357 | 0.01295  | -0.20631 | 6.96E-06 |
| 0.71303  | -0.304   | 1.93E-11 | -0.14069 | 0.00231  | -0.3716178 | 9.68E-17 | -0.59784 | 1.36E-46 |
| 0.11113  | -0.10159 | 0.02815  | 0.061318 | 0.18591  | -0.126423  | 0.00623  | -0.22391 | 1.02E-06 |
| 0.42652  | 0.008886 | 0.84812  | -0.19037 | 3.46E-05 | -0.1650978 | 0.00034  | -0.0969  | 0.03631  |
| 0.08896  | 0.03764  | 0.41707  | -0.15417 | 0.00083  | -0.1340672 | 0.0037   | -0.08278 | 0.0739   |
| 0.43804  | -0.05664 | 0.22184  | -0.20528 | 7.75E-06 | 0.02150352 | 0.643    | 0.0989   | 0.03262  |
| 0.69792  | 0.001461 | 0.97488  | -0.10069 | 0.02958  | -0.0039123 | 0.9328   | -0.01319 | 0.7762   |
| 0.65585  | -0.05658 | 0.22229  | -0.14585 | 0.00158  | 0.04929153 | 0.28779  | 0.037774 | 0.41541  |
| 0.88063  | -0.00073 | 0.98745  | -0.17373 | 0.00016  | -0.0819115 | 0.077    | -0.08148 | 0.07859  |
| 0.59076  | 0.095972 | 0.03815  | -0.18297 | 6.98E-05 | -0.003916  | 0.93274  | -0.02591 | 0.57648  |
| 1.58E-11 | -0.02605 | 0.57449  | -0.20082 | 1.23E-05 | -0.0420722 | 0.36433  | -0.00071 | 0.9878   |
| 0.66499  | 0.001159 | 0.98008  | -0.1296  | 0.00503  | 0.01395414 | 0.7636   | 0.042133 | 0.36363  |
| 0.81753  | -0.11064 | 0.01676  | -0.25026 | 4.23E-08 | -0.0720311 | 0.12008  | -0.0084  | 0.85628  |
| 0.09198  | -0.23107 | 4.45E-07 | -0.20493 | 8.04E-06 | 0.00788622 | 0.86503  | -0.03879 | 0.40297  |
| 0.99571  | 0.06033  | 0.19311  | -0.19664 | 1.87E-05 | 0.04043784 | 0.38327  | 0.158576 | 0.00058  |
| 0.47516  | 0.061162 | 0.18703  | -0.05249 | 0.25762  | -0.0336033 | 0.4688   | -0.05808 | 0.21024  |
| 0.60072  | 0.019612 | 0.6725   | -0.14024 | 0.00239  | -0.0113962 | 0.80597  | 0.047552 | 0.30515  |
| 0.14607  | -0.01375 | 0.76692  | -0.23392 | 3.18E-07 | -0.1213487 | 0.00866  | -0.08299 | 0.07317  |
| 0.66368  | -0.07421 | 0.10923  | -0.23117 | 4.40E-07 | -0.0844428 | 0.06827  | -0.04177 | 0.36784  |
| 0.63507  | 0.006024 | 0.8967   | -0.1462  | 0.00153  | -0.0168418 | 0.7166   | -0.03967 | 0.39236  |
| 0.30067  | -0.02171 | 0.63985  | -0.19991 | 1.35E-05 | -0.0626077 | 0.1768   | -0.03318 | 0.4744   |
| 0.07702  | -0.05698 | 0.21904  | -0.17485 | 0.00015  | -0.0244909 | 0.59756  | -0.03962 | 0.39293  |
| 0.10275  | 0.005344 | 0.90831  | -0.07464 | 0.10719  | -0.0128896 | 0.78116  | -0.07135 | 0.12363  |
| 0.33706  | -0.07205 | 0.11997  | -0.21882 | 1.81E-06 | -0.1014314 | 0.0284   | -0.02763 | 0.55139  |
| 0.67293  | 0.008959 | 0.84688  | -0.19014 | 3.54E-05 | -0.0532386 | 0.25087  | -0.01354 | 0.77038  |
| 0.26723  | 0.011187 | 0.80947  | -0.13883 | 0.00264  | -0.0399036 | 0.38959  | -0.0661  | 0.15381  |
| 0.3984   | -0.06525 | 0.15922  | -0.22006 | 1.57E-06 | -0.0617115 | 0.18309  | -0.06886 | 0.13732  |
| 0.47575  | -0.03735 | 0.42073  | -0.24597 | 7.28E-08 | -0.1248646 | 0.0069   | -0.09297 | 0.04464  |
| 0.09829  | 0.143399 | 0.00189  | 0.067619 | 0.14456  | 0.05451585 | 0.23967  | -0.05029 | 0.27815  |

|         |          |         |          |          |            |         |          |          |
|---------|----------|---------|----------|----------|------------|---------|----------|----------|
| 0.72794 | -0.01171 | 0.80067 | -0.04075 | 0.37961  | 0.07361018 | 0.11215 | 0.118073 | 0.01066  |
| 0.95719 | -0.03247 | 0.48397 | -0.1448  | 0.00171  | -0.0643868 | 0.16479 | -0.05555 | 0.23086  |
| 0.02811 | 0.002729 | 0.9531  | -0.06656 | 0.15097  | -0.0209207 | 0.65203 | -0.06987 | 0.13165  |
| 0.96206 | 0.053581 | 0.24784 | -0.115   | 0.01289  | -0.0612564 | 0.18635 | -0.0491  | 0.28967  |
| 0.94923 | -0.03174 | 0.49376 | -0.27194 | 2.32E-09 | -0.1160784 | 0.01206 | -0.03607 | 0.43672  |
| 0.46246 | -0.06447 | 0.16423 | -0.17171 | 0.00019  | -0.0292848 | 0.52785 | -0.04655 | 0.31544  |
| 0.01381 | 0.0381   | 0.41139 | -0.22204 | 1.26E-06 | 0.01469307 | 0.75148 | 0.158747 | 0.00057  |
| 0.84382 | -0.00542 | 0.90706 | -0.15331 | 0.00089  | -0.0155763 | 0.73708 | 0.026925 | 0.56165  |
| 0.18198 | -0.15274 | 0.00093 | -0.12588 | 0.00645  | -0.0437239 | 0.34578 | -0.13865 | 0.00268  |
| 0.39675 | 0.033507 | 0.47008 | -0.07173 | 0.12163  | -0.0891325 | 0.05425 | -0.07917 | 0.08745  |
| 0.86937 | 0.054287 | 0.24165 | -0.02931 | 0.52751  | -0.0210281 | 0.65037 | -0.02584 | 0.57759  |
| 0.73333 | -0.07011 | 0.13033 | -0.1304  | 0.00477  | -0.0699956 | 0.13094 | -0.08203 | 0.07659  |
| 0.72838 | 0.12441  | 0.00711 | -0.04548 | 0.32676  | -0.039772  | 0.39116 | -0.02481 | 0.59283  |
| 0.17213 | 0.087046 | 0.06016 | -0.02927 | 0.5281   | -0.0838316 | 0.0703  | -0.09607 | 0.03795  |
| 0.4364  | -0.05814 | 0.20984 | -0.18769 | 4.47E-05 | -0.0670127 | 0.14821 | -0.06765 | 0.14438  |
| 0.87327 | -0.03424 | 0.46046 | -0.20861 | 5.46E-06 | -0.0643948 | 0.16474 | -0.0628  | 0.17545  |
| 0.01256 | 0.027656 | 0.55106 | -0.12839 | 0.00546  | 0.00436725 | 0.92501 | 0.031732 | 0.49393  |
| 0.61677 | -0.10711 | 0.02061 | -0.09593 | 0.03824  | 0.09134641 | 0.04851 | 0.138203 | 0.00276  |
| 0.86114 | -0.05553 | 0.23105 | -0.2342  | 3.07E-07 | -0.1557815 | 0.00073 | -0.08784 | 0.05786  |
| 0.19159 | 0.03846  | 0.40698 | -0.20536 | 7.69E-06 | -0.1516054 | 0.00101 | -0.10141 | 0.02843  |
| 0.46372 | -0.03559 | 0.44286 | -0.23495 | 2.81E-07 | -0.1394939 | 0.00252 | -0.07764 | 0.09378  |
| 0.88031 | -0.05216 | 0.26063 | -0.1507  | 0.00109  | -0.0083732 | 0.85679 | -0.00225 | 0.9613   |
| 0.75078 | -0.12842 | 0.00545 | -0.18847 | 4.16E-05 | -0.0430371 | 0.35342 | -0.00554 | 0.90501  |
| 0.89542 | -0.01812 | 0.69604 | -0.18094 | 8.42E-05 | -0.0878976 | 0.05769 | -0.02974 | 0.52141  |
| 0.3514  | -0.04308 | 0.35295 | -0.19017 | 3.53E-05 | -0.0282037 | 0.5432  | 0.010015 | 0.82911  |
| 0.76472 | -0.12172 | 0.00846 | -0.15167 | 0.00101  | 0.0888473  | 0.05503 | 0.077324 | 0.09511  |
| 0.72988 | -0.04832 | 0.29743 | -0.26822 | 3.89E-09 | -0.1064586 | 0.02139 | -0.02872 | 0.5358   |
| 0.15733 | 0.081052 | 0.08017 | -0.07601 | 0.10091  | -0.0820934 | 0.07635 | -0.09078 | 0.04992  |
| 0.6411  | -0.04398 | 0.34297 | -0.1721  | 0.00019  | -0.0577285 | 0.21305 | -0.11926 | 0.00989  |
| 0.03285 | -0.03613 | 0.43605 | -0.04475 | 0.33454  | 0.03237739 | 0.48518 | -0.00757 | 0.8704   |
| 0.62361 | -0.17732 | 0.00012 | -0.38224 | 1.08E-17 | -0.1757714 | 0.00013 | -0.12996 | 0.00491  |
| 0.11994 | -0.00774 | 0.86753 | -0.05949 | 0.19943  | 0.01328639 | 0.7746  | 0.035831 | 0.43982  |
| 0.96838 | -0.0094  | 0.83945 | -0.1804  | 8.85E-05 | -0.0278302 | 0.54856 | -0.02259 | 0.62633  |
| 0.98267 | -0.01905 | 0.68137 | -0.20322 | 9.60E-06 | -0.1055281 | 0.02256 | -0.01432 | 0.75766  |
| 0.8365  | -0.0901  | 0.05167 | -0.1747  | 0.00015  | -0.0080356 | 0.8625  | -0.02929 | 0.52781  |
| 0.40394 | 0.021878 | 0.63723 | -0.17458 | 0.00015  | -0.0469818 | 0.311   | 0.02506  | 0.58908  |
| 0.99392 | -0.00114 | 0.98041 | -0.09725 | 0.03565  | -0.0210151 | 0.65057 | 0.016627 | 0.72007  |
| 0.65454 | 0.04007  | 0.38762 | -0.20944 | 5.01E-06 | -0.08524   | 0.0657  | -0.00864 | 0.85229  |
| 0.28769 | 0.033022 | 0.47653 | -0.11071 | 0.01669  | 0.1615386  | 0.00046 | 0.218843 | 1.80E-06 |
| 0.11357 | 0.074986 | 0.10558 | -0.20115 | 1.19E-05 | -0.1696617 | 0.00023 | -0.12709 | 0.00595  |
| 0.5467  | -0.01676 | 0.71796 | -0.22288 | 1.14E-06 | -0.0804173 | 0.08257 | 0.008818 | 0.84927  |
| 0.41577 | -0.00361 | 0.93806 | -0.13659 | 0.0031   | -0.0695276 | 0.13354 | -0.07383 | 0.11106  |
| 0.94098 | 0.09494  | 0.04029 | -0.11469 | 0.01314  | -0.1221968 | 0.0082  | -0.13484 | 0.00351  |
| 0.20297 | -0.08249 | 0.07492 | -0.18081 | 8.52E-05 | -0.0184986 | 0.6901  | 0.033098 | 0.47552  |
| 0.83534 | -0.02918 | 0.52939 | -0.16873 | 0.00025  | -0.1216814 | 0.00848 | -0.09422 | 0.04184  |

|          |          |         |          |          |            |          |          |          |
|----------|----------|---------|----------|----------|------------|----------|----------|----------|
| 0.43129  | 0.018132 | 0.69593 | -0.07983 | 0.08484  | -0.0267222 | 0.5646   | -0.01518 | 0.74354  |
| 0.66713  | -0.06779 | 0.14356 | -0.22646 | 7.61E-07 | -0.0716901 | 0.12185  | -0.07622 | 0.09997  |
| 6.89E-07 | -0.08467 | 0.06754 | -0.21251 | 3.60E-06 | -0.0813696 | 0.07898  | -0.04775 | 0.30315  |
| 0.00334  | 0.058481 | 0.20714 | -0.09289 | 0.04483  | -0.0328683 | 0.47859  | -0.02749 | 0.55343  |
| 0.61121  | 0.061102 | 0.18746 | -0.10031 | 0.0302   | -0.0193111 | 0.67724  | -0.00482 | 0.91718  |
| 0.61791  | -0.05386 | 0.2454  | -0.11355 | 0.01408  | -0.2701979 | 2.95E-09 | -0.32746 | 3.91E-13 |
| 0.89253  | -0.02544 | 0.58336 | -0.20747 | 6.16E-06 | -0.0928899 | 0.04482  | -0.11075 | 0.01666  |
| 0.94941  | -0.00323 | 0.94457 | -0.09907 | 0.03233  | -0.0215491 | 0.6423   | -0.05047 | 0.27639  |
| 0.2824   | -0.05931 | 0.20075 | -0.1588  | 0.00057  | -0.0079188 | 0.86448  | -0.02387 | 0.60683  |
| 0.61061  | -0.04512 | 0.33062 | -0.13296 | 0.004    | 0.05254708 | 0.25709  | 0.093924 | 0.04248  |
| 0.75627  | 0.089806 | 0.05245 | -0.03717 | 0.42295  | -0.0340967 | 0.46229  | -0.07829 | 0.09103  |
| 0.2318   | -0.03349 | 0.47032 | -0.33459 | 1.12E-13 | -0.1059851 | 0.02198  | 0.049243 | 0.28827  |
| 0.03008  | -0.06448 | 0.1642  | -0.10732 | 0.02036  | 0.01336223 | 0.77335  | -0.00273 | 0.9531   |
| 0.66806  | -0.03863 | 0.40496 | -0.17754 | 0.00011  | -0.0526348 | 0.2563   | -0.04395 | 0.34331  |
| 0.24835  | -0.12974 | 0.00498 | -0.12276 | 0.00791  | 0.02326222 | 0.61607  | -0.0202  | 0.66326  |
| 0.5522   | -0.07704 | 0.09633 | -0.09111 | 0.0491   | 0.00381765 | 0.93442  | -0.00027 | 0.99529  |
| 0.43299  | -0.05854 | 0.20671 | -0.18091 | 8.44E-05 | -0.1346328 | 0.00356  | -0.13817 | 0.00277  |
| 0.71131  | -0.05193 | 0.26277 | -0.20051 | 1.27E-05 | -0.0535511 | 0.2481   | -0.02928 | 0.52795  |
| 0.65231  | 0.011212 | 0.80905 | 0.017906 | 0.69954  | -0.0608203 | 0.18951  | -0.14328 | 0.00191  |
| 0.62016  | -0.01467 | 0.75189 | -0.12298 | 0.0078   | -0.0683108 | 0.14049  | -0.07344 | 0.11297  |
| 0.61837  | 0.000973 | 0.98327 | -0.12288 | 0.00785  | -0.0393113 | 0.39667  | -0.01901 | 0.68194  |
| 0.87247  | -0.02712 | 0.55884 | -0.05357 | 0.24791  | -0.0200658 | 0.66537  | -0.05933 | 0.2006   |
| 0.05112  | 0.001494 | 0.97431 | -0.15024 | 0.00113  | -0.1738113 | 0.00016  | -0.20934 | 5.06E-06 |
| 0.49382  | 0.000507 | 0.99128 | -0.13563 | 0.00332  | -0.1144815 | 0.01331  | -0.06579 | 0.15574  |
| 0.22901  | -0.13424 | 0.00366 | -0.14147 | 0.00218  | -0.0463914 | 0.31713  | -0.06765 | 0.14439  |
| 0.21671  | -0.05005 | 0.28042 | -0.06991 | 0.1314   | -0.0210348 | 0.65026  | -0.03611 | 0.43632  |
| 0.81855  | -0.02444 | 0.59837 | -0.12087 | 0.00893  | 0.00854891 | 0.85382  | -0.02023 | 0.66274  |
| 0.26353  | 0.003979 | 0.93167 | -0.11729 | 0.01119  | -0.0259045 | 0.57658  | -0.00606 | 0.89603  |
| 0.36511  | 0.128559 | 0.0054  | 0.006075 | 0.89583  | -0.0217322 | 0.63947  | 0.037899 | 0.41387  |
| 0.61928  | 0.155054 | 0.00077 | -0.05102 | 0.27122  | -0.0979449 | 0.03434  | -0.1025  | 0.02676  |
| 0.385    | 0.030278 | 0.51394 | -0.10008 | 0.03059  | 0.0270259  | 0.56018  | 0.058918 | 0.20376  |
| 0.40444  | 0.099415 | 0.03172 | -0.08298 | 0.0732   | 0.01779012 | 0.70139  | 0.099528 | 0.03152  |
| 0.54727  | 0.037088 | 0.42394 | -0.03086 | 0.50588  | 0.02173954 | 0.63936  | 0.020186 | 0.66349  |
| 0.19784  | -0.10581 | 0.02221 | -0.23854 | 1.82E-07 | -0.0419142 | 0.36613  | 0.0235   | 0.61248  |
| 0.57388  | -0.055   | 0.23554 | -0.25124 | 3.73E-08 | -0.1047139 | 0.02363  | -0.09101 | 0.04934  |
| 0.76337  | -0.03969 | 0.39211 | -0.18051 | 8.76E-05 | -0.0407627 | 0.37946  | -0.05022 | 0.27881  |
| 0.67704  | -0.03755 | 0.41819 | -0.1361  | 0.00321  | -0.1478246 | 0.00136  | -0.14482 | 0.0017   |
| 0.66698  | -0.05098 | 0.27161 | -0.13146 | 0.00443  | -0.0211818 | 0.64798  | -0.07587 | 0.10152  |
| 0.42713  | 0.062269 | 0.17916 | -0.10665 | 0.02115  | -0.1219816 | 0.00832  | -0.16679 | 0.00029  |
| 0.9718   | 0.033369 | 0.47191 | -0.00094 | 0.9839   | 0.00271159 | 0.9534   | -0.01701 | 0.71388  |
| 0.01494  | -0.14745 | 0.0014  | -0.24321 | 1.03E-07 | -0.0962171 | 0.03766  | -0.12699 | 0.006    |
| 0.55944  | -0.01352 | 0.77072 | -0.23751 | 2.07E-07 | 0.01034317 | 0.82359  | 0.10813  | 0.01942  |
| 0.57338  | -0.05148 | 0.26689 | -0.3183  | 1.87E-12 | -0.2188738 | 1.79E-06 | -0.23294 | 3.57E-07 |
| 0.29503  | -0.0504  | 0.2771  | -0.17115 | 0.0002   | -0.0757837 | 0.10191  | -0.03736 | 0.42052  |
| 0.25498  | -0.09462 | 0.04097 | -0.23822 | 1.90E-07 | -0.0554569 | 0.23164  | -0.01447 | 0.75517  |

|         |          |          |          |          |            |          |          |          |
|---------|----------|----------|----------|----------|------------|----------|----------|----------|
| 0.59214 | -0.00314 | 0.94608  | -0.08432 | 0.06869  | 0.02254709 | 0.62697  | 0.059784 | 0.19718  |
| 0.54495 | 0.078966 | 0.08827  | -0.06846 | 0.13959  | -0.0405779 | 0.38163  | -0.07982 | 0.0849   |
| 0.17746 | 0.069969 | 0.13108  | 0.002602 | 0.95528  | 0.04863782 | 0.29424  | 0.014299 | 0.75794  |
| 0.30072 | -0.14464 | 0.00173  | -0.25339 | 2.82E-08 | -0.0144992 | 0.75466  | 0.007579 | 0.87025  |
| 0.22533 | 0.057182 | 0.21742  | -0.02937 | 0.52665  | 0.00025467 | 0.99562  | -0.02048 | 0.65897  |
| 0.39775 | 0.117642 | 0.01095  | -0.10315 | 0.02581  | -0.1182128 | 0.01057  | -0.15447 | 0.00081  |
| 0.6766  | 0.018498 | 0.69011  | -0.06554 | 0.15734  | -0.0378098 | 0.41497  | -0.03158 | 0.49604  |
| 0.08871 | -0.00762 | 0.86963  | -0.16704 | 0.00029  | 0.09415426 | 0.04198  | 0.062776 | 0.17564  |
| 0.00246 | -0.24527 | 7.95E-08 | -0.42188 | 1.41E-21 | -0.2058783 | 7.28E-06 | -0.2709  | 2.68E-09 |
| 0.56205 | 0.02736  | 0.55534  | -0.23817 | 1.91E-07 | -0.1365224 | 0.00311  | -0.05736 | 0.21599  |
| 0.28477 | -0.05846 | 0.20733  | -0.25412 | 2.57E-08 | -0.1153276 | 0.01263  | -0.06709 | 0.14772  |
| 0.97828 | -0.01723 | 0.71034  | -0.17803 | 0.00011  | -0.1007438 | 0.0295   | -0.05773 | 0.21302  |
| 0.4179  | -0.06493 | 0.16122  | -0.15085 | 0.00108  | -0.0522203 | 0.26007  | -0.02846 | 0.53953  |
| 0.14329 | -0.01496 | 0.74711  | -0.16181 | 0.00045  | -0.0654685 | 0.1578   | 0.003125 | 0.94631  |
| 0.97714 | 0.001383 | 0.97623  | -0.1282  | 0.00553  | -0.0934155 | 0.04362  | -0.10747 | 0.02018  |
| 0.5107  | -0.02591 | 0.57649  | -0.19928 | 1.43E-05 | -0.0551619 | 0.23414  | 0.016128 | 0.72813  |
| 0.7979  | 0.019723 | 0.67076  | -0.17523 | 0.00014  | -0.0438187 | 0.34474  | -0.07622 | 0.09996  |
| 0.15968 | 0.149468 | 0.0012   | -0.15517 | 0.00077  | -0.0019349 | 0.96674  | 0.035225 | 0.4476   |
| 0.54401 | -0.07706 | 0.09623  | -0.24614 | 7.12E-08 | -0.09403   | 0.04225  | -0.03006 | 0.51696  |
| 0.18339 | 0.112935 | 0.01461  | -0.04009 | 0.38741  | -0.0515282 | 0.26644  | -0.05681 | 0.2204   |
| 0.43293 | 0.024081 | 0.6037   | -0.01583 | 0.73303  | 0.08015479 | 0.08358  | 0.090104 | 0.05167  |
| 0.8038  | -0.03515 | 0.44853  | -0.10797 | 0.0196   | 0.03128581 | 0.50003  | -0.0167  | 0.71882  |
| 0.85161 | -0.03983 | 0.39049  | -0.08302 | 0.07308  | -0.0724639 | 0.11786  | -0.10114 | 0.02885  |
| 0.55658 | 0.114751 | 0.01309  | -0.10568 | 0.02237  | -0.0127587 | 0.78332  | 0.018926 | 0.68333  |
| 0.64814 | -0.00833 | 0.85751  | -0.20574 | 7.39E-06 | -0.0380689 | 0.41178  | 0.106564 | 0.02126  |
| 0.44228 | 0.025573 | 0.58147  | -0.07153 | 0.12267  | 0.07883783 | 0.0888   | 0.02378  | 0.60824  |
| 0.10158 | -0.05385 | 0.24544  | -0.15018 | 0.00113  | -0.0298128 | 0.52043  | -0.05024 | 0.2786   |
| 0.033   | 0.015855 | 0.73256  | -0.15472 | 0.00079  | -0.1218933 | 0.00837  | -0.14029 | 0.00238  |
| 0.30007 | 0.045842 | 0.3229   | -0.00167 | 0.97133  | 0.15183305 | 0.001    | 0.145018 | 0.00168  |
| 0.55652 | -0.19445 | 2.32E-05 | -0.26848 | 3.75E-09 | -0.1413006 | 0.00221  | -0.14626 | 0.00153  |
| 0.78707 | -0.02995 | 0.51854  | -0.255   | 2.29E-08 | -0.0166584 | 0.71956  | 0.121417 | 0.00863  |
| 0.68503 | -0.23662 | 2.30E-07 | -0.34914 | 7.81E-15 | -0.1913892 | 3.14E-05 | -0.16514 | 0.00034  |
| 0.49238 | -0.03568 | 0.44175  | -0.22226 | 1.23E-06 | -0.0885442 | 0.05587  | -0.01186 | 0.79823  |
| 0.85763 | -0.04594 | 0.32191  | -0.18905 | 3.93E-05 | -0.0479066 | 0.30156  | -0.009   | 0.84622  |
| 0.52797 | -0.05606 | 0.22658  | -0.24175 | 1.23E-07 | -0.0310202 | 0.50368  | 0.021692 | 0.6401   |
| 0.51123 | 0.043679 | 0.34628  | -0.23852 | 1.83E-07 | -0.0443408 | 0.33901  | 0.03374  | 0.467    |
| 0.18228 | -0.08097 | 0.08046  | -0.14567 | 0.0016   | -0.0534931 | 0.24861  | -0.05861 | 0.20612  |
| 0.56205 | -0.12871 | 0.00534  | -0.11054 | 0.01687  | -0.0235888 | 0.61113  | -0.05454 | 0.23942  |
| 0.29552 | -0.01955 | 0.6735   | -0.19749 | 1.72E-05 | -0.059627  | 0.19836  | -0.00904 | 0.84553  |
| 0.96229 | 0.07055  | 0.12791  | -0.17984 | 9.31E-05 | -0.0802853 | 0.08307  | -0.03808 | 0.4116   |
| 0.36124 | -0.0736  | 0.11221  | -0.15476 | 0.00079  | -0.0314251 | 0.49812  | -0.0571  | 0.21807  |
| 0.53463 | 0.035862 | 0.43942  | -0.11719 | 0.01126  | -0.0035654 | 0.93875  | 0.061479 | 0.18475  |
| 0.72955 | -0.09054 | 0.05053  | -0.31722 | 2.24E-12 | -0.0743656 | 0.1085   | 0.062115 | 0.18024  |
| 0.87832 | -0.10562 | 0.02244  | -0.19496 | 2.21E-05 | -0.0476427 | 0.30424  | -0.02024 | 0.66264  |
| 0.85759 | -0.00192 | 0.96691  | -0.13271 | 0.00407  | 0.0031788  | 0.94538  | 0.063003 | 0.17408  |

|          |          |          |          |          |            |         |          |         |
|----------|----------|----------|----------|----------|------------|---------|----------|---------|
| 0.24435  | -0.05006 | 0.28034  | -0.1496  | 0.00118  | -0.1037816 | 0.02491 | -0.05627 | 0.22489 |
| 4.34E-05 | -0.12857 | 0.00539  | -0.25031 | 4.20E-08 | -0.0490374 | 0.29028 | 0.004006 | 0.9312  |
| 0.68821  | -0.04621 | 0.31904  | -0.17531 | 0.00014  | -0.0994175 | 0.03171 | -0.08509 | 0.06617 |
| 0.50731  | -0.10414 | 0.02441  | -0.18758 | 4.52E-05 | -0.0903532 | 0.05102 | -0.12322 | 0.00768 |
| 0.47268  | -0.08856 | 0.05581  | -0.11919 | 0.00993  | -0.064688  | 0.16282 | -0.11495 | 0.01293 |
| 0.00499  | 0.039882 | 0.38985  | -0.09589 | 0.03832  | -0.0892809 | 0.05385 | -0.09344 | 0.04356 |
| 0.19064  | -0.04976 | 0.28326  | -0.22928 | 5.49E-07 | -0.0806418 | 0.08171 | -0.09146 | 0.04824 |
| 0.42853  | 0.115206 | 0.01273  | 0.052171 | 0.26052  | 0.08394041 | 0.06994 | 0.064829 | 0.1619  |
| 0.37138  | -0.03898 | 0.40072  | -0.16406 | 0.00037  | -0.0251961 | 0.58705 | 0.007206 | 0.87659 |
| 0.59869  | -0.06234 | 0.17863  | -0.19526 | 2.14E-05 | -0.079357  | 0.08671 | -0.07271 | 0.11663 |
| 0.47988  | 0.139833 | 0.00246  | 0.022465 | 0.62822  | 0.04002403 | 0.38816 | 0.006091 | 0.89555 |
| 0.57943  | 0.022952 | 0.62079  | -0.18192 | 7.69E-05 | -0.0414444 | 0.37153 | -0.02179 | 0.63859 |
| 0.43314  | 0.024814 | 0.59273  | -0.13534 | 0.00339  | -0.0111462 | 0.81015 | 0.017007 | 0.71394 |
| 0.49317  | -0.02189 | 0.63697  | -0.14208 | 0.00209  | -0.0114204 | 0.80557 | -0.0618  | 0.18244 |
| 0.30176  | 0.052026 | 0.26185  | -0.04959 | 0.28483  | -0.0358018 | 0.4402  | -0.03619 | 0.43525 |
| 0.80872  | -0.09063 | 0.0503   | -0.22669 | 7.41E-07 | -0.0462546 | 0.31856 | -0.0369  | 0.42633 |
| 0.76615  | 0.024185 | 0.60214  | -0.07664 | 0.0981   | 0.02258611 | 0.62637 | 0.071666 | 0.12197 |
| 0.07644  | -0.07147 | 0.12299  | -0.1591  | 0.00056  | -0.0420986 | 0.36402 | -0.05625 | 0.22501 |
| 0.06964  | 0.155981 | 0.00072  | -0.00535 | 0.9082   | -0.0912666 | 0.04871 | -0.06225 | 0.17928 |
| 0.84981  | -0.0519  | 0.263    | -0.1404  | 0.00236  | 0.0408716  | 0.37819 | -0.0206  | 0.65705 |
| 0.87727  | -0.04678 | 0.31309  | -0.17962 | 9.50E-05 | -0.0063691 | 0.89082 | -0.02845 | 0.53969 |
| 0.99902  | -0.04899 | 0.29077  | -0.17577 | 0.00013  | -0.0229359 | 0.62103 | -0.07524 | 0.10442 |
| 0.87225  | -0.00538 | 0.90774  | -0.14991 | 0.00116  | -0.0267453 | 0.56426 | 0.040276 | 0.38518 |
| 0.19053  | -0.04494 | 0.33257  | -0.18354 | 6.62E-05 | -0.1027939 | 0.02633 | -0.05757 | 0.21429 |
| 1.53E-09 | -0.13979 | 0.00247  | -0.24185 | 1.22E-07 | -0.0664777 | 0.15148 | -0.07817 | 0.09155 |
| 0.85348  | -0.00563 | 0.9035   | -0.23441 | 3.00E-07 | -0.1025614 | 0.02667 | -0.03838 | 0.408   |
| 0.50949  | 0.002349 | 0.95963  | -0.15061 | 0.0011   | -0.0433578 | 0.34984 | -0.00868 | 0.85166 |
| 0.9165   | -0.00232 | 0.96017  | -0.27051 | 2.83E-09 | -0.0806901 | 0.08153 | 0.040909 | 0.37774 |
| 0.37427  | -0.13159 | 0.00439  | -0.1645  | 0.00036  | 0.08155862 | 0.07829 | 0.142458 | 0.00203 |
| 0.18566  | 0.020349 | 0.66094  | -0.15019 | 0.00113  | 0.00649518 | 0.88867 | 0.074013 | 0.11019 |
| 0.75387  | -0.06408 | 0.16683  | -0.16249 | 0.00042  | -0.1198088 | 0.00956 | -0.12924 | 0.00515 |
| 0.78638  | -0.27095 | 2.66E-09 | -0.23275 | 3.65E-07 | 0.0081036  | 0.86135 | -0.03161 | 0.49563 |
| 0.07201  | -0.10408 | 0.02449  | -0.22381 | 1.03E-06 | -0.0805394 | 0.0821  | -0.02813 | 0.54431 |
| 0.43533  | -0.02827 | 0.54229  | -0.09124 | 0.04878  | 0.05180837 | 0.26385 | 0.015114 | 0.74461 |
| 2.46E-21 | -0.1053  | 0.02286  | -0.1792  | 9.87E-05 | -0.061506  | 0.18456 | -0.04348 | 0.34851 |
| 0.94762  | 0.03581  | 0.4401   | -0.05286 | 0.25423  | 0.06191117 | 0.18168 | 0.102674 | 0.02651 |
| 0.3391   | 0.002115 | 0.96364  | -0.14328 | 0.00191  | 0.04643092 | 0.31671 | 0.087779 | 0.05803 |
| 0.04181  | 0.135929 | 0.00325  | -0.01635 | 0.72456  | -0.1082208 | 0.01932 | -0.13533 | 0.00339 |
| 0.09921  | 0.098882 | 0.03265  | -0.02737 | 0.55519  | -0.0816584 | 0.07792 | -0.12193 | 0.00835 |
| 0.11026  | 0.154361 | 0.00082  | 0.092357 | 0.04607  | -0.0568002 | 0.22051 | -0.07638 | 0.09926 |
| 0.74869  | 0.055478 | 0.23146  | -0.15121 | 0.00105  | 0.00761986 | 0.86955 | 0.117548 | 0.01101 |
| 0.4644   | -0.05665 | 0.22172  | -0.21575 | 2.53E-06 | -0.1437906 | 0.00184 | -0.08624 | 0.06258 |
| 0.1669   | 0.000258 | 0.99557  | -0.12843 | 0.00544  | -0.0006218 | 0.98931 | 0.007563 | 0.87051 |
| 0.17049  | 0.169228 | 0.00024  | 0.048478 | 0.29582  | 0.16670433 | 0.0003  | 0.172051 | 0.00019 |
| 0.46339  | 0.08305  | 0.07297  | -0.03563 | 0.44238  | -0.0117169 | 0.80063 | -0.03147 | 0.49751 |

|          |          |          |          |          |            |         |          |         |
|----------|----------|----------|----------|----------|------------|---------|----------|---------|
| 0.86551  | -0.0406  | 0.3814   | -0.15373 | 0.00086  | -0.0430582 | 0.35318 | -0.04771 | 0.30357 |
| 0.75557  | 0.062685 | 0.17627  | -0.00866 | 0.85186  | 0.13258644 | 0.0041  | 0.093949 | 0.04243 |
| 0.70149  | -0.09068 | 0.05017  | -0.30536 | 1.55E-11 | -0.0971822 | 0.03578 | -0.13045 | 0.00475 |
| 0.90527  | 0.11992  | 0.00949  | -0.0315  | 0.49707  | -0.0086809 | 0.85158 | 0.001932 | 0.96678 |
| 0.07934  | -0.09152 | 0.0481   | -0.1057  | 0.02234  | 0.04519332 | 0.3298  | 0.025482 | 0.58281 |
| 0.49158  | -0.0604  | 0.1926   | -0.20354 | 9.29E-06 | -0.0545638 | 0.23926 | -0.03793 | 0.41347 |
| 0.86295  | -0.14421 | 0.00178  | -0.22995 | 5.08E-07 | -0.0268039 | 0.56341 | -0.06082 | 0.18954 |
| 0.36457  | 0.167284 | 0.00028  | 0.075817 | 0.10176  | 0.07814697 | 0.09164 | 0.127245 | 0.00589 |
| 0.0074   | 0.035862 | 0.43944  | -0.13646 | 0.00313  | -0.0202899 | 0.66187 | 0.041136 | 0.3751  |
| 0.01757  | 0.051257 | 0.26897  | -0.03355 | 0.46954  | 0.02843763 | 0.53986 | -0.00814 | 0.86075 |
| 0.74459  | 0.008518 | 0.85435  | -0.17057 | 0.00021  | 0.00562872 | 0.90344 | 0.044783 | 0.33422 |
| 0.05199  | 0.032553 | 0.48282  | -0.15764 | 0.00063  | -0.1289756 | 0.00525 | -0.10131 | 0.02859 |
| 0.65193  | -0.07738 | 0.09486  | -0.22977 | 5.18E-07 | -0.067436  | 0.14565 | -0.08869 | 0.05546 |
| 0.71477  | -0.01299 | 0.77943  | -0.17626 | 0.00013  | -0.0681826 | 0.14124 | -0.03222 | 0.48736 |
| 0.56359  | -0.07206 | 0.11994  | -0.24836 | 5.38E-08 | -0.125928  | 0.00643 | -0.10571 | 0.02232 |
| 0.44706  | -0.24292 | 1.06E-07 | -0.23646 | 2.35E-07 | 0.00039521 | 0.9932  | 0.062656 | 0.17647 |
| 3.24E-30 | -0.00608 | 0.89577  | -0.01208 | 0.79452  | 0.08478814 | 0.06715 | 0.058579 | 0.20638 |
| 1.82E-20 | -0.00346 | 0.9406   | -0.01335 | 0.77352  | 0.1008487  | 0.02933 | 0.050883 | 0.27249 |
| 0.00993  | -0.05205 | 0.26159  | -0.08052 | 0.08217  | 0.01803192 | 0.69753 | -0.04711 | 0.30972 |
| 0.21546  | -0.04924 | 0.28831  | -0.15025 | 0.00113  | -0.0197325 | 0.6706  | -0.06957 | 0.13332 |
| 0.48056  | -0.03343 | 0.47114  | -0.11071 | 0.01669  | 0.02406485 | 0.60395 | -0.03004 | 0.51723 |
| 0.36672  | -0.01364 | 0.7688   | -0.17203 | 0.00019  | -0.0295644 | 0.52392 | -0.04074 | 0.37973 |
| 0.66187  | 0.007927 | 0.86435  | -0.08458 | 0.06781  | 0.01627306 | 0.72578 | -0.04068 | 0.38039 |
| 0.126    | -0.03512 | 0.44898  | -0.17107 | 0.0002   | -0.0297945 | 0.52069 | -0.02991 | 0.51914 |
| 0.24497  | -0.03072 | 0.50783  | -0.07744 | 0.09461  | 0.03756876 | 0.41795 | -0.01441 | 0.75604 |
| 0.56982  | -0.05029 | 0.27814  | -0.12555 | 0.00659  | 0.01858559 | 0.68872 | -0.04419 | 0.34066 |
| 0.10945  | -0.00747 | 0.87212  | -0.13429 | 0.00364  | -0.0030428 | 0.94771 | 0.005758 | 0.90124 |
| 0.51284  | -0.0266  | 0.56644  | -0.08763 | 0.05845  | -0.0092162 | 0.84255 | -0.00971 | 0.83422 |
| 0.28835  | -0.04008 | 0.38746  | -0.1067  | 0.02109  | 0.03419155 | 0.46105 | -0.00662 | 0.88658 |
| 0.00429  | -0.07242 | 0.11809  | -0.19316 | 2.64E-05 | -0.0464422 | 0.3166  | -0.02012 | 0.6645  |
| 0.13749  | -0.01432 | 0.75757  | -0.14933 | 0.00121  | -0.047784  | 0.3028  | 0.004334 | 0.92558 |
| 0.13427  | -0.02984 | 0.5201   | -0.19035 | 3.47E-05 | -0.0508261 | 0.27302 | -0.00263 | 0.95483 |
| 0.99916  | -0.02004 | 0.66582  | -0.0882  | 0.05682  | 0.03462854 | 0.45534 | -0.00248 | 0.95731 |
| 0.16889  | -0.07507 | 0.10519  | -0.33504 | 1.03E-13 | -0.1575406 | 0.00063 | -0.14757 | 0.00138 |
| 0.09105  | -0.03946 | 0.39486  | -0.16009 | 0.00052  | -0.0320397 | 0.48975 | -0.03572 | 0.4413  |
| 0.43317  | -0.03384 | 0.4657   | -0.1704  | 0.00022  | -0.042122  | 0.36376 | -0.0483  | 0.29765 |
| 0.8189   | 0.004423 | 0.92406  | -0.07768 | 0.09359  | 0.02658172 | 0.56665 | -0.05487 | 0.23667 |
| 0.18616  | -0.04753 | 0.30543  | -0.23195 | 4.01E-07 | -0.0617553 | 0.18278 | -0.01962 | 0.67234 |
| 0.76965  | 0.047125 | 0.30953  | -0.02396 | 0.60553  | -0.0075966 | 0.86995 | -0.0002  | 0.99659 |
| 0.00441  | -0.08411 | 0.06938  | -0.12881 | 0.00531  | -0.0633674 | 0.1716  | -0.0838  | 0.07042 |
| 0.86366  | -0.03365 | 0.46819  | -0.0538  | 0.24591  | -0.0155708 | 0.73717 | 0.002008 | 0.96548 |
| 0.89298  | 0.044764 | 0.33442  | -0.15877 | 0.00057  | -0.037663  | 0.41679 | -0.02241 | 0.6291  |
| 0.59326  | -0.05207 | 0.2614   | -0.11269 | 0.01483  | -0.010533  | 0.82041 | -0.04135 | 0.37265 |
| 0.25645  | -0.01173 | 0.80046  | -0.13331 | 0.0039   | -0.078555  | 0.08995 | -0.04942 | 0.28655 |
| 0.9511   | -0.03448 | 0.45727  | -0.07829 | 0.09104  | -0.0053288 | 0.90857 | -0.03607 | 0.43677 |



|          |          |          |          |          |            |          |          |          |
|----------|----------|----------|----------|----------|------------|----------|----------|----------|
| 0.03749  | 0.046357 | 0.31749  | -0.07077 | 0.12672  | 0.02991333 | 0.51903  | 0.01502  | 0.74615  |
| 0.94895  | -0.0364  | 0.4326   | -0.1996  | 1.39E-05 | -0.0774928 | 0.09439  | -0.02272 | 0.62429  |
| 0.00166  | -0.07412 | 0.10968  | -0.39285 | 1.10E-18 | -0.2291611 | 5.57E-07 | -0.08458 | 0.06783  |
| 0.88473  | -0.01995 | 0.66725  | -0.09327 | 0.04395  | 0.01582613 | 0.73302  | 0.062561 | 0.17713  |
| 0.01412  | -0.06343 | 0.17117  | -0.21324 | 3.33E-06 | -0.1473336 | 0.00141  | -0.10152 | 0.02826  |
| 0.28417  | -0.03138 | 0.4987   | -0.17322 | 0.00017  | -0.0603831 | 0.19272  | -0.05885 | 0.20425  |
| 0.6184   | -0.00095 | 0.98374  | -0.04348 | 0.3485   | 0.12417695 | 0.00722  | 0.099877 | 0.03093  |
| 3.67E-41 | -0.02381 | 0.60785  | -0.10407 | 0.02451  | 0.01002608 | 0.82892  | -0.00021 | 0.99645  |
| 1.54E-63 | -0.05416 | 0.24276  | -0.1545  | 0.00081  | -0.0528111 | 0.25471  | -0.05936 | 0.2004   |
| 0.96292  | -0.03254 | 0.48301  | -0.20108 | 1.19E-05 | -0.0516004 | 0.26577  | -0.07669 | 0.09787  |
| 0.9819   | -0.07674 | 0.09766  | -0.18436 | 6.13E-05 | -0.1404182 | 0.00235  | -0.09824 | 0.03379  |
| 0.25543  | -0.04117 | 0.37476  | -0.20694 | 6.51E-06 | -0.040664  | 0.38062  | 0.041462 | 0.37133  |
| 0.89725  | 0.074625 | 0.10727  | -0.11875 | 0.01021  | -0.0167139 | 0.71866  | 0.045166 | 0.33009  |
| 0.37833  | -0.00839 | 0.85647  | -0.15217 | 0.00097  | -0.0768783 | 0.09704  | -0.03579 | 0.44041  |
| 0.96379  | 0.045188 | 0.32986  | -0.169   | 0.00024  | -0.0490955 | 0.28971  | -0.00161 | 0.97236  |
| 0.00489  | -0.14112 | 0.00224  | -0.27349 | 1.86E-09 | -0.1355512 | 0.00334  | -0.1461  | 0.00155  |
| 0.84253  | -0.04884 | 0.29225  | -0.08919 | 0.0541   | -0.0159563 | 0.73091  | -0.04674 | 0.31348  |
| 1.61E-05 | 0.095203 | 0.03973  | -0.05386 | 0.24541  | 0.00967126 | 0.83488  | 0.016045 | 0.72947  |
| 0.91632  | 0.007206 | 0.87658  | -0.06781 | 0.14342  | -0.0521945 | 0.2603   | -0.03024 | 0.51441  |
| 0.02352  | -0.03143 | 0.49806  | -0.12701 | 0.00599  | -0.0360099 | 0.43754  | -0.03901 | 0.40025  |
| 0.99373  | -0.03895 | 0.40099  | -0.1554  | 0.00075  | -0.0646458 | 0.1631   | -0.06929 | 0.13489  |
| 0.4524   | -0.17808 | 0.00011  | -0.0776  | 0.09395  | 0.32412013 | 6.96E-13 | 0.309548 | 7.91E-12 |
| 9.34E-09 | 0.054805 | 0.23718  | -0.16231 | 0.00043  | -0.0350598 | 0.44974  | 0.050159 | 0.27938  |
| 0.67464  | -0.08171 | 0.07773  | -0.14273 | 0.00199  | 0.04904851 | 0.29017  | 0.002403 | 0.9587   |
| 0.13202  | -0.01244 | 0.78868  | -0.16174 | 0.00045  | -0.0603487 | 0.19297  | -0.00605 | 0.89623  |
| 0.056    | -0.02062 | 0.6567   | -0.04649 | 0.31611  | 0.01185404 | 0.79834  | 0.017851 | 0.70041  |
| 0.38431  | -0.03925 | 0.39739  | -0.15794 | 0.00061  | -0.0421404 | 0.36355  | -0.04424 | 0.34015  |
| 0.68667  | -0.21562 | 2.57E-06 | -0.4061  | 5.71E-20 | -0.2178721 | 2.01E-06 | -0.13345 | 0.00386  |
| 0.76964  | -0.06098 | 0.18837  | -0.21027 | 4.58E-06 | -0.0864469 | 0.06195  | -0.03974 | 0.39151  |
| 0.81775  | -0.01379 | 0.76623  | -0.121   | 0.00886  | 8.33E-05   | 0.99857  | 0.02358  | 0.61126  |
| 0.63585  | -0.0385  | 0.40647  | -0.14273 | 0.00199  | -0.0226574 | 0.62528  | -0.02423 | 0.60153  |
| 0.52043  | -0.04451 | 0.33721  | -0.12634 | 0.00626  | -0.1360697 | 0.00322  | -0.15041 | 0.00111  |
| 0.58957  | 0.10143  | 0.0284   | -0.06151 | 0.18456  | 0.01232529 | 0.79051  | 0.115928 | 0.01218  |
| 0.62504  | -0.07631 | 0.09955  | -0.20231 | 1.05E-05 | -0.0518954 | 0.26305  | 0.014363 | 0.75688  |
| 0.68683  | -0.06547 | 0.15781  | -0.27457 | 1.60E-09 | -0.1256522 | 0.00655  | -0.10466 | 0.02371  |
| 0.785    | 0.041919 | 0.36608  | -0.17142 | 0.0002   | -0.0567824 | 0.22066  | -0.0151  | 0.74483  |
| 0.98275  | -0.00655 | 0.88782  | -0.10436 | 0.02411  | -0.0169538 | 0.7148   | -0.06827 | 0.14073  |
| 0.00066  | 0.018111 | 0.69627  | -0.04265 | 0.35777  | -0.0302156 | 0.51481  | -0.06012 | 0.19468  |
| 0.99114  | 0.009425 | 0.83902  | -0.1622  | 0.00043  | -0.0285455 | 0.53833  | 0.01934  | 0.67678  |
| 0.42186  | -0.08935 | 0.05368  | -0.22054 | 1.49E-06 | -0.0753963 | 0.10368  | -0.06709 | 0.14772  |
| 0.91831  | -0.06369 | 0.16944  | -0.24172 | 1.24E-07 | -0.1519421 | 0.00099  | -0.13198 | 0.00428  |
| 0.37179  | 0.045005 | 0.33182  | -0.07276 | 0.11638  | -0.0169632 | 0.71465  | -0.01912 | 0.68023  |
| 0.5358   | -0.05292 | 0.25375  | -0.22663 | 7.46E-07 | -0.0992169 | 0.03206  | -0.07521 | 0.10455  |
| 0.47767  | -0.15003 | 0.00115  | -0.30757 | 1.09E-11 | -0.088045  | 0.05727  | -0.05205 | 0.2616   |
| 0.57255  | -0.06019 | 0.19415  | -0.09508 | 0.03999  | -0.0684908 | 0.13944  | -0.10795 | 0.01963  |

|          |          |          |          |          |            |          |          |          |
|----------|----------|----------|----------|----------|------------|----------|----------|----------|
| 0.00098  | 0.056762 | 0.22082  | -0.0859  | 0.06364  | 0.0230663  | 0.61905  | 0.020911 | 0.65219  |
| 0.81517  | 0.018617 | 0.68822  | -0.10058 | 0.02976  | -0.1042648 | 0.02424  | -0.12267 | 0.00796  |
| 0.2273   | -0.1088  | 0.01868  | -0.16121 | 0.00047  | -0.084211  | 0.06904  | -0.10754 | 0.0201   |
| 0.02862  | 0.185952 | 5.28E-05 | 0.034678 | 0.45469  | 0.03400102 | 0.46355  | 0.047717 | 0.30348  |
| 0.21451  | -0.01852 | 0.68971  | -0.11684 | 0.01151  | -0.0269552 | 0.56121  | 0.035718 | 0.44127  |
| 0.3037   | 0.046455 | 0.31647  | -0.14645 | 0.00151  | -0.1026971 | 0.02647  | -0.08522 | 0.06577  |
| 0.68668  | 0.011297 | 0.80763  | -0.20044 | 1.28E-05 | -0.0732075 | 0.11413  | -0.04743 | 0.30637  |
| 0.93991  | -0.21196 | 3.82E-06 | -0.34202 | 2.92E-14 | -0.2812554 | 6.13E-10 | -0.2718  | 2.36E-09 |
| 0.98377  | -0.0326  | 0.48223  | -0.13657 | 0.0031   | -0.0436268 | 0.34686  | -0.04649 | 0.31611  |
| 0.41385  | -0.11028 | 0.01712  | -0.18675 | 4.89E-05 | -0.0939242 | 0.04248  | -0.08286 | 0.07365  |
| 0.96401  | -0.06213 | 0.18017  | -0.23088 | 4.55E-07 | -0.076624  | 0.09816  | -0.08527 | 0.0656   |
| 0.04844  | 0.067399 | 0.14588  | -0.17455 | 0.00015  | -0.1891139 | 3.91E-05 | -0.10996 | 0.01745  |
| 0.60594  | 0.076145 | 0.10028  | -0.01465 | 0.75211  | -0.0281534 | 0.54392  | -0.03623 | 0.43477  |
| 0.72732  | -0.06143 | 0.18509  | -0.09384 | 0.04266  | -0.0284972 | 0.53901  | -0.02312 | 0.61828  |
| 2.04E-15 | 0.09004  | 0.05183  | -0.068   | 0.14232  | -0.0315712 | 0.49612  | -0.04972 | 0.28365  |
| 0.41156  | -0.01159 | 0.80275  | -0.22759 | 6.68E-07 | -0.0236575 | 0.61009  | 0.08525  | 0.06567  |
| 0.20789  | -0.01338 | 0.77312  | -0.24242 | 1.13E-07 | -0.0424793 | 0.3597   | 0.105311 | 0.02284  |
| 0.96649  | 0.005697 | 0.90227  | -0.03297 | 0.47726  | 0.05262041 | 0.25643  | -0.00576 | 0.90118  |
| 0.49256  | -0.05455 | 0.23939  | -0.13343 | 0.00387  | 0.00656498 | 0.88748  | -0.02674 | 0.56438  |
| 0.50191  | -0.02    | 0.66644  | -0.0578  | 0.21251  | 0.0230657  | 0.61906  | -0.02059 | 0.65724  |
| 0.89482  | -0.02307 | 0.61897  | -0.05176 | 0.26432  | 0.03390492 | 0.46482  | -0.0111  | 0.81093  |
| 0.83668  | 0.104115 | 0.02445  | -0.01445 | 0.75548  | 0.00210532 | 0.96381  | 0.048167 | 0.29894  |
| 0.46463  | -0.0526  | 0.25664  | -0.18664 | 4.95E-05 | -0.0325599 | 0.48273  | -0.05128 | 0.26878  |
| 0.44333  | -0.03736 | 0.42053  | -0.17218 | 0.00018  | -0.0778858 | 0.09273  | -0.06409 | 0.16673  |
| 0.19572  | -0.02945 | 0.52552  | -0.18078 | 8.55E-05 | -0.0689789 | 0.13664  | -0.00487 | 0.91645  |
| 0.23694  | -0.04377 | 0.3453   | -0.19037 | 3.46E-05 | -0.0597774 | 0.19723  | -0.04458 | 0.33645  |
| 0.6147   | -0.04034 | 0.38438  | -0.13433 | 0.00363  | -0.0008471 | 0.98543  | -0.04151 | 0.37078  |
| 0.70321  | -0.01524 | 0.74255  | -0.1578  | 0.00062  | -0.0806806 | 0.08156  | -0.00943 | 0.83888  |
| 0.25623  | -0.04741 | 0.30656  | -0.14696 | 0.00145  | -0.0450802 | 0.33101  | -0.06247 | 0.17773  |
| 0.44671  | -0.01854 | 0.68947  | -0.16215 | 0.00043  | -0.0340467 | 0.46295  | -0.01817 | 0.69539  |
| 0.40277  | -0.05355 | 0.24815  | -0.21004 | 4.70E-06 | -0.070378  | 0.12884  | -0.05227 | 0.25959  |
| 0.47233  | -0.06647 | 0.15153  | -0.18109 | 8.31E-05 | -0.0458162 | 0.32317  | -0.04342 | 0.34913  |
| 0.19876  | -0.0558  | 0.22872  | -0.16221 | 0.00043  | -0.0317815 | 0.49326  | -0.02939 | 0.52641  |
| 0.753    | -0.04637 | 0.31731  | -0.30218 | 2.57E-11 | -0.1520121 | 0.00098  | -0.0364  | 0.43262  |
| 0.49966  | -0.02129 | 0.64634  | -0.17378 | 0.00016  | -0.0755298 | 0.10307  | -0.01221 | 0.79249  |
| 0.67485  | -0.05798 | 0.21107  | -0.16484 | 0.00035  | -0.0301264 | 0.51605  | -0.00037 | 0.99357  |
| 0.96576  | -0.09207 | 0.04676  | -0.23772 | 2.01E-07 | -0.1137471 | 0.01391  | -0.12021 | 0.00931  |
| 0.87365  | -0.0084  | 0.85636  | -0.15688 | 0.00067  | -0.0307446 | 0.50748  | -0.01059 | 0.81945  |
| 0.24134  | -0.07962 | 0.08566  | -0.20638 | 6.91E-06 | -0.0735847 | 0.11227  | -0.0311  | 0.50251  |
| 0.88284  | -0.02041 | 0.65995  | -0.10614 | 0.02179  | -0.0087692 | 0.85009  | -0.03413 | 0.46184  |
| 0.23835  | -0.06398 | 0.16748  | -0.18603 | 5.24E-05 | -0.0625778 | 0.17701  | -0.0776  | 0.09393  |
| 0.54804  | -0.0314  | 0.49842  | -0.18194 | 7.67E-05 | -0.0358872 | 0.43911  | -0.02385 | 0.60722  |
| 0.88361  | -0.03515 | 0.44862  | -0.11243 | 0.01507  | -0.00662   | 0.88655  | -0.03182 | 0.49268  |
| 0.83447  | 0.0056   | 0.90394  | -0.06663 | 0.15052  | 0.0137379  | 0.76716  | 0.014667 | 0.7519   |
| 0.87158  | -0.07327 | 0.11383  | -0.1604  | 0.0005   | 0.02265084 | 0.62538  | -0.0298  | 0.52057  |

|         |          |         |          |          |            |         |          |         |
|---------|----------|---------|----------|----------|------------|---------|----------|---------|
| 0.994   | 0.003604 | 0.93809 | 0.000476 | 0.99182  | 0.02677569 | 0.56382 | -0.00519 | 0.91092 |
| 0.84111 | 0.01925  | 0.6782  | -0.11234 | 0.01515  | 0.02273867 | 0.62404 | 0.035599 | 0.4428  |
| 0.9421  | -0.06243 | 0.17801 | -0.11093 | 0.01648  | 0.03200302 | 0.49025 | -0.00996 | 0.83002 |
| 0.45523 | -0.05072 | 0.27399 | -0.11055 | 0.01686  | 0.0118052  | 0.79916 | -0.04643 | 0.31669 |
| 0.19199 | -0.0476  | 0.30462 | -0.18523 | 5.65E-05 | -0.0648095 | 0.16203 | -0.05428 | 0.24174 |
| 0.54963 | -0.06021 | 0.19403 | -0.18544 | 5.54E-05 | -0.0527917 | 0.25488 | -0.06081 | 0.18959 |
| 0.3814  | -0.02477 | 0.59333 | -0.12948 | 0.00507  | -0.0100666 | 0.82824 | -0.01926 | 0.67812 |
| 0.31913 | 0.035507 | 0.44398 | -0.20531 | 7.73E-06 | -0.0893459 | 0.05367 | -0.03745 | 0.41945 |
| 0.51912 | 0.003279 | 0.94366 | -0.02776 | 0.54954  | -0.007001  | 0.88006 | -0.07298 | 0.11525 |
| 0.55298 | -0.02034 | 0.66103 | -0.15117 | 0.00105  | -0.0206396 | 0.65641 | 0.046287 | 0.31822 |
| 0.23852 | -0.02323 | 0.61662 | -0.16544 | 0.00033  | -0.0308347 | 0.50623 | 0.005315 | 0.9088  |
| 0.53873 | -0.04351 | 0.34811 | -0.11563 | 0.0124   | -0.0111626 | 0.80987 | -0.04217 | 0.36322 |
| 0.19416 | -0.03145 | 0.49775 | -0.11749 | 0.01106  | -0.0336068 | 0.46875 | -0.03611 | 0.43621 |
| 0.81012 | -0.02405 | 0.60419 | -0.08691 | 0.06058  | 0.00100574 | 0.98271 | -0.03407 | 0.46266 |
| 0.90346 | -0.04122 | 0.37419 | -0.08627 | 0.0625   | 0.01415147 | 0.76036 | -0.04581 | 0.32324 |
| 0.63729 | -0.03239 | 0.48507 | -0.03166 | 0.49492  | 0.04811907 | 0.29942 | -0.00364 | 0.93745 |
| 0.93253 | -0.03294 | 0.47761 | -0.02487 | 0.59195  | 0.04388736 | 0.34398 | -0.04267 | 0.35753 |
| 0.90592 | -0.02422 | 0.60162 | -0.07691 | 0.09689  | 0.00557778 | 0.90431 | -0.0136  | 0.7694  |
| 0.82769 | -0.067   | 0.14831 | -0.18474 | 5.91E-05 | -0.0575566 | 0.21442 | -0.07731 | 0.09517 |
| 0.8937  | -0.04327 | 0.35082 | -0.13051 | 0.00473  | 0.00623583 | 0.89309 | -0.04454 | 0.3369  |
| 0.5461  | -0.00354 | 0.93911 | -0.11628 | 0.01192  | -0.0130833 | 0.77795 | -0.00654 | 0.88788 |
| 0.99295 | -0.00415 | 0.92872 | -0.0364  | 0.43262  | 0.01956746 | 0.6732  | -0.01671 | 0.71871 |
| 0.76804 | 0.046084 | 0.32035 | -0.10619 | 0.02172  | -0.0196113 | 0.67251 | 0.001476 | 0.97463 |
| 0.30589 | -0.01836 | 0.69225 | -0.18572 | 5.39E-05 | -0.0818512 | 0.07722 | -0.03178 | 0.49334 |
| 0.29663 | -0.04167 | 0.36891 | -0.12409 | 0.00726  | -0.014188  | 0.75976 | -0.00717 | 0.87711 |
| 0.57484 | -0.01419 | 0.75966 | -0.16143 | 0.00046  | -0.0327452 | 0.48024 | -0.01319 | 0.77621 |
| 0.76982 | -0.01322 | 0.77566 | -0.19984 | 1.36E-05 | -0.0439318 | 0.34349 | 0.033683 | 0.46774 |
| 0.31295 | -0.05664 | 0.22184 | -0.14014 | 0.0024   | -0.0032191 | 0.94469 | -0.0491  | 0.28968 |
| 0.51787 | -0.038   | 0.41263 | -0.16562 | 0.00033  | -0.0398101 | 0.39071 | -0.06508 | 0.16029 |
| 0.20597 | -0.03947 | 0.39477 | -0.186   | 5.25E-05 | -0.0354561 | 0.44463 | 0.002317 | 0.96017 |
| 0.78468 | -0.09053 | 0.05056 | -0.16922 | 0.00024  | -0.0065992 | 0.8869  | -0.04481 | 0.3339  |
| 0.48614 | 0.007605 | 0.8698  | -0.19763 | 1.69E-05 | -0.0850577 | 0.06628 | -0.00347 | 0.9404  |
| 0.51879 | -0.04659 | 0.31501 | -0.18544 | 5.54E-05 | -0.083225  | 0.07237 | -0.05366 | 0.2471  |
| 0.36337 | -0.06046 | 0.19218 | -0.23252 | 3.75E-07 | -0.0803301 | 0.0829  | -0.05286 | 0.25425 |
| 0.28888 | 0.021059 | 0.64989 | -0.08163 | 0.07801  | -0.0047641 | 0.91822 | 0.024071 | 0.60386 |
| 0.37665 | -0.03396 | 0.46408 | -0.22562 | 8.38E-07 | -0.1096973 | 0.01772 | -0.0448  | 0.33408 |
| 0.231   | -0.05305 | 0.2526  | -0.15656 | 0.00069  | -0.0308248 | 0.50637 | -0.02941 | 0.52614 |
| 0.67307 | -0.05443 | 0.24041 | -0.16193 | 0.00044  | -0.0116685 | 0.80143 | 0.029841 | 0.52005 |
| 0.27942 | -0.03075 | 0.50742 | -0.10891 | 0.01855  | -0.002837  | 0.95124 | -0.0396  | 0.39325 |
| 0.17944 | -0.05499 | 0.23563 | -0.16604 | 0.00031  | -0.0449808 | 0.33208 | -0.06695 | 0.14859 |
| 0.86554 | -0.02734 | 0.55566 | -0.10823 | 0.01931  | -0.0350064 | 0.45043 | -0.01614 | 0.7279  |
| 0.09329 | -0.05386 | 0.24542 | -0.15096 | 0.00107  | -0.0364997 | 0.43133 | -0.04275 | 0.3566  |
| 0.46697 | -0.0825  | 0.07489 | -0.19429 | 2.36E-05 | -0.0680419 | 0.14206 | -0.07172 | 0.12171 |
| 0.5577  | -0.03564 | 0.44222 | -0.1632  | 0.0004   | -0.0068322 | 0.88293 | -0.0139  | 0.76451 |
| 0.95545 | 0.006921 | 0.88142 | -0.11431 | 0.01344  | 0.00519101 | 0.91092 | 0.030563 | 0.50999 |

|         |          |          |          |          |            |          |          |          |
|---------|----------|----------|----------|----------|------------|----------|----------|----------|
| 0.23927 | -0.01607 | 0.72899  | -0.13615 | 0.0032   | -0.0134614 | 0.77171  | 0.047623 | 0.30444  |
| 0.44409 | -0.07309 | 0.11472  | -0.22439 | 9.64E-07 | -0.0901145 | 0.05164  | -0.08809 | 0.05715  |
| 0.3424  | -0.00591 | 0.89871  | -0.17405 | 0.00016  | 0.04070878 | 0.38009  | 0.143272 | 0.00191  |
| 0.56236 | 0.037131 | 0.4234   | -0.11784 | 0.01082  | 0.08951231 | 0.05323  | 0.155567 | 0.00074  |
| 0.58848 | -0.01451 | 0.75442  | -0.21328 | 3.32E-06 | -0.0874163 | 0.05908  | -0.05042 | 0.27686  |
| 0.57312 | -0.06971 | 0.13249  | -0.26437 | 6.58E-09 | -0.1013324 | 0.02855  | -0.0399  | 0.38959  |
| 0.35681 | -0.03454 | 0.45644  | -0.15973 | 0.00053  | -0.0770982 | 0.09609  | -0.03336 | 0.47209  |
| 0.50365 | -0.07786 | 0.09284  | -0.16601 | 0.00031  | 0.01006189 | 0.82832  | -0.05061 | 0.27502  |
| 0.40686 | -0.01451 | 0.75443  | -0.16273 | 0.00041  | -0.0085969 | 0.853    | 0.013291 | 0.77452  |
| 0.76616 | -0.00999 | 0.82948  | -0.12379 | 0.0074   | -0.0021724 | 0.96266  | 0.088358 | 0.05639  |
| 0.45854 | -0.03356 | 0.4694   | -0.1834  | 6.71E-05 | -0.026662  | 0.56547  | 0.011297 | 0.80762  |
| 0.95883 | -0.01222 | 0.79226  | -0.20784 | 5.93E-06 | -0.0663433 | 0.15231  | -0.04083 | 0.37864  |
| 0.25713 | -0.02724 | 0.55709  | -0.21372 | 3.16E-06 | -0.0854116 | 0.06516  | -0.01561 | 0.73645  |
| 0.45076 | -0.05292 | 0.25374  | -0.19462 | 2.28E-05 | -0.0719402 | 0.12055  | -0.05303 | 0.25275  |
| 0.97894 | 0.022819 | 0.62281  | -0.01964 | 0.67205  | 0.05418274 | 0.24256  | 0.015539 | 0.73768  |
| 0.43217 | -0.03323 | 0.47375  | -0.17234 | 0.00018  | -0.0156932 | 0.73518  | -0.03679 | 0.42771  |
| 0.78177 | -0.00704 | 0.87932  | -0.13121 | 0.00451  | -0.0305985 | 0.5095   | 0.001618 | 0.97219  |
| 0.81395 | -0.01605 | 0.72947  | -0.15333 | 0.00089  | -0.046276  | 0.31833  | -0.07487 | 0.10611  |
| 0.90865 | -0.02264 | 0.62555  | -0.14513 | 0.00166  | -0.0426861 | 0.35736  | -0.04398 | 0.34293  |
| 0.39542 | -0.01869 | 0.68706  | -0.16572 | 0.00032  | -0.026666  | 0.56542  | 0.003326 | 0.94286  |
| 0.37555 | -0.04105 | 0.37607  | -0.15947 | 0.00054  | -0.0359238 | 0.43864  | -0.03458 | 0.45595  |
| 0.97918 | -0.0433  | 0.35043  | -0.01611 | 0.72845  | 0.04750659 | 0.30562  | -0.00064 | 0.98893  |
| 0.28322 | -0.00994 | 0.83039  | -0.19861 | 1.54E-05 | -0.064841  | 0.16183  | -0.02865 | 0.53682  |
| 0.76424 | -0.02175 | 0.63925  | -0.07827 | 0.09112  | 0.00487939 | 0.91625  | 0.00809  | 0.86158  |
| 0.82474 | 0.002975 | 0.94888  | -0.09673 | 0.03665  | -0.0588311 | 0.20443  | -0.03076 | 0.5073   |
| 0.75587 | 0.025649 | 0.58034  | -0.04653 | 0.31571  | 0.013105   | 0.77759  | -0.02688 | 0.5623   |
| 0.89795 | -0.01194 | 0.79695  | -0.18915 | 3.89E-05 | -0.121105  | 0.0088   | -0.07071 | 0.12702  |
| 0.83167 | -0.04373 | 0.34566  | -0.20267 | 1.02E-05 | -0.0916045 | 0.04788  | -0.07656 | 0.09843  |
| 0.19902 | -0.04588 | 0.32246  | -0.19816 | 1.61E-05 | -0.111264  | 0.01615  | -0.08036 | 0.08277  |
| 0.02337 | -0.11568 | 0.01237  | -0.2903  | 1.61E-10 | -0.0729367 | 0.11548  | -0.0344  | 0.45834  |
| 0.76539 | -0.00834 | 0.8574   | -0.20243 | 1.04E-05 | -0.0461924 | 0.31921  | 0.050881 | 0.2725   |
| 0.46111 | -0.07908 | 0.08782  | -0.17972 | 9.41E-05 | -0.0256908 | 0.57972  | -0.03819 | 0.4103   |
| 0.47537 | -0.03308 | 0.47573  | -0.15503 | 0.00078  | -0.0295394 | 0.52427  | -0.07727 | 0.09536  |
| 0.05471 | 0.004814 | 0.91736  | -0.07549 | 0.10327  | 0.08264844 | 0.07437  | 0.11236  | 0.01513  |
| 0.87051 | -0.2004  | 1.28E-05 | -0.23427 | 3.05E-07 | -0.0255482 | 0.58183  | 0.013878 | 0.76484  |
| 0.02785 | -0.03682 | 0.42724  | -0.15226 | 0.00096  | -0.0219502 | 0.63612  | -0.02959 | 0.52352  |
| 0.08142 | 0.013291 | 0.77452  | -0.1736  | 0.00016  | -0.0682007 | 0.14113  | -0.05283 | 0.25454  |
| 0.73921 | 0.052469 | 0.2578   | -0.11315 | 0.01443  | -0.054882  | 0.23652  | -0.01458 | 0.75326  |
| 0.01298 | -0.10253 | 0.02671  | -0.12893 | 0.00526  | -0.0137645 | 0.76672  | -0.04832 | 0.29737  |
| 0.22382 | 0.076184 | 0.10011  | -0.05883 | 0.20444  | 0.0180161  | 0.69778  | 0.110588 | 0.01681  |
| 0.62932 | 0.241838 | 1.22E-07 | 0.2591   | 1.34E-08 | 0.22914304 | 5.58E-07 | 0.234611 | 2.93E-07 |
| 0.80487 | -0.00689 | 0.88192  | -0.18159 | 7.93E-05 | 0.01789205 | 0.69976  | 0.039332 | 0.39643  |
| 0.56131 | -0.09051 | 0.05063  | -0.19563 | 2.07E-05 | -0.0687848 | 0.13775  | -0.12148 | 0.00859  |
| 0.84714 | -0.016   | 0.73019  | -0.18985 | 3.64E-05 | -0.0695976 | 0.13315  | -0.07387 | 0.11089  |
| 0.3003  | -0.04075 | 0.37965  | -0.19721 | 1.77E-05 | -0.0593376 | 0.20055  | -0.07045 | 0.12847  |

|          |          |         |          |          |            |          |          |         |
|----------|----------|---------|----------|----------|------------|----------|----------|---------|
| 0.02143  | -0.02432 | 0.60018 | -0.07627 | 0.09974  | -0.0368315 | 0.42715  | -0.0749  | 0.10599 |
| 0.97317  | -0.01736 | 0.70825 | -0.22413 | 9.93E-07 | -0.0897692 | 0.05254  | -0.05715 | 0.21771 |
| 0.86778  | 0.072772 | 0.1163  | -0.06729 | 0.14655  | -0.0154341 | 0.73939  | 0.046995 | 0.31087 |
| 0.76941  | -0.08852 | 0.05592 | -0.31119 | 6.05E-12 | -0.0997305 | 0.03118  | -0.03947 | 0.39481 |
| 0.46407  | -0.03642 | 0.43232 | -0.24829 | 5.43E-08 | -0.1927545 | 2.74E-05 | -0.13024 | 0.00482 |
| 0.89413  | 0.024326 | 0.60003 | -0.16567 | 0.00032  | -0.060247  | 0.19372  | 0.039389 | 0.39574 |
| 0.80984  | -0.01505 | 0.74569 | -0.24215 | 1.17E-07 | -0.0981451 | 0.03397  | -0.05388 | 0.24522 |
| 0.54626  | -0.06392 | 0.16791 | -0.21667 | 2.29E-06 | -0.0872403 | 0.05959  | -0.09226 | 0.04629 |
| 0.86484  | 0.061525 | 0.18442 | -0.05873 | 0.20518  | -0.0245686 | 0.5964   | -0.03527 | 0.44706 |
| 0.78602  | 0.027166 | 0.55815 | -0.14901 | 0.00124  | -0.0434192 | 0.34916  | -0.04124 | 0.37386 |
| 0.69214  | -0.01569 | 0.73528 | -0.17142 | 0.0002   | -0.0294859 | 0.52502  | -0.05033 | 0.2777  |
| 0.45359  | -0.03916 | 0.39848 | -0.10402 | 0.02457  | 0.02367944 | 0.60976  | -0.00346 | 0.94064 |
| 0.98648  | -0.00731 | 0.8748  | -0.07607 | 0.10063  | -0.0199282 | 0.66753  | -0.01263 | 0.78553 |
| 0.37338  | -0.0843  | 0.06873 | -0.28445 | 3.84E-10 | -0.1737282 | 0.00016  | -0.07169 | 0.12184 |
| 0.41234  | -0.01345 | 0.77192 | -0.13576 | 0.00329  | -0.0315641 | 0.49622  | -0.03873 | 0.40365 |
| 0.59109  | -0.0254  | 0.584   | -0.14329 | 0.00191  | -0.0813558 | 0.07903  | -0.08806 | 0.05722 |
| 0.58884  | -0.02773 | 0.55005 | -0.24166 | 1.24E-07 | -0.0765865 | 0.09832  | -0.06791 | 0.14286 |
| 0.57186  | -0.01076 | 0.81666 | -0.065   | 0.1608   | 0.04945646 | 0.28617  | -0.01751 | 0.70589 |
| 0.77176  | -0.08188 | 0.07712 | -0.25498 | 2.30E-08 | -0.0826806 | 0.07426  | -0.07431 | 0.10878 |
| 0.90196  | -0.00791 | 0.86456 | -0.23183 | 4.07E-07 | -0.0814774 | 0.07859  | -0.08229 | 0.07563 |
| 0.71136  | -0.02102 | 0.65056 | -0.21547 | 2.61E-06 | -0.0976239 | 0.03494  | -0.05978 | 0.19724 |
| 0.96939  | -0.04117 | 0.37472 | -0.20324 | 9.58E-06 | -0.0387547 | 0.4034   | -0.05279 | 0.25491 |
| 0.53404  | 0.029468 | 0.52527 | -0.05479 | 0.2373   | 0.02192966 | 0.63643  | 0.042779 | 0.35632 |
| 0.57411  | -0.1162  | 0.01197 | -0.2583  | 1.48E-08 | -0.129422  | 0.00509  | -0.06801 | 0.14223 |
| 0.42779  | -0.07448 | 0.10794 | -0.33388 | 1.27E-13 | -0.1248382 | 0.00691  | -0.01711 | 0.71233 |
| 0.51295  | -0.03344 | 0.47091 | -0.22713 | 7.05E-07 | -0.0444983 | 0.3373   | 0.03406  | 0.46278 |
| 0.52339  | -0.02729 | 0.55642 | -0.11402 | 0.01368  | -0.0023448 | 0.9597   | -0.05656 | 0.22245 |
| 0.80849  | -0.06892 | 0.13697 | -0.23865 | 1.80E-07 | -0.0588988 | 0.2039   | -0.01089 | 0.81452 |
| 0.03541  | 0.034435 | 0.45787 | 0.00368  | 0.93678  | 0.08479042 | 0.06714  | 0.04799  | 0.30072 |
| 0.85507  | 0.003688 | 0.93665 | -0.08187 | 0.07716  | 0.01763497 | 0.70387  | 0.028913 | 0.53311 |
| 0.40975  | 0.14435  | 0.00176 | -0.02486 | 0.59201  | -0.0109837 | 0.81287  | -0.01405 | 0.76209 |
| 0.81442  | -0.06616 | 0.15342 | -0.224   | 1.01E-06 | -0.0504206 | 0.27687  | 0.024566 | 0.59643 |
| 0.30281  | -0.03275 | 0.48021 | -0.16479 | 0.00035  | -0.0340232 | 0.46326  | -0.04712 | 0.30958 |
| 0.74044  | 0.079606 | 0.08572 | -0.07359 | 0.11226  | -0.0553356 | 0.23267  | -0.04139 | 0.37215 |
| 0.07158  | -0.02548 | 0.58282 | -0.15873 | 0.00058  | -0.0583861 | 0.20788  | -0.04963 | 0.28452 |
| 0.00228  | -0.02254 | 0.62707 | -0.16925 | 0.00024  | -0.0549886 | 0.23561  | -0.03225 | 0.48694 |
| 0.89321  | -0.13511 | 0.00344 | -0.22379 | 1.03E-06 | -0.0595224 | 0.19915  | -0.0161  | 0.72864 |
| 1.03E-07 | -0.02776 | 0.54963 | -0.12809 | 0.00557  | 0.06162858 | 0.18368  | 0.102713 | 0.02645 |
| 0.67259  | 0.080393 | 0.08266 | -0.15091 | 0.00107  | -0.0839107 | 0.07004  | -0.05377 | 0.24618 |
| 0.66988  | 0.002844 | 0.95113 | -0.16444 | 0.00036  | 0.04586357 | 0.32267  | 0.113056 | 0.01451 |
| 0.92317  | -0.04386 | 0.34431 | -0.18664 | 4.94E-05 | -0.0365498 | 0.4307   | -0.03613 | 0.43597 |
| 0.43213  | -0.06768 | 0.14421 | -0.16079 | 0.00049  | -0.0202635 | 0.66228  | -0.0492  | 0.28868 |
| 0.63182  | 0.010014 | 0.82912 | -0.02073 | 0.65502  | 0.07919306 | 0.08736  | 0.074445 | 0.10812 |
| 0.56515  | 0.002086 | 0.96414 | 0.005514 | 0.9054   | 0.07164827 | 0.12206  | -0.01377 | 0.76659 |
| 0.31905  | -0.02002 | 0.66604 | -0.08872 | 0.05538  | 0.08006909 | 0.08391  | 0.099605 | 0.03139 |

|          |          |          |          |          |            |          |          |          |
|----------|----------|----------|----------|----------|------------|----------|----------|----------|
| 0.797    | -0.03508 | 0.44945  | -0.04912 | 0.28944  | -0.002164  | 0.9628   | -0.03886 | 0.4021   |
| 0.44771  | 0.049366 | 0.28706  | -0.06431 | 0.1653   | 0.02313724 | 0.61797  | 0.012605 | 0.78587  |
| 0.7384   | 0.093683 | 0.04302  | -0.1262  | 0.00632  | -0.2250768 | 8.92E-07 | -0.26481 | 6.20E-09 |
| 0.52956  | 0.018436 | 0.6911   | -0.08878 | 0.05521  | -0.0829173 | 0.07343  | -0.1419  | 0.00211  |
| 0.58442  | -0.02036 | 0.66084  | -0.13627 | 0.00317  | -0.0188351 | 0.68476  | -0.00436 | 0.92522  |
| 0.69316  | -0.03558 | 0.4431   | -0.2004  | 1.28E-05 | -0.043657  | 0.34652  | -0.02825 | 0.54254  |
| 0.38064  | -0.19974 | 1.37E-05 | -0.29231 | 1.19E-10 | -0.119336  | 0.00985  | -0.10756 | 0.02008  |
| 0.97264  | 0.060481 | 0.19199  | -0.05248 | 0.25774  | 0.02452834 | 0.597    | 0.003804 | 0.93466  |
| 0.82343  | -0.01558 | 0.73704  | -0.05139 | 0.26776  | 0.07408573 | 0.10984  | 0.08508  | 0.06621  |
| 0.49086  | -0.04656 | 0.31534  | -0.19624 | 1.95E-05 | -0.0859014 | 0.06362  | -0.05596 | 0.22746  |
| 0.95298  | -0.01797 | 0.69851  | -0.22355 | 1.06E-06 | -0.1486729 | 0.00127  | -0.19252 | 2.81E-05 |
| 0.8675   | 0.041031 | 0.37633  | -0.1184  | 0.01044  | 0.12483704 | 0.00691  | 0.194815 | 2.24E-05 |
| 0.57822  | 0.012273 | 0.79137  | -0.17425 | 0.00015  | -0.0055305 | 0.90512  | 0.011435 | 0.80533  |
| 0.05776  | 0.057074 | 0.2183   | -0.03959 | 0.39328  | 0.11184152 | 0.0156   | 0.144937 | 0.00169  |
| 0.67666  | -0.04955 | 0.28528  | -0.26183 | 9.27E-09 | -0.0935768 | 0.04326  | -0.00294 | 0.94945  |
| 0.70136  | -0.12385 | 0.00737  | -0.27287 | 2.03E-09 | -0.0856271 | 0.06448  | 0.01477  | 0.75023  |
| 1.30E-18 | -0.15834 | 0.00059  | -0.25893 | 1.36E-08 | -0.0756588 | 0.10248  | -0.07445 | 0.10809  |
| 0.34028  | 0.007923 | 0.86442  | -0.15223 | 0.00097  | -0.0982307 | 0.03382  | -0.09007 | 0.05176  |
| 0.61465  | 0.06017  | 0.1943   | -0.15694 | 0.00067  | 0.05399076 | 0.24423  | 0.086475 | 0.06187  |
| 0.70398  | -0.05249 | 0.25757  | -0.20196 | 1.09E-05 | -0.0331422 | 0.47493  | -0.04672 | 0.31375  |
| 0.5852   | -0.05434 | 0.24123  | -0.22044 | 1.51E-06 | -0.0870884 | 0.06004  | -0.06677 | 0.14966  |
| 3.93E-08 | 0.039956 | 0.38897  | -0.08997 | 0.05202  | -0.0053913 | 0.9075   | 0.013647 | 0.76866  |
| 0.06424  | -0.12403 | 0.00729  | -0.39811 | 3.46E-19 | -0.1540517 | 0.00084  | -0.0366  | 0.43009  |
| 0.04866  | -0.1667  | 0.0003   | -0.17044 | 0.00022  | -0.0153294 | 0.7411   | -0.02436 | 0.59949  |
| 0.83348  | 0.020987 | 0.651    | -0.12306 | 0.00776  | -0.053785  | 0.24604  | -0.03193 | 0.49128  |
| 0.76835  | -0.04428 | 0.33965  | -0.2001  | 1.32E-05 | -0.0806352 | 0.08173  | -0.08788 | 0.05774  |
| 0.28283  | -0.00388 | 0.93332  | -0.14788 | 0.00135  | -0.0841269 | 0.06932  | -0.08837 | 0.05636  |
| 0.31678  | -0.02856 | 0.53812  | -0.18823 | 4.25E-05 | -0.0827588 | 0.07399  | -0.05257 | 0.25688  |
| 0.9757   | -0.07262 | 0.11708  | -0.24553 | 7.69E-08 | -0.0841262 | 0.06932  | -0.08526 | 0.06565  |
| 0.97733  | 0.01451  | 0.75448  | -0.21269 | 3.53E-06 | -0.077074  | 0.09619  | -0.03852 | 0.40619  |
| 0.36965  | 0.009354 | 0.84022  | -0.15412 | 0.00083  | -0.0985658 | 0.03321  | -0.10328 | 0.02563  |
| 0.93717  | -0.15121 | 0.00105  | -0.30077 | 3.21E-11 | -0.0721416 | 0.11951  | -0.01    | 0.82928  |
| 0.80328  | 0.011243 | 0.80854  | -0.24529 | 7.93E-08 | -0.1937581 | 2.49E-05 | -0.089   | 0.0546   |
| 0.76505  | 0.029482 | 0.52507  | -0.08955 | 0.05312  | -0.0603645 | 0.19286  | -0.05402 | 0.24393  |
| 0.15735  | -0.03142 | 0.49819  | -0.24448 | 8.77E-08 | -0.1117518 | 0.01569  | -0.03985 | 0.39021  |
| 0.49703  | -0.14428 | 0.00177  | -0.20898 | 5.25E-06 | -0.0955814 | 0.03895  | -0.12217 | 0.00822  |
| 0.61095  | -0.11636 | 0.01185  | -0.20072 | 1.24E-05 | -0.1752996 | 0.00014  | -0.18382 | 6.45E-05 |
| 0.25651  | 0.00443  | 0.92393  | -0.08786 | 0.05781  | -0.1143062 | 0.01345  | -0.09742 | 0.03532  |
| 0.53918  | -0.06919 | 0.13542  | -0.24036 | 1.46E-07 | -0.0877224 | 0.05819  | -0.06353 | 0.17047  |
| 0.53964  | 0.004296 | 0.92623  | -0.13102 | 0.00457  | -0.0736419 | 0.11199  | -0.01602 | 0.72993  |
| 0.04003  | -0.05405 | 0.24374  | -0.18803 | 4.33E-05 | -0.0977844 | 0.03464  | -0.0987  | 0.03298  |
| 0.51866  | -0.13072 | 0.00466  | -0.25732 | 1.69E-08 | -0.0892597 | 0.05391  | 0.003972 | 0.93177  |
| 0.94278  | -0.02001 | 0.66618  | -0.10962 | 0.0178   | -0.0339321 | 0.46446  | -0.01811 | 0.69622  |
| 0.27887  | 0.05581  | 0.22868  | -0.0327  | 0.48088  | -0.0604355 | 0.19233  | -0.06488 | 0.16159  |
| 0.92428  | -0.03389 | 0.46504  | -0.19143 | 3.12E-05 | -0.0723264 | 0.11856  | -0.09645 | 0.0372   |

|         |          |         |          |          |            |          |          |          |
|---------|----------|---------|----------|----------|------------|----------|----------|----------|
| 0.90182 | -0.03204 | 0.48979 | -0.18442 | 6.09E-05 | -0.0285642 | 0.53806  | -0.05297 | 0.25325  |
| 0.08238 | 0.025039 | 0.58939 | -0.08673 | 0.0611   | 0.01327801 | 0.77474  | 0.069389 | 0.13432  |
| 0.78552 | -0.02657 | 0.56686 | -0.19686 | 1.83E-05 | -0.0482343 | 0.29826  | -0.05502 | 0.23538  |
| 0.55944 | -0.0213  | 0.64619 | -0.15765 | 0.00063  | 0.00263146 | 0.95477  | -0.00441 | 0.92423  |
| 0.59028 | -0.06268 | 0.17632 | -0.27481 | 1.55E-09 | -0.1470885 | 0.00144  | -0.12082 | 0.00896  |
| 0.17377 | 0.000831 | 0.98571 | -0.14555 | 0.00161  | -0.0500835 | 0.2801   | -0.01481 | 0.74951  |
| 0.90165 | 0.086598 | 0.0615  | -0.04252 | 0.35924  | 0.06291308 | 0.1747   | 0.086744 | 0.06106  |
| 0.70036 | -0.01998 | 0.66673 | -0.11376 | 0.0139   | -0.02889   | 0.53343  | -0.04235 | 0.36112  |
| 0.59742 | -0.0421  | 0.36397 | -0.12201 | 0.00831  | -0.0592793 | 0.20099  | -0.02564 | 0.58052  |
| 0.25354 | -0.08917 | 0.05414 | -0.18059 | 8.70E-05 | -0.0187478 | 0.68614  | -0.0372  | 0.4225   |
| 0.62283 | 0.018953 | 0.6829  | -0.11148 | 0.01595  | -0.0776429 | 0.09376  | -0.09098 | 0.04943  |
| 0.82844 | 0.080313 | 0.08297 | 0.019365 | 0.67638  | 0.01412459 | 0.7608   | -0.01604 | 0.72957  |
| 0.36047 | 0.038046 | 0.41206 | -0.15086 | 0.00108  | -0.103518  | 0.02528  | -0.02188 | 0.63727  |
| 0.75006 | -0.02679 | 0.56359 | -0.17287 | 0.00017  | -0.0370137 | 0.42487  | 0.049541 | 0.28535  |
| 0.30803 | -0.01273 | 0.78373 | -0.20319 | 9.62E-06 | -0.1273844 | 0.00584  | -0.06296 | 0.1744   |
| 0.25449 | 0.030757 | 0.5073  | -0.1004  | 0.03006  | 0.0441664  | 0.34092  | 0.108715 | 0.01877  |
| 0.86433 | 0.035187 | 0.4481  | -0.0628  | 0.17545  | 0.04952169 | 0.28554  | 0.117554 | 0.01101  |
| 0.92028 | 0.021936 | 0.63634 | -0.20477 | 8.17E-06 | -0.2128192 | 3.48E-06 | -0.19158 | 3.08E-05 |
| 0.68015 | 0.000464 | 0.99203 | -0.16845 | 0.00026  | -0.0212515 | 0.6469   | 0.026841 | 0.56287  |
| 0.71412 | -0.04786 | 0.30205 | -0.20286 | 9.95E-06 | -0.0830057 | 0.07312  | -0.0184  | 0.69159  |
| 0.37124 | -0.01919 | 0.67916 | -0.15674 | 0.00068  | -0.1240738 | 0.00726  | -0.13143 | 0.00444  |
| 0.2896  | -0.04391 | 0.34377 | -0.24934 | 4.75E-08 | -0.1174154 | 0.01111  | -0.07259 | 0.1172   |
| 0.23249 | -0.02781 | 0.54883 | -0.19529 | 2.14E-05 | -0.0175971 | 0.70447  | 0.019398 | 0.67587  |
| 0.7847  | 0.07123  | 0.12426 | -0.03961 | 0.39312  | -0.0464311 | 0.31671  | -0.02322 | 0.61678  |
| 0.70573 | -0.05542 | 0.23197 | -0.16815 | 0.00026  | -0.0235066 | 0.61237  | -0.04375 | 0.34552  |
| 0.98474 | 0.008146 | 0.86063 | -0.11998 | 0.00945  | -0.0217472 | 0.63924  | -0.0156  | 0.73665  |
| 0.78462 | 0.002776 | 0.95229 | -0.20846 | 5.55E-06 | -0.0721514 | 0.11946  | 0.011937 | 0.79696  |
| 0.26186 | 0.018545 | 0.68937 | -0.16016 | 0.00051  | -0.037978  | 0.4129   | -0.01021 | 0.82582  |
| 0.5254  | -0.02613 | 0.57326 | -0.13632 | 0.00316  | 0.01690498 | 0.71558  | -0.01338 | 0.77303  |
| 0.76704 | -0.01339 | 0.77283 | -0.14725 | 0.00142  | -0.112762  | 0.01477  | -0.12792 | 0.00563  |
| 0.82394 | 0.00651  | 0.88841 | -0.09639 | 0.03732  | 0.05052124 | 0.27591  | 0.054795 | 0.23726  |
| 0.54005 | -0.00914 | 0.84388 | -0.08534 | 0.0654   | -0.1087083 | 0.01878  | -0.1704  | 0.00022  |
| 0.29596 | 0.020681 | 0.65576 | -0.17721 | 0.00012  | -0.0791573 | 0.08751  | -0.01286 | 0.78163  |
| 0.76712 | 0.021565 | 0.64206 | -0.26667 | 4.81E-09 | -0.0637612 | 0.16895  | 0.056384 | 0.22392  |
| 0.49796 | -0.02999 | 0.51793 | 0.051813 | 0.26381  | 0.07913455 | 0.0876   | 0.035685 | 0.44169  |
| 0.28881 | -0.04482 | 0.33379 | -0.10449 | 0.02393  | 0.02283484 | 0.62257  | 0.004105 | 0.92951  |
| 0.78977 | -0.14241 | 0.00204 | -0.21761 | 2.06E-06 | -0.1174004 | 0.01112  | -0.11424 | 0.0135   |
| 0.12534 | -0.08286 | 0.07364 | -0.1774  | 0.00012  | 0.00375565 | 0.93549  | 0.023217 | 0.61677  |
| 0.39493 | -0.09728 | 0.03559 | -0.13166 | 0.00437  | -0.0513318 | 0.26827  | -0.09523 | 0.03967  |
| 0.68937 | -0.03851 | 0.40637 | -0.01306 | 0.77833  | 0.0062258  | 0.89326  | -0.0197  | 0.67109  |
| 0.22939 | -0.03069 | 0.50817 | -0.04791 | 0.30153  | 0.00203227 | 0.96506  | -0.04975 | 0.28327  |
| 0.63166 | -0.05677 | 0.22076 | -0.12493 | 0.00687  | -0.0302062 | 0.51494  | -0.04789 | 0.30168  |
| 0.72323 | -0.00377 | 0.93526 | -0.12285 | 0.00787  | -0.0287757 | 0.53505  | 0.000575 | 0.99011  |
| 0.87332 | 0.005174 | 0.91122 | -0.10442 | 0.02403  | 0.01884017 | 0.68468  | -0.00733 | 0.87452  |
| 0.88379 | 0.022201 | 0.63226 | -0.05625 | 0.22503  | 0.0345757  | 0.45603  | -0.00079 | 0.98642  |

|          |          |          |          |          |            |          |          |          |
|----------|----------|----------|----------|----------|------------|----------|----------|----------|
| 0.31415  | -0.08707 | 0.06008  | -0.19421 | 2.38E-05 | -0.1635563 | 0.00039  | -0.14883 | 0.00126  |
| 0.40149  | 0.088066 | 0.05721  | -0.02638 | 0.56958  | -0.0760545 | 0.10069  | -0.07035 | 0.12901  |
| 0.93255  | 0.013113 | 0.77746  | -0.08637 | 0.0622   | -0.0225247 | 0.62731  | -0.01663 | 0.71997  |
| 0.34015  | 0.015815 | 0.73321  | -0.15088 | 0.00107  | -0.0622501 | 0.17929  | 0.01939  | 0.67599  |
| 0.7993   | -0.0332  | 0.47409  | -0.12428 | 0.00717  | -0.0190363 | 0.68158  | -0.01967 | 0.67165  |
| 0.82455  | -0.02241 | 0.62901  | -0.21997 | 1.59E-06 | -0.1249135 | 0.00688  | -0.05726 | 0.21678  |
| 0.94184  | 0.020414 | 0.65993  | 0.044873 | 0.33324  | 0.07893462 | 0.0884   | 0.018181 | 0.69515  |
| 4.25E-30 | 0.017715 | 0.70259  | 0.003117 | 0.94643  | 0.09039806 | 0.0509   | 0.048412 | 0.29648  |
| 0.8456   | -0.04199 | 0.36522  | -0.18499 | 5.78E-05 | -0.0282887 | 0.54199  | -0.04267 | 0.35759  |
| 0.51948  | -0.04399 | 0.34288  | -0.1582  | 0.0006   | -0.0157564 | 0.73415  | -0.0176  | 0.70436  |
| 0.49871  | 0.067401 | 0.14586  | -0.06288 | 0.17492  | -0.0711735 | 0.12456  | -0.08489 | 0.06683  |
| 0.68451  | -0.09833 | 0.03363  | -0.22302 | 1.13E-06 | -0.0095054 | 0.83768  | 0.082372 | 0.07535  |
| 0.66119  | -0.04341 | 0.34926  | -0.22127 | 1.37E-06 | -0.103193  | 0.02575  | -0.04941 | 0.28659  |
| 0.90095  | -0.28929 | 1.87E-10 | -0.2705  | 2.83E-09 | 0.06488299 | 0.16156  | 0.170461 | 0.00021  |
| 0.64387  | 0.12073  | 0.00901  | -0.0954  | 0.03933  | -0.0106974 | 0.81766  | 0.074766 | 0.1066   |
| 0.53051  | -0.05693 | 0.21943  | -0.15408 | 0.00084  | 0.00515549 | 0.91153  | -0.03687 | 0.42663  |
| 4.24E-06 | 0.028619 | 0.53728  | -0.1322  | 0.00421  | -0.1047912 | 0.02353  | -0.10566 | 0.0224   |
| 0.39647  | -0.04049 | 0.38268  | -0.16212 | 0.00044  | -0.041416  | 0.37186  | 0.007385 | 0.87354  |
| 0.69239  | -0.00651 | 0.88846  | -0.19635 | 1.93E-05 | -0.0827846 | 0.07389  | -0.06704 | 0.14804  |
| 0.41511  | 0.159743 | 0.00053  | 0.047052 | 0.31028  | 0.18240909 | 7.35E-05 | 0.398779 | 2.98E-19 |
| 0.016    | 0.374534 | 5.34E-17 | 0.262545 | 8.42E-09 | 0.40157358 | 1.59E-19 | 0.640572 | 2.67E-55 |
| 0.0839   | 0.448181 | 1.87E-24 | 0.216382 | 2.36E-06 | 0.14300585 | 0.00195  | 0.419371 | 2.57E-21 |
| 0.00068  | 0.308553 | 9.29E-12 | 0.208188 | 5.71E-06 | 0.27228797 | 2.21E-09 | 0.475194 | 1.11E-27 |
| 0.02646  | 0.372012 | 8.94E-17 | 0.492661 | 6.32E-30 | 0.32160125 | 1.07E-12 | 0.356742 | 1.84E-15 |
| 0.8945   | 0.359083 | 1.17E-15 | 0.234471 | 2.98E-07 | 0.32712668 | 4.14E-13 | 0.576336 | 1.10E-42 |
| 0.0002   | 0.524396 | 2.37E-34 | 0.339074 | 4.99E-14 | -0.2513761 | 3.66E-08 | -0.17528 | 0.00014  |
| 0.32373  | 0.457654 | 1.49E-25 | 0.122542 | 0.00802  | 0.23968133 | 1.59E-07 | 0.399736 | 2.41E-19 |
| 0.0594   | 0.595655 | 3.50E-46 | 0.367908 | 2.05E-16 | 0.04426334 | 0.33986  | 0.169531 | 0.00023  |
| 0.67372  | 0.243883 | 9.45E-08 | 0.195091 | 2.18E-05 | 0.43462284 | 6.11E-23 | 0.681578 | 4.58E-65 |
| 0.27926  | 0.665489 | 4.76E-61 | 0.409946 | 2.36E-20 | 0.08917486 | 0.05413  | 0.241412 | 1.28E-07 |
| 2.66E-06 | 0.407681 | 3.98E-20 | 0.326036 | 5.00E-13 | 0.15361158 | 0.00087  | 0.307536 | 1.09E-11 |
| 0.57143  | 0.237455 | 2.08E-07 | 0.080742 | 0.08133  | 0.30387212 | 1.97E-11 | 0.574042 | 2.76E-42 |
| 0.81078  | 0.485608 | 5.28E-29 | 0.239336 | 1.65E-07 | 0.21746039 | 2.10E-06 | 0.431264 | 1.42E-22 |
| 0.19705  | 0.21337  | 3.28E-06 | 0.161069 | 0.00048  | 0.05557064 | 0.23068  | 0.213404 | 3.27E-06 |
| 0.97023  | 0.205942 | 7.23E-06 | 0.409416 | 2.67E-20 | 0.20776071 | 5.98E-06 | 0.244682 | 8.55E-08 |
| 0.36951  | 0.29126  | 1.39E-10 | 0.250921 | 3.88E-08 | 0.16260594 | 0.00042  | 0.405217 | 6.99E-20 |
| 0.1766   | 0.472406 | 2.46E-27 | 0.293797 | 9.45E-11 | -0.1293722 | 0.00511  | -0.00767 | 0.86864  |
| 0.03689  | 0.302664 | 2.38E-11 | 0.222307 | 1.22E-06 | 0.27049359 | 2.84E-09 | 0.355883 | 2.17E-15 |
| 0.00041  | 0.346416 | 1.30E-14 | 0.257805 | 1.58E-08 | 0.34007534 | 4.16E-14 | 0.442524 | 8.17E-24 |
| 0.00345  | 0.39333  | 9.94E-19 | 0.244367 | 8.90E-08 | 0.31826228 | 1.88E-12 | 0.589177 | 5.54E-45 |
| 0.12212  | 0.263288 | 7.62E-09 | -0.07609 | 0.10053  | -0.0921068 | 0.04666  | 0.064842 | 0.16182  |
| 0.88066  | 0.217801 | 2.02E-06 | 0.025435 | 0.5835   | 0.1375941  | 0.00289  | 0.423249 | 1.01E-21 |
| 0.20954  | 0.395133 | 6.69E-19 | 0.228715 | 5.86E-07 | 0.3077805  | 1.05E-11 | 0.553132 | 8.82E-39 |
| 0.0822   | 0.36197  | 6.65E-16 | 0.283714 | 4.28E-10 | 0.41563578 | 6.24E-21 | 0.608904 | 1.01E-48 |
| 0.00047  | 0.457829 | 1.42E-25 | 0.249636 | 4.58E-08 | 0.00979062 | 0.83288  | 0.152299 | 0.00096  |



|          |          |          |          |          |            |          |          |          |
|----------|----------|----------|----------|----------|------------|----------|----------|----------|
| 0.01656  | 0.429754 | 2.06E-22 | 0.221978 | 1.27E-06 | 0.07825547 | 0.09119  | 0.347428 | 1.08E-14 |
| 3.52E-05 | 0.411049 | 1.83E-20 | 0.475042 | 1.16E-27 | 0.20462584 | 8.30E-06 | 0.270294 | 2.92E-09 |
| 0.00284  | 0.659351 | 1.40E-59 | 0.601533 | 2.71E-47 | 0.02440958 | 0.59878  | 0.085977 | 0.06339  |
| 0.0062   | 0.432067 | 1.16E-22 | 0.502518 | 2.99E-31 | -0.0550124 | 0.23541  | 0.000273 | 0.9953   |
| 0.12833  | 0.340328 | 3.98E-14 | 0.300532 | 3.33E-11 | 0.35447361 | 2.84E-15 | 0.585959 | 2.13E-44 |
| 0.0345   | 0.564063 | 1.40E-40 | 0.218572 | 1.86E-06 | -0.074506  | 0.10783  | 0.071069 | 0.12512  |
| 0.57986  | 0.474054 | 1.54E-27 | 0.346078 | 1.38E-14 | 0.21325075 | 3.33E-06 | 0.433502 | 8.10E-23 |
| 0.03725  | 0.336093 | 8.54E-14 | 0.213879 | 3.11E-06 | 0.30306449 | 2.24E-11 | 0.566874 | 4.69E-41 |
| 0.80084  | 0.202341 | 1.05E-05 | 0.127568 | 0.00577  | 0.52280256 | 4.07E-34 | 0.745311 | 6.73E-84 |
| 0.00363  | 0.495118 | 2.98E-30 | 0.199591 | 1.39E-05 | -0.0451875 | 0.32986  | 0.072234 | 0.11904  |
| 0.83217  | 0.462104 | 4.41E-26 | 0.227416 | 6.82E-07 | -0.0793066 | 0.08691  | 0.041532 | 0.37052  |
| 0.04787  | 0.509731 | 3.01E-32 | 0.354273 | 2.95E-15 | 0.17000622 | 0.00022  | 0.346149 | 1.36E-14 |
| 0.2848   | 0.214638 | 2.86E-06 | 0.103154 | 0.0258   | 0.1261961  | 0.00632  | 0.365536 | 3.29E-16 |
| 0.13581  | 0.461473 | 5.25E-26 | 0.219967 | 1.59E-06 | 0.20302927 | 9.78E-06 | 0.492048 | 7.61E-30 |
| 2.72E-05 | 0.199216 | 1.44E-05 | 0.217148 | 2.17E-06 | 0.29748442 | 5.36E-11 | 0.321723 | 1.05E-12 |
| 0.34135  | 0.213764 | 3.15E-06 | 0.279127 | 8.34E-10 | 0.27281896 | 2.05E-09 | 0.460349 | 7.14E-26 |
| 0.05808  | 0.252002 | 3.38E-08 | 0.190701 | 3.35E-05 | 0.18545976 | 5.53E-05 | 0.444969 | 4.33E-24 |
| 0.03154  | 0.45532  | 2.80E-25 | 0.17279  | 0.00018  | -0.1618935 | 0.00044  | 0.058037 | 0.21061  |
| 0.68145  | 0.330233 | 2.41E-13 | 0.206026 | 7.17E-06 | 0.44549035 | 3.78E-24 | 0.638147 | 9.07E-55 |
| 7.33E-06 | 0.255081 | 2.27E-08 | 0.094444 | 0.04135  | 0.00980068 | 0.83271  | 0.254173 | 2.55E-08 |
| 0.00962  | 0.615896 | 4.14E-50 | 0.461216 | 5.63E-26 | 0.40886462 | 3.03E-20 | 0.576786 | 9.17E-43 |
| 0.25733  | 0.265418 | 5.71E-09 | 0.034624 | 0.4554   | 0.20601168 | 7.18E-06 | 0.508829 | 4.02E-32 |
| 0.17095  | 0.281427 | 5.98E-10 | 0.126084 | 0.00637  | -0.0230304 | 0.6196   | 0.154417 | 0.00081  |
| 0.01246  | 0.185574 | 5.47E-05 | 0.233683 | 3.27E-07 | 0.40453714 | 8.16E-20 | 0.545984 | 1.22E-37 |
| 0.26925  | 0.339591 | 4.55E-14 | 0.159536 | 0.00054  | 0.1876244  | 4.50E-05 | 0.466793 | 1.20E-26 |
| 0.81401  | 0.482773 | 1.22E-28 | 0.278222 | 9.50E-10 | 0.18667795 | 4.93E-05 | 0.309981 | 7.37E-12 |
| 0.68495  | 0.470711 | 3.99E-27 | 0.215947 | 2.48E-06 | 0.21124556 | 4.13E-06 | 0.491036 | 1.03E-29 |
| 0.29145  | 0.184947 | 5.80E-05 | 0.053566 | 0.24796  | 0.13738295 | 0.00293  | 0.436364 | 3.94E-23 |
| 0.89394  | 0.4257   | 5.57E-22 | 0.258623 | 1.42E-08 | 0.52372816 | 2.98E-34 | 0.746133 | 3.53E-84 |
| 0.00867  | 0.433718 | 7.67E-23 | 0.383229 | 8.73E-18 | 0.10992417 | 0.01749  | 0.298384 | 4.66E-11 |
| 0.01456  | 0.432715 | 9.86E-23 | 0.333714 | 1.31E-13 | 0.12888456 | 0.00528  | 0.384806 | 6.25E-18 |
| 0.01754  | 0.548369 | 5.13E-38 | 0.316118 | 2.69E-12 | -0.2326381 | 3.70E-07 | -0.20242 | 1.04E-05 |
| 1.12E-05 | 0.409037 | 2.91E-20 | 0.207894 | 5.89E-06 | 0.23992889 | 1.54E-07 | 0.485235 | 5.90E-29 |
| 0.17606  | 0.303554 | 2.07E-11 | 0.144721 | 0.00172  | 0.10405597 | 0.02453  | 0.340351 | 3.96E-14 |
| 0.00574  | 0.393169 | 1.03E-18 | 0.484397 | 7.56E-29 | 0.20928622 | 5.09E-06 | 0.269871 | 3.09E-09 |
| 2.88E-06 | 0.555042 | 4.32E-39 | 0.273259 | 1.93E-09 | 0.02486564 | 0.59196  | 0.205962 | 7.22E-06 |
| 0.02256  | 0.261566 | 9.61E-09 | 0.308463 | 9.43E-12 | 0.17370761 | 0.00016  | 0.219194 | 1.73E-06 |
| 0.01815  | 0.499355 | 8.04E-31 | 0.304178 | 1.87E-11 | 0.00104424 | 0.98204  | 0.23704  | 2.19E-07 |
| 0.14096  | 0.260125 | 1.16E-08 | 0.095983 | 0.03813  | 0.19852053 | 1.55E-05 | 0.518072 | 1.97E-33 |
| 0.27934  | 0.278477 | 9.16E-10 | 0.151992 | 0.00098  | 0.50702816 | 7.16E-32 | 0.713608 | 6.94E-74 |
| 0.04107  | 0.294784 | 8.13E-11 | 0.244389 | 8.87E-08 | 0.28080336 | 6.55E-10 | 0.504473 | 1.61E-31 |
| 0.00099  | 0.504002 | 1.87E-31 | 0.269301 | 3.35E-09 | 0.07244383 | 0.11796  | 0.308362 | 9.58E-12 |
| 3.00E-05 | 0.2173   | 2.14E-06 | 0.056291 | 0.22469  | 0.15144495 | 0.00103  | 0.433567 | 7.97E-23 |
| 0.24387  | 0.199515 | 1.40E-05 | 0.132593 | 0.0041   | 0.14013919 | 0.0024   | 0.416213 | 5.44E-21 |
| 0.26781  | 0.238235 | 1.89E-07 | 0.221699 | 1.31E-06 | 0.2233362  | 1.09E-06 | 0.194664 | 2.28E-05 |

|          |          |          |          |          |            |          |          |          |
|----------|----------|----------|----------|----------|------------|----------|----------|----------|
| 0.75426  | 0.261835 | 9.27E-09 | 0.171626 | 0.00019  | 0.33178942 | 1.83E-13 | 0.392722 | 1.14E-18 |
| 0.39355  | 0.324432 | 6.60E-13 | 0.194953 | 2.21E-05 | 0.13274287 | 0.00406  | 0.25246  | 3.19E-08 |
| 0.50133  | 0.387564 | 3.47E-18 | 0.277247 | 1.09E-09 | 0.52481508 | 2.06E-34 | 0.631893 | 2.02E-53 |
| 0.24623  | 0.352658 | 4.02E-15 | 0.080783 | 0.08118  | -0.0156417 | 0.73602  | 0.101772 | 0.02787  |
| 0.04873  | 0.368523 | 1.81E-16 | 0.11455  | 0.01325  | -0.0375189 | 0.41857  | 0.108559 | 0.01894  |
| 0.00392  | -0.10605 | 0.0219   | -0.10031 | 0.03021  | -0.12921   | 0.00517  | -0.17817 | 0.00011  |
| 0.00885  | -0.07691 | 0.09689  | -0.09414 | 0.04202  | -0.1532346 | 0.00089  | -0.21738 | 2.12E-06 |
| 0.14564  | -0.08252 | 0.07483  | -0.08885 | 0.05502  | 0.06301883 | 0.17397  | 0.167542 | 0.00028  |
| 0.27372  | -0.10546 | 0.02265  | 0.095863 | 0.03837  | 0.0039395  | 0.93234  | 0.079897 | 0.08458  |
| 0.00799  | 0.121149 | 0.00877  | 0.138134 | 0.00278  | -0.0365131 | 0.43116  | -0.11943 | 0.00979  |
| 0.00072  | 0.014016 | 0.76259  | 0.147023 | 0.00144  | 0.32501838 | 5.96E-13 | 0.314873 | 3.30E-12 |
| 0.40153  | -0.14425 | 0.00178  | -0.10056 | 0.02979  | 0.15059331 | 0.0011   | 0.223164 | 1.11E-06 |
| 0.99134  | -0.18984 | 3.64E-05 | -0.13796 | 0.00281  | -0.1226223 | 0.00798  | -0.09298 | 0.04462  |
| 0.77712  | -0.20307 | 9.75E-06 | -0.06072 | 0.19023  | 0.13139111 | 0.00445  | 0.187828 | 4.42E-05 |
| 0.99026  | -0.05058 | 0.2754   | -0.09487 | 0.04044  | -0.2237666 | 1.04E-06 | -0.25292 | 3.00E-08 |
| 0.20171  | -0.15072 | 0.00109  | -0.04291 | 0.35484  | 0.00416144 | 0.92853  | -0.12328 | 0.00765  |
| 0.05006  | 0.153148 | 0.0009   | 0.144983 | 0.00168  | -0.1064424 | 0.02141  | -0.19066 | 3.37E-05 |
| 0.13315  | -0.07075 | 0.12685  | 0.014018 | 0.76256  | 0.08527565 | 0.06559  | 0.179358 | 9.73E-05 |
| 0.00652  | -0.1346  | 0.00357  | -0.02178 | 0.63866  | -0.1717891 | 0.00019  | -0.2943  | 8.75E-11 |
| 0.68874  | -0.11559 | 0.01243  | 0.054494 | 0.23986  | -0.1254873 | 0.00662  | -0.21159 | 3.98E-06 |
| 0.51486  | -0.0899  | 0.0522   | 0.162536 | 0.00042  | 0.01118056 | 0.80958  | -0.12234 | 0.00813  |
| 0.20072  | -0.34883 | 8.27E-15 | -0.09625 | 0.0376   | -0.1589511 | 0.00057  | -0.22472 | 9.29E-07 |
| 0.85358  | -0.10593 | 0.02205  | -0.02148 | 0.64337  | -0.1889744 | 3.96E-05 | -0.29683 | 5.93E-11 |
| 0.16689  | -0.12731 | 0.00587  | 0.072363 | 0.11837  | 0.13321388 | 0.00393  | -0.00435 | 0.92536  |
| 0.49766  | 0.105686 | 0.02236  | 0.013205 | 0.77594  | -0.0484617 | 0.29599  | -0.04218 | 0.36311  |
| 2.10E-05 | 0.007311 | 0.8748   | 0.105563 | 0.02252  | -0.1994692 | 1.41E-05 | -0.34373 | 2.13E-14 |
| 0.00019  | -0.04583 | 0.32299  | 0.046029 | 0.32093  | 0.01391147 | 0.7643   | -0.0891  | 0.05434  |
| 0.06547  | -0.45255 | 5.87E-25 | -0.29827 | 4.75E-11 | -0.0322874 | 0.4864   | -0.1695  | 0.00023  |
| 0.81346  | -0.13871 | 0.00266  | -0.03426 | 0.4602   | -0.1005848 | 0.02975  | -0.25447 | 2.46E-08 |
| 0.6479   | 0.014605 | 0.75291  | 0.064081 | 0.16681  | -0.0764666 | 0.09885  | -0.18619 | 5.16E-05 |
| 0.49672  | -0.08179 | 0.07745  | -0.01823 | 0.69436  | -0.1210767 | 0.00882  | -0.25087 | 3.91E-08 |
| 0.02731  | -0.24658 | 6.74E-08 | 0.040595 | 0.38142  | 0.02498853 | 0.59013  | -0.14516 | 0.00166  |
| 0.15362  | 0.009166 | 0.84339  | -0.11964 | 0.00966  | -0.0185925 | 0.68861  | -0.06699 | 0.14837  |
| 0.38981  | -0.15948 | 0.00054  | -0.0198  | 0.66947  | 0.13514651 | 0.00343  | 0.000114 | 0.99805  |
| 0.99847  | -0.06802 | 0.14216  | -0.01567 | 0.73549  | -0.2412264 | 1.31E-07 | -0.35045 | 6.11E-15 |
| 0.24375  | 0.004338 | 0.92552  | 0.08129  | 0.07928  | -0.1581687 | 0.0006   | -0.28185 | 5.62E-10 |
| 0.00638  | -0.04708 | 0.31     | 0.007547 | 0.87079  | -0.0991111 | 0.03225  | -0.19992 | 1.34E-05 |
| 0.52092  | 0.184334 | 6.14E-05 | 0.298986 | 4.24E-11 | 0.12603602 | 0.00639  | 0.038535 | 0.40607  |
| 0.03958  | 0.166024 | 0.00031  | 0.138546 | 0.0027   | -0.1457468 | 0.00159  | -0.153   | 0.00091  |
| 0.03699  | 0.001897 | 0.96739  | -0.03955 | 0.39377  | -0.0838768 | 0.07015  | -0.2315  | 4.23E-07 |
| 0.08308  | -0.16921 | 0.00024  | 0.054774 | 0.23745  | 0.0880041  | 0.05738  | -0.03743 | 0.41972  |
| 0.81795  | -0.22419 | 9.87E-07 | -0.13309 | 0.00396  | 0.10982915 | 0.01758  | 0.228446 | 6.05E-07 |
| 0.00189  | -0.24189 | 1.21E-07 | -0.19968 | 1.38E-05 | -0.1021832 | 0.02724  | -0.21061 | 4.42E-06 |
| 2.12E-05 | 0.242735 | 1.09E-07 | 0.315422 | 3.02E-12 | 0.10480087 | 0.02352  | 0.039423 | 0.39533  |
| 0.08903  | 0.270944 | 2.66E-09 | 0.102498 | 0.02677  | -0.249212  | 4.83E-08 | -0.4131  | 1.13E-20 |

|          |          |          |          |          |            |          |          |          |
|----------|----------|----------|----------|----------|------------|----------|----------|----------|
| 0.02581  | -0.03339 | 0.47168  | -0.0957  | 0.0387   | -0.2206644 | 1.47E-06 | -0.39    | 2.05E-18 |
| 1.40E-05 | 0.082753 | 0.074    | 0.034676 | 0.45472  | -0.1820288 | 7.61E-05 | -0.34374 | 2.13E-14 |
| 8.84E-08 | 0.362974 | 5.46E-16 | 0.408236 | 3.50E-20 | -0.0360916 | 0.4365   | -0.26099 | 1.04E-08 |
| 0.00544  | -0.03167 | 0.49473  | 0.112015 | 0.01544  | 0.42053674 | 1.94E-21 | 0.452306 | 6.28E-25 |
| 0.06724  | 0.205155 | 7.85E-06 | 0.157303 | 0.00065  | -0.2586344 | 1.42E-08 | -0.41386 | 9.48E-21 |
| 0.51972  | 0.278771 | 8.78E-10 | 0.260979 | 1.04E-08 | 0.02317918 | 0.61733  | -0.14751 | 0.00139  |
| 0.82635  | 0.383833 | 7.68E-18 | 0.441474 | 1.07E-23 | -0.0811738 | 0.07971  | -0.27561 | 1.38E-09 |
| 0.07907  | 0.224531 | 9.49E-07 | 0.079375 | 0.08664  | -0.3199174 | 1.42E-12 | -0.40984 | 2.42E-20 |
| 0.44454  | 0.405072 | 7.22E-20 | 0.358088 | 1.42E-15 | -0.204658  | 8.27E-06 | -0.33288 | 1.51E-13 |
| 0.02396  | 0.353523 | 3.41E-15 | 0.046183 | 0.31931  | -0.3384129 | 5.63E-14 | -0.4439  | 5.73E-24 |
| 0.70927  | 0.084887 | 0.06683  | 0.167457 | 0.00028  | -0.4090327 | 2.91E-20 | -0.61428 | 8.74E-50 |
| 0.0719   | 0.234868 | 2.84E-07 | 0.183733 | 6.50E-05 | -0.5639263 | 1.47E-40 | -0.63808 | 9.39E-55 |
| 0.00965  | 0.285575 | 3.25E-10 | 0.249963 | 4.39E-08 | -0.336441  | 8.02E-14 | -0.5294  | 4.32E-35 |
| 0.01452  | 0.313754 | 3.97E-12 | 0.15828  | 0.0006   | -0.4877512 | 2.78E-29 | -0.48892 | 1.96E-29 |
| 0.00243  | 0.14339  | 0.00189  | 0.083664 | 0.07087  | -0.572441  | 5.23E-42 | -0.71245 | 1.51E-73 |
| 0.15215  | 0.370215 | 1.29E-16 | 0.130254 | 0.00481  | -0.3990886 | 2.78E-19 | -0.53433 | 7.80E-36 |
| 0.0011   | 0.30263  | 2.40E-11 | 0.265305 | 5.79E-09 | -0.4190821 | 2.75E-21 | -0.493   | 5.69E-30 |
| 0.00012  | 0.270236 | 2.94E-09 | 0.234419 | 2.99E-07 | -0.5224246 | 4.62E-34 | -0.55034 | 2.49E-38 |
| 0.0616   | 0.120459 | 0.00917  | -0.02321 | 0.61683  | -0.3816212 | 1.23E-17 | -0.45688 | 1.84E-25 |
| 2.17E-05 | 0.242657 | 1.10E-07 | 0.192367 | 2.85E-05 | -0.4615362 | 5.16E-26 | -0.6806  | 8.18E-65 |
| 7.86E-05 | 0.400319 | 2.11E-19 | 0.326523 | 4.60E-13 | -0.2768641 | 1.15E-09 | -0.43284 | 9.56E-23 |
| 0.00465  | 0.031164 | 0.5017   | 0.088226 | 0.05675  | -0.3678029 | 2.09E-16 | -0.50466 | 1.52E-31 |
| 0.00879  | 0.371003 | 1.10E-16 | 0.500909 | 4.95E-31 | -0.0298511 | 0.5199   | -0.24809 | 5.57E-08 |
| 1.40E-09 | 0.204548 | 8.36E-06 | 0.20249  | 1.03E-05 | -0.1490098 | 0.00124  | -0.35843 | 1.33E-15 |
| 0.25729  | 0.254926 | 2.31E-08 | 0.146898 | 0.00146  | -0.0930851 | 0.04437  | -0.31326 | 4.31E-12 |
| 0.03544  | 0.222659 | 1.17E-06 | 0.131696 | 0.00436  | -0.3616279 | 7.11E-16 | -0.41711 | 4.40E-21 |
| 0.00295  | 0.162312 | 0.00043  | 0.209724 | 4.85E-06 | 0.02529022 | 0.58565  | -0.27482 | 1.55E-09 |
| 0.22518  | 0.125913 | 0.00644  | 0.021115 | 0.64901  | 0.02122177 | 0.64736  | -0.18233 | 7.41E-05 |
| 0.00825  | 0.172931 | 0.00017  | -0.07802 | 0.09218  | -0.2845632 | 3.78E-10 | -0.40562 | 6.38E-20 |
| 0.00309  | 0.283865 | 4.19E-10 | 0.217069 | 2.19E-06 | -0.4028263 | 1.20E-19 | -0.62267 | 1.73E-51 |
| 0.88442  | 0.194094 | 2.41E-05 | 0.113554 | 0.01408  | -0.0915222 | 0.04808  | -0.28477 | 3.67E-10 |
| 0.02248  | 0.406582 | 5.12E-20 | 0.498871 | 9.35E-31 | -0.2143024 | 2.97E-06 | -0.36332 | 5.10E-16 |
| 0.04623  | 0.218423 | 1.89E-06 | 0.000893 | 0.98465  | -0.5167066 | 3.10E-33 | -0.4635  | 3.00E-26 |
| 0.00068  | 0.27446  | 1.62E-09 | 0.081149 | 0.0798   | -0.4623375 | 4.14E-26 | -0.55719 | 1.93E-39 |
| 0.23269  | -0.02478 | 0.59318  | -0.21321 | 3.34E-06 | -0.4975892 | 1.39E-30 | -0.71833 | 2.74E-75 |
| 0.54703  | 0.215913 | 2.49E-06 | 0.228972 | 5.69E-07 | -0.211532  | 4.00E-06 | -0.32363 | 7.57E-13 |
| 0.20031  | 0.270929 | 2.67E-09 | 0.151159 | 0.00105  | -0.3680722 | 1.98E-16 | -0.53487 | 6.46E-36 |
| 0.12202  | 0.117014 | 0.01139  | -0.07902 | 0.08807  | -0.2796972 | 7.68E-10 | -0.44336 | 6.58E-24 |
| 0.01736  | 0.271012 | 2.64E-09 | 0.367021 | 2.44E-16 | -0.2245966 | 9.42E-07 | -0.39169 | 1.42E-18 |
| 0.23488  | 0.332232 | 1.70E-13 | 0.224777 | 9.23E-07 | -0.1709571 | 0.00021  | -0.37045 | 1.23E-16 |
| 0.68846  | 0.150485 | 0.00111  | 0.138016 | 0.0028   | -0.2925382 | 1.15E-10 | -0.41082 | 1.93E-20 |
| 0.00037  | 0.336738 | 7.61E-14 | 0.040389 | 0.38384  | -0.2391277 | 1.70E-07 | -0.43184 | 1.23E-22 |
| 0.72434  | 0.197816 | 1.66E-05 | 0.428837 | 2.58E-22 | 0.2037755  | 9.06E-06 | -0.01459 | 0.75321  |
| 0.03056  | 0.215232 | 2.68E-06 | 0.294101 | 9.02E-11 | -0.2536872 | 2.72E-08 | -0.43846 | 2.31E-23 |
| 0.06672  | 0.05366  | 0.24714  | -0.1609  | 0.00048  | -0.5107386 | 2.17E-32 | -0.66702 | 2.02E-61 |

|          |          |          |          |          |            |          |          |          |
|----------|----------|----------|----------|----------|------------|----------|----------|----------|
| 0.23016  | 0.177709 | 0.00011  | 0.253729 | 2.70E-08 | -0.1066077 | 0.02121  | -0.30738 | 1.12E-11 |
| 0.84515  | 0.022931 | 0.62111  | -0.12563 | 0.00656  | -0.1866254 | 4.95E-05 | -0.33067 | 2.23E-13 |
| 0.19428  | 0.162054 | 0.00044  | 0.027009 | 0.56043  | -0.0384455 | 0.40716  | -0.24701 | 6.38E-08 |
| 0.00106  | 0.498831 | 9.46E-31 | 0.364509 | 4.03E-16 | -0.1697381 | 0.00023  | -0.36889 | 1.68E-16 |
| 0.24128  | 0.45834  | 1.24E-25 | 0.294274 | 8.79E-11 | -0.3486443 | 8.57E-15 | -0.48132 | 1.87E-28 |
| 0.00015  | 0.278775 | 8.78E-10 | 0.145527 | 0.00161  | -0.20284   | 9.98E-06 | -0.38326 | 8.67E-18 |
| 0.00626  | 0.409738 | 2.48E-20 | 0.388382 | 2.91E-18 | -0.1171185 | 0.01131  | -0.29494 | 7.94E-11 |
| 0.20891  | 0.413004 | 1.16E-20 | 0.252059 | 3.35E-08 | -0.3404915 | 3.86E-14 | -0.35536 | 2.40E-15 |
| 0.00015  | 0.332412 | 1.64E-13 | 0.298803 | 4.37E-11 | -0.0995894 | 0.03142  | -0.26113 | 1.02E-08 |
| 0.38799  | 0.075652 | 0.10251  | -0.07519 | 0.10462  | -0.1499543 | 0.00115  | -0.34529 | 1.60E-14 |
| 0.32987  | 0.32811  | 3.49E-13 | 0.225561 | 8.44E-07 | -0.370283  | 1.27E-16 | -0.42313 | 1.04E-21 |
| 0.00013  | 0.254891 | 2.32E-08 | 0.467327 | 1.03E-26 | -0.0280809 | 0.54496  | -0.2328  | 3.63E-07 |
| 0.31658  | -0.13412 | 0.00369  | -0.04966 | 0.28417  | -0.4273771 | 3.70E-22 | -0.65497 | 1.48E-58 |
| 0.4983   | 0.131845 | 0.00432  | 0.071436 | 0.12318  | -0.3309857 | 2.11E-13 | -0.51846 | 1.74E-33 |
| 0.00046  | 0.164434 | 0.00036  | 0.391415 | 1.51E-18 | -0.1482495 | 0.00131  | -0.32585 | 5.17E-13 |
| 0.4286   | -0.14612 | 0.00154  | -0.16985 | 0.00023  | -0.3186924 | 1.75E-12 | -0.41871 | 3.01E-21 |
| 0.00033  | 0.082866 | 0.07361  | 0.134569 | 0.00357  | -0.2853183 | 3.38E-10 | -0.43596 | 4.36E-23 |
| 0.28473  | 0.282843 | 4.86E-10 | 0.115824 | 0.01226  | -0.1639714 | 0.00037  | -0.38273 | 9.70E-18 |
| 0.1405   | 0.222828 | 1.15E-06 | 0.296059 | 6.68E-11 | -0.2230941 | 1.12E-06 | -0.35799 | 1.44E-15 |
| 0.14094  | -0.01372 | 0.7675   | 0.080587 | 0.08192  | -0.1465178 | 0.0015   | -0.31687 | 2.37E-12 |
| 0.52261  | 0.469876 | 5.05E-27 | 0.425721 | 5.54E-22 | -0.1381953 | 0.00276  | -0.29225 | 1.20E-10 |
| 0.43665  | 0.164732 | 0.00035  | 0.365863 | 3.08E-16 | 0.10519916 | 0.02299  | -0.16372 | 0.00038  |
| 0.25603  | 0.196319 | 1.93E-05 | 0.05841  | 0.20769  | -0.5418844 | 5.38E-37 | -0.55249 | 1.12E-38 |
| 0.29558  | 0.232747 | 3.65E-07 | 0.164449 | 0.00036  | -0.3688083 | 1.71E-16 | -0.60891 | 1.01E-48 |
| 0.00028  | 0.234142 | 3.09E-07 | 0.071848 | 0.12102  | -0.4150302 | 7.20E-21 | -0.39883 | 2.95E-19 |
| 0.95659  | 0.242765 | 1.09E-07 | 0.131173 | 0.00452  | -0.1550065 | 0.00078  | -0.25599 | 2.01E-08 |
| 0.00519  | 0.165883 | 0.00032  | 0.291187 | 1.41E-10 | -0.2141919 | 3.00E-06 | -0.30116 | 3.02E-11 |
| 0.00494  | 0.095114 | 0.03992  | 0.375204 | 4.65E-17 | -0.2498583 | 4.45E-08 | -0.43875 | 2.15E-23 |
| 0.00051  | 0.165492 | 0.00033  | -0.06757 | 0.14486  | -0.5050945 | 1.32E-31 | -0.67106 | 2.06E-62 |
| 0.08384  | 0.230378 | 4.83E-07 | 0.269766 | 3.14E-09 | -0.310878  | 6.37E-12 | -0.5465  | 1.01E-37 |
| 0.00247  | 0.155387 | 0.00075  | -0.02624 | 0.5717   | -0.5627398 | 2.32E-40 | -0.73977 | 4.80E-82 |
| 0.193    | 0.37267  | 7.82E-17 | 0.235525 | 2.62E-07 | -0.4210833 | 1.70E-21 | -0.42655 | 4.53E-22 |
| 0.0001   | 0.261219 | 1.01E-08 | 0.175053 | 0.00014  | -0.337968  | 6.10E-14 | -0.46988 | 5.04E-27 |
| 0.03482  | 0.119725 | 0.00961  | 0.152099 | 0.00098  | -0.3843615 | 6.87E-18 | -0.4204  | 2.01E-21 |
| 0.31686  | 0.015768 | 0.73396  | -0.10035 | 0.03014  | -0.2221559 | 1.24E-06 | -0.34051 | 3.85E-14 |
| 5.18E-05 | -0.07281 | 0.11612  | -0.01067 | 0.81819  | -0.1862139 | 5.15E-05 | -0.31833 | 1.86E-12 |
| 0.00056  | 0.322253 | 9.57E-13 | 0.081578 | 0.07822  | -0.5876803 | 1.04E-44 | -0.69475 | 1.49E-68 |
| 0.00515  | 0.0501   | 0.27994  | 0.001768 | 0.96961  | -0.1788813 | 0.0001   | -0.30244 | 2.47E-11 |
| 0.44676  | 0.197798 | 1.67E-05 | 0.151262 | 0.00104  | -0.0527035 | 0.25568  | -0.27657 | 1.20E-09 |
| 0.0394   | 0.307663 | 1.07E-11 | 0.059515 | 0.1992   | -0.342234  | 2.81E-14 | -0.44747 | 2.25E-24 |
| 0.00967  | 0.384281 | 6.99E-18 | 0.40054  | 2.01E-19 | -0.0300475 | 0.51715  | -0.22555 | 8.45E-07 |
| 0.18381  | 0.140307 | 0.00237  | 0.020964 | 0.65136  | -0.1991458 | 1.45E-05 | -0.36447 | 4.06E-16 |
| 0.91604  | 0.103463 | 0.02536  | 0.167463 | 0.00028  | -0.1735102 | 0.00016  | -0.4188  | 2.95E-21 |
| 0.12796  | 0.263048 | 7.87E-09 | 0.08142  | 0.0788   | -0.1397335 | 0.00247  | -0.32073 | 1.24E-12 |
| 0.02556  | 0.217512 | 2.09E-06 | 0.236726 | 2.27E-07 | -0.2498596 | 4.45E-08 | -0.3914  | 1.51E-18 |

|          |          |          |          |          |            |          |          |          |
|----------|----------|----------|----------|----------|------------|----------|----------|----------|
| 0.00815  | 0.000603 | 0.98964  | -0.01146 | 0.80495  | -0.3078433 | 1.04E-11 | -0.54193 | 5.29E-37 |
| 0.70656  | -0.10863 | 0.01887  | -0.0454  | 0.32763  | -0.5468999 | 8.77E-38 | -0.77548 | 6.47E-95 |
| 0.11176  | 0.33025  | 2.40E-13 | 0.286093 | 3.01E-10 | -0.1547654 | 0.00079  | -0.3664  | 2.77E-16 |
| 0.1635   | 0.323457 | 7.79E-13 | 0.25547  | 2.15E-08 | -0.3578384 | 1.49E-15 | -0.41192 | 1.49E-20 |
| 0.0321   | 0.370751 | 1.15E-16 | 0.233246 | 3.44E-07 | -0.2298249 | 5.15E-07 | -0.42519 | 6.31E-22 |
| 0.58182  | 0.298817 | 4.36E-11 | 0.374655 | 5.21E-17 | -0.0250886 | 0.58864  | -0.25058 | 4.06E-08 |
| 0.75455  | 0.160119 | 0.00051  | 0.384935 | 6.08E-18 | 0.10242587 | 0.02687  | -0.17645 | 0.00013  |
| 0.24281  | 0.238878 | 1.75E-07 | 0.035009 | 0.4504   | -0.2249717 | 9.03E-07 | -0.38133 | 1.30E-17 |
| 0.78934  | 0.131367 | 0.00446  | -0.17919 | 9.88E-05 | -0.2111484 | 4.17E-06 | -0.35102 | 5.48E-15 |
| 0.60195  | 0.106993 | 0.02075  | 0.20254  | 1.03E-05 | 0.61982371 | 6.64E-51 | 0.795681 | #####    |
| 0.02949  | 0.360773 | 8.41E-16 | 0.286931 | 2.66E-10 | -0.1396053 | 0.0025   | -0.37354 | 6.54E-17 |
| 0.77541  | 0.319873 | 1.43E-12 | 0.410924 | 1.88E-20 | -0.0846146 | 0.06771  | -0.28982 | 1.73E-10 |
| 0.42837  | -0.0797  | 0.08537  | -0.13698 | 0.00302  | -0.217086  | 2.19E-06 | -0.377   | 3.21E-17 |
| 3.74E-06 | 0.314497 | 3.52E-12 | 0.100601 | 0.02973  | -0.3148834 | 3.30E-12 | -0.31758 | 2.10E-12 |
| 0.2308   | 0.010035 | 0.82878  | -0.08328 | 0.07218  | -0.341828  | 3.03E-14 | -0.60772 | 1.73E-48 |
| 0.00663  | 0.129507 | 0.00506  | -0.02289 | 0.62166  | -0.4166135 | 4.95E-21 | -0.60351 | 1.13E-47 |
| 0.38192  | 0.041009 | 0.37659  | -0.03074 | 0.50758  | -0.395765  | 5.82E-19 | -0.64949 | 2.70E-57 |
| 0.36526  | 0.090719 | 0.05008  | 0.019969 | 0.66688  | -0.0858    | 0.06394  | -0.31353 | 4.12E-12 |
| 0.03059  | 0.22614  | 7.90E-07 | 0.008231 | 0.8592   | -0.5649533 | 9.89E-41 | -0.64616 | 1.53E-56 |
| 0.00077  | 0.497111 | 1.61E-30 | 0.444812 | 4.51E-24 | -0.2673508 | 4.38E-09 | -0.37915 | 2.05E-17 |
| 0.0013   | 0.329815 | 2.59E-13 | 0.237631 | 2.04E-07 | -0.242039  | 1.19E-07 | -0.37043 | 1.23E-16 |
| 0.00691  | 0.118329 | 0.01049  | -0.03828 | 0.4092   | -0.6024564 | 1.80E-47 | -0.7839  | 2.65E-98 |
| 0.00104  | 0.264087 | 6.84E-09 | 0.137786 | 0.00285  | -0.2429079 | 1.07E-07 | -0.39453 | 7.64E-19 |
| 0.02046  | 0.418255 | 3.35E-21 | 0.228796 | 5.81E-07 | -0.4037771 | 9.69E-20 | -0.4922  | 7.27E-30 |
| 0.00066  | 0.021532 | 0.64257  | 0.00073  | 0.98744  | 0.06783104 | 0.1433   | -0.16406 | 0.00037  |
| 0.02448  | 0.225024 | 8.97E-07 | 0.422459 | 1.22E-21 | -0.0994694 | 0.03162  | -0.27509 | 1.49E-09 |
| 0.02323  | -0.00534 | 0.9083   | 0.086812 | 0.06086  | -0.1645649 | 0.00036  | -0.33084 | 2.17E-13 |
| 0.70347  | 0.314237 | 3.67E-12 | 0.049133 | 0.28934  | -0.4530066 | 5.20E-25 | -0.47068 | 4.02E-27 |
| 0.49093  | 0.199904 | 1.35E-05 | 0.428729 | 2.65E-22 | -0.1116411 | 0.01579  | -0.35143 | 5.08E-15 |
| 0.13452  | -0.05828 | 0.20868  | -0.06084 | 0.18938  | -0.1682723 | 0.00026  | -0.33369 | 1.31E-13 |
| 0.11574  | 0.127124 | 0.00594  | -0.1806  | 8.69E-05 | -0.42543   | 5.95E-22 | -0.33142 | 1.96E-13 |
| 0.08895  | -0.02523 | 0.58652  | -0.10569 | 0.02236  | -0.1168916 | 0.01147  | -0.26619 | 5.13E-09 |
| 0.39747  | -0.12426 | 0.00718  | -0.21065 | 4.40E-06 | 0.29659802 | 6.15E-11 | 0.348455 | 8.88E-15 |
| 0.00765  | 0.02788  | 0.54784  | -0.08583 | 0.06385  | -0.5277749 | 7.53E-35 | -0.64723 | 8.77E-57 |
| 0.12564  | 0.219075 | 1.76E-06 | 0.210469 | 4.48E-06 | -0.3905844 | 1.81E-18 | -0.54583 | 1.30E-37 |
| 0.74338  | 0.43966  | 1.70E-23 | 0.458992 | 1.04E-25 | -0.1547272 | 0.00079  | -0.40924 | 2.77E-20 |
| 0.00775  | 0.389089 | 2.50E-18 | 0.315708 | 2.88E-12 | -0.2174626 | 2.10E-06 | -0.33998 | 4.24E-14 |
| 0.00723  | -0.23096 | 4.51E-07 | -0.09782 | 0.03458  | 0.31907899 | 1.64E-12 | 0.368369 | 1.87E-16 |
| 0.17436  | 0.211373 | 4.07E-06 | 0.310832 | 6.42E-12 | -0.2735594 | 1.85E-09 | -0.40728 | 4.36E-20 |
| 0.03185  | 0.358143 | 1.40E-15 | 0.263598 | 7.31E-09 | -0.3643111 | 4.19E-16 | -0.47099 | 3.69E-27 |
| 0.56067  | 0.111791 | 0.01565  | 0.204134 | 8.73E-06 | -0.2525993 | 3.13E-08 | -0.42024 | 2.09E-21 |
| 0.05912  | 0.151771 | 0.001    | 0.02942  | 0.52595  | -0.2403646 | 1.46E-07 | -0.31308 | 4.44E-12 |
| 0.82692  | 0.186422 | 5.05E-05 | -0.00273 | 0.95311  | -0.1499899 | 0.00115  | -0.31521 | 3.13E-12 |
| 0.17918  | 0.073909 | 0.11069  | 0.076965 | 0.09667  | 0.35295991 | 3.79E-15 | 0.417681 | 3.84E-21 |
| 0.0207   | 0.386207 | 4.64E-18 | 0.33068  | 2.23E-13 | -0.2660125 | 5.26E-09 | -0.43086 | 1.56E-22 |

|          |          |          |          |          |            |          |          |          |
|----------|----------|----------|----------|----------|------------|----------|----------|----------|
| 0.6306   | 0.108579 | 0.01892  | 0.007133 | 0.87782  | -0.4319012 | 1.21E-22 | -0.60866 | 1.13E-48 |
| 0.00898  | 0.425009 | 6.60E-22 | 0.469209 | 6.10E-27 | -0.0003804 | 0.99346  | -0.22255 | 1.19E-06 |
| 0.12201  | 0.084045 | 0.06959  | -0.00636 | 0.89102  | -0.134587  | 0.00357  | -0.29551 | 7.27E-11 |
| 0.36998  | 0.14413  | 0.00179  | 0.099281 | 0.03195  | 0.50562432 | 1.12E-31 | 0.746427 | 2.81E-84 |
| 0.19906  | 0.383198 | 8.79E-18 | 0.39836  | 3.27E-19 | 0.05130054 | 0.26857  | -0.25737 | 1.68E-08 |
| 0.06486  | 0.394197 | 8.22E-19 | 0.341372 | 3.29E-14 | -0.152992  | 0.00091  | -0.37229 | 8.44E-17 |
| 0.70028  | -0.10257 | 0.02666  | 0.026794 | 0.56356  | -0.1168517 | 0.0115   | -0.33392 | 1.26E-13 |
| 0.50408  | 0.338914 | 5.14E-14 | 0.418237 | 3.37E-21 | -0.0738    | 0.11122  | -0.10167 | 0.02802  |
| 0.00941  | 0.211426 | 4.05E-06 | 0.407192 | 4.45E-20 | -0.0005915 | 0.98983  | -0.2118  | 3.89E-06 |
| 0.85369  | -0.17184 | 0.00019  | -0.05906 | 0.20269  | 0.52847628 | 5.92E-35 | 0.71358  | 7.07E-74 |
| 0.00881  | 0.250142 | 4.29E-08 | 0.060828 | 0.18945  | -0.3295519 | 2.72E-13 | -0.44131 | 1.12E-23 |
| 0.00197  | 0.054031 | 0.24388  | -0.03556 | 0.44332  | -0.1867342 | 4.90E-05 | -0.26596 | 5.30E-09 |
| 0.46552  | 0.297044 | 5.74E-11 | 0.189721 | 3.68E-05 | -0.3386085 | 5.43E-14 | -0.501   | 4.82E-31 |
| 0.0002   | 0.106947 | 0.0208   | 0.209576 | 4.93E-06 | -0.2655622 | 5.59E-09 | -0.42721 | 3.85E-22 |
| 0.45459  | 0.228146 | 6.26E-07 | 0.31302  | 4.49E-12 | -0.1102796 | 0.01712  | -0.286   | 3.06E-10 |
| 0.64759  | 0.343306 | 2.31E-14 | 0.233453 | 3.36E-07 | 0.00299452 | 0.94854  | -0.23826 | 1.89E-07 |
| 0.00054  | 0.322552 | 9.10E-13 | 0.245016 | 8.20E-08 | -0.4071524 | 4.49E-20 | -0.63337 | 9.77E-54 |
| 0.00132  | 0.416729 | 4.82E-21 | 0.370069 | 1.33E-16 | -0.3768265 | 3.33E-17 | -0.52551 | 1.63E-34 |
| 0.00068  | 0.35913  | 1.16E-15 | 0.259001 | 1.35E-08 | -0.1537133 | 0.00086  | -0.26434 | 6.61E-09 |
| 6.50E-06 | 0.348165 | 9.37E-15 | 0.371423 | 1.01E-16 | -0.3490103 | 8.00E-15 | -0.4426  | 8.01E-24 |
| 0.00203  | 0.252016 | 3.37E-08 | 0.196199 | 1.95E-05 | -0.3683063 | 1.89E-16 | -0.50014 | 6.30E-31 |
| 0.11807  | 0.344542 | 1.84E-14 | 0.07584  | 0.10165  | -0.3589825 | 1.19E-15 | -0.42272 | 1.15E-21 |
| 0.20796  | 0.023694 | 0.60953  | -0.02264 | 0.6255   | -0.4242748 | 7.88E-22 | -0.65232 | 6.08E-58 |
| 0.35411  | 0.085612 | 0.06453  | 0.019098 | 0.6806   | -0.40209   | 1.42E-19 | -0.56306 | 2.05E-40 |
| 0.02882  | 0.138752 | 0.00266  | 0.113867 | 0.01381  | -0.4809941 | 2.06E-28 | -0.67449 | 2.89E-63 |
| 0.10104  | 0.35719  | 1.69E-15 | 0.281301 | 6.09E-10 | -0.1519603 | 0.00099  | -0.24082 | 1.38E-07 |
| 0.04815  | 0.410336 | 2.15E-20 | 0.393183 | 1.03E-18 | -0.0992766 | 0.03196  | -0.26848 | 3.75E-09 |
| 0.89883  | -0.15519 | 0.00076  | -0.18919 | 3.88E-05 | -0.4416721 | 1.02E-23 | -0.67575 | 1.40E-63 |
| 0.85916  | 0.265035 | 6.01E-09 | 0.09846  | 0.0334   | -0.5923033 | 1.47E-45 | -0.68739 | 1.39E-66 |
| 0.60145  | 0.32361  | 7.59E-13 | 0.085287 | 0.06555  | -0.2550598 | 2.27E-08 | -0.36338 | 5.03E-16 |
| 0.31702  | 0.1003   | 0.03022  | 0.000116 | 0.998    | -0.234089  | 3.11E-07 | -0.42952 | 2.18E-22 |
| 0.00064  | 0.359912 | 9.95E-16 | 0.021381 | 0.64491  | -0.5751535 | 1.77E-42 | -0.58971 | 4.42E-45 |
| 0.99804  | 0.271603 | 2.43E-09 | 0.05307  | 0.25238  | -0.3817491 | 1.19E-17 | -0.40866 | 3.18E-20 |
| 5.46E-09 | 0.423754 | 8.95E-22 | 0.327314 | 4.01E-13 | -0.2775809 | 1.04E-09 | -0.33339 | 1.38E-13 |
| 0.15584  | -0.01466 | 0.75203  | 0.061846 | 0.18214  | 0.30501349 | 1.64E-11 | 0.375757 | 4.15E-17 |
| 0.0013   | 0.330536 | 2.29E-13 | 0.220352 | 1.52E-06 | -0.0440168 | 0.34256  | -0.24193 | 1.20E-07 |
| 0.02981  | 0.189886 | 3.63E-05 | 0.142777 | 0.00198  | -0.1057121 | 0.02233  | -0.26633 | 5.04E-09 |
| 0.76913  | 0.286958 | 2.65E-10 | 0.082103 | 0.07631  | -0.0562947 | 0.22466  | -0.26741 | 4.34E-09 |
| 0.09251  | 0.327689 | 3.76E-13 | 0.226503 | 7.57E-07 | -0.0196904 | 0.67126  | -0.22063 | 1.48E-06 |
| 0.40139  | 0.193549 | 2.54E-05 | 0.179389 | 9.70E-05 | -0.5131856 | 9.82E-33 | -0.58563 | 2.44E-44 |
| 0.68451  | 0.289364 | 1.85E-10 | 0.252829 | 3.04E-08 | -0.3414957 | 3.22E-14 | -0.50445 | 1.62E-31 |
| 0.14478  | 0.124834 | 0.00691  | 0.027229 | 0.55723  | -0.5076351 | 5.89E-32 | -0.73658 | 5.35E-81 |
| 0.0124   | 0.131594 | 0.00439  | 0.15485  | 0.00079  | -0.3189341 | 1.68E-12 | -0.59968 | 6.12E-47 |
| 0.08587  | 0.485105 | 6.13E-29 | 0.393755 | 9.05E-19 | -0.0959264 | 0.03825  | -0.28793 | 2.29E-10 |
| 0.17058  | -0.05642 | 0.2236   | 0.111743 | 0.0157   | -0.2086207 | 5.46E-06 | -0.31723 | 2.23E-12 |

|          |          |          |          |          |            |          |          |          |
|----------|----------|----------|----------|----------|------------|----------|----------|----------|
| 0.36495  | 0.168041 | 0.00026  | 0.127993 | 0.00561  | -0.1576114 | 0.00063  | -0.33344 | 1.37E-13 |
| 0.00061  | 0.125943 | 0.00643  | -0.0197  | 0.67111  | -0.5950348 | 4.58E-46 | -0.66006 | 9.50E-60 |
| 0.91165  | 0.363203 | 5.22E-16 | 0.260449 | 1.12E-08 | -0.1523776 | 0.00096  | -0.28135 | 6.05E-10 |
| 0.04704  | 0.043634 | 0.34678  | 0.003053 | 0.94754  | -0.5578982 | 1.47E-39 | -0.77581 | 4.79E-95 |
| 0.13241  | 0.071914 | 0.12068  | -0.01792 | 0.69929  | -0.504484  | 1.61E-31 | -0.70781 | 3.36E-72 |
| 0.3671   | -0.0344  | 0.45836  | -0.20479 | 8.15E-06 | -0.5249413 | 1.97E-34 | -0.74324 | 3.38E-83 |
| 0.55706  | 0.240293 | 1.47E-07 | 0.208076 | 5.78E-06 | -0.2146213 | 2.87E-06 | -0.3422  | 2.83E-14 |
| 0.87572  | 0.173568 | 0.00016  | 0.173173 | 0.00017  | -0.3408753 | 3.60E-14 | -0.50673 | 7.87E-32 |
| 0.00359  | 0.323531 | 7.70E-13 | 0.279314 | 8.12E-10 | -0.3548011 | 2.67E-15 | -0.49797 | 1.24E-30 |
| 0.23889  | 0.314941 | 3.27E-12 | 0.283001 | 4.75E-10 | -0.3504942 | 6.05E-15 | -0.51918 | 1.36E-33 |
| 0.00029  | 0.28515  | 3.46E-10 | 0.366139 | 2.92E-16 | -0.3562836 | 2.01E-15 | -0.439   | 2.01E-23 |
| 0.09751  | 0.32578  | 5.23E-13 | 0.083661 | 0.07088  | -0.2226622 | 1.17E-06 | -0.22022 | 1.55E-06 |
| 0.00034  | 0.099174 | 0.03214  | 0.155037 | 0.00077  | -0.36927   | 1.56E-16 | -0.66452 | 8.18E-61 |
| 1.35E-05 | 0.414145 | 8.86E-21 | 0.322416 | 9.31E-13 | -0.3477056 | 1.02E-14 | -0.43596 | 4.36E-23 |
| 0.02391  | 0.090587 | 0.05042  | 0.005078 | 0.91285  | -0.3814057 | 1.28E-17 | -0.36078 | 8.39E-16 |
| 0.71173  | 0.094283 | 0.04169  | -0.02365 | 0.61025  | -0.4656666 | 1.64E-26 | -0.64082 | 2.36E-55 |
| 0.00154  | 0.325484 | 5.50E-13 | 0.313714 | 4.00E-12 | -0.3433627 | 2.28E-14 | -0.55715 | 1.96E-39 |
| 0.11614  | 0.114867 | 0.013    | -0.01922 | 0.67874  | -0.3623227 | 6.21E-16 | -0.64911 | 3.30E-57 |
| 0.03289  | 0.133174 | 0.00394  | 0.04492  | 0.33274  | -0.2465222 | 6.79E-08 | -0.41243 | 1.32E-20 |
| 0.00604  | 0.328909 | 3.04E-13 | 0.356678 | 1.86E-15 | -0.2665757 | 4.87E-09 | -0.47005 | 4.81E-27 |
| 0.70308  | 0.480873 | 2.14E-28 | 0.272335 | 2.19E-09 | -0.3643386 | 4.17E-16 | -0.50364 | 2.10E-31 |
| 0.67908  | 0.128346 | 0.00548  | -0.08028 | 0.08309  | -0.3188972 | 1.69E-12 | -0.43587 | 4.46E-23 |
| 0.4909   | 0.246786 | 6.57E-08 | 0.27775  | 1.02E-09 | -0.2673927 | 4.35E-09 | -0.37766 | 2.80E-17 |
| 0.26761  | 0.480496 | 2.38E-28 | 0.266332 | 5.04E-09 | -0.3514747 | 5.03E-15 | -0.45662 | 1.97E-25 |
| 0.05138  | 0.134113 | 0.00369  | 0.076235 | 0.09988  | -0.1744296 | 0.00015  | -0.4336  | 7.89E-23 |
| 0.00104  | 0.439909 | 1.60E-23 | 0.467085 | 1.11E-26 | -0.1227732 | 0.00791  | -0.38104 | 1.39E-17 |
| 0.00325  | -0.22417 | 9.89E-07 | -0.03361 | 0.46874  | 0.27096514 | 2.66E-09 | 0.350046 | 6.59E-15 |
| 0.00119  | 0.189149 | 3.89E-05 | 0.378707 | 2.25E-17 | -0.1845869 | 6.00E-05 | -0.38587 | 4.98E-18 |
| 0.05086  | 0.544383 | 2.19E-37 | 0.411995 | 1.47E-20 | -0.249687  | 4.55E-08 | -0.43162 | 1.30E-22 |
| 0.86799  | -0.12224 | 0.00818  | -0.03403 | 0.46319  | 0.28460517 | 3.75E-10 | 0.409553 | 2.58E-20 |
| 0.11193  | 0.242005 | 1.19E-07 | 0.142566 | 0.00201  | -0.2745815 | 1.60E-09 | -0.41328 | 1.08E-20 |
| 0.00049  | 0.021835 | 0.63789  | -0.19883 | 1.50E-05 | -0.2847193 | 3.69E-10 | -0.35623 | 2.03E-15 |
| 0.19727  | 0.221145 | 1.39E-06 | 0.297946 | 4.99E-11 | -0.3036781 | 2.03E-11 | -0.42592 | 5.29E-22 |
| 0.66953  | 0.450195 | 1.10E-24 | 0.580298 | 2.20E-43 | -0.0265536 | 0.56706  | -0.20966 | 4.89E-06 |
| 0.76739  | 0.196307 | 1.93E-05 | -0.04958 | 0.28497  | -0.3396916 | 4.46E-14 | -0.38155 | 1.24E-17 |
| 0.6469   | 0.243195 | 1.03E-07 | 0.176125 | 0.00013  | -0.1735927 | 0.00016  | -0.40583 | 6.07E-20 |
| 0.00346  | 0.289414 | 1.84E-10 | -0.03179 | 0.49316  | -0.5890344 | 5.88E-45 | -0.65834 | 2.41E-59 |
| 0.65218  | -0.04437 | 0.33865  | 0.020014 | 0.66618  | -0.3121824 | 5.15E-12 | -0.5746  | 2.21E-42 |
| 0.16432  | 0.037972 | 0.41297  | 0.065174 | 0.15968  | -0.0033987 | 0.94161  | -0.23937 | 1.65E-07 |
| 0.06894  | 0.155815 | 0.00073  | 0.011218 | 0.80895  | -0.0541887 | 0.2425   | -0.27755 | 1.05E-09 |
| 0.16485  | 0.377817 | 2.71E-17 | 0.408839 | 3.05E-20 | -0.0919436 | 0.04706  | -0.27311 | 1.97E-09 |
| 0.33592  | 0.263094 | 7.82E-09 | 0.032926 | 0.47782  | -0.5061412 | 9.49E-32 | -0.47795 | 5.01E-28 |
| 0.10983  | 0.181692 | 7.85E-05 | 0.024659 | 0.59505  | -0.3339273 | 1.26E-13 | -0.45461 | 3.39E-25 |
| 0.25412  | 0.263344 | 7.56E-09 | 0.393998 | 8.58E-19 | 0.00117181 | 0.97985  | -0.26415 | 6.78E-09 |
| 0.18387  | 0.040931 | 0.37749  | 0.285798 | 3.15E-10 | -0.1748192 | 0.00015  | -0.35584 | 2.19E-15 |

|          |          |          |          |          |            |          |          |          |
|----------|----------|----------|----------|----------|------------|----------|----------|----------|
| 0.00012  | 0.150984 | 0.00106  | 0.235013 | 2.79E-07 | -0.3008463 | 3.17E-11 | -0.35346 | 3.45E-15 |
| 0.0028   | 0.503781 | 2.01E-31 | 0.335623 | 9.29E-14 | -0.232074  | 3.95E-07 | -0.35141 | 5.09E-15 |
| 0.53943  | 0.088198 | 0.05683  | -0.09227 | 0.04627  | -0.584316  | 4.22E-44 | -0.76407 | 1.49E-90 |
| 0.31215  | 0.246442 | 6.86E-08 | 0.111063 | 0.01635  | -0.3423099 | 2.77E-14 | -0.53947 | 1.28E-36 |
| 0.099    | 0.438568 | 2.25E-23 | 0.305741 | 1.46E-11 | -0.2810292 | 6.34E-10 | -0.49654 | 1.92E-30 |
| 0.00013  | 0.307264 | 1.14E-11 | 0.186937 | 4.81E-05 | -0.4246174 | 7.25E-22 | -0.5158  | 4.18E-33 |
| 0.83494  | 0.144213 | 0.00178  | 0.062847 | 0.17515  | -0.4019283 | 1.47E-19 | -0.48287 | 1.19E-28 |
| 0.75209  | 0.232246 | 3.88E-07 | 0.209698 | 4.87E-06 | -0.0293641 | 0.52673  | -0.18877 | 4.04E-05 |
| 0.00263  | 0.221338 | 1.36E-06 | 0.324852 | 6.14E-13 | -0.1279457 | 0.00562  | -0.30701 | 1.19E-11 |
| 0.00817  | 0.465121 | 1.91E-26 | 0.188931 | 3.97E-05 | -0.4190474 | 2.78E-21 | -0.48838 | 2.30E-29 |
| 0.85481  | 0.119217 | 0.00992  | -0.05017 | 0.27927  | -0.4287503 | 2.64E-22 | -0.63921 | 5.31E-55 |
| 0.07593  | 0.04068  | 0.38042  | 0.119229 | 0.00991  | -0.296213  | 6.52E-11 | -0.43409 | 6.98E-23 |
| 0.00018  | 0.12141  | 0.00863  | 0.070466 | 0.12836  | -0.370948  | 1.11E-16 | -0.50225 | 3.25E-31 |
| 0.50925  | 0.20843  | 5.57E-06 | -0.00506 | 0.91321  | -0.3783761 | 2.41E-17 | -0.43986 | 1.62E-23 |
| 0.00481  | 0.325793 | 5.22E-13 | 0.300105 | 3.56E-11 | -0.4197139 | 2.37E-21 | -0.52121 | 6.94E-34 |
| 0.11544  | 0.221104 | 1.40E-06 | 0.141728 | 0.00214  | -0.3886712 | 2.73E-18 | -0.61831 | 1.35E-50 |
| 0.51121  | 0.237295 | 2.12E-07 | 0.403041 | 1.15E-19 | -0.1696814 | 0.00023  | -0.45394 | 4.05E-25 |
| 0.78873  | 0.258098 | 1.52E-08 | 0.293982 | 9.19E-11 | -0.2723636 | 2.18E-09 | -0.47691 | 6.76E-28 |
| 0.00324  | 0.392947 | 1.08E-18 | 0.25972  | 1.23E-08 | -0.0877467 | 0.05812  | -0.25629 | 1.93E-08 |
| 0.53183  | 0.218642 | 1.84E-06 | 0.336247 | 8.31E-14 | -0.2440249 | 9.28E-08 | -0.45735 | 1.62E-25 |
| 0.83838  | 0.288004 | 2.27E-10 | 0.24931  | 4.77E-08 | -0.405925  | 5.95E-20 | -0.46722 | 1.06E-26 |
| 0.54997  | 0.203573 | 9.25E-06 | 0.049393 | 0.2868   | -0.4199784 | 2.22E-21 | -0.60892 | 1.01E-48 |
| 0.23831  | 0.290764 | 1.50E-10 | 0.397323 | 4.12E-19 | -0.1693144 | 0.00024  | -0.26755 | 4.26E-09 |
| 0.92966  | 0.35788  | 1.48E-15 | 0.169086 | 0.00024  | -0.3244847 | 6.54E-13 | -0.3291  | 2.94E-13 |
| 0.68236  | 0.270294 | 2.92E-09 | 0.081758 | 0.07756  | -0.2621925 | 8.83E-09 | -0.42122 | 1.65E-21 |
| 0.00118  | 0.113013 | 0.01454  | -0.06642 | 0.15186  | -0.1774604 | 0.00012  | -0.28454 | 3.79E-10 |
| 0.05614  | 0.017328 | 0.70879  | -0.09987 | 0.03094  | -0.2272005 | 6.99E-07 | -0.43162 | 1.30E-22 |
| 0.41856  | 0.255753 | 2.08E-08 | 0.304261 | 1.85E-11 | -0.0415298 | 0.37055  | -0.30341 | 2.12E-11 |
| 6.15E-05 | 0.225277 | 8.72E-07 | -0.06337 | 0.17157  | -0.2256434 | 8.36E-07 | -0.36788 | 2.06E-16 |
| 0.04554  | 0.040066 | 0.38766  | -0.02606 | 0.57424  | -0.2403367 | 1.46E-07 | -0.44219 | 8.89E-24 |
| 0.98742  | -0.16677 | 0.00029  | -0.18836 | 4.20E-05 | 0.25608703 | 1.99E-08 | 0.400201 | 2.17E-19 |
| 0.30396  | 0.233231 | 3.45E-07 | 0.02807  | 0.54512  | -0.4413328 | 1.11E-23 | -0.47238 | 2.48E-27 |
| 0.24237  | 0.187918 | 4.38E-05 | 0.509632 | 3.10E-32 | 0.08068844 | 0.08153  | -0.19665 | 1.87E-05 |
| 0.68286  | 0.042305 | 0.36167  | -0.14464 | 0.00172  | -0.0969853 | 0.03615  | -0.25763 | 1.62E-08 |
| 0.78805  | 0.110169 | 0.01724  | 0.087592 | 0.05856  | -0.0189004 | 0.68373  | -0.3458  | 1.46E-14 |
| 0.03089  | 0.172679 | 0.00018  | 0.173141 | 0.00017  | -0.4368071 | 3.52E-23 | -0.65654 | 6.38E-59 |
| 0.26241  | 0.226997 | 7.15E-07 | 0.396729 | 4.70E-19 | -0.0199363 | 0.6674   | -0.25458 | 2.42E-08 |
| 0.07175  | 0.14432  | 0.00177  | 0.05253  | 0.25725  | -0.4736209 | 1.74E-27 | -0.74172 | 1.09E-82 |
| 0.0573   | 0.135482 | 0.00335  | 0.183316 | 6.76E-05 | -0.3751219 | 4.73E-17 | -0.40008 | 2.23E-19 |
| 0.00147  | 0.275381 | 1.43E-09 | 0.14397  | 0.00181  | -0.2847943 | 3.65E-10 | -0.29939 | 3.98E-11 |
| 0.55268  | 0.431734 | 1.26E-22 | 0.558155 | 1.34E-39 | 0.00394453 | 0.93225  | -0.20635 | 6.93E-06 |
| 0.05551  | 0.287524 | 2.44E-10 | 0.179073 | 9.99E-05 | -0.3381451 | 5.91E-14 | -0.52074 | 8.13E-34 |
| 0.00142  | 0.2712   | 2.57E-09 | 0.19263  | 2.78E-05 | -0.2115169 | 4.01E-06 | -0.32291 | 8.55E-13 |
| 0.8244   | 0.092695 | 0.04527  | 0.118602 | 0.01031  | -0.4117913 | 1.54E-20 | -0.59477 | 5.12E-46 |
| 0.20986  | 0.2132   | 3.34E-06 | 0.386291 | 4.55E-18 | 0.08103034 | 0.08025  | -0.20407 | 8.79E-06 |



|          |          |          |          |          |            |          |          |          |
|----------|----------|----------|----------|----------|------------|----------|----------|----------|
| 0.75505  | 0.357921 | 1.46E-15 | 0.268665 | 3.65E-09 | -0.1074169 | 0.02024  | -0.30868 | 9.11E-12 |
| 9.79E-06 | 0.458208 | 1.28E-25 | 0.398965 | 2.86E-19 | -0.2521194 | 3.33E-08 | -0.4334  | 8.31E-23 |
| 0.26129  | 0.068689 | 0.1383   | 0.028812 | 0.53454  | -0.1120174 | 0.01544  | -0.11926 | 0.00989  |
| 0.01547  | 0.202512 | 1.03E-05 | 0.352984 | 3.78E-15 | -0.2990147 | 4.23E-11 | -0.43929 | 1.87E-23 |
| 0.0121   | 0.072293 | 0.11873  | 0.008323 | 0.85764  | -0.4216147 | 1.50E-21 | -0.61553 | 4.92E-50 |
| 0.03054  | -0.03442 | 0.45812  | -0.04295 | 0.35439  | -0.4434344 | 6.45E-24 | -0.47425 | 1.46E-27 |
| 0.53031  | -0.10225 | 0.02714  | -0.23619 | 2.42E-07 | -0.5576195 | 1.64E-39 | -0.74036 | 3.09E-82 |
| 0.49909  | 0.235714 | 2.56E-07 | 0.031315 | 0.49963  | -0.5593613 | 8.46E-40 | -0.60751 | 1.90E-48 |
| 0.10324  | 0.299217 | 4.09E-11 | -0.03564 | 0.44232  | -0.6272875 | 1.90E-52 | -0.647   | 9.87E-57 |
| 0.10369  | -0.17806 | 0.00011  | -0.08408 | 0.06948  | 0.33454548 | 1.13E-13 | 0.376032 | 3.92E-17 |
| 0.04115  | 0.113885 | 0.0138   | 0.051704 | 0.26481  | -0.185006  | 5.77E-05 | -0.36336 | 5.05E-16 |
| 0.46395  | 0.218589 | 1.85E-06 | 0.108578 | 0.01892  | -0.4361357 | 4.17E-23 | -0.49806 | 1.20E-30 |
| 0.11144  | 0.353463 | 3.45E-15 | 0.145811 | 0.00158  | -0.3198724 | 1.43E-12 | -0.39483 | 7.15E-19 |
| 0.3705   | 0.254643 | 2.40E-08 | 0.347246 | 1.11E-14 | -0.2333421 | 3.40E-07 | -0.40516 | 7.08E-20 |
| 0.05289  | 0.303398 | 2.12E-11 | 0.305376 | 1.55E-11 | -0.3586285 | 1.28E-15 | -0.5567  | 2.32E-39 |
| 0.94611  | 0.475568 | 9.96E-28 | 0.15413  | 0.00083  | -0.3797666 | 1.81E-17 | -0.51354 | 8.74E-33 |
| 7.00E-05 | 0.292225 | 1.20E-10 | 0.31934  | 1.57E-12 | -0.2813533 | 6.04E-10 | -0.39746 | 4.00E-19 |
| 0.90226  | 0.130167 | 0.00484  | 0.024147 | 0.60272  | -0.3796793 | 1.84E-17 | -0.54069 | 8.23E-37 |
| 0.25921  | 0.46729  | 1.05E-26 | 0.104995 | 0.02326  | -0.4651363 | 1.91E-26 | -0.45285 | 5.43E-25 |
| 0.62042  | 0.06796  | 0.14254  | 0.083786 | 0.07046  | -0.3165935 | 2.48E-12 | -0.61425 | 8.84E-50 |
| 5.68E-05 | 0.055441 | 0.23178  | 0.094868 | 0.04044  | -0.1923986 | 2.84E-05 | -0.26667 | 4.81E-09 |
| 5.73E-05 | 0.165075 | 0.00034  | 0.150149 | 0.00114  | -0.3212312 | 1.14E-12 | -0.56408 | 1.39E-40 |
| 0.00028  | 0.290757 | 1.50E-10 | 0.194096 | 2.41E-05 | -0.343122  | 2.39E-14 | -0.412   | 1.47E-20 |
| 0.02089  | 0.240637 | 1.41E-07 | 0.086261 | 0.06252  | -0.2236793 | 1.05E-06 | -0.44513 | 4.15E-24 |
| 0.58249  | 0.119918 | 0.00949  | 0.058854 | 0.20425  | -0.3535548 | 3.39E-15 | -0.42295 | 1.09E-21 |
| 0.68238  | 0.01567  | 0.73555  | 0.256395 | 1.91E-08 | -0.1879437 | 4.37E-05 | -0.40146 | 1.64E-19 |
| 0.71697  | 0.11054  | 0.01686  | 0.061438 | 0.18504  | -0.488394  | 2.29E-29 | -0.70882 | 1.73E-72 |
| 0.79473  | 0.200408 | 1.28E-05 | 0.538652 | 1.70E-36 | 0.11224968 | 0.01523  | -0.04876 | 0.29306  |
| 0.00162  | 0.407586 | 4.07E-20 | 0.561353 | 3.96E-40 | 0.01566061 | 0.73571  | -0.18667 | 4.93E-05 |
| 0.78917  | 0.029243 | 0.52843  | -0.17617 | 0.00013  | -0.3949627 | 6.95E-19 | -0.56869 | 2.30E-41 |
| 0.36634  | -0.0678  | 0.14349  | -0.07646 | 0.09886  | -0.4810587 | 2.02E-28 | -0.75712 | 5.09E-88 |
| 0.00464  | 0.112061 | 0.0154   | 0.184672 | 5.95E-05 | -0.4246178 | 7.25E-22 | -0.63273 | 1.34E-53 |
| 0.35165  | 0.319295 | 1.58E-12 | 0.22751  | 6.74E-07 | -0.2483746 | 5.37E-08 | -0.42856 | 2.77E-22 |
| 0.60757  | 0.285571 | 3.26E-10 | 0.49206  | 7.58E-30 | 0.15736333 | 0.00064  | -0.05161 | 0.26566  |
| 0.03363  | 0.252975 | 2.98E-08 | 0.190635 | 3.37E-05 | -0.0666444 | 0.15045  | -0.32069 | 1.25E-12 |
| 0.00065  | 0.45092  | 9.07E-25 | 0.214552 | 2.89E-06 | -0.2393182 | 1.66E-07 | -0.38076 | 1.47E-17 |
| 0.93177  | 0.396051 | 5.46E-19 | 0.304155 | 1.88E-11 | -0.2964393 | 6.30E-11 | -0.43519 | 5.30E-23 |
| 0.45416  | 0.098173 | 0.03392  | -0.02814 | 0.5441   | -0.2351128 | 2.76E-07 | -0.38747 | 3.54E-18 |
| 0.00152  | 0.256474 | 1.89E-08 | -0.04346 | 0.34874  | -0.4204836 | 1.97E-21 | -0.51432 | 6.77E-33 |
| 0.05149  | 0.09871  | 0.03295  | 0.156403 | 0.00069  | -0.2680575 | 3.97E-09 | -0.42722 | 3.84E-22 |
| 0.08541  | 0.238972 | 1.73E-07 | 0.05537  | 0.23237  | -0.1622539 | 0.00043  | -0.28394 | 4.14E-10 |
| 0.27504  | 0.321129 | 1.16E-12 | 0.227499 | 6.75E-07 | -0.1922134 | 2.89E-05 | -0.24602 | 7.24E-08 |
| 0.10474  | 0.131906 | 0.0043   | 0.030719 | 0.50784  | -0.139811  | 0.00246  | -0.41842 | 3.23E-21 |
| 0.02841  | 0.198941 | 1.48E-05 | 0.143172 | 0.00192  | -0.1719423 | 0.00019  | -0.2769  | 1.15E-09 |
| 0.00247  | 0.453283 | 4.83E-25 | 0.32294  | 8.51E-13 | -0.1023044 | 0.02706  | -0.30319 | 2.19E-11 |

|          |          |          |          |          |            |          |          |          |
|----------|----------|----------|----------|----------|------------|----------|----------|----------|
| 0.00556  | 0.18025  | 8.97E-05 | 0.494762 | 3.32E-30 | -0.0913828 | 0.04842  | -0.38457 | 6.57E-18 |
| 0.0182   | 0.159242 | 0.00055  | 0.228986 | 5.68E-07 | 0.01521646 | 0.74294  | -0.23817 | 1.91E-07 |
| 0.00284  | 0.150659 | 0.00109  | 0.145991 | 0.00156  | -0.2350576 | 2.77E-07 | -0.38646 | 4.40E-18 |
| 0.39608  | 0.062427 | 0.17806  | -0.03501 | 0.45035  | -0.4098127 | 2.43E-20 | -0.62352 | 1.15E-51 |
| 0.53649  | 0.083102 | 0.07279  | 0.056679 | 0.2215   | -0.3636994 | 4.73E-16 | -0.37754 | 2.87E-17 |
| 0.43986  | 0.408561 | 3.25E-20 | 0.307642 | 1.08E-11 | -0.2723247 | 2.20E-09 | -0.37398 | 5.98E-17 |
| 0.06126  | 0.312735 | 4.70E-12 | 0.220929 | 1.43E-06 | -0.4035755 | 1.01E-19 | -0.3532  | 3.63E-15 |
| 8.41E-06 | 0.327594 | 3.82E-13 | 0.187016 | 4.77E-05 | -0.1918134 | 3.01E-05 | -0.34236 | 2.74E-14 |
| 0.1338   | 0.189102 | 3.91E-05 | 0.042029 | 0.36482  | -0.4960993 | 2.20E-30 | -0.59058 | 3.06E-45 |
| 0.25389  | 0.203669 | 9.16E-06 | 0.40443  | 8.36E-20 | 0.05096317 | 0.27173  | -0.2074  | 6.21E-06 |
| 0.42819  | 0.319344 | 1.57E-12 | 0.071511 | 0.12278  | -0.4792247 | 3.46E-28 | -0.39245 | 1.20E-18 |
| 0.48743  | -0.03969 | 0.3921   | 0.004445 | 0.92368  | -0.1201705 | 0.00934  | -0.36549 | 3.32E-16 |
| 0.0438   | 0.300323 | 3.44E-11 | 0.003983 | 0.9316   | -0.5362019 | 4.05E-36 | -0.62332 | 1.27E-51 |
| 0.00459  | 0.231035 | 4.47E-07 | 0.123524 | 0.00753  | -0.4751788 | 1.11E-27 | -0.68462 | 7.45E-66 |
| 0.71648  | 0.171168 | 0.0002   | 0.09688  | 0.03636  | -0.483281  | 1.05E-28 | -0.64145 | 1.71E-55 |
| 0.48779  | 0.064374 | 0.16488  | 0.30422  | 1.86E-11 | -0.073497  | 0.1127   | -0.29168 | 1.30E-10 |
| 0.71725  | 0.305862 | 1.43E-11 | 0.127502 | 0.00579  | -0.2727302 | 2.07E-09 | -0.34398 | 2.04E-14 |
| 0.05048  | 0.287454 | 2.46E-10 | 0.086367 | 0.0622   | -0.0584245 | 0.20758  | -0.26228 | 8.73E-09 |
| 0.40546  | 0.301945 | 2.67E-11 | 0.534794 | 6.63E-36 | 0.2180994  | 1.96E-06 | -0.00351 | 0.93973  |
| 0.21171  | 0.303899 | 1.96E-11 | 0.148554 | 0.00128  | -0.4091739 | 2.82E-20 | -0.48268 | 1.26E-28 |
| 0.62781  | 0.118814 | 0.01018  | 0.148872 | 0.00125  | -0.1442022 | 0.00178  | -0.39088 | 1.69E-18 |
| 0.00046  | 0.391338 | 1.53E-18 | 0.581622 | 1.28E-43 | -0.0098742 | 0.83147  | -0.24142 | 1.28E-07 |
| 0.00108  | 0.402573 | 1.27E-19 | 0.415437 | 6.54E-21 | -0.1212617 | 0.00871  | -0.3037  | 2.02E-11 |
| 0.14553  | 0.27194  | 2.32E-09 | 0.090129 | 0.0516   | -0.4609894 | 5.99E-26 | -0.50615 | 9.46E-32 |
| 0.141    | 0.266501 | 4.92E-09 | 0.301606 | 2.82E-11 | -0.0809214 | 0.08065  | -0.28238 | 5.20E-10 |
| 0.27788  | -0.29946 | 3.94E-11 | -0.14482 | 0.0017   | 0.37029286 | 1.27E-16 | 0.60369  | 1.05E-47 |
| 0.21089  | 0.343721 | 2.14E-14 | 0.060851 | 0.18929  | -0.4718252 | 2.91E-27 | -0.40546 | 6.61E-20 |
| 0.08908  | -0.00412 | 0.92916  | 0.198804 | 1.50E-05 | -0.1019165 | 0.02765  | -0.28752 | 2.44E-10 |
| 0.67009  | 0.508909 | 3.92E-32 | 0.289629 | 1.78E-10 | -0.1764235 | 0.00013  | -0.35587 | 2.17E-15 |
| 0.09717  | 0.273606 | 1.83E-09 | 0.036019 | 0.43742  | -0.2421678 | 1.17E-07 | -0.44019 | 1.49E-23 |
| 0.05717  | 0.059896 | 0.19634  | 0.096903 | 0.03631  | 0.17641861 | 0.00013  | -0.02976 | 0.52112  |
| 0.04627  | 0.073938 | 0.11055  | 0.034218 | 0.4607   | -0.5881575 | 8.50E-45 | -0.73468 | 2.23E-80 |
| 0.20457  | -0.05864 | 0.20589  | -0.21088 | 4.29E-06 | -0.6745989 | 2.72E-63 | -0.7781  | 5.93E-96 |
| 0.22066  | -0.03647 | 0.43176  | -0.26208 | 8.97E-09 | -0.0632103 | 0.17267  | 0.105668 | 0.02238  |
| 0.83568  | 0.019229 | 0.67853  | -0.18267 | 7.17E-05 | -0.0383742 | 0.40804  | 0.206325 | 6.95E-06 |
| 0.55712  | 0.041354 | 0.37258  | -0.01367 | 0.76835  | 0.10758876 | 0.02004  | 0.19036  | 3.46E-05 |
| 0.31259  | 0.005382 | 0.90765  | -0.12653 | 0.00618  | 0.06942933 | 0.13409  | 0.248347 | 5.39E-08 |
| 0.6793   | -0.23723 | 2.14E-07 | -0.27903 | 8.46E-10 | -0.0244819 | 0.59769  | 0.126963 | 0.00601  |
| 0.92109  | 0.041131 | 0.37516  | -0.21084 | 4.31E-06 | -0.0286703 | 0.53655  | 0.210233 | 4.60E-06 |
| 0.54455  | 0.026544 | 0.5672   | -0.23977 | 1.57E-07 | -0.0704466 | 0.12847  | 0.204038 | 8.82E-06 |
| 0.15385  | -0.02027 | 0.66214  | -0.1298  | 0.00496  | -0.1031003 | 0.02588  | -0.00377 | 0.93531  |
| 0.83355  | -0.02669 | 0.56505  | -0.23171 | 4.13E-07 | -0.126412  | 0.00623  | -0.00098 | 0.9832   |
| 0.42509  | -0.01123 | 0.80874  | -0.30634 | 1.33E-11 | -0.1777949 | 0.00011  | -0.07845 | 0.09037  |
| 0.81264  | 0.051023 | 0.27117  | -0.19014 | 3.54E-05 | -0.0602572 | 0.19365  | 0.183468 | 6.66E-05 |
| 0.31246  | 0.027094 | 0.55919  | -0.1836  | 6.58E-05 | -0.0285776 | 0.53787  | 0.233954 | 3.16E-07 |

|          |          |          |          |          |            |          |          |          |
|----------|----------|----------|----------|----------|------------|----------|----------|----------|
| 0.06674  | -0.08977 | 0.05255  | -0.41805 | 3.52E-21 | -0.1033807 | 0.02548  | 0.072873 | 0.1158   |
| 0.8957   | 0.094316 | 0.04162  | -0.02654 | 0.56727  | 0.09670252 | 0.0367   | 0.245893 | 7.35E-08 |
| 0.84951  | 0.001083 | 0.98138  | -0.09142 | 0.04834  | -0.0156435 | 0.73599  | 0.111881 | 0.01557  |
| 0.27291  | 0.060296 | 0.19336  | -0.26045 | 1.12E-08 | -0.0070975 | 0.87842  | 0.244385 | 8.88E-08 |
| 0.74652  | 0.19519  | 2.16E-05 | -0.01764 | 0.70386  | 0.15245075 | 0.00095  | 0.323367 | 7.91E-13 |
| 0.38203  | 0.033196 | 0.47421  | -0.23529 | 2.70E-07 | -0.0406547 | 0.38072  | 0.157269 | 0.00065  |
| 0.07043  | 0.039042 | 0.39991  | -0.14528 | 0.00164  | 0.01282813 | 0.78217  | 0.232424 | 3.79E-07 |
| 0.7085   | 0.012469 | 0.78813  | -0.2479  | 5.71E-08 | -0.0578895 | 0.21178  | 0.202392 | 1.04E-05 |
| 0.748    | 0.040742 | 0.3797   | -0.22024 | 1.54E-06 | -0.0346429 | 0.45515  | 0.239866 | 1.55E-07 |
| 0.71486  | 0.004261 | 0.92683  | -0.20832 | 5.63E-06 | -0.0481833 | 0.29878  | 0.149289 | 0.00121  |
| 0.60833  | 0.077006 | 0.09649  | -0.13309 | 0.00396  | -0.0508863 | 0.27246  | 0.101873 | 0.02771  |
| 0.03887  | -0.04665 | 0.31446  | -0.22069 | 1.47E-06 | 0.000668   | 0.98851  | 0.128387 | 0.00546  |
| 0.6626   | -0.01541 | 0.73983  | -0.12773 | 0.00571  | 0.14445473 | 0.00175  | 0.325849 | 5.17E-13 |
| 0.93475  | -0.02852 | 0.53862  | -0.27317 | 1.95E-09 | -0.0634534 | 0.17102  | 0.191963 | 2.96E-05 |
| 0.93284  | 0.064957 | 0.16108  | -0.18719 | 4.69E-05 | -0.0217716 | 0.63887  | 0.23199  | 3.99E-07 |
| 0.57909  | 0.026807 | 0.56337  | -0.22974 | 5.20E-07 | -0.0511581 | 0.2699   | 0.201446 | 1.15E-05 |
| 0.04942  | 0.02077  | 0.65438  | -0.03604 | 0.43712  | 0.04345565 | 0.34875  | 0.130312 | 0.00479  |
| 0.92336  | 0.055118 | 0.23451  | -0.18488 | 5.84E-05 | -0.0493116 | 0.28759  | 0.189201 | 3.87E-05 |
| 0.79038  | 0.032452 | 0.48418  | -0.22124 | 1.38E-06 | -0.0289625 | 0.53241  | 0.244904 | 8.32E-08 |
| 0.29576  | 0.075241 | 0.10439  | 0.000384 | 0.99339  | 0.17952472 | 9.58E-05 | 0.310363 | 6.93E-12 |
| 0.81927  | 0.127415 | 0.00583  | -0.15436 | 0.00082  | -0.0040402 | 0.93061  | 0.219154 | 1.74E-06 |
| 0.58418  | 0.036886 | 0.42647  | -0.14682 | 0.00146  | 0.0715758  | 0.12244  | 0.301463 | 2.88E-11 |
| 0.42878  | -0.00094 | 0.98375  | -0.26886 | 3.56E-09 | -0.0505038 | 0.27608  | 0.102278 | 0.0271   |
| 0.97838  | -0.045   | 0.33185  | -0.22009 | 1.57E-06 | -0.0229244 | 0.62121  | 0.176062 | 0.00013  |
| 0.69756  | 0.162863 | 0.00041  | 0.004515 | 0.92248  | 0.27755716 | 1.05E-09 | 0.497282 | 1.53E-30 |
| 0.64338  | 0.034827 | 0.45275  | -0.22761 | 6.67E-07 | -0.0110535 | 0.8117   | 0.274868 | 1.53E-09 |
| 0.21784  | 0.020623 | 0.65667  | -0.22065 | 1.47E-06 | -0.0452027 | 0.3297   | 0.190877 | 3.29E-05 |
| 0.11123  | 0.027746 | 0.54977  | -0.12069 | 0.00903  | 0.08408508 | 0.06946  | 0.215548 | 2.59E-06 |
| 0.91177  | 0.132937 | 0.004    | -0.18291 | 7.02E-05 | 0.0085654  | 0.85354  | 0.281431 | 5.98E-10 |
| 0.39166  | 0.005531 | 0.90512  | -0.28511 | 3.49E-10 | -0.0946683 | 0.04086  | 0.108351 | 0.01917  |
| 0.54044  | 0.015268 | 0.74209  | -0.20494 | 8.03E-06 | 0.0683003  | 0.14055  | 0.259701 | 1.23E-08 |
| 0.45336  | 0.030686 | 0.50828  | -0.18841 | 4.18E-05 | 0.03065743 | 0.50868  | 0.271626 | 2.42E-09 |
| 0.72962  | 0.023844 | 0.60728  | -0.13599 | 0.00323  | 0.03126873 | 0.50026  | 0.178259 | 0.00011  |
| 0.16808  | 0.145642 | 0.0016   | -0.12372 | 0.00743  | 0.08270599 | 0.07417  | 0.326754 | 4.42E-13 |
| 0.9306   | 0.036332 | 0.43346  | -0.15243 | 0.00095  | 0.05100025 | 0.27138  | 0.319464 | 1.53E-12 |
| 1.28E-08 | 0.080033 | 0.08405  | -0.02157 | 0.64196  | 0.06468631 | 0.16284  | 0.117985 | 0.01072  |
| 0.9798   | 0.059088 | 0.20245  | -0.12388 | 0.00736  | -0.0352197 | 0.44767  | 0.11675  | 0.01157  |
| 0.04253  | 0.077676 | 0.09362  | -0.13502 | 0.00346  | -0.0875875 | 0.05858  | -0.03307 | 0.47588  |
| 0.30266  | 0.44827  | 1.83E-24 | 0.044932 | 0.3326   | -0.1578599 | 0.00062  | -0.04245 | 0.36003  |
| 0.75317  | 0.011074 | 0.81135  | -0.25999 | 1.19E-08 | -0.0502881 | 0.27814  | 0.176838 | 0.00012  |
| 0.67969  | 0.107371 | 0.0203   | -0.05604 | 0.22673  | -0.0219806 | 0.63565  | 0.162481 | 0.00042  |
| 0.47046  | -0.01383 | 0.76566  | -0.28116 | 6.22E-10 | -0.0404748 | 0.38284  | 0.18984  | 3.64E-05 |
| 4.73E-07 | -0.0072  | 0.87674  | -0.2672  | 4.47E-09 | -0.153165  | 0.0009   | 0.068174 | 0.14129  |
| 0.72533  | 0.030444 | 0.51164  | -0.32543 | 5.55E-13 | -0.1362726 | 0.00317  | 0.02494  | 0.59086  |
| 0.52333  | -0.19334 | 2.59E-05 | -0.27768 | 1.03E-09 | -0.0216251 | 0.64113  | 0.18791  | 4.38E-05 |

|         |          |          |          |          |            |          |          |          |
|---------|----------|----------|----------|----------|------------|----------|----------|----------|
| 0.02663 | -0.13137 | 0.00446  | -0.21489 | 2.78E-06 | -0.0768775 | 0.09705  | 0.11057  | 0.01683  |
| 0.08942 | 0.016557 | 0.7212   | -0.02745 | 0.55405  | 0.15575635 | 0.00073  | 0.206094 | 7.12E-06 |
| 0.00478 | 0.065245 | 0.15922  | -0.12528 | 0.00671  | 0.14991099 | 0.00116  | 0.234906 | 2.82E-07 |
| 0.83794 | -0.07998 | 0.08425  | -0.16672 | 0.0003   | 0.00990025 | 0.83103  | 0.220426 | 1.51E-06 |
| 0.072   | 0.02088  | 0.65267  | -0.08951 | 0.05324  | 0.08566868 | 0.06435  | 0.231172 | 4.40E-07 |
| 0.74692 | 0.084428 | 0.06832  | -0.2561  | 1.98E-08 | -0.0848216 | 0.06704  | 0.155352 | 0.00076  |
| 0.82551 | 0.003542 | 0.93915  | -0.2919  | 1.26E-10 | -0.0704053 | 0.12869  | 0.147312 | 0.00141  |
| 0.67536 | 0.023223 | 0.61667  | -0.15464 | 0.0008   | 0.01458776 | 0.75321  | 0.245442 | 7.78E-08 |
| 0.34278 | 0.030877 | 0.50565  | -0.27429 | 1.67E-09 | -0.0957822 | 0.03854  | 0.138986 | 0.00261  |
| 0.24512 | 0.035096 | 0.44927  | -0.23408 | 3.12E-07 | -0.0699406 | 0.13124  | 0.177733 | 0.00011  |
| 0.19191 | 0.061727 | 0.18298  | -0.13902 | 0.00261  | 0.1003284  | 0.03018  | 0.340253 | 4.03E-14 |
| 0.69176 | -0.01935 | 0.67666  | -0.24207 | 1.18E-07 | -0.0410612 | 0.37598  | 0.182588 | 7.23E-05 |
| 0.32001 | 0.053577 | 0.24787  | -0.20134 | 1.16E-05 | -0.027562  | 0.55242  | 0.197784 | 1.67E-05 |
| 0.62204 | -0.00801 | 0.86286  | -0.15783 | 0.00062  | -0.0550938 | 0.23472  | 0.088878 | 0.05494  |
| 0.51586 | 0.0392   | 0.39802  | -0.10617 | 0.02175  | -0.039537  | 0.39397  | 0.135118 | 0.00344  |
| 0.93331 | 0.021085 | 0.64949  | -0.23804 | 1.94E-07 | -0.0205209 | 0.65826  | 0.231157 | 4.41E-07 |
| 0.92487 | 0.027896 | 0.54761  | -0.09856 | 0.03323  | 0.02638875 | 0.56947  | 0.222377 | 1.21E-06 |
| 0.24196 | 0.015298 | 0.74161  | -0.24303 | 1.05E-07 | -0.0263583 | 0.56991  | 0.22685  | 7.28E-07 |
| 0.03272 | -0.1603  | 0.00051  | -0.20223 | 1.06E-05 | 0.00301486 | 0.94819  | 0.13209  | 0.00424  |
| 0.88333 | 0.047322 | 0.3075   | -0.21882 | 1.80E-06 | -0.0489123 | 0.29152  | 0.239407 | 1.64E-07 |
| 0.77507 | -0.15067 | 0.00109  | -0.18756 | 4.53E-05 | 0.02475416 | 0.59363  | 0.144182 | 0.00179  |
| 0.64657 | -0.07299 | 0.11521  | -0.31013 | 7.19E-12 | -0.0462773 | 0.31832  | 0.258206 | 1.50E-08 |
| 0.42977 | 0.155803 | 0.00073  | -0.20504 | 7.94E-06 | -0.2447087 | 8.52E-08 | -0.01922 | 0.67868  |
| 0.00398 | -0.15315 | 0.0009   | -0.26339 | 7.51E-09 | -0.2833091 | 4.54E-10 | -0.16921 | 0.00024  |
| 0.56696 | 0.04463  | 0.33587  | -0.1387  | 0.00267  | -0.0210312 | 0.65032  | 0.202597 | 1.02E-05 |
| 0.12012 | -0.11224 | 0.01524  | -0.27953 | 7.87E-10 | -0.0997827 | 0.03109  | 0.036727 | 0.42847  |
| 0.5172  | 0.084056 | 0.06955  | -0.20535 | 7.70E-06 | 0.06654086 | 0.15109  | 0.360494 | 8.88E-16 |
| 0.85518 | 0.139941 | 0.00244  | -0.11371 | 0.01395  | 0.11548118 | 0.01252  | 0.392994 | 1.07E-18 |
| 0.99303 | 0.083133 | 0.07268  | -0.18399 | 6.35E-05 | 0.04163211 | 0.36937  | 0.326485 | 4.63E-13 |
| 0.83834 | -0.09819 | 0.0339   | -0.24183 | 1.22E-07 | -0.0961598 | 0.03778  | 0.026336 | 0.57024  |
| 0.42042 | 0.127259 | 0.00589  | -0.13417 | 0.00368  | 0.19730184 | 1.75E-05 | 0.39562  | 6.01E-19 |
| 0.93776 | 0.172038 | 0.00019  | -0.13591 | 0.00325  | -0.0055506 | 0.90478  | 0.220565 | 1.49E-06 |
| 0.19151 | 0.031661 | 0.4949   | -0.11248 | 0.01502  | -0.033938  | 0.46438  | 0.102795 | 0.02633  |
| 0.64151 | 0.071187 | 0.12449  | -0.32012 | 1.37E-12 | -0.1895454 | 3.75E-05 | 0.086578 | 0.06156  |
| 0.63843 | 0.230573 | 4.72E-07 | -0.01272 | 0.78395  | 0.01924329 | 0.67831  | 0.314346 | 3.61E-12 |
| 0.5338  | 0.046647 | 0.31447  | -0.08908 | 0.05438  | 0.01380574 | 0.76604  | 0.154383 | 0.00082  |
| 0.8842  | -0.0493  | 0.28767  | -0.21597 | 2.47E-06 | -0.0511992 | 0.26951  | 0.17628  | 0.00013  |
| 0.75521 | 0.199887 | 1.35E-05 | 0.043205 | 0.35155  | 0.0095674  | 0.83663  | 0.059777 | 0.19723  |
| 0.0414  | 0.055402 | 0.2321   | -0.11368 | 0.01397  | 0.09692611 | 0.03627  | 0.136337 | 0.00316  |
| 0.22197 | 0.160739 | 0.00049  | 0.419621 | 2.42E-21 | 0.24803522 | 5.61E-08 | -0.05643 | 0.22351  |
| 0.7208  | 0.011096 | 0.81098  | -0.19704 | 1.80E-05 | 0.07814024 | 0.09167  | 0.363931 | 4.52E-16 |
| 0.98795 | 0.106301 | 0.02159  | -0.15792 | 0.00061  | -0.0112039 | 0.80919  | 0.236928 | 2.22E-07 |
| 0.45645 | -0.14749 | 0.00139  | -0.24075 | 1.39E-07 | -0.0969665 | 0.03619  | 0.021115 | 0.64902  |
| 0.68137 | -0.10111 | 0.02891  | -0.41389 | 9.42E-21 | -0.2478107 | 5.77E-08 | -0.00324 | 0.94435  |
| 0.70887 | 0.023955 | 0.6056   | -0.14148 | 0.00218  | 0.04040997 | 0.3836   | 0.130548 | 0.00472  |

|          |          |          |          |          |            |          |          |          |
|----------|----------|----------|----------|----------|------------|----------|----------|----------|
| 0.44117  | 0.055356 | 0.23249  | -0.20391 | 8.94E-06 | -0.0436961 | 0.34609  | 0.129639 | 0.00502  |
| 0.4908   | 0.164072 | 0.00037  | -0.1829  | 7.02E-05 | -0.0855745 | 0.06464  | -0.1253  | 0.00671  |
| 0.1815   | 0.079049 | 0.08794  | -0.20656 | 6.78E-06 | -0.0214316 | 0.64412  | 0.144551 | 0.00174  |
| 0.95084  | 0.273165 | 1.95E-09 | 0.099746 | 0.03115  | 0.36891173 | 1.67E-16 | 0.514804 | 5.79E-33 |
| 6.58E-07 | -0.01621 | 0.72688  | -0.18676 | 4.89E-05 | 0.01520242 | 0.74316  | 0.218546 | 1.86E-06 |
| 0.11967  | 0.173128 | 0.00017  | -0.04323 | 0.35121  | 0.07990912 | 0.08453  | 0.278529 | 9.09E-10 |
| 0.81088  | 0.011608 | 0.80245  | -0.11874 | 0.01022  | 0.17893606 | 0.0001   | 0.293695 | 9.60E-11 |
| 0.0138   | 0.172745 | 0.00018  | 0.331016 | 2.10E-13 | 0.12150676 | 0.00858  | -0.08112 | 0.07989  |
| 0.61223  | 0.033976 | 0.46388  | -0.16882 | 0.00025  | -0.0153524 | 0.74072  | 0.205275 | 7.75E-06 |
| 0.53357  | -0.01822 | 0.69448  | -0.26413 | 6.80E-09 | -0.088916  | 0.05484  | 0.105883 | 0.02211  |
| 0.74868  | 0.069905 | 0.13144  | -0.21325 | 3.33E-06 | -0.0609938 | 0.18825  | 0.197674 | 1.69E-05 |
| 0.59279  | 0.012616 | 0.78569  | -0.26689 | 4.67E-09 | -0.0297183 | 0.52176  | 0.235579 | 2.61E-07 |
| 0.94073  | -0.11817 | 0.01059  | -0.34188 | 2.99E-14 | 0.02768818 | 0.5506   | 0.266998 | 4.60E-09 |
| 0.64052  | 0.023335 | 0.61497  | -0.28299 | 4.76E-10 | -0.0765205 | 0.09861  | 0.155841 | 0.00073  |
| 0.52143  | 0.093709 | 0.04296  | -0.03494 | 0.45131  | 0.05082365 | 0.27305  | 0.264286 | 6.66E-09 |
| 0.00347  | -0.05733 | 0.21621  | -0.17904 | 0.0001   | 0.22592983 | 8.09E-07 | 0.333779 | 1.29E-13 |
| 0.28376  | 0.12464  | 0.007    | -0.06295 | 0.17447  | -0.0450253 | 0.3316   | 0.202428 | 1.04E-05 |
| 0.88841  | -0.29106 | 1.43E-10 | 0.187083 | 4.74E-05 | 0.1792155  | 9.86E-05 | -0.08489 | 0.06681  |
| 0.69276  | 0.053149 | 0.25167  | -0.19967 | 1.38E-05 | -0.0383405 | 0.40845  | 0.209828 | 4.80E-06 |
| 0.66588  | 0.049755 | 0.28327  | -0.18023 | 8.99E-05 | 0.04093045 | 0.3775   | 0.259055 | 1.34E-08 |
| 0.30487  | -0.01366 | 0.76849  | -0.22972 | 5.22E-07 | -0.1607418 | 0.00049  | 0.001901 | 0.96732  |
| 0.62164  | 0.042772 | 0.35639  | -0.20877 | 5.37E-06 | -0.028435  | 0.5399   | 0.168904 | 0.00025  |
| 0.34252  | 0.076092 | 0.10052  | -0.12805 | 0.00558  | 0.00272491 | 0.95317  | 0.112344 | 0.01514  |
| 0.55995  | 0.032162 | 0.48809  | -0.228   | 6.37E-07 | -0.0384557 | 0.40704  | 0.204966 | 8.01E-06 |
| 0.82381  | 0.039073 | 0.39954  | -0.2212  | 1.38E-06 | -0.0841495 | 0.06924  | 0.117354 | 0.01115  |
| 0.22718  | -0.01618 | 0.72727  | -0.24126 | 1.31E-07 | -0.189502  | 3.76E-05 | -0.14754 | 0.00139  |
| 0.90135  | 0.017942 | 0.69896  | -0.29849 | 4.58E-11 | -0.1656856 | 0.00032  | 0.010262 | 0.82496  |
| 0.08464  | 0.079859 | 0.08473  | -0.14766 | 0.00137  | -0.0903539 | 0.05102  | 0.106502 | 0.02134  |
| 0.96218  | 0.051505 | 0.26666  | -0.17459 | 0.00015  | 0.10787597 | 0.01971  | 0.356932 | 1.77E-15 |
| 0.27567  | -0.02975 | 0.52132  | -0.29602 | 6.72E-11 | -0.2213741 | 1.36E-06 | -0.02975 | 0.52128  |
| 0.8672   | 0.059147 | 0.202    | -0.22488 | 9.12E-07 | -0.0393167 | 0.39661  | 0.219998 | 1.58E-06 |
| 0.52358  | 0.089357 | 0.05364  | -0.08233 | 0.07549  | 0.07679287 | 0.09742  | 0.269757 | 3.14E-09 |
| 0.19391  | 0.310289 | 7.01E-12 | 0.021442 | 0.64395  | 0.02672165 | 0.56461  | 0.118212 | 0.01057  |
| 0.01346  | 0.107879 | 0.01971  | -0.02112 | 0.64891  | 0.08129519 | 0.07926  | 0.217556 | 2.08E-06 |
| 0.8848   | -0.05501 | 0.23547  | -0.2009  | 1.22E-05 | 0.07465532 | 0.10713  | 0.33887  | 5.18E-14 |
| 0.72889  | -0.00017 | 0.99708  | -0.24494 | 8.28E-08 | -0.0501315 | 0.27964  | 0.216467 | 2.34E-06 |
| 0.09365  | 0.098181 | 0.03391  | -0.10315 | 0.02581  | -0.1156345 | 0.0124   | 0.018275 | 0.69366  |
| 0.78886  | 0.060835 | 0.1894   | -0.14833 | 0.00131  | 0.00152211 | 0.97383  | 0.175858 | 0.00013  |
| 0.84496  | -0.15137 | 0.00103  | -0.48127 | 1.90E-28 | -0.2726228 | 2.11E-09 | -0.08707 | 0.0601   |
| 0.84276  | 0.220469 | 1.50E-06 | -0.01819 | 0.69495  | -0.0675509 | 0.14497  | 0.181215 | 8.21E-05 |
| 0.52252  | 0.047764 | 0.30301  | -0.0728  | 0.11615  | 0.066832   | 0.1493   | 0.277665 | 1.03E-09 |
| 0.58116  | 0.008871 | 0.84838  | -0.26486 | 6.16E-09 | -0.021445  | 0.64391  | 0.216082 | 2.44E-06 |
| 0.58895  | 0.094341 | 0.04157  | -0.23689 | 2.23E-07 | -0.1071436 | 0.02057  | 0.131159 | 0.00452  |
| 0.1168   | -0.12212 | 0.00825  | -0.1854  | 5.56E-05 | 0.0426791  | 0.35744  | 0.271846 | 2.35E-09 |
| 1.01E-05 | -0.04726 | 0.30816  | -0.30146 | 2.88E-11 | -0.0934256 | 0.0436   | 0.169729 | 0.00023  |

|          |          |          |          |          |            |          |          |          |
|----------|----------|----------|----------|----------|------------|----------|----------|----------|
| 0.89799  | 0.025747 | 0.5789   | -0.22941 | 5.41E-07 | -0.0357135 | 0.44133  | 0.227812 | 6.51E-07 |
| 0.57048  | -0.03068 | 0.50838  | -0.20738 | 6.22E-06 | -0.0114514 | 0.80505  | 0.187333 | 4.63E-05 |
| 0.41792  | 0.02626  | 0.57135  | -0.10804 | 0.01953  | 0.01740416 | 0.70757  | 0.139202 | 0.00257  |
| 0.97185  | 0.112867 | 0.01467  | 0.206593 | 6.76E-06 | -0.0104108 | 0.82246  | -0.1098  | 0.01761  |
| 0.23251  | 0.114235 | 0.01351  | -0.13413 | 0.00369  | -0.1400116 | 0.00243  | -0.01628 | 0.7256   |
| 0.71044  | 0.004077 | 0.92998  | -0.20951 | 4.97E-06 | -0.0202161 | 0.66302  | 0.19567  | 2.06E-05 |
| 0.69433  | 0.178939 | 0.0001   | -0.14383 | 0.00183  | -0.067608  | 0.14463  | 0.161153 | 0.00047  |
| 0.14528  | -0.11613 | 0.01203  | -0.29296 | 1.07E-10 | -0.0280462 | 0.54546  | 0.258929 | 1.37E-08 |
| 0.74516  | -0.00211 | 0.96365  | -0.15644 | 0.00069  | 0.02947239 | 0.52521  | 0.237137 | 2.16E-07 |
| 0.49055  | -0.07502 | 0.10542  | -0.18711 | 4.73E-05 | -0.0099447 | 0.83028  | 0.183499 | 6.64E-05 |
| 0.55945  | 0.057898 | 0.21171  | -0.11676 | 0.01157  | -0.0014379 | 0.97528  | 0.204894 | 8.07E-06 |
| 0.43591  | 0.039362 | 0.39607  | -0.19232 | 2.86E-05 | -0.0254755 | 0.58291  | 0.238592 | 1.81E-07 |
| 0.40611  | 0.053666 | 0.24708  | -0.20928 | 5.09E-06 | -0.0163877 | 0.72393  | 0.247246 | 6.20E-08 |
| 0.77815  | 0.050277 | 0.27825  | -0.08184 | 0.07727  | 0.03286186 | 0.47867  | 0.227291 | 6.91E-07 |
| 0.92113  | 0.139317 | 0.00255  | -0.15267 | 0.00093  | 0.05393863 | 0.24469  | 0.250587 | 4.05E-08 |
| 0.05046  | 0.004073 | 0.93006  | -0.34549 | 1.54E-14 | -0.1572694 | 0.00065  | 0.104224 | 0.0243   |
| 0.90874  | -0.008   | 0.86305  | -0.21535 | 2.65E-06 | -0.0535738 | 0.2479   | 0.134806 | 0.00351  |
| 0.22594  | 0.120074 | 0.0094   | -0.23179 | 4.09E-07 | -0.2331753 | 3.47E-07 | -0.02237 | 0.62975  |
| 1.02E-05 | 0.200754 | 1.24E-05 | 0.352301 | 4.30E-15 | 0.02773595 | 0.54991  | -0.14016 | 0.0024   |
| 0.60007  | -0.05038 | 0.27723  | -0.1776  | 0.00011  | 0.03259994 | 0.48219  | 0.209929 | 4.75E-06 |
| 0.00139  | 0.141888 | 0.00212  | -0.04304 | 0.35339  | 0.15949604 | 0.00054  | 0.441617 | 1.03E-23 |
| 0.4474   | -0.01783 | 0.70067  | -0.23848 | 1.84E-07 | 0.05704248 | 0.21855  | 0.312154 | 5.17E-12 |
| 0.82519  | 0.059704 | 0.19778  | -0.19173 | 3.03E-05 | -0.0653424 | 0.1586   | 0.184677 | 5.95E-05 |
| 0.6305   | 0.110088 | 0.01732  | 0.206609 | 6.75E-06 | 0.0484718  | 0.29589  | -0.23607 | 2.46E-07 |
| 0.67601  | 0.096384 | 0.03733  | -0.12405 | 0.00728  | -0.00511   | 0.9123   | 0.144396 | 0.00176  |
| 0.27677  | 0.07273  | 0.11651  | -0.14907 | 0.00123  | -0.2484119 | 5.35E-08 | -0.07323 | 0.114    |
| 0.50307  | 0.149725 | 0.00117  | -0.03576 | 0.44069  | -0.0230943 | 0.61862  | 0.125755 | 0.00651  |
| 0.4704   | 0.054859 | 0.23672  | -0.11823 | 0.01055  | 0.02108459 | 0.64949  | 0.204773 | 8.17E-06 |
| 0.64211  | 0.042969 | 0.35419  | -0.08186 | 0.07719  | 0.02581453 | 0.5779   | 0.146975 | 0.00145  |
| 0.07099  | -0.26381 | 7.10E-09 | -0.47924 | 3.44E-28 | -0.1082719 | 0.01926  | 0.06049  | 0.19193  |
| 0.64806  | -0.03638 | 0.43288  | -0.21827 | 1.92E-06 | -0.0611544 | 0.18708  | 0.061068 | 0.18771  |
| 0.19957  | -0.0519  | 0.26302  | -0.14673 | 0.00147  | 0.08286985 | 0.0736   | 0.170618 | 0.00021  |
| 0.33054  | 0.036571 | 0.43043  | -0.15324 | 0.00089  | 0.02014895 | 0.66407  | 0.164484 | 0.00036  |
| 0.00171  | -0.14485 | 0.0017   | -0.25304 | 2.96E-08 | -0.0049244 | 0.91548  | 0.056201 | 0.22543  |
| 0.65663  | 0.098783 | 0.03282  | -0.16812 | 0.00026  | -0.0444419 | 0.33791  | 0.200937 | 1.21E-05 |
| 0.00322  | 0.035244 | 0.44736  | -0.169   | 0.00024  | -0.0100521 | 0.82848  | 0.143374 | 0.0019   |
| 0.17109  | -0.0327  | 0.48088  | -0.16665 | 0.0003   | -0.0154045 | 0.73987  | 0.019696 | 0.67118  |
| 0.75026  | 0.036007 | 0.43758  | -0.0339  | 0.46489  | -0.0278536 | 0.54822  | 0.047923 | 0.3014   |
| 0.47703  | 0.044671 | 0.33543  | -0.06052 | 0.19171  | -0.0171079 | 0.71232  | 0.091301 | 0.04863  |
| 0.01507  | -0.0439  | 0.34382  | -0.23337 | 3.39E-07 | 0.12413325 | 0.00724  | 0.356888 | 1.79E-15 |
| 0.91516  | 0.168015 | 0.00027  | 0.451507 | 7.76E-25 | 0.22629741 | 7.75E-07 | 0.008793 | 0.84969  |
| 0.9173   | 0.054288 | 0.24165  | -0.158   | 0.00061  | -0.0177203 | 0.7025   | 0.179666 | 9.46E-05 |
| 0.3195   | -0.13766 | 0.00287  | -0.21731 | 2.13E-06 | 0.01401116 | 0.76266  | 0.193063 | 2.66E-05 |
| 0.10393  | 0.070194 | 0.12985  | 0.398075 | 3.49E-19 | 0.36107893 | 7.92E-16 | 0.141139 | 0.00223  |
| 0.1042   | 0.047932 | 0.30131  | -0.13994 | 0.00244  | -0.0793227 | 0.08684  | 0.003567 | 0.93872  |

|          |          |          |          |          |            |          |          |          |
|----------|----------|----------|----------|----------|------------|----------|----------|----------|
| 0.85162  | 0.00117  | 0.97988  | 0.294331 | 8.71E-11 | -0.0061009 | 0.89539  | -0.18284 | 7.06E-05 |
| 0.83319  | 0.083671 | 0.07084  | -0.21859 | 1.85E-06 | -0.0851741 | 0.06591  | 0.129764 | 0.00498  |
| 0.00038  | 0.020201 | 0.66326  | -0.12832 | 0.00549  | 0.07035937 | 0.12894  | 0.134024 | 0.00371  |
| 0.31568  | -0.01657 | 0.72094  | -0.12926 | 0.00515  | 0.03892786 | 0.4013   | 0.196093 | 1.97E-05 |
| 0.58298  | 0.000358 | 0.99385  | -0.14561 | 0.00161  | 0.07818253 | 0.09149  | 0.190167 | 3.53E-05 |
| 0.9715   | 0.03668  | 0.42906  | -0.23651 | 2.33E-07 | -0.1207593 | 0.009    | 0.072244 | 0.11898  |
| 0.89375  | 0.057459 | 0.2152   | -0.09282 | 0.04497  | 0.17422803 | 0.00015  | 0.390892 | 1.69E-18 |
| 0.73097  | 0.117699 | 0.01091  | -0.18949 | 3.77E-05 | -0.0175785 | 0.70477  | 0.217355 | 2.12E-06 |
| 0.64381  | 0.082232 | 0.07585  | -0.12477 | 0.00694  | 0.10502559 | 0.02322  | 0.363035 | 5.39E-16 |
| 0.82353  | 0.026702 | 0.56488  | -0.21137 | 4.07E-06 | -0.0196266 | 0.67227  | 0.24989  | 4.43E-08 |
| 0.15042  | -0.06491 | 0.16137  | -0.20116 | 1.19E-05 | -0.1279256 | 0.00563  | -0.02336 | 0.61465  |
| 0.7513   | 0.015352 | 0.74073  | -0.22002 | 1.58E-06 | -0.048922  | 0.29142  | 0.207496 | 6.15E-06 |
| 0.02423  | -0.2202  | 1.55E-06 | 0.071119 | 0.12485  | 0.12093179 | 0.0089   | -0.06528 | 0.15902  |
| 0.35035  | -0.02088 | 0.6526   | -0.1851  | 5.72E-05 | -0.1737849 | 0.00016  | -0.10939 | 0.01805  |
| 0.8839   | 0.034039 | 0.46306  | -0.17851 | 0.00011  | -0.0243358 | 0.59988  | 0.178435 | 0.00011  |
| 0.8463   | -0.16233 | 0.00043  | -0.27011 | 2.99E-09 | -0.0229377 | 0.62101  | 0.078531 | 0.09005  |
| 0.2086   | 0.031523 | 0.49678  | -0.18617 | 5.17E-05 | -0.0668967 | 0.14891  | 0.114178 | 0.01355  |
| 0.96261  | 0.099157 | 0.03217  | -0.11345 | 0.01417  | 0.00249881 | 0.95705  | 0.164671 | 0.00035  |
| 0.92496  | -0.10576 | 0.02227  | -0.169   | 0.00024  | 0.0859381  | 0.06351  | 0.291149 | 1.41E-10 |
| 4.29E-05 | 0.073496 | 0.1127   | -0.16191 | 0.00044  | -0.0481116 | 0.2995   | 0.099298 | 0.03192  |
| 0.69912  | 0.196756 | 1.85E-05 | -0.11864 | 0.01029  | 0.02940885 | 0.5261   | 0.157755 | 0.00062  |
| 0.23542  | -0.04514 | 0.33035  | -0.20484 | 8.11E-06 | -0.0376875 | 0.41648  | 0.106414 | 0.02145  |
| 0.12386  | 0.299404 | 3.98E-11 | -0.04912 | 0.28943  | -0.2194796 | 1.68E-06 | -0.01272 | 0.7839   |
| 0.95743  | 0.018944 | 0.68303  | -0.19745 | 1.72E-05 | -0.0272364 | 0.55713  | 0.206917 | 6.53E-06 |
| 0.46256  | -0.03846 | 0.40702  | -0.3086  | 9.23E-12 | -0.1360997 | 0.00321  | 0.093776 | 0.04281  |
| 0.08454  | -0.01225 | 0.79174  | -0.09841 | 0.03349  | -0.013267  | 0.77492  | 0.067742 | 0.14383  |
| 0.00132  | 0.017106 | 0.71236  | -0.22125 | 1.38E-06 | -0.1791011 | 9.96E-05 | 0.003578 | 0.93854  |
| 0.71638  | 0.069157 | 0.13563  | -0.0789  | 0.08856  | -0.0522758 | 0.25956  | 0.040851 | 0.37842  |
| 0.78481  | -0.20475 | 8.19E-06 | -0.31038 | 6.91E-12 | 0.08629844 | 0.06241  | 0.376341 | 3.68E-17 |
| 0.6127   | -0.00278 | 0.95215  | -0.15755 | 0.00063  | -0.0171482 | 0.71167  | 0.149223 | 0.00122  |
| 0.06137  | -0.01559 | 0.7368   | -0.24066 | 1.41E-07 | -0.0619973 | 0.18107  | 0.068376 | 0.14011  |
| 0.85488  | 0.26966  | 3.18E-09 | -0.01864 | 0.68787  | -0.0525971 | 0.25664  | 0.223296 | 1.09E-06 |
| 0.3391   | 0.135579 | 0.00333  | -0.03785 | 0.41449  | 0.07091098 | 0.12596  | 0.306406 | 1.31E-11 |
| 0.6059   | 0.035324 | 0.44633  | -0.26099 | 1.04E-08 | -0.0686254 | 0.13867  | 0.153772 | 0.00086  |
| 0.03359  | 0.223362 | 1.08E-06 | -0.26281 | 8.12E-09 | -0.1699623 | 0.00022  | 0.103026 | 0.02599  |
| 0.7963   | 0.054665 | 0.23838  | -0.26433 | 6.62E-09 | -0.0417959 | 0.36749  | 0.239638 | 1.59E-07 |
| 0.365    | -0.09783 | 0.03455  | -0.33835 | 5.69E-14 | 0.03860597 | 0.40521  | 0.043665 | 0.34644  |
| 0.4382   | -0.07174 | 0.12161  | -0.16209 | 0.00044  | 0.08966948 | 0.05281  | 0.306175 | 1.36E-11 |
| 0.97099  | 0.008801 | 0.84956  | -0.16363 | 0.00038  | -0.0383833 | 0.40792  | 0.09544  | 0.03924  |
| 0.29616  | 0.004816 | 0.91734  | -0.18354 | 6.61E-05 | 0.01883306 | 0.68479  | 0.169521 | 0.00023  |
| 0.0284   | 0.052123 | 0.26096  | -0.19274 | 2.75E-05 | 0.16764266 | 0.00027  | 0.43452  | 6.27E-23 |
| 0.4525   | 0.024392 | 0.59904  | -0.16039 | 0.0005   | -0.0631009 | 0.17341  | 0.05765  | 0.21367  |
| 0.09517  | 0.061194 | 0.1868   | -0.18464 | 5.97E-05 | 0.03148891 | 0.49725  | 0.277044 | 1.13E-09 |
| 0.16859  | 0.065739 | 0.15609  | -0.10392 | 0.02472  | -0.0466611 | 0.31432  | 0.115073 | 0.01283  |
| 0.01784  | 0.136529 | 0.00311  | 0.248915 | 5.02E-08 | -0.0121146 | 0.79401  | -0.18613 | 5.19E-05 |

|          |          |          |          |          |            |         |          |          |
|----------|----------|----------|----------|----------|------------|---------|----------|----------|
| 1.17E-08 | -0.01696 | 0.71474  | -0.21439 | 2.94E-06 | 0.02238117 | 0.6295  | 0.166017 | 0.00031  |
| 0.96048  | -0.08529 | 0.06554  | -0.19569 | 2.05E-05 | -0.0181857 | 0.69508 | 0.127746 | 0.0057   |
| 0.81282  | -0.05023 | 0.2787   | -0.28276 | 4.92E-10 | -0.0935639 | 0.04329 | 0.076923 | 0.09685  |
| 0.36548  | -0.0115  | 0.80417  | -0.13597 | 0.00324  | 0.03106292 | 0.50309 | 0.199498 | 1.40E-05 |
| 0.00248  | -0.11538 | 0.01259  | -0.2155  | 2.60E-06 | -0.0136899 | 0.76795 | 0.156791 | 0.00067  |
| 0.0746   | 0.075201 | 0.10458  | -0.19291 | 2.70E-05 | -0.1691475 | 0.00024 | -0.00014 | 0.99767  |
| 0.03808  | 0.150833 | 0.00108  | -0.11674 | 0.01158  | 0.039755   | 0.39136 | 0.239447 | 1.63E-07 |
| 0.08072  | -0.05231 | 0.25924  | -0.23053 | 4.74E-07 | 0.09555115 | 0.03901 | 0.285396 | 3.34E-10 |
| 0.40215  | -0.04388 | 0.34407  | -0.29142 | 1.36E-10 | -0.0323526 | 0.48552 | 0.183897 | 6.40E-05 |
| 0.84722  | 0.105266 | 0.0229   | -0.08412 | 0.06934  | -0.0290851 | 0.53067 | 0.11584  | 0.01224  |
| 0.45861  | 0.06205  | 0.1807   | -0.04961 | 0.28464  | 0.01872359 | 0.68653 | 0.140814 | 0.00229  |
| 0.49386  | -0.10275 | 0.0264   | -0.25877 | 1.40E-08 | 0.0707218  | 0.12698 | 0.172307 | 0.00018  |
| 0.00083  | 0.168393 | 0.00026  | -0.06236 | 0.1785   | 0.0869186  | 0.06054 | 0.214763 | 2.82E-06 |
| 0.81911  | 0.033704 | 0.46747  | -0.21822 | 1.93E-06 | -0.032941  | 0.47761 | 0.257149 | 1.73E-08 |
| 0.02714  | 0.115761 | 0.0123   | -0.07546 | 0.10338  | 0.02975116 | 0.5213  | 0.179129 | 9.94E-05 |
| 0.61644  | 0.0043   | 0.92617  | -0.21039 | 4.52E-06 | 0.04036179 | 0.38417 | 0.281854 | 5.62E-10 |
| 0.20108  | 0.063031 | 0.17389  | 0.065559 | 0.15723  | 0.06301346 | 0.17401 | -0.17335 | 0.00017  |
| 0.97412  | -0.01204 | 0.79517  | -0.16931 | 0.00024  | 0.03262117 | 0.4819  | 0.167898 | 0.00027  |
| 0.40842  | 0.055393 | 0.23218  | -0.18809 | 4.31E-05 | 0.06426428 | 0.1656  | 0.182892 | 7.03E-05 |
| 0.90396  | 0.077225 | 0.09554  | -0.14922 | 0.00122  | 0.0196781  | 0.67146 | 0.233963 | 3.16E-07 |
| 0.63527  | -0.09988 | 0.03092  | -0.31005 | 7.29E-12 | -0.0740746 | 0.10989 | 0.144839 | 0.0017   |
| 0.16421  | 0.025826 | 0.57773  | -0.17216 | 0.00019  | -0.0458397 | 0.32292 | 0.176324 | 0.00013  |
| 0.80248  | 0.09635  | 0.0374   | -0.13499 | 0.00347  | -0.0237892 | 0.6081  | 0.175271 | 0.00014  |
| 0.84269  | 0.120805 | 0.00897  | -0.24336 | 1.01E-07 | -0.134717  | 0.00354 | 0.062752 | 0.17581  |
| 0.25949  | 0.043452 | 0.3488   | -0.10287 | 0.02621  | 0.05011129 | 0.27983 | 0.200929 | 1.21E-05 |
| 0.93362  | -0.13771 | 0.00286  | -0.28732 | 2.51E-10 | -0.0417833 | 0.36763 | 0.134543 | 0.00358  |
| 0.91298  | 0.089492 | 0.05328  | -0.04244 | 0.36013  | -0.1132686 | 0.01432 | -0.01465 | 0.75216  |
| 0.61549  | 0.020207 | 0.66316  | -0.21027 | 4.58E-06 | -0.09807   | 0.03411 | 0.13742  | 0.00292  |
| 0.69843  | 0.076768 | 0.09752  | -0.03322 | 0.47387  | -0.1417305 | 0.00214 | -0.02583 | 0.57761  |
| 0.00136  | 0.015995 | 0.73028  | -0.10225 | 0.02714  | 0.04848539 | 0.29575 | 0.18242  | 7.34E-05 |
| 0.67566  | 0.029982 | 0.51807  | -0.23089 | 4.54E-07 | -0.0643472 | 0.16506 | 0.175016 | 0.00014  |
| 0.0711   | 0.000956 | 0.98356  | -0.15846 | 0.00059  | -0.0315994 | 0.49574 | 0.058324 | 0.20836  |
| 0.85843  | 0.026477 | 0.56818  | -0.09532 | 0.03949  | -0.0037157 | 0.93617 | 0.106491 | 0.02135  |
| 0.43289  | 0.02945  | 0.52552  | -0.20694 | 6.52E-06 | 0.02897955 | 0.53216 | 0.210197 | 4.62E-06 |
| 0.43945  | -0.2302  | 4.93E-07 | -0.34232 | 2.76E-14 | -0.0528518 | 0.25434 | 0.178603 | 0.0001   |
| 0.63464  | 0.021161 | 0.6483   | -0.20864 | 5.45E-06 | -0.0187514 | 0.68609 | 0.228029 | 6.35E-07 |
| 0.3127   | 0.029644 | 0.5228   | -0.25286 | 3.02E-08 | -0.0345884 | 0.45586 | 0.256164 | 1.97E-08 |
| 0.25614  | -0.0026  | 0.95535  | -0.07321 | 0.1141   | 0.09231049 | 0.04618 | 0.212047 | 3.79E-06 |
| 0.71432  | 0.10898  | 0.01848  | -0.01447 | 0.75519  | 0.07365216 | 0.11194 | 0.16434  | 0.00036  |
| 0.61477  | 0.118822 | 0.01017  | -0.11284 | 0.0147   | 0.16375931 | 0.00038 | 0.293675 | 9.63E-11 |
| 0.87126  | 0.026445 | 0.56864  | -0.17783 | 0.00011  | -0.0280367 | 0.5456  | 0.113987 | 0.01371  |
| 0.13511  | 0.021685 | 0.64021  | -0.17542 | 0.00014  | -0.0184175 | 0.69139 | 0.157329 | 0.00064  |
| 0.35192  | 0.162703 | 0.00042  | -0.05839 | 0.20787  | 0.05215537 | 0.26066 | 0.290435 | 1.57E-10 |
| 0.46654  | -0.00224 | 0.96158  | -0.25554 | 2.13E-08 | -0.031254  | 0.50046 | 0.200881 | 1.22E-05 |
| 0.82695  | 0.062823 | 0.17531  | -0.21385 | 3.12E-06 | 0.0208973  | 0.6524  | 0.294164 | 8.94E-11 |



|         |          |          |          |          |            |          |          |          |
|---------|----------|----------|----------|----------|------------|----------|----------|----------|
| 0.1158  | -0.02637 | 0.56981  | -0.19859 | 1.54E-05 | 0.05845548 | 0.20734  | 0.258028 | 1.54E-08 |
| 0.00658 | -0.08371 | 0.07071  | -0.06264 | 0.17655  | 0.03920558 | 0.39795  | -0.16575 | 0.00032  |
| 0.82171 | 0.047906 | 0.30156  | -0.15626 | 0.0007   | -0.0162904 | 0.7255   | 0.097747 | 0.03471  |
| 0.04757 | -0.04078 | 0.37929  | -0.1942  | 2.38E-05 | -0.1447292 | 0.00171  | -0.09675 | 0.0366   |
| 0.86746 | 0.046199 | 0.31914  | -0.22519 | 8.81E-07 | -0.0614147 | 0.18521  | 0.028846 | 0.53406  |
| 0.0308  | 0.005882 | 0.89913  | -0.2678  | 4.12E-09 | -0.0694446 | 0.134    | 0.110325 | 0.01708  |
| 0.2712  | 0.066178 | 0.15333  | -0.15136 | 0.00103  | 0.02755699 | 0.55249  | 0.265798 | 5.42E-09 |
| 0.34939 | 0.009233 | 0.84227  | -0.23872 | 1.78E-07 | -0.0916681 | 0.04772  | 0.128904 | 0.00527  |
| 0.37557 | -0.11456 | 0.01324  | -0.24991 | 4.42E-08 | 0.01310658 | 0.77757  | 0.267579 | 4.24E-09 |
| 0.47127 | 0.095609 | 0.03889  | 0.413281 | 1.09E-20 | 0.28368268 | 4.30E-10 | -0.02541 | 0.58395  |
| 0.24354 | 0.031716 | 0.49415  | -0.2378  | 1.99E-07 | -0.0454752 | 0.32679  | 0.237008 | 2.19E-07 |
| 0.86734 | -0.04191 | 0.36617  | -0.06209 | 0.18038  | 0.05504873 | 0.2351   | 0.182758 | 7.12E-05 |
| 0.47425 | 0.087061 | 0.06012  | -0.06966 | 0.13282  | 0.0285831  | 0.53779  | 0.204844 | 8.11E-06 |
| 0.04062 | 0.200492 | 1.27E-05 | 0.087883 | 0.05773  | 0.18821209 | 4.26E-05 | 0.213426 | 3.26E-06 |
| 0.38911 | -0.02649 | 0.56794  | -0.23599 | 2.48E-07 | -0.0697273 | 0.13242  | 0.12207  | 0.00827  |
| 0.68048 | -0.06865 | 0.13855  | -0.21466 | 2.85E-06 | -0.0317527 | 0.49365  | 0.204916 | 8.05E-06 |
| 0.2218  | -0.23573 | 2.56E-07 | -0.27522 | 1.46E-09 | 0.00725411 | 0.87576  | 0.226807 | 7.31E-07 |
| 0.91238 | 0.041951 | 0.36571  | -0.21025 | 4.59E-06 | -0.0062512 | 0.89283  | 0.252    | 3.38E-08 |
| 0.73485 | 0.109978 | 0.01743  | -0.15789 | 0.00062  | -0.1846827 | 5.95E-05 | -0.0794  | 0.08654  |
| 0.33998 | -0.03904 | 0.39991  | -0.24045 | 1.44E-07 | -0.0825016 | 0.07489  | 0.164406 | 0.00036  |
| 0.97179 | 0.065983 | 0.15455  | -0.10549 | 0.02262  | 0.05775912 | 0.21281  | 0.217199 | 2.16E-06 |
| 0.59135 | 0.027755 | 0.54964  | -0.17032 | 0.00022  | -0.0666705 | 0.15029  | 0.109712 | 0.01771  |
| 0.45567 | 0.075764 | 0.102    | -0.11927 | 0.00989  | -0.1003959 | 0.03006  | 0.049094 | 0.28972  |
| 0.57836 | 0.164546 | 0.00036  | 0.000882 | 0.98483  | 0.09160653 | 0.04787  | 0.203737 | 9.10E-06 |
| 0.53813 | -0.04861 | 0.29451  | -0.09764 | 0.03491  | 0.07849134 | 0.09021  | 0.196312 | 1.93E-05 |
| 0.48553 | 0.050536 | 0.27577  | -0.22002 | 1.58E-06 | -0.030748  | 0.50743  | 0.200141 | 1.31E-05 |
| 0.73037 | 0.364475 | 4.06E-16 | 0.185636 | 5.44E-05 | 0.03743755 | 0.41958  | -0.1181  | 0.01064  |
| 0.12921 | 0.033923 | 0.46458  | -0.10374 | 0.02497  | 0.04094311 | 0.37735  | 0.228612 | 5.93E-07 |
| 0.95125 | 0.017009 | 0.71391  | -0.17975 | 9.39E-05 | -0.121667  | 0.00849  | 0.045127 | 0.33051  |
| 0.92138 | 0.044015 | 0.34258  | -0.17769 | 0.00011  | -0.0637099 | 0.16929  | 0.132133 | 0.00423  |
| 0.44896 | 0.01228  | 0.79126  | -0.10839 | 0.01914  | 0.00194891 | 0.9665   | 0.159395 | 0.00055  |
| 0.7022  | 0.183229 | 6.81E-05 | 0.180158 | 9.04E-05 | 0.05580697 | 0.2287   | -0.19357 | 2.53E-05 |
| 0.99509 | -0.0224  | 0.62921  | -0.24017 | 1.49E-07 | -0.0566549 | 0.2217   | 0.101775 | 0.02786  |
| 0.00019 | 0.131347 | 0.00447  | -0.06484 | 0.16185  | 0.02526557 | 0.58602  | 0.177825 | 0.00011  |
| 0.51414 | -0.02976 | 0.52119  | -0.2643  | 6.64E-09 | -0.0655176 | 0.15749  | 0.197658 | 1.69E-05 |
| 0.94307 | 0.054757 | 0.23759  | -0.06105 | 0.18782  | 0.00480078 | 0.91759  | 0.113613 | 0.01403  |
| 0.1341  | 0.104492 | 0.02393  | -0.13774 | 0.00286  | -0.0408711 | 0.37819  | 0.168858 | 0.00025  |
| 0.62277 | -0.00292 | 0.94977  | -0.14587 | 0.00157  | 0.09319867 | 0.04411  | 0.190159 | 3.53E-05 |
| 0.30543 | 0.08425  | 0.06891  | -0.09417 | 0.04194  | 0.12965368 | 0.00501  | 0.345367 | 1.58E-14 |
| 0.05752 | 0.030375 | 0.51259  | -0.22384 | 1.03E-06 | -0.0629346 | 0.17455  | 0.190772 | 3.33E-05 |
| 0.91267 | 0.010235 | 0.82542  | -0.18186 | 7.73E-05 | -0.0132723 | 0.77483  | 0.174002 | 0.00016  |
| 0.04428 | 0.043719 | 0.34584  | -0.10644 | 0.02142  | 0.07809802 | 0.09184  | 0.182301 | 7.42E-05 |
| 0.18381 | -0.09958 | 0.03144  | -0.13656 | 0.00311  | 0.00643472 | 0.8897   | 0.089993 | 0.05196  |
| 0.52005 | 0.072104 | 0.1197   | -0.09061 | 0.05036  | 0.03884471 | 0.40231  | 0.20419  | 8.68E-06 |
| 0.6109  | 0.037184 | 0.42274  | -0.17382 | 0.00016  | -0.1200657 | 0.0094   | 0.091841 | 0.0473   |

|          |          |          |          |          |            |          |          |          |
|----------|----------|----------|----------|----------|------------|----------|----------|----------|
| 0.82956  | 0.052664 | 0.25603  | -0.1993  | 1.43E-05 | -0.0262682 | 0.57123  | 0.208586 | 5.48E-06 |
| 0.68515  | 0.017825 | 0.70084  | -0.15199 | 0.00098  | -0.0168889 | 0.71584  | 0.136967 | 0.00302  |
| 0.85002  | 0.027271 | 0.55663  | -0.25329 | 2.86E-08 | -0.0553631 | 0.23243  | 0.219301 | 1.71E-06 |
| 0.97595  | 0.063935 | 0.16778  | -0.15391 | 0.00085  | -0.0445675 | 0.33655  | 0.143476 | 0.00188  |
| 0.4769   | 0.136433 | 0.00313  | 0.021793 | 0.63853  | 0.16135761 | 0.00046  | 0.340572 | 3.80E-14 |
| 0.76997  | -0.09638 | 0.03733  | -0.1574  | 0.00064  | 0.00857149 | 0.85343  | 0.149502 | 0.00119  |
| 0.73396  | -0.01161 | 0.80243  | -0.24694 | 6.44E-08 | -0.0592065 | 0.20155  | 0.195273 | 2.14E-05 |
| 0.70323  | 0.05504  | 0.23517  | -0.16778 | 0.00027  | 0.06254172 | 0.17726  | 0.333652 | 1.32E-13 |
| 0.66485  | 0.152191 | 0.00097  | -0.02268 | 0.62496  | -0.015656  | 0.73578  | 0.117998 | 0.01071  |
| 0.81259  | 0.084547 | 0.06793  | 0.253084 | 2.94E-08 | 0.14261382 | 0.00201  | -0.1262  | 0.00632  |
| 0.96267  | 0.070788 | 0.12662  | -0.09381 | 0.04274  | 0.01542286 | 0.73957  | 0.124579 | 0.00703  |
| 0.24014  | 0.009557 | 0.83681  | -0.07344 | 0.11299  | 0.09914625 | 0.03218  | 0.313097 | 4.43E-12 |
| 0.62933  | 0.171883 | 0.00019  | -0.00235 | 0.95963  | 0.2429068  | 1.07E-07 | 0.383748 | 7.82E-18 |
| 0.49178  | 0.129397 | 0.0051   | -0.1189  | 0.01012  | -0.0067328 | 0.88463  | 0.067816 | 0.14339  |
| 0.00502  | 0.260669 | 1.08E-08 | -0.03405 | 0.46294  | -0.0151494 | 0.74403  | 0.129752 | 0.00498  |
| 2.08E-06 | 0.051109 | 0.27036  | -0.05298 | 0.2532   | 0.09230428 | 0.04619  | 0.181267 | 8.17E-05 |
| 0.42586  | 0.102397 | 0.02692  | -0.09273 | 0.0452   | -0.0154562 | 0.73903  | 0.191318 | 3.16E-05 |
| 0.005    | 0.233655 | 3.28E-07 | -0.08281 | 0.07381  | -0.073307  | 0.11364  | 0.085624 | 0.06449  |
| 0.79614  | -0.18454 | 6.03E-05 | -0.26754 | 4.27E-09 | 0.01440735 | 0.75616  | 0.225174 | 8.82E-07 |
| 0.31467  | 0.024204 | 0.60186  | -0.18173 | 7.82E-05 | 0.11005963 | 0.01735  | 0.256899 | 1.79E-08 |
| 0.34703  | 0.039148 | 0.39864  | -0.23466 | 2.91E-07 | -0.0468951 | 0.3119   | 0.228498 | 6.01E-07 |
| 0.23673  | 0.187927 | 4.38E-05 | 0.261581 | 9.59E-09 | 0.06761346 | 0.14459  | -0.07823 | 0.09129  |
| 0.45456  | -0.09789 | 0.03445  | -0.2213  | 1.37E-06 | -0.0058917 | 0.89896  | 0.24678  | 6.57E-08 |
| 0.57839  | 0.059698 | 0.19782  | -0.17534 | 0.00014  | 0.0355899  | 0.44291  | 0.251597 | 3.56E-08 |
| 0.09536  | 0.276317 | 1.25E-09 | -0.03032 | 0.51343  | 0.15691997 | 0.00067  | 0.374149 | 5.78E-17 |
| 0.0007   | -0.05998 | 0.19573  | -0.27321 | 1.94E-09 | -0.237366  | 2.10E-07 | -0.24315 | 1.03E-07 |
| 0.39936  | 0.068492 | 0.13944  | -0.03697 | 0.42544  | -0.0170063 | 0.71395  | 0.073737 | 0.11153  |
| 0.91676  | -0.11177 | 0.01567  | -0.42597 | 5.22E-22 | -0.345791  | 1.46E-14 | -0.13685 | 0.00304  |
| 0.44228  | 0.280383 | 6.96E-10 | -0.04094 | 0.37735  | 0.05603062 | 0.22684  | 0.214404 | 2.93E-06 |
| 0.7537   | 0.01643  | 0.72324  | -0.18509 | 5.72E-05 | 0.00849659 | 0.8547   | 0.207615 | 6.07E-06 |
| 0.83517  | 0.013519 | 0.77076  | -0.21233 | 3.67E-06 | 0.02599881 | 0.57519  | 0.246954 | 6.43E-08 |
| 0.18351  | 0.060768 | 0.18989  | -0.15159 | 0.00102  | 0.10308754 | 0.0259   | 0.220369 | 1.52E-06 |
| 0.10629  | 0.106812 | 0.02096  | -0.1091  | 0.01835  | -0.0568579 | 0.22004  | 0.082147 | 0.07615  |
| 0.88594  | -0.08797 | 0.05747  | -0.1903  | 3.48E-05 | -0.0009847 | 0.98307  | 0.155349 | 0.00076  |
| 0.10189  | 0.185326 | 5.60E-05 | -0.02115 | 0.64852  | 0.1939871  | 2.43E-05 | 0.37     | 1.34E-16 |
| 0.98378  | -0.05706 | 0.2184   | -0.20578 | 7.35E-06 | 0.03424702 | 0.46032  | 0.311857 | 5.43E-12 |
| 0.12135  | -0.01192 | 0.79722  | -0.16049 | 0.0005   | -0.0125769 | 0.78634  | 0.178192 | 0.00011  |
| 0.14386  | -0.05664 | 0.22182  | -0.25062 | 4.03E-08 | -0.052179  | 0.26044  | 0.074148 | 0.10954  |
| 0.91708  | 0.051005 | 0.27133  | -0.13559 | 0.00333  | 0.0244578  | 0.59805  | 0.230705 | 4.65E-07 |
| 0.06315  | 0.044402 | 0.33835  | -0.21901 | 1.77E-06 | -0.1328548 | 0.00403  | 0.025627 | 0.58066  |
| 0.88207  | 0.030344 | 0.51302  | -0.22225 | 1.23E-06 | -0.1119207 | 0.01553  | 0.08468  | 0.0675   |
| 0.13778  | 0.06481  | 0.16203  | -0.08558 | 0.06464  | 0.14410552 | 0.0018   | 0.306715 | 1.25E-11 |
| 0.68023  | 0.094415 | 0.04141  | -0.33865 | 5.39E-14 | -0.198818  | 1.50E-05 | -0.00951 | 0.83759  |
| 0.5784   | 0.107948 | 0.01963  | -0.10285 | 0.02624  | 0.0270577  | 0.55972  | 0.195047 | 2.19E-05 |
| 0.08536  | 0.152098 | 0.00098  | 0.065351 | 0.15855  | 0.20190816 | 1.10E-05 | 0.256248 | 1.95E-08 |

|          |          |          |          |          |            |          |          |          |
|----------|----------|----------|----------|----------|------------|----------|----------|----------|
| 0.56005  | 0.029073 | 0.53084  | -0.11003 | 0.01738  | 0.02127534 | 0.64653  | 0.188568 | 4.12E-05 |
| 0.98264  | 0.010279 | 0.82467  | -0.33702 | 7.23E-14 | -0.2313838 | 4.29E-07 | -0.04653 | 0.31565  |
| 0.19119  | 0.089986 | 0.05197  | -0.04078 | 0.37926  | 0.00065718 | 0.9887   | 0.155327 | 0.00076  |
| 0.39113  | 0.017265 | 0.70979  | -0.22464 | 9.37E-07 | -0.022786  | 0.62332  | 0.248345 | 5.39E-08 |
| 0.38152  | 0.092438 | 0.04588  | -0.06025 | 0.19371  | -0.0018879 | 0.96754  | 0.135228 | 0.00341  |
| 0.52839  | 0.077657 | 0.09369  | -0.3699  | 1.37E-16 | -0.2895948 | 1.79E-10 | -0.10206 | 0.02742  |
| 0.43608  | 0.157959 | 0.00061  | -0.14076 | 0.0023   | -0.1746492 | 0.00015  | -0.04597 | 0.3216   |
| 0.92727  | 0.020573 | 0.65744  | 0.115496 | 0.0125   | 0.0975232  | 0.03513  | -0.11164 | 0.0158   |
| 0.05202  | -0.02133 | 0.6457   | -0.109   | 0.01846  | 0.0507459  | 0.27378  | 0.206201 | 7.04E-06 |
| 0.76464  | 0.030192 | 0.51514  | -0.2237  | 1.04E-06 | -0.0383326 | 0.40854  | 0.223587 | 1.06E-06 |
| 0.00867  | 0.094332 | 0.04159  | 0.019376 | 0.67622  | 0.15311982 | 0.0009   | 0.299885 | 3.69E-11 |
| 0.47275  | 0.049907 | 0.2818   | -0.1103  | 0.0171   | 0.03099303 | 0.50405  | 0.156448 | 0.00069  |
| 0.66022  | -0.07429 | 0.10887  | -0.12705 | 0.00597  | 0.29150412 | 1.34E-10 | 0.421053 | 1.72E-21 |
| 0.53608  | 0.1225   | 0.00805  | -0.16786 | 0.00027  | 0.14249448 | 0.00202  | 0.464594 | 2.22E-26 |
| 0.66652  | 0.029214 | 0.52885  | -0.20266 | 1.02E-05 | -0.0357198 | 0.44125  | 0.111397 | 0.01602  |
| 0.98188  | -0.0016  | 0.9725   | -0.22325 | 1.10E-06 | -0.0891008 | 0.05434  | 0.124142 | 0.00723  |
| 0.28838  | -0.13271 | 0.00407  | -0.14424 | 0.00178  | 0.007635   | 0.86929  | 0.18634  | 5.09E-05 |
| 0.49989  | 0.022679 | 0.62495  | -0.20693 | 6.52E-06 | -0.0518352 | 0.2636   | 0.130615 | 0.0047   |
| 0.63084  | 0.10909  | 0.01836  | -0.25711 | 1.74E-08 | -0.1774025 | 0.00012  | 0.142702 | 0.00199  |
| 1.93E-10 | 0.027932 | 0.5471   | -0.17114 | 0.0002   | 0.00566369 | 0.90285  | 0.158032 | 0.00061  |
| 0.84807  | -0.22008 | 1.57E-06 | -0.22128 | 1.37E-06 | 0.0108752  | 0.81468  | 0.196427 | 1.91E-05 |
| 0.55491  | 0.061788 | 0.18255  | -0.09337 | 0.04371  | 0.04112056 | 0.37529  | 0.166131 | 0.00031  |
| 0.04371  | -0.05075 | 0.27375  | -0.08451 | 0.06805  | 0.06272898 | 0.17596  | 0.240579 | 1.42E-07 |
| 0.00061  | 0.034216 | 0.46073  | -0.17786 | 0.00011  | 0.03692483 | 0.42598  | 0.257213 | 1.71E-08 |
| 0.03407  | 0.478522 | 4.24E-28 | 0.438163 | 2.50E-23 | 0.01043459 | 0.82206  | -0.21246 | 3.62E-06 |
| 0.73566  | 0.089014 | 0.05457  | -0.06504 | 0.16055  | 0.04720329 | 0.30872  | 0.130416 | 0.00476  |
| 0.41746  | -0.078   | 0.09224  | -0.32357 | 7.65E-13 | -0.0580586 | 0.21044  | 0.137852 | 0.00283  |
| 0.95933  | 0.100419 | 0.03003  | 0.079025 | 0.08804  | 0.04591036 | 0.32218  | -0.18515 | 5.69E-05 |
| 0.27045  | -0.02566 | 0.58022  | 0.409195 | 2.81E-20 | 0.1054327  | 0.02269  | -0.17148 | 0.0002   |
| 0.73998  | 0.023644 | 0.61029  | -0.20854 | 5.51E-06 | -0.0431361 | 0.35231  | 0.20322  | 9.59E-06 |
| 0.34616  | 0.064499 | 0.16406  | -0.03715 | 0.42315  | 0.03040022 | 0.51225  | 0.119233 | 0.00991  |
| 0.56599  | 0.053347 | 0.24991  | 0.395158 | 6.65E-19 | 0.32113901 | 1.16E-12 | 0.114513 | 0.01328  |
| 0.6883   | 0.050122 | 0.27973  | -0.12685 | 0.00605  | -0.0555407 | 0.23094  | 0.080883 | 0.0808   |
| 0.86522  | 0.055853 | 0.22832  | -0.15662 | 0.00068  | -0.0498234 | 0.28261  | 0.127881 | 0.00565  |
| 0.90936  | -0.20938 | 5.03E-06 | -0.23651 | 2.33E-07 | -0.0560708 | 0.22651  | 0.098123 | 0.03401  |
| 0.3463   | -0.0206  | 0.6571   | -0.234   | 3.15E-07 | -0.0596812 | 0.19795  | 0.094717 | 0.04076  |
| 0.80594  | 0.046127 | 0.31989  | -0.19509 | 2.18E-05 | -0.0721717 | 0.11935  | -0.0235  | 0.61251  |
| 0.70687  | 0.092527 | 0.04567  | -0.16275 | 0.00041  | 0.03302147 | 0.47654  | 0.284398 | 3.87E-10 |
| 0.35892  | 0.070046 | 0.13066  | -0.02213 | 0.63333  | 0.14685248 | 0.00146  | 0.185818 | 5.34E-05 |
| 0.1608   | -0.18086 | 8.48E-05 | -0.53743 | 2.62E-36 | -0.2804468 | 6.89E-10 | -0.10592 | 0.02206  |
| 0.70014  | -0.03988 | 0.38982  | -0.24481 | 8.42E-08 | -0.0063506 | 0.89113  | 0.179467 | 9.63E-05 |
| 0.47322  | 0.046102 | 0.32016  | -0.23131 | 4.33E-07 | -0.058034  | 0.21064  | 0.12985  | 0.00495  |
| 0.97696  | -0.00147 | 0.97466  | -0.18854 | 4.13E-05 | -0.0978896 | 0.03444  | 0.057969 | 0.21115  |
| 0.32432  | -0.0028  | 0.95188  | -0.23398 | 3.15E-07 | -0.0632393 | 0.17247  | 0.085006 | 0.06645  |
| 0.44689  | -0.10959 | 0.01783  | -0.16379 | 0.00038  | -0.0347806 | 0.45336  | 0.052829 | 0.25454  |

|          |          |          |          |          |            |          |          |          |
|----------|----------|----------|----------|----------|------------|----------|----------|----------|
| 0.86779  | 0.025474 | 0.58292  | -0.19693 | 1.82E-05 | -0.081663  | 0.07791  | 0.12229  | 0.00816  |
| 0.68469  | -0.04184 | 0.36692  | -0.25994 | 1.19E-08 | -0.1423843 | 0.00204  | -0.02376 | 0.60861  |
| 0.90624  | 0.139831 | 0.00246  | -0.00494 | 0.91525  | -0.0393475 | 0.39624  | 0.072957 | 0.11537  |
| 0.85974  | 0.123451 | 0.00757  | -0.20191 | 1.10E-05 | -0.1133291 | 0.01427  | 0.103981 | 0.02463  |
| 4.61E-06 | -0.00561 | 0.90383  | -0.17339 | 0.00017  | 0.03349184 | 0.47028  | 0.198161 | 1.61E-05 |
| 0.27144  | 0.028949 | 0.5326   | -0.21931 | 1.71E-06 | 0.09396176 | 0.0424   | 0.410285 | 2.18E-20 |
| 0.57408  | 0.078103 | 0.09182  | -0.03879 | 0.40291  | 0.26513379 | 5.93E-09 | 0.44635  | 3.02E-24 |
| 0.37819  | 0.208199 | 5.71E-06 | -0.07933 | 0.0868   | 0.04069922 | 0.3802   | 0.226714 | 7.39E-07 |
| 0.0582   | 0.298139 | 4.84E-11 | 0.529694 | 3.90E-35 | 0.05817961 | 0.20949  | -0.11745 | 0.01108  |
| 0.77634  | 0.002348 | 0.95964  | -0.17575 | 0.00013  | 0.03605756 | 0.43694  | 0.313458 | 4.17E-12 |
| 0.2216   | -0.07606 | 0.10067  | -0.19686 | 1.83E-05 | -0.0563318 | 0.22435  | 0.087275 | 0.05949  |
| 0.67254  | 0.076062 | 0.10066  | -0.12436 | 0.00713  | -0.0006356 | 0.98907  | 0.120836 | 0.00895  |
| 0.40222  | 0.164441 | 0.00036  | -0.03831 | 0.40879  | -0.0152728 | 0.74202  | 0.142732 | 0.00199  |
| 0.76699  | 0.076371 | 0.09928  | -0.10122 | 0.02873  | 0.07309917 | 0.11467  | 0.280095 | 7.26E-10 |
| 0.53397  | -0.04236 | 0.36104  | -0.41532 | 6.73E-21 | -0.0419501 | 0.36572  | 0.154743 | 0.00079  |
| 0.98031  | 0.003884 | 0.9333   | -0.24879 | 5.10E-08 | -0.0369282 | 0.42594  | 0.199348 | 1.42E-05 |
| 0.05226  | 0.062291 | 0.17901  | -0.13415 | 0.00368  | 0.09242384 | 0.04591  | 0.299848 | 3.71E-11 |
| 0.19759  | -0.15045 | 0.00111  | 0.085942 | 0.0635   | -0.0601808 | 0.19422  | -0.30409 | 1.90E-11 |
| 1.07E-05 | -0.01406 | 0.76187  | -0.1684  | 0.00026  | -0.0133899 | 0.77289  | 0.203413 | 9.41E-06 |
| 0.72851  | 0.018026 | 0.69763  | -0.32673 | 4.44E-13 | -0.1229549 | 0.00781  | 0.063727 | 0.16918  |
| 0.17169  | 0.079552 | 0.08593  | -0.02817 | 0.54372  | 0.03850271 | 0.40647  | 0.173812 | 0.00016  |
| 0.41312  | -0.07261 | 0.11714  | -0.3045  | 1.78E-11 | -0.0860949 | 0.06303  | 0.090183 | 0.05146  |
| 0.90904  | 0.12178  | 0.00843  | 0.001135 | 0.98048  | 0.0002262  | 0.99611  | 0.097099 | 0.03594  |
| 0.12199  | -0.09458 | 0.04106  | -0.15324 | 0.00089  | -0.0795737 | 0.08585  | -0.01848 | 0.69034  |
| 0.08945  | -0.01593 | 0.7313   | -0.25651 | 1.88E-08 | -0.0626771 | 0.17632  | 0.185791 | 5.36E-05 |
| 1.75E-12 | -0.15486 | 0.00079  | -0.22554 | 8.46E-07 | -0.0559765 | 0.22729  | 0.091192 | 0.0489   |
| 0.28498  | 0.081518 | 0.07844  | -0.23005 | 5.02E-07 | 0.11287507 | 0.01467  | 0.379945 | 1.74E-17 |
| 0.92317  | 0.03569  | 0.44162  | -0.21826 | 1.92E-06 | -0.0075893 | 0.87007  | 0.226919 | 7.22E-07 |
| 0.90977  | 0.121022 | 0.00885  | -0.07975 | 0.08515  | -0.0208026 | 0.65387  | 0.079916 | 0.0845   |
| 0.02003  | 0.108879 | 0.01859  | -0.08781 | 0.05793  | 0.0215302  | 0.64259  | 0.077488 | 0.09441  |
| 0.15952  | -0.01118 | 0.8096   | -0.24505 | 8.17E-08 | -0.0357053 | 0.44143  | 0.148115 | 0.00133  |
| 0.98016  | -0.03025 | 0.51427  | -0.19209 | 2.93E-05 | 0.06624905 | 0.15289  | 0.178434 | 0.00011  |
| 0.96033  | 0.033394 | 0.47158  | -0.168   | 0.00027  | -0.0465116 | 0.31587  | 0.179411 | 9.68E-05 |
| 0.93028  | 0.063197 | 0.17276  | -0.1392  | 0.00257  | -0.0080877 | 0.86162  | 0.205405 | 7.65E-06 |
| 0.3143   | 0.009485 | 0.83803  | -0.2726  | 2.11E-09 | -0.0770471 | 0.09631  | 0.113932 | 0.01376  |
| 0.7637   | 0.036768 | 0.42795  | -0.22326 | 1.10E-06 | -0.0508403 | 0.27289  | 0.203137 | 9.68E-06 |
| 0.99231  | 0.01644  | 0.72309  | -0.16927 | 0.00024  | -0.0390411 | 0.39993  | 0.152132 | 0.00097  |
| 0.4174   | -0.00357 | 0.93864  | -0.24006 | 1.51E-07 | -0.0856205 | 0.0645   | 0.123117 | 0.00773  |
| 0.7632   | 0.049831 | 0.28254  | -0.16868 | 0.00025  | -0.0285102 | 0.53883  | 0.22392  | 1.02E-06 |
| 0.09036  | -0.02823 | 0.54282  | -0.0737  | 0.11169  | 0.05771544 | 0.21316  | 0.087197 | 0.05972  |
| 0.66234  | -0.02726 | 0.55676  | -0.20108 | 1.19E-05 | -0.0594634 | 0.19959  | 0.095468 | 0.03918  |
| 0.51781  | -0.04085 | 0.37844  | -0.16016 | 0.00051  | 0.09363475 | 0.04313  | 0.207268 | 6.30E-06 |
| 0.32194  | 0.02672  | 0.56463  | -0.10703 | 0.0207   | 0.10175288 | 0.0279   | 0.255761 | 2.07E-08 |
| 0.41143  | 0.074165 | 0.10946  | -0.20031 | 1.29E-05 | -0.098916  | 0.03259  | 0.055114 | 0.23455  |
| 0.8044   | -0.00027 | 0.99538  | -0.22384 | 1.03E-06 | -0.0357717 | 0.44058  | 0.182412 | 7.35E-05 |

|         |          |          |          |          |            |          |          |          |
|---------|----------|----------|----------|----------|------------|----------|----------|----------|
| 0.4478  | 0.002111 | 0.96372  | -0.21258 | 3.58E-06 | -0.0328722 | 0.47853  | 0.171709 | 0.00019  |
| 0.26492 | -0.10795 | 0.01962  | -0.12331 | 0.00763  | -0.0098948 | 0.83112  | 0.105122 | 0.02309  |
| 0.96532 | -0.00875 | 0.85035  | -0.12403 | 0.00729  | -0.0339097 | 0.46475  | 0.098619 | 0.03312  |
| 0.79087 | -0.01787 | 0.70013  | -0.18357 | 6.60E-05 | -0.0702102 | 0.12976  | 0.086156 | 0.06284  |
| 0.82279 | 0.021325 | 0.64577  | -0.108   | 0.01957  | -0.0152097 | 0.74305  | 0.107731 | 0.01988  |
| 0.93044 | 0.000405 | 0.99303  | -0.10169 | 0.028    | 0.01454851 | 0.75385  | 0.082081 | 0.07639  |
| 0.45905 | 0.066801 | 0.14949  | -0.06745 | 0.14556  | -0.0108252 | 0.81552  | 0.093232 | 0.04403  |
| 0.53743 | 0.039788 | 0.39097  | -0.17007 | 0.00022  | -0.0231233 | 0.61818  | 0.195235 | 2.15E-05 |
| 0.40305 | -0.03914 | 0.39879  | -0.26668 | 4.80E-09 | -0.1096063 | 0.01782  | 0.045993 | 0.3213   |
| 0.88776 | -0.01298 | 0.7797   | -0.24058 | 1.42E-07 | -0.0239827 | 0.60519  | 0.129226 | 0.00516  |
| 0.51403 | -0.01529 | 0.74166  | -0.23546 | 2.64E-07 | -0.0515947 | 0.26583  | 0.13664  | 0.00309  |
| 0.56987 | 0.018764 | 0.68589  | -0.16496 | 0.00034  | -0.0123191 | 0.79061  | 0.180244 | 8.97E-05 |
| 0.53364 | -0.03988 | 0.38982  | -0.30579 | 1.45E-11 | -0.1317912 | 0.00433  | 0.015171 | 0.74367  |
| 0.23931 | -0.02663 | 0.56595  | -0.25086 | 3.91E-08 | -0.0057583 | 0.90123  | 0.161912 | 0.00044  |
| 0.47437 | 0.012143 | 0.79353  | -0.21354 | 3.22E-06 | -0.0331314 | 0.47507  | 0.187932 | 4.37E-05 |
| 0.4761  | 0.036848 | 0.42695  | -0.17983 | 9.32E-05 | -0.0302327 | 0.51457  | 0.145949 | 0.00156  |
| 0.58641 | 0.039074 | 0.39953  | -0.18627 | 5.12E-05 | -0.0453372 | 0.32826  | 0.158519 | 0.00059  |
| 0.7971  | 0.062147 | 0.18002  | -0.1575  | 0.00064  | -0.0372771 | 0.42158  | 0.171324 | 0.0002   |
| 0.00308 | 0.012019 | 0.79561  | -0.17409 | 0.00016  | -0.1052074 | 0.02298  | 0.045367 | 0.32795  |
| 0.303   | 0.027022 | 0.56024  | -0.22187 | 1.28E-06 | -0.0309482 | 0.50467  | 0.197865 | 1.65E-05 |
| 0.17008 | 0.02387  | 0.60689  | -0.15825 | 0.0006   | 0.01731721 | 0.70896  | 0.219912 | 1.60E-06 |
| 0.30324 | 0.008918 | 0.84759  | -0.1986  | 1.54E-05 | -0.0295748 | 0.52377  | 0.189937 | 3.61E-05 |
| 0.00564 | -0.04765 | 0.30412  | -0.1383  | 0.00274  | -0.033911  | 0.46474  | 0.067027 | 0.14812  |
| 0.82914 | -0.02148 | 0.64329  | -0.18765 | 4.49E-05 | -0.0325488 | 0.48287  | 0.175315 | 0.00014  |
| 0.75816 | 0.081236 | 0.07948  | -0.09636 | 0.03739  | 0.01897025 | 0.68262  | 0.13067  | 0.00468  |
| 0.66067 | 0.011773 | 0.79969  | -0.221   | 1.41E-06 | -0.0729111 | 0.1156   | 0.140119 | 0.00241  |
| 0.41152 | 0.021803 | 0.63839  | -0.15661 | 0.00068  | 0.01102874 | 0.81211  | 0.189456 | 3.78E-05 |
| 0.87216 | 0.06173  | 0.18296  | -0.0685  | 0.13937  | 0.0181233  | 0.69607  | 0.121909 | 0.00836  |
| 0.61855 | 0.027988 | 0.54629  | -0.20732 | 6.26E-06 | -0.0513409 | 0.26819  | 0.069219 | 0.13527  |
| 0.7083  | 0.015358 | 0.74064  | -0.24508 | 8.13E-08 | -0.0329713 | 0.47721  | 0.199759 | 1.37E-05 |
| 0.5907  | 0.06002  | 0.19541  | -0.22612 | 7.91E-07 | -0.1177192 | 0.0109   | 0.071001 | 0.12548  |
| 0.96892 | -0.01306 | 0.77826  | -0.15928 | 0.00055  | -0.0775859 | 0.094    | 0.057582 | 0.21422  |
| 0.37676 | 0.032144 | 0.48833  | -0.14879 | 0.00126  | -0.0096009 | 0.83607  | 0.151611 | 0.00101  |
| 0.50938 | -0.03237 | 0.48533  | -0.08736 | 0.05923  | 0.24570256 | 7.53E-08 | 0.301426 | 2.90E-11 |
| 0.3246  | 0.274909 | 1.52E-09 | 0.104859 | 0.02344  | 0.16767426 | 0.00027  | 0.252498 | 3.17E-08 |
| 0.01311 | 0.013951 | 0.76365  | -0.21524 | 2.68E-06 | -0.035402  | 0.44532  | 0.210579 | 4.43E-06 |
| 0.50104 | -0.01765 | 0.7037   | -0.23241 | 3.80E-07 | -0.0186083 | 0.68836  | 0.212449 | 3.63E-06 |
| 0.53603 | 0.038381 | 0.40796  | -0.16769 | 0.00027  | -0.0175896 | 0.7046   | 0.185259 | 5.63E-05 |
| 0.91676 | 0.074303 | 0.1088   | -0.1289  | 0.00528  | 0.00125407 | 0.97844  | 0.18312  | 6.88E-05 |
| 0.34095 | 0.025238 | 0.58642  | -0.20722 | 6.33E-06 | -0.0436344 | 0.34677  | 0.14331  | 0.0019   |
| 0.49007 | 0.023271 | 0.61594  | -0.20029 | 1.30E-05 | -0.0211068 | 0.64915  | 0.184472 | 6.07E-05 |
| 0.82029 | 0.017411 | 0.70745  | -0.24644 | 6.86E-08 | -0.0729994 | 0.11516  | 0.205136 | 7.87E-06 |
| 0.01894 | 0.157808 | 0.00062  | 0.022508 | 0.62757  | 0.11778571 | 0.01085  | 0.244647 | 8.59E-08 |
| 0.31305 | -0.09364 | 0.04312  | -0.14036 | 0.00236  | 0.07119558 | 0.12445  | 0.228208 | 6.22E-07 |
| 0.10614 | 0.076875 | 0.09706  | -0.0722  | 0.11919  | 0.0904466  | 0.05078  | 0.169659 | 0.00023  |

|          |           |          |          |          |            |          |          |          |
|----------|-----------|----------|----------|----------|------------|----------|----------|----------|
| 0.79992  | 0.082166  | 0.07609  | -0.03264 | 0.48168  | 0.21744279 | 2.10E-06 | 0.261174 | 1.01E-08 |
| 0.77492  | 0.036657  | 0.42934  | -0.22164 | 1.32E-06 | -0.0348465 | 0.4525   | 0.21425  | 2.98E-06 |
| 0.83493  | -0.12203  | 0.00829  | -0.18187 | 7.72E-05 | 0.15539205 | 0.00075  | 0.369439 | 1.50E-16 |
| 0.77304  | 0.006968  | 0.88062  | -0.22522 | 8.77E-07 | -0.0357663 | 0.44065  | 0.194671 | 2.27E-05 |
| 0.35639  | -0.13143  | 0.00444  | -0.19112 | 3.22E-05 | 0.21833502 | 1.91E-06 | 0.354007 | 3.11E-15 |
| 0.34537  | 0.051885  | 0.26314  | -0.22751 | 6.74E-07 | -0.0344144 | 0.45813  | 0.222984 | 1.13E-06 |
| 0.31869  | 0.006785  | 0.88374  | -0.40646 | 5.26E-20 | -0.2492253 | 4.82E-08 | -0.03661 | 0.42989  |
| 0.8532   | -0.08328  | 0.07216  | -0.28005 | 7.31E-10 | -0.0674163 | 0.14577  | 0.163514 | 0.00039  |
| 6.54E-06 | 0.058972  | 0.20335  | 0.33013  | 2.46E-13 | 0.09834833 | 0.0336   | -0.12352 | 0.00753  |
| 0.00685  | 0.066352  | 0.15226  | -0.19425 | 2.37E-05 | -0.1172714 | 0.01121  | -0.05174 | 0.2645   |
| 0.98303  | 0.033942  | 0.46433  | -0.11454 | 0.01326  | -0.1169264 | 0.01145  | 0.117323 | 0.01117  |
| 0.80471  | -0.18049  | 8.77E-05 | -0.37881 | 2.21E-17 | -0.1279985 | 0.0056   | -0.09262 | 0.04545  |
| 0.73494  | 0.03667   | 0.42918  | -0.25074 | 3.97E-08 | -0.0580818 | 0.21026  | 0.211569 | 3.99E-06 |
| 0.57333  | 0.02125   | 0.64693  | -0.15614 | 0.00071  | 0.02985429 | 0.51985  | 0.153886 | 0.00085  |
| 0.77689  | -0.00466  | 0.91991  | -0.2371  | 2.17E-07 | -0.0344902 | 0.45714  | 0.214139 | 3.02E-06 |
| 0.01883  | 0.147369  | 0.00141  | -0.09777 | 0.03466  | 0.02761456 | 0.55166  | 0.177238 | 0.00012  |
| 0.81644  | 0.059282  | 0.20097  | -0.17669 | 0.00012  | 0.03641983 | 0.43234  | 0.229283 | 5.49E-07 |
| 0.6383   | 0.082684  | 0.07425  | -0.16054 | 0.0005   | 0.1049091  | 0.02337  | 0.302968 | 2.27E-11 |
| 0.62232  | -0.04547  | 0.32689  | -0.13898 | 0.00261  | 0.03595139 | 0.43829  | 0.128379 | 0.00546  |
| 0.6378   | 0.036541  | 0.43082  | -0.14089 | 0.00227  | -0.0402312 | 0.38571  | 0.124441 | 0.00709  |
| 0.49834  | 0.010179  | 0.82635  | -0.27788 | 9.99E-10 | -0.073143  | 0.11445  | 0.188844 | 4.01E-05 |
| 0.22563  | 0.219905  | 1.60E-06 | 0.067173 | 0.14724  | 0.09867507 | 0.03302  | 0.187719 | 4.46E-05 |
| 0.83412  | 0.046106  | 0.32012  | -0.24084 | 1.38E-07 | -0.0190616 | 0.68118  | 0.279515 | 7.89E-10 |
| 0.73172  | 0.063048  | 0.17377  | -0.12496 | 0.00686  | 0.00920152 | 0.8428   | 0.208825 | 5.34E-06 |
| 0.21288  | 0.024131  | 0.60295  | -0.05755 | 0.21444  | 0.06072414 | 0.19021  | 0.131753 | 0.00434  |
| 0.37667  | 0.097765  | 0.03468  | -0.06446 | 0.16432  | -0.0476167 | 0.3045   | 0.039968 | 0.38882  |
| 0.00253  | 0.06712   | 0.14756  | -0.06235 | 0.17862  | 0.01083158 | 0.81541  | 0.116864 | 0.01149  |
| 0.85753  | 0.07625   | 0.09981  | -0.14011 | 0.00241  | -0.0131335 | 0.77712  | 0.191738 | 3.03E-05 |
| 6.77E-07 | 0.281972  | 5.52E-10 | 0.385048 | 5.93E-18 | 0.06339116 | 0.17144  | -0.1306  | 0.0047   |
| 0.7693   | 0.022539  | 0.62708  | -0.30121 | 2.99E-11 | -0.2073289 | 6.25E-06 | 0.033291 | 0.47294  |
| 0.81243  | 0.014661  | 0.75201  | -0.24881 | 5.08E-08 | -0.0809227 | 0.08065  | 0.131541 | 0.00441  |
| 0.66112  | -0.02904  | 0.53133  | -0.19937 | 1.42E-05 | 0.15356612 | 0.00087  | 0.355973 | 2.13E-15 |
| 0.89953  | -0.2353   | 2.69E-07 | -0.34933 | 7.54E-15 | 0.0235538  | 0.61166  | 0.125322 | 0.00669  |
| 0.55333  | -0.16246  | 0.00042  | -0.10268 | 0.0265   | 0.08731734 | 0.05936  | 0.177379 | 0.00012  |
| 0.08559  | 0.008267  | 0.85859  | -0.30581 | 1.45E-11 | -0.0669981 | 0.14829  | 0.20548  | 7.59E-06 |
| 0.51343  | 0.112488  | 0.01501  | -0.12337 | 0.00761  | -0.012939  | 0.78034  | 0.105474 | 0.02263  |
| 0.84079  | 0.004514  | 0.9225   | -0.21104 | 4.22E-06 | -0.0164133 | 0.72351  | 0.221956 | 1.27E-06 |
| 0.70671  | 0.033466  | 0.47062  | -0.25014 | 4.29E-08 | -0.0819087 | 0.07701  | 0.047323 | 0.30749  |
| 0.74731  | 0.090948  | 0.04951  | -0.14791 | 0.00135  | -0.0808611 | 0.08088  | 0.035565 | 0.44324  |
| 0.43864  | 0.014983  | 0.74675  | -0.25328 | 2.87E-08 | -0.0347117 | 0.45425  | 0.216638 | 2.30E-06 |
| 0.00469  | -3.97E-05 | 0.99932  | -0.1927  | 2.76E-05 | -0.0227219 | 0.6243   | 0.090385 | 0.05094  |
| 0.22823  | 0.023586  | 0.61117  | -0.18167 | 7.87E-05 | -0.0280391 | 0.54556  | 0.107008 | 0.02073  |
| 0.63321  | 0.082814  | 0.07379  | -0.20294 | 9.87E-06 | -0.1143882 | 0.01338  | 0.008102 | 0.86138  |
| 0.86741  | 0.038413  | 0.40756  | -0.19864 | 1.53E-05 | -0.094947  | 0.04027  | 0.104374 | 0.02409  |
| 0.50353  | -0.00482  | 0.91726  | -0.21763 | 2.06E-06 | -0.0527879 | 0.25491  | 0.082672 | 0.07429  |

|         |          |          |          |          |            |          |          |          |
|---------|----------|----------|----------|----------|------------|----------|----------|----------|
| 0.31512 | 0.017675 | 0.70322  | -0.17093 | 0.00021  | -0.0199176 | 0.6677   | 0.134366 | 0.00362  |
| 0.0282  | 0.171526 | 0.0002   | 0.210142 | 4.64E-06 | -0.1406921 | 0.00231  | -0.31022 | 7.09E-12 |
| 0.22336 | -0.24439 | 8.87E-08 | -0.33269 | 1.57E-13 | -0.1745602 | 0.00015  | -0.04149 | 0.37098  |
| 0.48355 | 0.013962 | 0.76347  | -0.19333 | 2.59E-05 | 0.05784722 | 0.21211  | 0.304275 | 1.85E-11 |
| 0.82089 | 0.06674  | 0.14987  | -0.10906 | 0.01839  | 0.00146872 | 0.97475  | 0.129696 | 0.005    |
| 0.02402 | 0.069872 | 0.13162  | 0.468503 | 7.44E-27 | 0.30952834 | 7.93E-12 | 0.029511 | 0.52467  |
| 0.36743 | 0.217979 | 1.98E-06 | 0.024056 | 0.60409  | 0.11709375 | 0.01133  | 0.288596 | 2.08E-10 |
| 0.74926 | -0.00039 | 0.99327  | -0.23898 | 1.73E-07 | -0.1540897 | 0.00083  | 0.046453 | 0.31648  |
| 0.93454 | 0.07077  | 0.12672  | -0.2244  | 9.64E-07 | -0.0637045 | 0.16933  | 0.201136 | 1.19E-05 |
| 0.28762 | 0.038555 | 0.40583  | -0.15721 | 0.00065  | -0.0366613 | 0.42929  | 0.154017 | 0.00084  |
| 0.54041 | -0.0775  | 0.09437  | -0.11144 | 0.01598  | 0.08861822 | 0.05566  | 0.279651 | 7.74E-10 |
| 0.90239 | 0.161863 | 0.00045  | -0.02749 | 0.55341  | 0.30515706 | 1.60E-11 | 0.530708 | 2.75E-35 |
| 0.6804  | 0.279026 | 8.47E-10 | 0.157958 | 0.00061  | 0.19701282 | 1.80E-05 | 0.370038 | 1.33E-16 |
| 0.40833 | 0.025686 | 0.57979  | -0.29807 | 4.89E-11 | -0.0389199 | 0.4014   | 0.227218 | 6.97E-07 |
| 0.78062 | -0.00661 | 0.88678  | -0.19428 | 2.36E-05 | -0.0379659 | 0.41305  | 0.128806 | 0.00531  |
| 0.89658 | 0.017094 | 0.71254  | -0.25934 | 1.29E-08 | -0.0786587 | 0.08953  | 0.155661 | 0.00074  |
| 0.98738 | 0.100136 | 0.03049  | -0.01875 | 0.68603  | 0.04949047 | 0.28584  | 0.139466 | 0.00252  |
| 0.53774 | 0.081762 | 0.07754  | -0.1237  | 0.00744  | -0.0037311 | 0.93591  | 0.10706  | 0.02067  |
| 0.71179 | -0.07166 | 0.122    | -0.2409  | 1.37E-07 | -0.0228694 | 0.62205  | 0.076138 | 0.10031  |
| 0.04008 | 0.012694 | 0.7844   | -0.18935 | 3.82E-05 | -0.0611367 | 0.18721  | 0.08725  | 0.05956  |
| 0.33861 | 0.034825 | 0.45279  | -0.11633 | 0.01188  | -0.0357397 | 0.44099  | 0.119593 | 0.00969  |
| 0.35579 | 0.062493 | 0.1776   | -0.06266 | 0.17646  | -0.0014713 | 0.9747   | 0.089591 | 0.05302  |
| 0.08501 | 0.007342 | 0.87427  | -0.13857 | 0.00269  | 0.098744   | 0.03289  | 0.344071 | 2.00E-14 |
| 0.07409 | 0.019669 | 0.6716   | -0.21778 | 2.03E-06 | -0.0527094 | 0.25562  | 0.152772 | 0.00093  |
| 0.2792  | -0.16942 | 0.00024  | -0.24515 | 8.06E-08 | -0.0820167 | 0.07662  | 0.025493 | 0.58264  |
| 0.38562 | -0.16058 | 0.00049  | -0.30528 | 1.57E-11 | -0.1419773 | 0.0021   | -0.06862 | 0.13867  |
| 0.676   | 0.016048 | 0.72942  | -0.26031 | 1.14E-08 | -0.0387077 | 0.40397  | 0.21484  | 2.80E-06 |
| 0.67504 | -0.01596 | 0.73089  | -0.2143  | 2.97E-06 | -0.0095486 | 0.83695  | 0.233751 | 3.24E-07 |
| 0.5915  | -0.03468 | 0.45461  | -0.31153 | 5.73E-12 | -0.1197695 | 0.00958  | 0.076749 | 0.09761  |
| 0.97207 | 0.187765 | 4.44E-05 | 0.462261 | 4.23E-26 | 0.23409295 | 3.11E-07 | 0.060933 | 0.18869  |
| 0.59821 | 0.007324 | 0.87457  | -0.30792 | 1.03E-11 | -0.1591202 | 0.00056  | 0.069501 | 0.13369  |
| 0.59234 | -0.11323 | 0.01435  | 0.401942 | 1.47E-19 | 0.37135072 | 1.02E-16 | 0.096948 | 0.03623  |
| 0.60696 | 0.124384 | 0.00712  | -0.034   | 0.46356  | 0.15463462 | 0.0008   | 0.439662 | 1.70E-23 |
| 0.4312  | 0.022173 | 0.6327   | -0.13838 | 0.00273  | 0.11618073 | 0.01199  | 0.293574 | 9.78E-11 |
| 0.71831 | -0.01632 | 0.72509  | -0.11082 | 0.01658  | 0.05994622 | 0.19596  | 0.234564 | 2.94E-07 |
| 0.77274 | -0.15106 | 0.00106  | -0.41203 | 1.45E-20 | -0.0198581 | 0.66863  | 0.08785  | 0.05782  |
| 0.49585 | -0.05697 | 0.21912  | -0.29155 | 1.33E-10 | -0.0432812 | 0.35069  | 0.235275 | 2.70E-07 |
| 0.73345 | -0.16289 | 0.00041  | -0.1552  | 0.00076  | 0.07142763 | 0.12322  | 0.254055 | 2.59E-08 |
| 0.79023 | 0.087484 | 0.05888  | -0.26726 | 4.44E-09 | -0.0421063 | 0.36394  | 0.222696 | 1.17E-06 |
| 0.92257 | 0.04112  | 0.37529  | -0.1537  | 0.00086  | -0.0202189 | 0.66298  | 0.15994  | 0.00052  |
| 0.7692  | -0.00079 | 0.98635  | -0.03926 | 0.39731  | 0.02391653 | 0.60618  | 0.132014 | 0.00427  |
| 0.03834 | -0.16667 | 0.0003   | -0.43063 | 1.66E-22 | -0.0065023 | 0.88855  | 0.235528 | 2.62E-07 |
| 0.72567 | -0.04435 | 0.33888  | -0.17203 | 0.00019  | 0.09731604 | 0.03552  | 0.312844 | 4.62E-12 |
| 0.49834 | 0.094435 | 0.04136  | -0.12203 | 0.00829  | 0.05031341 | 0.2779   | 0.276385 | 1.24E-09 |
| 0.0668  | 0.163185 | 0.0004   | -0.02726 | 0.55685  | 0.15411816 | 0.00083  | 0.326715 | 4.45E-13 |

|         |          |          |          |          |            |          |          |          |
|---------|----------|----------|----------|----------|------------|----------|----------|----------|
| 0.7715  | 0.106303 | 0.02159  | -0.03277 | 0.47984  | 0.14454299 | 0.00174  | 0.373401 | 6.73E-17 |
| 0.47625 | 0.048009 | 0.30053  | -0.07127 | 0.12403  | 0.00909664 | 0.84457  | 0.130809 | 0.00463  |
| 0.93151 | 0.014711 | 0.75118  | -0.23127 | 4.35E-07 | 0.03739976 | 0.42005  | 0.223672 | 1.05E-06 |
| 0.91192 | 0.053207 | 0.25115  | -0.27249 | 2.14E-09 | -0.0355724 | 0.44314  | 0.249808 | 4.48E-08 |
| 0.76385 | 0.057192 | 0.21734  | -0.13524 | 0.00341  | -0.0068457 | 0.8827   | 0.219762 | 1.63E-06 |
| 0.03047 | 0.287384 | 2.49E-10 | -0.02352 | 0.61213  | 0.24496462 | 8.26E-08 | 0.371816 | 9.30E-17 |
| 0.8976  | 0.003738 | 0.93579  | -0.06061 | 0.19101  | 0.02589297 | 0.57674  | 0.101152 | 0.02884  |
| 0.63472 | -0.08809 | 0.05715  | -0.22421 | 9.85E-07 | -0.0563172 | 0.22447  | 0.159311 | 0.00055  |
| 0.47274 | 0.0495   | 0.28575  | -0.08514 | 0.06602  | 0.11569964 | 0.01235  | 0.241229 | 1.31E-07 |
| 0.51227 | 0.170933 | 0.00021  | -0.00221 | 0.96193  | 0.10244558 | 0.02685  | 0.30982  | 7.57E-12 |
| 0.51824 | 0.031939 | 0.49112  | -0.07183 | 0.12112  | 0.02309305 | 0.61864  | 0.119668 | 0.00964  |
| 0.83654 | -0.02554 | 0.58201  | -0.14824 | 0.00131  | -0.040444  | 0.3832   | 0.072942 | 0.11545  |
| 0.37122 | 0.02261  | 0.62601  | -0.22975 | 5.19E-07 | -0.0286964 | 0.53618  | 0.194255 | 2.37E-05 |
| 0.20239 | -0.01318 | 0.77641  | -0.17197 | 0.00019  | 0.03364178 | 0.46829  | 0.304395 | 1.81E-11 |
| 0.2353  | -0.11542 | 0.01257  | -0.28055 | 6.79E-10 | -0.0150981 | 0.74487  | 0.263519 | 7.38E-09 |
| 0.65645 | -0.01777 | 0.70177  | -0.2512  | 3.75E-08 | 0.08846087 | 0.0561   | 0.346228 | 1.34E-14 |
| 0.08057 | 0.169146 | 0.00024  | 0.031321 | 0.49954  | 0.14737873 | 0.0014   | 0.270851 | 2.70E-09 |
| 0.18941 | 0.316568 | 2.49E-12 | -0.05419 | 0.24249  | 0.10148499 | 0.02831  | 0.241442 | 1.28E-07 |
| 0.69902 | -0.07659 | 0.09832  | -0.08591 | 0.06361  | 0.03855312 | 0.40585  | 0.112455 | 0.01504  |
| 0.98494 | 0.204236 | 8.64E-06 | 0.003622 | 0.93778  | 0.10410151 | 0.02447  | 0.238994 | 1.72E-07 |
| 0.59114 | 0.049466 | 0.28608  | -0.1062  | 0.02172  | -0.0279428 | 0.54694  | 0.138014 | 0.0028   |
| 0.55655 | 0.072086 | 0.11979  | -0.14151 | 0.00217  | 0.03414549 | 0.46165  | 0.260747 | 1.07E-08 |
| 0.42519 | 0.048431 | 0.2963   | -0.18949 | 3.77E-05 | -0.0967547 | 0.0366   | 0.098454 | 0.03341  |
| 0.72753 | 0.024294 | 0.60051  | -0.19975 | 1.37E-05 | -0.0493931 | 0.28679  | 0.206637 | 6.73E-06 |
| 0.68747 | 0.085516 | 0.06483  | -0.15175 | 0.001    | -0.050299  | 0.27803  | 0.20009  | 1.32E-05 |
| 0.78459 | 0.161371 | 0.00046  | -0.17308 | 0.00017  | -0.0565687 | 0.2224   | 0.153811 | 0.00085  |
| 0.82826 | -0.0868  | 0.0609   | -0.11757 | 0.011    | 0.00330729 | 0.94318  | 0.12919  | 0.00517  |
| 0.7862  | 0.138642 | 0.00268  | -0.09026 | 0.05125  | 0.09574176 | 0.03862  | 0.26983  | 3.11E-09 |
| 0.4016  | 0.084287 | 0.06879  | -0.12841 | 0.00545  | 0.04543707 | 0.3272   | 0.216212 | 2.41E-06 |
| 0.00743 | 0.050936 | 0.27198  | -0.10821 | 0.01934  | -0.0959524 | 0.03819  | 0.026967 | 0.56103  |
| 0.47383 | 0.092327 | 0.04614  | -0.19248 | 2.82E-05 | -0.0960394 | 0.03802  | 0.084109 | 0.06938  |
| 0.15033 | 0.097785 | 0.03464  | -0.13796 | 0.00281  | -0.4935264 | 4.85E-30 | -0.3129  | 4.57E-12 |
| 0.4101  | 0.204798 | 8.15E-06 | 0.302924 | 2.29E-11 | 0.24801018 | 5.63E-08 | -0.0925  | 0.04572  |
| 0.87384 | 0.031578 | 0.49603  | -0.11554 | 0.01247  | 0.09900731 | 0.03243  | 0.178557 | 0.0001   |
| 0.06069 | -0.02378 | 0.60827  | -0.1419  | 0.00211  | 0.0711348  | 0.12477  | 0.236836 | 2.24E-07 |
| 0.725   | 0.385012 | 5.98E-18 | 0.140105 | 0.00241  | 0.00868234 | 0.85156  | 0.043591 | 0.34725  |
| 0.36286 | 0.000199 | 0.99658  | -0.23013 | 4.97E-07 | -0.0709734 | 0.12563  | 0.037198 | 0.42257  |
| 0.14264 | 0.077599 | 0.09394  | -0.14933 | 0.00121  | -0.0766296 | 0.09813  | 0.102787 | 0.02634  |
| 0.00389 | 0.039525 | 0.39411  | -0.11408 | 0.01364  | 0.01371522 | 0.76753  | 0.198442 | 1.56E-05 |
| 0.35851 | 0.155809 | 0.00073  | 0.373248 | 6.95E-17 | 0.24869003 | 5.16E-08 | -0.00915 | 0.84362  |
| 0.3492  | 0.013911 | 0.7643   | -0.17449 | 0.00015  | -0.0100844 | 0.82794  | 0.14751  | 0.00139  |
| 0.00375 | -0.1949  | 2.22E-05 | -0.42912 | 2.40E-22 | -0.2091984 | 5.13E-06 | -0.06326 | 0.17233  |
| 0.1951  | 0.179214 | 9.86E-05 | -0.09893 | 0.03257  | -0.0613732 | 0.18551  | 0.067775 | 0.14364  |
| 0.65537 | 0.100738 | 0.02951  | -0.06202 | 0.18092  | 0.02932719 | 0.52725  | 0.165275 | 0.00033  |
| 0.52501 | -0.0243  | 0.60048  | -0.30018 | 3.52E-11 | -0.0529343 | 0.2536   | 0.154495 | 0.00081  |



|          |          |          |          |          |            |          |          |          |
|----------|----------|----------|----------|----------|------------|----------|----------|----------|
| 0.61545  | 0.008918 | 0.84758  | 0.189525 | 3.75E-05 | 0.18870531 | 4.06E-05 | -0.02704 | 0.55996  |
| 0.71168  | 0.116486 | 0.01176  | -0.15465 | 0.0008   | -0.0244987 | 0.59744  | 0.171739 | 0.00019  |
| 0.3004   | 0.01329  | 0.77455  | -0.24409 | 9.21E-08 | -0.0840222 | 0.06967  | 0.120673 | 0.00905  |
| 0.2452   | 0.024811 | 0.59278  | -0.14868 | 0.00127  | -0.0815954 | 0.07815  | 0.017508 | 0.7059   |
| 3.34E-08 | -0.132   | 0.00427  | -0.16492 | 0.00035  | 0.03872424 | 0.40377  | 0.184572 | 6.01E-05 |
| 0.14827  | 0.072683 | 0.11675  | -0.18035 | 8.89E-05 | 0.02493233 | 0.59097  | 0.215524 | 2.60E-06 |
| 0.31879  | 0.090722 | 0.05008  | -0.20132 | 1.17E-05 | -0.075138  | 0.10487  | 0.157267 | 0.00065  |
| 0.47501  | 0.032622 | 0.4819   | -0.23628 | 2.40E-07 | -0.1119943 | 0.01546  | 0.065663 | 0.15657  |
| 0.97832  | 0.134455 | 0.0036   | -0.08516 | 0.06595  | 0.03464575 | 0.45511  | 0.149457 | 0.0012   |
| 0.99559  | 0.033141 | 0.47494  | -0.19348 | 2.56E-05 | -0.0265917 | 0.5665   | 0.133361 | 0.00389  |
| 0.9929   | 0.029261 | 0.52819  | -0.16571 | 0.00032  | -0.0602438 | 0.19375  | -0.01031 | 0.82409  |
| 0.14558  | 0.105691 | 0.02236  | 0.261174 | 1.01E-08 | 0.29870544 | 4.43E-11 | 0.009668 | 0.83494  |
| 0.60114  | -0.08514 | 0.06602  | -0.25705 | 1.75E-08 | -0.0253006 | 0.5855   | 0.186262 | 5.12E-05 |
| 0.86692  | 0.07354  | 0.11249  | -0.02326 | 0.61615  | 0.04692015 | 0.31164  | 0.165475 | 0.00033  |
| 0.26109  | 0.073505 | 0.11266  | -0.25439 | 2.48E-08 | -0.2527138 | 3.08E-08 | -0.04481 | 0.33391  |
| 0.32709  | 0.087996 | 0.05741  | -0.06291 | 0.17471  | -0.1336583 | 0.00381  | -0.003   | 0.94847  |
| 0.02876  | 0.139658 | 0.00249  | -0.05239 | 0.25855  | 0.02957262 | 0.5238   | 0.136218 | 0.00318  |
| 0.20207  | -0.18857 | 4.11E-05 | -0.24368 | 9.69E-08 | 0.0796625  | 0.0855   | 0.191392 | 3.13E-05 |
| 0.95486  | -0.17602 | 0.00013  | -0.30062 | 3.29E-11 | -0.0298247 | 0.52027  | 0.050379 | 0.27727  |
| 0.2713   | -0.01602 | 0.72994  | -0.12282 | 0.00788  | -0.0551602 | 0.23415  | -0.00645 | 0.88944  |
| 0.77781  | 0.010854 | 0.81503  | -0.24653 | 6.78E-08 | -0.0677696 | 0.14367  | 0.157735 | 0.00062  |
| 0.08037  | 0.133302 | 0.0039   | -0.01907 | 0.68101  | 0.05806116 | 0.21042  | 0.164004 | 0.00037  |
| 0.2213   | 0.004112 | 0.92939  | -0.1065  | 0.02134  | -0.038793  | 0.40293  | 0.080114 | 0.08373  |
| 0.88581  | 0.049422 | 0.28651  | -0.20105 | 1.20E-05 | -0.1310737 | 0.00455  | 0.029369 | 0.52667  |
| 0.42516  | 0.079289 | 0.08698  | -0.14473 | 0.00171  | 0.17989491 | 9.26E-05 | 0.380668 | 1.50E-17 |
| 0.66008  | 0.09686  | 0.0364   | -0.09299 | 0.04459  | -0.0833955 | 0.07178  | -0.02105 | 0.65001  |
| 0.20295  | -0.10468 | 0.02368  | -0.27772 | 1.02E-09 | -0.1866257 | 4.95E-05 | 0.004095 | 0.92967  |
| 0.69916  | 0.046483 | 0.31617  | -0.22968 | 5.24E-07 | -0.0318168 | 0.49278  | 0.245987 | 7.26E-08 |
| 0.01715  | -0.27112 | 2.60E-09 | 0.11303  | 0.01453  | 0.0203152  | 0.66147  | -0.14559 | 0.00161  |
| 0.41468  | 0.210317 | 4.56E-06 | -0.0546  | 0.23897  | -0.084973  | 0.06655  | 0.149807 | 0.00117  |
| 0.05346  | 0.136717 | 0.00307  | 0.580378 | 2.13E-43 | 0.31671737 | 2.43E-12 | 0.078204 | 0.0914   |
| 0.08587  | -0.03245 | 0.48419  | -0.15645 | 0.00069  | 0.05063561 | 0.27483  | 0.293675 | 9.63E-11 |
| 0.47306  | 0.042156 | 0.36337  | -0.15901 | 0.00056  | -0.0351099 | 0.44909  | 0.13619  | 0.00319  |
| 5.59E-05 | 0.110082 | 0.01732  | -0.05807 | 0.21036  | 0.01967122 | 0.67157  | 0.149429 | 0.0012   |
| 0.3009   | 0.103576 | 0.0252   | -0.00277 | 0.95248  | 0.20187697 | 1.10E-05 | 0.262416 | 8.57E-09 |
| 0.45217  | 0.060282 | 0.19347  | -0.38736 | 3.62E-18 | -0.1931078 | 2.65E-05 | 0.070405 | 0.12869  |
| 0.90912  | 0.095889 | 0.03832  | -0.20952 | 4.96E-06 | 0.00963667 | 0.83547  | 0.267639 | 4.21E-09 |
| 0.69054  | 0.096186 | 0.03772  | -0.15571 | 0.00073  | 0.08349447 | 0.07144  | 0.318626 | 1.77E-12 |
| 0.40135  | 0.041373 | 0.37236  | -0.08482 | 0.06704  | 0.0656379  | 0.15672  | 0.166734 | 0.0003   |
| 0.56562  | 0.013204 | 0.77597  | -0.32643 | 4.68E-13 | -0.0683593 | 0.14021  | 0.175083 | 0.00014  |
| 0.60473  | 0.17207  | 0.00019  | -0.07578 | 0.10194  | 0.03628343 | 0.43407  | 0.072534 | 0.11751  |
| 0.71472  | 0.094723 | 0.04075  | 0.029472 | 0.52521  | 0.17672997 | 0.00012  | 0.260281 | 1.14E-08 |
| 0.93953  | 0.00669  | 0.88536  | -0.18492 | 5.82E-05 | 0.02805596 | 0.54532  | 0.255041 | 2.28E-08 |
| 0.00496  | -0.12459 | 0.00703  | -0.19302 | 2.67E-05 | -0.0763749 | 0.09926  | 0.071481 | 0.12294  |
| 0.31336  | 0.002118 | 0.96359  | -0.2484  | 5.36E-08 | -0.0745218 | 0.10776  | 0.156614 | 0.00068  |

|          |          |          |          |          |            |          |          |          |
|----------|----------|----------|----------|----------|------------|----------|----------|----------|
| 0.66028  | -0.00089 | 0.98463  | -0.26712 | 4.52E-09 | -0.1176107 | 0.01097  | 0.112985 | 0.01457  |
| 0.31845  | 0.033466 | 0.47062  | -0.13622 | 0.00318  | 0.02958176 | 0.52367  | 0.19981  | 1.36E-05 |
| 0.0119   | 0.184601 | 5.99E-05 | -0.09435 | 0.04156  | -0.1119025 | 0.01555  | 0.003214 | 0.94477  |
| 0.46628  | -0.02889 | 0.53341  | -0.27824 | 9.47E-10 | -0.0343417 | 0.45908  | 0.243458 | 9.96E-08 |
| 0.05081  | 0.079963 | 0.08432  | 0.601575 | 2.66E-47 | 0.36003417 | 9.71E-16 | 0.018939 | 0.68311  |
| 0.58282  | 0.0533   | 0.25033  | -0.20404 | 8.82E-06 | -0.0525504 | 0.25706  | 0.216331 | 2.38E-06 |
| 0.65562  | 0.114803 | 0.01305  | -0.24536 | 7.86E-08 | -0.0605287 | 0.19164  | 0.218155 | 1.94E-06 |
| 0.12452  | 0.183334 | 6.75E-05 | -0.05018 | 0.27914  | 0.03526608 | 0.44707  | 0.136479 | 0.00312  |
| 0.51881  | 0.167032 | 0.00029  | -0.08526 | 0.06565  | -0.0525965 | 0.25664  | 0.060122 | 0.19465  |
| 0.74365  | -0.00733 | 0.87452  | -0.29942 | 3.96E-11 | -0.0448558 | 0.33343  | 0.202219 | 1.06E-05 |
| 0.03699  | 0.087455 | 0.05896  | -0.04149 | 0.37101  | 0.11209033 | 0.01537  | 0.145685 | 0.0016   |
| 3.78E-06 | 0.095721 | 0.03866  | -0.01832 | 0.69294  | 0.04174782 | 0.36804  | 0.1386   | 0.00269  |
| 0.44304  | 0.075496 | 0.10322  | -0.0726  | 0.11718  | 0.13704972 | 0.003    | 0.346878 | 1.19E-14 |
| 0.97974  | 0.02105  | 0.65002  | -0.15592 | 0.00072  | -0.0928309 | 0.04496  | 0.019042 | 0.68149  |
| 0.42828  | 0.062032 | 0.18082  | -0.13373 | 0.00379  | -0.0722109 | 0.11915  | 0.058463 | 0.20728  |
| 0.28561  | -0.05028 | 0.27819  | 0.257161 | 1.73E-08 | 0.39081542 | 1.72E-18 | 0.124013 | 0.00729  |
| 0.94155  | -0.05302 | 0.25282  | -0.19958 | 1.39E-05 | 0.06917938 | 0.1355   | 0.176857 | 0.00012  |
| 0.86164  | 0.079717 | 0.08528  | -0.08779 | 0.05798  | -0.0377563 | 0.41563  | 0.074515 | 0.10779  |
| 0.211    | 0.014752 | 0.75052  | -0.29197 | 1.25E-10 | -0.0538104 | 0.24581  | 0.174428 | 0.00015  |
| 0.74438  | 0.044835 | 0.33365  | -0.23237 | 3.82E-07 | -0.0382709 | 0.4093   | 0.241055 | 1.34E-07 |
| 0.91091  | 0.045563 | 0.32586  | -0.17923 | 9.84E-05 | 0.00924959 | 0.84199  | 0.286776 | 2.72E-10 |
| 0.76244  | 0.089925 | 0.05214  | -0.19304 | 2.67E-05 | 0.01178154 | 0.79955  | 0.268511 | 3.73E-09 |
| 0.54199  | 0.093964 | 0.04239  | -0.10711 | 0.02061  | 0.08708292 | 0.06005  | 0.369968 | 1.35E-16 |
| 0.86907  | 0.016701 | 0.71887  | -0.21792 | 2.00E-06 | 0.00852093 | 0.85429  | 0.275288 | 1.45E-09 |
| 0.66166  | 0.042479 | 0.3597   | -0.21973 | 1.63E-06 | -0.0368979 | 0.42632  | 0.241823 | 1.22E-07 |
| 0.65922  | 0.106211 | 0.0217   | -0.14023 | 0.00239  | 0.07219474 | 0.11923  | 0.336848 | 7.46E-14 |
| 0.85188  | -0.11188 | 0.01557  | -0.33242 | 1.64E-13 | -0.0556486 | 0.23003  | 0.191502 | 3.10E-05 |
| 0.48827  | 0.023622 | 0.61062  | -0.23448 | 2.97E-07 | -0.0735444 | 0.11247  | 0.176125 | 0.00013  |
| 0.95799  | 0.022045 | 0.63466  | -0.16778 | 0.00027  | -0.0003428 | 0.9941   | 0.209212 | 5.13E-06 |
| 0.2685   | 0.017188 | 0.71103  | -0.22564 | 8.36E-07 | -0.0540407 | 0.2438   | 0.168489 | 0.00025  |
| 0.49192  | 0.04026  | 0.38537  | -0.17791 | 0.00011  | 0.0059985  | 0.89713  | 0.233876 | 3.19E-07 |
| 0.6763   | 0.042348 | 0.36119  | -0.21959 | 1.66E-06 | -0.0380431 | 0.4121   | 0.242883 | 1.07E-07 |
| 0.83166  | 0.050015 | 0.28076  | -0.20977 | 4.83E-06 | -0.0189629 | 0.68274  | 0.264497 | 6.47E-09 |
| 3.38E-05 | -0.00089 | 0.98472  | -0.20331 | 9.50E-06 | -0.0491077 | 0.28959  | 0.126304 | 0.00627  |
| 0.68123  | 0.054589 | 0.23904  | -0.14792 | 0.00135  | 0.01648772 | 0.72231  | 0.193869 | 2.46E-05 |
| 0.75135  | -0.03817 | 0.41053  | -0.21363 | 3.19E-06 | 0.0057071  | 0.90211  | 0.215565 | 2.59E-06 |
| 0.76932  | 0.087488 | 0.05887  | -0.11755 | 0.01101  | 0.04209102 | 0.36411  | 0.21444  | 2.92E-06 |
| 0.53631  | 0.020457 | 0.65926  | -0.09083 | 0.04981  | -0.0156699 | 0.73556  | 0.08915  | 0.0542   |
| 0.86881  | 0.041576 | 0.37002  | -0.12094 | 0.00889  | -0.0002012 | 0.99654  | 0.166384 | 0.0003   |
| 0.0001   | -0.16392 | 0.00038  | -0.27934 | 8.09E-10 | -0.0565625 | 0.22245  | 0.143458 | 0.00188  |
| 0.45687  | -0.05986 | 0.19661  | -0.27689 | 1.15E-09 | -0.045843  | 0.32289  | 0.155888 | 0.00072  |
| 0.84371  | 0.055346 | 0.23257  | -0.26563 | 5.54E-09 | -0.1803533 | 8.88E-05 | 0.053985 | 0.24428  |
| 0.00035  | 0.009723 | 0.83401  | -0.13427 | 0.00365  | -0.1180213 | 0.01069  | -0.1154  | 0.01258  |
| 0.27125  | -0.03899 | 0.40054  | -0.07017 | 0.12996  | 0.11774321 | 0.01088  | 0.314369 | 3.59E-12 |
| 0.93643  | 0.156243 | 0.0007   | -0.04696 | 0.31126  | -0.1408837 | 0.00228  | -0.07017 | 0.12998  |

|          |          |          |          |          |            |          |          |          |
|----------|----------|----------|----------|----------|------------|----------|----------|----------|
| 5.25E-07 | 0.169253 | 0.00024  | 0.016245 | 0.72623  | 0.06997391 | 0.13106  | 0.159037 | 0.00056  |
| 0.12845  | -0.00622 | 0.89333  | 0.297601 | 5.26E-11 | 0.0199799  | 0.66672  | -0.23666 | 2.29E-07 |
| 0.85754  | 0.051185 | 0.26965  | -0.20527 | 7.76E-06 | -0.0225083 | 0.62756  | 0.248788 | 5.10E-08 |
| 0.20972  | 0.213879 | 3.11E-06 | 0.463405 | 3.08E-26 | 0.19999797 | 1.33E-05 | 0.032131 | 0.48851  |
| 0.00101  | -0.07578 | 0.10194  | 0.059614 | 0.19846  | 0.24367048 | 9.70E-08 | 0.05958  | 0.19871  |
| 0.76704  | 0.048143 | 0.29918  | -0.18255 | 7.25E-05 | -0.0367749 | 0.42786  | 0.174084 | 0.00016  |
| 0.20283  | 0.032566 | 0.48265  | -0.07943 | 0.08642  | 0.01799464 | 0.69812  | 0.126931 | 0.00602  |
| 0.70883  | 0.032351 | 0.48554  | -0.25468 | 2.39E-08 | -0.0697992 | 0.13202  | 0.093869 | 0.04261  |
| 0.0527   | 0.079979 | 0.08426  | -0.06838 | 0.14008  | -0.0091454 | 0.84374  | 0.084591 | 0.06779  |
| 0.03653  | -0.0038  | 0.93475  | -0.21525 | 2.68E-06 | -0.0128545 | 0.78174  | 0.210641 | 4.40E-06 |
| 0.00022  | -0.07902 | 0.08808  | -0.18683 | 4.86E-05 | 0.01350705 | 0.77096  | 0.179237 | 9.84E-05 |
| 0.06275  | -0.0201  | 0.66488  | -0.24996 | 4.39E-08 | -0.0133453 | 0.77363  | 0.147266 | 0.00142  |
| 0.90876  | 0.055695 | 0.22964  | -0.23925 | 1.67E-07 | -0.075318  | 0.10404  | 0.116711 | 0.0116   |
| 0.00056  | 0.151113 | 0.00105  | -0.0258  | 0.57816  | 0.04599121 | 0.32132  | 0.157345 | 0.00064  |
| 0.48999  | -0.01544 | 0.73929  | -0.2036  | 9.22E-06 | -0.0749567 | 0.10571  | 0.064216 | 0.16592  |
| 0.5587   | -0.12943 | 0.00509  | 0.241872 | 1.21E-07 | 0.32969819 | 2.65E-13 | 0.075023 | 0.1054   |
| 0.2922   | -0.03396 | 0.46407  | -0.03402 | 0.46326  | 0.0297291  | 0.52161  | 0.162881 | 0.00041  |
| 0.64169  | 0.273708 | 1.81E-09 | 0.156283 | 0.0007   | 0.335303   | 9.84E-14 | 0.518775 | 1.56E-33 |
| 0.49502  | 0.080785 | 0.08117  | -0.04548 | 0.32672  | 0.27904794 | 8.44E-10 | 0.439757 | 1.66E-23 |
| 0.93107  | 0.045614 | 0.32531  | -0.16448 | 0.00036  | -0.0392932 | 0.39689  | 0.16943  | 0.00023  |
| 0.74484  | 0.064562 | 0.16365  | -0.22299 | 1.13E-06 | -0.0319442 | 0.49105  | 0.195834 | 2.03E-05 |
| 0.11737  | -0.23073 | 4.63E-07 | -0.35127 | 5.22E-15 | -0.1541729 | 0.00083  | 0.012144 | 0.79351  |
| 0.30178  | -0.21548 | 2.61E-06 | -0.19913 | 1.46E-05 | -0.003902  | 0.93298  | 0.085693 | 0.06427  |
| 0.53249  | 0.156835 | 0.00067  | -0.00873 | 0.85083  | 0.07604915 | 0.10071  | 0.165215 | 0.00034  |
| 0.48219  | 0.032392 | 0.48499  | -0.1318  | 0.00433  | 0.01292212 | 0.78062  | 0.166559 | 0.0003   |
| 1.30E-10 | 0.011421 | 0.80555  | -0.17801 | 0.00011  | -0.0860845 | 0.06306  | 0.090841 | 0.04978  |
| 0.27059  | 0.018338 | 0.69265  | -0.19801 | 1.63E-05 | -0.0097961 | 0.83278  | 0.197385 | 1.74E-05 |
| 0.37938  | 0.057749 | 0.21289  | -0.17318 | 0.00017  | 0.1583346  | 0.00059  | 0.265936 | 5.32E-09 |
| 0.58079  | 0.37151  | 9.90E-17 | 0.515133 | 5.20E-33 | 0.22639431 | 7.67E-07 | 0.013797 | 0.76618  |
| 0.30039  | 0.025426 | 0.58364  | -0.03625 | 0.43447  | 0.07462888 | 0.10725  | 0.179215 | 9.86E-05 |
| 0.19107  | 0.022384 | 0.62946  | -0.10962 | 0.01781  | 0.00894483 | 0.84713  | 0.125418 | 0.00665  |
| 0.53214  | 0.013526 | 0.77065  | -0.24357 | 9.83E-08 | -0.0302036 | 0.51498  | 0.206423 | 6.88E-06 |
| 0.9299   | -0.02605 | 0.57441  | -0.23131 | 4.33E-07 | -0.1054784 | 0.02263  | 0.023425 | 0.6136   |
| 0.38613  | -0.01224 | 0.7919   | -0.11921 | 0.00992  | 0.31314033 | 4.40E-12 | 0.459727 | 8.47E-26 |
| 0.00263  | -0.04798 | 0.30083  | -0.0951  | 0.03995  | 0.35799719 | 1.44E-15 | 0.529466 | 4.21E-35 |
| 0.65227  | 0.036939 | 0.42581  | -0.22913 | 5.59E-07 | 0.00960855 | 0.83594  | 0.278871 | 8.66E-10 |
| 0.16573  | 0.199305 | 1.43E-05 | 0.000611 | 0.9895   | 0.00609693 | 0.89546  | 0.040708 | 0.38009  |
| 0.06114  | 0.013687 | 0.768    | -0.16124 | 0.00047  | 0.10684321 | 0.02093  | 0.257514 | 1.65E-08 |
| 0.21531  | -0.10564 | 0.02242  | -0.36991 | 1.37E-16 | -0.3188037 | 1.72E-12 | -0.11896 | 0.01008  |
| 0.60524  | 0.0099   | 0.83103  | -0.21205 | 3.79E-06 | -0.0555985 | 0.23045  | 0.171481 | 0.0002   |
| 0.18643  | -0.05472 | 0.2379   | -0.16576 | 0.00032  | -0.0670588 | 0.14793  | 0.077028 | 0.09639  |
| 0.25873  | 0.164996 | 0.00034  | -0.05913 | 0.20217  | 0.11116403 | 0.01625  | 0.298516 | 4.57E-11 |
| 0.96164  | -0.00302 | 0.94803  | -0.22999 | 5.05E-07 | 0.0084804  | 0.85497  | 0.260811 | 1.06E-08 |
| 0.3046   | -0.3165  | 2.52E-12 | -0.3676  | 2.18E-16 | 0.04380431 | 0.3449   | 0.11129  | 0.01613  |
| 0.59239  | 0.012783 | 0.78292  | -0.19923 | 1.44E-05 | -0.024547  | 0.59672  | 0.189096 | 3.91E-05 |

|         |          |          |          |          |            |          |          |          |
|---------|----------|----------|----------|----------|------------|----------|----------|----------|
| 0.45225 | 0.062508 | 0.17749  | -0.13349 | 0.00385  | 0.00507662 | 0.91287  | 0.161649 | 0.00045  |
| 0.1183  | -0.02962 | 0.52313  | 0.418165 | 3.43E-21 | 0.41520989 | 6.90E-21 | 0.092388 | 0.046    |
| 0.68157 | -0.02277 | 0.62362  | -0.23495 | 2.81E-07 | -0.0952414 | 0.03965  | 0.133038 | 0.00398  |
| 0.9735  | 0.051076 | 0.27067  | -0.0232  | 0.61706  | 0.08437588 | 0.06849  | 0.154673 | 0.0008   |
| 0.18384 | 0.033052 | 0.47613  | -0.12316 | 0.00771  | 0.07874048 | 0.08919  | 0.233233 | 3.45E-07 |
| 0.3036  | 0.020677 | 0.65582  | -0.11335 | 0.01425  | 0.11018346 | 0.01722  | 0.225782 | 8.23E-07 |
| 0.90842 | -0.01335 | 0.77354  | -0.2915  | 1.34E-10 | -0.1497859 | 0.00117  | 0.040214 | 0.38592  |
| 0.05996 | -0.18096 | 8.41E-05 | -0.22308 | 1.12E-06 | 0.01808811 | 0.69663  | 0.186186 | 5.16E-05 |
| 0.56911 | -0.02515 | 0.58772  | -0.11907 | 0.01001  | -0.0381623 | 0.41063  | 0.069534 | 0.1335   |
| 0.72753 | 0.078032 | 0.09212  | -0.16431 | 0.00036  | -0.0273692 | 0.55521  | 0.141316 | 0.00221  |
| 0.44864 | -0.03624 | 0.43462  | -0.25262 | 3.12E-08 | -0.0344271 | 0.45797  | 0.180595 | 8.69E-05 |
| 0.09677 | -0.15922 | 0.00055  | 0.067681 | 0.14419  | 0.13966026 | 0.00249  | -0.05769 | 0.21337  |
| 0.63823 | -0.01868 | 0.68727  | -0.35852 | 1.30E-15 | -0.1905169 | 3.41E-05 | -0.03653 | 0.431    |
| 0.70696 | 0.087644 | 0.05842  | -0.09381 | 0.04274  | 0.1229572  | 0.00781  | 0.416947 | 4.58E-21 |
| 0.16028 | -0.08741 | 0.0591   | -0.3184  | 1.83E-12 | -0.0862223 | 0.06264  | 0.097412 | 0.03534  |
| 0.41803 | 0.13542  | 0.00337  | -0.06846 | 0.13962  | 0.00874834 | 0.85045  | 0.09807  | 0.03411  |
| 0.5109  | -0.02605 | 0.57445  | -0.21294 | 3.44E-06 | 0.02994681 | 0.51856  | 0.250649 | 4.02E-08 |
| 0.61319 | -0.02607 | 0.5742   | -0.25094 | 3.88E-08 | -0.0736868 | 0.11177  | 0.122611 | 0.00799  |
| 0.01099 | 0.273968 | 1.74E-09 | 0.030313 | 0.51346  | 0.10264306 | 0.02655  | 0.303651 | 2.04E-11 |
| 0.50904 | 0.073492 | 0.11272  | -0.08656 | 0.06162  | -0.0345919 | 0.45581  | 0.108145 | 0.01941  |
| 0.61573 | 0.356717 | 1.85E-15 | 0.389772 | 2.16E-18 | 0.20889388 | 5.30E-06 | -0.03073 | 0.50765  |
| 0.57626 | 0.026379 | 0.56961  | -0.07543 | 0.10351  | 0.12955181 | 0.00505  | 0.203314 | 9.50E-06 |
| 0.8596  | 0.124826 | 0.00692  | 0.544432 | 2.15E-37 | 0.38700989 | 3.90E-18 | 0.119723 | 0.00961  |
| 0.20016 | 0.013254 | 0.77513  | -0.27053 | 2.82E-09 | -0.4814803 | 1.79E-28 | -0.35531 | 2.42E-15 |
| 0.17424 | -0.02591 | 0.57648  | -0.24694 | 6.45E-08 | 0.07420056 | 0.10929  | 0.279056 | 8.43E-10 |
| 0.64385 | 0.010264 | 0.82492  | -0.2633  | 7.60E-09 | -0.1390051 | 0.00261  | 0.046302 | 0.31806  |
| 0.90812 | 0.052944 | 0.25351  | -0.09331 | 0.04385  | 0.00546143 | 0.9063   | 0.139024 | 0.0026   |
| 0.7216  | -0.17141 | 0.0002   | -0.29988 | 3.69E-11 | 0.03178981 | 0.49314  | 0.24262  | 1.11E-07 |
| 0.29344 | -0.07272 | 0.11656  | -0.11765 | 0.01095  | 0.19165188 | 3.06E-05 | 0.239032 | 1.72E-07 |
| 0.21273 | 0.087091 | 0.06003  | -0.07617 | 0.10015  | -0.0226095 | 0.62601  | 0.0685   | 0.13939  |
| 0.01724 | 0.202115 | 1.07E-05 | -0.0928  | 0.04504  | -0.0284504 | 0.53968  | 0.161477 | 0.00046  |
| 0.98079 | 0.137038 | 0.003    | -0.07168 | 0.12189  | 0.22515982 | 8.83E-07 | 0.486392 | 4.18E-29 |
| 0.68922 | -0.23297 | 3.56E-07 | -0.2652  | 5.87E-09 | 0.09233017 | 0.04613  | 0.320507 | 1.29E-12 |
| 0.80524 | -0.11204 | 0.01542  | -0.23788 | 1.97E-07 | -0.0529887 | 0.25311  | 0.084744 | 0.06729  |
| 0.79651 | -0.02397 | 0.60541  | -0.21296 | 3.43E-06 | 0.02437249 | 0.59933  | 0.266137 | 5.17E-09 |
| 0.03714 | 0.186959 | 4.80E-05 | -0.09119 | 0.04891  | 0.01700929 | 0.71391  | 0.244702 | 8.53E-08 |
| 0.8003  | 0.127287 | 0.00588  | -0.07248 | 0.11779  | 0.20221673 | 1.06E-05 | 0.428667 | 2.69E-22 |
| 0.05221 | 0.081702 | 0.07776  | -0.07919 | 0.08736  | 0.09488323 | 0.04041  | 0.182133 | 7.54E-05 |
| 0.76233 | 0.211163 | 4.16E-06 | 0.020106 | 0.66474  | 0.16188721 | 0.00044  | 0.289154 | 1.91E-10 |
| 0.20635 | 0.124577 | 0.00703  | -0.08552 | 0.06481  | -0.0036771 | 0.93683  | 0.123566 | 0.00751  |
| 0.15914 | -0.0147  | 0.7514   | -0.2414  | 1.28E-07 | -0.0877036 | 0.05824  | 0.058506 | 0.20694  |
| 0.1493  | 0.192577 | 2.79E-05 | -0.05125 | 0.26908  | 0.30419294 | 1.87E-11 | 0.574737 | 2.09E-42 |
| 0.48188 | 0.181553 | 7.96E-05 | -0.00925 | 0.842    | 0.29841441 | 4.64E-11 | 0.53724  | 2.81E-36 |
| 0.1794  | 0.391818 | 1.38E-18 | 0.086924 | 0.06052  | 0.08841244 | 0.05623  | 0.282142 | 5.39E-10 |
| 0.35872 | 0.091409 | 0.04836  | -0.09011 | 0.05165  | 0.19229829 | 2.87E-05 | 0.449587 | 1.29E-24 |

|          |          |          |          |          |            |          |          |          |
|----------|----------|----------|----------|----------|------------|----------|----------|----------|
| 0.274    | 0.091423 | 0.04832  | -0.09382 | 0.04271  | 0.02848042 | 0.53925  | 0.165989 | 0.00032  |
| 0.55222  | 0.047445 | 0.30625  | -0.1927  | 2.76E-05 | -0.0446467 | 0.33569  | 0.107202 | 0.0205   |
| 0.43618  | -0.05583 | 0.2285   | -0.11313 | 0.01444  | 0.02066222 | 0.65606  | 0.167396 | 0.00028  |
| 0.09978  | -0.04648 | 0.31618  | -0.31051 | 6.76E-12 | -0.0847356 | 0.06732  | 0.138276 | 0.00275  |
| 0.30349  | 0.059664 | 0.19808  | -0.05292 | 0.25371  | 0.20194986 | 1.09E-05 | 0.434684 | 6.02E-23 |
| 0.13221  | 0.062958 | 0.17439  | -0.1586  | 0.00058  | -0.0935568 | 0.0433   | 0.007769 | 0.86702  |
| 0.93681  | -0.41867 | 3.04E-21 | -0.2147  | 2.84E-06 | -0.2460723 | 7.19E-08 | -0.39248 | 1.20E-18 |
| 0.05188  | -0.1782  | 0.00011  | -0.1775  | 0.00012  | -0.1505636 | 0.0011   | -0.26096 | 1.04E-08 |
| 0.05852  | -0.37337 | 6.78E-17 | -0.10087 | 0.02929  | -0.1316296 | 0.00438  | -0.37379 | 6.22E-17 |
| 0.05307  | 0.523563 | 3.15E-34 | 0.355381 | 2.39E-15 | 0.2300522  | 5.02E-07 | 0.486102 | 4.55E-29 |
| 0.41182  | 0.359539 | 1.07E-15 | 0.192743 | 2.75E-05 | 0.27145141 | 2.48E-09 | 0.300349 | 3.43E-11 |
| 0.0006   | 0.425566 | 5.76E-22 | 0.325053 | 5.93E-13 | 0.45053619 | 1.00E-24 | 0.492367 | 6.91E-30 |
| 0.0408   | 0.343172 | 2.37E-14 | 0.274295 | 1.66E-09 | 0.33240416 | 1.65E-13 | 0.392877 | 1.10E-18 |
| 0.00104  | 0.202685 | 1.01E-05 | 0.059295 | 0.20087  | 0.19808334 | 1.62E-05 | 0.374285 | 5.62E-17 |
| 0.59122  | 0.49813  | 1.18E-30 | 0.419658 | 2.40E-21 | 0.41665315 | 4.91E-21 | 0.573817 | 3.02E-42 |
| 0.0014   | 0.384644 | 6.47E-18 | 0.228614 | 5.93E-07 | 0.33085845 | 2.16E-13 | 0.543727 | 2.77E-37 |
| 2.91E-06 | -0.25656 | 1.87E-08 | -0.1067  | 0.0211   | -0.0900925 | 0.0517   | -0.26704 | 4.57E-09 |
| 0.0132   | 0.276684 | 1.18E-09 | 0.272387 | 2.18E-09 | 0.30914075 | 8.45E-12 | 0.38648  | 4.37E-18 |
| 0.0011   | 0.311695 | 5.57E-12 | 0.164205 | 0.00037  | 0.30264216 | 2.39E-11 | 0.534802 | 6.61E-36 |
| 0.06134  | 0.424119 | 8.19E-22 | 0.128864 | 0.00529  | 0.28308854 | 4.69E-10 | 0.56741  | 3.80E-41 |
| 0.49316  | 0.462219 | 4.27E-26 | 0.294089 | 9.04E-11 | 0.3516581  | 4.86E-15 | 0.501421 | 4.22E-31 |
| 0.02404  | -0.33536 | 9.73E-14 | -0.07683 | 0.09726  | 0.04307722 | 0.35297  | -0.10921 | 0.01824  |
| 0.34177  | 0.403824 | 9.59E-20 | 0.260379 | 1.13E-08 | 0.12383018 | 0.00738  | 0.209247 | 5.11E-06 |
| 0.19346  | 0.372132 | 8.72E-17 | 0.164831 | 0.00035  | 0.1413194  | 0.00221  | 0.25214  | 3.32E-08 |
| 0.86011  | 0.544862 | 1.84E-37 | 0.468819 | 6.80E-27 | 0.31611363 | 2.69E-12 | 0.364802 | 3.80E-16 |
| 0.53539  | 0.400125 | 2.21E-19 | 0.235815 | 2.53E-07 | 0.27776469 | 1.01E-09 | 0.517688 | 2.24E-33 |
| 1.02E-06 | 0.450103 | 1.13E-24 | 0.267103 | 4.53E-09 | 0.1885426  | 4.13E-05 | 0.314726 | 3.39E-12 |
| 0.00193  | 0.385135 | 5.83E-18 | 0.300204 | 3.51E-11 | 0.16375831 | 0.00038  | 0.364357 | 4.15E-16 |
| 0.56153  | 0.359833 | 1.01E-15 | 0.014664 | 0.75196  | 0.27566865 | 1.37E-09 | 0.287708 | 2.37E-10 |
| 3.23E-09 | 0.374717 | 5.14E-17 | 0.307032 | 1.19E-11 | 0.33945364 | 4.66E-14 | 0.428811 | 2.60E-22 |
| 2.35E-07 | 0.302036 | 2.63E-11 | 0.177977 | 0.00011  | 0.09243353 | 0.04589  | 0.225344 | 8.65E-07 |
| 0.32811  | 0.413528 | 1.02E-20 | 0.138409 | 0.00272  | 0.1701334  | 0.00022  | 0.334306 | 1.17E-13 |
| 5.25E-08 | 0.486794 | 3.71E-29 | 0.233137 | 3.49E-07 | 0.02501692 | 0.58971  | 0.163413 | 0.00039  |
| 0.39876  | 0.203424 | 9.39E-06 | 0.169734 | 0.00023  | 0.22109238 | 1.40E-06 | 0.31413  | 3.74E-12 |
| 0.02563  | 0.445466 | 3.81E-24 | 0.425622 | 5.68E-22 | 0.46016285 | 7.52E-26 | 0.431168 | 1.45E-22 |
| 0.02393  | 0.493751 | 4.53E-30 | 0.383733 | 7.85E-18 | 0.31514683 | 3.16E-12 | 0.535819 | 4.63E-36 |
| 0.00205  | 0.471293 | 3.38E-27 | 0.227274 | 6.93E-07 | 0.19668616 | 1.86E-05 | 0.489605 | 1.59E-29 |
| 0.18402  | 0.512399 | 1.27E-32 | 0.223132 | 1.11E-06 | 0.16719516 | 0.00028  | 0.231459 | 4.25E-07 |
| 0.53201  | 0.145034 | 0.00168  | 0.038084 | 0.41159  | 0.0181012  | 0.69642  | 0.140292 | 0.00238  |
| 0.33163  | 0.451236 | 8.34E-25 | 0.183197 | 6.83E-05 | 0.0581744  | 0.20953  | 0.226482 | 7.59E-07 |
| 0.49841  | 0.375213 | 4.64E-17 | 0.261636 | 9.52E-09 | 0.45008592 | 1.13E-24 | 0.698052 | 1.87E-69 |
| 0.62271  | 0.411941 | 1.48E-20 | 0.26628  | 5.07E-09 | 0.25824586 | 1.50E-08 | 0.427502 | 3.59E-22 |
| 0.00295  | 0.417624 | 3.90E-21 | 0.361445 | 7.37E-16 | 0.34024162 | 4.04E-14 | 0.467835 | 8.97E-27 |
| 0.76943  | 0.337005 | 7.25E-14 | 0.05564  | 0.2301   | 0.21829051 | 1.91E-06 | 0.511483 | 1.71E-32 |
| 0.03673  | 0.226088 | 7.94E-07 | 0.136219 | 0.00318  | 0.19627482 | 1.94E-05 | 0.299694 | 3.80E-11 |

|          |          |          |          |          |            |          |          |          |
|----------|----------|----------|----------|----------|------------|----------|----------|----------|
| 0.9246   | 0.334909 | 1.06E-13 | 0.178629 | 0.0001   | 0.50131353 | 4.36E-31 | 0.381293 | 1.31E-17 |
| 0.04062  | 0.408502 | 3.29E-20 | 0.236454 | 2.35E-07 | 0.3520555  | 4.51E-15 | 0.544986 | 1.76E-37 |
| 0.79867  | 0.388328 | 2.94E-18 | 0.300635 | 3.28E-11 | 0.19671701 | 1.86E-05 | 0.35277  | 3.93E-15 |
| 0.06326  | 0.419754 | 2.34E-21 | 0.139132 | 0.00258  | 0.14934978 | 0.00121  | 0.290603 | 1.54E-10 |
| 0.33945  | 0.214491 | 2.91E-06 | 0.19144  | 3.12E-05 | 0.15773018 | 0.00062  | 0.272852 | 2.04E-09 |
| 0.00065  | 0.364121 | 4.35E-16 | 0.122822 | 0.00788  | 0.099758   | 0.03113  | 0.259372 | 1.29E-08 |
| 4.35E-09 | 0.225696 | 8.31E-07 | 0.056822 | 0.22034  | 0.12586485 | 0.00646  | 0.26755  | 4.26E-09 |
| 0.0533   | 0.440221 | 1.48E-23 | 0.206665 | 6.71E-06 | 0.19380843 | 2.48E-05 | 0.486303 | 4.29E-29 |
| 0.68946  | 0.395321 | 6.42E-19 | 0.347305 | 1.10E-14 | 0.28798442 | 2.27E-10 | 0.289765 | 1.74E-10 |
| 0.00191  | 0.219319 | 1.71E-06 | 0.138735 | 0.00266  | 0.2172648  | 2.14E-06 | 0.204984 | 7.99E-06 |
| 0.05951  | 0.252586 | 3.13E-08 | 0.222541 | 1.19E-06 | 0.1373321  | 0.00294  | 0.183024 | 6.94E-05 |
| 0.9846   | 0.381429 | 1.28E-17 | 0.316964 | 2.33E-12 | 0.37831912 | 2.44E-17 | 0.611046 | 3.84E-49 |
| 0.56109  | 0.497486 | 1.44E-30 | 0.162289 | 0.00043  | 0.27854075 | 9.08E-10 | 0.539999 | 1.06E-36 |
| 4.41E-07 | 0.286373 | 2.89E-10 | 0.073162 | 0.11435  | 0.07957379 | 0.08585  | 0.24368  | 9.69E-08 |
| 0.03521  | 0.480892 | 2.12E-28 | 0.432738 | 9.80E-23 | 0.3106224  | 6.64E-12 | 0.540744 | 8.09E-37 |
| 0.03224  | -0.27991 | 7.45E-10 | -0.17225 | 0.00018  | -0.1249687 | 0.00685  | -0.28302 | 4.74E-10 |
| 9.25E-13 | -0.24366 | 9.71E-08 | -0.0958  | 0.0385   | -0.0896888 | 0.05276  | -0.27758 | 1.04E-09 |
| 0.89011  | 0.353791 | 3.24E-15 | 0.111999 | 0.01546  | 0.14292495 | 0.00196  | 0.334841 | 1.07E-13 |
| 0.00059  | 0.348554 | 8.72E-15 | 0.159579 | 0.00054  | 0.2229681  | 1.13E-06 | 0.494764 | 3.32E-30 |
| 0.06978  | 0.315077 | 3.19E-12 | 0.219284 | 1.71E-06 | 0.18835001 | 4.20E-05 | 0.288723 | 2.04E-10 |
| 0.00184  | 0.389237 | 2.42E-18 | 0.253169 | 2.91E-08 | 0.15974119 | 0.00053  | 0.323135 | 8.23E-13 |
| 0.22494  | 0.322757 | 8.78E-13 | 0.184239 | 6.20E-05 | 0.25043508 | 4.13E-08 | 0.491141 | 1.00E-29 |
| 0.05666  | 0.469482 | 5.64E-27 | 0.206501 | 6.82E-06 | 0.26023236 | 1.15E-08 | 0.550298 | 2.52E-38 |
| 6.05E-05 | 0.471775 | 2.95E-27 | 0.439638 | 1.71E-23 | 0.4011007  | 1.77E-19 | 0.58816  | 8.49E-45 |
| 0.00276  | -0.30411 | 1.89E-11 | 0.04386  | 0.34428  | 0.1315364  | 0.00441  | -0.08039 | 0.08268  |
| 0.03353  | 0.361039 | 7.98E-16 | 0.106397 | 0.02147  | 0.04583719 | 0.32295  | 0.111879 | 0.01557  |
| 0.05357  | 0.41313  | 1.12E-20 | 0.340187 | 4.08E-14 | 0.42578388 | 5.46E-22 | 0.628982 | 8.37E-53 |
| 0.64855  | -0.34877 | 8.36E-15 | -0.04246 | 0.35997  | 0.15803085 | 0.00061  | -0.08312 | 0.07274  |
| 0.83974  | 0.419124 | 2.73E-21 | 2.54E-05 | 0.99956  | 0.021132   | 0.64875  | 0.218365 | 1.90E-06 |
| 0.37288  | 0.434374 | 6.51E-23 | 0.273196 | 1.94E-09 | 0.4828614  | 1.19E-28 | 0.706182 | 9.82E-72 |
| 0.76468  | 0.44801  | 1.96E-24 | 0.29116  | 1.41E-10 | 0.31822332 | 1.89E-12 | 0.542183 | 4.83E-37 |
| 7.14E-05 | 0.515834 | 4.13E-33 | 0.358574 | 1.29E-15 | 0.37475884 | 5.10E-17 | 0.561841 | 3.28E-40 |
| 2.42E-06 | 0.457158 | 1.70E-25 | 0.420468 | 1.98E-21 | 0.48795436 | 2.62E-29 | 0.654493 | 1.91E-58 |
| 0.29052  | 0.36002  | 9.74E-16 | 0.126818 | 0.00606  | 0.02397561 | 0.60529  | 0.100791 | 0.02942  |
| 0.37338  | 0.387156 | 3.78E-18 | 0.353671 | 3.31E-15 | 0.53098581 | 2.50E-35 | 0.73747  | 2.75E-81 |
| 3.88E-08 | -0.18247 | 7.31E-05 | -0.05531 | 0.23288  | -0.0070757 | 0.87879  | -0.21244 | 3.63E-06 |
| 1.03E-05 | -0.2772  | 1.10E-09 | -0.20829 | 5.65E-06 | -0.2669836 | 4.61E-09 | -0.40958 | 2.57E-20 |
| 0.652    | 0.410692 | 1.98E-20 | 0.234714 | 2.89E-07 | 0.39978491 | 2.38E-19 | 0.628127 | 1.27E-52 |
| 0.02759  | 0.341689 | 3.10E-14 | 0.14962  | 0.00118  | 0.3352327  | 9.96E-14 | 0.318901 | 1.69E-12 |
| 0.06097  | 0.27169  | 2.40E-09 | 0.048588 | 0.29473  | 0.24416925 | 9.12E-08 | 0.508607 | 4.32E-32 |
| 0.00105  | 0.334973 | 1.04E-13 | 0.130997 | 0.00458  | 0.27976819 | 7.61E-10 | 0.550573 | 2.28E-38 |
| 0.01301  | 0.430275 | 1.81E-22 | 0.255011 | 2.29E-08 | 0.24375119 | 9.60E-08 | 0.542083 | 5.01E-37 |
| 0.09087  | 0.49729  | 1.53E-30 | 0.275912 | 1.32E-09 | 0.30998667 | 7.37E-12 | 0.550745 | 2.14E-38 |
| 0.01492  | -0.27806 | 9.73E-10 | -0.03578 | 0.44053  | -0.0947265 | 0.04074  | -0.24886 | 5.05E-08 |
| 0.39464  | -0.26989 | 3.08E-09 | -0.09723 | 0.03568  | -0.1409614 | 0.00226  | -0.29038 | 1.59E-10 |

|          |          |          |          |          |            |          |          |          |
|----------|----------|----------|----------|----------|------------|----------|----------|----------|
| 0.05397  | 0.27789  | 9.97E-10 | 0.120038 | 0.00942  | 0.09637378 | 0.03735  | 0.236521 | 2.33E-07 |
| 0.08026  | -0.1263  | 0.00628  | -0.00633 | 0.89151  | 0.08097165 | 0.08047  | -0.21246 | 3.62E-06 |
| 0.22461  | 0.218936 | 1.78E-06 | 0.190352 | 3.47E-05 | 0.2802749  | 7.07E-10 | 0.360712 | 8.51E-16 |
| 0.93431  | 0.378912 | 2.16E-17 | 0.175538 | 0.00014  | 0.33818796 | 5.86E-14 | 0.610432 | 5.08E-49 |
| 0.5557   | 0.317076 | 2.29E-12 | 0.156718 | 0.00068  | 0.31422116 | 3.68E-12 | 0.486842 | 3.65E-29 |
| 0.67183  | 0.386312 | 4.53E-18 | 0.338773 | 5.27E-14 | 0.29921204 | 4.10E-11 | 0.348385 | 9.00E-15 |
| 0.04602  | 0.160717 | 0.00049  | 0.005666 | 0.90281  | 0.00599614 | 0.89717  | 0.148688 | 0.00127  |
| 0.4024   | 0.577633 | 6.51E-43 | 0.45584  | 2.43E-25 | 0.37097148 | 1.10E-16 | 0.478346 | 4.46E-28 |
| 0.73711  | -0.26619 | 5.13E-09 | -0.10581 | 0.02221  | -0.0619891 | 0.18113  | -0.25235 | 3.23E-08 |
| 0.02917  | 0.304441 | 1.80E-11 | 0.150447 | 0.00111  | 0.06389785 | 0.16803  | 0.192864 | 2.72E-05 |
| 0.71909  | 0.068489 | 0.13945  | 0.060055 | 0.19515  | 0.10004532 | 0.03065  | 0.206016 | 7.18E-06 |
| 0.04346  | 0.246106 | 7.16E-08 | 0.112072 | 0.01539  | 0.1540999  | 0.00083  | 0.269998 | 3.04E-09 |
| 0.6371   | 0.330803 | 2.18E-13 | 0.165414 | 0.00033  | 0.33337592 | 1.39E-13 | 0.595478 | 3.78E-46 |
| 7.39E-05 | 0.460691 | 6.51E-26 | 0.415885 | 5.88E-21 | 0.27764341 | 1.03E-09 | 0.32594  | 5.09E-13 |
| 0.68316  | 0.565919 | 6.80E-41 | 0.388239 | 3.00E-18 | 0.40492724 | 7.47E-20 | 0.493247 | 5.28E-30 |
| 0.14771  | 0.370106 | 1.32E-16 | 0.150279 | 0.00112  | 0.18179811 | 7.78E-05 | 0.42908  | 2.43E-22 |
| 7.15E-05 | 0.449123 | 1.46E-24 | 0.25412  | 2.57E-08 | 0.26804174 | 3.98E-09 | 0.500825 | 5.08E-31 |
| 9.96E-09 | 0.232898 | 3.59E-07 | 0.107194 | 0.02051  | 0.12856723 | 0.00539  | 0.288915 | 1.98E-10 |
| 0.36615  | 0.477944 | 5.01E-28 | 0.282939 | 4.80E-10 | 0.31931927 | 1.57E-12 | 0.576233 | 1.15E-42 |
| 0.43421  | 0.394483 | 7.72E-19 | 0.193469 | 2.56E-05 | 0.31904823 | 1.65E-12 | 0.438668 | 2.20E-23 |
| 0.01473  | 0.409051 | 2.90E-20 | 0.275571 | 1.39E-09 | 0.18296625 | 6.98E-05 | 0.356136 | 2.07E-15 |
| 0.3815   | 0.315257 | 3.10E-12 | 0.118688 | 0.01026  | 0.23821633 | 1.90E-07 | 0.47276  | 2.23E-27 |
| 0.0046   | 0.320781 | 1.23E-12 | 0.056022 | 0.22691  | 0.07768354 | 0.09358  | 0.192795 | 2.73E-05 |
| 0.9616   | 0.509021 | 3.78E-32 | 0.239428 | 1.64E-07 | 0.24739966 | 6.08E-08 | 0.46499  | 1.99E-26 |
| 0.47169  | 0.478706 | 4.02E-28 | 0.264633 | 6.35E-09 | 0.21437171 | 2.94E-06 | 0.317359 | 2.18E-12 |
| 0.00018  | 0.318109 | 1.93E-12 | 0.07556  | 0.10293  | 0.02687126 | 0.56243  | 0.276242 | 1.26E-09 |
| 0.06675  | 0.471913 | 2.83E-27 | 0.24512  | 8.10E-08 | 0.30364366 | 2.04E-11 | 0.566873 | 4.69E-41 |
| 0.04179  | 0.353676 | 3.31E-15 | -0.03269 | 0.48099  | -0.1701097 | 0.00022  | 0.011757 | 0.79996  |
| 0.19223  | 0.429489 | 2.20E-22 | 0.26464  | 6.34E-09 | 0.35060655 | 5.93E-15 | 0.338419 | 5.62E-14 |
| 0.00225  | 0.36444  | 4.09E-16 | 0.191596 | 3.07E-05 | 0.16037028 | 0.0005   | 0.291393 | 1.36E-10 |
| 0.08771  | 0.561053 | 4.44E-40 | 0.295423 | 7.37E-11 | 0.12932914 | 0.00512  | 0.333008 | 1.48E-13 |
| 0.00257  | 0.510435 | 2.40E-32 | 0.282986 | 4.76E-10 | 0.29300106 | 1.07E-10 | 0.56484  | 1.03E-40 |
| 0.73001  | 0.546953 | 8.60E-38 | 0.291416 | 1.36E-10 | 0.29937483 | 3.99E-11 | 0.547363 | 7.41E-38 |
| 0.00808  | 0.410098 | 2.28E-20 | 0.260331 | 1.13E-08 | 0.2185809  | 1.85E-06 | 0.486031 | 4.65E-29 |
| 1.25E-06 | 0.39768  | 3.81E-19 | 0.236691 | 2.28E-07 | 0.3555553  | 2.31E-15 | 0.533757 | 9.53E-36 |
| 3.84E-05 | 0.305347 | 1.56E-11 | 0.338423 | 5.62E-14 | 0.12301737 | 0.00778  | 0.195846 | 2.02E-05 |
| 0.02812  | 0.485924 | 4.80E-29 | 0.265447 | 5.68E-09 | 0.24223053 | 1.16E-07 | 0.496704 | 1.83E-30 |
| 0.10981  | 0.459331 | 9.43E-26 | 0.393158 | 1.03E-18 | 0.23464341 | 2.91E-07 | 0.371558 | 9.80E-17 |
| 0.2005   | 0.351474 | 5.03E-15 | 0.131905 | 0.0043   | 0.3108489  | 6.40E-12 | 0.357697 | 1.53E-15 |
| 3.70E-10 | 0.256344 | 1.92E-08 | -0.01284 | 0.78198  | 0.14144955 | 0.00218  | 0.297011 | 5.77E-11 |
| 0.06061  | 0.356849 | 1.80E-15 | 0.407753 | 3.91E-20 | 0.27457588 | 1.60E-09 | 0.292598 | 1.13E-10 |
| 1.03E-06 | 0.249184 | 4.85E-08 | 0.195332 | 2.13E-05 | 0.22727093 | 6.93E-07 | 0.374348 | 5.55E-17 |
| 0.00168  | -0.15893 | 0.00057  | -0.01544 | 0.73937  | 0.00204862 | 0.96478  | -0.21649 | 2.34E-06 |
| 0.01375  | 0.397906 | 3.62E-19 | 0.257704 | 1.61E-08 | 0.12354821 | 0.00752  | 0.197448 | 1.72E-05 |
| 0.01476  | 0.474931 | 1.20E-27 | 0.221034 | 1.41E-06 | 0.31643223 | 2.55E-12 | 0.590348 | 3.38E-45 |

|          |          |          |          |          |            |          |          |          |
|----------|----------|----------|----------|----------|------------|----------|----------|----------|
| 0.00055  | 0.291863 | 1.27E-10 | 0.158371 | 0.00059  | 0.26418592 | 6.75E-09 | 0.533535 | 1.03E-35 |
| 0.01672  | 0.128868 | 0.00529  | -0.03941 | 0.39553  | 0.06846809 | 0.13957  | 0.196979 | 1.81E-05 |
| 0.06441  | -0.30064 | 3.28E-11 | -0.11843 | 0.01043  | -0.073232  | 0.11401  | -0.2237  | 1.04E-06 |
| 0.06293  | 0.313312 | 4.28E-12 | 0.309404 | 8.10E-12 | 0.03911452 | 0.39904  | 0.183127 | 6.88E-05 |
| 0.00028  | 0.351088 | 5.41E-15 | 0.149434 | 0.0012   | 0.00984806 | 0.83191  | 0.18425  | 6.19E-05 |
| 4.49E-09 | 0.466488 | 1.31E-26 | 0.207317 | 6.26E-06 | 0.12093341 | 0.0089   | 0.328679 | 3.16E-13 |
| 0.06113  | 0.422    | 1.37E-21 | 0.228904 | 5.73E-07 | 0.08852924 | 0.05591  | 0.35334  | 3.53E-15 |
| 0.11708  | 0.259308 | 1.30E-08 | 0.144692 | 0.00172  | 0.09456119 | 0.04109  | 0.205571 | 7.52E-06 |
| 2.07E-08 | 0.465198 | 1.87E-26 | 0.159702 | 0.00053  | 0.24920348 | 4.84E-08 | 0.353869 | 3.19E-15 |
| 0.00042  | 0.452452 | 6.04E-25 | 0.193054 | 2.67E-05 | 0.03304313 | 0.47625  | 0.219784 | 1.62E-06 |
| 0.92428  | 0.342899 | 2.49E-14 | 0.134986 | 0.00347  | 0.17279162 | 0.00018  | 0.482323 | 1.39E-28 |
| 7.96E-08 | 0.289733 | 1.75E-10 | 0.137832 | 0.00284  | 0.14349989 | 0.00188  | 0.311401 | 5.85E-12 |
| 0.78769  | 0.502949 | 2.61E-31 | 0.311231 | 6.01E-12 | 0.47617715 | 8.36E-28 | 0.673275 | 5.83E-63 |
| 0.40188  | 0.366019 | 2.99E-16 | 0.183837 | 6.44E-05 | 0.31769038 | 2.07E-12 | 0.576803 | 9.11E-43 |
| 0.58291  | 0.316216 | 2.64E-12 | 0.170993 | 0.00021  | 0.12174881 | 0.00844  | 0.198262 | 1.59E-05 |
| 0.11749  | 0.317312 | 2.20E-12 | 0.13469  | 0.00354  | 0.41846861 | 3.19E-21 | 0.666334 | 2.97E-61 |
| 0.13654  | -0.34264 | 2.61E-14 | -0.31467 | 3.41E-12 | -0.2500014 | 4.37E-08 | -0.35313 | 3.67E-15 |
| 0.16259  | 0.314307 | 3.63E-12 | 0.199808 | 1.36E-05 | 0.42984933 | 2.01E-22 | 0.706585 | 7.54E-72 |
| 0.05239  | -0.2989  | 4.30E-11 | -0.18184 | 7.75E-05 | -0.1966638 | 1.87E-05 | -0.3172  | 2.24E-12 |
| 2.04E-05 | 0.385005 | 5.99E-18 | 0.296206 | 6.53E-11 | 0.1121793  | 0.01529  | 0.181804 | 7.77E-05 |
| 0.15453  | 0.511544 | 1.67E-32 | 0.354404 | 2.88E-15 | 0.47844753 | 4.33E-28 | 0.560662 | 5.16E-40 |
| 3.79E-06 | 0.429101 | 2.42E-22 | 0.276616 | 1.20E-09 | 0.14800017 | 0.00134  | 0.270389 | 2.88E-09 |
| 0.02584  | 0.342599 | 2.63E-14 | 0.213395 | 3.27E-06 | 0.18103378 | 8.35E-05 | 0.244471 | 8.78E-08 |
| 0.00031  | 0.285437 | 3.32E-10 | 0.060258 | 0.19365  | -0.136495  | 0.00312  | 0.0654   | 0.15824  |
| 0.0652   | 0.414279 | 8.59E-21 | 0.333009 | 1.48E-13 | 0.3272642  | 4.05E-13 | 0.480386 | 2.46E-28 |
| 0.10928  | 0.419211 | 2.67E-21 | 0.064354 | 0.16501  | 0.16643867 | 0.0003   | 0.342816 | 2.53E-14 |
| 0.819    | 0.531811 | 1.88E-35 | 0.321477 | 1.09E-12 | 0.35131176 | 5.19E-15 | 0.619762 | 6.83E-51 |
| 0.00229  | 0.335998 | 8.69E-14 | 0.262249 | 8.76E-09 | 0.15099881 | 0.00106  | 0.189936 | 3.61E-05 |
| 0.00523  | 0.373989 | 5.97E-17 | 0.320649 | 1.26E-12 | 0.13070457 | 0.00467  | 0.237706 | 2.02E-07 |
| 4.92E-06 | 0.185395 | 5.56E-05 | 0.027968 | 0.54658  | 0.15796429 | 0.00061  | 0.270661 | 2.77E-09 |
| 0.13828  | 0.380375 | 1.59E-17 | 0.272691 | 2.09E-09 | 0.23372084 | 3.25E-07 | 0.318448 | 1.82E-12 |
| 0.05547  | 0.466999 | 1.13E-26 | 0.344154 | 1.97E-14 | 0.34924342 | 7.66E-15 | 0.580751 | 1.83E-43 |
| 1.40E-06 | 0.513705 | 8.29E-33 | 0.3204   | 1.31E-12 | 0.25739292 | 1.67E-08 | 0.412986 | 1.16E-20 |
| 0.04196  | 0.324891 | 6.10E-13 | 0.202943 | 9.87E-06 | 0.18782711 | 4.42E-05 | 0.350187 | 6.41E-15 |
| 0.1698   | 0.468928 | 6.60E-27 | 0.244557 | 8.69E-08 | 0.22327499 | 1.10E-06 | 0.455551 | 2.63E-25 |
| 0.35922  | 0.438159 | 2.50E-23 | 0.225419 | 8.58E-07 | 0.20635518 | 6.93E-06 | 0.413464 | 1.04E-20 |
| 0.19603  | 0.308887 | 8.80E-12 | 0.350945 | 5.56E-15 | 0.42902946 | 2.46E-22 | 0.540851 | 7.78E-37 |
| 0.73799  | 0.454913 | 3.12E-25 | 0.311795 | 5.48E-12 | 0.21943104 | 1.69E-06 | 0.501687 | 3.88E-31 |
| 0.01175  | 0.472676 | 2.28E-27 | 0.195028 | 2.19E-05 | 0.07908747 | 0.08779  | 0.207456 | 6.17E-06 |
| 0.23084  | 0.519801 | 1.11E-33 | 0.294481 | 8.51E-11 | 0.28071638 | 6.63E-10 | 0.520802 | 7.95E-34 |
| 0.00906  | 0.446892 | 2.62E-24 | 0.122738 | 0.00792  | -0.0394948 | 0.39447  | 0.078188 | 0.09146  |
| 2.14E-13 | -0.25426 | 2.52E-08 | -0.24052 | 1.43E-07 | -0.2633626 | 7.54E-09 | -0.35073 | 5.79E-15 |
| 0.00812  | 0.397045 | 4.38E-19 | 0.220541 | 1.49E-06 | 0.27361931 | 1.83E-09 | 0.523854 | 2.85E-34 |
| 6.38E-05 | 0.307684 | 1.07E-11 | 0.150814 | 0.00108  | 0.23990193 | 1.54E-07 | 0.384244 | 7.04E-18 |
| 9.35E-06 | 0.290199 | 1.63E-10 | 0.070311 | 0.1292   | 0.26572412 | 5.47E-09 | 0.311802 | 5.48E-12 |



|          |          |          |          |          |            |          |          |          |
|----------|----------|----------|----------|----------|------------|----------|----------|----------|
| 0.35415  | 0.549811 | 3.02E-38 | 0.537242 | 2.80E-36 | 0.54657337 | 9.88E-38 | 0.650038 | 2.02E-57 |
| 0.00036  | 0.384237 | 7.05E-18 | 0.163235 | 0.0004   | 0.18823533 | 4.25E-05 | 0.447868 | 2.03E-24 |
| 0.00184  | 0.289885 | 1.71E-10 | 0.159794 | 0.00053  | 0.09946405 | 0.03163  | 0.167722 | 0.00027  |
| 0.00284  | 0.247222 | 6.22E-08 | 0.148956 | 0.00124  | 0.29732842 | 5.49E-11 | 0.421018 | 1.73E-21 |
| 1.22E-08 | -0.24638 | 6.92E-08 | -0.05511 | 0.23458  | 0.14950052 | 0.00119  | -0.00822 | 0.85939  |
| 0.72935  | 0.146647 | 0.00148  | 0.206938 | 6.52E-06 | 0.2249671  | 9.03E-07 | 0.309466 | 8.02E-12 |
| 0.76358  | 0.439497 | 1.78E-23 | 0.248568 | 5.24E-08 | 0.25188944 | 3.43E-08 | 0.41926  | 2.64E-21 |
| 0.57837  | 0.498621 | 1.01E-30 | 0.332251 | 1.69E-13 | 0.24292417 | 1.06E-07 | 0.42942  | 2.24E-22 |
| 0.01407  | 0.31285  | 4.61E-12 | 0.161881 | 0.00044  | 0.17977313 | 9.37E-05 | 0.31273  | 4.70E-12 |
| 0.00014  | -0.39608 | 5.43E-19 | -0.15024 | 0.00113  | -0.0600163 | 0.19544  | -0.25676 | 1.82E-08 |
| 0.79722  | -0.31275 | 4.69E-12 | 0.005791 | 0.90067  | -0.0985107 | 0.03331  | -0.27782 | 1.01E-09 |
| 0.81589  | 0.122125 | 0.00824  | 0.110139 | 0.01727  | 0.12992384 | 0.00492  | 0.2371   | 2.17E-07 |
| 0.0055   | 0.499991 | 6.60E-31 | 0.335969 | 8.73E-14 | 0.15058503 | 0.0011   | 0.226494 | 7.58E-07 |
| 0.03449  | 0.498427 | 1.07E-30 | 0.300004 | 3.62E-11 | 0.29461791 | 8.34E-11 | 0.419335 | 2.59E-21 |
| 0.80744  | 0.529736 | 3.84E-35 | 0.354884 | 2.63E-15 | 0.2836841  | 4.30E-10 | 0.458915 | 1.06E-25 |
| 0.01409  | 0.269222 | 3.38E-09 | 0.175414 | 0.00014  | 0.08845481 | 0.05611  | 0.157765 | 0.00062  |
| 0.17629  | 0.401453 | 1.64E-19 | 0.208125 | 5.75E-06 | 0.17918126 | 9.89E-05 | 0.421653 | 1.49E-21 |
| 0.29159  | 0.334198 | 1.20E-13 | 0.197553 | 1.71E-05 | 0.43396325 | 7.21E-23 | 0.690153 | 2.59E-67 |
| 0.00011  | 0.36439  | 4.13E-16 | 0.320883 | 1.21E-12 | 0.111786   | 0.01566  | 0.230966 | 4.51E-07 |
| 0.0653   | 0.443356 | 6.59E-24 | 0.316411 | 2.56E-12 | 0.36479726 | 3.81E-16 | 0.400377 | 2.09E-19 |
| 0.01909  | 0.526556 | 1.14E-34 | 0.358721 | 1.25E-15 | 0.21490324 | 2.78E-06 | 0.410852 | 1.91E-20 |
| 0.82784  | 0.226426 | 7.64E-07 | 0.099767 | 0.03112  | 0.16130946 | 0.00047  | 0.239025 | 1.72E-07 |
| 0.00848  | 0.587613 | 1.07E-44 | 0.261663 | 9.48E-09 | 0.16087361 | 0.00048  | 0.417123 | 4.39E-21 |
| 0.01758  | 0.610244 | 5.53E-49 | 0.429668 | 2.10E-22 | 0.49817279 | 1.16E-30 | 0.581277 | 1.48E-43 |
| 0.02068  | 0.355052 | 2.55E-15 | 0.118871 | 0.01014  | 0.31520926 | 3.12E-12 | 0.453435 | 4.64E-25 |
| 0.49696  | 0.19114  | 3.21E-05 | 0.159965 | 0.00052  | 0.19917761 | 1.45E-05 | 0.329556 | 2.72E-13 |
| 0.8334   | 0.447651 | 2.15E-24 | 0.372769 | 7.66E-17 | 0.38950449 | 2.28E-18 | 0.649942 | 2.13E-57 |
| 0.50433  | 0.338186 | 5.86E-14 | 0.19315  | 2.64E-05 | 0.1513638  | 0.00103  | 0.329845 | 2.58E-13 |
| 0.58615  | 0.331667 | 1.87E-13 | 0.315653 | 2.90E-12 | 0.27459189 | 1.59E-09 | 0.246556 | 6.76E-08 |
| 0.12993  | 0.448518 | 1.71E-24 | 0.247469 | 6.03E-08 | 0.21841228 | 1.89E-06 | 0.400275 | 2.13E-19 |
| 0.23553  | 0.451365 | 8.06E-25 | 0.16243  | 0.00042  | 0.24309686 | 1.04E-07 | 0.387559 | 3.47E-18 |
| 0.95637  | 0.27592  | 1.32E-09 | 0.036627 | 0.42972  | 0.09411094 | 0.04207  | 0.243874 | 9.46E-08 |
| 0.60903  | 0.381145 | 1.35E-17 | 0.388233 | 3.00E-18 | 0.38373865 | 7.84E-18 | 0.468412 | 7.63E-27 |
| 0.02542  | 0.367884 | 2.06E-16 | 0.267725 | 4.16E-09 | 0.25542309 | 2.17E-08 | 0.322127 | 9.78E-13 |
| 0.39288  | 0.505018 | 1.36E-31 | 0.324665 | 6.34E-13 | 0.30567277 | 1.48E-11 | 0.551056 | 1.91E-38 |
| 0.11551  | 0.326122 | 4.93E-13 | 0.167181 | 0.00028  | 0.15217831 | 0.00097  | 0.200486 | 1.27E-05 |
| 0.42238  | 0.331923 | 1.79E-13 | 0.220202 | 1.55E-06 | 0.25453403 | 2.43E-08 | 0.293688 | 9.61E-11 |
| 0.46828  | 0.288465 | 2.12E-10 | 0.095235 | 0.03967  | 0.05230656 | 0.25928  | 0.170842 | 0.00021  |
| 0.41167  | 0.100365 | 0.03012  | 0.105476 | 0.02263  | 0.09654517 | 0.03701  | 0.192202 | 2.90E-05 |
| 2.11E-05 | 0.374058 | 5.89E-17 | 0.196586 | 1.88E-05 | 0.18236092 | 7.38E-05 | 0.365393 | 3.38E-16 |
| 0.75856  | 0.469167 | 6.17E-27 | 0.1624   | 0.00043  | 0.20156934 | 1.14E-05 | 0.37691  | 3.27E-17 |
| 0.00509  | 0.08463  | 0.06766  | 0.278596 | 9.01E-10 | 0.35640815 | 1.96E-15 | 0.220512 | 1.50E-06 |
| 0.7075   | -0.19878 | 1.51E-05 | -0.32444 | 6.58E-13 | 0.10692884 | 0.02082  | 0.123373 | 0.0076   |
| 0.99909  | 0.308113 | 9.98E-12 | 0.376654 | 3.45E-17 | 0.21226182 | 3.70E-06 | 0.213666 | 3.18E-06 |
| 1.18E-17 | -0.31551 | 2.97E-12 | -0.21367 | 3.18E-06 | -0.0781599 | 0.09158  | -0.03491 | 0.45168  |

|          |          |          |          |          |            |          |          |          |
|----------|----------|----------|----------|----------|------------|----------|----------|----------|
| 3.05E-15 | -0.20991 | 4.76E-06 | -0.17809 | 0.00011  | 0.07966179 | 0.0855   | 0.142588 | 0.00201  |
| 0.16532  | -0.37181 | 9.31E-17 | -0.24086 | 1.37E-07 | 0.07384761 | 0.11099  | 0.114094 | 0.01362  |
| 0.03856  | -0.00766 | 0.86883  | -0.05396 | 0.24454  | -0.0721749 | 0.11934  | -0.13648 | 0.00312  |
| 0.08598  | -0.05578 | 0.22897  | 0.028671 | 0.53655  | 0.2587399  | 1.40E-08 | 0.067572 | 0.14484  |
| 0.2738   | 0.005157 | 0.9115   | 0.208883 | 5.31E-06 | 0.12584075 | 0.00647  | -0.01277 | 0.78311  |
| 0.00234  | -0.20061 | 1.25E-05 | -0.05082 | 0.27312  | 0.13619377 | 0.00319  | 0.11899  | 0.01006  |
| 0.02917  | -0.07073 | 0.12692  | -0.0082  | 0.85972  | 0.05335395 | 0.24985  | -0.01043 | 0.82214  |
| 0.93353  | -0.08818 | 0.05688  | -0.08362 | 0.07101  | -0.0986619 | 0.03304  | -0.1569  | 0.00067  |
| 0.11613  | -0.09732 | 0.03552  | -0.10546 | 0.02265  | -0.0006545 | 0.98875  | 0.016911 | 0.71549  |
| 4.70E-20 | -0.15178 | 0.001    | -0.0485  | 0.29557  | 0.06133602 | 0.18578  | 0.10195  | 0.0276   |
| 1.14E-12 | 0.101801 | 0.02782  | 0.152842 | 0.00092  | -0.0628476 | 0.17515  | -0.12306 | 0.00776  |
| 1.17E-05 | -0.2766  | 1.20E-09 | -0.17604 | 0.00013  | -0.0606108 | 0.19104  | -0.08654 | 0.06167  |
| 0.01889  | -0.30004 | 3.60E-11 | -0.16813 | 0.00026  | 0.03023841 | 0.51449  | 0.061129 | 0.18727  |
| 1.76E-05 | -0.28231 | 5.26E-10 | -0.18432 | 6.15E-05 | -0.0862243 | 0.06263  | -0.0874  | 0.05911  |
| 6.11E-05 | -0.17469 | 0.00015  | -0.02538 | 0.58437  | 0.13537309 | 0.00338  | 0.143996 | 0.00181  |
| 2.79E-08 | -0.10104 | 0.02901  | -0.10574 | 0.02229  | 0.00730462 | 0.8749   | 0.108678 | 0.01881  |
| 0.4624   | -0.23783 | 1.99E-07 | -0.16764 | 0.00027  | 0.07114601 | 0.12471  | 0.086701 | 0.06119  |
| 2.35E-11 | -0.15359 | 0.00087  | -0.18252 | 7.27E-05 | -0.0143067 | 0.75781  | 0.044359 | 0.33882  |
| 8.50E-06 | -0.1473  | 0.00141  | -0.14004 | 0.00242  | 0.00915385 | 0.8436   | 0.059539 | 0.19902  |
| 0.00065  | -0.07992 | 0.0845   | -0.10866 | 0.01883  | -0.0769924 | 0.09655  | -0.10973 | 0.01769  |
| 0.1047   | -0.06305 | 0.17376  | 0.00371  | 0.93627  | 0.17448629 | 0.00015  | 0.109313 | 0.01813  |
| 0.24572  | -0.18918 | 3.88E-05 | -0.0888  | 0.05516  | 0.08106658 | 0.08011  | 0.021952 | 0.6361   |
| 0.00215  | 0.340544 | 3.82E-14 | 0.193293 | 2.60E-05 | 0.04622994 | 0.31882  | 0.058669 | 0.20568  |
| 9.02E-05 | 0.147138 | 0.00143  | 0.205078 | 7.91E-06 | 0.01955988 | 0.67332  | 0.047805 | 0.30259  |
| 4.24E-09 | -0.40269 | 1.24E-19 | -0.35535 | 2.40E-15 | -0.0598675 | 0.19655  | -0.06679 | 0.14955  |
| 0.20284  | -0.07784 | 0.09292  | -0.04317 | 0.35194  | -0.0028102 | 0.95171  | -0.06259 | 0.17695  |
| 0.44256  | -0.31704 | 2.31E-12 | 0.004815 | 0.91734  | 0.16675569 | 0.0003   | 0.101252 | 0.02868  |
| 7.93E-05 | 0.043508 | 0.34818  | 0.138641 | 0.00268  | 0.08786561 | 0.05778  | -0.0251  | 0.58854  |
| 0.48695  | 0.001669 | 0.97131  | 0.134174 | 0.00367  | 0.08794124 | 0.05756  | 0.012688 | 0.78449  |
| 2.68E-21 | -0.28344 | 4.46E-10 | -0.00638 | 0.89057  | 0.01879386 | 0.68541  | 0.002736 | 0.95299  |
| 0.15888  | -0.03063 | 0.50908  | -0.14773 | 0.00137  | -0.0791764 | 0.08743  | -0.04031 | 0.38482  |
| 1.15E-06 | 0.004926 | 0.91544  | -0.00327 | 0.94387  | 0.17533971 | 0.00014  | 0.232774 | 3.64E-07 |
| 5.08E-05 | -0.15    | 0.00115  | -0.15874 | 0.00058  | 0.00527628 | 0.90946  | -0.03851 | 0.40636  |
| 1.48E-05 | 0.043089 | 0.35284  | 0.022836 | 0.62256  | 0.08178028 | 0.07748  | 0.1054   | 0.02273  |
| 0.49037  | 0.029833 | 0.52016  | -0.00925 | 0.84202  | 0.0609056  | 0.18889  | 0.094979 | 0.0402   |
| 8.96E-07 | -0.29387 | 9.35E-11 | -0.36308 | 5.34E-16 | -0.0464264 | 0.31676  | 0.033561 | 0.46937  |
| 3.61E-15 | -0.19983 | 1.36E-05 | -0.12611 | 0.00636  | 0.05328584 | 0.25045  | 0.101914 | 0.02765  |
| 0.00014  | 0.363843 | 4.60E-16 | 0.279757 | 7.62E-10 | 0.16789401 | 0.00027  | 0.1148   | 0.01305  |
| 0.29465  | -0.10151 | 0.02827  | 0.053306 | 0.25028  | -0.002583  | 0.9556   | -0.05848 | 0.20714  |
| 0.44591  | -0.02637 | 0.56971  | 0.176022 | 0.00013  | 0.38259334 | 9.98E-18 | 0.306685 | 1.26E-11 |
| 0.00011  | -0.00944 | 0.83873  | -0.08494 | 0.06667  | -0.0602492 | 0.19371  | 0.010214 | 0.82577  |
| 0.47509  | -0.29149 | 1.34E-10 | -0.23338 | 3.39E-07 | 0.02352996 | 0.61202  | 0.13976  | 0.00247  |
| 0.98614  | -0.07214 | 0.11952  | -0.05517 | 0.23411  | -0.0801767 | 0.08349  | -0.11876 | 0.01021  |
| 0.0019   | -0.47352 | 1.79E-27 | -0.30721 | 1.15E-11 | -0.0289539 | 0.53253  | 0.00718  | 0.87703  |
| 5.36E-10 | -0.2003  | 1.29E-05 | -0.06175 | 0.18284  | 0.14952925 | 0.00119  | 0.180841 | 8.50E-05 |

|          |          |          |          |          |            |          |          |          |
|----------|----------|----------|----------|----------|------------|----------|----------|----------|
| 4.40E-05 | -0.23157 | 4.19E-07 | -0.1254  | 0.00666  | -0.0568667 | 0.21997  | -0.12353 | 0.00753  |
| 2.17E-10 | 0.322193 | 9.67E-13 | 0.250667 | 4.01E-08 | 0.03777395 | 0.41541  | -0.07652 | 0.09861  |
| 0.14802  | -0.00634 | 0.89138  | -0.03696 | 0.42553  | -0.0472934 | 0.3078   | 0.013687 | 0.76799  |
| 1.74E-16 | -0.12151 | 0.00857  | -0.08808 | 0.05716  | -0.0061272 | 0.89494  | -0.04915 | 0.28913  |
| 1.89E-10 | -0.07901 | 0.08809  | 0.045525 | 0.32625  | 0.11860535 | 0.01031  | 0.136023 | 0.00323  |
| 0.03568  | 0.036328 | 0.4335   | 0.071974 | 0.12037  | 0.09006952 | 0.05176  | 0.103434 | 0.0254   |
| 6.16E-10 | 0.033329 | 0.47244  | -0.02363 | 0.61044  | 0.08321199 | 0.07241  | 0.188154 | 4.28E-05 |
| 0.06888  | 0.085168 | 0.06593  | -0.04321 | 0.35148  | -0.0602675 | 0.19357  | 0.045782 | 0.32353  |
| 0.44739  | -0.2058  | 7.34E-06 | -0.06776 | 0.14374  | 0.08826765 | 0.05664  | 0.095388 | 0.03935  |
| 0.23991  | -0.04749 | 0.30577  | -0.05351 | 0.24849  | -0.1507225 | 0.00109  | -0.16739 | 0.00028  |
| 4.88E-05 | 0.047348 | 0.30724  | 0.089013 | 0.05457  | 0.26777375 | 4.13E-09 | 0.214372 | 2.94E-06 |
| 0.00973  | -0.10767 | 0.01995  | -0.14627 | 0.00153  | -0.0582635 | 0.20883  | -0.01001 | 0.82926  |
| 0.02472  | -0.44585 | 3.45E-24 | -0.28595 | 3.08E-10 | 0.03519991 | 0.44793  | 0.057519 | 0.21472  |
| 0.00044  | -0.34891 | 8.16E-15 | -0.13765 | 0.00287  | 0.22624935 | 7.80E-07 | 0.285053 | 3.52E-10 |
| 0.22183  | -0.08171 | 0.07773  | -0.09765 | 0.03489  | 0.00354557 | 0.93909  | -0.0777  | 0.09351  |
| 0.80614  | -0.0021  | 0.96385  | 0.219422 | 1.69E-06 | 0.18311434 | 6.88E-05 | 0.16464  | 0.00035  |
| 0.29651  | -0.09803 | 0.03418  | -0.11112 | 0.01629  | -0.0304583 | 0.51144  | -0.02783 | 0.54852  |
| 0.30747  | -0.07004 | 0.13072  | -0.05157 | 0.26608  | 0.03016668 | 0.51549  | -0.0805  | 0.08224  |
| 0.0003   | 0.079396 | 0.08655  | 0.018033 | 0.69751  | 0.07392312 | 0.11062  | 0.082605 | 0.07453  |
| 0.77092  | 0.381506 | 1.26E-17 | 0.203119 | 9.69E-06 | 0.10936034 | 0.01808  | 0.187255 | 4.66E-05 |
| 2.27E-06 | 0.134826 | 0.00351  | 0.10567  | 0.02238  | -0.0016693 | 0.9713   | -0.01464 | 0.75241  |
| 0.13737  | -0.22877 | 5.83E-07 | -0.34594 | 1.42E-14 | -0.1815294 | 7.97E-05 | -0.19885 | 1.50E-05 |
| 0.00133  | 0.260623 | 1.09E-08 | 0.146505 | 0.0015   | 0.06116555 | 0.187    | 0.093669 | 0.04305  |
| 4.18E-11 | -0.35379 | 3.24E-15 | -0.25942 | 1.28E-08 | -0.0676551 | 0.14435  | -0.07605 | 0.10069  |
| 4.55E-11 | -0.38427 | 7.00E-18 | -0.17567 | 0.00014  | 0.01099318 | 0.81271  | 0.027585 | 0.55209  |
| 0.00287  | 0.126025 | 0.00639  | 0.146621 | 0.00149  | 0.2346795  | 2.90E-07 | 0.24468  | 8.56E-08 |
| 0.00903  | 0.22912  | 5.59E-07 | 0.305427 | 1.54E-11 | 0.20796057 | 5.85E-06 | 0.135506 | 0.00335  |
| 0.00011  | -0.2089  | 5.30E-06 | -0.10162 | 0.02811  | 0.19840819 | 1.57E-05 | 0.114612 | 0.0132   |
| 2.80E-05 | -0.23834 | 1.87E-07 | -0.16426 | 0.00036  | 0.01109786 | 0.81096  | 0.000525 | 0.99098  |
| 3.72E-06 | 0.263017 | 7.90E-09 | 0.119596 | 0.00969  | 0.03649765 | 0.43136  | 0.037623 | 0.41728  |
| 0.0076   | -0.22672 | 7.38E-07 | -0.39525 | 6.52E-19 | -0.0434899 | 0.34837  | -0.10653 | 0.02131  |
| 0.02154  | -0.20276 | 1.01E-05 | -0.19236 | 2.85E-05 | -0.074334  | 0.10865  | -0.16132 | 0.00047  |
| 1.08E-05 | 0.168387 | 0.00026  | 0.181195 | 8.22E-05 | 0.09287917 | 0.04485  | 0.053532 | 0.24827  |
| 2.95E-08 | 0.30487  | 1.68E-11 | 0.217215 | 2.16E-06 | -0.0326587 | 0.4814   | -0.05958 | 0.19872  |
| 0.28116  | -0.06843 | 0.1398   | 0.091799 | 0.0474   | 0.21083679 | 4.31E-06 | 0.265504 | 5.64E-09 |
| 0.00014  | 0.144123 | 0.00179  | 0.089118 | 0.05429  | 0.07472374 | 0.10681  | 0.163712 | 0.00038  |
| 0.00422  | -0.11752 | 0.01103  | -0.12426 | 0.00718  | 0.26555928 | 5.60E-09 | 0.232223 | 3.89E-07 |
| 0.13548  | -0.32166 | 1.06E-12 | -0.24674 | 6.61E-08 | -0.1351093 | 0.00344  | -0.15977 | 0.00053  |
| 5.54E-06 | -0.21122 | 4.14E-06 | -0.1815  | 7.99E-05 | -0.055     | 0.23551  | -0.00502 | 0.91388  |
| 0.00075  | -0.17199 | 0.00019  | -0.07951 | 0.0861   | 0.04351399 | 0.34811  | -0.00086 | 0.9853   |
| 0.70623  | -0.283   | 4.76E-10 | -0.12919 | 0.00517  | 0.0755458  | 0.10299  | 0.003396 | 0.94165  |
| 0.56502  | -0.18012 | 9.07E-05 | -0.0621  | 0.18033  | 0.00956736 | 0.83663  | 0.045573 | 0.32575  |
| 3.12E-07 | -0.03067 | 0.50849  | -0.01877 | 0.6858   | 0.03168836 | 0.49453  | 0.035911 | 0.4388   |
| 0.00087  | -0.38879 | 2.66E-18 | -0.2134  | 3.27E-06 | 0.08669437 | 0.06121  | 0.197968 | 1.64E-05 |
| 0.745    | -0.2816  | 5.83E-10 | -0.26111 | 1.02E-08 | -0.1144654 | 0.01332  | -0.09179 | 0.04742  |

|          |          |          |          |          |            |          |          |          |
|----------|----------|----------|----------|----------|------------|----------|----------|----------|
| 0.66272  | 0.147454 | 0.0014   | 0.098688 | 0.03299  | 0.10556611 | 0.02251  | 0.151705 | 0.00101  |
| 0.03726  | -0.12474 | 0.00696  | -0.13263 | 0.00409  | -0.1333667 | 0.00389  | -0.19428 | 2.36E-05 |
| 0.98432  | -0.02109 | 0.64944  | 0.015879 | 0.73216  | 0.15754416 | 0.00063  | 0.209159 | 5.16E-06 |
| 0.89965  | -0.10982 | 0.0176   | -0.1264  | 0.00624  | -0.0223712 | 0.62966  | -0.05714 | 0.21779  |
| 6.22E-06 | -0.15173 | 0.001    | -0.03523 | 0.44759  | 0.02623779 | 0.57168  | -0.06983 | 0.13186  |
| 0.83692  | 0.176995 | 0.00012  | 0.158383 | 0.00059  | 0.07648563 | 0.09877  | 0.087776 | 0.05803  |
| 0.12122  | -0.06344 | 0.17113  | -0.1262  | 0.00632  | -0.1031485 | 0.02581  | -0.105   | 0.02325  |
| 0.78362  | 0.274881 | 1.53E-09 | 0.069544 | 0.13345  | -0.0569381 | 0.21939  | -0.06257 | 0.17705  |
| 0.03114  | -0.23618 | 2.42E-07 | -0.1875  | 4.56E-05 | -0.1191106 | 0.00999  | -0.11009 | 0.01732  |
| 0.04658  | -0.16051 | 0.0005   | -0.03996 | 0.38895  | 0.02632954 | 0.57033  | -0.04406 | 0.34204  |
| 0.35359  | -0.1232  | 0.00769  | -0.14889 | 0.00125  | -0.0344299 | 0.45793  | -0.163   | 0.00041  |
| 0.00214  | 0.054108 | 0.24321  | 0.064976 | 0.16096  | 0.08029042 | 0.08305  | 0.100754 | 0.02948  |
| 2.53E-14 | -0.30038 | 3.42E-11 | -0.31402 | 3.80E-12 | -0.1355388 | 0.00334  | -0.20745 | 6.17E-06 |
| 0.89963  | -0.31624 | 2.63E-12 | -0.17924 | 9.83E-05 | -0.0980607 | 0.03413  | -0.14465 | 0.00172  |
| 0.00674  | 0.001518 | 0.97391  | 0.003531 | 0.93933  | 0.09723149 | 0.03568  | 0.145549 | 0.00161  |
| 9.12E-14 | -0.2772  | 1.10E-09 | -0.23555 | 2.62E-07 | -0.0571892 | 0.21736  | -0.03579 | 0.44041  |
| 1.59E-10 | -0.27798 | 9.84E-10 | -0.16022 | 0.00051  | 0.05270655 | 0.25565  | 0.057894 | 0.21174  |
| 6.86E-10 | 0.080004 | 0.08416  | 0.044311 | 0.33934  | 0.01368616 | 0.76801  | -0.01162 | 0.80229  |
| 0.02944  | 0.112787 | 0.01474  | 0.115639 | 0.0124   | 0.16287327 | 0.00041  | 0.141524 | 0.00217  |
| 0.10559  | -0.22035 | 1.52E-06 | -0.14642 | 0.00151  | -0.0630988 | 0.17343  | -0.10322 | 0.02571  |
| 0.02291  | -0.21115 | 4.17E-06 | -0.23324 | 3.44E-07 | -0.2924283 | 1.16E-10 | -0.28408 | 4.06E-10 |
| 0.80311  | -0.07724 | 0.09547  | -0.02869 | 0.53626  | -0.0730848 | 0.11474  | -0.06902 | 0.13643  |
| 0.01417  | -0.11851 | 0.01037  | -0.04062 | 0.3811   | 0.05046507 | 0.27645  | 0.061136 | 0.18722  |
| 5.60E-07 | 0.01339  | 0.77289  | 0.096355 | 0.03739  | 0.04236528 | 0.36099  | 0.110491 | 0.01691  |
| 0.02911  | -0.06228 | 0.17911  | -0.19946 | 1.41E-05 | -0.2146175 | 2.87E-06 | -0.06248 | 0.1777   |
| 0.10889  | 0.239441 | 1.63E-07 | 0.199599 | 1.39E-05 | 0.08660641 | 0.06147  | 0.142317 | 0.00205  |
| 0.00234  | -0.06241 | 0.17816  | -0.09016 | 0.05151  | 0.05098919 | 0.27149  | 0.129292 | 0.00514  |
| 0.01406  | -0.24498 | 8.24E-08 | -0.1225  | 0.00804  | -0.0684882 | 0.13946  | -0.12983 | 0.00495  |
| 0.00097  | -0.14971 | 0.00117  | -0.0695  | 0.13371  | 0.04759869 | 0.30468  | 0.088066 | 0.05721  |
| 0.26746  | -0.08147 | 0.07862  | -0.10244 | 0.02685  | -0.0534185 | 0.24927  | -0.10818 | 0.01937  |
| 3.73E-08 | -0.15677 | 0.00067  | -0.07359 | 0.11223  | -0.0700314 | 0.13074  | -0.09866 | 0.03305  |
| 0.00563  | 0.037795 | 0.41515  | 0.009804 | 0.83265  | -0.0870993 | 0.06     | -0.04127 | 0.3736   |
| 0.52533  | -0.16233 | 0.00043  | -0.25363 | 2.74E-08 | 0.042267   | 0.36211  | 0.002572 | 0.9558   |
| 1.24E-07 | -0.03017 | 0.51546  | -0.10175 | 0.0279   | -0.0990229 | 0.0324   | -0.10945 | 0.01798  |
| 1.49E-08 | 0.34759  | 1.04E-14 | 0.282896 | 4.83E-10 | -0.0896277 | 0.05292  | -0.14284 | 0.00197  |
| 0.91821  | -0.30951 | 7.96E-12 | -0.18173 | 7.83E-05 | 0.20432174 | 8.56E-06 | 0.091053 | 0.04924  |
| 0.27097  | -0.18653 | 4.99E-05 | -0.19741 | 1.73E-05 | -0.0394807 | 0.39464  | -0.13038 | 0.00477  |
| 4.16E-06 | -0.19098 | 3.26E-05 | -0.0003  | 0.99477  | 0.19806288 | 1.62E-05 | 0.127683 | 0.00572  |
| 5.20E-09 | -0.25841 | 1.46E-08 | -0.17226 | 0.00018  | -0.0898758 | 0.05226  | -0.04077 | 0.37941  |
| 2.19E-12 | -0.33083 | 2.17E-13 | -0.21433 | 2.96E-06 | -0.1147435 | 0.01309  | -0.13687 | 0.00304  |
| 0.00021  | 0.342361 | 2.74E-14 | 0.183173 | 6.85E-05 | 0.06013783 | 0.19453  | 0.050776 | 0.2735   |
| 3.08E-06 | -0.34179 | 3.05E-14 | -0.1699  | 0.00023  | -0.1100497 | 0.01736  | -0.08048 | 0.08231  |
| 0.01225  | -0.26262 | 8.33E-09 | -0.21322 | 3.34E-06 | -0.0520841 | 0.26131  | -0.07591 | 0.10132  |
| 0.00117  | -0.29501 | 7.85E-11 | -0.15523 | 0.00076  | -0.0390844 | 0.39941  | -0.07651 | 0.09866  |
| 4.32E-07 | -0.37434 | 5.56E-17 | -0.17915 | 9.92E-05 | 0.15464735 | 0.0008   | 0.217094 | 2.19E-06 |

|          |          |          |          |          |            |          |          |          |
|----------|----------|----------|----------|----------|------------|----------|----------|----------|
| 0.01855  | 0.315857 | 2.81E-12 | 0.153694 | 0.00086  | -0.0001921 | 0.9967   | -0.22586 | 8.16E-07 |
| 0.2325   | 0.090837 | 0.04978  | -0.01027 | 0.82482  | 0.31688988 | 2.36E-12 | 0.52035  | 9.25E-34 |
| 0.65644  | -0.02362 | 0.61068  | -0.10381 | 0.02486  | 0.2350026  | 2.79E-07 | 0.419764 | 2.34E-21 |
| 0.50227  | -0.03873 | 0.40369  | 0.018717 | 0.68663  | 0.34388611 | 2.07E-14 | 0.465843 | 1.57E-26 |
| 0.00577  | 0.156364 | 0.0007   | 0.041124 | 0.37524  | 0.22712844 | 7.05E-07 | 0.3134   | 4.21E-12 |
| 0.7784   | 0.127369 | 0.00585  | -0.06893 | 0.13693  | 0.2474646  | 6.03E-08 | 0.462587 | 3.86E-26 |
| 0.26664  | 0.161404 | 0.00046  | 0.054797 | 0.23725  | 0.24693115 | 6.45E-08 | 0.32138  | 1.11E-12 |
| 0.61153  | 0.274989 | 1.51E-09 | 0.251746 | 3.49E-08 | 0.52596131 | 1.40E-34 | 0.611501 | 3.12E-49 |
| 0.52435  | 0.364412 | 4.11E-16 | 0.186347 | 5.08E-05 | 0.48571789 | 5.11E-29 | 0.625313 | 4.91E-52 |
| 0.81993  | 0.186737 | 4.90E-05 | -0.03134 | 0.49933  | 0.30743303 | 1.11E-11 | 0.599159 | 7.67E-47 |
| 9.06E-05 | -0.22843 | 6.06E-07 | -0.06536 | 0.15851  | -0.2728212 | 2.05E-09 | -0.38239 | 1.04E-17 |
| 0.00233  | -0.28495 | 3.57E-10 | -0.09398 | 0.04236  | 0.48847532 | 2.24E-29 | 0.611618 | 2.96E-49 |
| 0.2368   | 0.215637 | 2.56E-06 | 0.301859 | 2.71E-11 | -0.0515023 | 0.26669  | -0.31608 | 2.70E-12 |
| 0.53872  | -0.03909 | 0.39936  | 0.005849 | 0.89968  | 0.22622473 | 7.82E-07 | 0.336662 | 7.71E-14 |
| 0.08899  | 0.198158 | 1.61E-05 | 0.30235  | 2.50E-11 | -0.0651261 | 0.15999  | -0.36295 | 5.48E-16 |
| 0.31249  | 0.239316 | 1.66E-07 | 0.179883 | 9.27E-05 | 0.56217842 | 2.88E-40 | 0.757574 | 3.51E-88 |
| 5.83E-05 | -0.10543 | 0.02269  | -0.10537 | 0.02276  | 0.38430329 | 6.95E-18 | 0.527631 | 7.91E-35 |
| 0.00208  | 0.197957 | 1.64E-05 | 0.1847   | 5.94E-05 | -0.4464087 | 2.98E-24 | -0.57039 | 1.18E-41 |
| 0.31432  | 0.23561  | 2.60E-07 | 0.083822 | 0.07034  | 0.28704202 | 2.62E-10 | 0.316203 | 2.65E-12 |
| 0.89459  | 0.18797  | 4.36E-05 | 0.170589 | 0.00021  | 0.53434304 | 7.77E-36 | 0.794399 | #####    |
| 0.79672  | -0.02348 | 0.61272  | -0.01498 | 0.74682  | -0.318539  | 1.79E-12 | -0.51699 | 2.82E-33 |
| 0.93718  | 0.206453 | 6.86E-06 | 0.142591 | 0.00201  | -0.281286  | 6.10E-10 | -0.49426 | 3.88E-30 |
| 4.30E-07 | -0.23362 | 3.29E-07 | -0.07377 | 0.11138  | 0.50283857 | 2.70E-31 | 0.505184 | 1.29E-31 |
| 0.07431  | 0.040071 | 0.38761  | 0.137369 | 0.00293  | -0.1551149 | 0.00077  | -0.27073 | 2.74E-09 |
| 0.00219  | 0.287738 | 2.36E-10 | 0.265685 | 5.50E-09 | 0.60814909 | 1.43E-48 | 0.783279 | 4.78E-98 |
| 0.19658  | 0.196342 | 1.93E-05 | 0.161593 | 0.00046  | -0.1956532 | 2.06E-05 | -0.37783 | 2.70E-17 |
| 5.80E-05 | 0.289186 | 1.90E-10 | 0.213304 | 3.31E-06 | -0.4170858 | 4.43E-21 | -0.56257 | 2.48E-40 |
| 0.6752   | 0.23359  | 3.30E-07 | 0.156229 | 0.0007   | 0.60536553 | 4.96E-48 | 0.829187 | #####    |
| 0.42219  | 0.223953 | 1.01E-06 | 0.137852 | 0.00283  | 0.40490564 | 7.50E-20 | 0.63344  | 9.44E-54 |
| 0.19112  | 0.063815 | 0.16859  | 0.112619 | 0.01489  | 0.59152561 | 2.05E-45 | 0.796164 | #####    |
| 0.54923  | 0.374123 | 5.81E-17 | 0.198251 | 1.59E-05 | 0.41063807 | 2.01E-20 | 0.628393 | 1.11E-52 |
| 0.5024   | -0.05698 | 0.21906  | -0.00411 | 0.92949  | -0.2776001 | 1.04E-09 | -0.53252 | 1.47E-35 |
| 0.00207  | 0.241727 | 1.23E-07 | 0.042462 | 0.3599   | -0.1645393 | 0.00036  | -0.21344 | 3.26E-06 |
| 0.03161  | 0.144553 | 0.00174  | -0.07144 | 0.12313  | -0.4775837 | 5.57E-28 | -0.65911 | 1.59E-59 |
| 0.49062  | -0.01616 | 0.72759  | -0.06962 | 0.13301  | 0.18907541 | 3.92E-05 | 0.38863  | 2.76E-18 |
| 0.17579  | 0.173002 | 0.00017  | 0.060503 | 0.19184  | 0.18446267 | 6.07E-05 | 0.341126 | 3.44E-14 |
| 0.2131   | 0.142658 | 0.002    | -0.04198 | 0.36538  | 0.30112477 | 3.04E-11 | 0.580758 | 1.83E-43 |
| 0.8218   | 0.057353 | 0.21605  | 0.080265 | 0.08315  | -0.4151617 | 6.98E-21 | -0.55124 | 1.78E-38 |
| 0.14087  | 0.243497 | 9.91E-08 | 0.162171 | 0.00043  | 0.58946444 | 4.91E-45 | 0.765892 | 3.10E-91 |
| 0.4137   | -0.05415 | 0.24285  | 0.176277 | 0.00013  | -0.0845095 | 0.06806  | -0.27924 | 8.21E-10 |
| 0.49433  | 0.293568 | 9.79E-11 | 0.181618 | 7.91E-05 | 0.32610921 | 4.94E-13 | 0.41181  | 1.53E-20 |
| 0.10298  | -0.19502 | 2.20E-05 | 0.010662 | 0.81825  | -0.374781  | 5.08E-17 | -0.52594 | 1.41E-34 |
| 0.92072  | 0.02849  | 0.53911  | -0.05905 | 0.20273  | -0.3175461 | 2.12E-12 | -0.46593 | 1.53E-26 |
| 5.23E-05 | 0.049746 | 0.28336  | 0.067762 | 0.14371  | 0.2302741  | 4.89E-07 | 0.352419 | 4.21E-15 |
| 0.00065  | 0.089258 | 0.05391  | 0.030588 | 0.50965  | 0.15823679 | 0.0006   | 0.277828 | 1.01E-09 |

|          |          |          |          |          |            |          |          |          |
|----------|----------|----------|----------|----------|------------|----------|----------|----------|
| 0.00771  | 0.08093  | 0.08062  | 0.062083 | 0.18047  | 0.33819849 | 5.85E-14 | 0.5316   | 2.02E-35 |
| 0.63305  | -0.18788 | 4.40E-05 | -0.1014  | 0.02845  | -0.2653731 | 5.74E-09 | -0.44563 | 3.65E-24 |
| 0.03103  | 0.01374  | 0.76713  | 0.01851  | 0.68992  | 0.22525169 | 8.74E-07 | 0.360443 | 8.97E-16 |
| 0.00828  | 0.135279 | 0.0034   | 0.030645 | 0.50886  | 0.60467999 | 6.73E-48 | 0.723244 | 8.83E-77 |
| 0.62069  | 0.127463 | 0.00581  | 0.128844 | 0.0053   | -0.3371816 | 7.02E-14 | -0.54262 | 4.13E-37 |
| 0.71308  | 0.020486 | 0.6588   | -0.1446  | 0.00173  | 0.06912091 | 0.13583  | 0.257061 | 1.75E-08 |
| 0.20008  | 0.200931 | 1.21E-05 | 0.239217 | 1.68E-07 | -0.2012599 | 1.17E-05 | -0.44467 | 4.68E-24 |
| 0.07444  | -0.11751 | 0.01104  | -0.04315 | 0.35211  | 0.38752931 | 3.49E-18 | 0.621596 | 2.88E-51 |
| 0.34917  | 0.154162 | 0.00083  | 0.148376 | 0.0013   | 0.30527517 | 1.57E-11 | 0.381373 | 1.29E-17 |
| 0.79569  | 0.257037 | 1.75E-08 | 0.240785 | 1.39E-07 | 0.48957354 | 1.61E-29 | 0.574062 | 2.74E-42 |
| 0.15153  | 0.055376 | 0.23232  | -0.08413 | 0.06931  | -0.1860089 | 5.25E-05 | -0.37825 | 2.48E-17 |
| 0.03916  | 0.060105 | 0.19478  | 0.211855 | 3.87E-06 | -0.2440824 | 9.22E-08 | -0.50339 | 2.27E-31 |
| 0.58151  | -0.01266 | 0.78503  | 0.080014 | 0.08412  | -0.4096408 | 2.53E-20 | -0.56777 | 3.31E-41 |
| 0.27106  | -0.10595 | 0.02203  | -0.0331  | 0.47552  | -0.4309048 | 1.55E-22 | -0.56231 | 2.74E-40 |
| 0.72002  | -0.21591 | 2.49E-06 | -0.18761 | 4.51E-05 | 0.21027387 | 4.58E-06 | 0.449093 | 1.47E-24 |
| 0.01031  | 0.223063 | 1.12E-06 | 0.116093 | 0.01205  | -0.4486303 | 1.66E-24 | -0.64688 | 1.05E-56 |
| 0.89778  | -0.0122  | 0.79262  | -0.01274 | 0.78371  | 0.27403578 | 1.73E-09 | 0.46828  | 7.92E-27 |
| 0.27877  | -0.08985 | 0.05232  | -0.16493 | 0.00034  | -0.4981785 | 1.16E-30 | -0.69922 | 8.85E-70 |
| 5.75E-08 | 0.006781 | 0.88381  | 0.052853 | 0.25433  | -0.2373985 | 2.09E-07 | -0.47938 | 3.31E-28 |
| 0.35505  | 0.091713 | 0.04761  | 0.08482  | 0.06705  | 0.39589313 | 5.66E-19 | 0.583006 | 7.25E-44 |
| 0.35263  | 0.117042 | 0.01137  | 0.11362  | 0.01402  | 0.61605187 | 3.86E-50 | 0.782945 | 6.54E-98 |
| 0.02744  | 0.13052  | 0.00473  | 0.06134  | 0.18575  | 0.12896938 | 0.00525  | 0.26376  | 7.15E-09 |
| 0.91871  | 0.015518 | 0.73803  | 0.075038 | 0.10533  | -0.2794028 | 8.02E-10 | -0.38028 | 1.62E-17 |
| 0.06746  | 0.184162 | 6.24E-05 | 0.406713 | 4.97E-20 | -0.1559052 | 0.00072  | -0.29074 | 1.50E-10 |
| 0.40459  | 0.182815 | 7.08E-05 | 0.147932 | 0.00135  | 0.43817738 | 2.49E-23 | 0.59574  | 3.38E-46 |
| 7.74E-07 | 0.258857 | 1.38E-08 | 0.215878 | 2.50E-06 | 0.44246315 | 8.30E-24 | 0.61491  | 6.54E-50 |
| 0.00701  | 0.207703 | 6.01E-06 | 0.025286 | 0.58572  | 0.20501215 | 7.97E-06 | 0.343803 | 2.11E-14 |
| 0.92405  | 0.057588 | 0.21417  | -0.04    | 0.38839  | -0.4491986 | 1.43E-24 | -0.55939 | 8.38E-40 |
| 0.09861  | -0.15806 | 0.00061  | -0.06929 | 0.13488  | -0.4810988 | 2.00E-28 | -0.73739 | 2.92E-81 |
| 2.10E-08 | 0.263664 | 7.24E-09 | 0.082277 | 0.07569  | 0.23686647 | 2.23E-07 | 0.433481 | 8.14E-23 |
| 0.00075  | 0.015558 | 0.73737  | 0.056517 | 0.22283  | 0.39076732 | 1.74E-18 | 0.5311   | 2.40E-35 |
| 0.00192  | 0.109594 | 0.01783  | -0.05266 | 0.25604  | 0.28494186 | 3.57E-10 | 0.491171 | 9.93E-30 |
| 0.5781   | 0.026322 | 0.57044  | 0.049904 | 0.28184  | 0.49748033 | 1.44E-30 | 0.679539 | 1.53E-64 |
| 0.00013  | -0.0143  | 0.75792  | -0.06803 | 0.14214  | 0.25412806 | 2.57E-08 | 0.402964 | 1.17E-19 |
| 0.03106  | -0.31742 | 2.16E-12 | -0.21976 | 1.63E-06 | -0.2302293 | 4.91E-07 | -0.43817 | 2.49E-23 |
| 0.15851  | 0.024511 | 0.59726  | 0.109481 | 0.01795  | 0.49845196 | 1.06E-30 | 0.426096 | 5.06E-22 |
| 0.09665  | 0.148205 | 0.00132  | 0.057848 | 0.2121   | 0.45439859 | 3.59E-25 | 0.709844 | 8.71E-73 |
| 0.86518  | 0.024701 | 0.59442  | 0.097045 | 0.03604  | 0.35623608 | 2.03E-15 | 0.396891 | 4.54E-19 |
| 0.59732  | 0.098195 | 0.03388  | -0.0168  | 0.71725  | 0.37970673 | 1.83E-17 | 0.525846 | 1.45E-34 |
| 0.51602  | -0.20293 | 9.89E-06 | -0.19153 | 3.09E-05 | -0.2445404 | 8.71E-08 | -0.32519 | 5.79E-13 |
| 0.80798  | -0.06807 | 0.14188  | -0.09277 | 0.0451   | 0.17195334 | 0.00019  | 0.331978 | 1.77E-13 |
| 0.66872  | 0.304821 | 1.69E-11 | 0.04257  | 0.35868  | 0.31456405 | 3.48E-12 | 0.523086 | 3.70E-34 |
| 0.142    | -0.21144 | 4.04E-06 | -0.06568 | 0.15644  | 0.54120763 | 6.85E-37 | 0.664704 | 7.37E-61 |
| 0.83193  | -0.13677 | 0.00306  | -0.21829 | 1.92E-06 | -0.3185326 | 1.79E-12 | -0.39036 | 1.90E-18 |
| 0.03139  | 0.13857  | 0.00269  | 0.03534  | 0.44612  | 0.3917588  | 1.40E-18 | 0.516127 | 3.75E-33 |

|          |          |          |          |          |            |          |          |          |
|----------|----------|----------|----------|----------|------------|----------|----------|----------|
| 0.08073  | 0.049402 | 0.28671  | 0.044443 | 0.3379   | 0.59186832 | 1.77E-45 | 0.755271 | 2.34E-87 |
| 0.04274  | 0.03487  | 0.45219  | -0.08509 | 0.06617  | 0.33664802 | 7.73E-14 | 0.496061 | 2.23E-30 |
| 1.27E-31 | 0.020813 | 0.6537   | -0.00071 | 0.98777  | 0.27083372 | 2.70E-09 | 0.382373 | 1.05E-17 |
| 3.22E-05 | 0.046476 | 0.31625  | 0.087802 | 0.05796  | -0.2923573 | 1.18E-10 | -0.42052 | 1.95E-21 |
| 0.14316  | -0.21336 | 3.29E-06 | -0.01386 | 0.76507  | -0.3856734 | 5.19E-18 | -0.4532  | 4.94E-25 |
| 0.01261  | 0.108602 | 0.0189   | 0.138389 | 0.00273  | 0.29658119 | 6.16E-11 | 0.392917 | 1.09E-18 |
| 0.07397  | 0.391114 | 1.61E-18 | 0.24359  | 9.80E-08 | 0.3105275  | 6.74E-12 | 0.366733 | 2.59E-16 |
| 0.18432  | 0.235925 | 2.50E-07 | 0.054914 | 0.23625  | 0.44784408 | 2.04E-24 | 0.567132 | 4.24E-41 |
| 1.02E-06 | 0.047671 | 0.30394  | 0.021763 | 0.639    | 0.29949597 | 3.92E-11 | 0.465662 | 1.65E-26 |
| 0.02609  | 0.255933 | 2.03E-08 | 0.38974  | 2.17E-18 | -0.0277152 | 0.55021  | -0.21066 | 4.39E-06 |
| 0.15374  | 0.065859 | 0.15533  | 0.059547 | 0.19896  | 0.3818668  | 1.16E-17 | 0.364203 | 4.28E-16 |
| 0.3361   | -0.05379 | 0.24597  | -0.07589 | 0.10143  | 0.28242626 | 5.17E-10 | 0.454527 | 3.46E-25 |
| 0.41592  | 0.100973 | 0.02913  | 0.058554 | 0.20657  | 0.57763464 | 6.51E-43 | 0.670047 | 3.67E-62 |
| 0.63029  | 0.263009 | 7.91E-09 | 0.206324 | 6.95E-06 | 0.44351173 | 6.33E-24 | 0.649515 | 2.66E-57 |
| 0.18335  | -0.16266 | 0.00042  | -0.10836 | 0.01917  | 0.51786647 | 2.11E-33 | 0.593795 | 7.79E-46 |
| 0.88522  | 0.054881 | 0.23654  | 0.061697 | 0.1832   | 0.56683242 | 4.76E-41 | 0.789804 | #####    |
| 0.79743  | 0.115674 | 0.01237  | 0.163228 | 0.0004   | 0.29427353 | 8.79E-11 | 0.389411 | 2.33E-18 |
| 0.11936  | 0.132326 | 0.00418  | 0.187464 | 4.57E-05 | 0.66967524 | 4.54E-62 | 0.781721 | 2.07E-97 |
| 0.51808  | -0.03214 | 0.48837  | -0.09298 | 0.04462  | 0.43629366 | 4.01E-23 | 0.660497 | 7.47E-60 |
| 0.01069  | -0.08381 | 0.07038  | 0.05443  | 0.24041  | 0.56846127 | 2.52E-41 | 0.60842  | 1.26E-48 |
| 0.96942  | 0.039596 | 0.39326  | 0.157988 | 0.00061  | -0.406085  | 5.73E-20 | -0.65601 | 8.49E-59 |
| 0.338    | 0.263066 | 7.85E-09 | 0.019807 | 0.66944  | 0.31642348 | 2.55E-12 | 0.382778 | 9.60E-18 |
| 0.03087  | -0.07592 | 0.10128  | -0.01854 | 0.6894   | -0.4727972 | 2.20E-27 | -0.60873 | 1.10E-48 |
| 0.49373  | 0.064389 | 0.16478  | 0.011231 | 0.80874  | 0.19240709 | 2.84E-05 | 0.329934 | 2.54E-13 |
| 0.76191  | 0.090034 | 0.05185  | 0.012688 | 0.7845   | 0.2308617  | 4.56E-07 | 0.284946 | 3.57E-10 |
| 0.22546  | 0.188748 | 4.04E-05 | 0.061272 | 0.18624  | 0.39530479 | 6.44E-19 | 0.415694 | 6.15E-21 |
| 0.82525  | 0.143152 | 0.00193  | 0.008766 | 0.85015  | 0.15762775 | 0.00063  | 0.308583 | 9.25E-12 |
| 0.0329   | -0.12853 | 0.00541  | 0.046825 | 0.31262  | 0.5434531  | 3.06E-37 | 0.726269 | 1.03E-77 |
| 3.28E-06 | 0.346025 | 1.40E-14 | 0.14073  | 0.0023   | 0.36311051 | 5.31E-16 | 0.418055 | 3.52E-21 |
| 0.99869  | -0.0394  | 0.39555  | 0.065264 | 0.1591   | 0.59780077 | 1.38E-46 | 0.710661 | 5.05E-73 |
| 0.80764  | 0.151583 | 0.00102  | 0.113297 | 0.0143   | 0.31104071 | 6.20E-12 | 0.386699 | 4.17E-18 |
| 0.20992  | -0.19703 | 1.80E-05 | -0.02464 | 0.59537  | 0.3533566  | 3.52E-15 | 0.462916 | 3.53E-26 |
| 0.67785  | 0.177447 | 0.00012  | 0.053592 | 0.24774  | -0.2825861 | 5.05E-10 | -0.35531 | 2.42E-15 |
| 0.42929  | -0.07801 | 0.09219  | 0.03101  | 0.50382  | 0.56458521 | 1.14E-40 | 0.734014 | 3.64E-80 |
| 0.19853  | 0.029929 | 0.51881  | -0.03464 | 0.45523  | -0.4129243 | 1.18E-20 | -0.53662 | 3.49E-36 |
| 0.08808  | 0.095692 | 0.03872  | -0.0238  | 0.60794  | -0.2693237 | 3.34E-09 | -0.43265 | 1.00E-22 |
| 0.91411  | 0.009514 | 0.83753  | 0.114114 | 0.01361  | 0.58160062 | 1.29E-43 | 0.764848 | 7.61E-91 |
| 0.00049  | 0.051346 | 0.26814  | 0.307116 | 1.17E-11 | -0.2656085 | 5.56E-09 | -0.43271 | 9.86E-23 |
| 0.00014  | -0.04586 | 0.32274  | -0.04888 | 0.29188  | 0.2617558  | 9.37E-09 | 0.424533 | 7.40E-22 |
| 0.58409  | 0.013545 | 0.77034  | 0.001378 | 0.97631  | -0.3730916 | 7.17E-17 | -0.5681  | 2.90E-41 |
| 0.44925  | 0.038065 | 0.41182  | 0.06271  | 0.1761   | -0.4678519 | 8.93E-27 | -0.69406 | 2.30E-68 |
| 0.62963  | 0.035339 | 0.44613  | -0.01788 | 0.69997  | 0.2875629  | 2.42E-10 | 0.451663 | 7.45E-25 |
| 0.24205  | 0.271852 | 2.35E-09 | 0.369076 | 1.62E-16 | -0.2837521 | 4.26E-10 | -0.47334 | 1.89E-27 |
| 0.13698  | -0.06257 | 0.17707  | -0.07637 | 0.0993   | 0.49452381 | 3.58E-30 | 0.735397 | 1.30E-80 |
| 0.00079  | 0.158018 | 0.00061  | 0.346943 | 1.18E-14 | -0.2223686 | 1.21E-06 | -0.41387 | 9.46E-21 |

|          |          |          |          |          |            |          |          |          |
|----------|----------|----------|----------|----------|------------|----------|----------|----------|
| 0.12239  | -0.14891 | 0.00125  | -0.10316 | 0.0258   | 0.3010756  | 3.06E-11 | 0.450868 | 9.20E-25 |
| 0.33944  | -0.22614 | 7.90E-07 | -0.15659 | 0.00068  | 0.24241329 | 1.13E-07 | 0.337989 | 6.07E-14 |
| 0.18154  | 0.163778 | 0.00038  | 0.034999 | 0.45052  | 0.34006783 | 4.17E-14 | 0.407138 | 4.50E-20 |
| 0.28422  | -0.07206 | 0.11991  | -0.10197 | 0.02757  | -0.2524042 | 3.21E-08 | -0.3853  | 5.63E-18 |
| 0.49835  | -0.0764  | 0.09914  | -0.06605 | 0.15414  | -0.2427146 | 1.09E-07 | -0.30954 | 7.92E-12 |
| 0.74776  | 0.053031 | 0.25273  | 0.099147 | 0.03218  | -0.3566504 | 1.87E-15 | -0.56619 | 6.13E-41 |
| 0.80717  | 0.462541 | 3.91E-26 | 0.231896 | 4.04E-07 | 0.19802196 | 1.63E-05 | 0.365854 | 3.09E-16 |
| 0.09036  | 0.135341 | 0.00339  | 0.073561 | 0.11238  | 0.24151082 | 1.27E-07 | 0.34586  | 1.44E-14 |
| 0.92195  | -0.12558 | 0.00658  | -0.06945 | 0.134    | 0.31494204 | 3.27E-12 | 0.437611 | 2.87E-23 |
| 0.83671  | -0.16164 | 0.00045  | -0.07518 | 0.10465  | 0.36520204 | 3.51E-16 | 0.444829 | 4.49E-24 |
| 0.15185  | 0.151776 | 0.001    | 0.06019  | 0.19415  | 0.27798555 | 9.83E-10 | 0.351893 | 4.65E-15 |
| 1.93E-05 | 0.154855 | 0.00079  | 0.03147  | 0.49751  | 0.26508609 | 5.97E-09 | 0.378292 | 2.46E-17 |
| 0.30509  | 0.024871 | 0.59188  | 0.114345 | 0.01342  | 0.51886832 | 1.51E-33 | 0.731437 | 2.43E-79 |
| 0.19526  | -0.19183 | 3.00E-05 | 0.000293 | 0.99496  | 0.51822101 | 1.88E-33 | 0.507941 | 5.34E-32 |
| 0.12413  | 0.223678 | 1.05E-06 | 0.196388 | 1.92E-05 | -0.1797232 | 9.41E-05 | -0.10303 | 0.02599  |
| 7.62E-05 | -0.12107 | 0.00882  | -0.11957 | 0.0097   | 0.24243535 | 1.13E-07 | 0.361664 | 7.06E-16 |
| 0.00124  | -0.17582 | 0.00013  | -0.14733 | 0.00141  | 0.41576437 | 6.05E-21 | 0.602055 | 2.15E-47 |
| 0.57449  | 0.040057 | 0.38777  | 0.065495 | 0.15763  | -0.2167842 | 2.26E-06 | -0.34222 | 2.82E-14 |
| 0.4992   | -0.29682 | 5.94E-11 | -0.21955 | 1.66E-06 | 0.4010547  | 1.79E-19 | 0.465773 | 1.60E-26 |
| 0.59264  | 0.229117 | 5.59E-07 | 0.047112 | 0.30966  | -0.3688315 | 1.70E-16 | -0.54759 | 6.81E-38 |
| 0.13638  | 0.048213 | 0.29848  | -0.04906 | 0.29008  | -0.3402468 | 4.04E-14 | -0.5485  | 4.89E-38 |
| 0.00674  | 0.11545  | 0.01254  | -0.06415 | 0.16634  | 0.36007935 | 9.63E-16 | 0.618472 | 1.25E-50 |
| 0.30058  | 0.068392 | 0.14002  | 0.005308 | 0.90893  | 0.37728495 | 3.03E-17 | 0.549739 | 3.10E-38 |
| 0.31574  | 0.095764 | 0.03858  | -0.00269 | 0.95376  | 0.41453421 | 8.09E-21 | 0.63738  | 1.33E-54 |
| 0.00058  | 0.211054 | 4.21E-06 | 0.304486 | 1.78E-11 | -0.2328874 | 3.59E-07 | -0.33927 | 4.82E-14 |
| 0.11493  | 0.253087 | 2.94E-08 | 0.195936 | 2.01E-05 | 0.5987277  | 9.25E-47 | 0.671122 | 2.00E-62 |
| 0.09163  | -0.0449  | 0.33296  | 0.043644 | 0.34667  | 0.47863435 | 4.10E-28 | 0.574191 | 2.60E-42 |
| 6.36E-05 | 0.032813 | 0.47933  | 0.216206 | 2.41E-06 | -0.2117654 | 3.90E-06 | -0.31996 | 1.41E-12 |
| 7.55E-06 | -0.00316 | 0.94573  | 0.147233 | 0.00142  | -0.3189971 | 1.66E-12 | -0.55111 | 1.87E-38 |
| 0.00011  | -0.00329 | 0.94354  | -0.0246  | 0.59591  | 0.2689707  | 3.50E-09 | 0.44734  | 2.33E-24 |
| 1.54E-07 | 0.222769 | 1.16E-06 | 0.294233 | 8.84E-11 | -0.167811  | 0.00027  | -0.31433 | 3.61E-12 |
| 0.01835  | 0.223154 | 1.11E-06 | 0.049871 | 0.28215  | 0.43413878 | 6.90E-23 | 0.640388 | 2.93E-55 |
| 0.20254  | 0.349383 | 7.46E-15 | 0.25784  | 1.58E-08 | -0.2341432 | 3.09E-07 | -0.39486 | 7.10E-19 |
| 0.28836  | 0.2811   | 6.27E-10 | 0.25364  | 2.73E-08 | -0.2287411 | 5.84E-07 | -0.41709 | 4.42E-21 |
| 0.53173  | -0.06487 | 0.16167  | -0.12558 | 0.00658  | 0.29823755 | 4.77E-11 | 0.517738 | 2.20E-33 |
| 0.91766  | 0.254117 | 2.57E-08 | 0.228685 | 5.88E-07 | -0.3007138 | 3.24E-11 | -0.43004 | 1.92E-22 |
| 0.28727  | 0.063169 | 0.17295  | 0.034982 | 0.45074  | -0.3377516 | 6.34E-14 | -0.39118 | 1.59E-18 |
| 0.18722  | 0.035875 | 0.43927  | 0.066385 | 0.15205  | -0.1480888 | 0.00133  | -0.36245 | 6.05E-16 |
| 0.00072  | 0.241444 | 1.28E-07 | 0.099665 | 0.03129  | 0.51523934 | 5.02E-33 | 0.580498 | 2.03E-43 |
| 0.52573  | 0.008422 | 0.85597  | 0.044166 | 0.34093  | 0.47474684 | 1.26E-27 | 0.572889 | 4.38E-42 |
| 0.02362  | 0.161981 | 0.00044  | -0.02392 | 0.6061   | 0.53733943 | 2.71E-36 | 0.643384 | 6.37E-56 |
| 0.5464   | 0.048797 | 0.29266  | -0.11274 | 0.01478  | 0.33085745 | 2.16E-13 | 0.604756 | 6.51E-48 |
| 1.52E-07 | -0.03781 | 0.41496  | 0.092888 | 0.04483  | 0.59012211 | 3.72E-45 | 0.676819 | 7.51E-64 |
| 0.04404  | -0.09185 | 0.04727  | 0.126635 | 0.00614  | -0.2204432 | 1.51E-06 | -0.33287 | 1.52E-13 |
| 0.66504  | -0.01693 | 0.71511  | -0.00816 | 0.86042  | -0.1441562 | 0.00179  | -0.33271 | 1.56E-13 |



|          |          |          |          |          |            |          |          |          |
|----------|----------|----------|----------|----------|------------|----------|----------|----------|
| 0.24644  | -0.03992 | 0.3894   | -0.04365 | 0.34665  | 0.29071146 | 1.51E-10 | 0.436882 | 3.46E-23 |
| 0.92613  | 0.112031 | 0.01543  | 0.11932  | 0.00986  | 0.5923346  | 1.45E-45 | 0.836824 | #####    |
| 0.16927  | 0.187496 | 4.56E-05 | 0.206964 | 6.50E-06 | -0.2856366 | 3.22E-10 | -0.49658 | 1.90E-30 |
| 0.11256  | 0.130232 | 0.00482  | 0.04058  | 0.3816   | 0.22592298 | 8.09E-07 | 0.340677 | 3.73E-14 |
| 0.91684  | 0.141199 | 0.00222  | 0.124279 | 0.00717  | 0.24720977 | 6.23E-08 | 0.36565  | 3.21E-16 |
| 0.02451  | 0.167124 | 0.00029  | 0.146253 | 0.00153  | 0.42246085 | 1.22E-21 | 0.52355  | 3.16E-34 |
| 0.74439  | 0.110092 | 0.01731  | 0.316474 | 2.53E-12 | -0.1127993 | 0.01473  | -0.37921 | 2.03E-17 |
| 0.15408  | -0.05769 | 0.21335  | 0.113881 | 0.0138   | -0.2435776 | 9.81E-08 | -0.47395 | 1.59E-27 |
| 0.25526  | 0.311972 | 5.33E-12 | 0.224314 | 9.73E-07 | 0.54133143 | 6.56E-37 | 0.583204 | 6.68E-44 |
| 0.75802  | 0.162401 | 0.00043  | 0.066361 | 0.1522   | 0.29290374 | 1.08E-10 | 0.491581 | 8.77E-30 |
| 0.48919  | -0.20508 | 7.91E-06 | -0.02182 | 0.63807  | -0.2883172 | 2.16E-10 | -0.38733 | 3.64E-18 |
| 0.0214   | 0.301619 | 2.81E-11 | 0.024759 | 0.59356  | -0.4601595 | 7.52E-26 | -0.50754 | 6.08E-32 |
| 0.00556  | -0.21838 | 1.90E-06 | -0.03291 | 0.478    | -0.2188632 | 1.80E-06 | -0.44329 | 6.69E-24 |
| 0.01428  | -0.2454  | 7.82E-08 | -0.07564 | 0.10255  | -0.3245243 | 6.49E-13 | -0.3853  | 5.62E-18 |
| 0.35023  | 0.049649 | 0.2843   | -0.13564 | 0.00332  | -0.3307868 | 2.19E-13 | -0.51728 | 2.56E-33 |
| 0.61327  | 0.079285 | 0.087    | -0.00156 | 0.97323  | 0.41702508 | 4.49E-21 | 0.704247 | 3.48E-71 |
| 0.06328  | -0.05756 | 0.21435  | -0.12389 | 0.00735  | 0.26699862 | 4.60E-09 | 0.459103 | 1.00E-25 |
| 0.00024  | -0.07643 | 0.09901  | 0.020622 | 0.65668  | 0.52516905 | 1.83E-34 | 0.666512 | 2.69E-61 |
| 0.09058  | -0.12281 | 0.00789  | -0.03766 | 0.41677  | 0.42313662 | 1.04E-21 | 0.523514 | 3.20E-34 |
| 0.05159  | 0.061567 | 0.18412  | 0.050644 | 0.27475  | 0.52339051 | 3.34E-34 | 0.562723 | 2.34E-40 |
| 0.00062  | -0.04611 | 0.32006  | -0.01857 | 0.68904  | 0.24630093 | 6.98E-08 | 0.341872 | 3.00E-14 |
| 8.61E-05 | 0.092459 | 0.04583  | -0.07619 | 0.10006  | 0.14065993 | 0.00231  | 0.341155 | 3.42E-14 |
| 0.47113  | -0.07984 | 0.08482  | 0.187769 | 4.44E-05 | -0.1588468 | 0.00057  | -0.34515 | 1.64E-14 |
| 4.25E-07 | 0.225443 | 8.55E-07 | 0.142579 | 0.00201  | 0.31417287 | 3.71E-12 | 0.434543 | 6.24E-23 |
| 1.07E-05 | 0.215212 | 2.69E-06 | 0.037296 | 0.42135  | 0.30674765 | 1.24E-11 | 0.381784 | 1.18E-17 |
| 0.37389  | 0.152027 | 0.00098  | 0.140657 | 0.00231  | 0.39740094 | 4.05E-19 | 0.578717 | 4.20E-43 |
| 0.18743  | 0.013019 | 0.77902  | 0.021607 | 0.6414   | -0.0593157 | 0.20072  | -0.27749 | 1.06E-09 |
| 0.29704  | -0.12487 | 0.0069   | 0.031916 | 0.49143  | -0.3573658 | 1.63E-15 | -0.39595 | 5.59E-19 |
| 3.24E-05 | 0.102205 | 0.02721  | 0.021837 | 0.63787  | -0.2827736 | 4.91E-10 | -0.41315 | 1.12E-20 |
| 0.08167  | 0.086562 | 0.06161  | -0.04234 | 0.3613   | 0.21845283 | 1.88E-06 | 0.446466 | 2.93E-24 |
| 0.13202  | -0.03159 | 0.49591  | -0.02464 | 0.59528  | 0.45458517 | 3.41E-25 | 0.57231  | 5.51E-42 |
| 0.23729  | -0.13696 | 0.00302  | -0.16562 | 0.00033  | 0.32222929 | 9.61E-13 | 0.342752 | 2.55E-14 |
| 0.59862  | -0.04227 | 0.36205  | -0.07613 | 0.10034  | 0.35409793 | 3.05E-15 | 0.504293 | 1.71E-31 |
| 0.74137  | -0.17221 | 0.00018  | -0.28103 | 6.33E-10 | 0.3189252  | 1.68E-12 | 0.295473 | 7.31E-11 |
| 0.93051  | 0.042875 | 0.35524  | 0.154822 | 0.00079  | -0.1855221 | 5.50E-05 | -0.374   | 5.95E-17 |
| 0.00701  | -0.0158  | 0.73337  | -0.04899 | 0.29076  | 0.52367397 | 3.03E-34 | 0.730937 | 3.50E-79 |
| 0.71971  | 0.147892 | 0.00135  | 0.058705 | 0.2054   | 0.2612463  | 1.00E-08 | 0.38378  | 7.77E-18 |
| 0.07257  | 0.020189 | 0.66344  | 0.13057  | 0.00471  | 0.4871234  | 3.36E-29 | 0.61144  | 3.21E-49 |
| 7.66E-06 | 0.085904 | 0.06362  | 0.13594  | 0.00325  | 0.339659   | 4.49E-14 | 0.446254 | 3.10E-24 |
| 0.28928  | -0.11451 | 0.01328  | -0.04466 | 0.33556  | 0.47252356 | 2.38E-27 | 0.645529 | 2.12E-56 |
| 0.61347  | -0.13719 | 0.00297  | -0.1109  | 0.01651  | 0.33807044 | 5.99E-14 | 0.404527 | 8.18E-20 |
| 0.18843  | 0.352529 | 4.12E-15 | 0.118761 | 0.01021  | 0.26042168 | 1.12E-08 | 0.474912 | 1.20E-27 |
| 0.03823  | 0.011764 | 0.79985  | 0.066478 | 0.15148  | -0.4093112 | 2.73E-20 | -0.54484 | 1.86E-37 |
| 0.42074  | -0.10833 | 0.01919  | -0.04971 | 0.28366  | -0.2294967 | 5.35E-07 | -0.49475 | 3.34E-30 |
| 0.02507  | 0.062665 | 0.17641  | 0.182302 | 7.42E-05 | -0.2534407 | 2.81E-08 | -0.46807 | 8.39E-27 |

|          |          |          |          |          |            |          |          |          |
|----------|----------|----------|----------|----------|------------|----------|----------|----------|
| 0.98952  | 0.05372  | 0.24661  | -0.02602 | 0.57488  | -0.5305316 | 2.92E-35 | -0.57352 | 3.40E-42 |
| 0.29572  | 0.183888 | 6.41E-05 | 0.059891 | 0.19637  | 0.38759141 | 3.45E-18 | 0.532275 | 1.60E-35 |
| 0.61633  | 0.122746 | 0.00792  | 0.091508 | 0.04811  | 0.56511821 | 9.28E-41 | 0.766447 | 1.92E-91 |
| 0.27787  | -0.04873 | 0.29336  | 0.029464 | 0.52533  | -0.2402825 | 1.47E-07 | -0.54541 | 1.51E-37 |
| 0.3982   | -0.03891 | 0.4015   | 0.102777 | 0.02635  | -0.2086455 | 5.44E-06 | -0.42516 | 6.35E-22 |
| 0.74392  | 0.134414 | 0.00361  | 0.009762 | 0.83336  | 0.53599546 | 4.35E-36 | 0.668329 | 9.70E-62 |
| 0.00026  | 0.234401 | 3.00E-07 | 0.167251 | 0.00028  | -0.4030377 | 1.15E-19 | -0.539   | 1.51E-36 |
| 0.50578  | -0.21219 | 3.73E-06 | -0.12313 | 0.00772  | 0.34421626 | 1.95E-14 | 0.431198 | 1.44E-22 |
| 0.04847  | 0.188983 | 3.95E-05 | 0.042878 | 0.3552   | 0.46165242 | 5.00E-26 | 0.676059 | 1.17E-63 |
| 0.10263  | -0.06685 | 0.14918  | 0.162406 | 0.00043  | -0.3157136 | 2.87E-12 | -0.56283 | 2.24E-40 |
| 0.00486  | 0.147196 | 0.00142  | 0.077408 | 0.09475  | -0.3964946 | 4.95E-19 | -0.55076 | 2.13E-38 |
| 0.00705  | 0.336435 | 8.03E-14 | 0.144545 | 0.00174  | 0.41269845 | 1.24E-20 | 0.584823 | 3.42E-44 |
| 0.28637  | 0.012034 | 0.79535  | -0.00881 | 0.84948  | 0.3661918  | 2.88E-16 | 0.540402 | 9.14E-37 |
| 0.1794   | 0.154328 | 0.00082  | 0.136683 | 0.00308  | 0.66984073 | 4.13E-62 | 0.898703 | #####    |
| 0.99855  | 0.330921 | 2.14E-13 | 0.198746 | 1.51E-05 | 0.52154587 | 6.20E-34 | 0.773014 | 5.95E-94 |
| 0.57448  | 0.019385 | 0.67607  | -0.00195 | 0.96648  | 0.49685353 | 1.75E-30 | 0.735336 | 1.36E-80 |
| 0.4729   | 0.000975 | 0.98324  | 0.077671 | 0.09363  | 0.49801104 | 1.22E-30 | 0.694557 | 1.69E-68 |
| 0.07429  | 0.032582 | 0.48243  | -0.01765 | 0.70364  | 0.4824173  | 1.36E-28 | 0.72242  | 1.58E-76 |
| 0.53484  | 0.205567 | 7.52E-06 | 0.24436  | 8.90E-08 | 0.59516833 | 4.32E-46 | 0.695906 | 7.24E-69 |
| 0.00824  | 0.184847 | 5.86E-05 | 0.081393 | 0.0789   | 0.60619245 | 3.43E-48 | 0.765456 | 4.52E-91 |
| 1.46E-06 | 0.063022 | 0.17395  | 0.026752 | 0.56417  | 0.37208494 | 8.81E-17 | 0.529141 | 4.71E-35 |
| 0.89332  | 0.186171 | 5.17E-05 | 0.177701 | 0.00011  | 0.53104447 | 2.45E-35 | 0.565819 | 7.07E-41 |
| 0.41035  | -0.01235 | 0.79015  | 0.045624 | 0.32521  | 0.31135106 | 5.90E-12 | 0.338335 | 5.71E-14 |
| 0.9022   | -0.05597 | 0.22736  | 0.06504  | 0.16054  | -0.2164584 | 2.34E-06 | -0.3892  | 2.44E-18 |
| 0.15751  | 0.064593 | 0.16344  | -0.01734 | 0.70863  | 0.348378   | 9.01E-15 | 0.517828 | 2.14E-33 |
| 0.03859  | 0.089982 | 0.05198  | -0.03856 | 0.40583  | 0.56028114 | 5.96E-40 | 0.680421 | 9.08E-65 |
| 0.04713  | -0.12162 | 0.00851  | -0.15687 | 0.00067  | 0.41709298 | 4.42E-21 | 0.558777 | 1.06E-39 |
| 0.10032  | -0.05819 | 0.20937  | -0.12073 | 0.00901  | 0.34795116 | 9.76E-15 | 0.428749 | 2.64E-22 |
| 0.47369  | 0.011684 | 0.80117  | 0.158303 | 0.0006   | 0.63119165 | 2.85E-53 | 0.768066 | 4.71E-92 |
| 0.0807   | -0.04893 | 0.29129  | -0.28295 | 4.79E-10 | 0.09194466 | 0.04705  | 0.272675 | 2.09E-09 |
| 0.90446  | 0.124634 | 0.007    | -0.03189 | 0.49178  | 0.34785352 | 9.94E-15 | 0.565256 | 8.80E-41 |
| 0.01173  | -0.01157 | 0.80302  | 0.039749 | 0.39143  | 0.39636415 | 5.10E-19 | 0.53942  | 1.30E-36 |
| 0.83946  | 0.192108 | 2.92E-05 | 0.058848 | 0.2043   | 0.4605604  | 6.74E-26 | 0.641563 | 1.61E-55 |
| 0.28504  | 0.234019 | 3.14E-07 | 0.213777 | 3.14E-06 | 0.60285642 | 1.51E-47 | 0.731411 | 2.48E-79 |
| 0.74822  | 0.397315 | 4.13E-19 | 0.336792 | 7.53E-14 | 0.56096638 | 4.59E-40 | 0.707202 | 5.02E-72 |
| 0.00795  | 0.118251 | 0.01054  | 0.054878 | 0.23656  | 0.35782414 | 1.49E-15 | 0.452427 | 6.07E-25 |
| 0.23559  | 0.212445 | 3.63E-06 | -0.04127 | 0.3735   | 0.36512906 | 3.56E-16 | 0.495802 | 2.41E-30 |
| 0.42794  | 0.107667 | 0.01995  | -0.11102 | 0.01639  | 0.37900746 | 2.12E-17 | 0.557777 | 1.54E-39 |
| 0.64976  | 0.356816 | 1.81E-15 | 0.167807 | 0.00027  | 0.38280164 | 9.55E-18 | 0.535288 | 5.58E-36 |
| 0.15806  | -0.00973 | 0.83391  | 0.057194 | 0.21733  | 0.51501682 | 5.40E-33 | 0.717179 | 6.06E-75 |
| 0.10795  | -0.06497 | 0.16097  | -0.07678 | 0.09749  | 0.46962286 | 5.42E-27 | 0.483063 | 1.12E-28 |
| 0.49945  | 0.547994 | 5.88E-38 | 0.232201 | 3.90E-07 | 0.43823172 | 2.45E-23 | 0.619809 | 6.68E-51 |
| 0.19741  | -0.07273 | 0.1165   | -0.07555 | 0.10296  | 0.1668797  | 0.00029  | 0.306927 | 1.21E-11 |
| 0.21641  | 0.308328 | 9.64E-12 | 0.329552 | 2.72E-13 | 0.53841377 | 1.85E-36 | 0.573421 | 3.54E-42 |
| 0.31211  | 0.384229 | 7.06E-18 | 0.145069 | 0.00167  | 0.41580502 | 5.99E-21 | 0.58023  | 2.27E-43 |

|          |          |          |          |          |            |          |          |          |
|----------|----------|----------|----------|----------|------------|----------|----------|----------|
| 0.086    | 0.140537 | 0.00233  | 0.084257 | 0.06889  | 0.34985262 | 6.83E-15 | 0.35464  | 2.75E-15 |
| 0.00878  | 0.304037 | 1.92E-11 | 0.155097 | 0.00077  | 0.52643357 | 1.19E-34 | 0.596826 | 2.11E-46 |
| 0.31116  | 0.12883  | 0.0053   | 0.060649 | 0.19076  | 0.52078945 | 7.99E-34 | 0.707313 | 4.67E-72 |
| 0.39395  | 0.136266 | 0.00317  | -0.07167 | 0.12193  | 0.25785672 | 1.57E-08 | 0.455222 | 2.87E-25 |
| 0.0231   | 0.452902 | 5.35E-25 | 0.333554 | 1.34E-13 | 0.32237678 | 9.37E-13 | 0.402135 | 1.41E-19 |
| 3.32E-06 | -0.0675  | 0.1453   | -0.14344 | 0.00189  | 0.41632642 | 5.30E-21 | 0.603954 | 9.30E-48 |
| 0.72908  | 0.33662  | 7.77E-14 | 0.246048 | 7.21E-08 | 0.51110015 | 1.93E-32 | 0.701943 | 1.55E-70 |
| 0.081    | 0.253378 | 2.83E-08 | 0.287702 | 2.37E-10 | -0.2352806 | 2.70E-07 | -0.43983 | 1.63E-23 |
| 9.21E-22 | 0.15746  | 0.00064  | 0.163915 | 0.00038  | 0.42709367 | 3.96E-22 | 0.498431 | 1.07E-30 |
| 0.83166  | 0.240034 | 1.52E-07 | 0.083487 | 0.07147  | 0.3782934  | 2.46E-17 | 0.580556 | 1.98E-43 |
| 0.42455  | -0.04913 | 0.28933  | -0.13689 | 0.00303  | -0.0547642 | 0.23753  | 0.01946  | 0.67489  |
| 0.00863  | 0.177116 | 0.00012  | 0.090945 | 0.04951  | -0.0269987 | 0.56057  | -0.01275 | 0.78347  |
| 0.32902  | -0.1972  | 1.77E-05 | -0.08905 | 0.05447  | 0.00536288 | 0.90798  | 0.068812 | 0.13759  |
| 0.43598  | 0.078762 | 0.0891   | -0.02975 | 0.52131  | -0.0243174 | 0.60016  | -0.0005  | 0.99148  |
| 0.00927  | 0.100265 | 0.03028  | 0.030878 | 0.50563  | 0.01343353 | 0.77217  | -0.05855 | 0.20662  |
| 0.84952  | 0.087675 | 0.05833  | -0.02883 | 0.53426  | -0.114625  | 0.01319  | -0.04981 | 0.28277  |
| 0.43247  | 0.030244 | 0.51442  | -0.00439 | 0.92468  | -0.0360353 | 0.43722  | -0.0417  | 0.36861  |
| 0.3542   | 0.115505 | 0.0125   | -0.01373 | 0.76731  | -0.0546881 | 0.23819  | -0.02467 | 0.59484  |
| 0.9649   | -0.051   | 0.27142  | -0.18692 | 4.81E-05 | -0.1292084 | 0.00517  | -0.13258 | 0.0041   |
| 0.83285  | 0.007422 | 0.87291  | -0.01865 | 0.68767  | 0.00846722 | 0.8552   | 0.06078  | 0.1898   |
| 0.00019  | 0.005193 | 0.91088  | -0.21901 | 1.77E-06 | 0.02232198 | 0.63041  | 0.08105  | 0.08017  |
| 0.03367  | 0.092761 | 0.04512  | 0.038977 | 0.40071  | 0.01299489 | 0.77942  | 0.014268 | 0.75845  |
| 0.13284  | 0.178507 | 0.00011  | 0.086457 | 0.06192  | -0.0741099 | 0.10972  | -0.08847 | 0.05608  |
| 0.00146  | -0.06443 | 0.1645   | -0.0114  | 0.80591  | 0.05265362 | 0.25613  | 0.030906 | 0.50524  |
| 0.6699   | -0.04833 | 0.29728  | 0.009206 | 0.84273  | 0.00981248 | 0.83251  | 0.013877 | 0.76486  |
| 0.62671  | 0.084677 | 0.06751  | -0.0422  | 0.36282  | -0.0577563 | 0.21283  | -0.07305 | 0.11489  |
| 0.46041  | 0.124117 | 0.00724  | -0.04725 | 0.30822  | 0.00441016 | 0.92428  | 0.137997 | 0.0028   |
| 3.27E-07 | 0.077412 | 0.09474  | 0.008766 | 0.85015  | 0.00635803 | 0.89101  | -0.01104 | 0.81198  |
| 0.83262  | 0.255212 | 2.23E-08 | 0.172382 | 0.00018  | 0.1296421  | 0.00502  | 0.067927 | 0.14274  |
| 0.12952  | 0.057609 | 0.214    | 0.017028 | 0.71361  | 0.06378255 | 0.1688   | 0.097918 | 0.03439  |
| 0.56109  | 0.082778 | 0.07392  | -0.00093 | 0.98394  | 0.02634707 | 0.57008  | 0.056821 | 0.22034  |
| 0.14602  | 0.149001 | 0.00124  | -0.00971 | 0.8343   | -0.0205046 | 0.65851  | 0.030925 | 0.50498  |
| 0.47053  | -0.18061 | 8.68E-05 | -0.15079 | 0.00108  | 0.0017798  | 0.9694   | 0.041644 | 0.36923  |
| 4.47E-18 | -0.11325 | 0.01434  | -0.03049 | 0.51095  | 0.04196249 | 0.36558  | 0.054814 | 0.23711  |
| 0.73985  | 0.038463 | 0.40695  | 0.014547 | 0.75386  | -0.0159239 | 0.73143  | -0.00933 | 0.84057  |
| 0.67526  | 0.070725 | 0.12696  | -0.02804 | 0.54549  | 0.02582184 | 0.57779  | 0.088324 | 0.05648  |
| 0.20254  | -0.08742 | 0.05906  | -0.11795 | 0.01074  | -0.0218437 | 0.63776  | 0.04997  | 0.2812   |
| 0.74572  | 0.128897 | 0.00528  | 0.070819 | 0.12645  | -0.0383553 | 0.40827  | -0.06465 | 0.16306  |
| 0.01113  | -0.07107 | 0.12511  | -0.15942 | 0.00054  | 0.00571337 | 0.902    | 0.161431 | 0.00046  |
| 0.06837  | -0.18651 | 5.01E-05 | -0.07847 | 0.09029  | 0.13590922 | 0.00325  | 0.22696  | 7.18E-07 |
| 0.83818  | 0.137514 | 0.0029   | 0.035364 | 0.44582  | 0.00690471 | 0.8817   | 0.051186 | 0.26963  |
| 0.97464  | 0.036791 | 0.42767  | -0.01186 | 0.79824  | -0.0265756 | 0.56674  | -0.01195 | 0.79668  |
| 0.02024  | 0.15521  | 0.00076  | 0.068777 | 0.13779  | -0.1484591 | 0.00129  | -0.10541 | 0.02272  |
| 0.32923  | 0.1804   | 8.85E-05 | 0.046057 | 0.32063  | -0.0721526 | 0.11945  | -0.11553 | 0.01248  |
| 0.97662  | 0.041138 | 0.37508  | 0.003898 | 0.93304  | 0.02977836 | 0.52092  | 0.000881 | 0.98484  |

|          |          |          |          |         |            |          |          |          |
|----------|----------|----------|----------|---------|------------|----------|----------|----------|
| 0.12892  | -0.10657 | 0.02126  | -0.12361 | 0.00749 | -0.0127061 | 0.7842   | 0.034025 | 0.46324  |
| 7.26E-05 | 0.1595   | 0.00054  | 0.048494 | 0.29567 | -0.0514407 | 0.26726  | -0.09155 | 0.04801  |
| 0.42369  | -0.0241  | 0.60336  | 0.002013 | 0.96539 | 0.01174033 | 0.80024  | 0.02059  | 0.65717  |
| 0.65299  | 0.164768 | 0.00035  | 0.073718 | 0.11162 | 0.06697193 | 0.14845  | 0.117062 | 0.01135  |
| 0.00078  | 0.136182 | 0.00319  | 0.050637 | 0.27482 | 0.02438517 | 0.59914  | 0.030701 | 0.50808  |
| 8.02E-05 | 0.101965 | 0.02757  | -0.02865 | 0.53686 | -0.0602687 | 0.19356  | -0.03623 | 0.43469  |
| 0.07074  | 0.063789 | 0.16876  | 0.121425 | 0.00862 | 0.08352741 | 0.07133  | 0.032222 | 0.48728  |
| 0.3599   | 0.012829 | 0.78217  | 0.023218 | 0.61674 | 0.06902442 | 0.13638  | 0.005874 | 0.89925  |
| 0.00013  | 0.04935  | 0.28722  | -0.04388 | 0.34406 | -0.0148574 | 0.7488   | -0.04636 | 0.31741  |
| 0.00391  | 0.073793 | 0.11126  | -0.07173 | 0.12162 | -0.0059723 | 0.89758  | -0.03034 | 0.5131   |
| 0.0048   | -0.09483 | 0.04053  | 0.013026 | 0.7789  | -0.0081951 | 0.8598   | -0.04156 | 0.3702   |
| 0.43337  | 0.075719 | 0.1022   | -0.12868 | 0.00536 | -0.0658119 | 0.15563  | 0.063457 | 0.17099  |
| 0.84983  | 0.021051 | 0.65001  | -0.03814 | 0.41091 | -0.0717234 | 0.12167  | -0.06306 | 0.17372  |
| 0.05752  | 0.156584 | 0.00068  | -0.01761 | 0.70423 | -0.1289608 | 0.00525  | -0.0728  | 0.11619  |
| 0.61321  | 0.135678 | 0.00331  | 0.015106 | 0.74473 | -0.01206   | 0.79492  | -0.01991 | 0.66774  |
| 0.00666  | 0.139175 | 0.00258  | 0.089771 | 0.05254 | 0.04988569 | 0.28201  | 0.027101 | 0.55909  |
| 0.22693  | 0.061306 | 0.18599  | -0.01925 | 0.67822 | 0.0965532  | 0.037    | 0.138594 | 0.00269  |
| 0.85708  | 0.089559 | 0.0531   | 0.025284 | 0.58574 | 0.03276239 | 0.48001  | 0.045199 | 0.32974  |
| 0.07257  | 0.031154 | 0.50184  | 0.038708 | 0.40396 | 0.01677156 | 0.71773  | -0.0116  | 0.80263  |
| 0.00282  | -0.00371 | 0.9362   | -0.06507 | 0.16034 | -0.0283466 | 0.54116  | 0.089878 | 0.05226  |
| 0.82404  | 0.009272 | 0.84161  | -0.08969 | 0.05274 | -0.0749863 | 0.10558  | 0.051897 | 0.26303  |
| 0.36978  | -0.14834 | 0.00131  | -0.1381  | 0.00278 | -0.019958  | 0.66706  | 0.047725 | 0.3034   |
| 0.16498  | 0.118745 | 0.01022  | 0.10719  | 0.02051 | 0.05587946 | 0.2281   | 0.052494 | 0.25758  |
| 0.92266  | 0.106632 | 0.02118  | 0.054294 | 0.24159 | -0.0087396 | 0.85059  | -0.00221 | 0.96209  |
| 0.64286  | 0.142319 | 0.00205  | -0.08079 | 0.08115 | -0.1658488 | 0.00032  | -0.12376 | 0.00742  |
| 4.77E-05 | 0.121395 | 0.00864  | 0.020204 | 0.66321 | 0.00486264 | 0.91653  | 0.030414 | 0.51205  |
| 0.35437  | 0.116147 | 0.01201  | 0.088506 | 0.05597 | 0.00722721 | 0.87622  | -0.0208  | 0.65388  |
| 0.92404  | 0.095812 | 0.03848  | -0.0567  | 0.22131 | -0.0065589 | 0.88758  | 0.104641 | 0.02373  |
| 0.24721  | 0.017654 | 0.70356  | -0.05224 | 0.25991 | -0.1711562 | 0.0002   | -0.15029 | 0.00112  |
| 0.80802  | -0.03321 | 0.47397  | -0.0168  | 0.71722 | 0.18979047 | 3.66E-05 | 0.303555 | 2.07E-11 |
| 0.0643   | 0.0181   | 0.69644  | -0.05281 | 0.25471 | 0.00031094 | 0.99465  | 0.004541 | 0.92204  |
| 0.393    | 0.150893 | 0.00107  | 0.059792 | 0.19712 | 0.03313571 | 0.47501  | 0.034012 | 0.4634   |
| 0.5436   | 0.09562  | 0.03887  | -0.03482 | 0.45283 | 0.00889351 | 0.84799  | 0.013309 | 0.77423  |
| 0.19954  | 0.170605 | 0.00021  | 0.058236 | 0.20905 | 0.0113439  | 0.80685  | 0.019276 | 0.67779  |
| 1.21E-17 | 0.1031   | 0.02588  | 0.067995 | 0.14234 | 0.08628045 | 0.06246  | 0.048837 | 0.29226  |
| 0.00205  | 0.225629 | 8.37E-07 | 0.134695 | 0.00354 | 0.05082482 | 0.27304  | 0.028639 | 0.537    |
| 8.04E-16 | 0.160054 | 0.00052  | 0.013043 | 0.77861 | 0.00818016 | 0.86006  | 0.033059 | 0.47603  |
| 0.72174  | 0.093698 | 0.04298  | -0.09466 | 0.04088 | -0.0795809 | 0.08582  | 0.01864  | 0.68785  |
| 0.86693  | 0.115925 | 0.01218  | 0.045196 | 0.32978 | -0.0184714 | 0.69053  | -0.00165 | 0.97163  |
| 0.00832  | -0.05904 | 0.20285  | -0.13668 | 0.00308 | 0.01768323 | 0.7031   | 0.043236 | 0.3512   |
| 0.97085  | 0.031844 | 0.4924   | -0.06131 | 0.18596 | -0.0384022 | 0.40769  | 0.06499  | 0.16086  |
| 0.18761  | 0.091269 | 0.04871  | -0.00457 | 0.92157 | -0.0280204 | 0.54583  | 0.030033 | 0.51736  |
| 0.28984  | 0.132496 | 0.00413  | 0.059155 | 0.20194 | 0.03282275 | 0.4792   | 0.022019 | 0.63507  |
| 0.12268  | 0.141417 | 0.00219  | -0.00911 | 0.84429 | -0.0779579 | 0.09243  | -0.10822 | 0.01932  |
| 0.62434  | 0.14373  | 0.00185  | 0.070363 | 0.12892 | 0.09321121 | 0.04408  | 0.10955  | 0.01788  |

|          |          |          |          |          |            |          |          |          |
|----------|----------|----------|----------|----------|------------|----------|----------|----------|
| 0.70548  | 0.0595   | 0.19932  | -0.06124 | 0.1865   | 0.00879507 | 0.84966  | -0.00542 | 0.90709  |
| 0.76029  | 0.084151 | 0.06924  | -0.10468 | 0.02368  | -0.0618179 | 0.18234  | -0.04259 | 0.3585   |
| 0.04399  | 0.055017 | 0.23537  | 0.022222 | 0.63195  | 0.03027682 | 0.51396  | 0.066598 | 0.15074  |
| 0.36683  | 0.106532 | 0.0213   | 0.059811 | 0.19697  | 0.01297562 | 0.77973  | -0.00431 | 0.92605  |
| 0.0028   | 0.043527 | 0.34796  | 0.026097 | 0.57374  | -0.0073671 | 0.87384  | -0.00587 | 0.89936  |
| 0.00143  | 0.054034 | 0.24386  | 0.036877 | 0.42658  | 0.03021893 | 0.51477  | 0.035918 | 0.43871  |
| 0.00969  | 0.205795 | 7.35E-06 | 0.109746 | 0.01767  | 0.17459946 | 0.00015  | 0.158032 | 0.00061  |
| 0.25855  | 0.093203 | 0.0441   | 0.109265 | 0.01818  | -0.0304866 | 0.51105  | -0.04783 | 0.30229  |
| 0.61982  | 0.134254 | 0.00365  | -0.03112 | 0.50228  | -0.0029399 | 0.94948  | 0.089006 | 0.05459  |
| 1.08E-07 | 0.105217 | 0.02297  | 0.059571 | 0.19878  | 0.04379112 | 0.34504  | 0.046165 | 0.3195   |
| 0.77849  | 0.154489 | 0.00081  | 0.014265 | 0.75849  | -0.0504733 | 0.27637  | -0.00401 | 0.93119  |
| 0.00497  | 0.131503 | 0.00442  | 0.01343  | 0.77223  | 0.00780965 | 0.86633  | -0.01441 | 0.75615  |
| 0.41916  | 0.194905 | 2.22E-05 | 0.183467 | 6.66E-05 | 0.04201255 | 0.36501  | -0.04538 | 0.32776  |
| 0.9488   | 0.079269 | 0.08706  | -0.01755 | 0.70517  | -0.0495707 | 0.28506  | -0.03132 | 0.49952  |
| 0.2847   | 0.14409  | 0.0018   | 0.066965 | 0.14849  | 0.02051335 | 0.65838  | -0.04962 | 0.28458  |
| 6.29E-05 | 0.232396 | 3.81E-07 | 0.216056 | 2.45E-06 | 0.12432255 | 0.00715  | 0.101596 | 0.02814  |
| 0.55055  | 0.061481 | 0.18474  | -0.00085 | 0.98534  | -0.0341677 | 0.46136  | -0.01323 | 0.77547  |
| 0.07817  | 0.2185   | 1.87E-06 | 0.080931 | 0.08062  | -0.0301204 | 0.51614  | -0.00583 | 0.90002  |
| 0.11151  | 0.126773 | 0.00608  | 0.028665 | 0.53662  | 0.03203236 | 0.48985  | 0.058376 | 0.20796  |
| 0.46288  | 0.142341 | 0.00205  | 0.053589 | 0.24776  | 0.02807291 | 0.54508  | 0.050596 | 0.2752   |
| 0.30744  | 0.058077 | 0.2103   | -0.05937 | 0.20029  | -0.0356302 | 0.44239  | 0.012554 | 0.78671  |
| 0.66645  | -0.12894 | 0.00526  | -0.05069 | 0.27431  | -0.4251415 | 6.39E-22 | -0.48829 | 2.37E-29 |
| 0.77263  | -0.0521  | 0.26121  | 0.002088 | 0.9641   | 0.22173982 | 1.30E-06 | 0.159202 | 0.00055  |
| 0.00158  | -0.23274 | 3.65E-07 | -0.03252 | 0.48328  | -0.0892134 | 0.05403  | 0.005526 | 0.9052   |
| 0.77648  | 0.2781   | 9.67E-10 | 0.188303 | 4.22E-05 | -0.2655632 | 5.59E-09 | -0.38088 | 1.43E-17 |
| 0.00019  | -0.04678 | 0.31312  | -0.03784 | 0.41464  | -0.1120776 | 0.01539  | -0.08566 | 0.06436  |
| 0.87892  | 0.311143 | 6.10E-12 | 0.197571 | 1.70E-05 | 0.17592581 | 0.00013  | 0.23568  | 2.57E-07 |
| 0.65743  | -0.08232 | 0.07554  | 0.060017 | 0.19543  | 0.03382423 | 0.46588  | -0.03529 | 0.44676  |
| 0.0405   | 0.210593 | 4.43E-06 | 0.119721 | 0.00961  | -0.0476128 | 0.30454  | 0.021549 | 0.6423   |
| 0.38524  | 0.09324  | 0.04402  | -0.00871 | 0.85115  | 0.31819804 | 1.90E-12 | 0.247133 | 6.29E-08 |
| 0.99366  | -0.11221 | 0.01526  | 0.145768 | 0.00159  | -0.3080281 | 1.01E-11 | -0.29288 | 1.09E-10 |
| 0.06394  | 0.232756 | 3.65E-07 | 0.386418 | 4.43E-18 | -0.1462159 | 0.00153  | -0.27016 | 2.97E-09 |
| 0.01718  | 0.074055 | 0.10999  | 0.436637 | 3.68E-23 | 0.04376877 | 0.34529  | -0.02742 | 0.55452  |
| 0.01207  | 0.222648 | 1.18E-06 | 0.320446 | 1.30E-12 | 0.42225809 | 1.28E-21 | 0.252905 | 3.01E-08 |
| 0.0091   | -0.10223 | 0.02717  | -0.12366 | 0.00746  | -0.4078508 | 3.82E-20 | -0.39134 | 1.53E-18 |
| 0.03088  | 0.026475 | 0.5682   | 0.360915 | 8.18E-16 | -0.0425492 | 0.35891  | -0.078   | 0.09225  |
| 0.08218  | 0.198059 | 1.62E-05 | 0.448775 | 1.60E-24 | 0.0246676  | 0.59492  | -0.08495 | 0.06662  |
| 0.75834  | -0.10039 | 0.03007  | 0.206842 | 6.58E-06 | -0.0656946 | 0.15637  | -0.13771 | 0.00286  |
| 0.67782  | -0.01745 | 0.70686  | 0.398349 | 3.28E-19 | 0.26736645 | 4.37E-09 | 0.061116 | 0.18737  |
| 0.01762  | -0.07249 | 0.11774  | 0.360884 | 8.23E-16 | 0.14626168 | 0.00153  | 0.001665 | 0.97138  |
| 0.12835  | -0.41772 | 3.81E-21 | -0.16397 | 0.00037  | -0.3033316 | 2.14E-11 | -0.43779 | 2.74E-23 |
| 0.01247  | -0.19794 | 1.64E-05 | -0.0364  | 0.43264  | -0.1505472 | 0.0011   | -0.36982 | 1.39E-16 |
| 3.76E-05 | 0.210067 | 4.68E-06 | 0.293373 | 1.01E-10 | 0.15872011 | 0.00058  | 0.137161 | 0.00298  |
| 0.18727  | -0.04195 | 0.36572  | -0.09145 | 0.04827  | -0.4871932 | 3.29E-29 | -0.47338 | 1.87E-27 |
| 0.0108   | -0.28927 | 1.88E-10 | 0.109909 | 0.0175   | 0.02869296 | 0.53623  | 0.002004 | 0.96554  |

|          |          |          |          |          |            |          |          |          |
|----------|----------|----------|----------|----------|------------|----------|----------|----------|
| 0.92084  | 0.044307 | 0.33938  | 0.24987  | 4.44E-08 | -0.078812  | 0.0889   | -0.22262 | 1.18E-06 |
| 0.78554  | 0.179409 | 9.69E-05 | 0.238983 | 1.73E-07 | -0.1810449 | 8.34E-05 | -0.24084 | 1.38E-07 |
| 0.34986  | -0.07472 | 0.10684  | 0.139275 | 0.00256  | 0.39409455 | 8.40E-19 | 0.317635 | 2.09E-12 |
| 0.4037   | 0.112949 | 0.0146   | -0.00102 | 0.98252  | -0.2991782 | 4.12E-11 | -0.35805 | 1.43E-15 |
| 0.47378  | -0.08489 | 0.06681  | -0.09811 | 0.03403  | -0.4774689 | 5.75E-28 | -0.40467 | 7.91E-20 |
| 0.64914  | -0.01321 | 0.77591  | 0.060005 | 0.19552  | -0.3179695 | 1.97E-12 | -0.29365 | 9.67E-11 |
| 0.3304   | 0.200096 | 1.32E-05 | 0.280366 | 6.98E-10 | -0.3457467 | 1.47E-14 | -0.31386 | 3.90E-12 |
| 0.48265  | 0.005468 | 0.90619  | -0.07783 | 0.09295  | 0.10046819 | 0.02995  | 0.116649 | 0.01165  |
| 0.51461  | 0.12863  | 0.00537  | 0.076088 | 0.10054  | 0.38777574 | 3.31E-18 | 0.46345  | 3.04E-26 |
| 0.02651  | -0.09511 | 0.03993  | 0.161711 | 0.00045  | -0.1231599 | 0.00771  | -0.19053 | 3.41E-05 |
| 0.73059  | -0.26399 | 6.93E-09 | -0.15775 | 0.00062  | -0.5768656 | 8.88E-43 | -0.70311 | 7.27E-71 |
| 0.08945  | 0.358425 | 1.33E-15 | 0.49847  | 1.06E-30 | 0.00997072 | 0.82985  | -0.15888 | 0.00057  |
| 0.04891  | 0.007678 | 0.86856  | 0.0828   | 0.07384  | 0.41108038 | 1.81E-20 | 0.328551 | 3.24E-13 |
| 0.01798  | 0.301298 | 2.96E-11 | 0.208202 | 5.70E-06 | 0.45754267 | 1.53E-25 | 0.292937 | 1.08E-10 |
| 0.02009  | -0.0946  | 0.04101  | -0.02414 | 0.60289  | -0.1074698 | 0.02018  | -0.2676  | 4.23E-09 |
| 0.00904  | 0.195717 | 2.05E-05 | 0.202003 | 1.09E-05 | -0.1559422 | 0.00072  | -0.10387 | 0.02478  |
| 0.89879  | 0.114053 | 0.01366  | 0.303871 | 1.97E-11 | 0.05134167 | 0.26818  | 0.029408 | 0.52612  |
| 3.57E-11 | 0.005674 | 0.90268  | -0.03035 | 0.51288  | 0.364543   | 4.00E-16 | 0.220009 | 1.58E-06 |
| 0.0603   | 0.0607   | 0.19039  | -0.02112 | 0.64901  | -0.4391161 | 1.96E-23 | -0.6386  | 7.21E-55 |
| 0.49592  | -0.02464 | 0.59526  | -0.17357 | 0.00016  | -0.333105  | 1.45E-13 | -0.45318 | 4.96E-25 |
| 0.66684  | 0.320652 | 1.26E-12 | 0.090991 | 0.0494   | -0.1302299 | 0.00482  | -0.14    | 0.00243  |
| 1.26E-13 | 0.084611 | 0.06772  | 0.088097 | 0.05712  | -0.2846687 | 3.72E-10 | -0.15223 | 0.00097  |
| 0.05484  | -0.02954 | 0.52422  | 0.102343 | 0.027    | -0.3007396 | 3.23E-11 | -0.44933 | 1.38E-24 |
| 0.46662  | -0.24682 | 6.54E-08 | 0.087716 | 0.05821  | -0.2119564 | 3.82E-06 | -0.31712 | 2.27E-12 |
| 0.32514  | -0.03171 | 0.49425  | 0.442895 | 7.42E-24 | 0.06693822 | 0.14866  | -0.01523 | 0.7427   |
| 0.84105  | -0.10767 | 0.01995  | -0.00557 | 0.90443  | -0.4070749 | 4.57E-20 | -0.42921 | 2.35E-22 |
| 0.00611  | -0.19435 | 2.35E-05 | -0.26264 | 8.32E-09 | -0.4806064 | 2.31E-28 | -0.53462 | 7.06E-36 |
| 0.04968  | -0.35712 | 1.71E-15 | -0.2207  | 1.46E-06 | -0.4452757 | 4.00E-24 | -0.63077 | 3.50E-53 |
| 0.73241  | -0.11078 | 0.01662  | 0.161845 | 0.00045  | -0.3180442 | 1.95E-12 | -0.45228 | 6.32E-25 |
| 0.99897  | -0.05491 | 0.23632  | -0.07955 | 0.08593  | -0.5353822 | 5.40E-36 | -0.55272 | 1.03E-38 |
| 0.02512  | -0.28331 | 4.54E-10 | -0.10757 | 0.02006  | -0.1760957 | 0.00013  | -0.18405 | 6.31E-05 |
| 0.81955  | 0.094944 | 0.04028  | 0.350389 | 6.17E-15 | 0.04970879 | 0.28372  | 0.08277  | 0.07395  |
| 0.357    | -0.24477 | 8.46E-08 | -0.22747 | 6.78E-07 | -0.4950604 | 3.03E-30 | -0.69605 | 6.60E-69 |
| 0.26638  | -0.02691 | 0.56185  | 0.044203 | 0.34052  | -0.3343372 | 1.17E-13 | -0.50081 | 5.10E-31 |
| 0.81791  | -0.08578 | 0.06399  | -0.00312 | 0.94647  | -0.3728918 | 7.47E-17 | -0.51598 | 3.94E-33 |
| 0.06556  | -0.0403  | 0.38492  | 0.136726 | 0.00307  | -0.2701444 | 2.98E-09 | -0.16957 | 0.00023  |
| 0.17971  | 0.003803 | 0.93467  | 0.135208 | 0.00342  | -0.2845024 | 3.81E-10 | -0.15048 | 0.00111  |
| 0.50391  | 0.223526 | 1.06E-06 | 0.078776 | 0.08905  | -0.3921264 | 1.29E-18 | -0.33175 | 1.85E-13 |
| 0.22352  | -0.11079 | 0.01661  | 0.008138 | 0.86077  | -0.3300918 | 2.47E-13 | -0.37358 | 6.50E-17 |
| 0.2064   | 0.004167 | 0.92843  | 0.286299 | 2.92E-10 | -0.2323178 | 3.84E-07 | -0.33296 | 1.49E-13 |
| 0.05396  | 0.022519 | 0.62739  | -0.06347 | 0.17089  | -0.6270061 | 2.18E-52 | -0.56424 | 1.30E-40 |
| 0.95513  | 0.01367  | 0.76827  | 0.303231 | 2.18E-11 | -0.2538972 | 2.64E-08 | -0.23241 | 3.80E-07 |
| 0.71887  | -0.04589 | 0.32236  | 0.224609 | 9.41E-07 | -0.2802101 | 7.14E-10 | -0.40319 | 1.11E-19 |
| 0.63437  | -0.08207 | 0.07643  | -0.07228 | 0.11879  | -0.6182011 | 1.42E-50 | -0.65429 | 2.13E-58 |
| 0.54915  | -0.11022 | 0.01719  | -0.14686 | 0.00146  | -0.4317307 | 1.26E-22 | -0.69388 | 2.58E-68 |

|          |          |          |          |          |            |          |          |          |
|----------|----------|----------|----------|----------|------------|----------|----------|----------|
| 0.66977  | -0.13408 | 0.0037   | -0.0968  | 0.03652  | -0.4109096 | 1.89E-20 | -0.56488 | 1.02E-40 |
| 0.00417  | -0.27798 | 9.84E-10 | 0.058034 | 0.21063  | -0.1047058 | 0.02364  | -0.28306 | 4.71E-10 |
| 0.01644  | 0.136595 | 0.0031   | 0.315778 | 2.84E-12 | -0.226061  | 7.97E-07 | -0.27045 | 2.85E-09 |
| 0.37396  | -0.14069 | 0.00231  | -0.06404 | 0.16711  | -0.4798125 | 2.91E-28 | -0.46937 | 5.82E-27 |
| 0.89839  | -0.09927 | 0.03196  | -0.08577 | 0.06404  | -0.5515964 | 1.56E-38 | -0.61338 | 1.32E-49 |
| 0.61201  | -0.26319 | 7.72E-09 | -0.20169 | 1.12E-05 | -0.554832  | 4.68E-39 | -0.54723 | 7.78E-38 |
| 0.63399  | -0.05429 | 0.24166  | -0.082   | 0.07668  | -0.6281638 | 1.24E-52 | -0.74188 | 9.58E-83 |
| 0.0157   | 0.1468   | 0.00147  | 0.116766 | 0.01156  | -0.4451118 | 4.18E-24 | -0.39837 | 3.26E-19 |
| 0.69291  | -0.13429 | 0.00364  | -0.00255 | 0.95618  | -0.4617208 | 4.90E-26 | -0.64544 | 2.22E-56 |
| 0.90674  | -0.01707 | 0.71297  | -0.1374  | 0.00293  | -0.7277267 | 3.60E-78 | -0.66829 | 9.93E-62 |
| 0.00671  | -0.02452 | 0.59714  | 0.138838 | 0.00264  | -0.3129952 | 4.50E-12 | -0.31388 | 3.90E-12 |
| 0.36645  | -0.16207 | 0.00044  | 0.115159 | 0.01277  | -0.4184578 | 3.20E-21 | -0.51671 | 3.09E-33 |
| 0.79448  | -0.06529 | 0.15894  | -0.07047 | 0.12834  | -0.4683775 | 7.70E-27 | -0.5781  | 5.40E-43 |
| 0.70267  | 0.016388 | 0.72392  | 0.172363 | 0.00018  | -0.3951471 | 6.67E-19 | -0.45528 | 2.83E-25 |
| 0.14842  | -0.00118 | 0.97964  | 0.02543  | 0.58357  | -0.552168  | 1.26E-38 | -0.63697 | 1.63E-54 |
| 0.23415  | 0.050739 | 0.27385  | 0.06834  | 0.14032  | -0.5298047 | 3.75E-35 | -0.42512 | 6.42E-22 |
| 0.23334  | -0.11631 | 0.0119   | -0.01237 | 0.78977  | -0.3885481 | 2.81E-18 | -0.3786  | 2.30E-17 |
| 0.01524  | 0.149681 | 0.00118  | 0.49074  | 1.13E-29 | -0.1024614 | 0.02682  | -0.17418 | 0.00016  |
| 0.18458  | -0.11082 | 0.01658  | 0.048513 | 0.29547  | -0.2893325 | 1.86E-10 | -0.26335 | 7.55E-09 |
| 0.68269  | 0.053449 | 0.249    | 0.083366 | 0.07188  | -0.3960852 | 5.42E-19 | -0.3299  | 2.56E-13 |
| 0.86327  | 0.1456   | 0.00161  | 0.326227 | 4.84E-13 | -0.1288523 | 0.00529  | -0.04941 | 0.28666  |
| 9.04E-05 | -0.20529 | 7.74E-06 | 0.097316 | 0.03552  | -0.1258581 | 0.00646  | -0.31976 | 1.46E-12 |
| 0.80518  | -0.14036 | 0.00236  | -0.15756 | 0.00063  | -0.518977  | 1.46E-33 | -0.39999 | 2.27E-19 |
| 0.0021   | -0.04109 | 0.37563  | 0.275677 | 1.37E-09 | -0.0250101 | 0.58981  | -0.24377 | 9.59E-08 |
| 0.01804  | -0.2429  | 1.07E-07 | -0.09461 | 0.04098  | -0.3890345 | 2.53E-18 | -0.62383 | 1.00E-51 |
| 0.27349  | -0.13265 | 0.00409  | -0.09269 | 0.04528  | -0.4862013 | 4.42E-29 | -0.69221 | 7.29E-68 |
| 0.01026  | 0.084022 | 0.06967  | 0.138499 | 0.0027   | -0.5317569 | 1.91E-35 | -0.58657 | 1.66E-44 |
| 0.79873  | -0.14725 | 0.00142  | -0.01926 | 0.67807  | -0.3879929 | 3.16E-18 | -0.57728 | 7.52E-43 |
| 0.10168  | 0.070391 | 0.12877  | 0.406354 | 5.39E-20 | -0.0791223 | 0.08765  | -0.1441  | 0.0018   |
| 0.36139  | -0.14385 | 0.00183  | 0.061044 | 0.18788  | -0.3188998 | 1.69E-12 | -0.32874 | 3.13E-13 |
| 0.1471   | -0.2048  | 8.15E-06 | 0.044477 | 0.33753  | -0.2546381 | 2.40E-08 | -0.46793 | 8.73E-27 |
| 0.32047  | 0.032993 | 0.47691  | 0.288119 | 2.23E-10 | -0.3148082 | 3.34E-12 | -0.31897 | 1.67E-12 |
| 0.28842  | -0.05777 | 0.21269  | 0.039375 | 0.39591  | -0.4773994 | 5.87E-28 | -0.48757 | 2.94E-29 |
| 0.57284  | -0.05525 | 0.23342  | 0.030187 | 0.51521  | -0.2856763 | 3.21E-10 | -0.44706 | 2.51E-24 |
| 0.08143  | 0.08175  | 0.07759  | 0.040827 | 0.3787   | -0.5746807 | 2.14E-42 | -0.70076 | 3.31E-70 |
| 0.0009   | -0.05766 | 0.21363  | -0.00669 | 0.88527  | -0.1732711 | 0.00017  | -0.43673 | 3.59E-23 |
| 0.07379  | 0.059978 | 0.19572  | -0.05214 | 0.26084  | -0.6331386 | 1.10E-53 | -0.56015 | 6.27E-40 |
| 0.51476  | -0.05895 | 0.20354  | 0.212548 | 3.59E-06 | -0.2320106 | 3.98E-07 | -0.22586 | 8.15E-07 |
| 0.94002  | 0.037799 | 0.4151   | 0.054402 | 0.24065  | -0.4918047 | 8.19E-30 | -0.45339 | 4.69E-25 |
| 0.55267  | 0.065587 | 0.15705  | 0.109512 | 0.01792  | -0.3622556 | 6.29E-16 | -0.22987 | 5.13E-07 |
| 0.98264  | 0.069569 | 0.1333   | 0.04404  | 0.34231  | -0.357903  | 1.47E-15 | -0.49772 | 1.34E-30 |
| 0.30611  | 0.016889 | 0.71585  | 0.134158 | 0.00368  | -0.3452654 | 1.61E-14 | -0.29202 | 1.24E-10 |
| 0.00792  | 0.045092 | 0.33088  | 0.267305 | 4.41E-09 | -0.2598218 | 1.21E-08 | -0.26544 | 5.69E-09 |
| 0.15238  | -0.20514 | 7.87E-06 | 0.002732 | 0.95304  | -0.2097729 | 4.83E-06 | -0.47405 | 1.54E-27 |
| 0.57502  | 0.092553 | 0.04561  | 0.353921 | 3.16E-15 | -0.2324418 | 3.79E-07 | -0.31159 | 5.67E-12 |

|          |          |          |          |          |            |          |          |          |
|----------|----------|----------|----------|----------|------------|----------|----------|----------|
| 0.15129  | -0.08669 | 0.06122  | 0.123416 | 0.00758  | -0.2493752 | 4.73E-08 | -0.43359 | 7.92E-23 |
| 0.92739  | -0.0075  | 0.87161  | 0.223823 | 1.03E-06 | -0.2342623 | 3.05E-07 | -0.11361 | 0.01403  |
| 0.00073  | -0.19332 | 2.60E-05 | 0.068452 | 0.13967  | -0.2392478 | 1.67E-07 | -0.32181 | 1.03E-12 |
| 0.79113  | -0.08913 | 0.05425  | 0.215723 | 2.54E-06 | -0.0540607 | 0.24362  | -0.29796 | 4.98E-11 |
| 0.01258  | -0.12866 | 0.00536  | 0.019386 | 0.67605  | -0.315849  | 2.81E-12 | -0.35653 | 1.92E-15 |
| 0.83715  | 0.148753 | 0.00126  | 0.037574 | 0.41789  | -0.4889942 | 1.92E-29 | -0.37881 | 2.21E-17 |
| 0.83058  | -0.1454  | 0.00163  | 0.019061 | 0.68118  | -0.3862151 | 4.63E-18 | -0.45962 | 8.73E-26 |
| 0.62204  | -0.19119 | 3.20E-05 | 0.0189   | 0.68373  | -0.4444456 | 4.97E-24 | -0.62614 | 3.30E-52 |
| 0.34163  | 0.012978 | 0.77969  | 0.070686 | 0.12717  | -0.4046777 | 7.90E-20 | -0.56448 | 1.19E-40 |
| 0.12472  | 0.116829 | 0.01152  | 0.10843  | 0.01909  | -0.0906069 | 0.05037  | -0.16989 | 0.00023  |
| 0.45483  | 0.18279  | 7.10E-05 | 0.11833  | 0.01049  | 0.32202892 | 9.94E-13 | 0.192871 | 2.71E-05 |
| 0.00337  | 0.064192 | 0.16608  | 0.180213 | 9.00E-05 | 0.33080524 | 2.18E-13 | 0.149239 | 0.00122  |
| 4.13E-05 | -0.11988 | 0.00952  | 0.095069 | 0.04001  | 0.04370586 | 0.34598  | -0.01689 | 0.71578  |
| 0.01576  | 0.053953 | 0.24456  | 0.139578 | 0.0025   | -0.2569215 | 1.78E-08 | -0.27596 | 1.31E-09 |
| 0.20452  | -0.07054 | 0.12795  | 0.221415 | 1.35E-06 | 0.11300126 | 0.01456  | 0.067329 | 0.1463   |
| 0.50127  | 0.18409  | 6.29E-05 | 0.308301 | 9.68E-12 | 0.48692663 | 3.56E-29 | 0.337872 | 6.20E-14 |
| 0.31421  | -0.18083 | 8.51E-05 | 0.231802 | 4.08E-07 | -0.1915497 | 3.09E-05 | -0.27215 | 2.25E-09 |
| 0.0276   | -0.41752 | 3.99E-21 | -0.32208 | 9.86E-13 | -0.3366053 | 7.79E-14 | -0.25395 | 2.63E-08 |
| 0.1048   | 0.060345 | 0.193    | 0.142441 | 0.00203  | -0.2834071 | 4.48E-10 | -0.53151 | 2.08E-35 |
| 0.7705   | 0.027725 | 0.55008  | 0.03391  | 0.46475  | -0.5026962 | 2.83E-31 | -0.54717 | 7.94E-38 |
| 0.0009   | -0.00805 | 0.86224  | 0.003977 | 0.93169  | -0.3080724 | 1.00E-11 | -0.40107 | 1.78E-19 |
| 0.41214  | -0.13068 | 0.00468  | -0.08712 | 0.05994  | -0.3723687 | 8.31E-17 | -0.46996 | 4.93E-27 |
| 0.98354  | -0.01819 | 0.69495  | 0.085729 | 0.06416  | -0.2856582 | 3.21E-10 | -0.30326 | 2.17E-11 |
| 0.64548  | 0.079213 | 0.08728  | 0.29101  | 1.44E-10 | -0.1029643 | 0.02608  | -0.33679 | 7.54E-14 |
| 0.47043  | 0.145741 | 0.00159  | 0.146948 | 0.00145  | -0.142551  | 0.00201  | -0.21028 | 4.58E-06 |
| 1.68E-06 | 0.412202 | 1.40E-20 | 0.409343 | 2.71E-20 | 0.15634165 | 0.0007   | -0.03944 | 0.39518  |
| 0.2644   | 0.152289 | 0.00096  | -0.07801 | 0.0922   | -0.2574281 | 1.67E-08 | -0.48572 | 5.10E-29 |
| 0.00053  | 0.385478 | 5.42E-18 | 0.232006 | 3.99E-07 | -0.087199  | 0.05971  | -0.31022 | 7.10E-12 |
| 0.0006   | 0.260848 | 1.06E-08 | 0.345681 | 1.49E-14 | 0.07324624 | 0.11394  | -0.16447 | 0.00036  |
| 0.44744  | 0.249306 | 4.77E-08 | 0.203891 | 8.95E-06 | 0.29906303 | 4.19E-11 | 0.163556 | 0.00039  |
| 0.00402  | 0.411941 | 1.48E-20 | 0.390822 | 1.72E-18 | -0.0450828 | 0.33099  | -0.31182 | 5.47E-12 |
| 0.22887  | 0.440172 | 1.49E-23 | 0.351862 | 4.67E-15 | -0.0281942 | 0.54334  | -0.30004 | 3.60E-11 |
| 0.13471  | 0.269998 | 3.04E-09 | 0.219296 | 1.71E-06 | -0.1111054 | 0.01631  | -0.31944 | 1.54E-12 |
| 0.00052  | -0.28692 | 2.67E-10 | -0.21432 | 2.96E-06 | 0.16643114 | 0.0003   | 0.335272 | 9.89E-14 |
| 0.00247  | 0.3467   | 1.23E-14 | 0.503806 | 1.99E-31 | 0.3426875  | 2.59E-14 | 0.029114 | 0.53027  |
| 0.12003  | 0.279481 | 7.93E-10 | 0.269983 | 3.04E-09 | -0.1662128 | 0.00031  | -0.37693 | 3.26E-17 |
| 0.62304  | 0.211348 | 4.08E-06 | 0.12967  | 0.00501  | 0.16841839 | 0.00026  | -0.10501 | 0.02324  |
| 0.00032  | 0.438284 | 2.42E-23 | 0.536423 | 3.74E-36 | 0.17688974 | 0.00012  | -0.09625 | 0.0376   |
| 0.02669  | 0.168812 | 0.00025  | 0.181517 | 7.98E-05 | -0.1231163 | 0.00773  | -0.38893 | 2.58E-18 |
| 0.0331   | 0.137473 | 0.00291  | -0.00785 | 0.86573  | -0.1386508 | 0.00268  | -0.36876 | 1.73E-16 |
| 0.00015  | 0.223861 | 1.02E-06 | 0.44001  | 1.56E-23 | 0.16180384 | 0.00045  | -0.07654 | 0.09853  |
| 0.00278  | 0.568923 | 2.10E-41 | 0.421006 | 1.74E-21 | -0.0488049 | 0.29258  | -0.21755 | 2.08E-06 |
| 0.17161  | 0.467602 | 9.58E-27 | 0.400629 | 1.97E-19 | -0.0008006 | 0.98623  | -0.13474 | 0.00353  |
| 0.02092  | 0.4069   | 4.76E-20 | 0.525163 | 1.83E-34 | 0.03986159 | 0.39009  | -0.17025 | 0.00022  |
| 0.00704  | 0.267186 | 4.48E-09 | 0.422297 | 1.27E-21 | 0.33537766 | 9.71E-14 | 0.13012  | 0.00486  |



|          |          |          |          |          |            |          |          |          |
|----------|----------|----------|----------|----------|------------|----------|----------|----------|
| 0.27526  | 0.247583 | 5.94E-08 | 0.243364 | 1.01E-07 | -0.2459139 | 7.33E-08 | -0.53667 | 3.43E-36 |
| 0.17033  | -0.1613  | 0.00047  | -0.28339 | 4.49E-10 | -0.2012099 | 1.18E-05 | -0.29668 | 6.07E-11 |
| 0.61763  | 0.288823 | 2.01E-10 | 0.151719 | 0.00101  | 0.1953957  | 2.12E-05 | -0.00528 | 0.90937  |
| 0.04267  | 0.322473 | 9.22E-13 | 0.057435 | 0.21539  | -0.2629574 | 7.97E-09 | -0.48229 | 1.41E-28 |
| 0.60477  | -0.04732 | 0.30756  | -0.20991 | 4.76E-06 | -0.2390651 | 1.71E-07 | -0.43672 | 3.60E-23 |
| 0.97721  | 0.218556 | 1.86E-06 | 0.333265 | 1.41E-13 | 0.13488164 | 0.0035   | -0.15677 | 0.00067  |
| 0.3606   | 0.048467 | 0.29594  | 0.139096 | 0.00259  | 0.1026413  | 0.02655  | -0.1857  | 5.40E-05 |
| 0.00022  | 0.069733 | 0.13239  | 0.050187 | 0.27911  | -0.0211272 | 0.64883  | -0.16767 | 0.00027  |
| 0.77238  | 0.118863 | 0.01014  | 0.250182 | 4.27E-08 | 0.28372863 | 4.27E-10 | 0.046155 | 0.3196   |
| 5.32E-05 | 0.393643 | 9.28E-19 | 0.563089 | 2.03E-40 | 0.19004874 | 3.57E-05 | -0.03443 | 0.45789  |
| 0.08384  | 0.365341 | 3.42E-16 | 0.191367 | 3.14E-05 | -0.0999942 | 0.03073  | -0.33527 | 9.90E-14 |
| 0.00517  | 0.273547 | 1.85E-09 | 0.30088  | 3.16E-11 | 0.22993573 | 5.08E-07 | -0.02572 | 0.57924  |
| 0.00414  | 0.349491 | 7.31E-15 | 0.529523 | 4.13E-35 | 0.14912084 | 0.00123  | -0.09841 | 0.03349  |
| 0.01678  | 0.325444 | 5.54E-13 | 0.379446 | 1.93E-17 | 0.0196623  | 0.67171  | -0.27336 | 1.90E-09 |
| 0.89374  | 0.163777 | 0.00038  | 0.335043 | 1.03E-13 | 0.37492504 | 4.93E-17 | 0.06742  | 0.14575  |
| 0.43498  | 0.15845  | 0.00059  | 0.333624 | 1.33E-13 | 0.3785836  | 2.31E-17 | 0.162221 | 0.00043  |
| 0.07515  | 0.326801 | 4.38E-13 | 0.06103  | 0.18798  | 0.11168635 | 0.01575  | -0.02465 | 0.59517  |
| 0.00512  | 0.388673 | 2.73E-18 | 0.334299 | 1.18E-13 | 0.08228224 | 0.07567  | -0.14351 | 0.00188  |
| 0.5533   | 0.295146 | 7.69E-11 | 0.275885 | 1.33E-09 | 0.20121766 | 1.18E-05 | -0.00134 | 0.97704  |
| 0.00039  | 0.128351 | 0.00547  | 0.27859  | 9.01E-10 | 0.03505673 | 0.44978  | -0.2381  | 1.92E-07 |
| 0.00128  | 0.076444 | 0.09895  | 0.064478 | 0.1642   | 0.00795409 | 0.86388  | -0.24899 | 4.97E-08 |
| 0.41655  | 0.500817 | 5.10E-31 | 0.460106 | 7.64E-26 | 0.27026186 | 2.93E-09 | 0.04499  | 0.33199  |
| 0.90477  | 0.35147  | 5.03E-15 | 0.399786 | 2.38E-19 | -0.0107291 | 0.81713  | -0.27558 | 1.39E-09 |
| 0.61142  | 0.159131 | 0.00056  | 0.006965 | 0.88067  | 0.15074402 | 0.00108  | -0.00507 | 0.91307  |
| 0.92247  | 0.404955 | 7.42E-20 | 0.536197 | 4.05E-36 | 0.50472454 | 1.49E-31 | 0.247168 | 6.26E-08 |
| 1.27E-07 | 0.0929   | 0.0448   | 0.01079  | 0.81611  | -0.2237034 | 1.04E-06 | -0.40334 | 1.07E-19 |
| 0.42857  | 0.319484 | 1.53E-12 | 0.325031 | 5.95E-13 | 0.2103201  | 4.56E-06 | 0.051156 | 0.26992  |
| 2.80E-06 | 0.228632 | 5.92E-07 | 0.393669 | 9.23E-19 | -0.0138769 | 0.76487  | -0.34067 | 3.74E-14 |
| 0.08025  | 0.269098 | 3.44E-09 | 0.257082 | 1.74E-08 | 0.2468509  | 6.52E-08 | 0.053594 | 0.24772  |
| 0.06286  | 0.309237 | 8.32E-12 | 0.355289 | 2.43E-15 | 0.15687982 | 0.00067  | -0.14352 | 0.00187  |
| 0.02923  | 0.479403 | 3.28E-28 | 0.60227  | 1.96E-47 | 0.11031491 | 0.01709  | -0.13059 | 0.00471  |
| 0.00015  | 0.448978 | 1.52E-24 | 0.218014 | 1.97E-06 | -0.3194455 | 1.54E-12 | -0.47473 | 1.27E-27 |
| 0.0021   | 0.114972 | 0.01291  | 0.120908 | 0.00891  | -0.0805522 | 0.08205  | -0.36368 | 4.75E-16 |
| 0.7447   | 0.396861 | 4.57E-19 | 0.521923 | 5.46E-34 | 0.09639033 | 0.03732  | -0.16379 | 0.00038  |
| 0.00419  | 0.363893 | 4.55E-16 | 0.54157  | 6.02E-37 | 0.218726   | 1.82E-06 | -0.06469 | 0.16282  |
| 0.03513  | 0.291524 | 1.34E-10 | 0.229518 | 5.34E-07 | -0.0567966 | 0.22054  | -0.32791 | 3.62E-13 |
| 0.01302  | 0.492178 | 7.31E-30 | 0.526688 | 1.09E-34 | 0.09555475 | 0.039    | -0.17127 | 0.0002   |
| 9.71E-06 | 0.231182 | 4.39E-07 | 0.272698 | 2.08E-09 | 0.15959889 | 0.00054  | -0.01326 | 0.77497  |
| 0.957    | 0.201879 | 1.10E-05 | -0.00231 | 0.96027  | -0.1148378 | 0.01302  | -0.29359 | 9.76E-11 |
| 0.99537  | 0.271028 | 2.63E-09 | 0.40591  | 5.97E-20 | 0.23012023 | 4.98E-07 | -0.03442 | 0.45811  |
| 0.84578  | 0.46243  | 4.03E-26 | 0.393237 | 1.01E-18 | 0.39372571 | 9.11E-19 | 0.145664 | 0.0016   |
| 0.00194  | 0.196628 | 1.87E-05 | 0.308984 | 8.67E-12 | 0.10402904 | 0.02457  | -0.19698 | 1.81E-05 |
| 0.16508  | 0.060024 | 0.19538  | -0.00728 | 0.87537  | -0.1892832 | 3.84E-05 | -0.4945  | 3.60E-30 |
| 0.0226   | 0.396331 | 5.14E-19 | 0.446322 | 3.04E-24 | 0.26868507 | 3.64E-09 | 0.029581 | 0.52369  |
| 0.64087  | 0.428046 | 3.14E-22 | 0.340701 | 3.72E-14 | 0.18314771 | 6.86E-05 | -0.02529 | 0.58561  |

|          |          |          |          |          |            |          |          |          |
|----------|----------|----------|----------|----------|------------|----------|----------|----------|
| 0.03655  | 0.224386 | 9.65E-07 | 0.039321 | 0.39656  | -0.1558246 | 0.00073  | -0.37221 | 8.58E-17 |
| 3.82E-06 | 0.099684 | 0.03126  | 0.097347 | 0.03546  | 0.20214097 | 1.07E-05 | 0.116762 | 0.01157  |
| 0.83479  | 0.409477 | 2.63E-20 | 0.331633 | 1.89E-13 | 0.03066398 | 0.50859  | -0.2389  | 1.74E-07 |
| 0.01992  | 0.291568 | 1.33E-10 | 0.265694 | 5.49E-09 | 0.06927873 | 0.13494  | -0.08764 | 0.05844  |
| 0.00431  | 0.522299 | 4.82E-34 | 0.415365 | 6.65E-21 | -0.0373227 | 0.42101  | -0.26709 | 4.54E-09 |
| 0.91646  | 0.258144 | 1.52E-08 | 0.4425   | 8.22E-24 | 0.27387251 | 1.77E-09 | 0.074174 | 0.10942  |
| 0.07904  | 0.208586 | 5.48E-06 | 0.276557 | 1.21E-09 | 0.10587377 | 0.02212  | -0.13342 | 0.00387  |
| 0.54118  | 0.228031 | 6.35E-07 | -0.03369 | 0.4676   | -0.206229  | 7.02E-06 | -0.26043 | 1.12E-08 |
| 0.34677  | 0.22598  | 8.04E-07 | 0.334575 | 1.12E-13 | 0.38899755 | 2.55E-18 | 0.254573 | 2.42E-08 |
| 0.97855  | 0.037286 | 0.42147  | 0.013585 | 0.76968  | 0.0320073  | 0.49019  | -0.10163 | 0.02808  |
| 0.45123  | 0.298416 | 4.64E-11 | 0.203593 | 9.23E-06 | -0.0921066 | 0.04666  | -0.33926 | 4.82E-14 |
| 0.23459  | 0.284459 | 3.84E-10 | 0.442337 | 8.57E-24 | 0.35375323 | 3.26E-15 | 0.159943 | 0.00052  |
| 0.32954  | 0.45406  | 3.93E-25 | 0.482948 | 1.16E-28 | 0.25740739 | 1.67E-08 | -0.01601 | 0.73005  |
| 0.25742  | -0.10963 | 0.01779  | 0.028854 | 0.53394  | -0.2339021 | 3.18E-07 | -0.54192 | 5.30E-37 |
| 0.88384  | 0.447702 | 2.12E-24 | 0.441912 | 9.56E-24 | 0.18826417 | 4.24E-05 | 0.007404 | 0.87321  |
| 0.80716  | 0.203372 | 9.44E-06 | -0.04591 | 0.32214  | 0.18606267 | 5.22E-05 | -0.02393 | 0.60604  |
| 0.9329   | 0.135892 | 0.00326  | 0.210695 | 4.38E-06 | 0.20062953 | 1.25E-05 | -0.02488 | 0.59169  |
| 0.27284  | 0.005241 | 0.91006  | 0.049797 | 0.28287  | 0.1698151  | 0.00023  | -0.00249 | 0.95717  |
| 0.03934  | 0.438016 | 2.59E-23 | 0.422524 | 1.20E-21 | 0.32283385 | 8.67E-13 | 0.224765 | 9.24E-07 |
| 0.01785  | 0.4528   | 5.50E-25 | 0.397602 | 3.88E-19 | 0.25099421 | 3.85E-08 | 0.129957 | 0.00491  |
| 0.26792  | 0.179912 | 9.25E-05 | 0.134185 | 0.00367  | -0.1503289 | 0.00112  | -0.35685 | 1.80E-15 |
| 0.01266  | 0.17075  | 0.00021  | 0.314002 | 3.82E-12 | -0.0038916 | 0.93316  | -0.28759 | 2.41E-10 |
| 0.56647  | 0.19595  | 2.00E-05 | 0.266425 | 4.97E-09 | -0.0664918 | 0.15139  | -0.40474 | 7.79E-20 |
| 0.06232  | 0.372423 | 8.22E-17 | 0.57509  | 1.82E-42 | 0.10294992 | 0.0261   | -0.09646 | 0.03719  |
| 0.20528  | 0.284238 | 3.96E-10 | 0.227696 | 6.60E-07 | -0.1970696 | 1.79E-05 | -0.4452  | 4.08E-24 |
| 0.05409  | 0.424276 | 7.88E-22 | 0.476998 | 6.60E-28 | 0.23958312 | 1.61E-07 | -0.05997 | 0.19576  |
| 0.10018  | 0.051542 | 0.26632  | -0.01402 | 0.76246  | -0.0386175 | 0.40507  | -0.2646  | 6.38E-09 |
| 9.07E-37 | 0.100618 | 0.0297   | -0.04747 | 0.30598  | -0.2994065 | 3.97E-11 | -0.45543 | 2.72E-25 |
| 0.61499  | 0.258472 | 1.45E-08 | 0.021543 | 0.64239  | -0.376112  | 3.86E-17 | -0.56373 | 1.58E-40 |
| 0.58058  | 0.155387 | 0.00075  | 0.162034 | 0.00044  | -0.2430294 | 1.05E-07 | -0.49338 | 5.07E-30 |
| 0.72471  | 0.315355 | 3.05E-12 | 0.325917 | 5.11E-13 | -0.0471166 | 0.30961  | -0.2721  | 2.27E-09 |
| 0.69934  | 0.180528 | 8.74E-05 | 0.402682 | 1.24E-19 | 0.2795503  | 7.85E-10 | 0.004756 | 0.91836  |
| 6.32E-05 | 0.445674 | 3.61E-24 | 0.292717 | 1.11E-10 | -0.2255244 | 8.47E-07 | -0.4678  | 9.05E-27 |
| 0.73435  | 0.088456 | 0.05611  | 0.100189 | 0.03041  | -0.0030781 | 0.94711  | -0.26192 | 9.16E-09 |
| 0.98396  | 0.178571 | 0.0001   | 0.077476 | 0.09447  | 0.12251685 | 0.00804  | -0.16706 | 0.00029  |
| 0.15953  | 0.399681 | 2.44E-19 | 0.347542 | 1.05E-14 | -0.060808  | 0.1896   | -0.30877 | 8.97E-12 |
| 0.94232  | 0.118783 | 0.0102   | 0.113756 | 0.01391  | -0.2590145 | 1.35E-08 | -0.53362 | 9.98E-36 |
| 0.77975  | 0.023584 | 0.6112   | 0.081373 | 0.07897  | -0.1427816 | 0.00198  | -0.37929 | 2.00E-17 |
| 0.98101  | 0.097705 | 0.03479  | 0.107064 | 0.02066  | -0.1626297 | 0.00042  | -0.38366 | 7.97E-18 |
| 0.16189  | 0.502894 | 2.65E-31 | 0.274489 | 1.62E-09 | -0.0896226 | 0.05293  | -0.29175 | 1.29E-10 |
| 0.69165  | 0.418875 | 2.89E-21 | 0.283348 | 4.52E-10 | -0.0439065 | 0.34377  | -0.3131  | 4.43E-12 |
| 0.06475  | 0.451429 | 7.93E-25 | 0.47907  | 3.61E-28 | 0.0278191  | 0.54872  | -0.19312 | 2.65E-05 |
| 1.49E-05 | 0.104918 | 0.02336  | -0.08903 | 0.05453  | -0.3993883 | 2.60E-19 | -0.55722 | 1.90E-39 |
| 0.07754  | 0.474246 | 1.46E-27 | 0.153267 | 0.00089  | -0.1004905 | 0.02991  | -0.34211 | 2.88E-14 |
| 0.00027  | 0.203348 | 9.47E-06 | 0.081679 | 0.07785  | -0.3162613 | 2.62E-12 | -0.53633 | 3.87E-36 |

|          |          |          |          |          |            |          |          |          |
|----------|----------|----------|----------|----------|------------|----------|----------|----------|
| 0.00168  | 0.317764 | 2.04E-12 | 0.360914 | 8.18E-16 | -0.1151139 | 0.0128   | -0.395   | 6.90E-19 |
| 0.11254  | 0.09656  | 0.03698  | 0.088985 | 0.05465  | -0.1105063 | 0.0169   | -0.35999 | 9.81E-16 |
| 0.88386  | 0.118326 | 0.01049  | 0.066241 | 0.15294  | -0.2817617 | 5.70E-10 | -0.53992 | 1.09E-36 |
| 0.03589  | 0.579417 | 3.16E-43 | 0.228495 | 6.01E-07 | -0.1158893 | 0.01221  | -0.329   | 2.99E-13 |
| 0.49044  | 0.294107 | 9.02E-11 | 0.037275 | 0.4216   | -0.0069653 | 0.88067  | -0.20725 | 6.31E-06 |
| 0.07852  | 0.121675 | 0.00848  | 0.223133 | 1.11E-06 | -0.1344808 | 0.0036   | -0.42176 | 1.45E-21 |
| 0.19609  | 0.289656 | 1.77E-10 | 0.107943 | 0.01964  | -0.2362747 | 2.40E-07 | -0.46275 | 3.69E-26 |
| 0.37613  | 0.296689 | 6.06E-11 | 0.057089 | 0.21817  | -0.3222894 | 9.51E-13 | -0.46784 | 8.95E-27 |
| 0.67518  | 0.280814 | 6.54E-10 | 0.17483  | 0.00015  | -0.2623143 | 8.69E-09 | -0.53071 | 2.75E-35 |
| 0.01066  | 0.438315 | 2.40E-23 | 0.451642 | 7.49E-25 | 0.03864559 | 0.40473  | -0.15103 | 0.00106  |
| 0.86003  | 0.051424 | 0.26741  | 0.02286  | 0.6222   | -0.3371811 | 7.03E-14 | -0.52692 | 1.01E-34 |
| 0.34399  | 0.404685 | 7.89E-20 | 0.418377 | 3.26E-21 | -0.0380882 | 0.41154  | -0.30528 | 1.57E-11 |
| 0.39924  | -0.01744 | 0.70692  | -0.00963 | 0.83566  | -0.2587766 | 1.39E-08 | -0.46177 | 4.83E-26 |
| 0.6441   | 0.45768  | 1.48E-25 | 0.302734 | 2.36E-11 | 0.06083461 | 0.18941  | -0.12887 | 0.00528  |
| 0.01662  | 0.183968 | 6.36E-05 | 0.263752 | 7.16E-09 | -0.0600265 | 0.19536  | -0.36426 | 4.23E-16 |
| 0.83389  | 0.158807 | 0.00057  | 0.200777 | 1.23E-05 | -0.2578897 | 1.57E-08 | -0.50829 | 4.78E-32 |
| 0.21803  | 0.294488 | 8.50E-11 | 0.223372 | 1.08E-06 | -0.0452828 | 0.32884  | -0.34815 | 9.40E-15 |
| 0.2292   | -0.01466 | 0.75201  | 0.104668 | 0.02369  | -0.0519398 | 0.26264  | -0.33621 | 8.36E-14 |
| 0.98317  | 0.514983 | 5.46E-33 | 0.414297 | 8.55E-21 | -0.0559904 | 0.22718  | -0.26728 | 4.42E-09 |
| 0.15216  | 0.028697 | 0.53617  | 0.165315 | 0.00033  | -0.1277457 | 0.0057   | -0.35913 | 1.16E-15 |
| 0.88482  | 0.165177 | 0.00034  | 0.114597 | 0.01321  | -0.2907473 | 1.50E-10 | -0.55194 | 1.38E-38 |
| 0.02508  | 0.013609 | 0.76928  | 0.058264 | 0.20883  | -0.2195681 | 1.66E-06 | -0.50242 | 3.08E-31 |
| 0.00374  | 0.209983 | 4.72E-06 | 0.101701 | 0.02798  | -0.3668501 | 2.53E-16 | -0.56824 | 2.75E-41 |
| 5.46E-07 | 0.15997  | 0.00052  | 0.230928 | 4.53E-07 | -0.2690368 | 3.47E-09 | -0.50182 | 3.73E-31 |
| 0.00115  | 0.327854 | 3.65E-13 | 0.22282  | 1.15E-06 | -0.3162001 | 2.65E-12 | -0.43559 | 4.79E-23 |
| 0.66401  | 0.258967 | 1.36E-08 | 0.093438 | 0.04357  | -0.2481592 | 5.52E-08 | -0.41805 | 3.52E-21 |
| 0.33462  | 0.17839  | 0.00011  | 0.494796 | 3.29E-30 | 0.06815789 | 0.14138  | -0.18756 | 4.53E-05 |
| 0.00466  | 0.238131 | 1.92E-07 | 0.210626 | 4.41E-06 | -0.1037432 | 0.02496  | -0.3604  | 9.04E-16 |
| 0.56035  | 0.248215 | 5.48E-08 | 0.343864 | 2.08E-14 | -0.1015032 | 0.02829  | -0.405   | 7.34E-20 |
| 0.2634   | 0.248939 | 5.00E-08 | 0.421935 | 1.39E-21 | 0.17616658 | 0.00013  | -0.18168 | 7.86E-05 |
| 0.37885  | 0.325549 | 5.44E-13 | 0.286043 | 3.04E-10 | -0.2545382 | 2.43E-08 | -0.44976 | 1.23E-24 |
| 0.03184  | 0.150976 | 0.00107  | 0.197234 | 1.76E-05 | -0.3299683 | 2.53E-13 | -0.61984 | 6.59E-51 |
| 0.75989  | 0.428826 | 2.59E-22 | 0.57927  | 3.35E-43 | 0.08143294 | 0.07875  | -0.12119 | 0.00875  |
| 0.00022  | 0.417242 | 4.27E-21 | 0.440212 | 1.48E-23 | -0.1212694 | 0.00871  | -0.3813  | 1.31E-17 |
| 0.33759  | 0.239281 | 1.67E-07 | 0.140955 | 0.00226  | -0.2662524 | 5.09E-09 | -0.53438 | 7.66E-36 |
| 0.22581  | 0.218131 | 1.95E-06 | 0.355253 | 2.45E-15 | -0.1169145 | 0.01146  | -0.43984 | 1.63E-23 |
| 0.43094  | 0.449195 | 1.43E-24 | 0.077747 | 0.09331  | -0.3093486 | 8.17E-12 | -0.46949 | 5.63E-27 |
| 0.08352  | 0.35765  | 1.54E-15 | 0.227952 | 6.41E-07 | -0.1226734 | 0.00796  | -0.2965  | 6.24E-11 |
| 0.00134  | 0.02872  | 0.53584  | 0.042643 | 0.35785  | -0.2898071 | 1.73E-10 | -0.52093 | 7.62E-34 |
| 0.5415   | 0.093697 | 0.04299  | 0.062372 | 0.17844  | -0.3247068 | 6.29E-13 | -0.46625 | 1.40E-26 |
| 0.05623  | 0.224652 | 9.36E-07 | 0.248232 | 5.47E-08 | -0.0441914 | 0.34065  | -0.31902 | 1.65E-12 |
| 0.18123  | 0.023654 | 0.61014  | 0.112912 | 0.01463  | -0.3476754 | 1.03E-14 | -0.63471 | 5.04E-54 |
| 0.00181  | 0.320644 | 1.26E-12 | 0.299329 | 4.02E-11 | -0.3242533 | 6.80E-13 | -0.52237 | 4.70E-34 |
| 0.33526  | 0.002567 | 0.95589  | -0.06106 | 0.18774  | -0.2847259 | 3.69E-10 | -0.54334 | 3.19E-37 |
| 0.08774  | 0.232645 | 3.70E-07 | 0.237187 | 2.15E-07 | -0.1561621 | 0.00071  | -0.46662 | 1.26E-26 |

|         |          |          |          |          |            |          |          |          |
|---------|----------|----------|----------|----------|------------|----------|----------|----------|
| 0.8221  | -0.00394 | 0.93237  | 0.113436 | 0.01418  | -0.2492152 | 4.83E-08 | -0.56326 | 1.90E-40 |
| 0.00027 | 0.14319  | 0.00192  | 0.237766 | 2.00E-07 | -0.2446413 | 8.60E-08 | -0.53321 | 1.15E-35 |
| 0.96534 | 0.172621 | 0.00018  | 0.278721 | 8.85E-10 | -0.0537193 | 0.24662  | -0.39734 | 4.10E-19 |
| 0.459   | 0.232535 | 3.75E-07 | 0.487328 | 3.16E-29 | 0.11882821 | 0.01017  | -0.17488 | 0.00015  |
| 0.69386 | 0.101625 | 0.0281   | 0.017301 | 0.70922  | -0.3042192 | 1.86E-11 | -0.57756 | 6.71E-43 |
| 0.94322 | 0.441809 | 9.82E-24 | 0.246844 | 6.52E-08 | -0.1860223 | 5.24E-05 | -0.43002 | 1.93E-22 |
| 0.02108 | -0.15825 | 0.0006   | -0.06009 | 0.1949   | 0.3562805  | 2.01E-15 | 0.575003 | 1.88E-42 |
| 0.60186 | 0.184598 | 5.99E-05 | 0.016847 | 0.71651  | -0.2058234 | 7.32E-06 | -0.3883  | 2.96E-18 |
| 0.12905 | 0.097063 | 0.036    | 0.017101 | 0.71243  | -0.2202051 | 1.55E-06 | -0.46157 | 5.10E-26 |
| 0.16944 | 0.444343 | 5.10E-24 | 0.259678 | 1.24E-08 | -0.233932  | 3.17E-07 | -0.44724 | 2.39E-24 |
| 0.05967 | 0.341142 | 3.43E-14 | 0.431275 | 1.41E-22 | -0.1809763 | 8.39E-05 | -0.39603 | 5.49E-19 |
| 0.93367 | 0.191166 | 3.20E-05 | -0.00878 | 0.84998  | -0.2476564 | 5.89E-08 | -0.46534 | 1.80E-26 |
| 0.41204 | 0.356981 | 1.76E-15 | 0.481867 | 1.60E-28 | 0.08555024 | 0.06472  | -0.16322 | 0.0004   |
| 0.57656 | 0.007707 | 0.86807  | 0.025332 | 0.58503  | -0.2542061 | 2.54E-08 | -0.56206 | 3.02E-40 |
| 0.17678 | 0.191529 | 3.09E-05 | 0.316809 | 2.40E-12 | -0.1321629 | 0.00422  | -0.44016 | 1.50E-23 |
| 0.03548 | 0.393874 | 8.82E-19 | 0.555531 | 3.60E-39 | 0.11360629 | 0.01403  | -0.11158 | 0.01585  |
| 0.03462 | 0.504926 | 1.40E-31 | 0.457739 | 1.46E-25 | 0.00679342 | 0.88359  | -0.24348 | 9.93E-08 |
| 0.55759 | 0.287325 | 2.51E-10 | 0.285569 | 3.26E-10 | -0.0535277 | 0.24831  | -0.34324 | 2.34E-14 |
| 0.63936 | 0.196398 | 1.92E-05 | 0.094535 | 0.04115  | -0.088227  | 0.05675  | -0.36157 | 7.19E-16 |
| 0.02229 | 0.24575  | 7.48E-08 | 0.249669 | 4.56E-08 | -0.3061375 | 1.37E-11 | -0.57191 | 6.45E-42 |
| 0.05607 | 0.282718 | 4.95E-10 | 0.327735 | 3.73E-13 | -0.1690909 | 0.00024  | -0.4493  | 1.39E-24 |
| 0.00253 | 0.477864 | 5.13E-28 | 0.600884 | 3.60E-47 | 0.16666087 | 0.0003   | -0.02726 | 0.55672  |
| 0.56677 | 0.213464 | 3.25E-06 | 0.320468 | 1.30E-12 | -0.0245526 | 0.59664  | -0.33939 | 4.72E-14 |
| 0.61731 | 0.066517 | 0.15124  | 0.039167 | 0.39841  | -0.279161  | 8.30E-10 | -0.55034 | 2.48E-38 |
| 0.91474 | 0.049515 | 0.28561  | 0.067867 | 0.14309  | 0.16454219 | 0.00036  | -0.11409 | 0.01363  |
| 0.14489 | 0.07621  | 0.09999  | 0.081523 | 0.07842  | -0.2273085 | 6.90E-07 | -0.47682 | 6.95E-28 |
| 0.63779 | 0.190939 | 3.27E-05 | 0.284682 | 3.71E-10 | 0.0425558  | 0.35883  | -0.24152 | 1.27E-07 |
| 0.00817 | 0.403906 | 9.41E-20 | 0.431758 | 1.25E-22 | 0.13269329 | 0.00407  | -0.12895 | 0.00526  |
| 0.01556 | 0.279694 | 7.69E-10 | 0.22502  | 8.98E-07 | -0.0401184 | 0.38704  | -0.36482 | 3.79E-16 |
| 0.03487 | 0.146408 | 0.00151  | 0.196923 | 1.82E-05 | -0.0894529 | 0.05339  | -0.39616 | 5.33E-19 |
| 0.09573 | 0.429927 | 1.97E-22 | 0.358862 | 1.22E-15 | -0.1835976 | 6.58E-05 | -0.46899 | 6.49E-27 |
| 0.03167 | 0.423056 | 1.06E-21 | 0.079134 | 0.0876   | -0.1678201 | 0.00027  | -0.3008  | 3.20E-11 |
| 0.75829 | 0.01079  | 0.8161   | 0.053309 | 0.25025  | -0.2948131 | 8.09E-11 | -0.60967 | 7.18E-49 |
| 0.59526 | 0.292242 | 1.20E-10 | 0.440493 | 1.38E-23 | 0.17856557 | 0.0001   | -0.05614 | 0.22595  |
| 0.05597 | 0.161758 | 0.00045  | 0.417757 | 3.78E-21 | -0.1027946 | 0.02633  | -0.40746 | 4.18E-20 |
| 0.0569  | 0.274985 | 1.51E-09 | 0.069806 | 0.13199  | -0.0956742 | 0.03876  | -0.29493 | 7.95E-11 |
| 0.2784  | 0.181684 | 7.86E-05 | 0.262584 | 8.38E-09 | 0.05596321 | 0.2274   | -0.304   | 1.93E-11 |
| 0.28831 | 0.30718  | 1.16E-11 | 0.070915 | 0.12594  | -0.3263896 | 4.71E-13 | -0.51106 | 1.96E-32 |
| 0.02912 | 0.37367  | 6.37E-17 | 0.267156 | 4.50E-09 | -0.0853262 | 0.06543  | -0.36666 | 2.63E-16 |
| 0.01715 | 0.321725 | 1.05E-12 | 0.409702 | 2.50E-20 | 0.16970511 | 0.00023  | -0.08753 | 0.05874  |
| 0.12763 | 0.408418 | 3.36E-20 | 0.30694  | 1.21E-11 | 0.12546029 | 0.00663  | -0.03926 | 0.3973   |
| 0.31107 | 0.310253 | 7.05E-12 | 0.267215 | 4.46E-09 | -0.1897632 | 3.67E-05 | -0.43139 | 1.37E-22 |
| 0.24602 | 0.126071 | 0.00637  | 0.111163 | 0.01625  | -0.1995069 | 1.40E-05 | -0.43542 | 5.00E-23 |
| 0.82435 | 0.316814 | 2.39E-12 | 0.083578 | 0.07116  | -0.3482981 | 9.14E-15 | -0.55443 | 5.44E-39 |
| 0.42469 | 0.237763 | 2.00E-07 | 0.127508 | 0.00579  | -0.1224296 | 0.00808  | -0.41201 | 1.46E-20 |

|         |          |          |          |          |            |          |          |          |
|---------|----------|----------|----------|----------|------------|----------|----------|----------|
| 0.00052 | 0.295631 | 7.14E-11 | 0.287472 | 2.46E-10 | -0.1467779 | 0.00147  | -0.4023  | 1.35E-19 |
| 0.49349 | 0.365586 | 3.25E-16 | 0.142965 | 0.00195  | -0.0115838 | 0.80285  | -0.20823 | 5.69E-06 |
| 0.15371 | 0.091331 | 0.04855  | 0.216955 | 2.22E-06 | 0.0471342  | 0.30943  | -0.32809 | 3.51E-13 |
| 0.06648 | 0.18779  | 4.43E-05 | 0.159984 | 0.00052  | 0.01053836 | 0.82032  | -0.30457 | 1.76E-11 |
| 0.02642 | 0.239614 | 1.60E-07 | 0.047204 | 0.30872  | -0.2869671 | 2.65E-10 | -0.52881 | 5.28E-35 |
| 0.30221 | 0.440633 | 1.33E-23 | 0.423033 | 1.07E-21 | -0.1784103 | 0.00011  | -0.39949 | 2.55E-19 |
| 0.59933 | 0.109839 | 0.01757  | 0.199134 | 1.46E-05 | -0.0888667 | 0.05497  | -0.36402 | 4.44E-16 |
| 0.70384 | 0.229099 | 5.61E-07 | 0.271296 | 2.54E-09 | -0.0475767 | 0.30491  | -0.33104 | 2.09E-13 |
| 0.04132 | 0.149876 | 0.00116  | 0.068672 | 0.1384   | -0.2365243 | 2.33E-07 | -0.51908 | 1.41E-33 |
| 0.97606 | 0.389532 | 2.27E-18 | 0.108178 | 0.01937  | -0.2285169 | 6.00E-07 | -0.38032 | 1.61E-17 |
| 0.12992 | 0.303843 | 1.98E-11 | 0.503926 | 1.92E-31 | 0.12626825 | 0.00629  | -0.20241 | 1.04E-05 |
| 0.34773 | 0.270986 | 2.65E-09 | 0.264271 | 6.67E-09 | -0.1707109 | 0.00021  | -0.42356 | 9.37E-22 |
| 0.17034 | 0.119686 | 0.00963  | 0.03667  | 0.42918  | -0.3334592 | 1.37E-13 | -0.54659 | 9.81E-38 |
| 0.10366 | 0.29187  | 1.27E-10 | 0.407808 | 3.86E-20 | 0.15445514 | 0.00081  | -0.09913 | 0.03221  |
| 0.01614 | 0.275358 | 1.43E-09 | 0.084465 | 0.0682   | -0.1795713 | 9.54E-05 | -0.42068 | 1.88E-21 |
| 0.84961 | 0.074263 | 0.10899  | 0.310964 | 6.28E-12 | -0.0104031 | 0.82259  | -0.35085 | 5.66E-15 |
| 0.66064 | 0.303211 | 2.19E-11 | 0.312442 | 4.93E-12 | 0.02464424 | 0.59527  | -0.25518 | 2.24E-08 |
| 0.69939 | 0.165239 | 0.00034  | 0.176969 | 0.00012  | -0.2428238 | 1.08E-07 | -0.47804 | 4.88E-28 |
| 0.77904 | -0.0229  | 0.62156  | -0.03798 | 0.41286  | -0.3165736 | 2.49E-12 | -0.48882 | 2.02E-29 |
| 0.35218 | 0.363813 | 4.63E-16 | 0.507452 | 6.25E-32 | 0.47634745 | 7.96E-28 | 0.171457 | 0.0002   |
| 0.19135 | 0.023931 | 0.60596  | 0.178949 | 0.0001   | -0.0638491 | 0.16836  | -0.30196 | 2.66E-11 |
| 0.00169 | 0.155646 | 0.00074  | 0.101311 | 0.02859  | -0.2232755 | 1.09E-06 | -0.42493 | 6.72E-22 |
| 0.06053 | 0.000834 | 0.98565  | 0.039025 | 0.40013  | -0.2892837 | 1.87E-10 | -0.55357 | 7.51E-39 |
| 0.30032 | 0.141986 | 0.0021   | 0.038796 | 0.4029   | -0.1837851 | 6.47E-05 | -0.18127 | 8.17E-05 |
| 0.83372 | 0.346556 | 1.27E-14 | 0.142439 | 0.00203  | -0.1851498 | 5.69E-05 | -0.13011 | 0.00486  |
| 0.00666 | 0.296233 | 6.50E-11 | 0.37248  | 8.12E-17 | -0.0593654 | 0.20034  | 0.00801  | 0.86294  |
| 0.01534 | -0.07828 | 0.09108  | 0.212732 | 3.52E-06 | 0.64118794 | 1.95E-55 | 0.414338 | 8.47E-21 |
| 0.25898 | 0.608961 | 9.88E-49 | 0.569008 | 2.03E-41 | -0.0144079 | 0.75615  | 0.008823 | 0.84918  |
| 0.00058 | 0.333446 | 1.37E-13 | 0.126305 | 0.00627  | -0.4214049 | 1.58E-21 | -0.32495 | 6.04E-13 |
| 0.02284 | 0.310954 | 6.29E-12 | 0.306527 | 1.29E-11 | -0.2287157 | 5.86E-07 | -0.2515  | 3.61E-08 |
| 0.01453 | 0.247549 | 5.97E-08 | 0.015723 | 0.73469  | -0.4986997 | 9.86E-31 | -0.3938  | 8.96E-19 |
| 0.01141 | 0.400232 | 2.16E-19 | 0.348207 | 9.30E-15 | -0.3172631 | 2.22E-12 | -0.2557  | 2.09E-08 |
| 0.04284 | -0.20914 | 5.17E-06 | 0.077315 | 0.09515  | 0.35638242 | 1.97E-15 | 0.07801  | 0.09221  |
| 0.09245 | 0.561536 | 3.69E-40 | 0.373801 | 6.20E-17 | -0.0848176 | 0.06705  | 0.030438 | 0.51173  |
| 0.57944 | 0.44147  | 1.07E-23 | 0.266654 | 4.82E-09 | -0.0903294 | 0.05108  | 0.047991 | 0.30071  |
| 0.00088 | 0.039702 | 0.39199  | 0.193546 | 2.54E-05 | -0.112697  | 0.01482  | -0.05326 | 0.2507   |
| 0.00163 | 0.623263 | 1.31E-51 | 0.369169 | 1.59E-16 | -0.0811007 | 0.07998  | 0.098087 | 0.03408  |
| 0.07335 | 0.21489  | 2.78E-06 | 0.436215 | 4.09E-23 | -0.0061964 | 0.89376  | -0.03829 | 0.40902  |
| 0.00371 | 0.469346 | 5.87E-27 | 0.250669 | 4.01E-08 | -0.0509917 | 0.27146  | 0.212038 | 3.79E-06 |
| 0.01389 | 0.389038 | 2.52E-18 | 0.337678 | 6.43E-14 | -0.2883208 | 2.16E-10 | -0.22775 | 6.56E-07 |
| 0.97109 | 0.376502 | 3.56E-17 | 0.238077 | 1.93E-07 | -0.240019  | 1.52E-07 | -0.11004 | 0.01736  |
| 0.03786 | 0.298323 | 4.71E-11 | 0.307519 | 1.10E-11 | -0.3497655 | 6.94E-15 | -0.4025  | 1.29E-19 |
| 0.06949 | 0.308345 | 9.61E-12 | 0.152192 | 0.00097  | -0.3811662 | 1.35E-17 | -0.29644 | 6.30E-11 |
| 0.51142 | 0.297923 | 5.01E-11 | 0.10136  | 0.02851  | -0.4016561 | 1.57E-19 | -0.26625 | 5.09E-09 |
| 0.85098 | 0.312414 | 4.95E-12 | 0.340612 | 3.78E-14 | -0.1562047 | 0.00071  | -0.05763 | 0.21386  |

|          |          |          |          |          |            |          |          |          |
|----------|----------|----------|----------|----------|------------|----------|----------|----------|
| 0.00452  | 0.240808 | 1.38E-07 | 0.038814 | 0.40268  | -0.4603023 | 7.24E-26 | -0.36818 | 1.94E-16 |
| 0.45874  | 0.437611 | 2.87E-23 | 0.186408 | 5.05E-05 | -0.2141467 | 3.02E-06 | -0.05392 | 0.24484  |
| 0.07916  | 0.298641 | 4.48E-11 | 0.13085  | 0.00462  | -0.4464344 | 2.96E-24 | -0.28221 | 5.34E-10 |
| 2.40E-05 | 0.392362 | 1.23E-18 | 0.075654 | 0.1025   | -0.3005228 | 3.34E-11 | -0.18449 | 6.06E-05 |
| 0.46209  | 0.417196 | 4.31E-21 | 0.22543  | 8.56E-07 | -0.1377524 | 0.00285  | 0.024949 | 0.59072  |
| 0.85046  | 0.617555 | 1.92E-50 | 0.328843 | 3.08E-13 | -0.0423178 | 0.36153  | 0.155613 | 0.00074  |
| 0.01963  | 0.282423 | 5.17E-10 | 0.244208 | 9.07E-08 | -0.2345329 | 2.95E-07 | -0.15611 | 0.00071  |
| 0.30928  | 0.521705 | 5.88E-34 | 0.349397 | 7.44E-15 | 0.06765002 | 0.14438  | 0.228703 | 5.87E-07 |
| 0.00055  | 0.567636 | 3.48E-41 | 0.223882 | 1.02E-06 | -0.3631297 | 5.29E-16 | -0.23767 | 2.02E-07 |
| 0.0171   | 0.493888 | 4.34E-30 | 0.297765 | 5.13E-11 | -0.1055917 | 0.02248  | 0.058978 | 0.20329  |
| 0.05916  | 0.611302 | 3.42E-49 | 0.546337 | 1.08E-37 | 0.1108985  | 0.01651  | 0.181105 | 8.29E-05 |
| 0.60143  | 0.2412   | 1.32E-07 | 0.543277 | 3.26E-37 | 0.05206517 | 0.26149  | 0.056133 | 0.22599  |
| 0.00395  | 0.566803 | 4.82E-41 | 0.298795 | 4.37E-11 | 0.10205069 | 0.02744  | 0.30705  | 1.18E-11 |
| 0.11205  | 0.075535 | 0.10304  | 0.225147 | 8.85E-07 | -0.2451729 | 8.04E-08 | -0.18982 | 3.65E-05 |
| 0.00173  | 0.445716 | 3.57E-24 | 0.4221   | 1.33E-21 | 0.00360554 | 0.93806  | -0.02806 | 0.54525  |
| 0.00042  | 0.405339 | 6.80E-20 | 0.233802 | 3.22E-07 | -0.1580545 | 0.00061  | -0.0892  | 0.05405  |
| 0.00555  | 0.41752  | 3.99E-21 | 0.445486 | 3.79E-24 | -0.1486301 | 0.00128  | -0.06001 | 0.19548  |
| 0.23561  | 0.402387 | 1.33E-19 | 0.377269 | 3.04E-17 | -0.1623973 | 0.00043  | -0.04775 | 0.30316  |
| 0.06156  | 0.184143 | 6.26E-05 | 0.22357  | 1.06E-06 | -0.3104427 | 6.84E-12 | -0.3085  | 9.37E-12 |
| 0.65353  | 0.453257 | 4.87E-25 | 0.314295 | 3.64E-12 | -0.1286762 | 0.00536  | 0.008997 | 0.84624  |
| 0.00148  | 0.643154 | 7.17E-56 | 0.486704 | 3.81E-29 | -0.0126715 | 0.78477  | 0.075193 | 0.10462  |
| 0.02238  | 0.240824 | 1.38E-07 | 0.01433  | 0.75743  | -0.1845948 | 6.00E-05 | -0.01674 | 0.7182   |
| 0.07781  | 0.393782 | 9.00E-19 | 0.1519   | 0.00099  | -0.396165  | 5.33E-19 | -0.30943 | 8.07E-12 |
| 0.6714   | 0.191572 | 3.08E-05 | 0.058946 | 0.20354  | -0.3826008 | 9.97E-18 | -0.27627 | 1.26E-09 |
| 0.61148  | 0.250564 | 4.06E-08 | 0.325123 | 5.86E-13 | -0.2322103 | 3.89E-07 | -0.17929 | 9.79E-05 |
| 0.00656  | 0.254095 | 2.58E-08 | 0.050285 | 0.27816  | -0.517008  | 2.80E-33 | -0.47201 | 2.76E-27 |
| 6.74E-05 | 0.207223 | 6.32E-06 | 0.004474 | 0.92318  | -0.5707659 | 1.02E-41 | -0.57804 | 5.52E-43 |
| 0.00325  | 0.26056  | 1.10E-08 | 0.339389 | 4.72E-14 | -0.0349148 | 0.45162  | 0.117828 | 0.01082  |
| 0.0023   | -0.24751 | 6.00E-08 | -0.22302 | 1.13E-06 | 0.27064574 | 2.78E-09 | 0.072475 | 0.11781  |
| 0.00779  | 0.343052 | 2.42E-14 | 0.132236 | 0.0042   | -0.2673269 | 4.39E-09 | -0.01338 | 0.77297  |
| 0.00123  | 0.295024 | 7.83E-11 | -0.0469  | 0.31185  | -0.2257132 | 8.29E-07 | -0.06386 | 0.16832  |
| 0.72153  | 0.570683 | 1.05E-41 | 0.277008 | 1.13E-09 | -0.0333428 | 0.47226  | 0.135495 | 0.00335  |
| 0.00137  | 0.350411 | 6.15E-15 | 0.384359 | 6.87E-18 | -0.1519887 | 0.00098  | -0.22539 | 8.60E-07 |
| 0.64405  | 0.160854 | 0.00048  | 0.174696 | 0.00015  | -0.0751275 | 0.10492  | -0.04251 | 0.35937  |
| 0.00959  | 0.28083  | 6.52E-10 | 0.00203  | 0.9651   | -0.4635734 | 2.94E-26 | -0.3322  | 1.71E-13 |
| 0.00011  | 0.526871 | 1.03E-34 | 0.22328  | 1.09E-06 | -0.2794085 | 8.01E-10 | -0.09033 | 0.05108  |
| 0.70154  | 0.223298 | 1.09E-06 | 0.384704 | 6.39E-18 | -0.1867389 | 4.90E-05 | -0.18412 | 6.27E-05 |
| 3.94E-05 | 0.278305 | 9.39E-10 | 0.420357 | 2.03E-21 | -0.291287  | 1.38E-10 | -0.36124 | 7.67E-16 |
| 0.05597  | 0.297789 | 5.11E-11 | 0.114477 | 0.01331  | -0.257539  | 1.64E-08 | -0.1522  | 0.00097  |
| 0.09069  | 0.604944 | 5.99E-48 | 0.426548 | 4.53E-22 | 0.01330836 | 0.77424  | 0.220828 | 1.44E-06 |
| 0.3106   | 0.341574 | 3.17E-14 | 0.167579 | 0.00028  | -0.3935215 | 9.53E-19 | -0.38929 | 2.39E-18 |
| 0.04835  | 0.476636 | 7.32E-28 | 0.186134 | 5.19E-05 | -0.0595284 | 0.1991   | 0.152839 | 0.00092  |
| 0.79857  | 0.479499 | 3.19E-28 | 0.503962 | 1.90E-31 | 0.03254813 | 0.48288  | 0.08368  | 0.07082  |
| 0.26548  | 0.32756  | 3.84E-13 | 0.408126 | 3.59E-20 | 0.02363788 | 0.61039  | -0.00484 | 0.91696  |
| 0.00112  | 0.504355 | 1.67E-31 | 0.434068 | 7.03E-23 | -0.0492274 | 0.28841  | 0.13917  | 0.00258  |

|          |          |          |          |          |            |          |          |          |
|----------|----------|----------|----------|----------|------------|----------|----------|----------|
| 0.00028  | 0.407678 | 3.98E-20 | 0.177717 | 0.00011  | -0.2973352 | 5.49E-11 | -0.20318 | 9.64E-06 |
| 7.18E-06 | 0.615009 | 6.25E-50 | 0.700007 | 5.37E-70 | -0.0075288 | 0.8711   | -0.06256 | 0.17711  |
| 0.00549  | 0.298008 | 4.94E-11 | 0.204109 | 8.75E-06 | -0.2585797 | 1.43E-08 | -0.18799 | 4.35E-05 |
| 0.00637  | 0.521139 | 7.10E-34 | 0.217274 | 2.14E-06 | -0.2696788 | 3.18E-09 | -0.14131 | 0.00221  |
| 9.76E-08 | -0.28617 | 2.98E-10 | 0.11542  | 0.01256  | 0.42846358 | 2.83E-22 | 0.232581 | 3.72E-07 |
| 0.84638  | 0.345575 | 1.52E-14 | 0.191509 | 3.10E-05 | -0.0197333 | 0.67059  | 0.030396 | 0.5123   |
| 0.00774  | 0.263518 | 7.39E-09 | 0.339415 | 4.69E-14 | -0.1683271 | 0.00026  | -0.04327 | 0.35086  |
| 0.0141   | 0.340136 | 4.12E-14 | -0.00186 | 0.96808  | -0.3701283 | 1.31E-16 | -0.1808  | 8.53E-05 |
| 0.11634  | 0.173071 | 0.00017  | 0.300764 | 3.21E-11 | -0.1935741 | 2.53E-05 | -0.23607 | 2.46E-07 |
| 0.66271  | 0.38885  | 2.63E-18 | 0.019328 | 0.67697  | -0.2409122 | 1.36E-07 | -0.13229 | 0.00419  |
| 0.33142  | 0.569372 | 1.76E-41 | 0.377484 | 2.91E-17 | -0.1032323 | 0.02569  | -0.01421 | 0.75939  |
| 0.23853  | 0.336651 | 7.73E-14 | 0.333479 | 1.36E-13 | 0.05105723 | 0.27085  | 0.126571 | 0.00616  |
| 0.00035  | 0.207536 | 6.12E-06 | 0.070004 | 0.13089  | -0.3598131 | 1.01E-15 | -0.23754 | 2.06E-07 |
| 0.6592   | 0.540908 | 7.63E-37 | 0.433524 | 8.05E-23 | -0.1215255 | 0.00857  | -0.03567 | 0.4419   |
| 0.0247   | 0.218275 | 1.92E-06 | 0.299282 | 4.05E-11 | -0.3190302 | 1.65E-12 | -0.20069 | 1.24E-05 |
| 0.30368  | 0.578615 | 4.37E-43 | 0.636386 | 2.19E-54 | 0.21606184 | 2.45E-06 | 0.171719 | 0.00019  |
| 0.00623  | 0.354654 | 2.75E-15 | 0.214057 | 3.05E-06 | -0.148753  | 0.00126  | -0.04377 | 0.34531  |
| 0.0014   | 0.353582 | 3.37E-15 | 0.283464 | 4.44E-10 | -0.0877885 | 0.058    | 0.009785 | 0.83297  |
| 0.00314  | 0.094766 | 0.04066  | 0.351614 | 4.90E-15 | -0.0210548 | 0.64995  | 0.004175 | 0.92831  |
| 0.1375   | 0.056487 | 0.22307  | 0.260595 | 1.09E-08 | -0.2221874 | 1.24E-06 | -0.18179 | 7.79E-05 |
| 0.07537  | 0.487451 | 3.04E-29 | 0.377243 | 3.05E-17 | -0.2235954 | 1.06E-06 | -0.20166 | 1.13E-05 |
| 0.00126  | 0.318591 | 1.78E-12 | 0.367034 | 2.44E-16 | -0.1485481 | 0.00128  | -0.10275 | 0.0264   |
| 9.23E-05 | 0.337398 | 6.76E-14 | 0.121962 | 0.00833  | -0.3759962 | 3.95E-17 | -0.36294 | 5.50E-16 |
| 0.28313  | 0.468373 | 7.71E-27 | 0.24841  | 5.35E-08 | -0.2819525 | 5.54E-10 | -0.19751 | 1.71E-05 |
| 0.00145  | 0.5599   | 6.90E-40 | 0.355954 | 2.14E-15 | 0.00610579 | 0.8953   | 0.192548 | 2.80E-05 |
| 0.63188  | 0.556236 | 2.76E-39 | 0.471644 | 3.06E-27 | -0.0154982 | 0.73835  | 0.126397 | 0.00624  |
| 0.00066  | 0.583293 | 6.44E-44 | 0.522481 | 4.53E-34 | -0.0399961 | 0.38849  | -0.05531 | 0.23288  |
| 0.00742  | 0.477631 | 5.49E-28 | 0.284856 | 3.62E-10 | -0.2231376 | 1.11E-06 | -0.14006 | 0.00242  |
| 0.05678  | 0.548396 | 5.08E-38 | 0.156647 | 0.00068  | -0.2740517 | 1.72E-09 | -0.18018 | 9.03E-05 |
| 0.20912  | 0.632322 | 1.64E-53 | 0.495317 | 2.80E-30 | 0.16251409 | 0.00042  | 0.239427 | 1.64E-07 |
| 0.06091  | 0.272355 | 2.19E-09 | 0.487888 | 2.67E-29 | -0.0519361 | 0.26267  | -0.17679 | 0.00012  |
| 0.00969  | 0.449699 | 1.25E-24 | 0.522322 | 4.78E-34 | 0.00689498 | 0.88187  | -0.03264 | 0.48166  |
| 0.70304  | 0.233067 | 3.52E-07 | 0.137038 | 0.003    | -0.2957286 | 7.03E-11 | -0.12231 | 0.00815  |
| 0.03972  | 0.353084 | 3.71E-15 | 0.159559 | 0.00054  | -0.2083815 | 5.60E-06 | -0.0019  | 0.96734  |
| 0.05561  | 0.33771  | 6.39E-14 | 0.175899 | 0.00013  | -0.1536671 | 0.00086  | -0.11731 | 0.01118  |
| 8.01E-06 | 0.190011 | 3.58E-05 | 0.07454  | 0.10767  | -0.4151623 | 6.98E-21 | -0.32693 | 4.29E-13 |
| 0.01265  | 0.437829 | 2.72E-23 | 0.206785 | 6.62E-06 | -0.3673809 | 2.28E-16 | -0.29499 | 7.88E-11 |
| 0.74601  | 0.292855 | 1.09E-10 | 0.206037 | 7.16E-06 | -0.1093232 | 0.01812  | 0.10365  | 0.0251   |
| 0.30158  | 0.162503 | 0.00042  | 0.334997 | 1.04E-13 | 0.08699804 | 0.0603   | 0.137167 | 0.00297  |
| 0.91926  | 0.397791 | 3.72E-19 | 0.431954 | 1.19E-22 | 0.19374313 | 2.49E-05 | 0.171047 | 0.0002   |
| 0.01194  | 0.511349 | 1.78E-32 | 0.356037 | 2.11E-15 | -0.0061793 | 0.89405  | 0.086072 | 0.0631   |
| 0.97727  | 0.327337 | 4.00E-13 | 0.15218  | 0.00097  | -0.2798678 | 7.50E-10 | -0.20447 | 8.43E-06 |
| 0.01675  | 0.354388 | 2.89E-15 | 0.104297 | 0.0242   | -0.0471996 | 0.30876  | 0.07007  | 0.13053  |
| 0.02831  | 0.442506 | 8.20E-24 | 0.272043 | 2.28E-09 | -0.0952839 | 0.03956  | 0.110234 | 0.01717  |
| 0.01322  | 0.615789 | 4.35E-50 | 0.439348 | 1.85E-23 | -0.063659  | 0.16963  | 0.044468 | 0.33762  |

|          |          |          |          |          |            |          |          |          |
|----------|----------|----------|----------|----------|------------|----------|----------|----------|
| 0.05092  | 0.255355 | 2.19E-08 | 0.05186  | 0.26337  | -0.3217552 | 1.04E-12 | -0.17036 | 0.00022  |
| 0.36688  | 0.637896 | 1.03E-54 | 0.378988 | 2.13E-17 | 0.1899945  | 3.59E-05 | 0.317644 | 2.08E-12 |
| 0.47516  | 0.500633 | 5.40E-31 | 0.543463 | 3.05E-37 | 0.16614778 | 0.00031  | 0.282276 | 5.28E-10 |
| 0.80342  | 0.53207  | 1.71E-35 | 0.426817 | 4.24E-22 | 0.1543268  | 0.00082  | 0.20296  | 9.85E-06 |
| 0.03486  | 0.723207 | 9.07E-77 | 0.598393 | 1.07E-46 | 0.15256384 | 0.00094  | 0.246414 | 6.88E-08 |
| 0.11272  | 0.290084 | 1.66E-10 | 0.052942 | 0.25353  | -0.2717396 | 2.38E-09 | -0.2058  | 7.34E-06 |
| 0.01238  | 0.397832 | 3.68E-19 | 0.075277 | 0.10423  | -0.2618686 | 9.22E-09 | -0.1227  | 0.00794  |
| 0.34822  | 0.457852 | 1.41E-25 | 0.468428 | 7.60E-27 | -0.0648836 | 0.16155  | 0.055615 | 0.23031  |
| 0.0205   | 0.620765 | 4.26E-51 | 0.466468 | 1.32E-26 | 0.01089629 | 0.81433  | 0.116819 | 0.01152  |
| 0.00091  | 0.357042 | 1.74E-15 | 0.150679 | 0.00109  | -0.3060594 | 1.39E-11 | -0.15608 | 0.00071  |
| 0.00085  | 0.552016 | 1.34E-38 | 0.33527  | 9.89E-14 | -0.3502109 | 6.39E-15 | -0.32881 | 3.10E-13 |
| 0.01488  | 0.324701 | 6.30E-13 | 0.346213 | 1.35E-14 | -0.0292134 | 0.52886  | 0.011422 | 0.80554  |
| 0.65156  | 0.341968 | 2.95E-14 | 0.032892 | 0.47827  | -0.3506546 | 5.87E-15 | -0.15714 | 0.00065  |
| 0.01097  | 0.343448 | 2.25E-14 | 0.284677 | 3.72E-10 | -0.1498352 | 0.00116  | -0.16428 | 0.00036  |
| 4.18E-05 | 0.391114 | 1.61E-18 | 0.426585 | 4.49E-22 | 0.00171897 | 0.97045  | 0.005782 | 0.90083  |
| 3.58E-05 | 0.193727 | 2.50E-05 | 0.162974 | 0.00041  | -0.1752487 | 0.00014  | -0.11904 | 0.01003  |
| 0.94765  | 0.456623 | 1.97E-25 | 0.063196 | 0.17276  | -0.2265159 | 7.56E-07 | -0.01829 | 0.69336  |
| 0.53186  | 0.219889 | 1.60E-06 | 0.169481 | 0.00023  | -0.4145339 | 8.09E-21 | -0.39004 | 2.03E-18 |
| 0.00078  | 0.509204 | 3.56E-32 | 0.530642 | 2.81E-35 | -0.0577871 | 0.21259  | 0.057049 | 0.21849  |
| 0.00394  | 0.50354  | 2.17E-31 | 0.415152 | 6.99E-21 | 0.11575876 | 0.0123   | 0.270333 | 2.90E-09 |
| 6.69E-05 | 0.550635 | 2.23E-38 | 0.462251 | 4.24E-26 | -0.2097638 | 4.83E-06 | -0.12637 | 0.00625  |
| 0.02845  | 0.577312 | 7.42E-43 | 0.308036 | 1.01E-11 | -0.307347  | 1.13E-11 | -0.1628  | 0.00041  |
| 0.0318   | 0.443837 | 5.81E-24 | 0.432283 | 1.10E-22 | -0.0218262 | 0.63803  | 0.114852 | 0.01301  |
| 0.04059  | 0.526636 | 1.11E-34 | 0.355717 | 2.24E-15 | 0.0072414  | 0.87598  | 0.161971 | 0.00044  |
| 0.3358   | 0.645326 | 2.35E-56 | 0.506005 | 9.92E-32 | -0.0112454 | 0.80849  | 0.044133 | 0.34128  |
| 0.37329  | 0.500204 | 6.17E-31 | 0.098489 | 0.03335  | -0.3279475 | 3.59E-13 | -0.14584 | 0.00158  |
| 0.04825  | 0.444555 | 4.83E-24 | 0.391006 | 1.65E-18 | -0.3128173 | 4.64E-12 | -0.2082  | 5.70E-06 |
| 0.30703  | -0.20498 | 7.99E-06 | -0.11762 | 0.01097  | 0.28353313 | 4.40E-10 | 0.065455 | 0.15789  |
| 0.56226  | 0.255269 | 2.21E-08 | 0.094573 | 0.04107  | -0.0986578 | 0.03305  | 0.120444 | 0.00918  |
| 0.09388  | 0.453517 | 4.54E-25 | 0.333465 | 1.36E-13 | -0.0287041 | 0.53607  | 0.14335  | 0.0019   |
| 0.85132  | 0.229254 | 5.51E-07 | 0.151127 | 0.00105  | -0.2100028 | 4.71E-06 | -0.20026 | 1.30E-05 |
| 0.49773  | 0.59243  | 1.40E-45 | 0.41659  | 4.98E-21 | -0.1676461 | 0.00027  | -0.06639 | 0.15203  |
| 0.05063  | -0.12637 | 0.00625  | 0.081925 | 0.07695  | 0.57071671 | 1.04E-41 | 0.297086 | 5.70E-11 |
| 0.86572  | 0.39958  | 2.49E-19 | 0.410754 | 1.96E-20 | -0.0473054 | 0.30768  | 0.036633 | 0.42965  |
| 0.40964  | -0.16915 | 0.00024  | -0.03659 | 0.43024  | 0.3797432  | 1.82E-17 | 0.178949 | 0.0001   |
| 0.14511  | 0.441739 | 1.00E-23 | 0.268296 | 3.84E-09 | -0.0533956 | 0.24948  | 0.135059 | 0.00345  |
| 0.55895  | 0.372208 | 8.59E-17 | 0.127059 | 0.00597  | -0.1216701 | 0.00849  | 0.084342 | 0.06861  |
| 0.48178  | 0.504578 | 1.56E-31 | 0.326196 | 4.87E-13 | -0.0082214 | 0.85936  | 0.120011 | 0.00943  |
| 0.19595  | 0.367472 | 2.23E-16 | 0.285861 | 3.12E-10 | -0.2772725 | 1.09E-09 | -0.1321  | 0.00424  |
| 0.00083  | 0.304314 | 1.83E-11 | 0.076434 | 0.099    | -0.2596124 | 1.25E-08 | -0.25192 | 3.42E-08 |
| 0.58481  | 0.372329 | 8.38E-17 | 0.260675 | 1.08E-08 | -0.1161193 | 0.01203  | 0.024581 | 0.59621  |
| 3.55E-05 | 0.332761 | 1.55E-13 | 0.382306 | 1.06E-17 | -0.2218848 | 1.28E-06 | -0.07971 | 0.08532  |
| 0.01346  | 0.500377 | 5.85E-31 | 0.394919 | 7.01E-19 | 0.01731516 | 0.70899  | 0.197994 | 1.63E-05 |
| 0.11703  | 0.554075 | 6.21E-39 | 0.36405  | 4.41E-16 | 0.00210686 | 0.96378  | 0.086779 | 0.06095  |
| 5.62E-05 | 0.324713 | 6.28E-13 | 0.443324 | 6.64E-24 | -0.112338  | 0.01515  | -0.12772 | 0.00571  |



|          |          |          |          |          |            |          |          |          |
|----------|----------|----------|----------|----------|------------|----------|----------|----------|
| 0.00281  | 0.480416 | 2.44E-28 | 0.479984 | 2.77E-28 | -0.3182195 | 1.89E-12 | -0.35128 | 5.21E-15 |
| 0.00661  | 0.508773 | 4.09E-32 | 0.408734 | 3.12E-20 | 0.00618603 | 0.89394  | 0.194651 | 2.28E-05 |
| 0.01765  | 0.394767 | 7.25E-19 | 0.331773 | 1.84E-13 | -0.2535985 | 2.75E-08 | -0.23741 | 2.09E-07 |
| 0.00075  | 0.424523 | 7.42E-22 | 0.491241 | 9.72E-30 | -0.0816299 | 0.07803  | -0.01296 | 0.78007  |
| 1.48E-06 | 0.541707 | 5.73E-37 | 0.352728 | 3.97E-15 | -0.0569841 | 0.21902  | 0.082059 | 0.07647  |
| 0.17752  | 0.1118   | 0.01564  | -0.11141 | 0.01601  | -0.2326426 | 3.70E-07 | -0.08738 | 0.05917  |
| 0.4132   | 0.251081 | 3.80E-08 | 0.344007 | 2.03E-14 | -0.1232515 | 0.00766  | -0.11253 | 0.01498  |
| 0.00097  | 0.382775 | 9.61E-18 | 0.250327 | 4.19E-08 | -0.2140386 | 3.05E-06 | -0.06968 | 0.13267  |
| 0.05034  | 0.382369 | 1.05E-17 | 0.382313 | 1.06E-17 | -0.1912154 | 3.19E-05 | -0.16678 | 0.00029  |
| 0.21527  | 0.573188 | 3.88E-42 | 0.286909 | 2.67E-10 | -0.0201297 | 0.66437  | 0.210357 | 4.54E-06 |
| 0.05257  | 0.304201 | 1.87E-11 | 0.133786 | 0.00377  | -0.065826  | 0.15554  | 0.059703 | 0.19778  |
| 0.15255  | -0.09103 | 0.04929  | 0.138536 | 0.0027   | 0.62131654 | 3.29E-51 | 0.412812 | 1.21E-20 |
| 0.55827  | 0.242031 | 1.19E-07 | 0.338296 | 5.75E-14 | -0.2065952 | 6.76E-06 | -0.16615 | 0.00031  |
| 9.54E-05 | 0.475881 | 9.10E-28 | 0.592842 | 1.17E-45 | -0.1269544 | 0.00601  | -0.19184 | 3.00E-05 |
| 0.01605  | 0.502644 | 2.87E-31 | 0.419355 | 2.58E-21 | -0.2026778 | 1.01E-05 | -0.09805 | 0.03415  |
| 0.00706  | 0.510201 | 2.58E-32 | 0.482657 | 1.26E-28 | -0.175139  | 0.00014  | -0.1114  | 0.01602  |
| 0.02531  | 0.42926  | 2.33E-22 | 0.472561 | 2.36E-27 | -0.1606544 | 0.00049  | -0.16394 | 0.00037  |
| 0.12081  | 0.205677 | 7.44E-06 | 0.166619 | 0.0003   | -0.428132  | 3.07E-22 | -0.35034 | 6.23E-15 |
| 0.38423  | 0.176735 | 0.00012  | 0.337951 | 6.12E-14 | -0.0412463 | 0.37383  | 0.011097 | 0.81097  |
| 0.00046  | 0.441017 | 1.20E-23 | 0.520633 | 8.41E-34 | 0.07491376 | 0.10591  | 0.023991 | 0.60506  |
| 0.09039  | 0.513459 | 8.98E-33 | 0.318481 | 1.81E-12 | -0.0620452 | 0.18073  | 0.133746 | 0.00379  |
| 0.00059  | 0.431205 | 1.44E-22 | 0.143588 | 0.00187  | -0.3661525 | 2.91E-16 | -0.26647 | 4.94E-09 |
| 0.00019  | 0.66707  | 1.97E-61 | 0.418815 | 2.93E-21 | -0.0743274 | 0.10868  | 0.078328 | 0.09089  |
| 0.00122  | 0.474937 | 1.19E-27 | 0.337004 | 7.25E-14 | -0.2866626 | 2.77E-10 | -0.2031  | 9.71E-06 |
| 0.0196   | 0.651045 | 1.19E-57 | 0.383004 | 9.15E-18 | -0.1233919 | 0.00759  | 0.030792 | 0.50682  |
| 0.52221  | 0.0666   | 0.15072  | -0.06013 | 0.19462  | -0.4458614 | 3.43E-24 | -0.36505 | 3.62E-16 |
| 0.97859  | 0.388427 | 2.88E-18 | 0.262969 | 7.95E-09 | -0.0429718 | 0.35415  | 0.066884 | 0.14898  |
| 0.24898  | 0.228667 | 5.89E-07 | 0.338325 | 5.72E-14 | 0.04742406 | 0.30646  | 0.126046 | 0.00638  |
| 0.03526  | 0.245025 | 8.19E-08 | 0.275401 | 1.42E-09 | -0.3386313 | 5.41E-14 | -0.28366 | 4.32E-10 |
| 0.10743  | 0.307575 | 1.09E-11 | 0.334626 | 1.11E-13 | 0.03879574 | 0.4029   | 0.11682  | 0.01152  |
| 0.36068  | 0.486827 | 3.67E-29 | 0.283597 | 4.36E-10 | -0.0618875 | 0.18184  | 0.099282 | 0.03195  |
| 0.40051  | 0.441576 | 1.04E-23 | 0.473249 | 1.94E-27 | -0.1083854 | 0.01914  | -0.0851  | 0.06616  |
| 0.00854  | 0.36959  | 1.46E-16 | 0.393309 | 9.98E-19 | 0.09637844 | 0.03734  | 0.092321 | 0.04615  |
| 0.00032  | 0.322364 | 9.39E-13 | 0.242452 | 1.13E-07 | -0.3421538 | 2.85E-14 | -0.26007 | 1.17E-08 |
| 0.03105  | 0.318557 | 1.79E-12 | 0.127735 | 0.0057   | -0.4157321 | 6.10E-21 | -0.24606 | 7.20E-08 |
| 0.04572  | 0.295808 | 6.94E-11 | 0.231417 | 4.27E-07 | -0.3037899 | 1.99E-11 | -0.29831 | 4.72E-11 |
| 0.00148  | -0.39403 | 8.52E-19 | -0.15741 | 0.00064  | 0.29337316 | 1.01E-10 | 0.10552  | 0.02257  |
| 0.25959  | 0.385676 | 5.19E-18 | 0.368513 | 1.81E-16 | 0.01369486 | 0.76786  | 0.020087 | 0.66503  |
| 0.66472  | -0.23904 | 1.71E-07 | -0.21403 | 3.06E-06 | 0.26627928 | 5.07E-09 | 0.114308 | 0.01345  |
| 0.47143  | 0.41338  | 1.06E-20 | 0.493108 | 5.51E-30 | 0.00632038 | 0.89165  | 0.100714 | 0.02954  |
| 0.17907  | -0.12599 | 0.00641  | 0.088975 | 0.05468  | 0.42104696 | 1.72E-21 | 0.18966  | 3.71E-05 |
| 0.91176  | 0.491344 | 9.42E-30 | 0.180831 | 8.50E-05 | -0.1428359 | 0.00197  | -0.01132 | 0.80718  |
| 0.16088  | 0.376324 | 3.69E-17 | 0.264965 | 6.07E-09 | -0.3927257 | 1.13E-18 | -0.30556 | 1.50E-11 |
| 0.73775  | 0.295488 | 7.29E-11 | 0.238437 | 1.85E-07 | -0.1385721 | 0.00269  | 0.000433 | 0.99255  |
| 0.01464  | 0.360423 | 9.00E-16 | 0.263804 | 7.10E-09 | -0.0236376 | 0.61039  | 0.086018 | 0.06326  |

|          |          |          |          |          |            |          |          |          |
|----------|----------|----------|----------|----------|------------|----------|----------|----------|
| 0.90226  | 0.277513 | 1.05E-09 | 0.252165 | 3.31E-08 | 0.01009567 | 0.82775  | 0.052594 | 0.25666  |
| 8.71E-06 | 0.482205 | 1.44E-28 | 0.528246 | 6.40E-35 | 0.01229179 | 0.79107  | -0.00888 | 0.84824  |
| 0.06944  | 0.312731 | 4.70E-12 | 0.265451 | 5.68E-09 | -0.2629254 | 8.00E-09 | -0.18119 | 8.22E-05 |
| 0.07809  | 0.458263 | 1.26E-25 | 0.346684 | 1.24E-14 | -0.208569  | 5.49E-06 | -0.06307 | 0.17359  |
| 0.00503  | 0.32244  | 9.27E-13 | 0.190797 | 3.32E-05 | -0.4804939 | 2.39E-28 | -0.30198 | 2.66E-11 |
| 0.20669  | 0.533583 | 1.01E-35 | 0.331429 | 1.95E-13 | -0.1924004 | 2.84E-05 | -0.1152  | 0.01273  |
| 0.01135  | 0.533107 | 1.20E-35 | 0.404358 | 8.50E-20 | -0.2706322 | 2.78E-09 | -0.21568 | 2.55E-06 |
| 0.14902  | 0.47037  | 4.39E-27 | 0.328257 | 3.41E-13 | 0.02402593 | 0.60454  | 0.22816  | 6.25E-07 |
| 0.59279  | 0.504401 | 1.65E-31 | 0.388841 | 2.63E-18 | 0.06473826 | 0.1625   | 0.177731 | 0.00011  |
| 0.27282  | 0.572975 | 4.23E-42 | 0.314018 | 3.81E-12 | -0.1962264 | 1.95E-05 | -0.12036 | 0.00923  |
| 0.00915  | 0.310556 | 6.71E-12 | 0.041579 | 0.36998  | -0.2610985 | 1.02E-08 | -0.11478 | 0.01306  |
| 0.68175  | 0.294036 | 9.11E-11 | 0.07972  | 0.08527  | -0.2233568 | 1.08E-06 | -0.07326 | 0.11389  |
| 0.00917  | 0.04087  | 0.3782   | -0.10059 | 0.02975  | -0.5617365 | 3.42E-40 | -0.36715 | 2.38E-16 |
| 0.03482  | 0.559524 | 7.96E-40 | 0.551068 | 1.90E-38 | 0.02400566 | 0.60484  | 0.128171 | 0.00554  |
| 0.0038   | 0.546795 | 9.11E-38 | 0.399618 | 2.47E-19 | -0.0137348 | 0.76721  | 0.03447  | 0.45741  |
| 0.10335  | 0.500799 | 5.12E-31 | 0.549836 | 2.99E-38 | 0.03804035 | 0.41213  | 0.043981 | 0.34295  |
| 0.44358  | 0.150029 | 0.00115  | 0.021762 | 0.63901  | -0.4259793 | 5.21E-22 | -0.29111 | 1.42E-10 |
| 0.0055   | 0.320254 | 1.34E-12 | 0.347166 | 1.13E-14 | -0.0216079 | 0.64139  | 0.118303 | 0.01051  |
| 0.05332  | 0.338766 | 5.28E-14 | 0.19623  | 1.95E-05 | -0.0944242 | 0.04139  | 0.001976 | 0.96603  |
| 0.15357  | 0.185584 | 5.46E-05 | 0.015252 | 0.74236  | -0.1814342 | 8.04E-05 | 0.008005 | 0.86303  |
| 0.21773  | 0.422027 | 1.36E-21 | 0.495511 | 2.64E-30 | 0.04948625 | 0.28588  | -0.02755 | 0.55254  |
| 0.0073   | 0.253831 | 2.67E-08 | 0.075312 | 0.10407  | -0.2695279 | 3.24E-09 | -0.26053 | 1.10E-08 |
| 0.78479  | 0.442823 | 7.56E-24 | 0.527065 | 9.59E-35 | 0.16022044 | 0.00051  | 0.152532 | 0.00094  |
| 0.00934  | 0.468366 | 7.73E-27 | 0.479969 | 2.78E-28 | -0.0004706 | 0.99191  | 0.148629 | 0.00128  |
| 0.00013  | 0.419988 | 2.22E-21 | 0.103887 | 0.02476  | -0.3539018 | 3.17E-15 | -0.17555 | 0.00014  |
| 0.18489  | 0.347465 | 1.07E-14 | 0.086103 | 0.063    | -0.3439831 | 2.04E-14 | -0.18544 | 5.54E-05 |
| 0.00132  | 0.154988 | 0.00078  | 0.168224 | 0.00026  | -0.2134319 | 3.26E-06 | -0.08937 | 0.0536   |
| 0.00022  | 0.279183 | 8.28E-10 | 0.449162 | 1.44E-24 | 0.09429859 | 0.04166  | 0.073306 | 0.11364  |
| 0.02236  | 0.127299 | 0.00587  | 0.145123 | 0.00166  | -0.3571095 | 1.71E-15 | -0.22271 | 1.17E-06 |
| 0.00095  | 0.510329 | 2.48E-32 | 0.394512 | 7.67E-19 | -0.0472281 | 0.30847  | 0.013897 | 0.76454  |
| 0.27668  | 0.29557  | 7.20E-11 | 0.279896 | 7.47E-10 | -0.4146872 | 7.80E-21 | -0.3557  | 2.25E-15 |
| 0.00442  | 0.538474 | 1.81E-36 | 0.440242 | 1.47E-23 | -0.1808055 | 8.52E-05 | -0.10664 | 0.02117  |
| 0.38714  | 0.622702 | 1.71E-51 | 0.301732 | 2.76E-11 | 0.22674885 | 7.36E-07 | 0.330985 | 2.11E-13 |
| 5.06E-12 | 0.414567 | 8.02E-21 | 0.353306 | 3.55E-15 | -0.0522416 | 0.25987  | 0.058729 | 0.20521  |
| 0.00087  | 0.586825 | 1.49E-44 | 0.314885 | 3.30E-12 | -0.0370988 | 0.4238   | 0.124771 | 0.00694  |
| 0.00227  | 0.182533 | 7.27E-05 | 0.148181 | 0.00132  | -0.3541859 | 3.00E-15 | -0.26402 | 6.90E-09 |
| 0.56102  | 0.312252 | 5.09E-12 | 0.073027 | 0.11503  | -0.2183642 | 1.90E-06 | -0.08607 | 0.06311  |
| 0.43869  | 0.366918 | 2.50E-16 | 0.227439 | 6.80E-07 | -0.2034175 | 9.40E-06 | -0.11309 | 0.01448  |
| 0.06368  | 0.418233 | 3.37E-21 | 0.304764 | 1.71E-11 | 0.01783831 | 0.70062  | 0.264787 | 6.22E-09 |
| 0.00915  | 0.476074 | 8.61E-28 | 0.276317 | 1.25E-09 | -0.2558891 | 2.04E-08 | -0.11034 | 0.01707  |
| 0.36277  | 0.454727 | 3.28E-25 | 0.460164 | 7.52E-26 | -0.2321232 | 3.93E-07 | -0.18609 | 5.21E-05 |
| 0.09965  | 0.592546 | 1.33E-45 | 0.438171 | 2.49E-23 | -0.2932646 | 1.03E-10 | -0.2592  | 1.32E-08 |
| 9.91E-08 | 0.285908 | 3.10E-10 | 0.431461 | 1.35E-22 | 0.06314332 | 0.17312  | 0.039597 | 0.39324  |
| 0.84482  | 0.341826 | 3.03E-14 | 0.531918 | 1.81E-35 | 0.12007529 | 0.0094   | 0.144253 | 0.00178  |
| 0.43963  | 0.286828 | 2.70E-10 | 0.091355 | 0.04849  | -0.4329441 | 9.31E-23 | -0.267   | 4.60E-09 |

|          |          |          |          |          |            |          |          |          |
|----------|----------|----------|----------|----------|------------|----------|----------|----------|
| 0.43082  | 0.658408 | 2.33E-59 | 0.320532 | 1.28E-12 | 0.06465019 | 0.16307  | 0.274114 | 1.71E-09 |
| 0.2413   | 0.686663 | 2.17E-66 | 0.395566 | 6.08E-19 | 0.0684655  | 0.13959  | 0.189775 | 3.66E-05 |
| 0.01518  | 0.605081 | 5.63E-48 | 0.46544  | 1.75E-26 | -0.0007548 | 0.98702  | 0.170206 | 0.00022  |
| 0.20787  | 0.585434 | 2.65E-44 | 0.398606 | 3.10E-19 | 0.30829561 | 9.69E-12 | 0.307828 | 1.04E-11 |
| 0.00475  | 0.539476 | 1.27E-36 | 0.453761 | 4.25E-25 | 0.02539239 | 0.58414  | 0.209217 | 5.12E-06 |
| 0.33683  | 0.476249 | 8.19E-28 | 0.274789 | 1.55E-09 | -0.326435  | 4.67E-13 | -0.27151 | 2.46E-09 |
| 0.10189  | 0.36789  | 2.05E-16 | 0.210449 | 4.49E-06 | -0.2237987 | 1.03E-06 | 0.007489 | 0.87177  |
| 1.65E-10 | 0.389492 | 2.29E-18 | 0.518666 | 1.62E-33 | -0.0466659 | 0.31427  | -0.09442 | 0.0414   |
| 0.00155  | 0.514301 | 6.82E-33 | 0.384803 | 6.25E-18 | -0.1590639 | 0.00056  | 0.04715  | 0.30927  |
| 0.00192  | 0.429536 | 2.17E-22 | 0.337386 | 6.77E-14 | -0.1181215 | 0.01063  | 0.034032 | 0.46314  |
| 0.04843  | 0.475637 | 9.77E-28 | 0.298044 | 4.91E-11 | -0.1440862 | 0.0018   | -0.05957 | 0.1988   |
| 0.12872  | 0.600947 | 3.51E-47 | 0.506911 | 7.43E-32 | -0.0193082 | 0.67728  | 0.079794 | 0.08498  |
| 0.33154  | 0.335223 | 9.98E-14 | 0.377559 | 2.86E-17 | -0.1758604 | 0.00013  | -0.07459 | 0.10745  |
| 0.001    | 0.338576 | 5.46E-14 | 0.191571 | 3.08E-05 | -0.1151071 | 0.01281  | 0.111358 | 0.01606  |
| 3.23E-05 | -0.18503 | 5.76E-05 | 0.04794  | 0.30122  | 0.60501653 | 5.80E-48 | 0.416345 | 5.28E-21 |
| 0.00209  | 0.538509 | 1.79E-36 | 0.284774 | 3.66E-10 | -0.0881261 | 0.05704  | 0.027458 | 0.55392  |
| 0.31278  | 0.264089 | 6.84E-09 | 0.053639 | 0.24732  | -0.3729977 | 7.31E-17 | -0.2071  | 6.41E-06 |
| 0.33817  | 0.208385 | 5.60E-06 | 0.140495 | 0.00234  | -0.3617112 | 7.00E-16 | -0.2159  | 2.49E-06 |
| 0.00479  | 0.431327 | 1.39E-22 | 0.409699 | 2.50E-20 | 0.09927104 | 0.03197  | 0.135014 | 0.00346  |
| 0.05137  | 0.223086 | 1.12E-06 | 0.070906 | 0.12599  | -0.5521336 | 1.28E-38 | -0.48481 | 6.69E-29 |
| 0.30455  | 0.256352 | 1.92E-08 | 0.130807 | 0.00464  | -0.2637119 | 7.19E-09 | -0.1903  | 3.48E-05 |
| 4.44E-05 | 0.482527 | 1.31E-28 | 0.410593 | 2.03E-20 | -0.0613885 | 0.1854   | 0.031438 | 0.49794  |
| 0.01719  | 0.262647 | 8.31E-09 | 0.359303 | 1.12E-15 | -0.026081  | 0.57398  | -0.02315 | 0.6178   |
| 0.02426  | 0.433827 | 7.46E-23 | 0.398097 | 3.47E-19 | -0.004481  | 0.92306  | 0.034755 | 0.45369  |
| 0.15672  | 0.138915 | 0.00263  | 0.142348 | 0.00204  | -0.1549404 | 0.00078  | -0.01149 | 0.80444  |
| 0.11299  | 0.246781 | 6.57E-08 | 0.031332 | 0.4994   | -0.2341112 | 3.11E-07 | -0.15272 | 0.00093  |
| 0.0047   | 0.487607 | 2.91E-29 | 0.520093 | 1.01E-33 | -0.0824901 | 0.07493  | -0.13233 | 0.00418  |
| 0.46648  | 0.397382 | 4.07E-19 | 0.216306 | 2.38E-06 | -0.246654  | 6.68E-08 | -0.10783 | 0.01977  |
| 0.17299  | 0.335572 | 9.37E-14 | 0.12637  | 0.00625  | -0.3282445 | 3.41E-13 | -0.16022 | 0.00051  |
| 0.12195  | 0.575631 | 1.46E-42 | 0.521546 | 6.20E-34 | -0.1015314 | 0.02824  | -0.07009 | 0.13042  |
| 0.01204  | 0.431192 | 1.44E-22 | 0.22305  | 1.12E-06 | -0.013564  | 0.77002  | 0.163467 | 0.00039  |
| 4.38E-06 | 0.552558 | 1.09E-38 | 0.409971 | 2.35E-20 | -0.0415829 | 0.36994  | 0.122907 | 0.00784  |
| 0.98653  | -0.02485 | 0.59222  | -0.00068 | 0.98825  | 0.32538344 | 5.60E-13 | 0.108605 | 0.01889  |
| 0.0028   | 0.556792 | 2.24E-39 | 0.515246 | 5.01E-33 | -0.154734  | 0.00079  | -0.24379 | 9.55E-08 |
| 0.16857  | 0.176336 | 0.00013  | 0.252199 | 3.29E-08 | -0.3119539 | 5.34E-12 | -0.29412 | 8.99E-11 |
| 0.00034  | 0.277615 | 1.04E-09 | 0.349893 | 6.78E-15 | 0.04954979 | 0.28526  | 0.067108 | 0.14763  |
| 0.69581  | 0.44275  | 7.70E-24 | 0.235624 | 2.59E-07 | -0.1253463 | 0.00668  | -0.03661 | 0.42994  |
| 0.42405  | 0.403798 | 9.65E-20 | 0.295746 | 7.01E-11 | -0.0825771 | 0.07462  | 0.20058  | 1.26E-05 |
| 0.7449   | 0.555525 | 3.61E-39 | 0.194388 | 2.34E-05 | -0.0040934 | 0.9297   | 0.156093 | 0.00071  |
| 0.18456  | 0.109535 | 0.01789  | 0.051939 | 0.26264  | -0.5039165 | 1.92E-31 | -0.39872 | 3.02E-19 |
| 0.73927  | 0.471833 | 2.90E-27 | 0.282781 | 4.91E-10 | -0.1833316 | 6.75E-05 | -0.00602 | 0.89677  |
| 0.35064  | 0.424423 | 7.61E-22 | 0.392346 | 1.23E-18 | -0.0378999 | 0.41386  | 0.0657   | 0.15633  |
| 0.0974   | 0.578127 | 5.33E-43 | 0.515507 | 4.60E-33 | 0.12234715 | 0.00813  | 0.336368 | 8.13E-14 |
| 0.01894  | 0.41214  | 1.42E-20 | 0.220666 | 1.47E-06 | -0.1720647 | 0.00019  | -0.01551 | 0.73819  |
| 0.5586   | 0.30657  | 1.28E-11 | 0.296953 | 5.82E-11 | -0.1134215 | 0.01419  | -0.04478 | 0.33426  |

|          |          |          |          |          |            |          |          |          |
|----------|----------|----------|----------|----------|------------|----------|----------|----------|
| 0.00375  | 0.235293 | 2.70E-07 | -0.06509 | 0.16022  | -0.1917802 | 3.02E-05 | -0.04302 | 0.35365  |
| 0.00176  | -0.19048 | 3.42E-05 | -0.14995 | 0.00115  | 0.28349223 | 4.42E-10 | 0.026698 | 0.56495  |
| 0.00016  | -0.32135 | 1.12E-12 | -0.21044 | 4.50E-06 | 0.21796077 | 1.99E-06 | 0.369489 | 1.49E-16 |
| 0.35108  | -0.42277 | 1.13E-21 | -0.39633 | 5.13E-19 | -0.09243   | 0.0459   | 0.045151 | 0.33025  |
| 0.55743  | -0.45958 | 8.81E-26 | -0.3233  | 8.00E-13 | 0.02723178 | 0.55719  | 0.168913 | 0.00025  |
| 0.32755  | -0.5329  | 1.28E-35 | -0.24438 | 8.88E-08 | 0.09825009 | 0.03378  | 0.18505  | 5.75E-05 |
| 0.75075  | -0.53002 | 3.48E-35 | -0.29335 | 1.01E-10 | 0.05363098 | 0.24739  | 0.152501 | 0.00095  |
| 0.0484   | 0.346497 | 1.28E-14 | 0.187017 | 4.77E-05 | 0.33789149 | 6.18E-14 | 0.33351  | 1.35E-13 |
| 0.85798  | -0.52341 | 3.31E-34 | -0.29873 | 4.42E-11 | 0.10701155 | 0.02072  | 0.243461 | 9.96E-08 |
| 0.11378  | -0.41504 | 7.18E-21 | -0.2125  | 3.60E-06 | 0.0468865  | 0.31198  | 0.136297 | 0.00316  |
| 8.94E-08 | 0.29685  | 5.91E-11 | 0.043649 | 0.34661  | -0.2184887 | 1.87E-06 | -0.35452 | 2.82E-15 |
| 0.06049  | 0.198029 | 1.63E-05 | 0.195701 | 2.05E-05 | 0.18308174 | 6.91E-05 | 0.217098 | 2.18E-06 |
| 0.02001  | -0.43714 | 3.23E-23 | -0.25005 | 4.34E-08 | 0.10455609 | 0.02385  | 0.205716 | 7.41E-06 |
| 0.0672   | -0.39247 | 1.20E-18 | -0.14376 | 0.00184  | 0.07886645 | 0.08868  | 0.119067 | 0.01001  |
| 0.44821  | 0.479774 | 2.94E-28 | 0.235891 | 2.51E-07 | -0.0898182 | 0.05242  | 0.022541 | 0.62705  |
| 0.05778  | -0.24971 | 4.54E-08 | -0.10461 | 0.02377  | 0.15362032 | 0.00087  | 0.151435 | 0.00103  |
| 0.0281   | -0.22992 | 5.09E-07 | -0.16186 | 0.00045  | 0.007789   | 0.86668  | 0.162481 | 0.00042  |
| 0.16927  | -0.35949 | 1.08E-15 | -0.10651 | 0.02133  | 0.11753396 | 0.01102  | 0.083166 | 0.07257  |
| 3.98E-16 | -0.17327 | 0.00017  | -0.07383 | 0.11107  | 0.14216932 | 0.00207  | 0.243503 | 9.90E-08 |
| 0.06835  | -0.43561 | 4.77E-23 | -0.16732 | 0.00028  | 0.0899137  | 0.05216  | 0.059829 | 0.19684  |
| 0.2267   | -0.13196 | 0.00428  | -0.07101 | 0.12541  | -0.0137342 | 0.76722  | -0.00834 | 0.85741  |
| 0.66443  | -0.41257 | 1.28E-20 | -0.20547 | 7.60E-06 | 0.01771202 | 0.70264  | 0.00968  | 0.83474  |
| 0.00043  | -0.15757 | 0.00063  | 0.1346   | 0.00357  | 0.55511881 | 4.20E-39 | 0.497237 | 1.55E-30 |
| 0.2154   | 0.364314 | 4.19E-16 | 0.328361 | 3.34E-13 | 0.15971577 | 0.00053  | 0.119067 | 0.01001  |
| 0.20691  | 0.140297 | 0.00238  | 0.116376 | 0.01185  | -0.0554649 | 0.23157  | -0.21494 | 2.77E-06 |
| 0.47974  | -0.04965 | 0.28431  | -0.02021 | 0.66314  | 0.02569301 | 0.57969  | -0.05187 | 0.26329  |
| 0.08171  | -0.11602 | 0.01211  | -0.01926 | 0.678    | 0.22547888 | 8.52E-07 | 0.337445 | 6.70E-14 |
| 0.00344  | -0.33256 | 1.60E-13 | -0.27917 | 8.29E-10 | -0.0435044 | 0.34821  | -0.04554 | 0.3261   |
| 0.01305  | -0.11155 | 0.01588  | -0.03126 | 0.50038  | 0.21138804 | 4.06E-06 | 0.323558 | 7.66E-13 |
| 0.00037  | -0.3603  | 9.22E-16 | -0.24244 | 1.13E-07 | 0.14680106 | 0.00147  | 0.092396 | 0.04598  |
| 0.78375  | -0.29884 | 4.34E-11 | -0.21381 | 3.13E-06 | 0.1116461  | 0.01579  | 0.265457 | 5.68E-09 |
| 0.20861  | -0.4227  | 1.16E-21 | -0.20062 | 1.25E-05 | 0.09366425 | 0.04306  | 0.119049 | 0.01003  |
| 0.00741  | -0.30475 | 1.71E-11 | -0.07965 | 0.08553  | 0.20762135 | 6.07E-06 | 0.247165 | 6.26E-08 |
| 0.008    | -0.22833 | 6.13E-07 | -0.08505 | 0.0663   | 0.1668773  | 0.00029  | 0.193719 | 2.50E-05 |
| 0.02089  | -0.41283 | 1.21E-20 | -0.24236 | 1.14E-07 | -0.0181539 | 0.69558  | -0.0484  | 0.29663  |
| 0.02341  | -0.21527 | 2.67E-06 | -0.11815 | 0.01061  | 0.1614015  | 0.00046  | 0.184559 | 6.02E-05 |
| 0.99916  | -0.28317 | 4.63E-10 | -0.1172  | 0.01126  | 0.13839455 | 0.00273  | 0.142716 | 0.00199  |
| 0.23425  | -0.01236 | 0.78995  | 0.221733 | 1.30E-06 | 0.53619777 | 4.05E-36 | 0.472222 | 2.60E-27 |
| 1.64E-09 | -0.06859 | 0.13886  | 0.090497 | 0.05065  | 0.22174211 | 1.30E-06 | 0.16107  | 0.00048  |
| 1.59E-06 | -0.12321 | 0.00768  | -0.03754 | 0.41837  | 0.14239895 | 0.00204  | 0.128347 | 0.00548  |
| 0.97393  | -0.12131 | 0.00869  | -0.05002 | 0.28075  | 0.06097341 | 0.1884   | 0.10003  | 0.03067  |
| 0.54     | -0.55427 | 5.77E-39 | -0.24469 | 8.55E-08 | 0.04645786 | 0.31643  | 0.090929 | 0.04955  |
| 0.28798  | -0.32646 | 4.65E-13 | -0.31111 | 6.13E-12 | -0.0752553 | 0.10433  | -0.0462  | 0.31909  |
| 0.03117  | 0.188606 | 4.10E-05 | 0.051777 | 0.26414  | -0.0220395 | 0.63475  | -0.10086 | 0.02931  |
| 0.30802  | -0.28372 | 4.28E-10 | -0.12596 | 0.00642  | 0.04922871 | 0.2884   | 0.071414 | 0.12329  |

|          |          |          |          |          |            |          |          |          |
|----------|----------|----------|----------|----------|------------|----------|----------|----------|
| 4.02E-05 | -0.36283 | 5.62E-16 | -0.17389 | 0.00016  | 0.10650036 | 0.02134  | 0.099711 | 0.03121  |
| 4.79E-05 | -0.30811 | 9.98E-12 | -0.13071 | 0.00467  | -0.0089868 | 0.84642  | -0.10083 | 0.02935  |
| 0.2548   | -0.40617 | 5.62E-20 | -0.16763 | 0.00027  | 0.13482828 | 0.00351  | 0.199497 | 1.40E-05 |
| 1.16E-06 | -0.28403 | 4.08E-10 | -0.02113 | 0.64879  | 0.28519556 | 3.44E-10 | 0.280221 | 7.12E-10 |
| 6.53E-09 | -0.33177 | 1.84E-13 | -0.17112 | 0.0002   | 0.14384775 | 0.00183  | 0.220683 | 1.47E-06 |
| 0.00846  | 0.339504 | 4.62E-14 | 0.216745 | 2.27E-06 | 0.02838513 | 0.54061  | 0.01112  | 0.81058  |
| 0.00015  | 0.223495 | 1.07E-06 | 0.268948 | 3.51E-09 | 0.33245128 | 1.63E-13 | 0.169588 | 0.00023  |
| 0.05747  | 0.492867 | 5.93E-30 | 0.532297 | 1.58E-35 | 0.21320854 | 3.34E-06 | 0.001598 | 0.97253  |
| 0.00011  | -0.30484 | 1.69E-11 | -0.05393 | 0.24477  | 0.36788017 | 2.06E-16 | 0.492678 | 6.28E-30 |
| 9.78E-06 | 0.362006 | 6.60E-16 | 0.385977 | 4.87E-18 | 0.04238178 | 0.3608   | -0.01569 | 0.7353   |
| 0.97502  | -0.24655 | 6.77E-08 | -0.19005 | 3.57E-05 | 0.13123403 | 0.0045   | 0.324568 | 6.44E-13 |
| 0.01121  | -0.15351 | 0.00087  | -0.25207 | 3.35E-08 | -0.0892457 | 0.05394  | 0.035589 | 0.44293  |
| 0.03875  | -0.46673 | 1.22E-26 | -0.27442 | 1.63E-09 | 0.12075922 | 0.009    | 0.251816 | 3.46E-08 |
| 0.00963  | 0.258586 | 1.43E-08 | 0.195947 | 2.00E-05 | 0.19031573 | 3.48E-05 | 0.242731 | 1.09E-07 |
| 0.00056  | -0.1576  | 0.00063  | -0.04892 | 0.2914   | 0.13821081 | 0.00276  | 0.203176 | 9.64E-06 |
| 0.39257  | -0.42101 | 1.74E-21 | -0.25166 | 3.53E-08 | 0.10162979 | 0.02809  | 0.163113 | 0.0004   |
| 4.09E-12 | -0.39646 | 5.00E-19 | -0.25887 | 1.38E-08 | 0.03359534 | 0.46891  | 0.119484 | 0.00975  |
| 0.51605  | 0.078762 | 0.0891   | 0.353821 | 3.22E-15 | 0.36310891 | 5.32E-16 | 0.323318 | 7.98E-13 |
| 0.00036  | 0.333011 | 1.48E-13 | 0.427522 | 3.57E-22 | 0.109818   | 0.0176   | -0.12301 | 0.00778  |
| 0.87771  | -0.131   | 0.00457  | 0.125239 | 0.00673  | 0.30930641 | 8.23E-12 | 0.285889 | 3.11E-10 |
| 0.34545  | -0.30837 | 9.56E-12 | -0.12611 | 0.00636  | 0.09151901 | 0.04809  | 0.139492 | 0.00252  |
| 0.13741  | -0.40491 | 7.49E-20 | -0.1711  | 0.0002   | -0.1361225 | 0.0032   | -0.18765 | 4.49E-05 |
| 0.0197   | -0.10185 | 0.02775  | -0.09383 | 0.04269  | 0.12931376 | 0.00513  | 0.297207 | 5.60E-11 |
| 0.00016  | -0.34546 | 1.55E-14 | -0.13753 | 0.0029   | 0.12837585 | 0.00546  | 0.242307 | 1.15E-07 |
| 0.08206  | -0.2833  | 4.55E-10 | -0.12904 | 0.00523  | 0.16165488 | 0.00045  | 0.293452 | 9.97E-11 |
| 0.22451  | -0.1986  | 1.54E-05 | -0.25104 | 3.82E-08 | 0.06441308 | 0.16462  | 0.119453 | 0.00977  |
| 0.00813  | -0.48554 | 5.39E-29 | -0.25215 | 3.31E-08 | 0.02869964 | 0.53613  | 0.105406 | 0.02272  |
| 6.97E-06 | 0.006471 | 0.88908  | 0.058286 | 0.20866  | 0.16802789 | 0.00026  | 0.202815 | 1.00E-05 |
| 0.00012  | -0.28558 | 3.25E-10 | -0.2526  | 3.13E-08 | 0.08005606 | 0.08396  | 0.109459 | 0.01797  |
| 0.01681  | 0.217621 | 2.06E-06 | 0.105298 | 0.02286  | -0.1079914 | 0.01958  | -0.15841 | 0.00059  |
| 0.65102  | -0.30377 | 2.00E-11 | -0.20925 | 5.10E-06 | 0.09793664 | 0.03436  | 0.165536 | 0.00033  |
| 0.17198  | -0.157   | 0.00066  | -0.15661 | 0.00068  | 0.04041198 | 0.38358  | 0.196092 | 1.97E-05 |
| 0.12179  | 0.222514 | 1.19E-06 | -0.04205 | 0.36454  | -0.0989743 | 0.03249  | -0.20123 | 1.18E-05 |
| 0.00019  | -0.48753 | 2.97E-29 | -0.20171 | 1.12E-05 | 0.17474788 | 0.00015  | 0.28227  | 5.29E-10 |
| 0.02502  | -0.20343 | 9.39E-06 | 0.065919 | 0.15495  | 0.09210687 | 0.04666  | 0.043907 | 0.34376  |
| 0.66785  | -0.4652  | 1.88E-26 | -0.22323 | 1.10E-06 | 0.10076696 | 0.02946  | 0.103161 | 0.02579  |
| 0.17064  | -0.43106 | 1.49E-22 | -0.16492 | 0.00035  | 0.11825921 | 0.01054  | 0.176631 | 0.00012  |
| 0.09215  | 0.429877 | 2.00E-22 | 0.563881 | 1.50E-40 | 0.14642251 | 0.00151  | -0.02472 | 0.59419  |
| 0.71478  | -0.1102  | 0.0172   | -0.10222 | 0.02718  | 0.04586676 | 0.32264  | 0.149298 | 0.00121  |
| 0.30617  | -0.34881 | 8.30E-15 | -0.18803 | 4.33E-05 | 0.21711636 | 2.18E-06 | 0.268877 | 3.55E-09 |
| 0.44511  | -0.26426 | 6.68E-09 | -0.01084 | 0.81527  | 0.17470356 | 0.00015  | 0.110033 | 0.01737  |
| 0.56055  | 0.343938 | 2.05E-14 | 0.607925 | 1.58E-48 | 0.28424648 | 3.96E-10 | 0.024668 | 0.59491  |
| 0.22444  | 0.454398 | 3.59E-25 | 0.486008 | 4.68E-29 | 0.21940262 | 1.69E-06 | 0.074816 | 0.10637  |
| 0.00983  | -0.56283 | 2.24E-40 | -0.34898 | 8.04E-15 | -0.1104952 | 0.01691  | -0.11425 | 0.01349  |
| 0.43278  | -0.20456 | 8.35E-06 | -0.13041 | 0.00476  | 0.07366886 | 0.11186  | 0.215442 | 2.62E-06 |

|          |          |          |          |          |            |          |          |          |
|----------|----------|----------|----------|----------|------------|----------|----------|----------|
| 0.77045  | -0.25125 | 3.72E-08 | -0.22879 | 5.81E-07 | -0.1001676 | 0.03044  | -0.11053 | 0.01687  |
| 0.53245  | -0.30516 | 1.60E-11 | -0.1542  | 0.00083  | 0.12706441 | 0.00597  | 0.224255 | 9.80E-07 |
| 0.03791  | -0.28602 | 3.05E-10 | -0.18744 | 4.58E-05 | 0.04903297 | 0.29033  | 0.106084 | 0.02186  |
| 0.50617  | -0.47998 | 2.78E-28 | -0.24709 | 6.32E-08 | 0.06988308 | 0.13156  | 0.171967 | 0.00019  |
| 0.83975  | -0.1755  | 0.00014  | -0.05794 | 0.21138  | 0.21403234 | 3.06E-06 | 0.19036  | 3.46E-05 |
| 0.97086  | -0.14347 | 0.00188  | -0.12513 | 0.00678  | 0.10646818 | 0.02138  | 0.242601 | 1.11E-07 |
| 0.43828  | -0.42073 | 1.86E-21 | -0.21068 | 4.39E-06 | 0.10830889 | 0.01922  | 0.195847 | 2.02E-05 |
| 0.24032  | -0.19011 | 3.55E-05 | -0.12096 | 0.00888  | 0.33297554 | 1.49E-13 | 0.361965 | 6.66E-16 |
| 0.12978  | -0.17507 | 0.00014  | 0.020671 | 0.65592  | 0.4866596  | 3.86E-29 | 0.448344 | 1.79E-24 |
| 0.01603  | 0.303183 | 2.19E-11 | 0.278247 | 9.47E-10 | 0.17445709 | 0.00015  | 0.044683 | 0.33529  |
| 0.80637  | -0.23381 | 3.22E-07 | -0.09261 | 0.04548  | 0.05461667 | 0.2388   | 0.050446 | 0.27663  |
| 0.05438  | -0.04326 | 0.35091  | -0.00777 | 0.86693  | 0.20043243 | 1.28E-05 | 0.308119 | 9.97E-12 |
| 7.42E-06 | -0.19795 | 1.64E-05 | -0.02769 | 0.5506   | 0.34545022 | 1.55E-14 | 0.306116 | 1.38E-11 |
| 0.2097   | 0.337197 | 7.01E-14 | 0.41998  | 2.22E-21 | 0.13626891 | 0.00317  | 0.110592 | 0.01681  |
| 0.03805  | 0.02982  | 0.52034  | 0.004984 | 0.91447  | 0.23568414 | 2.57E-07 | 0.32503  | 5.95E-13 |
| 0.29746  | -0.10539 | 0.02274  | 0.098875 | 0.03266  | 0.2871146  | 2.59E-10 | 0.351607 | 4.91E-15 |
| 0.37124  | -0.13685 | 0.00304  | -0.08129 | 0.07928  | 0.11473752 | 0.0131   | 0.238874 | 1.75E-07 |
| 0.55165  | -0.13649 | 0.00312  | -0.08828 | 0.0566   | 0.18555715 | 5.48E-05 | 0.271337 | 2.52E-09 |
| 8.04E-06 | -0.21734 | 2.13E-06 | 0.032966 | 0.47727  | 0.13391393 | 0.00374  | 0.077223 | 0.09555  |
| 0.01257  | -0.17697 | 0.00012  | -0.05534 | 0.23266  | -5.27E-05  | 0.99909  | -0.02317 | 0.61742  |
| 0.85336  | -0.30505 | 1.63E-11 | -0.26348 | 7.43E-09 | -0.0323356 | 0.48575  | 0.16525  | 0.00034  |
| 0.0006   | 0.239615 | 1.60E-07 | -0.00086 | 0.98522  | -0.1089637 | 0.0185   | -0.16338 | 0.00039  |
| 0.01705  | 0.215539 | 2.59E-06 | 0.16879  | 0.00025  | 0.20751125 | 6.14E-06 | 0.024358 | 0.59955  |
| 0.32542  | 0.057712 | 0.21318  | 0.259974 | 1.19E-08 | 0.35477323 | 2.68E-15 | 0.316405 | 2.56E-12 |
| 0.02399  | -0.48952 | 1.63E-29 | -0.19284 | 2.72E-05 | 0.0386458  | 0.40472  | -0.02856 | 0.53809  |
| 0.7565   | -0.24952 | 4.65E-08 | -0.19518 | 2.16E-05 | 0.00093067 | 0.984    | 0.071055 | 0.12519  |
| 0.21389  | -0.50351 | 2.18E-31 | -0.21477 | 2.82E-06 | 0.05572796 | 0.22936  | 0.108782 | 0.0187   |
| 0.12693  | -0.46448 | 2.29E-26 | -0.32811 | 3.50E-13 | -0.0267977 | 0.5635   | 0.099702 | 0.03123  |
| 0.14114  | 0.448439 | 1.75E-24 | 0.46212  | 4.39E-26 | 0.01502699 | 0.74603  | -0.07716 | 0.09583  |
| 7.75E-08 | -0.13585 | 0.00327  | 0.16776  | 0.00027  | 0.47991011 | 2.83E-28 | 0.542276 | 4.67E-37 |
| 2.15E-05 | -0.42677 | 4.29E-22 | -0.17125 | 0.0002   | 0.04592133 | 0.32206  | 0.039453 | 0.39498  |
| 0.27208  | 0.161248 | 0.00047  | 0.074174 | 0.10942  | 0.12009881 | 0.00938  | -0.14437 | 0.00176  |
| 1.37E-05 | 0.232695 | 3.67E-07 | 0.298539 | 4.55E-11 | 0.36156988 | 7.19E-16 | 0.096554 | 0.03699  |
| 0.08665  | -0.44725 | 2.39E-24 | -0.25335 | 2.84E-08 | 0.06076248 | 0.18993  | 0.081805 | 0.07739  |
| 0.01401  | 0.173182 | 0.00017  | 0.320065 | 1.39E-12 | 0.18439649 | 6.11E-05 | 0.021743 | 0.63931  |
| 0.0113   | 0.271078 | 2.61E-09 | 0.225218 | 8.78E-07 | -0.1747868 | 0.00015  | -0.38302 | 9.12E-18 |
| 0.06174  | -0.05713 | 0.21786  | 0.001168 | 0.97992  | 0.14258705 | 0.00201  | 0.169882 | 0.00023  |
| 0.60838  | -0.1447  | 0.00172  | 0.009632 | 0.83554  | 0.42767461 | 3.44E-22 | 0.445631 | 3.65E-24 |
| 0.54325  | -0.43662 | 3.69E-23 | -0.2963  | 6.44E-11 | 0.01322367 | 0.77563  | 0.213332 | 3.30E-06 |
| 0.97419  | -0.17482 | 0.00015  | -0.14969 | 0.00118  | 0.09823621 | 0.03381  | 0.221795 | 1.29E-06 |
| 0.46867  | -0.35701 | 1.75E-15 | -0.24951 | 4.65E-08 | 0.09787127 | 0.03448  | 0.23245  | 3.78E-07 |
| 0.00193  | -0.24166 | 1.24E-07 | -0.1106  | 0.0168   | -0.0609829 | 0.18833  | -0.0752  | 0.10459  |
| 0.05264  | 0.217578 | 2.07E-06 | 0.307903 | 1.03E-11 | 0.39044719 | 1.86E-18 | 0.124619 | 0.00701  |
| 0.65678  | -0.40783 | 3.84E-20 | -0.18983 | 3.64E-05 | 0.13276845 | 0.00405  | 0.15617  | 0.00071  |
| 0.58232  | -0.11318 | 0.0144   | -0.0645  | 0.16404  | 0.16268683 | 0.00042  | 0.305809 | 1.44E-11 |

|          |          |          |          |          |            |          |          |          |
|----------|----------|----------|----------|----------|------------|----------|----------|----------|
| 0.76633  | 0.32128  | 1.13E-12 | 0.211372 | 4.07E-06 | 0.00596309 | 0.89774  | -0.05938 | 0.20023  |
| 0.3603   | -0.10055 | 0.02981  | 0.183574 | 6.60E-05 | 0.1882022  | 4.26E-05 | 0.094635 | 0.04094  |
| 0.5216   | -0.12164 | 0.0085   | -0.05482 | 0.23704  | 0.22685472 | 7.27E-07 | 0.321663 | 1.06E-12 |
| 0.15658  | -0.00879 | 0.84979  | 0.027382 | 0.55502  | 0.1183973  | 0.01044  | 0.288432 | 2.13E-10 |
| 0.65621  | -0.24058 | 1.42E-07 | -0.08593 | 0.06353  | 0.08611963 | 0.06295  | 0.170033 | 0.00022  |
| 0.14598  | 0.341012 | 3.51E-14 | 0.183109 | 6.89E-05 | -0.0080196 | 0.86277  | -0.08358 | 0.07115  |
| 0.45857  | -0.28817 | 2.21E-10 | -0.12251 | 0.00804  | -0.0154696 | 0.73881  | -0.03412 | 0.46202  |
| 0.27296  | -0.39256 | 1.18E-18 | -0.12745 | 0.00581  | 0.08710978 | 0.05997  | 0.162936 | 0.00041  |
| 1.63E-07 | -0.25239 | 3.22E-08 | -0.09429 | 0.04169  | 0.18136603 | 8.09E-05 | 0.312136 | 5.19E-12 |
| 0.00024  | 0.269417 | 3.29E-09 | 0.160119 | 0.00051  | 0.06042439 | 0.19241  | -0.04565 | 0.32493  |
| 0.59208  | -0.14076 | 0.0023   | -0.01554 | 0.73774  | 0.10411497 | 0.02445  | 0.041722 | 0.36834  |
| 0.77254  | -0.05528 | 0.23317  | -0.08623 | 0.06261  | 0.06063669 | 0.19085  | 0.209873 | 4.78E-06 |
| 0.1465   | -0.25722 | 1.71E-08 | -0.13394 | 0.00374  | 0.0293805  | 0.5265   | 0.060336 | 0.19306  |
| 0.84475  | -0.15047 | 0.00111  | -0.03188 | 0.49192  | 0.09117465 | 0.04894  | 0.14332  | 0.0019   |
| 0.00322  | -0.07683 | 0.09728  | -0.12533 | 0.00669  | -0.0147834 | 0.75001  | 0.089598 | 0.053    |
| 0.57576  | 0.0183   | 0.69325  | -0.12792 | 0.00563  | -0.2929936 | 1.07E-10 | -0.33205 | 1.75E-13 |
| 0.00104  | -0.19649 | 1.90E-05 | -0.10251 | 0.02675  | 0.1517619  | 0.001    | 0.158586 | 0.00058  |
| 0.37863  | -0.43381 | 7.49E-23 | -0.1803  | 8.92E-05 | 0.16456821 | 0.00036  | 0.231812 | 4.08E-07 |
| 0.00218  | -0.15112 | 0.00105  | 0.02454  | 0.59683  | 0.36089496 | 8.21E-16 | 0.382534 | 1.01E-17 |
| 0.91354  | -0.30921 | 8.35E-12 | -0.21418 | 3.01E-06 | -0.0395495 | 0.39382  | -0.04068 | 0.38042  |
| 0.00988  | -0.22819 | 6.23E-07 | -0.08797 | 0.05747  | -0.0536    | 0.24767  | 0.027366 | 0.55524  |
| 0.62951  | -0.24447 | 8.79E-08 | -0.20551 | 7.56E-06 | 0.16128803 | 0.00047  | 0.219898 | 1.60E-06 |
| 1.76E-05 | -0.30399 | 1.93E-11 | -0.17968 | 9.45E-05 | 0.05254559 | 0.25711  | 0.241665 | 1.24E-07 |
| 0.54658  | -0.08203 | 0.07656  | 0.013158 | 0.77673  | 0.22213657 | 1.25E-06 | 0.306354 | 1.32E-11 |
| 0.0238   | -0.07496 | 0.10568  | -0.06074 | 0.19012  | 0.22520727 | 8.79E-07 | 0.31673  | 2.43E-12 |
| 0.02217  | -0.55059 | 2.27E-38 | -0.34302 | 2.43E-14 | -0.078703  | 0.08934  | -0.09429 | 0.04167  |
| 0.27203  | -0.40195 | 1.46E-19 | -0.24777 | 5.80E-08 | -0.1058916 | 0.0221   | 0.057637 | 0.21378  |
| 0.47282  | -0.30456 | 1.76E-11 | -0.11543 | 0.01256  | 0.14565651 | 0.0016   | 0.147861 | 0.00135  |
| 0.15427  | -0.49716 | 1.59E-30 | -0.23849 | 1.83E-07 | 0.11405443 | 0.01366  | 0.111251 | 0.01616  |
| 0.64984  | -0.2706  | 2.79E-09 | 0.033317 | 0.47259  | -0.0627804 | 0.17561  | -0.17077 | 0.00021  |
| 0.26887  | -0.04212 | 0.3638   | 0.063096 | 0.17345  | 0.20704408 | 6.44E-06 | 0.253984 | 2.61E-08 |
| 0.59004  | -0.12948 | 0.00507  | 0.101979 | 0.02755  | 0.20943068 | 5.01E-06 | 0.194909 | 2.22E-05 |
| 0.51803  | 0.229424 | 5.40E-07 | 0.063641 | 0.16975  | 0.06710213 | 0.14766  | -0.14536 | 0.00163  |
| 0.25952  | 0.315147 | 3.16E-12 | -0.06254 | 0.17731  | -0.1808551 | 8.48E-05 | -0.32641 | 4.69E-13 |
| 0.17406  | -0.35128 | 5.21E-15 | -0.2256  | 8.40E-07 | -0.0445359 | 0.33689  | 0.047349 | 0.30723  |
| 0.00747  | 0.187691 | 4.47E-05 | 0.040787 | 0.37917  | -0.0807714 | 0.08122  | -0.16243 | 0.00042  |
| 0.0588   | -0.50546 | 1.18E-31 | -0.30041 | 3.40E-11 | -0.0586622 | 0.20573  | -0.08175 | 0.0776   |
| 0.4276   | -0.41307 | 1.14E-20 | -0.25768 | 1.61E-08 | -0.0715072 | 0.1228   | -0.05804 | 0.21057  |
| 0.35649  | -0.4186  | 3.09E-21 | -0.22137 | 1.36E-06 | 0.0562588  | 0.22495  | -0.0671  | 0.14765  |
| 0.43994  | -0.50628 | 9.08E-32 | -0.29208 | 1.23E-10 | 0.06950632 | 0.13366  | 0.198944 | 1.48E-05 |
| 0.34183  | -0.26286 | 8.07E-09 | -0.00555 | 0.90472  | 0.00171047 | 0.97059  | -0.063   | 0.17409  |
| 0.07272  | -0.29441 | 8.61E-11 | -0.13829 | 0.00275  | 0.00655493 | 0.88765  | 0.05077  | 0.27356  |
| 0.47177  | -0.23242 | 3.79E-07 | -0.10698 | 0.02076  | -0.0512306 | 0.26922  | -0.09206 | 0.04678  |
| 0.96534  | 0.459045 | 1.02E-25 | 0.202531 | 1.03E-05 | -0.0367317 | 0.42841  | 0.08812  | 0.05706  |
| 0.72414  | -0.1714  | 0.0002   | 0.05177  | 0.2642   | 0.07262582 | 0.11704  | 0.124518 | 0.00706  |

|          |          |          |          |          |            |          |          |          |
|----------|----------|----------|----------|----------|------------|----------|----------|----------|
| 0.33529  | -0.21769 | 2.05E-06 | 0.00595  | 0.89796  | 0.01240975 | 0.78911  | 0.061345 | 0.18572  |
| 0.0977   | -0.18884 | 4.01E-05 | -0.01753 | 0.70559  | 0.08396382 | 0.06986  | 0.054597 | 0.23897  |
| 0.99778  | -0.41377 | 9.68E-21 | -0.21731 | 2.13E-06 | 0.08290094 | 0.07349  | 0.154974 | 0.00078  |
| 0.38171  | -0.31579 | 2.84E-12 | -0.23287 | 3.60E-07 | -0.0596561 | 0.19814  | 0.101993 | 0.02753  |
| 0.73404  | -0.49357 | 4.79E-30 | -0.20852 | 5.52E-06 | 0.06875813 | 0.1379   | 0.109157 | 0.01829  |
| 0.00609  | -0.05918 | 0.20177  | -0.06281 | 0.17541  | 0.06026379 | 0.1936   | 0.133848 | 0.00376  |
| 0.44533  | -0.26285 | 8.08E-09 | -0.31211 | 5.21E-12 | -0.0947086 | 0.04078  | -0.01623 | 0.7264   |
| 0.24088  | -0.23906 | 1.71E-07 | -0.06584 | 0.15547  | 0.10305245 | 0.02595  | 0.199215 | 1.44E-05 |
| 1.56E-05 | -0.312   | 5.31E-12 | -0.25256 | 3.14E-08 | -0.0374525 | 0.4194   | 0.041375 | 0.37234  |
| 0.56549  | -0.23857 | 1.82E-07 | -0.05359 | 0.24774  | -0.0385289 | 0.40615  | -0.09042 | 0.05085  |
| 0.43628  | -0.30152 | 2.86E-11 | -0.24115 | 1.32E-07 | -0.0222421 | 0.63164  | 0.088069 | 0.0572   |
| 0.99693  | -0.34176 | 3.07E-14 | -0.06179 | 0.18257  | 0.14126966 | 0.00221  | 0.233929 | 3.17E-07 |
| 0.08985  | -0.3686  | 1.78E-16 | -0.30307 | 2.23E-11 | -0.0785227 | 0.09008  | -0.09056 | 0.05049  |
| 0.00264  | -0.45894 | 1.05E-25 | -0.24133 | 1.30E-07 | 0.14081536 | 0.00229  | 0.197858 | 1.66E-05 |
| 0.16267  | -0.27638 | 1.24E-09 | -0.16806 | 0.00026  | 0.07165174 | 0.12205  | 0.081107 | 0.07996  |
| 0.18091  | -0.56721 | 4.11E-41 | -0.25759 | 1.63E-08 | 0.14515254 | 0.00166  | 0.112854 | 0.01468  |
| 0.91132  | -0.25245 | 3.19E-08 | -0.14141 | 0.00219  | 0.11320674 | 0.01438  | 0.217206 | 2.16E-06 |
| 0.71635  | -0.46415 | 2.51E-26 | -0.36283 | 5.61E-16 | 0.01270488 | 0.78422  | 0.140051 | 0.00242  |
| 0.0661   | -0.30883 | 8.89E-12 | -0.19846 | 1.56E-05 | -0.0433194 | 0.35027  | -0.00819 | 0.85995  |
| 0.13809  | -0.34105 | 3.49E-14 | -0.0076  | 0.86986  | 0.49420211 | 3.95E-30 | 0.487264 | 3.22E-29 |
| 0.00225  | -0.34071 | 3.71E-14 | -0.17826 | 0.00011  | 0.16170652 | 0.00045  | 0.330941 | 2.13E-13 |
| 0.45806  | -0.3874  | 3.59E-18 | -0.02939 | 0.52642  | 0.27358853 | 1.84E-09 | 0.182838 | 7.06E-05 |
| 0.34072  | 0.454858 | 3.17E-25 | 0.442008 | 9.33E-24 | -0.0610104 | 0.18813  | -0.20252 | 1.03E-05 |
| 0.98016  | -0.48837 | 2.31E-29 | -0.21    | 4.71E-06 | 0.07424445 | 0.10908  | 0.109876 | 0.01754  |
| 0.70963  | -0.00214 | 0.9633   | 0.121703 | 0.00847  | 0.36455632 | 3.99E-16 | 0.40382  | 9.60E-20 |
| 0.00896  | 0.369236 | 1.57E-16 | 0.00894  | 0.84721  | -0.1879183 | 4.38E-05 | -0.03843 | 0.40736  |
| 0.00061  | 0.102529 | 0.02672  | 0.148709 | 0.00127  | 0.32476694 | 6.23E-13 | 0.291587 | 1.32E-10 |
| 0.24001  | 0.157022 | 0.00066  | -0.03877 | 0.4032   | 0.2110002  | 4.24E-06 | -0.03638 | 0.43282  |
| 0.1084   | -0.01757 | 0.70495  | 0.191928 | 2.98E-05 | 0.45937726 | 9.32E-26 | 0.299155 | 4.13E-11 |
| 0.70064  | 0.434305 | 6.62E-23 | 0.242541 | 1.12E-07 | 0.02140136 | 0.64458  | 0.068738 | 0.13802  |
| 0.21664  | -0.41221 | 1.39E-20 | -0.17031 | 0.00022  | 0.07644175 | 0.09896  | 0.140404 | 0.00236  |
| 0.8847   | -0.43822 | 2.46E-23 | -0.20066 | 1.25E-05 | 0.08991574 | 0.05216  | 0.195277 | 2.14E-05 |
| 0.97913  | -0.4193  | 2.61E-21 | -0.28406 | 4.07E-10 | -0.0342522 | 0.46025  | 0.117298 | 0.01119  |
| 0.57849  | -0.20136 | 1.16E-05 | -0.10046 | 0.02996  | -0.0212621 | 0.64674  | -0.01041 | 0.82246  |
| 0.88692  | -0.38493 | 6.09E-18 | -0.2311  | 4.44E-07 | -0.0015033 | 0.97415  | 0.049003 | 0.29062  |
| 0.30447  | -0.13977 | 0.00247  | -0.02495 | 0.59069  | 0.16261939 | 0.00042  | 0.130149 | 0.00485  |
| 0.12573  | -0.56232 | 2.73E-40 | -0.22734 | 6.88E-07 | 0.12373494 | 0.00743  | 0.102268 | 0.02711  |
| 0.12438  | 0.372583 | 7.96E-17 | 0.293702 | 9.59E-11 | 0.02087276 | 0.65278  | -0.11701 | 0.01139  |
| 9.17E-10 | -0.43041 | 1.75E-22 | -0.18989 | 3.62E-05 | 0.06671616 | 0.15001  | 0.092629 | 0.04543  |
| 0.15595  | 0.372944 | 7.39E-17 | 0.3529   | 3.84E-15 | -0.019897  | 0.66802  | -0.0602  | 0.19409  |
| 0.15704  | -0.26832 | 3.83E-09 | -0.17861 | 0.0001   | 0.01859248 | 0.68861  | 0.048304 | 0.29756  |
| 0.31577  | -0.24721 | 6.23E-08 | -0.20507 | 7.92E-06 | 0.03063497 | 0.50899  | 0.164811 | 0.00035  |
| 0.7641   | -0.30483 | 1.69E-11 | -0.13411 | 0.00369  | 0.09674421 | 0.03662  | 0.19029  | 3.49E-05 |
| 0.01844  | -0.17201 | 0.00019  | -0.13889 | 0.00263  | -0.1199404 | 0.00948  | 0.030181 | 0.5153   |
| 0.818    | -0.16768 | 0.00027  | -0.11635 | 0.01186  | 0.02407061 | 0.60386  | 0.106382 | 0.02149  |



|          |          |          |          |          |            |          |          |          |
|----------|----------|----------|----------|----------|------------|----------|----------|----------|
| 0.13451  | -0.41247 | 1.31E-20 | -0.21671 | 2.28E-06 | -0.0587771 | 0.20484  | -0.04307 | 0.35304  |
| 0.56611  | -0.20971 | 4.86E-06 | -0.08868 | 0.0555   | 0.01553175 | 0.7378   | 0.018518 | 0.6898   |
| 0.35146  | -0.23992 | 1.54E-07 | -0.30469 | 1.73E-11 | -0.0217389 | 0.63937  | 0.126595 | 0.00615  |
| 2.40E-06 | 0.104623 | 0.02375  | -0.103   | 0.02602  | -0.0463546 | 0.31751  | -0.16676 | 0.0003   |
| 0.21925  | -0.35944 | 1.09E-15 | -0.1255  | 0.00662  | 0.13349482 | 0.00385  | 0.19148  | 3.11E-05 |
| 0.15574  | -0.29219 | 1.21E-10 | -0.082   | 0.07669  | 0.1775415  | 0.00011  | 0.236758 | 2.26E-07 |
| 0.28358  | -0.12913 | 0.00519  | -0.09057 | 0.05047  | 0.04666802 | 0.31425  | 0.06738  | 0.14599  |
| 0.59413  | -0.51259 | 1.19E-32 | -0.22757 | 6.70E-07 | -0.0116267 | 0.80213  | 0.043739 | 0.34562  |
| 0.95588  | -0.42037 | 2.02E-21 | -0.30376 | 2.00E-11 | -0.0562196 | 0.22528  | 0.012085 | 0.7945   |
| 0.13927  | -0.50095 | 4.88E-31 | -0.32636 | 4.73E-13 | -0.0829132 | 0.07345  | -0.09956 | 0.03147  |
| 0.12248  | -0.44244 | 8.35E-24 | -0.15404 | 0.00084  | -0.0414721 | 0.37121  | -0.01101 | 0.81238  |
| 0.03557  | -0.35461 | 2.77E-15 | -0.21378 | 3.14E-06 | 0.10730238 | 0.02038  | 0.180489 | 8.77E-05 |
| 0.12192  | -0.22501 | 8.99E-07 | -0.18335 | 6.74E-05 | 0.06283455 | 0.17524  | 0.146661 | 0.00148  |
| 0.46754  | -0.42779 | 3.34E-22 | -0.20159 | 1.13E-05 | 0.01062663 | 0.81884  | 0.059527 | 0.19911  |
| 0.15675  | -0.31919 | 1.61E-12 | -0.21068 | 4.39E-06 | 0.0702957  | 0.12929  | 0.317668 | 2.07E-12 |
| 0.22895  | -0.2299  | 5.10E-07 | 0.023388 | 0.61417  | 0.14389866 | 0.00182  | 0.084832 | 0.06701  |
| 4.85E-09 | -0.3254  | 5.59E-13 | -0.17751 | 0.00012  | 0.15027247 | 0.00113  | 0.316571 | 2.49E-12 |
| 0.20028  | -0.32308 | 8.32E-13 | -0.11917 | 0.00995  | -0.1733366 | 0.00017  | -0.24029 | 1.47E-07 |
| 0.00178  | -0.45927 | 9.60E-26 | -0.22368 | 1.05E-06 | 0.11423202 | 0.01351  | 0.179545 | 9.57E-05 |
| 0.0458   | -0.1455  | 0.00162  | -0.01731 | 0.70905  | 0.10439098 | 0.02407  | 0.06551  | 0.15754  |
| 0.01051  | -0.13325 | 0.00392  | 0.014245 | 0.75882  | 0.18090722 | 8.44E-05 | 0.083342 | 0.07197  |
| 0.20174  | -0.31796 | 1.98E-12 | -0.15919 | 0.00055  | 0.04722291 | 0.30852  | 0.090508 | 0.05062  |
| 0.17291  | -0.10954 | 0.01788  | 0.017153 | 0.71159  | 0.29328471 | 1.02E-10 | 0.393708 | 9.15E-19 |
| 2.50E-07 | -0.3013  | 2.95E-11 | -0.11785 | 0.01081  | 0.16905933 | 0.00024  | 0.270465 | 2.85E-09 |
| 0.00012  | -0.17401 | 0.00016  | -0.07219 | 0.11926  | 0.1579376  | 0.00061  | 0.345317 | 1.59E-14 |
| 0.37375  | -0.24431 | 8.96E-08 | 0.002145 | 0.96313  | 0.07543185 | 0.10351  | 0.066369 | 0.15215  |
| 0.00041  | -0.17153 | 0.0002   | -0.07546 | 0.10337  | 0.06508188 | 0.16027  | 0.209237 | 5.11E-06 |
| 2.11E-05 | -0.44027 | 1.46E-23 | -0.20215 | 1.07E-05 | 0.18899861 | 3.95E-05 | 0.256636 | 1.85E-08 |
| 0.14174  | 0.263925 | 6.99E-09 | -0.11592 | 0.01218  | -0.1855296 | 5.49E-05 | -0.16509 | 0.00034  |
| 2.04E-05 | 0.127007 | 0.00599  | 0.225343 | 8.65E-07 | 0.16908125 | 0.00024  | 0.025809 | 0.57798  |
| 0.90056  | -0.02634 | 0.57025  | 0.11101  | 0.0164   | 0.11476515 | 0.01308  | 0.193286 | 2.61E-05 |
| 0.74657  | -0.37822 | 2.50E-17 | -0.29062 | 1.53E-10 | -0.0122157 | 0.79233  | -0.03927 | 0.39714  |
| 0.42925  | -0.33542 | 9.62E-14 | -0.09713 | 0.03588  | 0.10952013 | 0.01791  | 0.150531 | 0.0011   |
| 0.43357  | -0.38038 | 1.59E-17 | -0.17416 | 0.00016  | 0.04983455 | 0.2825   | 0.063556 | 0.17033  |
| 7.73E-05 | -0.04574 | 0.32398  | -0.03716 | 0.42309  | 0.16146556 | 0.00046  | 0.274675 | 1.58E-09 |
| 0.08608  | -0.11864 | 0.01029  | 0.107488 | 0.02016  | 0.11827611 | 0.01052  | 0.132612 | 0.00409  |
| 0.24768  | -0.28169 | 5.75E-10 | -0.07326 | 0.11385  | 0.13834041 | 0.00274  | 0.090176 | 0.05148  |
| 3.20E-05 | -0.09186 | 0.04725  | -0.02988 | 0.51953  | 0.08171089 | 0.07773  | 0.110524 | 0.01688  |
| 0.72064  | -0.27853 | 9.09E-10 | -0.09664 | 0.03682  | 0.00021942 | 0.99623  | -0.03221 | 0.48751  |
| 0.48821  | -0.38114 | 1.35E-17 | -0.12975 | 0.00498  | 0.08514872 | 0.06599  | 0.075611 | 0.10269  |
| 0.67433  | -0.06575 | 0.15601  | 0.055697 | 0.22962  | 0.26753714 | 4.27E-09 | 0.166003 | 0.00031  |
| 0.50741  | -0.42834 | 2.92E-22 | -0.32171 | 1.05E-12 | 0.02993895 | 0.51867  | 0.04227  | 0.36208  |
| 0.20205  | -0.43243 | 1.06E-22 | -0.2343  | 3.03E-07 | 0.09269677 | 0.04527  | 0.19605  | 1.98E-05 |
| 0.00318  | -0.09637 | 0.03736  | -0.04472 | 0.33484  | 0.17094649 | 0.00021  | 0.283126 | 4.67E-10 |
| 0.59289  | -0.18904 | 3.93E-05 | -0.0747  | 0.10694  | 0.01895954 | 0.68279  | 0.081155 | 0.07978  |

|          |          |          |          |          |            |          |          |          |
|----------|----------|----------|----------|----------|------------|----------|----------|----------|
| 0.30521  | -0.31355 | 4.11E-12 | -0.13233 | 0.00418  | -0.0084294 | 0.85584  | 0.065634 | 0.15675  |
| 0.00345  | -0.08035 | 0.08282  | -0.02847 | 0.53939  | -0.0141108 | 0.76103  | -0.00442 | 0.92407  |
| 0.35514  | -0.23946 | 1.63E-07 | -0.11179 | 0.01565  | -0.0324062 | 0.4848   | -0.03087 | 0.50581  |
| 0.04908  | -0.27076 | 2.73E-09 | -0.22647 | 7.60E-07 | 0.12171397 | 0.00846  | 0.278983 | 8.52E-10 |
| 0.76273  | -0.45493 | 3.11E-25 | -0.23116 | 4.41E-07 | 0.01077295 | 0.81639  | 0.009334 | 0.84057  |
| 0.47526  | -0.17793 | 0.00011  | -0.10944 | 0.01799  | 0.05886542 | 0.20416  | 0.082964 | 0.07327  |
| 4.23E-25 | -0.09857 | 0.0332   | 0.037364 | 0.42049  | 0.03502026 | 0.45025  | 0.010572 | 0.81976  |
| 0.09582  | -0.59322 | 9.95E-46 | -0.36239 | 6.12E-16 | -0.0158858 | 0.73205  | 0.050331 | 0.27773  |
| 1.36E-05 | -0.15459 | 0.0008   | -0.13074 | 0.00466  | 0.14430444 | 0.00177  | 0.277097 | 1.12E-09 |
| 0.00323  | -0.40596 | 5.90E-20 | -0.25989 | 1.20E-08 | 0.08874869 | 0.0553   | 0.182096 | 7.57E-05 |
| 0.90533  | -0.18044 | 8.82E-05 | -0.0415  | 0.37084  | 0.28972107 | 1.75E-10 | 0.262206 | 8.82E-09 |
| 0.06424  | -0.19037 | 3.46E-05 | -0.12532 | 0.00669  | 0.1987574  | 1.51E-05 | 0.323273 | 8.04E-13 |
| 0.91748  | -0.29419 | 8.90E-11 | -0.16111 | 0.00047  | 0.1263076  | 0.00627  | 0.177347 | 0.00012  |
| 0.07654  | -0.28893 | 1.97E-10 | -0.20777 | 5.97E-06 | -0.013346  | 0.77362  | 0.007508 | 0.87146  |
| 0.04183  | -0.39847 | 3.20E-19 | -0.12879 | 0.00532  | 0.14500247 | 0.00168  | 0.199415 | 1.41E-05 |
| 0.21701  | -0.26536 | 5.75E-09 | -0.08317 | 0.07255  | 0.11749039 | 0.01105  | 0.187827 | 4.42E-05 |
| 0.66166  | 0.206774 | 6.63E-06 | 0.241642 | 1.25E-07 | 0.35834881 | 1.35E-15 | 0.197175 | 1.77E-05 |
| 0.12834  | 0.254515 | 2.44E-08 | 0.243563 | 9.83E-08 | -0.14956   | 0.00119  | -0.16855 | 0.00025  |
| 0.48053  | -0.35175 | 4.78E-15 | -0.21164 | 3.96E-06 | -0.1786813 | 0.0001   | -0.17993 | 9.24E-05 |
| 0.97051  | 0.153838 | 0.00085  | 0.213653 | 3.18E-06 | 0.11976302 | 0.00958  | -0.06398 | 0.16748  |
| 0.87134  | -0.37997 | 1.73E-17 | -0.17133 | 0.0002   | 0.07714983 | 0.09587  | 0.099536 | 0.03151  |
| 0.24494  | -0.17264 | 0.00018  | -0.20188 | 1.10E-05 | -0.270343  | 2.90E-09 | -0.26728 | 4.42E-09 |
| 0.23273  | 0.417652 | 3.87E-21 | 0.331062 | 2.09E-13 | -0.2313808 | 4.29E-07 | -0.32099 | 1.19E-12 |
| 0.01926  | -0.6183  | 1.35E-50 | -0.4543  | 3.68E-25 | -0.3456471 | 1.50E-14 | -0.35544 | 2.36E-15 |
| 0.14993  | -0.30925 | 8.30E-12 | -0.16164 | 0.00045  | 0.04803999 | 0.30022  | 0.147813 | 0.00136  |
| 0.06742  | -0.17799 | 0.00011  | -0.00999 | 0.82961  | 0.18012426 | 9.07E-05 | 0.269544 | 3.24E-09 |
| 0.36971  | -0.36466 | 3.91E-16 | -0.17998 | 9.19E-05 | 0.01982814 | 0.6691   | 0.061046 | 0.18787  |
| 0.00022  | -0.53573 | 4.78E-36 | -0.27819 | 9.55E-10 | 0.151654   | 0.00101  | 0.284923 | 3.58E-10 |
| 0.91291  | -0.42435 | 7.75E-22 | -0.20593 | 7.25E-06 | 0.09663798 | 0.03683  | 0.189747 | 3.67E-05 |
| 0.1502   | -0.21055 | 4.44E-06 | -0.10623 | 0.02168  | 0.02340063 | 0.61398  | -0.0504  | 0.27706  |
| 0.31385  | -0.3906  | 1.80E-18 | -0.08645 | 0.06195  | 0.24336145 | 1.01E-07 | 0.157434 | 0.00064  |
| 0.14754  | -0.35917 | 1.15E-15 | -0.32944 | 2.77E-13 | 0.09876846 | 0.03285  | 0.338865 | 5.19E-14 |
| 0.59971  | -0.37642 | 3.62E-17 | -0.18959 | 3.73E-05 | 0.02441297 | 0.59873  | 0.115363 | 0.01261  |
| 0.12373  | -0.27605 | 1.30E-09 | -0.04175 | 0.36798  | 0.34918119 | 7.75E-15 | 0.489052 | 1.88E-29 |
| 0.29078  | -0.35785 | 1.48E-15 | -0.23392 | 3.18E-07 | 0.08978637 | 0.0525   | 0.185464 | 5.53E-05 |
| 0.00111  | -0.19759 | 1.70E-05 | -0.09059 | 0.05042  | 0.13165339 | 0.00437  | 0.101206 | 0.02875  |
| 0.052    | -0.29902 | 4.22E-11 | -0.06811 | 0.14166  | 0.1319964  | 0.00427  | 0.181629 | 7.90E-05 |
| 0.49878  | -0.49993 | 6.72E-31 | -0.26307 | 7.85E-09 | 0.07690493 | 0.09693  | 0.07217  | 0.11936  |
| 2.93E-12 | -0.42005 | 2.18E-21 | -0.27546 | 1.41E-09 | 0.10226848 | 0.02711  | 0.203313 | 9.50E-06 |
| 0.01909  | -0.34131 | 3.33E-14 | -0.21219 | 3.73E-06 | 0.15616133 | 0.00071  | 0.179332 | 9.75E-05 |
| 0.90632  | -0.46793 | 8.73E-27 | -0.16573 | 0.00032  | 0.06623127 | 0.153    | 0.091282 | 0.04867  |
| 0.00015  | 0.177784 | 0.00011  | 0.103371 | 0.02549  | -0.154479  | 0.00081  | -0.2917  | 1.30E-10 |
| 0.87203  | -0.41808 | 3.49E-21 | -0.25861 | 1.42E-08 | 0.136586   | 0.0031   | 0.211237 | 4.13E-06 |
| 0.31588  | -0.35534 | 2.41E-15 | -0.1044  | 0.02405  | 0.0477659  | 0.30299  | 0.071991 | 0.12028  |
| 0.7654   | -0.34864 | 8.58E-15 | -0.06808 | 0.14182  | 0.1790217  | 0.0001   | 0.077903 | 0.09266  |

|          |          |          |          |          |            |          |          |          |
|----------|----------|----------|----------|----------|------------|----------|----------|----------|
| 0.15474  | -0.33916 | 4.92E-14 | -0.14616 | 0.00154  | 0.25041278 | 4.14E-08 | 0.32658  | 4.56E-13 |
| 7.60E-05 | -0.40926 | 2.77E-20 | -0.17826 | 0.00011  | 0.21369476 | 3.17E-06 | 0.146769 | 0.00147  |
| 0.47996  | -0.39147 | 1.49E-18 | -0.18423 | 6.21E-05 | 0.07032272 | 0.12914  | 0.173772 | 0.00016  |
| 0.67458  | -0.21873 | 1.82E-06 | -0.00831 | 0.85784  | -0.00164   | 0.9718   | -0.03769 | 0.4164   |
| 0.46076  | -0.37983 | 1.78E-17 | -0.13673 | 0.00307  | -0.0129924 | 0.77946  | -0.00424 | 0.92719  |
| 0.28263  | -0.36263 | 5.84E-16 | -0.19873 | 1.52E-05 | 0.07831936 | 0.09092  | 0.139311 | 0.00255  |
| 0.01596  | -0.34467 | 1.79E-14 | -0.04053 | 0.3822   | 0.23061134 | 4.70E-07 | 0.389601 | 2.24E-18 |
| 0.00221  | -0.27958 | 7.81E-10 | -0.10708 | 0.02065  | 0.31905703 | 1.64E-12 | 0.356769 | 1.83E-15 |
| 0.30728  | -0.45638 | 2.10E-25 | -0.24477 | 8.46E-08 | 0.05773904 | 0.21297  | 0.118492 | 0.01038  |
| 0.52179  | -0.22118 | 1.39E-06 | -0.04622 | 0.31896  | 0.09926005 | 0.03199  | 0.145428 | 0.00163  |
| 0.98247  | -0.35341 | 3.49E-15 | -0.16304 | 0.0004   | 0.17764601 | 0.00011  | 0.326168 | 4.89E-13 |
| 0.12503  | -0.37973 | 1.82E-17 | -0.18093 | 8.42E-05 | 0.13339731 | 0.00388  | 0.213705 | 3.17E-06 |
| 0.4212   | -0.29659 | 6.15E-11 | -0.08296 | 0.0733   | 0.2130164  | 3.41E-06 | 0.340208 | 4.07E-14 |
| 0.57773  | -0.29271 | 1.12E-10 | -0.13901 | 0.00261  | 0.13802966 | 0.0028   | 0.219151 | 1.74E-06 |
| 0.00117  | -0.1957  | 2.05E-05 | -0.13699 | 0.00301  | -0.0103789 | 0.82299  | 0.000619 | 0.98935  |
| 5.47E-08 | -0.13535 | 0.00338  | -0.02663 | 0.56587  | 0.07337934 | 0.11328  | 0.099224 | 0.03205  |
| 4.86E-13 | -0.11089 | 0.01651  | 0.058746 | 0.20508  | 0.40604005 | 5.79E-20 | 0.451646 | 7.48E-25 |
| 0.37083  | -0.41986 | 2.28E-21 | -0.26568 | 5.50E-09 | 0.07708021 | 0.09617  | 0.232435 | 3.79E-07 |
| 4.44E-31 | -0.31556 | 2.95E-12 | -0.19784 | 1.66E-05 | 0.12333633 | 0.00762  | 0.198486 | 1.55E-05 |
| 0.21035  | -0.41015 | 2.25E-20 | -0.17942 | 9.67E-05 | 0.04851728 | 0.29543  | 0.078952 | 0.08833  |
| 0.4235   | 0.324764 | 6.23E-13 | 0.349068 | 7.92E-15 | 0.08002501 | 0.08408  | -0.0911  | 0.04912  |
| 0.99898  | 0.477416 | 5.84E-28 | 0.389871 | 2.11E-18 | -0.1317543 | 0.00434  | -0.14661 | 0.00149  |
| 0.54062  | 0.396006 | 5.52E-19 | 0.236344 | 2.38E-07 | 0.07526057 | 0.1043   | -0.03636 | 0.43316  |
| 0.00019  | -0.02129 | 0.64625  | 0.219596 | 1.66E-06 | 0.28264861 | 5.00E-10 | 0.272857 | 2.04E-09 |
| 0.3916   | -0.27117 | 2.58E-09 | -0.08892 | 0.05482  | 0.16757296 | 0.00028  | 0.174515 | 0.00015  |
| 0.00188  | -0.25575 | 2.08E-08 | -0.05949 | 0.19937  | 0.41593252 | 5.82E-21 | 0.414296 | 8.55E-21 |
| 0.77642  | -0.03147 | 0.49753  | 0.051797 | 0.26396  | 0.18914972 | 3.89E-05 | 0.301801 | 2.73E-11 |
| 0.88408  | -0.03966 | 0.39245  | -0.07926 | 0.0871   | 0.15111844 | 0.00105  | 0.251058 | 3.82E-08 |
| 0.06088  | -0.49695 | 1.69E-30 | -0.21832 | 1.91E-06 | 0.11955745 | 0.00971  | 0.19182  | 3.01E-05 |
| 0.03622  | -0.16401 | 0.00037  | 0.081729 | 0.07766  | 0.26862906 | 3.67E-09 | 0.264386 | 6.57E-09 |
| 0.44548  | -0.33324 | 1.42E-13 | -0.14804 | 0.00133  | 0.19866298 | 1.53E-05 | 0.336138 | 8.47E-14 |
| 0.00109  | 0.308446 | 9.45E-12 | 0.656501 | 6.52E-59 | 0.32972375 | 2.64E-13 | 1.61E-05 | 0.99972  |
| 0.22519  | -0.32127 | 1.13E-12 | -0.25478 | 2.36E-08 | -0.1423995 | 0.00204  | -0.14153 | 0.00217  |
| 0.96523  | -0.34458 | 1.82E-14 | -0.15903 | 0.00056  | 0.12446201 | 0.00708  | 0.119222 | 0.00992  |
| 1.28E-08 | 0.135465 | 0.00336  | 0.014639 | 0.75237  | -0.0806773 | 0.08158  | -0.07769 | 0.09356  |
| 0.05674  | -0.37113 | 1.07E-16 | -0.15775 | 0.00062  | -0.0194531 | 0.675    | -0.02793 | 0.5471   |
| 0.5841   | -0.25061 | 4.04E-08 | 0.018978 | 0.6825   | 0.40020393 | 2.17E-19 | 0.439716 | 1.68E-23 |
| 0.61015  | -0.21284 | 3.48E-06 | -0.06307 | 0.17363  | 0.18566263 | 5.42E-05 | 0.259295 | 1.30E-08 |
| 0.91858  | -0.39403 | 8.52E-19 | -0.18825 | 4.24E-05 | 0.05517124 | 0.23406  | 0.13495  | 0.00348  |
| 0.69641  | -0.54707 | 8.23E-38 | -0.19273 | 2.75E-05 | 0.07329448 | 0.1137   | 0.037022 | 0.42476  |
| 0.78389  | -0.10219 | 0.02723  | -0.01373 | 0.7673   | 0.36894361 | 1.66E-16 | 0.451195 | 8.43E-25 |
| 0.85719  | -0.40232 | 1.35E-19 | -0.17075 | 0.00021  | 0.02434258 | 0.59978  | 0.013278 | 0.77474  |
| 0.85009  | -0.39458 | 7.55E-19 | -0.14388 | 0.00183  | 0.2669499  | 4.63E-09 | 0.433251 | 8.62E-23 |
| 4.85E-08 | -0.38782 | 3.28E-18 | -0.27219 | 2.24E-09 | 0.11394368 | 0.01375  | 0.303622 | 2.05E-11 |
| 3.03E-05 | -0.20988 | 4.77E-06 | -0.09385 | 0.04264  | 0.23694004 | 2.21E-07 | 0.207573 | 6.10E-06 |

|          |          |          |          |          |            |          |          |          |
|----------|----------|----------|----------|----------|------------|----------|----------|----------|
| 4.76E-05 | -0.24624 | 7.04E-08 | -0.08555 | 0.06471  | 0.27805731 | 9.73E-10 | 0.237443 | 2.08E-07 |
| 0.13409  | -0.35109 | 5.41E-15 | -0.18477 | 5.90E-05 | 0.1729796  | 0.00017  | 0.359216 | 1.14E-15 |
| 0.00064  | -0.29445 | 8.55E-11 | -0.25626 | 1.94E-08 | -0.041694  | 0.36866  | -0.14963 | 0.00118  |
| 0.33558  | -0.05932 | 0.20067  | 0.037309 | 0.42119  | 0.1442025  | 0.00178  | 0.157147 | 0.00065  |
| 0.00118  | -0.14356 | 0.00187  | 0.022121 | 0.63349  | 0.21466454 | 2.85E-06 | 0.307825 | 1.05E-11 |
| 0.78906  | -0.34942 | 7.41E-15 | -0.18669 | 4.92E-05 | -0.033558  | 0.4694   | -0.01578 | 0.73377  |
| 2.85E-05 | -0.21371 | 3.17E-06 | -0.22019 | 1.55E-06 | 0.01328863 | 0.77456  | 0.177852 | 0.00011  |
| 0.80886  | 0.56286  | 2.22E-40 | 0.591686 | 1.92E-45 | 0.301899   | 2.69E-11 | 0.149314 | 0.00121  |
| 0.13706  | -0.47189 | 2.86E-27 | -0.24711 | 6.30E-08 | 0.06651464 | 0.15125  | 0.082776 | 0.07392  |
| 0.08087  | -0.51574 | 4.25E-33 | -0.19958 | 1.39E-05 | 0.04015872 | 0.38657  | 0.065901 | 0.15507  |
| 0.31301  | -0.32615 | 4.90E-13 | -0.1161  | 0.01205  | 0.19433926 | 2.35E-05 | 0.299003 | 4.23E-11 |
| 0.00614  | -0.2004  | 1.28E-05 | -0.01059 | 0.81949  | 0.24955711 | 4.62E-08 | 0.321254 | 1.13E-12 |
| 3.29E-12 | -0.30623 | 1.35E-11 | -0.14235 | 0.00204  | 0.09533102 | 0.03947  | 0.125655 | 0.00655  |
| 0.02205  | -0.01915 | 0.67979  | -0.01569 | 0.73531  | 0.09742434 | 0.03532  | 0.068699 | 0.13824  |
| 0.78709  | -0.05789 | 0.21181  | -0.15055 | 0.0011   | 0.05741886 | 0.21552  | 0.183382 | 6.72E-05 |
| 0.00172  | -0.15355 | 0.00087  | -0.0597  | 0.19779  | 0.09386547 | 0.04261  | 0.075375 | 0.10378  |
| 0.30571  | -0.05916 | 0.20187  | -0.06169 | 0.18322  | 0.05235716 | 0.25882  | 0.167063 | 0.00029  |
| 0.00978  | 0.444859 | 4.46E-24 | 0.342972 | 2.45E-14 | 0.38637813 | 4.47E-18 | 0.465059 | 1.95E-26 |
| 0.55072  | -0.29848 | 4.59E-11 | -0.03564 | 0.44221  | 0.01580128 | 0.73342  | 0.17617  | 0.00013  |
| 0.61866  | -0.07552 | 0.1031   | -0.00591 | 0.89872  | 0.13997795 | 0.00243  | 0.224577 | 9.44E-07 |
| 0.00051  | 0.068766 | 0.13785  | 0.005903 | 0.89877  | -0.0700171 | 0.13082  | -0.19932 | 1.43E-05 |
| 0.04236  | -0.47668 | 7.23E-28 | -0.23076 | 4.62E-07 | 0.13527645 | 0.0034   | 0.19086  | 3.30E-05 |
| 0.00084  | -0.07569 | 0.10233  | 0.107415 | 0.02025  | 0.26091532 | 1.05E-08 | 0.335703 | 9.16E-14 |
| 0.80574  | -0.11506 | 0.01284  | -0.1155  | 0.0125   | 0.11929288 | 0.00987  | 0.216412 | 2.36E-06 |
| 0.95947  | -0.39296 | 1.08E-18 | -0.32395 | 7.16E-13 | -0.0157607 | 0.73408  | 0.114376 | 0.01339  |
| 0.94829  | -0.10002 | 0.03068  | -0.07102 | 0.12536  | 0.03889466 | 0.4017   | 0.09088  | 0.04968  |
| 0.6201   | -0.11156 | 0.01587  | -0.08279 | 0.07389  | 0.04786022 | 0.30203  | 0.107073 | 0.02065  |
| 0.49595  | -0.25509 | 2.26E-08 | -0.21969 | 1.64E-06 | 0.00890666 | 0.84777  | -0.0299  | 0.51928  |
| 0.19896  | -0.53762 | 2.45E-36 | -0.33771 | 6.38E-14 | 0.07017671 | 0.12994  | 0.212844 | 3.47E-06 |
| 0.00112  | -0.27138 | 2.50E-09 | -0.03732 | 0.42102  | 0.30233807 | 2.51E-11 | 0.384792 | 6.27E-18 |
| 0.01641  | 0.250044 | 4.34E-08 | 0.330649 | 2.24E-13 | -0.0214296 | 0.64415  | -0.16558 | 0.00033  |
| 6.05E-07 | -0.40022 | 2.16E-19 | -0.32542 | 5.57E-13 | -0.0067251 | 0.88476  | 0.164337 | 0.00036  |
| 0.0012   | -0.40439 | 8.44E-20 | -0.25821 | 1.50E-08 | 0.11375466 | 0.01391  | 0.248766 | 5.11E-08 |
| 0.00918  | -0.41933 | 2.59E-21 | -0.32677 | 4.40E-13 | -0.0587384 | 0.20514  | 0.106789 | 0.02099  |
| 0.00093  | -0.49507 | 3.02E-30 | -0.26865 | 3.66E-09 | -0.0700974 | 0.13038  | -0.11656 | 0.01171  |
| 0.94219  | -0.38246 | 1.03E-17 | -0.18497 | 5.79E-05 | 0.04027479 | 0.38519  | 0.107395 | 0.02027  |
| 0.33934  | -0.1904  | 3.45E-05 | -0.06746 | 0.14551  | 0.06124717 | 0.18642  | -0.02971 | 0.52185  |
| 6.11E-09 | -0.29199 | 1.24E-10 | -0.14846 | 0.00129  | 0.17606482 | 0.00013  | 0.150813 | 0.00108  |
| 0.13326  | 0.260365 | 1.13E-08 | -0.01345 | 0.77182  | -0.1992313 | 1.44E-05 | -0.21641 | 2.36E-06 |
| 1.28E-05 | 0.333548 | 1.34E-13 | 0.156341 | 0.0007   | -0.1242078 | 0.0072   | -0.13415 | 0.00368  |
| 0.92116  | -0.0889  | 0.05489  | -0.05036 | 0.27745  | 0.16968619 | 0.00023  | 0.160907 | 0.00048  |
| 0.28875  | -0.27213 | 2.26E-09 | -0.0472  | 0.30877  | 0.3023049  | 2.52E-11 | 0.342139 | 2.86E-14 |
| 0.00034  | -0.22768 | 6.61E-07 | -0.09636 | 0.03737  | 0.24189435 | 1.21E-07 | 0.281938 | 5.55E-10 |
| 0.06629  | -0.12722 | 0.0059   | 0.132169 | 0.00422  | 0.26403778 | 6.88E-09 | 0.14008  | 0.00241  |
| 0.35807  | -0.54127 | 6.69E-37 | -0.28706 | 2.61E-10 | 0.05306614 | 0.25242  | 0.003077 | 0.94713  |

|          |          |          |          |          |            |          |          |          |
|----------|----------|----------|----------|----------|------------|----------|----------|----------|
| 0.05357  | -0.00333 | 0.94281  | -0.00606 | 0.89611  | 0.07055212 | 0.12789  | 0.180332 | 8.90E-05 |
| 0.03951  | -0.24003 | 1.52E-07 | -0.06807 | 0.14187  | 0.28097901 | 6.38E-10 | 0.460223 | 7.40E-26 |
| 0.45813  | -0.16635 | 0.00031  | -0.06509 | 0.16021  | 0.15221272 | 0.00097  | 0.105095 | 0.02313  |
| 1.03E-05 | -0.3931  | 1.05E-18 | -0.11044 | 0.01696  | 0.12422354 | 0.00719  | 0.070349 | 0.129    |
| 0.01547  | -0.17252 | 0.00018  | 0.009285 | 0.84139  | 0.22841124 | 6.07E-07 | 0.19175  | 3.03E-05 |
| 0.21757  | -0.13661 | 0.0031   | -0.00538 | 0.90769  | 0.28548293 | 3.30E-10 | 0.354226 | 2.98E-15 |
| 0.70065  | -0.41637 | 5.24E-21 | -0.24245 | 1.13E-07 | -0.2173063 | 2.14E-06 | -0.34087 | 3.60E-14 |
| 0.00052  | 0.58872  | 6.71E-45 | 0.602769 | 1.57E-47 | 0.1314526  | 0.00443  | -0.00036 | 0.99374  |
| 0.00769  | -0.14299 | 0.00195  | -0.01886 | 0.68436  | 0.15498664 | 0.00078  | 0.196293 | 1.94E-05 |
| 0.40291  | -0.30957 | 7.88E-12 | -0.21357 | 3.21E-06 | 0.07449946 | 0.10786  | 0.224987 | 9.01E-07 |
| 0.44612  | -0.26443 | 6.53E-09 | -0.20267 | 1.01E-05 | 0.07724125 | 0.09547  | 0.219017 | 1.77E-06 |
| 0.19154  | 0.29497  | 7.90E-11 | 0.238744 | 1.78E-07 | 0.06952143 | 0.13357  | -0.1481  | 0.00133  |
| 0.93978  | -0.38581 | 5.05E-18 | -0.21111 | 4.19E-06 | 0.08806902 | 0.0572   | 0.18499  | 5.78E-05 |
| 0.00413  | -0.29561 | 7.16E-11 | -0.12291 | 0.00783  | 0.12629486 | 0.00628  | 0.205447 | 7.62E-06 |
| 0.00025  | -0.2516  | 3.56E-08 | -0.11016 | 0.01724  | 0.14548047 | 0.00162  | 0.233822 | 3.21E-07 |
| 0.38246  | -0.16248 | 0.00042  | -0.14311 | 0.00193  | -0.0201095 | 0.66469  | 0.042246 | 0.36235  |
| 0.04229  | -0.17717 | 0.00012  | 0.005166 | 0.91135  | 0.08143982 | 0.07872  | 0.007132 | 0.87784  |
| 0.26295  | -0.16213 | 0.00044  | 0.044464 | 0.33767  | 0.26621308 | 5.12E-09 | 0.399747 | 2.40E-19 |
| 0.53225  | -0.27939 | 8.03E-10 | -0.28626 | 2.94E-10 | -0.1556274 | 0.00074  | -0.15054 | 0.0011   |
| 2.16E-07 | 0.144709 | 0.00172  | 0.06503  | 0.16061  | -0.0708006 | 0.12655  | -0.18776 | 4.44E-05 |
| 0.00176  | 0.318611 | 1.77E-12 | 0.347064 | 1.15E-14 | 0.05553512 | 0.23098  | -0.12001 | 0.00944  |
| 0.06786  | -0.10394 | 0.02468  | -0.00772 | 0.86791  | 0.22194354 | 1.27E-06 | 0.254976 | 2.30E-08 |
| 0.10609  | -0.21213 | 3.75E-06 | -0.09947 | 0.03163  | 0.04438715 | 0.33851  | 0.054773 | 0.23746  |
| 0.78646  | -0.42743 | 3.65E-22 | -0.20549 | 7.58E-06 | 0.2485511  | 5.25E-08 | 0.235748 | 2.55E-07 |
| 4.07E-13 | 0.292567 | 1.14E-10 | 0.200978 | 1.21E-05 | 0.05060879 | 0.27508  | 0.047012 | 0.31069  |
| 0.39397  | -0.55169 | 1.51E-38 | -0.31898 | 1.67E-12 | -0.048008  | 0.30054  | -0.09354 | 0.04334  |
| 0.21026  | 0.214357 | 2.95E-06 | 0.24175  | 1.23E-07 | -0.0273581 | 0.55536  | -0.15997 | 0.00052  |
| 2.47E-06 | -0.25115 | 3.77E-08 | -0.13606 | 0.00322  | 0.13712526 | 0.00298  | 0.236465 | 2.34E-07 |
| 0.66451  | -0.36596 | 3.02E-16 | -0.15592 | 0.00072  | 0.19601947 | 1.99E-05 | 0.352481 | 4.16E-15 |
| 0.09697  | 0.18504  | 5.75E-05 | 0.10009  | 0.03057  | -0.055403  | 0.2321   | 0.001727 | 0.97031  |
| 0.00036  | -0.00315 | 0.94584  | 0.022902 | 0.62155  | 0.1955441  | 2.09E-05 | 0.184029 | 6.32E-05 |
| 0.12846  | 0.30148  | 2.87E-11 | 0.11528  | 0.01267  | -0.1285082 | 0.00542  | -0.24976 | 4.51E-08 |
| 0.06702  | 0.010609 | 0.81914  | 0.05337  | 0.24971  | 0.15614957 | 0.00071  | 0.206345 | 6.94E-06 |
| 0.235    | -0.34862 | 8.60E-15 | -0.20578 | 7.36E-06 | 0.1417362  | 0.00214  | 0.230826 | 4.58E-07 |
| 0.88905  | -0.12029 | 0.00927  | 0.070157 | 0.13005  | 0.27059006 | 2.80E-09 | 0.274573 | 1.60E-09 |
| 0.12364  | -0.30259 | 2.41E-11 | -0.15468 | 0.0008   | 0.1243996  | 0.00711  | 0.209905 | 4.76E-06 |
| 0.9578   | -0.41148 | 1.65E-20 | -0.20896 | 5.26E-06 | 0.10449432 | 0.02393  | 0.144984 | 0.00168  |
| 0.43328  | -0.40653 | 5.18E-20 | -0.14754 | 0.00139  | 0.19373005 | 2.49E-05 | 0.286134 | 3.00E-10 |
| 0.01253  | -0.25464 | 2.40E-08 | -0.18818 | 4.27E-05 | -0.0135906 | 0.76958  | 0.049773 | 0.2831   |
| 0.75816  | -0.40934 | 2.71E-20 | -0.18169 | 7.86E-05 | 0.12807438 | 0.00558  | 0.188142 | 4.29E-05 |
| 0.46401  | -0.2708  | 2.72E-09 | -0.18818 | 4.27E-05 | -0.0488432 | 0.2922   | -0.02    | 0.66641  |
| 0.00388  | -0.26518 | 5.89E-09 | -0.12156 | 0.00855  | 0.04570593 | 0.32434  | 0.099544 | 0.0315   |
| 6.04E-07 | -0.41556 | 6.35E-21 | -0.25844 | 1.46E-08 | 0.0704065  | 0.12869  | 0.238814 | 1.76E-07 |
| 1.74E-09 | -0.23735 | 2.11E-07 | -0.1669  | 0.00029  | -0.0025656 | 0.9559   | -0.02995 | 0.51857  |
| 0.33168  | -0.3117  | 5.57E-12 | -0.06331 | 0.17197  | 0.16248571 | 0.00042  | 0.16553  | 0.00033  |

|          |          |          |          |          |            |          |          |          |
|----------|----------|----------|----------|----------|------------|----------|----------|----------|
| 0.91588  | 0.091016 | 0.04934  | 0.136479 | 0.00312  | 0.36621801 | 2.87E-16 | 0.332992 | 1.48E-13 |
| 0.21759  | -0.30508 | 1.62E-11 | -0.37743 | 2.94E-17 | -0.3033673 | 2.13E-11 | -0.17176 | 0.00019  |
| 0.17391  | -0.29593 | 6.81E-11 | -0.14439 | 0.00176  | 0.06062156 | 0.19096  | 0.174215 | 0.00015  |
| 6.53E-08 | -0.20732 | 6.26E-06 | -0.00075 | 0.98712  | 0.1489713  | 0.00124  | 0.098343 | 0.03361  |
| 0.05179  | -0.25419 | 2.55E-08 | -0.11158 | 0.01227  | 0.01979233 | 0.66966  | 0.182781 | 7.10E-05 |
| 0.80981  | -0.25496 | 2.30E-08 | -0.04498 | 0.33211  | 0.3165516  | 2.50E-12 | 0.218726 | 1.82E-06 |
| 0.11738  | -0.46391 | 2.68E-26 | -0.22855 | 5.97E-07 | 0.05828367 | 0.20868  | 0.154169 | 0.00083  |
| 0.74671  | -0.32971 | 2.64E-13 | -0.26411 | 6.82E-09 | 0.09559135 | 0.03893  | 0.149502 | 0.00119  |
| 0.63424  | -0.1752  | 0.00014  | -0.07266 | 0.11684  | 0.10459543 | 0.02379  | 0.23216  | 3.91E-07 |
| 0.74404  | 0.222934 | 1.14E-06 | 0.099043 | 0.03237  | -0.226943  | 7.20E-07 | -0.32277 | 8.76E-13 |
| 1.57E-11 | -0.35533 | 2.41E-15 | -0.169   | 0.00024  | 0.03796884 | 0.41301  | 0.064966 | 0.16102  |
| 0.97752  | 0.2886   | 2.07E-10 | 0.238066 | 1.93E-07 | 0.1259398  | 0.00643  | 0.074701 | 0.10691  |
| 0.02461  | -0.21273 | 3.52E-06 | -0.16637 | 0.00031  | -0.0600501 | 0.19519  | -0.00119 | 0.97962  |
| 0.00929  | -0.20717 | 6.36E-06 | -0.12352 | 0.00753  | 0.24822854 | 5.47E-08 | 0.393348 | 9.90E-19 |
| 0.4926   | -0.44652 | 2.89E-24 | -0.17846 | 0.00011  | 0.15963104 | 0.00053  | 0.200784 | 1.23E-05 |
| 0.47398  | -0.42605 | 5.11E-22 | -0.27362 | 1.83E-09 | 0.07003191 | 0.13074  | 0.092816 | 0.04499  |
| 0.34784  | -0.44673 | 2.74E-24 | -0.18338 | 6.72E-05 | 0.05652574 | 0.22276  | 0.074186 | 0.10936  |
| 0.00099  | -0.53539 | 5.39E-36 | -0.34376 | 2.12E-14 | 0.03844259 | 0.4072   | 0.1103   | 0.0171   |
| 7.37E-05 | -0.02484 | 0.59234  | -0.04445 | 0.33787  | 0.00048637 | 0.99164  | -0.00471 | 0.91917  |
| 0.4536   | -0.43639 | 3.92E-23 | -0.18422 | 6.21E-05 | 0.14168879 | 0.00215  | 0.229688 | 5.23E-07 |
| 0.43769  | -0.11728 | 0.0112   | -0.02334 | 0.61484  | 0.25067391 | 4.01E-08 | 0.413408 | 1.05E-20 |
| 0.74523  | -0.22571 | 8.29E-07 | -0.01818 | 0.69511  | 0.01957695 | 0.67305  | -0.09764 | 0.03491  |
| 0.28572  | -0.31724 | 2.23E-12 | -0.13266 | 0.00408  | -0.0480445 | 0.30017  | -0.01878 | 0.6857   |
| 0.8047   | -0.16338 | 0.00039  | -0.17009 | 0.00022  | 0.05730992 | 0.21639  | 0.15453  | 0.00081  |
| 0.7286   | -0.42661 | 4.47E-22 | -0.21651 | 2.33E-06 | 0.05615996 | 0.22577  | 0.124884 | 0.00689  |
| 7.89E-14 | -0.19332 | 2.60E-05 | -0.0973  | 0.03555  | 0.08390163 | 0.07007  | 0.227235 | 6.96E-07 |
| 0.4588   | -0.41779 | 3.75E-21 | -0.22271 | 1.17E-06 | 0.10015595 | 0.03046  | 0.224275 | 9.77E-07 |
| 0.64698  | -0.50149 | 4.13E-31 | -0.24539 | 7.82E-08 | 0.05739331 | 0.21572  | 0.15401  | 0.00084  |
| 0.96079  | -0.45546 | 2.70E-25 | -0.23792 | 1.97E-07 | 0.08747502 | 0.0589   | 0.133793 | 0.00377  |
| 2.12E-06 | -0.14145 | 0.00218  | -0.01894 | 0.68316  | -0.0129188 | 0.78067  | -0.10436 | 0.02411  |
| 0.55435  | -0.53681 | 3.27E-36 | -0.2878  | 2.34E-10 | 0.04370965 | 0.34594  | 0.141416 | 0.00219  |
| 0.06192  | -0.30612 | 1.38E-11 | -0.15887 | 0.00057  | 0.08764626 | 0.05841  | 0.153825 | 0.00085  |
| 0.93528  | -0.33526 | 9.91E-14 | -0.17782 | 0.00011  | -0.0240764 | 0.60378  | 0.031552 | 0.49638  |
| 0.52346  | -0.3048  | 1.70E-11 | -0.17834 | 0.00011  | 0.04671355 | 0.31377  | 0.159273 | 0.00055  |
| 1.60E-06 | -0.36281 | 5.64E-16 | -0.2642  | 6.73E-09 | 0.15753058 | 0.00063  | 0.285547 | 3.27E-10 |
| 5.55E-07 | -0.21722 | 2.15E-06 | -0.08329 | 0.07215  | 0.10508231 | 0.02314  | 0.258216 | 1.50E-08 |
| 0.57564  | 0.430658 | 1.64E-22 | 0.234584 | 2.94E-07 | -0.0315596 | 0.49628  | -0.20047 | 1.27E-05 |
| 0.4247   | -0.13547 | 0.00336  | 0.181903 | 7.70E-05 | 0.50528518 | 1.25E-31 | 0.430558 | 1.69E-22 |
| 0.19858  | -0.40494 | 7.45E-20 | -0.13239 | 0.00416  | 0.15700306 | 0.00066  | 0.16052  | 0.0005   |
| 0.02847  | -0.4077  | 3.96E-20 | -0.21904 | 1.76E-06 | 0.11302001 | 0.01454  | 0.187607 | 4.51E-05 |
| 0.97011  | 0.022515 | 0.62746  | -0.0157  | 0.73502  | 0.26776471 | 4.14E-09 | 0.299028 | 4.22E-11 |
| 0.11603  | -0.11049 | 0.01691  | -0.14052 | 0.00234  | 0.00219258 | 0.96231  | 0.065957 | 0.15471  |
| 9.86E-05 | -0.39354 | 9.49E-19 | -0.14606 | 0.00155  | 0.14490591 | 0.00169  | 0.177407 | 0.00012  |
| 7.48E-10 | -0.13886 | 0.00264  | -0.05189 | 0.2631   | 0.21840526 | 1.89E-06 | 0.258987 | 1.36E-08 |
| 0.10821  | -0.06971 | 0.13255  | 0.021302 | 0.64612  | 0.08419434 | 0.06909  | 0.085614 | 0.06452  |

|          |          |          |          |          |            |          |          |          |
|----------|----------|----------|----------|----------|------------|----------|----------|----------|
| 0.51952  | -0.35316 | 3.66E-15 | -0.18568 | 5.41E-05 | 0.14503314 | 0.00168  | 0.203408 | 9.41E-06 |
| 0.64922  | -0.32097 | 1.19E-12 | -0.22585 | 8.16E-07 | -0.0030431 | 0.94771  | 0.086763 | 0.061    |
| 0.75038  | -0.22078 | 1.45E-06 | -0.12978 | 0.00497  | 0.14941165 | 0.0012   | 0.234717 | 2.89E-07 |
| 0.98434  | -0.22487 | 9.14E-07 | -0.07549 | 0.10326  | 0.14636627 | 0.00152  | 0.067195 | 0.1471   |
| 0.11811  | -0.23569 | 2.57E-07 | -0.01767 | 0.70335  | 0.36359017 | 4.83E-16 | 0.371654 | 9.61E-17 |
| 0.37163  | -0.49676 | 1.80E-30 | -0.27366 | 1.82E-09 | -0.0018257 | 0.96861  | -0.01337 | 0.7733   |
| 0.28015  | -0.44713 | 2.47E-24 | -0.21273 | 3.52E-06 | 0.21886343 | 1.80E-06 | 0.273042 | 1.98E-09 |
| 0.39172  | -0.22383 | 1.03E-06 | -0.07349 | 0.11272  | 0.33409385 | 1.22E-13 | 0.488469 | 2.24E-29 |
| 0.0921   | -0.29486 | 8.04E-11 | -0.10396 | 0.02466  | 0.29412487 | 8.99E-11 | 0.427182 | 3.88E-22 |
| 0.97661  | -0.31748 | 2.14E-12 | -0.05529 | 0.23304  | 0.27559335 | 1.38E-09 | 0.28262  | 5.02E-10 |
| 0.07575  | -0.45729 | 1.65E-25 | -0.45056 | 9.98E-25 | -0.0815398 | 0.07836  | 0.063035 | 0.17386  |
| 0.60207  | -0.43872 | 2.17E-23 | -0.18704 | 4.76E-05 | 0.06663395 | 0.15052  | 0.130178 | 0.00484  |
| 0.71227  | 0.445352 | 3.92E-24 | 0.409651 | 2.53E-20 | 0.00212414 | 0.96349  | -0.01228 | 0.79118  |
| 0.97825  | -0.2398  | 1.56E-07 | -0.19454 | 2.30E-05 | 0.11885958 | 0.01015  | 0.234093 | 3.11E-07 |
| 0.00861  | -0.23943 | 1.64E-07 | -0.14497 | 0.00168  | 0.08598886 | 0.06335  | 0.246868 | 6.50E-08 |
| 2.02E-06 | -0.31511 | 3.18E-12 | -0.13538 | 0.00338  | 0.221075   | 1.40E-06 | 0.369469 | 1.50E-16 |
| 0.32595  | -0.38282 | 9.51E-18 | -0.17213 | 0.00019  | 0.05468648 | 0.2382   | 0.142821 | 0.00197  |
| 0.05355  | -0.42395 | 8.54E-22 | -0.26892 | 3.53E-09 | 0.17931586 | 9.77E-05 | 0.31805  | 1.95E-12 |
| 0.00746  | -0.0451  | 0.3308   | 0.029494 | 0.52491  | 0.31298536 | 4.51E-12 | 0.439484 | 1.78E-23 |
| 0.00064  | -0.17715 | 0.00012  | -0.10218 | 0.02724  | -0.0891848 | 0.05411  | -0.18334 | 6.74E-05 |
| 0.02619  | -0.4495  | 1.32E-24 | -0.19927 | 1.44E-05 | -0.0934979 | 0.04343  | -0.08546 | 0.06499  |
| 0.68603  | -0.18618 | 5.16E-05 | -0.03219 | 0.48776  | 0.07038035 | 0.12883  | 0.035663 | 0.44197  |
| 0.02732  | -0.40987 | 2.40E-20 | -0.12412 | 0.00724  | 0.45347423 | 4.59E-25 | 0.543281 | 3.26E-37 |
| 4.49E-12 | -0.14668 | 0.00148  | -0.01605 | 0.72939  | 0.17190636 | 0.00019  | 0.234093 | 3.11E-07 |
| 0.01285  | -0.26149 | 9.71E-09 | -0.1477  | 0.00137  | 0.12196137 | 0.00833  | 0.236874 | 2.23E-07 |
| 0.00827  | 0.049885 | 0.28201  | 0.191751 | 3.03E-05 | 0.30968229 | 7.74E-12 | 0.338382 | 5.66E-14 |
| 0.51792  | -0.06523 | 0.15934  | 0.154709 | 0.00079  | 0.45742519 | 1.58E-25 | 0.464662 | 2.18E-26 |
| 0.78629  | -0.26877 | 3.60E-09 | -0.08384 | 0.07026  | 0.07747881 | 0.09445  | 0.168949 | 0.00024  |
| 0.81321  | -0.18131 | 8.13E-05 | -0.25435 | 2.49E-08 | -0.0022498 | 0.96133  | 0.049129 | 0.28938  |
| 0.45468  | -0.1405  | 0.00234  | -0.01599 | 0.73033  | 0.10934563 | 0.01809  | 0.169158 | 0.00024  |
| 0.58815  | 0.214106 | 3.03E-06 | 0.04552  | 0.32632  | -0.1209501 | 0.00889  | -0.26369 | 7.22E-09 |
| 0.57748  | -0.40671 | 4.97E-20 | -0.19925 | 1.44E-05 | 0.03496799 | 0.45093  | 0.103128 | 0.02584  |
| 0.00975  | -0.09617 | 0.03775  | 0.105183 | 0.02301  | 0.17222206 | 0.00018  | 0.135992 | 0.00323  |
| 0.29653  | 0.018505 | 0.69     | -0.05401 | 0.24404  | -0.1710574 | 0.0002   | -0.18665 | 4.94E-05 |
| 0.62782  | 0.431059 | 1.49E-22 | 0.445348 | 3.93E-24 | 0.05555008 | 0.23086  | -0.16051 | 0.0005   |
| 0.91376  | -0.34976 | 6.95E-15 | -0.22125 | 1.38E-06 | 0.12486102 | 0.0069   | 0.223562 | 1.06E-06 |
| 0.09237  | -0.30556 | 1.50E-11 | -0.12173 | 0.00846  | 0.18372228 | 6.51E-05 | 0.224605 | 9.41E-07 |
| 0.0618   | -0.46733 | 1.03E-26 | -0.15463 | 0.0008   | 0.0439702  | 0.34307  | -0.02861 | 0.5374   |
| 0.14643  | -0.27062 | 2.79E-09 | -0.11042 | 0.01698  | 0.17052348 | 0.00021  | 0.239643 | 1.59E-07 |
| 0.77908  | -0.36163 | 7.10E-16 | -0.10651 | 0.02133  | 0.06520194 | 0.1595   | 0.11617  | 0.012    |
| 0.01765  | -0.22324 | 1.10E-06 | -0.15518 | 0.00077  | 0.12961274 | 0.00503  | 0.258668 | 1.41E-08 |
| 0.66885  | -0.29808 | 4.89E-11 | -0.24478 | 8.44E-08 | 0.01835845 | 0.69233  | 0.187817 | 4.42E-05 |
| 0.49429  | -0.17909 | 9.97E-05 | -0.17633 | 0.00013  | 0.00416838 | 0.92842  | 0.023085 | 0.61876  |
| 7.63E-05 | -0.16427 | 0.00036  | -0.02023 | 0.66273  | 0.10210304 | 0.02736  | 0.123622 | 0.00748  |
| 0.32736  | 0.099876 | 0.03093  | 0.050413 | 0.27695  | -0.0274312 | 0.55431  | -0.09983 | 0.03101  |

|          |          |          |          |          |            |          |          |          |
|----------|----------|----------|----------|----------|------------|----------|----------|----------|
| 0.10013  | -0.34818 | 9.34E-15 | -0.21565 | 2.56E-06 | 0.11685077 | 0.0115   | 0.173722 | 0.00016  |
| 0.00992  | -0.3613  | 7.58E-16 | -0.25767 | 1.61E-08 | 0.13362506 | 0.00382  | 0.254174 | 2.55E-08 |
| 0.71681  | -0.26792 | 4.05E-09 | -0.1328  | 0.00404  | 0.04086248 | 0.37829  | 0.066096 | 0.15384  |
| 0.90143  | -0.17647 | 0.00013  | -0.03145 | 0.49776  | 0.09680153 | 0.03651  | 0.123766 | 0.00741  |
| 0.00635  | -0.41534 | 6.69E-21 | -0.21063 | 4.41E-06 | -0.147108  | 0.00143  | -0.22385 | 1.03E-06 |
| 0.66876  | -0.36382 | 4.62E-16 | -0.15936 | 0.00055  | 0.14832583 | 0.00131  | 0.259431 | 1.28E-08 |
| 0.00408  | 0.27208  | 2.27E-09 | 0.225869 | 8.14E-07 | -0.0589659 | 0.20339  | -0.2796  | 7.79E-10 |
| 0.48862  | -0.22676 | 7.35E-07 | -0.12459 | 0.00702  | 0.14059758 | 0.00232  | 0.217991 | 1.98E-06 |
| 0.03662  | -0.2946  | 8.36E-11 | -0.04665 | 0.31446  | -0.0171829 | 0.71112  | -0.0972  | 0.03573  |
| 0.00546  | -0.35993 | 9.92E-16 | -0.21037 | 4.53E-06 | 0.0713273  | 0.12375  | 0.048023 | 0.30038  |
| 0.02449  | -0.31734 | 2.19E-12 | -0.13498 | 0.00347  | 0.20344038 | 9.38E-06 | 0.168041 | 0.00026  |
| 0.80093  | -0.14729 | 0.00141  | -0.01473 | 0.75092  | 0.26243512 | 8.55E-09 | 0.306006 | 1.40E-11 |
| 0.17362  | -0.30091 | 3.14E-11 | -0.22295 | 1.14E-06 | 0.04348187 | 0.34846  | 0.221733 | 1.30E-06 |
| 0.26825  | -0.38298 | 9.20E-18 | -0.13901 | 0.00261  | 0.05942399 | 0.19989  | 0.115021 | 0.01287  |
| 0.08619  | -0.23849 | 1.83E-07 | -0.14899 | 0.00124  | -0.1329365 | 0.004    | -0.15321 | 0.0009   |
| 0.00405  | -0.24205 | 1.19E-07 | -0.17154 | 0.0002   | 0.03520769 | 0.44783  | 0.011094 | 0.81103  |
| 0.37803  | -0.26379 | 7.11E-09 | -0.18611 | 5.20E-05 | 0.02074561 | 0.65476  | 0.080449 | 0.08244  |
| 0.2583   | -0.33114 | 2.06E-13 | -0.14708 | 0.00144  | 0.01600648 | 0.7301   | 0.072113 | 0.11966  |
| 0.25635  | -0.24058 | 1.42E-07 | -0.11574 | 0.01232  | 0.03432314 | 0.45932  | 0.047129 | 0.30949  |
| 0.01235  | -0.35174 | 4.78E-15 | -0.19951 | 1.40E-05 | 0.10879065 | 0.01869  | 0.231462 | 4.25E-07 |
| 0.60847  | 0.163091 | 0.0004   | 0.235295 | 2.70E-07 | -0.0742181 | 0.1092   | -0.14757 | 0.00138  |
| 0.32373  | 0.336214 | 8.36E-14 | 0.216972 | 2.22E-06 | 0.15892995 | 0.00057  | 0.011839 | 0.79859  |
| 0.6256   | -0.54187 | 5.40E-37 | -0.28144 | 5.97E-10 | 0.09247588 | 0.04579  | 0.172047 | 0.00019  |
| 0.12119  | -0.24208 | 1.18E-07 | -0.10358 | 0.02519  | 0.08934617 | 0.05367  | 0.113834 | 0.01384  |
| 0.44361  | -0.35177 | 4.76E-15 | -0.1745  | 0.00015  | 0.12601082 | 0.0064   | 0.140767 | 0.0023   |
| 0.29595  | -0.05233 | 0.25904  | 0.098664 | 0.03304  | 0.21885202 | 1.80E-06 | 0.183767 | 6.48E-05 |
| 0.65499  | -0.39438 | 7.89E-19 | -0.23727 | 2.12E-07 | -0.1579159 | 0.00061  | -0.04748 | 0.30591  |
| 4.82E-08 | -0.1983  | 1.58E-05 | -0.19257 | 2.80E-05 | -0.042032  | 0.36478  | 0.105405 | 0.02272  |
| 0.13338  | -0.39979 | 2.38E-19 | -0.1864  | 5.06E-05 | -0.0314388 | 0.49793  | -0.04526 | 0.32905  |
| 0.01361  | 0.027315 | 0.55599  | -0.06093 | 0.18868  | -0.1996477 | 1.38E-05 | -0.20301 | 9.80E-06 |
| 0.00227  | 0.390288 | 1.93E-18 | 0.370204 | 1.29E-16 | 0.05344156 | 0.24907  | -0.05895 | 0.20352  |
| 0.14437  | 0.554466 | 5.36E-39 | 0.473981 | 1.57E-27 | 0.13373819 | 0.00379  | -0.01751 | 0.70587  |
| 0.66832  | -0.52668 | 1.09E-34 | -0.20621 | 7.03E-06 | 0.00052619 | 0.99095  | 0.002062 | 0.96454  |
| 0.32199  | -0.34639 | 1.31E-14 | -0.19099 | 3.26E-05 | -0.0050087 | 0.91404  | 0.065707 | 0.15629  |
| 0.14839  | -0.28763 | 2.40E-10 | -0.26837 | 3.81E-09 | 0.03856918 | 0.40566  | 0.186438 | 5.04E-05 |
| 0.00036  | -0.44718 | 2.43E-24 | -0.14617 | 0.00154  | 0.35508792 | 2.53E-15 | 0.335475 | 9.54E-14 |
| 0.99825  | -0.44862 | 1.67E-24 | -0.18522 | 5.66E-05 | 0.14485515 | 0.0017   | 0.15774  | 0.00062  |
| 0.69259  | -0.13153 | 0.00441  | -0.08265 | 0.07436  | 0.15496145 | 0.00078  | 0.259833 | 1.21E-08 |
| 0.10911  | -0.44544 | 3.83E-24 | -0.10032 | 0.03018  | 0.41028238 | 2.18E-20 | 0.337895 | 6.18E-14 |
| 0.00144  | -0.10317 | 0.02578  | -0.01537 | 0.74043  | 0.24707374 | 6.33E-08 | 0.174585 | 0.00015  |
| 1.53E-05 | -0.04057 | 0.38175  | 0.122799 | 0.00789  | 0.35627196 | 2.01E-15 | 0.411471 | 1.66E-20 |
| 0.77905  | -0.17718 | 0.00012  | -0.19025 | 3.50E-05 | 0.06000073 | 0.19556  | 0.132794 | 0.00404  |
| 0.45209  | 0.218653 | 1.84E-06 | 0.098401 | 0.03351  | 0.1413007  | 0.00221  | 0.166927 | 0.00029  |
| 0.93085  | -0.14946 | 0.0012   | -0.08009 | 0.08381  | 0.1429275  | 0.00196  | 0.184    | 6.34E-05 |
| 0.64411  | -0.42222 | 1.30E-21 | -0.2531  | 2.93E-08 | 0.02507363 | 0.58887  | 0.125926 | 0.00643  |



|          |          |          |          |          |            |          |          |          |
|----------|----------|----------|----------|----------|------------|----------|----------|----------|
| 0.57547  | -0.22272 | 1.17E-06 | -0.09447 | 0.04129  | 0.23635821 | 2.37E-07 | 0.208979 | 5.25E-06 |
| 0.45865  | -0.24905 | 4.93E-08 | -0.23181 | 4.08E-07 | -0.0301643 | 0.51553  | 0.026089 | 0.57386  |
| 0.26406  | -0.52298 | 3.83E-34 | -0.32256 | 9.09E-13 | 0.09060359 | 0.05038  | 0.209708 | 4.86E-06 |
| 0.29809  | -0.25139 | 3.66E-08 | 0.019004 | 0.68209  | 0.29938061 | 3.99E-11 | 0.4121   | 1.43E-20 |
| 0.49948  | 0.39312  | 1.04E-18 | 0.279123 | 8.35E-10 | 0.06122098 | 0.1866   | -0.05495 | 0.23598  |
| 0.31522  | -0.19145 | 3.12E-05 | -0.11831 | 0.0105   | -0.1127317 | 0.01479  | -0.11153 | 0.0159   |
| 0.58687  | -0.13977 | 0.00247  | -0.10403 | 0.02456  | 0.08898835 | 0.05464  | 0.222542 | 1.19E-06 |
| 0.97132  | -0.22179 | 1.30E-06 | -0.20595 | 7.23E-06 | 0.04556061 | 0.32588  | 0.213287 | 3.31E-06 |
| 0.14712  | -0.45799 | 1.36E-25 | -0.22792 | 6.43E-07 | 0.1000304  | 0.03067  | 0.093671 | 0.04304  |
| 0.42811  | -0.3556  | 2.29E-15 | -0.1011  | 0.02892  | 0.08574491 | 0.06411  | 0.12509  | 0.0068   |
| 0.70033  | -0.28064 | 6.70E-10 | -0.2844  | 3.87E-10 | -0.0546548 | 0.23847  | 0.062215 | 0.17954  |
| 0.5964   | -0.14086 | 0.00228  | 0.097261 | 0.03563  | 0.14422823 | 0.00178  | 0.153828 | 0.00085  |
| 0.33706  | -0.45132 | 8.17E-25 | 0.065917 | 0.15497  | 0.24263418 | 1.10E-07 | 0.138735 | 0.00266  |
| 0.09601  | -0.16831 | 0.00026  | -0.06007 | 0.19504  | 0.06365075 | 0.16969  | 0.136419 | 0.00314  |
| 0.00968  | 0.291151 | 1.41E-10 | 0.273664 | 1.82E-09 | -0.0107333 | 0.81706  | -0.22693 | 7.21E-07 |
| 0.00499  | -0.12724 | 0.0059   | -0.18942 | 3.79E-05 | -0.0603243 | 0.19315  | -0.02929 | 0.52775  |
| 0.74439  | -0.57154 | 7.47E-42 | -0.2893  | 1.87E-10 | -0.0048655 | 0.91648  | 0.02863  | 0.53712  |
| 0.32656  | -0.2966  | 6.15E-11 | -0.18968 | 3.70E-05 | -0.1178491 | 0.01081  | -0.01462 | 0.75276  |
| 0.94787  | -0.44312 | 7.00E-24 | -0.33777 | 6.32E-14 | 0.03201677 | 0.49006  | 0.220411 | 1.51E-06 |
| 0.10182  | -0.14031 | 0.00237  | -0.11138 | 0.01604  | 0.13865275 | 0.00268  | 0.263898 | 7.02E-09 |
| 0.2476   | 0.299267 | 4.06E-11 | 0.227763 | 6.55E-07 | 0.14154185 | 0.00217  | 0.002146 | 0.96311  |
| 0.30074  | -0.26359 | 7.32E-09 | 0.025379 | 0.58433  | 0.4451     | 4.19E-24 | 0.423265 | 1.01E-21 |
| 0.00247  | -0.43619 | 4.12E-23 | -0.2972  | 5.60E-11 | -0.0198338 | 0.66901  | -0.07494 | 0.10581  |
| 5.11E-21 | -0.02583 | 0.57765  | 0.144517 | 0.00174  | 0.09885462 | 0.0327   | 0.142746 | 0.00199  |
| 0.70862  | -0.51275 | 1.13E-32 | -0.27294 | 2.01E-09 | 0.02675111 | 0.56418  | 0.069205 | 0.13535  |
| 0.50563  | -0.31476 | 3.37E-12 | -0.21867 | 1.84E-06 | -0.1091601 | 0.01829  | -0.12349 | 0.00755  |
| 0.64705  | -0.25086 | 3.91E-08 | -0.14426 | 0.00178  | 0.0324322  | 0.48444  | 0.052081 | 0.26134  |
| 0.08961  | -0.27678 | 1.17E-09 | -0.10304 | 0.02597  | 0.03732609 | 0.42097  | 0.122219 | 0.00819  |
| 0.14356  | -0.31974 | 1.47E-12 | 0.023291 | 0.61565  | 0.27758433 | 1.04E-09 | 0.105807 | 0.02221  |
| 0.00175  | -0.33944 | 4.68E-14 | -0.15753 | 0.00063  | 0.10828395 | 0.01925  | 0.186223 | 5.14E-05 |
| 7.28E-06 | 0.212707 | 3.53E-06 | 0.106327 | 0.02156  | -0.1470048 | 0.00144  | -0.21906 | 1.76E-06 |
| 0.588    | -0.27369 | 1.81E-09 | -0.24738 | 6.09E-08 | 0.0140853  | 0.76144  | 0.199682 | 1.38E-05 |
| 0.76305  | -0.10753 | 0.02012  | -0.0728  | 0.11618  | 0.00213853 | 0.96324  | -0.03294 | 0.47762  |
| 0.00698  | -0.56638 | 5.69E-41 | -0.35386 | 3.19E-15 | 0.04697154 | 0.31111  | -0.00914 | 0.84388  |
| 0.24533  | 0.367266 | 2.33E-16 | 0.268835 | 3.57E-09 | 0.06889076 | 0.13714  | 0.106043 | 0.02191  |
| 0.07907  | 0.21546  | 2.61E-06 | 0.080247 | 0.08322  | 0.11954111 | 0.00972  | -0.03028 | 0.51395  |
| 0.93927  | 0.505183 | 1.29E-31 | 0.394885 | 7.06E-19 | 0.30505842 | 1.63E-11 | 0.336634 | 7.75E-14 |
| 0.21127  | -0.4315  | 1.33E-22 | -0.17635 | 0.00013  | 0.15042455 | 0.00111  | 0.216203 | 2.41E-06 |
| 0.19743  | -0.38554 | 5.34E-18 | -0.21974 | 1.63E-06 | 0.09287525 | 0.04486  | 0.080222 | 0.08332  |
| 0.10105  | 0.320189 | 1.36E-12 | 0.279427 | 7.99E-10 | 0.09104491 | 0.04926  | 0.120828 | 0.00896  |
| 0.2296   | -0.47542 | 1.04E-27 | -0.34943 | 7.40E-15 | -0.1116627 | 0.01577  | 0.021213 | 0.6475   |
| 0.2919   | 0.27325  | 1.93E-09 | 0.172793 | 0.00018  | 0.04848283 | 0.29578  | -0.06797 | 0.1425   |
| 0.71571  | -0.24902 | 4.95E-08 | -0.16942 | 0.00024  | -0.0417489 | 0.36803  | 0.021523 | 0.6427   |
| 0.68003  | -0.04269 | 0.35732  | -0.05496 | 0.23584  | -0.0231406 | 0.61792  | 0.059313 | 0.20074  |
| 0.16174  | -0.23058 | 4.71E-07 | -0.13951 | 0.00251  | -0.0035555 | 0.93892  | 0.016855 | 0.71639  |

|          |          |          |          |          |            |          |          |          |
|----------|----------|----------|----------|----------|------------|----------|----------|----------|
| 0.33669  | -0.11138 | 0.01604  | -0.04604 | 0.32086  | 0.05190398 | 0.26297  | 0.076763 | 0.09755  |
| 0.33416  | -0.35855 | 1.30E-15 | -0.2026  | 1.02E-05 | -0.1038156 | 0.02486  | 0.013533 | 0.77053  |
| 0.47149  | -0.31877 | 1.72E-12 | -0.18787 | 4.40E-05 | 0.03950671 | 0.39433  | 0.106162 | 0.02176  |
| 0.16925  | -0.32898 | 3.00E-13 | -0.20211 | 1.08E-05 | -0.0641224 | 0.16654  | -0.11561 | 0.01242  |
| 0.05962  | -0.30157 | 2.83E-11 | -0.06058 | 0.19128  | -0.0720873 | 0.11979  | -0.17336 | 0.00017  |
| 0.54405  | 0.225464 | 8.53E-07 | 0.24788  | 5.72E-08 | 0.17080618 | 0.00021  | 0.100072 | 0.0306   |
| 0.00782  | -0.19435 | 2.35E-05 | -0.18424 | 6.20E-05 | 0.07721616 | 0.09558  | 0.193439 | 2.57E-05 |
| 0.54984  | -0.08158 | 0.07822  | -0.00823 | 0.85921  | 0.03956786 | 0.3936   | 0.179437 | 9.66E-05 |
| 0.36641  | -0.31815 | 1.91E-12 | -0.14023 | 0.00239  | 0.01776518 | 0.70179  | 0.097979 | 0.03428  |
| 0.3697   | -0.26068 | 1.08E-08 | -0.04601 | 0.32115  | 0.1104522  | 0.01695  | 0.161136 | 0.00047  |
| 0.73858  | -0.45051 | 1.01E-24 | -0.18731 | 4.64E-05 | 0.02790504 | 0.54748  | -0.02248 | 0.62795  |
| 0.10228  | -0.3972  | 4.24E-19 | -0.18535 | 5.58E-05 | -0.1464877 | 0.0015   | -0.13608 | 0.00321  |
| 0.16677  | -0.31766 | 2.08E-12 | -0.12943 | 0.00509  | -0.0039836 | 0.93158  | 0.032773 | 0.47987  |
| 0.70235  | -0.37336 | 6.79E-17 | -0.19444 | 2.33E-05 | -0.012711  | 0.78411  | 0.026196 | 0.57229  |
| 0.06659  | -0.36419 | 4.29E-16 | -0.2416  | 1.25E-07 | -0.0580822 | 0.21026  | -0.07943 | 0.08642  |
| 0.63568  | -0.50826 | 4.82E-32 | -0.23224 | 3.88E-07 | 0.07954876 | 0.08595  | 0.105349 | 0.02279  |
| 0.36256  | -0.48126 | 1.91E-28 | -0.2894  | 1.84E-10 | -0.0024566 | 0.95778  | 0.072813 | 0.1161   |
| 0.00838  | -0.10643 | 0.02143  | -0.00509 | 0.91271  | 0.2042021  | 8.67E-06 | 0.201593 | 1.13E-05 |
| 0.00125  | -0.30041 | 3.40E-11 | -0.1978  | 1.66E-05 | 0.01549096 | 0.73847  | 0.102493 | 0.02677  |
| 0.34792  | -0.37122 | 1.05E-16 | -0.22204 | 1.26E-06 | 0.13857137 | 0.00269  | 0.249454 | 4.68E-08 |
| 3.44E-11 | -0.31662 | 2.47E-12 | -0.1024  | 0.02692  | 0.0120275  | 0.79546  | 0.052832 | 0.25452  |
| 0.03951  | -0.3459  | 1.43E-14 | -0.15403 | 0.00084  | -0.0744657 | 0.10802  | -0.15172 | 0.00101  |
| 0.16519  | 0.290578 | 1.54E-10 | 0.258818 | 1.39E-08 | 0.05005486 | 0.28038  | -0.09063 | 0.0503   |
| 0.03959  | -0.17322 | 0.00017  | -0.14022 | 0.00239  | 0.20180373 | 1.11E-05 | 0.264285 | 6.66E-09 |
| 0.56317  | -0.15371 | 0.00086  | -0.09606 | 0.03798  | 0.18613903 | 5.18E-05 | 0.123765 | 0.00741  |
| 0.91331  | -0.23854 | 1.82E-07 | -0.05762 | 0.2139   | 0.18299136 | 6.96E-05 | 0.249914 | 4.42E-08 |
| 0.69026  | -0.3979  | 3.63E-19 | -0.24524 | 7.98E-08 | -0.1773008 | 0.00012  | -0.22587 | 8.15E-07 |
| 0.00017  | -0.21014 | 4.65E-06 | -0.20683 | 6.59E-06 | -0.0170413 | 0.71339  | 0.004597 | 0.92109  |
| 0.14999  | -0.48558 | 5.31E-29 | -0.35246 | 4.18E-15 | 0.05136222 | 0.26799  | 0.205539 | 7.54E-06 |
| 7.51E-14 | 0.082872 | 0.07359  | 0.206828 | 6.59E-06 | 0.17062018 | 0.00021  | -0.01471 | 0.75124  |
| 0.00476  | 0.34791  | 9.83E-15 | 0.257812 | 1.58E-08 | 0.21271909 | 3.52E-06 | 0.162607 | 0.00042  |
| 0.08941  | -0.29124 | 1.39E-10 | -0.10322 | 0.02571  | 0.11048202 | 0.01692  | 0.135521 | 0.00334  |
| 0.05476  | 0.165926 | 0.00032  | 0.073078 | 0.11477  | -0.0225806 | 0.62645  | -0.1304  | 0.00477  |
| 0.60754  | -0.17159 | 0.00019  | -0.07954 | 0.08599  | -0.0141656 | 0.76013  | -0.04358 | 0.3474   |
| 0.28385  | -0.0836  | 0.07109  | 0.016882 | 0.71596  | 0.06565426 | 0.15662  | 0.092522 | 0.04568  |
| 0.00298  | -0.51552 | 4.58E-33 | -0.28986 | 1.72E-10 | -0.0679349 | 0.14269  | -0.06426 | 0.16565  |
| 0.77336  | -0.271   | 2.64E-09 | -0.14507 | 0.00167  | 0.02055205 | 0.65777  | 0.128438 | 0.00544  |
| 0.1615   | -0.11058 | 0.01682  | 0.130502 | 0.00473  | 0.39387909 | 8.81E-19 | 0.448187 | 1.87E-24 |
| 0.00846  | -0.31279 | 4.66E-12 | -0.18    | 9.18E-05 | 0.2545311  | 2.44E-08 | 0.217451 | 2.10E-06 |
| 0.06382  | -0.17953 | 9.58E-05 | -0.05206 | 0.26153  | 0.09171822 | 0.0476   | 0.0846   | 0.06776  |
| 6.81E-11 | -0.30268 | 2.38E-11 | -0.05128 | 0.26875  | 0.40088023 | 1.86E-19 | 0.459561 | 8.86E-26 |
| 0.41384  | -0.08427 | 0.06883  | -0.04532 | 0.32848  | 0.10378865 | 0.0249   | 0.162206 | 0.00043  |
| 0.01468  | -0.34068 | 3.73E-14 | -0.10811 | 0.01944  | 0.15457119 | 0.0008   | 0.178445 | 0.00011  |
| 0.00595  | -0.15931 | 0.00055  | 0.092045 | 0.04681  | 0.07183193 | 0.12111  | 0.105241 | 0.02294  |
| 1.10E-05 | -0.39407 | 8.45E-19 | -0.17858 | 0.0001   | 0.14848797 | 0.00129  | 0.151934 | 0.00099  |

|          |          |          |          |          |            |          |          |          |
|----------|----------|----------|----------|----------|------------|----------|----------|----------|
| 0.0496   | -0.1988  | 1.51E-05 | -0.08109 | 0.08004  | 0.10522324 | 0.02296  | 0.073305 | 0.11365  |
| 0.00151  | -0.47437 | 1.41E-27 | -0.24515 | 8.07E-08 | 0.09020045 | 0.05142  | 0.19392  | 2.45E-05 |
| 0.00172  | -0.24467 | 8.57E-08 | -0.09166 | 0.04774  | 0.13432238 | 0.00364  | 0.216665 | 2.29E-06 |
| 0.31744  | -0.30124 | 2.98E-11 | -0.2308  | 4.59E-07 | -0.0729527 | 0.1154   | -0.02446 | 0.59808  |
| 1.00E-06 | -0.18266 | 7.18E-05 | -0.02584 | 0.5776   | 0.14232361 | 0.00205  | 0.141215 | 0.00222  |
| 0.07826  | -0.3812  | 1.34E-17 | -0.13883 | 0.00264  | 0.07877414 | 0.08905  | 0.13345  | 0.00386  |
| 0.00016  | -0.33862 | 5.42E-14 | -0.12116 | 0.00877  | 0.25583852 | 2.05E-08 | 0.291162 | 1.41E-10 |
| 0.6133   | -0.44664 | 2.80E-24 | -0.18563 | 5.44E-05 | 0.22880497 | 5.80E-07 | 0.376602 | 3.49E-17 |
| 7.17E-07 | -0.28121 | 6.17E-10 | -0.18784 | 4.41E-05 | 0.14112863 | 0.00224  | 0.232601 | 3.72E-07 |
| 0.83678  | -0.22746 | 6.78E-07 | -0.05906 | 0.20269  | 0.2377045  | 2.02E-07 | 0.172592 | 0.00018  |
| 0.61279  | -0.45802 | 1.35E-25 | -0.27475 | 1.56E-09 | 0.05142161 | 0.26744  | 0.149666 | 0.00118  |
| 0.05585  | -0.37372 | 6.30E-17 | -0.21501 | 2.75E-06 | 0.02893139 | 0.53285  | 0.096423 | 0.03725  |
| 0.02583  | -0.43338 | 8.34E-23 | -0.24812 | 5.55E-08 | 0.02058775 | 0.65722  | 0.207303 | 6.27E-06 |
| 0.15902  | -0.42614 | 5.00E-22 | -0.16186 | 0.00045  | 0.06640336 | 0.15194  | 0.074584 | 0.10746  |
| 0.26773  | -0.47541 | 1.04E-27 | -0.23306 | 3.52E-07 | 0.07448009 | 0.10796  | 0.102671 | 0.02651  |
| 0.29496  | -0.33542 | 9.64E-14 | -0.08903 | 0.05453  | 0.37332109 | 6.84E-17 | 0.347742 | 1.01E-14 |
| 0.80979  | -0.27697 | 1.14E-09 | -0.14062 | 0.00232  | 0.23155308 | 4.21E-07 | 0.405386 | 6.72E-20 |
| 0.96226  | -0.31351 | 4.14E-12 | -0.14528 | 0.00164  | 0.05380837 | 0.24583  | 0.03834  | 0.40845  |
| 0.83388  | -0.19837 | 1.57E-05 | -0.20621 | 7.03E-06 | -0.0047347 | 0.91872  | 0.124472 | 0.00708  |
| 0.02497  | -0.25841 | 1.46E-08 | -0.17158 | 0.00019  | 0.04629092 | 0.31818  | 0.092171 | 0.04651  |
| 0.15733  | -0.20145 | 1.15E-05 | -0.12233 | 0.00813  | 0.00200695 | 0.9655   | 0.033541 | 0.46963  |
| 0.85141  | -0.36664 | 2.64E-16 | -0.28335 | 4.51E-10 | 0.00582348 | 0.90012  | 0.22713  | 7.04E-07 |
| 0.27943  | -0.28625 | 2.94E-10 | -0.33239 | 1.65E-13 | -0.0548704 | 0.23662  | -0.03467 | 0.45477  |
| 0.60788  | -0.52327 | 3.48E-34 | -0.20553 | 7.55E-06 | 0.09921569 | 0.03206  | 0.132509 | 0.00412  |
| 0.10856  | -0.29379 | 9.46E-11 | -0.12363 | 0.00748  | 0.14146986 | 0.00218  | 0.260174 | 1.16E-08 |
| 0.09644  | -0.48944 | 1.68E-29 | -0.2808  | 6.55E-10 | 0.0422356  | 0.36246  | 0.110761 | 0.01664  |
| 0.00013  | -0.45889 | 1.06E-25 | -0.24835 | 5.39E-08 | 0.06164127 | 0.18359  | 0.127772 | 0.00569  |
| 0.49926  | -0.00467 | 0.91987  | 0.091923 | 0.04711  | 0.14990669 | 0.00116  | 0.099319 | 0.03188  |
| 0.30461  | -0.39883 | 2.95E-19 | -0.14411 | 0.00179  | 0.04113257 | 0.37515  | 0.105054 | 0.02318  |
| 0.17398  | -0.23838 | 1.86E-07 | -0.10054 | 0.02983  | 0.03979894 | 0.39084  | 0.022865 | 0.62211  |
| 0.01101  | -0.43963 | 1.72E-23 | -0.17129 | 0.0002   | 0.11063958 | 0.01676  | 0.140154 | 0.0024   |
| 0.81206  | -0.45556 | 2.62E-25 | -0.22293 | 1.14E-06 | 0.04531154 | 0.32854  | 0.050187 | 0.27911  |
| 0.38875  | -0.17604 | 0.00013  | -0.02247 | 0.6281   | 0.13556285 | 0.00333  | 0.131095 | 0.00454  |
| 0.00182  | -0.06224 | 0.17933  | 0.126119 | 0.00635  | 0.47284388 | 2.17E-27 | 0.549076 | 3.96E-38 |
| 0.06448  | -0.23278 | 3.64E-07 | -0.05227 | 0.25959  | 0.19047388 | 3.43E-05 | 0.310775 | 6.48E-12 |
| 0.7513   | -0.05962 | 0.19842  | 0.028534 | 0.53849  | 0.12202256 | 0.0083   | 0.117905 | 0.01077  |
| 0.81793  | 0.018128 | 0.696    | 0.158104 | 0.00061  | 0.10046809 | 0.02995  | -0.02455 | 0.59664  |
| 0.54956  | -0.21242 | 3.64E-06 | -0.0182  | 0.69481  | 0.38205865 | 1.12E-17 | 0.466468 | 1.32E-26 |
| 0.60113  | -0.37221 | 8.58E-17 | -0.24666 | 6.67E-08 | 0.02569263 | 0.5797   | 0.100117 | 0.03053  |
| 0.57493  | -0.28055 | 6.79E-10 | -0.18197 | 7.66E-05 | 0.03810476 | 0.41134  | 0.099271 | 0.03197  |
| 0.00553  | -0.48091 | 2.11E-28 | -0.20132 | 1.17E-05 | 0.16077259 | 0.00049  | 0.240102 | 1.51E-07 |
| 0.0929   | -0.29449 | 8.51E-11 | -0.25673 | 1.83E-08 | 0.11571392 | 0.01234  | 0.177694 | 0.00011  |
| 0.8873   | -0.43969 | 1.69E-23 | -0.20488 | 8.08E-06 | 0.15186866 | 0.00099  | 0.181506 | 7.99E-05 |
| 3.22E-05 | -0.52424 | 2.51E-34 | -0.37617 | 3.81E-17 | -0.0759354 | 0.10122  | -0.05793 | 0.21147  |
| 0.0001   | -0.22162 | 1.32E-06 | 0.017458 | 0.7067   | 0.22000312 | 1.58E-06 | 0.171593 | 0.00019  |

|          |          |          |          |          |            |          |          |          |
|----------|----------|----------|----------|----------|------------|----------|----------|----------|
| 8.54E-26 | -0.14352 | 0.00188  | -0.05657 | 0.22237  | 0.21886385 | 1.80E-06 | 0.312261 | 5.08E-12 |
| 0.50552  | -0.40267 | 1.25E-19 | -0.26041 | 1.12E-08 | 0.02201765 | 0.63508  | 0.073289 | 0.11372  |
| 0.92992  | -0.61906 | 9.49E-51 | -0.31977 | 1.46E-12 | 0.02723742 | 0.55711  | -0.03177 | 0.49345  |
| 0.00119  | -0.30864 | 9.17E-12 | 0.009632 | 0.83555  | 0.35633308 | 1.99E-15 | 0.417927 | 3.63E-21 |
| 0.00024  | -0.2327  | 3.67E-07 | -0.17062 | 0.00021  | 0.25471987 | 2.38E-08 | 0.447589 | 2.19E-24 |
| 0.14449  | -0.38701 | 3.90E-18 | -0.16684 | 0.00029  | 0.17725122 | 0.00012  | 0.343222 | 2.34E-14 |
| 0.23071  | -0.49007 | 1.39E-29 | -0.34654 | 1.27E-14 | 0.10359372 | 0.02518  | 0.27033  | 2.90E-09 |
| 0.03611  | -0.23768 | 2.02E-07 | -0.14327 | 0.00191  | 0.1138385  | 0.01384  | 0.233442 | 3.36E-07 |
| 0.00574  | -0.17014 | 0.00022  | -0.00651 | 0.88838  | 0.40422527 | 8.76E-20 | 0.353672 | 3.31E-15 |
| 0.93604  | -0.44843 | 1.75E-24 | -0.19226 | 2.88E-05 | 0.12590729 | 0.00644  | 0.121296 | 0.00869  |
| 0.30853  | -0.46083 | 6.26E-26 | -0.19067 | 3.36E-05 | 0.11790536 | 0.01077  | 0.147641 | 0.00138  |
| 0.40368  | -0.48149 | 1.78E-28 | -0.17352 | 0.00016  | 0.07860151 | 0.08976  | 0.144585 | 0.00173  |
| 0.48214  | -0.26874 | 3.62E-09 | -0.11325 | 0.01433  | 0.01238196 | 0.78957  | 0.071834 | 0.12109  |
| 1.03E-08 | 0.25682  | 1.80E-08 | 0.162235 | 0.00043  | -0.0928956 | 0.04481  | -0.17015 | 0.00022  |
| 0.76795  | -0.23403 | 3.14E-07 | -0.23605 | 2.46E-07 | 0.22732651 | 6.89E-07 | 0.271597 | 2.43E-09 |
| 0.23267  | -0.28274 | 4.94E-10 | -0.10795 | 0.01963  | 0.12304488 | 0.00777  | 0.171884 | 0.00019  |
| 5.43E-07 | -0.33487 | 1.06E-13 | -0.14692 | 0.00145  | 0.23447023 | 2.98E-07 | 0.320373 | 1.32E-12 |
| 0.00184  | -0.4045  | 8.22E-20 | -0.2535  | 2.78E-08 | 0.11232092 | 0.01516  | 0.220457 | 1.50E-06 |
| 0.5599   | 0.300576 | 3.31E-11 | 0.147818 | 0.00136  | -0.3613819 | 7.46E-16 | -0.4165  | 5.08E-21 |
| 0.00532  | -0.20323 | 9.59E-06 | -0.16337 | 0.00039  | 0.34671698 | 1.23E-14 | 0.483221 | 1.07E-28 |
| 0.72012  | -0.37434 | 5.56E-17 | -0.17276 | 0.00018  | -0.0140313 | 0.76233  | 0.047329 | 0.30743  |
| 0.90942  | -0.18058 | 8.70E-05 | -0.00303 | 0.94795  | 0.29671399 | 6.04E-11 | 0.268439 | 3.77E-09 |
| 0.66969  | -0.31773 | 2.05E-12 | -0.11761 | 0.01097  | 0.07569783 | 0.1023   | 0.11993  | 0.00948  |
| 0.46068  | -0.4078  | 3.87E-20 | -0.16122 | 0.00047  | 0.02660537 | 0.5663   | 0.072544 | 0.11746  |
| 1.56E-05 | -0.5076  | 5.97E-32 | -0.33079 | 2.19E-13 | 0.07594628 | 0.10118  | 0.202181 | 1.07E-05 |
| 0.77975  | -0.27838 | 9.29E-10 | -0.18334 | 6.74E-05 | 0.02818641 | 0.54345  | 0.052348 | 0.2589   |
| 0.21383  | -0.46381 | 2.75E-26 | -0.34656 | 1.26E-14 | 0.01382125 | 0.76578  | 0.034008 | 0.46346  |
| 0.00022  | -0.44062 | 1.33E-23 | -0.29347 | 9.94E-11 | 0.2003334  | 1.29E-05 | 0.342999 | 2.44E-14 |
| 0.28811  | -0.31647 | 2.53E-12 | -0.17955 | 9.56E-05 | 0.01243929 | 0.78862  | 0.033587 | 0.46902  |
| 0.41097  | -0.42183 | 1.43E-21 | -0.2317  | 4.13E-07 | 0.13018423 | 0.00484  | 0.284815 | 3.64E-10 |
| 0.79744  | -0.19601 | 1.99E-05 | -0.05022 | 0.2788   | 0.07952443 | 0.08604  | 0.134442 | 0.00361  |
| 0.1801   | -0.27796 | 9.87E-10 | -0.09327 | 0.04395  | 0.03058098 | 0.50974  | 0.003217 | 0.94472  |
| 0.70565  | -0.54084 | 7.81E-37 | -0.29283 | 1.09E-10 | -0.0414709 | 0.37123  | -0.02845 | 0.53969  |
| 0.00084  | -0.32006 | 1.39E-12 | -0.17354 | 0.00016  | 0.21981145 | 1.62E-06 | 0.281386 | 6.02E-10 |
| 0.42029  | -0.3445  | 1.85E-14 | -0.18529 | 5.61E-05 | 0.20384252 | 9.00E-06 | 0.396608 | 4.83E-19 |
| 0.96868  | -0.52361 | 3.10E-34 | -0.31047 | 6.81E-12 | -0.0915747 | 0.04795  | -0.15624 | 0.0007   |
| 1.55E-24 | -0.24743 | 6.05E-08 | -0.13299 | 0.00399  | 0.09818188 | 0.03391  | 0.222192 | 1.24E-06 |
| 0.49028  | -0.1624  | 0.00043  | -0.04209 | 0.36412  | 0.08800087 | 0.05739  | 0.139519 | 0.00251  |
| 0.15388  | -0.38518 | 5.77E-18 | -0.21817 | 1.94E-06 | 0.09951364 | 0.03155  | 0.211621 | 3.96E-06 |
| 0.07051  | -0.34532 | 1.59E-14 | -0.14061 | 0.00232  | 0.03209087 | 0.48906  | 0.072368 | 0.11835  |
| 0.83193  | -0.5226  | 4.35E-34 | -0.24637 | 6.92E-08 | 0.0692629  | 0.13503  | 0.081477 | 0.07859  |
| 0.60728  | -0.01857 | 0.689    | 0.134771 | 0.00352  | 0.10545456 | 0.02266  | 0.154375 | 0.00082  |
| 0.55448  | -0.36158 | 7.17E-16 | -0.16135 | 0.00046  | 0.23703411 | 2.19E-07 | 0.365887 | 3.07E-16 |
| 0.95403  | -0.28377 | 4.24E-10 | -0.03325 | 0.47345  | 0.14504268 | 0.00167  | 0.162324 | 0.00043  |
| 2.56E-06 | -0.27378 | 1.79E-09 | -0.08451 | 0.06807  | 0.19416042 | 2.39E-05 | 0.293961 | 9.22E-11 |

|          |          |          |          |          |            |          |          |          |
|----------|----------|----------|----------|----------|------------|----------|----------|----------|
| 0.76001  | 0.2838   | 4.23E-10 | 0.230121 | 4.98E-07 | 0.03562572 | 0.44245  | -0.19429 | 2.36E-05 |
| 0.95423  | -0.13886 | 0.00264  | -0.15617 | 0.00071  | 0.0838226  | 0.07033  | 0.21936  | 1.70E-06 |
| 5.00E-12 | -0.43259 | 1.02E-22 | -0.41359 | 1.01E-20 | -0.0804629 | 0.08239  | 0.11274  | 0.01479  |
| 0.51754  | -0.27504 | 1.50E-09 | -0.21201 | 3.80E-06 | 0.29131351 | 1.38E-10 | 0.520415 | 9.05E-34 |
| 0.09559  | -0.16877 | 0.00025  | -0.16469 | 0.00035  | 0.05445165 | 0.24022  | 0.219541 | 1.67E-06 |
| 0.1909   | -0.10897 | 0.0185   | -0.0632  | 0.17271  | 0.09441793 | 0.0414   | 0.152654 | 0.00093  |
| 0.00085  | -0.34437 | 1.90E-14 | -0.05353 | 0.2483   | 0.45916408 | 9.88E-26 | 0.436813 | 3.52E-23 |
| 3.93E-11 | -0.4857  | 5.13E-29 | -0.21065 | 4.40E-06 | 0.06244672 | 0.17792  | 0.124624 | 0.00701  |
| 0.00032  | -0.36672 | 2.60E-16 | -0.20436 | 8.53E-06 | 0.10742412 | 0.02024  | 0.112725 | 0.0148   |
| 0.19238  | -0.46296 | 3.48E-26 | -0.2535  | 2.78E-08 | 0.03705118 | 0.4244   | -0.03296 | 0.47742  |
| 0.76324  | -0.34269 | 2.58E-14 | -0.30541 | 1.54E-11 | 0.01966545 | 0.67166  | 0.264121 | 6.81E-09 |
| 0.27427  | -0.17013 | 0.00022  | -0.11592 | 0.01218  | 0.12984582 | 0.00495  | 0.31609  | 2.70E-12 |
| 0.27148  | -0.3327  | 1.56E-13 | -0.23361 | 3.30E-07 | 0.07530394 | 0.1041   | 0.248805 | 5.09E-08 |
| 0.00828  | -0.58674 | 1.54E-44 | -0.35663 | 1.88E-15 | -0.0192548 | 0.67812  | 0.017346 | 0.7085   |
| 6.85E-10 | -0.15161 | 0.00101  | -0.10727 | 0.02041  | 0.06644882 | 0.15166  | 0.123835 | 0.00738  |
| 0.45389  | -0.21265 | 3.55E-06 | -0.13336 | 0.00389  | 0.06183948 | 0.18218  | 0.102537 | 0.02671  |
| 4.78E-06 | -0.24608 | 7.18E-08 | -0.04338 | 0.34955  | 0.29354945 | 9.82E-11 | 0.307553 | 1.09E-11 |
| 0.91108  | -0.47956 | 3.14E-28 | -0.20651 | 6.81E-06 | 0.17890358 | 0.0001   | 0.078968 | 0.08827  |
| 0.04447  | -0.3519  | 4.64E-15 | -0.15432 | 0.00082  | -0.0418568 | 0.36679  | -0.04788 | 0.30182  |
| 0.00174  | -0.07069 | 0.12714  | 0.002674 | 0.95404  | 0.04985678 | 0.28229  | 0.090767 | 0.04996  |
| 0.00795  | 0.326111 | 4.94E-13 | 0.338835 | 5.21E-14 | -0.0671499 | 0.14737  | -0.24646 | 6.84E-08 |
| 0.24133  | -0.2619  | 9.19E-09 | -0.21659 | 2.31E-06 | -0.1263686 | 0.00625  | -0.01611 | 0.72839  |
| 0.77601  | 0.018907 | 0.68363  | 0.084325 | 0.06866  | 0.1221578  | 0.00823  | 0.105088 | 0.02314  |
| 0.69668  | -0.43908 | 1.97E-23 | -0.23236 | 3.82E-07 | 0.03689079 | 0.42641  | 0.161285 | 0.00047  |
| 0.00035  | -0.41387 | 9.46E-21 | -0.17099 | 0.00021  | 0.10610955 | 0.02183  | 0.203757 | 9.08E-06 |
| 0.71223  | -0.01438 | 0.75658  | 0.152906 | 0.00092  | 0.3260501  | 4.99E-13 | 0.341774 | 3.06E-14 |
| 0.5091   | -0.12949 | 0.00507  | -0.10166 | 0.02804  | 0.07218221 | 0.1193   | 0.190906 | 3.29E-05 |
| 0.0823   | -0.1626  | 0.00042  | -0.02065 | 0.65618  | 0.05496069 | 0.23585  | 0.113823 | 0.01385  |
| 0.81898  | -0.13793 | 0.00282  | -0.06558 | 0.15708  | 0.12756977 | 0.00577  | 0.137867 | 0.00283  |
| 0.04437  | -0.25303 | 2.96E-08 | -0.18026 | 8.96E-05 | 0.06948942 | 0.13375  | 0.209684 | 4.88E-06 |
| 0.65698  | -0.50853 | 4.43E-32 | -0.23296 | 3.56E-07 | 0.10497549 | 0.02328  | 0.192253 | 2.88E-05 |
| 0.003    | -0.13501 | 0.00347  | -0.04479 | 0.33411  | 0.27195587 | 2.31E-09 | 0.317185 | 2.25E-12 |
| 1.21E-12 | -0.20145 | 1.15E-05 | -0.16203 | 0.00044  | 0.13226967 | 0.00419  | 0.305797 | 1.45E-11 |
| 0.03466  | -0.42463 | 7.24E-22 | -0.23157 | 4.20E-07 | 0.03374057 | 0.46699  | 0.079312 | 0.08689  |
| 0.02133  | 0.286482 | 2.84E-10 | 0.30983  | 7.56E-12 | -0.2536909 | 2.72E-08 | -0.26517 | 5.90E-09 |
| 5.58E-07 | -0.52186 | 5.59E-34 | -0.22826 | 6.18E-07 | 0.1033931  | 0.02546  | 0.149157 | 0.00123  |
| 0.05018  | -0.12939 | 0.0051   | -0.05945 | 0.19971  | 0.0990835  | 0.03229  | 0.173617 | 0.00016  |
| 2.00E-13 | -0.17857 | 0.0001   | -0.09662 | 0.03686  | 0.1789986  | 0.0001   | 0.326579 | 4.56E-13 |
| 0.00164  | 0.212722 | 3.52E-06 | 0.329118 | 2.93E-13 | 0.09804431 | 0.03416  | 0.006214 | 0.89346  |
| 0.29659  | -0.16014 | 0.00051  | -0.17116 | 0.0002   | 0.20838127 | 5.60E-06 | 0.222348 | 1.22E-06 |
| 0.78213  | -0.24986 | 4.45E-08 | 0.010072 | 0.82814  | 0.4915617  | 8.82E-30 | 0.47515  | 1.12E-27 |
| 0.22816  | -0.37174 | 9.45E-17 | -0.36082 | 8.33E-16 | -0.0799459 | 0.08439  | 0.001354 | 0.97671  |
| 0.00044  | -0.03538 | 0.4456   | 0.033565 | 0.4693   | 0.11985254 | 0.00953  | 0.224902 | 9.10E-07 |
| 0.17693  | -0.32644 | 4.67E-13 | -0.2232  | 1.10E-06 | 0.10198819 | 0.02754  | 0.22062  | 1.48E-06 |
| 0.00127  | -0.2197  | 1.64E-06 | 0.114606 | 0.0132   | 0.22683708 | 7.29E-07 | 0.01144  | 0.80524  |

|          |          |          |          |          |            |          |          |          |
|----------|----------|----------|----------|----------|------------|----------|----------|----------|
| 0.12182  | 0.312699 | 4.73E-12 | 0.358662 | 1.27E-15 | 0.18308752 | 6.90E-05 | -0.00896 | 0.8469   |
| 0.10017  | -0.26283 | 8.10E-09 | -0.11116 | 0.01626  | 0.43453161 | 6.25E-23 | 0.418962 | 2.83E-21 |
| 4.55E-08 | -0.12758 | 0.00576  | -0.03422 | 0.46063  | 0.24148069 | 1.27E-07 | 0.306877 | 1.22E-11 |
| 0.00103  | 0.404096 | 9.02E-20 | 0.346846 | 1.20E-14 | 0.15504031 | 0.00077  | 0.037218 | 0.42232  |
| 0.30402  | -0.09793 | 0.03437  | 0.175003 | 0.00014  | 0.27946282 | 7.95E-10 | 0.204123 | 8.74E-06 |
| 0.7569   | -0.37779 | 2.73E-17 | -0.28938 | 1.84E-10 | 0.00709288 | 0.8785   | 0.089045 | 0.05449  |
| 0.49202  | -0.32085 | 1.21E-12 | -0.17716 | 0.00012  | 0.02036164 | 0.66074  | 0.123713 | 0.00744  |
| 0.6907   | -0.54081 | 7.91E-37 | -0.24614 | 7.12E-08 | 0.08175583 | 0.07757  | 0.126254 | 0.00629  |
| 0.00321  | -0.44227 | 8.73E-24 | -0.32178 | 1.04E-12 | 0.11871936 | 0.01024  | 0.26388  | 7.03E-09 |
| 0.00208  | -0.30613 | 1.37E-11 | -0.07215 | 0.11945  | 0.1459146  | 0.00157  | 0.154304 | 0.00082  |
| 0.6616   | 0.332592 | 1.59E-13 | 0.294662 | 8.28E-11 | 0.11200311 | 0.01545  | -0.06192 | 0.18164  |
| 0.19551  | -0.20456 | 8.35E-06 | -0.06529 | 0.15894  | 0.08755698 | 0.05867  | 0.110992 | 0.01642  |
| 0.22287  | -0.41091 | 1.89E-20 | -0.28259 | 5.05E-10 | 0.00891753 | 0.84759  | 0.145826 | 0.00158  |
| 0.10904  | -0.18963 | 3.72E-05 | -0.07405 | 0.11001  | 0.17078137 | 0.00021  | 0.136347 | 0.00315  |
| 0.91755  | -0.16939 | 0.00024  | -0.02388 | 0.60671  | 0.34343725 | 2.25E-14 | 0.414144 | 8.86E-21 |
| 0.65831  | -0.39552 | 6.14E-19 | -0.21831 | 1.91E-06 | 0.04304238 | 0.35336  | 0.1304   | 0.00477  |
| 0.56858  | -0.51465 | 6.09E-33 | -0.33289 | 1.51E-13 | 0.05078263 | 0.27343  | 0.197026 | 1.80E-05 |
| 0.36724  | -0.37183 | 9.28E-17 | -0.09418 | 0.04192  | 0.430623   | 1.66E-22 | 0.383949 | 7.49E-18 |
| 0.35829  | -0.34667 | 1.24E-14 | -0.19505 | 2.19E-05 | 0.04638315 | 0.31721  | 0.120888 | 0.00892  |
| 0.18692  | -0.50275 | 2.78E-31 | -0.28671 | 2.75E-10 | -0.006232  | 0.89315  | -0.01998 | 0.66675  |
| 0.00087  | 0.004216 | 0.9276   | 0.080625 | 0.08177  | 0.090746   | 0.05002  | 0.102196 | 0.02722  |
| 0.70728  | -0.23304 | 3.53E-07 | -0.05479 | 0.23735  | 0.02942585 | 0.52586  | 0.062287 | 0.17904  |
| 0.04939  | -0.21824 | 1.92E-06 | -0.03311 | 0.4753   | 0.12851844 | 0.00541  | 0.194266 | 2.37E-05 |
| 1.10E-07 | -0.08408 | 0.06947  | -0.00521 | 0.91056  | 0.36861161 | 1.78E-16 | 0.382718 | 9.72E-18 |
| 0.23189  | -0.39228 | 1.25E-18 | -0.19635 | 1.92E-05 | 0.11945683 | 0.00977  | 0.122375 | 0.00811  |
| 7.55E-05 | -0.18466 | 5.96E-05 | -0.19626 | 1.94E-05 | -0.0444553 | 0.33777  | 0.018674 | 0.68732  |
| 0.87738  | -0.37448 | 5.40E-17 | -0.17169 | 0.00019  | 0.03222286 | 0.48727  | 0.092415 | 0.04593  |
| 0.10048  | 0.413293 | 1.08E-20 | 0.413995 | 9.18E-21 | 0.35549406 | 2.34E-15 | 0.159849 | 0.00053  |
| 0.00559  | -0.36185 | 6.81E-16 | -0.19728 | 1.75E-05 | -0.0456899 | 0.32451  | 0.007313 | 0.87476  |
| 0.53536  | -0.17326 | 0.00017  | -0.01048 | 0.82131  | 0.35892423 | 1.21E-15 | 0.390516 | 1.83E-18 |
| 6.66E-10 | -0.37666 | 3.44E-17 | -0.3753  | 4.56E-17 | 0.00328797 | 0.94351  | 0.208488 | 5.54E-06 |
| 0.03317  | -0.3774  | 2.96E-17 | -0.24397 | 9.34E-08 | 0.15675679 | 0.00068  | 0.318878 | 1.69E-12 |
| 1.56E-15 | -0.16884 | 0.00025  | -0.16011 | 0.00051  | 0.09873151 | 0.03292  | 0.199056 | 1.47E-05 |
| 0.00662  | 0.204488 | 8.42E-06 | 0.185409 | 5.55E-05 | -0.0274472 | 0.55408  | -0.17237 | 0.00018  |
| 6.96E-05 | -0.07914 | 0.08759  | -0.15053 | 0.0011   | 0.06276744 | 0.1757   | 0.232356 | 3.83E-07 |
| 0.44555  | -0.284   | 4.11E-10 | -0.25284 | 3.03E-08 | -0.0373498 | 0.42067  | 0.057169 | 0.21753  |
| 0.85347  | -0.13996 | 0.00244  | 0.041628 | 0.36941  | 0.27104344 | 2.63E-09 | 0.273506 | 1.86E-09 |
| 0.42341  | -0.54288 | 3.77E-37 | -0.23337 | 3.39E-07 | 0.01249468 | 0.7877   | -0.00106 | 0.98177  |
| 0.96958  | -0.18846 | 4.16E-05 | -0.00435 | 0.92524  | 0.20940899 | 5.02E-06 | 0.230362 | 4.84E-07 |
| 0.00101  | -0.18389 | 6.40E-05 | 0.034889 | 0.45195  | 0.13687895 | 0.00304  | 0.109427 | 0.018    |
| 0.00109  | 0.364656 | 3.91E-16 | 0.31146  | 5.79E-12 | 0.10712693 | 0.02059  | -0.10287 | 0.02621  |
| 0.00837  | 0.343811 | 2.10E-14 | 0.089541 | 0.05315  | -0.0616077 | 0.18383  | -0.19333 | 2.60E-05 |
| 0.00445  | -0.2182  | 1.93E-06 | -0.07753 | 0.09423  | 0.38524942 | 5.69E-18 | 0.397435 | 4.02E-19 |
| 0.91982  | -0.08135 | 0.07904  | -0.00054 | 0.99073  | 0.22255448 | 1.19E-06 | 0.256397 | 1.91E-08 |
| 0.00031  | -0.16482 | 0.00035  | 0.042608 | 0.35824  | 0.12250742 | 0.00804  | 0.089169 | 0.05415  |

|          |          |          |          |          |            |          |          |          |
|----------|----------|----------|----------|----------|------------|----------|----------|----------|
| 0.90832  | 0.360012 | 9.76E-16 | 0.173771 | 0.00016  | 0.04527609 | 0.32891  | 0.183124 | 6.88E-05 |
| 0.60942  | -0.28774 | 2.36E-10 | -0.07674 | 0.09763  | 0.1987336  | 1.52E-05 | 0.190327 | 3.47E-05 |
| 0.29185  | -0.52299 | 3.82E-34 | -0.21299 | 3.42E-06 | 0.07360834 | 0.11215  | 0.052202 | 0.26023  |
| 0.10222  | -0.5217  | 5.89E-34 | -0.29825 | 4.76E-11 | 0.08689374 | 0.06061  | 0.152129 | 0.00097  |
| 0.44989  | -0.40689 | 4.77E-20 | -0.29379 | 9.47E-11 | 0.00015162 | 0.99739  | 0.145024 | 0.00168  |
| 0.00112  | -0.30754 | 1.09E-11 | -0.29369 | 9.61E-11 | -0.1511152 | 0.00105  | -0.18387 | 6.42E-05 |
| 0.00024  | -0.37647 | 3.58E-17 | -0.14605 | 0.00155  | 0.16337887 | 0.00039  | 0.250382 | 4.16E-08 |
| 0.61623  | 0.207447 | 6.18E-06 | 0.052251 | 0.25979  | -0.1456418 | 0.0016   | -0.27882 | 8.72E-10 |
| 0.60722  | 0.185983 | 5.26E-05 | 0.008297 | 0.85807  | -0.2038983 | 8.95E-06 | -0.31106 | 6.18E-12 |
| 0.00738  | 0.381473 | 1.26E-17 | 0.353132 | 3.67E-15 | -0.1982452 | 1.59E-05 | -0.37262 | 7.89E-17 |
| 0.81857  | 0.436417 | 3.89E-23 | 0.228    | 6.37E-07 | 0.09392227 | 0.04249  | 0.086272 | 0.06248  |
| 0.133    | -0.20888 | 5.31E-06 | -0.19006 | 3.57E-05 | 0.18742642 | 4.59E-05 | 0.274149 | 1.70E-09 |
| 9.07E-09 | -0.17942 | 9.68E-05 | -0.05208 | 0.26134  | 0.12578273 | 0.00649  | 0.153186 | 0.0009   |
| 0.04544  | 0.418445 | 3.20E-21 | 0.431599 | 1.30E-22 | 0.20721147 | 6.33E-06 | 0.061841 | 0.18217  |
| 0.95879  | -0.31674 | 2.42E-12 | -0.10073 | 0.02953  | 0.07134475 | 0.12366  | -0.01481 | 0.74956  |
| 0.69542  | -0.3549  | 2.62E-15 | -0.20291 | 9.90E-06 | 0.0840023  | 0.06973  | 0.211531 | 4.00E-06 |
| 0.59392  | -0.23326 | 3.44E-07 | -0.14238 | 0.00204  | -0.0838365 | 0.07029  | -0.05901 | 0.20306  |
| 0.32526  | -0.18833 | 4.21E-05 | 0.041511 | 0.37076  | 0.3693198  | 1.54E-16 | 0.310572 | 6.70E-12 |
| 0.58356  | -0.20138 | 1.16E-05 | 0.060721 | 0.19023  | 0.21361375 | 3.20E-06 | 0.26349  | 7.41E-09 |
| 0.10048  | -0.33672 | 7.63E-14 | -0.02223 | 0.63181  | 0.34877585 | 8.36E-15 | 0.349571 | 7.20E-15 |
| 0.83048  | -0.49973 | 7.14E-31 | -0.24805 | 5.60E-08 | 0.07775309 | 0.09329  | 0.090761 | 0.04998  |
| 0.01233  | -0.25672 | 1.83E-08 | -0.18651 | 5.01E-05 | -0.1770464 | 0.00012  | -0.18179 | 7.78E-05 |
| 0.70699  | -0.41378 | 9.64E-21 | -0.24666 | 6.67E-08 | -0.1456796 | 0.0016   | -0.16951 | 0.00023  |
| 0.75531  | -0.4637  | 2.84E-26 | -0.2419  | 1.21E-07 | 0.18704069 | 4.76E-05 | 0.266817 | 4.71E-09 |
| 1.78E-07 | 0.366114 | 2.93E-16 | 0.186839 | 4.85E-05 | 0.32180934 | 1.03E-12 | 0.401855 | 1.50E-19 |
| 0.60074  | -0.51894 | 1.48E-33 | -0.24697 | 6.42E-08 | 0.06757793 | 0.14481  | 0.118184 | 0.01059  |
| 0.00749  | -0.36962 | 1.45E-16 | -0.17091 | 0.00021  | 0.02651002 | 0.56769  | 0.058561 | 0.20652  |
| 0.23878  | -0.28633 | 2.91E-10 | -0.09605 | 0.03799  | 0.03730284 | 0.42126  | -0.0302  | 0.51498  |
| 0.23574  | -0.36899 | 1.65E-16 | -0.19199 | 2.96E-05 | -0.0337329 | 0.46709  | 0.048699 | 0.29363  |
| 0.33592  | -0.03102 | 0.5037   | -0.00498 | 0.91455  | 0.05328795 | 0.25044  | 0.090894 | 0.04964  |
| 0.82147  | -0.48092 | 2.11E-28 | -0.24571 | 7.52E-08 | -0.0145388 | 0.75401  | 0.06041  | 0.19252  |
| 0.73456  | -0.32593 | 5.10E-13 | -0.2834  | 4.48E-10 | -0.0592147 | 0.20149  | 0.057223 | 0.21709  |
| 0.37571  | -0.23788 | 1.97E-07 | -0.23229 | 3.86E-07 | 0.02571721 | 0.57934  | 0.193156 | 2.64E-05 |
| 0.9102   | -0.3137  | 4.01E-12 | -0.1484  | 0.0013   | -0.0325392 | 0.483    | -0.06791 | 0.14283  |
| 0.7336   | -0.09598 | 0.03814  | 0.006671 | 0.88568  | 0.1067357  | 0.02106  | 0.083386 | 0.07181  |
| 0.01894  | 0.513938 | 7.68E-33 | 0.301646 | 2.80E-11 | 0.18541661 | 5.55E-05 | -0.00038 | 0.9935   |
| 0.34497  | -0.41248 | 1.31E-20 | -0.04624 | 0.31872  | 0.41529464 | 6.76E-21 | 0.306677 | 1.26E-11 |
| 0.0247   | -0.26175 | 9.37E-09 | -0.07161 | 0.12225  | 0.11638962 | 0.01184  | 0.193329 | 2.59E-05 |
| 0.79612  | -0.2621  | 8.94E-09 | -0.09745 | 0.03526  | 0.14019358 | 0.00239  | 0.237667 | 2.03E-07 |
| 0.45243  | -0.25391 | 2.64E-08 | -0.14794 | 0.00135  | 0.08350003 | 0.07143  | 0.214985 | 2.75E-06 |
| 0.0957   | -0.15201 | 0.00098  | -0.07052 | 0.12809  | 0.00816695 | 0.86028  | 0.093592 | 0.04322  |
| 5.18E-05 | -0.25565 | 2.11E-08 | -0.15349 | 0.00088  | 0.10825365 | 0.01928  | 0.238614 | 1.81E-07 |
| 0.43013  | -0.20169 | 1.12E-05 | -0.06485 | 0.16178  | 0.28021983 | 7.13E-10 | 0.426574 | 4.50E-22 |
| 0.04311  | 0.10794  | 0.01964  | -0.09481 | 0.04056  | 0.21827463 | 1.92E-06 | 0.080148 | 0.0836   |
| 0.93044  | -0.42782 | 3.32E-22 | -0.25831 | 1.48E-08 | -0.2129533 | 3.43E-06 | -0.30626 | 1.34E-11 |

|          |          |          |          |          |            |          |          |          |
|----------|----------|----------|----------|----------|------------|----------|----------|----------|
| 0.72514  | -0.26817 | 3.91E-09 | -0.05259 | 0.2567   | 0.11691506 | 0.01146  | 0.168782 | 0.00025  |
| 2.94E-05 | -0.00591 | 0.89868  | 0.159713 | 0.00053  | 0.20221796 | 1.06E-05 | 0.151735 | 0.001    |
| 0.12174  | -0.567   | 4.47E-41 | -0.2925  | 1.15E-10 | -0.0030823 | 0.94704  | 0.005823 | 0.90014  |
| 0.02358  | -0.31031 | 6.99E-12 | -0.13886 | 0.00264  | 0.17570222 | 0.00014  | 0.256525 | 1.88E-08 |
| 0.10629  | -0.38543 | 5.47E-18 | -0.07827 | 0.09114  | 0.09454071 | 0.04114  | 0.119541 | 0.00972  |
| 0.62798  | 0.007445 | 0.87252  | 0.020275 | 0.66209  | 0.15329403 | 0.00089  | 0.196841 | 1.83E-05 |
| 0.13768  | -0.31304 | 4.47E-12 | -0.17291 | 0.00017  | -0.024807  | 0.59284  | 0.079107 | 0.08771  |
| 0.00592  | 0.308986 | 8.66E-12 | 0.160128 | 0.00051  | -0.1515828 | 0.00102  | -0.24837 | 5.38E-08 |
| 0.65746  | -0.24765 | 5.89E-08 | -0.15358 | 0.00087  | 0.20215783 | 1.07E-05 | 0.403316 | 1.08E-19 |
| 0.38836  | -0.33966 | 4.49E-14 | -0.1682  | 0.00026  | 0.03468483 | 0.4546   | 0.098031 | 0.03418  |
| 0.04218  | -0.47506 | 1.15E-27 | -0.27945 | 7.96E-10 | -0.0798852 | 0.08462  | 0.012135 | 0.79367  |
| 0.04074  | 0.244985 | 8.23E-08 | 0.296186 | 6.55E-11 | 0.3417188  | 3.09E-14 | 0.285764 | 3.16E-10 |
| 9.36E-06 | -0.12931 | 0.00513  | 0.059231 | 0.20136  | 0.06120158 | 0.18674  | 0.048838 | 0.29225  |
| 0.06638  | 0.351827 | 4.71E-15 | 0.393702 | 9.16E-19 | 0.08306268 | 0.07293  | -0.04601 | 0.32116  |
| 0.55225  | -0.07866 | 0.0895   | -0.00829 | 0.8582   | 0.0476974  | 0.30368  | 0.022634 | 0.62563  |
| 0.82067  | -0.12922 | 0.00516  | 0.001765 | 0.96965  | 0.24894459 | 5.00E-08 | 0.264622 | 6.36E-09 |
| 0.24669  | -0.33057 | 2.27E-13 | -0.18701 | 4.77E-05 | 0.01871423 | 0.68668  | 0.13798  | 0.00281  |
| 0.35533  | -0.51766 | 2.26E-33 | -0.24176 | 1.23E-07 | 0.06913108 | 0.13577  | 0.095303 | 0.03952  |
| 0.30601  | -0.19913 | 1.46E-05 | -0.21359 | 3.20E-06 | 0.15415393 | 0.00083  | 0.272795 | 2.06E-09 |
| 0.00522  | -0.28524 | 3.42E-10 | -0.21504 | 2.74E-06 | -0.0918312 | 0.04733  | -0.13109 | 0.00455  |
| 0.00104  | -0.41712 | 4.39E-21 | -0.26394 | 6.98E-09 | 0.00743806 | 0.87264  | 0.011395 | 0.80599  |
| 0.00014  | -0.19603 | 1.99E-05 | -0.04255 | 0.35889  | 0.07636786 | 0.09929  | 0.028853 | 0.53396  |
| 0.01889  | -0.34052 | 3.84E-14 | -0.27243 | 2.16E-09 | 0.05592114 | 0.22775  | 0.204811 | 8.14E-06 |
| 0.44053  | -0.51776 | 2.19E-33 | -0.265   | 6.04E-09 | -0.0350311 | 0.45011  | 0.037828 | 0.41474  |
| 0.01847  | -0.06349 | 0.17074  | -0.07845 | 0.09038  | 0.06692329 | 0.14875  | 0.149956 | 0.00115  |
| 0.99873  | -0.03075 | 0.50745  | -0.01301 | 0.77922  | 0.2016953  | 1.12E-05 | 0.142965 | 0.00195  |
| 0.39901  | -0.32085 | 1.21E-12 | -0.13055 | 0.00472  | 0.13833847 | 0.00274  | 0.121523 | 0.00857  |
| 0.48913  | -0.24293 | 1.06E-07 | -0.11134 | 0.01608  | 0.01842258 | 0.69131  | 0.038672 | 0.4044   |
| 0.01933  | 0.063369 | 0.17159  | 0.077484 | 0.09443  | 0.08125519 | 0.07941  | 0.233774 | 3.23E-07 |
| 0.00795  | -0.29253 | 1.15E-10 | -0.15877 | 0.00057  | 0.00254812 | 0.9562   | -0.02848 | 0.53919  |
| 0.21053  | -0.30063 | 3.28E-11 | -0.30231 | 2.52E-11 | 0.11486012 | 0.013    | 0.199022 | 1.47E-05 |
| 0.04446  | -0.51788 | 2.10E-33 | -0.38777 | 3.32E-18 | -0.1283534 | 0.00547  | 0.034103 | 0.46221  |
| 0.28233  | -0.19618 | 1.96E-05 | -0.19883 | 1.50E-05 | -0.0616821 | 0.1833   | 0.03723  | 0.42216  |
| 0.50858  | -0.39709 | 4.34E-19 | -0.25784 | 1.58E-08 | -0.0086477 | 0.85215  | 0.02309  | 0.61868  |
| 6.81E-08 | -0.14116 | 0.00223  | -0.01688 | 0.71603  | 0.07324744 | 0.11393  | 0.037524 | 0.41851  |
| 0.08499  | -0.35071 | 5.82E-15 | -0.19623 | 1.95E-05 | 0.14042915 | 0.00235  | 0.167419 | 0.00028  |
| 0.15366  | -0.18694 | 4.80E-05 | -0.08911 | 0.0543   | 0.13110851 | 0.00454  | 0.263634 | 7.27E-09 |
| 0.5236   | -0.23859 | 1.81E-07 | -0.1376  | 0.00289  | 0.04244655 | 0.36007  | 0.112972 | 0.01458  |
| 0.54748  | -0.1562  | 0.00071  | -0.10743 | 0.02023  | 0.01925673 | 0.67809  | 0.095908 | 0.03828  |
| 0.03001  | -0.2732  | 1.94E-09 | -0.08758 | 0.05861  | 0.19977679 | 1.36E-05 | 0.164775 | 0.00035  |
| 0.80969  | -0.35454 | 2.81E-15 | -0.12148 | 0.00859  | 0.28495589 | 3.57E-10 | 0.29429  | 8.77E-11 |
| 4.46E-07 | 0.388433 | 2.88E-18 | 0.192014 | 2.95E-05 | -0.1006004 | 0.02973  | -0.23939 | 1.64E-07 |
| 0.00058  | -0.20916 | 5.15E-06 | -0.12078 | 0.00899  | 0.11034075 | 0.01706  | 0.236505 | 2.33E-07 |
| 9.34E-06 | -0.26248 | 8.50E-09 | -0.10451 | 0.02391  | 0.23856151 | 1.82E-07 | 0.39243  | 1.21E-18 |
| 0.50749  | -0.2811  | 6.27E-10 | -0.13505 | 0.00346  | 0.2167     | 2.28E-06 | 0.260718 | 1.08E-08 |



|          |          |          |          |          |            |          |          |          |
|----------|----------|----------|----------|----------|------------|----------|----------|----------|
| 0.69018  | -0.25863 | 1.42E-08 | -0.16654 | 0.0003   | 0.13118626 | 0.00452  | 0.231066 | 4.45E-07 |
| 0.74511  | -0.27353 | 1.85E-09 | -0.20517 | 7.84E-06 | 0.05878042 | 0.20482  | 0.210146 | 4.64E-06 |
| 0.01185  | -0.52455 | 2.25E-34 | -0.37518 | 4.67E-17 | 0.02310387 | 0.61848  | 0.066864 | 0.14911  |
| 7.47E-12 | -0.11642 | 0.01181  | 0.033875 | 0.46522  | 0.29218298 | 1.21E-10 | 0.364212 | 4.27E-16 |
| 0.894    | -0.34017 | 4.09E-14 | -0.18747 | 4.57E-05 | 0.02242721 | 0.6288   | -0.00895 | 0.847    |
| 0.4897   | -0.15309 | 0.0009   | -0.11842 | 0.01043  | 0.23650085 | 2.33E-07 | 0.343528 | 2.22E-14 |
| 3.70E-05 | -0.36332 | 5.10E-16 | -0.18129 | 8.15E-05 | 0.14265027 | 0.002    | 0.212961 | 3.43E-06 |
| 0.32194  | 0.06298  | 0.17424  | 0.277238 | 1.09E-09 | 0.25923486 | 1.31E-08 | 0.25193  | 3.41E-08 |
| 0.71936  | -0.3293  | 2.84E-13 | -0.20794 | 5.87E-06 | 0.06225683 | 0.17925  | 0.142977 | 0.00195  |
| 0.04229  | -0.01438 | 0.75658  | 0.114922 | 0.01295  | 0.32109564 | 1.16E-12 | 0.392512 | 1.19E-18 |
| 0.06209  | 0.313849 | 3.91E-12 | 0.176732 | 0.00012  | 0.16358281 | 0.00039  | 0.146351 | 0.00152  |
| 0.07436  | -0.27241 | 2.17E-09 | -0.17947 | 9.63E-05 | 0.01188178 | 0.79788  | 0.092009 | 0.0469   |
| 0.49122  | -0.0926  | 0.0455   | -0.0462  | 0.31915  | 0.06930542 | 0.13479  | 0.15639  | 0.0007   |
| 0.57849  | -0.24921 | 4.83E-08 | 0.02368  | 0.60975  | 0.03559175 | 0.44289  | 0.077364 | 0.09495  |
| 0.26104  | -0.21893 | 1.78E-06 | -0.21663 | 2.30E-06 | 0.17155393 | 0.0002   | 0.064263 | 0.16561  |
| 0.12918  | -0.09724 | 0.03567  | 0.014259 | 0.75859  | 0.23165284 | 4.16E-07 | 0.306093 | 1.38E-11 |
| 1.80E-08 | -0.46916 | 6.18E-27 | -0.13178 | 0.00434  | 0.11004284 | 0.01736  | 0.106084 | 0.02186  |
| 0.02867  | -0.06712 | 0.14756  | 0.012793 | 0.78276  | 0.1098688  | 0.01754  | 0.112307 | 0.01518  |
| 0.0008   | -0.28111 | 6.26E-10 | -0.16968 | 0.00023  | -0.0369485 | 0.42569  | -0.09597 | 0.03816  |
| 0.29255  | 0.254259 | 2.52E-08 | 0.141233 | 0.00222  | -0.2159453 | 2.48E-06 | -0.23214 | 3.92E-07 |
| 0.69036  | -0.56192 | 3.19E-40 | -0.31218 | 5.15E-12 | 0.0324278  | 0.4845   | 0.127226 | 0.0059   |
| 0.14542  | -0.32094 | 1.20E-12 | -0.10583 | 0.02218  | 0.04908703 | 0.28979  | 0.050882 | 0.2725   |
| 0.01661  | -0.41777 | 3.76E-21 | -0.26718 | 4.48E-09 | 0.06555905 | 0.15722  | 0.140036 | 0.00242  |
| 2.41E-05 | -0.41503 | 7.20E-21 | -0.16341 | 0.00039  | 0.22000035 | 1.58E-06 | 0.237831 | 1.99E-07 |
| 6.48E-09 | -0.48371 | 9.26E-29 | -0.18386 | 6.42E-05 | -0.0125497 | 0.78679  | 0.010125 | 0.82725  |
| 0.64877  | -0.51194 | 1.47E-32 | -0.3236  | 7.60E-13 | 0.03198001 | 0.49056  | 0.180229 | 8.99E-05 |
| 1.03E-05 | -0.36668 | 2.62E-16 | -0.18679 | 4.88E-05 | -0.0131027 | 0.77763  | 0.062451 | 0.17789  |
| 0.09839  | 0.014551 | 0.75381  | 0.123968 | 0.00732  | 0.20169467 | 1.12E-05 | 0.301579 | 2.83E-11 |
| 0.86253  | -0.30708 | 1.18E-11 | -0.20494 | 8.03E-06 | -0.0021122 | 0.96369  | 0.124862 | 0.0069   |
| 0.99489  | 0.23799  | 1.95E-07 | 0.257384 | 1.68E-08 | -0.1084456 | 0.01907  | -0.30972 | 7.70E-12 |
| 0.89494  | -0.16015 | 0.00051  | 0.019119 | 0.68027  | 0.26592081 | 5.33E-09 | 0.43646  | 3.84E-23 |
| 7.24E-06 | -0.44988 | 1.19E-24 | -0.1997  | 1.37E-05 | 0.24803833 | 5.61E-08 | 0.157436 | 0.00064  |
| 0.40903  | -0.31173 | 5.54E-12 | -0.16644 | 0.0003   | 0.05545273 | 0.23168  | 0.055241 | 0.23346  |
| 0.83259  | -0.38377 | 7.78E-18 | -0.19705 | 1.79E-05 | 0.09822763 | 0.03382  | 0.091943 | 0.04706  |
| 0.43939  | -0.25358 | 2.75E-08 | -0.09056 | 0.05048  | 0.03982721 | 0.3905   | 0.063226 | 0.17256  |
| 0.90844  | -0.17703 | 0.00012  | -0.10385 | 0.02482  | 0.06907108 | 0.13611  | 0.071217 | 0.12433  |
| 2.94E-08 | -0.2496  | 4.60E-08 | -0.0998  | 0.03106  | 0.1673923  | 0.00028  | 0.164869 | 0.00035  |
| 0.01906  | 0.375873 | 4.05E-17 | 0.309438 | 8.05E-12 | 0.27210071 | 2.27E-09 | 0.232803 | 3.63E-07 |
| 0.00029  | -0.2858  | 3.15E-10 | -0.29527 | 7.55E-11 | -0.0255718 | 0.58148  | -0.08446 | 0.06821  |
| 0.24873  | 0.249302 | 4.78E-08 | 0.074757 | 0.10665  | -0.087727  | 0.05818  | -0.10592 | 0.02206  |
| 0.0084   | -0.38434 | 6.90E-18 | -0.30733 | 1.13E-11 | 0.0658911  | 0.15513  | 0.227245 | 6.95E-07 |
| 0.67653  | -0.35462 | 2.76E-15 | -0.29724 | 5.57E-11 | -0.0492773 | 0.28793  | 0.057947 | 0.21132  |
| 0.86583  | -0.05274 | 0.25534  | 0.004747 | 0.9185   | 0.12739546 | 0.00584  | 0.206439 | 6.87E-06 |
| 0.39939  | -0.12357 | 0.00751  | 0.017223 | 0.71048  | -0.0037637 | 0.93535  | -0.088   | 0.05738  |
| 0.5815   | -0.47334 | 1.89E-27 | -0.25401 | 2.61E-08 | 0.05194538 | 0.26259  | 0.169592 | 0.00023  |

|          |          |          |          |          |            |          |           |          |
|----------|----------|----------|----------|----------|------------|----------|-----------|----------|
| 0.00486  | 0.291315 | 1.38E-10 | 0.128656 | 0.00536  | 0.10840862 | 0.01911  | 0.096686  | 0.03673  |
| 0.60168  | -0.28072 | 6.63E-10 | -0.18243 | 7.34E-05 | -0.0620304 | 0.18084  | -0.03343  | 0.47108  |
| 0.15717  | -0.21321 | 3.34E-06 | -0.05905 | 0.20271  | 0.14798655 | 0.00134  | 0.224414  | 9.62E-07 |
| 0.00023  | -0.29301 | 1.07E-10 | -0.07708 | 0.09616  | 0.29424419 | 8.83E-11 | 0.439789  | 1.65E-23 |
| 4.91E-08 | -0.13694 | 0.00302  | -0.04676 | 0.31329  | 0.00414345 | 0.92884  | -0.05167  | 0.26513  |
| 0.29959  | -0.22357 | 1.06E-06 | -0.05553 | 0.23105  | 0.2523869  | 3.22E-08 | 0.379903  | 1.76E-17 |
| 0.65311  | -0.16663 | 0.0003   | -0.17324 | 0.00017  | 0.07690627 | 0.09692  | 0.100348  | 0.03014  |
| 0.82304  | -0.39257 | 1.17E-18 | -0.25792 | 1.56E-08 | 0.10620934 | 0.0217   | 0.235476  | 2.64E-07 |
| 0.01855  | 0.369872 | 1.38E-16 | 0.347508 | 1.06E-14 | 0.29546532 | 7.32E-11 | 0.151608  | 0.00101  |
| 0.68099  | -0.33732 | 6.85E-14 | -0.12792 | 0.00563  | 0.12830444 | 0.00549  | 0.187933  | 4.37E-05 |
| 8.41E-20 | -0.39755 | 3.92E-19 | -0.19887 | 1.50E-05 | 0.1345798  | 0.00357  | 0.209821  | 4.81E-06 |
| 0.32314  | -0.37716 | 3.11E-17 | -0.16095 | 0.00048  | 0.19217826 | 2.90E-05 | 0.31345   | 4.18E-12 |
| 0.00055  | 0.199    | 1.48E-05 | -0.03122 | 0.50094  | -0.0675188 | 0.14516  | -0.0881   | 0.05712  |
| 0.01007  | -0.13663 | 0.00309  | -0.00809 | 0.86151  | 0.1079783  | 0.0196   | 0.180461  | 8.80E-05 |
| 0.9988   | 0.206517 | 6.81E-06 | 0.176487 | 0.00013  | -0.0328632 | 0.47866  | -0.13693  | 0.00303  |
| 0.46104  | -0.37203 | 8.90E-17 | -0.23082 | 4.59E-07 | -0.1154261 | 0.01256  | -0.11149  | 0.01593  |
| 2.17E-11 | -0.30876 | 8.99E-12 | -0.16036 | 0.0005   | 0.22642002 | 7.64E-07 | 0.342602  | 2.63E-14 |
| 0.03898  | -0.12714 | 0.00594  | -0.08162 | 0.07806  | -0.0458006 | 0.32334  | 0.053274  | 0.25056  |
| 0.00034  | -0.15901 | 0.00056  | -0.13041 | 0.00476  | 0.19771937 | 1.68E-05 | 0.285759  | 3.17E-10 |
| 0.00019  | 0.026875 | 0.56238  | 0.05767  | 0.21351  | 0.29514484 | 7.69E-11 | 0.330295  | 2.39E-13 |
| 0.11086  | -0.1684  | 0.00026  | -0.10788 | 0.0197   | 0.24428157 | 8.99E-08 | 0.363018  | 5.41E-16 |
| 0.00198  | -0.1089  | 0.01857  | -0.06064 | 0.19081  | 0.25345769 | 2.80E-08 | 0.327508  | 3.88E-13 |
| 0.5435   | -0.36212 | 6.45E-16 | -0.2322  | 3.90E-07 | 0.05985627 | 0.19664  | 0.135667  | 0.00331  |
| 0.73056  | -0.32513 | 5.85E-13 | -0.22753 | 6.73E-07 | 0.11274987 | 0.01478  | 0.226846  | 7.28E-07 |
| 0.65591  | -0.27056 | 2.81E-09 | -0.16633 | 0.00031  | 0.0924575  | 0.04583  | 0.129232  | 0.00516  |
| 0.62717  | -0.22086 | 1.44E-06 | -0.08982 | 0.05241  | 0.1604805  | 0.0005   | 0.170575  | 0.00021  |
| 0.2755   | -0.07857 | 0.08988  | -0.08823 | 0.05675  | 0.11446819 | 0.01332  | 0.12379   | 0.0074   |
| 0.01734  | -0.3716  | 9.73E-17 | -0.13883 | 0.00264  | 0.28945283 | 1.83E-10 | 0.347066  | 1.15E-14 |
| 0.9378   | -0.38232 | 1.06E-17 | -0.18131 | 8.14E-05 | 0.20835016 | 5.62E-06 | 0.293626  | 9.70E-11 |
| 0.98933  | -0.35688 | 1.79E-15 | -0.16056 | 0.0005   | 0.26219365 | 8.83E-09 | 0.320717  | 1.24E-12 |
| 0.91414  | -0.34764 | 1.03E-14 | -0.18509 | 5.72E-05 | 0.26511048 | 5.95E-09 | 0.35498   | 2.58E-15 |
| 0.72133  | -0.27729 | 1.09E-09 | -0.21498 | 2.76E-06 | 0.16482135 | 0.00035  | 0.275012  | 1.50E-09 |
| 0.66744  | -0.19901 | 1.47E-05 | -0.14906 | 0.00124  | 0.16772185 | 0.00027  | 0.258954  | 1.36E-08 |
| 0.0461   | -0.23422 | 3.06E-07 | -0.06904 | 0.13628  | 0.30160104 | 2.82E-11 | 0.378893  | 2.17E-17 |
| 0.00052  | -0.19508 | 2.18E-05 | -0.03712 | 0.42357  | 0.25138849 | 3.66E-08 | 0.295658  | 7.11E-11 |
| 0.26984  | -0.25495 | 2.31E-08 | -0.02228 | 0.63106  | 0.37885319 | 2.19E-17 | 0.396188  | 5.30E-19 |
| 0.10947  | 0.266805 | 4.72E-09 | 0.204771 | 8.17E-06 | 0.13501007 | 0.00346  | 0.033211  | 0.47401  |
| 0.93584  | -0.22709 | 7.08E-07 | -0.17313 | 0.00017  | 0.10068857 | 0.02959  | 0.259877  | 1.20E-08 |
| 0.14977  | -0.3658  | 3.12E-16 | -0.26923 | 3.38E-09 | -0.0205429 | 0.65792  | 0.120838  | 0.00895  |
| 0.12145  | -0.30711 | 1.17E-11 | -0.14388 | 0.00183  | -0.0047875 | 0.91782  | -4.21E-05 | 0.99928  |
| 0.63343  | -0.33252 | 1.61E-13 | -0.11924 | 0.0099   | 0.0454769  | 0.32677  | 0.090527  | 0.05057  |
| 0.10053  | -0.55402 | 6.34E-39 | -0.23336 | 3.40E-07 | 0.07827874 | 0.09109  | 0.093139  | 0.04425  |
| 4.34E-10 | -0.31949 | 1.53E-12 | -0.27393 | 1.75E-09 | 0.13791758 | 0.00282  | 0.326473  | 4.64E-13 |
| 0.53139  | -0.33515 | 1.01E-13 | -0.18843 | 4.17E-05 | 0.14339494 | 0.00189  | 0.270758  | 2.73E-09 |
| 0.00046  | -0.46591 | 1.54E-26 | -0.23067 | 4.66E-07 | 0.17551893 | 0.00014  | 0.274635  | 1.59E-09 |

|          |          |          |          |          |            |          |          |          |
|----------|----------|----------|----------|----------|------------|----------|----------|----------|
| 0.00652  | -0.30455 | 1.77E-11 | -0.17579 | 0.00013  | 0.16403664 | 0.00037  | 0.319372 | 1.56E-12 |
| 0.0003   | -0.39789 | 3.63E-19 | -0.22538 | 8.62E-07 | 0.13510175 | 0.00344  | 0.248657 | 5.18E-08 |
| 0.01494  | -0.12436 | 0.00713  | 0.027161 | 0.55821  | 0.1211853  | 0.00875  | 0.165179 | 0.00034  |
| 0.22322  | 0.442495 | 8.23E-24 | 0.488178 | 2.45E-29 | 0.18456491 | 6.01E-05 | 0.168227 | 0.00026  |
| 0.74744  | -0.35199 | 4.56E-15 | -0.1145  | 0.01329  | 0.17105459 | 0.0002   | 0.342    | 2.93E-14 |
| 0.0017   | -0.26576 | 5.45E-09 | -0.11531 | 0.01265  | 0.01744148 | 0.70697  | -0.08254 | 0.07474  |
| 0.71204  | -0.41617 | 5.50E-21 | -0.18292 | 7.01E-05 | 0.08211058 | 0.07628  | 0.130932 | 0.0046   |
| 0.89277  | -0.13921 | 0.00257  | -0.07668 | 0.09791  | -0.0248863 | 0.59166  | -0.1753  | 0.00014  |
| 0.41576  | -0.10983 | 0.01758  | -0.06467 | 0.16291  | 0.03634319 | 0.43331  | 0.097727 | 0.03475  |
| 0.9039   | -0.31155 | 5.71E-12 | -0.09852 | 0.03329  | -0.0072755 | 0.8754   | -0.0478  | 0.30265  |
| 4.52E-07 | -0.30407 | 1.91E-11 | -0.11195 | 0.01551  | 0.16478431 | 0.00035  | 0.215789 | 2.52E-06 |
| 0.96914  | -0.42451 | 7.44E-22 | -0.14805 | 0.00133  | 0.07719037 | 0.09569  | 0.105336 | 0.02281  |
| 0.2461   | -0.54418 | 2.35E-37 | -0.31613 | 2.68E-12 | 0.16491961 | 0.00035  | 0.18726  | 4.66E-05 |
| 0.98326  | 0.333287 | 1.41E-13 | 0.254158 | 2.56E-08 | 0.22849358 | 6.02E-07 | 0.244316 | 8.95E-08 |
| 0.45614  | -0.46    | 7.86E-26 | -0.20236 | 1.05E-05 | 0.11288162 | 0.01466  | 0.179631 | 9.49E-05 |
| 0.06543  | -0.07025 | 0.12952  | 0.171621 | 0.00019  | 0.14251914 | 0.00202  | -0.00813 | 0.86096  |
| 0.46774  | -0.13324 | 0.00392  | -0.04315 | 0.35221  | 0.03280135 | 0.47948  | 0.053214 | 0.25109  |
| 0.85054  | -0.31127 | 5.97E-12 | -0.07875 | 0.08917  | 0.21019414 | 4.62E-06 | 0.196392 | 1.92E-05 |
| 0.02836  | -0.20044 | 1.28E-05 | -0.10314 | 0.02583  | 0.22683366 | 7.29E-07 | 0.297683 | 5.20E-11 |
| 0.52195  | 0.435621 | 4.75E-23 | 0.293141 | 1.04E-10 | 0.1821518  | 7.53E-05 | 0.144926 | 0.00169  |
| 0.01847  | 0.237194 | 2.15E-07 | 0.235808 | 2.54E-07 | 0.25324685 | 2.88E-08 | 0.101315 | 0.02858  |
| 0.79148  | 0.528553 | 5.77E-35 | 0.543732 | 2.77E-37 | 0.26751951 | 4.28E-09 | 0.132022 | 0.00426  |
| 0.28694  | -0.43753 | 2.93E-23 | -0.11744 | 0.01109  | 0.14773594 | 0.00137  | 0.171903 | 0.00019  |
| 0.0643   | -0.22516 | 8.84E-07 | -0.10306 | 0.02594  | -0.0442783 | 0.3397   | -0.1036  | 0.02517  |
| 9.36E-06 | -0.28629 | 2.93E-10 | -0.20741 | 6.20E-06 | -0.0234548 | 0.61316  | -0.02609 | 0.57391  |
| 0.83338  | 0.204045 | 8.81E-06 | 0.170392 | 0.00022  | -0.0217892 | 0.6386   | -0.09743 | 0.0353   |
| 9.51E-11 | -0.25369 | 2.72E-08 | -0.14155 | 0.00217  | 0.16350729 | 0.00039  | 0.313727 | 3.99E-12 |
| 0.88542  | -0.58111 | 1.58E-43 | -0.3021  | 2.61E-11 | -0.0354746 | 0.44439  | -0.03707 | 0.42411  |
| 0.11116  | -0.2794  | 8.02E-10 | -0.19176 | 3.02E-05 | 0.06805137 | 0.14201  | 0.233658 | 3.28E-07 |
| 0.22305  | -0.38514 | 5.82E-18 | -0.16693 | 0.00029  | 0.00353725 | 0.93923  | 0.039539 | 0.39394  |
| 0.04948  | -0.29267 | 1.12E-10 | -0.14387 | 0.00183  | 0.10201569 | 0.02749  | 0.072136 | 0.11954  |
| 0.93686  | -0.44332 | 6.65E-24 | -0.1517  | 0.00101  | 0.12499935 | 0.00684  | 0.174892 | 0.00015  |
| 4.96E-16 | -0.23256 | 3.73E-07 | -0.19602 | 1.99E-05 | 0.10504548 | 0.02319  | 0.246098 | 7.16E-08 |
| 0.08744  | -0.30961 | 7.83E-12 | 0.023823 | 0.60759  | 0.22639395 | 7.67E-07 | 0.211759 | 3.91E-06 |
| 0.54963  | -0.37894 | 2.15E-17 | -0.26155 | 9.62E-09 | -0.0612291 | 0.18655  | -0.08154 | 0.07837  |
| 0.1272   | 0.266643 | 4.83E-09 | 0.186059 | 5.22E-05 | 0.10033752 | 0.03016  | -0.02689 | 0.56222  |
| 6.46E-11 | -0.31119 | 6.06E-12 | -0.30308 | 2.23E-11 | -0.0058261 | 0.90007  | 0.062765 | 0.17571  |
| 0.01819  | -0.24118 | 1.32E-07 | -0.08697 | 0.06038  | 0.27468571 | 1.57E-09 | 0.459045 | 1.02E-25 |
| 0.29726  | -0.36637 | 2.79E-16 | -0.30962 | 7.82E-12 | 0.17471719 | 0.00015  | 0.038681 | 0.40429  |
| 0.16184  | -0.31718 | 2.25E-12 | -0.23535 | 2.68E-07 | 0.30511212 | 1.62E-11 | 0.501502 | 4.11E-31 |
| 0.37826  | -0.45584 | 2.43E-25 | -0.29402 | 9.14E-11 | -0.1198274 | 0.00954  | -0.09225 | 0.04633  |
| 0.17351  | 0.403258 | 1.09E-19 | 0.477878 | 5.11E-28 | 0.2511404  | 3.78E-08 | 0.058079 | 0.21028  |
| 0.61017  | -0.27532 | 1.44E-09 | -0.09258 | 0.04554  | 0.14389384 | 0.00182  | 0.147964 | 0.00134  |
| 0.0117   | -0.41278 | 1.22E-20 | -0.28851 | 2.10E-10 | 0.11275445 | 0.01477  | 0.278439 | 9.21E-10 |
| 0.45173  | -0.48389 | 8.79E-29 | -0.35979 | 1.02E-15 | -0.1480121 | 0.00134  | -0.09437 | 0.0415   |

|          |          |          |          |          |            |          |          |          |
|----------|----------|----------|----------|----------|------------|----------|----------|----------|
| 2.32E-12 | -0.36743 | 2.25E-16 | -0.20051 | 1.27E-05 | 0.15373404 | 0.00086  | 0.163176 | 0.0004   |
| 0.79342  | -0.38104 | 1.39E-17 | -0.20217 | 1.07E-05 | 0.08172107 | 0.07769  | 0.178318 | 0.00011  |
| 0.0791   | 0.346402 | 1.30E-14 | 0.225574 | 8.43E-07 | 0.08732078 | 0.05935  | 0.061605 | 0.18385  |
| 0.89376  | -0.25225 | 3.27E-08 | -0.23756 | 2.05E-07 | 0.09999798 | 0.03073  | 0.248203 | 5.49E-08 |
| 0.0003   | -0.43644 | 3.87E-23 | -0.29477 | 8.14E-11 | -0.0092852 | 0.84139  | -0.01433 | 0.75744  |
| 0.50595  | -0.43632 | 3.98E-23 | -0.27961 | 7.78E-10 | -0.0815578 | 0.07829  | -0.0903  | 0.05116  |
| 0.93223  | -0.43677 | 3.56E-23 | -0.24195 | 1.20E-07 | 0.04013204 | 0.38688  | 0.140648 | 0.00232  |
| 0.66503  | 0.267837 | 4.10E-09 | 0.27316  | 1.95E-09 | 0.02140121 | 0.64459  | -0.10303 | 0.02599  |
| 0.30907  | -0.32966 | 2.67E-13 | -0.1341  | 0.00369  | 0.02527618 | 0.58586  | 0.095657 | 0.03879  |
| 0.8529   | -0.42654 | 4.54E-22 | -0.20977 | 4.83E-06 | 0.18101885 | 8.36E-05 | 0.316241 | 2.63E-12 |
| 7.11E-05 | -0.45749 | 1.56E-25 | -0.35344 | 3.46E-15 | 0.06335215 | 0.1717   | 0.114455 | 0.01333  |
| 0.3632   | -0.24575 | 7.48E-08 | -0.10414 | 0.02441  | 0.15695882 | 0.00066  | 0.306117 | 1.38E-11 |
| 0.01832  | -0.43203 | 1.17E-22 | -0.13236 | 0.00417  | 0.12001325 | 0.00943  | 0.167293 | 0.00028  |
| 4.74E-05 | 0.135646 | 0.00331  | 0.061434 | 0.18507  | -0.0834709 | 0.07152  | -0.23392 | 3.18E-07 |
| 0.05262  | -0.20273 | 1.01E-05 | -0.05805 | 0.2105   | 0.0010604  | 0.98177  | -0.05161 | 0.26569  |
| 0.00507  | -0.45474 | 3.27E-25 | -0.17665 | 0.00012  | 0.16729963 | 0.00028  | 0.144315 | 0.00177  |
| 5.82E-05 | 0.341082 | 3.47E-14 | 0.25902  | 1.35E-08 | 0.10138868 | 0.02847  | -0.01066 | 0.81824  |
| 0.00169  | 0.451251 | 8.31E-25 | 0.532849 | 1.31E-35 | 0.17262694 | 0.00018  | -0.04063 | 0.38099  |
| 0.0162   | -0.06303 | 0.17391  | 0.310059 | 7.28E-12 | 0.39886737 | 2.92E-19 | 0.240375 | 1.46E-07 |
| 0.48894  | -0.38125 | 1.32E-17 | -0.28152 | 5.90E-10 | -0.0654853 | 0.15769  | -0.05563 | 0.23021  |
| 0.93938  | 0.165163 | 0.00034  | 0.340903 | 3.58E-14 | 0.31973248 | 1.47E-12 | 0.057943 | 0.21136  |
| 0.00569  | -0.06474 | 0.16248  | 0.023414 | 0.61378  | 0.18085267 | 8.49E-05 | 0.301123 | 3.04E-11 |
| 0.98857  | -0.35467 | 2.74E-15 | -0.26539 | 5.73E-09 | 0.09890246 | 0.03261  | 0.093706 | 0.04297  |
| 0.17164  | -0.42397 | 8.50E-22 | -0.21194 | 3.83E-06 | 0.02880729 | 0.53461  | 0.013681 | 0.76809  |
| 0.01553  | 0.233631 | 3.29E-07 | -0.0125  | 0.78764  | 0.0715392  | 0.12263  | 0.098455 | 0.03341  |
| 0.06646  | -0.3339  | 1.26E-13 | -0.14695 | 0.00145  | 0.10277996 | 0.02635  | 0.069261 | 0.13504  |
| 0.00166  | -0.3523  | 4.30E-15 | -0.15809 | 0.00061  | 0.05161459 | 0.26564  | 0.181224 | 8.20E-05 |
| 0.8701   | -0.46554 | 1.71E-26 | -0.2491  | 4.90E-08 | 0.16285404 | 0.00041  | 0.270886 | 2.68E-09 |
| 0.04162  | -0.22689 | 7.24E-07 | -0.08143 | 0.07877  | -0.0207777 | 0.65426  | -0.13957 | 0.0025   |
| 0.00817  | -0.24552 | 7.70E-08 | -0.22075 | 1.46E-06 | -0.3565749 | 1.90E-15 | -0.39473 | 7.31E-19 |
| 0.29224  | -0.04242 | 0.36033  | 0.004188 | 0.92809  | 0.17168547 | 0.00019  | 0.134131 | 0.00368  |
| 0.65796  | -0.40208 | 1.42E-19 | -0.1838  | 6.46E-05 | 0.12571751 | 0.00652  | 0.220041 | 1.58E-06 |
| 0.00081  | 0.308577 | 9.26E-12 | 0.119691 | 0.00963  | 0.00129326 | 0.97776  | -0.00442 | 0.92411  |
| 0.00105  | -0.05677 | 0.22076  | 0.030411 | 0.5121   | 0.33863706 | 5.40E-14 | 0.349456 | 7.36E-15 |
| 0.82602  | -0.23909 | 1.71E-07 | -0.12606 | 0.00638  | 0.1837639  | 6.48E-05 | 0.306479 | 1.30E-11 |
| 0.90827  | -0.43398 | 7.19E-23 | -0.17165 | 0.00019  | 0.09399026 | 0.04234  | 0.113846 | 0.01383  |
| 0.28215  | -0.48976 | 1.52E-29 | -0.24734 | 6.13E-08 | 0.0381469  | 0.41082  | 0.065648 | 0.15666  |
| 0.00041  | -0.17637 | 0.00013  | -0.07234 | 0.1185   | 0.08848558 | 0.05603  | 0.191982 | 2.96E-05 |
| 0.00114  | -0.4637  | 2.84E-26 | -0.34361 | 2.18E-14 | 0.01119586 | 0.80932  | 0.16898  | 0.00024  |
| 1.06E-07 | -0.04297 | 0.35416  | 0.086914 | 0.06055  | 0.15534645 | 0.00076  | 0.161886 | 0.00044  |
| 0.02371  | -0.16512 | 0.00034  | -0.04489 | 0.33303  | 0.18208567 | 7.57E-05 | 0.301661 | 2.79E-11 |
| 2.92E-06 | -0.24485 | 8.38E-08 | -0.07223 | 0.11907  | 0.2130978  | 3.38E-06 | 0.273932 | 1.75E-09 |
| 5.80E-10 | 0.177274 | 0.00012  | 0.171611 | 0.00019  | 0.2281468  | 6.26E-07 | 0.089808 | 0.05244  |
| 0.9341   | -0.34277 | 2.55E-14 | -0.30183 | 2.72E-11 | -0.216892  | 2.23E-06 | -0.28379 | 4.23E-10 |
| 0.15237  | 0.34569  | 1.49E-14 | 0.487071 | 3.41E-29 | 0.42053261 | 1.95E-21 | 0.270255 | 2.93E-09 |

|          |          |          |          |          |            |          |          |          |
|----------|----------|----------|----------|----------|------------|----------|----------|----------|
| 0.03865  | -0.13383 | 0.00376  | -0.03546 | 0.44452  | 0.25211755 | 3.33E-08 | 0.337989 | 6.07E-14 |
| 0.13899  | -0.43203 | 1.17E-22 | -0.22728 | 6.92E-07 | 0.07843012 | 0.09046  | 0.208518 | 5.52E-06 |
| 0.8186   | -0.42267 | 1.16E-21 | -0.17705 | 0.00012  | 0.06843577 | 0.13976  | 0.081026 | 0.08026  |
| 0.69292  | -0.27889 | 8.63E-10 | -0.22168 | 1.31E-06 | 0.06550051 | 0.1576   | 0.239295 | 1.66E-07 |
| 0.19942  | -0.22053 | 1.49E-06 | -0.08242 | 0.07517  | 0.11358677 | 0.01405  | 0.138629 | 0.00268  |
| 0.24564  | -0.14563 | 0.0016   | -0.00558 | 0.90436  | 0.12321089 | 0.00768  | 0.222581 | 1.18E-06 |
| 0.74677  | -0.27519 | 1.47E-09 | -0.09663 | 0.03684  | 0.20802152 | 5.81E-06 | 0.153064 | 0.00091  |
| 0.34467  | -0.35904 | 1.18E-15 | -0.18923 | 3.86E-05 | -0.1082064 | 0.01934  | -0.0908  | 0.04987  |
| 0.90576  | -0.31985 | 1.44E-12 | -0.11851 | 0.01037  | 0.11987338 | 0.00952  | 0.265851 | 5.38E-09 |
| 0.02188  | 0.219571 | 1.66E-06 | 0.088757 | 0.05528  | -0.0276741 | 0.55081  | -0.05208 | 0.26131  |
| 0.73903  | -0.18188 | 7.72E-05 | -0.1331  | 0.00396  | 0.10746149 | 0.02019  | 0.150243 | 0.00113  |
| 0.90508  | -0.23134 | 4.31E-07 | -0.12734 | 0.00586  | 0.08829351 | 0.05657  | 0.158083 | 0.00061  |
| 0.00092  | 0.199753 | 1.37E-05 | 0.01821  | 0.69469  | 0.03896147 | 0.40089  | -0.07743 | 0.09466  |
| 0.00981  | 0.174166 | 0.00016  | 0.086645 | 0.06136  | -0.0351798 | 0.44819  | -0.23934 | 1.65E-07 |
| 0.48352  | -0.16881 | 0.00025  | -0.19655 | 1.89E-05 | 0.05848729 | 0.20709  | 0.146563 | 0.00149  |
| 0.58157  | -0.25703 | 1.76E-08 | -0.17385 | 0.00016  | -0.0760787 | 0.10058  | -0.13872 | 0.00266  |
| 0.93267  | -0.28275 | 4.93E-10 | -0.18807 | 4.32E-05 | 0.00693457 | 0.88119  | 0.013356 | 0.77344  |
| 2.08E-12 | -0.25583 | 2.05E-08 | -0.15817 | 0.0006   | 0.12820483 | 0.00553  | 0.257448 | 1.66E-08 |
| 9.03E-24 | -0.17082 | 0.00021  | -0.03933 | 0.3965   | 0.1354324  | 0.00336  | 0.239715 | 1.58E-07 |
| 0.08797  | -0.10107 | 0.02896  | -0.05316 | 0.25161  | 0.07221943 | 0.11911  | 0.127529 | 0.00578  |
| 0.05391  | -0.39786 | 3.66E-19 | -0.16987 | 0.00023  | 0.13971651 | 0.00248  | 0.241117 | 1.33E-07 |
| 0.00229  | -0.2397  | 1.58E-07 | 0.035752 | 0.44083  | 0.1000747  | 0.0306   | 0.055798 | 0.22878  |
| 0.57549  | -0.42433 | 7.78E-22 | -0.20579 | 7.35E-06 | -0.0110531 | 0.8117   | -0.0544  | 0.24063  |
| 9.83E-21 | -0.27182 | 2.36E-09 | -0.08218 | 0.07602  | 0.33313643 | 1.45E-13 | 0.348901 | 8.17E-15 |
| 0.01959  | -0.3516  | 4.92E-15 | -0.24638 | 6.91E-08 | 0.13256315 | 0.00411  | 0.04767  | 0.30396  |
| 0.65158  | -0.29429 | 8.77E-11 | -0.14028 | 0.00238  | 0.10938604 | 0.01805  | 0.191447 | 3.12E-05 |
| 0.06834  | -0.39783 | 3.69E-19 | -0.36238 | 6.13E-16 | -0.0381472 | 0.41082  | 0.074619 | 0.1073   |
| 9.95E-10 | -0.23397 | 3.16E-07 | -0.17766 | 0.00011  | -0.0146128 | 0.7528   | -0.02185 | 0.63771  |
| 0.0143   | -0.38289 | 9.38E-18 | -0.29388 | 9.34E-11 | -0.203915  | 8.93E-06 | -0.25155 | 3.58E-08 |
| 0.01215  | -0.47311 | 2.01E-27 | -0.21503 | 2.74E-06 | 0.20140798 | 1.16E-05 | 0.256664 | 1.84E-08 |
| 0.37997  | -0.38455 | 6.59E-18 | -0.18052 | 8.75E-05 | 0.06499158 | 0.16086  | 0.135551 | 0.00334  |
| 0.99254  | -0.10401 | 0.0246   | -0.15999 | 0.00052  | -0.0564274 | 0.22356  | -0.01186 | 0.79833  |
| 0.46178  | -0.4805  | 2.38E-28 | -0.20214 | 1.07E-05 | 0.09229396 | 0.04622  | 0.163882 | 0.00038  |
| 0.89591  | -0.42533 | 6.10E-22 | -0.14218 | 0.00207  | 0.14639839 | 0.00151  | 0.160522 | 0.0005   |
| 0.0885   | -0.40372 | 9.81E-20 | -0.34381 | 2.10E-14 | -0.1456229 | 0.0016   | -0.17394 | 0.00016  |
| 0.0107   | -0.21136 | 4.08E-06 | -0.12661 | 0.00615  | -0.0059173 | 0.89852  | 0.080549 | 0.08206  |
| 0.01212  | -0.21536 | 2.64E-06 | -0.08705 | 0.06015  | 0.38061522 | 1.51E-17 | 0.500863 | 5.02E-31 |
| 0.92369  | 0.137602 | 0.00288  | 0.034229 | 0.46056  | -0.1143527 | 0.01341  | -0.33186 | 1.81E-13 |
| 0.12353  | -0.05979 | 0.19711  | -0.06542 | 0.1581   | 0.16935351 | 0.00024  | 0.264083 | 6.84E-09 |
| 0.37527  | -0.45017 | 1.11E-24 | -0.12725 | 0.00589  | 0.10524616 | 0.02293  | 0.099852 | 0.03097  |
| 1.04E-10 | -0.13893 | 0.00262  | -0.03323 | 0.47378  | 0.09129728 | 0.04863  | 0.174918 | 0.00015  |
| 0.20889  | -0.2513  | 3.70E-08 | -0.10818 | 0.01936  | 0.08531268 | 0.06547  | 0.148779 | 0.00126  |
| 0.98761  | -0.45009 | 1.13E-24 | -0.16482 | 0.00035  | 0.01650442 | 0.72204  | -0.00115 | 0.98019  |
| 0.94823  | -0.24953 | 4.64E-08 | -0.17739 | 0.00012  | 0.05138237 | 0.2678   | 0.148633 | 0.00128  |
| 0.00914  | 0.463605 | 2.92E-26 | 0.485566 | 5.34E-29 | 0.25738032 | 1.68E-08 | 0.09136  | 0.04848  |

|          |          |          |          |          |            |          |          |          |
|----------|----------|----------|----------|----------|------------|----------|----------|----------|
| 0.10931  | -0.27605 | 1.30E-09 | -0.08113 | 0.07987  | 0.05385597 | 0.24541  | 0.037274 | 0.42162  |
| 5.91E-06 | 0.446771 | 2.71E-24 | 0.375627 | 4.27E-17 | 0.19720809 | 1.77E-05 | 0.146156 | 0.00154  |
| 0.05462  | -0.22387 | 1.02E-06 | -0.01552 | 0.73806  | 0.30969615 | 7.72E-12 | 0.316444 | 2.55E-12 |
| 0.05252  | 0.025183 | 0.58724  | 0.043544 | 0.34777  | -0.2013308 | 1.16E-05 | -0.2794  | 8.02E-10 |
| 2.85E-06 | 0.06615  | 0.15351  | 0.204501 | 8.40E-06 | 0.02592318 | 0.5763   | -0.08989 | 0.05223  |
| 0.56954  | -0.10048 | 0.02992  | 0.07592  | 0.10129  | 0.46031227 | 7.22E-26 | 0.645024 | 2.74E-56 |
| 0.13885  | -0.25594 | 2.02E-08 | -0.09542 | 0.03929  | 0.13294252 | 0.004    | 0.272054 | 2.28E-09 |
| 0.40004  | -0.19034 | 3.47E-05 | -0.13125 | 0.0045   | -0.005472  | 0.90612  | 0.060908 | 0.18887  |
| 0.12617  | -0.37349 | 6.61E-17 | -0.23189 | 4.04E-07 | -0.0426865 | 0.35736  | -0.13368 | 0.0038   |
| 0.61013  | -0.0886  | 0.05572  | -0.1402  | 0.00239  | -0.0813589 | 0.07902  | 0.063456 | 0.171    |
| 0.55912  | -0.19501 | 2.20E-05 | -0.13815 | 0.00277  | 0.03056618 | 0.50994  | 0.103227 | 0.0257   |
| 0.3409   | -0.2064  | 6.90E-06 | -0.08148 | 0.07858  | 0.14864842 | 0.00127  | 0.293032 | 1.06E-10 |
| 0.84654  | -0.17129 | 0.0002   | 0.039413 | 0.39545  | 0.16501538 | 0.00034  | 0.102422 | 0.02688  |
| 0.31966  | -0.54669 | 9.46E-38 | -0.26902 | 3.48E-09 | -0.0696767 | 0.13271  | -0.1399  | 0.00244  |
| 0.00426  | -0.36376 | 4.67E-16 | -0.23084 | 4.57E-07 | 0.16006185 | 0.00052  | 0.334414 | 1.15E-13 |
| 0.36918  | -0.3093  | 8.24E-12 | -0.162   | 0.00044  | -0.1569943 | 0.00066  | -0.24836 | 5.38E-08 |
| 0.25929  | -0.34876 | 8.39E-15 | -0.11524 | 0.0127   | 0.22643223 | 7.63E-07 | 0.223499 | 1.07E-06 |
| 0.66194  | -0.33213 | 1.73E-13 | -0.17315 | 0.00017  | 0.10055942 | 0.0298   | 0.165397 | 0.00033  |
| 0.54593  | -0.27204 | 2.29E-09 | -0.13071 | 0.00467  | 0.03537702 | 0.44565  | 0.073176 | 0.11428  |
| 0.05952  | -0.44904 | 1.49E-24 | -0.24131 | 1.30E-07 | 0.13870532 | 0.00267  | 0.093113 | 0.04431  |
| 8.14E-06 | -0.39537 | 6.35E-19 | -0.29845 | 4.61E-11 | 0.01039663 | 0.8227   | 0.147439 | 0.0014   |
| 0.16098  | -0.3454  | 1.57E-14 | -0.12152 | 0.00857  | -0.0353413 | 0.44611  | -0.05006 | 0.28035  |
| 0.98958  | -0.51845 | 1.74E-33 | -0.27648 | 1.22E-09 | 0.00040218 | 0.99308  | 0.002388 | 0.95895  |
| 0.002    | -0.33932 | 4.78E-14 | -0.17736 | 0.00012  | 0.1302004  | 0.00483  | 0.223029 | 1.13E-06 |
| 5.18E-05 | -0.25917 | 1.32E-08 | -0.12649 | 0.0062   | 0.21576321 | 2.53E-06 | 0.402867 | 1.19E-19 |
| 0.04428  | -0.14062 | 0.00232  | 0.065681 | 0.15645  | 0.54185672 | 5.43E-37 | 0.64298  | 7.83E-56 |
| 0.34566  | -0.29312 | 1.05E-10 | -0.12854 | 0.0054   | 0.03766711 | 0.41673  | 0.070355 | 0.12897  |
| 1.17E-05 | -0.30793 | 1.03E-11 | -0.18489 | 5.83E-05 | 0.02579187 | 0.57823  | 0.097221 | 0.0357   |
| 0.35129  | -0.44993 | 1.18E-24 | -0.25267 | 3.10E-08 | 0.07245315 | 0.11791  | 0.173166 | 0.00017  |
| 1.28E-06 | 0.186866 | 4.84E-05 | 0.012329 | 0.79045  | 0.08370848 | 0.07072  | 0.125757 | 0.00651  |
| 0.74238  | -0.34816 | 9.38E-15 | -0.25156 | 3.58E-08 | 0.09326213 | 0.04397  | 0.264747 | 6.25E-09 |
| 0.12568  | -0.16882 | 0.00025  | -0.11623 | 0.01195  | -0.2063051 | 6.96E-06 | -0.19209 | 2.93E-05 |
| 0.0212   | -0.10522 | 0.02297  | -0.00482 | 0.91726  | 0.14622729 | 0.00153  | 0.108642 | 0.01885  |
| 3.55E-15 | -0.27054 | 2.82E-09 | -0.10843 | 0.01908  | 0.14990388 | 0.00116  | 0.244758 | 8.47E-08 |
| 0.69588  | -0.18928 | 3.84E-05 | -0.08863 | 0.05562  | 0.26326025 | 7.65E-09 | 0.354719 | 2.71E-15 |
| 0.70467  | -0.30051 | 3.34E-11 | -0.16414 | 0.00037  | 0.11868927 | 0.01026  | 0.243505 | 9.90E-08 |
| 0.8149   | -0.30199 | 2.65E-11 | -0.0946  | 0.041    | 0.1243066  | 0.00716  | 0.186533 | 5.00E-05 |
| 0.92669  | -0.45823 | 1.27E-25 | -0.24004 | 1.52E-07 | -0.0341722 | 0.4613   | -0.0739  | 0.11075  |
| 3.42E-06 | 0.315233 | 3.11E-12 | 0.323117 | 8.26E-13 | 0.02770288 | 0.55039  | -0.12131 | 0.00868  |
| 0.59182  | -0.43611 | 4.20E-23 | -0.206   | 7.19E-06 | 0.09825984 | 0.03377  | 0.183647 | 6.55E-05 |
| 0.25716  | -0.47491 | 1.21E-27 | -0.22899 | 5.68E-07 | 0.02479187 | 0.59306  | 0.071892 | 0.12079  |
| 0.0952   | -0.39287 | 1.10E-18 | -0.36826 | 1.91E-16 | -0.0283973 | 0.54044  | 0.154188 | 0.00083  |
| 0.15051  | -0.23536 | 2.68E-07 | -0.02948 | 0.52514  | 0.27126041 | 2.55E-09 | 0.317685 | 2.07E-12 |
| 2.73E-16 | -0.42301 | 1.07E-21 | -0.28026 | 7.08E-10 | 0.16028071 | 0.00051  | 0.316191 | 2.65E-12 |
| 0.05701  | -0.20848 | 5.54E-06 | -0.01106 | 0.81163  | 0.21771114 | 2.04E-06 | 0.158547 | 0.00058  |

|          |          |          |          |          |            |          |          |          |
|----------|----------|----------|----------|----------|------------|----------|----------|----------|
| 0.23829  | -0.1743  | 0.00015  | -0.12503 | 0.00683  | 0.00108827 | 0.98129  | 0.112563 | 0.01494  |
| 0.03421  | -0.33217 | 1.72E-13 | -0.19012 | 3.55E-05 | -0.0537788 | 0.24609  | 0.034546 | 0.45641  |
| 0.00722  | -0.03755 | 0.41815  | -0.07074 | 0.12687  | 0.14227259 | 0.00206  | 0.26038  | 1.13E-08 |
| 0.3874   | -0.18861 | 4.10E-05 | -0.08347 | 0.07153  | -0.0733811 | 0.11327  | -0.06869 | 0.13829  |
| 0.0129   | -0.39023 | 1.95E-18 | -0.16671 | 0.0003   | 0.16890362 | 0.00025  | 0.200866 | 1.22E-05 |
| 0.16925  | -0.05512 | 0.23453  | 0.197055 | 1.79E-05 | 0.28310638 | 4.68E-10 | 0.18722  | 4.68E-05 |
| 0.52281  | 0.043597 | 0.34719  | 0.062863 | 0.17504  | -0.1576402 | 0.00063  | -0.19906 | 1.47E-05 |
| 0.04861  | 0.281197 | 6.18E-10 | 0.15581  | 0.00073  | 0.20072687 | 1.24E-05 | 0.260358 | 1.13E-08 |
| 0.03606  | -0.3022  | 2.56E-11 | -0.18733 | 4.63E-05 | 0.06416738 | 0.16624  | 0.132508 | 0.00412  |
| 0.06834  | -0.14549 | 0.00162  | 0.114346 | 0.01342  | 0.32785175 | 3.65E-13 | 0.153192 | 0.0009   |
| 0.98901  | -0.07174 | 0.12157  | 0.021584 | 0.64177  | 0.21133722 | 4.09E-06 | 0.23056  | 4.73E-07 |
| 2.36E-07 | 0.359431 | 1.09E-15 | 0.460864 | 6.20E-26 | 0.16544909 | 0.00033  | -0.023   | 0.6201   |
| 0.7461   | -0.48231 | 1.40E-28 | -0.26712 | 4.52E-09 | -0.2554767 | 2.15E-08 | -0.18414 | 6.26E-05 |
| 0.10206  | -0.13673 | 0.00307  | -0.14582 | 0.00158  | -0.089494  | 0.05328  | -0.07399 | 0.11029  |
| 0.76931  | -0.01841 | 0.69156  | 0.067012 | 0.14821  | 0.37359115 | 6.48E-17 | 0.48892  | 1.96E-29 |
| 0.96595  | -0.26905 | 3.47E-09 | -0.23911 | 1.70E-07 | 0.04380312 | 0.34491  | 0.151556 | 0.00102  |
| 0.00277  | -0.16589 | 0.00032  | -0.10726 | 0.02043  | 0.07614365 | 0.10029  | 0.16331  | 0.00039  |
| 0.10373  | -0.16747 | 0.00028  | -0.05886 | 0.2042   | 0.06629391 | 0.15261  | 0.13332  | 0.0039   |
| 0.80425  | -0.23618 | 2.42E-07 | -0.05737 | 0.21593  | 0.0627962  | 0.1755   | 0.091691 | 0.04767  |
| 0.54914  | -0.16142 | 0.00046  | -0.17731 | 0.00012  | -0.1632562 | 0.0004   | -0.01918 | 0.67923  |
| 0.19826  | -0.29109 | 1.43E-10 | 0.010878 | 0.81463  | 0.01176623 | 0.79981  | 0.045489 | 0.32665  |
| 0.54203  | -0.28262 | 5.03E-10 | -0.05441 | 0.2406   | 0.10857432 | 0.01893  | 0.126081 | 0.00637  |
| 0.01524  | 0.403307 | 1.08E-19 | 0.425219 | 6.27E-22 | 0.05577997 | 0.22893  | -0.07419 | 0.10936  |
| 0.98275  | -0.32155 | 1.08E-12 | -0.1071  | 0.02062  | 0.08414613 | 0.06925  | 0.092472 | 0.0458   |
| 0.1745   | 0.181248 | 8.18E-05 | 0.107641 | 0.01998  | 0.03547364 | 0.4444   | -0.06054 | 0.19159  |
| 0.41766  | -0.43148 | 1.34E-22 | -0.18888 | 3.99E-05 | 0.30680185 | 1.23E-11 | 0.365317 | 3.43E-16 |
| 0.05416  | -0.14808 | 0.00133  | -0.09922 | 0.03206  | 0.03416501 | 0.4614   | 0.117018 | 0.01138  |
| 0.25608  | -0.53698 | 3.08E-36 | -0.21499 | 2.75E-06 | 0.07294116 | 0.11545  | 0.060229 | 0.19386  |
| 0.16395  | -0.15813 | 0.0006   | -0.08584 | 0.06382  | 0.0274089  | 0.55463  | 0.099775 | 0.0311   |
| 0.09837  | 0.427051 | 4.00E-22 | 0.234569 | 2.94E-07 | 0.01809723 | 0.69649  | -0.12403 | 0.00729  |
| 0.05918  | 0.421826 | 1.43E-21 | 0.310438 | 6.84E-12 | -0.1478152 | 0.00136  | -0.17889 | 0.0001   |
| 0.43183  | -0.36581 | 3.12E-16 | -0.24195 | 1.20E-07 | -0.0211625 | 0.64828  | 0.110312 | 0.01709  |
| 0.43346  | -0.44543 | 3.84E-24 | -0.30788 | 1.04E-11 | 0.0463337  | 0.31773  | 0.145998 | 0.00156  |
| 0.88463  | -0.29826 | 4.75E-11 | -0.18448 | 6.06E-05 | 0.23988688 | 1.55E-07 | 0.212459 | 3.62E-06 |
| 0.22981  | -0.13984 | 0.00246  | -0.17284 | 0.00017  | 0.02271673 | 0.62437  | 0.154382 | 0.00082  |
| 0.93186  | -0.38654 | 4.32E-18 | -0.23092 | 4.53E-07 | 0.07305442 | 0.11489  | 0.177738 | 0.00011  |
| 0.25671  | -0.00427 | 0.92675  | -0.20347 | 9.35E-06 | -0.2941335 | 8.98E-11 | -0.35496 | 2.59E-15 |
| 1.92E-06 | -0.30164 | 2.80E-11 | -0.16692 | 0.00029  | 0.21412045 | 3.03E-06 | 0.29261  | 1.13E-10 |
| 0.82431  | 0.244504 | 8.74E-08 | 0.036074 | 0.43672  | -0.0963785 | 0.03734  | -0.28333 | 4.53E-10 |
| 0.94093  | -0.24327 | 1.02E-07 | -0.18161 | 7.92E-05 | 0.09047896 | 0.0507   | 0.236402 | 2.36E-07 |
| 0.09541  | -0.19703 | 1.80E-05 | -0.19185 | 3.00E-05 | 0.00789262 | 0.86493  | 0.167836 | 0.00027  |
| 0.05299  | -0.17511 | 0.00014  | 0.105547 | 0.02254  | 0.3439734  | 2.04E-14 | 0.41704  | 4.48E-21 |
| 0.0006   | -0.36939 | 1.52E-16 | -0.25141 | 3.65E-08 | 0.14610301 | 0.00155  | 0.228514 | 6.00E-07 |
| 8.32E-06 | 0.465424 | 1.76E-26 | 0.284921 | 3.58E-10 | 0.24809569 | 5.57E-08 | 0.165479 | 0.00033  |
| 0.70113  | -0.34889 | 8.18E-15 | -0.04673 | 0.31362  | 0.25824615 | 1.50E-08 | 0.19127  | 3.17E-05 |

|          |          |          |          |          |            |          |          |          |
|----------|----------|----------|----------|----------|------------|----------|----------|----------|
| 0.34943  | -0.35471 | 2.72E-15 | -0.15186 | 0.00099  | 0.03629432 | 0.43393  | 0.047343 | 0.3073   |
| 0.04948  | -0.19259 | 2.79E-05 | -0.04615 | 0.31971  | 0.21511172 | 2.72E-06 | 0.084224 | 0.069    |
| 0.09626  | -0.4117  | 1.57E-20 | -0.22906 | 5.63E-07 | -0.0920752 | 0.04674  | -0.13331 | 0.0039   |
| 0.11366  | -0.28715 | 2.58E-10 | -0.09283 | 0.04497  | 0.09516782 | 0.03981  | 0.126576 | 0.00616  |
| 8.19E-16 | -0.18611 | 5.20E-05 | -0.08986 | 0.0523   | 0.09116985 | 0.04895  | 0.128364 | 0.00547  |
| 0.34447  | -0.36576 | 3.14E-16 | -0.12621 | 0.00631  | 0.07523943 | 0.1044   | 0.140051 | 0.00242  |
| 0.08296  | -0.39439 | 7.87E-19 | -0.18146 | 8.03E-05 | 0.03979244 | 0.39092  | 0.121045 | 0.00883  |
| 0.93033  | -0.22608 | 7.95E-07 | -0.20728 | 6.29E-06 | -0.0088217 | 0.84921  | 0.159685 | 0.00053  |
| 0.00535  | 0.317405 | 2.17E-12 | 0.225423 | 8.57E-07 | 0.11644681 | 0.01179  | 0.028587 | 0.53774  |
| 0.2831   | -0.43819 | 2.48E-23 | -0.20699 | 6.48E-06 | 0.07982943 | 0.08484  | 0.170786 | 0.00021  |
| 0.07334  | 0.242113 | 1.18E-07 | 0.378643 | 2.28E-17 | 0.19560788 | 2.07E-05 | 0.026893 | 0.5621   |
| 0.36135  | -0.40604 | 5.80E-20 | -0.20622 | 7.03E-06 | 0.00191258 | 0.96712  | 0.072815 | 0.11609  |
| 0.03038  | -0.30215 | 2.58E-11 | -0.18285 | 7.06E-05 | 0.03652533 | 0.43101  | 0.143064 | 0.00194  |
| 0.0186   | -0.39544 | 6.25E-19 | -0.2171  | 2.19E-06 | -0.2729143 | 2.02E-09 | -0.31743 | 2.16E-12 |
| 1.79E-05 | 0.142107 | 0.00208  | 0.008445 | 0.85558  | -0.0096726 | 0.83486  | -0.0688  | 0.13768  |
| 8.68E-21 | -0.12343 | 0.00757  | -0.08763 | 0.05847  | 0.22418389 | 9.88E-07 | 0.321137 | 1.16E-12 |
| 0.30809  | 0.313087 | 4.44E-12 | 0.336993 | 7.27E-14 | 0.02929059 | 0.52777  | 0.015001 | 0.74646  |
| 3.98E-08 | -0.21256 | 3.58E-06 | -0.19261 | 2.78E-05 | -0.1232806 | 0.00765  | -0.12025 | 0.00929  |
| 3.21E-05 | -0.27693 | 1.14E-09 | -0.1086  | 0.0189   | -0.0247081 | 0.59431  | 0.028894 | 0.53338  |
| 0.0012   | -0.39253 | 1.18E-18 | -0.21586 | 2.50E-06 | -0.0185834 | 0.68875  | -0.01675 | 0.7181   |
| 0.05171  | -0.35619 | 2.05E-15 | -0.17094 | 0.00021  | -0.0290679 | 0.53091  | -0.04428 | 0.33972  |
| 7.76E-05 | -0.24514 | 8.07E-08 | -0.18769 | 4.47E-05 | 0.09839194 | 0.03353  | 0.245719 | 7.51E-08 |
| 0.2549   | -0.33342 | 1.37E-13 | -0.04924 | 0.28829  | 0.10763412 | 0.01999  | 0.181922 | 7.69E-05 |
| 0.2255   | -0.27413 | 1.70E-09 | -0.17793 | 0.00011  | 0.27714237 | 1.11E-09 | 0.417686 | 3.84E-21 |
| 0.01064  | -0.32444 | 6.59E-13 | -0.07994 | 0.08442  | 0.30071169 | 3.24E-11 | 0.453491 | 4.57E-25 |
| 3.16E-13 | 0.151872 | 0.00099  | 0.073516 | 0.11261  | -0.1266301 | 0.00614  | -0.25295 | 2.99E-08 |
| 0.43486  | -0.30004 | 3.60E-11 | -0.14244 | 0.00203  | 0.13475062 | 0.00353  | 0.195835 | 2.03E-05 |
| 0.85361  | -0.47357 | 1.77E-27 | -0.27826 | 9.45E-10 | 0.04725744 | 0.30817  | 0.050071 | 0.28022  |
| 0.69434  | -0.45315 | 5.01E-25 | -0.22291 | 1.14E-06 | -0.0063872 | 0.89051  | 0.001288 | 0.97785  |
| 0.40085  | -0.01366 | 0.76843  | 0.13959  | 0.0025   | 0.28418985 | 3.99E-10 | 0.345232 | 1.62E-14 |
| 0.05163  | -0.20324 | 9.57E-06 | -0.36548 | 3.32E-16 | -0.0772252 | 0.09554  | 0.107587 | 0.02004  |
| 0.83885  | -0.29566 | 7.10E-11 | -0.18179 | 7.79E-05 | 0.05504346 | 0.23514  | 0.287717 | 2.37E-10 |
| 0.61078  | -0.28991 | 1.70E-10 | 0.089926 | 0.05213  | 0.46521475 | 1.87E-26 | 0.483809 | 9.00E-29 |
| 6.69E-06 | -0.17014 | 0.00022  | -0.10758 | 0.02006  | 0.25142757 | 3.64E-08 | 0.336283 | 8.25E-14 |
| 0.00792  | -0.49532 | 2.80E-30 | -0.28832 | 2.16E-10 | -0.0800538 | 0.08397  | -0.15215 | 0.00097  |
| 0.00122  | -0.16832 | 0.00026  | -0.04244 | 0.3601   | 0.02817485 | 0.54362  | 0.022958 | 0.62069  |
| 0.03437  | 0.408058 | 3.65E-20 | 0.341831 | 3.02E-14 | 0.13192585 | 0.00429  | 0.072353 | 0.11843  |
| 0.4925   | -0.35582 | 2.20E-15 | -0.06882 | 0.13752  | 0.27945999 | 7.95E-10 | 0.168737 | 0.00025  |
| 0.10775  | -0.23074 | 4.63E-07 | -0.18493 | 5.81E-05 | 0.06007261 | 0.19502  | 0.144104 | 0.0018   |
| 0.90415  | -0.30289 | 2.30E-11 | -0.1938  | 2.48E-05 | 0.1905606  | 3.40E-05 | 0.303125 | 2.22E-11 |
| 0.03535  | -0.26312 | 7.79E-09 | 0.062583 | 0.17697  | 0.43972458 | 1.68E-23 | 0.323836 | 7.30E-13 |
| 0.01289  | 0.236815 | 2.25E-07 | 0.072029 | 0.12009  | 0.11348339 | 0.01414  | 0.133798 | 0.00377  |
| 0.00017  | -0.25058 | 4.06E-08 | -0.03875 | 0.40352  | 0.27624515 | 1.26E-09 | 0.312538 | 4.86E-12 |
| 0.00153  | 0.273917 | 1.75E-09 | 0.313196 | 4.36E-12 | 0.04600048 | 0.32123  | -0.07711 | 0.09604  |
| 0.10151  | -0.3359  | 8.85E-14 | -0.27323 | 1.93E-09 | 0.0402497  | 0.38549  | 0.223693 | 1.04E-06 |



|          |          |          |          |          |            |          |          |          |
|----------|----------|----------|----------|----------|------------|----------|----------|----------|
| 0.38975  | -0.40667 | 5.01E-20 | -0.21192 | 3.84E-06 | 0.03599508 | 0.43773  | 0.086085 | 0.06306  |
| 0.68388  | -0.17357 | 0.00016  | -0.11398 | 0.01372  | 0.03744388 | 0.4195   | -0.0206  | 0.65703  |
| 0.05394  | -0.4603  | 7.24E-26 | -0.19664 | 1.87E-05 | 0.04915044 | 0.28917  | 0.090978 | 0.04943  |
| 3.70E-07 | -0.26767 | 4.19E-09 | -0.19241 | 2.84E-05 | 0.30523765 | 1.58E-11 | 0.333207 | 1.43E-13 |
| 0.24633  | -0.52227 | 4.86E-34 | -0.23702 | 2.19E-07 | 0.12088341 | 0.00893  | 0.136824 | 0.00305  |
| 0.70521  | 0.347425 | 1.08E-14 | 0.303432 | 2.11E-11 | 0.17468182 | 0.00015  | -0.05197 | 0.26232  |
| 0.00082  | -0.19751 | 1.71E-05 | 0.007666 | 0.86876  | 0.1713629  | 0.0002   | 0.070385 | 0.1288   |
| 0.44345  | 0.048859 | 0.29205  | -0.01427 | 0.75837  | 0.19331118 | 2.60E-05 | 0.178258 | 0.00011  |
| 1.60E-09 | 0.25319  | 2.90E-08 | 0.033341 | 0.47229  | -0.021216  | 0.64745  | -0.17241 | 0.00018  |
| 0.13075  | -0.34006 | 4.17E-14 | -0.12029 | 0.00927  | 0.14684888 | 0.00146  | 0.145336 | 0.00164  |
| 0.37789  | 0.193501 | 2.55E-05 | 0.105193 | 0.023    | -0.0504901 | 0.27621  | -0.1722  | 0.00018  |
| 0.3557   | -0.17264 | 0.00018  | -0.0983  | 0.03369  | 0.07055059 | 0.1279   | 0.167703 | 0.00027  |
| 0.74242  | -0.09279 | 0.04506  | -0.10232 | 0.02704  | 0.07250749 | 0.11764  | 0.202252 | 1.06E-05 |
| 0.00229  | 0.129617 | 0.00503  | 0.033631 | 0.46843  | 0.17632155 | 0.00013  | 0.040278 | 0.38515  |
| 0.6473   | 0.202695 | 1.01E-05 | 0.166065 | 0.00031  | 0.11200345 | 0.01545  | 0.116114 | 0.01204  |
| 0.82167  | -0.45053 | 1.01E-24 | -0.21843 | 1.89E-06 | 0.02856201 | 0.53809  | -0.03084 | 0.5062   |
| 3.74E-06 | 0.345586 | 1.52E-14 | 0.189543 | 3.75E-05 | -0.1478766 | 0.00135  | -0.23061 | 4.70E-07 |
| 0.00018  | -0.34264 | 2.61E-14 | -0.21881 | 1.81E-06 | -0.1029149 | 0.02615  | -0.07767 | 0.09366  |
| 0.00191  | -0.3026  | 2.41E-11 | -0.24606 | 7.19E-08 | 0.05578921 | 0.22885  | 0.147805 | 0.00136  |
| 0.10136  | -0.24378 | 9.57E-08 | -0.09137 | 0.04846  | 0.11820302 | 0.01057  | 0.129021 | 0.00523  |
| 6.28E-07 | 0.255096 | 2.26E-08 | 0.181154 | 8.25E-05 | 0.13025848 | 0.00481  | 0.036035 | 0.43722  |
| 0.00486  | -0.10397 | 0.02464  | -0.09245 | 0.04586  | 0.11417924 | 0.01355  | 0.224632 | 9.38E-07 |
| 0.81062  | -0.32374 | 7.42E-13 | -0.10736 | 0.02031  | 0.07156487 | 0.1225   | 0.059577 | 0.19873  |
| 0.00923  | -0.19388 | 2.46E-05 | -0.03646 | 0.43177  | 0.1869303  | 4.81E-05 | 0.314936 | 3.27E-12 |
| 0.01566  | -0.28401 | 4.10E-10 | -0.06093 | 0.18873  | 0.23807041 | 1.93E-07 | 0.247237 | 6.21E-08 |
| 0.37564  | -0.4123  | 1.36E-20 | -0.12478 | 0.00694  | 0.07228007 | 0.1188   | 0.093298 | 0.04388  |
| 4.91E-08 | -0.28386 | 4.19E-10 | -0.16657 | 0.0003   | 0.16598431 | 0.00032  | 0.289254 | 1.88E-10 |
| 0.00011  | 0.432818 | 9.61E-23 | 0.352814 | 3.90E-15 | 0.38718399 | 3.76E-18 | 0.230001 | 5.05E-07 |
| 0.78459  | -0.23794 | 1.96E-07 | -0.06046 | 0.19212  | -0.0306912 | 0.50821  | 0.040686 | 0.38036  |
| 0.01657  | -0.44007 | 1.53E-23 | -0.20043 | 1.28E-05 | 0.13180902 | 0.00433  | 0.149683 | 0.00118  |
| 0.53966  | -0.26764 | 4.21E-09 | -0.16995 | 0.00022  | 0.00897794 | 0.84657  | 0.138906 | 0.00263  |
| 0.0098   | -0.33481 | 1.07E-13 | -0.13175 | 0.00435  | 0.15407422 | 0.00084  | 0.056558 | 0.22249  |
| 8.45E-07 | -0.31173 | 5.54E-12 | -0.17472 | 0.00015  | 0.15072769 | 0.00109  | 0.257098 | 1.74E-08 |
| 0.62945  | -0.12568 | 0.00654  | -0.05019 | 0.27904  | 0.09604783 | 0.038    | 0.164579 | 0.00036  |
| 0.81769  | -0.26882 | 3.58E-09 | -0.0732  | 0.11419  | 0.11793678 | 0.01075  | 0.203187 | 9.63E-06 |
| 0.00223  | -0.39778 | 3.73E-19 | -0.25526 | 2.22E-08 | 0.14646528 | 0.0015   | 0.233397 | 3.38E-07 |
| 0.00114  | -0.5204  | 9.09E-34 | -0.28555 | 3.27E-10 | 0.20256728 | 1.03E-05 | 0.217617 | 2.06E-06 |
| 0.05308  | -0.24604 | 7.21E-08 | -0.19077 | 3.33E-05 | 0.06829769 | 0.14056  | 0.063094 | 0.17346  |
| 0.47968  | -0.29514 | 7.70E-11 | -0.14781 | 0.00136  | 0.02074356 | 0.65479  | 0.061624 | 0.18372  |
| 0.00182  | -0.24975 | 4.51E-08 | -0.02261 | 0.62597  | -0.0635463 | 0.17039  | -0.12028 | 0.00927  |
| 0.4875   | -0.45298 | 5.25E-25 | -0.06528 | 0.15899  | 0.43959317 | 1.73E-23 | 0.362067 | 6.53E-16 |
| 0.72365  | -0.18769 | 4.48E-05 | -0.17347 | 0.00017  | 0.06156987 | 0.1841   | 0.089665 | 0.05282  |
| 0.33878  | -0.36319 | 5.23E-16 | -0.18566 | 5.42E-05 | 0.09019972 | 0.05142  | 0.197273 | 1.76E-05 |
| 1.16E-07 | -0.41325 | 1.09E-20 | -0.18265 | 7.19E-05 | 0.18079409 | 8.53E-05 | 0.284943 | 3.57E-10 |
| 0.02644  | -0.20676 | 6.64E-06 | -0.19101 | 3.25E-05 | -0.0127887 | 0.78283  | -0.1387  | 0.00267  |

|          |          |          |          |          |            |          |          |          |
|----------|----------|----------|----------|----------|------------|----------|----------|----------|
| 0.46591  | -0.30825 | 9.76E-12 | -0.1296  | 0.00503  | 0.1034074  | 0.02544  | 0.133263 | 0.00391  |
| 0.83785  | -0.35731 | 1.65E-15 | -0.15895 | 0.00057  | 0.10579669 | 0.02222  | 0.075484 | 0.10328  |
| 0.09709  | -0.3631  | 5.32E-16 | -0.22644 | 7.62E-07 | 0.0734132  | 0.11311  | 0.175037 | 0.00014  |
| 0.37708  | 0.041377 | 0.37232  | -0.06064 | 0.19084  | -0.3289611 | 3.01E-13 | -0.36776 | 2.11E-16 |
| 0.23734  | -0.42095 | 1.76E-21 | -0.14565 | 0.0016   | 0.15468257 | 0.0008   | 0.240122 | 1.50E-07 |
| 0.30936  | -0.2765  | 1.22E-09 | -0.16659 | 0.0003   | 0.01889743 | 0.68377  | 0.039848 | 0.39025  |
| 0.15535  | 0.259287 | 1.30E-08 | 0.197972 | 1.64E-05 | 0.09531948 | 0.03949  | 0.135164 | 0.00343  |
| 0.17984  | -0.28256 | 5.07E-10 | -0.18178 | 7.79E-05 | 0.07120763 | 0.12438  | 0.087745 | 0.05813  |
| 0.93653  | 0.322544 | 9.11E-13 | 0.265297 | 5.80E-09 | 0.36333404 | 5.08E-16 | 0.253834 | 2.67E-08 |
| 0.00268  | -0.14124 | 0.00222  | -0.06382 | 0.16854  | -0.0179324 | 0.69911  | -0.07556 | 0.10292  |
| 0.84306  | 0.06187  | 0.18197  | 0.101149 | 0.02885  | 0.16080681 | 0.00049  | -0.01529 | 0.7417   |
| 0.65595  | -0.07201 | 0.1202   | 0.198335 | 1.58E-05 | 0.39428865 | 8.05E-19 | 0.236192 | 2.42E-07 |
| 0.04302  | -0.3784  | 2.40E-17 | -0.1515  | 0.00102  | 0.05576658 | 0.22904  | 0.085222 | 0.06576  |
| 0.91468  | 0.316016 | 2.73E-12 | 0.308735 | 9.02E-12 | -0.2202565 | 1.54E-06 | -0.20834 | 5.62E-06 |
| 0.44779  | -0.28408 | 4.06E-10 | -0.09626 | 0.03758  | 0.09517017 | 0.0398   | 0.125873 | 0.00646  |
| 3.25E-05 | -0.20212 | 1.07E-05 | -0.04787 | 0.30195  | 0.21033579 | 4.55E-06 | 0.300451 | 3.38E-11 |
| 0.00259  | -0.48677 | 3.74E-29 | -0.28312 | 4.67E-10 | 0.10011679 | 0.03053  | 0.08276  | 0.07398  |
| 0.84684  | -0.38163 | 1.22E-17 | -0.10939 | 0.01804  | 0.13146141 | 0.00443  | 0.240305 | 1.47E-07 |
| 0.51441  | -0.08747 | 0.0589   | -0.03824 | 0.40969  | 0.1495356  | 0.00119  | 0.192805 | 2.73E-05 |
| 0.04056  | -0.1907  | 3.35E-05 | -0.02    | 0.66642  | 0.04677137 | 0.31318  | 0.065476 | 0.15775  |
| 0.00694  | -0.03432 | 0.45936  | 0.051095 | 0.27049  | 0.23909621 | 1.70E-07 | 0.206634 | 6.73E-06 |
| 0.60071  | -0.24409 | 9.21E-08 | -0.13412 | 0.00369  | -0.0510285 | 0.27112  | -0.14484 | 0.0017   |
| 7.72E-05 | -0.34794 | 9.78E-15 | -0.16753 | 0.00028  | 0.00441784 | 0.92414  | 0.057646 | 0.21371  |
| 0.00149  | -0.36219 | 6.37E-16 | 0.007499 | 0.8716   | 0.47020891 | 4.60E-27 | 0.523488 | 3.23E-34 |
| 7.40E-20 | -0.00351 | 0.93964  | -0.00271 | 0.95338  | 0.1930697  | 2.66E-05 | 0.279836 | 7.53E-10 |
| 0.01497  | -0.23211 | 3.94E-07 | -0.14087 | 0.00228  | 0.02531114 | 0.58534  | 0.133125 | 0.00395  |
| 0.00011  | -0.36711 | 2.40E-16 | 0.011591 | 0.80273  | 0.04134255 | 0.37271  | -0.05186 | 0.26336  |
| 0.68998  | -0.30347 | 2.10E-11 | -0.22991 | 5.10E-07 | -0.0125664 | 0.78651  | 0.103707 | 0.02502  |
| 0.89353  | -0.36341 | 5.01E-16 | -0.24613 | 7.13E-08 | 0.00386755 | 0.93357  | 0.063101 | 0.17341  |
| 0.55138  | -0.41348 | 1.04E-20 | -0.26497 | 6.06E-09 | 0.21935118 | 1.70E-06 | 0.364929 | 3.71E-16 |
| 0.20938  | -0.43504 | 5.50E-23 | -0.17528 | 0.00014  | 0.21444285 | 2.92E-06 | 0.223517 | 1.07E-06 |
| 0.08828  | -0.42098 | 1.75E-21 | -0.29793 | 5.00E-11 | 0.13140261 | 0.00445  | 0.234637 | 2.92E-07 |
| 0.98679  | -0.38789 | 3.23E-18 | -0.1156  | 0.01242  | 0.34176959 | 3.06E-14 | 0.362839 | 5.61E-16 |
| 0.42295  | 0.335257 | 9.92E-14 | 0.254404 | 2.48E-08 | 0.07536255 | 0.10383  | 0.075789 | 0.10188  |
| 0.23367  | -0.3852  | 5.75E-18 | -0.22352 | 1.06E-06 | 0.05568729 | 0.2297   | 0.182636 | 7.20E-05 |
| 0.97356  | -0.07115 | 0.12469  | 0.014413 | 0.75607  | -0.0105864 | 0.81952  | -0.08486 | 0.06691  |
| 0.2685   | -0.23819 | 1.90E-07 | -0.10486 | 0.02344  | 0.12661902 | 0.00614  | 0.238641 | 1.80E-07 |
| 0.37584  | -0.26363 | 7.27E-09 | -0.16966 | 0.00023  | -0.0811754 | 0.0797   | -0.01717 | 0.71136  |
| 0.08521  | -0.18614 | 5.18E-05 | -0.12591 | 0.00644  | 0.06995649 | 0.13115  | 0.010079 | 0.82804  |
| 0.74868  | -0.26198 | 9.09E-09 | -0.171   | 0.0002   | 0.14732967 | 0.00141  | 0.224837 | 9.17E-07 |
| 1.89E-06 | -0.16428 | 0.00036  | 0.033119 | 0.47524  | 0.26713684 | 4.51E-09 | 0.258989 | 1.36E-08 |
| 0.00679  | -0.37224 | 8.53E-17 | -0.18168 | 7.86E-05 | 0.07609545 | 0.1005   | 0.09412  | 0.04205  |
| 0.15299  | -0.06558 | 0.15712  | -0.06325 | 0.1724   | 0.08580507 | 0.06392  | 0.205626 | 7.48E-06 |
| 6.20E-05 | -0.42312 | 1.04E-21 | -0.23798 | 1.95E-07 | 0.15992791 | 0.00052  | 0.240021 | 1.52E-07 |
| 0.62348  | -0.22393 | 1.02E-06 | 0.02974  | 0.52145  | 0.40291118 | 1.18E-19 | 0.504846 | 1.43E-31 |

|          |          |          |          |          |            |          |          |          |
|----------|----------|----------|----------|----------|------------|----------|----------|----------|
| 2.91E-10 | 0.186564 | 4.98E-05 | 0.181389 | 8.08E-05 | 0.15834932 | 0.00059  | 0.146766 | 0.00147  |
| 0.03819  | -0.33343 | 1.37E-13 | -0.05994 | 0.19599  | 0.24818627 | 5.50E-08 | 0.28606  | 3.03E-10 |
| 0.97605  | -0.47036 | 4.41E-27 | -0.30075 | 3.22E-11 | 0.14311849 | 0.00193  | 0.295265 | 7.55E-11 |
| 0.25252  | -0.44272 | 7.75E-24 | -0.19586 | 2.02E-05 | 0.16369807 | 0.00038  | 0.207508 | 6.14E-06 |
| 0.83736  | -0.35947 | 1.08E-15 | -0.10412 | 0.02443  | 0.13268055 | 0.00408  | 0.175618 | 0.00014  |
| 0.25967  | -0.37821 | 2.50E-17 | -0.16103 | 0.00048  | 0.14846849 | 0.00129  | 0.13129  | 0.00448  |
| 0.51393  | -0.51661 | 3.20E-33 | -0.28007 | 7.28E-10 | 0.10607068 | 0.02187  | 0.205732 | 7.39E-06 |
| 0.01835  | -0.26842 | 3.78E-09 | -0.13269 | 0.00407  | 0.06092708 | 0.18873  | 0.088557 | 0.05583  |
| 5.41E-40 | -0.18738 | 4.61E-05 | -0.12084 | 0.00895  | 0.09289217 | 0.04482  | 0.165283 | 0.00033  |
| 0.21107  | -0.4767  | 7.20E-28 | -0.24134 | 1.29E-07 | 0.00814783 | 0.8606   | 0.077317 | 0.09515  |
| 0.84141  | -0.21497 | 2.76E-06 | -0.10801 | 0.01956  | 0.07806619 | 0.09197  | 0.135952 | 0.00324  |
| 0.69108  | -0.47646 | 7.71E-28 | -0.23812 | 1.92E-07 | 0.10825377 | 0.01928  | 0.214868 | 2.79E-06 |
| 0.00027  | -0.29224 | 1.20E-10 | -0.16952 | 0.00023  | 0.0784013  | 0.09058  | 0.168755 | 0.00025  |
| 0.00927  | -0.42638 | 4.72E-22 | -0.22406 | 1.00E-06 | 0.19855226 | 1.54E-05 | 0.357949 | 1.46E-15 |
| 0.62722  | -0.41086 | 1.91E-20 | -0.13123 | 0.0045   | 0.08113399 | 0.07986  | 0.07925  | 0.08713  |
| 0.35734  | -0.39067 | 1.78E-18 | -0.14109 | 0.00224  | 0.02480017 | 0.59294  | 0.0098   | 0.83272  |
| 0.70613  | -0.51128 | 1.83E-32 | -0.30523 | 1.59E-11 | -0.0155407 | 0.73766  | 0.069027 | 0.13636  |
| 0.00133  | 0.301929 | 2.68E-11 | 0.356589 | 1.89E-15 | -0.1429549 | 0.00196  | -0.2775  | 1.05E-09 |
| 0.24108  | 0.374231 | 5.68E-17 | 0.295614 | 7.16E-11 | -0.0776649 | 0.09366  | -0.32278 | 8.75E-13 |
| 0.4258   | -0.27719 | 1.10E-09 | -0.05929 | 0.20093  | 0.17518587 | 0.00014  | 0.213121 | 3.37E-06 |
| 0.37941  | -0.29581 | 6.94E-11 | 0.022471 | 0.62812  | 0.43242666 | 1.06E-22 | 0.459667 | 8.61E-26 |
| 3.30E-05 | 0.524377 | 2.39E-34 | 0.322769 | 8.77E-13 | -0.1129408 | 0.01461  | -0.14239 | 0.00204  |
| 0.10876  | -0.10207 | 0.02741  | 0.108912 | 0.01856  | 0.41979561 | 2.32E-21 | 0.424784 | 6.97E-22 |
| 5.98E-06 | -0.24877 | 5.11E-08 | -0.14481 | 0.0017   | 0.04125407 | 0.37374  | -0.00383 | 0.93426  |
| 9.14E-12 | -0.35832 | 1.35E-15 | -0.20177 | 1.11E-05 | 0.1442032  | 0.00178  | 0.210874 | 4.29E-06 |
| 0.01835  | -0.34849 | 8.82E-15 | -0.21874 | 1.82E-06 | 0.1000597  | 0.03062  | 0.219175 | 1.74E-06 |
| 0.00247  | -0.24732 | 6.14E-08 | 0.020395 | 0.66023  | 0.14293127 | 0.00196  | 0.290981 | 1.45E-10 |
| 0.51813  | -0.11539 | 0.01259  | 0.038079 | 0.41166  | 0.06794765 | 0.14262  | 0.089881 | 0.05225  |
| 0.37691  | -0.27772 | 1.02E-09 | -0.01241 | 0.78914  | -0.0460421 | 0.32079  | -0.02693 | 0.56155  |
| 0.48752  | -0.20606 | 7.15E-06 | -0.02901 | 0.53175  | -0.108644  | 0.01885  | -0.06066 | 0.19066  |
| 0.1161   | -0.02649 | 0.56804  | -0.00321 | 0.94481  | 0.00375439 | 0.93551  | 0.049117 | 0.2895   |
| 0.45841  | -0.44306 | 7.12E-24 | -0.12378 | 0.0074   | 0.09454236 | 0.04113  | 0.123952 | 0.00732  |
| 0.39261  | -0.44876 | 1.61E-24 | -0.28271 | 4.96E-10 | -0.0290123 | 0.5317   | 0.092679 | 0.04531  |
| 0.00074  | -0.44058 | 1.35E-23 | -0.20694 | 6.52E-06 | 0.04123673 | 0.37394  | 0.070836 | 0.12637  |
| 0.26758  | -0.49235 | 6.94E-30 | -0.18992 | 3.61E-05 | 0.0685841  | 0.1389   | 0.08624  | 0.06258  |
| 2.74E-10 | -0.32526 | 5.72E-13 | -0.28218 | 5.36E-10 | 0.07614263 | 0.10029  | 0.280573 | 6.77E-10 |
| 0.01432  | -0.14678 | 0.00147  | -0.12219 | 0.00821  | 0.19845623 | 1.56E-05 | 0.286069 | 3.02E-10 |
| 0.15362  | -0.28788 | 2.31E-10 | -0.23775 | 2.01E-07 | -0.0446528 | 0.33562  | -0.01911 | 0.68042  |
| 0.56735  | -0.08453 | 0.06798  | -0.04877 | 0.29288  | 0.29622549 | 6.51E-11 | 0.252622 | 3.12E-08 |
| 0.77357  | -0.39999 | 2.28E-19 | -0.04672 | 0.31368  | 0.2048341  | 8.12E-06 | 0.166589 | 0.0003   |
| 0.4294   | -0.19448 | 2.32E-05 | -0.12226 | 0.00817  | 0.08627412 | 0.06248  | 0.213741 | 3.15E-06 |
| 0.04751  | 0.277447 | 1.06E-09 | 0.150996 | 0.00106  | 0.12202948 | 0.00829  | 0.125118 | 0.00678  |
| 0.46304  | -0.27192 | 2.32E-09 | -0.20969 | 4.87E-06 | -0.0587137 | 0.20533  | 0.05721  | 0.2172   |
| 0.08158  | -0.46071 | 6.48E-26 | -0.21664 | 2.30E-06 | 0.08768671 | 0.05829  | 0.036536 | 0.43088  |
| 0.00021  | -0.2296  | 5.29E-07 | -0.00331 | 0.94312  | 0.26294827 | 7.98E-09 | 0.267711 | 4.17E-09 |

|          |          |          |          |          |            |          |          |          |
|----------|----------|----------|----------|----------|------------|----------|----------|----------|
| 0.00583  | -0.34783 | 9.99E-15 | -0.16385 | 0.00038  | 0.10026301 | 0.03028  | 0.217706 | 2.04E-06 |
| 0.48829  | -0.43228 | 1.10E-22 | -0.19247 | 2.82E-05 | 0.15388642 | 0.00085  | 0.122576 | 0.00801  |
| 5.82E-07 | -0.06763 | 0.14451  | 0.07114  | 0.12474  | 0.17427222 | 0.00015  | 0.169798 | 0.00023  |
| 0.05699  | -0.04812 | 0.29943  | -0.06814 | 0.14149  | -0.0487349 | 0.29327  | -0.05477 | 0.23748  |
| 0.00013  | -0.27388 | 1.76E-09 | 0.079951 | 0.08437  | 0.41800595 | 3.56E-21 | 0.302714 | 2.36E-11 |
| 1.31E-10 | -0.05579 | 0.22885  | -0.09114 | 0.04903  | 0.09594089 | 0.03822  | 0.202926 | 9.89E-06 |
| 0.17454  | -0.15627 | 0.0007   | -0.05963 | 0.19833  | 0.21249749 | 3.61E-06 | 0.309481 | 8.00E-12 |
| 0.57092  | -0.23261 | 3.71E-07 | -0.03577 | 0.44059  | 0.15402184 | 0.00084  | 0.204743 | 8.20E-06 |
| 0.47574  | -0.36041 | 9.02E-16 | -0.04338 | 0.34963  | 0.31631294 | 2.60E-12 | 0.310277 | 7.03E-12 |
| 0.54499  | -0.32129 | 1.13E-12 | -0.02984 | 0.52009  | 0.20995535 | 4.74E-06 | 0.192116 | 2.92E-05 |
| 0.35074  | 0.33941  | 4.70E-14 | 0.372315 | 8.40E-17 | 0.10352398 | 0.02527  | -0.05883 | 0.20445  |
| 0.00188  | 0.252955 | 2.99E-08 | 0.093805 | 0.04275  | -0.211276  | 4.11E-06 | -0.35059 | 5.95E-15 |
| 0.21129  | -0.28307 | 4.71E-10 | -0.11317 | 0.01441  | 0.19450613 | 2.31E-05 | 0.260329 | 1.13E-08 |
| 0.47107  | -0.15032 | 0.00112  | -0.0871  | 0.06     | 0.12729597 | 0.00587  | 0.226842 | 7.28E-07 |
| 0.28824  | -0.17576 | 0.00013  | 0.092724 | 0.04521  | 0.63194906 | 1.97E-53 | 0.552727 | 1.03E-38 |
| 0.23418  | 0.320016 | 1.40E-12 | 0.153015 | 0.00091  | -0.1111243 | 0.01629  | -0.29303 | 1.06E-10 |
| 0.06728  | 0.177536 | 0.00011  | 0.110227 | 0.01718  | 0.04577395 | 0.32362  | -0.12395 | 0.00732  |
| 0.01106  | -0.38116 | 1.35E-17 | -0.23942 | 1.64E-07 | -0.034187  | 0.46111  | -0.02166 | 0.64053  |
| 0.00057  | 0.150086 | 0.00114  | 0.083393 | 0.07179  | -0.0283373 | 0.5413   | -0.14107 | 0.00225  |
| 0.99238  | -0.41254 | 1.29E-20 | -0.16223 | 0.00043  | 0.08019196 | 0.08343  | 0.092104 | 0.04667  |
| 2.48E-23 | -0.20034 | 1.29E-05 | -0.15478 | 0.00079  | -0.0998864 | 0.03091  | -0.08087 | 0.08083  |
| 0.13856  | 0.522388 | 4.67E-34 | 0.591672 | 1.93E-45 | 0.2157527  | 2.53E-06 | 0.074868 | 0.10613  |
| 0.74415  | -0.21024 | 4.59E-06 | -0.16545 | 0.00033  | -0.0275333 | 0.55283  | 0.024008 | 0.60481  |
| 0.38065  | -0.37326 | 6.93E-17 | -0.21458 | 2.88E-06 | 0.16663646 | 0.0003   | 0.296084 | 6.66E-11 |
| 0.60728  | -0.42889 | 2.55E-22 | -0.16068 | 0.00049  | 0.13575241 | 0.00329  | 0.160845 | 0.00048  |
| 0.27316  | -0.10793 | 0.01965  | -0.1391  | 0.00259  | 0.06059913 | 0.19113  | 0.164756 | 0.00035  |
| 0.85951  | -0.40765 | 4.01E-20 | -0.19354 | 2.54E-05 | 0.03706215 | 0.42426  | 0.059242 | 0.20127  |
| 0.59552  | 0.152845 | 0.00092  | 0.226633 | 7.46E-07 | 0.04022939 | 0.38573  | -0.18299 | 6.96E-05 |
| 0.56616  | -0.39331 | 9.99E-19 | -0.16714 | 0.00029  | -0.0168961 | 0.71573  | -0.08554 | 0.06475  |
| 0.13449  | -0.20126 | 1.17E-05 | -0.02291 | 0.6215   | 0.15902034 | 0.00056  | 0.177708 | 0.00011  |
| 0.26433  | -0.31123 | 6.01E-12 | -0.08973 | 0.05264  | 0.13149492 | 0.00442  | 0.18891  | 3.98E-05 |
| 0.00066  | -0.12193 | 0.00834  | 0.035736 | 0.44104  | 0.22868665 | 5.88E-07 | 0.305335 | 1.56E-11 |
| 0.05141  | -0.14806 | 0.00133  | 0.098568 | 0.03321  | 0.41361847 | 1.00E-20 | 0.483768 | 9.11E-29 |
| 0.00693  | -0.24639 | 6.91E-08 | -0.16432 | 0.00036  | 0.1431235  | 0.00193  | 0.290448 | 1.57E-10 |
| 0.28408  | -0.12752 | 0.00579  | -0.0785  | 0.09016  | 0.07577406 | 0.10195  | 0.24294  | 1.06E-07 |
| 0.33352  | 0.349818 | 6.88E-15 | 0.449445 | 1.34E-24 | 0.38121281 | 1.33E-17 | 0.177442 | 0.00012  |
| 0.07767  | -0.3792  | 2.04E-17 | -0.3384  | 5.64E-14 | -0.1928882 | 2.71E-05 | -0.23848 | 1.84E-07 |
| 0.20074  | 0.204954 | 8.02E-06 | 0.221363 | 1.36E-06 | 0.25977054 | 1.22E-08 | 0.027445 | 0.55411  |
| 0.12292  | -0.30117 | 3.01E-11 | 0.005356 | 0.9081   | 0.29559787 | 7.17E-11 | 0.153062 | 0.00091  |
| 9.48E-05 | -0.16711 | 0.00029  | 0.050784 | 0.27342  | 0.17792949 | 0.00011  | 0.233062 | 3.52E-07 |
| 0.62649  | -0.3246  | 6.41E-13 | -0.14553 | 0.00161  | 0.16772346 | 0.00027  | 0.31349  | 4.15E-12 |
| 1.85E-08 | 0.285763 | 3.16E-10 | 0.160724 | 0.00049  | 0.05508181 | 0.23482  | 0.037402 | 0.42002  |
| 0.00459  | -0.52781 | 7.44E-35 | -0.22797 | 6.40E-07 | 0.06752991 | 0.14509  | 0.13158  | 0.0044   |
| 0.83601  | -0.12892 | 0.00527  | -0.15126 | 0.00104  | 0.12945693 | 0.00508  | 0.157371 | 0.00064  |
| 0.90487  | -0.4554  | 2.74E-25 | -0.19888 | 1.49E-05 | 0.30485341 | 1.68E-11 | 0.363687 | 4.74E-16 |

|          |          |          |          |          |            |          |          |          |
|----------|----------|----------|----------|----------|------------|----------|----------|----------|
| 0.48546  | -0.65714 | 4.62E-59 | -0.39456 | 7.60E-19 | 0.11720564 | 0.01125  | 0.079309 | 0.0869   |
| 0.47993  | -0.57874 | 4.15E-43 | -0.23769 | 2.02E-07 | 0.17269375 | 0.00018  | 0.185399 | 5.56E-05 |
| 0.00949  | 0.507652 | 5.86E-32 | 0.57224  | 5.66E-42 | 0.04287578 | 0.35523  | -0.13856 | 0.00269  |
| 0.39858  | -0.2659  | 5.34E-09 | 0.008098 | 0.86145  | 0.22140135 | 1.35E-06 | 0.281614 | 5.82E-10 |
| 0.17423  | -0.25609 | 1.99E-08 | -0.15062 | 0.0011   | -0.2253946 | 8.60E-07 | -0.28948 | 1.82E-10 |
| 0.59466  | -0.25013 | 4.30E-08 | -0.19216 | 2.91E-05 | 0.02680121 | 0.56345  | 0.096385 | 0.03733  |
| 0.03398  | 0.213202 | 3.34E-06 | 0.236531 | 2.32E-07 | -0.07289   | 0.11571  | -0.28292 | 4.81E-10 |
| 0.25048  | -0.42648 | 4.61E-22 | -0.26053 | 1.10E-08 | -0.0434138 | 0.34922  | -0.0823  | 0.07562  |
| 0.24642  | -0.42615 | 5.00E-22 | -0.27501 | 1.50E-09 | -0.0745964 | 0.10741  | -0.08681 | 0.06086  |
| 0.04285  | -0.25978 | 1.22E-08 | -0.09673 | 0.03665  | 0.1055952  | 0.02248  | 0.069424 | 0.13412  |
| 0.99317  | -0.4467  | 2.76E-24 | -0.21291 | 3.45E-06 | 0.03576366 | 0.44069  | 0.068023 | 0.14217  |
| 0.68255  | 0.395888 | 5.66E-19 | 0.290416 | 1.58E-10 | 0.10280418 | 0.02631  | -0.04811 | 0.29952  |
| 0.79543  | -0.33362 | 1.33E-13 | -0.15732 | 0.00065  | 0.313802   | 3.94E-12 | 0.348897 | 8.17E-15 |
| 0.13608  | -0.25265 | 3.11E-08 | -0.09835 | 0.0336   | 0.01514882 | 0.74404  | 0.051281 | 0.26874  |
| 0.00351  | -0.07915 | 0.08754  | -0.05124 | 0.26909  | 0.2722894  | 2.21E-09 | 0.354609 | 2.77E-15 |
| 0.05575  | -0.28834 | 2.16E-10 | -0.13895 | 0.00262  | -0.0401692 | 0.38644  | -0.06408 | 0.16683  |
| 0.01167  | -0.16414 | 0.00037  | 0.067881 | 0.14301  | 0.27706286 | 1.12E-09 | 0.348686 | 8.50E-15 |
| 0.51873  | -0.22403 | 1.01E-06 | -0.0235  | 0.61247  | 0.23515466 | 2.74E-07 | 0.307994 | 1.02E-11 |
| 0.62876  | -0.3336  | 1.33E-13 | -0.21656 | 2.32E-06 | -0.0301684 | 0.51547  | 0.020817 | 0.65365  |
| 0.62125  | -0.06188 | 0.18187  | 0.029586 | 0.52361  | 0.15277919 | 0.00093  | 0.203414 | 9.40E-06 |
| 0.09124  | -0.29917 | 4.12E-11 | -0.38413 | 7.21E-18 | -0.2841416 | 4.02E-10 | -0.32172 | 1.05E-12 |
| 0.73686  | 0.081308 | 0.07921  | 0.058811 | 0.20458  | 0.114087   | 0.01363  | 0.119761 | 0.00959  |
| 0.09972  | -0.30654 | 1.29E-11 | -0.29769 | 5.19E-11 | 0.00577435 | 0.90096  | 0.152058 | 0.00098  |
| 0.28463  | -0.41166 | 1.58E-20 | -0.23816 | 1.91E-07 | 0.07648437 | 0.09877  | 0.155923 | 0.00072  |
| 0.00036  | 0.15992  | 0.00052  | 0.040761 | 0.37947  | -0.2748999 | 1.53E-09 | -0.38942 | 2.33E-18 |
| 5.57E-21 | -0.14047 | 0.00235  | -0.14614 | 0.00154  | 0.05814459 | 0.20977  | 0.133291 | 0.00391  |
| 0.36335  | 0.366065 | 2.96E-16 | 0.461961 | 4.59E-26 | 0.13959236 | 0.0025   | -0.04447 | 0.33761  |
| 0.47826  | 0.292617 | 1.13E-10 | -0.09016 | 0.05152  | -0.1920358 | 2.94E-05 | -0.13629 | 0.00317  |
| 0.92101  | -0.17918 | 9.89E-05 | 0.023491 | 0.61261  | 0.06510652 | 0.16012  | 0.082501 | 0.07489  |
| 0.28918  | -0.38615 | 4.70E-18 | -0.22696 | 7.18E-07 | 0.01973295 | 0.6706   | 0.159248 | 0.00055  |
| 3.09E-10 | -0.18884 | 4.01E-05 | -0.15067 | 0.00109  | 0.16509641 | 0.00034  | 0.323732 | 7.44E-13 |
| 0.03246  | -0.54927 | 3.68E-38 | -0.31089 | 6.36E-12 | 0.12639307 | 0.00624  | 0.19367  | 2.51E-05 |
| 0.00604  | -0.24967 | 4.56E-08 | -0.18071 | 8.59E-05 | -0.027985  | 0.54634  | 0.106276 | 0.02162  |
| 0.00074  | 0.486139 | 4.51E-29 | 0.51293  | 1.07E-32 | 0.10681104 | 0.02096  | -0.04535 | 0.32816  |
| 0.25551  | -0.32838 | 3.34E-13 | -0.16565 | 0.00032  | 0.1296092  | 0.00503  | 0.169789 | 0.00023  |
| 0.27218  | -0.35239 | 4.22E-15 | -0.16984 | 0.00023  | 0.06769751 | 0.14409  | 0.176007 | 0.00013  |
| 0.95742  | 0.218741 | 1.82E-06 | 0.152702 | 0.00093  | -0.0741395 | 0.10958  | -0.18956 | 3.74E-05 |
| 0.00189  | -0.23648 | 2.34E-07 | 0.0078   | 0.86649  | 0.11803863 | 0.01068  | -0.07679 | 0.09743  |
| 3.20E-37 | -0.36178 | 6.90E-16 | -0.15982 | 0.00053  | 0.07328406 | 0.11375  | 0.167462 | 0.00028  |
| 0.81038  | -0.19945 | 1.41E-05 | -0.10322 | 0.02571  | 0.06113404 | 0.18723  | 0.112547 | 0.01496  |
| 0.0369   | -0.3561  | 2.08E-15 | -0.03983 | 0.39051  | 0.21350116 | 3.24E-06 | 0.149238 | 0.00122  |
| 0.00081  | -0.32973 | 2.64E-13 | -0.20776 | 5.98E-06 | 0.04338171 | 0.34957  | -0.01703 | 0.71364  |
| 0.22493  | -0.23015 | 4.96E-07 | -0.12577 | 0.0065   | 0.08442292 | 0.06834  | 0.136434 | 0.00313  |
| 0.00058  | 0.441941 | 9.49E-24 | 0.489169 | 1.82E-29 | 0.23224332 | 3.88E-07 | 0.053654 | 0.24719  |
| 0.13428  | -0.16588 | 0.00032  | 0.048418 | 0.29643  | 0.25631143 | 1.93E-08 | 0.247284 | 6.17E-08 |

|          |          |          |          |          |            |          |          |          |
|----------|----------|----------|----------|----------|------------|----------|----------|----------|
| 0.0437   | -0.28034 | 7.00E-10 | -0.08809 | 0.05714  | 0.21112765 | 4.18E-06 | 0.253296 | 2.86E-08 |
| 0.00055  | -0.07906 | 0.08789  | 0.065008 | 0.16075  | 0.16007524 | 0.00052  | 0.07582  | 0.10175  |
| 0.40966  | -0.1512  | 0.00105  | -0.06288 | 0.17493  | 0.18551555 | 5.50E-05 | 0.004898 | 0.91592  |
| 0.92298  | -0.11607 | 0.01207  | 0.024716 | 0.5942   | 0.09142193 | 0.04833  | 0.081631 | 0.07802  |
| 0.32727  | -0.28464 | 3.74E-10 | -0.25351 | 2.78E-08 | -0.093784  | 0.04279  | -0.0263  | 0.57071  |
| 1.19E-15 | -0.02578 | 0.57837  | -0.04158 | 0.36994  | 0.03091798 | 0.50508  | 0.059269 | 0.20107  |
| 1.94E-08 | -0.37657 | 3.51E-17 | -0.20581 | 7.34E-06 | -0.0020481 | 0.96479  | -0.0066  | 0.88691  |
| 0.03053  | -0.38209 | 1.11E-17 | -0.18184 | 7.75E-05 | 0.0958446  | 0.03841  | 0.207178 | 6.35E-06 |
| 0.00427  | -0.25824 | 1.50E-08 | -0.12948 | 0.00507  | 0.06824902 | 0.14085  | 0.172396 | 0.00018  |
| 0.23132  | -0.44826 | 1.83E-24 | -0.14591 | 0.00157  | 0.21339583 | 3.27E-06 | 0.263067 | 7.85E-09 |
| 0.25416  | 0.43668  | 3.64E-23 | 0.351754 | 4.77E-15 | -0.212271  | 3.70E-06 | -0.29932 | 4.03E-11 |
| 0.0047   | 0.240382 | 1.46E-07 | 0.253987 | 2.61E-08 | -0.0197259 | 0.67071  | -0.19296 | 2.69E-05 |
| 2.45E-17 | -0.18165 | 7.88E-05 | -0.06237 | 0.17847  | 0.10722907 | 0.02046  | 0.105539 | 0.02255  |
| 0.56003  | 0.101461 | 0.02835  | 0.00204  | 0.96493  | -0.0766108 | 0.09822  | -0.21888 | 1.79E-06 |
| 8.10E-05 | 0.143695 | 0.00185  | 0.165327 | 0.00033  | 0.07069408 | 0.12713  | -0.16014 | 0.00051  |
| 0.69061  | 0.155471 | 0.00075  | 0.141582 | 0.00216  | -0.2358769 | 2.51E-07 | -0.40716 | 4.48E-20 |
| 0.36908  | -0.04666 | 0.3143   | 0.075694 | 0.10232  | 0.25583515 | 2.05E-08 | 0.32684  | 4.36E-13 |
| 0.14749  | -0.0546  | 0.23894  | -0.016   | 0.73016  | 0.17964861 | 9.48E-05 | 0.271087 | 2.61E-09 |
| 0.01701  | -0.14874 | 0.00127  | -0.00752 | 0.87121  | 0.19177483 | 3.02E-05 | 0.287952 | 2.29E-10 |
| 0.15537  | -0.45477 | 3.24E-25 | -0.22705 | 7.11E-07 | 0.02020625 | 0.66317  | -0.01575 | 0.7343   |
| 0.00315  | -0.17958 | 9.54E-05 | -0.05601 | 0.22699  | 0.18680441 | 4.87E-05 | 0.133298 | 0.0039   |
| 0.00408  | -0.17633 | 0.00013  | -0.08866 | 0.05553  | 0.01218972 | 0.79276  | 0.054535 | 0.23951  |
| 0.05841  | 0.272997 | 2.00E-09 | 0.103874 | 0.02478  | 0.09188073 | 0.04721  | 0.181407 | 8.06E-05 |
| 0.04419  | -0.37142 | 1.01E-16 | -0.23759 | 2.04E-07 | 0.08699672 | 0.06031  | 0.234231 | 3.06E-07 |
| 0.7792   | -0.45602 | 2.32E-25 | -0.35351 | 3.42E-15 | -0.0966831 | 0.03674  | 0.00191  | 0.96717  |
| 0.89667  | -0.5336  | 1.01E-35 | -0.29183 | 1.28E-10 | 0.06046827 | 0.19209  | 0.048965 | 0.29099  |
| 0.77105  | 0.064688 | 0.16283  | 0.004333 | 0.9256   | -0.0457852 | 0.3235   | -0.18501 | 5.76E-05 |
| 0.24295  | -0.4993  | 8.17E-31 | -0.24322 | 1.03E-07 | 0.04976302 | 0.28319  | 0.107212 | 0.02049  |
| 0.83537  | -0.32531 | 5.67E-13 | -0.15568 | 0.00074  | 0.04606888 | 0.32051  | 0.079527 | 0.08603  |
| 0.19792  | -0.19289 | 2.71E-05 | -0.00708 | 0.87875  | 0.082832   | 0.07373  | 0.081806 | 0.07739  |
| 0.47424  | -0.12817 | 0.00554  | -0.05359 | 0.24779  | 0.16058729 | 0.00049  | 0.304923 | 1.66E-11 |
| 0.13574  | 0.311469 | 5.78E-12 | 0.272655 | 2.10E-09 | 0.27495084 | 1.52E-09 | 0.267004 | 4.59E-09 |
| 0.00049  | -0.15211 | 0.00098  | -0.04049 | 0.3827   | 0.1224719  | 0.00806  | 0.131023 | 0.00457  |
| 0.17847  | -0.46703 | 1.12E-26 | -0.23586 | 2.52E-07 | -0.0175009 | 0.70602  | 0.012972 | 0.77979  |
| 0.50987  | -0.25329 | 2.86E-08 | -0.20456 | 8.35E-06 | 0.08649445 | 0.06181  | 0.201959 | 1.09E-05 |
| 0.31586  | -0.37889 | 2.17E-17 | -0.21427 | 2.98E-06 | -0.0024806 | 0.95736  | -0.04408 | 0.34188  |
| 0.50963  | -0.21821 | 1.93E-06 | -0.16429 | 0.00036  | 0.08851812 | 0.05594  | 0.189958 | 3.60E-05 |
| 0.70643  | -0.28596 | 3.07E-10 | -0.10102 | 0.02905  | 0.09851804 | 0.0333   | 0.13098  | 0.00458  |
| 0.00064  | -0.23301 | 3.54E-07 | -0.0279  | 0.54751  | 0.10501583 | 0.02323  | 0.114394 | 0.01338  |
| 2.60E-10 | -0.15503 | 0.00078  | -0.09768 | 0.03483  | 0.33524603 | 9.94E-14 | 0.377834 | 2.70E-17 |
| 0.00851  | -0.057   | 0.21889  | -0.10209 | 0.02739  | 0.11323043 | 0.01436  | 0.294969 | 7.90E-11 |
| 0.00302  | 0.024648 | 0.59521  | 0.082223 | 0.07588  | 0.26440137 | 6.55E-09 | 0.298071 | 4.89E-11 |
| 0.31132  | -0.24898 | 4.98E-08 | -0.14996 | 0.00115  | -0.0754533 | 0.10342  | -0.0461  | 0.32022  |
| 0.00162  | -0.30229 | 2.53E-11 | -0.12887 | 0.00529  | 0.18703617 | 4.76E-05 | 0.237983 | 1.95E-07 |
| 0.85321  | 0.110694 | 0.01671  | 0.241299 | 1.30E-07 | -0.0433277 | 0.35018  | -0.04046 | 0.38296  |

|          |          |          |          |          |            |          |          |          |
|----------|----------|----------|----------|----------|------------|----------|----------|----------|
| 0.94937  | -0.30154 | 2.84E-11 | -0.29906 | 4.19E-11 | -0.028733  | 0.53566  | 0.09193  | 0.04709  |
| 0.2298   | 0.367644 | 2.16E-16 | 0.25507  | 2.27E-08 | 0.0445134  | 0.33714  | -0.03223 | 0.48713  |
| 0.46394  | -0.52131 | 6.71E-34 | -0.25092 | 3.88E-08 | 0.07007017 | 0.13053  | 0.127375 | 0.00584  |
| 0.90654  | -0.44842 | 1.76E-24 | -0.17525 | 0.00014  | 0.27760085 | 1.04E-09 | 0.326319 | 4.77E-13 |
| 0.14792  | -0.21916 | 1.74E-06 | -0.17862 | 0.0001   | 0.02433136 | 0.59995  | -0.00461 | 0.92081  |
| 0.49304  | -0.23435 | 3.02E-07 | 0.084905 | 0.06677  | 0.51744139 | 2.43E-33 | 0.413303 | 1.08E-20 |
| 0.27585  | -0.21095 | 4.26E-06 | -0.21007 | 4.68E-06 | 0.09187651 | 0.04722  | 0.259075 | 1.34E-08 |
| 1.08E-05 | -0.37132 | 1.03E-16 | -0.09222 | 0.04639  | 0.16216545 | 0.00043  | 0.205939 | 7.24E-06 |
| 0.00125  | 0.071193 | 0.12446  | 0.081146 | 0.07981  | 0.15452305 | 0.00081  | 0.220156 | 1.56E-06 |
| 0.02987  | -0.46282 | 3.62E-26 | -0.19322 | 2.62E-05 | 0.17286746 | 0.00017  | 0.212305 | 3.68E-06 |
| 0.73151  | -0.29805 | 4.91E-11 | -0.17702 | 0.00012  | 0.03014932 | 0.51573  | 0.099693 | 0.03124  |
| 0.01262  | -0.134   | 0.00372  | -0.19238 | 2.85E-05 | 0.07676353 | 0.09755  | 0.247071 | 6.34E-08 |
| 0.96467  | -0.2103  | 4.57E-06 | -0.10474 | 0.0236   | 0.02136083 | 0.64521  | 0.046999 | 0.31082  |
| 0.21375  | -0.12344 | 0.00757  | -0.06628 | 0.1527   | 0.12337527 | 0.0076   | 0.224915 | 9.08E-07 |
| 0.00033  | 0.306052 | 1.39E-11 | 0.210612 | 4.42E-06 | 0.06798649 | 0.14239  | -0.06165 | 0.1835   |
| 0.0035   | -0.42047 | 1.98E-21 | -0.32662 | 4.53E-13 | 0.08551104 | 0.06484  | 0.252003 | 3.38E-08 |
| 0.07724  | -0.39815 | 3.43E-19 | -0.28378 | 4.24E-10 | 0.07596998 | 0.10107  | 0.261896 | 9.19E-09 |
| 0.34547  | -0.35334 | 3.53E-15 | -0.17746 | 0.00012  | 0.12597008 | 0.00641  | 0.263747 | 7.16E-09 |
| 0.81085  | -0.363   | 5.43E-16 | -0.12978 | 0.00497  | 0.21979915 | 1.62E-06 | 0.115772 | 0.01229  |
| 0.00135  | 0.394744 | 7.29E-19 | 0.037134 | 0.42336  | -0.2842914 | 3.93E-10 | -0.16577 | 0.00032  |
| 0.14207  | -0.19185 | 3.00E-05 | -0.12958 | 0.00504  | 0.05655097 | 0.22255  | 0.114409 | 0.01336  |
| 0.00738  | -0.02653 | 0.56736  | -0.00248 | 0.95742  | 0.1054818  | 0.02262  | 0.167807 | 0.00027  |
| 0.02369  | -0.29538 | 7.42E-11 | -0.18878 | 4.03E-05 | 0.21315791 | 3.36E-06 | 0.428091 | 3.10E-22 |
| 0.43588  | -0.08752 | 0.05879  | -0.08447 | 0.06817  | 0.08507316 | 0.06623  | 0.072654 | 0.1169   |
| 0.27213  | -0.29019 | 1.63E-10 | -0.29005 | 1.67E-10 | -0.031969  | 0.49071  | 0.123042 | 0.00777  |
| 0.2416   | -0.24621 | 7.07E-08 | -0.13206 | 0.00425  | 0.05988445 | 0.19642  | 0.113221 | 0.01436  |
| 0.15845  | -0.2307  | 4.65E-07 | -0.24291 | 1.07E-07 | 0.07322871 | 0.11402  | 0.21948  | 1.68E-06 |
| 0.76846  | -0.01429 | 0.75804  | 0.064721 | 0.16261  | 0.25721686 | 1.71E-08 | 0.354127 | 3.04E-15 |
| 0.95377  | -0.15833 | 0.00059  | -0.11718 | 0.01127  | 0.04298268 | 0.35403  | 0.139396 | 0.00254  |
| 2.57E-06 | -0.31072 | 6.53E-12 | -0.14106 | 0.00225  | 0.16847808 | 0.00025  | 0.263366 | 7.54E-09 |
| 0.61716  | -0.49439 | 3.72E-30 | -0.43165 | 1.29E-22 | -0.1145379 | 0.01326  | 0.026451 | 0.56856  |
| 0.27668  | -0.06791 | 0.14281  | -0.14776 | 0.00136  | 0.06200157 | 0.18104  | 0.184468 | 6.07E-05 |
| 0.10127  | -0.31782 | 2.02E-12 | -0.20966 | 4.89E-06 | 0.05503426 | 0.23522  | -0.04356 | 0.34757  |
| 0.91089  | -0.20968 | 4.88E-06 | -0.13627 | 0.00317  | -0.0618733 | 0.18195  | 0.009492 | 0.8379   |
| 0.06489  | -0.1367  | 0.00307  | -0.19102 | 3.25E-05 | -0.0321733 | 0.48794  | 0.088003 | 0.05739  |
| 0.48782  | 0.18733  | 4.63E-05 | 0.30596  | 1.41E-11 | 0.24305162 | 1.05E-07 | 0.024354 | 0.59961  |
| 0.1745   | -0.23518 | 2.73E-07 | -0.16814 | 0.00026  | 0.05208858 | 0.26127  | 0.114271 | 0.01348  |
| 0.13103  | -0.10458 | 0.02381  | -0.06719 | 0.14712  | 0.09520238 | 0.03973  | 0.195185 | 2.16E-05 |
| 0.86429  | -0.20977 | 4.83E-06 | -0.18107 | 8.31E-05 | -0.0221009 | 0.6338   | 0.104608 | 0.02378  |
| 0.14387  | -0.28766 | 2.39E-10 | -0.06455 | 0.16376  | 0.11128316 | 0.01613  | 0.082554 | 0.07471  |
| 0.28137  | -0.2446  | 8.64E-08 | -0.12107 | 0.00882  | 0.10981356 | 0.0176   | 0.111828 | 0.01562  |
| 0.89706  | -0.36728 | 2.32E-16 | -0.06322 | 0.17258  | 0.18664006 | 4.94E-05 | 0.031777 | 0.49332  |
| 0.58424  | 0.066298 | 0.15259  | -0.20043 | 1.28E-05 | -0.0293258 | 0.52727  | 0.05483  | 0.23697  |
| 0.66286  | 0.005461 | 0.9063   | -0.23086 | 4.56E-07 | -0.0979083 | 0.03441  | 0.026514 | 0.56764  |
| 0.92887  | 0.030997 | 0.504    | -0.20289 | 9.93E-06 | -0.0880243 | 0.05733  | 0.096963 | 0.0362   |

|          |           |          |          |          |            |         |          |          |
|----------|-----------|----------|----------|----------|------------|---------|----------|----------|
| 0.52004  | -0.01068  | 0.81799  | -0.22514 | 8.85E-07 | -0.0711431 | 0.12472 | 0.073063 | 0.11484  |
| 0.71743  | 0.065126  | 0.15999  | -0.07191 | 0.1207   | -0.0552529 | 0.23336 | 0.066904 | 0.14887  |
| 0.53158  | 0.011845  | 0.7985   | -0.14233 | 0.00205  | -0.0513717 | 0.2679  | 0.039703 | 0.39199  |
| 4.86E-05 | 0.040367  | 0.38411  | -0.18866 | 4.08E-05 | -0.0768946 | 0.09697 | 0.014909 | 0.74795  |
| 0.9304   | 0.03638   | 0.43285  | -0.18825 | 4.24E-05 | -0.094292  | 0.04168 | 0.020638 | 0.65643  |
| 0.26525  | 0.0228    | 0.62311  | -0.17225 | 0.00018  | -0.0859969 | 0.06333 | 0.073677 | 0.11182  |
| 0.46811  | 0.131559  | 0.0044   | 0.008076 | 0.86182  | 0.03623776 | 0.43465 | 0.087708 | 0.05823  |
| 0.73602  | -0.0986   | 0.03316  | -0.07149 | 0.12287  | 0.02571044 | 0.57944 | 0.061217 | 0.18663  |
| 0.58298  | 0.016561  | 0.72113  | -0.18228 | 7.44E-05 | -0.1050658 | 0.02317 | 0.032157 | 0.48816  |
| 0.61144  | 0.094255  | 0.04176  | -0.12844 | 0.00544  | -0.1014306 | 0.0284  | -0.03152 | 0.4968   |
| 0.59657  | 0.068592  | 0.13886  | -0.07147 | 0.12299  | -0.0917178 | 0.0476  | -0.0547  | 0.23808  |
| 0.6195   | 0.035365  | 0.4458   | -0.26431 | 6.63E-09 | -0.0938977 | 0.04254 | 0.072056 | 0.11995  |
| 0.39071  | 0.059147  | 0.202    | -0.15121 | 0.00105  | -0.0979499 | 0.03433 | 0.016308 | 0.72521  |
| 0.62071  | 0.038105  | 0.41133  | -0.19213 | 2.92E-05 | -0.0780779 | 0.09193 | 0.100931 | 0.02919  |
| 0.84343  | -0.0656   | 0.15697  | -0.06536 | 0.15851  | 0.06840859 | 0.13992 | 0.140623 | 0.00232  |
| 0.35896  | 0.042483  | 0.35966  | 0.020292 | 0.66184  | 0.01469407 | 0.75147 | 0.002588 | 0.95551  |
| 0.84341  | 0.006031  | 0.89657  | -0.18724 | 4.67E-05 | -0.1188714 | 0.01014 | 0.016448 | 0.72296  |
| 0.36133  | -0.13542  | 0.00337  | -0.22957 | 5.30E-07 | -0.0766036 | 0.09825 | 0.048248 | 0.29813  |
| 0.33864  | -1.56E-05 | 0.99973  | -0.22521 | 8.78E-07 | -0.0956176 | 0.03887 | 0.009068 | 0.84506  |
| 0.40582  | -0.04741  | 0.30665  | -0.17027 | 0.00022  | -0.166419  | 0.0003  | -0.11428 | 0.01347  |
| 0.83831  | 0.041021  | 0.37644  | -0.0875  | 0.05884  | 0.00809074 | 0.86157 | 0.132764 | 0.00405  |
| 0.10142  | -0.00385  | 0.93384  | -0.14201 | 0.0021   | -0.0769138 | 0.09689 | 0.031385 | 0.49867  |
| 0.17275  | -0.00539  | 0.90756  | -0.20052 | 1.26E-05 | -0.1149616 | 0.01292 | 0.007426 | 0.87284  |
| 0.89361  | 0.089824  | 0.0524   | -0.07547 | 0.10335  | 0.00392659 | 0.93256 | 0.085053 | 0.0663   |
| 0.10607  | 0.012325  | 0.79051  | -0.18184 | 7.75E-05 | -0.0479356 | 0.30127 | 0.079632 | 0.08562  |
| 0.42008  | 0.064347  | 0.16506  | -0.07403 | 0.11012  | -0.0554557 | 0.23165 | 0.024253 | 0.60113  |
| 0.31116  | -0.06134  | 0.18574  | -0.24335 | 1.01E-07 | -0.1134068 | 0.0142  | 0.068629 | 0.13864  |
| 0.39176  | -0.00897  | 0.84662  | -0.16308 | 0.0004   | -0.1323967 | 0.00416 | 0.00345  | 0.94073  |
| 0.367    | 0.039363  | 0.39605  | -0.11581 | 0.01227  | -0.0563106 | 0.22452 | 0.074693 | 0.10695  |
| 0.44312  | -0.00183  | 0.96848  | -0.22802 | 6.35E-07 | -0.1346711 | 0.00355 | 0.006362 | 0.89093  |
| 0.74072  | -0.18312  | 6.88E-05 | -0.17412 | 0.00016  | -0.0452411 | 0.32929 | 0.028824 | 0.53437  |
| 0.04366  | -0.02361  | 0.61077  | -0.05734 | 0.21616  | 0.08699348 | 0.06032 | 0.250167 | 4.28E-08 |
| 0.13945  | -0.02311  | 0.61832  | -0.22062 | 1.48E-06 | -0.1223885 | 0.0081  | -0.03091 | 0.50516  |
| 0.8191   | -0.09829  | 0.0337   | -0.19241 | 2.84E-05 | -0.0179982 | 0.69807 | 0.11395  | 0.01374  |
| 0.90812  | 0.002015  | 0.96537  | -0.15731 | 0.00065  | -0.0792448 | 0.08716 | 0.005358 | 0.90807  |
| 0.69038  | 0.105603  | 0.02247  | -0.0091  | 0.84455  | 0.01175281 | 0.80003 | 0.107472 | 0.02018  |
| 0.66236  | 0.100724  | 0.02953  | -0.08216 | 0.07612  | -0.0927351 | 0.04518 | 0.030277 | 0.51396  |
| 0.76655  | -0.05064  | 0.2748   | -0.27109 | 2.61E-09 | -0.0229235 | 0.62122 | 0.106174 | 0.02175  |
| 0.00859  | -0.11781  | 0.01084  | -0.22255 | 1.19E-06 | -0.104716  | 0.02363 | -0.02542 | 0.5838   |
| 0.50673  | 0.008779  | 0.84993  | -0.1726  | 0.00018  | -0.1127812 | 0.01475 | 0.026813 | 0.56327  |
| 0.30571  | 0.056908  | 0.21964  | -0.09983 | 0.03101  | -0.030117  | 0.51619 | 0.102722 | 0.02644  |
| 0.73854  | -0.02608  | 0.57399  | -0.11782 | 0.01083  | -0.130969  | 0.00458 | -0.10137 | 0.02849  |
| 0.65778  | 0.041169  | 0.37473  | -0.17582 | 0.00013  | -0.162256  | 0.00043 | -0.02912 | 0.53022  |
| 0.40615  | 0.02637   | 0.56974  | -0.16952 | 0.00023  | -0.0927241 | 0.04521 | 0.069481 | 0.1338   |
| 0.86826  | 0.003636  | 0.93754  | -0.17618 | 0.00013  | -0.0750967 | 0.10506 | 0.005072 | 0.91295  |



|         |          |          |          |          |            |          |          |          |
|---------|----------|----------|----------|----------|------------|----------|----------|----------|
| 0.25807 | 0.024554 | 0.59661  | -0.17095 | 0.00021  | -0.0680502 | 0.14201  | 0.117016 | 0.01138  |
| 0.06778 | 0.008599 | 0.85296  | -0.13156 | 0.0044   | -0.079093  | 0.08776  | 0.051618 | 0.26561  |
| 0.63325 | -0.0121  | 0.79422  | -0.20813 | 5.75E-06 | -0.1208216 | 0.00896  | 0.045471 | 0.32684  |
| 0.62788 | -0.0728  | 0.11619  | -0.20526 | 7.77E-06 | -0.0649174 | 0.16133  | 0.094918 | 0.04033  |
| 0.02138 | -0.05978 | 0.19723  | -0.15336 | 0.00088  | -0.0500345 | 0.28057  | 0.091037 | 0.04928  |
| 0.1074  | -0.09451 | 0.0412   | -0.24774 | 5.82E-08 | -0.1188428 | 0.01016  | 0.049433 | 0.2864   |
| 0.88841 | -0.04565 | 0.3249   | -0.05782 | 0.21231  | 0.14993535 | 0.00115  | 0.254333 | 2.50E-08 |
| 0.02782 | -0.16042 | 0.0005   | -0.35651 | 1.92E-15 | -0.2321966 | 3.90E-07 | -0.12797 | 0.00562  |
| 0.9293  | 0.045007 | 0.33181  | -0.15558 | 0.00074  | -0.153514  | 0.00087  | -0.10129 | 0.02862  |
| 0.83667 | 0.022103 | 0.63377  | -0.1551  | 0.00077  | -0.0742524 | 0.10904  | 0.045594 | 0.32552  |
| 0.98893 | -0.05958 | 0.19872  | -0.26934 | 3.33E-09 | -0.2224926 | 1.20E-06 | -0.06615 | 0.15348  |
| 0.55452 | -0.01308 | 0.77799  | -0.23671 | 2.28E-07 | -0.1067325 | 0.02106  | -0.01577 | 0.73391  |
| 0.71302 | 0.089657 | 0.05284  | -0.15281 | 0.00092  | -0.1271662 | 0.00593  | -0.00613 | 0.89495  |
| 0.88301 | -0.00848 | 0.85502  | -0.15253 | 0.00094  | -0.0772528 | 0.09542  | 0.044025 | 0.34247  |
| 0.27096 | -0.06599 | 0.15449  | -0.23678 | 2.25E-07 | -0.1250184 | 0.00683  | -0.021   | 0.65077  |
| 0.00734 | -0.1946  | 2.29E-05 | -0.24292 | 1.06E-07 | 0.04311273 | 0.35257  | 0.15896  | 0.00056  |
| 0.65139 | 0.037772 | 0.41544  | -0.08762 | 0.05849  | -0.0423216 | 0.36149  | 0.034436 | 0.45784  |
| 0.35864 | -0.02301 | 0.61995  | -0.25285 | 3.03E-08 | -0.1103606 | 0.01704  | 0.098721 | 0.03294  |
| 0.67635 | 0.02069  | 0.65562  | -0.1609  | 0.00048  | -0.0686444 | 0.13856  | 0.051658 | 0.26524  |
| 0.21488 | -0.00977 | 0.83317  | -0.21047 | 4.49E-06 | -0.0911568 | 0.04898  | 0.043102 | 0.35269  |
| 0.3176  | 0.037164 | 0.42299  | -0.07948 | 0.08623  | -0.0370767 | 0.42408  | 0.031789 | 0.49316  |
| 0.78682 | 0.040004 | 0.3884   | -0.17442 | 0.00015  | -0.0540402 | 0.2438   | 0.096537 | 0.03703  |
| 0.16984 | 0.002135 | 0.96329  | -0.16253 | 0.00042  | -0.0957432 | 0.03862  | 0.012623 | 0.78557  |
| 0.15483 | -0.01156 | 0.80322  | -0.15668 | 0.00068  | -0.0938674 | 0.04261  | -0.01397 | 0.76332  |
| 0.27886 | -0.01833 | 0.6928   | -0.17458 | 0.00015  | -0.0833012 | 0.0721   | 0.039144 | 0.39868  |
| 0.31446 | 0.001467 | 0.97478  | -0.16804 | 0.00026  | -0.0943747 | 0.0415   | 0.031851 | 0.49231  |
| 0.94391 | -0.02537 | 0.58445  | -0.15665 | 0.00068  | -0.0720193 | 0.12014  | 0.031901 | 0.49164  |
| 0.34874 | 0.017322 | 0.70888  | -0.16389 | 0.00038  | -0.1051494 | 0.02306  | -0.00714 | 0.87772  |
| 0.38567 | 0.004092 | 0.92972  | -0.18445 | 6.08E-05 | -0.0549153 | 0.23624  | 0.034298 | 0.45966  |
| 0.23992 | 0.009153 | 0.84361  | -0.17318 | 0.00017  | -0.0967802 | 0.03655  | 0.043773 | 0.34525  |
| 0.50644 | 0.028144 | 0.54406  | -0.17005 | 0.00022  | -0.0863711 | 0.06218  | 0.061914 | 0.18166  |
| 0.75378 | -0.02744 | 0.55421  | -0.2409  | 1.37E-07 | -0.113884  | 0.0138   | 0.04543  | 0.32727  |
| 0.18049 | 0.010002 | 0.82931  | -0.15489 | 0.00078  | -0.0719912 | 0.12028  | 0.087928 | 0.0576   |
| 0.16351 | 0.002757 | 0.95262  | -0.21883 | 1.80E-06 | -0.0903076 | 0.05114  | 0.095896 | 0.03831  |
| 0.34962 | -0.01871 | 0.68676  | -0.15307 | 0.0009   | 0.05243564 | 0.2581   | 0.186074 | 5.22E-05 |
| 0.00066 | 0.096006 | 0.03809  | -0.07639 | 0.09921  | -0.0502454 | 0.27855  | -0.00193 | 0.96674  |
| 0.59205 | 0.018549 | 0.6893   | -0.17275 | 0.00018  | -0.0460803 | 0.32039  | 0.073125 | 0.11454  |
| 0.08978 | 0.036544 | 0.43077  | -0.11642 | 0.01181  | -0.0508898 | 0.27242  | 0.027401 | 0.55475  |
| 0.72236 | 0.075512 | 0.10315  | -0.10977 | 0.01764  | -0.0900578 | 0.05179  | -0.01218 | 0.79292  |
| 0.31068 | 0.039476 | 0.3947   | -0.11902 | 0.01005  | -0.0364521 | 0.43193  | 0.050859 | 0.27271  |
| 0.47197 | 0.034212 | 0.46078  | -0.13333 | 0.0039   | -0.0559732 | 0.22732  | 0.049373 | 0.28699  |
| 0.64053 | 0.000641 | 0.98897  | -0.00512 | 0.9121   | 0.08788617 | 0.05772  | 0.141212 | 0.00222  |
| 0.62663 | 0.011804 | 0.79918  | -0.15254 | 0.00094  | -0.0582769 | 0.20873  | 0.041582 | 0.36995  |
| 0.85956 | 0.059229 | 0.20138  | -0.2267  | 7.41E-07 | -0.1105231 | 0.01688  | 0.024115 | 0.6032   |
| 0.43248 | -0.06541 | 0.15814  | -0.16369 | 0.00038  | -0.0330641 | 0.47597  | 0.05216  | 0.26062  |

|          |          |         |          |          |            |         |          |          |
|----------|----------|---------|----------|----------|------------|---------|----------|----------|
| 0.81785  | 0.051137 | 0.2701  | -0.04911 | 0.28961  | -0.037905  | 0.4138  | -0.02472 | 0.5942   |
| 0.29691  | -0.01082 | 0.81562 | -0.1986  | 1.54E-05 | -0.0892666 | 0.05389 | 0.018998 | 0.68218  |
| 0.47356  | 0.03315  | 0.47482 | -0.17574 | 0.00013  | -0.0955151 | 0.03909 | 0.068045 | 0.14204  |
| 0.32085  | 0.025782 | 0.57837 | -0.19713 | 1.78E-05 | -0.0951483 | 0.03985 | 0.024477 | 0.59777  |
| 0.01224  | 0.001072 | 0.98158 | -0.1797  | 9.43E-05 | -0.0701724 | 0.12996 | 0.068983 | 0.13662  |
| 0.98628  | 0.043226 | 0.35131 | -0.11799 | 0.01072  | -0.0659338 | 0.15486 | 0.043921 | 0.34361  |
| 0.91425  | -0.1264  | 0.00623 | -0.10591 | 0.02207  | -0.0168752 | 0.71606 | 0.075514 | 0.10314  |
| 0.73404  | 0.057162 | 0.21758 | -0.19332 | 2.60E-05 | -0.111581  | 0.01585 | -0.00528 | 0.90947  |
| 0.50709  | 0.024447 | 0.59821 | -0.14037 | 0.00236  | -0.0239944 | 0.60501 | 0.068688 | 0.1383   |
| 0.31527  | 0.035411 | 0.44521 | -0.16816 | 0.00026  | -0.0670029 | 0.14826 | 0.06453  | 0.16386  |
| 0.26477  | -0.0488  | 0.29262 | -0.13241 | 0.00415  | -0.0108654 | 0.81484 | 0.089402 | 0.05352  |
| 0.46825  | -0.0084  | 0.85628 | -0.24019 | 1.49E-07 | -0.1280129 | 0.0056  | 0.04445  | 0.33783  |
| 0.47858  | 0.036354 | 0.43318 | -0.19014 | 3.54E-05 | -0.0935285 | 0.04336 | 0.052877 | 0.25411  |
| 0.23358  | 0.002382 | 0.95905 | -0.21143 | 4.05E-06 | -0.1056942 | 0.02235 | 0.036209 | 0.43501  |
| 0.2854   | 0.004281 | 0.92649 | -0.14518 | 0.00166  | -0.040034  | 0.38804 | 0.051629 | 0.26551  |
| 0.9259   | 0.088933 | 0.05479 | -0.14937 | 0.00121  | -0.0848163 | 0.06706 | 0.059813 | 0.19696  |
| 0.44748  | -0.01438 | 0.75656 | -0.18859 | 4.11E-05 | -0.117979  | 0.01072 | 0.012685 | 0.78455  |
| 0.00043  | -0.15121 | 0.00105 | -0.31307 | 4.45E-12 | -0.1204518 | 0.00917 | 0.04694  | 0.31144  |
| 0.29234  | 0.020746 | 0.65475 | -0.19604 | 1.98E-05 | -0.0837338 | 0.07063 | 0.109984 | 0.01742  |
| 0.48238  | 0.099498 | 0.03158 | -0.20346 | 9.36E-06 | -0.1316181 | 0.00438 | -0.04453 | 0.3369   |
| 0.42357  | -0.03783 | 0.41468 | -0.2314  | 4.28E-07 | -0.0924913 | 0.04575 | 0.061521 | 0.18445  |
| 0.25036  | -0.01946 | 0.67491 | -0.24302 | 1.05E-07 | -0.0907168 | 0.05009 | 0.078089 | 0.09188  |
| 0.72875  | 0.027445 | 0.5541  | -0.23714 | 2.16E-07 | -0.1020492 | 0.02744 | 0.071892 | 0.1208   |
| 0.95055  | 0.057717 | 0.21314 | -0.07043 | 0.12857  | 0.04749742 | 0.30571 | 0.133106 | 0.00396  |
| 0.96324  | 0.003727 | 0.93599 | -0.31368 | 4.02E-12 | -0.160889  | 0.00048 | -0.01357 | 0.76988  |
| 0.86728  | 0.058742 | 0.20512 | -0.09111 | 0.04911  | -0.025358  | 0.58465 | 0.074438 | 0.10816  |
| 0.86231  | 0.089006 | 0.05459 | -0.06794 | 0.14263  | -0.0455149 | 0.32637 | 0.054952 | 0.23592  |
| 0.38781  | 0.041547 | 0.37035 | -0.14026 | 0.00238  | -0.0562939 | 0.22466 | 0.089328 | 0.05372  |
| 0.42632  | 0.055671 | 0.22984 | -0.0943  | 0.04166  | -0.0674952 | 0.1453  | 0.014863 | 0.7487   |
| 0.15103  | -0.02322 | 0.61673 | -0.24027 | 1.48E-07 | -0.1476937 | 0.00137 | -0.00284 | 0.95114  |
| 0.67148  | 0.072652 | 0.11691 | -0.16934 | 0.00024  | -0.0756273 | 0.10262 | 0.078115 | 0.09177  |
| 0.17519  | -0.0013  | 0.97769 | -0.20172 | 1.12E-05 | -0.1000789 | 0.03059 | 0.030755 | 0.50733  |
| 0.85998  | 0.003971 | 0.9318  | -0.17942 | 9.67E-05 | -0.0743765 | 0.10845 | 0.033626 | 0.46849  |
| 0.54376  | 0.026976 | 0.56091 | -0.08154 | 0.07836  | -0.0105334 | 0.8204  | 0.031551 | 0.49641  |
| 0.9183   | 0.076787 | 0.09744 | -0.091   | 0.04939  | -0.0321681 | 0.48801 | 0.070751 | 0.12682  |
| 0.08911  | -0.0295  | 0.52489 | -0.15618 | 0.00071  | -0.1211267 | 0.00879 | -0.04497 | 0.33221  |
| 3.11E-21 | -0.11142 | 0.016   | -0.27504 | 1.50E-09 | -0.1371508 | 0.00298 | 0.006814 | 0.88324  |
| 0.26392  | 0.132572 | 0.00411 | -0.02361 | 0.61084  | 0.09339297 | 0.04367 | 0.242734 | 1.09E-07 |
| 0.55175  | 0.069445 | 0.134   | -0.09843 | 0.03346  | -0.0381034 | 0.41135 | 0.095231 | 0.03967  |
| 0.31337  | 0.012742 | 0.78361 | -0.06942 | 0.13415  | -0.0267811 | 0.56374 | -0.01748 | 0.70631  |
| 0.64536  | 0.043256 | 0.35098 | -0.0644  | 0.16469  | -0.0219406 | 0.63626 | 0.00114  | 0.98039  |
| 0.81103  | -0.00139 | 0.97605 | -0.14441 | 0.00176  | -0.0457437 | 0.32394 | 0.054963 | 0.23583  |
| 0.90226  | -0.00371 | 0.93629 | -0.08367 | 0.07086  | -0.0304542 | 0.5115  | -0.02151 | 0.64289  |
| 0.05363  | -0.08204 | 0.07652 | -0.23923 | 1.68E-07 | -0.1119271 | 0.01553 | -0.01856 | 0.6891   |
| 0.87027  | -0.02427 | 0.60089 | -0.24003 | 1.52E-07 | -0.174777  | 0.00015 | -0.0808  | 0.08113  |

|          |          |          |          |          |            |          |          |          |
|----------|----------|----------|----------|----------|------------|----------|----------|----------|
| 0.57242  | -0.05103 | 0.27106  | -0.21531 | 2.66E-06 | -0.1123278 | 0.01516  | -0.05895 | 0.20352  |
| 0.7256   | -0.07073 | 0.12691  | -0.18916 | 3.89E-05 | -0.0828592 | 0.07363  | -0.02016 | 0.66383  |
| 0.0825   | -0.02273 | 0.62412  | -0.20958 | 4.93E-06 | -0.1242292 | 0.00719  | -0.05994 | 0.196    |
| 0.00322  | -0.0594  | 0.20005  | -0.13977 | 0.00247  | -0.0425885 | 0.35846  | 0.003271 | 0.94379  |
| 0.55561  | -0.15246 | 0.00095  | -0.22239 | 1.21E-06 | -0.163225  | 0.0004   | -0.11452 | 0.01328  |
| 0.90565  | 0.112034 | 0.01543  | 0.057982 | 0.21105  | -0.0952811 | 0.03957  | -0.11751 | 0.01104  |
| 0.62263  | 0.000525 | 0.99098  | -0.19753 | 1.71E-05 | -0.111972  | 0.01548  | -0.08207 | 0.07642  |
| 0.03693  | -0.20817 | 5.72E-06 | -0.17199 | 0.00019  | 0.06266468 | 0.17641  | 0.097816 | 0.03458  |
| 0.74826  | -0.03836 | 0.40816  | -0.28845 | 2.12E-10 | -0.119505  | 0.00974  | 0.006702 | 0.88515  |
| 0.56563  | -0.06272 | 0.17602  | -0.26018 | 1.16E-08 | -0.105869  | 0.02213  | -0.01453 | 0.75407  |
| 0.90968  | 0.045006 | 0.33181  | -0.1487  | 0.00127  | -0.1387181 | 0.00266  | -0.05939 | 0.20014  |
| 0.51831  | -0.01761 | 0.7043   | -0.21849 | 1.87E-06 | -0.0899611 | 0.05204  | -0.04614 | 0.31979  |
| 0.97145  | 0.07538  | 0.10375  | -0.19767 | 1.69E-05 | -0.0723073 | 0.11866  | 0.091639 | 0.04779  |
| 0.01468  | -0.02752 | 0.55296  | -0.23441 | 3.00E-07 | -0.1679049 | 0.00027  | -0.05424 | 0.24204  |
| 0.39965  | 0.023027 | 0.61965  | -0.20034 | 1.29E-05 | -0.0852517 | 0.06566  | 0.014605 | 0.75292  |
| 0.5193   | 0.011148 | 0.81013  | -0.22867 | 5.90E-07 | -0.1086308 | 0.01886  | -0.0159  | 0.73186  |
| 0.48369  | -0.01678 | 0.71752  | -0.19122 | 3.19E-05 | -0.0819823 | 0.07675  | -0.00629 | 0.8922   |
| 0.44271  | 0.035631 | 0.44239  | -0.12059 | 0.00909  | -0.0635368 | 0.17045  | -0.07654 | 0.09851  |
| 0.69578  | -0.02568 | 0.57985  | -0.20665 | 6.71E-06 | -0.104279  | 0.02422  | 0.016614 | 0.72027  |
| 0.49406  | 0.029282 | 0.5279   | -0.09151 | 0.0481   | -0.1210667 | 0.00882  | -0.07905 | 0.08796  |
| 0.38514  | 0.108845 | 0.01863  | -0.06631 | 0.15253  | -0.0150727 | 0.74528  | 0.072587 | 0.11723  |
| 0.13864  | -0.00756 | 0.87051  | -0.12606 | 0.00638  | -0.0269322 | 0.56154  | 0.075644 | 0.10254  |
| 0.09004  | 0.064263 | 0.16561  | 0.06322  | 0.1726   | 0.11891791 | 0.01011  | 0.135275 | 0.0034   |
| 0.29174  | -0.00984 | 0.83205  | -0.19521 | 2.16E-05 | -0.0924486 | 0.04585  | 0.01421  | 0.7594   |
| 1.58E-05 | -0.03675 | 0.42823  | -0.19156 | 3.08E-05 | -0.0839455 | 0.06992  | -0.01683 | 0.71677  |
| 0.55428  | -0.04206 | 0.36442  | -0.21035 | 4.54E-06 | -0.0918164 | 0.04736  | 0.016461 | 0.72274  |
| 0.1134   | -0.07291 | 0.11562  | -0.25311 | 2.93E-08 | -0.1160131 | 0.01211  | -0.08042 | 0.08254  |
| 0.0881   | 0.004396 | 0.92451  | -0.14831 | 0.00131  | -0.0592844 | 0.20095  | 0.002479 | 0.9574   |
| 0.37102  | 0.027422 | 0.55444  | -0.03108 | 0.50289  | -0.1138832 | 0.0138   | -0.10329 | 0.02561  |
| 0.57909  | -0.1581  | 0.00061  | -0.56176 | 3.39E-40 | -0.4225133 | 1.21E-21 | -0.30319 | 2.19E-11 |
| 0.10142  | -0.01988 | 0.66827  | -0.21411 | 3.03E-06 | -0.176634  | 0.00012  | -0.15476 | 0.00079  |
| 0.95403  | -0.05016 | 0.27934  | -0.23373 | 3.25E-07 | -0.1049619 | 0.0233   | -0.07571 | 0.10226  |
| 0.38844  | -0.08702 | 0.06025  | -0.51306 | 1.02E-32 | -0.3215084 | 1.09E-12 | -0.15616 | 0.00071  |
| 0.70305  | 0.022439 | 0.62862  | -0.17746 | 0.00012  | -0.1194992 | 0.00975  | -0.04303 | 0.35347  |
| 0.32272  | 0.093858 | 0.04263  | -0.13367 | 0.00381  | -0.0894544 | 0.05338  | 0.009532 | 0.83723  |
| 0.07674  | -0.03402 | 0.46327  | -0.1579  | 0.00062  | -0.0524961 | 0.25755  | 0.008102 | 0.86137  |
| 0.06323  | 0.032634 | 0.48172  | -0.14126 | 0.00221  | -0.0268695 | 0.56245  | 0.035926 | 0.43862  |
| 0.38266  | -0.02789 | 0.54768  | -0.19169 | 3.05E-05 | -0.0935783 | 0.04325  | -0.01935 | 0.67656  |
| 0.0949   | -0.01883 | 0.68477  | -0.16413 | 0.00037  | -0.0799692 | 0.0843   | 0.007692 | 0.86834  |
| 0.25237  | 0.008986 | 0.84644  | -0.17775 | 0.00011  | -0.1169111 | 0.01146  | -0.04656 | 0.3154   |
| 0.56227  | 0.050144 | 0.27952  | -0.10408 | 0.0245   | -0.0885435 | 0.05587  | -0.03853 | 0.40608  |
| 0.35225  | 0.007464 | 0.87219  | -0.14147 | 0.00218  | -0.0628408 | 0.17519  | 0.024035 | 0.6044   |
| 0.85487  | 0.00326  | 0.94399  | -0.10943 | 0.01801  | -0.1471014 | 0.00143  | -0.09149 | 0.04816  |
| 0.60908  | -0.10515 | 0.02305  | -0.23253 | 3.75E-07 | -0.0559097 | 0.22785  | 0.005575 | 0.90437  |
| 0.47901  | 0.043923 | 0.34359  | -0.10242 | 0.02689  | -0.0749148 | 0.10591  | -0.07676 | 0.09756  |

|          |          |          |          |          |            |          |          |          |
|----------|----------|----------|----------|----------|------------|----------|----------|----------|
| 0.00534  | 0.096101 | 0.03789  | 0.001813 | 0.96882  | 0.00826737 | 0.85858  | 0.005617 | 0.90365  |
| 0.98914  | -0.08039 | 0.08267  | -0.23222 | 3.89E-07 | -0.1243914 | 0.00712  | -0.02382 | 0.60759  |
| 0.43658  | -0.0038  | 0.93476  | -0.10504 | 0.02319  | -0.1286982 | 0.00535  | -0.15332 | 0.00089  |
| 0.07488  | -0.06879 | 0.13769  | -0.22768 | 6.61E-07 | -0.1852009 | 5.66E-05 | -0.16264 | 0.00042  |
| 0.01827  | 0.034957 | 0.45107  | -0.08351 | 0.07138  | 0.00774552 | 0.86742  | 0.014433 | 0.75573  |
| 0.74554  | 0.098015 | 0.03421  | -0.01915 | 0.6798   | 0.00335548 | 0.94235  | 0.045757 | 0.3238   |
| 0.56828  | -0.1792  | 9.87E-05 | -0.24661 | 6.72E-08 | -0.090942  | 0.04952  | -0.00132 | 0.97729  |
| 0.34281  | -0.01178 | 0.79956  | -0.13641 | 0.00314  | -0.0856835 | 0.0643   | -0.03968 | 0.3922   |
| 0.84218  | -0.02756 | 0.5525   | -0.16295 | 0.00041  | -0.0998831 | 0.03092  | -0.08927 | 0.05389  |
| 0.95508  | -0.10427 | 0.02423  | -0.18045 | 8.81E-05 | -0.0211749 | 0.64809  | 0.012598 | 0.78598  |
| 0.78056  | 0.141676 | 0.00215  | -0.06872 | 0.13814  | -0.0799265 | 0.08446  | -0.01688 | 0.71596  |
| 0.70249  | -0.04332 | 0.35026  | -0.24275 | 1.09E-07 | -0.1508442 | 0.00108  | -0.11021 | 0.0172   |
| 0.99719  | -0.03412 | 0.46203  | -0.17065 | 0.00021  | -0.0388004 | 0.40284  | 0.025367 | 0.58451  |
| 6.49E-17 | -0.12736 | 0.00585  | -0.29688 | 5.88E-11 | -0.1823926 | 7.36E-05 | -0.14708 | 0.00144  |
| 0.23414  | 0.085542 | 0.06475  | 0.002778 | 0.95226  | -0.0127327 | 0.78375  | -0.00784 | 0.86576  |
| 0.54066  | 0.005721 | 0.90187  | -0.02713 | 0.55862  | 0.00442877 | 0.92396  | 0.017179 | 0.71118  |
| 0.57944  | -0.03387 | 0.46533  | -0.15636 | 0.0007   | -0.0874988 | 0.05884  | -0.04448 | 0.33754  |
| 0.25436  | -0.02001 | 0.66627  | -0.14942 | 0.0012   | -0.0335135 | 0.46999  | 0.042608 | 0.35824  |
| 0.00043  | 0.119267 | 0.00989  | -0.14057 | 0.00233  | -0.0202531 | 0.66244  | 0.10755  | 0.02009  |
| 0.72609  | -0.02876 | 0.53531  | -0.22112 | 1.40E-06 | -0.1124596 | 0.01504  | -0.00721 | 0.87647  |
| 0.45902  | -0.08371 | 0.0707   | -0.30623 | 1.35E-11 | -0.1772181 | 0.00012  | -0.09302 | 0.04452  |
| 0.04201  | 0.065741 | 0.15607  | -0.04127 | 0.37352  | 0.00550815 | 0.9055   | 0.055863 | 0.22823  |
| 0.04926  | -0.15155 | 0.00102  | -0.23144 | 4.26E-07 | -0.0399025 | 0.38961  | 0.047984 | 0.30078  |
| 0.7738   | 0.04378  | 0.34516  | -0.1887  | 4.06E-05 | -0.0983525 | 0.0336   | -0.02532 | 0.58521  |
| 0.05764  | -0.11017 | 0.01724  | -0.29871 | 4.43E-11 | -0.2509033 | 3.89E-08 | -0.20026 | 1.30E-05 |
| 0.44512  | -0.03104 | 0.50341  | -0.21752 | 2.09E-06 | -0.0945444 | 0.04113  | -0.05279 | 0.25486  |
| 0.04916  | 0.034561 | 0.45622  | -0.03921 | 0.39794  | -0.0107545 | 0.8167   | -0.00735 | 0.87413  |
| 0.10216  | -0.01578 | 0.73379  | -0.13089 | 0.00461  | -0.0532122 | 0.25111  | 0.012128 | 0.79379  |
| 0.63875  | 0.019379 | 0.67617  | -0.14359 | 0.00187  | -0.0811648 | 0.07974  | -0.05935 | 0.20044  |
| 0.15703  | -0.03499 | 0.45065  | -0.21416 | 3.01E-06 | -0.0734728 | 0.11282  | 0.010509 | 0.82081  |
| 0.25829  | 0.007603 | 0.86983  | -0.09934 | 0.03186  | -0.0427996 | 0.35608  | 0.00644  | 0.88961  |
| 0.4826   | -0.00212 | 0.96354  | -0.17914 | 9.93E-05 | -0.04209   | 0.36412  | 0.026396 | 0.56936  |
| 0.27546  | -0.01128 | 0.80789  | -0.1032  | 0.02573  | -0.0649476 | 0.16114  | -0.03756 | 0.41812  |
| 0.26537  | -0.05925 | 0.20118  | -0.17718 | 0.00012  | -0.0680597 | 0.14196  | 0.046115 | 0.32002  |
| 0.3621   | -0.04063 | 0.38098  | -0.18789 | 4.39E-05 | -0.0843815 | 0.06848  | 0.004827 | 0.91714  |
| 0.35721  | -0.03175 | 0.49373  | -0.16936 | 0.00024  | -0.1013281 | 0.02856  | -0.04619 | 0.31918  |
| 0.27515  | -0.0257  | 0.57961  | -0.1687  | 0.00025  | -0.1069134 | 0.02084  | 0.002142 | 0.96317  |
| 0.25179  | -0.02158 | 0.64175  | -0.15441 | 0.00081  | -0.099269  | 0.03197  | -0.03467 | 0.45474  |
| 0.3513   | -0.05028 | 0.27819  | -0.19719 | 1.77E-05 | -0.079669  | 0.08547  | -0.05739 | 0.21575  |
| 0.23956  | -0.00535 | 0.90824  | -0.18349 | 6.65E-05 | -0.0974119 | 0.03534  | -0.00087 | 0.98503  |
| 0.38864  | 0.001821 | 0.96869  | -0.08803 | 0.0573   | -0.030045  | 0.51719  | -0.01144 | 0.80526  |
| 0.2238   | -0.01274 | 0.78355  | -0.20376 | 9.07E-06 | -0.1083864 | 0.01914  | -0.02925 | 0.52834  |
| 0.41618  | -0.01886 | 0.68443  | -0.21614 | 2.43E-06 | -0.1298054 | 0.00496  | -0.01876 | 0.68599  |
| 0.23606  | -0.02983 | 0.5202   | -0.25161 | 3.55E-08 | -0.1093627 | 0.01807  | -0.01396 | 0.76355  |
| 0.3056   | -0.01778 | 0.70149  | -0.22607 | 7.96E-07 | -0.1112038 | 0.01621  | -0.01271 | 0.78414  |

|          |          |          |          |          |            |          |          |          |
|----------|----------|----------|----------|----------|------------|----------|----------|----------|
| 0.44167  | -0.01408 | 0.76154  | -0.13001 | 0.00489  | -0.0931054 | 0.04433  | -0.0876  | 0.05853  |
| 0.43748  | -0.02832 | 0.54153  | -0.16878 | 0.00025  | -0.0458417 | 0.3229   | -0.01702 | 0.71371  |
| 0.15958  | -0.00211 | 0.9638   | -0.15704 | 0.00066  | -0.0932563 | 0.04398  | 0.003595 | 0.93824  |
| 0.20343  | -0.00112 | 0.98069  | -0.20542 | 7.64E-06 | -0.0686844 | 0.13833  | 0.053235 | 0.25091  |
| 0.18693  | -0.00686 | 0.88253  | -0.16064 | 0.00049  | -0.0895198 | 0.05321  | -0.00277 | 0.95237  |
| 0.21417  | -0.0449  | 0.33295  | -0.17226 | 0.00018  | -0.0933549 | 0.04376  | -0.02442 | 0.59856  |
| 0.99541  | 0.066057 | 0.15409  | 0.033931 | 0.46448  | 0.02028347 | 0.66197  | 0.018176 | 0.69524  |
| 0.95186  | 0.058312 | 0.20846  | 0.022636 | 0.62561  | -0.0278364 | 0.54847  | -0.00419 | 0.92809  |
| 0.5633   | -0.03311 | 0.47536  | -0.09697 | 0.03618  | -0.0481132 | 0.29948  | 0.00501  | 0.91402  |
| 2.79E-14 | 0.04395  | 0.34329  | -0.11809 | 0.01065  | -0.0764251 | 0.09904  | -0.01076 | 0.81668  |
| 0.12893  | -0.06701 | 0.14825  | -0.16376 | 0.00038  | -0.0322328 | 0.48714  | 0.027855 | 0.54821  |
| 0.35559  | 0.124515 | 0.00706  | -0.13696 | 0.00302  | -0.1910889 | 3.23E-05 | -0.19734 | 1.74E-05 |
| 0.04225  | -0.25787 | 1.57E-08 | -0.25335 | 2.84E-08 | -0.051347  | 0.26813  | 0.00994  | 0.83037  |
| 0.22526  | -0.0463  | 0.31809  | -0.20349 | 9.33E-06 | -0.1033357 | 0.02554  | -0.03308 | 0.47581  |
| 0.65295  | 0.02157  | 0.64197  | -0.1722  | 0.00018  | -0.0603756 | 0.19277  | -0.06567 | 0.15653  |
| 0.40366  | -0.14589 | 0.00157  | -0.22399 | 1.01E-06 | -0.0518454 | 0.26351  | 0.005091 | 0.91262  |
| 0.6489   | -0.08733 | 0.05931  | -0.06257 | 0.17707  | -0.0053556 | 0.90811  | 0.016117 | 0.72831  |
| 0.24316  | -0.01236 | 0.78991  | -0.18072 | 8.59E-05 | -0.0969414 | 0.03624  | -0.01513 | 0.7444   |
| 4.15E-05 | -0.02953 | 0.52438  | -0.14842 | 0.0013   | -0.006196  | 0.89377  | 0.071143 | 0.12472  |
| 0.21578  | -0.01392 | 0.76415  | -0.03447 | 0.45734  | -0.0053283 | 0.90857  | 0.016744 | 0.71818  |
| 0.82863  | 0.142111 | 0.00208  | -0.00849 | 0.85489  | 0.01091379 | 0.81403  | 0.001254 | 0.97844  |
| 5.47E-06 | -0.0164  | 0.72367  | -0.03234 | 0.48566  | 0.03650044 | 0.43132  | 0.047903 | 0.3016   |
| 0.22608  | -0.05024 | 0.2786   | -0.23469 | 2.90E-07 | -0.1363921 | 0.00314  | -0.11662 | 0.01166  |
| 0.07774  | 0.064371 | 0.1649   | -0.05646 | 0.22327  | 0.006824   | 0.88307  | 0.030951 | 0.50463  |
| 0.51798  | 0.030576 | 0.50981  | -0.14656 | 0.00149  | -0.0664254 | 0.1518   | 0.044681 | 0.33532  |
| 5.34E-06 | -0.25294 | 3.00E-08 | -0.40336 | 1.06E-19 | -0.2744029 | 1.64E-09 | -0.2403  | 1.47E-07 |
| 0.08387  | -0.02522 | 0.58676  | -0.12442 | 0.0071   | -0.0427409 | 0.35675  | 0.020706 | 0.65538  |
| 0.10463  | -0.04471 | 0.33496  | -0.22693 | 7.21E-07 | -0.1255054 | 0.00661  | -0.03418 | 0.4612   |
| 0.98969  | -0.0924  | 0.04596  | -0.05847 | 0.20723  | -0.0353717 | 0.44571  | -0.00748 | 0.87189  |
| 0.38515  | -0.012   | 0.7959   | -0.15916 | 0.00056  | -0.0414619 | 0.37133  | 0.030227 | 0.51465  |
| 0.74148  | -0.09706 | 0.03602  | -0.13473 | 0.00353  | 0.01024714 | 0.82521  | 0.050798 | 0.27329  |
| 0.87856  | -0.00359 | 0.93834  | -0.1902  | 3.52E-05 | -0.08437   | 0.06851  | 0.007191 | 0.87683  |
| 0.35754  | 0.088835 | 0.05506  | -0.11753 | 0.01103  | -0.081279  | 0.07932  | -0.02158 | 0.64179  |
| 0.72813  | 0.10761  | 0.02002  | -0.09173 | 0.04757  | -0.0694639 | 0.1339   | 0.022859 | 0.6222   |
| 0.7435   | -0.21248 | 3.61E-06 | -0.21754 | 2.08E-06 | -0.0961012 | 0.03789  | -0.03785 | 0.41448  |
| 0.94715  | -0.02474 | 0.59389  | -0.03425 | 0.46034  | 0.03643314 | 0.43217  | 0.029296 | 0.52769  |
| 0.00772  | -0.0112  | 0.80931  | -0.17142 | 0.0002   | -0.1513412 | 0.00104  | -0.15317 | 0.0009   |
| 0.26336  | -0.03611 | 0.43628  | -0.19423 | 2.37E-05 | -0.0855365 | 0.06476  | -0.03732 | 0.4211   |
| 0.69672  | -0.09355 | 0.04332  | -0.22448 | 9.54E-07 | -0.1643829 | 0.00036  | -0.15009 | 0.00114  |
| 0.14222  | -0.02677 | 0.56391  | -0.21638 | 2.36E-06 | -0.1052551 | 0.02292  | -0.04728 | 0.30796  |
| 0.56856  | 0.01961  | 0.67253  | -0.12331 | 0.00764  | 0.06814528 | 0.14145  | 0.097219 | 0.0357   |
| 0.72685  | 0.029283 | 0.52788  | -0.17145 | 0.0002   | -0.0929772 | 0.04462  | 0.014801 | 0.74971  |
| 0.63336  | -0.01248 | 0.78798  | -0.21155 | 4.00E-06 | -0.0713404 | 0.12368  | -0.04652 | 0.31574  |
| 0.08552  | -0.02455 | 0.59668  | -0.2003  | 1.29E-05 | -0.1024896 | 0.02678  | -0.04666 | 0.31432  |
| 0.12346  | 0.077833 | 0.09295  | -0.16404 | 0.00037  | -0.2308085 | 4.59E-07 | -0.21336 | 3.29E-06 |

|         |          |          |          |          |            |          |          |          |
|---------|----------|----------|----------|----------|------------|----------|----------|----------|
| 0.26244 | -0.01483 | 0.74917  | -0.18153 | 7.97E-05 | -0.0862558 | 0.06254  | -0.02973 | 0.52165  |
| 0.92823 | -0.01351 | 0.77085  | -0.14361 | 0.00186  | -0.0036571 | 0.93718  | 0.094549 | 0.04112  |
| 0.19221 | -0.06494 | 0.16116  | -0.19245 | 2.83E-05 | -0.0680542 | 0.14199  | -0.02322 | 0.61677  |
| 0.95462 | 0.316376 | 2.57E-12 | 0.255773 | 2.07E-08 | 0.27060532 | 2.79E-09 | 0.488237 | 2.41E-29 |
| 0.31077 | 0.408246 | 3.49E-20 | 0.177563 | 0.00011  | 0.27766089 | 1.03E-09 | 0.537306 | 2.74E-36 |
| 0.93492 | 0.505971 | 1.00E-31 | 0.183395 | 6.71E-05 | 0.0556829  | 0.22974  | 0.265762 | 5.44E-09 |
| 0.28044 | 0.326975 | 4.25E-13 | 0.238591 | 1.81E-07 | -0.0657046 | 0.1563   | 0.119422 | 0.00979  |
| 0.00136 | 0.131066 | 0.00455  | -0.08139 | 0.0789   | 0.00698636 | 0.88031  | 0.094253 | 0.04176  |
| 0.00342 | 0.345963 | 1.41E-14 | 0.362429 | 6.08E-16 | 0.16222416 | 0.00043  | 0.094899 | 0.04037  |
| 0.22379 | 0.353236 | 3.60E-15 | 0.45692  | 1.82E-25 | 0.33187247 | 1.81E-13 | 0.372296 | 8.43E-17 |
| 0.54711 | 0.440631 | 1.33E-23 | 0.28475  | 3.68E-10 | 0.19291283 | 2.70E-05 | 0.309166 | 8.41E-12 |
| 0.13855 | 0.366017 | 2.99E-16 | 0.40962  | 2.54E-20 | 0.20235644 | 1.05E-05 | 0.257698 | 1.61E-08 |
| 0.00606 | 0.468588 | 7.26E-27 | 0.383834 | 7.68E-18 | 0.40135193 | 1.68E-19 | 0.471389 | 3.29E-27 |
| 0.17414 | 0.522419 | 4.63E-34 | 0.351612 | 4.90E-15 | -0.1017096 | 0.02797  | 0.02583  | 0.57768  |
| 0.75097 | 0.58213  | 1.04E-43 | 0.29639  | 6.35E-11 | 0.25192723 | 3.41E-08 | 0.461223 | 5.62E-26 |
| 0.25874 | 0.358196 | 1.39E-15 | 0.240052 | 1.52E-07 | 0.18258619 | 7.23E-05 | 0.287885 | 2.31E-10 |
| 0.0036  | 0.490586 | 1.19E-29 | 0.322358 | 9.40E-13 | 0.04089668 | 0.37789  | 0.059661 | 0.1981   |
| 0.17998 | 0.263332 | 7.57E-09 | 0.110575 | 0.01683  | 0.0552647  | 0.23326  | 0.074796 | 0.10647  |
| 0.65764 | 0.283877 | 4.18E-10 | 0.275011 | 1.50E-09 | 0.19369133 | 2.50E-05 | 0.330288 | 2.39E-13 |
| 0.01628 | 0.269598 | 3.21E-09 | 0.181365 | 8.10E-05 | -0.0756864 | 0.10235  | 0.033352 | 0.47213  |
| 0.6692  | 0.130241 | 0.00482  | 0.171337 | 0.0002   | -0.0381209 | 0.41114  | 0.176786 | 0.00012  |
| 0.41844 | 0.500972 | 4.85E-31 | 0.464105 | 2.54E-26 | 0.1061221  | 0.02181  | 0.124277 | 0.00717  |
| 0.46533 | 0.129913 | 0.00493  | -0.01921 | 0.67885  | -0.0062231 | 0.8933   | 0.025872 | 0.57705  |
| 0.67073 | 0.357881 | 1.48E-15 | 0.37824  | 2.48E-17 | 0.16237565 | 0.00043  | 0.154287 | 0.00082  |
| 0.2112  | 0.273106 | 1.97E-09 | 0.10489  | 0.0234   | -0.2601136 | 1.17E-08 | -0.15855 | 0.00058  |
| 0.36565 | 0.500191 | 6.20E-31 | 0.531645 | 1.99E-35 | 0.41191112 | 1.49E-20 | 0.564333 | 1.26E-40 |
| 0.16778 | 0.43318  | 8.78E-23 | 0.384205 | 7.10E-18 | 0.29909466 | 4.17E-11 | 0.152531 | 0.00094  |
| 0.22554 | 0.439116 | 1.96E-23 | 0.414357 | 8.43E-21 | 0.03759545 | 0.41762  | -0.00939 | 0.83954  |
| 0.01137 | 0.402777 | 1.22E-19 | 0.008787 | 0.84979  | 0.04726465 | 0.30809  | 0.179435 | 9.66E-05 |
| 0.13653 | 0.253183 | 2.90E-08 | 0.420609 | 1.91E-21 | 0.46200944 | 4.53E-26 | 0.412364 | 1.34E-20 |
| 0.17222 | 0.286108 | 3.01E-10 | 0.472544 | 2.37E-27 | 0.44474353 | 4.60E-24 | 0.324624 | 6.38E-13 |
| 0.32282 | 0.126629 | 0.00614  | -0.05587 | 0.22816  | -0.0995376 | 0.03151  | 0.138637 | 0.00268  |
| 0.25406 | 0.381177 | 1.34E-17 | 0.489731 | 1.53E-29 | 0.31894138 | 1.68E-12 | 0.253146 | 2.91E-08 |
| 0.75649 | 0.338666 | 5.38E-14 | 0.12959  | 0.00504  | -0.2733907 | 1.89E-09 | -0.16767 | 0.00027  |
| 0.13867 | 0.223695 | 1.04E-06 | 0.108358 | 0.01917  | 0.02693667 | 0.56148  | 0.188751 | 4.04E-05 |
| 0.54736 | 0.204404 | 8.49E-06 | 0.109151 | 0.0183   | -0.2165766 | 2.31E-06 | -0.24876 | 5.12E-08 |
| 0.12363 | 0.242675 | 1.10E-07 | 0.059801 | 0.19705  | -0.1123485 | 0.01514  | -0.03317 | 0.47451  |
| 0.63237 | 0.398396 | 3.25E-19 | 0.541705 | 5.74E-37 | 0.50259958 | 2.91E-31 | 0.616573 | 3.03E-50 |
| 0.86578 | 0.577083 | 8.14E-43 | 0.321807 | 1.03E-12 | 0.26167133 | 9.47E-09 | 0.391632 | 1.44E-18 |
| 0.49774 | 0.600066 | 5.16E-47 | 0.551422 | 1.67E-38 | 0.39430273 | 8.03E-19 | 0.397922 | 3.61E-19 |
| 0.08193 | 0.261656 | 9.49E-09 | 0.214419 | 2.93E-06 | -0.2696969 | 3.17E-09 | -0.30946 | 8.02E-12 |
| 0.0173  | 0.300359 | 3.42E-11 | 0.202945 | 9.87E-06 | -0.0739579 | 0.11046  | -0.15199 | 0.00098  |
| 0.22826 | 0.675652 | 1.48E-63 | 0.333706 | 1.31E-13 | 0.182428   | 7.34E-05 | 0.391539 | 1.47E-18 |
| 0.99015 | 0.431937 | 1.20E-22 | 0.260131 | 1.16E-08 | 0.06826003 | 0.14078  | 0.094785 | 0.04062  |
| 0.56424 | 0.329939 | 2.54E-13 | 0.623331 | 1.27E-51 | 0.51973922 | 1.13E-33 | 0.429671 | 2.10E-22 |

|          |          |          |          |          |            |          |          |          |
|----------|----------|----------|----------|----------|------------|----------|----------|----------|
| 0.68592  | 0.195003 | 2.20E-05 | 0.113195 | 0.01439  | -0.1496133 | 0.00118  | 0.038394 | 0.4078   |
| 0.16085  | 0.119002 | 0.01006  | -0.04501 | 0.33173  | -0.2814909 | 5.92E-10 | -0.12315 | 0.00771  |
| 0.10055  | 0.530087 | 3.40E-35 | 0.534244 | 8.04E-36 | 0.17290599 | 0.00017  | 0.152516 | 0.00094  |
| 0.21224  | 0.192154 | 2.91E-05 | 0.35731  | 1.65E-15 | 0.08902131 | 0.05455  | 0.17906  | 1.00E-04 |
| 0.00895  | 0.312769 | 4.67E-12 | 0.533044 | 1.22E-35 | 0.27970099 | 7.68E-10 | 0.112304 | 0.01518  |
| 0.98079  | 0.412969 | 1.17E-20 | 0.291315 | 1.38E-10 | 0.11919407 | 0.00993  | 0.332321 | 1.67E-13 |
| 5.90E-08 | 0.00951  | 0.8376   | 0.043228 | 0.35129  | -0.0515219 | 0.2665   | 0.04978  | 0.28303  |
| 0.85346  | 0.419584 | 2.44E-21 | 0.448484 | 1.73E-24 | 0.37089694 | 1.12E-16 | 0.566738 | 4.94E-41 |
| 0.88406  | 0.417621 | 3.90E-21 | 0.282635 | 5.01E-10 | 0.12547224 | 0.00663  | 0.268613 | 3.68E-09 |
| 0.22544  | 0.491767 | 8.29E-30 | 0.382404 | 1.04E-17 | 0.08109528 | 0.08     | 0.197007 | 1.80E-05 |
| 0.78983  | 0.653796 | 2.77E-58 | 0.723504 | 7.35E-77 | 0.48656882 | 3.96E-29 | 0.477507 | 5.69E-28 |
| 0.68045  | 0.109168 | 0.01828  | 0.255463 | 2.16E-08 | 0.26979847 | 3.12E-09 | 0.305491 | 1.52E-11 |
| 0.0954   | 0.298031 | 4.92E-11 | 0.412431 | 1.32E-20 | 0.33987393 | 4.32E-14 | 0.461783 | 4.82E-26 |
| 0.03602  | 0.226205 | 7.84E-07 | 0.09238  | 0.04601  | 0.03487132 | 0.45218  | 0.108542 | 0.01896  |
| 8.34E-06 | 0.297799 | 5.10E-11 | 0.124044 | 0.00728  | 0.06393387 | 0.16779  | 0.24927  | 4.80E-08 |
| 0.17858  | 0.335515 | 9.47E-14 | 0.321361 | 1.11E-12 | 0.19572378 | 2.05E-05 | 0.226282 | 7.77E-07 |
| 0.2741   | 0.441071 | 1.19E-23 | 0.340361 | 3.95E-14 | -0.0044552 | 0.9235   | -0.02516 | 0.58761  |
| 0.27764  | 0.354118 | 3.04E-15 | 0.108618 | 0.01888  | 0.02538861 | 0.58419  | 0.098687 | 0.033    |
| 0.43362  | 0.357223 | 1.68E-15 | 0.272209 | 2.23E-09 | 0.08710941 | 0.05997  | 0.03656  | 0.43057  |
| 0.19188  | 0.23749  | 2.07E-07 | 0.251834 | 3.45E-08 | 0.1251164  | 0.00679  | 0.303723 | 2.01E-11 |
| 0.00248  | 0.408566 | 3.24E-20 | 0.28499  | 3.55E-10 | 0.06590754 | 0.15503  | 0.05882  | 0.20451  |
| 0.14408  | 0.115768 | 0.0123   | -0.13727 | 0.00295  | -0.3863547 | 4.49E-18 | -0.19638 | 1.92E-05 |
| 0.92477  | 0.460332 | 7.18E-26 | 0.307959 | 1.02E-11 | 0.05487504 | 0.23658  | 0.217316 | 2.13E-06 |
| 0.02583  | 0.286341 | 2.91E-10 | 0.273085 | 1.97E-09 | 0.09997796 | 0.03076  | 0.03601  | 0.43754  |
| 0.25454  | 0.417776 | 3.76E-21 | 0.390217 | 1.96E-18 | 0.20954044 | 4.95E-06 | 0.425455 | 5.92E-22 |
| 0.95725  | 0.3168   | 2.40E-12 | 0.482663 | 1.26E-28 | 0.13482252 | 0.00351  | -0.05976 | 0.19738  |
| 0.59311  | 0.203349 | 9.47E-06 | 0.296265 | 6.47E-11 | 0.1633674  | 0.00039  | 0.180683 | 8.62E-05 |
| 0.05963  | 0.353128 | 3.68E-15 | 0.44238  | 8.48E-24 | 0.33524275 | 9.94E-14 | 0.46753  | 9.77E-27 |
| 0.14618  | 0.180319 | 8.91E-05 | 0.369538 | 1.47E-16 | 0.38676717 | 4.11E-18 | 0.229821 | 5.15E-07 |
| 0.37388  | 0.365555 | 3.27E-16 | 0.356414 | 1.96E-15 | 0.37778453 | 2.73E-17 | 0.376119 | 3.85E-17 |
| 1.17E-18 | 0.25416  | 2.56E-08 | 0.201021 | 1.20E-05 | 0.16744169 | 0.00028  | 0.261795 | 9.32E-09 |
| 0.05061  | 0.115939 | 0.01217  | 0.368055 | 1.99E-16 | 0.37860431 | 2.30E-17 | 0.276638 | 1.19E-09 |
| 0.25544  | 0.301325 | 2.94E-11 | 0.318869 | 1.70E-12 | 0.05142444 | 0.26741  | 0.093644 | 0.04311  |
| 0.93665  | 0.40711  | 4.53E-20 | 0.307968 | 1.02E-11 | 0.12097693 | 0.00887  | 0.330001 | 2.51E-13 |
| 0.00283  | 0.242378 | 1.14E-07 | 0.08051  | 0.08221  | 0.05917101 | 0.20182  | 0.216169 | 2.42E-06 |
| 0.03838  | 0.496502 | 1.95E-30 | 0.387581 | 3.45E-18 | 0.13524492 | 0.00341  | 0.065877 | 0.15522  |
| 0.85863  | 0.156083 | 0.00071  | 0.07595  | 0.10116  | -0.0313018 | 0.49981  | 0.121139 | 0.00878  |
| 0.63912  | 0.524702 | 2.14E-34 | 0.267325 | 4.39E-09 | 0.09094751 | 0.04951  | 0.272607 | 2.11E-09 |
| 0.09984  | 0.505428 | 1.19E-31 | 0.563822 | 1.53E-40 | 0.31503781 | 3.21E-12 | 0.424172 | 8.08E-22 |
| 0.18132  | 0.522479 | 4.53E-34 | 0.452611 | 5.78E-25 | -0.0574171 | 0.21553  | 0.089325 | 0.05373  |
| 0.51853  | 0.321524 | 1.08E-12 | 0.159532 | 0.00054  | 0.03958097 | 0.39344  | 0.301414 | 2.90E-11 |
| 0.43911  | 0.415136 | 7.02E-21 | 0.491157 | 9.97E-30 | 0.20572706 | 7.40E-06 | 0.300861 | 3.17E-11 |
| 0.03332  | 0.140307 | 0.00237  | 0.19     | 3.59E-05 | 0.07923307 | 0.0872   | 0.262973 | 7.95E-09 |
| 0.04831  | 0.307763 | 1.06E-11 | 0.333072 | 1.46E-13 | 0.05502629 | 0.23529  | 0.029226 | 0.52868  |
| 0.70954  | 0.570222 | 1.26E-41 | 0.479457 | 3.23E-28 | 0.1908841  | 3.29E-05 | 0.271165 | 2.58E-09 |

|         |          |          |          |          |            |          |          |          |
|---------|----------|----------|----------|----------|------------|----------|----------|----------|
| 0.03156 | 0.442505 | 8.21E-24 | 0.27063  | 2.78E-09 | 0.03927577 | 0.3971   | 0.237273 | 2.13E-07 |
| 0.6075  | 0.259438 | 1.28E-08 | 0.241504 | 1.27E-07 | 0.00948833 | 0.83796  | 0.261962 | 9.11E-09 |
| 0.15116 | 0.461648 | 5.00E-26 | 0.033867 | 0.46531  | -0.0390686 | 0.3996   | 0.136361 | 0.00315  |
| 0.31882 | 0.324075 | 7.01E-13 | 0.279955 | 7.40E-10 | 0.2448407  | 8.38E-08 | 0.269609 | 3.21E-09 |
| 0.58214 | 0.473602 | 1.75E-27 | 0.563186 | 1.96E-40 | 0.4331477  | 8.85E-23 | 0.419919 | 2.25E-21 |
| 0.64245 | 0.493377 | 5.08E-30 | 0.260855 | 1.06E-08 | 0.14698956 | 0.00145  | 0.401856 | 1.50E-19 |
| 0.07936 | 0.162243 | 0.00043  | 0.110573 | 0.01683  | 0.25759751 | 1.63E-08 | 0.179469 | 9.63E-05 |
| 0.40792 | 0.276931 | 1.14E-09 | 0.071805 | 0.12124  | 0.00825641 | 0.85876  | 0.152638 | 0.00094  |
| 0.93626 | 0.469217 | 6.08E-27 | 0.396655 | 4.78E-19 | 0.05114149 | 0.27005  | -0.00505 | 0.91339  |



| MMdarkgrp | MMdarkl  | MMblue   | p.MMblue | MMsalmoip | MMsaln   | MMbrownp | MMbrov   | MMdarkre |
|-----------|----------|----------|----------|-----------|----------|----------|----------|----------|
| 0.226935  | 7.20E-07 | 0.339493 | 4.63E-14 | 0.343755  | 2.12E-14 | 0.160947 | 0.00048  | 0.117735 |
| -0.02744  | 0.55424  | 0.169136 | 0.00024  | 0.111205  | 0.01621  | 0.04269  | 0.35732  | -0.03801 |
| -0.05862  | 0.20609  | 0.046635 | 0.31459  | 0.03425   | 0.46029  | -0.05306 | 0.25244  | -0.10687 |
| 0.020059  | 0.66548  | 0.211909 | 3.84E-06 | 0.142163  | 0.00207  | 0.100324 | 0.03018  | 0.096824 |
| -0.10179  | 0.02784  | 0.149006 | 0.00124  | 0.11796   | 0.01073  | -0.04072 | 0.37995  | -0.16039 |
| 0.029845  | 0.51998  | 0.185594 | 5.46E-05 | 0.189304  | 3.83E-05 | 0.023002 | 0.62002  | -0.02024 |
| 0.061429  | 0.18511  | 0.168843 | 0.00025  | 0.153721  | 0.00086  | 0.031472 | 0.49749  | 0.014246 |
| 0.054441  | 0.24032  | 0.201695 | 1.12E-05 | 0.194294  | 2.36E-05 | 0.044372 | 0.33867  | -0.03883 |
| 0.032011  | 0.49014  | 0.117537 | 0.01102  | 0.090685  | 0.05017  | 0.00557  | 0.90444  | -0.03971 |
| -0.03185  | 0.49235  | 0.086772 | 0.06098  | 0.073591  | 0.11224  | -0.07646 | 0.0989   | -0.16203 |
| 0.025606  | 0.58098  | 0.164601 | 0.00035  | 0.183515  | 6.63E-05 | 0.016113 | 0.72837  | 0.006046 |
| 0.083608  | 0.07106  | 0.118543 | 0.01035  | 0.117573  | 0.011    | 0.086632 | 0.0614   | -0.06784 |
| -0.03293  | 0.47776  | 0.043606 | 0.34708  | 0.021337  | 0.64558  | 0.019404 | 0.67577  | -0.19217 |
| 0.172459  | 0.00018  | 0.334742 | 1.09E-13 | 0.372015  | 8.93E-17 | 0.227263 | 6.94E-07 | 0.151146 |
| 0.034756  | 0.45368  | 0.144655 | 0.00172  | 0.126862  | 0.00605  | 0.019105 | 0.68049  | -0.01562 |
| 0.025393  | 0.58413  | 0.131189 | 0.00452  | 0.108728  | 0.01876  | 0.03107  | 0.503    | -0.02466 |
| -0.00048  | 0.99176  | 0.10444  | 0.024    | 0.115284  | 0.01267  | 0.02962  | 0.52314  | -0.05481 |
| 0.025206  | 0.58691  | 0.223383 | 1.08E-06 | 0.236516  | 2.33E-07 | 0.047241 | 0.30834  | 0.047237 |
| 0.036097  | 0.43644  | 0.003422 | 0.94121  | -0.015    | 0.74647  | 0.020175 | 0.66367  | -0.13037 |
| 0.048168  | 0.29893  | 0.128963 | 0.00525  | 0.102519  | 0.02674  | 0.029943 | 0.51861  | -0.03621 |
| 0.048915  | 0.29149  | 0.096356 | 0.03739  | 0.113854  | 0.01382  | -0.00675 | 0.8844   | -0.12402 |
| -0.15765  | 0.00063  | -0.04291 | 0.35483  | 0.000904  | 0.98445  | -0.15024 | 0.00113  | -0.20228 |
| 0.151972  | 0.00099  | 0.25515  | 2.25E-08 | 0.230313  | 4.87E-07 | 0.155233 | 0.00076  | 0.038045 |
| 0.085383  | 0.06525  | 0.141812 | 0.00213  | 0.103563  | 0.02522  | 0.081441 | 0.07872  | -0.02739 |
| -0.00044  | 0.9925   | -0.01163 | 0.80207  | -0.02121  | 0.64761  | 0.019826 | 0.66913  | -0.11614 |
| 0.049894  | 0.28193  | 0.290026 | 1.67E-10 | 0.247499  | 6.00E-08 | 0.071627 | 0.12218  | -0.01094 |
| 0.013442  | 0.77204  | 0.166064 | 0.00031  | 0.204809  | 8.14E-06 | 0.034671 | 0.45479  | -0.00219 |
| 0.093389  | 0.04368  | 0.159824 | 0.00053  | 0.156259  | 0.0007   | 0.013897 | 0.76455  | -0.11627 |
| -0.00636  | 0.89095  | 0.028738 | 0.53558  | 0.007168  | 0.87722  | -0.06308 | 0.17357  | -0.13052 |
| -0.14195  | 0.00211  | -0.04589 | 0.32237  | -0.07264  | 0.11695  | -0.07311 | 0.11459  | -0.07765 |
| -0.06452  | 0.16391  | 0.116522 | 0.01174  | 0.055365  | 0.23242  | 0.03108  | 0.50285  | -0.04761 |
| 0.067559  | 0.14492  | 0.244666 | 8.57E-08 | 0.167319  | 0.00028  | 0.093888 | 0.04256  | -0.03016 |
| 0.002612  | 0.9551   | 0.240776 | 1.39E-07 | 0.154834  | 0.00079  | 0.038429 | 0.40736  | 0.011511 |
| -0.0548   | 0.23726  | 0.048928 | 0.29136  | -0.0018   | 0.969    | -0.02179 | 0.63857  | -0.00374 |
| 0.206337  | 6.94E-06 | 0.250352 | 4.18E-08 | 0.2911    | 1.42E-10 | 0.123826 | 0.00738  | 0.066171 |
| -0.04087  | 0.37822  | 0.093057 | 0.04444  | 0.054701  | 0.23808  | 0.023658 | 0.61008  | -0.01869 |
| 0.027316  | 0.55598  | 0.215995 | 2.47E-06 | 0.170908  | 0.00021  | 0.041331 | 0.37284  | 0.017761 |
| -0.03811  | 0.41129  | -0.01106 | 0.81153  | -0.05079  | 0.2734   | 0.050182 | 0.27915  | -0.06749 |
| -0.03993  | 0.38924  | 0.120544 | 0.00912  | 0.067167  | 0.14727  | 0.101901 | 0.02767  | 0.064248 |
| 0.142006  | 0.0021   | 0.369928 | 1.36E-16 | 0.33452   | 1.13E-13 | 0.176639 | 0.00012  | 0.078604 |
| -0.00808  | 0.86167  | 0.113091 | 0.01448  | 0.099728  | 0.03118  | 0.055999 | 0.2271   | -0.04326 |
| 0.044183  | 0.34073  | 0.165485 | 0.00033  | 0.093197  | 0.04412  | 0.036724 | 0.42851  | -0.05832 |
| 0.460146  | 7.55E-26 | 0.42394  | 8.55E-22 | 0.509679  | 3.06E-32 | 0.261682 | 9.46E-09 | 0.189355 |
| 0.591605  | 1.98E-45 | 0.406783 | 4.89E-20 | 0.361664  | 7.06E-16 | 0.351923 | 4.62E-15 | 0.217292 |

|          |          |          |          |          |          |          |          |          |
|----------|----------|----------|----------|----------|----------|----------|----------|----------|
| 0.438137 | 2.51E-23 | 0.400143 | 2.20E-19 | 0.482321 | 1.40E-28 | 0.347032 | 1.16E-14 | 0.469101 |
| 0.429265 | 2.32E-22 | 0.421265 | 1.63E-21 | 0.365496 | 3.31E-16 | 0.350001 | 6.64E-15 | 0.331208 |
| 0.326535 | 4.59E-13 | 0.21369  | 3.17E-06 | 0.359291 | 1.12E-15 | 0.205633 | 7.47E-06 | 0.014801 |
| 0.383579 | 8.11E-18 | 0.388546 | 2.81E-18 | 0.380424 | 1.57E-17 | 0.245108 | 8.11E-08 | 0.241623 |
| 0.386814 | 4.07E-18 | 0.441444 | 1.08E-23 | 0.485567 | 5.34E-29 | 0.298273 | 4.74E-11 | 0.23588  |
| 0.39582  | 5.75E-19 | 0.302239 | 2.55E-11 | 0.2624   | 8.59E-09 | 0.342999 | 2.44E-14 | 0.398298 |
| 0.577646 | 6.48E-43 | 0.316501 | 2.52E-12 | 0.406323 | 5.43E-20 | 0.242129 | 1.17E-07 | 0.20105  |
| 0.56108  | 4.39E-40 | 0.472664 | 2.29E-27 | 0.623776 | 1.02E-51 | 0.389639 | 2.22E-18 | 0.386511 |
| 0.441369 | 1.10E-23 | 0.374087 | 5.85E-17 | 0.382192 | 1.09E-17 | 0.306696 | 1.25E-11 | 0.330029 |
| 0.433863 | 7.40E-23 | 0.400576 | 2.00E-19 | 0.415208 | 6.90E-21 | 0.347584 | 1.04E-14 | 0.508528 |
| 0.547664 | 6.64E-38 | 0.349197 | 7.73E-15 | 0.403365 | 1.06E-19 | 0.343586 | 2.19E-14 | 0.257797 |
| 0.539159 | 1.42E-36 | 0.552687 | 1.04E-38 | 0.548213 | 5.43E-38 | 0.470236 | 4.56E-27 | 0.523773 |
| 0.763824 | 1.83E-90 | 0.582119 | 1.04E-43 | 0.725498 | 1.78E-77 | 0.281326 | 6.07E-10 | 0.317499 |
| 0.573247 | 3.79E-42 | 0.517735 | 2.21E-33 | 0.526635 | 1.11E-34 | 0.615455 | 5.08E-50 | 0.628855 |
| 0.624822 | 6.21E-52 | 0.369679 | 1.43E-16 | 0.458197 | 1.28E-25 | 0.263194 | 7.72E-09 | 0.218535 |
| 0.502734 | 2.79E-31 | 0.402803 | 1.21E-19 | 0.420238 | 2.09E-21 | 0.409988 | 2.34E-20 | 0.506304 |
| 0.32236  | 9.40E-13 | 0.291941 | 1.25E-10 | 0.394259 | 8.11E-19 | 0.139252 | 0.00256  | 0.214564 |
| 0.717736 | 4.13E-75 | 0.677174 | 6.11E-64 | 0.670072 | 3.62E-62 | 0.361418 | 7.41E-16 | 0.310192 |
| 0.397004 | 4.43E-19 | 0.44151  | 1.06E-23 | 0.517294 | 2.55E-33 | 0.16606  | 0.00031  | 0.231785 |
| -0.36424 | 4.25E-16 | -0.16954 | 0.00023  | -0.33915 | 4.92E-14 | -0.17191 | 0.00019  | -0.26215 |
| 0.666403 | 2.86E-61 | 0.637678 | 1.15E-54 | 0.697858 | 2.11E-69 | 0.357355 | 1.63E-15 | 0.38061  |
| 0.48823  | 2.41E-29 | 0.40609  | 5.73E-20 | 0.416311 | 5.32E-21 | 0.361765 | 6.92E-16 | 0.622499 |
| 0.579432 | 3.14E-43 | 0.623186 | 1.36E-51 | 0.6023   | 1.93E-47 | 0.415288 | 6.77E-21 | 0.491238 |
| -0.3399  | 4.30E-14 | -0.28532 | 3.38E-10 | -0.27501 | 1.50E-09 | -0.23492 | 2.82E-07 | -0.21173 |
| 0.495359 | 2.77E-30 | 0.350862 | 5.65E-15 | 0.385348 | 5.57E-18 | 0.105662 | 0.02239  | -0.03094 |
| 0.376541 | 3.53E-17 | 0.41859  | 3.10E-21 | 0.42163  | 1.49E-21 | 0.158841 | 0.00057  | 0.078972 |
| 0.463271 | 3.20E-26 | 0.257184 | 1.72E-08 | 0.186295 | 5.11E-05 | 0.398839 | 2.94E-19 | 0.382373 |
| 0.469026 | 6.42E-27 | 0.403419 | 1.05E-19 | 0.514117 | 7.24E-33 | 0.262405 | 8.58E-09 | 0.228129 |
| 0.605603 | 4.46E-48 | 0.583189 | 6.73E-44 | 0.63741  | 1.31E-54 | 0.285747 | 3.17E-10 | 0.206895 |
| 0.440884 | 1.25E-23 | 0.446667 | 2.78E-24 | 0.540671 | 8.30E-37 | 0.324376 | 6.66E-13 | 0.20215  |
| 0.373347 | 6.81E-17 | 0.320434 | 1.30E-12 | 0.425397 | 6.00E-22 | 0.079635 | 0.0856   | 0.00206  |
| 0.698966 | 1.04E-69 | 0.679213 | 1.85E-64 | 0.779465 | 1.68E-96 | 0.481241 | 1.92E-28 | 0.545372 |
| 0.607548 | 1.87E-48 | 0.471855 | 2.88E-27 | 0.609275 | 8.57E-49 | 0.260927 | 1.05E-08 | 0.215587 |
| -0.51166 | 1.61E-32 | -0.34683 | 1.20E-14 | -0.39427 | 8.08E-19 | -0.33431 | 1.17E-13 | -0.30901 |
| 0.570585 | 1.09E-41 | 0.696885 | 3.91E-69 | 0.633577 | 8.83E-54 | 0.41348  | 1.04E-20 | 0.439759 |
| 0.773427 | 4.11E-94 | 0.734236 | 3.09E-80 | 0.774183 | 2.08E-94 | 0.513265 | 9.57E-33 | 0.53404  |
| 0.415219 | 6.88E-21 | 0.302476 | 2.45E-11 | 0.277699 | 1.02E-09 | 0.251315 | 3.69E-08 | 0.360952 |
| -0.36886 | 1.69E-16 | -0.30376 | 2.00E-11 | -0.54271 | 3.99E-37 | -0.12185 | 0.00839  | -0.12929 |
| 0.645307 | 2.37E-56 | 0.397974 | 3.57E-19 | 0.504136 | 1.79E-31 | 0.236142 | 2.44E-07 | 0.233721 |
| 0.282674 | 4.99E-10 | 0.356012 | 2.12E-15 | 0.355352 | 2.40E-15 | 0.254167 | 2.55E-08 | 0.379963 |
| 0.67162  | 1.50E-62 | 0.630364 | 4.27E-53 | 0.750168 | 1.45E-85 | 0.406377 | 5.36E-20 | 0.407689 |
| 0.337227 | 6.97E-14 | 0.295112 | 7.73E-11 | 0.29135  | 1.37E-10 | 0.185931 | 5.29E-05 | 0.065193 |
| 0.694908 | 1.35E-68 | 0.651597 | 8.90E-58 | 0.59634  | 2.61E-46 | 0.450143 | 1.11E-24 | 0.51832  |
| 0.483059 | 1.12E-28 | 0.662953 | 1.94E-60 | 0.599796 | 5.81E-47 | 0.30009  | 3.57E-11 | 0.343161 |
| 0.394377 | 7.90E-19 | 0.255525 | 2.14E-08 | 0.317526 | 2.12E-12 | 0.112563 | 0.01494  | 0.117419 |

|          |          |          |          |          |          |          |          |          |
|----------|----------|----------|----------|----------|----------|----------|----------|----------|
| 0.384395 | 6.82E-18 | 0.326234 | 4.84E-13 | 0.408968 | 2.96E-20 | 0.183569 | 6.60E-05 | 0.167828 |
| 0.441731 | 1.00E-23 | 0.362943 | 5.49E-16 | 0.378417 | 2.39E-17 | 0.248544 | 5.26E-08 | 0.328429 |
| 0.656286 | 7.32E-59 | 0.645099 | 2.64E-56 | 0.702247 | 1.27E-70 | 0.383074 | 9.02E-18 | 0.208598 |
| 0.634147 | 6.66E-54 | 0.47464  | 1.30E-27 | 0.724043 | 5.02E-77 | 0.193143 | 2.64E-05 | 0.2122   |
| 0.692105 | 7.76E-68 | 0.627412 | 1.79E-52 | 0.685855 | 3.54E-66 | 0.56737  | 3.86E-41 | 0.611916 |
| 0.672319 | 1.01E-62 | 0.805769 | #####    | 0.840923 | #####    | 0.447985 | 1.97E-24 | 0.524853 |
| 0.474216 | 1.47E-27 | 0.370009 | 1.34E-16 | 0.408301 | 3.45E-20 | 0.231997 | 3.99E-07 | 0.285345 |
| 0.447068 | 2.51E-24 | 0.637022 | 1.59E-54 | 0.624268 | 8.10E-52 | 0.342458 | 2.70E-14 | 0.390736 |
| 0.653529 | 3.20E-58 | 0.487284 | 3.20E-29 | 0.618045 | 1.53E-50 | 0.296173 | 6.56E-11 | 0.268045 |
| 0.533579 | 1.01E-35 | 0.514102 | 7.28E-33 | 0.43994  | 1.59E-23 | 0.30309  | 2.23E-11 | 0.289235 |
| 0.226229 | 7.81E-07 | 0.228355 | 6.11E-07 | 0.229428 | 5.39E-07 | 0.228555 | 5.97E-07 | 0.22957  |
| 0.637257 | 1.42E-54 | 0.358127 | 1.41E-15 | 0.436876 | 3.46E-23 | 0.289484 | 1.82E-10 | 0.214442 |
| 0.381988 | 1.13E-17 | 0.42352  | 9.47E-22 | 0.470912 | 3.77E-27 | 0.287597 | 2.41E-10 | 0.184647 |
| 0.58955  | 4.73E-45 | 0.513846 | 7.92E-33 | 0.505541 | 1.15E-31 | 0.345875 | 1.44E-14 | 0.44721  |
| 0.25914  | 1.33E-08 | -0.1659  | 0.00032  | -0.04872 | 0.29343  | -0.02305 | 0.6193   | -0.23552 |
| 0.469943 | 4.95E-27 | 0.262853 | 8.08E-09 | 0.246416 | 6.88E-08 | 0.378074 | 2.57E-17 | 0.221516 |
| 0.536774 | 3.31E-36 | 0.376892 | 3.28E-17 | 0.473637 | 1.73E-27 | 0.291952 | 1.25E-10 | 0.27139  |
| 0.525461 | 1.66E-34 | 0.552292 | 1.21E-38 | 0.471988 | 2.78E-27 | 0.297414 | 5.42E-11 | 0.367447 |
| 0.54013  | 1.01E-36 | 0.473742 | 1.68E-27 | 0.433718 | 7.67E-23 | 0.313492 | 4.15E-12 | 0.379081 |
| 0.375224 | 4.63E-17 | 0.227774 | 6.54E-07 | 0.340692 | 3.72E-14 | 0.081771 | 0.07751  | -0.12478 |
| -0.39693 | 4.50E-19 | -0.24596 | 7.29E-08 | -0.3494  | 7.43E-15 | -0.21248 | 3.62E-06 | -0.27827 |
| 0.530249 | 3.22E-35 | 0.464169 | 2.49E-26 | 0.530625 | 2.83E-35 | 0.354237 | 2.97E-15 | 0.213091 |
| -0.71219 | 1.81E-73 | -0.68975 | 3.31E-67 | -0.77254 | 9.08E-94 | -0.42356 | 9.38E-22 | -0.44683 |
| 0.767506 | 7.67E-92 | 0.730862 | 3.70E-79 | 0.790858 | #####    | 0.353984 | 3.12E-15 | 0.417592 |
| 0.49158  | 8.77E-30 | 0.427107 | 3.95E-22 | 0.423509 | 9.49E-22 | 0.3677   | 2.13E-16 | 0.378321 |
| 0.334273 | 1.18E-13 | 0.050983 | 0.27154  | 0.318864 | 1.70E-12 | -0.03327 | 0.47328  | -0.16653 |
| 0.227545 | 6.71E-07 | 0.29186  | 1.27E-10 | 0.213013 | 3.41E-06 | 0.249897 | 4.43E-08 | 0.431617 |
| 0.488746 | 2.06E-29 | 0.570951 | 9.44E-42 | 0.536832 | 3.24E-36 | 0.39111  | 1.61E-18 | 0.446641 |
| 0.614439 | 8.12E-50 | 0.332108 | 1.73E-13 | 0.492859 | 5.95E-30 | 0.282713 | 4.96E-10 | 0.239186 |
| -0.4743  | 1.43E-27 | -0.59715 | 1.83E-46 | -0.6611  | 5.38E-60 | -0.34421 | 1.95E-14 | -0.43437 |
| 0.261564 | 9.61E-09 | 0.211987 | 3.81E-06 | 0.343181 | 2.36E-14 | 0.173986 | 0.00016  | 0.16061  |
| -0.28688 | 2.68E-10 | -0.04974 | 0.28341  | -0.39093 | 1.68E-18 | -0.07422 | 0.10919  | -0.11233 |
| -0.24634 | 6.95E-08 | -0.35719 | 1.69E-15 | -0.30733 | 1.13E-11 | -0.16739 | 0.00028  | -0.25236 |
| -0.40241 | 1.32E-19 | -0.50912 | 3.66E-32 | -0.56314 | 1.99E-40 | -0.31078 | 6.47E-12 | -0.45527 |
| 0.562102 | 2.97E-40 | 0.508477 | 4.50E-32 | 0.598168 | 1.18E-46 | 0.295293 | 7.52E-11 | 0.390882 |
| -0.27851 | 9.12E-10 | -0.0549  | 0.23636  | -0.28656 | 2.81E-10 | -0.0551  | 0.23466  | -0.01076 |
| 0.355123 | 2.51E-15 | 0.375457 | 4.42E-17 | 0.332831 | 1.53E-13 | 0.231589 | 4.19E-07 | 0.272426 |
| -0.30882 | 8.90E-12 | -0.26259 | 8.37E-09 | -0.2697  | 3.16E-09 | -0.30002 | 3.61E-11 | -0.40983 |
| -0.36344 | 4.98E-16 | -0.3237  | 7.47E-13 | -0.31568 | 2.89E-12 | -0.27717 | 1.10E-09 | -0.29516 |
| -0.44707 | 2.50E-24 | -0.5495  | 3.38E-38 | -0.54575 | 1.33E-37 | -0.27233 | 2.19E-09 | -0.22487 |
| 0.42993  | 1.97E-22 | 0.513029 | 1.03E-32 | 0.48776  | 2.78E-29 | 0.237429 | 2.09E-07 | 0.271351 |
| 0.395784 | 5.80E-19 | 0.311882 | 5.41E-12 | 0.255401 | 2.17E-08 | 0.341952 | 2.96E-14 | 0.219867 |
| 0.640248 | 3.14E-55 | 0.532566 | 1.44E-35 | 0.537115 | 2.93E-36 | 0.436985 | 3.37E-23 | 0.314234 |
| 0.591879 | 1.76E-45 | 0.375975 | 3.97E-17 | 0.414848 | 7.51E-21 | 0.410224 | 2.21E-20 | 0.367959 |
| 0.714931 | 2.83E-74 | 0.665975 | 3.63E-61 | 0.633379 | 9.73E-54 | 0.508704 | 4.18E-32 | 0.445254 |

|          |          |          |          |          |          |          |          |          |
|----------|----------|----------|----------|----------|----------|----------|----------|----------|
| -0.48828 | 2.37E-29 | -0.44358 | 6.21E-24 | -0.54521 | 1.62E-37 | -0.34525 | 1.61E-14 | -0.44034 |
| 0.741657 | 1.14E-82 | 0.621537 | 2.96E-51 | 0.735277 | 1.42E-80 | 0.40868  | 3.16E-20 | 0.451776 |
| -0.58224 | 9.93E-44 | -0.6698  | 4.23E-62 | -0.76511 | 6.07E-91 | -0.34703 | 1.16E-14 | -0.47638 |
| -0.34583 | 1.45E-14 | -0.25253 | 3.16E-08 | -0.37022 | 1.28E-16 | -0.24256 | 1.11E-07 | -0.17302 |
| -0.47246 | 2.43E-27 | -0.23122 | 4.37E-07 | -0.42585 | 5.37E-22 | -0.08602 | 0.06326  | 0.108714 |
| -0.23996 | 1.53E-07 | -0.30165 | 2.80E-11 | -0.33041 | 2.34E-13 | -0.1186  | 0.01031  | -0.41919 |
| -0.38742 | 3.58E-18 | -0.40198 | 1.45E-19 | -0.40963 | 2.54E-20 | -0.22453 | 9.50E-07 | -0.26345 |
| 0.591731 | 1.88E-45 | 0.602484 | 1.78E-47 | 0.658832 | 1.85E-59 | 0.320496 | 1.29E-12 | 0.220886 |
| -0.43286 | 9.50E-23 | -0.32368 | 7.51E-13 | -0.37416 | 5.76E-17 | -0.30728 | 1.14E-11 | -0.42547 |
| 0.600068 | 5.15E-47 | 0.600511 | 4.25E-47 | 0.520515 | 8.75E-34 | 0.51093  | 2.04E-32 | 0.519311 |
| 0.833601 | #####    | 0.702926 | 8.21E-71 | 0.731477 | 2.36E-79 | 0.460693 | 6.50E-26 | 0.515759 |
| -0.52409 | 2.64E-34 | -0.56688 | 4.67E-41 | -0.63374 | 8.16E-54 | -0.34415 | 1.98E-14 | -0.48154 |
| -0.39442 | 7.83E-19 | -0.35862 | 1.28E-15 | -0.42666 | 4.40E-22 | -0.15086 | 0.00108  | -0.14327 |
| 0.72354  | 7.16E-77 | 0.644558 | 3.49E-56 | 0.625141 | 5.33E-52 | 0.38028  | 1.62E-17 | 0.474408 |
| 0.434502 | 6.30E-23 | 0.276095 | 1.29E-09 | 0.28262  | 5.03E-10 | 0.356718 | 1.85E-15 | 0.149751 |
| 0.324375 | 6.66E-13 | 0.241575 | 1.26E-07 | 0.227457 | 6.78E-07 | 0.207748 | 5.99E-06 | 0.013096 |
| 0.682054 | 3.45E-65 | 0.444346 | 5.09E-24 | 0.401491 | 1.62E-19 | 0.353299 | 3.56E-15 | 0.361939 |
| -0.37566 | 4.24E-17 | -0.33302 | 1.48E-13 | -0.37017 | 1.30E-16 | -0.13751 | 0.0029   | -0.04887 |
| 0.579696 | 2.82E-43 | 0.386035 | 4.81E-18 | 0.376122 | 3.85E-17 | 0.237729 | 2.01E-07 | 0.338186 |
| -0.43006 | 1.91E-22 | -0.23703 | 2.19E-07 | -0.44621 | 3.13E-24 | -0.1958  | 2.03E-05 | -0.19839 |
| 0.696244 | 5.85E-69 | 0.594203 | 6.54E-46 | 0.538261 | 1.96E-36 | 0.459264 | 9.61E-26 | 0.567545 |
| 0.532244 | 1.61E-35 | 0.201217 | 1.18E-05 | 0.276332 | 1.25E-09 | 0.323868 | 7.26E-13 | 0.137741 |
| 0.361748 | 6.95E-16 | 0.363036 | 5.39E-16 | 0.379398 | 1.95E-17 | 0.156278 | 0.0007   | 0.17103  |
| -0.31746 | 2.15E-12 | -0.41506 | 7.14E-21 | -0.44389 | 5.74E-24 | -0.30313 | 2.21E-11 | -0.46022 |
| 0.506057 | 9.75E-32 | 0.412635 | 1.26E-20 | 0.466663 | 1.25E-26 | 0.275789 | 1.35E-09 | 0.417792 |
| 0.465217 | 1.86E-26 | 0.511699 | 1.59E-32 | 0.434761 | 5.90E-23 | 0.310817 | 6.43E-12 | 0.365747 |
| 0.558072 | 1.38E-39 | 0.281134 | 6.24E-10 | 0.456071 | 2.29E-25 | 0.151848 | 0.001    | 0.171553 |
| 0.757798 | 2.91E-88 | 0.535117 | 5.92E-36 | 0.708648 | 1.93E-72 | 0.4582   | 1.28E-25 | 0.43951  |
| -0.32539 | 5.60E-13 | -0.36902 | 1.64E-16 | -0.59557 | 3.63E-46 | -0.06259 | 0.17696  | -0.13934 |
| 0.458376 | 1.22E-25 | 0.40778  | 3.89E-20 | 0.409127 | 2.85E-20 | 0.344464 | 1.86E-14 | 0.299195 |
| -0.51681 | 2.99E-33 | -0.52833 | 6.23E-35 | -0.49425 | 3.89E-30 | -0.24578 | 7.45E-08 | -0.2479  |
| 0.566397 | 5.64E-41 | 0.43958  | 1.74E-23 | 0.41188  | 1.51E-20 | 0.255551 | 2.13E-08 | 0.161062 |
| 0.389542 | 2.26E-18 | 0.358774 | 1.24E-15 | 0.238766 | 1.77E-07 | 0.333087 | 1.46E-13 | 0.443446 |
| 0.375743 | 4.16E-17 | 0.59622  | 2.75E-46 | 0.550682 | 2.19E-38 | 0.373973 | 5.99E-17 | 0.550505 |
| 0.372581 | 7.96E-17 | 0.373236 | 6.96E-17 | 0.313647 | 4.05E-12 | 0.375058 | 4.79E-17 | 0.285103 |
| 0.343818 | 2.10E-14 | 0.478087 | 4.81E-28 | 0.50126  | 4.44E-31 | 0.29232  | 1.18E-10 | 0.301511 |
| -0.41884 | 2.91E-21 | -0.24411 | 9.18E-08 | -0.20878 | 5.36E-06 | -0.28584 | 3.13E-10 | -0.2359  |
| 0.694525 | 1.72E-68 | 0.63903  | 5.82E-55 | 0.587285 | 1.23E-44 | 0.389592 | 2.24E-18 | 0.372825 |
| 0.770015 | 8.52E-93 | 0.632931 | 1.21E-53 | 0.706405 | 8.48E-72 | 0.513928 | 7.71E-33 | 0.577154 |
| 0.649755 | 2.35E-57 | 0.549752 | 3.08E-38 | 0.559546 | 7.89E-40 | 0.512331 | 1.30E-32 | 0.605371 |
| 0.510599 | 2.27E-32 | 0.351286 | 5.21E-15 | 0.477983 | 4.96E-28 | 0.211589 | 3.98E-06 | 0.117258 |
| -0.33374 | 1.30E-13 | -0.29724 | 5.56E-11 | -0.37472 | 5.14E-17 | -0.20544 | 7.62E-06 | -0.15908 |
| 0.463635 | 2.89E-26 | 0.4172   | 4.31E-21 | 0.376146 | 3.83E-17 | 0.307472 | 1.11E-11 | 0.381265 |
| 0.686899 | 1.88E-66 | 0.479385 | 3.30E-28 | 0.566287 | 5.89E-41 | 0.421898 | 1.40E-21 | 0.324793 |
| 0.701202 | 2.50E-70 | 0.671364 | 1.74E-62 | 0.661498 | 4.32E-60 | 0.418698 | 3.02E-21 | 0.556945 |

|          |          |          |          |          |          |          |          |          |
|----------|----------|----------|----------|----------|----------|----------|----------|----------|
| 0.384436 | 6.76E-18 | 0.443299 | 6.68E-24 | 0.472359 | 2.50E-27 | 0.221915 | 1.28E-06 | 0.106683 |
| 0.324722 | 6.28E-13 | 0.148243 | 0.00131  | 0.354414 | 2.88E-15 | 0.015643 | 0.736    | -0.08902 |
| 0.55071  | 2.17E-38 | 0.38713  | 3.81E-18 | 0.290909 | 1.47E-10 | 0.352532 | 4.12E-15 | 0.582602 |
| 0.591666 | 1.93E-45 | 0.596687 | 2.24E-46 | 0.631334 | 2.66E-53 | 0.423301 | 9.98E-22 | 0.255348 |
| 0.328451 | 3.29E-13 | -0.01902 | 0.68179  | 0.188376 | 4.19E-05 | 0.066398 | 0.15197  | -0.17607 |
| 0.63821  | 8.78E-55 | 0.56267  | 2.39E-40 | 0.395321 | 6.42E-19 | 0.344596 | 1.82E-14 | 0.422733 |
| 0.48716  | 3.32E-29 | 0.554057 | 6.25E-39 | 0.579727 | 2.78E-43 | 0.42143  | 1.57E-21 | 0.414378 |
| 0.387423 | 3.57E-18 | 0.329405 | 2.79E-13 | 0.407119 | 4.52E-20 | 0.181944 | 7.67E-05 | 0.180478 |
| 0.298285 | 4.73E-11 | 0.236578 | 2.31E-07 | 0.374983 | 4.87E-17 | 0.133723 | 0.00379  | -0.07779 |
| 0.562167 | 2.90E-40 | 0.439052 | 1.99E-23 | 0.46984  | 5.10E-27 | 0.158564 | 0.00058  | 0.062132 |
| 0.589138 | 5.63E-45 | 0.23485  | 2.84E-07 | 0.392354 | 1.23E-18 | 0.209166 | 5.15E-06 | 0.307068 |
| 0.615544 | 4.88E-50 | 0.593882 | 7.50E-46 | 0.650266 | 1.80E-57 | 0.267271 | 4.43E-09 | 0.249864 |
| 0.744896 | 9.30E-84 | 0.612349 | 2.12E-49 | 0.710959 | 4.13E-73 | 0.485694 | 5.14E-29 | 0.499919 |
| -0.42178 | 1.44E-21 | -0.40336 | 1.07E-19 | -0.44308 | 7.06E-24 | -0.31415 | 3.72E-12 | -0.47508 |
| 0.446502 | 2.90E-24 | 0.601163 | 3.19E-47 | 0.592293 | 1.48E-45 | 0.252258 | 3.27E-08 | 0.400606 |
| 0.809871 | #####    | 0.758592 | 1.51E-88 | 0.749338 | 2.81E-85 | 0.503309 | 2.33E-31 | 0.538212 |
| 0.521552 | 6.19E-34 | 0.573381 | 3.60E-42 | 0.692714 | 5.32E-68 | 0.284676 | 3.72E-10 | 0.425197 |
| 0.425665 | 5.62E-22 | 0.305585 | 1.50E-11 | 0.448751 | 1.61E-24 | 0.262675 | 8.28E-09 | 0.429082 |
| 0.339032 | 5.03E-14 | 0.027422 | 0.55444  | 0.087787 | 0.058    | 0.116987 | 0.01141  | 0.273896 |
| 0.576723 | 9.41E-43 | 0.490956 | 1.06E-29 | 0.469791 | 5.17E-27 | 0.434631 | 6.10E-23 | 0.437732 |
| 0.389141 | 2.47E-18 | 0.214692 | 2.84E-06 | 0.272354 | 2.19E-09 | 0.227921 | 6.43E-07 | 0.022363 |
| 0.466042 | 1.48E-26 | 0.151983 | 0.00099  | 0.188268 | 4.24E-05 | 0.207977 | 5.84E-06 | -0.08492 |
| 0.516334 | 3.50E-33 | 0.50285  | 2.69E-31 | 0.415961 | 5.78E-21 | 0.442967 | 7.28E-24 | 0.385211 |
| 0.69674  | 4.28E-69 | 0.588734 | 6.67E-45 | 0.561912 | 3.20E-40 | 0.432283 | 1.10E-22 | 0.424125 |
| 0.731048 | 3.23E-79 | 0.79444  | #####    | 0.765683 | 3.71E-91 | 0.533447 | 1.06E-35 | 0.639069 |
| 0.592076 | 1.62E-45 | 0.622011 | 2.37E-51 | 0.616533 | 3.08E-50 | 0.473789 | 1.66E-27 | 0.636777 |
| 0.484589 | 7.14E-29 | 0.44283  | 7.55E-24 | 0.470784 | 3.91E-27 | 0.234276 | 3.05E-07 | 0.465295 |
| 0.380461 | 1.56E-17 | 0.516352 | 3.48E-33 | 0.513975 | 7.59E-33 | 0.281719 | 5.73E-10 | 0.411043 |
| 0.397651 | 3.83E-19 | 0.354972 | 2.58E-15 | 0.469528 | 5.57E-27 | 0.287029 | 2.62E-10 | 0.512045 |
| 0.536468 | 3.69E-36 | 0.240347 | 1.46E-07 | 0.403254 | 1.09E-19 | 0.255263 | 2.21E-08 | 0.238552 |
| 0.345752 | 1.47E-14 | 0.228798 | 5.81E-07 | 0.351015 | 5.49E-15 | 0.144118 | 0.00179  | 0.173675 |
| 0.675862 | 1.31E-63 | 0.729863 | 7.67E-79 | 0.657488 | 3.83E-59 | 0.46218  | 4.32E-26 | 0.761381 |
| 0.494927 | 3.16E-30 | 0.328106 | 3.50E-13 | 0.362405 | 6.11E-16 | 0.277643 | 1.03E-09 | 0.111351 |
| 0.441363 | 1.10E-23 | 0.455925 | 2.38E-25 | 0.446781 | 2.70E-24 | 0.14954  | 0.00119  | 0.195572 |
| -0.36122 | 7.70E-16 | -0.41883 | 2.92E-21 | -0.5101  | 2.67E-32 | -0.2682  | 3.90E-09 | -0.40363 |
| 0.312409 | 4.96E-12 | 0.344987 | 1.69E-14 | 0.33884  | 5.21E-14 | 0.160027 | 0.00052  | 0.136737 |
| 0.307738 | 1.06E-11 | 0.32915  | 2.91E-13 | 0.338904 | 5.15E-14 | 0.291189 | 1.41E-10 | 0.284167 |
| 0.584208 | 4.41E-44 | 0.614779 | 6.94E-50 | 0.565883 | 6.89E-41 | 0.325773 | 5.24E-13 | 0.398985 |
| 0.577906 | 5.83E-43 | 0.458485 | 1.19E-25 | 0.535304 | 5.55E-36 | 0.412024 | 1.46E-20 | 0.547379 |
| 0.288722 | 2.04E-10 | 0.326444 | 4.66E-13 | 0.357231 | 1.67E-15 | 0.154229 | 0.00083  | 0.047287 |
| 0.234527 | 2.96E-07 | 0.276532 | 1.21E-09 | 0.319347 | 1.57E-12 | 0.170889 | 0.00021  | 0.039367 |
| 0.49268  | 6.28E-30 | 0.49466  | 3.43E-30 | 0.41907  | 2.76E-21 | 0.276765 | 1.17E-09 | 0.514055 |
| 0.644351 | 3.88E-56 | 0.50579  | 1.06E-31 | 0.660667 | 6.81E-60 | 0.312695 | 4.73E-12 | 0.259827 |
| 0.685504 | 4.38E-66 | 0.40412  | 8.97E-20 | 0.402962 | 1.17E-19 | 0.293893 | 9.32E-11 | 0.169286 |
| -0.2254  | 8.59E-07 | 0.041289 | 0.37333  | -0.35203 | 4.53E-15 | -0.00388 | 0.93333  | 0.164665 |

|          |          |          |          |          |          |          |          |          |
|----------|----------|----------|----------|----------|----------|----------|----------|----------|
| 0.396108 | 5.40E-19 | 0.313653 | 4.04E-12 | 0.254411 | 2.47E-08 | 0.260876 | 1.05E-08 | 0.21401  |
| 0.456381 | 2.10E-25 | 0.362825 | 5.62E-16 | 0.42538  | 6.03E-22 | 0.282924 | 4.81E-10 | 0.385014 |
| 0.605885 | 3.94E-48 | 0.668373 | 9.46E-62 | 0.615372 | 5.28E-50 | 0.40443  | 8.36E-20 | 0.503211 |
| -0.45548 | 2.68E-25 | -0.47238 | 2.48E-27 | -0.57173 | 6.93E-42 | -0.26557 | 5.58E-09 | -0.33859 |
| 0.681201 | 5.73E-65 | 0.70754  | 4.02E-72 | 0.676922 | 7.07E-64 | 0.435109 | 5.41E-23 | 0.486504 |
| 0.426598 | 4.48E-22 | 0.473082 | 2.03E-27 | 0.548087 | 5.68E-38 | 0.209853 | 4.79E-06 | 0.092882 |
| 0.538334 | 1.91E-36 | 0.444679 | 4.67E-24 | 0.475632 | 9.78E-28 | 0.3513   | 5.20E-15 | 0.37988  |
| 0.392655 | 1.15E-18 | 0.270888 | 2.68E-09 | 0.311161 | 6.08E-12 | 0.267036 | 4.57E-09 | 0.173735 |
| 0.610958 | 4.00E-49 | 0.752494 | 2.24E-86 | 0.731493 | 2.33E-79 | 0.45735  | 1.62E-25 | 0.351419 |
| -0.23592 | 2.50E-07 | -0.22437 | 9.67E-07 | -0.45339 | 4.70E-25 | -0.0505  | 0.27616  | -0.00671 |
| 0.63226  | 1.69E-53 | 0.51477  | 5.85E-33 | 0.58155  | 1.32E-43 | 0.373931 | 6.04E-17 | 0.370586 |
| 0.533344 | 1.10E-35 | 0.486352 | 4.23E-29 | 0.512262 | 1.33E-32 | 0.385415 | 5.49E-18 | 0.312367 |
| 0.246636 | 6.69E-08 | 0.177906 | 0.00011  | 0.29744  | 5.40E-11 | 0.134408 | 0.00361  | 0.153227 |
| -0.3871  | 3.83E-18 | -0.18606 | 5.22E-05 | -0.30472 | 1.72E-11 | -0.22575 | 8.26E-07 | -0.22178 |
| 0.328666 | 3.17E-13 | 0.167134 | 0.00029  | 0.248    | 5.63E-08 | 0.162185 | 0.00043  | 0.246468 |
| 0.6712   | 1.91E-62 | 0.704701 | 2.59E-71 | 0.66237  | 2.68E-60 | 0.407936 | 3.75E-20 | 0.441772 |
| 0.575101 | 1.81E-42 | 0.445764 | 3.52E-24 | 0.564809 | 1.05E-40 | 0.312898 | 4.58E-12 | 0.379746 |
| 0.709152 | 1.38E-72 | 0.557798 | 1.53E-39 | 0.721105 | 3.97E-76 | 0.417399 | 4.11E-21 | 0.388591 |
| 0.327749 | 3.72E-13 | 0.329634 | 2.68E-13 | 0.432919 | 9.37E-23 | 0.316644 | 2.46E-12 | 0.304092 |
| -0.38808 | 3.10E-18 | -0.30698 | 1.20E-11 | -0.4043  | 8.62E-20 | -0.21743 | 2.11E-06 | -0.22197 |
| 0.367815 | 2.09E-16 | 0.451555 | 7.66E-25 | 0.49158  | 8.77E-30 | 0.190243 | 3.50E-05 | 0.326213 |
| 0.810131 | #####    | 0.836346 | #####    | 0.848386 | #####    | 0.444936 | 4.37E-24 | 0.489605 |
| 0.48034  | 2.50E-28 | 0.443122 | 7.00E-24 | 0.413952 | 9.27E-21 | 0.251755 | 3.49E-08 | 0.277573 |
| 0.511714 | 1.58E-32 | 0.344402 | 1.89E-14 | 0.265963 | 5.30E-09 | 0.278944 | 8.57E-10 | 0.331611 |
| 0.755108 | 2.67E-87 | 0.740592 | 2.58E-82 | 0.708376 | 2.31E-72 | 0.472975 | 2.10E-27 | 0.516968 |
| 0.49083  | 1.10E-29 | 0.417234 | 4.27E-21 | 0.351627 | 4.89E-15 | 0.366323 | 2.81E-16 | 0.547351 |
| -0.55456 | 5.17E-39 | -0.52416 | 2.57E-34 | -0.74435 | 1.42E-83 | -0.26571 | 5.48E-09 | -0.27071 |
| 0.514446 | 6.51E-33 | 0.30021  | 3.51E-11 | 0.352438 | 4.19E-15 | 0.232232 | 3.88E-07 | 0.105285 |
| 0.416192 | 5.47E-21 | 0.420116 | 2.15E-21 | 0.426199 | 4.93E-22 | 0.406356 | 5.39E-20 | 0.284967 |
| 0.162769 | 0.00041  | 0.170397 | 0.00022  | 0.366452 | 2.74E-16 | 0.090496 | 0.05065  | 0.138077 |
| 0.521105 | 7.19E-34 | 0.437064 | 3.30E-23 | 0.412603 | 1.27E-20 | 0.432582 | 1.02E-22 | 0.43487  |
| 0.731056 | 3.21E-79 | 0.694273 | 2.01E-68 | 0.718828 | 1.94E-75 | 0.450258 | 1.08E-24 | 0.457846 |
| 0.43278  | 9.70E-23 | 0.296718 | 6.04E-11 | 0.396466 | 4.98E-19 | 0.319335 | 1.57E-12 | 0.255427 |
| 0.432802 | 9.65E-23 | 0.390268 | 1.94E-18 | 0.32881  | 3.09E-13 | 0.17403  | 0.00016  | 0.137121 |
| 0.631454 | 2.51E-53 | 0.47033  | 4.44E-27 | 0.620764 | 4.26E-51 | 0.401729 | 1.54E-19 | 0.464808 |
| 0.306644 | 1.26E-11 | 0.278751 | 8.81E-10 | 0.312638 | 4.78E-12 | 0.288889 | 1.99E-10 | 0.297372 |
| 0.42698  | 4.08E-22 | 0.220036 | 1.58E-06 | 0.389004 | 2.54E-18 | 0.075376 | 0.10377  | 0.211045 |
| 0.483428 | 1.01E-28 | 0.52344  | 3.28E-34 | 0.468907 | 6.64E-27 | 0.436476 | 3.83E-23 | 0.673122 |
| 0.312753 | 4.69E-12 | 0.246048 | 7.21E-08 | 0.312164 | 5.16E-12 | 0.303087 | 2.23E-11 | 0.437729 |
| 0.598557 | 9.96E-47 | 0.557225 | 1.90E-39 | 0.593399 | 9.23E-46 | 0.380505 | 1.55E-17 | 0.301609 |
| 0.405993 | 5.85E-20 | 0.262226 | 8.79E-09 | 0.392086 | 1.30E-18 | 0.141117 | 0.00224  | 0.063842 |
| 0.510965 | 2.02E-32 | 0.521494 | 6.31E-34 | 0.425984 | 5.20E-22 | 0.47598  | 8.85E-28 | 0.363227 |
| 0.741649 | 1.15E-82 | 0.706076 | 1.05E-71 | 0.685038 | 5.79E-66 | 0.442083 | 9.15E-24 | 0.426426 |
| 0.524157 | 2.58E-34 | 0.491474 | 9.06E-30 | 0.442136 | 9.03E-24 | 0.441173 | 1.16E-23 | 0.384339 |
| 0.560395 | 5.71E-40 | 0.751157 | 6.57E-86 | 0.680525 | 8.54E-65 | 0.410606 | 2.02E-20 | 0.51467  |

|          |          |          |          |          |          |          |          |          |
|----------|----------|----------|----------|----------|----------|----------|----------|----------|
| 0.39311  | 1.04E-18 | 0.364501 | 4.04E-16 | 0.373875 | 6.11E-17 | 0.166164 | 0.00031  | 0.213762 |
| 0.521452 | 6.40E-34 | 0.272857 | 2.04E-09 | 0.368495 | 1.82E-16 | 0.352245 | 4.35E-15 | 0.225715 |
| 0.506426 | 8.67E-32 | 0.142907 | 0.00196  | 0.312311 | 5.04E-12 | 0.257079 | 1.74E-08 | 0.176965 |
| 0.359991 | 9.80E-16 | 0.399097 | 2.78E-19 | 0.416591 | 4.98E-21 | 0.27625  | 1.26E-09 | 0.41147  |
| 0.389056 | 2.52E-18 | 0.487815 | 2.73E-29 | 0.460474 | 6.90E-26 | 0.356403 | 1.96E-15 | 0.487754 |
| 0.380058 | 1.70E-17 | 0.337953 | 6.11E-14 | 0.241404 | 1.28E-07 | 0.316703 | 2.44E-12 | 0.426028 |
| 0.706209 | 9.65E-72 | 0.688956 | 5.38E-67 | 0.747771 | 9.74E-85 | 0.389171 | 2.45E-18 | 0.397658 |
| 0.507512 | 6.13E-32 | 0.383137 | 8.90E-18 | 0.381703 | 1.20E-17 | 0.361721 | 6.98E-16 | 0.386627 |
| 0.299262 | 4.07E-11 | 0.36148  | 7.32E-16 | 0.384006 | 7.40E-18 | 0.233261 | 3.44E-07 | 0.262665 |
| -0.27855 | 9.07E-10 | -0.25935 | 1.29E-08 | -0.54096 | 7.50E-37 | 0.004466 | 0.92332  | -0.03053 |
| 0.840796 | #####    | 0.6573   | 4.24E-59 | 0.742066 | 8.32E-83 | 0.45479  | 3.23E-25 | 0.44061  |
| 0.351304 | 5.20E-15 | 0.138756 | 0.00266  | 0.303044 | 2.24E-11 | 0.123729 | 0.00743  | 0.058781 |
| -0.33684 | 7.46E-14 | -0.39174 | 1.41E-18 | -0.35451 | 2.82E-15 | -0.31379 | 3.95E-12 | -0.26013 |
| 0.684071 | 1.04E-65 | 0.721685 | 2.65E-76 | 0.728149 | 2.66E-78 | 0.425787 | 5.46E-22 | 0.477967 |
| -0.59117 | 2.39E-45 | -0.49184 | 8.10E-30 | -0.57332 | 3.68E-42 | -0.33049 | 2.30E-13 | -0.4045  |
| -0.50749 | 6.18E-32 | -0.4391  | 1.97E-23 | -0.47087 | 3.81E-27 | -0.21266 | 3.55E-06 | -0.17614 |
| 0.36527  | 3.47E-16 | 0.39347  | 9.64E-19 | 0.4423   | 8.65E-24 | 0.218733 | 1.82E-06 | 0.031582 |
| 0.723872 | 5.66E-77 | 0.687294 | 1.48E-66 | 0.528872 | 5.17E-35 | 0.505079 | 1.33E-31 | 0.605265 |
| 0.788072 | #####    | 0.683344 | 1.60E-65 | 0.69072  | 1.82E-67 | 0.385645 | 5.23E-18 | 0.438933 |
| 0.727009 | 6.04E-78 | 0.755021 | 2.87E-87 | 0.744453 | 1.31E-83 | 0.477173 | 6.27E-28 | 0.570422 |
| 0.450864 | 9.21E-25 | 0.414562 | 8.03E-21 | 0.52003  | 1.03E-33 | 0.235286 | 2.70E-07 | 0.169974 |
| 0.487371 | 3.12E-29 | 0.396628 | 4.81E-19 | 0.390411 | 1.88E-18 | 0.287811 | 2.33E-10 | 0.354897 |
| 0.566184 | 6.13E-41 | 0.663345 | 1.56E-60 | 0.671739 | 1.40E-62 | 0.490213 | 1.33E-29 | 0.707389 |
| -0.3692  | 1.58E-16 | -0.1685  | 0.00025  | -0.22991 | 5.10E-07 | -0.10862 | 0.01887  | -0.12025 |
| 0.812306 | #####    | 0.755386 | 2.13E-87 | 0.73314  | 6.94E-80 | 0.512262 | 1.33E-32 | 0.527907 |
| -0.38611 | 4.73E-18 | -0.28144 | 5.97E-10 | -0.35179 | 4.74E-15 | -0.16729 | 0.00028  | -0.23592 |
| -0.2722  | 2.23E-09 | -0.33119 | 2.04E-13 | -0.36038 | 9.08E-16 | -0.28075 | 6.60E-10 | -0.26451 |
| 0.397742 | 3.76E-19 | 0.316839 | 2.38E-12 | 0.58397  | 4.87E-44 | 0.068462 | 0.13961  | 0.117724 |
| 0.648494 | 4.54E-57 | 0.245046 | 8.17E-08 | 0.374824 | 5.03E-17 | 0.34122  | 3.38E-14 | 0.332456 |
| 0.527485 | 8.31E-35 | 0.214085 | 3.04E-06 | 0.263491 | 7.41E-09 | 0.323574 | 7.64E-13 | 0.355645 |
| 0.375301 | 4.56E-17 | 0.236698 | 2.28E-07 | 0.349226 | 7.68E-15 | 0.118597 | 0.01031  | 0.117709 |
| -0.6566  | 6.17E-59 | -0.54561 | 1.40E-37 | -0.58922 | 5.45E-45 | -0.34173 | 3.08E-14 | -0.45067 |
| -0.51957 | 1.20E-33 | -0.46021 | 7.41E-26 | -0.5712  | 8.56E-42 | -0.36746 | 2.24E-16 | -0.38191 |
| 0.523586 | 3.12E-34 | 0.463628 | 2.90E-26 | 0.475311 | 1.07E-27 | 0.32217  | 9.71E-13 | 0.192335 |
| 0.656142 | 7.91E-59 | 0.386192 | 4.65E-18 | 0.461411 | 5.34E-26 | 0.395547 | 6.11E-19 | 0.163116 |
| 0.615467 | 5.05E-50 | 0.59056  | 3.09E-45 | 0.602246 | 1.98E-47 | 0.490441 | 1.24E-29 | 0.513079 |
| 0.636827 | 1.76E-54 | 0.695756 | 7.96E-69 | 0.652138 | 6.69E-58 | 0.45449  | 3.50E-25 | 0.624901 |
| -0.2052  | 7.81E-06 | -0.18869 | 4.07E-05 | -0.46952 | 5.58E-27 | -0.14224 | 0.00206  | -0.26348 |
| 0.382798 | 9.56E-18 | 0.463421 | 3.07E-26 | 0.481446 | 1.80E-28 | 0.358109 | 1.41E-15 | 0.456102 |
| 0.386541 | 4.32E-18 | 0.464031 | 2.59E-26 | 0.401968 | 1.46E-19 | 0.336014 | 8.66E-14 | 0.568126 |
| 0.738246 | 1.53E-81 | 0.691391 | 1.21E-67 | 0.662904 | 1.99E-60 | 0.506318 | 8.98E-32 | 0.554302 |
| 0.426612 | 4.46E-22 | 0.130712 | 0.00467  | 0.404398 | 8.42E-20 | 0.099429 | 0.03169  | 0.169872 |
| 0.611396 | 3.27E-49 | 0.515893 | 4.05E-33 | 0.701084 | 2.69E-70 | 0.304258 | 1.85E-11 | 0.304637 |
| 0.192911 | 2.70E-05 | 0.316984 | 2.33E-12 | 0.387922 | 3.21E-18 | 0.157023 | 0.00066  | 0.262515 |
| 0.402918 | 1.18E-19 | 0.523523 | 3.19E-34 | 0.523856 | 2.85E-34 | 0.218735 | 1.82E-06 | 0.296347 |

|          |          |          |          |          |          |          |          |          |
|----------|----------|----------|----------|----------|----------|----------|----------|----------|
| 0.483796 | 9.03E-29 | 0.360508 | 8.86E-16 | 0.422662 | 1.17E-21 | 0.268892 | 3.54E-09 | 0.163286 |
| 0.604736 | 6.57E-48 | 0.3889   | 2.60E-18 | 0.398178 | 3.41E-19 | 0.404737 | 7.80E-20 | 0.294435 |
| -0.4045  | 8.23E-20 | -0.28803 | 2.26E-10 | -0.40493 | 7.47E-20 | -0.24225 | 1.16E-07 | -0.32352 |
| 0.352525 | 4.12E-15 | 0.423303 | 9.98E-22 | 0.424611 | 7.27E-22 | 0.2063   | 6.97E-06 | 0.20116  |
| 0.580254 | 2.24E-43 | 0.659793 | 1.10E-59 | 0.716071 | 1.30E-74 | 0.385552 | 5.33E-18 | 0.413412 |
| 0.533503 | 1.04E-35 | 0.608759 | 1.08E-48 | 0.623547 | 1.14E-51 | 0.298034 | 4.92E-11 | 0.284793 |
| 0.706502 | 7.96E-72 | 0.669419 | 5.25E-62 | 0.621766 | 2.66E-51 | 0.400931 | 1.84E-19 | 0.430167 |
| 0.678469 | 2.86E-64 | 0.682141 | 3.28E-65 | 0.526426 | 1.19E-34 | 0.405653 | 6.33E-20 | 0.54905  |
| 0.715171 | 2.40E-74 | 0.704683 | 2.62E-71 | 0.662987 | 1.90E-60 | 0.533865 | 9.18E-36 | 0.451787 |
| 0.586481 | 1.71E-44 | 0.406013 | 5.83E-20 | 0.548571 | 4.76E-38 | 0.177126 | 0.00012  | 0.217285 |
| 0.490043 | 1.40E-29 | 0.202075 | 1.08E-05 | 0.308124 | 9.96E-12 | 0.257568 | 1.64E-08 | 0.077553 |
| 0.677535 | 4.95E-64 | 0.398374 | 3.26E-19 | 0.465191 | 1.88E-26 | 0.371006 | 1.10E-16 | 0.263885 |
| 0.748519 | 5.39E-85 | 0.723906 | 5.53E-77 | 0.743411 | 2.95E-83 | 0.46872  | 7.00E-27 | 0.535238 |
| 0.306716 | 1.25E-11 | 0.2272   | 6.99E-07 | 0.344038 | 2.02E-14 | 0.283878 | 4.18E-10 | 0.234255 |
| 0.542605 | 4.15E-37 | 0.26639  | 5.00E-09 | 0.46421  | 2.47E-26 | 0.155205 | 0.00076  | 0.116961 |
| 0.410057 | 2.30E-20 | 0.359857 | 1.01E-15 | 0.388302 | 2.96E-18 | 0.325019 | 5.96E-13 | 0.160004 |
| 0.565925 | 6.78E-41 | 0.535381 | 5.40E-36 | 0.53989  | 1.10E-36 | 0.425268 | 6.19E-22 | 0.508883 |
| 0.586848 | 1.47E-44 | 0.478674 | 4.06E-28 | 0.585051 | 3.11E-44 | 0.308066 | 1.01E-11 | 0.193228 |
| 0.427837 | 3.30E-22 | 0.347662 | 1.03E-14 | 0.380179 | 1.66E-17 | 0.154255 | 0.00082  | 0.315682 |
| 0.419024 | 2.79E-21 | 0.338088 | 5.97E-14 | 0.320597 | 1.27E-12 | 0.430713 | 1.62E-22 | 0.291889 |
| 0.580608 | 1.94E-43 | 0.413609 | 1.00E-20 | 0.543155 | 3.41E-37 | 0.365846 | 3.09E-16 | 0.225522 |
| 0.542606 | 4.15E-37 | 0.540264 | 9.60E-37 | 0.606411 | 3.11E-48 | 0.332595 | 1.59E-13 | 0.588449 |
| 0.651067 | 1.18E-57 | 0.603671 | 1.05E-47 | 0.631883 | 2.03E-53 | 0.429363 | 2.27E-22 | 0.442613 |
| 0.70949  | 1.10E-72 | 0.779835 | 1.20E-96 | 0.716189 | 1.20E-74 | 0.466419 | 1.33E-26 | 0.441313 |
| 0.532976 | 1.25E-35 | 0.666217 | 3.17E-61 | 0.671605 | 1.52E-62 | 0.314653 | 3.43E-12 | 0.320231 |
| 0.246138 | 7.13E-08 | 0.229147 | 5.57E-07 | 0.283071 | 4.70E-10 | 0.452373 | 6.16E-25 | 0.506721 |
| 0.647061 | 9.57E-57 | 0.66023  | 8.65E-60 | 0.717598 | 4.54E-75 | 0.327674 | 3.77E-13 | 0.300334 |
| 0.424006 | 8.42E-22 | 0.237811 | 1.99E-07 | 0.337685 | 6.42E-14 | 0.091139 | 0.04903  | -0.18887 |
| 0.51364  | 8.47E-33 | 0.581056 | 1.62E-43 | 0.554688 | 4.94E-39 | 0.436927 | 3.42E-23 | 0.455863 |
| 0.585402 | 2.69E-44 | 0.573827 | 3.01E-42 | 0.600466 | 4.33E-47 | 0.289528 | 1.81E-10 | 0.228661 |
| 0.484931 | 6.45E-29 | 0.326189 | 4.87E-13 | 0.499884 | 6.82E-31 | 0.326092 | 4.96E-13 | 0.27085  |
| 0.627904 | 1.41E-52 | 0.727648 | 3.81E-78 | 0.622702 | 1.71E-51 | 0.458638 | 1.14E-25 | 0.470804 |
| 0.525149 | 1.84E-34 | 0.696292 | 5.68E-69 | 0.707266 | 4.81E-72 | 0.38156  | 1.24E-17 | 0.441515 |
| -0.455   | 3.05E-25 | -0.4307  | 1.63E-22 | -0.61989 | 6.45E-51 | -0.25373 | 2.70E-08 | -0.23825 |
| 0.397771 | 3.73E-19 | 0.278867 | 8.66E-10 | 0.346886 | 1.19E-14 | 0.052738 | 0.25536  | 0.054598 |
| 0.74666  | 2.34E-84 | 0.781233 | 3.26E-97 | 0.642622 | 9.41E-56 | 0.501205 | 4.51E-31 | 0.551583 |
| 0.326356 | 4.74E-13 | 0.374957 | 4.89E-17 | 0.440362 | 1.42E-23 | 0.289375 | 1.85E-10 | 0.303344 |
| 0.419148 | 2.71E-21 | 0.156144 | 0.00071  | 0.206148 | 7.08E-06 | 0.099983 | 0.03075  | 0.067714 |
| 0.312753 | 4.69E-12 | 0.193512 | 2.55E-05 | 0.324962 | 6.02E-13 | 0.216024 | 2.46E-06 | 0.254833 |
| 0.16887  | 0.00025  | 0.24984  | 4.46E-08 | 0.347871 | 9.90E-15 | 0.034324 | 0.45931  | 0.08823  |
| 0.548439 | 5.00E-38 | 0.45194  | 6.92E-25 | 0.51587  | 4.08E-33 | 0.398511 | 3.17E-19 | 0.501327 |
| -0.45813 | 1.31E-25 | -0.39415 | 8.31E-19 | -0.44824 | 1.84E-24 | -0.0762  | 0.10004  | -0.22402 |
| 0.387128 | 3.81E-18 | 0.303564 | 2.07E-11 | 0.33627  | 8.27E-14 | 0.102071 | 0.02741  | 0.220514 |
| 0.666431 | 2.81E-61 | 0.51448  | 6.43E-33 | 0.668553 | 8.55E-62 | 0.294873 | 8.02E-11 | 0.360317 |
| 0.714548 | 3.67E-74 | 0.581096 | 1.59E-43 | 0.596448 | 2.49E-46 | 0.482428 | 1.35E-28 | 0.58805  |



|          |          |          |          |          |          |          |          |          |
|----------|----------|----------|----------|----------|----------|----------|----------|----------|
| 0.500374 | 5.85E-31 | 0.442446 | 8.33E-24 | 0.508785 | 4.08E-32 | 0.161489 | 0.00046  | 0.240735 |
| 0.541352 | 6.51E-37 | 0.517375 | 2.48E-33 | 0.57638  | 1.08E-42 | 0.435885 | 4.45E-23 | 0.633334 |
| 0.507283 | 6.60E-32 | 0.479376 | 3.31E-28 | 0.561097 | 4.37E-40 | 0.216732 | 2.27E-06 | 0.316654 |
| 0.197175 | 1.77E-05 | -0.00646 | 0.88932  | 0.172167 | 0.00019  | 0.117514 | 0.01104  | 0.151147 |
| 0.514165 | 7.13E-33 | 0.356253 | 2.02E-15 | 0.434545 | 6.23E-23 | 0.222711 | 1.17E-06 | 0.378166 |
| 0.289012 | 1.95E-10 | 0.114947 | 0.01293  | 0.260488 | 1.11E-08 | 0.177622 | 0.00011  | 0.131706 |
| 0.431998 | 1.18E-22 | 0.161507 | 0.00046  | 0.374552 | 5.32E-17 | 0.219633 | 1.65E-06 | 0.291042 |
| 0.248122 | 5.55E-08 | 0.33653  | 7.90E-14 | 0.341623 | 3.14E-14 | 0.275701 | 1.36E-09 | 0.205621 |
| -0.29139 | 1.36E-10 | -0.02565 | 0.58034  | -0.22513 | 8.87E-07 | -0.07746 | 0.09455  | -0.00836 |
| 0.602812 | 1.54E-47 | 0.638068 | 9.44E-55 | 0.70722  | 4.96E-72 | 0.346831 | 1.20E-14 | 0.329464 |
| 0.375365 | 4.50E-17 | 0.318087 | 1.93E-12 | 0.142799 | 0.00198  | 0.259873 | 1.20E-08 | 0.195217 |
| 0.270568 | 2.81E-09 | 0.23857  | 1.82E-07 | 0.332879 | 1.51E-13 | 0.153634 | 0.00087  | 0.207819 |
| -0.46277 | 3.68E-26 | -0.36731 | 2.31E-16 | -0.41946 | 2.51E-21 | -0.25153 | 3.59E-08 | -0.05723 |
| 0.554162 | 6.01E-39 | 0.617804 | 1.71E-50 | 0.677247 | 5.85E-64 | 0.265048 | 6.00E-09 | 0.404308 |
| 0.327975 | 3.58E-13 | 0.426518 | 4.56E-22 | 0.421222 | 1.65E-21 | 0.293843 | 9.39E-11 | 0.379111 |
| -0.44334 | 6.61E-24 | -0.30427 | 1.85E-11 | -0.41432 | 8.51E-21 | -0.16092 | 0.00048  | -0.13434 |
| 0.359052 | 1.18E-15 | 0.310626 | 6.64E-12 | 0.323669 | 7.52E-13 | 0.280514 | 6.83E-10 | 0.178879 |
| 0.387063 | 3.86E-18 | 0.259453 | 1.27E-08 | 0.198215 | 1.60E-05 | 0.343358 | 2.29E-14 | 0.179353 |
| 0.399523 | 2.53E-19 | 0.299041 | 4.21E-11 | 0.362272 | 6.27E-16 | 0.311248 | 6.00E-12 | 0.159718 |
| 0.472103 | 2.69E-27 | 0.378638 | 2.29E-17 | 0.42059  | 1.92E-21 | 0.293506 | 9.88E-11 | 0.245574 |
| 0.767919 | 5.35E-92 | 0.676311 | 1.01E-63 | 0.704148 | 3.71E-71 | 0.503841 | 1.97E-31 | 0.604146 |
| 0.438771 | 2.14E-23 | 0.500181 | 6.22E-31 | 0.436043 | 4.27E-23 | 0.208196 | 5.71E-06 | 0.246819 |
| 0.393434 | 9.71E-19 | 0.050249 | 0.27851  | 0.270902 | 2.68E-09 | 0.084833 | 0.067    | 0.07785  |
| 0.418618 | 3.08E-21 | 0.355533 | 2.32E-15 | 0.445405 | 3.87E-24 | 0.125424 | 0.00665  | 0.121155 |
| -0.41946 | 2.51E-21 | -0.44185 | 9.72E-24 | -0.51415 | 7.17E-33 | -0.28883 | 2.00E-10 | -0.35931 |
| 0.444954 | 4.35E-24 | 0.417196 | 4.31E-21 | 0.51776  | 2.19E-33 | 0.233748 | 3.24E-07 | 0.453317 |
| 0.329002 | 2.99E-13 | 0.368639 | 1.77E-16 | 0.388175 | 3.04E-18 | 0.188238 | 4.25E-05 | 0.496044 |
| 0.741964 | 9.00E-83 | 0.594702 | 5.28E-46 | 0.577634 | 6.51E-43 | 0.386549 | 4.31E-18 | 0.370386 |
| 0.707188 | 5.07E-72 | 0.596964 | 1.99E-46 | 0.640411 | 2.89E-55 | 0.437916 | 2.66E-23 | 0.512585 |
| 0.338944 | 5.11E-14 | 0.320663 | 1.25E-12 | 0.374028 | 5.92E-17 | 0.076524 | 0.0986   | 0.137678 |
| 0.535261 | 5.63E-36 | 0.334153 | 1.21E-13 | 0.292785 | 1.10E-10 | 0.261743 | 9.38E-09 | 0.238103 |
| 0.792057 | #####    | 0.747815 | 9.40E-85 | 0.830705 | #####    | 0.464158 | 2.50E-26 | 0.541509 |
| 0.598378 | 1.08E-46 | 0.267736 | 4.15E-09 | 0.417128 | 4.38E-21 | 0.218953 | 1.78E-06 | 0.133904 |
| -0.1979  | 1.65E-05 | -0.30396 | 1.94E-11 | -0.26786 | 4.08E-09 | -0.27185 | 2.35E-09 | -0.41423 |
| 0.551175 | 1.82E-38 | 0.291475 | 1.35E-10 | 0.429088 | 2.43E-22 | 0.289154 | 1.91E-10 | 0.352275 |
| -0.39943 | 2.58E-19 | -0.42075 | 1.85E-21 | -0.50721 | 6.76E-32 | -0.17981 | 9.34E-05 | -0.22216 |
| -0.42383 | 8.78E-22 | -0.60253 | 1.75E-47 | -0.64116 | 1.98E-55 | -0.38622 | 4.62E-18 | -0.54155 |
| -0.26422 | 6.71E-09 | -0.14598 | 0.00156  | -0.43001 | 1.93E-22 | 0.022223 | 0.63193  | 0.019315 |
| 0.373359 | 6.79E-17 | 0.147693 | 0.00137  | 0.266749 | 4.76E-09 | 0.092574 | 0.04556  | 0.042471 |
| 0.398271 | 3.34E-19 | 0.289353 | 1.85E-10 | 0.252244 | 3.28E-08 | 0.161707 | 0.00045  | 0.364215 |
| -0.30189 | 2.69E-11 | -0.23206 | 3.96E-07 | -0.43878 | 2.14E-23 | -0.17305 | 0.00017  | -0.16393 |
| -0.45593 | 2.38E-25 | -0.42447 | 7.52E-22 | -0.50293 | 2.63E-31 | -0.12847 | 0.00543  | -0.17866 |
| 0.375153 | 4.70E-17 | 0.345407 | 1.57E-14 | 0.24527  | 7.95E-08 | 0.204404 | 8.49E-06 | 0.055043 |
| 0.55638  | 2.62E-39 | 0.553943 | 6.52E-39 | 0.661672 | 3.93E-60 | 0.370439 | 1.23E-16 | 0.418596 |
| 0.034859 | 0.45235  | -0.07845 | 0.0904   | -0.07838 | 0.09067  | -0.05603 | 0.22685  | -0.11115 |

|          |          |          |          |          |          |          |          |          |
|----------|----------|----------|----------|----------|----------|----------|----------|----------|
| 0.637642 | 1.17E-54 | 0.47973  | 2.98E-28 | 0.552792 | 1.00E-38 | 0.35895  | 1.20E-15 | 0.385106 |
| 0.591989 | 1.68E-45 | 0.605468 | 4.74E-48 | 0.634637 | 5.22E-54 | 0.282658 | 5.00E-10 | 0.364382 |
| 0.525251 | 1.78E-34 | 0.306484 | 1.30E-11 | 0.508363 | 4.67E-32 | 0.247749 | 5.82E-08 | 0.276577 |
| 0.456464 | 2.06E-25 | 0.260446 | 1.12E-08 | 0.274368 | 1.65E-09 | 0.127579 | 0.00576  | 0.03987  |
| 0.556045 | 2.97E-39 | 0.446746 | 2.73E-24 | 0.49859  | 1.02E-30 | 0.292455 | 1.16E-10 | 0.125169 |
| 0.396224 | 5.26E-19 | 0.247412 | 6.07E-08 | 0.40259  | 1.27E-19 | 0.190363 | 3.46E-05 | 0.195917 |
| -0.35421 | 2.99E-15 | -0.28414 | 4.02E-10 | -0.40853 | 3.27E-20 | -0.16632 | 0.00031  | -0.18764 |
| 0.363352 | 5.07E-16 | 0.435645 | 4.72E-23 | 0.462124 | 4.39E-26 | 0.363308 | 5.11E-16 | 0.533896 |
| 0.368503 | 1.82E-16 | 0.475986 | 8.83E-28 | 0.493366 | 5.09E-30 | 0.306844 | 1.22E-11 | 0.52163  |
| 0.205793 | 7.35E-06 | 0.215142 | 2.71E-06 | 0.272033 | 2.29E-09 | 0.111566 | 0.01586  | 0.188692 |
| 0.350243 | 6.35E-15 | 0.220549 | 1.49E-06 | 0.340408 | 3.92E-14 | 0.219733 | 1.63E-06 | 0.224217 |
| 0.401812 | 1.51E-19 | 0.376898 | 3.28E-17 | 0.473592 | 1.76E-27 | 0.368208 | 1.93E-16 | 0.284121 |
| 0.570981 | 9.33E-42 | 0.521778 | 5.74E-34 | 0.568778 | 2.22E-41 | 0.356475 | 1.94E-15 | 0.40138  |
| 0.484417 | 7.52E-29 | 0.636647 | 1.92E-54 | 0.656384 | 6.94E-59 | 0.353088 | 3.70E-15 | 0.345658 |
| 0.626811 | 2.39E-52 | 0.661427 | 4.49E-60 | 0.536888 | 3.18E-36 | 0.431076 | 1.48E-22 | 0.6534   |
| 0.68133  | 5.30E-65 | 0.470074 | 4.78E-27 | 0.578788 | 4.08E-43 | 0.320421 | 1.31E-12 | 0.297487 |
| 0.540726 | 8.14E-37 | 0.59163  | 1.96E-45 | 0.64125  | 1.89E-55 | 0.478806 | 3.90E-28 | 0.46058  |
| 0.413834 | 9.53E-21 | 0.454359 | 3.62E-25 | 0.480171 | 2.62E-28 | 0.40628  | 5.48E-20 | 0.453209 |
| -0.42222 | 1.30E-21 | -0.35336 | 3.52E-15 | -0.60816 | 1.42E-48 | -0.14704 | 0.00144  | -0.11488 |
| -0.47938 | 3.30E-28 | -0.43939 | 1.82E-23 | -0.67186 | 1.31E-62 | -0.16172 | 0.00045  | -0.15622 |
| -0.55561 | 3.49E-39 | -0.48707 | 3.42E-29 | -0.70825 | 2.51E-72 | -0.21335 | 3.29E-06 | -0.24513 |
| -0.28822 | 2.20E-10 | -0.11389 | 0.01379  | -0.40754 | 4.11E-20 | -0.07849 | 0.09022  | -0.01705 |
| 0.333446 | 1.37E-13 | 0.335999 | 8.69E-14 | 0.388552 | 2.80E-18 | 0.073905 | 0.11071  | 0.136267 |
| -0.49431 | 3.82E-30 | -0.36476 | 3.83E-16 | -0.5323  | 1.58E-35 | -0.07624 | 0.09985  | -0.16194 |
| 0.330929 | 2.13E-13 | 0.310243 | 7.06E-12 | 0.345732 | 1.47E-14 | 0.123449 | 0.00757  | 0.073676 |
| 0.589024 | 5.91E-45 | 0.453486 | 4.58E-25 | 0.668301 | 9.85E-62 | 0.402022 | 1.44E-19 | 0.348015 |
| 0.585062 | 3.10E-44 | 0.48284  | 1.20E-28 | 0.556363 | 2.63E-39 | 0.382075 | 1.11E-17 | 0.479731 |
| 0.394811 | 7.18E-19 | 0.2376   | 2.04E-07 | 0.419179 | 2.69E-21 | 0.204653 | 8.27E-06 | 0.032902 |
| 0.470649 | 4.06E-27 | 0.448277 | 1.82E-24 | 0.443991 | 5.59E-24 | 0.288624 | 2.07E-10 | 0.325683 |
| 0.539631 | 1.20E-36 | 0.449166 | 1.44E-24 | 0.474674 | 1.29E-27 | 0.285304 | 3.39E-10 | 0.265489 |
| 0.344462 | 1.87E-14 | 0.325345 | 5.64E-13 | 0.438347 | 2.38E-23 | 0.163876 | 0.00038  | 0.357922 |
| -0.54489 | 1.82E-37 | -0.47638 | 7.88E-28 | -0.54805 | 5.77E-38 | -0.21068 | 4.38E-06 | -0.15465 |
| 0.448463 | 1.74E-24 | 0.045623 | 0.32522  | 0.241787 | 1.22E-07 | 0.070469 | 0.12835  | -0.02082 |
| 0.549747 | 3.09E-38 | 0.391313 | 1.54E-18 | 0.531531 | 2.07E-35 | 0.310014 | 7.33E-12 | 0.177289 |
| 0.586467 | 1.73E-44 | 0.571312 | 8.19E-42 | 0.750685 | 9.59E-86 | 0.277402 | 1.07E-09 | 0.29514  |
| 0.305776 | 1.45E-11 | 0.095758 | 0.03859  | 0.33615  | 8.45E-14 | -0.00933 | 0.8407   | -0.13884 |
| -0.47038 | 4.38E-27 | -0.32656 | 4.57E-13 | -0.45375 | 4.27E-25 | -0.31359 | 4.08E-12 | -0.2533  |
| 0.535389 | 5.38E-36 | 0.579674 | 2.84E-43 | 0.47461  | 1.31E-27 | 0.340772 | 3.67E-14 | 0.556447 |
| 0.707825 | 3.33E-72 | 0.605871 | 3.96E-48 | 0.697275 | 3.05E-69 | 0.320146 | 1.37E-12 | 0.366919 |
| 0.727199 | 5.27E-78 | 0.681245 | 5.58E-65 | 0.766365 | 2.06E-91 | 0.44626  | 3.09E-24 | 0.562698 |
| 0.355597 | 2.29E-15 | 0.524269 | 2.48E-34 | 0.541859 | 5.43E-37 | 0.304089 | 1.90E-11 | 0.571685 |
| 0.840851 | #####    | 0.715505 | 1.91E-74 | 0.737924 | 1.95E-81 | 0.427258 | 3.81E-22 | 0.406708 |
| 0.80985  | #####    | 0.702945 | 8.11E-71 | 0.701475 | 2.09E-70 | 0.499517 | 7.64E-31 | 0.427667 |
| 0.403909 | 9.41E-20 | 0.015269 | 0.74208  | 0.21488  | 2.79E-06 | 0.237537 | 2.06E-07 | 0.120634 |
| 0.400854 | 1.87E-19 | 0.21755  | 2.08E-06 | 0.356224 | 2.03E-15 | 0.091984 | 0.04696  | 0.088817 |

|          |          |          |          |          |          |          |          |          |
|----------|----------|----------|----------|----------|----------|----------|----------|----------|
| 0.744569 | 1.20E-83 | 0.58913  | 5.65E-45 | 0.651864 | 7.73E-58 | 0.4601   | 7.65E-26 | 0.481173 |
| -0.42268 | 1.16E-21 | -0.29346 | 9.95E-11 | -0.39462 | 7.49E-19 | -0.19797 | 1.64E-05 | -0.09126 |
| -0.39059 | 1.81E-18 | -0.32849 | 3.27E-13 | -0.50344 | 2.23E-31 | -0.27121 | 2.56E-09 | -0.12404 |
| 0.633913 | 7.48E-54 | 0.397992 | 3.55E-19 | 0.485424 | 5.57E-29 | 0.328245 | 3.41E-13 | 0.524199 |
| -0.32293 | 8.53E-13 | -0.47168 | 3.03E-27 | -0.47467 | 1.29E-27 | -0.3133  | 4.29E-12 | -0.46333 |
| -0.45347 | 4.59E-25 | -0.245   | 8.22E-08 | -0.36403 | 4.43E-16 | -0.29695 | 5.82E-11 | -0.19063 |
| 0.435654 | 4.71E-23 | 0.306619 | 1.27E-11 | 0.356626 | 1.88E-15 | 0.062616 | 0.17675  | 0.184743 |
| -0.37981 | 1.79E-17 | -0.38324 | 8.71E-18 | -0.45239 | 6.13E-25 | -0.20119 | 1.18E-05 | -0.14192 |
| -0.18557 | 5.47E-05 | -0.08371 | 0.07072  | -0.41992 | 2.25E-21 | -0.04796 | 0.30101  | -0.09058 |
| 0.551446 | 1.65E-38 | 0.41019  | 2.23E-20 | 0.421319 | 1.61E-21 | 0.223867 | 1.02E-06 | 0.190221 |
| 0.644412 | 3.76E-56 | 0.564134 | 1.36E-40 | 0.550443 | 2.39E-38 | 0.364842 | 3.77E-16 | 0.602133 |
| 0.625844 | 3.81E-52 | 0.420901 | 1.78E-21 | 0.524318 | 2.44E-34 | 0.321722 | 1.05E-12 | 0.346168 |
| 0.317589 | 2.10E-12 | 0.30427  | 1.85E-11 | 0.311145 | 6.10E-12 | 0.329076 | 2.95E-13 | 0.326122 |
| 0.32965  | 2.67E-13 | 0.240278 | 1.47E-07 | 0.394573 | 7.57E-19 | 0.108842 | 0.01863  | 0.10458  |
| 0.281365 | 6.03E-10 | 0.310765 | 6.49E-12 | 0.379335 | 1.98E-17 | 0.146426 | 0.00151  | 0.123795 |
| 0.450005 | 1.16E-24 | 0.460552 | 6.76E-26 | 0.565075 | 9.43E-41 | 0.26257  | 8.39E-09 | 0.229225 |
| 0.190976 | 3.26E-05 | 0.249139 | 4.88E-08 | 0.253995 | 2.61E-08 | 0.163238 | 0.0004   | 0.202358 |
| -0.4562  | 2.21E-25 | -0.25824 | 1.50E-08 | -0.37294 | 7.40E-17 | -0.19902 | 1.47E-05 | -0.05788 |
| 0.339111 | 4.96E-14 | 0.120359 | 0.00923  | 0.258456 | 1.45E-08 | 0.02451  | 0.59727  | -0.09238 |
| 0.500205 | 6.17E-31 | 0.485925 | 4.80E-29 | 0.46426  | 2.43E-26 | 0.450323 | 1.06E-24 | 0.427963 |
| -0.41857 | 3.11E-21 | -0.31245 | 4.93E-12 | -0.3166  | 2.48E-12 | -0.33746 | 6.68E-14 | -0.28295 |
| -0.48319 | 1.08E-28 | -0.43152 | 1.33E-22 | -0.709   | 1.52E-72 | -0.19601 | 1.99E-05 | -0.18505 |
| 0.491926 | 7.90E-30 | 0.262813 | 8.12E-09 | 0.393892 | 8.79E-19 | 0.182246 | 7.46E-05 | 0.243718 |
| 0.51852  | 1.70E-33 | 0.196711 | 1.86E-05 | 0.244717 | 8.52E-08 | 0.199179 | 1.45E-05 | -0.00077 |
| 0.486584 | 3.94E-29 | 0.216617 | 2.30E-06 | 0.302193 | 2.57E-11 | 0.238708 | 1.79E-07 | 0.179909 |
| 0.410316 | 2.17E-20 | 0.331671 | 1.87E-13 | 0.300515 | 3.34E-11 | 0.155244 | 0.00076  | -0.04263 |
| 0.357153 | 1.70E-15 | 0.181079 | 8.31E-05 | 0.325151 | 5.83E-13 | -0.06296 | 0.1744   | -0.09158 |
| 0.566913 | 4.62E-41 | 0.426258 | 4.86E-22 | 0.468094 | 8.34E-27 | 0.29488  | 8.01E-11 | 0.37341  |
| 0.458349 | 1.23E-25 | 0.493898 | 4.33E-30 | 0.480226 | 2.58E-28 | 0.246005 | 7.25E-08 | 0.185943 |
| 0.429381 | 2.26E-22 | 0.376913 | 3.27E-17 | 0.390179 | 1.97E-18 | 0.138291 | 0.00275  | 0.236862 |
| 0.481996 | 1.54E-28 | 0.506921 | 7.41E-32 | 0.44664  | 2.80E-24 | 0.380986 | 1.40E-17 | 0.411528 |
| 0.462654 | 3.79E-26 | 0.329247 | 2.87E-13 | 0.440831 | 1.26E-23 | 0.290062 | 1.67E-10 | 0.364409 |
| 0.481549 | 1.75E-28 | 0.379063 | 2.09E-17 | 0.352163 | 4.42E-15 | 0.365092 | 3.59E-16 | 0.380001 |
| -0.43309 | 8.97E-23 | -0.45073 | 9.54E-25 | -0.45003 | 1.15E-24 | -0.34589 | 1.43E-14 | -0.33914 |
| 0.419659 | 2.40E-21 | 0.427733 | 3.39E-22 | 0.506017 | 9.88E-32 | 0.117485 | 0.01106  | 0.093268 |
| 0.47276  | 2.23E-27 | 0.10575  | 0.02228  | 0.188539 | 4.13E-05 | 0.207647 | 6.05E-06 | 0.106712 |
| 0.279787 | 7.59E-10 | 0.098023 | 0.0342   | 0.160143 | 0.00051  | 0.0936   | 0.0432   | 0.007243 |
| 0.425341 | 6.08E-22 | 0.412225 | 1.39E-20 | 0.35698  | 1.76E-15 | 0.330383 | 2.35E-13 | 0.539576 |
| 0.410879 | 1.90E-20 | 0.299392 | 3.98E-11 | 0.380057 | 1.70E-17 | 0.200264 | 1.30E-05 | 0.345086 |
| 0.568283 | 2.70E-41 | 0.115677 | 0.01237  | 0.284901 | 3.59E-10 | 0.215231 | 2.68E-06 | 0.179988 |
| 0.318067 | 1.94E-12 | 0.252304 | 3.25E-08 | 0.395252 | 6.52E-19 | 0.110431 | 0.01697  | 0.102931 |
| -0.51384 | 7.92E-33 | -0.42594 | 5.25E-22 | -0.49487 | 3.22E-30 | -0.2744  | 1.64E-09 | -0.33874 |
| 0.791572 | #####    | 0.695491 | 9.39E-69 | 0.69926  | 8.65E-70 | 0.373506 | 6.59E-17 | 0.391325 |
| 0.621932 | 2.46E-51 | 0.320366 | 1.32E-12 | 0.42961  | 2.13E-22 | 0.255186 | 2.24E-08 | 0.3099   |
| 0.307687 | 1.07E-11 | 0.335652 | 9.24E-14 | 0.286925 | 2.66E-10 | 0.313775 | 3.96E-12 | 0.374961 |

|          |          |          |          |          |          |          |          |          |
|----------|----------|----------|----------|----------|----------|----------|----------|----------|
| 0.375775 | 4.14E-17 | 0.19548  | 2.10E-05 | 0.217256 | 2.15E-06 | 0.282472 | 5.13E-10 | 0.3588   |
| 0.317554 | 2.11E-12 | 0.263813 | 7.10E-09 | 0.345102 | 1.66E-14 | 0.214058 | 3.05E-06 | 0.182511 |
| 0.48067  | 2.27E-28 | 0.343553 | 2.21E-14 | 0.352608 | 4.06E-15 | 0.227449 | 6.79E-07 | 0.412909 |
| 0.49851  | 1.05E-30 | 0.24574  | 7.49E-08 | 0.409871 | 2.40E-20 | 0.111478 | 0.01595  | -0.01009 |
| 0.317843 | 2.01E-12 | 0.243969 | 9.35E-08 | 0.297467 | 5.37E-11 | 0.272825 | 2.05E-09 | 0.016905 |
| 0.54897  | 4.11E-38 | 0.357836 | 1.49E-15 | 0.558585 | 1.14E-39 | 0.209891 | 4.77E-06 | 0.346856 |
| 0.580311 | 2.19E-43 | 0.372133 | 8.72E-17 | 0.475882 | 9.10E-28 | 0.269728 | 3.15E-09 | 0.457651 |
| 0.285107 | 3.49E-10 | 0.333878 | 1.27E-13 | 0.272993 | 2.00E-09 | 0.234837 | 2.85E-07 | 0.216518 |
| 0.402992 | 1.16E-19 | 0.340889 | 3.59E-14 | 0.296169 | 6.57E-11 | 0.168365 | 0.00026  | 0.083    |
| 0.469191 | 6.13E-27 | 0.282248 | 5.31E-10 | 0.273095 | 1.97E-09 | 0.097721 | 0.03476  | 0.062107 |
| -0.30073 | 3.23E-11 | -0.31722 | 2.24E-12 | -0.37282 | 7.58E-17 | -0.22311 | 1.12E-06 | -0.13752 |
| 0.695779 | 7.84E-69 | 0.482344 | 1.39E-28 | 0.5931   | 1.05E-45 | 0.332329 | 1.67E-13 | 0.311489 |
| 0.410036 | 2.31E-20 | 0.455372 | 2.76E-25 | 0.4648   | 2.09E-26 | 0.220217 | 1.55E-06 | 0.239036 |
| 0.60425  | 8.15E-48 | 0.614417 | 8.20E-50 | 0.680554 | 8.40E-65 | 0.33588  | 8.87E-14 | 0.36959  |
| 0.426013 | 5.16E-22 | 0.101494 | 0.0283   | 0.314394 | 3.58E-12 | 0.127065 | 0.00597  | -0.06315 |
| 0.732473 | 1.14E-79 | 0.751677 | 4.32E-86 | 0.761272 | 1.60E-89 | 0.494848 | 3.24E-30 | 0.573678 |
| 0.526098 | 1.33E-34 | 0.205383 | 7.67E-06 | 0.248912 | 5.02E-08 | 0.366372 | 2.78E-16 | 0.221348 |
| 0.593774 | 7.86E-46 | 0.354092 | 3.06E-15 | 0.491537 | 8.89E-30 | 0.294998 | 7.86E-11 | 0.32524  |
| 0.487429 | 3.06E-29 | 0.272197 | 2.24E-09 | 0.484826 | 6.66E-29 | 0.125432 | 0.00665  | 0.118537 |
| 0.367019 | 2.45E-16 | 0.375365 | 4.50E-17 | 0.363329 | 5.09E-16 | 0.182917 | 7.01E-05 | 0.185652 |
| 0.724824 | 2.88E-77 | 0.577413 | 7.12E-43 | 0.699283 | 8.53E-70 | 0.406257 | 5.51E-20 | 0.463723 |
| -0.42809 | 3.11E-22 | -0.3552  | 2.48E-15 | -0.44774 | 2.10E-24 | -0.19216 | 2.91E-05 | -0.11834 |
| -0.43996 | 1.58E-23 | -0.38191 | 1.15E-17 | -0.44148 | 1.07E-23 | -0.29273 | 1.11E-10 | -0.2228  |
| 0.451003 | 8.87E-25 | 0.148947 | 0.00125  | 0.282075 | 5.44E-10 | 0.13049  | 0.00474  | -0.09235 |
| 0.486005 | 4.69E-29 | 0.382301 | 1.06E-17 | 0.308962 | 8.70E-12 | 0.228319 | 6.14E-07 | 0.214804 |
| 0.709327 | 1.23E-72 | 0.397234 | 4.20E-19 | 0.439758 | 1.66E-23 | 0.389841 | 2.12E-18 | 0.374151 |
| 0.566844 | 4.74E-41 | 0.417573 | 3.94E-21 | 0.549071 | 3.96E-38 | 0.25255  | 3.15E-08 | 0.279987 |
| 0.52783  | 7.39E-35 | 0.358363 | 1.34E-15 | 0.381427 | 1.28E-17 | 0.278183 | 9.56E-10 | 0.086824 |
| 0.37333  | 6.83E-17 | 0.25569  | 2.09E-08 | 0.356908 | 1.78E-15 | 0.144955 | 0.00169  | 0.248025 |
| 0.517255 | 2.58E-33 | 0.486671 | 3.84E-29 | 0.583485 | 5.95E-44 | 0.268934 | 3.52E-09 | 0.41036  |
| 0.56461  | 1.13E-40 | 0.59018  | 3.63E-45 | 0.67165  | 1.48E-62 | 0.328537 | 3.24E-13 | 0.442403 |
| 0.480832 | 2.16E-28 | 0.374943 | 4.91E-17 | 0.546037 | 1.20E-37 | 0.465859 | 1.56E-26 | 0.475252 |
| -0.62928 | 7.23E-53 | -0.46669 | 1.24E-26 | -0.52002 | 1.03E-33 | -0.34183 | 3.02E-14 | -0.21155 |
| 0.594387 | 6.04E-46 | 0.495689 | 2.50E-30 | 0.480737 | 2.22E-28 | 0.36901  | 1.64E-16 | 0.312598 |
| -0.38399 | 7.43E-18 | -0.25904 | 1.35E-08 | -0.50257 | 2.94E-31 | 0.011835 | 0.79866  | 0.066926 |
| 0.42434  | 7.76E-22 | 0.319618 | 1.50E-12 | 0.379922 | 1.75E-17 | 0.224102 | 9.97E-07 | 0.220325 |
| 0.78012  | 9.18E-97 | 0.813046 | #####    | 0.75048  | 1.13E-85 | 0.524548 | 2.26E-34 | 0.642308 |
| 0.649093 | 3.32E-57 | 0.78252  | 9.76E-98 | 0.709672 | 9.77E-73 | 0.474605 | 1.31E-27 | 0.639051 |
| 0.524228 | 2.51E-34 | 0.537157 | 2.89E-36 | 0.577047 | 8.26E-43 | 0.325012 | 5.97E-13 | 0.152176 |
| 0.744652 | 1.12E-83 | 0.71165  | 2.60E-73 | 0.725867 | 1.37E-77 | 0.475965 | 8.89E-28 | 0.485448 |
| -0.39794 | 3.60E-19 | -0.32961 | 2.69E-13 | -0.35325 | 3.59E-15 | -0.25233 | 3.24E-08 | -0.39474 |
| 0.720407 | 6.47E-76 | 0.563514 | 1.73E-40 | 0.592658 | 1.27E-45 | 0.409106 | 2.86E-20 | 0.386953 |
| 0.655313 | 1.23E-58 | 0.578711 | 4.21E-43 | 0.593665 | 8.24E-46 | 0.495343 | 2.78E-30 | 0.419243 |
| 0.381848 | 1.17E-17 | 0.404102 | 9.01E-20 | 0.483168 | 1.09E-28 | 0.040499 | 0.38256  | 0.128975 |
| 0.424976 | 6.65E-22 | 0.511527 | 1.68E-32 | 0.457579 | 1.52E-25 | 0.259774 | 1.22E-08 | 0.392394 |

|          |          |          |          |          |          |          |          |          |
|----------|----------|----------|----------|----------|----------|----------|----------|----------|
| -0.33422 | 1.19E-13 | -0.36036 | 9.11E-16 | -0.38899 | 2.55E-18 | -0.22186 | 1.29E-06 | -0.20173 |
| 0.468178 | 8.15E-27 | 0.487283 | 3.20E-29 | 0.555282 | 3.95E-39 | 0.123587 | 0.0075   | 0.198682 |
| 0.369337 | 1.54E-16 | 0.345496 | 1.54E-14 | 0.35241  | 4.21E-15 | 0.208151 | 5.74E-06 | 0.202622 |
| -0.43073 | 1.62E-22 | -0.52904 | 4.88E-35 | -0.57987 | 2.62E-43 | -0.33901 | 5.05E-14 | -0.55099 |
| -0.43901 | 2.01E-23 | -0.28029 | 7.05E-10 | -0.35705 | 1.73E-15 | -0.33609 | 8.54E-14 | -0.10921 |
| 0.687348 | 1.43E-66 | 0.684328 | 8.88E-66 | 0.803094 | #####    | 0.461798 | 4.80E-26 | 0.538045 |
| 0.631076 | 3.02E-53 | 0.480036 | 2.73E-28 | 0.457275 | 1.65E-25 | 0.340821 | 3.64E-14 | 0.332183 |
| 0.662857 | 2.05E-60 | 0.754077 | 6.19E-87 | 0.732866 | 8.50E-80 | 0.403929 | 9.37E-20 | 0.425487 |
| 0.772353 | 1.07E-93 | 0.654233 | 2.20E-58 | 0.677674 | 4.56E-64 | 0.32167  | 1.06E-12 | 0.333899 |
| 0.402407 | 1.32E-19 | 0.390813 | 1.72E-18 | 0.433987 | 7.17E-23 | 0.326363 | 4.73E-13 | 0.217213 |
| -0.46873 | 6.97E-27 | -0.40518 | 7.05E-20 | -0.42341 | 9.72E-22 | -0.23826 | 1.89E-07 | -0.13856 |
| 0.40094  | 1.84E-19 | 0.264117 | 6.81E-09 | 0.323859 | 7.28E-13 | 0.253232 | 2.88E-08 | 0.235584 |
| 0.308179 | 9.87E-12 | 0.313632 | 4.06E-12 | 0.299883 | 3.69E-11 | 0.1035   | 0.02531  | 0.168942 |
| 0.567044 | 4.39E-41 | 0.546561 | 9.92E-38 | 0.522313 | 4.79E-34 | 0.295702 | 7.06E-11 | 0.385745 |
| 0.377799 | 2.72E-17 | 0.416938 | 4.58E-21 | 0.524672 | 2.16E-34 | 0.272059 | 2.28E-09 | 0.5493   |
| -0.12213 | 0.00824  | -0.18279 | 7.09E-05 | -0.17742 | 0.00012  | -0.28209 | 5.43E-10 | -0.23546 |
| -0.33673 | 7.62E-14 | -0.3497  | 7.03E-15 | -0.49739 | 1.48E-30 | -0.30572 | 1.47E-11 | -0.29043 |
| 0.235586 | 2.60E-07 | 0.321744 | 1.04E-12 | 0.30389  | 1.96E-11 | 0.351235 | 5.26E-15 | 0.424457 |
| 0.500465 | 5.69E-31 | 0.298041 | 4.92E-11 | 0.329009 | 2.99E-13 | 0.199442 | 1.41E-05 | -0.104   |
| -0.36357 | 4.85E-16 | -0.20883 | 5.34E-06 | -0.28652 | 2.83E-10 | -0.26633 | 5.04E-09 | -0.25811 |
| 0.306904 | 1.21E-11 | 0.367068 | 2.42E-16 | 0.441703 | 1.01E-23 | 0.196892 | 1.82E-05 | 0.176258 |
| -0.31403 | 3.80E-12 | -0.37859 | 2.31E-17 | -0.47815 | 4.73E-28 | -0.32753 | 3.86E-13 | -0.41935 |
| 0.760812 | 2.35E-89 | 0.670481 | 2.87E-62 | 0.689939 | 2.95E-67 | 0.466388 | 1.35E-26 | 0.435558 |
| 0.598018 | 1.26E-46 | 0.380672 | 1.50E-17 | 0.42302  | 1.07E-21 | 0.259513 | 1.26E-08 | 0.156699 |
| 0.441177 | 1.16E-23 | 0.260703 | 1.08E-08 | 0.247797 | 5.78E-08 | 0.327822 | 3.67E-13 | 0.422985 |
| -0.45399 | 4.00E-25 | -0.30551 | 1.52E-11 | -0.26913 | 3.43E-09 | -0.31548 | 2.99E-12 | -0.35183 |
| 0.35537  | 2.39E-15 | 0.184836 | 5.86E-05 | 0.279319 | 8.12E-10 | 0.293837 | 9.40E-11 | 0.469326 |
| 0.642666 | 9.20E-56 | 0.247034 | 6.37E-08 | 0.357079 | 1.72E-15 | 0.379227 | 2.02E-17 | 0.457509 |
| 0.738648 | 1.13E-81 | 0.785363 | 6.61E-99 | 0.749589 | 2.30E-85 | 0.56943  | 1.72E-41 | 0.675815 |
| 0.555656 | 3.43E-39 | 0.549588 | 3.28E-38 | 0.58936  | 5.13E-45 | 0.437621 | 2.86E-23 | 0.649173 |
| -0.2958  | 6.95E-11 | -0.12809 | 0.00557  | -0.41708 | 4.43E-21 | 0.00277  | 0.9524   | 0.066176 |
| -0.31004 | 7.30E-12 | -0.18905 | 3.93E-05 | -0.31467 | 3.42E-12 | -0.00026 | 0.99558  | -0.04764 |
| 0.735828 | 9.43E-81 | 0.77017  | 7.44E-93 | 0.738992 | 8.70E-82 | 0.509949 | 2.80E-32 | 0.575949 |
| 0.622469 | 1.91E-51 | 0.626261 | 3.12E-52 | 0.663607 | 1.35E-60 | 0.414935 | 7.36E-21 | 0.424671 |
| 0.551087 | 1.88E-38 | 0.373753 | 6.27E-17 | 0.384818 | 6.23E-18 | 0.205623 | 7.48E-06 | 0.169475 |
| 0.451496 | 7.78E-25 | 0.193468 | 2.56E-05 | 0.288337 | 2.16E-10 | 0.175449 | 0.00014  | 0.164525 |
| 0.647159 | 9.10E-57 | 0.222029 | 1.26E-06 | 0.318001 | 1.96E-12 | 0.351253 | 5.25E-15 | 0.204905 |
| -0.08389 | 0.07011  | -0.15839 | 0.00059  | -0.39542 | 6.28E-19 | -0.03877 | 0.40316  | -0.01128 |
| 0.495258 | 2.85E-30 | 0.27319  | 1.94E-09 | 0.370929 | 1.11E-16 | 0.242585 | 1.11E-07 | 0.330851 |
| 0.282407 | 5.18E-10 | 0.188225 | 4.25E-05 | 0.276678 | 1.19E-09 | 0.265831 | 5.39E-09 | 0.346322 |
| 0.30531  | 1.56E-11 | 0.313096 | 4.43E-12 | 0.380527 | 1.54E-17 | 0.326478 | 4.64E-13 | 0.216208 |
| 0.531424 | 2.14E-35 | 0.435224 | 5.25E-23 | 0.541571 | 6.02E-37 | 0.38582  | 5.04E-18 | 0.462407 |
| 0.416833 | 4.70E-21 | 0.314467 | 3.53E-12 | 0.41131  | 1.72E-20 | 0.190016 | 3.58E-05 | 0.41769  |
| 0.710423 | 5.92E-73 | 0.606876 | 2.53E-48 | 0.629198 | 7.54E-53 | 0.407511 | 4.14E-20 | 0.41446  |
| 0.1751   | 0.00014  | 0.220066 | 1.57E-06 | 0.294029 | 9.12E-11 | -0.03958 | 0.39349  | -0.12821 |

|          |          |          |          |          |          |          |          |          |
|----------|----------|----------|----------|----------|----------|----------|----------|----------|
| 0.441374 | 1.10E-23 | 0.163932 | 0.00037  | 0.408497 | 3.30E-20 | 0.101495 | 0.0283   | 0.241821 |
| 0.44355  | 6.26E-24 | 0.442264 | 8.73E-24 | 0.531791 | 1.89E-35 | 0.143084 | 0.00194  | 0.093422 |
| 0.497069 | 1.63E-30 | 0.426438 | 4.65E-22 | 0.451289 | 8.23E-25 | 0.437053 | 3.31E-23 | 0.549449 |
| 0.519076 | 1.41E-33 | 0.640718 | 2.48E-55 | 0.667701 | 1.38E-61 | 0.337103 | 7.13E-14 | 0.537591 |
| 0.510546 | 2.31E-32 | 0.497105 | 1.62E-30 | 0.525447 | 1.66E-34 | 0.325253 | 5.73E-13 | 0.446223 |
| 0.611239 | 3.52E-49 | 0.323343 | 7.95E-13 | 0.463591 | 2.93E-26 | 0.300809 | 3.19E-11 | 0.30527  |
| -0.4676  | 9.58E-27 | -0.3734  | 6.74E-17 | -0.48422 | 7.97E-29 | -0.16686 | 0.00029  | -0.23057 |
| 0.575855 | 1.33E-42 | 0.407045 | 4.60E-20 | 0.432456 | 1.05E-22 | 0.313684 | 4.02E-12 | 0.314026 |
| 0.365063 | 3.61E-16 | 0.326207 | 4.86E-13 | 0.330568 | 2.27E-13 | 0.218417 | 1.89E-06 | 0.194769 |
| -0.23783 | 1.99E-07 | -0.3414  | 3.27E-14 | -0.34253 | 2.66E-14 | -0.33107 | 2.08E-13 | -0.28905 |
| 0.594048 | 6.99E-46 | 0.294323 | 8.72E-11 | 0.431763 | 1.25E-22 | 0.16317  | 0.0004   | 0.214885 |
| 0.444944 | 4.36E-24 | 0.466037 | 1.48E-26 | 0.478283 | 4.54E-28 | 0.234158 | 3.09E-07 | 0.323407 |
| 0.482187 | 1.45E-28 | 0.291323 | 1.38E-10 | 0.473572 | 1.77E-27 | 0.23952  | 1.62E-07 | 0.119831 |
| 0.3946   | 7.52E-19 | 0.037186 | 0.42271  | 0.063068 | 0.17364  | 0.130331 | 0.00479  | 0.120625 |
| 0.482212 | 1.44E-28 | 0.386211 | 4.63E-18 | 0.420375 | 2.02E-21 | 0.469547 | 5.54E-27 | 0.21243  |
| 0.548005 | 5.86E-38 | 0.487791 | 2.75E-29 | 0.409041 | 2.91E-20 | 0.407683 | 3.98E-20 | 0.558432 |
| 0.504193 | 1.76E-31 | 0.403805 | 9.63E-20 | 0.423909 | 8.62E-22 | 0.36387  | 4.57E-16 | 0.272825 |
| 0.435429 | 4.99E-23 | 0.227734 | 6.57E-07 | 0.345671 | 1.49E-14 | 0.266153 | 5.16E-09 | 0.313355 |
| 0.629292 | 7.20E-53 | 0.420497 | 1.96E-21 | 0.433786 | 7.54E-23 | 0.380073 | 1.69E-17 | 0.324197 |
| 0.719495 | 1.22E-75 | 0.666388 | 2.88E-61 | 0.691658 | 1.02E-67 | 0.439228 | 1.90E-23 | 0.471664 |
| 0.365855 | 3.09E-16 | 0.352968 | 3.79E-15 | 0.341324 | 3.32E-14 | 0.141613 | 0.00216  | 0.106659 |
| 0.730296 | 5.60E-79 | 0.460046 | 7.76E-26 | 0.512629 | 1.18E-32 | 0.444475 | 4.93E-24 | 0.349326 |
| 0.669069 | 6.39E-62 | 0.499924 | 6.73E-31 | 0.663299 | 1.60E-60 | 0.416227 | 5.43E-21 | 0.371566 |
| -0.39596 | 5.57E-19 | -0.26706 | 4.55E-09 | -0.4608  | 6.31E-26 | 0.003327 | 0.94284  | 0.136153 |
| -0.41193 | 1.49E-20 | -0.32291 | 8.56E-13 | -0.37846 | 2.37E-17 | -0.19936 | 1.42E-05 | 0.09792  |
| 0.508304 | 4.76E-32 | 0.519211 | 1.35E-33 | 0.531189 | 2.33E-35 | 0.229651 | 5.26E-07 | 0.37635  |
| 0.47044  | 4.31E-27 | 0.246639 | 6.69E-08 | 0.262115 | 8.92E-09 | 0.225796 | 8.21E-07 | 0.067728 |
| -0.4643  | 2.41E-26 | -0.41196 | 1.48E-20 | -0.67099 | 2.15E-62 | -0.16959 | 0.00023  | -0.19286 |
| 0.472732 | 2.25E-27 | 0.537781 | 2.32E-36 | 0.374161 | 5.76E-17 | 0.408571 | 3.24E-20 | 0.53561  |
| 0.527947 | 7.10E-35 | 0.606348 | 3.20E-48 | 0.535158 | 5.84E-36 | 0.409279 | 2.75E-20 | 0.48017  |
| 0.596223 | 2.74E-46 | 0.617059 | 2.42E-50 | 0.632176 | 1.76E-53 | 0.380187 | 1.65E-17 | 0.529329 |
| -0.32144 | 1.10E-12 | -0.33612 | 8.50E-14 | -0.34861 | 8.63E-15 | -0.08664 | 0.06137  | -0.15025 |
| 0.558697 | 1.09E-39 | 0.537215 | 2.83E-36 | 0.604953 | 5.96E-48 | 0.35617  | 2.05E-15 | 0.44688  |
| 0.393084 | 1.05E-18 | 0.467836 | 8.97E-27 | 0.54191  | 5.33E-37 | 0.279579 | 7.82E-10 | 0.385157 |
| 0.47888  | 3.82E-28 | 0.589576 | 4.68E-45 | 0.591805 | 1.82E-45 | 0.35878  | 1.24E-15 | 0.484143 |
| 0.699459 | 7.62E-70 | 0.72583  | 1.41E-77 | 0.749588 | 2.30E-85 | 0.446744 | 2.73E-24 | 0.450654 |
| 0.38087  | 1.43E-17 | 0.322214 | 9.63E-13 | 0.3961   | 5.40E-19 | 0.195409 | 2.11E-05 | 0.37767  |
| 0.459675 | 8.59E-26 | 0.253713 | 2.71E-08 | 0.354039 | 3.09E-15 | 0.20145  | 1.15E-05 | 0.313217 |
| 0.518164 | 1.91E-33 | 0.617116 | 2.35E-50 | 0.602647 | 1.66E-47 | 0.457435 | 1.58E-25 | 0.727099 |
| -0.20049 | 1.27E-05 | -0.201   | 1.20E-05 | -0.20269 | 1.01E-05 | -0.04059 | 0.38147  | -0.0367  |
| 0.568147 | 2.85E-41 | 0.486793 | 3.71E-29 | 0.498647 | 1.00E-30 | 0.46086  | 6.21E-26 | 0.328087 |
| 0.611773 | 2.76E-49 | 0.599082 | 7.93E-47 | 0.563736 | 1.58E-40 | 0.33286  | 1.52E-13 | 0.329459 |
| -0.42203 | 1.36E-21 | -0.39526 | 6.51E-19 | -0.40499 | 7.35E-20 | -0.2201  | 1.57E-06 | -0.37726 |
| 0.318403 | 1.83E-12 | 0.389583 | 2.24E-18 | 0.304598 | 1.75E-11 | 0.219167 | 1.74E-06 | 0.319963 |
| 0.350166 | 6.44E-15 | 0.264466 | 6.49E-09 | 0.227847 | 6.48E-07 | 0.263154 | 7.76E-09 | 0.245552 |

|          |          |          |          |          |          |          |          |          |
|----------|----------|----------|----------|----------|----------|----------|----------|----------|
| -0.27123 | 2.56E-09 | -0.39567 | 5.94E-19 | -0.41375 | 9.71E-21 | -0.26056 | 1.10E-08 | -0.2184  |
| 0.447913 | 2.01E-24 | 0.509382 | 3.36E-32 | 0.610317 | 5.35E-49 | 0.322763 | 8.77E-13 | 0.395192 |
| 0.290344 | 1.60E-10 | 0.128465 | 0.00543  | 0.420625 | 1.90E-21 | -0.00245 | 0.95797  | -0.00167 |
| 0.345434 | 1.56E-14 | 0.088969 | 0.05469  | 0.233609 | 3.30E-07 | 0.212059 | 3.78E-06 | 0.194505 |
| 0.260077 | 1.17E-08 | 0.056724 | 0.22113  | 0.144051 | 0.0018   | 0.182554 | 7.25E-05 | 0.289881 |
| 0.561689 | 3.48E-40 | 0.583571 | 5.74E-44 | 0.670306 | 3.17E-62 | 0.327422 | 3.94E-13 | 0.260434 |
| -0.23918 | 1.69E-07 | -0.04085 | 0.37849  | -0.22045 | 1.51E-06 | -0.10122 | 0.02874  | -0.04157 |
| 0.794904 | #####    | 0.779542 | 1.57E-96 | 0.784841 | 1.09E-98 | 0.45676  | 1.90E-25 | 0.474039 |
| 0.412642 | 1.26E-20 | 0.343166 | 2.37E-14 | 0.44236  | 8.52E-24 | 0.285277 | 3.40E-10 | 0.41845  |
| 0.23501  | 2.79E-07 | 0.218597 | 1.85E-06 | 0.252584 | 3.13E-08 | 0.307109 | 1.17E-11 | 0.468139 |
| 0.55022  | 2.60E-38 | 0.269188 | 3.40E-09 | 0.487458 | 3.04E-29 | 0.201409 | 1.16E-05 | 0.069603 |
| 0.345778 | 1.46E-14 | 0.050003 | 0.28087  | 0.228318 | 6.14E-07 | 0.161147 | 0.00047  | 0.032637 |
| 0.465955 | 1.52E-26 | 0.475834 | 9.23E-28 | 0.462986 | 3.46E-26 | 0.201817 | 1.11E-05 | 0.251015 |
| 0.518402 | 1.77E-33 | 0.265974 | 5.29E-09 | 0.26541  | 5.71E-09 | 0.368159 | 1.95E-16 | 0.446404 |
| 0.292302 | 1.19E-10 | 0.282792 | 4.90E-10 | 0.300799 | 3.20E-11 | 0.244332 | 8.93E-08 | 0.174737 |
| 0.417901 | 3.65E-21 | 0.204151 | 8.71E-06 | 0.094637 | 0.04093  | 0.283213 | 4.61E-10 | 0.412054 |
| 0.281785 | 5.68E-10 | 0.028151 | 0.54396  | 0.246549 | 6.77E-08 | 0.045411 | 0.32747  | -0.09247 |
| 0.493075 | 5.57E-30 | 0.361329 | 7.54E-16 | 0.448557 | 1.69E-24 | 0.256456 | 1.89E-08 | 0.339832 |
| 0.558049 | 1.39E-39 | 0.552062 | 1.31E-38 | 0.521747 | 5.80E-34 | 0.363475 | 4.94E-16 | 0.440891 |
| 0.367574 | 2.19E-16 | 0.417357 | 4.15E-21 | 0.413574 | 1.01E-20 | 0.15546  | 0.00075  | 0.019071 |
| 0.331216 | 2.03E-13 | 0.34866  | 8.55E-15 | 0.356463 | 1.94E-15 | 0.283175 | 4.63E-10 | 0.376062 |
| 0.740622 | 2.52E-82 | 0.77622  | 3.30E-95 | 0.779293 | 1.97E-96 | 0.455866 | 2.42E-25 | 0.468094 |
| 0.549213 | 3.76E-38 | 0.303045 | 2.24E-11 | 0.347157 | 1.13E-14 | 0.160284 | 0.00051  | 0.058525 |
| 0.426995 | 4.06E-22 | 0.318502 | 1.80E-12 | 0.295248 | 7.57E-11 | 0.407259 | 4.38E-20 | 0.302495 |
| -0.24028 | 1.47E-07 | -0.09076 | 0.04998  | -0.34244 | 2.70E-14 | -0.0631  | 0.17342  | -0.00564 |
| -0.44486 | 4.46E-24 | -0.35666 | 1.87E-15 | -0.48022 | 2.58E-28 | -0.27517 | 1.47E-09 | -0.23086 |
| 0.765075 | 6.27E-91 | 0.557041 | 2.04E-39 | 0.737544 | 2.60E-81 | 0.339818 | 4.36E-14 | 0.313712 |
| 0.656049 | 8.31E-59 | 0.702041 | 1.45E-70 | 0.679013 | 2.08E-64 | 0.433414 | 8.28E-23 | 0.509436 |
| -0.24184 | 1.22E-07 | -0.27022 | 2.95E-09 | -0.27631 | 1.25E-09 | -0.25775 | 1.60E-08 | -0.44417 |
| 0.619865 | 6.51E-51 | 0.451474 | 7.83E-25 | 0.580993 | 1.66E-43 | 0.318413 | 1.83E-12 | 0.344043 |
| 0.499173 | 8.51E-31 | 0.402082 | 1.42E-19 | 0.301238 | 2.98E-11 | 0.344552 | 1.83E-14 | 0.334928 |
| 0.700282 | 4.50E-70 | 0.522182 | 5.01E-34 | 0.637678 | 1.15E-54 | 0.341922 | 2.97E-14 | 0.372248 |
| 0.610257 | 5.49E-49 | 0.542161 | 4.87E-37 | 0.51973  | 1.14E-33 | 0.271857 | 2.34E-09 | 0.375027 |
| 0.431955 | 1.19E-22 | 0.166962 | 0.00029  | 0.238616 | 1.81E-07 | 0.275634 | 1.38E-09 | 0.177383 |
| 0.396979 | 4.45E-19 | 0.286329 | 2.91E-10 | 0.347591 | 1.04E-14 | 0.216099 | 2.44E-06 | 0.151052 |
| 0.26785  | 4.09E-09 | 0.365653 | 3.21E-16 | 0.309325 | 8.20E-12 | 0.22671  | 7.39E-07 | 0.242137 |
| 0.673397 | 5.43E-63 | 0.458774 | 1.10E-25 | 0.648596 | 4.30E-57 | 0.276011 | 1.30E-09 | 0.2071   |
| 0.662802 | 2.11E-60 | 0.619831 | 6.61E-51 | 0.598136 | 1.20E-46 | 0.386839 | 4.05E-18 | 0.550798 |
| 0.66314  | 1.75E-60 | 0.654676 | 1.73E-58 | 0.624577 | 6.98E-52 | 0.437818 | 2.73E-23 | 0.428964 |
| -0.5535  | 7.70E-39 | -0.41319 | 1.11E-20 | -0.40061 | 1.98E-19 | -0.28217 | 5.36E-10 | -0.27649 |
| 0.432319 | 1.09E-22 | 0.404977 | 7.38E-20 | 0.433849 | 7.42E-23 | 0.417937 | 3.62E-21 | 0.482944 |
| 0.541956 | 5.24E-37 | 0.691115 | 1.43E-67 | 0.630712 | 3.61E-53 | 0.335551 | 9.41E-14 | 0.479645 |
| 0.546388 | 1.06E-37 | 0.387285 | 3.68E-18 | 0.335694 | 9.17E-14 | 0.394251 | 8.12E-19 | 0.576098 |
| 0.471791 | 2.94E-27 | 0.198654 | 1.53E-05 | 0.310327 | 6.97E-12 | 0.053525 | 0.24833  | 0.040449 |
| 0.56934  | 1.78E-41 | 0.43881  | 2.12E-23 | 0.483962 | 8.60E-29 | 0.30143  | 2.89E-11 | 0.457006 |

|          |          |          |          |          |          |          |          |          |
|----------|----------|----------|----------|----------|----------|----------|----------|----------|
| 0.421086 | 1.70E-21 | 0.239825 | 1.56E-07 | 0.253849 | 2.66E-08 | 0.193174 | 2.63E-05 | 0.146247 |
| 0.472194 | 2.62E-27 | 0.250885 | 3.90E-08 | 0.288846 | 2.00E-10 | 0.134198 | 0.00367  | -0.06369 |
| 0.579584 | 2.95E-43 | 0.597768 | 1.40E-46 | 0.615684 | 4.57E-50 | 0.420349 | 2.03E-21 | 0.604919 |
| 0.395722 | 5.88E-19 | 0.325077 | 5.90E-13 | 0.336935 | 7.34E-14 | 0.254501 | 2.44E-08 | 0.107143 |
| 0.626646 | 2.59E-52 | 0.315522 | 2.97E-12 | 0.462551 | 3.90E-26 | 0.129021 | 0.00523  | 0.087151 |
| -0.57471 | 2.11E-42 | -0.50236 | 3.14E-31 | -0.61886 | 1.04E-50 | -0.26644 | 4.96E-09 | -0.12095 |
| 0.355905 | 2.16E-15 | 0.194897 | 2.22E-05 | 0.325442 | 5.54E-13 | 0.308394 | 9.54E-12 | 0.224393 |
| 0.472798 | 2.20E-27 | 0.484783 | 6.74E-29 | 0.469046 | 6.38E-27 | 0.243516 | 9.89E-08 | 0.373359 |
| -0.58707 | 1.34E-44 | -0.43433 | 6.57E-23 | -0.50081 | 5.10E-31 | -0.31559 | 2.93E-12 | -0.40553 |
| -0.49695 | 1.70E-30 | -0.26675 | 4.76E-09 | -0.33953 | 4.60E-14 | -0.20725 | 6.31E-06 | -0.22137 |
| -0.45173 | 7.32E-25 | -0.52907 | 4.83E-35 | -0.65163 | 8.76E-58 | -0.16678 | 0.00029  | -0.2275  |
| 0.373507 | 6.59E-17 | 0.177389 | 0.00012  | 0.258951 | 1.36E-08 | 0.156793 | 0.00067  | 0.151785 |
| 0.338709 | 5.33E-14 | 0.160581 | 0.00049  | 0.267339 | 4.39E-09 | 0.494334 | 3.79E-30 | 0.361372 |
| -0.23166 | 4.16E-07 | -0.32536 | 5.63E-13 | -0.3587  | 1.26E-15 | -0.28764 | 2.40E-10 | -0.36651 |
| 0.463852 | 2.72E-26 | 0.386901 | 4.00E-18 | 0.384171 | 7.15E-18 | 0.313224 | 4.34E-12 | 0.45123  |
| 0.758403 | 1.76E-88 | 0.660518 | 7.39E-60 | 0.730358 | 5.35E-79 | 0.496878 | 1.73E-30 | 0.549646 |
| 0.315101 | 3.18E-12 | 0.22807  | 6.32E-07 | 0.301876 | 2.70E-11 | 0.198239 | 1.59E-05 | 0.251518 |
| 0.735964 | 8.51E-81 | 0.648588 | 4.32E-57 | 0.626583 | 2.67E-52 | 0.455269 | 2.84E-25 | 0.480736 |
| 0.394802 | 7.20E-19 | 0.300959 | 3.12E-11 | 0.393702 | 9.16E-19 | 0.114074 | 0.01364  | 0.229707 |
| 0.660189 | 8.84E-60 | 0.495561 | 2.60E-30 | 0.780002 | 1.02E-96 | 0.211108 | 4.19E-06 | 0.229699 |
| -0.19197 | 2.96E-05 | -0.124   | 0.0073   | -0.40504 | 7.28E-20 | 0.019991 | 0.66655  | -0.02547 |
| 0.459137 | 9.95E-26 | 0.370112 | 1.31E-16 | 0.46767  | 9.40E-27 | 0.660085 | 9.35E-60 | 0.282961 |
| 0.34626  | 1.34E-14 | 0.32454  | 6.47E-13 | 0.27902  | 8.47E-10 | 0.310849 | 6.40E-12 | 0.50484  |
| 0.7359   | 8.93E-81 | 0.712237 | 1.75E-73 | 0.696613 | 4.64E-69 | 0.483672 | 9.37E-29 | 0.525286 |
| 0.714851 | 2.98E-74 | 0.501536 | 4.07E-31 | 0.716482 | 9.78E-75 | 0.306479 | 1.30E-11 | 0.245928 |
| 0.36562  | 3.23E-16 | 0.429261 | 2.32E-22 | 0.378913 | 2.16E-17 | 0.283447 | 4.45E-10 | 0.287613 |
| 0.367198 | 2.36E-16 | 0.335713 | 9.14E-14 | 0.289951 | 1.69E-10 | 0.230796 | 4.60E-07 | 0.308903 |
| 0.633243 | 1.04E-53 | 0.597004 | 1.96E-46 | 0.524043 | 2.68E-34 | 0.508208 | 4.91E-32 | 0.508969 |
| 0.702263 | 1.26E-70 | 0.66748  | 1.56E-61 | 0.781652 | 2.20E-97 | 0.402503 | 1.29E-19 | 0.441427 |
| 0.627161 | 2.02E-52 | 0.546005 | 1.21E-37 | 0.487535 | 2.97E-29 | 0.397863 | 3.66E-19 | 0.452494 |
| 0.288843 | 2.00E-10 | 0.263914 | 7.00E-09 | 0.332528 | 1.61E-13 | 0.10171  | 0.02797  | -0.07628 |
| 0.549638 | 3.22E-38 | 0.455203 | 2.89E-25 | 0.38522  | 5.72E-18 | 0.364226 | 4.26E-16 | 0.525416 |
| 0.315818 | 2.82E-12 | 0.276216 | 1.27E-09 | 0.35071  | 5.81E-15 | 0.232681 | 3.68E-07 | 0.201393 |
| 0.372308 | 8.41E-17 | 0.15813  | 0.0006   | 0.287918 | 2.30E-10 | 0.191626 | 3.06E-05 | 0.101678 |
| -0.36035 | 9.14E-16 | -0.27763 | 1.04E-09 | -0.36909 | 1.61E-16 | -0.31628 | 2.61E-12 | -0.30324 |
| 0.489377 | 1.71E-29 | 0.218518 | 1.87E-06 | 0.460107 | 7.63E-26 | 0.187559 | 4.53E-05 | 0.128153 |
| 0.697702 | 2.33E-69 | 0.623036 | 1.46E-51 | 0.570446 | 1.15E-41 | 0.375463 | 4.41E-17 | 0.380264 |
| 0.729217 | 1.23E-78 | 0.671178 | 1.93E-62 | 0.605279 | 5.16E-48 | 0.511511 | 1.69E-32 | 0.461151 |
| 0.648749 | 3.97E-57 | 0.549086 | 3.94E-38 | 0.799005 | #####    | 0.31381  | 3.94E-12 | 0.278774 |
| -0.41027 | 2.19E-20 | -0.27383 | 1.78E-09 | -0.36543 | 3.36E-16 | -0.14556 | 0.00161  | -0.13061 |
| 0.548519 | 4.85E-38 | 0.344382 | 1.89E-14 | 0.49582  | 2.40E-30 | 0.317668 | 2.07E-12 | 0.385161 |
| 0.684882 | 6.36E-66 | 0.518109 | 1.95E-33 | 0.635582 | 3.27E-54 | 0.367819 | 2.08E-16 | 0.351586 |
| 0.533661 | 9.85E-36 | 0.192765 | 2.74E-05 | 0.39154  | 1.47E-18 | 0.291073 | 1.43E-10 | 0.252196 |
| 0.441908 | 9.57E-24 | 0.293785 | 9.47E-11 | 0.34295  | 2.46E-14 | 0.372635 | 7.87E-17 | 0.398503 |
| 0.353886 | 3.18E-15 | 0.160923 | 0.00048  | 0.29079  | 1.49E-10 | 0.261553 | 9.62E-09 | 0.133961 |



|          |          |          |          |          |          |          |          |          |
|----------|----------|----------|----------|----------|----------|----------|----------|----------|
| 0.344313 | 1.92E-14 | 0.249885 | 4.43E-08 | 0.437334 | 3.08E-23 | 0.071937 | 0.12056  | -0.04043 |
| 0.424568 | 7.34E-22 | 0.064015 | 0.16725  | 0.197777 | 1.67E-05 | 0.147874 | 0.00135  | 0.116376 |
| 0.697537 | 2.59E-69 | 0.376559 | 3.52E-17 | 0.533709 | 9.69E-36 | 0.381191 | 1.34E-17 | 0.240949 |
| -0.21658 | 2.31E-06 | -0.18961 | 3.73E-05 | -0.45023 | 1.09E-24 | 0.013939 | 0.76385  | 0.016192 |
| 0.719885 | 9.32E-76 | 0.489178 | 1.81E-29 | 0.468476 | 7.49E-27 | 0.474011 | 1.56E-27 | 0.462892 |
| 0.552039 | 1.32E-38 | 0.54539  | 1.52E-37 | 0.455313 | 2.80E-25 | 0.402751 | 1.22E-19 | 0.309996 |
| 0.431088 | 1.48E-22 | 0.265316 | 5.79E-09 | 0.39088  | 1.70E-18 | 0.096903 | 0.03631  | -0.02283 |
| 0.354361 | 2.91E-15 | 0.330291 | 2.39E-13 | 0.441922 | 9.54E-24 | 0.306648 | 1.26E-11 | 0.401157 |
| 0.534312 | 7.85E-36 | 0.528859 | 5.19E-35 | 0.514323 | 6.77E-33 | 0.443261 | 6.75E-24 | 0.499651 |
| 0.65988  | 1.05E-59 | 0.611151 | 3.66E-49 | 0.665661 | 4.32E-61 | 0.364886 | 3.74E-16 | 0.464125 |
| 0.788954 | #####    | 0.775237 | 8.06E-95 | 0.699881 | 5.82E-70 | 0.490262 | 1.31E-29 | 0.608817 |
| 0.539776 | 1.14E-36 | 0.36658  | 2.67E-16 | 0.42405  | 8.33E-22 | 0.20543  | 7.63E-06 | 0.433705 |
| 0.527794 | 7.48E-35 | 0.58401  | 4.79E-44 | 0.605437 | 4.81E-48 | 0.279454 | 7.96E-10 | 0.256487 |
| 0.64593  | 1.72E-56 | 0.6282   | 1.22E-52 | 0.603374 | 1.20E-47 | 0.418355 | 3.27E-21 | 0.502285 |
| 0.728641 | 1.86E-78 | 0.571885 | 6.52E-42 | 0.687063 | 1.71E-66 | 0.427041 | 4.01E-22 | 0.403141 |
| 0.735854 | 9.25E-81 | 0.488978 | 1.93E-29 | 0.5713   | 8.22E-42 | 0.448151 | 1.89E-24 | 0.437877 |
| 0.212421 | 3.64E-06 | 0.15574  | 0.00073  | 0.224658 | 9.36E-07 | 0.05126  | 0.26894  | 0.109971 |
| 0.396726 | 4.71E-19 | 0.450998 | 8.89E-25 | 0.54903  | 4.02E-38 | 0.173944 | 0.00016  | 0.196673 |
| 0.470346 | 4.42E-27 | 0.281782 | 5.68E-10 | 0.258793 | 1.39E-08 | 0.301114 | 3.04E-11 | 0.477226 |
| 0.539055 | 1.48E-36 | 0.485151 | 6.05E-29 | 0.391733 | 1.41E-18 | 0.490305 | 1.29E-29 | 0.514881 |
| -0.46102 | 5.94E-26 | -0.54265 | 4.08E-37 | -0.57234 | 5.45E-42 | -0.37868 | 2.27E-17 | -0.47993 |
| 0.42919  | 2.37E-22 | 0.385212 | 5.73E-18 | 0.356263 | 2.02E-15 | 0.319595 | 1.50E-12 | 0.441851 |
| 0.384478 | 6.70E-18 | 0.301065 | 3.07E-11 | 0.26969  | 3.17E-09 | 0.223599 | 1.06E-06 | 0.149017 |
| 0.60325  | 1.27E-47 | 0.643882 | 4.94E-56 | 0.727272 | 5.00E-78 | 0.341915 | 2.98E-14 | 0.406671 |
| 0.78279  | 7.57E-98 | 0.628442 | 1.09E-52 | 0.675355 | 1.76E-63 | 0.443332 | 6.63E-24 | 0.37015  |
| 0.377446 | 2.93E-17 | 0.311197 | 6.05E-12 | 0.305955 | 1.41E-11 | 0.29757  | 5.29E-11 | 0.374835 |
| 0.548307 | 5.24E-38 | 0.303292 | 2.16E-11 | 0.4522   | 6.45E-25 | 0.374968 | 4.88E-17 | 0.348018 |
| 0.455871 | 2.41E-25 | 0.531233 | 2.29E-35 | 0.565796 | 7.13E-41 | 0.345661 | 1.49E-14 | 0.340185 |
| -0.47617 | 8.37E-28 | -0.45029 | 1.07E-24 | -0.46527 | 1.84E-26 | -0.34436 | 1.90E-14 | -0.40877 |
| 0.467912 | 8.78E-27 | 0.400009 | 2.27E-19 | 0.334231 | 1.19E-13 | 0.243656 | 9.72E-08 | 0.146945 |
| -0.32086 | 1.21E-12 | -0.28196 | 5.53E-10 | -0.32839 | 3.33E-13 | -0.17747 | 0.00012  | -0.30506 |
| 0.626492 | 2.79E-52 | 0.564153 | 1.35E-40 | 0.574908 | 1.95E-42 | 0.451846 | 7.09E-25 | 0.44695  |
| 0.608662 | 1.13E-48 | 0.578583 | 4.43E-43 | 0.654196 | 2.24E-58 | 0.331519 | 1.92E-13 | 0.384297 |
| 0.402744 | 1.22E-19 | 0.214074 | 3.04E-06 | 0.335342 | 9.77E-14 | 0.216    | 2.46E-06 | 0.081719 |
| 0.494437 | 3.67E-30 | 0.225702 | 8.30E-07 | 0.317621 | 2.09E-12 | 0.228817 | 5.79E-07 | 0.359633 |
| 0.29987  | 3.70E-11 | 0.267762 | 4.14E-09 | 0.2757   | 1.36E-09 | 0.231489 | 4.24E-07 | 0.366547 |
| 0.398353 | 3.28E-19 | 0.187722 | 4.46E-05 | 0.414267 | 8.61E-21 | 0.074988 | 0.10557  | -0.0543  |
| 0.354322 | 2.93E-15 | 0.483667 | 9.38E-29 | 0.458435 | 1.20E-25 | 0.286086 | 3.02E-10 | 0.38735  |
| 0.809857 | #####    | 0.800703 | #####    | 0.764035 | 1.53E-90 | 0.44465  | 4.71E-24 | 0.532433 |
| 0.329815 | 2.59E-13 | 0.21945  | 1.68E-06 | 0.333635 | 1.32E-13 | 0.205226 | 7.79E-06 | 0.128725 |
| 0.656047 | 8.32E-59 | 0.657401 | 4.02E-59 | 0.669507 | 4.99E-62 | 0.35696  | 1.76E-15 | 0.33683  |
| -0.40565 | 6.33E-20 | -0.27716 | 1.11E-09 | -0.41716 | 4.35E-21 | -0.2446  | 8.64E-08 | -0.22454 |
| -0.28128 | 6.11E-10 | -0.28436 | 3.89E-10 | -0.28701 | 2.63E-10 | -0.24248 | 1.12E-07 | -0.42013 |
| 0.39868  | 3.05E-19 | 0.347779 | 1.01E-14 | 0.383666 | 7.96E-18 | 0.105127 | 0.02308  | 0.109817 |
| 0.460451 | 6.95E-26 | 0.4667   | 1.23E-26 | 0.526298 | 1.25E-34 | 0.187497 | 4.56E-05 | 0.189124 |

|          |          |          |          |          |          |          |          |          |
|----------|----------|----------|----------|----------|----------|----------|----------|----------|
| 0.497407 | 1.47E-30 | 0.227641 | 6.64E-07 | 0.326419 | 4.68E-13 | 0.177757 | 0.00011  | -0.05799 |
| 0.221619 | 1.32E-06 | 0.025409 | 0.58389  | 0.347566 | 1.05E-14 | -0.03387 | 0.46525  | -0.155   |
| 0.666999 | 2.05E-61 | 0.578468 | 4.64E-43 | 0.608358 | 1.30E-48 | 0.482653 | 1.27E-28 | 0.477065 |
| 0.706165 | 9.94E-72 | 0.555632 | 3.46E-39 | 0.64017  | 3.27E-55 | 0.422965 | 1.08E-21 | 0.544616 |
| 0.437953 | 2.63E-23 | 0.32879  | 3.10E-13 | 0.327674 | 3.77E-13 | 0.185061 | 5.74E-05 | 0.182748 |
| 0.713437 | 7.79E-74 | 0.661793 | 3.67E-60 | 0.683954 | 1.11E-65 | 0.345826 | 1.45E-14 | 0.277704 |
| 0.514388 | 6.63E-33 | 0.395135 | 6.69E-19 | 0.44232  | 8.61E-24 | 0.439838 | 1.63E-23 | 0.380533 |
| 0.339141 | 4.93E-14 | 0.282003 | 5.50E-10 | 0.280462 | 6.88E-10 | 0.165628 | 0.00032  | 0.064629 |
| 0.622697 | 1.71E-51 | 0.478128 | 4.75E-28 | 0.530199 | 3.27E-35 | 0.393743 | 9.08E-19 | 0.573853 |
| -0.33625 | 8.30E-14 | -0.46107 | 5.87E-26 | -0.67013 | 3.50E-62 | -0.12653 | 0.00618  | -0.21225 |
| 0.428691 | 2.68E-22 | 0.166605 | 0.0003   | 0.291288 | 1.38E-10 | 0.088374 | 0.05634  | -0.10173 |
| 0.491621 | 8.66E-30 | 0.632753 | 1.32E-53 | 0.634151 | 6.64E-54 | 0.260478 | 1.11E-08 | 0.248646 |
| 0.44317  | 6.91E-24 | 0.397496 | 3.97E-19 | 0.436754 | 3.57E-23 | 0.158285 | 0.0006   | 0.136219 |
| 0.589168 | 5.56E-45 | 0.579106 | 3.58E-43 | 0.667624 | 1.44E-61 | 0.449515 | 1.32E-24 | 0.505972 |
| 0.399977 | 2.28E-19 | 0.294801 | 8.11E-11 | 0.454481 | 3.51E-25 | 0.101513 | 0.02827  | -0.01339 |
| 0.630287 | 4.44E-53 | 0.556862 | 2.18E-39 | 0.615825 | 4.28E-50 | 0.376139 | 3.84E-17 | 0.306906 |
| 0.543606 | 2.90E-37 | 0.191982 | 2.96E-05 | 0.344386 | 1.89E-14 | 0.158592 | 0.00058  | 0.081197 |
| -0.475   | 1.17E-27 | -0.34597 | 1.41E-14 | -0.47659 | 7.41E-28 | -0.2385  | 1.83E-07 | -0.13745 |
| 0.476224 | 8.25E-28 | 0.319144 | 1.62E-12 | 0.385732 | 5.13E-18 | 0.125015 | 0.00683  | 0.075309 |
| -0.37377 | 6.24E-17 | -0.26581 | 5.41E-09 | -0.41293 | 1.18E-20 | -0.17318 | 0.00017  | -0.13405 |
| 0.595442 | 3.84E-46 | 0.394295 | 8.04E-19 | 0.489311 | 1.74E-29 | 0.408996 | 2.94E-20 | 0.358807 |
| 0.82049  | #####    | 0.772333 | 1.09E-93 | 0.818046 | #####    | 0.446578 | 2.85E-24 | 0.541951 |
| -0.39642 | 5.03E-19 | -0.29513 | 7.71E-11 | -0.41122 | 1.75E-20 | -0.20022 | 1.30E-05 | -0.20156 |
| 0.458181 | 1.29E-25 | 0.213972 | 3.08E-06 | 0.273644 | 1.82E-09 | 0.281336 | 6.06E-10 | 0.157299 |
| 0.356233 | 2.03E-15 | 0.303169 | 2.20E-11 | 0.277783 | 1.01E-09 | 0.288569 | 2.08E-10 | 0.243157 |
| 0.468865 | 6.72E-27 | 0.491813 | 8.17E-30 | 0.566145 | 6.22E-41 | 0.218139 | 1.95E-06 | 0.281792 |
| 0.511175 | 1.89E-32 | 0.374129 | 5.80E-17 | 0.283807 | 4.22E-10 | 0.384819 | 6.23E-18 | 0.214857 |
| 0.417743 | 3.79E-21 | 0.376728 | 3.40E-17 | 0.424086 | 8.25E-22 | 0.129996 | 0.0049   | 0.310161 |
| 0.764175 | 1.36E-90 | 0.710242 | 6.68E-73 | 0.766091 | 2.61E-91 | 0.387635 | 3.41E-18 | 0.333177 |
| -0.24294 | 1.06E-07 | -0.04117 | 0.37473  | -0.38661 | 4.25E-18 | 0.075813 | 0.10178  | 0.226689 |
| 0.436938 | 3.41E-23 | 0.152663 | 0.00093  | 0.314943 | 3.27E-12 | 0.304545 | 1.77E-11 | 0.062499 |
| 0.556786 | 2.24E-39 | 0.519153 | 1.38E-33 | 0.526772 | 1.06E-34 | 0.221525 | 1.33E-06 | 0.194743 |
| 0.426488 | 4.60E-22 | 0.392977 | 1.07E-18 | 0.495137 | 2.96E-30 | 0.071266 | 0.12407  | 0.061032 |
| 0.314367 | 3.59E-12 | 0.471442 | 3.24E-27 | 0.271812 | 2.36E-09 | 0.286971 | 2.65E-10 | 0.427773 |
| 0.589962 | 3.98E-45 | 0.673047 | 6.64E-63 | 0.566225 | 6.03E-41 | 0.407498 | 4.15E-20 | 0.474404 |
| 0.114661 | 0.01316  | 0.455636 | 2.57E-25 | 0.268404 | 3.79E-09 | 0.249003 | 4.96E-08 | 0.457006 |
| 0.630574 | 3.86E-53 | 0.717172 | 6.09E-75 | 0.632337 | 1.63E-53 | 0.414676 | 7.82E-21 | 0.317646 |
| 0.263095 | 7.82E-09 | 0.503295 | 2.34E-31 | 0.434282 | 6.66E-23 | 0.208424 | 5.57E-06 | 0.268745 |
| 0.428595 | 2.74E-22 | 0.640953 | 2.20E-55 | 0.602411 | 1.84E-47 | 0.255454 | 2.16E-08 | 0.253407 |
| 0.439184 | 1.92E-23 | 0.601752 | 2.46E-47 | 0.415686 | 6.16E-21 | 0.375503 | 4.38E-17 | 0.513288 |
| 0.62804  | 1.32E-52 | 0.799911 | #####    | 0.684408 | 8.46E-66 | 0.390699 | 1.76E-18 | 0.50554  |
| 0.228308 | 6.15E-07 | 0.417286 | 4.22E-21 | 0.369021 | 1.64E-16 | 0.220541 | 1.49E-06 | 0.36479  |
| -0.34394 | 2.05E-14 | -0.5673  | 3.96E-41 | -0.41867 | 3.04E-21 | -0.34628 | 1.33E-14 | -0.50907 |
| -0.07727 | 0.09534  | -0.41871 | 3.01E-21 | -0.22703 | 7.12E-07 | -0.15617 | 0.00071  | -0.20377 |
| 0.265243 | 5.84E-09 | 0.400883 | 1.86E-19 | 0.370379 | 1.24E-16 | 0.266796 | 4.73E-09 | 0.332355 |

|          |          |          |          |          |          |          |          |          |
|----------|----------|----------|----------|----------|----------|----------|----------|----------|
| 0.227917 | 6.43E-07 | 0.430949 | 1.53E-22 | 0.294844 | 8.05E-11 | 0.318723 | 1.74E-12 | 0.456677 |
| -0.3423  | 2.78E-14 | -0.41291 | 1.18E-20 | -0.32373 | 7.44E-13 | -0.37228 | 8.47E-17 | -0.29396 |
| 0.522041 | 5.25E-34 | 0.664478 | 8.35E-61 | 0.52671  | 1.08E-34 | 0.34493  | 1.71E-14 | 0.376689 |
| 0.478396 | 4.40E-28 | 0.538348 | 1.90E-36 | 0.55888  | 1.02E-39 | 0.200217 | 1.30E-05 | 0.124741 |
| 0.215688 | 2.55E-06 | 0.390955 | 1.67E-18 | 0.388269 | 2.98E-18 | 0.168482 | 0.00025  | 0.062379 |
| -0.17096 | 0.00021  | -0.36562 | 3.23E-16 | -0.23963 | 1.60E-07 | -0.16194 | 0.00044  | -0.19877 |
| 0.492377 | 6.89E-30 | 0.578292 | 4.99E-43 | 0.428959 | 2.51E-22 | 0.473057 | 2.05E-27 | 0.611264 |
| 0.269933 | 3.07E-09 | 0.449829 | 1.21E-24 | 0.427125 | 3.93E-22 | 0.189798 | 3.66E-05 | 0.33515  |
| -0.24475 | 8.48E-08 | -0.67601 | 1.20E-63 | -0.56499 | 9.75E-41 | -0.37293 | 7.41E-17 | -0.58396 |
| 0.498485 | 1.05E-30 | 0.709636 | 1.00E-72 | 0.642333 | 1.09E-55 | 0.413602 | 1.01E-20 | 0.617962 |
| 0.735431 | 1.27E-80 | 0.882452 | #####    | 0.807696 | #####    | 0.571968 | 6.31E-42 | 0.711539 |
| -0.23363 | 3.29E-07 | -0.42013 | 2.14E-21 | -0.31117 | 6.08E-12 | -0.26074 | 1.07E-08 | -0.43649 |
| 0.459589 | 8.79E-26 | 0.540108 | 1.01E-36 | 0.344098 | 1.99E-14 | 0.40162  | 1.58E-19 | 0.507668 |
| 0.429333 | 2.28E-22 | 0.682501 | 2.65E-65 | 0.611909 | 2.59E-49 | 0.26839  | 3.80E-09 | 0.411322 |
| -0.37008 | 1.32E-16 | -0.5017  | 3.86E-31 | -0.4796  | 3.10E-28 | -0.32209 | 9.84E-13 | -0.1944  |
| 0.633343 | 9.91E-54 | 0.643942 | 4.79E-56 | 0.574843 | 2.00E-42 | 0.456205 | 2.20E-25 | 0.491839 |
| -0.35715 | 1.70E-15 | -0.51802 | 2.01E-33 | -0.41677 | 4.77E-21 | -0.34728 | 1.11E-14 | -0.22945 |
| 0.359301 | 1.12E-15 | 0.519372 | 1.28E-33 | 0.477183 | 6.25E-28 | 0.326465 | 4.65E-13 | 0.535652 |
| -0.44481 | 4.51E-24 | -0.6201  | 5.83E-51 | -0.54627 | 1.10E-37 | -0.4138  | 9.61E-21 | -0.60556 |
| 0.611375 | 3.31E-49 | 0.743553 | 2.64E-83 | 0.620334 | 5.22E-51 | 0.414927 | 7.37E-21 | 0.611104 |
| 0.59922  | 7.47E-47 | 0.88782  | #####    | 0.779226 | 2.10E-96 | 0.47062  | 4.09E-27 | 0.660127 |
| 0.354521 | 2.82E-15 | 0.481056 | 2.02E-28 | 0.438168 | 2.49E-23 | 0.249639 | 4.57E-08 | 0.246343 |
| 0.641253 | 1.89E-55 | 0.814056 | #####    | 0.758219 | 2.05E-88 | 0.467    | 1.13E-26 | 0.591159 |
| 0.295197 | 7.63E-11 | 0.40825  | 3.49E-20 | 0.348059 | 9.56E-15 | 0.242331 | 1.15E-07 | 0.1068   |
| 0.536805 | 3.27E-36 | 0.67715  | 6.19E-64 | 0.484771 | 6.77E-29 | 0.348193 | 9.33E-15 | 0.499741 |
| 0.636314 | 2.27E-54 | 0.704871 | 2.32E-71 | 0.767819 | 5.83E-92 | 0.366825 | 2.54E-16 | 0.484423 |
| 0.482749 | 1.23E-28 | 0.597742 | 1.42E-46 | 0.415605 | 6.28E-21 | 0.551152 | 1.84E-38 | 0.411712 |
| 0.568464 | 2.52E-41 | 0.716825 | 7.73E-75 | 0.469584 | 5.48E-27 | 0.398961 | 2.86E-19 | 0.5251   |
| 0.645596 | 2.04E-56 | 0.754611 | 4.01E-87 | 0.725946 | 1.29E-77 | 0.445169 | 4.11E-24 | 0.467837 |
| 0.707388 | 4.44E-72 | 0.712131 | 1.88E-73 | 0.702679 | 9.63E-71 | 0.422357 | 1.25E-21 | 0.45993  |
| -0.18985 | 3.64E-05 | -0.50351 | 2.19E-31 | -0.26208 | 8.96E-09 | -0.23914 | 1.70E-07 | -0.39178 |
| 0.361527 | 7.25E-16 | 0.360534 | 8.81E-16 | 0.251349 | 3.68E-08 | 0.192051 | 2.94E-05 | 0.305437 |
| 0.425134 | 6.40E-22 | 0.547291 | 7.60E-38 | 0.469474 | 5.66E-27 | 0.349171 | 7.76E-15 | 0.609781 |
| 0.692901 | 4.74E-68 | 0.774944 | 1.05E-94 | 0.681814 | 3.98E-65 | 0.463778 | 2.78E-26 | 0.607679 |
| 0.497957 | 1.24E-30 | 0.569432 | 1.72E-41 | 0.369553 | 1.47E-16 | 0.462908 | 3.53E-26 | 0.515323 |
| 0.424951 | 6.69E-22 | 0.748536 | 5.32E-85 | 0.599142 | 7.72E-47 | 0.405516 | 6.53E-20 | 0.509508 |
| 0.242725 | 1.09E-07 | 0.425314 | 6.12E-22 | 0.378807 | 2.21E-17 | 0.10443  | 0.02402  | 0.205561 |
| 0.620825 | 4.14E-51 | 0.839505 | #####    | 0.605165 | 5.42E-48 | 0.518109 | 1.95E-33 | 0.70771  |
| 0.674791 | 2.43E-63 | 0.751774 | 4.00E-86 | 0.713909 | 5.66E-74 | 0.396608 | 4.83E-19 | 0.502488 |
| 0.635604 | 3.23E-54 | 0.670566 | 2.74E-62 | 0.519175 | 1.37E-33 | 0.37143  | 1.01E-16 | 0.411326 |
| 0.609901 | 6.46E-49 | 0.723263 | 8.71E-77 | 0.687369 | 1.42E-66 | 0.508884 | 3.95E-32 | 0.522424 |
| 0.157143 | 0.00065  | 0.408776 | 3.09E-20 | 0.355458 | 2.35E-15 | 0.215525 | 2.60E-06 | 0.170335 |
| 0.621393 | 3.17E-51 | 0.719754 | 1.02E-75 | 0.639595 | 4.37E-55 | 0.498763 | 9.67E-31 | 0.629479 |
| -0.19305 | 2.67E-05 | -0.41784 | 3.70E-21 | -0.28802 | 2.26E-10 | -0.13179 | 0.00433  | -0.25829 |
| 0.334356 | 1.16E-13 | 0.510266 | 2.53E-32 | 0.461754 | 4.86E-26 | 0.248806 | 5.09E-08 | 0.178484 |

|          |          |          |          |          |          |          |          |          |
|----------|----------|----------|----------|----------|----------|----------|----------|----------|
| 0.748937 | 3.87E-85 | 0.86113  | #####    | 0.801346 | #####    | 0.513695 | 8.32E-33 | 0.625853 |
| 0.201235 | 1.18E-05 | 0.468846 | 6.75E-27 | 0.342403 | 2.72E-14 | 0.232033 | 3.97E-07 | 0.320089 |
| 0.729285 | 1.17E-78 | 0.743631 | 2.48E-83 | 0.68944  | 4.00E-67 | 0.440462 | 1.39E-23 | 0.580718 |
| 0.701325 | 2.31E-70 | 0.820563 | #####    | 0.639139 | 5.51E-55 | 0.470021 | 4.85E-27 | 0.605001 |
| 0.702493 | 1.09E-70 | 0.797798 | #####    | 0.617206 | 2.26E-50 | 0.557293 | 1.85E-39 | 0.612343 |
| 0.604988 | 5.87E-48 | 0.609486 | 7.80E-49 | 0.512397 | 1.27E-32 | 0.359473 | 1.08E-15 | 0.523515 |
| 0.659138 | 1.57E-59 | 0.698683 | 1.25E-69 | 0.584607 | 3.74E-44 | 0.534115 | 8.41E-36 | 0.694483 |
| 0.291795 | 1.28E-10 | 0.532997 | 1.24E-35 | 0.482169 | 1.46E-28 | 0.240489 | 1.44E-07 | 0.511738 |
| -0.49054 | 1.20E-29 | -0.59894 | 8.43E-47 | -0.44889 | 1.55E-24 | -0.45888 | 1.07E-25 | -0.59446 |
| -0.3755  | 4.38E-17 | -0.46971 | 5.29E-27 | -0.35789 | 1.47E-15 | -0.32923 | 2.87E-13 | -0.54847 |
| 0.477304 | 6.04E-28 | 0.739085 | 8.11E-82 | 0.528375 | 6.13E-35 | 0.451451 | 7.88E-25 | 0.695604 |
| 0.52762  | 7.94E-35 | 0.734993 | 1.76E-80 | 0.648366 | 4.85E-57 | 0.38877  | 2.68E-18 | 0.478171 |
| 0.247266 | 6.18E-08 | 0.457339 | 1.62E-25 | 0.362367 | 6.15E-16 | 0.124081 | 0.00726  | 0.055409 |
| 0.490695 | 1.15E-29 | 0.651903 | 7.57E-58 | 0.654054 | 2.42E-58 | 0.313722 | 4.00E-12 | 0.430588 |
| 0.624414 | 7.55E-52 | 0.866175 | #####    | 0.699534 | 7.26E-70 | 0.467532 | 9.77E-27 | 0.615443 |
| 0.659941 | 1.01E-59 | 0.811401 | #####    | 0.775419 | 6.83E-95 | 0.498825 | 9.48E-31 | 0.68443  |
| 0.369074 | 1.62E-16 | 0.54297  | 3.64E-37 | 0.52408  | 2.64E-34 | 0.239715 | 1.58E-07 | 0.316789 |
| 0.156277 | 0.0007   | 0.385879 | 4.97E-18 | 0.286201 | 2.97E-10 | 0.233291 | 3.42E-07 | 0.300285 |
| 0.592276 | 1.49E-45 | 0.714437 | 3.95E-74 | 0.722299 | 1.72E-76 | 0.403523 | 1.03E-19 | 0.465741 |
| 0.501263 | 4.43E-31 | 0.800806 | #####    | 0.586608 | 1.63E-44 | 0.440257 | 1.46E-23 | 0.543169 |
| 0.386597 | 4.26E-18 | 0.619189 | 8.94E-51 | 0.542967 | 3.65E-37 | 0.246461 | 6.84E-08 | 0.32136  |
| 0.660255 | 8.53E-60 | 0.824792 | #####    | 0.755595 | 1.79E-87 | 0.518914 | 1.49E-33 | 0.629956 |
| 0.53972  | 1.17E-36 | 0.753262 | 1.20E-86 | 0.542796 | 3.88E-37 | 0.35098  | 5.52E-15 | 0.564283 |
| -0.39177 | 1.40E-18 | -0.54404 | 2.48E-37 | -0.56585 | 6.98E-41 | -0.38233 | 1.06E-17 | -0.58361 |
| 0.393215 | 1.02E-18 | 0.633654 | 8.50E-54 | 0.400276 | 2.13E-19 | 0.396761 | 4.67E-19 | 0.568714 |
| -0.32302 | 8.40E-13 | -0.44558 | 3.70E-24 | -0.40512 | 7.14E-20 | -0.26811 | 3.94E-09 | -0.4465  |
| 0.389136 | 2.47E-18 | 0.577151 | 7.92E-43 | 0.402888 | 1.19E-19 | 0.41632  | 5.31E-21 | 0.59138  |
| 0.412985 | 1.16E-20 | 0.556955 | 2.11E-39 | 0.551977 | 1.36E-38 | 0.324239 | 6.82E-13 | 0.485091 |
| -0.12366 | 0.00747  | -0.41714 | 4.37E-21 | -0.31591 | 2.78E-12 | -0.25217 | 3.31E-08 | -0.17453 |
| 0.311912 | 5.38E-12 | 0.444876 | 4.44E-24 | 0.354664 | 2.74E-15 | 0.299043 | 4.21E-11 | 0.444085 |
| 0.658226 | 2.57E-59 | 0.758327 | 1.88E-88 | 0.527638 | 7.89E-35 | 0.573017 | 4.16E-42 | 0.681065 |
| -0.29515 | 7.69E-11 | -0.50801 | 5.22E-32 | -0.39009 | 2.01E-18 | -0.26656 | 4.88E-09 | -0.12501 |
| 0.518959 | 1.47E-33 | 0.664666 | 7.52E-61 | 0.514193 | 7.07E-33 | 0.427206 | 3.86E-22 | 0.64701  |
| 0.588548 | 7.21E-45 | 0.68221  | 3.15E-65 | 0.600146 | 4.98E-47 | 0.3262   | 4.87E-13 | 0.441377 |
| 0.469552 | 5.53E-27 | 0.545603 | 1.41E-37 | 0.317087 | 2.29E-12 | 0.370024 | 1.34E-16 | 0.436801 |
| 0.600438 | 4.38E-47 | 0.793742 | #####    | 0.697175 | 3.25E-69 | 0.480438 | 2.43E-28 | 0.570446 |
| 0.625905 | 3.70E-52 | 0.757862 | 2.76E-88 | 0.625502 | 4.49E-52 | 0.413726 | 9.78E-21 | 0.592261 |
| 0.626739 | 2.48E-52 | 0.820553 | #####    | 0.638414 | 7.93E-55 | 0.489091 | 1.86E-29 | 0.649672 |
| 0.418157 | 3.43E-21 | 0.563378 | 1.82E-40 | 0.466359 | 1.36E-26 | 0.407788 | 3.88E-20 | 0.563029 |
| 0.51655  | 3.26E-33 | 0.678874 | 2.26E-64 | 0.644837 | 3.02E-56 | 0.297595 | 5.27E-11 | 0.424081 |
| 0.448175 | 1.87E-24 | 0.793417 | #####    | 0.715259 | 2.26E-74 | 0.364459 | 4.07E-16 | 0.504905 |
| -0.21918 | 1.74E-06 | -0.43537 | 5.06E-23 | -0.28792 | 2.30E-10 | -0.26253 | 8.44E-09 | -0.43887 |
| 0.461334 | 5.45E-26 | 0.632414 | 1.57E-53 | 0.474449 | 1.37E-27 | 0.429902 | 1.98E-22 | 0.561546 |
| 0.501868 | 3.67E-31 | 0.840279 | #####    | 0.73628  | 6.72E-81 | 0.375479 | 4.40E-17 | 0.523497 |
| 0.437374 | 3.05E-23 | 0.53754  | 2.52E-36 | 0.528194 | 6.52E-35 | 0.148886 | 0.00125  | 0.234182 |

|          |          |          |          |          |          |          |          |          |
|----------|----------|----------|----------|----------|----------|----------|----------|----------|
| 0.621158 | 3.54E-51 | 0.720745 | 5.11E-76 | 0.620822 | 4.15E-51 | 0.424878 | 6.81E-22 | 0.427124 |
| 0.585289 | 2.82E-44 | 0.658111 | 2.74E-59 | 0.514863 | 5.68E-33 | 0.380404 | 1.58E-17 | 0.467377 |
| 0.286681 | 2.76E-10 | 0.469473 | 5.66E-27 | 0.407891 | 3.79E-20 | 0.284686 | 3.71E-10 | 0.311459 |
| 0.611682 | 2.87E-49 | 0.794647 | #####    | 0.694197 | 2.11E-68 | 0.477267 | 6.10E-28 | 0.646989 |
| 0.181684 | 7.86E-05 | 0.461012 | 5.96E-26 | 0.322642 | 8.96E-13 | 0.288945 | 1.97E-10 | 0.428597 |
| 0.503582 | 2.14E-31 | 0.655122 | 1.37E-58 | 0.637575 | 1.21E-54 | 0.273705 | 1.81E-09 | 0.499178 |
| 0.584366 | 4.13E-44 | 0.854957 | #####    | 0.740086 | 3.79E-82 | 0.523061 | 3.73E-34 | 0.592583 |
| 0.375693 | 4.21E-17 | 0.685382 | 4.71E-66 | 0.662566 | 2.40E-60 | 0.350285 | 6.30E-15 | 0.489019 |
| 0.518315 | 1.82E-33 | 0.755235 | 2.41E-87 | 0.70248  | 1.10E-70 | 0.443463 | 6.41E-24 | 0.648161 |
| 0.500378 | 5.84E-31 | 0.587856 | 9.65E-45 | 0.504217 | 1.75E-31 | 0.371266 | 1.04E-16 | 0.452003 |
| 0.337633 | 6.48E-14 | 0.506335 | 8.93E-32 | 0.362931 | 5.50E-16 | 0.143107 | 0.00193  | 0.148711 |
| -0.4587  | 1.12E-25 | -0.67396 | 3.93E-63 | -0.52634 | 1.23E-34 | -0.36571 | 3.18E-16 | -0.40348 |
| 0.58145  | 1.37E-43 | 0.755897 | 1.40E-87 | 0.702705 | 9.47E-71 | 0.367371 | 2.28E-16 | 0.448828 |
| 0.425766 | 5.48E-22 | 0.806208 | #####    | 0.717987 | 3.47E-75 | 0.388057 | 3.12E-18 | 0.522436 |
| 0.187333 | 4.63E-05 | 0.597607 | 1.51E-46 | 0.318545 | 1.79E-12 | 0.38855  | 2.80E-18 | 0.522905 |
| 0.578192 | 5.19E-43 | 0.743246 | 3.35E-83 | 0.500412 | 5.78E-31 | 0.328452 | 3.29E-13 | 0.384306 |
| 0.449152 | 1.45E-24 | 0.63551  | 3.39E-54 | 0.495863 | 2.37E-30 | 0.43825  | 2.44E-23 | 0.489184 |
| 0.693544 | 3.17E-68 | 0.834343 | #####    | 0.761198 | 1.70E-89 | 0.496977 | 1.68E-30 | 0.653348 |
| 0.174991 | 0.00014  | 0.520828 | 7.88E-34 | 0.14596  | 0.00156  | 0.392795 | 1.12E-18 | 0.5211   |
| -0.29347 | 9.94E-11 | -0.63192 | 1.99E-53 | -0.59142 | 2.14E-45 | -0.32801 | 3.55E-13 | -0.38606 |
| 0.67093  | 2.23E-62 | 0.891351 | #####    | 0.782869 | 7.03E-98 | 0.522805 | 4.06E-34 | 0.640163 |
| 0.196492 | 1.90E-05 | 0.336923 | 7.36E-14 | 0.29887  | 4.32E-11 | 0.005841 | 0.89983  | 0.024979 |
| 0.506776 | 7.75E-32 | 0.652667 | 5.05E-58 | 0.529951 | 3.57E-35 | 0.305611 | 1.49E-11 | 0.235003 |
| 0.34663  | 1.25E-14 | 0.44529  | 3.99E-24 | 0.390783 | 1.73E-18 | 0.088375 | 0.05634  | 0.269343 |
| 0.205191 | 7.82E-06 | 0.464085 | 2.55E-26 | 0.156236 | 0.0007   | 0.18429  | 6.17E-05 | 0.294534 |
| 0.653071 | 4.08E-58 | 0.795159 | #####    | 0.508856 | 3.98E-32 | 0.604523 | 7.22E-48 | 0.687698 |
| -0.27965 | 7.74E-10 | -0.5063  | 9.02E-32 | -0.36673 | 2.59E-16 | -0.28886 | 2.00E-10 | -0.30283 |
| 0.478923 | 3.77E-28 | 0.660921 | 5.93E-60 | 0.450213 | 1.09E-24 | 0.450377 | 1.05E-24 | 0.478337 |
| 0.612834 | 1.70E-49 | 0.825038 | #####    | 0.744829 | 9.79E-84 | 0.428811 | 2.60E-22 | 0.531413 |
| 0.444612 | 4.76E-24 | 0.784378 | 1.69E-98 | 0.51422  | 7.01E-33 | 0.4736   | 1.75E-27 | 0.582579 |
| -0.5014  | 4.24E-31 | -0.66368 | 1.30E-60 | -0.50511 | 1.32E-31 | -0.39756 | 3.91E-19 | -0.48523 |
| 0.571868 | 6.57E-42 | 0.797009 | #####    | 0.705822 | 1.24E-71 | 0.507387 | 6.38E-32 | 0.529594 |
| -0.16831 | 0.00026  | -0.42843 | 2.85E-22 | -0.40527 | 6.91E-20 | -0.16047 | 0.0005   | -0.26826 |
| 0.61714  | 2.33E-50 | 0.722008 | 2.11E-76 | 0.701288 | 2.36E-70 | 0.398852 | 2.93E-19 | 0.537833 |
| 0.549631 | 3.23E-38 | 0.760187 | 3.97E-89 | 0.740029 | 3.96E-82 | 0.383086 | 9.00E-18 | 0.512425 |
| 0.475158 | 1.12E-27 | 0.542571 | 4.20E-37 | 0.536747 | 3.34E-36 | 0.265728 | 5.47E-09 | 0.437183 |
| 0.543299 | 3.23E-37 | 0.731618 | 2.13E-79 | 0.706892 | 6.16E-72 | 0.371622 | 9.67E-17 | 0.493583 |
| 0.253382 | 2.83E-08 | 0.424243 | 7.95E-22 | 0.283238 | 4.59E-10 | 0.16445  | 0.00036  | 0.421186 |
| 0.192015 | 2.95E-05 | 0.376616 | 3.48E-17 | 0.223199 | 1.10E-06 | 0.331097 | 2.07E-13 | 0.423774 |
| -0.18617 | 5.17E-05 | -0.42183 | 1.43E-21 | -0.24813 | 5.54E-08 | -0.16533 | 0.00033  | -0.26449 |
| 0.581241 | 1.50E-43 | 0.659032 | 1.66E-59 | 0.680996 | 6.47E-65 | 0.360098 | 9.59E-16 | 0.382244 |
| 0.434884 | 5.72E-23 | 0.62974  | 5.79E-53 | 0.350884 | 5.62E-15 | 0.355878 | 2.17E-15 | 0.606013 |
| -0.48301 | 1.14E-28 | -0.57412 | 2.67E-42 | -0.61642 | 3.25E-50 | -0.23163 | 4.17E-07 | -0.37697 |
| 0.382861 | 9.43E-18 | 0.419015 | 2.80E-21 | 0.406814 | 4.85E-20 | 0.28802  | 2.26E-10 | 0.064731 |
| 0.299743 | 3.77E-11 | 0.557754 | 1.56E-39 | 0.352809 | 3.91E-15 | 0.273284 | 1.92E-09 | 0.368409 |

|          |          |          |          |          |          |          |          |          |
|----------|----------|----------|----------|----------|----------|----------|----------|----------|
| -0.08397 | 0.06984  | 0.139003 | 0.00261  | 0.028266 | 0.54232  | 0.015722 | 0.7347   | 0.111485 |
| 0.535469 | 5.23E-36 | 0.486225 | 4.39E-29 | 0.381309 | 1.31E-17 | 0.189207 | 3.87E-05 | 0.211712 |
| 0.437101 | 3.27E-23 | 0.592305 | 1.47E-45 | 0.441718 | 1.01E-23 | 0.422673 | 1.16E-21 | 0.491142 |
| 0.677778 | 4.29E-64 | 0.69122  | 1.34E-67 | 0.662323 | 2.75E-60 | 0.363465 | 4.95E-16 | 0.495154 |
| 0.252246 | 3.27E-08 | 0.60137  | 2.91E-47 | 0.552957 | 9.42E-39 | 0.208239 | 5.68E-06 | 0.331206 |
| 0.573104 | 4.02E-42 | 0.689421 | 4.05E-67 | 0.513859 | 7.88E-33 | 0.376137 | 3.84E-17 | 0.393673 |
| 0.251975 | 3.39E-08 | 0.470629 | 4.08E-27 | 0.262086 | 8.96E-09 | 0.212002 | 3.80E-06 | 0.203604 |
| 0.435193 | 5.29E-23 | 0.516178 | 3.69E-33 | 0.341026 | 3.50E-14 | 0.350993 | 5.51E-15 | 0.414704 |
| 0.382032 | 1.12E-17 | 0.612476 | 2.00E-49 | 0.459893 | 8.09E-26 | 0.401217 | 1.73E-19 | 0.636824 |
| -0.43197 | 1.19E-22 | -0.61144 | 3.21E-49 | -0.44615 | 3.19E-24 | -0.3055  | 1.52E-11 | -0.39636 |
| 0.712434 | 1.53E-73 | 0.8493   | #####    | 0.5811   | 1.59E-43 | 0.518983 | 1.46E-33 | 0.679365 |
| -0.51149 | 1.70E-32 | -0.56389 | 1.49E-40 | -0.57383 | 3.00E-42 | -0.26993 | 3.06E-09 | -0.34186 |
| 0.534723 | 6.80E-36 | 0.537456 | 2.60E-36 | 0.509222 | 3.54E-32 | 0.346206 | 1.35E-14 | 0.347068 |
| 0.536403 | 3.77E-36 | 0.768994 | 2.09E-92 | 0.503892 | 1.94E-31 | 0.484355 | 7.65E-29 | 0.560333 |
| 0.471713 | 3.00E-27 | 0.605587 | 4.50E-48 | 0.434153 | 6.88E-23 | 0.418821 | 2.93E-21 | 0.485998 |
| 0.36039  | 9.06E-16 | 0.667461 | 1.58E-61 | 0.425269 | 6.19E-22 | 0.434713 | 5.97E-23 | 0.628054 |
| -0.24339 | 1.00E-07 | -0.33993 | 4.27E-14 | -0.29369 | 9.61E-11 | -0.14067 | 0.00231  | -0.21095 |
| 0.228303 | 6.15E-07 | 0.420071 | 2.17E-21 | 0.378299 | 2.45E-17 | 0.32335  | 7.94E-13 | 0.359064 |
| -0.20269 | 1.01E-05 | -0.49537 | 2.76E-30 | -0.3994  | 2.59E-19 | -0.17984 | 9.31E-05 | -0.22537 |
| 0.343506 | 2.22E-14 | 0.510152 | 2.63E-32 | 0.273205 | 1.94E-09 | 0.302771 | 2.34E-11 | 0.454803 |
| 0.381323 | 1.30E-17 | 0.566407 | 5.62E-41 | 0.4395   | 1.78E-23 | 0.426982 | 4.07E-22 | 0.569085 |
| 0.392104 | 1.30E-18 | 0.585638 | 2.44E-44 | 0.416693 | 4.86E-21 | 0.299274 | 4.06E-11 | 0.380472 |
| 0.200655 | 1.25E-05 | 0.357184 | 1.69E-15 | 0.300941 | 3.13E-11 | 0.30586  | 1.43E-11 | 0.430285 |
| 0.68368  | 1.31E-65 | 0.827297 | #####    | 0.644665 | 3.30E-56 | 0.519365 | 1.28E-33 | 0.617792 |
| -0.37314 | 7.10E-17 | -0.59744 | 1.62E-46 | -0.487   | 3.49E-29 | -0.33307 | 1.46E-13 | -0.25713 |
| 0.457785 | 1.44E-25 | 0.762712 | 4.72E-90 | 0.560937 | 4.64E-40 | 0.360669 | 8.58E-16 | 0.532456 |
| 0.505597 | 1.13E-31 | 0.789727 | #####    | 0.485359 | 5.68E-29 | 0.480295 | 2.53E-28 | 0.705923 |
| 0.720512 | 6.02E-76 | 0.823804 | #####    | 0.754731 | 3.63E-87 | 0.496815 | 1.77E-30 | 0.489328 |
| 0.388407 | 2.89E-18 | 0.587321 | 1.21E-44 | 0.522382 | 4.68E-34 | 0.414826 | 7.55E-21 | 0.51856  |
| 0.526664 | 1.10E-34 | 0.692046 | 8.04E-68 | 0.412707 | 1.24E-20 | 0.45826  | 1.26E-25 | 0.537676 |
| 0.355129 | 2.51E-15 | 0.642801 | 8.58E-56 | 0.43162  | 1.30E-22 | 0.3521   | 4.47E-15 | 0.547116 |
| -0.31823 | 1.89E-12 | -0.68749 | 1.31E-66 | -0.63997 | 3.61E-55 | -0.32888 | 3.05E-13 | -0.50886 |
| 0.632016 | 1.90E-53 | 0.782097 | 1.45E-97 | 0.588609 | 7.03E-45 | 0.460408 | 7.03E-26 | 0.638254 |
| 0.33239  | 1.65E-13 | 0.468593 | 7.25E-27 | 0.40489  | 7.53E-20 | 0.289887 | 1.71E-10 | 0.300078 |
| 0.290054 | 1.67E-10 | 0.580162 | 2.33E-43 | 0.445822 | 3.47E-24 | 0.323183 | 8.17E-13 | 0.413632 |
| 0.603062 | 1.38E-47 | 0.784797 | 1.13E-98 | 0.676635 | 8.36E-64 | 0.483537 | 9.75E-29 | 0.71924  |
| 0.38259  | 9.99E-18 | 0.693177 | 3.99E-68 | 0.421856 | 1.42E-21 | 0.274315 | 1.66E-09 | 0.366707 |
| 0.290575 | 1.54E-10 | 0.395025 | 6.85E-19 | 0.315977 | 2.75E-12 | 0.154141 | 0.00083  | 0.245426 |
| 0.305892 | 1.43E-11 | 0.439822 | 1.63E-23 | 0.295988 | 6.76E-11 | 0.31368  | 4.02E-12 | 0.286113 |
| 0.471114 | 3.56E-27 | 0.789386 | #####    | 0.506955 | 7.33E-32 | 0.359449 | 1.09E-15 | 0.586524 |
| -0.45504 | 3.02E-25 | -0.52307 | 3.71E-34 | -0.50982 | 2.92E-32 | -0.32241 | 9.32E-13 | -0.55474 |
| 0.282062 | 5.45E-10 | 0.477367 | 5.93E-28 | 0.438451 | 2.32E-23 | 0.243686 | 9.68E-08 | 0.135269 |
| 0.436164 | 4.14E-23 | 0.678571 | 2.70E-64 | 0.39961  | 2.48E-19 | 0.305223 | 1.59E-11 | 0.534667 |
| -0.28147 | 5.94E-10 | -0.56004 | 6.53E-40 | -0.41061 | 2.02E-20 | -0.2653  | 5.80E-09 | -0.51111 |
| 0.593508 | 8.80E-46 | 0.74415  | 1.66E-83 | 0.528204 | 6.50E-35 | 0.444016 | 5.55E-24 | 0.566302 |

|          |          |          |          |          |          |          |          |          |
|----------|----------|----------|----------|----------|----------|----------|----------|----------|
| 0.773203 | 5.02E-94 | 0.820869 | #####    | 0.726552 | 8.39E-78 | 0.480712 | 2.24E-28 | 0.490994 |
| 0.591332 | 2.23E-45 | 0.715315 | 2.17E-74 | 0.559065 | 9.47E-40 | 0.496163 | 2.16E-30 | 0.606392 |
| 0.428991 | 2.49E-22 | 0.671655 | 1.47E-62 | 0.508009 | 5.23E-32 | 0.479268 | 3.41E-28 | 0.67612  |
| 0.237987 | 1.95E-07 | 0.394652 | 7.44E-19 | 0.326089 | 4.96E-13 | 0.229062 | 5.63E-07 | 0.241799 |
| -0.36777 | 2.11E-16 | -0.53972 | 1.17E-36 | -0.38967 | 2.20E-18 | -0.26993 | 3.07E-09 | -0.272   |
| 0.394861 | 7.10E-19 | 0.634875 | 4.64E-54 | 0.44894  | 1.53E-24 | 0.472091 | 2.69E-27 | 0.645692 |
| 0.520309 | 9.38E-34 | 0.606233 | 3.37E-48 | 0.540824 | 7.86E-37 | 0.367535 | 2.21E-16 | 0.418472 |
| 0.620843 | 4.11E-51 | 0.767905 | 5.41E-92 | 0.718326 | 2.75E-75 | 0.33814  | 5.91E-14 | 0.486531 |
| 0.3558   | 2.20E-15 | 0.464416 | 2.33E-26 | 0.350192 | 6.41E-15 | 0.299445 | 3.95E-11 | 0.319211 |
| 0.468915 | 6.62E-27 | 0.821692 | #####    | 0.614622 | 7.47E-50 | 0.368737 | 1.73E-16 | 0.533599 |
| 0.542822 | 3.84E-37 | 0.649039 | 3.41E-57 | 0.571246 | 8.40E-42 | 0.398422 | 3.23E-19 | 0.328687 |
| -0.41934 | 2.59E-21 | -0.57226 | 5.62E-42 | -0.53347 | 1.05E-35 | -0.3309  | 2.14E-13 | -0.17798 |
| 0.375249 | 4.61E-17 | 0.503965 | 1.89E-31 | 0.519266 | 1.33E-33 | 0.22161  | 1.32E-06 | 0.161898 |
| -0.25613 | 1.97E-08 | -0.5167  | 3.11E-33 | -0.40169 | 1.55E-19 | -0.19129 | 3.17E-05 | -0.48361 |
| 0.596672 | 2.26E-46 | 0.837529 | #####    | 0.622782 | 1.64E-51 | 0.489517 | 1.64E-29 | 0.574838 |
| 0.459177 | 9.84E-26 | 0.752137 | 2.98E-86 | 0.48115  | 1.97E-28 | 0.458727 | 1.11E-25 | 0.599626 |
| 0.561632 | 3.56E-40 | 0.58955  | 4.73E-45 | 0.55415  | 6.04E-39 | 0.31671  | 2.43E-12 | 0.384391 |
| 0.500058 | 6.46E-31 | 0.78225  | 1.26E-97 | 0.595846 | 3.23E-46 | 0.354274 | 2.95E-15 | 0.504235 |
| 0.232203 | 3.89E-07 | 0.371919 | 9.11E-17 | 0.247771 | 5.80E-08 | 0.256965 | 1.77E-08 | 0.288321 |
| 0.662106 | 3.09E-60 | 0.726877 | 6.64E-78 | 0.734994 | 1.76E-80 | 0.336012 | 8.67E-14 | 0.394373 |
| 0.613526 | 1.24E-49 | 0.737549 | 2.59E-81 | 0.688071 | 9.24E-67 | 0.430173 | 1.86E-22 | 0.442387 |
| 0.13853  | 0.0027   | 0.413458 | 1.04E-20 | 0.260327 | 1.13E-08 | 0.058587 | 0.20631  | 0.277074 |
| 0.471241 | 3.43E-27 | 0.636856 | 1.73E-54 | 0.534605 | 7.09E-36 | 0.378129 | 2.54E-17 | 0.27131  |
| 0.236949 | 2.21E-07 | 0.645519 | 2.13E-56 | 0.504029 | 1.86E-31 | 0.34844  | 8.90E-15 | 0.354688 |
| 0.612516 | 1.96E-49 | 0.750729 | 9.26E-86 | 0.648937 | 3.60E-57 | 0.482888 | 1.18E-28 | 0.56671  |
| 0.710851 | 4.45E-73 | 0.836421 | #####    | 0.724117 | 4.76E-77 | 0.510109 | 2.66E-32 | 0.689081 |
| 0.642389 | 1.06E-55 | 0.793085 | #####    | 0.56807  | 2.94E-41 | 0.585784 | 2.29E-44 | 0.731693 |
| 0.146263 | 0.00153  | 0.477555 | 5.61E-28 | 0.490937 | 1.07E-29 | 0.178524 | 0.0001   | 0.392644 |
| 0.617423 | 2.04E-50 | 0.805364 | #####    | 0.50185  | 3.69E-31 | 0.51023  | 2.56E-32 | 0.5885   |
| 0.503369 | 2.29E-31 | 0.767723 | 6.34E-92 | 0.549526 | 3.35E-38 | 0.408966 | 2.96E-20 | 0.597023 |
| 0.475376 | 1.05E-27 | 0.726464 | 8.93E-78 | 0.678389 | 3.00E-64 | 0.377051 | 3.18E-17 | 0.525891 |
| 0.501033 | 4.76E-31 | 0.707202 | 5.02E-72 | 0.689768 | 3.28E-67 | 0.322333 | 9.44E-13 | 0.437668 |
| 0.478488 | 4.28E-28 | 0.832381 | #####    | 0.704951 | 2.20E-71 | 0.518946 | 1.48E-33 | 0.638851 |
| 0.328898 | 3.05E-13 | 0.724282 | 4.23E-77 | 0.535843 | 4.59E-36 | 0.357255 | 1.67E-15 | 0.561691 |
| -0.14514 | 0.00166  | -0.44553 | 3.75E-24 | -0.38545 | 5.45E-18 | -0.12509 | 0.0068   | -0.18379 |
| 0.684207 | 9.54E-66 | 0.795329 | #####    | 0.724201 | 4.48E-77 | 0.409895 | 2.39E-20 | 0.52117  |
| -0.11939 | 0.00981  | -0.42802 | 3.16E-22 | -0.48615 | 4.49E-29 | -0.22952 | 5.34E-07 | -0.26746 |
| 0.445641 | 3.64E-24 | 0.635573 | 3.28E-54 | 0.432571 | 1.02E-22 | 0.369403 | 1.52E-16 | 0.538394 |
| -0.20761 | 6.07E-06 | -0.3936  | 9.38E-19 | -0.2657  | 5.49E-09 | -0.14868 | 0.00127  | -0.13715 |
| 0.577401 | 7.15E-43 | 0.633547 | 8.96E-54 | 0.539496 | 1.26E-36 | 0.413732 | 9.76E-21 | 0.380379 |
| 0.46442  | 2.33E-26 | 0.618144 | 1.46E-50 | 0.413746 | 9.73E-21 | 0.449552 | 1.30E-24 | 0.541181 |
| -0.32757 | 3.84E-13 | -0.46606 | 1.48E-26 | -0.47467 | 1.29E-27 | -0.09628 | 0.03754  | 0.112482 |
| 0.551913 | 1.39E-38 | 0.835632 | #####    | 0.675451 | 1.66E-63 | 0.502823 | 2.71E-31 | 0.597006 |
| 0.304316 | 1.83E-11 | 0.49113  | 1.01E-29 | 0.493344 | 5.13E-30 | 0.210006 | 4.71E-06 | 0.23093  |
| 0.314619 | 3.45E-12 | 0.446828 | 2.67E-24 | 0.450437 | 1.03E-24 | 0.078184 | 0.09148  | 0.029767 |

|          |          |          |          |          |          |          |          |          |
|----------|----------|----------|----------|----------|----------|----------|----------|----------|
| 0.565686 | 7.44E-41 | 0.564255 | 1.30E-40 | 0.462304 | 4.18E-26 | 0.413089 | 1.14E-20 | 0.63163  |
| 0.494458 | 3.65E-30 | 0.721174 | 3.79E-76 | 0.424265 | 7.90E-22 | 0.39085  | 1.71E-18 | 0.450394 |
| 0.50849  | 4.48E-32 | 0.706467 | 8.15E-72 | 0.513932 | 7.70E-33 | 0.446757 | 2.72E-24 | 0.410936 |
| 0.49813  | 1.18E-30 | 0.727896 | 3.19E-78 | 0.638278 | 8.49E-55 | 0.473727 | 1.69E-27 | 0.650627 |
| 0.244593 | 8.65E-08 | 0.480064 | 2.71E-28 | 0.404326 | 8.56E-20 | 0.127857 | 0.00566  | 0.167112 |
| 0.573427 | 3.53E-42 | 0.815057 | #####    | 0.751811 | 3.88E-86 | 0.467842 | 8.95E-27 | 0.655611 |
| -0.58787 | 9.61E-45 | -0.67351 | 5.08E-63 | -0.66315 | 1.74E-60 | -0.30697 | 1.20E-11 | -0.34141 |
| 0.543158 | 3.40E-37 | 0.706922 | 6.04E-72 | 0.545289 | 1.58E-37 | 0.424594 | 7.30E-22 | 0.583682 |
| -0.32563 | 5.37E-13 | -0.42034 | 2.04E-21 | -0.32659 | 4.55E-13 | -0.16611 | 0.00031  | -0.25833 |
| 0.287539 | 2.43E-10 | 0.431681 | 1.28E-22 | 0.432691 | 9.92E-23 | 0.341868 | 3.00E-14 | 0.286285 |
| 0.472655 | 2.30E-27 | 0.634398 | 5.88E-54 | 0.50318  | 2.43E-31 | 0.34159  | 3.16E-14 | 0.376593 |
| 0.524927 | 1.98E-34 | 0.751788 | 3.95E-86 | 0.579928 | 2.56E-43 | 0.444556 | 4.83E-24 | 0.520562 |
| 0.516941 | 2.87E-33 | 0.768065 | 4.71E-92 | 0.599193 | 7.55E-47 | 0.511409 | 1.75E-32 | 0.676333 |
| 0.382999 | 9.16E-18 | 0.568887 | 2.13E-41 | 0.354923 | 2.61E-15 | 0.387659 | 3.40E-18 | 0.386904 |
| 0.55863  | 1.12E-39 | 0.611651 | 2.91E-49 | 0.428038 | 3.14E-22 | 0.406016 | 5.82E-20 | 0.565054 |
| 0.672518 | 9.00E-63 | 0.793491 | #####    | 0.714178 | 4.72E-74 | 0.51975  | 1.13E-33 | 0.603798 |
| 0.543356 | 3.17E-37 | 0.565822 | 7.06E-41 | 0.452051 | 6.72E-25 | 0.366666 | 2.62E-16 | 0.619883 |
| 0.236582 | 2.31E-07 | 0.47305  | 2.05E-27 | 0.343239 | 2.34E-14 | 0.288513 | 2.10E-10 | 0.348819 |
| -0.2099  | 4.76E-06 | -0.43981 | 1.64E-23 | -0.32832 | 3.37E-13 | -0.0998  | 0.03106  | -0.0693  |
| -0.37161 | 9.70E-17 | -0.70809 | 2.79E-72 | -0.60591 | 3.90E-48 | -0.27009 | 3.00E-09 | -0.32138 |
| -0.21354 | 3.22E-06 | -0.50914 | 3.64E-32 | -0.31696 | 2.34E-12 | -0.29077 | 1.50E-10 | -0.15749 |
| 0.222336 | 1.22E-06 | 0.6477   | 6.86E-57 | 0.49014  | 1.36E-29 | 0.324858 | 6.13E-13 | 0.560192 |
| 0.193204 | 2.63E-05 | 0.463424 | 3.07E-26 | 0.379312 | 1.99E-17 | 0.240865 | 1.37E-07 | 0.5605   |
| 0.349453 | 7.36E-15 | 0.701522 | 2.03E-70 | 0.614192 | 9.10E-50 | 0.384814 | 6.24E-18 | 0.719322 |
| 0.133662 | 0.00381  | 0.363833 | 4.61E-16 | 0.28584  | 3.13E-10 | -0.03351 | 0.47002  | 0.107717 |
| -0.37987 | 1.77E-17 | -0.55091 | 2.01E-38 | -0.43549 | 4.91E-23 | -0.35285 | 3.88E-15 | -0.41753 |
| -0.38849 | 2.84E-18 | -0.53491 | 6.37E-36 | -0.48443 | 7.48E-29 | -0.303   | 2.26E-11 | -0.2931  |
| 0.346955 | 1.18E-14 | 0.45428  | 3.70E-25 | 0.396417 | 5.04E-19 | 0.178583 | 0.0001   | 0.196732 |
| 0.364312 | 4.19E-16 | 0.714966 | 2.76E-74 | 0.413755 | 9.71E-21 | 0.285659 | 3.21E-10 | 0.404203 |
| 0.756229 | 1.06E-87 | 0.883617 | #####    | 0.757601 | 3.43E-88 | 0.491061 | 1.03E-29 | 0.541046 |
| 0.253255 | 2.87E-08 | 0.433502 | 8.10E-23 | 0.427369 | 3.70E-22 | 0.298061 | 4.90E-11 | 0.332094 |
| 0.428154 | 3.05E-22 | 0.62084  | 4.11E-51 | 0.410106 | 2.27E-20 | 0.387688 | 3.38E-18 | 0.543968 |
| 0.631085 | 3.00E-53 | 0.751116 | 6.78E-86 | 0.621839 | 2.57E-51 | 0.371583 | 9.75E-17 | 0.493369 |
| -0.23632 | 2.38E-07 | -0.41921 | 2.67E-21 | -0.29918 | 4.12E-11 | -0.20141 | 1.16E-05 | -0.22098 |
| 0.328443 | 3.30E-13 | 0.373396 | 6.74E-17 | 0.35932  | 1.12E-15 | 0.295477 | 7.31E-11 | 0.262372 |
| 0.476905 | 6.77E-28 | 0.625797 | 3.90E-52 | 0.457209 | 1.68E-25 | 0.331108 | 2.07E-13 | 0.504031 |
| 0.371163 | 1.06E-16 | 0.548237 | 5.38E-38 | 0.326381 | 4.71E-13 | 0.394198 | 8.22E-19 | 0.420677 |
| 0.533464 | 1.06E-35 | 0.7193   | 1.40E-75 | 0.540623 | 8.44E-37 | 0.447935 | 2.00E-24 | 0.483165 |
| 0.629481 | 6.57E-53 | 0.811183 | #####    | 0.537624 | 2.45E-36 | 0.474245 | 1.46E-27 | 0.650249 |
| 0.494327 | 3.80E-30 | 0.555447 | 3.71E-39 | 0.462744 | 3.70E-26 | 0.362413 | 6.10E-16 | 0.3363   |
| 0.333855 | 1.27E-13 | 0.602491 | 1.78E-47 | 0.559254 | 8.82E-40 | 0.254174 | 2.55E-08 | 0.309391 |
| 0.325375 | 5.61E-13 | 0.559885 | 6.94E-40 | 0.324566 | 6.45E-13 | 0.302476 | 2.45E-11 | 0.577376 |
| 0.255754 | 2.08E-08 | 0.373223 | 6.98E-17 | 0.338988 | 5.07E-14 | 0.169438 | 0.00023  | 0.163186 |
| 0.702379 | 1.17E-70 | 0.845753 | #####    | 0.606124 | 3.54E-48 | 0.555473 | 3.68E-39 | 0.627884 |
| 0.615315 | 5.42E-50 | 0.712029 | 2.02E-73 | 0.706018 | 1.09E-71 | 0.318334 | 1.86E-12 | 0.43063  |



|          |          |          |          |          |          |          |          |          |
|----------|----------|----------|----------|----------|----------|----------|----------|----------|
| 0.491502 | 8.98E-30 | 0.699434 | 7.74E-70 | 0.457117 | 1.72E-25 | 0.391275 | 1.56E-18 | 0.454969 |
| -0.21637 | 2.37E-06 | -0.5436  | 2.90E-37 | -0.55961 | 7.70E-40 | -0.17014 | 0.00022  | -0.39795 |
| 0.444315 | 5.14E-24 | 0.624864 | 6.09E-52 | 0.410229 | 2.21E-20 | 0.338722 | 5.32E-14 | 0.326916 |
| -0.19891 | 1.49E-05 | -0.50954 | 3.19E-32 | -0.3908  | 1.73E-18 | -0.20965 | 4.89E-06 | -0.38765 |
| -0.14537 | 0.00163  | -0.49103 | 1.04E-29 | -0.35158 | 4.93E-15 | -0.11144 | 0.01599  | -0.04443 |
| -0.37962 | 1.86E-17 | -0.57713 | 7.98E-43 | -0.48872 | 2.08E-29 | -0.31042 | 6.86E-12 | -0.12192 |
| 0.210497 | 4.47E-06 | 0.440664 | 1.32E-23 | 0.381766 | 1.19E-17 | 0.241957 | 1.20E-07 | 0.388261 |
| 0.215289 | 2.66E-06 | 0.388234 | 3.00E-18 | 0.208609 | 5.46E-06 | 0.252557 | 3.15E-08 | 0.418516 |
| 0.362718 | 5.74E-16 | 0.618466 | 1.25E-50 | 0.399965 | 2.29E-19 | 0.44218  | 8.92E-24 | 0.543745 |
| 0.294952 | 7.92E-11 | 0.374026 | 5.93E-17 | 0.324744 | 6.25E-13 | 0.291966 | 1.25E-10 | 0.261036 |
| 0.622672 | 1.73E-51 | 0.701774 | 1.73E-70 | 0.584903 | 3.31E-44 | 0.444823 | 4.50E-24 | 0.487019 |
| 0.639723 | 4.10E-55 | 0.655722 | 9.91E-59 | 0.522723 | 4.18E-34 | 0.458515 | 1.18E-25 | 0.424052 |
| 0.74553  | 5.67E-84 | 0.87134  | #####    | 0.723503 | 7.35E-77 | 0.474265 | 1.45E-27 | 0.581501 |
| 0.45304  | 5.16E-25 | 0.56922  | 1.87E-41 | 0.484781 | 6.75E-29 | 0.424118 | 8.19E-22 | 0.449229 |
| 0.269724 | 3.16E-09 | 0.379331 | 1.98E-17 | 0.272152 | 2.25E-09 | 0.266212 | 5.12E-09 | 0.357201 |
| 0.613653 | 1.17E-49 | 0.713521 | 7.37E-74 | 0.564299 | 1.27E-40 | 0.493373 | 5.08E-30 | 0.505574 |
| 0.57465  | 2.17E-42 | 0.704974 | 2.17E-71 | 0.468186 | 8.13E-27 | 0.558056 | 1.39E-39 | 0.662804 |
| 0.211755 | 3.91E-06 | 0.483226 | 1.07E-28 | 0.470994 | 3.68E-27 | 0.255377 | 2.18E-08 | 0.297942 |
| 0.457867 | 1.41E-25 | 0.740931 | 1.99E-82 | 0.50603  | 9.84E-32 | 0.518398 | 1.77E-33 | 0.590079 |
| -0.20031 | 1.29E-05 | -0.35704 | 1.74E-15 | -0.3955  | 6.17E-19 | -0.20782 | 5.94E-06 | -0.4756  |
| 0.397909 | 3.62E-19 | 0.668881 | 7.11E-62 | 0.549322 | 3.61E-38 | 0.436885 | 3.45E-23 | 0.487704 |
| 0.580453 | 2.07E-43 | 0.651323 | 1.03E-57 | 0.556154 | 2.85E-39 | 0.434185 | 6.82E-23 | 0.603139 |
| -0.02794 | 0.54705  | -0.45355 | 4.50E-25 | -0.4083  | 3.45E-20 | -0.1001  | 0.03055  | -0.1847  |
| -0.15542 | 0.00075  | -0.60504 | 5.73E-48 | -0.43218 | 1.13E-22 | -0.26568 | 5.50E-09 | -0.42734 |
| -0.19816 | 1.61E-05 | -0.57552 | 1.53E-42 | -0.49079 | 1.12E-29 | -0.23872 | 1.78E-07 | -0.39588 |
| 0.603707 | 1.04E-47 | 0.609688 | 7.11E-49 | 0.388969 | 2.56E-18 | 0.384287 | 6.98E-18 | 0.594145 |
| 0.705424 | 1.61E-71 | 0.841417 | #####    | 0.654248 | 2.18E-58 | 0.556428 | 2.57E-39 | 0.673657 |
| -0.13605 | 0.00322  | -0.36982 | 1.39E-16 | -0.24381 | 9.54E-08 | -0.08839 | 0.0563   | -0.28704 |
| -0.44639 | 2.99E-24 | -0.50058 | 5.48E-31 | -0.50181 | 3.73E-31 | -0.17665 | 0.00012  | -0.11297 |
| 0.200035 | 1.33E-05 | 0.472761 | 2.23E-27 | 0.458055 | 1.34E-25 | 0.259885 | 1.20E-08 | 0.229982 |
| 0.336821 | 7.49E-14 | 0.734944 | 1.82E-80 | 0.602487 | 1.78E-47 | 0.444169 | 5.34E-24 | 0.606938 |
| 0.654981 | 1.47E-58 | 0.78358  | 3.59E-98 | 0.785179 | 7.88E-99 | 0.47393  | 1.59E-27 | 0.545725 |
| 0.385369 | 5.54E-18 | 0.521243 | 6.86E-34 | 0.452262 | 6.35E-25 | 0.169159 | 0.00024  | 0.128761 |
| 0.532208 | 1.63E-35 | 0.726934 | 6.38E-78 | 0.552819 | 9.92E-39 | 0.464682 | 2.16E-26 | 0.473266 |
| 0.198025 | 1.63E-05 | 0.471832 | 2.90E-27 | 0.330674 | 2.23E-13 | 0.270168 | 2.97E-09 | 0.456627 |
| -0.11333 | 0.01427  | -0.45762 | 1.50E-25 | -0.21863 | 1.84E-06 | -0.2026  | 1.02E-05 | -0.42918 |
| 0.391014 | 1.65E-18 | 0.578463 | 4.65E-43 | 0.330426 | 2.33E-13 | 0.348277 | 9.18E-15 | 0.492363 |
| -0.12308 | 0.00775  | -0.40834 | 3.42E-20 | -0.43261 | 1.01E-22 | -0.15958 | 0.00054  | -0.31619 |
| -0.27129 | 2.54E-09 | -0.41134 | 1.71E-20 | -0.2796  | 7.80E-10 | -0.18201 | 7.63E-05 | -0.27731 |
| -0.0662  | 0.15318  | -0.34639 | 1.30E-14 | -0.3484  | 8.98E-15 | 0.012997 | 0.77937  | -0.20577 |
| 0.426378 | 4.72E-22 | 0.473873 | 1.62E-27 | 0.304996 | 1.65E-11 | 0.262677 | 8.27E-09 | 0.398329 |
| 0.288662 | 2.06E-10 | 0.536394 | 3.78E-36 | 0.357072 | 1.73E-15 | 0.243484 | 9.93E-08 | 0.448887 |
| 0.573852 | 2.98E-42 | 0.809092 | #####    | 0.699515 | 7.35E-70 | 0.418709 | 3.01E-21 | 0.622716 |
| 0.497599 | 1.39E-30 | 0.493895 | 4.33E-30 | 0.307289 | 1.14E-11 | 0.454517 | 3.47E-25 | 0.522217 |
| 0.530986 | 2.49E-35 | 0.859142 | #####    | 0.778177 | 5.52E-96 | 0.466873 | 1.17E-26 | 0.645241 |

|          |          |          |          |          |          |          |          |          |
|----------|----------|----------|----------|----------|----------|----------|----------|----------|
| 0.536391 | 3.79E-36 | 0.865468 | #####    | 0.636257 | 2.33E-54 | 0.499524 | 7.63E-31 | 0.716037 |
| -0.38632 | 4.52E-18 | -0.46426 | 2.43E-26 | -0.49637 | 2.03E-30 | -0.19695 | 1.81E-05 | -0.2487  |
| 0.303606 | 2.05E-11 | 0.650812 | 1.35E-57 | 0.399943 | 2.30E-19 | 0.354547 | 2.80E-15 | 0.459719 |
| 0.423533 | 9.44E-22 | 0.499672 | 7.28E-31 | 0.394071 | 8.45E-19 | 0.251159 | 3.77E-08 | 0.303388 |
| 0.620676 | 4.44E-51 | 0.779741 | 1.30E-96 | 0.754592 | 4.07E-87 | 0.351316 | 5.18E-15 | 0.42804  |
| 0.611709 | 2.84E-49 | 0.645198 | 2.51E-56 | 0.574173 | 2.62E-42 | 0.425609 | 5.70E-22 | 0.614905 |
| 0.621245 | 3.40E-51 | 0.776456 | 2.66E-95 | 0.706853 | 6.32E-72 | 0.465687 | 1.64E-26 | 0.538709 |
| 0.48246  | 1.34E-28 | 0.796413 | #####    | 0.654985 | 1.47E-58 | 0.398329 | 3.30E-19 | 0.452823 |
| -0.5059  | 1.02E-31 | -0.47928 | 3.40E-28 | -0.53703 | 3.02E-36 | -0.23081 | 4.59E-07 | -0.17944 |
| -0.32725 | 4.05E-13 | -0.3679  | 2.05E-16 | -0.28495 | 3.57E-10 | -0.182   | 7.63E-05 | -0.2931  |
| 0.284449 | 3.84E-10 | 0.431187 | 1.44E-22 | 0.403964 | 9.29E-20 | 0.243576 | 9.82E-08 | 0.2311   |
| 0.529588 | 4.04E-35 | 0.811371 | #####    | 0.740622 | 2.52E-82 | 0.423457 | 9.62E-22 | 0.559293 |
| 0.30245  | 2.46E-11 | 0.510544 | 2.31E-32 | 0.331432 | 1.95E-13 | 0.319616 | 1.50E-12 | 0.457205 |
| -0.55285 | 9.81E-39 | -0.64527 | 2.41E-56 | -0.64157 | 1.61E-55 | -0.2805  | 6.84E-10 | -0.29072 |
| -0.40925 | 2.77E-20 | -0.47154 | 3.15E-27 | -0.50106 | 4.72E-31 | -0.14196 | 0.0021   | -0.17829 |
| 0.564733 | 1.08E-40 | 0.837795 | #####    | 0.644246 | 4.09E-56 | 0.466363 | 1.35E-26 | 0.732246 |
| 0.246715 | 6.63E-08 | 0.50831  | 4.75E-32 | 0.48038  | 2.47E-28 | 0.303169 | 2.20E-11 | 0.311775 |
| 0.442401 | 8.43E-24 | 0.629469 | 6.61E-53 | 0.544873 | 1.83E-37 | 0.344948 | 1.71E-14 | 0.248659 |
| 0.21304  | 3.40E-06 | 0.600189 | 4.89E-47 | 0.215677 | 2.55E-06 | 0.404769 | 7.74E-20 | 0.572599 |
| 0.595002 | 4.64E-46 | 0.667948 | 1.20E-61 | 0.558246 | 1.29E-39 | 0.403501 | 1.03E-19 | 0.709173 |
| -0.32394 | 7.18E-13 | -0.44852 | 1.71E-24 | -0.3072  | 1.16E-11 | -0.18823 | 4.25E-05 | -0.14195 |
| -0.21731 | 2.14E-06 | -0.41804 | 3.53E-21 | -0.2938  | 9.44E-11 | -0.23282 | 3.62E-07 | -0.36348 |
| 0.619698 | 7.04E-51 | 0.744462 | 1.30E-83 | 0.708881 | 1.65E-72 | 0.405598 | 6.41E-20 | 0.497896 |
| -0.11551 | 0.0125   | -0.39079 | 1.73E-18 | -0.42751 | 3.57E-22 | -0.2279  | 6.45E-07 | -0.34483 |
| 0.385133 | 5.83E-18 | 0.512434 | 1.25E-32 | 0.385051 | 5.93E-18 | 0.378729 | 2.24E-17 | 0.422121 |
| 0.463989 | 2.62E-26 | 0.815019 | #####    | 0.645755 | 1.88E-56 | 0.454335 | 3.65E-25 | 0.627885 |
| -0.17291 | 0.00017  | -0.47427 | 1.45E-27 | -0.38042 | 1.58E-17 | -0.27983 | 7.54E-10 | -0.5186  |
| 0.600998 | 3.43E-47 | 0.745658 | 5.13E-84 | 0.622215 | 2.15E-51 | 0.489351 | 1.72E-29 | 0.669095 |
| 0.539695 | 1.18E-36 | 0.723866 | 5.69E-77 | 0.483127 | 1.10E-28 | 0.420164 | 2.13E-21 | 0.590246 |
| 0.439029 | 2.00E-23 | 0.641552 | 1.62E-55 | 0.539249 | 1.38E-36 | 0.318807 | 1.71E-12 | 0.501072 |
| 0.497875 | 1.27E-30 | 0.74368  | 2.39E-83 | 0.530316 | 3.14E-35 | 0.374845 | 5.01E-17 | 0.437065 |
| 0.366996 | 2.46E-16 | 0.571288 | 8.26E-42 | 0.185423 | 5.55E-05 | 0.392684 | 1.14E-18 | 0.502994 |
| 0.619097 | 9.33E-51 | 0.575245 | 1.71E-42 | 0.550732 | 2.15E-38 | 0.467824 | 9.00E-27 | 0.495209 |
| -0.26941 | 3.29E-09 | -0.53704 | 3.01E-36 | -0.51352 | 8.79E-33 | -0.18901 | 3.94E-05 | -0.38531 |
| -0.18679 | 4.87E-05 | -0.48648 | 4.07E-29 | -0.45291 | 5.34E-25 | -0.32385 | 7.28E-13 | -0.41601 |
| -0.25863 | 1.42E-08 | -0.54607 | 1.19E-37 | -0.53078 | 2.68E-35 | -0.34925 | 7.66E-15 | -0.47301 |
| 0.47296  | 2.10E-27 | 0.509183 | 3.59E-32 | 0.482993 | 1.14E-28 | 0.331248 | 2.02E-13 | 0.327959 |
| 0.454575 | 3.42E-25 | 0.611658 | 2.91E-49 | 0.367897 | 2.05E-16 | 0.220183 | 1.55E-06 | 0.391049 |
| 0.25483  | 2.34E-08 | 0.513338 | 9.34E-33 | 0.385825 | 5.03E-18 | 0.235933 | 2.50E-07 | 0.316966 |
| 0.551661 | 1.52E-38 | 0.713116 | 9.68E-74 | 0.576776 | 9.21E-43 | 0.411388 | 1.69E-20 | 0.548903 |
| -0.28329 | 4.56E-10 | -0.68465 | 7.34E-66 | -0.61601 | 3.92E-50 | -0.37206 | 8.85E-17 | -0.50623 |
| 0.56667  | 5.07E-41 | 0.801997 | #####    | 0.656763 | 5.66E-59 | 0.453083 | 5.10E-25 | 0.571822 |
| 0.436626 | 3.69E-23 | 0.735964 | 8.52E-81 | 0.634297 | 6.18E-54 | 0.401853 | 1.50E-19 | 0.529749 |
| -0.3828  | 9.56E-18 | -0.57983 | 2.67E-43 | -0.57608 | 1.22E-42 | -0.40143 | 1.65E-19 | -0.51729 |
| 0.309235 | 8.32E-12 | 0.466243 | 1.40E-26 | 0.289093 | 1.93E-10 | 0.227198 | 6.99E-07 | 0.388223 |

|          |          |          |          |          |          |          |          |          |
|----------|----------|----------|----------|----------|----------|----------|----------|----------|
| -0.11424 | 0.0135   | -0.39506 | 6.80E-19 | -0.40092 | 1.85E-19 | -0.08302 | 0.07308  | -0.11009 |
| 0.496    | 2.27E-30 | 0.494994 | 3.10E-30 | 0.511428 | 1.74E-32 | 0.232136 | 3.93E-07 | 0.316109 |
| 0.427662 | 3.45E-22 | 0.431696 | 1.27E-22 | 0.39263  | 1.16E-18 | 0.359028 | 1.18E-15 | 0.556975 |
| 0.260373 | 1.13E-08 | 0.523478 | 3.24E-34 | 0.372665 | 7.83E-17 | 0.376209 | 3.78E-17 | 0.476247 |
| 0.264066 | 6.86E-09 | 0.396642 | 4.79E-19 | 0.342347 | 2.75E-14 | 0.305641 | 1.48E-11 | 0.371282 |
| 0.498353 | 1.10E-30 | 0.585382 | 2.71E-44 | 0.571607 | 7.28E-42 | 0.239055 | 1.71E-07 | 0.371738 |
| 0.445274 | 4.00E-24 | 0.72775  | 3.54E-78 | 0.574942 | 1.93E-42 | 0.381669 | 1.21E-17 | 0.451907 |
| 0.121199 | 0.00875  | 0.357154 | 1.70E-15 | 0.306665 | 1.26E-11 | -0.05408 | 0.24343  | 0.001476 |
| -0.26697 | 4.61E-09 | -0.58207 | 1.07E-43 | -0.35175 | 4.78E-15 | -0.349   | 8.01E-15 | -0.4954  |
| 0.572895 | 4.37E-42 | 0.84672  | #####    | 0.644843 | 3.01E-56 | 0.461366 | 5.41E-26 | 0.61828  |
| 0.364342 | 4.17E-16 | 0.565214 | 8.94E-41 | 0.50321  | 2.40E-31 | 0.460205 | 7.43E-26 | 0.596965 |
| -0.10084 | 0.02934  | -0.45466 | 3.34E-25 | -0.26989 | 3.08E-09 | -0.16445 | 0.00036  | -0.46726 |
| 0.6519   | 7.58E-58 | 0.727089 | 5.71E-78 | 0.620885 | 4.03E-51 | 0.381075 | 1.37E-17 | 0.496035 |
| 0.462682 | 3.76E-26 | 0.659008 | 1.68E-59 | 0.635079 | 4.20E-54 | 0.383759 | 7.80E-18 | 0.479022 |
| 0.593745 | 7.96E-46 | 0.804231 | #####    | 0.747372 | 1.33E-84 | 0.475521 | 1.01E-27 | 0.531625 |
| -0.26115 | 1.02E-08 | -0.57703 | 8.30E-43 | -0.40159 | 1.59E-19 | -0.27806 | 9.73E-10 | -0.39237 |
| 0.380735 | 1.48E-17 | 0.498088 | 1.19E-30 | 0.385024 | 5.97E-18 | 0.304202 | 1.87E-11 | 0.358413 |
| 0.243858 | 9.48E-08 | 0.527563 | 8.09E-35 | 0.451494 | 7.79E-25 | 0.351742 | 4.78E-15 | 0.580577 |
| 0.277654 | 1.03E-09 | 0.438205 | 2.47E-23 | 0.333463 | 1.36E-13 | 0.305093 | 1.62E-11 | 0.44548  |
| 0.447742 | 2.10E-24 | 0.43945  | 1.80E-23 | 0.47439  | 1.40E-27 | 0.284674 | 3.72E-10 | 0.394516 |
| 0.410071 | 2.29E-20 | 0.587041 | 1.36E-44 | 0.305451 | 1.53E-11 | 0.398568 | 3.13E-19 | 0.53288  |
| -0.48711 | 3.38E-29 | -0.68157 | 4.60E-65 | -0.70093 | 2.96E-70 | -0.26007 | 1.17E-08 | -0.41255 |
| 0.568391 | 2.59E-41 | 0.830331 | #####    | 0.739249 | 7.16E-82 | 0.442473 | 8.27E-24 | 0.646717 |
| 0.49151  | 8.96E-30 | 0.693854 | 2.62E-68 | 0.410815 | 1.93E-20 | 0.390737 | 1.75E-18 | 0.628263 |
| 0.297602 | 5.26E-11 | 0.412872 | 1.19E-20 | 0.390694 | 1.77E-18 | 0.331048 | 2.09E-13 | 0.572017 |
| 0.486952 | 3.53E-29 | 0.640986 | 2.16E-55 | 0.33837  | 5.67E-14 | 0.410227 | 2.21E-20 | 0.468298 |
| 0.571265 | 8.34E-42 | 0.637469 | 1.27E-54 | 0.54204  | 5.09E-37 | 0.473569 | 1.77E-27 | 0.533728 |
| 0.543747 | 2.75E-37 | 0.656822 | 5.49E-59 | 0.592414 | 1.40E-45 | 0.474374 | 1.40E-27 | 0.555328 |
| 0.272618 | 2.11E-09 | 0.456024 | 2.31E-25 | 0.39707  | 4.36E-19 | 0.300146 | 3.54E-11 | 0.207686 |
| 0.463313 | 3.16E-26 | 0.628983 | 8.37E-53 | 0.397668 | 3.82E-19 | 0.486069 | 4.60E-29 | 0.586764 |
| 0.501785 | 3.76E-31 | 0.560424 | 5.65E-40 | 0.415898 | 5.86E-21 | 0.298047 | 4.91E-11 | 0.355762 |
| 0.184987 | 5.78E-05 | 0.384212 | 7.09E-18 | 0.220847 | 1.44E-06 | 0.263626 | 7.28E-09 | 0.212672 |
| 0.387873 | 3.24E-18 | 0.674185 | 3.45E-63 | 0.535153 | 5.85E-36 | 0.400389 | 2.08E-19 | 0.444182 |
| 0.419263 | 2.64E-21 | 0.697303 | 3.00E-69 | 0.640198 | 3.23E-55 | 0.299469 | 3.94E-11 | 0.459577 |
| 0.36885  | 1.69E-16 | 0.513495 | 8.88E-33 | 0.364356 | 4.15E-16 | 0.416759 | 4.78E-21 | 0.552132 |
| 0.519114 | 1.40E-33 | 0.772071 | 1.38E-93 | 0.607769 | 1.69E-48 | 0.457464 | 1.57E-25 | 0.546454 |
| 0.262751 | 8.19E-09 | 0.698824 | 1.14E-69 | 0.49514  | 2.96E-30 | 0.367951 | 2.03E-16 | 0.550644 |
| 0.517268 | 2.57E-33 | 0.595075 | 4.50E-46 | 0.376514 | 3.55E-17 | 0.372965 | 7.36E-17 | 0.345942 |
| 0.332949 | 1.49E-13 | 0.450888 | 9.15E-25 | 0.387849 | 3.26E-18 | 0.361502 | 7.29E-16 | 0.264711 |
| 0.492881 | 5.91E-30 | 0.70995  | 8.12E-73 | 0.418065 | 3.51E-21 | 0.428885 | 2.55E-22 | 0.592228 |
| 0.402302 | 1.35E-19 | 0.671171 | 1.94E-62 | 0.451435 | 7.91E-25 | 0.385668 | 5.20E-18 | 0.40487  |
| 0.403569 | 1.02E-19 | 0.689594 | 3.64E-67 | 0.531595 | 2.02E-35 | 0.339138 | 4.94E-14 | 0.413788 |
| 0.242602 | 1.11E-07 | 0.412336 | 1.35E-20 | 0.328058 | 3.53E-13 | 0.157339 | 0.00064  | 0.054469 |
| 0.474132 | 1.50E-27 | 0.733816 | 4.21E-80 | 0.410569 | 2.04E-20 | 0.460873 | 6.19E-26 | 0.573395 |
| 0.20654  | 6.79E-06 | 0.422323 | 1.26E-21 | 0.328757 | 3.12E-13 | 0.146462 | 0.0015   | 0.312126 |

|          |          |          |          |          |          |          |          |          |
|----------|----------|----------|----------|----------|----------|----------|----------|----------|
| -0.18495 | 5.80E-05 | -0.60195 | 2.25E-47 | -0.54023 | 9.72E-37 | -0.27627 | 1.26E-09 | -0.50239 |
| 0.642458 | 1.02E-55 | 0.819911 | #####    | 0.669258 | 5.74E-62 | 0.445547 | 3.73E-24 | 0.5689   |
| 0.715546 | 1.86E-74 | 0.782292 | 1.21E-97 | 0.773283 | 4.68E-94 | 0.407018 | 4.63E-20 | 0.520934 |
| 0.254971 | 2.30E-08 | 0.612195 | 2.27E-49 | 0.427141 | 3.92E-22 | 0.435186 | 5.30E-23 | 0.729674 |
| 0.422223 | 1.30E-21 | 0.573931 | 2.89E-42 | 0.425835 | 5.39E-22 | 0.270387 | 2.88E-09 | 0.238415 |
| 0.27114  | 2.59E-09 | 0.540974 | 7.45E-37 | 0.260891 | 1.05E-08 | 0.346075 | 1.38E-14 | 0.530244 |
| -0.4223  | 1.27E-21 | -0.5503  | 2.52E-38 | -0.50045 | 5.71E-31 | -0.34013 | 4.12E-14 | -0.4307  |
| -0.33293 | 1.50E-13 | -0.64092 | 2.23E-55 | -0.55378 | 6.94E-39 | -0.38528 | 5.64E-18 | -0.51542 |
| 0.415193 | 6.93E-21 | 0.749472 | 2.53E-85 | 0.609781 | 6.82E-49 | 0.292095 | 1.23E-10 | 0.45364  |
| 0.420908 | 1.78E-21 | 0.740533 | 2.69E-82 | 0.619338 | 8.34E-51 | 0.284802 | 3.65E-10 | 0.485008 |
| 0.375816 | 4.10E-17 | 0.628352 | 1.14E-52 | 0.334716 | 1.09E-13 | 0.396917 | 4.51E-19 | 0.562602 |
| 0.46428  | 2.42E-26 | 0.763666 | 2.09E-90 | 0.504717 | 1.49E-31 | 0.408706 | 3.14E-20 | 0.602456 |
| 0.375565 | 4.32E-17 | 0.450599 | 9.88E-25 | 0.311403 | 5.85E-12 | 0.37627  | 3.74E-17 | 0.44793  |
| -0.15677 | 0.00067  | -0.50668 | 8.01E-32 | -0.4207  | 1.87E-21 | -0.32544 | 5.55E-13 | -0.56147 |
| -0.44638 | 3.00E-24 | -0.6985  | 1.41E-69 | -0.55049 | 2.35E-38 | -0.32192 | 1.01E-12 | -0.45601 |
| 0.500983 | 4.84E-31 | 0.703443 | 5.87E-71 | 0.505549 | 1.15E-31 | 0.37506  | 4.79E-17 | 0.581144 |
| 0.58585  | 2.23E-44 | 0.771614 | 2.07E-93 | 0.594294 | 6.29E-46 | 0.371978 | 9.00E-17 | 0.478866 |
| 0.650787 | 1.36E-57 | 0.769365 | 1.51E-92 | 0.64908  | 3.34E-57 | 0.471692 | 3.02E-27 | 0.630576 |
| 0.44379  | 5.89E-24 | 0.670745 | 2.47E-62 | 0.445041 | 4.25E-24 | 0.520175 | 9.80E-34 | 0.73497  |
| 0.54412  | 2.41E-37 | 0.791047 | #####    | 0.546476 | 1.02E-37 | 0.504988 | 1.37E-31 | 0.645498 |
| 0.580572 | 1.97E-43 | 0.851807 | #####    | 0.705749 | 1.31E-71 | 0.503679 | 2.07E-31 | 0.523037 |
| 0.715001 | 2.69E-74 | 0.79979  | #####    | 0.665746 | 4.12E-61 | 0.453277 | 4.84E-25 | 0.68233  |
| 0.331536 | 1.92E-13 | 0.342508 | 2.67E-14 | 0.341233 | 3.37E-14 | 0.25518  | 2.24E-08 | 0.267147 |
| -0.28413 | 4.03E-10 | -0.3338  | 1.29E-13 | -0.3173  | 2.21E-12 | -0.25055 | 4.07E-08 | -0.38694 |
| 0.278387 | 9.28E-10 | 0.439534 | 1.76E-23 | 0.274403 | 1.64E-09 | 0.228769 | 5.83E-07 | 0.273534 |
| 0.235895 | 2.51E-07 | 0.441959 | 9.45E-24 | 0.237229 | 2.14E-07 | 0.201339 | 1.16E-05 | 0.480411 |
| 0.44251  | 8.19E-24 | 0.545758 | 1.33E-37 | 0.426715 | 4.35E-22 | 0.313094 | 4.43E-12 | 0.435783 |
| -0.18605 | 5.23E-05 | -0.52162 | 6.05E-34 | -0.26724 | 4.45E-09 | -0.18878 | 4.03E-05 | -0.2065  |
| 0.465849 | 1.56E-26 | 0.769184 | 1.77E-92 | 0.523114 | 3.66E-34 | 0.426017 | 5.16E-22 | 0.778171 |
| 0.488643 | 2.13E-29 | 0.573894 | 2.93E-42 | 0.458659 | 1.13E-25 | 0.321161 | 1.15E-12 | 0.381358 |
| 0.606128 | 3.53E-48 | 0.793079 | #####    | 0.652479 | 5.58E-58 | 0.462722 | 3.72E-26 | 0.520434 |
| 0.531403 | 2.16E-35 | 0.742503 | 5.94E-83 | 0.567908 | 3.13E-41 | 0.508677 | 4.22E-32 | 0.710453 |
| 0.542165 | 4.86E-37 | 0.764827 | 7.76E-91 | 0.695623 | 8.65E-69 | 0.40051  | 2.03E-19 | 0.43219  |
| 0.407639 | 4.02E-20 | 0.662392 | 2.64E-60 | 0.444219 | 5.27E-24 | 0.357633 | 1.55E-15 | 0.405227 |
| 0.484544 | 7.24E-29 | 0.563115 | 2.01E-40 | 0.530713 | 2.74E-35 | 0.305231 | 1.58E-11 | 0.48235  |
| 0.39455  | 7.60E-19 | 0.625064 | 5.53E-52 | 0.606304 | 3.26E-48 | 0.425057 | 6.52E-22 | 0.543208 |
| -0.26611 | 5.19E-09 | -0.57771 | 6.32E-43 | -0.5123  | 1.31E-32 | -0.23709 | 2.17E-07 | -0.42571 |
| -0.21179 | 3.89E-06 | -0.36949 | 1.49E-16 | -0.27326 | 1.93E-09 | -0.21747 | 2.10E-06 | -0.40037 |
| 0.356285 | 2.01E-15 | 0.543397 | 3.12E-37 | 0.41523  | 6.87E-21 | 0.439319 | 1.86E-23 | 0.455662 |
| -0.40818 | 3.54E-20 | -0.63951 | 4.57E-55 | -0.56981 | 1.48E-41 | -0.34235 | 2.75E-14 | -0.48532 |
| 0.662514 | 2.47E-60 | 0.767018 | 1.17E-91 | 0.573019 | 4.15E-42 | 0.501267 | 4.43E-31 | 0.720158 |
| -0.29177 | 1.29E-10 | -0.47475 | 1.26E-27 | -0.4719  | 2.85E-27 | -0.42173 | 1.46E-21 | -0.43693 |
| -0.12172 | 0.00846  | -0.39969 | 2.43E-19 | -0.26996 | 3.05E-09 | -0.23697 | 2.20E-07 | -0.19223 |
| 0.403857 | 9.52E-20 | 0.57171  | 6.99E-42 | 0.479446 | 3.24E-28 | 0.30542  | 1.54E-11 | 0.382869 |
| 0.501258 | 4.44E-31 | 0.686052 | 3.14E-66 | 0.583792 | 5.24E-44 | 0.480085 | 2.69E-28 | 0.599847 |

|          |          |          |          |          |          |          |          |          |
|----------|----------|----------|----------|----------|----------|----------|----------|----------|
| 0.376781 | 3.36E-17 | 0.527002 | 9.80E-35 | 0.533196 | 1.16E-35 | 0.29191  | 1.26E-10 | 0.503503 |
| 0.620515 | 4.80E-51 | 0.845164 | #####    | 0.742599 | 5.52E-83 | 0.511784 | 1.55E-32 | 0.65312  |
| 0.368662 | 1.76E-16 | 0.642377 | 1.07E-55 | 0.571355 | 8.05E-42 | 0.392442 | 1.21E-18 | 0.557488 |
| 0.601365 | 2.92E-47 | 0.784765 | 1.17E-98 | 0.649692 | 2.43E-57 | 0.395323 | 6.41E-19 | 0.522506 |
| 0.537971 | 2.17E-36 | 0.714937 | 2.81E-74 | 0.604061 | 8.86E-48 | 0.451992 | 6.82E-25 | 0.558171 |
| -0.20912 | 5.18E-06 | -0.51325 | 9.63E-33 | -0.42004 | 2.19E-21 | -0.15788 | 0.00062  | -0.24743 |
| 0.367373 | 2.28E-16 | 0.559421 | 8.27E-40 | 0.451739 | 7.30E-25 | 0.328807 | 3.09E-13 | 0.560406 |
| 0.645756 | 1.88E-56 | 0.845056 | #####    | 0.740851 | 2.11E-82 | 0.49026  | 1.31E-29 | 0.589038 |
| 0.455632 | 2.57E-25 | 0.696617 | 4.63E-69 | 0.604164 | 8.47E-48 | 0.436206 | 4.10E-23 | 0.638069 |
| 0.339401 | 4.71E-14 | 0.351176 | 5.32E-15 | 0.328947 | 3.02E-13 | 0.27903  | 8.46E-10 | 0.283741 |
| 0.49096  | 1.06E-29 | 0.543742 | 2.76E-37 | 0.474618 | 1.31E-27 | 0.433662 | 7.78E-23 | 0.563513 |
| -0.22221 | 1.23E-06 | -0.46663 | 1.26E-26 | -0.41523 | 6.87E-21 | -0.16001 | 0.00052  | -0.14977 |
| 0.401121 | 1.77E-19 | 0.726221 | 1.06E-77 | 0.630097 | 4.87E-53 | 0.368429 | 1.84E-16 | 0.440904 |
| 0.206226 | 7.02E-06 | 0.490561 | 1.19E-29 | 0.409799 | 2.44E-20 | 0.193749 | 2.49E-05 | 0.406029 |
| 0.331835 | 1.82E-13 | 0.404424 | 8.37E-20 | 0.315851 | 2.81E-12 | 0.322597 | 9.03E-13 | 0.409309 |
| 0.35181  | 4.72E-15 | 0.484053 | 8.37E-29 | 0.467609 | 9.56E-27 | 0.294428 | 8.58E-11 | 0.498752 |
| 0.679779 | 1.33E-64 | 0.699549 | 7.20E-70 | 0.698791 | 1.17E-69 | 0.488846 | 2.00E-29 | 0.608366 |
| 0.271969 | 2.31E-09 | 0.340096 | 4.15E-14 | 0.363708 | 4.72E-16 | 0.060507 | 0.19181  | 0.322408 |
| 0.395856 | 5.70E-19 | 0.60165  | 2.57E-47 | 0.263555 | 7.35E-09 | 0.395668 | 5.95E-19 | 0.6335   |
| 0.55872  | 1.08E-39 | 0.820009 | #####    | 0.699027 | 1.00E-69 | 0.395676 | 5.94E-19 | 0.694304 |
| 0.36048  | 8.90E-16 | 0.39124  | 1.57E-18 | 0.261582 | 9.59E-09 | 0.335024 | 1.03E-13 | 0.400353 |
| 0.346671 | 1.24E-14 | 0.420136 | 2.14E-21 | 0.327679 | 3.77E-13 | 0.244224 | 9.05E-08 | 0.04894  |
| 0.611127 | 3.70E-49 | 0.717472 | 4.95E-75 | 0.731605 | 2.15E-79 | 0.404148 | 8.91E-20 | 0.529116 |
| 0.279178 | 8.28E-10 | 0.523377 | 3.35E-34 | 0.438235 | 2.45E-23 | 0.273439 | 1.88E-09 | 0.502001 |
| 0.308034 | 1.01E-11 | 0.468919 | 6.61E-27 | 0.339688 | 4.47E-14 | 0.329699 | 2.65E-13 | 0.367437 |
| 0.364378 | 4.14E-16 | 0.542228 | 4.75E-37 | 0.455102 | 2.97E-25 | 0.168517 | 0.00025  | 0.231982 |
| 0.669468 | 5.10E-62 | 0.735564 | 1.15E-80 | 0.640377 | 2.95E-55 | 0.332161 | 1.72E-13 | 0.461508 |
| 0.360746 | 8.45E-16 | 0.445673 | 3.61E-24 | 0.30528  | 1.57E-11 | 0.241206 | 1.32E-07 | 0.30658  |
| 0.339536 | 4.59E-14 | 0.607695 | 1.75E-48 | 0.398889 | 2.91E-19 | 0.341239 | 3.37E-14 | 0.592773 |
| -0.15092 | 0.00107  | -0.42738 | 3.70E-22 | -0.24236 | 1.14E-07 | -0.24792 | 5.69E-08 | -0.45454 |
| 0.417444 | 4.07E-21 | 0.682608 | 2.48E-65 | 0.487163 | 3.32E-29 | 0.439231 | 1.90E-23 | 0.616969 |
| 0.458206 | 1.28E-25 | 0.705872 | 1.20E-71 | 0.458482 | 1.19E-25 | 0.461816 | 4.78E-26 | 0.52593  |
| 0.362347 | 6.18E-16 | 0.425351 | 6.07E-22 | 0.416459 | 5.14E-21 | 0.305303 | 1.57E-11 | 0.539471 |
| 0.42595  | 5.24E-22 | 0.457587 | 1.52E-25 | 0.322576 | 9.06E-13 | 0.372273 | 8.47E-17 | 0.5506   |
| 0.061116 | 0.18736  | 0.437783 | 2.75E-23 | 0.20873  | 5.40E-06 | 0.135169 | 0.00343  | 0.300549 |
| 0.207115 | 6.40E-06 | 0.396941 | 4.49E-19 | 0.305847 | 1.44E-11 | 0.169208 | 0.00024  | 0.275801 |
| 0.450007 | 1.16E-24 | 0.683644 | 1.34E-65 | 0.591133 | 2.42E-45 | 0.319391 | 1.55E-12 | 0.618044 |
| 0.40569  | 6.27E-20 | 0.433583 | 7.93E-23 | 0.320592 | 1.27E-12 | 0.321755 | 1.04E-12 | 0.383862 |
| 0.634347 | 6.03E-54 | 0.662627 | 2.32E-60 | 0.497943 | 1.25E-30 | 0.47817  | 4.70E-28 | 0.641973 |
| 0.505544 | 1.15E-31 | 0.636561 | 2.01E-54 | 0.410332 | 2.16E-20 | 0.472403 | 2.47E-27 | 0.591774 |
| 0.308995 | 8.65E-12 | 0.397287 | 4.16E-19 | 0.351719 | 4.80E-15 | 0.279579 | 7.82E-10 | 0.205143 |
| 0.317625 | 2.09E-12 | 0.427833 | 3.30E-22 | 0.283515 | 4.41E-10 | 0.285144 | 3.47E-10 | 0.503166 |
| 0.31929  | 1.58E-12 | 0.376937 | 3.25E-17 | 0.292756 | 1.11E-10 | 0.273155 | 1.95E-09 | 0.359003 |
| 0.512215 | 1.35E-32 | 0.568861 | 2.15E-41 | 0.448998 | 1.51E-24 | 0.272243 | 2.22E-09 | 0.321655 |
| 0.272516 | 2.14E-09 | 0.368932 | 1.67E-16 | 0.38605  | 4.79E-18 | 0.256116 | 1.98E-08 | 0.250967 |

|          |          |          |          |          |          |          |          |          |
|----------|----------|----------|----------|----------|----------|----------|----------|----------|
| -0.34043 | 3.91E-14 | -0.59275 | 1.22E-45 | -0.52635 | 1.22E-34 | -0.3261  | 4.95E-13 | -0.28186 |
| 0.298698 | 4.44E-11 | 0.413065 | 1.14E-20 | 0.27572  | 1.36E-09 | 0.166547 | 0.0003   | 0.246828 |
| 0.456087 | 2.28E-25 | 0.4851   | 6.14E-29 | 0.462378 | 4.09E-26 | 0.344921 | 1.71E-14 | 0.464086 |
| 0.008583 | 0.85324  | -0.40906 | 2.90E-20 | -0.17054 | 0.00021  | -0.19628 | 1.94E-05 | -0.22135 |
| -0.33969 | 4.47E-14 | -0.54141 | 6.38E-37 | -0.49808 | 1.20E-30 | -0.24902 | 4.95E-08 | -0.31546 |
| -0.26315 | 7.76E-09 | -0.59518 | 4.30E-46 | -0.43159 | 1.31E-22 | -0.4017  | 1.55E-19 | -0.40815 |
| 0.591711 | 1.89E-45 | 0.622154 | 2.21E-51 | 0.530598 | 2.85E-35 | 0.39932  | 2.64E-19 | 0.431934 |
| -0.08624 | 0.0626   | -0.39557 | 6.08E-19 | -0.3533  | 3.56E-15 | -0.0324  | 0.48492  | -0.1833  |
| -0.13802 | 0.0028   | -0.49103 | 1.04E-29 | -0.35603 | 2.11E-15 | -0.19606 | 1.98E-05 | -0.36858 |
| -0.49939 | 7.97E-31 | -0.7248  | 2.94E-77 | -0.59356 | 8.60E-46 | -0.31074 | 6.51E-12 | -0.40888 |
| 0.261753 | 9.37E-09 | 0.566605 | 5.20E-41 | 0.411262 | 1.74E-20 | 0.415726 | 6.11E-21 | 0.539392 |
| 0.37168  | 9.56E-17 | 0.37606  | 3.90E-17 | 0.375164 | 4.69E-17 | 0.213036 | 3.40E-06 | 0.1633   |
| 0.249766 | 4.50E-08 | 0.38381  | 7.72E-18 | 0.401615 | 1.58E-19 | 0.25011  | 4.31E-08 | 0.207497 |
| 0.53235  | 1.56E-35 | 0.537209 | 2.84E-36 | 0.512994 | 1.05E-32 | 0.418723 | 3.00E-21 | 0.249124 |
| 0.509372 | 3.38E-32 | 0.76952  | 1.32E-92 | 0.677325 | 5.59E-64 | 0.468718 | 7.00E-27 | 0.42343  |
| 0.416546 | 5.03E-21 | 0.760781 | 2.41E-89 | 0.61073  | 4.43E-49 | 0.455746 | 2.50E-25 | 0.518248 |
| 0.401599 | 1.59E-19 | 0.502849 | 2.69E-31 | 0.430997 | 1.51E-22 | 0.307603 | 1.08E-11 | 0.455214 |
| 0.314759 | 3.37E-12 | 0.451346 | 8.10E-25 | 0.414554 | 8.05E-21 | 0.073003 | 0.11515  | 0.052271 |
| 0.523976 | 2.74E-34 | 0.658467 | 2.26E-59 | 0.576099 | 1.21E-42 | 0.408763 | 3.10E-20 | 0.648433 |
| 0.629439 | 6.70E-53 | 0.742858 | 4.52E-83 | 0.694622 | 1.62E-68 | 0.483118 | 1.10E-28 | 0.686295 |
| 0.554271 | 5.77E-39 | 0.492388 | 6.86E-30 | 0.393721 | 9.12E-19 | 0.197616 | 1.70E-05 | 0.248014 |
| 0.420734 | 1.85E-21 | 0.688471 | 7.24E-67 | 0.596701 | 2.23E-46 | 0.354284 | 2.95E-15 | 0.492775 |
| 0.324943 | 6.04E-13 | 0.721683 | 2.65E-76 | 0.54399  | 2.52E-37 | 0.292754 | 1.11E-10 | 0.395007 |
| 0.688454 | 7.31E-67 | 0.845131 | #####    | 0.838348 | #####    | 0.454427 | 3.56E-25 | 0.543869 |
| 0.501802 | 3.74E-31 | 0.630822 | 3.42E-53 | 0.549343 | 3.59E-38 | 0.471977 | 2.78E-27 | 0.572499 |
| 0.491582 | 8.77E-30 | 0.755058 | 2.78E-87 | 0.516461 | 3.36E-33 | 0.444475 | 4.93E-24 | 0.623895 |
| 0.50199  | 3.53E-31 | 0.698796 | 1.16E-69 | 0.493074 | 5.57E-30 | 0.376535 | 3.54E-17 | 0.484894 |
| 0.232027 | 3.98E-07 | 0.437685 | 2.82E-23 | 0.373405 | 6.73E-17 | 0.131099 | 0.00454  | -0.00674 |
| 0.417041 | 4.47E-21 | 0.466428 | 1.33E-26 | 0.450968 | 8.96E-25 | 0.403298 | 1.08E-19 | 0.369737 |
| 0.370322 | 1.26E-16 | 0.753924 | 7.02E-87 | 0.64757  | 7.34E-57 | 0.336745 | 7.60E-14 | 0.568587 |
| -0.3005  | 3.35E-11 | -0.55001 | 2.80E-38 | -0.39931 | 2.65E-19 | -0.40698 | 4.67E-20 | -0.35403 |
| 0.271326 | 2.52E-09 | 0.618084 | 1.50E-50 | 0.595198 | 4.27E-46 | 0.37667  | 3.44E-17 | 0.34585  |
| 0.632601 | 1.43E-53 | 0.767632 | 6.87E-92 | 0.540582 | 8.57E-37 | 0.474942 | 1.19E-27 | 0.50421  |
| 0.572766 | 4.60E-42 | 0.695657 | 8.46E-69 | 0.550607 | 2.25E-38 | 0.431518 | 1.33E-22 | 0.570931 |
| 0.330553 | 2.28E-13 | 0.360191 | 9.42E-16 | 0.301091 | 3.05E-11 | 0.25987  | 1.21E-08 | 0.260105 |
| -0.11716 | 0.01129  | -0.38852 | 2.82E-18 | -0.32736 | 3.98E-13 | -0.19138 | 3.14E-05 | -0.29347 |
| -0.51002 | 2.74E-32 | -0.53984 | 1.11E-36 | -0.51726 | 2.58E-33 | -0.22925 | 5.51E-07 | -0.22291 |
| -0.17334 | 0.00017  | -0.34724 | 1.11E-14 | -0.26854 | 3.72E-09 | -0.10215 | 0.0273   | -0.31789 |
| 0.487653 | 2.87E-29 | 0.720946 | 4.44E-76 | 0.513924 | 7.72E-33 | 0.479394 | 3.29E-28 | 0.712353 |
| 0.601525 | 2.72E-47 | 0.761746 | 1.07E-89 | 0.49088  | 1.08E-29 | 0.556956 | 2.11E-39 | 0.691466 |
| 0.601206 | 3.13E-47 | 0.702372 | 1.17E-70 | 0.577651 | 6.47E-43 | 0.470745 | 3.95E-27 | 0.660343 |
| 0.35729  | 1.65E-15 | 0.668368 | 9.49E-62 | 0.530451 | 3.00E-35 | 0.359365 | 1.11E-15 | 0.408353 |
| 0.357035 | 1.74E-15 | 0.508834 | 4.01E-32 | 0.390533 | 1.83E-18 | 0.289124 | 1.92E-10 | 0.478436 |
| 0.377568 | 2.86E-17 | 0.601804 | 2.41E-47 | 0.373546 | 6.54E-17 | 0.350237 | 6.35E-15 | 0.578397 |
| 0.385757 | 5.10E-18 | 0.605658 | 4.36E-48 | 0.591571 | 2.01E-45 | 0.298975 | 4.25E-11 | 0.577179 |

|          |          |          |          |          |          |          |          |           |
|----------|----------|----------|----------|----------|----------|----------|----------|-----------|
| 0.328937 | 3.02E-13 | 0.457141 | 1.71E-25 | 0.404259 | 8.69E-20 | 0.159045 | 0.00056  | 0.174329  |
| 0.500479 | 5.66E-31 | 0.821177 | #####    | 0.532957 | 1.26E-35 | 0.471956 | 2.80E-27 | 0.622308  |
| 0.154882 | 0.00078  | 0.418692 | 3.02E-21 | 0.330641 | 2.25E-13 | 0.134223 | 0.00366  | 0.490817  |
| 0.481752 | 1.65E-28 | 0.528211 | 6.48E-35 | 0.535697 | 4.83E-36 | 0.187544 | 4.54E-05 | 0.351535  |
| 0.325317 | 5.67E-13 | 0.73617  | 7.30E-81 | 0.542382 | 4.50E-37 | 0.420334 | 2.04E-21 | 0.645526  |
| -0.12322 | 0.00768  | -0.38324 | 8.71E-18 | -0.28144 | 5.97E-10 | -0.09749 | 0.03519  | -0.13162  |
| 0.470824 | 3.86E-27 | 0.469847 | 5.09E-27 | 0.519684 | 1.15E-33 | 0.288693 | 2.05E-10 | 0.510146  |
| 0.628932 | 8.58E-53 | 0.730332 | 5.45E-79 | 0.465734 | 1.61E-26 | 0.484507 | 7.32E-29 | 0.537217  |
| 0.514536 | 6.32E-33 | 0.853893 | #####    | 0.778668 | 3.52E-96 | 0.394626 | 7.48E-19 | 0.624762  |
| 0.230563 | 4.72E-07 | 0.494765 | 3.32E-30 | 0.495878 | 2.36E-30 | 0.166038 | 0.00031  | 0.381974  |
| 0.478914 | 3.78E-28 | 0.653905 | 2.62E-58 | 0.527784 | 7.50E-35 | 0.420821 | 1.82E-21 | 0.39566   |
| 0.522528 | 4.46E-34 | 0.77223  | 1.20E-93 | 0.659887 | 1.04E-59 | 0.4071   | 4.54E-20 | 0.554778  |
| 0.535265 | 5.62E-36 | 0.606256 | 3.33E-48 | 0.559546 | 7.89E-40 | 0.376623 | 3.47E-17 | 0.432573  |
| 0.392672 | 1.15E-18 | 0.559468 | 8.13E-40 | 0.454839 | 3.19E-25 | 0.388111 | 3.08E-18 | 0.359131  |
| 0.21207  | 3.78E-06 | 0.444033 | 5.53E-24 | 0.284809 | 3.64E-10 | 0.330604 | 2.26E-13 | 0.572727  |
| 0.693331 | 3.63E-68 | 0.785628 | 5.13E-99 | 0.651018 | 1.21E-57 | 0.429839 | 2.02E-22 | 0.593483  |
| -0.50107 | 4.70E-31 | -0.66607 | 3.44E-61 | -0.59058 | 3.06E-45 | -0.35529 | 2.43E-15 | -0.34703  |
| 0.575677 | 1.43E-42 | 0.730698 | 4.17E-79 | 0.650151 | 1.91E-57 | 0.356989 | 1.75E-15 | 0.510478  |
| 0.385436 | 5.46E-18 | 0.496523 | 1.93E-30 | 0.544104 | 2.42E-37 | 0.151678 | 0.00101  | 0.353983  |
| 0.370968 | 1.10E-16 | 0.506545 | 8.35E-32 | 0.486168 | 4.47E-29 | 0.271581 | 2.44E-09 | 0.420936  |
| 0.539683 | 1.18E-36 | 0.652795 | 4.72E-58 | 0.628194 | 1.23E-52 | 0.341769 | 3.06E-14 | 0.240702  |
| 0.378503 | 2.35E-17 | 0.612343 | 2.12E-49 | 0.517304 | 2.54E-33 | 0.267829 | 4.10E-09 | 0.583057  |
| 0.34997  | 6.68E-15 | 0.701918 | 1.57E-70 | 0.511919 | 1.48E-32 | 0.418544 | 3.13E-21 | 0.56173   |
| 0.649347 | 2.91E-57 | 0.868422 | #####    | 0.762076 | 8.09E-90 | 0.475455 | 1.03E-27 | 0.594051  |
| 0.307212 | 1.15E-11 | 0.384145 | 7.19E-18 | 0.37596  | 3.98E-17 | 0.245514 | 7.71E-08 | 0.305196  |
| -0.31351 | 4.14E-12 | -0.53321 | 1.15E-35 | -0.41797 | 3.59E-21 | -0.24412 | 9.17E-08 | -0.29474  |
| 0.48193  | 1.57E-28 | 0.736137 | 7.48E-81 | 0.600899 | 3.58E-47 | 0.26537  | 5.74E-09 | 0.433611  |
| -0.42895 | 2.51E-22 | -0.53679 | 3.29E-36 | -0.51385 | 7.92E-33 | -0.18501 | 5.77E-05 | -0.36571  |
| 0.642974 | 7.86E-56 | 0.763996 | 1.58E-90 | 0.518674 | 1.62E-33 | 0.414187 | 8.77E-21 | 0.674048  |
| 0.46641  | 1.34E-26 | 0.793238 | #####    | 0.718916 | 1.83E-75 | 0.315185 | 3.14E-12 | 0.476825  |
| 0.350273 | 6.31E-15 | 0.475852 | 9.18E-28 | 0.492623 | 6.39E-30 | 0.048731 | 0.29331  | -8.36E-05 |
| 0.325778 | 5.23E-13 | 0.588764 | 6.59E-45 | 0.375445 | 4.43E-17 | 0.402742 | 1.23E-19 | 0.530699  |
| 0.531778 | 1.90E-35 | 0.68562  | 4.08E-66 | 0.549119 | 3.89E-38 | 0.326865 | 4.34E-13 | 0.384281  |
| 0.224145 | 9.92E-07 | 0.530194 | 3.28E-35 | 0.255587 | 2.12E-08 | 0.365593 | 3.25E-16 | 0.485442  |
| 0.133691 | 0.0038   | 0.337855 | 6.22E-14 | 0.176165 | 0.00013  | 0.29498  | 7.89E-11 | 0.262539  |
| 0.458423 | 1.21E-25 | 0.572009 | 6.21E-42 | 0.380949 | 1.41E-17 | 0.478446 | 4.33E-28 | 0.557846  |
| 0.278728 | 8.84E-10 | 0.538106 | 2.07E-36 | 0.451625 | 7.52E-25 | 0.210238 | 4.60E-06 | 0.18602   |
| 0.189579 | 3.73E-05 | 0.395387 | 6.32E-19 | 0.389643 | 2.22E-18 | 0.075986 | 0.101    | 0.011659  |
| 0.297771 | 5.13E-11 | 0.442086 | 9.14E-24 | 0.234656 | 2.91E-07 | 0.232193 | 3.90E-07 | 0.327897  |
| 0.485451 | 5.53E-29 | 0.59877  | 9.08E-47 | 0.360648 | 8.62E-16 | 0.528231 | 6.44E-35 | 0.552904  |
| 0.669805 | 4.22E-62 | 0.636954 | 1.65E-54 | 0.586724 | 1.55E-44 | 0.397529 | 3.94E-19 | 0.409369  |
| 0.366913 | 2.50E-16 | 0.581526 | 1.33E-43 | 0.428631 | 2.72E-22 | 0.365767 | 3.14E-16 | 0.583683  |
| 0.376214 | 3.78E-17 | 0.550104 | 2.71E-38 | 0.467973 | 8.63E-27 | 0.483247 | 1.06E-28 | 0.696285  |
| 0.558794 | 1.05E-39 | 0.695425 | 9.80E-69 | 0.565475 | 8.08E-41 | 0.497724 | 1.33E-30 | 0.625808  |
| 0.494523 | 3.58E-30 | 0.542687 | 4.03E-37 | 0.441721 | 1.00E-23 | 0.472399 | 2.47E-27 | 0.539096  |

|          |          |          |          |          |          |          |          |          |
|----------|----------|----------|----------|----------|----------|----------|----------|----------|
| 0.450495 | 1.02E-24 | 0.656802 | 5.55E-59 | 0.566812 | 4.80E-41 | 0.312063 | 5.25E-12 | 0.409372 |
| 0.635218 | 3.92E-54 | 0.675748 | 1.40E-63 | 0.625113 | 5.40E-52 | 0.547795 | 6.32E-38 | 0.54621  |
| 0.558864 | 1.02E-39 | 0.614871 | 6.66E-50 | 0.455929 | 2.37E-25 | 0.426215 | 4.91E-22 | 0.484798 |
| 0.483729 | 9.21E-29 | 0.564938 | 9.95E-41 | 0.459494 | 9.02E-26 | 0.41643  | 5.17E-21 | 0.549209 |
| 0.211389 | 4.06E-06 | 0.341006 | 3.52E-14 | 0.374045 | 5.90E-17 | 0.13802  | 0.0028   | 0.184288 |
| 0.509793 | 2.95E-32 | 0.834244 | #####    | 0.608518 | 1.21E-48 | 0.442393 | 8.45E-24 | 0.674164 |
| 0.571158 | 8.70E-42 | 0.851692 | #####    | 0.825758 | #####    | 0.506909 | 7.43E-32 | 0.596345 |
| 0.287042 | 2.62E-10 | 0.364511 | 4.03E-16 | 0.341046 | 3.49E-14 | 0.180514 | 8.75E-05 | 0.048075 |
| 0.380508 | 1.55E-17 | 0.612098 | 2.38E-49 | 0.495457 | 2.68E-30 | 0.227349 | 6.87E-07 | 0.242908 |
| 0.503168 | 2.44E-31 | 0.659184 | 1.53E-59 | 0.568891 | 2.13E-41 | 0.425884 | 5.33E-22 | 0.66785  |
| 0.376484 | 3.57E-17 | 0.533034 | 1.23E-35 | 0.398394 | 3.25E-19 | 0.196724 | 1.85E-05 | 0.430127 |
| -0.07304 | 0.11496  | -0.54347 | 3.04E-37 | -0.38983 | 2.13E-18 | -0.17207 | 0.00019  | -0.28216 |
| 0.513376 | 9.23E-33 | 0.781995 | 1.60E-97 | 0.733957 | 3.79E-80 | 0.43499  | 5.57E-23 | 0.513131 |
| 0.465602 | 1.67E-26 | 0.639708 | 4.13E-55 | 0.639606 | 4.35E-55 | 0.362789 | 5.66E-16 | 0.529401 |
| 0.516074 | 3.81E-33 | 0.534037 | 8.64E-36 | 0.477425 | 5.83E-28 | 0.331984 | 1.77E-13 | 0.555824 |
| 0.533306 | 1.12E-35 | 0.703735 | 4.86E-71 | 0.528501 | 5.87E-35 | 0.441823 | 9.78E-24 | 0.663029 |
| 0.283349 | 4.52E-10 | 0.493492 | 4.90E-30 | 0.416512 | 5.07E-21 | 0.300056 | 3.59E-11 | 0.322118 |
| 0.415588 | 6.31E-21 | 0.563582 | 1.68E-40 | 0.54584  | 1.29E-37 | 0.243096 | 1.04E-07 | 0.120341 |
| 0.556118 | 2.89E-39 | 0.693577 | 3.11E-68 | 0.601731 | 2.48E-47 | 0.469729 | 5.26E-27 | 0.629787 |
| 0.303717 | 2.02E-11 | 0.506863 | 7.54E-32 | 0.386063 | 4.78E-18 | 0.283533 | 4.40E-10 | 0.339013 |
| 0.167767 | 0.00027  | 0.410462 | 2.09E-20 | 0.399319 | 2.64E-19 | 0.012844 | 0.78191  | 0.097663 |
| 0.523206 | 3.55E-34 | 0.577309 | 7.43E-43 | 0.490165 | 1.35E-29 | 0.407566 | 4.08E-20 | 0.405248 |
| -0.22566 | 8.34E-07 | -0.56815 | 2.84E-41 | -0.43235 | 1.08E-22 | -0.29104 | 1.44E-10 | -0.6131  |
| 0.538447 | 1.83E-36 | 0.706091 | 1.04E-71 | 0.58173  | 1.23E-43 | 0.439051 | 1.99E-23 | 0.450439 |
| 0.668336 | 9.66E-62 | 0.877466 | #####    | 0.735791 | 9.70E-81 | 0.55545  | 3.71E-39 | 0.705123 |
| 0.477168 | 6.28E-28 | 0.596283 | 2.67E-46 | 0.486245 | 4.36E-29 | 0.396874 | 4.55E-19 | 0.269419 |
| 0.464993 | 1.98E-26 | 0.568211 | 2.78E-41 | 0.578067 | 5.46E-43 | 0.203271 | 9.54E-06 | 0.246122 |
| 0.685528 | 4.31E-66 | 0.785491 | 5.85E-99 | 0.60242  | 1.83E-47 | 0.479018 | 3.67E-28 | 0.606539 |
| 0.559896 | 6.91E-40 | 0.737337 | 3.04E-81 | 0.77375  | 3.08E-94 | 0.483796 | 9.03E-29 | 0.62425  |
| 0.273362 | 1.90E-09 | 0.724992 | 2.56E-77 | 0.429618 | 2.13E-22 | 0.374042 | 5.91E-17 | 0.456103 |
| 0.194171 | 2.39E-05 | 0.482693 | 1.25E-28 | 0.292917 | 1.08E-10 | 0.159936 | 0.00052  | 0.13581  |
| 0.694523 | 1.72E-68 | 0.831979 | #####    | 0.635983 | 2.68E-54 | 0.432152 | 1.13E-22 | 0.567211 |
| 0.331362 | 1.98E-13 | 0.538437 | 1.84E-36 | 0.323497 | 7.74E-13 | 0.327505 | 3.88E-13 | 0.39047  |
| 0.231362 | 4.30E-07 | 0.371344 | 1.02E-16 | 0.268423 | 3.78E-09 | 0.162165 | 0.00043  | 0.233859 |
| 0.335583 | 9.36E-14 | 0.536546 | 3.59E-36 | 0.398999 | 2.84E-19 | 0.247784 | 5.79E-08 | 0.436295 |
| 0.390536 | 1.83E-18 | 0.451087 | 8.68E-25 | 0.230567 | 4.72E-07 | 0.248048 | 5.60E-08 | 0.365436 |
| 0.640955 | 2.20E-55 | 0.725956 | 1.28E-77 | 0.581697 | 1.24E-43 | 0.468217 | 8.06E-27 | 0.609778 |
| 0.709479 | 1.11E-72 | 0.897132 | #####    | 0.785862 | 4.10E-99 | 0.573641 | 3.24E-42 | 0.693626 |
| -0.16484 | 0.00035  | -0.38062 | 1.51E-17 | -0.3605  | 8.87E-16 | -0.17922 | 9.85E-05 | -0.30776 |
| 0.557351 | 1.81E-39 | 0.732016 | 1.59E-79 | 0.689769 | 3.27E-67 | 0.367501 | 2.22E-16 | 0.530066 |
| 0.396296 | 5.18E-19 | 0.388275 | 2.98E-18 | 0.324556 | 6.46E-13 | 0.227836 | 6.49E-07 | 0.107524 |
| 0.681684 | 4.30E-65 | 0.82418  | #####    | 0.618042 | 1.53E-50 | 0.552451 | 1.14E-38 | 0.612862 |
| 0.36461  | 3.95E-16 | 0.685531 | 4.31E-66 | 0.475415 | 1.04E-27 | 0.347262 | 1.11E-14 | 0.591474 |
| 0.426974 | 4.08E-22 | 0.546488 | 1.02E-37 | 0.494097 | 4.07E-30 | 0.370734 | 1.16E-16 | 0.430951 |
| 0.444317 | 5.13E-24 | 0.702063 | 1.43E-70 | 0.486023 | 4.66E-29 | 0.347329 | 1.10E-14 | 0.650029 |



|          |          |          |          |          |          |          |          |          |
|----------|----------|----------|----------|----------|----------|----------|----------|----------|
| 0.535423 | 5.32E-36 | 0.631272 | 2.74E-53 | 0.473016 | 2.07E-27 | 0.520126 | 9.97E-34 | 0.68392  |
| 0.440129 | 1.51E-23 | 0.482684 | 1.25E-28 | 0.468396 | 7.66E-27 | 0.303385 | 2.13E-11 | 0.318497 |
| 0.37349  | 6.61E-17 | 0.550825 | 2.08E-38 | 0.407052 | 4.59E-20 | 0.41203  | 1.45E-20 | 0.571269 |
| 0.300688 | 3.25E-11 | 0.502926 | 2.63E-31 | 0.384361 | 6.87E-18 | 0.259105 | 1.33E-08 | 0.422168 |
| -0.2199  | 1.60E-06 | -0.62741 | 1.80E-52 | -0.47713 | 6.35E-28 | -0.26055 | 1.10E-08 | -0.29233 |
| 0.60654  | 2.94E-48 | 0.727158 | 5.43E-78 | 0.627259 | 1.93E-52 | 0.432684 | 9.94E-23 | 0.647837 |
| 0.543154 | 3.41E-37 | 0.728437 | 2.16E-78 | 0.656479 | 6.60E-59 | 0.335566 | 9.39E-14 | 0.529375 |
| 0.504971 | 1.38E-31 | 0.575358 | 1.63E-42 | 0.556727 | 2.29E-39 | 0.419747 | 2.35E-21 | 0.659665 |
| 0.348041 | 9.59E-15 | 0.466956 | 1.15E-26 | 0.397545 | 3.92E-19 | 0.267863 | 4.08E-09 | 0.244691 |
| 0.444075 | 5.47E-24 | 0.691319 | 1.26E-67 | 0.61693  | 2.57E-50 | 0.373405 | 6.73E-17 | 0.469864 |
| 0.317624 | 2.09E-12 | 0.515287 | 4.94E-33 | 0.508602 | 4.32E-32 | 0.175435 | 0.00014  | 0.158231 |
| 0.396245 | 5.23E-19 | 0.674846 | 2.36E-63 | 0.661495 | 4.33E-60 | 0.232729 | 3.66E-07 | 0.234753 |
| 0.524473 | 2.31E-34 | 0.693803 | 2.70E-68 | 0.63004  | 5.00E-53 | 0.388729 | 2.70E-18 | 0.326738 |
| 0.663444 | 1.48E-60 | 0.74293  | 4.27E-83 | 0.716339 | 1.08E-74 | 0.394024 | 8.54E-19 | 0.418976 |
| 0.327363 | 3.98E-13 | 0.491532 | 8.90E-30 | 0.344799 | 1.75E-14 | 0.331324 | 1.99E-13 | 0.204024 |
| 0.323338 | 7.95E-13 | 0.546395 | 1.05E-37 | 0.461279 | 5.54E-26 | 0.32444  | 6.59E-13 | 0.591005 |
| 0.260384 | 1.13E-08 | 0.503972 | 1.89E-31 | 0.279329 | 8.10E-10 | 0.365019 | 3.64E-16 | 0.481517 |
| 0.461752 | 4.86E-26 | 0.594512 | 5.73E-46 | 0.435372 | 5.06E-23 | 0.370989 | 1.10E-16 | 0.324058 |
| 0.621974 | 2.41E-51 | 0.88536  | #####    | 0.742039 | 8.50E-83 | 0.428138 | 3.07E-22 | 0.598341 |
| 0.37967  | 1.84E-17 | 0.6139   | 1.04E-49 | 0.35286  | 3.87E-15 | 0.451052 | 8.76E-25 | 0.546534 |
| 0.572486 | 5.14E-42 | 0.808936 | #####    | 0.548333 | 5.19E-38 | 0.561925 | 3.18E-40 | 0.824252 |
| 0.311825 | 5.46E-12 | 0.658674 | 2.02E-59 | 0.611291 | 3.44E-49 | 0.376801 | 3.35E-17 | 0.520171 |
| -0.3353  | 9.85E-14 | -0.42133 | 1.60E-21 | -0.40717 | 4.47E-20 | -0.18098 | 8.39E-05 | -0.17229 |
| -0.28725 | 2.54E-10 | -0.49072 | 1.14E-29 | -0.38697 | 3.94E-18 | -0.22119 | 1.39E-06 | -0.41192 |
| 0.638961 | 6.02E-55 | 0.732469 | 1.14E-79 | 0.712835 | 1.17E-73 | 0.444594 | 4.78E-24 | 0.565454 |
| 0.395455 | 6.23E-19 | 0.4306   | 1.67E-22 | 0.442761 | 7.68E-24 | 0.215586 | 2.58E-06 | 0.184559 |
| 0.621957 | 2.43E-51 | 0.795948 | #####    | 0.649389 | 2.84E-57 | 0.489291 | 1.75E-29 | 0.736328 |
| -0.17034 | 0.00022  | -0.46876 | 6.91E-27 | -0.45778 | 1.44E-25 | -0.12279 | 0.0079   | -0.16629 |
| 0.46327  | 3.20E-26 | 0.586176 | 1.95E-44 | 0.476459 | 7.71E-28 | 0.457733 | 1.46E-25 | 0.66202  |
| 0.702836 | 8.70E-71 | 0.831034 | #####    | 0.641719 | 1.49E-55 | 0.536818 | 3.26E-36 | 0.6945   |
| -0.02854 | 0.53844  | -0.3876  | 3.44E-18 | -0.17068 | 0.00021  | -0.19317 | 2.64E-05 | -0.39644 |
| 0.546206 | 1.13E-37 | 0.647749 | 6.69E-57 | 0.520689 | 8.26E-34 | 0.577313 | 7.41E-43 | 0.625804 |
| 0.444672 | 4.68E-24 | 0.611368 | 3.32E-49 | 0.524286 | 2.47E-34 | 0.245018 | 8.20E-08 | 0.534311 |
| 0.607602 | 1.82E-48 | 0.881761 | #####    | 0.77568  | 5.39E-95 | 0.469754 | 5.23E-27 | 0.689053 |
| 0.322162 | 9.72E-13 | 0.461617 | 5.04E-26 | 0.463932 | 2.66E-26 | 0.366444 | 2.74E-16 | 0.293433 |
| 0.166377 | 0.00031  | 0.369145 | 1.60E-16 | 0.34847  | 8.86E-15 | 0.15488  | 0.00078  | 0.310812 |
| 0.538191 | 2.01E-36 | 0.651834 | 7.86E-58 | 0.550887 | 2.03E-38 | 0.360103 | 9.58E-16 | 0.426464 |
| 0.580343 | 2.16E-43 | 0.822996 | #####    | 0.61311  | 1.50E-49 | 0.424297 | 7.84E-22 | 0.583582 |
| 0.55835  | 1.24E-39 | 0.836992 | #####    | 0.574415 | 2.38E-42 | 0.492739 | 6.17E-30 | 0.581314 |
| 0.462441 | 4.02E-26 | 0.681894 | 3.80E-65 | 0.503337 | 2.31E-31 | 0.402682 | 1.24E-19 | 0.590058 |
| 0.611653 | 2.91E-49 | 0.651325 | 1.03E-57 | 0.647568 | 7.35E-57 | 0.326433 | 4.67E-13 | 0.280967 |
| 0.556583 | 2.42E-39 | 0.674638 | 2.66E-63 | 0.494248 | 3.89E-30 | 0.514483 | 6.43E-33 | 0.578405 |
| 0.531862 | 1.84E-35 | 0.683463 | 1.49E-65 | 0.491054 | 1.03E-29 | 0.422471 | 1.22E-21 | 0.524717 |
| 0.379185 | 2.04E-17 | 0.738723 | 1.07E-81 | 0.533946 | 8.92E-36 | 0.351522 | 4.99E-15 | 0.551197 |
| 0.274577 | 1.60E-09 | 0.666334 | 2.97E-61 | 0.541323 | 6.58E-37 | 0.208711 | 5.41E-06 | 0.359097 |

|          |          |          |          |          |          |          |          |          |
|----------|----------|----------|----------|----------|----------|----------|----------|----------|
| 0.517928 | 2.07E-33 | 0.611185 | 3.60E-49 | 0.548243 | 5.37E-38 | 0.314303 | 3.63E-12 | 0.43524  |
| 0.698071 | 1.84E-69 | 0.688098 | 9.09E-67 | 0.626097 | 3.37E-52 | 0.430765 | 1.60E-22 | 0.422441 |
| 0.201183 | 1.18E-05 | 0.459566 | 8.85E-26 | 0.356568 | 1.90E-15 | 0.40061  | 1.98E-19 | 0.342827 |
| 0.614924 | 6.49E-50 | 0.677339 | 5.55E-64 | 0.662996 | 1.90E-60 | 0.460804 | 6.31E-26 | 0.548599 |
| -0.09865 | 0.03307  | -0.35041 | 6.15E-15 | -0.32578 | 5.23E-13 | -0.11774 | 0.01088  | -0.25673 |
| 0.614393 | 8.29E-50 | 0.716112 | 1.26E-74 | 0.794933 | #####    | 0.359302 | 1.12E-15 | 0.29946  |
| 0.306614 | 1.27E-11 | 0.310529 | 6.74E-12 | 0.275272 | 1.45E-09 | 0.189439 | 3.79E-05 | 0.337846 |
| 0.733823 | 4.19E-80 | 0.797244 | #####    | 0.772231 | 1.20E-93 | 0.416473 | 5.12E-21 | 0.505295 |
| 0.498713 | 9.82E-31 | 0.759781 | 5.58E-89 | 0.741251 | 1.56E-82 | 0.384413 | 6.79E-18 | 0.447165 |
| 0.583445 | 6.05E-44 | 0.779302 | 1.96E-96 | 0.682928 | 2.05E-65 | 0.478596 | 4.15E-28 | 0.645284 |
| 0.581056 | 1.62E-43 | 0.539451 | 1.28E-36 | 0.425744 | 5.51E-22 | 0.341685 | 3.11E-14 | 0.273427 |
| 0.440762 | 1.29E-23 | 0.441912 | 9.56E-24 | 0.432958 | 9.28E-23 | 0.378443 | 2.38E-17 | 0.363715 |
| 0.370496 | 1.22E-16 | 0.603266 | 1.26E-47 | 0.384476 | 6.70E-18 | 0.437273 | 3.13E-23 | 0.63153  |
| 0.446457 | 2.94E-24 | 0.517613 | 2.30E-33 | 0.381687 | 1.21E-17 | 0.465843 | 1.57E-26 | 0.480938 |
| 0.362349 | 6.17E-16 | 0.573717 | 3.14E-42 | 0.321008 | 1.18E-12 | 0.413674 | 9.90E-21 | 0.519852 |
| 0.731987 | 1.62E-79 | 0.735992 | 8.34E-81 | 0.654657 | 1.75E-58 | 0.48697  | 3.52E-29 | 0.499702 |
| -0.23436 | 3.01E-07 | -0.51678 | 3.02E-33 | -0.43113 | 1.46E-22 | -0.21273 | 3.52E-06 | -0.2369  |
| -0.22646 | 7.61E-07 | -0.52978 | 3.78E-35 | -0.4798  | 2.93E-28 | -0.29332 | 1.02E-10 | -0.27271 |
| 0.456994 | 1.78E-25 | 0.717877 | 3.75E-75 | 0.435144 | 5.36E-23 | 0.386467 | 4.39E-18 | 0.591619 |
| 0.712801 | 1.20E-73 | 0.844464 | #####    | 0.808494 | #####    | 0.4792   | 3.48E-28 | 0.556202 |
| 0.346944 | 1.18E-14 | 0.616903 | 2.60E-50 | 0.330981 | 2.11E-13 | 0.386699 | 4.17E-18 | 0.474663 |
| 0.726319 | 9.91E-78 | 0.835055 | #####    | 0.742014 | 8.66E-83 | 0.483916 | 8.72E-29 | 0.541437 |
| 0.336154 | 8.45E-14 | 0.491431 | 9.18E-30 | 0.490328 | 1.28E-29 | 0.266039 | 5.24E-09 | 0.337201 |
| 0.601652 | 2.57E-47 | 0.796023 | #####    | 0.57     | 1.37E-41 | 0.520227 | 9.64E-34 | 0.65621  |
| 0.657631 | 3.55E-59 | 0.819105 | #####    | 0.611948 | 2.54E-49 | 0.482427 | 1.35E-28 | 0.634375 |
| -0.17443 | 0.00015  | -0.57783 | 6.02E-43 | -0.57042 | 1.17E-41 | -0.1813  | 8.14E-05 | -0.28371 |
| 0.603884 | 9.59E-48 | 0.755144 | 2.59E-87 | 0.75711  | 5.15E-88 | 0.428196 | 3.02E-22 | 0.484549 |
| 0.460177 | 7.49E-26 | 0.668555 | 8.54E-62 | 0.571505 | 7.58E-42 | 0.285281 | 3.40E-10 | 0.373082 |
| 0.583463 | 6.00E-44 | 0.689986 | 2.86E-67 | 0.663039 | 1.85E-60 | 0.352435 | 4.19E-15 | 0.405584 |
| 0.412187 | 1.40E-20 | 0.549534 | 3.34E-38 | 0.541909 | 5.33E-37 | 0.334612 | 1.11E-13 | 0.573147 |
| 0.477593 | 5.55E-28 | 0.729615 | 9.19E-79 | 0.497663 | 1.36E-30 | 0.422514 | 1.21E-21 | 0.606764 |
| -0.41007 | 2.29E-20 | -0.46896 | 6.54E-27 | -0.47652 | 7.57E-28 | -0.26638 | 5.00E-09 | -0.3472  |
| 0.396915 | 4.51E-19 | 0.48087  | 2.14E-28 | 0.393802 | 8.96E-19 | 0.20034  | 1.29E-05 | 0.201784 |
| -0.17356 | 0.00016  | -0.45183 | 7.12E-25 | -0.34398 | 2.04E-14 | -0.08272 | 0.07411  | -0.22317 |
| 0.415024 | 7.21E-21 | 0.831682 | #####    | 0.675736 | 1.41E-63 | 0.400814 | 1.89E-19 | 0.592193 |
| 0.566648 | 5.12E-41 | 0.87801  | #####    | 0.694959 | 1.31E-68 | 0.437951 | 2.63E-23 | 0.579706 |
| 0.200655 | 1.25E-05 | 0.51093  | 2.04E-32 | 0.223983 | 1.01E-06 | 0.314276 | 3.65E-12 | 0.415034 |
| 0.596123 | 2.86E-46 | 0.705466 | 1.57E-71 | 0.523355 | 3.38E-34 | 0.512234 | 1.34E-32 | 0.692949 |
| 0.40442  | 8.38E-20 | 0.707333 | 4.61E-72 | 0.61322  | 1.42E-49 | 0.416409 | 5.20E-21 | 0.420508 |
| 0.320887 | 1.21E-12 | 0.504118 | 1.80E-31 | 0.288657 | 2.06E-10 | 0.336888 | 7.41E-14 | 0.458944 |
| 0.357774 | 1.51E-15 | 0.411517 | 1.64E-20 | 0.340897 | 3.59E-14 | 0.179354 | 9.73E-05 | 0.393182 |
| -0.52237 | 4.70E-34 | -0.56645 | 5.53E-41 | -0.56877 | 2.23E-41 | -0.29574 | 7.02E-11 | -0.2096  |
| -0.28098 | 6.38E-10 | -0.65546 | 1.14E-58 | -0.5692  | 1.88E-41 | -0.40418 | 8.85E-20 | -0.63194 |
| -0.22838 | 6.10E-07 | -0.44783 | 2.05E-24 | -0.46295 | 3.50E-26 | -0.11106 | 0.01635  | -0.16315 |
| -0.56916 | 1.92E-41 | -0.75407 | 6.21E-87 | -0.62186 | 2.54E-51 | -0.39061 | 1.80E-18 | -0.49542 |

|          |          |          |          |          |          |          |          |          |
|----------|----------|----------|----------|----------|----------|----------|----------|----------|
| -0.09893 | 0.03256  | -0.57492 | 1.94E-42 | -0.44626 | 3.09E-24 | -0.21477 | 2.82E-06 | -0.38593 |
| 0.330806 | 2.18E-13 | 0.425102 | 6.45E-22 | 0.341956 | 2.96E-14 | 0.186041 | 5.23E-05 | 0.274444 |
| 0.40412  | 8.97E-20 | 0.565684 | 7.45E-41 | 0.424924 | 6.73E-22 | 0.285505 | 3.29E-10 | 0.345002 |
| 0.612238 | 2.23E-49 | 0.61973  | 6.94E-51 | 0.52189  | 5.52E-34 | 0.475082 | 1.15E-27 | 0.62883  |
| 0.620474 | 4.89E-51 | 0.737572 | 2.55E-81 | 0.571329 | 8.13E-42 | 0.378229 | 2.49E-17 | 0.401406 |
| -0.33727 | 6.91E-14 | -0.46683 | 1.19E-26 | -0.41099 | 1.85E-20 | -0.22618 | 7.86E-07 | -0.21333 |
| -0.14741 | 0.0014   | -0.30592 | 1.42E-11 | -0.37838 | 2.41E-17 | -0.00988 | 0.83134  | -0.22635 |
| -0.26915 | 3.42E-09 | -0.44159 | 1.04E-23 | -0.41417 | 8.81E-21 | -0.09875 | 0.03289  | -0.30919 |
| 0.26623  | 5.11E-09 | 0.36895  | 1.66E-16 | 0.21344  | 3.26E-06 | 0.207068 | 6.43E-06 | 0.310187 |
| 0.558543 | 1.16E-39 | 0.664143 | 1.01E-60 | 0.61328  | 1.38E-49 | 0.383565 | 8.13E-18 | 0.53136  |
| 0.198052 | 1.62E-05 | 0.480072 | 2.70E-28 | 0.310636 | 6.63E-12 | 0.151839 | 0.001    | 0.306384 |
| 0.248825 | 5.07E-08 | 0.491616 | 8.68E-30 | 0.461047 | 5.90E-26 | 0.178692 | 0.0001   | 0.267623 |
| 0.610286 | 5.42E-49 | 0.771017 | 3.52E-93 | 0.55539  | 3.79E-39 | 0.536828 | 3.25E-36 | 0.743708 |
| 0.500065 | 6.44E-31 | 0.722669 | 1.32E-76 | 0.600767 | 3.79E-47 | 0.332926 | 1.50E-13 | 0.490493 |
| 0.504696 | 1.50E-31 | 0.692803 | 5.03E-68 | 0.574507 | 2.29E-42 | 0.225198 | 8.80E-07 | 0.402279 |
| 0.183203 | 6.83E-05 | 0.396563 | 4.88E-19 | 0.277455 | 1.06E-09 | 0.219488 | 1.68E-06 | 0.224922 |
| 0.344986 | 1.69E-14 | 0.534225 | 8.09E-36 | 0.419948 | 2.24E-21 | 0.559736 | 7.34E-40 | 0.662277 |
| 0.64123  | 1.91E-55 | 0.753302 | 1.16E-86 | 0.5723   | 5.53E-42 | 0.407304 | 4.34E-20 | 0.482074 |
| 0.33571  | 9.15E-14 | 0.417016 | 4.50E-21 | 0.428996 | 2.48E-22 | 0.280426 | 6.92E-10 | 0.38752  |
| 0.399337 | 2.63E-19 | 0.554484 | 5.33E-39 | 0.340006 | 4.22E-14 | 0.359077 | 1.17E-15 | 0.356253 |
| 0.457906 | 1.39E-25 | 0.531339 | 2.21E-35 | 0.380641 | 1.51E-17 | 0.343797 | 2.11E-14 | 0.464235 |
| 0.323362 | 7.92E-13 | 0.500375 | 5.85E-31 | 0.437325 | 3.09E-23 | 0.308043 | 1.01E-11 | 0.437743 |
| 0.378195 | 2.51E-17 | 0.462958 | 3.49E-26 | 0.457327 | 1.63E-25 | 0.307064 | 1.18E-11 | 0.549279 |
| 0.407225 | 4.42E-20 | 0.77641  | 2.78E-95 | 0.734883 | 1.91E-80 | 0.309507 | 7.96E-12 | 0.43053  |
| 0.203581 | 9.24E-06 | 0.393472 | 9.63E-19 | 0.308144 | 9.93E-12 | 0.217896 | 2.00E-06 | 0.382999 |
| 0.696881 | 3.92E-69 | 0.787981 | #####    | 0.685533 | 4.30E-66 | 0.529588 | 4.04E-35 | 0.596088 |
| 0.293269 | 1.02E-10 | 0.420749 | 1.85E-21 | 0.262562 | 8.40E-09 | 0.230893 | 4.55E-07 | 0.277366 |
| -0.46384 | 2.73E-26 | -0.54126 | 6.73E-37 | -0.52083 | 7.88E-34 | -0.21042 | 4.51E-06 | -0.20679 |
| 0.277476 | 1.06E-09 | 0.519499 | 1.23E-33 | 0.419531 | 2.47E-21 | 0.253593 | 2.75E-08 | 0.504759 |
| 0.470924 | 3.75E-27 | 0.60907  | 9.41E-49 | 0.489284 | 1.76E-29 | 0.249346 | 4.75E-08 | 0.293299 |
| -0.25875 | 1.40E-08 | -0.43173 | 1.26E-22 | -0.41489 | 7.43E-21 | -0.12808 | 0.00557  | -0.15155 |
| -0.28224 | 5.31E-10 | -0.48818 | 2.45E-29 | -0.37826 | 2.47E-17 | -0.31811 | 1.93E-12 | -0.34248 |
| 0.479642 | 3.06E-28 | 0.655299 | 1.24E-58 | 0.514392 | 6.62E-33 | 0.482143 | 1.47E-28 | 0.638809 |
| 0.509626 | 3.11E-32 | 0.67642  | 9.47E-64 | 0.483288 | 1.05E-28 | 0.363175 | 5.25E-16 | 0.600466 |
| 0.552244 | 1.23E-38 | 0.602922 | 1.47E-47 | 0.586984 | 1.39E-44 | 0.399499 | 2.54E-19 | 0.354474 |
| 0.441354 | 1.10E-23 | 0.52256  | 4.41E-34 | 0.521819 | 5.66E-34 | 0.282244 | 5.31E-10 | 0.328807 |
| 0.199269 | 1.44E-05 | 0.46231  | 4.17E-26 | 0.287967 | 2.28E-10 | 0.1734   | 0.00017  | 0.277442 |
| 0.442885 | 7.44E-24 | 0.654847 | 1.58E-58 | 0.577052 | 8.24E-43 | 0.274564 | 1.60E-09 | 0.327128 |
| 0.257083 | 1.74E-08 | 0.256242 | 1.95E-08 | 0.232843 | 3.61E-07 | 0.082181 | 0.07603  | 0.140053 |
| 0.258153 | 1.51E-08 | 0.371343 | 1.02E-16 | 0.356602 | 1.89E-15 | 0.303011 | 2.26E-11 | 0.394654 |
| 0.350433 | 6.12E-15 | 0.613757 | 1.11E-49 | 0.49797  | 1.24E-30 | 0.321272 | 1.13E-12 | 0.411416 |
| 0.34087  | 3.60E-14 | 0.470646 | 4.06E-27 | 0.382051 | 1.12E-17 | 0.238536 | 1.82E-07 | 0.193232 |
| 0.553871 | 6.70E-39 | 0.645926 | 1.72E-56 | 0.423374 | 9.81E-22 | 0.432591 | 1.02E-22 | 0.658297 |
| 0.741777 | 1.04E-82 | 0.774158 | 2.13E-94 | 0.710545 | 5.46E-73 | 0.479548 | 3.14E-28 | 0.633563 |
| 0.34585  | 1.44E-14 | 0.389901 | 2.10E-18 | 0.403126 | 1.12E-19 | 0.304916 | 1.67E-11 | 0.268957 |

|          |          |          |          |          |          |          |          |          |
|----------|----------|----------|----------|----------|----------|----------|----------|----------|
| 0.528005 | 6.96E-35 | 0.59796  | 1.29E-46 | 0.57636  | 1.09E-42 | 0.284275 | 3.94E-10 | 0.43262  |
| 0.172922 | 0.00017  | 0.318597 | 1.78E-12 | 0.349275 | 7.61E-15 | 0.067972 | 0.14247  | 0.220753 |
| -0.49045 | 1.23E-29 | -0.55866 | 1.11E-39 | -0.56754 | 3.61E-41 | -0.28232 | 5.25E-10 | -0.28559 |
| 0.517893 | 2.09E-33 | 0.760982 | 2.04E-89 | 0.574984 | 1.89E-42 | 0.544727 | 1.93E-37 | 0.65776  |
| 0.483769 | 9.11E-29 | 0.77135  | 2.62E-93 | 0.556654 | 2.36E-39 | 0.430766 | 1.60E-22 | 0.637809 |
| 0.361089 | 7.90E-16 | 0.508715 | 4.17E-32 | 0.344356 | 1.90E-14 | 0.168691 | 0.00025  | 0.300186 |
| 0.65198  | 7.27E-58 | 0.753355 | 1.11E-86 | 0.672203 | 1.08E-62 | 0.451238 | 8.34E-25 | 0.535847 |
| 0.328067 | 3.52E-13 | 0.336799 | 7.52E-14 | 0.380732 | 1.48E-17 | 0.158432 | 0.00059  | 0.099427 |
| 0.59016  | 3.66E-45 | 0.752855 | 1.67E-86 | 0.748335 | 6.23E-85 | 0.40822  | 3.51E-20 | 0.526833 |
| 0.647582 | 7.30E-57 | 0.72773  | 3.60E-78 | 0.558445 | 1.20E-39 | 0.51818  | 1.90E-33 | 0.645876 |
| 0.174028 | 0.00016  | 0.348269 | 9.19E-15 | 0.242763 | 1.09E-07 | 0.341322 | 3.32E-14 | 0.411235 |
| -0.36926 | 1.56E-16 | -0.40739 | 4.25E-20 | -0.32028 | 1.34E-12 | -0.33836 | 5.68E-14 | -0.29496 |
| -0.27746 | 1.06E-09 | -0.58717 | 1.29E-44 | -0.51925 | 1.34E-33 | -0.30139 | 2.91E-11 | -0.33981 |
| 0.601525 | 2.72E-47 | 0.58039  | 2.12E-43 | 0.568481 | 2.50E-41 | 0.439101 | 1.97E-23 | 0.518898 |
| 0.548673 | 4.59E-38 | 0.821503 | #####    | 0.657588 | 3.63E-59 | 0.483279 | 1.05E-28 | 0.62867  |
| 0.465963 | 1.51E-26 | 0.687048 | 1.72E-66 | 0.506497 | 8.48E-32 | 0.388721 | 2.70E-18 | 0.621046 |
| 0.191805 | 3.01E-05 | 0.414245 | 8.66E-21 | 0.309185 | 8.39E-12 | 0.299344 | 4.01E-11 | 0.405729 |
| 0.531656 | 1.98E-35 | 0.647264 | 8.61E-57 | 0.574477 | 2.32E-42 | 0.454665 | 3.34E-25 | 0.483596 |
| 0.436225 | 4.08E-23 | 0.444253 | 5.22E-24 | 0.43272  | 9.85E-23 | 0.382655 | 9.85E-18 | 0.479442 |
| 0.692654 | 5.52E-68 | 0.812846 | #####    | 0.762703 | 4.76E-90 | 0.368823 | 1.70E-16 | 0.469797 |
| -0.30459 | 1.76E-11 | -0.41366 | 9.93E-21 | -0.42867 | 2.69E-22 | -0.05211 | 0.26112  | -0.12895 |
| 0.751082 | 6.97E-86 | 0.861453 | #####    | 0.801805 | #####    | 0.51003  | 2.73E-32 | 0.567896 |
| -0.09881 | 0.03278  | -0.48881 | 2.02E-29 | -0.47665 | 7.30E-28 | -0.102   | 0.02752  | -0.3566  |
| -0.14078 | 0.00229  | -0.4095  | 2.62E-20 | -0.21649 | 2.34E-06 | -0.17238 | 0.00018  | -0.21192 |
| 0.441414 | 1.09E-23 | 0.703478 | 5.74E-71 | 0.460298 | 7.24E-26 | 0.314331 | 3.61E-12 | 0.499709 |
| 0.588528 | 7.28E-45 | 0.774046 | 2.36E-94 | 0.785502 | 5.78E-99 | 0.364638 | 3.93E-16 | 0.444277 |
| 0.372504 | 8.09E-17 | 0.464899 | 2.04E-26 | 0.438356 | 2.38E-23 | 0.254274 | 2.52E-08 | 0.27423  |
| 0.521883 | 5.54E-34 | 0.685309 | 4.92E-66 | 0.638043 | 9.55E-55 | 0.434422 | 6.43E-23 | 0.644965 |
| 0.011042 | 0.81188  | -0.44813 | 1.89E-24 | -0.33755 | 6.58E-14 | -0.14809 | 0.00133  | -0.26628 |
| 0.496341 | 2.05E-30 | 0.56707  | 4.34E-41 | 0.503838 | 1.97E-31 | 0.391391 | 1.52E-18 | 0.348984 |
| -0.43634 | 3.97E-23 | -0.61535 | 5.33E-50 | -0.62283 | 1.61E-51 | -0.32846 | 3.29E-13 | -0.4013  |
| 0.632296 | 1.66E-53 | 0.811153 | #####    | 0.667225 | 1.80E-61 | 0.444919 | 4.39E-24 | 0.668583 |
| 0.44798  | 1.97E-24 | 0.52997  | 3.54E-35 | 0.388966 | 2.56E-18 | 0.321337 | 1.12E-12 | 0.359538 |
| -0.40477 | 7.73E-20 | -0.59409 | 6.86E-46 | -0.57839 | 4.79E-43 | -0.31359 | 4.09E-12 | -0.38512 |
| -0.10834 | 0.01919  | -0.53164 | 1.99E-35 | -0.42274 | 1.14E-21 | -0.13844 | 0.00272  | -0.18878 |
| -0.43211 | 1.15E-22 | -0.59948 | 6.67E-47 | -0.47763 | 5.49E-28 | -0.33213 | 1.73E-13 | -0.25814 |
| 0.599005 | 8.20E-47 | 0.725807 | 1.43E-77 | 0.604104 | 8.70E-48 | 0.404591 | 8.06E-20 | 0.592014 |
| 0.39668  | 4.75E-19 | 0.442397 | 8.44E-24 | 0.333929 | 1.26E-13 | 0.291631 | 1.31E-10 | 0.30623  |
| 0.654576 | 1.83E-58 | 0.69803  | 1.89E-69 | 0.587514 | 1.11E-44 | 0.475537 | 1.01E-27 | 0.467616 |
| -0.18261 | 7.22E-05 | -0.47079 | 3.90E-27 | -0.37998 | 1.73E-17 | -0.22235 | 1.22E-06 | -0.27036 |
| 0.280588 | 6.76E-10 | 0.601148 | 3.21E-47 | 0.447699 | 2.12E-24 | 0.333672 | 1.32E-13 | 0.46559  |
| 0.45835  | 1.23E-25 | 0.639198 | 5.34E-55 | 0.619509 | 7.69E-51 | 0.338655 | 5.39E-14 | 0.419318 |
| 0.23867  | 1.79E-07 | 0.384176 | 7.14E-18 | 0.334554 | 1.12E-13 | 0.196008 | 1.99E-05 | 0.316299 |
| 0.655315 | 1.23E-58 | 0.871335 | #####    | 0.729712 | 8.56E-79 | 0.533068 | 1.21E-35 | 0.602025 |
| 0.610846 | 4.21E-49 | 0.765547 | 4.18E-91 | 0.55581  | 3.24E-39 | 0.449944 | 1.18E-24 | 0.545662 |

|          |          |          |          |          |          |          |          |          |
|----------|----------|----------|----------|----------|----------|----------|----------|----------|
| -0.25461 | 2.41E-08 | -0.56397 | 1.45E-40 | -0.55972 | 7.39E-40 | -0.29343 | 1.00E-10 | -0.33276 |
| 0.312628 | 4.78E-12 | 0.589436 | 4.96E-45 | 0.355946 | 2.14E-15 | 0.420449 | 1.99E-21 | 0.524417 |
| 0.251758 | 3.49E-08 | 0.445571 | 3.70E-24 | 0.340548 | 3.82E-14 | 0.045479 | 0.32675  | 0.129191 |
| 0.525085 | 1.88E-34 | 0.627919 | 1.40E-52 | 0.607529 | 1.88E-48 | 0.340785 | 3.66E-14 | 0.327517 |
| 0.605299 | 5.11E-48 | 0.809513 | #####    | 0.712445 | 1.52E-73 | 0.409588 | 2.56E-20 | 0.630501 |
| 0.471732 | 2.98E-27 | 0.705371 | 1.67E-71 | 0.52464  | 2.19E-34 | 0.472889 | 2.15E-27 | 0.633269 |
| -0.06955 | 0.13342  | -0.39206 | 1.31E-18 | -0.37638 | 3.65E-17 | -0.07401 | 0.11021  | 0.060879 |
| 0.342085 | 2.89E-14 | 0.480837 | 2.16E-28 | 0.384817 | 6.23E-18 | 0.138872 | 0.00263  | 0.200444 |
| 0.336447 | 8.02E-14 | 0.402147 | 1.40E-19 | 0.332254 | 1.69E-13 | 0.184991 | 5.78E-05 | 0.148182 |
| 0.546422 | 1.04E-37 | 0.794865 | #####    | 0.525265 | 1.77E-34 | 0.511223 | 1.86E-32 | 0.718529 |
| 0.696251 | 5.83E-69 | 0.837667 | #####    | 0.679001 | 2.10E-64 | 0.421838 | 1.42E-21 | 0.479779 |
| 0.617803 | 1.71E-50 | 0.79279  | #####    | 0.63154  | 2.40E-53 | 0.527618 | 7.94E-35 | 0.624825 |
| 0.391937 | 1.35E-18 | 0.402144 | 1.40E-19 | 0.332762 | 1.55E-13 | 0.304567 | 1.76E-11 | 0.127887 |
| -0.24214 | 1.17E-07 | -0.38985 | 2.12E-18 | -0.30557 | 1.50E-11 | -0.22912 | 5.59E-07 | -0.2591  |
| 0.332098 | 1.74E-13 | 0.524417 | 2.36E-34 | 0.395531 | 6.13E-19 | 0.215968 | 2.47E-06 | 0.263465 |
| 0.346963 | 1.17E-14 | 0.431239 | 1.42E-22 | 0.376904 | 3.28E-17 | 0.21057  | 4.44E-06 | 0.459225 |
| 0.469574 | 5.50E-27 | 0.757253 | 4.57E-88 | 0.518158 | 1.92E-33 | 0.443508 | 6.33E-24 | 0.525199 |
| 0.436681 | 3.64E-23 | 0.607801 | 1.67E-48 | 0.486265 | 4.34E-29 | 0.321988 | 1.00E-12 | 0.314698 |
| 0.311549 | 5.71E-12 | 0.414968 | 7.30E-21 | 0.305703 | 1.47E-11 | 0.157501 | 0.00064  | 0.330522 |
| -0.17912 | 9.94E-05 | -0.35317 | 3.65E-15 | -0.31453 | 3.49E-12 | -0.02093 | 0.65184  | -0.32279 |
| 0.416214 | 5.44E-21 | 0.593445 | 9.05E-46 | 0.455508 | 2.66E-25 | 0.323505 | 7.73E-13 | 0.526048 |
| 0.612672 | 1.83E-49 | 0.82762  | #####    | 0.628841 | 8.96E-53 | 0.530925 | 2.55E-35 | 0.629975 |
| 0.624405 | 7.58E-52 | 0.636523 | 2.04E-54 | 0.555733 | 3.34E-39 | 0.400251 | 2.15E-19 | 0.416307 |
| 0.212188 | 3.73E-06 | 0.485638 | 5.23E-29 | 0.220427 | 1.51E-06 | 0.321729 | 1.05E-12 | 0.495773 |
| 0.643148 | 7.19E-56 | 0.736041 | 8.04E-81 | 0.551479 | 1.63E-38 | 0.502116 | 3.39E-31 | 0.741716 |
| 0.28005  | 7.30E-10 | 0.402699 | 1.24E-19 | 0.332667 | 1.57E-13 | 0.199053 | 1.47E-05 | 0.263763 |
| 0.241158 | 1.32E-07 | 0.430667 | 1.64E-22 | 0.373642 | 6.41E-17 | 0.2893   | 1.87E-10 | 0.306027 |
| 0.147106 | 0.00143  | 0.446427 | 2.96E-24 | 0.379738 | 1.82E-17 | 0.182523 | 7.27E-05 | 0.4019   |
| 0.476485 | 7.65E-28 | 0.55791  | 1.47E-39 | 0.472447 | 2.44E-27 | 0.316117 | 2.69E-12 | 0.394172 |
| 0.19154  | 3.09E-05 | 0.492967 | 5.75E-30 | 0.428857 | 2.57E-22 | 0.320236 | 1.35E-12 | 0.568448 |
| 0.361697 | 7.02E-16 | 0.511399 | 1.75E-32 | 0.438778 | 2.13E-23 | 0.357053 | 1.73E-15 | 0.536172 |
| 0.62138  | 3.19E-51 | 0.687511 | 1.30E-66 | 0.627333 | 1.86E-52 | 0.455609 | 2.59E-25 | 0.552201 |
| 0.159232 | 0.00055  | 0.391613 | 1.45E-18 | 0.384437 | 6.76E-18 | 0.103412 | 0.02543  | 0.143401 |
| 0.61526  | 5.56E-50 | 0.821516 | #####    | 0.678528 | 2.77E-64 | 0.43578  | 4.57E-23 | 0.477051 |
| -0.14136 | 0.0022   | -0.37435 | 5.55E-17 | -0.11083 | 0.01658  | -0.3443  | 1.92E-14 | -0.35467 |
| 0.499566 | 7.53E-31 | 0.629864 | 5.45E-53 | 0.517848 | 2.12E-33 | 0.300451 | 3.38E-11 | 0.516209 |
| 0.370107 | 1.31E-16 | 0.490142 | 1.36E-29 | 0.444391 | 5.04E-24 | 0.087677 | 0.05832  | 0.107715 |
| 0.674235 | 3.36E-63 | 0.691454 | 1.16E-67 | 0.524904 | 2.00E-34 | 0.510021 | 2.74E-32 | 0.702131 |
| 0.494518 | 3.58E-30 | 0.525644 | 1.56E-34 | 0.305163 | 1.60E-11 | 0.359156 | 1.15E-15 | 0.441833 |
| -0.12232 | 0.00814  | -0.46462 | 2.20E-26 | -0.32393 | 7.19E-13 | -0.27113 | 2.60E-09 | -0.30931 |
| -0.47118 | 3.49E-27 | -0.69491 | 1.35E-68 | -0.62884 | 8.97E-53 | -0.37927 | 2.00E-17 | -0.37379 |
| -0.01858 | 0.68873  | -0.46043 | 6.98E-26 | -0.18954 | 3.75E-05 | -0.1195  | 0.00975  | -0.24067 |
| -0.23137 | 4.30E-07 | -0.66571 | 4.20E-61 | -0.58573 | 2.34E-44 | -0.18936 | 3.82E-05 | -0.32138 |
| 0.382865 | 9.43E-18 | 0.610525 | 4.87E-49 | 0.531982 | 1.77E-35 | 0.421463 | 1.56E-21 | 0.271274 |
| 0.19582  | 2.03E-05 | 0.389281 | 2.40E-18 | 0.263618 | 7.29E-09 | 0.174421 | 0.00015  | 0.341095 |

|          |          |          |          |          |          |          |          |          |
|----------|----------|----------|----------|----------|----------|----------|----------|----------|
| 0.326185 | 4.88E-13 | 0.443571 | 6.23E-24 | 0.428558 | 2.77E-22 | 0.332549 | 1.60E-13 | 0.439394 |
| 0.440876 | 1.25E-23 | 0.73307  | 7.31E-80 | 0.680364 | 9.40E-65 | 0.344686 | 1.79E-14 | 0.468686 |
| 0.533013 | 1.24E-35 | 0.710335 | 6.28E-73 | 0.647316 | 8.38E-57 | 0.410362 | 2.14E-20 | 0.424601 |
| 0.28336  | 4.51E-10 | 0.497032 | 1.65E-30 | 0.436354 | 3.95E-23 | 0.192466 | 2.82E-05 | 0.188121 |
| 0.717281 | 5.65E-75 | 0.882392 | #####    | 0.704997 | 2.13E-71 | 0.463408 | 3.08E-26 | 0.57711  |
| 0.503672 | 2.08E-31 | 0.781925 | 1.71E-97 | 0.636204 | 2.40E-54 | 0.429418 | 2.24E-22 | 0.467969 |
| 0.364403 | 4.12E-16 | 0.510265 | 2.53E-32 | 0.402006 | 1.45E-19 | 0.471976 | 2.78E-27 | 0.702221 |
| 0.508191 | 4.93E-32 | 0.71867  | 2.17E-75 | 0.691273 | 1.30E-67 | 0.33597  | 8.73E-14 | 0.450638 |
| 0.576036 | 1.24E-42 | 0.782001 | 1.59E-97 | 0.636676 | 1.89E-54 | 0.418589 | 3.10E-21 | 0.605833 |
| -0.30939 | 8.11E-12 | -0.53976 | 1.15E-36 | -0.37689 | 3.28E-17 | -0.2745  | 1.62E-09 | -0.27816 |
| 0.639654 | 4.25E-55 | 0.884451 | #####    | 0.752081 | 3.12E-86 | 0.508702 | 4.19E-32 | 0.719654 |
| 0.629354 | 6.99E-53 | 0.738075 | 1.74E-81 | 0.612442 | 2.03E-49 | 0.373452 | 6.66E-17 | 0.428191 |
| 0.619212 | 8.84E-51 | 0.855891 | #####    | 0.780596 | 5.90E-97 | 0.438483 | 2.30E-23 | 0.596053 |
| -0.04611 | 0.32005  | -0.34615 | 1.36E-14 | -0.39382 | 8.92E-19 | -0.07705 | 0.09629  | -0.23929 |
| 0.609474 | 7.84E-49 | 0.822971 | #####    | 0.642911 | 8.11E-56 | 0.537874 | 2.24E-36 | 0.694224 |
| 0.677371 | 5.44E-64 | 0.875486 | #####    | 0.647385 | 8.09E-57 | 0.488935 | 1.95E-29 | 0.656998 |
| 0.162066 | 0.00044  | 0.276052 | 1.30E-09 | 0.17668  | 0.00012  | 0.153495 | 0.00087  | 0.218043 |
| 0.243245 | 1.02E-07 | 0.506078 | 9.69E-32 | 0.517915 | 2.08E-33 | 0.137021 | 0.00301  | 0.087195 |
| 0.279821 | 7.55E-10 | 0.467801 | 9.06E-27 | 0.370726 | 1.16E-16 | 0.31928  | 1.58E-12 | 0.545985 |
| 0.169811 | 0.00023  | 0.381751 | 1.19E-17 | 0.282065 | 5.45E-10 | 0.299552 | 3.89E-11 | 0.512169 |
| 0.187911 | 4.38E-05 | 0.381161 | 1.35E-17 | 0.320763 | 1.23E-12 | 0.320983 | 1.19E-12 | 0.418222 |
| 0.204727 | 8.21E-06 | 0.379807 | 1.79E-17 | 0.303331 | 2.14E-11 | 0.24226  | 1.16E-07 | 0.295227 |
| 0.106979 | 0.02076  | 0.367052 | 2.43E-16 | 0.379982 | 1.73E-17 | 0.004216 | 0.9276   | 0.152691 |
| 0.513791 | 8.06E-33 | 0.597981 | 1.28E-46 | 0.505435 | 1.19E-31 | 0.479654 | 3.05E-28 | 0.558726 |
| 0.585576 | 2.50E-44 | 0.844532 | #####    | 0.697762 | 2.24E-69 | 0.437003 | 3.35E-23 | 0.597882 |
| 0.323047 | 8.36E-13 | 0.527378 | 8.62E-35 | 0.394278 | 8.07E-19 | 0.376369 | 3.66E-17 | 0.569162 |
| -0.34769 | 1.02E-14 | -0.39006 | 2.03E-18 | -0.29648 | 6.26E-11 | -0.37164 | 9.64E-17 | -0.40194 |
| 0.447524 | 2.22E-24 | 0.494213 | 3.93E-30 | 0.499882 | 6.82E-31 | 0.392411 | 1.21E-18 | 0.439633 |
| -0.01363 | 0.76886  | -0.36134 | 7.52E-16 | -0.18052 | 8.75E-05 | -0.12476 | 0.00695  | -0.29321 |
| 0.522518 | 4.47E-34 | 0.611462 | 3.18E-49 | 0.454681 | 3.32E-25 | 0.318615 | 1.77E-12 | 0.301585 |
| 0.301701 | 2.77E-11 | 0.626664 | 2.57E-52 | 0.381121 | 1.36E-17 | 0.257589 | 1.63E-08 | 0.409955 |
| 0.403821 | 9.60E-20 | 0.566627 | 5.16E-41 | 0.337674 | 6.43E-14 | 0.201906 | 1.10E-05 | 0.255547 |
| 0.550891 | 2.03E-38 | 0.828832 | #####    | 0.605096 | 5.60E-48 | 0.516793 | 3.01E-33 | 0.770629 |
| 0.361808 | 6.87E-16 | 0.687654 | 1.19E-66 | 0.326336 | 4.75E-13 | 0.39377  | 9.03E-19 | 0.531135 |
| 0.48999  | 1.42E-29 | 0.621727 | 2.71E-51 | 0.632941 | 1.21E-53 | 0.348307 | 9.13E-15 | 0.314222 |
| -0.44161 | 1.03E-23 | -0.5948  | 5.06E-46 | -0.52374 | 2.96E-34 | -0.359   | 1.19E-15 | -0.39405 |
| 0.387246 | 3.71E-18 | 0.522482 | 4.53E-34 | 0.539307 | 1.35E-36 | 0.063593 | 0.17007  | 0.134548 |
| 0.658668 | 2.02E-59 | 0.848064 | #####    | 0.644972 | 2.82E-56 | 0.499019 | 8.93E-31 | 0.691975 |
| 0.65883  | 1.85E-59 | 0.830066 | #####    | 0.647311 | 8.41E-57 | 0.521315 | 6.70E-34 | 0.647902 |
| 0.668638 | 8.15E-62 | 0.65098  | 1.23E-57 | 0.493414 | 5.02E-30 | 0.382958 | 9.24E-18 | 0.427119 |
| 0.260229 | 1.15E-08 | 0.479437 | 3.25E-28 | 0.38472  | 6.36E-18 | 0.307069 | 1.18E-11 | 0.439421 |
| 0.587013 | 1.37E-44 | 0.83184  | #####    | 0.675176 | 1.95E-63 | 0.487412 | 3.08E-29 | 0.510356 |
| 0.512309 | 1.31E-32 | 0.671729 | 1.41E-62 | 0.456056 | 2.29E-25 | 0.331926 | 1.79E-13 | 0.401227 |
| 0.134379 | 0.00362  | 0.342288 | 2.78E-14 | 0.24258  | 1.11E-07 | 0.410486 | 2.08E-20 | 0.395497 |
| 0.401951 | 1.46E-19 | 0.544205 | 2.33E-37 | 0.491796 | 8.22E-30 | 0.335695 | 9.17E-14 | 0.488251 |

|          |          |          |          |          |          |          |          |          |
|----------|----------|----------|----------|----------|----------|----------|----------|----------|
| 0.405789 | 6.13E-20 | 0.571548 | 7.46E-42 | 0.509359 | 3.39E-32 | 0.288505 | 2.10E-10 | 0.561831 |
| -0.14669 | 0.00148  | -0.53775 | 2.35E-36 | -0.35258 | 4.08E-15 | -0.13636 | 0.00315  | -0.33873 |
| 0.39406  | 8.47E-19 | 0.619767 | 6.82E-51 | 0.572195 | 5.77E-42 | 0.195372 | 2.12E-05 | 0.20024  |
| -0.22985 | 5.13E-07 | -0.41428 | 8.59E-21 | -0.36177 | 6.91E-16 | -0.23336 | 3.40E-07 | -0.43565 |
| 0.425267 | 6.19E-22 | 0.599313 | 7.17E-47 | 0.466715 | 1.23E-26 | 0.415066 | 7.14E-21 | 0.502968 |
| 0.490106 | 1.37E-29 | 0.692969 | 4.54E-68 | 0.436404 | 3.90E-23 | 0.435272 | 5.19E-23 | 0.481432 |
| 0.541624 | 5.90E-37 | 0.513016 | 1.04E-32 | 0.493863 | 4.38E-30 | 0.242275 | 1.15E-07 | 0.328073 |
| 0.439769 | 1.66E-23 | 0.594916 | 4.82E-46 | 0.572002 | 6.23E-42 | 0.353191 | 3.63E-15 | 0.404376 |
| 0.205915 | 7.25E-06 | 0.339464 | 4.65E-14 | 0.239196 | 1.68E-07 | 0.124791 | 0.00693  | 0.378861 |
| 0.552541 | 1.10E-38 | 0.754759 | 3.55E-87 | 0.711803 | 2.35E-73 | 0.379077 | 2.09E-17 | 0.452368 |
| 0.681563 | 4.62E-65 | 0.785705 | 4.77E-99 | 0.602569 | 1.72E-47 | 0.435712 | 4.65E-23 | 0.629748 |
| 0.213166 | 3.36E-06 | 0.386771 | 4.11E-18 | 0.402792 | 1.21E-19 | 0.194358 | 2.34E-05 | 0.344834 |
| 0.53436  | 7.72E-36 | 0.805303 | #####    | 0.586003 | 2.09E-44 | 0.40661  | 5.08E-20 | 0.691905 |
| 0.379664 | 1.85E-17 | 0.57471  | 2.11E-42 | 0.532489 | 1.48E-35 | 0.216792 | 2.26E-06 | 0.3556   |
| 0.475844 | 9.20E-28 | 0.632752 | 1.33E-53 | 0.490485 | 1.22E-29 | 0.38209  | 1.11E-17 | 0.367519 |
| 0.467789 | 9.09E-27 | 0.675929 | 1.26E-63 | 0.480902 | 2.12E-28 | 0.439993 | 1.56E-23 | 0.475716 |
| 0.595061 | 4.52E-46 | 0.749788 | 1.96E-85 | 0.551943 | 1.37E-38 | 0.418226 | 3.38E-21 | 0.6012   |
| -0.07264 | 0.11699  | -0.46552 | 1.71E-26 | -0.39698 | 4.44E-19 | -0.29098 | 1.45E-10 | -0.42437 |
| -0.11249 | 0.01501  | -0.40386 | 9.52E-20 | -0.14699 | 0.00145  | -0.20127 | 1.17E-05 | -0.33262 |
| 0.625241 | 5.08E-52 | 0.720093 | 8.06E-76 | 0.660557 | 7.23E-60 | 0.402878 | 1.19E-19 | 0.352835 |
| 0.516837 | 2.97E-33 | 0.546104 | 1.17E-37 | 0.30194  | 2.67E-11 | 0.289113 | 1.92E-10 | 0.299725 |
| -0.00729 | 0.87514  | -0.51054 | 2.32E-32 | -0.27416 | 1.69E-09 | -0.1448  | 0.0017   | -0.47296 |
| 0.531841 | 1.86E-35 | 0.663617 | 1.35E-60 | 0.475659 | 9.70E-28 | 0.390874 | 1.70E-18 | 0.556705 |
| 0.689242 | 4.52E-67 | 0.801805 | #####    | 0.641135 | 2.01E-55 | 0.453517 | 4.54E-25 | 0.520673 |
| -0.1131  | 0.01447  | -0.46833 | 7.80E-27 | -0.34209 | 2.88E-14 | -0.32717 | 4.12E-13 | -0.54171 |
| 0.295942 | 6.80E-11 | 0.503572 | 2.14E-31 | 0.453655 | 4.38E-25 | 0.153414 | 0.00088  | 0.211863 |
| 0.27364  | 1.82E-09 | 0.562023 | 3.06E-40 | 0.517148 | 2.68E-33 | 0.285239 | 3.42E-10 | 0.23082  |
| 0.420218 | 2.10E-21 | 0.536755 | 3.33E-36 | 0.50093  | 4.92E-31 | 0.468133 | 8.25E-27 | 0.298322 |
| 0.561042 | 4.46E-40 | 0.864156 | #####    | 0.711085 | 3.80E-73 | 0.467205 | 1.07E-26 | 0.652291 |
| -0.31576 | 2.85E-12 | -0.55569 | 3.39E-39 | -0.47121 | 3.46E-27 | -0.29281 | 1.10E-10 | -0.44938 |
| -0.32518 | 5.80E-13 | -0.5611  | 4.37E-40 | -0.36887 | 1.69E-16 | -0.30894 | 8.73E-12 | -0.54143 |
| 0.295169 | 7.66E-11 | 0.591621 | 1.97E-45 | 0.398945 | 2.87E-19 | 0.281431 | 5.98E-10 | 0.457791 |
| 0.446564 | 2.86E-24 | 0.599681 | 6.10E-47 | 0.480947 | 2.09E-28 | 0.32956  | 2.71E-13 | 0.361785 |
| 0.562815 | 2.26E-40 | 0.71195  | 2.13E-73 | 0.499101 | 8.70E-31 | 0.497049 | 1.64E-30 | 0.652845 |
| 0.396545 | 4.90E-19 | 0.542991 | 3.61E-37 | 0.545864 | 1.28E-37 | 0.138378 | 0.00273  | 0.160552 |
| 0.526937 | 1.00E-34 | 0.767099 | 1.09E-91 | 0.670612 | 2.67E-62 | 0.429178 | 2.37E-22 | 0.651268 |
| 0.558352 | 1.24E-39 | 0.65241  | 5.79E-58 | 0.616659 | 2.91E-50 | 0.372908 | 7.45E-17 | 0.389092 |
| 0.641796 | 1.43E-55 | 0.826208 | #####    | 0.658901 | 1.78E-59 | 0.430912 | 1.54E-22 | 0.584562 |
| 0.384475 | 6.70E-18 | 0.736259 | 6.83E-81 | 0.580014 | 2.47E-43 | 0.379913 | 1.75E-17 | 0.557073 |
| -0.27877 | 8.79E-10 | -0.61455 | 7.70E-50 | -0.48092 | 2.11E-28 | -0.29966 | 3.82E-11 | -0.47121 |
| 0.592196 | 1.54E-45 | 0.774304 | 1.87E-94 | 0.66154  | 4.22E-60 | 0.466259 | 1.39E-26 | 0.622796 |
| -0.3635  | 4.92E-16 | -0.60597 | 3.79E-48 | -0.47666 | 7.27E-28 | -0.31269 | 4.74E-12 | -0.40475 |
| -0.12085 | 0.00895  | -0.38326 | 8.67E-18 | -0.18604 | 5.23E-05 | -0.271   | 2.64E-09 | -0.28883 |
| 0.609456 | 7.90E-49 | 0.789971 | #####    | 0.499305 | 8.17E-31 | 0.483282 | 1.05E-28 | 0.691001 |
| -0.12068 | 0.00904  | -0.4069  | 4.75E-20 | -0.30566 | 1.48E-11 | -0.15544 | 0.00075  | -0.18783 |

|          |          |          |          |          |          |          |          |          |
|----------|----------|----------|----------|----------|----------|----------|----------|----------|
| 0.413089 | 1.14E-20 | 0.595514 | 3.72E-46 | 0.509497 | 3.24E-32 | 0.30234  | 2.51E-11 | 0.34599  |
| 0.322888 | 8.59E-13 | 0.590073 | 3.79E-45 | 0.471691 | 3.02E-27 | 0.331113 | 2.07E-13 | 0.216946 |
| -0.2267  | 7.40E-07 | -0.4967  | 1.83E-30 | -0.39896 | 2.87E-19 | -0.20685 | 6.57E-06 | -0.28377 |
| 0.503119 | 2.47E-31 | 0.760824 | 2.33E-89 | 0.656891 | 5.28E-59 | 0.41251  | 1.30E-20 | 0.388801 |
| 0.711471 | 2.93E-73 | 0.753379 | 1.09E-86 | 0.725207 | 2.19E-77 | 0.522245 | 4.90E-34 | 0.486719 |
| -0.42792 | 3.23E-22 | -0.5703  | 1.22E-41 | -0.53579 | 4.68E-36 | -0.43566 | 4.71E-23 | -0.545   |
| 0.332124 | 1.73E-13 | 0.548547 | 4.80E-38 | 0.356025 | 2.11E-15 | 0.265762 | 5.44E-09 | 0.327771 |
| 0.493572 | 4.78E-30 | 0.662823 | 2.08E-60 | 0.523729 | 2.98E-34 | 0.367663 | 2.15E-16 | 0.413634 |
| 0.454286 | 3.70E-25 | 0.623299 | 1.28E-51 | 0.474961 | 1.19E-27 | 0.344143 | 1.98E-14 | 0.422686 |
| 0.353459 | 3.45E-15 | 0.634327 | 6.09E-54 | 0.505793 | 1.06E-31 | 0.444465 | 4.94E-24 | 0.411996 |
| 0.39729  | 4.15E-19 | 0.771424 | 2.45E-93 | 0.556829 | 2.21E-39 | 0.443408 | 6.50E-24 | 0.608078 |
| 0.648809 | 3.85E-57 | 0.768183 | 4.25E-92 | 0.633429 | 9.49E-54 | 0.415805 | 5.99E-21 | 0.512708 |
| 0.322969 | 8.47E-13 | 0.68273  | 2.31E-65 | 0.491132 | 1.00E-29 | 0.373262 | 6.93E-17 | 0.439956 |
| -0.51764 | 2.27E-33 | -0.61424 | 8.91E-50 | -0.52945 | 4.24E-35 | -0.43331 | 8.50E-23 | -0.52867 |
| 0.458662 | 1.13E-25 | 0.622885 | 1.56E-51 | 0.450339 | 1.06E-24 | 0.503199 | 2.41E-31 | 0.48386  |
| 0.554726 | 4.87E-39 | 0.644399 | 3.78E-56 | 0.535176 | 5.80E-36 | 0.374186 | 5.73E-17 | 0.449635 |
| -0.3432  | 2.35E-14 | -0.61122 | 3.55E-49 | -0.50286 | 2.68E-31 | -0.27311 | 1.97E-09 | -0.32197 |
| 0.676007 | 1.20E-63 | 0.677968 | 3.84E-64 | 0.534793 | 6.63E-36 | 0.410209 | 2.22E-20 | 0.55976  |
| 0.346749 | 1.22E-14 | 0.549234 | 3.73E-38 | 0.418739 | 2.99E-21 | 0.370557 | 1.20E-16 | 0.406909 |
| 0.260289 | 1.14E-08 | 0.365485 | 3.32E-16 | 0.329555 | 2.72E-13 | 0.068279 | 0.14067  | 0.063882 |
| 0.349201 | 7.72E-15 | 0.490378 | 1.26E-29 | 0.503934 | 1.91E-31 | 0.199407 | 1.42E-05 | 0.277189 |
| 0.319592 | 1.50E-12 | 0.474591 | 1.32E-27 | 0.416385 | 5.23E-21 | 0.137178 | 0.00297  | 0.251599 |
| 0.43748  | 2.97E-23 | 0.777839 | 7.53E-96 | 0.662634 | 2.31E-60 | 0.421513 | 1.54E-21 | 0.540459 |
| 0.227245 | 6.95E-07 | 0.379029 | 2.11E-17 | 0.29574  | 7.02E-11 | 0.095486 | 0.03914  | 0.218525 |
| -0.33131 | 2.00E-13 | -0.6557  | 1.00E-58 | -0.56989 | 1.44E-41 | -0.33507 | 1.03E-13 | -0.53693 |
| 0.5724   | 5.32E-42 | 0.754623 | 3.97E-87 | 0.572031 | 6.15E-42 | 0.488097 | 2.51E-29 | 0.666787 |
| 0.631072 | 3.02E-53 | 0.775093 | 9.17E-95 | 0.599527 | 6.53E-47 | 0.532875 | 1.30E-35 | 0.597155 |
| 0.414986 | 7.27E-21 | 0.678263 | 3.23E-64 | 0.511157 | 1.90E-32 | 0.437568 | 2.90E-23 | 0.513353 |
| 0.447517 | 2.23E-24 | 0.713222 | 9.01E-74 | 0.477382 | 5.90E-28 | 0.365218 | 3.50E-16 | 0.446723 |
| 0.499758 | 7.09E-31 | 0.784314 | 1.79E-98 | 0.749474 | 2.52E-85 | 0.453411 | 4.67E-25 | 0.624094 |
| 0.443408 | 6.50E-24 | 0.560943 | 4.63E-40 | 0.58052  | 2.01E-43 | 0.182255 | 7.46E-05 | 0.295216 |
| 0.364565 | 3.99E-16 | 0.650506 | 1.58E-57 | 0.363934 | 4.52E-16 | 0.322757 | 8.78E-13 | 0.529962 |
| 0.28267  | 4.99E-10 | 0.45735  | 1.62E-25 | 0.392446 | 1.21E-18 | 0.253877 | 2.65E-08 | 0.274865 |
| 0.356396 | 1.97E-15 | 0.47316  | 1.99E-27 | 0.314021 | 3.80E-12 | 0.340772 | 3.67E-14 | 0.338131 |
| 0.354332 | 2.92E-15 | 0.438366 | 2.37E-23 | 0.381558 | 1.24E-17 | 0.174913 | 0.00015  | 0.262048 |
| 0.432396 | 1.07E-22 | 0.517525 | 2.36E-33 | 0.341801 | 3.04E-14 | 0.450636 | 9.78E-25 | 0.448098 |
| 0.701303 | 2.34E-70 | 0.777759 | 8.10E-96 | 0.61224  | 2.23E-49 | 0.541175 | 6.93E-37 | 0.581725 |
| -0.34749 | 1.06E-14 | -0.50407 | 1.83E-31 | -0.38811 | 3.08E-18 | -0.33371 | 1.31E-13 | -0.45696 |
| -0.13841 | 0.00272  | -0.4985  | 1.05E-30 | -0.41663 | 4.94E-21 | -0.15082 | 0.00108  | -0.45682 |
| 0.573361 | 3.63E-42 | 0.781945 | 1.67E-97 | 0.656927 | 5.18E-59 | 0.41619  | 5.47E-21 | 0.46641  |
| 0.386288 | 4.56E-18 | 0.66147  | 4.39E-60 | 0.43935  | 1.84E-23 | 0.313723 | 4.00E-12 | 0.448535 |
| 0.555975 | 3.05E-39 | 0.766211 | 2.36E-91 | 0.643952 | 4.76E-56 | 0.453786 | 4.23E-25 | 0.571251 |
| -0.34971 | 7.02E-15 | -0.61597 | 4.00E-50 | -0.6238  | 1.01E-51 | -0.41538 | 6.63E-21 | -0.559   |
| 0.379028 | 2.11E-17 | 0.646745 | 1.13E-56 | 0.390961 | 1.67E-18 | 0.321015 | 1.18E-12 | 0.518149 |
| 0.484012 | 8.47E-29 | 0.619096 | 9.34E-51 | 0.356041 | 2.11E-15 | 0.357203 | 1.68E-15 | 0.406942 |



|          |          |          |          |          |          |          |          |          |
|----------|----------|----------|----------|----------|----------|----------|----------|----------|
| 0.275554 | 1.39E-09 | 0.58528  | 2.83E-44 | 0.476648 | 7.30E-28 | 0.15537  | 0.00075  | 0.159605 |
| 0.611893 | 2.61E-49 | 0.681966 | 3.64E-65 | 0.520324 | 9.33E-34 | 0.478841 | 3.86E-28 | 0.481995 |
| 0.181876 | 7.72E-05 | 0.48597  | 4.74E-29 | 0.27658  | 1.20E-09 | 0.358231 | 1.38E-15 | 0.384556 |
| 0.599971 | 5.38E-47 | 0.645852 | 1.79E-56 | 0.536883 | 3.18E-36 | 0.469591 | 5.47E-27 | 0.568307 |
| 0.658155 | 2.67E-59 | 0.72359  | 6.92E-77 | 0.580587 | 1.96E-43 | 0.564701 | 1.09E-40 | 0.607705 |
| 0.603454 | 1.16E-47 | 0.814931 | #####    | 0.688986 | 5.29E-67 | 0.453414 | 4.67E-25 | 0.593792 |
| 0.608311 | 1.32E-48 | 0.777265 | 1.27E-95 | 0.713107 | 9.74E-74 | 0.504469 | 1.61E-31 | 0.523331 |
| 0.695299 | 1.06E-68 | 0.744339 | 1.43E-83 | 0.726052 | 1.20E-77 | 0.508646 | 4.26E-32 | 0.545318 |
| -0.33987 | 4.32E-14 | -0.61494 | 6.44E-50 | -0.5998  | 5.80E-47 | -0.32655 | 4.58E-13 | -0.50578 |
| -0.21758 | 2.07E-06 | -0.49833 | 1.11E-30 | -0.32593 | 5.09E-13 | -0.16375 | 0.00038  | -0.25956 |
| 0.352206 | 4.38E-15 | 0.466847 | 1.18E-26 | 0.360522 | 8.83E-16 | 0.386887 | 4.01E-18 | 0.363058 |
| 0.319051 | 1.65E-12 | 0.432961 | 9.27E-23 | 0.37974  | 1.82E-17 | 0.174541 | 0.00015  | 0.141532 |
| -0.36769 | 2.14E-16 | -0.6072  | 2.19E-48 | -0.42913 | 2.40E-22 | -0.30548 | 1.52E-11 | -0.37541 |
| 0.374363 | 5.53E-17 | 0.57814  | 5.30E-43 | 0.375457 | 4.42E-17 | 0.216358 | 2.37E-06 | 0.29407  |
| 0.276479 | 1.22E-09 | 0.399267 | 2.67E-19 | 0.271003 | 2.64E-09 | 0.240667 | 1.41E-07 | 0.398605 |
| 0.639564 | 4.44E-55 | 0.827111 | #####    | 0.837708 | #####    | 0.465562 | 1.69E-26 | 0.452803 |
| 0.523124 | 3.65E-34 | 0.677541 | 4.93E-64 | 0.55578  | 3.28E-39 | 0.405841 | 6.06E-20 | 0.376356 |
| 0.426311 | 4.80E-22 | 0.7905   | #####    | 0.660966 | 5.78E-60 | 0.214276 | 2.98E-06 | 0.420831 |
| 0.705981 | 1.12E-71 | 0.840703 | #####    | 0.758673 | 1.41E-88 | 0.439777 | 1.65E-23 | 0.431115 |
| 0.400336 | 2.11E-19 | 0.545929 | 1.25E-37 | 0.324422 | 6.61E-13 | 0.396473 | 4.98E-19 | 0.543851 |
| 0.734015 | 3.64E-80 | 0.765313 | 5.11E-91 | 0.709493 | 1.10E-72 | 0.478949 | 3.74E-28 | 0.47124  |
| 0.694116 | 2.22E-68 | 0.828029 | #####    | 0.72599  | 1.25E-77 | 0.524592 | 2.22E-34 | 0.637435 |
| 0.304685 | 1.73E-11 | 0.63894  | 6.09E-55 | 0.427634 | 3.47E-22 | 0.257095 | 1.74E-08 | 0.348745 |
| 0.702856 | 8.59E-71 | 0.690981 | 1.55E-67 | 0.603763 | 1.01E-47 | 0.417801 | 3.74E-21 | 0.528456 |
| 0.254834 | 2.34E-08 | 0.509298 | 3.46E-32 | 0.380668 | 1.50E-17 | 0.297543 | 5.31E-11 | 0.481923 |
| 0.325004 | 5.98E-13 | 0.475623 | 9.81E-28 | 0.361965 | 6.66E-16 | 0.226524 | 7.55E-07 | 0.223956 |
| 0.24564  | 7.59E-08 | 0.635295 | 3.77E-54 | 0.362945 | 5.49E-16 | 0.330625 | 2.25E-13 | 0.64317  |
| 0.56432  | 1.26E-40 | 0.791007 | #####    | 0.538394 | 1.87E-36 | 0.525411 | 1.68E-34 | 0.650693 |
| 0.253794 | 2.68E-08 | 0.453578 | 4.47E-25 | 0.318905 | 1.69E-12 | 0.211165 | 4.16E-06 | 0.414943 |
| 0.566134 | 6.25E-41 | 0.732113 | 1.48E-79 | 0.506052 | 9.77E-32 | 0.389807 | 2.14E-18 | 0.645206 |
| 0.524056 | 2.66E-34 | 0.593304 | 9.61E-46 | 0.477557 | 5.61E-28 | 0.45126  | 8.29E-25 | 0.657873 |
| 0.439269 | 1.88E-23 | 0.701132 | 2.61E-70 | 0.461459 | 5.27E-26 | 0.355356 | 2.40E-15 | 0.425324 |
| 0.225658 | 8.34E-07 | 0.417601 | 3.92E-21 | 0.400133 | 2.20E-19 | 0.035695 | 0.44156  | 0.11376  |
| 0.407243 | 4.40E-20 | 0.523237 | 3.51E-34 | 0.39674  | 4.69E-19 | 0.335312 | 9.82E-14 | 0.378673 |
| 0.16012  | 0.00051  | 0.448375 | 1.78E-24 | 0.27375  | 1.80E-09 | 0.198608 | 1.53E-05 | 0.419457 |
| -0.00119 | 0.97956  | -0.40074 | 1.92E-19 | -0.32052 | 1.28E-12 | -0.05037 | 0.27734  | -0.232   |
| 0.44238  | 8.47E-24 | 0.674834 | 2.38E-63 | 0.643316 | 6.60E-56 | 0.291772 | 1.29E-10 | 0.430329 |
| -0.28718 | 2.57E-10 | -0.51518 | 5.11E-33 | -0.37756 | 2.86E-17 | -0.25678 | 1.81E-08 | -0.26065 |
| 0.249689 | 4.55E-08 | 0.583493 | 5.93E-44 | 0.479004 | 3.69E-28 | 0.222286 | 1.22E-06 | 0.296566 |
| -0.37053 | 1.21E-16 | -0.57994 | 2.55E-43 | -0.36458 | 3.97E-16 | -0.32466 | 6.34E-13 | -0.24824 |
| 0.710108 | 7.30E-73 | 0.836844 | #####    | 0.753824 | 7.61E-87 | 0.435594 | 4.79E-23 | 0.535774 |
| 0.556615 | 2.39E-39 | 0.817778 | #####    | 0.707611 | 3.83E-72 | 0.409048 | 2.90E-20 | 0.493392 |
| 0.259915 | 1.20E-08 | 0.40754  | 4.11E-20 | 0.371823 | 9.29E-17 | 0.317481 | 2.14E-12 | 0.252313 |
| 0.176788 | 0.00012  | 0.564801 | 1.05E-40 | 0.47463  | 1.30E-27 | 0.336772 | 7.56E-14 | 0.392725 |
| 0.316581 | 2.49E-12 | 0.36503  | 3.63E-16 | 0.336305 | 8.22E-14 | 0.138328 | 0.00274  | 0.162045 |

|          |          |          |          |          |          |          |          |          |
|----------|----------|----------|----------|----------|----------|----------|----------|----------|
| 0.605503 | 4.67E-48 | 0.746077 | 3.69E-84 | 0.62402  | 9.11E-52 | 0.492648 | 6.34E-30 | 0.668175 |
| 0.652411 | 5.79E-58 | 0.731799 | 1.86E-79 | 0.624242 | 8.20E-52 | 0.457817 | 1.42E-25 | 0.497079 |
| -0.39006 | 2.02E-18 | -0.65185 | 7.78E-58 | -0.61679 | 2.73E-50 | -0.29666 | 6.09E-11 | -0.54675 |
| 0.513031 | 1.03E-32 | 0.584746 | 3.53E-44 | 0.484663 | 6.99E-29 | 0.377218 | 3.07E-17 | 0.273553 |
| 0.688437 | 7.39E-67 | 0.651021 | 1.21E-57 | 0.576315 | 1.11E-42 | 0.328411 | 3.32E-13 | 0.264888 |
| -0.35563 | 2.28E-15 | -0.61177 | 2.76E-49 | -0.54548 | 1.47E-37 | -0.39189 | 1.36E-18 | -0.61624 |
| 0.577401 | 7.15E-43 | 0.696913 | 3.84E-69 | 0.638555 | 7.39E-55 | 0.381995 | 1.13E-17 | 0.478381 |
| -0.09512 | 0.0399   | -0.41419 | 8.77E-21 | -0.21013 | 4.65E-06 | -0.22196 | 1.27E-06 | -0.31031 |
| 0.188328 | 4.21E-05 | 0.469115 | 6.26E-27 | 0.35383  | 3.22E-15 | 0.39382  | 8.93E-19 | 0.49779  |
| 0.422662 | 1.17E-21 | 0.531543 | 2.06E-35 | 0.384285 | 6.98E-18 | 0.21232  | 3.68E-06 | 0.19432  |
| -0.16459 | 0.00035  | -0.5682  | 2.79E-41 | -0.51654 | 3.27E-33 | -0.19067 | 3.36E-05 | -0.45045 |
| 0.650064 | 2.00E-57 | 0.873571 | #####    | 0.650499 | 1.59E-57 | 0.510038 | 2.72E-32 | 0.621007 |
| 0.597514 | 1.57E-46 | 0.702124 | 1.38E-70 | 0.558336 | 1.25E-39 | 0.466212 | 1.41E-26 | 0.567752 |
| 0.664569 | 7.94E-61 | 0.772365 | 1.06E-93 | 0.644724 | 3.20E-56 | 0.396417 | 5.04E-19 | 0.451159 |
| 0.587741 | 1.01E-44 | 0.663657 | 1.32E-60 | 0.520325 | 9.33E-34 | 0.568713 | 2.28E-41 | 0.732642 |
| 0.391565 | 1.46E-18 | 0.535434 | 5.30E-36 | 0.364492 | 4.04E-16 | 0.281933 | 5.55E-10 | 0.479893 |
| 0.576402 | 1.07E-42 | 0.618002 | 1.56E-50 | 0.594267 | 6.36E-46 | 0.459352 | 9.38E-26 | 0.383064 |
| 0.42763  | 3.47E-22 | 0.810402 | #####    | 0.573363 | 3.62E-42 | 0.465925 | 1.53E-26 | 0.599177 |
| 0.303492 | 2.09E-11 | 0.596765 | 2.17E-46 | 0.48242  | 1.36E-28 | 0.213794 | 3.14E-06 | 0.235406 |
| 0.599406 | 6.88E-47 | 0.766088 | 2.62E-91 | 0.527721 | 7.67E-35 | 0.555675 | 3.41E-39 | 0.572736 |
| 0.650139 | 1.92E-57 | 0.764563 | 9.73E-91 | 0.581875 | 1.15E-43 | 0.466755 | 1.21E-26 | 0.417777 |
| 0.575556 | 1.51E-42 | 0.723248 | 8.81E-77 | 0.597337 | 1.69E-46 | 0.414657 | 7.86E-21 | 0.337435 |
| 0.611929 | 2.57E-49 | 0.827854 | #####    | 0.594791 | 5.08E-46 | 0.542245 | 4.73E-37 | 0.71073  |
| 0.480603 | 2.31E-28 | 0.64694  | 1.02E-56 | 0.619673 | 7.12E-51 | 0.420329 | 2.04E-21 | 0.296649 |
| 0.539369 | 1.32E-36 | 0.760073 | 4.37E-89 | 0.600554 | 4.17E-47 | 0.41807  | 3.50E-21 | 0.493855 |
| -0.29739 | 5.44E-11 | -0.59749 | 1.59E-46 | -0.61302 | 1.56E-49 | -0.36816 | 1.95E-16 | -0.58178 |
| 0.448709 | 1.63E-24 | 0.618092 | 1.49E-50 | 0.611028 | 3.87E-49 | 0.223789 | 1.03E-06 | 0.364961 |
| 0.564268 | 1.29E-40 | 0.81588  | #####    | 0.761721 | 1.09E-89 | 0.541618 | 5.92E-37 | 0.652883 |
| 0.720581 | 5.74E-76 | 0.84965  | #####    | 0.715677 | 1.70E-74 | 0.480887 | 2.13E-28 | 0.635888 |
| 0.696753 | 4.25E-69 | 0.866803 | #####    | 0.769353 | 1.53E-92 | 0.470349 | 4.42E-27 | 0.54606  |
| 0.539095 | 1.46E-36 | 0.74309  | 3.78E-83 | 0.613194 | 1.44E-49 | 0.335588 | 9.35E-14 | 0.388357 |
| 0.571669 | 7.11E-42 | 0.743162 | 3.57E-83 | 0.417389 | 4.12E-21 | 0.517861 | 2.11E-33 | 0.77651  |
| 0.541021 | 7.33E-37 | 0.674058 | 3.71E-63 | 0.636374 | 2.20E-54 | 0.443126 | 6.99E-24 | 0.402158 |
| -0.46667 | 1.24E-26 | -0.67821 | 3.33E-64 | -0.56755 | 3.59E-41 | -0.28508 | 3.50E-10 | -0.34947 |
| 0.56867  | 2.32E-41 | 0.705116 | 1.97E-71 | 0.466002 | 1.50E-26 | 0.52566  | 1.55E-34 | 0.688348 |
| 0.229742 | 5.20E-07 | 0.35482  | 2.66E-15 | 0.222653 | 1.17E-06 | 0.232386 | 3.81E-07 | 0.188744 |
| -0.25684 | 1.80E-08 | -0.48751 | 3.00E-29 | -0.47653 | 7.55E-28 | -0.20469 | 8.24E-06 | -0.17476 |
| 0.561644 | 3.54E-40 | 0.671384 | 1.72E-62 | 0.562099 | 2.97E-40 | 0.498775 | 9.63E-31 | 0.416923 |
| 0.625198 | 5.19E-52 | 0.691655 | 1.03E-67 | 0.652484 | 5.57E-58 | 0.472976 | 2.09E-27 | 0.717214 |
| 0.338295 | 5.75E-14 | 0.546428 | 1.04E-37 | 0.489725 | 1.54E-29 | 0.292779 | 1.10E-10 | 0.505856 |
| 0.555915 | 3.12E-39 | 0.595719 | 3.41E-46 | 0.434137 | 6.90E-23 | 0.454057 | 3.93E-25 | 0.507601 |
| 0.450504 | 1.01E-24 | 0.793529 | #####    | 0.593842 | 7.63E-46 | 0.451049 | 8.77E-25 | 0.759716 |
| 0.657843 | 3.16E-59 | 0.787635 | #####    | 0.686728 | 2.09E-66 | 0.420943 | 1.76E-21 | 0.64135  |
| 0.337548 | 6.58E-14 | 0.454272 | 3.71E-25 | 0.338793 | 5.25E-14 | 0.33928  | 4.81E-14 | 0.389177 |
| 0.45678  | 1.89E-25 | 0.551806 | 1.44E-38 | 0.411253 | 1.74E-20 | 0.315021 | 3.22E-12 | 0.503865 |

|          |          |          |          |          |          |          |          |          |
|----------|----------|----------|----------|----------|----------|----------|----------|----------|
| 0.334768 | 1.08E-13 | 0.52605  | 1.36E-34 | 0.382852 | 9.45E-18 | 0.135347 | 0.00338  | 0.322325 |
| 0.591207 | 2.35E-45 | 0.710334 | 6.28E-73 | 0.530361 | 3.10E-35 | 0.433236 | 8.65E-23 | 0.485694 |
| 0.587495 | 1.12E-44 | 0.617929 | 1.61E-50 | 0.58765  | 1.05E-44 | 0.390505 | 1.84E-18 | 0.365757 |
| 0.713268 | 8.74E-74 | 0.747687 | 1.04E-84 | 0.568445 | 2.53E-41 | 0.50981  | 2.93E-32 | 0.625534 |
| 0.506914 | 7.42E-32 | 0.58989  | 4.10E-45 | 0.533639 | 9.93E-36 | 0.469272 | 5.99E-27 | 0.605711 |
| 0.598785 | 9.03E-47 | 0.725831 | 1.41E-77 | 0.571469 | 7.69E-42 | 0.427703 | 3.41E-22 | 0.497082 |
| 0.425508 | 5.84E-22 | 0.579828 | 2.67E-43 | 0.463658 | 2.87E-26 | 0.271726 | 2.39E-09 | 0.46863  |
| -0.29008 | 1.66E-10 | -0.35026 | 6.33E-15 | -0.35168 | 4.84E-15 | -0.20251 | 1.03E-05 | -0.23242 |
| 0.527266 | 8.96E-35 | 0.517706 | 2.23E-33 | 0.491149 | 1.00E-29 | 0.320048 | 1.39E-12 | 0.291697 |
| 0.256976 | 1.77E-08 | 0.552142 | 1.28E-38 | 0.285177 | 3.45E-10 | 0.460406 | 7.03E-26 | 0.584269 |
| 0.418381 | 3.25E-21 | 0.613861 | 1.06E-49 | 0.452359 | 6.19E-25 | 0.47918  | 3.50E-28 | 0.552868 |
| 0.470472 | 4.27E-27 | 0.564256 | 1.30E-40 | 0.540372 | 9.24E-37 | 0.409698 | 2.50E-20 | 0.538388 |
| 0.292981 | 1.07E-10 | 0.625293 | 4.96E-52 | 0.346853 | 1.20E-14 | 0.347548 | 1.05E-14 | 0.491509 |
| 0.204232 | 8.64E-06 | 0.389633 | 2.22E-18 | 0.105078 | 0.02315  | 0.317616 | 2.09E-12 | 0.296826 |
| 0.642441 | 1.03E-55 | 0.764892 | 7.33E-91 | 0.75537  | 2.15E-87 | 0.463481 | 3.02E-26 | 0.552851 |
| 0.637458 | 1.28E-54 | 0.766306 | 2.17E-91 | 0.638929 | 6.12E-55 | 0.407489 | 4.16E-20 | 0.546693 |
| 0.585854 | 2.23E-44 | 0.633376 | 9.75E-54 | 0.649838 | 2.25E-57 | 0.382181 | 1.09E-17 | 0.449668 |
| 0.245344 | 7.87E-08 | 0.354303 | 2.94E-15 | 0.414022 | 9.12E-21 | 0.0994   | 0.03174  | 0.10305  |
| 0.462765 | 3.68E-26 | 0.5631   | 2.02E-40 | 0.459348 | 9.39E-26 | 0.302732 | 2.36E-11 | 0.562357 |
| 0.390325 | 1.91E-18 | 0.622411 | 1.96E-51 | 0.529015 | 4.92E-35 | 0.378194 | 2.51E-17 | 0.657183 |
| 0.213285 | 3.31E-06 | 0.467198 | 1.07E-26 | 0.283394 | 4.49E-10 | 0.27997  | 7.39E-10 | 0.407953 |
| 0.461663 | 4.98E-26 | 0.634526 | 5.52E-54 | 0.498307 | 1.11E-30 | 0.37335  | 6.80E-17 | 0.328293 |
| -0.15419 | 0.00083  | -0.3827  | 9.76E-18 | -0.23221 | 3.89E-07 | -0.2494  | 4.72E-08 | -0.40534 |
| 0.303578 | 2.06E-11 | 0.477706 | 5.37E-28 | 0.364178 | 4.30E-16 | 0.245511 | 7.71E-08 | 0.389348 |
| 0.436626 | 3.69E-23 | 0.710461 | 5.77E-73 | 0.541466 | 6.25E-37 | 0.348195 | 9.32E-15 | 0.533743 |
| -0.26095 | 1.04E-08 | -0.41323 | 1.10E-20 | -0.36692 | 2.49E-16 | -0.19514 | 2.17E-05 | -0.15668 |
| -0.03908 | 0.39945  | -0.37135 | 1.02E-16 | -0.15325 | 0.00089  | -0.12976 | 0.00498  | -0.24782 |
| -0.08206 | 0.07647  | -0.42612 | 5.03E-22 | -0.23158 | 4.19E-07 | -0.37673 | 3.39E-17 | -0.40689 |
| 0.4442   | 5.29E-24 | 0.744269 | 1.51E-83 | 0.477737 | 5.32E-28 | 0.517771 | 2.18E-33 | 0.712811 |
| -0.42458 | 7.32E-22 | -0.50905 | 3.74E-32 | -0.49389 | 4.34E-30 | -0.29244 | 1.16E-10 | -0.16234 |
| 0.280565 | 6.78E-10 | 0.329236 | 2.87E-13 | 0.273847 | 1.77E-09 | 0.129752 | 0.00498  | -0.04061 |
| -0.50648 | 8.52E-32 | -0.58233 | 9.59E-44 | -0.48883 | 2.01E-29 | -0.33022 | 2.42E-13 | -0.38728 |
| 0.675629 | 1.50E-63 | 0.8395   | #####    | 0.594364 | 6.10E-46 | 0.531668 | 1.97E-35 | 0.602177 |
| 0.310919 | 6.33E-12 | 0.566602 | 5.21E-41 | 0.43247  | 1.05E-22 | 0.117314 | 0.01118  | 0.372679 |
| 0.569636 | 1.59E-41 | 0.728756 | 1.71E-78 | 0.568677 | 2.31E-41 | 0.502767 | 2.76E-31 | 0.75208  |
| 0.47616  | 8.40E-28 | 0.735216 | 1.49E-80 | 0.576707 | 9.47E-43 | 0.417005 | 4.51E-21 | 0.781982 |
| 0.495338 | 2.78E-30 | 0.507169 | 6.84E-32 | 0.401029 | 1.80E-19 | 0.342901 | 2.49E-14 | 0.422945 |
| 0.190038 | 3.57E-05 | 0.397497 | 3.97E-19 | 0.39356  | 9.45E-19 | 0.116175 | 0.01199  | 0.189992 |
| 0.533848 | 9.23E-36 | 0.654136 | 2.31E-58 | 0.540111 | 1.01E-36 | 0.416003 | 5.72E-21 | 0.541365 |
| -0.23916 | 1.69E-07 | -0.52948 | 4.20E-35 | -0.3874  | 3.59E-18 | -0.18336 | 6.73E-05 | -0.25507 |
| -0.11609 | 0.01206  | -0.54016 | 9.97E-37 | -0.48479 | 6.73E-29 | -0.11845 | 0.01041  | -0.32038 |
| 0.269143 | 3.42E-09 | 0.455434 | 2.71E-25 | 0.316967 | 2.33E-12 | 0.104682 | 0.02368  | 0.194327 |
| 0.127389 | 0.00584  | 0.429546 | 2.17E-22 | 0.342147 | 2.85E-14 | 0.20334  | 9.48E-06 | 0.404101 |
| 0.592675 | 1.26E-45 | 0.738245 | 1.53E-81 | 0.564174 | 1.34E-40 | 0.508159 | 4.98E-32 | 0.623284 |
| 0.542677 | 4.05E-37 | 0.697719 | 2.30E-69 | 0.532237 | 1.62E-35 | 0.345599 | 1.51E-14 | 0.567629 |

|          |          |          |          |          |          |          |          |          |
|----------|----------|----------|----------|----------|----------|----------|----------|----------|
| -0.056   | 0.22705  | -0.43036 | 1.77E-22 | -0.30708 | 1.18E-11 | -0.13033 | 0.00479  | -0.20702 |
| -0.35853 | 1.30E-15 | -0.47678 | 7.02E-28 | -0.41251 | 1.30E-20 | -0.19884 | 1.50E-05 | -0.35542 |
| 0.262893 | 8.04E-09 | 0.595146 | 4.36E-46 | 0.5268   | 1.05E-34 | 0.224826 | 9.18E-07 | 0.341741 |
| -0.32533 | 5.65E-13 | -0.45067 | 9.69E-25 | -0.39438 | 7.89E-19 | -0.30044 | 3.38E-11 | -0.40902 |
| 0.335232 | 9.96E-14 | 0.663986 | 1.10E-60 | 0.592862 | 1.16E-45 | 0.334972 | 1.04E-13 | 0.389096 |
| 0.536827 | 3.25E-36 | 0.711866 | 2.25E-73 | 0.600826 | 3.70E-47 | 0.442349 | 8.54E-24 | 0.717023 |
| 0.439656 | 1.71E-23 | 0.488419 | 2.28E-29 | 0.466223 | 1.41E-26 | 0.290812 | 1.49E-10 | 0.0938   |
| 0.707114 | 5.32E-72 | 0.722341 | 1.67E-76 | 0.690794 | 1.74E-67 | 0.515261 | 4.98E-33 | 0.537428 |
| 0.419846 | 2.29E-21 | 0.536028 | 4.30E-36 | 0.465681 | 1.64E-26 | 0.178827 | 0.0001   | 0.359965 |
| 0.339622 | 4.52E-14 | 0.484256 | 7.88E-29 | 0.425308 | 6.13E-22 | 0.250664 | 4.01E-08 | 0.202931 |
| 0.40727  | 4.37E-20 | 0.562029 | 3.06E-40 | 0.463149 | 3.31E-26 | 0.378791 | 2.21E-17 | 0.597895 |
| 0.463357 | 3.12E-26 | 0.605211 | 5.32E-48 | 0.448998 | 1.51E-24 | 0.147682 | 0.00137  | 0.299523 |
| 0.43786  | 2.70E-23 | 0.568817 | 2.19E-41 | 0.478041 | 4.88E-28 | 0.159957 | 0.00052  | 0.254506 |
| 0.583797 | 5.23E-44 | 0.603256 | 1.27E-47 | 0.572385 | 5.35E-42 | 0.241114 | 1.33E-07 | 0.296358 |
| 0.519921 | 1.07E-33 | 0.702208 | 1.31E-70 | 0.623561 | 1.13E-51 | 0.453374 | 4.72E-25 | 0.583756 |
| 0.566128 | 6.27E-41 | 0.633855 | 7.69E-54 | 0.620407 | 5.05E-51 | 0.374976 | 4.88E-17 | 0.318124 |
| 0.542694 | 4.02E-37 | 0.62194  | 2.45E-51 | 0.486968 | 3.52E-29 | 0.371392 | 1.01E-16 | 0.535728 |
| 0.161506 | 0.00046  | 0.444931 | 4.38E-24 | 0.319919 | 1.42E-12 | 0.236305 | 2.39E-07 | 0.186192 |
| 0.421902 | 1.40E-21 | 0.519786 | 1.12E-33 | 0.444547 | 4.84E-24 | 0.309453 | 8.03E-12 | 0.419094 |
| 0.566016 | 6.55E-41 | 0.718764 | 2.03E-75 | 0.550885 | 2.03E-38 | 0.536238 | 3.99E-36 | 0.615945 |
| 0.506849 | 7.58E-32 | 0.761307 | 1.55E-89 | 0.640058 | 3.46E-55 | 0.409445 | 2.65E-20 | 0.550085 |
| 0.600564 | 4.15E-47 | 0.638144 | 9.08E-55 | 0.43329  | 8.54E-23 | 0.426237 | 4.89E-22 | 0.57067  |
| 0.683263 | 1.68E-65 | 0.766804 | 1.41E-91 | 0.672352 | 9.89E-63 | 0.466624 | 1.26E-26 | 0.56659  |
| 0.567533 | 3.62E-41 | 0.716664 | 8.64E-75 | 0.596029 | 2.98E-46 | 0.418602 | 3.09E-21 | 0.465254 |
| 0.656415 | 6.83E-59 | 0.837017 | #####    | 0.604174 | 8.43E-48 | 0.554878 | 4.60E-39 | 0.646968 |
| 0.367171 | 2.37E-16 | 0.52309  | 3.69E-34 | 0.401032 | 1.80E-19 | 0.335383 | 9.70E-14 | 0.490561 |
| 0.725684 | 1.56E-77 | 0.851894 | #####    | 0.654069 | 2.40E-58 | 0.567599 | 3.53E-41 | 0.691348 |
| 0.635968 | 2.70E-54 | 0.799821 | #####    | 0.58445  | 3.99E-44 | 0.56003  | 6.56E-40 | 0.668056 |
| 0.644978 | 2.81E-56 | 0.828709 | #####    | 0.721553 | 2.90E-76 | 0.407407 | 4.23E-20 | 0.454585 |
| 0.672512 | 9.03E-63 | 0.809898 | #####    | 0.81523  | #####    | 0.372955 | 7.38E-17 | 0.477337 |
| 0.357277 | 1.66E-15 | 0.494453 | 3.65E-30 | 0.462596 | 3.85E-26 | 0.173472 | 0.00017  | 0.194727 |
| 0.604963 | 5.94E-48 | 0.751231 | 6.18E-86 | 0.568384 | 2.60E-41 | 0.470331 | 4.44E-27 | 0.621532 |
| 0.302589 | 2.41E-11 | 0.697084 | 3.45E-69 | 0.555916 | 3.11E-39 | 0.420381 | 2.02E-21 | 0.488442 |
| 0.429403 | 2.24E-22 | 0.640858 | 2.31E-55 | 0.597555 | 1.54E-46 | 0.343173 | 2.36E-14 | 0.33476  |
| 0.59338  | 9.30E-46 | 0.857072 | #####    | 0.680494 | 8.70E-65 | 0.501316 | 4.36E-31 | 0.676544 |
| 0.399381 | 2.61E-19 | 0.705324 | 1.72E-71 | 0.437469 | 2.98E-23 | 0.427742 | 3.38E-22 | 0.498543 |
| -0.09306 | 0.04443  | -0.42168 | 1.48E-21 | -0.1898  | 3.66E-05 | -0.15717 | 0.00065  | -0.41792 |
| 0.405432 | 6.65E-20 | 0.544776 | 1.90E-37 | 0.449882 | 1.19E-24 | 0.324903 | 6.08E-13 | 0.442743 |
| 0.632346 | 1.62E-53 | 0.816054 | #####    | 0.693029 | 4.37E-68 | 0.426709 | 4.35E-22 | 0.423374 |
| 0.570255 | 1.24E-41 | 0.694019 | 2.36E-68 | 0.573801 | 3.04E-42 | 0.494537 | 3.56E-30 | 0.659143 |
| 0.658602 | 2.10E-59 | 0.797223 | #####    | 0.743987 | 1.89E-83 | 0.313683 | 4.02E-12 | 0.4206   |
| 0.647528 | 7.51E-57 | 0.842054 | #####    | 0.701329 | 2.30E-70 | 0.446955 | 2.58E-24 | 0.567985 |
| 0.419315 | 2.60E-21 | 0.45829  | 1.25E-25 | 0.425737 | 5.52E-22 | 0.210064 | 4.68E-06 | 0.152845 |
| 0.249175 | 4.85E-08 | 0.468973 | 6.52E-27 | 0.395105 | 6.73E-19 | 0.209953 | 4.74E-06 | 0.344797 |
| 0.574564 | 2.24E-42 | 0.717391 | 5.24E-75 | 0.687472 | 1.33E-66 | 0.354497 | 2.83E-15 | 0.586691 |

|          |          |          |          |          |          |          |          |          |
|----------|----------|----------|----------|----------|----------|----------|----------|----------|
| 0.782161 | 1.37E-97 | 0.86197  | #####    | 0.71734  | 5.43E-75 | 0.473703 | 1.70E-27 | 0.532157 |
| 0.668902 | 7.03E-62 | 0.785721 | 4.69E-99 | 0.666051 | 3.48E-61 | 0.472983 | 2.09E-27 | 0.44562  |
| 0.610089 | 5.93E-49 | 0.742014 | 8.66E-83 | 0.676823 | 7.49E-64 | 0.481775 | 1.64E-28 | 0.543548 |
| 0.270362 | 2.89E-09 | 0.516292 | 3.55E-33 | 0.462765 | 3.68E-26 | 0.245882 | 7.36E-08 | 0.504016 |
| 0.674947 | 2.22E-63 | 0.677376 | 5.43E-64 | 0.671597 | 1.52E-62 | 0.431235 | 1.43E-22 | 0.434933 |
| 0.368929 | 1.67E-16 | 0.597876 | 1.34E-46 | 0.408064 | 3.64E-20 | 0.327866 | 3.65E-13 | 0.444969 |
| 0.575985 | 1.27E-42 | 0.666277 | 3.07E-61 | 0.594613 | 5.48E-46 | 0.312847 | 4.61E-12 | 0.479003 |
| 0.603484 | 1.15E-47 | 0.726126 | 1.14E-77 | 0.543255 | 3.29E-37 | 0.433395 | 8.32E-23 | 0.61125  |
| 0.493671 | 4.64E-30 | 0.557704 | 1.59E-39 | 0.468873 | 6.70E-27 | 0.234543 | 2.95E-07 | 0.315619 |
| 0.674182 | 3.46E-63 | 0.789293 | #####    | 0.708049 | 2.87E-72 | 0.365272 | 3.46E-16 | 0.480471 |
| 0.488878 | 1.98E-29 | 0.738028 | 1.81E-81 | 0.538342 | 1.90E-36 | 0.467235 | 1.06E-26 | 0.613615 |
| 0.308314 | 9.66E-12 | 0.411742 | 1.55E-20 | 0.361164 | 7.79E-16 | 0.194164 | 2.39E-05 | 0.250339 |
| 0.480905 | 2.12E-28 | 0.630968 | 3.18E-53 | 0.442639 | 7.93E-24 | 0.315272 | 3.09E-12 | 0.29223  |
| 0.197393 | 1.73E-05 | 0.360068 | 9.65E-16 | 0.183861 | 6.42E-05 | 0.229906 | 5.10E-07 | 0.416326 |
| 0.456875 | 1.84E-25 | 0.470171 | 4.65E-27 | 0.409072 | 2.89E-20 | 0.169512 | 0.00023  | 0.354568 |
| 0.338129 | 5.92E-14 | 0.355948 | 2.14E-15 | 0.383103 | 8.96E-18 | 0.182733 | 7.13E-05 | 0.097078 |
| 0.389701 | 2.19E-18 | 0.513143 | 9.96E-33 | 0.456178 | 2.22E-25 | 0.447523 | 2.22E-24 | 0.574524 |
| 0.422925 | 1.09E-21 | 0.408797 | 3.08E-20 | 0.463475 | 3.02E-26 | 0.223498 | 1.07E-06 | 0.344549 |
| 0.678705 | 2.49E-64 | 0.816681 | #####    | 0.647686 | 6.91E-57 | 0.49708  | 1.63E-30 | 0.609084 |
| -0.28406 | 4.07E-10 | -0.39712 | 4.32E-19 | -0.34342 | 2.26E-14 | -0.02088 | 0.65262  | 0.019495 |
| -0.37602 | 3.93E-17 | -0.5296  | 4.03E-35 | -0.43106 | 1.49E-22 | -0.26638 | 5.00E-09 | -0.17377 |
| 0.422026 | 1.36E-21 | 0.420056 | 2.18E-21 | 0.311106 | 6.14E-12 | 0.385315 | 5.61E-18 | 0.420616 |
| 0.39339  | 9.81E-19 | 0.516714 | 3.09E-33 | 0.367746 | 2.11E-16 | 0.27975  | 7.63E-10 | 0.295346 |
| 0.524976 | 1.95E-34 | 0.652    | 7.20E-58 | 0.590389 | 3.32E-45 | 0.263754 | 7.15E-09 | 0.382794 |
| 0.320106 | 1.38E-12 | 0.506068 | 9.72E-32 | 0.502687 | 2.83E-31 | 0.203723 | 9.11E-06 | 0.220475 |
| 0.712189 | 1.81E-73 | 0.789374 | #####    | 0.741318 | 1.48E-82 | 0.455438 | 2.71E-25 | 0.616944 |
| 0.654558 | 1.85E-58 | 0.783583 | 3.58E-98 | 0.637528 | 1.24E-54 | 0.454974 | 3.07E-25 | 0.599265 |
| 0.669204 | 5.92E-62 | 0.746627 | 2.40E-84 | 0.669476 | 5.08E-62 | 0.488552 | 2.19E-29 | 0.65328  |
| -0.37553 | 4.35E-17 | -0.48494 | 6.44E-29 | -0.41854 | 3.13E-21 | -0.34166 | 3.12E-14 | -0.42454 |
| -0.09658 | 0.03694  | -0.37581 | 4.11E-17 | -0.23919 | 1.68E-07 | -0.15976 | 0.00053  | -0.21664 |
| 0.452348 | 6.20E-25 | 0.703644 | 5.15E-71 | 0.481501 | 1.78E-28 | 0.341863 | 3.01E-14 | 0.478977 |
| 0.489159 | 1.82E-29 | 0.695595 | 8.80E-69 | 0.588817 | 6.44E-45 | 0.328807 | 3.09E-13 | 0.534329 |
| 0.388996 | 2.55E-18 | 0.597735 | 1.43E-46 | 0.515304 | 4.91E-33 | 0.403242 | 1.09E-19 | 0.561624 |
| -0.23884 | 1.76E-07 | -0.4987  | 9.85E-31 | -0.47158 | 3.12E-27 | -0.29632 | 6.42E-11 | -0.48112 |
| 0.299257 | 4.07E-11 | 0.453255 | 4.87E-25 | 0.389264 | 2.40E-18 | 0.158792 | 0.00057  | 0.256977 |
| 0.498627 | 1.01E-30 | 0.616338 | 3.38E-50 | 0.513676 | 8.37E-33 | 0.405158 | 7.08E-20 | 0.484472 |
| 0.383978 | 7.45E-18 | 0.632437 | 1.55E-53 | 0.435078 | 5.45E-23 | 0.395827 | 5.74E-19 | 0.486753 |
| 0.480941 | 2.09E-28 | 0.582533 | 8.81E-44 | 0.46217  | 4.33E-26 | 0.481882 | 1.59E-28 | 0.692636 |
| -0.18883 | 4.01E-05 | -0.44751 | 2.23E-24 | -0.45933 | 9.44E-26 | -0.15057 | 0.0011   | -0.36483 |
| -0.24744 | 6.05E-08 | -0.46353 | 2.98E-26 | -0.30616 | 1.37E-11 | -0.27374 | 1.80E-09 | -0.42274 |
| 0.420745 | 1.85E-21 | 0.717273 | 5.68E-75 | 0.673385 | 5.47E-63 | 0.369479 | 1.49E-16 | 0.49907  |
| 0.592896 | 1.14E-45 | 0.738452 | 1.31E-81 | 0.570918 | 9.57E-42 | 0.48712  | 3.36E-29 | 0.656469 |
| 0.213544 | 3.22E-06 | 0.443285 | 6.71E-24 | 0.455924 | 2.38E-25 | 0.239606 | 1.60E-07 | 0.215589 |
| 0.734992 | 1.76E-80 | 0.760523 | 3.00E-89 | 0.686371 | 2.59E-66 | 0.431321 | 1.40E-22 | 0.444208 |
| 0.534524 | 7.29E-36 | 0.814375 | #####    | 0.726354 | 9.66E-78 | 0.443683 | 6.05E-24 | 0.53458  |

|          |          |          |          |          |          |          |          |          |
|----------|----------|----------|----------|----------|----------|----------|----------|----------|
| 0.526706 | 1.08E-34 | 0.436009 | 4.31E-23 | 0.524785 | 2.08E-34 | 0.144331 | 0.00177  | 0.155242 |
| 0.42881  | 2.60E-22 | 0.616715 | 2.83E-50 | 0.409244 | 2.77E-20 | 0.393192 | 1.02E-18 | 0.409331 |
| 0.683728 | 1.27E-65 | 0.865633 | #####    | 0.793509 | #####    | 0.498575 | 1.02E-30 | 0.615328 |
| 0.28619  | 2.97E-10 | 0.414087 | 8.98E-21 | 0.428274 | 2.97E-22 | 0.143842 | 0.00183  | 0.262795 |
| 0.212694 | 3.53E-06 | 0.459692 | 8.55E-26 | 0.218506 | 1.87E-06 | 0.328149 | 3.47E-13 | 0.512338 |
| 0.218673 | 1.84E-06 | 0.449488 | 1.33E-24 | 0.238571 | 1.82E-07 | 0.201452 | 1.15E-05 | 0.310246 |
| 0.178971 | 0.0001   | 0.429892 | 1.99E-22 | 0.455634 | 2.57E-25 | 0.072685 | 0.11674  | 0.136702 |
| 0.556943 | 2.12E-39 | 0.671496 | 1.61E-62 | 0.596804 | 2.13E-46 | 0.329107 | 2.94E-13 | 0.486008 |
| 0.515544 | 4.54E-33 | 0.743014 | 4.01E-83 | 0.616687 | 2.87E-50 | 0.48292  | 1.17E-28 | 0.624432 |
| 0.548728 | 4.49E-38 | 0.725776 | 1.46E-77 | 0.498223 | 1.14E-30 | 0.387614 | 3.43E-18 | 0.489603 |
| 0.495521 | 2.63E-30 | 0.753718 | 8.30E-87 | 0.572527 | 5.05E-42 | 0.451002 | 8.88E-25 | 0.568282 |
| 0.588785 | 6.53E-45 | 0.773724 | 3.15E-94 | 0.560048 | 6.52E-40 | 0.445958 | 3.35E-24 | 0.560744 |
| 0.273852 | 1.77E-09 | 0.529235 | 4.56E-35 | 0.368544 | 1.80E-16 | 0.296049 | 6.69E-11 | 0.439306 |
| 0.259435 | 1.28E-08 | 0.538074 | 2.09E-36 | 0.452361 | 6.18E-25 | 0.18513  | 5.70E-05 | 0.382444 |
| -0.24758 | 5.94E-08 | -0.54497 | 1.77E-37 | -0.48853 | 2.20E-29 | -0.30143 | 2.89E-11 | -0.5644  |
| 0.611221 | 3.55E-49 | 0.830955 | #####    | 0.657687 | 3.44E-59 | 0.418029 | 3.54E-21 | 0.55234  |
| 0.435073 | 5.46E-23 | 0.679032 | 2.06E-64 | 0.540755 | 8.06E-37 | 0.347301 | 1.10E-14 | 0.519111 |
| 0.490231 | 1.32E-29 | 0.641832 | 1.41E-55 | 0.409776 | 2.45E-20 | 0.499917 | 6.75E-31 | 0.525049 |
| 0.276446 | 1.23E-09 | 0.423097 | 1.05E-21 | 0.203152 | 9.66E-06 | 0.263037 | 7.88E-09 | 0.334921 |
| 0.539509 | 1.26E-36 | 0.459098 | 1.01E-25 | 0.387915 | 3.22E-18 | 0.371991 | 8.97E-17 | 0.420771 |
| 0.654236 | 2.19E-58 | 0.678374 | 3.03E-64 | 0.617581 | 1.89E-50 | 0.548553 | 4.79E-38 | 0.556184 |
| 0.159714 | 0.00053  | 0.476926 | 6.73E-28 | 0.138659 | 0.00267  | 0.370069 | 1.33E-16 | 0.478035 |
| 0.474043 | 1.54E-27 | 0.424815 | 6.92E-22 | 0.322781 | 8.75E-13 | 0.252363 | 3.23E-08 | 0.485695 |
| 0.686295 | 2.71E-66 | 0.792272 | #####    | 0.733356 | 5.92E-80 | 0.400881 | 1.86E-19 | 0.46108  |
| -0.2474  | 6.08E-08 | -0.52755 | 8.14E-35 | -0.49969 | 7.24E-31 | -0.28867 | 2.05E-10 | -0.30589 |
| 0.517762 | 2.18E-33 | 0.767855 | 5.66E-92 | 0.717818 | 3.90E-75 | 0.51572  | 4.28E-33 | 0.649885 |
| 0.59639  | 2.55E-46 | 0.757663 | 3.26E-88 | 0.623524 | 1.15E-51 | 0.434429 | 6.42E-23 | 0.493173 |
| 0.411179 | 1.77E-20 | 0.605278 | 5.16E-48 | 0.326037 | 5.00E-13 | 0.322541 | 9.11E-13 | 0.338414 |
| 0.014073 | 0.76165  | -0.43992 | 1.60E-23 | -0.3724  | 8.26E-17 | -0.13707 | 0.003    | -0.34072 |
| 0.470925 | 3.75E-27 | 0.764038 | 1.52E-90 | 0.503934 | 1.91E-31 | 0.479344 | 3.34E-28 | 0.729246 |
| -0.0486  | 0.29456  | -0.22861 | 5.94E-07 | -0.22041 | 1.51E-06 | -0.20026 | 1.30E-05 | -0.38056 |
| 0.234739 | 2.88E-07 | 0.466605 | 1.27E-26 | 0.417334 | 4.17E-21 | 0.23238  | 3.81E-07 | 0.311053 |
| 0.461336 | 5.45E-26 | 0.707138 | 5.24E-72 | 0.391258 | 1.56E-18 | 0.451374 | 8.04E-25 | 0.722121 |
| 0.122372 | 0.00811  | 0.410619 | 2.02E-20 | 0.237139 | 2.16E-07 | 0.104099 | 0.02447  | 0.0861   |
| 0.354665 | 2.74E-15 | 0.684956 | 6.09E-66 | 0.499406 | 7.91E-31 | 0.353522 | 3.41E-15 | 0.49714  |
| 0.530862 | 2.60E-35 | 0.606829 | 2.58E-48 | 0.550412 | 2.42E-38 | 0.348748 | 8.41E-15 | 0.525429 |
| 0.285656 | 3.22E-10 | 0.42139  | 1.58E-21 | 0.407424 | 4.22E-20 | 0.048469 | 0.29591  | 0.128255 |
| 0.628468 | 1.07E-52 | 0.776157 | 3.50E-95 | 0.647736 | 6.74E-57 | 0.5072   | 6.77E-32 | 0.565931 |
| -0.10428 | 0.02422  | -0.49133 | 9.48E-30 | -0.49607 | 2.22E-30 | -0.1526  | 0.00094  | -0.15395 |
| 0.556254 | 2.74E-39 | 0.782334 | 1.16E-97 | 0.543352 | 3.17E-37 | 0.469067 | 6.35E-27 | 0.61875  |
| -0.35969 | 1.04E-15 | -0.44946 | 1.34E-24 | -0.44628 | 3.08E-24 | -0.16604 | 0.00031  | -0.30045 |
| 0.427905 | 3.25E-22 | 0.602473 | 1.79E-47 | 0.463182 | 3.28E-26 | 0.340341 | 3.97E-14 | 0.484057 |
| -0.11826 | 0.01054  | -0.48169 | 1.68E-28 | -0.41493 | 7.37E-21 | -0.15839 | 0.00059  | -0.3237  |
| 0.606352 | 3.19E-48 | 0.781668 | 2.17E-97 | 0.610626 | 4.65E-49 | 0.450456 | 1.03E-24 | 0.635743 |
| 0.429884 | 1.99E-22 | 0.738462 | 1.30E-81 | 0.467198 | 1.07E-26 | 0.487276 | 3.21E-29 | 0.652534 |

|          |          |          |          |          |          |          |          |          |
|----------|----------|----------|----------|----------|----------|----------|----------|----------|
| 0.445325 | 3.95E-24 | 0.627335 | 1.86E-52 | 0.566433 | 5.56E-41 | 0.251007 | 3.84E-08 | 0.166259 |
| 0.33804  | 6.02E-14 | 0.551264 | 1.77E-38 | 0.45531  | 2.81E-25 | 0.406663 | 5.02E-20 | 0.59704  |
| -0.11228 | 0.0152   | -0.393   | 1.07E-18 | -0.26097 | 1.04E-08 | -0.13851 | 0.0027   | -0.16467 |
| 0.434557 | 6.21E-23 | 0.492207 | 7.25E-30 | 0.37298  | 7.34E-17 | 0.419828 | 2.30E-21 | 0.533021 |
| -0.25304 | 2.96E-08 | -0.52359 | 3.12E-34 | -0.53241 | 1.53E-35 | -0.25916 | 1.32E-08 | -0.25334 |
| -0.35516 | 2.49E-15 | -0.55333 | 8.20E-39 | -0.44138 | 1.10E-23 | -0.15723 | 0.00065  | -0.25619 |
| 0.501332 | 4.34E-31 | 0.699588 | 7.02E-70 | 0.587881 | 9.55E-45 | 0.326639 | 4.51E-13 | 0.427465 |
| 0.495108 | 2.99E-30 | 0.671101 | 2.02E-62 | 0.497707 | 1.34E-30 | 0.422982 | 1.08E-21 | 0.685664 |
| 0.5563   | 2.70E-39 | 0.624679 | 6.65E-52 | 0.568753 | 2.25E-41 | 0.305676 | 1.48E-11 | 0.412763 |
| 0.278108 | 9.66E-10 | 0.323229 | 8.10E-13 | 0.231527 | 4.22E-07 | 0.13431  | 0.00364  | 0.06862  |
| -0.15686 | 0.00067  | -0.3749  | 4.95E-17 | -0.25247 | 3.18E-08 | -0.11959 | 0.00969  | -0.09128 |
| -0.24455 | 8.70E-08 | -0.38498 | 6.03E-18 | -0.28357 | 4.37E-10 | -0.15144 | 0.00103  | -0.25192 |
| 0.307587 | 1.09E-11 | 0.503389 | 2.27E-31 | 0.323068 | 8.33E-13 | 0.388709 | 2.71E-18 | 0.590316 |
| 0.425399 | 6.00E-22 | 0.655445 | 1.15E-58 | 0.484075 | 8.32E-29 | 0.297238 | 5.57E-11 | 0.459211 |
| 0.401204 | 1.73E-19 | 0.554004 | 6.37E-39 | 0.457217 | 1.68E-25 | 0.395775 | 5.81E-19 | 0.26385  |
| -0.15315 | 0.0009   | -0.41738 | 4.13E-21 | -0.40015 | 2.19E-19 | -0.02243 | 0.62882  | -0.0949  |
| 0.61361  | 1.19E-49 | 0.812639 | #####    | 0.599295 | 7.22E-47 | 0.518138 | 1.93E-33 | 0.819143 |
| 0.275525 | 1.40E-09 | 0.359384 | 1.10E-15 | 0.349226 | 7.69E-15 | 0.056841 | 0.22018  | 0.017375 |
| 0.456411 | 2.09E-25 | 0.521982 | 5.36E-34 | 0.460124 | 7.60E-26 | 0.48581  | 4.97E-29 | 0.548965 |
| 0.479183 | 3.50E-28 | 0.737765 | 2.20E-81 | 0.449999 | 1.16E-24 | 0.455625 | 2.58E-25 | 0.662681 |
| -0.17439 | 0.00015  | -0.41947 | 2.51E-21 | -0.38232 | 1.06E-17 | -0.19094 | 3.28E-05 | -0.14543 |
| 0.669368 | 5.40E-62 | 0.809504 | #####    | 0.698147 | 1.76E-69 | 0.499008 | 8.96E-31 | 0.648255 |
| 0.252706 | 3.09E-08 | 0.601894 | 2.31E-47 | 0.57048  | 1.14E-41 | 0.202068 | 1.08E-05 | 0.295447 |
| -0.07148 | 0.12295  | -0.30713 | 1.17E-11 | -0.33063 | 2.25E-13 | -0.15005 | 0.00114  | -0.38319 |
| 0.738459 | 1.30E-81 | 0.758995 | 1.08E-88 | 0.536433 | 3.73E-36 | 0.507728 | 5.72E-32 | 0.54204  |
| -0.1414  | 0.00219  | -0.45212 | 6.60E-25 | -0.38896 | 2.57E-18 | -0.0561  | 0.22629  | -0.07125 |
| 0.369983 | 1.35E-16 | 0.592038 | 1.65E-45 | 0.422053 | 1.35E-21 | 0.34877  | 8.37E-15 | 0.508957 |
| 0.665174 | 5.67E-61 | 0.771774 | 1.80E-93 | 0.602113 | 2.10E-47 | 0.43182  | 1.23E-22 | 0.617323 |
| -0.37005 | 1.33E-16 | -0.57112 | 8.83E-42 | -0.50015 | 6.28E-31 | -0.41309 | 1.13E-20 | -0.56951 |
| 0.32405  | 7.04E-13 | 0.381846 | 1.17E-17 | 0.318124 | 1.92E-12 | 0.100893 | 0.02926  | 0.056044 |
| -0.23187 | 4.05E-07 | -0.56741 | 3.81E-41 | -0.39709 | 4.34E-19 | -0.18429 | 6.17E-05 | -0.21042 |
| -0.24562 | 7.60E-08 | -0.57124 | 8.41E-42 | -0.48351 | 9.82E-29 | -0.2921  | 1.22E-10 | -0.38548 |
| 0.567017 | 4.43E-41 | 0.749705 | 2.10E-85 | 0.774213 | 2.03E-94 | 0.457785 | 1.44E-25 | 0.510065 |
| 0.38825  | 2.99E-18 | 0.57148  | 7.66E-42 | 0.537237 | 2.81E-36 | 0.200325 | 1.29E-05 | 0.348621 |
| 0.778274 | 5.05E-96 | 0.83327  | #####    | 0.672512 | 9.02E-63 | 0.621193 | 3.48E-51 | 0.734455 |
| 0.698738 | 1.21E-69 | 0.842963 | #####    | 0.701745 | 1.76E-70 | 0.439631 | 1.72E-23 | 0.698501 |
| 0.291309 | 1.38E-10 | 0.491097 | 1.02E-29 | 0.394734 | 7.30E-19 | 0.400983 | 1.82E-19 | 0.422114 |
| 0.30958  | 7.87E-12 | 0.630701 | 3.62E-53 | 0.354091 | 3.06E-15 | 0.429489 | 2.20E-22 | 0.581796 |
| 0.542288 | 4.65E-37 | 0.809916 | #####    | 0.58309  | 7.00E-44 | 0.495577 | 2.59E-30 | 0.550278 |
| 0.025483 | 0.58279  | -0.46511 | 1.92E-26 | -0.25717 | 1.72E-08 | -0.17092 | 0.00021  | -0.48315 |
| 0.559323 | 8.59E-40 | 0.755414 | 2.08E-87 | 0.639632 | 4.29E-55 | 0.481831 | 1.61E-28 | 0.518427 |
| 0.586999 | 1.38E-44 | 0.572103 | 5.98E-42 | 0.583313 | 6.39E-44 | 0.281638 | 5.80E-10 | 0.346784 |
| 0.41382  | 9.56E-21 | 0.487087 | 3.40E-29 | 0.37287  | 7.50E-17 | 0.376161 | 3.82E-17 | 0.511211 |
| 0.298008 | 4.94E-11 | 0.463273 | 3.20E-26 | 0.346693 | 1.23E-14 | 0.236358 | 2.37E-07 | 0.374203 |
| 0.296333 | 6.41E-11 | 0.409448 | 2.65E-20 | 0.417704 | 3.82E-21 | 0.170232 | 0.00022  | 0.314614 |

|          |          |          |          |          |          |          |          |          |
|----------|----------|----------|----------|----------|----------|----------|----------|----------|
| 0.665023 | 6.17E-61 | 0.797848 | #####    | 0.70995  | 8.12E-73 | 0.470584 | 4.13E-27 | 0.639369 |
| 0.282525 | 5.10E-10 | 0.631509 | 2.44E-53 | 0.333363 | 1.39E-13 | 0.384231 | 7.06E-18 | 0.60191  |
| -0.29047 | 1.57E-10 | -0.42328 | 1.00E-21 | -0.40385 | 9.54E-20 | -0.39703 | 4.40E-19 | -0.52365 |
| 0.538774 | 1.63E-36 | 0.645996 | 1.66E-56 | 0.453717 | 4.30E-25 | 0.373434 | 6.69E-17 | 0.410904 |
| -0.31398 | 3.83E-12 | -0.55255 | 1.09E-38 | -0.43862 | 2.22E-23 | -0.35694 | 1.77E-15 | -0.57699 |
| 0.647074 | 9.51E-57 | 0.853461 | #####    | 0.691215 | 1.34E-67 | 0.585231 | 2.89E-44 | 0.741808 |
| 0.420773 | 1.84E-21 | 0.489678 | 1.56E-29 | 0.458448 | 1.20E-25 | 0.530942 | 2.53E-35 | 0.515808 |
| -0.42052 | 1.95E-21 | -0.60525 | 5.23E-48 | -0.57499 | 1.89E-42 | -0.26821 | 3.89E-09 | -0.27125 |
| 0.275521 | 1.40E-09 | 0.516412 | 3.41E-33 | 0.446046 | 3.27E-24 | 0.211903 | 3.85E-06 | 0.257627 |
| 0.439474 | 1.79E-23 | 0.655741 | 9.81E-59 | 0.665596 | 4.48E-61 | 0.197076 | 1.79E-05 | 0.214824 |
| -0.36045 | 8.96E-16 | -0.58327 | 6.51E-44 | -0.54506 | 1.71E-37 | -0.19906 | 1.47E-05 | -0.13736 |
| 0.560233 | 6.07E-40 | 0.657936 | 3.01E-59 | 0.570256 | 1.24E-41 | 0.364848 | 3.77E-16 | 0.291663 |
| -0.37034 | 1.25E-16 | -0.66229 | 2.80E-60 | -0.60453 | 7.20E-48 | -0.37244 | 8.19E-17 | -0.55924 |
| -0.37998 | 1.73E-17 | -0.48022 | 2.59E-28 | -0.51057 | 2.30E-32 | -0.27764 | 1.03E-09 | -0.10151 |
| 0.319769 | 1.46E-12 | 0.748757 | 4.46E-85 | 0.571116 | 8.85E-42 | 0.398832 | 2.95E-19 | 0.508849 |
| 0.353919 | 3.16E-15 | 0.56527  | 8.75E-41 | 0.470066 | 4.79E-27 | 0.153262 | 0.00089  | 0.308642 |
| 0.497064 | 1.64E-30 | 0.7066   | 7.47E-72 | 0.583189 | 6.72E-44 | 0.385972 | 4.87E-18 | 0.473582 |
| 0.468032 | 8.49E-27 | 0.663635 | 1.33E-60 | 0.548352 | 5.16E-38 | 0.45748  | 1.56E-25 | 0.497875 |
| 0.599774 | 5.86E-47 | 0.810806 | #####    | 0.513657 | 8.42E-33 | 0.449895 | 1.19E-24 | 0.623863 |
| 0.636845 | 1.74E-54 | 0.764252 | 1.27E-90 | 0.641045 | 2.10E-55 | 0.472994 | 2.08E-27 | 0.639849 |
| 0.107766 | 0.01984  | 0.419786 | 2.33E-21 | 0.327435 | 3.93E-13 | 0.231394 | 4.29E-07 | 0.415314 |
| 0.646658 | 1.18E-56 | 0.615463 | 5.06E-50 | 0.564182 | 1.33E-40 | 0.335831 | 8.95E-14 | 0.34178  |
| -0.19182 | 3.01E-05 | -0.52189 | 5.52E-34 | -0.5063  | 9.02E-32 | -0.10812 | 0.01944  | -0.26309 |
| 0.454601 | 3.40E-25 | 0.605023 | 5.78E-48 | 0.422916 | 1.10E-21 | 0.288896 | 1.98E-10 | 0.333929 |
| -0.39369 | 9.19E-19 | -0.53751 | 2.56E-36 | -0.48055 | 2.35E-28 | -0.24945 | 4.69E-08 | -0.26752 |
| 0.165626 | 0.00033  | 0.425701 | 5.57E-22 | 0.254793 | 2.35E-08 | 0.056651 | 0.22173  | 0.351477 |
| 0.545202 | 1.63E-37 | 0.721623 | 2.77E-76 | 0.585844 | 2.24E-44 | 0.466794 | 1.20E-26 | 0.610262 |
| -0.33583 | 8.95E-14 | -0.52077 | 8.03E-34 | -0.38883 | 2.64E-18 | -0.3296  | 2.70E-13 | -0.44947 |
| -0.31328 | 4.30E-12 | -0.60521 | 5.31E-48 | -0.47977 | 2.95E-28 | -0.43153 | 1.33E-22 | -0.45066 |
| 0.262277 | 8.73E-09 | 0.332348 | 1.66E-13 | 0.296092 | 6.65E-11 | 0.20491  | 8.05E-06 | 0.206363 |
| 0.650922 | 1.27E-57 | 0.77754  | 9.90E-96 | 0.535827 | 4.62E-36 | 0.530657 | 2.80E-35 | 0.660638 |
| 0.555501 | 3.64E-39 | 0.67548  | 1.63E-63 | 0.748123 | 7.37E-85 | 0.384484 | 6.69E-18 | 0.441808 |
| 0.40657  | 5.13E-20 | 0.747482 | 1.22E-84 | 0.500015 | 6.55E-31 | 0.395878 | 5.68E-19 | 0.674591 |
| 0.601208 | 3.13E-47 | 0.801309 | #####    | 0.694016 | 2.37E-68 | 0.548737 | 4.48E-38 | 0.758923 |
| 0.585261 | 2.85E-44 | 0.773579 | 3.59E-94 | 0.701248 | 2.42E-70 | 0.371778 | 9.37E-17 | 0.473798 |
| 0.654467 | 1.94E-58 | 0.836371 | #####    | 0.743552 | 2.64E-83 | 0.506436 | 8.64E-32 | 0.673711 |
| -0.20983 | 4.80E-06 | -0.42984 | 2.01E-22 | -0.27625 | 1.26E-09 | -0.2384  | 1.85E-07 | -0.32662 |
| 0.566939 | 4.57E-41 | 0.71243  | 1.54E-73 | 0.523522 | 3.19E-34 | 0.506222 | 9.25E-32 | 0.812862 |
| -0.22015 | 1.56E-06 | -0.47201 | 2.75E-27 | -0.4159  | 5.86E-21 | -0.2822  | 5.34E-10 | -0.4117  |
| 0.44043  | 1.40E-23 | 0.686893 | 1.89E-66 | 0.467753 | 9.18E-27 | 0.322815 | 8.70E-13 | 0.438305 |
| 0.677527 | 4.97E-64 | 0.728964 | 1.47E-78 | 0.634452 | 5.73E-54 | 0.618472 | 1.25E-50 | 0.657262 |
| 0.610852 | 4.19E-49 | 0.768404 | 3.50E-92 | 0.652583 | 5.28E-58 | 0.414385 | 8.38E-21 | 0.460666 |
| 0.324483 | 6.54E-13 | 0.490911 | 1.07E-29 | 0.371046 | 1.09E-16 | 0.287096 | 2.60E-10 | 0.314233 |
| -0.23397 | 3.16E-07 | -0.69819 | 1.71E-69 | -0.51184 | 1.52E-32 | -0.23211 | 3.94E-07 | -0.42789 |
| -0.24737 | 6.10E-08 | -0.52811 | 6.71E-35 | -0.46208 | 4.44E-26 | -0.24381 | 9.54E-08 | -0.51056 |



|          |          |          |          |          |          |          |          |          |
|----------|----------|----------|----------|----------|----------|----------|----------|----------|
| -0.24247 | 1.13E-07 | -0.46338 | 3.10E-26 | -0.4383  | 2.41E-23 | -0.3416  | 3.15E-14 | -0.48899 |
| 0.559949 | 6.77E-40 | 0.756139 | 1.15E-87 | 0.579079 | 3.62E-43 | 0.411548 | 1.63E-20 | 0.521984 |
| 0.358503 | 1.31E-15 | 0.383717 | 7.87E-18 | 0.340977 | 3.53E-14 | 0.302466 | 2.46E-11 | 0.191108 |
| 0.506933 | 7.38E-32 | 0.730689 | 4.20E-79 | 0.558936 | 9.95E-40 | 0.433706 | 7.69E-23 | 0.56169  |
| 0.525079 | 1.88E-34 | 0.777676 | 8.74E-96 | 0.606752 | 2.67E-48 | 0.332759 | 1.55E-13 | 0.527824 |
| 0.319351 | 1.56E-12 | 0.476647 | 7.30E-28 | 0.423105 | 1.05E-21 | 0.373064 | 7.21E-17 | 0.498614 |
| 0.59357  | 8.58E-46 | 0.805862 | #####    | 0.573972 | 2.84E-42 | 0.445838 | 3.46E-24 | 0.650649 |
| 0.204126 | 8.74E-06 | 0.336585 | 7.82E-14 | 0.370634 | 1.18E-16 | 0.105625 | 0.02244  | 0.137907 |
| 0.691797 | 9.39E-68 | 0.694236 | 2.06E-68 | 0.652812 | 4.68E-58 | 0.482868 | 1.19E-28 | 0.526594 |
| 0.559722 | 7.38E-40 | 0.765095 | 6.16E-91 | 0.51502  | 5.39E-33 | 0.528271 | 6.35E-35 | 0.628142 |
| 0.520143 | 9.91E-34 | 0.570909 | 9.60E-42 | 0.570562 | 1.10E-41 | 0.311011 | 6.23E-12 | 0.154299 |
| 0.245133 | 8.08E-08 | 0.572    | 6.23E-42 | 0.412293 | 1.37E-20 | 0.396215 | 5.27E-19 | 0.591138 |
| 0.640032 | 3.51E-55 | 0.805868 | #####    | 0.595665 | 3.49E-46 | 0.585226 | 2.89E-44 | 0.75146  |
| 0.488383 | 2.30E-29 | 0.502142 | 3.36E-31 | 0.469107 | 6.27E-27 | 0.397181 | 4.25E-19 | 0.462305 |
| 0.372522 | 8.06E-17 | 0.686037 | 3.17E-66 | 0.664019 | 1.08E-60 | 0.403374 | 1.06E-19 | 0.497887 |
| 0.419961 | 2.23E-21 | 0.478875 | 3.83E-28 | 0.451938 | 6.92E-25 | -0.00975 | 0.83351  | 0.152261 |
| 0.189595 | 3.73E-05 | 0.333035 | 1.47E-13 | 0.362788 | 5.66E-16 | 0.142137 | 0.00208  | 0.303529 |
| 0.403541 | 1.02E-19 | 0.502843 | 2.70E-31 | 0.335511 | 9.48E-14 | 0.242309 | 1.15E-07 | 0.320521 |
| -0.2043  | 8.58E-06 | -0.41023 | 2.21E-20 | -0.30427 | 1.85E-11 | -0.273   | 2.00E-09 | -0.42381 |
| 0.574534 | 2.27E-42 | 0.775333 | 7.38E-95 | 0.728408 | 2.20E-78 | 0.414768 | 7.65E-21 | 0.560431 |
| -0.22676 | 7.35E-07 | -0.3913  | 1.55E-18 | -0.31841 | 1.83E-12 | -0.20609 | 7.12E-06 | -0.35451 |
| 0.137553 | 0.00289  | 0.356377 | 1.97E-15 | 0.198368 | 1.57E-05 | 0.045918 | 0.3221   | 0.276985 |
| 0.465    | 1.98E-26 | 0.742348 | 6.69E-83 | 0.667276 | 1.75E-61 | 0.348994 | 8.03E-15 | 0.583439 |
| 0.417123 | 4.39E-21 | 0.734303 | 2.94E-80 | 0.686916 | 1.86E-66 | 0.422474 | 1.22E-21 | 0.70859  |
| 0.442307 | 8.63E-24 | 0.641853 | 1.39E-55 | 0.705244 | 1.82E-71 | 0.323466 | 7.78E-13 | 0.483461 |
| -0.17995 | 9.22E-05 | -0.39037 | 1.89E-18 | -0.32442 | 6.61E-13 | -0.2041  | 8.76E-06 | -0.40009 |
| 0.5714   | 7.90E-42 | 0.735982 | 8.40E-81 | 0.518747 | 1.58E-33 | 0.432012 | 1.17E-22 | 0.685985 |
| 0.563291 | 1.88E-40 | 0.652477 | 5.59E-58 | 0.624139 | 8.61E-52 | 0.363446 | 4.97E-16 | 0.431903 |
| 0.610911 | 4.08E-49 | 0.770978 | 3.64E-93 | 0.509132 | 3.65E-32 | 0.495694 | 2.50E-30 | 0.683691 |
| 0.340209 | 4.06E-14 | 0.58172  | 1.23E-43 | 0.498234 | 1.14E-30 | 0.142929 | 0.00196  | 0.281176 |
| 0.357074 | 1.73E-15 | 0.56836  | 2.62E-41 | 0.445756 | 3.53E-24 | 0.367414 | 2.26E-16 | 0.683199 |
| 0.265722 | 5.47E-09 | 0.341602 | 3.15E-14 | 0.308483 | 9.40E-12 | 0.17727  | 0.00012  | 0.182152 |
| 0.244725 | 8.51E-08 | 0.469694 | 5.32E-27 | 0.349937 | 6.72E-15 | 0.16632  | 0.00031  | 0.257681 |
| 0.595378 | 3.95E-46 | 0.727003 | 6.06E-78 | 0.597183 | 1.81E-46 | 0.49417  | 3.98E-30 | 0.637315 |
| 0.603341 | 1.22E-47 | 0.701682 | 1.83E-70 | 0.648855 | 3.76E-57 | 0.441336 | 1.11E-23 | 0.533059 |
| 0.186125 | 5.19E-05 | 0.390294 | 1.92E-18 | 0.403086 | 1.13E-19 | 0.189824 | 3.65E-05 | 0.344347 |
| 0.537623 | 2.45E-36 | 0.764331 | 1.19E-90 | 0.76959  | 1.24E-92 | 0.452229 | 6.40E-25 | 0.593747 |
| 0.69306  | 4.29E-68 | 0.762263 | 6.91E-90 | 0.657835 | 3.17E-59 | 0.443591 | 6.20E-24 | 0.627509 |
| 0.562838 | 2.24E-40 | 0.616942 | 2.55E-50 | 0.555791 | 3.26E-39 | 0.360561 | 8.76E-16 | 0.492767 |
| 0.437329 | 3.09E-23 | 0.616361 | 3.34E-50 | 0.500248 | 6.09E-31 | 0.291021 | 1.44E-10 | 0.356016 |
| 0.7272   | 5.27E-78 | 0.843402 | #####    | 0.608319 | 1.32E-48 | 0.533711 | 9.68E-36 | 0.686518 |
| 0.635714 | 3.06E-54 | 0.791391 | #####    | 0.640318 | 3.03E-55 | 0.517501 | 2.38E-33 | 0.655412 |
| 0.628327 | 1.15E-52 | 0.723316 | 8.39E-77 | 0.65094  | 1.26E-57 | 0.474686 | 1.28E-27 | 0.556582 |
| 0.434799 | 5.85E-23 | 0.621225 | 3.43E-51 | 0.452336 | 6.23E-25 | 0.321237 | 1.14E-12 | 0.406696 |
| 0.561725 | 3.43E-40 | 0.572159 | 5.85E-42 | 0.517441 | 2.43E-33 | 0.343261 | 2.33E-14 | 0.441072 |

|          |          |          |          |          |          |          |          |          |
|----------|----------|----------|----------|----------|----------|----------|----------|----------|
| -0.30191 | 2.68E-11 | -0.55032 | 2.50E-38 | -0.57147 | 7.69E-42 | -0.28962 | 1.78E-10 | -0.45421 |
| 0.27806  | 9.73E-10 | 0.325277 | 5.70E-13 | 0.283913 | 4.16E-10 | 0.226482 | 7.59E-07 | 0.407668 |
| 0.6362   | 2.40E-54 | 0.757598 | 3.44E-88 | 0.678693 | 2.51E-64 | 0.739179 | 7.55E-82 | 0.493106 |
| 0.412631 | 1.26E-20 | 0.590708 | 2.90E-45 | 0.559268 | 8.77E-40 | 0.197129 | 1.78E-05 | 0.293259 |
| 0.57153  | 7.51E-42 | 0.702732 | 9.30E-71 | 0.535055 | 6.05E-36 | 0.498685 | 9.90E-31 | 0.589855 |
| 0.52756  | 8.10E-35 | 0.693999 | 2.39E-68 | 0.608649 | 1.14E-48 | 0.458958 | 1.04E-25 | 0.663603 |
| 0.712278 | 1.70E-73 | 0.793605 | #####    | 0.772076 | 1.37E-93 | 0.459253 | 9.64E-26 | 0.522931 |
| 0.528255 | 6.39E-35 | 0.829308 | #####    | 0.723959 | 5.32E-77 | 0.405448 | 6.63E-20 | 0.54474  |
| 0.652209 | 6.44E-58 | 0.759421 | 7.54E-89 | 0.660302 | 8.31E-60 | 0.421059 | 1.71E-21 | 0.500996 |
| 0.37301  | 7.29E-17 | 0.599635 | 6.23E-47 | 0.484344 | 7.68E-29 | 0.130694 | 0.00467  | 0.351226 |
| 0.262422 | 8.56E-09 | 0.516483 | 3.33E-33 | 0.285776 | 3.16E-10 | 0.207338 | 6.25E-06 | 0.423003 |
| 0.6856   | 4.13E-66 | 0.773021 | 5.92E-94 | 0.557328 | 1.83E-39 | 0.466765 | 1.21E-26 | 0.538822 |
| 0.516562 | 3.25E-33 | 0.654883 | 1.55E-58 | 0.435462 | 4.95E-23 | 0.50684  | 7.60E-32 | 0.703637 |
| 0.611942 | 2.55E-49 | 0.78966  | #####    | 0.693314 | 3.66E-68 | 0.490781 | 1.12E-29 | 0.487756 |
| 0.423362 | 9.84E-22 | 0.441013 | 1.20E-23 | 0.468088 | 8.36E-27 | 0.337477 | 6.66E-14 | 0.303765 |
| 0.68471  | 7.06E-66 | 0.816636 | #####    | 0.656856 | 5.39E-59 | 0.463581 | 2.94E-26 | 0.623661 |
| 0.651583 | 8.97E-58 | 0.866219 | #####    | 0.680104 | 1.10E-64 | 0.450241 | 1.09E-24 | 0.585446 |
| 0.659477 | 1.30E-59 | 0.695331 | 1.04E-68 | 0.473033 | 2.06E-27 | 0.360748 | 8.45E-16 | 0.483895 |
| -0.14006 | 0.00242  | -0.43123 | 1.43E-22 | -0.28592 | 3.09E-10 | -0.12401 | 0.00729  | -0.31271 |
| 0.597788 | 1.39E-46 | 0.78165  | 2.21E-97 | 0.654689 | 1.72E-58 | 0.546829 | 9.00E-38 | 0.596114 |
| 0.61474  | 7.07E-50 | 0.772467 | 9.70E-94 | 0.533961 | 8.88E-36 | 0.404229 | 8.75E-20 | 0.497279 |
| 0.587144 | 1.30E-44 | 0.700716 | 3.41E-70 | 0.649508 | 2.67E-57 | 0.337309 | 6.87E-14 | 0.387856 |
| 0.607129 | 2.25E-48 | 0.74079  | 2.21E-82 | 0.70264  | 9.88E-71 | 0.430481 | 1.72E-22 | 0.540195 |
| 0.566969 | 4.52E-41 | 0.759033 | 1.04E-88 | 0.636007 | 2.64E-54 | 0.366153 | 2.91E-16 | 0.505982 |
| 0.089818 | 0.05242  | -0.31299 | 4.51E-12 | -0.1272  | 0.00591  | -0.00565 | 0.90315  | -0.18512 |
| 0.221111 | 1.40E-06 | 0.558286 | 1.27E-39 | 0.364981 | 3.67E-16 | 0.352486 | 4.15E-15 | 0.396345 |
| 0.391459 | 1.49E-18 | 0.716406 | 1.03E-74 | 0.460012 | 7.83E-26 | 0.419921 | 2.25E-21 | 0.483462 |
| 0.329084 | 2.95E-13 | 0.643059 | 7.52E-56 | 0.583637 | 5.59E-44 | 0.244402 | 8.86E-08 | 0.330973 |
| 0.617884 | 1.65E-50 | 0.702092 | 1.41E-70 | 0.58717  | 1.29E-44 | 0.390089 | 2.01E-18 | 0.46518  |
| 0.289069 | 1.93E-10 | 0.687241 | 1.53E-66 | 0.565964 | 6.68E-41 | 0.303952 | 1.94E-11 | 0.436282 |
| 0.700529 | 3.84E-70 | 0.767325 | 8.97E-92 | 0.604534 | 7.18E-48 | 0.465741 | 1.61E-26 | 0.667142 |
| 0.518258 | 1.85E-33 | 0.54258  | 4.19E-37 | 0.543175 | 3.38E-37 | 0.368913 | 1.67E-16 | 0.522317 |
| 0.507675 | 5.82E-32 | 0.701948 | 1.54E-70 | 0.478354 | 4.45E-28 | 0.463859 | 2.72E-26 | 0.623642 |
| 0.421318 | 1.61E-21 | 0.62262  | 1.77E-51 | 0.489561 | 1.62E-29 | 0.401301 | 1.70E-19 | 0.67813  |
| 0.179486 | 9.62E-05 | 0.574326 | 2.47E-42 | 0.318674 | 1.75E-12 | 0.351055 | 5.45E-15 | 0.479249 |
| -0.26504 | 6.01E-09 | -0.6415  | 1.67E-55 | -0.54832 | 5.22E-38 | -0.20681 | 6.61E-06 | -0.20493 |
| 0.262996 | 7.92E-09 | 0.39637  | 5.09E-19 | 0.280321 | 7.02E-10 | 0.485557 | 5.36E-29 | 0.463131 |
| 0.556926 | 2.13E-39 | 0.787549 | #####    | 0.597279 | 1.74E-46 | 0.42853  | 2.78E-22 | 0.610522 |
| -0.32226 | 9.56E-13 | -0.52255 | 4.42E-34 | -0.3216  | 1.07E-12 | -0.31231 | 5.04E-12 | -0.24074 |
| -0.43973 | 1.67E-23 | -0.58404 | 4.72E-44 | -0.59143 | 2.13E-45 | -0.26642 | 4.97E-09 | -0.4209  |
| 0.467174 | 1.08E-26 | 0.564593 | 1.14E-40 | 0.419333 | 2.59E-21 | 0.312578 | 4.82E-12 | 0.488364 |
| 0.391252 | 1.56E-18 | 0.677834 | 4.15E-64 | 0.385669 | 5.20E-18 | 0.428124 | 3.08E-22 | 0.637966 |
| 0.486911 | 3.58E-29 | 0.68251  | 2.63E-65 | 0.404647 | 7.96E-20 | 0.508234 | 4.86E-32 | 0.47884  |
| 0.085626 | 0.06448  | 0.470503 | 4.23E-27 | 0.201494 | 1.15E-05 | 0.229231 | 5.52E-07 | 0.314796 |
| 0.172441 | 0.00018  | 0.356447 | 1.95E-15 | 0.299997 | 3.62E-11 | 0.033968 | 0.46398  | 0.044227 |

|          |          |          |          |          |          |          |          |          |
|----------|----------|----------|----------|----------|----------|----------|----------|----------|
| 0.175183 | 0.00014  | 0.414861 | 7.49E-21 | 0.288029 | 2.26E-10 | 0.191205 | 3.19E-05 | 0.307916 |
| 0.408236 | 3.50E-20 | 0.593004 | 1.09E-45 | 0.340867 | 3.61E-14 | 0.363218 | 5.20E-16 | 0.41661  |
| 0.31336  | 4.24E-12 | 0.493465 | 4.94E-30 | 0.35904  | 1.18E-15 | 0.381433 | 1.27E-17 | 0.29859  |
| 0.615363 | 5.30E-50 | 0.819465 | #####    | 0.739506 | 5.89E-82 | 0.460562 | 6.74E-26 | 0.516406 |
| 0.500831 | 5.07E-31 | 0.836758 | #####    | 0.590994 | 2.57E-45 | 0.484401 | 7.55E-29 | 0.701912 |
| 0.541804 | 5.53E-37 | 0.706458 | 8.20E-72 | 0.553461 | 7.81E-39 | 0.440247 | 1.47E-23 | 0.459047 |
| 0.32732  | 4.01E-13 | 0.610303 | 5.38E-49 | 0.450887 | 9.15E-25 | 0.326974 | 4.25E-13 | 0.523345 |
| 0.489448 | 1.67E-29 | 0.516893 | 2.91E-33 | 0.441061 | 1.19E-23 | 0.331884 | 1.80E-13 | 0.228317 |
| 0.257883 | 1.57E-08 | 0.426881 | 4.18E-22 | 0.292759 | 1.11E-10 | 0.043926 | 0.34356  | 0.063044 |
| 0.613532 | 1.23E-49 | 0.788645 | #####    | 0.677105 | 6.36E-64 | 0.349249 | 7.65E-15 | 0.365016 |
| 0.355574 | 2.30E-15 | 0.602091 | 2.12E-47 | 0.555548 | 3.58E-39 | 0.369584 | 1.46E-16 | 0.486022 |
| 0.627822 | 1.47E-52 | 0.764324 | 1.19E-90 | 0.640471 | 2.81E-55 | 0.366165 | 2.90E-16 | 0.426563 |
| 0.508447 | 4.54E-32 | 0.738621 | 1.15E-81 | 0.558405 | 1.22E-39 | 0.424872 | 6.82E-22 | 0.604476 |
| 0.671606 | 1.51E-62 | 0.746983 | 1.81E-84 | 0.617785 | 1.72E-50 | 0.450357 | 1.05E-24 | 0.495715 |
| 0.662341 | 2.72E-60 | 0.754382 | 4.83E-87 | 0.728798 | 1.66E-78 | 0.551559 | 1.58E-38 | 0.598059 |
| 0.464902 | 2.03E-26 | 0.65724  | 4.38E-59 | 0.508613 | 4.31E-32 | 0.327676 | 3.77E-13 | 0.505138 |
| 0.076272 | 0.09971  | 0.389059 | 2.51E-18 | 0.22639  | 7.67E-07 | 0.154905 | 0.00078  | 0.32731  |
| 0.687815 | 1.08E-66 | 0.822357 | #####    | 0.693782 | 2.74E-68 | 0.473039 | 2.06E-27 | 0.526213 |
| 0.291853 | 1.27E-10 | 0.408933 | 2.98E-20 | 0.340687 | 3.73E-14 | 0.190744 | 3.34E-05 | 0.338501 |
| 0.582703 | 8.22E-44 | 0.677239 | 5.88E-64 | 0.515299 | 4.92E-33 | 0.352619 | 4.05E-15 | 0.413049 |
| 0.589151 | 5.60E-45 | 0.704418 | 3.11E-71 | 0.53992  | 1.09E-36 | 0.341155 | 3.42E-14 | 0.422338 |
| 0.680614 | 8.11E-65 | 0.84506  | #####    | 0.739148 | 7.74E-82 | 0.443806 | 5.86E-24 | 0.569351 |
| 0.313826 | 3.93E-12 | 0.593627 | 8.37E-46 | 0.493543 | 4.83E-30 | 0.344432 | 1.88E-14 | 0.416905 |
| 0.324031 | 7.06E-13 | 0.437182 | 3.20E-23 | 0.461008 | 5.96E-26 | 0.153204 | 0.0009   | 0.233347 |
| 0.353614 | 3.35E-15 | 0.544569 | 2.05E-37 | 0.414227 | 8.69E-21 | 0.221086 | 1.40E-06 | 0.239544 |
| 0.35855  | 1.30E-15 | 0.605531 | 4.61E-48 | 0.362296 | 6.24E-16 | 0.283153 | 4.65E-10 | 0.398675 |
| 0.457106 | 1.73E-25 | 0.687148 | 1.62E-66 | 0.391677 | 1.43E-18 | 0.474721 | 1.27E-27 | 0.618266 |
| 0.503445 | 2.23E-31 | 0.667139 | 1.89E-61 | 0.418621 | 3.07E-21 | 0.415466 | 6.49E-21 | 0.434011 |
| 0.492989 | 5.71E-30 | 0.436641 | 3.67E-23 | 0.382252 | 1.07E-17 | 0.237327 | 2.11E-07 | 0.152293 |
| 0.494261 | 3.87E-30 | 0.505536 | 1.15E-31 | 0.419588 | 2.44E-21 | 0.413359 | 1.07E-20 | 0.461026 |
| -0.43248 | 1.05E-22 | -0.61375 | 1.11E-49 | -0.54796 | 5.95E-38 | -0.28453 | 3.80E-10 | -0.47131 |
| 0.224182 | 9.88E-07 | 0.437016 | 3.34E-23 | 0.267498 | 4.29E-09 | 0.081835 | 0.07728  | 0.220411 |
| 0.501429 | 4.21E-31 | 0.537419 | 2.64E-36 | 0.48001  | 2.75E-28 | 0.225168 | 8.83E-07 | 0.430155 |
| 0.445397 | 3.88E-24 | 0.62161  | 2.86E-51 | 0.620171 | 5.64E-51 | 0.327583 | 3.83E-13 | 0.415312 |
| 0.579183 | 3.47E-43 | 0.757053 | 5.40E-88 | 0.526458 | 1.18E-34 | 0.384572 | 6.57E-18 | 0.611963 |
| 0.190845 | 3.31E-05 | 0.494702 | 3.38E-30 | 0.361199 | 7.74E-16 | 0.043384 | 0.34955  | 0.085141 |
| 0.478226 | 4.62E-28 | 0.687465 | 1.34E-66 | 0.561373 | 3.93E-40 | 0.323277 | 8.04E-13 | 0.550742 |
| 0.297372 | 5.45E-11 | 0.394069 | 8.45E-19 | 0.355034 | 2.55E-15 | 0.169285 | 0.00024  | 0.168264 |
| 0.663171 | 1.72E-60 | 0.711022 | 3.97E-73 | 0.612518 | 1.96E-49 | 0.508279 | 4.80E-32 | 0.481059 |
| 0.347684 | 1.03E-14 | 0.770086 | 8.01E-93 | 0.494755 | 3.33E-30 | 0.438483 | 2.30E-23 | 0.596964 |
| 0.496117 | 2.19E-30 | 0.56252  | 2.53E-40 | 0.403757 | 9.74E-20 | 0.495028 | 3.06E-30 | 0.266198 |
| 0.304441 | 1.80E-11 | 0.457723 | 1.46E-25 | 0.306222 | 1.35E-11 | 0.325457 | 5.53E-13 | 0.112152 |
| 0.466949 | 1.15E-26 | 0.538277 | 1.95E-36 | 0.336423 | 8.05E-14 | 0.423367 | 9.83E-22 | 0.422559 |
| 0.555091 | 4.25E-39 | 0.82756  | #####    | 0.740309 | 3.20E-82 | 0.476272 | 8.13E-28 | 0.567263 |
| 0.238708 | 1.79E-07 | 0.337694 | 6.41E-14 | 0.330634 | 2.25E-13 | 0.121143 | 0.00878  | 0.22947  |

|          |          |          |          |          |          |          |          |          |
|----------|----------|----------|----------|----------|----------|----------|----------|----------|
| 0.258178 | 1.51E-08 | 0.5336   | 1.01E-35 | 0.424886 | 6.80E-22 | 0.105837 | 0.02217  | 0.176742 |
| 0.29981  | 3.73E-11 | 0.517665 | 2.26E-33 | 0.489098 | 1.86E-29 | 0.182218 | 7.48E-05 | 0.22912  |
| 0.53443  | 7.53E-36 | 0.726453 | 9.00E-78 | 0.529715 | 3.87E-35 | 0.374922 | 4.93E-17 | 0.572712 |
| 0.411768 | 1.55E-20 | 0.617365 | 2.10E-50 | 0.393215 | 1.02E-18 | 0.343595 | 2.19E-14 | 0.579842 |
| 0.43115  | 1.46E-22 | 0.573819 | 3.02E-42 | 0.454006 | 3.98E-25 | 0.229004 | 5.67E-07 | 0.131598 |
| 0.599501 | 6.60E-47 | 0.764066 | 1.49E-90 | 0.669292 | 5.63E-62 | 0.368438 | 1.84E-16 | 0.413258 |
| 0.473985 | 1.57E-27 | 0.62486  | 6.10E-52 | 0.460308 | 7.22E-26 | 0.286374 | 2.89E-10 | 0.406738 |
| -0.25557 | 2.13E-08 | -0.57435 | 2.44E-42 | -0.41117 | 1.78E-20 | -0.30449 | 1.78E-11 | -0.52817 |
| 0.58473  | 3.55E-44 | 0.738681 | 1.10E-81 | 0.717586 | 4.58E-75 | 0.381214 | 1.33E-17 | 0.489482 |
| 0.538271 | 1.95E-36 | 0.592009 | 1.67E-45 | 0.51315  | 9.93E-33 | 0.371329 | 1.03E-16 | 0.380763 |
| 0.474565 | 1.33E-27 | 0.562116 | 2.95E-40 | 0.473657 | 1.72E-27 | 0.442521 | 8.17E-24 | 0.403807 |
| 0.375555 | 4.33E-17 | 0.663907 | 1.15E-60 | 0.460053 | 7.75E-26 | 0.22616  | 7.88E-07 | 0.365384 |
| 0.261093 | 1.02E-08 | 0.50616  | 9.44E-32 | 0.370105 | 1.32E-16 | 0.256818 | 1.81E-08 | 0.287316 |
| 0.598747 | 9.17E-47 | 0.636404 | 2.17E-54 | 0.648712 | 4.05E-57 | 0.441509 | 1.06E-23 | 0.305788 |
| 0.483516 | 9.81E-29 | 0.819769 | #####    | 0.703715 | 4.92E-71 | 0.398151 | 3.43E-19 | 0.484644 |
| 0.467989 | 8.59E-27 | 0.740881 | 2.06E-82 | 0.675135 | 2.00E-63 | 0.338334 | 5.71E-14 | 0.527737 |
| 0.320799 | 1.22E-12 | 0.483294 | 1.05E-28 | 0.367258 | 2.33E-16 | 0.369305 | 1.55E-16 | 0.325284 |
| 0.64715  | 9.14E-57 | 0.818092 | #####    | 0.641864 | 1.38E-55 | 0.521176 | 7.02E-34 | 0.630354 |
| 0.377607 | 2.83E-17 | 0.73024  | 5.83E-79 | 0.569501 | 1.67E-41 | 0.361725 | 6.98E-16 | 0.61041  |
| 0.508251 | 4.84E-32 | 0.62775  | 1.52E-52 | 0.549615 | 3.24E-38 | 0.396865 | 4.56E-19 | 0.327692 |
| 0.442258 | 8.75E-24 | 0.631049 | 3.06E-53 | 0.581873 | 1.16E-43 | 0.176189 | 0.00013  | 0.139451 |
| 0.520291 | 9.43E-34 | 0.464523 | 2.26E-26 | 0.445658 | 3.62E-24 | 0.307342 | 1.13E-11 | 0.316236 |
| 0.455925 | 2.38E-25 | 0.64297  | 7.87E-56 | 0.559302 | 8.66E-40 | 0.438646 | 2.21E-23 | 0.416876 |
| 0.392558 | 1.18E-18 | 0.513496 | 8.87E-33 | 0.316675 | 2.45E-12 | 0.203432 | 9.39E-06 | 0.307775 |
| 0.517834 | 2.13E-33 | 0.590062 | 3.81E-45 | 0.432025 | 1.17E-22 | 0.37817  | 2.52E-17 | 0.515858 |
| 0.351635 | 4.88E-15 | 0.445926 | 3.38E-24 | 0.445295 | 3.98E-24 | 0.278121 | 9.64E-10 | 0.42034  |
| -0.44209 | 9.13E-24 | -0.56552 | 7.95E-41 | -0.50446 | 1.62E-31 | -0.40095 | 1.83E-19 | -0.59769 |
| -0.46068 | 6.53E-26 | -0.53785 | 2.27E-36 | -0.49171 | 8.43E-30 | -0.27271 | 2.08E-09 | -0.43889 |
| 0.520789 | 7.99E-34 | 0.643606 | 5.69E-56 | 0.468579 | 7.28E-27 | 0.3015   | 2.86E-11 | 0.370897 |
| 0.328999 | 2.99E-13 | 0.490363 | 1.27E-29 | 0.363337 | 5.08E-16 | 0.207184 | 6.35E-06 | 0.238216 |
| 0.344169 | 1.97E-14 | 0.420958 | 1.76E-21 | 0.353059 | 3.72E-15 | 0.334697 | 1.10E-13 | 0.427552 |
| 0.464312 | 2.40E-26 | 0.676145 | 1.11E-63 | 0.599523 | 6.54E-47 | 0.40867  | 3.17E-20 | 0.518502 |
| 0.353534 | 3.40E-15 | 0.670807 | 2.39E-62 | 0.428037 | 3.14E-22 | 0.382879 | 9.40E-18 | 0.478744 |
| 0.644722 | 3.21E-56 | 0.644104 | 4.41E-56 | 0.502468 | 3.04E-31 | 0.3108   | 6.45E-12 | 0.386662 |
| -0.1213  | 0.00869  | -0.5153  | 4.92E-33 | -0.21007 | 4.68E-06 | -0.28085 | 6.50E-10 | -0.52579 |
| 0.158697 | 0.00058  | 0.477332 | 5.99E-28 | 0.365313 | 3.44E-16 | 0.271657 | 2.41E-09 | 0.346001 |
| 0.456932 | 1.81E-25 | 0.701991 | 1.50E-70 | 0.569937 | 1.41E-41 | 0.413541 | 1.02E-20 | 0.491469 |
| 0.699606 | 6.94E-70 | 0.868071 | #####    | 0.694652 | 1.59E-68 | 0.429801 | 2.03E-22 | 0.545616 |
| 0.394804 | 7.19E-19 | 0.515021 | 5.39E-33 | 0.435727 | 4.63E-23 | 0.353054 | 3.73E-15 | 0.635103 |
| -0.20952 | 4.96E-06 | -0.42378 | 8.90E-22 | -0.35302 | 3.75E-15 | -0.26766 | 4.20E-09 | -0.34863 |
| 0.614089 | 9.54E-50 | 0.81702  | #####    | 0.625689 | 4.10E-52 | 0.579133 | 3.54E-43 | 0.68475  |
| 0.453059 | 5.13E-25 | 0.597877 | 1.34E-46 | 0.475195 | 1.11E-27 | 0.29812  | 4.86E-11 | 0.371272 |
| 0.373532 | 6.56E-17 | 0.529555 | 4.09E-35 | 0.283797 | 4.23E-10 | 0.361053 | 7.96E-16 | 0.333499 |
| 0.264683 | 6.31E-09 | 0.446302 | 3.06E-24 | 0.365075 | 3.60E-16 | 0.143951 | 0.00182  | -0.03915 |
| 0.373616 | 6.44E-17 | 0.615796 | 4.34E-50 | 0.572305 | 5.52E-42 | 0.247046 | 6.36E-08 | 0.291499 |

|          |          |          |          |          |          |          |          |          |
|----------|----------|----------|----------|----------|----------|----------|----------|----------|
| 0.515804 | 4.17E-33 | 0.562337 | 2.71E-40 | 0.584018 | 4.77E-44 | 0.317204 | 2.24E-12 | 0.277788 |
| 0.466614 | 1.26E-26 | 0.526264 | 1.26E-34 | 0.577093 | 8.10E-43 | 0.228146 | 6.26E-07 | 0.35042  |
| 0.292329 | 1.18E-10 | 0.482605 | 1.28E-28 | 0.382629 | 9.91E-18 | 0.366163 | 2.90E-16 | 0.382662 |
| 0.359588 | 1.06E-15 | 0.526368 | 1.22E-34 | 0.390842 | 1.71E-18 | 0.280064 | 7.29E-10 | 0.183291 |
| 0.378535 | 2.34E-17 | 0.520789 | 7.99E-34 | 0.47945  | 3.24E-28 | 0.382036 | 1.12E-17 | 0.361677 |
| 0.220287 | 1.53E-06 | 0.41333  | 1.07E-20 | 0.366448 | 2.74E-16 | -0.00872 | 0.85086  | 0.08377  |
| 0.395181 | 6.62E-19 | 0.539418 | 1.30E-36 | 0.53482  | 6.57E-36 | 0.183801 | 6.46E-05 | 0.204723 |
| 0.542498 | 4.31E-37 | 0.758404 | 1.76E-88 | 0.595006 | 4.63E-46 | 0.387788 | 3.30E-18 | 0.555031 |
| 0.29571  | 7.05E-11 | 0.357649 | 1.54E-15 | 0.410059 | 2.30E-20 | 0.096581 | 0.03694  | 0.066384 |
| 0.427279 | 3.79E-22 | 0.534742 | 6.76E-36 | 0.497587 | 1.39E-30 | 0.316906 | 2.36E-12 | 0.443219 |
| 0.32202  | 9.96E-13 | 0.569718 | 1.54E-41 | 0.402253 | 1.37E-19 | 0.359586 | 1.06E-15 | 0.478001 |
| 0.386372 | 4.48E-18 | 0.471566 | 3.13E-27 | 0.440886 | 1.24E-23 | 0.297592 | 5.27E-11 | 0.391271 |
| 0.336682 | 7.68E-14 | 0.41192  | 1.49E-20 | 0.389151 | 2.46E-18 | 0.156028 | 0.00072  | 0.135506 |
| 0.295209 | 7.61E-11 | 0.409882 | 2.39E-20 | 0.368418 | 1.85E-16 | 0.166551 | 0.0003   | 0.314085 |
| 0.355461 | 2.35E-15 | 0.560303 | 5.91E-40 | 0.433727 | 7.65E-23 | 0.239459 | 1.63E-07 | 0.27997  |
| 0.53879  | 1.62E-36 | 0.823127 | #####    | 0.669833 | 4.15E-62 | 0.512348 | 1.29E-32 | 0.690124 |
| 0.304203 | 1.87E-11 | 0.376828 | 3.33E-17 | 0.281609 | 5.82E-10 | 0.289623 | 1.78E-10 | 0.502569 |
| 0.474896 | 1.21E-27 | 0.443626 | 6.14E-24 | 0.263418 | 7.49E-09 | 0.382715 | 9.73E-18 | 0.391576 |
| 0.099136 | 0.0322   | 0.412128 | 1.42E-20 | 0.472121 | 2.67E-27 | 0.149456 | 0.0012   | 0.288781 |
| 0.466535 | 1.29E-26 | 0.512836 | 1.10E-32 | 0.43315  | 8.84E-23 | 0.285749 | 3.17E-10 | 0.321    |
| 0.070157 | 0.13005  | 0.443074 | 7.08E-24 | 0.293542 | 9.83E-11 | 0.064103 | 0.16667  | 0.214952 |
| -0.2914  | 1.36E-10 | -0.49711 | 1.62E-30 | -0.34597 | 1.41E-14 | -0.32819 | 3.44E-13 | -0.51212 |
| 0.389056 | 2.52E-18 | 0.706176 | 9.86E-72 | 0.667301 | 1.73E-61 | 0.348966 | 8.07E-15 | 0.451171 |
| -0.15715 | 0.00065  | -0.35834 | 1.35E-15 | -0.29468 | 8.26E-11 | -0.16189 | 0.00044  | -0.3447  |
| 0.420978 | 1.75E-21 | 0.58736  | 1.19E-44 | 0.44943  | 1.35E-24 | 0.159717 | 0.00053  | 0.162656 |
| 0.35417  | 3.01E-15 | 0.440563 | 1.35E-23 | 0.148919 | 0.00125  | 0.260541 | 1.10E-08 | 0.295188 |
| 0.318466 | 1.82E-12 | 0.54003  | 1.04E-36 | 0.270485 | 2.84E-09 | 0.211592 | 3.98E-06 | 0.156354 |
| 0.55938  | 8.40E-40 | 0.622824 | 1.61E-51 | 0.497878 | 1.27E-30 | 0.412269 | 1.37E-20 | 0.559427 |
| 0.57769  | 6.37E-43 | 0.642058 | 1.25E-55 | 0.515164 | 5.14E-33 | 0.425486 | 5.87E-22 | 0.49867  |
| 0.379039 | 2.10E-17 | 0.568667 | 2.32E-41 | 0.561263 | 4.10E-40 | 0.349997 | 6.65E-15 | 0.542338 |
| 0.502182 | 3.32E-31 | 0.673201 | 6.08E-63 | 0.637596 | 1.20E-54 | 0.283452 | 4.45E-10 | 0.331289 |
| 0.614299 | 8.66E-50 | 0.794111 | #####    | 0.668373 | 9.47E-62 | 0.44915  | 1.45E-24 | 0.517894 |
| 0.667465 | 1.58E-61 | 0.843999 | #####    | 0.714286 | 4.38E-74 | 0.459079 | 1.01E-25 | 0.444546 |
| 0.67023  | 3.31E-62 | 0.820332 | #####    | 0.697032 | 3.56E-69 | 0.439781 | 1.65E-23 | 0.521012 |
| 0.220319 | 1.53E-06 | 0.271918 | 2.32E-09 | 0.211784 | 3.90E-06 | 0.207953 | 5.86E-06 | 0.258082 |
| 0.073125 | 0.11454  | 0.243993 | 9.32E-08 | 0.271153 | 2.59E-09 | 0.081309 | 0.07921  | 0.212253 |
| 0.003506 | 0.93976  | 0.120592 | 0.00909  | 0.112463 | 0.01503  | 0.062408 | 0.17819  | 0.149036 |
| -0.10962 | 0.0178   | -0.09523 | 0.03967  | -0.00699 | 0.88019  | -0.14526 | 0.00165  | -0.08599 |
| -0.18029 | 8.94E-05 | -0.29667 | 6.08E-11 | -0.12159 | 0.00853  | -0.34402 | 2.02E-14 | -0.39972 |
| 0.084667 | 0.06754  | 0.244615 | 8.62E-08 | 0.125691 | 0.00653  | 0.294021 | 9.13E-11 | 0.329096 |
| -0.04283 | 0.35577  | -0.08049 | 0.08229  | -0.0246  | 0.59588  | -0.09497 | 0.04023  | -0.05029 |
| 0.079905 | 0.08455  | -0.01079 | 0.81613  | -0.15198 | 0.00099  | 0.079663 | 0.0855   | 0.117564 |
| -0.23024 | 4.91E-07 | -0.06747 | 0.14545  | -0.13954 | 0.00251  | -0.04324 | 0.35113  | 0.097236 |
| -0.058   | 0.21094  | 0.202205 | 1.06E-05 | 0.101085 | 0.02895  | 0.07229  | 0.11875  | 0.220333 |
| 0.129581 | 0.00504  | 0.222364 | 1.21E-06 | 0.142015 | 0.0021   | 0.09917  | 0.03214  | 0.2016   |

|          |          |          |          |          |          |          |          |          |
|----------|----------|----------|----------|----------|----------|----------|----------|----------|
| 0.029886 | 0.51942  | 0.214602 | 2.87E-06 | 0.223815 | 1.03E-06 | 0.055658 | 0.22995  | 0.162302 |
| -0.01397 | 0.76339  | -0.12599 | 0.00641  | -0.17741 | 0.00012  | 0.07712  | 0.096    | 0.149693 |
| -0.13139 | 0.00445  | 0.02307  | 0.619    | -0.03533 | 0.4462   | 0.052219 | 0.26008  | 0.236245 |
| -0.00565 | 0.90304  | 0.140347 | 0.00237  | 0.08684  | 0.06077  | 0.064326 | 0.16519  | 0.181559 |
| -0.24902 | 4.95E-08 | -0.26735 | 4.38E-09 | -0.33354 | 1.35E-13 | -0.27641 | 1.23E-09 | -0.12807 |
| -0.00211 | 0.96369  | -0.02936 | 0.52681  | -0.06752 | 0.14514  | 0.079319 | 0.08686  | 0.124105 |
| -0.00777 | 0.86708  | 0.242903 | 1.07E-07 | 0.180383 | 8.86E-05 | 0.137833 | 0.00284  | 0.252791 |
| -0.30328 | 2.16E-11 | -0.02612 | 0.57348  | -0.10161 | 0.02812  | -0.18129 | 8.15E-05 | -0.07246 |
| 0.11805  | 0.01067  | -0.36475 | 3.85E-16 | -0.20117 | 1.18E-05 | -0.12876 | 0.00532  | -0.39138 |
| -0.01579 | 0.73366  | 0.032051 | 0.48959  | 0.061826 | 0.18228  | 0.064237 | 0.16578  | 0.043894 |
| -0.07869 | 0.0894   | 0.141956 | 0.0021   | 0.101037 | 0.02902  | 0.077194 | 0.09567  | 0.26428  |
| -0.06391 | 0.16798  | -0.09735 | 0.03545  | -0.03317 | 0.4745   | -0.1594  | 0.00055  | -0.00353 |
| -0.12754 | 0.00578  | 0.130707 | 0.00467  | -0.10826 | 0.01928  | 0.042941 | 0.3545   | 0.169418 |
| -0.08467 | 0.06754  | 0.125457 | 0.00664  | 0.053527 | 0.24831  | 0.079354 | 0.08672  | 0.164219 |
| -0.11184 | 0.01561  | 0.017944 | 0.69892  | 0.022487 | 0.62789  | 0.10665  | 0.02116  | 0.169381 |
| -0.00594 | 0.89814  | 0.118688 | 0.01026  | 0.09563  | 0.03885  | 0.1113   | 0.01612  | 0.205097 |
| -0.0295  | 0.52476  | 0.191435 | 3.12E-05 | 0.106467 | 0.02138  | 0.131455 | 0.00443  | 0.338503 |
| -0.07808 | 0.09191  | 0.020783 | 0.65418  | -0.02003 | 0.66587  | -0.05144 | 0.26729  | 0.164339 |
| -0.06102 | 0.18807  | 0.140822 | 0.00229  | 0.063923 | 0.16787  | 0.100382 | 0.03009  | 0.370574 |
| -0.00367 | 0.93698  | 0.003862 | 0.93366  | -0.00787 | 0.86525  | 0.049861 | 0.28224  | 0.110316 |
| 0.06973  | 0.13241  | -0.01976 | 0.67013  | -0.06586 | 0.15533  | -0.01124 | 0.80862  | 0.164421 |
| -0.08861 | 0.05569  | 0.137511 | 0.0029   | 0.048266 | 0.29795  | 0.04727  | 0.30803  | 0.261121 |
| 0.110322 | 0.01708  | 0.267637 | 4.21E-09 | 0.244416 | 8.84E-08 | 0.127517 | 0.00579  | 0.066234 |
| 0.013059 | 0.77835  | -0.12241 | 0.00809  | -0.0502  | 0.27895  | 0.050635 | 0.27483  | -0.23073 |
| -0.01978 | 0.6698   | -0.04358 | 0.34735  | -0.09335 | 0.04377  | 0.086529 | 0.06171  | 0.390678 |
| -0.05799 | 0.21097  | 0.076758 | 0.09757  | -0.06128 | 0.18617  | 0.042533 | 0.3591   | 0.349191 |
| 0.104595 | 0.02379  | 0.164115 | 0.00037  | 0.084448 | 0.06826  | 0.178105 | 0.00011  | 0.40683  |
| -0.09657 | 0.03697  | -0.01996 | 0.66697  | -0.07382 | 0.11111  | 0.028553 | 0.53821  | 0.218945 |
| 0.2609   | 1.05E-08 | 0.457595 | 1.51E-25 | 0.2953   | 7.51E-11 | 0.344135 | 1.98E-14 | 0.573561 |
| -0.07362 | 0.1121   | 0.062744 | 0.17586  | -0.0388  | 0.40285  | 0.098104 | 0.03405  | 0.294424 |
| 0.013014 | 0.7791   | 0.216884 | 2.24E-06 | 0.178579 | 0.0001   | 0.072777 | 0.11628  | 0.283447 |
| -0.03655 | 0.43068  | 0.032216 | 0.48736  | 0.007714 | 0.86796  | 0.087113 | 0.05996  | 0.1761   |
| -0.00032 | 0.99457  | 0.037593 | 0.41765  | 0.069127 | 0.1358   | 0.044529 | 0.33696  | 0.152246 |
| -0.06825 | 0.14083  | -0.18784 | 4.41E-05 | -0.15843 | 0.00059  | -0.02116 | 0.64825  | 0.041571 |
| -0.16433 | 0.00036  | -0.13835 | 0.00273  | -0.05897 | 0.20337  | -0.28406 | 4.07E-10 | -0.05714 |
| 0.107146 | 0.02056  | -0.09699 | 0.03615  | -0.04235 | 0.36114  | -0.0355  | 0.44412  | -0.16675 |
| 0.076063 | 0.10065  | 0.085786 | 0.06398  | -0.09511 | 0.03994  | 0.209094 | 5.19E-06 | 0.411761 |
| -0.21173 | 3.92E-06 | -0.22136 | 1.36E-06 | -0.22061 | 1.48E-06 | -0.14322 | 0.00192  | -0.01873 |
| 0.007166 | 0.87725  | -0.00726 | 0.87574  | 0.038845 | 0.40231  | 0.052152 | 0.26069  | 0.143051 |
| 0.00717  | 0.87719  | 0.358183 | 1.39E-15 | 0.285533 | 3.27E-10 | 0.13761  | 0.00288  | 0.467274 |
| -0.06547 | 0.1578   | -0.11434 | 0.01342  | -0.0868  | 0.06089  | -0.03082 | 0.50646  | 0.099934 |
| 0.049255 | 0.28815  | 0.282405 | 5.19E-10 | 0.186996 | 4.78E-05 | 0.121751 | 0.00844  | 0.315934 |
| 0.143134 | 0.00193  | 0.325965 | 5.07E-13 | 0.310476 | 6.80E-12 | 0.171034 | 0.0002   | 0.464791 |
| -0.13887 | 0.00263  | 0.041519 | 0.37067  | -0.00222 | 0.96177  | -0.04617 | 0.31947  | 0.069188 |
| -0.12121 | 0.00874  | 0.213336 | 3.29E-06 | 0.011398 | 0.80594  | 0.139456 | 0.00252  | 0.391952 |

|          |          |          |          |          |          |          |          |          |
|----------|----------|----------|----------|----------|----------|----------|----------|----------|
| -0.04564 | 0.32501  | 0.233863 | 3.20E-07 | 0.145348 | 0.00164  | 0.075581 | 0.10283  | 0.355259 |
| -0.10597 | 0.022    | 0.084028 | 0.06965  | 0.019573 | 0.67311  | 0.104228 | 0.02429  | 0.366599 |
| -0.27065 | 2.78E-09 | -0.08249 | 0.07494  | -0.09707 | 0.03599  | -0.11295 | 0.0146   | 0.059948 |
| -0.09493 | 0.0403   | -0.02065 | 0.65622  | 0.031921 | 0.49136  | -0.03283 | 0.47907  | 0.123531 |
| 0.329398 | 2.79E-13 | 0.482615 | 1.28E-28 | 0.39787  | 3.65E-19 | 0.135869 | 0.00326  | 0.296269 |
| -0.1879  | 4.39E-05 | 0.019766 | 0.67008  | -0.02932 | 0.52732  | 0.064579 | 0.16353  | 0.18576  |
| 0.11518  | 0.01275  | 0.088913 | 0.05485  | -0.0112  | 0.80931  | 0.29885  | 4.34E-11 | 0.371353 |
| 0.311375 | 5.87E-12 | 0.462912 | 3.53E-26 | 0.340544 | 3.82E-14 | 0.300659 | 3.27E-11 | 0.596162 |
| 0.213918 | 3.09E-06 | 0.33022  | 2.42E-13 | 0.231267 | 4.35E-07 | 0.184697 | 5.94E-05 | 0.307124 |
| -0.08964 | 0.05288  | 0.032813 | 0.47932  | 0.025187 | 0.58718  | -0.10947 | 0.01796  | -0.08428 |
| -0.25208 | 3.35E-08 | -0.32384 | 7.30E-13 | -0.36032 | 9.19E-16 | -0.09876 | 0.03286  | -0.00406 |
| -0.15773 | 0.00062  | -0.07615 | 0.10024  | -0.09213 | 0.04661  | -0.05077 | 0.27353  | -0.03729 |
| -0.04682 | 0.31266  | 0.08836  | 0.05638  | 0.007219 | 0.87635  | 0.091401 | 0.04838  | 0.315943 |
| -0.00518 | 0.9111   | -0.01679 | 0.7174   | 0.051437 | 0.26729  | -0.07149 | 0.12288  | 0.077347 |
| -0.02875 | 0.53537  | 0.18754  | 4.54E-05 | 0.157509 | 0.00064  | 0.125005 | 0.00684  | 0.319961 |
| -0.04809 | 0.29968  | 0.105775 | 0.02225  | 0.070214 | 0.12974  | 0.049464 | 0.28611  | 0.073064 |
| -0.08118 | 0.07968  | -0.04989 | 0.28201  | -0.00534 | 0.90841  | -0.0132  | 0.77608  | 0.056586 |
| -0.05383 | 0.24563  | 0.012417 | 0.78898  | 0.046814 | 0.31274  | 0.010051 | 0.82849  | 0.054714 |
| 0.232168 | 3.91E-07 | 0.065213 | 0.15943  | 0.007304 | 0.87492  | 0.220997 | 1.42E-06 | 0.122249 |
| -0.03334 | 0.47227  | 0.139912 | 0.00244  | 0.048058 | 0.30003  | 0.127528 | 0.00578  | 0.369223 |
| 0.045456 | 0.327    | -0.05868 | 0.20558  | -0.29349 | 9.91E-11 | 0.247329 | 6.13E-08 | 0.31059  |
| -0.01294 | 0.78027  | 0.146355 | 0.00152  | 0.128362 | 0.00547  | 0.054384 | 0.24081  | 0.163202 |
| 0.01825  | 0.69405  | -0.01775 | 0.70195  | -0.00307 | 0.94725  | 0.065512 | 0.15752  | 0.238417 |
| -0.14342 | 0.00189  | 0.065921 | 0.15494  | 0.023793 | 0.60804  | -0.06455 | 0.16371  | 0.154574 |
| 0.224995 | 9.00E-07 | 0.493408 | 5.03E-30 | 0.283082 | 4.70E-10 | 0.363218 | 5.20E-16 | 0.672621 |
| 0.065989 | 0.15452  | 0.20878  | 5.37E-06 | 0.197833 | 1.66E-05 | 0.187101 | 4.73E-05 | 0.53102  |
| 0.118147 | 0.01061  | 0.271071 | 2.62E-09 | 0.222759 | 1.16E-06 | 0.191369 | 3.14E-05 | 0.137945 |
| -0.01924 | 0.67836  | 0.292348 | 1.18E-10 | 0.179784 | 9.36E-05 | 0.009601 | 0.83607  | 0.073471 |
| 0.020019 | 0.6661   | 0.22558  | 8.42E-07 | 0.186427 | 5.05E-05 | 0.109621 | 0.0178   | 0.481072 |
| 0.167794 | 0.00027  | 0.059548 | 0.19896  | -0.11804 | 0.01068  | 0.322465 | 9.23E-13 | 0.161768 |
| 0.363576 | 4.85E-16 | 0.594953 | 4.74E-46 | 0.369468 | 1.50E-16 | 0.353911 | 3.17E-15 | 0.569951 |
| 0.122662 | 0.00796  | 0.312823 | 4.63E-12 | 0.218395 | 1.89E-06 | 0.158474 | 0.00059  | 0.382056 |
| 0.036558 | 0.4306   | 0.136125 | 0.0032   | 0.078503 | 0.09016  | 0.135633 | 0.00332  | 0.374019 |
| 0.111996 | 0.01546  | 0.211299 | 4.10E-06 | 0.124012 | 0.00729  | 0.181972 | 7.65E-05 | 0.33023  |
| -0.02304 | 0.61948  | 0.110825 | 0.01658  | -0.01799 | 0.69817  | 0.15679  | 0.00067  | 0.306841 |
| -0.23454 | 2.95E-07 | -0.06767 | 0.14426  | -0.06215 | 0.17998  | -0.08652 | 0.06174  | 0.091691 |
| -0.03475 | 0.4537   | -0.04377 | 0.34529  | -0.08821 | 0.05679  | 0.070754 | 0.12681  | 0.330007 |
| 0.073599 | 0.1122   | 0.068107 | 0.14168  | 0.077024 | 0.09641  | 0.141589 | 0.00216  | 0.050405 |
| -0.13557 | 0.00333  | 0.103154 | 0.0258   | 0.062151 | 0.17999  | -0.11279 | 0.01474  | 0.116126 |
| -0.19591 | 2.01E-05 | -0.11789 | 0.01078  | -0.16011 | 0.00051  | -0.03312 | 0.47528  | -0.04548 |
| 0.023874 | 0.60683  | -0.0147  | 0.75141  | -0.01461 | 0.75284  | 0.083116 | 0.07274  | -0.0586  |
| 0.055207 | 0.23376  | 0.162003 | 0.00044  | 0.118986 | 0.01007  | 0.0853   | 0.06551  | 0.234888 |
| 0.185754 | 5.38E-05 | 0.497323 | 1.51E-30 | 0.248235 | 5.47E-08 | 0.263409 | 7.50E-09 | 0.464546 |
| -0.04765 | 0.30421  | 0.153847 | 0.00085  | -0.00997 | 0.82986  | 0.104638 | 0.02373  | 0.180185 |
| 0.198622 | 1.53E-05 | 0.354366 | 2.90E-15 | 0.374885 | 4.97E-17 | 0.259815 | 1.21E-08 | 0.406193 |

|          |          |          |          |          |          |          |          |          |
|----------|----------|----------|----------|----------|----------|----------|----------|----------|
| -0.06862 | 0.13871  | -0.14765 | 0.00138  | -0.12205 | 0.00828  | -0.10192 | 0.02763  | -0.13946 |
| -0.039   | 0.40045  | 0.113659 | 0.01399  | 0.041573 | 0.37005  | 0.087426 | 0.05905  | 0.217746 |
| -0.19216 | 2.91E-05 | -0.10008 | 0.03059  | -0.13441 | 0.00361  | -0.00523 | 0.91028  | 0.133982 |
| -0.01485 | 0.74894  | 0.05594  | 0.2276   | 0.10309  | 0.0259   | 0.062548 | 0.17721  | 0.2551   |
| -0.13357 | 0.00383  | -0.09259 | 0.04551  | -0.10223 | 0.02716  | -0.1183  | 0.01051  | -0.06584 |
| -0.16845 | 0.00026  | -0.22599 | 8.03E-07 | -0.25428 | 2.52E-08 | -0.09362 | 0.04317  | -0.00257 |
| -0.26029 | 1.14E-08 | -0.40412 | 8.97E-20 | -0.34237 | 2.74E-14 | -0.15941 | 0.00054  | -0.08607 |
| -0.15524 | 0.00076  | -0.07171 | 0.12175  | -0.05634 | 0.22427  | -0.02372 | 0.60917  | 0.155629 |
| -0.04734 | 0.3073   | -0.1791  | 9.97E-05 | -0.1303  | 0.0048   | -0.07205 | 0.11996  | -0.23172 |
| 0.172818 | 0.00017  | 0.169979 | 0.00022  | 0.170943 | 0.00021  | 0.17801  | 0.00011  | 0.236608 |
| 0.386799 | 4.09E-18 | 0.536625 | 3.49E-36 | 0.359094 | 1.17E-15 | 0.276379 | 1.24E-09 | 0.518841 |
| 0.372879 | 7.49E-17 | 0.48282  | 1.20E-28 | 0.2756   | 1.38E-09 | 0.378441 | 2.38E-17 | 0.607787 |
| 0.088589 | 0.05574  | 0.204377 | 8.51E-06 | 0.066683 | 0.15022  | 0.163729 | 0.00038  | 0.286582 |
| -0.05735 | 0.21606  | 0.050637 | 0.27482  | 0.051556 | 0.26618  | -0.0406  | 0.38139  | 0.177972 |
| 0.284667 | 3.72E-10 | 0.248947 | 5.00E-08 | 0.341555 | 3.18E-14 | 0.095549 | 0.03902  | 0.152061 |
| -0.03285 | 0.47877  | 0.330679 | 2.23E-13 | 0.215686 | 2.55E-06 | 0.097912 | 0.0344   | 0.306162 |
| -0.15645 | 0.00069  | -0.05987 | 0.19653  | -0.11714 | 0.01129  | -0.02718 | 0.55797  | 0.069872 |
| -0.1438  | 0.00184  | -0.05918 | 0.20174  | -0.053   | 0.25302  | -0.24274 | 1.09E-07 | -0.19985 |
| 0.122297 | 0.00815  | 0.216242 | 2.40E-06 | 0.209398 | 5.03E-06 | 0.182555 | 7.25E-05 | 0.284898 |
| 0.236262 | 2.40E-07 | 0.178671 | 0.0001   | 0.153504 | 0.00087  | 0.224402 | 9.63E-07 | 0.102611 |
| 0.095706 | 0.03869  | 0.215041 | 2.74E-06 | 0.128448 | 0.00544  | 0.220548 | 1.49E-06 | 0.461298 |
| 0.34312  | 2.39E-14 | 0.38743  | 3.57E-18 | 0.519983 | 1.05E-33 | 0.199649 | 1.38E-05 | 0.239382 |
| -0.00188 | 0.96772  | 0.152019 | 0.00098  | 0.045367 | 0.32794  | 0.130588 | 0.0047   | 0.318271 |
| -0.05493 | 0.23615  | 0.194628 | 2.28E-05 | -0.01741 | 0.70741  | 0.08459  | 0.06779  | 0.363967 |
| -0.04721 | 0.30864  | 0.071909 | 0.12071  | 0.034512 | 0.45686  | -0.04328 | 0.35069  | 0.075006 |
| -0.0203  | 0.66168  | 0.129122 | 0.0052   | 0.10861  | 0.01889  | 0.056642 | 0.22181  | 0.100107 |
| -0.0944  | 0.04144  | 0.039821 | 0.39058  | -0.02896 | 0.53249  | 0.065047 | 0.1605   | 0.28257  |
| 0.073784 | 0.1113   | -0.07491 | 0.10592  | -0.0871  | 0.05999  | 0.077274 | 0.09533  | 0.1172   |
| 0.031806 | 0.49293  | 0.097725 | 0.03475  | 0.033119 | 0.47524  | 0.105676 | 0.02237  | 0.310832 |
| 0.175639 | 0.00014  | 0.290956 | 1.46E-10 | 0.141751 | 0.00214  | 0.284892 | 3.60E-10 | 0.467349 |
| -0.00621 | 0.89353  | 0.210025 | 4.70E-06 | 0.015871 | 0.73229  | 0.160027 | 0.00052  | 0.344853 |
| -0.04121 | 0.37427  | 0.138194 | 0.00276  | -0.15718 | 0.00065  | 0.105362 | 0.02278  | 0.242316 |
| -0.10693 | 0.02082  | 0.102838 | 0.02626  | -0.02517 | 0.58743  | 0.07133  | 0.12374  | 0.247937 |
| -0.01836 | 0.69228  | 0.015908 | 0.73169  | 0.031642 | 0.49516  | 0.090372 | 0.05097  | 0.110396 |
| 0.14245  | 0.00203  | 0.214559 | 2.89E-06 | 0.020071 | 0.66528  | 0.068075 | 0.14187  | 0.216752 |
| 0.170522 | 0.00021  | 0.353876 | 3.19E-15 | 0.384121 | 7.23E-18 | 0.214951 | 2.76E-06 | 0.494695 |
| 0.338861 | 5.19E-14 | 0.33868  | 5.36E-14 | 0.193982 | 2.43E-05 | 0.281265 | 6.12E-10 | 0.242564 |
| -0.0642  | 0.16601  | 0.141565 | 0.00217  | 0.12967  | 0.00501  | -0.07852 | 0.09011  | 0.093673 |
| 0.173247 | 0.00017  | 0.168356 | 0.00026  | -0.03974 | 0.39152  | 0.214348 | 2.95E-06 | 0.46969  |
| 0.009984 | 0.82963  | 0.017792 | 0.70136  | 0.023477 | 0.61281  | 0.048469 | 0.29592  | 0.163358 |
| -0.14266 | 0.002    | -0.10732 | 0.02035  | -0.26268 | 8.27E-09 | -0.1222  | 0.0082   | -0.01689 |
| -0.1557  | 0.00073  | -0.04829 | 0.29774  | -0.1652  | 0.00034  | -0.10942 | 0.01801  | -0.07137 |
| -0.03881 | 0.40275  | 0.113309 | 0.01429  | 0.039366 | 0.39602  | 0.121649 | 0.0085   | 0.345374 |
| -0.07016 | 0.13003  | 0.11935  | 0.00984  | -0.13958 | 0.0025   | 0.168164 | 0.00026  | 0.520371 |
| 0.334349 | 1.17E-13 | 0.3509   | 5.61E-15 | 0.243474 | 9.94E-08 | 0.328084 | 3.51E-13 | 0.497802 |



|          |          |          |          |          |          |          |          |          |
|----------|----------|----------|----------|----------|----------|----------|----------|----------|
| -0.09945 | 0.03166  | 0.010179 | 0.82635  | -0.0511  | 0.27042  | 0.030399 | 0.51227  | 0.280623 |
| -0.06194 | 0.18149  | -0.13398 | 0.00372  | -0.16816 | 0.00026  | -0.05973 | 0.19758  | 0.067075 |
| -0.15926 | 0.00055  | -0.06475 | 0.16245  | -0.12644 | 0.00622  | -0.00872 | 0.85085  | 0.113952 |
| -0.04747 | 0.30594  | 0.023283 | 0.61576  | -0.15055 | 0.0011   | 0.132524 | 0.00412  | 0.278588 |
| 0.192577 | 2.79E-05 | 0.251096 | 3.80E-08 | 0.135872 | 0.00326  | 0.356654 | 1.87E-15 | 0.42253  |
| -0.37106 | 1.08E-16 | -0.08788 | 0.05773  | -0.25578 | 2.07E-08 | -0.06339 | 0.17144  | 0.058425 |
| 0.146169 | 0.00154  | -0.10706 | 0.02066  | 0.013658 | 0.76846  | 0.144219 | 0.00178  | -0.05588 |
| -0.07813 | 0.09171  | -0.07772 | 0.09343  | -0.10321 | 0.02572  | -0.20676 | 6.64E-06 | -0.20571 |
| 0.025446 | 0.58334  | 0.41631  | 5.32E-21 | 0.294694 | 8.24E-11 | 0.123381 | 0.0076   | 0.343644 |
| 0.027166 | 0.55814  | 0.076824 | 0.09728  | 0.063267 | 0.17228  | 0.086819 | 0.06084  | 0.178422 |
| -0.06166 | 0.18343  | 0.012147 | 0.79347  | -0.03499 | 0.45068  | 0.021737 | 0.6394   | 0.148705 |
| -0.15278 | 0.00093  | -0.00266 | 0.95425  | -0.07356 | 0.11237  | 0.04461  | 0.33609  | 0.23559  |
| 0.097964 | 0.03431  | 0.318602 | 1.77E-12 | 0.194527 | 2.31E-05 | 0.150456 | 0.00111  | 0.396138 |
| -0.20081 | 1.23E-05 | -0.04644 | 0.31658  | -0.06803 | 0.14214  | -0.15088 | 0.00107  | 0.099822 |
| -0.07961 | 0.08569  | 0.076857 | 0.09714  | -0.03745 | 0.41943  | 0.104629 | 0.02375  | 0.31775  |
| -0.20178 | 1.11E-05 | -0.00587 | 0.89926  | -0.11455 | 0.01325  | 0.044967 | 0.33223  | 0.264611 |
| -0.33734 | 6.82E-14 | -0.17461 | 0.00015  | -0.19486 | 2.23E-05 | -0.12604 | 0.00638  | -0.01398 |
| -0.01983 | 0.66905  | 0.140673 | 0.00231  | 0.068131 | 0.14154  | 0.076677 | 0.09792  | 0.27956  |
| 0.014526 | 0.75422  | -0.12991 | 0.00493  | -0.062   | 0.18102  | -0.10905 | 0.0184   | -0.3073  |
| -0.15438 | 0.00082  | -0.0596  | 0.19853  | -0.10477 | 0.02356  | 0.004913 | 0.91567  | 0.076716 |
| 0.019463 | 0.67484  | -0.02518 | 0.58734  | 0.048636 | 0.29425  | -0.13064 | 0.00469  | -0.10238 |
| -0.17211 | 0.00019  | -0.01922 | 0.67873  | -0.09392 | 0.04249  | 0.024002 | 0.60489  | 0.207003 |
| 0.057115 | 0.21796  | 0.036691 | 0.42892  | -0.11118 | 0.01623  | 0.115309 | 0.01265  | 0.07878  |
| -0.03812 | 0.41121  | -0.08197 | 0.07679  | -0.11495 | 0.01293  | -0.00125 | 0.97847  | 0.085185 |
| -0.17298 | 0.00017  | -0.06232 | 0.17884  | -0.39314 | 1.04E-18 | 0.037419 | 0.41982  | 0.206674 |
| -0.14303 | 0.00194  | 0.000875 | 0.98495  | -0.06211 | 0.18025  | 0.024489 | 0.59758  | 0.21606  |
| 0.250126 | 4.30E-08 | 0.330471 | 2.31E-13 | 0.273991 | 1.74E-09 | 0.180684 | 8.62E-05 | 0.252076 |
| 0.000389 | 0.99332  | 0.029672 | 0.5224   | -0.01781 | 0.70111  | -0.01473 | 0.75082  | 0.077695 |
| 0.071822 | 0.12116  | -0.07272 | 0.11654  | 0.015726 | 0.73465  | 0.057033 | 0.21863  | 0.21886  |
| -0.06601 | 0.1544   | 0.012909 | 0.78083  | -0.00981 | 0.83255  | 0.032718 | 0.48061  | 0.200803 |
| -0.15254 | 0.00094  | -0.13859 | 0.00269  | -0.11107 | 0.01634  | -0.11986 | 0.00952  | -0.0226  |
| -0.06125 | 0.18638  | 0.127956 | 0.00562  | -0.0036  | 0.93809  | 0.087486 | 0.05887  | 0.291049 |
| -0.22729 | 6.92E-07 | -0.16507 | 0.00034  | -0.20846 | 5.55E-06 | -0.09277 | 0.04509  | 0.016411 |
| 0.071138 | 0.12475  | 0.16925  | 0.00024  | 0.112808 | 0.01473  | 0.102421 | 0.02688  | 0.381015 |
| 0.002183 | 0.96247  | 0.166948 | 0.00029  | 0.034418 | 0.45809  | 0.128874 | 0.00528  | 0.333612 |
| 0.219236 | 1.72E-06 | 0.359081 | 1.17E-15 | 0.115587 | 0.01244  | 0.329456 | 2.76E-13 | 0.620085 |
| -0.02316 | 0.61763  | 0.136226 | 0.00318  | -0.03272 | 0.48056  | 0.13773  | 0.00286  | 0.343966 |
| -0.14872 | 0.00127  | -0.00706 | 0.87904  | -0.06804 | 0.14208  | -0.01136 | 0.80657  | 0.188202 |
| -0.11894 | 0.01009  | 0.057841 | 0.21216  | 0.026131 | 0.57324  | 0.004217 | 0.92758  | 0.147551 |
| -0.02525 | 0.58621  | 0.158999 | 0.00056  | 0.099428 | 0.0317   | 0.074787 | 0.10651  | 0.265161 |
| 0.008597 | 0.853    | 0.117222 | 0.01124  | 0.033315 | 0.47263  | 0.11311  | 0.01446  | 0.315149 |
| 0.048151 | 0.2991   | 0.302212 | 2.56E-11 | 0.21292  | 3.45E-06 | 0.160576 | 0.0005   | 0.352924 |
| 0.036098 | 0.43643  | 0.329916 | 2.55E-13 | 0.332113 | 1.73E-13 | 0.154614 | 0.0008   | 0.313642 |
| 0.108245 | 0.01929  | -0.12841 | 0.00545  | -0.02406 | 0.60396  | -0.01418 | 0.75981  | -0.0594  |
| 0.005306 | 0.90895  | 0.150449 | 0.00111  | 0.087669 | 0.05834  | 0.088267 | 0.05664  | 0.190158 |

|          |          |          |          |          |          |          |          |          |
|----------|----------|----------|----------|----------|----------|----------|----------|----------|
| -0.01559 | 0.73691  | -0.08385 | 0.07023  | -0.17227 | 0.00018  | 0.104871 | 0.02342  | 0.179595 |
| 0.029356 | 0.52685  | 0.027568 | 0.55234  | -0.24084 | 1.38E-07 | 0.033794 | 0.46628  | 0.173773 |
| 0.04315  | 0.35216  | 0.16355  | 0.00039  | 0.08176  | 0.07755  | 0.154697 | 0.0008   | 0.36051  |
| -0.09676 | 0.03659  | 0.043223 | 0.35134  | 0.010047 | 0.82857  | 0.022476 | 0.62806  | 0.209207 |
| 0.213646 | 3.19E-06 | 0.333774 | 1.29E-13 | 0.297498 | 5.35E-11 | 0.28935  | 1.85E-10 | 0.424266 |
| 0.083985 | 0.06979  | 0.233264 | 3.44E-07 | 0.075192 | 0.10462  | 0.210179 | 4.63E-06 | 0.148026 |
| -0.1161  | 0.01205  | -0.14369 | 0.00185  | -0.2257  | 8.30E-07 | 0.040709 | 0.38009  | 0.242174 |
| -0.08262 | 0.07448  | 0.018572 | 0.68893  | -0.03519 | 0.44805  | 0.028981 | 0.53214  | 0.23213  |
| -0.01579 | 0.73357  | 0.097563 | 0.03505  | -0.00666 | 0.88589  | 0.067621 | 0.14455  | 0.19659  |
| -0.09614 | 0.03781  | -0.00424 | 0.92724  | -0.06641 | 0.1519   | 0.030871 | 0.50574  | 0.216069 |
| -0.15665 | 0.00068  | -0.05253 | 0.25721  | -0.08225 | 0.07578  | -0.02741 | 0.55458  | 0.194826 |
| 0.112024 | 0.01544  | 0.093005 | 0.04456  | -0.06845 | 0.13968  | 0.129018 | 0.00523  | 0.192927 |
| -0.14897 | 0.00124  | -0.10188 | 0.0277   | -0.15427 | 0.00082  | -0.07182 | 0.12117  | -0.04025 |
| -0.1256  | 0.00657  | -0.02404 | 0.60425  | -0.12128 | 0.0087   | 0.059868 | 0.19655  | 0.216625 |
| 0.12318  | 0.0077   | 0.048131 | 0.2993   | 0.045898 | 0.32231  | 0.08516  | 0.06595  | 0.12313  |
| 0.107206 | 0.02049  | 0.015384 | 0.74021  | 0.11708  | 0.01134  | -0.1013  | 0.0286   | -0.30989 |
| 0.063563 | 0.17028  | 0.104865 | 0.02343  | 0.044584 | 0.33637  | -0.08665 | 0.06134  | -0.02731 |
| 0.19866  | 1.53E-05 | 0.16762  | 0.00027  | 0.096618 | 0.03687  | 0.254283 | 2.51E-08 | 0.371035 |
| 0.150447 | 0.00111  | 0.079566 | 0.08588  | -0.0209  | 0.65239  | 0.204503 | 8.40E-06 | 0.464794 |
| -0.04275 | 0.35659  | 0.051474 | 0.26695  | 0.031934 | 0.49119  | 0.060954 | 0.18853  | 0.189464 |
| -0.0551  | 0.23468  | -0.08105 | 0.08015  | -0.11221 | 0.01526  | -0.04118 | 0.37457  | 0.09463  |
| -0.28343 | 4.46E-10 | -0.23828 | 1.88E-07 | -0.26416 | 6.77E-09 | -0.01943 | 0.67529  | 0.197528 |
| 0.150344 | 0.00112  | 0.496727 | 1.82E-30 | 0.327379 | 3.97E-13 | 0.294403 | 8.62E-11 | 0.455887 |
| -0.08048 | 0.08233  | 0.062204 | 0.17962  | -0.04675 | 0.31343  | 0.096714 | 0.03668  | 0.308583 |
| -0.00255 | 0.95621  | 0.007283 | 0.87527  | -0.01796 | 0.69862  | -0.04425 | 0.33997  | 0.047922 |
| 0.053356 | 0.24983  | 0.199983 | 1.34E-05 | 0.06859  | 0.13887  | 0.133543 | 0.00384  | 0.395114 |
| -0.11526 | 0.01269  | 0.094339 | 0.04157  | 0.099903 | 0.03089  | -0.00232 | 0.96012  | 0.070057 |
| -0.18584 | 5.33E-05 | -0.05703 | 0.21868  | -0.11925 | 0.0099   | -0.02678 | 0.56371  | 0.182797 |
| -0.17107 | 0.0002   | 0.014246 | 0.75881  | -0.04403 | 0.34242  | 0.003441 | 0.94088  | 0.194364 |
| -0.2069  | 6.54E-06 | -0.11181 | 0.01563  | -0.4292  | 2.36E-22 | 0.096461 | 0.03718  | 0.241458 |
| 0.181929 | 7.68E-05 | 0.447231 | 2.40E-24 | 0.305736 | 1.46E-11 | 0.260683 | 1.08E-08 | 0.474839 |
| 0.134371 | 0.00362  | 0.114445 | 0.01334  | 0.059649 | 0.19819  | 0.082212 | 0.07592  | 0.142918 |
| -0.12555 | 0.0066   | 0.043364 | 0.34978  | -0.00454 | 0.92206  | 0.031506 | 0.49702  | 0.243905 |
| 0.164608 | 0.00035  | 0.200952 | 1.21E-05 | 0.150271 | 0.00113  | 0.201972 | 1.09E-05 | 0.436553 |
| -0.1502  | 0.00113  | -0.06741 | 0.14582  | -0.09339 | 0.04369  | -0.01458 | 0.75339  | 0.152437 |
| 0.196013 | 1.99E-05 | 0.213926 | 3.09E-06 | 0.060362 | 0.19287  | 0.317382 | 2.18E-12 | 0.603914 |
| -0.06934 | 0.13462  | 0.085762 | 0.06406  | 0.011098 | 0.81096  | 0.055289 | 0.23306  | 0.246035 |
| 0.506766 | 7.78E-32 | 0.467999 | 8.57E-27 | 0.324036 | 7.06E-13 | 0.357255 | 1.67E-15 | 0.468767 |
| 0.15219  | 0.00097  | 0.228593 | 5.95E-07 | 0.102741 | 0.02641  | 0.268807 | 3.58E-09 | 0.377107 |
| 0.202472 | 1.04E-05 | 0.461707 | 4.92E-26 | 0.351686 | 4.83E-15 | 0.309369 | 8.14E-12 | 0.497005 |
| -0.17665 | 0.00012  | -0.10482 | 0.0235   | -0.14244 | 0.00203  | -0.11099 | 0.01642  | -0.00729 |
| -0.27803 | 9.77E-10 | -0.12564 | 0.00655  | -0.23115 | 4.41E-07 | -0.13928 | 0.00256  | 0.046918 |
| -0.14934 | 0.00121  | -0.1684  | 0.00026  | -0.16027 | 0.00051  | -0.12773 | 0.00571  | -0.04612 |
| -0.03406 | 0.46283  | 0.090894 | 0.04964  | -0.08677 | 0.06098  | 0.264162 | 6.77E-09 | 0.458324 |
| -0.17647 | 0.00013  | 0.058698 | 0.20546  | -0.02952 | 0.52459  | -0.00178 | 0.96942  | 0.235414 |

|          |          |          |          |          |          |          |          |          |
|----------|----------|----------|----------|----------|----------|----------|----------|----------|
| -0.03573 | 0.44105  | 0.186045 | 5.23E-05 | 0.058316 | 0.20842  | 0.216401 | 2.36E-06 | 0.395956 |
| 0.066657 | 0.15038  | 0.210779 | 4.34E-06 | 0.082493 | 0.07492  | 0.172193 | 0.00018  | 0.367418 |
| 0.135862 | 0.00326  | 0.373742 | 6.28E-17 | 0.166821 | 0.00029  | 0.272036 | 2.29E-09 | 0.544964 |
| -0.04133 | 0.37281  | 0.272903 | 2.02E-09 | 0.180058 | 9.13E-05 | 0.086292 | 0.06242  | 0.232206 |
| -0.38864 | 2.75E-18 | -0.30891 | 8.77E-12 | -0.40325 | 1.09E-19 | -0.28494 | 3.58E-10 | -0.09119 |
| 0.122355 | 0.00812  | 0.212408 | 3.64E-06 | -0.07172 | 0.12168  | 0.224753 | 9.25E-07 | 0.449511 |
| 0.11635  | 0.01186  | 0.41378  | 9.65E-21 | 0.309567 | 7.89E-12 | 0.148586 | 0.00128  | 0.366758 |
| -0.09999 | 0.03074  | 0.038295 | 0.409    | -0.04634 | 0.31767  | 0.022424 | 0.62885  | 0.240932 |
| -0.1556  | 0.00074  | 0.015912 | 0.73163  | -0.05439 | 0.24074  | 0.017533 | 0.7055   | 0.196911 |
| 0.126069 | 0.00637  | 0.412291 | 1.37E-20 | 0.286243 | 2.95E-10 | 0.166396 | 0.0003   | 0.390657 |
| -0.0396  | 0.39317  | 0.026838 | 0.5629   | 0.001908 | 0.9672   | 0.015916 | 0.73157  | 0.228416 |
| -0.17386 | 0.00016  | -0.08369 | 0.07078  | -0.12919 | 0.00517  | -0.01557 | 0.73724  | 0.179106 |
| -0.30897 | 8.69E-12 | -0.12129 | 0.0087   | -0.17622 | 0.00013  | -0.14599 | 0.00156  | 0.026894 |
| -0.15977 | 0.00053  | 0.044866 | 0.33331  | 0.019257 | 0.67809  | 0.011506 | 0.80414  | 0.257625 |
| 0.022941 | 0.62096  | 0.202306 | 1.05E-05 | 0.110693 | 0.01671  | 0.117431 | 0.01109  | 0.346735 |
| 0.070254 | 0.12952  | 0.195753 | 2.04E-05 | 0.118165 | 0.0106   | 0.039823 | 0.39055  | 0.132839 |
| -0.15372 | 0.00086  | -0.02473 | 0.59404  | -0.15851 | 0.00059  | -0.02486 | 0.59209  | 0.062355 |
| -0.04012 | 0.38697  | 0.081414 | 0.07882  | -0.06204 | 0.18076  | 0.033911 | 0.46474  | 0.103829 |
| -0.23264 | 3.70E-07 | -0.09213 | 0.04661  | -0.17105 | 0.0002   | -0.05838 | 0.20789  | 0.153516 |
| -0.01062 | 0.81903  | 0.232976 | 3.55E-07 | 0.123496 | 0.00754  | 0.100517 | 0.02987  | 0.204873 |
| 0.208803 | 5.35E-06 | 0.102471 | 0.02681  | 0.102644 | 0.02655  | 0.096382 | 0.03733  | 0.140654 |
| 0.313129 | 4.41E-12 | 0.150018 | 0.00115  | 0.238518 | 1.83E-07 | 0.234631 | 2.92E-07 | 0.344372 |
| 0.084725 | 0.06736  | 0.229844 | 5.14E-07 | 0.159305 | 0.00055  | 0.043512 | 0.34813  | 0.132546 |
| -0.15057 | 0.0011   | -0.05617 | 0.22571  | -0.18058 | 8.70E-05 | 0.061068 | 0.18771  | 0.259199 |
| -0.08752 | 0.05878  | 0.066876 | 0.14904  | 0.004659 | 0.92002  | -0.04665 | 0.31444  | 0.198213 |
| -0.07154 | 0.12264  | 0.042771 | 0.35641  | -0.02369 | 0.60961  | 0.013437 | 0.77211  | 0.114462 |
| -0.02857 | 0.53792  | 0.004599 | 0.92104  | 0.011048 | 0.81179  | 0.016406 | 0.72362  | 0.30652  |
| 0.082124 | 0.07624  | 0.034811 | 0.45296  | 0.019033 | 0.68162  | 0.139499 | 0.00252  | 0.266952 |
| -0.13679 | 0.00306  | -0.23472 | 2.89E-07 | -0.22316 | 1.11E-06 | -0.00397 | 0.9319   | 0.151011 |
| 0.137893 | 0.00282  | 0.195245 | 2.15E-05 | -0.02082 | 0.65366  | 0.232272 | 3.86E-07 | 0.356539 |
| -0.21381 | 3.13E-06 | -0.12519 | 0.00675  | -0.17739 | 0.00012  | -0.01117 | 0.80968  | 0.120487 |
| 0.019971 | 0.66686  | 0.050746 | 0.27378  | 0.011378 | 0.80627  | 0.154223 | 0.00083  | 0.303905 |
| 0.14561  | 0.0016   | -0.1646  | 0.00035  | -0.0494  | 0.28677  | -0.12058 | 0.0091   | -0.39207 |
| -0.08806 | 0.05723  | -0.072   | 0.12025  | 0.060344 | 0.19301  | -0.09961 | 0.03138  | 0.007384 |
| -0.08073 | 0.08137  | 0.106878 | 0.02088  | 0.025245 | 0.58632  | 0.097407 | 0.03535  | 0.299023 |
| -0.14877 | 0.00126  | 0.013865 | 0.76507  | -0.03424 | 0.46045  | 0.049417 | 0.28656  | 0.268517 |
| 0.171411 | 0.0002   | 0.117679 | 0.01092  | 0.133617 | 0.00382  | 0.165999 | 0.00031  | 0.281589 |
| 0.116974 | 0.01141  | 0.412938 | 1.18E-20 | 0.366861 | 2.52E-16 | 0.125604 | 0.00657  | 0.33915  |
| 0.016421 | 0.72339  | -0.00525 | 0.90992  | -0.00258 | 0.95558  | 0.323762 | 7.40E-13 | 0.341371 |
| 0.155635 | 0.00074  | 0.320256 | 1.34E-12 | 0.107421 | 0.02024  | 0.185651 | 5.43E-05 | 0.309408 |
| 0.008244 | 0.85898  | 0.042776 | 0.35635  | 0.017684 | 0.70308  | 0.116875 | 0.01149  | 0.169057 |
| 0.256014 | 2.01E-08 | 0.266206 | 5.12E-09 | 0.199569 | 1.39E-05 | 0.271325 | 2.52E-09 | 0.569675 |
| -0.17511 | 0.00014  | 0.004692 | 0.91946  | -0.06014 | 0.19448  | -0.11045 | 0.01695  | 0.120295 |
| -0.05364 | 0.24727  | -0.02045 | 0.65931  | -0.07621 | 0.09999  | 0.125903 | 0.00644  | 0.163093 |
| -0.09989 | 0.03091  | -0.02463 | 0.59545  | -0.07202 | 0.12012  | 0.004195 | 0.92796  | 0.023621 |

|          |          |          |          |          |          |          |          |          |
|----------|----------|----------|----------|----------|----------|----------|----------|----------|
| 0.091966 | 0.047    | 0.22091  | 1.43E-06 | 0.193849 | 2.47E-05 | 0.028635 | 0.53705  | -0.04801 |
| 0.37848  | 2.36E-17 | 0.389434 | 2.32E-18 | 0.225519 | 8.48E-07 | 0.261473 | 9.73E-09 | 0.26016  |
| 0.336688 | 7.68E-14 | 0.327257 | 4.05E-13 | 0.193814 | 2.47E-05 | 0.301066 | 3.07E-11 | 0.342573 |
| 0.253666 | 2.72E-08 | 0.519434 | 1.25E-33 | 0.246185 | 7.08E-08 | 0.367132 | 2.39E-16 | 0.543036 |
| -0.10749 | 0.02016  | -0.22144 | 1.35E-06 | -0.18256 | 7.25E-05 | -0.11358 | 0.01405  | -0.32344 |
| 0.166894 | 0.00029  | 0.289748 | 1.75E-10 | 0.149885 | 0.00116  | 0.261569 | 9.60E-09 | 0.542188 |
| -0.05007 | 0.28026  | 0.129873 | 0.00494  | 0.083066 | 0.07292  | 0.005837 | 0.89989  | 0.086781 |
| 0.002407 | 0.95863  | 0.132674 | 0.00408  | -0.16203 | 0.00044  | 0.097904 | 0.03442  | 0.311045 |
| -0.01215 | 0.79336  | 0.172288 | 0.00018  | 0.116646 | 0.01165  | 0.068127 | 0.14156  | 0.337775 |
| 0.167853 | 0.00027  | 0.257477 | 1.66E-08 | -0.13513 | 0.00344  | 0.301998 | 2.65E-11 | 0.433188 |
| 0.004876 | 0.91631  | 0.209291 | 5.08E-06 | 0.104399 | 0.02406  | 0.151023 | 0.00106  | 0.382026 |
| -0.14404 | 0.0018   | -0.04766 | 0.30411  | -0.1407  | 0.00231  | 0.0394   | 0.39561  | 0.235265 |
| -0.03121 | 0.50101  | 0.064328 | 0.16518  | 0.053574 | 0.2479   | 0.035955 | 0.43825  | 0.196355 |
| -0.05556 | 0.23081  | 0.064929 | 0.16126  | 0.00502  | 0.91385  | 0.035642 | 0.44224  | 0.204368 |
| -0.02777 | 0.54939  | 0.091149 | 0.049    | -0.0584  | 0.20779  | 0.042624 | 0.35807  | 0.321586 |
| 0.116604 | 0.01168  | 0.383827 | 7.69E-18 | 0.346468 | 1.29E-14 | 0.167089 | 0.00029  | 0.350808 |
| -0.08729 | 0.05944  | 0.063464 | 0.17094  | -0.01698 | 0.7144   | 0.050156 | 0.27941  | 0.272594 |
| -0.01309 | 0.77791  | 0.241293 | 1.30E-07 | 0.100739 | 0.0295   | 0.148999 | 0.00124  | 0.322258 |
| 0.018282 | 0.69355  | 0.137339 | 0.00294  | 0.128392 | 0.00546  | 0.101157 | 0.02883  | 0.278007 |
| 0.040127 | 0.38695  | 0.380214 | 1.65E-17 | 0.231654 | 4.16E-07 | 0.18029  | 8.94E-05 | 0.421137 |
| -0.00495 | 0.9151   | 0.274589 | 1.60E-09 | 0.15373  | 0.00086  | 0.124462 | 0.00708  | 0.330033 |
| -0.14074 | 0.0023   | -0.00302 | 0.94805  | -0.03395 | 0.46419  | 0.023183 | 0.61728  | 0.215027 |
| -0.13141 | 0.00445  | -0.0305  | 0.51088  | -0.07358 | 0.11229  | 0.004264 | 0.92678  | 0.204647 |
| 0.090913 | 0.04959  | 0.200849 | 1.22E-05 | 0.133984 | 0.00372  | 0.040785 | 0.37919  | 0.227288 |
| -0.29674 | 6.01E-11 | -0.16518 | 0.00034  | -0.12737 | 0.00585  | -0.14037 | 0.00236  | -0.04868 |
| -0.02394 | 0.60581  | 0.011277 | 0.80797  | 0.029273 | 0.52802  | 0.052466 | 0.25783  | 0.183102 |
| -0.11404 | 0.01367  | -0.14473 | 0.00171  | -0.16348 | 0.00039  | 0.041787 | 0.36759  | 0.112687 |
| -0.08718 | 0.05977  | -0.01923 | 0.67847  | -0.04973 | 0.28348  | -0.06101 | 0.18811  | 0.121412 |
| 0.118945 | 0.01009  | 0.299228 | 4.09E-11 | 0.207448 | 6.18E-06 | 0.200486 | 1.27E-05 | 0.251129 |
| 0.125329 | 0.00669  | -0.03989 | 0.3898   | 0.14353  | 0.00187  | 0.059427 | 0.19987  | 0.02462  |
| 0.107968 | 0.01961  | 0.082221 | 0.07589  | 0.162065 | 0.00044  | 0.06806  | 0.14195  | 0.268936 |
| -0.06741 | 0.14581  | 0.072921 | 0.11555  | 0.030725 | 0.50775  | -0.00176 | 0.96978  | 0.121838 |
| -0.0297  | 0.522    | -0.07932 | 0.08686  | 0.029528 | 0.52443  | 0.072445 | 0.11796  | 0.257515 |
| 0.106086 | 0.02186  | 0.169709 | 0.00023  | 0.160197 | 0.00051  | 0.052036 | 0.26175  | 0.149784 |
| 0.043377 | 0.34963  | 0.283768 | 4.25E-10 | 0.298709 | 4.43E-11 | 0.112336 | 0.01515  | 0.237487 |
| 0.140439 | 0.00235  | 0.126279 | 0.00628  | 0.018092 | 0.69657  | 0.189327 | 3.83E-05 | 0.30919  |
| 0.147872 | 0.00135  | 0.485231 | 5.90E-29 | 0.318244 | 1.88E-12 | 0.243647 | 9.73E-08 | 0.427471 |
| -0.08113 | 0.07985  | 0.004236 | 0.92725  | 0.01378  | 0.76646  | -0.00059 | 0.98994  | 0.11312  |
| 0.377083 | 3.16E-17 | 0.395834 | 5.73E-19 | 0.428356 | 2.91E-22 | 0.215836 | 2.51E-06 | 0.452688 |
| 0.160192 | 0.00051  | 0.330502 | 2.30E-13 | 0.041925 | 0.36601  | 0.306136 | 1.37E-11 | 0.390904 |
| -0.07545 | 0.10345  | 0.06533  | 0.15869  | 0.019224 | 0.67862  | 0.054326 | 0.24131  | 0.287735 |
| 0.027497 | 0.55336  | -0.04464 | 0.33581  | -0.05453 | 0.23957  | 0.14431  | 0.00177  | -0.01671 |
| -0.09409 | 0.04212  | 0.123928 | 0.00733  | 0.042852 | 0.35549  | 0.026288 | 0.57094  | 0.273984 |
| 0.266204 | 5.13E-09 | 0.430676 | 1.64E-22 | 0.435525 | 4.87E-23 | 0.248971 | 4.98E-08 | 0.402046 |
| 0.167099 | 0.00029  | 0.32188  | 1.02E-12 | 0.231425 | 4.27E-07 | 0.260669 | 1.08E-08 | 0.2907   |

|          |          |          |          |          |          |          |          |          |
|----------|----------|----------|----------|----------|----------|----------|----------|----------|
| 0.174292 | 0.00015  | 0.220295 | 1.53E-06 | 0.232359 | 3.82E-07 | 0.145794 | 0.00158  | 0.16109  |
| 0.06259  | 0.17693  | 0.230537 | 4.74E-07 | 0.180109 | 9.09E-05 | 0.173756 | 0.00016  | 0.192463 |
| -0.11907 | 0.01001  | 0.051521 | 0.26651  | -0.00131 | 0.97747  | 0.034961 | 0.45102  | 0.056211 |
| 0.161443 | 0.00046  | 0.136284 | 0.00317  | 0.183216 | 6.82E-05 | 0.139233 | 0.00257  | 0.37791  |
| 0.055577 | 0.23063  | -0.00148 | 0.97452  | 0.064646 | 0.1631   | 0.037301 | 0.42128  | 0.279467 |
| 0.062829 | 0.17527  | 0.301652 | 2.80E-11 | 0.233575 | 3.31E-07 | 0.274181 | 1.69E-09 | 0.312961 |
| -0.0908  | 0.04989  | 0.234525 | 2.96E-07 | 0.113378 | 0.01423  | 0.068713 | 0.13816  | 0.267283 |
| -0.07862 | 0.08968  | 0.102337 | 0.02701  | 0.000322 | 0.99446  | 0.051977 | 0.2623   | 0.225178 |
| -0.17963 | 9.49E-05 | 0.124185 | 0.00721  | 0.026373 | 0.56969  | -0.12101 | 0.00885  | -0.00568 |
| 0.04186  | 0.36676  | 0.075466 | 0.10336  | -0.12353 | 0.00753  | 0.072429 | 0.11804  | 0.058782 |
| -0.35883 | 1.23E-15 | -0.44178 | 9.89E-24 | -0.42963 | 2.12E-22 | -0.1968  | 1.84E-05 | -0.08709 |
| -0.15143 | 0.00103  | -0.05433 | 0.24128  | -0.19008 | 3.56E-05 | 0.005556 | 0.90469  | 0.014072 |
| -0.11781 | 0.01084  | 0.068085 | 0.14181  | -0.00123 | 0.9789   | 0.058304 | 0.20852  | 0.299659 |
| -0.00392 | 0.93263  | -0.07207 | 0.11988  | -0.01222 | 0.7923   | 0.124052 | 0.00728  | 0.147482 |
| 0.028471 | 0.53939  | 0.13856  | 0.00269  | 0.088361 | 0.05638  | 0.119413 | 0.0098   | 0.284845 |
| -0.0214  | 0.64465  | 0.027405 | 0.55468  | 0.032464 | 0.48402  | -0.06962 | 0.13304  | 0.131425 |
| -0.03233 | 0.4858   | 0.115152 | 0.01277  | 0.090171 | 0.05149  | 0.057382 | 0.21582  | 0.054877 |
| 0.032263 | 0.48672  | 0.173231 | 0.00017  | 0.142678 | 0.002    | 0.043731 | 0.34571  | 0.252285 |
| -0.048   | 0.30064  | -0.03916 | 0.39847  | 0.010146 | 0.8269   | -0.04275 | 0.35663  | -0.08466 |
| -0.13528 | 0.0034   | -0.04711 | 0.30964  | -0.16956 | 0.00023  | -0.05577 | 0.22899  | -0.0364  |
| 0.37     | 1.34E-16 | 0.538175 | 2.02E-36 | 0.48426  | 7.87E-29 | 0.354111 | 3.05E-15 | 0.43656  |
| -0.06171 | 0.18312  | 0.06661  | 0.15066  | 0.021703 | 0.63993  | -0.02041 | 0.65994  | 0.077809 |
| -0.07027 | 0.12942  | 0.07465  | 0.10715  | 0.027414 | 0.55456  | 0.007799 | 0.86651  | 0.129136 |
| -0.02213 | 0.63341  | 0.025082 | 0.58875  | -0.02037 | 0.66054  | 0.093812 | 0.04273  | 0.121258 |
| -0.10551 | 0.02259  | -0.31245 | 4.93E-12 | -0.27141 | 2.49E-09 | -0.1551  | 0.00077  | -0.21797 |
| -0.14283 | 0.00197  | 0.239442 | 1.63E-07 | 0.197629 | 1.69E-05 | 0.072029 | 0.12009  | 0.211415 |
| 0.089278 | 0.05386  | -0.06287 | 0.175    | -0.06634 | 0.15236  | 0.090979 | 0.04943  | 0.239494 |
| 0.031686 | 0.49455  | 0.139385 | 0.00254  | 0.035198 | 0.44795  | 0.135883 | 0.00326  | 0.375008 |
| 0.000648 | 0.98885  | 0.004174 | 0.92832  | 0.073363 | 0.11336  | 0.039123 | 0.39894  | 0.091957 |
| -0.21902 | 1.77E-06 | -0.13366 | 0.00381  | -0.13791 | 0.00282  | 0.039113 | 0.39906  | 0.193629 |
| -0.11352 | 0.01411  | 0.113258 | 0.01433  | 0.075294 | 0.10415  | 0.100978 | 0.02912  | 0.270901 |
| -0.04449 | 0.33738  | 0.048678 | 0.29384  | 0.07129  | 0.12395  | 0.091213 | 0.04884  | 0.263112 |
| 0.095772 | 0.03856  | 0.131606 | 0.00439  | 0.179339 | 9.75E-05 | 0.074019 | 0.11016  | 0.281003 |
| -0.0063  | 0.89208  | 0.107578 | 0.02006  | 0.195027 | 2.19E-05 | 0.059848 | 0.1967   | 0.214761 |
| 0.051645 | 0.26536  | 0.328966 | 3.01E-13 | 0.288382 | 2.14E-10 | 0.143516 | 0.00188  | 0.386034 |
| 0.109628 | 0.01779  | 0.332557 | 1.60E-13 | 0.298002 | 4.95E-11 | 0.196323 | 1.93E-05 | 0.363084 |
| 0.117759 | 0.01087  | 0.308916 | 8.76E-12 | 0.160703 | 0.00049  | 0.268667 | 3.65E-09 | 0.394712 |
| -0.12722 | 0.0059   | 0.109664 | 0.01776  | -0.00125 | 0.97847  | -0.13256 | 0.00411  | 0.023188 |
| 0.000528 | 0.99092  | 0.041091 | 0.37563  | 0.039711 | 0.39189  | 0.028056 | 0.54532  | 0.115887 |
| -0.17858 | 0.0001   | -0.20941 | 5.02E-06 | -0.27486 | 1.54E-09 | 0.001191 | 0.97953  | 0.254542 |
| 0.213917 | 3.09E-06 | 0.264547 | 6.42E-09 | 0.216846 | 2.25E-06 | 0.20888  | 5.31E-06 | 0.376581 |
| 0.006566 | 0.88746  | 0.102429 | 0.02687  | 0.075417 | 0.10358  | 0.042801 | 0.35607  | 0.076995 |
| 0.189023 | 3.94E-05 | 0.041895 | 0.36635  | 0.02481  | 0.59279  | 0.237014 | 2.19E-07 | 0.225354 |
| 0.135446 | 0.00336  | 0.389579 | 2.25E-18 | 0.359133 | 1.16E-15 | 0.218765 | 1.82E-06 | 0.415569 |
| 0.141052 | 0.00225  | 0.17476  | 0.00015  | 0.147966 | 0.00134  | -0.08095 | 0.08056  | 0.205356 |

|          |          |          |          |          |          |          |          |          |
|----------|----------|----------|----------|----------|----------|----------|----------|----------|
| 0.041792 | 0.36753  | 0.262944 | 7.98E-09 | 0.252233 | 3.28E-08 | 0.151332 | 0.00104  | 0.312143 |
| 0.044478 | 0.33752  | 0.170075 | 0.00022  | 0.068788 | 0.13773  | 0.106859 | 0.02091  | 0.289928 |
| -0.39357 | 9.42E-19 | -0.28162 | 5.82E-10 | -0.31915 | 1.62E-12 | -0.14404 | 0.0018   | 0.01414  |
| -0.01319 | 0.77617  | 0.114897 | 0.01297  | 0.098493 | 0.03334  | 0.092749 | 0.04515  | 0.179162 |
| -0.21596 | 2.47E-06 | -0.21282 | 3.49E-06 | -0.20975 | 4.84E-06 | -0.1054  | 0.02273  | 0.096629 |
| -0.28634 | 2.91E-10 | -0.29025 | 1.62E-10 | -0.35062 | 5.91E-15 | -0.0588  | 0.20465  | 0.168353 |
| 0.01698  | 0.71437  | 0.167127 | 0.00029  | 0.153663 | 0.00086  | 0.013415 | 0.77248  | 0.174657 |
| -0.20056 | 1.26E-05 | -0.14442 | 0.00175  | -0.08235 | 0.07541  | -0.13105 | 0.00456  | -0.03564 |
| -0.14972 | 0.00117  | 0.053641 | 0.24731  | -0.0222  | 0.63221  | 0.00208  | 0.96425  | 0.216376 |
| -0.07412 | 0.10969  | -0.03778 | 0.41537  | 0.00519  | 0.91094  | 0.009648 | 0.83527  | 0.139286 |
| -0.14014 | 0.0024   | 0.04554  | 0.3261   | -0.04294 | 0.35456  | 0.054738 | 0.23776  | 0.288536 |
| -0.11508 | 0.01283  | -0.09304 | 0.04448  | -0.16056 | 0.0005   | 0.012399 | 0.78929  | 0.143582 |
| 0.03922  | 0.39778  | 0.190256 | 3.50E-05 | 0.145233 | 0.00165  | 0.130882 | 0.00461  | 0.331364 |
| 0.149753 | 0.00117  | 0.33755  | 6.57E-14 | 0.30462  | 1.75E-11 | 0.244454 | 8.80E-08 | 0.434355 |
| -0.04565 | 0.3249   | 0.181385 | 8.08E-05 | 0.069243 | 0.13514  | 0.130134 | 0.00485  | 0.352643 |
| -0.00279 | 0.952    | 0.074942 | 0.10578  | 0.088314 | 0.05651  | 0.031767 | 0.49345  | 0.090395 |
| 0.012678 | 0.78465  | 0.144282 | 0.00177  | 0.139729 | 0.00248  | 0.112087 | 0.01538  | 0.330736 |
| 0.090762 | 0.04998  | 0.292719 | 1.11E-10 | 0.265882 | 5.36E-09 | 0.162174 | 0.00043  | 0.420582 |
| 0.021558 | 0.64216  | 0.270957 | 2.66E-09 | 0.192352 | 2.85E-05 | 0.148162 | 0.00132  | 0.365646 |
| 0.15415  | 0.00083  | 0.410708 | 1.98E-20 | 0.40528  | 6.89E-20 | 0.203954 | 8.89E-06 | 0.398755 |
| 0.010935 | 0.81367  | 0.149    | 0.00124  | 0.102159 | 0.02728  | 0.142244 | 0.00206  | 0.341262 |
| -0.13307 | 0.00397  | 0.029296 | 0.52769  | -0.02385 | 0.60723  | 0.022787 | 0.6233   | 0.237124 |
| -0.11208 | 0.01539  | 0.046332 | 0.31775  | -0.00771 | 0.86795  | 0.0313   | 0.49983  | 0.221193 |
| 0.131679 | 0.00437  | 0.209004 | 5.24E-06 | 0.180664 | 8.63E-05 | 0.100261 | 0.03029  | 0.396607 |
| -0.07203 | 0.12006  | 0.022775 | 0.62349  | -0.04323 | 0.3513   | -0.01926 | 0.6781   | 0.296651 |
| 0.179453 | 9.65E-05 | 0.377968 | 2.63E-17 | 0.208715 | 5.40E-06 | 0.251686 | 3.52E-08 | 0.591555 |
| 0.378351 | 2.43E-17 | 0.534302 | 7.88E-36 | 0.401969 | 1.46E-19 | 0.388809 | 2.65E-18 | 0.582697 |
| 0.04665  | 0.31444  | -0.11125 | 0.01617  | -0.1834  | 6.70E-05 | 0.052212 | 0.26014  | 0.192227 |
| -0.1513  | 0.00104  | -0.09839 | 0.03352  | -0.127   | 0.00599  | -0.10212 | 0.02734  | 0.03549  |
| -0.14318 | 0.00192  | -0.02984 | 0.52007  | -0.08808 | 0.05716  | -0.06833 | 0.14035  | -0.01058 |
| -0.17353 | 0.00016  | -0.34067 | 3.74E-14 | -0.3957  | 5.90E-19 | -0.02518 | 0.58731  | 0.006248 |
| 0.091165 | 0.04896  | 0.14849  | 0.00129  | 0.063208 | 0.17268  | 0.143431 | 0.00189  | 0.157091 |
| -0.08149 | 0.07855  | 0.029513 | 0.52464  | -0.04105 | 0.37613  | 0.041056 | 0.37603  | 0.232045 |
| -0.11578 | 0.01229  | -0.02971 | 0.52188  | -0.05592 | 0.22776  | 0.009129 | 0.84402  | 0.207808 |
| -0.32543 | 5.56E-13 | -0.07703 | 0.0964   | -0.06855 | 0.13907  | -0.11028 | 0.01713  | -0.03507 |
| 0.011967 | 0.79646  | 0.228316 | 6.14E-07 | 0.14691  | 0.00145  | 0.130535 | 0.00472  | 0.383581 |
| -0.09401 | 0.0423   | 0.043528 | 0.34795  | 0.080086 | 0.08384  | 0.03315  | 0.47483  | 0.174971 |
| -0.06384 | 0.16843  | 0.017624 | 0.70405  | 0.084164 | 0.06919  | -0.03851 | 0.40642  | 0.04668  |
| -0.05668 | 0.22151  | 0.073879 | 0.11084  | 0.079615 | 0.08569  | 0.032806 | 0.47942  | 0.119024 |
| -0.05481 | 0.23715  | -0.06403 | 0.16715  | 0.059748 | 0.19744  | -0.07456 | 0.10759  | -0.02477 |
| 0.218921 | 1.79E-06 | 0.037205 | 0.42248  | 0.022231 | 0.6318   | 0.205177 | 7.83E-06 | 0.23878  |
| 0.010947 | 0.81347  | 0.136759 | 0.00306  | 0.236029 | 2.47E-07 | -0.0244  | 0.59893  | 0.14868  |
| 0.293539 | 9.83E-11 | 0.523914 | 2.80E-34 | 0.348741 | 8.42E-15 | 0.283532 | 4.40E-10 | 0.501856 |
| 0.041441 | 0.37157  | 0.109097 | 0.01836  | 0.143202 | 0.00192  | 0.040033 | 0.38806  | 0.042506 |
| -0.06238 | 0.17836  | 0.071343 | 0.12366  | -0.02731 | 0.55601  | 0.09107  | 0.0492   | 0.26112  |

|          |          |          |          |          |          |          |          |          |
|----------|----------|----------|----------|----------|----------|----------|----------|----------|
| -0.06977 | 0.1322   | 0.049178 | 0.2889   | -0.07549 | 0.10326  | 0.029842 | 0.52003  | 0.225178 |
| 0.29928  | 4.05E-11 | 0.597356 | 1.68E-46 | 0.541564 | 6.03E-37 | 0.258504 | 1.44E-08 | 0.391754 |
| 0.3733   | 6.87E-17 | 0.574972 | 1.90E-42 | 0.221134 | 1.39E-06 | 0.35647  | 1.94E-15 | 0.596376 |
| 0.04368  | 0.34627  | -0.18312 | 6.88E-05 | -0.34526 | 1.61E-14 | 0.159147 | 0.00056  | 0.099815 |
| -0.11967 | 0.00964  | 0.071139 | 0.12475  | -0.06852 | 0.13929  | 0.079878 | 0.08465  | 0.302824 |
| -0.12696 | 0.00601  | -0.24462 | 8.62E-08 | -0.31082 | 6.43E-12 | 0.128845 | 0.00529  | 0.240621 |
| 0.204697 | 8.23E-06 | 0.412408 | 1.33E-20 | 0.317604 | 2.10E-12 | 0.271166 | 2.58E-09 | 0.394452 |
| -0.01196 | 0.79662  | 0.132082 | 0.00425  | -0.11047 | 0.01693  | 0.136226 | 0.00318  | 0.383492 |
| 0.227471 | 6.77E-07 | 0.395902 | 5.65E-19 | 0.339027 | 5.04E-14 | 0.158029 | 0.00061  | 0.298703 |
| -0.03767 | 0.41666  | 0.242682 | 1.10E-07 | 0.152386 | 0.00095  | 0.089325 | 0.05373  | 0.223743 |
| 0.314366 | 3.59E-12 | 0.498173 | 1.16E-30 | 0.301648 | 2.80E-11 | 0.307055 | 1.18E-11 | 0.534672 |
| -0.04754 | 0.30523  | -0.15983 | 0.00053  | -0.08342 | 0.07169  | 0.082163 | 0.0761   | -0.01107 |
| -0.24883 | 5.07E-08 | 0.027368 | 0.55522  | -0.12334 | 0.00762  | -0.08086 | 0.08087  | 0.096199 |
| -0.08777 | 0.05804  | -0.00147 | 0.97467  | -0.1407  | 0.00231  | 0.070022 | 0.13079  | 0.151571 |
| 0.03303  | 0.47642  | 0.287509 | 2.44E-10 | 0.234073 | 3.12E-07 | 0.153448 | 0.00088  | 0.31773  |
| 0.012627 | 0.7855   | -0.04283 | 0.35574  | 0.008062 | 0.86206  | 0.171297 | 0.0002   | 0.136977 |
| -0.07285 | 0.11591  | 0.131468 | 0.00443  | 0.032573 | 0.48255  | 0.095303 | 0.03952  | 0.251644 |
| 0.002094 | 0.96401  | 0.215926 | 2.48E-06 | 0.075965 | 0.10109  | 0.149005 | 0.00124  | 0.394611 |
| 0.214509 | 2.90E-06 | 0.21799  | 1.98E-06 | 0.055737 | 0.22929  | 0.228227 | 6.20E-07 | 0.422337 |
| -0.13989 | 0.00245  | 0.00294  | 0.94948  | -0.01826 | 0.69392  | -0.00715 | 0.87757  | 0.178116 |
| 0.021692 | 0.6401   | 0.225544 | 8.45E-07 | 0.080157 | 0.08357  | 0.071538 | 0.12264  | 0.311006 |
| 0.087497 | 0.05884  | 0.30176  | 2.75E-11 | 0.240613 | 1.42E-07 | 0.154139 | 0.00083  | 0.367661 |
| 0.054165 | 0.24271  | 0.199113 | 1.46E-05 | 0.096337 | 0.03742  | 0.143871 | 0.00183  | 0.330081 |
| 0.012494 | 0.78771  | 0.260704 | 1.08E-08 | 0.131351 | 0.00447  | 0.110694 | 0.01671  | 0.312145 |
| 0.18203  | 7.61E-05 | 0.368979 | 1.65E-16 | 0.257445 | 1.66E-08 | 0.109358 | 0.01808  | 0.389142 |
| 0.060404 | 0.19256  | 0.008661 | 0.85192  | -0.00168 | 0.97104  | 0.140091 | 0.00241  | 0.307481 |
| -0.21429 | 2.97E-06 | -0.17799 | 0.00011  | -0.33652 | 7.91E-14 | -0.24421 | 9.08E-08 | -0.07743 |
| 0.199918 | 1.34E-05 | 0.062467 | 0.17778  | -0.01625 | 0.72618  | 0.206252 | 7.00E-06 | 0.296095 |
| 0.021603 | 0.64146  | 0.236983 | 2.20E-07 | 0.159646 | 0.00053  | 0.05273  | 0.25544  | 0.143924 |
| -0.00547 | 0.90621  | 0.067896 | 0.14292  | -0.02349 | 0.61264  | 0.39944  | 2.57E-19 | 0.360202 |
| -0.43777 | 2.76E-23 | -0.3017  | 2.78E-11 | -0.45743 | 1.58E-25 | -0.15479 | 0.00079  | -0.04489 |
| -0.02822 | 0.54295  | 0.121404 | 0.00863  | 0.003184 | 0.94529  | 0.131762 | 0.00434  | 0.34831  |
| 0.076331 | 0.09945  | 0.166745 | 0.0003   | 0.165155 | 0.00034  | 0.126795 | 0.00607  | 0.300739 |
| 0.260626 | 1.09E-08 | 0.292161 | 1.21E-10 | 0.216417 | 2.35E-06 | 0.219897 | 1.60E-06 | 0.504174 |
| -0.08226 | 0.07576  | 0.182618 | 7.21E-05 | 0.161698 | 0.00045  | 0.076126 | 0.10037  | 0.26692  |
| 0.224518 | 9.51E-07 | 0.296026 | 6.72E-11 | 0.260893 | 1.05E-08 | 0.126323 | 0.00627  | 0.173724 |
| -0.16017 | 0.00051  | -0.02861 | 0.53746  | -0.2221  | 1.25E-06 | 0.139845 | 0.00245  | 0.253898 |
| -0.01246 | 0.78822  | 0.16596  | 0.00032  | 0.085749 | 0.0641   | 0.168901 | 0.00025  | 0.428222 |
| 0.032122 | 0.48864  | 0.008636 | 0.85234  | -0.05081 | 0.27322  | -0.07841 | 0.09056  | 0.067344 |
| -0.25655 | 1.87E-08 | -0.04251 | 0.35933  | -0.1053  | 0.02286  | -0.12589 | 0.00645  | -0.03082 |
| 0.022319 | 0.63046  | 0.09635  | 0.0374   | 0.104836 | 0.02347  | -0.2049  | 8.07E-06 | -0.00362 |
| 0.130201 | 0.00483  | -0.12447 | 0.00708  | -0.11343 | 0.01418  | 0.0129   | 0.78098  | -0.13385 |
| 0.217387 | 2.12E-06 | 0.11526  | 0.01269  | 0.112149 | 0.01532  | 0.134717 | 0.00354  | 0.01583  |
| -0.04031 | 0.38479  | -0.04714 | 0.3094   | -0.09472 | 0.04075  | 0.113125 | 0.01445  | 0.273514 |
| -0.11267 | 0.01485  | -0.09491 | 0.04036  | 0.030922 | 0.50502  | -0.13179 | 0.00433  | -0.16414 |

|          |          |          |          |          |          |          |          |          |
|----------|----------|----------|----------|----------|----------|----------|----------|----------|
| -0.20259 | 1.02E-05 | -0.17001 | 0.00022  | -0.22671 | 7.39E-07 | -0.22266 | 1.17E-06 | -0.11947 |
| 0.303625 | 2.05E-11 | 0.377855 | 2.69E-17 | 0.105904 | 0.02208  | 0.239958 | 1.53E-07 | 0.482575 |
| -0.03853 | 0.40611  | 0.006458 | 0.8893   | 0.00379  | 0.9349   | 0.023784 | 0.60818  | -0.07026 |
| 0.107308 | 0.02037  | 0.10443  | 0.02402  | 0.164839 | 0.00035  | 0.121534 | 0.00856  | 0.254801 |
| -0.0446  | 0.3362   | 0.138778 | 0.00265  | -0.20805 | 5.80E-06 | 0.120359 | 0.00923  | 0.219744 |
| 0.002021 | 0.96526  | 0.16001  | 0.00052  | 0.098064 | 0.03412  | 0.094134 | 0.04202  | 0.357025 |
| -0.1353  | 0.00339  | 0.014159 | 0.76024  | -0.03417 | 0.46128  | 0.081265 | 0.07937  | 0.315837 |
| 0.018321 | 0.69292  | 0.218486 | 1.87E-06 | 0.078467 | 0.09031  | 0.174937 | 0.00014  | 0.287725 |
| 0.107278 | 0.02041  | 0.298682 | 4.45E-11 | 0.245735 | 7.50E-08 | 0.208874 | 5.31E-06 | 0.411374 |
| 0.096904 | 0.03631  | 0.17732  | 0.00012  | 0.180379 | 8.86E-05 | 0.101183 | 0.02879  | 0.178041 |
| 0.035837 | 0.43975  | 0.208154 | 5.73E-06 | 0.106056 | 0.02189  | 0.175204 | 0.00014  | 0.403514 |
| 0.181584 | 7.93E-05 | 0.248786 | 5.10E-08 | 0.152122 | 0.00097  | 0.230781 | 4.60E-07 | 0.277715 |
| 0.349269 | 7.62E-15 | 0.471082 | 3.59E-27 | 0.31577  | 2.85E-12 | 0.26972  | 3.16E-09 | 0.370598 |
| 0.128804 | 0.00531  | 0.093658 | 0.04307  | 0.108308 | 0.01922  | 0.067542 | 0.14502  | 0.064943 |
| -0.13714 | 0.00298  | 0.00839  | 0.85651  | -0.08759 | 0.05857  | 0.043256 | 0.35097  | 0.273143 |
| -0.24549 | 7.73E-08 | -0.1162  | 0.01198  | -0.13357 | 0.00383  | -0.06806 | 0.14198  | 0.041677 |
| 0.20304  | 9.77E-06 | 0.163246 | 0.0004   | 0.001146 | 0.98029  | 0.249965 | 4.39E-08 | 0.544669 |
| -0.11333 | 0.01427  | 0.061938 | 0.18149  | 0.001442 | 0.97521  | 0.007293 | 0.8751   | 0.221539 |
| 0.343468 | 2.24E-14 | 0.660405 | 7.86E-60 | 0.560708 | 5.07E-40 | 0.202006 | 1.09E-05 | 0.376745 |
| -0.08856 | 0.05581  | -0.16427 | 0.00036  | -0.13887 | 0.00263  | -0.12926 | 0.00515  | -0.03611 |
| -0.13013 | 0.00486  | -0.02446 | 0.59795  | -0.11529 | 0.01266  | -0.01309 | 0.77783  | 0.106408 |
| 0.13255  | 0.00411  | 0.236341 | 2.38E-07 | 0.231731 | 4.12E-07 | 0.105176 | 0.02302  | 0.090101 |
| -0.20514 | 7.86E-06 | -0.05142 | 0.26748  | -0.1267  | 0.00611  | 0.003712 | 0.93624  | 0.18513  |
| -0.31888 | 1.69E-12 | -0.0668  | 0.1495   | -0.11884 | 0.01016  | -0.11837 | 0.01046  | 0.008302 |
| 0.442721 | 7.76E-24 | 0.495234 | 2.87E-30 | 0.228798 | 5.81E-07 | 0.423755 | 8.94E-22 | 0.645043 |
| -0.03515 | 0.44861  | 0.142433 | 0.00203  | 0.050339 | 0.27766  | 0.14037  | 0.00236  | 0.387636 |
| 0.227112 | 7.06E-07 | 0.372788 | 7.63E-17 | 0.308413 | 9.51E-12 | 0.186082 | 5.21E-05 | 0.385282 |
| 0.161902 | 0.00044  | -0.0599  | 0.19629  | 0.050796 | 0.27331  | 0.074665 | 0.10708  | -0.17542 |
| 0.169692 | 0.00023  | 0.33982  | 4.36E-14 | 0.317831 | 2.02E-12 | 0.131186 | 0.00452  | 0.311949 |
| -0.15344 | 0.00088  | 0.078131 | 0.0917   | -0.1162  | 0.01197  | 0.074115 | 0.1097   | 0.158896 |
| -0.01073 | 0.81709  | -0.11191 | 0.01554  | -0.21658 | 2.31E-06 | 0.005813 | 0.90031  | 0.013241 |
| -0.01197 | 0.79647  | 0.23226  | 3.87E-07 | 0.078543 | 0.09     | 0.156881 | 0.00067  | 0.431748 |
| -0.06221 | 0.17957  | 0.08993  | 0.05212  | -0.01599 | 0.7304   | 0.055793 | 0.22882  | 0.385053 |
| -0.04554 | 0.32605  | 0.110735 | 0.01667  | -0.02578 | 0.57847  | 0.094604 | 0.041    | 0.333601 |
| -0.02213 | 0.63343  | -0.02894 | 0.53274  | -0.00026 | 0.99551  | -0.02301 | 0.61987  | -0.04902 |
| 7.30E-05 | 0.99875  | 0.013015 | 0.77908  | -0.08718 | 0.05977  | 0.31     | 7.35E-12 | 0.119202 |
| 0.123211 | 0.00768  | 0.124396 | 0.00711  | 0.155582 | 0.00074  | 0.293661 | 9.65E-11 | 0.094068 |
| -0.1264  | 0.00623  | 0.01286  | 0.78165  | -0.06176 | 0.18278  | 0.053501 | 0.24854  | 0.276852 |
| 0.256316 | 1.93E-08 | 0.359159 | 1.15E-15 | 0.093332 | 0.04381  | 0.287499 | 2.45E-10 | 0.471157 |
| -0.10418 | 0.02435  | 0.065421 | 0.1581   | -0.03836 | 0.40817  | 0.059546 | 0.19897  | 0.299295 |
| 0.293045 | 1.06E-10 | 0.546962 | 8.57E-38 | 0.527892 | 7.23E-35 | 0.314383 | 3.58E-12 | 0.432374 |
| 0.252761 | 3.06E-08 | 0.432794 | 9.67E-23 | 0.370932 | 1.11E-16 | 0.138394 | 0.00273  | 0.217228 |
| 0.064686 | 0.16284  | 0.143452 | 0.00188  | 0.056657 | 0.22168  | 0.098027 | 0.03419  | 0.215864 |
| 0.052815 | 0.25467  | 0.021708 | 0.63985  | -0.12133 | 0.00867  | 0.444181 | 5.32E-24 | 0.393985 |
| 0.287481 | 2.45E-10 | 0.338333 | 5.71E-14 | 0.251815 | 3.46E-08 | 0.283643 | 4.33E-10 | 0.510318 |



|          |          |          |          |          |          |          |          |          |
|----------|----------|----------|----------|----------|----------|----------|----------|----------|
| -0.11521 | 0.01273  | 0.011307 | 0.80746  | -0.04489 | 0.3331   | 0.064584 | 0.16351  | 0.08301  |
| 0.103494 | 0.02532  | -0.28195 | 5.54E-10 | -0.16749 | 0.00028  | -0.04342 | 0.34918  | -0.07274 |
| -0.14884 | 0.00126  | -0.15387 | 0.00085  | -0.05295 | 0.2535   | -0.13588 | 0.00326  | 0.040896 |
| 0.121456 | 0.0086   | 0.171213 | 0.0002   | 0.279196 | 8.26E-10 | 0.082273 | 0.0757   | 0.203321 |
| -0.08184 | 0.07726  | -0.06896 | 0.13677  | -0.02807 | 0.54513  | -0.0845  | 0.0681   | -0.00731 |
| 0.003297 | 0.94336  | 0.114087 | 0.01363  | 0.081734 | 0.07765  | 0.080727 | 0.08139  | 0.222425 |
| 0.100565 | 0.02979  | 0.397819 | 3.69E-19 | 0.149785 | 0.00117  | 0.218052 | 1.97E-06 | 0.373896 |
| 0.083384 | 0.07182  | 0.128921 | 0.00527  | 0.052693 | 0.25577  | 0.191094 | 3.23E-05 | 0.313878 |
| 0.012295 | 0.79102  | 0.159994 | 0.00052  | 0.100032 | 0.03067  | 0.079097 | 0.08775  | 0.327329 |
| -0.20127 | 1.17E-05 | 0.007486 | 0.87182  | -0.1201  | 0.00938  | 0.056486 | 0.22308  | 0.125575 |
| 0.150701 | 0.00109  | 0.272284 | 2.21E-09 | 0.320085 | 1.38E-12 | 0.10235  | 0.02699  | 0.135845 |
| -0.05806 | 0.21045  | 0.04936  | 0.28711  | 0.029932 | 0.51876  | -0.00479 | 0.91781  | 0.099319 |
| 0.370915 | 1.12E-16 | 0.430134 | 1.87E-22 | 0.498479 | 1.06E-30 | 0.301341 | 2.94E-11 | 0.453014 |
| 0.059415 | 0.19996  | 0.301054 | 3.07E-11 | 0.266535 | 4.90E-09 | 0.18328  | 6.78E-05 | 0.262682 |
| 0.097625 | 0.03494  | 0.392912 | 1.09E-18 | 0.246859 | 6.51E-08 | 0.193941 | 2.44E-05 | 0.405687 |
| -0.10614 | 0.02178  | 0.036597 | 0.43011  | 0.050506 | 0.27606  | 0.133058 | 0.00397  | 0.179162 |
| -0.06478 | 0.16222  | -0.13481 | 0.00351  | -0.0727  | 0.11666  | 0.037269 | 0.42168  | -0.06769 |
| 0.112751 | 0.01478  | 0.054078 | 0.24347  | 0.054292 | 0.24161  | 0.151619 | 0.00101  | 0.243645 |
| -0.14192 | 0.00211  | -0.10208 | 0.0274   | -0.11774 | 0.01088  | -0.05199 | 0.26215  | 0.065772 |
| -0.0295  | 0.52488  | -0.05839 | 0.20783  | 0.075117 | 0.10497  | -0.10692 | 0.02083  | -0.06185 |
| 0.067726 | 0.14392  | 0.162929 | 0.00041  | 0.110477 | 0.01692  | 0.088833 | 0.05507  | 0.154198 |
| -0.11592 | 0.01218  | -0.14056 | 0.00233  | -0.15773 | 0.00062  | -0.06386 | 0.16832  | 0.18225  |
| -0.0756  | 0.10276  | -0.04272 | 0.35693  | -0.08654 | 0.06166  | 0.067907 | 0.14286  | 0.096847 |
| 0.002541 | 0.95632  | -0.0816  | 0.07814  | -0.1779  | 0.00011  | -0.04536 | 0.32798  | 0.043463 |
| 0.079089 | 0.08778  | 0.199241 | 1.44E-05 | 0.184415 | 6.10E-05 | 0.19512  | 2.17E-05 | 0.387255 |
| 0.277752 | 1.02E-09 | 0.511044 | 1.97E-32 | 0.370078 | 1.32E-16 | 0.302551 | 2.43E-11 | 0.577481 |
| 0.242823 | 1.08E-07 | 0.394385 | 7.89E-19 | 0.227162 | 7.02E-07 | 0.215644 | 2.56E-06 | 0.356056 |
| -0.01533 | 0.74103  | -0.00017 | 0.99711  | -0.03929 | 0.39692  | -0.02121 | 0.64751  | -0.15638 |
| 0.028928 | 0.53289  | 0.06697  | 0.14847  | -0.04839 | 0.29673  | 0.123115 | 0.00773  | 0.492774 |
| -0.0768  | 0.09738  | -0.13986 | 0.00245  | -0.14742 | 0.0014   | -0.1855  | 5.50E-05 | -0.22528 |
| -0.06699 | 0.14832  | 0.065255 | 0.15916  | 0.056828 | 0.22029  | -0.00435 | 0.92539  | 0.25511  |
| 0.274195 | 1.69E-09 | 0.492373 | 6.89E-30 | 0.365987 | 3.01E-16 | 0.194566 | 2.30E-05 | 0.396532 |
| 0.144671 | 0.00172  | -0.04588 | 0.32253  | 0.056683 | 0.22147  | 0.047101 | 0.30977  | 0.112318 |
| -0.19976 | 1.37E-05 | -0.25356 | 2.76E-08 | -0.16966 | 0.00023  | -0.18906 | 3.92E-05 | -0.16722 |
| -0.103   | 0.02603  | 0.015349 | 0.74077  | -0.03294 | 0.47767  | 0.076744 | 0.09763  | 0.278064 |
| -0.0407  | 0.3802   | -0.02881 | 0.5345   | -0.11059 | 0.01681  | 0.097376 | 0.03541  | 0.242729 |
| -0.00973 | 0.83387  | 0.144808 | 0.0017   | 0.138181 | 0.00277  | -0.09538 | 0.03937  | -0.0297  |
| -0.08707 | 0.06008  | 0.040951 | 0.37726  | -0.12664 | 0.00614  | 0.129559 | 0.00505  | 0.263959 |
| 0.146382 | 0.00151  | 0.032528 | 0.48315  | 0.115027 | 0.01287  | 0.221671 | 1.31E-06 | 0.169145 |
| -0.17577 | 0.00013  | -0.01363 | 0.76898  | -0.06207 | 0.18059  | -0.02193 | 0.63644  | 0.183645 |
| 0.01018  | 0.82633  | 0.13223  | 0.0042   | 0.113423 | 0.01419  | 0.064908 | 0.1614   | 0.147782 |
| 0.217374 | 2.12E-06 | 0.408348 | 3.41E-20 | 0.359471 | 1.08E-15 | 0.280825 | 6.53E-10 | 0.455888 |
| -0.07551 | 0.10314  | 0.040302 | 0.38487  | -0.02517 | 0.58748  | -0.00183 | 0.96858  | 0.168545 |
| -0.05749 | 0.21496  | -0.0922  | 0.04644  | -0.07366 | 0.1119   | -0.0409  | 0.3778   | 0.041557 |
| 0.113482 | 0.01414  | 0.202106 | 1.08E-05 | 0.209587 | 4.93E-06 | 0.067158 | 0.14732  | 0.117894 |

|          |          |          |          |           |          |          |          |          |
|----------|----------|----------|----------|-----------|----------|----------|----------|----------|
| 0.291235 | 1.40E-10 | 0.332453 | 1.63E-13 | 0.178104  | 0.00011  | 0.316449 | 2.54E-12 | 0.49778  |
| 0.259446 | 1.28E-08 | 0.28822  | 2.20E-10 | 0.052604  | 0.25658  | 0.266348 | 5.02E-09 | 0.347386 |
| -0.01118 | 0.80951  | 0.098353 | 0.0336   | 0.032828  | 0.47913  | 0.061904 | 0.18173  | 0.314942 |
| -0.14552 | 0.00162  | -0.18239 | 7.36E-05 | -0.13703  | 0.003    | -0.11379 | 0.01388  | 0.021084 |
| 0.102096 | 0.02737  | 0.204457 | 8.44E-06 | 0.118964  | 0.01008  | 0.18084  | 8.50E-05 | 0.295201 |
| -0.10882 | 0.01865  | -0.17018 | 0.00022  | -0.24062  | 1.41E-07 | -0.04086 | 0.37835  | 0.075321 |
| -0.03565 | 0.44215  | -0.19281 | 2.73E-05 | -0.23665  | 2.29E-07 | -0.08492 | 0.06671  | -0.44146 |
| -0.28304 | 4.73E-10 | -0.17623 | 0.00013  | -0.12522  | 0.00674  | -0.12788 | 0.00565  | -0.1067  |
| 0.126691 | 0.00612  | 0.303928 | 1.95E-11 | 0.231855  | 4.06E-07 | 0.149093 | 0.00123  | 0.266422 |
| 0.115074 | 0.01283  | 0.185135 | 5.70E-05 | 0.182026  | 7.62E-05 | 0.062288 | 0.17903  | 0.156254 |
| 0.135503 | 0.00335  | 0.277495 | 1.05E-09 | 0.239736  | 1.58E-07 | 0.106659 | 0.02115  | 0.193473 |
| 0.110112 | 0.01729  | 0.208497 | 5.53E-06 | 0.227682  | 6.61E-07 | 0.039709 | 0.39191  | 0.163919 |
| 0.115423 | 0.01256  | 0.197464 | 1.72E-05 | 0.102999  | 0.02603  | 0.078189 | 0.09146  | 0.155733 |
| 0.133361 | 0.00389  | 0.103912 | 0.02473  | -2.29E-05 | 0.99961  | 0.236391 | 2.36E-07 | 0.49317  |
| 0.205371 | 7.68E-06 | 0.152908 | 0.00092  | 0.169338  | 0.00024  | 0.240458 | 1.44E-07 | 0.381287 |
| -0.08666 | 0.06132  | -0.00648 | 0.88889  | -0.00329  | 0.94353  | -0.01005 | 0.82856  | 0.17912  |
| -0.10798 | 0.01959  | 0.05297  | 0.25328  | 0.061666  | 0.18342  | -0.1292  | 0.00517  | 0.040533 |
| 0.025217 | 0.58674  | -0.18529 | 5.61E-05 | -0.03709  | 0.4239   | -0.09105 | 0.04925  | -0.32226 |
| -0.03184 | 0.4925   | 0.032262 | 0.48674  | 0.029651  | 0.5227   | -0.02541 | 0.58389  | 0.003127 |
| 0.071369 | 0.12353  | 0.36636  | 2.79E-16 | 0.262885  | 8.04E-09 | 0.0994   | 0.03174  | 0.234895 |
| -0.12081 | 0.00897  | 0.021704 | 0.63991  | -0.05106  | 0.27078  | -0.01147 | 0.80477  | -0.05804 |
| 0.090273 | 0.05123  | -0.08534 | 0.0654   | 0.003145  | 0.94596  | 0.045597 | 0.32549  | -0.23876 |
| -0.21304 | 3.40E-06 | -0.0123  | 0.79094  | -0.00977  | 0.8333   | -0.05933 | 0.20061  | 0.118607 |
| 0.10271  | 0.02645  | 0.360927 | 8.16E-16 | 0.18778   | 4.44E-05 | 0.068755 | 0.13792  | 0.43914  |
| 0.034583 | 0.45593  | 0.054673 | 0.23831  | 0.04645   | 0.31652  | -0.11621 | 0.01197  | 0.077615 |
| -0.00078 | 0.98664  | 0.210193 | 4.62E-06 | 0.138876  | 0.00263  | 0.072191 | 0.11925  | 0.216919 |
| -0.01834 | 0.69264  | -0.03378 | 0.46643  | 0.038372  | 0.40806  | 0.03082  | 0.50643  | -0.06288 |
| -0.10561 | 0.02246  | -0.01146 | 0.80483  | 0.003443  | 0.94085  | -0.03379 | 0.46634  | 0.145633 |
| 0.114181 | 0.01355  | 0.107685 | 0.01993  | 0.165884  | 0.00032  | 0.012271 | 0.79142  | -0.13915 |
| -0.01207 | 0.79472  | 0.343202 | 2.35E-14 | 0.171462  | 0.0002   | 0.158936 | 0.00057  | 0.482916 |
| 0.041529 | 0.37055  | 0.081097 | 0.08     | 0.026879  | 0.56232  | 0.063388 | 0.17146  | 0.122638 |
| -0.08266 | 0.07434  | 0.092743 | 0.04516  | -0.00958  | 0.83644  | 0.082636 | 0.07442  | 0.27326  |
| -0.10982 | 0.01759  | 0.251202 | 3.75E-08 | -0.02402  | 0.60469  | 0.04907  | 0.28996  | 0.174766 |
| 0.092319 | 0.04616  | 0.351551 | 4.96E-15 | 0.346007  | 1.40E-14 | 0.178594 | 0.0001   | 0.311428 |
| -0.10158 | 0.02816  | -0.03244 | 0.48438  | -0.06117  | 0.18696  | 0.018962 | 0.68276  | 0.015729 |
| -0.07405 | 0.11002  | -0.00093 | 0.98407  | 0.019659  | 0.67176  | -0.097   | 0.03613  | 0.15002  |
| 0.022734 | 0.62411  | 0.074795 | 0.10647  | 0.135178  | 0.00342  | -0.04551 | 0.32645  | 0.031683 |
| -0.07292 | 0.11557  | 0.144542 | 0.00174  | 0.15905   | 0.00056  | -0.00059 | 0.98992  | 0.09415  |
| -0.16125 | 0.00047  | -0.05909 | 0.20245  | -0.09839  | 0.03353  | 0.055452 | 0.23168  | 0.137689 |
| -0.09579 | 0.03853  | 0.070948 | 0.12576  | 0.061515  | 0.1845   | 0.101536 | 0.02823  | 0.069401 |
| 0.288153 | 2.22E-10 | 0.41352  | 1.03E-20 | 0.326988  | 4.24E-13 | 0.335182 | 1.01E-13 | 0.439928 |
| -0.09162 | 0.04783  | 0.061423 | 0.18516  | -0.01309  | 0.77781  | 0.01215  | 0.79343  | 0.088251 |
| -0.0961  | 0.03789  | 0.060223 | 0.19391  | 0.055751  | 0.22917  | -0.0822  | 0.07597  | 0.164839 |
| 0.145043 | 0.00167  | 0.176392 | 0.00013  | 0.261513  | 9.68E-09 | 0.120391 | 0.00921  | 0.073455 |
| 0.007993 | 0.86322  | 0.052249 | 0.2598   | 0.056026  | 0.22688  | 0.10349  | 0.02532  | 0.217606 |

|          |          |          |          |          |          |          |          |          |
|----------|----------|----------|----------|----------|----------|----------|----------|----------|
| 0.032671 | 0.48123  | -0.07585 | 0.10162  | 0.040185 | 0.38626  | -0.03071 | 0.50801  | 0.18475  |
| 0.060167 | 0.19432  | 0.060389 | 0.19267  | 0.082103 | 0.07631  | 0.226765 | 7.35E-07 | 0.336109 |
| -0.14807 | 0.00133  | -0.00816 | 0.86038  | 0.011167 | 0.8098   | -0.04075 | 0.37963  | 0.098489 |
| 0.050207 | 0.27891  | 0.031326 | 0.49948  | 0.011649 | 0.80176  | -0.01148 | 0.80463  | 0.132154 |
| -0.05181 | 0.26387  | 0.137328 | 0.00294  | 0.086667 | 0.06129  | -0.03396 | 0.46409  | 0.160128 |
| -0.03466 | 0.45494  | 0.052847 | 0.25439  | 0.043364 | 0.34978  | -0.03412 | 0.46196  | 0.118821 |
| -0.15184 | 0.001    | -0.08416 | 0.0692   | -0.09054 | 0.05055  | -0.10186 | 0.02773  | 0.059943 |
| -0.10478 | 0.02355  | -0.07317 | 0.1143   | -0.07173 | 0.12161  | -0.09443 | 0.04138  | 0.098539 |
| -0.09314 | 0.04424  | -0.07048 | 0.12827  | -0.07759 | 0.094    | -0.11611 | 0.01204  | 0.061323 |
| -0.08038 | 0.08271  | -0.12884 | 0.0053   | -0.0827  | 0.0742   | -0.12714 | 0.00593  | -0.11086 |
| 0.011777 | 0.79963  | -0.03567 | 0.44193  | -0.22711 | 7.06E-07 | 0.249331 | 4.76E-08 | 0.305932 |
| -0.33512 | 1.02E-13 | -0.08731 | 0.05938  | -0.17463 | 0.00015  | -0.1243  | 0.00716  | -0.01544 |
| 0.101411 | 0.02843  | 0.249756 | 4.51E-08 | 0.130211 | 0.00483  | 0.10467  | 0.02369  | 0.186577 |
| 0.041463 | 0.37131  | 0.205549 | 7.54E-06 | 0.196703 | 1.86E-05 | 0.095116 | 0.03991  | 0.269561 |
| 0.045123 | 0.33055  | 0.428926 | 2.53E-22 | 0.261663 | 9.48E-09 | 0.181543 | 7.96E-05 | 0.355475 |
| -0.03541 | 0.44517  | 0.087796 | 0.05798  | -0.14266 | 0.002    | 0.233345 | 3.40E-07 | 0.433366 |
| -0.08806 | 0.05722  | -0.11232 | 0.01516  | 0.07505  | 0.10528  | -0.11144 | 0.01598  | -0.10786 |
| 0.04891  | 0.29153  | 0.069892 | 0.13151  | 0.103158 | 0.0258   | 0.000262 | 0.9955   | 0.173051 |
| -0.04462 | 0.33599  | 0.053805 | 0.24586  | 0.053179 | 0.2514   | -0.05617 | 0.22565  | 0.124288 |
| 0.079035 | 0.088    | -0.05875 | 0.20504  | -0.15971 | 0.00053  | 0.064109 | 0.16663  | 0.136282 |
| -0.26426 | 6.68E-09 | -0.07503 | 0.10539  | -0.23532 | 2.69E-07 | -0.07546 | 0.10339  | 0.070033 |
| -0.37279 | 7.62E-17 | -0.31985 | 1.44E-12 | -0.48842 | 2.28E-29 | -0.1274  | 0.00584  | -0.03624 |
| 0.043825 | 0.34467  | 0.128187 | 0.00553  | 0.015826 | 0.73302  | 0.075801 | 0.10183  | 0.170124 |
| 0.396453 | 5.00E-19 | 0.350137 | 6.48E-15 | 0.186834 | 4.85E-05 | 0.192846 | 2.72E-05 | 0.289698 |
| 0.26908  | 3.45E-09 | 0.456462 | 2.06E-25 | 0.115297 | 0.01266  | 0.277176 | 1.10E-09 | 0.509337 |
| 0.262393 | 8.60E-09 | 0.542552 | 4.23E-37 | 0.247624 | 5.91E-08 | 0.348472 | 8.85E-15 | 0.581496 |
| 0.012803 | 0.78259  | 0.154898 | 0.00078  | 0.08984  | 0.05236  | 0.105754 | 0.02227  | 0.25953  |
| 0.226711 | 7.39E-07 | 0.102362 | 0.02697  | -0.20318 | 9.64E-06 | 0.163494 | 0.00039  | 0.292365 |
| 0.138483 | 0.00271  | 0.138009 | 0.0028   | 0.077527 | 0.09425  | 0.089602 | 0.05299  | 0.074626 |
| 0.116013 | 0.01211  | 0.251747 | 3.49E-08 | 0.202316 | 1.05E-05 | 0.154365 | 0.00082  | 0.363216 |
| -0.11571 | 0.01234  | -0.12654 | 0.00618  | -0.09929 | 0.03194  | -0.0112  | 0.80932  | 0.140752 |
| -0.09492 | 0.04033  | 0.031256 | 0.50044  | -0.04982 | 0.28267  | 0.061847 | 0.18213  | 0.181771 |
| -0.21022 | 4.60E-06 | 0.064434 | 0.16449  | -0.01711 | 0.71231  | -0.00039 | 0.99332  | 0.111041 |
| -0.01849 | 0.6903   | 0.144998 | 0.00168  | 0.074798 | 0.10646  | 0.114777 | 0.01307  | 0.33387  |
| 0.169387 | 0.00024  | 0.396954 | 4.47E-19 | 0.34121  | 3.39E-14 | 0.239377 | 1.65E-07 | 0.424824 |
| 0.122545 | 0.00802  | 0.070549 | 0.12791  | 0.011021 | 0.81224  | 0.060259 | 0.19363  | 0.046    |
| -0.212   | 3.81E-06 | -0.03496 | 0.45107  | -0.14417 | 0.00179  | -0.08428 | 0.06881  | 0.021087 |
| 0.360976 | 8.08E-16 | 0.653714 | 2.90E-58 | 0.530143 | 3.34E-35 | 0.402154 | 1.40E-19 | 0.544285 |
| 0.000869 | 0.98506  | 0.259124 | 1.33E-08 | 0.172546 | 0.00018  | 0.175402 | 0.00014  | 0.342998 |
| 0.166184 | 0.00031  | 0.065414 | 0.15814  | -0.03982 | 0.39055  | 0.143364 | 0.0019   | 0.035488 |
| -0.0898  | 0.05247  | -0.10631 | 0.02157  | -0.14571 | 0.00159  | -0.01379 | 0.76629  | 0.133022 |
| 0.109229 | 0.01822  | 0.076763 | 0.09755  | 0.144882 | 0.00169  | 0.145128 | 0.00166  | 0.16229  |
| 0.149187 | 0.00122  | 0.204587 | 8.33E-06 | 0.072271 | 0.11884  | 0.164178 | 0.00037  | 0.356131 |
| 0.202775 | 1.00E-05 | 0.324311 | 6.73E-13 | 0.25869  | 1.41E-08 | 0.224717 | 9.29E-07 | 0.41224  |
| 0.344782 | 1.76E-14 | 0.37011  | 1.31E-16 | 0.249242 | 4.81E-08 | 0.210123 | 4.65E-06 | 0.472475 |

|          |          |          |          |          |          |          |          |          |
|----------|----------|----------|----------|----------|----------|----------|----------|----------|
| 0.34524  | 1.62E-14 | 0.362726 | 5.73E-16 | 0.312396 | 4.97E-12 | 0.298303 | 4.72E-11 | 0.479071 |
| 0.090945 | 0.04951  | 0.25802  | 1.54E-08 | 0.153298 | 0.00089  | 0.21519  | 2.69E-06 | 0.448795 |
| -0.11528 | 0.01268  | -0.08119 | 0.07966  | -0.05579 | 0.22884  | 0.000855 | 0.98529  | 0.067775 |
| -0.08217 | 0.07609  | 0.036237 | 0.43465  | -0.00129 | 0.9779   | 0.090924 | 0.04957  | 0.203472 |
| -0.26448 | 6.48E-09 | 0.058335 | 0.20828  | -0.03284 | 0.47893  | -0.05484 | 0.23689  | -0.00335 |
| 0.103196 | 0.02574  | 0.176291 | 0.00013  | 0.095262 | 0.03961  | 0.075372 | 0.10379  | 0.157714 |
| 0.131624 | 0.00438  | -0.16726 | 0.00028  | -0.07016 | 0.13005  | 0.08337  | 0.07187  | 0.086284 |
| -0.14297 | 0.00195  | -0.00637 | 0.89079  | 0.036819 | 0.42731  | -0.15446 | 0.00081  | 0.036498 |
| 0.018025 | 0.69764  | 0.137542 | 0.0029   | 0.155882 | 0.00072  | 0.113959 | 0.01374  | 0.292658 |
| 0.054318 | 0.24138  | -0.09117 | 0.04895  | -0.05958 | 0.19873  | 0.032226 | 0.48723  | 0.042849 |
| -0.05885 | 0.20431  | 0.011687 | 0.80113  | -0.01892 | 0.68334  | 0.025766 | 0.57862  | 0.0728   |
| 0.077415 | 0.09473  | 0.355463 | 2.35E-15 | 0.260119 | 1.17E-08 | 0.055215 | 0.23369  | 0.186867 |
| 0.039921 | 0.38938  | 0.288546 | 2.09E-10 | 0.249945 | 4.40E-08 | 0.11353  | 0.0141   | 0.152184 |
| -0.07031 | 0.1292   | 0.130489 | 0.00474  | 0.051251 | 0.26902  | 0.121645 | 0.0085   | 0.342756 |
| 0.12011  | 0.00938  | -0.09487 | 0.04044  | -0.06773 | 0.14388  | -0.06078 | 0.18979  | -0.34002 |
| 0.008832 | 0.84903  | 0.208679 | 5.42E-06 | 0.155713 | 0.00073  | 0.197537 | 1.71E-05 | 0.293405 |
| 0.072295 | 0.11872  | 0.116189 | 0.01198  | 0.120701 | 0.00903  | 0.049126 | 0.28941  | 0.108669 |
| 0.240512 | 1.43E-07 | 0.257198 | 1.72E-08 | 0.364534 | 4.01E-16 | 0.097779 | 0.03465  | 0.31196  |
| 0.357539 | 1.58E-15 | 0.635529 | 3.35E-54 | 0.612947 | 1.61E-49 | 0.361835 | 6.83E-16 | 0.527689 |
| 0.051866 | 0.26332  | 0.079637 | 0.0856   | 0.037183 | 0.42275  | -0.03204 | 0.48971  | 0.225735 |
| 0.014176 | 0.75995  | 0.017312 | 0.70905  | -0.01194 | 0.79684  | 0.063537 | 0.17045  | 0.108007 |
| 0.07768  | 0.0936   | 0.411938 | 1.48E-20 | 0.252343 | 3.23E-08 | 0.203406 | 9.41E-06 | 0.396582 |
| 0.087085 | 0.06005  | 0.373663 | 6.38E-17 | 0.183277 | 6.78E-05 | 0.13384  | 0.00376  | 0.402964 |
| -0.01195 | 0.79667  | 0.326336 | 4.75E-13 | 0.20679  | 6.62E-06 | 0.285029 | 3.53E-10 | 0.288697 |
| 0.265132 | 5.93E-09 | 0.340753 | 3.68E-14 | 0.261759 | 9.36E-09 | 0.341502 | 3.21E-14 | 0.373545 |
| -0.19014 | 3.54E-05 | -0.13209 | 0.00424  | -0.11955 | 0.00972  | -0.16173 | 0.00045  | -0.12109 |
| -0.02325 | 0.61625  | 0.173212 | 0.00017  | 0.118071 | 0.01066  | 0.09492  | 0.04033  | 0.241918 |
| -0.07065 | 0.12737  | 0.070698 | 0.12711  | 0.066398 | 0.15197  | -0.08555 | 0.06473  | -0.02603 |
| -0.1167  | 0.01161  | -0.00083 | 0.98567  | -0.06058 | 0.19124  | 0.027355 | 0.5554   | 0.194535 |
| 0.350203 | 6.40E-15 | 0.225703 | 8.30E-07 | 0.274941 | 1.52E-09 | 0.179245 | 9.83E-05 | 0.260907 |
| 0.48678  | 3.72E-29 | 0.603946 | 9.33E-48 | 0.519163 | 1.37E-33 | 0.425064 | 6.51E-22 | 0.597024 |
| 0.09193  | 0.04709  | 0.210921 | 4.27E-06 | 0.138438 | 0.00272  | 0.124461 | 0.00708  | 0.310051 |
| 0.045068 | 0.33115  | -0.03038 | 0.51259  | -0.10437 | 0.02409  | 0.132803 | 0.00404  | 0.272489 |
| 0.135827 | 0.00327  | 0.231741 | 4.11E-07 | 0.223646 | 1.05E-06 | 0.159191 | 0.00055  | 0.24392  |
| -0.20478 | 8.16E-06 | -0.19447 | 2.32E-05 | -0.29725 | 5.56E-11 | -0.04723 | 0.30847  | 0.103062 |
| -0.00907 | 0.84505  | 0.275362 | 1.43E-09 | 0.251022 | 3.83E-08 | 0.067424 | 0.14573  | 0.236787 |
| 0.135384 | 0.00338  | 0.260788 | 1.07E-08 | 0.18204  | 7.61E-05 | 0.087601 | 0.05854  | 0.231698 |
| 0.067372 | 0.14603  | 0.290842 | 1.48E-10 | 0.155464 | 0.00075  | 0.123006 | 0.00779  | 0.255895 |
| 0.01621  | 0.7268   | 0.193157 | 2.64E-05 | 0.194691 | 2.27E-05 | 0.095719 | 0.03867  | 0.318859 |
| -0.12283 | 0.00788  | -0.09036 | 0.05101  | -0.07149 | 0.12289  | -0.05367 | 0.24708  | 0.149724 |
| 0.370618 | 1.19E-16 | 0.351688 | 4.83E-15 | 0.310976 | 6.27E-12 | 0.280626 | 6.72E-10 | 0.428866 |
| -0.11348 | 0.01414  | 0.03356  | 0.46937  | -0.03899 | 0.4005   | 0.065606 | 0.15692  | 0.224855 |
| -0.08819 | 0.05685  | 0.142571 | 0.00201  | 0.062541 | 0.17727  | 0.01125  | 0.80841  | 0.10226  |
| -0.06067 | 0.1906   | 0.0555   | 0.23128  | 0.091473 | 0.0482   | 0.034732 | 0.45399  | 0.229105 |
| -0.04078 | 0.37925  | 0.09702  | 0.03609  | 0.11096  | 0.01645  | 0.072691 | 0.11671  | 0.209195 |

|          |          |          |          |          |          |          |          |          |
|----------|----------|----------|----------|----------|----------|----------|----------|----------|
| 0.02434  | 0.59983  | 0.112971 | 0.01458  | -0.12209 | 0.00826  | 0.052476 | 0.25774  | 0.248392 |
| 0.286249 | 2.94E-10 | 0.595322 | 4.04E-46 | 0.427949 | 3.21E-22 | 0.325904 | 5.12E-13 | 0.398167 |
| 0.129891 | 0.00493  | 0.372945 | 7.39E-17 | 0.177171 | 0.00012  | 0.281345 | 6.05E-10 | 0.512918 |
| -0.04753 | 0.30543  | 0.039358 | 0.39611  | -0.00541 | 0.90713  | 0.025432 | 0.58355  | 0.316012 |
| 0.163115 | 0.0004   | 0.395028 | 6.85E-19 | 0.286594 | 2.80E-10 | 0.095951 | 0.0382   | 0.293767 |
| 0.075413 | 0.1036   | -0.08733 | 0.05934  | -0.01159 | 0.80271  | -0.05948 | 0.19949  | -0.05362 |
| -0.21948 | 1.68E-06 | -0.14576 | 0.00159  | -0.17185 | 0.00019  | -0.18575 | 5.38E-05 | -0.10377 |
| 0.22276  | 1.16E-06 | 0.332184 | 1.71E-13 | 0.330784 | 2.19E-13 | 0.14226  | 0.00206  | 0.367355 |
| 0.083422 | 0.07169  | 0.236111 | 2.44E-07 | 0.20906  | 5.21E-06 | 0.180999 | 8.37E-05 | 0.357108 |
| -0.01215 | 0.7934   | 0.01356  | 0.77009  | -0.03322 | 0.47396  | -0.01025 | 0.82523  | 0.134018 |
| -0.07503 | 0.10538  | 0.034114 | 0.46207  | 0.040865 | 0.37826  | -0.03911 | 0.39914  | 0.029893 |
| 0.116465 | 0.01178  | 0.113904 | 0.01378  | 0.105277 | 0.02289  | -0.00628 | 0.89233  | 0.098074 |
| -0.07976 | 0.08511  | -0.06531 | 0.15881  | -0.02253 | 0.62717  | 0.038689 | 0.40419  | 0.08985  |
| -0.01436 | 0.75688  | 0.196986 | 1.81E-05 | 0.110988 | 0.01642  | 0.128363 | 0.00547  | 0.354039 |
| 0.138506 | 0.0027   | 0.171696 | 0.00019  | 0.165996 | 0.00032  | 0.09411  | 0.04207  | 0.259147 |
| 0.205455 | 7.61E-06 | 0.28284  | 4.87E-10 | 0.180589 | 8.69E-05 | 0.282489 | 5.12E-10 | 0.47632  |
| -0.04057 | 0.38175  | 0.276447 | 1.23E-09 | 0.18695  | 4.80E-05 | 0.172396 | 0.00018  | 0.378753 |
| -0.16257 | 0.00042  | -0.02565 | 0.58026  | -0.08417 | 0.06918  | 0.019765 | 0.67009  | 0.166917 |
| 0.116665 | 0.01164  | 0.205935 | 7.24E-06 | 0.134263 | 0.00365  | 0.297171 | 5.63E-11 | 0.215752 |
| -0.09486 | 0.04045  | 0.075775 | 0.10195  | -0.00052 | 0.99112  | 0.076031 | 0.10079  | 0.299844 |
| -0.20765 | 6.05E-06 | -0.09905 | 0.03236  | -0.21431 | 2.96E-06 | -0.00878 | 0.84993  | 0.155909 |
| -0.10755 | 0.02009  | 0.018838 | 0.68471  | -0.13657 | 0.0031   | 0.009534 | 0.8372   | 0.125458 |
| 0.174817 | 0.00015  | 0.349042 | 7.95E-15 | 0.282425 | 5.17E-10 | 0.048596 | 0.29465  | 0.216345 |
| -0.15946 | 0.00054  | 0.04371  | 0.34593  | -0.05146 | 0.26704  | 0.055754 | 0.22914  | 0.282146 |
| 0.121295 | 0.00869  | 0.11042  | 0.01698  | 0.039041 | 0.39993  | 0.156969 | 0.00066  | 0.084342 |
| -0.01869 | 0.68701  | 0.018185 | 0.69509  | -0.01469 | 0.75149  | 0.039261 | 0.39728  | 0.241673 |
| -0.19026 | 3.50E-05 | -0.04515 | 0.33031  | -0.13537 | 0.00338  | 0.02747  | 0.55375  | 0.251612 |
| -0.12086 | 0.00894  | 0.079737 | 0.0852   | 0.019771 | 0.67     | 0.060939 | 0.18865  | 0.263337 |
| 0.287901 | 2.30E-10 | 0.510209 | 2.58E-32 | 0.303752 | 2.01E-11 | 0.321918 | 1.01E-12 | 0.460848 |
| -0.08778 | 0.05803  | -0.11359 | 0.01405  | -0.11752 | 0.01103  | -0.01089 | 0.81442  | 0.137427 |
| 0.044672 | 0.33542  | 0.228921 | 5.72E-07 | 0.113548 | 0.01408  | 0.147859 | 0.00135  | 0.383666 |
| 0.067781 | 0.1436   | 0.259865 | 1.21E-08 | 0.171451 | 0.0002   | 0.118301 | 0.01051  | 0.350739 |
| -0.17671 | 0.00012  | -0.01856 | 0.68919  | -0.0855  | 0.06488  | 0.030287 | 0.51382  | 0.224966 |
| -0.14853 | 0.00129  | -0.22094 | 1.42E-06 | -0.19363 | 2.52E-05 | -0.07922 | 0.08725  | -0.045   |
| -0.13932 | 0.00255  | 0.042022 | 0.3649   | -0.04654 | 0.31555  | 0.020292 | 0.66184  | 0.223295 |
| 0.18784  | 4.41E-05 | 0.375014 | 4.84E-17 | 0.305489 | 1.52E-11 | 0.203005 | 9.81E-06 | 0.35993  |
| 0.247042 | 6.36E-08 | 0.364371 | 4.14E-16 | 0.212156 | 3.74E-06 | 0.216943 | 2.22E-06 | 0.426668 |
| -0.00162 | 0.97209  | 0.086466 | 0.0619   | 0.011132 | 0.81038  | 0.139224 | 0.00257  | 0.350209 |
| 0.048903 | 0.2916   | -0.25163 | 3.54E-08 | -0.2026  | 1.02E-05 | 0.025081 | 0.58876  | -0.02068 |
| -0.11133 | 0.01609  | -0.02875 | 0.53539  | -0.00355 | 0.93897  | 0.0188   | 0.68532  | 0.173935 |
| -0.22258 | 1.18E-06 | -0.1568  | 0.00067  | -0.2826  | 5.04E-10 | 0.058306 | 0.2085   | 0.132134 |
| 0.063032 | 0.17388  | 0.17777  | 0.00011  | 0.069486 | 0.13377  | 0.021357 | 0.64527  | 0.447135 |
| 0.458549 | 1.17E-25 | 0.639232 | 5.25E-55 | 0.345128 | 1.65E-14 | 0.41799  | 3.57E-21 | 0.633013 |
| 0.031915 | 0.49145  | 0.275243 | 1.45E-09 | 0.1774   | 0.00012  | 0.004524 | 0.92233  | 0.156237 |
| 0.171049 | 0.0002   | 0.377319 | 3.01E-17 | 0.312216 | 5.12E-12 | 0.303894 | 1.96E-11 | 0.467677 |

|          |          |          |          |          |          |          |          |          |
|----------|----------|----------|----------|----------|----------|----------|----------|----------|
| 0.173572 | 0.00016  | 0.361973 | 6.65E-16 | 0.343607 | 2.18E-14 | 0.190549 | 3.40E-05 | 0.37868  |
| 0.017254 | 0.70998  | 0.212067 | 3.78E-06 | 0.204708 | 8.23E-06 | 0.140886 | 0.00228  | 0.153372 |
| 0.013874 | 0.76492  | 0.16241  | 0.00043  | 0.102251 | 0.02714  | 0.136565 | 0.00311  | 0.366218 |
| -0.08848 | 0.05603  | 0.202586 | 1.02E-05 | 0.055533 | 0.231    | 0.052419 | 0.25826  | 0.198075 |
| -0.02511 | 0.58831  | -0.09632 | 0.03745  | -0.08931 | 0.05376  | 0.054719 | 0.23792  | -0.15706 |
| -0.14004 | 0.00242  | -0.17434 | 0.00015  | -0.14889 | 0.00125  | -0.11476 | 0.01308  | -0.07253 |
| 0.083061 | 0.07293  | -0.09035 | 0.05103  | -0.03833 | 0.40858  | 0.006893 | 0.8819   | -0.1167  |
| -0.13762 | 0.00288  | 0.077717 | 0.09344  | 0.010846 | 0.81516  | 0.075496 | 0.10322  | 0.193346 |
| -0.14571 | 0.00159  | 0.002966 | 0.94903  | -0.07111 | 0.12492  | -0.04883 | 0.29238  | 0.107647 |
| -0.04936 | 0.28711  | -0.01475 | 0.75053  | -0.03045 | 0.51157  | 0.053213 | 0.25111  | -0.04061 |
| 0.092554 | 0.0456   | -0.07234 | 0.11847  | -0.02205 | 0.63456  | -0.03486 | 0.45232  | -0.26059 |
| 0.044225 | 0.34028  | 0.006361 | 0.89096  | 0.082039 | 0.07654  | 0.035172 | 0.44829  | -0.17334 |
| -0.08658 | 0.06154  | -0.05349 | 0.24865  | -0.08675 | 0.06104  | 0.084767 | 0.06722  | 0.257954 |
| -0.15281 | 0.00092  | 0.002458 | 0.95775  | -0.08118 | 0.07968  | -0.04603 | 0.32087  | 0.05469  |
| 0.136387 | 0.00314  | 0.229931 | 5.09E-07 | 0.239948 | 1.54E-07 | 0.239404 | 1.64E-07 | 0.17471  |
| 0.049455 | 0.28619  | 0.023484 | 0.61271  | -0.00389 | 0.93318  | 0.10165  | 0.02806  | 0.273422 |
| 0.111098 | 0.01631  | 0.231246 | 4.36E-07 | 0.09021  | 0.05139  | 0.123519 | 0.00753  | 0.31797  |
| 0.438861 | 2.09E-23 | 0.6203   | 5.31E-51 | 0.302356 | 2.50E-11 | 0.44052  | 1.37E-23 | 0.630918 |
| 0.299531 | 3.90E-11 | 0.424609 | 7.27E-22 | 0.285352 | 3.36E-10 | 0.484866 | 6.58E-29 | 0.677919 |
| -0.13909 | 0.00259  | -0.2685  | 3.74E-09 | -0.17529 | 0.00014  | -0.24267 | 1.10E-07 | -0.22135 |
| -0.00066 | 0.98869  | 0.074175 | 0.10941  | -0.06753 | 0.14508  | 0.053782 | 0.24606  | 0.164744 |
| 0.077767 | 0.09323  | 0.217106 | 2.18E-06 | 0.152175 | 0.00097  | -0.00481 | 0.9174   | 0.099693 |
| 0.138826 | 0.00264  | 0.433966 | 7.21E-23 | 0.223141 | 1.11E-06 | 0.239527 | 1.62E-07 | 0.502673 |
| 0.005653 | 0.90302  | 0.178508 | 0.00011  | 0.115337 | 0.01263  | 0.215546 | 2.59E-06 | 0.436255 |
| -0.04468 | 0.33538  | 0.052213 | 0.26013  | 0.031432 | 0.49803  | -0.01095 | 0.81338  | 0.222396 |
| -0.13575 | 0.00329  | -0.03622 | 0.43482  | -0.34622 | 1.35E-14 | 0.137808 | 0.00284  | 0.436341 |
| 0.227576 | 6.69E-07 | -0.03936 | 0.3961   | 0.047516 | 0.30552  | 0.060844 | 0.18934  | 0.177159 |
| 0.3986   | 3.10E-19 | 0.148456 | 0.00129  | 0.148722 | 0.00127  | 0.253096 | 2.93E-08 | 0.342755 |
| 0.173873 | 0.00016  | 0.040419 | 0.38349  | -0.09872 | 0.03293  | 0.03855  | 0.40588  | 0.107586 |
| 0.21767  | 2.05E-06 | 0.245951 | 7.30E-08 | 0.169082 | 0.00024  | 0.202821 | 1.00E-05 | 0.198395 |
| 0.11692  | 0.01145  | 0.012488 | 0.78781  | 0.076545 | 0.0985   | -0.0605  | 0.19186  | -0.03364 |
| 0.303895 | 1.96E-11 | 0.324847 | 6.14E-13 | 0.122051 | 0.00828  | 0.246385 | 6.91E-08 | 0.400894 |
| 0.001935 | 0.96674  | 0.133645 | 0.00381  | 0.116154 | 0.01201  | -0.02296 | 0.62061  | 0.081101 |
| -0.0974  | 0.03537  | 0.066412 | 0.15188  | 0.031311 | 0.49969  | 0.008984 | 0.84646  | 0.143916 |
| -0.11998 | 0.00945  | -0.03968 | 0.39226  | -0.0183  | 0.69331  | -0.13346 | 0.00386  | -0.03856 |
| -0.05662 | 0.22201  | 0.040767 | 0.37941  | -0.19346 | 2.56E-05 | 0.107101 | 0.02062  | 0.33679  |
| -0.18929 | 3.84E-05 | -0.11438 | 0.01339  | -0.16472 | 0.00035  | -0.01175 | 0.80005  | 0.107065 |
| 0.174101 | 0.00016  | 0.172328 | 0.00018  | 0.024717 | 0.59418  | 0.193055 | 2.67E-05 | 0.157553 |
| -0.18031 | 8.92E-05 | 0.00894  | 0.84721  | -0.09546 | 0.0392   | 0.000197 | 0.99662  | 0.195703 |
| 0.137574 | 0.00289  | 0.223454 | 1.07E-06 | 0.155612 | 0.00074  | 0.25213  | 3.32E-08 | 0.339798 |
| -0.0411  | 0.37555  | 0.049964 | 0.28125  | -0.06827 | 0.14073  | 0.180475 | 8.79E-05 | 0.365802 |
| 0.053407 | 0.24938  | 0.24603  | 7.22E-08 | 0.183441 | 6.68E-05 | 0.175844 | 0.00013  | 0.363866 |
| -0.06319 | 0.1728   | 0.099309 | 0.0319   | 0.04346  | 0.34871  | 0.012583 | 0.78624  | 0.280509 |
| -0.22173 | 1.30E-06 | -0.05505 | 0.23505  | -0.26716 | 4.49E-09 | -0.10268 | 0.0265   | -0.07329 |
| -0.1789  | 0.0001   | -0.1149  | 0.01297  | -0.10716 | 0.02054  | -0.01315 | 0.77686  | 0.108786 |

|          |          |          |          |          |          |          |          |          |
|----------|----------|----------|----------|----------|----------|----------|----------|----------|
| -0.14205 | 0.00209  | -0.02544 | 0.5834   | -0.13207 | 0.00425  | 0.062638 | 0.17659  | 0.255806 |
| -0.07382 | 0.11114  | 0.093479 | 0.04348  | -0.08046 | 0.0824   | 0.069615 | 0.13305  | 0.206085 |
| 0.138413 | 0.00272  | 0.305569 | 1.50E-11 | 0.304743 | 1.71E-11 | 0.191404 | 3.13E-05 | 0.394954 |
| -0.07045 | 0.12847  | 0.019238 | 0.6784   | -0.0102  | 0.82596  | 0.029173 | 0.52943  | 0.378093 |
| -0.03394 | 0.4644   | -0.03781 | 0.41496  | 0.143706 | 0.00185  | -0.19224 | 2.89E-05 | -0.06278 |
| 0.163337 | 0.00039  | 0.105703 | 0.02234  | 0.025775 | 0.57849  | 0.189085 | 3.92E-05 | 0.366838 |
| 0.342988 | 2.45E-14 | 0.222181 | 1.24E-06 | 0.10245  | 0.02684  | 0.337848 | 6.23E-14 | 0.547728 |
| -0.06005 | 0.19518  | 0.115719 | 0.01233  | 0.006603 | 0.88684  | 0.100956 | 0.02915  | 0.272273 |
| 0.02071  | 0.6553   | 0.164756 | 0.00035  | 0.142883 | 0.00197  | 0.149503 | 0.00119  | 0.299028 |
| -0.02926 | 0.52816  | -0.21344 | 3.26E-06 | -0.13581 | 0.00327  | -0.25396 | 2.62E-08 | -0.388   |
| -0.1747  | 0.00015  | -0.01563 | 0.73616  | -0.27016 | 2.97E-09 | 0.065191 | 0.15957  | 0.134152 |
| -0.02584 | 0.57749  | 0.112104 | 0.01536  | 0.069344 | 0.13457  | 0.028002 | 0.5461   | 0.161899 |
| 0.034124 | 0.46194  | 0.02265  | 0.62539  | 0.019575 | 0.67308  | -0.00212 | 0.96353  | -0.05242 |
| 0.197957 | 1.64E-05 | 0.05855  | 0.2066   | 0.196933 | 1.82E-05 | 0.052677 | 0.25592  | -0.02694 |
| -0.29184 | 1.27E-10 | -0.00428 | 0.92643  | -0.15989 | 0.00052  | 0.00785  | 0.86565  | 0.249538 |
| 0.052612 | 0.2565   | 0.290812 | 1.49E-10 | 0.229903 | 5.10E-07 | 0.198764 | 1.51E-05 | 0.414058 |
| 0.144358 | 0.00176  | 0.297709 | 5.18E-11 | 0.197273 | 1.76E-05 | 0.137694 | 0.00287  | 0.35079  |
| -0.02784 | 0.54841  | 0.233124 | 3.49E-07 | 0.131247 | 0.0045   | 0.063166 | 0.17296  | 0.377739 |
| -0.03333 | 0.47241  | -0.01493 | 0.74764  | -0.03495 | 0.45116  | -0.05958 | 0.19871  | -0.07538 |
| -0.08765 | 0.05838  | 0.027299 | 0.55622  | -0.09413 | 0.04203  | 0.091443 | 0.04827  | 0.245407 |
| 0.029208 | 0.52893  | -0.02563 | 0.58056  | 0.011373 | 0.80636  | 0.07563  | 0.10261  | 0.032624 |
| 0.192326 | 2.86E-05 | 0.348029 | 9.62E-15 | 0.305403 | 1.54E-11 | 0.16048  | 0.0005   | 0.235652 |
| 0.016562 | 0.72111  | 0.210967 | 4.25E-06 | -0.00227 | 0.96092  | 0.203923 | 8.92E-06 | 0.49555  |
| 0.465326 | 1.81E-26 | 0.483979 | 8.56E-29 | 0.270703 | 2.75E-09 | 0.40047  | 2.04E-19 | 0.468775 |
| -0.06919 | 0.13543  | 0.133168 | 0.00394  | 0.05962  | 0.19841  | 0.064063 | 0.16693  | 0.271043 |
| -0.16898 | 0.00024  | -0.00456 | 0.92164  | 0.02543  | 0.58358  | -0.07264 | 0.11699  | 0.073725 |
| 0.171078 | 0.0002   | 0.411245 | 1.74E-20 | 0.341218 | 3.38E-14 | 0.188217 | 4.26E-05 | 0.350642 |
| -0.07992 | 0.08448  | 0.065274 | 0.15904  | 0.006387 | 0.89052  | 0.110315 | 0.01709  | 0.203134 |
| 0.012537 | 0.787    | 0.285995 | 3.06E-10 | 0.146134 | 0.00154  | 0.101999 | 0.02752  | 0.333232 |
| 0.397586 | 3.89E-19 | 0.210226 | 4.60E-06 | 0.405461 | 6.61E-20 | 0.113753 | 0.01391  | 0.158197 |
| 0.008322 | 0.85766  | -0.05525 | 0.23335  | -0.10428 | 0.02422  | 0.176189 | 0.00013  | 0.342991 |
| -0.07679 | 0.09743  | 0.070293 | 0.1293   | 0.051991 | 0.26217  | -0.08919 | 0.0541   | 0.046652 |
| 0.11013  | 0.01727  | 0.098602 | 0.03315  | 0.089172 | 0.05414  | 0.059859 | 0.19661  | -0.12684 |
| 0.141428 | 0.00219  | 0.193252 | 2.61E-05 | 0.152015 | 0.00098  | 0.038545 | 0.40595  | 0.146945 |
| -0.09641 | 0.03728  | -0.30885 | 8.85E-12 | -0.29571 | 7.05E-11 | -0.10909 | 0.01836  | -0.44532 |
| -0.14334 | 0.0019   | -0.24638 | 6.91E-08 | -0.16779 | 0.00027  | -0.02149 | 0.64327  | 0.006731 |
| 0.216957 | 2.22E-06 | 0.296518 | 6.22E-11 | 0.220847 | 1.44E-06 | 0.118809 | 0.01018  | 0.31761  |
| 0.081599 | 0.07814  | 0.10543  | 0.02269  | 0.154968 | 0.00078  | 0.134575 | 0.00357  | 0.210045 |
| -0.09552 | 0.03909  | 0.147384 | 0.0014   | -0.15748 | 0.00064  | 0.244916 | 8.31E-08 | 0.486886 |
| 0.232749 | 3.65E-07 | 0.29233  | 1.18E-10 | 0.209546 | 4.95E-06 | 0.278068 | 9.72E-10 | 0.489473 |
| 0.014107 | 0.76109  | 0.121879 | 0.00837  | 0.118486 | 0.01039  | 0.127483 | 0.0058   | 0.354586 |
| -0.14843 | 0.0013   | 0.000262 | 0.99549  | -0.01137 | 0.80645  | 0.023224 | 0.61666  | 0.158206 |
| -0.09589 | 0.03833  | 0.037326 | 0.42097  | -0.0313  | 0.49977  | -0.0192  | 0.67897  | 0.231627 |
| 0.364244 | 4.25E-16 | 0.157146 | 0.00065  | 0.065285 | 0.15897  | 0.290226 | 1.62E-10 | 0.369817 |
| 0.140438 | 0.00235  | 0.477792 | 5.24E-28 | 0.238707 | 1.79E-07 | 0.303195 | 2.19E-11 | 0.580129 |

|          |          |          |          |          |          |          |          |          |
|----------|----------|----------|----------|----------|----------|----------|----------|----------|
| -0.40189 | 1.49E-19 | -0.27328 | 1.92E-09 | -0.30183 | 2.72E-11 | -0.18307 | 6.91E-05 | 0.049622 |
| -0.16546 | 0.00033  | 0.015067 | 0.74538  | 0.046184 | 0.3193   | -0.08876 | 0.05527  | 0.007978 |
| -0.05427 | 0.24181  | -0.03122 | 0.50093  | -0.04589 | 0.32239  | 0.132817 | 0.00404  | 0.159331 |
| -0.04595 | 0.32178  | 0.171032 | 0.0002   | 0.105894 | 0.0221   | 0.142342 | 0.00205  | 0.38204  |
| 0.011465 | 0.80483  | 0.146517 | 0.0015   | 0.219896 | 1.60E-06 | 0.007775 | 0.86692  | 0.128494 |
| 0.077514 | 0.0943   | 0.113718 | 0.01394  | 0.122724 | 0.00793  | 0.092789 | 0.04505  | 0.143227 |
| 0.012839 | 0.782    | 0.066993 | 0.14833  | -0.06067 | 0.19064  | 0.159425 | 0.00054  | 0.356914 |
| 0.186125 | 5.19E-05 | 0.118837 | 0.01016  | 0.161928 | 0.00044  | 0.207173 | 6.36E-06 | 0.329463 |
| -0.19078 | 3.32E-05 | 0.013102 | 0.77764  | -0.09305 | 0.04446  | 0.020102 | 0.6648   | 0.237169 |
| 0.044778 | 0.33427  | 0.195212 | 2.15E-05 | 0.153089 | 0.0009   | -0.04306 | 0.35318  | 0.029706 |
| -0.10815 | 0.0194   | -0.0118  | 0.79924  | -0.02213 | 0.63343  | -0.01659 | 0.72067  | -0.10872 |
| -0.17189 | 0.00019  | -0.22373 | 1.04E-06 | -0.17092 | 0.00021  | -0.0436  | 0.34714  | 0.066928 |
| -0.04027 | 0.38522  | 0.141481 | 0.00218  | 0.028581 | 0.53782  | 0.087816 | 0.05792  | 0.225493 |
| 0.095866 | 0.03837  | 0.142672 | 0.002    | 0.046931 | 0.31152  | 0.171285 | 0.0002   | 0.202518 |
| 0.032292 | 0.48633  | 0.323154 | 8.21E-13 | 0.113774 | 0.01389  | 0.275037 | 1.50E-09 | 0.460183 |
| 0.212981 | 3.42E-06 | 0.38507  | 5.91E-18 | 0.25135  | 3.67E-08 | 0.226996 | 7.15E-07 | 0.510897 |
| 0.222248 | 1.23E-06 | 0.251365 | 3.67E-08 | 0.178566 | 0.0001   | 0.300676 | 3.26E-11 | 0.466711 |
| 0.17459  | 0.00015  | 0.367216 | 2.35E-16 | 0.225231 | 8.76E-07 | 0.243473 | 9.94E-08 | 0.607778 |
| 0.070033 | 0.13073  | 0.195392 | 2.12E-05 | 0.175135 | 0.00014  | -0.1042  | 0.02432  | 0.039621 |
| -0.34567 | 1.49E-14 | -0.31315 | 4.39E-12 | -0.24403 | 9.28E-08 | -0.17251 | 0.00018  | -0.18742 |
| 0.109398 | 0.01804  | 0.105508 | 0.02259  | -0.02784 | 0.54846  | 0.155514 | 0.00075  | 0.131802 |
| 0.130481 | 0.00474  | 0.20336  | 9.46E-06 | 0.153911 | 0.00085  | 0.238404 | 1.85E-07 | 0.240807 |
| -0.07805 | 0.09206  | -0.10962 | 0.01781  | -0.15858 | 0.00058  | 0.05078  | 0.27346  | 0.231224 |
| 0.199956 | 1.34E-05 | 0.249279 | 4.79E-08 | 0.100982 | 0.02911  | 0.338656 | 5.39E-14 | 0.408729 |
| -0.17068 | 0.00021  | -0.25529 | 2.20E-08 | -0.21937 | 1.70E-06 | -0.11946 | 0.00977  | -0.19747 |
| -0.02643 | 0.5689   | -0.02909 | 0.53065  | 0.033899 | 0.46489  | 0.033741 | 0.46697  | 0.058719 |
| -0.02491 | 0.59135  | 0.091938 | 0.04707  | -0.10114 | 0.02887  | -0.03784 | 0.4146   | 0.059505 |
| 0.169937 | 0.00022  | -0.03078 | 0.507    | 0.01124  | 0.80858  | -0.02252 | 0.62739  | -0.27782 |
| 0.047932 | 0.30131  | 0.110486 | 0.01692  | 0.016916 | 0.71541  | 0.212315 | 3.68E-06 | 0.325692 |
| 0.428566 | 2.76E-22 | 0.408013 | 3.68E-20 | 0.319507 | 1.52E-12 | 0.283162 | 4.64E-10 | 0.452736 |
| 0.04646  | 0.31641  | 0.097887 | 0.03445  | 0.060513 | 0.19176  | 0.079262 | 0.08709  | 0.280257 |
| -0.05266 | 0.25603  | 0.096615 | 0.03687  | -0.0171  | 0.71247  | 0.081741 | 0.07762  | 0.321554 |
| 0.058847 | 0.2043   | 0.211204 | 4.15E-06 | 0.041083 | 0.37573  | 0.172779 | 0.00018  | 0.415282 |
| -0.05863 | 0.206    | 0.11261  | 0.0149   | -0.01894 | 0.68303  | 0.1205   | 0.00915  | 0.345721 |
| 0.169356 | 0.00024  | 0.371479 | 9.96E-17 | 0.279903 | 7.46E-10 | 0.34006  | 4.18E-14 | 0.498488 |
| 0.246313 | 6.97E-08 | 0.363389 | 5.03E-16 | 0.245871 | 7.37E-08 | 0.37722  | 3.07E-17 | 0.512588 |
| 0.15823  | 0.0006   | -0.14026 | 0.00238  | 0.137931 | 0.00282  | -0.07438 | 0.10843  | -0.01888 |
| -0.00602 | 0.89673  | 0.115908 | 0.01219  | 0.125652 | 0.00655  | 0.207534 | 6.12E-06 | 0.236279 |
| 0.280153 | 7.19E-10 | 0.278316 | 9.38E-10 | 0.259815 | 1.21E-08 | 0.177645 | 0.00011  | 0.363656 |
| -0.2591  | 1.33E-08 | -0.19862 | 1.53E-05 | -0.1785  | 0.00011  | -0.10909 | 0.01836  | 0.157667 |
| -0.07267 | 0.11682  | 0.013652 | 0.76857  | 0.00331  | 0.94314  | -0.01633 | 0.72479  | 0.187159 |
| 0.065711 | 0.15626  | -0.24747 | 6.03E-08 | -0.11349 | 0.01413  | -0.01631 | 0.72525  | -0.27138 |
| 0.223509 | 1.07E-06 | 0.271716 | 2.39E-09 | 0.239023 | 1.72E-07 | 0.237204 | 2.14E-07 | 0.468552 |
| 0.024133 | 0.60292  | -0.1017  | 0.02798  | -0.09861 | 0.03313  | 0.002531 | 0.9565   | 0.07889  |
| -0.17013 | 0.00022  | 0.16642  | 0.0003   | 0.055922 | 0.22775  | 0.091952 | 0.04703  | 0.404691 |



|          |          |          |          |          |          |          |          |          |
|----------|----------|----------|----------|----------|----------|----------|----------|----------|
| 0.197914 | 1.65E-05 | 0.267355 | 4.38E-09 | 0.263506 | 7.40E-09 | 0.193875 | 2.46E-05 | 0.367197 |
| -0.14936 | 0.00121  | -0.01618 | 0.72729  | 0.0011   | 0.98109  | 0.064911 | 0.16138  | 0.35872  |
| -0.00612 | 0.89512  | 0.057865 | 0.21197  | 0.052717 | 0.25555  | 0.039969 | 0.38881  | 0.198094 |
| 0.201628 | 1.13E-05 | 0.094707 | 0.04078  | 0.150466 | 0.00111  | -0.00204 | 0.96492  | -0.09956 |
| -0.17178 | 0.00019  | -0.15892 | 0.00057  | -0.02492 | 0.59118  | -0.24238 | 1.14E-07 | -0.16917 |
| -0.03178 | 0.49324  | 0.076344 | 0.09939  | 0.053766 | 0.24621  | -0.00693 | 0.88123  | 0.066394 |
| 0.174077 | 0.00016  | 0.218349 | 1.90E-06 | 0.236701 | 2.28E-07 | 0.169841 | 0.00023  | 0.33188  |
| 0.110082 | 0.01732  | 0.138807 | 0.00265  | 0.153819 | 0.00085  | -0.03008 | 0.51669  | 0.033087 |
| 0.034697 | 0.45445  | 0.125435 | 0.00664  | 0.035326 | 0.4463   | 0.424284 | 7.87E-22 | 0.450005 |
| 0.077129 | 0.09596  | 0.200764 | 1.23E-05 | 0.112949 | 0.0146   | 0.128596 | 0.00538  | 0.364551 |
| 0.197119 | 1.78E-05 | 0.293266 | 1.03E-10 | 0.21905  | 1.76E-06 | 0.187678 | 4.48E-05 | 0.292689 |
| -0.26153 | 9.66E-09 | -0.18014 | 9.06E-05 | -0.27747 | 1.06E-09 | -0.13662 | 0.00309  | -0.03763 |
| 0.116406 | 0.01182  | 0.077805 | 0.09307  | 0.205932 | 7.24E-06 | -0.02807 | 0.54507  | 0.110002 |
| 0.124222 | 0.0072   | 0.030334 | 0.51316  | 0.036051 | 0.43703  | 0.054049 | 0.24372  | 0.092536 |
| -0.20203 | 1.08E-05 | -0.03577 | 0.44058  | -0.10947 | 0.01796  | -0.00433 | 0.92564  | 0.208051 |
| -0.0894  | 0.05353  | 0.107784 | 0.01982  | -0.00875 | 0.85034  | 0.061923 | 0.1816   | 0.324072 |
| -0.00875 | 0.85043  | 0.172567 | 0.00018  | 0.017418 | 0.70735  | 0.152298 | 0.00096  | 0.333894 |
| -0.13699 | 0.00301  | 0.055833 | 0.22848  | 0.031588 | 0.49589  | 0.024325 | 0.60005  | 0.145854 |
| -0.05606 | 0.22658  | 0.025374 | 0.58441  | -0.01168 | 0.80116  | 0.017116 | 0.71218  | 0.08671  |
| -0.16326 | 0.0004   | -0.193   | 2.68E-05 | -0.11422 | 0.01352  | -0.16022 | 0.00051  | -0.07113 |
| 0.002774 | 0.95233  | 0.068495 | 0.13942  | 0.008451 | 0.85548  | 0.032943 | 0.47758  | 0.147034 |
| -0.10506 | 0.02317  | 0.005884 | 0.89908  | -0.0632  | 0.17274  | 0.006244 | 0.89295  | 0.190601 |
| 0.037407 | 0.41996  | 0.048912 | 0.29152  | 0.013007 | 0.77921  | 0.103177 | 0.02577  | 0.070458 |
| -0.23988 | 1.55E-07 | -0.27779 | 1.01E-09 | -0.22078 | 1.45E-06 | -0.34944 | 7.39E-15 | -0.35241 |
| 0.048302 | 0.29758  | 0.141897 | 0.00211  | 0.143939 | 0.00182  | 0.052239 | 0.2599   | 0.145066 |
| -0.30637 | 1.32E-11 | -0.21265 | 3.55E-06 | -0.4856  | 5.30E-29 | -0.14251 | 0.00202  | 0.05003  |
| 0.103031 | 0.02598  | 0.221054 | 1.41E-06 | -0.05454 | 0.2395   | 0.107428 | 0.02023  | 0.303975 |
| 0.203033 | 9.78E-06 | 0.476561 | 7.48E-28 | 0.335709 | 9.15E-14 | 0.271677 | 2.40E-09 | 0.488322 |
| 0.08369  | 0.07078  | 0.276163 | 1.28E-09 | 0.251979 | 3.39E-08 | 0.087083 | 0.06005  | 0.15734  |
| 0.071445 | 0.12313  | 0.144551 | 0.00174  | 0.157184 | 0.00065  | -0.09408 | 0.04213  | -0.01884 |
| -0.30055 | 3.32E-11 | -0.17508 | 0.00014  | -0.22097 | 1.42E-06 | -0.17726 | 0.00012  | 0.026194 |
| -0.05172 | 0.26464  | 0.111589 | 0.01584  | 0.090776 | 0.04994  | 0.135173 | 0.00343  | 0.2684   |
| -0.08399 | 0.06977  | -0.07434 | 0.10862  | 0.026607 | 0.56627  | -0.04384 | 0.34452  | -0.07813 |
| 0.02966  | 0.52257  | 0.037705 | 0.41626  | 0.068984 | 0.13661  | 0.052506 | 0.25746  | 0.182034 |
| -0.06715 | 0.14736  | 0.174956 | 0.00014  | 0.131087 | 0.00455  | 0.077681 | 0.09359  | 0.167364 |
| 0.102144 | 0.0273   | 0.249994 | 4.37E-08 | 0.158119 | 0.0006   | 0.016982 | 0.71435  | 0.116182 |
| 0.204944 | 8.03E-06 | 0.216092 | 2.44E-06 | 0.078811 | 0.0889   | 0.251253 | 3.72E-08 | 0.388825 |
| -0.04981 | 0.28274  | 0.150251 | 0.00113  | 0.11688  | 0.01148  | 0.097776 | 0.03466  | 0.286867 |
| 0.376321 | 3.70E-17 | 0.381148 | 1.35E-17 | 0.410125 | 2.26E-20 | 0.249475 | 4.67E-08 | 0.376308 |
| 0.082635 | 0.07442  | -0.01609 | 0.72867  | 0.035602 | 0.44275  | -0.13621 | 0.00318  | -0.14558 |
| -0.05843 | 0.20756  | 0.050414 | 0.27693  | -0.05418 | 0.24255  | 0.014355 | 0.75702  | 0.236296 |
| 0.322836 | 8.67E-13 | 0.337134 | 7.08E-14 | 0.257533 | 1.64E-08 | 0.256278 | 1.94E-08 | 0.5692   |
| -0.08635 | 0.06224  | -0.06209 | 0.18041  | -0.09125 | 0.04874  | -0.02306 | 0.61911  | 0.064949 |
| -0.08093 | 0.08063  | -0.09985 | 0.03097  | -0.14485 | 0.0017   | 0.064482 | 0.16417  | 0.011315 |
| -0.06998 | 0.13105  | 0.125915 | 0.00644  | 0.091114 | 0.04909  | 0.071762 | 0.12147  | 0.176895 |

|          |          |          |          |          |          |          |          |          |
|----------|----------|----------|----------|----------|----------|----------|----------|----------|
| 0.422066 | 1.35E-21 | 0.558019 | 1.41E-39 | 0.475043 | 1.16E-27 | 0.385224 | 5.72E-18 | 0.597654 |
| 0.092624 | 0.04544  | 0.065634 | 0.15675  | 0.085844 | 0.0638   | 0.146251 | 0.00153  | 0.021549 |
| 0.000627 | 0.98922  | 0.306798 | 1.23E-11 | 0.182029 | 7.61E-05 | 0.134091 | 0.0037   | 0.267082 |
| -0.0241  | 0.60345  | 0.153327 | 0.00089  | 0.126853 | 0.00605  | 0.118427 | 0.01043  | 0.157956 |
| 0.152041 | 0.00098  | 0.357561 | 1.57E-15 | 0.323756 | 7.41E-13 | 0.151568 | 0.00102  | 0.336865 |
| 0.020952 | 0.65155  | -0.09034 | 0.05105  | -0.16828 | 0.00026  | -0.061   | 0.18819  | -0.13146 |
| -0.10166 | 0.02804  | -0.04171 | 0.36852  | -0.11606 | 0.01208  | 0.051594 | 0.26583  | 0.229214 |
| 0.015023 | 0.74608  | -0.05473 | 0.23779  | -0.11917 | 0.00995  | 0.102602 | 0.02661  | 0.168968 |
| -0.19769 | 1.68E-05 | 0.015707 | 0.73496  | -0.11972 | 0.00961  | 0.021123 | 0.6489   | 0.255203 |
| -0.12806 | 0.00558  | 0.001252 | 0.97848  | -0.16365 | 0.00038  | 0.126108 | 0.00636  | 0.286561 |
| 0.024202 | 0.60189  | -0.03046 | 0.51147  | -0.05423 | 0.2421   | 0.28704  | 2.62E-10 | 0.041122 |
| -0.08757 | 0.05862  | -0.03057 | 0.50989  | -0.16628 | 0.00031  | -0.03497 | 0.45086  | 0.159788 |
| 0.114462 | 0.01332  | 0.326243 | 4.83E-13 | 0.234855 | 2.84E-07 | 0.093136 | 0.04425  | 0.215249 |
| 0.128752 | 0.00533  | 0.225538 | 8.46E-07 | 0.198292 | 1.58E-05 | 0.254292 | 2.51E-08 | 0.314652 |
| 0.015641 | 0.73602  | 0.057835 | 0.21221  | 0.084127 | 0.06932  | 0.067912 | 0.14283  | 0.111646 |
| -0.10429 | 0.02421  | 0.008835 | 0.84898  | -0.06175 | 0.18279  | 0.072894 | 0.11569  | 0.274116 |
| 0.093528 | 0.04337  | 0.317852 | 2.01E-12 | 0.321335 | 1.12E-12 | 0.17297  | 0.00017  | 0.32669  |
| 0.061298 | 0.18605  | 0.041213 | 0.37421  | 0.060101 | 0.19481  | 0.078008 | 0.09222  | 0.125524 |
| 0.185777 | 5.37E-05 | 0.246363 | 6.93E-08 | 0.281812 | 5.65E-10 | 0.153396 | 0.00088  | 0.19808  |
| 0.097667 | 0.03486  | 0.306755 | 1.24E-11 | 0.274704 | 1.57E-09 | 0.110038 | 0.01737  | 0.172711 |
| -0.07522 | 0.10448  | 0.119716 | 0.00961  | 0.085931 | 0.06353  | 0.018031 | 0.69755  | 0.185824 |
| 0.027414 | 0.55456  | 0.239875 | 1.55E-07 | 0.165621 | 0.00033  | 0.119489 | 0.00975  | 0.348952 |
| 0.039075 | 0.39952  | 0.164459 | 0.00036  | 0.022253 | 0.63148  | 0.083261 | 0.07224  | 0.175409 |
| 0.00284  | 0.9512   | 0.157224 | 0.00065  | 0.137544 | 0.0029   | 0.076901 | 0.09694  | 0.219527 |
| 0.142064 | 0.00209  | 0.154113 | 0.00083  | 0.11745  | 0.01108  | 0.192852 | 2.72E-05 | 0.309042 |
| -0.04432 | 0.33925  | 0.121631 | 0.00851  | 0.091532 | 0.04806  | 0.041352 | 0.3726   | 0.133114 |
| 0.199911 | 1.35E-05 | 0.238455 | 1.84E-07 | 0.189748 | 3.67E-05 | 0.063351 | 0.17171  | 0.164089 |
| -0.18718 | 4.70E-05 | 0.077781 | 0.09317  | -0.02131 | 0.64604  | -0.03819 | 0.41032  | 0.083263 |
| 0.264509 | 6.46E-09 | 0.497993 | 1.23E-30 | 0.306938 | 1.21E-11 | 0.267116 | 4.52E-09 | 0.46923  |
| 0.400567 | 2.00E-19 | 0.550873 | 2.04E-38 | 0.459127 | 9.98E-26 | 0.41338  | 1.06E-20 | 0.538886 |
| -0.26501 | 6.04E-09 | -0.07275 | 0.1164   | -0.0805  | 0.08225  | -0.13648 | 0.00312  | 0.041006 |
| -0.09474 | 0.0407   | -0.02194 | 0.63627  | -0.09347 | 0.04349  | 0.05422  | 0.24223  | 0.295364 |
| -0.07138 | 0.12348  | 0.097187 | 0.03577  | 0.020911 | 0.65219  | 0.031419 | 0.4982   | 0.221454 |
| 0.024412 | 0.59875  | 0.17054  | 0.00021  | 0.104163 | 0.02438  | 0.097998 | 0.03424  | 0.269784 |
| -0.13068 | 0.00468  | -0.0603  | 0.19334  | -0.09786 | 0.03451  | -0.03968 | 0.39228  | 0.117358 |
| 0.257828 | 1.58E-08 | 0.440131 | 1.51E-23 | 0.390142 | 1.99E-18 | 0.251366 | 3.67E-08 | 0.557557 |
| 0.042462 | 0.35989  | 0.195615 | 2.07E-05 | 0.100602 | 0.02973  | 0.183651 | 6.55E-05 | 0.393795 |
| -0.09345 | 0.04354  | 0.06784  | 0.14325  | 0.003104 | 0.94666  | 0.022093 | 0.63392  | 0.13396  |
| 0.160258 | 0.00051  | 0.154737 | 0.00079  | 0.143306 | 0.00191  | 0.207913 | 5.88E-06 | 0.191029 |
| 0.147788 | 0.00136  | 0.018662 | 0.6875   | -0.10634 | 0.02153  | 0.129986 | 0.0049   | 0.174964 |
| 0.33413  | 1.21E-13 | 0.258854 | 1.38E-08 | 0.24321  | 1.03E-07 | 0.301026 | 3.08E-11 | 0.508288 |
| 0.304779 | 1.70E-11 | 0.308149 | 9.92E-12 | 0.258848 | 1.38E-08 | 0.214983 | 2.75E-06 | 0.393744 |
| -0.19006 | 3.56E-05 | -0.10197 | 0.02757  | -0.20365 | 9.18E-06 | 0.182721 | 7.14E-05 | 0.33532  |
| -0.01099 | 0.8127   | -0.17855 | 0.0001   | -0.10703 | 0.0207   | 0.101702 | 0.02798  | 0.209597 |
| -0.15061 | 0.0011   | -0.14297 | 0.00195  | -0.12906 | 0.00522  | 0.011952 | 0.79671  | 0.067823 |

|          |          |          |          |          |          |          |          |          |
|----------|----------|----------|----------|----------|----------|----------|----------|----------|
| -0.21604 | 2.45E-06 | -0.1207  | 0.00903  | -0.17271 | 0.00018  | -0.0509  | 0.2723   | 0.20245  |
| -0.20213 | 1.07E-05 | -0.02097 | 0.65128  | -0.10018 | 0.03043  | 0.029231 | 0.52861  | 0.170112 |
| -0.1932  | 2.63E-05 | -0.10828 | 0.01925  | -0.19265 | 2.77E-05 | 0.03277  | 0.4799   | 0.320435 |
| -0.29807 | 4.89E-11 | -0.11044 | 0.01697  | -0.17395 | 0.00016  | -0.05339 | 0.24953  | 0.14537  |
| 0.048889 | 0.29174  | 0.22084  | 1.44E-06 | 0.195246 | 2.15E-05 | 0.152402 | 0.00095  | 0.247001 |
| -0.17703 | 0.00012  | -0.12734 | 0.00586  | -0.06145 | 0.18497  | -0.00212 | 0.96352  | 0.138497 |
| -0.10816 | 0.01939  | -0.00239 | 0.95896  | -0.01031 | 0.82417  | -0.01532 | 0.74127  | 0.213453 |
| 0.024353 | 0.59963  | 0.009859 | 0.83173  | 0.02219  | 0.63244  | -0.12188 | 0.00838  | -0.22373 |
| -0.2146  | 2.87E-06 | -0.03849 | 0.40668  | -0.08073 | 0.08138  | -0.06265 | 0.17653  | 0.093454 |
| 0.00099  | 0.98298  | 0.089957 | 0.05205  | 0.080227 | 0.0833   | 0.051393 | 0.2677   | 0.195079 |
| 0.013774 | 0.76656  | -0.00924 | 0.84218  | 0.04847  | 0.2959   | 0.001512 | 0.974    | 0.056634 |
| 0.129713 | 0.00499  | 0.291367 | 1.37E-10 | 0.202606 | 1.02E-05 | 0.220069 | 1.57E-06 | 0.334803 |
| 0.0654   | 0.15823  | 0.134165 | 0.00368  | 0.063542 | 0.17042  | 0.19298  | 2.68E-05 | 0.210821 |
| -0.11997 | 0.00946  | 0.011023 | 0.8122   | -0.0227  | 0.62466  | 0.06939  | 0.13431  | 0.224673 |
| -0.2523  | 3.25E-08 | -0.18311 | 6.89E-05 | -0.17606 | 0.00013  | -0.0805  | 0.08226  | 0.140479 |
| -0.17368 | 0.00016  | -0.0189  | 0.68381  | -0.05734 | 0.21613  | 0.007422 | 0.87291  | 0.257295 |
| 0.065068 | 0.16037  | 0.108996 | 0.01847  | 0.030163 | 0.51554  | 0.214471 | 2.91E-06 | 0.168091 |
| 0.032932 | 0.47774  | -0.19881 | 1.50E-05 | -0.10997 | 0.01744  | -0.1515  | 0.00102  | -0.34107 |
| -0.03933 | 0.39644  | 0.16953  | 0.00023  | 0.040507 | 0.38246  | -0.02247 | 0.62814  | 0.195636 |
| -0.05881 | 0.20463  | -0.07118 | 0.12451  | -0.04441 | 0.33828  | -0.08761 | 0.0585   | -0.00409 |
| 0.093293 | 0.0439   | 0.414357 | 8.43E-21 | 0.134512 | 0.00359  | 0.322222 | 9.62E-13 | 0.525608 |
| 0.16021  | 0.00051  | 0.033725 | 0.4672   | 0.101045 | 0.02901  | 0.014578 | 0.75337  | -0.14608 |
| -0.02121 | 0.64753  | 0.121037 | 0.00884  | -0.10078 | 0.02944  | 0.217835 | 2.01E-06 | 0.295479 |
| 0.093358 | 0.04375  | -0.23915 | 1.69E-07 | -0.09871 | 0.03295  | -0.12511 | 0.00679  | -0.33329 |
| 0.026203 | 0.57218  | 0.082215 | 0.07591  | 0.047858 | 0.30206  | 0.01825  | 0.69405  | 0.028358 |
| -0.01164 | 0.80188  | 0.006103 | 0.89536  | 0.017257 | 0.70993  | 0.131058 | 0.00456  | 0.300155 |
| -0.08945 | 0.0534   | 0.105388 | 0.02274  | 0.090924 | 0.04957  | -0.00424 | 0.92714  | -0.01304 |
| 0.226361 | 7.70E-07 | 0.374256 | 5.65E-17 | 0.155072 | 0.00077  | 0.299011 | 4.23E-11 | 0.605023 |
| 0.113672 | 0.01398  | 0.266267 | 5.08E-09 | 0.331516 | 1.93E-13 | 0.168336 | 0.00026  | 0.374776 |
| -0.24308 | 1.04E-07 | -0.23222 | 3.89E-07 | -0.23504 | 2.78E-07 | -0.04184 | 0.367    | 0.005291 |
| 0.122608 | 0.00799  | 0.192252 | 2.88E-05 | 0.223766 | 1.04E-06 | 0.051369 | 0.26792  | 0.119432 |
| -0.08837 | 0.05634  | 0.018584 | 0.68874  | 0.070738 | 0.12689  | 0.093557 | 0.0433   | 0.282961 |
| 0.285635 | 3.23E-10 | 0.214858 | 2.79E-06 | 0.297679 | 5.20E-11 | 0.285992 | 3.06E-10 | 0.33184  |
| 0.248242 | 5.46E-08 | 0.329511 | 2.74E-13 | 0.243944 | 9.38E-08 | 0.193012 | 2.68E-05 | 0.394614 |
| 0.065761 | 0.15595  | 0.182346 | 7.39E-05 | 0.125811 | 0.00648  | 0.187209 | 4.68E-05 | 0.460554 |
| 0.033548 | 0.46953  | 0.111596 | 0.01584  | 0.074368 | 0.10849  | 0.065692 | 0.15638  | 0.165112 |
| 0.140405 | 0.00236  | 0.102423 | 0.02688  | 0.237798 | 1.99E-07 | 0.147517 | 0.00139  | 0.128419 |
| 0.006199 | 0.89371  | 0.226857 | 7.27E-07 | 0.173048 | 0.00017  | 0.117123 | 0.01131  | 0.39715  |
| 0.063185 | 0.17284  | 0.202345 | 1.05E-05 | 0.167032 | 0.00029  | 0.18163  | 7.90E-05 | 0.416103 |
| -0.02589 | 0.57674  | 0.061251 | 0.18639  | 0.081905 | 0.07702  | 0.063107 | 0.17337  | 0.267589 |
| 0.142592 | 0.00201  | 0.239581 | 1.61E-07 | -0.02351 | 0.61238  | 0.244163 | 9.12E-08 | 0.313415 |
| 0.210635 | 4.41E-06 | 0.050551 | 0.27563  | 0.006843 | 0.88274  | 0.230389 | 4.82E-07 | 0.34739  |
| 0.153808 | 0.00085  | 0.300239 | 3.49E-11 | 0.178323 | 0.00011  | 0.173883 | 0.00016  | 0.298632 |
| 0.021314 | 0.64593  | 0.140404 | 0.00236  | 0.16425  | 0.00036  | 0.104832 | 0.02348  | 0.300806 |
| 0.108201 | 0.01934  | 0.052516 | 0.25737  | 0.03933  | 0.39645  | 0.11883  | 0.01016  | 0.037524 |

|          |          |          |          |          |          |          |          |          |
|----------|----------|----------|----------|----------|----------|----------|----------|----------|
| 0.009072 | 0.84498  | 0.040616 | 0.38118  | 0.039219 | 0.39778  | 0.06923  | 0.13521  | 0.062489 |
| 0.02624  | 0.57165  | -0.04852 | 0.29538  | 0.033109 | 0.47538  | -0.05124 | 0.26915  | -0.23109 |
| 0.124733 | 0.00696  | -0.21624 | 2.40E-06 | -0.1856  | 5.45E-05 | 0.018217 | 0.69457  | -0.16232 |
| 0.064378 | 0.16485  | 0.270047 | 3.02E-09 | 0.198576 | 1.54E-05 | 0.248335 | 5.40E-08 | 0.492679 |
| -0.12147 | 0.0086   | -0.05138 | 0.26785  | -0.01331 | 0.77413  | -0.07016 | 0.13005  | 0.228949 |
| 0.072694 | 0.1167   | 0.190549 | 3.40E-05 | 0.120986 | 0.00887  | 0.091925 | 0.0471   | 0.150812 |
| -0.06093 | 0.18872  | 0.047968 | 0.30094  | 0.050655 | 0.27464  | 0.053577 | 0.24787  | 0.217691 |
| -0.00089 | 0.98475  | 0.070621 | 0.12752  | 0.021451 | 0.64381  | 0.085225 | 0.06575  | 0.249952 |
| 0.081199 | 0.07962  | -0.05296 | 0.25338  | 0.003984 | 0.93158  | -0.12733 | 0.00586  | -0.19128 |
| 0.162536 | 0.00042  | 0.22727  | 6.93E-07 | 0.233255 | 3.44E-07 | 0.096971 | 0.03618  | 0.303551 |
| 0.104173 | 0.02437  | 0.220882 | 1.43E-06 | 0.231712 | 4.13E-07 | 0.043648 | 0.34662  | 0.197958 |
| -0.07869 | 0.08941  | -0.01879 | 0.68551  | 0.022578 | 0.6265   | 0.049502 | 0.28573  | 0.025982 |
| -0.17984 | 9.31E-05 | -0.14193 | 0.00211  | -0.12876 | 0.00533  | -0.121   | 0.00886  | 0.028024 |
| -0.06224 | 0.17939  | 0.160162 | 0.00051  | 0.159145 | 0.00056  | 0.06329  | 0.17212  | 0.032857 |
| 0.015965 | 0.73076  | -0.20731 | 6.27E-06 | -0.106   | 0.02196  | -0.02779 | 0.54919  | 0.149825 |
| 0.028248 | 0.54257  | 0.320636 | 1.26E-12 | 0.268367 | 3.81E-09 | 0.074101 | 0.10977  | 0.191163 |
| -0.0087  | 0.85129  | -0.11053 | 0.01687  | 0.00022  | 0.99622  | -0.09303 | 0.04449  | -0.132   |
| 0.091352 | 0.0485   | 0.224577 | 9.44E-07 | 0.206963 | 6.50E-06 | 0.13692  | 0.00303  | 0.142358 |
| -0.18736 | 4.62E-05 | -0.06434 | 0.1651   | -0.01639 | 0.72392  | -0.15481 | 0.00079  | 0.031935 |
| -0.20087 | 1.22E-05 | -0.06383 | 0.16849  | -0.15048 | 0.00111  | -0.02806 | 0.54523  | 0.273193 |
| 0.031692 | 0.49447  | -0.08716 | 0.05981  | -0.20313 | 9.69E-06 | 0.00695  | 0.88093  | -0.02516 |
| -0.01088 | 0.81467  | 0.080402 | 0.08262  | 0.029714 | 0.52182  | 0.005709 | 0.90208  | 0.105408 |
| -0.05511 | 0.23455  | -0.21435 | 2.95E-06 | -0.07649 | 0.09875  | -0.02243 | 0.62877  | -0.16021 |
| -0.31171 | 5.56E-12 | -0.40164 | 1.57E-19 | -0.38834 | 2.93E-18 | -0.17558 | 0.00014  | -0.043   |
| -0.01479 | 0.74995  | 0.01467  | 0.75186  | 0.022871 | 0.62202  | 0.133134 | 0.00395  | 0.333597 |
| 0.05736  | 0.21599  | -0.21699 | 2.21E-06 | -0.16513 | 0.00034  | -0.08235 | 0.07545  | -0.16868 |
| -0.0548  | 0.23721  | 0.145616 | 0.0016   | 0.017243 | 0.71015  | 0.123367 | 0.00761  | 0.355331 |
| 0.097983 | 0.03427  | 0.197706 | 1.68E-05 | 0.133917 | 0.00374  | 0.073215 | 0.11409  | 0.199649 |
| 0.202611 | 1.02E-05 | 0.368639 | 1.77E-16 | 0.260554 | 1.10E-08 | 0.37821  | 2.50E-17 | 0.600022 |
| 0.138117 | 0.00278  | 0.036642 | 0.42954  | 0.104465 | 0.02397  | 0.018384 | 0.69192  | -0.05187 |
| -0.05798 | 0.21109  | -0.05845 | 0.20737  | -0.15414 | 0.00083  | 0.083523 | 0.07135  | 0.215188 |
| -0.03089 | 0.50545  | 0.05981  | 0.19698  | -0.00386 | 0.93367  | 0.042206 | 0.3628   | 0.023217 |
| 0.139209 | 0.00257  | 0.135322 | 0.00339  | 0.187242 | 4.67E-05 | 0.015244 | 0.74249  | 0.008283 |
| 0.050138 | 0.27957  | 0.107713 | 0.0199   | -0.10039 | 0.03007  | 0.210646 | 4.40E-06 | 0.457455 |
| 0.2192   | 1.73E-06 | 0.395855 | 5.71E-19 | 0.301077 | 3.06E-11 | 0.263584 | 7.32E-09 | 0.532742 |
| 0.169649 | 0.00023  | 0.392232 | 1.26E-18 | 0.219115 | 1.75E-06 | 0.117319 | 0.01117  | 0.241471 |
| 0.056484 | 0.2231   | 0.278755 | 8.80E-10 | 0.234205 | 3.07E-07 | 0.083487 | 0.07147  | 0.276031 |
| 0.053523 | 0.24835  | 0.124503 | 0.00706  | 0.098398 | 0.03351  | 0.047329 | 0.30744  | 0.03855  |
| -0.10262 | 0.02658  | 0.057752 | 0.21287  | -0.03954 | 0.39391  | 0.043762 | 0.34537  | 0.238432 |
| 0.078815 | 0.08889  | 0.188544 | 4.12E-05 | 0.029842 | 0.52002  | 0.165341 | 0.00033  | 0.399662 |
| 0.00014  | 0.99759  | 0.192738 | 2.75E-05 | 0.087355 | 0.05925  | 0.231634 | 4.17E-07 | 0.520021 |
| -0.05898 | 0.20331  | -0.00743 | 0.87282  | -0.2481  | 5.56E-08 | -0.00028 | 0.99512  | 0.133981 |
| -0.1177  | 0.01091  | -0.18997 | 3.60E-05 | -0.23184 | 4.07E-07 | 0.033886 | 0.46507  | 0.073328 |
| 0.041286 | 0.37336  | 0.199795 | 1.36E-05 | 0.097954 | 0.03433  | 0.096476 | 0.03715  | 0.257697 |
| 0.269333 | 3.33E-09 | 0.531379 | 2.18E-35 | 0.356996 | 1.75E-15 | 0.37793  | 2.65E-17 | 0.603229 |

|          |          |          |          |          |          |          |          |          |
|----------|----------|----------|----------|----------|----------|----------|----------|----------|
| -0.00186 | 0.96808  | 0.283586 | 4.36E-10 | 0.237591 | 2.04E-07 | 0.064891 | 0.16151  | 0.323534 |
| 0.132351 | 0.00417  | 0.480055 | 2.71E-28 | 0.207103 | 6.41E-06 | 0.240616 | 1.41E-07 | 0.333137 |
| -0.0301  | 0.51643  | 0.056736 | 0.22104  | -0.00086 | 0.98519  | 0.097277 | 0.03559  | 0.242063 |
| -0.08546 | 0.06499  | 0.078258 | 0.09118  | 0.075212 | 0.10453  | 0.074911 | 0.10593  | 0.294139 |
| -0.14855 | 0.00128  | -0.10539 | 0.02274  | -0.13725 | 0.00296  | -0.03984 | 0.39033  | 0.109778 |
| 0.036145 | 0.43583  | 0.366434 | 2.75E-16 | 0.155372 | 0.00075  | 0.125249 | 0.00673  | 0.394488 |
| -0.13349 | 0.00385  | -0.15774 | 0.00062  | -0.16621 | 0.00031  | -0.10343 | 0.02541  | -0.16125 |
| -0.30216 | 2.58E-11 | -0.23529 | 2.70E-07 | -0.19243 | 2.83E-05 | -0.19076 | 3.33E-05 | -0.12196 |
| -0.37718 | 3.10E-17 | -0.39986 | 2.34E-19 | -0.38353 | 8.20E-18 | -0.14075 | 0.0023   | -0.0916  |
| 0.182854 | 7.05E-05 | 0.390143 | 1.99E-18 | 0.351623 | 4.89E-15 | 0.309931 | 7.43E-12 | 0.520291 |
| -0.01305 | 0.77853  | 0.004264 | 0.92678  | 0.000891 | 0.98468  | -0.01728 | 0.7095   | -0.03629 |
| -0.01328 | 0.77469  | 0.162764 | 0.00041  | 0.081132 | 0.07987  | 0.134099 | 0.00369  | 0.356264 |
| 0.126333 | 0.00626  | 0.225252 | 8.74E-07 | 0.264713 | 6.28E-09 | 0.044507 | 0.3372   | 0.208401 |
| 0.005325 | 0.90862  | 0.170473 | 0.00021  | 0.152959 | 0.00091  | -0.03318 | 0.47446  | 0.059814 |
| -0.00695 | 0.88086  | 0.214821 | 2.80E-06 | 0.130357 | 0.00478  | -0.10477 | 0.02356  | 0.212277 |
| -0.02387 | 0.60696  | -0.01509 | 0.74501  | -0.04557 | 0.32575  | 0.013921 | 0.76414  | 0.180845 |
| 0.146223 | 0.00153  | 0.3045   | 1.78E-11 | 0.296385 | 6.35E-11 | 0.10165  | 0.02806  | 0.116699 |
| 0.104563 | 0.02384  | 0.381466 | 1.27E-17 | 0.187326 | 4.63E-05 | 0.153544 | 0.00087  | 0.384026 |
| 0.102118 | 0.02734  | 0.219519 | 1.67E-06 | 0.203448 | 9.37E-06 | 0.037574 | 0.41789  | 0.202793 |
| -0.01976 | 0.67019  | 0.118853 | 0.01015  | -0.01319 | 0.77613  | 0.153248 | 0.00089  | 0.347946 |
| -0.09064 | 0.05029  | 0.047598 | 0.30469  | -0.01362 | 0.76915  | 0.058661 | 0.20574  | 0.277339 |
| 0.25672  | 1.83E-08 | 0.27661  | 1.20E-09 | 0.159944 | 0.00052  | 0.256528 | 1.88E-08 | 0.355071 |
| 0.103358 | 0.02551  | 0.149043 | 0.00124  | 0.055099 | 0.23467  | 0.220958 | 1.42E-06 | 0.422284 |
| -0.02166 | 0.64059  | 0.05152  | 0.26652  | -0.06503 | 0.16062  | 0.054232 | 0.24213  | 0.377847 |
| 0.069201 | 0.13537  | 0.057446 | 0.21531  | 0.050954 | 0.27182  | -0.12526 | 0.00672  | -0.22544 |
| -0.13343 | 0.00387  | -0.1425  | 0.00202  | -0.23051 | 4.75E-07 | -0.06967 | 0.13275  | 0.015297 |
| -0.01256 | 0.78662  | -0.09592 | 0.03826  | -0.1218  | 0.00841  | 0.025621 | 0.58076  | 0.100982 |
| 0.053978 | 0.24434  | 0.148766 | 0.00126  | 0.139373 | 0.00254  | -0.0499  | 0.28188  | 0.11499  |
| 0.10099  | 0.0291   | 0.16078  | 0.00049  | 0.169067 | 0.00024  | 0.174566 | 0.00015  | 0.193197 |
| 0.125145 | 0.00677  | 0.107894 | 0.01969  | 0.058372 | 0.20799  | -0.06707 | 0.14786  | 0.052202 |
| -0.15163 | 0.00101  | -0.14736 | 0.00141  | -0.14178 | 0.00213  | -0.08266 | 0.07432  | -0.07875 |
| -0.07844 | 0.09042  | -0.09111 | 0.0491   | -0.07117 | 0.12459  | -0.05656 | 0.2225   | 0.085743 |
| 0.035963 | 0.43814  | 0.039666 | 0.39243  | 0.065544 | 0.15732  | 0.128187 | 0.00553  | 0.306387 |
| 0.071032 | 0.12532  | 0.167311 | 0.00028  | 0.166624 | 0.0003   | 0.091028 | 0.0493   | 0.13875  |
| -0.00604 | 0.89638  | 0.247967 | 5.66E-08 | 0.264069 | 6.85E-09 | 0.00187  | 0.96786  | 0.132141 |
| 0.000712 | 0.98776  | 0.178334 | 0.00011  | 0.090764 | 0.04997  | 0.101339 | 0.02854  | 0.23951  |
| 0.200032 | 1.33E-05 | 0.300461 | 3.37E-11 | 0.323251 | 8.07E-13 | 0.193708 | 2.50E-05 | 0.514909 |
| 0.054864 | 0.23668  | 0.064329 | 0.16518  | 0.044963 | 0.33228  | 0.14184  | 0.00212  | 0.174488 |
| -0.1858  | 5.35E-05 | -0.03085 | 0.50609  | -0.14947 | 0.0012   | -0.16262 | 0.00042  | -0.10015 |
| -0.07407 | 0.10991  | 0.038627 | 0.40495  | 0.03259  | 0.48232  | 0.045263 | 0.32905  | 0.232264 |
| 0.019807 | 0.66943  | 0.223208 | 1.10E-06 | 0.150984 | 0.00106  | 0.075171 | 0.10472  | 0.151798 |
| -0.02782 | 0.54873  | -0.03824 | 0.40963  | -0.23624 | 2.41E-07 | 0.146484 | 0.0015   | 0.114234 |
| -0.1791  | 9.96E-05 | -0.04908 | 0.28988  | -0.07411 | 0.10973  | 0.001993 | 0.96573  | 0.170519 |
| 0.060036 | 0.1953   | 0.232686 | 3.68E-07 | 0.087125 | 0.05993  | 0.133464 | 0.00386  | 0.371924 |
| 0.260633 | 1.09E-08 | 0.19087  | 3.30E-05 | 0.188309 | 4.22E-05 | 0.216398 | 2.36E-06 | 0.214843 |

|          |          |          |          |           |          |          |          |          |
|----------|----------|----------|----------|-----------|----------|----------|----------|----------|
| 0.022784 | 0.62335  | 0.297267 | 5.54E-11 | 0.192718  | 2.75E-05 | 0.199181 | 1.45E-05 | 0.107402 |
| -0.09851 | 0.03332  | 0.039383 | 0.39581  | -0.02552  | 0.58218  | 0.057165 | 0.21756  | 0.244746 |
| -0.14722 | 0.00142  | -0.13851 | 0.0027   | -0.13947  | 0.00252  | -0.05787 | 0.21189  | 0.064899 |
| -0.21182 | 3.88E-06 | 0.024424 | 0.59856  | -0.06052  | 0.19169  | 0.012868 | 0.78151  | 0.180706 |
| -0.2011  | 1.19E-05 | -0.08606 | 0.06315  | -0.11079  | 0.01661  | -0.00657 | 0.88748  | 0.175816 |
| 0.011624 | 0.80217  | 0.086459 | 0.06192  | 0.031108  | 0.50247  | 0.106815 | 0.02096  | 0.116201 |
| 0.311449 | 5.80E-12 | 0.518386 | 1.78E-33 | 0.355424  | 2.37E-15 | 0.328644 | 3.18E-13 | 0.573829 |
| -0.21961 | 1.65E-06 | -0.21392 | 3.09E-06 | -0.1848   | 5.88E-05 | -0.05324 | 0.25086  | 0.123016 |
| -0.0723  | 0.11869  | -0.10258 | 0.02665  | -0.08022  | 0.08333  | 0.069371 | 0.13442  | 0.199734 |
| 0.11704  | 0.01137  | 0.176479 | 0.00013  | 0.203785  | 9.05E-06 | -0.07708 | 0.09617  | 0.054267 |
| 0.25169  | 3.52E-08 | 0.450636 | 9.78E-25 | 0.28107   | 6.30E-10 | 0.270558 | 2.81E-09 | 0.518778 |
| 0.047517 | 0.30551  | 0.141763 | 0.00213  | 0.094665  | 0.04087  | 0.157873 | 0.00062  | 0.2776   |
| 0.000317 | 0.99454  | 0.174254 | 0.00015  | 0.163668  | 0.00038  | 0.051563 | 0.26612  | 0.165238 |
| -0.07092 | 0.12593  | 0.09934  | 0.03185  | 0.059192  | 0.20166  | 0.075406 | 0.10364  | 0.213368 |
| -0.02757 | 0.55231  | 0.124106 | 0.00725  | -9.00E-05 | 0.99845  | 0.117261 | 0.01121  | 0.405731 |
| -0.27523 | 1.46E-09 | -0.05413 | 0.24299  | -0.13153  | 0.00441  | -0.10104 | 0.02901  | 0.133254 |
| 0.158444 | 0.00059  | 0.121644 | 0.0085   | 0.052814  | 0.25468  | 0.273968 | 1.74E-09 | 0.337471 |
| -0.15541 | 0.00075  | -0.17101 | 0.0002   | -0.18034  | 8.89E-05 | -0.04985 | 0.28233  | -0.0548  |
| -0.12898 | 0.00525  | 0.17774  | 0.00011  | 0.088821  | 0.0551   | 0.050279 | 0.27823  | 0.154432 |
| -0.24279 | 1.08E-07 | -0.11414 | 0.01359  | -0.11462  | 0.01319  | -0.05945 | 0.19968  | -0.04668 |
| -0.00887 | 0.84835  | -0.06119 | 0.18681  | -0.11648  | 0.01177  | -0.01169 | 0.801    | 0.060321 |
| 0.089412 | 0.05349  | 0.295622 | 7.15E-11 | 0.277242  | 1.09E-09 | 0.231    | 4.49E-07 | 0.48755  |
| 0.381223 | 1.33E-17 | 0.437313 | 3.10E-23 | 0.215794  | 2.52E-06 | 0.263789 | 7.12E-09 | 0.43646  |
| 0.041225 | 0.37407  | -0.11408 | 0.01364  | -0.04487  | 0.33324  | -0.17636 | 0.00013  | -0.13299 |
| -0.08579 | 0.06396  | 0.015073 | 0.74528  | -0.05381  | 0.24579  | 0.092316 | 0.04617  | 0.060391 |
| -0.21166 | 3.95E-06 | -0.04645 | 0.31648  | -0.11941  | 0.0098   | -0.05662 | 0.22195  | 0.099575 |
| 0.1091   | 0.01835  | 0.130863 | 0.00462  | 0.122519  | 0.00804  | 0.014615 | 0.75276  | 0.011121 |
| -0.01536 | 0.74062  | 0.152241 | 0.00097  | 0.052586  | 0.25674  | 0.092615 | 0.04546  | 0.290538 |
| 0.057468 | 0.21513  | 0.141509 | 0.00217  | 0.049132  | 0.28935  | 0.16083  | 0.00048  | 0.340321 |
| 0.055005 | 0.23547  | 0.27593  | 1.32E-09 | 0.130941  | 0.00459  | 0.149529 | 0.00119  | 0.419935 |
| -0.29134 | 1.37E-10 | -0.24969 | 4.55E-08 | -0.27026  | 2.93E-09 | -0.21226 | 3.70E-06 | -0.16807 |
| 0.25759  | 1.63E-08 | 0.225981 | 8.04E-07 | 0.013896  | 0.76455  | 0.365843 | 3.09E-16 | 0.517342 |
| 0.153381 | 0.00088  | 0.092573 | 0.04556  | 0.103118  | 0.02586  | 0.049788 | 0.28295  | -0.16511 |
| -0.15651 | 0.00069  | -0.02094 | 0.65175  | -0.09672  | 0.03666  | -0.00779 | 0.86658  | -0.03275 |
| -0.06261 | 0.17678  | -0.04061 | 0.38122  | 0.004287  | 0.92638  | 0.054984 | 0.23565  | 0.094365 |
| 0.105031 | 0.02321  | -0.00095 | 0.98365  | 0.036863  | 0.42675  | 0.085551 | 0.06472  | 0.244445 |
| 0.372107 | 8.77E-17 | 0.599455 | 6.74E-47 | 0.46089   | 6.16E-26 | 0.333767 | 1.29E-13 | 0.469765 |
| 0.076304 | 0.09957  | 0.016861 | 0.71629  | 0.038464  | 0.40694  | 0.130545 | 0.00472  | 0.334684 |
| 0.016014 | 0.72997  | -0.09049 | 0.05067  | -0.0096   | 0.83602  | -0.13165 | 0.00438  | 0.069774 |
| 0.054938 | 0.23604  | 0.143718 | 0.00185  | 0.13623   | 0.00318  | -0.01588 | 0.73214  | 0.127321 |
| -0.03003 | 0.51739  | -0.0458  | 0.3233   | -0.08695  | 0.06045  | 0.039587 | 0.39337  | 0.127701 |
| -0.31817 | 1.91E-12 | -0.19095 | 3.27E-05 | -0.23352  | 3.33E-07 | -0.15407 | 0.00084  | -0.15981 |
| -0.2808  | 6.55E-10 | -0.26857 | 3.70E-09 | -0.24679  | 6.57E-08 | -0.23403 | 3.13E-07 | -0.20034 |
| -0.06379 | 0.16874  | 0.034801 | 0.45309  | -0.06869  | 0.13827  | 0.101654 | 0.02805  | 0.266261 |
| 0.050362 | 0.27743  | -0.01187 | 0.7981   | 0.009745  | 0.83364  | 0.184579 | 6.00E-05 | 0.296776 |

|          |          |          |          |          |          |          |          |          |
|----------|----------|----------|----------|----------|----------|----------|----------|----------|
| 0.032577 | 0.4825   | 0.031391 | 0.49858  | 0.185036 | 5.75E-05 | -0.05784 | 0.2122   | -0.23197 |
| 0.002125 | 0.96347  | 0.165536 | 0.00033  | 0.183591 | 6.59E-05 | 0.064924 | 0.16129  | 0.135    |
| -0.20853 | 5.51E-06 | -0.0508  | 0.27331  | -0.12629 | 0.00628  | -0.00245 | 0.95784  | 0.190444 |
| 0.1071   | 0.02062  | 0.053908 | 0.24495  | 0.107406 | 0.02026  | 0.020314 | 0.66148  | 0.078777 |
| 0.481605 | 1.72E-28 | 0.527001 | 9.80E-35 | 0.377756 | 2.75E-17 | 0.342939 | 2.47E-14 | 0.602968 |
| -0.16211 | 0.00044  | -0.05048 | 0.27632  | -0.02647 | 0.56831  | -0.00888 | 0.8483   | 0.213148 |
| 0.042027 | 0.36485  | -0.21402 | 3.06E-06 | -0.0755  | 0.1032   | -0.12308 | 0.00775  | -0.23606 |
| 0.057743 | 0.21293  | 0.02734  | 0.55562  | 0.078954 | 0.08832  | -0.1047  | 0.02365  | 0.103121 |
| -0.05166 | 0.26518  | -0.12373 | 0.00743  | -0.08022 | 0.08331  | -0.14394 | 0.00182  | 0.025817 |
| -0.11315 | 0.01442  | -0.06592 | 0.15492  | -0.06339 | 0.17148  | -0.08868 | 0.05548  | 0.196347 |
| 0.121637 | 0.00851  | -0.0219  | 0.63691  | -0.04009 | 0.38739  | -0.01401 | 0.76268  | 0.001058 |
| -0.0497  | 0.2838   | 0.127657 | 0.00573  | 0.083241 | 0.07231  | 0.072173 | 0.11935  | 0.286912 |
| -0.05403 | 0.24393  | 0.012396 | 0.78933  | -0.07621 | 0.09999  | 0.015361 | 0.74059  | 0.027909 |
| -0.11643 | 0.01181  | -0.0125  | 0.78755  | -0.20559 | 7.50E-06 | 0.00984  | 0.83204  | 0.011572 |
| 0.229112 | 5.60E-07 | 0.393972 | 8.63E-19 | 0.27294  | 2.01E-09 | 0.200963 | 1.21E-05 | 0.43546  |
| -0.18836 | 4.20E-05 | -0.04247 | 0.35976  | -0.15858 | 0.00058  | 0.01444  | 0.75563  | 0.179844 |
| -0.14774 | 0.00137  | -0.20317 | 9.65E-06 | -0.17768 | 0.00011  | -0.10994 | 0.01747  | 0.185339 |
| 0.065253 | 0.15917  | 0.211552 | 3.99E-06 | 0.179513 | 9.59E-05 | 0.081155 | 0.07978  | 0.193855 |
| 0.328886 | 3.05E-13 | 0.26639  | 5.00E-09 | 0.120564 | 0.00911  | 0.184564 | 6.01E-05 | 0.421719 |
| 0.186824 | 4.86E-05 | 0.158108 | 0.00061  | 0.096421 | 0.03726  | 0.237886 | 1.97E-07 | 0.365281 |
| -0.09835 | 0.0336   | 0.033299 | 0.47284  | -0.01667 | 0.71934  | -0.01191 | 0.79733  | 0.190329 |
| -0.24336 | 1.01E-07 | 0.006158 | 0.89441  | -0.05169 | 0.26491  | -0.02742 | 0.55449  | 0.172482 |
| 0.07118  | 0.12453  | 0.255831 | 2.05E-08 | 0.151794 | 0.001    | 0.113314 | 0.01428  | 0.340005 |
| -0.09394 | 0.04246  | 0.079803 | 0.08495  | -0.0806  | 0.08186  | 0.088819 | 0.05511  | 0.292458 |
| 0.417283 | 4.22E-21 | 0.476647 | 7.30E-28 | 0.311619 | 5.64E-12 | 0.36899  | 1.65E-16 | 0.583309 |
| -0.027   | 0.56053  | 0.138996 | 0.00261  | 0.038077 | 0.41167  | 0.088918 | 0.05483  | 0.341839 |
| 0.337133 | 7.09E-14 | 0.400036 | 2.25E-19 | 0.317489 | 2.14E-12 | 0.158032 | 0.00061  | 0.239188 |
| 0.2697   | 3.17E-09 | 0.343979 | 2.04E-14 | 0.234114 | 3.10E-07 | 0.126881 | 0.00604  | 0.328995 |
| -0.01127 | 0.80806  | 0.170594 | 0.00021  | 0.129064 | 0.00522  | -0.07487 | 0.1061   | 0.072067 |
| 0.19499  | 2.20E-05 | 0.29531  | 7.50E-11 | 0.230887 | 4.55E-07 | 0.090882 | 0.04967  | 0.310502 |
| -0.04668 | 0.31409  | 0.135896 | 0.00326  | 0.073748 | 0.11147  | 0.077001 | 0.09651  | 0.207119 |
| 0.288542 | 2.09E-10 | 0.433876 | 7.37E-23 | 0.26465  | 6.33E-09 | 0.341331 | 3.31E-14 | 0.484077 |
| 0.009165 | 0.84341  | -0.15534 | 0.00076  | -0.12978 | 0.00497  | 0.051802 | 0.26391  | 0.05208  |
| -0.13651 | 0.00312  | 0.011707 | 0.8008   | -0.00267 | 0.95409  | -0.00614 | 0.89476  | 0.210091 |
| 0.469391 | 5.79E-27 | 0.424079 | 8.27E-22 | 0.461651 | 5.00E-26 | 0.320236 | 1.35E-12 | 0.352001 |
| -0.07627 | 0.09974  | 0.098339 | 0.03362  | 0.037876 | 0.41416  | -0.01638 | 0.72404  | 0.152028 |
| 0.187211 | 4.68E-05 | 0.460699 | 6.49E-26 | 0.340388 | 3.93E-14 | 0.362087 | 6.50E-16 | 0.431305 |
| -0.01971 | 0.67101  | 0.133759 | 0.00378  | 0.09998  | 0.03076  | 0.043438 | 0.34895  | 0.204764 |
| -0.07873 | 0.08923  | -0.30924 | 8.31E-12 | -0.15794 | 0.00061  | -0.17048 | 0.00021  | -0.1585  |
| 0.245171 | 8.05E-08 | 0.446306 | 3.06E-24 | 0.323438 | 7.82E-13 | 0.22288  | 1.15E-06 | 0.269282 |
| 0.051744 | 0.26444  | 0.17431  | 0.00015  | 0.078315 | 0.09094  | 0.154921 | 0.00078  | 0.474845 |
| -0.29657 | 6.17E-11 | -0.29996 | 3.64E-11 | -0.32775 | 3.72E-13 | -0.15372 | 0.00086  | -0.08403 |
| -0.05205 | 0.26159  | -0.02846 | 0.53954  | -0.03942 | 0.39542  | 0.001445 | 0.97516  | 0.036234 |
| -0.06405 | 0.16705  | -0.06958 | 0.13326  | -0.30287 | 2.31E-11 | 0.073834 | 0.11106  | 0.275542 |
| -0.06068 | 0.19055  | 0.054239 | 0.24206  | -0.00675 | 0.88441  | -0.16574 | 0.00032  | 0.112212 |

|          |          |          |          |          |          |          |          |          |
|----------|----------|----------|----------|----------|----------|----------|----------|----------|
| 0.105058 | 0.02318  | -0.093   | 0.04457  | 0.009846 | 0.83194  | 0.074961 | 0.10569  | 0.029519 |
| 0.133383 | 0.00388  | 0.370159 | 1.30E-16 | 0.349977 | 6.67E-15 | 0.119449 | 0.00978  | 0.249531 |
| 6.57E-06 | 0.99989  | 0.030711 | 0.50793  | 0.007087 | 0.87861  | 0.014751 | 0.75053  | 0.105828 |
| 0.148622 | 0.00128  | 0.229825 | 5.15E-07 | 0.271516 | 2.46E-09 | 0.107516 | 0.02013  | 0.073837 |
| -0.0429  | 0.35496  | -0.03855 | 0.40588  | -0.01307 | 0.77817  | 0.047574 | 0.30493  | 0.228219 |
| -0.05989 | 0.19642  | -0.00956 | 0.83682  | -0.02715 | 0.55837  | -0.03202 | 0.49002  | 0.019427 |
| -0.07463 | 0.10723  | -0.08595 | 0.06348  | -0.04127 | 0.37354  | -0.11342 | 0.01419  | 0.037764 |
| 0.07341  | 0.11313  | -0.04423 | 0.34018  | 0.058071 | 0.21035  | -0.00116 | 0.97998  | -0.22266 |
| 0.05127  | 0.26885  | 0.155279 | 0.00076  | 0.121255 | 0.00872  | 0.066951 | 0.14858  | 0.129006 |
| 0.107936 | 0.01964  | 0.1353   | 0.00339  | 0.121322 | 0.00868  | 0.059108 | 0.2023   | 0.143406 |
| 0.138796 | 0.00265  | 0.211106 | 4.19E-06 | 0.175519 | 0.00014  | -0.06802 | 0.14222  | 0.204458 |
| 0.062563 | 0.17711  | -0.05047 | 0.27637  | -0.06819 | 0.14117  | 0.063277 | 0.17221  | -0.1808  |
| -0.14381 | 0.00184  | 0.042616 | 0.35815  | 0.058375 | 0.20796  | -0.02907 | 0.53095  | 0.215095 |
| 0.162161 | 0.00043  | -0.04838 | 0.29676  | 0.011164 | 0.80984  | 0.161081 | 0.00047  | 0.108539 |
| 0.086228 | 0.06262  | 0.025502 | 0.58251  | 0.024226 | 0.60153  | -0.01515 | 0.74408  | -0.16402 |
| -0.22202 | 1.26E-06 | 0.020438 | 0.65956  | -0.05624 | 0.22511  | -0.00537 | 0.90785  | 0.207123 |
| -0.04456 | 0.3366   | 0.094088 | 0.04212  | 0.03044  | 0.51169  | 0.077408 | 0.09475  | 0.328392 |
| 0.080803 | 0.0811   | 0.121003 | 0.00886  | 0.232175 | 3.91E-07 | -0.00637 | 0.89077  | -0.04863 |
| -0.22076 | 1.45E-06 | -0.09998 | 0.03076  | -0.0978  | 0.03461  | 0.018967 | 0.68268  | 0.077241 |
| 0.114538 | 0.01326  | 0.192927 | 2.70E-05 | 0.266017 | 5.26E-09 | 0.028133 | 0.54421  | 0.164773 |
| -0.26218 | 8.85E-09 | -0.23157 | 4.20E-07 | -0.26318 | 7.74E-09 | -0.19193 | 2.97E-05 | -0.0455  |
| -0.19632 | 1.93E-05 | -0.25187 | 3.44E-08 | -0.21569 | 2.55E-06 | -0.12847 | 0.00543  | -0.14904 |
| 0.383481 | 8.28E-18 | 0.561722 | 3.44E-40 | 0.440402 | 1.41E-23 | 0.289358 | 1.85E-10 | 0.392976 |
| 0.297923 | 5.01E-11 | 0.296602 | 6.14E-11 | 0.275616 | 1.38E-09 | 0.329029 | 2.98E-13 | 0.522288 |
| -0.16009 | 0.00052  | -0.02626 | 0.5714   | -0.06479 | 0.16216  | 6.56E-06 | 0.99989  | 0.213792 |
| 0.048145 | 0.29916  | 0.224701 | 9.31E-07 | 0.123185 | 0.0077   | 0.143037 | 0.00194  | 0.38241  |
| -0.11732 | 0.01117  | -0.29108 | 1.43E-10 | -0.23705 | 2.18E-07 | -0.11658 | 0.0117   | -0.15537 |
| 0.35256  | 4.09E-15 | 0.471709 | 3.00E-27 | 0.258866 | 1.38E-08 | 0.183858 | 6.42E-05 | 0.427976 |
| 0.275577 | 1.39E-09 | 0.482102 | 1.49E-28 | 0.408214 | 3.52E-20 | 0.2416   | 1.25E-07 | 0.417351 |
| 0.034091 | 0.46237  | 0.199405 | 1.42E-05 | 0.091424 | 0.04832  | 0.143748 | 0.00184  | 0.356136 |
| -0.03618 | 0.43543  | 0.110884 | 0.01652  | 0.04298  | 0.35406  | 0.091861 | 0.04726  | 0.29474  |
| 0.008029 | 0.86262  | -0.09747 | 0.03523  | -0.09384 | 0.04268  | 0.013013 | 0.77911  | 0.0884   |
| 0.073005 | 0.11514  | 0.291751 | 1.29E-10 | 0.142481 | 0.00202  | 0.220148 | 1.56E-06 | 0.475895 |
| -0.02136 | 0.64521  | -0.14176 | 0.00213  | 0.002679 | 0.95396  | -0.048   | 0.30061  | 1.70E-05 |
| -0.0407  | 0.38014  | 0.234899 | 2.83E-07 | -0.04997 | 0.28119  | 0.085697 | 0.06426  | 0.170243 |
| -0.11432 | 0.01343  | 0.072268 | 0.11886  | -0.0211  | 0.64923  | 0.02984  | 0.52006  | 0.272189 |
| -0.2538  | 2.68E-08 | -0.1996  | 1.39E-05 | -0.22816 | 6.25E-07 | -0.13895 | 0.00262  | -0.04938 |
| -0.14423 | 0.00178  | 0.099603 | 0.0314   | 0.011693 | 0.80103  | 0.085844 | 0.0638   | 0.2827   |
| 0.049867 | 0.28219  | 0.093061 | 0.04443  | 0.231507 | 4.23E-07 | -0.00584 | 0.89976  | 0.017376 |
| 0.279469 | 7.94E-10 | 0.378719 | 2.25E-17 | 0.128216 | 0.00552  | 0.358145 | 1.40E-15 | 0.493971 |
| -0.08899 | 0.05465  | -0.02154 | 0.64242  | -0.03049 | 0.51095  | 0.084993 | 0.06649  | 0.251756 |
| 0.361682 | 7.04E-16 | 0.380468 | 1.56E-17 | 0.397435 | 4.02E-19 | 0.254518 | 2.44E-08 | 0.486613 |
| -0.02088 | 0.65265  | 0.191869 | 2.99E-05 | 0.069271 | 0.13498  | 0.100129 | 0.03051  | 0.332255 |
| 0.017246 | 0.7101   | 0.248698 | 5.16E-08 | 0.167623 | 0.00027  | 0.235044 | 2.78E-07 | 0.470683 |
| -0.00957 | 0.83667  | 0.072232 | 0.11904  | -0.08089 | 0.08078  | 0.026519 | 0.56756  | 0.277866 |



|          |          |          |          |          |          |          |          |          |
|----------|----------|----------|----------|----------|----------|----------|----------|----------|
| -0.0365  | 0.43132  | 0.177331 | 0.00012  | -0.0292  | 0.52907  | -0.0007  | 0.98804  | 0.026137 |
| -0.15556 | 0.00074  | -0.03202 | 0.48997  | -0.09478 | 0.04063  | 0.047189 | 0.30887  | 0.264709 |
| -0.09839 | 0.03353  | -0.00244 | 0.95806  | 0.004822 | 0.91723  | -0.15597 | 0.00072  | -0.08753 |
| -0.03233 | 0.48579  | 0.101136 | 0.02887  | 0.073786 | 0.11129  | -0.02469 | 0.59461  | -0.06684 |
| 0.155638 | 0.00074  | -0.10255 | 0.02669  | -0.01808 | 0.6967   | 0.109899 | 0.01751  | -0.04865 |
| -0.03913 | 0.39884  | 0.044409 | 0.33827  | 0.1206   | 0.00909  | -0.00793 | 0.86431  | 0.050106 |
| 0.146774 | 0.00147  | 0.073967 | 0.11041  | 0.023134 | 0.61803  | 0.08803  | 0.05731  | 0.13255  |
| -0.14606 | 0.00155  | 0.023532 | 0.61198  | 0.028292 | 0.54195  | -0.08755 | 0.05868  | 0.088975 |
| -0.15756 | 0.00063  | -0.11736 | 0.01114  | -0.12859 | 0.00539  | 0.032447 | 0.48424  | 0.154818 |
| -0.0463  | 0.31809  | 0.133138 | 0.00395  | -0.01823 | 0.69439  | 0.071797 | 0.12129  | 0.353371 |
| 0.265709 | 5.48E-09 | 0.488287 | 2.37E-29 | 0.432237 | 1.11E-22 | 0.132984 | 0.00399  | 0.182002 |
| 0.10353  | 0.02527  | 0.366295 | 2.83E-16 | 0.108829 | 0.01865  | 0.231054 | 4.46E-07 | 0.42275  |
| 0.037569 | 0.41795  | 0.229062 | 5.63E-07 | 0.071856 | 0.12098  | 0.094356 | 0.04154  | 0.223292 |
| 0.157258 | 0.00065  | 0.263318 | 7.59E-09 | 0.045993 | 0.32131  | 0.194373 | 2.34E-05 | 0.272542 |
| 0.332543 | 1.61E-13 | 0.500796 | 5.13E-31 | 0.297383 | 5.44E-11 | 0.302947 | 2.28E-11 | 0.489317 |
| 0.242376 | 1.14E-07 | 0.38333  | 8.54E-18 | 0.198581 | 1.54E-05 | 0.172503 | 0.00018  | 0.475361 |
| 0.316573 | 2.49E-12 | 0.426074 | 5.09E-22 | 0.366931 | 2.49E-16 | 0.143634 | 0.00186  | 0.444735 |
| -0.26425 | 6.69E-09 | -0.24135 | 1.29E-07 | -0.37212 | 8.74E-17 | -0.0363  | 0.43382  | -0.08467 |
| 0.288782 | 2.02E-10 | 0.214123 | 3.03E-06 | 0.206062 | 7.14E-06 | 0.192646 | 2.77E-05 | 0.108707 |
| 0.045187 | 0.32987  | 0.163571 | 0.00039  | 0.092334 | 0.04612  | 0.139589 | 0.0025   | 0.383059 |
| -0.00072 | 0.98762  | 0.240874 | 1.37E-07 | 0.056806 | 0.22047  | 0.164859 | 0.00035  | 0.359021 |
| -0.05136 | 0.26801  | -0.14493 | 0.00169  | -0.03434 | 0.45915  | -0.03747 | 0.41915  | -0.0351  |
| 0.227423 | 6.81E-07 | 0.071401 | 0.12336  | 0.189724 | 3.68E-05 | 0.136801 | 0.00305  | -0.03341 |
| 0.222327 | 1.22E-06 | 0.328192 | 3.44E-13 | 0.200268 | 1.30E-05 | 0.108798 | 0.01868  | 0.122353 |
| -0.04196 | 0.36558  | 0.134652 | 0.00355  | 0.093509 | 0.04341  | 0.063325 | 0.17188  | 0.161823 |
| 0.092891 | 0.04482  | 0.209768 | 4.83E-06 | 0.165043 | 0.00034  | 0.021226 | 0.6473   | 0.250137 |
| -0.00042 | 0.99271  | 0.146989 | 0.00145  | 0.092303 | 0.0462   | 0.122572 | 0.00801  | 0.32628  |
| -0.02286 | 0.62214  | 0.131307 | 0.00448  | 0.100518 | 0.02986  | 0.055673 | 0.22983  | 0.060161 |
| 0.110626 | 0.01678  | 0.13474  | 0.00353  | 0.099563 | 0.03146  | 0.058433 | 0.20751  | 0.092636 |
| 0.703014 | 7.75E-71 | 0.5764   | 1.07E-42 | 0.455786 | 2.47E-25 | 0.816867 | #####    | 0.517253 |
| 0.41585  | 5.93E-21 | 0.385357 | 5.56E-18 | 0.335581 | 9.36E-14 | 0.645252 | 2.44E-56 | 0.528109 |
| 0.447708 | 2.12E-24 | 0.368981 | 1.65E-16 | 0.272008 | 2.29E-09 | 0.674496 | 2.89E-63 | 0.272507 |
| 0.360233 | 9.34E-16 | 0.232901 | 3.59E-07 | 0.18788  | 4.39E-05 | 0.725899 | 1.34E-77 | 0.37537  |
| 0.562759 | 2.31E-40 | 0.625542 | 4.40E-52 | 0.530833 | 2.63E-35 | 0.683035 | 1.92E-65 | 0.48948  |
| 0.282075 | 5.44E-10 | 0.177992 | 0.00011  | 0.108807 | 0.01867  | 0.625911 | 3.69E-52 | 0.305986 |
| 0.408759 | 3.10E-20 | 0.519334 | 1.30E-33 | 0.306706 | 1.25E-11 | 0.759446 | 7.39E-89 | 0.558403 |
| 0.213955 | 3.08E-06 | -0.01452 | 0.75436  | -0.12986 | 0.00494  | 0.617343 | 2.12E-50 | 0.152286 |
| 0.43919  | 1.92E-23 | 0.369382 | 1.52E-16 | 0.148961 | 0.00124  | 0.822153 | #####    | 0.496573 |
| 0.225434 | 8.56E-07 | 0.067892 | 0.14294  | -0.0574  | 0.21568  | 0.705216 | 1.85E-71 | 0.197562 |
| 0.255934 | 2.03E-08 | 0.265807 | 5.41E-09 | 0.384641 | 6.47E-18 | 0.593176 | 1.01E-45 | 0.259223 |
| 0.664358 | 8.92E-61 | 0.633669 | 8.43E-54 | 0.415647 | 6.22E-21 | 0.903238 | #####    | 0.571075 |
| 0.394999 | 6.89E-19 | 0.422307 | 1.27E-21 | 0.101172 | 0.02881  | 0.81409  | #####    | 0.538794 |
| 0.515006 | 5.42E-33 | 0.668251 | 1.01E-61 | 0.53394  | 8.94E-36 | 0.720538 | 5.91E-76 | 0.544368 |
| 0.401772 | 1.53E-19 | 0.516956 | 2.85E-33 | 0.391267 | 1.56E-18 | 0.752987 | 1.50E-86 | 0.634474 |
| 0.393937 | 8.70E-19 | 0.370806 | 1.14E-16 | 0.336379 | 8.11E-14 | 0.625903 | 3.70E-52 | 0.253855 |

|          |          |          |          |           |          |          |          |          |
|----------|----------|----------|----------|-----------|----------|----------|----------|----------|
| 0.44948  | 1.33E-24 | 0.459623 | 8.71E-26 | 0.369315  | 1.54E-16 | 0.7141   | 4.97E-74 | 0.558424 |
| 0.178494 | 0.00011  | 0.268984 | 3.50E-09 | 0.182488  | 7.30E-05 | 0.624529 | 7.15E-52 | 0.330922 |
| 0.289468 | 1.82E-10 | 0.019458 | 0.67492  | -7.71E-05 | 0.99867  | 0.601571 | 2.67E-47 | 0.313222 |
| 0.567942 | 3.09E-41 | 0.492672 | 6.30E-30 | 0.483134  | 1.10E-28 | 0.74097  | 1.93E-82 | 0.440244 |
| 0.159764 | 0.00053  | 0.039208 | 0.39792  | -0.18373  | 6.50E-05 | 0.645134 | 2.59E-56 | 0.260716 |
| 0.239407 | 1.64E-07 | 0.519255 | 1.33E-33 | 0.4339    | 7.33E-23 | 0.655444 | 1.15E-58 | 0.325484 |
| 0.11154  | 0.01589  | 0.168606 | 0.00025  | -0.00435  | 0.92528  | 0.662084 | 3.13E-60 | 0.408315 |
| 0.243208 | 1.03E-07 | 0.060297 | 0.19335  | 0.00595   | 0.89796  | 0.677873 | 4.06E-64 | 0.236163 |
| 0.537878 | 2.24E-36 | 0.657237 | 4.39E-59 | 0.450675  | 9.68E-25 | 0.777481 | 1.05E-95 | 0.62319  |
| 0.261661 | 9.48E-09 | 0.357932 | 1.46E-15 | 0.083431  | 0.07166  | 0.752464 | 2.29E-86 | 0.52504  |
| 0.448538 | 1.70E-24 | 0.617897 | 1.64E-50 | 0.440581  | 1.35E-23 | 0.721429 | 3.17E-76 | 0.485925 |
| 0.456141 | 2.24E-25 | 0.225913 | 8.10E-07 | 0.034111  | 0.4621   | 0.627162 | 2.02E-52 | 0.37926  |
| 0.562186 | 2.88E-40 | 0.530575 | 2.88E-35 | 0.338657  | 5.38E-14 | 0.774028 | 2.40E-94 | 0.438841 |
| 0.434039 | 7.08E-23 | 0.505293 | 1.24E-31 | 0.368295  | 1.89E-16 | 0.818242 | #####    | 0.522128 |
| 0.462096 | 4.42E-26 | 0.700751 | 3.33E-70 | 0.583218  | 6.64E-44 | 0.688512 | 7.06E-67 | 0.368902 |
| 0.184238 | 6.20E-05 | -0.02462 | 0.59569  | -0.04947  | 0.28604  | 0.557186 | 1.93E-39 | 0.14119  |
| 0.51368  | 8.36E-33 | 0.648319 | 4.97E-57 | 0.46384   | 2.73E-26 | 0.823569 | #####    | 0.638009 |
| 0.377504 | 2.89E-17 | 0.478874 | 3.83E-28 | 0.446325  | 3.04E-24 | 0.544664 | 1.98E-37 | 0.393355 |
| 0.47058  | 4.14E-27 | 0.117949 | 0.01074  | 0.219293  | 1.71E-06 | 0.631013 | 3.11E-53 | 0.072837 |
| 0.479639 | 3.06E-28 | 0.533018 | 1.23E-35 | 0.372418  | 8.23E-17 | 0.770688 | 4.71E-93 | 0.522372 |
| 0.603222 | 1.29E-47 | 0.566109 | 6.31E-41 | 0.465601  | 1.68E-26 | 0.889142 | #####    | 0.519856 |
| 0.185982 | 5.26E-05 | 0.315086 | 3.19E-12 | 0.165575  | 0.00033  | 0.492178 | 7.32E-30 | 0.327158 |
| 0.439574 | 1.74E-23 | 0.424919 | 6.74E-22 | 0.261231  | 1.00E-08 | 0.694099 | 2.25E-68 | 0.440969 |
| 0.283836 | 4.20E-10 | 0.410358 | 2.14E-20 | 0.198968  | 1.48E-05 | 0.694982 | 1.29E-68 | 0.564638 |
| 0.325962 | 5.07E-13 | 0.200269 | 1.30E-05 | 0.073806  | 0.11119  | 0.59995  | 5.43E-47 | 0.267952 |
| 0.201489 | 1.15E-05 | 0.16227  | 0.00043  | 0.180053  | 9.13E-05 | 0.586558 | 1.66E-44 | 0.373697 |
| 0.511166 | 1.89E-32 | 0.619707 | 7.01E-51 | 0.570379  | 1.18E-41 | 0.758073 | 2.32E-88 | 0.511355 |
| 0.571928 | 6.41E-42 | 0.263285 | 7.62E-09 | 0.174376  | 0.00015  | 0.760501 | 3.05E-89 | 0.407183 |
| 0.328268 | 3.40E-13 | 0.340515 | 3.84E-14 | 0.102555  | 0.02668  | 0.622779 | 1.64E-51 | 0.362247 |
| 0.552457 | 1.13E-38 | 0.680202 | 1.03E-64 | 0.468908  | 6.64E-27 | 0.880286 | #####    | 0.696053 |
| 0.48796  | 2.61E-29 | 0.677184 | 6.07E-64 | 0.588688  | 6.80E-45 | 0.678542 | 2.74E-64 | 0.530683 |
| 0.548871 | 4.26E-38 | 0.428927 | 2.52E-22 | 0.443479  | 6.38E-24 | 0.77884  | 3.00E-96 | 0.396434 |
| 0.329439 | 2.77E-13 | 0.221743 | 1.30E-06 | 0.194459  | 2.32E-05 | 0.579765 | 2.74E-43 | 0.159711 |
| 0.068335 | 0.14035  | 0.286207 | 2.96E-10 | 0.351488  | 5.02E-15 | 0.094742 | 0.04071  | 0.144077 |
| 0.059421 | 0.19991  | 0.167902 | 0.00027  | 0.198751  | 1.51E-05 | 0.013093 | 0.77779  | 0.068421 |
| 0.071036 | 0.12529  | 0.215637 | 2.56E-06 | 0.232755  | 3.65E-07 | 0.079806 | 0.08493  | 0.127071 |
| 0.037434 | 0.41963  | 0.089415 | 0.05349  | 0.085732  | 0.06415  | 0.003538 | 0.93922  | 0.023057 |
| -0.01446 | 0.75523  | 0.129743 | 0.00498  | 0.170822  | 0.00021  | -0.01938 | 0.67613  | 0.042491 |
| 0.024944 | 0.5908   | 0.177619 | 0.00011  | 0.190543  | 3.40E-05 | 0.092533 | 0.04565  | 0.131979 |
| 0.021657 | 0.64063  | 0.314191 | 3.70E-12 | 0.316411  | 2.56E-12 | 0.044221 | 0.34032  | 0.096705 |
| 0.102325 | 0.02703  | 0.247605 | 5.92E-08 | 0.305774  | 1.45E-11 | 0.031087 | 0.50276  | 0.080066 |
| 0.06765  | 0.14438  | 0.222224 | 1.23E-06 | 0.260303  | 1.14E-08 | 0.062772 | 0.17567  | 0.133362 |
| 0.057504 | 0.21484  | 0.217469 | 2.10E-06 | 0.262675  | 8.28E-09 | 0.01933  | 0.67694  | 0.113204 |
| -0.02666 | 0.56554  | 0.059135 | 0.20209  | 0.054645  | 0.23855  | -0.02866 | 0.53672  | 0.101747 |
| 0.081837 | 0.07727  | 0.200767 | 1.23E-05 | 0.204938  | 8.03E-06 | 0.081422 | 0.07879  | 0.133038 |

|          |          |          |          |          |          |          |          |          |
|----------|----------|----------|----------|----------|----------|----------|----------|----------|
| 0.010104 | 0.82761  | 0.232745 | 3.65E-07 | 0.281043 | 6.32E-10 | 0.046904 | 0.3118   | 0.101599 |
| -0.0126  | 0.78598  | 0.111089 | 0.01632  | 0.166045 | 0.00031  | -0.02659 | 0.56647  | 0.025971 |
| 0.067521 | 0.14514  | 0.244858 | 8.37E-08 | 0.31319  | 4.36E-12 | 0.039415 | 0.39543  | 0.098207 |
| 0.101935 | 0.02762  | 0.202325 | 1.05E-05 | 0.223663 | 1.05E-06 | 0.058913 | 0.20379  | 0.084337 |
| 0.252931 | 3.00E-08 | 0.395302 | 6.44E-19 | 0.347509 | 1.06E-14 | 0.2534   | 2.82E-08 | 0.333033 |
| 0.040192 | 0.38617  | 0.268762 | 3.61E-09 | 0.312121 | 5.20E-12 | 0.080302 | 0.08301  | 0.153376 |
| 0.049618 | 0.2846   | 0.147393 | 0.0014   | 0.159791 | 0.00053  | -0.00873 | 0.85077  | 0.014356 |
| -0.01389 | 0.76461  | 0.104112 | 0.02445  | 0.147127 | 0.00143  | -0.0136  | 0.76936  | 0.051201 |
| -0.01508 | 0.74514  | 0.10502  | 0.02323  | 0.179822 | 9.33E-05 | -0.07622 | 0.09994  | 0.0378   |
| 0.020159 | 0.66391  | 0.152748 | 0.00093  | 0.276661 | 1.19E-09 | -0.02566 | 0.58017  | 0.021651 |
| -0.02925 | 0.5283   | 0.139201 | 0.00257  | 0.177313 | 0.00012  | -0.09065 | 0.05027  | -0.00575 |
| 0.005394 | 0.90746  | 0.211405 | 4.06E-06 | 0.221303 | 1.37E-06 | 0.051996 | 0.26212  | 0.159013 |
| 0.074409 | 0.10829  | 0.163375 | 0.00039  | 0.284639 | 3.74E-10 | -0.03467 | 0.45484  | -0.03319 |
| 0.10479  | 0.02353  | 0.29293  | 1.08E-10 | 0.354857 | 2.64E-15 | 0.068308 | 0.1405   | 0.129734 |
| 0.070854 | 0.12627  | 0.222712 | 1.17E-06 | 0.281504 | 5.91E-10 | 0.050871 | 0.2726   | 0.077101 |
| 0.182208 | 7.49E-05 | 0.408624 | 3.20E-20 | 0.291412 | 1.36E-10 | 0.139597 | 0.0025   | 0.140201 |
| 0.065979 | 0.15458  | 0.227422 | 6.81E-07 | 0.281462 | 5.95E-10 | 0.006068 | 0.89594  | 0.085416 |
| -0.09692 | 0.03627  | 0.031493 | 0.49719  | 0.107677 | 0.01994  | -0.05091 | 0.27219  | -0.05006 |
| 0.073657 | 0.11192  | 0.111179 | 0.01623  | 0.15431  | 0.00082  | 0.009254 | 0.84192  | 0.031248 |
| 0.031807 | 0.49291  | 0.227262 | 6.94E-07 | 0.224087 | 9.99E-07 | -0.00097 | 0.98336  | 0.100315 |
| 0.002213 | 0.96195  | 0.040123 | 0.38699  | 0.16253  | 0.00042  | -0.00865 | 0.85216  | -0.0623  |
| 0.033958 | 0.46412  | 0.258349 | 1.48E-08 | 0.295013 | 7.85E-11 | 0.055744 | 0.22923  | 0.141373 |
| 0.08207  | 0.07643  | 0.328151 | 3.47E-13 | 0.325064 | 5.92E-13 | 0.100148 | 0.03048  | 0.106031 |
| 0.053493 | 0.24862  | 0.129167 | 0.00518  | 0.148543 | 0.00128  | 0.078836 | 0.0888   | 0.092387 |
| 0.104218 | 0.0243   | 0.284797 | 3.65E-10 | 0.281859 | 5.62E-10 | 0.104901 | 0.02338  | 0.207062 |
| -0.00272 | 0.95325  | 0.199169 | 1.45E-05 | 0.181135 | 8.27E-05 | 0.10522  | 0.02296  | 0.168578 |
| 0.078437 | 0.09044  | 0.262105 | 8.94E-09 | 0.315477 | 2.99E-12 | 0.097957 | 0.03432  | 0.1379   |
| 0.169103 | 0.00024  | 0.212154 | 3.74E-06 | 0.174045 | 0.00016  | 0.054001 | 0.24415  | 0.070707 |
| 0.096635 | 0.03683  | 0.282106 | 5.42E-10 | 0.349195 | 7.73E-15 | 0.061187 | 0.18685  | 0.1304   |
| 0.074973 | 0.10564  | 0.243291 | 1.02E-07 | 0.291248 | 1.39E-10 | 0.043786 | 0.3451   | 0.119891 |
| 0.021201 | 0.64768  | 0.107498 | 0.02015  | 0.157924 | 0.00061  | -0.0326  | 0.48213  | 0.050257 |
| 0.071103 | 0.12494  | 0.225211 | 8.78E-07 | 0.271927 | 2.32E-09 | 0.038092 | 0.41149  | 0.123289 |
| 0.009193 | 0.84294  | 0.180517 | 8.75E-05 | 0.261313 | 9.94E-09 | -0.03269 | 0.48101  | 0.061066 |
| 0.007907 | 0.86469  | 0.112719 | 0.0148   | 0.171171 | 0.0002   | 0.009697 | 0.83446  | 0.031466 |
| 0.01951  | 0.6741   | 0.175822 | 0.00013  | 0.202119 | 1.07E-05 | 0.008288 | 0.85823  | 0.106403 |
| -0.01033 | 0.82387  | 0.193436 | 2.57E-05 | 0.253563 | 2.76E-08 | -0.00485 | 0.91678  | 0.03451  |
| 0.116918 | 0.01145  | 0.144369 | 0.00176  | 0.143682 | 0.00185  | -0.03029 | 0.51385  | -0.02311 |
| 0.043111 | 0.35259  | 0.057077 | 0.21827  | 0.055402 | 0.2321   | -0.07097 | 0.12567  | -0.05803 |
| 0.041092 | 0.37562  | 0.178124 | 0.00011  | 0.209756 | 4.84E-06 | 0.017052 | 0.71322  | 0.073784 |
| 0.059547 | 0.19896  | 0.20566  | 7.45E-06 | 0.205525 | 7.56E-06 | 0.026313 | 0.57057  | 0.109456 |
| -0.02534 | 0.58494  | 0.162255 | 0.00043  | 0.160676 | 0.00049  | -0.00409 | 0.92974  | 0.079642 |
| 0.229467 | 5.37E-07 | 0.403987 | 9.24E-20 | 0.437759 | 2.77E-23 | 0.16075  | 0.00049  | 0.161731 |
| -0.01517 | 0.74375  | 0.067609 | 0.14462  | 0.082022 | 0.0766   | 0.008701 | 0.85124  | 0.07956  |
| -0.01859 | 0.6887   | 0.145805 | 0.00158  | 0.171576 | 0.00019  | 0.016717 | 0.71862  | 0.058668 |
| -0.01978 | 0.66984  | 0.101484 | 0.02832  | 0.18452  | 6.04E-05 | -0.04862 | 0.2944   | 0.013041 |

|          |         |          |          |          |          |          |         |          |
|----------|---------|----------|----------|----------|----------|----------|---------|----------|
| 0.105167 | 0.02303 | 0.362882 | 5.56E-16 | 0.432689 | 9.92E-23 | 0.107537 | 0.0201  | 0.188489 |
| 0.016171 | 0.72743 | 0.253362 | 2.83E-08 | 0.306745 | 1.24E-11 | 0.016169 | 0.72746 | 0.104072 |
| 0.007076 | 0.87878 | 0.150229 | 0.00113  | 0.125805 | 0.00648  | 0.051618 | 0.26561 | 0.070878 |
| -0.00041 | 0.99292 | 0.053204 | 0.25119  | 0.045236 | 0.32934  | -0.03966 | 0.39248 | 0.039951 |
| 0.080967 | 0.08048 | -0.02637 | 0.56973  | 0.073795 | 0.11124  | -0.03739 | 0.42012 | 0.037234 |
| 0.003031 | 0.94792 | 0.18975  | 3.67E-05 | 0.237111 | 2.17E-07 | -0.04726 | 0.30817 | 0.057753 |
| 0.070482 | 0.12828 | 0.299702 | 3.80E-11 | 0.388504 | 2.83E-18 | 0.0734   | 0.11318 | 0.132634 |
| 0.075802 | 0.10183 | 0.215386 | 2.64E-06 | 0.245322 | 7.89E-08 | 0.071122 | 0.12483 | 0.047058 |
| -0.07922 | 0.08724 | -0.0559  | 0.22795  | 0.055155 | 0.2342   | -0.06379 | 0.16872 | -0.12915 |
| 0.066362 | 0.15219 | 0.121642 | 0.0085   | 0.16795  | 0.00027  | -0.13186 | 0.00431 | -0.04311 |
| 0.086518 | 0.06174 | 0.276106 | 1.29E-09 | 0.317772 | 2.04E-12 | 0.037249 | 0.42193 | 0.096306 |
| 0.000447 | 0.99231 | 0.070553 | 0.12789  | 0.151637 | 0.00101  | -0.07795 | 0.09248 | -0.0858  |
| 0.074826 | 0.10632 | 0.187686 | 4.48E-05 | 0.212283 | 3.69E-06 | 0.02857  | 0.53798 | 0.135789 |
| -0.02068 | 0.65572 | 0.068449 | 0.13969  | 0.091961 | 0.04701  | -0.04515 | 0.33023 | 0.07007  |
| 0.067278 | 0.1466  | 0.256702 | 1.83E-08 | 0.33021  | 2.42E-13 | 0.0388   | 0.40285 | 0.107307 |
| 0.001868 | 0.96789 | 0.077898 | 0.09268  | 0.169726 | 0.00023  | 0.002836 | 0.95126 | -0.02756 |
| 0.004252 | 0.92698 | 0.119394 | 0.00981  | 0.190386 | 3.46E-05 | 0.052804 | 0.25477 | 0.062761 |
| 0.059243 | 0.20127 | 0.225882 | 8.13E-07 | 0.258433 | 1.46E-08 | 0.103917 | 0.02472 | 0.129457 |
| 0.084049 | 0.06958 | 0.301687 | 2.78E-11 | 0.376089 | 3.88E-17 | 0.114755 | 0.01309 | 0.16504  |
| 0.090159 | 0.05152 | 0.29036  | 1.59E-10 | 0.346848 | 1.20E-14 | 0.090606 | 0.05037 | 0.150581 |
| 0.012276 | 0.79133 | 0.097767 | 0.03467  | 0.152522 | 0.00094  | -0.05817 | 0.20955 | 0.038775 |
| 0.018024 | 0.69765 | 0.166406 | 0.0003   | 0.2116   | 3.97E-06 | -0.03857 | 0.40562 | 0.070973 |
| 0.065066 | 0.16037 | 0.220226 | 1.54E-06 | 0.234535 | 2.95E-07 | 0.030533 | 0.51041 | 0.087914 |
| 0.024342 | 0.59979 | 0.163556 | 0.00039  | 0.229776 | 5.18E-07 | -0.00258 | 0.95567 | 0.024132 |
| 0.074516 | 0.10778 | 0.17319  | 0.00017  | 0.186531 | 5.00E-05 | 0.110628 | 0.01677 | 0.181162 |
| 0.038937 | 0.40119 | 0.174263 | 0.00015  | 0.221593 | 1.32E-06 | 0.027761 | 0.54955 | 0.085874 |
| 0.035552 | 0.4434  | 0.146797 | 0.00147  | 0.225489 | 8.51E-07 | 0.029315 | 0.52743 | 0.06208  |
| 0.1374   | 0.00293 | 0.233039 | 3.53E-07 | 0.293059 | 1.06E-10 | 0.054283 | 0.24169 | 0.083258 |
| 0.008456 | 0.85539 | 0.23857  | 1.82E-07 | 0.180825 | 8.51E-05 | -0.01996 | 0.66698 | 0.047493 |
| 0.102367 | 0.02696 | 0.183742 | 6.49E-05 | 0.199524 | 1.40E-05 | 0.068023 | 0.14217 | 0.079573 |
| -0.01739 | 0.70781 | 0.105865 | 0.02213  | 0.178594 | 0.0001   | -0.04352 | 0.34802 | -0.00089 |
| 0.013292 | 0.77451 | 0.045956 | 0.32169  | 0.070223 | 0.12969  | -0.11126 | 0.01616 | -0.02437 |
| -0.08491 | 0.06674 | 0.065196 | 0.15954  | 0.123902 | 0.00735  | -0.04039 | 0.38381 | 0.03564  |
| 0.050935 | 0.272   | 0.202697 | 1.01E-05 | 0.266029 | 5.25E-09 | -0.01884 | 0.68467 | 0.063325 |
| 0.056854 | 0.22008 | 0.248612 | 5.21E-08 | 0.297687 | 5.19E-11 | 0.056146 | 0.22588 | 0.11827  |
| 0.06007  | 0.19504 | 0.213779 | 3.14E-06 | 0.272262 | 2.21E-09 | 0.063052 | 0.17375 | 0.107456 |
| -0.03549 | 0.44425 | 0.047593 | 0.30474  | 0.085998 | 0.06333  | -0.09802 | 0.0342  | 0.031321 |
| 0.037096 | 0.42384 | 0.004712 | 0.91911  | 0.082947 | 0.07333  | -0.06779 | 0.14357 | -0.00869 |
| 0.00663  | 0.88637 | 0.179152 | 9.91E-05 | 0.219685 | 1.64E-06 | -0.00356 | 0.93892 | 0.095928 |
| -0.01008 | 0.82796 | 0.112861 | 0.01468  | 0.169515 | 0.00023  | 0.054187 | 0.24252 | 0.053474 |
| 0.045813 | 0.32321 | 0.179159 | 9.91E-05 | 0.216321 | 2.38E-06 | 0.002953 | 0.94926 | 0.088863 |
| -0.03023 | 0.5146  | 0.076273 | 0.09971  | 0.122106 | 0.00825  | -0.088   | 0.0574  | -0.01265 |
| 0.059652 | 0.19817 | 0.131816 | 0.00433  | 0.20642  | 6.88E-06 | 0.016954 | 0.71479 | 0.021021 |
| -0.11806 | 0.01067 | 0.028047 | 0.54544  | 0.079762 | 0.0851   | -0.03008 | 0.51674 | -0.03218 |
| 0.09064  | 0.05029 | 0.192842 | 2.72E-05 | 0.23256  | 3.73E-07 | 0.058921 | 0.20373 | 0.093103 |

|          |          |          |          |          |          |          |         |          |
|----------|----------|----------|----------|----------|----------|----------|---------|----------|
| -0.00079 | 0.98637  | 0.180512 | 8.76E-05 | 0.253968 | 2.62E-08 | 0.002049 | 0.96478 | 0.066292 |
| -0.05301 | 0.25287  | 0.146202 | 0.00153  | 0.208883 | 5.31E-06 | 0.004088 | 0.9298  | 0.046321 |
| 0.049965 | 0.28124  | 0.261331 | 9.91E-09 | 0.288939 | 1.97E-10 | -0.00029 | 0.99496 | 0.076815 |
| 0.077497 | 0.09438  | 0.19966  | 1.38E-05 | 0.21404  | 3.05E-06 | 0.0626   | 0.17685 | 0.116379 |
| -0.02367 | 0.60995  | 0.133471 | 0.00386  | 0.180419 | 8.83E-05 | -0.03298 | 0.47711 | 0.06498  |
| -0.03347 | 0.47061  | 0.138351 | 0.00273  | 0.150677 | 0.00109  | 0.002335 | 0.95987 | 0.09052  |
| 0.075176 | 0.10469  | 0.220182 | 1.55E-06 | 0.272111 | 2.26E-09 | 0.017517 | 0.70576 | 0.035117 |
| 0.118431 | 0.01042  | 0.209577 | 4.93E-06 | 0.269038 | 3.47E-09 | 0.116778 | 0.01155 | 0.149049 |
| -0.19319 | 2.63E-05 | -0.01128 | 0.80791  | 0.008652 | 0.85207  | -0.08957 | 0.05308 | -0.0223  |
| 0.067362 | 0.1461   | 0.269762 | 3.14E-09 | 0.339748 | 4.42E-14 | 0.051721 | 0.26466 | 0.132389 |
| 0.068401 | 0.13997  | 0.211355 | 4.08E-06 | 0.246316 | 6.97E-08 | 0.048212 | 0.29849 | 0.112729 |
| 0.198075 | 1.62E-05 | 0.169935 | 0.00022  | 0.189165 | 3.89E-05 | 0.110407 | 0.017   | 0.066278 |
| -0.00461 | 0.9208   | 0.126517 | 0.00619  | 0.168701 | 0.00025  | -0.00834 | 0.85743 | 0.075728 |
| 0.018486 | 0.69029  | 0.173658 | 0.00016  | 0.230655 | 4.67E-07 | 0.005029 | 0.91368 | 0.052337 |
| 0.067311 | 0.1464   | 0.244432 | 8.82E-08 | 0.297483 | 5.36E-11 | 0.066141 | 0.15357 | 0.138629 |
| -0.09932 | 0.03188  | -0.07901 | 0.08811  | -0.01975 | 0.67033  | -0.12959 | 0.00503 | -0.11875 |
| 0.048767 | 0.29295  | 0.21504  | 2.74E-06 | 0.266594 | 4.86E-09 | 0.01748  | 0.70635 | 0.107139 |
| 0.006525 | 0.88817  | 0.129546 | 0.00505  | 0.195798 | 2.03E-05 | -0.0094  | 0.83948 | 0.05879  |
| -0.01711 | 0.71227  | 0.171479 | 0.0002   | 0.204909 | 8.06E-06 | 0.00262  | 0.95497 | 0.120427 |
| -0.05351 | 0.24844  | 0.120482 | 0.00916  | 0.155575 | 0.00074  | -0.03094 | 0.50474 | 0.029379 |
| -0.03838 | 0.408    | 0.126593 | 0.00616  | 0.134952 | 0.00348  | -0.0196  | 0.67264 | 0.089396 |
| 0.036147 | 0.4358   | 0.203457 | 9.36E-06 | 0.224767 | 9.24E-07 | 0.013879 | 0.76484 | 0.112639 |
| 0.092797 | 0.04504  | 0.324436 | 6.59E-13 | 0.421239 | 1.64E-21 | 0.052535 | 0.25721 | 0.146109 |
| 0.192148 | 2.91E-05 | 0.231581 | 4.19E-07 | 0.221778 | 1.30E-06 | 0.124069 | 0.00727 | 0.131115 |
| 0.057956 | 0.21125  | 0.282632 | 5.02E-10 | 0.346005 | 1.40E-14 | 0.077418 | 0.09471 | 0.135186 |
| 0.045639 | 0.32505  | 0.212322 | 3.68E-06 | 0.272446 | 2.16E-09 | 0.000265 | 0.99544 | 0.091292 |
| -0.09468 | 0.04083  | 0.035244 | 0.44736  | 0.037147 | 0.42321  | -0.08387 | 0.07017 | -0.02677 |
| 0.088799 | 0.05516  | 0.249713 | 4.53E-08 | 0.345123 | 1.65E-14 | 0.014417 | 0.75601 | 0.072928 |
| 0.010984 | 0.81286  | 0.183233 | 6.81E-05 | 0.275676 | 1.37E-09 | 0.019657 | 0.67179 | 0.088951 |
| 0.075751 | 0.10206  | 0.128722 | 0.00534  | 0.231142 | 4.41E-07 | -0.02381 | 0.60774 | 0.09311  |
| -0.05827 | 0.20878  | 0.058558 | 0.20654  | 0.097941 | 0.03435  | -0.07409 | 0.10983 | -0.03494 |
| 0.000259 | 0.99554  | 0.170573 | 0.00021  | 0.236036 | 2.47E-07 | -0.02218 | 0.63256 | 0.066846 |
| -0.03913 | 0.39885  | 0.117678 | 0.01093  | 0.153728 | 0.00086  | -0.04779 | 0.30272 | 0.010195 |
| 0.086331 | 0.0623   | 0.310672 | 6.59E-12 | 0.402966 | 1.16E-19 | 0.108242 | 0.0193  | 0.136187 |
| -0.0004  | 0.99309  | 0.192018 | 2.95E-05 | 0.278028 | 9.77E-10 | 0.012662 | 0.78493 | 0.038183 |
| -0.03563 | 0.44242  | 0.126591 | 0.00616  | 0.129762 | 0.00498  | 0.089236 | 0.05397 | 0.160242 |
| 0.034467 | 0.45745  | 0.24826  | 5.45E-08 | 0.30453  | 1.77E-11 | 0.043287 | 0.35063 | 0.129318 |
| 0.029339 | 0.52709  | 0.152271 | 0.00096  | 0.24306  | 1.05E-07 | 0.013262 | 0.775   | 0.030193 |
| -0.01932 | 0.67712  | 0.084539 | 0.06796  | 0.134116 | 0.00369  | -0.06061 | 0.19102 | 0.026159 |
| -0.00253 | 0.95659  | 0.108854 | 0.01862  | 0.162958 | 0.00041  | -0.05901 | 0.20303 | -0.01111 |
| 0.014959 | 0.74713  | 0.150682 | 0.00109  | 0.242877 | 1.07E-07 | -0.0899  | 0.05221 | -0.02033 |
| -0.01193 | 0.79711  | 0.137758 | 0.00285  | 0.189037 | 3.93E-05 | -0.02586 | 0.57728 | 0.038824 |
| -0.03996 | 0.38895  | 0.095087 | 0.03998  | 0.171269 | 0.0002   | -0.06699 | 0.14832 | 0.009548 |
| 0.101909 | 0.02766  | 0.318625 | 1.77E-12 | 0.389305 | 2.38E-18 | 0.074117 | 0.10969 | 0.15575  |
| 0.035275 | 0.44696  | 0.155081 | 0.00077  | 0.184954 | 5.80E-05 | -0.02864 | 0.53696 | 0.095561 |

|          |         |          |          |          |          |          |         |          |
|----------|---------|----------|----------|----------|----------|----------|---------|----------|
| 0.025469 | 0.583   | 0.116937 | 0.01144  | 0.171771 | 0.00019  | 0.004833 | 0.91704 | 0.028048 |
| -0.05409 | 0.24341 | 0.011048 | 0.81179  | 0.104554 | 0.02385  | -0.14598 | 0.00156 | -0.0885  |
| 0.023235 | 0.61649 | 0.154826 | 0.00079  | 0.220923 | 1.43E-06 | -0.06354 | 0.17043 | 0.014362 |
| 0.048268 | 0.29793 | 0.191358 | 3.14E-05 | 0.236433 | 2.35E-07 | -0.01154 | 0.80352 | 0.089617 |
| 0.047316 | 0.30757 | 0.16516  | 0.00034  | 0.203271 | 9.54E-06 | -0.02369 | 0.6096  | 0.042625 |
| 0.023263 | 0.61606 | 0.184119 | 6.27E-05 | 0.232213 | 3.89E-07 | 0.005667 | 0.90279 | 0.113682 |
| 0.064908 | 0.1614  | 0.269767 | 3.14E-09 | 0.327374 | 3.97E-13 | 0.102766 | 0.02637 | 0.147749 |
| -0.0174  | 0.70769 | 0.075506 | 0.10318  | 0.171399 | 0.0002   | -0.04699 | 0.31088 | -0.02711 |
| 0.036523 | 0.43104 | 0.225957 | 8.06E-07 | 0.283608 | 4.35E-10 | 0.038016 | 0.41242 | 0.115633 |
| 0.018806 | 0.68522 | 0.162805 | 0.00041  | 0.234628 | 2.92E-07 | -0.01852 | 0.68976 | 0.057666 |
| 0.076924 | 0.09684 | 0.15568  | 0.00074  | 0.217846 | 2.01E-06 | -0.04781 | 0.30255 | 0.067176 |
| 0.072875 | 0.11579 | 0.240362 | 1.46E-07 | 0.287836 | 2.33E-10 | 0.033465 | 0.47063 | 0.131045 |
| -0.00289 | 0.9503  | 0.180593 | 8.69E-05 | 0.198462 | 1.56E-05 | 0.040767 | 0.37941 | 0.082349 |
| 0.089409 | 0.0535  | 0.22545  | 8.55E-07 | 0.264466 | 6.50E-09 | 0.078515 | 0.09011 | 0.118529 |
| -0.00971 | 0.8343  | 0.001154 | 0.98016  | 0.021616 | 0.64127  | -0.11999 | 0.00945 | -0.03154 |
| 0.089059 | 0.05445 | 0.301264 | 2.97E-11 | 0.356431 | 1.95E-15 | 0.053019 | 0.25283 | 0.131001 |
| -0.0778  | 0.09307 | 0.060643 | 0.19081  | 0.142817 | 0.00198  | -0.08523 | 0.06572 | -0.0361  |
| 0.072741 | 0.11646 | 0.223784 | 1.03E-06 | 0.311425 | 5.83E-12 | 0.050027 | 0.28064 | 0.086243 |
| 0.054818 | 0.23707 | 0.232003 | 3.99E-07 | 0.270877 | 2.69E-09 | 0.077909 | 0.09263 | 0.147208 |
| 0.067264 | 0.14668 | 0.238827 | 1.76E-07 | 0.286179 | 2.98E-10 | 0.06529  | 0.15894 | 0.138329 |
| 0.009757 | 0.83344 | 0.135549 | 0.00334  | 0.190106 | 3.55E-05 | -0.01049 | 0.82117 | 0.062619 |
| 0.111378 | 0.01604 | 0.330136 | 2.45E-13 | 0.398467 | 3.20E-19 | 0.102897 | 0.02618 | 0.143282 |
| 0.004288 | 0.92637 | 0.138298 | 0.00274  | 0.14962  | 0.00118  | 0.012563 | 0.78656 | 0.097924 |
| 0.048268 | 0.29792 | 0.27423  | 1.68E-09 | 0.352615 | 4.05E-15 | 0.054397 | 0.24069 | 0.139198 |
| 0.011033 | 0.81204 | 0.16737  | 0.00028  | 0.198355 | 1.57E-05 | -0.00724 | 0.876   | 0.085237 |
| -0.00118 | 0.97979 | 0.148241 | 0.00131  | 0.167159 | 0.00029  | 0.036012 | 0.43752 | 0.089584 |
| 0.052787 | 0.25492 | 0.266767 | 4.74E-09 | 0.322712 | 8.85E-13 | 0.069077 | 0.13608 | 0.135253 |
| 0.024662 | 0.595   | 0.15787  | 0.00062  | 0.278812 | 8.73E-10 | -0.06083 | 0.18946 | -0.00248 |
| 0.018444 | 0.69097 | 0.314898 | 3.29E-12 | 0.316617 | 2.47E-12 | 0.029693 | 0.52211 | 0.134221 |
| 0.037531 | 0.41842 | 0.246572 | 6.75E-08 | 0.315303 | 3.08E-12 | -0.00229 | 0.9606  | 0.07887  |
| 0.044005 | 0.34269 | 0.200569 | 1.26E-05 | 0.246202 | 7.07E-08 | -0.00243 | 0.95824 | 0.084372 |
| -0.05852 | 0.20681 | 0.11329  | 0.0143   | 0.124393 | 0.00711  | -0.00079 | 0.98645 | 0.093493 |
| -0.01052 | 0.82065 | 0.118028 | 0.01069  | 0.170315 | 0.00022  | -0.03293 | 0.47777 | 0.036889 |
| 0.054351 | 0.2411  | 0.238123 | 1.92E-07 | 0.2856   | 3.24E-10 | 0.047687 | 0.30378 | 0.117633 |
| 0.016685 | 0.71912 | 0.179932 | 9.23E-05 | 0.241623 | 1.25E-07 | -0.02156 | 0.64208 | 0.047853 |
| 0.068786 | 0.13774 | 0.251834 | 3.45E-08 | 0.323681 | 7.50E-13 | 0.022067 | 0.63433 | 0.102266 |
| 0.021988 | 0.63554 | 0.177342 | 0.00012  | 0.237537 | 2.06E-07 | -0.00151 | 0.97396 | 0.070504 |
| 0.059872 | 0.19652 | 0.267839 | 4.09E-09 | 0.340742 | 3.69E-14 | 0.061761 | 0.18274 | 0.120049 |
| 0.003251 | 0.94414 | 0.166555 | 0.0003   | 0.219455 | 1.68E-06 | -0.00989 | 0.83113 | 0.066531 |
| 0.098352 | 0.0336  | 0.32982  | 2.59E-13 | 0.394615 | 7.50E-19 | 0.104369 | 0.0241  | 0.181398 |
| 0.041207 | 0.37429 | 0.135753 | 0.00329  | 0.16184  | 0.00045  | -0.02209 | 0.634   | 0.078548 |
| 0.012693 | 0.78441 | 0.180372 | 8.87E-05 | 0.229401 | 5.41E-07 | -0.00132 | 0.97738 | 0.090498 |
| -0.03929 | 0.39689 | 0.12877  | 0.00532  | 0.157428 | 0.00064  | -0.014   | 0.76289 | 0.064846 |
| 0.00623  | 0.89319 | -0.0014  | 0.97594  | 0.100181 | 0.03042  | -0.03076 | 0.50726 | 0.010677 |
| -0.03054 | 0.51026 | 0.108845 | 0.01863  | 0.172171 | 0.00019  | -0.04165 | 0.36917 | 0.011625 |

|          |          |          |          |          |          |          |         |          |
|----------|----------|----------|----------|----------|----------|----------|---------|----------|
| 0.027373 | 0.55516  | 0.221293 | 1.37E-06 | 0.276586 | 1.20E-09 | 0.022592 | 0.62627 | 0.103366 |
| 0.074536 | 0.10769  | 0.259491 | 1.27E-08 | 0.345928 | 1.42E-14 | 0.05711  | 0.218   | 0.1017   |
| 0.011473 | 0.8047   | 0.157138 | 0.00065  | 0.181479 | 8.01E-05 | 0.042819 | 0.35587 | 0.075474 |
| 0.00078  | 0.98659  | 0.127065 | 0.00597  | 0.177647 | 0.00011  | -0.02272 | 0.62438 | 0.03088  |
| 0.038094 | 0.41147  | 0.20768  | 6.03E-06 | 0.271436 | 2.49E-09 | 0.013622 | 0.76907 | 0.080609 |
| -0.04472 | 0.33488  | 0.098848 | 0.03271  | 0.106304 | 0.02158  | 0.026377 | 0.56964 | 0.09012  |
| -0.02732 | 0.55589  | 0.166269 | 0.00031  | 0.205629 | 7.47E-06 | 0.006361 | 0.89095 | 0.045042 |
| 0.042414 | 0.36044  | 0.215654 | 2.56E-06 | 0.25184  | 3.45E-08 | 0.04125  | 0.37379 | 0.124365 |
| 0.093584 | 0.04324  | 0.271162 | 2.58E-09 | 0.301102 | 3.05E-11 | 0.121344 | 0.00867 | 0.202035 |
| 0.055053 | 0.23506  | 0.185143 | 5.70E-05 | 0.210853 | 4.30E-06 | 0.060361 | 0.19288 | 0.152154 |
| 0.064522 | 0.16391  | 0.232816 | 3.62E-07 | 0.27547  | 1.41E-09 | 0.067521 | 0.14515 | 0.141066 |
| -0.01673 | 0.71845  | 0.077131 | 0.09595  | 0.148799 | 0.00126  | -0.01625 | 0.72618 | -0.03082 |
| 0.033505 | 0.47011  | 0.231496 | 4.23E-07 | 0.288343 | 2.16E-10 | 0.058865 | 0.20417 | 0.120937 |
| 0.066727 | 0.14995  | 0.250039 | 4.35E-08 | 0.310131 | 7.19E-12 | 0.056183 | 0.22558 | 0.135253 |
| 0.070661 | 0.1273   | 0.244641 | 8.60E-08 | 0.293604 | 9.74E-11 | 0.071828 | 0.12113 | 0.135415 |
| 0.078106 | 0.09181  | 0.127069 | 0.00596  | 0.185343 | 5.59E-05 | 0.022369 | 0.6297  | 0.036692 |
| 0.03773  | 0.41595  | 0.213984 | 3.07E-06 | 0.258336 | 1.48E-08 | 0.026362 | 0.56986 | 0.114923 |
| -0.02644 | 0.56878  | 0.064302 | 0.16535  | 0.076703 | 0.09781  | -0.0101  | 0.8277  | 0.030554 |
| 0.0601   | 0.19482  | 0.253416 | 2.81E-08 | 0.320593 | 1.27E-12 | 0.033156 | 0.47474 | 0.119752 |
| 0.041566 | 0.37012  | 0.224952 | 9.05E-07 | 0.277441 | 1.06E-09 | 0.04717  | 0.30906 | 0.119109 |
| 0.027287 | 0.55639  | 0.171447 | 0.0002   | 0.218752 | 1.82E-06 | -0.04438 | 0.3386  | 0.078638 |
| -0.04636 | 0.31746  | 0.096284 | 0.03753  | 0.160833 | 0.00048  | -0.09983 | 0.03102 | 0.005389 |
| -0.063   | 0.1741   | 0.062559 | 0.17714  | 0.087184 | 0.05975  | -0.0859  | 0.06364 | 0.018811 |
| -0.00501 | 0.91407  | 0.122943 | 0.00782  | 0.198196 | 1.60E-05 | -0.03966 | 0.39248 | 0.042412 |
| 0.078333 | 0.09086  | 0.191257 | 3.18E-05 | 0.23467  | 2.91E-07 | 0.02782  | 0.54871 | 0.050169 |
| -0.00994 | 0.83031  | 0.133118 | 0.00395  | 0.174676 | 0.00015  | 0.015171 | 0.74368 | 0.082304 |
| 0.055261 | 0.2333   | 0.268703 | 3.63E-09 | 0.289499 | 1.81E-10 | 0.064525 | 0.16389 | 0.112676 |
| -0.04924 | 0.28825  | 0.126319 | 0.00627  | 0.132434 | 0.00415  | -0.04104 | 0.37616 | -0.01368 |
| 0.016557 | 0.72119  | 0.182254 | 7.46E-05 | 0.233769 | 3.23E-07 | 0.018609 | 0.68835 | 0.076338 |
| 0.062031 | 0.18083  | 0.15868  | 0.00058  | 0.183923 | 6.39E-05 | 0.111359 | 0.01606 | 0.097123 |
| 0.037209 | 0.42243  | 0.100243 | 0.03032  | 0.106774 | 0.02101  | 0.077008 | 0.09648 | 0.054669 |
| 0.004513 | 0.92251  | 0.2181   | 1.96E-06 | 0.261029 | 1.03E-08 | -0.006   | 0.89714 | 0.096365 |
| 0.020076 | 0.66521  | 0.195485 | 2.10E-05 | 0.242689 | 1.10E-07 | 0.031081 | 0.50283 | 0.098464 |
| 0.076463 | 0.09887  | 0.289316 | 1.86E-10 | 0.362818 | 5.63E-16 | 0.106606 | 0.02121 | 0.149049 |
| 0.082181 | 0.07603  | 0.175548 | 0.00014  | 0.184569 | 6.01E-05 | 0.028407 | 0.5403  | 0.014716 |
| 0.043383 | 0.34956  | 0.215068 | 2.73E-06 | 0.264307 | 6.64E-09 | 0.062436 | 0.17799 | 0.110827 |
| -0.00267 | 0.9542   | 0.089205 | 0.05405  | 0.212276 | 3.69E-06 | -0.08642 | 0.06204 | -0.06356 |
| 0.018314 | 0.69304  | 0.219313 | 1.71E-06 | 0.248522 | 5.27E-08 | 0.021352 | 0.64534 | 0.136204 |
| 0.001738 | 0.97012  | 0.089197 | 0.05407  | 0.100323 | 0.03018  | -0.05916 | 0.20192 | -0.01474 |
| 0.058686 | 0.20555  | 0.228412 | 6.07E-07 | 0.217345 | 2.13E-06 | 0.091097 | 0.04913 | 0.134764 |
| -0.0285  | 0.539    | 0.072873 | 0.11579  | 0.095022 | 0.04011  | -0.09176 | 0.04751 | 0.020747 |
| 0.198414 | 1.57E-05 | 0.241999 | 1.19E-07 | 0.32999  | 2.52E-13 | 0.107436 | 0.02022 | 0.178311 |
| 0.066563 | 0.15095  | 0.268131 | 3.93E-09 | 0.331529 | 1.92E-13 | 0.032473 | 0.4839  | 0.129607 |
| 0.002598 | 0.95536  | 0.003853 | 0.93382  | 0.048073 | 0.29988  | -0.07317 | 0.1143  | 0.018986 |
| 0.100149 | 0.03047  | 0.090317 | 0.05111  | 0.112225 | 0.01525  | 0.078069 | 0.09196 | 0.004477 |

|          |          |          |          |          |          |          |          |          |
|----------|----------|----------|----------|----------|----------|----------|----------|----------|
| 0.03336  | 0.47202  | 0.150855 | 0.00108  | 0.205674 | 7.44E-06 | 0.04888  | 0.29183  | 0.031194 |
| 0.080756 | 0.08128  | 0.227669 | 6.62E-07 | 0.249132 | 4.88E-08 | 0.05792  | 0.21154  | 0.148817 |
| 0.05946  | 0.19962  | 0.149629 | 0.00118  | 0.225746 | 8.26E-07 | -0.03307 | 0.47594  | 0.057177 |
| 0.034098 | 0.46228  | 0.202352 | 1.05E-05 | 0.242839 | 1.08E-07 | 0.044281 | 0.33967  | 0.092559 |
| 0.004372 | 0.92493  | 0.095588 | 0.03893  | 0.161056 | 0.00048  | -0.01651 | 0.72194  | 0.016464 |
| 0.086641 | 0.06137  | 0.192008 | 2.95E-05 | 0.229891 | 5.11E-07 | -0.01051 | 0.82078  | 0.077863 |
| 0.126988 | 0.006    | 0.266888 | 4.67E-09 | 0.285533 | 3.27E-10 | 0.164909 | 0.00035  | 0.181566 |
| 0.011866 | 0.79814  | 0.227064 | 7.10E-07 | 0.275232 | 1.46E-09 | 0.037806 | 0.41501  | 0.128059 |
| -0.02374 | 0.60885  | 0.152092 | 0.00098  | 0.199431 | 1.41E-05 | -0.00764 | 0.86926  | 0.054949 |
| 0.116317 | 0.01189  | 0.177352 | 0.00012  | 0.224067 | 1.00E-06 | 0.045101 | 0.33079  | 0.042188 |
| 0.028264 | 0.54234  | 0.190018 | 3.58E-05 | 0.25036  | 4.17E-08 | -0.00353 | 0.93942  | 0.103251 |
| -0.05594 | 0.22757  | -0.0136  | 0.76936  | 0.05303  | 0.25274  | -0.18819 | 4.27E-05 | -0.08341 |
| -0.01611 | 0.72839  | 0.137874 | 0.00283  | 0.214457 | 2.92E-06 | 0.012208 | 0.79245  | 0.092277 |
| 0.031596 | 0.49578  | 0.114102 | 0.01362  | 0.168354 | 0.00026  | 0.105479 | 0.02263  | -0.01489 |
| 0.003479 | 0.94024  | -0.00193 | 0.96681  | 0.023183 | 0.61728  | -0.09229 | 0.04622  | -0.05053 |
| -0.00971 | 0.8343   | 0.001154 | 0.98016  | 0.021616 | 0.64127  | -0.11999 | 0.00945  | -0.03154 |
| 0.0666   | 0.15073  | 0.215506 | 2.60E-06 | 0.246672 | 6.66E-08 | 0.031339 | 0.4993   | 0.100383 |
| 0.027576 | 0.55222  | 0.142436 | 0.00203  | 0.192456 | 2.83E-05 | 0.050512 | 0.276    | 0.002606 |
| 0.075102 | 0.10504  | 0.261665 | 9.48E-09 | 0.259845 | 1.21E-08 | 0.109194 | 0.01825  | 0.214209 |
| 0.060551 | 0.19148  | 0.341792 | 3.05E-14 | 0.349259 | 7.64E-15 | 0.117387 | 0.01113  | 0.150908 |
| -0.09987 | 0.03095  | 0.087074 | 0.06008  | 0.110574 | 0.01683  | -0.04868 | 0.29386  | -0.02322 |
| 0.070642 | 0.12741  | 0.200549 | 1.26E-05 | 0.229991 | 5.05E-07 | 0.034897 | 0.45185  | 0.092741 |
| 0.117486 | 0.01106  | 0.24091  | 1.36E-07 | 0.257086 | 1.74E-08 | -0.02842 | 0.54008  | 0.091115 |
| 0.042967 | 0.3542   | 0.087587 | 0.05858  | 0.108702 | 0.01879  | -0.07447 | 0.10801  | -0.01048 |
| 0.034296 | 0.45967  | 0.218972 | 1.78E-06 | 0.222251 | 1.23E-06 | 0.081411 | 0.07883  | 0.192404 |
| 0.065602 | 0.15695  | 0.202601 | 1.02E-05 | 0.200978 | 1.21E-05 | 0.111765 | 0.01568  | 0.162892 |
| 0.0512   | 0.26951  | 0.216775 | 2.26E-06 | 0.263328 | 7.58E-09 | 0.057221 | 0.2171   | 0.112701 |
| -0.07777 | 0.09321  | 0.154244 | 0.00082  | 0.142923 | 0.00196  | 0.035782 | 0.44045  | 0.059351 |
| -0.01144 | 0.80517  | 0.307713 | 1.06E-11 | 0.236363 | 2.37E-07 | 0.115628 | 0.0124   | 0.168519 |
| -0.0106  | 0.81922  | 0.354906 | 2.62E-15 | 0.209357 | 5.05E-06 | 0.034514 | 0.45683  | 0.147457 |
| 0.102531 | 0.02672  | 0.273822 | 1.78E-09 | 0.232419 | 3.80E-07 | 0.079231 | 0.08721  | 0.027941 |
| -0.34455 | 1.84E-14 | -0.04569 | 0.32455  | -0.0721  | 0.11972  | -0.14145 | 0.00218  | -0.08294 |
| -0.31235 | 5.01E-12 | -0.08169 | 0.07781  | -0.04161 | 0.36967  | -0.15147 | 0.00103  | -0.14053 |
| 0.030258 | 0.51422  | 0.119499 | 0.00975  | 0.170272 | 0.00022  | 0.11333  | 0.01427  | 0.053606 |
| -0.26673 | 4.77E-09 | 0.057753 | 0.21286  | 0.023519 | 0.61218  | -0.10064 | 0.02967  | -0.03424 |
| 0.060249 | 0.19371  | 0.225746 | 8.26E-07 | 0.198058 | 1.62E-05 | -0.00478 | 0.91798  | 0.007971 |
| -0.10583 | 0.02218  | 0.109783 | 0.01763  | 0.128165 | 0.00554  | 0.078248 | 0.09122  | 0.134765 |
| -0.0781  | 0.09183  | -0.00708 | 0.87869  | 0.064773 | 0.16227  | 0.00923  | 0.84231  | -0.03806 |
| -0.19901 | 1.47E-05 | 0.103892 | 0.02476  | 0.037852 | 0.41445  | -0.0305  | 0.5108   | 0.011874 |
| 0.093082 | 0.04438  | 0.441723 | 1.00E-23 | 0.425387 | 6.02E-22 | 0.153841 | 0.00085  | 0.178034 |
| -0.1877  | 4.47E-05 | 0.144437 | 0.00175  | 0.079025 | 0.08804  | -0.03583 | 0.43987  | 0.033298 |
| 0.163637 | 0.00038  | 0.45545  | 2.70E-25 | 0.379057 | 2.10E-17 | 0.185779 | 5.36E-05 | 0.295063 |
| -0.28324 | 4.59E-10 | -0.14157 | 0.00216  | -0.18328 | 6.78E-05 | -0.21414 | 3.02E-06 | -0.31516 |
| 0.21484  | 2.80E-06 | 0.545412 | 1.51E-37 | 0.31008  | 7.26E-12 | 0.400278 | 2.13E-19 | 0.606688 |
| -0.04636 | 0.31741  | 0.252857 | 3.03E-08 | 0.136754 | 0.00306  | 0.01706  | 0.7131   | 0.060788 |



|          |          |          |          |          |          |          |          |          |
|----------|----------|----------|----------|----------|----------|----------|----------|----------|
| 0.030584 | 0.50969  | 0.146853 | 0.00146  | 0.240089 | 1.51E-07 | -0.04473 | 0.33483  | 0.04251  |
| 0.034558 | 0.45626  | 0.030921 | 0.50505  | 0.295131 | 7.71E-11 | -0.04836 | 0.29697  | -0.10834 |
| -0.1824  | 7.36E-05 | 0.048931 | 0.29133  | 0.018064 | 0.69702  | -0.12796 | 0.00562  | -0.00548 |
| -0.08321 | 0.07242  | 0.091268 | 0.04871  | 0.047754 | 0.3031   | 0.019979 | 0.66673  | 0.112221 |
| -0.16217 | 0.00043  | -0.0813  | 0.07922  | 0.01793  | 0.69916  | -0.18304 | 6.93E-05 | -0.15678 |
| 0.134894 | 0.00349  | 0.457962 | 1.37E-25 | 0.351836 | 4.70E-15 | 0.215164 | 2.70E-06 | 0.282003 |
| -0.1117  | 0.01574  | 0.089252 | 0.05393  | 0.073814 | 0.11115  | -0.03005 | 0.51718  | -0.04155 |
| -0.14677 | 0.00147  | 0.022533 | 0.62718  | 0.012995 | 0.77942  | -0.09169 | 0.04767  | -0.13226 |
| -0.22027 | 1.54E-06 | 0.117188 | 0.01126  | 0.026236 | 0.57171  | -0.03391 | 0.4647   | 0.074857 |
| -0.2522  | 3.29E-08 | -0.01313 | 0.77719  | -0.06904 | 0.13627  | -0.15026 | 0.00113  | -0.28131 |
| -0.03106 | 0.50318  | 0.202774 | 1.00E-05 | 0.103187 | 0.02576  | 0.073547 | 0.11245  | 0.100056 |
| 0.115297 | 0.01266  | 0.395446 | 6.24E-19 | 0.393352 | 9.89E-19 | 0.160954 | 0.00048  | 0.245564 |
| -0.02565 | 0.58028  | -0.05876 | 0.20494  | 0.026626 | 0.566    | -0.16589 | 0.00032  | -0.07331 |
| 0.044761 | 0.33445  | 0.228689 | 5.88E-07 | 0.256464 | 1.89E-08 | 0.133622 | 0.00382  | 0.178289 |
| -0.08716 | 0.05983  | 0.042274 | 0.36203  | -0.02641 | 0.56908  | -0.12376 | 0.00742  | -0.09458 |
| -0.41251 | 1.30E-20 | -0.17875 | 0.0001   | -0.20231 | 1.05E-05 | -0.21174 | 3.91E-06 | -0.26952 |
| -0.10107 | 0.02897  | 0.131002 | 0.00457  | 0.023435 | 0.61346  | 0.031834 | 0.49254  | 0.06516  |
| -0.08235 | 0.07542  | 0.308148 | 9.92E-12 | 0.162763 | 0.00041  | 0.020606 | 0.65694  | 0.112175 |
| -0.21489 | 2.78E-06 | 0.123192 | 0.00769  | -0.05667 | 0.22161  | -0.03516 | 0.44838  | 0.038118 |
| -0.26679 | 4.73E-09 | 0.079751 | 0.08515  | -0.08366 | 0.07087  | -0.03829 | 0.4091   | -0.04593 |
| -0.12571 | 0.00653  | 0.205392 | 7.66E-06 | 0.12207  | 0.00827  | -0.014   | 0.76278  | 0.070778 |
| -0.03966 | 0.39255  | 0.413069 | 1.14E-20 | 0.181286 | 8.15E-05 | 0.109795 | 0.01762  | 0.244926 |
| 0.108221 | 0.01932  | 0.183524 | 6.63E-05 | 0.173795 | 0.00016  | 0.061679 | 0.18332  | 0.001637 |
| -0.07573 | 0.10214  | 0.044148 | 0.34112  | 0.122656 | 0.00797  | -0.00949 | 0.83798  | -0.13384 |
| -0.16142 | 0.00046  | 0.213148 | 3.36E-06 | 0.117247 | 0.01122  | -0.0316  | 0.49578  | 0.039189 |
| -0.20648 | 6.84E-06 | -0.08272 | 0.07412  | -0.15753 | 0.00063  | -0.02344 | 0.61341  | 0.010179 |
| -0.0041  | 0.92954  | 0.327559 | 3.84E-13 | 0.200347 | 1.29E-05 | 0.014511 | 0.75447  | 0.08625  |
| -0.233   | 3.54E-07 | -0.0329  | 0.47822  | 0.001602 | 0.97246  | -0.07982 | 0.08488  | -0.08362 |
| -0.03853 | 0.40609  | 0.074332 | 0.10866  | 0.12385  | 0.00737  | 0.01442  | 0.75596  | -0.02268 |
| 0.037611 | 0.41743  | 0.075694 | 0.10232  | 0.209492 | 4.98E-06 | -0.03704 | 0.42453  | -0.08365 |
| -0.33777 | 6.32E-14 | -0.044   | 0.34271  | -0.20928 | 5.09E-06 | -0.06899 | 0.13658  | -0.12524 |
| 0.113171 | 0.01441  | 0.329868 | 2.57E-13 | 0.202069 | 1.08E-05 | 0.102511 | 0.02675  | 0.210426 |
| -0.37264 | 7.86E-17 | -0.20592 | 7.25E-06 | -0.24357 | 9.83E-08 | -0.21836 | 1.90E-06 | -0.32066 |
| -0.16316 | 0.0004   | -0.07013 | 0.1302   | -0.01123 | 0.80876  | -0.11921 | 0.00993  | -0.17447 |
| 0.067912 | 0.14282  | 0.208953 | 5.27E-06 | 0.211832 | 3.88E-06 | 0.083133 | 0.07269  | 0.136642 |
| 0.027418 | 0.5545   | 0.413797 | 9.62E-21 | 0.233983 | 3.15E-07 | 0.152278 | 0.00096  | 0.268308 |
| -0.11619 | 0.01198  | 0.322506 | 9.17E-13 | 0.148031 | 0.00134  | 0.052603 | 0.25659  | 0.136982 |
| -0.31969 | 1.48E-12 | -0.11637 | 0.01185  | -0.1046  | 0.02379  | -0.15221 | 0.00097  | -0.15403 |
| 0.036262 | 0.43434  | 0.32625  | 4.82E-13 | 0.255013 | 2.29E-08 | 0.081472 | 0.07861  | 0.118673 |
| 0.147163 | 0.00143  | 0.423949 | 8.53E-22 | 0.306296 | 1.34E-11 | 0.24938  | 4.73E-08 | 0.242316 |
| 0.155297 | 0.00076  | 0.350751 | 5.77E-15 | 0.371546 | 9.83E-17 | 0.210477 | 4.48E-06 | 0.386027 |
| -0.04932 | 0.28746  | 0.321773 | 1.04E-12 | 0.211668 | 3.94E-06 | 0.137279 | 0.00295  | 0.228306 |
| -0.07677 | 0.09753  | 0.096653 | 0.0368   | 0.041575 | 0.37002  | 0.011795 | 0.79933  | 0.023073 |
| 0.321166 | 1.15E-12 | 0.522937 | 3.89E-34 | 0.469724 | 5.27E-27 | 0.26395  | 6.97E-09 | 0.388553 |
| -0.22671 | 7.40E-07 | -0.21234 | 3.67E-06 | -0.19536 | 2.12E-05 | -0.09894 | 0.03255  | -0.15594 |

|          |          |          |          |          |          |          |          |          |
|----------|----------|----------|----------|----------|----------|----------|----------|----------|
| -0.19837 | 1.57E-05 | -0.00632 | 0.89171  | -0.07148 | 0.12294  | -0.05636 | 0.22413  | -0.0739  |
| -0.23212 | 3.93E-07 | 0.059636 | 0.19829  | -0.05072 | 0.27399  | -0.07272 | 0.11655  | -0.08673 |
| 0.068576 | 0.13895  | 0.276866 | 1.15E-09 | 0.163872 | 0.00038  | 0.116724 | 0.01159  | 0.104884 |
| -0.50985 | 2.90E-32 | -0.35036 | 6.20E-15 | -0.4266  | 4.47E-22 | -0.22348 | 1.07E-06 | -0.33251 |
| -0.4037  | 9.86E-20 | -0.22538 | 8.61E-07 | -0.24035 | 1.46E-07 | -0.18436 | 6.13E-05 | -0.39113 |
| -0.0106  | 0.8193   | 0.209198 | 5.13E-06 | 0.224009 | 1.01E-06 | 0.001248 | 0.97854  | 0.01838  |
| -0.01825 | 0.69411  | 0.286542 | 2.82E-10 | 0.220539 | 1.49E-06 | 0.020839 | 0.65331  | 0.134212 |
| 0.313297 | 4.29E-12 | 0.520177 | 9.80E-34 | 0.440181 | 1.49E-23 | 0.286559 | 2.81E-10 | 0.37909  |
| -0.14701 | 0.00144  | 0.106023 | 0.02193  | 0.082923 | 0.07341  | -0.06992 | 0.13135  | -0.05994 |
| -0.14877 | 0.00126  | 0.158301 | 0.0006   | 0.008604 | 0.85289  | 0.063038 | 0.17384  | 0.190402 |
| -0.43953 | 1.76E-23 | -0.28213 | 5.39E-10 | -0.28636 | 2.90E-10 | -0.18432 | 6.15E-05 | -0.2264  |
| -0.22045 | 1.50E-06 | 0.062959 | 0.17438  | -0.04008 | 0.38751  | -0.05947 | 0.19954  | -0.02658 |
| 0.017387 | 0.70785  | 0.253562 | 2.76E-08 | 0.143097 | 0.00194  | 0.137918 | 0.00282  | 0.345696 |
| -0.06691 | 0.14884  | 0.182966 | 6.98E-05 | 0.031224 | 0.50087  | 0.049086 | 0.2898   | 0.161025 |
| 0.074482 | 0.10795  | 0.401562 | 1.60E-19 | 0.367091 | 2.41E-16 | 0.112305 | 0.01518  | 0.163615 |
| 0.019638 | 0.67208  | 0.300402 | 3.40E-11 | 0.223808 | 1.03E-06 | 0.09261  | 0.04547  | 0.183038 |
| -0.06834 | 0.1403   | 0.197867 | 1.65E-05 | 0.036317 | 0.43364  | 0.046517 | 0.31582  | 0.165728 |
| -0.07241 | 0.11811  | 0.252726 | 3.08E-08 | 0.155567 | 0.00074  | 0.026155 | 0.57289  | 0.103332 |
| -0.21547 | 2.61E-06 | 0.059882 | 0.19644  | -0.00179 | 0.96931  | -0.0602  | 0.19409  | -0.06815 |
| -0.21708 | 2.19E-06 | -0.10597 | 0.022    | -0.1135  | 0.01412  | -0.0136  | 0.7694   | -0.14332 |
| -0.09239 | 0.04599  | 0.125409 | 0.00666  | 0.053173 | 0.25146  | 0.024903 | 0.59141  | 0.054145 |
| -0.07742 | 0.0947   | -0.2356  | 2.60E-07 | -0.1322  | 0.00421  | -0.02138 | 0.64493  | -0.15558 |
| 0.176809 | 0.00012  | 0.494757 | 3.33E-30 | 0.446796 | 2.69E-24 | 0.171807 | 0.00019  | 0.281844 |
| -0.11188 | 0.01557  | -0.05036 | 0.27742  | 0.019226 | 0.67858  | -0.02472 | 0.59414  | -0.0478  |
| -0.1527  | 0.00093  | 0.215389 | 2.64E-06 | 0.19122  | 3.19E-05 | -0.02919 | 0.52921  | 0.046649 |
| 0.099999 | 0.03072  | 0.191668 | 3.05E-05 | -0.05219 | 0.2603   | 0.245532 | 7.69E-08 | 0.240728 |
| 0.161903 | 0.00044  | 0.428978 | 2.49E-22 | 0.407158 | 4.48E-20 | 0.228964 | 5.70E-07 | 0.418884 |
| -0.31717 | 2.26E-12 | -0.07414 | 0.10956  | -0.08879 | 0.05518  | -0.16756 | 0.00028  | -0.17752 |
| 0.208864 | 5.32E-06 | 0.484242 | 7.92E-29 | 0.494379 | 3.74E-30 | 0.17402  | 0.00016  | 0.208419 |
| -0.00736 | 0.87389  | 0.168041 | 0.00026  | 0.137915 | 0.00282  | 0.063823 | 0.16853  | 0.040661 |
| 0.045137 | 0.33041  | 0.203109 | 9.71E-06 | 0.089316 | 0.05375  | -0.0367  | 0.4288   | -0.04776 |
| -0.28007 | 7.28E-10 | 0.03268  | 0.48112  | -0.09694 | 0.03625  | -0.08637 | 0.06219  | -0.08243 |
| 0.132239 | 0.0042   | 0.052893 | 0.25397  | 0.077539 | 0.0942   | -0.04793 | 0.30133  | -0.04521 |
| -0.02062 | 0.65678  | 0.259575 | 1.25E-08 | 0.164021 | 0.00037  | 0.047169 | 0.30907  | 0.080421 |
| -0.04123 | 0.37397  | 0.146892 | 0.00146  | 0.065412 | 0.15816  | 0.029774 | 0.52098  | -0.02349 |
| 0.012378 | 0.78964  | 0.265    | 6.04E-09 | 0.203999 | 8.85E-06 | 0.080062 | 0.08394  | 0.014888 |
| 0.003392 | 0.94173  | 0.171732 | 0.00019  | 0.091229 | 0.0488   | 0.034186 | 0.46112  | -0.03409 |
| 0.037198 | 0.42257  | 0.234329 | 3.03E-07 | 0.089151 | 0.0542   | 0.075217 | 0.10451  | 0.058192 |
| -0.2387  | 1.79E-07 | 0.013747 | 0.76701  | -0.09361 | 0.04317  | -0.0772  | 0.09565  | -0.1159  |
| -0.19823 | 1.60E-05 | -0.20442 | 8.48E-06 | -0.11372 | 0.01393  | -0.18754 | 4.54E-05 | -0.19043 |
| -0.13123 | 0.0045   | 0.122953 | 0.00781  | 0.02702  | 0.56026  | -0.07753 | 0.09425  | -0.07195 |
| -0.22363 | 1.05E-06 | -0.04825 | 0.29811  | -0.01083 | 0.81546  | -0.16145 | 0.00046  | -0.16136 |
| 0.016458 | 0.72279  | 0.04367  | 0.34638  | -0.03124 | 0.50063  | -0.13723 | 0.00296  | -0.07861 |
| -0.26895 | 3.51E-09 | 0.015507 | 0.7382   | -0.01936 | 0.67648  | -0.1333  | 0.0039   | -0.11607 |
| -0.16773 | 0.00027  | 0.141442 | 0.00219  | 0.015451 | 0.73911  | -0.01849 | 0.69022  | 0.177531 |

|          |          |          |          |          |          |          |          |          |
|----------|----------|----------|----------|----------|----------|----------|----------|----------|
| 0.03042  | 0.51196  | 0.422303 | 1.27E-21 | 0.243225 | 1.03E-07 | 0.237884 | 1.97E-07 | 0.424148 |
| -0.2883  | 2.17E-10 | -0.16385 | 0.00038  | -0.11514 | 0.01278  | -0.21211 | 3.76E-06 | -0.22136 |
| -0.44367 | 6.07E-24 | -0.15527 | 0.00076  | -0.27322 | 1.94E-09 | -0.16956 | 0.00023  | -0.13714 |
| -0.02953 | 0.5244   | 0.284089 | 4.05E-10 | 0.345343 | 1.58E-14 | -0.0203  | 0.66178  | 0.053716 |
| 0.030893 | 0.50543  | 0.357388 | 1.62E-15 | 0.384658 | 6.45E-18 | 0.017519 | 0.70573  | 0.187009 |
| 0.115216 | 0.01272  | 0.409795 | 2.44E-20 | 0.363256 | 5.16E-16 | 0.217215 | 2.16E-06 | 0.271862 |
| 0.036512 | 0.43118  | 0.150486 | 0.00111  | 0.189115 | 3.91E-05 | 0.028046 | 0.54546  | 0.013576 |
| -0.26075 | 1.07E-08 | -0.02702 | 0.56027  | -0.03269 | 0.48093  | -0.12351 | 0.00754  | -0.14957 |
| 0.212853 | 3.47E-06 | 0.457875 | 1.40E-25 | 0.381932 | 1.15E-17 | 0.215022 | 2.74E-06 | 0.271151 |
| 0.070339 | 0.12906  | 0.395969 | 5.56E-19 | 0.322798 | 8.72E-13 | 0.082311 | 0.07557  | 0.148538 |
| 0.041874 | 0.36659  | 0.162898 | 0.00041  | 0.173019 | 0.00017  | -0.06083 | 0.18946  | -0.13199 |
| -0.42674 | 4.32E-22 | -0.2456  | 7.62E-08 | -0.25326 | 2.87E-08 | -0.29118 | 1.41E-10 | -0.34034 |
| -0.27534 | 1.44E-09 | -0.17392 | 0.00016  | -0.2168  | 2.26E-06 | -0.04671 | 0.31381  | -0.12164 |
| 0.196401 | 1.91E-05 | 0.261164 | 1.01E-08 | 0.248814 | 5.08E-08 | 0.118998 | 0.01006  | -0.03163 |
| -0.23257 | 3.73E-07 | -0.0762  | 0.10002  | -0.12582 | 0.00648  | -0.06919 | 0.13545  | 0.009597 |
| -0.00974 | 0.83368  | 0.376015 | 3.94E-17 | 0.256123 | 1.98E-08 | 0.061075 | 0.18766  | 0.214061 |
| -0.041   | 0.37666  | 0.199758 | 1.37E-05 | 0.174231 | 0.00015  | 0.033528 | 0.4698   | 0.026261 |
| -0.01443 | 0.75585  | 0.408179 | 3.55E-20 | 0.211803 | 3.89E-06 | 0.109136 | 0.01832  | 0.209079 |
| 0.015588 | 0.73689  | 0.068248 | 0.14085  | 0.097003 | 0.03612  | 0.079076 | 0.08784  | 0.081716 |
| -0.08725 | 0.05957  | 0.158001 | 0.00061  | 0.183328 | 6.75E-05 | 0.008149 | 0.86058  | 0.002518 |
| -0.17846 | 0.00011  | 0.104019 | 0.02458  | 0.118504 | 0.01037  | -0.13923 | 0.00257  | -0.17053 |
| 0.153249 | 0.00089  | 0.408623 | 3.20E-20 | 0.321406 | 1.11E-12 | 0.215019 | 2.74E-06 | 0.358386 |
| -0.09182 | 0.04734  | 0.036831 | 0.42716  | 0.020438 | 0.65955  | 0.133331 | 0.0039   | 0.170308 |
| -0.02696 | 0.5611   | 0.148858 | 0.00125  | 0.112917 | 0.01463  | 0.141667 | 0.00215  | 0.155298 |
| 0.014205 | 0.75948  | 0.275779 | 1.35E-09 | 0.268661 | 3.66E-09 | 0.062914 | 0.17469  | 0.114421 |
| -0.04734 | 0.30736  | 0.132656 | 0.00408  | 0.13307  | 0.00397  | 0.021219 | 0.6474   | -0.02906 |
| 0.16108  | 0.00047  | 0.385788 | 5.07E-18 | 0.443164 | 6.92E-24 | 0.135978 | 0.00324  | 0.205793 |
| -0.06209 | 0.18041  | 0.154632 | 0.0008   | 0.142342 | 0.00205  | 0.057261 | 0.21679  | 0.078042 |
| -0.13702 | 0.00301  | 0.119433 | 0.00979  | 0.072231 | 0.11905  | -0.1014  | 0.02845  | -0.03644 |
| -0.23921 | 1.68E-07 | -0.27115 | 2.59E-09 | -0.08257 | 0.07465  | -0.15388 | 0.00085  | -0.25171 |
| -0.00242 | 0.95845  | -0.00259 | 0.95545  | 0.160563 | 0.0005   | -0.11978 | 0.00957  | -0.23737 |
| 0.057662 | 0.21358  | 0.30088  | 3.16E-11 | 0.172409 | 0.00018  | 0.199629 | 1.38E-05 | 0.303417 |
| -0.19179 | 3.01E-05 | -0.05561 | 0.23037  | -0.13941 | 0.00253  | 0.03216  | 0.48812  | -0.01789 |
| 0.0046   | 0.92102  | 0.181109 | 8.29E-05 | 0.227984 | 6.38E-07 | 0.005474 | 0.90609  | 0.049214 |
| 0.207589 | 6.09E-06 | 0.400408 | 2.07E-19 | 0.339245 | 4.84E-14 | 0.231916 | 4.03E-07 | 0.50131  |
| -0.20725 | 6.31E-06 | -0.15302 | 0.00091  | -0.09307 | 0.04442  | -0.14672 | 0.00148  | -0.25215 |
| 0.027278 | 0.55652  | 0.432949 | 9.30E-23 | 0.363433 | 4.99E-16 | 0.143533 | 0.00187  | 0.268042 |
| -0.4058  | 6.12E-20 | -0.12472 | 0.00697  | -0.20064 | 1.25E-05 | -0.16292 | 0.00041  | -0.21219 |
| -0.39705 | 4.38E-19 | -0.21992 | 1.60E-06 | -0.28231 | 5.26E-10 | -0.05909 | 0.20242  | -0.06957 |
| -0.28319 | 4.62E-10 | -0.0161  | 0.72861  | -0.04884 | 0.2922   | -0.11761 | 0.01097  | -0.15313 |
| -0.22635 | 7.71E-07 | -0.16419 | 0.00037  | -0.12999 | 0.0049   | -0.21849 | 1.87E-06 | -0.26155 |
| -0.21241 | 3.64E-06 | 0.018453 | 0.69082  | 0.019684 | 0.67137  | -0.12059 | 0.00909  | -0.15532 |
| -0.01668 | 0.71926  | 0.215495 | 2.60E-06 | 0.177737 | 0.00011  | -0.00796 | 0.86376  | 0.030251 |
| -0.00503 | 0.91363  | 0.21336  | 3.29E-06 | 0.003182 | 0.94532  | 0.129214 | 0.00516  | 0.244284 |
| 0.119637 | 0.00966  | 0.488169 | 2.46E-29 | 0.30394  | 1.95E-11 | 0.250759 | 3.96E-08 | 0.377832 |

|          |          |          |          |          |          |          |          |          |
|----------|----------|----------|----------|----------|----------|----------|----------|----------|
| -0.10348 | 0.02533  | 0.280315 | 7.03E-10 | 0.206062 | 7.14E-06 | 0.030507 | 0.51076  | 0.026462 |
| -0.1485  | 0.00129  | 0.144368 | 0.00176  | 0.074766 | 0.10661  | -0.00075 | 0.98713  | 0.025669 |
| 0.096702 | 0.0367   | 0.382926 | 9.31E-18 | 0.293239 | 1.03E-10 | 0.193639 | 2.52E-05 | 0.29839  |
| 0.006285 | 0.89225  | 0.208218 | 5.70E-06 | 0.171374 | 0.0002   | 0.038702 | 0.40404  | 0.097333 |
| -0.10568 | 0.02237  | 0.205317 | 7.72E-06 | 0.166496 | 0.0003   | 0.034907 | 0.45172  | 0.070549 |
| -0.09982 | 0.03102  | 0.079597 | 0.08576  | -0.00828 | 0.8584   | 0.107195 | 0.02051  | 0.067889 |
| -0.17831 | 0.00011  | -0.13114 | 0.00453  | -0.04641 | 0.3169   | -0.12106 | 0.00882  | -0.24584 |
| 0.068664 | 0.13844  | 0.158281 | 0.0006   | 0.207575 | 6.10E-06 | 0.098154 | 0.03396  | 0.042271 |
| 0.085987 | 0.06336  | 0.405607 | 6.39E-20 | 0.360658 | 8.60E-16 | 0.130519 | 0.00473  | 0.21036  |
| 0.332833 | 1.53E-13 | 0.438991 | 2.02E-23 | 0.518557 | 1.68E-33 | 0.170124 | 0.00022  | 0.264695 |
| -0.28221 | 5.34E-10 | -0.04933 | 0.28743  | -0.02244 | 0.62863  | -0.15531 | 0.00076  | -0.11267 |
| 0.026104 | 0.57364  | 0.364082 | 4.39E-16 | 0.280281 | 7.06E-10 | 0.089448 | 0.0534   | 0.103474 |
| 0.250752 | 3.97E-08 | 0.331608 | 1.89E-13 | 0.330778 | 2.19E-13 | 0.137525 | 0.0029   | 0.098834 |
| 0.363048 | 5.38E-16 | -0.00742 | 0.87287  | 0.180726 | 8.59E-05 | 0.080884 | 0.08079  | 0.044274 |
| 0.02378  | 0.60824  | 0.306941 | 1.21E-11 | 0.254448 | 2.46E-08 | 0.090103 | 0.05167  | 0.100099 |
| -0.33574 | 9.09E-14 | -0.16864 | 0.00025  | -0.18161 | 7.91E-05 | -0.25362 | 2.74E-08 | -0.30998 |
| 0.066776 | 0.14964  | 0.279798 | 7.57E-10 | 0.309446 | 8.04E-12 | 0.023727 | 0.60904  | 0.026481 |
| 0.046521 | 0.31577  | 0.375149 | 4.71E-17 | 0.23563  | 2.59E-07 | 0.100629 | 0.02968  | 0.328515 |
| -0.02703 | 0.56009  | 0.344737 | 1.77E-14 | 0.295857 | 6.89E-11 | 0.111193 | 0.01622  | 0.230586 |
| 0.052694 | 0.25576  | 0.306521 | 1.29E-11 | 0.269143 | 3.42E-09 | 0.0746   | 0.10739  | 0.198092 |
| -0.23341 | 3.38E-07 | -0.06323 | 0.17254  | -0.03381 | 0.46602  | -0.12377 | 0.00741  | -0.19941 |
| 0.072762 | 0.11635  | 0.391569 | 1.46E-18 | 0.32225  | 9.58E-13 | 0.177787 | 0.00011  | 0.273779 |
| -0.04679 | 0.313    | -0.07964 | 0.08558  | 0.024225 | 0.60154  | -0.11925 | 0.0099   | -0.14743 |
| 0.382908 | 9.34E-18 | 0.546884 | 8.82E-38 | 0.539806 | 1.13E-36 | 0.251625 | 3.55E-08 | 0.37948  |
| 0.02765  | 0.55115  | 0.273329 | 1.91E-09 | 0.241636 | 1.25E-07 | 0.106321 | 0.02156  | 0.149697 |
| -0.09735 | 0.03546  | 0.231592 | 4.19E-07 | 0.134974 | 0.00347  | 0.010452 | 0.82177  | 0.096316 |
| -0.14445 | 0.00175  | 0.101773 | 0.02787  | 0.117804 | 0.01084  | -0.14516 | 0.00166  | -0.08516 |
| 0.192037 | 2.94E-05 | 0.384554 | 6.59E-18 | 0.315934 | 2.77E-12 | 0.294283 | 8.78E-11 | 0.399684 |
| 0.072094 | 0.11975  | 0.398109 | 3.46E-19 | 0.23607  | 2.46E-07 | 0.126054 | 0.00638  | 0.222035 |
| -0.15802 | 0.00061  | 0.022039 | 0.63475  | 0.062974 | 0.17428  | -0.06867 | 0.1384   | -0.07032 |
| -0.40478 | 7.71E-20 | -0.07716 | 0.0958   | -0.1042  | 0.02432  | -0.2121  | 3.77E-06 | -0.21494 |
| 0.132953 | 0.004    | 0.275382 | 1.43E-09 | 0.299006 | 4.23E-11 | 0.215204 | 2.69E-06 | 0.272527 |
| -0.27499 | 1.51E-09 | -0.03174 | 0.49385  | -0.11319 | 0.01439  | -0.12727 | 0.00589  | -0.12957 |
| -0.02976 | 0.52119  | 0.248305 | 5.42E-08 | 0.068111 | 0.14165  | 0.089197 | 0.05407  | 0.241782 |
| -0.01167 | 0.80134  | 0.027206 | 0.55757  | 0.221151 | 1.39E-06 | 0.015805 | 0.73337  | -0.04094 |
| -0.26723 | 4.45E-09 | -0.03978 | 0.39107  | -0.15011 | 0.00114  | -0.01975 | 0.67034  | 0.023508 |
| 0.091351 | 0.0485   | 0.323658 | 7.53E-13 | 0.408103 | 3.61E-20 | 0.071205 | 0.1244   | 0.115883 |
| 0.676778 | 7.69E-64 | 0.487062 | 3.42E-29 | 0.444952 | 4.35E-24 | 0.389871 | 2.11E-18 | 0.335768 |
| 0.742924 | 4.29E-83 | 0.650311 | 1.75E-57 | 0.506664 | 8.04E-32 | 0.555035 | 4.33E-39 | 0.676763 |
| 0.770671 | 4.78E-93 | 0.570375 | 1.19E-41 | 0.616117 | 3.74E-50 | 0.528344 | 6.20E-35 | 0.462393 |
| 0.686207 | 2.86E-66 | 0.602647 | 1.66E-47 | 0.658502 | 2.21E-59 | 0.330172 | 2.44E-13 | 0.250607 |
| 0.786233 | 2.87E-99 | 0.564294 | 1.28E-40 | 0.507783 | 5.62E-32 | 0.471922 | 2.83E-27 | 0.352598 |
| 0.464559 | 2.24E-26 | 0.154093 | 0.00083  | 0.182164 | 7.52E-05 | 0.227967 | 6.39E-07 | 0.13449  |
| 0.768592 | 2.97E-92 | 0.598288 | 1.12E-46 | 0.622011 | 2.37E-51 | 0.444861 | 4.46E-24 | 0.507549 |
| 0.474826 | 1.23E-27 | 0.188584 | 4.11E-05 | 0.171252 | 0.0002   | 0.21726  | 2.15E-06 | 0.098094 |

|          |          |          |          |          |          |          |          |          |
|----------|----------|----------|----------|----------|----------|----------|----------|----------|
| 0.477953 | 5.00E-28 | 0.326656 | 4.50E-13 | 0.236438 | 2.35E-07 | 0.113456 | 0.01416  | 0.08859  |
| 0.776584 | 2.37E-95 | 0.553177 | 8.68E-39 | 0.469111 | 6.27E-27 | 0.433837 | 7.44E-23 | 0.357716 |
| 0.719503 | 1.21E-75 | 0.529746 | 3.83E-35 | 0.587787 | 9.93E-45 | 0.412366 | 1.34E-20 | 0.355512 |
| 0.854652 | #####    | 0.719403 | 1.30E-75 | 0.666294 | 3.04E-61 | 0.545748 | 1.33E-37 | 0.519822 |
| 0.825484 | #####    | 0.660956 | 5.81E-60 | 0.611951 | 2.54E-49 | 0.560695 | 5.09E-40 | 0.586546 |
| 0.382296 | 1.06E-17 | 0.005787 | 0.90073  | 0.061779 | 0.18261  | 0.133366 | 0.00389  | 0.088067 |
| 0.771296 | 2.75E-93 | 0.58978  | 4.29E-45 | 0.422364 | 1.25E-21 | 0.37471  | 5.15E-17 | 0.460112 |
| 0.803903 | #####    | 0.742878 | 4.45E-83 | 0.669012 | 6.60E-62 | 0.527237 | 9.05E-35 | 0.531479 |
| 0.5128   | 1.11E-32 | 0.340418 | 3.91E-14 | 0.29355  | 9.82E-11 | 0.294401 | 8.62E-11 | 0.181033 |
| 0.846342 | #####    | 0.653243 | 3.72E-58 | 0.562474 | 2.58E-40 | 0.493977 | 4.23E-30 | 0.533072 |
| 0.491377 | 9.33E-30 | 0.177969 | 0.00011  | 0.29825  | 4.76E-11 | 0.112824 | 0.01471  | -0.11043 |
| 0.603196 | 1.30E-47 | 0.172582 | 0.00018  | 0.253861 | 2.66E-08 | 0.108129 | 0.01942  | -0.0068  |
| 0.761846 | 9.82E-90 | 0.582486 | 8.99E-44 | 0.587979 | 9.16E-45 | 0.458091 | 1.32E-25 | 0.606578 |
| 0.841262 | #####    | 0.676866 | 7.31E-64 | 0.630555 | 3.89E-53 | 0.497374 | 1.49E-30 | 0.4602   |
| 0.632136 | 1.79E-53 | 0.232569 | 3.73E-07 | 0.309377 | 8.13E-12 | 0.339576 | 4.56E-14 | 0.239466 |
| 0.7553   | 2.28E-87 | 0.602769 | 1.57E-47 | 0.491394 | 9.28E-30 | 0.493186 | 5.38E-30 | 0.528709 |
| 0.8262   | #####    | 0.699334 | 8.26E-70 | 0.621148 | 3.56E-51 | 0.504838 | 1.44E-31 | 0.535884 |
| 0.754389 | 4.80E-87 | 0.502205 | 3.30E-31 | 0.44726  | 2.38E-24 | 0.382467 | 1.03E-17 | 0.367853 |
| 0.765657 | 3.80E-91 | 0.473018 | 2.07E-27 | 0.508184 | 4.94E-32 | 0.33546  | 9.56E-14 | 0.358773 |
| 0.527574 | 8.06E-35 | 0.266549 | 4.89E-09 | 0.185932 | 5.29E-05 | 0.271329 | 2.52E-09 | 0.179388 |
| 0.838289 | #####    | 0.638684 | 6.92E-55 | 0.629904 | 5.35E-53 | 0.496724 | 1.82E-30 | 0.523005 |
| 0.530588 | 2.86E-35 | 0.35556  | 2.31E-15 | 0.379187 | 2.04E-17 | 0.28829  | 2.17E-10 | 0.143074 |
| 0.903561 | #####    | 0.547999 | 5.87E-38 | 0.554516 | 5.26E-39 | 0.472596 | 2.33E-27 | 0.392414 |
| 0.767133 | 1.06E-91 | 0.470849 | 3.83E-27 | 0.39664  | 4.80E-19 | 0.438315 | 2.40E-23 | 0.347317 |
| 0.78289  | 6.89E-98 | 0.3957   | 5.90E-19 | 0.462708 | 3.74E-26 | 0.306451 | 1.30E-11 | 0.291723 |
| 0.831021 | #####    | 0.525061 | 1.90E-34 | 0.530282 | 3.18E-35 | 0.387184 | 3.76E-18 | 0.399819 |
| 0.680461 | 8.87E-65 | 0.530853 | 2.61E-35 | 0.515105 | 5.24E-33 | 0.431808 | 1.24E-22 | 0.372664 |
| 0.832538 | #####    | 0.634341 | 6.05E-54 | 0.607122 | 2.26E-48 | 0.509391 | 3.36E-32 | 0.532574 |
| 0.683178 | 1.77E-65 | 0.562214 | 2.85E-40 | 0.593222 | 9.95E-46 | 0.406458 | 5.26E-20 | 0.426583 |
| 0.473078 | 2.03E-27 | 0.226217 | 7.83E-07 | 0.23857  | 1.82E-07 | 0.174347 | 0.00015  | 0.068038 |
| 0.623116 | 1.40E-51 | 0.467556 | 9.70E-27 | 0.448823 | 1.58E-24 | 0.36097  | 8.09E-16 | 0.508191 |
| 0.719701 | 1.06E-75 | 0.522594 | 4.36E-34 | 0.444548 | 4.84E-24 | 0.436945 | 3.40E-23 | 0.367184 |
| 0.777323 | 1.21E-95 | 0.685254 | 5.09E-66 | 0.651524 | 9.25E-58 | 0.467999 | 8.57E-27 | 0.513061 |
| 0.750435 | 1.17E-85 | 0.524876 | 2.02E-34 | 0.453594 | 4.45E-25 | 0.407354 | 4.29E-20 | 0.421237 |
| 0.813346 | #####    | 0.579232 | 3.40E-43 | 0.442228 | 8.81E-24 | 0.479246 | 3.43E-28 | 0.48844  |
| 0.822531 | #####    | 0.649018 | 3.45E-57 | 0.617425 | 2.04E-50 | 0.463672 | 2.86E-26 | 0.47036  |
| 0.808841 | #####    | 0.712195 | 1.80E-73 | 0.603548 | 1.11E-47 | 0.474117 | 1.51E-27 | 0.556192 |
| 0.456878 | 1.84E-25 | 0.041242 | 0.37388  | 0.158464 | 0.00059  | 0.166892 | 0.00029  | -0.04962 |
| 0.787308 | 1.02E-99 | 0.549048 | 4.00E-38 | 0.455046 | 3.01E-25 | 0.413374 | 1.06E-20 | 0.322099 |
| 0.449828 | 1.21E-24 | 0.205302 | 7.73E-06 | 0.0537   | 0.24679  | 0.363564 | 4.86E-16 | 0.409676 |
| 0.560284 | 5.96E-40 | 0.255453 | 2.16E-08 | 0.091953 | 0.04703  | 0.379426 | 1.94E-17 | 0.346643 |
| 0.725433 | 1.87E-77 | 0.579521 | 3.03E-43 | 0.528531 | 5.81E-35 | 0.417665 | 3.86E-21 | 0.407416 |
| 0.654666 | 1.74E-58 | 0.46685  | 1.18E-26 | 0.524506 | 2.29E-34 | 0.322441 | 9.27E-13 | 0.396697 |
| 0.548021 | 5.82E-38 | 0.224317 | 9.73E-07 | 0.186324 | 5.09E-05 | 0.17869  | 0.0001   | 0.203452 |
| 0.780979 | 4.13E-97 | 0.645427 | 2.23E-56 | 0.585167 | 2.96E-44 | 0.476118 | 8.50E-28 | 0.586593 |

|          |          |          |          |          |          |          |          |          |
|----------|----------|----------|----------|----------|----------|----------|----------|----------|
| 0.685875 | 3.50E-66 | 0.490262 | 1.31E-29 | 0.419679 | 2.39E-21 | 0.423629 | 9.22E-22 | 0.514146 |
| 0.847307 | #####    | 0.616983 | 2.50E-50 | 0.606065 | 3.63E-48 | 0.49721  | 1.56E-30 | 0.426962 |
| 0.786998 | 1.38E-99 | 0.633303 | 1.01E-53 | 0.491377 | 9.33E-30 | 0.422755 | 1.14E-21 | 0.419299 |
| 0.786777 | 1.71E-99 | 0.71537  | 2.09E-74 | 0.628384 | 1.12E-52 | 0.522511 | 4.48E-34 | 0.54229  |
| 0.620337 | 5.21E-51 | 0.250598 | 4.05E-08 | 0.129626 | 0.00502  | 0.276072 | 1.29E-09 | 0.179951 |
| 0.625484 | 4.53E-52 | 0.267295 | 4.41E-09 | 0.199133 | 1.46E-05 | 0.417356 | 4.15E-21 | 0.491836 |
| 0.789153 | #####    | 0.602823 | 1.53E-47 | 0.293783 | 9.47E-11 | 0.626531 | 2.74E-52 | 0.655897 |
| 0.495406 | 2.73E-30 | 0.199435 | 1.41E-05 | 0.225428 | 8.57E-07 | 0.165208 | 0.00034  | 0.030129 |
| 0.833593 | #####    | 0.542357 | 4.54E-37 | 0.551715 | 1.49E-38 | 0.491006 | 1.04E-29 | 0.504161 |
| 0.717534 | 4.75E-75 | 0.524241 | 2.50E-34 | 0.574652 | 2.16E-42 | 0.405846 | 6.05E-20 | 0.487834 |
| 0.650562 | 1.54E-57 | 0.592735 | 1.23E-45 | 0.518475 | 1.73E-33 | 0.419892 | 2.27E-21 | 0.463035 |
| 0.745697 | 4.97E-84 | 0.612776 | 1.74E-49 | 0.47105  | 3.62E-27 | 0.512753 | 1.13E-32 | 0.657539 |
| 0.819722 | #####    | 0.711698 | 2.52E-73 | 0.639489 | 4.61E-55 | 0.45978  | 8.35E-26 | 0.530578 |
| 0.706622 | 7.36E-72 | 0.585275 | 2.83E-44 | 0.57268  | 4.76E-42 | 0.379405 | 1.95E-17 | 0.467329 |
| 0.828816 | #####    | 0.681532 | 4.71E-65 | 0.63554  | 3.34E-54 | 0.472273 | 2.56E-27 | 0.592849 |
| 0.471095 | 3.58E-27 | 0.232666 | 3.69E-07 | 0.22958  | 5.30E-07 | 0.148364 | 0.0013   | 0.042713 |
| 0.598939 | 8.44E-47 | 0.234843 | 2.85E-07 | 0.160517 | 0.0005   | 0.383581 | 8.10E-18 | 0.264147 |
| 0.802567 | #####    | 0.616566 | 3.04E-50 | 0.639244 | 5.22E-55 | 0.462345 | 4.13E-26 | 0.379201 |
| 0.497403 | 1.47E-30 | 0.514698 | 5.99E-33 | 0.374996 | 4.86E-17 | 0.46099  | 5.99E-26 | 0.57394  |
| 0.773519 | 3.79E-94 | 0.584713 | 3.58E-44 | 0.606008 | 3.73E-48 | 0.52238  | 4.69E-34 | 0.600705 |
| 0.755257 | 2.36E-87 | 0.595055 | 4.54E-46 | 0.611084 | 3.77E-49 | 0.476505 | 7.60E-28 | 0.453659 |
| 0.705652 | 1.39E-71 | 0.370326 | 1.26E-16 | 0.459814 | 8.27E-26 | 0.342499 | 2.68E-14 | 0.35153  |
| 0.584832 | 3.41E-44 | 0.251922 | 3.41E-08 | 0.23918  | 1.69E-07 | 0.284391 | 3.88E-10 | 0.104082 |
| 0.794376 | #####    | 0.600217 | 4.83E-47 | 0.576842 | 8.97E-43 | 0.468175 | 8.16E-27 | 0.431689 |
| 0.538798 | 1.62E-36 | 0.210068 | 4.68E-06 | 0.160842 | 0.00048  | 0.159128 | 0.00056  | 0.154872 |
| 0.753901 | 7.15E-87 | 0.426523 | 4.56E-22 | 0.52547  | 1.65E-34 | 0.34221  | 2.82E-14 | 0.372657 |
| 0.784648 | 1.31E-98 | 0.530293 | 3.17E-35 | 0.595431 | 3.86E-46 | 0.360421 | 9.01E-16 | 0.334255 |
| 0.783184 | 5.22E-98 | 0.55587  | 3.17E-39 | 0.49566  | 2.52E-30 | 0.453871 | 4.13E-25 | 0.379178 |
| 0.669944 | 3.90E-62 | 0.321313 | 1.12E-12 | 0.45034  | 1.06E-24 | 0.237114 | 2.17E-07 | 0.159964 |
| 0.621941 | 2.45E-51 | 0.429417 | 2.24E-22 | 0.459855 | 8.18E-26 | 0.243062 | 1.05E-07 | 0.20903  |
| 0.756302 | 1.00E-87 | 0.586505 | 1.70E-44 | 0.473727 | 1.69E-27 | 0.542922 | 3.71E-37 | 0.596333 |
| 0.780223 | 8.34E-97 | 0.56717  | 4.17E-41 | 0.50371  | 2.05E-31 | 0.534629 | 7.03E-36 | 0.545021 |
| 0.605944 | 3.83E-48 | 0.276904 | 1.15E-09 | 0.306267 | 1.34E-11 | 0.316996 | 2.32E-12 | 0.261036 |
| 0.686218 | 2.84E-66 | 0.573349 | 3.64E-42 | 0.592155 | 1.57E-45 | 0.427157 | 3.90E-22 | 0.56752  |
| 0.809049 | #####    | 0.713169 | 9.35E-74 | 0.659713 | 1.15E-59 | 0.550032 | 2.78E-38 | 0.654627 |
| 0.663849 | 1.18E-60 | 0.510704 | 2.20E-32 | 0.538542 | 1.77E-36 | 0.352279 | 4.32E-15 | 0.276124 |
| 0.839206 | #####    | 0.539263 | 1.37E-36 | 0.562906 | 2.18E-40 | 0.450156 | 1.11E-24 | 0.540766 |
| 0.656507 | 6.50E-59 | 0.468209 | 8.08E-27 | 0.538463 | 1.82E-36 | 0.384061 | 7.32E-18 | 0.299996 |
| 0.64903  | 3.43E-57 | 0.25605  | 2.00E-08 | 0.203231 | 9.58E-06 | 0.337581 | 6.54E-14 | 0.176223 |
| 0.838367 | #####    | 0.564119 | 1.37E-40 | 0.579161 | 3.50E-43 | 0.482005 | 1.53E-28 | 0.370192 |
| 0.754198 | 5.61E-87 | 0.558252 | 1.29E-39 | 0.496464 | 1.97E-30 | 0.338211 | 5.84E-14 | 0.340611 |
| 0.781588 | 2.34E-97 | 0.573737 | 3.12E-42 | 0.502817 | 2.72E-31 | 0.459097 | 1.01E-25 | 0.459124 |
| 0.68134  | 5.28E-65 | 0.458062 | 1.33E-25 | 0.524852 | 2.04E-34 | 0.464787 | 2.10E-26 | 0.332344 |
| 0.649526 | 2.65E-57 | 0.605043 | 5.73E-48 | 0.322635 | 8.97E-13 | 0.47251  | 2.39E-27 | 0.664641 |
| 0.750753 | 9.08E-86 | 0.57514  | 1.78E-42 | 0.579673 | 2.84E-43 | 0.433121 | 8.91E-23 | 0.364916 |

|          |          |          |          |          |          |          |          |          |
|----------|----------|----------|----------|----------|----------|----------|----------|----------|
| 0.734459 | 2.61E-80 | 0.503415 | 2.25E-31 | 0.571492 | 7.62E-42 | 0.262862 | 8.07E-09 | 0.224134 |
| 0.880124 | #####    | 0.632739 | 1.33E-53 | 0.614889 | 6.60E-50 | 0.480918 | 2.11E-28 | 0.5083   |
| 0.628751 | 9.36E-53 | 0.375002 | 4.85E-17 | 0.402252 | 1.37E-19 | 0.335113 | 1.02E-13 | 0.204582 |
| 0.728906 | 1.54E-78 | 0.514778 | 5.84E-33 | 0.296314 | 6.42E-11 | 0.509362 | 3.39E-32 | 0.455511 |
| 0.60751  | 1.90E-48 | 0.590249 | 3.52E-45 | 0.281998 | 5.50E-10 | 0.527961 | 7.06E-35 | 0.723076 |
| 0.732929 | 8.12E-80 | 0.493838 | 4.41E-30 | 0.643352 | 6.48E-56 | 0.366888 | 2.51E-16 | 0.191573 |
| 0.76442  | 1.10E-90 | 0.428728 | 2.65E-22 | 0.367779 | 2.10E-16 | 0.396518 | 4.93E-19 | 0.301057 |
| 0.581663 | 1.26E-43 | 0.565803 | 7.11E-41 | 0.371524 | 9.87E-17 | 0.449798 | 1.22E-24 | 0.622202 |
| 0.681739 | 4.16E-65 | 0.657294 | 4.25E-59 | 0.451684 | 7.40E-25 | 0.539887 | 1.10E-36 | 0.713878 |
| 0.773395 | 4.23E-94 | 0.569695 | 1.55E-41 | 0.389563 | 2.25E-18 | 0.604008 | 9.08E-48 | 0.675046 |
| 0.695146 | 1.17E-68 | 0.416549 | 5.03E-21 | 0.435423 | 5.00E-23 | 0.25922  | 1.31E-08 | 0.292829 |
| 0.805756 | #####    | 0.632139 | 1.79E-53 | 0.457955 | 1.37E-25 | 0.534709 | 6.83E-36 | 0.521635 |
| 0.882396 | #####    | 0.746989 | 1.80E-84 | 0.671795 | 1.36E-62 | 0.596081 | 2.91E-46 | 0.51095  |
| 0.680865 | 6.99E-65 | 0.680331 | 9.58E-65 | 0.428825 | 2.59E-22 | 0.564859 | 1.03E-40 | 0.701477 |
| 0.807641 | #####    | 0.67111  | 2.01E-62 | 0.537097 | 2.95E-36 | 0.55128  | 1.75E-38 | 0.487093 |
| 0.698886 | 1.10E-69 | 0.549729 | 3.11E-38 | 0.374591 | 5.28E-17 | 0.427963 | 3.20E-22 | 0.482674 |
| 0.736663 | 5.04E-81 | 0.424658 | 7.18E-22 | 0.480924 | 2.10E-28 | 0.4222   | 1.30E-21 | 0.440297 |
| 0.636285 | 2.30E-54 | 0.377272 | 3.04E-17 | 0.422865 | 1.11E-21 | 0.324045 | 7.05E-13 | 0.225097 |
| 0.720005 | 8.57E-76 | 0.326003 | 5.03E-13 | 0.311073 | 6.17E-12 | 0.434821 | 5.81E-23 | 0.26217  |
| 0.800351 | #####    | 0.485353 | 5.69E-29 | 0.490981 | 1.05E-29 | 0.435647 | 4.72E-23 | 0.284305 |
| 0.847816 | #####    | 0.720741 | 5.13E-76 | 0.578244 | 5.08E-43 | 0.505407 | 1.20E-31 | 0.57792  |
| 0.471634 | 3.07E-27 | 0.222613 | 1.18E-06 | 0.066356 | 0.15223  | 0.246504 | 6.81E-08 | 0.186046 |
| 0.597497 | 1.58E-46 | 0.270041 | 3.02E-09 | 0.320567 | 1.27E-12 | 0.454553 | 3.44E-25 | 0.51447  |
| 0.777019 | 1.59E-95 | 0.481142 | 1.97E-28 | 0.543794 | 2.71E-37 | 0.437063 | 3.30E-23 | 0.350487 |
| 0.825891 | #####    | 0.701514 | 2.04E-70 | 0.504666 | 1.52E-31 | 0.537666 | 2.41E-36 | 0.503855 |
| 0.846203 | #####    | 0.585254 | 2.86E-44 | 0.516892 | 2.91E-33 | 0.444556 | 4.82E-24 | 0.452768 |
| 0.836746 | #####    | 0.701672 | 1.84E-70 | 0.606207 | 3.41E-48 | 0.463391 | 3.09E-26 | 0.610732 |
| 0.723058 | 1.01E-76 | 0.532147 | 1.67E-35 | 0.403886 | 9.46E-20 | 0.38777  | 3.32E-18 | 0.446109 |
| 0.830817 | #####    | 0.590772 | 2.82E-45 | 0.59167  | 1.93E-45 | 0.428989 | 2.49E-22 | 0.507694 |
| 0.760048 | 4.47E-89 | 0.388468 | 2.86E-18 | 0.377942 | 2.64E-17 | 0.391488 | 1.49E-18 | 0.381791 |
| 0.753734 | 8.19E-87 | 0.574948 | 1.92E-42 | 0.533486 | 1.05E-35 | 0.425669 | 5.62E-22 | 0.265195 |
| 0.862108 | #####    | 0.615709 | 4.52E-50 | 0.445768 | 3.52E-24 | 0.555714 | 3.36E-39 | 0.528332 |
| 0.474798 | 1.24E-27 | 0.167079 | 0.00029  | 0.25584  | 2.05E-08 | 0.07805  | 0.09204  | 0.126365 |
| 0.750892 | 8.12E-86 | 0.595325 | 4.04E-46 | 0.461039 | 5.91E-26 | 0.4506   | 9.88E-25 | 0.483568 |
| 0.670924 | 2.23E-62 | 0.383523 | 8.20E-18 | 0.430908 | 1.55E-22 | 0.407012 | 4.64E-20 | 0.30576  |
| 0.509996 | 2.76E-32 | 0.15724  | 0.00065  | 0.048131 | 0.2993   | 0.251188 | 3.75E-08 | 0.263944 |
| 0.486468 | 4.08E-29 | 0.250294 | 4.21E-08 | 0.212927 | 3.44E-06 | 0.268418 | 3.78E-09 | 0.300213 |
| 0.629746 | 5.78E-53 | 0.533713 | 9.68E-36 | 0.513095 | 1.01E-32 | 0.442529 | 8.16E-24 | 0.510222 |
| 0.782684 | 8.36E-98 | 0.604015 | 9.05E-48 | 0.502844 | 2.70E-31 | 0.48263  | 1.27E-28 | 0.552418 |
| 0.798379 | #####    | 0.592511 | 1.35E-45 | 0.469608 | 5.45E-27 | 0.447047 | 2.52E-24 | 0.398207 |
| 0.712593 | 1.38E-73 | 0.402589 | 1.27E-19 | 0.374938 | 4.91E-17 | 0.461584 | 5.09E-26 | 0.332135 |
| 0.769311 | 1.58E-92 | 0.58496  | 3.23E-44 | 0.656927 | 5.18E-59 | 0.492314 | 7.02E-30 | 0.51403  |
| 0.724081 | 4.88E-77 | 0.45314  | 5.02E-25 | 0.428122 | 3.08E-22 | 0.356556 | 1.91E-15 | 0.357546 |
| 0.800958 | #####    | 0.674543 | 2.81E-63 | 0.547265 | 7.68E-38 | 0.621702 | 2.74E-51 | 0.635576 |
| 0.791012 | #####    | 0.685903 | 3.44E-66 | 0.637233 | 1.43E-54 | 0.463326 | 3.15E-26 | 0.434147 |

|          |          |          |          |          |          |          |          |          |
|----------|----------|----------|----------|----------|----------|----------|----------|----------|
| 0.651229 | 1.08E-57 | 0.525697 | 1.53E-34 | 0.583888 | 5.04E-44 | 0.203884 | 8.96E-06 | 0.263787 |
| 0.740019 | 3.99E-82 | 0.638672 | 6.96E-55 | 0.663644 | 1.32E-60 | 0.469514 | 5.59E-27 | 0.401057 |
| 0.764934 | 7.07E-91 | 0.436862 | 3.47E-23 | 0.39553  | 6.13E-19 | 0.313182 | 4.37E-12 | 0.259345 |
| 0.444706 | 4.64E-24 | 0.169915 | 0.00023  | 0.168613 | 0.00025  | 0.086281 | 0.06246  | -0.04034 |
| 0.841547 | #####    | 0.661751 | 3.76E-60 | 0.629187 | 7.58E-53 | 0.448507 | 1.72E-24 | 0.400458 |
| 0.720118 | 7.92E-76 | 0.493832 | 4.42E-30 | 0.453807 | 4.20E-25 | 0.477023 | 6.55E-28 | 0.4433   |
| 0.773    | 6.03E-94 | 0.533222 | 1.15E-35 | 0.456289 | 2.16E-25 | 0.484279 | 7.83E-29 | 0.365669 |
| 0.735884 | 9.04E-81 | 0.50582  | 1.05E-31 | 0.531749 | 1.92E-35 | 0.407683 | 3.97E-20 | 0.269589 |
| 0.675148 | 1.98E-63 | 0.765025 | 6.54E-91 | 0.528284 | 6.32E-35 | 0.501663 | 3.91E-31 | 0.615308 |
| 0.515679 | 4.34E-33 | 0.188115 | 4.30E-05 | 0.107409 | 0.02025  | 0.304776 | 1.70E-11 | 0.256845 |
| 0.665813 | 3.97E-61 | 0.50533  | 1.23E-31 | 0.57232  | 5.49E-42 | 0.398246 | 3.36E-19 | 0.390054 |
| 0.084453 | 0.06824  | 0.028625 | 0.5372   | 0.123369 | 0.00761  | 0.107367 | 0.0203   | 0.148113 |
| 0.028246 | 0.5426   | -0.03048 | 0.51117  | 0.008275 | 0.85846  | 0.08024  | 0.08325  | 0.078715 |
| 0.029496 | 0.52488  | 0.174665 | 0.00015  | 0.034485 | 0.45721  | 0.061468 | 0.18483  | 0.116726 |
| -0.03323 | 0.4737   | -0.03371 | 0.46738  | -0.00336 | 0.94235  | -0.05226 | 0.2597   | -0.03804 |
| -0.01395 | 0.76372  | -0.09381 | 0.04274  | -0.04775 | 0.3031   | 0.073515 | 0.11261  | 0.022023 |
| -0.04013 | 0.38689  | -0.13504 | 0.00346  | -0.07987 | 0.08468  | -0.00226 | 0.9611   | -0.09895 |
| 0.021944 | 0.63621  | -0.0494  | 0.28674  | 0.014917 | 0.74783  | 0.097377 | 0.0354   | 0.167451 |
| 0.004048 | 0.93048  | 0.062518 | 0.17742  | 0.088697 | 0.05544  | 0.056107 | 0.22621  | 0.039823 |
| 0.083993 | 0.06976  | 0.050326 | 0.27777  | 0.061202 | 0.18674  | 0.06933  | 0.13465  | 0.011115 |
| -0.01946 | 0.67491  | -0.05623 | 0.22515  | -0.02836 | 0.54092  | -0.00621 | 0.89357  | -0.02175 |
| -0.05862 | 0.20609  | -0.09977 | 0.03111  | -0.00587 | 0.89926  | 0.020339 | 0.6611   | -0.07622 |
| 0.069165 | 0.13558  | 0.038437 | 0.40727  | 0.022995 | 0.62013  | 0.086164 | 0.06282  | 0.044616 |
| 0.057172 | 0.2175   | -0.01509 | 0.74492  | 0.039658 | 0.39251  | 0.117534 | 0.01102  | 0.050038 |
| 0.128248 | 0.00551  | 0.088122 | 0.05705  | 0.073902 | 0.11073  | 0.145497 | 0.00162  | 0.108151 |
| 0.002478 | 0.95741  | 0.052844 | 0.25441  | 0.02191  | 0.63674  | 0.067814 | 0.1434   | 0.049825 |
| 0.007667 | 0.86876  | 0.057752 | 0.21286  | 0.018847 | 0.68458  | 0.181697 | 7.85E-05 | 0.086036 |
| 0.167241 | 0.00028  | 0.209028 | 5.23E-06 | 0.200492 | 1.27E-05 | 0.175848 | 0.00013  | 0.130439 |
| -0.08919 | 0.0541   | -0.11058 | 0.01682  | -0.13287 | 0.00402  | 0.013232 | 0.7755   | 0.005831 |
| 0.070044 | 0.13067  | -0.02823 | 0.54276  | -0.02591 | 0.57653  | 0.104568 | 0.02383  | 0.21349  |
| 0.138109 | 0.00278  | 0.076231 | 0.0999   | 0.1349   | 0.00349  | 0.222387 | 1.21E-06 | 0.287421 |
| 0.166559 | 0.0003   | 0.098938 | 0.03255  | 0.097087 | 0.03596  | 0.191815 | 3.01E-05 | 0.148661 |
| 0.050367 | 0.27738  | 0.051622 | 0.26557  | 0.135344 | 0.00338  | 0.11012  | 0.01729  | 0.080331 |
| 0.298723 | 4.42E-11 | 0.059066 | 0.20262  | 0.200633 | 1.25E-05 | 0.086395 | 0.06211  | 0.007191 |
| 0.028514 | 0.53878  | -0.12718 | 0.00592  | 0.024106 | 0.60334  | -0.03888 | 0.40189  | -0.03195 |
| 0.027816 | 0.54877  | -0.01629 | 0.72543  | 0.049762 | 0.28321  | 0.035268 | 0.44706  | -0.02471 |
| 0.036982 | 0.42527  | -0.04135 | 0.37261  | 0.009219 | 0.8425   | 0.127529 | 0.00578  | 0.026652 |
| 0.057381 | 0.21582  | 0.066223 | 0.15305  | 0.072252 | 0.11894  | 0.029212 | 0.52888  | 0.047225 |
| -0.05056 | 0.2755   | 0.029021 | 0.53158  | 0.026448 | 0.5686   | 0.019204 | 0.67892  | -0.01299 |
| -0.00061 | 0.98956  | -0.04898 | 0.29089  | 0.004498 | 0.92277  | -0.05553 | 0.23101  | 0.004458 |
| -0.04999 | 0.28103  | -0.15482 | 0.00079  | -0.05686 | 0.22001  | -0.05729 | 0.21656  | -0.1498  |
| -0.03004 | 0.51726  | -0.17772 | 0.00011  | -0.07885 | 0.08876  | 0.035184 | 0.44813  | -0.02664 |
| -0.06113 | 0.18729  | -0.22767 | 6.62E-07 | -0.10375 | 0.02496  | -0.16468 | 0.00035  | -0.22676 |
| 0.035652 | 0.44211  | 0.017256 | 0.70994  | 0.021862 | 0.63747  | 0.03801  | 0.4125   | 0.012489 |
| 0.067457 | 0.14553  | 0.024424 | 0.59856  | 0.019479 | 0.67459  | 0.112825 | 0.01471  | 0.072746 |



|          |          |          |          |          |          |          |          |          |
|----------|----------|----------|----------|----------|----------|----------|----------|----------|
| 0.12914  | 0.00519  | 0.065792 | 0.15575  | 0.051228 | 0.26925  | 0.139962 | 0.00243  | 0.046669 |
| 0.055643 | 0.23007  | -0.09817 | 0.03393  | 0.023877 | 0.60678  | 0.011398 | 0.80594  | -0.10105 |
| 0.05025  | 0.2785   | -0.10524 | 0.02294  | 0.027741 | 0.54984  | 0.07061  | 0.12758  | 0.007595 |
| -0.0276  | 0.5519   | -0.13621 | 0.00318  | -0.01966 | 0.67182  | -0.00574 | 0.9015   | -0.07035 |
| -0.02495 | 0.59077  | -0.08775 | 0.0581   | -0.00997 | 0.82986  | -0.00354 | 0.9392   | -0.03063 |
| 0.062085 | 0.18045  | 0.023986 | 0.60514  | 0.001857 | 0.96807  | 0.073132 | 0.1145   | -0.01485 |
| -0.00928 | 0.84144  | -0.00728 | 0.87534  | 0.070494 | 0.12821  | 0.057549 | 0.21448  | -0.03523 |
| -0.0317  | 0.49435  | -0.13311 | 0.00396  | -0.04447 | 0.33756  | 0.015617 | 0.73642  | -0.05646 |
| 0.066917 | 0.14878  | 0.008073 | 0.86187  | -0.00891 | 0.84765  | 0.144117 | 0.00179  | 0.004416 |
| 0.00908  | 0.84485  | -0.07868 | 0.08944  | -0.01053 | 0.82053  | 0.025119 | 0.58819  | -0.05571 |
| 0.058289 | 0.20863  | 0.016596 | 0.72057  | 0.022302 | 0.63071  | 0.030575 | 0.50982  | 0.010477 |
| 0.059661 | 0.19811  | 0.084514 | 0.06804  | 0.098357 | 0.03359  | 0.044239 | 0.34013  | 0.023836 |
| 0.0243   | 0.60041  | -0.02307 | 0.61894  | -0.00393 | 0.93242  | 0.009419 | 0.83912  | -0.00355 |
| 0.029448 | 0.52555  | -0.00603 | 0.89655  | -0.00815 | 0.86065  | 0.03565  | 0.44214  | 0.025225 |
| 0.098379 | 0.03355  | 0.040561 | 0.38183  | 0.085421 | 0.06513  | 0.107362 | 0.02031  | 0.082888 |
| -0.07347 | 0.11283  | -0.14129 | 0.00221  | -0.02465 | 0.59516  | -0.05009 | 0.28002  | -0.11344 |
| 0.024636 | 0.59539  | -0.12827 | 0.0055   | -0.00823 | 0.85924  | 0.032728 | 0.48047  | -0.0856  |
| 0.076271 | 0.09972  | 0.103296 | 0.0256   | 0.055344 | 0.23259  | 0.144314 | 0.00177  | -0.00454 |
| 0.006132 | 0.89485  | -0.02312 | 0.61819  | -0.05992 | 0.19618  | 0.130663 | 0.00468  | 0.088889 |
| -0.04815 | 0.29908  | -0.12294 | 0.00782  | -0.00491 | 0.91579  | -0.11076 | 0.01664  | -0.13132 |
| 0.030889 | 0.50548  | -0.02541 | 0.58393  | 0.069416 | 0.13416  | 0.05852  | 0.20683  | -0.0022  |
| -0.0183  | 0.69332  | -0.04881 | 0.29258  | 0.039257 | 0.39732  | -0.04761 | 0.30459  | -0.06746 |
| -0.17714 | 0.00012  | -0.28315 | 4.65E-10 | -0.15015 | 0.00114  | -0.21042 | 4.51E-06 | -0.13103 |
| 0.147048 | 0.00144  | -0.01139 | 0.8061   | 0.087615 | 0.0585   | 0.076836 | 0.09723  | -0.05768 |
| -0.0916  | 0.04789  | -0.01948 | 0.6746   | 0.027801 | 0.54897  | 0.015064 | 0.74542  | 0.063064 |
| -0.15592 | 0.00072  | -0.20282 | 1.00E-05 | -0.08186 | 0.07717  | -0.11683 | 0.01152  | -0.20565 |
| 0.054492 | 0.23988  | -0.01155 | 0.80334  | -0.00414 | 0.92888  | 0.072163 | 0.1194   | 0.048197 |
| 0.131131 | 0.00453  | -0.00238 | 0.95902  | 0.096523 | 0.03705  | 0.090947 | 0.04951  | 0.098551 |
| -0.00539 | 0.90757  | -0.12254 | 0.00803  | -0.02945 | 0.5255   | -0.05468 | 0.23823  | -0.13427 |
| 0.012126 | 0.79381  | -0.00208 | 0.96419  | 0.051563 | 0.26612  | 0.077267 | 0.09536  | 0.106822 |
| 0.043578 | 0.3474   | -0.00754 | 0.87091  | 0.019107 | 0.68046  | 0.109863 | 0.01755  | 0.06551  |
| -0.13714 | 0.00298  | -0.05823 | 0.20912  | 0.005718 | 0.90191  | -0.0248  | 0.59301  | -0.00344 |
| -0.0796  | 0.08575  | -0.29678 | 5.98E-11 | -0.19011 | 3.55E-05 | -0.12122 | 0.00873  | -0.15972 |
| -0.08833 | 0.05647  | -0.16075 | 0.00049  | -0.13233 | 0.00417  | 0.035459 | 0.44459  | -0.08822 |
| -0.12742 | 0.00583  | -0.13259 | 0.0041   | -0.06167 | 0.18336  | -0.0428  | 0.35613  | -0.05189 |
| -0.04123 | 0.37406  | -0.04285 | 0.35551  | 0.046739 | 0.31351  | -0.03873 | 0.40375  | -0.05044 |
| -0.15519 | 0.00077  | -0.16705 | 0.00029  | -0.11538 | 0.0126   | -0.04631 | 0.31794  | -0.0265  |
| -0.06823 | 0.14095  | -0.21691 | 2.23E-06 | -0.05322 | 0.25106  | -0.08703 | 0.06021  | -0.10641 |
| -0.09672 | 0.03667  | -0.22953 | 5.33E-07 | -0.13014 | 0.00485  | 0.005122 | 0.9121   | 0.022425 |
| -0.04304 | 0.35336  | -0.11644 | 0.0118   | -0.05058 | 0.27531  | 0.047849 | 0.30215  | -0.10425 |
| 0.057576 | 0.21427  | 0.071235 | 0.12424  | 0.060288 | 0.19342  | 0.06162  | 0.18375  | 0.013544 |
| 0.123731 | 0.00743  | 0.123697 | 0.00745  | 0.12758  | 0.00576  | 0.146518 | 0.0015   | 0.110625 |
| 0.059666 | 0.19807  | 0.068267 | 0.14074  | 0.078701 | 0.08935  | 0.080181 | 0.08348  | 0.103961 |
| 0.143525 | 0.00187  | 0.107537 | 0.0201   | 0.180867 | 8.48E-05 | 0.108994 | 0.01847  | 0.067921 |
| 0.221372 | 1.36E-06 | 0.113072 | 0.01449  | 0.132551 | 0.00411  | 0.151094 | 0.00106  | 0.156861 |

|          |          |          |          |          |          |          |          |          |
|----------|----------|----------|----------|----------|----------|----------|----------|----------|
| 0.060363 | 0.19287  | 0.071412 | 0.1233   | 0.092537 | 0.04564  | 0.142757 | 0.00198  | 0.331624 |
| -0.15207 | 0.00098  | -0.1737  | 0.00016  | -0.08917 | 0.05414  | -0.03325 | 0.47344  | -0.13883 |
| -0.00226 | 0.96118  | 0.041732 | 0.36822  | 0.017922 | 0.69928  | 0.114055 | 0.01366  | 0.16287  |
| -0.01252 | 0.78731  | 0.018612 | 0.6883   | 0.019722 | 0.67077  | 0.098405 | 0.0335   | 0.166759 |
| 0.046238 | 0.31873  | 0.029481 | 0.52509  | 0.035649 | 0.44215  | 0.159818 | 0.00053  | 0.106998 |
| 0.024618 | 0.59566  | 0.012525 | 0.78719  | 0.026984 | 0.56079  | 0.135037 | 0.00346  | 0.0895   |
| 0.050942 | 0.27193  | 0.063244 | 0.17244  | 0.051193 | 0.26957  | 0.103911 | 0.02473  | 0.117603 |
| -0.0089  | 0.84781  | -0.1153  | 0.01265  | -0.04916 | 0.2891   | 0.06014  | 0.19452  | -0.02661 |
| -0.00968 | 0.83479  | -0.11521 | 0.01273  | -0.05054 | 0.27573  | 0.063338 | 0.1718   | -0.00433 |
| 0.001554 | 0.97328  | -0.05747 | 0.21515  | -0.013   | 0.77932  | 0.029438 | 0.52569  | 0.019726 |
| 0.008015 | 0.86285  | 0.011232 | 0.80872  | 0.002674 | 0.95404  | 0.034455 | 0.4576   | 0.015799 |
| -0.00039 | 0.99323  | -0.05998 | 0.19571  | -0.03436 | 0.45882  | 0.084983 | 0.06652  | 0.054964 |
| -0.01942 | 0.67544  | -0.05985 | 0.19666  | -0.01584 | 0.73274  | 0.033249 | 0.47351  | -0.00234 |
| 0.016633 | 0.71997  | 0.011001 | 0.81258  | 0.022146 | 0.6331   | 0.063917 | 0.16791  | 0.000373 |
| 0.005376 | 0.90776  | -0.02765 | 0.55117  | 0.018961 | 0.68277  | 0.002243 | 0.96145  | -0.04112 |
| 0.001621 | 0.97214  | -0.05374 | 0.24644  | -0.00056 | 0.99041  | 0.051144 | 0.27003  | 0.037643 |
| -0.01548 | 0.73871  | 0.033173 | 0.47452  | -0.00413 | 0.92902  | 0.138108 | 0.00278  | 0.246133 |
| 0.123974 | 0.00731  | 0.042457 | 0.35995  | 0.067319 | 0.14636  | 0.064352 | 0.16503  | 0.024246 |
| 0.129382 | 0.00511  | 0.067454 | 0.14554  | 0.080902 | 0.08073  | 0.084889 | 0.06682  | 0.085079 |
| -0.01849 | 0.69018  | -0.0409  | 0.37785  | 0.012756 | 0.78337  | 0.031034 | 0.50348  | -0.00739 |
| 0.066847 | 0.14921  | 0.04587  | 0.3226   | 0.104322 | 0.02416  | 0.121359 | 0.00866  | 0.102341 |
| -0.10059 | 0.02975  | -0.13302 | 0.00398  | -0.03075 | 0.50735  | -0.00724 | 0.87607  | 0.03035  |
| 0.030929 | 0.50493  | -0.10968 | 0.01774  | 0.04744  | 0.3063   | -0.13253 | 0.00412  | -0.13271 |
| 0.004949 | 0.91505  | -0.01287 | 0.78149  | -0.01039 | 0.82282  | 0.101122 | 0.02889  | 0.062477 |
| 0.021058 | 0.64991  | 0.059226 | 0.2014   | 0.084107 | 0.06938  | 0.116756 | 0.01157  | 0.164322 |
| 0.18718  | 4.70E-05 | 0.105679 | 0.02237  | 0.19718  | 1.77E-05 | 0.259064 | 1.34E-08 | 0.246951 |
| 0.592138 | 1.58E-45 | 0.639269 | 5.16E-55 | 0.461681 | 4.96E-26 | 0.456535 | 2.02E-25 | 0.641024 |
| 0.357178 | 1.69E-15 | 0.567114 | 4.27E-41 | 0.636587 | 1.98E-54 | 0.275558 | 1.39E-09 | 0.34464  |
| 0.634619 | 5.27E-54 | 0.662287 | 2.80E-60 | 0.540115 | 1.01E-36 | 0.429717 | 2.08E-22 | 0.663319 |
| 0.345797 | 1.46E-14 | 0.229374 | 5.43E-07 | 0.140269 | 0.00238  | 0.338937 | 5.12E-14 | 0.504288 |
| 0.444356 | 5.08E-24 | 0.426687 | 4.38E-22 | 0.202559 | 1.03E-05 | 0.503786 | 2.00E-31 | 0.637097 |
| 0.432484 | 1.04E-22 | 0.711209 | 3.50E-73 | 0.445473 | 3.80E-24 | 0.420628 | 1.90E-21 | 0.574525 |
| 0.496402 | 2.01E-30 | 0.424872 | 6.82E-22 | 0.51662  | 3.19E-33 | 0.300159 | 3.53E-11 | 0.338982 |
| 0.343968 | 2.04E-14 | 0.19886  | 1.50E-05 | 0.235341 | 2.68E-07 | 0.163079 | 0.0004   | -0.00366 |
| 0.426163 | 4.98E-22 | 0.722348 | 1.66E-76 | 0.529145 | 4.71E-35 | 0.401292 | 1.70E-19 | 0.597536 |
| 0.628286 | 1.17E-52 | 0.575323 | 1.65E-42 | 0.526173 | 1.30E-34 | 0.413184 | 1.11E-20 | 0.481789 |
| 0.277358 | 1.08E-09 | 0.306949 | 1.20E-11 | 0.190972 | 3.26E-05 | 0.170758 | 0.00021  | 0.38089  |
| 0.530262 | 3.20E-35 | 0.700088 | 5.10E-70 | 0.418331 | 3.29E-21 | 0.428551 | 2.77E-22 | 0.626973 |
| 0.522948 | 3.87E-34 | 0.629533 | 6.40E-53 | 0.420024 | 2.20E-21 | 0.458529 | 1.17E-25 | 0.696262 |
| 0.314197 | 3.69E-12 | 0.298335 | 4.70E-11 | 0.301445 | 2.89E-11 | 0.228024 | 6.35E-07 | 0.21061  |
| 0.424585 | 7.31E-22 | 0.608509 | 1.21E-48 | 0.301628 | 2.81E-11 | 0.412066 | 1.44E-20 | 0.661573 |
| 0.47127  | 3.40E-27 | 0.756719 | 7.11E-88 | 0.535523 | 5.14E-36 | 0.434065 | 7.03E-23 | 0.463777 |
| 0.49304  | 5.63E-30 | 0.654257 | 2.17E-58 | 0.492325 | 7.00E-30 | 0.409553 | 2.58E-20 | 0.770942 |
| 0.360249 | 9.31E-16 | 0.578007 | 5.60E-43 | 0.501362 | 4.30E-31 | 0.288651 | 2.06E-10 | 0.477203 |
| 0.59153  | 2.05E-45 | 0.463385 | 3.10E-26 | 0.421351 | 1.60E-21 | 0.371819 | 9.30E-17 | 0.417222 |

|          |          |          |          |          |          |          |          |          |
|----------|----------|----------|----------|----------|----------|----------|----------|----------|
| 0.742376 | 6.55E-83 | 0.720845 | 4.77E-76 | 0.548368 | 5.13E-38 | 0.594501 | 5.75E-46 | 0.659266 |
| 0.560016 | 6.60E-40 | 0.726232 | 1.05E-77 | 0.559114 | 9.30E-40 | 0.521512 | 6.27E-34 | 0.505688 |
| 0.580876 | 1.74E-43 | 0.803163 | #####    | 0.730587 | 4.53E-79 | 0.477138 | 6.33E-28 | 0.599593 |
| 0.522997 | 3.81E-34 | 0.685853 | 3.55E-66 | 0.59458  | 5.56E-46 | 0.375208 | 4.65E-17 | 0.546344 |
| 0.485613 | 5.27E-29 | 0.438681 | 2.19E-23 | 0.447242 | 2.39E-24 | 0.320452 | 1.30E-12 | 0.49674  |
| 0.431455 | 1.35E-22 | 0.551678 | 1.51E-38 | 0.36259  | 5.89E-16 | 0.378464 | 2.37E-17 | 0.596849 |
| 0.024505 | 0.59735  | 0.327256 | 4.05E-13 | 0.098648 | 0.03306  | 0.04435  | 0.33891  | 0.199832 |
| 0.554181 | 5.97E-39 | 0.655636 | 1.04E-58 | 0.380829 | 1.45E-17 | 0.506953 | 7.33E-32 | 0.638885 |
| 0.322639 | 8.96E-13 | 0.546245 | 1.11E-37 | 0.428011 | 3.16E-22 | 0.37447  | 5.41E-17 | 0.621308 |
| 0.691785 | 9.46E-68 | 0.645107 | 2.63E-56 | 0.503463 | 2.22E-31 | 0.500192 | 6.19E-31 | 0.557273 |
| 0.677923 | 3.94E-64 | 0.569051 | 2.00E-41 | 0.527993 | 6.99E-35 | 0.36365  | 4.78E-16 | 0.377794 |
| 0.303999 | 1.93E-11 | 0.356644 | 1.87E-15 | 0.36967  | 1.44E-16 | 0.315141 | 3.16E-12 | 0.280421 |
| 0.229117 | 5.59E-07 | 0.295605 | 7.16E-11 | 0.299816 | 3.73E-11 | 0.168162 | 0.00026  | 0.153757 |
| 0.581308 | 1.46E-43 | 0.732398 | 1.20E-79 | 0.560483 | 5.52E-40 | 0.465316 | 1.81E-26 | 0.728452 |
| 0.605069 | 5.66E-48 | 0.616646 | 2.93E-50 | 0.503937 | 1.91E-31 | 0.447146 | 2.45E-24 | 0.522692 |
| 0.564694 | 1.09E-40 | 0.607151 | 2.23E-48 | 0.516473 | 3.34E-33 | 0.477456 | 5.78E-28 | 0.501987 |
| 0.2869   | 2.67E-10 | 0.391379 | 1.52E-18 | 0.427895 | 3.25E-22 | 0.17433  | 0.00015  | 0.37287  |
| 0.200486 | 1.27E-05 | 0.244138 | 9.15E-08 | 0.251579 | 3.57E-08 | 0.150674 | 0.00109  | 0.395228 |
| 0.594203 | 6.54E-46 | 0.769643 | 1.18E-92 | 0.664685 | 7.44E-61 | 0.453461 | 4.61E-25 | 0.621954 |
| 0.542632 | 4.11E-37 | 0.593883 | 7.50E-46 | 0.462363 | 4.11E-26 | 0.393192 | 1.02E-18 | 0.384206 |
| 0.570515 | 1.12E-41 | 0.683564 | 1.40E-65 | 0.479339 | 3.34E-28 | 0.505968 | 1.00E-31 | 0.628896 |
| 0.078734 | 0.08922  | 0.310591 | 6.68E-12 | 0.212066 | 3.78E-06 | 0.22769  | 6.60E-07 | 0.445146 |
| 0.28331  | 4.54E-10 | 0.374128 | 5.80E-17 | 0.294936 | 7.94E-11 | 0.273858 | 1.77E-09 | 0.4584   |
| 0.386405 | 4.44E-18 | 0.480425 | 2.43E-28 | 0.259583 | 1.25E-08 | 0.284354 | 3.90E-10 | 0.583674 |
| 0.566641 | 5.13E-41 | 0.58033  | 2.17E-43 | 0.607728 | 1.72E-48 | 0.31005  | 7.29E-12 | 0.28145  |
| 0.45091  | 9.10E-25 | 0.598607 | 9.75E-47 | 0.350741 | 5.78E-15 | 0.443818 | 5.84E-24 | 0.599473 |
| 0.462866 | 3.58E-26 | 0.660933 | 5.89E-60 | 0.515651 | 4.38E-33 | 0.413793 | 9.62E-21 | 0.565933 |
| 0.389355 | 2.36E-18 | 0.429649 | 2.11E-22 | 0.474028 | 1.55E-27 | 0.13023  | 0.00482  | 0.268939 |
| 0.346696 | 1.23E-14 | 0.521219 | 6.92E-34 | 0.323934 | 7.18E-13 | 0.324014 | 7.09E-13 | 0.562339 |
| 0.302357 | 2.50E-11 | 0.320284 | 1.34E-12 | 0.263269 | 7.64E-09 | 0.263653 | 7.25E-09 | 0.388077 |
| 0.543276 | 3.26E-37 | 0.631456 | 2.50E-53 | 0.452965 | 5.26E-25 | 0.477687 | 5.40E-28 | 0.593893 |
| 0.605374 | 4.94E-48 | 0.533579 | 1.01E-35 | 0.514753 | 5.88E-33 | 0.477589 | 5.56E-28 | 0.456244 |
| 0.413328 | 1.07E-20 | 0.481523 | 1.76E-28 | 0.307976 | 1.02E-11 | 0.434485 | 6.33E-23 | 0.484307 |
| 0.558551 | 1.15E-39 | 0.375061 | 4.79E-17 | 0.32222  | 9.62E-13 | 0.436427 | 3.88E-23 | 0.397247 |
| 0.247639 | 5.90E-08 | 0.462721 | 3.72E-26 | 0.296978 | 5.80E-11 | 0.358103 | 1.41E-15 | 0.531293 |
| 0.438822 | 2.11E-23 | 0.53182  | 1.87E-35 | 0.41441  | 8.33E-21 | 0.480083 | 2.69E-28 | 0.546103 |
| 0.222847 | 1.15E-06 | 0.399688 | 2.43E-19 | 0.283035 | 4.73E-10 | 0.28112  | 6.25E-10 | 0.366986 |
| 0.270839 | 2.70E-09 | 0.554419 | 5.46E-39 | 0.514679 | 6.03E-33 | 0.266842 | 4.70E-09 | 0.345351 |
| 0.540131 | 1.01E-36 | 0.630166 | 4.71E-53 | 0.459961 | 7.94E-26 | 0.48806  | 2.54E-29 | 0.636964 |
| 0.390309 | 1.92E-18 | 0.324838 | 6.15E-13 | 0.281544 | 5.88E-10 | 0.361521 | 7.26E-16 | 0.483384 |
| 0.251854 | 3.44E-08 | 0.41737  | 4.14E-21 | 0.348665 | 8.54E-15 | 0.267655 | 4.20E-09 | 0.45522  |
| 0.324105 | 6.98E-13 | 0.331922 | 1.79E-13 | 0.384022 | 7.38E-18 | 0.238632 | 1.80E-07 | 0.216771 |
| 0.420296 | 2.06E-21 | 0.451553 | 7.67E-25 | 0.463964 | 2.64E-26 | 0.306907 | 1.21E-11 | 0.361651 |
| 0.321413 | 1.10E-12 | 0.213857 | 3.11E-06 | 0.177478 | 0.00012  | 0.221054 | 1.41E-06 | 0.373901 |
| 0.434126 | 6.92E-23 | 0.504868 | 1.42E-31 | 0.295423 | 7.37E-11 | 0.372114 | 8.75E-17 | 0.289224 |

|          |          |          |          |          |          |          |          |          |
|----------|----------|----------|----------|----------|----------|----------|----------|----------|
| 0.260564 | 1.10E-08 | 0.462094 | 4.42E-26 | 0.385856 | 5.00E-18 | 0.298404 | 4.65E-11 | 0.441338 |
| 0.08989  | 0.05223  | 0.265222 | 5.86E-09 | 0.329265 | 2.86E-13 | 0.107099 | 0.02062  | 0.10267  |
| 0.167967 | 0.00027  | 0.2317   | 4.13E-07 | 0.116998 | 0.0114   | 0.117323 | 0.01117  | 0.368767 |
| 0.210904 | 4.28E-06 | 0.296952 | 5.82E-11 | 0.312527 | 4.86E-12 | 0.185788 | 5.36E-05 | 0.467742 |
| 0.227816 | 6.51E-07 | 0.302329 | 2.51E-11 | 0.286793 | 2.72E-10 | 0.209538 | 4.95E-06 | 0.311396 |
| 0.618972 | 9.90E-51 | 0.601536 | 2.71E-47 | 0.508325 | 4.73E-32 | 0.339752 | 4.42E-14 | 0.412916 |
| 0.646169 | 1.52E-56 | 0.571708 | 7.00E-42 | 0.466394 | 1.34E-26 | 0.377861 | 2.69E-17 | 0.376128 |
| 0.32665  | 4.50E-13 | 0.496236 | 2.11E-30 | 0.459531 | 8.93E-26 | 0.165415 | 0.00033  | 0.207923 |
| 0.725733 | 1.51E-77 | 0.758733 | 1.34E-88 | 0.631563 | 2.38E-53 | 0.535439 | 5.29E-36 | 0.626222 |
| 0.310856 | 6.39E-12 | 0.452335 | 6.23E-25 | 0.206609 | 6.75E-06 | 0.312253 | 5.09E-12 | 0.549519 |
| 0.391457 | 1.50E-18 | 0.329005 | 2.99E-13 | 0.315566 | 2.95E-12 | 0.237694 | 2.02E-07 | 0.158153 |
| 0.561248 | 4.12E-40 | 0.740755 | 2.27E-82 | 0.615691 | 4.56E-50 | 0.49441  | 3.70E-30 | 0.617129 |
| 0.301557 | 2.84E-11 | 0.538886 | 1.57E-36 | 0.37606  | 3.90E-17 | 0.388951 | 2.57E-18 | 0.627228 |
| 0.555721 | 3.35E-39 | 0.714774 | 3.15E-74 | 0.682474 | 2.69E-65 | 0.422645 | 1.17E-21 | 0.551863 |
| 0.524683 | 2.16E-34 | 0.545765 | 1.33E-37 | 0.433763 | 7.58E-23 | 0.425745 | 5.51E-22 | 0.398413 |
| 0.529382 | 4.34E-35 | 0.85454  | #####    | 0.718067 | 3.29E-75 | 0.488809 | 2.03E-29 | 0.664781 |
| 0.360015 | 9.75E-16 | 0.65718  | 4.52E-59 | 0.483369 | 1.02E-28 | 0.330673 | 2.23E-13 | 0.462057 |
| 0.383957 | 7.48E-18 | 0.464389 | 2.35E-26 | 0.360519 | 8.84E-16 | 0.38141  | 1.28E-17 | 0.41438  |
| 0.289137 | 1.91E-10 | 0.49646  | 1.97E-30 | 0.315754 | 2.85E-12 | 0.219128 | 1.74E-06 | 0.391145 |
| 0.64738  | 8.11E-57 | 0.685894 | 3.46E-66 | 0.509133 | 3.65E-32 | 0.430784 | 1.59E-22 | 0.518585 |
| 0.572907 | 4.34E-42 | 0.691084 | 1.46E-67 | 0.533232 | 1.14E-35 | 0.460775 | 6.36E-26 | 0.528399 |
| 0.375121 | 4.73E-17 | 0.561699 | 3.47E-40 | 0.406194 | 5.59E-20 | 0.394847 | 7.12E-19 | 0.569752 |
| 0.366281 | 2.83E-16 | 0.451853 | 7.08E-25 | 0.269245 | 3.37E-09 | 0.354095 | 3.06E-15 | 0.498701 |
| 0.701497 | 2.06E-70 | 0.768284 | 3.89E-92 | 0.616835 | 2.68E-50 | 0.544285 | 2.27E-37 | 0.664392 |
| 0.304967 | 1.65E-11 | 0.304009 | 1.93E-11 | 0.277756 | 1.02E-09 | 0.16782  | 0.00027  | 0.165712 |
| 0.240032 | 1.52E-07 | 0.270019 | 3.03E-09 | 0.30067  | 3.26E-11 | 0.354185 | 3.00E-15 | 0.365322 |
| 0.450925 | 9.06E-25 | 0.586395 | 1.78E-44 | 0.503981 | 1.88E-31 | 0.458015 | 1.35E-25 | 0.716133 |
| 0.539688 | 1.18E-36 | 0.406254 | 5.52E-20 | 0.353725 | 3.28E-15 | 0.286616 | 2.79E-10 | 0.338313 |
| 0.590833 | 2.75E-45 | 0.630197 | 4.63E-53 | 0.509338 | 3.41E-32 | 0.454807 | 3.21E-25 | 0.586809 |
| 0.382228 | 1.08E-17 | 0.314644 | 3.43E-12 | 0.335891 | 8.85E-14 | 0.199948 | 1.34E-05 | 0.054813 |
| 0.436112 | 4.20E-23 | 0.612149 | 2.32E-49 | 0.409583 | 2.57E-20 | 0.43297  | 9.25E-23 | 0.526525 |
| 0.49451  | 3.59E-30 | 0.711998 | 2.06E-73 | 0.50382  | 1.98E-31 | 0.431256 | 1.42E-22 | 0.52964  |
| 0.678795 | 2.37E-64 | 0.692841 | 4.91E-68 | 0.456689 | 1.93E-25 | 0.491549 | 8.86E-30 | 0.561675 |
| 0.605817 | 4.06E-48 | 0.416145 | 5.53E-21 | 0.465211 | 1.87E-26 | 0.381247 | 1.33E-17 | 0.434864 |
| 0.532407 | 1.53E-35 | 0.758085 | 2.30E-88 | 0.486903 | 3.59E-29 | 0.515621 | 4.43E-33 | 0.678628 |
| 0.312378 | 4.98E-12 | 0.376161 | 3.82E-17 | 0.403099 | 1.13E-19 | 0.205921 | 7.25E-06 | 0.2616   |
| 0.70104  | 2.77E-70 | 0.595036 | 4.57E-46 | 0.597644 | 1.48E-46 | 0.362388 | 6.13E-16 | 0.336116 |
| -0.05762 | 0.21395  | 0.28407  | 4.06E-10 | 0.133595 | 0.00382  | 0.184149 | 6.25E-05 | 0.335723 |
| 0.653213 | 3.78E-58 | 0.820907 | #####    | 0.755054 | 2.79E-87 | 0.54645  | 1.03E-37 | 0.593908 |
| 0.387562 | 3.47E-18 | 0.227351 | 6.87E-07 | 0.230388 | 4.82E-07 | 0.203443 | 9.38E-06 | 0.27247  |
| 0.293227 | 1.03E-10 | 0.328987 | 3.00E-13 | 0.173301 | 0.00017  | 0.392666 | 1.15E-18 | 0.528847 |
| 0.44288  | 7.45E-24 | 0.197108 | 1.78E-05 | 0.331291 | 2.00E-13 | 0.17296  | 0.00017  | 0.14059  |
| 0.475005 | 1.17E-27 | 0.61638  | 3.31E-50 | 0.447045 | 2.52E-24 | 0.436376 | 3.93E-23 | 0.6727   |
| 0.36084  | 8.30E-16 | 0.689472 | 3.93E-67 | 0.382455 | 1.03E-17 | 0.429773 | 2.05E-22 | 0.603011 |
| 0.633767 | 8.03E-54 | 0.733919 | 3.90E-80 | 0.645547 | 2.10E-56 | 0.463538 | 2.97E-26 | 0.61896  |

|          |          |          |          |          |          |          |          |          |
|----------|----------|----------|----------|----------|----------|----------|----------|----------|
| 0.432562 | 1.02E-22 | 0.413593 | 1.01E-20 | 0.323522 | 7.71E-13 | 0.346071 | 1.38E-14 | 0.466511 |
| 0.431693 | 1.27E-22 | 0.652806 | 4.69E-58 | 0.502228 | 3.27E-31 | 0.423868 | 8.70E-22 | 0.575381 |
| 0.395775 | 5.81E-19 | 0.341577 | 3.17E-14 | 0.217362 | 2.12E-06 | 0.362099 | 6.48E-16 | 0.286254 |
| 0.391111 | 1.61E-18 | 0.719507 | 1.21E-75 | 0.65115  | 1.13E-57 | 0.356787 | 1.82E-15 | 0.495454 |
| 0.629101 | 7.90E-53 | 0.780528 | 6.28E-97 | 0.610901 | 4.10E-49 | 0.552104 | 1.29E-38 | 0.705064 |
| 0.588733 | 6.68E-45 | 0.789689 | #####    | 0.599705 | 6.04E-47 | 0.512597 | 1.19E-32 | 0.637108 |
| 0.42794  | 3.22E-22 | 0.594591 | 5.54E-46 | 0.606909 | 2.49E-48 | 0.347947 | 9.77E-15 | 0.384185 |
| 0.673945 | 3.97E-63 | 0.721403 | 3.23E-76 | 0.636032 | 2.61E-54 | 0.503827 | 1.98E-31 | 0.528058 |
| 0.608745 | 1.09E-48 | 0.461135 | 5.76E-26 | 0.483749 | 9.16E-29 | 0.408736 | 3.12E-20 | 0.323069 |
| 0.422901 | 1.10E-21 | 0.691199 | 1.36E-67 | 0.553721 | 7.08E-39 | 0.380467 | 1.56E-17 | 0.452374 |
| -0.03542 | 0.44505  | -0.16315 | 0.0004   | -0.04944 | 0.28629  | -0.01573 | 0.73465  | 0.130901 |
| -0.03484 | 0.45263  | -0.30799 | 1.02E-11 | -0.25573 | 2.08E-08 | -0.13081 | 0.00463  | 0.043653 |
| -0.02015 | 0.66406  | -0.1067  | 0.0211   | 0.004079 | 0.92995  | -0.05176 | 0.2643   | 0.154791 |
| -0.02166 | 0.64053  | -0.2969  | 5.87E-11 | -0.20781 | 5.94E-06 | -0.10552 | 0.02258  | 0.043054 |
| 0.129553 | 0.00505  | -0.23976 | 1.57E-07 | 0.036533 | 0.43091  | -0.10709 | 0.02064  | -0.10379 |
| 0.080204 | 0.08339  | -0.20708 | 6.42E-06 | -0.13866 | 0.00267  | 0.120364 | 0.00923  | 0.260027 |
| 0.20151  | 1.14E-05 | -0.01114 | 0.81031  | 0.171264 | 0.0002   | -0.12572 | 0.00652  | -0.04649 |
| 0.166618 | 0.0003   | -0.16251 | 0.00042  | -0.09553 | 0.03905  | 0.003218 | 0.94471  | 0.150402 |
| 0.152598 | 0.00094  | -0.10172 | 0.02795  | 0.071011 | 0.12543  | -0.15353 | 0.00087  | -0.07126 |
| -0.07797 | 0.09239  | -0.36014 | 9.52E-16 | -0.23458 | 2.94E-07 | -0.12901 | 0.00523  | -0.00016 |
| 0.254833 | 2.34E-08 | -0.15398 | 0.00084  | 0.051556 | 0.26618  | -0.0171  | 0.71243  | 0.082846 |
| -0.20826 | 5.67E-06 | -0.38085 | 1.44E-17 | -0.30836 | 9.59E-12 | -0.2522  | 3.29E-08 | -0.14071 |
| -0.24556 | 7.66E-08 | -0.24117 | 1.32E-07 | -0.22869 | 5.88E-07 | -0.09135 | 0.0485   | 0.110921 |
| 0.177284 | 0.00012  | 0.109259 | 0.01818  | 0.063063 | 0.17367  | 0.151124 | 0.00105  | 0.372467 |
| -0.0305  | 0.5109   | -0.21438 | 2.94E-06 | -0.04383 | 0.34465  | -0.09323 | 0.04405  | 0.061082 |
| 0.312506 | 4.88E-12 | 0.068125 | 0.14158  | 0.096441 | 0.03722  | 0.026756 | 0.56411  | 0.207022 |
| 0.149994 | 0.00115  | -0.13752 | 0.0029   | 0.033544 | 0.46959  | 0.058565 | 0.20649  | 0.133693 |
| 0.215578 | 2.58E-06 | -0.00714 | 0.87771  | 0.168446 | 0.00026  | 0.131913 | 0.0043   | 0.277062 |
| 0.29016  | 1.64E-10 | 0.045781 | 0.32354  | 0.082723 | 0.07411  | 0.148722 | 0.00127  | 0.385419 |
| 0.306167 | 1.36E-11 | 0.092071 | 0.04675  | 0.252335 | 3.24E-08 | 0.012153 | 0.79337  | 0.216301 |
| 0.361323 | 7.55E-16 | 0.057284 | 0.2166   | 0.298908 | 4.30E-11 | -0.01933 | 0.67698  | 0.07007  |
| 0.245654 | 7.57E-08 | 0.074735 | 0.10675  | 0.154534 | 0.00081  | -0.03682 | 0.42731  | 0.16471  |
| 0.33901  | 5.05E-14 | 0.118085 | 0.01065  | 0.044168 | 0.3409   | 0.228268 | 6.17E-07 | 0.31508  |
| -0.19055 | 3.40E-05 | -0.41494 | 7.35E-21 | -0.27634 | 1.24E-09 | -0.28069 | 6.65E-10 | -0.15989 |
| 0.075125 | 0.10493  | -0.21825 | 1.92E-06 | -0.05255 | 0.2571   | -0.08228 | 0.07569  | -0.00258 |
| 0.085668 | 0.06435  | -0.26162 | 9.53E-09 | -0.16146 | 0.00046  | -0.0698  | 0.13201  | 0.063338 |
| 0.161469 | 0.00046  | -0.06153 | 0.18437  | 0.022896 | 0.62165  | 0.061929 | 0.18155  | 0.31478  |
| -0.18884 | 4.01E-05 | -0.29645 | 6.29E-11 | -0.27216 | 2.25E-09 | -0.17309 | 0.00017  | -0.035   |
| 0.240545 | 1.43E-07 | 0.061649 | 0.18354  | 0.146038 | 0.00155  | 0.11144  | 0.01598  | 0.354816 |
| -0.11289 | 0.01465  | -0.38135 | 1.30E-17 | -0.30021 | 3.51E-11 | -0.12735 | 0.00585  | 0.05561  |
| 0.28817  | 2.21E-10 | 0.018968 | 0.68266  | 0.15659  | 0.00068  | 0.019965 | 0.66695  | 0.162265 |
| -0.1688  | 0.00025  | -0.17312 | 0.00017  | -0.1316  | 0.00439  | -0.25897 | 1.36E-08 | 0.002656 |
| -0.04279 | 0.35619  | -0.16555 | 0.00033  | -0.10905 | 0.01841  | -0.11319 | 0.01439  | 0.137224 |
| -0.23847 | 1.84E-07 | -0.32099 | 1.19E-12 | -0.25893 | 1.36E-08 | -0.28607 | 3.02E-10 | -0.0503  |
| 0.10218  | 0.02724  | -0.09681 | 0.03649  | -0.1507  | 0.00109  | -0.02816 | 0.54383  | 0.225609 |

|          |          |          |          |          |          |          |          |          |
|----------|----------|----------|----------|----------|----------|----------|----------|----------|
| 0.053539 | 0.24821  | -0.19137 | 3.14E-05 | -0.04309 | 0.35281  | -0.05354 | 0.24817  | 0.017932 |
| 0.058977 | 0.2033   | -0.17527 | 0.00014  | -0.11336 | 0.01424  | 0.051002 | 0.27136  | 0.164953 |
| -0.29417 | 8.93E-11 | -0.34925 | 7.65E-15 | -0.28151 | 5.91E-10 | -0.36467 | 3.90E-16 | -0.17387 |
| -0.13512 | 0.00344  | -0.32232 | 9.46E-13 | -0.19703 | 1.80E-05 | -0.25412 | 2.57E-08 | -0.08526 |
| -0.04235 | 0.36117  | -0.1231  | 0.00774  | -0.07059 | 0.12768  | -0.14331 | 0.00191  | 0.07843  |
| 0.203167 | 9.65E-06 | 0.047151 | 0.30926  | 0.059192 | 0.20166  | 0.09484  | 0.0405   | 0.195166 |
| 0.114358 | 0.01341  | -0.14306 | 0.00194  | 0.008521 | 0.85429  | -0.02225 | 0.63152  | 0.112439 |
| -0.02815 | 0.54402  | -0.27201 | 2.29E-09 | -0.15627 | 0.0007   | -0.21282 | 3.48E-06 | -0.07679 |
| 0.049084 | 0.28982  | -0.04027 | 0.3853   | -0.09998 | 0.03076  | 0.079653 | 0.08554  | 0.310875 |
| 0.316241 | 2.63E-12 | 0.116818 | 0.01153  | 0.144739 | 0.00171  | 0.177525 | 0.00011  | 0.366174 |
| 0.241504 | 1.27E-07 | -0.1199  | 0.0095   | 0.040244 | 0.38556  | 0.07074  | 0.12688  | 0.150995 |
| -0.14178 | 0.00213  | -0.15818 | 0.0006   | -0.10534 | 0.02281  | -0.09522 | 0.0397   | 0.161955 |
| -0.02636 | 0.56996  | -0.34162 | 3.14E-14 | -0.15533 | 0.00076  | -0.15977 | 0.00053  | -0.14164 |
| -0.07567 | 0.10243  | -0.14242 | 0.00203  | -0.01783 | 0.70075  | 0.01917  | 0.67947  | 0.221168 |
| -0.23297 | 3.56E-07 | -0.24911 | 4.90E-08 | -0.21549 | 2.61E-06 | -0.11582 | 0.01226  | 0.136189 |
| -0.0445  | 0.33729  | -0.18455 | 6.02E-05 | -0.12866 | 0.00536  | -0.01003 | 0.82886  | 0.027165 |
| -0.08274 | 0.07406  | -0.18687 | 4.84E-05 | -0.0699  | 0.13146  | -0.18764 | 4.50E-05 | 0.00236  |
| 0.11887  | 0.01014  | -0.12926 | 0.00515  | 0.085228 | 0.06574  | -0.06314 | 0.17312  | 0.09418  |
| 0.268651 | 3.66E-09 | 0.132751 | 0.00406  | 0.181834 | 7.75E-05 | 0.240246 | 1.48E-07 | 0.374422 |
| 0.00014  | 0.99759  | -0.192   | 2.95E-05 | -0.11616 | 0.012    | -0.01371 | 0.76769  | 0.065106 |
| 0.023175 | 0.6174   | 0.063736 | 0.16911  | -0.0708  | 0.12655  | 0.095688 | 0.03873  | 0.392558 |
| 0.167497 | 0.00028  | 0.008137 | 0.86079  | 0.065043 | 0.16053  | 0.064067 | 0.16691  | 0.377086 |
| 0.191421 | 3.13E-05 | 0.134864 | 0.0035   | 0.138283 | 0.00275  | 0.209941 | 4.74E-06 | 0.386411 |
| -0.00183 | 0.96861  | -0.08787 | 0.05777  | 0.042961 | 0.35427  | -0.2348  | 2.86E-07 | -0.11608 |
| 0.102392 | 0.02693  | -0.25577 | 2.07E-08 | -0.09633 | 0.03743  | -0.15184 | 0.001    | -0.11076 |
| 0.089664 | 0.05282  | -0.25505 | 2.27E-08 | -0.14777 | 0.00136  | -0.01474 | 0.75064  | 0.086032 |
| 0.207926 | 5.87E-06 | -0.08896 | 0.05472  | 0.071903 | 0.12074  | -0.01977 | 0.67007  | 0.067108 |
| 0.259229 | 1.31E-08 | 0.199912 | 1.35E-05 | 0.18918  | 3.88E-05 | 0.092947 | 0.04469  | 0.357134 |
| -0.31039 | 6.90E-12 | -0.54354 | 2.97E-37 | -0.48599 | 4.71E-29 | -0.26428 | 6.66E-09 | -0.16558 |
| -0.11237 | 0.01512  | -0.32359 | 7.62E-13 | -0.24764 | 5.90E-08 | -0.22714 | 7.03E-07 | -0.13445 |
| -0.16439 | 0.00036  | -0.47189 | 2.86E-27 | -0.38638 | 4.47E-18 | -0.20191 | 1.10E-05 | -0.12639 |
| 0.127539 | 0.00578  | -0.03434 | 0.45912  | 0.111717 | 0.01572  | -0.01387 | 0.76505  | 0.039284 |
| -0.24879 | 5.10E-08 | -0.44268 | 7.84E-24 | -0.37511 | 4.74E-17 | -0.15369 | 0.00086  | -0.11818 |
| -0.10049 | 0.02991  | -0.28005 | 7.30E-10 | -0.22177 | 1.30E-06 | -0.11222 | 0.01526  | 0.128491 |
| 0.046951 | 0.31132  | -0.14171 | 0.00214  | 0.041021 | 0.37645  | -0.19692 | 1.82E-05 | -0.01563 |
| 0.133744 | 0.00379  | 0.038999 | 0.40044  | 0.084075 | 0.06949  | 0.054996 | 0.23555  | 0.291869 |
| -0.24428 | 8.99E-08 | -0.24372 | 9.65E-08 | -0.16906 | 0.00024  | -0.20838 | 5.60E-06 | 0.070615 |
| -0.07596 | 0.1011   | -0.31928 | 1.58E-12 | -0.1725  | 0.00018  | -0.23663 | 2.30E-07 | -0.01926 |
| -0.20998 | 4.72E-06 | -0.19099 | 3.26E-05 | -0.17058 | 0.00021  | -0.11178 | 0.01567  | 0.169574 |
| -0.03923 | 0.39761  | -0.42287 | 1.11E-21 | -0.23707 | 2.18E-07 | -0.2272  | 6.98E-07 | -0.18135 |
| 0.063134 | 0.17318  | -0.00091 | 0.98441  | 0.059527 | 0.19911  | -0.08851 | 0.05596  | 0.091911 |
| 0.261933 | 9.14E-09 | 0.108159 | 0.01939  | 0.087806 | 0.05795  | 0.048888 | 0.29176  | 0.191954 |
| 0.438835 | 2.10E-23 | 0.251971 | 3.39E-08 | 0.25368  | 2.72E-08 | 0.219527 | 1.67E-06 | 0.425749 |
| 0.169604 | 0.00023  | -0.05627 | 0.22484  | 0.027478 | 0.55364  | 0.087026 | 0.06022  | 0.268912 |
| 0.359618 | 1.05E-15 | 0.192794 | 2.73E-05 | 0.181558 | 7.95E-05 | 0.2761   | 1.29E-09 | 0.522525 |

|          |          |          |          |          |          |          |          |          |
|----------|----------|----------|----------|----------|----------|----------|----------|----------|
| 0.175521 | 0.00014  | 0.012328 | 0.79047  | -0.04543 | 0.32725  | 0.163065 | 0.0004   | 0.371768 |
| -0.05119 | 0.26963  | -0.27879 | 8.76E-10 | -0.19009 | 3.56E-05 | -0.14073 | 0.0023   | -0.0492  |
| 0.241813 | 1.22E-07 | 0.297388 | 5.44E-11 | 0.240956 | 1.36E-07 | 0.239569 | 1.61E-07 | 0.50091  |
| -0.20011 | 1.32E-05 | -0.28143 | 5.97E-10 | -0.17628 | 0.00013  | -0.26654 | 4.89E-09 | -0.01941 |
| -0.09988 | 0.03093  | -0.13349 | 0.00385  | -0.07222 | 0.11908  | -0.24611 | 7.16E-08 | -0.06751 |
| 0.113538 | 0.01409  | -0.18237 | 7.38E-05 | 0.017477 | 0.7064   | -0.13541 | 0.00337  | -0.03701 |
| 0.417469 | 4.04E-21 | 0.205951 | 7.23E-06 | 0.370799 | 1.14E-16 | 0.127508 | 0.00579  | 0.340137 |
| -0.05966 | 0.19814  | -0.24238 | 1.14E-07 | -0.20891 | 5.29E-06 | -0.06921 | 0.13532  | 0.119727 |
| -0.28106 | 6.31E-10 | -0.28561 | 3.23E-10 | -0.20177 | 1.11E-05 | -0.25753 | 1.64E-08 | -0.00186 |
| 0.269621 | 3.20E-09 | 0.163215 | 0.0004   | 0.083986 | 0.06979  | 0.201798 | 1.11E-05 | 0.499439 |
| -0.04957 | 0.28502  | -0.35726 | 1.66E-15 | -0.23988 | 1.55E-07 | -0.14041 | 0.00236  | -0.02646 |
| 0.287423 | 2.47E-10 | 0.087779 | 0.05803  | 0.257505 | 1.65E-08 | -0.00509 | 0.91258  | 0.084919 |
| -0.08232 | 0.07554  | -0.25528 | 2.21E-08 | -0.06269 | 0.17625  | -0.07401 | 0.11021  | -0.08346 |
| 0.047834 | 0.3023   | -0.07776 | 0.09324  | 0.037895 | 0.41392  | -0.01705 | 0.71326  | 0.154356 |
| 0.055335 | 0.23267  | -0.01189 | 0.79768  | -0.11156 | 0.01587  | 0.215054 | 2.73E-06 | 0.32792  |
| 0.082987 | 0.07319  | -0.11241 | 0.01508  | -0.12016 | 0.00935  | 0.065613 | 0.15688  | 0.25197  |
| -0.20469 | 8.24E-06 | -0.38446 | 6.73E-18 | -0.31033 | 6.97E-12 | -0.09278 | 0.04508  | 0.01362  |
| -0.09529 | 0.03955  | -0.13736 | 0.00293  | -0.01831 | 0.69315  | -0.1188  | 0.01018  | 0.046759 |
| -0.09328 | 0.04393  | -0.31654 | 2.50E-12 | -0.23867 | 1.79E-07 | -0.11585 | 0.01224  | 0.0265   |
| 0.027681 | 0.5507   | -0.17879 | 0.0001   | -0.02886 | 0.5339   | -0.08975 | 0.0526   | 0.009081 |
| 0.196683 | 1.86E-05 | 0.131939 | 0.00429  | 0.147613 | 0.00138  | 0.247716 | 5.84E-08 | 0.495355 |
| 0.44028  | 1.45E-23 | 0.052187 | 0.26037  | 0.321209 | 1.14E-12 | 0.129759 | 0.00498  | 0.098003 |
| 0.007983 | 0.86339  | -0.12049 | 0.00915  | -0.00632 | 0.89171  | -0.00105 | 0.98202  | 0.129455 |
| -0.07979 | 0.08501  | -0.24892 | 5.01E-08 | -0.19616 | 1.96E-05 | -0.01432 | 0.75767  | 0.097237 |
| 0.328508 | 3.26E-13 | 0.067737 | 0.14386  | 0.263007 | 7.91E-09 | 0.085713 | 0.06421  | 0.18039  |
| -0.01959 | 0.67284  | -0.12811 | 0.00556  | -0.08426 | 0.06889  | -0.05879 | 0.20472  | 0.185901 |
| -0.31011 | 7.22E-12 | -0.35238 | 4.23E-15 | -0.36419 | 4.29E-16 | -0.1612  | 0.00047  | -0.10226 |
| 0.299562 | 3.88E-11 | -0.0154  | 0.73988  | 0.143016 | 0.00195  | -0.00506 | 0.91323  | 0.139048 |
| 0.044226 | 0.34027  | -0.15119 | 0.00105  | -0.03594 | 0.43847  | -0.15439 | 0.00082  | 0.138329 |
| 0.336489 | 7.96E-14 | 0.090752 | 0.05     | 0.201251 | 1.17E-05 | 0.23607  | 2.46E-07 | 0.423953 |
| 0.167454 | 0.00028  | -0.11307 | 0.0145   | 0.045809 | 0.32324  | 0.039963 | 0.38889  | 0.12194  |
| 0.371571 | 9.77E-17 | 0.126331 | 0.00626  | 0.357641 | 1.55E-15 | 0.094883 | 0.04041  | 0.277085 |
| -0.10125 | 0.02869  | -0.24061 | 1.42E-07 | -0.2381  | 1.92E-07 | -0.16731 | 0.00028  | 0.006445 |
| 0.077539 | 0.0942   | -0.01727 | 0.70977  | 0.079856 | 0.08474  | -0.06198 | 0.18119  | 0.143628 |
| 0.17158  | 0.00019  | -0.02644 | 0.56865  | 0.075468 | 0.10335  | 0.133918 | 0.00374  | 0.368021 |
| -0.01648 | 0.72238  | -0.04969 | 0.28387  | 0.06279  | 0.17554  | -0.11149 | 0.01593  | 0.097755 |
| -0.28833 | 2.16E-10 | -0.29809 | 4.88E-11 | -0.26487 | 6.15E-09 | -0.2298  | 5.16E-07 | 0.044692 |
| 0.043351 | 0.34992  | -0.29977 | 3.75E-11 | -0.16872 | 0.00025  | -0.10473 | 0.02361  | -0.01769 |
| -0.30553 | 1.51E-11 | -0.14877 | 0.00126  | -0.09186 | 0.04726  | -0.16331 | 0.00039  | 0.065207 |
| 0.045656 | 0.32487  | -0.29655 | 6.20E-11 | -0.16755 | 0.00028  | -0.04253 | 0.35912  | 0.092654 |
| 0.005816 | 0.90025  | -0.29901 | 4.23E-11 | -0.26966 | 3.18E-09 | -0.12688 | 0.00604  | 0.003832 |
| 0.019491 | 0.6744   | -0.33689 | 7.40E-14 | -0.15415 | 0.00083  | -0.09371 | 0.04296  | -0.01487 |
| -0.32229 | 9.51E-13 | -0.59536 | 3.98E-46 | -0.48159 | 1.73E-28 | -0.24931 | 4.77E-08 | -0.12438 |
| -0.25194 | 3.41E-08 | -0.38332 | 8.56E-18 | -0.40864 | 3.19E-20 | -0.17952 | 9.58E-05 | -0.1043  |
| -0.18814 | 4.29E-05 | -0.45525 | 2.85E-25 | -0.31701 | 2.32E-12 | -0.36663 | 2.65E-16 | -0.05582 |

|          |          |          |          |          |          |          |          |          |
|----------|----------|----------|----------|----------|----------|----------|----------|----------|
| -0.31055 | 6.72E-12 | -0.38431 | 6.95E-18 | -0.37253 | 8.04E-17 | -0.04576 | 0.32372  | 0.112178 |
| -0.00593 | 0.8983   | -0.06772 | 0.14398  | -0.02437 | 0.5994   | 0.012178 | 0.79296  | 0.181811 |
| -0.00667 | 0.88566  | -0.29647 | 6.28E-11 | -0.29497 | 7.90E-11 | -0.03956 | 0.39369  | 0.069642 |
| -0.11257 | 0.01494  | -0.29453 | 8.45E-11 | -0.20446 | 8.44E-06 | -0.01128 | 0.80786  | 0.190905 |
| -0.14869 | 0.00127  | -0.21869 | 1.83E-06 | -0.23247 | 3.77E-07 | -0.12373 | 0.00743  | 0.178245 |
| 0.216362 | 2.37E-06 | -0.23017 | 4.95E-07 | -0.1101  | 0.01731  | 0.03132  | 0.49956  | 0.052199 |
| -0.13184 | 0.00432  | -0.33499 | 1.04E-13 | -0.19806 | 1.62E-05 | -0.2014  | 1.16E-05 | -0.02288 |
| -0.06615 | 0.15352  | -0.13279 | 0.00405  | -0.19863 | 1.53E-05 | -0.1138  | 0.01387  | 0.112054 |
| -0.14195 | 0.00211  | -0.16933 | 0.00024  | -0.09254 | 0.04563  | -0.07754 | 0.09419  | 0.147856 |
| 0.195947 | 2.00E-05 | 0.175635 | 0.00014  | 0.174134 | 0.00016  | 0.079366 | 0.08667  | 0.327578 |
| 0.12317  | 0.0077   | -0.09985 | 0.03098  | -0.04125 | 0.37374  | 0.127893 | 0.00564  | 0.199192 |
| -0.05597 | 0.22738  | -0.21194 | 3.83E-06 | -0.10529 | 0.02287  | -0.10819 | 0.01935  | 0.081295 |
| -0.17691 | 0.00012  | -0.30999 | 7.36E-12 | -0.42622 | 4.91E-22 | -0.05996 | 0.19585  | 0.049766 |
| 0.058084 | 0.21025  | 0.056811 | 0.22042  | 0.052134 | 0.26085  | 0.164536 | 0.00036  | 0.341209 |
| -0.27897 | 8.54E-10 | -0.4824  | 1.36E-28 | -0.47398 | 1.57E-27 | -0.207   | 6.48E-06 | -0.05743 |
| 0.089998 | 0.05194  | 0.057714 | 0.21316  | 0.108681 | 0.01881  | -0.02583 | 0.57774  | 0.175011 |
| -0.24119 | 1.32E-07 | -0.25687 | 1.79E-08 | -0.19759 | 1.70E-05 | -0.18938 | 3.81E-05 | 0.019781 |
| 0.205758 | 7.37E-06 | -0.0567  | 0.22132  | 0.029579 | 0.52372  | -0.05443 | 0.2404   | 0.192775 |
| -0.02269 | 0.62483  | -0.33363 | 1.33E-13 | -0.16036 | 0.0005   | -0.23423 | 3.06E-07 | -0.14926 |
| 0.065379 | 0.15837  | -0.21626 | 2.40E-06 | -0.06029 | 0.19338  | -0.09844 | 0.03343  | -0.09024 |
| 0.144296 | 0.00177  | -0.05457 | 0.23924  | 0.028535 | 0.53847  | 0.127601 | 0.00576  | 0.207107 |
| 0.327322 | 4.01E-13 | 0.609726 | 6.99E-49 | 0.431171 | 1.45E-22 | 0.270484 | 2.84E-09 | 0.263979 |
| 0.529464 | 4.22E-35 | 0.620009 | 6.09E-51 | 0.479223 | 3.46E-28 | 0.355696 | 2.25E-15 | 0.422083 |
| 0.540197 | 9.83E-37 | 0.541265 | 6.71E-37 | 0.48295  | 1.16E-28 | 0.344454 | 1.87E-14 | 0.308727 |
| 0.557376 | 1.80E-39 | 0.612508 | 1.97E-49 | 0.600581 | 4.12E-47 | 0.360144 | 9.51E-16 | 0.412812 |
| 0.550953 | 1.98E-38 | 0.684797 | 6.70E-66 | 0.564507 | 1.18E-40 | 0.373901 | 6.08E-17 | 0.321777 |
| 0.523299 | 3.44E-34 | 0.62503  | 5.62E-52 | 0.391366 | 1.53E-18 | 0.363845 | 4.60E-16 | 0.394447 |
| 0.105366 | 0.02277  | 0.370335 | 1.26E-16 | 0.277669 | 1.03E-09 | 0.170074 | 0.00022  | 0.225595 |
| 0.420751 | 1.85E-21 | 0.462296 | 4.18E-26 | 0.197551 | 1.71E-05 | 0.329769 | 2.62E-13 | 0.296659 |
| 0.307825 | 1.05E-11 | 0.415422 | 6.56E-21 | 0.357531 | 1.58E-15 | 0.158342 | 0.00059  | 0.221734 |
| 0.423752 | 8.95E-22 | 0.607551 | 1.87E-48 | 0.441086 | 1.18E-23 | 0.390311 | 1.92E-18 | 0.411081 |
| 0.222596 | 1.18E-06 | 0.455156 | 2.93E-25 | 0.208817 | 5.35E-06 | 0.27677  | 1.17E-09 | 0.411525 |
| 0.566566 | 5.28E-41 | 0.598668 | 9.50E-47 | 0.410356 | 2.15E-20 | 0.399988 | 2.28E-19 | 0.389894 |
| 0.393747 | 9.07E-19 | 0.53237  | 1.54E-35 | 0.326092 | 4.96E-13 | 0.325999 | 5.04E-13 | 0.403823 |
| 0.605401 | 4.88E-48 | 0.671864 | 1.31E-62 | 0.644829 | 3.03E-56 | 0.40799  | 3.70E-20 | 0.434782 |
| 0.450749 | 9.49E-25 | 0.664028 | 1.07E-60 | 0.586498 | 1.70E-44 | 0.305796 | 1.45E-11 | 0.33518  |
| 0.313071 | 4.45E-12 | 0.332529 | 1.61E-13 | 0.254829 | 2.34E-08 | 0.108008 | 0.01956  | 0.108452 |
| 0.496625 | 1.87E-30 | 0.604898 | 6.11E-48 | 0.56363  | 1.65E-40 | 0.356145 | 2.06E-15 | 0.395696 |
| 0.133647 | 0.00381  | 0.227788 | 6.53E-07 | 0.092743 | 0.04516  | 0.162416 | 0.00043  | 0.133577 |
| 0.520485 | 8.84E-34 | 0.548801 | 4.38E-38 | 0.5327   | 1.38E-35 | 0.308943 | 8.72E-12 | 0.284557 |
| 0.497306 | 1.52E-30 | 0.403557 | 1.02E-19 | 0.336821 | 7.49E-14 | 0.340045 | 4.19E-14 | 0.270473 |
| 0.574044 | 2.76E-42 | 0.727294 | 4.92E-78 | 0.683475 | 1.48E-65 | 0.46983  | 5.12E-27 | 0.450059 |
| 0.27069  | 2.76E-09 | 0.455085 | 2.98E-25 | 0.269185 | 3.40E-09 | 0.215711 | 2.54E-06 | 0.295013 |
| 0.169226 | 0.00024  | 0.406959 | 4.69E-20 | 0.248767 | 5.11E-08 | 0.294554 | 8.42E-11 | 0.383386 |
| 0.481112 | 1.99E-28 | 0.350878 | 5.63E-15 | 0.285875 | 3.11E-10 | 0.292045 | 1.23E-10 | 0.154218 |



|          |          |          |          |           |          |          |          |          |
|----------|----------|----------|----------|-----------|----------|----------|----------|----------|
| 0.107244 | 0.02045  | 0.305128 | 1.61E-11 | 0.15294   | 0.00091  | 0.14722  | 0.00142  | 0.159279 |
| 0.652259 | 6.27E-58 | 0.633063 | 1.14E-53 | 0.554     | 6.39E-39 | 0.411286 | 1.73E-20 | 0.387915 |
| 0.437888 | 2.68E-23 | 0.554114 | 6.12E-39 | 0.453003  | 5.21E-25 | 0.399656 | 2.45E-19 | 0.355838 |
| 0.124852 | 0.0069   | 0.516121 | 3.76E-33 | 0.338308  | 5.74E-14 | 0.182772 | 7.11E-05 | 0.267266 |
| 0.130469 | 0.00474  | 0.345815 | 1.45E-14 | 0.313094  | 4.43E-12 | 0.169207 | 0.00024  | 0.228388 |
| -0.08442 | 0.06833  | 0.129112 | 0.0052   | -1.80E-05 | 0.99969  | 0.077038 | 0.09635  | 0.155801 |
| 0.473116 | 2.01E-27 | 0.677054 | 6.55E-64 | 0.505693  | 1.10E-31 | 0.386879 | 4.02E-18 | 0.392725 |
| 0.344816 | 1.75E-14 | 0.414584 | 7.99E-21 | 0.360942  | 8.13E-16 | 0.251682 | 3.52E-08 | 0.230195 |
| 0.611962 | 2.53E-49 | 0.642657 | 9.24E-56 | 0.590886  | 2.69E-45 | 0.352422 | 4.20E-15 | 0.36384  |
| 0.393094 | 1.05E-18 | 0.56727  | 4.02E-41 | 0.373739  | 6.28E-17 | 0.411642 | 1.59E-20 | 0.333845 |
| 0.275249 | 1.45E-09 | 0.411317 | 1.72E-20 | 0.242771  | 1.08E-07 | 0.179558 | 9.55E-05 | 0.221684 |
| 0.311114 | 6.13E-12 | 0.423425 | 9.69E-22 | 0.242577  | 1.11E-07 | 0.226983 | 7.16E-07 | 0.323432 |
| 0.31877  | 1.72E-12 | 0.400828 | 1.89E-19 | 0.363498  | 4.92E-16 | 0.233817 | 3.22E-07 | 0.262968 |
| 0.592145 | 1.58E-45 | 0.739008 | 8.60E-82 | 0.593713  | 8.07E-46 | 0.449879 | 1.20E-24 | 0.463688 |
| 0.413535 | 1.02E-20 | 0.665354 | 5.13E-61 | 0.507213  | 6.75E-32 | 0.368873 | 1.69E-16 | 0.425337 |
| 0.601994 | 2.21E-47 | 0.570234 | 1.25E-41 | 0.495874  | 2.36E-30 | 0.416379 | 5.23E-21 | 0.375216 |
| 0.497566 | 1.40E-30 | 0.493925 | 4.29E-30 | 0.437137  | 3.24E-23 | 0.297298 | 5.52E-11 | 0.30415  |
| 0.335283 | 9.87E-14 | 0.46278  | 3.66E-26 | 0.412057  | 1.44E-20 | 0.306243 | 1.35E-11 | 0.176086 |
| 0.494225 | 3.92E-30 | 0.418026 | 3.54E-21 | 0.301396  | 2.91E-11 | 0.415121 | 7.04E-21 | 0.298136 |
| 0.28588  | 3.11E-10 | 0.31931  | 1.58E-12 | 0.218707  | 1.83E-06 | 0.187591 | 4.52E-05 | 0.163954 |
| 0.661186 | 5.12E-60 | 0.682052 | 3.46E-65 | 0.601041  | 3.36E-47 | 0.441296 | 1.12E-23 | 0.546787 |
| -0.22132 | 1.36E-06 | 0.065532 | 0.1574   | 0.009654  | 0.83517  | -0.09203 | 0.04684  | 0.046045 |
| 0.205055 | 7.93E-06 | 0.367554 | 2.20E-16 | 0.273367  | 1.90E-09 | 0.273418 | 1.88E-09 | 0.215557 |
| 0.247898 | 5.71E-08 | 0.351373 | 5.13E-15 | 0.294496  | 8.49E-11 | 0.235541 | 2.62E-07 | 0.326453 |
| 0.029312 | 0.52747  | 0.199857 | 1.35E-05 | -0.00636  | 0.89102  | 0.05917  | 0.20182  | 0.005003 |
| 0.152122 | 0.00097  | 0.330819 | 2.18E-13 | 0.152749  | 0.00093  | 0.21473  | 2.83E-06 | 0.506846 |
| 0.259185 | 1.32E-08 | 0.263346 | 7.56E-09 | 0.098315  | 0.03366  | 0.390392 | 1.88E-18 | 0.506476 |
| 0.326839 | 4.36E-13 | 0.397328 | 4.12E-19 | 0.256752  | 1.82E-08 | 0.403493 | 1.03E-19 | 0.549763 |
| 0.323095 | 8.29E-13 | 0.396482 | 4.97E-19 | 0.164627  | 0.00035  | 0.360842 | 8.30E-16 | 0.689242 |
| 0.42119  | 1.66E-21 | 0.613707 | 1.14E-49 | 0.328008  | 3.56E-13 | 0.445879 | 3.42E-24 | 0.708638 |
| 0.228491 | 6.02E-07 | 0.3641   | 4.37E-16 | 0.125088  | 0.0068   | 0.344825 | 1.74E-14 | 0.566642 |
| 0.572921 | 4.32E-42 | 0.636592 | 1.97E-54 | 0.526761  | 1.06E-34 | 0.527649 | 7.86E-35 | 0.780378 |
| 0.234476 | 2.97E-07 | 0.324387 | 6.65E-13 | 0.170037  | 0.00022  | 0.44802  | 1.95E-24 | 0.654838 |
| 0.484049 | 8.38E-29 | 0.678603 | 2.65E-64 | 0.330157  | 2.44E-13 | 0.506036 | 9.82E-32 | 0.875585 |
| 0.166994 | 0.00029  | 0.344374 | 1.90E-14 | 0.218099  | 1.96E-06 | 0.276221 | 1.27E-09 | 0.446902 |
| 0.395513 | 6.15E-19 | 0.535695 | 4.84E-36 | 0.236736  | 2.27E-07 | 0.485761 | 5.04E-29 | 0.777292 |
| 0.282181 | 5.36E-10 | 0.373149 | 7.09E-17 | 0.139989  | 0.00243  | 0.431044 | 1.49E-22 | 0.691376 |
| 0.134253 | 0.00365  | 0.382779 | 9.60E-18 | 0.20054   | 1.26E-05 | 0.279855 | 7.51E-10 | 0.490466 |
| 0.280016 | 7.34E-10 | 0.296828 | 5.93E-11 | 0.128804  | 0.00531  | 0.371137 | 1.07E-16 | 0.555968 |
| 0.401577 | 1.59E-19 | 0.395618 | 6.01E-19 | 0.397552  | 3.92E-19 | 0.317044 | 2.30E-12 | 0.64766  |
| 0.268993 | 3.49E-09 | 0.335865 | 8.90E-14 | 0.283864  | 4.19E-10 | 0.212752 | 3.51E-06 | 0.453346 |
| 0.242237 | 1.16E-07 | 0.292757 | 1.11E-10 | 0.270088  | 3.00E-09 | 0.219243 | 1.72E-06 | 0.429623 |
| 0.130948 | 0.00459  | 0.444066 | 5.48E-24 | 0.07193   | 0.1206   | 0.382408 | 1.04E-17 | 0.606337 |
| 0.478978 | 3.71E-28 | 0.519348 | 1.29E-33 | 0.34052   | 3.84E-14 | 0.473332 | 1.89E-27 | 0.652221 |
| -0.0955  | 0.03912  | -0.35232 | 4.29E-15 | -0.26135  | 9.89E-09 | -0.20652 | 6.81E-06 | -0.58517 |

|          |          |          |          |          |          |          |          |          |
|----------|----------|----------|----------|----------|----------|----------|----------|----------|
| 0.296591 | 6.15E-11 | 0.234778 | 2.87E-07 | 0.059644 | 0.19823  | 0.296734 | 6.02E-11 | 0.446504 |
| 0.114992 | 0.0129   | 0.344697 | 1.79E-14 | 0.267098 | 4.53E-09 | 0.201714 | 1.12E-05 | 0.461866 |
| 0.58389  | 5.03E-44 | 0.769631 | 1.20E-92 | 0.517876 | 2.10E-33 | 0.489193 | 1.80E-29 | 0.800076 |
| 0.390106 | 2.00E-18 | 0.318674 | 1.75E-12 | 0.272821 | 2.05E-09 | 0.336488 | 7.96E-14 | 0.491716 |
| 0.473724 | 1.69E-27 | 0.449443 | 1.34E-24 | 0.319253 | 1.59E-12 | 0.475752 | 9.45E-28 | 0.627097 |
| 0.37987  | 1.77E-17 | 0.421979 | 1.37E-21 | 0.263507 | 7.40E-09 | 0.262639 | 8.32E-09 | 0.521512 |
| 0.20377  | 9.06E-06 | 0.523646 | 3.06E-34 | 0.230326 | 4.86E-07 | 0.292971 | 1.07E-10 | 0.702766 |
| 0.470994 | 3.68E-27 | 0.547362 | 7.41E-38 | 0.363326 | 5.09E-16 | 0.407917 | 3.77E-20 | 0.785865 |
| 0.263419 | 7.49E-09 | 0.255054 | 2.27E-08 | -0.06139 | 0.18542  | 0.332082 | 1.74E-13 | 0.541773 |
| 0.213114 | 3.37E-06 | 0.295158 | 7.67E-11 | 0.311237 | 6.01E-12 | 0.260799 | 1.06E-08 | 0.47416  |
| 0.312351 | 5.01E-12 | 0.203477 | 9.34E-06 | 0.183415 | 6.69E-05 | 0.311585 | 5.68E-12 | 0.5795   |
| 0.604313 | 7.93E-48 | 0.646608 | 1.21E-56 | 0.524281 | 2.47E-34 | 0.56121  | 4.18E-40 | 0.795738 |
| 0.435733 | 4.62E-23 | 0.567109 | 4.28E-41 | 0.271327 | 2.52E-09 | 0.480449 | 2.42E-28 | 0.776525 |
| 0.425706 | 5.56E-22 | 0.477352 | 5.95E-28 | 0.300454 | 3.37E-11 | 0.304283 | 1.84E-11 | 0.637274 |
| 0.437095 | 3.27E-23 | 0.647625 | 7.14E-57 | 0.53272  | 1.37E-35 | 0.382688 | 9.78E-18 | 0.696166 |
| 0.66952  | 4.95E-62 | 0.796664 | #####    | 0.609655 | 7.22E-49 | 0.546424 | 1.04E-37 | 0.789569 |
| 0.43526  | 5.21E-23 | 0.361845 | 6.82E-16 | 0.204568 | 8.35E-06 | 0.422359 | 1.25E-21 | 0.645931 |
| 0.420467 | 1.98E-21 | 0.472086 | 2.70E-27 | 0.410461 | 2.09E-20 | 0.296953 | 5.82E-11 | 0.660323 |
| -0.16405 | 0.00037  | -0.34274 | 2.56E-14 | -0.22075 | 1.46E-06 | -0.29829 | 4.73E-11 | -0.53095 |
| 0.229726 | 5.21E-07 | 0.441265 | 1.13E-23 | 0.180505 | 8.76E-05 | 0.292317 | 1.18E-10 | 0.62038  |
| 0.016034 | 0.72965  | 0.265921 | 5.33E-09 | 0.036802 | 0.42752  | 0.307444 | 1.11E-11 | 0.488918 |
| 0.070247 | 0.12955  | 0.311036 | 6.21E-12 | 0.164317 | 0.00036  | 0.207888 | 5.90E-06 | 0.509081 |
| 0.23714  | 2.16E-07 | 0.282463 | 5.14E-10 | 0.207199 | 6.34E-06 | 0.285569 | 3.26E-10 | 0.598818 |
| 0.419257 | 2.64E-21 | 0.560678 | 5.12E-40 | 0.223103 | 1.12E-06 | 0.525123 | 1.86E-34 | 0.763668 |
| 0.41074  | 1.96E-20 | 0.591596 | 1.99E-45 | 0.361409 | 7.42E-16 | 0.478874 | 3.83E-28 | 0.705742 |
| 0.506613 | 8.17E-32 | 0.59991  | 5.52E-47 | 0.488048 | 2.55E-29 | 0.489303 | 1.75E-29 | 0.803177 |
| 0.205274 | 7.76E-06 | 0.3636   | 4.82E-16 | 0.050583 | 0.27532  | 0.272887 | 2.03E-09 | 0.617899 |
| 0.347445 | 1.07E-14 | 0.623627 | 1.10E-51 | 0.310401 | 6.89E-12 | 0.477438 | 5.81E-28 | 0.679919 |
| 0.051983 | 0.26224  | -0.37022 | 1.28E-16 | -0.14066 | 0.00231  | -0.19992 | 1.34E-05 | -0.56042 |
| 0.145278 | 0.00165  | 0.339844 | 4.34E-14 | 0.287041 | 2.62E-10 | 0.211889 | 3.85E-06 | 0.460613 |
| 0.4773   | 6.04E-28 | 0.460344 | 7.15E-26 | 0.349901 | 6.77E-15 | 0.493237 | 5.30E-30 | 0.658224 |
| 0.413977 | 9.22E-21 | 0.473268 | 1.93E-27 | 0.328446 | 3.30E-13 | 0.368809 | 1.71E-16 | 0.70758  |
| 0.615635 | 4.68E-50 | 0.799019 | #####    | 0.600599 | 4.08E-47 | 0.534544 | 7.24E-36 | 0.828035 |
| 0.49467  | 3.42E-30 | 0.571181 | 8.62E-42 | 0.308718 | 9.05E-12 | 0.423704 | 9.06E-22 | 0.76655  |
| 0.20483  | 8.12E-06 | 0.223409 | 1.08E-06 | 0.123522 | 0.00753  | 0.197112 | 1.78E-05 | 0.51791  |
| 0.286556 | 2.81E-10 | 0.375614 | 4.28E-17 | 0.199684 | 1.38E-05 | 0.443715 | 6.00E-24 | 0.615573 |
| 0.298503 | 4.58E-11 | 0.480045 | 2.72E-28 | 0.320855 | 1.21E-12 | 0.344862 | 1.73E-14 | 0.623331 |
| 0.523992 | 2.72E-34 | 0.680662 | 7.88E-65 | 0.320387 | 1.31E-12 | 0.502651 | 2.87E-31 | 0.690811 |
| 0.449324 | 1.38E-24 | 0.375748 | 4.16E-17 | 0.306307 | 1.33E-11 | 0.405657 | 6.32E-20 | 0.680914 |
| 0.368482 | 1.82E-16 | 0.386871 | 4.02E-18 | 0.099083 | 0.03229  | 0.309523 | 7.94E-12 | 0.567805 |
| 0.487496 | 3.00E-29 | 0.65592  | 8.91E-59 | 0.350945 | 5.56E-15 | 0.481485 | 1.78E-28 | 0.755576 |
| 0.256279 | 1.94E-08 | 0.32815  | 3.47E-13 | 0.03273  | 0.48043  | 0.296961 | 5.81E-11 | 0.446493 |
| 0.406146 | 5.65E-20 | 0.377448 | 2.93E-17 | 0.311245 | 6.00E-12 | 0.189175 | 3.88E-05 | 0.543445 |
| 0.434208 | 6.78E-23 | 0.46163  | 5.03E-26 | 0.285193 | 3.44E-10 | 0.403511 | 1.03E-19 | 0.782865 |
| 0.437379 | 3.05E-23 | 0.496135 | 2.18E-30 | 0.439044 | 1.99E-23 | 0.375771 | 4.14E-17 | 0.720032 |

|          |          |          |          |          |          |          |          |          |
|----------|----------|----------|----------|----------|----------|----------|----------|----------|
| 0.208961 | 5.26E-06 | 0.450853 | 9.24E-25 | 0.210732 | 4.36E-06 | 0.256364 | 1.92E-08 | 0.6377   |
| 0.108808 | 0.01867  | 0.238838 | 1.76E-07 | 0.096279 | 0.03754  | 0.308168 | 9.89E-12 | 0.538536 |
| 0.181369 | 8.09E-05 | 0.31554  | 2.96E-12 | 0.271769 | 2.37E-09 | 0.287879 | 2.31E-10 | 0.47619  |
| 0.477243 | 6.14E-28 | 0.529933 | 3.59E-35 | 0.31764  | 2.08E-12 | 0.432409 | 1.06E-22 | 0.736685 |
| 0.530936 | 2.54E-35 | 0.611911 | 2.59E-49 | 0.514222 | 7.00E-33 | 0.454838 | 3.19E-25 | 0.748551 |
| 0.267221 | 4.46E-09 | 0.290368 | 1.59E-10 | 0.255546 | 2.13E-08 | 0.254915 | 2.32E-08 | 0.504951 |
| 0.606029 | 3.69E-48 | 0.538337 | 1.90E-36 | 0.324565 | 6.45E-13 | 0.565445 | 8.17E-41 | 0.801126 |
| 0.204149 | 8.72E-06 | 0.347025 | 1.16E-14 | 0.104936 | 0.02334  | 0.393873 | 8.82E-19 | 0.65536  |
| 0.359227 | 1.14E-15 | 0.20049  | 1.27E-05 | 0.148772 | 0.00126  | 0.329478 | 2.75E-13 | 0.522106 |
| -0.01038 | 0.82298  | -0.31751 | 2.13E-12 | -0.19836 | 1.57E-05 | -0.24936 | 4.74E-08 | -0.49661 |
| 0.393963 | 8.65E-19 | 0.438429 | 2.33E-23 | 0.231687 | 4.14E-07 | 0.43883  | 2.11E-23 | 0.594208 |
| 0.358814 | 1.23E-15 | 0.40658  | 5.12E-20 | 0.170513 | 0.00021  | 0.371565 | 9.79E-17 | 0.489373 |
| -0.05402 | 0.244    | -0.32139 | 1.11E-12 | -0.2346  | 2.93E-07 | -0.23453 | 2.95E-07 | -0.45972 |
| 0.111228 | 0.01619  | 0.439387 | 1.83E-23 | 0.150054 | 0.00114  | 0.12412  | 0.00724  | 0.432782 |
| 0.227983 | 6.38E-07 | 0.21051  | 4.46E-06 | 0.127137 | 0.00594  | 0.233624 | 3.29E-07 | 0.397839 |
| 0.314011 | 3.81E-12 | 0.306574 | 1.28E-11 | 0.159727 | 0.00053  | 0.274684 | 1.57E-09 | 0.454568 |
| 0.252334 | 3.24E-08 | 0.27193  | 2.32E-09 | 0.362455 | 6.05E-16 | 0.252305 | 3.25E-08 | 0.562733 |
| 0.401158 | 1.75E-19 | 0.511163 | 1.89E-32 | 0.411962 | 1.48E-20 | 0.453255 | 4.87E-25 | 0.667333 |
| 0.358891 | 1.21E-15 | 0.575974 | 1.27E-42 | 0.401047 | 1.80E-19 | 0.398151 | 3.43E-19 | 0.666079 |
| 0.480067 | 2.70E-28 | 0.616302 | 3.43E-50 | 0.281702 | 5.75E-10 | 0.501809 | 3.73E-31 | 0.741821 |
| 0.496337 | 2.05E-30 | 0.686558 | 2.32E-66 | 0.46013  | 7.59E-26 | 0.513395 | 9.17E-33 | 0.739384 |
| 0.407499 | 4.15E-20 | 0.513295 | 9.48E-33 | 0.340106 | 4.14E-14 | 0.377477 | 2.91E-17 | 0.599187 |
| 0.623798 | 1.01E-51 | 0.685033 | 5.81E-66 | 0.500387 | 5.83E-31 | 0.446805 | 2.68E-24 | 0.738192 |
| 0.499857 | 6.88E-31 | 0.687511 | 1.30E-66 | 0.398404 | 3.24E-19 | 0.445215 | 4.06E-24 | 0.694533 |
| 0.300512 | 3.34E-11 | 0.286558 | 2.81E-10 | 0.268937 | 3.52E-09 | 0.353229 | 3.61E-15 | 0.539888 |
| 0.234186 | 3.08E-07 | 0.467629 | 9.50E-27 | 0.259769 | 1.22E-08 | 0.38171  | 1.20E-17 | 0.645596 |
| 0.271374 | 2.51E-09 | 0.419119 | 2.73E-21 | 0.162277 | 0.00043  | 0.434564 | 6.20E-23 | 0.554146 |
| 0.587665 | 1.05E-44 | 0.641504 | 1.66E-55 | 0.499336 | 8.09E-31 | 0.570291 | 1.23E-41 | 0.778481 |
| 0.367589 | 2.18E-16 | 0.220711 | 1.46E-06 | 0.161155 | 0.00047  | 0.32823  | 3.42E-13 | 0.579055 |
| 0.225073 | 8.92E-07 | 0.392591 | 1.17E-18 | 0.05871  | 0.20536  | 0.325229 | 5.75E-13 | 0.572887 |
| 0.507263 | 6.64E-32 | 0.543134 | 3.43E-37 | 0.431422 | 1.36E-22 | 0.427314 | 3.75E-22 | 0.677601 |
| 0.491043 | 1.03E-29 | 0.456663 | 1.95E-25 | 0.284449 | 3.84E-10 | 0.475987 | 8.83E-28 | 0.664601 |
| 0.385771 | 5.09E-18 | 0.329696 | 2.65E-13 | 0.324445 | 6.58E-13 | 0.39395  | 8.68E-19 | 0.553442 |
| 0.293446 | 9.97E-11 | 0.23196  | 4.01E-07 | 0.122403 | 0.0081   | 0.247585 | 5.94E-08 | 0.513861 |
| 0.18297  | 6.98E-05 | 0.393199 | 1.02E-18 | 0.235653 | 2.58E-07 | 0.238144 | 1.91E-07 | 0.531346 |
| 0.141665 | 0.00215  | 0.329169 | 2.91E-13 | -0.00889 | 0.84805  | 0.381717 | 1.20E-17 | 0.506586 |
| 0.258256 | 1.49E-08 | 0.334727 | 1.09E-13 | 0.197665 | 1.69E-05 | 0.30208  | 2.61E-11 | 0.634191 |
| 0.248081 | 5.58E-08 | 0.254356 | 2.49E-08 | 0.088633 | 0.05562  | 0.223719 | 1.04E-06 | 0.422412 |
| -0.263   | 7.92E-09 | -0.30546 | 1.53E-11 | -0.20119 | 1.18E-05 | -0.46838 | 7.71E-27 | -0.46443 |
| 0.38817  | 3.04E-18 | 0.386978 | 3.93E-18 | 0.354363 | 2.90E-15 | 0.344716 | 1.78E-14 | 0.69615  |
| -0.20997 | 4.73E-06 | -0.24546 | 7.76E-08 | -0.21127 | 4.12E-06 | -0.3086  | 9.22E-12 | -0.47376 |
| 0.463646 | 2.88E-26 | 0.43089  | 1.55E-22 | 0.164865 | 0.00035  | 0.453963 | 4.03E-25 | 0.692872 |
| 0.232566 | 3.73E-07 | 0.437475 | 2.97E-23 | 0.17315  | 0.00017  | 0.227626 | 6.65E-07 | 0.49849  |
| 0.260951 | 1.04E-08 | 0.284024 | 4.09E-10 | -0.04386 | 0.34423  | 0.304959 | 1.65E-11 | 0.542004 |
| 0.327828 | 3.67E-13 | 0.5026   | 2.91E-31 | 0.17031  | 0.00022  | 0.369261 | 1.56E-16 | 0.682831 |

|          |          |          |          |          |          |          |          |          |
|----------|----------|----------|----------|----------|----------|----------|----------|----------|
| -0.06725 | 0.14677  | -0.30134 | 2.94E-11 | -0.04673 | 0.31357  | -0.22171 | 1.31E-06 | -0.45602 |
| 0.29594  | 6.81E-11 | 0.289715 | 1.76E-10 | 0.203702 | 9.13E-06 | 0.370569 | 1.20E-16 | 0.603262 |
| -0.23548 | 2.64E-07 | -0.25462 | 2.41E-08 | -0.2584  | 1.46E-08 | -0.27488 | 1.53E-09 | -0.43436 |
| 0.31887  | 1.70E-12 | 0.260475 | 1.11E-08 | 0.071636 | 0.12213  | 0.309379 | 8.13E-12 | 0.599708 |
| 0.516514 | 3.30E-33 | 0.746749 | 2.18E-84 | 0.427806 | 3.33E-22 | 0.50881  | 4.04E-32 | 0.831957 |
| 0.529997 | 3.51E-35 | 0.7449   | 9.27E-84 | 0.423828 | 8.79E-22 | 0.439787 | 1.65E-23 | 0.706718 |
| 0.443075 | 7.08E-24 | 0.620912 | 3.98E-51 | 0.375983 | 3.96E-17 | 0.465152 | 1.90E-26 | 0.788309 |
| 0.357726 | 1.52E-15 | 0.301492 | 2.87E-11 | 0.138026 | 0.0028   | 0.331826 | 1.82E-13 | 0.461134 |
| -0.04027 | 0.3853   | -0.33626 | 8.28E-14 | -0.29729 | 5.52E-11 | -0.31339 | 4.22E-12 | -0.48847 |
| 0.581859 | 1.16E-43 | 0.772599 | 8.62E-94 | 0.548079 | 5.70E-38 | 0.527101 | 9.48E-35 | 0.737628 |
| 0.344439 | 1.87E-14 | 0.455887 | 2.40E-25 | 0.254236 | 2.53E-08 | 0.485079 | 6.18E-29 | 0.722981 |
| 0.17275  | 0.00018  | 0.219421 | 1.69E-06 | 0.082346 | 0.07544  | 0.312605 | 4.80E-12 | 0.491696 |
| 0.26083  | 1.06E-08 | 0.302336 | 2.51E-11 | 0.236099 | 2.45E-07 | 0.230135 | 4.97E-07 | 0.499739 |
| 0.244249 | 9.03E-08 | 0.397477 | 3.98E-19 | 0.220391 | 1.52E-06 | 0.352751 | 3.95E-15 | 0.511922 |
| 0.713404 | 7.97E-74 | 0.746379 | 2.91E-84 | 0.579912 | 2.58E-43 | 0.577923 | 5.79E-43 | 0.843255 |
| 0.208814 | 5.35E-06 | 0.250414 | 4.14E-08 | 0.215557 | 2.59E-06 | 0.239331 | 1.66E-07 | 0.555211 |
| 0.267547 | 4.26E-09 | 0.471556 | 3.14E-27 | 0.173209 | 0.00017  | 0.367707 | 2.13E-16 | 0.649703 |
| 0.410779 | 1.94E-20 | 0.430341 | 1.78E-22 | 0.140398 | 0.00236  | 0.463698 | 2.84E-26 | 0.69915  |
| 0.483684 | 9.34E-29 | 0.44741  | 2.29E-24 | 0.411195 | 1.77E-20 | 0.408452 | 3.33E-20 | 0.62623  |
| 0.215845 | 2.51E-06 | 0.209772 | 4.83E-06 | 0.153286 | 0.00089  | 0.328611 | 3.20E-13 | 0.520771 |
| 0.58873  | 6.68E-45 | 0.70796  | 3.04E-72 | 0.49873  | 9.77E-31 | 0.503282 | 2.35E-31 | 0.778984 |
| -0.00375 | 0.93558  | 0.145282 | 0.00164  | -0.17109 | 0.0002   | 0.187    | 4.78E-05 | 0.503466 |
| 0.192359 | 2.85E-05 | 0.320094 | 1.38E-12 | 0.281247 | 6.14E-10 | 0.347085 | 1.15E-14 | 0.478363 |
| 0.369729 | 1.42E-16 | 0.17949  | 9.61E-05 | 0.020514 | 0.65836  | 0.383834 | 7.68E-18 | 0.521186 |
| 0.570815 | 9.97E-42 | 0.663845 | 1.19E-60 | 0.528145 | 6.63E-35 | 0.444306 | 5.15E-24 | 0.741257 |
| 0.285766 | 3.16E-10 | 0.431349 | 1.39E-22 | 0.273166 | 1.95E-09 | 0.370695 | 1.17E-16 | 0.73665  |
| 0.487014 | 3.47E-29 | 0.600995 | 3.43E-47 | 0.243072 | 1.04E-07 | 0.499368 | 8.01E-31 | 0.859954 |
| 0.442777 | 7.65E-24 | 0.358695 | 1.26E-15 | 0.372436 | 8.20E-17 | 0.435533 | 4.86E-23 | 0.597696 |
| 0.354647 | 2.75E-15 | 0.501114 | 4.64E-31 | 0.26273  | 8.21E-09 | 0.505533 | 1.15E-31 | 0.645445 |
| 0.525277 | 1.76E-34 | 0.720655 | 5.44E-76 | 0.503311 | 2.33E-31 | 0.530159 | 3.32E-35 | 0.728562 |
| 0.251361 | 3.67E-08 | 0.242842 | 1.08E-07 | 0.154693 | 0.0008   | 0.203551 | 9.27E-06 | 0.497868 |
| 0.314494 | 3.52E-12 | 0.327679 | 3.77E-13 | 0.355773 | 2.22E-15 | 0.373411 | 6.72E-17 | 0.521306 |
| 0.299388 | 3.99E-11 | 0.377027 | 3.19E-17 | 0.206832 | 6.59E-06 | 0.271987 | 2.30E-09 | 0.502342 |
| 0.188094 | 4.31E-05 | 0.301805 | 2.73E-11 | 0.200878 | 1.22E-05 | 0.312437 | 4.94E-12 | 0.494217 |
| 0.648066 | 5.67E-57 | 0.661593 | 4.10E-60 | 0.435368 | 5.07E-23 | 0.546426 | 1.04E-37 | 0.775244 |
| 0.505775 | 1.07E-31 | 0.655087 | 1.39E-58 | 0.486155 | 4.48E-29 | 0.455334 | 2.79E-25 | 0.807373 |
| 0.229624 | 5.27E-07 | 0.370319 | 1.26E-16 | 0.28558  | 3.25E-10 | 0.189091 | 3.91E-05 | 0.541875 |
| 0.411151 | 1.78E-20 | 0.509431 | 3.31E-32 | 0.294626 | 8.33E-11 | 0.380703 | 1.49E-17 | 0.713966 |
| 0.413712 | 9.81E-21 | 0.527692 | 7.74E-35 | 0.408931 | 2.98E-20 | 0.359164 | 1.15E-15 | 0.658217 |
| 0.244459 | 8.79E-08 | 0.461926 | 4.63E-26 | 0.271904 | 2.33E-09 | 0.332867 | 1.52E-13 | 0.774803 |
| 0.482029 | 1.52E-28 | 0.55855  | 1.15E-39 | 0.141698 | 0.00214  | 0.458309 | 1.25E-25 | 0.761136 |
| 0.457758 | 1.45E-25 | 0.666949 | 2.11E-61 | 0.406167 | 5.63E-20 | 0.439964 | 1.58E-23 | 0.75251  |
| 0.32336  | 7.92E-13 | 0.409925 | 2.37E-20 | 0.312005 | 5.30E-12 | 0.344623 | 1.81E-14 | 0.635835 |
| 0.390136 | 1.99E-18 | 0.604981 | 5.89E-48 | 0.354604 | 2.77E-15 | 0.404532 | 8.17E-20 | 0.715859 |
| 0.487307 | 3.18E-29 | 0.638927 | 6.12E-55 | 0.456369 | 2.11E-25 | 0.509416 | 3.33E-32 | 0.801011 |

|          |          |          |          |          |          |          |          |          |
|----------|----------|----------|----------|----------|----------|----------|----------|----------|
| 0.274939 | 1.52E-09 | 0.320241 | 1.35E-12 | 0.027273 | 0.5566   | 0.370564 | 1.20E-16 | 0.487088 |
| 0.524133 | 2.60E-34 | 0.807334 | #####    | 0.627996 | 1.35E-52 | 0.492361 | 6.92E-30 | 0.791747 |
| 0.172478 | 0.00018  | 0.379393 | 1.95E-17 | 0.278169 | 9.58E-10 | 0.304985 | 1.65E-11 | 0.533268 |
| 0.245164 | 8.05E-08 | 0.314534 | 3.49E-12 | 0.292389 | 1.17E-10 | 0.266214 | 5.12E-09 | 0.502007 |
| 0.392312 | 1.24E-18 | 0.675214 | 1.91E-63 | 0.385431 | 5.47E-18 | 0.554988 | 4.41E-39 | 0.743878 |
| 0.363205 | 5.22E-16 | 0.429455 | 2.22E-22 | 0.140166 | 0.0024   | 0.345719 | 1.48E-14 | 0.646059 |
| 0.287215 | 2.55E-10 | 0.386982 | 3.93E-18 | 0.097396 | 0.03537  | 0.393346 | 9.90E-19 | 0.598914 |
| 0.245171 | 8.05E-08 | 0.218748 | 1.82E-06 | 0.051111 | 0.27034  | 0.315114 | 3.17E-12 | 0.565898 |
| 0.308134 | 9.94E-12 | 0.281146 | 6.23E-10 | 0.194032 | 2.42E-05 | 0.311532 | 5.73E-12 | 0.468231 |
| 0.488322 | 2.34E-29 | 0.68739  | 1.40E-66 | 0.435768 | 4.58E-23 | 0.454342 | 3.64E-25 | 0.77735  |
| 0.330398 | 2.34E-13 | 0.498939 | 9.15E-31 | 0.376217 | 3.78E-17 | 0.324395 | 6.64E-13 | 0.648279 |
| -0.31146 | 5.79E-12 | -0.33705 | 7.19E-14 | -0.33652 | 7.91E-14 | -0.34555 | 1.53E-14 | -0.54614 |
| 0.216687 | 2.29E-06 | 0.374967 | 4.88E-17 | -0.0084  | 0.85629  | 0.387456 | 3.55E-18 | 0.459783 |
| 0.193802 | 2.48E-05 | 0.343929 | 2.06E-14 | 0.225689 | 8.31E-07 | 0.233917 | 3.18E-07 | 0.557196 |
| 0.329325 | 2.83E-13 | 0.196105 | 1.97E-05 | 0.124599 | 0.00702  | 0.294826 | 8.08E-11 | 0.513252 |
| 0.463306 | 3.17E-26 | 0.428552 | 2.77E-22 | 0.327231 | 4.07E-13 | 0.391886 | 1.36E-18 | 0.629223 |
| 0.550323 | 2.50E-38 | 0.737632 | 2.43E-81 | 0.412958 | 1.17E-20 | 0.456427 | 2.08E-25 | 0.840443 |
| 0.249929 | 4.41E-08 | 0.448327 | 1.80E-24 | 0.291129 | 1.42E-10 | 0.341437 | 3.25E-14 | 0.537542 |
| 0.284098 | 4.05E-10 | 0.401107 | 1.77E-19 | 0.304355 | 1.82E-11 | 0.371688 | 9.55E-17 | 0.704212 |
| 0.266512 | 4.91E-09 | 0.344288 | 1.93E-14 | 0.162918 | 0.00041  | 0.343423 | 2.26E-14 | 0.621057 |
| 0.365727 | 3.16E-16 | 0.629045 | 8.12E-53 | 0.253099 | 2.93E-08 | 0.468179 | 8.15E-27 | 0.736098 |
| 0.54424  | 2.30E-37 | 0.64716  | 9.09E-57 | 0.455898 | 2.39E-25 | 0.543922 | 2.58E-37 | 0.6886   |
| 0.243707 | 9.66E-08 | 0.284881 | 3.61E-10 | 0.2712   | 2.57E-09 | 0.316066 | 2.71E-12 | 0.451305 |
| -0.03106 | 0.50316  | -0.3004  | 3.40E-11 | -0.18966 | 3.71E-05 | -0.13046 | 0.00475  | -0.47986 |
| 0.259083 | 1.34E-08 | 0.364816 | 3.79E-16 | 0.143634 | 0.00186  | 0.363824 | 4.62E-16 | 0.59905  |
| 0.182714 | 7.15E-05 | 0.255558 | 2.13E-08 | -0.07058 | 0.12774  | 0.22515  | 8.84E-07 | 0.586323 |
| 0.297572 | 5.29E-11 | 0.363649 | 4.78E-16 | 0.126551 | 0.00617  | 0.252197 | 3.30E-08 | 0.583734 |
| 0.458267 | 1.26E-25 | 0.513144 | 9.95E-33 | 0.262317 | 8.68E-09 | 0.469419 | 5.75E-27 | 0.714882 |
| 0.477648 | 5.46E-28 | 0.642904 | 8.15E-56 | 0.475262 | 1.09E-27 | 0.392079 | 1.31E-18 | 0.751203 |
| 0.287972 | 2.28E-10 | 0.2956   | 7.17E-11 | 0.05028  | 0.27821  | 0.339347 | 4.75E-14 | 0.648342 |
| 0.64051  | 2.75E-55 | 0.701789 | 1.71E-70 | 0.505811 | 1.05E-31 | 0.580347 | 2.16E-43 | 0.848029 |
| 0.220672 | 1.47E-06 | 0.410572 | 2.04E-20 | 0.247002 | 6.39E-08 | 0.324351 | 6.69E-13 | 0.557682 |
| 0.37923  | 2.02E-17 | 0.358693 | 1.26E-15 | 0.296541 | 6.20E-11 | 0.204792 | 8.15E-06 | 0.492482 |
| 0.410846 | 1.91E-20 | 0.499981 | 6.62E-31 | 0.430686 | 1.63E-22 | 0.416822 | 4.71E-21 | 0.705082 |
| 0.18501  | 5.77E-05 | 0.202347 | 1.05E-05 | 0.043421 | 0.34913  | 0.270931 | 2.67E-09 | 0.590351 |
| 0.497918 | 1.26E-30 | 0.580048 | 2.44E-43 | 0.299198 | 4.11E-11 | 0.53539  | 5.38E-36 | 0.777508 |
| 0.53936  | 1.32E-36 | 0.639019 | 5.85E-55 | 0.341478 | 3.23E-14 | 0.52556  | 1.60E-34 | 0.850321 |
| 0.430188 | 1.85E-22 | 0.631259 | 2.76E-53 | 0.40524  | 6.95E-20 | 0.494282 | 3.85E-30 | 0.741843 |
| 0.671656 | 1.47E-62 | 0.788379 | #####    | 0.535792 | 4.67E-36 | 0.526557 | 1.14E-34 | 0.795994 |
| -0.03931 | 0.39664  | -0.39349 | 9.60E-19 | -0.156   | 0.00072  | -0.2942  | 8.89E-11 | -0.55403 |
| 0.59884  | 8.81E-47 | 0.806843 | #####    | 0.51196  | 1.46E-32 | 0.52799  | 6.99E-35 | 0.810351 |
| 0.122237 | 0.00818  | 0.427101 | 3.96E-22 | 0.231146 | 4.41E-07 | 0.221806 | 1.29E-06 | 0.555013 |
| 0.427731 | 3.39E-22 | 0.374604 | 5.26E-17 | 0.300327 | 3.44E-11 | 0.38332  | 8.56E-18 | 0.597336 |
| 0.686421 | 2.52E-66 | 0.777368 | 1.16E-95 | 0.549183 | 3.80E-38 | 0.545488 | 1.47E-37 | 0.782861 |
| -0.10643 | 0.02143  | -0.31971 | 1.47E-12 | -0.05304 | 0.25262  | -0.28703 | 2.62E-10 | -0.43222 |

|          |          |          |          |          |          |          |          |          |
|----------|----------|----------|----------|----------|----------|----------|----------|----------|
| 0.385446 | 5.45E-18 | 0.603078 | 1.37E-47 | 0.462956 | 3.49E-26 | 0.242594 | 1.11E-07 | 0.350817 |
| 0.048189 | 0.29871  | 0.168534 | 0.00025  | -0.06543 | 0.15806  | 0.04141  | 0.37193  | -0.04784 |
| 0.042008 | 0.36506  | 0.247646 | 5.89E-08 | 0.204836 | 8.12E-06 | -0.00426 | 0.92685  | 0.094548 |
| 0.479316 | 3.37E-28 | 0.70417  | 3.66E-71 | 0.55644  | 2.56E-39 | 0.328411 | 3.32E-13 | 0.42346  |
| 0.622146 | 2.22E-51 | 0.704098 | 3.84E-71 | 0.606019 | 3.71E-48 | 0.410388 | 2.13E-20 | 0.446903 |
| 0.154622 | 0.0008   | 0.298357 | 4.68E-11 | 0.231886 | 4.04E-07 | 0.030869 | 0.50576  | -0.08401 |
| 0.435557 | 4.83E-23 | 0.663119 | 1.77E-60 | 0.457671 | 1.48E-25 | 0.275172 | 1.47E-09 | 0.268151 |
| 0.565441 | 8.18E-41 | 0.637878 | 1.04E-54 | 0.522303 | 4.81E-34 | 0.334802 | 1.08E-13 | 0.411702 |
| 0.295401 | 7.39E-11 | 0.336187 | 8.40E-14 | 0.162489 | 0.00042  | 0.21729  | 2.14E-06 | 0.234201 |
| 0.222035 | 1.26E-06 | 0.473931 | 1.59E-27 | 0.292995 | 1.07E-10 | 0.052595 | 0.25666  | 0.06257  |
| 0.11867  | 0.01027  | 0.216562 | 2.32E-06 | 0.211707 | 3.93E-06 | -0.20212 | 1.07E-05 | -0.17588 |
| 0.108914 | 0.01855  | 0.293205 | 1.03E-10 | 0.260728 | 1.07E-08 | -0.05647 | 0.22321  | -0.11652 |
| 0.249631 | 4.58E-08 | 0.526791 | 1.05E-34 | 0.430736 | 1.61E-22 | 0.124507 | 0.00706  | 0.172603 |
| 0.2913   | 1.38E-10 | 0.458651 | 1.14E-25 | 0.39903  | 2.82E-19 | 0.184123 | 6.27E-05 | 0.124965 |
| 0.317263 | 2.22E-12 | 0.593219 | 9.97E-46 | 0.421518 | 1.54E-21 | 0.200538 | 1.26E-05 | 0.279461 |
| -0.10239 | 0.02692  | 0.23235  | 3.83E-07 | 0.062689 | 0.17624  | -0.07838 | 0.09067  | 0.000182 |
| 0.467604 | 9.57E-27 | 0.586481 | 1.71E-44 | 0.393807 | 8.95E-19 | 0.31978  | 1.46E-12 | 0.293781 |
| 0.399764 | 2.39E-19 | 0.633307 | 1.01E-53 | 0.48414  | 8.16E-29 | 0.257123 | 1.73E-08 | 0.324004 |
| 0.454291 | 3.69E-25 | 0.657366 | 4.09E-59 | 0.597244 | 1.76E-46 | 0.159383 | 0.00055  | 0.217092 |
| 0.310249 | 7.06E-12 | 0.54571  | 1.35E-37 | 0.423041 | 1.06E-21 | 0.225162 | 8.83E-07 | 0.207324 |
| 0.208883 | 5.31E-06 | 0.551181 | 1.82E-38 | 0.411229 | 1.75E-20 | 0.143096 | 0.00194  | 0.233308 |
| 0.065648 | 0.15666  | 0.450839 | 9.27E-25 | 0.352947 | 3.80E-15 | 0.048485 | 0.29575  | 0.180823 |
| 0.171959 | 0.00019  | 0.314283 | 3.64E-12 | 0.288002 | 2.27E-10 | 0.109317 | 0.01812  | 0.112188 |
| 0.426315 | 4.80E-22 | 0.665494 | 4.75E-61 | 0.51418  | 7.10E-33 | 0.270495 | 2.83E-09 | 0.284299 |
| 0.544394 | 2.18E-37 | 0.692012 | 8.22E-68 | 0.574472 | 2.33E-42 | 0.345792 | 1.46E-14 | 0.382859 |
| 0.230061 | 5.01E-07 | 0.458496 | 1.18E-25 | 0.387809 | 3.29E-18 | 0.090287 | 0.05119  | 0.07487  |
| 0.469512 | 5.60E-27 | 0.547665 | 6.63E-38 | 0.344039 | 2.02E-14 | 0.311129 | 6.11E-12 | 0.301602 |
| 0.475309 | 1.07E-27 | 0.615721 | 4.49E-50 | 0.512796 | 1.11E-32 | 0.309399 | 8.10E-12 | 0.380239 |
| 0.291562 | 1.33E-10 | 0.642426 | 1.04E-55 | 0.486686 | 3.83E-29 | 0.262025 | 9.03E-09 | 0.365979 |
| 0.489831 | 1.49E-29 | 0.65628  | 7.34E-59 | 0.620187 | 5.60E-51 | 0.246989 | 6.40E-08 | 0.260885 |
| 0.332997 | 1.48E-13 | 0.490424 | 1.25E-29 | 0.496579 | 1.90E-30 | 0.121861 | 0.00838  | 0.221252 |
| 0.257599 | 1.63E-08 | 0.209528 | 4.96E-06 | 0.305399 | 1.54E-11 | -0.00402 | 0.93101  | -0.09155 |
| 0.058825 | 0.20448  | 0.225632 | 8.37E-07 | 0.137232 | 0.00296  | -0.06504 | 0.16056  | -0.07147 |
| 0.335008 | 1.04E-13 | 0.568748 | 2.25E-41 | 0.473939 | 1.59E-27 | 0.172535 | 0.00018  | 0.344246 |
| 0.355307 | 2.42E-15 | 0.617956 | 1.59E-50 | 0.576229 | 1.15E-42 | 0.188358 | 4.20E-05 | 0.331088 |
| 0.371544 | 9.83E-17 | 0.582541 | 8.78E-44 | 0.502439 | 3.06E-31 | 0.28067  | 6.68E-10 | 0.37887  |
| 0.344834 | 1.74E-14 | 0.533408 | 1.08E-35 | 0.497838 | 1.29E-30 | 0.193563 | 2.54E-05 | 0.179521 |
| 0.268279 | 3.85E-09 | 0.395222 | 6.56E-19 | 0.387602 | 3.44E-18 | 0.040516 | 0.38235  | -0.00415 |
| 0.375007 | 4.85E-17 | 0.332872 | 1.52E-13 | 0.438853 | 2.09E-23 | 0.090215 | 0.05138  | -0.05436 |
| 0.214467 | 2.91E-06 | 0.372299 | 8.43E-17 | 0.230404 | 4.81E-07 | 0.077444 | 0.0946   | 0.020076 |
| 0.030155 | 0.51565  | 0.17082  | 0.00021  | 0.184325 | 6.15E-05 | 0.07931  | 0.0869   | 0.086337 |
| -0.0149  | 0.74803  | 0.035313 | 0.44647  | 0.009069 | 0.84504  | 0.095475 | 0.03917  | 0.117849 |
| 0.1225   | 0.00805  | 0.11123  | 0.01618  | 0.115005 | 0.01289  | 0.10993  | 0.01748  | 0.02338  |
| 0.198991 | 1.48E-05 | 0.177735 | 0.00011  | 0.135524 | 0.00334  | 0.264153 | 6.78E-09 | 0.156146 |
| 0.06565  | 0.15665  | 0.183818 | 6.45E-05 | 0.086243 | 0.06257  | 0.278979 | 8.52E-10 | 0.176407 |

|          |          |          |          |          |          |          |          |          |
|----------|----------|----------|----------|----------|----------|----------|----------|----------|
| -0.13606 | 0.00322  | -0.12108 | 0.00881  | -0.08475 | 0.06726  | -0.0531  | 0.25211  | -0.11927 |
| 0.071598 | 0.12232  | 0.023823 | 0.6076   | 0.028651 | 0.53683  | 0.069697 | 0.13259  | -0.0065  |
| 0.260153 | 1.16E-08 | 0.247925 | 5.69E-08 | 0.313044 | 4.47E-12 | 0.222101 | 1.25E-06 | 0.257691 |
| -0.05281 | 0.25468  | 0.040084 | 0.38745  | 0.021679 | 0.64029  | 0.038813 | 0.40269  | 0.026327 |
| -0.02717 | 0.55802  | 0.048941 | 0.29123  | 0.037114 | 0.42361  | 0.013397 | 0.77277  | 0.056609 |
| -0.04112 | 0.37534  | -0.07387 | 0.11089  | -0.05984 | 0.19675  | 0.034381 | 0.45857  | -0.0261  |
| 0.192264 | 2.88E-05 | 0.251963 | 3.40E-08 | 0.163929 | 0.00037  | 0.256532 | 1.87E-08 | 0.209939 |
| 0.103352 | 0.02552  | 0.065145 | 0.15987  | 0.03209  | 0.48907  | 0.213574 | 3.21E-06 | 0.087935 |
| 0.008954 | 0.84698  | 0.019543 | 0.67359  | 0.015382 | 0.74024  | 0.054481 | 0.23997  | 0.037537 |
| -0.00173 | 0.97032  | 0.040297 | 0.38493  | 0.034032 | 0.46314  | 0.089613 | 0.05296  | -0.00293 |
| 0.044773 | 0.33432  | 0.005009 | 0.91403  | 0.024596 | 0.59599  | 0.073757 | 0.11143  | -0.01394 |
| 0.136733 | 0.00307  | 0.103493 | 0.02532  | 0.102516 | 0.02674  | 0.165583 | 0.00033  | 0.056681 |
| -0.13778 | 0.00285  | 0.002584 | 0.95559  | 0.006787 | 0.8837   | 0.069083 | 0.13605  | 0.075628 |
| -0.08345 | 0.0716   | -0.04068 | 0.38038  | -0.05295 | 0.25348  | 0.044951 | 0.3324   | 0.093385 |
| 0.004548 | 0.92191  | 0.010419 | 0.82232  | 0.032607 | 0.48209  | -0.01281 | 0.78248  | -0.01541 |
| -0.15369 | 0.00086  | -0.10731 | 0.02037  | -0.05885 | 0.20427  | -0.07695 | 0.09673  | -0.07832 |
| -0.1024  | 0.02691  | -0.12099 | 0.00887  | -0.07762 | 0.09384  | 0.003408 | 0.94145  | -0.05708 |
| 0.080317 | 0.08295  | 0.212327 | 3.67E-06 | 0.140995 | 0.00226  | 0.12521  | 0.00674  | 0.134322 |
| -0.02755 | 0.55261  | -0.07115 | 0.12471  | -0.08125 | 0.07943  | 0.004248 | 0.92706  | 0.025527 |
| 0.218773 | 1.82E-06 | 0.16621  | 0.00031  | 0.224953 | 9.05E-07 | 0.17624  | 0.00013  | 0.172594 |
| -0.00646 | 0.88935  | -0.0012  | 0.97935  | 0.011766 | 0.79981  | 0.072118 | 0.11963  | -0.05679 |
| 0.021955 | 0.63605  | 0.119483 | 0.00975  | 0.11345  | 0.01417  | 0.153005 | 0.00091  | 0.066411 |
| -0.13158 | 0.0044   | -0.12889 | 0.00528  | -0.04777 | 0.3029   | -0.05251 | 0.25747  | -0.18633 |
| -0.10159 | 0.02815  | -0.11512 | 0.0128   | -0.11235 | 0.01513  | 0.038157 | 0.41069  | -0.04507 |
| -0.03461 | 0.45563  | -0.10043 | 0.03001  | -0.10029 | 0.03023  | 0.076496 | 0.09872  | -0.06095 |
| -0.16239 | 0.00043  | -0.10762 | 0.02     | -0.12444 | 0.00709  | 0.022646 | 0.62545  | 0.034042 |
| -0.17729 | 0.00012  | -0.1349  | 0.00349  | -0.0962  | 0.0377   | -0.03947 | 0.39478  | -0.01406 |
| -0.16979 | 0.00023  | -0.07881 | 0.08891  | -0.12283 | 0.00788  | 0.036121 | 0.43614  | 0.012208 |
| -0.09528 | 0.03958  | -0.15677 | 0.00067  | -0.07811 | 0.09179  | -0.08099 | 0.08038  | -0.16149 |
| -0.14784 | 0.00136  | -0.16031 | 0.00051  | 0.008102 | 0.86137  | -0.12236 | 0.00812  | -0.19288 |
| -0.15963 | 0.00053  | -0.09489 | 0.0404   | -0.13728 | 0.00295  | 0.145046 | 0.00167  | 0.117115 |
| -0.10312 | 0.02585  | -0.08556 | 0.06468  | -0.07482 | 0.10633  | 0.019559 | 0.67332  | -0.03048 |
| -0.00518 | 0.91106  | 0.202077 | 1.08E-05 | 0.158074 | 0.00061  | 0.140593 | 0.00233  | 0.215544 |
| -0.12231 | 0.00814  | -0.08093 | 0.08063  | -0.05402 | 0.24395  | -0.06286 | 0.17505  | -0.0392  |
| -0.05238 | 0.25862  | -0.04226 | 0.36213  | -0.01692 | 0.71541  | -0.02751 | 0.55315  | -0.01677 |
| 0.075873 | 0.10151  | 0.106606 | 0.02121  | 0.135109 | 0.00344  | 0.142605 | 0.00201  | -0.02161 |
| 0.12649  | 0.0062   | 0.134305 | 0.00364  | 0.030188 | 0.51519  | 0.154138 | 0.00083  | 0.091875 |
| 0.06318  | 0.17287  | 0.04668  | 0.31412  | 0.036218 | 0.4349   | 0.092304 | 0.04619  | 0.100272 |
| -0.05869 | 0.20553  | -0.06943 | 0.13407  | -0.05552 | 0.2311   | 0.06354  | 0.17043  | 0.035523 |
| 0.138021 | 0.0028   | -0.03905 | 0.39981  | -0.01098 | 0.81292  | -0.02227 | 0.6312   | -0.22871 |
| -0.19071 | 3.35E-05 | -0.14908 | 0.00123  | -0.10624 | 0.02166  | -0.11955 | 0.00971  | -0.05205 |
| 0.140101 | 0.00241  | 0.037977 | 0.4129   | 0.08767  | 0.05834  | 0.191411 | 3.13E-05 | -0.01278 |
| 0.206473 | 6.84E-06 | 0.197693 | 1.68E-05 | 0.073182 | 0.11425  | 0.329751 | 2.62E-13 | 0.303646 |
| 0.136545 | 0.00311  | 0.114297 | 0.01346  | 0.17924  | 9.84E-05 | 0.074687 | 0.10698  | 0.077271 |
| -0.081   | 0.08036  | 0.02446  | 0.59802  | -0.06847 | 0.13956  | 0.075197 | 0.1046   | 0.132756 |

|          |          |          |          |          |          |          |          |          |
|----------|----------|----------|----------|----------|----------|----------|----------|----------|
| 0.195268 | 2.14E-05 | 0.199604 | 1.39E-05 | 0.157034 | 0.00066  | 0.268853 | 3.56E-09 | 0.246797 |
| 0.08421  | 0.06904  | 0.042742 | 0.35674  | 0.058345 | 0.20819  | 0.02302  | 0.61976  | 0.027457 |
| 0.017821 | 0.70089  | -0.00878 | 0.84999  | 0.017762 | 0.70184  | 0.047241 | 0.30834  | -0.05598 |
| -0.06102 | 0.18805  | -0.08059 | 0.08191  | -0.08273 | 0.07409  | 0.034307 | 0.45953  | -0.00873 |
| -0.00633 | 0.89143  | -0.06136 | 0.18564  | -0.04179 | 0.36752  | 0.013663 | 0.76839  | -0.07022 |
| -0.05692 | 0.21954  | -0.09934 | 0.03185  | -0.07196 | 0.12043  | -0.08296 | 0.07327  | -0.14962 |
| 0.151541 | 0.00102  | 0.089508 | 0.05324  | 0.081508 | 0.07847  | 0.233553 | 3.32E-07 | 0.175537 |
| 0.000789 | 0.98644  | -0.03707 | 0.42414  | -0.03754 | 0.41835  | 0.073806 | 0.11119  | 0.018607 |
| -0.04794 | 0.30127  | -0.01946 | 0.6749   | -0.06575 | 0.15603  | 0.119824 | 0.00955  | 0.087098 |
| -0.05974 | 0.19754  | -0.10739 | 0.02027  | -0.06713 | 0.14747  | 0.007763 | 0.86712  | -0.07458 |
| -0.06441 | 0.16466  | -0.05627 | 0.22483  | -0.05114 | 0.27008  | 0.023643 | 0.61032  | -0.01177 |
| -0.08415 | 0.06925  | -0.11387 | 0.01381  | -0.10672 | 0.02107  | 0.02936  | 0.52679  | -0.11734 |
| -0.11168 | 0.01576  | -0.07229 | 0.11874  | -0.10192 | 0.02764  | 0.085005 | 0.06645  | 0.078561 |
| 0.039652 | 0.39259  | 0.000384 | 0.9934   | 0.026687 | 0.56511  | -0.03297 | 0.47716  | -0.10145 |
| -0.0128  | 0.78258  | -0.09981 | 0.03104  | -0.04602 | 0.32104  | 0.008444 | 0.85558  | -0.13987 |
| 0.059732 | 0.19756  | 0.003946 | 0.93223  | 0.00272  | 0.95325  | 0.159894 | 0.00052  | 0.176972 |
| -0.056   | 0.22713  | -0.028   | 0.54613  | -0.04152 | 0.37071  | 0.179219 | 9.85E-05 | 0.145025 |
| -0.08398 | 0.06981  | 0.017802 | 0.7012   | -0.00233 | 0.95997  | -0.01013 | 0.82723  | -0.06281 |
| -0.00184 | 0.96844  | 0.089193 | 0.05408  | 0.008411 | 0.85615  | 0.088377 | 0.05633  | 0.02854  |
| 0.06962  | 0.13302  | 0.018575 | 0.68889  | 0.067076 | 0.14782  | -0.01447 | 0.75505  | -0.01168 |
| -0.00866 | 0.8519   | -0.02132 | 0.64584  | -0.00345 | 0.94079  | -0.03844 | 0.40728  | -0.06234 |
| -0.00971 | 0.83422  | 0.224528 | 9.50E-07 | 0.124431 | 0.0071   | 0.257859 | 1.57E-08 | 0.285422 |
| 0.061963 | 0.18131  | 0.223009 | 1.13E-06 | 0.227081 | 7.08E-07 | 0.053033 | 0.25271  | 0.057904 |
| 0.018707 | 0.68679  | 0.027589 | 0.55204  | 0.03223  | 0.48718  | 0.031321 | 0.49954  | 0.071032 |
| -0.09594 | 0.03822  | -0.09828 | 0.03373  | -0.06501 | 0.16074  | 0.011643 | 0.80186  | 0.102173 |
| -0.02988 | 0.51955  | 0.163368 | 0.00039  | 0.052552 | 0.25704  | 0.220343 | 1.52E-06 | 0.180569 |
| 0.058729 | 0.20522  | 0.114816 | 0.01304  | 0.128428 | 0.00545  | 0.077992 | 0.09229  | 0.017121 |
| 0.057836 | 0.2122   | 0.036791 | 0.42766  | 0.080162 | 0.08355  | 0.051946 | 0.26258  | 0.044386 |
| -0.0603  | 0.19332  | -0.01248 | 0.78789  | 0.00699  | 0.88025  | -0.02055 | 0.65773  | -0.0279  |
| 0.000765 | 0.98684  | 0.087546 | 0.0587   | 0.090627 | 0.05032  | 0.05377  | 0.24617  | 0.058144 |
| 0.260157 | 1.16E-08 | 0.266574 | 4.87E-09 | 0.241141 | 1.33E-07 | 0.26288  | 8.05E-09 | 0.251772 |
| -0.04565 | 0.32492  | 0.159326 | 0.00055  | 0.110588 | 0.01681  | 0.039258 | 0.39731  | 0.049945 |
| 0.28614  | 2.99E-10 | 0.179502 | 9.60E-05 | 0.237773 | 2.00E-07 | 0.178216 | 0.00011  | -0.05882 |
| 0.125219 | 0.00674  | 0.040933 | 0.37747  | 0.103293 | 0.0256   | 0.104943 | 0.02333  | -0.0104  |
| -0.00226 | 0.96113  | 0.033277 | 0.47313  | 0.053661 | 0.24713  | 0.005943 | 0.89808  | -0.02439 |
| 0.086763 | 0.061    | 0.085683 | 0.0643   | 0.141659 | 0.00215  | 0.045725 | 0.32413  | -0.00259 |
| 0.277419 | 1.07E-09 | 0.294926 | 7.95E-11 | 0.251555 | 3.58E-08 | 0.300166 | 3.53E-11 | 0.075124 |
| 0.122731 | 0.00793  | -0.01942 | 0.67544  | -0.01775 | 0.70208  | 0.010552 | 0.8201   | -0.01372 |
| 0.015835 | 0.73287  | 0.087435 | 0.05902  | 0.133339 | 0.00389  | 0.014153 | 0.76033  | 0.010494 |
| 0.006512 | 0.88839  | 0.037064 | 0.42424  | 0.090678 | 0.05019  | 0.000701 | 0.98794  | -0.04371 |
| 0.022457 | 0.62834  | 0.048686 | 0.29376  | 0.12598  | 0.00641  | 0.032956 | 0.47741  | -0.02106 |
| 0.275392 | 1.42E-09 | 0.185927 | 5.29E-05 | 0.268659 | 3.66E-09 | 0.236907 | 2.22E-07 | 0.216964 |
| -0.10839 | 0.01913  | 0.056299 | 0.22462  | -0.11236 | 0.01512  | 0.112638 | 0.01488  | 0.18488  |
| -0.17667 | 0.00012  | 0.001229 | 0.97887  | -0.06499 | 0.16084  | -0.0339  | 0.46488  | 0.084242 |
| 0.014618 | 0.7527   | -0.01935 | 0.67658  | -0.00484 | 0.91685  | 0.067211 | 0.14701  | 0.028629 |



|          |          |          |          |          |          |          |          |          |
|----------|----------|----------|----------|----------|----------|----------|----------|----------|
| -0.0239  | 0.60639  | -0.00558 | 0.90421  | -0.01466 | 0.75207  | 0.042205 | 0.36281  | -0.02681 |
| -0.11314 | 0.01443  | -0.0246  | 0.5959   | -0.06445 | 0.16436  | 0.089932 | 0.05212  | 0.054683 |
| 0.090882 | 0.04967  | 0.130864 | 0.00462  | 0.04964  | 0.28439  | 0.327209 | 4.09E-13 | 0.232173 |
| 0.250435 | 4.13E-08 | 0.085128 | 0.06606  | 0.152111 | 0.00098  | 0.271361 | 2.51E-09 | 0.071644 |
| 0.05167  | 0.26513  | 0.087119 | 0.05995  | 0.111075 | 0.01633  | 0.070221 | 0.1297   | 0.034407 |
| -0.05567 | 0.22984  | -0.09584 | 0.03843  | -0.04491 | 0.33289  | -0.03306 | 0.47605  | -0.07466 |
| 0.0709   | 0.12602  | 0.010737 | 0.81699  | -0.0223  | 0.63075  | 0.080493 | 0.08228  | -0.03284 |
| 0.04193  | 0.36595  | 0.059182 | 0.20174  | -0.01407 | 0.76168  | 0.208353 | 5.61E-06 | 0.186928 |
| -0.15623 | 0.0007   | -0.12565 | 0.00655  | -0.09234 | 0.0461   | -0.02322 | 0.61669  | 0.014177 |
| -0.17077 | 0.00021  | -0.07076 | 0.12679  | -0.06073 | 0.19016  | -0.04792 | 0.30138  | -0.06986 |
| 0.029396 | 0.52628  | 0.031975 | 0.49062  | 0.017155 | 0.71157  | 0.104531 | 0.02388  | -0.04563 |
| 0.013697 | 0.76783  | 0.071029 | 0.12533  | 0.083184 | 0.07251  | 0.130427 | 0.00476  | 0.020875 |
| -0.12892 | 0.00527  | -0.25769 | 1.61E-08 | -0.10829 | 0.01924  | -0.13497 | 0.00347  | -0.35697 |
| 0.06805  | 0.14201  | 0.060783 | 0.18978  | 0.138619 | 0.00268  | 0.070383 | 0.12881  | -0.02707 |
| -0.04621 | 0.31903  | -0.10563 | 0.02243  | -0.0762  | 0.10005  | 0.010467 | 0.82152  | -0.09373 |
| 0.057056 | 0.21844  | 0.049631 | 0.28447  | 0.065299 | 0.15888  | 0.076062 | 0.10065  | -0.01304 |
| 0.102993 | 0.02604  | 0.150064 | 0.00114  | 0.181362 | 8.10E-05 | 0.093672 | 0.04304  | 0.069795 |
| -0.10759 | 0.02004  | -0.09881 | 0.03277  | -0.07403 | 0.11012  | -0.00018 | 0.9969   | -0.19071 |
| 0.036775 | 0.42787  | 0.076284 | 0.09966  | 0.066814 | 0.14941  | 0.08433  | 0.06865  | 0.009813 |
| 0.076927 | 0.09683  | 0.086686 | 0.06123  | 0.098493 | 0.03334  | 0.248525 | 5.27E-08 | 0.188897 |
| 0.093913 | 0.04251  | 0.03086  | 0.50588  | 0.054888 | 0.23647  | 0.04381  | 0.34484  | 0.036194 |
| -0.06087 | 0.18914  | -0.01745 | 0.70688  | -0.10641 | 0.02145  | 0.098815 | 0.03277  | 0.09811  |
| 0.117885 | 0.01078  | 0.24015  | 1.50E-07 | 0.184056 | 6.31E-05 | 0.157951 | 0.00061  | 0.202072 |
| -0.00014 | 0.99765  | -0.00888 | 0.84822  | -0.00806 | 0.86212  | 0.049996 | 0.28094  | 0.044176 |
| 0.129458 | 0.00508  | 0.228544 | 5.98E-07 | 0.298008 | 4.94E-11 | 0.192696 | 2.76E-05 | 0.152863 |
| -0.13956 | 0.00251  | -0.00547 | 0.90609  | -0.05386 | 0.24541  | 0.089501 | 0.05326  | 0.126547 |
| 0.061834 | 0.18223  | 0.110551 | 0.01685  | 0.070426 | 0.12858  | 0.062221 | 0.17949  | -0.05238 |
| 0.291011 | 1.44E-10 | 0.100926 | 0.0292   | 0.130238 | 0.00482  | 0.119384 | 0.00982  | 0.141179 |
| -0.09101 | 0.04934  | -0.1198  | 0.00956  | -0.02693 | 0.56161  | -0.05802 | 0.21077  | -0.1556  |
| 0.123246 | 0.00767  | 0.195782 | 2.04E-05 | 0.219553 | 1.66E-06 | 0.155893 | 0.00072  | 0.095709 |
| 0.041847 | 0.3669   | 0.316601 | 2.48E-12 | 0.154408 | 0.00081  | 0.200106 | 1.32E-05 | 0.197993 |
| 0.019113 | 0.68037  | -0.03324 | 0.47366  | -0.00471 | 0.91912  | 0.057915 | 0.21157  | -0.03279 |
| -0.04581 | 0.32322  | 0.122598 | 0.008    | 0.06312  | 0.17328  | 0.082978 | 0.07322  | 0.182858 |
| -0.07178 | 0.1214   | 0.028    | 0.54612  | 0.011106 | 0.81081  | 0.01805  | 0.69724  | 0.074797 |
| 0.086249 | 0.06256  | 0.000553 | 0.99049  | 0.025781 | 0.5784   | 0.105096 | 0.02313  | -0.03619 |
| -0.01254 | 0.78698  | 0.088635 | 0.05561  | 0.019542 | 0.6736   | 0.140467 | 0.00235  | 0.184061 |
| 0.073814 | 0.11115  | 0.07575  | 0.10206  | 0.079277 | 0.08703  | 0.06382  | 0.16855  | -0.03346 |
| -0.08123 | 0.07948  | 0.128633 | 0.00537  | 0.140835 | 0.00228  | 0.105144 | 0.02306  | 0.117264 |
| 0.152904 | 0.00092  | 0.132287 | 0.00419  | 0.096893 | 0.03633  | 0.261623 | 9.53E-09 | 0.156265 |
| 0.005789 | 0.9007   | 0.105751 | 0.02228  | 0.044299 | 0.33947  | 0.091636 | 0.0478   | 0.105464 |
| 0.002195 | 0.96227  | -0.00036 | 0.99373  | -0.01767 | 0.70335  | 0.083743 | 0.0706   | 0.097876 |
| -0.0655  | 0.15758  | -0.05424 | 0.24207  | -0.08717 | 0.05979  | 0.11664  | 0.01165  | 0.051921 |
| 0.121416 | 0.00863  | -0.01671 | 0.71866  | 0.002638 | 0.95466  | 0.124174 | 0.00722  | -0.0837  |
| 0.075928 | 0.10126  | 0.052727 | 0.25547  | 0.033168 | 0.47458  | 0.155659 | 0.00074  | 0.005399 |
| 0.004444 | 0.92369  | 0.037963 | 0.41308  | 0.094542 | 0.04113  | 0.006816 | 0.88321  | -0.05812 |

|          |          |          |          |          |          |          |          |          |
|----------|----------|----------|----------|----------|----------|----------|----------|----------|
| 0.157232 | 0.00065  | 0.095082 | 0.03999  | 0.123145 | 0.00772  | 0.178222 | 0.00011  | 0.09717  |
| -0.01651 | 0.72195  | 0.008724 | 0.85085  | 0.035494 | 0.44414  | 0.028813 | 0.53453  | 0.006383 |
| 0.048308 | 0.29753  | 0.06272  | 0.17603  | 0.008469 | 0.85517  | 0.123222 | 0.00768  | 0.197631 |
| -0.06598 | 0.15458  | -0.02754 | 0.55272  | 0.060291 | 0.1934   | -0.03003 | 0.51738  | -0.07742 |
| -0.29277 | 1.11E-10 | -0.18302 | 6.94E-05 | -0.17092 | 0.00021  | -0.09781 | 0.03459  | -0.1416  |
| 0.212639 | 3.55E-06 | 0.267657 | 4.20E-09 | 0.223192 | 1.11E-06 | 0.226675 | 7.42E-07 | 0.202338 |
| -0.03416 | 0.46146  | 0.026478 | 0.56816  | -0.00918 | 0.8431   | 0.085132 | 0.06604  | 0.027405 |
| -0.02608 | 0.57395  | -0.01698 | 0.71431  | 0.039599 | 0.39323  | 0.123075 | 0.00775  | 0.120252 |
| 0.115733 | 0.01232  | 0.179166 | 9.90E-05 | 0.069732 | 0.1324   | 0.329959 | 2.53E-13 | 0.41461  |
| 0.009461 | 0.83842  | 0.054495 | 0.23985  | 0.105766 | 0.02226  | 0.161225 | 0.00047  | 0.130412 |
| 0.203493 | 9.33E-06 | 0.052362 | 0.25878  | 0.072217 | 0.11912  | 0.32061  | 1.26E-12 | 0.375495 |
| 0.089388 | 0.05356  | 0.005262 | 0.9097   | 0.005987 | 0.89733  | 0.124623 | 0.00701  | 0.025914 |
| 0.260896 | 1.05E-08 | 0.114819 | 0.01303  | 0.272988 | 2.00E-09 | 0.166391 | 0.0003   | 0.157232 |
| 0.060304 | 0.1933   | 0.059259 | 0.20115  | 0.026218 | 0.57197  | 0.233746 | 3.24E-07 | 0.123881 |
| 0.018621 | 0.68815  | 0.062072 | 0.18055  | 0.115745 | 0.01231  | -0.05351 | 0.24849  | -0.02489 |
| -0.11702 | 0.01138  | -0.12219 | 0.00821  | -0.06433 | 0.16519  | -0.16081 | 0.00049  | -0.27102 |
| -0.04569 | 0.32449  | -0.08227 | 0.0757   | -0.09095 | 0.04951  | 0.020667 | 0.65598  | -0.10744 |
| 0.029474 | 0.52519  | 0.195457 | 2.10E-05 | 0.312705 | 4.72E-12 | 0.086782 | 0.06095  | 0.04913  |
| -0.16955 | 0.00023  | -0.12363 | 0.00748  | -0.23724 | 2.13E-07 | -0.0959  | 0.0383   | -0.00704 |
| 0.10701  | 0.02073  | 0.297086 | 5.70E-11 | 0.417394 | 4.12E-21 | 0.095377 | 0.03937  | 0.099014 |
| 0.042377 | 0.36086  | 0.196692 | 1.86E-05 | 0.28504  | 3.52E-10 | 0.109951 | 0.01746  | 0.104297 |
| 0.133771 | 0.00378  | 0.204499 | 8.41E-06 | 0.295317 | 7.49E-11 | 0.009456 | 0.83851  | 0.050962 |
| 0.061186 | 0.18686  | 0.20459  | 8.33E-06 | 0.351243 | 5.26E-15 | 0.079461 | 0.08629  | 0.011457 |
| 0.144924 | 0.00169  | 0.118907 | 0.01012  | 0.062215 | 0.17954  | 0.08059  | 0.08191  | 0.236508 |
| 0.13701  | 0.00301  | 0.170619 | 0.00021  | 0.254786 | 2.36E-08 | 0.108041 | 0.01952  | 0.203679 |
| -0.20324 | 9.58E-06 | -0.13265 | 0.00408  | -0.11042 | 0.01698  | -0.01639 | 0.72389  | 0.032556 |
| 0.286765 | 2.73E-10 | 0.242514 | 1.12E-07 | 0.327564 | 3.84E-13 | 0.193577 | 2.53E-05 | 0.208156 |
| 0.058232 | 0.20908  | 0.151096 | 0.00106  | 0.311819 | 5.46E-12 | 0.071714 | 0.12172  | 0.013696 |
| 0.210238 | 4.60E-06 | 0.244307 | 8.96E-08 | 0.363019 | 5.41E-16 | 0.124281 | 0.00717  | 0.10294  |
| 0.058524 | 0.20681  | 0.111845 | 0.0156   | 0.190518 | 3.41E-05 | 0.146087 | 0.00155  | 0.042451 |
| 0.049463 | 0.28611  | 0.08851  | 0.05596  | 0.221214 | 1.38E-06 | 0.098575 | 0.0332   | 0.098397 |
| 0.001969 | 0.96615  | 0.075899 | 0.10139  | 0.109549 | 0.01788  | 0.064002 | 0.16734  | 0.081717 |
| 0.063346 | 0.17174  | 0.074706 | 0.10689  | 0.147268 | 0.00142  | 0.020415 | 0.65991  | 0.180556 |
| -0.12352 | 0.00753  | -0.09353 | 0.04337  | -0.05185 | 0.26342  | -0.13605 | 0.00322  | 0.043834 |
| -0.02859 | 0.53773  | 0.108648 | 0.01885  | 0.1271   | 0.00595  | 0.067188 | 0.14715  | 0.156494 |
| 0.124999 | 0.00684  | 0.232865 | 3.60E-07 | 0.400175 | 2.18E-19 | 0.096576 | 0.03695  | 0.128059 |
| 0.070236 | 0.12962  | 0.105353 | 0.02279  | 0.202621 | 1.02E-05 | 0.094897 | 0.04038  | 0.145434 |
| -0.03411 | 0.46214  | -0.08446 | 0.06822  | 0.064133 | 0.16647  | -0.07779 | 0.09313  | -0.0628  |
| 0.104547 | 0.02386  | 0.27539  | 1.42E-09 | 0.449102 | 1.47E-24 | 0.095337 | 0.03945  | 0.075549 |
| 0.123707 | 0.00744  | 0.016803 | 0.71722  | 0.104988 | 0.02327  | 0.024396 | 0.59899  | 0.032741 |
| 0.203143 | 9.67E-06 | 0.020328 | 0.66127  | 0.056566 | 0.22243  | 0.019467 | 0.67478  | 0.061656 |
| 0.138147 | 0.00277  | 0.147325 | 0.00141  | 0.323658 | 7.53E-13 | 0.098751 | 0.03288  | -0.00424 |
| 0.075853 | 0.1016   | 0.19618  | 1.96E-05 | 0.326137 | 4.92E-13 | 0.126916 | 0.00602  | 0.075675 |
| 0.233824 | 3.21E-07 | 0.291796 | 1.28E-10 | 0.323757 | 7.40E-13 | 0.131802 | 0.00433  | 0.174454 |
| 0.204229 | 8.64E-06 | 0.157192 | 0.00065  | 0.312341 | 5.01E-12 | 0.049205 | 0.28863  | -0.00386 |

|          |          |          |          |          |          |          |          |          |
|----------|----------|----------|----------|----------|----------|----------|----------|----------|
| 0.069514 | 0.13362  | 0.181231 | 8.20E-05 | 0.289249 | 1.88E-10 | 0.172092 | 0.00019  | 0.132434 |
| 0.10648  | 0.02137  | 0.178363 | 0.00011  | 0.326009 | 5.03E-13 | 0.048212 | 0.29849  | 0.003399 |
| -0.00272 | 0.95319  | 0.076845 | 0.09719  | 0.170969 | 0.00021  | 0.064107 | 0.16664  | 0.00209  |
| -0.14606 | 0.00155  | -0.12308 | 0.00775  | 0.019702 | 0.67109  | -0.08175 | 0.07758  | -0.01728 |
| -0.01633 | 0.72489  | 0.067212 | 0.147    | 0.232817 | 3.62E-07 | -0.0562  | 0.22543  | -0.08326 |
| 0.053512 | 0.24845  | 0.078829 | 0.08883  | 0.147811 | 0.00136  | -0.04067 | 0.38058  | -0.01517 |
| 0.082662 | 0.07432  | -0.01365 | 0.76861  | 0.006243 | 0.89297  | 0.059493 | 0.19937  | 0.061348 |
| -0.02235 | 0.63002  | 0.107779 | 0.01982  | 0.250429 | 4.14E-08 | -0.00389 | 0.93314  | -0.02082 |
| 0.13174  | 0.00435  | 0.164991 | 0.00034  | 0.254678 | 2.39E-08 | 0.095013 | 0.04013  | 0.070099 |
| 0.046085 | 0.32034  | 0.168613 | 0.00025  | 0.371399 | 1.01E-16 | 0.065043 | 0.16052  | 0.019544 |
| 0.013755 | 0.76688  | 0.179563 | 9.55E-05 | 0.372077 | 8.82E-17 | 0.041103 | 0.37549  | 0.015649 |
| 0.10579  | 0.02223  | 0.27433  | 1.66E-09 | 0.413399 | 1.06E-20 | 0.080207 | 0.08337  | 0.036561 |
| 0.056387 | 0.2239   | 0.220366 | 1.52E-06 | 0.325159 | 5.82E-13 | 0.112062 | 0.0154   | 0.147883 |
| 0.062715 | 0.17606  | 0.157778 | 0.00062  | 0.314528 | 3.50E-12 | 0.045859 | 0.32271  | 0.063965 |
| 0.097173 | 0.03579  | 0.245457 | 7.76E-08 | 0.430646 | 1.65E-22 | 0.048169 | 0.29892  | 0.049378 |
| 0.185195 | 5.67E-05 | 0.093466 | 0.0435   | 0.272612 | 2.11E-09 | -0.01102 | 0.81228  | 0.022682 |
| 0.070054 | 0.13061  | 0.024751 | 0.59367  | -0.06227 | 0.17916  | -0.01548 | 0.73871  | 0.094472 |
| 0.071612 | 0.12225  | 0.150462 | 0.00111  | 0.103621 | 0.02514  | 0.047395 | 0.30676  | 0.077708 |
| 0.078786 | 0.08901  | 0.237899 | 1.97E-07 | 0.391468 | 1.49E-18 | 0.071982 | 0.12033  | 0.063683 |
| 0.07718  | 0.09574  | 0.252591 | 3.13E-08 | 0.406386 | 5.35E-20 | 0.087906 | 0.05766  | 0.064117 |
| -0.20998 | 4.73E-06 | -0.18292 | 7.01E-05 | -0.09725 | 0.03564  | -0.03257 | 0.48253  | -0.18696 |
| 0.071329 | 0.12374  | 0.143958 | 0.00182  | 0.088026 | 0.05732  | 0.160503 | 0.0005   | 0.300449 |
| 0.09951  | 0.03155  | 0.318375 | 1.84E-12 | 0.357199 | 1.68E-15 | 0.176466 | 0.00013  | 0.268593 |
| 0.10013  | 0.0305   | 0.237074 | 2.18E-07 | 0.33634  | 8.17E-14 | 0.103924 | 0.02471  | 0.065224 |
| 0.09764  | 0.03491  | 0.125247 | 0.00673  | 0.149448 | 0.0012   | 0.08223  | 0.07586  | 0.101993 |
| -0.03837 | 0.40809  | -0.07507 | 0.10517  | -0.08775 | 0.0581   | -0.14382 | 0.00183  | -0.18603 |
| 0.511303 | 1.81E-32 | 0.205554 | 7.53E-06 | 0.164695 | 0.00035  | 0.323589 | 7.62E-13 | 0.400093 |
| 0.350653 | 5.88E-15 | 0.046787 | 0.31302  | 0.161659 | 0.00045  | 0.019629 | 0.67223  | -0.18368 |
| 0.311892 | 5.40E-12 | 0.241865 | 1.21E-07 | 0.18204  | 7.61E-05 | 0.2405   | 1.43E-07 | 0.373733 |
| -0.32256 | 9.08E-13 | -0.20168 | 1.12E-05 | -0.1992  | 1.45E-05 | -0.32429 | 6.76E-13 | -0.32934 |
| 0.154442 | 0.00081  | 0.020369 | 0.66062  | -0.08359 | 0.07111  | 0.125458 | 0.00663  | 0.160787 |
| 0.094536 | 0.04115  | -0.24395 | 9.37E-08 | -0.0876  | 0.05853  | -0.08465 | 0.06759  | -0.2695  |
| 0.372724 | 7.73E-17 | 0.015672 | 0.73552  | -0.03592 | 0.43871  | 0.276263 | 1.26E-09 | 0.046786 |
| 0.164069 | 0.00037  | 0.075448 | 0.10344  | 0.132955 | 0.004    | -0.16218 | 0.00043  | -0.17359 |
| 0.453619 | 4.42E-25 | 0.227601 | 6.67E-07 | 0.07942  | 0.08646  | 0.268623 | 3.68E-09 | 0.315626 |
| 0.625815 | 3.86E-52 | 0.377841 | 2.70E-17 | 0.227748 | 6.56E-07 | 0.238628 | 1.80E-07 | 0.249292 |
| -0.0518  | 0.26397  | -0.19211 | 2.92E-05 | -0.14381 | 0.00184  | -0.19289 | 2.71E-05 | -0.33933 |
| 0.239368 | 1.65E-07 | 0.043063 | 0.35313  | 0.162853 | 0.00041  | -0.03435 | 0.45894  | -0.28471 |
| -0.14468 | 0.00172  | 0.010136 | 0.82707  | -0.01563 | 0.73623  | -0.04904 | 0.29022  | 0.021167 |
| 0.206357 | 6.93E-06 | -0.02546 | 0.58308  | -0.09044 | 0.05079  | -0.01965 | 0.67185  | -0.01386 |
| 0.294113 | 9.01E-11 | 0.222306 | 1.22E-06 | 0.011733 | 0.80036  | 0.119777 | 0.00958  | 0.230152 |
| 0.270295 | 2.91E-09 | -0.28105 | 6.32E-10 | -0.27415 | 1.70E-09 | 0.024193 | 0.60202  | -0.22306 |
| 0.280068 | 7.28E-10 | 0.104376 | 0.02409  | 0.069312 | 0.13475  | 0.187185 | 4.70E-05 | 0.164413 |
| 0.191942 | 2.97E-05 | 0.022735 | 0.6241   | 0.108031 | 0.01954  | -0.13747 | 0.00291  | -0.32122 |
| -0.28621 | 2.96E-10 | -0.09602 | 0.03806  | -0.16873 | 0.00025  | -0.06901 | 0.13644  | -0.04668 |

|          |          |          |          |          |          |          |          |          |
|----------|----------|----------|----------|----------|----------|----------|----------|----------|
| 0.044514 | 0.33713  | -0.21884 | 1.80E-06 | -0.09754 | 0.0351   | -0.04096 | 0.37715  | -0.23767 |
| 0.580296 | 2.20E-43 | 0.295728 | 7.03E-11 | 0.301801 | 2.73E-11 | 0.284652 | 3.73E-10 | 0.25069  |
| 0.276597 | 1.20E-09 | -0.07406 | 0.10998  | 0.190503 | 3.42E-05 | 0.013141 | 0.777    | -0.07942 |
| 0.480899 | 2.12E-28 | 0.044151 | 0.34109  | 0.041104 | 0.37548  | 0.121679 | 0.00848  | 0.0699   |
| 0.082019 | 0.07661  | -0.07583 | 0.1017   | -0.0308  | 0.50674  | -0.05326 | 0.25065  | -0.28316 |
| 0.244914 | 8.31E-08 | -0.12099 | 0.00886  | -0.07732 | 0.09515  | -0.08785 | 0.05783  | -0.06385 |
| 0.56723  | 4.08E-41 | 0.275993 | 1.31E-09 | 0.224425 | 9.61E-07 | 0.256399 | 1.91E-08 | 0.244096 |
| 0.387977 | 3.17E-18 | 0.235227 | 2.72E-07 | 0.294036 | 9.11E-11 | 0.109815 | 0.0176   | 0.061174 |
| -0.0061  | 0.89547  | -0.01517 | 0.74365  | -0.03947 | 0.39476  | 0.002759 | 0.95259  | -0.19682 |
| 0.094695 | 0.04081  | 0.253508 | 2.78E-08 | 0.227107 | 7.06E-07 | 0.165026 | 0.00034  | 0.258113 |
| 0.117989 | 0.01072  | -0.19504 | 2.19E-05 | -0.20447 | 8.43E-06 | -0.06913 | 0.13577  | -0.15373 |
| 0.329026 | 2.98E-13 | 0.12498  | 0.00685  | 0.241675 | 1.24E-07 | 0.089137 | 0.05424  | 0.1071   |
| 0.278385 | 9.28E-10 | 0.058065 | 0.21039  | 0.151892 | 0.00099  | 0.03327  | 0.47322  | -0.10895 |
| 0.536264 | 3.96E-36 | 0.364719 | 3.87E-16 | 0.163615 | 0.00038  | 0.364796 | 3.81E-16 | 0.385067 |
| 0.289925 | 1.70E-10 | 0.169277 | 0.00024  | 0.293572 | 9.78E-11 | 0.060391 | 0.19266  | 0.064374 |
| 0.228919 | 5.72E-07 | -0.23325 | 3.44E-07 | -0.14437 | 0.00176  | -0.03068 | 0.50835  | -0.11815 |
| 0.117608 | 0.01097  | -0.40212 | 1.41E-19 | -0.31043 | 6.85E-12 | -0.09633 | 0.03743  | -0.23134 |
| 0.178494 | 0.00011  | -0.03081 | 0.5066   | -0.09331 | 0.04387  | 0.055856 | 0.2283   | -0.07948 |
| 0.592293 | 1.48E-45 | 0.373283 | 6.90E-17 | 0.38433  | 6.91E-18 | 0.26925  | 3.37E-09 | 0.19399  |
| 0.564419 | 1.22E-40 | 0.326303 | 4.78E-13 | 0.349084 | 7.89E-15 | 0.258855 | 1.38E-08 | 0.101271 |
| 0.556908 | 2.14E-39 | 0.521053 | 7.31E-34 | 0.492321 | 7.00E-30 | 0.30346  | 2.10E-11 | 0.260516 |
| 0.15874  | 0.00058  | 0.040371 | 0.38405  | 0.043609 | 0.34706  | 0.15429  | 0.00082  | -0.05955 |
| -0.04573 | 0.32404  | -0.31524 | 3.11E-12 | -0.26227 | 8.73E-09 | -0.20454 | 8.37E-06 | -0.29639 |
| 0.155947 | 0.00072  | -0.27201 | 2.29E-09 | -0.12311 | 0.00773  | -0.16868 | 0.00025  | -0.19863 |
| 0.250839 | 3.92E-08 | 0.089359 | 0.05364  | 0.044182 | 0.34075  | 0.232667 | 3.69E-07 | 0.189406 |
| 0.078361 | 0.09075  | -0.13732 | 0.00294  | -0.38705 | 3.87E-18 | 0.068137 | 0.1415   | 0.126178 |
| 0.263843 | 7.07E-09 | 0.136457 | 0.00313  | -0.04943 | 0.28645  | 0.211176 | 4.16E-06 | 0.234841 |
| 0.367944 | 2.03E-16 | -0.00702 | 0.87968  | 0.005765 | 0.90112  | 0.071269 | 0.12406  | -0.04462 |
| 0.351836 | 4.70E-15 | -0.02851 | 0.53885  | -0.00049 | 0.99162  | 0.045623 | 0.32521  | -0.09135 |
| 0.060484 | 0.19198  | -0.39558 | 6.07E-19 | -0.29565 | 7.12E-11 | -0.08992 | 0.05215  | -0.2965  |
| 0.178637 | 0.0001   | -0.22001 | 1.58E-06 | -0.13405 | 0.0037   | -0.14361 | 0.00186  | -0.18448 |
| 0.667852 | 1.27E-61 | 0.569175 | 1.90E-41 | 0.529449 | 4.24E-35 | 0.42759  | 3.51E-22 | 0.360945 |
| -0.0489  | 0.29165  | -0.47819 | 4.67E-28 | -0.46445 | 2.30E-26 | -0.17175 | 0.00019  | -0.36842 |
| -0.00569 | 0.90236  | 0.252104 | 3.34E-08 | 0.289635 | 1.78E-10 | -0.02315 | 0.61783  | 0.084653 |
| 0.520701 | 8.23E-34 | 0.180932 | 8.42E-05 | 0.382266 | 1.07E-17 | 0.119623 | 0.00967  | -0.00438 |
| 0.214717 | 2.84E-06 | -0.23992 | 1.54E-07 | -0.17996 | 9.21E-05 | -0.03116 | 0.50174  | -0.20487 |
| 0.450205 | 1.10E-24 | 0.175245 | 0.00014  | 0.141953 | 0.00211  | 0.159236 | 0.00055  | 0.078722 |
| 0.31257  | 4.83E-12 | 0.150523 | 0.0011   | 0.014774 | 0.75016  | 0.327417 | 3.94E-13 | 0.310691 |
| 0.0335   | 0.47018  | -0.1894  | 3.80E-05 | -0.35963 | 1.05E-15 | -0.00502 | 0.91391  | 0.017099 |
| 0.652831 | 4.63E-58 | 0.400745 | 1.92E-19 | 0.387162 | 3.78E-18 | 0.24822  | 5.48E-08 | 0.263047 |
| 0.625954 | 3.61E-52 | 0.33305  | 1.47E-13 | 0.332543 | 1.61E-13 | 0.385203 | 5.74E-18 | 0.291252 |
| 0.570054 | 1.35E-41 | 0.461884 | 4.69E-26 | 0.534486 | 7.39E-36 | 0.245431 | 7.79E-08 | 0.241792 |
| 0.480474 | 2.40E-28 | 0.126337 | 0.00626  | 0.168591 | 0.00025  | 0.272498 | 2.14E-09 | 0.316322 |
| 0.605805 | 4.08E-48 | 0.381419 | 1.28E-17 | 0.332785 | 1.54E-13 | 0.31438  | 3.58E-12 | 0.233911 |
| 0.545809 | 1.30E-37 | 0.176265 | 0.00013  | 0.234293 | 3.04E-07 | 0.158817 | 0.00057  | 0.075386 |

|          |          |          |          |          |          |          |          |          |
|----------|----------|----------|----------|----------|----------|----------|----------|----------|
| 0.585955 | 2.14E-44 | 0.225212 | 8.78E-07 | 0.212043 | 3.79E-06 | 0.246176 | 7.09E-08 | 0.193639 |
| 0.515667 | 4.36E-33 | 0.247245 | 6.20E-08 | 0.168769 | 0.00025  | 0.386261 | 4.58E-18 | 0.297785 |
| 0.26858  | 3.70E-09 | -0.26831 | 3.84E-09 | -0.19163 | 3.06E-05 | -0.05409 | 0.24335  | -0.33678 |
| 0.51141  | 1.75E-32 | 0.205189 | 7.82E-06 | 0.088921 | 0.05483  | 0.237213 | 2.14E-07 | 0.207475 |
| 0.103226 | 0.0257   | -0.3034  | 2.12E-11 | -0.279   | 8.50E-10 | 0.021332 | 0.64565  | -0.19742 |
| 0.244601 | 8.64E-08 | -0.19504 | 2.19E-05 | -0.12639 | 0.00624  | 0.011638 | 0.80195  | -0.26695 |
| 0.065775 | 0.15586  | -0.07658 | 0.09833  | -0.25501 | 2.29E-08 | 0.02209  | 0.63398  | -0.11832 |
| 0.063179 | 0.17288  | -0.39918 | 2.73E-19 | -0.34972 | 7.01E-15 | -0.06902 | 0.13639  | -0.30275 |
| -0.2039  | 8.94E-06 | -0.05235 | 0.25884  | -0.09836 | 0.03358  | -0.05187 | 0.26329  | 0.04178  |
| 0.221224 | 1.38E-06 | -0.1596  | 0.00054  | -0.0988  | 0.0328   | -0.06012 | 0.19465  | -0.22225 |
| 0.063203 | 0.17272  | -0.20785 | 5.92E-06 | -0.23064 | 4.68E-07 | -0.0653  | 0.15885  | -0.37247 |
| 0.533104 | 1.20E-35 | 0.492685 | 6.27E-30 | 0.41002  | 2.32E-20 | 0.248898 | 5.03E-08 | 0.182146 |
| 0.263687 | 7.22E-09 | -0.03972 | 0.39178  | -0.0913  | 0.04863  | -0.04204 | 0.36467  | -0.13386 |
| 0.028728 | 0.53572  | -0.23397 | 3.16E-07 | -0.2366  | 2.30E-07 | -0.16598 | 0.00032  | -0.20776 |
| 0.151744 | 0.001    | -0.05914 | 0.20208  | -0.05125 | 0.26908  | -0.08525 | 0.06566  | -0.24545 |
| 0.643298 | 6.66E-56 | 0.406096 | 5.72E-20 | 0.444214 | 5.27E-24 | 0.312123 | 5.20E-12 | 0.188366 |
| 0.002887 | 0.95039  | 0.170926 | 0.00021  | 0.04809  | 0.29972  | 0.17016  | 0.00022  | 0.312817 |
| 0.228235 | 6.20E-07 | -0.10712 | 0.02059  | -0.16047 | 0.0005   | -0.00221 | 0.9621   | -0.1104  |
| 0.138024 | 0.0028   | 0.000981 | 0.98314  | -0.05645 | 0.22334  | -0.11686 | 0.01149  | -0.18475 |
| 0.617421 | 2.04E-50 | 0.478376 | 4.42E-28 | 0.328632 | 3.19E-13 | 0.42115  | 1.68E-21 | 0.347722 |
| 0.382796 | 9.57E-18 | 0.314332 | 3.61E-12 | 0.234684 | 2.90E-07 | 0.109602 | 0.01782  | 0.086725 |
| 0.413532 | 1.02E-20 | 0.179441 | 9.66E-05 | -0.01374 | 0.7671   | 0.336684 | 7.68E-14 | 0.162608 |
| 0.320043 | 1.39E-12 | 0.040456 | 0.38306  | 0.166937 | 0.00029  | 0.064488 | 0.16413  | -0.22282 |
| 0.11852  | 0.01037  | -0.12919 | 0.00517  | -0.10307 | 0.02592  | 0.056521 | 0.2228   | -0.13357 |
| -0.04668 | 0.31411  | 0.167023 | 0.00029  | 0.067942 | 0.14265  | 0.150762 | 0.00108  | 0.331455 |
| 0.291137 | 1.42E-10 | 0.040319 | 0.38467  | -0.03542 | 0.44515  | 0.234988 | 2.80E-07 | 0.172096 |
| 0.603471 | 1.15E-47 | 0.370972 | 1.10E-16 | 0.39251  | 1.19E-18 | 0.362686 | 5.78E-16 | 0.320861 |
| 0.266329 | 5.04E-09 | -0.00412 | 0.92922  | 0.088084 | 0.05716  | -0.08183 | 0.07728  | -0.21234 |
| 0.277873 | 9.99E-10 | -0.07138 | 0.12349  | -0.00077 | 0.98684  | 0.147013 | 0.00144  | -0.1637  |
| 0.651744 | 8.24E-58 | 0.518551 | 1.68E-33 | 0.531321 | 2.22E-35 | 0.357165 | 1.69E-15 | 0.260878 |
| 0.208933 | 5.28E-06 | 0.103124 | 0.02585  | 0.209202 | 5.13E-06 | 0.010331 | 0.8238   | 0.083668 |
| 0.352352 | 4.26E-15 | 0.203631 | 9.20E-06 | 0.281954 | 5.54E-10 | 0.076887 | 0.097    | -0.11011 |
| 0.175618 | 0.00014  | 0.192194 | 2.90E-05 | 0.164817 | 0.00035  | -0.03472 | 0.4542   | -0.08719 |
| 0.425005 | 6.60E-22 | 0.455425 | 2.72E-25 | 0.320231 | 1.35E-12 | 0.283237 | 4.59E-10 | 0.292997 |
| 0.186648 | 4.94E-05 | 0.022245 | 0.63159  | -0.14551 | 0.00162  | 0.173265 | 0.00017  | 0.097809 |
| 0.358513 | 1.31E-15 | 0.139607 | 0.0025   | -0.01108 | 0.8113   | 0.083365 | 0.07189  | -0.0738  |
| 0.490253 | 1.31E-29 | 0.103074 | 0.02592  | 0.086532 | 0.0617   | 0.210788 | 4.33E-06 | 0.126271 |
| 0.3679   | 2.05E-16 | -0.1156  | 0.01243  | -0.09189 | 0.04718  | 0.114739 | 0.0131   | -0.01211 |
| 0.331503 | 1.93E-13 | -0.14211 | 0.00208  | -0.06478 | 0.1622   | 0.058735 | 0.20517  | -0.07519 |
| 0.125039 | 0.00682  | -0.18685 | 4.85E-05 | -0.10893 | 0.01854  | -0.11149 | 0.01593  | -0.26079 |
| 0.393929 | 8.72E-19 | 0.331864 | 1.81E-13 | 0.305628 | 1.49E-11 | 0.343047 | 2.42E-14 | 0.206041 |
| 0.298626 | 4.49E-11 | -0.18439 | 6.11E-05 | 0.000367 | 0.99368  | 0.059466 | 0.19957  | -0.23329 |
| 0.262682 | 8.27E-09 | -0.1344  | 0.00362  | -0.211   | 4.24E-06 | 0.087042 | 0.06017  | -0.06651 |
| 0.596501 | 2.43E-46 | 0.302625 | 2.40E-11 | 0.18094  | 8.42E-05 | 0.404186 | 8.84E-20 | 0.319783 |
| 0.099598 | 0.0314   | -0.15661 | 0.00068  | -0.15074 | 0.00108  | -0.04626 | 0.3185   | -0.24119 |

|          |          |          |          |          |          |          |          |          |
|----------|----------|----------|----------|----------|----------|----------|----------|----------|
| -0.00472 | 0.91906  | 0.166867 | 0.00029  | 0.090861 | 0.04972  | 0.16404  | 0.00037  | 0.305494 |
| -0.21901 | 1.77E-06 | -0.2861  | 3.01E-10 | -0.22264 | 1.18E-06 | -0.2025  | 1.03E-05 | -0.2848  |
| 0.391573 | 1.46E-18 | 0.032388 | 0.48504  | -0.10176 | 0.02789  | 0.18331  | 6.76E-05 | 0.108422 |
| 0.085721 | 0.06419  | -0.38113 | 1.36E-17 | -0.23686 | 2.23E-07 | -0.13028 | 0.0048   | -0.30369 |
| 0.340441 | 3.90E-14 | -0.03938 | 0.39582  | 0.025159 | 0.58761  | 0.117963 | 0.01073  | -0.1464  |
| 0.21092  | 4.27E-06 | -0.13208 | 0.00425  | -0.16744 | 0.00028  | -0.02307 | 0.61896  | -0.13212 |
| 0.273186 | 1.95E-09 | -0.2278  | 6.52E-07 | -0.10913 | 0.01832  | 0.011202 | 0.80922  | -0.19474 |
| 0.393987 | 8.61E-19 | -0.04062 | 0.38116  | -0.04905 | 0.29019  | 0.162708 | 0.00042  | 0.070915 |
| 0.524959 | 1.96E-34 | 0.242233 | 1.16E-07 | 0.160035 | 0.00052  | 0.224404 | 9.63E-07 | 0.068467 |
| 0.433979 | 7.18E-23 | 0.114113 | 0.01361  | 0.12442  | 0.0071   | 0.443462 | 6.41E-24 | 0.108556 |
| 0.098479 | 0.03337  | -0.29418 | 8.92E-11 | -0.25235 | 3.23E-08 | -0.0869  | 0.06061  | -0.27065 |
| 0.294078 | 9.06E-11 | -0.13577 | 0.00328  | -0.06618 | 0.15334  | 0.05121  | 0.26942  | -0.24896 |
| 0.295573 | 7.20E-11 | -0.20083 | 1.23E-05 | -0.12246 | 0.00807  | 0.001051 | 0.98194  | -0.22258 |
| 0.353557 | 3.39E-15 | 0.209683 | 4.88E-06 | 0.112795 | 0.01474  | 0.256879 | 1.79E-08 | 0.315982 |
| 0.411853 | 1.51E-20 | -0.10262 | 0.02659  | 0.022003 | 0.63531  | 0.077024 | 0.09641  | -0.10165 |
| 0.069687 | 0.13265  | -0.11435 | 0.01341  | -0.03585 | 0.43957  | 0.073218 | 0.11407  | -0.2361  |
| 0.391601 | 1.45E-18 | 0.146726 | 0.00148  | -0.01738 | 0.70794  | 0.239854 | 1.55E-07 | 0.225113 |
| 0.038687 | 0.40422  | -0.29809 | 4.88E-11 | -0.03724 | 0.42203  | -0.18009 | 9.10E-05 | -0.30027 |
| 0.636054 | 2.58E-54 | 0.384834 | 6.21E-18 | 0.260227 | 1.15E-08 | 0.346762 | 1.22E-14 | 0.223365 |
| -0.01834 | 0.6926   | -0.20292 | 9.89E-06 | -0.22436 | 9.68E-07 | -0.1712  | 0.0002   | -0.3362  |
| -0.05199 | 0.26215  | -0.22145 | 1.35E-06 | -0.12802 | 0.0056   | -0.35321 | 3.62E-15 | -0.3692  |
| 0.290845 | 1.48E-10 | -0.08924 | 0.05397  | -0.11444 | 0.01334  | 0.120718 | 0.00902  | -0.05262 |
| 0.17579  | 0.00013  | -0.07659 | 0.09829  | 0.038347 | 0.40837  | -0.15295 | 0.00091  | -0.11674 |
| 0.072045 | 0.12001  | -0.43786 | 2.70E-23 | -0.28426 | 3.95E-10 | -0.05801 | 0.2108   | -0.24628 |
| 0.207275 | 6.29E-06 | -0.00436 | 0.92512  | 0.089968 | 0.05202  | 0.02654  | 0.56725  | -0.23791 |
| 0.27417  | 1.69E-09 | -0.07262 | 0.11709  | -0.08612 | 0.06296  | 0.001085 | 0.98135  | -0.12935 |
| 0.549379 | 3.54E-38 | 0.364534 | 4.01E-16 | 0.322378 | 9.37E-13 | 0.294056 | 9.09E-11 | 0.22516  |
| 0.547503 | 7.04E-38 | 0.254138 | 2.56E-08 | 0.253206 | 2.89E-08 | 0.241727 | 1.23E-07 | 0.175474 |
| 0.286417 | 2.87E-10 | -0.02331 | 0.61532  | -0.17704 | 0.00012  | 0.190186 | 3.52E-05 | 0.02383  |
| 0.549951 | 2.87E-38 | 0.322804 | 8.71E-13 | 0.392633 | 1.16E-18 | 0.228562 | 5.97E-07 | 0.143784 |
| 0.520129 | 9.96E-34 | 0.375442 | 4.43E-17 | 0.201616 | 1.13E-05 | 0.371272 | 1.04E-16 | 0.429161 |
| 0.510854 | 2.09E-32 | 0.311651 | 5.62E-12 | 0.267499 | 4.29E-09 | 0.252492 | 3.17E-08 | 0.152609 |
| 0.372581 | 7.96E-17 | 0.032691 | 0.48097  | 0.036296 | 0.43391  | 0.211741 | 3.91E-06 | 0.09636  |
| 0.412403 | 1.33E-20 | -0.03994 | 0.38913  | 0.104885 | 0.0234   | 0.081251 | 0.07942  | -0.19693 |
| 0.50081  | 5.11E-31 | 0.372423 | 8.22E-17 | 0.396692 | 4.74E-19 | 0.265327 | 5.78E-09 | 0.11734  |
| 0.367744 | 2.12E-16 | 0.103495 | 0.02532  | -0.01806 | 0.69709  | 0.257048 | 1.75E-08 | 0.220535 |
| 0.02776  | 0.54956  | -0.20023 | 1.30E-05 | -0.30675 | 1.24E-11 | -0.01252 | 0.78725  | -0.14295 |
| 0.375994 | 3.95E-17 | 0.081015 | 0.0803   | 0.032417 | 0.48466  | 0.160779 | 0.00049  | 0.147177 |
| 0.416862 | 4.67E-21 | 0.135533 | 0.00334  | 0.244097 | 9.20E-08 | 0.079421 | 0.08645  | -0.06908 |
| 0.699883 | 5.81E-70 | 0.364781 | 3.82E-16 | 0.386264 | 4.58E-18 | 0.406888 | 4.77E-20 | 0.305395 |
| 0.238047 | 1.94E-07 | 0.055138 | 0.23434  | 0.019813 | 0.66935  | -0.01898 | 0.68239  | -0.07835 |
| 0.031394 | 0.49854  | -0.19073 | 3.34E-05 | -0.21676 | 2.27E-06 | 0.034432 | 0.45791  | -0.31008 |
| -0.11535 | 0.01262  | 0.023901 | 0.60641  | 0.039936 | 0.38921  | 0.043431 | 0.34903  | 0.043268 |
| 0.498724 | 9.78E-31 | 0.312087 | 5.23E-12 | 0.157742 | 0.00062  | 0.326294 | 4.79E-13 | 0.283638 |
| 0.356351 | 1.98E-15 | -0.18375 | 6.49E-05 | -0.06955 | 0.13342  | 0.150263 | 0.00113  | -0.05449 |

|          |          |          |          |          |          |          |          |          |
|----------|----------|----------|----------|----------|----------|----------|----------|----------|
| 0.327248 | 4.06E-13 | -0.08534 | 0.06538  | -0.10674 | 0.02105  | 0.193293 | 2.60E-05 | -0.00272 |
| 0.514304 | 6.82E-33 | 0.19003  | 3.58E-05 | 0.137977 | 0.00281  | 0.265704 | 5.49E-09 | 0.08316  |
| 0.268809 | 3.58E-09 | 0.045167 | 0.33008  | -0.07944 | 0.08639  | 0.091038 | 0.04928  | 0.009908 |
| 0.192892 | 2.71E-05 | 0.104141 | 0.02441  | -0.02164 | 0.64087  | 0.025806 | 0.57802  | -0.08683 |
| 0.284073 | 4.06E-10 | 0.066708 | 0.15006  | 0.027047 | 0.55987  | 0.208072 | 5.78E-06 | 0.008699 |
| 0.54429  | 2.26E-37 | 0.269212 | 3.39E-09 | 0.316301 | 2.61E-12 | 0.128143 | 0.00555  | 0.04332  |
| 0.125084 | 0.0068   | -0.1162  | 0.01198  | -0.02386 | 0.60702  | -0.08982 | 0.05242  | -0.32286 |
| -0.16228 | 0.00043  | 0.021039 | 0.6502   | -0.24093 | 1.36E-07 | 0.06763  | 0.14449  | 0.10871  |
| 0.348711 | 8.46E-15 | 0.029648 | 0.52274  | 0.19519  | 2.16E-05 | 0.069447 | 0.13399  | -0.08563 |
| 0.677606 | 4.75E-64 | 0.390673 | 1.77E-18 | 0.307836 | 1.04E-11 | 0.361251 | 7.66E-16 | 0.285927 |
| 0.570126 | 1.31E-41 | 0.245533 | 7.69E-08 | 0.259785 | 1.22E-08 | 0.224622 | 9.39E-07 | 0.110695 |
| 0.761015 | 1.98E-89 | 0.413786 | 9.64E-21 | 0.452293 | 6.30E-25 | 0.365524 | 3.29E-16 | 0.253433 |
| 0.326648 | 4.50E-13 | -0.12863 | 0.00537  | -0.12992 | 0.00492  | 0.009245 | 0.84206  | -0.21139 |
| 0.203445 | 9.37E-06 | -0.20056 | 1.26E-05 | -0.25513 | 2.25E-08 | 0.0781   | 0.09183  | -0.02434 |
| 0.103797 | 0.02489  | -0.14593 | 0.00157  | -0.03165 | 0.49511  | -0.19337 | 2.58E-05 | -0.32541 |
| 0.047313 | 0.3076   | -0.30557 | 1.50E-11 | -0.34875 | 8.41E-15 | -0.04743 | 0.30642  | -0.14564 |
| 0.172668 | 0.00018  | -0.19471 | 2.26E-05 | 0.121093 | 0.00881  | 0.04121  | 0.37425  | -0.12596 |
| 0.172187 | 0.00018  | -0.25095 | 3.87E-08 | -0.04734 | 0.30734  | -0.21162 | 3.96E-06 | -0.18099 |
| 0.618254 | 1.38E-50 | 0.25746  | 1.66E-08 | 0.411148 | 1.78E-20 | 0.29053  | 1.55E-10 | 0.119157 |
| -0.12722 | 0.0059   | -0.01509 | 0.74504  | -0.04416 | 0.34098  | 0.005212 | 0.91056  | 0.040198 |
| 0.163682 | 0.00038  | 0.032011 | 0.49013  | -0.12831 | 0.00549  | 0.241528 | 1.26E-07 | 0.175405 |
| 0.325416 | 5.57E-13 | 0.257486 | 1.65E-08 | 0.081202 | 0.07961  | 0.257516 | 1.65E-08 | 0.28093  |
| 0.157775 | 0.00062  | -0.21013 | 4.65E-06 | -0.03362 | 0.46856  | -0.06177 | 0.18271  | -0.27547 |
| 0.416617 | 4.95E-21 | 0.137624 | 0.00288  | -0.03995 | 0.38906  | 0.428094 | 3.10E-22 | 0.281431 |
| 0.208884 | 5.31E-06 | -0.12712 | 0.00594  | -0.07695 | 0.09671  | 0.034946 | 0.45122  | -0.09457 |
| 0.303961 | 1.94E-11 | 0.163982 | 0.00037  | -0.01139 | 0.80603  | 0.28839  | 2.14E-10 | 0.313235 |
| 0.085679 | 0.06432  | -0.02314 | 0.61795  | -0.28762 | 2.40E-10 | 0.140615 | 0.00232  | 0.060282 |
| 0.308271 | 9.73E-12 | -0.03246 | 0.48406  | -0.095   | 0.04016  | 0.06443  | 0.16451  | -0.03341 |
| 0.185081 | 5.73E-05 | -0.24096 | 1.36E-07 | -0.1876  | 4.51E-05 | 0.031021 | 0.50366  | -0.28827 |
| 0.13463  | 0.00356  | 0.279555 | 7.84E-10 | 0.303235 | 2.18E-11 | 0.148444 | 0.00129  | 0.212172 |
| 0.482377 | 1.37E-28 | 0.238135 | 1.91E-07 | 0.156855 | 0.00067  | 0.200218 | 1.30E-05 | 0.05108  |
| 0.335723 | 9.13E-14 | 0.075012 | 0.10546  | 0.122509 | 0.00804  | 0.07009  | 0.13042  | -0.07658 |
| 0.23835  | 1.87E-07 | -0.06409 | 0.16673  | -0.01454 | 0.75394  | 0.096793 | 0.03653  | -0.1311  |
| 0.573103 | 4.02E-42 | 0.134571 | 0.00357  | 0.112859 | 0.01468  | 0.271804 | 2.36E-09 | 0.239866 |
| 0.469461 | 5.68E-27 | 0.239756 | 1.57E-07 | 0.244799 | 8.43E-08 | 0.176589 | 0.00013  | -0.02597 |
| 0.586392 | 1.78E-44 | 0.413861 | 9.47E-21 | 0.295189 | 7.64E-11 | 0.396364 | 5.10E-19 | 0.28343  |
| 0.238566 | 1.82E-07 | 0.118455 | 0.01041  | 0.040065 | 0.38768  | 0.114615 | 0.0132   | 0.003118 |
| 0.082649 | 0.07437  | 0.253658 | 2.73E-08 | 0.253241 | 2.88E-08 | 0.103689 | 0.02504  | 0.22841  |
| -0.05118 | 0.26968  | -0.00502 | 0.91389  | -0.14325 | 0.00191  | 0.033786 | 0.46639  | 0.194262 |
| -0.13984 | 0.00245  | -0.01936 | 0.67652  | -0.03248 | 0.48387  | -0.04781 | 0.30257  | 0.004578 |
| 0.638529 | 7.48E-55 | 0.329469 | 2.76E-13 | 0.259996 | 1.19E-08 | 0.339106 | 4.96E-14 | 0.365802 |
| 0.207564 | 6.10E-06 | -0.23797 | 1.95E-07 | -0.28988 | 1.71E-10 | 0.022651 | 0.62538  | -0.28483 |
| 0.060493 | 0.19191  | -0.23176 | 4.10E-07 | -0.29919 | 4.11E-11 | 0.10339  | 0.02546  | -0.07039 |
| 0.501581 | 4.01E-31 | 0.339509 | 4.62E-14 | 0.128298 | 0.00549  | 0.347021 | 1.16E-14 | 0.269644 |
| 0.366165 | 2.90E-16 | 0.102082 | 0.02739  | 0.103735 | 0.02498  | 0.083697 | 0.07076  | -0.06388 |

|          |          |          |          |          |          |          |          |          |
|----------|----------|----------|----------|----------|----------|----------|----------|----------|
| 0.225053 | 8.94E-07 | -0.16379 | 0.00038  | -0.11141 | 0.01601  | 0.025537 | 0.58199  | -0.28509 |
| 0.017489 | 0.7062   | -0.31182 | 5.46E-12 | -0.15941 | 0.00054  | -0.26943 | 3.29E-09 | -0.42706 |
| 0.7458   | 4.59E-84 | 0.348811 | 8.31E-15 | 0.387945 | 3.19E-18 | 0.360023 | 9.73E-16 | 0.25829  |
| 0.413658 | 9.93E-21 | 0.135268 | 0.0034   | 0.022519 | 0.62739  | 0.190509 | 3.41E-05 | 0.097984 |
| 0.561687 | 3.48E-40 | 0.355201 | 2.47E-15 | 0.327743 | 3.72E-13 | 0.248993 | 4.97E-08 | 0.226802 |
| 0.057797 | 0.21251  | -0.17988 | 9.28E-05 | -0.1582  | 0.0006   | -0.06621 | 0.15311  | -0.21025 |
| 0.266014 | 5.26E-09 | -0.02293 | 0.62118  | -0.07301 | 0.11509  | -0.06916 | 0.13563  | -0.22811 |
| 0.562575 | 2.48E-40 | 0.287133 | 2.58E-10 | 0.281003 | 6.36E-10 | 0.242468 | 1.13E-07 | 0.168412 |
| 0.492555 | 6.52E-30 | 0.196833 | 1.83E-05 | 0.176071 | 0.00013  | 0.163452 | 0.00039  | 0.098587 |
| 0.412895 | 1.19E-20 | 0.135741 | 0.00329  | 0.187457 | 4.58E-05 | 0.177312 | 0.00012  | 0.018793 |
| 0.083037 | 0.07302  | -0.08517 | 0.06592  | 0.005774 | 0.90097  | -0.15295 | 0.00091  | -0.27383 |
| 0.264564 | 6.41E-09 | -0.10102 | 0.02905  | 0.076569 | 0.0984   | -0.02309 | 0.6187   | -0.03543 |
| 0.155847 | 0.00073  | -0.2844  | 3.87E-10 | -0.09006 | 0.05179  | 0.017801 | 0.70121  | -0.17934 |
| 0.633954 | 7.33E-54 | 0.296616 | 6.13E-11 | 0.206513 | 6.81E-06 | 0.396155 | 5.34E-19 | 0.31775  |
| -0.28064 | 6.71E-10 | -0.02519 | 0.58712  | -0.22994 | 5.08E-07 | -0.14645 | 0.00151  | 0.000464 |
| 0.319594 | 1.50E-12 | -0.23275 | 3.65E-07 | -0.00881 | 0.84935  | 0.013882 | 0.76478  | -0.2113  |
| 0.581965 | 1.11E-43 | 0.309002 | 8.64E-12 | 0.338201 | 5.85E-14 | 0.299017 | 4.22E-11 | 0.232241 |
| 0.510664 | 2.23E-32 | 0.126644 | 0.00613  | 0.106857 | 0.02091  | 0.201718 | 1.12E-05 | 0.080969 |
| 0.5703   | 1.22E-41 | 0.411422 | 1.67E-20 | 0.367688 | 2.14E-16 | 0.314736 | 3.38E-12 | 0.256434 |
| 0.093615 | 0.04317  | -0.02583 | 0.57769  | -0.21314 | 3.37E-06 | -0.03051 | 0.51069  | 0.002304 |
| 0.142541 | 0.00202  | 0.148538 | 0.00129  | -0.15073 | 0.00109  | -0.01466 | 0.75207  | 0.060189 |
| 0.713322 | 8.43E-74 | 0.281516 | 5.90E-10 | 0.270534 | 2.82E-09 | 0.337305 | 6.87E-14 | 0.166621 |
| 0.017527 | 0.7056   | -0.30949 | 7.98E-12 | -0.33362 | 1.33E-13 | -0.04462 | 0.33602  | -0.05677 |
| 0.53855  | 1.77E-36 | 0.1036   | 0.02517  | 0.254862 | 2.33E-08 | 0.16023  | 0.00051  | 0.089785 |
| 0.419084 | 2.75E-21 | 0.20332  | 9.50E-06 | 0.29862  | 4.49E-11 | 0.071877 | 0.12087  | -0.09784 |
| 0.32344  | 7.82E-13 | 0.111618 | 0.01581  | 0.146098 | 0.00155  | 0.129659 | 0.00501  | 0.038405 |
| 0.334941 | 1.05E-13 | 0.185811 | 5.35E-05 | 0.062555 | 0.17717  | 0.213117 | 3.37E-06 | 0.133695 |
| 0.139379 | 0.00254  | -0.06098 | 0.18835  | -0.00891 | 0.84766  | 0.028928 | 0.5329   | -0.22917 |
| 0.452962 | 5.27E-25 | -0.03472 | 0.45417  | 0.101341 | 0.02854  | 0.020653 | 0.6562   | -0.08328 |
| 0.112151 | 0.01532  | -0.20304 | 9.78E-06 | -0.32387 | 7.27E-13 | -0.06262 | 0.17671  | -0.12096 |
| 0.53838  | 1.88E-36 | 0.399344 | 2.63E-19 | 0.400532 | 2.02E-19 | 0.132726 | 0.00406  | 0.072727 |
| 0.447174 | 2.44E-24 | 0.16532  | 0.00033  | 0.079502 | 0.08613  | 0.249242 | 4.81E-08 | 0.036616 |
| 0.292676 | 1.12E-10 | 0.053875 | 0.24524  | -0.08281 | 0.0738   | 0.085736 | 0.06414  | -0.08059 |
| 0.252038 | 3.36E-08 | -0.08954 | 0.05316  | -0.18854 | 4.12E-05 | 0.066062 | 0.15406  | -0.09113 |
| 0.53673  | 3.36E-36 | 0.195589 | 2.08E-05 | 0.155842 | 0.00073  | 0.315417 | 3.02E-12 | 0.184639 |
| 0.097994 | 0.03425  | -0.31911 | 1.63E-12 | -0.3825  | 1.02E-17 | 0.02743  | 0.55432  | -0.14512 |
| 0.113916 | 0.01377  | -0.07376 | 0.1114   | 3.68E-05 | 0.99937  | -0.13657 | 0.0031   | -0.31537 |
| 0.133441 | 0.00387  | -0.32367 | 7.51E-13 | -0.19995 | 1.34E-05 | -0.10511 | 0.02311  | -0.39059 |
| 0.331612 | 1.89E-13 | -0.0962  | 0.0377   | 0.020027 | 0.66598  | 0.084991 | 0.06649  | -0.14222 |
| 0.510164 | 2.62E-32 | 0.35363  | 3.34E-15 | 0.338185 | 5.86E-14 | 0.194223 | 2.38E-05 | 0.17416  |
| 0.4814   | 1.83E-28 | 0.286638 | 2.78E-10 | 0.276503 | 1.22E-09 | 0.410108 | 2.27E-20 | 0.38068  |
| 0.610615 | 4.67E-49 | 0.235408 | 2.66E-07 | 0.319478 | 1.53E-12 | 0.22446  | 9.57E-07 | 0.211687 |
| -0.11883 | 0.01017  | -0.38903 | 2.53E-18 | -0.39205 | 1.31E-18 | -0.13303 | 0.00398  | -0.26273 |
| 0.577345 | 7.32E-43 | 0.330237 | 2.41E-13 | 0.301821 | 2.72E-11 | 0.194195 | 2.38E-05 | 0.275703 |
| 0.188747 | 4.05E-05 | -0.06602 | 0.15433  | -0.02969 | 0.52219  | 0.050959 | 0.27177  | -0.12825 |



|          |          |          |          |          |          |          |          |          |
|----------|----------|----------|----------|----------|----------|----------|----------|----------|
| 0.275317 | 1.44E-09 | 0.033407 | 0.4714   | -0.05703 | 0.21867  | 0.182841 | 7.06E-05 | 0.217591 |
| 0.301199 | 3.00E-11 | -0.01707 | 0.71291  | -0.13386 | 0.00376  | 0.136745 | 0.00307  | -0.01615 |
| 0.615895 | 4.15E-50 | 0.255439 | 2.16E-08 | 0.180154 | 9.05E-05 | 0.32984  | 2.58E-13 | 0.35723  |
| 0.438919 | 2.06E-23 | 0.222277 | 1.23E-06 | 0.187252 | 4.67E-05 | 0.279667 | 7.72E-10 | 0.205035 |
| 0.541448 | 6.29E-37 | 0.200319 | 1.29E-05 | 0.320179 | 1.36E-12 | 0.223529 | 1.06E-06 | 0.075407 |
| 0.319506 | 1.52E-12 | -0.02057 | 0.65742  | -0.07235 | 0.11845  | -0.00215 | 0.96308  | -0.07212 |
| -0.12838 | 0.00546  | -0.18756 | 4.53E-05 | -0.19845 | 1.56E-05 | -0.02581 | 0.57791  | 0.09671  |
| 0.038381 | 0.40796  | 0.174474 | 0.00015  | 0.062621 | 0.17671  | 0.265203 | 5.88E-09 | 0.151381 |
| 0.613622 | 1.18E-49 | 0.397702 | 3.79E-19 | 0.437617 | 2.87E-23 | 0.293316 | 1.02E-10 | 0.320701 |
| 0.177539 | 0.00011  | -0.30758 | 1.09E-11 | -0.34365 | 2.16E-14 | -0.04134 | 0.37279  | -0.1784  |
| 0.56359  | 1.68E-40 | 0.255279 | 2.21E-08 | 0.243998 | 9.31E-08 | 0.254212 | 2.54E-08 | 0.162329 |
| 0.200184 | 1.31E-05 | 0.011398 | 0.80594  | -0.26032 | 1.14E-08 | 0.217629 | 2.06E-06 | 0.193107 |
| 0.609516 | 7.69E-49 | 0.341925 | 2.97E-14 | 0.332223 | 1.70E-13 | 0.593921 | 7.38E-46 | 0.339452 |
| 0.249015 | 4.95E-08 | 0.142797 | 0.00198  | 0.068731 | 0.13806  | 0.136993 | 0.00301  | 0.13544  |
| 0.392293 | 1.25E-18 | -0.03674 | 0.42828  | 0.116924 | 0.01145  | -0.01549 | 0.73842  | -0.18653 |
| -0.22639 | 7.67E-07 | 0.073913 | 0.11067  | -0.012   | 0.79591  | -0.08307 | 0.0729   | -0.00305 |
| 0.384355 | 6.88E-18 | 0.104549 | 0.02385  | 0.004635 | 0.92042  | 0.264674 | 6.31E-09 | 0.133347 |
| 0.497192 | 1.57E-30 | 0.116569 | 0.0117   | 0.108604 | 0.01889  | 0.23355  | 3.32E-07 | 0.081062 |
| 0.488956 | 1.94E-29 | 0.237754 | 2.00E-07 | 0.103284 | 0.02562  | 0.18342  | 6.69E-05 | 0.113815 |
| 0.34218  | 2.84E-14 | 0.043213 | 0.35145  | -0.00857 | 0.85338  | 0.139219 | 0.00257  | -0.10408 |
| 0.508492 | 4.48E-32 | 0.227516 | 6.74E-07 | 0.063066 | 0.17365  | 0.254141 | 2.56E-08 | 0.122841 |
| 0.347297 | 1.10E-14 | -0.00061 | 0.98949  | 0.01173  | 0.8004   | 0.156189 | 0.00071  | -0.04994 |
| 0.216301 | 2.38E-06 | 0.000623 | 0.98929  | -0.0653  | 0.15891  | 0.18469  | 5.94E-05 | 0.034096 |
| 0.421739 | 1.46E-21 | 0.223666 | 1.05E-06 | 0.220921 | 1.43E-06 | 0.248848 | 5.06E-08 | 0.127902 |
| 0.241942 | 1.20E-07 | -0.03099 | 0.50409  | 0.034391 | 0.45843  | 0.226971 | 7.17E-07 | 0.138043 |
| 0.298555 | 4.54E-11 | 0.162824 | 0.00041  | 0.046891 | 0.31194  | 0.252608 | 3.13E-08 | 0.112104 |
| 0.405074 | 7.22E-20 | 0.152382 | 0.00095  | 0.203191 | 9.62E-06 | 0.239242 | 1.67E-07 | 0.173152 |
| 0.126585 | 0.00616  | -0.06799 | 0.14237  | 0.03604  | 0.43716  | -0.092   | 0.04693  | -0.03891 |
| 0.255162 | 2.24E-08 | -0.11432 | 0.01343  | -0.19184 | 3.00E-05 | 0.116365 | 0.01185  | 0.001204 |
| 0.177312 | 0.00012  | -0.09876 | 0.03287  | -0.26453 | 6.44E-09 | -0.06685 | 0.14921  | -0.11204 |
| 0.153998 | 0.00084  | 0.184526 | 6.03E-05 | 0.25145  | 3.63E-08 | 0.100153 | 0.03047  | 0.12208  |
| 0.396595 | 4.84E-19 | -0.09245 | 0.04585  | -0.06863 | 0.13867  | 0.140297 | 0.00238  | -0.14725 |
| 0.456829 | 1.86E-25 | 0.243177 | 1.03E-07 | 0.156027 | 0.00072  | 0.1938   | 2.48E-05 | 0.104348 |
| 0.52913  | 4.73E-35 | 0.255114 | 2.26E-08 | 0.203704 | 9.13E-06 | 0.176088 | 0.00013  | 0.071307 |
| 0.078133 | 0.0917   | 0.003788 | 0.93493  | -0.1049  | 0.02338  | 0.010316 | 0.82406  | -0.04913 |
| 0.077815 | 0.09303  | 0.014    | 0.76284  | -0.09304 | 0.04447  | -0.01677 | 0.71775  | -0.09039 |
| 0.540454 | 8.97E-37 | 0.056324 | 0.22441  | 0.193591 | 2.53E-05 | 0.155484 | 0.00075  | -0.02551 |
| 0.361205 | 7.73E-16 | 0.004272 | 0.92664  | 0.151959 | 0.00099  | 0.160933 | 0.00048  | -0.02144 |
| 0.499318 | 8.14E-31 | 0.425208 | 6.28E-22 | 0.42684  | 4.22E-22 | 0.274192 | 1.69E-09 | 0.197612 |
| 0.562475 | 2.57E-40 | 0.243148 | 1.04E-07 | 0.266946 | 4.63E-09 | 0.357593 | 1.56E-15 | 0.184099 |
| 0.536246 | 3.98E-36 | 0.211272 | 4.12E-06 | 0.251172 | 3.76E-08 | 0.198589 | 1.54E-05 | 0.117601 |
| 0.412727 | 1.24E-20 | 0.059711 | 0.19772  | 0.122311 | 0.00814  | 0.089141 | 0.05423  | -0.23335 |
| 0.327258 | 4.05E-13 | -0.09636 | 0.03738  | -0.13339 | 0.00388  | 0.090482 | 0.05069  | -0.16586 |
| 0.496084 | 2.21E-30 | 0.160825 | 0.00049  | 0.153195 | 0.0009   | 0.266064 | 5.22E-09 | 0.170869 |
| 0.14316  | 0.00193  | -0.4071  | 4.54E-20 | -0.31739 | 2.17E-12 | -0.12726 | 0.00589  | -0.30472 |

|          |          |          |          |          |          |          |          |          |
|----------|----------|----------|----------|----------|----------|----------|----------|----------|
| 0.183958 | 6.36E-05 | 0.002581 | 0.95565  | -0.1987  | 1.52E-05 | 0.188465 | 4.16E-05 | 0.064896 |
| 0.376538 | 3.53E-17 | -0.1052  | 0.02299  | 0.201664 | 1.13E-05 | 0.022522 | 0.62735  | -0.10729 |
| 0.326162 | 4.90E-13 | 0.330329 | 2.37E-13 | 0.148959 | 0.00124  | 0.191599 | 3.07E-05 | 0.266314 |
| 0.343058 | 2.42E-14 | 0.136524 | 0.00311  | 0.233819 | 3.22E-07 | 0.127643 | 0.00574  | -0.04747 |
| 0.256999 | 1.76E-08 | -0.11858 | 0.01033  | -0.00237 | 0.95921  | -0.07373 | 0.11157  | -0.20565 |
| -0.02012 | 0.66456  | 0.077925 | 0.09256  | 0.054483 | 0.23995  | 0.153989 | 0.00084  | 0.071349 |
| 0.224627 | 9.39E-07 | 0.075882 | 0.10147  | 0.2068   | 6.61E-06 | -0.00036 | 0.99387  | -0.16992 |
| 0.128271 | 0.0055   | 0.085679 | 0.06432  | -0.03278 | 0.47971  | 0.165814 | 0.00032  | 0.012505 |
| 0.600675 | 3.95E-47 | 0.367523 | 2.21E-16 | 0.287937 | 2.29E-10 | 0.274981 | 1.51E-09 | 0.191508 |
| 0.711445 | 2.98E-73 | 0.459301 | 9.51E-26 | 0.335263 | 9.91E-14 | 0.426356 | 4.75E-22 | 0.261817 |
| 0.315803 | 2.83E-12 | -0.25671 | 1.83E-08 | -0.18684 | 4.85E-05 | 0.072658 | 0.11688  | -0.12996 |
| 0.671971 | 1.23E-62 | 0.602831 | 1.53E-47 | 0.482126 | 1.48E-28 | 0.391196 | 1.58E-18 | 0.323169 |
| 0.11216  | 0.01531  | -0.24992 | 4.42E-08 | -0.24146 | 1.28E-07 | -0.00205 | 0.96474  | -0.20758 |
| 0.300566 | 3.32E-11 | -0.0287  | 0.53609  | 0.147752 | 0.00136  | -0.0656  | 0.15695  | -0.17319 |
| 0.536189 | 4.06E-36 | 0.005496 | 0.90571  | 0.149811 | 0.00117  | 0.146327 | 0.00152  | 0.007676 |
| 0.338929 | 5.13E-14 | 0.042181 | 0.36309  | 0.152312 | 0.00096  | 0.138694 | 0.00267  | 0.004191 |
| 0.183915 | 6.39E-05 | -0.01641 | 0.72364  | 0.010918 | 0.81396  | 0.08253  | 0.07479  | 0.100734 |
| 0.338067 | 5.99E-14 | 0.034597 | 0.45575  | 0.068154 | 0.1414   | 0.0513   | 0.26857  | -0.16681 |
| -0.28819 | 2.21E-10 | -0.11966 | 0.00965  | -0.19528 | 2.14E-05 | -0.01158 | 0.80296  | 0.049179 |
| -0.36051 | 8.85E-16 | -0.21526 | 2.67E-06 | -0.29207 | 1.23E-10 | -0.08127 | 0.07936  | -0.02557 |
| 0.314381 | 3.58E-12 | -0.02581 | 0.57795  | -0.03969 | 0.39217  | 0.121742 | 0.00845  | 0.026959 |
| 0.450646 | 9.75E-25 | 0.308304 | 9.67E-12 | 0.273285 | 1.92E-09 | 0.247868 | 5.73E-08 | 0.152987 |
| 0.494658 | 3.43E-30 | 0.101309 | 0.02859  | 0.260194 | 1.15E-08 | 0.158619 | 0.00058  | 0.012969 |
| 0.202249 | 1.06E-05 | -0.0379  | 0.41392  | -0.1232  | 0.00769  | 0.005652 | 0.90305  | -0.00036 |
| 0.309887 | 7.49E-12 | 0.148316 | 0.00131  | -0.01259 | 0.78609  | 0.177711 | 0.00011  | 0.066764 |
| 0.06813  | 0.14154  | -0.29694 | 5.83E-11 | -0.26766 | 4.20E-09 | -0.17818 | 0.00011  | -0.33079 |
| 0.493325 | 5.16E-30 | 0.231976 | 4.00E-07 | 0.049768 | 0.28314  | 0.285377 | 3.35E-10 | 0.123614 |
| 0.29654  | 6.20E-11 | 0.347669 | 1.03E-14 | 0.275086 | 1.49E-09 | 0.140155 | 0.0024   | 0.170362 |
| 0.314867 | 3.31E-12 | 0.065889 | 0.15514  | -0.00537 | 0.90795  | 0.197483 | 1.72E-05 | 0.063914 |
| 0.452095 | 6.64E-25 | 0.097298 | 0.03555  | 0.181481 | 8.01E-05 | 0.055066 | 0.23495  | -0.12797 |
| 0.499093 | 8.72E-31 | 0.11429  | 0.01346  | 0.144432 | 0.00175  | 0.186321 | 5.10E-05 | 0.026538 |
| 0.223171 | 1.11E-06 | -0.20353 | 9.29E-06 | -0.26032 | 1.14E-08 | 0.136952 | 0.00302  | -0.05959 |
| 0.432587 | 1.02E-22 | 0.189033 | 3.94E-05 | 0.075919 | 0.1013   | 0.352065 | 4.50E-15 | 0.32366  |
| 0.577367 | 7.25E-43 | 0.201554 | 1.14E-05 | 0.343907 | 2.07E-14 | 0.249539 | 4.63E-08 | 0.014027 |
| 0.092314 | 0.04617  | -0.10248 | 0.02679  | -0.23375 | 3.24E-07 | 0.163741 | 0.00038  | 0.060215 |
| 0.23091  | 4.54E-07 | 0.014204 | 0.75949  | 0.106622 | 0.02119  | -0.07702 | 0.09641  | -0.20894 |
| 0.090311 | 0.05113  | -0.15782 | 0.00062  | -0.02098 | 0.65118  | -0.12342 | 0.00758  | -0.28652 |
| 0.408265 | 3.48E-20 | 0.066098 | 0.15383  | -0.06556 | 0.15725  | 0.226712 | 7.39E-07 | 0.037451 |
| 0.708363 | 2.33E-72 | 0.504493 | 1.60E-31 | 0.447439 | 2.27E-24 | 0.356497 | 1.93E-15 | 0.298936 |
| 0.436983 | 3.37E-23 | 0.106473 | 0.02138  | 0.011344 | 0.80685  | 0.254265 | 2.52E-08 | 0.127318 |
| 0.286072 | 3.02E-10 | 0.115708 | 0.01234  | 0.0709   | 0.12602  | 0.138109 | 0.00278  | -0.15296 |
| -0.18003 | 9.15E-05 | -0.03257 | 0.48263  | 0.022769 | 0.62358  | -0.02527 | 0.58596  | -0.0401  |
| 0.132999 | 0.00399  | -0.01154 | 0.8036   | 0.063859 | 0.16829  | -0.22846 | 6.04E-07 | -0.28332 |
| 0.309307 | 8.22E-12 | 0.01585  | 0.73263  | 0.036326 | 0.43353  | 0.236631 | 2.30E-07 | 0.005175 |
| 0.609209 | 8.83E-49 | 0.426349 | 4.76E-22 | 0.394552 | 7.60E-19 | 0.31647  | 2.53E-12 | 0.267125 |

|          |          |          |          |          |          |          |          |          |
|----------|----------|----------|----------|----------|----------|----------|----------|----------|
| 0.065161 | 0.15976  | -0.4265  | 4.58E-22 | -0.26583 | 5.39E-09 | -0.13308 | 0.00396  | -0.37741 |
| 0.60093  | 3.53E-47 | 0.132557 | 0.00411  | 0.264969 | 6.07E-09 | 0.246872 | 6.50E-08 | 0.104701 |
| 0.368032 | 2.00E-16 | 0.001708 | 0.97063  | 0.075037 | 0.10534  | 0.033371 | 0.47189  | -0.09419 |
| 0.517922 | 2.07E-33 | 0.209048 | 5.22E-06 | 0.270458 | 2.85E-09 | 0.110064 | 0.01734  | 0.130304 |
| 0.266225 | 5.11E-09 | -0.02061 | 0.65691  | 0.155417 | 0.00075  | -0.00765 | 0.8691   | -0.08889 |
| 0.187289 | 4.65E-05 | -0.13848 | 0.00271  | -0.14315 | 0.00193  | -0.13822 | 0.00276  | -0.2743  |
| 0.610836 | 4.23E-49 | 0.25329  | 2.86E-08 | 0.188713 | 4.06E-05 | 0.230162 | 4.95E-07 | 0.158536 |
| 0.376777 | 3.36E-17 | -0.0472  | 0.30871  | 0.001127 | 0.98062  | 0.116514 | 0.01174  | -0.01581 |
| 0.426774 | 4.29E-22 | 0.210311 | 4.56E-06 | 0.098013 | 0.03422  | 0.292092 | 1.23E-10 | 0.099417 |
| -0.00979 | 0.83287  | -0.40576 | 6.18E-20 | -0.38557 | 5.31E-18 | -0.08216 | 0.0761   | -0.23147 |
| 0.486627 | 3.89E-29 | 0.105674 | 0.02238  | 0.05924  | 0.20129  | 0.28928  | 1.87E-10 | 0.310854 |
| 0.355833 | 2.19E-15 | -0.09109 | 0.04914  | -0.1518  | 0.001    | 0.260611 | 1.09E-08 | 0.105961 |
| 0.193856 | 2.46E-05 | 0.141993 | 0.0021   | 0.101322 | 0.02857  | 0.127263 | 0.00589  | 0.1673   |
| 0.18007  | 9.12E-05 | -0.02434 | 0.59982  | -0.06172 | 0.18303  | -0.04839 | 0.29667  | -0.22386 |
| 0.102122 | 0.02733  | -0.23739 | 2.10E-07 | -0.29222 | 1.20E-10 | -0.09694 | 0.03624  | -0.26983 |
| 0.287939 | 2.29E-10 | -0.00563 | 0.90338  | -0.10633 | 0.02155  | 0.170264 | 0.00022  | 0.120595 |
| 0.084435 | 0.0683   | 0.10484  | 0.02346  | -0.06863 | 0.13865  | 0.172305 | 0.00018  | 0.160436 |
| 0.337539 | 6.59E-14 | -0.01477 | 0.75015  | -0.0834  | 0.07176  | 0.052416 | 0.25828  | 0.026906 |
| 0.530526 | 2.92E-35 | 0.420506 | 1.96E-21 | 0.351206 | 5.29E-15 | 0.352761 | 3.94E-15 | 0.305377 |
| 0.0638   | 0.16869  | -0.00313 | 0.9463   | 0.003239 | 0.94434  | -0.20193 | 1.10E-05 | -0.25614 |
| 0.351883 | 4.66E-15 | 0.149062 | 0.00123  | 0.148217 | 0.00132  | 0.106364 | 0.02151  | 0.00658  |
| 0.291796 | 1.28E-10 | -0.06751 | 0.14522  | -0.05453 | 0.23952  | 0.035207 | 0.44783  | -0.1226  |
| 0.125657 | 0.00655  | -0.18096 | 8.40E-05 | -0.31195 | 5.35E-12 | 0.085499 | 0.06488  | -0.11349 |
| 0.211682 | 3.94E-06 | -0.26072 | 1.08E-08 | -0.09426 | 0.04174  | -0.16409 | 0.00037  | -0.23781 |
| 0.375231 | 4.63E-17 | 0.080348 | 0.08283  | -0.11467 | 0.01315  | 0.188575 | 4.11E-05 | 0.026613 |
| 0.182079 | 7.58E-05 | -0.1428  | 0.00198  | -0.19429 | 2.36E-05 | 0.100725 | 0.02953  | -0.03141 |
| 0.557533 | 1.69E-39 | 0.235374 | 2.67E-07 | 0.147443 | 0.0014   | 0.242538 | 1.12E-07 | 0.232623 |
| -0.0554  | 0.2321   | -0.39749 | 3.97E-19 | -0.37767 | 2.80E-17 | -0.09723 | 0.03568  | -0.18557 |
| 0.278873 | 8.65E-10 | -0.1313  | 0.00448  | -0.22358 | 1.06E-06 | 0.118148 | 0.01061  | 0.074176 |
| 0.078465 | 0.09032  | -0.14333 | 0.0019   | -0.07798 | 0.09234  | -0.25205 | 3.36E-08 | -0.39435 |
| 0.273837 | 1.77E-09 | 0.216068 | 2.45E-06 | -0.01267 | 0.7848   | 0.248957 | 4.99E-08 | 0.310698 |
| 0.394617 | 7.49E-19 | 0.183875 | 6.41E-05 | 0.18065  | 8.65E-05 | 0.027049 | 0.55985  | -0.10828 |
| 0.678491 | 2.83E-64 | 0.479154 | 3.53E-28 | 0.395752 | 5.84E-19 | 0.406332 | 5.42E-20 | 0.383393 |
| 0.610855 | 4.19E-49 | 0.257713 | 1.60E-08 | 0.154017 | 0.00084  | 0.328688 | 3.16E-13 | 0.342369 |
| 0.494462 | 3.64E-30 | 0.194845 | 2.23E-05 | 0.059981 | 0.1957   | 0.283859 | 4.19E-10 | 0.21098  |
| 0.362901 | 5.54E-16 | 0.097137 | 0.03586  | 0.43214  | 1.14E-22 | 0.165328 | 0.00033  | -0.0087  |
| 0.250419 | 4.14E-08 | -0.23623 | 2.41E-07 | -0.07757 | 0.09406  | 0.012648 | 0.78515  | -0.13364 |
| -0.3637  | 4.73E-16 | -0.07693 | 0.0968   | -0.13821 | 0.00276  | -0.10623 | 0.02167  | -0.05511 |
| 0.516359 | 3.47E-33 | 0.0616   | 0.18389  | 0.025813 | 0.57792  | 0.222848 | 1.15E-06 | 0.094267 |
| 0.363423 | 5.00E-16 | 0.138636 | 0.00268  | 0.148547 | 0.00128  | 0.063982 | 0.16747  | -0.06924 |
| -0.06426 | 0.1656   | -0.27633 | 1.25E-09 | -0.26748 | 4.30E-09 | -0.11868 | 0.01026  | -0.40125 |
| 0.255985 | 2.01E-08 | -0.06852 | 0.13925  | 0.048415 | 0.29646  | 0.043351 | 0.34991  | -0.00932 |
| 0.202901 | 9.91E-06 | 0.047746 | 0.30319  | 0.102358 | 0.02698  | 0.096924 | 0.03627  | -0.12452 |
| 0.617664 | 1.82E-50 | 0.135003 | 0.00347  | 0.357767 | 1.51E-15 | 0.18392  | 6.39E-05 | 0.034322 |
| 0.347149 | 1.13E-14 | 0.431849 | 1.22E-22 | 0.263774 | 7.13E-09 | 0.372161 | 8.67E-17 | 0.323601 |

|          |          |          |          |          |          |          |          |          |
|----------|----------|----------|----------|----------|----------|----------|----------|----------|
| 0.291165 | 1.41E-10 | -0.01713 | 0.71204  | 0.124782 | 0.00694  | 0.002868 | 0.95071  | -0.08135 |
| 0.348042 | 9.59E-15 | -0.12775 | 0.0057   | 0.042028 | 0.36483  | 0.014819 | 0.74942  | -0.08544 |
| -0.12712 | 0.00594  | 0.072612 | 0.11711  | 0.162679 | 0.00042  | -0.10119 | 0.02878  | -0.04681 |
| -0.39823 | 3.37E-19 | -0.10017 | 0.03043  | -0.14495 | 0.00169  | -0.02852 | 0.53864  | 0.171411 |
| 0.237918 | 1.97E-07 | 0.135623 | 0.00332  | 0.090372 | 0.05097  | -0.08086 | 0.0809   | 0.046733 |
| 0.516437 | 3.38E-33 | 0.143406 | 0.00189  | 0.150925 | 0.00107  | 0.291157 | 1.41E-10 | 0.091272 |
| 0.172107 | 0.00019  | -0.08075 | 0.08131  | -0.21451 | 2.90E-06 | 0.179507 | 9.60E-05 | 0.166719 |
| 0.642424 | 1.04E-55 | 0.387744 | 3.34E-18 | 0.361927 | 6.71E-16 | 0.247364 | 6.11E-08 | 0.179933 |
| -0.15332 | 0.00089  | 0.053598 | 0.24769  | 0.045551 | 0.32598  | -0.17589 | 0.00013  | -0.15515 |
| 0.529026 | 4.90E-35 | 0.178588 | 0.0001   | 0.130434 | 0.00475  | 0.247136 | 6.28E-08 | 0.15931  |
| 0.599117 | 7.81E-47 | 0.394543 | 7.62E-19 | 0.397024 | 4.41E-19 | 0.332137 | 1.73E-13 | 0.269718 |
| 0.593181 | 1.01E-45 | 0.260878 | 1.05E-08 | 0.222826 | 1.15E-06 | 0.270035 | 3.02E-09 | 0.143884 |
| 0.58555  | 2.53E-44 | 0.299028 | 4.22E-11 | 0.281361 | 6.04E-10 | 0.261774 | 9.34E-09 | 0.179339 |
| 0.369945 | 1.36E-16 | -0.11325 | 0.01434  | 0.01507  | 0.74532  | 0.024859 | 0.59206  | -0.17318 |
| 0.196402 | 1.91E-05 | -0.03333 | 0.47238  | 0.083423 | 0.07169  | -0.04047 | 0.38291  | -0.28178 |
| 0.377926 | 2.65E-17 | -0.01113 | 0.81048  | 0.045403 | 0.32756  | 0.070237 | 0.12961  | 0.010946 |
| 0.652598 | 5.24E-58 | 0.518025 | 2.00E-33 | 0.411411 | 1.68E-20 | 0.36874  | 1.73E-16 | 0.374023 |
| 0.094645 | 0.04091  | -0.30902 | 8.62E-12 | -0.31799 | 1.97E-12 | -0.12566 | 0.00655  | -0.31443 |
| 0.522025 | 5.28E-34 | 0.165125 | 0.00034  | 0.210943 | 4.26E-06 | 0.149153 | 0.00123  | 0.058166 |
| 0.264771 | 6.23E-09 | -0.1751  | 0.00014  | -0.11097 | 0.01644  | -0.0124  | 0.78933  | -0.21689 |
| 0.464307 | 2.40E-26 | 0.012485 | 0.78786  | 0.060844 | 0.18934  | 0.151342 | 0.00104  | 0.011762 |
| 0.262732 | 8.21E-09 | 0.1403   | 0.00238  | 0.204394 | 8.50E-06 | 0.117932 | 0.01075  | 0.113496 |
| 0.262745 | 8.20E-09 | -0.24665 | 6.69E-08 | -0.11854 | 0.01035  | -0.04472 | 0.33489  | -0.26157 |
| 0.066169 | 0.15339  | -0.14101 | 0.00226  | -0.05514 | 0.23436  | -0.09642 | 0.03727  | -0.21965 |
| 0.356448 | 1.95E-15 | 0.210581 | 4.43E-06 | 0.217997 | 1.98E-06 | 0.018181 | 0.69516  | 0.140359 |
| 0.121628 | 0.00851  | -0.04548 | 0.32678  | 0.066581 | 0.15084  | -0.14197 | 0.0021   | -0.25383 |
| 0.381663 | 1.21E-17 | 0.045109 | 0.33071  | 0.016859 | 0.71633  | 0.136271 | 0.00317  | -0.03812 |
| 0.392983 | 1.07E-18 | 0.06997  | 0.13108  | -0.0002  | 0.99655  | 0.145464 | 0.00162  | 0.071531 |
| 0.384223 | 7.07E-18 | 0.316852 | 2.38E-12 | 0.285999 | 3.06E-10 | 0.218122 | 1.95E-06 | 0.139591 |
| 0.464967 | 2.00E-26 | 0.005117 | 0.91218  | 0.044208 | 0.34046  | 0.137417 | 0.00292  | 0.082528 |
| 0.042598 | 0.35836  | -0.21416 | 3.01E-06 | -0.29541 | 7.39E-11 | -0.22652 | 7.56E-07 | -0.32859 |
| 0.0523   | 0.25934  | -0.27803 | 9.76E-10 | -0.40276 | 1.22E-19 | 0.042883 | 0.35515  | -0.12309 |
| 0.66799  | 1.17E-61 | 0.446914 | 2.61E-24 | 0.442711 | 7.78E-24 | 0.35524  | 2.46E-15 | 0.346749 |
| 0.346049 | 1.39E-14 | 0.074794 | 0.10647  | 0.144437 | 0.00175  | 0.176997 | 0.00012  | 0.093699 |
| 0.30955  | 7.91E-12 | -0.00423 | 0.92735  | -0.00798 | 0.86344  | 0.196119 | 1.97E-05 | 0.255633 |
| 0.061117 | 0.18736  | -0.15792 | 0.00061  | -0.19028 | 3.49E-05 | -0.1534  | 0.00088  | -0.29398 |
| 0.241016 | 1.35E-07 | -0.1555  | 0.00075  | 0.070578 | 0.12775  | 0.025097 | 0.58851  | -0.10708 |
| 0.279367 | 8.06E-10 | -0.17292 | 0.00017  | -0.10578 | 0.02224  | 0.06442  | 0.16457  | -0.15981 |
| 0.207714 | 6.01E-06 | -0.12656 | 0.00617  | 0.090899 | 0.04963  | -0.04677 | 0.31316  | -0.20591 |
| 0.264461 | 6.50E-09 | 0.160162 | 0.00051  | 0.272881 | 2.03E-09 | 0.094507 | 0.04121  | 0.078689 |
| 0.562583 | 2.47E-40 | 0.103362 | 0.02551  | 0.102371 | 0.02696  | 0.245205 | 8.01E-08 | 0.176602 |
| 0.439073 | 1.98E-23 | -0.15125 | 0.00104  | -0.01126 | 0.80818  | 0.158975 | 0.00056  | -0.12513 |
| 0.179721 | 9.41E-05 | -0.04664 | 0.31454  | -0.01126 | 0.80823  | -0.00554 | 0.90501  | -0.07551 |
| 0.405815 | 6.10E-20 | 0.161945 | 0.00044  | 0.283763 | 4.25E-10 | 0.109485 | 0.01794  | 0.008796 |
| 0.427438 | 3.64E-22 | 0.184367 | 6.13E-05 | -0.02544 | 0.58339  | 0.263297 | 7.61E-09 | 0.195732 |

|          |          |          |          |          |          |          |          |          |
|----------|----------|----------|----------|----------|----------|----------|----------|----------|
| 0.363538 | 4.88E-16 | 0.26546  | 5.67E-09 | 0.240045 | 1.52E-07 | 0.20447  | 8.43E-06 | 0.312667 |
| 0.264289 | 6.65E-09 | 0.073333 | 0.11351  | 0.153948 | 0.00084  | -0.08202 | 0.0766   | -0.12467 |
| 0.224948 | 9.05E-07 | -0.10774 | 0.01986  | -0.07849 | 0.0902   | 0.185398 | 5.56E-05 | -0.02026 |
| -0.46783 | 8.99E-27 | -0.25732 | 1.69E-08 | -0.26535 | 5.76E-09 | -0.23176 | 4.11E-07 | -0.13128 |
| 0.47246  | 2.43E-27 | 0.278267 | 9.44E-10 | 0.25266  | 3.10E-08 | 0.150403 | 0.00111  | 0.245544 |
| 0.47075  | 3.94E-27 | 0.213395 | 3.27E-06 | 0.255656 | 2.10E-08 | 0.076359 | 0.09933  | -0.03463 |
| 0.018913 | 0.68353  | -0.41552 | 6.41E-21 | -0.44649 | 2.91E-24 | -0.07169 | 0.12184  | -0.33349 |
| -0.02953 | 0.52445  | -0.41277 | 1.22E-20 | -0.48828 | 2.37E-29 | -0.09018 | 0.05147  | -0.23062 |
| 0.100899 | 0.02924  | 0.042192 | 0.36296  | -0.14877 | 0.00126  | 0.005706 | 0.90213  | 0.034089 |
| 0.21747  | 2.10E-06 | -0.08224 | 0.07583  | 0.118329 | 0.01049  | 0.014669 | 0.75188  | -0.19639 |
| -0.1665  | 0.0003   | -0.09804 | 0.03416  | -0.00403 | 0.93077  | -0.12312 | 0.00773  | -0.182   |
| -0.24236 | 1.14E-07 | 0.032849 | 0.47885  | -0.22462 | 9.40E-07 | -0.05497 | 0.23575  | 0.110172 |
| 0.612745 | 1.77E-49 | 0.218811 | 1.81E-06 | 0.127313 | 0.00587  | 0.302433 | 2.47E-11 | 0.24427  |
| -0.02519 | 0.58709  | -0.39474 | 7.29E-19 | -0.30651 | 1.29E-11 | -0.05359 | 0.24773  | -0.4019  |
| 0.311418 | 5.83E-12 | 0.04383  | 0.34461  | -0.12573 | 0.00652  | -0.04057 | 0.3817   | -0.05016 |
| 0.121587 | 0.00853  | -0.09461 | 0.04099  | -0.36836 | 1.87E-16 | 0.024185 | 0.60215  | -0.05332 |
| 0.039395 | 0.39567  | -0.11719 | 0.01126  | -0.01218 | 0.79284  | -0.0304  | 0.51222  | -0.17488 |
| -0.03556 | 0.44333  | -0.2047  | 8.24E-06 | -0.17155 | 0.0002   | -0.16052 | 0.0005   | -0.37767 |
| 0.206638 | 6.73E-06 | 0.106563 | 0.02127  | 0.126789 | 0.00608  | -0.02181 | 0.63828  | -0.09676 |
| 0.3729   | 7.46E-17 | -0.10614 | 0.02179  | 0.062228 | 0.17945  | 0.069795 | 0.13205  | -0.09082 |
| 0.140142 | 0.0024   | -0.1182  | 0.01058  | -0.00073 | 0.98751  | -0.04309 | 0.35279  | -0.41137 |
| 0.581057 | 1.62E-43 | 0.395037 | 6.83E-19 | 0.317482 | 2.14E-12 | 0.280348 | 6.99E-10 | 0.266916 |
| 0.571607 | 7.28E-42 | 0.15311  | 0.0009   | 0.200474 | 1.27E-05 | 0.18953  | 3.75E-05 | 0.011688 |
| 0.489134 | 1.84E-29 | -0.10021 | 0.03038  | 0.098803 | 0.03279  | 0.046152 | 0.31964  | -0.19629 |
| 0.504129 | 1.80E-31 | 0.000627 | 0.98922  | 0.037185 | 0.42272  | 0.094968 | 0.04023  | -0.14409 |
| 0.556124 | 2.88E-39 | 0.069833 | 0.13184  | 0.182388 | 7.37E-05 | 0.227278 | 6.92E-07 | 0.005173 |
| 0.183483 | 6.65E-05 | -0.31265 | 4.76E-12 | -0.09305 | 0.04446  | -0.10669 | 0.02111  | -0.31427 |
| 0.569154 | 1.92E-41 | 0.14322  | 0.00192  | 0.144824 | 0.0017   | 0.230201 | 4.93E-07 | 0.010462 |
| 0.23695  | 2.21E-07 | -0.28392 | 4.16E-10 | -0.16645 | 0.0003   | -0.04855 | 0.29512  | -0.37443 |
| 0.58219  | 1.01E-43 | 0.376286 | 3.72E-17 | 0.440244 | 1.47E-23 | 0.198395 | 1.57E-05 | 0.059137 |
| 0.417006 | 4.51E-21 | 0.295168 | 7.66E-11 | 0.234075 | 3.12E-07 | 0.187235 | 4.67E-05 | 0.089243 |
| 0.589182 | 5.52E-45 | 0.299261 | 4.07E-11 | 0.341861 | 3.01E-14 | 0.263796 | 7.11E-09 | 0.000903 |
| 0.35198  | 4.57E-15 | 0.093944 | 0.04244  | 0.093902 | 0.04253  | 0.03337  | 0.4719   | -0.02691 |
| 0.120371 | 0.00922  | -0.2108  | 4.33E-06 | -0.20051 | 1.27E-05 | -0.04164 | 0.36927  | -0.0995  |
| 0.485502 | 5.45E-29 | 0.086168 | 0.0628   | 0.082628 | 0.07444  | 0.172288 | 0.00018  | 0.12174  |
| 0.218007 | 1.98E-06 | 0.038502 | 0.40648  | -0.01435 | 0.7571   | 0.022865 | 0.62212  | -0.01538 |
| 0.112456 | 0.01504  | -0.04971 | 0.28373  | -0.16777 | 0.00027  | -0.02389 | 0.60655  | -0.11101 |
| 0.151101 | 0.00106  | 0.088275 | 0.05662  | -0.0842  | 0.06906  | 0.258776 | 1.39E-08 | 0.164213 |
| 0.341318 | 3.32E-14 | 0.085457 | 0.06501  | 0.119916 | 0.00949  | 0.193533 | 2.54E-05 | -0.04698 |
| 0.456812 | 1.87E-25 | 0.114902 | 0.01297  | 0.176942 | 0.00012  | 0.327618 | 3.81E-13 | 0.238213 |
| -0.08326 | 0.07225  | 0.093688 | 0.04301  | 0.114623 | 0.01319  | 0.037719 | 0.41609  | 0.204302 |
| 0.458246 | 1.27E-25 | 0.208505 | 5.53E-06 | 0.104658 | 0.02371  | 0.149777 | 0.00117  | 0.048855 |
| 0.189836 | 3.64E-05 | 0.061693 | 0.18322  | 0.103027 | 0.02599  | 0.125874 | 0.00646  | 0.109234 |
| 0.444343 | 5.10E-24 | 0.111826 | 0.01562  | -0.02021 | 0.66306  | 0.177062 | 0.00012  | 0.042217 |
| 0.411685 | 1.57E-20 | 0.017867 | 0.70016  | 0.159658 | 0.00053  | 0.137182 | 0.00297  | -0.00624 |

|          |          |          |          |          |          |          |          |          |
|----------|----------|----------|----------|----------|----------|----------|----------|----------|
| 0.304965 | 1.65E-11 | 0.090149 | 0.05155  | 0.13937  | 0.00254  | 0.126782 | 0.00608  | 0.105949 |
| 0.516229 | 3.62E-33 | 0.533629 | 9.97E-36 | 0.555596 | 3.51E-39 | 0.3235   | 7.74E-13 | 0.261174 |
| 0.257949 | 1.56E-08 | -0.03886 | 0.40209  | -0.19367 | 2.51E-05 | 0.158084 | 0.00061  | 0.086944 |
| 0.475509 | 1.01E-27 | 0.199535 | 1.40E-05 | 0.23971  | 1.58E-07 | 0.096394 | 0.03731  | 0.002155 |
| 0.108875 | 0.0186   | -0.19896 | 1.48E-05 | -0.20743 | 6.19E-06 | -0.10338 | 0.02548  | -0.39474 |
| 0.053167 | 0.25151  | -0.3292  | 2.89E-13 | -0.39851 | 3.17E-19 | -0.11956 | 0.00971  | -0.36524 |
| 0.287549 | 2.43E-10 | -0.03917 | 0.39833  | -0.16435 | 0.00036  | 0.12126  | 0.00871  | 0.002624 |
| 0.627241 | 1.94E-52 | 0.394851 | 7.12E-19 | 0.243067 | 1.05E-07 | 0.302353 | 2.50E-11 | 0.340724 |
| 0.251605 | 3.56E-08 | -0.27943 | 7.99E-10 | -0.22889 | 5.74E-07 | 0.070679 | 0.12721  | -0.13119 |
| -0.02157 | 0.64204  | -0.10023 | 0.03033  | -0.33975 | 4.41E-14 | -0.08062 | 0.08178  | -0.08152 |
| 0.00719  | 0.87685  | -0.15123 | 0.00104  | -0.40564 | 6.34E-20 | -0.00016 | 0.99728  | 0.041306 |
| 0.331133 | 2.06E-13 | -0.05699 | 0.219    | -0.10437 | 0.0241   | 0.092442 | 0.04587  | 0.008469 |
| 0.174801 | 0.00015  | -0.31572 | 2.87E-12 | -0.32037 | 1.32E-12 | -0.05507 | 0.23495  | -0.15952 |
| -0.00234 | 0.9598   | -0.35456 | 2.80E-15 | -0.43742 | 3.02E-23 | -0.04643 | 0.31677  | -0.26675 |
| 0.765154 | 5.86E-91 | 0.465747 | 1.61E-26 | 0.381813 | 1.18E-17 | 0.358063 | 1.42E-15 | 0.312074 |
| 0.152861 | 0.00092  | -0.04034 | 0.38447  | -0.00559 | 0.90407  | 0.089647 | 0.05287  | -0.14749 |
| 0.287887 | 2.31E-10 | -0.19267 | 2.77E-05 | -0.12686 | 0.00605  | 0.120365 | 0.00922  | -0.06844 |
| 0.513853 | 7.90E-33 | 0.490788 | 1.12E-29 | 0.429823 | 2.02E-22 | 0.220952 | 1.42E-06 | 0.135244 |
| 0.39809  | 3.48E-19 | 0.01647  | 0.72259  | 0.017097 | 0.71249  | 0.25523  | 2.22E-08 | 0.250431 |
| 0.30181  | 2.73E-11 | 0.002725 | 0.95317  | -0.0486  | 0.2946   | 0.032298 | 0.48625  | -0.00521 |
| 0.570342 | 1.20E-41 | 0.139144 | 0.00258  | 0.117447 | 0.01108  | 0.302897 | 2.30E-11 | 0.1467   |
| 0.35318  | 3.64E-15 | 0.004302 | 0.92613  | 0.138051 | 0.00279  | 0.017092 | 0.71258  | -0.13558 |
| 0.509422 | 3.32E-32 | 0.152934 | 0.00091  | 0.171665 | 0.00019  | 0.195445 | 2.11E-05 | 0.129954 |
| 0.377992 | 2.62E-17 | 0.19773  | 1.68E-05 | 0.017916 | 0.69938  | 0.114245 | 0.0135   | 0.198498 |
| 0.382838 | 9.48E-18 | 0.345119 | 1.65E-14 | 0.304989 | 1.65E-11 | 0.256144 | 1.97E-08 | 0.122945 |
| 0.127382 | 0.00584  | -0.34065 | 3.75E-14 | -0.18805 | 4.32E-05 | -0.09612 | 0.03785  | -0.27083 |
| 0.246914 | 6.46E-08 | 0.018352 | 0.69243  | 0.022334 | 0.63023  | -0.09613 | 0.03783  | -0.10709 |
| 0.284332 | 3.91E-10 | 0.063189 | 0.17281  | 0.187652 | 4.49E-05 | 0.101609 | 0.02812  | 0.039788 |
| 0.152252 | 0.00096  | -0.09311 | 0.0443   | 0.171802 | 0.00019  | -0.0913  | 0.04864  | -0.32817 |
| 0.333655 | 1.32E-13 | 0.160205 | 0.00051  | 0.16975  | 0.00023  | 0.158314 | 0.0006   | 0.17851  |
| 0.603581 | 1.10E-47 | 0.475036 | 1.16E-27 | 0.44983  | 1.21E-24 | 0.421815 | 1.43E-21 | 0.365931 |
| 0.211739 | 3.91E-06 | 0.033232 | 0.47373  | -0.14425 | 0.00178  | 0.257169 | 1.72E-08 | 0.1519   |
| 0.165304 | 0.00033  | -0.00177 | 0.96952  | -0.17453 | 0.00015  | 0.111529 | 0.0159   | -0.11516 |
| 0.416343 | 5.28E-21 | 0.055433 | 0.23185  | 0.097051 | 0.03603  | 0.137945 | 0.00281  | -0.04809 |
| 0.625864 | 3.77E-52 | 0.13421  | 0.00366  | 0.2071   | 6.41E-06 | 0.159885 | 0.00052  | 0.014393 |
| 0.705581 | 1.46E-71 | 0.309778 | 7.62E-12 | 0.4132   | 1.11E-20 | 0.36317  | 5.25E-16 | 0.249278 |
| 0.435162 | 5.34E-23 | 0.079119 | 0.08766  | 0.053306 | 0.25027  | 0.184924 | 5.81E-05 | 0.064544 |
| 0.704817 | 2.40E-71 | 0.353159 | 3.65E-15 | 0.391245 | 1.57E-18 | 0.331791 | 1.83E-13 | 0.212647 |
| 0.486108 | 4.55E-29 | 0.034417 | 0.45809  | 0.103756 | 0.02495  | 0.124688 | 0.00698  | 4.75E-05 |
| 0.349183 | 7.75E-15 | 0.269295 | 3.35E-09 | 0.036206 | 0.43505  | 0.092417 | 0.04593  | 0.108098 |
| 0.692932 | 4.65E-68 | 0.400745 | 1.92E-19 | 0.350472 | 6.08E-15 | 0.33072  | 2.21E-13 | 0.269787 |
| 0.327428 | 3.93E-13 | 0.079877 | 0.08466  | -0.01761 | 0.70434  | 0.040766 | 0.37942  | -0.05507 |
| 0.214366 | 2.95E-06 | -0.15364 | 0.00086  | 0.053981 | 0.24431  | -0.08461 | 0.06772  | -0.13689 |
| -0.09876 | 0.03286  | 0.116021 | 0.01211  | 0.068714 | 0.13816  | 0.028826 | 0.53434  | 0.123834 |
| 0.149314 | 0.00121  | 0.165351 | 0.00033  | 0.015409 | 0.7398   | 0.127193 | 0.00591  | 0.030263 |

|          |          |          |          |          |          |          |          |          |
|----------|----------|----------|----------|----------|----------|----------|----------|----------|
| 0.269336 | 3.33E-09 | 0.240347 | 1.46E-07 | -0.10046 | 0.02996  | 0.138013 | 0.0028   | 0.258136 |
| 0.500909 | 4.95E-31 | 0.211739 | 3.91E-06 | 0.210412 | 4.51E-06 | 0.254743 | 2.37E-08 | 0.088215 |
| 0.492722 | 6.20E-30 | 0.118248 | 0.01054  | 0.077422 | 0.0947   | 0.258524 | 1.44E-08 | 0.236941 |
| 0.286177 | 2.98E-10 | -0.07655 | 0.0985   | -0.01149 | 0.80435  | -0.00225 | 0.96136  | -0.15187 |
| 0.333174 | 1.44E-13 | 0.160997 | 0.00048  | 0.146756 | 0.00147  | 0.210979 | 4.25E-06 | 0.105125 |
| -0.17217 | 0.00018  | 0.029092 | 0.53057  | 0.070516 | 0.12809  | 0.134624 | 0.00356  | 0.178034 |
| 0.305786 | 1.45E-11 | 0.145319 | 0.00164  | 0.264153 | 6.78E-09 | 0.129221 | 0.00516  | 0.245892 |
| 0.659379 | 1.37E-59 | 0.288849 | 2.00E-10 | 0.242196 | 1.16E-07 | 0.170937 | 0.00021  | 0.150146 |
| 0.441719 | 1.00E-23 | -0.02454 | 0.59683  | 0.027855 | 0.54821  | 0.102521 | 0.02673  | -0.03018 |
| 0.106584 | 0.02124  | -0.15872 | 0.00058  | -0.15931 | 0.00055  | 0.096648 | 0.03681  | -0.01667 |
| 0.106874 | 0.02089  | -0.1597  | 0.00053  | -0.15755 | 0.00063  | -0.09717 | 0.0358   | -0.23836 |
| 0.175381 | 0.00014  | -0.18142 | 8.06E-05 | -0.08316 | 0.07258  | -0.06214 | 0.18005  | -0.15285 |
| 0.023907 | 0.60633  | -0.29699 | 5.79E-11 | -0.28761 | 2.41E-10 | -0.15408 | 0.00084  | -0.24644 |
| 0.261481 | 9.72E-09 | -0.11496 | 0.01292  | -0.14803 | 0.00134  | 0.018139 | 0.69582  | -0.29403 |
| -0.39942 | 2.59E-19 | -0.21543 | 2.62E-06 | -0.29997 | 3.64E-11 | -0.04745 | 0.30617  | 0.116793 |
| 0.106565 | 0.02126  | -0.07795 | 0.09246  | 0.18452  | 6.04E-05 | -0.18582 | 5.35E-05 | -0.24593 |
| -0.10068 | 0.02959  | -0.01722 | 0.71058  | 0.008564 | 0.85356  | -0.059   | 0.20313  | 0.044479 |
| -0.10812 | 0.01944  | -0.29753 | 5.32E-11 | -0.47553 | 1.01E-27 | -0.07827 | 0.09113  | -0.21041 |
| 0.184665 | 5.96E-05 | 0.135103 | 0.00344  | 0.278973 | 8.53E-10 | -0.03663 | 0.42969  | -0.15741 |
| 0.364024 | 4.44E-16 | 0.317493 | 2.14E-12 | 0.235077 | 2.77E-07 | 0.255067 | 2.27E-08 | 0.222435 |
| 0.657778 | 3.27E-59 | 0.390869 | 1.70E-18 | 0.355955 | 2.14E-15 | 0.242125 | 1.17E-07 | 0.241343 |
| 0.42959  | 2.14E-22 | 0.190014 | 3.58E-05 | 0.291514 | 1.34E-10 | 0.202762 | 1.01E-05 | 0.168898 |
| 0.055802 | 0.22874  | -0.34326 | 2.33E-14 | -0.15639 | 0.0007   | -0.12845 | 0.00544  | -0.51585 |
| 0.427529 | 3.56E-22 | 0.278892 | 8.63E-10 | 0.074521 | 0.10776  | 0.205372 | 7.68E-06 | 0.370914 |
| 0.314623 | 3.44E-12 | 0.188033 | 4.33E-05 | 0.117921 | 0.01076  | 0.122623 | 0.00798  | 0.242123 |
| 0.119074 | 0.01001  | 0.124018 | 0.00729  | 0.01774  | 0.70219  | 0.072802 | 0.11615  | 0.024964 |
| 0.156163 | 0.00071  | -0.0961  | 0.0379   | -0.2055  | 7.57E-06 | 0.065414 | 0.15815  | 0.115575 |
| 0.388314 | 2.95E-18 | 0.13319  | 0.00393  | -0.00917 | 0.84341  | 0.158918 | 0.00057  | 0.084459 |
| 0.640074 | 3.43E-55 | 0.460013 | 7.83E-26 | 0.319009 | 1.66E-12 | 0.296102 | 6.64E-11 | 0.249361 |
| 0.701554 | 1.99E-70 | 0.471515 | 3.17E-27 | 0.570158 | 1.29E-41 | 0.259003 | 1.35E-08 | 0.189929 |
| 0.326542 | 4.59E-13 | -0.09942 | 0.03172  | 0.093215 | 0.04407  | 0.089774 | 0.05253  | -0.0436  |
| 0.426619 | 4.45E-22 | 0.328529 | 3.25E-13 | 0.244055 | 9.25E-08 | 0.355251 | 2.45E-15 | 0.27818  |
| 0.403212 | 1.10E-19 | -0.07437 | 0.10846  | 0.08647  | 0.06188  | 0.129539 | 0.00505  | -0.09768 |
| 0.295455 | 7.33E-11 | -0.03534 | 0.44614  | -0.0263  | 0.57083  | -0.00276 | 0.95255  | -0.16931 |
| 0.497209 | 1.56E-30 | 0.133031 | 0.00398  | 0.114597 | 0.01321  | 0.280696 | 6.65E-10 | 0.191821 |
| 0.434444 | 6.39E-23 | 0.009232 | 0.84228  | 0.082293 | 0.07563  | 0.178603 | 0.0001   | 0.048153 |
| 0.45105  | 8.77E-25 | 0.103198 | 0.02574  | 0.046046 | 0.32075  | 0.237344 | 2.11E-07 | 0.153214 |
| 0.148497 | 0.00129  | -0.12175 | 0.00844  | -0.00741 | 0.87306  | -0.04709 | 0.30993  | -0.26699 |
| -0.05089 | 0.27244  | -0.33136 | 1.98E-13 | -0.41047 | 2.09E-20 | -0.13525 | 0.00341  | -0.35393 |
| 0.560276 | 5.97E-40 | 0.180128 | 9.07E-05 | 0.19178  | 3.02E-05 | 0.206538 | 6.80E-06 | 0.003878 |
| 0.497233 | 1.55E-30 | 0.029873 | 0.51959  | 0.019227 | 0.67856  | 0.188644 | 4.09E-05 | 0.093109 |
| 0.462856 | 3.59E-26 | -0.05422 | 0.24224  | 0.085069 | 0.06624  | 0.11869  | 0.01025  | -0.08655 |
| 0.3404   | 3.93E-14 | 0.058784 | 0.20479  | 0.009308 | 0.841    | 0.171116 | 0.0002   | 0.073476 |
| 0.177067 | 0.00012  | -0.12322 | 0.00768  | -0.00123 | 0.97885  | 0.049081 | 0.28985  | -0.0439  |
| 0.327828 | 3.67E-13 | 0.240786 | 1.39E-07 | 0.271987 | 2.30E-09 | 0.049395 | 0.28678  | 0.108271 |

|          |          |          |          |          |          |          |          |          |
|----------|----------|----------|----------|----------|----------|----------|----------|----------|
| -0.07172 | 0.12171  | -0.32453 | 6.49E-13 | -0.49434 | 3.79E-30 | -0.11586 | 0.01223  | -0.2738  |
| 0.562003 | 3.09E-40 | 0.237935 | 1.96E-07 | 0.111528 | 0.0159   | 0.365191 | 3.52E-16 | 0.311555 |
| -0.06817 | 0.14131  | -0.17723 | 0.00012  | -0.33893 | 5.13E-14 | -0.19111 | 3.22E-05 | -0.28848 |
| 0.459241 | 9.67E-26 | 0.200241 | 1.30E-05 | 0.048956 | 0.29109  | 0.217665 | 2.05E-06 | 0.073332 |
| 0.569451 | 1.71E-41 | 0.346238 | 1.34E-14 | 0.221628 | 1.32E-06 | 0.305141 | 1.61E-11 | 0.256359 |
| 0.299958 | 3.65E-11 | 0.125403 | 0.00666  | 0.198528 | 1.55E-05 | 0.112822 | 0.01471  | 0.091419 |
| 0.406161 | 5.63E-20 | 0.05604  | 0.22677  | -0.02454 | 0.59686  | 0.442171 | 8.94E-24 | 0.179637 |
| -0.09133 | 0.04856  | 0.041504 | 0.37085  | -0.09691 | 0.0363   | 0.014665 | 0.75194  | 0.008445 |
| 0.349045 | 7.95E-15 | -0.18224 | 7.47E-05 | -0.07634 | 0.09939  | 0.051358 | 0.26803  | 0.029444 |
| 0.108804 | 0.01868  | -0.30432 | 1.83E-11 | -0.1992  | 1.45E-05 | -0.02479 | 0.59307  | -0.13186 |
| 0.487255 | 3.23E-29 | -0.02177 | 0.63894  | -0.03226 | 0.48674  | 0.227854 | 6.48E-07 | 0.052207 |
| 0.493448 | 4.97E-30 | 0.252198 | 3.30E-08 | 0.413231 | 1.10E-20 | 0.139826 | 0.00246  | -0.05305 |
| 0.19996  | 1.34E-05 | -0.24554 | 7.68E-08 | 0.108657 | 0.01884  | -0.12918 | 0.00518  | -0.31427 |
| 0.092012 | 0.04689  | -0.24112 | 1.33E-07 | -0.34447 | 1.86E-14 | -0.11796 | 0.01074  | -0.16382 |
| -0.06924 | 0.13515  | -0.14974 | 0.00117  | -0.3415  | 3.21E-14 | -0.13714 | 0.00298  | -0.19761 |
| 0.379997 | 1.72E-17 | 0.34281  | 2.53E-14 | 0.323816 | 7.33E-13 | 0.385074 | 5.90E-18 | 0.264409 |
| 0.035477 | 0.44435  | -0.16593 | 0.00032  | -0.15776 | 0.00062  | -0.0919  | 0.04716  | -0.1637  |
| 0.254809 | 2.35E-08 | 0.069012 | 0.13645  | 0.093789 | 0.04278  | 0.297806 | 5.10E-11 | 0.194873 |
| -0.30627 | 1.34E-11 | -0.148   | 0.00134  | -0.07729 | 0.09526  | -0.20495 | 8.02E-06 | -0.20097 |
| 0.018793 | 0.68543  | -0.32809 | 3.51E-13 | -0.3746  | 5.27E-17 | -0.10229 | 0.02707  | -0.34829 |
| 0.442574 | 8.06E-24 | 0.148178 | 0.00132  | 0.077347 | 0.09502  | 0.189522 | 3.76E-05 | 0.116667 |
| 0.414992 | 7.26E-21 | -0.13537 | 0.00338  | -0.00332 | 0.94294  | 0.14438  | 0.00176  | 0.022875 |
| 0.467254 | 1.06E-26 | 0.088665 | 0.05553  | -0.03357 | 0.46922  | 0.23909  | 1.70E-07 | 0.206857 |
| 0.157938 | 0.00061  | -0.17941 | 9.68E-05 | -0.09354 | 0.04334  | 0.003484 | 0.94014  | -0.21581 |
| 0.042923 | 0.3547   | -0.21192 | 3.84E-06 | -0.18376 | 6.48E-05 | -0.11693 | 0.01145  | -0.28074 |
| 0.26215  | 8.88E-09 | 0.278531 | 9.09E-10 | 0.046816 | 0.31272  | 0.128935 | 0.00526  | 0.130837 |
| 0.193552 | 2.54E-05 | -0.34347 | 2.24E-14 | -0.17809 | 0.00011  | -0.04339 | 0.34946  | -0.23374 |
| 0.030414 | 0.51205  | -0.23462 | 2.92E-07 | -0.24465 | 8.58E-08 | 0.057437 | 0.21537  | -0.14761 |
| 0.19913  | 1.46E-05 | -0.06836 | 0.1402   | -0.03492 | 0.45149  | 0.140958 | 0.00226  | 0.1253   |
| -0.04121 | 0.3743   | -0.04193 | 0.36599  | 0.017909 | 0.69948  | -0.04288 | 0.35521  | -0.12751 |
| 0.152645 | 0.00094  | -0.10728 | 0.0204   | -0.03075 | 0.50745  | -0.07049 | 0.12821  | -0.20672 |
| 0.324289 | 6.76E-13 | -0.25443 | 2.47E-08 | -0.03344 | 0.47093  | -0.03613 | 0.43599  | -0.21369 |
| 0.543186 | 3.37E-37 | 0.306444 | 1.31E-11 | 0.22969  | 5.23E-07 | 0.323668 | 7.52E-13 | 0.348479 |
| 0.264098 | 6.83E-09 | -0.10781 | 0.01979  | -0.04888 | 0.29179  | 0.18085  | 8.49E-05 | 0.107484 |
| -0.32326 | 8.07E-13 | -0.04258 | 0.35854  | -0.07577 | 0.10199  | -0.13186 | 0.00431  | -0.01652 |
| 0.136743 | 0.00307  | -0.34    | 4.22E-14 | -0.22539 | 8.61E-07 | -0.05083 | 0.27294  | -0.20673 |
| 0.751303 | 5.84E-86 | 0.58688  | 1.45E-44 | 0.537172 | 2.87E-36 | 0.503652 | 2.09E-31 | 0.360454 |
| 0.131375 | 0.00446  | -0.2892  | 1.90E-10 | -0.16982 | 0.00023  | -0.0452  | 0.32968  | -0.26762 |
| 0.149897 | 0.00116  | -0.38787 | 3.25E-18 | -0.1448  | 0.00171  | -0.11196 | 0.0155   | -0.46142 |
| 0.626521 | 2.75E-52 | 0.52552  | 1.62E-34 | 0.398062 | 3.50E-19 | 0.429571 | 2.15E-22 | 0.410999 |
| 0.235936 | 2.50E-07 | -0.10351 | 0.02529  | 0.036675 | 0.42913  | 0.062309 | 0.17888  | -0.20812 |
| 0.33404  | 1.23E-13 | 0.192811 | 2.73E-05 | 0.098275 | 0.03374  | 0.188169 | 4.28E-05 | 0.090029 |
| 0.460429 | 6.99E-26 | 0.297015 | 5.76E-11 | 0.355353 | 2.40E-15 | 0.133822 | 0.00377  | 0.081856 |
| 0.597815 | 1.38E-46 | 0.262676 | 8.27E-09 | 0.21437  | 2.94E-06 | 0.334479 | 1.14E-13 | 0.136028 |
| 0.243979 | 9.34E-08 | -0.00069 | 0.9881   | 0.095105 | 0.03994  | 0.023255 | 0.61619  | -0.13203 |



|          |          |          |          |          |          |          |          |          |
|----------|----------|----------|----------|----------|----------|----------|----------|----------|
| 0.445632 | 3.65E-24 | 0.200206 | 1.31E-05 | 0.235944 | 2.49E-07 | 0.20275  | 1.01E-05 | 0.042545 |
| 0.003468 | 0.94042  | -0.14863 | 0.00128  | -0.18397 | 6.36E-05 | -0.18278 | 7.10E-05 | -0.19458 |
| 0.094154 | 0.04198  | -0.26096 | 1.04E-08 | -0.3798  | 1.79E-17 | 0.045958 | 0.32167  | -0.00844 |
| 0.186942 | 4.80E-05 | -0.31279 | 4.66E-12 | -0.1214  | 0.00864  | -0.03936 | 0.39613  | -0.17843 |
| 0.01061  | 0.81912  | -0.28159 | 5.84E-10 | -0.46304 | 3.41E-26 | -0.04391 | 0.34368  | -0.12244 |
| 0.099714 | 0.03121  | -0.47314 | 2.00E-27 | -0.38431 | 6.94E-18 | -0.131   | 0.00457  | -0.29044 |
| 0.538662 | 1.70E-36 | 0.087892 | 0.0577   | 0.149715 | 0.00117  | 0.204759 | 8.18E-06 | 0.076787 |
| 0.164715 | 0.00035  | -0.3029  | 2.30E-11 | -0.29843 | 4.63E-11 | 0.120039 | 0.00942  | -0.11315 |
| 0.071599 | 0.12232  | -0.44873 | 1.62E-24 | -0.4341  | 6.97E-23 | -0.13433 | 0.00363  | -0.23904 |
| 0.217659 | 2.05E-06 | -0.07733 | 0.0951   | 0.166248 | 0.00031  | -0.05582 | 0.22856  | -0.0728  |
| 0.605278 | 5.16E-48 | 0.242538 | 1.12E-07 | 0.175776 | 0.00013  | 0.324858 | 6.13E-13 | 0.105354 |
| 0.568022 | 2.99E-41 | 0.38589  | 4.96E-18 | 0.302188 | 2.57E-11 | 0.230895 | 4.54E-07 | 0.125996 |
| 0.491804 | 8.19E-30 | 0.162462 | 0.00042  | 0.141773 | 0.00213  | 0.299268 | 4.06E-11 | 0.232635 |
| 0.465736 | 1.61E-26 | 0.233533 | 3.33E-07 | 0.150525 | 0.0011   | 0.238687 | 1.79E-07 | 0.131051 |
| 0.401845 | 1.50E-19 | 0.031965 | 0.49076  | 0.108445 | 0.01907  | 0.064267 | 0.16558  | -0.0721  |
| 0.044417 | 0.33818  | -0.26554 | 5.61E-09 | -0.22164 | 1.32E-06 | -0.06464 | 0.16314  | -0.21488 |
| 0.355744 | 2.23E-15 | 0.03265  | 0.48152  | 0.019359 | 0.67648  | -0.00546 | 0.90639  | 0.027524 |
| 0.215165 | 2.70E-06 | -0.16621 | 0.00031  | -0.2459  | 7.34E-08 | 0.047026 | 0.31055  | 0.104499 |
| 0.17565  | 0.00014  | -0.35262 | 4.05E-15 | -0.21493 | 2.77E-06 | -0.03593 | 0.43853  | -0.31628 |
| 0.165901 | 0.00032  | -0.25057 | 4.06E-08 | -0.20382 | 9.02E-06 | 0.013133 | 0.77713  | -0.09915 |
| 0.440105 | 1.52E-23 | 0.150787 | 0.00108  | -0.04846 | 0.29604  | 0.29474  | 8.18E-11 | 0.251803 |
| 0.565253 | 8.80E-41 | 0.17495  | 0.00014  | 0.092551 | 0.04561  | 0.349713 | 7.01E-15 | 0.147225 |
| 0.504354 | 1.67E-31 | 0.192044 | 2.94E-05 | 0.08112  | 0.07991  | 0.259732 | 1.23E-08 | 0.194385 |
| 0.525687 | 1.53E-34 | 0.171653 | 0.00019  | 0.115993 | 0.01213  | 0.272008 | 2.30E-09 | 0.25327  |
| 0.353343 | 3.53E-15 | -0.16702 | 0.00029  | 0.051058 | 0.27084  | -0.05666 | 0.22167  | -0.25815 |
| 0.289738 | 1.75E-10 | -0.14681 | 0.00147  | -0.13277 | 0.00405  | 0.027023 | 0.56022  | -0.21145 |
| 0.384158 | 7.17E-18 | -0.06519 | 0.15957  | -0.00408 | 0.92998  | 0.156638 | 0.00068  | 0.078373 |
| 0.452973 | 5.25E-25 | 0.07644  | 0.09897  | 0.201645 | 1.13E-05 | 0.244586 | 8.66E-08 | -0.0137  |
| 0.208719 | 5.40E-06 | -0.11164 | 0.0158   | -0.29376 | 9.50E-11 | 0.111722 | 0.01572  | 0.028461 |
| 0.027463 | 0.55386  | -0.31589 | 2.79E-12 | -0.36823 | 1.92E-16 | -0.05587 | 0.22819  | -0.19156 |
| 0.597863 | 1.35E-46 | 0.469644 | 5.39E-27 | 0.330054 | 2.49E-13 | 0.377543 | 2.87E-17 | 0.355014 |
| 0.147746 | 0.00137  | -0.04327 | 0.35082  | 0.026186 | 0.57245  | 0.104943 | 0.02333  | 0.035736 |
| 0.223819 | 1.03E-06 | -0.10143 | 0.0284   | 0.054542 | 0.23944  | 0.108255 | 0.01928  | -0.03543 |
| 0.287606 | 2.41E-10 | -0.08152 | 0.07842  | -0.1996  | 1.39E-05 | 0.247939 | 5.68E-08 | -0.01385 |
| 0.577692 | 6.36E-43 | 0.34418  | 1.96E-14 | 0.457732 | 1.46E-25 | 0.316856 | 2.38E-12 | 0.20048  |
| 0.23614  | 2.44E-07 | 0.047168 | 0.30908  | 0.118761 | 0.01021  | 0.176194 | 0.00013  | 0.029852 |
| 0.412518 | 1.30E-20 | 0.075605 | 0.10272  | 0.086661 | 0.06131  | 0.076151 | 0.10026  | 0.112941 |
| 0.064913 | 0.16136  | -0.35626 | 2.02E-15 | -0.27017 | 2.96E-09 | -0.10408 | 0.0245   | -0.34359 |
| 0.590609 | 3.02E-45 | 0.131342 | 0.00447  | 0.204526 | 8.38E-06 | 0.238089 | 1.93E-07 | 0.056149 |
| 0.555045 | 4.32E-39 | 0.445995 | 3.32E-24 | 0.381738 | 1.20E-17 | 0.315823 | 2.82E-12 | 0.197065 |
| 0.408796 | 3.08E-20 | -0.00131 | 0.97754  | -0.09598 | 0.03814  | 0.068924 | 0.13695  | 0.03392  |
| 0.339464 | 4.65E-14 | -0.14013 | 0.0024   | -0.11156 | 0.01587  | 0.077673 | 0.09363  | -0.05593 |
| 0.594042 | 7.01E-46 | 0.300437 | 3.38E-11 | 0.233692 | 3.26E-07 | 0.238452 | 1.84E-07 | 0.188613 |
| 0.187602 | 4.51E-05 | 0.286448 | 2.86E-10 | 0.186173 | 5.17E-05 | 0.081317 | 0.07918  | 0.151618 |
| 0.459769 | 8.37E-26 | 0.023991 | 0.60506  | 0.132082 | 0.00425  | 0.12168  | 0.00848  | -0.07872 |

|          |          |          |          |          |          |          |          |          |
|----------|----------|----------|----------|----------|----------|----------|----------|----------|
| 0.440591 | 1.34E-23 | 0.100568 | 0.02978  | 0.026948 | 0.56131  | 0.106607 | 0.02121  | -0.11465 |
| 0.254407 | 2.47E-08 | -0.16684 | 0.00029  | -0.26157 | 9.60E-09 | 0.05775  | 0.21288  | -0.16806 |
| -0.0866  | 0.06151  | -0.061   | 0.18822  | -0.06336 | 0.17164  | 0.041572 | 0.37006  | 0.123522 |
| -0.19318 | 2.63E-05 | -0.03469 | 0.45453  | -0.03363 | 0.46846  | -0.00149 | 0.97435  | 0.177154 |
| 0.44117  | 1.16E-23 | 0.40663  | 5.06E-20 | 0.33692  | 7.36E-14 | 0.30614  | 1.37E-11 | 0.172787 |
| 0.430148 | 1.87E-22 | 0.451878 | 7.03E-25 | 0.452694 | 5.66E-25 | 0.288622 | 2.07E-10 | 0.27278  |
| 0.602745 | 1.59E-47 | 0.397083 | 4.35E-19 | 0.359683 | 1.04E-15 | 0.305912 | 1.42E-11 | 0.141452 |
| -0.25015 | 4.29E-08 | 0.123719 | 0.00743  | 0.076896 | 0.09697  | 0.045078 | 0.33103  | 0.175562 |
| 0.366109 | 2.93E-16 | -0.10946 | 0.01797  | -0.07471 | 0.10685  | 0.092508 | 0.04571  | 0.022267 |
| 0.391573 | 1.46E-18 | -0.01784 | 0.70055  | 0.023362 | 0.61457  | 0.140625 | 0.00232  | 0.105533 |
| 0.124117 | 0.00724  | -0.1171  | 0.01133  | -0.20404 | 8.82E-06 | -0.02788 | 0.5479   | -0.00063 |
| 0.192581 | 2.79E-05 | -0.24079 | 1.39E-07 | -0.14942 | 0.0012   | -0.00896 | 0.84691  | -0.24013 |
| 0.298308 | 4.72E-11 | -0.04156 | 0.37016  | -0.00983 | 0.83217  | 0.08941  | 0.0535   | -0.16598 |
| 0.100415 | 0.03003  | -0.1762  | 0.00013  | -0.20707 | 6.43E-06 | -0.06575 | 0.156    | -0.22941 |
| -0.06496 | 0.16106  | -0.44807 | 1.92E-24 | -0.28666 | 2.77E-10 | -0.1505  | 0.00111  | -0.4422  |
| 0.009972 | 0.82983  | -0.4508  | 9.37E-25 | -0.35003 | 6.61E-15 | 0.171072 | 0.0002   | -0.27745 |
| 0.211852 | 3.87E-06 | -0.14534 | 0.00164  | 0.072205 | 0.11918  | 0.028734 | 0.53565  | -0.19753 |
| 0.216426 | 2.35E-06 | -0.28221 | 5.33E-10 | -0.28163 | 5.80E-10 | 0.083707 | 0.07072  | -0.20238 |
| 0.722108 | 1.97E-76 | 0.444155 | 5.35E-24 | 0.346887 | 1.19E-14 | 0.425172 | 6.34E-22 | 0.39895  |
| 0.302619 | 2.40E-11 | 0.019268 | 0.67792  | -0.09771 | 0.03478  | -0.00488 | 0.91632  | -0.14826 |
| 0.547668 | 6.63E-38 | 0.268671 | 3.65E-09 | 0.140774 | 0.00229  | 0.30556  | 1.50E-11 | 0.135035 |
| 0.289034 | 1.94E-10 | -0.01936 | 0.67653  | -0.0508  | 0.27323  | 0.028536 | 0.53847  | -0.09182 |
| 0.674425 | 3.01E-63 | 0.354458 | 2.85E-15 | 0.37861  | 2.30E-17 | 0.411277 | 1.73E-20 | 0.360916 |
| 0.350799 | 5.71E-15 | 0.123941 | 0.00733  | -0.06963 | 0.13297  | 0.139836 | 0.00246  | 0.177077 |
| 0.233013 | 3.54E-07 | -0.1071  | 0.02061  | -0.15618 | 0.00071  | -0.05027 | 0.27827  | -0.15022 |
| 0.452612 | 5.78E-25 | 0.116964 | 0.01142  | 0.196326 | 1.93E-05 | 0.0797   | 0.08535  | -0.0265  |
| 0.065869 | 0.15527  | -0.41532 | 6.72E-21 | -0.34738 | 1.08E-14 | -0.14051 | 0.00234  | -0.38094 |
| 0.472783 | 2.21E-27 | 0.178384 | 0.00011  | 0.228837 | 5.78E-07 | 0.313888 | 3.89E-12 | 0.24046  |
| 0.294332 | 8.71E-11 | 0.156377 | 0.0007   | 0.049058 | 0.29008  | 0.144807 | 0.0017   | 0.199528 |
| 0.145592 | 0.00161  | -0.18887 | 4.00E-05 | -0.03355 | 0.46955  | -0.00936 | 0.84018  | -0.19468 |
| 0.2192   | 1.73E-06 | -0.16015 | 0.00051  | -0.24512 | 8.10E-08 | 0.075649 | 0.10252  | -0.17063 |
| 0.14666  | 0.00148  | -0.08591 | 0.06358  | -0.17416 | 0.00016  | 0.024429 | 0.59848  | -0.02875 |
| 0.224696 | 9.32E-07 | -0.00863 | 0.85249  | -0.20611 | 7.11E-06 | 0.165947 | 0.00032  | 0.122333 |
| 0.369058 | 1.62E-16 | 0.147701 | 0.00137  | 0.033552 | 0.46947  | 0.30074  | 3.23E-11 | 0.142754 |
| 0.319607 | 1.50E-12 | 0.059476 | 0.1995   | -0.06267 | 0.17638  | 0.186041 | 5.23E-05 | 0.155576 |
| 0.08911  | 0.05431  | -0.15966 | 0.00053  | -0.16807 | 0.00026  | -0.12782 | 0.00567  | -0.21665 |
| 0.085677 | 0.06432  | -0.07921 | 0.0873   | -0.32328 | 8.03E-13 | -0.00995 | 0.83024  | 0.097029 |
| 0.193758 | 2.49E-05 | 0.003062 | 0.94738  | -0.1532  | 0.0009   | 0.029115 | 0.53024  | -0.05747 |
| 0.531771 | 1.90E-35 | 0.31963  | 1.49E-12 | 0.274199 | 1.69E-09 | 0.414007 | 9.15E-21 | 0.329034 |
| 0.704576 | 2.81E-71 | 0.297335 | 5.49E-11 | 0.236427 | 2.35E-07 | 0.477837 | 5.17E-28 | 0.323215 |
| 0.363142 | 5.28E-16 | -0.05228 | 0.25955  | 0.003648 | 0.93733  | 0.161558 | 0.00046  | 0.058911 |
| 0.229515 | 5.34E-07 | -0.15239 | 0.00095  | -0.21372 | 3.16E-06 | 0.047312 | 0.30761  | -0.08049 |
| 0.298166 | 4.82E-11 | -0.06025 | 0.19368  | -0.14805 | 0.00133  | 0.061636 | 0.18363  | -0.12543 |
| 0.487004 | 3.48E-29 | 0.327119 | 4.15E-13 | 0.267298 | 4.41E-09 | 0.260975 | 1.04E-08 | 0.196128 |
| 0.31758  | 2.11E-12 | -0.14997 | 0.00115  | -0.11551 | 0.0125   | -0.02587 | 0.57707  | -0.11962 |

|          |          |          |          |          |          |          |          |          |
|----------|----------|----------|----------|----------|----------|----------|----------|----------|
| 0.127507 | 0.00579  | -0.28017 | 7.18E-10 | -0.22937 | 5.43E-07 | 0.028601 | 0.53753  | -0.00864 |
| 0.602447 | 1.81E-47 | 0.543049 | 3.54E-37 | 0.358014 | 1.44E-15 | 0.325041 | 5.94E-13 | 0.402104 |
| 0.29729  | 5.52E-11 | 0.01142  | 0.80557  | 0.062454 | 0.17787  | 0.197726 | 1.68E-05 | 0.229363 |
| 0.197186 | 1.77E-05 | -0.15667 | 0.00068  | -0.22744 | 6.79E-07 | 0.083685 | 0.0708   | -0.03984 |
| 0.340749 | 3.68E-14 | 0.351503 | 5.00E-15 | 0.298524 | 4.56E-11 | 0.155355 | 0.00076  | 0.082023 |
| 0.330774 | 2.19E-13 | 0.073548 | 0.11245  | 0.223023 | 1.13E-06 | 0.033589 | 0.46899  | 0.040325 |
| 0.745337 | 6.59E-84 | 0.677824 | 4.18E-64 | 0.563729 | 1.59E-40 | 0.45241  | 6.10E-25 | 0.38303  |
| 0.368874 | 1.69E-16 | 0.088833 | 0.05507  | 0.0025   | 0.95703  | 0.243817 | 9.53E-08 | 0.053313 |
| 0.217005 | 2.21E-06 | 0.034889 | 0.45195  | 0.128624 | 0.00537  | 0.11829  | 0.01052  | -0.14031 |
| -0.23424 | 3.06E-07 | -0.11745 | 0.01108  | -0.22943 | 5.39E-07 | -0.11043 | 0.01697  | -0.05775 |
| 0.323402 | 7.87E-13 | 0.134246 | 0.00366  | 0.002182 | 0.96249  | 0.234855 | 2.84E-07 | 0.107232 |
| 0.384713 | 6.37E-18 | 0.224632 | 9.38E-07 | 0.265053 | 6.00E-09 | 0.043768 | 0.3453   | 0.049007 |
| 0.530594 | 2.86E-35 | 0.247363 | 6.11E-08 | 0.18908  | 3.92E-05 | 0.352953 | 3.80E-15 | 0.310346 |
| -0.05276 | 0.25519  | 0.113449 | 0.01417  | 0.140312 | 0.00237  | 0.071272 | 0.12404  | 0.131166 |
| 0.079536 | 0.086    | -0.15028 | 0.00112  | 0.000489 | 0.99159  | -0.03798 | 0.41291  | -0.24821 |
| 0.440845 | 1.26E-23 | 0.182898 | 7.02E-05 | 0.131719 | 0.00435  | 0.171949 | 0.00019  | 0.102566 |
| 0.627254 | 1.93E-52 | 0.415627 | 6.25E-21 | 0.307372 | 1.12E-11 | 0.345717 | 1.48E-14 | 0.297846 |
| 0.345383 | 1.57E-14 | 0.09536  | 0.03941  | 0.102561 | 0.02667  | 0.194471 | 2.32E-05 | 0.186644 |
| 0.283561 | 4.38E-10 | -0.26528 | 5.81E-09 | -0.15717 | 0.00065  | 0.060474 | 0.19204  | -0.1811  |
| 0.11031  | 0.01709  | -0.24156 | 1.26E-07 | -0.17406 | 0.00016  | -0.05497 | 0.23576  | -0.16795 |
| 0.291388 | 1.36E-10 | -0.07045 | 0.12842  | -0.05625 | 0.22498  | 0.083597 | 0.0711   | -0.05567 |
| 0.327699 | 3.75E-13 | -0.00717 | 0.87721  | -0.04165 | 0.36913  | 0.118991 | 0.01006  | 0.038495 |
| 0.636949 | 1.65E-54 | 0.4047   | 7.86E-20 | 0.305643 | 1.48E-11 | 0.372847 | 7.54E-17 | 0.299778 |
| 0.544502 | 2.10E-37 | 0.277476 | 1.06E-09 | 0.072467 | 0.11784  | 0.372196 | 8.61E-17 | 0.310308 |
| 0.234173 | 3.08E-07 | 0.228058 | 6.33E-07 | 0.262093 | 8.95E-09 | 0.051688 | 0.26497  | -0.00826 |
| -0.09179 | 0.04743  | 0.026978 | 0.56087  | -0.04017 | 0.38645  | -0.05058 | 0.27531  | -0.06383 |
| 0.254365 | 2.49E-08 | 0.221809 | 1.29E-06 | 0.235623 | 2.59E-07 | 0.287482 | 2.45E-10 | 0.229815 |
| 0.357559 | 1.57E-15 | 0.041571 | 0.37007  | 0.02119  | 0.64786  | -0.03595 | 0.4383   | -0.01659 |
| 0.173031 | 0.00017  | 0.041298 | 0.37323  | -0.11152 | 0.01591  | 0.121575 | 0.00854  | 0.219508 |
| -0.27491 | 1.52E-09 | -0.15977 | 0.00053  | -0.09606 | 0.03797  | -0.18591 | 5.30E-05 | -0.10672 |
| 0.042218 | 0.36266  | -0.29665 | 6.10E-11 | -0.12077 | 0.00899  | -0.21551 | 2.60E-06 | -0.29581 |
| 0.394622 | 7.49E-19 | 0.047293 | 0.3078   | 0.207872 | 5.91E-06 | 0.064942 | 0.16117  | 0.176173 |
| 0.149136 | 0.00123  | -0.09684 | 0.03643  | 0.000385 | 0.99337  | -0.2195  | 1.67E-06 | -0.20853 |
| 0.21495  | 2.76E-06 | -0.15418 | 0.00083  | 0.010656 | 0.81834  | -0.07855 | 0.08997  | -0.20776 |
| 0.18566  | 5.42E-05 | 0.045865 | 0.32266  | 0.050947 | 0.27189  | -0.06983 | 0.13188  | -0.31821 |
| 0.259027 | 1.35E-08 | 0.067994 | 0.14234  | 0.245362 | 7.86E-08 | 0.205639 | 7.47E-06 | 0.066444 |
| 0.524861 | 2.03E-34 | 0.212152 | 3.74E-06 | 0.170921 | 0.00021  | 0.254802 | 2.35E-08 | 0.106077 |
| 0.064589 | 0.16347  | 0.003825 | 0.9343   | 0.033929 | 0.4645   | -0.10532 | 0.02283  | -0.17945 |
| 0.764483 | 1.04E-90 | 0.474939 | 1.19E-27 | 0.394386 | 7.88E-19 | 0.48774  | 2.79E-29 | 0.45888  |
| 0.683966 | 1.10E-65 | 0.519826 | 1.10E-33 | 0.501838 | 3.70E-31 | 0.332124 | 1.73E-13 | 0.306988 |
| 0.243539 | 9.86E-08 | -0.11113 | 0.01628  | 0.097234 | 0.03568  | -0.07745 | 0.09456  | -0.22421 |
| 0.532186 | 1.65E-35 | 0.134143 | 0.00368  | 0.234667 | 2.91E-07 | 0.084661 | 0.06756  | -0.05147 |
| 0.158052 | 0.00061  | -0.08614 | 0.06288  | -0.24353 | 9.87E-08 | 0.129694 | 0.005    | 0.118314 |
| -0.06237 | 0.17849  | -0.45626 | 2.17E-25 | -0.55246 | 1.13E-38 | -0.11457 | 0.01323  | -0.32788 |
| 0.013351 | 0.77354  | -0.42334 | 9.89E-22 | -0.50816 | 4.98E-32 | -0.1163  | 0.0119   | -0.33964 |

|          |          |          |          |          |          |          |          |          |
|----------|----------|----------|----------|----------|----------|----------|----------|----------|
| 0.168603 | 0.00025  | -0.16453 | 0.00036  | -0.349   | 8.02E-15 | 0.067431 | 0.14568  | -0.08252 |
| -0.0095  | 0.8377   | -0.33932 | 4.77E-14 | -0.45818 | 1.29E-25 | -0.06005 | 0.1952   | -0.1731  |
| -0.23077 | 4.61E-07 | -0.05939 | 0.20016  | -0.11193 | 0.01552  | -0.07265 | 0.11691  | 0.013223 |
| 0.096528 | 0.03705  | -0.2057  | 7.42E-06 | -0.11704 | 0.01137  | -0.07566 | 0.10249  | -0.4208  |
| 0.337451 | 6.69E-14 | -0.03435 | 0.45896  | -0.05362 | 0.24745  | 0.080355 | 0.08281  | -0.02343 |
| -0.01682 | 0.71698  | -0.34461 | 1.82E-14 | -0.28223 | 5.32E-10 | -0.19786 | 1.65E-05 | -0.31972 |
| 0.376852 | 3.31E-17 | -0.00517 | 0.91132  | -0.0335  | 0.47016  | 0.095873 | 0.03835  | -0.06194 |
| 0.538912 | 1.55E-36 | 0.314074 | 3.77E-12 | 0.156364 | 0.0007   | 0.220305 | 1.53E-06 | 0.180844 |
| -0.00677 | 0.88407  | -0.0535  | 0.24851  | -0.00096 | 0.98358  | 0.067538 | 0.14505  | 0.15205  |
| 0.408635 | 3.19E-20 | 0.22508  | 8.91E-07 | 0.259847 | 1.21E-08 | 0.11355  | 0.01408  | 0.064755 |
| 0.145519 | 0.00162  | -0.33993 | 4.27E-14 | -0.3459  | 1.43E-14 | -0.0281  | 0.5447   | -0.318   |
| 0.524535 | 2.27E-34 | 0.289945 | 1.70E-10 | 0.367088 | 2.41E-16 | 0.218549 | 1.86E-06 | 0.260306 |
| 0.359466 | 1.09E-15 | -0.12397 | 0.00732  | -0.09618 | 0.03774  | 0.100369 | 0.03011  | -0.02771 |
| 0.359974 | 9.83E-16 | 0.1438   | 0.00184  | -0.10808 | 0.01948  | 0.268122 | 3.94E-09 | 0.091386 |
| 0.307977 | 1.02E-11 | -0.02667 | 0.5653   | 0.053155 | 0.25162  | -0.00059 | 0.98978  | -0.18021 |
| 0.057907 | 0.21164  | -0.28828 | 2.18E-10 | -0.16296 | 0.00041  | -0.10371 | 0.02501  | -0.33544 |
| 0.663363 | 1.55E-60 | 0.383705 | 7.89E-18 | 0.326767 | 4.41E-13 | 0.380909 | 1.42E-17 | 0.212346 |
| -0.01293 | 0.78054  | -0.14868 | 0.00127  | -0.20907 | 5.20E-06 | -0.05826 | 0.20888  | -0.24133 |
| -0.0025  | 0.95697  | -0.25572 | 2.08E-08 | -0.12388 | 0.00736  | -0.16646 | 0.0003   | -0.30324 |
| 0.155353 | 0.00076  | 0.056324 | 0.22441  | 0.125549 | 0.0066   | -0.13586 | 0.00326  | -0.21901 |
| 0.121491 | 0.00858  | -0.3116  | 5.66E-12 | -0.26048 | 1.11E-08 | -0.0902  | 0.05142  | -0.25424 |
| 0.324184 | 6.88E-13 | 0.178304 | 0.00011  | -0.05348 | 0.24875  | 0.182752 | 7.12E-05 | 0.049891 |
| 0.523132 | 3.64E-34 | 0.397683 | 3.81E-19 | 0.233615 | 3.29E-07 | 0.363175 | 5.25E-16 | 0.189278 |
| 0.592036 | 1.65E-45 | 0.317537 | 2.12E-12 | 0.243563 | 9.83E-08 | 0.285121 | 3.48E-10 | 0.277348 |
| -0.02305 | 0.6193   | -0.15668 | 0.00068  | -0.2433  | 1.02E-07 | 0.034012 | 0.46341  | -0.18088 |
| 0.486634 | 3.89E-29 | 0.334482 | 1.14E-13 | 0.290819 | 1.49E-10 | 0.28162  | 5.81E-10 | 0.12226  |
| 0.364577 | 3.98E-16 | 0.011968 | 0.79645  | 0.043041 | 0.35337  | 0.158763 | 0.00057  | -0.02449 |
| 0.30394  | 1.95E-11 | -0.08545 | 0.06503  | -0.01288 | 0.78133  | 0.244199 | 9.08E-08 | 0.003189 |
| 0.126543 | 0.00618  | -0.2398  | 1.56E-07 | -0.27668 | 1.18E-09 | -0.07671 | 0.09777  | -0.3071  |
| 0.559036 | 9.58E-40 | 0.274001 | 1.73E-09 | 0.209945 | 4.74E-06 | 0.362974 | 5.46E-16 | 0.305715 |
| 0.387273 | 3.69E-18 | 0.17591  | 0.00013  | 0.171975 | 0.00019  | 0.098039 | 0.03417  | 0.083574 |
| 0.285866 | 3.12E-10 | 0.097248 | 0.03565  | 0.071364 | 0.12356  | 0.136231 | 0.00318  | -0.03203 |
| -0.01098 | 0.81298  | -0.36137 | 7.48E-16 | -0.17809 | 0.00011  | -0.30165 | 2.79E-11 | -0.42134 |
| 0.05158  | 0.26597  | -0.17771 | 0.00011  | -0.09833 | 0.03364  | -0.03158 | 0.49596  | -0.2111  |
| 0.248435 | 5.33E-08 | -0.01658 | 0.7208   | -0.10171 | 0.02796  | -0.01984 | 0.66886  | -0.18558 |
| 0.475511 | 1.01E-27 | 0.242858 | 1.07E-07 | 0.238926 | 1.74E-07 | 0.112531 | 0.01497  | 0.252077 |
| 0.542578 | 4.19E-37 | 0.259831 | 1.21E-08 | 0.316446 | 2.54E-12 | 0.316731 | 2.43E-12 | 0.296597 |
| 0.208863 | 5.32E-06 | -0.10815 | 0.0194   | -0.21022 | 4.61E-06 | -0.01852 | 0.68978  | -0.05595 |
| 0.273214 | 1.94E-09 | -0.01909 | 0.68076  | 0.152065 | 0.00098  | -0.0519  | 0.26297  | -0.24841 |
| 0.373004 | 7.30E-17 | 0.049546 | 0.2853   | 0.172786 | 0.00018  | 0.103584 | 0.02519  | -0.11315 |
| 0.038865 | 0.40207  | -0.23648 | 2.34E-07 | -0.21715 | 2.17E-06 | 0.035643 | 0.44223  | -0.19394 |
| 0.564531 | 1.16E-40 | 0.091186 | 0.04891  | 0.12104  | 0.00884  | 0.216595 | 2.31E-06 | 0.02843  |
| 0.01892  | 0.68342  | -0.1575  | 0.00064  | -0.35405 | 3.08E-15 | 0.089505 | 0.05325  | 0.154312 |
| 0.273611 | 1.83E-09 | 0.030155 | 0.51565  | -0.0604  | 0.1926   | 0.097335 | 0.03548  | -0.10122 |
| 0.3091   | 8.51E-12 | 0.062479 | 0.1777   | -0.13242 | 0.00415  | 0.286367 | 2.89E-10 | 0.186095 |

|          |          |          |          |          |          |          |          |          |
|----------|----------|----------|----------|----------|----------|----------|----------|----------|
| 1.29E-05 | 0.99978  | -0.45586 | 2.42E-25 | -0.32071 | 1.24E-12 | -0.21857 | 1.86E-06 | -0.27732 |
| 0.23915  | 1.69E-07 | -0.19917 | 1.45E-05 | 0.089622 | 0.05294  | -0.06696 | 0.14852  | -0.19887 |
| 0.250157 | 4.28E-08 | -0.07347 | 0.11282  | -0.06516 | 0.15978  | 0.205584 | 7.51E-06 | 0.058606 |
| -0.10159 | 0.02815  | 0.015898 | 0.73185  | -0.02858 | 0.53785  | -0.13506 | 0.00345  | 0.078699 |
| -0.0021  | 0.96396  | -0.22728 | 6.92E-07 | -0.12807 | 0.00558  | -0.02695 | 0.56135  | -0.13204 |
| -0.17642 | 0.00013  | -0.2768  | 1.17E-09 | -0.2943  | 8.75E-11 | -0.13316 | 0.00394  | -0.21419 |
| 0.731775 | 1.90E-79 | 0.590793 | 2.80E-45 | 0.537162 | 2.89E-36 | 0.381371 | 1.29E-17 | 0.271998 |
| 0.177451 | 0.00012  | -0.18786 | 4.40E-05 | -0.01179 | 0.79936  | -0.08495 | 0.06661  | -0.29162 |
| 0.45906  | 1.02E-25 | 0.170924 | 0.00021  | 0.130755 | 0.00465  | 0.321012 | 1.18E-12 | 0.166241 |
| 0.129983 | 0.0049   | -0.15822 | 0.0006   | -0.05303 | 0.25278  | -0.11044 | 0.01696  | -0.29721 |
| 0.133192 | 0.00393  | 0.000697 | 0.98801  | 0.031207 | 0.5011   | -0.14321 | 0.00192  | -0.22595 |
| 0.469112 | 6.26E-27 | 0.102455 | 0.02683  | 0.052474 | 0.25775  | 0.241726 | 1.23E-07 | 0.136906 |
| 0.637586 | 1.20E-54 | 0.49554  | 2.62E-30 | 0.353525 | 3.41E-15 | 0.415265 | 6.81E-21 | 0.361321 |
| 0.240438 | 1.45E-07 | 0.150871 | 0.00107  | 0.076747 | 0.09762  | 0.163204 | 0.0004   | -0.13923 |
| -0.38347 | 8.30E-18 | -0.10484 | 0.02347  | -0.28286 | 4.85E-10 | -0.0548  | 0.23726  | 0.048842 |
| 0.320324 | 1.33E-12 | 0.130229 | 0.00482  | 0.23888  | 1.75E-07 | 0.101016 | 0.02906  | -0.09941 |
| -0.08704 | 0.06017  | 0.158187 | 0.0006   | 0.206309 | 6.96E-06 | 0.016964 | 0.71463  | 0.053671 |
| 0.316159 | 2.67E-12 | -0.08638 | 0.06215  | -0.08166 | 0.07793  | 0.132953 | 0.004    | -0.02975 |
| -0.09991 | 0.03088  | -0.53737 | 2.68E-36 | -0.43273 | 9.83E-23 | -0.21402 | 3.06E-06 | -0.46224 |
| 0.28948  | 1.82E-10 | -0.05646 | 0.22333  | -0.22239 | 1.21E-06 | 0.097148 | 0.03584  | -0.04036 |
| 0.234364 | 3.01E-07 | -0.24263 | 1.10E-07 | -0.06991 | 0.13143  | -0.00871 | 0.85116  | -0.33455 |
| 0.527204 | 9.15E-35 | 0.172611 | 0.00018  | 0.162745 | 0.00041  | 0.243635 | 9.74E-08 | 0.163478 |
| 0.36529  | 3.45E-16 | 0.112936 | 0.01461  | 0.191743 | 3.03E-05 | 0.328897 | 3.05E-13 | 0.115024 |
| 0.727482 | 4.30E-78 | 0.543623 | 2.88E-37 | 0.519308 | 1.31E-33 | 0.287495 | 2.45E-10 | 0.2231   |
| -0.15745 | 0.00064  | 0.027616 | 0.55164  | 0.142351 | 0.00204  | -0.2067  | 6.68E-06 | -0.10669 |
| 0.496598 | 1.89E-30 | 0.214898 | 2.78E-06 | 0.160413 | 0.0005   | 0.290269 | 1.61E-10 | 0.310511 |
| 0.329355 | 2.81E-13 | 0.218464 | 1.88E-06 | 0.070289 | 0.12932  | 0.181698 | 7.85E-05 | 0.344745 |
| 0.127667 | 0.00573  | 0.05311  | 0.25202  | 0.067913 | 0.14282  | 0.071853 | 0.121    | 0.156493 |
| 0.334774 | 1.08E-13 | -0.0826  | 0.07454  | -0.02813 | 0.54424  | 0.011203 | 0.8092   | -0.12626 |
| 0.702996 | 7.84E-71 | 0.578227 | 5.12E-43 | 0.436998 | 3.36E-23 | 0.408372 | 3.39E-20 | 0.314282 |
| 0.090151 | 0.05154  | -0.28446 | 3.84E-10 | -0.19658 | 1.88E-05 | -0.13496 | 0.00348  | -0.38659 |
| 0.386469 | 4.38E-18 | 0.347156 | 1.13E-14 | 0.224151 | 9.91E-07 | 0.151143 | 0.00105  | 0.285099 |
| 0.437253 | 3.15E-23 | 0.061963 | 0.18131  | 0.08016  | 0.08356  | 0.069838 | 0.13181  | 0.007976 |
| 0.081675 | 0.07786  | -0.25448 | 2.45E-08 | -0.22474 | 9.27E-07 | -0.11644 | 0.0118   | -0.25988 |
| 0.311788 | 5.49E-12 | -0.10987 | 0.01754  | 0.06691  | 0.14883  | 0.070381 | 0.12882  | -0.08942 |
| 0.308766 | 8.98E-12 | 0.221965 | 1.27E-06 | 0.111591 | 0.01584  | 0.138885 | 0.00263  | 0.149688 |
| 0.683772 | 1.24E-65 | 0.41844  | 3.21E-21 | 0.501008 | 4.80E-31 | 0.297408 | 5.42E-11 | 0.278814 |
| 0.512031 | 1.43E-32 | 0.259678 | 1.24E-08 | 0.38316  | 8.86E-18 | 0.116717 | 0.0116   | -0.04806 |
| 0.478706 | 4.02E-28 | 0.218411 | 1.89E-06 | 0.188449 | 4.16E-05 | 0.132837 | 0.00403  | 0.058902 |
| 0.435348 | 5.09E-23 | 0.245414 | 7.80E-08 | 0.363513 | 4.91E-16 | 0.236573 | 2.31E-07 | -0.06968 |
| 0.401739 | 1.54E-19 | 0.181689 | 7.86E-05 | 0.319675 | 1.48E-12 | 0.114535 | 0.01326  | 0.100216 |
| 0.328621 | 3.20E-13 | -0.03552 | 0.44379  | 0.205104 | 7.89E-06 | 0.145485 | 0.00162  | -0.02453 |
| 0.458875 | 1.07E-25 | -0.12501 | 0.00683  | 0.005301 | 0.90905  | 0.126247 | 0.0063   | -0.01415 |
| 0.215654 | 2.56E-06 | -0.23174 | 4.12E-07 | -0.17341 | 0.00017  | -0.02548 | 0.58286  | -0.35202 |
| 0.305124 | 1.61E-11 | 0.047979 | 0.30083  | 0.12395  | 0.00732  | 0.163094 | 0.0004   | -0.08005 |

|          |          |          |          |          |          |          |          |          |
|----------|----------|----------|----------|----------|----------|----------|----------|----------|
| 0.434045 | 7.07E-23 | -0.01773 | 0.70229  | -0.02661 | 0.56621  | 0.17148  | 0.0002   | -0.00886 |
| 0.412079 | 1.44E-20 | -0.08034 | 0.08287  | -0.05821 | 0.20923  | 0.120854 | 0.00894  | -0.05417 |
| 0.155432 | 0.00075  | -0.19401 | 2.43E-05 | 0.083801 | 0.07041  | -0.08857 | 0.05578  | -0.15897 |
| 0.080101 | 0.08378  | -0.24901 | 4.96E-08 | -0.24228 | 1.15E-07 | -0.09406 | 0.04219  | -0.21402 |
| 0.382215 | 1.08E-17 | -0.04481 | 0.33397  | 0.113174 | 0.0144   | 0.063287 | 0.17214  | -0.1202  |
| -0.0051  | 0.91255  | -0.40715 | 4.50E-20 | -0.42398 | 8.48E-22 | -0.08722 | 0.05965  | -0.40522 |
| 0.322954 | 8.49E-13 | -0.08717 | 0.05981  | -0.14374 | 0.00185  | 0.189763 | 3.67E-05 | 0.070731 |
| 0.070276 | 0.1294   | -0.34047 | 3.88E-14 | -0.22884 | 5.78E-07 | -0.07634 | 0.09943  | -0.26212 |
| 0.216737 | 2.27E-06 | 0.017096 | 0.71252  | 0.081834 | 0.07728  | -0.0583  | 0.20851  | -0.33042 |
| 0.22958  | 5.30E-07 | -0.04616 | 0.31955  | -0.01645 | 0.72293  | 0.084983 | 0.06652  | -0.04144 |
| -0.02688 | 0.56232  | -0.2337  | 3.26E-07 | -0.27562 | 1.38E-09 | -0.03262 | 0.48192  | -0.1045  |
| 0.433533 | 8.03E-23 | -0.04793 | 0.30136  | 0.111418 | 0.016    | 0.211595 | 3.98E-06 | 0.074402 |
| 0.254335 | 2.50E-08 | 0.111629 | 0.0158   | 0.12615  | 0.00634  | 0.19391  | 2.45E-05 | 0.082571 |
| 0.596126 | 2.86E-46 | 0.188841 | 4.01E-05 | 0.152183 | 0.00097  | 0.166082 | 0.00031  | 0.048825 |
| 0.151407 | 0.00103  | -0.10092 | 0.02921  | -0.08701 | 0.06026  | 0.006578 | 0.88726  | -0.1353  |
| 0.555479 | 3.67E-39 | 0.146269 | 0.00153  | 0.02257  | 0.62661  | 0.251025 | 3.83E-08 | 0.075617 |
| 0.559243 | 8.86E-40 | 0.171334 | 0.0002   | 0.139708 | 0.00248  | 0.233083 | 3.51E-07 | 0.046713 |
| 0.438549 | 2.26E-23 | 0.07218  | 0.11931  | -0.04728 | 0.30794  | 0.262234 | 8.78E-09 | 0.386647 |
| 0.261817 | 9.29E-09 | 0.012555 | 0.7867   | -0.10926 | 0.01818  | 0.321978 | 1.00E-12 | 0.118062 |
| 0.501485 | 4.13E-31 | 0.282818 | 4.88E-10 | 0.10183  | 0.02778  | 0.268016 | 4.00E-09 | 0.189715 |
| -0.13822 | 0.00276  | 0.073277 | 0.11378  | -0.01468 | 0.75171  | -0.15707 | 0.00066  | -0.00088 |
| 0.158647 | 0.00058  | 0.209854 | 4.79E-06 | 0.208081 | 5.78E-06 | 0.252737 | 3.07E-08 | 0.256829 |
| 0.682028 | 3.51E-65 | 0.376231 | 3.77E-17 | 0.319795 | 1.45E-12 | 0.362294 | 6.24E-16 | 0.202682 |
| 0.212928 | 3.44E-06 | 0.069089 | 0.13601  | -0.10336 | 0.0255   | -0.07034 | 0.12907  | -0.14839 |
| 0.171835 | 0.00019  | -0.24837 | 5.38E-08 | -0.03502 | 0.45026  | -0.07938 | 0.08661  | -0.31969 |
| 0.314609 | 3.45E-12 | 0.203406 | 9.41E-06 | 0.091632 | 0.04781  | 0.044573 | 0.33649  | -0.07611 |
| 0.526023 | 1.37E-34 | 0.202276 | 1.06E-05 | 0.163343 | 0.00039  | 0.358788 | 1.24E-15 | 0.204275 |
| -0.10159 | 0.02816  | -0.10179 | 0.02784  | -0.01607 | 0.72913  | 0.003887 | 0.93324  | -0.02398 |
| 0.564678 | 1.10E-40 | 0.245897 | 7.35E-08 | 0.367392 | 2.27E-16 | 0.293437 | 9.99E-11 | 0.157697 |
| 0.226344 | 7.71E-07 | -0.21881 | 1.81E-06 | -0.18306 | 6.92E-05 | 0.047804 | 0.3026   | -0.02759 |
| 0.430977 | 1.52E-22 | 0.084162 | 0.0692   | 0.07234  | 0.11849  | 0.116512 | 0.01175  | 0.054138 |
| 0.550853 | 2.06E-38 | 0.161428 | 0.00046  | 0.300213 | 3.50E-11 | 0.122732 | 0.00793  | -0.1097  |
| 0.52489  | 2.01E-34 | 0.309396 | 8.11E-12 | 0.31282  | 4.64E-12 | 0.22647  | 7.60E-07 | 0.172941 |
| 0.085929 | 0.06354  | -0.20798 | 5.84E-06 | -0.14251 | 0.00202  | -0.07894 | 0.08836  | -0.28573 |
| 0.335377 | 9.71E-14 | 0.064896 | 0.16147  | 0.037322 | 0.42102  | 0.024469 | 0.59789  | -0.11591 |
| 0.258217 | 1.50E-08 | 0.131834 | 0.00432  | 0.231855 | 4.06E-07 | 0.158393 | 0.00059  | 0.084973 |
| 0.368022 | 2.00E-16 | -0.06464 | 0.16316  | -0.05868 | 0.20559  | 0.178216 | 0.00011  | 0.083518 |
| 0.438594 | 2.24E-23 | 0.155035 | 0.00077  | -0.01422 | 0.75917  | 0.249565 | 4.62E-08 | 0.345017 |
| 0.392753 | 1.13E-18 | 0.002503 | 0.95698  | -0.02042 | 0.65978  | 0.1      | 0.03072  | -0.03245 |
| 0.081872 | 0.07715  | -0.06669 | 0.15015  | -0.00377 | 0.93529  | -0.16018 | 0.00051  | -0.30094 |
| 0.276633 | 1.19E-09 | -0.15256 | 0.00094  | -0.10994 | 0.01747  | 0.059558 | 0.19888  | -0.10032 |
| 0.581773 | 1.20E-43 | 0.234135 | 3.10E-07 | 0.161925 | 0.00044  | 0.346554 | 1.27E-14 | 0.233362 |
| 0.295413 | 7.38E-11 | 0.079618 | 0.08567  | 0.122878 | 0.00785  | -0.00583 | 0.90006  | -0.05466 |
| 0.460676 | 6.53E-26 | 0.471304 | 3.37E-27 | 0.454084 | 3.90E-25 | 0.169113 | 0.00024  | 0.168025 |
| -0.17161 | 0.00019  | -0.06131 | 0.18597  | -0.01046 | 0.82156  | 0.036661 | 0.4293   | 0.186571 |

|          |          |          |          |          |          |          |          |          |
|----------|----------|----------|----------|----------|----------|----------|----------|----------|
| 0.176195 | 0.00013  | -0.06919 | 0.13545  | -0.24866 | 5.18E-08 | 0.076504 | 0.09868  | -0.13849 |
| 0.163329 | 0.00039  | -0.12829 | 0.0055   | -0.22789 | 6.45E-07 | 0.131282 | 0.00449  | 0.000223 |
| -0.09687 | 0.03638  | -0.11541 | 0.01257  | -0.12966 | 0.00501  | -0.06895 | 0.1368   | -0.00408 |
| 0.553412 | 7.95E-39 | 0.467611 | 9.55E-27 | 0.45044  | 1.03E-24 | 0.345512 | 1.54E-14 | 0.242158 |
| 0.383367 | 8.48E-18 | 0.498202 | 1.15E-30 | 0.439995 | 1.56E-23 | 0.226688 | 7.41E-07 | 0.254096 |
| 0.626702 | 2.52E-52 | 0.3517   | 4.82E-15 | 0.256473 | 1.89E-08 | 0.388595 | 2.78E-18 | 0.319232 |
| 0.211831 | 3.88E-06 | -0.17968 | 9.45E-05 | -0.09959 | 0.03141  | -0.03663 | 0.42967  | -0.30284 |
| 0.210545 | 4.45E-06 | 0.210569 | 4.44E-06 | 0.209661 | 4.89E-06 | 0.026183 | 0.57249  | -0.08611 |
| 0.263632 | 7.27E-09 | 0.142858 | 0.00197  | 0.157899 | 0.00062  | 0.103217 | 0.02571  | -0.04398 |
| 0.496623 | 1.88E-30 | 0.310768 | 6.49E-12 | 0.382235 | 1.08E-17 | 0.229028 | 5.65E-07 | 0.047578 |
| 0.267431 | 4.33E-09 | 0.049316 | 0.28755  | 0.063512 | 0.17062  | 0.002653 | 0.9544   | -0.15467 |
| 0.445922 | 3.38E-24 | 0.279555 | 7.84E-10 | 0.295494 | 7.29E-11 | 0.215531 | 2.59E-06 | 0.08449  |
| 0.148353 | 0.0013   | 0.170534 | 0.00021  | 0.139306 | 0.00255  | 0.0326   | 0.48219  | 0.001497 |
| -0.11657 | 0.0117   | 0.171758 | 0.00019  | 0.093285 | 0.04391  | 0.068592 | 0.13886  | 0.103492 |
| 0.435483 | 4.92E-23 | 0.068534 | 0.13919  | 0.078493 | 0.0902   | 0.121346 | 0.00866  | -0.04538 |
| 0.161364 | 0.00046  | 0.058548 | 0.20662  | -0.15233 | 0.00096  | 0.098771 | 0.03285  | 0.156399 |
| 0.541041 | 7.27E-37 | 0.362609 | 5.87E-16 | 0.198193 | 1.60E-05 | 0.362432 | 6.07E-16 | 0.36668  |
| 0.356438 | 1.95E-15 | -0.07628 | 0.09966  | -0.1065  | 0.02135  | 0.150372 | 0.00112  | 0.069874 |
| 0.058967 | 0.20338  | 0.036563 | 0.43053  | 0.092384 | 0.04601  | -0.04043 | 0.38332  | -0.13537 |
| 0.093149 | 0.04423  | 0.240454 | 1.44E-07 | 0.2017   | 1.12E-05 | -0.05825 | 0.20897  | -0.09698 |
| 0.231134 | 4.42E-07 | 0.17884  | 0.0001   | 0.05441  | 0.24059  | 0.183323 | 6.75E-05 | 0.077451 |
| -0.07913 | 0.08761  | -0.31362 | 4.06E-12 | -0.12484 | 0.00691  | 0.033467 | 0.4706   | -0.158   |
| 0.104087 | 0.02449  | 0.299403 | 3.98E-11 | 0.167127 | 0.00029  | 0.14483  | 0.0017   | 0.1487   |
| -0.19144 | 3.12E-05 | 0.023053 | 0.61925  | -0.00058 | 0.98998  | -0.10263 | 0.02657  | 0.018907 |
| 0.09857  | 0.03321  | 0.240955 | 1.36E-07 | 0.129402 | 0.0051   | 0.029936 | 0.51871  | 0.057168 |
| -0.20515 | 7.85E-06 | 0.063731 | 0.16915  | -0.06974 | 0.13233  | -0.08528 | 0.06556  | 0.062497 |
| 0.274166 | 1.69E-09 | 0.65818  | 2.63E-59 | 0.491501 | 8.98E-30 | 0.366677 | 2.62E-16 | 0.502288 |
| -0.01353 | 0.77057  | 0.296399 | 6.34E-11 | 0.108624 | 0.01887  | -0.01973 | 0.67057  | 0.123826 |
| 0.135423 | 0.00337  | 0.497547 | 1.41E-30 | 0.280974 | 6.39E-10 | 0.227929 | 6.42E-07 | 0.497816 |
| 0.015732 | 0.73455  | 0.330112 | 2.46E-13 | 0.202839 | 9.98E-06 | -0.00807 | 0.862    | 0.189639 |
| 0.407421 | 4.22E-20 | 0.690574 | 2.00E-67 | 0.551729 | 1.49E-38 | 0.42505  | 6.53E-22 | 0.476999 |
| 0.233067 | 3.52E-07 | 0.50857  | 4.37E-32 | 0.280055 | 7.30E-10 | 0.163844 | 0.00038  | 0.361886 |
| 0.23257  | 3.73E-07 | 0.485182 | 5.99E-29 | 0.187262 | 4.66E-05 | 0.155281 | 0.00076  | 0.315011 |
| 0.060286 | 0.19343  | -0.45948 | 9.05E-26 | -0.23622 | 2.41E-07 | -0.1631  | 0.0004   | -0.34992 |
| 0.31809  | 1.93E-12 | 0.643608 | 5.68E-56 | 0.407798 | 3.87E-20 | 0.222078 | 1.25E-06 | 0.341569 |
| -0.2948  | 8.11E-11 | -0.04889 | 0.29177  | -0.0873  | 0.05941  | -0.14434 | 0.00176  | -0.0689  |
| 0.12451  | 0.00706  | -0.33158 | 1.90E-13 | -0.02763 | 0.55139  | -0.14084 | 0.00228  | -0.30937 |
| 0.04458  | 0.33642  | -0.27496 | 1.51E-09 | -0.04015 | 0.38663  | 0.075025 | 0.1054   | -0.00394 |
| 0.234001 | 3.15E-07 | 0.624626 | 6.82E-52 | 0.460561 | 6.74E-26 | 0.218281 | 1.92E-06 | 0.292685 |
| 0.492159 | 7.36E-30 | 0.809316 | #####    | 0.631422 | 2.55E-53 | 0.391004 | 1.65E-18 | 0.537684 |
| 0.483192 | 1.08E-28 | 0.64284  | 8.41E-56 | 0.33449  | 1.14E-13 | 0.476768 | 7.05E-28 | 0.520077 |
| 0.392374 | 1.22E-18 | 0.786278 | 2.75E-99 | 0.521061 | 7.29E-34 | 0.328122 | 3.49E-13 | 0.476933 |
| 0.301088 | 3.05E-11 | 0.488121 | 2.49E-29 | 0.171957 | 0.00019  | 0.283709 | 4.28E-10 | 0.284103 |
| 0.459869 | 8.15E-26 | 0.704949 | 2.20E-71 | 0.4225   | 1.21E-21 | 0.283497 | 4.42E-10 | 0.517828 |
| 0.359527 | 1.07E-15 | 0.561886 | 3.23E-40 | 0.307871 | 1.04E-11 | 0.193959 | 2.44E-05 | 0.524072 |

|          |          |          |          |          |          |          |          |          |
|----------|----------|----------|----------|----------|----------|----------|----------|----------|
| 0.223299 | 1.09E-06 | 0.340569 | 3.81E-14 | 0.204997 | 7.98E-06 | 0.15456  | 0.0008   | 0.238791 |
| 0.04056  | 0.38184  | 0.226989 | 7.16E-07 | 0.027983 | 0.54637  | 0.113181 | 0.0144   | 0.324277 |
| 0.35375  | 3.26E-15 | 0.567231 | 4.08E-41 | 0.233163 | 3.48E-07 | 0.39726  | 4.18E-19 | 0.45111  |
| 0.021159 | 0.64833  | 0.26566  | 5.52E-09 | 0.088806 | 0.05514  | -0.00609 | 0.89561  | -0.00902 |
| 0.039652 | 0.3926   | 0.339298 | 4.79E-14 | 0.205341 | 7.70E-06 | 0.078056 | 0.09202  | 0.255614 |
| 0.170471 | 0.00021  | 0.456694 | 1.93E-25 | 0.308207 | 9.83E-12 | 0.1281   | 0.00557  | 0.154542 |
| 0.170262 | 0.00022  | 0.592481 | 1.37E-45 | 0.382229 | 1.08E-17 | 0.210697 | 4.38E-06 | 0.361141 |
| -0.20808 | 5.78E-06 | 0.169509 | 0.00023  | 0.091709 | 0.04762  | -0.03953 | 0.39408  | 0.045512 |
| 0.04857  | 0.29491  | 0.24275  | 1.09E-07 | 0.067273 | 0.14663  | 0.037173 | 0.42287  | 0.110216 |
| 0.521756 | 5.78E-34 | 0.550936 | 1.99E-38 | 0.29658  | 6.17E-11 | 0.386253 | 4.59E-18 | 0.518688 |
| 0.240286 | 1.47E-07 | 0.489772 | 1.52E-29 | 0.314486 | 3.52E-12 | 0.167747 | 0.00027  | 0.331379 |
| 0.313692 | 4.02E-12 | 0.660195 | 8.81E-60 | 0.391259 | 1.56E-18 | 0.304657 | 1.74E-11 | 0.488848 |
| -0.1011  | 0.02892  | 0.181793 | 7.78E-05 | 0.013398 | 0.77276  | 0.014965 | 0.74704  | 0.044539 |
| 0.238892 | 1.75E-07 | 0.54384  | 2.66E-37 | 0.41052  | 2.07E-20 | 0.124955 | 0.00686  | 0.274073 |
| -0.08223 | 0.07584  | 0.118219 | 0.01056  | -0.0085  | 0.85463  | -0.06987 | 0.13165  | 0.073216 |
| 0.387244 | 3.71E-18 | 0.735441 | 1.26E-80 | 0.590832 | 2.75E-45 | 0.300762 | 3.21E-11 | 0.487506 |
| 0.047505 | 0.30564  | 0.231904 | 4.04E-07 | 0.018612 | 0.6883   | 0.083456 | 0.07158  | 0.225879 |
| 0.015939 | 0.73119  | 0.245924 | 7.32E-08 | -0.03227 | 0.48663  | 0.159945 | 0.00052  | 0.321279 |
| 0.281323 | 6.07E-10 | 0.346719 | 1.23E-14 | 0.240736 | 1.39E-07 | 0.227274 | 6.93E-07 | 0.257738 |
| 0.340594 | 3.79E-14 | 0.637961 | 9.95E-55 | 0.355131 | 2.51E-15 | 0.403711 | 9.84E-20 | 0.561793 |
| 0.39176  | 1.40E-18 | 0.746963 | 1.84E-84 | 0.438414 | 2.34E-23 | 0.366892 | 2.51E-16 | 0.567945 |
| 0.411796 | 1.53E-20 | 0.562071 | 3.01E-40 | 0.349764 | 6.95E-15 | 0.388301 | 2.96E-18 | 0.381378 |
| 0.298586 | 4.52E-11 | 0.531149 | 2.36E-35 | 0.236685 | 2.28E-07 | 0.179349 | 9.74E-05 | 0.328584 |
| 0.010863 | 0.81488  | 0.411759 | 1.55E-20 | 0.251971 | 3.39E-08 | 0.161694 | 0.00045  | 0.366736 |
| 0.04141  | 0.37193  | 0.518872 | 1.51E-33 | 0.245435 | 7.78E-08 | 0.125568 | 0.00659  | 0.352548 |
| 0.082428 | 0.07515  | 0.553625 | 7.34E-39 | 0.306818 | 1.23E-11 | 0.143426 | 0.00189  | 0.328926 |
| -0.12559 | 0.00658  | 0.098481 | 0.03336  | 0.006606 | 0.88678  | -0.06655 | 0.15104  | 0.044251 |
| 0.290023 | 1.68E-10 | 0.668883 | 7.10E-62 | 0.446104 | 3.22E-24 | 0.405038 | 7.28E-20 | 0.541056 |
| -0.03997 | 0.38881  | -0.34642 | 1.30E-14 | -0.1321  | 0.00424  | -0.08057 | 0.082    | -0.23649 |
| 0.472418 | 2.46E-27 | 0.726138 | 1.13E-77 | 0.582372 | 9.42E-44 | 0.330879 | 2.15E-13 | 0.53849  |
| 0.62791  | 1.41E-52 | 0.648059 | 5.69E-57 | 0.407693 | 3.97E-20 | 0.389957 | 2.07E-18 | 0.419447 |
| 0.249431 | 4.70E-08 | 0.563318 | 1.86E-40 | 0.391738 | 1.41E-18 | 0.245237 | 7.98E-08 | 0.276546 |
| 0.380142 | 1.67E-17 | 0.432311 | 1.09E-22 | 0.355725 | 2.24E-15 | 0.184413 | 6.10E-05 | 0.207047 |
| 0.272601 | 2.11E-09 | 0.546021 | 1.21E-37 | 0.479732 | 2.98E-28 | 0.209055 | 5.21E-06 | 0.273729 |
| -0.1838  | 6.46E-05 | 0.148389 | 0.0013   | -0.07672 | 0.09776  | -0.09356 | 0.0433   | 0.034511 |
| 0.371835 | 9.26E-17 | 0.67518  | 1.94E-63 | 0.52079  | 7.99E-34 | 0.324218 | 6.84E-13 | 0.394759 |
| 0.386337 | 4.51E-18 | 0.646709 | 1.15E-56 | 0.642915 | 8.10E-56 | 0.3257   | 5.30E-13 | 0.429869 |
| 0.024414 | 0.59871  | 0.355972 | 2.13E-15 | 0.211582 | 3.98E-06 | 0.042061 | 0.36446  | 0.129599 |
| -0.00817 | 0.8602   | 0.22273  | 1.16E-06 | 0.001415 | 0.97567  | 0.028901 | 0.53328  | -0.01485 |
| -0.10865 | 0.01884  | -0.33703 | 7.22E-14 | -0.05852 | 0.20687  | -0.18391 | 6.39E-05 | -0.2787  |
| 0.047703 | 0.30362  | 0.228982 | 5.68E-07 | 0.161818 | 0.00045  | 0.049171 | 0.28897  | 0.317256 |
| -0.03362 | 0.46859  | 0.141333 | 0.0022   | 0.105796 | 0.02222  | 0.068822 | 0.13754  | 0.066537 |
| 0.633247 | 1.04E-53 | 0.655983 | 8.61E-59 | 0.426585 | 4.49E-22 | 0.427399 | 3.68E-22 | 0.412143 |
| -0.05032 | 0.27782  | -0.41975 | 2.35E-21 | -0.21434 | 2.95E-06 | -0.07107 | 0.12512  | -0.13688 |
| 0.558871 | 1.02E-39 | 0.757919 | 2.63E-88 | 0.523029 | 3.77E-34 | 0.422932 | 1.09E-21 | 0.668609 |



|          |          |          |          |          |          |          |          |          |
|----------|----------|----------|----------|----------|----------|----------|----------|----------|
| 0.220333 | 1.53E-06 | 0.449756 | 1.23E-24 | 0.281464 | 5.95E-10 | 0.292514 | 1.15E-10 | 0.274793 |
| 0.134577 | 0.00357  | 0.310703 | 6.56E-12 | 0.215544 | 2.59E-06 | 0.194834 | 2.24E-05 | 0.329768 |
| 0.410844 | 1.92E-20 | 0.738011 | 1.83E-81 | 0.673017 | 6.76E-63 | 0.347806 | 1.00E-14 | 0.520175 |
| 0.492958 | 5.77E-30 | 0.672317 | 1.01E-62 | 0.368968 | 1.65E-16 | 0.491205 | 9.83E-30 | 0.503809 |
| 0.564145 | 1.35E-40 | 0.785747 | 4.58E-99 | 0.518667 | 1.62E-33 | 0.411504 | 1.64E-20 | 0.574383 |
| 0.244821 | 8.41E-08 | 0.496479 | 1.96E-30 | 0.193267 | 2.61E-05 | 0.36177  | 6.92E-16 | 0.393362 |
| 0.432299 | 1.09E-22 | 0.558878 | 1.02E-39 | 0.214949 | 2.77E-06 | 0.365348 | 3.41E-16 | 0.375494 |
| 0.502178 | 3.33E-31 | 0.589422 | 4.99E-45 | 0.34766  | 1.03E-14 | 0.257137 | 1.73E-08 | 0.416476 |
| 0.243324 | 1.01E-07 | 0.611805 | 2.72E-49 | 0.475845 | 9.20E-28 | 0.325294 | 5.69E-13 | 0.453673 |
| 0.2913   | 1.38E-10 | 0.585681 | 2.39E-44 | 0.452673 | 5.69E-25 | 0.238132 | 1.92E-07 | 0.357203 |
| 0.420306 | 2.05E-21 | 0.645803 | 1.84E-56 | 0.318733 | 1.74E-12 | 0.321492 | 1.09E-12 | 0.412658 |
| 0.462839 | 3.60E-26 | 0.667676 | 1.40E-61 | 0.320017 | 1.40E-12 | 0.428944 | 2.51E-22 | 0.567947 |
| 0.329725 | 2.64E-13 | 0.447512 | 2.23E-24 | 0.122527 | 0.00803  | 0.315996 | 2.74E-12 | 0.30474  |
| -0.09347 | 0.0435   | 0.297466 | 5.38E-11 | 0.086651 | 0.06134  | 0.332177 | 1.71E-13 | 0.185264 |
| 0.038159 | 0.41067  | 0.383881 | 7.60E-18 | 0.179213 | 9.86E-05 | 0.150464 | 0.00111  | 0.323497 |
| -0.09382 | 0.04272  | 0.238942 | 1.74E-07 | 0.052413 | 0.25831  | -0.01605 | 0.72942  | 0.109557 |
| -0.18943 | 3.79E-05 | 0.161594 | 0.00046  | -0.06145 | 0.18498  | -0.06424 | 0.16574  | 0.079584 |
| 0.553303 | 8.28E-39 | 0.837402 | #####    | 0.560541 | 5.40E-40 | 0.438934 | 2.05E-23 | 0.557374 |
| 0.078662 | 0.08951  | 0.426058 | 5.11E-22 | 0.126491 | 0.0062   | 0.191159 | 3.21E-05 | 0.225036 |
| 0.302189 | 2.57E-11 | 0.56584  | 7.01E-41 | 0.344288 | 1.93E-14 | 0.368083 | 1.98E-16 | 0.425087 |
| 0.589951 | 4.00E-45 | 0.668395 | 9.35E-62 | 0.429339 | 2.28E-22 | 0.424251 | 7.93E-22 | 0.433957 |
| 0.165839 | 0.00032  | 0.276022 | 1.30E-09 | -0.03405 | 0.46294  | 0.127329 | 0.00586  | 0.050006 |
| 0.616089 | 3.79E-50 | 0.615199 | 5.72E-50 | 0.505345 | 1.22E-31 | 0.37608  | 3.88E-17 | 0.376888 |
| 0.100969 | 0.02913  | 0.312809 | 4.64E-12 | 0.132279 | 0.00419  | -0.02314 | 0.61796  | 0.040439 |
| 0.234227 | 3.06E-07 | 0.601963 | 2.24E-47 | 0.282278 | 5.28E-10 | 0.223598 | 1.06E-06 | 0.469777 |
| 0.519652 | 1.17E-33 | 0.606997 | 2.39E-48 | 0.346522 | 1.27E-14 | 0.426611 | 4.46E-22 | 0.479484 |
| 0.317955 | 1.98E-12 | 0.622201 | 2.16E-51 | 0.253629 | 2.74E-08 | 0.394993 | 6.90E-19 | 0.592622 |
| 0.292944 | 1.08E-10 | 0.440954 | 1.22E-23 | 0.289259 | 1.88E-10 | 0.13916  | 0.00258  | 0.232494 |
| 0.293805 | 9.44E-11 | 0.64224  | 1.14E-55 | 0.444812 | 4.51E-24 | 0.213976 | 3.07E-06 | 0.412278 |
| 0.384651 | 6.46E-18 | 0.54434  | 2.22E-37 | 0.165746 | 0.00032  | 0.365546 | 3.28E-16 | 0.460783 |
| 0.085538 | 0.06476  | 0.332553 | 1.60E-13 | 0.192781 | 2.74E-05 | 0.135191 | 0.00342  | 0.231259 |
| 0.0975   | 0.03517  | 0.359921 | 9.93E-16 | 0.224949 | 9.05E-07 | 0.193798 | 2.48E-05 | 0.215156 |
| 0.088266 | 0.05664  | 0.28714  | 2.58E-10 | 0.27285  | 2.04E-09 | -0.04453 | 0.33693  | -0.06494 |
| 0.513989 | 7.56E-33 | 0.730106 | 6.43E-79 | 0.55469  | 4.93E-39 | 0.487193 | 3.29E-29 | 0.618489 |
| 0.207113 | 6.40E-06 | 0.462418 | 4.05E-26 | 0.128297 | 0.00549  | 0.165462 | 0.00033  | 0.293516 |
| 0.037053 | 0.42438  | 0.308473 | 9.41E-12 | 0.111935 | 0.01552  | 0.04587  | 0.3226   | 0.131609 |
| 0.222389 | 1.21E-06 | 0.479905 | 2.83E-28 | 0.078511 | 0.09013  | 0.195095 | 2.18E-05 | 0.332091 |
| 0.487126 | 3.36E-29 | 0.655299 | 1.24E-58 | 0.59309  | 1.05E-45 | 0.306479 | 1.30E-11 | 0.41489  |
| 0.253799 | 2.68E-08 | 0.296365 | 6.37E-11 | 0.303679 | 2.03E-11 | 0.133576 | 0.00383  | 0.103739 |
| 0.027699 | 0.55044  | 0.213274 | 3.32E-06 | 0.025228 | 0.58657  | 0.022867 | 0.62209  | 0.046691 |
| 0.345599 | 1.51E-14 | 0.651003 | 1.22E-57 | 0.481809 | 1.62E-28 | 0.342935 | 2.47E-14 | 0.43031  |
| 0.192431 | 2.83E-05 | 0.396187 | 5.30E-19 | 0.024324 | 0.60005  | 0.19532  | 2.13E-05 | 0.35143  |
| 0.183723 | 6.51E-05 | 0.559133 | 9.23E-40 | 0.289719 | 1.75E-10 | 0.171716 | 0.00019  | 0.265883 |
| 0.271001 | 2.64E-09 | 0.286977 | 2.64E-10 | 0.287529 | 2.43E-10 | 0.084031 | 0.06964  | 0.077224 |
| -0.0883  | 0.05654  | 0.270957 | 2.66E-09 | 0.133431 | 0.00387  | 0.037704 | 0.41628  | 0.098811 |

|          |          |          |          |          |          |          |          |          |
|----------|----------|----------|----------|----------|----------|----------|----------|----------|
| 0.39261  | 1.16E-18 | 0.535848 | 4.58E-36 | 0.29187  | 1.27E-10 | 0.251904 | 3.42E-08 | 0.372775 |
| 0.062275 | 0.17912  | 0.329978 | 2.52E-13 | -0.04392 | 0.34357  | 0.289457 | 1.82E-10 | 0.354375 |
| 0.485424 | 5.57E-29 | 0.651399 | 9.88E-58 | 0.43812  | 2.52E-23 | 0.328621 | 3.20E-13 | 0.370538 |
| 0.205501 | 7.57E-06 | 0.402183 | 1.39E-19 | 0.233251 | 3.44E-07 | 0.216018 | 2.46E-06 | 0.447907 |
| 0.501565 | 4.03E-31 | 0.825924 | #####    | 0.710978 | 4.08E-73 | 0.406288 | 5.47E-20 | 0.614087 |
| 0.234695 | 2.90E-07 | 0.719318 | 1.38E-75 | 0.47811  | 4.78E-28 | 0.325992 | 5.04E-13 | 0.524987 |
| 0.455425 | 2.72E-25 | 0.742444 | 6.22E-83 | 0.505748 | 1.08E-31 | 0.40395  | 9.32E-20 | 0.539554 |
| 0.278542 | 9.08E-10 | 0.606717 | 2.71E-48 | 0.495505 | 2.65E-30 | 0.215392 | 2.63E-06 | 0.275143 |
| 0.195774 | 2.04E-05 | 0.351178 | 5.32E-15 | 0.15228  | 0.00096  | 0.07704  | 0.09634  | 0.114501 |
| 0.263047 | 7.87E-09 | 0.321453 | 1.10E-12 | 0.286958 | 2.65E-10 | 0.076806 | 0.09736  | 0.186151 |
| 0.137751 | 0.00285  | 0.473698 | 1.70E-27 | 0.137354 | 0.00294  | 0.232232 | 3.88E-07 | 0.32061  |
| 0.25537  | 2.18E-08 | 0.669448 | 5.16E-62 | 0.527158 | 9.29E-35 | 0.286432 | 2.87E-10 | 0.441205 |
| -0.01502 | 0.74608  | 0.497129 | 1.60E-30 | 0.214959 | 2.76E-06 | 0.127944 | 0.00562  | 0.246992 |
| 0.233031 | 3.53E-07 | 0.475647 | 9.74E-28 | 0.226391 | 7.67E-07 | 0.279864 | 7.50E-10 | 0.350868 |
| 0.328525 | 3.25E-13 | 0.445999 | 3.31E-24 | 0.138559 | 0.00269  | 0.232724 | 3.66E-07 | 0.324144 |
| 0.37112  | 1.07E-16 | 0.482535 | 1.31E-28 | 0.184215 | 6.21E-05 | 0.287042 | 2.62E-10 | 0.481641 |
| 0.00655  | 0.88774  | 0.279661 | 7.73E-10 | 0.000449 | 0.99229  | 0.069735 | 0.13238  | 0.273639 |
| 0.260497 | 1.11E-08 | 0.548695 | 4.55E-38 | 0.479407 | 3.28E-28 | 0.115468 | 0.01253  | 0.238317 |
| -0.13932 | 0.00255  | -0.54537 | 1.53E-37 | -0.32531 | 5.67E-13 | -0.15751 | 0.00064  | -0.28959 |
| 0.526262 | 1.26E-34 | 0.575538 | 1.52E-42 | 0.317494 | 2.14E-12 | 0.3366   | 7.80E-14 | 0.342228 |
| 0.279157 | 8.31E-10 | 0.49368  | 4.63E-30 | 0.150913 | 0.00107  | 0.227548 | 6.71E-07 | 0.454281 |
| 0.418238 | 3.37E-21 | 0.50007  | 6.43E-31 | 0.244952 | 8.27E-08 | 0.229612 | 5.28E-07 | 0.276978 |
| 0.373409 | 6.72E-17 | 0.735362 | 1.34E-80 | 0.498773 | 9.64E-31 | 0.314077 | 3.77E-12 | 0.569298 |
| 0.345216 | 1.62E-14 | 0.640879 | 2.28E-55 | 0.41192  | 1.49E-20 | 0.339223 | 4.86E-14 | 0.431549 |
| 0.527596 | 8.00E-35 | 0.779088 | 2.39E-96 | 0.566173 | 6.16E-41 | 0.388445 | 2.87E-18 | 0.508563 |
| 0.26985  | 3.10E-09 | 0.720534 | 5.93E-76 | 0.415791 | 6.01E-21 | 0.32958  | 2.70E-13 | 0.595148 |
| 0.458281 | 1.26E-25 | 0.729386 | 1.08E-78 | 0.495005 | 3.08E-30 | 0.266828 | 4.70E-09 | 0.383384 |
| -0.09569 | 0.03872  | 0.169546 | 0.00023  | 0.171939 | 0.00019  | -0.14462 | 0.00173  | 0.051636 |
| 0.398323 | 3.30E-19 | 0.569073 | 1.98E-41 | 0.479686 | 3.02E-28 | 0.301118 | 3.04E-11 | 0.370656 |
| 0.08531  | 0.06548  | 0.337498 | 6.64E-14 | 0.211822 | 3.88E-06 | 0.173472 | 0.00017  | 0.239637 |
| 0.53778  | 2.32E-36 | 0.68418  | 9.70E-66 | 0.388149 | 3.06E-18 | 0.411916 | 1.49E-20 | 0.499539 |
| 0.304079 | 1.90E-11 | 0.649041 | 3.41E-57 | 0.389544 | 2.26E-18 | 0.280667 | 6.68E-10 | 0.41075  |
| 0.367407 | 2.26E-16 | 0.487608 | 2.90E-29 | 0.167597 | 0.00027  | 0.314771 | 3.36E-12 | 0.450353 |
| 0.315322 | 3.07E-12 | 0.384225 | 7.07E-18 | 0.130333 | 0.00479  | 0.151386 | 0.00103  | 0.230418 |
| 0.265226 | 5.86E-09 | 0.610345 | 5.28E-49 | 0.302115 | 2.60E-11 | 0.327742 | 3.72E-13 | 0.548896 |
| 0.511678 | 1.60E-32 | 0.657648 | 3.51E-59 | 0.3661   | 2.94E-16 | 0.447026 | 2.53E-24 | 0.51681  |
| 0.486568 | 3.96E-29 | 0.642362 | 1.07E-55 | 0.352226 | 4.36E-15 | 0.366623 | 2.65E-16 | 0.503748 |
| 0.275348 | 1.43E-09 | 0.590666 | 2.95E-45 | 0.233778 | 3.23E-07 | 0.286557 | 2.81E-10 | 0.416454 |
| 0.255285 | 2.21E-08 | 0.551868 | 1.41E-38 | 0.330897 | 2.15E-13 | 0.14307  | 0.00194  | 0.171962 |
| 0.38201  | 1.13E-17 | 0.711606 | 2.68E-73 | 0.532316 | 1.57E-35 | 0.295182 | 7.65E-11 | 0.56914  |
| 0.125187 | 0.00675  | 0.314285 | 3.64E-12 | 0.231715 | 4.13E-07 | -0.02453 | 0.59693  | 0.004113 |
| -0.03982 | 0.39058  | 0.224276 | 9.77E-07 | 0.186222 | 5.14E-05 | 0.085975 | 0.0634   | 0.301611 |
| 0.372805 | 7.60E-17 | 0.767377 | 8.57E-92 | 0.556714 | 2.31E-39 | 0.283332 | 4.53E-10 | 0.457278 |
| 0.588252 | 8.17E-45 | 0.739921 | 4.30E-82 | 0.496061 | 2.23E-30 | 0.427901 | 3.25E-22 | 0.480715 |
| 0.360277 | 9.26E-16 | 0.617813 | 1.70E-50 | 0.337606 | 6.51E-14 | 0.352596 | 4.07E-15 | 0.489936 |

|          |          |          |          |          |          |          |          |          |
|----------|----------|----------|----------|----------|----------|----------|----------|----------|
| 0.357676 | 1.54E-15 | 0.609516 | 7.69E-49 | 0.357927 | 1.46E-15 | 0.233628 | 3.29E-07 | 0.340929 |
| 0.048978 | 0.29087  | 0.345152 | 1.64E-14 | 0.20788  | 5.90E-06 | 0.211479 | 4.02E-06 | 0.262215 |
| -0.10479 | 0.02353  | 0.188432 | 4.17E-05 | -0.07217 | 0.11936  | 0.069824 | 0.13189  | 0.078611 |
| 0.010583 | 0.81958  | 0.310596 | 6.67E-12 | 0.19877  | 1.51E-05 | -0.01724 | 0.71025  | 0.166905 |
| 0.435426 | 4.99E-23 | 0.648801 | 3.87E-57 | 0.512944 | 1.06E-32 | 0.204402 | 8.49E-06 | 0.326457 |
| -0.01649 | 0.72229  | 0.151208 | 0.00105  | 0.092782 | 0.04507  | -0.09207 | 0.04675  | 0.01575  |
| 0.598284 | 1.12E-46 | 0.710702 | 4.91E-73 | 0.351748 | 4.78E-15 | 0.496822 | 1.76E-30 | 0.589566 |
| 0.031374 | 0.49882  | 0.318842 | 1.70E-12 | 0.131366 | 0.00446  | 0.071444 | 0.12313  | 0.371907 |
| 0.466765 | 1.21E-26 | 0.623707 | 1.06E-51 | 0.39796  | 3.58E-19 | 0.394625 | 7.48E-19 | 0.499587 |
| 0.586162 | 1.96E-44 | 0.863722 | #####    | 0.599303 | 7.20E-47 | 0.477337 | 5.98E-28 | 0.578335 |
| 0.408833 | 3.05E-20 | 0.789248 | #####    | 0.526807 | 1.05E-34 | 0.399162 | 2.74E-19 | 0.541398 |
| 0.389268 | 2.40E-18 | 0.614724 | 7.12E-50 | 0.363189 | 5.23E-16 | 0.362669 | 5.80E-16 | 0.623018 |
| 0.11885  | 0.01015  | 0.281776 | 5.68E-10 | 0.10944  | 0.01799  | 0.063964 | 0.16759  | 0.153104 |
| -0.07954 | 0.08598  | 0.308023 | 1.01E-11 | 0.102548 | 0.02669  | -0.01027 | 0.82487  | 0.070994 |
| 0.340082 | 4.16E-14 | 0.673847 | 4.20E-63 | 0.420566 | 1.93E-21 | 0.335144 | 1.01E-13 | 0.536138 |
| 0.088884 | 0.05493  | 0.409837 | 2.42E-20 | 0.021274 | 0.64656  | 0.234151 | 3.09E-07 | 0.422099 |
| 0.359558 | 1.07E-15 | 0.534137 | 8.35E-36 | 0.44945  | 1.34E-24 | 0.253433 | 2.81E-08 | 0.424272 |
| 0.19421  | 2.38E-05 | 0.490832 | 1.10E-29 | 0.182651 | 7.19E-05 | 0.281573 | 5.85E-10 | 0.380217 |
| 0.201741 | 1.12E-05 | 0.374819 | 5.04E-17 | 0.329345 | 2.82E-13 | 0.107042 | 0.02069  | 0.098746 |
| 0.356009 | 2.12E-15 | 0.733008 | 7.66E-80 | 0.437149 | 3.23E-23 | 0.389706 | 2.19E-18 | 0.64653  |
| 0.04912  | 0.28947  | 0.181108 | 8.29E-05 | 0.146585 | 0.00149  | 0.067426 | 0.14571  | 0.096811 |
| 0.710306 | 6.40E-73 | 0.791181 | #####    | 0.557923 | 1.46E-39 | 0.531287 | 2.25E-35 | 0.654356 |
| 0.396152 | 5.34E-19 | 0.673125 | 6.35E-63 | 0.395939 | 5.60E-19 | 0.32271  | 8.85E-13 | 0.473252 |
| 0.294754 | 8.17E-11 | 0.421536 | 1.53E-21 | 0.08345  | 0.0716   | 0.241081 | 1.34E-07 | 0.307883 |
| 0.309935 | 7.43E-12 | 0.383058 | 9.05E-18 | 0.205019 | 7.96E-06 | 0.177876 | 0.00011  | 0.210198 |
| 0.041626 | 0.36944  | 0.35087  | 5.64E-15 | 0.148056 | 0.00133  | 0.022419 | 0.62892  | 0.133698 |
| 0.415598 | 6.30E-21 | 0.56677  | 4.88E-41 | 0.467513 | 9.82E-27 | 0.299385 | 3.99E-11 | 0.494476 |
| 0.268135 | 3.93E-09 | 0.302073 | 2.62E-11 | 0.234839 | 2.85E-07 | 0.032513 | 0.48336  | 0.065173 |
| 0.122038 | 0.00829  | 0.307517 | 1.10E-11 | 0.196395 | 1.92E-05 | 0.081938 | 0.07691  | 0.304454 |
| 0.36316  | 5.26E-16 | 0.652456 | 5.65E-58 | 0.582623 | 8.49E-44 | 0.257436 | 1.66E-08 | 0.368151 |
| 0.167874 | 0.00027  | 0.455568 | 2.62E-25 | 0.265051 | 6.00E-09 | 0.163567 | 0.00039  | 0.335015 |
| 0.442157 | 8.98E-24 | 0.592672 | 1.26E-45 | 0.404557 | 8.12E-20 | 0.304944 | 1.66E-11 | 0.421689 |
| 0.171066 | 0.0002   | 0.417406 | 4.10E-21 | 0.18796  | 4.36E-05 | 0.143728 | 0.00185  | 0.177719 |
| 0.456319 | 2.14E-25 | 0.682995 | 1.97E-65 | 0.421194 | 1.66E-21 | 0.394477 | 7.73E-19 | 0.515589 |
| 0.115017 | 0.01288  | 0.348563 | 8.70E-15 | 0.07412  | 0.10968  | 0.152008 | 0.00098  | 0.162319 |
| 0.615077 | 6.05E-50 | 0.760511 | 3.03E-89 | 0.566461 | 5.50E-41 | 0.536874 | 3.19E-36 | 0.571108 |
| 0.214984 | 2.75E-06 | 0.418958 | 2.84E-21 | 0.104332 | 0.02415  | 0.179026 | 0.0001   | 0.254798 |
| 0.287342 | 2.50E-10 | 0.603079 | 1.37E-47 | 0.33533  | 9.79E-14 | 0.277083 | 1.12E-09 | 0.39427  |
| 0.375474 | 4.40E-17 | 0.590238 | 3.54E-45 | 0.466289 | 1.38E-26 | 0.35845  | 1.32E-15 | 0.30256  |
| 0.065138 | 0.15991  | 0.122224 | 0.00819  | -0.07418 | 0.10936  | -0.02696 | 0.56121  | -0.02432 |
| 0.209245 | 5.11E-06 | 0.489438 | 1.68E-29 | 0.221119 | 1.40E-06 | 0.303578 | 2.06E-11 | 0.514586 |
| 0.20135  | 1.16E-05 | 0.431337 | 1.39E-22 | 0.081966 | 0.07681  | 0.30892  | 8.76E-12 | 0.485318 |
| 0.137837 | 0.00284  | 0.247206 | 6.23E-08 | 0.113963 | 0.01373  | 0.057983 | 0.21103  | 0.071949 |
| 0.123863 | 0.00737  | 0.477    | 6.59E-28 | 0.320541 | 1.28E-12 | 0.140422 | 0.00235  | 0.26471  |
| 0.180125 | 9.07E-05 | 0.433618 | 7.86E-23 | 0.245658 | 7.57E-08 | 0.253711 | 2.71E-08 | 0.294758 |

|          |          |          |          |          |          |          |          |          |
|----------|----------|----------|----------|----------|----------|----------|----------|----------|
| 0.403141 | 1.12E-19 | 0.691802 | 9.36E-68 | 0.374897 | 4.96E-17 | 0.354224 | 2.98E-15 | 0.525325 |
| 0.271469 | 2.47E-09 | 0.396489 | 4.96E-19 | 0.273407 | 1.89E-09 | 0.122531 | 0.00803  | 0.177295 |
| 0.279306 | 8.13E-10 | 0.58793  | 9.35E-45 | 0.36632  | 2.81E-16 | 0.088455 | 0.05611  | 0.281954 |
| -0.16001 | 0.00052  | 0.19503  | 2.19E-05 | 0.120733 | 0.00901  | -0.05278 | 0.25496  | 0.048228 |
| 0.389292 | 2.39E-18 | 0.746723 | 2.22E-84 | 0.498792 | 9.58E-31 | 0.398299 | 3.32E-19 | 0.49429  |
| -0.01658 | 0.72077  | 0.278001 | 9.81E-10 | 0.185889 | 5.31E-05 | 0.138302 | 0.00274  | 0.358609 |
| 0.518144 | 1.93E-33 | 0.704243 | 3.49E-71 | 0.620745 | 4.30E-51 | 0.368347 | 1.87E-16 | 0.461457 |
| 0.518179 | 1.90E-33 | 0.682228 | 3.11E-65 | 0.385927 | 4.92E-18 | 0.332788 | 1.54E-13 | 0.457671 |
| 0.371119 | 1.07E-16 | 0.703911 | 4.33E-71 | 0.614164 | 9.22E-50 | 0.353348 | 3.52E-15 | 0.544564 |
| 0.204883 | 8.08E-06 | 0.291905 | 1.26E-10 | 0.026371 | 0.56972  | 0.155028 | 0.00078  | 0.175634 |
| 0.405291 | 6.87E-20 | 0.725394 | 1.92E-77 | 0.581589 | 1.30E-43 | 0.357532 | 1.58E-15 | 0.502463 |
| 0.364775 | 3.82E-16 | 0.663831 | 1.19E-60 | 0.390704 | 1.76E-18 | 0.399127 | 2.76E-19 | 0.51603  |
| 0.211418 | 4.05E-06 | 0.466186 | 1.42E-26 | 0.132504 | 0.00413  | 0.243087 | 1.04E-07 | 0.331331 |
| 0.031845 | 0.49239  | -0.31516 | 3.15E-12 | -0.10021 | 0.03037  | 0.010119 | 0.82736  | -0.07579 |
| -0.05975 | 0.19742  | 0.26021  | 1.15E-08 | 0.247795 | 5.78E-08 | -0.06431 | 0.16528  | -0.0167  |
| 0.288017 | 2.26E-10 | 0.412415 | 1.33E-20 | 0.120974 | 0.00887  | 0.244114 | 9.18E-08 | 0.328257 |
| 0.277378 | 1.07E-09 | 0.5555   | 3.64E-39 | 0.411533 | 1.63E-20 | 0.250905 | 3.89E-08 | 0.329377 |
| 0.373695 | 6.34E-17 | 0.724129 | 4.72E-77 | 0.495596 | 2.57E-30 | 0.41587  | 5.90E-21 | 0.520494 |
| 0.328639 | 3.19E-13 | 0.615639 | 4.67E-50 | 0.300279 | 3.47E-11 | 0.299935 | 3.66E-11 | 0.358777 |
| 0.3396   | 4.54E-14 | 0.52392  | 2.79E-34 | 0.18619  | 5.16E-05 | 0.300708 | 3.24E-11 | 0.362656 |
| 0.351078 | 5.42E-15 | 0.622424 | 1.95E-51 | 0.48415  | 8.13E-29 | 0.299354 | 4.01E-11 | 0.445883 |
| 0.371854 | 9.23E-17 | 0.566305 | 5.85E-41 | 0.296057 | 6.68E-11 | 0.283638 | 4.33E-10 | 0.442931 |
| 0.407984 | 3.71E-20 | 0.823861 | #####    | 0.599285 | 7.26E-47 | 0.395464 | 6.22E-19 | 0.48411  |
| 0.547791 | 6.33E-38 | 0.796565 | #####    | 0.638874 | 6.29E-55 | 0.313994 | 3.82E-12 | 0.501771 |
| 0.567795 | 3.27E-41 | 0.597986 | 1.28E-46 | 0.393554 | 9.46E-19 | 0.348452 | 8.88E-15 | 0.470082 |
| 0.042028 | 0.36483  | 0.464589 | 2.22E-26 | 0.223595 | 1.06E-06 | 0.18684  | 4.85E-05 | 0.311865 |
| 0.457011 | 1.77E-25 | 0.73094  | 3.50E-79 | 0.493919 | 4.30E-30 | 0.419143 | 2.71E-21 | 0.60802  |
| 0.258645 | 1.42E-08 | 0.646086 | 1.59E-56 | 0.323442 | 7.81E-13 | 0.302307 | 2.52E-11 | 0.470001 |
| 0.063688 | 0.16943  | 0.470881 | 3.80E-27 | 0.216734 | 2.27E-06 | 0.183922 | 6.39E-05 | 0.349045 |
| 0.467345 | 1.03E-26 | 0.631714 | 2.21E-53 | 0.476822 | 6.94E-28 | 0.359852 | 1.01E-15 | 0.404269 |
| 0.388869 | 2.62E-18 | 0.51579  | 4.19E-33 | 0.259926 | 1.20E-08 | 0.349386 | 7.46E-15 | 0.488844 |
| 0.572211 | 5.73E-42 | 0.705639 | 1.40E-71 | 0.510158 | 2.62E-32 | 0.452005 | 6.80E-25 | 0.580661 |
| 0.232182 | 3.90E-07 | 0.527369 | 8.65E-35 | 0.435915 | 4.41E-23 | 0.173308 | 0.00017  | 0.274711 |
| 0.042969 | 0.35418  | 0.255607 | 2.12E-08 | -0.12018 | 0.00934  | 0.251167 | 3.76E-08 | 0.361948 |
| 0.337822 | 6.26E-14 | 0.475249 | 1.09E-27 | 0.271215 | 2.56E-09 | 0.285937 | 3.08E-10 | 0.364737 |
| 0.27193  | 2.32E-09 | 0.426866 | 4.19E-22 | 0.304176 | 1.87E-11 | 0.190987 | 3.26E-05 | 0.12059  |
| -0.0072  | 0.87664  | 0.369777 | 1.41E-16 | 0.07076  | 0.12677  | 0.163304 | 0.0004   | 0.333487 |
| 0.173305 | 0.00017  | 0.352597 | 4.07E-15 | 0.208318 | 5.64E-06 | 0.125336 | 0.00669  | 0.038236 |
| 0.506383 | 8.79E-32 | 0.769402 | 1.46E-92 | 0.594218 | 6.50E-46 | 0.472401 | 2.47E-27 | 0.603136 |
| 0.175233 | 0.00014  | 0.496607 | 1.88E-30 | 0.381502 | 1.26E-17 | 0.171852 | 0.00019  | 0.246564 |
| 0.020685 | 0.6557   | 0.256844 | 1.80E-08 | 0.089841 | 0.05236  | 0.0713   | 0.12389  | 0.198953 |
| 0.393153 | 1.03E-18 | 0.545937 | 1.25E-37 | 0.345021 | 1.68E-14 | 0.362548 | 5.94E-16 | 0.482577 |
| 0.373385 | 6.76E-17 | 0.542258 | 4.70E-37 | 0.367565 | 2.19E-16 | 0.226263 | 7.78E-07 | 0.335808 |
| 0.653816 | 2.74E-58 | 0.781921 | 1.71E-97 | 0.526826 | 1.04E-34 | 0.477141 | 6.33E-28 | 0.572848 |
| 0.165853 | 0.00032  | 0.368076 | 1.98E-16 | 0.306891 | 1.21E-11 | 0.089673 | 0.0528   | 0.078748 |

|          |          |          |          |          |          |          |          |          |
|----------|----------|----------|----------|----------|----------|----------|----------|----------|
| 0.227476 | 6.77E-07 | 0.414162 | 8.83E-21 | 0.091753 | 0.04752  | 0.169373 | 0.00024  | 0.227647 |
| 0.295679 | 7.08E-11 | 0.604883 | 6.15E-48 | 0.394382 | 7.89E-19 | 0.229208 | 5.54E-07 | 0.311946 |
| 0.215484 | 2.61E-06 | 0.483343 | 1.03E-28 | 0.381619 | 1.23E-17 | 0.28536  | 3.36E-10 | 0.40393  |
| 0.343028 | 2.43E-14 | 0.47223  | 2.59E-27 | 0.375401 | 4.47E-17 | 0.235529 | 2.62E-07 | 0.26143  |
| 0.579147 | 3.52E-43 | 0.724165 | 4.60E-77 | 0.612468 | 2.01E-49 | 0.382701 | 9.76E-18 | 0.425786 |
| 0.426817 | 4.24E-22 | 0.655243 | 1.28E-58 | 0.537315 | 2.73E-36 | 0.311992 | 5.31E-12 | 0.367472 |
| 0.130452 | 0.00475  | 0.390925 | 1.68E-18 | 0.272424 | 2.16E-09 | 0.244927 | 8.29E-08 | 0.374134 |
| 0.231506 | 4.23E-07 | 0.379206 | 2.03E-17 | 0.214123 | 3.03E-06 | 0.184457 | 6.07E-05 | 0.308688 |
| 0.252668 | 3.10E-08 | 0.413401 | 1.06E-20 | 0.294693 | 8.24E-11 | 0.033409 | 0.47138  | 0.092147 |
| 0.124055 | 0.00727  | 0.469318 | 5.91E-27 | 0.292819 | 1.10E-10 | 0.143368 | 0.0019   | 0.281385 |
| 0.282587 | 5.05E-10 | 0.495048 | 3.04E-30 | 0.286251 | 2.94E-10 | 0.277252 | 1.09E-09 | 0.458928 |
| 0.317254 | 2.22E-12 | 0.710319 | 6.34E-73 | 0.479506 | 3.18E-28 | 0.351733 | 4.79E-15 | 0.456171 |
| 0.248962 | 4.99E-08 | 0.63763  | 1.18E-54 | 0.477285 | 6.07E-28 | 0.27107  | 2.62E-09 | 0.403777 |
| 0.170186 | 0.00022  | 0.471315 | 3.36E-27 | 0.323963 | 7.15E-13 | 0.097118 | 0.0359   | 0.167471 |
| -0.0041  | 0.92963  | 0.34538  | 1.57E-14 | 0.158647 | 0.00058  | 0.059731 | 0.19758  | 0.122904 |
| 0.18849  | 4.15E-05 | 0.439094 | 1.97E-23 | 0.206501 | 6.82E-06 | 0.485848 | 4.91E-29 | 0.314871 |
| 0.005379 | 0.90771  | 0.217773 | 2.03E-06 | 0.146782 | 0.00147  | 0.009502 | 0.83773  | 0.150313 |
| 0.331547 | 1.91E-13 | 0.503234 | 2.38E-31 | 0.35545  | 2.36E-15 | 0.233479 | 3.35E-07 | 0.32414  |
| 0.519014 | 1.44E-33 | 0.768015 | 4.92E-92 | 0.445491 | 3.78E-24 | 0.398871 | 2.92E-19 | 0.526107 |
| 0.312474 | 4.91E-12 | 0.510407 | 2.42E-32 | 0.541922 | 5.31E-37 | 0.188772 | 4.04E-05 | 0.286529 |
| 0.568029 | 2.98E-41 | 0.635403 | 3.57E-54 | 0.545027 | 1.73E-37 | 0.366049 | 2.97E-16 | 0.461559 |
| 0.571655 | 7.15E-42 | 0.72389  | 5.59E-77 | 0.503148 | 2.45E-31 | 0.425382 | 6.02E-22 | 0.616522 |
| 0.387866 | 3.25E-18 | 0.529355 | 4.38E-35 | 0.42905  | 2.45E-22 | 0.345838 | 1.45E-14 | 0.36615  |
| 0.188119 | 4.30E-05 | 0.32773  | 3.73E-13 | 0.138103 | 0.00278  | 0.180843 | 8.49E-05 | 0.230844 |
| 0.294188 | 8.91E-11 | 0.474553 | 1.33E-27 | 0.281788 | 5.67E-10 | 0.105996 | 0.02197  | 0.197021 |
| 0.323606 | 7.60E-13 | 0.519605 | 1.19E-33 | 0.357514 | 1.58E-15 | 0.199518 | 1.40E-05 | 0.346279 |
| 0.510586 | 2.28E-32 | 0.696653 | 4.52E-69 | 0.619557 | 7.52E-51 | 0.406488 | 5.23E-20 | 0.45774  |
| 0.021156 | 0.64839  | 0.214858 | 2.79E-06 | 0.05464  | 0.2386   | 0.038292 | 0.40905  | 0.079031 |
| 0.473284 | 1.92E-27 | 0.645732 | 1.90E-56 | 0.429016 | 2.47E-22 | 0.364283 | 4.22E-16 | 0.546471 |
| 0.510794 | 2.13E-32 | 0.63706  | 1.56E-54 | 0.6005   | 4.27E-47 | 0.234548 | 2.95E-07 | 0.288113 |
| 0.34757  | 1.05E-14 | 0.383601 | 8.07E-18 | 0.248628 | 5.20E-08 | 0.148905 | 0.00125  | 0.197042 |
| 0.08293  | 0.07339  | 0.361913 | 6.73E-16 | 0.185152 | 5.69E-05 | 0.101905 | 0.02766  | 0.165114 |
| 0.002136 | 0.96329  | 0.185273 | 5.63E-05 | -0.05271 | 0.25564  | -0.02086 | 0.65298  | 0.027587 |
| 0.394691 | 7.37E-19 | 0.713768 | 6.23E-74 | 0.572221 | 5.71E-42 | 0.394843 | 7.13E-19 | 0.512851 |
| 0.135208 | 0.00342  | 0.366489 | 2.72E-16 | 0.225816 | 8.19E-07 | 0.113978 | 0.01372  | 0.217424 |
| 0.124543 | 0.00705  | 0.479905 | 2.83E-28 | 0.254177 | 2.55E-08 | 0.201236 | 1.18E-05 | 0.49137  |
| 0.361762 | 6.93E-16 | 0.503379 | 2.28E-31 | 0.335832 | 8.95E-14 | 0.156255 | 0.0007   | 0.378805 |
| -0.04161 | 0.36963  | 0.340893 | 3.59E-14 | 0.172769 | 0.00018  | 0.083625 | 0.071    | 0.232545 |
| 0.328045 | 3.53E-13 | 0.580355 | 2.15E-43 | 0.330274 | 2.39E-13 | 0.368081 | 1.98E-16 | 0.380139 |
| 0.235395 | 2.66E-07 | 0.389894 | 2.10E-18 | 0.221828 | 1.29E-06 | 0.138108 | 0.00278  | 0.239846 |
| 0.636913 | 1.68E-54 | 0.663952 | 1.12E-60 | 0.450412 | 1.04E-24 | 0.415861 | 5.92E-21 | 0.526605 |
| 0.272549 | 2.13E-09 | 0.260642 | 1.09E-08 | 0.184969 | 5.79E-05 | 0.153427 | 0.00088  | 0.167336 |
| 0.463199 | 3.26E-26 | 0.740051 | 3.89E-82 | 0.381212 | 1.34E-17 | 0.366353 | 2.79E-16 | 0.51134  |
| 0.419165 | 2.70E-21 | 0.663877 | 1.16E-60 | 0.504511 | 1.59E-31 | 0.266882 | 4.67E-09 | 0.400759 |
| 0.15575  | 0.00073  | 0.323634 | 7.56E-13 | 0.118097 | 0.01064  | 0.142897 | 0.00196  | 0.143331 |

|          |          |          |          |          |          |          |          |          |
|----------|----------|----------|----------|----------|----------|----------|----------|----------|
| -0.11094 | 0.01646  | 0.025156 | 0.58765  | 0.074513 | 0.1078   | -0.10608 | 0.02186  | -0.17139 |
| -0.25903 | 1.35E-08 | -0.19972 | 1.37E-05 | -0.1606  | 0.00049  | -0.06943 | 0.13408  | 0.080948 |
| 0.019714 | 0.67089  | 0.094616 | 0.04098  | 0.078801 | 0.08894  | -0.01889 | 0.68382  | 0.075617 |
| -0.00963 | 0.83551  | 0.092974 | 0.04463  | 0.036622 | 0.42978  | -0.02683 | 0.56296  | 0.1064   |
| 0.173549 | 0.00016  | 0.2954   | 7.39E-11 | 0.128122 | 0.00556  | 0.380777 | 1.46E-17 | 0.38502  |
| -0.18636 | 5.08E-05 | -0.16615 | 0.00031  | -0.09978 | 0.03109  | -0.31466 | 3.42E-12 | -0.3217  |
| 0.123525 | 0.00753  | 0.099016 | 0.03241  | 0.114676 | 0.01315  | 0.024932 | 0.59098  | -0.13034 |
| 0.08151  | 0.07847  | -0.16892 | 0.00025  | -0.18831 | 4.22E-05 | -0.07916 | 0.08749  | -0.20899 |
| 0.133714 | 0.00379  | 0.041662 | 0.36902  | 0.069651 | 0.13285  | -0.01369 | 0.768    | -0.1761  |
| -0.01829 | 0.69345  | -0.12637 | 0.00625  | 0.086272 | 0.06249  | -0.08643 | 0.06199  | -0.12105 |
| -0.03354 | 0.46968  | -0.07546 | 0.1034   | 0.004535 | 0.92214  | -0.20163 | 1.13E-05 | -0.33057 |
| 0.105188 | 0.023    | 0.017474 | 0.70644  | 0.109116 | 0.01834  | -0.02602 | 0.57484  | -0.12277 |
| 0.051634 | 0.26546  | 0.147705 | 0.00137  | 0.13945  | 0.00253  | 0.056579 | 0.22232  | 0.021866 |
| 0.122972 | 0.0078   | -0.18044 | 8.82E-05 | -0.13589 | 0.00326  | -0.01619 | 0.72719  | -0.1741  |
| -0.10382 | 0.02486  | -0.22305 | 1.12E-06 | -0.11861 | 0.01031  | 0.059427 | 0.19987  | -0.10979 |
| -0.14935 | 0.00121  | 0.026527 | 0.56744  | 0.02468  | 0.59473  | -0.08613 | 0.06292  | 0.007074 |
| 0.080008 | 0.08414  | 0.129945 | 0.00492  | 0.107016 | 0.02072  | 0.127382 | 0.00584  | 0.130441 |
| -0.08807 | 0.05719  | -0.13333 | 0.0039   | -0.05077 | 0.27357  | -0.05379 | 0.24601  | 0.111732 |
| -0.01519 | 0.74344  | 0.074767 | 0.1066   | 0.018096 | 0.69651  | 0.023472 | 0.61289  | -0.03392 |
| 0.097256 | 0.03563  | 0.032628 | 0.48181  | -0.02122 | 0.64743  | -0.0101  | 0.82763  | -0.08025 |
| -0.0113  | 0.80755  | -0.09856 | 0.03323  | 0.019041 | 0.68151  | -0.03219 | 0.48775  | 0.190271 |
| 0.070243 | 0.12958  | 0.079145 | 0.08756  | 0.168203 | 0.00026  | -0.11384 | 0.01384  | -0.21653 |
| -0.12402 | 0.00729  | 0.007514 | 0.87135  | 0.026856 | 0.56265  | -0.16301 | 0.0004   | -0.25791 |
| 0.048057 | 0.30004  | 0.169471 | 0.00023  | -0.16262 | 0.00042  | 0.203465 | 9.35E-06 | 0.350017 |
| 0.177764 | 0.00011  | 0.063135 | 0.17318  | 0.050152 | 0.27944  | 0.0558   | 0.22876  | 0.011434 |
| 0.207515 | 6.13E-06 | 0.064085 | 0.16679  | 0.014649 | 0.75221  | 0.053982 | 0.24431  | 0.252585 |
| 0.099229 | 0.03204  | 0.062498 | 0.17756  | 0.083958 | 0.06988  | 0.061837 | 0.1822   | 0.064468 |
| -0.04749 | 0.30576  | -0.30347 | 2.10E-11 | -0.19404 | 2.42E-05 | -0.1705  | 0.00021  | -0.37225 |
| 0.244515 | 8.73E-08 | 0.306959 | 1.20E-11 | 0.358134 | 1.41E-15 | 0.11396  | 0.01373  | 0.205952 |
| -0.0027  | 0.95355  | 0.073539 | 0.11249  | 0.091216 | 0.04884  | -0.07673 | 0.09768  | -0.07278 |
| 0.201036 | 1.20E-05 | 0.122478 | 0.00806  | 0.174979 | 0.00014  | 0.322827 | 8.68E-13 | 0.238182 |
| 0.04725  | 0.30825  | 0.047343 | 0.30729  | 0.10689  | 0.02087  | 0.043876 | 0.34411  | 0.023812 |
| -0.0219  | 0.63695  | -0.13983 | 0.00246  | -0.14515 | 0.00166  | -0.01645 | 0.72294  | -0.15511 |
| 0.212426 | 3.64E-06 | 0.128824 | 0.0053   | 0.126317 | 0.00627  | 0.141476 | 0.00218  | 0.070034 |
| 0.320146 | 1.37E-12 | 0.249455 | 4.68E-08 | 0.323761 | 7.40E-13 | 0.14501  | 0.00168  | 0.031984 |
| 0.267791 | 4.12E-09 | 0.321284 | 1.13E-12 | 0.336865 | 7.44E-14 | 0.207927 | 5.87E-06 | 0.176084 |
| 0.203229 | 9.58E-06 | 0.238979 | 1.73E-07 | 0.247275 | 6.18E-08 | 0.073859 | 0.11094  | 0.031468 |
| -0.05624 | 0.22514  | 0.074605 | 0.10737  | 0.030985 | 0.50416  | -0.02527 | 0.58595  | -0.01748 |
| -0.35481 | 2.67E-15 | -0.26645 | 4.95E-09 | -0.25521 | 2.23E-08 | -0.28333 | 4.53E-10 | -0.33797 |
| -0.04298 | 0.35401  | -0.02602 | 0.57488  | 0.003113 | 0.9465   | -0.10602 | 0.02194  | -0.06    |
| 0.000768 | 0.9868   | 0.084601 | 0.06776  | 0.12977  | 0.00497  | -0.04812 | 0.29945  | 0.002672 |
| -0.12483 | 0.00691  | -0.10747 | 0.02018  | -0.18383 | 6.44E-05 | -0.06536 | 0.15851  | -0.13356 |
| 0.091872 | 0.04723  | 0.030027 | 0.51743  | 0.017421 | 0.7073   | 0.073168 | 0.11432  | 0.018173 |
| 0.050351 | 0.27754  | 0.085005 | 0.06645  | 0.066789 | 0.14957  | 0.047672 | 0.30394  | 0.033549 |
| 0.020403 | 0.6601   | -0.01232 | 0.79062  | -0.02046 | 0.65927  | 0.025204 | 0.58693  | -0.05396 |

|          |          |          |          |          |          |          |          |          |
|----------|----------|----------|----------|----------|----------|----------|----------|----------|
| 0.142124 | 0.00208  | 0.061723 | 0.18301  | 0.02052  | 0.65827  | 0.093248 | 0.044    | 0.116543 |
| 0.072737 | 0.11648  | 0.030286 | 0.51384  | 0.092678 | 0.04531  | -0.07024 | 0.12962  | -0.12268 |
| 0.125708 | 0.00653  | 0.216405 | 2.36E-06 | 0.246522 | 6.79E-08 | 0.068036 | 0.14209  | 0.161178 |
| -0.14803 | 0.00134  | -0.09887 | 0.03267  | -0.18497 | 5.79E-05 | -0.08621 | 0.06268  | -0.14654 |
| 0.020546 | 0.65786  | 0.020599 | 0.65704  | 0.079656 | 0.08552  | -0.04142 | 0.37182  | -0.01641 |
| -0.04955 | 0.28527  | 0.031405 | 0.4984   | -0.00866 | 0.85199  | -0.06342 | 0.17128  | -0.05354 |
| -0.03891 | 0.40155  | 0.009189 | 0.843    | -0.07628 | 0.09968  | 0.00733  | 0.87447  | 0.008373 |
| 0.023205 | 0.61694  | 0.018407 | 0.69155  | 0.000222 | 0.99618  | 0.03771  | 0.4162   | 0.068676 |
| -0.04385 | 0.34435  | -0.01635 | 0.7246   | -0.0388  | 0.40284  | -0.01592 | 0.73147  | 0.041188 |
| -0.06652 | 0.15123  | -0.04875 | 0.29316  | -0.00088 | 0.98485  | -0.10994 | 0.01747  | -0.07083 |
| -0.08391 | 0.07004  | -0.02724 | 0.55705  | -0.0282  | 0.54319  | -0.07125 | 0.12416  | -0.05192 |
| 0.070888 | 0.12608  | 0.021992 | 0.63547  | 0.011315 | 0.80732  | -0.06139 | 0.18538  | -0.03726 |
| -0.02884 | 0.53408  | -0.08626 | 0.06253  | 0.037446 | 0.41948  | -0.02812 | 0.54446  | -0.04558 |
| -0.01874 | 0.68624  | 0.034495 | 0.45708  | 0.09312  | 0.04429  | -0.02562 | 0.58084  | -0.10493 |
| -0.01706 | 0.71315  | -0.07267 | 0.1168   | -0.06847 | 0.13957  | -0.01904 | 0.68154  | -0.06712 |
| -0.13557 | 0.00333  | -0.09605 | 0.03799  | -0.13964 | 0.00249  | -0.11133 | 0.01609  | -0.10366 |
| 0.007541 | 0.87089  | -0.03913 | 0.39888  | -0.07537 | 0.10378  | -0.1032  | 0.02574  | -0.05019 |
| -0.19007 | 3.56E-05 | -0.06721 | 0.147    | -0.04759 | 0.30473  | -0.10243 | 0.02687  | -0.07021 |
| -0.01057 | 0.81979  | 0.084833 | 0.067    | 0.149996 | 0.00115  | -0.04812 | 0.29945  | -0.03002 |
| -0.05696 | 0.21924  | 0.033792 | 0.4663   | 0.005773 | 0.90099  | -0.06612 | 0.15367  | -0.10182 |
| 0.158689 | 0.00058  | 0.121444 | 0.00861  | 0.181371 | 8.09E-05 | 0.08254  | 0.07475  | 0.102189 |
| 0.020654 | 0.65618  | -0.00924 | 0.84208  | 0.031528 | 0.49672  | 0.026326 | 0.57038  | -0.04029 |
| 0.089682 | 0.05278  | 0.069935 | 0.13127  | 0.027062 | 0.55966  | 0.044373 | 0.33866  | 0.07667  |
| 0.116746 | 0.01158  | 0.196777 | 1.84E-05 | 0.102915 | 0.02615  | 0.241393 | 1.29E-07 | 0.08382  |
| -0.08428 | 0.0688   | 0.000645 | 0.98891  | -0.03804 | 0.41212  | -0.01218 | 0.79289  | -0.05676 |
| 0.233884 | 3.19E-07 | 0.190244 | 3.50E-05 | 0.215349 | 2.65E-06 | 0.161436 | 0.00046  | 0.26999  |
| -0.03716 | 0.42303  | -0.02435 | 0.59966  | -0.02223 | 0.63184  | -0.08422 | 0.06902  | -0.01945 |
| 0.323394 | 7.88E-13 | 0.308894 | 8.79E-12 | 0.25219  | 3.30E-08 | 0.214474 | 2.91E-06 | 0.251039 |
| -0.07357 | 0.11236  | -0.04622 | 0.31895  | 0.002581 | 0.95565  | -0.07284 | 0.11597  | -0.09183 |
| 0.083068 | 0.07291  | 0.055005 | 0.23547  | -0.00749 | 0.87175  | 0.047982 | 0.3008   | 0.038889 |
| 0.060023 | 0.19539  | 0.029459 | 0.5254   | 0.012857 | 0.7817   | -0.05134 | 0.26817  | 0.008735 |
| -0.04713 | 0.30945  | -0.1119  | 0.01555  | -0.04816 | 0.29896  | 0.011032 | 0.81206  | -0.04762 |
| -0.10373 | 0.02499  | -0.08642 | 0.06204  | -0.03721 | 0.42236  | -0.07286 | 0.11585  | -0.04982 |
| -0.05541 | 0.23201  | 0.09086  | 0.04973  | -0.02383 | 0.60744  | -0.01253 | 0.78718  | 0.062276 |
| 0.056707 | 0.22128  | 0.053152 | 0.25165  | 0.029668 | 0.52246  | -0.0188  | 0.68532  | -0.0322  |
| -0.07833 | 0.09089  | -0.05089 | 0.2724   | -0.04176 | 0.36787  | -0.13072 | 0.00466  | -0.09874 |
| -0.08333 | 0.07201  | 0.007786 | 0.86673  | 0.018158 | 0.69553  | -0.0933  | 0.04389  | -0.0342  |
| 0.034657 | 0.45497  | 0.005549 | 0.90481  | 0.009843 | 0.832    | 0.057951 | 0.21129  | 0.020739 |
| -0.02973 | 0.52161  | 0.025376 | 0.58438  | -0.02183 | 0.63792  | 0.071161 | 0.12463  | 0.01842  |
| 0.015691 | 0.73521  | -0.00874 | 0.85054  | -0.0395  | 0.3944   | 0.007177 | 0.87707  | 0.007519 |
| -0.00404 | 0.93058  | 0.011261 | 0.80823  | -0.02979 | 0.52072  | 0.038913 | 0.40149  | -0.01214 |
| 0.11077  | 0.01663  | -0.02904 | 0.53136  | -0.0232  | 0.617    | 0.01639  | 0.72389  | -0.0168  |
| -0.04555 | 0.32598  | 0.228037 | 6.34E-07 | 0.087816 | 0.05792  | 0.054221 | 0.24222  | 0.02803  |
| 0.022819 | 0.62281  | -0.02854 | 0.53837  | -0.05687 | 0.21994  | -0.11856 | 0.01034  | -0.1254  |
| -0.10121 | 0.02875  | -0.03636 | 0.43312  | -0.07608 | 0.10059  | -0.11705 | 0.01136  | -0.0833  |

|          |          |          |          |          |          |          |          |          |
|----------|----------|----------|----------|----------|----------|----------|----------|----------|
| -0.1148  | 0.01305  | 0.027036 | 0.56003  | -0.07518 | 0.1047   | -0.18451 | 6.05E-05 | -0.25065 |
| 0.158994 | 0.00056  | 0.297873 | 5.05E-11 | 0.185666 | 5.42E-05 | 0.099369 | 0.0318   | 0.204615 |
| -0.01183 | 0.79881  | 0.058212 | 0.20924  | 0.108585 | 0.01892  | -0.07199 | 0.12027  | -0.05544 |
| 0.173462 | 0.00017  | -0.05977 | 0.19731  | 0.173665 | 0.00016  | -0.07763 | 0.09383  | 0.034534 |
| 0.040676 | 0.38047  | -0.00999 | 0.82945  | 0.05991  | 0.19623  | -0.03918 | 0.39829  | 0.002256 |
| -0.00189 | 0.96755  | -0.09591 | 0.03828  | -0.08103 | 0.08023  | -0.0935  | 0.04343  | -0.09121 |
| -0.08142 | 0.07878  | -0.23507 | 2.77E-07 | -0.2331  | 3.50E-07 | -0.27461 | 1.59E-09 | -0.16164 |
| 0.028423 | 0.54007  | 0.050918 | 0.27216  | 0.077428 | 0.09467  | -0.0399  | 0.38966  | -0.01185 |
| -0.12673 | 0.0061   | 0.015982 | 0.73049  | -0.02283 | 0.62266  | -0.06152 | 0.18443  | -0.01564 |
| 0.024997 | 0.59     | -0.07789 | 0.09271  | 0.177667 | 0.00011  | -0.06224 | 0.17936  | -0.1832  |
| -0.01028 | 0.82464  | -0.25933 | 1.29E-08 | -0.22254 | 1.19E-06 | 0.030886 | 0.50552  | 0.028034 |
| -0.00255 | 0.95619  | -0.00231 | 0.96035  | 0.034874 | 0.45215  | 0.080618 | 0.0818   | -0.02668 |
| -0.28602 | 3.04E-10 | -0.20379 | 9.05E-06 | -0.1063  | 0.02159  | -0.12273 | 0.00793  | -0.20619 |
| -0.27818 | 9.56E-10 | -0.20042 | 1.28E-05 | -0.37776 | 2.74E-17 | -0.11674 | 0.01158  | -0.15479 |
| -0.15427 | 0.00082  | -0.08044 | 0.0825   | -0.02142 | 0.64434  | -0.05794 | 0.2114   | 0.016342 |
| 0.061714 | 0.18307  | 0.082688 | 0.07423  | 0.093169 | 0.04418  | 0.089874 | 0.05227  | 0.261666 |
| -0.1204  | 0.00921  | -0.01285 | 0.78188  | -0.00996 | 0.82999  | -0.13553 | 0.00334  | -0.19388 |
| 0.140828 | 0.00229  | 0.074446 | 0.10812  | 0.19564  | 2.07E-05 | -0.14257 | 0.00201  | -0.15058 |
| 0.100354 | 0.03013  | -0.01239 | 0.7895   | -0.05627 | 0.22483  | 0.015282 | 0.74186  | 0.086952 |
| 0.173349 | 0.00017  | 0.045175 | 0.32999  | 0.253401 | 2.82E-08 | -0.02319 | 0.61717  | -0.03386 |
| 0.132304 | 0.00418  | 0.011262 | 0.80822  | -0.10442 | 0.02403  | 0.044244 | 0.34007  | 0.164193 |
| -0.02759 | 0.55198  | -0.12456 | 0.00704  | -0.16414 | 0.00037  | -0.03061 | 0.50932  | 0.14516  |
| 0.062214 | 0.17955  | 0.138806 | 0.00265  | 0.021334 | 0.64563  | 0.110894 | 0.01651  | 0.130208 |
| 0.044371 | 0.33868  | -0.04493 | 0.33258  | 0.038371 | 0.40807  | 0.252715 | 3.08E-08 | 0.159131 |
| 0.036012 | 0.43751  | 0.084282 | 0.0688   | 0.017916 | 0.69938  | 0.082533 | 0.07478  | 0.27366  |
| 0.222223 | 1.23E-06 | 0.14155  | 0.00217  | 0.194215 | 2.38E-05 | 0.088561 | 0.05582  | 0.138824 |
| -0.00951 | 0.83763  | 0.07605  | 0.10071  | 0.124127 | 0.00724  | -0.14223 | 0.00206  | -0.13612 |
| 0.006121 | 0.89505  | -0.13045 | 0.00475  | -0.11694 | 0.01144  | -0.0867  | 0.06118  | -0.11085 |
| -0.12757 | 0.00577  | 0.179512 | 9.59E-05 | 0.158227 | 0.0006   | -0.13762 | 0.00288  | -0.08116 |
| -0.06062 | 0.19094  | -0.22864 | 5.91E-07 | -0.1709  | 0.00021  | -0.23741 | 2.09E-07 | -0.28111 |
| 0.109727 | 0.01769  | 0.266376 | 5.01E-09 | 0.178983 | 0.0001   | 0.083811 | 0.07037  | 0.366719 |
| 0.037589 | 0.4177   | 0.122842 | 0.00787  | 0.153224 | 0.00089  | 0.113481 | 0.01414  | 0.01199  |
| -0.06839 | 0.14     | -0.10862 | 0.01888  | -0.06018 | 0.19425  | -0.07675 | 0.09762  | -0.1053  |
| -0.1186  | 0.01031  | -0.2079  | 5.89E-06 | -0.07406 | 0.10996  | -0.10591 | 0.02208  | -0.24952 |
| 0.036458 | 0.43186  | 0.003183 | 0.94531  | 0.08228  | 0.07568  | -0.00266 | 0.9543   | 0.066747 |
| 0.227509 | 6.74E-07 | -0.16984 | 0.00023  | -0.03708 | 0.42402  | 0.079368 | 0.08666  | -0.04674 |
| 0.035912 | 0.43879  | -0.09542 | 0.03928  | -0.03888 | 0.40183  | -0.19011 | 3.55E-05 | -0.25637 |
| -0.06996 | 0.13112  | 0.009671 | 0.83489  | -0.02464 | 0.59526  | -0.05262 | 0.25639  | -0.12369 |
| 0.222293 | 1.22E-06 | -0.0013  | 0.97765  | 0.209372 | 5.04E-06 | -0.05872 | 0.20525  | -0.06285 |
| -0.05438 | 0.24084  | -0.25376 | 2.69E-08 | -0.24735 | 6.12E-08 | 0.075176 | 0.1047   | -0.04348 |
| -0.09572 | 0.03866  | -0.17033 | 0.00022  | -0.26266 | 8.29E-09 | -0.03608 | 0.43659  | -0.27967 |
| -0.04221 | 0.36281  | -0.02121 | 0.64757  | 0.020858 | 0.65301  | -0.07686 | 0.09712  | -0.13914 |
| 0.219867 | 1.61E-06 | 0.126759 | 0.00609  | 0.123753 | 0.00742  | -0.03066 | 0.50864  | -0.05007 |
| 0.139441 | 0.00253  | 0.127655 | 0.00573  | -0.09659 | 0.03693  | 0.154323 | 0.00082  | 0.190604 |
| 0.040431 | 0.38335  | 0.062898 | 0.1748   | -0.05824 | 0.20904  | 0.008264 | 0.85863  | 0.106602 |



|          |          |          |          |          |          |          |          |          |
|----------|----------|----------|----------|----------|----------|----------|----------|----------|
| -0.0682  | 0.14116  | -0.03157 | 0.49618  | -0.05259 | 0.25671  | -0.07919 | 0.08738  | -0.13709 |
| 0.243128 | 1.04E-07 | 0.272021 | 2.29E-09 | 0.150961 | 0.00107  | 0.161687 | 0.00045  | 0.21514  |
| -0.14914 | 0.00123  | -0.26437 | 6.58E-09 | -0.17563 | 0.00014  | -0.01279 | 0.78288  | -0.02775 |
| 0.239581 | 1.61E-07 | 0.204089 | 8.77E-06 | 0.247278 | 6.17E-08 | -0.01793 | 0.69919  | -0.07868 |
| -0.14808 | 0.00133  | -0.08825 | 0.05668  | -0.12621 | 0.00631  | -0.17144 | 0.0002   | -0.14542 |
| -0.10201 | 0.0275   | -0.08108 | 0.08005  | 0.002328 | 0.95998  | -0.10438 | 0.02408  | -0.18568 |
| 0.049442 | 0.28632  | -0.00441 | 0.92431  | 0.08199  | 0.07672  | -0.11673 | 0.01159  | -0.2101  |
| 0.067441 | 0.14563  | 0.141878 | 0.00212  | 0.17743  | 0.00012  | -0.15403 | 0.00084  | -0.16894 |
| 0.040027 | 0.38813  | 0.071865 | 0.12094  | 0.124073 | 0.00727  | 0.038019 | 0.41239  | -0.08855 |
| 0.063605 | 0.16999  | 0.14118  | 0.00223  | 0.169638 | 0.00023  | 0.069517 | 0.1336   | -0.03042 |
| 0.138008 | 0.0028   | 0.019388 | 0.67603  | 0.099045 | 0.03236  | 0.047758 | 0.30307  | -0.14277 |
| 0.141487 | 0.00218  | 0.27189  | 2.33E-09 | 0.33587  | 8.89E-14 | 0.082091 | 0.07636  | 0.039528 |
| -0.03079 | 0.50678  | 0.053099 | 0.25212  | 0.064558 | 0.16368  | -0.14944 | 0.0012   | -0.08641 |
| 0.167884 | 0.00027  | -0.19066 | 3.37E-05 | -0.11823 | 0.01056  | 0.04926  | 0.28809  | -0.08693 |
| 0.020877 | 0.65271  | 0.020905 | 0.65228  | -0.0817  | 0.07777  | -0.04605 | 0.32074  | -0.07738 |
| -0.0162  | 0.72699  | -0.24332 | 1.01E-07 | -0.20551 | 7.57E-06 | -0.13868 | 0.00267  | -0.20969 |
| -0.01952 | 0.67387  | 0.020571 | 0.65748  | 0.020804 | 0.65384  | 0.142925 | 0.00196  | 0.039343 |
| 0.001376 | 0.97635  | 0.089572 | 0.05307  | 0.08034  | 0.08286  | -0.01253 | 0.78704  | -0.00983 |
| 0.186409 | 5.05E-05 | -0.02835 | 0.54112  | -0.14881 | 0.00126  | 0.130554 | 0.00472  | 0.156579 |
| 0.007384 | 0.87355  | 0.095769 | 0.03857  | 0.094502 | 0.04122  | 0.053363 | 0.24976  | 0.007839 |
| -0.09604 | 0.03802  | -0.02172 | 0.63965  | -0.01138 | 0.80629  | -0.04567 | 0.32471  | -0.05262 |
| 0.026074 | 0.57408  | 0.009079 | 0.84486  | -0.01204 | 0.79527  | 0.010902 | 0.81423  | 0.020033 |
| 0.034112 | 0.46209  | -0.05026 | 0.27843  | -0.05204 | 0.26169  | 0.210108 | 4.66E-06 | 0.226065 |
| -0.32964 | 2.68E-13 | -0.21511 | 2.72E-06 | -0.23797 | 1.95E-07 | -0.2971  | 5.69E-11 | -0.36219 |
| 0.035208 | 0.44783  | -0.15423 | 0.00083  | -0.03761 | 0.4174   | -0.10927 | 0.01817  | -0.23942 |
| 0.209117 | 5.18E-06 | 0.113765 | 0.0139   | 0.158665 | 0.00058  | 0.28383  | 4.21E-10 | 0.206147 |
| 0.146677 | 0.00148  | 0.08927  | 0.05388  | 0.143848 | 0.00183  | -0.20785 | 5.92E-06 | -0.16178 |
| -0.03187 | 0.49201  | -0.09058 | 0.05045  | -0.06915 | 0.13566  | -0.19343 | 2.57E-05 | -0.3469  |
| 0.112467 | 0.01503  | 0.052556 | 0.25701  | 0.119431 | 0.00979  | 0.120959 | 0.00888  | 0.015686 |
| 0.002757 | 0.95261  | -0.061   | 0.18817  | -0.05566 | 0.22994  | -0.04181 | 0.3673   | -0.08253 |
| 0.180418 | 8.83E-05 | -0.04427 | 0.33978  | 0.018336 | 0.69269  | 0.247845 | 5.75E-08 | 0.206911 |
| 0.019465 | 0.67481  | 0.067245 | 0.1468   | -0.07565 | 0.1025   | 0.196691 | 1.86E-05 | -0.08219 |
| 0.046024 | 0.32098  | -0.02299 | 0.62016  | -0.02519 | 0.58711  | -0.06741 | 0.14578  | 0.018326 |
| 0.262739 | 8.21E-09 | 0.239072 | 1.71E-07 | 0.223824 | 1.03E-06 | 0.247275 | 6.18E-08 | 0.262856 |
| 0.038413 | 0.40756  | 0.131911 | 0.0043   | 0.088638 | 0.05561  | 0.005854 | 0.89961  | 0.085647 |
| 0.136207 | 0.00318  | 0.03813  | 0.41103  | -0.10014 | 0.03049  | 0.050005 | 0.28086  | 0.194854 |
| 0.186293 | 5.11E-05 | 0.203159 | 9.65E-06 | 0.061812 | 0.18238  | 0.32142  | 1.10E-12 | 0.440088 |
| 0.111752 | 0.01569  | 0.037561 | 0.41804  | 0.082897 | 0.0735   | -0.06727 | 0.14664  | -0.10324 |
| 0.310951 | 6.30E-12 | 0.044058 | 0.3421   | 0.210821 | 4.32E-06 | 0.143361 | 0.0019   | 0.188051 |
| 0.135919 | 0.00325  | 0.229935 | 5.08E-07 | 0.162123 | 0.00044  | 0.105036 | 0.0232   | 0.189883 |
| -0.04482 | 0.33383  | 0.043653 | 0.34657  | 0.072933 | 0.1155   | 0.057012 | 0.2188   | -0.01705 |
| 0.112385 | 0.0151   | 0.180167 | 9.04E-05 | 0.131934 | 0.00429  | 0.041597 | 0.36977  | 0.14507  |
| 0.185626 | 5.44E-05 | 0.139628 | 0.00249  | 0.250248 | 4.23E-08 | -0.01684 | 0.71665  | -0.10293 |
| 0.203335 | 9.48E-06 | 0.235648 | 2.58E-07 | 0.306147 | 1.37E-11 | 0.018346 | 0.69253  | 0.026567 |
| 0.035209 | 0.44782  | 0.128898 | 0.00528  | 0.219937 | 1.59E-06 | -0.00662 | 0.88649  | -0.04377 |

|          |          |          |          |          |          |          |          |          |
|----------|----------|----------|----------|----------|----------|----------|----------|----------|
| 0.105805 | 0.02221  | -0.07432 | 0.10874  | -0.07198 | 0.12031  | -0.09257 | 0.04556  | -0.23102 |
| -0.08387 | 0.07017  | -0.27218 | 2.24E-09 | -0.21897 | 1.78E-06 | -0.00055 | 0.99055  | -0.01826 |
| -0.01847 | 0.69058  | 0.117023 | 0.01138  | -0.0448  | 0.33402  | -0.01359 | 0.76963  | 0.149883 |
| 0.166612 | 0.0003   | 0.231938 | 4.02E-07 | 0.256942 | 1.78E-08 | 0.174599 | 0.00015  | 0.334422 |
| 0.044537 | 0.33688  | -0.15151 | 0.00102  | -0.01555 | 0.73758  | -0.12443 | 0.0071   | -0.08988 |
| -0.08088 | 0.08081  | 0.056718 | 0.22118  | 0.059708 | 0.19775  | -0.14214 | 0.00208  | -0.13755 |
| 0.05402  | 0.24398  | 0.080643 | 0.0817   | 0.091669 | 0.04772  | -0.05989 | 0.19636  | 0.020698 |
| 0.015006 | 0.74636  | 0.056211 | 0.22535  | 0.062997 | 0.17412  | -0.11969 | 0.00963  | -0.18935 |
| 0.033626 | 0.4685   | 0.07281  | 0.11611  | 0.047561 | 0.30507  | 0.136574 | 0.0031   | -0.03574 |
| 0.093921 | 0.04249  | 0.039059 | 0.39972  | -0.06742 | 0.14572  | 0.074574 | 0.10751  | 0.142359 |
| 0.216345 | 2.37E-06 | 0.118603 | 0.01031  | 0.145249 | 0.00165  | 0.025129 | 0.58804  | 0.000633 |
| 0.173298 | 0.00017  | 0.349595 | 7.17E-15 | 0.299224 | 4.09E-11 | 0.201992 | 1.09E-05 | 0.211189 |
| 0.314242 | 3.67E-12 | 0.217034 | 2.20E-06 | 0.166855 | 0.00029  | 0.032021 | 0.49     | -0.04159 |
| -0.11502 | 0.01287  | -0.18616 | 5.17E-05 | -0.27187 | 2.34E-09 | -0.25021 | 4.25E-08 | -0.3559  |
| 0.215542 | 2.59E-06 | 0.105165 | 0.02304  | -0.06978 | 0.13215  | 0.309362 | 8.15E-12 | 0.284799 |
| 0.121766 | 0.00844  | -0.04633 | 0.31776  | -0.01877 | 0.68576  | -0.03792 | 0.41365  | -0.30883 |
| 0.05627  | 0.22486  | -0.01886 | 0.68438  | -0.01925 | 0.67812  | 0.089509 | 0.05324  | 0.150647 |
| 0.019262 | 0.67802  | 0.004839 | 0.91694  | 0.029882 | 0.51947  | 0.077601 | 0.09393  | 0.093812 |
| 0.051112 | 0.27034  | 0.022682 | 0.62491  | 0.027884 | 0.54779  | 0.147405 | 0.0014   | 0.088332 |
| 0.047352 | 0.3072   | 0.010218 | 0.82569  | 0.016683 | 0.71916  | 0.15206  | 0.00098  | 0.107301 |
| 0.081645 | 0.07797  | 0.124418 | 0.0071   | 0.179559 | 9.55E-05 | -0.0086  | 0.85304  | 0.006041 |
| 0.126089 | 0.00636  | -0.20215 | 1.07E-05 | -0.1834  | 6.71E-05 | 0.128025 | 0.00559  | -0.03451 |
| -0.22661 | 7.48E-07 | -0.19533 | 2.13E-05 | -0.17798 | 0.00011  | -0.18364 | 6.56E-05 | -0.14445 |
| 0.193307 | 2.60E-05 | -0.04291 | 0.35486  | 0.151352 | 0.00103  | -0.16171 | 0.00045  | -0.21924 |
| -0.00592 | 0.89843  | -0.01702 | 0.71376  | -0.04188 | 0.36658  | -0.05209 | 0.26126  | -0.0392  |
| 0.088004 | 0.05738  | -0.07855 | 0.08997  | 0.062896 | 0.17482  | 0.021128 | 0.64882  | -0.12857 |
| 0.024482 | 0.5977   | 0.036747 | 0.42821  | -0.07126 | 0.12411  | -0.01758 | 0.70474  | -0.01793 |
| 0.057125 | 0.21788  | 0.219737 | 1.63E-06 | 0.216568 | 2.32E-06 | 0.105654 | 0.0224   | 0.095961 |
| -0.0899  | 0.0522   | -0.00076 | 0.987    | 0.001781 | 0.96939  | -0.03695 | 0.42565  | 0.016193 |
| -0.1606  | 0.00049  | -0.00929 | 0.84124  | -0.17923 | 9.85E-05 | 0.089036 | 0.05451  | 0.058643 |
| 0.022587 | 0.62635  | -0.05397 | 0.24445  | -0.05709 | 0.2182   | -0.14635 | 0.00152  | -0.16513 |
| -0.2382  | 1.90E-07 | -0.05942 | 0.1999   | -0.03549 | 0.44417  | -0.10252 | 0.02674  | -0.06847 |
| -0.0841  | 0.0694   | 0.024264 | 0.60096  | 0.045792 | 0.32343  | -0.08939 | 0.05355  | 0.002935 |
| 0.055864 | 0.22823  | 0.033259 | 0.47337  | 0.039751 | 0.3914   | -0.02607 | 0.57419  | -0.02882 |
| 0.215559 | 2.59E-06 | 0.141078 | 0.00224  | 0.119302 | 0.00987  | 0.199349 | 1.42E-05 | 0.373738 |
| -0.01273 | 0.78386  | 0.041936 | 0.36588  | 0.08674  | 0.06107  | 0.016839 | 0.71664  | -0.03269 |
| 0.24192  | 1.20E-07 | 0.326713 | 4.45E-13 | 0.185088 | 5.72E-05 | 0.308717 | 9.05E-12 | 0.410947 |
| -0.04112 | 0.37532  | 0.000528 | 0.99092  | 0.026193 | 0.57234  | 0.056609 | 0.22208  | 0.058755 |
| 0.250183 | 4.27E-08 | 0.228809 | 5.80E-07 | 0.325179 | 5.80E-13 | 0.033023 | 0.47652  | 0.071243 |
| -0.22715 | 7.03E-07 | -0.12245 | 0.00807  | -0.25243 | 3.20E-08 | 0.028756 | 0.53533  | 0.175218 |
| -0.01921 | 0.67891  | -0.24669 | 6.65E-08 | -0.2323  | 3.85E-07 | 0.019677 | 0.67147  | -0.11789 |
| 0.270894 | 2.68E-09 | 0.038743 | 0.40354  | -0.13503 | 0.00346  | 0.131048 | 0.00456  | 0.162941 |
| -0.20553 | 7.55E-06 | -0.04362 | 0.34698  | -0.05022 | 0.27874  | -0.20891 | 5.29E-06 | -0.10429 |
| -0.05502 | 0.23538  | 0.063833 | 0.16846  | -0.08911 | 0.05432  | -0.09912 | 0.03224  | -0.08064 |
| 0.121904 | 0.00836  | 0.069385 | 0.13434  | 0.20081  | 1.23E-05 | -0.11423 | 0.01351  | -0.18082 |

|          |          |          |          |          |          |          |          |          |
|----------|----------|----------|----------|----------|----------|----------|----------|----------|
| -0.02933 | 0.52716  | 0.00638  | 0.89063  | -0.06656 | 0.15094  | -0.14291 | 0.00196  | -0.21546 |
| -0.15887 | 0.00057  | -0.04301 | 0.35374  | -0.17074 | 0.00021  | -0.12746 | 0.00581  | -0.15465 |
| -0.04199 | 0.36531  | 0.031388 | 0.49863  | 0.002649 | 0.95447  | 0.008347 | 0.85723  | 0.016068 |
| 0.07255  | 0.11742  | 0.209071 | 5.20E-06 | 0.260503 | 1.11E-08 | -0.04909 | 0.28981  | -0.01958 |
| 0.019759 | 0.67018  | -0.05171 | 0.26476  | 0.020989 | 0.65098  | -0.03729 | 0.42137  | -0.16161 |
| -0.01002 | 0.82901  | -0.08471 | 0.06739  | -0.02783 | 0.54859  | -0.09901 | 0.03242  | -0.00401 |
| 0.044985 | 0.33203  | 0.073664 | 0.11188  | 0.179163 | 9.91E-05 | -0.00425 | 0.92701  | -0.09054 |
| 0.005307 | 0.90893  | 0.022119 | 0.63352  | 0.112143 | 0.01533  | -0.02108 | 0.64951  | 0.026575 |
| -0.02617 | 0.57262  | -0.10262 | 0.02659  | -0.091   | 0.04937  | 0.012632 | 0.78542  | -0.05326 |
| -0.0734  | 0.1132   | -0.1361  | 0.00321  | -0.10229 | 0.02709  | -0.04062 | 0.38112  | 0.104368 |
| -0.23281 | 3.63E-07 | -0.08736 | 0.05923  | -0.02986 | 0.51978  | -0.25335 | 2.84E-08 | -0.10654 |
| 0.107732 | 0.01988  | 0.20852  | 5.52E-06 | 0.218988 | 1.77E-06 | -0.09721 | 0.03573  | -0.08078 |
| 0.070772 | 0.12671  | 0.166563 | 0.0003   | 0.132222 | 0.00421  | -0.03933 | 0.39643  | -0.05197 |
| 0.106685 | 0.02112  | 0.036978 | 0.42531  | 0.064546 | 0.16375  | -0.01864 | 0.68788  | -0.11122 |
| -0.03781 | 0.415    | -0.01394 | 0.76378  | -0.01063 | 0.81877  | 0.058925 | 0.2037   | -0.05199 |
| 0.332951 | 1.49E-13 | 0.255318 | 2.20E-08 | 0.19703  | 1.80E-05 | 0.261521 | 9.66E-09 | 0.358814 |
| -0.05627 | 0.22482  | -0.13578 | 0.00328  | -0.13188 | 0.00431  | 0.005966 | 0.89769  | 0.147934 |
| 0.117462 | 0.01107  | 0.076214 | 0.09997  | 0.049564 | 0.28513  | 0.049357 | 0.28714  | -0.03346 |
| 0.097679 | 0.03484  | 0.113457 | 0.01416  | 0.141086 | 0.00224  | 0.053824 | 0.2457   | 0.008944 |
| 0.030065 | 0.51691  | 0.010511 | 0.82077  | -0.01344 | 0.77209  | 0.013766 | 0.76669  | 0.026472 |
| 0.064422 | 0.16457  | 0.09965  | 0.03132  | 0.09195  | 0.04704  | 0.028956 | 0.53249  | -0.02551 |
| -0.05327 | 0.25062  | -0.03766 | 0.4168   | -0.04353 | 0.34795  | -0.06999 | 0.13099  | -0.08608 |
| -0.02642 | 0.56904  | -0.12285 | 0.00787  | -0.0942  | 0.04188  | 0.140805 | 0.00229  | 0.063849 |
| -0.32576 | 5.25E-13 | -0.14292 | 0.00196  | -0.1188  | 0.01018  | -0.1231  | 0.00774  | -0.22207 |
| -0.12235 | 0.00812  | -0.24247 | 1.13E-07 | -0.1066  | 0.02122  | -0.37147 | 9.97E-17 | -0.28494 |
| 0.022867 | 0.62209  | -0.11412 | 0.0136   | 0.090419 | 0.05085  | -0.22744 | 6.80E-07 | -0.43515 |
| 0.049495 | 0.2858   | 0.006295 | 0.89208  | 0.100593 | 0.02974  | 0.088756 | 0.05528  | -0.05633 |
| 0.096099 | 0.0379   | 0.151213 | 0.00105  | 0.168141 | 0.00026  | 0.029373 | 0.52661  | 0.113163 |
| 0.121202 | 0.00875  | 0.157834 | 0.00062  | 0.18204  | 7.61E-05 | 0.040058 | 0.38776  | 0.142222 |
| -0.03099 | 0.50404  | 0.058227 | 0.20912  | -0.01493 | 0.74758  | -0.02709 | 0.5592   | 0.04557  |
| -0.18512 | 5.71E-05 | 0.108447 | 0.01907  | -0.02522 | 0.58667  | -0.16559 | 0.00033  | -0.01441 |
| -0.0917  | 0.04764  | -0.12992 | 0.00492  | -0.23085 | 4.57E-07 | -0.1173  | 0.01118  | -0.10753 |
| 0.166372 | 0.00031  | 0.323142 | 8.23E-13 | 0.249341 | 4.75E-08 | 0.118005 | 0.0107   | 0.242342 |
| -0.04072 | 0.38     | 0.079698 | 0.08536  | 0.060824 | 0.18948  | 0.011566 | 0.80315  | -0.06761 |
| -0.05857 | 0.20641  | -0.1275  | 0.00579  | -0.10559 | 0.02248  | 0.094622 | 0.04096  | 0.075908 |
| 0.016921 | 0.71532  | 0.005935 | 0.89821  | -0.02199 | 0.63545  | -0.01832 | 0.69295  | -0.05449 |
| 0.056878 | 0.21988  | -0.09683 | 0.03646  | -0.02442 | 0.59859  | 0.011745 | 0.80015  | -0.00747 |
| 0.225369 | 8.63E-07 | 0.277019 | 1.13E-09 | 0.366458 | 2.74E-16 | 0.191551 | 3.09E-05 | 0.099249 |
| 0.119121 | 0.00998  | 0.118787 | 0.01019  | 0.115149 | 0.01277  | 0.092624 | 0.04544  | 0.048637 |
| 0.137308 | 0.00295  | 0.012054 | 0.79501  | -0.00617 | 0.89414  | 0.118998 | 0.01006  | -0.17727 |
| 0.039493 | 0.3945   | -0.21555 | 2.59E-06 | -0.22396 | 1.01E-06 | -0.08475 | 0.06727  | -0.23858 |
| 0.050177 | 0.27921  | 0.193957 | 2.44E-05 | 0.123571 | 0.00751  | 0.030185 | 0.51524  | 0.138824 |
| -0.06063 | 0.19088  | -0.09905 | 0.03236  | -0.04844 | 0.29619  | -0.23703 | 2.19E-07 | -0.19392 |
| 0.102459 | 0.02682  | 0.110235 | 0.01717  | 0.134683 | 0.00355  | 0.039755 | 0.39136  | 0.039628 |
| 0.016573 | 0.72094  | 0.116941 | 0.01144  | 0.096809 | 0.03649  | 0.032778 | 0.4798   | 0.028801 |

|          |          |          |          |          |          |          |          |          |
|----------|----------|----------|----------|----------|----------|----------|----------|----------|
| 0.121601 | 0.00852  | 0.222756 | 1.16E-06 | 0.209613 | 4.91E-06 | 0.043729 | 0.34573  | 0.074605 |
| 0.016018 | 0.72991  | 0.015609 | 0.73655  | 0.068708 | 0.13819  | -0.22896 | 5.70E-07 | -0.21877 |
| 0.114578 | 0.01323  | 0.115503 | 0.0125   | 0.17323  | 0.00017  | -0.00396 | 0.93204  | -0.0198  |
| 0.066905 | 0.14886  | 0.059141 | 0.20205  | 0.059498 | 0.19934  | -0.00955 | 0.837    | -0.09442 |
| 0.127376 | 0.00584  | 0.161373 | 0.00046  | 0.150076 | 0.00114  | -0.10015 | 0.03048  | -0.12606 |
| 0.216528 | 2.33E-06 | 0.003165 | 0.94562  | 0.061489 | 0.18468  | -0.07354 | 0.11247  | -0.09838 |
| -0.0386  | 0.40523  | -0.00808 | 0.86175  | 0.009927 | 0.83058  | 0.167792 | 0.00027  | 0.203456 |
| 0.046318 | 0.3179   | 0.189575 | 3.74E-05 | 0.225527 | 8.47E-07 | -0.0968  | 0.0365   | -0.17622 |
| 0.159118 | 0.00056  | 0.290688 | 1.52E-10 | 0.303535 | 2.08E-11 | 0.138982 | 0.00261  | 0.160838 |
| -0.00097 | 0.98337  | -0.08335 | 0.07193  | 0.027813 | 0.5488   | -0.09294 | 0.0447   | -0.14618 |
| 0.166402 | 0.0003   | 0.064867 | 0.16166  | 0.148266 | 0.00131  | 0.06972  | 0.13246  | 0.06745  |
| 0.113966 | 0.01373  | 0.008763 | 0.8502   | 0.176593 | 0.00012  | -0.00443 | 0.92395  | -0.03617 |
| -0.12151 | 0.00858  | -0.20047 | 1.27E-05 | -0.06323 | 0.17251  | -0.0714  | 0.12336  | -0.03725 |
| 0.017716 | 0.70258  | -0.04749 | 0.30584  | -0.00636 | 0.89098  | -0.06936 | 0.13449  | -0.13349 |
| 0.203709 | 9.12E-06 | 0.139001 | 0.00261  | 0.075665 | 0.10245  | 0.264724 | 6.27E-09 | 0.448925 |
| -0.05705 | 0.21852  | -0.1706  | 0.00021  | -0.13409 | 0.0037   | -0.21679 | 2.26E-06 | -0.03073 |
| -0.03246 | 0.48406  | -0.20027 | 1.30E-05 | -0.17623 | 0.00013  | 0.021996 | 0.63541  | 0.208057 |
| -0.28176 | 5.70E-10 | -0.08165 | 0.07796  | -0.14241 | 0.00204  | -0.04266 | 0.3576   | 0.015368 |
| 0.208985 | 5.25E-06 | 0.200099 | 1.32E-05 | 0.089483 | 0.0533   | 0.142238 | 0.00206  | 0.35813  |
| 0.061858 | 0.18205  | 0.095858 | 0.03839  | 0.04795  | 0.30113  | -0.07402 | 0.11016  | 0.246645 |
| 0.100193 | 0.0304   | 0.11722  | 0.01124  | 0.149075 | 0.00123  | 0.0452   | 0.32973  | 0.030232 |
| -0.12977 | 0.00497  | -0.16334 | 0.00039  | -0.05628 | 0.22475  | -0.31511 | 3.18E-12 | -0.15467 |
| 0.101395 | 0.02846  | 0.152317 | 0.00096  | 0.129335 | 0.00512  | 0.136731 | 0.00307  | 0.148829 |
| 0.061532 | 0.18438  | 0.005462 | 0.90628  | -0.14357 | 0.00187  | -0.05886 | 0.20417  | -0.04427 |
| 0.183429 | 6.69E-05 | 0.219891 | 1.60E-06 | 0.128284 | 0.0055   | 0.039811 | 0.39069  | 0.101207 |
| 0.088297 | 0.05656  | -0.00669 | 0.88531  | 0.001125 | 0.98065  | 0.077263 | 0.09538  | -0.01724 |
| 0.01227  | 0.79143  | 0.024357 | 0.59957  | -0.01302 | 0.77902  | 0.123237 | 0.00767  | 0.017953 |
| -0.03859 | 0.40543  | -0.17373 | 0.00016  | -0.19453 | 2.31E-05 | -0.07689 | 0.09701  | -0.15968 |
| -0.02498 | 0.59026  | -0.15564 | 0.00074  | -0.03489 | 0.452    | -0.01827 | 0.69367  | -0.06337 |
| 0.061963 | 0.18131  | -0.03498 | 0.4508   | -0.05004 | 0.28052  | -0.05779 | 0.21256  | -0.04023 |
| -0.31017 | 7.15E-12 | -0.06111 | 0.18743  | -0.1355  | 0.00335  | -0.0652  | 0.15953  | 0.075293 |
| 0.127653 | 0.00574  | -0.26837 | 3.80E-09 | -0.02977 | 0.52098  | 0.002974 | 0.9489   | 0.059231 |
| -0.00519 | 0.91089  | -0.10154 | 0.02823  | -0.07422 | 0.1092   | -0.05468 | 0.23821  | 0.043586 |
| -0.01052 | 0.8207   | -0.26575 | 5.46E-09 | -0.14877 | 0.00126  | -0.21663 | 2.30E-06 | -0.38766 |
| -0.02934 | 0.52707  | -0.20987 | 4.78E-06 | -0.02383 | 0.60742  | -0.03653 | 0.431    | -0.03575 |
| 0.048828 | 0.29235  | 0.014175 | 0.75998  | 0.035686 | 0.44168  | -0.1319  | 0.0043   | -0.3017  |
| 0.126583 | 0.00616  | 0.16465  | 0.00035  | 0.138597 | 0.00269  | 0.168907 | 0.00025  | 0.255134 |
| -0.239   | 1.72E-07 | -0.10151 | 0.02828  | -0.19999 | 1.34E-05 | -0.01365 | 0.76853  | 0.091197 |
| 0.132432 | 0.00415  | -0.15381 | 0.00085  | 0.101033 | 0.02903  | -0.05029 | 0.27809  | -0.19439 |
| 0.02973  | 0.52159  | -0.14838 | 0.0013   | -0.10668 | 0.02112  | -0.03334 | 0.47235  | -0.03315 |
| -0.20162 | 1.13E-05 | -0.05649 | 0.22305  | -0.0886  | 0.0557   | -0.12781 | 0.00567  | -0.06672 |
| 0.13218  | 0.00422  | 0.110214 | 0.01719  | 0.218729 | 1.82E-06 | 0.133413 | 0.00387  | -0.05184 |
| 0.126903 | 0.00603  | 0.122856 | 0.00786  | 0.194374 | 2.34E-05 | 0.056819 | 0.22036  | -0.11165 |
| -0.06316 | 0.17301  | -0.03133 | 0.49943  | -0.04482 | 0.33385  | -0.14842 | 0.0013   | -0.04893 |
| 0.030487 | 0.51104  | 0.042493 | 0.35955  | 0.014743 | 0.75066  | 0.006884 | 0.88206  | -0.03865 |

|          |          |          |          |          |          |          |          |          |
|----------|----------|----------|----------|----------|----------|----------|----------|----------|
| -0.128   | 0.0056   | -0.14526 | 0.00165  | -0.14912 | 0.00123  | -0.259   | 1.35E-08 | -0.30335 |
| 0.015666 | 0.73561  | -0.02193 | 0.63638  | -0.02064 | 0.6564   | 0.005294 | 0.90917  | -0.01816 |
| -0.12418 | 0.00721  | -0.14004 | 0.00242  | -0.15693 | 0.00067  | -0.1731  | 0.00017  | -0.10953 |
| 0.125205 | 0.00675  | 0.104865 | 0.02343  | 0.070023 | 0.13078  | 0.147686 | 0.00137  | 0.239739 |
| -0.21915 | 1.74E-06 | -0.14642 | 0.00151  | -0.23686 | 2.23E-07 | -0.15207 | 0.00098  | -0.20874 |
| 0.07924  | 0.08717  | -0.0185  | 0.69     | -0.25    | 4.37E-08 | 0.191199 | 3.19E-05 | 0.188586 |
| 0.311792 | 5.49E-12 | 0.268016 | 4.00E-09 | 0.341437 | 3.25E-14 | 0.125436 | 0.00664  | 0.022085 |
| -0.0788  | 0.08896  | -0.05231 | 0.25929  | -0.01012 | 0.8273   | -0.06699 | 0.14834  | -0.0097  |
| -0.05797 | 0.21117  | -0.06251 | 0.17748  | -0.02138 | 0.64498  | -0.0328  | 0.47951  | 0.008827 |
| -0.01142 | 0.8056   | -0.02035 | 0.66091  | -0.00153 | 0.97375  | 0.026515 | 0.56762  | 0.095675 |
| 0.060408 | 0.19253  | 0.068247 | 0.14086  | 0.081735 | 0.07764  | -0.00298 | 0.94878  | -0.00384 |
| -0.1011  | 0.02892  | -0.06525 | 0.15917  | -0.0452  | 0.3297   | -0.04148 | 0.37112  | -0.00169 |
| 0.061778 | 0.18262  | -0.15652 | 0.00069  | 0.069608 | 0.13309  | -0.08284 | 0.07369  | -0.2065  |
| 0.142459 | 0.00203  | 0.008024 | 0.86271  | 0.126383 | 0.00624  | -0.06391 | 0.16794  | -0.10942 |
| 7.64E-05 | 0.99869  | 0.110235 | 0.01717  | 0.081602 | 0.07813  | -0.07358 | 0.11229  | -0.06913 |
| -0.00178 | 0.96948  | 0.085129 | 0.06605  | 0.067485 | 0.14536  | 0.061018 | 0.18807  | -0.12803 |
| 0.134264 | 0.00365  | 0.094888 | 0.0404   | 0.122951 | 0.00781  | 0.102577 | 0.02665  | 0.12742  |
| 0.302366 | 2.50E-11 | 0.118251 | 0.01054  | 0.164919 | 0.00035  | 0.133952 | 0.00373  | 0.223691 |
| -0.11566 | 0.01238  | -0.31515 | 3.16E-12 | -0.32221 | 9.64E-13 | -0.136   | 0.00323  | -0.28816 |
| 0.240447 | 1.44E-07 | 0.130252 | 0.00481  | 0.131253 | 0.0045   | 0.229346 | 5.45E-07 | 0.202534 |
| 0.152336 | 0.00096  | 0.079803 | 0.08494  | 0.196754 | 1.85E-05 | 0.120353 | 0.00923  | 0.197001 |
| -0.06428 | 0.16552  | -0.13153 | 0.00441  | -0.1014  | 0.02844  | -0.11915 | 0.00996  | -0.26637 |
| 0.056329 | 0.22437  | 0.044783 | 0.33421  | 0.049669 | 0.28411  | -0.02672 | 0.56465  | -0.10923 |
| -0.20287 | 9.95E-06 | -0.12283 | 0.00788  | -0.08224 | 0.07583  | -0.29008 | 1.66E-10 | -0.13553 |
| -0.08874 | 0.05531  | -0.1977  | 1.68E-05 | -0.17091 | 0.00021  | -0.08115 | 0.07981  | -0.21007 |
| -0.05916 | 0.20189  | -0.08223 | 0.07587  | 0.081251 | 0.07942  | -0.16086 | 0.00048  | 0.013945 |
| 0.144488 | 0.00175  | 0.302822 | 2.32E-11 | 0.314674 | 3.41E-12 | 0.033875 | 0.46522  | 0.283035 |
| 0.251517 | 3.60E-08 | 0.142449 | 0.00203  | -0.0168  | 0.71734  | 0.193825 | 2.47E-05 | 0.293794 |
| 0.017149 | 0.71167  | 0.051391 | 0.26772  | 0.094599 | 0.04101  | -0.11644 | 0.0118   | -0.14014 |
| 0.122978 | 0.0078   | 0.039248 | 0.39744  | 0.112166 | 0.0153   | -0.00078 | 0.98663  | -0.04922 |
| 0.121841 | 0.00839  | 0.027704 | 0.55038  | 0.019346 | 0.67669  | -0.02329 | 0.61567  | -0.10923 |
| -0.2187  | 1.83E-06 | -0.10492 | 0.02336  | -0.34482 | 1.75E-14 | -0.06558 | 0.15709  | -0.03213 |
| -0.00853 | 0.85409  | 0.047619 | 0.30448  | 0.018894 | 0.68382  | 0.000717 | 0.98767  | 0.089222 |
| 0.123664 | 0.00746  | 0.168591 | 0.00025  | 0.116188 | 0.01198  | -0.02223 | 0.63186  | 0.100115 |
| 0.045456 | 0.327    | 0.096006 | 0.03809  | 0.111016 | 0.01639  | -0.07279 | 0.1162   | -0.01507 |
| 0.181509 | 7.99E-05 | 0.241993 | 1.19E-07 | -0.01142 | 0.80561  | 0.29205  | 1.23E-10 | 0.333155 |
| -0.14322 | 0.00192  | -0.14332 | 0.0019   | -0.22391 | 1.02E-06 | 0.112829 | 0.01471  | 0.152492 |
| 0.203562 | 9.26E-06 | -0.04969 | 0.28389  | -0.10088 | 0.02927  | 0.132126 | 0.00423  | 0.09022  |
| 0.0146   | 0.75301  | -0.03862 | 0.405    | -0.11577 | 0.01229  | 0.141376 | 0.0022   | 0.020697 |
| -0.06745 | 0.14555  | -0.03516 | 0.44838  | -0.07667 | 0.09798  | -0.10368 | 0.02506  | -0.26171 |
| 0.036051 | 0.43702  | -0.33432 | 1.17E-13 | -0.22457 | 9.46E-07 | -0.18381 | 6.45E-05 | -0.22303 |
| 0.20827  | 5.66E-06 | 0.328145 | 3.47E-13 | 0.190942 | 3.27E-05 | 0.105323 | 0.02283  | 0.098497 |
| -0.09887 | 0.03267  | -0.03483 | 0.45268  | -0.05021 | 0.27885  | 0.021996 | 0.63541  | 0.023913 |
| 0.148127 | 0.00133  | -0.18761 | 4.51E-05 | -0.14787 | 0.00135  | 0.03971  | 0.3919   | -0.04334 |
| -0.11208 | 0.01539  | -0.09769 | 0.03482  | -0.06477 | 0.16227  | -0.10651 | 0.02133  | 0.02899  |

|          |          |          |          |          |          |          |          |          |
|----------|----------|----------|----------|----------|----------|----------|----------|----------|
| 0.037003 | 0.425    | 0.023247 | 0.61631  | 0.065559 | 0.15723  | 0.025434 | 0.58352  | 0.104673 |
| 0.12681  | 0.00607  | 0.304361 | 1.82E-11 | 0.245814 | 7.42E-08 | 0.007067 | 0.87895  | 0.149505 |
| 0.231427 | 4.27E-07 | 0.068622 | 0.13869  | 0.109351 | 0.01809  | 0.195169 | 2.16E-05 | 0.281696 |
| 0.241415 | 1.28E-07 | 0.337684 | 6.42E-14 | 0.333099 | 1.46E-13 | 0.224936 | 9.06E-07 | 0.344449 |
| 0.009695 | 0.83449  | 0.040655 | 0.38072  | -0.01791 | 0.69948  | -0.09925 | 0.032    | -0.27663 |
| 0.170068 | 0.00022  | 0.111275 | 0.01614  | 0.09333  | 0.04381  | 0.178022 | 0.00011  | 0.038373 |
| 0.221263 | 1.37E-06 | 0.031165 | 0.50169  | 0.131373 | 0.00446  | 0.217099 | 2.18E-06 | 0.049483 |
| 0.149825 | 0.00116  | 0.246059 | 7.20E-08 | 0.284046 | 4.08E-10 | 0.03413  | 0.46185  | -0.10967 |
| -0.01814 | 0.69588  | -0.01553 | 0.73779  | 0.00772  | 0.86786  | -0.0138  | 0.76612  | -0.14364 |
| 0.003714 | 0.9362   | -0.08292 | 0.07341  | -0.09687 | 0.03637  | 0.033231 | 0.47374  | 0.015996 |
| 0.191374 | 3.14E-05 | 0.219584 | 1.66E-06 | 0.335396 | 9.67E-14 | 0.037721 | 0.41607  | 0.026352 |
| 0.085688 | 0.06429  | 0.074196 | 0.10931  | 0.059563 | 0.19884  | 0.065286 | 0.15896  | 0.050889 |
| -0.06485 | 0.16176  | -0.31675 | 2.42E-12 | -0.24687 | 6.50E-08 | -0.22577 | 8.24E-07 | -0.29731 |
| 0.255415 | 2.17E-08 | 0.135473 | 0.00335  | 0.103131 | 0.02584  | 0.068874 | 0.13724  | 0.058437 |
| -0.03798 | 0.41289  | -0.01835 | 0.6924   | -0.0664  | 0.15198  | 0.069534 | 0.1335   | -0.03157 |
| -0.16547 | 0.00033  | -0.23923 | 1.68E-07 | -0.27883 | 8.71E-10 | -0.04699 | 0.31097  | -0.04647 |
| 0.007822 | 0.86612  | 0.13067  | 0.00468  | 0.179039 | 0.0001   | -0.01539 | 0.74015  | 0.044829 |
| -0.07341 | 0.11313  | -0.02936 | 0.52676  | 0.010947 | 0.81348  | -0.04092 | 0.37759  | -0.03469 |
| -0.20974 | 4.85E-06 | -0.22433 | 9.71E-07 | -0.2074  | 6.21E-06 | -0.14084 | 0.00228  | -0.36085 |
| 0.069975 | 0.13105  | -0.03275 | 0.48013  | 9.96E-05 | 0.99829  | 0.097151 | 0.03584  | -0.03452 |
| 0.077111 | 0.09603  | 0.07255  | 0.11742  | 0.018575 | 0.68889  | 0.053428 | 0.24919  | 0.076485 |
| -0.31013 | 7.20E-12 | -0.17093 | 0.00021  | -0.19677 | 1.85E-05 | -0.2003  | 1.29E-05 | -0.24493 |
| -0.03665 | 0.42945  | -0.30665 | 1.26E-11 | -0.21835 | 1.90E-06 | -0.10941 | 0.01802  | -0.06566 |
| -0.01351 | 0.77087  | -0.19865 | 1.53E-05 | -0.20571 | 7.41E-06 | -0.02154 | 0.64238  | -0.14321 |
| -0.17421 | 0.00015  | -0.06196 | 0.18131  | -0.01072 | 0.8173   | -0.22948 | 5.36E-07 | -0.15831 |
| -0.14347 | 0.00188  | -0.20454 | 8.37E-06 | -0.20447 | 8.43E-06 | -0.15137 | 0.00103  | -0.19238 |
| 0.113895 | 0.01379  | -0.06691 | 0.14883  | 0.047597 | 0.3047   | -0.02459 | 0.59605  | -0.06245 |
| -0.04261 | 0.35824  | 0.095871 | 0.03836  | -0.00286 | 0.95078  | 0.011887 | 0.7978   | -0.10316 |
| -0.08519 | 0.06585  | -0.15399 | 0.00084  | -0.09155 | 0.048    | -0.20619 | 7.05E-06 | -0.26952 |
| 0.160233 | 0.00051  | 0.079579 | 0.08583  | 0.097712 | 0.03478  | -0.02991 | 0.51909  | -0.12988 |
| 0.047038 | 0.31042  | 0.169856 | 0.00023  | 0.11164  | 0.01579  | 0.073563 | 0.11238  | 0.031383 |
| 0.164769 | 0.00035  | 0.283816 | 4.22E-10 | 0.257692 | 1.61E-08 | 0.095806 | 0.03849  | -0.04023 |
| -0.29114 | 1.42E-10 | -0.1584  | 0.00059  | -0.15333 | 0.00089  | -0.22444 | 9.59E-07 | -0.18358 |
| -0.04185 | 0.36687  | -0.05727 | 0.21669  | -0.0389  | 0.40164  | -0.02819 | 0.54335  | -0.08248 |
| 0.100176 | 0.03043  | 0.311698 | 5.57E-12 | 0.203509 | 9.31E-06 | 0.148065 | 0.00133  | 0.192233 |
| -0.0651  | 0.16015  | -0.1553  | 0.00076  | -0.40889 | 3.01E-20 | 0.017138 | 0.71183  | 0.015344 |
| 0.160498 | 0.0005   | 0.16409  | 0.00037  | -0.03981 | 0.39071  | 0.268547 | 3.71E-09 | 0.312038 |
| 0.055007 | 0.23545  | -0.09345 | 0.04354  | 0.03098  | 0.50423  | -0.1451  | 0.00167  | -0.13425 |
| 0.154448 | 0.00081  | 0.072682 | 0.11676  | 0.136808 | 0.00305  | 0.122131 | 0.00824  | 0.210604 |
| -0.2504  | 4.15E-08 | -0.15974 | 0.00053  | -0.16286 | 0.00041  | -0.21195 | 3.83E-06 | -0.1107  |
| 0.112833 | 0.0147   | 0.029113 | 0.53027  | 0.032502 | 0.4835   | 0.019357 | 0.67651  | 0.032569 |
| 0.026573 | 0.56677  | -0.00284 | 0.95114  | -0.09869 | 0.03299  | -0.03398 | 0.46389  | -0.10933 |
| -0.05791 | 0.21159  | -0.08003 | 0.08408  | 0.013922 | 0.76412  | -0.15671 | 0.00068  | -0.12383 |
| 0.146984 | 0.00145  | 0.135987 | 0.00323  | 0.251698 | 3.51E-08 | 0.058046 | 0.21054  | 0.145215 |
| 0.0661   | 0.15382  | -0.03038 | 0.5125   | 0.018943 | 0.68304  | 0.01342  | 0.7724   | -0.09784 |

|           |          |          |          |          |          |          |          |          |
|-----------|----------|----------|----------|----------|----------|----------|----------|----------|
| 0.092822  | 0.04498  | 0.182393 | 7.36E-05 | 0.255049 | 2.28E-08 | 0.031343 | 0.49924  | 0.179971 |
| 0.057354  | 0.21604  | 0.08214  | 0.07618  | 0.11477  | 0.01307  | 0.123784 | 0.0074   | -0.00347 |
| 0.371695  | 9.53E-17 | 0.028542 | 0.53838  | 0.159172 | 0.00056  | 0.107554 | 0.02008  | 0.172479 |
| 0.124078  | 0.00726  | 0.165108 | 0.00034  | 0.135751 | 0.00329  | 0.173215 | 0.00017  | 0.006272 |
| -0.08693  | 0.06051  | -0.16964 | 0.00023  | -0.09713 | 0.03587  | -0.18498 | 5.78E-05 | -0.22607 |
| 0.086514  | 0.06175  | -0.0034  | 0.94155  | 0.070345 | 0.12902  | 0.102607 | 0.0266   | -0.05787 |
| 0.016982  | 0.71435  | 0.096723 | 0.03666  | 0.144748 | 0.00171  | -0.08503 | 0.06636  | 0.008268 |
| -3.58E-05 | 0.99938  | -0.06314 | 0.17314  | 0.018142 | 0.69578  | 0.023474 | 0.61286  | -0.14821 |
| -0.25149  | 3.61E-08 | -0.28606 | 3.03E-10 | -0.19091 | 3.29E-05 | -0.11272 | 0.0148   | -0.10245 |
| -0.15271  | 0.00093  | -0.16727 | 0.00028  | -0.10992 | 0.01749  | -0.1649  | 0.00035  | -0.23781 |
| 0.032377  | 0.48519  | -0.29198 | 1.25E-10 | -0.11701 | 0.01139  | -0.19128 | 3.17E-05 | -0.22337 |
| -0.01804  | 0.69743  | -0.03511 | 0.4491   | 0.119155 | 0.00996  | 0.100543 | 0.02982  | -0.04772 |
| -0.02331  | 0.61532  | 0.008488 | 0.85485  | 0.045674 | 0.32467  | 0.083928 | 0.06998  | 0.222644 |
| -0.12643  | 0.00622  | -0.24981 | 4.47E-08 | -0.33654 | 7.89E-14 | 0.018444 | 0.69096  | 0.173955 |
| -0.02947  | 0.52528  | -0.23901 | 1.72E-07 | -0.24747 | 6.02E-08 | 0.156386 | 0.0007   | -0.00035 |
| -0.09346  | 0.04351  | -0.21292 | 3.45E-06 | -0.10325 | 0.02566  | -0.32591 | 5.12E-13 | -0.32794 |
| -0.09115  | 0.04901  | -0.04629 | 0.31815  | -0.08561 | 0.06455  | 0.051768 | 0.26423  | 0.172421 |
| 0.128915  | 0.00527  | 0.01477  | 0.75023  | -0.12801 | 0.0056   | 0.122606 | 0.00799  | 0.173044 |
| 0.354315  | 2.93E-15 | 0.208397 | 5.59E-06 | 0.154236 | 0.00083  | 0.139135 | 0.00258  | 0.081105 |
| 0.102208  | 0.0272   | 0.17678  | 0.00012  | 0.138741 | 0.00266  | 0.097674 | 0.03485  | 0.047685 |
| 0.071447  | 0.12312  | 0.088864 | 0.05498  | 0.043455 | 0.34877  | 0.122903 | 0.00784  | 0.07906  |
| 0.31524   | 3.11E-12 | 0.148506 | 0.00129  | 0.302797 | 2.33E-11 | 0.056566 | 0.22243  | 0.170225 |
| -0.17148  | 0.0002   | -0.11137 | 0.01605  | -0.10008 | 0.03059  | -0.02932 | 0.52731  | 0.010627 |
| -0.03252  | 0.48324  | -0.04608 | 0.32044  | -0.07859 | 0.08979  | -0.15622 | 0.0007   | -0.31471 |
| 0.294244  | 8.83E-11 | 0.220942 | 1.42E-06 | 0.27527  | 1.45E-09 | 0.170183 | 0.00022  | 0.048237 |
| 0.02867   | 0.53655  | 0.030013 | 0.51763  | -0.24734 | 6.13E-08 | 0.205659 | 7.45E-06 | 0.212016 |
| 0.051566  | 0.26609  | -0.02034 | 0.6611   | -0.00216 | 0.96295  | 0.048357 | 0.29703  | -0.08688 |
| -0.02401  | 0.60478  | 0.056555 | 0.22252  | 0.151937 | 0.00099  | -0.03754 | 0.41826  | 0.117608 |
| -0.01934  | 0.67677  | 0.047738 | 0.30327  | 0.088812 | 0.05513  | 0.073962 | 0.11043  | 0.004969 |
| -0.14627  | 0.00153  | -0.06157 | 0.18408  | -0.06132 | 0.1859   | -0.15156 | 0.00102  | -0.12384 |
| -0.01377  | 0.76669  | 0.096197 | 0.0377   | 0.108778 | 0.0187   | -0.03644 | 0.43207  | -0.17228 |
| 0.208015  | 5.82E-06 | 0.163183 | 0.0004   | 0.164592 | 0.00035  | 0.06529  | 0.15894  | 0.044646 |
| -0.1932   | 2.63E-05 | -0.18864 | 4.09E-05 | -0.18895 | 3.97E-05 | -0.19484 | 2.23E-05 | -0.02818 |
| -0.01968  | 0.67143  | 0.003075 | 0.94716  | 0.043204 | 0.35155  | -0.06748 | 0.14537  | -0.09908 |
| 0.020787  | 0.65411  | -0.15668 | 0.00068  | -0.02318 | 0.6173   | -0.25422 | 2.54E-08 | -0.0659  |
| -0.02774  | 0.54987  | -0.04334 | 0.35003  | 0.051803 | 0.2639   | -0.04236 | 0.36111  | -0.04498 |
| 0.089421  | 0.05347  | -0.00474 | 0.91863  | 0.103111 | 0.02587  | -0.09501 | 0.04015  | -0.00012 |
| -0.05486  | 0.23667  | -0.05862 | 0.20602  | -0.04936 | 0.28716  | -0.2267  | 7.40E-07 | -0.18806 |
| 0.112718  | 0.01481  | 0.034042 | 0.46302  | 0.053726 | 0.24656  | 0.063194 | 0.17278  | -0.11368 |
| 0.0921    | 0.04668  | -0.06969 | 0.13262  | -0.06672 | 0.14997  | 0.025564 | 0.5816   | -0.2703  |
| 0.287862  | 2.32E-10 | 0.218297 | 1.91E-06 | 0.164725 | 0.00035  | 0.250139 | 4.29E-08 | 0.459958 |
| 0.102049  | 0.02744  | 0.176865 | 0.00012  | 0.191105 | 3.22E-05 | 0.128421 | 0.00545  | -0.03713 |
| 0.042739  | 0.35677  | 0.052101 | 0.26116  | 0.012043 | 0.7952   | 0.036573 | 0.43041  | 0.0546   |
| 0.014966  | 0.74701  | -0.20268 | 1.01E-05 | -0.32876 | 3.12E-13 | 0.085094 | 0.06617  | 0.06592  |
| 0.260293  | 1.14E-08 | 0.195427 | 2.11E-05 | 0.154263 | 0.00082  | 0.301103 | 3.05E-11 | 0.333577 |

|          |          |          |          |          |          |          |          |          |
|----------|----------|----------|----------|----------|----------|----------|----------|----------|
| 0.089484 | 0.0533   | 0.156579 | 0.00068  | 0.140869 | 0.00228  | 0.128763 | 0.00532  | 0.076749 |
| -0.03402 | 0.46328  | -0.01371 | 0.76769  | 0.008054 | 0.8622   | -0.03873 | 0.40366  | -0.18958 |
| -0.03716 | 0.42302  | -0.0857  | 0.06425  | 0.01298  | 0.77966  | -0.08478 | 0.06718  | -0.2526  |
| -0.04035 | 0.3843   | -0.16139 | 0.00046  | -0.03821 | 0.41008  | -0.27249 | 2.15E-09 | -0.20281 |
| -0.21332 | 3.30E-06 | -0.17978 | 9.36E-05 | -0.20493 | 8.03E-06 | -0.19627 | 1.94E-05 | 0.071245 |
| 0.052229 | 0.25998  | 0.029356 | 0.52685  | 0.067694 | 0.14412  | 0.079657 | 0.08552  | -0.01569 |
| 0.000956 | 0.98355  | -0.00586 | 0.89941  | 0.030808 | 0.5066   | 0.039479 | 0.39466  | -0.09526 |
| 0.086971 | 0.06039  | 0.049712 | 0.28369  | 0.070031 | 0.13074  | -0.11051 | 0.01689  | -0.08072 |
| 0.154869 | 0.00078  | 0.216386 | 2.36E-06 | 0.059455 | 0.19966  | 0.305584 | 1.50E-11 | 0.23294  |
| -0.20837 | 5.61E-06 | -0.13523 | 0.00341  | -0.17382 | 0.00016  | -0.15661 | 0.00068  | -0.1628  |
| 0.010893 | 0.81438  | -0.17974 | 9.40E-05 | -0.26927 | 3.36E-09 | 0.20262  | 1.02E-05 | 0.167874 |
| -0.0879  | 0.05769  | -0.16173 | 0.00045  | -0.07355 | 0.11243  | -0.33833 | 5.71E-14 | -0.37406 |
| 0.305616 | 1.49E-11 | 0.176914 | 0.00012  | 0.205267 | 7.76E-06 | 0.228016 | 6.36E-07 | 0.207829 |
| 0.206785 | 6.62E-06 | 0.223629 | 1.05E-06 | 0.142266 | 0.00206  | 0.043221 | 0.35136  | 0.178289 |
| 0.171217 | 0.0002   | 0.094989 | 0.04018  | 0.095049 | 0.04006  | -0.01645 | 0.72293  | -0.01351 |
| -0.00787 | 0.86529  | -0.26463 | 6.35E-09 | -0.20324 | 9.57E-06 | -0.24555 | 7.67E-08 | -0.1723  |
| -0.12592 | 0.00644  | 0.012507 | 0.78749  | -0.15706 | 0.00066  | 0.003749 | 0.93561  | 0.148349 |
| -0.0957  | 0.0387   | -0.00285 | 0.95094  | -0.00839 | 0.85659  | 0.02202  | 0.63505  | 0.328865 |
| 0.015386 | 0.74018  | -0.01364 | 0.76879  | 0.025518 | 0.58228  | -0.11632 | 0.01189  | 0.112977 |
| -0.09415 | 0.04198  | 0.037469 | 0.41919  | 0.050877 | 0.27254  | -0.11402 | 0.01368  | -0.11614 |
| 0.089998 | 0.05194  | 0.101219 | 0.02873  | 0.097768 | 0.03467  | 0.202711 | 1.01E-05 | 0.155242 |
| -0.04042 | 0.3835   | 0.027252 | 0.55689  | 0.196817 | 1.84E-05 | 0.012708 | 0.78416  | -0.08182 |
| 0.130566 | 0.00471  | 0.131744 | 0.00435  | 0.102577 | 0.02665  | 0.081969 | 0.0768   | -0.01454 |
| 0.066515 | 0.15125  | 0.104796 | 0.02352  | -0.04697 | 0.31108  | 0.099118 | 0.03223  | -0.12241 |
| 0.041471 | 0.37122  | -0.06801 | 0.14223  | -0.03947 | 0.3948   | 0.119444 | 0.00978  | 0.185064 |
| 0.128162 | 0.00554  | 0.084694 | 0.06745  | 0.018462 | 0.69068  | 0.059421 | 0.19992  | -0.17979 |
| 0.069773 | 0.13217  | 0.070227 | 0.12967  | 0.03092  | 0.50506  | -0.09101 | 0.04935  | -0.25141 |
| 0.032344 | 0.48563  | 0.211089 | 4.20E-06 | 0.036173 | 0.43547  | -0.05498 | 0.2357   | -0.04767 |
| 0.074305 | 0.10879  | 0.037569 | 0.41795  | -0.09728 | 0.03558  | 0.240796 | 1.38E-07 | 0.202928 |
| 0.015375 | 0.74036  | 0.069432 | 0.13407  | -0.12324 | 0.00767  | 0.111838 | 0.01561  | 0.120552 |
| 0.26598  | 5.28E-09 | 0.029693 | 0.52211  | 0.160492 | 0.0005   | 0.203275 | 9.54E-06 | 0.274222 |
| -0.07462 | 0.10731  | -0.06488 | 0.16155  | -0.06228 | 0.17906  | -0.06325 | 0.17239  | -0.16236 |
| -0.0164  | 0.72368  | 0.042822 | 0.35583  | -0.00785 | 0.86561  | 0.044298 | 0.33948  | 0.111901 |
| 0.067205 | 0.14704  | 0.020699 | 0.65548  | -0.00567 | 0.90268  | 0.115001 | 0.01289  | -0.04919 |
| -0.0118  | 0.79918  | 0.137271 | 0.00295  | 0.147397 | 0.0014   | -0.11925 | 0.0099   | -0.04163 |
| 0.094473 | 0.04128  | 0.294419 | 8.60E-11 | 0.314079 | 3.77E-12 | 0.033886 | 0.46506  | 0.093235 |
| 0.150001 | 0.00115  | -0.17009 | 0.00022  | -0.04523 | 0.32939  | -0.02214 | 0.63312  | -0.0765  |
| -0.25453 | 2.44E-08 | -0.20195 | 1.09E-05 | -0.18742 | 4.59E-05 | -0.28238 | 5.20E-10 | -0.23469 |
| -0.23255 | 3.74E-07 | -0.21674 | 2.27E-06 | -0.13155 | 0.00441  | -0.3214  | 1.11E-12 | -0.31602 |
| 0.144663 | 0.00172  | 0.200031 | 1.33E-05 | 0.169879 | 0.00023  | 0.140509 | 0.00234  | 0.153982 |
| -0.11647 | 0.01178  | -0.01373 | 0.76721  | -0.01395 | 0.76362  | -0.07155 | 0.12256  | 0.005688 |
| 0.289997 | 1.68E-10 | 0.136125 | 0.0032   | 0.003087 | 0.94696  | 0.248845 | 5.06E-08 | 0.042791 |
| -0.00935 | 0.84025  | 0.079229 | 0.08722  | 0.001485 | 0.97447  | 0.025524 | 0.5822   | 0.35141  |
| -0.0243  | 0.60036  | -0.24038 | 1.46E-07 | -0.17198 | 0.00019  | -0.14093 | 0.00227  | -0.20589 |
| 0.100429 | 0.03001  | -0.28501 | 3.54E-10 | -0.23254 | 3.74E-07 | -0.07383 | 0.11107  | -0.12653 |



|          |          |          |          |          |          |          |          |          |
|----------|----------|----------|----------|----------|----------|----------|----------|----------|
| -0.18954 | 3.75E-05 | 0.033181 | 0.47442  | -0.13521 | 0.00342  | -0.08489 | 0.06681  | -0.11826 |
| -0.04361 | 0.34701  | -0.0909  | 0.04962  | -0.29153 | 1.33E-10 | -0.01602 | 0.72994  | 0.094992 |
| 0.184252 | 6.19E-05 | 0.185842 | 5.33E-05 | 0.192801 | 2.73E-05 | -0.0144  | 0.75633  | 0.075308 |
| -0.06796 | 0.14251  | -0.09622 | 0.03766  | -0.07729 | 0.09525  | 0.177955 | 0.00011  | -0.2327  |
| 0.167772 | 0.00027  | 0.179091 | 9.97E-05 | 0.157071 | 0.00066  | -0.00614 | 0.89465  | 0.039933 |
| 0.140283 | 0.00238  | 0.071208 | 0.12438  | 0.05227  | 0.25961  | 0.190011 | 3.58E-05 | 0.057182 |
| 0.076809 | 0.09735  | -0.12009 | 0.00939  | -0.03918 | 0.39828  | -0.17559 | 0.00014  | -0.37352 |
| 0.17445  | 0.00015  | 0.053925 | 0.24481  | 0.192592 | 2.79E-05 | -0.06536 | 0.1585   | -0.10674 |
| 0.089307 | 0.05378  | 0.179764 | 9.38E-05 | 0.093387 | 0.04368  | 0.20063  | 1.25E-05 | 0.216192 |
| 0.072924 | 0.11554  | 0.093431 | 0.04358  | 0.113803 | 0.01387  | 0.002731 | 0.95306  | -0.08676 |
| 0.069567 | 0.13332  | 0.032727 | 0.48048  | 0.010498 | 0.82099  | 0.050839 | 0.2729   | -0.02863 |
| -0.17265 | 0.00018  | -0.22649 | 7.58E-07 | -0.36046 | 8.94E-16 | -0.16997 | 0.00022  | -0.08656 |
| -0.05527 | 0.23323  | -0.06589 | 0.15516  | 0.033046 | 0.47621  | -0.0035  | 0.93989  | -0.0493  |
| -0.02339 | 0.61418  | -0.08064 | 0.0817   | 0.013938 | 0.76387  | -0.0687  | 0.13825  | -0.18434 |
| -0.09607 | 0.03796  | -0.12286 | 0.00786  | 0.018944 | 0.68304  | -0.07373 | 0.11154  | -0.06186 |
| -0.10737 | 0.0203   | -0.05314 | 0.25172  | -0.03272 | 0.48056  | 0.036929 | 0.42593  | 0.186049 |
| 0.029316 | 0.52741  | 0.013312 | 0.77418  | 0.063696 | 0.16938  | -0.00542 | 0.90696  | -0.06887 |
| -0.02632 | 0.5705   | -0.02611 | 0.57353  | 0.040122 | 0.38701  | -0.08052 | 0.08217  | -0.08199 |
| -0.00913 | 0.84394  | -0.02728 | 0.55647  | 0.010551 | 0.82011  | -0.01697 | 0.71447  | 0.064691 |
| 0.110677 | 0.01673  | -0.05654 | 0.22263  | 0.083879 | 0.07015  | -0.11581 | 0.01227  | -0.27718 |
| 0.03948  | 0.39465  | 0.085876 | 0.0637   | 0.1651   | 0.00034  | 0.03721  | 0.42241  | -0.05519 |
| 0.031678 | 0.49466  | 0.068362 | 0.14019  | 0.053407 | 0.24938  | -0.13452 | 0.00359  | -0.13787 |
| 0.060034 | 0.19531  | 0.081082 | 0.08005  | 0.03799  | 0.41275  | 0.150397 | 0.00111  | 0.070123 |
| 0.040881 | 0.37808  | 0.122042 | 0.00829  | 0.106993 | 0.02075  | 0.048394 | 0.29666  | 0.017374 |
| 0.115037 | 0.01286  | 0.040971 | 0.37703  | 0.023781 | 0.60823  | 0.091552 | 0.04801  | -0.2216  |
| 0.027289 | 0.55636  | -0.0169  | 0.71574  | 0.011317 | 0.80729  | -0.03087 | 0.50576  | -0.13798 |
| 0.213395 | 3.27E-06 | -0.01834 | 0.69269  | 0.02531  | 0.58536  | 0.057179 | 0.21745  | 0.057072 |
| 0.23036  | 4.84E-07 | 0.149015 | 0.00124  | 0.287001 | 2.63E-10 | 0.045109 | 0.3307   | -0.19273 |
| 0.037517 | 0.4186   | 0.092815 | 0.04499  | 0.111879 | 0.01557  | -0.02252 | 0.62738  | 0.025926 |
| -0.01804 | 0.69736  | -0.01715 | 0.7117   | 0.020299 | 0.66172  | 0.080689 | 0.08153  | 0.075216 |
| -0.06582 | 0.15557  | -0.02127 | 0.64664  | -0.03296 | 0.47741  | 0.003938 | 0.93236  | 0.073397 |
| 0.011112 | 0.81073  | -0.05991 | 0.19626  | -0.01933 | 0.67697  | -0.05131 | 0.26848  | -0.26301 |
| -0.06945 | 0.134    | -0.00138 | 0.97631  | 0.046394 | 0.3171   | -0.14725 | 0.00142  | -0.0082  |
| 0.026105 | 0.57362  | 0.048383 | 0.29677  | 0.013839 | 0.7655   | -0.09426 | 0.04174  | -0.10244 |
| 0.05003  | 0.28062  | 0.202349 | 1.05E-05 | 0.079999 | 0.08418  | 0.000969 | 0.98334  | -0.03056 |
| -0.27921 | 8.24E-10 | -0.06957 | 0.13332  | -0.16164 | 0.00045  | -0.10998 | 0.01743  | 0.068185 |
| -0.09709 | 0.03596  | 0.016121 | 0.72823  | -0.02655 | 0.56717  | -0.0363  | 0.43382  | -0.01428 |
| 0.091668 | 0.04772  | 0.133727 | 0.00379  | 0.218276 | 1.92E-06 | -0.00041 | 0.99296  | 0.061596 |
| 0.123538 | 0.00752  | 0.011582 | 0.80288  | 0.083798 | 0.07042  | 0.085196 | 0.06584  | -0.0347  |
| 0.024019 | 0.60464  | 0.010847 | 0.81515  | -0.00462 | 0.92072  | -0.05079 | 0.27339  | -0.13067 |
| -0.00028 | 0.99514  | 0.019094 | 0.68067  | 0.046739 | 0.31351  | 0.052001 | 0.26208  | -0.03073 |
| -0.18873 | 4.05E-05 | -0.13872 | 0.00266  | -0.10268 | 0.0265   | -0.07894 | 0.08838  | 0.048837 |
| 0.160222 | 0.00051  | 0.073956 | 0.11046  | 0.124386 | 0.00712  | -0.10356 | 0.02522  | -0.08596 |
| 0.078928 | 0.08843  | 0.212295 | 3.69E-06 | -0.07646 | 0.0989   | 0.178115 | 0.00011  | 0.358508 |
| 0.058098 | 0.21013  | 0.045217 | 0.32954  | 0.020116 | 0.66459  | -0.00296 | 0.94917  | 0.014874 |

|          |          |          |          |          |          |          |          |          |
|----------|----------|----------|----------|----------|----------|----------|----------|----------|
| 0.007941 | 0.86411  | -0.01957 | 0.67315  | -0.02986 | 0.51975  | -0.09558 | 0.03896  | -0.1434  |
| -0.04136 | 0.37255  | -0.13029 | 0.0048   | -0.08927 | 0.05388  | -0.06922 | 0.13529  | -0.10766 |
| -0.02604 | 0.57463  | -0.10463 | 0.02374  | -0.11    | 0.01741  | -0.06176 | 0.18277  | -0.05517 |
| -0.01494 | 0.74753  | -0.17201 | 0.00019  | -0.31601 | 2.74E-12 | 0.066682 | 0.15022  | -0.1294  |
| -0.2639  | 7.02E-09 | 0.062188 | 0.17973  | 0.013704 | 0.76772  | -0.06914 | 0.13573  | -0.10101 |
| 0.043026 | 0.35354  | 0.05764  | 0.21376  | -0.00171 | 0.97059  | -0.0072  | 0.87674  | 0.099217 |
| -0.00476 | 0.91822  | 0.00771  | 0.86802  | -0.2201  | 1.57E-06 | 0.152059 | 0.00098  | 0.116014 |
| 0.098808 | 0.03278  | 0.096444 | 0.03721  | 0.022167 | 0.63279  | 0.031555 | 0.49634  | 0.325305 |
| 0.145968 | 0.00156  | -0.14902 | 0.00124  | -0.27087 | 2.69E-09 | -0.02051 | 0.65841  | -0.05457 |
| 0.086832 | 0.0608   | -0.04138 | 0.37227  | -0.0765  | 0.0987   | -0.07479 | 0.10648  | -0.06203 |
| -0.20549 | 7.58E-06 | -0.03187 | 0.49205  | -0.07206 | 0.11995  | -0.11008 | 0.01733  | -0.14518 |
| 0.002732 | 0.95304  | 0.138307 | 0.00274  | 0.055281 | 0.23313  | 0.049829 | 0.28256  | 0.034795 |
| 0.0477   | 0.30366  | 0.03166  | 0.49491  | 0.065346 | 0.15858  | -0.00876 | 0.85025  | -0.11886 |
| 0.374311 | 5.59E-17 | 0.264802 | 6.20E-09 | 0.156951 | 0.00066  | 0.299013 | 4.23E-11 | 0.250529 |
| 0.175267 | 0.00014  | 0.256535 | 1.87E-08 | 0.02375  | 0.6087   | 0.192258 | 2.88E-05 | 0.260891 |
| -0.02923 | 0.52863  | 0.111075 | 0.01633  | 0.055084 | 0.2348   | 0.004868 | 0.91644  | -0.01255 |
| 0.003411 | 0.94139  | -0.25241 | 3.21E-08 | -0.19964 | 1.38E-05 | -0.01501 | 0.74635  | -0.16574 |
| 0.330311 | 2.38E-13 | 0.293412 | 1.00E-10 | 0.204317 | 8.57E-06 | 0.190477 | 3.42E-05 | 0.254375 |
| -0.13642 | 0.00314  | -0.20558 | 7.51E-06 | -0.18695 | 4.80E-05 | -0.18643 | 5.05E-05 | -0.25821 |
| -0.12654 | 0.00618  | -0.03357 | 0.46927  | -0.006   | 0.89711  | -0.11099 | 0.01642  | -0.13373 |
| -0.0531  | 0.25215  | 0.048407 | 0.29654  | 0.012756 | 0.78337  | 0.004071 | 0.93008  | -0.05706 |
| -0.15647 | 0.00069  | -0.07969 | 0.08537  | -0.30999 | 7.37E-12 | 0.068508 | 0.13934  | -0.04102 |
| 0.126316 | 0.00627  | 0.189243 | 3.86E-05 | -0.05118 | 0.26967  | 0.0855   | 0.06488  | 0.22454  |
| -0.07514 | 0.10487  | -0.05389 | 0.24509  | -0.01596 | 0.73085  | -0.07924 | 0.08716  | -0.15202 |
| 0.057201 | 0.21727  | -0.01906 | 0.68117  | -0.00147 | 0.97468  | 0.028503 | 0.53894  | -0.06225 |
| 0.049317 | 0.28754  | 0.096106 | 0.03788  | 0.028165 | 0.54375  | -0.09885 | 0.03271  | -0.08966 |
| -0.24883 | 5.07E-08 | -0.26143 | 9.78E-09 | -0.30862 | 9.20E-12 | -0.40746 | 4.18E-20 | -0.2303  |
| -0.15728 | 0.00065  | -0.18492 | 5.81E-05 | -0.26352 | 7.38E-09 | 0.02593  | 0.5762   | -0.0017  |
| -0.06485 | 0.16174  | -0.32469 | 6.30E-13 | -0.20026 | 1.30E-05 | -0.26054 | 1.10E-08 | -0.3635  |
| 0.040965 | 0.37709  | -0.12625 | 0.0063   | -0.21558 | 2.58E-06 | -0.02343 | 0.61347  | -0.29454 |
| -0.27281 | 2.05E-09 | -0.25761 | 1.63E-08 | -0.28423 | 3.97E-10 | -0.16607 | 0.00031  | -0.27808 |
| -0.19266 | 2.77E-05 | -0.19778 | 1.67E-05 | -0.2046  | 8.32E-06 | -0.0979  | 0.03443  | -0.15904 |
| -0.01685 | 0.71643  | -0.10949 | 0.01794  | -0.08749 | 0.05886  | -0.32372 | 7.45E-13 | -0.27391 |
| 0.071403 | 0.12335  | 0.012193 | 0.79271  | 0.115941 | 0.01217  | -0.04577 | 0.32362  | 0.200744 |
| -0.06218 | 0.17981  | -0.07119 | 0.12446  | -0.04883 | 0.29231  | 0.000924 | 0.98411  | -0.0726  |
| -0.00352 | 0.93954  | 0.06806  | 0.14196  | 0.036864 | 0.42675  | -0.09181 | 0.04737  | -0.1527  |
| 0.229251 | 5.51E-07 | 0.044051 | 0.34219  | 0.089645 | 0.05287  | 0.092383 | 0.04601  | -0.19264 |
| 0.221    | 1.42E-06 | 0.052569 | 0.2569   | 0.160828 | 0.00048  | 0.054696 | 0.23812  | 0.071785 |
| -0.08149 | 0.07854  | 0.022896 | 0.62163  | -0.02093 | 0.65185  | -0.06306 | 0.17369  | 0.013465 |
| -0.05626 | 0.22497  | -0.02895 | 0.53257  | -0.1464  | 0.00151  | -0.01253 | 0.78717  | 0.047213 |
| -0.1198  | 0.00956  | -0.01948 | 0.67459  | 0.028679 | 0.53643  | -0.14843 | 0.0013   | -0.14073 |
| -0.0175  | 0.70603  | -0.00685 | 0.88258  | -0.00046 | 0.99206  | -0.04331 | 0.35035  | -0.05303 |
| 0.013202 | 0.77599  | 0.126273 | 0.00629  | 0.154039 | 0.00084  | -0.10902 | 0.01844  | -0.0378  |
| -0.01797 | 0.69847  | -0.06527 | 0.15907  | -0.03382 | 0.46592  | -0.06079 | 0.18971  | -0.14291 |
| -0.01072 | 0.81729  | -0.12528 | 0.00671  | -0.12044 | 0.00918  | -0.13379 | 0.00377  | -0.21112 |

|          |          |          |          |          |          |          |          |          |
|----------|----------|----------|----------|----------|----------|----------|----------|----------|
| -0.0239  | 0.60648  | 0.324394 | 6.64E-13 | 0.189207 | 3.87E-05 | 0.011126 | 0.81048  | 0.099494 |
| -0.1757  | 0.00014  | -0.17852 | 0.00011  | -0.18061 | 8.68E-05 | -0.0681  | 0.14172  | -0.02485 |
| -0.08971 | 0.05271  | 0.027609 | 0.55175  | -0.02662 | 0.56602  | -0.12039 | 0.00921  | -0.11418 |
| -0.03714 | 0.42335  | -0.04158 | 0.37002  | -0.0452  | 0.32971  | -0.14026 | 0.00238  | -0.12376 |
| 0.077636 | 0.09378  | 0.115377 | 0.0126   | 0.122768 | 0.00791  | 0.020706 | 0.65537  | 0.150021 |
| -0.15854 | 0.00058  | -0.05574 | 0.22929  | -0.03242 | 0.48458  | -0.0903  | 0.05115  | -0.18514 |
| 0.033949 | 0.46424  | -0.05254 | 0.25713  | -0.23025 | 4.90E-07 | 0.118975 | 0.01007  | 0.10821  |
| 0.035078 | 0.4495   | 0.105416 | 0.02271  | 0.056648 | 0.22176  | 0.04694  | 0.31143  | 0.051294 |
| 0.052681 | 0.25588  | -0.01519 | 0.74331  | -0.04008 | 0.3875   | 0.04881  | 0.29253  | -0.02493 |
| -0.14208 | 0.00209  | -0.20282 | 1.00E-05 | -0.19231 | 2.87E-05 | -0.13332 | 0.0039   | -0.19615 |
| 0.305201 | 1.59E-11 | 0.066992 | 0.14833  | 0.254064 | 2.59E-08 | 0.109659 | 0.01776  | -0.08622 |
| 0.054319 | 0.24137  | -0.0064  | 0.89031  | -0.01591 | 0.73164  | 0.084555 | 0.06791  | -0.02147 |
| 0.059887 | 0.19641  | 0.122877 | 0.00785  | -0.05225 | 0.25976  | 0.132559 | 0.00411  | 0.199108 |
| 0.07983  | 0.08484  | 0.252422 | 3.20E-08 | 0.262692 | 8.26E-09 | 0.126196 | 0.00632  | 0.139542 |
| -0.04633 | 0.31778  | -0.05218 | 0.26047  | -0.04278 | 0.3563   | -0.04625 | 0.3186   | 0.121676 |
| -0.2883  | 2.17E-10 | -0.12547 | 0.00663  | -0.12106 | 0.00883  | -0.22403 | 1.01E-06 | -0.01732 |
| -0.15151 | 0.00102  | -0.17636 | 0.00013  | -0.1521  | 0.00098  | -0.14166 | 0.00215  | -0.10082 |
| 0.171942 | 0.00019  | 0.205526 | 7.55E-06 | 0.180047 | 9.14E-05 | -0.10693 | 0.02082  | -0.04454 |
| -0.01253 | 0.78712  | -0.1736  | 0.00016  | -0.0653  | 0.15885  | -0.1785  | 0.00011  | -0.12684 |
| 0.014689 | 0.75155  | 0.178636 | 0.0001   | 0.120857 | 0.00894  | 0.185211 | 5.66E-05 | 0.149084 |
| 0.028648 | 0.53686  | -0.1052  | 0.02299  | -0.02713 | 0.55865  | -0.048   | 0.30065  | -0.10245 |
| 0.015747 | 0.7343   | 0.021686 | 0.64018  | 0.021707 | 0.63987  | 0.000521 | 0.99104  | -0.08363 |
| -0.26554 | 5.61E-09 | -0.30979 | 7.61E-12 | -0.27569 | 1.36E-09 | -0.27329 | 1.92E-09 | -0.33499 |
| -0.07925 | 0.08712  | 0.069515 | 0.13361  | 0.085422 | 0.06512  | 0.025576 | 0.58142  | 0.11217  |
| 0.097497 | 0.03518  | 0.210617 | 4.41E-06 | 0.069519 | 0.13359  | 0.093542 | 0.04333  | 0.024923 |
| 0.237656 | 2.03E-07 | 0.228237 | 6.20E-07 | 0.259825 | 1.21E-08 | 0.2125   | 3.61E-06 | 0.327381 |
| -0.05557 | 0.23069  | 0.020469 | 0.65907  | 0.018631 | 0.688    | -0.04981 | 0.28271  | -0.08024 |
| 0.22378  | 1.03E-06 | 0.229259 | 5.50E-07 | 0.229325 | 5.46E-07 | 0.00711  | 0.87822  | -0.01374 |
| 0.081422 | 0.07879  | 0.077781 | 0.09317  | 0.150719 | 0.00109  | 0.031555 | 0.49634  | 0.066883 |
| 0.053489 | 0.24865  | 0.032223 | 0.48727  | 0.105246 | 0.02293  | 0.022332 | 0.63025  | 0.043484 |
| -0.19117 | 3.20E-05 | -0.05367 | 0.24703  | -0.02517 | 0.58742  | 0.033305 | 0.47276  | 0.191671 |
| 0.04911  | 0.28957  | 0.200544 | 1.26E-05 | 0.187347 | 4.62E-05 | 0.07319  | 0.11421  | 0.436382 |
| 0.150535 | 0.0011   | 0.326425 | 4.68E-13 | 0.273745 | 1.80E-09 | 0.066128 | 0.15365  | 0.177283 |
| 0.206862 | 6.57E-06 | 0.344891 | 1.72E-14 | 0.244246 | 9.03E-08 | 0.236682 | 2.28E-07 | 0.223499 |
| -0.10705 | 0.02068  | -0.09061 | 0.05037  | -0.10251 | 0.02675  | -0.0791  | 0.08774  | -0.11374 |
| -0.0948  | 0.04059  | -0.14359 | 0.00187  | -0.05806 | 0.21041  | -0.04509 | 0.33086  | -0.14779 |
| -0.10358 | 0.0252   | 0.058104 | 0.21008  | -0.06562 | 0.15685  | 0.087244 | 0.05958  | 0.17046  |
| 0.128074 | 0.00558  | 0.185606 | 5.45E-05 | 0.162413 | 0.00043  | 0.011795 | 0.79933  | -0.08262 |
| -0.01251 | 0.78737  | -0.0171  | 0.7124   | 0.034847 | 0.4525   | -0.1754  | 0.00014  | -0.05647 |
| 0.110461 | 0.01694  | 0.207298 | 6.27E-06 | 0.268789 | 3.59E-09 | 0.040991 | 0.37679  | -0.06326 |
| 0.084568 | 0.06786  | 0.227531 | 6.72E-07 | 0.081877 | 0.07713  | 0.122077 | 0.00827  | 0.170305 |
| -0.0251  | 0.58848  | -0.22083 | 1.44E-06 | -0.2251  | 8.90E-07 | -0.04644 | 0.3166   | -0.02595 |
| 0.045279 | 0.32888  | 0.049655 | 0.28424  | 0.079848 | 0.08477  | 0.087265 | 0.05952  | -0.02056 |
| 0.045515 | 0.32636  | 0.252859 | 3.03E-08 | 0.08479  | 0.06714  | 0.193772 | 2.48E-05 | 0.377857 |
| -0.16652 | 0.0003   | -0.04383 | 0.34466  | -0.23574 | 2.56E-07 | 0.377047 | 3.18E-17 | -0.01656 |

|          |          |          |          |          |          |          |          |          |
|----------|----------|----------|----------|----------|----------|----------|----------|----------|
| -0.05161 | 0.26566  | 0.029656 | 0.52263  | 0.057318 | 0.21633  | 0.025267 | 0.58599  | -0.00434 |
| -0.10329 | 0.0256   | 0.145791 | 0.00158  | -0.02551 | 0.58243  | -0.00097 | 0.98337  | -0.07295 |
| -0.07206 | 0.11991  | 0.011989 | 0.7961   | 0.044352 | 0.33889  | -0.16411 | 0.00037  | -0.06066 |
| 0.063254 | 0.17237  | 0.110425 | 0.01698  | 0.157426 | 0.00064  | 0.051567 | 0.26608  | 0.042805 |
| -0.09751 | 0.03516  | -0.20513 | 7.87E-06 | -0.16636 | 0.00031  | -0.04892 | 0.29142  | -0.00185 |
| -0.07096 | 0.12568  | -0.10357 | 0.02521  | -0.11491 | 0.01297  | -0.19748 | 1.72E-05 | -0.12703 |
| 0.08709  | 0.06003  | 0.106912 | 0.02084  | 0.090644 | 0.05028  | -0.02345 | 0.61328  | -0.00495 |
| 0.196096 | 1.97E-05 | 0.05124  | 0.26913  | -0.2311  | 4.43E-07 | 0.143498 | 0.00188  | 0.155634 |
| 0.239537 | 1.61E-07 | 0.27895  | 8.56E-10 | 0.150099 | 0.00114  | 0.286589 | 2.80E-10 | 0.46491  |
| -0.04076 | 0.37952  | 0.105101 | 0.02312  | 0.095149 | 0.03984  | -0.03442 | 0.45799  | -0.12211 |
| -0.03264 | 0.48171  | 0.001315 | 0.9774   | -0.02529 | 0.58561  | 0.121269 | 0.00871  | 0.10637  |
| -0.03647 | 0.43166  | 0.088504 | 0.05598  | 0.047214 | 0.30862  | 0.133847 | 0.00376  | 0.361888 |
| 0.209097 | 5.19E-06 | 0.148177 | 0.00132  | 0.118552 | 0.01034  | 0.115255 | 0.01269  | -0.01499 |
| 0.250794 | 3.95E-08 | 0.049485 | 0.2859   | 0.103025 | 0.02599  | 0.16988  | 0.00023  | 0.117441 |
| -0.02035 | 0.66098  | 0.054025 | 0.24394  | 0.006851 | 0.88262  | -0.05608 | 0.22644  | -0.07125 |
| -0.02672 | 0.56466  | -0.20021 | 1.30E-05 | -0.14307 | 0.00194  | 0.014854 | 0.74884  | -0.02761 |
| 0.237299 | 2.12E-07 | 0.050462 | 0.27648  | 0.260051 | 1.18E-08 | 0.072614 | 0.1171   | 0.147341 |
| 0.087743 | 0.05813  | 0.025049 | 0.58923  | 0.032086 | 0.48913  | 0.113653 | 0.01399  | 0.062509 |
| -0.11709 | 0.01133  | -0.00693 | 0.8812   | -0.06857 | 0.13901  | -0.11111 | 0.0163   | 0.106126 |
| 0.020674 | 0.65587  | -0.07286 | 0.11585  | -0.04891 | 0.29158  | 0.052485 | 0.25766  | -0.15719 |
| -0.13454 | 0.00358  | -0.07544 | 0.1035   | -0.12728 | 0.00588  | -0.22052 | 1.49E-06 | -0.30545 |
| 0.096657 | 0.03679  | 0.029282 | 0.52789  | 0.079817 | 0.08489  | -0.06962 | 0.133    | -0.19544 |
| 0.065929 | 0.15489  | 0.259683 | 1.24E-08 | 0.319772 | 1.46E-12 | 0.11587  | 0.01222  | 0.149476 |
| -0.17791 | 0.00011  | -0.11048 | 0.01692  | -0.07451 | 0.10781  | -0.18638 | 5.07E-05 | -0.21115 |
| -0.15889 | 0.00057  | -0.09636 | 0.03738  | -0.05608 | 0.22646  | -0.07581 | 0.10181  | -0.16451 |
| 0.061113 | 0.18739  | 0.052134 | 0.26086  | 0.108607 | 0.01889  | -0.06758 | 0.14482  | -0.19996 |
| -0.12224 | 0.00818  | -0.06328 | 0.17218  | -0.03657 | 0.43047  | -0.13362 | 0.00382  | -0.13779 |
| 0.009754 | 0.8335   | 0.102283 | 0.02709  | 0.016464 | 0.72269  | 0.168269 | 0.00026  | 0.080575 |
| -0.03713 | 0.42346  | -0.04197 | 0.36551  | 0.030483 | 0.5111   | -0.11518 | 0.01275  | -0.15618 |
| -0.02795 | 0.54687  | -0.0162  | 0.72704  | 0.008597 | 0.85301  | -0.05069 | 0.27428  | -0.06567 |
| 0.110682 | 0.01672  | -0.04424 | 0.34006  | -0.01012 | 0.82741  | -0.07222 | 0.11909  | -0.2309  |
| 0.127201 | 0.00591  | -0.01769 | 0.70298  | 0.033637 | 0.46835  | 0.079408 | 0.0865   | -0.11415 |
| -0.03838 | 0.40794  | -0.05343 | 0.24918  | -0.0346  | 0.45573  | -0.0548  | 0.23726  | -0.15973 |
| -0.0374  | 0.42001  | 0.006565 | 0.88748  | 0.085492 | 0.0649   | -0.08639 | 0.06211  | -0.22416 |
| 0.169744 | 0.00023  | 0.15624  | 0.0007   | 0.205359 | 7.69E-06 | 0.211893 | 3.85E-06 | 0.259096 |
| -0.00266 | 0.95426  | 0.075313 | 0.10406  | 0.044981 | 0.33208  | 0.050924 | 0.2721   | -0.01174 |
| 0.04079  | 0.37914  | 0.146116 | 0.00154  | 0.197424 | 1.73E-05 | 0.037166 | 0.42297  | 0.051872 |
| 0.091231 | 0.0488   | 0.138777 | 0.00265  | 0.17138  | 0.0002   | 0.051276 | 0.2688   | 0.069581 |
| 0.121484 | 0.00859  | 0.088512 | 0.05595  | 0.128939 | 0.00526  | 0.026586 | 0.56658  | -0.04902 |
| -0.00267 | 0.95412  | -0.07891 | 0.08852  | -0.06482 | 0.16196  | -0.03155 | 0.49643  | -0.1969  |
| 0.075536 | 0.10304  | -0.00889 | 0.84805  | 0.008691 | 0.85142  | -0.04387 | 0.3442   | -0.13862 |
| 0.140512 | 0.00234  | 0.06606  | 0.15407  | 0.093651 | 0.04309  | -0.01596 | 0.73084  | -0.10342 |
| 0.050382 | 0.27724  | -0.0732  | 0.11416  | -0.02606 | 0.57433  | -0.12847 | 0.00543  | -0.17406 |
| -0.27656 | 1.21E-09 | -0.1657  | 0.00032  | -0.26269 | 8.25E-09 | -0.11755 | 0.01101  | -0.12088 |
| -0.07888 | 0.08861  | -0.1231  | 0.00774  | -0.09269 | 0.04529  | -0.07753 | 0.09422  | -0.2034  |

|          |          |          |          |          |          |          |          |          |
|----------|----------|----------|----------|----------|----------|----------|----------|----------|
| 0.214402 | 2.93E-06 | 0.170609 | 0.00021  | 0.218822 | 1.81E-06 | 0.125607 | 0.00657  | -0.00955 |
| 0.017439 | 0.707    | 0.086395 | 0.06211  | 0.095234 | 0.03967  | -0.02437 | 0.59931  | -0.11899 |
| -0.06812 | 0.14159  | -0.11124 | 0.01617  | -0.12821 | 0.00553  | 0.005908 | 0.89869  | -0.19928 |
| -0.00751 | 0.87135  | -0.19228 | 2.88E-05 | -0.13681 | 0.00305  | -0.01672 | 0.71863  | -0.23524 |
| 0.20231  | 1.05E-05 | 0.282376 | 5.21E-10 | 0.254213 | 2.54E-08 | 0.164886 | 0.00035  | 0.067528 |
| 0.036978 | 0.42532  | 0.05726  | 0.2168   | 0.054858 | 0.23673  | 0.001937 | 0.9667   | -0.06624 |
| 0.091199 | 0.04888  | -0.0189  | 0.68377  | 0.05586  | 0.22826  | -0.00487 | 0.91642  | -0.21357 |
| -0.1185  | 0.01038  | -0.19762 | 1.70E-05 | -0.12704 | 0.00598  | -0.02186 | 0.63746  | -0.0568  |
| 0.369559 | 1.47E-16 | 0.049142 | 0.28926  | 0.159984 | 0.00052  | 0.173415 | 0.00017  | 0.288141 |
| -0.16826 | 0.00026  | -0.25283 | 3.04E-08 | -0.23468 | 2.90E-07 | -0.12913 | 0.00519  | -0.20478 |
| -0.23658 | 2.31E-07 | -0.09746 | 0.03525  | -0.08274 | 0.07405  | -0.17179 | 0.00019  | -0.02289 |
| -0.01768 | 0.70319  | -0.05794 | 0.21138  | -0.01666 | 0.71949  | -0.01395 | 0.76368  | 0.13912  |
| -0.01319 | 0.77616  | 0.042581 | 0.35855  | 0.089713 | 0.05269  | -0.03242 | 0.48468  | 0.092215 |
| 0.007939 | 0.86414  | -0.04157 | 0.37014  | 0.130105 | 0.00486  | -0.26454 | 6.43E-09 | -0.26506 |
| -0.1477  | 0.00137  | -0.10344 | 0.0254   | -0.0861  | 0.06302  | -0.007   | 0.88002  | 0.146103 |
| -0.06908 | 0.13604  | 0.026167 | 0.57271  | 0.054199 | 0.24242  | 0.094567 | 0.04108  | 0.069481 |
| -0.14889 | 0.00125  | -0.03106 | 0.50317  | -0.05915 | 0.20196  | -0.02047 | 0.65911  | -0.08104 |
| 0.020254 | 0.66242  | -0.10787 | 0.01972  | -0.01962 | 0.67233  | 0.027081 | 0.55938  | 0.200089 |
| -0.03038 | 0.51252  | -0.04301 | 0.35375  | 0.053435 | 0.24913  | -0.0822  | 0.07597  | -0.07095 |
| 0.072087 | 0.11979  | 0.309024 | 8.61E-12 | 0.220503 | 1.50E-06 | 0.101077 | 0.02896  | 0.422534 |
| -0.12966 | 0.00501  | -0.09211 | 0.04667  | 0.003642 | 0.93743  | -0.22821 | 6.22E-07 | -0.24376 |
| -0.03221 | 0.4875   | -0.06189 | 0.18185  | -0.05841 | 0.20771  | 0.080089 | 0.08383  | -0.11672 |
| 0.082194 | 0.07599  | 0.06079  | 0.18973  | 0.049318 | 0.28753  | -0.06185 | 0.18212  | -0.18928 |
| 0.213924 | 3.09E-06 | 0.04566  | 0.32482  | 0.169303 | 0.00024  | 0.1189   | 0.01012  | -0.05798 |
| 0.038753 | 0.40342  | 0.033377 | 0.4718   | 0.090807 | 0.04986  | 0.08205  | 0.0765   | 0.028379 |
| 0.14071  | 0.00231  | 0.100594 | 0.02974  | 0.064755 | 0.16239  | 0.038909 | 0.40153  | 0.092795 |
| 0.154998 | 0.00078  | 0.089686 | 0.05276  | 0.093065 | 0.04442  | 0.137931 | 0.00282  | -0.07081 |
| 0.052384 | 0.25858  | 0.069831 | 0.13185  | 0.100679 | 0.0296   | -0.10727 | 0.02042  | -0.0643  |
| 0.214109 | 3.03E-06 | 0.203593 | 9.23E-06 | 0.314102 | 3.75E-12 | 0.105998 | 0.02197  | 0.325893 |
| -0.25731 | 1.69E-08 | -0.14389 | 0.00183  | -0.24691 | 6.47E-08 | -0.22645 | 7.62E-07 | -0.08044 |
| -0.19065 | 3.37E-05 | 0.085712 | 0.06421  | 0.068874 | 0.13724  | -0.01945 | 0.6751   | 0.169622 |
| 0.000226 | 0.99612  | 0.059118 | 0.20222  | 0.145113 | 0.00167  | -0.12092 | 0.0089   | -0.08435 |
| 0.106848 | 0.02092  | 0.0759   | 0.10138  | 0.052932 | 0.25362  | -0.00244 | 0.95801  | -0.04906 |
| 0.000263 | 0.99548  | 0.031919 | 0.49139  | -0.00213 | 0.96334  | -0.07047 | 0.12831  | -0.16887 |
| 0.10185  | 0.02775  | -0.09328 | 0.04394  | -0.10318 | 0.02576  | -0.03815 | 0.41077  | -0.08452 |
| -0.2806  | 6.74E-10 | -0.15844 | 0.00059  | -0.22969 | 5.23E-07 | -0.02834 | 0.54119  | -0.04427 |
| 0.171567 | 0.0002   | -0.05041 | 0.27696  | -0.00984 | 0.83203  | 0.136971 | 0.00302  | 0.163028 |
| 0.054323 | 0.24134  | -0.04543 | 0.32727  | 0.143462 | 0.00188  | -0.12999 | 0.0049   | -0.25311 |
| -0.06087 | 0.18911  | -0.177   | 0.00012  | -0.16675 | 0.0003   | -0.06206 | 0.18062  | -0.0313  |
| -0.08168 | 0.07785  | -0.06252 | 0.17743  | -0.08694 | 0.06049  | 0.035688 | 0.44166  | -0.0224  |
| -0.04076 | 0.37944  | -0.05171 | 0.26472  | -0.1501  | 0.00114  | -0.08047 | 0.08238  | -0.14651 |
| 0.175695 | 0.00014  | 0.157636 | 0.00063  | 0.082903 | 0.07348  | 0.156714 | 0.00068  | 0.117308 |
| 0.205027 | 7.96E-06 | 0.337545 | 6.58E-14 | 0.25099  | 3.85E-08 | 0.214553 | 2.89E-06 | 0.215757 |
| -0.25801 | 1.54E-08 | -0.1293  | 0.00513  | -0.10763 | 0.01999  | -0.14176 | 0.00213  | -0.16576 |
| 0.210294 | 4.57E-06 | 0.192933 | 2.70E-05 | 0.053561 | 0.24801  | 0.049562 | 0.28514  | -0.00699 |

|          |          |          |          |          |          |          |          |          |
|----------|----------|----------|----------|----------|----------|----------|----------|----------|
| 0.072607 | 0.11714  | 0.055675 | 0.22981  | 0.04456  | 0.33663  | 0.01762  | 0.7041   | -0.07267 |
| -0.34013 | 4.12E-14 | -0.22108 | 1.40E-06 | -0.29585 | 6.90E-11 | -0.17737 | 0.00012  | -0.17983 |
| -0.04318 | 0.35184  | -0.11776 | 0.01087  | -0.08787 | 0.05775  | -0.16131 | 0.00047  | -0.17502 |
| 0.125131 | 0.00678  | 0.015785 | 0.73368  | 0.015442 | 0.73926  | 0.07513  | 0.10491  | 0.043197 |
| 0.006217 | 0.8934   | -0.0542  | 0.24244  | 0.001355 | 0.9767   | -0.08258 | 0.0746   | -0.17157 |
| 0.25195  | 3.40E-08 | 0.320196 | 1.36E-12 | 0.272118 | 2.26E-09 | 0.155606 | 0.00074  | 0.138696 |
| -0.02118 | 0.64808  | 0.231403 | 4.28E-07 | -0.04932 | 0.28751  | 0.141736 | 0.00214  | 0.185344 |
| 0.028807 | 0.53461  | 0.155156 | 0.00077  | 0.104123 | 0.02444  | 0.037758 | 0.41561  | 0.010175 |
| -0.1827  | 7.16E-05 | -0.18758 | 4.52E-05 | -0.32706 | 4.20E-13 | -0.09912 | 0.03223  | -0.09168 |
| 0.117606 | 0.01097  | 0.004907 | 0.91578  | 0.046796 | 0.31292  | -0.05569 | 0.22965  | -0.10709 |
| -0.14119 | 0.00223  | -0.15188 | 0.00099  | -0.11112 | 0.01629  | -0.26302 | 7.90E-09 | -0.25208 |
| -0.02719 | 0.55785  | 0.164434 | 0.00036  | -0.17762 | 0.00011  | 0.199388 | 1.42E-05 | 0.287558 |
| 0.107329 | 0.02035  | 0.024281 | 0.60071  | 0.005914 | 0.89857  | -0.08929 | 0.05382  | -0.24745 |
| -0.11462 | 0.01319  | -0.06648 | 0.15146  | -0.04658 | 0.31521  | 0.001625 | 0.97207  | -0.01997 |
| 0.020426 | 0.65974  | -0.06054 | 0.19154  | -0.04804 | 0.30019  | -0.06656 | 0.15095  | -0.18149 |
| 0.027603 | 0.55183  | -0.06435 | 0.16507  | 0.011391 | 0.80606  | -0.01626 | 0.72598  | -0.18457 |
| -0.04093 | 0.37754  | 0.027412 | 0.55458  | 0.026868 | 0.56247  | 0.06349  | 0.17077  | -0.0469  |
| -0.13431 | 0.00364  | -0.15267 | 0.00093  | -0.06332 | 0.17194  | -0.0104  | 0.82266  | 0.059241 |
| -0.06412 | 0.16656  | 0.044215 | 0.34039  | -0.01985 | 0.6687   | 0.046638 | 0.31456  | -0.00437 |
| 0.073485 | 0.11276  | 0.041022 | 0.37643  | 0.023938 | 0.60586  | 0.098353 | 0.0336   | 0.002282 |
| 0.151038 | 0.00106  | 0.212861 | 3.47E-06 | 0.22372  | 1.04E-06 | 0.047691 | 0.30375  | 0.244448 |
| 0.256479 | 1.89E-08 | 0.248633 | 5.20E-08 | 0.280231 | 7.11E-10 | 0.14456  | 0.00174  | 0.142813 |
| 0.146919 | 0.00145  | 0.04123  | 0.37402  | 0.107166 | 0.02054  | 0.106015 | 0.02194  | 0.132122 |
| -0.07915 | 0.08754  | -0.1876  | 4.51E-05 | -0.12828 | 0.0055   | -0.1589  | 0.00057  | -0.28926 |
| 0.039014 | 0.40026  | -0.0279  | 0.54752  | 0.051751 | 0.26438  | -0.17662 | 0.00012  | -0.15013 |
| 0.175693 | 0.00014  | -0.02108 | 0.64955  | 0.045525 | 0.32626  | 0.049198 | 0.2887   | -0.11349 |
| -0.07678 | 0.09748  | -0.10512 | 0.02309  | -0.09469 | 0.04082  | 0.004531 | 0.92221  | -0.16633 |
| 0.063411 | 0.1713   | 0.169326 | 0.00024  | 0.190854 | 3.30E-05 | 0.097929 | 0.03437  | 0.155486 |
| -0.0884  | 0.05627  | -0.11147 | 0.01595  | -0.03951 | 0.39432  | -0.10356 | 0.02523  | -0.1196  |
| -0.03674 | 0.42826  | -0.09184 | 0.0473   | 0.001223 | 0.97897  | -0.0963  | 0.0375   | 0.025314 |
| -0.02213 | 0.63342  | -0.04025 | 0.38543  | 0.052296 | 0.25937  | -0.07751 | 0.09433  | 0.002252 |
| -0.07733 | 0.09508  | 0.047663 | 0.30403  | 0.070801 | 0.12655  | -0.21836 | 1.90E-06 | -0.19413 |
| 0.189841 | 3.64E-05 | -0.18075 | 8.57E-05 | 0.025241 | 0.58638  | 0.098527 | 0.03328  | 0.000531 |
| -0.09998 | 0.03075  | -0.24355 | 9.85E-08 | -0.39462 | 7.49E-19 | -0.06995 | 0.1312   | -0.16384 |
| 0.073708 | 0.11167  | 0.19868  | 1.52E-05 | 0.185897 | 5.30E-05 | 0.224456 | 9.57E-07 | 0.32673  |
| 0.174603 | 0.00015  | 0.290156 | 1.64E-10 | 0.199478 | 1.41E-05 | 0.115353 | 0.01262  | 0.353796 |
| 0.051607 | 0.26571  | 0.217934 | 1.99E-06 | 0.047838 | 0.30226  | 0.184147 | 6.25E-05 | 0.434841 |
| -0.05978 | 0.19721  | -0.01394 | 0.76387  | 0.012483 | 0.7879   | 0.011032 | 0.81205  | 0.00753  |
| 0.090329 | 0.05108  | 0.146243 | 0.00153  | 0.067541 | 0.14503  | 0.020056 | 0.66553  | 0.038711 |
| -0.15542 | 0.00075  | -0.04683 | 0.3126   | -0.18108 | 8.31E-05 | 0.071064 | 0.12515  | 0.113258 |
| -0.35357 | 3.38E-15 | -0.22715 | 7.03E-07 | -0.21331 | 3.30E-06 | -0.21254 | 3.59E-06 | -0.14544 |
| 0.177379 | 0.00012  | 0.097856 | 0.03451  | -0.00885 | 0.84866  | 0.141718 | 0.00214  | 0.017214 |
| 0.045246 | 0.32923  | -0.12081 | 0.00897  | -0.05302 | 0.25283  | 0.010193 | 0.82612  | -0.05836 |
| 0.257038 | 1.75E-08 | 0.108047 | 0.01952  | 0.188492 | 4.15E-05 | -0.03298 | 0.47708  | -0.03424 |
| 0.181725 | 7.83E-05 | 0.183379 | 6.72E-05 | 0.170411 | 0.00022  | 0.095875 | 0.03835  | 0.015321 |

|          |          |          |          |          |          |          |          |          |
|----------|----------|----------|----------|----------|----------|----------|----------|----------|
| 0.085724 | 0.06418  | 0.15026  | 0.00113  | 0.169371 | 0.00024  | 0.074813 | 0.10639  | 0.069734 |
| -0.2406  | 1.42E-07 | -0.1996  | 1.39E-05 | -0.15254 | 0.00094  | -0.12603 | 0.00639  | -0.13112 |
| -0.02875 | 0.5354   | -0.07954 | 0.08598  | -0.00867 | 0.85184  | -0.23536 | 2.68E-07 | -0.08594 |
| 0.068384 | 0.14006  | 0.073457 | 0.11289  | 0.094878 | 0.04042  | -0.00418 | 0.92815  | 0.05066  |
| 0.075736 | 0.10213  | 0.050861 | 0.2727   | 0.074262 | 0.10899  | -0.02654 | 0.56722  | -0.0518  |
| 0.076312 | 0.09954  | 0.208452 | 5.56E-06 | 0.188013 | 4.34E-05 | -0.00135 | 0.97673  | -0.00379 |
| 0.272218 | 2.23E-09 | 0.224051 | 1.00E-06 | 0.203244 | 9.57E-06 | 0.180454 | 8.80E-05 | 0.0402   |
| 0.085243 | 0.06569  | 0.023856 | 0.60709  | 0.06314  | 0.17315  | 0.013033 | 0.77878  | -0.12348 |
| -0.0806  | 0.08189  | -0.07196 | 0.12043  | -0.03308 | 0.47579  | -0.0509  | 0.27228  | -0.15038 |
| -0.06093 | 0.1887   | 0.123357 | 0.00761  | 0.168566 | 0.00025  | 0.031284 | 0.50005  | 0.210495 |
| 0.186245 | 5.13E-05 | -0.01934 | 0.67674  | 0.094972 | 0.04022  | 0.003921 | 0.93266  | -0.12846 |
| -0.03791 | 0.41374  | 0.073072 | 0.1148   | 0.075422 | 0.10356  | 0.002569 | 0.95585  | -0.06741 |
| 0.190097 | 3.55E-05 | 0.1158   | 0.01227  | 0.206853 | 6.58E-06 | -0.12195 | 0.00833  | -0.17519 |
| -0.11777 | 0.01086  | -0.0329  | 0.47815  | -0.05609 | 0.22636  | 0.011854 | 0.79835  | 0.079675 |
| 0.04874  | 0.29322  | 0.022986 | 0.62027  | 0.105317 | 0.02284  | -0.0208  | 0.6539   | -0.00191 |
| -0.0666  | 0.15074  | -0.19101 | 3.25E-05 | -0.15298 | 0.00091  | -0.23797 | 1.95E-07 | -0.28359 |
| -0.10082 | 0.02937  | -0.04585 | 0.32282  | -0.15841 | 0.00059  | -0.07637 | 0.09926  | -0.03103 |
| 0.225283 | 8.71E-07 | -0.0528  | 0.25482  | -0.14034 | 0.00237  | 0.050513 | 0.27599  | 0.024562 |
| -0.00192 | 0.96705  | -0.14674 | 0.00147  | -0.02502 | 0.58961  | -0.06335 | 0.17173  | -0.07258 |
| 0.109571 | 0.01785  | 0.185058 | 5.74E-05 | 0.018621 | 0.68815  | 0.015258 | 0.74227  | 0.078959 |
| 0.05533  | 0.23271  | -0.04117 | 0.37467  | 0.003151 | 0.94585  | -0.04892 | 0.2914   | -0.20692 |
| -0.108   | 0.01958  | -0.01275 | 0.78353  | -0.08132 | 0.07917  | -0.08585 | 0.06378  | -0.21491 |
| 0.12091  | 0.00891  | 0.173107 | 0.00017  | 0.249715 | 4.53E-08 | -0.13657 | 0.0031   | 0.008837 |
| 0.022136 | 0.63326  | -0.02607 | 0.57408  | -0.12067 | 0.00905  | -0.02121 | 0.64757  | -0.10425 |
| -0.03074 | 0.50748  | 0.013401 | 0.77271  | 0.008008 | 0.86298  | -0.0022  | 0.9621   | 0.023068 |
| -0.10621 | 0.0217   | -0.03383 | 0.46578  | -0.02928 | 0.52787  | -0.2029  | 9.92E-06 | -0.15026 |
| 0.014214 | 0.75934  | 0.04703  | 0.3105   | 0.038646 | 0.40472  | 0.022608 | 0.62604  | 0.07013  |
| 0.031166 | 0.50167  | 0.049741 | 0.28341  | -0.00459 | 0.92112  | -0.03558 | 0.44306  | -0.00912 |
| -0.24128 | 1.30E-07 | -0.12101 | 0.00885  | -0.14212 | 0.00208  | -0.24996 | 4.39E-08 | -0.27335 |
| -0.07496 | 0.1057   | -0.07225 | 0.11895  | -0.00443 | 0.92401  | -0.04575 | 0.32387  | -0.02642 |
| 0.022641 | 0.62553  | -0.0667  | 0.15013  | 0.042283 | 0.36192  | 0.013123 | 0.77729  | 0.166263 |
| 0.038987 | 0.40058  | -0.02973 | 0.52155  | 0.103375 | 0.02549  | 0.026666 | 0.56542  | 0.167212 |
| -0.02085 | 0.65321  | -0.02608 | 0.574    | 0.060607 | 0.19107  | -0.09706 | 0.036    | 0.132083 |
| 0.03031  | 0.5135   | -0.05082 | 0.27305  | -0.02431 | 0.60033  | -0.0443  | 0.33947  | -0.15678 |
| -0.18682 | 4.86E-05 | -0.17274 | 0.00018  | -0.14522 | 0.00165  | -0.21895 | 1.78E-06 | -0.18982 |
| -0.24293 | 1.06E-07 | -0.04824 | 0.29824  | -0.08771 | 0.05823  | -0.07015 | 0.13009  | -0.009   |
| 0.023336 | 0.61495  | -0.01047 | 0.8214   | -0.05008 | 0.28016  | 0.1704   | 0.00022  | 0.057895 |
| -0.07789 | 0.09272  | -0.08939 | 0.05356  | -0.09286 | 0.04488  | -0.01627 | 0.72584  | 0.093155 |
| -0.12568 | 0.00654  | -0.10271 | 0.02645  | -0.10837 | 0.01915  | -0.03515 | 0.44862  | 0.081604 |
| 0.065941 | 0.15481  | 0.042727 | 0.3569   | 0.069986 | 0.13099  | -0.15693 | 0.00067  | -0.21156 |
| -0.05947 | 0.19952  | -0.00471 | 0.91915  | -0.02969 | 0.52214  | -0.0881  | 0.05712  | -0.23404 |
| -0.07539 | 0.10373  | -0.10876 | 0.01872  | -0.08653 | 0.06171  | -0.13071 | 0.00467  | -0.25689 |
| 0.143963 | 0.00181  | 0.013345 | 0.77363  | -0.0545  | 0.23982  | 0.086029 | 0.06323  | -0.25225 |
| 0.13842  | 0.00272  | -0.03541 | 0.44524  | 0.031106 | 0.50249  | 0.110718 | 0.01668  | 0.055389 |
| 0.104888 | 0.0234   | 0.163793 | 0.00038  | 0.179386 | 9.71E-05 | 0.038368 | 0.40811  | 0.001517 |

|          |          |          |          |          |          |          |          |          |
|----------|----------|----------|----------|----------|----------|----------|----------|----------|
| -0.06037 | 0.19285  | -0.1299  | 0.00493  | -0.12247 | 0.00806  | -0.02761 | 0.55172  | -0.09926 |
| -0.04336 | 0.34985  | 0.042054 | 0.36453  | -0.06602 | 0.1543   | -0.05069 | 0.27434  | -0.2813  |
| -0.31147 | 5.79E-12 | -0.1949  | 2.22E-05 | -0.17463 | 0.00015  | -0.22203 | 1.26E-06 | -0.1655  |
| -0.06226 | 0.17922  | 0.027162 | 0.5582   | -0.06061 | 0.19107  | -0.01198 | 0.79621  | 0.072845 |
| 0.002626 | 0.95486  | 0.088785 | 0.0552   | 0.02329  | 0.61565  | 0.037193 | 0.42262  | 0.073902 |
| 0.037616 | 0.41737  | 0.174263 | 0.00015  | 0.146453 | 0.00151  | 0.14917  | 0.00122  | 0.222596 |
| -0.07468 | 0.107    | 0.052824 | 0.25459  | -0.02126 | 0.64677  | -0.02037 | 0.66065  | 0.061215 |
| -0.01195 | 0.79675  | 0.082319 | 0.07554  | -0.00191 | 0.96724  | 0.042475 | 0.35975  | 0.142185 |
| 0.132853 | 0.00403  | 0.281368 | 6.03E-10 | 0.213851 | 3.12E-06 | 0.081954 | 0.07685  | 0.217921 |
| 0.009467 | 0.83831  | 0.135168 | 0.00343  | 0.106863 | 0.0209   | 0.031683 | 0.4946   | 0.133446 |
| -0.04748 | 0.30589  | 0.057914 | 0.21158  | 0.029218 | 0.52879  | -0.0887  | 0.05543  | 0.105712 |
| 0.008923 | 0.84749  | -0.00712 | 0.87805  | -0.02101 | 0.65058  | 0.058099 | 0.21012  | -0.02657 |
| -0.08929 | 0.05383  | -0.07473 | 0.10678  | -0.05909 | 0.20246  | -0.03326 | 0.47338  | -0.05963 |
| -0.06536 | 0.15848  | -0.0795  | 0.08615  | -0.06553 | 0.15739  | -0.07044 | 0.12849  | -0.14103 |
| -0.06743 | 0.1457   | -0.15867 | 0.00058  | -0.11845 | 0.01041  | -0.17978 | 9.36E-05 | -0.27375 |
| -0.06468 | 0.16285  | -0.06399 | 0.16744  | -0.01992 | 0.6677   | -0.02654 | 0.5673   | -0.00054 |
| -0.07383 | 0.11108  | -0.05414 | 0.24294  | -0.03703 | 0.42464  | -0.01531 | 0.74139  | -0.00423 |
| 0.024869 | 0.59191  | -0.02149 | 0.6432   | -0.07953 | 0.08604  | -0.01423 | 0.75904  | -0.14704 |
| 0.166324 | 0.00031  | 0.172809 | 0.00017  | 0.153931 | 0.00085  | 0.059964 | 0.19583  | 0.111533 |
| 0.073072 | 0.1148   | 0.113989 | 0.01371  | 0.05691  | 0.21962  | 0.096921 | 0.03628  | 0.065571 |
| -0.06134 | 0.18578  | -0.04481 | 0.33397  | -0.03648 | 0.43157  | -0.0466  | 0.31498  | -0.08133 |
| 0.044333 | 0.3391   | 0.215931 | 2.48E-06 | 0.131179 | 0.00452  | 0.146047 | 0.00155  | 0.111314 |
| 0.035561 | 0.44329  | 0.004885 | 0.91616  | -0.04819 | 0.29873  | 0.019364 | 0.6764   | -0.00101 |
| 0.008796 | 0.84964  | -0.25036 | 4.17E-08 | -0.04419 | 0.34066  | -0.06191 | 0.18171  | -0.22125 |
| 0.190404 | 3.45E-05 | 0.032242 | 0.48701  | 0.011611 | 0.8024   | 0.029002 | 0.53185  | -0.04638 |
| 0.313172 | 4.37E-12 | 0.082255 | 0.07577  | 0.119552 | 0.00971  | 0.129858 | 0.00494  | -0.00207 |
| -0.1068  | 0.02098  | 0.139974 | 0.00243  | -0.19199 | 2.96E-05 | 0.017153 | 0.7116   | 0.189565 |
| -0.02344 | 0.6134   | -0.22995 | 5.08E-07 | -0.13443 | 0.00361  | -0.08917 | 0.05415  | -0.11709 |
| 0.126477 | 0.0062   | 0.185572 | 5.47E-05 | 0.250674 | 4.01E-08 | 0.001191 | 0.97952  | 0.054775 |
| 0.102211 | 0.0272   | 0.047677 | 0.30389  | 0.077533 | 0.09422  | 0.009718 | 0.8341   | 0.011874 |
| -0.2209  | 1.43E-06 | -0.30411 | 1.89E-11 | -0.21314 | 3.36E-06 | -0.30342 | 2.11E-11 | -0.31624 |
| 0.21312  | 3.37E-06 | 0.172942 | 0.00017  | 0.184202 | 6.22E-05 | 0.192802 | 2.73E-05 | 0.183915 |
| -0.07405 | 0.11003  | 0.009636 | 0.83548  | 0.033767 | 0.46663  | -0.10768 | 0.01994  | -0.19861 |
| 0.078072 | 0.09195  | -0.00067 | 0.98855  | 0.142218 | 0.00206  | 0.003765 | 0.93533  | 0.067711 |
| 0.10388  | 0.02477  | 0.088624 | 0.05564  | 0.044484 | 0.33746  | 0.108129 | 0.01943  | -0.05791 |
| -0.05755 | 0.21445  | -0.1013  | 0.02861  | -0.00387 | 0.9336   | -0.05169 | 0.26493  | -0.00185 |
| -0.20447 | 8.43E-06 | -0.07483 | 0.1063   | -0.05203 | 0.26185  | -0.01423 | 0.75902  | 0.042065 |
| 0.089731 | 0.05264  | 0.169313 | 0.00024  | 0.029765 | 0.52111  | 0.095575 | 0.03896  | 0.270915 |
| 0.161865 | 0.00045  | 0.229734 | 5.21E-07 | 0.224276 | 9.77E-07 | -0.04126 | 0.37364  | -0.00494 |
| -0.03897 | 0.40082  | -0.30186 | 2.70E-11 | -0.37309 | 7.18E-17 | -0.07925 | 0.08713  | -0.15191 |
| 0.098032 | 0.03418  | 0.037968 | 0.41303  | 0.044944 | 0.33247  | -0.03278 | 0.47975  | -0.15148 |
| -0.08396 | 0.06987  | -0.08704 | 0.06018  | -0.02857 | 0.53804  | -0.1467  | 0.00148  | -0.08971 |
| 0.181859 | 7.73E-05 | 0.191135 | 3.21E-05 | 0.217271 | 2.14E-06 | 0.070863 | 0.12622  | -0.00794 |
| -0.04108 | 0.37575  | -0.02206 | 0.6344   | -0.00805 | 0.86224  | -0.01537 | 0.74048  | -0.03793 |
| 0.028758 | 0.5353   | 0.177104 | 0.00012  | 0.117552 | 0.01101  | 0.12897  | 0.00525  | 0.157097 |



|          |          |          |          |          |          |          |          |          |
|----------|----------|----------|----------|----------|----------|----------|----------|----------|
| 0.204978 | 8.00E-06 | 0.222612 | 1.18E-06 | 0.209421 | 5.01E-06 | 0.118322 | 0.01049  | 0.092678 |
| 0.060695 | 0.19043  | -0.02964 | 0.52283  | 0.017951 | 0.69882  | -0.0195  | 0.67422  | -0.00733 |
| -0.33731 | 6.86E-14 | -0.13702 | 0.00301  | -0.14853 | 0.00129  | -0.08776 | 0.05808  | -0.07706 |
| 0.005819 | 0.90019  | -0.00764 | 0.86925  | 0.053394 | 0.2495   | 0.005791 | 0.90067  | -0.04802 |
| 0.022033 | 0.63485  | 0.035896 | 0.43899  | 0.061871 | 0.18196  | 0.014023 | 0.76246  | -0.0472  |
| 0.056049 | 0.22669  | 0.150775 | 0.00108  | 0.225082 | 8.91E-07 | 0.048762 | 0.293    | 0.049846 |
| 0.180253 | 8.97E-05 | 0.149323 | 0.00121  | 0.220999 | 1.42E-06 | -0.02349 | 0.61269  | -0.09486 |
| 0.16888  | 0.00025  | 0.077473 | 0.09448  | 0.075878 | 0.10148  | 0.18187  | 7.73E-05 | 0.100511 |
| 0.104607 | 0.02378  | 0.011632 | 0.80205  | 0.030041 | 0.51724  | -0.01755 | 0.70522  | -0.09976 |
| 0.214305 | 2.97E-06 | 0.145723 | 0.00159  | 0.187363 | 4.62E-05 | 0.13983  | 0.00246  | -0.00926 |
| 0.124338 | 0.00714  | 0.009012 | 0.84599  | 0.072696 | 0.11669  | -0.02087 | 0.65288  | -0.12759 |
| -0.03744 | 0.41952  | -0.0022  | 0.96219  | 0.021042 | 0.65015  | -0.00669 | 0.88538  | -0.03106 |
| -0.07854 | 0.09002  | -0.01968 | 0.67144  | -0.0324  | 0.48493  | -0.02699 | 0.56071  | -0.08553 |
| -0.03159 | 0.49584  | -0.04979 | 0.28296  | 0.011793 | 0.79936  | 0.084219 | 0.06901  | 0.042676 |
| -0.02385 | 0.60719  | 0.018002 | 0.69801  | -0.05956 | 0.19889  | 0.022285 | 0.63098  | -0.11625 |
| -0.11667 | 0.01163  | -0.1859  | 5.30E-05 | -0.09641 | 0.03728  | -0.26808 | 3.96E-09 | -0.33123 |
| 0.160349 | 0.0005   | 0.046073 | 0.32046  | -0.1057  | 0.02234  | 0.11842  | 0.01043  | 0.024814 |
| 0.246131 | 7.13E-08 | 0.252458 | 3.19E-08 | 0.361774 | 6.91E-16 | -0.00839 | 0.85651  | 0.000637 |
| 0.091426 | 0.04832  | 0.035048 | 0.44989  | 0.036481 | 0.43157  | 0.107741 | 0.01987  | 0.161924 |
| 0.117173 | 0.01127  | 0.176544 | 0.00013  | 0.230738 | 4.63E-07 | 0.166878 | 0.00029  | 0.201635 |
| 0.062324 | 0.17878  | 0.05802  | 0.21074  | 0.020284 | 0.66195  | 0.077353 | 0.09499  | -0.02067 |
| -0.09717 | 0.0358   | -0.06206 | 0.18063  | -0.08756 | 0.05867  | -0.06084 | 0.1894   | -0.17093 |
| 0.295055 | 7.80E-11 | 0.303083 | 2.23E-11 | 0.218626 | 1.84E-06 | 0.157797 | 0.00062  | 0.136888 |
| 0.134951 | 0.00348  | 0.043866 | 0.34422  | -0.02946 | 0.52543  | 0.110334 | 0.01707  | 0.02271  |
| 0.166072 | 0.00031  | -0.08636 | 0.06222  | -0.06439 | 0.16477  | 0.038751 | 0.40345  | -0.22813 |
| -0.12363 | 0.00748  | -0.05697 | 0.21913  | -0.03639 | 0.4327   | -0.09352 | 0.04339  | -0.12416 |
| 0.008342 | 0.85731  | -0.07498 | 0.10561  | -0.09059 | 0.05041  | -0.03041 | 0.51205  | -0.11802 |
| 0.19045  | 3.43E-05 | -0.00388 | 0.93328  | -0.08384 | 0.07028  | 0.199691 | 1.38E-05 | 0.210034 |
| -0.07766 | 0.09367  | -0.20848 | 5.54E-06 | -0.1226  | 0.00799  | -0.16414 | 0.00037  | -0.21959 |
| -0.11432 | 0.01343  | -0.22768 | 6.61E-07 | -0.15073 | 0.00109  | -0.07007 | 0.13055  | -0.19066 |
| -0.13745 | 0.00292  | -0.28996 | 1.69E-10 | -0.28059 | 6.75E-10 | -0.07385 | 0.11096  | -0.11742 |
| -0.1701  | 0.00022  | -0.273   | 2.00E-09 | -0.27969 | 7.69E-10 | -0.08197 | 0.07679  | -0.10557 |
| -0.02125 | 0.64686  | 0.139539 | 0.00251  | 0.112718 | 0.01481  | 0.009001 | 0.84618  | 0.055285 |
| -0.06257 | 0.17708  | -0.00239 | 0.95884  | 0.027179 | 0.55796  | -0.13992 | 0.00244  | -0.07983 |
| 0.072854 | 0.11589  | 0.109138 | 0.01831  | 0.111034 | 0.01637  | 0.214096 | 3.03E-06 | 0.279881 |
| 0.026546 | 0.56717  | 0.078359 | 0.09076  | 0.144735 | 0.00171  | -0.13429 | 0.00364  | -0.06092 |
| 0.272864 | 2.04E-09 | 0.207131 | 6.39E-06 | 0.280853 | 6.50E-10 | 0.00034  | 0.99416  | -0.06511 |
| -0.13818 | 0.00277  | -0.00384 | 0.93412  | -0.01948 | 0.67461  | -0.13802 | 0.0028   | -0.15975 |
| 0.022762 | 0.62368  | -0.02949 | 0.525    | 0.011337 | 0.80697  | -0.21207 | 3.78E-06 | -0.31555 |
| 0.199179 | 1.45E-05 | 0.233969 | 3.16E-07 | 0.276787 | 1.17E-09 | -0.06084 | 0.18938  | -0.00025 |
| -0.04479 | 0.33417  | -0.01594 | 0.73121  | -0.01871 | 0.68676  | -0.06304 | 0.17381  | 0.082064 |
| -0.12608 | 0.00637  | -0.15642 | 0.00069  | -0.06759 | 0.14472  | -0.1137  | 0.01396  | -0.07578 |
| 0.115769 | 0.0123   | 0.060832 | 0.18943  | 0.120456 | 0.00917  | -0.16571 | 0.00032  | -0.11022 |
| 0.105597 | 0.02248  | 0.039901 | 0.38962  | 0.042575 | 0.35862  | 0.108562 | 0.01894  | 0.086371 |
| 0.008649 | 0.85212  | -0.01312 | 0.77727  | 0.069204 | 0.13536  | -0.18843 | 4.17E-05 | -0.26518 |

|          |          |          |          |          |          |          |          |          |
|----------|----------|----------|----------|----------|----------|----------|----------|----------|
| -0.07667 | 0.09796  | -0.05058 | 0.27536  | -0.02601 | 0.57499  | -0.00807 | 0.86187  | -0.0078  |
| 0.093812 | 0.04273  | 0.029454 | 0.52547  | 0.040344 | 0.38437  | 0.298499 | 4.58E-11 | 0.119093 |
| 0.037013 | 0.42487  | 0.134717 | 0.00354  | 0.139116 | 0.00259  | -0.07483 | 0.10632  | -0.03719 |
| 0.084979 | 0.06653  | 0.185632 | 5.44E-05 | 0.136598 | 0.0031   | 0.098022 | 0.0342   | 0.23001  |
| -0.01583 | 0.73295  | -0.15086 | 0.00107  | -0.03895 | 0.401    | -0.22348 | 1.07E-06 | -0.32183 |
| -0.13351 | 0.00385  | -0.057   | 0.21892  | -0.06942 | 0.13412  | -0.16076 | 0.00049  | -0.17276 |
| -0.00554 | 0.9049   | -0.05335 | 0.2499   | -0.05227 | 0.25961  | -0.10856 | 0.01894  | -0.18144 |
| -0.09647 | 0.03716  | -0.1     | 0.03073  | -0.06729 | 0.14652  | -0.17514 | 0.00014  | -0.19259 |
| 0.045886 | 0.32244  | 0.059079 | 0.20252  | 0.051841 | 0.26355  | -0.02582 | 0.57776  | 0.066207 |
| 0.063164 | 0.17298  | 0.048812 | 0.29251  | 0.071941 | 0.12054  | -0.12578 | 0.00649  | -0.10047 |
| 0.043198 | 0.35162  | 0.050146 | 0.2795   | 0.057106 | 0.21804  | -0.05987 | 0.19651  | 0.013342 |
| -0.14843 | 0.0013   | -0.05823 | 0.20913  | -0.02146 | 0.64375  | -0.14128 | 0.00221  | -0.13488 |
| -0.2482  | 5.49E-08 | -0.35689 | 1.79E-15 | -0.23427 | 3.05E-07 | -0.2042  | 8.67E-06 | -0.16708 |
| 0.120978 | 0.00887  | 0.143388 | 0.00189  | 0.173762 | 0.00016  | -0.0128  | 0.78269  | 0.172009 |
| 0.075449 | 0.10343  | 0.059519 | 0.19917  | -0.00033 | 0.99425  | -0.02706 | 0.55974  | -0.01524 |
| -0.09058 | 0.05044  | -0.02898 | 0.53217  | -0.01436 | 0.75687  | 0.016623 | 0.72013  | 0.052788 |
| -0.06887 | 0.13728  | 0.088537 | 0.05588  | 0.056294 | 0.22466  | 0.182685 | 7.17E-05 | 0.123563 |
| -0.03086 | 0.50587  | -0.0427  | 0.35723  | 0.0036   | 0.93815  | -0.05352 | 0.2484   | -0.06421 |
| -0.08423 | 0.06896  | -0.15689 | 0.00067  | -0.14792 | 0.00135  | -0.04079 | 0.37917  | -0.06679 |
| -0.07788 | 0.09277  | -0.15902 | 0.00056  | -0.17351 | 0.00016  | -0.06242 | 0.17812  | -0.04296 |
| 0.073412 | 0.11312  | -0.30455 | 1.77E-11 | -0.07364 | 0.112    | -0.13096 | 0.00459  | -0.21571 |
| -0.04705 | 0.31029  | -0.10506 | 0.02317  | -0.06251 | 0.17747  | -0.08225 | 0.07578  | 0.080989 |
| 0.183047 | 6.93E-05 | 0.048607 | 0.29454  | 0.181888 | 7.71E-05 | -0.00378 | 0.93515  | 0.07707  |
| 0.239409 | 1.64E-07 | 0.044393 | 0.33844  | 0.142418 | 0.00203  | -0.00417 | 0.92833  | -0.17292 |
| 0.145736 | 0.00159  | 0.081378 | 0.07895  | 0.181706 | 7.84E-05 | 0.004444 | 0.9237   | -0.20276 |
| 0.129162 | 0.00518  | 0.128751 | 0.00533  | 0.032478 | 0.48383  | 0.122996 | 0.00779  | 0.171931 |
| -0.03522 | 0.44771  | -0.00642 | 0.88999  | -0.18288 | 7.04E-05 | 0.019938 | 0.66738  | 0.098549 |
| 0.187534 | 4.54E-05 | 0.131113 | 0.00454  | 0.014115 | 0.76096  | 0.222235 | 1.23E-06 | 0.255328 |
| -0.02175 | 0.63917  | -0.10082 | 0.02938  | -0.00185 | 0.96827  | -0.04646 | 0.31637  | -0.09568 |
| -0.27413 | 1.70E-09 | -0.08203 | 0.07657  | -0.08304 | 0.07301  | -0.08837 | 0.05636  | -0.00037 |
| -0.08995 | 0.05206  | -0.19111 | 3.22E-05 | -0.24609 | 7.17E-08 | -0.12234 | 0.00813  | -0.06705 |
| 0.28373  | 4.27E-10 | 0.098634 | 0.03309  | 0.036608 | 0.42996  | 0.170093 | 0.00022  | 0.354909 |
| -0.0082  | 0.85975  | 0.169037 | 0.00024  | 0.107389 | 0.02028  | 0.123963 | 0.00732  | 0.250524 |
| 0.08119  | 0.07965  | 0.024483 | 0.59767  | 0.080111 | 0.08375  | 0.073643 | 0.11199  | -0.04494 |
| -0.00449 | 0.92297  | -0.00372 | 0.93611  | 0.02764  | 0.55129  | -0.13506 | 0.00345  | -0.03543 |
| 0.1731   | 0.00017  | 0.289606 | 1.78E-10 | 0.268444 | 3.77E-09 | 0.050147 | 0.2795   | -0.00562 |
| 0.097136 | 0.03586  | 0.065006 | 0.16076  | 0.07814  | 0.09167  | 0.177989 | 0.00011  | 0.132951 |
| 0.200683 | 1.24E-05 | 0.240224 | 1.48E-07 | 0.353348 | 3.52E-15 | 0.189623 | 3.72E-05 | 0.171638 |
| 0.103082 | 0.02591  | 0.035949 | 0.43832  | 0.056854 | 0.22008  | 0.0869   | 0.06059  | -0.04629 |
| 0.132516 | 0.00412  | 0.219799 | 1.62E-06 | 0.217724 | 2.04E-06 | 0.073528 | 0.11255  | -0.00028 |
| -0.11702 | 0.01138  | -0.19158 | 3.08E-05 | -0.10715 | 0.02056  | -0.18593 | 5.29E-05 | -0.09107 |
| 0.07225  | 0.11895  | 0.078683 | 0.08943  | 0.075647 | 0.10253  | -0.0434  | 0.3494   | -0.25726 |
| 0.084086 | 0.06945  | 0.177224 | 0.00012  | 0.175423 | 0.00014  | -0.00648 | 0.88891  | 0.022516 |
| 0.106547 | 0.02128  | 0.084046 | 0.06959  | 0.049566 | 0.28511  | 0.224698 | 9.31E-07 | 0.058731 |
| 0.096921 | 0.03628  | 0.150507 | 0.0011   | 0.164377 | 0.00036  | 0.112927 | 0.01462  | -0.03451 |

|          |          |          |          |          |          |          |          |          |
|----------|----------|----------|----------|----------|----------|----------|----------|----------|
| 0.031602 | 0.4957   | -0.08038 | 0.08273  | -0.19441 | 2.33E-05 | 0.088507 | 0.05597  | -0.16812 |
| 0.136086 | 0.00321  | 0.012145 | 0.79351  | -0.04773 | 0.30338  | 0.167036 | 0.00029  | 0.04977  |
| 0.30403  | 1.92E-11 | 0.216941 | 2.22E-06 | 0.141792 | 0.00213  | 0.121438 | 0.00861  | 0.361995 |
| 0.15067  | 0.00109  | 0.129078 | 0.00521  | 0.153387 | 0.00088  | 0.018399 | 0.69168  | -0.02579 |
| 0.113673 | 0.01398  | 0.07419  | 0.10934  | 0.070186 | 0.12989  | -0.08412 | 0.06933  | -0.21971 |
| 0.039506 | 0.39434  | 0.03071  | 0.50795  | -0.00688 | 0.88209  | 0.042081 | 0.36423  | -0.02514 |
| 0.034372 | 0.45868  | -0.00671 | 0.88506  | 0.031011 | 0.5038   | 0.155128 | 0.00077  | 0.215055 |
| 0.031883 | 0.49188  | -0.10182 | 0.02779  | -0.02663 | 0.56589  | -0.15268 | 0.00093  | -0.17035 |
| 0.083202 | 0.07244  | 0.174054 | 0.00016  | 0.222323 | 1.22E-06 | 0.015577 | 0.73707  | 0.010672 |
| 0.025771 | 0.57854  | 0.080939 | 0.08059  | 0.128673 | 0.00536  | -0.11594 | 0.01217  | -0.19868 |
| -0.01313 | 0.7772   | -0.05064 | 0.27478  | -0.03897 | 0.40077  | -0.11858 | 0.01032  | -0.2188  |
| 0.171229 | 0.0002   | 0.13148  | 0.00443  | 0.172292 | 0.00018  | -0.06852 | 0.1393   | -0.08753 |
| 0.008869 | 0.84841  | -0.15207 | 0.00098  | -0.11153 | 0.0159   | -0.12815 | 0.00555  | -0.33367 |
| -0.17071 | 0.00021  | 0.138633 | 0.00268  | 0.029708 | 0.52191  | -0.08784 | 0.05784  | 0.04713  |
| 0.027745 | 0.54978  | -0.02217 | 0.63281  | -0.02287 | 0.62197  | 0.08656  | 0.06161  | -0.00216 |
| -0.0153  | 0.74164  | 0.184867 | 5.84E-05 | 0.247857 | 5.74E-08 | -0.09332 | 0.04383  | -0.06706 |
| 0.024035 | 0.6044   | 0.202858 | 9.96E-06 | 0.24435  | 8.91E-08 | -0.10462 | 0.02375  | -0.07339 |
| -0.06794 | 0.14267  | 0.010629 | 0.8188   | 0.06883  | 0.13749  | -0.1104  | 0.01701  | -0.17964 |
| 0.06056  | 0.19142  | 0.092556 | 0.0456   | 0.123354 | 0.00761  | -0.14337 | 0.0019   | -0.25226 |
| 0.119247 | 0.0099   | 0.104227 | 0.02429  | 0.090761 | 0.04998  | -0.18145 | 8.03E-05 | -0.09843 |
| -0.07708 | 0.09617  | -0.12807 | 0.00558  | -0.10544 | 0.02268  | -0.14491 | 0.00169  | -0.19893 |
| 0.106293 | 0.0216   | 0.010464 | 0.82157  | -0.00045 | 0.99226  | -0.03198 | 0.4905   | -0.24054 |
| 0.003402 | 0.94155  | 0.067813 | 0.14341  | 0.095565 | 0.03898  | -0.03942 | 0.39531  | -0.02229 |
| -0.1319  | 0.0043   | -0.04836 | 0.297    | -0.10863 | 0.01886  | -0.09151 | 0.0481   | -0.07435 |
| 0.000529 | 0.99091  | 0.063116 | 0.17331  | 0.023797 | 0.60799  | 0.148775 | 0.00126  | 0.073625 |
| 0.11689  | 0.01147  | 0.10843  | 0.01909  | 0.083957 | 0.06988  | 0.177525 | 0.00011  | 0.067289 |
| -0.07849 | 0.09022  | -0.13348 | 0.00386  | -0.04241 | 0.36046  | -0.22022 | 1.54E-06 | -0.29683 |
| 0.220118 | 1.56E-06 | 0.020335 | 0.66116  | -0.23299 | 3.55E-07 | 0.177744 | 0.00011  | 0.261325 |
| -0.03627 | 0.43423  | -0.122   | 0.00831  | -0.19319 | 2.63E-05 | -0.02603 | 0.57466  | 0.030787 |
| -0.1508  | 0.00108  | -0.0768  | 0.09738  | -0.08724 | 0.0596   | -0.22396 | 1.01E-06 | -0.22541 |
| -0.20301 | 9.81E-06 | -0.17918 | 9.89E-05 | -0.2603  | 1.14E-08 | -0.05358 | 0.2478   | -0.0667  |
| -0.15727 | 0.00065  | -0.14887 | 0.00125  | -0.16386 | 0.00038  | -0.07572 | 0.10218  | -0.2153  |
| -0.10144 | 0.02838  | -0.09951 | 0.03156  | -0.05944 | 0.1998   | -0.20185 | 1.10E-05 | -0.2734  |
| -0.11814 | 0.01062  | -0.09347 | 0.0435   | -0.00701 | 0.87989  | -0.13342 | 0.00387  | -0.13992 |
| 0.046166 | 0.31949  | 0.022189 | 0.63245  | 0.028352 | 0.54109  | -0.03619 | 0.43524  | -0.04296 |
| 0.024758 | 0.59358  | 0.005021 | 0.91382  | 0.033701 | 0.46751  | -0.14532 | 0.00164  | -0.07926 |
| 0.13713  | 0.00298  | 0.128996 | 0.00524  | 0.174987 | 0.00014  | -0.02563 | 0.58068  | 0.199136 |
| 0.029073 | 0.53084  | 0.019388 | 0.67603  | 0.025636 | 0.58053  | -0.04733 | 0.30747  | -0.1107  |
| 0.039338 | 0.39635  | 0.00265  | 0.95446  | -0.02268 | 0.62491  | 0.003506 | 0.93976  | -0.1571  |
| -0.00635 | 0.89106  | -0.05771 | 0.21319  | 0.052811 | 0.2547   | -0.00674 | 0.88445  | -0.10673 |
| -0.13826 | 0.00275  | -0.16329 | 0.0004   | -0.11013 | 0.01727  | -0.08259 | 0.07458  | -0.12734 |
| 0.134283 | 0.00365  | 0.089241 | 0.05396  | 0.076428 | 0.09902  | 0.171195 | 0.0002   | 0.062823 |
| -0.07624 | 0.09984  | -0.01763 | 0.70399  | 0.061137 | 0.18721  | -0.22753 | 6.73E-07 | -0.23362 |
| 0.048736 | 0.29326  | 0.188761 | 4.04E-05 | 0.117447 | 0.01108  | 0.01786  | 0.70027  | 0.203103 |
| -0.2627  | 8.25E-09 | -0.12817 | 0.00554  | -0.15611 | 0.00071  | -0.11469 | 0.01314  | -0.07362 |

|          |          |          |          |          |          |          |          |          |
|----------|----------|----------|----------|----------|----------|----------|----------|----------|
| 0.094273 | 0.04172  | -0.06948 | 0.13379  | 0.023063 | 0.61909  | 0.073614 | 0.11213  | -0.08852 |
| -0.17279 | 0.00018  | -0.09907 | 0.03232  | -0.08698 | 0.06035  | -0.05467 | 0.23831  | -0.06812 |
| 0.066583 | 0.15083  | 0.023467 | 0.61297  | 0.058133 | 0.20986  | -0.00099 | 0.98303  | 0.096983 |
| 0.149803 | 0.00117  | 0.157231 | 0.00065  | 0.145208 | 0.00165  | 0.135191 | 0.00342  | 0.102317 |
| -0.26291 | 8.01E-09 | -0.22877 | 5.83E-07 | -0.27172 | 2.39E-09 | -0.07128 | 0.12402  | -0.04815 |
| -0.05624 | 0.22507  | 0.112617 | 0.0149   | 0.056911 | 0.21962  | -0.1263  | 0.00628  | 0.010077 |
| 0.100923 | 0.02921  | 0.115918 | 0.01218  | 0.140551 | 0.00233  | 0.096516 | 0.03707  | 0.162045 |
| 0.165919 | 0.00032  | 0.160759 | 0.00049  | 0.167559 | 0.00028  | -0.01201 | 0.79567  | -0.00796 |
| 0.055848 | 0.22836  | 0.088372 | 0.05635  | 0.11792  | 0.01076  | -0.03592 | 0.43872  | 0.086401 |
| 0.248638 | 5.20E-08 | 0.207911 | 5.88E-06 | 0.306846 | 1.22E-11 | 0.102821 | 0.02629  | 0.146487 |
| -0.26653 | 4.90E-09 | -0.16393 | 0.00037  | -0.24015 | 1.50E-07 | -0.15974 | 0.00053  | -0.04296 |
| 0.007304 | 0.87492  | -0.01544 | 0.73931  | -0.01963 | 0.67216  | -0.03593 | 0.43854  | -0.3296  |
| 0.06101  | 0.18813  | 0.119869 | 0.00952  | 0.119696 | 0.00962  | -0.16732 | 0.00028  | -0.14784 |
| 0.224301 | 9.75E-07 | 0.134557 | 0.00358  | 0.171223 | 0.0002   | -0.03826 | 0.40944  | -0.05722 |
| 0.030276 | 0.51397  | -0.12291 | 0.00783  | -0.05744 | 0.21534  | 0.071557 | 0.12254  | -0.257   |
| 0.011517 | 0.80397  | -0.12002 | 0.00943  | -0.11147 | 0.01595  | -0.10341 | 0.02544  | -0.32011 |
| 0.012893 | 0.78109  | 0.088515 | 0.05595  | 0.159706 | 0.00053  | 0.006245 | 0.89293  | 0.060984 |
| -0.01958 | 0.67308  | -0.14704 | 0.00144  | -0.0869  | 0.06061  | 0.106026 | 0.02193  | 0.136699 |
| 0.055267 | 0.23325  | 0.037934 | 0.41344  | 0.138905 | 0.00263  | -0.17754 | 0.00011  | -0.25155 |
| 0.146421 | 0.00151  | 0.121705 | 0.00847  | 0.13994  | 0.00244  | 0.14214  | 0.00208  | 0.15051  |
| -0.1352  | 0.00342  | -0.2108  | 4.33E-06 | -0.25859 | 1.43E-08 | -0.07311 | 0.11461  | -0.11951 |
| 0.048273 | 0.29788  | 0.021225 | 0.64732  | 0.021715 | 0.63973  | 0.071099 | 0.12496  | -0.03101 |
| 0.002656 | 0.95435  | 0.06784  | 0.14325  | 0.115218 | 0.01272  | -0.02692 | 0.56167  | -0.15964 |
| -0.06208 | 0.18047  | -0.10683 | 0.02094  | -0.08804 | 0.05728  | -0.0906  | 0.0504   | -0.30872 |
| -0.0033  | 0.94325  | 0.044715 | 0.33495  | 0.094693 | 0.04081  | -0.11512 | 0.01279  | -0.02458 |
| 0.019834 | 0.66901  | -0.03454 | 0.45643  | 0.052564 | 0.25694  | -0.07902 | 0.08806  | -0.12539 |
| -0.11578 | 0.01229  | -0.04592 | 0.32205  | -0.03367 | 0.4679   | -0.1493  | 0.00121  | -0.0561  |
| 0.062016 | 0.18094  | 0.025796 | 0.57817  | 0.088213 | 0.05679  | -0.18972 | 3.69E-05 | -0.24542 |
| 0.00089  | 0.98469  | -0.14094 | 0.00227  | -0.00644 | 0.88965  | -0.14396 | 0.00182  | -0.30619 |
| -0.06298 | 0.17424  | -0.21951 | 1.67E-06 | -0.15265 | 0.00094  | -0.18196 | 7.66E-05 | -0.25973 |
| -0.03926 | 0.39728  | 0.04399  | 0.34285  | 0.034697 | 0.45444  | -0.1106  | 0.01681  | -0.11948 |
| -0.02482 | 0.59265  | -0.05091 | 0.27227  | -0.05704 | 0.21858  | 0.042386 | 0.36076  | -0.05632 |
| -0.26857 | 3.70E-09 | -0.21058 | 4.43E-06 | -0.15762 | 0.00063  | -0.18987 | 3.63E-05 | -0.13521 |
| -0.01183 | 0.7988   | -0.03424 | 0.46045  | -0.00528 | 0.90939  | -0.04533 | 0.32835  | -0.09033 |
| -0.03826 | 0.40949  | -0.0719  | 0.12077  | -0.03374 | 0.46699  | -0.04768 | 0.30387  | -0.11348 |
| -0.15646 | 0.00069  | 0.014567 | 0.75354  | 0.00426  | 0.92685  | -0.09369 | 0.04301  | -0.21843 |
| -0.35336 | 3.52E-15 | -0.05072 | 0.27406  | -0.21739 | 2.12E-06 | -0.11702 | 0.01138  | -0.04204 |
| -0.022   | 0.63542  | -0.06261 | 0.1768   | -0.0338  | 0.46618  | -0.00897 | 0.84677  | -0.02279 |
| 0.047388 | 0.30683  | -0.00308 | 0.94714  | -0.0109  | 0.81418  | 0.005636 | 0.90332  | -0.0801  |
| -0.00509 | 0.91259  | -0.02259 | 0.62631  | 0.013155 | 0.77677  | 0.016359 | 0.72439  | 0.006626 |
| -0.18109 | 8.30E-05 | -0.05257 | 0.25693  | -0.04897 | 0.29096  | 0.037367 | 0.42046  | 0.134071 |
| -0.08874 | 0.05533  | -0.08158 | 0.0782   | -0.04857 | 0.29491  | -0.14391 | 0.00182  | -0.12898 |
| -0.10697 | 0.02077  | -0.10355 | 0.02524  | -0.06094 | 0.18865  | -0.17517 | 0.00014  | -0.1648  |
| -0.08633 | 0.06232  | -0.06078 | 0.18984  | -0.01946 | 0.67482  | -0.13801 | 0.0028   | -0.11104 |
| -0.00885 | 0.84881  | 0.010909 | 0.81411  | -0.01307 | 0.77812  | 0.004113 | 0.92936  | 0.073439 |

|          |          |          |          |          |          |          |          |          |
|----------|----------|----------|----------|----------|----------|----------|----------|----------|
| 0.047566 | 0.30502  | 0.028002 | 0.54609  | 0.101105 | 0.02891  | -0.00747 | 0.87218  | -0.04505 |
| 0.178095 | 0.00011  | 0.129654 | 0.00501  | 0.087909 | 0.05765  | 0.254722 | 2.38E-08 | 0.106364 |
| 0.38369  | 7.92E-18 | 0.237943 | 1.96E-07 | 0.096417 | 0.03726  | 0.133984 | 0.00372  | 0.106371 |
| 0.080909 | 0.0807   | 0.129598 | 0.00503  | 0.153469 | 0.00088  | 0.003635 | 0.93756  | 0.016157 |
| -0.22641 | 7.65E-07 | -0.27954 | 7.86E-10 | -0.11987 | 0.00952  | -0.22205 | 1.26E-06 | -0.18603 |
| -0.0073  | 0.87491  | 0.000811 | 0.98606  | 0.04022  | 0.38584  | 0.019408 | 0.6757   | -0.05812 |
| 0.023322 | 0.61517  | 0.019025 | 0.68176  | 0.053501 | 0.24854  | 0.002565 | 0.95591  | -0.07155 |
| 0.058304 | 0.20851  | -0.05281 | 0.25469  | -0.03374 | 0.46693  | -0.12375 | 0.00742  | -0.1485  |
| 0.022823 | 0.62275  | -0.0248  | 0.59297  | -0.03228 | 0.48645  | -0.03317 | 0.47455  | -0.03815 |
| 0.08805  | 0.05725  | 0.004024 | 0.93089  | -0.00894 | 0.84714  | -0.04929 | 0.28776  | -0.05677 |
| 0.063363 | 0.17163  | -0.01402 | 0.76245  | 0.042461 | 0.3599   | -0.05375 | 0.24639  | -0.07076 |
| -0.04448 | 0.33749  | -0.07865 | 0.08955  | -0.08492 | 0.06673  | 0.003269 | 0.94384  | -0.05909 |
| 0.040701 | 0.38018  | 0.01478  | 0.75005  | 0.038414 | 0.40755  | -0.03508 | 0.44953  | 0.000448 |
| 0.084194 | 0.0691   | 0.032464 | 0.48401  | 0.069859 | 0.13169  | -0.05818 | 0.20951  | -0.08757 |
| 0.041636 | 0.36933  | -0.01132 | 0.80725  | 0.008622 | 0.85258  | -0.08167 | 0.07789  | -0.00323 |
| 0.089738 | 0.05263  | 0.027552 | 0.55257  | 0.018259 | 0.69391  | 0.003079 | 0.94708  | -0.05034 |
| 0.066424 | 0.15181  | -0.01575 | 0.73427  | -0.03257 | 0.48253  | -0.043   | 0.35383  | -0.06491 |
| 0.066578 | 0.15086  | 0.018387 | 0.69188  | -0.01053 | 0.82052  | 0.028799 | 0.53472  | -0.05539 |
| 0.027205 | 0.55758  | 0.097764 | 0.03468  | -0.02644 | 0.56865  | 0.080345 | 0.08284  | 0.215903 |
| -0.20966 | 4.89E-06 | -0.06445 | 0.16436  | -0.08163 | 0.07803  | -0.07447 | 0.10798  | 0.068405 |
| 0.009602 | 0.83606  | 0.028155 | 0.5439   | -0.13213 | 0.00423  | 0.015069 | 0.74533  | 0.0154   |
| 0.108398 | 0.01912  | 0.247216 | 6.22E-08 | 0.28782  | 2.33E-10 | 0.164026 | 0.00037  | 0.202916 |
| 0.170288 | 0.00022  | 0.07581  | 0.10179  | 0.02352  | 0.61217  | 0.10877  | 0.01871  | 0.199516 |
| 0.050893 | 0.27239  | 0.000559 | 0.99039  | -0.03727 | 0.42163  | 0.003208 | 0.94488  | -0.03121 |
| -0.01456 | 0.75362  | -0.05585 | 0.22835  | -0.07781 | 0.09306  | -0.00016 | 0.99726  | -0.05045 |
| -0.09534 | 0.03944  | -0.22725 | 6.94E-07 | -0.27557 | 1.39E-09 | -0.17197 | 0.00019  | -0.30674 |
| 0.021287 | 0.64635  | 0.000233 | 0.996    | 0.010276 | 0.82472  | -0.00218 | 0.96259  | 0.016317 |
| 0.005635 | 0.90333  | -0.00025 | 0.99572  | -0.00899 | 0.84629  | 0.006396 | 0.89037  | 0.045961 |
| -0.05124 | 0.26913  | -0.02217 | 0.6328   | 0.045682 | 0.32459  | -0.14815 | 0.00132  | -0.14118 |
| 0.131364 | 0.00446  | 0.053313 | 0.25022  | -0.00588 | 0.89915  | 0.084368 | 0.06852  | -0.00265 |
| 0.162045 | 0.00044  | 0.052457 | 0.25791  | 0.098475 | 0.03338  | 0.035667 | 0.44192  | 0.045432 |
| 0.020965 | 0.65135  | 0.145116 | 0.00167  | 0.138127 | 0.00278  | 0.044582 | 0.33639  | 0.039164 |
| 0.024442 | 0.59829  | -0.01673 | 0.71833  | 0.001147 | 0.98028  | 0.023592 | 0.61108  | 0.004637 |
| 0.046099 | 0.32019  | 0.019976 | 0.66678  | 0.006322 | 0.89162  | -0.01009 | 0.82786  | 0.00606  |
| 0.043394 | 0.34944  | 0.153975 | 0.00084  | 0.135556 | 0.00333  | 0.173842 | 0.00016  | 0.223919 |
| 0.196622 | 1.87E-05 | 0.046835 | 0.31252  | 0.110244 | 0.01716  | -0.20554 | 7.54E-06 | -0.23592 |
| -0.01806 | 0.6971   | -0.10379 | 0.02489  | -0.11935 | 0.00983  | -0.01457 | 0.75358  | -0.09652 |
| 0.170484 | 0.00021  | 0.348325 | 9.10E-15 | 0.288532 | 2.10E-10 | 0.092304 | 0.04619  | 0.196596 |
| -0.12092 | 0.0089   | -0.08747 | 0.05893  | -0.06983 | 0.13188  | -0.11197 | 0.01548  | -0.12007 |
| -0.0302  | 0.51499  | -0.03446 | 0.45753  | 0.011193 | 0.80937  | -0.02129 | 0.64631  | 0.006074 |
| 0.211138 | 4.17E-06 | 0.233386 | 3.39E-07 | 0.175534 | 0.00014  | 0.183781 | 6.47E-05 | 0.152679 |
| -0.08487 | 0.0669   | -0.07476 | 0.10662  | -0.01853 | 0.6896   | -0.06782 | 0.14335  | -0.09313 |
| -0.00577 | 0.90096  | -0.13637 | 0.00315  | 0.098737 | 0.03291  | -0.05466 | 0.23839  | -0.06181 |
| 0.038553 | 0.40585  | -0.07734 | 0.09506  | 0.034045 | 0.46298  | -0.06934 | 0.1346   | -0.06353 |
| 0.021935 | 0.63635  | -0.02589 | 0.5768   | 0.00614  | 0.89472  | -0.03267 | 0.48129  | -0.02994 |

|          |          |          |          |          |          |           |          |          |
|----------|----------|----------|----------|----------|----------|-----------|----------|----------|
| 0.158098 | 0.00061  | 0.072865 | 0.11583  | 0.048111 | 0.29951  | 0.101965  | 0.02757  | -0.01611 |
| 0.100353 | 0.03014  | 0.056929 | 0.21947  | 0.015737 | 0.73447  | -0.0601   | 0.19484  | -0.03195 |
| 0.004942 | 0.91517  | 0.055152 | 0.23422  | 0.073066 | 0.11483  | -0.03855  | 0.40593  | -0.01766 |
| 0.06853  | 0.13922  | 0.05244  | 0.25806  | -0.12833 | 0.00548  | 0.010864  | 0.81487  | 0.055949 |
| -0.19511 | 2.18E-05 | -0.21773 | 2.04E-06 | -0.21296 | 3.43E-06 | -0.28072  | 6.62E-10 | -0.25916 |
| 0.25566  | 2.10E-08 | 0.110839 | 0.01656  | 0.034873 | 0.45216  | 0.169547  | 0.00023  | 0.08384  |
| 0.020111 | 0.66466  | -0.01178 | 0.79951  | 0.022358 | 0.62986  | -0.02681  | 0.5633   | 0.008215 |
| 0.04058  | 0.3816   | -0.04898 | 0.29081  | 0.049656 | 0.28423  | -0.00716  | 0.87736  | -0.03297 |
| 0.067353 | 0.14615  | 0.015273 | 0.74202  | 0.055838 | 0.22844  | -1.98E-05 | 0.99966  | 0.005233 |
| 0.205847 | 7.31E-06 | 0.161201 | 0.00047  | 0.146805 | 0.00147  | 0.060402  | 0.19258  | 0.054238 |
| 0.02072  | 0.65515  | -0.07166 | 0.12199  | -0.13851 | 0.0027   | 0.037307  | 0.4212   | -0.05622 |
| -0.08632 | 0.06234  | -0.11747 | 0.01107  | -0.16914 | 0.00024  | -0.00658  | 0.88717  | -0.02614 |
| -0.14314 | 0.00193  | -0.19214 | 2.91E-05 | -0.27291 | 2.02E-09 | -0.08277  | 0.07394  | -0.19185 |
| 0.177702 | 0.00011  | 0.130159 | 0.00484  | 0.06315  | 0.17308  | 0.13105   | 0.00456  | 0.0916   |
| 0.08062  | 0.08179  | -0.00012 | 0.99799  | 0.046755 | 0.31335  | -0.0408   | 0.37903  | -0.01606 |
| -0.05356 | 0.24806  | -0.05587 | 0.22819  | -0.05352 | 0.24837  | -0.00883  | 0.84909  | -0.00871 |
| -0.06329 | 0.17211  | 0.0679   | 0.1429   | 0.074236 | 0.10912  | 0.009884  | 0.8313   | 0.073812 |
| 0.169095 | 0.00024  | -0.17159 | 0.00019  | -0.01565 | 0.7358   | -0.02199  | 0.63553  | -0.04353 |
| 0.102941 | 0.02611  | 0.137404 | 0.00293  | 0.158478 | 0.00059  | 0.169909  | 0.00023  | 0.194738 |
| 0.28279  | 4.90E-10 | 0.218703 | 1.83E-06 | 0.11141  | 0.01601  | 0.283835  | 4.21E-10 | 0.37691  |
| 0.192195 | 2.90E-05 | 0.113588 | 0.01405  | 0.139838 | 0.00246  | 0.109206  | 0.01824  | -0.02395 |
| 0.207567 | 6.10E-06 | 0.075307 | 0.10409  | 0.168273 | 0.00026  | 0.177026  | 0.00012  | 0.092609 |
| 0.141657 | 0.00215  | 0.014442 | 0.75559  | 0.117795 | 0.01085  | 0.04659   | 0.31505  | 0.007021 |
| 0.019877 | 0.66834  | -0.00966 | 0.83501  | -0.01856 | 0.68918  | 0.088006  | 0.05738  | -0.0168  |
| -0.02896 | 0.53249  | -0.02598 | 0.57547  | 0.002196 | 0.96224  | 0.050725  | 0.27398  | -0.04418 |
| -0.118   | 0.0107   | -0.3413  | 3.33E-14 | -0.22373 | 1.04E-06 | -0.22993  | 5.09E-07 | -0.19868 |
| -0.01862 | 0.68822  | -0.05495 | 0.23595  | 0.018313 | 0.69305  | -0.06306  | 0.1737   | 0.098572 |
| -0.21412 | 3.03E-06 | -0.13095 | 0.00459  | -0.1926  | 2.79E-05 | 0.013551  | 0.77024  | 0.15336  |
| 0.025395 | 0.5841   | -0.10711 | 0.0206   | -0.1196  | 0.00968  | 0.123801  | 0.0074   | 0.214566 |
| -0.0355  | 0.44406  | -0.11408 | 0.01363  | 0.008975 | 0.84662  | -0.04314  | 0.35229  | 0.095056 |
| 0.212094 | 3.77E-06 | 0.292871 | 1.09E-10 | 0.28892  | 1.98E-10 | -0.04603  | 0.32091  | 0.085226 |
| 0.081537 | 0.07837  | 0.122442 | 0.00808  | 0.08963  | 0.05291  | 0.119781  | 0.00957  | 0.139102 |
| 0.020899 | 0.65236  | -0.06329 | 0.17211  | 0.0953   | 0.03953  | -0.14025  | 0.00238  | -0.14734 |
| 0.014855 | 0.74883  | 0.041028 | 0.37636  | 0.034001 | 0.46355  | -0.07032  | 0.12915  | -0.08651 |
| -0.05601 | 0.227    | 0.098129 | 0.034    | 0.087294 | 0.05943  | -0.18468  | 5.95E-05 | -0.20446 |
| 0.152887 | 0.00092  | 0.263378 | 7.53E-09 | 0.064986 | 0.16089  | 0.105893  | 0.0221   | 0.149738 |
| 0.007765 | 0.86709  | -0.02507 | 0.58887  | 0.022287 | 0.63095  | 0.021372  | 0.64504  | 0.132144 |
| 0.088194 | 0.05685  | 0.151946 | 0.00099  | 0.169618 | 0.00023  | 0.066754  | 0.14978  | 0.132208 |
| 0.129132 | 0.00519  | 0.2042   | 8.67E-06 | 0.207768 | 5.97E-06 | 0.220237  | 1.54E-06 | 0.355405 |
| -0.0782  | 0.09143  | -0.01351 | 0.77095  | 0.083998 | 0.06975  | -0.01153  | 0.80371  | 0.097527 |
| 0.102235 | 0.02716  | -0.04043 | 0.38336  | -0.01208 | 0.79462  | 0.081365  | 0.079    | 0.01639  |
| 0.223958 | 1.01E-06 | 0.195324 | 2.13E-05 | 0.137176 | 0.00297  | 0.068244  | 0.14088  | 0.212411 |
| -0.03877 | 0.40327  | -0.05195 | 0.26256  | -0.04117 | 0.37477  | -0.02008  | 0.6652   | -0.09803 |
| -0.04777 | 0.30298  | -0.10258 | 0.02665  | -0.0814  | 0.07886  | -0.05172  | 0.26469  | -0.16142 |
| 6.76E-05 | 0.99884  | -0.06814 | 0.1415   | -0.01696 | 0.71463  | -0.09562  | 0.03886  | -0.17326 |

|          |          |          |          |          |          |          |          |          |
|----------|----------|----------|----------|----------|----------|----------|----------|----------|
| 0.032433 | 0.48443  | -0.1126  | 0.01491  | -0.05307 | 0.25236  | -0.27284 | 2.04E-09 | -0.18499 |
| 0.155066 | 0.00077  | 0.122538 | 0.00803  | 0.260474 | 1.11E-08 | -0.04933 | 0.28739  | -0.08729 |
| 0.345173 | 1.64E-14 | 0.192075 | 2.93E-05 | 0.120263 | 0.00928  | 0.311171 | 6.07E-12 | 0.44387  |
| 0.221705 | 1.31E-06 | 0.214346 | 2.95E-06 | 0.047657 | 0.30409  | 0.22984  | 5.14E-07 | 0.40788  |
| -0.07691 | 0.09691  | -0.08316 | 0.07258  | -0.11514 | 0.01278  | 0.033653 | 0.46815  | 0.052328 |
| 0.08465  | 0.0676   | -0.05257 | 0.25688  | 0.054954 | 0.2359   | 0.040115 | 0.38708  | 0.016242 |
| 0.24825  | 5.46E-08 | 0.092584 | 0.04553  | 0.236625 | 2.30E-07 | 0.038141 | 0.41089  | -0.21716 |
| -0.02342 | 0.61371  | 0.001404 | 0.97586  | 0.015457 | 0.73903  | 0.001325 | 0.97723  | -0.02594 |
| 0.052708 | 0.25564  | 0.017232 | 0.71033  | 0.000465 | 0.99201  | 0.091371 | 0.04845  | 0.046609 |
| 0.029909 | 0.51909  | 0.002299 | 0.96047  | 0.037571 | 0.41792  | -0.01558 | 0.7371   | -0.14197 |
| -0.11989 | 0.00951  | -0.0734  | 0.1132   | -0.0787  | 0.08937  | -0.00636 | 0.891    | -0.09321 |
| 0.102287 | 0.02708  | 0.160335 | 0.0005   | 0.18869  | 4.07E-05 | 0.14415  | 0.00179  | 0.211541 |
| 0.071176 | 0.12455  | -0.00394 | 0.93228  | 0.023501 | 0.61245  | -0.00032 | 0.99441  | -0.0872  |
| 0.16746  | 0.00028  | 0.142377 | 0.00204  | 0.181773 | 7.80E-05 | 0.111682 | 0.01575  | -0.07527 |
| 0.080749 | 0.08131  | 0.001959 | 0.96632  | 0.10495  | 0.02332  | -0.22265 | 1.18E-06 | -0.2081  |
| 0.098246 | 0.03379  | 0.000615 | 0.98943  | 0.042145 | 0.36349  | 0.043789 | 0.34507  | 0.107774 |
| 0.087239 | 0.05959  | 0.151661 | 0.00101  | 0.140546 | 0.00233  | 0.047973 | 0.30089  | -0.032   |
| -0.09801 | 0.03423  | 0.050931 | 0.27204  | 0.110028 | 0.01738  | -0.01358 | 0.76983  | -0.04598 |
| -0.02888 | 0.53364  | -0.06393 | 0.16781  | -0.00352 | 0.93948  | -0.12199 | 0.00832  | -0.03218 |
| -0.04815 | 0.29916  | -0.0333  | 0.47283  | -0.00878 | 0.84985  | -0.13437 | 0.00362  | 0.034567 |
| -0.12473 | 0.00696  | -0.06096 | 0.18852  | -0.05291 | 0.25383  | -0.13788 | 0.00283  | -0.04079 |
| -0.23105 | 4.46E-07 | -0.23807 | 1.93E-07 | -0.13733 | 0.00294  | -0.13129 | 0.00449  | -0.08105 |
| -0.18163 | 7.90E-05 | 0.033117 | 0.47527  | -0.00213 | 0.9634   | -0.03045 | 0.51157  | 0.029604 |
| 0.075412 | 0.10361  | 0.213176 | 3.35E-06 | 0.056377 | 0.22398  | 0.070387 | 0.12879  | 0.034762 |
| -0.12913 | 0.00519  | -0.17893 | 0.0001   | -0.07745 | 0.09457  | -0.31531 | 3.07E-12 | -0.27105 |
| 0.013559 | 0.7701   | -0.04193 | 0.36598  | 0.010619 | 0.81897  | -0.16487 | 0.00035  | -0.1906  |
| -0.11075 | 0.01665  | 0.103327 | 0.02555  | 0.090404 | 0.05089  | -0.03784 | 0.41462  | 0.097899 |
| 0.12965  | 0.00501  | 0.203702 | 9.13E-06 | 0.254449 | 2.46E-08 | 0.054943 | 0.236    | 0.122676 |
| 0.055201 | 0.2338   | 0.020134 | 0.6643   | 0.059508 | 0.19926  | 0.009492 | 0.8379   | 0.053972 |
| 0.063653 | 0.16967  | -0.09472 | 0.04076  | -0.04778 | 0.30289  | -0.05578 | 0.22895  | 0.055752 |
| -0.00385 | 0.93393  | 0.045577 | 0.32571  | 0.07492  | 0.10588  | -0.11043 | 0.01698  | -0.06054 |
| 0.096433 | 0.03723  | -0.03191 | 0.49152  | 0.046428 | 0.31674  | -0.02705 | 0.55984  | 0.043653 |
| -0.01727 | 0.70968  | -0.00245 | 0.9579   | 0.030432 | 0.51181  | -0.09416 | 0.04196  | -0.12993 |
| 0.083786 | 0.07046  | 0.128274 | 0.0055   | 0.123    | 0.00779  | 0.172865 | 0.00017  | 0.1129   |
| 0.047497 | 0.30572  | 0.202623 | 1.02E-05 | 0.164754 | 0.00035  | 0.107628 | 0.02     | 0.159138 |
| -0.20481 | 8.14E-06 | -0.34839 | 8.99E-15 | -0.30589 | 1.43E-11 | -0.14945 | 0.0012   | -0.15096 |
| -0.19334 | 2.59E-05 | -0.15073 | 0.00109  | -0.26678 | 4.74E-09 | -0.02801 | 0.54593  | 0.008141 |
| 0.204351 | 8.54E-06 | 0.128628 | 0.00537  | 0.114676 | 0.01315  | 0.126844 | 0.00605  | -0.06113 |
| 0.160147 | 0.00051  | 0.208325 | 5.63E-06 | 0.18374  | 6.49E-05 | -0.02981 | 0.52052  | -0.03599 |
| 0.224072 | 1.00E-06 | 0.148601 | 0.00128  | 0.202431 | 1.04E-05 | 0.032402 | 0.48486  | 0.096342 |
| 0.097549 | 0.03508  | 0.155206 | 0.00076  | 0.086925 | 0.06052  | 0.072641 | 0.11696  | 0.064651 |
| 0.320874 | 1.21E-12 | 0.106657 | 0.02115  | 0.163611 | 0.00039  | 0.227622 | 6.65E-07 | 0.37638  |
| 0.187659 | 4.49E-05 | 0.241748 | 1.23E-07 | 0.322247 | 9.58E-13 | 0.066268 | 0.15278  | 0.242798 |
| -0.0865  | 0.06178  | -0.03081 | 0.50663  | -0.02902 | 0.53164  | 0.108469 | 0.01904  | 0.17351  |
| -0.00302 | 0.94808  | -0.07579 | 0.10187  | -0.11505 | 0.01285  | 0.002288 | 0.96067  | -0.04083 |

|          |          |          |          |          |          |          |          |          |
|----------|----------|----------|----------|----------|----------|----------|----------|----------|
| -0.01552 | 0.73795  | -0.0048  | 0.91761  | -0.03701 | 0.42492  | 0.008036 | 0.86249  | 0.009183 |
| -0.03819 | 0.4103   | -0.02343 | 0.61353  | -0.04163 | 0.36938  | -0.03122 | 0.50094  | -0.00209 |
| -0.14882 | 0.00126  | -0.24544 | 7.78E-08 | -0.30874 | 9.02E-12 | -0.20498 | 8.00E-06 | -0.30796 |
| 0.082548 | 0.07473  | 0.023677 | 0.60979  | 0.066258 | 0.15284  | 0.045206 | 0.32966  | -0.06167 |
| 0.04505  | 0.33134  | 0.149314 | 0.00121  | 0.118554 | 0.01034  | 0.115605 | 0.01242  | 0.128618 |
| 0.154524 | 0.00081  | 0.128406 | 0.00545  | 0.141875 | 0.00212  | -0.15494 | 0.00078  | -0.08466 |
| 0.340811 | 3.64E-14 | 0.16864  | 0.00025  | 0.139394 | 0.00254  | 0.094024 | 0.04226  | -0.041   |
| -0.05237 | 0.25874  | -0.06894 | 0.13688  | -0.00913 | 0.84396  | -0.03329 | 0.47299  | -0.14031 |
| 0.012361 | 0.78992  | 0.09869  | 0.03299  | 0.098383 | 0.03354  | -0.02523 | 0.58661  | -0.02049 |
| -0.00226 | 0.96116  | 0.013269 | 0.77489  | 0.010236 | 0.8254   | 0.027142 | 0.55849  | 0.038674 |
| 0.237344 | 2.11E-07 | 0.247749 | 5.82E-08 | 0.217074 | 2.19E-06 | 0.269439 | 3.28E-09 | 0.413941 |
| 0.106313 | 0.02157  | 0.119976 | 0.00946  | 0.15066  | 0.00109  | 0.035913 | 0.43878  | -0.03665 |
| -0.05529 | 0.23308  | -0.01531 | 0.74148  | -0.01892 | 0.68338  | 0.02715  | 0.55838  | 0.010589 |
| 0.096292 | 0.03751  | 0.132508 | 0.00412  | 0.106699 | 0.0211   | 0.224092 | 9.98E-07 | 0.046778 |
| -0.08469 | 0.06746  | -0.32912 | 2.93E-13 | -0.27174 | 2.38E-09 | -0.08566 | 0.06437  | -0.07934 |
| -0.02161 | 0.6414   | 0.167332 | 0.00028  | 0.085334 | 0.0654   | 0.057983 | 0.21104  | 0.057837 |
| 0.331798 | 1.83E-13 | 0.1623   | 0.00043  | 0.080674 | 0.08159  | 0.300993 | 3.10E-11 | 0.36636  |
| -0.06349 | 0.17079  | 0.107628 | 0.02     | 0.076227 | 0.09992  | -0.12253 | 0.00803  | -0.17808 |
| 0.107634 | 0.01999  | 0.186719 | 4.91E-05 | 0.147769 | 0.00136  | 0.164989 | 0.00034  | 0.074407 |
| -0.02495 | 0.59064  | -0.28718 | 2.56E-10 | -0.19621 | 1.95E-05 | -0.21292 | 3.45E-06 | -0.29415 |
| 0.005407 | 0.90723  | -0.13238 | 0.00416  | -0.13282 | 0.00404  | 0.155279 | 0.00076  | 0.06774  |
| 0.107398 | 0.02027  | 0.010182 | 0.82629  | 0.042081 | 0.36422  | -0.04846 | 0.29605  | -0.00642 |
| -0.13623 | 0.00318  | -0.17024 | 0.00022  | -0.3592  | 1.14E-15 | -0.02319 | 0.6172   | -0.08885 |
| 0.175365 | 0.00014  | -0.03893 | 0.40133  | 0.014796 | 0.7498   | 0.164621 | 0.00035  | 0.192956 |
| 0.154045 | 0.00084  | 0.174885 | 0.00015  | 0.188654 | 4.08E-05 | 0.247247 | 6.20E-08 | 0.284599 |
| 0.174888 | 0.00015  | -0.00374 | 0.93573  | -0.03383 | 0.4658   | 0.166542 | 0.0003   | -0.02601 |
| -0.18823 | 4.25E-05 | -0.09403 | 0.04224  | -0.15244 | 0.00095  | -0.18339 | 6.71E-05 | -0.19089 |
| -0.13478 | 0.00352  | -0.09594 | 0.03821  | -0.29574 | 7.01E-11 | 0.064003 | 0.16733  | 0.088085 |
| 0.167641 | 0.00027  | 0.171259 | 0.0002   | 0.147942 | 0.00135  | -0.06019 | 0.19418  | -0.11846 |
| -0.00542 | 0.90694  | 0.11795  | 0.01074  | 0.080482 | 0.08232  | -0.00104 | 0.98206  | 0.011513 |
| -0.06392 | 0.16792  | 0.132495 | 0.00413  | 0.07426  | 0.10901  | 0.077338 | 0.09506  | 0.030419 |
| -0.1342  | 0.00367  | -0.33762 | 6.49E-14 | -0.27842 | 9.24E-10 | -0.119   | 0.01006  | -0.18631 |
| -0.07451 | 0.1078   | -0.08488 | 0.06687  | -0.09832 | 0.03366  | -0.00784 | 0.86577  | -0.12684 |
| -0.16993 | 0.00022  | -0.09506 | 0.04003  | -0.06151 | 0.18456  | -0.08081 | 0.08106  | -0.07704 |
| -0.13286 | 0.00403  | -0.08868 | 0.05549  | -0.00674 | 0.88458  | -0.04142 | 0.37186  | -0.09554 |
| -0.22016 | 1.56E-06 | -0.20356 | 9.26E-06 | -0.18361 | 6.57E-05 | -0.02737 | 0.55521  | 0.107071 |
| 0.003418 | 0.94128  | 0.032136 | 0.48844  | 0.016389 | 0.72391  | 0.000705 | 0.98788  | 0.02404  |
| 0.022596 | 0.62621  | 0.055871 | 0.22817  | -0.00375 | 0.93567  | 0.047614 | 0.30453  | 0.055837 |
| 0.030091 | 0.51655  | 0.045783 | 0.32352  | -0.03635 | 0.43323  | 0.060023 | 0.19539  | 0.108814 |
| 0.002446 | 0.95795  | 0.069973 | 0.13106  | 0.024362 | 0.59949  | 0.013595 | 0.76952  | 0.083651 |
| 0.02574  | 0.57899  | 0.046485 | 0.31615  | 0.013877 | 0.76486  | 0.05109  | 0.27053  | 0.061371 |
| 0.004964 | 0.9148   | 0.000648 | 0.98885  | 0.010935 | 0.81368  | -0.03171 | 0.49421  | -0.00646 |
| 0.071829 | 0.12112  | 0.064667 | 0.16296  | 0.049466 | 0.28609  | 0.043676 | 0.34631  | 0.070602 |
| -0.01043 | 0.82217  | -0.05051 | 0.276    | -0.06368 | 0.16946  | 0.0218   | 0.63844  | -0.04695 |
| -0.22226 | 1.23E-06 | -0.17191 | 0.00019  | -0.16816 | 0.00026  | -0.16864 | 0.00025  | -0.20409 |



|          |          |          |          |          |          |          |          |          |
|----------|----------|----------|----------|----------|----------|----------|----------|----------|
| 0.044413 | 0.33822  | 0.094643 | 0.04092  | 0.101962 | 0.02758  | 0.020174 | 0.66368  | 0.070806 |
| 0.00466  | 0.92     | 0.044708 | 0.33503  | 0.105655 | 0.0224   | 0.074244 | 0.10908  | -0.01126 |
| -0.11161 | 0.01582  | -0.09464 | 0.04093  | -0.11791 | 0.01077  | 0.078875 | 0.08864  | 0.191284 |
| -0.09568 | 0.03876  | -0.03426 | 0.46021  | -0.03898 | 0.40062  | 0.010976 | 0.813    | 0.07359  |
| -0.24005 | 1.52E-07 | -0.31189 | 5.40E-12 | -0.20841 | 5.58E-06 | -0.10805 | 0.01951  | -0.04518 |
| 0.330695 | 2.22E-13 | 0.087086 | 0.06004  | 0.201829 | 1.11E-05 | 0.145418 | 0.00163  | -0.04228 |
| 0.198194 | 1.60E-05 | 0.083607 | 0.07106  | 0.228391 | 6.09E-07 | -0.00785 | 0.86561  | -0.1352  |
| 0.064416 | 0.1646   | 0.05037  | 0.27735  | 0.004977 | 0.91458  | 0.065439 | 0.15799  | 0.230209 |
| 0.043484 | 0.34843  | -0.1367  | 0.00307  | -0.13042 | 0.00476  | -0.0771  | 0.09608  | -0.12305 |
| 0.195254 | 2.15E-05 | 0.057039 | 0.21858  | 0.186412 | 5.05E-05 | 0.016442 | 0.72305  | -0.15239 |
| -0.19078 | 3.33E-05 | -0.02045 | 0.65941  | -0.02641 | 0.56917  | 0.03596  | 0.43819  | 0.119574 |
| 0.088944 | 0.05476  | 0.131557 | 0.0044   | 0.137519 | 0.0029   | -0.04219 | 0.36296  | -0.04905 |
| 0.052509 | 0.25744  | 0.071387 | 0.12343  | 0.155884 | 0.00072  | -0.00334 | 0.94263  | -0.04339 |
| 0.000427 | 0.99266  | -0.17429 | 0.00015  | -0.01634 | 0.72463  | -0.0627  | 0.17614  | -0.0357  |
| 0.322269 | 9.55E-13 | 0.085225 | 0.06575  | 0.217947 | 1.99E-06 | 0.264221 | 6.71E-09 | 0.197609 |
| -0.08839 | 0.0563   | -0.24133 | 1.30E-07 | -0.20312 | 9.70E-06 | -0.07787 | 0.09278  | -0.24832 |
| 0.050588 | 0.27528  | -0.0511  | 0.27041  | -0.181   | 8.37E-05 | 0.152106 | 0.00098  | 0.129252 |
| 0.035513 | 0.4439   | -0.20355 | 9.27E-06 | -0.13346 | 0.00386  | -0.05938 | 0.20026  | -0.13409 |
| 0.019628 | 0.67225  | -0.15074 | 0.00109  | -0.08705 | 0.06014  | -0.01918 | 0.67928  | -0.17291 |
| 0.156651 | 0.00068  | 0.101382 | 0.02848  | -0.01619 | 0.72719  | 0.328933 | 3.03E-13 | 0.319757 |
| 0.009001 | 0.84618  | 0.03125  | 0.50052  | 0.084481 | 0.06815  | -0.01915 | 0.67974  | 0.119718 |
| 0.077828 | 0.09297  | -0.11042 | 0.01699  | -0.08809 | 0.05713  | 0.112639 | 0.01488  | 0.198698 |
| 0.268    | 4.01E-09 | 0.259677 | 1.24E-08 | 0.32381  | 7.34E-13 | 0.234468 | 2.98E-07 | 0.251722 |
| 0.175469 | 0.00014  | 0.17158  | 0.00019  | 0.103413 | 0.02543  | 0.201839 | 1.11E-05 | 0.092977 |
| 0.159381 | 0.00055  | 0.29066  | 1.52E-10 | 0.286806 | 2.71E-10 | -0.02519 | 0.58713  | -0.07366 |
| 0.121205 | 0.00874  | -0.00595 | 0.89797  | 0.052371 | 0.2587   | 0.0644   | 0.16471  | -0.14989 |
| 0.146956 | 0.00145  | 0.278697 | 8.88E-10 | 0.274177 | 1.69E-09 | 0.157703 | 0.00063  | 0.175722 |
| 0.047339 | 0.30733  | 0.153683 | 0.00086  | 0.12297  | 0.0078   | 0.103202 | 0.02573  | 0.020134 |
| -0.08057 | 0.08197  | -0.10076 | 0.02946  | -0.15014 | 0.00114  | -0.04795 | 0.30108  | -0.16444 |
| 0.11694  | 0.01144  | -0.0792  | 0.08733  | -0.09065 | 0.05026  | 0.130363 | 0.00478  | 0.178727 |
| 0.173377 | 0.00017  | 0.197078 | 1.79E-05 | 0.169856 | 0.00023  | 0.104771 | 0.02356  | 0.129235 |
| 0.037726 | 0.41601  | 0.104882 | 0.02341  | 0.07474  | 0.10673  | 0.078198 | 0.09143  | -0.0043  |
| 0.013795 | 0.76622  | -0.04829 | 0.29769  | 0.021361 | 0.64521  | -0.21772 | 2.04E-06 | -0.33561 |
| 0.071133 | 0.12478  | 0.042373 | 0.36091  | 0.02099  | 0.65095  | 0.056979 | 0.21907  | -0.07087 |
| 0.040987 | 0.37684  | 0.008535 | 0.85404  | 0.008492 | 0.85478  | -0.08087 | 0.08083  | -0.16737 |
| 0.040179 | 0.38633  | -0.08048 | 0.08234  | -0.00898 | 0.84661  | -0.05953 | 0.19909  | -0.33498 |
| -0.02261 | 0.626    | -0.16521 | 0.00034  | -0.14621 | 0.00153  | -0.14671 | 0.00148  | -0.33769 |
| 0.143227 | 0.00192  | 0.023857 | 0.60707  | 0.041232 | 0.37399  | 0.137483 | 0.00291  | -0.1143  |
| 0.146846 | 0.00146  | 0.02271  | 0.62448  | 0.05324  | 0.25086  | 0.127626 | 0.00575  | -0.11163 |
| 0.162209 | 0.00043  | -0.02277 | 0.62356  | -0.00447 | 0.92332  | -0.05395 | 0.2446   | -0.20104 |
| 0.084442 | 0.06828  | 0.032135 | 0.48845  | -0.0627  | 0.1762   | 0.236784 | 2.25E-07 | 0.26133  |
| 0.184014 | 6.33E-05 | 0.110137 | 0.01727  | 0.010887 | 0.81449  | 0.253747 | 2.70E-08 | 0.280095 |
| 0.102729 | 0.02642  | -0.07763 | 0.09381  | 0.029011 | 0.53172  | -0.06518 | 0.15962  | -0.13748 |
| 0.107167 | 0.02054  | 0.087088 | 0.06004  | 0.027947 | 0.54688  | 0.058077 | 0.2103   | -0.00712 |
| 0.109666 | 0.01775  | 0.358062 | 1.43E-15 | 0.258057 | 1.53E-08 | -0.0301  | 0.51645  | 0.082756 |

|          |          |          |          |          |          |          |          |          |
|----------|----------|----------|----------|----------|----------|----------|----------|----------|
| -0.19584 | 2.02E-05 | -0.21645 | 2.35E-06 | -0.24872 | 5.14E-08 | -0.21421 | 3.00E-06 | -0.21345 |
| 0.16747  | 0.00028  | 0.059323 | 0.20066  | 0.134209 | 0.00366  | -0.03975 | 0.39141  | -0.10033 |
| 0.090197 | 0.05142  | -0.01745 | 0.70686  | 0.022234 | 0.63175  | -0.00863 | 0.85247  | -0.0847  |
| 0.128246 | 0.00551  | -0.00579 | 0.90065  | 0.052277 | 0.25955  | -0.03934 | 0.39634  | -0.13061 |
| 0.109104 | 0.01835  | 0.178241 | 0.00011  | 0.109167 | 0.01828  | 0.191957 | 2.97E-05 | 0.243017 |
| 0.01305  | 0.77851  | -0.13757 | 0.00289  | -0.14615 | 0.00154  | 0.0984   | 0.03351  | -0.03387 |
| 0.036424 | 0.43229  | -0.00296 | 0.94919  | 0.002649 | 0.95448  | 0.009127 | 0.84405  | -0.04997 |
| -0.05769 | 0.21339  | -0.03394 | 0.46435  | 0.008243 | 0.859    | -0.05748 | 0.21501  | -0.12801 |
| 0.084823 | 0.06704  | 0.145703 | 0.00159  | 0.047615 | 0.30452  | 0.033955 | 0.46416  | 0.016941 |
| -0.00309 | 0.94698  | -0.03288 | 0.47843  | -0.05666 | 0.22169  | 0.306813 | 1.23E-11 | 0.174972 |
| 0.040524 | 0.38226  | -0.08714 | 0.05988  | 0.096022 | 0.03805  | -0.17602 | 0.00013  | -0.41831 |
| -0.15003 | 0.00115  | 0.126345 | 0.00626  | 0.210161 | 4.63E-06 | -0.04651 | 0.31584  | 0.116372 |
| 0.362752 | 5.70E-16 | 0.224457 | 9.57E-07 | 0.280814 | 6.54E-10 | 0.150307 | 0.00112  | 0.078556 |
| 0.184496 | 6.05E-05 | 0.00186  | 0.96802  | -0.03107 | 0.50296  | 0.124673 | 0.00699  | 0.107486 |
| -0.06456 | 0.16363  | -0.1802  | 9.01E-05 | -0.2192  | 1.73E-06 | -0.02425 | 0.60116  | 0.037967 |
| 0.099054 | 0.03235  | 0.078883 | 0.08861  | -0.17764 | 0.00011  | 0.273002 | 2.00E-09 | 0.310271 |
| 0.036572 | 0.43043  | 0.216969 | 2.22E-06 | 0.030465 | 0.51135  | 0.100411 | 0.03004  | 0.167128 |
| -0.05266 | 0.25606  | 0.041818 | 0.36723  | -0.1423  | 0.00205  | 0.054429 | 0.24042  | 0.242531 |
| 0.114851 | 0.01301  | 0.06193  | 0.18154  | 0.000896 | 0.9846   | 0.048217 | 0.29844  | 0.001467 |
| -0.07434 | 0.10861  | -0.16871 | 0.00025  | -0.38595 | 4.90E-18 | 0.009007 | 0.84608  | 0.011386 |
| -0.19158 | 3.08E-05 | -0.03949 | 0.39457  | 0.026865 | 0.56252  | -0.08012 | 0.08372  | -0.14067 |
| 0.049607 | 0.2847   | 0.093863 | 0.04262  | 0.106256 | 0.02164  | 0.002414 | 0.9585   | -0.05056 |
| -0.18146 | 8.03E-05 | -0.11882 | 0.01017  | -0.13922 | 0.00257  | -0.11548 | 0.01252  | -0.22499 |
| -0.063   | 0.1741   | -0.00855 | 0.85373  | 0.117338 | 0.01116  | -0.13368 | 0.0038   | -0.34107 |
| 0.154962 | 0.00078  | 0.288937 | 1.97E-10 | 0.191586 | 3.08E-05 | 0.22973  | 5.21E-07 | 0.466156 |
| 0.071581 | 0.12242  | 0.088176 | 0.0569   | 0.151497 | 0.00102  | -0.05658 | 0.22235  | -0.03221 |
| 0.062018 | 0.18093  | 0.112457 | 0.01504  | 0.173633 | 0.00016  | -0.19837 | 1.57E-05 | -0.20802 |
| 0.01711  | 0.71228  | 0.021294 | 0.64624  | 0.227623 | 6.65E-07 | -0.16233 | 0.00043  | -0.18264 |
| 0.038512 | 0.40635  | -0.05536 | 0.23242  | -0.00651 | 0.88845  | -0.01283 | 0.78213  | -0.10845 |
| 0.06853  | 0.13922  | 0.092175 | 0.0465   | 0.087494 | 0.05885  | -0.15881 | 0.00057  | -0.20141 |
| -0.10491 | 0.02337  | -0.16774 | 0.00027  | -0.1175  | 0.01105  | -0.20866 | 5.43E-06 | -0.10889 |
| 0.036525 | 0.43101  | 0.115473 | 0.01252  | 0.111196 | 0.01622  | 0.03269  | 0.48098  | 0.093031 |
| 0.078491 | 0.09021  | 0.001352 | 0.97675  | 0.023602 | 0.61093  | -0.01428 | 0.75827  | -0.05022 |
| 0.095298 | 0.03954  | 0.159737 | 0.00053  | 0.15726  | 0.00065  | 0.017104 | 0.71238  | 0.172244 |
| -0.02647 | 0.56826  | -0.08241 | 0.07523  | -0.0858  | 0.06393  | -0.15025 | 0.00113  | -0.06111 |
| -0.08541 | 0.06516  | -0.0481  | 0.29963  | -0.06174 | 0.18287  | -0.03919 | 0.39815  | -0.08373 |
| -0.03846 | 0.40696  | 0.024002 | 0.6049   | 0.028327 | 0.54144  | -0.06851 | 0.13932  | -0.01503 |
| -0.0999  | 0.03088  | -0.0428  | 0.35609  | -0.0612  | 0.18674  | -0.05036 | 0.27743  | -0.07032 |
| -0.07102 | 0.12536  | 0.011411 | 0.80573  | 0.010964 | 0.8132   | -0.06627 | 0.15277  | -0.00988 |
| -0.08937 | 0.0536   | 0.067995 | 0.14234  | 0.082209 | 0.07593  | 0.025999 | 0.57519  | -0.01561 |
| 0.07901  | 0.0881   | 0.005837 | 0.8999   | 0.044065 | 0.34203  | 0.025985 | 0.57539  | -0.22029 |
| -0.03888 | 0.40189  | -0.04021 | 0.38594  | -0.05668 | 0.22149  | -0.04046 | 0.38306  | 0.003844 |
| 0.08459  | 0.06779  | 0.123551 | 0.00752  | 0.113716 | 0.01394  | 0.014334 | 0.75736  | -0.03387 |
| -0.09354 | 0.04335  | -0.02884 | 0.53418  | 0.044019 | 0.34254  | -0.19141 | 3.13E-05 | -0.2533  |
| 0.048377 | 0.29683  | 0.002241 | 0.96147  | 0.04336  | 0.34981  | -0.08541 | 0.06516  | -0.14148 |

|          |          |          |          |          |          |          |          |          |
|----------|----------|----------|----------|----------|----------|----------|----------|----------|
| -0.01023 | 0.82553  | 0.029507 | 0.52473  | -0.01385 | 0.76533  | -0.01045 | 0.8218   | -0.04384 |
| 0.115309 | 0.01265  | 0.100333 | 0.03017  | 0.110582 | 0.01682  | 0.049146 | 0.28922  | 0.005784 |
| 0.139732 | 0.00247  | 0.044259 | 0.33991  | 0.087148 | 0.05986  | -0.07324 | 0.11397  | -0.09382 |
| 0.099247 | 0.03201  | 0.137273 | 0.00295  | 0.201149 | 1.19E-05 | 0.033325 | 0.4725   | -0.06036 |
| 0.06077  | 0.18988  | 0.001071 | 0.98158  | 0.024558 | 0.59655  | -0.09238 | 0.04601  | -0.13943 |
| 0.070641 | 0.12741  | -0.16581 | 0.00032  | -0.19934 | 1.43E-05 | 0.001633 | 0.97192  | -0.19211 |
| -0.15581 | 0.00073  | -0.11364 | 0.014    | -0.05312 | 0.2519   | -0.24146 | 1.28E-07 | -0.19006 |
| -0.11152 | 0.0159   | 0.05133  | 0.26829  | -0.04854 | 0.29518  | -0.01546 | 0.739    | -0.12576 |
| 0.063643 | 0.16974  | 0.090642 | 0.05028  | 0.217162 | 2.17E-06 | -0.10366 | 0.02508  | 0.010608 |
| -0.10426 | 0.02425  | -0.09022 | 0.05136  | -0.09424 | 0.04178  | -0.03044 | 0.51166  | -0.08111 |
| 0.16823  | 0.00026  | 0.169089 | 0.00024  | 0.189084 | 3.92E-05 | 0.189217 | 3.87E-05 | 0.360383 |
| -0.05087 | 0.27261  | -0.07629 | 0.09962  | -0.02969 | 0.52218  | -0.05379 | 0.24597  | -0.05983 |
| -0.12532 | 0.00669  | -0.15679 | 0.00067  | -0.1035  | 0.02531  | -0.17934 | 9.75E-05 | -0.44458 |
| 0.013701 | 0.76776  | 0.00833  | 0.85752  | -0.05938 | 0.2002   | 0.062195 | 0.17968  | -0.08806 |
| -0.05216 | 0.26059  | 0.143446 | 0.00189  | 0.092169 | 0.04651  | -0.09271 | 0.04523  | -0.02418 |
| 0.006077 | 0.8958   | -0.03923 | 0.39762  | -0.02374 | 0.60881  | -0.02602 | 0.57487  | 0.009619 |
| -0.00716 | 0.87736  | 0.045198 | 0.32975  | -0.07535 | 0.10387  | -0.01352 | 0.7708   | 0.016897 |
| 0.12149  | 0.00859  | 0.049507 | 0.28568  | 0.088758 | 0.05527  | 0.327272 | 4.04E-13 | 0.254868 |
| 0.17378  | 0.00016  | 0.214773 | 2.82E-06 | 0.065173 | 0.15968  | 0.264979 | 6.06E-09 | 0.404518 |
| 0.008756 | 0.85032  | 0.039451 | 0.395    | 0.075484 | 0.10328  | 0.095222 | 0.03969  | 0.172989 |
| 0.170854 | 0.00021  | 0.210169 | 4.63E-06 | 0.227729 | 6.57E-07 | 0.154599 | 0.0008   | 0.154692 |
| 0.348342 | 9.07E-15 | 0.083762 | 0.07054  | 0.05057  | 0.27545  | 0.121584 | 0.00853  | 0.034846 |
| -0.15958 | 0.00054  | -0.25525 | 2.22E-08 | -0.20807 | 5.78E-06 | -0.314   | 3.82E-12 | -0.24233 |
| 0.284626 | 3.74E-10 | -0.03236 | 0.48543  | -0.02933 | 0.52726  | 0.089762 | 0.05256  | 0.014703 |
| 0.070656 | 0.12733  | -0.03666 | 0.42929  | 0.069671 | 0.13274  | 0.056901 | 0.21969  | 0.086114 |
| 0.041988 | 0.36528  | -0.02539 | 0.58412  | 0.019678 | 0.67146  | -0.05886 | 0.20418  | -0.09759 |
| 0.121709 | 0.00847  | 0.14096  | 0.00226  | 0.126196 | 0.00632  | 0.108141 | 0.01941  | 0.065461 |
| 0.063744 | 0.16906  | -0.05207 | 0.26144  | 0.006702 | 0.88514  | 0.023413 | 0.61378  | -0.1547  |
| 0.261463 | 9.74E-09 | 0.055726 | 0.22938  | 0.036575 | 0.43039  | 0.086147 | 0.06287  | -0.00032 |
| 0.019024 | 0.68177  | 0.102172 | 0.02726  | 0.126671 | 0.00612  | 0.008118 | 0.86111  | -0.02118 |
| 0.018002 | 0.69801  | -0.10409 | 0.02449  | -0.04198 | 0.36536  | -0.05378 | 0.24605  | -0.06912 |
| -0.11478 | 0.01307  | -0.15595 | 0.00072  | -0.09785 | 0.03453  | -0.21948 | 1.68E-06 | -0.26198 |
| 0.057236 | 0.21699  | 0.119761 | 0.00959  | 0.097205 | 0.03573  | 0.052395 | 0.25847  | 0.017895 |
| 0.02013  | 0.66437  | -0.05556 | 0.23075  | 0.002436 | 0.95812  | 0.012616 | 0.78569  | -0.16356 |
| 0.105653 | 0.0224   | 0.053954 | 0.24455  | 0.09986  | 0.03096  | 0.025448 | 0.58331  | 0.043341 |
| 0.073544 | 0.11247  | -0.0501  | 0.27995  | 0.03149  | 0.49723  | -0.12511 | 0.00679  | -0.34418 |
| 0.251287 | 3.70E-08 | 0.314183 | 3.70E-12 | 0.321157 | 1.15E-12 | 0.008351 | 0.85717  | -0.00694 |
| 0.2327   | 3.67E-07 | 0.146369 | 0.00152  | 0.127033 | 0.00598  | 0.119105 | 0.00999  | -0.18435 |
| 0.323684 | 7.50E-13 | 0.136469 | 0.00313  | 0.264481 | 6.48E-09 | 0.154635 | 0.0008   | -0.06303 |
| 0.113765 | 0.0139   | 0.138692 | 0.00267  | 0.208497 | 5.53E-06 | 0.125668 | 0.00654  | 0.14355  |
| 0.250316 | 4.20E-08 | 0.158483 | 0.00059  | 0.158164 | 0.0006   | -0.07438 | 0.10844  | -0.02816 |
| 0.187834 | 4.41E-05 | 0.235934 | 2.50E-07 | 0.260776 | 1.07E-08 | 0.000509 | 0.99125  | -0.08115 |
| 0.07846  | 0.09034  | 0.265734 | 5.46E-09 | 0.225245 | 8.75E-07 | 0.324575 | 6.44E-13 | 0.228271 |
| 0.003707 | 0.93631  | 0.02812  | 0.5444   | -0.00904 | 0.84551  | 0.06197  | 0.18126  | 0.000768 |
| 0.160494 | 0.0005   | 0.168788 | 0.00025  | 0.298817 | 4.36E-11 | -0.09189 | 0.04718  | -0.07651 |

|          |          |          |          |          |          |          |          |          |
|----------|----------|----------|----------|----------|----------|----------|----------|----------|
| 0.180762 | 8.56E-05 | 0.137287 | 0.00295  | 0.170679 | 0.00021  | 0.195194 | 2.16E-05 | 0.304125 |
| -0.0564  | 0.22376  | 0.026898 | 0.56204  | 0.077335 | 0.09507  | -0.02943 | 0.52584  | -0.01877 |
| 0.076383 | 0.09922  | 0.205757 | 7.37E-06 | 0.009726 | 0.83396  | 0.166412 | 0.0003   | 0.377104 |
| 0.011488 | 0.80444  | -0.03255 | 0.48283  | -0.1063  | 0.02159  | 0.028246 | 0.5426   | -0.04734 |
| 0.069329 | 0.13466  | 0.310704 | 6.55E-12 | 0.20593  | 7.24E-06 | 0.111686 | 0.01575  | 0.091681 |
| -0.12084 | 0.00895  | -0.14741 | 0.0014   | -0.24254 | 1.12E-07 | 0.058997 | 0.20315  | 0.059076 |
| 0.185043 | 5.75E-05 | -0.18024 | 8.98E-05 | -0.08611 | 0.06298  | 0.172978 | 0.00017  | 0.047422 |
| -0.21726 | 2.15E-06 | -0.10581 | 0.0222   | -0.05318 | 0.25139  | -0.10144 | 0.02838  | -0.19429 |
| 0.092154 | 0.04655  | 0.211078 | 4.20E-06 | 0.134573 | 0.00357  | 0.135298 | 0.0034   | 0.165442 |
| -0.00795 | 0.86397  | -0.01816 | 0.69554  | 0.006218 | 0.8934   | -0.00853 | 0.85422  | -0.1634  |
| 0.075463 | 0.10337  | 0.060761 | 0.18994  | 0.051096 | 0.27048  | 0.063927 | 0.16784  | -0.03722 |
| 0.272503 | 2.14E-09 | 0.178054 | 0.00011  | 0.287365 | 2.49E-10 | -0.03654 | 0.43081  | 0.043475 |
| 0.05328  | 0.25051  | 0.037425 | 0.41973  | 0.051026 | 0.27114  | 0.211284 | 4.11E-06 | 0.248983 |
| 0.005671 | 0.90272  | -0.05498 | 0.23571  | 0.016244 | 0.72625  | -0.15858 | 0.00058  | -0.17384 |
| -0.02504 | 0.58936  | 0.152942 | 0.00091  | 0.012164 | 0.79318  | 0.036143 | 0.43585  | 0.098837 |
| 0.183158 | 6.86E-05 | 0.177051 | 0.00012  | 0.204052 | 8.80E-06 | -0.05793 | 0.21147  | -0.14548 |
| -0.00875 | 0.85049  | -0.09761 | 0.03496  | -0.04198 | 0.3654   | -0.18606 | 5.23E-05 | -0.26422 |
| 0.121076 | 0.00882  | 0.217907 | 2.00E-06 | 0.151493 | 0.00102  | 0.045937 | 0.32189  | -0.15471 |
| 0.002642 | 0.95459  | 0.032755 | 0.48011  | 0.060002 | 0.19555  | -0.01958 | 0.673    | -0.05799 |
| 0.202907 | 9.91E-06 | 0.06537  | 0.15843  | -0.19951 | 1.40E-05 | 0.179065 | 9.99E-05 | 0.228704 |
| 0.025    | 0.58996  | -0.00672 | 0.88492  | -0.32427 | 6.78E-13 | 0.189496 | 3.76E-05 | 0.368815 |
| -0.26419 | 6.75E-09 | -0.15414 | 0.00083  | -0.18016 | 9.05E-05 | -0.08782 | 0.05791  | -0.03651 |
| -0.02875 | 0.5354   | -0.12586 | 0.00646  | -0.14899 | 0.00124  | -0.03273 | 0.4804   | -0.15105 |
| -0.03183 | 0.49263  | 0.027664 | 0.55095  | -0.02249 | 0.62789  | -0.01279 | 0.78288  | -0.0175  |
| -0.12093 | 0.0089   | -0.25232 | 3.24E-08 | -0.17807 | 0.00011  | -0.14712 | 0.00143  | 0.048828 |
| -0.25083 | 3.93E-08 | -0.25508 | 2.27E-08 | -0.22092 | 1.43E-06 | -0.19164 | 3.06E-05 | -0.22351 |
| 0.002089 | 0.96409  | -0.00257 | 0.95586  | 0.056777 | 0.2207   | 0.043053 | 0.35324  | 0.099114 |
| 0.016349 | 0.72456  | -0.08562 | 0.06451  | -0.00776 | 0.86723  | -0.06185 | 0.18211  | -0.17511 |
| 0.0565   | 0.22297  | 0.130521 | 0.00473  | 0.042072 | 0.36433  | -0.01193 | 0.7971   | 0.058409 |
| 0.0175   | 0.70604  | -0.08335 | 0.07195  | -0.05457 | 0.23918  | -0.00569 | 0.9024   | -0.20996 |
| 0.035789 | 0.44036  | 0.031027 | 0.50359  | 0.011125 | 0.81051  | 0.125081 | 0.0068   | 0.16971  |
| 0.345026 | 1.68E-14 | 0.19314  | 2.64E-05 | 0.187565 | 4.53E-05 | 0.288069 | 2.25E-10 | 0.212882 |
| -0.22156 | 1.33E-06 | -0.13445 | 0.0036   | -0.16894 | 0.00024  | -0.23828 | 1.88E-07 | -0.25425 |
| -0.06525 | 0.15923  | 0.032149 | 0.48826  | -0.06441 | 0.16464  | -0.0563  | 0.2246   | 0.039984 |
| 0.017227 | 0.7104   | -0.0995  | 0.03157  | -0.1111  | 0.01631  | -0.12029 | 0.00927  | -0.34488 |
| 0.101348 | 0.02853  | -0.12179 | 0.00842  | -0.05207 | 0.26147  | 0.114325 | 0.01343  | -0.09387 |
| -0.08943 | 0.05345  | 0.107108 | 0.02061  | 0.06599  | 0.15451  | 0.13783  | 0.00284  | 0.259257 |
| 0.0111   | 0.81092  | -0.00636 | 0.89091  | 0.120334 | 0.00924  | -0.10656 | 0.02127  | -0.02766 |
| 0.015387 | 0.74016  | 0.035137 | 0.44874  | 0.028051 | 0.54538  | -0.03315 | 0.47482  | -0.03987 |
| -0.12732 | 0.00587  | -0.24313 | 1.04E-07 | -0.15186 | 0.00099  | -0.08298 | 0.07321  | -0.01303 |
| 0.194256 | 2.37E-05 | 0.195268 | 2.14E-05 | 0.224333 | 9.71E-07 | -0.06453 | 0.16383  | -0.00463 |
| -0.02718 | 0.55793  | -0.05608 | 0.22642  | 0.01116  | 0.80992  | -0.1214  | 0.00863  | -0.12472 |
| 0.272338 | 2.19E-09 | 0.078197 | 0.09143  | 0.22952  | 5.34E-07 | 0.040089 | 0.38739  | -0.03796 |
| 0.084744 | 0.06729  | -0.04748 | 0.30593  | -0.06853 | 0.13921  | -0.0568  | 0.22055  | -0.03816 |
| 0.211335 | 4.09E-06 | 0.178982 | 0.0001   | 0.189555 | 3.74E-05 | 0.005963 | 0.89775  | -0.11183 |

|          |          |          |          |          |          |          |          |          |
|----------|----------|----------|----------|----------|----------|----------|----------|----------|
| -0.02127 | 0.64659  | -0.10177 | 0.02787  | -0.0834  | 0.07177  | -0.03144 | 0.49798  | -0.06836 |
| 0.300914 | 3.14E-11 | 0.083866 | 0.07019  | 0.136583 | 0.0031   | 0.176256 | 0.00013  | -0.07742 |
| 0.042932 | 0.3546   | -0.05463 | 0.23868  | 0.046765 | 0.31324  | -0.14224 | 0.00206  | -0.16631 |
| 0.269427 | 3.29E-09 | 0.153988 | 0.00084  | 0.152093 | 0.00098  | 0.008548 | 0.85383  | -0.04359 |
| -0.13497 | 0.00347  | -0.04192 | 0.3661   | -0.10198 | 0.02754  | -0.15082 | 0.00108  | -0.14409 |
| 0.117616 | 0.01097  | 0.005853 | 0.89962  | 0.282326 | 5.25E-10 | -0.12148 | 0.00859  | -0.21076 |
| -0.12268 | 0.00795  | -0.118   | 0.01071  | -0.09076 | 0.04999  | -0.10331 | 0.02558  | 0.119126 |
| 0.088248 | 0.05669  | 0.099755 | 0.03114  | 0.093474 | 0.04349  | 0.053243 | 0.25084  | -0.00056 |
| -0.08884 | 0.05504  | 0.064521 | 0.16391  | 0.012031 | 0.7954   | -0.04538 | 0.32778  | 0.06338  |
| -0.06341 | 0.17129  | -0.0452  | 0.32976  | -0.05128 | 0.26876  | -0.06673 | 0.14994  | -0.17094 |
| 0.142363 | 0.00204  | -0.05818 | 0.20949  | 0.042854 | 0.35547  | -0.16522 | 0.00034  | -0.12272 |
| 0.146411 | 0.00151  | 0.149411 | 0.0012   | 0.180302 | 8.93E-05 | 0.100372 | 0.0301   | 0.088512 |
| 0.02257  | 0.62662  | 0.123461 | 0.00756  | 0.113793 | 0.01387  | -0.15612 | 0.00071  | 0.005173 |
| -0.11223 | 0.01525  | -0.16466 | 0.00035  | -0.09375 | 0.04286  | -0.08895 | 0.05473  | 0.063705 |
| 0.164423 | 0.00036  | 0.355462 | 2.35E-15 | 0.294719 | 8.21E-11 | 0.19949  | 1.40E-05 | 0.163496 |
| 0.036771 | 0.42792  | 0.041004 | 0.37665  | 0.10937  | 0.01807  | -0.02088 | 0.65273  | -0.01116 |
| -0.00388 | 0.93333  | 0.030316 | 0.51342  | 0.008125 | 0.86099  | -0.21611 | 2.44E-06 | -0.25012 |
| 0.114487 | 0.0133   | 0.019716 | 0.67087  | 0.080898 | 0.08074  | -0.02506 | 0.58904  | -0.06523 |
| 0.031353 | 0.49911  | 0.046216 | 0.31897  | 0.021959 | 0.63598  | -0.06184 | 0.18217  | -0.06794 |
| 0.093146 | 0.04423  | 0.047663 | 0.30403  | 0.014795 | 0.74981  | 0.036618 | 0.42984  | -0.16187 |
| -0.00774 | 0.86752  | 0.040856 | 0.37837  | -0.00256 | 0.95597  | 0.055875 | 0.22813  | 0.124532 |
| 0.137572 | 0.00289  | 0.27315  | 1.95E-09 | 0.154699 | 0.0008   | 0.297497 | 5.35E-11 | 0.340547 |
| 0.166375 | 0.00031  | 0.179099 | 9.96E-05 | 0.103094 | 0.02589  | 0.083529 | 0.07133  | 0.239999 |
| -0.03608 | 0.43671  | -0.16297 | 0.00041  | -0.0738  | 0.11123  | -0.05023 | 0.27873  | -0.08331 |
| -0.01991 | 0.66776  | 0.079656 | 0.08553  | -0.01948 | 0.67461  | 0.08168  | 0.07784  | 0.001281 |
| 0.039591 | 0.39332  | -0.03768 | 0.41653  | -0.03104 | 0.50337  | -0.11268 | 0.01484  | -0.15145 |
| -0.02436 | 0.59955  | -0.24435 | 8.91E-08 | 0.002248 | 0.96135  | -0.25942 | 1.28E-08 | -0.34303 |
| -0.10457 | 0.02382  | -0.19284 | 2.72E-05 | -0.12923 | 0.00516  | -0.33199 | 1.77E-13 | -0.20917 |
| 0.18816  | 4.28E-05 | 0.259184 | 1.32E-08 | 0.055653 | 0.22999  | 0.198199 | 1.60E-05 | 0.199972 |
| 0.1083   | 0.01923  | 0.028066 | 0.54518  | 0.100536 | 0.02983  | 0.509503 | 3.24E-32 | 0.126962 |
| 0.11615  | 0.01201  | 0.101768 | 0.02788  | 0.090438 | 0.0508   | 0.200957 | 1.21E-05 | 0.109952 |
| 0.114054 | 0.01366  | 0.082164 | 0.07609  | 0.142097 | 0.00208  | -0.12029 | 0.00927  | -0.20556 |
| 0.108541 | 0.01896  | 0.195121 | 2.17E-05 | 0.193772 | 2.48E-05 | 0.12871  | 0.00534  | 0.131755 |
| -0.2493  | 4.78E-08 | -0.23981 | 1.56E-07 | -0.21226 | 3.70E-06 | -0.19212 | 2.92E-05 | -0.14634 |
| 0.077573 | 0.09405  | 0.267647 | 4.20E-09 | 0.179564 | 9.55E-05 | 0.116392 | 0.01183  | 0.356573 |
| 0.113214 | 0.01437  | 0.124207 | 0.0072   | 0.112935 | 0.01461  | 0.11067  | 0.01673  | 0.235838 |
| -0.16776 | 0.00027  | -0.14922 | 0.00122  | -0.23101 | 4.48E-07 | -0.05649 | 0.22307  | -0.03104 |
| 0.017782 | 0.70153  | -0.04361 | 0.34709  | 0.007121 | 0.87802  | -0.03352 | 0.46986  | -0.02598 |
| -0.03862 | 0.40506  | 0.037172 | 0.42289  | -0.03781 | 0.41494  | 0.024918 | 0.59118  | 0.0851   |
| -0.00163 | 0.97194  | -0.18524 | 5.64E-05 | -0.12541 | 0.00665  | 0.04591  | 0.32218  | 0.149511 |
| -0.00883 | 0.84908  | -0.03464 | 0.45517  | -0.02322 | 0.61669  | -0.03893 | 0.40122  | -0.09177 |
| 0.086166 | 0.06281  | 0.158261 | 0.0006   | 0.162645 | 0.00042  | 0.185775 | 5.37E-05 | 0.155584 |
| -0.06385 | 0.16835  | 0.004844 | 0.91686  | 0.014214 | 0.75934  | -0.24257 | 1.11E-07 | -0.2246  |
| 0.018059 | 0.6971   | -0.03585 | 0.43953  | -0.02869 | 0.53623  | -0.03352 | 0.46992  | -0.08937 |
| -0.18384 | 6.44E-05 | -0.31434 | 3.61E-12 | -0.20583 | 7.32E-06 | -0.298   | 4.95E-11 | -0.4181  |

|          |          |          |          |          |          |          |          |          |
|----------|----------|----------|----------|----------|----------|----------|----------|----------|
| 0.055962 | 0.22741  | -0.05997 | 0.1958   | -0.01635 | 0.72453  | -0.01256 | 0.78668  | -0.13387 |
| -0.13627 | 0.00317  | -0.29373 | 9.55E-11 | -0.23731 | 2.12E-07 | -0.10624 | 0.02166  | -0.17922 |
| 0.194745 | 2.26E-05 | -0.11367 | 0.01398  | -0.14574 | 0.00159  | 0.101779 | 0.02786  | 0.065863 |
| 0.067773 | 0.14365  | -0.10092 | 0.02921  | -0.1719  | 0.00019  | -0.00646 | 0.88934  | -0.20589 |
| -0.04023 | 0.3857   | -0.07201 | 0.12019  | -0.13995 | 0.00244  | -0.03619 | 0.43531  | -0.26973 |
| -0.15381 | 0.00085  | -0.06843 | 0.13977  | -0.07313 | 0.11451  | 0.020421 | 0.65981  | 0.1108   |
| 0.104589 | 0.0238   | 0.160388 | 0.0005   | 0.165927 | 0.00032  | -0.04706 | 0.31018  | -0.06487 |
| -0.25007 | 4.33E-08 | -0.31517 | 3.14E-12 | -0.33935 | 4.75E-14 | -0.06809 | 0.14178  | -0.20157 |
| -0.11495 | 0.01293  | -0.03497 | 0.45088  | -0.11404 | 0.01367  | -0.09872 | 0.03294  | -0.0081  |
| -0.08249 | 0.07495  | 0.146452 | 0.00151  | 0.031734 | 0.4939   | 0.022514 | 0.62747  | 0.048323 |
| 0.056146 | 0.22588  | 0.087682 | 0.0583   | 0.087481 | 0.05889  | -0.06548 | 0.15774  | -0.10861 |
| -0.01409 | 0.76131  | 0.017823 | 0.70087  | -0.02187 | 0.63728  | 0.057495 | 0.21491  | -0.04626 |
| 0.015345 | 0.74085  | -0.13703 | 0.003    | -0.0845  | 0.06808  | -0.15429 | 0.00082  | -0.30945 |
| -0.16337 | 0.00039  | -0.24288 | 1.07E-07 | -0.20741 | 6.20E-06 | -0.32949 | 2.74E-13 | -0.34654 |
| 0.081505 | 0.07848  | 0.108665 | 0.01883  | 0.139709 | 0.00248  | -0.06656 | 0.15097  | -0.10897 |
| 0.27005  | 3.02E-09 | -0.0892  | 0.05406  | 0.010851 | 0.81509  | 0.03646  | 0.43184  | -0.09967 |
| 0.154724 | 0.00079  | 0.337557 | 6.57E-14 | 0.236961 | 2.21E-07 | 0.195143 | 2.17E-05 | 0.247265 |
| -0.05658 | 0.22227  | -0.08923 | 0.05399  | -0.21116 | 4.17E-06 | 0.143272 | 0.00191  | 0.124942 |
| 0.012561 | 0.7866   | 0.078557 | 0.08994  | 0.156661 | 0.00068  | -0.05582 | 0.2286   | -0.08383 |
| -0.04341 | 0.34928  | 0.059706 | 0.19776  | 0.067626 | 0.14452  | -0.01166 | 0.80151  | -0.05216 |
| -0.01723 | 0.71031  | 0.135784 | 0.00328  | 0.124992 | 0.00684  | -0.00611 | 0.89516  | -0.01093 |
| -0.05419 | 0.24253  | 0.141748 | 0.00214  | 0.025448 | 0.58331  | 0.080143 | 0.08362  | 0.215871 |
| 0.149579 | 0.00119  | -0.01802 | 0.69775  | -0.02291 | 0.62141  | -0.00519 | 0.91093  | -0.05501 |
| 0.033385 | 0.47169  | 0.000101 | 0.99825  | 0.021426 | 0.6442   | -0.06764 | 0.14444  | -0.05692 |
| -0.20091 | 1.22E-05 | -0.15537 | 0.00075  | -0.13983 | 0.00246  | 0.352454 | 4.18E-15 | 0.023079 |
| -0.1596  | 0.00054  | -0.11648 | 0.01177  | -0.10724 | 0.02045  | -0.10663 | 0.02119  | -0.04821 |
| 0.170042 | 0.00022  | 0.008953 | 0.84698  | 0.150649 | 0.00109  | 0.029755 | 0.52125  | -0.10356 |
| -0.09408 | 0.04214  | 0.044347 | 0.33895  | -0.02408 | 0.60376  | -0.00043 | 0.99258  | 0.039129 |
| 0.179151 | 9.92E-05 | 0.185882 | 5.31E-05 | 0.200285 | 1.30E-05 | 0.059232 | 0.20136  | 0.027706 |
| 0.184659 | 5.96E-05 | -0.10377 | 0.02493  | -0.00527 | 0.90958  | -0.0147  | 0.7514   | -0.14999 |
| -0.27061 | 2.79E-09 | -0.15332 | 0.00089  | -0.20781 | 5.94E-06 | -0.10051 | 0.02988  | -0.06241 |
| -0.1256  | 0.00657  | -0.0407  | 0.38021  | -0.07496 | 0.1057   | -0.14943 | 0.0012   | 0.015888 |
| -0.01755 | 0.70524  | -0.07203 | 0.1201   | -0.07    | 0.13093  | 0.050759 | 0.27366  | 0.044821 |
| 0.117973 | 0.01073  | 0.102769 | 0.02636  | -0.14349 | 0.00188  | 0.15959  | 0.00054  | 0.300483 |
| 0.038437 | 0.40727  | 0.162884 | 0.00041  | 0.103544 | 0.02525  | 0.010586 | 0.81952  | -0.01215 |
| -0.03494 | 0.45131  | -0.04254 | 0.35905  | -0.02309 | 0.61876  | -0.15939 | 0.00055  | -0.31286 |
| 0.0387   | 0.40406  | 0.019451 | 0.67502  | 0.035816 | 0.44002  | -0.15208 | 0.00098  | -0.11553 |
| -0.17313 | 0.00017  | -0.06739 | 0.1459   | -0.08742 | 0.05907  | -0.22665 | 7.45E-07 | -0.16681 |
| -0.29617 | 6.57E-11 | -0.1844  | 6.11E-05 | -0.2474  | 6.08E-08 | -0.27035 | 2.89E-09 | -0.21395 |
| -0.07157 | 0.1225   | 0.018092 | 0.69656  | 0.08669  | 0.06122  | -0.24395 | 9.37E-08 | -0.13952 |
| -0.09511 | 0.03994  | -0.18521 | 5.66E-05 | -0.06891 | 0.13701  | -0.18823 | 4.25E-05 | -0.38401 |
| 0.076518 | 0.09862  | 0.219764 | 1.63E-06 | 0.009826 | 0.83228  | 0.275429 | 1.42E-09 | 0.357596 |
| 0.158125 | 0.0006   | 0.168678 | 0.00025  | -0.00088 | 0.9849   | 0.117385 | 0.01113  | 0.155066 |
| -0.03352 | 0.46992  | -0.23529 | 2.70E-07 | -0.2009  | 1.22E-05 | -0.23141 | 4.28E-07 | -0.11483 |
| -0.16214 | 0.00044  | -0.14454 | 0.00174  | -0.07695 | 0.09674  | -0.04495 | 0.3324   | -0.13998 |

|          |          |          |          |          |          |          |          |          |
|----------|----------|----------|----------|----------|----------|----------|----------|----------|
| -0.03253 | 0.48317  | -0.00869 | 0.85151  | -0.00779 | 0.86661  | -0.13901 | 0.00261  | -0.03526 |
| 0.060644 | 0.1908   | 0.265685 | 5.50E-09 | 0.21093  | 4.27E-06 | -0.17919 | 9.88E-05 | -0.09118 |
| -0.03798 | 0.41293  | 0.217951 | 1.99E-06 | 0.143905 | 0.00182  | 0.044849 | 0.3335   | 0.07787  |
| -0.08555 | 0.06473  | 0.001012 | 0.9826   | -0.02459 | 0.59604  | -0.00079 | 0.98645  | -0.04791 |
| 0.021977 | 0.6357   | 0.049723 | 0.28358  | 6.11E-05 | 0.99895  | 0.047103 | 0.30976  | 0.042944 |
| -0.02476 | 0.59359  | 0.072134 | 0.11954  | 0.02623  | 0.57179  | -0.01212 | 0.7939   | 0.069343 |
| -0.00973 | 0.83382  | 0.004672 | 0.91979  | -0.0034  | 0.94151  | -0.24376 | 9.59E-08 | -0.30003 |
| -0.05629 | 0.22472  | -0.01704 | 0.7134   | -0.036   | 0.43761  | -0.04488 | 0.3332   | -0.04336 |
| -0.07657 | 0.09839  | -0.0729  | 0.11566  | -0.06014 | 0.19451  | -0.08172 | 0.07768  | -0.02763 |
| -0.1653  | 0.00033  | -0.14016 | 0.0024   | -0.0898  | 0.05248  | -0.03394 | 0.46439  | 0.112505 |
| -0.19298 | 2.68E-05 | -0.08738 | 0.05919  | -0.12786 | 0.00566  | -0.11756 | 0.01101  | -0.17139 |
| 0.042663 | 0.35763  | 0.339332 | 4.77E-14 | 0.31345  | 4.18E-12 | 0.166487 | 0.0003   | 0.198077 |
| -0.00465 | 0.92012  | -0.08975 | 0.05259  | 0.04278  | 0.3563   | 0.005546 | 0.90486  | -0.10694 |
| 0.038808 | 0.40276  | 0.105635 | 0.02243  | 0.019362 | 0.67643  | 0.066906 | 0.14885  | 0.088125 |
| 0.096872 | 0.03637  | 0.016059 | 0.72925  | 0.040048 | 0.38788  | -0.0591  | 0.20238  | -0.16599 |
| 0.023052 | 0.61926  | -0.05391 | 0.24491  | -0.04101 | 0.37658  | -0.09252 | 0.04569  | -0.18172 |
| 0.061095 | 0.18751  | 0.051495 | 0.26675  | 0.091798 | 0.04741  | 0.037224 | 0.42224  | -0.14717 |
| 0.167164 | 0.00029  | -0.13855 | 0.00269  | -0.00758 | 0.87015  | 0.112137 | 0.01533  | 0.142133 |
| 0.015569 | 0.73719  | -0.08144 | 0.07872  | -0.00506 | 0.91315  | -0.03154 | 0.49651  | -0.17716 |
| -0.13254 | 0.00411  | -0.18862 | 4.09E-05 | -0.1878  | 4.43E-05 | -0.21748 | 2.09E-06 | -0.2901  |
| -0.08709 | 0.06004  | -0.13706 | 0.003    | 0.020872 | 0.65279  | -0.07068 | 0.12722  | -0.1874  |
| -0.0512  | 0.26955  | 0.028989 | 0.53202  | 0.110248 | 0.01716  | -0.08968 | 0.05279  | -0.07015 |
| -0.13749 | 0.00291  | -0.02587 | 0.57708  | -0.02364 | 0.61029  | -0.10747 | 0.02018  | -0.02317 |
| -0.13921 | 0.00257  | 0.098671 | 0.03302  | 0.104556 | 0.02384  | -0.07642 | 0.09905  | 0.029273 |
| 0.024745 | 0.59376  | -0.1341  | 0.00369  | -0.00793 | 0.86422  | -0.03013 | 0.51603  | -0.10094 |
| 0.023061 | 0.61913  | -0.0899  | 0.0522   | 0.030302 | 0.51362  | -0.0698  | 0.13201  | -0.0218  |
| 0.085587 | 0.06461  | -0.21628 | 2.39E-06 | -0.18049 | 8.77E-05 | -0.0154  | 0.73989  | -0.09764 |
| 0.008612 | 0.85274  | -0.09431 | 0.04164  | -0.07024 | 0.12959  | -0.22395 | 1.01E-06 | -0.2446  |
| 0.085113 | 0.0661   | 0.153118 | 0.0009   | 0.08041  | 0.08259  | 0.034045 | 0.46297  | 0.031017 |
| -0.18059 | 8.69E-05 | -0.23542 | 2.66E-07 | -0.34274 | 2.56E-14 | -0.10079 | 0.02943  | -0.06174 |
| -0.02825 | 0.54254  | -0.05081 | 0.27317  | -0.06456 | 0.16364  | -0.00598 | 0.8974   | -0.05428 |
| 0.219572 | 1.66E-06 | 0.085109 | 0.06612  | 0.267998 | 4.01E-09 | 0.072062 | 0.11992  | 0.020151 |
| -0.1337  | 0.0038   | -0.16197 | 0.00044  | -0.14763 | 0.00138  | -0.05762 | 0.21395  | -0.20424 |
| 0.18794  | 4.37E-05 | 0.243496 | 9.91E-08 | 0.15566  | 0.00074  | 0.27849  | 9.15E-10 | 0.10808  |
| 0.046361 | 0.31745  | 0.103446 | 0.02539  | 0.097983 | 0.03427  | 0.083598 | 0.07109  | 0.073908 |
| -0.07587 | 0.10152  | -0.13345 | 0.00386  | -0.15753 | 0.00063  | -0.07623 | 0.09988  | -0.18871 |
| 0.02461  | 0.59577  | -0.0152  | 0.74319  | 0.147679 | 0.00137  | -0.14346 | 0.00188  | -0.33304 |
| 0.020476 | 0.65896  | 0.08189  | 0.07708  | 0.054005 | 0.24411  | 0.104629 | 0.02375  | 0.037101 |
| 0.173839 | 0.00016  | 0.018246 | 0.69412  | 0.096683 | 0.03674  | -0.11837 | 0.01046  | -0.29233 |
| -0.00476 | 0.91836  | 0.047889 | 0.30174  | 0.113468 | 0.01415  | 0.043267 | 0.35086  | 0.017005 |
| 0.009869 | 0.83155  | 0.064335 | 0.16514  | 0.035402 | 0.44533  | -0.06116 | 0.18708  | -0.00518 |
| 0.008033 | 0.86254  | -0.07103 | 0.12534  | -0.00487 | 0.91648  | -0.15517 | 0.00077  | -0.15706 |
| -0.0114  | 0.80594  | -0.091   | 0.04938  | -0.07341 | 0.11315  | 0.014705 | 0.75128  | -0.22442 |
| -0.17261 | 0.00018  | -0.2526  | 3.13E-08 | -0.19569 | 2.06E-05 | -0.25609 | 1.99E-08 | -0.36671 |
| -0.21846 | 1.88E-06 | -0.04155 | 0.37037  | -0.1349  | 0.00349  | -0.02425 | 0.60118  | -0.06972 |

|          |          |          |          |          |          |          |          |          |
|----------|----------|----------|----------|----------|----------|----------|----------|----------|
| 0.046111 | 0.32007  | -0.0337  | 0.46755  | 0.016098 | 0.72862  | -0.1686  | 0.00025  | -0.26806 |
| 0.058186 | 0.20944  | -0.16386 | 0.00038  | -0.08988 | 0.05225  | -0.04489 | 0.33307  | -0.29444 |
| 0.02307  | 0.619    | 0.141569 | 0.00217  | 0.218471 | 1.88E-06 | 0.065478 | 0.15774  | 0.193905 |
| -0.21712 | 2.18E-06 | -0.21585 | 2.51E-06 | -0.24662 | 6.71E-08 | -0.11726 | 0.01121  | -0.15285 |
| -0.08825 | 0.05668  | 0.011244 | 0.80852  | -0.04736 | 0.30716  | -0.12944 | 0.00509  | -0.10961 |
| -0.06184 | 0.18221  | -0.037   | 0.42502  | 0.00295  | 0.94931  | -0.07495 | 0.10573  | -0.08774 |
| -0.35519 | 2.48E-15 | -0.29862 | 4.49E-11 | -0.29362 | 9.71E-11 | -0.09936 | 0.0318   | -0.13783 |
| -0.07186 | 0.12099  | 0.027923 | 0.54722  | 0.008612 | 0.85275  | 0.051613 | 0.26566  | 0.22031  |
| 0.008933 | 0.84732  | 0.077648 | 0.09374  | 0.063346 | 0.17174  | -0.09164 | 0.04778  | -0.07841 |
| 0.005326 | 0.90861  | 0.078552 | 0.08996  | 0.096565 | 0.03697  | 0.017541 | 0.70538  | 0.018599 |
| 0.088806 | 0.05514  | 0.09161  | 0.04786  | -0.08528 | 0.06557  | 0.174639 | 0.00015  | 0.175475 |
| 0.051538 | 0.26635  | -0.0451  | 0.3308   | 0.140241 | 0.00239  | 0.038087 | 0.41155  | -0.13313 |
| 0.076037 | 0.10077  | 0.130057 | 0.00488  | 0.175931 | 0.00013  | -0.11495 | 0.01293  | -0.09048 |
| -0.15866 | 0.00058  | -0.12327 | 0.00765  | -0.08469 | 0.06745  | -0.12314 | 0.00772  | -0.1676  |
| 0.217743 | 2.03E-06 | 0.196113 | 1.97E-05 | 0.211886 | 3.85E-06 | 0.219868 | 1.61E-06 | 0.216722 |
| -0.05827 | 0.2088   | 0.06483  | 0.1619   | 0.087101 | 0.06     | 0.022347 | 0.63002  | 0.170095 |
| -0.0499  | 0.28184  | 0.016043 | 0.72951  | -0.03562 | 0.4425   | -0.01036 | 0.82333  | -0.09667 |
| -0.03693 | 0.42591  | -0.04485 | 0.33347  | -0.03768 | 0.41657  | -0.03558 | 0.44309  | 0.069497 |
| 0.082064 | 0.07645  | 0.119716 | 0.00961  | 0.15535  | 0.00076  | 0.124316 | 0.00715  | 0.037445 |
| -0.0588  | 0.20465  | 0.070296 | 0.12929  | 0.082152 | 0.07614  | -0.14491 | 0.00169  | -0.15864 |
| 0.272032 | 2.29E-09 | 0.125973 | 0.00641  | 0.201372 | 1.16E-05 | 0.166735 | 0.0003   | -0.13743 |
| 0.218401 | 1.89E-06 | 0.148498 | 0.00129  | 0.159853 | 0.00053  | 0.007274 | 0.87542  | -0.05189 |
| 0.178804 | 0.0001   | 0.189711 | 3.69E-05 | 0.171523 | 0.0002   | -0.03877 | 0.4032   | -0.10289 |
| -0.02659 | 0.56649  | 0.068433 | 0.13978  | 0.024651 | 0.59517  | -0.07274 | 0.11646  | -0.05623 |
| -0.09185 | 0.04728  | -0.08287 | 0.07358  | -0.0934  | 0.04365  | 0.055724 | 0.2294   | -0.21205 |
| 0.088221 | 0.05677  | -0.06711 | 0.14759  | -0.0779  | 0.09267  | -0.12312 | 0.00773  | -0.04327 |
| 0.008219 | 0.85939  | -0.05643 | 0.22356  | -0.04885 | 0.29212  | -0.0054  | 0.90735  | -0.1084  |
| 0.084801 | 0.06711  | 0.075955 | 0.10114  | 0.029223 | 0.52872  | 0.12984  | 0.00495  | 0.042155 |
| 0.070054 | 0.13062  | 0.021702 | 0.63994  | 0.079372 | 0.08665  | 0.030959 | 0.50452  | -0.07094 |
| 0.113538 | 0.01409  | 0.150675 | 0.00109  | 0.18017  | 9.03E-05 | 0.048226 | 0.29834  | 0.034864 |
| 0.193642 | 2.52E-05 | 0.222441 | 1.20E-06 | 0.126593 | 0.00616  | 0.055243 | 0.23345  | 0.077456 |
| -0.02862 | 0.53732  | -0.00405 | 0.93048  | -0.04861 | 0.29452  | -0.0361  | 0.43645  | -0.05246 |
| 0.058714 | 0.20533  | 0.024263 | 0.60098  | -0.15235 | 0.00096  | 0.05549  | 0.23136  | -0.08245 |
| 0.192302 | 2.87E-05 | 0.19391  | 2.45E-05 | 0.255674 | 2.10E-08 | 0.418537 | 3.14E-21 | 0.098225 |
| 0.185061 | 5.74E-05 | 0.275241 | 1.45E-09 | 0.238188 | 1.90E-07 | -0.04651 | 0.31589  | 0.166491 |
| -0.08031 | 0.08299  | -0.09872 | 0.03294  | 0.012125 | 0.79384  | -0.22922 | 5.52E-07 | -0.23021 |
| -0.084   | 0.06973  | -0.22691 | 7.23E-07 | -0.12576 | 0.0065   | -0.238   | 1.95E-07 | -0.26307 |
| 0.082784 | 0.0739   | -0.14757 | 0.00138  | 0.151497 | 0.00102  | -0.05519 | 0.23393  | -0.17917 |
| 0.015879 | 0.73217  | 0.10296  | 0.02608  | 0.00754  | 0.87091  | 0.179387 | 9.71E-05 | 0.294295 |
| 0.251472 | 3.62E-08 | 0.194013 | 2.43E-05 | 0.23688  | 2.23E-07 | 0.108    | 0.01957  | 0.217182 |
| -0.03807 | 0.41181  | 0.076998 | 0.09652  | 0.108066 | 0.0195   | 0.122013 | 0.0083   | 0.131496 |
| -0.23298 | 3.55E-07 | -0.24282 | 1.08E-07 | -0.21216 | 3.74E-06 | -0.09343 | 0.0436   | -0.1577  |
| 0.008494 | 0.85474  | -0.08967 | 0.05281  | -0.05297 | 0.25325  | 0.011308 | 0.80745  | -0.01712 |
| 0.139741 | 0.00247  | 0.165356 | 0.00033  | 0.211555 | 3.99E-06 | 0.225435 | 8.56E-07 | 0.4153   |
| -0.16675 | 0.0003   | -0.10665 | 0.02116  | -0.06606 | 0.1541   | -0.11322 | 0.01436  | -0.12357 |



|          |          |          |          |          |          |          |          |          |
|----------|----------|----------|----------|----------|----------|----------|----------|----------|
| 0.090905 | 0.04961  | 0.041119 | 0.3753   | 0.018426 | 0.69125  | -0.11856 | 0.01034  | -0.15079 |
| 0.05591  | 0.22784  | -0.06272 | 0.17605  | -0.06195 | 0.18139  | -0.00214 | 0.96326  | -0.24203 |
| -0.24228 | 1.15E-07 | -0.15358 | 0.00087  | -0.24616 | 7.11E-08 | -0.02002 | 0.66614  | 0.078306 |
| -0.05982 | 0.19693  | -0.16203 | 0.00044  | -0.13212 | 0.00424  | -0.2489  | 5.02E-08 | -0.37241 |
| 0.197207 | 1.77E-05 | 0.112715 | 0.01481  | 0.076335 | 0.09944  | 0.10415  | 0.0244   | 0.026238 |
| 0.237146 | 2.16E-07 | 0.246296 | 6.99E-08 | 0.243012 | 1.05E-07 | 0.144115 | 0.00179  | 0.081279 |
| 0.270973 | 2.65E-09 | 0.198691 | 1.52E-05 | 0.190058 | 3.57E-05 | 0.144919 | 0.00169  | 0.058341 |
| -0.04586 | 0.32275  | -0.03357 | 0.46919  | -0.07098 | 0.12559  | -0.14912 | 0.00123  | -0.10978 |
| 0.037977 | 0.41291  | 0.095282 | 0.03957  | 0.07607  | 0.10062  | -0.02513 | 0.58805  | -0.00843 |
| -0.19596 | 2.00E-05 | -0.06556 | 0.1572   | -0.13012 | 0.00486  | -0.16782 | 0.00027  | -0.19071 |
| -0.06503 | 0.16059  | 0.107111 | 0.0206   | 0.09037  | 0.05098  | -0.00476 | 0.91822  | 0.045647 |
| 0.051748 | 0.26441  | 0.096995 | 0.03613  | 0.06777  | 0.14366  | 0.038342 | 0.40843  | 0.036473 |
| -0.04987 | 0.28217  | 0.016584 | 0.72075  | 0.058764 | 0.20495  | -0.0139  | 0.76442  | -0.04148 |
| -0.02806 | 0.54524  | 0.017366 | 0.70818  | -0.07219 | 0.11927  | 0.003272 | 0.94378  | -0.04201 |
| 0.041785 | 0.36761  | 0.124117 | 0.00724  | 0.083342 | 0.07197  | 0.038058 | 0.41191  | 0.015482 |
| 0.116348 | 0.01187  | 0.115964 | 0.01215  | 0.189974 | 3.60E-05 | -0.01405 | 0.76197  | -0.057   |
| 0.148462 | 0.00129  | 0.164901 | 0.00035  | 0.20511  | 7.89E-06 | 0.01141  | 0.80575  | -0.05026 |
| 0.199511 | 1.40E-05 | 0.27821  | 9.52E-10 | 0.311561 | 5.70E-12 | 0.090222 | 0.05136  | 0.019596 |
| -0.15968 | 0.00053  | -0.11198 | 0.01548  | -0.04815 | 0.29914  | 0.031748 | 0.49371  | -0.11656 |
| 0.060732 | 0.19015  | 0.183282 | 6.78E-05 | 0.088613 | 0.05567  | 0.261113 | 1.02E-08 | 0.136278 |
| -0.08409 | 0.06945  | 0.045741 | 0.32397  | 0.040165 | 0.38649  | 0.055785 | 0.22889  | 0.063336 |
| -0.02967 | 0.52238  | 0.022843 | 0.62245  | 0.029244 | 0.52843  | -0.09582 | 0.03846  | -0.05414 |
| -0.05402 | 0.24395  | -0.23793 | 1.96E-07 | -0.21223 | 3.71E-06 | -0.02947 | 0.52527  | 0.053431 |
| -0.015   | 0.74642  | 0.036822 | 0.42727  | 0.063534 | 0.17047  | -0.00896 | 0.84687  | -0.25693 |
| 0.314923 | 3.28E-12 | 0.20572  | 7.40E-06 | 0.216587 | 2.31E-06 | 0.153492 | 0.00088  | 0.054499 |
| -0.04386 | 0.34427  | -0.13715 | 0.00298  | -0.21524 | 2.68E-06 | -0.01762 | 0.70419  | -0.04135 |
| 0.010711 | 0.81744  | 0.050678 | 0.27442  | 0.086956 | 0.06043  | -0.03565 | 0.44218  | -0.06207 |
| 0.05431  | 0.24145  | -0.00033 | 0.99424  | 0.05343  | 0.24918  | -0.03134 | 0.49931  | -0.05629 |
| -0.15677 | 0.00067  | -0.20784 | 5.93E-06 | -0.12542 | 0.00665  | -0.2858  | 3.15E-10 | -0.13531 |
| -0.13409 | 0.0037   | -0.1915  | 3.10E-05 | -0.1421  | 0.00208  | -0.34956 | 7.22E-15 | -0.33971 |
| -0.04768 | 0.30384  | -0.16058 | 0.00049  | -0.07419 | 0.10934  | -0.18631 | 5.10E-05 | -0.14483 |
| 0.098611 | 0.03313  | 0.121251 | 0.00872  | 0.142139 | 0.00208  | 0.255752 | 2.08E-08 | 0.153332 |
| 0.05296  | 0.25336  | 0.017501 | 0.70602  | 0.017579 | 0.70477  | 0.124654 | 0.00699  | 0.050207 |
| 0.051964 | 0.26241  | -0.053   | 0.25302  | 0.023384 | 0.61423  | -0.12984 | 0.00495  | -0.1242  |
| 0.027727 | 0.55004  | -0.01236 | 0.78994  | -0.03253 | 0.48316  | 0.003325 | 0.94287  | -0.04442 |
| 0.043721 | 0.34581  | -0.11066 | 0.01674  | -0.05141 | 0.2675   | -0.13699 | 0.00301  | -0.2555  |
| 0.020792 | 0.65404  | -0.04946 | 0.28613  | -0.14617 | 0.00154  | 0.032216 | 0.48737  | 0.025596 |
| -0.07186 | 0.12095  | -0.0549  | 0.23634  | -0.06014 | 0.19449  | -0.00616 | 0.89432  | -0.04678 |
| 0.115053 | 0.01285  | 0.04399  | 0.34285  | 0.020763 | 0.65449  | 0.077688 | 0.09357  | 0.065681 |
| -0.00871 | 0.85117  | -0.03477 | 0.45348  | -0.07473 | 0.10676  | 0.074589 | 0.10744  | -0.00216 |
| 0.072009 | 0.12019  | 0.021818 | 0.63816  | 0.09141  | 0.04836  | -0.08879 | 0.05518  | -0.10927 |
| -0.0071  | 0.87844  | -0.09097 | 0.04945  | -0.05962 | 0.19839  | 0.018221 | 0.69451  | -0.06894 |
| 0.042624 | 0.35806  | -0.05676 | 0.22081  | 0.018354 | 0.6924   | -0.05137 | 0.2679   | -0.08569 |
| 0.079082 | 0.08781  | -0.04088 | 0.37814  | -0.00314 | 0.94605  | -0.07799 | 0.0923   | -0.13039 |
| 0.006658 | 0.88589  | -0.07309 | 0.11474  | -0.01721 | 0.71075  | -0.01683 | 0.71677  | 0.012354 |

|          |          |          |          |          |          |          |          |          |
|----------|----------|----------|----------|----------|----------|----------|----------|----------|
| 0.085681 | 0.06431  | -0.04329 | 0.35058  | 0.040774 | 0.37933  | -0.15629 | 0.0007   | -0.22003 |
| 0.028187 | 0.54344  | -0.02091 | 0.65223  | 0.003439 | 0.94091  | -0.13135 | 0.00447  | -0.15851 |
| 0.075949 | 0.10116  | -0.04877 | 0.29297  | 0.066585 | 0.15082  | -0.14655 | 0.0015   | -0.32342 |
| 0.166861 | 0.00029  | 0.027304 | 0.55615  | 0.098753 | 0.03288  | 0.0559   | 0.22793  | 0.098453 |
| 0.058347 | 0.20818  | -0.0064  | 0.89024  | -0.00657 | 0.8874   | -0.09112 | 0.04907  | -0.06255 |
| 0.075531 | 0.10306  | 0.097506 | 0.03516  | 0.123693 | 0.00745  | -0.00265 | 0.95453  | -0.06364 |
| 0.088625 | 0.05564  | 0.085209 | 0.0658   | 0.090463 | 0.05074  | 0.18538  | 5.57E-05 | 0.09211  |
| 0.093819 | 0.04271  | 0.080923 | 0.08065  | 0.098167 | 0.03393  | 0.15383  | 0.00085  | 0.060458 |
| -0.03214 | 0.48834  | 0.008957 | 0.84692  | 0.0428   | 0.35608  | -0.15218 | 0.00097  | -0.13308 |
| 0.117098 | 0.01133  | 0.236582 | 2.31E-07 | 0.341917 | 2.98E-14 | 0.10546  | 0.02265  | 0.043316 |
| 0.234599 | 2.93E-07 | 0.100159 | 0.03046  | 0.183122 | 6.88E-05 | 0.106098 | 0.02184  | -0.03131 |
| 0.023656 | 0.61011  | 0.105725 | 0.02231  | 0.122141 | 0.00823  | 0.053872 | 0.24528  | 0.020255 |
| 0.147195 | 0.00142  | 0.316529 | 2.51E-12 | 0.20862  | 5.46E-06 | 0.20251  | 1.03E-05 | 0.224018 |
| -0.06341 | 0.1713   | -0.13518 | 0.00342  | -0.20944 | 5.00E-06 | -0.08618 | 0.06276  | -0.28847 |
| 0.059218 | 0.20146  | 0.152765 | 0.00093  | 0.077694 | 0.09354  | 0.030556 | 0.51009  | -0.00884 |
| 0.092248 | 0.04633  | -0.13153 | 0.00441  | -0.02033 | 0.66127  | -0.00348 | 0.94023  | -0.33885 |
| -0.10134 | 0.02855  | -0.15873 | 0.00058  | -0.04158 | 0.36992  | -0.13874 | 0.00266  | -0.12989 |
| 0.005684 | 0.9025   | 0.130197 | 0.00483  | 0.180562 | 8.72E-05 | 0.079717 | 0.08528  | 0.001771 |
| -0.07125 | 0.12414  | -0.1776  | 0.00011  | -0.14033 | 0.00237  | -0.21654 | 2.32E-06 | -0.4416  |
| 0.071527 | 0.1227   | 0.184288 | 6.17E-05 | 0.168056 | 0.00026  | 0.157929 | 0.00061  | 0.088408 |
| -0.20259 | 1.02E-05 | -0.1488  | 0.00126  | -0.09874 | 0.03291  | -0.23106 | 4.46E-07 | -0.35888 |
| 0.161847 | 0.00045  | 0.187128 | 4.72E-05 | 0.065422 | 0.1581   | 0.00713  | 0.87788  | 0.189918 |
| -0.02692 | 0.5617   | -0.09083 | 0.04981  | -0.04781 | 0.30258  | -0.1315  | 0.00442  | -0.11869 |
| -0.01294 | 0.78035  | 0.002623 | 0.95492  | 0.02787  | 0.54799  | 0.012717 | 0.78401  | 0.046918 |
| 0.016175 | 0.72737  | -0.14727 | 0.00142  | 0.000181 | 0.9969   | -0.11251 | 0.01499  | 0.042937 |
| 0.17575  | 0.00013  | -0.06171 | 0.18312  | 0.039762 | 0.39128  | -0.02648 | 0.56819  | -0.2054  |
| -0.13504 | 0.00346  | -0.15283 | 0.00092  | -0.07655 | 0.09849  | 0.009779 | 0.83307  | 0.226586 |
| 0.26036  | 1.13E-08 | 0.282367 | 5.21E-10 | 0.279915 | 7.45E-10 | 0.083862 | 0.0702   | 0.21002  |
| -0.24201 | 1.19E-07 | -0.27112 | 2.60E-09 | -0.07654 | 0.09852  | -0.15317 | 0.0009   | -0.29196 |
| -0.15604 | 0.00072  | -0.13047 | 0.00474  | -0.05636 | 0.22413  | -0.06776 | 0.14374  | 0.191059 |
| -0.0991  | 0.03227  | -0.07609 | 0.10052  | -0.0326  | 0.48219  | -0.17795 | 0.00011  | -0.14326 |
| -0.23306 | 3.52E-07 | -0.20315 | 9.66E-06 | -0.22266 | 1.17E-06 | -0.18544 | 5.54E-05 | -0.1901  |
| -0.11572 | 0.01233  | -0.0838  | 0.0704   | -0.06563 | 0.15678  | -0.28869 | 2.05E-10 | -0.34223 |
| -0.02216 | 0.63295  | -0.27282 | 2.05E-09 | -0.17533 | 0.00014  | -0.08332 | 0.07204  | -0.33609 |
| 0.152629 | 0.00094  | 0.006835 | 0.88289  | 0.094841 | 0.04049  | 0.168634 | 0.00025  | 0.111217 |
| 0.009477 | 0.83815  | -0.21074 | 4.35E-06 | -0.11524 | 0.0127   | -0.00366 | 0.93704  | -0.3072  |
| -0.24626 | 7.02E-08 | -0.11332 | 0.01428  | -0.09499 | 0.04018  | -0.01157 | 0.80315  | 0.134848 |
| -0.04229 | 0.36183  | -0.36721 | 2.35E-16 | -0.19216 | 2.91E-05 | -0.05884 | 0.20436  | -0.20419 |
| -0.10098 | 0.02912  | -0.21244 | 3.63E-06 | -0.15949 | 0.00054  | -0.14931 | 0.00121  | -0.14964 |
| 0.026069 | 0.57415  | -0.04871 | 0.29353  | 0.026478 | 0.56816  | -0.0151  | 0.74477  | -0.13607 |
| 0.088655 | 0.05556  | 0.136926 | 0.00303  | 0.094231 | 0.04181  | -0.02257 | 0.62665  | -0.0219  |
| 0.137628 | 0.00288  | 0.093088 | 0.04437  | 0.099503 | 0.03157  | -0.01567 | 0.7356   | -0.0535  |
| 0.046979 | 0.31103  | 0.02017  | 0.66375  | 0.047683 | 0.30383  | -0.11337 | 0.01423  | -0.10726 |
| -0.25034 | 4.19E-08 | -0.32212 | 9.78E-13 | -0.22482 | 9.19E-07 | -0.1607  | 0.00049  | -0.23263 |
| -0.02155 | 0.64229  | 0.156913 | 0.00067  | 0.170455 | 0.00021  | -0.13717 | 0.00297  | -0.14574 |

|          |          |          |          |          |          |           |          |          |
|----------|----------|----------|----------|----------|----------|-----------|----------|----------|
| 0.054671 | 0.23833  | 0.152244 | 0.00097  | 0.100879 | 0.02928  | 0.031157  | 0.50179  | 0.029191 |
| 0.06808  | 0.14183  | 0.048427 | 0.29634  | 0.085406 | 0.06518  | -0.11218  | 0.01529  | -0.10648 |
| 0.151931 | 0.00099  | 0.073363 | 0.11336  | 0.082949 | 0.07332  | 0.009819  | 0.8324   | -0.12995 |
| 0.127969 | 0.00562  | 0.201849 | 1.10E-05 | 0.237189 | 2.15E-07 | -0.03785  | 0.41451  | -0.13371 |
| 0.029269 | 0.52808  | 0.053025 | 0.25278  | 0.166483 | 0.0003   | -0.10155  | 0.02822  | -0.13107 |
| 0.080852 | 0.08092  | 0.030814 | 0.50651  | 0.002376 | 0.95917  | 0.111518  | 0.01591  | -0.01594 |
| 0.164948 | 0.00034  | 0.166857 | 0.00029  | 0.058775 | 0.20486  | 0.21244   | 3.63E-06 | 0.283522 |
| 0.01367  | 0.76828  | 0.05061  | 0.27507  | 0.06396  | 0.16762  | -0.02483  | 0.59245  | -0.05205 |
| 0.137786 | 0.00285  | 0.16318  | 0.0004   | 0.194517 | 2.31E-05 | -0.02613  | 0.57319  | -0.02707 |
| 0.100598 | 0.02973  | 0.020598 | 0.65706  | 0.041812 | 0.3673   | -0.04278  | 0.35634  | -0.05981 |
| 0.048626 | 0.29435  | -0.04004 | 0.38803  | -0.00507 | 0.91304  | -0.00905  | 0.84528  | -0.05099 |
| 0.145853 | 0.00158  | 0.039426 | 0.3953   | 0.064763 | 0.16234  | -0.04757  | 0.305    | -0.13082 |
| 0.035624 | 0.44248  | -0.17927 | 9.81E-05 | -0.03586 | 0.43944  | -0.022    | 0.63531  | 0.076176 |
| -0.02698 | 0.56084  | -0.17958 | 9.54E-05 | -0.15504 | 0.00077  | -0.11531  | 0.01265  | -0.32192 |
| -0.18364 | 6.55E-05 | -0.18578 | 5.36E-05 | -0.10913 | 0.01832  | -0.32633  | 4.76E-13 | -0.14732 |
| 0.106889 | 0.02087  | -0.0268  | 0.56344  | 0.124841 | 0.00691  | -0.06674  | 0.14984  | -0.02867 |
| 0.06531  | 0.15881  | 0.073076 | 0.11478  | 0.093748 | 0.04287  | -0.20027  | 1.30E-05 | -0.29227 |
| 0.109786 | 0.01763  | 0.246188 | 7.08E-08 | 0.157874 | 0.00062  | 0.088832  | 0.05507  | 0.016639 |
| -0.00433 | 0.92567  | -0.16873 | 0.00025  | -0.06209 | 0.18039  | -0.16883  | 0.00025  | -0.16686 |
| -0.00429 | 0.9263   | 0.006641 | 0.88619  | 0.02276  | 0.62372  | 0.161466  | 0.00046  | 0.045403 |
| 0.095859 | 0.03838  | 0.152078 | 0.00098  | 0.177196 | 0.00012  | 0.14175   | 0.00214  | 0.32616  |
| 0.043648 | 0.34662  | 0.057158 | 0.21761  | 0.105812 | 0.0222   | -0.10005  | 0.03063  | -0.18104 |
| -0.08204 | 0.07656  | -0.07801 | 0.09222  | -0.0077  | 0.86813  | -0.10157  | 0.02819  | -0.20893 |
| 0.002736 | 0.95298  | -0.00408 | 0.93001  | -0.03383 | 0.46582  | 0.071126  | 0.12481  | -0.02818 |
| 0.061497 | 0.18463  | 0.084717 | 0.06738  | 0.123174 | 0.0077   | -0.00322  | 0.94463  | -0.02961 |
| -0.09802 | 0.03421  | -0.20625 | 7.00E-06 | -0.07521 | 0.10454  | -0.07215  | 0.11947  | -0.18283 |
| -0.16997 | 0.00022  | -0.28544 | 3.32E-10 | -0.30592 | 1.42E-11 | -0.26371  | 7.19E-09 | -0.37742 |
| -0.27959 | 7.81E-10 | -0.24213 | 1.17E-07 | -0.26026 | 1.14E-08 | 0.018811  | 0.68515  | -0.21675 |
| 0.033511 | 0.47003  | 0.044603 | 0.33616  | 0.033771 | 0.46658  | -8.49E-07 | 0.99999  | -0.16883 |
| 0.190001 | 3.59E-05 | 0.003819 | 0.9344   | 0.052623 | 0.25641  | -0.00574  | 0.90149  | -0.23628 |
| 0.187457 | 4.58E-05 | 0.330745 | 2.20E-13 | 0.178051 | 0.00011  | 0.172218  | 0.00018  | 0.25226  |
| -0.04154 | 0.37045  | -0.27512 | 1.48E-09 | -0.20208 | 1.08E-05 | -0.06994  | 0.13122  | -0.07374 |
| -0.18325 | 6.80E-05 | -0.14525 | 0.00165  | -0.16226 | 0.00043  | -0.08337  | 0.07188  | -0.11406 |
| 0.023601 | 0.61094  | 0.132312 | 0.00418  | 0.081517 | 0.07844  | 0.076223  | 0.09993  | 0.030159 |
| -0.08115 | 0.07978  | -0.05026 | 0.27842  | 0.037712 | 0.41617  | -0.06579  | 0.15578  | -0.14836 |
| -0.17409 | 0.00016  | -0.07534 | 0.10392  | -0.0982  | 0.03388  | -0.06012  | 0.19467  | -0.17427 |
| 0.181838 | 7.75E-05 | 0.307493 | 1.10E-11 | 0.232373 | 3.82E-07 | 0.198699  | 1.52E-05 | 0.333269 |
| -0.27623 | 1.26E-09 | -0.17632 | 0.00013  | -0.24611 | 7.15E-08 | -0.23964  | 1.59E-07 | -0.2835  |
| -0.14691 | 0.00146  | -0.01672 | 0.7185   | -0.02102 | 0.6505   | -0.10974  | 0.01768  | -0.18908 |
| 0.119274 | 0.00988  | 0.18969  | 3.69E-05 | 0.202015 | 1.09E-05 | 0.115491  | 0.01251  | 0.111148 |
| 0.113216 | 0.01437  | -0.00875 | 0.8505   | 0.030055 | 0.51705  | 0.015708  | 0.73494  | -0.17117 |
| 0.024826 | 0.59255  | 0.031943 | 0.49106  | 0.023576 | 0.61133  | 0.027989  | 0.54629  | 0.015426 |
| -0.00463 | 0.92051  | -0.03721 | 0.42244  | -0.00261 | 0.95517  | -0.15845  | 0.00059  | -0.22088 |
| 0.088548 | 0.05586  | 0.060985 | 0.18831  | 0.047255 | 0.30819  | -0.0778   | 0.09309  | -0.22626 |
| -0.19126 | 3.18E-05 | -0.06891 | 0.13706  | -0.00981 | 0.83258  | -0.15002  | 0.00115  | -0.09829 |

|          |          |          |          |          |          |          |          |          |
|----------|----------|----------|----------|----------|----------|----------|----------|----------|
| 0.119459 | 0.00977  | 0.356569 | 1.90E-15 | 0.28693  | 2.66E-10 | 0.073166 | 0.11433  | 0.187083 |
| 0.120383 | 0.00921  | 0.098335 | 0.03363  | 0.088538 | 0.05588  | 0.06151  | 0.18453  | 0.304449 |
| 0.110357 | 0.01705  | 0.09645  | 0.0372   | 0.093877 | 0.04259  | 0.096286 | 0.03752  | -0.04679 |
| -0.19487 | 2.23E-05 | -0.04343 | 0.34905  | -0.09567 | 0.03878  | -0.07542 | 0.10356  | 0.066221 |
| -0.16512 | 0.00034  | -0.04149 | 0.37099  | -0.07478 | 0.10654  | -0.01567 | 0.7355   | 0.033303 |
| 0.120242 | 0.0093   | 0.178345 | 0.00011  | 0.146809 | 0.00147  | 0.088709 | 0.05541  | -0.07728 |
| 0.200923 | 1.21E-05 | 0.215181 | 2.70E-06 | 0.061447 | 0.18498  | 0.029828 | 0.52022  | 0.164871 |
| -0.03985 | 0.39028  | -0.1038  | 0.02489  | -0.05937 | 0.2003   | -0.16459 | 0.00035  | -0.26758 |
| -0.21481 | 2.81E-06 | -0.12157 | 0.00854  | -0.15851 | 0.00059  | -0.1566  | 0.00068  | -0.17671 |
| -0.11556 | 0.01246  | -0.12823 | 0.00552  | 0.007539 | 0.87092  | -0.28043 | 6.91E-10 | -0.44174 |
| -0.14922 | 0.00122  | -0.17642 | 0.00013  | -0.07945 | 0.08633  | -0.02714 | 0.55853  | 0.11319  |
| -0.04742 | 0.30648  | -0.07287 | 0.11582  | -0.02065 | 0.65623  | -0.09048 | 0.05069  | -0.18365 |
| -0.02211 | 0.63367  | 0.031497 | 0.49714  | 0.186633 | 4.95E-05 | -0.27318 | 1.95E-09 | -0.29653 |
| 0.004346 | 0.92538  | 0.052163 | 0.26059  | 0.011357 | 0.80663  | -0.01312 | 0.77737  | -0.14253 |
| -0.11403 | 0.01368  | -0.15092 | 0.00107  | -0.10861 | 0.01889  | 0.018609 | 0.68834  | -0.06067 |
| 0.001758 | 0.96978  | -0.0382  | 0.41014  | -0.02612 | 0.57337  | -0.08907 | 0.05442  | -0.10484 |
| 0.046765 | 0.31324  | -0.09987 | 0.03093  | -0.06334 | 0.17179  | 0.023414 | 0.61377  | -0.08371 |
| 0.309454 | 8.03E-12 | 0.168749 | 0.00025  | 0.247782 | 5.79E-08 | 0.126164 | 0.00633  | 0.16979  |
| 0.292338 | 1.18E-10 | 0.110665 | 0.01674  | 0.286101 | 3.01E-10 | -0.09669 | 0.03673  | -0.15096 |
| 0.319822 | 1.44E-12 | 0.080887 | 0.08078  | -0.03713 | 0.42344  | 0.174738 | 0.00015  | 0.30858  |
| -0.08691 | 0.06057  | -0.1046  | 0.02378  | 0.01593  | 0.73134  | -0.1357  | 0.0033   | -0.29819 |
| -0.22943 | 5.39E-07 | -0.2406  | 1.42E-07 | -0.18805 | 4.32E-05 | -0.07958 | 0.08584  | 0.104484 |
| -0.15403 | 0.00084  | -0.09899 | 0.03246  | -0.08808 | 0.05718  | -0.19655 | 1.89E-05 | -0.12271 |
| 0.19521  | 2.16E-05 | 0.036495 | 0.43139  | 0.068653 | 0.13851  | 0.012731 | 0.78378  | -0.17144 |
| -0.15698 | 0.00066  | -0.09476 | 0.04068  | -0.1308  | 0.00464  | -0.09139 | 0.04841  | -0.0292  |
| -0.13018 | 0.00484  | -0.02183 | 0.63797  | -0.02555 | 0.58186  | -0.1266  | 0.00615  | -0.20045 |
| -0.07882 | 0.08885  | -0.05548 | 0.23147  | -0.03399 | 0.4637   | -0.10623 | 0.02168  | -0.10978 |
| 0.0546   | 0.23895  | -0.0146  | 0.75302  | -0.01367 | 0.7683   | 0.055037 | 0.2352   | -0.09559 |
| 0.023591 | 0.61109  | 0.05149  | 0.2668   | 0.091239 | 0.04878  | 0.001158 | 0.98009  | 0.027084 |
| -0.14648 | 0.0015   | 0.049382 | 0.2869   | -0.06034 | 0.19306  | -0.10617 | 0.02175  | -0.20569 |
| 0.000194 | 0.99667  | -0.00395 | 0.93224  | 0.002713 | 0.95337  | 0.028844 | 0.53409  | -0.01962 |
| 0.104362 | 0.02411  | 0.338826 | 5.22E-14 | 0.200428 | 1.28E-05 | 0.173307 | 0.00017  | 0.304296 |
| 0.046261 | 0.31849  | -0.2585  | 1.45E-08 | -0.16624 | 0.00031  | -0.13982 | 0.00246  | -0.35455 |
| 0.051496 | 0.26674  | 0.048788 | 0.29275  | 0.065216 | 0.15941  | 0.071379 | 0.12348  | -0.07055 |
| -0.1443  | 0.00177  | -0.19151 | 3.10E-05 | -0.11961 | 0.00968  | -0.12905 | 0.00522  | 0.183528 |
| -0.06969 | 0.13264  | -0.2209  | 1.43E-06 | -0.07677 | 0.09752  | -0.22211 | 1.25E-06 | -0.19929 |
| -0.06061 | 0.19106  | -0.16918 | 0.00024  | -0.01969 | 0.67126  | -0.08616 | 0.06284  | -0.07934 |
| -0.01007 | 0.8281   | -0.11192 | 0.01553  | -0.06003 | 0.19535  | 0.016549 | 0.72133  | 0.034673 |
| 0.026962 | 0.56111  | 0.096072 | 0.03795  | 0.071197 | 0.12444  | 0.083975 | 0.06982  | -0.06129 |
| 0.380114 | 1.68E-17 | 0.068912 | 0.13702  | 0.137638 | 0.00288  | 0.223831 | 1.03E-06 | 0.334298 |
| 0.131501 | 0.00442  | 0.124171 | 0.00722  | 0.106338 | 0.02154  | 0.000928 | 0.98404  | -0.04    |
| -0.14818 | 0.00132  | -0.13434 | 0.00363  | -0.13887 | 0.00263  | -0.14222 | 0.00206  | -0.11452 |
| 0.123109 | 0.00774  | 0.063571 | 0.17022  | 0.086562 | 0.06161  | -0.0185  | 0.69     | -0.09008 |
| -0.08364 | 0.07095  | -0.03247 | 0.48397  | -0.03484 | 0.45264  | 0.011893 | 0.7977   | 0.109073 |
| 0.356335 | 1.99E-15 | 0.242076 | 1.18E-07 | 0.331937 | 1.79E-13 | 0.211288 | 4.11E-06 | 0.072967 |

|          |          |          |          |          |          |          |          |          |
|----------|----------|----------|----------|----------|----------|----------|----------|----------|
| 0.056428 | 0.22356  | -0.02133 | 0.64572  | -0.12881 | 0.00531  | 0.176056 | 0.00013  | 0.322471 |
| 0.100012 | 0.0307   | 0.021237 | 0.64713  | 0.019736 | 0.67054  | 0.026583 | 0.56663  | 0.013934 |
| 0.095602 | 0.03891  | 0.016354 | 0.72448  | 0.024814 | 0.59273  | 0.178319 | 0.00011  | 0.215    |
| -0.00569 | 0.90245  | 0.061528 | 0.1844   | 0.13971  | 0.00248  | -0.03513 | 0.44883  | -0.04226 |
| -0.10998 | 0.01743  | -0.14887 | 0.00125  | -0.15108 | 0.00106  | -0.01602 | 0.72994  | -0.09822 |
| 0.004485 | 0.92299  | -0.01997 | 0.6668   | -0.04137 | 0.37235  | 0.007414 | 0.87304  | 0.001256 |
| 0.042528 | 0.35915  | 0.100783 | 0.02943  | 0.108528 | 0.01898  | -0.03698 | 0.42535  | -0.23456 |
| 0.156495 | 0.00069  | 0.085922 | 0.06356  | 0.132628 | 0.00409  | 0.07469  | 0.10696  | -0.05727 |
| 0.15814  | 0.0006   | 0.143124 | 0.00193  | 0.120484 | 0.00916  | 0.179937 | 9.23E-05 | -0.07463 |
| -0.36757 | 2.19E-16 | -0.22241 | 1.21E-06 | -0.25851 | 1.44E-08 | -0.13007 | 0.00487  | -0.36779 |
| 0.162366 | 0.00043  | 0.123584 | 0.0075   | 0.161315 | 0.00047  | 0.020146 | 0.66411  | -0.00989 |
| -0.08405 | 0.06956  | -0.02329 | 0.61558  | -0.02423 | 0.60145  | 0.003305 | 0.94321  | -0.05177 |
| -0.07136 | 0.12359  | -0.02168 | 0.64032  | 0.005378 | 0.90773  | -0.0347  | 0.45438  | -0.06666 |
| -0.05302 | 0.25287  | -0.0685  | 0.1394   | -0.05102 | 0.27115  | 0.00159  | 0.97266  | -0.07133 |
| 0.073103 | 0.11464  | 0.229741 | 5.20E-07 | 0.208542 | 5.50E-06 | 0.082249 | 0.07579  | 0.156672 |
| -0.07539 | 0.1037   | -0.05707 | 0.21834  | -0.03726 | 0.42179  | -0.02356 | 0.61149  | -0.03894 |
| -0.11119 | 0.01623  | 0.011144 | 0.81018  | 0.049767 | 0.28316  | -0.08399 | 0.06976  | -0.086   |
| 0.073775 | 0.11134  | 0.204631 | 8.29E-06 | 0.115156 | 0.01277  | 0.119501 | 0.00974  | 0.112651 |
| 0.093182 | 0.04415  | 0.184284 | 6.17E-05 | 0.151008 | 0.00106  | -0.00354 | 0.93926  | 0.119615 |
| 0.183255 | 6.80E-05 | -0.0796  | 0.08576  | -0.07173 | 0.12162  | 0.195365 | 2.12E-05 | 0.253667 |
| 0.110411 | 0.01699  | 0.211267 | 4.12E-06 | 0.23101  | 4.48E-07 | 0.079552 | 0.08593  | 0.066151 |
| -0.19824 | 1.59E-05 | -0.10214 | 0.02731  | -0.10475 | 0.02359  | -0.04307 | 0.353    | -0.05325 |
| -0.00501 | 0.91402  | -0.06546 | 0.15782  | 0.017065 | 0.71301  | -0.029   | 0.53187  | 0.068621 |
| -0.00704 | 0.87937  | -0.01258 | 0.78633  | -0.01427 | 0.75836  | 0.030427 | 0.51187  | -0.08505 |
| -0.24959 | 4.60E-08 | -0.21046 | 4.49E-06 | -0.15416 | 0.00083  | -0.2411  | 1.33E-07 | -0.31816 |
| 0.08079  | 0.08115  | 0.085077 | 0.06622  | 0.089523 | 0.0532   | 0.124441 | 0.00709  | -0.14025 |
| 0.119723 | 0.00961  | 0.063591 | 0.17009  | 0.058371 | 0.20799  | 0.327481 | 3.90E-13 | 0.240502 |
| -0.07223 | 0.11907  | -0.07403 | 0.11009  | -0.04052 | 0.38234  | -0.09944 | 0.03167  | -0.00877 |
| -0.09213 | 0.04661  | -0.14201 | 0.0021   | -0.10545 | 0.02266  | -0.13948 | 0.00252  | -0.28034 |
| -0.0766  | 0.09824  | -0.03379 | 0.46637  | -0.01008 | 0.82807  | -0.00905 | 0.84532  | 0.002821 |
| 0.099849 | 0.03098  | -0.18887 | 4.00E-05 | -0.01813 | 0.69594  | 0.041585 | 0.36991  | -0.09892 |
| 0.073513 | 0.11262  | 0.090119 | 0.05163  | 0.172768 | 0.00018  | -0.04977 | 0.28315  | 0.07665  |
| 0.019135 | 0.68001  | 0.060156 | 0.1944   | 0.118219 | 0.01056  | -0.07325 | 0.1139   | 0.040329 |
| 0.006646 | 0.8861   | 0.034145 | 0.46166  | 0.085514 | 0.06483  | -0.06656 | 0.15098  | 0.03076  |
| -0.187   | 4.78E-05 | -0.14138 | 0.0022   | 0.086364 | 0.0622   | -0.12023 | 0.00931  | -0.02734 |
| -0.00311 | 0.9466   | 0.157863 | 0.00062  | 0.148158 | 0.00132  | -0.00277 | 0.95235  | 0.020191 |
| 0.016973 | 0.71449  | 0.034404 | 0.45827  | 0.07403  | 0.11011  | -0.12352 | 0.00753  | -0.14    |
| -0.04156 | 0.37024  | -0.08579 | 0.06396  | -0.0458  | 0.32333  | -0.11934 | 0.00984  | -0.13576 |
| 0.077634 | 0.09379  | 0.182399 | 7.36E-05 | 0.29229  | 1.19E-10 | 0.114371 | 0.0134   | 0.151851 |
| -0.05265 | 0.25613  | 0.002012 | 0.96541  | 0.142918 | 0.00196  | -0.02652 | 0.56749  | -0.10842 |
| 0.193169 | 2.64E-05 | 0.185366 | 5.58E-05 | 0.235259 | 2.71E-07 | -0.01176 | 0.79999  | -0.08844 |
| 0.242367 | 1.14E-07 | 0.07902  | 0.08806  | 0.107976 | 0.0196   | 0.256343 | 1.92E-08 | 0.303608 |
| 0.159013 | 0.00056  | 0.151605 | 0.00101  | 0.180458 | 8.80E-05 | -0.09641 | 0.03728  | -0.11506 |
| 0.148031 | 0.00134  | 0.215128 | 2.71E-06 | 0.162921 | 0.00041  | -0.03373 | 0.46713  | 0.289342 |
| 0.320557 | 1.28E-12 | 0.293727 | 9.55E-11 | 0.196473 | 1.90E-05 | 0.077357 | 0.09497  | 0.076193 |

|          |          |          |          |          |          |          |          |          |
|----------|----------|----------|----------|----------|----------|----------|----------|----------|
| 0.055758 | 0.22911  | 0.054471 | 0.24005  | 0.122528 | 0.00803  | -0.00992 | 0.8307   | 0.0253   |
| -0.24734 | 6.13E-08 | -0.25348 | 2.79E-08 | -0.15972 | 0.00053  | -0.19739 | 1.73E-05 | -0.02711 |
| 0.289272 | 1.88E-10 | 0.178662 | 0.0001   | 0.18282  | 7.08E-05 | 0.225212 | 8.78E-07 | 0.324859 |
| -0.05947 | 0.19954  | -0.0931  | 0.04434  | -0.0333  | 0.47281  | -0.09622 | 0.03766  | -0.064   |
| 0.114118 | 0.0136   | 0.090456 | 0.05076  | 0.150088 | 0.00114  | -0.05596 | 0.22741  | 0.012369 |
| 0.059431 | 0.19984  | -0.02928 | 0.52798  | 0.055342 | 0.23261  | 0.038887 | 0.40179  | -0.08469 |
| -0.05578 | 0.22892  | -0.07657 | 0.09841  | 0.024002 | 0.60489  | 0.042961 | 0.35427  | 0.040407 |
| 0.034268 | 0.46004  | -0.03276 | 0.48008  | -0.05282 | 0.25463  | 0.031774 | 0.49336  | -0.06625 |
| 0.048402 | 0.29658  | 0.006236 | 0.89309  | 0.016524 | 0.72172  | -0.04358 | 0.34735  | -0.19717 |
| 0.186553 | 4.99E-05 | 0.20463  | 8.29E-06 | 0.175959 | 0.00013  | 0.215957 | 2.48E-06 | 0.094037 |
| 0.1748   | 0.00015  | 0.202659 | 1.02E-05 | 0.232491 | 3.76E-07 | 0.070684 | 0.12718  | 0.01325  |
| -0.14942 | 0.0012   | -0.00884 | 0.84885  | -0.08516 | 0.06595  | -0.07851 | 0.09013  | 0.006155 |
| -0.13865 | 0.00268  | 0.113833 | 0.01384  | 0.009774 | 0.83315  | -0.07543 | 0.10352  | 0.037095 |
| 0.178736 | 0.0001   | 0.204454 | 8.45E-06 | 0.24091  | 1.36E-07 | 0.232306 | 3.85E-07 | 0.260326 |
| 0.079797 | 0.08497  | 0.027258 | 0.55682  | 0.118756 | 0.01021  | 0.009876 | 0.83144  | 0.125453 |
| 0.184633 | 5.97E-05 | 0.090127 | 0.05161  | 0.132502 | 0.00413  | -0.03253 | 0.48306  | -0.1731  |
| -0.09892 | 0.03258  | -0.20826 | 5.67E-06 | -0.09948 | 0.0316   | -0.38054 | 1.54E-17 | -0.11943 |
| 0.033643 | 0.46828  | -0.09749 | 0.0352   | -0.00977 | 0.83321  | -0.25909 | 1.34E-08 | -0.38388 |
| -0.18585 | 5.33E-05 | -0.05634 | 0.22426  | -0.1346  | 0.00357  | -0.08348 | 0.07151  | -0.13857 |
| 0.018429 | 0.69121  | -0.00972 | 0.83399  | -0.02871 | 0.53596  | 0.029407 | 0.52613  | -0.27612 |
| -0.20925 | 5.10E-06 | -0.13911 | 0.00259  | -0.07169 | 0.12183  | -0.27823 | 9.49E-10 | -0.21435 |
| 0.179637 | 9.49E-05 | 0.035971 | 0.43804  | 0.002257 | 0.9612   | 0.077688 | 0.09357  | -0.05602 |
| 0.02243  | 0.62875  | -0.12014 | 0.00936  | -0.05654 | 0.22265  | -0.16119 | 0.00047  | -0.07646 |
| 0.106314 | 0.02157  | 0.1239   | 0.00735  | 0.188019 | 4.34E-05 | -0.04246 | 0.35993  | -0.04354 |
| 0.261936 | 9.14E-09 | 0.123079 | 0.00775  | 0.103716 | 0.025    | 0.142471 | 0.00203  | 0.303195 |
| 0.037619 | 0.41733  | 0.174769 | 0.00015  | -0.00727 | 0.87549  | 0.180506 | 8.76E-05 | 0.195975 |
| -0.04449 | 0.33739  | 0.010664 | 0.81821  | -0.05714 | 0.21777  | 0.09867  | 0.03303  | 0.112514 |
| 0.109771 | 0.01764  | -0.1293  | 0.00513  | -0.00796 | 0.86383  | -0.24398 | 9.34E-08 | -0.22088 |
| 0.289043 | 1.94E-10 | 0.234302 | 3.04E-07 | 0.311407 | 5.84E-12 | 0.196444 | 1.91E-05 | 0.32209  |
| -0.00403 | 0.93084  | 0.120489 | 0.00915  | 0.086634 | 0.06139  | 0.044289 | 0.33958  | -0.06914 |
| 0.134283 | 0.00365  | 0.212827 | 3.48E-06 | 0.187931 | 4.37E-05 | 0.065451 | 0.15791  | -0.01629 |
| 0.111335 | 0.01608  | 0.022569 | 0.62663  | 0.141899 | 0.00211  | -0.09993 | 0.03083  | -0.20919 |
| 0.024254 | 0.6011   | 0.07981  | 0.08492  | 0.02046  | 0.65922  | 0.146776 | 0.00147  | 0.0712   |
| 0.013615 | 0.76918  | -0.04779 | 0.30273  | 0.086215 | 0.06266  | -0.12432 | 0.00715  | -0.0755  |
| 0.078992 | 0.08817  | 0.107578 | 0.02006  | 0.123326 | 0.00763  | -0.22593 | 8.09E-07 | -0.30065 |
| 0.066875 | 0.14904  | 0.194985 | 2.20E-05 | 0.18813  | 4.29E-05 | 0.02848  | 0.53926  | 0.03932  |
| 0.066659 | 0.15036  | -0.02239 | 0.62944  | 0.036974 | 0.42537  | -0.03342 | 0.47129  | -0.13308 |
| -0.21182 | 3.88E-06 | -0.28053 | 6.82E-10 | -0.19455 | 2.30E-05 | -0.11781 | 0.01084  | -0.03852 |
| 0.186304 | 5.10E-05 | 0.219353 | 1.70E-06 | 0.182348 | 7.39E-05 | 0.136119 | 0.0032   | 0.112944 |
| 0.342906 | 2.48E-14 | 0.163195 | 0.0004   | 0.13733  | 0.00294  | 0.188211 | 4.26E-05 | 0.092373 |
| 0.06307  | 0.17362  | 0.028445 | 0.53975  | 0.096382 | 0.03733  | -0.08799 | 0.05743  | -0.22368 |
| 0.085849 | 0.06379  | 0.21495  | 2.76E-06 | 0.119263 | 0.00989  | 0.206935 | 6.52E-06 | 0.09119  |
| 0.15507  | 0.00077  | 0.15941  | 0.00054  | 0.181157 | 8.25E-05 | 0.105872 | 0.02212  | 0.060625 |
| -0.11419 | 0.01354  | -0.10854 | 0.01896  | 0.0114   | 0.80592  | 0.017269 | 0.70974  | -0.09026 |
| 0.111655 | 0.01578  | 0.009663 | 0.83502  | 0.122307 | 0.00815  | -0.09735 | 0.03545  | -0.18506 |

|          |          |          |          |          |          |          |          |          |
|----------|----------|----------|----------|----------|----------|----------|----------|----------|
| -0.14169 | 0.00215  | 0.044573 | 0.33649  | 0.05636  | 0.22412  | -0.06594 | 0.15483  | -0.10103 |
| -0.0292  | 0.52906  | -0.07823 | 0.09128  | -0.08455 | 0.06792  | -0.01107 | 0.81144  | -0.06264 |
| 0.323572 | 7.64E-13 | 0.225039 | 8.96E-07 | 0.345147 | 1.64E-14 | 0.18435  | 6.14E-05 | 0.187707 |
| 0.215473 | 2.61E-06 | 0.102476 | 0.0268   | -0.00296 | 0.9491   | 0.133786 | 0.00377  | 0.293276 |
| -0.18918 | 3.88E-05 | -0.23263 | 3.70E-07 | -0.2489  | 5.02E-08 | -0.02322 | 0.61676  | -0.11782 |
| -0.16203 | 0.00044  | -0.02157 | 0.64201  | -0.08465 | 0.0676   | -0.24303 | 1.05E-07 | -0.08907 |
| 0.056163 | 0.22574  | 0.04529  | 0.32876  | 0.14225  | 0.00206  | -0.03983 | 0.39042  | 0.065966 |
| -0.01293 | 0.78047  | -0.03991 | 0.38957  | -0.0194  | 0.67584  | -0.03145 | 0.49783  | -0.18112 |
| 0.234019 | 3.14E-07 | 0.055774 | 0.22898  | 0.066513 | 0.15126  | 0.534009 | 8.73E-36 | 0.461626 |
| 0.070441 | 0.1285   | 0.061997 | 0.18107  | 0.020184 | 0.66353  | 0.108085 | 0.01947  | 0.109079 |
| -0.05554 | 0.23096  | 0.014067 | 0.76175  | -0.04892 | 0.29142  | -0.03972 | 0.39181  | 0.027458 |
| -0.11414 | 0.01359  | -0.0735  | 0.11269  | -0.12375 | 0.00742  | -0.10868 | 0.01881  | -0.14857 |
| -0.18074 | 8.57E-05 | -0.16391 | 0.00038  | -0.14389 | 0.00182  | -0.29253 | 1.15E-10 | -0.28548 |
| -0.03275 | 0.48021  | 0.003001 | 0.94843  | -0.04125 | 0.37376  | 0.043572 | 0.34746  | 0.075255 |
| 0.053774 | 0.24613  | -0.06405 | 0.16703  | -0.1448  | 0.00171  | -0.02658 | 0.56673  | -0.13725 |
| 0.059743 | 0.19749  | 0.017349 | 0.70845  | 0.035278 | 0.44692  | -0.04249 | 0.35961  | 0.001231 |
| 0.010549 | 0.82015  | -0.04627 | 0.31841  | -0.00076 | 0.98696  | -0.05937 | 0.20029  | -0.12499 |
| -0.0626  | 0.17683  | 0.13892  | 0.00262  | 0.100158 | 0.03046  | -0.06379 | 0.16875  | -0.08857 |
| 0.268487 | 3.74E-09 | 0.216315 | 2.38E-06 | 0.008475 | 0.85506  | 0.221419 | 1.35E-06 | 0.291001 |
| 0.014443 | 0.75557  | 2.45E-05 | 0.99958  | -0.00659 | 0.8871   | -0.05758 | 0.21423  | -0.06171 |
| -0.15488 | 0.00078  | -0.10706 | 0.02067  | -0.11593 | 0.01218  | -0.19787 | 1.65E-05 | -0.12131 |
| -0.02033 | 0.66119  | 0.099542 | 0.0315   | 0.104945 | 0.02333  | -0.04519 | 0.32986  | -0.05046 |
| -0.03313 | 0.47508  | -0.03308 | 0.47578  | -0.00665 | 0.88601  | -0.14769 | 0.00137  | -0.0744  |
| -0.03528 | 0.44688  | -0.03661 | 0.42989  | -0.04581 | 0.32321  | -0.04385 | 0.34439  | -0.08818 |
| -0.07842 | 0.09052  | -0.10589 | 0.0221   | -0.08101 | 0.08032  | -0.13489 | 0.00349  | -0.10764 |
| 0.217125 | 2.18E-06 | -0.12565 | 0.00655  | 0.087516 | 0.05879  | -0.01773 | 0.70239  | -0.03068 |
| -0.23595 | 2.49E-07 | -0.19407 | 2.41E-05 | -0.16781 | 0.00027  | -0.22025 | 1.54E-06 | -0.32746 |
| -0.06184 | 0.18218  | -0.31688 | 2.37E-12 | -0.26783 | 4.10E-09 | -0.19194 | 2.97E-05 | -0.20713 |
| 0.166711 | 0.0003   | 0.06181  | 0.18239  | 0.078819 | 0.08887  | 0.055346 | 0.23257  | 0.088264 |
| 0.01248  | 0.78794  | 0.218682 | 1.83E-06 | 0.18537  | 5.57E-05 | 0.045754 | 0.32383  | 0.082856 |
| 0.289314 | 1.86E-10 | 0.178518 | 0.00011  | -0.00174 | 0.97006  | 0.178865 | 0.0001   | 0.257984 |
| -0.06497 | 0.16101  | -0.02529 | 0.58563  | -0.06195 | 0.18138  | -0.03889 | 0.40181  | -0.04191 |
| -0.08818 | 0.05687  | -0.09721 | 0.03573  | -0.03999 | 0.38853  | -0.09152 | 0.04809  | -0.12829 |
| -0.01992 | 0.66761  | -0.05083 | 0.27296  | -0.08689 | 0.06062  | -0.01257 | 0.78653  | -0.00836 |
| -0.37518 | 4.68E-17 | -0.26742 | 4.34E-09 | -0.30975 | 7.65E-12 | -0.24235 | 1.14E-07 | -0.19233 |
| 0.123754 | 0.00742  | 0.001362 | 0.97659  | -0.09457 | 0.04108  | 0.103579 | 0.0252   | -0.02931 |
| -0.00229 | 0.96068  | 0.016077 | 0.72895  | 0.057001 | 0.21888  | -0.20163 | 1.13E-05 | -0.19875 |
| 0.047483 | 0.30586  | 0.009524 | 0.83737  | -0.05866 | 0.20577  | 0.037096 | 0.42384  | 0.08932  |
| -0.04777 | 0.30299  | -0.06277 | 0.17567  | -0.0544  | 0.24069  | -0.22821 | 6.22E-07 | -0.22337 |
| 0.127598 | 0.00576  | 0.057973 | 0.21112  | 0.152484 | 0.00095  | 0.017239 | 0.71021  | 0.026549 |
| 0.258677 | 1.41E-08 | 0.014331 | 0.75742  | -0.06092 | 0.18877  | 0.24547  | 7.75E-08 | 0.171288 |
| 0.024315 | 0.60019  | 0.061827 | 0.18227  | 0.074399 | 0.10834  | -0.08511 | 0.0661   | 0.030813 |
| 0.001799 | 0.96907  | -0.03096 | 0.50447  | 0.017285 | 0.70948  | 0.090575 | 0.05045  | -0.05628 |
| -0.02309 | 0.61871  | 0.03772  | 0.41608  | -0.00851 | 0.85446  | 0.056035 | 0.2268   | 0.144833 |
| -0.00176 | 0.96978  | 0.037197 | 0.42257  | 0.006707 | 0.88506  | 0.033284 | 0.47304  | -0.10538 |

|          |          |          |          |          |          |          |          |          |
|----------|----------|----------|----------|----------|----------|----------|----------|----------|
| -0.03628 | 0.43406  | -0.25956 | 1.26E-08 | -0.1376  | 0.00288  | -0.07434 | 0.1086   | -0.17607 |
| 0.14357  | 0.00187  | 0.102096 | 0.02737  | 0.128743 | 0.00533  | 0.021215 | 0.64746  | -0.08195 |
| 0.187464 | 4.57E-05 | -0.1039  | 0.02475  | -0.26405 | 6.87E-09 | 0.137731 | 0.00286  | 0.125953 |
| 0.168034 | 0.00026  | 0.236632 | 2.30E-07 | 0.238929 | 1.74E-07 | 0.269003 | 3.49E-09 | 0.074091 |
| 0.234882 | 2.83E-07 | 0.078146 | 0.09164  | 0.116346 | 0.01187  | 0.206334 | 6.94E-06 | 0.190132 |
| 0.014132 | 0.76067  | -0.01031 | 0.82418  | 0.123794 | 0.0074   | -0.08987 | 0.05227  | 0.013316 |
| -0.25453 | 2.44E-08 | -0.14291 | 0.00196  | -0.00367 | 0.93699  | -0.09526 | 0.03961  | -0.09733 |
| -0.36587 | 3.08E-16 | -0.20448 | 8.42E-06 | -0.23267 | 3.69E-07 | -0.08588 | 0.0637   | -0.16858 |
| -0.0791  | 0.08773  | 0.031202 | 0.50118  | 0.027111 | 0.55894  | 0.077359 | 0.09497  | 0.011674 |
| -0.03256 | 0.48269  | 0.031187 | 0.50138  | 0.003357 | 0.94233  | -0.01638 | 0.72411  | -0.01948 |
| -0.0509  | 0.27233  | -0.00655 | 0.88767  | -0.03694 | 0.42579  | -0.08766 | 0.05838  | -0.09068 |
| -0.11461 | 0.0132   | -0.07978 | 0.08502  | -0.06167 | 0.18341  | -0.07775 | 0.09331  | -0.12549 |
| -0.02481 | 0.59277  | -0.22865 | 5.91E-07 | -0.20325 | 9.56E-06 | -0.0677  | 0.14409  | -0.26699 |
| -0.02172 | 0.63971  | 0.002965 | 0.94905  | 0.032183 | 0.48781  | -0.08469 | 0.06748  | -0.08944 |
| 0.158995 | 0.00056  | 0.141173 | 0.00223  | 0.191091 | 3.23E-05 | -0.05748 | 0.21503  | -0.04313 |
| 0.036679 | 0.42907  | 0.002715 | 0.95334  | 0.133501 | 0.00385  | -0.037   | 0.4251   | 0.051384 |
| 0.058686 | 0.20555  | 0.057073 | 0.2183   | 0.229744 | 5.20E-07 | -0.00294 | 0.94954  | 0.08789  |
| -0.10352 | 0.02528  | 0.142402 | 0.00204  | 0.033903 | 0.46484  | -0.04486 | 0.33339  | 0.108951 |
| 0.01642  | 0.7234   | 0.141188 | 0.00223  | 0.086447 | 0.06195  | 0.133228 | 0.00392  | 0.14024  |
| 0.046131 | 0.31985  | -0.15169 | 0.00101  | -0.02179 | 0.63858  | -0.0328  | 0.47947  | -0.18843 |
| -0.02018 | 0.66351  | -0.04416 | 0.34101  | -0.02451 | 0.59728  | -0.02514 | 0.58783  | -0.11022 |
| 0.084638 | 0.06764  | 0.134093 | 0.00369  | 0.127226 | 0.0059   | 0.204625 | 8.30E-06 | 0.017435 |
| -0.11769 | 0.01092  | -0.19375 | 2.49E-05 | -0.18964 | 3.71E-05 | -0.19381 | 2.47E-05 | -0.23823 |
| 0.171529 | 0.0002   | 0.131773 | 0.00434  | 0.222708 | 1.17E-06 | 0.073794 | 0.11125  | -0.12366 |
| 0.011646 | 0.80181  | -0.00592 | 0.89849  | -0.03145 | 0.49781  | -0.22367 | 1.05E-06 | -0.23992 |
| 0.086723 | 0.06112  | 0.193996 | 2.43E-05 | 0.142198 | 0.00207  | 0.166338 | 0.00031  | 0.097791 |
| 0.068362 | 0.14019  | -0.23882 | 1.76E-07 | -0.37928 | 2.00E-17 | 0.009777 | 0.8331   | -0.05805 |
| 0.019249 | 0.67821  | -0.00916 | 0.84346  | 0.034353 | 0.45893  | 0.05873  | 0.2052   | -0.06954 |
| 0.207824 | 5.94E-06 | 0.030568 | 0.50993  | -0.00252 | 0.95662  | 0.073355 | 0.1134   | 0.223688 |
| 0.276517 | 1.21E-09 | 0.005524 | 0.90523  | 0.189592 | 3.73E-05 | 0.150244 | 0.00113  | 0.2037   |
| 0.17107  | 0.0002   | 0.059982 | 0.19569  | -0.00076 | 0.987    | 0.042805 | 0.35602  | -0.16853 |
| 0.042602 | 0.35831  | -0.24133 | 1.30E-07 | -0.02351 | 0.61226  | -0.0205  | 0.65866  | -0.11264 |
| 0.122022 | 0.0083   | 0.151213 | 0.00105  | 0.242605 | 1.11E-07 | 0.057874 | 0.2119   | 0.072471 |
| -0.02173 | 0.63958  | -0.02856 | 0.53809  | -0.00293 | 0.94969  | -0.10106 | 0.02899  | -0.13294 |
| -0.16479 | 0.00035  | -0.00489 | 0.91602  | -0.13824 | 0.00276  | -0.01725 | 0.70999  | 0.019491 |
| -0.03149 | 0.49723  | -0.02114 | 0.64859  | -0.06394 | 0.16772  | 0.00321  | 0.94485  | 0.095001 |
| 0.010746 | 0.81685  | -0.10436 | 0.02412  | -0.04577 | 0.32363  | 0.059516 | 0.1992   | 0.151349 |
| -0.08473 | 0.06734  | -0.06327 | 0.17225  | -0.0826  | 0.07456  | -0.04791 | 0.30155  | -0.14897 |
| -0.27111 | 2.60E-09 | -0.21356 | 3.21E-06 | -0.31646 | 2.54E-12 | -0.09369 | 0.04301  | 0.10524  |
| 0.252472 | 3.18E-08 | 0.089244 | 0.05395  | -0.06514 | 0.15988  | 0.163742 | 0.00038  | 0.269504 |
| 0.124928 | 0.00687  | -0.01149 | 0.80444  | -0.20855 | 5.50E-06 | 0.115253 | 0.01269  | 0.140754 |
| -0.00672 | 0.88481  | -0.02086 | 0.65301  | -0.04272 | 0.35696  | 0.191107 | 3.22E-05 | 0.110631 |
| -0.18245 | 7.32E-05 | -0.1376  | 0.00288  | -0.12727 | 0.00588  | -0.08401 | 0.0697   | -0.11948 |
| 0.034393 | 0.45841  | 0.168377 | 0.00026  | 0.120743 | 0.00901  | 0.171772 | 0.00019  | 0.186436 |
| 0.069751 | 0.13229  | -0.16155 | 0.00046  | -0.32936 | 2.81E-13 | -0.0303  | 0.51366  | -0.18618 |



|          |          |          |          |          |          |          |          |          |
|----------|----------|----------|----------|----------|----------|----------|----------|----------|
| 0.2205   | 1.50E-06 | 0.164405 | 0.00036  | 0.224817 | 9.19E-07 | 0.086856 | 0.06073  | 0.178538 |
| -0.22999 | 5.05E-07 | -0.17718 | 0.00012  | -0.18921 | 3.87E-05 | -0.05841 | 0.20769  | -0.062   |
| 0.071065 | 0.12514  | 0.068404 | 0.13995  | 0.048545 | 0.29515  | 0.078567 | 0.0899   | 0.055803 |
| -0.18241 | 7.35E-05 | -0.09542 | 0.03927  | -0.09216 | 0.04653  | -0.10892 | 0.01855  | -0.1761  |
| -0.03761 | 0.41741  | 0.009702 | 0.83436  | -0.03234 | 0.48564  | 0.00104  | 0.98212  | 0.02405  |
| 0.054182 | 0.24256  | -0.00592 | 0.89852  | -0.05035 | 0.27754  | -0.053   | 0.25298  | 0.049263 |
| 0.024441 | 0.5983   | 0.069682 | 0.13268  | 0.062835 | 0.17523  | 0.012603 | 0.78591  | -0.02792 |
| -0.05572 | 0.2294   | -0.15615 | 0.00071  | -0.19958 | 1.39E-05 | -0.04066 | 0.38061  | -0.0382  |
| 0.159689 | 0.00053  | -0.12005 | 0.00941  | 0.095906 | 0.03829  | 0.06152  | 0.18446  | -0.01329 |
| 0.053182 | 0.25138  | -0.02099 | 0.65094  | 0.051918 | 0.26284  | -0.09739 | 0.03538  | 0.147766 |
| 0.38158  | 1.24E-17 | 0.239411 | 1.64E-07 | 0.243055 | 1.05E-07 | 0.32516  | 5.82E-13 | 0.35165  |
| 0.107332 | 0.02034  | 0.266334 | 5.03E-09 | 0.218268 | 1.92E-06 | 0.090724 | 0.05007  | 0.084436 |
| -0.0378  | 0.41514  | -0.04869 | 0.29374  | -0.03741 | 0.41988  | 0.001177 | 0.97976  | 0.052521 |
| 0.172449 | 0.00018  | 0.275008 | 1.50E-09 | 0.002397 | 0.9588   | 0.257289 | 1.70E-08 | 0.385316 |
| -0.18206 | 7.59E-05 | -0.04641 | 0.3169   | -0.04073 | 0.37987  | -0.08605 | 0.06317  | -0.08297 |
| 0.05406  | 0.24363  | -0.00163 | 0.97206  | 0.022539 | 0.62709  | 0.042476 | 0.35974  | -0.06262 |
| 0.023108 | 0.61841  | -0.07544 | 0.10345  | -0.06047 | 0.19208  | -0.10663 | 0.02119  | -0.16854 |
| 0.02852  | 0.53869  | -0.04482 | 0.33383  | -0.02201 | 0.63523  | -0.03025 | 0.51433  | -0.1336  |
| 0.027547 | 0.55264  | -0.14161 | 0.00216  | -0.07265 | 0.11691  | 0.088121 | 0.05705  | -0.08427 |
| 0.097633 | 0.03492  | -0.04218 | 0.36308  | 0.004591 | 0.92119  | 0.113569 | 0.01406  | -0.00443 |
| -0.08714 | 0.05987  | -0.01514 | 0.74411  | -0.00352 | 0.93955  | -0.12426 | 0.00718  | 0.115243 |
| 0.009123 | 0.84413  | -0.04486 | 0.33342  | 0.032779 | 0.47979  | -0.1166  | 0.01168  | 0.0173   |
| 0.130846 | 0.00462  | 0.066071 | 0.154    | 0.029701 | 0.522    | 0.09536  | 0.03941  | 0.024634 |
| 0.082818 | 0.07378  | 0.042048 | 0.3646   | -0.03075 | 0.50739  | 0.063558 | 0.17031  | 0.055094 |
| 0.030417 | 0.51201  | 0.035943 | 0.4384   | 0.046877 | 0.31208  | -0.10484 | 0.02346  | -0.01959 |
| -0.12061 | 0.00908  | -0.29795 | 4.99E-11 | -0.2836  | 4.35E-10 | -0.09777 | 0.03466  | -0.32148 |
| 0.135759 | 0.00329  | -0.00481 | 0.91745  | 0.019797 | 0.66959  | 0.089284 | 0.05384  | 0.129282 |
| 0.150903 | 0.00107  | 0.183595 | 6.58E-05 | 0.188475 | 4.15E-05 | -0.01086 | 0.8149   | 0.079684 |
| 0.129113 | 0.0052   | 0.07819  | 0.09146  | 0.075368 | 0.10381  | -0.02491 | 0.59127  | -0.03583 |
| 0.214048 | 3.05E-06 | 0.17918  | 9.89E-05 | 0.097576 | 0.03503  | 0.23083  | 4.58E-07 | 0.182431 |
| 0.049728 | 0.28353  | 0.085834 | 0.06383  | 0.023974 | 0.60531  | -0.13057 | 0.00471  | -0.14197 |
| 0.059598 | 0.19858  | 0.064961 | 0.16105  | 0.037972 | 0.41297  | -0.1412  | 0.00223  | -0.12544 |
| 0.081647 | 0.07797  | 0.096748 | 0.03661  | 0.039038 | 0.39997  | -0.04305 | 0.35329  | -0.09688 |
| 0.260136 | 1.16E-08 | 0.234866 | 2.84E-07 | 0.276961 | 1.14E-09 | 0.089436 | 0.05343  | 0.001211 |
| 0.205462 | 7.60E-06 | 0.091188 | 0.0489   | 0.088866 | 0.05498  | 0.083143 | 0.07265  | -0.06168 |
| 0.120524 | 0.00913  | 0.090762 | 0.04997  | 0.03891  | 0.40152  | 0.152056 | 0.00098  | 0.035007 |
| 0.014953 | 0.74724  | -0.04706 | 0.3102   | -0.08188 | 0.07713  | 0.085151 | 0.06598  | 0.142841 |
| -0.16414 | 0.00037  | -0.1164  | 0.01183  | -0.21995 | 1.59E-06 | -0.11182 | 0.01563  | 0.00318  |
| -0.01204 | 0.79521  | -0.03427 | 0.46001  | -0.05936 | 0.20042  | -0.05096 | 0.27174  | 0.051047 |
| 0.079606 | 0.08572  | -0.06506 | 0.16044  | 0.006527 | 0.88812  | -0.04666 | 0.31437  | -0.09088 |
| 0.07975  | 0.08515  | -0.0687  | 0.13826  | -0.04244 | 0.3601   | 0.018388 | 0.69186  | -0.00231 |
| 0.034687 | 0.45458  | -0.09221 | 0.04642  | -0.09577 | 0.03856  | 0.049156 | 0.28911  | 0.013344 |
| 0.121376 | 0.00865  | 0.020444 | 0.65946  | 0.005113 | 0.91226  | 0.064667 | 0.16296  | -0.02382 |
| 0.097887 | 0.03445  | -0.05514 | 0.2343   | -0.05409 | 0.24338  | 0.045956 | 0.3217   | -0.0695  |
| 0.068287 | 0.14062  | -0.0027  | 0.95354  | -0.05443 | 0.24039  | -0.1021  | 0.02736  | -0.02269 |

|          |          |          |          |          |          |          |          |          |
|----------|----------|----------|----------|----------|----------|----------|----------|----------|
| 0.064113 | 0.1666   | 0.01532  | 0.74125  | -0.01683 | 0.71672  | 0.043439 | 0.34894  | -0.01056 |
| 0.019919 | 0.66768  | 0.004046 | 0.93052  | -0.0446  | 0.33622  | 0.019027 | 0.68172  | -0.01925 |
| 0.007946 | 0.86403  | -0.0828  | 0.07383  | -0.10127 | 0.02866  | -0.0174  | 0.70767  | -0.04208 |
| 0.084715 | 0.06739  | 0.051366 | 0.26796  | 0.042182 | 0.36308  | 0.028555 | 0.53819  | -0.01057 |
| 0.123419 | 0.00758  | 0.01789  | 0.6998   | 0.040809 | 0.37891  | 0.040883 | 0.37805  | -0.10795 |
| -0.20035 | 1.29E-05 | -0.13046 | 0.00474  | -0.11289 | 0.01465  | -0.02124 | 0.64702  | 0.098917 |
| -0.06314 | 0.17317  | -0.04593 | 0.32196  | -0.04403 | 0.34237  | -0.14305 | 0.00194  | -0.19952 |
| -0.01399 | 0.76303  | 0.109513 | 0.01791  | 0.002718 | 0.95329  | 0.154735 | 0.00079  | 0.13795  |
| -0.12039 | 0.00921  | -0.07518 | 0.10466  | -0.09088 | 0.04967  | -0.145   | 0.00168  | 0.013171 |
| -0.05564 | 0.2301   | 0.062091 | 0.18041  | 0.069606 | 0.1331   | 0.033509 | 0.47005  | 0.077038 |
| -0.09505 | 0.04006  | -0.21459 | 2.87E-06 | -0.15657 | 0.00069  | -0.06153 | 0.18437  | 0.031749 |
| 0.063306 | 0.17202  | -0.25342 | 2.81E-08 | -0.19322 | 2.62E-05 | -0.00358 | 0.93843  | -0.07243 |
| 0.172392 | 0.00018  | 0.172788 | 0.00018  | 0.178972 | 0.0001   | -0.00526 | 0.90981  | -0.02727 |
| 0.07407  | 0.10991  | -0.02802 | 0.54585  | 0.060312 | 0.19324  | 0.046171 | 0.31944  | -0.16226 |
| 0.136631 | 0.00309  | 0.042189 | 0.36299  | 0.017585 | 0.70467  | -0.05561 | 0.23036  | -0.09554 |
| 0.040752 | 0.37959  | 0.193308 | 2.60E-05 | 0.096933 | 0.03626  | 0.073109 | 0.11462  | 0.134674 |
| 0.102458 | 0.02683  | 0.222222 | 1.23E-06 | 0.235186 | 2.73E-07 | -0.06888 | 0.13721  | 0.131    |
| 0.076434 | 0.099    | 0.002162 | 0.96284  | -0.00992 | 0.8307   | 0.10169  | 0.028    | -0.07293 |
| 0.040432 | 0.38334  | 0.048243 | 0.29817  | 0.117539 | 0.01102  | -0.0001  | 0.99824  | -0.0852  |
| -0.1036  | 0.02517  | -0.09896 | 0.03251  | -0.17922 | 9.86E-05 | -0.01941 | 0.67568  | 0.070913 |
| 0.033306 | 0.47275  | 0.0556   | 0.23044  | 0.079457 | 0.08631  | 0.292089 | 1.23E-10 | 0.187853 |
| 0.030783 | 0.50695  | 0.019099 | 0.68059  | 0.018988 | 0.68234  | 0.16157  | 0.00046  | 0.065328 |
| 0.203183 | 9.63E-06 | 0.184007 | 6.33E-05 | 0.176442 | 0.00013  | 0.291679 | 1.30E-10 | 0.141509 |
| 0.03166  | 0.49491  | 0.027204 | 0.5576   | 0.057529 | 0.21464  | -0.06605 | 0.15412  | -0.03049 |
| 0.022767 | 0.62361  | 0.082027 | 0.07659  | 0.05909  | 0.20244  | 0.038429 | 0.40737  | -0.00713 |
| -0.17992 | 9.24E-05 | -0.07121 | 0.12436  | -0.26879 | 3.59E-09 | 0.036932 | 0.4259   | 0.130784 |
| -0.05051 | 0.27601  | -0.15235 | 0.00096  | -0.17751 | 0.00012  | -0.01032 | 0.8239   | 0.062015 |
| -0.14685 | 0.00146  | -0.21677 | 2.27E-06 | -0.23279 | 3.63E-07 | -0.04244 | 0.36009  | -0.15521 |
| -0.24955 | 4.63E-08 | -0.07947 | 0.08625  | -0.16836 | 0.00026  | -0.1437  | 0.00185  | -0.24913 |
| -0.1458  | 0.00158  | -0.13947 | 0.00252  | -0.11911 | 0.00999  | 0.037589 | 0.4177   | 0.015783 |
| -0.06603 | 0.15429  | 0.090302 | 0.05115  | 0.07749  | 0.09441  | -0.0118  | 0.79924  | -0.02748 |
| 0.217535 | 2.08E-06 | 0.254227 | 2.53E-08 | 0.110296 | 0.01711  | 0.358164 | 1.40E-15 | 0.287263 |
| -0.33947 | 4.65E-14 | -0.12469 | 0.00698  | -0.29965 | 3.83E-11 | -0.03675 | 0.42812  | 0.058602 |
| 0.133545 | 0.00384  | 0.161332 | 0.00047  | 0.21058  | 4.43E-06 | 0.054753 | 0.23762  | 0.055329 |
| 0.030077 | 0.51674  | 0.068011 | 0.14224  | 0.038585 | 0.40546  | 0.012068 | 0.79479  | 0.019954 |
| 0.049086 | 0.2898   | 0.051768 | 0.26422  | 0.010323 | 0.82393  | -0.01605 | 0.72936  | 0.057114 |
| 0.017186 | 0.71107  | 0.024356 | 0.59957  | 0.025922 | 0.57631  | -0.00124 | 0.97866  | -0.00396 |
| -0.11143 | 0.01599  | -0.02473 | 0.59396  | -0.07083 | 0.12641  | -0.03567 | 0.44194  | -0.12007 |
| 0.071796 | 0.12129  | -0.02502 | 0.58972  | -0.0785  | 0.09017  | 0.070579 | 0.12775  | 0.074115 |
| 0.043847 | 0.34443  | 0.114505 | 0.01329  | 0.093001 | 0.04457  | -0.01127 | 0.80806  | 0.093451 |
| -0.00053 | 0.99085  | -0.08308 | 0.07286  | -0.10063 | 0.02969  | 0.033987 | 0.46374  | 0.014277 |
| -0.23109 | 4.44E-07 | -0.21834 | 1.90E-06 | -0.16157 | 0.00046  | -0.18267 | 7.18E-05 | -0.36973 |
| 0.171657 | 0.00019  | 0.000293 | 0.99497  | -0.06306 | 0.17368  | 0.101024 | 0.02904  | 0.234314 |
| -0.01485 | 0.74894  | 0.013134 | 0.77711  | 0.045697 | 0.32443  | 0.02954  | 0.52426  | 0.022728 |
| -0.03159 | 0.49581  | 0.036405 | 0.43252  | 0.095663 | 0.03878  | -0.0103  | 0.8243   | 0.038376 |

|          |          |          |          |          |          |          |          |          |
|----------|----------|----------|----------|----------|----------|----------|----------|----------|
| 0.070277 | 0.12939  | -0.00675 | 0.88441  | 0.025375 | 0.5844   | 0.090011 | 0.05191  | 0.037472 |
| 0.118765 | 0.01021  | 0.140519 | 0.00234  | 0.191012 | 3.25E-05 | -0.03842 | 0.40747  | -0.05789 |
| 0.015287 | 0.74179  | -0.08072 | 0.0814   | -0.03097 | 0.50431  | -0.10334 | 0.02553  | -0.06831 |
| -0.05189 | 0.2631   | 0.00589  | 0.89899  | 0.024043 | 0.60427  | -0.08624 | 0.06259  | -0.0341  |
| 0.016886 | 0.71589  | -0.01084 | 0.81525  | 0.052561 | 0.25697  | 0.02996  | 0.51837  | -0.04767 |
| 0.114175 | 0.01356  | 7.33E-05 | 0.99874  | 0.094367 | 0.04151  | -0.14453 | 0.00174  | -0.12788 |
| 0.154084 | 0.00084  | 0.206723 | 6.67E-06 | 0.222748 | 1.16E-06 | 0.154375 | 0.00082  | 0.156534 |
| -0.19626 | 1.94E-05 | -0.0788  | 0.08896  | -0.01874 | 0.6862   | -0.11356 | 0.01408  | -0.13704 |
| -0.01502 | 0.7462   | -0.26755 | 4.26E-09 | -0.19556 | 2.08E-05 | -0.02771 | 0.55027  | -0.23163 |
| 0.055826 | 0.22854  | 0.09811  | 0.03404  | 0.108972 | 0.01849  | 0.050409 | 0.27698  | 0.104456 |
| -0.05636 | 0.22408  | -0.00635 | 0.8912   | -0.20288 | 9.94E-06 | 0.04394  | 0.34341  | -0.03453 |
| 0.078638 | 0.08961  | 0.213156 | 3.36E-06 | 0.032504 | 0.48348  | 0.174917 | 0.00015  | 0.263868 |
| -0.06388 | 0.16814  | 0.172868 | 0.00017  | 0.034263 | 0.46011  | 0.107557 | 0.02008  | 0.203808 |
| -0.17037 | 0.00022  | -0.06626 | 0.15281  | -0.09286 | 0.0449   | -0.10548 | 0.02263  | -0.11007 |
| 0.057051 | 0.21848  | 0.029167 | 0.52952  | -0.08997 | 0.05203  | 0.100293 | 0.03023  | 0.198332 |
| 0.287401 | 2.48E-10 | 0.166934 | 0.00029  | 0.315022 | 3.22E-12 | 0.122997 | 0.00779  | -0.03809 |
| 0.068789 | 0.13772  | 0.044657 | 0.33558  | 0.056467 | 0.22324  | 0.0612   | 0.18675  | 0.091993 |
| 0.106538 | 0.0213   | -0.02664 | 0.56581  | 0.025373 | 0.58442  | -0.14291 | 0.00196  | -0.14108 |
| 0.097067 | 0.036    | -0.04448 | 0.33755  | -0.01032 | 0.82398  | -0.11656 | 0.01171  | -0.14486 |
| -0.21743 | 2.11E-06 | -0.14848 | 0.00129  | -0.17244 | 0.00018  | 0.010582 | 0.8196   | -0.00488 |
| 0.192808 | 2.73E-05 | 0.308327 | 9.64E-12 | 0.098082 | 0.03409  | 0.287567 | 2.42E-10 | 0.380876 |
| -0.00265 | 0.95439  | 0.037339 | 0.4208   | -0.04557 | 0.32579  | 0.199589 | 1.39E-05 | 0.123756 |
| 0.099833 | 0.031    | 0.282308 | 5.26E-10 | 0.032148 | 0.48829  | 0.151407 | 0.00103  | 0.264723 |
| -0.08566 | 0.06437  | 0.016585 | 0.72075  | 0.00446  | 0.92342  | -0.05942 | 0.1999   | -0.02114 |
| -0.16264 | 0.00042  | -0.1467  | 0.00148  | -0.2857  | 3.20E-10 | -0.06834 | 0.14033  | -0.14852 |
| -0.02231 | 0.63063  | -0.05505 | 0.23507  | -0.08653 | 0.06169  | 0.062576 | 0.17702  | 0.157622 |
| 0.10174  | 0.02792  | 0.079824 | 0.08486  | -0.01877 | 0.68577  | 0.332365 | 1.66E-13 | 0.279196 |
| -0.20795 | 5.86E-06 | -0.34326 | 2.33E-14 | -0.31694 | 2.34E-12 | -0.18008 | 9.11E-05 | -0.14775 |
| 0.082857 | 0.07364  | 0.176596 | 0.00012  | 0.169335 | 0.00024  | 0.138122 | 0.00278  | 0.171309 |
| -0.18389 | 6.40E-05 | -0.29105 | 1.44E-10 | -0.18981 | 3.65E-05 | -0.16586 | 0.00032  | -0.22997 |
| 0.026113 | 0.5735   | 0.09934  | 0.03185  | 0.118461 | 0.0104   | 0.02065  | 0.65624  | -0.01929 |
| 0.025769 | 0.57858  | 0.105623 | 0.02244  | 0.124634 | 0.007    | -0.03347 | 0.47061  | 0.007158 |
| -0.07418 | 0.10938  | 0.077129 | 0.09595  | 0.057295 | 0.21652  | -0.07032 | 0.12917  | -0.04632 |
| 0.171286 | 0.0002   | 0.107183 | 0.02052  | -0.05646 | 0.22333  | 0.133593 | 0.00383  | 0.272552 |
| 0.360218 | 9.37E-16 | 0.225249 | 8.74E-07 | 0.259016 | 1.35E-08 | 0.188234 | 4.25E-05 | 0.152949 |
| 0.086113 | 0.06297  | 0.130927 | 0.0046   | 0.126072 | 0.00637  | -0.06054 | 0.19157  | -0.18449 |
| -0.18531 | 5.61E-05 | -0.02803 | 0.54565  | -0.11447 | 0.01332  | 0.061976 | 0.18122  | -0.04109 |
| 0.090575 | 0.05045  | 0.01675  | 0.71807  | 0.089472 | 0.05334  | -0.08906 | 0.05445  | -0.21422 |
| -0.13464 | 0.00356  | -0.18713 | 4.72E-05 | -0.10696 | 0.02079  | -0.26014 | 1.16E-08 | -0.24048 |
| -0.15039 | 0.00112  | -0.01467 | 0.75192  | -0.01505 | 0.74561  | -0.11706 | 0.01135  | -0.09551 |
| 0.128604 | 0.00538  | -0.09384 | 0.04268  | -0.07046 | 0.12837  | -0.0994  | 0.03174  | -0.21656 |
| -0.04719 | 0.30884  | 0.078872 | 0.08866  | 0.016124 | 0.72819  | 0.033577 | 0.46915  | 0.077117 |
| -0.01038 | 0.82306  | -0.07914 | 0.08756  | 0.011829 | 0.79876  | 0.026797 | 0.5635   | -0.08535 |
| 0.005019 | 0.91386  | -0.08663 | 0.0614   | -0.02325 | 0.61631  | -0.05839 | 0.20787  | -0.06037 |
| -0.08655 | 0.06165  | -0.09179 | 0.04743  | -0.05166 | 0.26518  | -0.00906 | 0.84519  | -0.07977 |

|          |          |          |          |          |          |          |          |          |
|----------|----------|----------|----------|----------|----------|----------|----------|----------|
| 0.08264  | 0.0744   | -0.01335 | 0.77362  | 0.036156 | 0.43569  | 0.078111 | 0.09179  | -0.09755 |
| -0.0106  | 0.8193   | -0.01574 | 0.73449  | 0.039031 | 0.40006  | -0.18637 | 5.07E-05 | -0.29074 |
| 0.183652 | 6.55E-05 | 0.179151 | 9.92E-05 | 0.203226 | 9.59E-06 | 0.018443 | 0.69098  | -0.08303 |
| 0.179738 | 9.40E-05 | 0.344586 | 1.82E-14 | 0.362137 | 6.44E-16 | 0.083156 | 0.0726   | 0.112927 |
| 0.136847 | 0.00304  | 0.190148 | 3.54E-05 | 0.196259 | 1.94E-05 | 0.005407 | 0.90724  | 0.0353   |
| -0.24537 | 7.85E-08 | -0.11728 | 0.0112   | -0.07691 | 0.09689  | -0.2088  | 5.35E-06 | -0.11669 |
| -0.05668 | 0.22145  | -0.10642 | 0.02145  | -0.08876 | 0.05527  | -0.16516 | 0.00034  | -0.19071 |
| 0.137166 | 0.00298  | 0.269843 | 3.10E-09 | 0.296206 | 6.53E-11 | 0.123471 | 0.00756  | 0.047632 |
| -0.02983 | 0.52019  | -0.04854 | 0.29522  | -0.18307 | 6.91E-05 | -0.07598 | 0.10101  | 0.00381  |
| 0.039542 | 0.39391  | 0.065301 | 0.15886  | 0.109723 | 0.0177   | 0.04522  | 0.32952  | -0.093   |
| 0.117542 | 0.01102  | 0.034488 | 0.45716  | 0.125831 | 0.00647  | -0.09204 | 0.04683  | -0.07378 |
| -0.01513 | 0.74439  | 0.044869 | 0.33329  | -0.0273  | 0.55617  | -0.02175 | 0.63926  | -0.02151 |
| -0.03389 | 0.46504  | 0.021186 | 0.64792  | -0.00738 | 0.87356  | 0.016957 | 0.71474  | 0.084697 |
| -0.23358 | 3.31E-07 | -0.09718 | 0.03579  | -0.07835 | 0.0908   | -0.08098 | 0.08042  | -0.15938 |
| -0.06029 | 0.19337  | -0.09187 | 0.04724  | -0.03226 | 0.48681  | -0.05104 | 0.271    | 0.019156 |
| 0.149468 | 0.0012   | 0.077105 | 0.09606  | 0.2271   | 7.07E-07 | 0.063277 | 0.17221  | 0.087201 |
| 0.114865 | 0.013    | 0.155138 | 0.00077  | 0.088718 | 0.05538  | 0.195664 | 2.06E-05 | 0.24242  |
| -0.21129 | 4.11E-06 | -0.23568 | 2.58E-07 | -0.21308 | 3.39E-06 | -0.0961  | 0.0379   | -0.05639 |
| -0.06527 | 0.15909  | -0.25234 | 3.23E-08 | -0.18333 | 6.75E-05 | -0.09114 | 0.04901  | -0.09391 |
| 0.092326 | 0.04614  | 0.125985 | 0.00641  | 0.248289 | 5.43E-08 | 0.035912 | 0.43879  | 0.014499 |
| -0.07615 | 0.10026  | -0.0498  | 0.28281  | -0.03339 | 0.47161  | 0.039797 | 0.39087  | 0.213695 |
| 0.048396 | 0.29665  | 0.116602 | 0.01168  | 0.14861  | 0.00128  | 0.11548  | 0.01252  | 0.224968 |
| -0.02831 | 0.54168  | -0.01697 | 0.7145   | 0.031422 | 0.49816  | -0.15472 | 0.00079  | -0.08505 |
| -0.03587 | 0.43935  | 0.112037 | 0.01542  | 0.105557 | 0.02253  | 0.035612 | 0.44262  | 0.093799 |
| -0.24461 | 8.63E-08 | -0.18231 | 7.42E-05 | -0.07162 | 0.12219  | -0.24942 | 4.71E-08 | -0.19363 |
| 0.151244 | 0.00104  | -0.02952 | 0.52453  | 0.05747  | 0.21511  | -0.05224 | 0.2599   | -0.12803 |
| 0.031153 | 0.50185  | 0.07524  | 0.1044   | 0.093416 | 0.04362  | -0.00411 | 0.92949  | 0.059865 |
| -0.00835 | 0.85717  | -0.14014 | 0.0024   | -0.15005 | 0.00114  | -0.11811 | 0.01063  | -0.17143 |
| 0.077242 | 0.09547  | 0.03117  | 0.50162  | 0.074954 | 0.10573  | 0.025288 | 0.58569  | 0.041369 |
| 0.06248  | 0.17769  | 0.028141 | 0.54411  | 0.016787 | 0.71748  | -0.04019 | 0.38621  | -0.0263  |
| -0.05416 | 0.24272  | 0.104738 | 0.0236   | 0.124039 | 0.00728  | 0.000913 | 0.9843   | 0.014777 |
| 0.208984 | 5.25E-06 | 0.330761 | 2.20E-13 | 0.322763 | 8.77E-13 | 0.157573 | 0.00063  | 0.268486 |
| 0.099435 | 0.03168  | 0.181461 | 8.02E-05 | 0.182157 | 7.52E-05 | 0.054502 | 0.23979  | 0.04308  |
| 0.10575  | 0.02228  | 0.182762 | 7.11E-05 | 0.191744 | 3.03E-05 | -0.02032 | 0.66139  | 0.038904 |
| 0.271579 | 2.44E-09 | 0.32542  | 5.57E-13 | 0.215262 | 2.67E-06 | 0.038022 | 0.41236  | 0.036441 |
| -0.15669 | 0.00068  | -0.32259 | 9.04E-13 | -0.18059 | 8.69E-05 | -0.27331 | 1.91E-09 | -0.32967 |
| 0.26257  | 8.39E-09 | 0.171467 | 0.0002   | 0.141252 | 0.00222  | 0.083015 | 0.07309  | 0.082348 |
| 0.135237 | 0.00341  | -0.02776 | 0.54961  | -0.12321 | 0.00769  | -0.04445 | 0.33787  | -0.1865  |
| 0.120839 | 0.00895  | 0.055789 | 0.22886  | 0.043904 | 0.34379  | -0.01641 | 0.72351  | -0.27201 |
| 0.013517 | 0.77079  | -0.00847 | 0.85522  | 0.042452 | 0.36001  | -0.03574 | 0.44097  | 0.029835 |
| 0.15879  | 0.00057  | 0.012126 | 0.79383  | 0.041131 | 0.37516  | 0.015677 | 0.73544  | -0.11024 |
| 0.13885  | 0.00264  | -0.03312 | 0.47525  | -0.09769 | 0.03481  | 0.168078 | 0.00026  | 0.022941 |
| -0.12082 | 0.00896  | -0.21706 | 2.19E-06 | -0.30097 | 3.11E-11 | -0.09907 | 0.03231  | -0.07595 |
| 0.055069 | 0.23492  | 0.227168 | 7.01E-07 | 0.073689 | 0.11176  | 0.085042 | 0.06633  | 0.161905 |
| -0.00182 | 0.96872  | -0.14291 | 0.00196  | -0.03947 | 0.39477  | -0.14475 | 0.00171  | -0.10713 |

|          |          |          |          |          |          |          |          |          |
|----------|----------|----------|----------|----------|----------|----------|----------|----------|
| -0.20748 | 6.16E-06 | -0.2594  | 1.28E-08 | -0.23416 | 3.09E-07 | -0.09811 | 0.03404  | -0.06661 |
| 0.178703 | 0.0001   | -0.01727 | 0.70972  | 0.102936 | 0.02612  | -0.02023 | 0.66287  | -0.12962 |
| 0.000883 | 0.98481  | -0.01175 | 0.8      | -0.01685 | 0.71643  | 0.02162  | 0.64121  | -0.09678 |
| 0.033964 | 0.46404  | 0.015827 | 0.733    | 0.038774 | 0.40317  | -0.09303 | 0.0445   | -0.07989 |
| 0.040174 | 0.38639  | -0.00311 | 0.94649  | 0.018316 | 0.693    | 0.036315 | 0.43366  | -0.00171 |
| 0.05525  | 0.23339  | 0.022399 | 0.62923  | 0.0338   | 0.4662   | 0.062198 | 0.17966  | 0.125714 |
| 0.066345 | 0.1523   | 0.006519 | 0.88826  | 0.018318 | 0.69296  | 0.118216 | 0.01056  | -0.03226 |
| 0.025095 | 0.58856  | 0.023581 | 0.61124  | -0.00058 | 0.99009  | 0.036819 | 0.42731  | -0.02679 |
| -0.08046 | 0.08239  | 0.017466 | 0.70657  | 0.073065 | 0.11483  | -0.1061  | 0.02184  | -0.11744 |
| 0.158458 | 0.00059  | -0.2816  | 5.83E-10 | -0.10324 | 0.02568  | -0.01065 | 0.81844  | -0.10849 |
| -0.02016 | 0.66386  | -0.09562 | 0.03887  | -0.13772 | 0.00286  | 0.055014 | 0.23539  | -0.1337  |
| -0.00457 | 0.92152  | 0.049243 | 0.28826  | 0.113726 | 0.01393  | -0.0997  | 0.03123  | -0.10008 |
| 0.055718 | 0.22945  | 0.140892 | 0.00227  | 0.124338 | 0.00714  | -0.13911 | 0.00259  | -0.10017 |
| -0.06978 | 0.13211  | -0.04371 | 0.34599  | -0.00884 | 0.84897  | -0.07316 | 0.11438  | -0.06123 |
| -0.023   | 0.62     | -0.00816 | 0.86034  | 0.022646 | 0.62545  | 0.088725 | 0.05537  | 0.064682 |
| 0.207117 | 6.40E-06 | 0.157553 | 0.00063  | 0.254612 | 2.41E-08 | -0.02216 | 0.63294  | 0.031803 |
| 0.260199 | 1.15E-08 | 0.107893 | 0.01969  | 0.344603 | 1.82E-14 | 0.126153 | 0.00634  | -0.0865  |
| -0.0089  | 0.84793  | -0.01353 | 0.77062  | -0.01133 | 0.80714  | -0.01623 | 0.72655  | -0.05249 |
| -0.09926 | 0.03199  | -0.12021 | 0.00932  | -0.11104 | 0.01637  | -0.11565 | 0.01239  | -0.16243 |
| 0.07413  | 0.10963  | 0.023588 | 0.61114  | 0.027085 | 0.55932  | 0.137236 | 0.00296  | 0.139451 |
| -0.21695 | 2.22E-06 | -0.20526 | 7.77E-06 | -0.12771 | 0.00571  | -0.15575 | 0.00073  | -0.16538 |
| 0.064076 | 0.16685  | 0.02897  | 0.53231  | 0.049465 | 0.28609  | 0.026694 | 0.56501  | -0.03607 |
| -0.03609 | 0.43656  | -0.08109 | 0.08002  | -0.01591 | 0.73165  | 0.055153 | 0.23422  | -0.0963  |
| 0.122981 | 0.0078   | 0.08767  | 0.05834  | 0.123767 | 0.00741  | 0.178336 | 0.00011  | 0.040842 |
| 0.155057 | 0.00077  | 0.15422  | 0.00083  | 0.192908 | 2.70E-05 | 0.054246 | 0.242    | 0.043568 |
| 0.089123 | 0.05428  | 0.075014 | 0.10545  | 0.085222 | 0.06576  | -0.06109 | 0.18758  | -0.16075 |
| 0.17326  | 0.00017  | 0.091581 | 0.04794  | 0.063447 | 0.17106  | 0.102969 | 0.02607  | 0.029497 |
| 0.064243 | 0.16575  | 0.093742 | 0.04289  | 0.092882 | 0.04484  | -0.0642  | 0.16603  | -0.10013 |
| -0.10801 | 0.01956  | 0.19387  | 2.46E-05 | 0.121307 | 0.00869  | 0.031118 | 0.50233  | 0.152133 |
| -0.11441 | 0.01336  | -0.16509 | 0.00034  | -0.16521 | 0.00034  | -0.11292 | 0.01462  | -0.18692 |
| -0.0561  | 0.22628  | 0.061939 | 0.18148  | 0.048856 | 0.29207  | -0.04615 | 0.31961  | -0.00791 |
| 0.164681 | 0.00035  | 0.23587  | 2.52E-07 | 0.336665 | 7.71E-14 | 0.003941 | 0.93231  | 0.074464 |
| 0.00751  | 0.87141  | -0.12593 | 0.00643  | 0.048339 | 0.29721  | -0.12861 | 0.00538  | 0.026156 |
| 0.091847 | 0.04729  | 0.003855 | 0.93378  | 0.059079 | 0.20253  | -0.02958 | 0.52373  | 0.00498  |
| 0.217249 | 2.15E-06 | 0.188601 | 4.10E-05 | 0.275195 | 1.46E-09 | 0.152969 | 0.00091  | 0.26002  |
| 0.046013 | 0.32109  | 0.183709 | 6.51E-05 | 0.178401 | 0.00011  | 0.08701  | 0.06027  | 0.168332 |
| -0.1275  | 0.00579  | -0.04976 | 0.28322  | -0.08046 | 0.08242  | -0.102   | 0.02751  | -0.07408 |
| -0.15611 | 0.00071  | -0.09487 | 0.04043  | -0.07502 | 0.10542  | -0.00684 | 0.88273  | -0.05428 |
| -0.08087 | 0.08086  | -0.25851 | 1.44E-08 | -0.19476 | 2.25E-05 | -0.05362 | 0.24745  | -0.35346 |
| -0.17394 | 0.00016  | -0.17297 | 0.00017  | -0.12993 | 0.00492  | -0.22217 | 1.24E-06 | -0.17544 |
| 0.156348 | 0.0007   | 0.000616 | 0.9894   | 0.087915 | 0.05764  | -0.07552 | 0.10311  | -0.24839 |
| 0.116128 | 0.01203  | -0.08173 | 0.07766  | -0.13684 | 0.00304  | 0.070409 | 0.12867  | 0.151338 |
| 0.086372 | 0.06218  | 0.07145  | 0.1231   | 0.106586 | 0.02124  | 0.047924 | 0.30139  | 0.254086 |
| -0.01149 | 0.8044   | -0.02436 | 0.5995   | -0.01751 | 0.70584  | -0.10509 | 0.02313  | -0.11428 |
| 0.139702 | 0.00248  | 0.298686 | 4.45E-11 | 0.244878 | 8.35E-08 | 0.017626 | 0.70401  | 0.110296 |

|          |          |          |          |          |          |          |          |          |
|----------|----------|----------|----------|----------|----------|----------|----------|----------|
| -0.05585 | 0.22832  | -0.2339  | 3.18E-07 | -0.04336 | 0.3498   | -0.25688 | 1.79E-08 | -0.28612 |
| 0.08155  | 0.07832  | 0.174468 | 0.00015  | 0.133519 | 0.00385  | -0.00662 | 0.88649  | -0.06696 |
| 0.085149 | 0.06599  | 0.174949 | 0.00014  | 0.190497 | 3.42E-05 | 0.138397 | 0.00272  | 0.073769 |
| 0.363742 | 4.69E-16 | 0.189015 | 3.94E-05 | 0.140654 | 0.00231  | 0.137504 | 0.0029   | 0.102364 |
| 0.089373 | 0.0536   | -0.16106 | 0.00048  | -0.20219 | 1.07E-05 | 0.140243 | 0.00238  | -0.0652  |
| 0.300993 | 3.10E-11 | 0.277798 | 1.01E-09 | 0.305147 | 1.61E-11 | 0.155575 | 0.00074  | 0.057945 |
| -0.04084 | 0.3785   | -0.0104  | 0.82267  | 0.049984 | 0.28106  | -0.18621 | 5.15E-05 | -0.20975 |
| 0.146843 | 0.00146  | 0.234536 | 2.95E-07 | 0.175976 | 0.00013  | 0.155239 | 0.00076  | 0.129161 |
| -0.06022 | 0.19389  | -0.00959 | 0.83621  | -0.03356 | 0.46937  | -0.02885 | 0.53399  | 0.017151 |
| -0.12358 | 0.0075   | -0.10717 | 0.02054  | -0.10223 | 0.02717  | -0.23613 | 2.44E-07 | -0.12824 |
| 0.156139 | 0.00071  | 0.138935 | 0.00262  | 0.194782 | 2.25E-05 | 0.182245 | 7.46E-05 | 0.004777 |
| 0.308905 | 8.78E-12 | 0.104739 | 0.0236   | 0.184102 | 6.28E-05 | 0.21504  | 2.74E-06 | 0.036269 |
| 0.138787 | 0.00265  | -0.12806 | 0.00558  | -0.28503 | 3.53E-10 | 0.160219 | 0.00051  | 0.170258 |
| -0.09978 | 0.03109  | -0.0493  | 0.28768  | -0.10622 | 0.02169  | -0.23167 | 4.15E-07 | -0.18746 |
| -0.24113 | 1.33E-07 | -0.25793 | 1.56E-08 | -0.29599 | 6.75E-11 | -0.05949 | 0.19942  | -0.01131 |
| 0.244581 | 8.66E-08 | 0.105082 | 0.02314  | 0.218342 | 1.90E-06 | -0.07158 | 0.12243  | 0.024325 |
| 0.190808 | 3.32E-05 | 0.230052 | 5.02E-07 | 0.172359 | 0.00018  | 0.237956 | 1.96E-07 | 0.097779 |
| -0.09629 | 0.03751  | -0.0236  | 0.61101  | -0.00282 | 0.95156  | -0.10224 | 0.02716  | -0.09653 |
| 0.12296  | 0.00781  | 0.097422 | 0.03532  | 0.079117 | 0.08767  | 0.07213  | 0.11956  | -0.11375 |
| 0.001806 | 0.96896  | 0.096455 | 0.03719  | 0.043542 | 0.34779  | -0.05416 | 0.24278  | 0.026398 |
| 0.072005 | 0.12021  | 0.150611 | 0.0011   | 0.162598 | 0.00042  | -0.08605 | 0.06316  | -0.20102 |
| -0.0765  | 0.09871  | -0.0848  | 0.06712  | -0.17133 | 0.0002   | -0.24241 | 1.13E-07 | -0.33496 |
| 0.042421 | 0.36036  | 0.083119 | 0.07273  | 0.043704 | 0.346    | 0.024877 | 0.5918   | 0.153853 |
| -0.03671 | 0.42862  | -0.02094 | 0.65176  | -0.02403 | 0.60452  | 0.029743 | 0.52142  | -0.12365 |
| -0.06493 | 0.16127  | -0.09695 | 0.03623  | -0.05561 | 0.23033  | -0.04921 | 0.28857  | -0.17717 |
| -0.02289 | 0.62167  | -0.03664 | 0.42952  | 0.015926 | 0.7314   | -0.08986 | 0.05231  | -0.31507 |
| -0.01903 | 0.68173  | -0.01574 | 0.73439  | 0.131156 | 0.00453  | -0.14369 | 0.00185  | -0.17231 |
| 0.076196 | 0.10005  | 0.099362 | 0.03181  | 0.099279 | 0.03195  | -0.13468 | 0.00355  | -0.16442 |
| -0.07163 | 0.12216  | 0.199085 | 1.46E-05 | 0.123858 | 0.00737  | -0.03756 | 0.4181   | -0.09213 |
| -0.03151 | 0.49691  | -0.02169 | 0.64014  | 0.006644 | 0.88613  | -0.16875 | 0.00025  | -0.37612 |
| 0.035445 | 0.44477  | 0.049954 | 0.28135  | 0.057599 | 0.21408  | -0.01223 | 0.79203  | 0.01204  |
| 0.058987 | 0.20323  | -0.24926 | 4.80E-08 | -0.1331  | 0.00396  | -0.06912 | 0.13581  | -0.17095 |
| 0.125686 | 0.00654  | -0.0117  | 0.8009   | 0.048502 | 0.29558  | -0.10041 | 0.03004  | -0.28871 |
| -0.28932 | 1.86E-10 | -0.17989 | 9.27E-05 | -0.11314 | 0.01443  | -0.19612 | 1.97E-05 | -0.26045 |
| -0.04465 | 0.33561  | 0.039909 | 0.38953  | 0.105597 | 0.02248  | 0.032885 | 0.47836  | 0.104787 |
| 0.095503 | 0.03911  | 0.137852 | 0.00283  | 0.177989 | 0.00011  | -0.06554 | 0.15733  | 0.017574 |
| -0.04247 | 0.35976  | -0.11335 | 0.01425  | -0.00247 | 0.95757  | -0.0376  | 0.41759  | -0.11845 |
| 0.135139 | 0.00343  | 0.329516 | 2.73E-13 | 0.312346 | 5.01E-12 | 0.185202 | 5.66E-05 | 0.26662  |
| 0.078256 | 0.09119  | 0.070289 | 0.12933  | 0.065264 | 0.15911  | -0.02293 | 0.62116  | -0.03363 |
| 0.093321 | 0.04383  | 0.019663 | 0.6717   | 0.05443  | 0.24041  | -0.1335  | 0.00385  | -0.20569 |
| 0.022334 | 0.63022  | -0.00841 | 0.85616  | 0.019377 | 0.6762   | 0.003963 | 0.93194  | -0.11885 |
| 0.221476 | 1.34E-06 | 0.152629 | 0.00094  | 0.171077 | 0.0002   | 0.265868 | 5.37E-09 | 0.414248 |
| -0.06284 | 0.17521  | -0.02777 | 0.54948  | 0.124049 | 0.00728  | -0.05865 | 0.20582  | -0.17847 |
| -0.04746 | 0.30609  | -0.12226 | 0.00817  | -0.04832 | 0.29741  | -0.11688 | 0.01148  | -0.09557 |
| 0.046378 | 0.31727  | 0.053455 | 0.24895  | 0.033535 | 0.46971  | 0.025038 | 0.5894   | 0.095552 |

|          |          |          |          |          |          |          |          |          |
|----------|----------|----------|----------|----------|----------|----------|----------|----------|
| -0.06619 | 0.15325  | -0.00627 | 0.89246  | -0.02486 | 0.59199  | -0.07649 | 0.09875  | -0.11925 |
| 0.095013 | 0.04013  | 0.191551 | 3.09E-05 | 0.213973 | 3.07E-06 | 0.148596 | 0.00128  | 0.085765 |
| 0.109041 | 0.01842  | 0.079888 | 0.08461  | 0.08793  | 0.0576   | -0.08246 | 0.07503  | -0.12728 |
| 0.086102 | 0.06301  | -0.10583 | 0.02218  | -0.00312 | 0.94643  | -0.05209 | 0.26128  | -0.03972 |
| -0.30339 | 2.12E-11 | -0.31611 | 2.69E-12 | -0.24715 | 6.28E-08 | -0.20381 | 9.03E-06 | -0.39639 |
| 0.057814 | 0.21238  | -0.05695 | 0.21933  | 0.004761 | 0.91826  | -0.20215 | 1.07E-05 | -0.26133 |
| 0.139432 | 0.00253  | 0.128574 | 0.00539  | 0.06167  | 0.18339  | 0.067336 | 0.14625  | -0.04785 |
| 0.055126 | 0.23444  | -0.03803 | 0.41222  | -0.00221 | 0.96206  | 0.085512 | 0.06484  | -0.09157 |
| -0.22059 | 1.48E-06 | -0.21989 | 1.60E-06 | -0.20512 | 7.88E-06 | -0.01877 | 0.68578  | 0.072554 |
| -0.12455 | 0.00704  | -0.09764 | 0.0349   | -0.06168 | 0.1833   | -0.06154 | 0.18431  | 0.038084 |
| -0.08596 | 0.06344  | -0.12357 | 0.00751  | -0.09084 | 0.04978  | -0.15961 | 0.00054  | -0.19669 |
| 0.20864  | 5.45E-06 | 0.25014  | 4.29E-08 | 0.359475 | 1.08E-15 | -0.04206 | 0.36442  | 0.024189 |
| 0.005187 | 0.91098  | 0.035197 | 0.44796  | 0.088578 | 0.05577  | -0.10386 | 0.0248   | -0.16469 |
| 0.134148 | 0.00368  | -0.01796 | 0.6986   | 0.079116 | 0.08767  | -0.15579 | 0.00073  | -0.18987 |
| 0.043631 | 0.34681  | 0.099157 | 0.03217  | 0.045282 | 0.32885  | 0.058425 | 0.20757  | 0.03411  |
| 0.006676 | 0.88559  | -0.07935 | 0.08674  | -0.04337 | 0.34973  | -0.23432 | 3.03E-07 | -0.32022 |
| -0.01936 | 0.67654  | 0.042543 | 0.35898  | 0.035666 | 0.44194  | 0.010006 | 0.82925  | -0.01029 |
| 0.097861 | 0.0345   | 0.123343 | 0.00762  | 0.18493  | 5.81E-05 | 0.004273 | 0.92662  | -0.01603 |
| -0.08216 | 0.07609  | -0.12704 | 0.00598  | 0.016865 | 0.71624  | -0.2925  | 1.15E-10 | -0.21344 |
| 0.151098 | 0.00106  | 0.031652 | 0.49502  | -0.05643 | 0.22351  | 0.184087 | 6.29E-05 | 0.171297 |
| -0.09004 | 0.05182  | -0.12504 | 0.00682  | -0.06889 | 0.13715  | 0.000674 | 0.98841  | -0.00351 |
| 0.221839 | 1.29E-06 | 0.003384 | 0.94186  | -0.03533 | 0.44631  | 0.281781 | 5.68E-10 | 0.265809 |
| 0.086814 | 0.06085  | 0.256528 | 1.88E-08 | 0.239898 | 1.54E-07 | 0.038557 | 0.4058   | 0.065286 |
| 0.159563 | 0.00054  | 0.059544 | 0.19898  | 0.071974 | 0.12037  | -0.06712 | 0.14754  | -0.24396 |
| 0.203478 | 9.34E-06 | 0.252561 | 3.14E-08 | 0.141609 | 0.00216  | 0.192127 | 2.92E-05 | 0.211448 |
| -0.01432 | 0.75752  | 0.064228 | 0.16584  | -0.0024  | 0.95873  | 0.028619 | 0.53729  | 0.30399  |
| -0.1566  | 0.00068  | -0.02761 | 0.55172  | 0.022206 | 0.63219  | -0.11866 | 0.01027  | -0.13382 |
| -0.02448 | 0.59777  | -0.05741 | 0.2156   | -0.0932  | 0.04411  | -0.12085 | 0.00895  | -0.18435 |
| 0.11352  | 0.01411  | -0.31534 | 3.06E-12 | -0.19622 | 1.95E-05 | -0.24711 | 6.31E-08 | -0.31984 |
| -0.08433 | 0.06864  | -0.07423 | 0.10917  | 0.012502 | 0.78758  | -0.16167 | 0.00045  | -0.24069 |
| 0.040992 | 0.37678  | 0.119277 | 0.00988  | 0.120398 | 0.00921  | 0.099643 | 0.03133  | 0.03956  |
| -0.00669 | 0.88539  | -0.01284 | 0.78205  | 1.02E-05 | 0.99983  | -0.25667 | 1.84E-08 | -0.33425 |
| 0.127307 | 0.00587  | 0.261653 | 9.50E-09 | 0.192687 | 2.76E-05 | 0.156762 | 0.00067  | 0.128821 |
| 0.183295 | 6.77E-05 | 0.164905 | 0.00035  | 0.152064 | 0.00098  | 0.223173 | 1.11E-06 | 0.06908  |
| 0.141463 | 0.00218  | 0.205477 | 7.59E-06 | 0.123237 | 0.00767  | 0.160669 | 0.00049  | 0.269145 |
| 0.209232 | 5.12E-06 | 0.096167 | 0.03776  | 0.182589 | 7.23E-05 | 0.198315 | 1.58E-05 | 0.279654 |
| -0.10196 | 0.02758  | -0.06109 | 0.18754  | -0.08568 | 0.06431  | 0.045467 | 0.32687  | -0.00788 |
| -0.18935 | 3.82E-05 | -0.28635 | 2.90E-10 | -0.16751 | 0.00028  | -0.10418 | 0.02436  | -0.10805 |
| 0.059975 | 0.19575  | 0.053255 | 0.25072  | 0.044793 | 0.33411  | -0.02781 | 0.54887  | -0.01655 |
| 0.316629 | 2.47E-12 | 0.087741 | 0.05813  | 0.229032 | 5.65E-07 | 0.108606 | 0.01889  | -0.00741 |
| 0.263799 | 7.11E-09 | 0.103702 | 0.02502  | 0.210664 | 4.39E-06 | 0.084932 | 0.06668  | -0.15104 |
| 0.252314 | 3.25E-08 | 0.338291 | 5.75E-14 | 0.325662 | 5.34E-13 | 0.282745 | 4.93E-10 | 0.259804 |
| -0.21958 | 1.66E-06 | -0.14315 | 0.00193  | -0.17452 | 0.00015  | -0.2379  | 1.97E-07 | 0.060748 |
| 0.320276 | 1.34E-12 | 0.061976 | 0.18122  | 0.155424 | 0.00075  | 0.161068 | 0.00048  | 0.108577 |
| -0.15044 | 0.00111  | -0.05767 | 0.21351  | -0.06654 | 0.15107  | -0.12275 | 0.00792  | -0.23762 |

|          |          |          |          |          |          |          |          |          |
|----------|----------|----------|----------|----------|----------|----------|----------|----------|
| 0.139027 | 0.0026   | 0.216413 | 2.36E-06 | 0.210107 | 4.66E-06 | -0.00107 | 0.98158  | -0.16764 |
| 0.268834 | 3.57E-09 | 0.200573 | 1.26E-05 | 0.220313 | 1.53E-06 | 0.150807 | 0.00108  | -0.06181 |
| 0.110866 | 0.01654  | 0.105626 | 0.02244  | 0.099212 | 0.03207  | -0.00715 | 0.87747  | -0.3229  |
| -0.07876 | 0.08912  | -0.04745 | 0.30619  | 0.086903 | 0.06059  | -0.15759 | 0.00063  | -0.1672  |
| -0.05462 | 0.23878  | 0.025761 | 0.57869  | -0.0039  | 0.93309  | -0.05826 | 0.20887  | -0.00865 |
| -0.09164 | 0.0478   | 0.014516 | 0.75439  | -0.00872 | 0.85089  | -0.05675 | 0.22095  | -0.02532 |
| -0.05999 | 0.1956   | -0.00241 | 0.95858  | -0.01631 | 0.72521  | -0.06657 | 0.15089  | -0.01476 |
| -0.01731 | 0.70904  | -0.0035  | 0.9399   | -0.01195 | 0.79683  | -0.04891 | 0.29156  | 0.043553 |
| -0.01611 | 0.72842  | -0.05947 | 0.19951  | -0.01238 | 0.7896   | -0.1699  | 0.00023  | -0.2717  |
| 0.139389 | 0.00254  | 0.057102 | 0.21806  | 0.100425 | 0.03002  | 0.064747 | 0.16244  | -0.04203 |
| -0.26979 | 3.13E-09 | -0.23052 | 4.75E-07 | -0.27594 | 1.32E-09 | -0.04828 | 0.29782  | -0.00466 |
| 0.049981 | 0.28108  | -0.17089 | 0.00021  | -0.05549 | 0.23133  | 0.041005 | 0.37663  | -0.0071  |
| 0.198694 | 1.52E-05 | -0.09627 | 0.03756  | 0.019417 | 0.67557  | 0.008413 | 0.85611  | -0.00365 |
| 0.051675 | 0.26508  | -0.13467 | 0.00355  | -0.13647 | 0.00313  | -0.12584 | 0.00647  | -0.20673 |
| -0.06852 | 0.13929  | -0.24346 | 9.96E-08 | -0.19371 | 2.50E-05 | -0.1924  | 2.84E-05 | -0.28454 |
| 0.115015 | 0.01288  | 0.065834 | 0.15549  | 0.049581 | 0.28496  | 0.010229 | 0.82551  | -0.14961 |
| 0.00412  | 0.92925  | 0.169967 | 0.00022  | 0.076951 | 0.09673  | -0.01135 | 0.80668  | -0.00032 |
| 0.052011 | 0.26198  | -0.08203 | 0.07659  | -0.02459 | 0.59601  | 0.035458 | 0.4446   | 0.254166 |
| 0.053879 | 0.24521  | 0.065647 | 0.15667  | 0.039768 | 0.3912   | 0.077573 | 0.09405  | -0.04002 |
| -0.08783 | 0.05787  | -0.05921 | 0.20154  | -0.0592  | 0.20161  | -0.1123  | 0.01518  | -0.28346 |
| 0.104845 | 0.02346  | 0.063264 | 0.1723   | 0.069935 | 0.13127  | -0.17817 | 0.00011  | -0.08201 |
| -0.22025 | 1.54E-06 | -0.28763 | 2.40E-10 | -0.19637 | 1.92E-05 | -0.24188 | 1.21E-07 | -0.21635 |
| -0.01707 | 0.71286  | -0.22069 | 1.47E-06 | -0.02351 | 0.61228  | -0.01742 | 0.70735  | -0.1959  |
| 0.068998 | 0.13653  | -0.1706  | 0.00021  | -0.04974 | 0.28339  | 0.199322 | 1.43E-05 | -0.02239 |
| 0.140588 | 0.00233  | 0.205651 | 7.46E-06 | 0.322171 | 9.70E-13 | 0.07224  | 0.119    | -0.13358 |
| 0.095222 | 0.03969  | 0.036905 | 0.42623  | 0.138321 | 0.00274  | -0.20118 | 1.18E-05 | -0.08542 |
| -0.0401  | 0.38726  | -0.0391  | 0.3992   | 0.08946  | 0.05337  | -0.12337 | 0.0076   | -0.12111 |
| -0.08671 | 0.06117  | -0.21762 | 2.06E-06 | -0.08581 | 0.06391  | -0.2141  | 3.03E-06 | -0.2984  |
| 0.051941 | 0.26263  | 0.039725 | 0.39172  | 0.018884 | 0.68399  | 0.007227 | 0.87622  | -0.08782 |
| -0.12699 | 0.006    | -0.02906 | 0.53101  | -0.05456 | 0.23926  | -0.11714 | 0.0113   | -0.10117 |
| -0.0805  | 0.08223  | -0.11301 | 0.01455  | -0.08469 | 0.06746  | -0.14186 | 0.00212  | 0.01458  |
| -0.12095 | 0.00889  | -0.08177 | 0.07752  | -0.06697 | 0.14846  | 0.067636 | 0.14446  | 0.117006 |
| -0.00378 | 0.93515  | -0.07222 | 0.11911  | -0.01813 | 0.69603  | -0.09695 | 0.03622  | -0.02777 |
| -0.12187 | 0.00838  | -0.09902 | 0.0324   | -0.08807 | 0.05719  | -0.01088 | 0.81463  | 0.091729 |
| -0.06784 | 0.14325  | -0.0159  | 0.73185  | -0.00935 | 0.84022  | 0.004327 | 0.9257   | -0.02401 |
| -0.09897 | 0.03249  | 0.039255 | 0.39735  | -0.02378 | 0.60821  | -0.02865 | 0.53691  | 0.062398 |
| -0.11182 | 0.01563  | -0.01376 | 0.76681  | -0.02393 | 0.60596  | -0.11009 | 0.01732  | -0.07498 |
| 0.038854 | 0.4022   | -0.05803 | 0.21069  | 0.024034 | 0.60441  | -0.14923 | 0.00122  | -0.25246 |
| -0.04957 | 0.28509  | -0.10762 | 0.02001  | -0.0106  | 0.8193   | -0.26003 | 1.18E-08 | -0.2624  |
| 0.026727 | 0.56452  | -0.05153 | 0.26639  | 0.006183 | 0.89399  | -0.19582 | 2.03E-05 | -0.20847 |
| -0.07701 | 0.09648  | -0.11653 | 0.01173  | -0.09031 | 0.05113  | -0.23089 | 4.55E-07 | -0.24779 |
| -0.02651 | 0.56762  | -0.08237 | 0.07535  | -0.03768 | 0.41653  | -0.03029 | 0.51376  | -0.08899 |
| -0.31212 | 5.20E-12 | -0.04631 | 0.31802  | -0.15559 | 0.00074  | -0.10674 | 0.02105  | 0.048088 |
| 0.062691 | 0.17623  | 0.22088  | 1.43E-06 | 0.104844 | 0.02346  | -0.02954 | 0.52424  | 0.129634 |
| -0.02748 | 0.55353  | 0.162939 | 0.00041  | 0.09994  | 0.03082  | 0.139399 | 0.00254  | 0.279284 |



|          |          |          |          |          |          |          |          |          |
|----------|----------|----------|----------|----------|----------|----------|----------|----------|
| 0.124852 | 0.0069   | 0.007079 | 0.87873  | -0.0119  | 0.79754  | 0.070892 | 0.12606  | -0.21188 |
| -0.02886 | 0.53383  | -0.25348 | 2.79E-08 | -0.15573 | 0.00073  | -0.11808 | 0.01065  | -0.35899 |
| -0.10613 | 0.0218   | -0.02215 | 0.633    | -0.30438 | 1.82E-11 | 0.054939 | 0.23604  | 0.11647  |
| 0.095493 | 0.03913  | -0.06717 | 0.14727  | -0.00243 | 0.95815  | 0.056743 | 0.22098  | -0.04117 |
| 0.087227 | 0.05963  | 0.023148 | 0.61781  | 0.037927 | 0.41352  | 0.063979 | 0.16749  | 0.007341 |
| 0.012515 | 0.78736  | -0.02483 | 0.59249  | 0.003457 | 0.94061  | 0.092889 | 0.04482  | 0.273662 |
| -0.02677 | 0.56386  | -0.00132 | 0.97736  | -0.01552 | 0.73791  | 0.019197 | 0.67904  | 0.107337 |
| 0.038716 | 0.40387  | 0.049667 | 0.28412  | 0.043217 | 0.35141  | 0.065293 | 0.15892  | 0.003367 |
| -0.00635 | 0.89114  | -0.07774 | 0.09332  | -0.03052 | 0.51052  | -0.03425 | 0.46026  | -0.13317 |
| 0.063144 | 0.17312  | -0.05688 | 0.21989  | 0.037633 | 0.41715  | -0.08632 | 0.06234  | -0.07207 |
| 0.06999  | 0.13097  | 0.02009  | 0.665    | 0.084628 | 0.06767  | 0.053248 | 0.25079  | 0.10826  |
| -0.00306 | 0.94737  | -0.03609 | 0.43654  | 0.001588 | 0.9727   | -0.00397 | 0.93175  | -0.08204 |
| 0.036521 | 0.43106  | 0.027842 | 0.54839  | 0.034748 | 0.45378  | 0.028718 | 0.53587  | -0.01284 |
| 0.108473 | 0.01904  | -0.02345 | 0.61327  | 0.060085 | 0.19493  | 0.187841 | 4.41E-05 | -0.02879 |
| -0.00654 | 0.88792  | 0.022182 | 0.63256  | 0.043066 | 0.3531   | -0.07986 | 0.08473  | -0.00681 |
| -0.00833 | 0.8575   | -0.1112  | 0.01621  | -0.09106 | 0.04923  | 0.054381 | 0.24084  | -0.07094 |
| -0.13101 | 0.00457  | -0.19871 | 1.52E-05 | -0.13959 | 0.0025   | -0.12241 | 0.00809  | -0.19936 |
| -0.15666 | 0.00068  | -0.22654 | 7.54E-07 | -0.17472 | 0.00015  | -0.15241 | 0.00095  | -0.1295  |
| -0.07179 | 0.12135  | -0.04452 | 0.3371   | 0.080774 | 0.08121  | -0.05641 | 0.22369  | -0.10854 |
| -0.02016 | 0.66394  | -0.05388 | 0.24524  | 0.035123 | 0.44893  | -0.20081 | 1.23E-05 | -0.25329 |
| 0.074426 | 0.10821  | 0.025646 | 0.58039  | 0.055811 | 0.22867  | 0.09576  | 0.03858  | 0.024885 |
| -0.09517 | 0.03981  | -0.01635 | 0.72459  | -0.01567 | 0.73562  | -0.04226 | 0.36219  | -0.00913 |
| 0.055383 | 0.23226  | 0.115434 | 0.01255  | 0.101078 | 0.02896  | 0.083354 | 0.07192  | 0.048684 |
| -0.04422 | 0.34037  | -0.02834 | 0.54129  | 0.021611 | 0.64134  | -0.00368 | 0.9368   | -0.10925 |
| -0.12961 | 0.00503  | -0.02977 | 0.52098  | -0.00251 | 0.95688  | -0.07212 | 0.11961  | 0.09157  |
| -0.34911 | 7.85E-15 | -0.2463  | 6.98E-08 | -0.21111 | 4.19E-06 | -0.27799 | 9.82E-10 | -0.25603 |
| -0.04673 | 0.31359  | -0.11484 | 0.01302  | -0.03533 | 0.44622  | -0.20948 | 4.98E-06 | -0.20675 |
| -0.30363 | 2.05E-11 | -0.13266 | 0.00408  | -0.18107 | 8.32E-05 | -0.17801 | 0.00011  | -0.11424 |
| -0.30067 | 3.26E-11 | -0.22074 | 1.46E-06 | -0.16817 | 0.00026  | -0.24086 | 1.37E-07 | -0.31353 |
| 0.21932  | 1.71E-06 | 0.174153 | 0.00016  | 0.337266 | 6.92E-14 | 0.07315  | 0.11441  | -0.04118 |
| 0.07984  | 0.0848   | 0.094414 | 0.04141  | 0.074132 | 0.10962  | 0.138139 | 0.00278  | 0.039738 |
| 0.124503 | 0.00706  | 0.075035 | 0.10535  | 0.040391 | 0.38382  | 0.062677 | 0.17632  | 0.01681  |
| 0.140865 | 0.00228  | -0.12188 | 0.00838  | -0.09302 | 0.04451  | 0.076073 | 0.1006   | 0.140712 |
| 0.0369   | 0.42629  | 0.142758 | 0.00198  | 0.002863 | 0.9508   | 0.068146 | 0.14145  | 0.081887 |
| 0.137645 | 0.00288  | 0.104236 | 0.02428  | 0.181423 | 8.05E-05 | 0.033487 | 0.47034  | 0.017987 |
| 0.160104 | 0.00051  | 0.191738 | 3.03E-05 | 0.263186 | 7.72E-09 | -0.00529 | 0.90917  | 0.256442 |
| 0.173736 | 0.00016  | -0.03957 | 0.3936   | 0.18715  | 4.71E-05 | -0.19784 | 1.66E-05 | -0.19704 |
| -0.00284 | 0.95114  | -0.06227 | 0.17918  | 0.099381 | 0.03178  | -0.09072 | 0.05008  | -0.25238 |
| -0.12719 | 0.00592  | -0.09384 | 0.04266  | -0.01955 | 0.67343  | -0.25176 | 3.49E-08 | -0.20549 |
| 0.212798 | 3.49E-06 | -0.09498 | 0.0402   | 0.037552 | 0.41816  | 0.002937 | 0.94953  | -0.01117 |
| 0.269131 | 3.43E-09 | 0.278871 | 8.66E-10 | 0.218563 | 1.86E-06 | 0.199886 | 1.35E-05 | 0.022626 |
| 0.071193 | 0.12446  | 0.104354 | 0.02412  | 0.016595 | 0.72058  | -0.00528 | 0.90944  | 0.04207  |
| -0.17631 | 0.00013  | -0.13196 | 0.00428  | -0.05999 | 0.1956   | -0.19003 | 3.58E-05 | -0.11031 |
| 0.016109 | 0.72843  | -0.06674 | 0.14986  | -0.07535 | 0.10388  | 0.065076 | 0.16031  | -0.06807 |
| -0.06616 | 0.15343  | -0.19189 | 2.99E-05 | -0.16421 | 0.00037  | -0.01205 | 0.79502  | -0.07555 |

|          |          |          |          |          |          |          |          |          |
|----------|----------|----------|----------|----------|----------|----------|----------|----------|
| 0.027744 | 0.5498   | 0.043036 | 0.35343  | 0.11058  | 0.01682  | 0.016069 | 0.72908  | -0.03225 |
| -0.05806 | 0.21039  | 0.01274  | 0.78364  | 0.01548  | 0.73864  | -0.00735 | 0.87407  | -0.01931 |
| 0.073799 | 0.11123  | 0.053986 | 0.24428  | 0.103944 | 0.02468  | 0.061076 | 0.18765  | 0.054541 |
| 0.025979 | 0.57547  | 0.002685 | 0.95386  | 0.030064 | 0.51693  | -0.00972 | 0.83404  | 0.000337 |
| 0.0217   | 0.63998  | 0.079268 | 0.08706  | 0.116045 | 0.01209  | 0.020519 | 0.65828  | -0.03666 |
| 0.004877 | 0.91629  | 0.048001 | 0.30061  | 0.066875 | 0.14904  | -0.0111  | 0.81091  | -0.0092  |
| -0.0645  | 0.16403  | -0.02281 | 0.62294  | -0.01389 | 0.76463  | -0.10485 | 0.02346  | -0.02467 |
| 0.023547 | 0.61176  | 0.043441 | 0.34891  | 0.046706 | 0.31386  | -0.14617 | 0.00154  | -0.13583 |
| 0.306296 | 1.34E-11 | 0.215452 | 2.62E-06 | 0.161758 | 0.00045  | 0.184451 | 6.08E-05 | 0.204496 |
| -0.08711 | 0.05998  | -0.03334 | 0.47231  | -0.04921 | 0.28854  | -0.03465 | 0.45512  | -0.10008 |
| -0.25672 | 1.83E-08 | -0.21235 | 3.67E-06 | -0.17559 | 0.00014  | -0.29147 | 1.35E-10 | -0.16538 |
| -0.06526 | 0.15912  | -0.09871 | 0.03295  | -0.13714 | 0.00298  | 0.066749 | 0.14981  | 0.008462 |
| -0.08992 | 0.05214  | -0.08152 | 0.07842  | -0.09646 | 0.03719  | -0.00566 | 0.90288  | -0.05319 |
| -0.02682 | 0.56318  | 0.040289 | 0.38503  | -0.00164 | 0.97179  | 0.012547 | 0.78683  | 0.07721  |
| -0.02755 | 0.55253  | 0.01346  | 0.77174  | 0.0799   | 0.08457  | -0.11029 | 0.01711  | -0.15236 |
| 0.0273   | 0.5562   | -0.00717 | 0.87711  | -0.03814 | 0.41095  | -0.03947 | 0.39482  | -0.05635 |
| -0.20875 | 5.38E-06 | -0.19567 | 2.06E-05 | -0.20999 | 4.72E-06 | -0.02902 | 0.53156  | 0.13989  |
| -0.01096 | 0.81322  | -0.18954 | 3.75E-05 | -0.10235 | 0.02699  | -0.03276 | 0.48007  | -0.03314 |
| -0.02962 | 0.5232   | 0.028234 | 0.54276  | 0.022427 | 0.62881  | -0.07589 | 0.10144  | -0.16578 |
| -0.04362 | 0.34691  | 0.113022 | 0.01454  | 0.007465 | 0.87218  | 0.097471 | 0.03523  | 0.109046 |
| 0.065545 | 0.15732  | 0.050906 | 0.27227  | 0.037137 | 0.42333  | -0.06803 | 0.14212  | -0.10038 |
| -0.05956 | 0.19886  | -0.11028 | 0.01712  | -0.10557 | 0.02251  | -0.09446 | 0.0413   | 0.12809  |
| 0.161794 | 0.00045  | -0.02484 | 0.59239  | 0.031644 | 0.49513  | -0.01985 | 0.6687   | -0.05596 |
| -0.05356 | 0.248    | 0.190051 | 3.57E-05 | 0.163454 | 0.00039  | 0.275977 | 1.31E-09 | 0.211272 |
| 0.116581 | 0.0117   | 0.26011  | 1.17E-08 | 0.088296 | 0.05656  | 0.146051 | 0.00155  | 0.226231 |
| -0.08291 | 0.07346  | -0.18214 | 7.53E-05 | -0.14539 | 0.00163  | 0.01708  | 0.71277  | -0.00768 |
| -0.02409 | 0.60359  | -0.03984 | 0.39034  | -0.01373 | 0.76735  | 0.004072 | 0.93006  | 0.056675 |
| -0.1085  | 0.01901  | -0.06118 | 0.18692  | -0.02569 | 0.57969  | -0.18473 | 5.92E-05 | -0.10563 |
| -0.12166 | 0.00849  | -0.0026  | 0.95539  | -0.13639 | 0.00314  | 0.052619 | 0.25644  | 0.237245 |
| -0.06619 | 0.15326  | -0.03048 | 0.51114  | -0.02664 | 0.56581  | -0.08853 | 0.05592  | -0.02522 |
| 0.004305 | 0.92607  | -0.10703 | 0.02071  | -0.06743 | 0.14568  | -0.0769  | 0.09694  | -0.15003 |
| -0.05885 | 0.20431  | -0.24001 | 1.52E-07 | -0.19394 | 2.44E-05 | -0.16174 | 0.00045  | -0.29801 |
| -0.05511 | 0.23457  | -0.10085 | 0.02932  | -0.04071 | 0.38004  | -0.06377 | 0.16891  | -0.03806 |
| -0.14451 | 0.00174  | -0.12216 | 0.00822  | -0.1192  | 0.00993  | -0.1016  | 0.02814  | -0.03568 |
| -0.00332 | 0.94294  | 0.066118 | 0.15371  | 0.036711 | 0.42867  | 0.021233 | 0.6472   | -0.03166 |
| 0.250546 | 4.07E-08 | 0.221033 | 1.41E-06 | 0.202454 | 1.04E-05 | 0.092693 | 0.04528  | 0.218635 |
| 0.080884 | 0.0808   | -0.03505 | 0.4499   | 0.003337 | 0.94266  | -0.0253  | 0.58552  | -0.15518 |
| 0.016152 | 0.72774  | -0.0484  | 0.29657  | 0.022153 | 0.63301  | 0.02213  | 0.63336  | -0.06731 |
| 0.030274 | 0.51399  | 0.13189  | 0.0043   | 0.13405  | 0.00371  | -0.04157 | 0.37009  | -0.02697 |
| 0.002475 | 0.95746  | 0.03564  | 0.44226  | 0.018248 | 0.69408  | 0.032501 | 0.48352  | 0.007797 |
| 0.056863 | 0.22     | -0.00285 | 0.95108  | 0.105982 | 0.02199  | -0.14067 | 0.00231  | -0.23962 |
| 0.073535 | 0.11251  | -0.06991 | 0.1314   | -0.05389 | 0.24507  | 0.112418 | 0.01507  | -0.09388 |
| 0.064094 | 0.16673  | 0.012924 | 0.78059  | 0.006811 | 0.88329  | 0.015291 | 0.74173  | -0.06276 |
| -0.10144 | 0.02838  | -0.12985 | 0.00495  | -0.12455 | 0.00704  | -0.08925 | 0.05392  | -0.11928 |
| 0.106597 | 0.02122  | 0.091506 | 0.04812  | 0.083332 | 0.072    | 0.145636 | 0.0016   | -0.02623 |

|          |          |          |          |          |          |          |          |          |
|----------|----------|----------|----------|----------|----------|----------|----------|----------|
| 0.067007 | 0.14824  | 0.047477 | 0.30593  | 0.043812 | 0.34481  | 0.055312 | 0.23286  | -0.0027  |
| 0.054597 | 0.23897  | 0.049094 | 0.28972  | 0.155864 | 0.00073  | -0.01819 | 0.69504  | 0.060792 |
| -0.0173  | 0.70917  | -0.00486 | 0.91652  | 0.024679 | 0.59474  | -0.08855 | 0.05585  | -0.11595 |
| -0.18278 | 7.10E-05 | -0.18098 | 8.38E-05 | -0.25268 | 3.09E-08 | -0.17917 | 9.89E-05 | -0.17984 |
| 0.193471 | 2.56E-05 | 0.088592 | 0.05573  | 0.191287 | 3.17E-05 | -0.05892 | 0.20377  | 0.102596 |
| -0.1694  | 0.00024  | -0.04157 | 0.37004  | -0.16296 | 0.00041  | -0.05336 | 0.24983  | -0.0257  |
| -0.21156 | 3.99E-06 | -0.09017 | 0.05149  | -0.14843 | 0.0013   | -0.06089 | 0.18899  | -0.07336 |
| 0.04488  | 0.33317  | 0.032032 | 0.48986  | 0.064239 | 0.16577  | 0.032188 | 0.48774  | -0.10951 |
| -0.15519 | 0.00077  | -0.084   | 0.06974  | -0.26863 | 3.67E-09 | -0.10027 | 0.03028  | -0.24451 |
| -0.32549 | 5.49E-13 | -0.16826 | 0.00026  | -0.24207 | 1.18E-07 | -0.23314 | 3.48E-07 | -0.04543 |
| 0.033605 | 0.46878  | -0.09528 | 0.03957  | -0.00675 | 0.88434  | -0.04358 | 0.34737  | -0.2521  |
| -0.13426 | 0.00365  | -0.21851 | 1.87E-06 | -0.0738  | 0.11123  | -0.08371 | 0.07072  | -0.24581 |
| -0.09357 | 0.04327  | 0.001825 | 0.96863  | -0.00935 | 0.84022  | 0.010055 | 0.82843  | 0.153811 |
| -0.03616 | 0.43559  | -0.02942 | 0.52592  | 0.030603 | 0.50943  | -0.15275 | 0.00093  | -0.10043 |
| 0.072323 | 0.11858  | -0.02797 | 0.5465   | 0.09255  | 0.04561  | 0.012218 | 0.79229  | -0.19845 |
| 0.079289 | 0.08698  | 0.079826 | 0.08486  | 0.089296 | 0.05381  | 0.078927 | 0.08844  | -0.01013 |
| 0.024955 | 0.59064  | -0.04688 | 0.31203  | 0.032767 | 0.47994  | -0.10559 | 0.02249  | -0.00352 |
| 0.003706 | 0.93633  | -0.07881 | 0.0889   | -0.08245 | 0.07509  | 0.062814 | 0.17538  | 0.236969 |
| 0.114582 | 0.01322  | 0.075946 | 0.10118  | 0.118638 | 0.01029  | -0.12565 | 0.00655  | -0.19453 |
| 0.025337 | 0.58496  | -0.03523 | 0.44755  | 0.014943 | 0.74739  | -0.05905 | 0.20275  | -0.0027  |
| 0.038096 | 0.41144  | 0.052424 | 0.25821  | 0.036823 | 0.42726  | 0.103587 | 0.02518  | 0.15328  |
| 0.28158  | 5.85E-10 | 0.143327 | 0.0019   | 0.085489 | 0.06491  | 0.012697 | 0.78434  | -0.02184 |
| -0.17217 | 0.00018  | -0.04993 | 0.2816   | -0.00041 | 0.99297  | -0.00802 | 0.8628   | -0.19344 |
| -0.2049  | 8.06E-06 | -0.28369 | 4.29E-10 | -0.2192  | 1.73E-06 | -0.17503 | 0.00014  | -0.26402 |
| -0.14636 | 0.00152  | -0.16963 | 0.00023  | -0.27657 | 1.20E-09 | -0.05067 | 0.27453  | 0.077508 |
| 0.083276 | 0.07219  | -0.0843  | 0.06874  | -0.05135 | 0.26808  | -0.10971 | 0.01771  | -0.23033 |
| -0.06022 | 0.19389  | 0.082905 | 0.07347  | -0.07982 | 0.08486  | 0.123603 | 0.00749  | 0.085398 |
| 0.08739  | 0.05915  | 0.152065 | 0.00098  | 0.153111 | 0.0009   | -0.0506  | 0.27512  | -0.13599 |
| 0.096955 | 0.03621  | 0.038044 | 0.41209  | 0.016314 | 0.72512  | 0.110828 | 0.01658  | -0.00569 |
| -0.01658 | 0.72076  | 0.085852 | 0.06378  | 0.044255 | 0.33995  | -0.09479 | 0.04061  | -0.07336 |
| -0.27374 | 1.80E-09 | -0.26849 | 3.74E-09 | -0.27293 | 2.02E-09 | -0.08829 | 0.05659  | -0.00878 |
| 0.043475 | 0.34854  | -0.07898 | 0.08821  | -0.03167 | 0.49471  | -0.05479 | 0.23733  | -0.17063 |
| 0.338523 | 5.52E-14 | 0.105494 | 0.02261  | 0.162842 | 0.00041  | 0.189855 | 3.64E-05 | 0.103011 |
| 0.260259 | 1.14E-08 | 0.293293 | 1.02E-10 | 0.297801 | 5.10E-11 | 0.193827 | 2.47E-05 | 0.223309 |
| -0.07553 | 0.10307  | -0.20176 | 1.11E-05 | -0.0628  | 0.1755   | -0.17827 | 0.00011  | -0.31924 |
| 0.234788 | 2.86E-07 | 0.117019 | 0.01138  | 0.173441 | 0.00017  | -0.00982 | 0.83237  | -0.26708 |
| 0.019961 | 0.66701  | -0.12547 | 0.00663  | -0.1459  | 0.00157  | -0.15308 | 0.0009   | -0.09897 |
| -0.07459 | 0.10744  | -0.11576 | 0.0123   | -0.02713 | 0.55872  | -0.14058 | 0.00233  | -0.40208 |
| 0.290627 | 1.53E-10 | 0.322249 | 9.58E-13 | 0.321325 | 1.12E-12 | 0.259977 | 1.19E-08 | 0.099311 |
| 0.198197 | 1.60E-05 | 0.127356 | 0.00585  | 0.153311 | 0.00089  | 0.023314 | 0.61529  | 0.011797 |
| 0.004928 | 0.91541  | 0.189982 | 3.59E-05 | 0.105854 | 0.02215  | 0.091424 | 0.04832  | 0.112815 |
| 0.02388  | 0.60673  | 0.008871 | 0.84838  | 0.014842 | 0.74905  | -0.03237 | 0.48527  | 0.013036 |
| -0.18478 | 5.89E-05 | -0.15866 | 0.00058  | -0.13755 | 0.0029   | -0.0392  | 0.39802  | -0.07777 |
| 0.19141  | 3.13E-05 | 0.305979 | 1.41E-11 | 0.27684  | 1.16E-09 | 0.147264 | 0.00142  | 0.294046 |
| 0.015431 | 0.73944  | 0.068924 | 0.13695  | 0.048047 | 0.30014  | 0.004681 | 0.91965  | -0.04994 |

|          |          |          |          |          |          |          |          |          |
|----------|----------|----------|----------|----------|----------|----------|----------|----------|
| 0.134337 | 0.00363  | 0.182511 | 7.28E-05 | 0.139319 | 0.00255  | 0.198814 | 1.50E-05 | 0.180756 |
| -0.24467 | 8.57E-08 | -0.15244 | 0.00095  | -0.14848 | 0.00129  | -0.14131 | 0.00221  | -0.20453 |
| -0.06593 | 0.15488  | -0.13119 | 0.00451  | -0.11181 | 0.01564  | -0.21763 | 2.06E-06 | -0.41037 |
| -0.05314 | 0.25171  | -0.06499 | 0.16084  | -0.01892 | 0.68346  | -0.03238 | 0.48519  | -0.15733 |
| -0.0592  | 0.20156  | 0.029122 | 0.53015  | -0.02371 | 0.60936  | 0.041059 | 0.376    | 0.088134 |
| 0.147332 | 0.00141  | 0.053834 | 0.24561  | 0.196485 | 1.90E-05 | 0.016964 | 0.71463  | -0.06218 |
| 0.122521 | 0.00803  | -0.2108  | 4.33E-06 | -0.13284 | 0.00403  | 0.028415 | 0.54019  | -0.11416 |
| 0.065331 | 0.15868  | 0.019027 | 0.68173  | 0.069037 | 0.13631  | 0.006734 | 0.8846   | -0.1985  |
| 0.089531 | 0.05318  | -0.00152 | 0.97389  | 0.004253 | 0.92697  | 0.093001 | 0.04457  | -0.04331 |
| 0.131349 | 0.00447  | 0.200058 | 1.33E-05 | 0.131068 | 0.00455  | 0.151746 | 0.001    | 0.14341  |
| 0.090687 | 0.05016  | 0.119004 | 0.01005  | 0.129552 | 0.00505  | -0.01468 | 0.75166  | 0.266608 |
| 0.045929 | 0.32198  | 0.193888 | 2.46E-05 | 0.056872 | 0.21993  | -0.03565 | 0.44216  | 0.066911 |
| -0.05881 | 0.20459  | -0.02838 | 0.5407   | -0.06223 | 0.17942  | -0.12172 | 0.00846  | -0.1824  |
| 0.22584  | 8.17E-07 | 0.166901 | 0.00029  | 0.260207 | 1.15E-08 | 0.228648 | 5.91E-07 | 0.191956 |
| 0.254192 | 2.55E-08 | 0.23262  | 3.71E-07 | 0.254971 | 2.30E-08 | 0.107052 | 0.02068  | 0.163533 |
| 0.016157 | 0.72765  | 0.067423 | 0.14573  | 0.094057 | 0.04219  | 0.061502 | 0.18459  | -0.03179 |
| 0.028311 | 0.54167  | -0.00495 | 0.91503  | 0.016177 | 0.72734  | 0.052313 | 0.25922  | -0.06092 |
| 0.086164 | 0.06282  | 0.112059 | 0.0154   | 0.109085 | 0.01837  | 0.090904 | 0.04962  | 0.069977 |
| 0.005456 | 0.9064   | 0.018197 | 0.69489  | 0.063759 | 0.16896  | -0.05612 | 0.22611  | -0.02311 |
| 0.045843 | 0.32289  | -0.21706 | 2.19E-06 | -0.13366 | 0.00381  | -0.02978 | 0.52091  | -0.04718 |
| -0.15504 | 0.00077  | 0.096619 | 0.03687  | -0.04822 | 0.29842  | 0.049104 | 0.28963  | 0.211383 |
| 0.107278 | 0.02041  | 0.128419 | 0.00545  | 0.14944  | 0.0012   | -0.04946 | 0.28614  | 0.039992 |
| 0.062738 | 0.17591  | 0.192096 | 2.93E-05 | 0.273072 | 1.98E-09 | -0.10065 | 0.02965  | 0.035888 |
| 0.243477 | 9.94E-08 | 0.259883 | 1.20E-08 | 0.282994 | 4.76E-10 | -0.01341 | 0.77262  | -0.08188 |
| 0.093781 | 0.0428   | -0.04379 | 0.3451   | 0.048661 | 0.294    | -0.19619 | 1.96E-05 | -0.27048 |
| 0.013706 | 0.76768  | -0.07649 | 0.09874  | 0.052194 | 0.2603   | -0.17185 | 0.00019  | -0.22764 |
| 0.158212 | 0.0006   | -0.00976 | 0.83344  | 0.024731 | 0.59397  | -0.03809 | 0.41152  | -0.13337 |
| -0.0213  | 0.6461   | 0.085926 | 0.06355  | 0.148978 | 0.00124  | 0.042042 | 0.36467  | -0.01469 |
| 0.097984 | 0.03427  | 0.014737 | 0.75077  | 0.012848 | 0.78185  | 0.050643 | 0.27476  | 0.02926  |
| -0.25238 | 3.22E-08 | -0.1103  | 0.0171   | -0.11283 | 0.0147   | -0.2125  | 3.61E-06 | -0.08789 |
| 0.086042 | 0.06319  | 0.002267 | 0.96104  | 0.191847 | 3.00E-05 | -0.11478 | 0.01306  | -0.2925  |
| -0.15966 | 0.00053  | -0.20459 | 8.32E-06 | -0.24385 | 9.48E-08 | -0.12533 | 0.00669  | 0.065349 |
| -0.04724 | 0.30839  | -0.1139  | 0.01378  | -0.09528 | 0.03956  | -0.06704 | 0.14802  | -0.09067 |
| 0.152294 | 0.00096  | 0.06524  | 0.15926  | 0.089606 | 0.05298  | 0.109242 | 0.0182   | 0.045831 |
| 0.043065 | 0.3531   | 0.123602 | 0.00749  | 0.124055 | 0.00727  | 0.07817  | 0.09154  | 0.272473 |
| 0.130588 | 0.0047   | 0.162069 | 0.00044  | 0.113626 | 0.01402  | 0.110945 | 0.01646  | 0.100702 |
| 0.051869 | 0.26329  | 0.331575 | 1.91E-13 | 0.142572 | 0.00201  | 0.115424 | 0.01256  | 0.406586 |
| -0.12507 | 0.0068   | -0.07239 | 0.11825  | -0.059   | 0.20309  | -0.10468 | 0.02367  | -0.20959 |
| -0.01109 | 0.81117  | -0.18559 | 5.46E-05 | -0.1192  | 0.00993  | -0.15873 | 0.00058  | -0.29049 |
| 0.077924 | 0.09257  | 0.053138 | 0.25177  | 0.032808 | 0.47939  | -0.03331 | 0.47274  | 0.165977 |
| -0.23262 | 3.71E-07 | -0.14033 | 0.00237  | -0.19788 | 1.65E-05 | -0.18957 | 3.74E-05 | -0.12919 |
| -0.00657 | 0.88734  | -0.10863 | 0.01886  | -0.10047 | 0.02994  | -0.11381 | 0.01386  | -0.19683 |
| -0.09154 | 0.04804  | -0.15516 | 0.00077  | -0.00321 | 0.94477  | -0.22156 | 1.33E-06 | -0.28388 |
| -0.10629 | 0.02161  | -0.15657 | 0.00069  | -0.07099 | 0.12556  | -0.04086 | 0.37832  | -0.06321 |
| 0.081366 | 0.079    | -0.05555 | 0.23088  | -0.00845 | 0.85551  | -0.22291 | 1.14E-06 | -0.18568 |

|          |          |          |          |          |          |          |          |          |
|----------|----------|----------|----------|----------|----------|----------|----------|----------|
| 0.035599 | 0.44279  | -0.00862 | 0.85264  | 0.008324 | 0.85762  | -0.06492 | 0.16131  | -0.16094 |
| 0.041699 | 0.3686   | 0.302223 | 2.55E-11 | -0.01055 | 0.82017  | 0.224003 | 1.01E-06 | 0.371083 |
| 0.018724 | 0.68652  | -0.06553 | 0.15744  | -0.03707 | 0.42416  | -0.02464 | 0.5954   | -0.09711 |
| -0.11731 | 0.01118  | -0.12197 | 0.00833  | -0.0414  | 0.37205  | -0.13862 | 0.00268  | -0.19099 |
| 0.116287 | 0.01191  | 0.037347 | 0.4207   | 0.096627 | 0.03685  | 0.133237 | 0.00392  | -0.09984 |
| -0.00864 | 0.85235  | -0.06479 | 0.16215  | -0.0149  | 0.74814  | -0.07115 | 0.12469  | 0.039367 |
| 0.107789 | 0.01981  | 0.226435 | 7.63E-07 | 0.243649 | 9.73E-08 | -0.09267 | 0.04532  | 0.003056 |
| -0.24688 | 6.49E-08 | -0.12901 | 0.00523  | -0.16382 | 0.00038  | -0.20435 | 8.53E-06 | -0.11772 |
| 0.226369 | 7.69E-07 | 0.102404 | 0.02691  | 0.246349 | 6.94E-08 | 0.216642 | 2.30E-06 | 0.13263  |
| 0.006957 | 0.88082  | -0.00924 | 0.84222  | 0.000906 | 0.98442  | 0.05339  | 0.24953  | -0.04438 |
| -0.00224 | 0.96156  | -0.1373  | 0.00295  | -0.07627 | 0.0997   | -0.07882 | 0.08886  | -0.28406 |
| 0.019158 | 0.67965  | 0.149923 | 0.00116  | 0.063719 | 0.16923  | 0.090553 | 0.05051  | 0.253764 |
| -0.02383 | 0.60751  | 0.032239 | 0.48705  | 0.0568   | 0.22051  | -0.18558 | 5.47E-05 | -0.19256 |
| 0.093808 | 0.04274  | 0.074351 | 0.10857  | 0.079375 | 0.08664  | 0.055842 | 0.22841  | -0.02636 |
| 0.147648 | 0.00138  | 0.092539 | 0.04564  | 0.095614 | 0.03888  | -0.08551 | 0.06485  | -0.08449 |
| 0.100552 | 0.02981  | 0.061049 | 0.18784  | 0.089143 | 0.05422  | -0.13211 | 0.00424  | -0.15202 |
| 0.081701 | 0.07777  | 0.029251 | 0.52833  | 0.03219  | 0.48772  | 0.015005 | 0.74638  | -0.0386  |
| 0.119148 | 0.00996  | 0.058801 | 0.20466  | 0.073652 | 0.11194  | 0.092648 | 0.04538  | 0.026179 |
| 0.117917 | 0.01076  | 0.038136 | 0.41096  | 0.036043 | 0.43712  | -0.10657 | 0.02125  | -0.15005 |
| 0.136037 | 0.00322  | 0.072322 | 0.11858  | 0.078109 | 0.0918   | 0.076433 | 0.099    | 0.032711 |
| 0.05166  | 0.26522  | 0.035678 | 0.44178  | -0.01276 | 0.78329  | -0.01047 | 0.8214   | 0.016391 |
| 0.047223 | 0.30852  | 0.086253 | 0.06254  | 0.073758 | 0.11143  | -0.07654 | 0.09853  | -0.05717 |
| 0.049839 | 0.28246  | -0.01183 | 0.79868  | 0.017533 | 0.7055   | -0.05476 | 0.23757  | -0.05401 |
| 0.12121  | 0.00874  | 0.120986 | 0.00887  | 0.135759 | 0.00329  | 0.039134 | 0.39881  | -0.03428 |
| 0.063735 | 0.16912  | 0.091631 | 0.04781  | 0.107298 | 0.02038  | 0.064684 | 0.16285  | 0.001233 |
| 0.19439  | 2.34E-05 | 0.162314 | 0.00043  | 0.125858 | 0.00646  | 0.125696 | 0.00653  | 0.103371 |
| 0.029501 | 0.52481  | 0.039066 | 0.39963  | 0.038603 | 0.40525  | -0.07485 | 0.1062   | -0.05126 |
| 0.055274 | 0.23319  | 0.005651 | 0.90306  | 0.051272 | 0.26883  | -0.05529 | 0.23308  | -0.08883 |
| -0.01415 | 0.76039  | -0.01303 | 0.77875  | -0.00117 | 0.97996  | 0.042312 | 0.36159  | -0.01825 |
| 0.093662 | 0.04307  | 0.05351  | 0.24846  | 0.050616 | 0.27501  | 0.008861 | 0.84854  | 0.004079 |
| 0.111609 | 0.01582  | 0.028726 | 0.53576  | 0.036602 | 0.43004  | 0.01245  | 0.78844  | -0.05718 |
| 0.098586 | 0.03318  | 0.006508 | 0.88845  | 0.068114 | 0.14164  | -0.04417 | 0.34086  | -0.11502 |
| 0.03353  | 0.46977  | 0.107556 | 0.02008  | 0.090509 | 0.05062  | 0.030488 | 0.51103  | 0.029159 |
| 0.249186 | 4.85E-08 | 0.08109  | 0.08002  | 0.058274 | 0.20875  | 0.082043 | 0.07653  | 0.029223 |
| 0.177131 | 0.00012  | 0.118853 | 0.01015  | -0.01433 | 0.75736  | 0.005593 | 0.90405  | -0.09707 |
| 0.119698 | 0.00962  | 0.036179 | 0.43539  | 0.087885 | 0.05772  | -0.009   | 0.84612  | -0.17332 |
| 0.076351 | 0.09937  | 0.053212 | 0.25111  | -0.0086  | 0.85303  | -0.00482 | 0.91729  | -0.15749 |
| -0.00302 | 0.9481   | -0.20318 | 9.64E-06 | -0.21765 | 2.06E-06 | 0.084362 | 0.06854  | 0.070657 |
| -0.08473 | 0.06732  | -0.13349 | 0.00385  | -0.09468 | 0.04084  | 0.023731 | 0.60898  | 0.005875 |
| -0.06071 | 0.19033  | -0.05606 | 0.22663  | -0.10086 | 0.0293   | -0.11779 | 0.01085  | -0.35515 |
| 0.249677 | 4.55E-08 | -0.07806 | 0.09199  | 0.072773 | 0.1163   | -0.02241 | 0.62899  | 0.005732 |
| 0.159443 | 0.00054  | 0.053557 | 0.24805  | 0.199287 | 1.43E-05 | 0.137565 | 0.00289  | 0.25003  |
| 0.214053 | 3.05E-06 | 0.205398 | 7.66E-06 | 0.196074 | 1.98E-05 | 0.049031 | 0.29034  | 0.149455 |
| -0.10796 | 0.01961  | -0.24352 | 9.89E-08 | -0.30456 | 1.76E-11 | -0.13404 | 0.00371  | -0.27468 |
| 0.094239 | 0.04179  | -0.05336 | 0.24979  | -0.03627 | 0.43426  | 0.067475 | 0.14542  | 0.006253 |

|          |          |          |          |          |          |          |          |          |
|----------|----------|----------|----------|----------|----------|----------|----------|----------|
| 0.080799 | 0.08112  | 0.281237 | 6.15E-10 | 0.198721 | 1.52E-05 | 0.153319 | 0.00089  | 0.289687 |
| 0.03378  | 0.46647  | 0.146911 | 0.00145  | -0.09205 | 0.04681  | 0.147795 | 0.00136  | 0.12816  |
| 0.125739 | 0.00651  | 0.107829 | 0.01977  | 0.119852 | 0.00953  | 0.013375 | 0.77313  | -0.03598 |
| -0.05385 | 0.24544  | -0.05045 | 0.27657  | -0.21759 | 2.07E-06 | -0.06032 | 0.19317  | -0.07906 |
| -0.05668 | 0.22152  | -0.11265 | 0.01486  | -0.08456 | 0.06788  | -0.15356 | 0.00087  | -0.19067 |
| 0.104631 | 0.02374  | 0.075481 | 0.10329  | 0.164698 | 0.00035  | -0.00255 | 0.9562   | 0.006573 |
| 0.079343 | 0.08676  | 0.085437 | 0.06508  | 0.149969 | 0.00115  | -0.15652 | 0.00069  | -0.1877  |
| -0.19836 | 1.57E-05 | -0.24002 | 1.52E-07 | -0.14642 | 0.00151  | -0.13027 | 0.00481  | -0.17669 |
| 0.120218 | 0.00931  | 0.329297 | 2.84E-13 | 0.288963 | 1.96E-10 | 0.001399 | 0.97595  | 0.209098 |
| 0.231385 | 4.29E-07 | 0.180541 | 8.73E-05 | 0.204232 | 8.64E-06 | 0.099715 | 0.0312   | -0.12716 |
| 0.001626 | 0.97204  | -0.07824 | 0.09126  | -0.05014 | 0.27954  | -0.00022 | 0.99625  | -0.12626 |
| -0.29089 | 1.47E-10 | -0.12068 | 0.00904  | -0.05026 | 0.27841  | -0.2512  | 3.75E-08 | -0.14671 |
| 0.026629 | 0.56596  | -0.10228 | 0.02709  | 0.030476 | 0.5112   | -0.00582 | 0.90016  | -0.05901 |
| 0.060922 | 0.18877  | 0.107273 | 0.02041  | 0.111969 | 0.01549  | 0.077889 | 0.09272  | -0.09901 |
| 0.095544 | 0.03903  | 0.235576 | 2.61E-07 | 0.066121 | 0.15369  | 0.219697 | 1.64E-06 | 0.413059 |
| -0.02579 | 0.57829  | -0.02289 | 0.62168  | -0.01897 | 0.68256  | -0.1911  | 3.23E-05 | -0.19655 |
| 0.123542 | 0.00752  | 0.128014 | 0.0056   | 0.18417  | 6.24E-05 | 0.178949 | 0.0001   | 0.196273 |
| 0.215872 | 2.50E-06 | 0.133291 | 0.00391  | 0.288563 | 2.09E-10 | 0.05345  | 0.249    | -0.05082 |
| 0.07042  | 0.12861  | -0.05089 | 0.27238  | -0.01822 | 0.69447  | -0.0337  | 0.46747  | -0.01614 |
| -0.21506 | 2.73E-06 | -0.11293 | 0.01462  | -0.11855 | 0.01035  | -0.06477 | 0.16226  | -0.01792 |
| 0.085302 | 0.0655   | 0.096049 | 0.038    | 0.088692 | 0.05545  | 0.039916 | 0.38944  | -0.06558 |
| -0.07161 | 0.12224  | -0.17017 | 0.00022  | -0.08669 | 0.06121  | -0.24346 | 9.96E-08 | -0.32186 |
| 0.163822 | 0.00038  | 0.18957  | 3.74E-05 | 0.37874  | 2.24E-17 | 0.009198 | 0.84286  | -0.07945 |
| 0.021271 | 0.64659  | 0.042561 | 0.35878  | 0.003462 | 0.94053  | 0.110584 | 0.01682  | 0.185188 |
| 0.025986 | 0.57538  | 0.017189 | 0.71102  | 0.021622 | 0.64117  | 0.01913  | 0.68009  | -0.03669 |
| 0.113499 | 0.01412  | 0.090628 | 0.05032  | 0.14962  | 0.00118  | -0.05203 | 0.26185  | -0.06788 |
| -0.15006 | 0.00114  | -0.06005 | 0.19519  | -0.03039 | 0.51233  | -0.2016  | 1.13E-05 | -0.09909 |
| 0.136502 | 0.00312  | 0.267306 | 4.41E-09 | 0.275575 | 1.39E-09 | -0.02094 | 0.65179  | -0.10833 |
| 0.118969 | 0.01008  | 0.2741   | 1.71E-09 | 0.259667 | 1.24E-08 | 0.091111 | 0.0491   | 0.31005  |
| -0.06816 | 0.14137  | -0.16397 | 0.00037  | -0.09337 | 0.04372  | -0.13826 | 0.00275  | -0.29071 |
| 0.167232 | 0.00028  | -0.05764 | 0.21378  | -0.22617 | 7.87E-07 | 0.058303 | 0.20853  | -0.07838 |
| 0.246155 | 7.11E-08 | 0.272477 | 2.15E-09 | 0.22017  | 1.55E-06 | 0.152688 | 0.00093  | 0.107808 |
| -0.18943 | 3.79E-05 | 0.012258 | 0.79163  | -0.0103  | 0.82437  | -0.1109  | 0.0165   | -0.1061  |
| -0.07129 | 0.12394  | -0.21524 | 2.68E-06 | -0.2756  | 1.38E-09 | 0.019688 | 0.6713   | -0.051   |
| 0.162221 | 0.00043  | -0.02061 | 0.65689  | -0.10125 | 0.02868  | 0.001013 | 0.98259  | -0.06139 |
| 0.147374 | 0.0014   | 0.145751 | 0.00159  | 0.233268 | 3.43E-07 | 0.133604 | 0.00382  | -0.02869 |
| -0.03421 | 0.46079  | -0.20404 | 8.81E-06 | -0.28117 | 6.21E-10 | 0.016616 | 0.72023  | 0.103084 |
| -0.0494  | 0.28668  | -0.15822 | 0.0006   | -0.17875 | 0.0001   | -0.19198 | 2.96E-05 | -0.17489 |
| 0.142955 | 0.00196  | 0.066122 | 0.15368  | -0.13602 | 0.00323  | 0.310995 | 6.25E-12 | 0.209603 |
| -0.23635 | 2.38E-07 | -0.1648  | 0.00035  | -0.25183 | 3.45E-08 | -0.15964 | 0.00053  | -0.17422 |
| 0.177525 | 0.00011  | 0.170592 | 0.00021  | -0.03405 | 0.46288  | 0.09564  | 0.03883  | 0.065167 |
| 0.140783 | 0.00229  | 0.239859 | 1.55E-07 | 0.218031 | 1.97E-06 | 0.043783 | 0.34514  | 0.043077 |
| 0.047978 | 0.30084  | 0.081051 | 0.08017  | 0.125994 | 0.0064   | 0.057726 | 0.21307  | 0.095735 |
| 0.06221  | 0.17957  | -0.01466 | 0.75197  | 0.067598 | 0.14468  | -0.12522 | 0.00674  | -0.2508  |
| 0.208361 | 5.61E-06 | 0.00954  | 0.83709  | 0.220569 | 1.49E-06 | -0.02433 | 0.59993  | -0.22082 |

|          |          |          |          |          |          |          |          |          |
|----------|----------|----------|----------|----------|----------|----------|----------|----------|
| 0.171567 | 0.0002   | 0.214783 | 2.82E-06 | 0.244586 | 8.66E-08 | -0.02244 | 0.62853  | -0.00612 |
| 0.088617 | 0.05566  | -0.20776 | 5.97E-06 | -0.20112 | 1.19E-05 | -0.12574 | 0.00651  | -0.36122 |
| 0.045589 | 0.32557  | -0.00711 | 0.87815  | 0.039653 | 0.39258  | 0.019972 | 0.66685  | 0.08903  |
| -0.12929 | 0.00514  | -0.17334 | 0.00017  | -0.17103 | 0.0002   | -0.05078 | 0.27345  | -0.04187 |
| 0.135459 | 0.00336  | 0.196053 | 1.98E-05 | 0.205769 | 7.37E-06 | 0.004282 | 0.92646  | 0.205077 |
| -0.34021 | 4.06E-14 | -0.31755 | 2.12E-12 | -0.26069 | 1.08E-08 | -0.20159 | 1.13E-05 | -0.18874 |
| -0.06022 | 0.19395  | -0.21497 | 2.76E-06 | -0.04393 | 0.34352  | -0.28089 | 6.46E-10 | -0.41805 |
| 0.13858  | 0.00269  | 0.202059 | 1.08E-05 | 0.15679  | 0.00067  | 0.194382 | 2.34E-05 | 0.067079 |
| -0.09403 | 0.04225  | -0.08787 | 0.05777  | -0.0369  | 0.42631  | -0.10555 | 0.02253  | -0.2861  |
| -0.05424 | 0.24209  | -0.22777 | 6.54E-07 | -0.18983 | 3.64E-05 | -0.21697 | 2.22E-06 | -0.1759  |
| 0.19646  | 1.90E-05 | -0.03426 | 0.4601   | -0.00692 | 0.88149  | 0.029617 | 0.52317  | -0.24484 |
| 0.081033 | 0.08024  | 0.00863  | 0.85244  | 0.102971 | 0.02607  | -0.0337  | 0.46756  | -0.13438 |
| -0.09208 | 0.04673  | -0.24386 | 9.47E-08 | -0.12654 | 0.00618  | -0.26561 | 5.56E-09 | -0.34551 |
| -0.11199 | 0.01547  | -0.061   | 0.18824  | -0.10611 | 0.02182  | -0.01655 | 0.72132  | -0.04698 |
| -0.04384 | 0.34445  | -0.09418 | 0.04193  | -0.0502  | 0.27902  | -0.08836 | 0.05638  | -0.05443 |
| -0.00203 | 0.96504  | 0.10378  | 0.02491  | 0.158059 | 0.00061  | 0.067562 | 0.1449   | 0.223548 |
| 0.034156 | 0.46152  | -0.12617 | 0.00633  | -0.08866 | 0.05554  | -0.24012 | 1.50E-07 | -0.15162 |
| -0.25797 | 1.55E-08 | -0.25706 | 1.75E-08 | -0.18901 | 3.94E-05 | -0.22274 | 1.16E-06 | -0.18834 |
| -0.0575  | 0.21484  | -0.28131 | 6.08E-10 | -0.1746  | 0.00015  | -0.14793 | 0.00135  | -0.18601 |
| 0.137938 | 0.00282  | 0.05634  | 0.22429  | 0.192053 | 2.94E-05 | -0.10155 | 0.02821  | -0.09827 |
| 0.168495 | 0.00025  | 0.056666 | 0.22161  | 0.081091 | 0.08002  | 0.082707 | 0.07417  | -0.11042 |
| 0.221013 | 1.41E-06 | 0.082315 | 0.07555  | 0.016976 | 0.71444  | 0.2157   | 2.55E-06 | 0.300386 |
| 0.041118 | 0.37532  | -0.0403  | 0.38489  | -0.17755 | 0.00011  | 0.156591 | 0.00068  | 0.142356 |
| -0.1761  | 0.00013  | -0.19543 | 2.11E-05 | -0.15535 | 0.00076  | -0.14538 | 0.00163  | -0.10054 |
| -0.01929 | 0.67758  | -0.07297 | 0.11533  | -0.07968 | 0.08543  | -0.05655 | 0.22252  | -0.04143 |
| -0.10884 | 0.01864  | -0.06877 | 0.13785  | -0.11089 | 0.01651  | -0.00273 | 0.95313  | -0.09222 |
| 0.250298 | 4.21E-08 | 0.000149 | 0.99744  | 0.174695 | 0.00015  | 0.07589  | 0.10143  | 0.009207 |
| 0.03395  | 0.46422  | -0.03974 | 0.3915   | -0.01696 | 0.71477  | 0.104254 | 0.02426  | 0.140469 |
| 0.089134 | 0.05425  | -0.05465 | 0.23849  | -0.02523 | 0.58652  | 0.052094 | 0.26122  | -0.01942 |
| 0.204561 | 8.35E-06 | -0.1297  | 0.005    | -0.07342 | 0.11309  | -0.02532 | 0.58527  | -0.02594 |
| 0.045229 | 0.32942  | 0.078415 | 0.09053  | 0.067842 | 0.14324  | 0.124164 | 0.00722  | 0.060062 |
| -0.17362 | 0.00016  | -0.20929 | 5.08E-06 | -0.10245 | 0.02684  | -0.205   | 7.98E-06 | -0.14991 |
| 0.022728 | 0.62421  | -0.0437  | 0.34606  | -0.02286 | 0.62217  | -0.16466 | 0.00035  | -0.18831 |
| 0.065928 | 0.15489  | 0.06214  | 0.18006  | 0.167137 | 0.00029  | 0.006047 | 0.89631  | 0.00205  |
| 0.073171 | 0.11431  | -0.09979 | 0.03107  | -0.03426 | 0.46015  | 0.24855  | 5.25E-08 | 0.288231 |
| -0.08493 | 0.06668  | -0.09586 | 0.03839  | 0.001075 | 0.98151  | -0.02132 | 0.6458   | 0.191075 |
| 0.186303 | 5.10E-05 | 0.148405 | 0.0013   | 0.226048 | 7.98E-07 | 0.00867  | 0.85177  | -0.12724 |
| -0.05141 | 0.26752  | -0.03679 | 0.42764  | -0.03186 | 0.49212  | -0.05392 | 0.24487  | -0.12233 |
| 0.159034 | 0.00056  | 0.02878  | 0.53499  | 0.047148 | 0.30929  | 0.204359 | 8.53E-06 | 0.187591 |
| 0.08701  | 0.06027  | 0.137741 | 0.00286  | 0.065055 | 0.16045  | -0.09316 | 0.0442   | -0.09837 |
| 0.180802 | 8.53E-05 | 0.219352 | 1.70E-06 | 0.19967  | 1.38E-05 | 0.031966 | 0.49075  | -0.0066  |
| 0.280143 | 7.20E-10 | 0.094272 | 0.04172  | 0.05186  | 0.26337  | 0.138541 | 0.0027   | 0.043086 |
| 0.215566 | 2.58E-06 | 0.341753 | 3.07E-14 | 0.187569 | 4.53E-05 | 0.409088 | 2.88E-20 | 0.387553 |
| 0.139214 | 0.00257  | 0.155343 | 0.00076  | 0.166059 | 0.00031  | 0.040307 | 0.38481  | -0.04158 |
| 0.024466 | 0.59794  | -0.00488 | 0.9162   | 0.147233 | 0.00142  | 0.059848 | 0.1967   | 0.034185 |

|          |          |          |          |          |          |          |          |          |
|----------|----------|----------|----------|----------|----------|----------|----------|----------|
| 0.165696 | 0.00032  | 0.179557 | 9.56E-05 | 0.271262 | 2.55E-09 | 0.1251   | 0.00679  | 0.054096 |
| -0.2146  | 2.87E-06 | -0.24388 | 9.46E-08 | -0.19614 | 1.96E-05 | -0.24778 | 5.79E-08 | -0.33477 |
| -0.14835 | 0.0013   | -0.22072 | 1.46E-06 | -0.18547 | 5.52E-05 | -0.20582 | 7.33E-06 | 0.035979 |
| 0.15257  | 0.00094  | 0.067263 | 0.14669  | 0.095101 | 0.03995  | -0.00671 | 0.88496  | 0.03931  |
| 0.078505 | 0.09016  | 0.16063  | 0.00049  | 0.259663 | 1.24E-08 | 0.035526 | 0.44374  | 0.057457 |
| -0.15809 | 0.00061  | -0.17005 | 0.00022  | -0.11805 | 0.01067  | -0.01305 | 0.77843  | -0.19604 |
| 0.05177  | 0.2642   | 0.120167 | 0.00934  | 0.173134 | 0.00017  | -0.00622 | 0.89342  | -0.02312 |
| -0.12377 | 0.00741  | -0.06576 | 0.15598  | -0.04968 | 0.28396  | -0.1296  | 0.00503  | -0.20414 |
| -0.00849 | 0.85482  | 0.050686 | 0.27435  | 0.072628 | 0.11703  | -0.02863 | 0.53711  | -0.03722 |
| 0.093403 | 0.04365  | 0.068071 | 0.14189  | 0.110038 | 0.01737  | 0.019006 | 0.68205  | 0.06268  |
| 0.018782 | 0.68561  | 0.044229 | 0.34023  | 0.065616 | 0.15686  | -0.06872 | 0.13813  | 0.055587 |
| 0.043007 | 0.35375  | 0.100303 | 0.03022  | 0.13802  | 0.0028   | -0.01855 | 0.68932  | -0.00069 |
| -0.09515 | 0.03985  | -0.17096 | 0.00021  | -0.19093 | 3.28E-05 | 0.033211 | 0.47401  | 0.156386 |
| 0.120455 | 0.00917  | 0.032445 | 0.48427  | 0.085439 | 0.06507  | 0.131479 | 0.00443  | 0.26793  |
| 0.098991 | 0.03246  | 0.05381  | 0.24582  | 0.040428 | 0.38339  | 0.061383 | 0.18544  | 0.006543 |
| -0.00451 | 0.92255  | 0.168556 | 0.00025  | 0.168086 | 0.00026  | 0.07115  | 0.12469  | 0.262041 |
| -0.04885 | 0.29212  | -0.05703 | 0.21869  | 0.030685 | 0.5083   | -0.10067 | 0.02961  | 0.00744  |
| 0.168338 | 0.00026  | 0.095967 | 0.03816  | 0.19058  | 3.39E-05 | 0.293222 | 1.03E-10 | 0.326089 |
| 0.348342 | 9.07E-15 | 0.327442 | 3.92E-13 | 0.220395 | 1.51E-06 | 0.383668 | 7.95E-18 | 0.262324 |
| -0.02634 | 0.57013  | -0.04051 | 0.38247  | -0.0436  | 0.34715  | -0.0465  | 0.31595  | -0.08561 |
| -0.20178 | 1.11E-05 | 0.002175 | 0.9626   | 0.014123 | 0.76083  | -0.06236 | 0.17854  | -0.11235 |
| 0.032166 | 0.48804  | 0.173846 | 0.00016  | -0.03034 | 0.51307  | 0.128185 | 0.00553  | 0.30931  |
| 0.125251 | 0.00673  | -0.14903 | 0.00124  | -0.16586 | 0.00032  | 0.10078  | 0.02944  | 0.117721 |
| 0.060647 | 0.19078  | -0.02697 | 0.56103  | 0.037773 | 0.41543  | -0.04687 | 0.31218  | -0.10056 |
| 0.219583 | 1.66E-06 | 0.117977 | 0.01072  | 0.181526 | 7.98E-05 | 0.067902 | 0.14289  | -0.2277  |
| 0.081779 | 0.07748  | 0.157802 | 0.00062  | 0.143484 | 0.00188  | -0.04531 | 0.3286   | -0.16605 |
| -0.02485 | 0.59212  | 0.126106 | 0.00636  | 0.065539 | 0.15735  | -0.01533 | 0.74106  | -0.0373  |
| -0.08595 | 0.06348  | -0.11268 | 0.01484  | -0.09174 | 0.04754  | -0.08658 | 0.06154  | -0.03147 |
| -0.08665 | 0.06135  | 0.07035  | 0.12899  | 0.070112 | 0.1303   | -0.19734 | 1.74E-05 | -0.17023 |
| 0.015129 | 0.74436  | 0.062982 | 0.17422  | 0.018507 | 0.68997  | -0.10278 | 0.02635  | -0.16598 |
| 0.227676 | 6.61E-07 | 0.252751 | 3.07E-08 | 0.004999 | 0.9142   | 0.120483 | 0.00916  | 0.20193  |
| 0.05656  | 0.22248  | -0.02339 | 0.6141   | 0.020381 | 0.66045  | 0.009453 | 0.83856  | -0.04233 |
| 0.366432 | 2.75E-16 | 0.165033 | 0.00034  | 0.162149 | 0.00043  | 0.106723 | 0.02107  | 0.118261 |
| 0.037998 | 0.41265  | -0.24017 | 1.49E-07 | -0.31622 | 2.64E-12 | -0.04512 | 0.33057  | -0.12522 |
| 0.143205 | 0.00192  | 0.197814 | 1.66E-05 | 0.227112 | 7.06E-07 | 0.126561 | 0.00617  | 0.076768 |
| 0.059817 | 0.19693  | 0.025441 | 0.58342  | 0.026753 | 0.56414  | -0.06743 | 0.14568  | -0.00644 |
| -0.18542 | 5.55E-05 | -0.33193 | 1.79E-13 | -0.17496 | 0.00014  | -0.272   | 2.30E-09 | -0.35985 |
| 0.029864 | 0.51972  | 0.19951  | 1.40E-05 | 0.09394  | 0.04245  | 0.03211  | 0.4888   | 0.043348 |
| 0.081754 | 0.07758  | 0.191088 | 3.23E-05 | 0.095708 | 0.03869  | 0.051793 | 0.26399  | -0.03639 |
| 0.052322 | 0.25914  | -0.19209 | 2.93E-05 | -0.25918 | 1.32E-08 | -0.12511 | 0.00679  | -0.23957 |
| -0.03327 | 0.47328  | -0.08418 | 0.06913  | -0.03668 | 0.42912  | -0.1883  | 4.22E-05 | -0.25745 |
| 0.031003 | 0.50392  | 0.147819 | 0.00136  | 0.176374 | 0.00013  | 0.077854 | 0.09286  | 0.047505 |
| -0.02806 | 0.54523  | 0.010529 | 0.82047  | -0.0122  | 0.79261  | 0.055864 | 0.22822  | 0.066173 |
| 0.100969 | 0.02913  | 0.159148 | 0.00056  | 0.127311 | 0.00587  | 0.055567 | 0.23072  | 0.10547  |
| -0.11588 | 0.01222  | -0.15193 | 0.00099  | -0.06435 | 0.16505  | -0.27097 | 2.66E-09 | -0.14882 |



|          |          |          |          |          |          |          |          |          |
|----------|----------|----------|----------|----------|----------|----------|----------|----------|
| -0.1063  | 0.02159  | -0.11893 | 0.0101   | -0.05819 | 0.20938  | -0.22543 | 8.56E-07 | -0.20193 |
| -0.10288 | 0.02621  | -0.02229 | 0.63093  | -0.14949 | 0.0012   | 0.368583 | 1.79E-16 | 0.17356  |
| -0.28262 | 5.02E-10 | -0.24764 | 5.90E-08 | -0.28083 | 6.52E-10 | -0.27055 | 2.81E-09 | -0.24527 |
| -0.08032 | 0.08295  | -0.18798 | 4.35E-05 | -0.10402 | 0.02458  | -0.05521 | 0.23373  | 0.113505 |
| 0.032812 | 0.47934  | 0.209334 | 5.06E-06 | 0.123914 | 0.00734  | 0.033008 | 0.47672  | 0.125125 |
| -0.1067  | 0.0211   | -0.14517 | 0.00166  | -0.17801 | 0.00011  | -0.05713 | 0.21786  | -0.1516  |
| -0.13426 | 0.00365  | -0.11168 | 0.01576  | -0.14044 | 0.00235  | -0.0858  | 0.06395  | 0.030814 |
| -0.23252 | 3.75E-07 | -0.23934 | 1.65E-07 | -0.20722 | 6.33E-06 | -0.18305 | 6.92E-05 | -0.27803 |
| -0.09831 | 0.03368  | -0.29424 | 8.83E-11 | -0.21976 | 1.63E-06 | -0.05746 | 0.21517  | -0.18608 |
| -0.06083 | 0.18945  | -0.21895 | 1.78E-06 | -0.15792 | 0.00061  | -0.16549 | 0.00033  | -0.22528 |
| -0.02671 | 0.56481  | -0.06066 | 0.19069  | 0.060389 | 0.19267  | -0.1092  | 0.01825  | -0.10738 |
| -0.10303 | 0.02599  | -0.17498 | 0.00014  | -0.12962 | 0.00503  | -0.09953 | 0.03152  | -0.23465 |
| -0.16306 | 0.0004   | -0.23749 | 2.07E-07 | -0.2194  | 1.69E-06 | -0.00189 | 0.96754  | -0.13215 |
| 0.126628 | 0.00614  | -0.09443 | 0.04137  | -0.02562 | 0.58072  | -0.00407 | 0.93004  | -0.16224 |
| 0.021331 | 0.64567  | 0.113739 | 0.01392  | 0.096252 | 0.03759  | 0.098389 | 0.03353  | 0.035641 |
| -0.08965 | 0.05285  | 0.103252 | 0.02566  | -0.16652 | 0.0003   | 0.132737 | 0.00406  | 0.142918 |
| -0.00452 | 0.92236  | 0.048958 | 0.29106  | 0.145263 | 0.00165  | -0.09987 | 0.03095  | -0.12363 |
| -0.12507 | 0.00681  | -0.00809 | 0.86159  | -0.04749 | 0.30575  | -0.00261 | 0.95506  | -0.03177 |
| -0.35071 | 5.81E-15 | -0.09615 | 0.03779  | -0.16627 | 0.00031  | -0.15028 | 0.00112  | -0.12184 |
| -0.25684 | 1.80E-08 | -0.04468 | 0.33529  | -0.03186 | 0.49223  | -0.14127 | 0.00221  | -0.04479 |
| -0.26509 | 5.96E-09 | -0.02782 | 0.5487   | -0.1162  | 0.01197  | -0.10025 | 0.0303   | -0.02584 |
| -0.25209 | 3.34E-08 | -0.06234 | 0.17869  | -0.076   | 0.10093  | -0.10776 | 0.01984  | -0.04826 |
| -0.31873 | 1.74E-12 | -0.04745 | 0.30619  | -0.06964 | 0.1329   | -0.13143 | 0.00444  | -0.01185 |
| -0.15836 | 0.00059  | 0.016555 | 0.72122  | -0.00807 | 0.86194  | -0.02576 | 0.57869  | 0.020826 |
| -0.27684 | 1.16E-09 | -0.0223  | 0.63074  | -0.10794 | 0.01964  | -0.13902 | 0.0026   | -0.08938 |
| 0.198015 | 1.63E-05 | 0.319103 | 1.63E-12 | 0.334356 | 1.16E-13 | 0.252355 | 3.23E-08 | 0.09628  |
| 0.122107 | 0.00825  | 0.126238 | 0.0063   | 0.139906 | 0.00244  | 0.28538  | 3.35E-10 | 0.122374 |
| -0.23629 | 2.39E-07 | -0.09961 | 0.03138  | -0.13398 | 0.00372  | -0.14525 | 0.00165  | -0.07615 |
| 0.185575 | 5.47E-05 | 0.225785 | 8.22E-07 | 0.221315 | 1.37E-06 | 0.065183 | 0.15963  | 0.087174 |
| 0.051624 | 0.26555  | 0.040928 | 0.37753  | 0.208949 | 5.27E-06 | -0.1094  | 0.01804  | 0.080548 |
| -0.01992 | 0.66762  | -0.07125 | 0.12415  | 0.023778 | 0.60826  | 0.012276 | 0.79133  | -0.02616 |
| -0.07969 | 0.08539  | -0.0791  | 0.08772  | -0.00629 | 0.89224  | -0.14475 | 0.00171  | -0.10348 |
| -0.14474 | 0.00171  | -0.05403 | 0.24388  | -0.04002 | 0.38815  | 0.012584 | 0.78622  | 0.123513 |
| 0.027776 | 0.54934  | 0.04136  | 0.37251  | 0.05261  | 0.25652  | 0.126351 | 0.00625  | 0.145252 |
| 0.199271 | 1.44E-05 | -0.01426 | 0.75862  | -0.10434 | 0.02413  | 0.137261 | 0.00296  | -0.08377 |
| -0.13759 | 0.00289  | -0.21299 | 3.42E-06 | -0.13573 | 0.00329  | -0.08006 | 0.08394  | -0.12759 |
| 0.223664 | 1.05E-06 | 0.2382   | 1.90E-07 | 0.371966 | 9.02E-17 | -0.00505 | 0.91333  | 0.057472 |
| 0.01711  | 0.71229  | -0.06891 | 0.13706  | -0.04006 | 0.38769  | -0.05271 | 0.2556   | -0.05262 |
| -0.00806 | 0.86213  | 0.034086 | 0.46244  | 0.021698 | 0.64     | -0.03184 | 0.49249  | -0.02017 |
| -0.01561 | 0.7365   | -0.05663 | 0.22188  | 0.00178  | 0.9694   | 0.018363 | 0.69225  | -0.02928 |
| -0.11588 | 0.01221  | -0.1191  | 0.00999  | -0.08166 | 0.07792  | -0.0964  | 0.03729  | -0.04358 |
| -0.1084  | 0.01912  | -0.06095 | 0.18856  | -0.01716 | 0.71146  | -0.0385  | 0.40655  | -0.13245 |
| 0.06626  | 0.15282  | 0.056882 | 0.21985  | 0.099715 | 0.0312   | -0.12326 | 0.00766  | -0.08157 |
| 0.067921 | 0.14277  | 0.002989 | 0.94863  | 0.008581 | 0.85327  | 0.151553 | 0.00102  | 0.101941 |
| 0.027894 | 0.54764  | -0.14598 | 0.00156  | -0.06966 | 0.1328   | -0.02895 | 0.53253  | 0.050526 |

|          |          |          |          |          |          |          |          |          |
|----------|----------|----------|----------|----------|----------|----------|----------|----------|
| 0.011164 | 0.80985  | -0.01511 | 0.74465  | 0.001287 | 0.97787  | -0.01349 | 0.77121  | -0.03412 |
| 0.103854 | 0.02481  | 0.092353 | 0.04608  | 0.084647 | 0.06761  | -0.01884 | 0.68469  | -0.01248 |
| -0.26734 | 4.39E-09 | 0.015679 | 0.7354   | -0.09271 | 0.04525  | -0.18887 | 4.00E-05 | -0.20416 |
| -0.00514 | 0.91174  | -0.03485 | 0.45242  | -0.04058 | 0.38162  | -0.19416 | 2.39E-05 | -0.13245 |
| -0.02368 | 0.60969  | -0.05349 | 0.24864  | -0.05059 | 0.27526  | -0.1145  | 0.01329  | -0.09189 |
| 0.07702  | 0.09643  | 0.158252 | 0.0006   | 0.166226 | 0.00031  | 0.004038 | 0.93064  | -0.0144  |
| 0.049432 | 0.28641  | 0.059514 | 0.19921  | 0.043503 | 0.34823  | -0.02938 | 0.52649  | -0.06122 |
| -0.01953 | 0.67378  | -0.02662 | 0.56602  | -0.01401 | 0.76261  | -0.00247 | 0.95758  | -0.10379 |
| 0.280103 | 7.25E-10 | 0.106287 | 0.02161  | -0.03564 | 0.44225  | 0.07371  | 0.11166  | 0.276648 |
| -0.05157 | 0.26605  | -0.13471 | 0.00354  | -0.30354 | 2.07E-11 | -0.12965 | 0.00501  | 0.032804 |
| -0.13123 | 0.0045   | -0.09479 | 0.0406   | -0.09296 | 0.04466  | -0.09343 | 0.04358  | -0.06272 |
| -0.16449 | 0.00036  | -0.17869 | 0.0001   | -0.20179 | 1.11E-05 | -0.10882 | 0.01865  | -0.23165 |
| -0.16643 | 0.0003   | -0.17335 | 0.00017  | -0.1833  | 6.77E-05 | -0.19799 | 1.63E-05 | -0.28901 |
| 0.095715 | 0.03867  | 0.244634 | 8.60E-08 | 0.228009 | 6.36E-07 | -0.14783 | 0.00136  | 0.065074 |
| -0.05063 | 0.27486  | 0.055049 | 0.2351   | 0.05644  | 0.22346  | -0.08428 | 0.06882  | -0.16078 |
| -0.06829 | 0.14061  | -0.07153 | 0.12267  | -0.01218 | 0.79294  | -0.06687 | 0.14909  | -0.10582 |
| 0.052007 | 0.26202  | -0.01867 | 0.68741  | 0.04397  | 0.34307  | -0.01945 | 0.67507  | -0.01105 |
| -0.02277 | 0.62351  | -0.03473 | 0.45406  | 0.055109 | 0.23459  | 0.014135 | 0.76063  | 0.138322 |
| 0.074356 | 0.10855  | 0.049954 | 0.28135  | 0.059209 | 0.20153  | 0.013102 | 0.77764  | -0.10475 |
| 0.200905 | 1.22E-05 | 0.248843 | 5.06E-08 | 0.275021 | 1.50E-09 | 0.169596 | 0.00023  | 0.23224  |
| 0.017986 | 0.69826  | -0.04114 | 0.37507  | 0.069967 | 0.1311   | -0.24715 | 6.27E-08 | -0.17447 |
| -0.07463 | 0.10725  | 0.129828 | 0.00495  | 0.112341 | 0.01515  | -0.06436 | 0.16498  | 0.027215 |
| 0.089175 | 0.05414  | -0.005   | 0.91421  | 0.000773 | 0.98671  | -0.13945 | 0.00252  | -0.21712 |
| 0.029276 | 0.52797  | 0.057391 | 0.21574  | 0.048146 | 0.29915  | -0.0384  | 0.4077   | -0.06824 |
| 0.054898 | 0.23639  | 0.040354 | 0.38426  | 0.144162 | 0.00179  | -0.16483 | 0.00035  | -0.15172 |
| 0.00916  | 0.8435   | 0.277315 | 1.08E-09 | 0.197434 | 1.73E-05 | 0.072794 | 0.11619  | 0.080067 |
| 0.038279 | 0.4092   | -0.00745 | 0.87241  | -0.05405 | 0.24369  | -0.16777 | 0.00027  | -0.23844 |
| -0.11023 | 0.01718  | -0.29458 | 8.38E-11 | -0.23974 | 1.57E-07 | -0.1125  | 0.015    | -0.26826 |
| -0.00173 | 0.97033  | -0.045   | 0.33187  | 0.028465 | 0.53947  | -0.20864 | 5.45E-06 | -0.07698 |
| -0.11652 | 0.01174  | 0.070553 | 0.12789  | 0.032278 | 0.48652  | -0.09117 | 0.04894  | 0.003497 |
| 0.063624 | 0.16986  | -0.00039 | 0.99324  | 0.089455 | 0.05338  | -0.22507 | 8.93E-07 | -0.3059  |
| -0.00973 | 0.83396  | 0.03472  | 0.45415  | 0.053257 | 0.25071  | -0.00623 | 0.89324  | -0.04595 |
| 0.107783 | 0.01982  | 0.050397 | 0.2771   | 0.001171 | 0.97986  | 0.000124 | 0.99787  | -0.27035 |
| -0.02764 | 0.55126  | -0.0757  | 0.10229  | 0.039389 | 0.39574  | -0.01364 | 0.7688   | 0.0047   |
| 0.147602 | 0.00138  | -0.04976 | 0.2832   | 0.058651 | 0.20582  | 0.096156 | 0.03778  | 0.152517 |
| 0.037672 | 0.41667  | 0.025712 | 0.57941  | 0.010598 | 0.81932  | -0.07395 | 0.11048  | 0.036573 |
| 0.12845  | 0.00544  | -0.19347 | 2.56E-05 | -0.09979 | 0.03108  | 0.030282 | 0.51388  | -0.06108 |
| -0.03289 | 0.47827  | 0.154519 | 0.00081  | 0.100895 | 0.02925  | 0.063835 | 0.16845  | 0.13709  |
| 0.203288 | 9.53E-06 | 0.207997 | 5.83E-06 | 0.159833 | 0.00053  | 0.153437 | 0.00088  | 0.045614 |
| -0.23413 | 3.10E-07 | -0.30271 | 2.37E-11 | -0.31994 | 1.42E-12 | -0.11922 | 0.00992  | -0.26663 |
| 0.037237 | 0.42208  | 0.100367 | 0.03011  | 0.070032 | 0.13073  | -0.1005  | 0.02989  | -0.09113 |
| -0.11133 | 0.01609  | -0.03726 | 0.42176  | 0.006011 | 0.89692  | -0.18735 | 4.62E-05 | -0.10356 |
| 0.171455 | 0.0002   | 0.224714 | 9.30E-07 | 0.096756 | 0.0366   | 0.390013 | 2.05E-18 | 0.492609 |
| -0.16692 | 0.00029  | -0.17884 | 0.0001   | -0.249   | 4.96E-08 | -0.03836 | 0.40821  | -0.18486 |
| 0.008923 | 0.8475   | -0.00034 | 0.99409  | 0.007634 | 0.86931  | -0.07934 | 0.08679  | -0.13337 |

|          |          |          |          |          |          |          |          |          |
|----------|----------|----------|----------|----------|----------|----------|----------|----------|
| 0.061382 | 0.18545  | 0.036096 | 0.43645  | 0.037128 | 0.42344  | -0.04686 | 0.31221  | -0.11916 |
| 0.1555   | 0.00075  | 0.168536 | 0.00025  | 0.128105 | 0.00556  | 0.314512 | 3.51E-12 | 0.310002 |
| 0.137852 | 0.00283  | 0.268933 | 3.52E-09 | 0.179477 | 9.63E-05 | 0.062109 | 0.18028  | 0.143437 |
| -0.04538 | 0.32781  | -0.03379 | 0.46636  | -0.01735 | 0.70848  | -0.06347 | 0.17089  | -0.09671 |
| 0.137926 | 0.00282  | -0.03622 | 0.43483  | 0.07846  | 0.09034  | 0.172088 | 0.00019  | -0.04129 |
| 0.263226 | 7.68E-09 | 0.239944 | 1.54E-07 | 0.260452 | 1.12E-08 | 0.034477 | 0.45732  | 0.298048 |
| 0.006147 | 0.8946   | -0.33793 | 6.14E-14 | -0.1562  | 0.00071  | -0.03958 | 0.39347  | -0.27248 |
| 0.059328 | 0.20062  | 0.034694 | 0.45449  | 0.048332 | 0.29728  | -0.02141 | 0.64449  | 0.065426 |
| 0.346876 | 1.19E-14 | 0.240214 | 1.49E-07 | 0.127429 | 0.00582  | 0.212032 | 3.79E-06 | 0.09542  |
| 0.096319 | 0.03746  | 0.193231 | 2.62E-05 | 0.196212 | 1.95E-05 | 0.115569 | 0.01245  | 0.038096 |
| 0.139917 | 0.00244  | -0.14483 | 0.0017   | -0.06488 | 0.16155  | 0.003365 | 0.94218  | -0.12447 |
| -0.09055 | 0.0505   | -0.21671 | 2.28E-06 | -0.1628  | 0.00041  | -0.04196 | 0.3656   | -0.25802 |
| 0.164428 | 0.00036  | 0.238532 | 1.82E-07 | 0.254612 | 2.41E-08 | 0.098726 | 0.03293  | 0.094467 |
| -0.01382 | 0.76587  | -0.05143 | 0.26737  | -0.04517 | 0.33002  | 0.039826 | 0.39051  | -0.16455 |
| 0.329345 | 2.82E-13 | 0.262932 | 7.99E-09 | 0.318967 | 1.67E-12 | 0.18594  | 5.28E-05 | 0.312587 |
| 0.115759 | 0.0123   | -0.06021 | 0.19404  | -0.16291 | 0.00041  | 0.192543 | 2.80E-05 | 0.117174 |
| 0.104961 | 0.0233   | 0.029367 | 0.5267   | 0.035491 | 0.44419  | -0.03304 | 0.47634  | -0.18345 |
| -0.02426 | 0.60098  | -0.04542 | 0.32739  | 0.013334 | 0.77382  | -0.14071 | 0.0023   | -0.17457 |
| -0.25107 | 3.81E-08 | -0.30687 | 1.22E-11 | -0.29386 | 9.37E-11 | -0.22596 | 8.06E-07 | -0.14236 |
| 0.046817 | 0.3127   | 0.02165  | 0.64075  | 0.048212 | 0.29848  | -0.10221 | 0.0272   | -0.11922 |
| 0.238551 | 1.82E-07 | 0.1973   | 1.75E-05 | 0.177533 | 0.00011  | 0.188698 | 4.06E-05 | 0.100144 |
| 0.053086 | 0.25224  | 0.081279 | 0.07932  | 0.130875 | 0.00461  | -0.01346 | 0.7718   | -0.00898 |
| -0.07782 | 0.09301  | -0.12463 | 0.00701  | -0.04511 | 0.33071  | -0.14279 | 0.00198  | -0.21863 |
| 0.070729 | 0.12694  | 0.043219 | 0.35139  | 0.033366 | 0.47194  | 0.136494 | 0.00312  | -0.03694 |
| 0.078931 | 0.08842  | 0.037361 | 0.42054  | 0.028321 | 0.54153  | 0.071911 | 0.1207   | -0.02901 |
| -0.00223 | 0.96169  | -0.04781 | 0.30254  | -0.02214 | 0.63315  | 0.139157 | 0.00258  | -0.02878 |
| 0.006202 | 0.89366  | 0.021437 | 0.64403  | 0.022816 | 0.62287  | 0.049763 | 0.28319  | 0.146863 |
| -0.00425 | 0.92702  | 0.017372 | 0.70808  | -0.02324 | 0.61636  | 0.039653 | 0.39258  | 0.058608 |
| 0.176918 | 0.00012  | -0.005   | 0.91414  | 0.134354 | 0.00363  | 0.034719 | 0.45416  | -0.00274 |
| 0.003707 | 0.93633  | 0.005054 | 0.91326  | 0.071958 | 0.12045  | -0.04346 | 0.34876  | -0.0848  |
| -0.12053 | 0.00913  | -0.2078  | 5.95E-06 | -0.16079 | 0.00049  | -0.13395 | 0.00373  | -0.18893 |
| 0.319439 | 1.54E-12 | 0.200486 | 1.27E-05 | 0.186324 | 5.09E-05 | 0.115207 | 0.01273  | 0.126204 |
| 0.232831 | 3.62E-07 | 0.274933 | 1.52E-09 | 0.258802 | 1.39E-08 | 0.269818 | 3.11E-09 | 0.195716 |
| 0.163726 | 0.00038  | 0.221693 | 1.31E-06 | 0.215687 | 2.55E-06 | 0.123794 | 0.0074   | 0.107611 |
| 0.021741 | 0.63933  | 0.081233 | 0.07949  | 0.071522 | 0.12272  | -0.03941 | 0.3955   | 0.059847 |
| -0.21652 | 2.33E-06 | -0.07425 | 0.10907  | -0.04066 | 0.38065  | -0.23445 | 2.98E-07 | -0.24009 |
| 0.031133 | 0.50212  | 0.294425 | 8.59E-11 | 0.268531 | 3.72E-09 | 0.10568  | 0.02237  | 0.33773  |
| 0.121021 | 0.00885  | -0.02429 | 0.60051  | -0.09479 | 0.0406   | 0.003038 | 0.9478   | 0.015538 |
| 0.039088 | 0.39937  | -0.07509 | 0.1051   | -0.08621 | 0.06267  | 0.000401 | 0.99311  | -0.04537 |
| 0.169072 | 0.00024  | 0.035867 | 0.43936  | -0.05633 | 0.22438  | 0.055454 | 0.23166  | -0.16538 |
| -0.07021 | 0.12975  | -0.01874 | 0.68631  | -0.01207 | 0.79481  | 0.011335 | 0.807    | -0.0925  |
| 0.032109 | 0.48881  | -0.01309 | 0.77786  | 0.065424 | 0.15808  | -0.04724 | 0.30839  | -0.09765 |
| 0.166348 | 0.00031  | 0.002958 | 0.94916  | 0.089952 | 0.05206  | -0.17394 | 0.00016  | -0.2074  |
| -0.02147 | 0.64347  | 0.081007 | 0.08033  | 0.03617  | 0.4355   | 0.047444 | 0.30626  | 0.092967 |
| -0.06479 | 0.16219  | -0.15051 | 0.00111  | -0.00962 | 0.83579  | -0.14869 | 0.00127  | -0.05141 |

|          |          |          |          |          |          |          |          |          |
|----------|----------|----------|----------|----------|----------|----------|----------|----------|
| 0.301062 | 3.07E-11 | 0.183505 | 6.64E-05 | 0.206072 | 7.14E-06 | 0.251682 | 3.52E-08 | 0.389473 |
| -0.0415  | 0.37093  | 0.093755 | 0.04286  | 0.22107  | 1.40E-06 | -0.04632 | 0.31785  | -0.13727 |
| -0.10156 | 0.0282   | -0.21656 | 2.32E-06 | -0.22889 | 5.74E-07 | -0.09946 | 0.03164  | -0.08436 |
| 0.165066 | 0.00034  | -0.01269 | 0.7845   | 0.021994 | 0.63545  | 0.029788 | 0.52079  | -0.22321 |
| 0.147175 | 0.00143  | 0.086669 | 0.06129  | 0.077516 | 0.0943   | 0.033873 | 0.46523  | -0.06624 |
| 0.023577 | 0.6113   | 0.023244 | 0.61634  | 0.060709 | 0.19032  | 0.075774 | 0.10195  | -0.0252  |
| -0.0823  | 0.07562  | -0.08995 | 0.05206  | -0.02817 | 0.54368  | -0.25214 | 3.32E-08 | -0.30793 |
| 0.015635 | 0.73613  | -0.11613 | 0.01203  | 0.004811 | 0.91741  | -0.09221 | 0.04642  | -0.22609 |
| -0.1392  | 0.00257  | -0.08153 | 0.07838  | -0.06205 | 0.18072  | -0.10382 | 0.02486  | -0.07366 |
| 0.160555 | 0.0005   | 0.081965 | 0.07681  | 0.09338  | 0.0437   | 0.187089 | 4.74E-05 | 0.089002 |
| 0.134761 | 0.00353  | 0.037755 | 0.41564  | 0.000215 | 0.9963   | 0.09755  | 0.03508  | -0.00188 |
| 0.022885 | 0.62181  | -0.02068 | 0.65572  | -0.0491  | 0.28971  | 0.082492 | 0.07492  | 0.101757 |
| -0.03633 | 0.4335   | -0.04214 | 0.36358  | -0.05748 | 0.21506  | -0.02067 | 0.65592  | -0.03053 |
| 0.006871 | 0.88228  | -0.0067  | 0.88519  | 0.00607  | 0.89592  | -0.09953 | 0.03152  | -0.122   |
| -0.00971 | 0.83423  | -0.14768 | 0.00137  | -0.07627 | 0.09974  | -0.10162 | 0.0281   | -0.24572 |
| 0.054231 | 0.24214  | -0.1051  | 0.02313  | -0.10163 | 0.02809  | -0.13918 | 0.00258  | -0.15253 |
| 0.03788  | 0.4141   | 0.166268 | 0.00031  | 0.082487 | 0.07494  | 0.31641  | 2.56E-12 | 0.262992 |
| 0.030399 | 0.51227  | 0.043158 | 0.35207  | 0.084539 | 0.06796  | -0.00656 | 0.88755  | -0.1084  |
| 0.080751 | 0.0813   | -0.03574 | 0.44098  | -0.04755 | 0.30521  | 0.023199 | 0.61704  | -0.10629 |
| 0.021845 | 0.63774  | 0.033969 | 0.46397  | 0.056253 | 0.225    | -0.01068 | 0.81799  | -0.04322 |
| -0.02461 | 0.59577  | -0.03088 | 0.50567  | -0.01601 | 0.73     | 0.036817 | 0.42734  | -0.00707 |
| 0.179293 | 9.79E-05 | -0.21176 | 3.90E-06 | -0.16034 | 0.0005   | 0.075934 | 0.10123  | -0.1673  |
| 0.25439  | 2.48E-08 | 0.292378 | 1.17E-10 | 0.253837 | 2.67E-08 | 0.095811 | 0.03848  | 0.213272 |
| 0.048016 | 0.30046  | 0.045485 | 0.32669  | 0.086251 | 0.06255  | -0.05657 | 0.22243  | 0.019809 |
| -0.0265  | 0.56783  | 0.001069 | 0.98161  | 0.012315 | 0.79069  | -0.0926  | 0.04549  | -0.07525 |
| 0.040624 | 0.38108  | -0.07247 | 0.11783  | -0.03466 | 0.45492  | -0.07201 | 0.12019  | -0.05832 |
| -0.0064  | 0.89022  | -0.01208 | 0.7946   | -0.01934 | 0.67685  | -0.14693 | 0.00145  | -0.06941 |
| 0.033452 | 0.4708   | -0.04901 | 0.29053  | 0.015564 | 0.73728  | -0.10323 | 0.0257   | -0.16091 |
| 0.117841 | 0.01081  | -0.1245  | 0.00706  | 0.023365 | 0.61451  | 0.045043 | 0.33142  | 0.110852 |
| -0.05287 | 0.25422  | -0.29879 | 4.38E-11 | -0.28937 | 1.85E-10 | -0.05031 | 0.27792  | -0.17211 |
| 0.046578 | 0.31519  | -0.22103 | 1.41E-06 | -0.29599 | 6.76E-11 | 0.005324 | 0.90865  | -0.08646 |
| 0.215687 | 2.55E-06 | 0.181512 | 7.99E-05 | 0.230813 | 4.59E-07 | 0.090023 | 0.05188  | 0.055455 |
| 0.171396 | 0.0002   | 0.136322 | 0.00316  | 0.143387 | 0.00189  | 0.050327 | 0.27776  | 0.087353 |
| 0.06021  | 0.194    | 0.144636 | 0.00173  | 0.128901 | 0.00527  | -0.00868 | 0.85153  | -0.11184 |
| -0.1171  | 0.01133  | 0.098664 | 0.03304  | -0.18219 | 7.50E-05 | 0.26518  | 5.89E-09 | 0.466574 |
| -0.07119 | 0.12445  | 0.015752 | 0.73423  | 0.036132 | 0.43599  | 0.042118 | 0.3638   | 0.146414 |
| -0.33238 | 1.65E-13 | -0.16901 | 0.00024  | -0.1591  | 0.00056  | -0.21468 | 2.85E-06 | -0.12043 |
| 0.037798 | 0.41511  | 0.013357 | 0.77344  | -0.0649  | 0.16142  | 0.090992 | 0.0494   | 0.141602 |
| -0.17121 | 0.0002   | -0.14725 | 0.00142  | -0.27776 | 1.02E-09 | 0.025333 | 0.58502  | 0.116231 |
| 0.214985 | 2.75E-06 | 0.151292 | 0.00104  | 0.152575 | 0.00094  | 0.029415 | 0.52602  | -0.02084 |
| 0.220366 | 1.52E-06 | 0.174129 | 0.00016  | 0.309364 | 8.15E-12 | -0.14125 | 0.00222  | -0.14917 |
| -0.02832 | 0.54153  | 0.00048  | 0.99174  | 0.042784 | 0.35626  | -0.11281 | 0.01473  | -0.14895 |
| 0.001292 | 0.97779  | -0.01496 | 0.74714  | 0.031627 | 0.49536  | -0.03916 | 0.39847  | 0.016949 |
| 0.100287 | 0.03024  | 0.159877 | 0.00052  | 0.116227 | 0.01195  | 0.081115 | 0.07993  | 0.166206 |
| 0.078128 | 0.09172  | 0.234573 | 2.94E-07 | 0.205458 | 7.61E-06 | -0.02361 | 0.61086  | 0.066707 |

|          |          |          |          |          |          |          |          |          |
|----------|----------|----------|----------|----------|----------|----------|----------|----------|
| 0.081338 | 0.0791   | -0.02222 | 0.63197  | 0.071758 | 0.12149  | 0.011873 | 0.79804  | 0.039045 |
| -0.09098 | 0.04943  | -0.21049 | 4.48E-06 | -0.18304 | 6.93E-05 | -0.10032 | 0.0302   | -0.16591 |
| -0.06171 | 0.1831   | -0.00615 | 0.89449  | -0.09982 | 0.03103  | -0.02683 | 0.563    | -0.05338 |
| 0.044467 | 0.33764  | -0.02197 | 0.63578  | -0.00185 | 0.9682   | 0.113843 | 0.01383  | -0.06184 |
| -0.07306 | 0.11487  | -0.06054 | 0.19156  | 0.01355  | 0.77025  | -0.15086 | 0.00108  | -0.05355 |
| 0.0689   | 0.13709  | 0.009635 | 0.83549  | 0.063721 | 0.16922  | -0.20102 | 1.20E-05 | -0.18103 |
| -0.21866 | 1.84E-06 | -0.01869 | 0.68708  | -0.17806 | 0.00011  | -0.10061 | 0.02971  | -0.13816 |
| -0.05241 | 0.25833  | -0.0135  | 0.7711   | -0.0385  | 0.40652  | 0.001671 | 0.97127  | 0.018259 |
| -0.32063 | 1.26E-12 | -0.11686 | 0.01149  | -0.14508 | 0.00167  | -0.14145 | 0.00218  | -0.16118 |
| -0.20917 | 5.15E-06 | -0.03505 | 0.44984  | -0.0794  | 0.08654  | -0.11187 | 0.01558  | -0.07757 |
| -0.06562 | 0.15682  | -0.01281 | 0.78249  | -0.06191 | 0.18166  | -0.02922 | 0.52881  | 0.001088 |
| -0.0358  | 0.44022  | -0.0281  | 0.54471  | 0.019089 | 0.68074  | -0.07865 | 0.08958  | -0.07178 |
| -0.28815 | 2.22E-10 | -0.11302 | 0.01454  | -0.08606 | 0.06312  | -0.22458 | 9.44E-07 | -0.10922 |
| -0.27288 | 2.03E-09 | -0.06946 | 0.13392  | -0.19264 | 2.78E-05 | -0.10328 | 0.02562  | -0.025   |
| -0.22173 | 1.30E-06 | -0.10429 | 0.0242   | -0.16892 | 0.00025  | -0.13794 | 0.00281  | -0.16284 |
| -0.04459 | 0.33633  | 0.042986 | 0.35399  | 0.021968 | 0.63584  | -0.07017 | 0.12997  | 0.013101 |
| 0.065716 | 0.15623  | 0.080254 | 0.08319  | 0.022564 | 0.62671  | 0.013332 | 0.77384  | -0.02846 |
| -0.13687 | 0.00304  | -0.09452 | 0.04118  | -0.16425 | 0.00036  | 0.212317 | 3.68E-06 | -0.01246 |
| 0.160635 | 0.00049  | 0.237326 | 2.11E-07 | 0.193128 | 2.65E-05 | 0.164652 | 0.00035  | 0.146684 |
| -0.01631 | 0.72511  | 0.070642 | 0.12741  | 0.027412 | 0.55458  | 0.014434 | 0.75573  | -0.0198  |
| -0.01331 | 0.77418  | -0.04642 | 0.31681  | -0.00776 | 0.86719  | -0.05064 | 0.27481  | -0.09361 |
| 0.029293 | 0.52774  | -0.04656 | 0.3154   | -0.06088 | 0.18911  | 0.052463 | 0.25785  | -0.04563 |
| 0.063888 | 0.1681   | 0.112161 | 0.01531  | 0.101434 | 0.02839  | 0.049554 | 0.28522  | 0.099989 |
| -0.01686 | 0.71628  | -0.02051 | 0.65837  | 0.036672 | 0.42915  | 0.0226   | 0.62616  | -0.02254 |
| 0.034643 | 0.45515  | 0.051938 | 0.26266  | 0.062502 | 0.17754  | 0.095556 | 0.039    | 0.003848 |
| 0.021584 | 0.64176  | -0.03786 | 0.41429  | -0.00154 | 0.97359  | -0.04193 | 0.36593  | -0.14645 |
| -0.02072 | 0.65509  | 0.043826 | 0.34465  | 0.12653  | 0.00618  | -0.16861 | 0.00025  | -0.22135 |
| 0.015942 | 0.73115  | 0.01747  | 0.70651  | 0.05256  | 0.25697  | 0.001028 | 0.98233  | -0.07484 |
| -0.09278 | 0.04507  | -0.25381 | 2.67E-08 | -0.1845  | 6.05E-05 | -0.24059 | 1.42E-07 | -0.37399 |
| 0.04356  | 0.34759  | 0.026737 | 0.56438  | 0.053888 | 0.24514  | -0.16429 | 0.00036  | -0.20915 |
| -0.24368 | 9.69E-08 | -0.23209 | 3.95E-07 | -0.25719 | 1.72E-08 | -0.11252 | 0.01499  | -0.19982 |
| 0.032049 | 0.48963  | -0.0208  | 0.65393  | 0.058474 | 0.20719  | -0.04633 | 0.31773  | -0.13245 |
| 0.021004 | 0.65074  | -0.0951  | 0.03994  | -0.08395 | 0.06991  | -0.07021 | 0.12975  | -0.10381 |
| -0.08873 | 0.05536  | -0.02076 | 0.6545   | 0.005574 | 0.90438  | -0.15616 | 0.00071  | -0.10056 |
| 0.046552 | 0.31545  | 0.022182 | 0.63255  | 0.045463 | 0.32692  | 0.052478 | 0.25772  | -0.06452 |
| 0.018351 | 0.69245  | 0.212989 | 3.42E-06 | 0.170308 | 0.00022  | 0.182071 | 7.58E-05 | 0.210248 |
| 0.007125 | 0.87795  | 0.005587 | 0.90415  | 0.005592 | 0.90407  | -0.05282 | 0.25459  | -0.00947 |
| 0.239742 | 1.57E-07 | 0.00466  | 0.92     | 0.158994 | 0.00056  | -0.01599 | 0.73029  | -0.09569 |
| 0.2442   | 9.08E-08 | -0.08679 | 0.06093  | -0.0184  | 0.69171  | 0.082216 | 0.07591  | -0.17721 |
| 0.137825 | 0.00284  | 0.179036 | 0.0001   | 0.19377  | 2.48E-05 | 0.027061 | 0.55966  | -0.0672  |
| 0.336032 | 8.63E-14 | 0.246719 | 6.62E-08 | 0.242109 | 1.18E-07 | 0.241865 | 1.21E-07 | 0.165571 |
| 0.100262 | 0.03029  | 0.23161  | 4.18E-07 | 0.256496 | 1.88E-08 | 0.106356 | 0.02152  | 0.024513 |
| -0.06965 | 0.13286  | 0.081704 | 0.07776  | 0.007551 | 0.87073  | 0.032964 | 0.47731  | -0.02401 |
| 0.087116 | 0.05995  | 0.085815 | 0.06389  | 0.102755 | 0.02639  | -0.08482 | 0.06706  | -0.0414  |
| -0.22852 | 6.00E-07 | -0.21621 | 2.41E-06 | -0.21661 | 2.31E-06 | -0.20596 | 7.22E-06 | -0.22077 |

|          |          |          |          |          |          |          |          |          |
|----------|----------|----------|----------|----------|----------|----------|----------|----------|
| 0.227905 | 6.44E-07 | 0.243717 | 9.65E-08 | 0.282656 | 5.00E-10 | 0.013835 | 0.76557  | -0.10022 |
| -0.10643 | 0.02143  | -0.14143 | 0.00219  | -0.17978 | 9.36E-05 | -0.09878 | 0.03283  | -0.16557 |
| 0.056329 | 0.22437  | 0.055889 | 0.22802  | -0.0253  | 0.58546  | 0.235554 | 2.61E-07 | 0.130682 |
| -0.07362 | 0.11208  | -0.19982 | 1.36E-05 | -0.19971 | 1.37E-05 | -0.07842 | 0.09049  | -0.31122 |
| 0.064865 | 0.16167  | 0.138535 | 0.0027   | 0.055144 | 0.23429  | 0.042557 | 0.35882  | -0.01123 |
| 0.106671 | 0.02113  | 0.180705 | 8.60E-05 | 0.153308 | 0.00089  | 0.070185 | 0.12989  | 0.033084 |
| 0.005109 | 0.91232  | -0.19713 | 1.78E-05 | -0.20823 | 5.69E-06 | 0.005272 | 0.90954  | -0.15949 |
| 0.032316 | 0.48601  | -0.11117 | 0.01624  | -0.03242 | 0.48458  | -0.02635 | 0.5701   | -0.25759 |
| 0.052162 | 0.2606   | -0.03172 | 0.49415  | 0.068292 | 0.1406   | 0.068732 | 0.13805  | -0.07174 |
| -0.01954 | 0.67362  | -0.20872 | 5.40E-06 | -0.33183 | 1.82E-13 | 0.020661 | 0.65608  | -0.22301 |
| -0.05181 | 0.26383  | -0.11952 | 0.00973  | -0.20395 | 8.90E-06 | -0.00612 | 0.89506  | -0.27665 |
| 0.017393 | 0.70775  | 0.064536 | 0.16381  | 0.050993 | 0.27145  | -0.17061 | 0.00021  | -0.25589 |
| 0.027977 | 0.54646  | 0.026679 | 0.56522  | 0.046274 | 0.31835  | -0.12794 | 0.00563  | -0.19655 |
| 0.207751 | 5.98E-06 | 0.142013 | 0.0021   | 0.315175 | 3.14E-12 | 0.05566  | 0.22993  | -0.17012 |
| -0.24957 | 4.61E-08 | -0.0428  | 0.3561   | -0.09922 | 0.03206  | -0.14488 | 0.00169  | -0.17567 |
| 0.193604 | 2.53E-05 | 0.196379 | 1.92E-05 | 0.241698 | 1.24E-07 | 0.07761  | 0.09389  | -0.07569 |
| -0.12236 | 0.00812  | -0.01994 | 0.66735  | 0.015318 | 0.74128  | -0.15009 | 0.00114  | -0.16546 |
| 0.143448 | 0.00189  | 0.188326 | 4.21E-05 | 0.20075  | 1.24E-05 | 0.130646 | 0.00469  | 0.136111 |
| 0.089027 | 0.05454  | 0.003772 | 0.9352   | -0.02185 | 0.63766  | 0.044594 | 0.33627  | -0.04629 |
| 0.077668 | 0.09365  | -0.00243 | 0.95816  | 0.040713 | 0.38004  | -0.07655 | 0.09851  | -0.18344 |
| 0.263475 | 7.43E-09 | 0.013322 | 0.77402  | -0.11254 | 0.01496  | 0.200008 | 1.33E-05 | 0.316972 |
| 0.16218  | 0.00043  | 0.047646 | 0.3042   | 0.121731 | 0.00845  | 0.092409 | 0.04595  | -0.08215 |
| 0.127394 | 0.00584  | 0.054    | 0.24415  | 0.072782 | 0.11625  | -0.02417 | 0.60233  | -0.04831 |
| 0.260003 | 1.18E-08 | 0.228177 | 6.24E-07 | 0.1235   | 0.00754  | 0.105721 | 0.02232  | 0.128289 |
| 0.316979 | 2.33E-12 | 0.32084  | 1.22E-12 | 0.258979 | 1.36E-08 | 0.236376 | 2.37E-07 | 0.237063 |
| -0.03007 | 0.51687  | -0.04049 | 0.38261  | 0.004872 | 0.91637  | -0.23357 | 3.31E-07 | -0.2257  |
| 0.075458 | 0.10339  | 0.072117 | 0.11963  | 0.026683 | 0.56516  | 0.100669 | 0.02962  | -0.04658 |
| 0.27518  | 1.47E-09 | 0.312866 | 4.60E-12 | 0.305969 | 1.41E-11 | 0.214191 | 3.00E-06 | 0.101267 |
| 0.024979 | 0.59027  | 0.021355 | 0.6453   | -0.0363  | 0.4338   | 0.141447 | 0.00218  | 0.014301 |
| 0.030299 | 0.51365  | 0.078358 | 0.09076  | 0.045171 | 0.33004  | 0.020503 | 0.65853  | 0.033891 |
| 0.046922 | 0.31162  | 0.128205 | 0.00553  | 0.146505 | 0.0015   | 0.090079 | 0.05173  | 0.102802 |
| 0.26197  | 9.10E-09 | 0.168246 | 0.00026  | 0.109966 | 0.01744  | 0.247286 | 6.17E-08 | 0.203862 |
| 0.150625 | 0.00109  | 0.158238 | 0.0006   | 0.107188 | 0.02051  | 0.088691 | 0.05546  | 0.056508 |
| 0.122684 | 0.00795  | 0.068858 | 0.13733  | 0.056981 | 0.21905  | 0.146059 | 0.00155  | -0.07946 |
| 0.086359 | 0.06222  | 0.143211 | 0.00192  | 0.142797 | 0.00198  | 0.165691 | 0.00032  | 0.27228  |
| 0.018375 | 0.69206  | 0.064777 | 0.16225  | 0.091774 | 0.04747  | -0.10722 | 0.02048  | 0.01309  |
| 0.1074   | 0.02026  | 0.189657 | 3.71E-05 | 0.259908 | 1.20E-08 | 0.061971 | 0.18125  | 0.142507 |
| 0.232183 | 3.90E-07 | 0.210883 | 4.29E-06 | 0.274541 | 1.61E-09 | 0.004893 | 0.91601  | -0.09132 |
| -0.0575  | 0.2149   | -0.07262 | 0.11707  | -0.01149 | 0.80447  | -0.11652 | 0.01174  | -0.08422 |
| 0.229641 | 5.26E-07 | 0.25016  | 4.28E-08 | 0.034333 | 0.45919  | 0.351342 | 5.16E-15 | 0.2797   |
| -0.23414 | 3.10E-07 | -0.18996 | 3.60E-05 | -0.23149 | 4.24E-07 | 0.039013 | 0.40027  | 0.115558 |
| 0.074394 | 0.10837  | 0.002978 | 0.94882  | -0.16039 | 0.0005   | 0.126317 | 0.00627  | 0.221676 |
| -0.11655 | 0.01172  | -0.06462 | 0.16327  | -0.08165 | 0.07797  | -0.02507 | 0.58891  | 0.027018 |
| -0.0962  | 0.03769  | -0.02764 | 0.55134  | -0.07463 | 0.10724  | 0.086342 | 0.06227  | 0.124586 |
| -0.03309 | 0.47565  | 0.002096 | 0.96397  | 0.125964 | 0.00642  | -0.20081 | 1.23E-05 | -0.33173 |

|          |          |          |          |          |          |          |         |          |
|----------|----------|----------|----------|----------|----------|----------|---------|----------|
| -0.04695 | 0.31136  | -0.1226  | 0.00799  | -0.02378 | 0.60826  | -0.16922 | 0.00024 | -0.27183 |
| 0.088285 | 0.05659  | 0.097054 | 0.03602  | 0.141846 | 0.00212  | 0.028222 | 0.54294 | 0.03657  |
| 0.183106 | 6.89E-05 | 0.044734 | 0.33474  | 0.142258 | 0.00206  | -0.07876 | 0.08911 | -0.1498  |
| -0.06299 | 0.17417  | -0.03374 | 0.46699  | -0.03288 | 0.47844  | 0.029619 | 0.52315 | 0.018255 |
| -0.12982 | 0.00496  | -0.11191 | 0.01555  | -0.11383 | 0.01384  | -0.00099 | 0.98293 | -0.04734 |
| -0.04406 | 0.34211  | -0.15341 | 0.00088  | -0.10807 | 0.01949  | -0.15098 | 0.00107 | -0.15572 |
| 0.176559 | 0.00013  | 0.135097 | 0.00344  | 0.130821 | 0.00463  | -0.07286 | 0.11587 | -0.17583 |
| 0.147064 | 0.00144  | 0.117932 | 0.01075  | 0.111918 | 0.01553  | 0.064219 | 0.1659  | -0.02588 |
| -0.07069 | 0.12713  | -0.10236 | 0.02697  | -0.08824 | 0.05672  | -0.07295 | 0.1154  | -0.08511 |
| -0.06681 | 0.14945  | -0.08998 | 0.05198  | -0.054   | 0.24415  | -0.10428 | 0.02422 | -0.11619 |
| 0.13911  | 0.00259  | 0.0228   | 0.6231   | 0.177215 | 0.00012  | -0.0572  | 0.21729 | -0.08954 |
| 0.058235 | 0.20906  | 0.024482 | 0.59769  | 0.026216 | 0.572    | 0.07976  | 0.08512 | 0.134491 |
| 0.163309 | 0.00039  | 0.103095 | 0.02589  | 0.199167 | 1.45E-05 | -0.01324 | 0.77533 | -0.06169 |
| -0.05426 | 0.2419   | -0.10274 | 0.02641  | -0.09692 | 0.03627  | 0.037717 | 0.41612 | 0.096978 |
| -0.05478 | 0.23743  | -0.0332  | 0.47412  | -0.06876 | 0.13791  | -0.08282 | 0.07376 | -0.05981 |
| 0.093275 | 0.04394  | -0.14141 | 0.00219  | 0.005917 | 0.89852  | -0.09972 | 0.03119 | -0.19401 |
| -0.02504 | 0.58932  | -0.0086  | 0.85301  | 0.024782 | 0.59321  | -0.00677 | 0.88403 | -0.01497 |
| 0.002542 | 0.95631  | 0.034532 | 0.45659  | 0.087553 | 0.05868  | -0.17024 | 0.00022 | -0.08036 |
| 0.252415 | 3.20E-08 | 0.132968 | 0.004    | 0.169954 | 0.00022  | 0.136291 | 0.00317 | 0.051789 |
| 0.034194 | 0.46101  | -0.02408 | 0.60376  | 0.044571 | 0.33651  | -0.12376 | 0.00742 | -0.21455 |
| 0.003441 | 0.94088  | 0.071685 | 0.12187  | 0.130242 | 0.00482  | 0.07642  | 0.09906 | -0.00867 |
| 0.063793 | 0.16873  | 0.123999 | 0.0073   | 0.116021 | 0.01211  | 0.053891 | 0.24511 | 0.023857 |
| 0.005022 | 0.91382  | 0.002326 | 0.96002  | 0.049409 | 0.28664  | -0.00021 | 0.99646 | -0.05944 |
| 0.030949 | 0.50466  | 0.041978 | 0.3654   | 0.01522  | 0.74288  | -0.00573 | 0.90164 | -0.0477  |
| -0.03571 | 0.44135  | -0.06642 | 0.1518   | 0.022053 | 0.63453  | -0.08736 | 0.05923 | -0.05714 |
| -0.03266 | 0.48138  | -0.02599 | 0.57531  | 0.017401 | 0.70761  | -0.05833 | 0.20834 | 0.022746 |
| 0.059343 | 0.20051  | 0.097336 | 0.03548  | 0.154347 | 0.00082  | 0.007685 | 0.86845 | 0.01009  |
| 0.037036 | 0.42458  | 0.040636 | 0.38094  | 0.066114 | 0.15373  | -0.08943 | 0.05344 | -0.10852 |
| 0.113257 | 0.01433  | 0.225967 | 8.05E-07 | 0.214647 | 2.86E-06 | 0.064043 | 0.16707 | 0.099688 |
| -0.07523 | 0.10444  | 0.094949 | 0.04027  | 0.154161 | 0.00083  | 0.024815 | 0.59271 | 0.011316 |
| 0.063831 | 0.16848  | 0.051775 | 0.26416  | 0.071588 | 0.12238  | 0.084324 | 0.06866 | 0.043526 |
| 0.010302 | 0.82428  | 0.13206  | 0.00425  | 0.140807 | 0.00229  | -0.0164  | 0.72379 | 0.005716 |
| 0.030164 | 0.51553  | -0.00216 | 0.96283  | 0.112746 | 0.01478  | 0.062032 | 0.18082 | 0.124275 |
| -0.10433 | 0.02415  | -0.02851 | 0.53886  | 0.01778  | 0.70155  | -0.09731 | 0.03553 | -0.04469 |
| -0.11548 | 0.01252  | 0.020426 | 0.65974  | 0.084169 | 0.06918  | -0.09545 | 0.03923 | -0.01627 |
| 0.106352 | 0.02153  | 0.179903 | 9.26E-05 | 0.23294  | 3.57E-07 | 0.060232 | 0.19384 | 0.098332 |
| -0.01414 | 0.76057  | 0.126325 | 0.00627  | 0.106026 | 0.02193  | -0.04526 | 0.32907 | 0.015483 |
| -0.02404 | 0.60437  | 0.029132 | 0.53001  | 0.057696 | 0.21331  | -0.04663 | 0.31462 | -0.00889 |
| -0.09756 | 0.03506  | -0.0488  | 0.29262  | 0.001548 | 0.97339  | -0.12451 | 0.00706 | -0.13139 |
| 0.039027 | 0.4001   | 0.087434 | 0.05902  | 0.157826 | 0.00062  | -0.09685 | 0.03641 | -0.0275  |
| 0.026762 | 0.56401  | 0.027483 | 0.55356  | -0.01798 | 0.69836  | -0.09709 | 0.03595 | -0.02108 |
| 0.055942 | 0.22758  | 0.048739 | 0.29323  | 0.057818 | 0.21235  | -0.11792 | 0.01076 | -0.0529  |
| 0.061378 | 0.18547  | 0.035382 | 0.44558  | 0.049838 | 0.28247  | -0.16992 | 0.00023 | -0.08952 |
| -0.01503 | 0.74591  | 0.053713 | 0.24667  | 0.090546 | 0.05052  | -0.03336 | 0.47198 | -0.04223 |
| -0.04805 | 0.30007  | 0.020689 | 0.65563  | 0.043293 | 0.35056  | -0.09708 | 0.03596 | -0.04195 |

|          |          |          |          |          |          |          |          |          |
|----------|----------|----------|----------|----------|----------|----------|----------|----------|
| -0.08234 | 0.07546  | 0.012057 | 0.79496  | -0.00324 | 0.94426  | -0.02605 | 0.57446  | 0.018619 |
| 0.069801 | 0.13201  | 0.060134 | 0.19456  | 0.078771 | 0.08907  | -0.05022 | 0.27877  | 0.059628 |
| -0.0401  | 0.38721  | -0.08957 | 0.05308  | -0.07276 | 0.11635  | -0.06734 | 0.14623  | -0.1482  |
| 0.085344 | 0.06537  | 0.039101 | 0.3992   | 0.053496 | 0.24858  | -0.00805 | 0.86218  | -0.01129 |
| 0.040296 | 0.38494  | 0.086234 | 0.0626   | 0.164284 | 0.00036  | -0.06026 | 0.19365  | -0.01335 |
| -0.02223 | 0.63176  | 0.051769 | 0.26422  | 0.090458 | 0.05075  | -0.03515 | 0.44862  | -0.04077 |
| 0.00855  | 0.85381  | 0.022571 | 0.6266   | 0.03755  | 0.41819  | -0.08198 | 0.07676  | 0.009751 |
| -0.02796 | 0.5467   | 0.046946 | 0.31137  | 0.049437 | 0.28636  | -0.04134 | 0.37279  | 0.005176 |
| 0.067165 | 0.14729  | 0.11098  | 0.01643  | 0.164901 | 0.00035  | -0.0924  | 0.04597  | -0.06941 |
| 0.003738 | 0.93579  | 0.122172 | 0.00822  | 0.187126 | 4.72E-05 | -0.03051 | 0.51078  | -0.01333 |
| -0.10934 | 0.0181   | -0.09468 | 0.04083  | -0.0825  | 0.07489  | -0.0175  | 0.70608  | 0.015868 |
| -0.07329 | 0.11373  | 0.023939 | 0.60585  | 0.090355 | 0.05102  | -0.10751 | 0.02014  | -0.07985 |
| -0.05481 | 0.23712  | -0.0292  | 0.52901  | -0.00672 | 0.88489  | -0.09306 | 0.04443  | -0.07421 |
| 0.056259 | 0.22495  | 0.09254  | 0.04564  | 0.058313 | 0.20845  | -0.03884 | 0.40232  | 0.052417 |
| 0.028601 | 0.53753  | 0.041026 | 0.37639  | 0.05623  | 0.22519  | 0.024489 | 0.59758  | 0.069786 |
| -0.10493 | 0.02335  | -0.01713 | 0.712    | -0.00379 | 0.93487  | -0.05117 | 0.26977  | 0.013254 |
| -0.0541  | 0.24328  | -0.00379 | 0.93494  | -0.0077  | 0.86817  | -0.08016 | 0.08356  | -0.00516 |
| 0.029994 | 0.5179   | 0.045699 | 0.32441  | 0.00381  | 0.93455  | 0.037324 | 0.421    | 0.042238 |
| -0.03281 | 0.47942  | 0.021734 | 0.63945  | 0.04481  | 0.33392  | -0.01872 | 0.68651  | 0.03405  |
| 0.077822 | 0.093    | -0.06021 | 0.19398  | 0.01171  | 0.80074  | -0.07966 | 0.08552  | -0.1118  |
| 0.001392 | 0.97607  | 0.033497 | 0.47021  | -0.00763 | 0.8694   | -0.0454  | 0.32756  | -0.1423  |
| -0.20697 | 6.49E-06 | -0.08431 | 0.06873  | -0.11943 | 0.00979  | -0.02358 | 0.61127  | 0.186059 |
| -0.2092  | 5.13E-06 | -0.07496 | 0.10571  | -0.14919 | 0.00122  | 0.034049 | 0.46292  | 0.227594 |
| 0.115443 | 0.01255  | -0.03975 | 0.39144  | -0.06765 | 0.14438  | 0.025771 | 0.57855  | -0.0227  |
| 0.40108  | 1.78E-19 | 0.143781 | 0.00184  | 0.239777 | 1.57E-07 | 0.053264 | 0.25065  | 0.059949 |
| 0.242549 | 1.11E-07 | 0.128849 | 0.00529  | 0.269818 | 3.11E-09 | -0.06959 | 0.13318  | -0.04709 |
| -0.18645 | 5.03E-05 | -0.09681 | 0.03648  | -0.08036 | 0.0828   | -0.14999 | 0.00115  | -0.07977 |
| -0.12931 | 0.00513  | -0.21771 | 2.04E-06 | -0.31229 | 5.05E-12 | 0.012636 | 0.78536  | -0.09389 |
| -0.145   | 0.00168  | -0.2625  | 8.48E-09 | -0.20847 | 5.55E-06 | 0.071847 | 0.12103  | 0.064918 |
| 0.124375 | 0.00712  | 0.056972 | 0.21912  | -0.10264 | 0.02655  | 0.375362 | 4.50E-17 | 0.505064 |
| -0.02373 | 0.60902  | 0.116214 | 0.01196  | 0.042398 | 0.36062  | -0.06668 | 0.15025  | -0.03774 |
| -0.07541 | 0.10361  | -0.09463 | 0.04094  | -0.02012 | 0.66458  | -0.04923 | 0.28841  | -0.08742 |
| 0.060719 | 0.19025  | -0.05012 | 0.27979  | 0.027955 | 0.54677  | -0.09985 | 0.03098  | -0.18996 |
| 0.035831 | 0.43982  | -0.01449 | 0.75478  | 0.043729 | 0.34573  | 0.031826 | 0.49265  | -0.11782 |
| 0.131211 | 0.00451  | 0.016967 | 0.71458  | 0.088924 | 0.05482  | 0.066969 | 0.14847  | -0.00383 |
| 0.083204 | 0.07244  | 0.047233 | 0.30842  | 0.003561 | 0.93883  | 0.115484 | 0.01251  | -0.01132 |
| 0.018457 | 0.69076  | -0.05518 | 0.23397  | -0.06246 | 0.17781  | 0.048116 | 0.29945  | -0.05147 |
| 0.065846 | 0.15541  | 0.015529 | 0.73784  | 0.048037 | 0.30025  | -0.02456 | 0.59649  | -0.08773 |
| 0.043559 | 0.3476   | -0.19892 | 1.49E-05 | -0.08213 | 0.07622  | -0.11949 | 0.00975  | -0.32052 |
| 0.028902 | 0.53327  | -0.05328 | 0.25047  | -0.03882 | 0.40262  | 0.008234 | 0.85914  | -0.1389  |
| -0.02993 | 0.51882  | 0.118829 | 0.01017  | 0.12946  | 0.00508  | -0.06026 | 0.19366  | 0.00536  |
| -0.1462  | 0.00154  | -0.16275 | 0.00041  | 0.004606 | 0.92092  | -0.17783 | 0.00011  | -0.33145 |
| -0.02839 | 0.5405   | -0.19145 | 3.12E-05 | -0.29252 | 1.15E-10 | -0.06611 | 0.15373  | -0.04164 |
| -0.19765 | 1.69E-05 | -0.11815 | 0.01061  | -0.13142 | 0.00445  | -0.16428 | 0.00036  | -0.34375 |
| 0.210165 | 4.63E-06 | 0.16731  | 0.00028  | 0.255085 | 2.27E-08 | 0.076446 | 0.09895  | -0.02476 |



|          |          |          |          |          |          |          |          |          |
|----------|----------|----------|----------|----------|----------|----------|----------|----------|
| -0.19758 | 1.70E-05 | -0.07965 | 0.08554  | -0.06567 | 0.1565   | -0.23707 | 2.18E-07 | -0.2161  |
| 0.312462 | 4.92E-12 | 0.202369 | 1.05E-05 | 0.175846 | 0.00013  | 0.182457 | 7.32E-05 | 0.039878 |
| 0.012541 | 0.78693  | -0.15027 | 0.00113  | 0.089852 | 0.05233  | -0.13327 | 0.00391  | -0.08516 |
| -0.13007 | 0.00487  | -0.25796 | 1.55E-08 | -0.22814 | 6.26E-07 | -0.0945  | 0.04122  | -0.29663 |
| -0.0705  | 0.12818  | -0.32483 | 6.16E-13 | -0.34222 | 2.82E-14 | -0.04129 | 0.37334  | -0.24605 |
| 0.177633 | 0.00011  | 0.017768 | 0.70174  | 0.042993 | 0.35391  | 0.143192 | 0.00192  | 0.313465 |
| 0.179718 | 9.42E-05 | 0.007157 | 0.87742  | -0.08022 | 0.08334  | 0.139385 | 0.00254  | 0.092825 |
| -0.06547 | 0.1578   | -0.03493 | 0.45138  | -0.04149 | 0.37098  | -0.20868 | 5.42E-06 | -0.18536 |
| 0.077502 | 0.09435  | 0.119847 | 0.00953  | 0.107009 | 0.02073  | -0.06537 | 0.15844  | -0.02074 |
| -0.00305 | 0.94753  | 0.045073 | 0.33109  | 0.043117 | 0.35253  | -0.0356  | 0.44284  | -0.05102 |
| 0.21765  | 2.06E-06 | 0.131235 | 0.0045   | 0.268523 | 3.73E-09 | 0.169919 | 0.00023  | 0.118839 |
| 0.360717 | 8.50E-16 | 0.192033 | 2.94E-05 | 0.159794 | 0.00053  | 0.124473 | 0.00708  | 0.06637  |
| -0.02874 | 0.53553  | 0.002397 | 0.9588   | -0.00505 | 0.91328  | -0.04892 | 0.2914   | -0.10236 |
| -0.08016 | 0.08355  | -0.12659 | 0.00616  | 0.092824 | 0.04497  | -0.2081  | 5.76E-06 | -0.0967  |
| 0.305331 | 1.56E-11 | 0.128009 | 0.0056   | 0.209702 | 4.87E-06 | 0.222531 | 1.19E-06 | 0.316611 |
| -0.12918 | 0.00518  | -0.33254 | 1.61E-13 | -0.3484  | 8.98E-15 | -0.05771 | 0.2132   | -0.24912 |
| -0.08961 | 0.05297  | -0.0994  | 0.03175  | -0.04261 | 0.35823  | -0.0342  | 0.46096  | -0.00288 |
| 0.066665 | 0.15032  | -0.0423  | 0.36168  | 0.067226 | 0.14692  | 0.00103  | 0.9823   | 0.067191 |
| 0.080066 | 0.08392  | -0.00858 | 0.85323  | 0.006921 | 0.88142  | -0.00375 | 0.93551  | -0.05393 |
| -0.13846 | 0.00271  | -0.01506 | 0.74549  | -0.0377  | 0.41635  | -0.14286 | 0.00197  | -0.06561 |
| -0.13964 | 0.00249  | -0.46563 | 1.66E-26 | -0.43648 | 3.83E-23 | -0.26159 | 9.57E-09 | -0.36525 |
| -0.05941 | 0.19997  | -0.01608 | 0.72882  | -0.01277 | 0.78314  | 0.03825  | 0.40956  | -0.06053 |
| 0.008986 | 0.84643  | -0.03753 | 0.41847  | 0.011104 | 0.81086  | -0.06202 | 0.1809   | -0.17799 |
| -0.01055 | 0.82018  | -0.0083  | 0.85807  | 0.087894 | 0.0577   | -0.0855  | 0.06488  | -0.18553 |
| 0.104681 | 0.02368  | 0.115177 | 0.01275  | 0.109144 | 0.01831  | -0.01415 | 0.76038  | -0.01407 |
| -0.08512 | 0.06609  | -0.09815 | 0.03397  | -0.046   | 0.32123  | -0.13227 | 0.00419  | -0.20221 |
| 0.211289 | 4.11E-06 | 0.043749 | 0.3455   | -0.23116 | 4.41E-07 | 0.098093 | 0.03407  | 0.089917 |
| 0.376425 | 3.62E-17 | 0.225197 | 8.80E-07 | 0.154219 | 0.00083  | 0.31156  | 5.70E-12 | 0.445702 |
| 0.119226 | 0.00991  | -0.22782 | 6.50E-07 | -0.09631 | 0.03747  | -0.14665 | 0.00148  | -0.1147  |
| 0.092744 | 0.04516  | -0.00058 | 0.98999  | 0.07194  | 0.12055  | 0.032499 | 0.48354  | -0.18983 |
| -0.15416 | 0.00083  | -0.16366 | 0.00038  | -0.18814 | 4.29E-05 | -0.17634 | 0.00013  | -0.20385 |
| 0.244843 | 8.38E-08 | 0.255621 | 2.11E-08 | 0.221591 | 1.32E-06 | 0.070189 | 0.12987  | 0.059519 |
| 0.348459 | 8.87E-15 | -0.00053 | 0.99087  | 0.09207  | 0.04675  | 0.019672 | 0.67156  | -0.0612  |
| -0.05668 | 0.22153  | -0.15199 | 0.00098  | -0.05538 | 0.23231  | -0.06489 | 0.16151  | -0.11161 |
| -0.13865 | 0.00268  | -0.27178 | 2.37E-09 | -0.18617 | 5.17E-05 | -0.12442 | 0.0071   | -0.20247 |
| 0.034    | 0.46357  | -0.01102 | 0.81229  | 0.035601 | 0.44277  | 0.02068  | 0.65578  | -0.11514 |
| 0.114853 | 0.01301  | 0.116057 | 0.01208  | 0.08124  | 0.07946  | 0.038342 | 0.40843  | -0.03001 |
| 0.256007 | 2.01E-08 | 0.311626 | 5.64E-12 | 0.312504 | 4.88E-12 | 0.178058 | 0.00011  | 0.277989 |
| 0.249441 | 4.69E-08 | 0.237545 | 2.06E-07 | 0.292465 | 1.16E-10 | 0.135884 | 0.00326  | 0.078364 |
| -0.20588 | 7.28E-06 | -0.22794 | 6.41E-07 | -0.25708 | 1.74E-08 | -0.12328 | 0.00765  | -0.0671  |
| -0.10075 | 0.02949  | -0.079   | 0.08815  | -0.13451 | 0.00359  | -0.13245 | 0.00414  | -0.0596  |
| 0.158644 | 0.00058  | 0.263876 | 7.04E-09 | 0.213616 | 3.20E-06 | 0.06091  | 0.18885  | 0.045895 |
| 0.293998 | 9.17E-11 | 0.022442 | 0.62857  | 0.048197 | 0.29864  | 0.014238 | 0.75894  | 0.061086 |
| 0.04886  | 0.29203  | -0.0535  | 0.24857  | 0.001457 | 0.97496  | -0.03946 | 0.39491  | 0.036924 |
| -0.06418 | 0.16617  | 0.003744 | 0.93569  | 0.05125  | 0.26904  | -0.0896  | 0.05299  | -0.18432 |

|          |          |          |          |          |          |          |          |          |
|----------|----------|----------|----------|----------|----------|----------|----------|----------|
| -0.1407  | 0.00231  | -0.17509 | 0.00014  | -0.17995 | 9.22E-05 | -0.11279 | 0.01474  | -0.18408 |
| 0.108797 | 0.01868  | 0.028354 | 0.54106  | 0.044799 | 0.33404  | 0.053266 | 0.25063  | -0.02841 |
| 0.311004 | 6.24E-12 | 0.056566 | 0.22243  | -0.00081 | 0.98613  | 0.07826  | 0.09117  | 0.116082 |
| 0.017478 | 0.70639  | 0.09493  | 0.04031  | 0.08258  | 0.07461  | -0.0659  | 0.15508  | -0.0566  |
| 0.084107 | 0.06938  | 0.06904  | 0.13629  | 0.056938 | 0.2194   | 0.041471 | 0.37122  | -0.08296 |
| 0.073721 | 0.11161  | 0.090275 | 0.05122  | 0.039015 | 0.40024  | 0.14706  | 0.00144  | 0.072378 |
| 0.001083 | 0.98138  | -0.04358 | 0.3474   | 0.006396 | 0.89035  | -0.00062 | 0.98939  | -0.11617 |
| 0.102047 | 0.02745  | 0.079815 | 0.0849   | 0.060908 | 0.18887  | 0.200142 | 1.31E-05 | 0.171799 |
| 0.040155 | 0.38661  | 0.028928 | 0.5329   | 0.023093 | 0.61864  | 0.068554 | 0.13908  | -0.02344 |
| 0.003733 | 0.93587  | -0.06362 | 0.1699   | -0.01821 | 0.69471  | 0.087825 | 0.05789  | 0.164212 |
| -0.24955 | 4.63E-08 | -0.25838 | 1.47E-08 | -0.2109  | 4.28E-06 | -0.26977 | 3.14E-09 | -0.39628 |
| 0.130575 | 0.00471  | -0.22123 | 1.38E-06 | -0.02351 | 0.61231  | 0.029306 | 0.52755  | -0.17104 |
| 0.302402 | 2.48E-11 | 0.246361 | 6.93E-08 | 0.190451 | 3.43E-05 | 0.330736 | 2.21E-13 | 0.382772 |
| 0.113568 | 0.01406  | -0.04948 | 0.2859   | 0.180012 | 9.17E-05 | -0.11556 | 0.01246  | 0.022596 |
| 0.142558 | 0.00201  | 0.16926  | 0.00024  | 0.153106 | 0.0009   | -0.10753 | 0.02011  | -0.08341 |
| 0.190668 | 3.36E-05 | 0.275856 | 1.33E-09 | 0.326312 | 4.77E-13 | 0.162282 | 0.00043  | 0.077727 |
| 0.115644 | 0.01239  | 0.18273  | 7.14E-05 | 0.238632 | 1.80E-07 | 0.008251 | 0.85886  | 0.04977  |
| 0.050967 | 0.27169  | 0.063475 | 0.17087  | 0.078137 | 0.09168  | 0.004138 | 0.92894  | -0.05358 |
| 0.26622  | 5.11E-09 | 0.178242 | 0.00011  | 0.214046 | 3.05E-06 | 0.28763  | 2.40E-10 | 0.183227 |
| 0.090449 | 0.05077  | 0.04016  | 0.38655  | 0.091054 | 0.04924  | 0.138352 | 0.00273  | -0.0966  |
| 0.073431 | 0.11302  | 0.002117 | 0.96361  | 0.080862 | 0.08088  | -0.03263 | 0.48175  | -0.08468 |
| 0.190439 | 3.44E-05 | 0.181132 | 8.27E-05 | 0.307926 | 1.03E-11 | -0.02862 | 0.53728  | -0.04222 |
| 0.1528   | 0.00092  | 0.072525 | 0.11755  | 0.206388 | 6.90E-06 | -0.10994 | 0.01747  | -0.08834 |
| 0.093936 | 0.04246  | 0.139013 | 0.00261  | 0.271219 | 2.56E-09 | 0.020726 | 0.65506  | -0.03172 |
| 0.130458 | 0.00475  | 0.083427 | 0.07167  | 0.215041 | 2.74E-06 | 0.000686 | 0.9882   | -0.08269 |
| 0.115785 | 0.01228  | 0.181781 | 7.79E-05 | 0.226266 | 7.78E-07 | 0.011892 | 0.7977   | 0.007336 |
| 0.225171 | 8.82E-07 | 0.160251 | 0.00051  | 0.31805  | 1.95E-12 | 0.097085 | 0.03596  | 0.140102 |
| 0.184805 | 5.88E-05 | 0.179306 | 9.78E-05 | 0.28985  | 1.72E-10 | 0.078422 | 0.0905   | 0.069032 |
| 0.008119 | 0.86109  | 0.050964 | 0.27172  | 0.168245 | 0.00026  | -0.08685 | 0.06073  | -0.04047 |
| 0.194257 | 2.37E-05 | 0.30392  | 1.95E-11 | 0.357876 | 1.48E-15 | 0.110081 | 0.01733  | 0.224296 |
| 0.097595 | 0.03499  | 0.247662 | 5.88E-08 | 0.157733 | 0.00062  | 0.078232 | 0.09128  | 0.125627 |
| 0.206725 | 6.66E-06 | 0.156163 | 0.00071  | 0.162263 | 0.00043  | 0.098501 | 0.03333  | 0.05275  |
| 0.248857 | 5.05E-08 | 0.260235 | 1.15E-08 | 0.276379 | 1.24E-09 | 0.051786 | 0.26406  | 0.07639  |
| 0.096888 | 0.03634  | 0.196135 | 1.97E-05 | 0.160802 | 0.00049  | -0.10267 | 0.02652  | -0.10521 |
| 0.213419 | 3.27E-06 | 0.085801 | 0.06394  | 0.215921 | 2.49E-06 | 0.058413 | 0.20767  | -0.03308 |
| 0.186033 | 5.24E-05 | 0.175152 | 0.00014  | 0.2542   | 2.54E-08 | 0.050329 | 0.27775  | -0.06343 |
| 0.302356 | 2.50E-11 | 0.282535 | 5.09E-10 | 0.319149 | 1.62E-12 | 0.241369 | 1.29E-07 | 0.239827 |
| 0.294669 | 8.27E-11 | 0.209467 | 4.99E-06 | 0.343787 | 2.11E-14 | 0.072914 | 0.11559  | 0.043824 |
| 0.184761 | 5.90E-05 | 0.232642 | 3.70E-07 | 0.270511 | 2.83E-09 | 0.01299  | 0.77949  | 0.09356  |
| 0.200674 | 1.25E-05 | 0.219973 | 1.59E-06 | 0.277965 | 9.86E-10 | 0.09582  | 0.03846  | 0.136493 |
| -0.12826 | 0.00551  | -0.28249 | 5.12E-10 | -0.2178  | 2.02E-06 | -0.21984 | 1.61E-06 | -0.28364 |
| 0.108934 | 0.01853  | 0.006287 | 0.89221  | 0.047107 | 0.30971  | -0.0606  | 0.19109  | -0.12815 |
| 0.077992 | 0.09228  | 0.15985  | 0.00053  | 0.120421 | 0.00919  | 0.005175 | 0.91119  | -0.10212 |
| 0.075669 | 0.10243  | 0.102169 | 0.02726  | 0.028072 | 0.54509  | 0.107493 | 0.02016  | -0.04083 |
| 0.086907 | 0.06057  | 0.10746  | 0.02019  | 0.093789 | 0.04278  | 0.138712 | 0.00266  | 0.104028 |

|          |          |          |          |          |          |          |          |          |
|----------|----------|----------|----------|----------|----------|----------|----------|----------|
| 0.106608 | 0.02121  | 0.076052 | 0.1007   | 0.072201 | 0.1192   | 0.050502 | 0.2761   | -0.03036 |
| -0.20254 | 1.03E-05 | -0.22286 | 1.15E-06 | -0.1616  | 0.00045  | -0.28921 | 1.89E-10 | -0.47313 |
| 0.139583 | 0.0025   | 0.277299 | 1.08E-09 | 0.255084 | 2.27E-08 | 0.090681 | 0.05018  | 0.072971 |
| 0.144197 | 0.00178  | 0.089343 | 0.05368  | 0.217548 | 2.08E-06 | 0.038249 | 0.40957  | 0.05745  |
| 0.049858 | 0.28227  | -0.13621 | 0.00318  | -0.06181 | 0.18243  | 0.027082 | 0.55936  | 0.150814 |
| 0.295033 | 7.82E-11 | 0.162552 | 0.00042  | 0.087388 | 0.05916  | 0.053186 | 0.25134  | 0.365271 |
| -0.01338 | 0.77304  | -0.04358 | 0.34737  | -0.04749 | 0.30581  | -0.12767 | 0.00573  | -0.20201 |
| -0.02322 | 0.61666  | 0.080384 | 0.08269  | 0.028027 | 0.54574  | -0.02198 | 0.63565  | -0.02185 |
| 0.296455 | 6.28E-11 | 0.31008  | 7.25E-12 | 0.32194  | 1.01E-12 | 0.200563 | 1.26E-05 | 0.048677 |
| -0.13866 | 0.00267  | 0.010541 | 0.82028  | 0.038863 | 0.40209  | -0.15623 | 0.0007   | -0.07609 |
| -0.08129 | 0.07928  | -0.02586 | 0.5772   | -0.02059 | 0.6572   | -0.1817  | 7.85E-05 | -0.03803 |
| -0.06732 | 0.14637  | -0.03198 | 0.49051  | 0.002871 | 0.95067  | -0.05036 | 0.27746  | 0.010276 |
| 0.022724 | 0.62426  | -0.04552 | 0.32636  | -0.00852 | 0.85427  | -0.2196  | 1.66E-06 | -0.33208 |
| 0.256932 | 1.78E-08 | 0.166413 | 0.0003   | 0.016946 | 0.71493  | 0.197414 | 1.73E-05 | 0.18707  |
| -0.014   | 0.76282  | -0.07619 | 0.10006  | -0.0728  | 0.11616  | -0.26479 | 6.22E-09 | -0.22213 |
| -0.08821 | 0.05679  | -0.14496 | 0.00169  | -0.13137 | 0.00446  | -0.20061 | 1.25E-05 | -0.15873 |
| -0.04784 | 0.30223  | 0.033517 | 0.46995  | 0.056727 | 0.22111  | -0.06707 | 0.14787  | -0.04566 |
| -0.08014 | 0.08363  | -0.13832 | 0.00274  | -0.12709 | 0.00595  | -0.13576 | 0.00329  | -0.05417 |
| 0.152065 | 0.00098  | 0.004141 | 0.92888  | -0.05252 | 0.25738  | 0.177058 | 0.00012  | 0.250832 |
| 0.019854 | 0.6687   | 0.028449 | 0.5397   | 0.073592 | 0.11224  | -0.06559 | 0.15704  | -0.01153 |
| -0.04424 | 0.34009  | -0.14105 | 0.00225  | -0.12959 | 0.00503  | -0.04772 | 0.30347  | -0.06149 |
| 0.048088 | 0.29973  | -0.01521 | 0.74304  | 0.032647 | 0.48155  | -0.14723 | 0.00142  | -0.16575 |
| -0.05328 | 0.25054  | -0.02854 | 0.53836  | -0.01503 | 0.74591  | -0.00387 | 0.93352  | -0.13511 |
| 0.049621 | 0.28457  | 0.142684 | 0.00199  | 0.067329 | 0.14629  | 0.069088 | 0.13602  | 0.164993 |
| 0.052503 | 0.25749  | 0.082456 | 0.07505  | 0.033897 | 0.46492  | 0.136599 | 0.0031   | 0.076598 |
| -0.14586 | 0.00157  | 0.034568 | 0.45613  | -0.05809 | 0.21019  | 0.076654 | 0.09802  | 0.041641 |
| 0.221136 | 1.39E-06 | 0.160407 | 0.0005   | 0.099231 | 0.03204  | 0.078711 | 0.08931  | 0.22475  |
| 0.205329 | 7.71E-06 | -0.10702 | 0.02072  | 0.087614 | 0.0585   | -0.13611 | 0.00321  | -0.23072 |
| -0.15375 | 0.00086  | -0.12141 | 0.00863  | -0.07645 | 0.09894  | -0.07448 | 0.10796  | -0.10409 |
| 0.225782 | 8.23E-07 | 0.235813 | 2.53E-07 | 0.316937 | 2.34E-12 | 0.258927 | 1.37E-08 | 0.315937 |
| 0.189575 | 3.74E-05 | -0.09444 | 0.04135  | 0.040138 | 0.38682  | 0.066753 | 0.14979  | 0.123705 |
| 0.017616 | 0.70417  | -0.03742 | 0.41975  | -0.01701 | 0.71384  | -0.14863 | 0.00128  | -0.15354 |
| 0.048134 | 0.29927  | 0.043266 | 0.35086  | 0.055363 | 0.23243  | -0.01154 | 0.80354  | -0.024   |
| -0.00508 | 0.91289  | -0.03405 | 0.46291  | 0.014041 | 0.76217  | -0.12543 | 0.00665  | -0.20631 |
| -0.1242  | 0.00721  | -0.20596 | 7.22E-06 | -0.16582 | 0.00032  | -0.21651 | 2.33E-06 | -0.16527 |
| 0.010815 | 0.81568  | 0.043298 | 0.3505   | 0.080278 | 0.0831   | -0.03042 | 0.51193  | -0.08073 |
| -0.1804  | 8.85E-05 | -0.13755 | 0.00289  | -0.15478 | 0.00079  | -0.11421 | 0.01352  | -0.30969 |
| -0.12751 | 0.00579  | 0.009798 | 0.83275  | -0.01618 | 0.72722  | -0.02198 | 0.63565  | 0.050258 |
| -0.01708 | 0.71275  | 0.026518 | 0.56758  | 0.059104 | 0.20233  | 0.034068 | 0.46267  | 0.061488 |
| -0.06727 | 0.14667  | -0.00375 | 0.93555  | 0.053708 | 0.24671  | -0.11133 | 0.01609  | -0.13612 |
| 0.253621 | 2.74E-08 | 0.196332 | 1.93E-05 | 0.287422 | 2.47E-10 | 0.030425 | 0.5119   | -0.03341 |
| 0.009642 | 0.83538  | 0.126701 | 0.00611  | 0.129699 | 0.005    | -0.07253 | 0.11751  | -0.11923 |
| 0.103934 | 0.0247   | -0.07843 | 0.09046  | -0.09639 | 0.03731  | 0.077026 | 0.0964   | -0.09894 |
| 0.147048 | 0.00144  | 0.246921 | 6.46E-08 | 0.177207 | 0.00012  | 0.159482 | 0.00054  | 0.170927 |
| -0.06576 | 0.15597  | 0.240975 | 1.35E-07 | -0.04615 | 0.31964  | 0.160086 | 0.00052  | 0.450789 |

|          |          |          |          |          |          |          |          |          |
|----------|----------|----------|----------|----------|----------|----------|----------|----------|
| 0.025078 | 0.58881  | 0.003066 | 0.94731  | 0.021652 | 0.64072  | -0.03955 | 0.39378  | -0.03532 |
| 0.086331 | 0.06231  | 0.117389 | 0.01112  | 0.168921 | 0.00025  | 0.059234 | 0.20134  | -0.11133 |
| -0.24723 | 6.21E-08 | -0.27668 | 1.19E-09 | -0.27026 | 2.93E-09 | -0.07371 | 0.11167  | -0.03799 |
| -0.20106 | 1.20E-05 | -0.20332 | 9.50E-06 | -0.25071 | 3.99E-08 | -0.01841 | 0.69148  | -0.06594 |
| 0.250176 | 4.27E-08 | 0.198427 | 1.56E-05 | 0.281031 | 6.33E-10 | 0.338548 | 5.49E-14 | 0.254496 |
| -0.02505 | 0.58924  | -0.07889 | 0.08859  | 0.009231 | 0.8423   | -0.2553  | 2.20E-08 | -0.28549 |
| 0.026154 | 0.5729   | -0.0359  | 0.43896  | -0.02642 | 0.56903  | -0.12352 | 0.00753  | -0.17946 |
| 0.008028 | 0.86264  | 0.017349 | 0.70845  | 0.051284 | 0.26872  | 0.034992 | 0.45061  | -0.0583  |
| 0.161491 | 0.00046  | 0.148604 | 0.00128  | 0.00264  | 0.95463  | 0.195831 | 2.03E-05 | 0.169823 |
| -0.27665 | 1.19E-09 | -0.12399 | 0.00731  | -0.23388 | 3.19E-07 | -0.09433 | 0.04159  | 0.113892 |
| 0.059005 | 0.20309  | -0.07551 | 0.10318  | -0.05573 | 0.22932  | 0.029259 | 0.52821  | -0.04837 |
| -0.05641 | 0.22374  | -0.11138 | 0.01604  | 0.116653 | 0.01164  | -0.16815 | 0.00026  | -0.28564 |
| -0.13724 | 0.00296  | -0.05508 | 0.2348   | -0.40573 | 6.22E-20 | 0.034348 | 0.459    | 0.198078 |
| 0.256568 | 1.87E-08 | 0.2525   | 3.17E-08 | 0.025477 | 0.58288  | 0.382384 | 1.04E-17 | 0.410197 |
| -0.2388  | 1.77E-07 | -0.14013 | 0.0024   | -0.13721 | 0.00297  | -0.12766 | 0.00573  | -0.10732 |
| 0.062007 | 0.181    | 0.148057 | 0.00133  | 0.114886 | 0.01298  | 0.148256 | 0.00131  | 0.15015  |
| 0.042142 | 0.36353  | 0.16991  | 0.00023  | 0.137386 | 0.00293  | -0.0681  | 0.14174  | 0.05241  |
| 0.006558 | 0.8876   | 0.109255 | 0.01819  | 0.04978  | 0.28303  | 0.042807 | 0.356    | -0.14571 |
| -0.16839 | 0.00026  | -0.19792 | 1.64E-05 | -0.17782 | 0.00011  | -0.05219 | 0.26038  | 0.053465 |
| -0.14951 | 0.00119  | 0.010181 | 0.82632  | 0.001296 | 0.97771  | 0.024296 | 0.60048  | 0.200966 |
| 0.221411 | 1.35E-06 | 0.26783  | 4.10E-09 | 0.142808 | 0.00198  | 0.144794 | 0.00171  | 0.011674 |
| 0.030028 | 0.51742  | -0.05836 | 0.20806  | -0.08076 | 0.08126  | -0.0945  | 0.04122  | -0.2336  |
| 0.062489 | 0.17762  | 0.068439 | 0.13974  | 0.07171  | 0.12174  | -0.10487 | 0.02342  | -0.07443 |
| 0.109319 | 0.01812  | 0.036543 | 0.43078  | -0.14703 | 0.00144  | 0.284531 | 3.80E-10 | 0.292934 |
| 0.208723 | 5.40E-06 | 0.026722 | 0.5646   | 0.120435 | 0.00918  | -0.11696 | 0.01143  | -0.09969 |
| 0.155236 | 0.00076  | 0.127012 | 0.00599  | -0.00459 | 0.92123  | 0.261263 | 1.00E-08 | 0.308949 |
| -0.06039 | 0.1927   | 0.069994 | 0.13095  | 0.214531 | 2.89E-06 | -0.01162 | 0.8022   | -0.07808 |
| 0.145522 | 0.00162  | 0.00983  | 0.83221  | 0.014774 | 0.75016  | 0.215139 | 2.71E-06 | 0.198595 |
| 0.012652 | 0.78509  | -0.01459 | 0.75318  | 0.024309 | 0.60028  | -0.01567 | 0.73554  | -0.0593  |
| -0.00869 | 0.85147  | -0.10039 | 0.03008  | -0.07811 | 0.09179  | -0.13128 | 0.00449  | -0.20345 |
| 0.042638 | 0.35791  | -0.00967 | 0.83491  | 0.006017 | 0.89682  | 0.026378 | 0.56963  | -0.01328 |
| -0.03409 | 0.46235  | 0.222107 | 1.25E-06 | 0.21779  | 2.02E-06 | -0.11367 | 0.01398  | -0.028   |
| 0.04559  | 0.32557  | 0.073533 | 0.11252  | 0.077024 | 0.09641  | 0.085628 | 0.06448  | 0.149654 |
| -0.08347 | 0.07153  | -0.0175  | 0.70599  | -0.06465 | 0.16305  | 0.121376 | 0.00865  | 0.142621 |
| 0.159088 | 0.00056  | 0.300386 | 3.41E-11 | 0.32591  | 5.11E-13 | 0.129046 | 0.00522  | 0.172407 |
| 0.250248 | 4.23E-08 | 0.275653 | 1.37E-09 | 0.231144 | 4.41E-07 | 0.017742 | 0.70215  | -0.11901 |
| 0.029077 | 0.53078  | 0.135313 | 0.00339  | 0.021735 | 0.63943  | -0.01293 | 0.78044  | 0.129508 |
| 0.222109 | 1.25E-06 | 0.214876 | 2.79E-06 | 0.259809 | 1.22E-08 | 0.006457 | 0.88932  | -0.04523 |
| -0.16591 | 0.00032  | 0.020467 | 0.65911  | -0.03088 | 0.50555  | -0.04158 | 0.37001  | 0.109339 |
| -0.05831 | 0.20847  | -0.26917 | 3.41E-09 | -0.17618 | 0.00013  | -0.06026 | 0.19366  | -0.18566 |
| -0.27733 | 1.08E-09 | -0.21045 | 4.49E-06 | -0.19835 | 1.58E-05 | -0.25075 | 3.97E-08 | -0.15629 |
| -0.10214 | 0.0273   | 0.024967 | 0.59045  | 0.007866 | 0.86538  | -0.04045 | 0.38314  | -0.08617 |
| -0.24903 | 4.94E-08 | 0.001749 | 0.96993  | -0.04999 | 0.28101  | -0.00011 | 0.99812  | 0.173391 |
| 0.283185 | 4.63E-10 | 0.257708 | 1.61E-08 | 0.152067 | 0.00098  | 0.363505 | 4.92E-16 | 0.441988 |
| 0.024818 | 0.59268  | -0.03508 | 0.44945  | 0.00069  | 0.98814  | -0.0357  | 0.44154  | -0.03737 |

|          |          |          |          |          |          |          |          |          |
|----------|----------|----------|----------|----------|----------|----------|----------|----------|
| -0.26919 | 3.40E-09 | -0.0972  | 0.03574  | -0.1821  | 7.57E-05 | -0.13869 | 0.00267  | -0.02259 |
| 0.044196 | 0.34059  | -0.02546 | 0.58306  | -0.02065 | 0.6562   | -0.13704 | 0.003    | -0.1861  |
| -0.2178  | 2.02E-06 | -0.12642 | 0.00623  | -0.23502 | 2.79E-07 | -0.21558 | 2.58E-06 | -0.15223 |
| 0.036677 | 0.42909  | -0.03113 | 0.50218  | 0.034602 | 0.45568  | 0.002167 | 0.96275  | 0.045244 |
| -0.06829 | 0.14061  | -0.18372 | 6.51E-05 | -0.05433 | 0.24128  | -0.01321 | 0.77589  | 0.113741 |
| -0.10177 | 0.02788  | 0.044585 | 0.33636  | 0.092619 | 0.04545  | 0.069477 | 0.13382  | 0.038615 |
| 0.094545 | 0.04113  | 0.062798 | 0.17549  | 0.07997  | 0.08429  | -0.11163 | 0.0158   | -0.05739 |
| -0.07232 | 0.11861  | -0.13911 | 0.00259  | -0.06476 | 0.16237  | -0.22292 | 1.14E-06 | -0.33903 |
| 0.216321 | 2.38E-06 | 0.266613 | 4.85E-09 | 0.259178 | 1.32E-08 | 0.110682 | 0.01672  | 0.011366 |
| 0.153974 | 0.00084  | 0.198131 | 1.61E-05 | 0.259141 | 1.33E-08 | 0.010186 | 0.82623  | 0.013809 |
| -0.04325 | 0.35106  | -0.05295 | 0.25347  | 0.004148 | 0.92876  | -0.22245 | 1.20E-06 | -0.13822 |
| 0.051173 | 0.26976  | 0.064714 | 0.16266  | 0.207349 | 6.24E-06 | -0.00904 | 0.84549  | -0.00757 |
| -0.06345 | 0.17106  | -0.24954 | 4.63E-08 | -0.12963 | 0.00502  | -0.2312  | 4.38E-07 | -0.34064 |
| 0.082132 | 0.07621  | 0.214859 | 2.79E-06 | 0.144999 | 0.00168  | 0.166473 | 0.0003   | 0.137446 |
| 0.263981 | 6.94E-09 | 0.142747 | 0.00199  | 0.023164 | 0.61756  | 0.29185  | 1.27E-10 | 0.219794 |
| -0.05304 | 0.25269  | -0.17699 | 0.00012  | -0.19297 | 2.69E-05 | -0.0906  | 0.05039  | 0.002307 |
| -0.04373 | 0.34574  | -0.09562 | 0.03888  | -0.0838  | 0.07041  | -0.10366 | 0.02508  | -0.30422 |
| 0.073452 | 0.11292  | 0.066909 | 0.14884  | 0.133238 | 0.00392  | 0.008277 | 0.85841  | 0.250156 |
| 0.062618 | 0.17673  | 0.001265 | 0.97825  | 0.055558 | 0.23079  | 0.024092 | 0.60355  | 0.037791 |
| 0.078111 | 0.09179  | 0.045291 | 0.32875  | 0.142212 | 0.00207  | -0.05128 | 0.26876  | -0.20894 |
| 0.278172 | 9.57E-10 | 0.200014 | 1.33E-05 | 0.278516 | 9.11E-10 | 0.057706 | 0.21323  | 0.031629 |
| 0.156707 | 0.00068  | 0.018738 | 0.68631  | 0.047668 | 0.30397  | -0.0965  | 0.0371   | -0.18214 |
| 0.044714 | 0.33497  | -0.00953 | 0.83722  | -0.00558 | 0.90432  | -0.03606 | 0.4369   | -0.13718 |
| 0.155481 | 0.00075  | -0.0151  | 0.74478  | 0.103932 | 0.0247   | 0.054092 | 0.24335  | -0.01002 |
| 0.135914 | 0.00325  | -0.04706 | 0.31018  | -0.09871 | 0.03295  | 0.271424 | 2.49E-09 | 0.078552 |
| 0.09324  | 0.04402  | -0.00188 | 0.96776  | 0.141436 | 0.00219  | 0.134883 | 0.0035   | 0.222509 |
| -0.10995 | 0.01746  | -0.18644 | 5.04E-05 | -0.06061 | 0.19104  | -0.22273 | 1.16E-06 | -0.17148 |
| -0.06291 | 0.17474  | 0.218399 | 1.89E-06 | 0.073736 | 0.11153  | 0.076626 | 0.09815  | 0.075911 |
| 0.217181 | 2.16E-06 | 0.274259 | 1.67E-09 | 0.171071 | 0.0002   | 0.158431 | 0.00059  | 0.199927 |
| -0.10061 | 0.02972  | 0.040877 | 0.37812  | 0.016936 | 0.71509  | -0.00614 | 0.89466  | 0.042284 |
| 0.175661 | 0.00014  | -0.10525 | 0.02293  | -0.01151 | 0.80403  | 0.23372  | 3.25E-07 | 0.264705 |
| -0.28235 | 5.23E-10 | -0.05909 | 0.20243  | -0.15048 | 0.00111  | -0.05579 | 0.22881  | 0.019377 |
| -0.0148  | 0.74978  | 0.031518 | 0.49685  | 0.122279 | 0.00816  | -0.01415 | 0.76035  | -0.03972 |
| -0.03245 | 0.48426  | -0.20326 | 9.55E-06 | -0.23712 | 2.17E-07 | -0.01953 | 0.67374  | -0.15928 |
| -0.1202  | 0.00932  | -0.14718 | 0.00143  | -0.09774 | 0.03473  | -0.23788 | 1.97E-07 | -0.25843 |
| 0.128465 | 0.00543  | 0.150267 | 0.00113  | 0.250492 | 4.10E-08 | 0.122545 | 0.00802  | 0.209751 |
| 0.133848 | 0.00376  | 0.079636 | 0.0856   | 0.163765 | 0.00038  | -0.02401 | 0.60483  | -0.14888 |
| 0.015052 | 0.74562  | 0.06224  | 0.17936  | 0.151958 | 0.00099  | 0.134074 | 0.0037   | 0.048019 |
| 0.21626  | 2.40E-06 | 0.222346 | 1.22E-06 | 0.101804 | 0.02782  | 0.282394 | 5.19E-10 | 0.342668 |
| -0.03039 | 0.51234  | -0.01101 | 0.81246  | -0.00108 | 0.9814   | -0.01745 | 0.7068   | -0.09136 |
| -0.01405 | 0.76201  | 0.127214 | 0.00591  | 0.126486 | 0.0062   | -0.01693 | 0.7152   | 0.069391 |
| -0.09968 | 0.03126  | -0.12743 | 0.00582  | -0.11884 | 0.01016  | -0.13697 | 0.00302  | -0.26597 |
| 0.16521  | 0.00034  | 0.16936  | 0.00024  | 0.149579 | 0.00119  | 0.036401 | 0.43258  | -0.08972 |
| 0.012367 | 0.78982  | -0.03809 | 0.41154  | -0.00566 | 0.90299  | -0.25326 | 2.87E-08 | -0.39987 |
| -0.1781  | 0.00011  | -0.17471 | 0.00015  | -0.20312 | 9.70E-06 | -0.27099 | 2.65E-09 | -0.35266 |

|          |          |          |          |          |          |          |          |          |
|----------|----------|----------|----------|----------|----------|----------|----------|----------|
| 0.283791 | 4.23E-10 | 0.247515 | 5.99E-08 | 0.216616 | 2.30E-06 | 0.026693 | 0.56502  | -0.08119 |
| -0.06045 | 0.19223  | -0.10604 | 0.02191  | -0.06437 | 0.1649   | -0.19411 | 2.40E-05 | -0.25855 |
| 0.085978 | 0.06339  | 0.013541 | 0.7704   | 0.034094 | 0.46232  | -0.16583 | 0.00032  | -0.25073 |
| 0.208962 | 5.26E-06 | 0.074069 | 0.10992  | 0.208919 | 5.29E-06 | 0.150498 | 0.00111  | 0.103796 |
| 0.12445  | 0.00709  | 0.049346 | 0.28725  | -0.02189 | 0.63703  | 0.091122 | 0.04907  | 0.157646 |
| 0.003441 | 0.94089  | -0.07336 | 0.11337  | -0.02212 | 0.63348  | -0.08803 | 0.05732  | -0.22372 |
| -0.25819 | 1.51E-08 | -0.2774  | 1.07E-09 | -0.13438 | 0.00362  | -0.21678 | 2.26E-06 | -0.33386 |
| 0.180496 | 8.77E-05 | 0.180864 | 8.48E-05 | 0.192519 | 2.81E-05 | 0.056402 | 0.22377  | 0.213739 |
| -0.05079 | 0.27337  | -0.08279 | 0.07387  | -0.08164 | 0.07798  | -0.20445 | 8.45E-06 | -0.15104 |
| -0.0609  | 0.18891  | 0.053645 | 0.24727  | 0.104646 | 0.02372  | -0.01938 | 0.67618  | 0.063629 |
| -0.03596 | 0.43813  | 0.070326 | 0.12912  | 0.033352 | 0.47213  | -0.045   | 0.33189  | -0.09248 |
| 0.093993 | 0.04233  | 0.063786 | 0.16878  | -0.01018 | 0.82629  | 0.100704 | 0.02956  | 0.064309 |
| -0.1061  | 0.02184  | 0.010839 | 0.81529  | 0.041167 | 0.37474  | -0.10793 | 0.01965  | -0.14949 |
| -0.09808 | 0.03409  | -0.04171 | 0.36843  | -0.04528 | 0.32887  | -0.05696 | 0.21922  | -0.02195 |
| 0.035302 | 0.44661  | 0.007111 | 0.87819  | 0.093701 | 0.04298  | -0.12828 | 0.0055   | -0.01422 |
| 0.077562 | 0.0941   | 0.114257 | 0.01349  | 0.075863 | 0.10155  | 0.110533 | 0.01687  | 0.124452 |
| -0.10506 | 0.02317  | -0.14978 | 0.00117  | -0.1472  | 0.00142  | 0.004631 | 0.92049  | -0.15727 |
| -0.01671 | 0.71866  | -0.20692 | 6.53E-06 | -0.20143 | 1.15E-05 | -0.02283 | 0.62268  | -0.12304 |
| -0.02962 | 0.52312  | -0.28846 | 2.12E-10 | -0.1919  | 2.98E-05 | -0.07177 | 0.1214   | -0.19458 |
| -0.07543 | 0.10354  | -0.10187 | 0.02771  | -0.17582 | 0.00013  | 0.076627 | 0.09814  | -0.10206 |
| -0.01987 | 0.66838  | 0.066153 | 0.15349  | 0.078493 | 0.0902   | 0.007709 | 0.86803  | 0.040314 |
| 0.126996 | 0.00599  | 0.120757 | 0.009    | 0.060548 | 0.1915   | 0.082347 | 0.07544  | 0.049539 |
| 0.032844 | 0.47892  | 0.016683 | 0.71916  | 0.008903 | 0.84783  | 0.070263 | 0.12947  | 0.020418 |
| 0.140335 | 0.00237  | 0.059712 | 0.19772  | 0.083436 | 0.07164  | 0.098959 | 0.03251  | -0.04697 |
| 0.114246 | 0.0135   | -0.01404 | 0.76222  | 0.031583 | 0.49596  | -0.00935 | 0.84027  | -0.12955 |
| -0.01581 | 0.7332   | 0.086656 | 0.06132  | 0.086954 | 0.06043  | 0.012267 | 0.79148  | -0.03853 |
| 0.00086  | 0.98521  | 0.021887 | 0.63709  | 0.019462 | 0.67485  | -0.05078 | 0.27345  | -0.02627 |
| 0.137101 | 0.00299  | 0.025858 | 0.57726  | 0.122645 | 0.00797  | 0.021047 | 0.65007  | -0.07556 |
| -0.15587 | 0.00072  | 0.036594 | 0.43014  | -0.07589 | 0.10144  | -0.14927 | 0.00122  | 0.097438 |
| -0.11652 | 0.01174  | 0.081835 | 0.07728  | -0.0227  | 0.6247   | 0.02443  | 0.59847  | 0.195782 |
| 0.136494 | 0.00312  | 0.04034  | 0.38442  | -0.04953 | 0.2855   | 0.144538 | 0.00174  | 0.142746 |
| 0.012888 | 0.78118  | -0.10676 | 0.02102  | -0.04685 | 0.31233  | -0.06914 | 0.13574  | -0.25968 |
| 0.015312 | 0.74138  | 0.10957  | 0.01785  | 0.052495 | 0.25756  | 0.215784 | 2.52E-06 | 0.120638 |
| 0.107186 | 0.02052  | 0.206736 | 6.66E-06 | 0.227925 | 6.43E-07 | -0.11352 | 0.0141   | -0.08225 |
| 0.202853 | 9.96E-06 | 0.275732 | 1.36E-09 | 0.361966 | 6.66E-16 | 0.034472 | 0.45738  | 0.109685 |
| -0.05938 | 0.20025  | -0.0426  | 0.35829  | 0.027456 | 0.55395  | 0.019148 | 0.67981  | -0.0056  |
| 0.104237 | 0.02428  | 0.174169 | 0.00016  | 0.183925 | 6.38E-05 | 0.010132 | 0.82714  | 0.007028 |
| 0.121026 | 0.00884  | -0.00733 | 0.87447  | 0.109069 | 0.01839  | 0.009742 | 0.83369  | 0.100972 |
| 0.076768 | 0.09752  | -0.0243  | 0.6004   | -0.0266  | 0.56643  | 0.009586 | 0.83631  | 0.007759 |
| -0.23063 | 4.69E-07 | -0.06684 | 0.14929  | -0.15905 | 0.00056  | -0.05129 | 0.2687   | -0.00449 |
| 0.012235 | 0.792    | 0.012196 | 0.79266  | -0.05333 | 0.25004  | 0.005095 | 0.91257  | 0.023843 |
| -0.04728 | 0.30794  | -0.07798 | 0.09231  | -0.13496 | 0.00348  | -0.02989 | 0.51928  | -0.00555 |
| -0.02057 | 0.65752  | -0.09272 | 0.04521  | -0.07145 | 0.1231   | -0.08751 | 0.05879  | 0.139255 |
| 0.205095 | 7.90E-06 | 0.3224   | 9.33E-13 | 0.083883 | 0.07013  | 0.245318 | 7.90E-08 | 0.335322 |
| -0.14153 | 0.00217  | -0.09763 | 0.03492  | -0.17314 | 0.00017  | 0.034943 | 0.45125  | 0.037685 |

|          |          |          |          |          |          |          |          |          |
|----------|----------|----------|----------|----------|----------|----------|----------|----------|
| -0.11637 | 0.01185  | -0.18913 | 3.90E-05 | -0.16934 | 0.00024  | -0.19927 | 1.44E-05 | -0.1792  |
| 0.223447 | 1.07E-06 | 0.002135 | 0.9633   | 0.104171 | 0.02437  | 0.223041 | 1.12E-06 | 0.219691 |
| 0.095827 | 0.03845  | 0.02411  | 0.60327  | -0.04152 | 0.37069  | 0.094594 | 0.04102  | 0.098605 |
| 0.219697 | 1.64E-06 | 0.216557 | 2.32E-06 | 0.002281 | 0.9608   | 0.104951 | 0.02332  | 0.290977 |
| -0.08922 | 0.05402  | -0.13166 | 0.00437  | -0.19718 | 1.77E-05 | -0.11645 | 0.01179  | -0.05436 |
| -0.01161 | 0.80239  | 0.111764 | 0.01568  | -0.01809 | 0.69662  | 0.114566 | 0.01324  | 0.118095 |
| 0.05939  | 0.20015  | 0.153368 | 0.00088  | 0.139895 | 0.00245  | 0.159251 | 0.00055  | 0.019872 |
| -0.04384 | 0.34455  | -0.0853  | 0.0655   | -0.07659 | 0.09831  | -0.0519  | 0.26302  | -0.15862 |
| -0.08288 | 0.07358  | -0.09022 | 0.05136  | -0.1282  | 0.00553  | 0.033915 | 0.46468  | 0.142303 |
| 0.032791 | 0.47963  | 0.075062 | 0.10522  | 0.093156 | 0.04421  | -0.02746 | 0.55391  | 0.018787 |
| 0.310491 | 6.79E-12 | 0.052252 | 0.25978  | 0.089151 | 0.0542   | 0.048516 | 0.29544  | 0.099575 |
| -0.0412  | 0.37436  | -0.36748 | 2.23E-16 | -0.25856 | 1.43E-08 | -0.0652  | 0.15954  | -0.18448 |
| -0.05023 | 0.27867  | 0.188032 | 4.33E-05 | 0.021704 | 0.63992  | -0.01374 | 0.76707  | 0.032395 |
| -0.02348 | 0.61276  | 0.062831 | 0.17526  | 0.000172 | 0.99704  | -0.0159  | 0.73187  | -0.13568 |
| 0.024682 | 0.59471  | 0.045571 | 0.32577  | 0.047336 | 0.30736  | -0.00125 | 0.97856  | -0.05419 |
| 0.168942 | 0.00024  | -0.02433 | 0.59997  | -0.02454 | 0.59677  | 0.053027 | 0.25277  | 0.026149 |
| 0.112363 | 0.01513  | 0.133201 | 0.00393  | 0.074894 | 0.106    | -0.15321 | 0.0009   | -0.05664 |
| -0.04042 | 0.3835   | 0.084606 | 0.06774  | 0.032935 | 0.4777   | 0.124384 | 0.00712  | 0.14577  |
| -0.01245 | 0.78848  | -0.06399 | 0.16739  | 0.022448 | 0.62848  | 0.025966 | 0.57566  | -0.19759 |
| 0.014243 | 0.75886  | 0.037572 | 0.41791  | 0.041648 | 0.36919  | 0.10636  | 0.02151  | 0.138688 |
| 0.087009 | 0.06027  | 0.262614 | 8.34E-09 | 0.221205 | 1.38E-06 | 0.10005  | 0.03064  | 0.118625 |
| -0.07786 | 0.09284  | -0.24536 | 7.86E-08 | -0.15128 | 0.00104  | -0.0209  | 0.65241  | -0.09721 |
| 0.248528 | 5.27E-08 | 0.283997 | 4.11E-10 | 0.276203 | 1.27E-09 | 0.12975  | 0.00498  | -0.06334 |
| -0.15828 | 0.0006   | -0.13191 | 0.0043   | -0.08821 | 0.0568   | -0.21053 | 4.45E-06 | -0.22967 |
| 0.05518  | 0.23398  | 0.071448 | 0.12311  | 0.049779 | 0.28304  | -0.09706 | 0.03602  | -0.04345 |
| 0.067793 | 0.14353  | 0.020461 | 0.6592   | 0.002291 | 0.96062  | -0.01186 | 0.79823  | -0.07478 |
| -0.05054 | 0.27571  | -0.07285 | 0.11593  | -0.12125 | 0.00872  | 0.03095  | 0.50465  | 0.040964 |
| -0.07045 | 0.12845  | -0.05285 | 0.25436  | -0.05258 | 0.2568   | -0.02901 | 0.53168  | -0.09012 |
| -0.09046 | 0.05075  | -0.14232 | 0.00205  | -0.10625 | 0.02165  | -0.21032 | 4.56E-06 | -0.26843 |
| 0.009241 | 0.84213  | 0.09832  | 0.03366  | 0.030264 | 0.51414  | -0.02922 | 0.52876  | 0.031971 |
| -0.02366 | 0.6101   | -0.07612 | 0.10039  | -0.10657 | 0.02126  | 0.004496 | 0.9228   | -0.09022 |
| -0.03731 | 0.42114  | -0.05945 | 0.19966  | -0.06677 | 0.14971  | -0.02162 | 0.6412   | -0.00411 |
| 0.149845 | 0.00116  | 0.03966  | 0.39249  | 0.232199 | 3.90E-07 | -0.1955  | 2.09E-05 | -0.25663 |
| 0.031991 | 0.4904   | 0.095097 | 0.03995  | 0.07664  | 0.09809  | 0.053073 | 0.25235  | 0.026992 |
| -0.01906 | 0.68119  | 0.214996 | 2.75E-06 | 0.15866  | 0.00058  | -0.04773 | 0.30334  | 0.025224 |
| -0.06765 | 0.14438  | 0.01571  | 0.73491  | 0.008409 | 0.85618  | -0.08765 | 0.05839  | -0.10038 |
| -0.10815 | 0.0194   | 0.125138 | 0.00678  | 0.046296 | 0.31812  | 0.016165 | 0.72754  | 0.028803 |
| 0.18693  | 4.81E-05 | 0.195834 | 2.03E-05 | -0.0324  | 0.48491  | 0.076683 | 0.0979   | 0.080205 |
| 0.081826 | 0.07731  | 0.195447 | 2.11E-05 | 0.036861 | 0.42678  | 0.002883 | 0.95046  | -0.02024 |
| -0.00466 | 0.92005  | 0.028762 | 0.53525  | 0.007893 | 0.86492  | 0.027461 | 0.55388  | 0.276585 |
| 0.156443 | 0.00069  | 0.082366 | 0.07537  | 0.018713 | 0.68669  | 0.033235 | 0.47369  | -0.02973 |
| -0.08675 | 0.06104  | -0.24308 | 1.04E-07 | -0.20192 | 1.10E-05 | -0.18567 | 5.42E-05 | -0.38487 |
| -0.06105 | 0.18782  | -0.06802 | 0.14221  | -0.02863 | 0.53709  | -0.18694 | 4.81E-05 | -0.21212 |
| 0.09337  | 0.04372  | 0.074745 | 0.10671  | 0.081739 | 0.07763  | 0.010974 | 0.81303  | -0.0476  |
| 0.295756 | 7.00E-11 | 0.349811 | 6.88E-15 | 0.280376 | 6.97E-10 | 0.12364  | 0.00747  | 0.272649 |

|          |          |          |          |          |          |          |          |           |
|----------|----------|----------|----------|----------|----------|----------|----------|-----------|
| 0.369422 | 1.51E-16 | 0.171704 | 0.00019  | 0.197412 | 1.73E-05 | 0.14027  | 0.00238  | 0.228054  |
| 0.009805 | 0.83263  | 0.085712 | 0.06421  | 0.025019 | 0.58968  | 0.003051 | 0.94757  | -0.09633  |
| -0.31111 | 6.13E-12 | -0.27918 | 8.28E-10 | -0.26656 | 4.88E-09 | -0.05918 | 0.20174  | -0.07055  |
| -0.1002  | 0.03039  | 0.05672  | 0.22117  | 0.064998 | 0.16082  | -0.04433 | 0.33911  | -0.0482   |
| 0.042216 | 0.36269  | -0.1171  | 0.01133  | 0.067744 | 0.14382  | -0.05727 | 0.21673  | -0.2185   |
| -0.01675 | 0.71815  | -0.05384 | 0.24557  | -0.11132 | 0.0161   | -0.09319 | 0.04413  | -0.25523  |
| 0.056216 | 0.2253   | -0.11677 | 0.01156  | -0.05362 | 0.2475   | -0.04836 | 0.29702  | -0.00943  |
| 0.090626 | 0.05032  | 0.095993 | 0.03811  | 0.107947 | 0.01963  | -0.08058 | 0.08195  | -0.04593  |
| 0.07048  | 0.12828  | 0.115441 | 0.01255  | 0.119144 | 0.00997  | 0.100987 | 0.0291   | -0.00284  |
| 0.04967  | 0.2841   | -0.03936 | 0.39609  | 0.053762 | 0.24624  | 0.040032 | 0.38807  | -0.15979  |
| 0.033745 | 0.46693  | 0.030936 | 0.50483  | 0.026329 | 0.57034  | 0.116126 | 0.01203  | 0.051057  |
| 0.161523 | 0.00046  | 0.159018 | 0.00056  | 0.166017 | 0.00031  | 0.040168 | 0.38646  | 0.256915  |
| -0.02668 | 0.56519  | -0.04312 | 0.35249  | -0.00525 | 0.90995  | -0.02814 | 0.5441   | -0.07811  |
| -0.08629 | 0.06244  | 0.012644 | 0.78522  | 0.022049 | 0.6346   | -0.08484 | 0.067    | 0.040719  |
| 0.064247 | 0.16572  | -0.00943 | 0.83901  | -0.0317  | 0.49439  | 0.013055 | 0.77843  | -0.03881  |
| 0.02886  | 0.53386  | -0.00261 | 0.95507  | 0.029281 | 0.5279   | -0.02774 | 0.54986  | -0.04286  |
| -0.06343 | 0.17119  | -0.13086 | 0.00462  | -0.25556 | 2.13E-08 | -0.05602 | 0.22697  | -0.13142  |
| -0.05032 | 0.27779  | -0.00588 | 0.8992   | -0.01268 | 0.78462  | -0.08897 | 0.0547   | -0.06968  |
| -0.03    | 0.51786  | 0.002447 | 0.95794  | -0.01893 | 0.68333  | 0.031738 | 0.49384  | 0.017032  |
| 0.034823 | 0.4528   | -0.00281 | 0.9517   | 0.062878 | 0.17494  | 0.050262 | 0.27839  | -0.04568  |
| -0.01639 | 0.72383  | -0.04333 | 0.35011  | -0.01742 | 0.70737  | -0.02439 | 0.5991   | -0.09625  |
| -0.0168  | 0.71734  | 0.032816 | 0.47929  | 0.101826 | 0.02778  | 0.137456 | 0.00291  | 0.236957  |
| 0.108014 | 0.01955  | -0.09088 | 0.04967  | -0.04233 | 0.36136  | 0.031545 | 0.49649  | -0.16004  |
| 0.062633 | 0.17663  | 0.052083 | 0.26132  | 0.009492 | 0.83791  | 0.057071 | 0.21832  | -0.16353  |
| 0.027678 | 0.55074  | -0.11518 | 0.01275  | -0.04897 | 0.29093  | -0.19231 | 2.87E-05 | -0.25419  |
| 0.154145 | 0.00083  | 0.096791 | 0.03653  | 0.027741 | 0.54984  | 0.013965 | 0.76342  | 0.306659  |
| 0.003392 | 0.94173  | -0.09855 | 0.03325  | -0.05305 | 0.25254  | -0.21435 | 2.95E-06 | -0.24577  |
| -0.05634 | 0.2243   | -0.13544 | 0.00336  | -0.04289 | 0.35509  | -0.14212 | 0.00208  | -0.17492  |
| -0.09381 | 0.04274  | -0.09579 | 0.03853  | -0.06289 | 0.17487  | -0.05466 | 0.23844  | 0.007664  |
| -0.23474 | 2.88E-07 | -0.34215 | 2.85E-14 | -0.29602 | 6.72E-11 | -0.23282 | 3.62E-07 | -0.23772  |
| -0.11832 | 0.0105   | -0.00514 | 0.91182  | -0.00685 | 0.88266  | -0.17087 | 0.00021  | -0.14393  |
| -0.10414 | 0.02441  | -0.12109 | 0.00881  | -0.06441 | 0.16464  | -0.31922 | 1.60E-12 | -0.3663   |
| 0.140722 | 0.0023   | 0.247937 | 5.68E-08 | 0.233676 | 3.27E-07 | 0.129919 | 0.00492  | 0.087644  |
| -0.03923 | 0.39768  | -0.0667  | 0.15014  | -0.07213 | 0.11956  | 0.078984 | 0.08821  | 0.08216   |
| -0.09811 | 0.03404  | -0.02446 | 0.59798  | -0.06243 | 0.17803  | -0.12745 | 0.00581  | -0.13644  |
| -0.1127  | 0.01482  | -0.12598 | 0.00641  | -0.06629 | 0.15262  | -0.07571 | 0.10225  | -0.15558  |
| -0.0607  | 0.19036  | -0.01086 | 0.81486  | -0.0054  | 0.90739  | 0.016248 | 0.72619  | 0.018713  |
| 0.162482 | 0.00042  | -0.07681 | 0.09735  | 0.063319 | 0.17193  | 0.076692 | 0.09786  | -0.00699  |
| -0.05363 | 0.24742  | -0.04062 | 0.38116  | 0.049743 | 0.28339  | -0.12332 | 0.00763  | -0.20265  |
| -0.10724 | 0.02045  | -0.16055 | 0.0005   | -0.0729  | 0.11565  | 0.001665 | 0.97138  | -3.78E-05 |
| 0.082475 | 0.07499  | 0.078823 | 0.08886  | 0.097062 | 0.03601  | -0.01668 | 0.71919  | -0.05244  |
| -0.02694 | 0.56142  | -0.11584 | 0.01225  | -0.07047 | 0.12836  | 0.011773 | 0.7997   | -0.03428  |
| -0.09616 | 0.03777  | -0.00978 | 0.83298  | 0.037924 | 0.41356  | -0.07345 | 0.11293  | -0.07368  |
| 0.12884  | 0.0053   | -0.12351 | 0.00754  | -0.1146  | 0.01321  | -0.04455 | 0.33673  | -0.12821  |
| -0.15531 | 0.00076  | -0.05584 | 0.22842  | -0.13981 | 0.00246  | -0.07241 | 0.11815  | -0.0416   |



|           |          |          |          |          |          |          |          |          |
|-----------|----------|----------|----------|----------|----------|----------|----------|----------|
| -0.01083  | 0.81545  | -0.0741  | 0.10979  | -0.12505 | 0.00681  | 0.063656 | 0.16965  | -0.00609 |
| 0.098437  | 0.03344  | 0.197349 | 1.74E-05 | 0.089596 | 0.053    | 0.016176 | 0.72736  | -0.06257 |
| 0.19219   | 2.90E-05 | 0.229078 | 5.62E-07 | 0.161209 | 0.00047  | 0.189922 | 3.61E-05 | 0.286993 |
| -0.05202  | 0.26186  | -0.11344 | 0.01417  | -0.05013 | 0.27963  | 0.095754 | 0.0386   | -0.05246 |
| 0.043541  | 0.34781  | 0.135562 | 0.00333  | 0.073314 | 0.1136   | 0.195758 | 2.04E-05 | 0.208656 |
| -5.14E-05 | 0.99912  | 0.048994 | 0.29071  | 0.006442 | 0.88957  | 0.041345 | 0.37269  | 0.108352 |
| -0.09108  | 0.04917  | -0.16484 | 0.00035  | -0.13173 | 0.00435  | -0.26649 | 4.93E-09 | -0.29585 |
| -0.12259  | 0.008    | -0.10485 | 0.02345  | 0.009528 | 0.8373   | -0.24599 | 7.26E-08 | -0.23783 |
| 0.094026  | 0.04226  | 0.132735 | 0.00406  | -0.01452 | 0.75433  | 0.095549 | 0.03902  | 0.061717 |
| 0.37582   | 4.10E-17 | 0.164788 | 0.00035  | 0.009043 | 0.84548  | 0.247038 | 6.36E-08 | 0.357979 |
| 0.042369  | 0.36095  | -0.02987 | 0.5197   | 0.028856 | 0.53391  | -0.2244  | 9.63E-07 | -0.17339 |
| 0.143416  | 0.00189  | 0.191188 | 3.20E-05 | 0.145895 | 0.00157  | 0.2402   | 1.49E-07 | 0.29357  |
| 0.062755  | 0.17579  | 0.102989 | 0.02604  | 0.140528 | 0.00234  | 0.01156  | 0.80324  | 0.066953 |
| -0.12289  | 0.00785  | -0.19139 | 3.14E-05 | -0.17933 | 9.75E-05 | -0.0749  | 0.10598  | -0.18913 |
| 0.053605  | 0.24762  | 0.09279  | 0.04505  | 0.143383 | 0.00189  | -0.0064  | 0.89025  | 0.023877 |
| 0.05608   | 0.22643  | 0.137224 | 0.00296  | 0.072762 | 0.11635  | 0.169296 | 0.00024  | 0.143449 |
| -0.13045  | 0.00475  | -0.16225 | 0.00043  | -0.09411 | 0.04207  | -0.13721 | 0.00297  | 0.019881 |
| 0.325843  | 5.17E-13 | 0.11145  | 0.01597  | 0.206068 | 7.14E-06 | 0.179412 | 9.68E-05 | -0.03821 |
| -0.1487   | 0.00127  | -0.16749 | 0.00028  | -0.11746 | 0.01107  | -0.27507 | 1.49E-09 | -0.39015 |
| -0.03591  | 0.43878  | 0.091484 | 0.04817  | 0.032642 | 0.48162  | 0.043082 | 0.35292  | -0.04202 |
| -0.27744  | 1.06E-09 | -0.23057 | 4.72E-07 | -0.28553 | 3.28E-10 | -0.11827 | 0.01053  | 0.094799 |
| 0.108658  | 0.01883  | 0.238646 | 1.80E-07 | 0.21385  | 3.12E-06 | -0.01137 | 0.80643  | 0.007236 |
| -0.02057  | 0.65751  | 0.02906  | 0.53103  | 0.031856 | 0.49224  | -0.15473 | 0.00079  | -0.12519 |
| -0.05422  | 0.24223  | -0.09439 | 0.04147  | -0.03533 | 0.44626  | 0.009259 | 0.84182  | 0.119261 |
| 0.019899  | 0.66799  | 0.267509 | 4.28E-09 | 0.254793 | 2.35E-08 | -0.00968 | 0.8347   | 0.101856 |
| 0.071628  | 0.12217  | -0.02355 | 0.61165  | 0.083168 | 0.07256  | 0.027668 | 0.55089  | -0.12841 |
| 0.052981  | 0.25318  | -0.05947 | 0.19951  | 0.139382 | 0.00254  | -0.00051 | 0.99124  | -0.17167 |
| 0.028335  | 0.54133  | -0.01789 | 0.69978  | 0.161523 | 0.00046  | -0.16275 | 0.00041  | -0.11993 |
| 0.082374  | 0.07534  | 0.021143 | 0.64858  | 0.035236 | 0.44746  | -0.03085 | 0.50602  | -0.04951 |
| 0.079139  | 0.08758  | 0.020306 | 0.66161  | 0.100778 | 0.02944  | -0.02517 | 0.58751  | -0.11784 |
| 0.156933  | 0.00067  | 0.192974 | 2.69E-05 | 0.023672 | 0.60987  | 0.074242 | 0.10909  | 0.238463 |
| 0.180388  | 8.86E-05 | 0.143756 | 0.00184  | 0.134877 | 0.0035   | -0.10155 | 0.02821  | -0.21043 |
| -0.06585  | 0.15537  | -0.09341 | 0.04363  | -0.07939 | 0.08659  | -0.20441 | 8.48E-06 | -0.23122 |
| 0.16545   | 0.00033  | 0.011326 | 0.80715  | -0.01958 | 0.67301  | -0.01075 | 0.81674  | -0.04395 |
| -0.05477  | 0.23748  | 0.039235 | 0.39759  | 0.074609 | 0.10735  | -0.13717 | 0.00297  | -0.29822 |
| 0.235447  | 2.65E-07 | 0.208455 | 5.55E-06 | 0.305308 | 1.57E-11 | 0.013133 | 0.77714  | 0.049593 |
| -0.01222  | 0.79229  | -0.00837 | 0.8569   | -0.00984 | 0.83203  | -0.04348 | 0.34843  | 0.016433 |
| 0.110355  | 0.01705  | 0.123956 | 0.00732  | 0.07411  | 0.10972  | 0.061571 | 0.18409  | 0.027583 |
| -0.12899  | 0.00524  | -0.20871 | 5.41E-06 | -0.37201 | 8.93E-17 | -0.04864 | 0.29418  | 0.021096 |
| -0.09889  | 0.03263  | -0.11914 | 0.00997  | -0.07537 | 0.1038   | -0.12585 | 0.00647  | -0.15573 |
| -0.01919  | 0.67914  | -0.24705 | 6.36E-08 | -0.05725 | 0.2169   | -0.08987 | 0.05227  | -0.09987 |
| 0.234896  | 2.83E-07 | 0.119386 | 0.00981  | 0.033839 | 0.46569  | 0.264394 | 6.56E-09 | 0.179866 |
| -0.16727  | 0.00028  | -0.02166 | 0.64055  | -0.08949 | 0.05328  | -0.10361 | 0.02515  | 0.007317 |
| 0.130497  | 0.00473  | -0.05755 | 0.21446  | -0.14272 | 0.00199  | 0.149332 | 0.00121  | 0.04429  |
| 0.083743  | 0.0706   | 0.146667 | 0.00148  | 0.094124 | 0.04204  | 0.047002 | 0.31079  | 0.144417 |

|          |          |          |          |          |          |          |          |          |
|----------|----------|----------|----------|----------|----------|----------|----------|----------|
| -0.15133 | 0.00104  | -0.11861 | 0.01031  | -0.1171  | 0.01132  | -0.28181 | 5.66E-10 | -0.06098 |
| 0.117268 | 0.01121  | 0.061493 | 0.18465  | 0.066581 | 0.15084  | 0.015954 | 0.73094  | -0.12705 |
| 0.116392 | 0.01183  | -0.10328 | 0.02562  | -0.00172 | 0.97049  | 0.061004 | 0.18818  | 0.066508 |
| 0.405961 | 5.90E-20 | 0.166027 | 0.00031  | 0.120242 | 0.0093   | 0.194645 | 2.28E-05 | 0.039133 |
| 0.003357 | 0.94232  | -0.06371 | 0.1693   | 0.011059 | 0.8116   | 0.103824 | 0.02485  | 0.0216   |
| -0.04575 | 0.32385  | -0.27831 | 9.38E-10 | -0.28884 | 2.00E-10 | -0.14889 | 0.00125  | -0.20422 |
| 0.308499 | 9.37E-12 | 0.183499 | 6.64E-05 | 0.195644 | 2.06E-05 | 0.08078  | 0.08119  | 0.155006 |
| 0.108442 | 0.01907  | -0.10601 | 0.02194  | -0.00773 | 0.86764  | 0.061507 | 0.18455  | -0.14526 |
| 0.24129  | 1.30E-07 | 0.113883 | 0.0138   | 0.168452 | 0.00026  | 0.187186 | 4.69E-05 | 0.07687  |
| 0.130972 | 0.00458  | 0.133225 | 0.00392  | 0.036359 | 0.43312  | 0.027805 | 0.54892  | 0.157376 |
| -0.05498 | 0.23571  | -0.05425 | 0.242    | -0.0996  | 0.0314   | 0.028738 | 0.5356   | 0.051657 |
| 0.112507 | 0.01499  | 0.05363  | 0.24741  | 0.117827 | 0.01082  | -0.05211 | 0.26104  | -0.15313 |
| -0.05948 | 0.19945  | 0.02934  | 0.52707  | 0.020024 | 0.66603  | 0.073343 | 0.11346  | -0.00517 |
| 0.093537 | 0.04335  | 0.062543 | 0.17725  | -0.03848 | 0.40675  | 0.053619 | 0.2475   | 0.002834 |
| 0.059976 | 0.19574  | 0.009002 | 0.84616  | -0.18792 | 4.38E-05 | 0.174011 | 0.00016  | 0.207376 |
| -0.02648 | 0.5681   | 0.101036 | 0.02903  | 0.024329 | 0.59999  | 0.060815 | 0.18955  | 0.113437 |
| 0.145201 | 0.00165  | 0.089891 | 0.05222  | 0.061825 | 0.18228  | 0.195544 | 2.09E-05 | 0.144267 |
| 0.089593 | 0.05301  | 0.00215  | 0.96305  | 0.046163 | 0.31952  | 0.056495 | 0.22301  | -0.02289 |
| -0.18002 | 9.16E-05 | -0.18136 | 8.10E-05 | -0.06242 | 0.17808  | -0.10486 | 0.02343  | -0.07696 |
| 0.034603 | 0.45567  | 0.115906 | 0.01219  | 0.139607 | 0.0025   | -0.04194 | 0.36589  | 0.014522 |
| 0.035411 | 0.44521  | 0.227325 | 6.89E-07 | 0.152626 | 0.00094  | -0.04526 | 0.32907  | 0.182806 |
| 0.214614 | 2.87E-06 | 0.083667 | 0.07086  | 0.136795 | 0.00305  | 0.156009 | 0.00072  | 0.147318 |
| 0.091025 | 0.04931  | 0.090576 | 0.05045  | 0.098888 | 0.03264  | 0.010165 | 0.82659  | -0.05083 |
| 0.219882 | 1.60E-06 | 0.117197 | 0.01126  | 0.159204 | 0.00055  | -0.04856 | 0.29499  | 0.108822 |
| -0.16032 | 0.00051  | -0.06265 | 0.17654  | -0.03581 | 0.44015  | -0.24886 | 5.05E-08 | -0.17226 |
| -0.0506  | 0.27514  | -0.14751 | 0.00139  | -0.10255 | 0.02669  | -0.08765 | 0.05839  | 0.032798 |
| -0.10543 | 0.02269  | -0.10403 | 0.02457  | -0.08611 | 0.06299  | -0.22198 | 1.27E-06 | -0.23697 |
| 0.183345 | 6.74E-05 | 0.032984 | 0.47704  | 0.102175 | 0.02725  | -0.0905  | 0.05065  | -0.20724 |
| 0.036636 | 0.42961  | 0.133155 | 0.00394  | 0.148404 | 0.0013   | -0.09894 | 0.03255  | 0.015258 |
| 0.01156  | 0.80325  | -0.20499 | 7.99E-06 | -0.06154 | 0.18434  | -0.25999 | 1.19E-08 | -0.22563 |
| 0.105604 | 0.02247  | 0.307049 | 1.18E-11 | 0.229544 | 5.32E-07 | 0.170544 | 0.00021  | 0.352134 |
| -0.03391 | 0.46469  | -0.08814 | 0.05699  | -0.07239 | 0.11825  | -0.11954 | 0.00972  | -0.22669 |
| -0.2368  | 2.25E-07 | -0.17809 | 0.00011  | -0.2423  | 1.15E-07 | -0.1353  | 0.00339  | -0.16708 |
| 0.167008 | 0.00029  | 0.028711 | 0.53598  | 0.064194 | 0.16606  | -0.07149 | 0.12289  | -0.33091 |
| -0.10103 | 0.02903  | -0.22295 | 1.14E-06 | -0.25207 | 3.35E-08 | 0.081443 | 0.07871  | -0.1357  |
| 0.125835 | 0.00647  | 0.002064 | 0.96453  | 0.076525 | 0.09859  | -0.20793 | 5.87E-06 | -0.1543  |
| 0.073844 | 0.11101  | -0.02283 | 0.62261  | 0.034048 | 0.46293  | -0.01459 | 0.75315  | -0.1333  |
| -0.08226 | 0.07575  | -0.02146 | 0.64369  | -0.05384 | 0.24555  | -0.04684 | 0.31251  | -0.08825 |
| 0.104797 | 0.02352  | 0.16991  | 0.00023  | 0.046311 | 0.31797  | 0.123674 | 0.00746  | 0.069176 |
| 0.017571 | 0.70489  | -0.20871 | 5.41E-06 | -0.23273 | 3.66E-07 | 0.0743   | 0.10881  | -0.08655 |
| 0.175895 | 0.00013  | 0.322016 | 9.96E-13 | 0.231308 | 4.33E-07 | -0.04228 | 0.36201  | -0.04332 |
| 0.237347 | 2.11E-07 | 0.010695 | 0.8177   | 0.022228 | 0.63185  | 0.046166 | 0.31948  | -0.05817 |
| 0.131703 | 0.00436  | 0.194194 | 2.38E-05 | 0.008304 | 0.85796  | 0.250938 | 3.87E-08 | 0.344751 |
| 0.27588  | 1.33E-09 | 0.310035 | 7.31E-12 | 0.131712 | 0.00436  | 0.250459 | 4.12E-08 | 0.223067 |
| -0.19076 | 3.33E-05 | -0.21962 | 1.65E-06 | -0.20314 | 9.67E-06 | -0.05916 | 0.20188  | -0.2651  |

|          |          |          |          |          |          |          |          |          |
|----------|----------|----------|----------|----------|----------|----------|----------|----------|
| 0.103412 | 0.02543  | 0.134913 | 0.00349  | 0.177322 | 0.00012  | 0.057819 | 0.21233  | -0.04816 |
| -0.06342 | 0.17126  | -0.10234 | 0.02701  | -0.05785 | 0.21208  | -0.05078 | 0.27349  | -0.17395 |
| 0.093481 | 0.04347  | 0.183586 | 6.59E-05 | 0.200172 | 1.31E-05 | 0.19925  | 1.44E-05 | 0.299411 |
| -0.16237 | 0.00043  | 0.02248  | 0.62798  | -0.02031 | 0.66149  | -0.11749 | 0.01105  | -0.11543 |
| 0.127073 | 0.00596  | 0.050933 | 0.27201  | 0.097302 | 0.03555  | -0.0311  | 0.50265  | -0.08095 |
| 0.14994  | 0.00115  | 0.159948 | 0.00052  | 0.175337 | 0.00014  | 0.194859 | 2.23E-05 | 0.336159 |
| 0.218405 | 1.89E-06 | 0.231918 | 4.03E-07 | 0.077612 | 0.09389  | 0.31144  | 5.81E-12 | 0.421086 |
| -0.10395 | 0.02468  | -0.18277 | 7.11E-05 | -0.0525  | 0.25748  | -0.21709 | 2.19E-06 | -0.21194 |
| -0.17414 | 0.00016  | 0.018687 | 0.68711  | 0.012732 | 0.78376  | -0.1805  | 8.77E-05 | -0.23831 |
| 0.048522 | 0.29539  | 0.048158 | 0.29903  | 0.060166 | 0.19433  | -0.04779 | 0.30277  | 0.08581  |
| 0.021272 | 0.64659  | -0.09598 | 0.03814  | -0.10924 | 0.0182   | -0.02379 | 0.60814  | -0.03684 |
| -0.18411 | 6.28E-05 | -0.24813 | 5.54E-08 | -0.23813 | 1.92E-07 | -0.33078 | 2.19E-13 | -0.34381 |
| 0.007096 | 0.87844  | -0.11001 | 0.0174   | -0.11572 | 0.01233  | -0.0847  | 0.06744  | -0.41034 |
| -0.09756 | 0.03507  | -0.04041 | 0.38358  | -0.00568 | 0.90265  | -0.1694  | 0.00024  | -0.05074 |
| 0.033018 | 0.47658  | 0.012599 | 0.78597  | 0.057832 | 0.21223  | -0.07292 | 0.11557  | -0.02497 |
| -0.09213 | 0.04661  | -0.01778 | 0.70161  | -0.02551 | 0.58246  | -0.05532 | 0.23277  | 0.002816 |
| -0.03814 | 0.41087  | -0.02382 | 0.60757  | -0.03274 | 0.48034  | -0.07887 | 0.08867  | -0.06458 |
| -0.00504 | 0.91349  | -0.00613 | 0.89498  | -0.025   | 0.58995  | 0.008464 | 0.85525  | 0.035089 |
| 0.193582 | 2.53E-05 | 0.016588 | 0.7207   | 0.033862 | 0.46538  | 0.120671 | 0.00905  | 0.131093 |
| 0.248076 | 5.58E-08 | 0.00446  | 0.92343  | 0.072026 | 0.1201   | 0.043716 | 0.34587  | -0.02587 |
| 0.035483 | 0.44428  | 0.121738 | 0.00845  | 0.180151 | 9.05E-05 | -0.0104  | 0.82271  | -0.0345  |
| -0.23337 | 3.39E-07 | -0.14589 | 0.00157  | -0.15652 | 0.00069  | 0.00268  | 0.95394  | -0.05101 |
| -0.09873 | 0.03293  | 0.074757 | 0.10665  | -0.0112  | 0.80921  | -0.1867  | 4.92E-05 | -0.16958 |
| 0.285966 | 3.07E-10 | -0.13066 | 0.00468  | -0.00097 | 0.98337  | 0.129618 | 0.00503  | 0.102612 |
| 0.050456 | 0.27654  | 0.004068 | 0.93014  | 0.025661 | 0.58016  | 0.001715 | 0.97052  | -0.02243 |
| 0.115527 | 0.01248  | -0.13116 | 0.00453  | 0.04708  | 0.30999  | -0.01059 | 0.81942  | -0.04829 |
| 0.040128 | 0.38693  | 0.019955 | 0.66712  | -0.02469 | 0.59458  | 0.036092 | 0.43649  | 0.019934 |
| -0.02983 | 0.52016  | 0.032687 | 0.48102  | 0.027811 | 0.54884  | -0.09674 | 0.03663  | -0.08071 |
| -0.12365 | 0.00747  | -0.01232 | 0.79065  | -0.12213 | 0.00824  | -0.17835 | 0.00011  | -0.09722 |
| 0.036259 | 0.43437  | 0.030683 | 0.50833  | 0.054988 | 0.23561  | 0.042718 | 0.35701  | -0.08965 |
| -0.03051 | 0.51073  | 0.172336 | 0.00018  | 0.140226 | 0.00239  | 0.013249 | 0.77521  | 0.029521 |
| -0.03617 | 0.43556  | -0.02704 | 0.56002  | -0.06273 | 0.17598  | -0.04947 | 0.28608  | 0.028909 |
| -0.09409 | 0.04211  | -0.06381 | 0.16859  | -0.12808 | 0.00557  | -0.12463 | 0.00701  | -0.03538 |
| -0.01121 | 0.80913  | 0.141186 | 0.00223  | 0.118925 | 0.0101   | 0.056729 | 0.22109  | 0.081587 |
| 0.050507 | 0.27605  | 0.099924 | 0.03085  | 0.10711  | 0.02061  | 0.122984 | 0.0078   | 0.079977 |
| 0.087799 | 0.05797  | 0.103003 | 0.02602  | 0.100796 | 0.02941  | -0.00323 | 0.94458  | 0.024411 |
| -0.06678 | 0.14961  | -0.03916 | 0.3985   | -0.03648 | 0.43161  | 0.03754  | 0.41831  | 0.097059 |
| -0.19129 | 3.16E-05 | -0.12812 | 0.00556  | -0.35081 | 5.70E-15 | -0.00014 | 0.99763  | 0.123967 |
| -0.2049  | 8.06E-06 | -0.0804  | 0.08262  | -0.10678 | 0.02101  | -0.11322 | 0.01436  | -0.14077 |
| -0.13051 | 0.00473  | -0.29392 | 9.28E-11 | -0.26721 | 4.47E-09 | -0.22438 | 9.65E-07 | -0.13286 |
| 0.137244 | 0.00296  | 0.170434 | 0.00022  | 0.135454 | 0.00336  | 0.119931 | 0.00948  | 0.148211 |
| 0.005314 | 0.90882  | 0.076928 | 0.09683  | 0.097373 | 0.03541  | 0.045842 | 0.3229   | 0.005274 |
| 0.068652 | 0.13851  | -0.04127 | 0.37352  | -0.03128 | 0.50013  | 0.108029 | 0.01954  | 0.20833  |
| 0.079974 | 0.08428  | 0.105505 | 0.02259  | 0.025554 | 0.58174  | 0.140772 | 0.00229  | 0.071859 |
| -0.16354 | 0.00039  | -0.09701 | 0.0361   | -0.04058 | 0.38154  | -0.12297 | 0.00781  | -0.18944 |

|          |          |          |          |          |          |          |          |          |
|----------|----------|----------|----------|----------|----------|----------|----------|----------|
| 0.003566 | 0.93874  | -0.04149 | 0.37098  | 0.0278   | 0.54899  | -0.16493 | 0.00034  | -0.14957 |
| -0.09474 | 0.04071  | -0.11842 | 0.01043  | 0.023082 | 0.61881  | -0.08172 | 0.07769  | -0.03083 |
| 0.069989 | 0.13097  | -0.20401 | 8.84E-06 | 0.01382  | 0.76581  | -0.21862 | 1.85E-06 | -0.20548 |
| 0.13055  | 0.00472  | 0.109598 | 0.01782  | 0.15211  | 0.00098  | 0.113332 | 0.01427  | 0.301667 |
| 0.130228 | 0.00482  | 0.082688 | 0.07423  | 0.068568 | 0.139    | 0.219945 | 1.59E-06 | -0.05871 |
| -0.09164 | 0.0478   | 0.014918 | 0.7478   | 0.057858 | 0.21203  | -0.10289 | 0.02619  | -0.1226  |
| 0.031494 | 0.49718  | -0.03308 | 0.47578  | 0.067139 | 0.14744  | -0.11751 | 0.01104  | -0.13266 |
| -0.06821 | 0.14107  | -0.00628 | 0.89234  | 0.071353 | 0.12361  | -0.16881 | 0.00025  | -0.15266 |
| -0.21777 | 2.03E-06 | -0.37613 | 3.84E-17 | -0.31296 | 4.53E-12 | -0.17204 | 0.00019  | -0.21544 |
| 0.092594 | 0.04551  | -0.12008 | 0.00939  | 0.014036 | 0.76225  | -0.1782  | 0.00011  | -0.16846 |
| -0.11845 | 0.01041  | 0.033006 | 0.47674  | 0.037721 | 0.41606  | -0.13829 | 0.00275  | -0.11443 |
| -0.02723 | 0.55724  | -0.01811 | 0.69633  | 0.005226 | 0.91032  | -0.0445  | 0.3373   | -0.05603 |
| 0.035763 | 0.44069  | 0.052801 | 0.25479  | 0.11243  | 0.01506  | 0.039206 | 0.39794  | -0.0109  |
| 0.354791 | 2.68E-15 | 0.004871 | 0.91639  | 0.055443 | 0.23176  | 0.200485 | 1.27E-05 | 0.068805 |
| -0.02433 | 0.59994  | 0.051229 | 0.26923  | 0.081656 | 0.07793  | 0.02156  | 0.64213  | 0.139924 |
| 0.165116 | 0.00034  | 0.066886 | 0.14898  | 0.154354 | 0.00082  | 0.071925 | 0.12062  | -0.00937 |
| 0.103394 | 0.02546  | 0.130706 | 0.00467  | 0.089951 | 0.05207  | 0.104536 | 0.02387  | 0.083955 |
| -0.09168 | 0.04768  | -0.05898 | 0.20326  | -0.12497 | 0.00685  | 0.003125 | 0.94631  | -0.02342 |
| 0.209465 | 4.99E-06 | 0.011949 | 0.79677  | 0.061211 | 0.18668  | 0.210643 | 4.40E-06 | 0.151328 |
| 0.038512 | 0.40635  | 0.160833 | 0.00048  | 0.16805  | 0.00026  | -0.04378 | 0.34517  | -0.0195  |
| 0.073301 | 0.11367  | 0.160475 | 0.0005   | 0.129413 | 0.0051   | 0.199328 | 1.43E-05 | 0.191388 |
| 0.189678 | 3.70E-05 | 0.1114   | 0.01602  | 0.133946 | 0.00373  | 0.106491 | 0.02135  | -0.06444 |
| 0.013174 | 0.77645  | -0.04443 | 0.33803  | -0.14915 | 0.00123  | -0.14484 | 0.0017   | -0.0775  |
| 0.111973 | 0.01548  | 0.123991 | 0.0073   | 0.061222 | 0.1866   | 0.167903 | 0.00027  | 0.351082 |
| -0.14751 | 0.00139  | -0.11481 | 0.01304  | -0.10107 | 0.02898  | -0.14777 | 0.00136  | 0.035952 |
| -0.04419 | 0.34068  | -0.00287 | 0.95069  | -0.01315 | 0.77689  | -0.0877  | 0.05824  | -0.07181 |
| 0.037889 | 0.414    | 0.043836 | 0.34454  | -0.05763 | 0.21384  | 0.030779 | 0.507    | -0.1427  |
| -0.03393 | 0.46455  | -0.06036 | 0.1929   | -0.15128 | 0.00104  | 0.097743 | 0.03472  | 0.097957 |
| -0.00592 | 0.89849  | -0.01516 | 0.74389  | 0.005592 | 0.90407  | -0.03681 | 0.42736  | -0.01875 |
| 0.098393 | 0.03352  | 0.107441 | 0.02022  | 0.056071 | 0.2265   | 0.053264 | 0.25065  | -0.01428 |
| 0.170629 | 0.00021  | 0.133103 | 0.00396  | 0.056781 | 0.22067  | 0.051392 | 0.26771  | 0.005057 |
| 0.07359  | 0.11224  | -0.21766 | 2.05E-06 | -0.08545 | 0.06502  | -0.0888  | 0.05515  | -0.21471 |
| -0.21937 | 1.70E-06 | -0.16859 | 0.00025  | -0.18218 | 7.51E-05 | -0.13138 | 0.00446  | -0.16094 |
| -0.00844 | 0.85568  | -0.07368 | 0.11179  | -0.07886 | 0.08871  | -0.01716 | 0.71151  | -0.09787 |
| -0.06726 | 0.14668  | 0.058733 | 0.20518  | 0.057728 | 0.21305  | -0.13933 | 0.00255  | -0.11953 |
| 0.014771 | 0.7502   | -0.15476 | 0.00079  | -0.29621 | 6.53E-11 | 0.107367 | 0.0203   | 0.158941 |
| -0.185   | 5.77E-05 | -0.24122 | 1.31E-07 | -0.31554 | 2.96E-12 | -0.02005 | 0.66555  | -0.00567 |
| -0.04686 | 0.31224  | -0.04349 | 0.34838  | -0.10995 | 0.01746  | 0.095648 | 0.03881  | 0.149681 |
| 0.075978 | 0.10103  | -0.01572 | 0.73478  | -0.02004 | 0.66584  | 0.029766 | 0.52109  | -0.22227 |
| 0.147584 | 0.00138  | 0.002065 | 0.96451  | -0.08289 | 0.07354  | 0.162607 | 0.00042  | 0.226183 |
| 0.09755  | 0.03508  | 0.10777  | 0.01983  | 0.048241 | 0.29819  | 0.083797 | 0.07042  | 0.072874 |
| 0.08502  | 0.0664   | 0.077465 | 0.09451  | 0.07506  | 0.10523  | -0.00754 | 0.87089  | 0.127758 |
| 0.06778  | 0.1436   | 0.142977 | 0.00195  | 0.004747 | 0.91851  | 0.120119 | 0.00937  | 0.16327  |
| 0.276632 | 1.19E-09 | 0.276639 | 1.19E-09 | 0.267655 | 4.20E-09 | 0.053946 | 0.24463  | 0.269597 |
| -0.16906 | 0.00024  | -0.05952 | 0.1992   | -0.03034 | 0.5131   | -0.10321 | 0.02573  | -0.15805 |

|          |          |          |          |          |          |          |          |          |
|----------|----------|----------|----------|----------|----------|----------|----------|----------|
| 0.17608  | 0.00013  | 0.083655 | 0.0709   | 0.129614 | 0.00503  | 0.019679 | 0.67145  | -0.10207 |
| 0.185621 | 5.44E-05 | 0.143941 | 0.00182  | 0.219732 | 1.63E-06 | -0.01601 | 0.7301   | -0.19027 |
| 0.080883 | 0.0808   | 0.143137 | 0.00193  | 0.132848 | 0.00403  | 0.147731 | 0.00137  | 0.088463 |
| -0.0138  | 0.76607  | 0.075095 | 0.10507  | 0.008158 | 0.86044  | 0.173837 | 0.00016  | 0.070236 |
| 0.087431 | 0.05903  | 0.097042 | 0.03605  | 0.112375 | 0.01511  | -0.07131 | 0.12382  | -0.16105 |
| -0.10275 | 0.0264   | -0.10085 | 0.02932  | -0.02008 | 0.6652   | -0.19852 | 1.55E-05 | -0.05325 |
| -0.11427 | 0.01348  | 0.042451 | 0.36002  | 0.067066 | 0.14788  | -0.23676 | 2.26E-07 | -0.05161 |
| 0.059908 | 0.19625  | -0.01019 | 0.82622  | 0.018829 | 0.68485  | -0.21398 | 3.07E-06 | -0.2802  |
| -0.13936 | 0.00254  | -0.12581 | 0.00648  | -0.17396 | 0.00016  | -0.20337 | 9.45E-06 | -0.23556 |
| -0.17536 | 0.00014  | -0.21183 | 3.88E-06 | -0.17789 | 0.00011  | -0.00626 | 0.89266  | 0.127213 |
| -0.11621 | 0.01196  | -0.17703 | 0.00012  | -0.11688 | 0.01148  | -0.17722 | 0.00012  | -0.14542 |
| 0.096899 | 0.03632  | -0.00246 | 0.95778  | 0.132792 | 0.00404  | 0.075057 | 0.10525  | -0.03594 |
| 0.293983 | 9.19E-11 | 0.274299 | 1.66E-09 | 0.349476 | 7.33E-15 | 0.324999 | 5.98E-13 | 0.157419 |
| 0.009373 | 0.8399   | 0.114376 | 0.01339  | 0.075844 | 0.10164  | 0.062917 | 0.17467  | 0.312406 |
| 0.145298 | 0.00164  | 0.271936 | 2.32E-09 | 0.244753 | 8.48E-08 | -0.13051 | 0.00473  | 0.040626 |
| -0.1087  | 0.01879  | -0.01653 | 0.72164  | -0.05587 | 0.22814  | -0.22538 | 8.62E-07 | -0.35061 |
| -0.25495 | 2.31E-08 | -0.17513 | 0.00014  | -0.3164  | 2.56E-12 | -0.09819 | 0.0339   | -0.22464 |
| 0.017974 | 0.69845  | 0.016735 | 0.71832  | -0.00388 | 0.93339  | 0.010652 | 0.81841  | 0.060401 |
| 0.130974 | 0.00458  | 0.214532 | 2.89E-06 | 0.177489 | 0.00012  | 0.120568 | 0.00911  | 0.166946 |
| -0.06296 | 0.17435  | 0.030779 | 0.507    | -0.02246 | 0.6283   | 0.020653 | 0.65621  | 0.246555 |
| 0.110107 | 0.0173   | 0.101383 | 0.02847  | 0.127801 | 0.00568  | 0.018305 | 0.69318  | 0.098694 |
| -0.02311 | 0.61846  | 0.055846 | 0.22838  | -0.06728 | 0.14657  | -0.12023 | 0.0093   | -0.06481 |
| 0.146408 | 0.00151  | 0.122482 | 0.00806  | 0.142737 | 0.00199  | 0.099947 | 0.03081  | 0.015102 |
| 0.025415 | 0.58381  | -0.00632 | 0.8916   | -0.0262  | 0.57218  | 0.016042 | 0.72952  | 0.030082 |
| 0.078562 | 0.08992  | -0.01541 | 0.73974  | 0.106632 | 0.02118  | 0.022865 | 0.62211  | -0.01226 |
| 0.064256 | 0.16566  | -0.0101  | 0.82772  | 0.054056 | 0.24366  | 0.040224 | 0.38579  | -0.0374  |
| 0.027335 | 0.5557   | 0.039712 | 0.39187  | 0.047892 | 0.30171  | 0.013589 | 0.76961  | 0.059683 |
| 0.038762 | 0.40331  | 0.065151 | 0.15983  | 0.049586 | 0.28491  | 0.072652 | 0.11691  | 0.055923 |
| -0.07372 | 0.1116   | 0.024608 | 0.59581  | 0.136685 | 0.00308  | -0.05902 | 0.20296  | -0.03441 |
| -0.06678 | 0.14959  | -0.11164 | 0.01579  | -0.06413 | 0.16651  | -0.06244 | 0.17794  | -0.06558 |
| 0.072044 | 0.12001  | 0.054465 | 0.24011  | 0.0903   | 0.05116  | 0.065622 | 0.15683  | 0.033977 |
| 0.040084 | 0.38745  | 0.019758 | 0.67021  | 0.027012 | 0.56038  | 0.066697 | 0.15013  | 0.014152 |
| -0.03783 | 0.41467  | 0.040163 | 0.38651  | -0.01888 | 0.68412  | -0.00701 | 0.87988  | -0.0635  |
| 0.075244 | 0.10438  | 0.097543 | 0.03509  | 0.207035 | 6.45E-06 | -0.04922 | 0.28849  | 0.054606 |
| 0.066335 | 0.15236  | -0.02447 | 0.59788  | -0.05217 | 0.2605   | 0.034284 | 0.45984  | 0.122646 |
| 0.027524 | 0.55298  | 0.082805 | 0.07382  | 0.051856 | 0.26341  | 0.024165 | 0.60244  | 0.115634 |
| 0.063961 | 0.16761  | 0.03709  | 0.42391  | 0.040772 | 0.37935  | 0.033553 | 0.46946  | 0.0652   |
| 0.04143  | 0.37169  | -0.00822 | 0.85937  | -0.00781 | 0.86629  | -0.01631 | 0.72519  | -0.04262 |
| 0.154346 | 0.00082  | 0.020693 | 0.65557  | 0.03245  | 0.4842   | 0.122216 | 0.00819  | 0.027086 |
| 0.013648 | 0.76863  | 0.006546 | 0.88781  | 0.011138 | 0.81029  | 0.059992 | 0.19562  | -0.00122 |
| -0.267   | 4.60E-09 | -0.06102 | 0.18803  | -0.15248 | 0.00095  | -0.11117 | 0.01624  | -0.04155 |
| 0.1444   | 0.00176  | 0.112012 | 0.01545  | 0.084767 | 0.06722  | 0.126006 | 0.0064   | 0.146627 |
| -0.11841 | 0.01044  | -0.02098 | 0.6511   | -0.13208 | 0.00425  | -0.03955 | 0.39381  | -0.02007 |
| -0.08614 | 0.06288  | 0.049715 | 0.28366  | 0.013147 | 0.7769   | -0.11408 | 0.01364  | -0.12417 |
| -0.01111 | 0.81078  | -0.03519 | 0.44812  | -0.08307 | 0.07291  | -0.01121 | 0.80901  | 0.052356 |

|          |          |          |          |          |          |          |          |          |
|----------|----------|----------|----------|----------|----------|----------|----------|----------|
| 0.110255 | 0.01715  | -0.05631 | 0.2245   | -0.11426 | 0.01348  | 0.158676 | 0.00058  | 0.098378 |
| -0.11669 | 0.01162  | -0.05711 | 0.21797  | -0.17404 | 0.00016  | -0.06246 | 0.17786  | -0.08689 |
| 0.012524 | 0.78722  | 0.130178 | 0.00484  | 0.067329 | 0.1463   | 0.027339 | 0.55564  | 0.023047 |
| -0.11952 | 0.00973  | -0.18091 | 8.44E-05 | -0.31731 | 2.20E-12 | -0.07449 | 0.10792  | -0.26401 |
| 0.22317  | 1.11E-06 | 0.092075 | 0.04674  | 0.091227 | 0.04881  | 0.103976 | 0.02464  | 0.090025 |
| -0.03033 | 0.51316  | -0.10182 | 0.02779  | -0.0803  | 0.08303  | -0.13037 | 0.00478  | -0.08093 |
| -0.07673 | 0.09767  | -0.10483 | 0.02348  | -0.10886 | 0.01861  | -0.05084 | 0.27289  | -0.03743 |
| 0.061834 | 0.18222  | -0.0521  | 0.26117  | -0.03321 | 0.47402  | 0.076088 | 0.10054  | -0.00569 |
| 0.124364 | 0.00713  | 0.171638 | 0.00019  | 0.172677 | 0.00018  | 0.012376 | 0.78967  | 0.034396 |
| -0.04977 | 0.28311  | -0.11131 | 0.01611  | -0.27932 | 8.12E-10 | 0.003884 | 0.93329  | -0.07807 |
| -0.04012 | 0.38706  | 0.004706 | 0.91921  | 0.00728  | 0.87532  | -0.10528 | 0.02288  | -0.03353 |
| 0.024458 | 0.59805  | -0.00819 | 0.85991  | -0.16669 | 0.0003   | 0.124675 | 0.00698  | 0.057674 |
| -0.11601 | 0.01212  | -0.04318 | 0.35177  | -0.00204 | 0.96501  | -0.02899 | 0.532    | 0.00878  |
| -0.02573 | 0.57912  | -0.09087 | 0.04969  | -0.15357 | 0.00087  | -0.01509 | 0.74492  | -0.06034 |
| 0.081794 | 0.07743  | 0.047279 | 0.30795  | 0.059138 | 0.20207  | -0.03821 | 0.41003  | -0.0239  |
| -0.01142 | 0.80558  | -0.05758 | 0.21427  | -0.06268 | 0.1763   | -0.0492  | 0.28871  | -0.01019 |
| -0.09198 | 0.04698  | -0.10656 | 0.02127  | -0.09861 | 0.03314  | -0.08726 | 0.05952  | -0.10776 |
| 0.201837 | 1.11E-05 | 0.166465 | 0.0003   | 0.112961 | 0.01459  | 0.198075 | 1.62E-05 | 0.168343 |
| 0.033105 | 0.47542  | 0.055013 | 0.23541  | -0.01818 | 0.69513  | 0.0457   | 0.3244   | 0.110935 |
| 0.145306 | 0.00164  | -0.035   | 0.45048  | -0.01977 | 0.67004  | 0.024181 | 0.60221  | -0.01194 |
| 0.029294 | 0.52772  | 0.053434 | 0.24914  | 0.018051 | 0.69722  | 0.033994 | 0.46365  | 0.08713  |
| -0.02015 | 0.66405  | 0.018871 | 0.68419  | -0.06279 | 0.17556  | -0.07732 | 0.09515  | -0.05731 |
| 0.115739 | 0.01232  | 0.067441 | 0.14562  | 0.037596 | 0.41762  | 0.011946 | 0.79682  | -0.00188 |
| 0.124324 | 0.00715  | -0.03827 | 0.40937  | -0.07631 | 0.09953  | 0.021897 | 0.63694  | -0.03571 |
| -0.02041 | 0.66001  | -0.00867 | 0.85174  | -0.04558 | 0.32569  | -0.01301 | 0.77913  | 0.033538 |
| -0.02645 | 0.56864  | -0.14649 | 0.0015   | -0.29962 | 3.85E-11 | -0.01599 | 0.73039  | -0.0589  |
| 0.150405 | 0.00111  | 0.10756  | 0.02008  | 0.15673  | 0.00068  | 0.027167 | 0.55814  | -0.03283 |
| 0.201733 | 1.12E-05 | 0.11253  | 0.01497  | 0.130396 | 0.00477  | 0.108982 | 0.01848  | 0.067875 |
| 0.141429 | 0.00219  | 0.080056 | 0.08396  | 0.041448 | 0.37149  | 0.167199 | 0.00028  | 0.186409 |
| 0.026724 | 0.56458  | 0.023314 | 0.61529  | 0.041789 | 0.36756  | -0.021   | 0.65085  | -0.00361 |
| -0.09855 | 0.03323  | -0.1197  | 0.00962  | -0.07382 | 0.11114  | -0.16388 | 0.00038  | -0.08045 |
| -0.00022 | 0.9962   | -0.0192  | 0.67894  | -0.0491  | 0.28966  | 0.006763 | 0.88411  | 0.064935 |
| 0.095354 | 0.03942  | 0.111534 | 0.01589  | 0.077311 | 0.09517  | 0.119309 | 0.00986  | 0.166039 |
| 0.001941 | 0.96664  | 0.140851 | 0.00228  | 0.004494 | 0.92284  | 0.111862 | 0.01559  | 0.11355  |
| -0.35351 | 3.42E-15 | -0.11911 | 0.00999  | -0.19896 | 1.48E-05 | -0.15359 | 0.00087  | -0.05103 |
| 0.114663 | 0.01316  | 0.230109 | 4.98E-07 | 0.293487 | 9.91E-11 | 0.126176 | 0.00633  | 0.172565 |
| 0.050811 | 0.27316  | 0.022047 | 0.63462  | 0.033971 | 0.46394  | -0.0753  | 0.1041   | 0.002611 |
| 0.178187 | 0.00011  | 0.270426 | 2.86E-09 | 0.231901 | 4.04E-07 | 0.22609  | 7.94E-07 | 0.370425 |
| 0.094116 | 0.04206  | 0.144837 | 0.0017   | 0.067275 | 0.14662  | 0.124648 | 0.007    | 0.099704 |
| 0.080949 | 0.08055  | 0.068094 | 0.14176  | -0.01444 | 0.75568  | 0.13354  | 0.00384  | 0.125127 |
| -0.01105 | 0.81171  | 0.03766  | 0.41682  | -0.08638 | 0.06215  | 0.020279 | 0.66204  | 0.014146 |
| 0.089332 | 0.05371  | 0.063109 | 0.17335  | 0.057853 | 0.21206  | 0.032469 | 0.48395  | 0.04419  |
| 0.156478 | 0.00069  | 0.117782 | 0.01085  | 0.033352 | 0.47213  | 0.159021 | 0.00056  | 0.099674 |
| 0.14851  | 0.00129  | 0.221982 | 1.27E-06 | 0.172434 | 0.00018  | 0.097804 | 0.0346   | 0.115954 |
| -0.0203  | 0.66173  | 0.009294 | 0.84124  | 0.027997 | 0.54616  | -0.01801 | 0.69789  | -0.00319 |

|          |          |           |          |          |          |          |         |          |
|----------|----------|-----------|----------|----------|----------|----------|---------|----------|
| 0.069172 | 0.13554  | -0.02039  | 0.66036  | -0.05732 | 0.21635  | 0.081845 | 0.07724 | 0.01758  |
| 0.085989 | 0.06335  | 0.220792  | 1.45E-06 | 0.197464 | 1.72E-05 | 0.060768 | 0.18989 | 0.087057 |
| 0.17516  | 0.00014  | -3.53E-05 | 0.99939  | 0.014621 | 0.75266  | 0.05962  | 0.19841 | 0.064252 |
| 0.239637 | 1.59E-07 | 0.07739   | 0.09483  | 0.27287  | 2.03E-09 | 0.133504 | 0.00385 | 0.106314 |
| 0.003042 | 0.94773  | 0.024101  | 0.60341  | -0.01531 | 0.7414   | 0.0515   | 0.2667  | 0.056081 |
| 0.135972 | 0.00324  | 0.01924   | 0.67836  | -0.00414 | 0.92882  | 0.06102  | 0.18806 | -0.016   |
| 0.124257 | 0.00718  | 0.131904  | 0.0043   | 0.105281 | 0.02288  | 0.079069 | 0.08786 | -0.01217 |
| -0.0375  | 0.41875  | -0.06851  | 0.13932  | 0.081759 | 0.07756  | -0.02881 | 0.53457 | -0.1231  |
| 0.004544 | 0.92199  | 0.018699  | 0.68691  | 0.005298 | 0.90908  | 0.030299 | 0.51365 | 0.048861 |
| 0.040472 | 0.38287  | 0.0348    | 0.45311  | 0.000997 | 0.98287  | 0.075964 | 0.1011  | 0.054367 |
| 0.211662 | 3.95E-06 | 0.074599  | 0.1074   | 0.043797 | 0.34498  | 0.168595 | 0.00025 | 0.116712 |
| 0.030664 | 0.50859  | -0.01974  | 0.67041  | -0.11139 | 0.01604  | 0.085914 | 0.06359 | 0.03703  |
| 0.043738 | 0.34563  | 0.038508  | 0.4064   | -0.01034 | 0.82373  | 0.059504 | 0.19929 | 0.072468 |
| -0.05313 | 0.2518   | 0.031998  | 0.49032  | -0.20824 | 5.68E-06 | -0.09191 | 0.04713 | 0.092058 |
| -0.02946 | 0.52537  | 0.018555  | 0.6892   | -0.0838  | 0.07041  | 0.060148 | 0.19446 | 0.045794 |
| 0.247656 | 5.89E-08 | 0.139557  | 0.00251  | 0.054059 | 0.24363  | 0.108386 | 0.01914 | 0.086184 |
| 0.139646 | 0.00249  | 0.285965  | 3.07E-10 | 0.143345 | 0.0019   | 0.15311  | 0.0009  | 0.230385 |
| 0.096473 | 0.03715  | 0.078417  | 0.09052  | 0.102527 | 0.02672  | 0.015061 | 0.74547 | 0.075176 |
| 0.042984 | 0.35402  | 0.040676  | 0.38047  | -0.03315 | 0.47477  | 0.10417  | 0.02437 | 0.126046 |
| 0.077374 | 0.0949   | 0.034693  | 0.45449  | -0.01322 | 0.77563  | 0.026611 | 0.56621 | 0.063186 |
| 0.371063 | 1.08E-16 | 0.268287  | 3.85E-09 | 0.283665 | 4.31E-10 | 0.166231 | 0.00031 | 0.144174 |
| 0.146062 | 0.00155  | 0.049607  | 0.28471  | 0.027817 | 0.54875  | 0.079257 | 0.08711 | -0.02075 |
| 0.102668 | 0.02651  | 0.031619  | 0.49548  | -0.09597 | 0.03816  | 0.083328 | 0.07201 | -0.01082 |
| -0.00391 | 0.93277  | 0.024577  | 0.59628  | -0.04516 | 0.33014  | -0.1293  | 0.00514 | -0.11073 |
| 0.033629 | 0.46845  | -0.03432  | 0.45934  | -0.09587 | 0.03837  | -0.0555  | 0.23125 | -0.06587 |
| 0.044731 | 0.33478  | -0.00457  | 0.92161  | -0.04145 | 0.37141  | 0.008912 | 0.84768 | 0.072688 |
| 0.159634 | 0.00053  | 0.123771  | 0.00741  | 0.056767 | 0.22078  | 0.142241 | 0.00206 | 0.143855 |
| 0.036377 | 0.43289  | 0.049904  | 0.28183  | -0.06093 | 0.18873  | -0.02789 | 0.54767 | 0.056433 |
| 0.098119 | 0.03402  | -0.00819  | 0.85985  | -0.00691 | 0.88155  | 0.056863 | 0.22    | -0.04023 |
| 0.07772  | 0.09343  | -0.02496  | 0.5906   | -0.10925 | 0.01819  | 0.129138 | 0.00519 | 0.063604 |
| -0.36228 | 6.25E-16 | -0.11843  | 0.01042  | -0.25428 | 2.51E-08 | -0.05306 | 0.25249 | -0.01897 |
| -0.15892 | 0.00057  | 0.087545  | 0.0587   | -0.00751 | 0.87139  | -0.03526 | 0.44715 | -0.08262 |
| 0.088446 | 0.05614  | 0.032036  | 0.4898   | -0.01314 | 0.77703  | 0.053921 | 0.24484 | 0.051009 |
| 0.009566 | 0.83665  | -0.03415  | 0.46165  | -0.06818 | 0.14124  | -0.02556 | 0.58165 | -0.0151  |
| -0.19031 | 3.48E-05 | -0.18955  | 3.75E-05 | -0.29516 | 7.68E-11 | -0.06034 | 0.19306 | 0.005474 |
| 0.086567 | 0.06159  | 0.12274   | 0.00792  | 0.125084 | 0.0068   | -0.03455 | 0.45631 | 0.048039 |
| -0.25453 | 2.44E-08 | -0.0602   | 0.19408  | -0.15484 | 0.00079  | -0.0848  | 0.0671  | -0.05734 |
| 0.18258  | 7.24E-05 | 0.061207  | 0.18671  | 0.0654   | 0.15824  | 0.06714  | 0.14744 | 0.098013 |
| -0.03561 | 0.44267  | -0.00423  | 0.92742  | -0.02399 | 0.60509  | -0.02551 | 0.58232 | 0.006769 |
| 0.015215 | 0.74296  | 0.064927  | 0.16128  | 0.02437  | 0.59937  | 0.031287 | 0.50002 | 0.01482  |
| 0.090763 | 0.04997  | 0.059953  | 0.19591  | 0.095637 | 0.03883  | 0.067364 | 0.14609 | 0.076052 |
| 0.322454 | 9.25E-13 | 0.133804  | 0.00377  | 0.186485 | 5.02E-05 | 0.140565 | 0.00233 | 0.16614  |
| 0.021201 | 0.64768  | 0.019144  | 0.67988  | 0.012259 | 0.79161  | -0.02417 | 0.60233 | -0.0055  |
| -0.12668 | 0.00612  | -0.25717  | 1.72E-08 | -0.25601 | 2.01E-08 | -0.04971 | 0.28374 | -0.24666 |
| -0.10474 | 0.02359  | 0.073561  | 0.11239  | -0.00426 | 0.92682  | -0.00933 | 0.84067 | 0.064798 |

|          |          |          |          |          |          |          |          |          |
|----------|----------|----------|----------|----------|----------|----------|----------|----------|
| 0.002245 | 0.96141  | 0.016282 | 0.72564  | 0.021408 | 0.64448  | 0.007107 | 0.87826  | 0.008266 |
| 0.069226 | 0.13524  | 0.043908 | 0.34375  | 0.024131 | 0.60296  | 0.002195 | 0.96226  | -0.06014 |
| 0.020984 | 0.65105  | 0.040749 | 0.37961  | 0.155964 | 0.00072  | -0.00491 | 0.91573  | -0.00046 |
| -0.09285 | 0.04491  | -0.03623 | 0.43473  | -0.03622 | 0.43482  | -0.07435 | 0.10858  | -0.07072 |
| 0.117739 | 0.01088  | 0.018319 | 0.69295  | -0.11627 | 0.01192  | 0.006369 | 0.89082  | -0.05534 |
| 0.189607 | 3.72E-05 | 0.150855 | 0.00108  | 0.074344 | 0.1086   | 0.110603 | 0.0168   | 0.172874 |
| 0.14837  | 0.0013   | 0.117012 | 0.01139  | -0.04957 | 0.28503  | 0.064991 | 0.16086  | 0.015872 |
| -0.09016 | 0.05153  | 0.026364 | 0.56983  | -0.15836 | 0.00059  | 0.061158 | 0.18706  | 0.133616 |
| 0.039615 | 0.39303  | -0.01589 | 0.73196  | 0.002862 | 0.95082  | 0.021167 | 0.64821  | -0.10276 |
| 0.28325  | 4.58E-10 | 0.275785 | 1.35E-09 | 0.262165 | 8.86E-09 | 0.218025 | 1.97E-06 | 0.163734 |
| -0.09473 | 0.04074  | -0.02425 | 0.60115  | -0.04065 | 0.38074  | -0.07002 | 0.13081  | -0.0472  |
| 0.097334 | 0.03549  | 0.170142 | 0.00022  | 0.097762 | 0.03468  | -0.00541 | 0.90726  | 0.11313  |
| -0.04128 | 0.37349  | -0.03829 | 0.40901  | -0.05652 | 0.22283  | 0.03462  | 0.45544  | 0.143404 |
| -0.18568 | 5.41E-05 | -0.03572 | 0.44124  | -0.07076 | 0.12675  | -0.04817 | 0.29889  | 0.037024 |
| 0.084903 | 0.06678  | 0.095898 | 0.0383   | -0.00046 | 0.99212  | 0.139841 | 0.00246  | 0.078061 |
| -0.01595 | 0.73108  | -0.0835  | 0.07141  | -0.01778 | 0.70152  | -0.04138 | 0.37229  | -0.12717 |
| -0.01021 | 0.82578  | -0.15562 | 0.00074  | -0.18981 | 3.65E-05 | -0.06118 | 0.18688  | -0.23404 |
| -0.13711 | 0.00299  | -0.13092 | 0.0046   | -0.10926 | 0.01819  | -0.09855 | 0.03323  | -0.10493 |
| -0.02352 | 0.61222  | -0.02767 | 0.55082  | -0.01954 | 0.67365  | -0.06164 | 0.1836   | 0.02748  |
| -0.06151 | 0.18456  | -0.132   | 0.00427  | -0.09674 | 0.03663  | -0.10175 | 0.0279   | -0.13102 |
| 0.206669 | 6.70E-06 | 0.174853 | 0.00015  | 0.086483 | 0.06185  | 0.126878 | 0.00604  | 0.090267 |
| 0.180352 | 8.89E-05 | 0.182111 | 7.56E-05 | 0.207583 | 6.09E-06 | 0.189025 | 3.94E-05 | 0.192281 |
| 0.000783 | 0.98653  | -0.15524 | 0.00076  | -0.10883 | 0.01865  | 0.012798 | 0.78266  | 0.112705 |
| -0.14314 | 0.00193  | -0.19548 | 2.10E-05 | -0.3324  | 1.65E-13 | -0.06487 | 0.16162  | -0.01555 |
| 0.094434 | 0.04137  | 0.123116 | 0.00773  | -0.08675 | 0.06104  | 0.249963 | 4.39E-08 | 0.194486 |
| 0.039474 | 0.39472  | 0.033234 | 0.47371  | 0.005735 | 0.90163  | 0.017871 | 0.7001   | -0.00059 |
| 0.19798  | 1.64E-05 | -0.03279 | 0.47959  | 0.164376 | 0.00036  | 0.053759 | 0.24626  | 0.011425 |
| 0.139837 | 0.00246  | 0.084459 | 0.06822  | 0.081675 | 0.07786  | 0.188538 | 4.13E-05 | 0.010459 |
| -0.01489 | 0.74828  | -0.10812 | 0.01944  | -0.04877 | 0.29296  | -0.11033 | 0.01708  | -0.21077 |
| 0.059643 | 0.19823  | 0.121555 | 0.00855  | 0.265198 | 5.88E-09 | -0.06978 | 0.13213  | -0.08795 |
| 0.11426  | 0.01349  | 0.04825  | 0.29811  | 0.101317 | 0.02858  | 0.132976 | 0.00399  | -0.09447 |
| -0.07832 | 0.0909   | -0.1451  | 0.00167  | -0.11151 | 0.01592  | -0.19959 | 1.39E-05 | -0.28772 |
| 0.117862 | 0.0108   | -0.18495 | 5.80E-05 | -0.01884 | 0.68461  | -0.09618 | 0.03774  | -0.30235 |
| -0.00832 | 0.85761  | -0.02289 | 0.62176  | 0.00379  | 0.9349   | 0.040094 | 0.38733  | -0.01137 |
| 0.026975 | 0.56092  | -0.03389 | 0.46498  | -0.00063 | 0.98915  | 0.003622 | 0.93778  | 0.073011 |
| 0.019214 | 0.67876  | 0.033376 | 0.47182  | 0.028866 | 0.53378  | 0.129947 | 0.00491  | 0.072948 |
| 0.052638 | 0.25626  | -0.00507 | 0.91295  | 0.0083   | 0.85803  | -0.03178 | 0.4933   | -0.06319 |
| -0.01062 | 0.81898  | -0.05979 | 0.1971   | -0.05483 | 0.23698  | -0.09283 | 0.04496  | -0.22289 |
| 0.097468 | 0.03523  | 0.126418 | 0.00623  | 0.265835 | 5.39E-09 | 0.130074 | 0.00487  | 0.247917 |
| 0.000196 | 0.99663  | -0.13228 | 0.00419  | 0.007979 | 0.86347  | -0.16853 | 0.00025  | -0.14196 |
| 0.086446 | 0.06196  | -0.12972 | 0.00499  | -0.11829 | 0.01051  | -0.01193 | 0.79715  | 0.007329 |
| 0.153293 | 0.00089  | 0.102617 | 0.02659  | -0.14149 | 0.00218  | 0.0707   | 0.1271   | 0.182264 |
| -0.06276 | 0.17575  | 0.161769 | 0.00045  | 0.077666 | 0.09366  | -0.03567 | 0.44195  | 0.201977 |
| 0.085921 | 0.06356  | 0.049648 | 0.28431  | 0.094981 | 0.0402   | -0.04769 | 0.30378  | 0.017712 |
| 0.011686 | 0.80113  | -0.10058 | 0.02976  | -0.07707 | 0.09623  | -0.00916 | 0.84355  | -0.07565 |



|          |          |          |          |          |          |          |          |          |
|----------|----------|----------|----------|----------|----------|----------|----------|----------|
| 0.08502  | 0.0664   | 0.055287 | 0.23307  | 0.08949  | 0.05329  | -0.0417  | 0.36855  | -0.04311 |
| 0.175192 | 0.00014  | 0.011283 | 0.80786  | -0.00406 | 0.9303   | -0.00197 | 0.96606  | -0.23294 |
| 0.071318 | 0.1238   | 0.077822 | 0.093    | 0.0085   | 0.85464  | 0.040947 | 0.37731  | 0.066974 |
| 0.042038 | 0.36471  | -0.07524 | 0.1044   | -0.01701 | 0.71394  | -0.22087 | 1.44E-06 | -0.32588 |
| -0.00648 | 0.88893  | -0.03539 | 0.44542  | -0.156   | 0.00072  | 0.002189 | 0.96237  | 0.115805 |
| -0.0378  | 0.41507  | -0.19279 | 2.74E-05 | -0.18267 | 7.17E-05 | -0.13999 | 0.00243  | -0.09773 |
| -0.19484 | 2.24E-05 | -0.21316 | 3.36E-06 | -0.20143 | 1.15E-05 | -0.20957 | 4.94E-06 | -0.08327 |
| -0.19355 | 2.54E-05 | -0.26742 | 4.34E-09 | -0.30087 | 3.16E-11 | -0.20775 | 5.99E-06 | -0.20177 |
| -0.08811 | 0.05709  | -0.191   | 3.26E-05 | -0.14114 | 0.00223  | -0.32318 | 8.17E-13 | -0.3448  |
| -0.27882 | 8.72E-10 | -0.33502 | 1.03E-13 | -0.34887 | 8.21E-15 | -0.27696 | 1.14E-09 | -0.17408 |
| -0.07038 | 0.12882  | -0.19235 | 2.86E-05 | -0.07095 | 0.12578  | -0.15643 | 0.00069  | -0.21286 |
| -0.04213 | 0.36366  | -0.1359  | 0.00326  | -0.10861 | 0.01889  | -0.22293 | 1.14E-06 | -0.27649 |
| -0.30677 | 1.24E-11 | -0.27419 | 1.69E-09 | -0.22557 | 8.43E-07 | -0.21206 | 3.78E-06 | -0.0143  |
| -0.22399 | 1.01E-06 | -0.172   | 0.00019  | -0.12101 | 0.00886  | -0.12325 | 0.00766  | 0.099674 |
| -0.21502 | 2.74E-06 | -0.17901 | 0.0001   | -0.18157 | 7.94E-05 | -0.11251 | 0.01499  | 0.064467 |
| -0.29514 | 7.70E-11 | -0.15929 | 0.00055  | -0.15939 | 0.00055  | -0.14181 | 0.00213  | 0.040016 |
| 0.165723 | 0.00032  | -0.13248 | 0.00413  | -0.28843 | 2.13E-10 | 0.086047 | 0.06318  | -0.08677 |
| -0.0846  | 0.06774  | -0.12802 | 0.0056   | -0.28804 | 2.26E-10 | -0.00484 | 0.91691  | -0.07322 |
| 0.043864 | 0.34424  | 0.064984 | 0.16091  | 0.02984  | 0.52005  | 0.008106 | 0.86131  | 0.053424 |
| 0.032412 | 0.48471  | -0.00638 | 0.89059  | -0.014   | 0.76282  | 0.020185 | 0.66351  | -0.05256 |
| 0.120575 | 0.0091   | 0.052371 | 0.25869  | 0.141822 | 0.00213  | -0.19637 | 1.92E-05 | -0.22787 |
| 0.036148 | 0.43578  | 0.018853 | 0.68447  | -0.05143 | 0.26737  | -0.12794 | 0.00563  | -0.14624 |
| 0.226098 | 7.93E-07 | 0.298989 | 4.24E-11 | 0.079357 | 0.08671  | 0.184267 | 6.18E-05 | 0.264414 |
| 0.022183 | 0.63255  | 0.038236 | 0.40972  | 0.016931 | 0.71517  | 0.070219 | 0.12971  | -0.10645 |
| 0.278566 | 9.05E-10 | 0.11097  | 0.01644  | 0.282021 | 5.48E-10 | -0.07388 | 0.11083  | -0.16407 |
| 0.114198 | 0.01354  | -0.12206 | 0.00828  | -0.18198 | 7.65E-05 | 0.240791 | 1.38E-07 | 0.208958 |
| -0.09151 | 0.04812  | -0.259   | 1.35E-08 | -0.31604 | 2.72E-12 | -0.2229  | 1.14E-06 | -0.35598 |
| -0.17999 | 9.19E-05 | -0.16177 | 0.00045  | -0.28793 | 2.29E-10 | -0.1757  | 0.00014  | -0.17516 |
| -0.12649 | 0.0062   | -0.08105 | 0.08016  | -0.08887 | 0.05497  | -0.10071 | 0.02955  | -0.1872  |
| 0.175921 | 0.00013  | 0.223353 | 1.09E-06 | 0.155773 | 0.00073  | 0.286257 | 2.94E-10 | 0.231175 |
| -0.04753 | 0.30538  | 0.010563 | 0.81992  | -0.21172 | 3.92E-06 | 0.035231 | 0.44752  | 0.085039 |
| 0.001876 | 0.96775  | -0.01241 | 0.78907  | 0.015338 | 0.74096  | -0.03819 | 0.41035  | -0.15616 |
| 0.010302 | 0.82429  | -0.15713 | 0.00065  | 0.074237 | 0.10911  | -0.06164 | 0.18363  | 0.022892 |
| 0.081517 | 0.07844  | 0.106154 | 0.02177  | 0.069404 | 0.13423  | 0.0928   | 0.04503  | 0.06707  |
| 0.102922 | 0.02614  | -0.16664 | 0.0003   | -0.10724 | 0.02045  | 0.01319  | 0.77619  | 0.22812  |
| 0.039937 | 0.3892   | -0.06825 | 0.14084  | -0.03086 | 0.50587  | -0.09542 | 0.03928  | -0.23617 |
| -0.03996 | 0.38898  | -0.22098 | 1.42E-06 | -0.08312 | 0.07271  | -0.00237 | 0.95927  | -0.08917 |
| 0.253038 | 2.96E-08 | 0.271074 | 2.62E-09 | 0.169989 | 0.00022  | 0.362651 | 5.82E-16 | 0.349961 |
| 0.182144 | 7.53E-05 | 0.154897 | 0.00078  | 0.218786 | 1.81E-06 | -0.02419 | 0.60202  | 0.109259 |
| 0.082259 | 0.07575  | 0.104615 | 0.02377  | 0.059197 | 0.20162  | 0.038565 | 0.40571  | -0.03501 |
| 0.128372 | 0.00547  | 0.077469 | 0.0945   | 0.063936 | 0.16778  | 0.070216 | 0.12973  | -0.00951 |
| 0.014566 | 0.75356  | 0.099308 | 0.0319   | -0.01115 | 0.81004  | 0.000831 | 0.98571  | -0.05288 |
| -0.08612 | 0.06294  | -0.08177 | 0.07751  | -0.08499 | 0.06651  | -0.06857 | 0.13899  | -0.09326 |
| -0.09036 | 0.05101  | -0.09847 | 0.03339  | -0.1068  | 0.02098  | -0.08862 | 0.05566  | -0.11475 |
| -0.03521 | 0.44778  | -0.01614 | 0.7279   | -0.06011 | 0.19473  | 0.113048 | 0.01451  | 0.167372 |

|          |          |          |          |          |          |          |          |          |
|----------|----------|----------|----------|----------|----------|----------|----------|----------|
| 0.04025  | 0.38549  | 0.011714 | 0.80068  | 0.040614 | 0.3812   | -0.07659 | 0.09831  | -0.04724 |
| 0.047207 | 0.30868  | 0.045962 | 0.32163  | 0.010814 | 0.81571  | 0.074594 | 0.10742  | 0.033376 |
| 0.040948 | 0.3773   | 0.166133 | 0.00031  | 0.155824 | 0.00073  | -0.00519 | 0.91089  | 0.126225 |
| 0.061616 | 0.18377  | 0.255544 | 2.13E-08 | 0.181315 | 8.13E-05 | 0.251487 | 3.61E-08 | 0.254808 |
| 0.07826  | 0.09117  | 0.032792 | 0.4796   | 0.069399 | 0.13426  | -0.1037  | 0.02503  | -0.21772 |
| -0.05235 | 0.25887  | 0.042613 | 0.35819  | 0.088535 | 0.05589  | -0.08723 | 0.05963  | -0.22672 |
| 0.116417 | 0.01182  | 0.147851 | 0.00135  | 0.229715 | 5.22E-07 | -0.15082 | 0.00108  | -0.23958 |
| 0.238461 | 1.84E-07 | 0.233303 | 3.42E-07 | 0.245531 | 7.69E-08 | 0.115196 | 0.01274  | 0.101069 |
| -0.28134 | 6.06E-10 | -0.23962 | 1.60E-07 | -0.20012 | 1.32E-05 | -0.32537 | 5.62E-13 | -0.38934 |
| 0.301089 | 3.05E-11 | 0.268217 | 3.89E-09 | 0.161683 | 0.00045  | 0.134263 | 0.00365  | 0.29799  |
| 0.021325 | 0.64577  | -0.02159 | 0.64172  | 0.021519 | 0.64277  | -0.05551 | 0.23123  | -0.18851 |
| 0.040891 | 0.37796  | 0.066186 | 0.15328  | 0.082847 | 0.07368  | 0.082094 | 0.07634  | -0.01551 |
| -0.00965 | 0.83518  | 0.023974 | 0.60532  | 0.067197 | 0.14709  | -0.06995 | 0.1312   | -0.01739 |
| 0.074916 | 0.1059   | 0.113723 | 0.01393  | 0.095512 | 0.03909  | 0.136388 | 0.00314  | 0.06071  |
| 0.152789 | 0.00092  | 0.181117 | 8.28E-05 | 0.295988 | 6.75E-11 | 0.120398 | 0.00921  | -0.06745 |
| -0.15362 | 0.00087  | -0.27596 | 1.31E-09 | -0.21549 | 2.61E-06 | -0.27975 | 7.62E-10 | -0.41889 |
| -0.07495 | 0.10572  | -0.117   | 0.01139  | -0.08175 | 0.0776   | -0.19067 | 3.36E-05 | 0.020637 |
| -0.09162 | 0.04783  | -0.15123 | 0.00104  | -0.07286 | 0.11585  | 0.06844  | 0.13974  | 0.163039 |
| 0.086661 | 0.06131  | -0.22812 | 6.28E-07 | -0.20668 | 6.70E-06 | -0.09091 | 0.04961  | -0.16171 |
| 0.109302 | 0.01814  | 0.112189 | 0.01528  | 0.184201 | 6.22E-05 | 0.08774  | 0.05814  | -0.08923 |
| 0.065677 | 0.15648  | 0.062575 | 0.17703  | 0.110044 | 0.01736  | -0.0976  | 0.03499  | -0.08096 |
| 0.098938 | 0.03255  | -0.00359 | 0.93837  | 0.053898 | 0.24504  | -0.06727 | 0.14664  | -0.1388  |
| 0.188998 | 3.95E-05 | 0.256688 | 1.84E-08 | 0.26835  | 3.82E-09 | -0.00036 | 0.99376  | 0.08613  |
| 0.100309 | 0.03021  | 0.051237 | 0.26916  | -0.16858 | 0.00025  | 0.240108 | 1.51E-07 | 0.409178 |
| -0.09872 | 0.03293  | -0.07485 | 0.10622  | -0.08847 | 0.05606  | -0.04412 | 0.34139  | 0.057507 |
| 0.08521  | 0.0658   | 0.004686 | 0.91956  | 0.081847 | 0.07724  | -0.06384 | 0.16839  | -0.08329 |
| -0.0051  | 0.91242  | 0.147738 | 0.00137  | 0.137235 | 0.00296  | -0.05729 | 0.21652  | 0.001355 |
| -0.1294  | 0.0051   | 0.096269 | 0.03756  | -0.0026  | 0.95524  | 0.006514 | 0.88834  | 0.083028 |
| 0.012467 | 0.78816  | 0.001177 | 0.97977  | 0.008469 | 0.85517  | -0.12889 | 0.00528  | -0.21207 |
| 0.197966 | 1.64E-05 | 0.155872 | 0.00072  | 0.107056 | 0.02067  | 0.259381 | 1.29E-08 | 0.167137 |
| -0.24018 | 1.49E-07 | -0.21523 | 2.68E-06 | -0.12778 | 0.00569  | -0.27375 | 1.80E-09 | -0.28739 |
| -0.02168 | 0.64024  | -0.21332 | 3.30E-06 | -0.01581 | 0.73327  | -0.13798 | 0.00281  | -0.23258 |
| 0.273434 | 1.88E-09 | 0.077633 | 0.0938   | 0.106551 | 0.02128  | 0.173259 | 0.00017  | -0.06602 |
| 0.18675  | 4.89E-05 | 0.049153 | 0.28914  | 0.188617 | 4.10E-05 | -0.0187  | 0.68687  | -0.0421  |
| 0.074982 | 0.1056   | 0.005897 | 0.89887  | 0.043076 | 0.35299  | -0.00917 | 0.84338  | -0.10034 |
| 0.176231 | 0.00013  | 0.271198 | 2.57E-09 | 0.272998 | 2.00E-09 | 0.1159   | 0.0122   | 0.024795 |
| 0.023609 | 0.61082  | 0.07067  | 0.12725  | 0.039775 | 0.39112  | -0.07648 | 0.09881  | -0.30344 |
| 0.113413 | 0.0142   | 0.230221 | 4.92E-07 | 0.210494 | 4.47E-06 | -0.0285  | 0.53901  | -0.06144 |
| 0.036573 | 0.4304   | -0.05944 | 0.19974  | 0.068077 | 0.14186  | 0.004521 | 0.92237  | -0.09658 |
| -0.0202  | 0.66333  | 0.00942  | 0.83912  | 0.048604 | 0.29457  | -0.04052 | 0.38235  | 0.007662 |
| -0.00308 | 0.94712  | -0.01246 | 0.78832  | 0.012486 | 0.78784  | 0.033337 | 0.47233  | 0.032017 |
| 0.311121 | 6.12E-12 | 0.19859  | 1.54E-05 | 0.184347 | 6.14E-05 | 0.246894 | 6.48E-08 | 0.175717 |
| 0.140174 | 0.0024   | 0.028122 | 0.54437  | 0.105963 | 0.02201  | 0.227028 | 7.13E-07 | 0.177498 |
| 0.063745 | 0.16905  | 0.07739  | 0.09483  | 0.111827 | 0.01562  | 0.046338 | 0.31769  | -0.00815 |
| 0.096656 | 0.03679  | 0.071493 | 0.12288  | 0.119577 | 0.0097   | 0.12345  | 0.00757  | -0.17538 |

|          |          |          |          |          |          |          |          |          |
|----------|----------|----------|----------|----------|----------|----------|----------|----------|
| 0.113724 | 0.01393  | 0.087543 | 0.05871  | 0.08651  | 0.06176  | 0.071818 | 0.12118  | 0.02482  |
| 0.16275  | 0.00041  | 0.081826 | 0.07731  | -0.01393 | 0.76399  | 0.121192 | 0.00875  | 0.04242  |
| 0.067387 | 0.14595  | 0.108    | 0.01957  | 0.061853 | 0.18209  | 0.093343 | 0.04378  | 0.00593  |
| 0.06157  | 0.1841   | 0.035067 | 0.44965  | -0.05586 | 0.22826  | 0.055728 | 0.22936  | 0.087902 |
| -0.23676 | 2.26E-07 | -0.1798  | 9.35E-05 | -0.11867 | 0.01027  | -0.0689  | 0.13707  | 0.169759 |
| -0.0936  | 0.04321  | 0.021422 | 0.64426  | 0.038832 | 0.40246  | 0.000499 | 0.99142  | 0.049397 |
| -0.17461 | 0.00015  | -0.02919 | 0.52926  | -0.03653 | 0.43097  | 0.009939 | 0.83037  | 0.185371 |
| -0.02871 | 0.53606  | 0.044366 | 0.33874  | 0.02157  | 0.64197  | 0.106069 | 0.02188  | 0.275468 |
| -0.09751 | 0.03516  | -0.02897 | 0.53227  | 0.05161  | 0.26568  | -0.04365 | 0.34656  | -0.02176 |
| 0.005355 | 0.90812  | -0.00065 | 0.98886  | -0.07074 | 0.12686  | 0.059472 | 0.19953  | 0.368821 |
| 0.047543 | 0.30525  | 0.128944 | 0.00526  | 0.134244 | 0.00366  | 0.031792 | 0.49311  | 0.108987 |
| 0.042177 | 0.36313  | 0.021446 | 0.64389  | 0.072584 | 0.11725  | 0.012161 | 0.79323  | 0.137981 |
| 0.010505 | 0.82088  | -0.00592 | 0.89847  | 0.028999 | 0.53189  | -0.04878 | 0.2928   | 0.048742 |
| 0.066499 | 0.15135  | 0.027774 | 0.54936  | 0.107532 | 0.02011  | -0.00934 | 0.84052  | 0.048595 |
| 0.220319 | 1.53E-06 | 0.216419 | 2.35E-06 | 0.236749 | 2.26E-07 | 0.140825 | 0.00229  | 0.248357 |
| -0.23012 | 4.98E-07 | -0.21515 | 2.71E-06 | -0.14964 | 0.00118  | -0.20927 | 5.09E-06 | -0.13912 |
| 0.182003 | 7.63E-05 | 0.303954 | 1.94E-11 | 0.127191 | 0.00592  | 0.069881 | 0.13157  | 0.104417 |
| -0.28948 | 1.82E-10 | -0.1444  | 0.00176  | -0.3056  | 1.49E-11 | -0.19597 | 2.00E-05 | -0.10856 |
| 0.133423 | 0.00387  | -0.03444 | 0.4578   | 0.024755 | 0.59362  | 0.196704 | 1.86E-05 | 0.145793 |
| 0.242141 | 1.17E-07 | 0.178954 | 0.0001   | 0.110698 | 0.0167   | 0.090474 | 0.05071  | 0.166138 |
| 0.07867  | 0.08948  | 0.062146 | 0.18002  | 0.144558 | 0.00174  | 0.065887 | 0.15515  | -0.0656  |
| -0.12255 | 0.00802  | -0.16013 | 0.00051  | -0.10301 | 0.02601  | -0.14557 | 0.00161  | -0.10496 |
| 0.111826 | 0.01562  | -0.12477 | 0.00694  | -0.14793 | 0.00135  | -0.06341 | 0.1713   | -0.06489 |
| 0.054898 | 0.23639  | 0.016477 | 0.72249  | 0.084001 | 0.06974  | 0.014823 | 0.74936  | -0.08798 |
| 0.03502  | 0.45025  | 0.060886 | 0.18903  | 0.051608 | 0.26571  | -0.11776 | 0.01087  | -0.16303 |
| -0.01659 | 0.7207   | 0.04167  | 0.36893  | -0.03789 | 0.41395  | -0.0551  | 0.23468  | -0.12369 |
| -0.29527 | 7.55E-11 | -0.23873 | 1.78E-07 | -0.22678 | 7.34E-07 | -0.23572 | 2.56E-07 | 0.021889 |
| 0.090521 | 0.05059  | 0.026443 | 0.56867  | 0.005708 | 0.9021   | 0.078453 | 0.09037  | -0.0172  |
| 0.049429 | 0.28644  | 0.10491  | 0.02337  | 0.138104 | 0.00278  | -0.01087 | 0.81473  | 0.027029 |
| -0.02698 | 0.56083  | 0.029737 | 0.52149  | 0.050943 | 0.27192  | 0.016716 | 0.71863  | 0.14029  |
| 0.074258 | 0.10901  | 0.030719 | 0.50783  | 0.058381 | 0.20792  | -0.0067  | 0.88516  | -0.00839 |
| 0.075137 | 0.10488  | 0.070299 | 0.12927  | 0.100162 | 0.03045  | 0.081928 | 0.07694  | 0.026965 |
| -0.05807 | 0.21036  | -0.08972 | 0.05267  | -0.10213 | 0.02732  | -0.0261  | 0.57372  | -0.13345 |
| 0.196611 | 1.88E-05 | 0.162993 | 0.00041  | 0.108582 | 0.01892  | 0.225328 | 8.67E-07 | 0.236559 |
| 0.17328  | 0.00017  | 0.365331 | 3.42E-16 | 0.252238 | 3.28E-08 | 0.235027 | 2.78E-07 | 0.332461 |
| 0.062047 | 0.18072  | 0.080445 | 0.08246  | 0.096018 | 0.03806  | -0.1348  | 0.00352  | -0.19234 |
| 0.107675 | 0.01994  | 0.330272 | 2.40E-13 | 0.273684 | 1.81E-09 | 0.124139 | 0.00723  | 0.258708 |
| -0.06891 | 0.13701  | -0.05108 | 0.27064  | -0.00624 | 0.89297  | -0.10107 | 0.02896  | 0.061102 |
| 0.247256 | 6.19E-08 | 0.038761 | 0.40332  | 0.17234  | 0.00018  | 0.219755 | 1.63E-06 | 0.112148 |
| -0.14515 | 0.00166  | -0.22612 | 7.91E-07 | -0.12323 | 0.00768  | -0.14321 | 0.00192  | -0.04303 |
| 0.095365 | 0.0394   | 0.21772  | 2.04E-06 | 0.193702 | 2.50E-05 | -0.0829  | 0.07349  | -0.05169 |
| -0.17961 | 9.51E-05 | -0.12864 | 0.00537  | -0.03916 | 0.3985   | -0.03194 | 0.49108  | -0.082   |
| -0.12896 | 0.00525  | -0.05324 | 0.25088  | -0.18149 | 8.00E-05 | -0.09968 | 0.03127  | -0.07301 |
| -0.0048  | 0.91767  | -0.08199 | 0.07673  | 0.088349 | 0.05641  | -0.18386 | 6.42E-05 | -0.21035 |
| 0.042913 | 0.35481  | -0.03166 | 0.49487  | 0.01636  | 0.72437  | -0.03762 | 0.41734  | -0.14523 |

|          |          |          |          |          |          |          |          |           |
|----------|----------|----------|----------|----------|----------|----------|----------|-----------|
| 0.067417 | 0.14577  | 0.115765 | 0.0123   | 0.021358 | 0.64525  | 0.063068 | 0.17364  | -8.42E-05 |
| 0.191315 | 3.16E-05 | 0.128909 | 0.00527  | 0.130832 | 0.00463  | -0.01519 | 0.7434   | -0.00819  |
| -0.19933 | 1.43E-05 | -0.26036 | 1.13E-08 | -0.09989 | 0.03091  | -0.22468 | 9.34E-07 | -0.14063  |
| -0.02179 | 0.63864  | 0.11385  | 0.01383  | 0.201876 | 1.10E-05 | 0.036744 | 0.42826  | 0.090735  |
| 0.018436 | 0.69109  | 0.050252 | 0.27848  | 0.117746 | 0.01088  | 0.060849 | 0.1893   | -0.01706  |
| -0.20326 | 9.56E-06 | -0.10182 | 0.02779  | -0.10904 | 0.01842  | -0.06603 | 0.15425  | -0.20593  |
| 0.081713 | 0.07772  | 0.165434 | 0.00033  | 0.137819 | 0.00284  | 0.059757 | 0.19738  | 0.032726  |
| 0.154317 | 0.00082  | 0.170662 | 0.00021  | 0.134395 | 0.00362  | 0.040397 | 0.38375  | 0.043621  |
| -0.05388 | 0.24524  | -0.08242 | 0.07518  | -0.11524 | 0.0127   | 0.042037 | 0.36473  | -0.14359  |
| -0.06288 | 0.17494  | -0.0502  | 0.27896  | -0.0563  | 0.22464  | 0.031535 | 0.49661  | 0.206946  |
| 0.064975 | 0.16096  | 0.11379  | 0.01388  | 0.101727 | 0.02794  | 0.081544 | 0.07834  | 0.061934  |
| 0.097775 | 0.03466  | 0.075978 | 0.10103  | 0.060467 | 0.1921   | 0.013892 | 0.76462  | -0.02315  |
| 0.054864 | 0.23668  | -0.05625 | 0.22503  | -0.04411 | 0.34157  | 0.026102 | 0.57368  | -0.20667  |
| 0.124317 | 0.00715  | 0.096628 | 0.03685  | 0.192922 | 2.70E-05 | 0.046691 | 0.31401  | -0.03059  |
| 0.110585 | 0.01682  | 0.11904  | 0.01003  | 0.127271 | 0.00588  | 0.073662 | 0.11189  | -0.01633  |
| -0.1576  | 0.00063  | -0.18296 | 6.99E-05 | -0.30239 | 2.49E-11 | 0.091258 | 0.04873  | 0.00412   |
| -0.30441 | 1.81E-11 | -0.11609 | 0.01206  | -0.15289 | 0.00092  | -0.13101 | 0.00457  | -0.12506  |
| 0.289092 | 1.93E-10 | 0.221056 | 1.41E-06 | 0.341112 | 3.45E-14 | 0.149523 | 0.00119  | 0.175998  |
| 0.115513 | 0.01249  | 0.074934 | 0.10582  | 0.0769   | 0.09695  | 0.161776 | 0.00045  | 0.155076  |
| 0.149189 | 0.00122  | 0.027912 | 0.54739  | 0.067764 | 0.1437   | 0.047349 | 0.30723  | 0.087024  |
| 0.098575 | 0.0332   | 0.14013  | 0.0024   | 0.080015 | 0.08412  | 0.077742 | 0.09334  | 0.040969  |
| 0.021166 | 0.64822  | -0.00501 | 0.91406  | 0.044424 | 0.33811  | -0.00182 | 0.96875  | -0.04241  |
| 0.083465 | 0.07155  | -0.02351 | 0.61229  | 0.075003 | 0.1055   | 0.061144 | 0.18716  | -0.10365  |
| -0.07462 | 0.10732  | -0.03024 | 0.51453  | -0.15969 | 0.00053  | 0.011778 | 0.79961  | -0.0099   |
| -0.01745 | 0.70685  | -0.04489 | 0.33309  | -0.16087 | 0.00048  | 0.024415 | 0.5987   | 0.039236  |
| -0.04937 | 0.287    | -0.00527 | 0.90953  | -0.18824 | 4.24E-05 | -0.02188 | 0.63727  | -0.06523  |
| 0.204944 | 8.03E-06 | 0.062179 | 0.17979  | 0.103227 | 0.0257   | 0.103853 | 0.02481  | 0.035935  |
| 0.049824 | 0.2826   | -0.09912 | 0.03222  | -0.0222  | 0.63235  | -0.01603 | 0.7297   | -0.16215  |
| 0.034855 | 0.45239  | -0.04587 | 0.32258  | 0.039918 | 0.38942  | -0.12266 | 0.00796  | -0.18127  |
| -0.25093 | 3.88E-08 | -0.08022 | 0.08333  | -0.1611  | 0.00047  | -0.19184 | 3.00E-05 | 0.065817  |
| 0.096101 | 0.03789  | 0.131136 | 0.00453  | 0.115268 | 0.01268  | 0.071293 | 0.12393  | -0.1065   |
| -0.08253 | 0.07481  | 0.034472 | 0.45738  | 0.01281  | 0.78247  | 0.021451 | 0.64381  | -0.0596   |
| -0.00897 | 0.84676  | -0.12509 | 0.0068   | -0.06034 | 0.19303  | -0.01985 | 0.66872  | -0.08898  |
| -0.01503 | 0.74605  | 0.013078 | 0.77804  | 0.057221 | 0.21711  | -0.0214  | 0.64465  | -0.00916  |
| 0.060242 | 0.19376  | -0.03048 | 0.51115  | 0.000217 | 0.99626  | -0.02431 | 0.6002   | -0.06588  |
| 0.129382 | 0.00511  | 0.141535 | 0.00217  | 0.128723 | 0.00534  | 0.105612 | 0.02246  | 0.114559  |
| 0.03177  | 0.49341  | 0.025662 | 0.58015  | 0.03695  | 0.42567  | -0.14169 | 0.00215  | -0.04907  |
| -0.19311 | 2.65E-05 | -0.2837  | 4.29E-10 | -0.20539 | 7.66E-06 | -0.27524 | 1.46E-09 | -0.45933  |
| -0.10728 | 0.0204   | -0.35122 | 5.28E-15 | -0.26123 | 1.00E-08 | -0.18569 | 5.41E-05 | -0.30347  |
| -0.09421 | 0.04185  | -0.11012 | 0.01729  | -0.0154  | 0.73999  | -0.13475 | 0.00353  | -0.03073  |
| 0.001581 | 0.97282  | 0.050406 | 0.27701  | 0.081246 | 0.07944  | -0.09394 | 0.04246  | -0.03701  |
| -0.03346 | 0.47073  | 0.014834 | 0.74918  | 0.048568 | 0.29493  | -0.07993 | 0.08445  | -0.14849  |
| 0.08441  | 0.06838  | 0.100814 | 0.02938  | 0.116769 | 0.01156  | 0.069967 | 0.1311   | 0.012788  |
| 0.0512   | 0.2695   | 0.059344 | 0.2005   | 0.148375 | 0.0013   | -0.05032 | 0.27788  | -0.09999  |
| -0.15434 | 0.00082  | -0.04652 | 0.31578  | -0.02088 | 0.65268  | -0.06995 | 0.1312   | 0.002928  |

|          |          |          |          |          |          |          |          |          |
|----------|----------|----------|----------|----------|----------|----------|----------|----------|
| 0.25407  | 2.59E-08 | 0.250227 | 4.24E-08 | 0.179362 | 9.73E-05 | 0.229573 | 5.30E-07 | 0.316418 |
| 0.286101 | 3.01E-10 | 0.037588 | 0.41771  | 0.136833 | 0.00305  | 0.140315 | 0.00237  | 0.062853 |
| -0.04165 | 0.36917  | -0.07918 | 0.08742  | 0.071604 | 0.12229  | -0.32752 | 3.87E-13 | -0.17982 |
| 0.078098 | 0.09184  | 0.226926 | 7.21E-07 | 0.208186 | 5.71E-06 | 0.027757 | 0.54962  | 0.148884 |
| 0.091642 | 0.04779  | 0.085129 | 0.06605  | 0.085504 | 0.06486  | -0.00076 | 0.98689  | 0.113076 |
| 0.214139 | 3.02E-06 | 0.311853 | 5.43E-12 | 0.188534 | 4.13E-05 | 0.043172 | 0.35191  | 0.174651 |
| -0.06924 | 0.13515  | 0.068911 | 0.13703  | 0.035317 | 0.44641  | -0.07039 | 0.12879  | -0.05717 |
| 0.022763 | 0.62367  | 0.059345 | 0.2005   | 0.085279 | 0.06557  | -0.03125 | 0.50055  | 0.035343 |
| -0.03942 | 0.3954   | -0.07195 | 0.1205   | -0.06893 | 0.13691  | -0.02222 | 0.63194  | -0.16462 |
| -0.13473 | 0.00353  | -0.14124 | 0.00222  | -0.09679 | 0.03653  | -0.29653 | 6.21E-11 | -0.22968 |
| 0.03509  | 0.44935  | -0.03576 | 0.44073  | 0.033903 | 0.46484  | -0.01027 | 0.82481  | -0.091   |
| 0.13225  | 0.0042   | 0.162725 | 0.00041  | 0.22065  | 1.47E-06 | 0.196837 | 1.83E-05 | 0.066106 |
| 0.088362 | 0.05637  | 0.009907 | 0.83091  | 0.047691 | 0.30375  | 0.019422 | 0.67549  | -0.07394 |
| -0.10098 | 0.02911  | 0.003791 | 0.93489  | 0.05872  | 0.20528  | -0.09809 | 0.03408  | -0.10232 |
| 0.16907  | 0.00024  | 0.291153 | 1.41E-10 | 0.229234 | 5.52E-07 | 0.215069 | 2.73E-06 | 0.456463 |
| 0.253231 | 2.88E-08 | 0.185443 | 5.54E-05 | 0.226292 | 7.76E-07 | 0.090319 | 0.05111  | 0.021569 |
| 0.080685 | 0.08155  | 0.077744 | 0.09333  | 0.111884 | 0.01557  | 0.149436 | 0.0012   | 0.178405 |
| -0.16222 | 0.00043  | -0.35361 | 3.35E-15 | -0.19861 | 1.53E-05 | -0.22315 | 1.11E-06 | -0.24459 |
| -0.06172 | 0.18303  | -0.06012 | 0.19467  | -0.01684 | 0.71669  | -0.14477 | 0.00171  | -0.12414 |
| 0.199739 | 1.37E-05 | 0.121569 | 0.00854  | 0.314527 | 3.50E-12 | 0.097934 | 0.03436  | -0.04111 |
| -0.23465 | 2.91E-07 | -0.04057 | 0.38169  | 0.025918 | 0.57637  | -0.11793 | 0.01076  | -0.08082 |
| -0.14058 | 0.00233  | -0.06468 | 0.16286  | -0.01697 | 0.71447  | -0.13208 | 0.00425  | -0.09649 |
| 0.090055 | 0.05179  | 0.046219 | 0.31893  | 0.069672 | 0.13273  | 0.061464 | 0.18486  | -0.10265 |
| -0.21319 | 3.35E-06 | -0.30846 | 9.43E-12 | -0.22941 | 5.41E-07 | -0.13351 | 0.00385  | 0.050162 |
| -0.18432 | 6.15E-05 | -0.19244 | 2.83E-05 | -0.13535 | 0.00338  | -0.18679 | 4.88E-05 | -0.18644 |
| -0.00865 | 0.85218  | 0.043266 | 0.35086  | 0.061049 | 0.18785  | -0.0852  | 0.06583  | 0.000344 |
| -0.23317 | 3.47E-07 | 0.003815 | 0.93447  | -0.05113 | 0.27019  | -0.14399 | 0.00181  | -0.09333 |
| -0.01101 | 0.81238  | 0.118595 | 0.01032  | 0.122478 | 0.00806  | 0.031228 | 0.50082  | -0.0782  |
| -0.12823 | 0.00552  | -0.03327 | 0.47316  | -0.04028 | 0.38513  | -0.05698 | 0.21902  | -0.12885 |
| 0.125312 | 0.0067   | 0.070603 | 0.12762  | 0.018945 | 0.68302  | 0.082234 | 0.07584  | 0.278268 |
| 0.22064  | 1.47E-06 | 0.258707 | 1.41E-08 | 0.116342 | 0.01187  | 0.187706 | 4.47E-05 | 0.099891 |
| 0.238487 | 1.83E-07 | 0.101183 | 0.02879  | 0.131673 | 0.00437  | -0.06328 | 0.17218  | -0.04637 |
| 0.180118 | 9.08E-05 | 0.096838 | 0.03644  | -0.01145 | 0.80514  | 0.166622 | 0.0003   | 0.036861 |
| -0.20218 | 1.07E-05 | -0.12727 | 0.00588  | -0.11661 | 0.01167  | -0.17477 | 0.00015  | -0.14208 |
| -0.27734 | 1.08E-09 | 0.0278   | 0.549    | -0.08332 | 0.07205  | -0.14628 | 0.00153  | -0.07859 |
| -0.11625 | 0.01194  | 0.14031  | 0.00237  | 0.096853 | 0.03641  | 0.342579 | 2.64E-14 | 0.138535 |
| -0.0035  | 0.93984  | -0.0594  | 0.2001   | -0.20637 | 6.92E-06 | 0.040801 | 0.37901  | 0.084616 |
| -0.25489 | 2.33E-08 | -0.2157  | 2.55E-06 | -0.17444 | 0.00015  | -0.20899 | 5.25E-06 | -0.34007 |
| -0.13468 | 0.00355  | -0.15972 | 0.00053  | -0.15316 | 0.0009   | -0.07584 | 0.10168  | 0.067602 |
| -0.14862 | 0.00128  | -0.18871 | 4.06E-05 | -0.15477 | 0.00079  | -0.05992 | 0.19619  | -0.14186 |
| -0.02609 | 0.57378  | -0.07656 | 0.09846  | -0.05246 | 0.25787  | 0.086128 | 0.06293  | 0.068641 |
| 0.043878 | 0.34409  | -0.01175 | 0.80001  | 0.185179 | 5.68E-05 | -0.06379 | 0.16878  | -0.01418 |
| 0.288612 | 2.07E-10 | 0.137148 | 0.00298  | 0.13206  | 0.00425  | 0.021575 | 0.64189  | -0.03503 |
| 0.020864 | 0.65291  | 0.101088 | 0.02894  | 0.082902 | 0.07348  | 0.077832 | 0.09296  | 0.076422 |
| -0.0319  | 0.49162  | 0.159621 | 0.00054  | 0.137483 | 0.00291  | 0.04757  | 0.30497  | 0.189167 |

|          |          |          |          |          |          |          |          |          |
|----------|----------|----------|----------|----------|----------|----------|----------|----------|
| 0.192455 | 2.83E-05 | 0.262182 | 8.84E-09 | 0.195093 | 2.18E-05 | 0.138754 | 0.00266  | 0.119286 |
| -0.02477 | 0.59339  | -0.01702 | 0.71369  | 0.079912 | 0.08452  | 0.034245 | 0.46035  | 0.100296 |
| -0.13057 | 0.00471  | -0.26926 | 3.37E-09 | -0.26826 | 3.87E-09 | -0.16553 | 0.00033  | -0.36943 |
| 0.016856 | 0.71638  | 0.09419  | 0.0419   | 0.096269 | 0.03756  | -0.00351 | 0.93969  | 0.148887 |
| 0.109982 | 0.01743  | -0.07547 | 0.10335  | 0.042866 | 0.35534  | -0.12067 | 0.00905  | -0.24958 |
| -0.07141 | 0.12332  | -0.20693 | 6.52E-06 | -0.09373 | 0.0429   | -0.03259 | 0.4823   | -0.20597 |
| 0.209814 | 4.81E-06 | 0.320108 | 1.38E-12 | 0.371633 | 9.65E-17 | 0.031273 | 0.50021  | 0.130406 |
| -0.11299 | 0.01457  | 0.008085 | 0.86167  | -0.01031 | 0.82418  | -0.12485 | 0.0069   | -0.18012 |
| 0.010599 | 0.81931  | 0.082944 | 0.07334  | 0.124986 | 0.00684  | 0.122235 | 0.00818  | 0.004669 |
| 0.221972 | 1.27E-06 | 0.201492 | 1.15E-05 | 0.216896 | 2.23E-06 | 0.099147 | 0.03218  | 0.1948   |
| -0.06974 | 0.13237  | -0.16944 | 0.00023  | -0.06134 | 0.18574  | -0.12017 | 0.00934  | -0.1824  |
| 0.056055 | 0.22664  | 0.00386  | 0.93371  | 0.075755 | 0.10204  | -0.03459 | 0.45581  | -0.17681 |
| 0.049132 | 0.28935  | 0.181106 | 8.29E-05 | 0.176154 | 0.00013  | 0.016996 | 0.71412  | 0.015983 |
| -0.07859 | 0.08979  | -0.10366 | 0.02508  | -0.02309 | 0.61862  | -0.16452 | 0.00036  | -0.18853 |
| 0.156324 | 0.0007   | -0.1703  | 0.00022  | 0.02037  | 0.66061  | 0.003288 | 0.9435   | 0.121712 |
| 0.160298 | 0.00051  | 0.148228 | 0.00132  | -0.03038 | 0.51249  | 0.324166 | 6.90E-13 | 0.392695 |
| 0.059404 | 0.20005  | 0.104282 | 0.02422  | 0.056329 | 0.22437  | 0.180012 | 9.17E-05 | 0.242657 |
| 0.082768 | 0.07395  | -0.13893 | 0.00262  | 0.026488 | 0.56802  | -0.22187 | 1.28E-06 | -0.28148 |
| 0.322759 | 8.78E-13 | 0.238821 | 1.76E-07 | 0.18405  | 6.31E-05 | 0.087101 | 0.06     | 0.283526 |
| 0.04573  | 0.32409  | -0.20199 | 1.09E-05 | 0.057491 | 0.21494  | -0.04487 | 0.33331  | -0.03903 |
| -0.26029 | 1.14E-08 | -0.10202 | 0.02749  | -0.05279 | 0.25491  | -0.00455 | 0.92185  | -0.17554 |
| 0.043351 | 0.34992  | 0.071602 | 0.1223   | 0.184271 | 6.18E-05 | -0.10319 | 0.02576  | -0.12909 |
| -0.13456 | 0.00358  | -0.28778 | 2.35E-10 | -0.28177 | 5.69E-10 | -0.11771 | 0.01091  | 0.021134 |
| 0.031291 | 0.49995  | 0.145307 | 0.00164  | 0.132297 | 0.00418  | 0.050217 | 0.27882  | 0.08255  |
| -0.08119 | 0.07966  | -0.05354 | 0.24824  | -0.03252 | 0.48333  | -0.10038 | 0.03009  | -0.1219  |
| 0.043943 | 0.34336  | -0.08729 | 0.05943  | 0.004778 | 0.91798  | 0.021273 | 0.64657  | -0.09744 |
| -0.24512 | 8.10E-08 | -0.25838 | 1.47E-08 | -0.23186 | 4.05E-07 | -0.30027 | 3.47E-11 | -0.36303 |
| -0.04675 | 0.31335  | -0.0286  | 0.53755  | 0.027112 | 0.55893  | -0.17861 | 0.0001   | -0.02035 |
| -0.032   | 0.49024  | -0.09397 | 0.04238  | -0.03771 | 0.41622  | -0.24826 | 5.45E-08 | -0.20116 |
| 0.214207 | 3.00E-06 | 0.221544 | 1.33E-06 | 0.168809 | 0.00025  | 0.232813 | 3.62E-07 | 0.277353 |
| 0.058493 | 0.20704  | 0.036315 | 0.43367  | 0.094013 | 0.04229  | -0.12739 | 0.00584  | 0.074367 |
| 0.108579 | 0.01892  | 0.061635 | 0.18364  | 0.052344 | 0.25893  | 0.062406 | 0.17821  | 0.0263   |
| -0.01194 | 0.79695  | -0.25737 | 1.68E-08 | -0.08227 | 0.0757   | -0.08408 | 0.06949  | -0.01196 |
| -0.03919 | 0.39819  | -0.05106 | 0.27081  | -0.03493 | 0.45144  | -0.24311 | 1.04E-07 | -0.25741 |
| 0.164099 | 0.00037  | 0.204163 | 8.70E-06 | 0.160531 | 0.0005   | -0.02709 | 0.55932  | 0.083523 |
| -0.08189 | 0.0771   | 0.066523 | 0.1512   | 0.085238 | 0.06571  | -0.01399 | 0.76295  | 0.023431 |
| 0.076938 | 0.09678  | 0.062814 | 0.17538  | 0.109762 | 0.01765  | 0.015683 | 0.73535  | 0.066543 |
| -0.08563 | 0.06448  | -0.25706 | 1.75E-08 | -0.05043 | 0.27677  | -0.2844  | 3.87E-10 | -0.17625 |
| -0.08379 | 0.07044  | -0.01721 | 0.71062  | 0.026101 | 0.57369  | -0.12851 | 0.00542  | -0.3423  |
| -0.08894 | 0.05477  | -0.18032 | 8.91E-05 | -0.04049 | 0.38267  | -0.27206 | 2.28E-09 | -0.26024 |
| -0.10345 | 0.02538  | -0.0862  | 0.06269  | -0.01784 | 0.70066  | -0.11422 | 0.01352  | -0.00932 |
| 0.001179 | 0.97973  | 0.116879 | 0.01148  | 0.091903 | 0.04715  | 0.101369 | 0.0285   | 0.048974 |
| -0.11857 | 0.01034  | -0.03611 | 0.43622  | -0.04081 | 0.37892  | 0.004927 | 0.91544  | 0.00223  |
| 0.086423 | 0.06203  | 0.002944 | 0.9494   | 0.053224 | 0.25101  | -0.17594 | 0.00013  | -0.2758  |
| -0.04085 | 0.37842  | -0.03986 | 0.39008  | 0.00578  | 0.90086  | -0.31011 | 7.22E-12 | -0.2334  |

|          |          |          |          |          |          |          |          |          |
|----------|----------|----------|----------|----------|----------|----------|----------|----------|
| 0.212461 | 3.62E-06 | 0.158791 | 0.00057  | 0.178322 | 0.00011  | -0.09    | 0.05193  | -0.14776 |
| 0.053684 | 0.24692  | 0.077613 | 0.09388  | 0.090172 | 0.05149  | 0.050016 | 0.28075  | 0.057254 |
| 0.063438 | 0.17112  | 0.001461 | 0.97488  | 0.116783 | 0.01155  | 0.020291 | 0.66185  | 0.098445 |
| -0.09034 | 0.05104  | -0.02116 | 0.64832  | -0.01816 | 0.69543  | -0.08684 | 0.06078  | -0.13821 |
| 0.066503 | 0.15132  | 0.155754 | 0.00073  | 0.188073 | 4.31E-05 | 0.11079  | 0.01661  | 0.087853 |
| 0.015528 | 0.73787  | -0.20817 | 5.73E-06 | -0.03692 | 0.42609  | -0.0739  | 0.11075  | -0.26039 |
| 0.119277 | 0.00988  | -0.04668 | 0.31415  | 0.126772 | 0.00608  | -0.10308 | 0.02591  | -0.13718 |
| -0.00745 | 0.87248  | -0.00316 | 0.94562  | 0.049101 | 0.28965  | -0.21129 | 4.11E-06 | -0.24299 |
| 0.345993 | 1.40E-14 | 0.230898 | 4.54E-07 | 0.228324 | 6.13E-07 | 0.373284 | 6.90E-17 | 0.358282 |
| 0.004299 | 0.92617  | 0.019218 | 0.67871  | 0.039518 | 0.3942   | -0.05665 | 0.22177  | -0.03037 |
| 0.082546 | 0.07473  | 0.253002 | 2.97E-08 | 0.211185 | 4.15E-06 | 0.097374 | 0.03541  | 0.13188  |
| 0.018966 | 0.68268  | 0.025609 | 0.58093  | 0.0743   | 0.10881  | -0.05808 | 0.21031  | -0.0257  |
| 0.241123 | 1.33E-07 | 0.308036 | 1.01E-11 | 0.371624 | 9.67E-17 | 0.163729 | 0.00038  | 0.159358 |
| 0.028531 | 0.53853  | 0.106551 | 0.02128  | 0.138465 | 0.00271  | 0.000301 | 0.99482  | -0.06855 |
| -0.11645 | 0.01179  | 0.063616 | 0.16992  | 0.073876 | 0.11085  | -0.23274 | 3.66E-07 | -0.10673 |
| -0.19704 | 1.80E-05 | -0.21565 | 2.56E-06 | -0.10319 | 0.02576  | -0.24454 | 8.70E-08 | -0.15935 |
| 0.204363 | 8.53E-06 | 0.158069 | 0.00061  | 0.186858 | 4.84E-05 | 0.137108 | 0.00299  | 0.224821 |
| 0.162838 | 0.00041  | 0.134302 | 0.00364  | 0.170013 | 0.00022  | 0.115455 | 0.01254  | 0.012203 |
| 0.188425 | 4.17E-05 | 0.109744 | 0.01767  | 0.174594 | 0.00015  | 0.038442 | 0.40721  | 0.136498 |
| -0.12383 | 0.00738  | -0.02955 | 0.52414  | -0.01916 | 0.67954  | -0.06799 | 0.14234  | -0.14434 |
| 0.138403 | 0.00272  | 0.190842 | 3.31E-05 | 0.319802 | 1.45E-12 | 0.026932 | 0.56154  | 0.157941 |
| -0.02169 | 0.64016  | -0.0102  | 0.82595  | -0.02    | 0.66633  | 0.026601 | 0.56636  | 0.075207 |
| 0.096097 | 0.0379   | 0.109633 | 0.01779  | 0.092313 | 0.04617  | 0.104337 | 0.02414  | 0.036566 |
| 0.174285 | 0.00015  | 0.165785 | 0.00032  | 0.200802 | 1.23E-05 | 0.04304  | 0.35339  | -0.01033 |
| 0.275249 | 1.45E-09 | 0.358651 | 1.27E-15 | 0.270056 | 3.01E-09 | 0.15866  | 0.00058  | 0.217259 |
| 0.042884 | 0.35514  | 0.100367 | 0.03011  | 0.074849 | 0.10622  | -0.17858 | 0.0001   | -0.02322 |
| 0.03825  | 0.40956  | -0.05755 | 0.21451  | 0.017994 | 0.69814  | -0.05825 | 0.20896  | -0.19036 |
| 0.132657 | 0.00408  | 0.152759 | 0.00093  | 0.177664 | 0.00011  | -0.02472 | 0.59407  | -0.02071 |
| -0.03492 | 0.45156  | 0.124514 | 0.00706  | 0.106508 | 0.02133  | -0.01858 | 0.68882  | 0.019067 |
| 0.14043  | 0.00235  | 0.148216 | 0.00132  | 0.03739  | 0.42017  | 0.258252 | 1.49E-08 | 0.242111 |
| -0.07346 | 0.11289  | -0.09172 | 0.0476   | -0.06642 | 0.15183  | -0.13688 | 0.00304  | -0.17053 |
| -0.17892 | 0.0001   | -0.15494 | 0.00078  | -0.14343 | 0.00189  | -0.171   | 0.0002   | -0.1787  |
| 0.192699 | 2.76E-05 | 0.223961 | 1.01E-06 | 0.169307 | 0.00024  | 0.029737 | 0.5215   | 0.027589 |
| 0.214609 | 2.87E-06 | 0.11689  | 0.01147  | 0.25296  | 2.99E-08 | -0.11756 | 0.011    | -0.1333  |
| 0.17813  | 0.00011  | -0.04751 | 0.30563  | 0.011039 | 0.81194  | 0.063861 | 0.16828  | -0.03104 |
| -0.08738 | 0.05918  | -0.02536 | 0.58461  | -0.10478 | 0.02355  | -0.03334 | 0.47235  | -0.25246 |
| -0.06472 | 0.1626   | -0.054   | 0.24418  | -0.00443 | 0.92388  | -0.14544 | 0.00163  | -0.13761 |
| -0.13162 | 0.00439  | -0.07406 | 0.10996  | -0.15114 | 0.00105  | -0.08319 | 0.07248  | -0.15374 |
| 0.043638 | 0.34673  | 0.091098 | 0.04913  | -0.18941 | 3.79E-05 | 0.257544 | 1.64E-08 | 0.222383 |
| 0.003934 | 0.93244  | 0.069874 | 0.13161  | 0.156821 | 0.00067  | -0.08423 | 0.06897  | -0.10371 |
| -0.18246 | 7.31E-05 | -0.09023 | 0.05135  | -0.13928 | 0.00256  | -0.17329 | 0.00017  | -0.04405 |
| -0.09031 | 0.05113  | -0.23975 | 1.57E-07 | -0.15456 | 0.0008   | -0.23244 | 3.79E-07 | -0.23837 |
| 0.198947 | 1.48E-05 | 0.180734 | 8.58E-05 | 0.12982  | 0.00496  | 0.049819 | 0.28265  | 0.005386 |
| 0.069411 | 0.13419  | 0.177918 | 0.00011  | -0.09088 | 0.04967  | 0.142877 | 0.00197  | 0.193532 |
| 0.22528  | 8.71E-07 | 0.086242 | 0.06258  | 0.116679 | 0.01163  | 0.066574 | 0.15089  | -0.21005 |

|          |          |          |          |          |          |          |          |          |
|----------|----------|----------|----------|----------|----------|----------|----------|----------|
| -0.07398 | 0.11037  | -0.17321 | 0.00017  | -0.14746 | 0.0014   | 0.028684 | 0.53635  | -0.0098  |
| -0.0654  | 0.15825  | 0.009622 | 0.8357   | -0.00391 | 0.93287  | 0.029514 | 0.52462  | 0.121136 |
| 0.023812 | 0.60776  | 0.03349  | 0.4703   | 0.005855 | 0.89957  | 0.018997 | 0.6822   | -0.02381 |
| -0.01382 | 0.76578  | -0.0226  | 0.62622  | -0.07511 | 0.10499  | -0.03507 | 0.44958  | -0.05291 |
| -0.00104 | 0.98206  | 0.059996 | 0.19559  | 0.063274 | 0.17224  | -0.0286  | 0.53755  | 0.017385 |
| -0.04742 | 0.30654  | -0.01118 | 0.80963  | -0.07865 | 0.08958  | 0.040426 | 0.38341  | 0.006373 |
| -0.00427 | 0.92667  | 0.048885 | 0.29178  | 0.091847 | 0.04729  | -0.01479 | 0.74994  | -0.13017 |
| 0.3022   | 2.56E-11 | 0.23486  | 2.84E-07 | 0.067665 | 0.14429  | 0.219636 | 1.65E-06 | 0.32423  |
| -0.01243 | 0.78884  | 0.145599 | 0.00161  | 0.075339 | 0.10394  | 0.048647 | 0.29414  | -0.02109 |
| -0.00337 | 0.94207  | -0.00852 | 0.8543   | -0.2676  | 4.23E-09 | -0.06066 | 0.19069  | 0.11925  |
| -0.07288 | 0.11576  | -0.12575 | 0.00651  | -0.11655 | 0.01172  | -0.10507 | 0.02317  | -0.185   |
| -0.21807 | 1.96E-06 | -0.18351 | 6.64E-05 | -0.167   | 0.00029  | -0.26538 | 5.74E-09 | -0.36999 |
| 0.203331 | 9.48E-06 | -0.08882 | 0.05512  | 0.020102 | 0.66481  | 0.121018 | 0.00885  | 0.146482 |
| -0.04243 | 0.36022  | -0.04984 | 0.28244  | -0.18407 | 6.30E-05 | 0.014154 | 0.76031  | 0.004632 |
| -0.13935 | 0.00254  | -0.24513 | 8.09E-08 | -0.22036 | 1.52E-06 | -0.10239 | 0.02693  | -0.43723 |
| 0.219785 | 1.62E-06 | 0.236554 | 2.32E-07 | 0.289914 | 1.70E-10 | 0.178561 | 0.0001   | 0.255425 |
| 0.003521 | 0.93952  | 0.018698 | 0.68693  | 0.076481 | 0.09879  | -0.08056 | 0.08203  | -0.0924  |
| 0.009664 | 0.83501  | -0.18965 | 3.71E-05 | -0.24798 | 5.65E-08 | -0.02274 | 0.624    | 0.03434  |
| -0.01004 | 0.82862  | 0.154602 | 0.0008   | 0.138895 | 0.00263  | -0.06116 | 0.18705  | -0.19068 |
| 0.051187 | 0.26963  | 0.116908 | 0.01146  | 0.136806 | 0.00305  | -0.06558 | 0.15711  | -0.02141 |
| 0.071817 | 0.12118  | -0.00446 | 0.92346  | -0.00085 | 0.98541  | -0.11185 | 0.0156   | -0.10158 |
| -0.01826 | 0.69394  | 0.133586 | 0.00383  | 0.079235 | 0.08719  | -0.02481 | 0.59285  | 0.026955 |
| 0.042546 | 0.35894  | 0.106289 | 0.0216   | 0.188659 | 4.08E-05 | -0.12505 | 0.00681  | -0.15201 |
| 0.122186 | 0.00821  | 0.225907 | 8.11E-07 | 0.297182 | 5.62E-11 | 0.04831  | 0.2975   | -0.05724 |
| 0.208308 | 5.64E-06 | 0.048526 | 0.29535  | 0.039649 | 0.39262  | 0.192585 | 2.79E-05 | 0.308386 |
| 0.08169  | 0.07781  | 0.049623 | 0.28456  | 0.027621 | 0.55157  | -0.03011 | 0.51634  | -0.07609 |
| 0.243721 | 9.64E-08 | 0.159676 | 0.00053  | 0.151288 | 0.00104  | -0.00082 | 0.98597  | 0.012678 |
| -0.04414 | 0.34124  | -0.02249 | 0.62784  | -0.02793 | 0.54716  | -0.03746 | 0.41928  | -0.11974 |
| 0.072711 | 0.11661  | 0.007693 | 0.86831  | 0.042562 | 0.35877  | -0.1633  | 0.0004   | -0.26267 |
| 0.205044 | 7.94E-06 | 0.126591 | 0.00616  | 0.179269 | 9.81E-05 | 0.188472 | 4.15E-05 | 0.152173 |
| 0.128507 | 0.00542  | 0.021905 | 0.63681  | 0.045802 | 0.32333  | 0.067899 | 0.1429   | 0.014434 |
| 0.017254 | 0.70997  | -0.00087 | 0.98504  | -0.0197  | 0.67113  | 0.155011 | 0.00078  | 0.006235 |
| -0.08709 | 0.06004  | -0.03732 | 0.42103  | -0.06364 | 0.16973  | -0.05857 | 0.20644  | -0.1202  |
| 0.114767 | 0.01308  | 0.071908 | 0.12071  | 0.121813 | 0.00841  | 0.052085 | 0.26131  | 0.178437 |
| 0.176905 | 0.00012  | 0.092224 | 0.04638  | 0.091579 | 0.04794  | 0.219637 | 1.65E-06 | 0.017088 |
| 0.162533 | 0.00042  | 0.048188 | 0.29872  | 0.016987 | 0.71427  | 0.194509 | 2.31E-05 | -0.01252 |
| -0.0488  | 0.29265  | 0.040466 | 0.38294  | 0.045842 | 0.3229   | 0.041424 | 0.37176  | 0.047792 |
| 0.001266 | 0.97823  | -0.02184 | 0.63778  | -0.013   | 0.7794   | 0.067877 | 0.14303  | 0.008407 |
| 0.028981 | 0.53215  | -0.01504 | 0.74581  | 0.000308 | 0.9947   | 0.079387 | 0.08659  | 0.010401 |
| 0.056685 | 0.22145  | 0.01268  | 0.78462  | -0.00547 | 0.90615  | -0.03871 | 0.40392  | -0.02593 |
| -0.0154  | 0.73991  | 0.032198 | 0.4876   | 0.038498 | 0.40652  | 0.069342 | 0.13458  | -0.01678 |
| 0.012978 | 0.77969  | 0.004184 | 0.92815  | 0.046469 | 0.31631  | -0.00544 | 0.90666  | -0.04791 |
| 0.084533 | 0.06798  | 0.105966 | 0.02201  | 0.142337 | 0.00205  | 0.110187 | 0.01722  | 0.011962 |
| 0.033396 | 0.47154  | 0.043499 | 0.34827  | 0.082749 | 0.07402  | 0.095659 | 0.03879  | -0.03104 |
| 0.021124 | 0.64887  | 0.060429 | 0.19238  | 0.08724  | 0.05959  | 0.036148 | 0.43578  | 0.010198 |



|          |          |          |          |          |          |          |          |           |
|----------|----------|----------|----------|----------|----------|----------|----------|-----------|
| -0.05725 | 0.2169   | 0.019792 | 0.66967  | 0.033606 | 0.46877  | 0.002491 | 0.95719  | -0.0088   |
| -0.17944 | 9.66E-05 | -0.22433 | 9.71E-07 | -0.28131 | 6.08E-10 | -0.15236 | 0.00096  | -0.0397   |
| 0.003616 | 0.93789  | 0.088774 | 0.05523  | 0.076012 | 0.10088  | -0.00683 | 0.88304  | 0.025403  |
| 0.233344 | 3.40E-07 | 0.272988 | 2.00E-09 | 0.302396 | 2.49E-11 | -0.05474 | 0.23776  | -0.14659  |
| 0.090835 | 0.04979  | 0.0954   | 0.03932  | 0.094578 | 0.04106  | -0.03011 | 0.51624  | 0.0174    |
| 0.041413 | 0.37189  | 0.03782  | 0.41485  | 0.015878 | 0.73219  | -0.00518 | 0.9111   | -0.00178  |
| -0.03261 | 0.48209  | -0.00381 | 0.93452  | 0.01913  | 0.6801   | -0.09162 | 0.04783  | -0.07851  |
| 0.05138  | 0.26782  | 0.051986 | 0.26221  | 0.014035 | 0.76228  | 0.022334 | 0.63023  | 0.066059  |
| -0.10999 | 0.01742  | 0.03982  | 0.39058  | -0.01283 | 0.78219  | -0.00578 | 0.90082  | 0.046964  |
| -0.10024 | 0.03032  | 0.002949 | 0.94932  | 0.011067 | 0.81147  | -0.03025 | 0.51427  | -0.06005  |
| -0.16769 | 0.00027  | -0.31493 | 3.27E-12 | -0.23567 | 2.58E-07 | -0.21226 | 3.70E-06 | -0.38268  |
| 0.145718 | 0.00159  | 0.267227 | 4.45E-09 | 0.190231 | 3.51E-05 | 0.09782  | 0.03457  | 0.326523  |
| -0.09098 | 0.04943  | -0.18408 | 6.29E-05 | -0.1731  | 0.00017  | -0.01732 | 0.70892  | -0.06026  |
| 0.230874 | 4.55E-07 | 0.186806 | 4.87E-05 | 0.109049 | 0.01841  | 0.120008 | 0.00944  | 0.022545  |
| 0.040889 | 0.37799  | 0.08251  | 0.07486  | 0.108043 | 0.01952  | 0.071783 | 0.12136  | 0.063621  |
| 0.280505 | 6.84E-10 | 0.154294 | 0.00082  | 0.138875 | 0.00263  | 0.212295 | 3.69E-06 | 0.092726  |
| 0.003    | 0.94845  | -0.01602 | 0.72985  | 0.002245 | 0.96142  | -0.02573 | 0.5792   | -0.10792  |
| -0.05554 | 0.23091  | -0.07346 | 0.11288  | -0.03298 | 0.4771   | -0.26714 | 4.51E-09 | -0.1326   |
| 0.052846 | 0.2544   | 0.122204 | 0.0082   | 0.045799 | 0.32335  | 0.102544 | 0.0267   | 0.080126  |
| 0.334232 | 1.19E-13 | -0.09109 | 0.04915  | 0.105294 | 0.02287  | 0.032147 | 0.48829  | -0.11783  |
| 0.133541 | 0.00384  | -0.01202 | 0.79561  | 0.037456 | 0.41936  | 0.01777  | 0.70171  | -0.05089  |
| -0.08958 | 0.05304  | -0.09145 | 0.04826  | -0.05245 | 0.25793  | -0.13801 | 0.0028   | 0.023793  |
| -0.05065 | 0.2747   | -0.05437 | 0.24096  | -0.1153  | 0.01266  | -0.07015 | 0.13011  | -0.07833  |
| -0.05541 | 0.23201  | 0.085554 | 0.06471  | 0.039342 | 0.3963   | 0.147876 | 0.00135  | 0.177487  |
| -0.00971 | 0.83431  | -0.02584 | 0.57758  | 0.067967 | 0.1425   | -0.00508 | 0.91289  | -9.87E-05 |
| -0.08502 | 0.06641  | -0.06682 | 0.14939  | -0.01747 | 0.70651  | -0.02189 | 0.63706  | -0.10304  |
| 0.225526 | 8.47E-07 | 0.256539 | 1.87E-08 | 0.206906 | 6.54E-06 | 0.073486 | 0.11276  | -0.02562  |
| 0.242361 | 1.14E-07 | 0.188076 | 4.31E-05 | 0.237491 | 2.07E-07 | -0.0738  | 0.11123  | -0.07971  |
| 0.04589  | 0.32239  | 0.075748 | 0.10207  | 0.064911 | 0.16138  | -0.07818 | 0.09148  | -0.02671  |
| -0.18938 | 3.81E-05 | -0.28392 | 4.15E-10 | -0.33239 | 1.65E-13 | -0.14347 | 0.00188  | -0.03682  |
| 0.270459 | 2.85E-09 | 0.227324 | 6.89E-07 | 0.316609 | 2.48E-12 | 0.133094 | 0.00396  | 0.028477  |
| 0.309597 | 7.85E-12 | 0.180967 | 8.40E-05 | 0.229347 | 5.45E-07 | 0.187791 | 4.43E-05 | 0.131205  |
| 0.160919 | 0.00048  | 0.082996 | 0.07316  | 0.041676 | 0.36887  | -0.03129 | 0.49996  | -0.00327  |
| 0.164809 | 0.00035  | 0.031368 | 0.4989   | 0.110575 | 0.01683  | -0.05271 | 0.25562  | -0.27521  |
| -0.05774 | 0.21298  | -0.0685  | 0.13937  | -0.05683 | 0.22029  | -0.04627 | 0.3184   | -0.03633  |
| 0.083846 | 0.07025  | 0.169227 | 0.00024  | 0.074832 | 0.10629  | 0.120703 | 0.00903  | 0.215179  |
| 0.254292 | 2.51E-08 | 0.082611 | 0.0745   | 0.053441 | 0.24907  | 0.131791 | 0.00433  | 0.234926  |
| 0.173264 | 0.00017  | 0.034997 | 0.45055  | 0.087669 | 0.05834  | -0.03971 | 0.39185  | -0.01108  |
| 0.130201 | 0.00483  | -0.05915 | 0.20198  | 0.023487 | 0.61267  | 0.04302  | 0.35361  | 0.128241  |
| -0.24321 | 1.03E-07 | -0.07485 | 0.10619  | -0.12918 | 0.00518  | -0.05582 | 0.22863  | 0.082165  |
| 0.278802 | 8.74E-10 | 0.239798 | 1.56E-07 | 0.060791 | 0.18973  | 0.434688 | 6.01E-23 | 0.343356  |
| -0.13581 | 0.00328  | -0.04253 | 0.35916  | -0.05154 | 0.26631  | 0.034871 | 0.45219  | -0.12821  |
| -0.02078 | 0.65421  | 0.118372 | 0.01046  | 0.033337 | 0.47233  | -0.04752 | 0.30553  | -0.00386  |
| 0.331971 | 1.78E-13 | 0.088747 | 0.0553   | 0.16246  | 0.00042  | 0.242937 | 1.06E-07 | 0.109641  |
| -0.04842 | 0.2964   | -0.04248 | 0.35968  | -0.00737 | 0.87378  | -0.16329 | 0.0004   | -0.09467  |

|          |          |          |          |          |          |          |          |          |
|----------|----------|----------|----------|----------|----------|----------|----------|----------|
| 0.10484  | 0.02346  | 0.053375 | 0.24966  | 0.008201 | 0.85971  | -0.10459 | 0.0238   | -0.20539 |
| 0.050987 | 0.2715   | -0.07488 | 0.10607  | -0.00799 | 0.86332  | -0.17258 | 0.00018  | -0.29473 |
| -0.07652 | 0.0986   | -0.18071 | 8.60E-05 | -0.04737 | 0.30702  | -0.13318 | 0.00394  | 0.00254  |
| -0.03627 | 0.43423  | 0.027791 | 0.54913  | 0.049802 | 0.28282  | -0.10331 | 0.02558  | -0.15885 |
| -0.07526 | 0.10432  | -0.11227 | 0.01521  | -0.06897 | 0.13668  | -0.2472  | 6.23E-08 | -0.25899 |
| 0.02918  | 0.52933  | 0.042226 | 0.36257  | 0.047764 | 0.30301  | -0.04886 | 0.29206  | -0.00768 |
| 0.031737 | 0.49386  | -0.06335 | 0.17173  | -0.00988 | 0.83131  | -0.0255  | 0.5826   | -0.00138 |
| 0.091526 | 0.04807  | 0.046414 | 0.31689  | 0.045511 | 0.3264   | 0.064132 | 0.16648  | -0.00677 |
| 0.021831 | 0.63795  | 0.094672 | 0.04086  | 0.131916 | 0.0043   | -0.00401 | 0.93115  | -0.00211 |
| 0.08533  | 0.06542  | 0.064563 | 0.16364  | 0.08732  | 0.05936  | 0.023577 | 0.6113   | -0.00714 |
| 0.062622 | 0.17671  | 0.04207  | 0.36435  | 0.040335 | 0.38448  | -0.01056 | 0.82002  | -0.02024 |
| 0.134777 | 0.00352  | 0.029487 | 0.52501  | -0.11631 | 0.0119   | 0.032755 | 0.48011  | -0.01351 |
| 0.07344  | 0.11298  | 0.130002 | 0.0049   | 0.229898 | 5.11E-07 | -0.05964 | 0.19823  | 0.011752 |
| 0.035425 | 0.44503  | -0.02386 | 0.60707  | -0.03155 | 0.49645  | 0.060006 | 0.19552  | -0.11045 |
| 0.2717   | 2.40E-09 | 0.225694 | 8.31E-07 | 0.303347 | 2.14E-11 | 0.04399  | 0.34286  | 0.182022 |
| -0.05576 | 0.22913  | -0.29912 | 4.16E-11 | -0.14981 | 0.00117  | -0.11669 | 0.01162  | -0.20249 |
| 0.17215  | 0.00019  | 0.112365 | 0.01512  | 0.113581 | 0.01405  | 0.035224 | 0.44762  | -0.03531 |
| 0.121705 | 0.00847  | 0.166585 | 0.0003   | 0.009842 | 0.83201  | 0.151506 | 0.00102  | 0.272129 |
| 0.110901 | 0.0165   | 0.017541 | 0.70538  | 0.084407 | 0.06839  | -0.07452 | 0.10778  | -0.18073 |
| 0.04335  | 0.34993  | -0.00629 | 0.8922   | 0.057958 | 0.21124  | -0.16702 | 0.00029  | -0.2034  |
| 0.183184 | 6.84E-05 | 0.188541 | 4.13E-05 | 0.218786 | 1.81E-06 | 0.231069 | 4.45E-07 | 0.171747 |
| 0.043557 | 0.34763  | 0.105935 | 0.02204  | 0.128579 | 0.00539  | -0.0664  | 0.15193  | -0.12924 |
| 0.077641 | 0.09376  | 0.019629 | 0.67222  | 0.069494 | 0.13373  | 0.033509 | 0.47005  | -0.07486 |
| -0.29175 | 1.29E-10 | -0.01151 | 0.80408  | -0.17731 | 0.00012  | -0.1369  | 0.00303  | -0.0603  |
| -0.07354 | 0.1125   | -0.24028 | 1.47E-07 | -0.15357 | 0.00087  | -0.16797 | 0.00027  | -0.27246 |
| 0.144792 | 0.00171  | 0.12855  | 0.0054   | 0.111562 | 0.01587  | 0.102615 | 0.02659  | -0.02635 |
| 0.01326  | 0.77504  | 0.105955 | 0.02202  | 0.135399 | 0.00337  | 0.044757 | 0.33449  | 0.170152 |
| -0.01024 | 0.82531  | 0.041953 | 0.36568  | 0.082856 | 0.07364  | 0.057277 | 0.21666  | 0.009602 |
| 0.239468 | 1.63E-07 | 0.162859 | 0.00041  | 0.158384 | 0.00059  | 0.363238 | 5.18E-16 | 0.274996 |
| 0.158111 | 0.00061  | 0.063811 | 0.16862  | 0.106245 | 0.02166  | -0.02643 | 0.56889  | -0.12262 |
| 0.009964 | 0.82997  | -0.10288 | 0.0262   | 0.022023 | 0.635    | 0.083658 | 0.07089  | 0.133872 |
| 0.166036 | 0.00031  | -0.1154  | 0.01258  | -0.02823 | 0.54279  | 0.029541 | 0.52425  | -0.05124 |
| 0.145191 | 0.00166  | -0.25627 | 1.94E-08 | -0.20177 | 1.11E-05 | -0.00715 | 0.87761  | 0.017123 |
| 0.093028 | 0.0445   | -0.30944 | 8.05E-12 | -0.18532 | 5.60E-05 | -0.04956 | 0.28519  | -0.32758 |
| 0.138534 | 0.0027   | 0.194267 | 2.37E-05 | 0.153881 | 0.00085  | 0.100938 | 0.02918  | 0.158779 |
| 0.113508 | 0.01412  | 0.094484 | 0.04126  | 0.09537  | 0.03939  | 0.100758 | 0.02947  | 0.050157 |
| -0.11818 | 0.01059  | -0.30128 | 2.96E-11 | -0.25882 | 1.39E-08 | -0.23817 | 1.91E-07 | -0.40017 |
| 0.221526 | 1.33E-06 | 0.259397 | 1.28E-08 | 0.168985 | 0.00024  | 0.30943  | 8.06E-12 | 0.411756 |
| -0.03654 | 0.43081  | 0.103338 | 0.02554  | -0.00037 | 0.99364  | 0.009015 | 0.84595  | -0.02468 |
| 0.000518 | 0.99108  | 0.053565 | 0.24798  | 0.029575 | 0.52376  | 0.115692 | 0.01236  | 0.016077 |
| 0.029363 | 0.52675  | 0.027531 | 0.55287  | 0.027285 | 0.55643  | 0.089393 | 0.05355  | -0.11606 |
| -0.24189 | 1.21E-07 | -0.27909 | 8.38E-10 | -0.30414 | 1.89E-11 | -0.11509 | 0.01282  | -0.01174 |
| 0.295074 | 7.77E-11 | 0.208212 | 5.70E-06 | 0.228089 | 6.30E-07 | 0.013388 | 0.77291  | 0.080938 |
| -0.01435 | 0.75708  | -0.09287 | 0.04488  | -0.00091 | 0.98442  | -0.02545 | 0.58321  | -0.04448 |
| -0.07784 | 0.09293  | -0.03887 | 0.40203  | -0.00099 | 0.983    | -0.06504 | 0.16052  | -0.04885 |

|          |          |          |          |          |          |          |          |          |
|----------|----------|----------|----------|----------|----------|----------|----------|----------|
| -0.18318 | 6.84E-05 | -0.07167 | 0.12196  | -0.09524 | 0.03967  | -0.08638 | 0.06214  | -0.05704 |
| 0.167708 | 0.00027  | 0.218965 | 1.78E-06 | 0.293161 | 1.04E-10 | -0.01536 | 0.74058  | 0.043987 |
| -0.0343  | 0.45961  | -0.22606 | 7.97E-07 | -0.07548 | 0.10329  | -0.1829  | 7.02E-05 | -0.39342 |
| 0.16546  | 0.00033  | 0.181451 | 8.03E-05 | 0.15543  | 0.00075  | 0.082051 | 0.0765   | 0.353889 |
| -0.11577 | 0.0123   | -0.15133 | 0.00104  | -0.14442 | 0.00175  | -0.16267 | 0.00042  | -0.07945 |
| -0.09969 | 0.03124  | 0.064443 | 0.16443  | -0.00712 | 0.87801  | -0.06623 | 0.153    | -0.02196 |
| -0.07255 | 0.11744  | -0.05464 | 0.2386   | -0.09789 | 0.03445  | -0.08742 | 0.05906  | -0.04512 |
| 0.011775 | 0.79965  | 0.162318 | 0.00043  | 0.147662 | 0.00137  | -0.07383 | 0.11105  | 0.091464 |
| 0.087354 | 0.05926  | 0.063548 | 0.17038  | 0.065579 | 0.1571   | -0.01804 | 0.69747  | -0.05159 |
| -0.26122 | 1.01E-08 | -0.28825 | 2.19E-10 | -0.21629 | 2.39E-06 | -0.07876 | 0.0891   | 0.07008  |
| -0.06653 | 0.15115  | -0.0047  | 0.91926  | -0.04674 | 0.31347  | -0.0849  | 0.06678  | -0.10143 |
| 0.111743 | 0.0157   | 0.135928 | 0.00325  | 0.032325 | 0.48589  | 0.064509 | 0.16399  | 0.266791 |
| 0.060772 | 0.18986  | 0.155651 | 0.00074  | 0.042297 | 0.36176  | -0.05309 | 0.25224  | -0.06876 |
| -0.07403 | 0.11012  | -0.35735 | 1.64E-15 | -0.20014 | 1.32E-05 | -0.30503 | 1.64E-11 | -0.3782  |
| -0.20816 | 5.73E-06 | -0.20899 | 5.25E-06 | -0.10347 | 0.02535  | -0.13396 | 0.00373  | -0.1498  |
| -0.04965 | 0.28428  | -0.04683 | 0.31261  | -0.02066 | 0.65616  | -0.20737 | 6.23E-06 | -0.26858 |
| 0.072911 | 0.1156   | -0.05441 | 0.24058  | 0.030098 | 0.51645  | -0.08534 | 0.06538  | -0.15867 |
| 0.140091 | 0.00241  | 0.130822 | 0.00463  | 0.144134 | 0.00179  | 0.101626 | 0.02809  | -0.22515 |
| 0.01936  | 0.67646  | 0.130847 | 0.00462  | 0.098299 | 0.03369  | 0.078568 | 0.0899   | -0.03408 |
| 0.106869 | 0.02089  | 0.170121 | 0.00022  | 0.176036 | 0.00013  | 0.038778 | 0.40312  | 0.02343  |
| -0.08975 | 0.05259  | -0.07836 | 0.09077  | -0.07976 | 0.08512  | -0.04628 | 0.31834  | -0.09018 |
| 0.023672 | 0.60988  | 0.077549 | 0.09415  | 0.02643  | 0.56887  | 0.080076 | 0.08388  | 0.030394 |
| -0.15858 | 0.00058  | -0.27884 | 8.70E-10 | -0.25866 | 1.42E-08 | -0.09003 | 0.05187  | -0.06802 |
| -0.01938 | 0.67608  | 0.013461 | 0.77172  | 0.027409 | 0.55463  | -0.14372 | 0.00185  | -0.23697 |
| 0.052725 | 0.25548  | 0.10705  | 0.02068  | 0.035218 | 0.4477   | 0.049247 | 0.28822  | -0.00968 |
| 0.048749 | 0.29313  | 0.030829 | 0.50631  | -0.02143 | 0.64412  | -0.07118 | 0.1245   | -0.19074 |
| -0.05924 | 0.20133  | 0.004006 | 0.9312   | -0.00997 | 0.82987  | -0.04327 | 0.35078  | -0.01715 |
| -0.03266 | 0.48139  | 0.006514 | 0.88835  | 0.060147 | 0.19446  | -0.00571 | 0.90213  | -0.14901 |
| -0.02142 | 0.64434  | -0.13985 | 0.00245  | -0.1293  | 0.00513  | -0.00284 | 0.95118  | -0.12087 |
| 0.098639 | 0.03308  | 0.09592  | 0.03826  | -0.11024 | 0.01716  | 0.114043 | 0.01367  | 0.080836 |
| 0.046672 | 0.3142   | -0.01994 | 0.66738  | -0.05826 | 0.20885  | 0.036009 | 0.43756  | -0.17706 |
| 0.318743 | 1.73E-12 | 0.270492 | 2.84E-09 | 0.153526 | 0.00087  | 0.203987 | 8.86E-06 | 0.181153 |
| -0.02483 | 0.59252  | -0.14338 | 0.0019   | -0.00592 | 0.89842  | -0.15185 | 0.001    | -0.18658 |
| 0.044179 | 0.34078  | 0.18751  | 4.55E-05 | 0.22177  | 1.30E-06 | -0.08341 | 0.07172  | -0.01635 |
| 0.065041 | 0.16054  | -0.07875 | 0.08914  | 0.033784 | 0.46641  | -0.03946 | 0.39488  | -0.04377 |
| 0.146318 | 0.00152  | 0.136521 | 0.00311  | 0.185515 | 5.50E-05 | 0.179552 | 9.56E-05 | 0.105557 |
| -0.07875 | 0.08916  | -0.09719 | 0.03575  | -0.0685  | 0.13942  | -0.15389 | 0.00085  | -0.17268 |
| 0.069369 | 0.13443  | 0.036744 | 0.42825  | 0.003058 | 0.94746  | 0.040538 | 0.3821   | -0.04086 |
| 0.054191 | 0.24248  | 0.008367 | 0.85688  | 0.143049 | 0.00194  | 0.030112 | 0.51626  | -0.01274 |
| -0.06898 | 0.13665  | -0.12828 | 0.0055   | -0.01237 | 0.78976  | -0.09393 | 0.04247  | 0.101059 |
| 0.035961 | 0.43817  | -0.02454 | 0.59688  | -0.04164 | 0.36927  | 0.056538 | 0.22265  | -0.07133 |
| -0.0325  | 0.48358  | 0.008019 | 0.86279  | 0.039158 | 0.39852  | -0.09341 | 0.04363  | -0.02851 |
| 0.093307 | 0.04386  | 0.14054  | 0.00233  | 0.136901 | 0.00303  | 0.213681 | 3.17E-06 | 0.131017 |
| -0.1128  | 0.01474  | -0.07778 | 0.09318  | -0.09262 | 0.04545  | -0.01205 | 0.79509  | -0.05242 |
| 0.22377  | 1.04E-06 | 0.169122 | 0.00024  | -0.01354 | 0.77035  | 0.116637 | 0.01166  | 0.107086 |

|          |          |          |          |          |          |          |          |          |
|----------|----------|----------|----------|----------|----------|----------|----------|----------|
| 0.291076 | 1.43E-10 | 0.027332 | 0.55574  | -0.11859 | 0.01032  | 0.295031 | 7.83E-11 | 0.197908 |
| -0.10723 | 0.02046  | -0.03332 | 0.47251  | -0.11713 | 0.0113   | 0.007286 | 0.87522  | -0.03469 |
| 0.001586 | 0.97273  | -0.24018 | 1.49E-07 | -0.21615 | 2.43E-06 | -0.07973 | 0.08523  | -0.23075 |
| 0.078168 | 0.09155  | 0.088358 | 0.05638  | 0.062529 | 0.17735  | 0.091271 | 0.0487   | -0.05293 |
| 0.112788 | 0.01474  | 0.009036 | 0.84559  | 0.026186 | 0.57243  | 0.028487 | 0.53916  | -0.09184 |
| 0.080054 | 0.08397  | 0.139562 | 0.00251  | 0.081182 | 0.07968  | 0.009269 | 0.84165  | 0.042654 |
| 0.242313 | 1.15E-07 | 0.235269 | 2.70E-07 | 0.108656 | 0.01884  | 0.232657 | 3.69E-07 | 0.174019 |
| -0.1299  | 0.00493  | -0.14342 | 0.00189  | -0.0982  | 0.03387  | -0.09397 | 0.04239  | -0.08201 |
| -0.06638 | 0.15208  | -0.118   | 0.01071  | 0.014549 | 0.75383  | -0.1653  | 0.00033  | -0.1565  |
| 0.001504 | 0.97415  | -0.00832 | 0.85762  | 0.008966 | 0.84678  | 0.059347 | 0.20048  | 0.036517 |
| 0.202874 | 9.94E-06 | 0.087241 | 0.05959  | 0.121548 | 0.00855  | 0.017134 | 0.71191  | -0.00181 |
| -0.04307 | 0.35307  | -0.32724 | 4.06E-13 | -0.19053 | 3.41E-05 | -0.19855 | 1.54E-05 | -0.2992  |
| 0.056509 | 0.22289  | -0.04941 | 0.28663  | -0.03027 | 0.514    | -0.03551 | 0.444    | -0.16582 |
| 0.176371 | 0.00013  | 0.049956 | 0.28133  | 0.269171 | 3.41E-09 | 0.020837 | 0.65333  | -0.0389  |
| -0.01374 | 0.76706  | -0.16286 | 0.00041  | 0.011591 | 0.80272  | 0.008196 | 0.85978  | 0.152509 |
| 0.257423 | 1.67E-08 | 0.287666 | 2.39E-10 | 0.343868 | 2.08E-14 | 0.249933 | 4.41E-08 | 0.143673 |
| -0.07051 | 0.12813  | -0.23616 | 2.43E-07 | -0.12191 | 0.00836  | -0.04143 | 0.37171  | -0.02795 |
| 0.134425 | 0.00361  | -0.00879 | 0.8498   | 0.087407 | 0.0591   | 0.082232 | 0.07585  | 0.030039 |
| 0.080515 | 0.08219  | -0.00218 | 0.9625   | 0.171657 | 0.00019  | 0.038943 | 0.40112  | -0.18639 |
| 0.087709 | 0.05823  | 0.079526 | 0.08604  | 0.141025 | 0.00225  | 0.045896 | 0.32233  | -0.09012 |
| -0.02952 | 0.52447  | 0.072443 | 0.11797  | 0.072055 | 0.11995  | -0.02398 | 0.6052   | -0.00873 |
| -0.0079  | 0.86472  | -0.02235 | 0.62998  | -0.07345 | 0.11292  | -0.09635 | 0.0374   | -0.04888 |
| -0.01048 | 0.82129  | -0.01595 | 0.73104  | 0.002891 | 0.95033  | -0.03674 | 0.42832  | -0.05316 |
| -0.20629 | 6.98E-06 | -0.13893 | 0.00262  | -0.1714  | 0.0002   | -0.14514 | 0.00166  | -0.18241 |
| -0.11999 | 0.00945  | -0.09315 | 0.04423  | -0.17708 | 0.00012  | -0.10833 | 0.0192   | -0.08693 |
| 0.002141 | 0.9632   | -0.00312 | 0.94642  | -0.05847 | 0.20723  | -0.0694  | 0.13427  | -0.0257  |
| -0.01166 | 0.80156  | 0.089999 | 0.05194  | 0.050465 | 0.27645  | -0.03142 | 0.49817  | 0.026434 |
| -0.01706 | 0.71313  | -0.01507 | 0.74532  | -0.06422 | 0.16589  | 0.002071 | 0.96439  | 0.008476 |
| 0.001315 | 0.97739  | 0.004542 | 0.92201  | 0.011528 | 0.80378  | -0.06006 | 0.19512  | -0.03388 |
| -0.03823 | 0.40975  | -0.09455 | 0.04112  | -0.03376 | 0.46672  | -0.14741 | 0.0014   | -0.15478 |
| 0.083185 | 0.0725   | 0.072126 | 0.11959  | 0.028773 | 0.53509  | -0.01408 | 0.76159  | 0.048747 |
| -0.13456 | 0.00358  | -0.05911 | 0.20228  | -0.21589 | 2.49E-06 | -0.08927 | 0.05387  | -0.1068  |
| 0.13605  | 0.00322  | -0.04459 | 0.33628  | -0.21706 | 2.19E-06 | 0.011376 | 0.80631  | -0.00171 |
| -0.12016 | 0.00935  | -0.03559 | 0.44288  | -0.10187 | 0.02771  | -0.12667 | 0.00613  | -0.33554 |
| 0.039632 | 0.39283  | 0.037385 | 0.42024  | 0.052529 | 0.25725  | 0.089971 | 0.05201  | -0.00766 |
| -0.01886 | 0.68429  | -0.01045 | 0.82173  | 0.033071 | 0.47588  | 0.016827 | 0.71683  | -0.19665 |
| -0.01152 | 0.80386  | -0.07289 | 0.1157   | -0.04692 | 0.31161  | -0.00344 | 0.94086  | 0.01531  |
| 0.091272 | 0.0487   | 0.03562  | 0.44253  | 0.056447 | 0.2234   | 0.039151 | 0.39861  | -0.00695 |
| 0.208922 | 5.29E-06 | 0.202231 | 1.06E-05 | 0.162748 | 0.00041  | 0.324872 | 6.11E-13 | 0.28887  |
| -0.06753 | 0.1451   | 0.16333  | 0.00039  | 0.145273 | 0.00165  | -0.08638 | 0.06217  | -0.02407 |
| 0.311324 | 5.92E-12 | 0.260046 | 1.18E-08 | 0.363214 | 5.21E-16 | 0.196896 | 1.82E-05 | 0.153099 |
| 0.116229 | 0.01195  | 0.119364 | 0.00983  | 0.084867 | 0.06689  | 0.007331 | 0.87446  | 0.023949 |
| 0.177433 | 0.00012  | 0.074566 | 0.10755  | 0.068434 | 0.13977  | -0.00212 | 0.96359  | -0.04873 |
| -0.0268  | 0.56343  | -0.11053 | 0.01687  | -0.00102 | 0.98243  | -0.10219 | 0.02723  | -0.18567 |
| -0.1376  | 0.00288  | -0.14418 | 0.00179  | -0.09465 | 0.04091  | -0.14596 | 0.00156  | -0.13825 |

|          |          |          |          |          |          |          |          |          |
|----------|----------|----------|----------|----------|----------|----------|----------|----------|
| -0.13394 | 0.00373  | -0.08789 | 0.0577   | -0.1062  | 0.02171  | -0.17149 | 0.0002   | -0.28253 |
| -0.12327 | 0.00765  | -0.03802 | 0.41241  | -0.06897 | 0.1367   | -0.0535  | 0.24859  | -0.03208 |
| 0.000351 | 0.99396  | 0.037429 | 0.41969  | 0.0574   | 0.21567  | 0.016833 | 0.71674  | 0.003305 |
| 0.07665  | 0.09804  | 0.090553 | 0.05051  | 0.078171 | 0.09154  | 0.02738  | 0.55505  | -0.0458  |
| 0.141066 | 0.00225  | 0.142044 | 0.00209  | 0.121834 | 0.0084   | 0.13645  | 0.00313  | 0.098308 |
| 0.186015 | 5.25E-05 | 0.084945 | 0.06664  | 0.129065 | 0.00522  | 0.079008 | 0.08811  | -0.14618 |
| 0.046191 | 0.31923  | 0.000549 | 0.99056  | -0.02    | 0.66641  | -0.07624 | 0.09987  | 0.008282 |
| -0.0883  | 0.05655  | 0.006146 | 0.89461  | 0.003108 | 0.9466   | 0.052161 | 0.26061  | 0.309778 |
| 0.048112 | 0.29949  | -0.07275 | 0.11641  | -0.02528 | 0.58576  | 0.059432 | 0.19983  | -0.06872 |
| 0.128215 | 0.00552  | 0.164727 | 0.00035  | 0.172127 | 0.00019  | -0.01839 | 0.69184  | 0.013968 |
| 0.025344 | 0.58486  | 0.002556 | 0.95607  | 0.082144 | 0.07616  | -0.0716  | 0.12231  | -0.10727 |
| 0.137306 | 0.00295  | 0.202116 | 1.07E-05 | 0.187898 | 4.39E-05 | 0.060474 | 0.19205  | 0.049295 |
| 0.076855 | 0.09715  | -0.07496 | 0.10569  | -0.03692 | 0.42604  | 0.06283  | 0.17527  | 0.186642 |
| 0.069946 | 0.13121  | 0.079656 | 0.08552  | 0.05784  | 0.21216  | 0.00559  | 0.9041   | 0.067796 |
| 0.105223 | 0.02296  | 0.122563 | 0.00801  | 0.166353 | 0.00031  | -0.07943 | 0.08641  | -0.02927 |
| 0.253528 | 2.77E-08 | 0.202339 | 1.05E-05 | 0.176379 | 0.00013  | 0.028705 | 0.53606  | 0.018664 |
| 0.052362 | 0.25877  | 0.017048 | 0.71328  | 0.023771 | 0.60838  | 0.053533 | 0.24826  | 0.008105 |
| 0.124574 | 0.00703  | 0.1954   | 2.12E-05 | 0.160453 | 0.0005   | 0.198308 | 1.58E-05 | 0.343768 |
| -0.18159 | 7.93E-05 | -0.24514 | 8.08E-08 | -0.17167 | 0.00019  | -0.06541 | 0.15815  | -0.00959 |
| 0.181996 | 7.64E-05 | 0.295481 | 7.30E-11 | 0.330714 | 2.22E-13 | -0.05743 | 0.21545  | -0.04335 |
| -0.03457 | 0.45608  | 0.031741 | 0.49381  | 0.036833 | 0.42714  | -0.01759 | 0.70459  | 0.035181 |
| -0.25726 | 1.70E-08 | -0.2822  | 5.34E-10 | -0.23929 | 1.66E-07 | -0.11764 | 0.01095  | -0.129   |
| 0.186156 | 5.18E-05 | 0.177328 | 0.00012  | 0.15863  | 0.00058  | 0.127733 | 0.00571  | 0.094759 |
| 0.141585 | 0.00216  | 0.15976  | 0.00053  | 0.018722 | 0.68655  | 0.010295 | 0.8244   | 0.032316 |
| 0.166962 | 0.00029  | 0.240139 | 1.50E-07 | 0.244753 | 8.48E-08 | 0.124655 | 0.00699  | 0.02205  |
| 0.107493 | 0.02016  | 0.056962 | 0.2192   | 0.098868 | 0.03267  | 0.014072 | 0.76167  | -0.08087 |
| 0.16419  | 0.00037  | 0.146809 | 0.00147  | 0.183633 | 6.56E-05 | 0.037201 | 0.42252  | -0.08365 |
| 0.172017 | 0.00019  | 0.178636 | 0.0001   | 0.289476 | 1.82E-10 | -0.08849 | 0.056    | -0.12914 |
| -0.16941 | 0.00024  | -0.00277 | 0.95248  | -0.00034 | 0.99419  | -0.18542 | 5.55E-05 | -0.25592 |
| -0.24394 | 9.38E-08 | -0.19168 | 3.05E-05 | -0.218   | 1.98E-06 | -0.02817 | 0.54365  | 0.053689 |
| 0.185912 | 5.30E-05 | -0.05139 | 0.26773  | -0.01408 | 0.76161  | 0.065184 | 0.15962  | 0.066838 |
| 0.292042 | 1.23E-10 | 0.264843 | 6.17E-09 | 0.285623 | 3.23E-10 | 0.092662 | 0.04535  | 0.006431 |
| 0.097644 | 0.0349   | 0.114382 | 0.01339  | 0.164857 | 0.00035  | 0.053135 | 0.2518   | 0.015513 |
| 0.026423 | 0.56896  | -0.1344  | 0.00362  | -0.08427 | 0.06885  | -0.08141 | 0.07883  | -0.17221 |
| -0.1634  | 0.00039  | -0.12577 | 0.0065   | -0.12355 | 0.00752  | -0.06221 | 0.17954  | -0.18114 |
| -0.31687 | 2.37E-12 | -0.19721 | 1.77E-05 | -0.2264  | 7.66E-07 | -0.19446 | 2.32E-05 | -0.18914 |
| 0.040963 | 0.37713  | 0.083311 | 0.07207  | 0.104662 | 0.0237   | -0.07207 | 0.11988  | -0.00612 |
| 0.147201 | 0.00142  | 0.148622 | 0.00128  | 0.138955 | 0.00262  | 0.212446 | 3.63E-06 | 0.152801 |
| 0.004669 | 0.91984  | 0.11921  | 0.00992  | 0.102022 | 0.02749  | 0.053464 | 0.24887  | 0.059957 |
| 0.029208 | 0.52894  | 0.131159 | 0.00452  | 0.097272 | 0.0356   | 0.115747 | 0.01231  | 0.169982 |
| -0.13889 | 0.00263  | -0.07484 | 0.10625  | -0.13046 | 0.00474  | -0.03901 | 0.40036  | -0.15872 |
| 0.125563 | 0.00659  | 0.119125 | 0.00998  | -0.0951  | 0.03994  | 0.24793  | 5.68E-08 | 0.350198 |
| 0.144361 | 0.00176  | 0.09884  | 0.03272  | 0.230312 | 4.87E-07 | 0.107191 | 0.02051  | 0.160181 |
| -0.00711 | 0.8782   | -0.07199 | 0.1203   | -0.0116  | 0.80252  | -0.03325 | 0.47353  | -0.01433 |
| -0.01349 | 0.77127  | 0.116379 | 0.01184  | 0.007532 | 0.87104  | 0.121261 | 0.00871  | 0.329066 |

|          |          |          |          |          |          |          |          |          |
|----------|----------|----------|----------|----------|----------|----------|----------|----------|
| 0.071181 | 0.12452  | 0.080235 | 0.08327  | 0.079493 | 0.08617  | 0.046662 | 0.31431  | 0.051812 |
| 0.285538 | 3.27E-10 | 0.163932 | 0.00037  | 0.2053   | 7.73E-06 | 0.257817 | 1.58E-08 | 0.30563  |
| -0.22258 | 1.19E-06 | -0.1729  | 0.00017  | -0.21772 | 2.04E-06 | -0.10163 | 0.02808  | -0.16173 |
| 0.172566 | 0.00018  | 0.262344 | 8.65E-09 | 0.074116 | 0.1097   | 0.207934 | 5.87E-06 | 0.329573 |
| 0.324994 | 5.99E-13 | 0.107071 | 0.02065  | 0.110994 | 0.01641  | 0.067299 | 0.14647  | -0.19068 |
| 0.322983 | 8.45E-13 | 0.118748 | 0.01022  | 0.073247 | 0.11393  | 0.055911 | 0.22784  | -0.04956 |
| 0.038018 | 0.4124   | 1.45E-05 | 0.99975  | -0.01504 | 0.74584  | -0.04451 | 0.3372   | -0.01792 |
| -0.03838 | 0.408    | -0.08936 | 0.05364  | -0.00984 | 0.83201  | -0.23527 | 2.71E-07 | -0.26524 |
| -0.02019 | 0.66336  | -0.01338 | 0.77306  | 0.038107 | 0.41131  | 0.023369 | 0.61446  | 0.080557 |
| -0.09357 | 0.04328  | -0.13966 | 0.00249  | -0.1391  | 0.00259  | -0.10267 | 0.02651  | -0.06453 |
| -0.07027 | 0.12942  | -0.11147 | 0.01595  | -0.07567 | 0.10244  | -0.10366 | 0.02508  | -0.26182 |
| 0.036882 | 0.42653  | 0.181168 | 8.24E-05 | 0.20865  | 5.44E-06 | -0.04911 | 0.28952  | -0.04406 |
| -0.07981 | 0.08492  | -0.02924 | 0.52843  | 0.038804 | 0.40281  | -0.24977 | 4.50E-08 | -0.38263 |
| -0.00672 | 0.88484  | 0.095917 | 0.03826  | 0.116714 | 0.0116   | 0.029909 | 0.51909  | -0.00598 |
| -0.01579 | 0.73357  | 0.182879 | 7.04E-05 | -0.01019 | 0.82615  | -0.01896 | 0.68279  | 0.097414 |
| -0.01576 | 0.73409  | 0.003595 | 0.93824  | -0.02481 | 0.59277  | -0.10384 | 0.02483  | -0.00296 |
| -0.13886 | 0.00263  | -0.0289  | 0.53329  | -0.02858 | 0.53782  | -0.1512  | 0.00105  | -0.12347 |
| 0.004873 | 0.91635  | -0.04207 | 0.36438  | -0.02268 | 0.62499  | 0.047045 | 0.31035  | -0.01517 |
| 0.195592 | 2.08E-05 | 0.243642 | 9.74E-08 | 0.287771 | 2.35E-10 | 0.062324 | 0.17878  | 0.049109 |
| 0.082049 | 0.07651  | -0.16722 | 0.00028  | -0.03489 | 0.45189  | -0.00843 | 0.85586  | 0.105568 |
| 0.138467 | 0.00271  | 0.097977 | 0.03428  | 0.003402 | 0.94154  | 0.152461 | 0.00095  | 0.26162  |
| -0.0492  | 0.28872  | 0.070269 | 0.12944  | 0.08048  | 0.08232  | -0.00999 | 0.8296   | -0.05839 |
| -0.02075 | 0.65475  | -0.01093 | 0.81374  | 0.026539 | 0.56728  | -0.08089 | 0.08077  | -0.02162 |
| -0.18654 | 4.99E-05 | -0.07518 | 0.10468  | -0.04184 | 0.36701  | -0.02872 | 0.53578  | 0.143113 |
| 0.139086 | 0.00259  | 0.103999 | 0.02461  | 0.103822 | 0.02485  | -0.08332 | 0.07203  | -0.21736 |
| 0.041309 | 0.3731   | -0.05334 | 0.25     | -0.01015 | 0.82683  | -0.16541 | 0.00033  | -0.21269 |
| 0.12634  | 0.00626  | 0.10009  | 0.03057  | 0.18356  | 6.60E-05 | 0.026746 | 0.56425  | 0.066047 |
| 0.291045 | 1.44E-10 | 0.299663 | 3.82E-11 | 0.280081 | 7.27E-10 | 0.327884 | 3.63E-13 | 0.266313 |
| 0.081934 | 0.07692  | 0.187178 | 4.70E-05 | 0.158226 | 0.0006   | -0.03324 | 0.47356  | 0.021854 |
| 0.187705 | 4.47E-05 | 0.097962 | 0.03431  | 0.119053 | 0.01002  | 0.142238 | 0.00206  | 0.220969 |
| 0.06994  | 0.13124  | -0.11729 | 0.01119  | 0.04259  | 0.35844  | 0.020783 | 0.65417  | -0.04591 |
| -0.1135  | 0.01412  | -0.2371  | 2.17E-07 | -0.25524 | 2.22E-08 | 0.06732  | 0.14635  | 0.03887  |
| 0.05339  | 0.24953  | 0.004773 | 0.91806  | -0.01465 | 0.75224  | -0.08542 | 0.06514  | -0.10174 |
| 0.232707 | 3.67E-07 | 0.192661 | 2.77E-05 | 0.333086 | 1.46E-13 | 0.071937 | 0.12056  | 0.084495 |
| 0.060454 | 0.19219  | 0.225557 | 8.44E-07 | 0.187148 | 4.71E-05 | 0.104528 | 0.02388  | 0.335596 |
| -0.03324 | 0.47365  | -0.08723 | 0.05961  | -0.08061 | 0.08183  | 0.000897 | 0.98458  | -0.06285 |
| -0.02939 | 0.5263   | -0.03244 | 0.48439  | -0.04833 | 0.2973   | 0.031325 | 0.49949  | -0.04695 |
| -0.0144  | 0.75624  | -0.10131 | 0.02858  | -0.08584 | 0.06381  | -0.07707 | 0.09621  | -0.16836 |
| 0.033238 | 0.47365  | -0.1151  | 0.01281  | -0.08031 | 0.08296  | -0.02195 | 0.63613  | -0.10377 |
| -0.11451 | 0.01328  | 0.03138  | 0.49874  | -0.01298 | 0.77971  | 0.008085 | 0.86167  | 0.116139 |
| -0.09741 | 0.03534  | -0.06698 | 0.1484   | 0.006081 | 0.89572  | -0.05956 | 0.19889  | -0.11993 |
| 0.004538 | 0.92208  | 0.016421 | 0.72339  | 0.055746 | 0.22921  | -0.10341 | 0.02543  | 0.00675  |
| -0.0019  | 0.96741  | -0.001   | 0.98275  | 0.008304 | 0.85795  | -0.02035 | 0.66092  | 0.092107 |
| -0.16064 | 0.00049  | -0.11819 | 0.01058  | -0.13574 | 0.00329  | -0.20594 | 7.24E-06 | -0.33319 |
| 0.120789 | 0.00898  | 0.035449 | 0.44472  | 0.13075  | 0.00465  | -0.09745 | 0.03527  | 0.01393  |

|          |          |          |          |          |          |          |          |          |
|----------|----------|----------|----------|----------|----------|----------|----------|----------|
| 0.208449 | 5.56E-06 | 0.220526 | 1.49E-06 | 0.247198 | 6.24E-08 | 0.107822 | 0.01977  | 0.068999 |
| 0.040448 | 0.38316  | 0.02771  | 0.55029  | 0.110251 | 0.01715  | -0.15198 | 0.00099  | -0.32324 |
| 0.201809 | 1.11E-05 | 0.254307 | 2.51E-08 | 0.077182 | 0.09572  | 0.063563 | 0.17028  | 0.191631 |
| -0.10257 | 0.02667  | -0.10757 | 0.02007  | -0.03298 | 0.47714  | -0.10672 | 0.02107  | 0.108332 |
| 0.063918 | 0.1679   | -0.08097 | 0.08048  | -0.16292 | 0.00041  | -0.13298 | 0.00399  | -0.1619  |
| 0.167585 | 0.00028  | 0.254086 | 2.58E-08 | 0.163576 | 0.00039  | -0.02457 | 0.59637  | 0.013737 |
| -0.03293 | 0.47777  | -0.08571 | 0.06421  | -0.09542 | 0.03927  | 0.007031 | 0.87956  | 0.005186 |
| 0.219605 | 1.65E-06 | 0.143656 | 0.00186  | 0.15259  | 0.00094  | 0.018233 | 0.69433  | -0.16733 |
| -0.2531  | 2.93E-08 | -0.20544 | 7.62E-06 | -0.17163 | 0.00019  | -0.07535 | 0.10387  | 0.022655 |
| 0.212632 | 3.56E-06 | 0.20666  | 6.71E-06 | 0.115665 | 0.01238  | 0.212326 | 3.67E-06 | 0.243295 |
| -0.08649 | 0.06183  | -0.20705 | 6.44E-06 | -0.0476  | 0.30462  | -0.16828 | 0.00026  | -0.47012 |
| 0.017313 | 0.70903  | -0.27912 | 8.36E-10 | -0.26728 | 4.42E-09 | -0.03362 | 0.46862  | -0.10622 |
| -0.08967 | 0.0528   | 0.005322 | 0.90868  | 0.01458  | 0.75333  | -0.18578 | 5.37E-05 | -0.21011 |
| 0.072823 | 0.11605  | 0.162846 | 0.00041  | 0.16051  | 0.0005   | -0.0312  | 0.50115  | -0.03026 |
| -0.0061  | 0.89534  | 0.063141 | 0.17313  | 0.014036 | 0.76225  | 0.044066 | 0.34202  | -0.05242 |
| -0.06675 | 0.14979  | -0.06225 | 0.17928  | -0.00194 | 0.96673  | -0.0717  | 0.1218   | -0.06522 |
| -0.02775 | 0.54967  | -0.10974 | 0.01767  | -0.08782 | 0.05791  | -0.15736 | 0.00064  | -0.07755 |
| 0.025971 | 0.5756   | -0.12358 | 0.0075   | -0.09893 | 0.03257  | -0.04495 | 0.33238  | -0.17988 |
| -0.19615 | 1.96E-05 | -0.24702 | 6.38E-08 | -0.14201 | 0.0021   | -0.18904 | 3.93E-05 | -0.33157 |
| 0.048561 | 0.295    | 0.248312 | 5.42E-08 | 0.092133 | 0.0466   | 0.264632 | 6.35E-09 | 0.37308  |
| -0.07899 | 0.08819  | -0.13347 | 0.00386  | -0.11044 | 0.01696  | -0.17176 | 0.00019  | -0.18034 |
| 0.156265 | 0.0007   | 0.093797 | 0.04276  | 0.106223 | 0.02168  | 0.028192 | 0.54337  | -0.11667 |
| 0.057566 | 0.21435  | 0.000304 | 0.99477  | -0.04237 | 0.36096  | -0.11323 | 0.01436  | -0.07595 |
| 0.058522 | 0.20682  | 0.196455 | 1.90E-05 | 0.076103 | 0.10047  | 0.20718  | 6.35E-06 | 0.272568 |
| 0.184592 | 6.00E-05 | 0.13925  | 0.00256  | 0.205404 | 7.65E-06 | -0.02019 | 0.6634   | -0.0794  |
| -0.15866 | 0.00058  | -0.14216 | 0.00207  | -0.09162 | 0.04784  | -0.27307 | 1.98E-09 | -0.21962 |
| 0.073621 | 0.11209  | 0.163984 | 0.00037  | 0.212703 | 3.53E-06 | 0.060812 | 0.18957  | -0.03366 |
| 0.161492 | 0.00046  | 0.071459 | 0.12305  | 0.049292 | 0.28778  | 0.043669 | 0.34639  | 0.047206 |
| -0.12065 | 0.00906  | -0.25972 | 1.23E-08 | -0.21553 | 2.59E-06 | -0.18374 | 6.49E-05 | -0.1905  |
| 0.045769 | 0.32367  | -0.0325  | 0.48354  | -0.0649  | 0.16145  | 0.015763 | 0.73405  | -0.19839 |
| 0.146976 | 0.00145  | -0.13088 | 0.00461  | -0.33699 | 7.27E-14 | -0.0003  | 0.99488  | -0.07764 |
| -0.00197 | 0.96605  | -0.00556 | 0.90461  | 0.015544 | 0.7376   | -0.15947 | 0.00054  | -0.05252 |
| -0.04771 | 0.30359  | -0.00532 | 0.90878  | 0.017523 | 0.70567  | 0.076809 | 0.09735  | 0.243819 |
| 0.031802 | 0.49298  | -0.08761 | 0.05851  | -0.14003 | 0.00242  | -0.15235 | 0.00096  | -0.20274 |
| 0.079206 | 0.08731  | 0.099138 | 0.0322   | 0.127427 | 0.00582  | 0.054686 | 0.2382   | 0.096298 |
| 0.030899 | 0.50535  | 0.05927  | 0.20106  | 0.011101 | 0.81091  | -0.04912 | 0.28943  | -0.22273 |
| 0.070789 | 0.12662  | 0.155915 | 0.00072  | 0.120065 | 0.0094   | 0.045162 | 0.33014  | -0.01005 |
| -0.12349 | 0.00755  | -0.1119  | 0.01555  | -0.04196 | 0.36564  | 0.036266 | 0.43429  | 0.125653 |
| -0.00177 | 0.96961  | 0.0842   | 0.06907  | 0.071619 | 0.12222  | 0.041926 | 0.366    | 0.091966 |
| 0.121225 | 0.00873  | 0.238575 | 1.81E-07 | 0.278106 | 9.66E-10 | 0.092094 | 0.04669  | 0.168272 |
| 0.174573 | 0.00015  | 0.097236 | 0.03567  | 0.123234 | 0.00767  | 0.095593 | 0.03892  | -0.0609  |
| 0.14063  | 0.00232  | 0.227332 | 6.88E-07 | 0.181375 | 8.09E-05 | 0.01886  | 0.68437  | 0.160253 |
| 0.106456 | 0.0214   | 0.191728 | 3.03E-05 | 0.151918 | 0.00099  | 0.112668 | 0.01485  | 0.089295 |
| 0.025179 | 0.5873   | 0.219415 | 1.69E-06 | 0.100189 | 0.03041  | 0.167476 | 0.00028  | 0.216427 |
| 0.16091  | 0.00048  | -0.18841 | 4.18E-05 | -0.13335 | 0.00389  | -0.01574 | 0.73447  | -0.10897 |

|          |          |          |          |          |          |          |          |          |
|----------|----------|----------|----------|----------|----------|----------|----------|----------|
| -0.06571 | 0.15629  | 0.053507 | 0.24849  | 0.06479  | 0.16216  | -0.08445 | 0.06824  | -0.02476 |
| 0.060085 | 0.19493  | 0.158091 | 0.00061  | -0.04293 | 0.35467  | 0.152584 | 0.00094  | 0.322571 |
| -0.11977 | 0.00958  | -0.08891 | 0.05487  | -0.13313 | 0.00395  | -0.01811 | 0.69634  | 0.131496 |
| -0.12624 | 0.0063   | -0.10395 | 0.02468  | -0.31096 | 6.28E-12 | -0.11613 | 0.01202  | -0.13115 |
| -0.07986 | 0.08471  | -0.0915  | 0.04814  | -0.15726 | 0.00065  | -0.15298 | 0.00091  | -0.24663 |
| -0.06656 | 0.15094  | -0.13051 | 0.00473  | -0.11031 | 0.0171   | -0.0943  | 0.04166  | 0.020721 |
| -0.00362 | 0.93776  | 0.022362 | 0.62979  | -0.00253 | 0.95659  | -0.07536 | 0.10383  | -0.20684 |
| 0.024781 | 0.59322  | -0.09487 | 0.04043  | -0.06424 | 0.16576  | 0.000393 | 0.99324  | -0.05792 |
| 0.027034 | 0.56007  | -0.05476 | 0.23757  | 0.065178 | 0.15966  | -0.12924 | 0.00515  | -0.22037 |
| 0.032247 | 0.48694  | -0.01387 | 0.76491  | 0.010966 | 0.81315  | -0.02514 | 0.58789  | 0.053277 |
| 0.142224 | 0.00206  | 0.1077   | 0.01991  | 0.097731 | 0.03474  | 0.184848 | 5.86E-05 | -0.03906 |
| -0.10754 | 0.0201   | -0.11573 | 0.01232  | -0.0819  | 0.07705  | -0.16555 | 0.00033  | -0.22276 |
| 0.103936 | 0.0247   | -0.10959 | 0.01783  | 0.013479 | 0.77142  | 0.046851 | 0.31236  | -0.13557 |
| 0.153009 | 0.00091  | 0.180965 | 8.40E-05 | -0.00561 | 0.90374  | 0.108502 | 0.01901  | 0.273404 |
| 0.012449 | 0.78846  | -0.0429  | 0.35499  | -0.15277 | 0.00093  | 0.071572 | 0.12246  | -0.1184  |
| -0.06071 | 0.19033  | -0.10577 | 0.02225  | -0.07051 | 0.12814  | -0.17275 | 0.00018  | -0.10799 |
| 0.112319 | 0.01516  | 0.014086 | 0.76143  | 0.076031 | 0.10079  | -0.13653 | 0.00311  | -0.15719 |
| -0.07808 | 0.09191  | -0.07649 | 0.09875  | -0.08329 | 0.07214  | -0.17475 | 0.00015  | -0.14671 |
| -0.11636 | 0.01186  | -0.13424 | 0.00366  | -0.15104 | 0.00106  | -0.14902 | 0.00124  | 0.071356 |
| 0.214511 | 2.90E-06 | 0.226211 | 7.83E-07 | 0.094438 | 0.04136  | 0.191094 | 3.23E-05 | 0.095622 |
| 0.168852 | 0.00025  | 0.074752 | 0.10667  | -0.05773 | 0.213    | 0.081001 | 0.08036  | 0.146185 |
| -0.12991 | 0.00493  | -0.12275 | 0.00792  | -0.10582 | 0.02219  | -0.26019 | 1.15E-08 | -0.35344 |
| -0.03748 | 0.41902  | 0.026892 | 0.56213  | 0.048588 | 0.29473  | 0.053567 | 0.24796  | -0.03122 |
| -0.01603 | 0.72964  | 0.004668 | 0.91986  | -0.04135 | 0.37262  | 0.013981 | 0.76316  | -0.03314 |
| 0.014849 | 0.74893  | 0.077704 | 0.0935   | 0.07926  | 0.08709  | 0.062043 | 0.18075  | 0.093986 |
| -0.07636 | 0.09934  | -0.03816 | 0.41072  | -0.01282 | 0.78232  | -0.1516  | 0.00101  | -0.13318 |
| -0.01315 | 0.77687  | -0.05966 | 0.19812  | -0.04523 | 0.32942  | -0.13602 | 0.00323  | -0.23703 |
| -0.05974 | 0.19751  | -0.16154 | 0.00046  | -0.30666 | 1.26E-11 | 0.173665 | 0.00016  | 0.054523 |
| -0.01509 | 0.74506  | -0.04297 | 0.3542   | -0.11772 | 0.0109   | 0.055162 | 0.23413  | 0.010559 |
| 0.030429 | 0.51185  | -0.02767 | 0.55087  | -0.08552 | 0.0648   | 0.029386 | 0.52643  | 0.10795  |
| 0.159415 | 0.00054  | 0.226965 | 7.18E-07 | 0.178006 | 0.00011  | 0.14879  | 0.00126  | 0.098835 |
| -0.00367 | 0.93698  | -0.04521 | 0.32967  | 0.024805 | 0.59286  | -0.09484 | 0.04051  | -0.07382 |
| 0.02863  | 0.53713  | -0.04849 | 0.29568  | 0.042836 | 0.35567  | -0.2164  | 2.36E-06 | 0.015576 |
| 0.213589 | 3.21E-06 | 0.356496 | 1.93E-15 | 0.377077 | 3.16E-17 | 0.17557  | 0.00014  | 0.301457 |
| 0.191229 | 3.18E-05 | 0.210272 | 4.58E-06 | 0.247678 | 5.87E-08 | 0.000742 | 0.98723  | 0.060474 |
| -0.02778 | 0.5493   | -0.056   | 0.22712  | -0.0177  | 0.70276  | 0.173368 | 0.00017  | 0.143653 |
| 0.262782 | 8.16E-09 | 0.293801 | 9.45E-11 | 0.302695 | 2.37E-11 | 0.416687 | 4.87E-21 | 0.157399 |
| 0.06759  | 0.14473  | 0.163614 | 0.00038  | 0.202764 | 1.01E-05 | -0.10933 | 0.01811  | 0.171706 |
| 0.168194 | 0.00026  | 0.204781 | 8.16E-06 | 0.235823 | 2.53E-07 | 0.122085 | 0.00826  | 0.081341 |
| -0.00722 | 0.87629  | -0.17951 | 9.60E-05 | -0.16835 | 0.00026  | -0.07575 | 0.10205  | -0.08481 |
| 0.042258 | 0.36221  | -0.07868 | 0.08942  | 0.029604 | 0.52336  | -0.14016 | 0.0024   | -0.24267 |
| -0.24677 | 6.58E-08 | -0.36187 | 6.78E-16 | -0.30946 | 8.02E-12 | -0.14701 | 0.00144  | -0.12587 |
| -0.15193 | 0.00099  | -0.16145 | 0.00046  | -0.102   | 0.02752  | -0.12743 | 0.00582  | -0.0594  |
| 0.199272 | 1.44E-05 | 0.103564 | 0.02522  | 0.198011 | 1.63E-05 | 0.088316 | 0.0565   | 0.249664 |
| -0.24188 | 1.21E-07 | -0.21527 | 2.67E-06 | -0.21773 | 2.04E-06 | -0.17341 | 0.00017  | -0.18345 |



|          |          |          |          |          |          |          |          |          |
|----------|----------|----------|----------|----------|----------|----------|----------|----------|
| 0.034073 | 0.4626   | 0.032547 | 0.4829   | 0.006983 | 0.88036  | 0.08113  | 0.07987  | 0.147223 |
| 0.086618 | 0.06144  | 0.034065 | 0.4627   | -0.06628 | 0.1527   | 0.055095 | 0.23471  | 0.034264 |
| 0.122165 | 0.00822  | 0.226224 | 7.82E-07 | 0.260844 | 1.06E-08 | 0.105918 | 0.02207  | 0.394622 |
| 0.158759 | 0.00057  | 0.195251 | 2.15E-05 | 0.180624 | 8.67E-05 | 0.144509 | 0.00174  | 0.192717 |
| 0.106875 | 0.02089  | 0.196142 | 1.97E-05 | 0.145154 | 0.00166  | 0.030343 | 0.51304  | 0.059508 |
| -0.07143 | 0.12323  | -0.19807 | 1.62E-05 | -0.18519 | 5.67E-05 | -0.02628 | 0.57108  | -0.01562 |
| 0.192344 | 2.86E-05 | 0.273948 | 1.75E-09 | 0.309236 | 8.32E-12 | -0.04472 | 0.33489  | 0.071716 |
| -0.13221 | 0.00421  | -0.32056 | 1.28E-12 | -0.25961 | 1.25E-08 | -0.16931 | 0.00024  | 0.070282 |
| -0.21614 | 2.43E-06 | -0.1859  | 5.30E-05 | -0.16221 | 0.00043  | -0.30781 | 1.05E-11 | -0.46767 |
| 0.262202 | 8.82E-09 | 0.074277 | 0.10892  | 0.130404 | 0.00476  | 0.188593 | 4.11E-05 | 0.246834 |
| 0.031525 | 0.49676  | 0.122103 | 0.00825  | 0.119197 | 0.00993  | -0.00599 | 0.89736  | -0.0934  |
| 0.066401 | 0.15195  | 0.053894 | 0.24508  | 0.136264 | 0.00317  | 0.006832 | 0.88293  | -0.10131 |
| -0.19067 | 3.36E-05 | -0.28049 | 6.85E-10 | -0.22091 | 1.43E-06 | -0.17163 | 0.00019  | -0.20472 |
| 0.10032  | 0.03019  | 0.02172  | 0.63967  | 0.038934 | 0.40123  | -0.09312 | 0.04429  | -0.00736 |
| -0.09362 | 0.04316  | 0.225353 | 8.64E-07 | 0.09103  | 0.0493   | 0.105247 | 0.02293  | 0.202052 |
| -0.20258 | 1.02E-05 | -0.13759 | 0.00289  | -0.17377 | 0.00016  | -0.15912 | 0.00056  | -0.10788 |
| -0.02267 | 0.62505  | 0.087304 | 0.0594   | 0.074722 | 0.10681  | -0.11573 | 0.01233  | -0.13103 |
| 0.146343 | 0.00152  | 0.051427 | 0.26739  | 0.026972 | 0.56096  | 0.027673 | 0.55082  | -0.03109 |
| 0.084572 | 0.06785  | -0.03407 | 0.46259  | -0.02627 | 0.57119  | -0.14119 | 0.00223  | 0.036855 |
| 0.213288 | 3.31E-06 | 0.174128 | 0.00016  | 0.177565 | 0.00011  | 0.086959 | 0.06042  | 0.088385 |
| -0.03155 | 0.49641  | -0.0463  | 0.31812  | -0.02632 | 0.57041  | -0.17162 | 0.00019  | -0.26691 |
| 0.114887 | 0.01298  | 0.123756 | 0.00742  | 0.195092 | 2.18E-05 | 0.121242 | 0.00872  | 0.302557 |
| 0.209691 | 4.87E-06 | 0.001542 | 0.97349  | -0.00127 | 0.97823  | 0.172968 | 0.00017  | 0.140459 |
| -0.05195 | 0.26255  | -0.24793 | 5.68E-08 | -0.31891 | 1.69E-12 | -0.00816 | 0.86044  | -0.03364 |
| 0.123008 | 0.00779  | 0.173522 | 0.00016  | 0.172918 | 0.00017  | 0.04821  | 0.29851  | -0.02095 |
| 0.018329 | 0.69279  | 0.027104 | 0.55904  | 0.025424 | 0.58366  | 0.036666 | 0.42923  | -0.0086  |
| 0.157704 | 0.00063  | 0.165826 | 0.00032  | 0.136146 | 0.0032   | -0.12132 | 0.00868  | -0.13688 |
| 0.188536 | 4.13E-05 | 0.140424 | 0.00235  | 0.157945 | 0.00061  | 0.191749 | 3.03E-05 | 0.104957 |
| 0.257824 | 1.58E-08 | 0.309231 | 8.33E-12 | 0.298089 | 4.88E-11 | 0.238337 | 1.87E-07 | 0.409543 |
| -0.02463 | 0.59551  | -0.09727 | 0.0356   | -0.03198 | 0.49061  | -0.19411 | 2.40E-05 | -0.17395 |
| 0.135363 | 0.00338  | 0.127244 | 0.00589  | 0.069424 | 0.13412  | 0.192375 | 2.85E-05 | 0.203526 |
| 0.012326 | 0.7905   | -0.17779 | 0.00011  | -0.11993 | 0.00948  | -0.17854 | 0.0001   | -0.34471 |
| 0.173938 | 0.00016  | 0.130268 | 0.00481  | 0.102866 | 0.02622  | -0.01891 | 0.6835   | 0.082547 |
| 0.084882 | 0.06685  | 0.092525 | 0.04567  | 0.154414 | 0.00081  | -0.00761 | 0.8698   | -0.05137 |
| 0.02033  | 0.66124  | 0.185362 | 5.58E-05 | 0.080957 | 0.08052  | 0.226178 | 7.86E-07 | 0.196007 |
| 0.116187 | 0.01198  | 0.124329 | 0.00714  | 0.146212 | 0.00153  | 0.006363 | 0.89092  | -0.0156  |
| -0.11898 | 0.01007  | 0.066369 | 0.15215  | -0.00169 | 0.97087  | -0.00645 | 0.88939  | 0.041718 |
| -0.08162 | 0.07805  | -0.00042 | 0.99276  | -0.01244 | 0.78856  | 0.036124 | 0.43609  | -0.03583 |
| -0.00479 | 0.91775  | 0.022137 | 0.63324  | 0.044355 | 0.33886  | -0.08125 | 0.07944  | -0.12954 |
| 0.108165 | 0.01938  | 0.137166 | 0.00298  | 0.092256 | 0.04631  | 0.122019 | 0.0083   | 0.113296 |
| -0.15573 | 0.00073  | -0.16643 | 0.0003   | -0.16619 | 0.00031  | -0.06079 | 0.1897   | -0.13697 |
| -0.02599 | 0.57531  | -0.04948 | 0.28593  | 0.030856 | 0.50594  | 0.004562 | 0.92167  | 0.006542 |
| 0.166579 | 0.0003   | 0.08228  | 0.07568  | 0.105356 | 0.02279  | -0.06559 | 0.15702  | -0.07809 |
| 0.170976 | 0.00021  | 0.178895 | 0.0001   | 0.114938 | 0.01294  | 0.187907 | 4.38E-05 | 0.09251  |
| -0.17227 | 0.00018  | -0.21164 | 3.96E-06 | -0.23808 | 1.93E-07 | -0.1081  | 0.01946  | -0.24997 |

|          |          |          |          |          |          |          |          |          |
|----------|----------|----------|----------|----------|----------|----------|----------|----------|
| 0.128275 | 0.0055   | 0.200547 | 1.26E-05 | 0.195559 | 2.08E-05 | -0.02834 | 0.54133  | -0.06068 |
| 0.138872 | 0.00263  | 0.207975 | 5.84E-06 | 0.25001  | 4.36E-08 | 0.045054 | 0.3313   | 0.051416 |
| 0.174589 | 0.00015  | 0.228474 | 6.03E-07 | 0.162654 | 0.00042  | 0.010442 | 0.82193  | -0.04474 |
| 0.183416 | 6.69E-05 | 0.118971 | 0.01008  | 0.140311 | 0.00237  | 0.166707 | 0.0003   | -0.12568 |
| -0.07422 | 0.1092   | -0.16393 | 0.00037  | -0.22489 | 9.11E-07 | -0.02635 | 0.56999  | -0.00381 |
| 0.16103  | 0.00048  | 0.004748 | 0.91849  | -0.00896 | 0.8468   | 0.242407 | 1.13E-07 | 0.206545 |
| 0.192522 | 2.81E-05 | 0.043692 | 0.34614  | -0.01139 | 0.80602  | 0.248641 | 5.19E-08 | 0.194933 |
| -0.0112  | 0.8093   | -0.04258 | 0.3586   | 0.0035   | 0.93988  | -0.11811 | 0.01063  | -0.11493 |
| 0.316821 | 2.39E-12 | 0.261514 | 9.67E-09 | 0.287795 | 2.34E-10 | 0.129442 | 0.00509  | 0.201985 |
| 0.268886 | 3.54E-09 | 0.030326 | 0.51327  | 0.058009 | 0.21083  | 0.168298 | 0.00026  | 0.256514 |
| 0.25888  | 1.37E-08 | 0.062733 | 0.17594  | 0.172197 | 0.00018  | 0.033204 | 0.4741   | 0.036972 |
| 0.235023 | 2.79E-07 | 0.172078 | 0.00019  | 0.152118 | 0.00097  | 0.206521 | 6.81E-06 | 0.304389 |
| 0.119776 | 0.00958  | 0.259398 | 1.28E-08 | 0.027701 | 0.55042  | 0.040986 | 0.37686  | 0.014807 |
| 0.075387 | 0.10372  | -0.03633 | 0.43349  | -0.16873 | 0.00025  | 0.113091 | 0.01448  | 0.030596 |
| 0.066375 | 0.15211  | 0.019388 | 0.67602  | 0.079787 | 0.08501  | -0.04527 | 0.32903  | -0.24885 |
| -0.08292 | 0.07341  | -0.183   | 6.96E-05 | -0.17507 | 0.00014  | -0.13755 | 0.0029   | -0.10014 |
| -0.0016  | 0.97252  | 0.031277 | 0.50015  | 0.075496 | 0.10322  | -0.10405 | 0.02453  | -0.06428 |
| -0.00439 | 0.92462  | -0.05427 | 0.24184  | -0.04925 | 0.28817  | -0.12622 | 0.00631  | -0.1225  |
| -0.12587 | 0.00646  | -0.20841 | 5.58E-06 | -0.13221 | 0.00421  | -0.17549 | 0.00014  | -0.24702 |
| 0.209207 | 5.13E-06 | 0.168592 | 0.00025  | 0.178593 | 0.0001   | -0.04811 | 0.29954  | 0.02199  |
| 0.090635 | 0.0503   | 0.157789 | 0.00062  | 0.188196 | 4.26E-05 | 0.052184 | 0.2604   | 0.026737 |
| 0.331147 | 2.05E-13 | 0.13671  | 0.00307  | 0.319974 | 1.41E-12 | 0.159963 | 0.00052  | -0.01606 |
| 0.019201 | 0.67897  | 0.004656 | 0.92007  | -0.01433 | 0.7575   | 0.023031 | 0.61958  | 0.015652 |
| 0.178219 | 0.00011  | -0.05821 | 0.20924  | -0.14961 | 0.00118  | 0.034472 | 0.45738  | -0.0224  |
| -0.03157 | 0.49614  | -0.0229  | 0.62156  | 0.002924 | 0.94975  | -0.04899 | 0.29079  | -0.0614  |
| 0.054423 | 0.24047  | 0.03646  | 0.43184  | 0.02349  | 0.61263  | -0.02675 | 0.56422  | 0.097657 |
| -0.26437 | 6.58E-09 | -0.19264 | 2.78E-05 | -0.2913  | 1.38E-10 | -0.14794 | 0.00135  | -0.07119 |
| -0.01777 | 0.70165  | -0.15265 | 0.00094  | -0.14074 | 0.0023   | -0.11202 | 0.01544  | -0.25355 |
| 0.08018  | 0.08348  | 0.149021 | 0.00124  | 0.110875 | 0.01653  | 0.150022 | 0.00115  | 0.051896 |
| -0.12959 | 0.00504  | -0.09385 | 0.04265  | -0.09561 | 0.03889  | -0.21088 | 4.29E-06 | -0.0901  |
| 0.051026 | 0.27114  | 0.127127 | 0.00594  | 0.103673 | 0.02506  | 0.109994 | 0.01741  | -0.01009 |
| 0.13985  | 0.00245  | 0.344187 | 1.96E-14 | 0.253685 | 2.72E-08 | 0.203078 | 9.74E-06 | 0.265783 |
| 0.055587 | 0.23055  | -0.00878 | 0.84983  | 0.01465  | 0.75219  | -0.05949 | 0.19941  | -0.05837 |
| 0.008829 | 0.84909  | 0.023733 | 0.60894  | 0.004867 | 0.91645  | 0.033512 | 0.47     | -0.06114 |
| 0.122162 | 0.00822  | 0.195622 | 2.07E-05 | 0.212441 | 3.63E-06 | 0.208973 | 5.26E-06 | 0.180725 |
| 0.008462 | 0.85529  | 0.030289 | 0.51379  | 0.041017 | 0.37649  | 0.053038 | 0.25266  | 0.116865 |
| 0.036405 | 0.43252  | 0.111028 | 0.01638  | 0.191929 | 2.97E-05 | 0.006753 | 0.88428  | -0.12269 |
| -0.06772 | 0.14397  | -0.1967  | 1.86E-05 | 0.000662 | 0.98862  | -0.06301 | 0.17404  | -0.0103  |
| 0.026266 | 0.57127  | -0.03368 | 0.46775  | 0.030744 | 0.50748  | -0.01908 | 0.68095  | -0.10576 |
| -0.08824 | 0.05672  | -0.22393 | 1.02E-06 | -0.2428  | 1.08E-07 | -0.17205 | 0.00019  | -0.13675 |
| 0.089538 | 0.05316  | 0.173912 | 0.00016  | 0.248709 | 5.15E-08 | -0.07782 | 0.09301  | -0.06814 |
| -0.24789 | 5.72E-08 | -0.12969 | 0.005    | -0.14414 | 0.00179  | -0.11297 | 0.01458  | -0.21857 |
| -0.08745 | 0.05899  | -0.0936  | 0.0432   | -0.16992 | 0.00023  | -0.18456 | 6.02E-05 | -0.1081  |
| 0.259739 | 1.23E-08 | 0.28252  | 5.10E-10 | 0.229484 | 5.36E-07 | -0.01462 | 0.75267  | 0.20074  |
| 0.218877 | 1.79E-06 | 0.032141 | 0.48837  | 0.178373 | 0.00011  | 0.146661 | 0.00148  | 0.152609 |

|          |          |          |          |          |          |          |          |          |
|----------|----------|----------|----------|----------|----------|----------|----------|----------|
| 0.157812 | 0.00062  | 0.106322 | 0.02156  | 0.131857 | 0.00431  | 0.044439 | 0.33795  | -0.17814 |
| -0.03622 | 0.43491  | -0.05513 | 0.23439  | -0.04075 | 0.37957  | -0.02709 | 0.55926  | -0.04859 |
| -0.00312 | 0.94639  | -0.05334 | 0.24993  | 0.030894 | 0.50541  | -0.03281 | 0.47934  | -0.04473 |
| -0.03781 | 0.41491  | -0.212   | 3.80E-06 | -0.35808 | 1.42E-15 | -0.03937 | 0.39602  | -0.23358 |
| 0.012966 | 0.7799   | -0.07644 | 0.09899  | -0.01198 | 0.79631  | -0.15715 | 0.00065  | -0.23304 |
| -0.03446 | 0.45752  | -0.08767 | 0.05833  | 0.016576 | 0.72088  | -0.25568 | 2.09E-08 | -0.08642 |
| 0.048528 | 0.29533  | 0.183444 | 6.68E-05 | 0.120521 | 0.00913  | 0.113168 | 0.01441  | 0.152925 |
| 0.211406 | 4.06E-06 | 0.17989  | 9.27E-05 | 0.175144 | 0.00014  | -0.01529 | 0.74175  | 0.033052 |
| -0.06238 | 0.1784   | -0.19436 | 2.34E-05 | -0.14845 | 0.00129  | 0.110705 | 0.0167   | 0.138415 |
| 0.035804 | 0.44017  | -0.04207 | 0.36432  | 0.057045 | 0.21853  | 0.001884 | 0.9676   | 0.209333 |
| -0.03901 | 0.40027  | -0.20508 | 7.91E-06 | -0.01928 | 0.67771  | -0.11885 | 0.01015  | -0.0259  |
| -0.29443 | 8.59E-11 | -0.27477 | 1.55E-09 | -0.24274 | 1.09E-07 | -0.19822 | 1.60E-05 | -0.21265 |
| 0.246177 | 7.09E-08 | 0.285957 | 3.07E-10 | 0.2536   | 2.75E-08 | 0.213448 | 3.26E-06 | 0.3141   |
| 0.010436 | 0.82204  | 0.094837 | 0.0405   | 0.099935 | 0.03083  | -0.03933 | 0.39643  | 0.015027 |
| 0.179892 | 9.27E-05 | 0.17626  | 0.00013  | 0.197094 | 1.79E-05 | 0.176295 | 0.00013  | 0.078603 |
| -0.06218 | 0.17978  | -0.02301 | 0.61994  | 0.046342 | 0.31765  | -0.11127 | 0.01615  | -0.18732 |
| 0.098633 | 0.03309  | 0.039927 | 0.38932  | -0.0119  | 0.79756  | 0.15876  | 0.00057  | -0.0414  |
| -0.04347 | 0.34855  | -0.04523 | 0.32942  | -0.05297 | 0.25326  | 0.004821 | 0.91725  | -0.03075 |
| -0.20695 | 6.51E-06 | -0.10412 | 0.02444  | -0.10644 | 0.02142  | -0.01722 | 0.71048  | -0.00996 |
| -0.02918 | 0.52931  | -0.05435 | 0.24114  | -0.00264 | 0.95459  | -0.01033 | 0.82388  | -0.25798 |
| 0.093615 | 0.04317  | 0.005638 | 0.90329  | 0.043542 | 0.34779  | 0.042592 | 0.35842  | -0.25259 |
| -0.11271 | 0.01481  | -0.04474 | 0.33463  | -0.10257 | 0.02666  | -0.08059 | 0.08189  | -0.06652 |
| -0.16977 | 0.00023  | -0.06118 | 0.1869   | 0.042176 | 0.36314  | -0.04975 | 0.28333  | -0.01635 |
| 0.120165 | 0.00934  | 0.097984 | 0.03427  | 0.158557 | 0.00058  | -0.07761 | 0.0939   | -0.2326  |
| 0.260006 | 1.18E-08 | 0.312184 | 5.15E-12 | 0.223529 | 1.06E-06 | 0.369808 | 1.40E-16 | 0.256026 |
| -0.00973 | 0.83398  | -0.11328 | 0.01431  | -0.14632 | 0.00152  | 0.039358 | 0.39612  | 0.299424 |
| 0.170046 | 0.00022  | 0.07331  | 0.11362  | -0.08661 | 0.06147  | 0.266916 | 4.65E-09 | 0.257233 |
| 0.212359 | 3.66E-06 | 0.173379 | 0.00017  | 0.1246   | 0.00702  | 0.064349 | 0.16504  | -0.04795 |
| 0.158335 | 0.00059  | 0.13588  | 0.00326  | 0.139154 | 0.00258  | 0.125877 | 0.00645  | -0.07593 |
| 0.02101  | 0.65065  | 0.056293 | 0.22467  | 0.087909 | 0.05765  | -0.01951 | 0.67406  | 0.005342 |
| 0.210519 | 4.46E-06 | 0.221581 | 1.33E-06 | 0.109117 | 0.01834  | 0.204801 | 8.15E-06 | 0.206964 |
| 0.007474 | 0.87203  | -0.10736 | 0.02031  | -0.05882 | 0.20449  | 0.072316 | 0.11862  | 0.126308 |
| 0.14622  | 0.00153  | -0.16428 | 0.00036  | -0.28578 | 3.16E-10 | 0.027415 | 0.55454  | -0.02159 |
| 0.007089 | 0.87857  | -0.26238 | 8.61E-09 | -0.21612 | 2.43E-06 | -0.13993 | 0.00244  | -0.08857 |
| 0.22118  | 1.39E-06 | 0.146618 | 0.00149  | 0.221242 | 1.38E-06 | 0.192099 | 2.93E-05 | 0.154355 |
| -0.04919 | 0.28879  | -0.0583  | 0.20852  | -0.13037 | 0.00478  | 0.115144 | 0.01278  | 0.106248 |
| -0.08017 | 0.0835   | -0.16169 | 0.00045  | -0.09974 | 0.03116  | -0.01352 | 0.77072  | 0.029384 |
| -0.02234 | 0.63017  | -0.26346 | 7.44E-09 | -0.03575 | 0.44089  | -0.0944  | 0.04144  | -0.0895  |
| 0.159368 | 0.00055  | 0.184815 | 5.87E-05 | 0.000906 | 0.98441  | 0.21406  | 3.05E-06 | 0.427525 |
| -0.12739 | 0.00584  | -0.00243 | 0.95823  | -0.17426 | 0.00015  | -0.00783 | 0.86598  | 0.072102 |
| 0.070545 | 0.12794  | 0.198625 | 1.53E-05 | 0.104425 | 0.02402  | -0.03723 | 0.42211  | -0.00576 |
| 0.162151 | 0.00043  | -0.02959 | 0.5236   | -0.21348 | 3.25E-06 | 0.192144 | 2.91E-05 | -0.00135 |
| -0.0452  | 0.32975  | -0.16851 | 0.00025  | -0.36595 | 3.03E-16 | 0.051604 | 0.26574  | 0.096107 |
| -0.05321 | 0.25114  | 0.12604  | 0.00638  | -0.02092 | 0.65198  | 0.110894 | 0.01651  | 0.092424 |
| 0.040775 | 0.37931  | 0.117037 | 0.01137  | 0.051518 | 0.26654  | -0.03811 | 0.41128  | -0.04309 |

|          |          |          |          |          |          |          |          |          |
|----------|----------|----------|----------|----------|----------|----------|----------|----------|
| 0.373922 | 6.05E-17 | 0.064669 | 0.16295  | 0.120583 | 0.0091   | 0.192591 | 2.79E-05 | 0.064931 |
| -0.11942 | 0.00979  | -0.1377  | 0.00286  | -0.07662 | 0.09817  | -0.12041 | 0.0092   | -0.29243 |
| -0.23699 | 2.20E-07 | 0.06912  | 0.13584  | -0.0211  | 0.64932  | -0.0503  | 0.27803  | 0.084688 |
| -0.03529 | 0.44683  | -0.02985 | 0.51992  | -0.00501 | 0.91405  | -0.09637 | 0.03736  | -0.06464 |
| -0.1739  | 0.00016  | -0.09351 | 0.04341  | 0.06274  | 0.17589  | -0.17258 | 0.00018  | -0.26566 |
| 0.176652 | 0.00012  | 0.10311  | 0.02587  | 0.14486  | 0.0017   | 0.025576 | 0.58142  | -0.05168 |
| -0.13373 | 0.00379  | 0.031767 | 0.49345  | 0.025265 | 0.58602  | -0.12231 | 0.00814  | -0.05792 |
| -0.00016 | 0.99728  | 0.016116 | 0.72832  | 0.0126   | 0.78595  | 0.004512 | 0.92253  | 0.009101 |
| 0.039    | 0.40042  | 0.001897 | 0.96738  | 0.035773 | 0.44056  | 0.010196 | 0.82606  | 0.061192 |
| 0.010575 | 0.81971  | 0.030809 | 0.50659  | 0.023082 | 0.61882  | 0.034091 | 0.46237  | 0.026021 |
| -0.01966 | 0.6718   | 0.019403 | 0.67578  | 0.016098 | 0.72861  | -0.07594 | 0.10119  | -0.03395 |
| -0.0431  | 0.35273  | -0.0612  | 0.18677  | -0.05038 | 0.27723  | -0.08947 | 0.05334  | -0.07562 |
| -0.0519  | 0.26299  | -0.02849 | 0.53918  | -0.00128 | 0.978    | -0.10014 | 0.0305   | -0.04222 |
| 0.029876 | 0.51955  | 0.128168 | 0.00554  | 0.116309 | 0.01189  | 0.05624  | 0.2251   | 0.024552 |
| 0.008753 | 0.85037  | 0.083412 | 0.07173  | 0.113512 | 0.01411  | -0.03576 | 0.44068  | 0.126974 |
| 0.009923 | 0.83064  | 0.070722 | 0.12698  | 0.099853 | 0.03097  | -0.13568 | 0.00331  | 0.036685 |
| -0.01151 | 0.80414  | 0.071738 | 0.12159  | 0.019854 | 0.66869  | 0.054994 | 0.23557  | 0.077165 |
| 0.01767  | 0.70332  | 0.05904  | 0.20282  | 0.148912 | 0.00125  | -0.07268 | 0.11678  | -0.10024 |
| 0.148918 | 0.00125  | 0.028552 | 0.53823  | 0.070816 | 0.12647  | -0.02941 | 0.52611  | -0.08729 |
| 0.260471 | 1.11E-08 | 0.235101 | 2.76E-07 | 0.208941 | 5.28E-06 | 0.18035  | 8.89E-05 | 0.424435 |
| -0.0081  | 0.86142  | -0.10962 | 0.0178   | -0.23507 | 2.77E-07 | 0.030857 | 0.50593  | 0.149496 |
| 0.078076 | 0.09193  | -0.03704 | 0.42458  | -0.02531 | 0.58535  | -0.06621 | 0.15311  | -0.12155 |
| -0.04984 | 0.28247  | -0.02964 | 0.52291  | -0.02216 | 0.63284  | -0.02377 | 0.60842  | -0.09346 |
| -0.04412 | 0.34145  | -0.12359 | 0.0075   | -0.01759 | 0.70458  | -0.15731 | 0.00065  | -0.08682 |
| 0.175502 | 0.00014  | 0.279354 | 8.07E-10 | 0.265607 | 5.56E-09 | 0.209796 | 4.82E-06 | 0.156598 |
| -0.08924 | 0.05395  | 0.001804 | 0.96899  | -0.02348 | 0.61284  | -0.14873 | 0.00127  | -0.02631 |
| 0.098276 | 0.03374  | 0.265903 | 5.34E-09 | 0.242181 | 1.17E-07 | 0.102815 | 0.0263   | 0.00327  |
| 0.172681 | 0.00018  | 0.04324  | 0.35115  | 0.09959  | 0.03142  | 0.155205 | 0.00076  | 0.131136 |
| 0.004816 | 0.91734  | -0.01172 | 0.80059  | 0.009845 | 0.83197  | 0.037929 | 0.4135   | -0.05805 |
| 0.295717 | 7.04E-11 | 0.200377 | 1.28E-05 | 0.238483 | 1.84E-07 | 0.023951 | 0.60566  | -0.0303  |
| 0.064816 | 0.16199  | -0.0531  | 0.2521   | 0.033171 | 0.47455  | -0.02633 | 0.57036  | -0.19077 |
| -0.00133 | 0.97711  | -0.06069 | 0.19047  | 0.019121 | 0.68023  | -0.21379 | 3.14E-06 | -0.25053 |
| -0.16034 | 0.0005   | -0.15582 | 0.00073  | -0.14591 | 0.00157  | -0.04563 | 0.32513  | -0.13402 |
| -0.0019  | 0.96741  | -0.12293 | 0.00782  | -0.04303 | 0.3535   | -0.2947  | 8.23E-11 | -0.26943 |
| -0.24687 | 6.50E-08 | -0.19877 | 1.51E-05 | -0.24871 | 5.15E-08 | -0.12554 | 0.0066   | -0.20248 |
| -0.22144 | 1.35E-06 | -0.26886 | 3.56E-09 | -0.17995 | 9.22E-05 | -0.16923 | 0.00024  | -0.14869 |
| 0.243669 | 9.70E-08 | 0.179191 | 9.88E-05 | 0.080772 | 0.08122  | 0.005311 | 0.90887  | 0.06138  |
| 0.01465  | 0.75218  | -0.06679 | 0.14956  | -0.19979 | 1.36E-05 | 0.224788 | 9.22E-07 | 0.171551 |
| 0.069118 | 0.13585  | -0.1293  | 0.00514  | -0.1234  | 0.00759  | 0.135467 | 0.00336  | 0.035812 |
| -0.0496  | 0.2848   | 0.03007  | 0.51683  | 0.040528 | 0.38221  | -0.08693 | 0.0605   | -0.06864 |
| 0.059418 | 0.19994  | 0.13477  | 0.00352  | 0.098391 | 0.03353  | 0.159357 | 0.00055  | 0.074913 |
| 0.051953 | 0.26252  | -0.12623 | 0.0063   | -0.18197 | 7.65E-05 | 0.023835 | 0.60742  | -0.02723 |
| 0.199854 | 1.35E-05 | -0.04996 | 0.28126  | 0.06206  | 0.18063  | 0.142133 | 0.00208  | 0.16991  |
| 0.053864 | 0.24534  | 0.108491 | 0.01902  | 0.13083  | 0.00463  | 0.038711 | 0.40393  | 0.118854 |
| 0.215238 | 2.68E-06 | 0.093338 | 0.0438   | 0.213871 | 3.11E-06 | -0.1174  | 0.01112  | -0.26734 |

|          |          |          |          |          |          |          |          |          |
|----------|----------|----------|----------|----------|----------|----------|----------|----------|
| -0.0167  | 0.71884  | 0.007258 | 0.8757   | 0.010894 | 0.81437  | -0.01628 | 0.72571  | 0.023321 |
| 0.034839 | 0.4526   | -0.01529 | 0.74177  | -0.04284 | 0.35566  | -0.03207 | 0.48929  | -0.0291  |
| 0.052669 | 0.25598  | 0.061715 | 0.18307  | 0.113359 | 0.01424  | 0.014937 | 0.74749  | 0.025279 |
| 0.056189 | 0.22553  | 0.152907 | 0.00092  | 0.217594 | 2.07E-06 | 0.042442 | 0.36012  | 0.034154 |
| -0.04116 | 0.37481  | -0.15939 | 0.00055  | -0.13457 | 0.00357  | -0.02103 | 0.65038  | -0.12419 |
| 0.113344 | 0.01426  | 0.176998 | 0.00012  | 0.197103 | 1.79E-05 | 0.005376 | 0.90775  | -0.03172 |
| 0.176243 | 0.00013  | 0.291671 | 1.31E-10 | 0.235437 | 2.65E-07 | -0.02803 | 0.54568  | -0.00348 |
| 0.123773 | 0.00741  | 0.277755 | 1.02E-09 | 0.19064  | 3.37E-05 | 0.058673 | 0.20565  | 0.037118 |
| -0.1053  | 0.02286  | -0.09413 | 0.04203  | -0.10104 | 0.02902  | -0.07083 | 0.1264   | -0.1288  |
| -0.16049 | 0.0005   | -0.06605 | 0.15416  | -0.11566 | 0.01238  | -0.08825 | 0.05669  | -0.05836 |
| 0.079321 | 0.08685  | -0.05044 | 0.27673  | 0.078769 | 0.08907  | -0.07363 | 0.11205  | -0.15419 |
| 0.097574 | 0.03503  | 0.158738 | 0.00058  | 0.131074 | 0.00455  | -0.01203 | 0.79535  | 0.001135 |
| 0.311184 | 6.06E-12 | 0.189934 | 3.61E-05 | 0.215861 | 2.50E-06 | 0.149622 | 0.00118  | 0.086207 |
| -0.06447 | 0.16425  | -0.18897 | 3.96E-05 | -0.03106 | 0.50308  | -0.27266 | 2.09E-09 | -0.38525 |
| -0.13162 | 0.00439  | -0.19589 | 2.01E-05 | -0.23957 | 1.61E-07 | -0.1905  | 3.42E-05 | -0.07967 |
| 0.126138 | 0.00634  | -0.02307 | 0.61907  | 0.066168 | 0.1534   | 0.107346 | 0.02033  | -0.1364  |
| 0.326115 | 4.94E-13 | 0.053849 | 0.24548  | 0.092352 | 0.04608  | 0.111746 | 0.01569  | 0.186814 |
| 0.040984 | 0.37688  | -0.03163 | 0.49536  | -0.02989 | 0.51934  | 0.117967 | 0.01073  | -0.00893 |
| -0.00113 | 0.98049  | -0.02204 | 0.63479  | -0.04848 | 0.2958   | -0.062   | 0.18106  | -0.02313 |
| 0.01793  | 0.69915  | -0.01472 | 0.75108  | -0.03365 | 0.46818  | 0.081462 | 0.07864  | -0.02364 |
| 0.11337  | 0.01423  | -0.05981 | 0.19696  | 0.046524 | 0.31575  | 0.113995 | 0.01371  | 0.220279 |
| 0.29604  | 6.70E-11 | 0.236703 | 2.28E-07 | 0.252547 | 3.15E-08 | 0.101722 | 0.02795  | 0.130433 |
| 0.033191 | 0.47428  | -0.0415  | 0.37091  | 0.038729 | 0.40371  | -0.22627 | 7.78E-07 | -0.18203 |
| -0.01827 | 0.69369  | 0.038176 | 0.41047  | -0.0043  | 0.92615  | -0.01718 | 0.71109  | -0.04612 |
| 0.110611 | 0.01679  | 0.008731 | 0.85074  | 0.065723 | 0.15619  | -0.00911 | 0.8443   | 0.108487 |
| -0.15578 | 0.00073  | -0.09036 | 0.051    | -0.04515 | 0.33023  | -0.23336 | 3.40E-07 | -0.1293  |
| 0.096011 | 0.03807  | -0.04787 | 0.30192  | -0.22548 | 8.51E-07 | 0.165522 | 0.00033  | 0.306608 |
| -0.07144 | 0.12316  | -0.09306 | 0.04443  | -0.07423 | 0.10914  | 0.035201 | 0.44791  | 0.082943 |
| 0.252646 | 3.11E-08 | 0.32135  | 1.12E-12 | 0.27489  | 1.53E-09 | 0.337009 | 7.25E-14 | 0.433225 |
| -0.11148 | 0.01595  | 0.0285   | 0.53898  | 0.009958 | 0.83006  | -0.07577 | 0.10198  | 0.21135  |
| 0.000185 | 0.99682  | -0.00388 | 0.93333  | -0.14846 | 0.00129  | 0.123284 | 0.00765  | 0.120087 |
| -0.18716 | 4.70E-05 | -0.13494 | 0.00348  | -0.0405  | 0.38251  | -0.10294 | 0.02612  | -0.08397 |
| 0.252134 | 3.32E-08 | 0.068122 | 0.14159  | 0.092184 | 0.04648  | 0.303338 | 2.14E-11 | 0.28378  |
| 0.226923 | 7.21E-07 | 0.007069 | 0.87891  | -0.01664 | 0.7198   | 0.123159 | 0.00771  | 0.101974 |
| 0.02413  | 0.60296  | -0.20786 | 5.91E-06 | -0.20721 | 6.34E-06 | -0.08255 | 0.07472  | -0.13415 |
| 0.165368 | 0.00033  | 0.196879 | 1.83E-05 | 0.241218 | 1.31E-07 | 0.207288 | 6.28E-06 | 0.251412 |
| 0.201623 | 1.13E-05 | 0.099944 | 0.03082  | 0.285732 | 3.18E-10 | 0.17618  | 0.00013  | 0.218662 |
| 0.080919 | 0.08066  | 0.128735 | 0.00533  | 0.096707 | 0.03669  | 0.017065 | 0.71302  | 0.183077 |
| 0.195225 | 2.15E-05 | 0.263888 | 7.02E-09 | 0.085608 | 0.06454  | 0.255846 | 2.05E-08 | 0.335999 |
| -0.11778 | 0.01086  | -0.04991 | 0.28181  | -0.0249  | 0.59148  | -0.03911 | 0.39916  | -0.05917 |
| -0.01078 | 0.81622  | 0.011409 | 0.80575  | 0.014473 | 0.75508  | -0.00365 | 0.93727  | -0.00097 |
| 0.051494 | 0.26676  | 0.008015 | 0.86285  | 0.013411 | 0.77254  | -0.07872 | 0.08927  | -0.1163  |
| -0.06095 | 0.18853  | -0.04242 | 0.36034  | 0.011095 | 0.811    | -0.13918 | 0.00258  | -0.19382 |
| 0.116164 | 0.012    | 0.129142 | 0.00519  | 0.151333 | 0.00104  | -0.09685 | 0.03641  | -0.12462 |
| -0.00253 | 0.95657  | 0.165    | 0.00034  | 0.089737 | 0.05263  | -0.01084 | 0.81533  | 0.017176 |

|          |          |          |          |          |          |          |          |          |
|----------|----------|----------|----------|----------|----------|----------|----------|----------|
| 0.009803 | 0.83266  | 0.001111 | 0.98089  | -0.04154 | 0.37039  | -0.02493 | 0.59099  | -0.02472 |
| 0.138255 | 0.00275  | 0.256636 | 1.85E-08 | 0.219621 | 1.65E-06 | 0.094767 | 0.04065  | 0.327593 |
| 0.005693 | 0.90235  | -0.01687 | 0.71622  | 0.016525 | 0.72171  | -0.05031 | 0.27794  | -0.24124 |
| 0.201198 | 1.18E-05 | 0.108861 | 0.01861  | -0.05589 | 0.228    | 0.145876 | 0.00157  | 0.147771 |
| -0.18963 | 3.72E-05 | -0.32391 | 7.21E-13 | -0.25297 | 2.98E-08 | -0.17727 | 0.00012  | -0.21618 |
| 0.190378 | 3.46E-05 | 0.202163 | 1.07E-05 | 0.116208 | 0.01197  | 0.235405 | 2.66E-07 | 0.214478 |
| 0.141721 | 0.00214  | 0.155071 | 0.00077  | 0.13397  | 0.00373  | 0.107129 | 0.02058  | 0.227334 |
| -0.1031  | 0.02588  | -0.00733 | 0.8744   | 0.012178 | 0.79296  | -0.11025 | 0.01715  | -0.17009 |
| 0.050143 | 0.27953  | 0.076093 | 0.10051  | 0.086718 | 0.06114  | -0.077   | 0.09653  | 0.060855 |
| -0.32616 | 4.90E-13 | -0.1911  | 3.22E-05 | -0.15804 | 0.00061  | -0.14707 | 0.00144  | -0.12222 |
| -0.22132 | 1.37E-06 | -0.17108 | 0.0002   | -0.08209 | 0.07636  | -0.12401 | 0.0073   | -0.14386 |
| 0.275918 | 1.32E-09 | 0.199392 | 1.42E-05 | 0.233958 | 3.16E-07 | 0.231049 | 4.46E-07 | 0.400127 |
| 0.242499 | 1.12E-07 | -0.03877 | 0.40326  | 0.030738 | 0.50756  | 0.017465 | 0.7066   | -0.15654 |
| 0.000942 | 0.9838   | 0.008422 | 0.85596  | -0.00083 | 0.98579  | -0.1093  | 0.01814  | -0.08551 |
| 0.171046 | 0.0002   | 0.029813 | 0.52043  | 0.12572  | 0.00652  | 0.036239 | 0.43464  | 0.131138 |
| -0.04659 | 0.3151   | 0.001711 | 0.97059  | 0.022521 | 0.62736  | -0.04423 | 0.34023  | 0.025621 |
| 0.028859 | 0.53388  | 0.042815 | 0.35591  | 0.046567 | 0.3153   | 0.032081 | 0.48919  | 0.046895 |
| 0.026638 | 0.56582  | -0.10135 | 0.02852  | 0.004104 | 0.92951  | -0.25562 | 2.11E-08 | -0.29437 |
| -0.13131 | 0.00448  | -0.0637  | 0.16938  | -0.06315 | 0.17308  | -0.05552 | 0.23109  | -0.10118 |
| 0.007498 | 0.87162  | -0.09523 | 0.03967  | -0.04604 | 0.3208   | -0.06539 | 0.1583   | -0.25808 |
| 0.194132 | 2.40E-05 | 0.080315 | 0.08296  | 0.115737 | 0.01232  | -0.01272 | 0.78399  | -0.1386  |
| -0.14631 | 0.00152  | -0.13549 | 0.00335  | -0.15286 | 0.00092  | -0.08297 | 0.07324  | -0.06023 |
| -0.04777 | 0.30289  | -0.00869 | 0.85135  | -0.02201 | 0.63524  | -0.08677 | 0.06098  | -0.22114 |
| 0.082109 | 0.07629  | -0.04348 | 0.34845  | 0.03493  | 0.45141  | -0.30853 | 9.33E-12 | -0.227   |
| -0.17953 | 9.58E-05 | -0.23206 | 3.96E-07 | -0.06452 | 0.16393  | -0.241   | 1.35E-07 | -0.13961 |
| 0.314844 | 3.32E-12 | 0.140156 | 0.0024   | 0.255427 | 2.17E-08 | 0.030027 | 0.51744  | -0.0161  |
| 0.032024 | 0.48996  | 0.014714 | 0.75113  | 0.011724 | 0.80052  | -0.03496 | 0.451    | -0.20056 |
| -0.03069 | 0.50823  | -0.00074 | 0.98731  | 0.088303 | 0.05654  | -0.19057 | 3.39E-05 | -0.38798 |
| 0.23706  | 2.18E-07 | 0.277855 | 1.00E-09 | 0.195207 | 2.16E-05 | 0.142028 | 0.00209  | 0.211322 |
| 0.103762 | 0.02494  | 0.075833 | 0.10169  | 0.083143 | 0.07265  | 0.042826 | 0.35579  | -0.00538 |
| 0.059634 | 0.19831  | 0.035177 | 0.44822  | 0.021204 | 0.64764  | 0.017066 | 0.713    | -0.01659 |
| -0.00116 | 0.98011  | 0.00323  | 0.94449  | 0.033204 | 0.4741   | -0.26062 | 1.09E-08 | -0.24337 |
| -0.04325 | 0.35103  | -0.04935 | 0.28726  | -0.03235 | 0.48557  | -0.13278 | 0.00405  | -0.12108 |
| 0.075521 | 0.10311  | 0.032519 | 0.48328  | 0.026761 | 0.56403  | -0.05996 | 0.19589  | -0.09449 |
| -0.16799 | 0.00027  | -0.03779 | 0.41521  | -0.04106 | 0.37602  | -0.19215 | 2.91E-05 | -0.10357 |
| 0.006135 | 0.89481  | 0.01002  | 0.82901  | 0.108608 | 0.01889  | -0.01692 | 0.71527  | 0.125317 |
| -0.00645 | 0.88948  | 0.031522 | 0.49679  | 0.077826 | 0.09298  | 0.017793 | 0.70134  | 0.020903 |
| 0.273464 | 1.87E-09 | 0.274371 | 1.65E-09 | 0.294374 | 8.65E-11 | 0.105866 | 0.02213  | 0.192938 |
| 0.212172 | 3.74E-06 | 0.193603 | 2.53E-05 | 0.193601 | 2.53E-05 | 0.074828 | 0.10632  | 0.109101 |
| 0.125169 | 0.00676  | 0.074732 | 0.10677  | 0.139075 | 0.0026   | -0.05387 | 0.24527  | -0.15738 |
| -0.11816 | 0.0106   | -0.20082 | 1.23E-05 | -0.23614 | 2.44E-07 | -0.09488 | 0.04042  | -0.12492 |
| 0.210046 | 4.69E-06 | 0.180732 | 8.58E-05 | 0.170037 | 0.00022  | 0.051944 | 0.2626   | 0.024663 |
| 0.166906 | 0.00029  | 0.105681 | 0.02237  | -0.15098 | 0.00106  | 0.25614  | 1.97E-08 | 0.28025  |
| 0.12097  | 0.00888  | 0.043112 | 0.35258  | 0.100009 | 0.03071  | 0.078123 | 0.09174  | 0.054537 |
| 0.141454 | 0.00218  | 0.008608 | 0.85281  | 0.155549 | 0.00074  | 0.029528 | 0.52443  | 0.197721 |

|          |          |          |          |          |          |          |          |          |
|----------|----------|----------|----------|----------|----------|----------|----------|----------|
| 0.112485 | 0.01501  | 0.01177  | 0.79974  | -0.00915 | 0.84366  | -0.00368 | 0.9368   | -0.05552 |
| -0.01263 | 0.78553  | -0.00902 | 0.84583  | -0.10288 | 0.0262   | 0.107928 | 0.01965  | 0.122397 |
| 0.003305 | 0.94321  | -0.2229  | 1.14E-06 | -0.20309 | 9.72E-06 | -0.06288 | 0.17492  | -0.08395 |
| 0.073801 | 0.11122  | 0.143591 | 0.00187  | 0.07038  | 0.12883  | -0.08228 | 0.07567  | 0.072534 |
| -0.11566 | 0.01238  | 0.12248  | 0.00806  | 0.116062 | 0.01208  | 0.011785 | 0.79949  | -0.04088 |
| -0.13285 | 0.00403  | -0.07165 | 0.12204  | -0.15628 | 0.0007   | -0.14896 | 0.00124  | -0.14493 |
| 0.329928 | 2.54E-13 | 0.18225  | 7.46E-05 | 0.23644  | 2.35E-07 | 0.110108 | 0.0173   | -0.09437 |
| 0.364794 | 3.81E-16 | 0.121289 | 0.0087   | 0.059602 | 0.19855  | 0.166042 | 0.00031  | 0.359046 |
| -0.10498 | 0.02328  | -0.07592 | 0.1013   | -0.04667 | 0.31423  | -0.13387 | 0.00375  | -0.11761 |
| 0.260461 | 1.11E-08 | 0.092347 | 0.04609  | 0.123872 | 0.00736  | 0.192073 | 2.93E-05 | 0.336547 |
| 0.35957  | 1.06E-15 | 0.178843 | 0.0001   | 0.21446  | 2.92E-06 | 0.135708 | 0.0033   | 0.084577 |
| 0.411148 | 1.78E-20 | 0.041557 | 0.37023  | 0.115137 | 0.01278  | 0.062633 | 0.17663  | -0.14784 |
| 0.190963 | 3.27E-05 | 0.028994 | 0.53196  | -0.01496 | 0.74709  | 0.084904 | 0.06678  | -0.16655 |
| -0.02121 | 0.64754  | -0.05553 | 0.231    | 0.104021 | 0.02458  | -0.04869 | 0.2937   | -0.07069 |
| 0.158466 | 0.00059  | 0.030407 | 0.51216  | 0.103644 | 0.0251   | -0.00504 | 0.91346  | 0.048741 |
| 0.229738 | 5.20E-07 | 0.173648 | 0.00016  | 0.188987 | 3.95E-05 | 0.114608 | 0.0132   | -0.15258 |
| 0.246922 | 6.46E-08 | 0.109063 | 0.01839  | 0.090084 | 0.05172  | 0.116119 | 0.01203  | -0.11396 |
| -0.11252 | 0.01498  | -0.06503 | 0.16061  | 0.020694 | 0.65557  | -0.02377 | 0.60841  | 0.210364 |
| 0.146333 | 0.00152  | 0.274123 | 1.70E-09 | 0.171315 | 0.0002   | 0.110893 | 0.01651  | 0.04321  |
| -0.16963 | 0.00023  | -0.18692 | 4.82E-05 | -0.15845 | 0.00059  | -0.2183  | 1.91E-06 | -0.37012 |
| 0.320145 | 1.37E-12 | 0.21597  | 2.47E-06 | 0.152182 | 0.00097  | 0.316062 | 2.71E-12 | 0.411061 |
| -0.1644  | 0.00036  | -0.22594 | 8.08E-07 | -0.29248 | 1.15E-10 | 0.045815 | 0.32318  | -0.07999 |
| 0.219763 | 1.63E-06 | 0.239215 | 1.68E-07 | 0.279897 | 7.47E-10 | 0.144299 | 0.00177  | -0.05834 |
| 0.060148 | 0.19446  | 0.262873 | 8.06E-09 | 0.184703 | 5.94E-05 | 0.116677 | 0.01163  | 0.283452 |
| 0.272706 | 2.08E-09 | 0.135385 | 0.00337  | 0.129575 | 0.00504  | 0.128628 | 0.00537  | 0.088073 |
| 0.165694 | 0.00032  | 0.167215 | 0.00028  | 0.189179 | 3.88E-05 | -0.12268 | 0.00795  | -0.1444  |
| -0.02182 | 0.63809  | -0.12342 | 0.00758  | -0.03662 | 0.42987  | -0.06884 | 0.13743  | -0.23131 |
| -0.01843 | 0.69124  | 0.064278 | 0.16551  | 0.142372 | 0.00204  | -0.04154 | 0.37043  | -0.03995 |
| 0.167535 | 0.00028  | -0.08845 | 0.05613  | -0.04615 | 0.31965  | -0.17012 | 0.00022  | -0.2447  |
| 0.112459 | 0.01504  | -0.01146 | 0.80493  | 0.015748 | 0.73429  | 0.087452 | 0.05897  | -0.02614 |
| 0.133688 | 0.0038   | -0.05739 | 0.21574  | 0.011715 | 0.80066  | 0.144432 | 0.00175  | -0.06808 |
| 0.104476 | 0.02395  | 0.088706 | 0.05542  | 0.081758 | 0.07756  | 0.10944  | 0.01799  | -0.00485 |
| 0.083428 | 0.07167  | 0.073881 | 0.11083  | 0.104728 | 0.02361  | 0.052736 | 0.25538  | -0.01212 |
| 0.18492  | 5.82E-05 | 0.030728 | 0.50771  | 0.055842 | 0.22841  | 0.165839 | 0.00032  | -0.01594 |
| 0.165436 | 0.00033  | 0.25743  | 1.67E-08 | 0.254511 | 2.44E-08 | 0.003565 | 0.93875  | -0.03708 |
| 0.314468 | 3.53E-12 | 0.25826  | 1.49E-08 | 0.275866 | 1.33E-09 | 0.145987 | 0.00156  | -0.04722 |
| 0.040032 | 0.38807  | -0.16316 | 0.0004   | 0.055038 | 0.23519  | -0.08264 | 0.07439  | -0.10927 |
| 0.008656 | 0.85201  | 0.086045 | 0.06318  | 0.10434  | 0.02414  | 0.094245 | 0.04178  | 0.150974 |
| 0.040431 | 0.38335  | -0.02524 | 0.58645  | -0.01143 | 0.80549  | -0.01689 | 0.7158   | -0.15456 |
| -0.15305 | 0.00091  | -0.00164 | 0.97186  | -0.03194 | 0.49116  | -0.13942 | 0.00253  | -0.2401  |
| 0.028177 | 0.54359  | 0.158774 | 0.00057  | 0.141534 | 0.00217  | -0.13398 | 0.00372  | -0.20271 |
| 0.21554  | 2.59E-06 | 0.215219 | 2.68E-06 | 0.255872 | 2.04E-08 | -0.01287 | 0.78152  | 0.052078 |
| 0.128415 | 0.00545  | 0.016758 | 0.71795  | -0.08932 | 0.05374  | 0.110478 | 0.01692  | 0.008074 |
| 0.186619 | 4.95E-05 | 0.328392 | 3.33E-13 | 0.261508 | 9.68E-09 | 0.107034 | 0.0207   | 0.218478 |
| 0.146415 | 0.00151  | -0.03164 | 0.49513  | -0.01794 | 0.69906  | 0.016127 | 0.72815  | -0.21577 |

|          |          |          |          |          |          |          |          |          |
|----------|----------|----------|----------|----------|----------|----------|----------|----------|
| 0.240427 | 1.45E-07 | 0.150764 | 0.00108  | -0.05705 | 0.2185   | 0.251944 | 3.40E-08 | 0.141814 |
| 0.20529  | 7.74E-06 | 0.317933 | 1.98E-12 | 0.183329 | 6.75E-05 | 0.147678 | 0.00137  | 0.213381 |
| 0.229308 | 5.47E-07 | 0.234017 | 3.14E-07 | 0.039419 | 0.39538  | 0.34062  | 3.77E-14 | 0.207217 |
| -0.06762 | 0.14453  | -0.02095 | 0.65156  | -0.06809 | 0.14178  | -0.01115 | 0.81002  | 0.016194 |
| 0.257625 | 1.62E-08 | 0.104764 | 0.02357  | 0.102207 | 0.0272   | 0.121977 | 0.00832  | 0.083576 |
| 0.032117 | 0.4887   | -0.15973 | 0.00053  | -0.15101 | 0.00106  | 0.107023 | 0.02071  | 0.089624 |
| 0.023708 | 0.60932  | 0.182186 | 7.50E-05 | 0.080875 | 0.08083  | -0.10025 | 0.0303   | -0.09603 |
| 0.110554 | 0.01685  | 0.278151 | 9.60E-10 | 0.171648 | 0.00019  | -0.02283 | 0.62272  | -0.01478 |
| 0.168903 | 0.00025  | 0.127914 | 0.00564  | 0.045242 | 0.32928  | 0.130254 | 0.00481  | 0.113423 |
| 0.161217 | 0.00047  | -0.04706 | 0.31021  | 0.12649  | 0.0062   | 0.079339 | 0.08678  | -0.18294 |
| 0.292687 | 1.12E-10 | 0.024186 | 0.60213  | 0.221743 | 1.30E-06 | 0.134903 | 0.00349  | -0.08663 |
| -0.15107 | 0.00106  | -0.17057 | 0.00021  | 0.045578 | 0.32569  | -0.20357 | 9.25E-06 | -0.30118 |
| 0.139804 | 0.00246  | 0.00046  | 0.99209  | -0.02094 | 0.65169  | 0.044438 | 0.33795  | -0.14281 |
| 0.203126 | 9.69E-06 | 0.156946 | 0.00066  | 0.10454  | 0.02387  | 0.03655  | 0.43069  | -0.11808 |
| 0.142623 | 0.002    | 0.236922 | 2.22E-07 | 0.287081 | 2.60E-10 | 0.038856 | 0.40217  | 0.061609 |
| -0.10771 | 0.0199   | -0.21731 | 2.13E-06 | -0.21107 | 4.20E-06 | -0.06081 | 0.18957  | -0.12564 |
| 0.162205 | 0.00043  | 0.203252 | 9.56E-06 | 0.109347 | 0.01809  | 0.306808 | 1.23E-11 | 0.263035 |
| 0.018739 | 0.68628  | 0.068126 | 0.14157  | -0.02699 | 0.56073  | 0.018978 | 0.6825   | -0.12718 |
| -0.14766 | 0.00137  | 0.004025 | 0.93086  | -0.22553 | 8.47E-07 | -0.13448 | 0.00359  | -0.07591 |
| 0.065368 | 0.15844  | 0.25722  | 1.71E-08 | 0.213881 | 3.11E-06 | -0.03907 | 0.39957  | 0.006233 |
| 0.192102 | 2.93E-05 | 0.139559 | 0.00251  | 0.270507 | 2.83E-09 | 0.090561 | 0.05049  | -0.10688 |
| -0.18272 | 7.14E-05 | -0.21966 | 1.65E-06 | -0.20317 | 9.64E-06 | -0.2105  | 4.47E-06 | -0.15365 |
| 0.029558 | 0.524    | 0.17844  | 0.00011  | 0.104712 | 0.02364  | 0.125735 | 0.00651  | 0.043705 |
| 0.164587 | 0.00035  | 0.013817 | 0.76586  | 0.071362 | 0.12357  | -0.00938 | 0.83973  | -0.20217 |
| 0.099199 | 0.03209  | 0.080692 | 0.08152  | 0.049956 | 0.28133  | -0.10475 | 0.02358  | -0.07386 |
| -0.06121 | 0.18668  | -0.17263 | 0.00018  | -0.19637 | 1.92E-05 | -0.08447 | 0.06819  | -0.08317 |
| 0.095448 | 0.03922  | -0.23474 | 2.88E-07 | 0.008986 | 0.84643  | -0.08477 | 0.0672   | -0.32914 |
| 0.042221 | 0.36263  | 0.079927 | 0.08446  | 0.106193 | 0.02172  | -0.07262 | 0.11706  | -0.14523 |
| -0.02604 | 0.57463  | -0.04903 | 0.29037  | -0.00666 | 0.88593  | -0.08287 | 0.07359  | -0.12314 |
| 0.056614 | 0.22203  | 0.059218 | 0.20146  | 0.096958 | 0.03621  | -0.07972 | 0.08528  | -0.11168 |
| 0.263648 | 7.26E-09 | 0.271462 | 2.48E-09 | 0.272028 | 2.29E-09 | 0.267091 | 4.54E-09 | 0.455151 |
| 0.120975 | 0.00887  | 0.253727 | 2.70E-08 | 0.078296 | 0.09102  | 0.197149 | 1.78E-05 | 0.102384 |
| 0.135549 | 0.00334  | 0.10786  | 0.01973  | 0.053903 | 0.245    | 0.061304 | 0.18601  | 0.093199 |
| 0.200954 | 1.21E-05 | 0.32601  | 5.03E-13 | 0.166246 | 0.00031  | 0.076869 | 0.09708  | 0.217895 |
| 0.018314 | 0.69304  | -0.33605 | 8.60E-14 | -0.11661 | 0.01167  | -0.18076 | 8.56E-05 | -0.39045 |
| 0.087097 | 0.06001  | -0.23442 | 2.99E-07 | -0.18401 | 6.33E-05 | -0.01998 | 0.66668  | -0.27228 |
| 0.209173 | 5.15E-06 | 0.331625 | 1.89E-13 | 0.252216 | 3.29E-08 | 0.273597 | 1.84E-09 | 0.396573 |
| 0.022914 | 0.62137  | 0.104794 | 0.02353  | 0.085572 | 0.06465  | 0.113433 | 0.01418  | 0.069246 |
| 0.354678 | 2.73E-15 | 0.226519 | 7.56E-07 | 0.108377 | 0.01915  | 0.11072  | 0.01668  | 0.109933 |
| -0.00885 | 0.84875  | 0.215258 | 2.67E-06 | 0.135821 | 0.00327  | 0.019845 | 0.66884  | 0.060374 |
| 0.102225 | 0.02718  | 0.124451 | 0.00709  | 0.175185 | 0.00014  | -0.08744 | 0.05902  | -0.05254 |
| 0.235695 | 2.57E-07 | 0.230505 | 4.76E-07 | 0.293202 | 1.04E-10 | -0.01986 | 0.66867  | -0.0397  |
| -0.11387 | 0.01381  | -0.07402 | 0.11017  | -0.10288 | 0.0262   | 0.151576 | 0.00102  | -0.03596 |
| 0.213911 | 3.10E-06 | -0.04924 | 0.28831  | 0.083877 | 0.07015  | 0.092247 | 0.04633  | -0.2721  |
| -0.0268  | 0.56343  | 0.048884 | 0.29179  | -0.13436 | 0.00363  | -0.0713  | 0.12387  | 0.039073 |



|          |          |          |          |          |          |          |          |          |
|----------|----------|----------|----------|----------|----------|----------|----------|----------|
| -0.09047 | 0.05071  | -0.2077  | 6.02E-06 | -0.12425 | 0.00718  | -0.10706 | 0.02066  | -0.16611 |
| 0.16598  | 0.00032  | 0.155997 | 0.00072  | 0.124443 | 0.00709  | 0.025175 | 0.58737  | 0.022154 |
| -0.02364 | 0.61031  | -0.27206 | 2.28E-09 | -0.30325 | 2.17E-11 | -0.17837 | 0.00011  | -0.27245 |
| 0.373391 | 6.75E-17 | 0.249455 | 4.68E-08 | 0.229733 | 5.21E-07 | 0.338457 | 5.58E-14 | 0.288393 |
| -0.10891 | 0.01856  | -0.22476 | 9.25E-07 | -0.1834  | 6.71E-05 | -0.18109 | 8.31E-05 | -0.4124  |
| -0.04676 | 0.31332  | 0.042276 | 0.36201  | -0.02787 | 0.548    | -0.06644 | 0.15169  | -0.19144 |
| 0.192237 | 2.89E-05 | 0.33365  | 1.32E-13 | 0.218008 | 1.98E-06 | 0.094408 | 0.04142  | 0.162835 |
| 0.267557 | 4.26E-09 | 0.300253 | 3.48E-11 | 0.226468 | 7.60E-07 | 0.219225 | 1.73E-06 | 0.116275 |
| 0.123478 | 0.00755  | 0.119114 | 0.00999  | 0.115987 | 0.01213  | 0.084753 | 0.06726  | -0.00698 |
| 0.262318 | 8.68E-09 | 0.082214 | 0.07591  | 0.141068 | 0.00225  | 0.021787 | 0.63863  | -0.23006 |
| -0.03043 | 0.51185  | 0.089666 | 0.05282  | 0.046093 | 0.32025  | -0.07712 | 0.09598  | -0.06997 |
| -0.02077 | 0.65443  | -0.2471  | 6.31E-08 | -0.23611 | 2.45E-07 | 0.055734 | 0.22932  | -0.00194 |
| -0.05259 | 0.25669  | 0.123986 | 0.00731  | 0.077751 | 0.0933   | -0.01195 | 0.79675  | -0.01961 |
| -0.00847 | 0.85519  | 0.007811 | 0.8663   | 0.049369 | 0.28702  | -0.06145 | 0.18499  | -0.01609 |
| -0.2052  | 7.82E-06 | -0.18184 | 7.75E-05 | -0.21593 | 2.48E-06 | -0.12699 | 0.006    | -0.19943 |
| -0.04482 | 0.33377  | -0.09677 | 0.03656  | -0.0482  | 0.29862  | -0.11231 | 0.01518  | -0.15604 |
| 0.382865 | 9.43E-18 | 0.127811 | 0.00568  | 0.125812 | 0.00648  | 0.176904 | 0.00012  | 0.004133 |
| 0.216453 | 2.35E-06 | 0.335042 | 1.03E-13 | 0.227717 | 6.58E-07 | 0.157208 | 0.00065  | 0.299322 |
| -0.04289 | 0.35503  | -0.02821 | 0.54315  | -0.01715 | 0.71169  | -0.03685 | 0.42696  | -0.04801 |
| 0.051277 | 0.26879  | -0.01991 | 0.66776  | 0.083539 | 0.07129  | -0.16304 | 0.0004   | -0.2429  |
| 0.192049 | 2.94E-05 | 0.035889 | 0.43908  | 0.153195 | 0.0009   | -0.126   | 0.0064   | -0.10726 |
| 0.14478  | 0.00171  | 0.208113 | 5.76E-06 | 0.2441   | 9.20E-08 | 0.242808 | 1.08E-07 | 0.211787 |
| -0.39564 | 5.98E-19 | -0.24944 | 4.69E-08 | -0.26692 | 4.65E-09 | -0.2043  | 8.58E-06 | -0.14158 |
| -0.21698 | 2.21E-06 | -0.17495 | 0.00014  | -0.13511 | 0.00344  | -0.13266 | 0.00408  | -0.11145 |
| 0.157374 | 0.00064  | 0.242757 | 1.09E-07 | 0.18303  | 6.94E-05 | 0.134785 | 0.00352  | 0.301342 |
| -0.11265 | 0.01486  | 0.022763 | 0.62367  | 0.044854 | 0.33345  | -0.06597 | 0.15464  | 0.024506 |
| -0.10501 | 0.02324  | -0.12959 | 0.00503  | -0.16453 | 0.00036  | 0.084744 | 0.06729  | 0.255758 |
| -0.12381 | 0.00739  | 0.007349 | 0.87414  | -0.04786 | 0.30199  | -0.11408 | 0.01364  | -0.05646 |
| -0.23136 | 4.30E-07 | -0.10418 | 0.02436  | -0.12894 | 0.00526  | -0.22664 | 7.45E-07 | -0.062   |
| -0.09136 | 0.04848  | -0.03316 | 0.47469  | -0.09641 | 0.03728  | -0.14395 | 0.00182  | -0.06261 |
| -0.13803 | 0.0028   | -0.0985  | 0.03333  | -0.17933 | 9.75E-05 | -0.01397 | 0.76333  | 0.035564 |
| -0.10434 | 0.02414  | 0.101643 | 0.02807  | 0.038819 | 0.40262  | 0.032948 | 0.47752  | 0.145702 |
| -0.20165 | 1.13E-05 | -0.15715 | 0.00065  | -0.12299 | 0.00779  | -0.11686 | 0.01149  | 0.007227 |
| -0.24348 | 9.93E-08 | -0.14372 | 0.00185  | -0.12737 | 0.00584  | -0.1937  | 2.50E-05 | -0.05622 |
| -0.20793 | 5.87E-06 | -0.2396  | 1.60E-07 | -0.29553 | 7.25E-11 | -0.16741 | 0.00028  | -0.1134  |
| -0.2522  | 3.29E-08 | -0.19073 | 3.34E-05 | -0.03343 | 0.47109  | -0.14188 | 0.00212  | -0.034   |
| -0.11568 | 0.01236  | -0.1863  | 5.11E-05 | -0.05916 | 0.20189  | -0.04634 | 0.31762  | 0.008183 |
| -0.36324 | 5.18E-16 | -0.35575 | 2.23E-15 | -0.34226 | 2.79E-14 | -0.19026 | 3.50E-05 | -0.1352  |
| 0.12554  | 0.0066   | 0.1621   | 0.00044  | 0.199333 | 1.43E-05 | 0.078804 | 0.08893  | 0.082449 |
| -0.15276 | 0.00093  | -0.13695 | 0.00302  | -0.13308 | 0.00396  | -0.11228 | 0.0152   | -0.11677 |
| -0.07242 | 0.11809  | 0.023366 | 0.6145   | -0.00278 | 0.95217  | -0.03629 | 0.434    | 0.133121 |
| -0.11477 | 0.01307  | -0.11964 | 0.00966  | -0.04141 | 0.37195  | -0.09258 | 0.04555  | -0.10755 |
| -0.13088 | 0.00461  | -0.02816 | 0.54385  | -0.08137 | 0.079    | -0.04098 | 0.37691  | -0.07838 |
| -0.12042 | 0.00919  | -0.02161 | 0.64128  | 0.022992 | 0.62018  | -0.07691 | 0.09692  | 0.05782  |
| -0.28607 | 3.02E-10 | -0.16809 | 0.00026  | -0.19929 | 1.43E-05 | -0.11448 | 0.01331  | 0.00771  |

|          |          |          |          |          |          |          |          |          |
|----------|----------|----------|----------|----------|----------|----------|----------|----------|
| -0.23698 | 2.20E-07 | -0.11769 | 0.01092  | -0.12361 | 0.00749  | -0.14008 | 0.00241  | -0.11871 |
| -0.25582 | 2.06E-08 | -0.23866 | 1.80E-07 | -0.28685 | 2.69E-10 | -0.16663 | 0.0003   | -0.05039 |
| -0.01575 | 0.73425  | 0.058111 | 0.21003  | 0.05688  | 0.21987  | 0.012459 | 0.78829  | 0.092817 |
| -0.02264 | 0.62551  | -0.02566 | 0.58018  | -0.01289 | 0.78118  | -0.01849 | 0.69022  | 0.096205 |
| -0.13834 | 0.00274  | -0.16671 | 0.0003   | -0.04588 | 0.32247  | -0.11795 | 0.01074  | -0.05184 |
| -0.01518 | 0.74347  | -0.04038 | 0.38394  | 0.041381 | 0.37227  | 0.030707 | 0.50799  | 0.057747 |
| -0.19417 | 2.39E-05 | -0.1965  | 1.90E-05 | -0.20063 | 1.25E-05 | -0.17521 | 0.00014  | -0.13055 |
| -0.17943 | 9.67E-05 | -0.11695 | 0.01143  | -0.18267 | 7.17E-05 | -0.06426 | 0.16563  | 0.095452 |
| -0.13381 | 0.00377  | -0.01675 | 0.71815  | -0.05274 | 0.25536  | -0.05735 | 0.21605  | 0.058374 |
| -0.15304 | 0.00091  | -0.12648 | 0.0062   | -0.12654 | 0.00618  | -0.0896  | 0.053    | 0.025869 |
| -0.20823 | 5.69E-06 | -0.25367 | 2.72E-08 | -0.20085 | 1.22E-05 | -0.13329 | 0.00391  | -0.05681 |
| -0.001   | 0.9828   | 0.149265 | 0.00122  | 0.152276 | 0.00096  | 0.04444  | 0.33793  | 0.177897 |
| -0.16808 | 0.00026  | -0.13024 | 0.00482  | 0.020435 | 0.65959  | -0.12078 | 0.00898  | -0.06213 |
| 0.019686 | 0.67134  | 0.020969 | 0.65129  | 0.03414  | 0.46173  | 0.009206 | 0.84272  | 0.114528 |
| -0.27199 | 2.30E-09 | -0.28067 | 6.68E-10 | -0.26931 | 3.34E-09 | -0.14526 | 0.00165  | -0.02633 |
| -0.18294 | 7.00E-05 | -0.15044 | 0.00111  | -0.15072 | 0.00109  | -0.09771 | 0.03479  | 0.068463 |
| 0.009785 | 0.83297  | 0.033906 | 0.4648   | 0.037695 | 0.41639  | -0.00853 | 0.85406  | 0.175837 |
| -0.1517  | 0.00101  | 0.040358 | 0.38421  | 0.025884 | 0.57688  | -0.05926 | 0.20117  | 0.115578 |
| -0.11433 | 0.01343  | -0.07048 | 0.12828  | -0.10128 | 0.02864  | -0.06895 | 0.13678  | 0.051516 |
| -0.09818 | 0.03391  | -0.03131 | 0.49973  | -0.00471 | 0.91913  | -0.02004 | 0.66573  | 0.124637 |
| -0.22597 | 8.05E-07 | -0.24617 | 7.10E-08 | -0.25738 | 1.68E-08 | -0.10102 | 0.02905  | -0.06327 |
| -0.23574 | 2.55E-07 | -0.20369 | 9.14E-06 | -0.16834 | 0.00026  | -0.17466 | 0.00015  | -0.06878 |
| -0.30438 | 1.81E-11 | -0.33777 | 6.31E-14 | -0.25381 | 2.67E-08 | -0.2378  | 1.99E-07 | -0.15929 |
| -0.16968 | 0.00023  | -0.27399 | 1.74E-09 | -0.18989 | 3.62E-05 | -0.20457 | 8.35E-06 | -0.18823 |
| -0.14251 | 0.00202  | -0.15496 | 0.00078  | -0.1374  | 0.00293  | -0.09484 | 0.04049  | -0.00743 |
| -0.28762 | 2.40E-10 | -0.19248 | 2.82E-05 | -0.20859 | 5.48E-06 | -0.20122 | 1.18E-05 | -0.23123 |
| -0.04354 | 0.34783  | -0.04086 | 0.37829  | -0.08111 | 0.07996  | -0.01419 | 0.75976  | 0.111377 |
| -0.12106 | 0.00882  | -0.16524 | 0.00034  | -0.15737 | 0.00064  | -0.011   | 0.81255  | -0.04094 |
| -0.11624 | 0.01194  | 0.075572 | 0.10287  | 0.012426 | 0.78884  | 0.02457  | 0.59637  | 0.22554  |
| -0.05414 | 0.24296  | 0.292808 | 1.10E-10 | 0.140472 | 0.00235  | 0.028712 | 0.53596  | 0.167911 |
| -0.14977 | 0.00117  | -0.03193 | 0.49123  | 0.050175 | 0.27922  | -0.0981  | 0.03406  | -0.0164  |
| -0.23224 | 3.88E-07 | -0.34356 | 2.20E-14 | -0.26173 | 9.39E-09 | -0.17547 | 0.00014  | -0.16734 |
| -0.12587 | 0.00646  | -0.03292 | 0.47784  | 0.054497 | 0.23983  | -0.03818 | 0.41044  | -0.12627 |
| -0.00543 | 0.9069   | 0.017617 | 0.70416  | -0.01617 | 0.72739  | -0.02556 | 0.58172  | 0.069089 |
| -0.23487 | 2.84E-07 | -0.21887 | 1.79E-06 | -0.19786 | 1.66E-05 | -0.15337 | 0.00088  | -0.06255 |
| -0.11619 | 0.01198  | -0.11767 | 0.01093  | -0.10892 | 0.01855  | -0.07092 | 0.12592  | 0.058196 |
| -0.24763 | 5.90E-08 | -0.2055  | 7.57E-06 | -0.2231  | 1.12E-06 | -0.14512 | 0.00167  | -0.06603 |
| -0.00182 | 0.96866  | -0.02852 | 0.53871  | -0.11404 | 0.01367  | -0.00217 | 0.96272  | 0.126455 |
| 0.095141 | 0.03986  | -0.00704 | 0.87935  | -0.01169 | 0.8011   | 0.039678 | 0.39228  | 0.142943 |
| -0.20018 | 1.31E-05 | -0.23077 | 4.61E-07 | -0.17145 | 0.0002   | -0.12469 | 0.00698  | -0.0582  |
| -0.06273 | 0.17596  | -0.08736 | 0.05923  | 0.011215 | 0.80901  | -0.10533 | 0.02282  | -0.07293 |
| -0.00813 | 0.86088  | 0.025292 | 0.58562  | 0.053735 | 0.24648  | 0.006157 | 0.89443  | 0.139916 |
| -0.31012 | 7.21E-12 | -0.17304 | 0.00017  | -0.185   | 5.77E-05 | -0.18693 | 4.81E-05 | -0.14205 |
| 0.009915 | 0.83079  | 0.130356 | 0.00478  | 0.102817 | 0.02629  | 0.01586  | 0.73247  | 0.230311 |
| -0.31465 | 3.43E-12 | -0.42186 | 1.41E-21 | -0.40701 | 4.64E-20 | -0.19835 | 1.58E-05 | -0.19334 |

|          |          |          |          |          |          |          |          |          |
|----------|----------|----------|----------|----------|----------|----------|----------|----------|
| 0.227396 | 6.83E-07 | 0.030739 | 0.50756  | 0.00116  | 0.98006  | 0.050688 | 0.27433  | 0.262997 |
| -0.21931 | 1.71E-06 | -0.22151 | 1.34E-06 | -0.24051 | 1.43E-07 | -0.0882  | 0.05683  | 0.025046 |
| -0.1052  | 0.02299  | -0.18104 | 8.34E-05 | -0.12617 | 0.00633  | -0.02582 | 0.5778   | 0.068043 |
| 0.014121 | 0.76086  | 0.00681  | 0.88332  | -0.12149 | 0.00859  | 0.150156 | 0.00114  | 0.276888 |
| -0.01761 | 0.70426  | 0.036164 | 0.43558  | -0.00201 | 0.96544  | -0.0017  | 0.97086  | 0.016027 |
| -0.0455  | 0.32648  | -0.04539 | 0.32766  | 0.045673 | 0.32469  | -0.03978 | 0.39109  | 0.098923 |
| -0.37028 | 1.27E-16 | -0.2387  | 1.79E-07 | -0.23007 | 5.01E-07 | -0.24133 | 1.30E-07 | -0.21339 |
| -0.14477 | 0.00171  | -0.10214 | 0.02731  | -0.07353 | 0.11254  | -0.15324 | 0.00089  | -0.08007 |
| -0.05114 | 0.2701   | -0.03343 | 0.4711   | -0.0771  | 0.09607  | 0.015095 | 0.74491  | 0.115476 |
| -0.21345 | 3.25E-06 | -0.31576 | 2.85E-12 | -0.31213 | 5.19E-12 | -0.11521 | 0.01272  | 0.051911 |
| -0.20607 | 7.14E-06 | -0.09496 | 0.04024  | -0.07522 | 0.10449  | -0.09904 | 0.03237  | -0.05131 |
| -0.10389 | 0.02476  | 0.026855 | 0.56266  | 0.068167 | 0.14133  | -0.0482  | 0.29862  | 0.080973 |
| -0.0707  | 0.1271   | -0.01348 | 0.7714   | 0.006046 | 0.89633  | -0.03607 | 0.43684  | 0.061136 |
| -0.09601 | 0.03807  | 0.000439 | 0.99245  | 0.000674 | 0.98841  | -0.04441 | 0.33828  | 0.053466 |
| -0.07533 | 0.104    | -0.03528 | 0.44688  | 0.013118 | 0.77738  | -0.05874 | 0.20512  | 0.027639 |
| -0.09688 | 0.03635  | 0.068744 | 0.13799  | 0.037256 | 0.42184  | -0.00089 | 0.98475  | 0.085404 |
| -0.11593 | 0.01218  | -0.07663 | 0.09814  | -0.06668 | 0.15026  | -0.08398 | 0.06981  | 0.009627 |
| -0.14064 | 0.00232  | -0.24433 | 8.94E-08 | -0.11217 | 0.01531  | -0.22494 | 9.06E-07 | -0.20736 |
| -0.12023 | 0.0093   | -0.21923 | 1.73E-06 | -0.08232 | 0.07554  | -0.09188 | 0.0472   | -0.06454 |
| 0.088418 | 0.05622  | 0.04986  | 0.28225  | 0.063727 | 0.16917  | 0.062182 | 0.17977  | 0.168171 |
| -0.03757 | 0.41798  | -0.02604 | 0.57459  | 0.040936 | 0.37744  | -0.03184 | 0.49242  | 0.054672 |
| -0.4169  | 4.62E-21 | -0.27163 | 2.42E-09 | -0.37745 | 2.93E-17 | -0.20317 | 9.65E-06 | -0.15796 |
| -0.33945 | 4.66E-14 | -0.26165 | 9.50E-09 | -0.29383 | 9.41E-11 | -0.22209 | 1.25E-06 | -0.21257 |
| -0.25283 | 3.04E-08 | -0.19046 | 3.43E-05 | -0.24577 | 7.46E-08 | -0.13559 | 0.00333  | -0.08603 |
| 0.000454 | 0.9922   | -0.15124 | 0.00104  | -0.05136 | 0.26799  | -0.06474 | 0.1625   | 0.041295 |
| -0.01122 | 0.8089   | 0.181655 | 7.88E-05 | 0.115475 | 0.01252  | 0.046142 | 0.31973  | 0.21861  |
| 0.176981 | 0.00012  | 0.283945 | 4.14E-10 | 0.369718 | 1.42E-16 | 0.127869 | 0.00565  | 0.267727 |
| -0.08107 | 0.08009  | -0.2116  | 3.97E-06 | -0.09225 | 0.04632  | -0.1084  | 0.01912  | -0.03041 |
| -0.10924 | 0.0182   | -0.14657 | 0.00149  | -0.00257 | 0.95583  | -0.02738 | 0.55502  | -0.00817 |
| -0.23884 | 1.76E-07 | -0.24374 | 9.62E-08 | -0.22827 | 6.17E-07 | -0.20832 | 5.64E-06 | -0.08939 |
| -0.06358 | 0.17014  | 0.009087 | 0.84472  | 0.031097 | 0.50262  | -0.0515  | 0.26674  | 0.080435 |
| -0.16224 | 0.00043  | -0.06945 | 0.13396  | -0.20837 | 5.60E-06 | -0.03835 | 0.40828  | 0.119886 |
| -0.16555 | 0.00033  | -0.22621 | 7.84E-07 | -0.24519 | 8.02E-08 | -0.10517 | 0.02303  | -0.07592 |
| -0.23127 | 4.35E-07 | -0.20137 | 1.16E-05 | -0.28241 | 5.18E-10 | -0.10981 | 0.01761  | -0.0627  |
| -0.06853 | 0.13921  | 0.047161 | 0.30915  | -0.06871 | 0.13816  | -0.01156 | 0.80332  | 0.100097 |
| -0.32934 | 2.82E-13 | -0.26877 | 3.60E-09 | -0.29843 | 4.63E-11 | -0.18956 | 3.74E-05 | -0.15989 |
| -0.46106 | 5.88E-26 | -0.47246 | 2.42E-27 | -0.43277 | 9.72E-23 | -0.32165 | 1.06E-12 | -0.34807 |
| -0.14944 | 0.0012   | -0.05935 | 0.20046  | -0.10947 | 0.01796  | -0.12381 | 0.00739  | 0.081826 |
| 0.004264 | 0.92678  | -0.06267 | 0.17638  | -0.00906 | 0.84525  | -0.03619 | 0.43529  | 0.061165 |
| 0.03263  | 0.48178  | 0.063784 | 0.16879  | 0.06925  | 0.1351   | 0.042471 | 0.3598   | 0.160858 |
| -0.04158 | 0.36993  | -0.10614 | 0.02178  | -0.1313  | 0.00448  | -0.01347 | 0.77163  | 0.018765 |
| -0.07512 | 0.10497  | 0.062075 | 0.18052  | 0.003379 | 0.94195  | 0.032632 | 0.48176  | 0.227808 |
| -0.14737 | 0.00141  | -0.11183 | 0.01562  | -0.08431 | 0.06871  | -0.11137 | 0.01605  | -0.04903 |
| -0.11637 | 0.01185  | -0.15979 | 0.00053  | -0.12009 | 0.00938  | -0.08875 | 0.05531  | 0.016484 |
| 0.10655  | 0.02128  | 0.117521 | 0.01103  | 0.152388 | 0.00095  | 0.042454 | 0.35998  | 0.095673 |

|          |          |          |          |           |          |          |          |          |
|----------|----------|----------|----------|-----------|----------|----------|----------|----------|
| -0.11887 | 0.01014  | -0.18678 | 4.88E-05 | -0.10621  | 0.02171  | -0.10809 | 0.01947  | -0.02748 |
| -0.15335 | 0.00089  | 0.028333 | 0.54136  | 0.032356  | 0.48548  | -0.07566 | 0.10245  | 0.054709 |
| -0.08844 | 0.05616  | -0.09143 | 0.0483   | 0.022831  | 0.62263  | -0.09548 | 0.03916  | -0.07312 |
| -0.16272 | 0.00041  | -0.00285 | 0.95099  | -0.01763  | 0.704    | -0.06763 | 0.14452  | 0.061015 |
| -0.05011 | 0.27989  | -0.12986 | 0.00494  | -0.05595  | 0.22754  | -0.06833 | 0.14037  | -0.02013 |
| 0.035019 | 0.45027  | 0.020922 | 0.65202  | 0.05593   | 0.22768  | 0.010464 | 0.82157  | 0.185227 |
| -0.20344 | 9.38E-06 | -0.19348 | 2.56E-05 | -0.21056  | 4.44E-06 | -0.16697 | 0.00029  | 0.011986 |
| -0.02451 | 0.59722  | -0.03929 | 0.39695  | 0.067542  | 0.14502  | -0.01736 | 0.70835  | 0.069301 |
| -0.03782 | 0.41482  | 0.029696 | 0.52207  | 0.055728  | 0.22936  | 0.007755 | 0.86727  | 0.075735 |
| -0.27728 | 1.09E-09 | -0.40553 | 6.50E-20 | -0.32756  | 3.84E-13 | -0.21078 | 4.34E-06 | -0.09009 |
| -0.01888 | 0.68409  | -0.15953 | 0.00054  | -0.28833  | 2.16E-10 | 0.056022 | 0.22691  | 0.086834 |
| -0.15022 | 0.00113  | -0.07789 | 0.0927   | -0.04787  | 0.30197  | -0.08102 | 0.08029  | 0.085116 |
| 0.038362 | 0.40818  | 0.221045 | 1.41E-06 | 0.201519  | 1.14E-05 | 0.070143 | 0.13013  | 0.243966 |
| -0.04592 | 0.32211  | -0.088   | 0.0574   | -0.12694  | 0.00602  | 0.033434 | 0.47105  | 0.056632 |
| 0.072677 | 0.11678  | 0.072393 | 0.11822  | 0.194554  | 2.30E-05 | 0.041923 | 0.36603  | 0.01232  |
| -0.0739  | 0.11075  | -0.06016 | 0.19437  | -0.06298  | 0.17427  | -0.06397 | 0.16752  | 0.064888 |
| -0.23741 | 2.09E-07 | 0.029096 | 0.53051  | -0.11674  | 0.01158  | -0.03212 | 0.48869  | 0.147921 |
| -0.01942 | 0.67552  | 0.106442 | 0.02141  | 0.037373  | 0.42038  | 0.039784 | 0.39101  | 0.134935 |
| -0.0395  | 0.39436  | 0.089808 | 0.05244  | 0.014992  | 0.74659  | 0.008196 | 0.8598   | 0.145318 |
| -0.01749 | 0.70613  | 0.140743 | 0.0023   | 0.10665   | 0.02116  | 0.037025 | 0.42472  | 0.146802 |
| 0.059975 | 0.19575  | 0.18473  | 5.92E-05 | 0.135704  | 0.0033   | 0.047823 | 0.3024   | 0.155592 |
| -0.17619 | 0.00013  | -0.20101 | 1.20E-05 | -0.2403   | 1.47E-07 | -0.10642 | 0.02144  | -0.18619 |
| -0.14195 | 0.00211  | -0.13583 | 0.00327  | -0.12967  | 0.00501  | -0.05984 | 0.19678  | -0.00919 |
| -0.21531 | 2.66E-06 | -0.03092 | 0.50511  | -0.00621  | 0.89359  | -0.17117 | 0.0002   | -0.15467 |
| 0.034018 | 0.46333  | 0.05859  | 0.20629  | 0.132088  | 0.00425  | -0.00014 | 0.99752  | 0.119088 |
| -0.07337 | 0.11334  | -0.16598 | 0.00032  | -0.10752  | 0.02012  | -0.0714  | 0.12335  | -0.01376 |
| 0.013746 | 0.76702  | 0.128711 | 0.00534  | 0.035127  | 0.44887  | 0.026962 | 0.5611   | 0.243227 |
| -0.18524 | 5.64E-05 | -0.25326 | 2.87E-08 | -0.19496  | 2.21E-05 | -0.14477 | 0.00171  | -0.1136  |
| -0.17511 | 0.00014  | -0.09448 | 0.04128  | -0.04015  | 0.38665  | -0.11373 | 0.01392  | -0.01333 |
| -0.20213 | 1.07E-05 | -0.25171 | 3.51E-08 | -0.23407  | 3.12E-07 | -0.3316  | 1.90E-13 | -0.31679 |
| -0.27332 | 1.91E-09 | -0.25801 | 1.54E-08 | -0.24538  | 7.84E-08 | -0.15841 | 0.00059  | -0.25741 |
| -0.20954 | 4.95E-06 | -0.17995 | 9.22E-05 | -0.12734  | 0.00586  | -0.16863 | 0.00025  | -0.12505 |
| -0.19721 | 1.77E-05 | -0.03768 | 0.41661  | -0.08298  | 0.0732   | -0.08177 | 0.0775   | -0.17191 |
| -0.18169 | 7.85E-05 | 0.003134 | 0.94615  | -0.08371  | 0.07072  | 0.002002 | 0.96559  | 0.194171 |
| -0.09028 | 0.0512   | 0.020362 | 0.66073  | 0.003466  | 0.94046  | -0.04138 | 0.37232  | 0.081197 |
| -0.11028 | 0.01712  | -0.20733 | 6.25E-06 | -0.04471  | 0.335    | -0.15051 | 0.0011   | -0.1282  |
| -0.02216 | 0.63292  | -0.06619 | 0.15327  | 0.01757   | 0.70491  | -0.15827 | 0.0006   | -0.11953 |
| -0.24262 | 1.10E-07 | -0.24711 | 6.30E-08 | -0.22438  | 9.66E-07 | -0.14004 | 0.00242  | -0.04426 |
| -0.10614 | 0.02179  | -0.00705 | 0.87922  | 0.011165  | 0.80983  | -0.08111 | 0.07995  | 0.028451 |
| -0.23568 | 2.58E-07 | -0.25302 | 2.96E-08 | -0.19353  | 2.54E-05 | -0.17301 | 0.00017  | -0.10128 |
| -0.22654 | 7.54E-07 | -0.25424 | 2.53E-08 | -0.26036  | 1.13E-08 | -0.18182 | 7.76E-05 | -0.10879 |
| -0.04181 | 0.36736  | 0.237533 | 2.06E-07 | 0.217615  | 2.06E-06 | 0.067997 | 0.14233  | 0.280339 |
| -0.03912 | 0.39896  | -0.07345 | 0.11293  | 0.022926  | 0.62118  | -0.09293 | 0.04474  | -0.01618 |
| -0.05278 | 0.25499  | -0.025   | 0.58996  | 0.02362   | 0.61066  | -0.01235 | 0.79012  | 0.084177 |
| -0.21153 | 4.00E-06 | -0.01934 | 0.67672  | -4.82E-05 | 0.99917  | -0.12483 | 0.00692  | -0.10878 |

|          |          |          |          |          |          |          |          |          |
|----------|----------|----------|----------|----------|----------|----------|----------|----------|
| -0.10726 | 0.02042  | -0.19027 | 3.50E-05 | -0.16127 | 0.00047  | -0.18305 | 6.93E-05 | -0.19613 |
| 0.080528 | 0.08214  | 0.137501 | 0.00291  | 0.203276 | 9.54E-06 | 0.055878 | 0.22811  | 0.206633 |
| -0.104   | 0.0246   | -0.09808 | 0.0341   | -0.03116 | 0.50172  | -0.08304 | 0.073    | -0.06733 |
| -0.05081 | 0.27321  | 0.196614 | 1.87E-05 | 0.211705 | 3.93E-06 | 0.000838 | 0.98558  | 0.163939 |
| -0.21353 | 3.23E-06 | -0.08953 | 0.05317  | -0.12788 | 0.00565  | -0.06543 | 0.15804  | 0.199559 |
| -0.18933 | 3.82E-05 | -0.24686 | 6.51E-08 | -0.225   | 9.00E-07 | -0.13762 | 0.00288  | -0.07359 |
| 0.02897  | 0.5323   | -0.06326 | 0.17236  | -0.04328 | 0.35068  | 0.019354 | 0.67655  | 0.092872 |
| -0.14146 | 0.00218  | -0.19876 | 1.51E-05 | -0.13181 | 0.00433  | -0.1559  | 0.00072  | -0.09775 |
| -0.12843 | 0.00544  | -0.09369 | 0.04301  | -0.03307 | 0.47588  | -0.0955  | 0.03912  | 0.0272   |
| -0.05054 | 0.27575  | -0.10708 | 0.02064  | -0.08024 | 0.08326  | -0.05533 | 0.2327   | 0.007269 |
| -0.32991 | 2.55E-13 | -0.31313 | 4.41E-12 | -0.26097 | 1.04E-08 | -0.22092 | 1.43E-06 | -0.20814 |
| -0.19385 | 2.47E-05 | -0.18625 | 5.13E-05 | -0.15228 | 0.00096  | -0.13481 | 0.00351  | -0.03477 |
| -0.05074 | 0.2738   | 0.075845 | 0.10163  | 0.004362 | 0.92511  | 0.005998 | 0.89714  | 0.154849 |
| -0.0462  | 0.31913  | -0.11269 | 0.01483  | -0.10079 | 0.02942  | -0.09922 | 0.03205  | -0.25353 |
| -0.12368 | 0.00745  | -0.04524 | 0.32931  | -0.0458  | 0.32331  | -0.10261 | 0.02661  | 0.050804 |
| -0.16663 | 0.0003   | -0.21548 | 2.61E-06 | -0.15105 | 0.00106  | -0.20898 | 5.26E-06 | -0.10643 |
| -0.29798 | 4.96E-11 | -0.24972 | 4.53E-08 | -0.20764 | 6.05E-06 | -0.18887 | 4.00E-05 | -0.08832 |
| -0.0577  | 0.21328  | 0.014259 | 0.75859  | 0.040318 | 0.38468  | -0.01256 | 0.78663  | 0.125756 |
| -0.10925 | 0.01819  | -0.1809  | 8.45E-05 | -0.16722 | 0.00028  | -0.22738 | 6.84E-07 | -0.22278 |
| -0.0642  | 0.16601  | -0.04838 | 0.29679  | -0.00776 | 0.86711  | -0.06618 | 0.15335  | 0.037412 |
| -0.15383 | 0.00085  | -0.09799 | 0.03427  | -0.08205 | 0.07651  | -0.09973 | 0.03118  | -0.07339 |
| -0.35447 | 2.85E-15 | -0.33476 | 1.08E-13 | -0.27266 | 2.09E-09 | -0.19892 | 1.49E-05 | -0.15834 |
| -0.12125 | 0.00872  | -0.14037 | 0.00236  | -0.08999 | 0.05196  | -0.0629  | 0.17476  | 0.025273 |
| -0.15401 | 0.00084  | 0.007168 | 0.87723  | 0.015539 | 0.73769  | -0.08647 | 0.06189  | 0.008937 |
| -0.04745 | 0.30619  | 0.068051 | 0.142    | 0.024404 | 0.59886  | -0.01074 | 0.81695  | 0.141916 |
| -0.21941 | 1.69E-06 | -0.25962 | 1.25E-08 | -0.14886 | 0.00125  | -0.18187 | 7.72E-05 | -0.02694 |
| -0.34731 | 1.10E-14 | -0.23647 | 2.34E-07 | -0.26259 | 8.38E-09 | -0.16835 | 0.00026  | -0.16159 |
| -0.04791 | 0.3015   | 0.046223 | 0.31889  | -0.04077 | 0.37939  | 0.00373  | 0.93592  | 0.137185 |
| 0.036729 | 0.42844  | 0.199569 | 1.39E-05 | 0.178401 | 0.00011  | 0.086793 | 0.06091  | 0.190884 |
| -0.21267 | 3.54E-06 | -0.28048 | 6.86E-10 | -0.26811 | 3.95E-09 | -0.3058  | 1.45E-11 | -0.30717 |
| -0.14678 | 0.00147  | -0.19076 | 3.33E-05 | -0.16999 | 0.00022  | -0.09932 | 0.03188  | -0.00512 |
| -0.144   | 0.00181  | -0.17958 | 9.54E-05 | -0.196   | 1.99E-05 | -0.07043 | 0.12856  | 0.015047 |
| -0.11395 | 0.01374  | -0.05761 | 0.21402  | -0.05437 | 0.24089  | -0.07206 | 0.11995  | 0.058233 |
| -0.11174 | 0.0157   | -0.03515 | 0.4486   | -0.02036 | 0.66074  | -0.04318 | 0.35182  | 0.06741  |
| -0.09395 | 0.04243  | -0.0051  | 0.91245  | -0.02372 | 0.60909  | -0.04285 | 0.35547  | 0.083035 |
| -0.04262 | 0.3581   | -0.08871 | 0.05542  | -0.05794 | 0.21141  | -0.07049 | 0.12823  | 0.008661 |
| -0.22237 | 1.21E-06 | -0.24011 | 1.50E-07 | -0.15571 | 0.00073  | -0.17447 | 0.00015  | -0.19079 |
| -0.13972 | 0.00248  | -0.14848 | 0.00129  | -0.11833 | 0.01049  | -0.10355 | 0.02524  | 0.002344 |
| -0.37235 | 8.35E-17 | -0.29491 | 7.97E-11 | -0.24536 | 7.86E-08 | -0.25776 | 1.59E-08 | -0.23876 |
| -0.10758 | 0.02005  | -0.0666  | 0.15073  | -0.05417 | 0.24264  | -0.07753 | 0.09422  | 0.01696  |
| -0.02721 | 0.55752  | -0.03146 | 0.49759  | 0.036372 | 0.43294  | -0.06232 | 0.17879  | 0.075691 |
| -0.08199 | 0.07671  | -0.1959  | 2.01E-05 | -0.10533 | 0.02282  | -0.28584 | 3.13E-10 | -0.26535 |
| -0.08718 | 0.05976  | 0.175319 | 0.00014  | 0.093523 | 0.04338  | 0.014586 | 0.75324  | 0.185575 |
| -0.27519 | 1.47E-09 | -0.25529 | 2.21E-08 | -0.22238 | 1.21E-06 | -0.29634 | 6.40E-11 | -0.19807 |
| -0.17047 | 0.00021  | -0.14971 | 0.00118  | -0.15341 | 0.00088  | -0.08158 | 0.0782   | -0.05252 |

|          |          |          |          |          |          |          |          |          |
|----------|----------|----------|----------|----------|----------|----------|----------|----------|
| -0.10937 | 0.01807  | -0.12622 | 0.00631  | -0.06793 | 0.14273  | -0.14617 | 0.00154  | -0.15668 |
| -0.13889 | 0.00263  | 0.085623 | 0.06449  | 0.049216 | 0.28853  | -0.0319  | 0.49167  | 0.046279 |
| 0.099899 | 0.03089  | 0.249904 | 4.42E-08 | 0.210364 | 4.54E-06 | 0.125153 | 0.00677  | 0.2928   |
| -0.0218  | 0.63844  | -0.03834 | 0.40842  | -0.06865 | 0.13852  | -0.01353 | 0.77054  | 0.124643 |
| -0.2615  | 9.69E-09 | -0.21963 | 1.65E-06 | -0.18235 | 7.39E-05 | -0.25508 | 2.27E-08 | -0.10095 |
| -0.17148 | 0.0002   | 0.006408 | 0.89016  | -0.02744 | 0.55415  | -0.06014 | 0.19451  | 0.090007 |
| -0.19619 | 1.96E-05 | -0.12523 | 0.00673  | -0.18666 | 4.93E-05 | -0.08289 | 0.07353  | -0.01231 |
| -0.21371 | 3.16E-06 | -0.17473 | 0.00015  | -0.11213 | 0.01533  | -0.13499 | 0.00347  | -0.09063 |
| -0.10383 | 0.02484  | -0.09177 | 0.04747  | -0.10827 | 0.01927  | -0.04669 | 0.314    | 0.032095 |
| -0.08282 | 0.07378  | -0.05155 | 0.26627  | -0.04149 | 0.37106  | -0.05505 | 0.23508  | -0.15032 |
| 0.058386 | 0.20788  | 0.0463   | 0.31808  | 0.144869 | 0.0017   | -0.06584 | 0.15542  | 0.107007 |
| -0.19041 | 3.45E-05 | 0.003473 | 0.94033  | 0.001622 | 0.97211  | -0.17146 | 0.0002   | 0.023065 |
| 0.01183  | 0.79875  | 0.116948 | 0.01143  | 0.084657 | 0.06758  | 0.051567 | 0.26608  | 0.192621 |
| -0.00058 | 0.99     | 0.155152 | 0.00077  | 0.097476 | 0.03522  | 0.027018 | 0.56029  | 0.194503 |
| -0.16316 | 0.0004   | -0.03393 | 0.4645   | -0.04792 | 0.3014   | -0.10076 | 0.02947  | -0.192   |
| 0.035539 | 0.44356  | 0.03766  | 0.41683  | 0.029153 | 0.52971  | 0.031981 | 0.49055  | 0.126078 |
| -0.16026 | 0.00051  | -0.12487 | 0.0069   | -0.09132 | 0.04858  | -0.10447 | 0.02396  | 0.006014 |
| -0.24694 | 6.44E-08 | -0.339   | 5.06E-14 | -0.21051 | 4.47E-06 | -0.26707 | 4.55E-09 | -0.26025 |
| -0.25595 | 2.02E-08 | -0.29803 | 4.92E-11 | -0.2432  | 1.03E-07 | -0.16524 | 0.00034  | -0.11708 |
| -0.16293 | 0.00041  | 0.018085 | 0.69668  | 0.000611 | 0.98949  | -0.10147 | 0.02834  | 0.004933 |
| -0.2421  | 1.18E-07 | -0.22731 | 6.90E-07 | -0.16604 | 0.00031  | -0.13436 | 0.00363  | -0.11154 |
| -0.01236 | 0.78988  | -0.12824 | 0.00551  | -0.04636 | 0.31745  | -0.18304 | 6.93E-05 | -0.09329 |
| -0.10821 | 0.01933  | -0.16106 | 0.00048  | -0.121   | 0.00886  | -0.10902 | 0.01844  | -0.1462  |
| -0.03155 | 0.49636  | -0.00671 | 0.88505  | 0.045674 | 0.32467  | -0.08969 | 0.05275  | -0.08898 |
| -0.08624 | 0.06258  | 0.021242 | 0.64704  | 0.12775  | 0.0057   | -0.08211 | 0.07629  | 0.015434 |
| -0.19942 | 1.41E-05 | -0.18956 | 3.74E-05 | -0.19529 | 2.14E-05 | -0.11349 | 0.01413  | 0.021602 |
| -0.05139 | 0.26772  | 0.098748 | 0.03289  | 0.123584 | 0.0075   | -0.01077 | 0.81649  | 0.131189 |
| -0.005   | 0.91425  | 0.02787  | 0.54799  | 0.025128 | 0.58805  | -0.07122 | 0.12431  | -0.10531 |
| 0.085903 | 0.06362  | 0.125585 | 0.00658  | 0.106945 | 0.0208   | 0.082059 | 0.07647  | -0.01704 |
| 0.109073 | 0.01838  | 0.289351 | 1.85E-10 | 0.218719 | 1.83E-06 | 0.109511 | 0.01792  | -0.00055 |
| 0.025045 | 0.58929  | 0.050696 | 0.27425  | 0.050095 | 0.27999  | 0.057854 | 0.21205  | -0.10278 |
| 0.072675 | 0.11679  | 0.187222 | 4.68E-05 | 0.133826 | 0.00376  | 0.081054 | 0.08016  | 0.039549 |
| 0.063939 | 0.16776  | 0.07373  | 0.11156  | 0.098028 | 0.03419  | -0.01567 | 0.73552  | -0.10766 |
| 0.026288 | 0.57094  | 0.136946 | 0.00302  | 0.183933 | 6.38E-05 | -0.02167 | 0.6405   | -0.01503 |
| 0.067308 | 0.14642  | 0.251974 | 3.39E-08 | 0.275393 | 1.42E-09 | 0.081676 | 0.07786  | 0.003316 |
| 0.051498 | 0.26673  | 0.033135 | 0.47502  | 0.034184 | 0.46115  | -0.05182 | 0.26373  | -0.08207 |
| 0.165803 | 0.00032  | 0.336798 | 7.53E-14 | 0.400096 | 2.22E-19 | 0.131841 | 0.00432  | 0.09012  |
| 0.067332 | 0.14628  | 0.217616 | 2.06E-06 | 0.298244 | 4.76E-11 | 0.077685 | 0.09358  | 0.011956 |
| 0.066965 | 0.1485   | 0.001991 | 0.96578  | 0.007616 | 0.86962  | -0.00442 | 0.9241   | -0.04624 |
| 0.000897 | 0.98458  | -0.05417 | 0.24263  | -0.04358 | 0.34734  | 0.005436 | 0.90673  | -0.14751 |
| 0.03947  | 0.39477  | 0.175694 | 0.00014  | 0.184721 | 5.93E-05 | 0.095517 | 0.03908  | 0.07646  |
| 0.06712  | 0.14755  | 0.142122 | 0.00208  | 0.194228 | 2.37E-05 | 0.089614 | 0.05296  | -0.04341 |
| -0.02603 | 0.5748   | -0.01175 | 0.80008  | -0.0379  | 0.41386  | -0.05596 | 0.22741  | -0.10228 |
| 0.089076 | 0.0544   | 0.050621 | 0.27496  | 0.112936 | 0.01461  | -0.00686 | 0.88252  | -0.10277 |
| -0.0394  | 0.39561  | 0.006285 | 0.89225  | 0.08116  | 0.07976  | 2.41E-05 | 0.99959  | -0.13447 |

|          |          |          |          |          |          |          |          |          |
|----------|----------|----------|----------|----------|----------|----------|----------|----------|
| -0.02014 | 0.66429  | 0.019424 | 0.67546  | 0.039811 | 0.39069  | -0.0561  | 0.22628  | -0.07273 |
| 0.03375  | 0.46686  | 0.028651 | 0.53682  | 0.00363  | 0.93764  | 0.035248 | 0.44731  | -0.03177 |
| 0.052546 | 0.2571   | 0.042684 | 0.35739  | 0.004813 | 0.91738  | 0.043293 | 0.35056  | -0.0258  |
| 0.046499 | 0.316    | 0.112625 | 0.01489  | 0.100212 | 0.03037  | 0.060249 | 0.19371  | 0.029461 |
| -0.02315 | 0.61777  | -0.0572  | 0.21729  | 0.011364 | 0.80651  | -0.06121 | 0.18667  | -0.0572  |
| 0.07007  | 0.13053  | 0.061447 | 0.18498  | 0.043587 | 0.3473   | 0.049969 | 0.2812   | -0.01424 |
| 0.135222 | 0.00341  | 0.187157 | 4.71E-05 | 0.188174 | 4.27E-05 | -0.04167 | 0.36889  | -0.00416 |
| 0.052534 | 0.25721  | 0.025207 | 0.58689  | 0.02265  | 0.62539  | -0.0289  | 0.53326  | -0.0526  |
| 0.033511 | 0.47002  | 0.168136 | 0.00026  | 0.177455 | 0.00012  | 0.044796 | 0.33407  | -0.02177 |
| 0.064518 | 0.16393  | 0.061107 | 0.18743  | 0.090503 | 0.05064  | 0.061911 | 0.18168  | -0.06697 |
| -0.00897 | 0.8467   | -0.02058 | 0.65736  | -0.01564 | 0.736    | -0.03565 | 0.44219  | -0.0795  |
| 0.046215 | 0.31897  | 0.112862 | 0.01468  | 0.13092  | 0.0046   | 0.004032 | 0.93075  | -0.00815 |
| 0.052077 | 0.26138  | 0.033531 | 0.46976  | 0.062059 | 0.18063  | 0.070078 | 0.13049  | -0.04246 |
| 0.0549   | 0.23637  | 0.068395 | 0.14     | 0.071656 | 0.12202  | 0.054004 | 0.24411  | -0.03479 |
| 0.054561 | 0.23928  | 0.046881 | 0.31205  | 0.074785 | 0.10652  | 0.046297 | 0.31811  | -0.07206 |
| -0.02166 | 0.64066  | -0.04771 | 0.30354  | -0.05542 | 0.23199  | -0.03933 | 0.39649  | -0.10993 |
| 0.035143 | 0.44866  | 0.037616 | 0.41736  | 0.020362 | 0.66074  | 0.004516 | 0.92247  | -0.03237 |
| -0.03604 | 0.43718  | -0.01919 | 0.67912  | -0.0499  | 0.28185  | -0.02003 | 0.66589  | -0.03561 |
| 0.029752 | 0.52129  | 0.026468 | 0.56831  | 0.019189 | 0.67917  | 0.002603 | 0.95526  | -0.05925 |
| 0.051281 | 0.26875  | 0.072085 | 0.1198   | 0.084326 | 0.06866  | 0.06722  | 0.14695  | -0.04364 |
| 0.040131 | 0.38689  | 0.042629 | 0.35801  | 0.045474 | 0.3268   | 0.062972 | 0.17429  | -0.036   |
| 0.075382 | 0.10374  | 0.121886 | 0.00837  | 0.113524 | 0.0141   | 0.046082 | 0.32037  | 0.002684 |
| 0.073999 | 0.11026  | 0.076939 | 0.09678  | 0.082104 | 0.07631  | 0.060346 | 0.19299  | -0.03689 |
| 0.040893 | 0.37794  | 0.041272 | 0.37352  | 0.090428 | 0.05083  | 0.034054 | 0.46286  | -0.10088 |
| 0.061933 | 0.18152  | 0.060076 | 0.195    | 0.114541 | 0.01326  | 0.019617 | 0.67242  | -0.12102 |
| -0.03289 | 0.47824  | 0.144505 | 0.00174  | 0.220592 | 1.48E-06 | 0.01998  | 0.66672  | -0.03737 |
| 0.180788 | 8.54E-05 | 0.102919 | 0.02615  | 0.095521 | 0.03907  | -0.0047  | 0.91926  | -0.00368 |
| 0.062461 | 0.17782  | 0.01183  | 0.79875  | 0.039242 | 0.39751  | 0.061719 | 0.18304  | -0.03912 |
| 0.077105 | 0.09606  | 0.054817 | 0.23708  | 0.036186 | 0.43531  | 0.091813 | 0.04737  | -0.01429 |
| 0.069952 | 0.13118  | 0.068464 | 0.1396   | 0.078397 | 0.0906   | 0.082596 | 0.07456  | -0.02977 |
| 0.084934 | 0.06668  | 0.08619  | 0.06274  | 0.059811 | 0.19697  | 0.104626 | 0.02375  | -0.00125 |
| 0.111172 | 0.01624  | 0.120349 | 0.00923  | 0.171359 | 0.0002   | 0.092629 | 0.04543  | -0.00988 |
| 0.105863 | 0.02214  | 0.114337 | 0.01342  | 0.113637 | 0.01401  | 0.097445 | 0.03528  | -0.02698 |
| 0.005491 | 0.90579  | -0.03016 | 0.51552  | 0.064864 | 0.16168  | -0.03888 | 0.40187  | -0.13795 |
| 0.08732  | 0.05936  | 0.061948 | 0.18142  | 0.044926 | 0.33267  | -0.02304 | 0.61948  | -0.04764 |
| 0.037974 | 0.41294  | -0.0073  | 0.87501  | 0.019316 | 0.67715  | 0.039687 | 0.39218  | -0.1549  |
| -0.00041 | 0.99293  | 0.125237 | 0.00673  | 0.158715 | 0.00058  | 0.015175 | 0.74361  | 0.027736 |
| 0.094593 | 0.04103  | 0.130453 | 0.00475  | 0.158792 | 0.00057  | 0.025336 | 0.58497  | -0.0035  |
| -0.09775 | 0.03471  | 0.080864 | 0.08087  | 0.078631 | 0.08964  | -0.03913 | 0.3988   | -0.05087 |
| 0.144863 | 0.0017   | 0.188218 | 4.26E-05 | 0.306729 | 1.25E-11 | 0.195937 | 2.01E-05 | 0.099909 |
| 0.185137 | 5.70E-05 | 0.101075 | 0.02896  | 0.150393 | 0.00111  | 0.028717 | 0.53589  | 0.117115 |
| 0.04085  | 0.37844  | 0.24316  | 1.03E-07 | 0.298436 | 4.62E-11 | 0.055136 | 0.23436  | 0.132486 |
| -0.00311 | 0.94648  | -0.02861 | 0.53734  | -0.03503 | 0.45012  | -0.0409  | 0.37782  | 0.00742  |
| 0.137749 | 0.00285  | 0.482828 | 1.20E-28 | 0.466933 | 1.16E-26 | 0.190503 | 3.42E-05 | 0.274785 |
| -0.02477 | 0.59335  | 0.015069 | 0.74534  | 0.063751 | 0.16901  | -0.06612 | 0.15367  | -0.01768 |

|          |          |          |          |          |          |          |         |          |
|----------|----------|----------|----------|----------|----------|----------|---------|----------|
| -0.0703  | 0.12925  | 0.016952 | 0.71482  | 0.029706 | 0.52193  | -0.05362 | 0.24752 | 0.12972  |
| -0.084   | 0.06974  | 0.030331 | 0.51321  | -0.00437 | 0.92496  | -0.07323 | 0.11404 | 0.006179 |
| 0.107    | 0.02074  | 0.134354 | 0.00363  | 0.187606 | 4.51E-05 | 0.095117 | 0.03991 | 0.192867 |
| -0.07348 | 0.11278  | 0.135637 | 0.00332  | 0.089807 | 0.05244  | -0.0576  | 0.21406 | 0.027444 |
| -0.00837 | 0.85676  | -0.02524 | 0.58636  | 0.065184 | 0.15962  | -0.02775 | 0.54974 | 0.071752 |
| 0.017272 | 0.70969  | -0.01044 | 0.82197  | 0.005382 | 0.90766  | -0.0855  | 0.06488 | -0.00363 |
| -0.01344 | 0.7721   | 0.011127 | 0.81047  | 0.077671 | 0.09364  | -0.02054 | 0.65804 | 0.212958 |
| 0.060604 | 0.19109  | 0.225641 | 8.36E-07 | 0.222386 | 1.21E-06 | -0.01258 | 0.78633 | 0.282092 |
| -0.01932 | 0.67709  | 0.059392 | 0.20013  | 0.035879 | 0.43922  | -0.01433 | 0.75741 | 0.091607 |
| 0.085225 | 0.06575  | 0.195158 | 2.17E-05 | 0.195728 | 2.05E-05 | 0.095494 | 0.03913 | 0.125662 |
| 0.056227 | 0.22521  | 0.060586 | 0.19122  | 0.085721 | 0.06419  | 0.014753 | 0.75049 | 0.103376 |
| -0.06983 | 0.13184  | 0.25457  | 2.42E-08 | 0.171289 | 0.0002   | -0.01558 | 0.73702 | 0.147945 |
| 0.074146 | 0.10955  | 0.146035 | 0.00155  | 0.166916 | 0.00029  | 0.05904  | 0.20282 | 0.123535 |
| 0.015717 | 0.73479  | 0.200129 | 1.32E-05 | 0.247524 | 5.98E-08 | -0.14539 | 0.00163 | 0.027386 |
| 0.004495 | 0.92283  | 0.088973 | 0.05468  | 0.048078 | 0.29984  | -0.00909 | 0.84466 | 0.255853 |
| 0.037269 | 0.42167  | 0.009905 | 0.83095  | 0.022454 | 0.62839  | 0.040162 | 0.38653 | 0.072286 |
| 0.13025  | 0.00481  | 0.203693 | 9.14E-06 | 0.291067 | 1.43E-10 | 0.027418 | 0.5545  | 0.068779 |
| 0.006593 | 0.88701  | -0.08187 | 0.07716  | -0.09064 | 0.05028  | -0.00036 | 0.99385 | 0.004005 |
| 0.193965 | 2.44E-05 | 0.18223  | 7.47E-05 | 0.227788 | 6.53E-07 | 0.078936 | 0.0884  | 0.157228 |
| 0.10178  | 0.02786  | 0.174791 | 0.00015  | 0.241738 | 1.23E-07 | 0.085029 | 0.06637 | 0.245521 |
| 0.201551 | 1.14E-05 | 0.156634 | 0.00068  | 0.289394 | 1.84E-10 | 0.078423 | 0.09049 | 0.157938 |
| -0.12263 | 0.00798  | 0.009118 | 0.8442   | 0.03527  | 0.44702  | -0.06741 | 0.14579 | 0.031867 |
| 0.16537  | 0.00033  | 0.085464 | 0.06499  | 0.183754 | 6.49E-05 | 0.040654 | 0.38074 | 0.006268 |
| -0.0515  | 0.26671  | 0.016068 | 0.7291   | 0.119809 | 0.00956  | -0.03721 | 0.42247 | -0.11502 |
| 0.006655 | 0.88595  | 0.053067 | 0.2524   | 0.066189 | 0.15326  | 0.094214 | 0.04184 | 0.183375 |
| -0.12511 | 0.00679  | -0.0278  | 0.54903  | -0.05499 | 0.23563  | -0.05124 | 0.26915 | 0.062666 |
| 0.105344 | 0.0228   | 0.376539 | 3.53E-17 | 0.40397  | 9.28E-20 | 0.077795 | 0.09311 | 0.232684 |
| 0.051542 | 0.26631  | 0.03915  | 0.39862  | 0.062284 | 0.17905  | 0.062084 | 0.18046 | -0.0041  |
| 0.085004 | 0.06645  | 0.391853 | 1.37E-18 | 0.384764 | 6.30E-18 | 0.162565 | 0.00042 | 0.32969  |
| 0.138703 | 0.00267  | 0.204086 | 8.77E-06 | 0.224391 | 9.64E-07 | 0.077381 | 0.09487 | 0.150441 |
| -0.07744 | 0.09462  | -0.02976 | 0.52115  | -0.01258 | 0.78632  | -0.05339 | 0.24949 | 0.115877 |
| 0.035278 | 0.44692  | 0.072222 | 0.11909  | 0.110521 | 0.01688  | 0.021972 | 0.63578 | 0.194369 |
| 0.122989 | 0.0078   | 0.210759 | 4.35E-06 | 0.120446 | 0.00918  | 0.066944 | 0.14862 | 0.290234 |
| 0.155979 | 0.00072  | 0.206364 | 6.92E-06 | 0.282936 | 4.80E-10 | 0.087672 | 0.05833 | 0.135751 |
| 0.112292 | 0.01519  | 0.21157  | 3.99E-06 | 0.292583 | 1.14E-10 | 0.074064 | 0.10994 | 0.194612 |
| 0.014387 | 0.75649  | 0.036221 | 0.43486  | 0.00393  | 0.93249  | 0.01995  | 0.66719 | 0.133578 |
| -0.05429 | 0.24161  | 0.084589 | 0.0678   | 0.017996 | 0.6981   | 0.003556 | 0.93891 | 0.219866 |
| -0.00153 | 0.97376  | 0.037296 | 0.42135  | 0.010415 | 0.8224   | -0.03095 | 0.50458 | 0.009659 |
| 0.026621 | 0.56607  | 0.225207 | 8.79E-07 | 0.268885 | 3.54E-09 | 0.01269  | 0.78447 | 0.079426 |
| 0.04666  | 0.31433  | 0.159987 | 0.00052  | 0.089608 | 0.05297  | 0.03711  | 0.42367 | 0.163973 |
| -0.05425 | 0.242    | 0.080948 | 0.08056  | 0.088849 | 0.05502  | -0.05188 | 0.26322 | 0.084981 |
| 0.154278 | 0.00082  | 0.151685 | 0.00101  | 0.203272 | 9.54E-06 | 0.061473 | 0.1848  | 0.205502 |
| 0.149111 | 0.00123  | 0.248594 | 5.23E-08 | 0.292876 | 1.09E-10 | 0.120297 | 0.00926 | 0.249203 |
| 0.238747 | 1.78E-07 | 0.274885 | 1.53E-09 | 0.269703 | 3.16E-09 | 0.163888 | 0.00038 | 0.303352 |
| -0.14144 | 0.00219  | -0.00962 | 0.83574  | -0.06132 | 0.18588  | -0.05596 | 0.22741 | 0.078596 |



|          |          |          |          |          |          |          |          |          |
|----------|----------|----------|----------|----------|----------|----------|----------|----------|
| -0.0815  | 0.07852  | 0.03402  | 0.4633   | 0.060372 | 0.1928   | -0.06479 | 0.16213  | -0.09811 |
| 0.133034 | 0.00398  | 0.27901  | 8.49E-10 | 0.387836 | 3.27E-18 | 0.095592 | 0.03893  | 0.186054 |
| -0.07644 | 0.09895  | -0.01506 | 0.74543  | 0.059462 | 0.19961  | -0.0799  | 0.08455  | 0.048551 |
| 0.067069 | 0.14786  | 0.200024 | 1.33E-05 | 0.247451 | 6.04E-08 | 0.042479 | 0.3597   | 0.192213 |
| 0.120461 | 0.00917  | 0.033503 | 0.47013  | -0.00771 | 0.86807  | 0.042327 | 0.36143  | 0.224632 |
| 0.122616 | 0.00799  | 0.013074 | 0.77811  | -0.03415 | 0.46155  | -0.01827 | 0.69377  | -0.05297 |
| 0.07447  | 0.108    | 0.129213 | 0.00516  | 0.090143 | 0.05156  | 0.098838 | 0.03273  | 0.41931  |
| 0.162062 | 0.00044  | 0.012729 | 0.78381  | 0.003415 | 0.94132  | 0.012891 | 0.78114  | 0.11064  |
| 0.122873 | 0.00785  | 0.029136 | 0.52995  | -0.0155  | 0.73831  | 0.013707 | 0.76767  | 0.11052  |
| 0.089051 | 0.05447  | 0.179013 | 0.0001   | 0.168794 | 0.00025  | 0.056384 | 0.22392  | 0.145995 |
| 0.187225 | 4.68E-05 | 0.21773  | 2.04E-06 | 0.236204 | 2.42E-07 | 0.128852 | 0.00529  | 0.257483 |
| 0.30213  | 2.59E-11 | 0.559005 | 9.69E-40 | 0.471165 | 3.51E-27 | 0.349728 | 6.99E-15 | 0.523766 |
| 0.063849 | 0.16836  | 0.284188 | 3.99E-10 | 0.287182 | 2.56E-10 | 0.04838  | 0.2968   | 0.227523 |
| 0.165127 | 0.00034  | 0.275849 | 1.33E-09 | 0.304796 | 1.70E-11 | 0.150376 | 0.00112  | 0.340873 |
| -0.14454 | 0.00174  | 0.067041 | 0.14803  | 0.241237 | 1.31E-07 | -0.1282  | 0.00553  | -0.10555 |
| 0.007605 | 0.86981  | -0.02964 | 0.52289  | -0.01544 | 0.73937  | 0.064862 | 0.16169  | -0.01841 |
| 0.254106 | 2.57E-08 | 0.453406 | 4.68E-25 | 0.482602 | 1.28E-28 | 0.199125 | 1.46E-05 | 0.296026 |
| 0.15059  | 0.0011   | 0.170857 | 0.00021  | 0.302737 | 2.36E-11 | 0.054965 | 0.23581  | 0.173755 |
| 0.247543 | 5.97E-08 | 0.311902 | 5.39E-12 | 0.381167 | 1.35E-17 | 0.117056 | 0.01136  | 0.252344 |
| -0.08507 | 0.06625  | 0.046013 | 0.3211   | 0.053105 | 0.25206  | 0.00862  | 0.85262  | 0.206987 |
| 0.130012 | 0.00489  | 0.290571 | 1.54E-10 | 0.186967 | 4.79E-05 | 0.207567 | 6.10E-06 | 0.27835  |
| 0.097614 | 0.03496  | 0.164085 | 0.00037  | 0.36137  | 7.48E-16 | 0.011993 | 0.79604  | 0.094354 |
| 0.020422 | 0.65981  | 0.149781 | 0.00117  | 0.310939 | 6.31E-12 | 0.006079 | 0.89577  | 0.129259 |
| 0.029943 | 0.51861  | 0.300619 | 3.29E-11 | 0.195149 | 2.17E-05 | 0.126549 | 0.00617  | 0.297684 |
| 0.030648 | 0.50881  | 0.206756 | 6.64E-06 | 0.141789 | 0.00213  | 0.073662 | 0.11189  | 0.268601 |
| 0.286869 | 2.69E-10 | 0.32803  | 3.54E-13 | 0.2546   | 2.41E-08 | 0.168015 | 0.00027  | 0.194087 |
| 0.071861 | 0.12096  | 0.186344 | 5.09E-05 | 0.369817 | 1.39E-16 | 0.039946 | 0.38909  | 0.081707 |
| 0.095658 | 0.03879  | 0.117891 | 0.01078  | 0.13093  | 0.0046   | 0.106839 | 0.02093  | 0.17557  |
| 0.083633 | 0.07097  | 0.008809 | 0.84942  | -0.02025 | 0.6625   | 0.058342 | 0.20822  | 0.08041  |
| 0.013588 | 0.76962  | 0.007389 | 0.87348  | 0.123341 | 0.00762  | -0.1343  | 0.00364  | -0.01639 |
| 0.131284 | 0.00449  | 0.341013 | 3.51E-14 | 0.267064 | 4.56E-09 | 0.187996 | 4.35E-05 | 0.25532  |
| -0.13786 | 0.00283  | 0.031937 | 0.49114  | 0.06623  | 0.15301  | -0.08763 | 0.05846  | 0.053543 |
| -0.00868 | 0.85162  | 0.09343  | 0.04359  | 0.11055  | 0.01685  | -0.02337 | 0.61446  | -0.00844 |
| 0.105002 | 0.02325  | 0.064286 | 0.16546  | 0.129233 | 0.00516  | 0.039783 | 0.39103  | -0.01937 |
| 0.096313 | 0.03747  | 0.192775 | 2.74E-05 | 0.332004 | 1.77E-13 | 0.064666 | 0.16297  | 0.141117 |
| 0.255641 | 2.11E-08 | 0.184027 | 6.32E-05 | 0.230017 | 5.04E-07 | 0.099348 | 0.03183  | 0.147965 |
| 0.131886 | 0.0043   | 0.27646  | 1.22E-09 | 0.252786 | 3.05E-08 | 0.094286 | 0.04169  | 0.300626 |
| -0.08256 | 0.07469  | 0.22533  | 8.66E-07 | 0.189364 | 3.81E-05 | -0.02283 | 0.62272  | 0.133036 |
| -0.07383 | 0.11105  | 0.206233 | 7.02E-06 | 0.135197 | 0.00342  | 0.005517 | 0.90536  | 0.230822 |
| 0.233412 | 3.38E-07 | 0.228005 | 6.37E-07 | 0.135246 | 0.00341  | 0.101499 | 0.02829  | 0.150308 |
| -0.12931 | 0.00513  | 0.053197 | 0.25124  | -0.05633 | 0.22439  | -0.03875 | 0.40347  | 0.072356 |
| 0.097982 | 0.03427  | 0.166987 | 0.00029  | 0.120262 | 0.00929  | 0.026786 | 0.56367  | 0.198202 |
| 0.145498 | 0.00162  | 0.38971  | 2.18E-18 | 0.357717 | 1.52E-15 | 0.180846 | 8.49E-05 | 0.201894 |
| 0.145965 | 0.00156  | 0.23819  | 1.90E-07 | 0.276599 | 1.20E-09 | 0.059395 | 0.20011  | 0.049299 |
| 0.061598 | 0.1839   | 0.340059 | 4.18E-14 | 0.2783   | 9.40E-10 | 0.106004 | 0.02196  | 0.306656 |

|          |          |          |          |          |          |          |          |          |
|----------|----------|----------|----------|----------|----------|----------|----------|----------|
| 0.176218 | 0.00013  | 0.469002 | 6.46E-27 | 0.418629 | 3.07E-21 | 0.219612 | 1.65E-06 | 0.3556   |
| 0.007127 | 0.87792  | 0.16008  | 0.00052  | 0.149183 | 0.00122  | 0.046079 | 0.3204   | 0.172136 |
| 0.139029 | 0.0026   | 0.40175  | 1.53E-19 | 0.371222 | 1.05E-16 | 0.234751 | 2.88E-07 | 0.469094 |
| -0.11631 | 0.01189  | -0.05403 | 0.24386  | -0.05472 | 0.23787  | -0.16044 | 0.0005   | -0.02368 |
| 0.097499 | 0.03518  | 0.161037 | 0.00048  | 0.372112 | 8.76E-17 | -0.06468 | 0.16287  | -0.07188 |
| 0.019763 | 0.67012  | 0.106344 | 0.02153  | 0.100679 | 0.0296   | 0.033357 | 0.47207  | 0.014722 |
| -0.15196 | 0.00099  | -0.01252 | 0.7872   | 0.036576 | 0.43037  | -0.06449 | 0.16409  | -0.00657 |
| 0.223945 | 1.01E-06 | 0.08013  | 0.08367  | 0.24739  | 6.09E-08 | -0.04678 | 0.31307  | 0.069989 |
| 0.027305 | 0.55613  | 0.144698 | 0.00172  | 0.203176 | 9.64E-06 | 0.032114 | 0.48874  | 0.179235 |
| -0.03868 | 0.40435  | 0.025474 | 0.58292  | 0.083114 | 0.07275  | -0.02676 | 0.56411  | 0.086685 |
| 0.008923 | 0.8475   | 0.128675 | 0.00536  | 0.122235 | 0.00818  | -0.00626 | 0.89263  | 0.104404 |
| 0.035667 | 0.44192  | 0.273762 | 1.79E-09 | 0.21638  | 2.36E-06 | -0.02798 | 0.54643  | 0.181909 |
| -0.1497  | 0.00118  | -0.0685  | 0.13939  | -0.12464 | 0.007    | -0.10607 | 0.02187  | 0.014085 |
| 0.088599 | 0.05571  | 0.121134 | 0.00878  | 0.170647 | 0.00021  | 0.125324 | 0.00669  | 0.210148 |
| 0.177369 | 0.00012  | 0.23013  | 4.97E-07 | 0.249001 | 4.96E-08 | 0.12937  | 0.00511  | 0.254547 |
| -0.01784 | 0.70065  | 0.076481 | 0.09879  | 0.108568 | 0.01893  | -0.02371 | 0.60929  | 0.01309  |
| 0.052366 | 0.25874  | 0.021548 | 0.64232  | 0.067704 | 0.14406  | 0.016459 | 0.72277  | 0.108139 |
| -0.13277 | 0.00405  | -0.01388 | 0.76489  | 0.095877 | 0.03834  | -0.06898 | 0.13662  | 0.067059 |
| 0.076592 | 0.0983   | 0.265821 | 5.40E-09 | 0.303821 | 1.98E-11 | 0.088986 | 0.05465  | 0.280222 |
| -0.07708 | 0.09616  | 0.020213 | 0.66306  | 0.060708 | 0.19033  | -0.04122 | 0.37411  | 0.079295 |
| 0.069001 | 0.13651  | 0.077486 | 0.09442  | 0.090595 | 0.0504   | 0.004947 | 0.91509  | 0.107973 |
| 0.03161  | 0.4956   | 0.090337 | 0.05106  | 0.155132 | 0.00077  | -0.0138  | 0.76608  | 0.034849 |
| 0.217284 | 2.14E-06 | -0.01535 | 0.74071  | 0.172885 | 0.00017  | 0.039735 | 0.3916   | 0.192802 |
| 0.323699 | 7.48E-13 | 0.388332 | 2.94E-18 | 0.398156 | 3.43E-19 | 0.218624 | 1.85E-06 | 0.251005 |
| 0.034008 | 0.46346  | 0.11226  | 0.01522  | 0.288515 | 2.10E-10 | 0.017511 | 0.70585  | 0.06227  |
| -0.04421 | 0.3404   | -0.04236 | 0.36108  | 0.008419 | 0.85601  | -0.09351 | 0.0434   | -0.114   |
| -0.09621 | 0.03768  | 0.056008 | 0.22703  | 0.171484 | 0.0002   | -0.00791 | 0.86469  | 0.126387 |
| 0.037968 | 0.41302  | 0.174739 | 0.00015  | 0.193327 | 2.59E-05 | 0.082572 | 0.07464  | 0.175645 |
| 0.13187  | 0.00431  | 0.347394 | 1.08E-14 | 0.357849 | 1.49E-15 | 0.136144 | 0.0032   | 0.277247 |
| 0.095406 | 0.03931  | 0.33911  | 4.96E-14 | 0.308627 | 9.18E-12 | 0.142796 | 0.00198  | 0.260559 |
| 0.226708 | 7.40E-07 | 0.325089 | 5.89E-13 | 0.214311 | 2.96E-06 | 0.088731 | 0.05535  | 0.139419 |
| -0.02616 | 0.57276  | 0.221274 | 1.37E-06 | 0.165039 | 0.00034  | 0.053466 | 0.24885  | 0.213338 |
| 0.012815 | 0.7824   | 0.124019 | 0.00729  | 0.130563 | 0.00471  | 0.099676 | 0.03127  | 0.308654 |
| 0.288549 | 2.09E-10 | 0.255694 | 2.09E-08 | 0.101978 | 0.02755  | 0.26448  | 6.48E-09 | 0.465943 |
| 0.05313  | 0.25184  | 0.101053 | 0.029    | 0.112458 | 0.01504  | 0.036046 | 0.43709  | 0.190212 |
| 0.015693 | 0.73517  | 0.148191 | 0.00132  | 0.142551 | 0.00201  | 0.043457 | 0.34873  | 0.230827 |
| -0.04734 | 0.30729  | -0.04911 | 0.28954  | -0.03553 | 0.4437   | 0.019939 | 0.66736  | -0.09955 |
| 0.162697 | 0.00042  | 0.273442 | 1.88E-09 | 0.259474 | 1.27E-08 | 0.01997  | 0.66687  | 0.292083 |
| -0.17924 | 9.83E-05 | 0.09386  | 0.04262  | -0.08973 | 0.05264  | -0.0189  | 0.68373  | 0.042561 |
| 0.259611 | 1.25E-08 | 0.229087 | 5.61E-07 | 0.220481 | 1.50E-06 | 0.246605 | 6.72E-08 | 0.466443 |
| 0.09979  | 0.03108  | 0.249209 | 4.83E-08 | 0.019352 | 0.6766   | 0.130982 | 0.00458  | 0.243352 |
| 0.227805 | 6.52E-07 | 0.149805 | 0.00117  | 0.160131 | 0.00051  | 0.134628 | 0.00356  | 0.268489 |
| 0.277888 | 9.97E-10 | 0.233917 | 3.18E-07 | 0.246461 | 6.84E-08 | 0.083081 | 0.07286  | 0.092173 |
| 0.229715 | 5.22E-07 | 0.499803 | 6.99E-31 | 0.49342  | 5.01E-30 | 0.159416 | 0.00054  | 0.31056  |
| 0.078371 | 0.09071  | 0.132071 | 0.00425  | 0.081615 | 0.07808  | -0.06524 | 0.15923  | 0.072233 |

|          |          |          |          |          |          |          |          |          |
|----------|----------|----------|----------|----------|----------|----------|----------|----------|
| -0.0413  | 0.37322  | 0.026407 | 0.56921  | 0.198533 | 1.55E-05 | -0.01855 | 0.68925  | -0.01423 |
| 0.278841 | 8.70E-10 | 0.109737 | 0.01768  | 0.162004 | 0.00044  | 0.095638 | 0.03883  | 0.166949 |
| 0.146869 | 0.00146  | 0.146994 | 0.00145  | 0.122123 | 0.00824  | 0.110606 | 0.0168   | 0.204345 |
| 0.018924 | 0.68335  | 0.107339 | 0.02033  | 0.148944 | 0.00125  | 0.014795 | 0.74982  | 0.08847  |
| 0.072214 | 0.11914  | 0.13847  | 0.00271  | 0.093285 | 0.04391  | 0.040678 | 0.38045  | -0.00545 |
| 0.112278 | 0.0152   | 0.311247 | 6.00E-12 | 0.292426 | 1.16E-10 | 0.127187 | 0.00592  | 0.118644 |
| -0.12937 | 0.00511  | 0.169249 | 0.00024  | 0.158379 | 0.00059  | -0.01943 | 0.67535  | 0.129175 |
| 0.050911 | 0.27222  | 0.07447  | 0.10801  | 0.061082 | 0.18761  | 0.067009 | 0.14823  | 0.08299  |
| -0.02391 | 0.60627  | 0.066544 | 0.15107  | 0.045543 | 0.32606  | 0.023666 | 0.60996  | 0.132293 |
| 0.077593 | 0.09397  | 0.253717 | 2.71E-08 | 0.221884 | 1.28E-06 | 0.118295 | 0.01051  | 0.177668 |
| 0.173797 | 0.00016  | 0.231406 | 4.28E-07 | 0.237123 | 2.16E-07 | 0.105858 | 0.02214  | 0.180299 |
| 0.111939 | 0.01551  | 0.075388 | 0.10372  | 0.105346 | 0.0228   | 0.133373 | 0.00388  | 0.266741 |
| 0.025104 | 0.58842  | 0.039888 | 0.38977  | 0.133731 | 0.00379  | 0.003863 | 0.93365  | 0.107719 |
| 0.223352 | 1.09E-06 | 0.058732 | 0.20519  | -0.04346 | 0.34868  | 0.118773 | 0.0102   | 0.149859 |
| 0.122921 | 0.00783  | 0.234957 | 2.81E-07 | 0.215571 | 2.58E-06 | 0.036374 | 0.43293  | 0.093989 |
| 0.033452 | 0.47081  | 0.216742 | 2.27E-06 | 0.305459 | 1.53E-11 | 0.008445 | 0.85557  | 0.137428 |
| -0.03867 | 0.40443  | 0.018056 | 0.69714  | 0.084583 | 0.06782  | 0.048415 | 0.29646  | 0.221438 |
| 0.069581 | 0.13324  | 0.149184 | 0.00122  | 0.097023 | 0.03608  | 0.043304 | 0.35044  | 0.163537 |
| 0.104492 | 0.02393  | 0.005626 | 0.90349  | 0.069462 | 0.13391  | -0.10965 | 0.01777  | -0.20107 |
| 0.092839 | 0.04494  | 0.078137 | 0.09168  | -0.06379 | 0.16874  | 0.107878 | 0.01971  | 0.117015 |
| 0.14377  | 0.00184  | 0.23998  | 1.53E-07 | 0.203555 | 9.27E-06 | 0.092149 | 0.04656  | 0.262892 |
| 0.052627 | 0.25637  | 0.319293 | 1.58E-12 | 0.277053 | 1.12E-09 | 0.099182 | 0.03212  | 0.205268 |
| -0.00846 | 0.85527  | 0.182944 | 6.99E-05 | 0.173816 | 0.00016  | 0.041286 | 0.37337  | 0.215556 |
| 0.231373 | 4.30E-07 | 0.431014 | 1.51E-22 | 0.45224  | 6.39E-25 | 0.18995  | 3.60E-05 | 0.357049 |
| -0.13381 | 0.00377  | 0.027386 | 0.55496  | 0.041556 | 0.37024  | -0.09142 | 0.04834  | 0.024353 |
| 0.117144 | 0.01129  | 0.240918 | 1.36E-07 | 0.228714 | 5.86E-07 | 0.060208 | 0.19402  | 0.097746 |
| 0.155592 | 0.00074  | 0.28841  | 2.13E-10 | 0.36373  | 4.70E-16 | 0.154564 | 0.0008   | 0.173064 |
| 0.254715 | 2.38E-08 | 0.1917   | 3.04E-05 | 0.265383 | 5.73E-09 | 0.013251 | 0.77519  | 0.097386 |
| -0.09666 | 0.03678  | 0.005884 | 0.89909  | 0.079267 | 0.08707  | -0.24939 | 4.73E-08 | -0.15299 |
| -0.02446 | 0.59808  | -0.01596 | 0.73079  | 0.095306 | 0.03952  | -0.07676 | 0.09756  | -0.01534 |
| 0.069888 | 0.13153  | 0.120041 | 0.00942  | 0.042316 | 0.36155  | 0.09157  | 0.04796  | 0.04886  |
| 0.121862 | 0.00838  | 0.146831 | 0.00146  | 0.135994 | 0.00323  | 0.080079 | 0.08387  | 0.197494 |
| 0.185842 | 5.33E-05 | 0.471275 | 3.40E-27 | 0.462255 | 4.23E-26 | 0.21088  | 4.29E-06 | 0.260715 |
| 0.148579 | 0.00128  | 0.033511 | 0.47002  | 0.203197 | 9.62E-06 | -0.01066 | 0.8183   | -0.14034 |
| -0.02772 | 0.55008  | 0.131544 | 0.00441  | 0.200345 | 1.29E-05 | -0.0514  | 0.26762  | 0.007754 |
| -0.03358 | 0.46913  | 0.130061 | 0.00488  | 0.087986 | 0.05744  | 0.001195 | 0.97945  | 0.037329 |
| 0.19283  | 2.72E-05 | 0.233621 | 3.29E-07 | 0.326149 | 4.91E-13 | 0.023255 | 0.61618  | 0.020166 |
| 0.046786 | 0.31302  | 0.240925 | 1.36E-07 | 0.183029 | 6.94E-05 | 0.11344  | 0.01417  | 0.359414 |
| 0.217044 | 2.20E-06 | 0.347335 | 1.09E-14 | 0.334206 | 1.20E-13 | 0.163477 | 0.00039  | 0.375249 |
| 0.224962 | 9.04E-07 | 0.420443 | 1.99E-21 | 0.276382 | 1.24E-09 | 0.274351 | 1.65E-09 | 0.431519 |
| 0.241292 | 1.30E-07 | 0.378043 | 2.59E-17 | 0.357724 | 1.52E-15 | 0.136487 | 0.00312  | 0.318481 |
| 0.108714 | 0.01877  | 0.374397 | 5.49E-17 | 0.364172 | 4.31E-16 | 0.178361 | 0.00011  | 0.230475 |
| 0.033114 | 0.4753   | 0.173175 | 0.00017  | 0.160875 | 0.00048  | 0.077592 | 0.09397  | 0.261527 |
| 0.066109 | 0.15376  | 0.23602  | 2.47E-07 | 0.189199 | 3.87E-05 | 0.075384 | 0.10374  | 0.269217 |
| 0.115833 | 0.01225  | 0.292445 | 1.16E-10 | 0.158654 | 0.00058  | 0.107293 | 0.02039  | 0.353037 |

|           |          |          |          |          |          |          |          |          |
|-----------|----------|----------|----------|----------|----------|----------|----------|----------|
| 0.111671  | 0.01576  | 0.380222 | 1.64E-17 | 0.32297  | 8.47E-13 | 0.139412 | 0.00253  | 0.320112 |
| 0.024208  | 0.60181  | 0.38415  | 7.18E-18 | 0.282669 | 4.99E-10 | 0.110141 | 0.01726  | 0.191616 |
| 0.142627  | 0.002    | 0.294727 | 8.20E-11 | 0.22135  | 1.36E-06 | 0.148389 | 0.0013   | 0.323652 |
| 0.01119   | 0.80941  | 0.048705 | 0.29357  | 0.113834 | 0.01384  | 0.006794 | 0.88358  | 0.085378 |
| 0.23699   | 2.20E-07 | 0.314148 | 3.72E-12 | 0.365351 | 3.41E-16 | 0.122513 | 0.00804  | 0.193958 |
| -0.04762  | 0.30442  | -0.04806 | 0.30004  | 0.05551  | 0.2312   | -0.0586  | 0.20619  | 0.007887 |
| 0.060982  | 0.18833  | 0.084301 | 0.06874  | 0.210428 | 4.50E-06 | -0.02638 | 0.56957  | 0.067158 |
| -0.00012  | 0.99786  | 0.125088 | 0.0068   | 0.225471 | 8.53E-07 | 0.001268 | 0.97821  | 0.042244 |
| 0.024742  | 0.59381  | 0.121832 | 0.0084   | 0.181714 | 7.84E-05 | 0.010862 | 0.81491  | 0.154103 |
| 0.064314  | 0.16528  | 0.228929 | 5.72E-07 | 0.200179 | 1.31E-05 | 0.107495 | 0.02015  | 0.112615 |
| 0.258175  | 1.51E-08 | 0.149015 | 0.00124  | 0.28865  | 2.06E-10 | 0.132738 | 0.00406  | 0.210626 |
| 0.009727  | 0.83395  | 0.278995 | 8.50E-10 | 0.248266 | 5.45E-08 | 0.042435 | 0.3602   | 0.313722 |
| 0.10486   | 0.02344  | 0.199694 | 1.38E-05 | 0.289483 | 1.82E-10 | 0.05861  | 0.20614  | 0.121139 |
| 0.057361  | 0.21599  | 0.282439 | 5.16E-10 | 0.305319 | 1.56E-11 | 0.026943 | 0.56139  | 0.179444 |
| 0.069455  | 0.13395  | 0.001341 | 0.97695  | 0.067752 | 0.14377  | 0.160715 | 0.00049  | 0.242453 |
| 0.190465  | 3.43E-05 | 0.226481 | 7.59E-07 | 0.163608 | 0.00039  | 0.054976 | 0.23572  | 0.076307 |
| 0.082297  | 0.07562  | 0.168326 | 0.00026  | 0.214467 | 2.91E-06 | 0.063688 | 0.16944  | 0.274017 |
| 0.088698  | 0.05544  | 0.256969 | 1.77E-08 | 0.157541 | 0.00063  | 0.114283 | 0.01347  | 0.258678 |
| 0.234142  | 3.09E-07 | 0.32769  | 3.76E-13 | 0.289903 | 1.71E-10 | 0.071675 | 0.12192  | 0.21668  |
| 0.202717  | 1.01E-05 | 0.346024 | 1.40E-14 | 0.297248 | 5.56E-11 | 0.208656 | 5.44E-06 | 0.251926 |
| -0.1221   | 0.00826  | 0.03073  | 0.50768  | -0.03002 | 0.51755  | -0.03038 | 0.51257  | 0.027843 |
| 0.106115  | 0.02182  | -0.04024 | 0.38557  | 0.145898 | 0.00157  | -0.03815 | 0.41078  | 0.000623 |
| 0.328419  | 3.31E-13 | 0.477772 | 5.27E-28 | 0.420636 | 1.90E-21 | 0.189757 | 3.67E-05 | 0.439556 |
| 0.053749  | 0.24636  | 0.082698 | 0.0742   | 0.196284 | 1.94E-05 | -0.03558 | 0.44302  | 0.076664 |
| 0.141783  | 0.00213  | 0.17662  | 0.00012  | 0.20818  | 5.72E-06 | 0.076701 | 0.09782  | 0.139342 |
| 0.190692  | 3.35E-05 | 0.313539 | 4.12E-12 | 0.333709 | 1.31E-13 | 0.095454 | 0.03921  | 0.242404 |
| 0.25949   | 1.27E-08 | 0.517645 | 2.27E-33 | 0.458356 | 1.23E-25 | 0.232284 | 3.86E-07 | 0.462686 |
| -0.07757  | 0.09405  | 0.145202 | 0.00165  | 0.124551 | 0.00704  | 4.55E-05 | 0.99922  | 0.213424 |
| 0.127351  | 0.00585  | 0.249766 | 4.50E-08 | 0.236949 | 2.21E-07 | 0.183747 | 6.49E-05 | 0.35688  |
| 0.148159  | 0.00132  | 0.37187  | 9.20E-17 | 0.356689 | 1.86E-15 | 0.182701 | 7.15E-05 | 0.342264 |
| 0.139366  | 0.00254  | 0.293532 | 9.84E-11 | 0.306913 | 1.21E-11 | 0.12748  | 0.0058   | 0.241186 |
| 0.156793  | 0.00067  | 0.197078 | 1.79E-05 | 0.274455 | 1.63E-09 | 0.080712 | 0.08144  | 0.134273 |
| 0.234745  | 2.88E-07 | 0.49851  | 1.05E-30 | 0.523741 | 2.96E-34 | 0.187146 | 4.71E-05 | 0.29893  |
| -0.04589  | 0.32237  | 0.176498 | 0.00013  | 0.167638 | 0.00027  | 0.08161  | 0.0781   | 0.143709 |
| 0.229007  | 5.67E-07 | 0.258417 | 1.46E-08 | 0.348822 | 8.29E-15 | 0.063539 | 0.17044  | 0.103126 |
| -0.032    | 0.49023  | 0.271129 | 2.59E-09 | 0.275251 | 1.45E-09 | 0.096631 | 0.03684  | 0.285313 |
| 0.193524  | 2.55E-05 | 0.326904 | 4.31E-13 | 0.211618 | 3.97E-06 | 0.199018 | 1.47E-05 | 0.291609 |
| -0.0355   | 0.4441   | 0.087862 | 0.05779  | 0.020084 | 0.66509  | 0.001825 | 0.96863  | 0.109049 |
| 0.026836  | 0.56294  | 0.093177 | 0.04416  | 0.109664 | 0.01776  | 0.123106 | 0.00774  | 0.15348  |
| -7.56E-05 | 0.9987   | 0.032203 | 0.48754  | 0.074608 | 0.10735  | 0.076564 | 0.09842  | 0.143003 |
| 0.125679  | 0.00654  | 0.266688 | 4.80E-09 | 0.205898 | 7.27E-06 | 0.084208 | 0.06905  | 0.140199 |
| 0.033652  | 0.46816  | 0.113015 | 0.01454  | 0.162425 | 0.00042  | 0.070771 | 0.12671  | 0.261677 |
| 0.097264  | 0.03562  | 0.021896 | 0.63695  | 0.078334 | 0.09086  | 0.04826  | 0.298    | 0.037491 |
| 0.071816  | 0.12119  | 0.060439 | 0.19231  | 0.163939 | 0.00037  | 0.047114 | 0.30964  | 0.096093 |
| 0.055621  | 0.23026  | 0.326396 | 4.70E-13 | 0.257033 | 1.75E-08 | 0.070944 | 0.12578  | 0.175817 |

|          |          |          |         |          |          |          |         |          |
|----------|----------|----------|---------|----------|----------|----------|---------|----------|
| 0.014325 | 0.75751  | 0.070082 | 0.13046 | 0.178187 | 0.00011  | -0.05191 | 0.26295 | 0.009568 |
| 0.04345  | 0.34881  | 0.127018 | 0.00598 | 0.191932 | 2.97E-05 | -0.02547 | 0.58293 | 0.06274  |
| 0.047887 | 0.30177  | 0.110738 | 0.01666 | 0.170389 | 0.00022  | -0.02185 | 0.63761 | 0.053937 |
| 0.030147 | 0.51577  | 0.122313 | 0.00814 | 0.192976 | 2.69E-05 | 0.032067 | 0.48938 | 0.017901 |
| -0.01836 | 0.69228  | -0.0524  | 0.25842 | 0.002939 | 0.94949  | 0.024501 | 0.59741 | -0.08647 |
| -0.01347 | 0.7715   | 0.005902 | 0.89877 | 0.019812 | 0.66935  | -0.0457  | 0.32438 | -0.0254  |
| -0.05727 | 0.21668  | 0.07304  | 0.11496 | -0.02533 | 0.58507  | -0.06231 | 0.17889 | 0.06096  |
| -0.06246 | 0.1778   | -0.0093  | 0.84115 | 0.009316 | 0.84087  | -0.05268 | 0.25588 | -0.03029 |
| -0.02631 | 0.57067  | 3.91E-05 | 0.99933 | -0.00756 | 0.87053  | -0.00545 | 0.90656 | 0.012201 |
| 0.015373 | 0.74039  | 0.060938 | 0.18866 | 0.082419 | 0.07518  | 0.008699 | 0.85129 | 0.024312 |
| -0.05045 | 0.27657  | -0.01102 | 0.81219 | -0.02878 | 0.53502  | -0.04672 | 0.31366 | -0.02262 |
| -0.05827 | 0.20879  | 0.042969 | 0.35418 | -0.0496  | 0.28479  | 0.053658 | 0.24716 | 0.116716 |
| 0.087326 | 0.05934  | 0.093093 | 0.04435 | 0.149602 | 0.00118  | 0.07513  | 0.10491 | 0.107493 |
| -0.09968 | 0.03126  | -0.00432 | 0.9258  | -0.0229  | 0.62162  | -0.07339 | 0.11322 | 0.088216 |
| -0.01023 | 0.82547  | 0.023578 | 0.6113  | 0.04305  | 0.35327  | -0.00165 | 0.97165 | 0.010105 |
| -0.07275 | 0.11639  | -0.03207 | 0.48934 | 0.003923 | 0.93262  | -0.08848 | 0.05604 | -0.03082 |
| 0.057295 | 0.21651  | 0.132792 | 0.00404 | 0.090663 | 0.05023  | 0.018964 | 0.68272 | 0.087322 |
| -0.009   | 0.8462   | 0.099032 | 0.03239 | 0.170161 | 0.00022  | 0.075166 | 0.10474 | 0.084404 |
| 0.022097 | 0.63386  | 0.104406 | 0.02405 | 0.141704 | 0.00214  | 0.018061 | 0.69706 | 0.054528 |
| 0.015159 | 0.74388  | 0.132938 | 0.004   | 0.158418 | 0.00059  | 0.024718 | 0.59417 | 0.098753 |
| -0.03519 | 0.44801  | -0.05606 | 0.22657 | -0.00595 | 0.89791  | -0.04661 | 0.31481 | -0.02424 |
| -0.08916 | 0.05417  | -0.08069 | 0.08151 | 0.055236 | 0.23351  | -0.09568 | 0.03874 | -0.06879 |
| 0.041016 | 0.3765   | 0.169928 | 0.00022 | 0.145918 | 0.00157  | 0.06046  | 0.19215 | 0.046521 |
| -0.02849 | 0.53911  | 0.016815 | 0.71703 | 0.033577 | 0.46915  | -0.06005 | 0.19518 | 0.09696  |
| -0.0324  | 0.48484  | 0.009413 | 0.83923 | 0.022485 | 0.62791  | -0.05941 | 0.19997 | 0.108588 |
| -0.01169 | 0.80115  | 0.025324 | 0.58515 | 0.064514 | 0.16396  | -0.077   | 0.0965  | 0.004922 |
| -0.06498 | 0.1609   | 0.015936 | 0.73123 | 0.06588  | 0.1552   | -0.10419 | 0.02435 | -0.07557 |
| 0.127434 | 0.00582  | 0.162736 | 0.00041 | 0.301674 | 2.79E-11 | 0.042335 | 0.36133 | 0.029327 |
| 0.010026 | 0.82893  | -0.00325 | 0.94413 | 0.016759 | 0.71793  | -0.0494  | 0.28671 | -0.01795 |
| 0.043968 | 0.3431   | 0.004231 | 0.92734 | 0.022969 | 0.62053  | 0.005869 | 0.89935 | -0.03953 |
| -0.09108 | 0.04919  | 0.052256 | 0.25974 | 0.037227 | 0.4222   | -0.07947 | 0.08624 | -0.04547 |
| -0.09147 | 0.0482   | -0.0166  | 0.72054 | 0.021567 | 0.64203  | -0.14191 | 0.00211 | -0.04707 |
| 0.029442 | 0.52563  | 0.077921 | 0.09258 | 0.130609 | 0.0047   | 0.018903 | 0.68368 | 0.029816 |
| -0.04852 | 0.29543  | 0.004878 | 0.91627 | 0.01467  | 0.75186  | -0.0328  | 0.47953 | 0.025796 |
| -0.21771 | 2.04E-06 | 0.045191 | 0.32982 | -0.00541 | 0.90724  | -0.06853 | 0.13919 | -0.0553  |
| -0.09265 | 0.04538  | -0.01999 | 0.66662 | 0.008919 | 0.84756  | -0.12669 | 0.00612 | -0.10323 |
| 0.056865 | 0.21998  | 0.118715 | 0.01024 | 0.100553 | 0.02981  | -0.02571 | 0.5795  | -0.02023 |
| 0.107375 | 0.02029  | 0.170935 | 0.00021 | 0.171046 | 0.0002   | 0.119089 | 0.01    | 0.098243 |
| -0.03495 | 0.45121  | 0.088401 | 0.05626 | 0.118734 | 0.01023  | -0.07086 | 0.12625 | 0.057295 |
| -0.07803 | 0.09211  | -0.02118 | 0.64794 | 0.02236  | 0.62983  | -0.02702 | 0.56023 | -0.02897 |
| 0.012457 | 0.78833  | 0.092399 | 0.04597 | 0.112404 | 0.01509  | 0.003937 | 0.93238 | 0.069761 |
| -0.0129  | 0.78106  | 0.021872 | 0.63732 | 0.085745 | 0.06411  | 0.007744 | 0.86745 | 0.039644 |
| -0.08175 | 0.07761  | -0.03016 | 0.51561 | -0.01047 | 0.82144  | -0.1162  | 0.01198 | -0.08072 |
| -0.02149 | 0.64325  | 0.066182 | 0.15331 | 0.111371 | 0.01605  | -0.07608 | 0.10057 | -0.00442 |
| -0.04387 | 0.34416  | 0.080496 | 0.08226 | 0.134239 | 0.00366  | -0.09351 | 0.0434  | 0.012679 |

|          |          |          |          |          |          |          |          |          |
|----------|----------|----------|----------|----------|----------|----------|----------|----------|
| 0.052253 | 0.25977  | 0.210324 | 4.55E-06 | 0.208493 | 5.53E-06 | 0.100511 | 0.02987  | 0.148938 |
| 0.04419  | 0.34066  | 0.24466  | 8.58E-08 | 0.282864 | 4.85E-10 | 0.066197 | 0.15322  | 0.139337 |
| 0.010249 | 0.82518  | 0.096672 | 0.03676  | 0.082661 | 0.07433  | -0.0496  | 0.2848   | 0.024341 |
| -0.02452 | 0.59714  | 0.052864 | 0.25423  | -0.00652 | 0.88817  | -0.00118 | 0.97966  | 0.092401 |
| -0.00516 | 0.91138  | 0.210033 | 4.70E-06 | 0.207096 | 6.41E-06 | 0.098931 | 0.03256  | 0.121001 |
| -0.02524 | 0.58636  | 0.027839 | 0.54844  | 0.057582 | 0.21421  | -0.09558 | 0.03896  | -0.00851 |
| 0.041538 | 0.37045  | 0.165737 | 0.00032  | 0.235337 | 2.68E-07 | 0.007552 | 0.8707   | 0.051637 |
| 0.026754 | 0.56413  | 0.005761 | 0.90118  | 0.048521 | 0.2954   | -0.07592 | 0.10128  | -0.03884 |
| -0.00483 | 0.91709  | 0.245559 | 7.66E-08 | 0.299422 | 3.97E-11 | 0.054374 | 0.24089  | 0.122425 |
| -0.07211 | 0.11967  | 0.026106 | 0.57362  | 0.01834  | 0.69263  | -0.03908 | 0.39949  | 0.007592 |
| -0.02025 | 0.66241  | -0.01353 | 0.77058  | 0.038044 | 0.41208  | -0.02805 | 0.54544  | -0.04618 |
| 0.015805 | 0.73337  | -0.09033 | 0.05107  | -0.02668 | 0.56519  | 0.021381 | 0.64489  | -0.06473 |
| -0.02723 | 0.55728  | -0.08372 | 0.07067  | -0.03931 | 0.39674  | -0.12659 | 0.00615  | -0.11311 |
| -0.03014 | 0.5159   | 0.044321 | 0.33923  | 0.012366 | 0.78984  | -0.03418 | 0.4612   | 0.076859 |
| -0.00632 | 0.89164  | -0.0086  | 0.85292  | 0.017132 | 0.71193  | -0.08409 | 0.06944  | -0.0017  |
| 0.033672 | 0.46789  | 0.06275  | 0.17582  | 0.02295  | 0.62081  | 0.018621 | 0.68815  | 0.077271 |
| -0.08508 | 0.06621  | -0.07941 | 0.08651  | -0.05167 | 0.26517  | -0.08169 | 0.07782  | -0.19607 |
| -0.08656 | 0.06162  | -0.09991 | 0.03087  | -0.07612 | 0.10039  | -0.02364 | 0.61038  | -0.16949 |
| -0.12216 | 0.00822  | -0.10583 | 0.02217  | -0.06405 | 0.16703  | -0.07313 | 0.11453  | -0.17353 |
| -0.08064 | 0.08172  | 0.088934 | 0.05479  | 0.067865 | 0.1431   | -0.06351 | 0.17065  | -0.06624 |
| 0.333342 | 1.39E-13 | -0.19368 | 2.51E-05 | -0.11901 | 0.01005  | -0.03496 | 0.45099  | -0.17186 |
| 0.45709  | 1.74E-25 | 0.15683  | 0.00067  | 0.016324 | 0.72495  | 0.144857 | 0.0017   | 0.048789 |
| 0.377536 | 2.87E-17 | 0.007688 | 0.8684   | 0.052931 | 0.25363  | 0.154528 | 0.00081  | 0.127087 |
| 0.331489 | 1.93E-13 | -0.14144 | 0.00219  | 0.029867 | 0.51967  | -0.04469 | 0.33524  | -0.30412 |
| 0.493024 | 5.65E-30 | -0.03903 | 0.4001   | 0.103849 | 0.02482  | 0.195641 | 2.07E-05 | -0.04204 |
| 0.302207 | 2.56E-11 | -0.08276 | 0.07398  | -0.14621 | 0.00153  | 0.039881 | 0.38986  | -0.148   |
| 0.372064 | 8.84E-17 | -0.07765 | 0.09374  | -0.02024 | 0.66272  | 0.117683 | 0.01092  | -0.04733 |
| 0.400333 | 2.11E-19 | 0.065648 | 0.15666  | 0.116744 | 0.01158  | 0.099854 | 0.03097  | -0.04143 |
| 0.342105 | 2.88E-14 | -0.00024 | 0.9958   | 0.075063 | 0.10522  | 0.065962 | 0.15468  | -0.1793  |
| 0.177765 | 0.00011  | -0.22343 | 1.08E-06 | -0.28636 | 2.90E-10 | 0.07151  | 0.12279  | -0.03894 |
| 0.606243 | 3.35E-48 | 0.033802 | 0.46618  | 0.037114 | 0.42361  | 0.251528 | 3.59E-08 | 0.159567 |
| 0.398282 | 3.33E-19 | -0.00766 | 0.86887  | 0.126187 | 0.00632  | 0.249549 | 4.63E-08 | 0.232328 |
| 0.32708  | 4.18E-13 | -0.10325 | 0.02566  | -0.03221 | 0.4874   | 0.152809 | 0.00092  | 0.161672 |
| -0.43395 | 7.23E-23 | -0.07602 | 0.10085  | -0.19019 | 3.52E-05 | -0.18647 | 5.03E-05 | -0.11534 |
| 0.310184 | 7.13E-12 | -0.0883  | 0.05655  | -0.30689 | 1.21E-11 | 0.145855 | 0.00158  | -0.01265 |
| 0.420244 | 2.09E-21 | -0.02069 | 0.65562  | -0.13082 | 0.00463  | 0.220992 | 1.42E-06 | 0.053102 |
| 0.386208 | 4.63E-18 | 0.056065 | 0.22656  | 0.020759 | 0.65455  | 0.130576 | 0.00471  | 0.064619 |
| 0.504027 | 1.86E-31 | 0.169307 | 0.00024  | 0.240972 | 1.35E-07 | 0.203374 | 9.44E-06 | 0.131136 |
| 0.44778  | 2.08E-24 | -0.03984 | 0.39036  | -0.01396 | 0.76358  | 0.172962 | 0.00017  | 0.11256  |
| 0.480444 | 2.42E-28 | -0.10459 | 0.0238   | -0.01603 | 0.72978  | 0.155683 | 0.00074  | -0.03452 |
| 0.537868 | 2.25E-36 | 0.176262 | 0.00013  | 0.015796 | 0.73352  | 0.356591 | 1.89E-15 | 0.357958 |
| 0.272215 | 2.23E-09 | -0.13044 | 0.00475  | -0.16854 | 0.00025  | 0.068046 | 0.14204  | 0.002334 |
| 0.32315  | 8.21E-13 | -0.0736  | 0.11221  | -0.15705 | 0.00066  | 0.119054 | 0.01002  | 0.096906 |
| 0.448365 | 1.78E-24 | 0.020429 | 0.65969  | 0.036228 | 0.43477  | 0.105927 | 0.02206  | -0.06668 |
| 0.177462 | 0.00012  | -0.29797 | 4.97E-11 | -0.28771 | 2.37E-10 | 0.013559 | 0.7701   | -0.16813 |

|          |          |          |          |          |          |          |          |          |
|----------|----------|----------|----------|----------|----------|----------|----------|----------|
| 0.449544 | 1.31E-24 | -0.04825 | 0.29815  | -0.14912 | 0.00123  | 0.261685 | 9.45E-09 | 0.166608 |
| 0.579129 | 3.55E-43 | 0.243895 | 9.43E-08 | 0.157285 | 0.00065  | 0.221633 | 1.32E-06 | 0.200578 |
| 0.345721 | 1.48E-14 | 0.045818 | 0.32315  | 0.224551 | 9.47E-07 | 0.052839 | 0.25445  | -0.11694 |
| 0.340219 | 4.06E-14 | 0.019854 | 0.6687   | -0.1125  | 0.015    | 0.138867 | 0.00263  | 0.000603 |
| 0.391747 | 1.40E-18 | 0.133207 | 0.00393  | 0.121084 | 0.00881  | 0.273866 | 1.77E-09 | 0.055482 |
| 0.167654 | 0.00027  | -0.23897 | 1.73E-07 | -0.1324  | 0.00415  | 0.094663 | 0.04087  | -0.147   |
| 0.088107 | 0.05709  | -0.28741 | 2.48E-10 | -0.23257 | 3.73E-07 | -0.04852 | 0.29546  | -0.11182 |
| 0.33817  | 5.88E-14 | -0.13614 | 0.0032   | -0.16935 | 0.00024  | 0.018713 | 0.68669  | -0.04152 |
| 0.48021  | 2.59E-28 | 0.003125 | 0.9463   | -0.08239 | 0.0753   | 0.157284 | 0.00065  | -0.01339 |
| 0.678964 | 2.14E-64 | 0.185522 | 5.50E-05 | 0.138866 | 0.00263  | 0.374644 | 5.22E-17 | 0.195832 |
| 0.57484  | 2.01E-42 | 0.064564 | 0.16363  | 0.119581 | 0.00969  | 0.201779 | 1.11E-05 | 0.098931 |
| 0.245802 | 7.43E-08 | -0.3377  | 6.40E-14 | -0.32668 | 4.48E-13 | 0.03517  | 0.44832  | -0.21185 |
| 0.65728  | 4.29E-59 | 0.145193 | 0.00166  | 0.16851  | 0.00025  | 0.318034 | 1.95E-12 | 0.041605 |
| 0.33349  | 1.36E-13 | -0.14987 | 0.00116  | -0.09943 | 0.03169  | 0.192658 | 2.77E-05 | -0.04185 |
| 0.141915 | 0.00211  | -0.28425 | 3.96E-10 | -0.36359 | 4.83E-16 | 0.108151 | 0.0194   | -0.0338  |
| 0.667441 | 1.60E-61 | 0.278536 | 9.08E-10 | 0.141941 | 0.00211  | 0.34758  | 1.05E-14 | 0.242707 |
| 0.363699 | 4.73E-16 | -0.08852 | 0.05592  | -0.04846 | 0.29599  | 0.17158  | 0.00019  | 0.106968 |
| 0.560094 | 6.40E-40 | 0.137549 | 0.0029   | 0.187456 | 4.58E-05 | 0.180084 | 9.11E-05 | 0.042058 |
| 0.294531 | 8.45E-11 | -0.14418 | 0.00179  | -0.15479 | 0.00079  | 0.156982 | 0.00066  | 0.008855 |
| 0.490997 | 1.05E-29 | 0.038302 | 0.40892  | 0.014028 | 0.76239  | 0.32351  | 7.72E-13 | 0.309794 |
| 0.494727 | 3.36E-30 | 0.123991 | 0.0073   | 0.218421 | 1.89E-06 | 0.065611 | 0.1569   | -0.0827  |
| -0.3964  | 5.06E-19 | -0.06732 | 0.14638  | -0.20397 | 8.88E-06 | -0.18118 | 8.24E-05 | -0.07587 |
| 0.23769  | 2.02E-07 | -0.05241 | 0.25833  | -0.07615 | 0.10028  | 0.168895 | 0.00025  | 0.165489 |
| 0.374994 | 4.86E-17 | 0.043745 | 0.34555  | 0.057369 | 0.21592  | 0.224054 | 1.00E-06 | 0.109777 |
| 0.298018 | 4.93E-11 | -0.08415 | 0.06925  | 0.024842 | 0.59232  | 0.067608 | 0.14463  | 0.016515 |
| 0.225683 | 8.32E-07 | -0.08553 | 0.06478  | -0.18685 | 4.84E-05 | 0.146252 | 0.00153  | -0.08622 |
| 0.164585 | 0.00035  | -0.23671 | 2.27E-07 | -0.22453 | 9.50E-07 | 0.048123 | 0.29938  | -0.16884 |
| 0.334187 | 1.20E-13 | -0.13354 | 0.00384  | -0.15273 | 0.00093  | 0.112845 | 0.01469  | -0.04093 |
| 0.273078 | 1.97E-09 | -0.13058 | 0.00471  | -0.05936 | 0.20035  | 0.082629 | 0.07444  | 0.066944 |
| 0.590913 | 2.66E-45 | 0.069499 | 0.1337   | 0.135096 | 0.00344  | 0.252489 | 3.17E-08 | 0.091883 |
| 0.465625 | 1.66E-26 | -0.03684 | 0.42708  | 0.089026 | 0.05454  | 0.185445 | 5.54E-05 | 0.147241 |
| 0.379133 | 2.06E-17 | -0.02396 | 0.60547  | 0.145212 | 0.00165  | 0.023792 | 0.60806  | -0.18001 |
| 0.658266 | 2.51E-59 | 0.210564 | 4.44E-06 | 0.132026 | 0.00426  | 0.267481 | 4.30E-09 | 0.137007 |
| 0.197619 | 1.70E-05 | -0.26511 | 5.95E-09 | -0.20665 | 6.72E-06 | 0.02753  | 0.55289  | 0.016416 |
| 0.398869 | 2.92E-19 | -0.08894 | 0.05477  | -0.12602 | 0.00639  | 0.269655 | 3.19E-09 | 0.283883 |
| 0.201333 | 1.16E-05 | -0.22288 | 1.15E-06 | -0.17239 | 0.00018  | 0.075262 | 0.1043   | -0.05591 |
| 0.362755 | 5.70E-16 | 0.01399  | 0.76301  | -0.02036 | 0.6608   | 0.109768 | 0.01765  | 0.015211 |
| 0.319267 | 1.59E-12 | -0.13707 | 0.003    | -0.06519 | 0.15957  | 0.025687 | 0.57978  | -0.08795 |
| 0.145389 | 0.00163  | -0.14857 | 0.00128  | -0.1898  | 3.66E-05 | 0.097061 | 0.03601  | -0.1442  |
| 0.556845 | 2.20E-39 | 0.011682 | 0.80121  | 0.114243 | 0.0135   | 0.108247 | 0.01929  | -0.06584 |
| 0.589852 | 4.16E-45 | 0.066878 | 0.14902  | 0.251118 | 3.79E-08 | 0.129244 | 0.00515  | 0.024296 |
| 0.327587 | 3.83E-13 | -0.15765 | 0.00063  | -0.14044 | 0.00235  | 0.114665 | 0.01316  | -0.00926 |
| 0.229794 | 5.17E-07 | -0.22727 | 6.93E-07 | -0.13349 | 0.00385  | 0.084094 | 0.06943  | -0.02964 |
| 0.522179 | 5.01E-34 | 0.150476 | 0.00111  | 0.301913 | 2.68E-11 | 0.208117 | 5.76E-06 | 0.00309  |
| 0.447253 | 2.39E-24 | 0.157831 | 0.00062  | 0.078932 | 0.08842  | 0.394733 | 7.31E-19 | 0.395893 |

|          |          |          |          |          |          |          |          |          |
|----------|----------|----------|----------|----------|----------|----------|----------|----------|
| 0.349368 | 7.48E-15 | -0.08257 | 0.07465  | -0.05246 | 0.25787  | 0.090536 | 0.05055  | 0.036907 |
| 0.242412 | 1.13E-07 | -0.07784 | 0.09292  | -0.0123  | 0.79098  | 0.035389 | 0.4455   | -0.10597 |
| 0.448069 | 1.93E-24 | -0.00274 | 0.9529   | -0.05926 | 0.20115  | 0.151494 | 0.00102  | 0.087988 |
| 0.374572 | 5.30E-17 | 0.097544 | 0.03509  | -0.03632 | 0.43362  | 0.139575 | 0.0025   | 0.045268 |
| 0.247358 | 6.11E-08 | -0.08485 | 0.06695  | -0.09759 | 0.03501  | 0.130333 | 0.00479  | 0.096715 |
| 0.377094 | 3.15E-17 | -0.05416 | 0.24275  | -0.04495 | 0.33243  | -0.00081 | 0.98605  | -0.11929 |
| 0.465194 | 1.88E-26 | 0.133698 | 0.0038   | 0.04215  | 0.36344  | 0.390436 | 1.87E-18 | 0.142063 |
| 0.640257 | 3.13E-55 | 0.196277 | 1.94E-05 | 0.264347 | 6.60E-09 | 0.263568 | 7.34E-09 | 0.187626 |
| 0.305507 | 1.52E-11 | -0.00974 | 0.83372  | 0.067565 | 0.14488  | 0.009648 | 0.83527  | -0.13507 |
| 0.380785 | 1.46E-17 | 0.208058 | 5.79E-06 | 0.205315 | 7.72E-06 | 0.222324 | 1.22E-06 | 0.059956 |
| 0.41319  | 1.11E-20 | -0.00839 | 0.85651  | -0.04364 | 0.34673  | 0.183287 | 6.77E-05 | 0.058259 |
| 0.199526 | 1.40E-05 | -0.17271 | 0.00018  | -0.12186 | 0.00839  | -0.00279 | 0.95197  | -0.13899 |
| 0.517863 | 2.11E-33 | 0.183154 | 6.86E-05 | 0.119835 | 0.00954  | 0.145996 | 0.00156  | 0.038565 |
| 0.189394 | 3.80E-05 | -0.273   | 2.00E-09 | -0.21078 | 4.34E-06 | 0.100138 | 0.03049  | -0.08938 |
| 0.462852 | 3.59E-26 | 0.133375 | 0.00388  | 0.074903 | 0.10596  | 0.245042 | 8.18E-08 | 0.249124 |
| 0.508221 | 4.89E-32 | 0.07333  | 0.11352  | 0.061223 | 0.18659  | 0.258573 | 1.43E-08 | 0.017257 |
| 0.296616 | 6.13E-11 | -0.08367 | 0.07084  | -0.20847 | 5.55E-06 | 0.278801 | 8.75E-10 | 0.261243 |
| 0.331929 | 1.79E-13 | -0.08286 | 0.07363  | 0.017629 | 0.70397  | 0.053895 | 0.24508  | -0.14642 |
| 0.521856 | 5.59E-34 | 0.165656 | 0.00032  | -0.02654 | 0.5672   | 0.315436 | 3.01E-12 | 0.18957  |
| 0.563388 | 1.81E-40 | 0.029011 | 0.53172  | 0.092754 | 0.04514  | 0.239633 | 1.60E-07 | 0.015027 |
| 0.559077 | 9.43E-40 | 0.170877 | 0.00021  | 0.099694 | 0.03124  | 0.226059 | 7.97E-07 | 0.092141 |
| 0.360647 | 8.62E-16 | -0.00432 | 0.92583  | -0.09001 | 0.05191  | 0.174858 | 0.00015  | 0.245629 |
| 0.664656 | 7.56E-61 | 0.245518 | 7.70E-08 | 0.336261 | 8.29E-14 | 0.383268 | 8.66E-18 | 0.232118 |
| 0.356136 | 2.07E-15 | -0.04894 | 0.29124  | -0.09825 | 0.03378  | 0.088395 | 0.05628  | -0.12711 |
| 0.631789 | 2.13E-53 | 0.243258 | 1.02E-07 | 0.144847 | 0.0017   | 0.316741 | 2.42E-12 | 0.231007 |
| 0.377405 | 2.95E-17 | 0.067855 | 0.14316  | -0.05045 | 0.27659  | 0.1712   | 0.0002   | 0.042994 |
| 0.364985 | 3.67E-16 | 0.084517 | 0.06803  | -0.06694 | 0.14867  | 0.231604 | 4.18E-07 | 0.062129 |
| 0.241044 | 1.34E-07 | -0.07199 | 0.12028  | 0.065534 | 0.15739  | -0.07072 | 0.12701  | -0.09118 |
| 0.629627 | 6.12E-53 | 0.197504 | 1.72E-05 | 0.144317 | 0.00177  | 0.268378 | 3.80E-09 | 0.125501 |
| 0.366912 | 2.50E-16 | -0.03644 | 0.43209  | -0.03264 | 0.48169  | 0.082298 | 0.07562  | -0.08136 |
| 0.389354 | 2.36E-18 | -0.12143 | 0.00862  | -0.13472 | 0.00354  | 0.097621 | 0.03494  | -0.01974 |
| 0.265972 | 5.29E-09 | -0.07155 | 0.12256  | -0.01735 | 0.70841  | 0.052983 | 0.25316  | -0.21581 |
| 0.573883 | 2.94E-42 | 0.226906 | 7.23E-07 | 0.027934 | 0.54707  | 0.333692 | 1.31E-13 | 0.328577 |
| 0.305221 | 1.59E-11 | -0.30421 | 1.87E-11 | -0.17049 | 0.00021  | 0.066079 | 0.15395  | -0.09339 |
| 0.358149 | 1.40E-15 | 0.008005 | 0.86303  | 0.118119 | 0.01063  | 0.136882 | 0.00304  | -0.0709  |
| 0.151798 | 0.001    | -0.09401 | 0.0423   | 0.031956 | 0.49089  | -0.03449 | 0.45718  | -0.01808 |
| 0.423161 | 1.03E-21 | 0.111034 | 0.01637  | 0.25114  | 3.78E-08 | 0.002571 | 0.95581  | -0.09775 |
| 0.107063 | 0.02066  | -0.42471 | 7.09E-22 | -0.30985 | 7.54E-12 | -0.17393 | 0.00016  | -0.37274 |
| 0.592311 | 1.47E-45 | 0.206938 | 6.52E-06 | 0.01012  | 0.82734  | 0.378181 | 2.51E-17 | 0.345117 |
| 0.443662 | 6.08E-24 | 0.130002 | 0.0049   | -0.02221 | 0.63218  | 0.182506 | 7.28E-05 | 0.170377 |
| 0.652415 | 5.77E-58 | 0.223381 | 1.08E-06 | 0.224782 | 9.22E-07 | 0.347431 | 1.08E-14 | 0.262318 |
| 0.391212 | 1.58E-18 | -0.12386 | 0.00737  | -0.08663 | 0.06139  | 0.028043 | 0.5455   | -0.07076 |
| 0.238357 | 1.86E-07 | -0.1529  | 0.00092  | -0.28493 | 3.58E-10 | 0.031855 | 0.49226  | -0.0478  |
| 0.147638 | 0.00138  | -0.31167 | 5.59E-12 | -0.24617 | 7.09E-08 | 0.012175 | 0.79301  | -0.18366 |
| -0.37592 | 4.01E-17 | -0.13069 | 0.00467  | -0.13117 | 0.00452  | -0.20424 | 8.63E-06 | -0.06848 |



|          |          |          |          |          |          |          |          |          |
|----------|----------|----------|----------|----------|----------|----------|----------|----------|
| -0.0013  | 0.97759  | 0.244513 | 8.74E-08 | 0.155969 | 0.00072  | 0.039311 | 0.39668  | 0.260189 |
| -0.3457  | 1.48E-14 | 0.011355 | 0.80666  | -0.03203 | 0.48982  | -0.15116 | 0.00105  | 0.03928  |
| -0.53333 | 1.11E-35 | -0.30148 | 2.87E-11 | -0.3146  | 3.46E-12 | -0.33441 | 1.15E-13 | -0.20258 |
| -0.41934 | 2.59E-21 | -0.08152 | 0.07843  | -0.19843 | 1.56E-05 | -0.18056 | 8.71E-05 | -0.01963 |
| -0.33429 | 1.18E-13 | -0.00848 | 0.85496  | -0.03354 | 0.46967  | -0.16673 | 0.0003   | 0.002903 |
| -0.32267 | 8.91E-13 | -0.0491  | 0.28968  | -0.0551  | 0.23465  | -0.17417 | 0.00016  | -0.02716 |
| -0.325   | 5.98E-13 | -0.06427 | 0.16554  | -0.15894 | 0.00057  | -0.21912 | 1.75E-06 | -0.05018 |
| -0.44165 | 1.02E-23 | -0.10309 | 0.02589  | -0.27334 | 1.90E-09 | -0.2275  | 6.75E-07 | -0.05248 |
| -0.30511 | 1.62E-11 | -0.0363  | 0.43388  | -0.0434  | 0.34939  | -0.17303 | 0.00017  | 0.013931 |
| -0.12092 | 0.00891  | 0.077494 | 0.09439  | 0.208569 | 5.49E-06 | -0.10437 | 0.0241   | 0.084124 |
| -0.25239 | 3.21E-08 | 0.088657 | 0.05555  | 0.149703 | 0.00118  | -0.15561 | 0.00074  | 0.031616 |
| -0.35287 | 3.86E-15 | -0.00783 | 0.86603  | -0.06997 | 0.13106  | -0.18195 | 7.67E-05 | -0.0421  |
| 0.311762 | 5.51E-12 | -0.0722  | 0.11923  | 0.094586 | 0.04104  | -0.04477 | 0.33434  | -0.20806 |
| 0.370779 | 1.15E-16 | 0.03634  | 0.43335  | -0.09554 | 0.03903  | 0.152794 | 0.00092  | 0.182578 |
| 0.402837 | 1.20E-19 | 0.025766 | 0.57862  | 0.150128 | 0.00114  | 0.071742 | 0.12157  | 0.104933 |
| 0.622108 | 2.26E-51 | 0.169011 | 0.00024  | 0.040687 | 0.38035  | 0.236103 | 2.45E-07 | 0.073773 |
| 0.25727  | 1.70E-08 | -0.20679 | 6.62E-06 | -0.3612  | 7.74E-16 | 0.045961 | 0.32165  | -0.12725 |
| 0.304973 | 1.65E-11 | -0.06916 | 0.13561  | -0.06725 | 0.14679  | 0.1437   | 0.00185  | 0.090652 |
| 0.241998 | 1.19E-07 | -0.27275 | 2.07E-09 | -0.1902  | 3.52E-05 | -0.08039 | 0.08268  | -0.25847 |
| 0.697587 | 2.51E-69 | 0.327386 | 3.96E-13 | 0.273898 | 1.76E-09 | 0.367059 | 2.43E-16 | 0.290231 |
| 0.628014 | 1.34E-52 | 0.172365 | 0.00018  | 0.155115 | 0.00077  | 0.349207 | 7.71E-15 | 0.241866 |
| 0.186811 | 4.87E-05 | -0.30535 | 1.55E-11 | -0.31835 | 1.85E-12 | 0.058102 | 0.2101   | -0.09504 |
| 0.520866 | 7.78E-34 | 0.16603  | 0.00031  | -0.04244 | 0.36014  | 0.309727 | 7.68E-12 | 0.28863  |
| 0.368881 | 1.68E-16 | 0.011451 | 0.80507  | 0.108649 | 0.01885  | 0.139229 | 0.00257  | 0.036826 |
| 0.372697 | 7.77E-17 | 0.050727 | 0.27396  | 0.005512 | 0.90544  | 0.228819 | 5.79E-07 | 0.181841 |
| 0.482101 | 1.49E-28 | 0.032637 | 0.48169  | 0.168658 | 0.00025  | 0.053217 | 0.25107  | -0.05898 |
| 0.438122 | 2.52E-23 | 0.09301  | 0.04454  | 0.232194 | 3.90E-07 | 0.171511 | 0.0002   | -0.08684 |
| 0.372348 | 8.35E-17 | -0.15027 | 0.00112  | -0.00618 | 0.89399  | 0.05616  | 0.22577  | -0.04573 |
| 0.656786 | 5.59E-59 | 0.246857 | 6.51E-08 | 0.277589 | 1.04E-09 | 0.309736 | 7.67E-12 | 0.288507 |
| 0.472696 | 2.27E-27 | 0.000956 | 0.98356  | 0.202561 | 1.03E-05 | 0.163769 | 0.00038  | -0.07276 |
| 0.175953 | 0.00013  | -0.32281 | 8.71E-13 | -0.23502 | 2.78E-07 | -0.11231 | 0.01517  | -0.27976 |
| 0.438799 | 2.12E-23 | 0.026664 | 0.56545  | 0.165607 | 0.00033  | 0.084458 | 0.06823  | 0.048734 |
| 0.666116 | 3.35E-61 | 0.258567 | 1.43E-08 | 0.261322 | 9.93E-09 | 0.440816 | 1.27E-23 | 0.336669 |
| 0.615394 | 5.23E-50 | 0.197546 | 1.71E-05 | 0.247661 | 5.88E-08 | 0.332472 | 1.63E-13 | 0.306009 |
| 0.340374 | 3.94E-14 | 0.046083 | 0.32036  | 0.119786 | 0.00957  | 0.215231 | 2.68E-06 | 0.169916 |
| 0.154427 | 0.00081  | -0.41732 | 4.19E-21 | -0.30134 | 2.94E-11 | -0.11195 | 0.0155   | -0.31347 |
| 0.311674 | 5.59E-12 | -0.09891 | 0.0326   | -0.18156 | 7.95E-05 | 0.240728 | 1.40E-07 | 0.106647 |
| 0.530362 | 3.09E-35 | 0.094404 | 0.04143  | 0.238074 | 1.93E-07 | 0.210987 | 4.24E-06 | 0.18614  |
| 0.093909 | 0.04252  | -0.21735 | 2.12E-06 | -0.09433 | 0.04158  | -0.10427 | 0.02423  | -0.11289 |
| 0.650693 | 1.43E-57 | 0.328791 | 3.10E-13 | 0.234816 | 2.86E-07 | 0.27383  | 1.78E-09 | 0.239788 |
| 0.432367 | 1.08E-22 | 0.192954 | 2.69E-05 | 0.328264 | 3.40E-13 | 0.154949 | 0.00078  | -0.01503 |
| 0.620088 | 5.86E-51 | 0.201655 | 1.13E-05 | 0.132746 | 0.00406  | 0.250843 | 3.92E-08 | 0.170151 |
| 0.578708 | 4.21E-43 | 0.096268 | 0.03756  | 0.154527 | 0.00081  | 0.278124 | 9.64E-10 | -0.01159 |
| 0.442707 | 7.79E-24 | 0.001659 | 0.97148  | 0.149427 | 0.0012   | 0.128487 | 0.00542  | -0.07615 |
| 0.145735 | 0.00159  | -0.17438 | 0.00015  | -0.24914 | 4.88E-08 | 0.168202 | 0.00026  | 0.119225 |

|          |          |          |          |          |          |          |          |          |
|----------|----------|----------|----------|----------|----------|----------|----------|----------|
| 0.509815 | 2.93E-32 | 0.189169 | 3.88E-05 | 0.027073 | 0.55949  | 0.303086 | 2.23E-11 | 0.365321 |
| 0.180063 | 9.12E-05 | -0.3539  | 3.17E-15 | -0.35175 | 4.77E-15 | 0.007339 | 0.87432  | -0.09917 |
| 0.554559 | 5.18E-39 | 0.16017  | 0.00051  | 0.22461  | 9.41E-07 | 0.224182 | 9.88E-07 | 0.052956 |
| 0.324774 | 6.22E-13 | -0.11398 | 0.01372  | -0.01558 | 0.73707  | -0.01259 | 0.78615  | -0.14611 |
| 0.362716 | 5.74E-16 | 0.068918 | 0.13699  | -0.02056 | 0.65765  | 0.267531 | 4.27E-09 | 0.239305 |
| 0.133966 | 0.00373  | -0.21915 | 1.74E-06 | -0.33093 | 2.13E-13 | 0.111861 | 0.01559  | -0.0849  |
| 0.174243 | 0.00015  | -0.29111 | 1.42E-10 | -0.28556 | 3.26E-10 | 0.020887 | 0.65255  | -0.11892 |
| 0.566151 | 6.21E-41 | 0.020793 | 0.65401  | 0.015365 | 0.74052  | 0.250521 | 4.09E-08 | 0.056424 |
| 0.587945 | 9.30E-45 | 0.169874 | 0.00023  | 0.213811 | 3.13E-06 | 0.316424 | 2.55E-12 | 0.109828 |
| 0.285827 | 3.13E-10 | -0.09157 | 0.04796  | 0.174876 | 0.00015  | 0.032881 | 0.47842  | -0.2046  |
| 0.511661 | 1.61E-32 | 0.022823 | 0.62276  | 0.155439 | 0.00075  | 0.085431 | 0.06509  | -0.13036 |
| 0.490894 | 1.08E-29 | 0.175619 | 0.00014  | 0.139071 | 0.0026   | 0.148276 | 0.00131  | 0.103182 |
| 0.349901 | 6.77E-15 | -0.08957 | 0.05307  | 0.028477 | 0.5393   | 0.112195 | 0.01528  | 0.02454  |
| 0.462265 | 4.22E-26 | 0.204016 | 8.84E-06 | 0.157097 | 0.00066  | 0.320019 | 1.40E-12 | 0.167642 |
| 0.147757 | 0.00136  | -0.27653 | 1.21E-09 | -0.13858 | 0.00269  | -0.02222 | 0.63196  | -0.15751 |
| 0.42799  | 3.18E-22 | -0.03285 | 0.47883  | 0.094368 | 0.04151  | 0.116937 | 0.01144  | 0.038423 |
| 0.514959 | 5.50E-33 | 0.051865 | 0.26333  | 0.086607 | 0.06147  | 0.274223 | 1.68E-09 | 0.029054 |
| 0.359444 | 1.09E-15 | 0.121906 | 0.00836  | -0.00194 | 0.96672  | 0.395055 | 6.81E-19 | 0.267306 |
| 0.229447 | 5.38E-07 | -0.18406 | 6.30E-05 | -0.14722 | 0.00142  | 0.033632 | 0.46843  | -0.10406 |
| 0.217296 | 2.14E-06 | -0.20144 | 1.15E-05 | 0.006339 | 0.89133  | 0.001669 | 0.97131  | -0.07552 |
| 0.335505 | 9.49E-14 | -0.04185 | 0.36687  | -0.15756 | 0.00063  | 0.178113 | 0.00011  | 0.159929 |
| 0.327769 | 3.71E-13 | -0.00541 | 0.90712  | -0.1769  | 0.00012  | 0.174092 | 0.00016  | -0.04798 |
| 0.438625 | 2.22E-23 | 0.105672 | 0.02238  | 0.023367 | 0.61449  | 0.206033 | 7.17E-06 | -0.10831 |
| 0.517256 | 2.58E-33 | 0.075461 | 0.10338  | -0.01478 | 0.75004  | 0.253879 | 2.65E-08 | 0.076244 |
| 0.442704 | 7.79E-24 | 0.077617 | 0.09387  | -0.04605 | 0.32075  | 0.261299 | 9.96E-09 | 0.111276 |
| 0.353152 | 3.66E-15 | 0.010825 | 0.81553  | -0.01505 | 0.7457   | 0.322792 | 8.73E-13 | 0.24584  |
| 0.4788   | 3.91E-28 | -0.10019 | 0.03041  | 0.044519 | 0.33708  | 0.142055 | 0.00209  | -0.00177 |
| 0.408619 | 3.20E-20 | 0.10049  | 0.02991  | 0.216756 | 2.27E-06 | 0.112746 | 0.01478  | -0.05912 |
| 0.319798 | 1.45E-12 | -0.11332 | 0.01428  | -0.1474  | 0.0014   | 0.122079 | 0.00827  | 0.008803 |
| 0.237035 | 2.19E-07 | -0.22536 | 8.64E-07 | -0.15746 | 0.00064  | 0.048447 | 0.29614  | 0.000163 |
| 0.484912 | 6.49E-29 | 0.075524 | 0.10309  | 0.17727  | 0.00012  | 0.127198 | 0.00591  | -0.00923 |
| 0.415091 | 7.09E-21 | 0.144282 | 0.00177  | 0.18358  | 6.59E-05 | 0.115663 | 0.01238  | -0.0293  |
| 0.295887 | 6.86E-11 | -0.19378 | 2.48E-05 | -0.18347 | 6.66E-05 | 0.083168 | 0.07256  | -0.08331 |
| 0.361484 | 7.32E-16 | -0.13287 | 0.00402  | -0.12284 | 0.00787  | 0.053783 | 0.24606  | 0.025072 |
| 0.088133 | 0.05702  | -0.26788 | 4.07E-09 | -0.17302 | 0.00017  | -0.04554 | 0.32605  | -0.26256 |
| 0.686564 | 2.31E-66 | 0.22812  | 6.28E-07 | 0.213113 | 3.38E-06 | 0.383324 | 8.56E-18 | 0.170195 |
| 0.295155 | 7.68E-11 | 0.078891 | 0.08858  | 0.262947 | 7.98E-09 | -0.05824 | 0.209    | -0.14102 |
| 0.173954 | 0.00016  | 0.030053 | 0.51707  | -0.08543 | 0.06509  | 0.021744 | 0.63929  | -0.00534 |
| 0.491204 | 9.83E-30 | 0.16053  | 0.0005   | 0.078069 | 0.09196  | 0.216525 | 2.33E-06 | 0.25304  |
| 0.591603 | 1.98E-45 | 0.019127 | 0.68015  | 0.06048  | 0.192    | 0.309268 | 8.28E-12 | 0.147277 |
| 0.644185 | 4.22E-56 | 0.101967 | 0.02757  | 0.118322 | 0.01049  | 0.283286 | 4.56E-10 | 0.061467 |
| 0.569528 | 1.66E-41 | 0.25023  | 4.24E-08 | 0.286456 | 2.86E-10 | 0.187359 | 4.62E-05 | 0.032555 |
| 0.367959 | 2.03E-16 | 0.046286 | 0.31822  | -0.02809 | 0.54486  | 0.206494 | 6.83E-06 | 0.023801 |
| 0.240772 | 1.39E-07 | -0.3297  | 2.65E-13 | -0.34735 | 1.09E-14 | 0.009076 | 0.84492  | -0.18394 |
| 0.490854 | 1.09E-29 | 0.061456 | 0.18492  | 0.176771 | 0.00012  | 0.248639 | 5.20E-08 | 0.300181 |

|          |          |          |          |          |          |          |          |          |
|----------|----------|----------|----------|----------|----------|----------|----------|----------|
| 0.392284 | 1.25E-18 | 0.032904 | 0.47811  | -0.00196 | 0.96636  | 0.196892 | 1.82E-05 | 0.208671 |
| 0.267823 | 4.10E-09 | -0.12458 | 0.00703  | -0.0735  | 0.11268  | 0.115902 | 0.0122   | -0.06682 |
| 0.311466 | 5.79E-12 | -0.12165 | 0.0085   | -0.10041 | 0.03004  | 0.000514 | 0.99116  | -0.0871  |
| 0.227862 | 6.47E-07 | -0.13958 | 0.0025   | -0.26746 | 4.32E-09 | 0.045394 | 0.32766  | -0.09254 |
| 0.442324 | 8.60E-24 | 0.160033 | 0.00052  | 0.041332 | 0.37283  | 0.253382 | 2.83E-08 | 0.179401 |
| 0.208856 | 5.32E-06 | -0.19063 | 3.37E-05 | -0.09111 | 0.04911  | 0.069996 | 0.13094  | -0.21875 |
| 0.502357 | 3.14E-31 | 0.149139 | 0.00123  | 0.127467 | 0.00581  | 0.251735 | 3.50E-08 | 0.098206 |
| 0.706437 | 8.31E-72 | 0.157851 | 0.00062  | 0.260902 | 1.05E-08 | 0.322801 | 8.72E-13 | 0.136219 |
| 0.409449 | 2.65E-20 | 0.137067 | 0.003    | 0.142178 | 0.00207  | 0.163159 | 0.0004   | 0.151739 |
| 0.294409 | 8.61E-11 | -0.07235 | 0.11846  | -0.17032 | 0.00022  | 0.160142 | 0.00051  | -0.06563 |
| 0.239817 | 1.56E-07 | -0.0648  | 0.16209  | -0.07762 | 0.09387  | -0.00611 | 0.89527  | -0.08691 |
| 0.239574 | 1.61E-07 | -0.32762 | 3.80E-13 | -0.13668 | 0.00308  | -0.03112 | 0.50226  | -0.32547 |
| 0.414708 | 7.76E-21 | -0.09577 | 0.03857  | 0.026885 | 0.56223  | 0.170399 | 0.00022  | 0.103128 |
| 0.434433 | 6.41E-23 | -0.03395 | 0.46426  | -0.06548 | 0.15774  | 0.168295 | 0.00026  | -0.09847 |
| 0.427441 | 3.64E-22 | 0.157191 | 0.00065  | 0.085588 | 0.0646   | 0.32824  | 3.42E-13 | 0.318528 |
| 0.362372 | 6.15E-16 | -0.01749 | 0.70623  | -0.16017 | 0.00051  | 0.22826  | 6.18E-07 | 0.089652 |
| 0.475275 | 1.08E-27 | 0.086009 | 0.06329  | 0.144147 | 0.00179  | 0.211435 | 4.04E-06 | 0.109922 |
| 0.386492 | 4.36E-18 | -0.09409 | 0.04211  | 0.060689 | 0.19047  | 0.100976 | 0.02912  | -0.02054 |
| 0.406991 | 4.66E-20 | 0.140676 | 0.00231  | -0.07781 | 0.09304  | 0.166923 | 0.00029  | 0.145445 |
| 0.127467 | 0.00581  | -0.2205  | 1.50E-06 | -0.24562 | 7.61E-08 | -0.05075 | 0.27377  | -0.15818 |
| 0.02003  | 0.66593  | -0.05441 | 0.24057  | 0.000818 | 0.98593  | -0.09281 | 0.045    | -0.11295 |
| -0.07329 | 0.11372  | -0.24769 | 5.86E-08 | -0.23222 | 3.89E-07 | -0.20473 | 8.20E-06 | -0.29019 |
| -0.25577 | 2.07E-08 | -0.12662 | 0.00614  | -0.17126 | 0.0002   | -0.26127 | 1.00E-08 | -0.23587 |
| 0.274325 | 1.66E-09 | 0.179002 | 0.0001   | 0.185633 | 5.44E-05 | 0.049201 | 0.28867  | 0.061443 |
| 0.357506 | 1.59E-15 | 0.277526 | 1.05E-09 | 0.242742 | 1.09E-07 | 0.109556 | 0.01787  | 0.113019 |
| 0.457528 | 1.54E-25 | 0.48734  | 3.15E-29 | 0.431678 | 1.28E-22 | 0.255596 | 2.12E-08 | 0.361024 |
| 0.153374 | 0.00088  | 0.396397 | 5.06E-19 | 0.325913 | 5.11E-13 | 0.172458 | 0.00018  | 0.272659 |
| 0.304206 | 1.87E-11 | 0.27497  | 1.51E-09 | 0.230113 | 4.98E-07 | 0.102993 | 0.02604  | 0.18906  |
| 0.601989 | 2.22E-47 | 0.587252 | 1.24E-44 | 0.54738  | 7.36E-38 | 0.28082  | 6.53E-10 | 0.272131 |
| 0.138606 | 0.00268  | 0.057062 | 0.21839  | 0.064608 | 0.16334  | -0.0584  | 0.20775  | -0.0183  |
| 0.059897 | 0.19633  | 0.090624 | 0.05033  | 0.058398 | 0.20779  | 0.048336 | 0.29724  | -0.0182  |
| 0.222904 | 1.14E-06 | -0.04499 | 0.33194  | 0.194759 | 2.25E-05 | -0.08607 | 0.06311  | -0.20506 |
| 0.180661 | 8.64E-05 | 0.195638 | 2.07E-05 | 0.141132 | 0.00224  | -0.0108  | 0.81589  | -0.11957 |
| 0.197151 | 1.78E-05 | 0.164619 | 0.00035  | 0.140654 | 0.00231  | 0.071695 | 0.12182  | 0.084401 |
| -0.21881 | 1.81E-06 | -0.23171 | 4.13E-07 | -0.27066 | 2.77E-09 | -0.24114 | 1.33E-07 | -0.03285 |
| 0.154985 | 0.00078  | 0.328741 | 3.13E-13 | 0.170709 | 0.00021  | 0.033084 | 0.4757   | 0.19694  |
| -0.16915 | 0.00024  | -0.28275 | 4.93E-10 | -0.23437 | 3.01E-07 | -0.19328 | 2.61E-05 | -0.2214  |
| 0.166085 | 0.00031  | 0.131089 | 0.00455  | 0.050166 | 0.27931  | 0.01988  | 0.66828  | 0.006003 |
| 0.166338 | 0.00031  | 0.153524 | 0.00087  | 0.115428 | 0.01256  | -0.00261 | 0.95507  | -0.01221 |
| -0.14188 | 0.00212  | -0.23332 | 3.41E-07 | -0.2266  | 7.49E-07 | -0.1881  | 4.30E-05 | -0.23387 |
| 0.356551 | 1.91E-15 | 0.288475 | 2.11E-10 | 0.234084 | 3.12E-07 | 0.137046 | 0.003    | 0.25245  |
| 0.205605 | 7.49E-06 | 0.132183 | 0.00422  | 0.066177 | 0.15334  | -0.00227 | 0.96095  | -0.04193 |
| 0.262844 | 8.09E-09 | 0.270965 | 2.66E-09 | 0.208264 | 5.67E-06 | 0.053637 | 0.24734  | 0.125319 |
| 0.213931 | 3.09E-06 | 0.137274 | 0.00295  | 0.108192 | 0.01935  | 0.013012 | 0.77914  | 0.029108 |
| 0.335154 | 1.01E-13 | 0.446954 | 2.58E-24 | 0.256911 | 1.78E-08 | 0.179083 | 9.98E-05 | 0.270088 |

|          |          |          |          |          |          |          |          |          |
|----------|----------|----------|----------|----------|----------|----------|----------|----------|
| 0.073958 | 0.11046  | 0.055246 | 0.23343  | 0.044487 | 0.33742  | -0.0054  | 0.90742  | -0.02688 |
| -0.23389 | 3.19E-07 | -0.37186 | 9.21E-17 | -0.32642 | 4.68E-13 | -0.29564 | 7.13E-11 | -0.28414 |
| 0.120297 | 0.00926  | 0.105868 | 0.02213  | 0.080658 | 0.08165  | -0.06518 | 0.15962  | -0.01765 |
| -0.2719  | 2.33E-09 | -0.47595 | 8.93E-28 | -0.43519 | 5.30E-23 | -0.27678 | 1.17E-09 | -0.35472 |
| 0.197585 | 1.70E-05 | 0.014121 | 0.76086  | 0.076091 | 0.10052  | -0.06066 | 0.19067  | -0.06418 |
| 0.462289 | 4.19E-26 | 0.156876 | 0.00067  | 0.188916 | 3.98E-05 | 0.18701  | 4.77E-05 | 0.208794 |
| -0.07347 | 0.11282  | -0.3262  | 4.87E-13 | -0.18054 | 8.73E-05 | -0.25669 | 1.84E-08 | -0.40041 |
| 0.075562 | 0.10292  | -0.07224 | 0.11901  | -0.01848 | 0.69044  | -0.10251 | 0.02675  | -0.16211 |
| 0.090048 | 0.05181  | 0.038092 | 0.41149  | 0.105258 | 0.02291  | -0.24064 | 1.41E-07 | -0.25275 |
| 0.238172 | 1.91E-07 | 0.177261 | 0.00012  | -0.01186 | 0.79831  | 0.094204 | 0.04187  | 0.282171 |
| 0.082296 | 0.07562  | -0.09169 | 0.04767  | -0.0241  | 0.60348  | -0.12533 | 0.00669  | -0.13332 |
| 0.082084 | 0.07638  | 0.007244 | 0.87593  | 0.014918 | 0.7478   | -0.04639 | 0.31718  | 0.043117 |
| 0.332816 | 1.53E-13 | 0.094135 | 0.04202  | 0.2147   | 2.84E-06 | 0.042191 | 0.36297  | 0.040523 |
| -0.02449 | 0.59754  | -0.186   | 5.25E-05 | -0.14995 | 0.00115  | -0.09147 | 0.0482   | -0.17791 |
| 0.030767 | 0.50717  | 0.04922  | 0.28849  | 0.004708 | 0.91918  | -0.11491 | 0.01296  | -0.08411 |
| -0.13833 | 0.00274  | -0.24174 | 1.23E-07 | -0.10205 | 0.02744  | -0.22652 | 7.55E-07 | -0.26362 |
| 0.276543 | 1.21E-09 | 0.278711 | 8.86E-10 | 0.330206 | 2.42E-13 | 0.030902 | 0.5053   | 0.167058 |
| 0.345808 | 1.45E-14 | 0.275909 | 1.32E-09 | 0.26307  | 7.85E-09 | 0.122184 | 0.00821  | 0.241865 |
| 0.360332 | 9.16E-16 | 0.354201 | 3.00E-15 | 0.262375 | 8.62E-09 | 0.084853 | 0.06694  | 0.24382  |
| 0.215177 | 2.70E-06 | 0.17012  | 0.00022  | 0.353886 | 3.18E-15 | -0.11547 | 0.01252  | 0.000122 |
| 0.20279  | 1.00E-05 | 0.118196 | 0.01058  | 0.143133 | 0.00193  | 0.027769 | 0.54944  | -0.05669 |
| -0.14014 | 0.0024   | -0.08265 | 0.07435  | -0.13312 | 0.00395  | -0.20139 | 1.16E-05 | -0.09398 |
| -0.1333  | 0.0039   | -0.09658 | 0.03695  | -0.11374 | 0.01392  | -0.19155 | 3.09E-05 | -0.12738 |
| 0.374302 | 5.60E-17 | 0.410323 | 2.16E-20 | 0.375113 | 4.74E-17 | 0.140964 | 0.00226  | 0.214539 |
| 0.199338 | 1.43E-05 | 0.349579 | 7.19E-15 | 0.298609 | 4.50E-11 | 0.092256 | 0.04631  | 0.242416 |
| 0.090135 | 0.05158  | 0.057627 | 0.21386  | 0.121553 | 0.00855  | -0.08889 | 0.05492  | -0.11241 |
| 0.20507  | 7.92E-06 | 0.412176 | 1.40E-20 | 0.222852 | 1.15E-06 | 0.12568  | 0.00654  | 0.349526 |
| -0.04977 | 0.2831   | 0.041823 | 0.36717  | -0.0525  | 0.25755  | -0.06028 | 0.19345  | -0.10966 |
| -0.03893 | 0.40132  | 0.085472 | 0.06497  | 0.067083 | 0.14778  | -0.08883 | 0.05508  | 0.009039 |
| 0.415803 | 6.00E-21 | 0.230228 | 4.91E-07 | 0.279383 | 8.04E-10 | 0.072187 | 0.11927  | 0.091218 |
| 0.18281  | 7.08E-05 | 0.179964 | 9.21E-05 | 0.261045 | 1.03E-08 | -0.01345 | 0.77183  | -0.04713 |
| 0.127193 | 0.00591  | -0.06281 | 0.17541  | 0.062308 | 0.17889  | -0.21318 | 3.35E-06 | -0.16173 |
| -0.06172 | 0.18302  | 0.033305 | 0.47276  | -0.02397 | 0.60532  | -0.22508 | 8.92E-07 | 0.004473 |
| 0.266102 | 5.20E-09 | 0.087138 | 0.05989  | 0.174259 | 0.00015  | 0.034815 | 0.45291  | 0.18263  |
| 0.158493 | 0.00059  | 0.035225 | 0.44761  | -0.05539 | 0.23218  | 0.110457 | 0.01694  | 0.141705 |
| 0.195099 | 2.18E-05 | 0.365129 | 3.56E-16 | 0.280178 | 7.17E-10 | 0.115975 | 0.01214  | 0.290143 |
| 0.136029 | 0.00322  | 0.158074 | 0.00061  | 0.0489   | 0.29164  | 0.048671 | 0.2939   | 0.099332 |
| 0.018145 | 0.69573  | -0.12138 | 0.00865  | -0.02641 | 0.56915  | -0.16101 | 0.00048  | -0.17298 |
| 0.48511  | 6.12E-29 | 0.067246 | 0.14679  | 0.160997 | 0.00048  | 0.127555 | 0.00577  | 0.109196 |
| 0.216884 | 2.24E-06 | 0.286852 | 2.69E-10 | 0.344759 | 1.77E-14 | 0.000835 | 0.98564  | 0.080113 |
| 0.227722 | 6.58E-07 | 0.253122 | 2.92E-08 | 0.425945 | 5.25E-22 | 0.041874 | 0.36659  | 0.089881 |
| 0.686994 | 1.78E-66 | 0.749462 | 2.55E-85 | 0.458261 | 1.26E-25 | 0.490121 | 1.36E-29 | 0.611511 |
| -0.33105 | 2.09E-13 | -0.34915 | 7.79E-15 | -0.1844  | 6.10E-05 | -0.15369 | 0.00086  | -0.06146 |
| 0.555191 | 4.09E-39 | 0.590348 | 3.38E-45 | 0.497555 | 1.41E-30 | 0.511064 | 1.96E-32 | 0.748361 |
| 0.705152 | 1.93E-71 | 0.697377 | 2.86E-69 | 0.434331 | 6.58E-23 | 0.525667 | 1.54E-34 | 0.582671 |

|          |          |          |          |          |          |          |          |          |
|----------|----------|----------|----------|----------|----------|----------|----------|----------|
| 0.594557 | 5.62E-46 | 0.785469 | 5.97E-99 | 0.548957 | 4.13E-38 | 0.409577 | 2.57E-20 | 0.637172 |
| -0.58973 | 4.39E-45 | -0.57861 | 4.38E-43 | -0.54997 | 2.85E-38 | -0.30078 | 3.21E-11 | -0.32257 |
| 0.524766 | 2.10E-34 | 0.371005 | 1.10E-16 | 0.400245 | 2.15E-19 | 0.523949 | 2.76E-34 | 0.595917 |
| 0.659747 | 1.12E-59 | 0.709272 | 1.28E-72 | 0.536473 | 3.68E-36 | 0.466259 | 1.39E-26 | 0.730255 |
| 0.675612 | 1.51E-63 | 0.654444 | 1.96E-58 | 0.374265 | 5.64E-17 | 0.512507 | 1.22E-32 | 0.597623 |
| 0.370427 | 1.23E-16 | 0.261601 | 9.56E-09 | 0.118528 | 0.01036  | 0.380569 | 1.53E-17 | 0.343441 |
| 0.628614 | 1.00E-52 | 0.596123 | 2.86E-46 | 0.446835 | 2.66E-24 | 0.538169 | 2.02E-36 | 0.746116 |
| 0.483399 | 1.02E-28 | 0.26831  | 3.84E-09 | 0.047186 | 0.3089   | 0.320987 | 1.19E-12 | 0.471505 |
| 0.666981 | 2.07E-61 | 0.568749 | 2.25E-41 | 0.420508 | 1.96E-21 | 0.495583 | 2.58E-30 | 0.692176 |
| 0.747559 | 1.15E-84 | 0.701404 | 2.19E-70 | 0.476947 | 6.69E-28 | 0.487781 | 2.76E-29 | 0.661356 |
| 0.59791  | 1.32E-46 | 0.471907 | 2.84E-27 | 0.420121 | 2.15E-21 | 0.315529 | 2.96E-12 | 0.373857 |
| 0.556428 | 2.57E-39 | 0.515805 | 4.17E-33 | 0.18287  | 7.04E-05 | 0.537484 | 2.58E-36 | 0.609798 |
| 0.610219 | 5.59E-49 | 0.635228 | 3.90E-54 | 0.54223  | 4.75E-37 | 0.373967 | 6.00E-17 | 0.610501 |
| 0.496862 | 1.74E-30 | 0.397908 | 3.62E-19 | 0.230559 | 4.73E-07 | 0.50268  | 2.84E-31 | 0.566581 |
| 0.596999 | 1.96E-46 | 0.393294 | 1.00E-18 | 0.391645 | 1.44E-18 | 0.272625 | 2.10E-09 | 0.186534 |
| 0.437004 | 3.35E-23 | 0.23528  | 2.70E-07 | 0.063205 | 0.1727   | 0.396291 | 5.18E-19 | 0.411083 |
| 0.52587  | 1.44E-34 | 0.476338 | 7.98E-28 | 0.3192   | 1.60E-12 | 0.342158 | 2.85E-14 | 0.258368 |
| 0.338973 | 5.09E-14 | 0.342251 | 2.80E-14 | 0.135483 | 0.00335  | 0.268478 | 3.75E-09 | 0.48069  |
| 0.647329 | 8.33E-57 | 0.815553 | #####    | 0.612602 | 1.89E-49 | 0.467652 | 9.44E-27 | 0.565929 |
| 0.690295 | 2.37E-67 | 0.342995 | 2.44E-14 | 0.330628 | 2.25E-13 | 0.237891 | 1.97E-07 | 0.183208 |
| 0.314877 | 3.30E-12 | 0.599167 | 7.64E-47 | 0.265081 | 5.97E-09 | 0.319862 | 1.44E-12 | 0.661231 |
| 0.762231 | 7.10E-90 | 0.682633 | 2.45E-65 | 0.434558 | 6.21E-23 | 0.546871 | 8.86E-38 | 0.684713 |
| 0.620523 | 4.78E-51 | 0.69989  | 5.79E-70 | 0.546898 | 8.78E-38 | 0.494604 | 3.49E-30 | 0.62383  |
| 0.498481 | 1.06E-30 | 0.578839 | 3.99E-43 | 0.441862 | 9.69E-24 | 0.454423 | 3.56E-25 | 0.627089 |
| 0.673252 | 5.90E-63 | 0.670672 | 2.58E-62 | 0.497332 | 1.51E-30 | 0.459583 | 8.81E-26 | 0.491242 |
| 0.36499  | 3.66E-16 | 0.271427 | 2.49E-09 | 0.245964 | 7.28E-08 | 0.218922 | 1.79E-06 | 0.303894 |
| 0.769038 | 2.01E-92 | 0.590867 | 2.71E-45 | 0.517124 | 2.70E-33 | 0.430213 | 1.84E-22 | 0.405944 |
| 0.522661 | 4.26E-34 | 0.346322 | 1.32E-14 | 0.28611  | 3.01E-10 | 0.284964 | 3.56E-10 | 0.134818 |
| 0.401826 | 1.51E-19 | 0.537363 | 2.69E-36 | 0.316169 | 2.66E-12 | 0.419455 | 2.52E-21 | 0.447881 |
| 0.401673 | 1.56E-19 | 0.299169 | 4.12E-11 | 0.188093 | 4.31E-05 | 0.161615 | 0.00045  | 0.261499 |
| 0.374072 | 5.87E-17 | 0.363494 | 4.93E-16 | 0.100372 | 0.0301   | 0.27839  | 9.28E-10 | 0.443823 |
| 0.622285 | 2.08E-51 | 0.451425 | 7.93E-25 | 0.322313 | 9.47E-13 | 0.344896 | 1.72E-14 | 0.296277 |
| 0.540616 | 8.47E-37 | 0.533257 | 1.13E-35 | 0.356908 | 1.78E-15 | 0.503697 | 2.06E-31 | 0.520946 |
| 0.517825 | 2.14E-33 | 0.482454 | 1.34E-28 | 0.421437 | 1.57E-21 | 0.389502 | 2.28E-18 | 0.548258 |
| 0.300636 | 3.28E-11 | 0.302614 | 2.40E-11 | -0.06609 | 0.15386  | 0.185128 | 5.70E-05 | 0.296213 |
| 0.548623 | 4.67E-38 | 0.439853 | 1.62E-23 | 0.398672 | 3.05E-19 | 0.337989 | 6.07E-14 | 0.500212 |
| -0.43313 | 8.88E-23 | -0.47206 | 2.72E-27 | -0.33832 | 5.72E-14 | -0.31994 | 1.42E-12 | -0.35844 |
| 0.562713 | 2.35E-40 | 0.562312 | 2.74E-40 | 0.379731 | 1.82E-17 | 0.469598 | 5.46E-27 | 0.495722 |
| 0.553753 | 7.00E-39 | 0.486695 | 3.82E-29 | 0.342134 | 2.86E-14 | 0.369737 | 1.42E-16 | 0.582465 |
| 0.683675 | 1.31E-65 | 0.741234 | 1.58E-82 | 0.51761  | 2.30E-33 | 0.547841 | 6.22E-38 | 0.73066  |
| 0.328297 | 3.38E-13 | 0.427009 | 4.05E-22 | 0.215706 | 2.55E-06 | 0.285145 | 3.47E-10 | 0.376558 |
| 0.341658 | 3.12E-14 | 0.222083 | 1.25E-06 | 0.276024 | 1.30E-09 | 0.30447  | 1.79E-11 | 0.355732 |
| 0.753501 | 9.89E-87 | 0.646703 | 1.15E-56 | 0.463545 | 2.96E-26 | 0.543879 | 2.62E-37 | 0.734454 |
| 0.792183 | #####    | 0.671018 | 2.12E-62 | 0.571432 | 7.81E-42 | 0.535612 | 4.98E-36 | 0.603991 |
| 0.650347 | 1.72E-57 | 0.741515 | 1.27E-82 | 0.527117 | 9.42E-35 | 0.496165 | 2.16E-30 | 0.68313  |

|          |          |          |          |          |          |          |          |          |
|----------|----------|----------|----------|----------|----------|----------|----------|----------|
| 0.666682 | 2.44E-61 | 0.621635 | 2.83E-51 | 0.366724 | 2.59E-16 | 0.528866 | 5.18E-35 | 0.56861  |
| 0.522715 | 4.19E-34 | 0.433466 | 8.17E-23 | 0.151518 | 0.00102  | 0.421694 | 1.47E-21 | 0.523482 |
| 0.734605 | 2.35E-80 | 0.629692 | 5.93E-53 | 0.545619 | 1.40E-37 | 0.484798 | 6.71E-29 | 0.681551 |
| 0.530457 | 3.00E-35 | 0.488684 | 2.10E-29 | 0.272791 | 2.06E-09 | 0.443628 | 6.14E-24 | 0.667126 |
| 0.657356 | 4.11E-59 | 0.413894 | 9.40E-21 | 0.277792 | 1.01E-09 | 0.403184 | 1.11E-19 | 0.483139 |
| 0.596561 | 2.37E-46 | 0.463053 | 3.40E-26 | 0.354749 | 2.70E-15 | 0.445058 | 4.23E-24 | 0.288187 |
| 0.692021 | 8.17E-68 | 0.805893 | #####    | 0.640358 | 2.97E-55 | 0.490986 | 1.05E-29 | 0.611183 |
| 0.665507 | 4.71E-61 | 0.728999 | 1.44E-78 | 0.595043 | 4.56E-46 | 0.498232 | 1.14E-30 | 0.539962 |
| 0.365264 | 3.47E-16 | 0.37639  | 3.64E-17 | 0.062028 | 0.18086  | 0.413301 | 1.08E-20 | 0.461311 |
| 0.596369 | 2.57E-46 | 0.623141 | 1.38E-51 | 0.433131 | 8.88E-23 | 0.418258 | 3.35E-21 | 0.54159  |
| 0.535178 | 5.80E-36 | 0.377747 | 2.75E-17 | 0.197797 | 1.67E-05 | 0.34946  | 7.35E-15 | 0.298794 |
| 0.582749 | 8.06E-44 | 0.585627 | 2.45E-44 | 0.361372 | 7.48E-16 | 0.422891 | 1.10E-21 | 0.555758 |
| 0.248954 | 4.99E-08 | 0.340516 | 3.84E-14 | 0.061567 | 0.18413  | 0.306728 | 1.25E-11 | 0.422675 |
| 0.618729 | 1.11E-50 | 0.381018 | 1.39E-17 | 0.351762 | 4.76E-15 | 0.284091 | 4.05E-10 | 0.268464 |
| 0.654349 | 2.07E-58 | 0.593259 | 9.80E-46 | 0.299508 | 3.91E-11 | 0.456924 | 1.81E-25 | 0.424238 |
| 0.471603 | 3.10E-27 | 0.504027 | 1.86E-31 | 0.458304 | 1.25E-25 | 0.468477 | 7.49E-27 | 0.501657 |
| 0.596303 | 2.65E-46 | 0.40302  | 1.15E-19 | 0.15668  | 0.00068  | 0.353602 | 3.36E-15 | 0.376436 |
| 0.524629 | 2.20E-34 | 0.616493 | 3.14E-50 | 0.368516 | 1.81E-16 | 0.37251  | 8.08E-17 | 0.518613 |
| 0.720521 | 5.98E-76 | 0.708902 | 1.63E-72 | 0.514294 | 6.84E-33 | 0.39824  | 3.36E-19 | 0.536048 |
| 0.481224 | 1.93E-28 | 0.271045 | 2.63E-09 | 0.148095 | 0.00133  | 0.386162 | 4.68E-18 | 0.407838 |
| 0.573479 | 3.46E-42 | 0.564342 | 1.25E-40 | 0.378935 | 2.15E-17 | 0.395664 | 5.95E-19 | 0.526039 |
| 0.596464 | 2.47E-46 | 0.592893 | 1.15E-45 | 0.412106 | 1.43E-20 | 0.517504 | 2.38E-33 | 0.555697 |
| 0.537327 | 2.72E-36 | 0.535403 | 5.36E-36 | 0.416614 | 4.95E-21 | 0.416462 | 5.13E-21 | 0.607671 |
| 0.404838 | 7.62E-20 | 0.451605 | 7.56E-25 | 0.229637 | 5.26E-07 | 0.23871  | 1.79E-07 | 0.451136 |
| 0.630536 | 3.93E-53 | 0.582973 | 7.35E-44 | 0.516279 | 3.57E-33 | 0.442417 | 8.40E-24 | 0.650426 |
| 0.361753 | 6.94E-16 | 0.292507 | 1.15E-10 | 0.043269 | 0.35083  | 0.395925 | 5.62E-19 | 0.517684 |
| 0.500055 | 6.46E-31 | 0.493257 | 5.27E-30 | 0.272981 | 2.00E-09 | 0.329313 | 2.83E-13 | 0.597254 |
| 0.696672 | 4.47E-69 | 0.620523 | 4.78E-51 | 0.597185 | 1.81E-46 | 0.521916 | 5.48E-34 | 0.603226 |
| 0.753011 | 1.47E-86 | 0.711768 | 2.40E-73 | 0.534799 | 6.62E-36 | 0.557753 | 1.56E-39 | 0.598531 |
| 0.438808 | 2.12E-23 | 0.444079 | 5.46E-24 | 0.29898  | 4.25E-11 | 0.251653 | 3.53E-08 | 0.440508 |
| 0.572054 | 6.10E-42 | 0.595848 | 3.22E-46 | 0.473456 | 1.83E-27 | 0.345191 | 1.63E-14 | 0.548054 |
| 0.369121 | 1.60E-16 | 0.430656 | 1.65E-22 | 0.31874  | 1.73E-12 | 0.419065 | 2.76E-21 | 0.574844 |
| 0.481871 | 1.59E-28 | 0.649287 | 3.00E-57 | 0.360655 | 8.61E-16 | 0.513936 | 7.69E-33 | 0.540579 |
| 0.620173 | 5.63E-51 | 0.456546 | 2.01E-25 | 0.153883 | 0.00085  | 0.458712 | 1.12E-25 | 0.469804 |
| 0.647946 | 6.04E-57 | 0.647373 | 8.14E-57 | 0.496878 | 1.73E-30 | 0.508155 | 4.99E-32 | 0.603343 |
| 0.560005 | 6.62E-40 | 0.595513 | 3.72E-46 | 0.462359 | 4.11E-26 | 0.473043 | 2.05E-27 | 0.696741 |
| 0.562812 | 2.26E-40 | 0.460613 | 6.65E-26 | 0.366507 | 2.71E-16 | 0.357564 | 1.57E-15 | 0.52381  |
| 0.339845 | 4.34E-14 | 0.287229 | 2.55E-10 | 0.211884 | 3.85E-06 | 0.29104  | 1.44E-10 | 0.238116 |
| -0.25322 | 2.89E-08 | -0.33428 | 1.18E-13 | -0.16752 | 0.00028  | -0.24117 | 1.32E-07 | -0.08908 |
| 0.684888 | 6.34E-66 | 0.846043 | #####    | 0.504428 | 1.64E-31 | 0.589746 | 4.36E-45 | 0.740912 |
| 0.422384 | 1.25E-21 | 0.273576 | 1.84E-09 | 0.029338 | 0.5271   | 0.198408 | 1.57E-05 | 0.397121 |
| 0.658934 | 1.75E-59 | 0.780374 | 7.25E-97 | 0.56154  | 3.68E-40 | 0.478287 | 4.54E-28 | 0.635603 |
| 0.539772 | 1.14E-36 | 0.534674 | 6.92E-36 | 0.360848 | 8.29E-16 | 0.254692 | 2.38E-08 | 0.237882 |
| 0.465301 | 1.82E-26 | 0.607498 | 1.91E-48 | 0.324167 | 6.90E-13 | 0.405752 | 6.19E-20 | 0.460362 |
| 0.53825  | 1.96E-36 | 0.25015  | 4.29E-08 | 0.113058 | 0.01451  | 0.297232 | 5.57E-11 | 0.179029 |

|          |          |          |          |          |          |          |          |          |
|----------|----------|----------|----------|----------|----------|----------|----------|----------|
| 0.445705 | 3.58E-24 | 0.229644 | 5.26E-07 | 0.041555 | 0.37026  | 0.219478 | 1.68E-06 | 0.061999 |
| 0.302316 | 2.52E-11 | 0.226649 | 7.45E-07 | 0.049735 | 0.28346  | 0.196825 | 1.84E-05 | 0.393014 |
| 0.653291 | 3.63E-58 | 0.476979 | 6.63E-28 | 0.378736 | 2.24E-17 | 0.416955 | 4.57E-21 | 0.626957 |
| 0.431757 | 1.25E-22 | 0.366714 | 2.60E-16 | 0.072282 | 0.11879  | 0.412658 | 1.26E-20 | 0.407757 |
| 0.619421 | 8.02E-51 | 0.632362 | 1.61E-53 | 0.417284 | 4.22E-21 | 0.388078 | 3.10E-18 | 0.306304 |
| 0.595947 | 3.09E-46 | 0.47485  | 1.22E-27 | 0.328586 | 3.22E-13 | 0.467054 | 1.12E-26 | 0.441427 |
| 0.655118 | 1.37E-58 | 0.622766 | 1.65E-51 | 0.423764 | 8.93E-22 | 0.460183 | 7.48E-26 | 0.592264 |
| 0.666945 | 2.11E-61 | 0.54356  | 2.94E-37 | 0.461839 | 4.75E-26 | 0.444267 | 5.20E-24 | 0.519544 |
| 0.375879 | 4.05E-17 | 0.398599 | 3.10E-19 | 0.110959 | 0.01645  | 0.361187 | 7.75E-16 | 0.443871 |
| 0.502845 | 2.70E-31 | 0.222023 | 1.26E-06 | 0.032803 | 0.47946  | 0.352072 | 4.49E-15 | 0.147845 |
| 0.691946 | 8.56E-68 | 0.616262 | 3.50E-50 | 0.429664 | 2.10E-22 | 0.440839 | 1.26E-23 | 0.459725 |
| 0.360757 | 8.43E-16 | 0.35638  | 1.97E-15 | 0.290719 | 1.51E-10 | 0.416031 | 5.68E-21 | 0.441997 |
| 0.397822 | 3.69E-19 | 0.546652 | 9.60E-38 | 0.21475  | 2.83E-06 | 0.283861 | 4.19E-10 | 0.387513 |
| 0.632559 | 1.46E-53 | 0.67218  | 1.09E-62 | 0.391263 | 1.56E-18 | 0.443734 | 5.97E-24 | 0.503935 |
| 0.741462 | 1.32E-82 | 0.721895 | 2.28E-76 | 0.456013 | 2.32E-25 | 0.543536 | 2.97E-37 | 0.636299 |
| 0.400532 | 2.02E-19 | 0.50924  | 3.52E-32 | 0.335157 | 1.01E-13 | 0.33386  | 1.27E-13 | 0.373055 |
| 0.547412 | 7.28E-38 | 0.349478 | 7.33E-15 | 0.259066 | 1.34E-08 | 0.346595 | 1.26E-14 | 0.423432 |
| 0.565487 | 8.04E-41 | 0.528254 | 6.39E-35 | 0.414225 | 8.70E-21 | 0.293571 | 9.79E-11 | 0.425281 |
| 0.631271 | 2.74E-53 | 0.680048 | 1.13E-64 | 0.62915  | 7.72E-53 | 0.512584 | 1.19E-32 | 0.56973  |
| 0.555659 | 3.43E-39 | 0.560245 | 6.05E-40 | 0.374418 | 5.47E-17 | 0.504479 | 1.61E-31 | 0.533226 |
| 0.485058 | 6.21E-29 | 0.363957 | 4.50E-16 | 0.062809 | 0.17541  | 0.363327 | 5.09E-16 | 0.31024  |
| 0.323464 | 7.78E-13 | 0.430947 | 1.53E-22 | 0.175316 | 0.00014  | 0.356374 | 1.97E-15 | 0.429116 |
| 0.534809 | 6.60E-36 | 0.525305 | 1.75E-34 | 0.219325 | 1.71E-06 | 0.36712  | 2.40E-16 | 0.45391  |
| 0.438428 | 2.33E-23 | 0.544291 | 2.26E-37 | 0.392665 | 1.15E-18 | 0.366283 | 2.83E-16 | 0.548106 |
| 0.490639 | 1.17E-29 | 0.329291 | 2.84E-13 | 0.072692 | 0.11671  | 0.455652 | 2.56E-25 | 0.5683   |
| 0.582765 | 8.01E-44 | 0.25757  | 1.63E-08 | 0.170546 | 0.00021  | 0.299315 | 4.03E-11 | 0.311638 |
| -0.31987 | 1.43E-12 | -0.32004 | 1.39E-12 | -0.37549 | 4.39E-17 | -0.198   | 1.63E-05 | -0.26498 |
| 0.687047 | 1.72E-66 | 0.815315 | #####    | 0.590712 | 2.90E-45 | 0.46395  | 2.65E-26 | 0.527866 |
| 0.65465  | 1.76E-58 | 0.730336 | 5.44E-79 | 0.536354 | 3.84E-36 | 0.511506 | 1.69E-32 | 0.586304 |
| 0.282539 | 5.08E-10 | 0.280625 | 6.72E-10 | 0.004338 | 0.92552  | 0.126957 | 0.00601  | 0.212948 |
| 0.650477 | 1.61E-57 | 0.684027 | 1.06E-65 | 0.448915 | 1.54E-24 | 0.501229 | 4.48E-31 | 0.58415  |
| 0.38408  | 7.29E-18 | 0.372224 | 8.56E-17 | 0.134795 | 0.00352  | 0.411314 | 1.72E-20 | 0.445314 |
| 0.596996 | 1.96E-46 | 0.542009 | 5.14E-37 | 0.279466 | 7.95E-10 | 0.437043 | 3.32E-23 | 0.697828 |
| 0.733982 | 3.73E-80 | 0.606222 | 3.38E-48 | 0.460307 | 7.23E-26 | 0.410254 | 2.20E-20 | 0.535474 |
| 0.706509 | 7.92E-72 | 0.785174 | 7.91E-99 | 0.589264 | 5.34E-45 | 0.436522 | 3.79E-23 | 0.578564 |
| 0.562778 | 2.29E-40 | 0.541741 | 5.66E-37 | 0.316804 | 2.40E-12 | 0.594866 | 4.92E-46 | 0.652393 |
| 0.439835 | 1.63E-23 | 0.219098 | 1.75E-06 | 0.142196 | 0.00207  | 0.188955 | 3.97E-05 | 0.177379 |
| 0.525416 | 1.68E-34 | 0.645156 | 2.56E-56 | 0.371774 | 9.38E-17 | 0.512137 | 1.38E-32 | 0.719036 |
| 0.484777 | 6.75E-29 | 0.490831 | 1.10E-29 | 0.227846 | 6.48E-07 | 0.381656 | 1.22E-17 | 0.451883 |
| 0.655228 | 1.29E-58 | 0.651672 | 8.56E-58 | 0.588671 | 6.85E-45 | 0.419961 | 2.23E-21 | 0.494708 |
| 0.588413 | 7.64E-45 | 0.600931 | 3.53E-47 | 0.592509 | 1.35E-45 | 0.38943  | 2.32E-18 | 0.445986 |
| 0.662893 | 2.01E-60 | 0.594518 | 5.71E-46 | 0.498471 | 1.06E-30 | 0.436715 | 3.61E-23 | 0.412419 |
| 0.545503 | 1.46E-37 | 0.592119 | 1.59E-45 | 0.425629 | 5.67E-22 | 0.425252 | 6.22E-22 | 0.646127 |
| 0.529754 | 3.82E-35 | 0.371958 | 9.04E-17 | 0.304033 | 1.92E-11 | 0.305702 | 1.47E-11 | 0.346483 |
| 0.584819 | 3.42E-44 | 0.58067  | 1.89E-43 | 0.350114 | 6.50E-15 | 0.451772 | 7.23E-25 | 0.67341  |

|          |          |          |          |          |          |          |          |          |
|----------|----------|----------|----------|----------|----------|----------|----------|----------|
| 0.54463  | 2.00E-37 | 0.601796 | 2.41E-47 | 0.374989 | 4.86E-17 | 0.412841 | 1.20E-20 | 0.572532 |
| 0.4204   | 2.01E-21 | 0.331915 | 1.79E-13 | 0.273532 | 1.85E-09 | 0.227512 | 6.74E-07 | 0.227891 |
| 0.602779 | 1.56E-47 | 0.408313 | 3.44E-20 | 0.279595 | 7.80E-10 | 0.493134 | 5.47E-30 | 0.600694 |
| 0.456062 | 2.29E-25 | 0.471842 | 2.89E-27 | 0.365488 | 3.32E-16 | 0.21951  | 1.67E-06 | 0.543927 |
| 0.412313 | 1.36E-20 | 0.570694 | 1.05E-41 | 0.328398 | 3.32E-13 | 0.388341 | 2.93E-18 | 0.626233 |
| 0.556122 | 2.88E-39 | 0.587662 | 1.05E-44 | 0.323469 | 7.78E-13 | 0.553049 | 9.10E-39 | 0.737431 |
| 0.586391 | 1.78E-44 | 0.491983 | 7.76E-30 | 0.320483 | 1.29E-12 | 0.308006 | 1.02E-11 | 0.322293 |
| 0.39831  | 3.31E-19 | 0.381147 | 1.35E-17 | 0.265774 | 5.44E-09 | 0.24193  | 1.20E-07 | 0.270045 |
| 0.644599 | 3.42E-56 | 0.435919 | 4.41E-23 | 0.168307 | 0.00026  | 0.380264 | 1.63E-17 | 0.276441 |
| 0.374424 | 5.46E-17 | 0.430617 | 1.66E-22 | 0.109196 | 0.01825  | 0.384637 | 6.48E-18 | 0.54917  |
| 0.355962 | 2.14E-15 | 0.339269 | 4.82E-14 | 0.12879  | 0.00531  | 0.18401  | 6.33E-05 | 0.271794 |
| 0.588125 | 8.62E-45 | 0.705818 | 1.25E-71 | 0.503734 | 2.04E-31 | 0.485833 | 4.93E-29 | 0.678908 |
| 0.4947   | 3.39E-30 | 0.471359 | 3.32E-27 | 0.330656 | 2.24E-13 | 0.336408 | 8.07E-14 | 0.310455 |
| 0.748635 | 4.92E-85 | 0.555268 | 3.97E-39 | 0.410544 | 2.05E-20 | 0.408261 | 3.48E-20 | 0.612985 |
| 0.554149 | 6.04E-39 | 0.56734  | 3.91E-41 | 0.377613 | 2.83E-17 | 0.50387  | 1.95E-31 | 0.606426 |
| 0.504398 | 1.65E-31 | 0.553176 | 8.68E-39 | 0.298479 | 4.59E-11 | 0.507521 | 6.11E-32 | 0.62629  |
| 0.543929 | 2.58E-37 | 0.492302 | 7.04E-30 | 0.450808 | 9.35E-25 | 0.415366 | 6.65E-21 | 0.426168 |
| 0.612156 | 2.31E-49 | 0.507772 | 5.64E-32 | 0.37798  | 2.62E-17 | 0.305845 | 1.44E-11 | 0.298978 |
| 0.59738  | 1.66E-46 | 0.576976 | 8.49E-43 | 0.571663 | 7.12E-42 | 0.281748 | 5.71E-10 | 0.383714 |
| 0.606446 | 3.06E-48 | 0.240049 | 1.52E-07 | 0.098171 | 0.03393  | 0.346586 | 1.26E-14 | 0.170399 |
| 0.531121 | 2.38E-35 | 0.383997 | 7.42E-18 | 0.206187 | 7.05E-06 | 0.343978 | 2.04E-14 | 0.325384 |
| 0.500699 | 5.29E-31 | 0.458889 | 1.06E-25 | 0.325179 | 5.80E-13 | 0.370841 | 1.13E-16 | 0.354559 |
| 0.522023 | 5.28E-34 | 0.641606 | 1.58E-55 | 0.445663 | 3.62E-24 | 0.417977 | 3.58E-21 | 0.676734 |
| 0.45533  | 2.79E-25 | 0.527648 | 7.86E-35 | 0.358782 | 1.24E-15 | 0.248014 | 5.62E-08 | 0.55949  |
| 0.213719 | 3.16E-06 | 0.408368 | 3.40E-20 | 0.080569 | 0.08199  | 0.34846  | 8.87E-15 | 0.399302 |
| 0.633052 | 1.14E-53 | 0.714266 | 4.44E-74 | 0.456061 | 2.29E-25 | 0.50819  | 4.93E-32 | 0.559809 |
| -0.33459 | 1.12E-13 | -0.29885 | 4.34E-11 | -0.23758 | 2.05E-07 | -0.24007 | 1.51E-07 | -0.28989 |
| 0.808067 | #####    | 0.675987 | 1.22E-63 | 0.45628  | 2.16E-25 | 0.531929 | 1.80E-35 | 0.495931 |
| 0.613006 | 1.57E-49 | 0.385319 | 5.60E-18 | 0.351594 | 4.92E-15 | 0.2688   | 3.59E-09 | 0.153599 |
| 0.46115  | 5.74E-26 | 0.29208  | 1.23E-10 | 0.173896 | 0.00016  | 0.390486 | 1.85E-18 | 0.441324 |
| 0.600481 | 4.30E-47 | 0.444661 | 4.69E-24 | 0.428494 | 2.81E-22 | 0.338    | 6.06E-14 | 0.281951 |
| -0.27375 | 1.80E-09 | -0.42939 | 2.25E-22 | -0.34517 | 1.64E-14 | -0.27963 | 7.76E-10 | -0.3285  |
| 0.378895 | 2.17E-17 | 0.386502 | 4.35E-18 | 0.206138 | 7.09E-06 | 0.265944 | 5.31E-09 | 0.179919 |
| 0.585627 | 2.45E-44 | 0.640571 | 2.67E-55 | 0.429742 | 2.06E-22 | 0.446672 | 2.78E-24 | 0.481884 |
| 0.349263 | 7.63E-15 | 0.386797 | 4.09E-18 | 0.275816 | 1.34E-09 | 0.215739 | 2.54E-06 | 0.335909 |
| 0.689315 | 4.32E-67 | 0.562284 | 2.77E-40 | 0.441826 | 9.78E-24 | 0.387616 | 3.43E-18 | 0.363739 |
| 0.61004  | 6.06E-49 | 0.53729  | 2.76E-36 | 0.535354 | 5.45E-36 | 0.339467 | 4.65E-14 | 0.193457 |
| 0.700238 | 4.63E-70 | 0.576296 | 1.12E-42 | 0.360539 | 8.80E-16 | 0.376678 | 3.43E-17 | 0.33294  |
| 0.615265 | 5.55E-50 | 0.63734  | 1.36E-54 | 0.557547 | 1.68E-39 | 0.460078 | 7.69E-26 | 0.414553 |
| 0.453382 | 4.71E-25 | 0.364648 | 3.92E-16 | 0.38664  | 4.23E-18 | 0.271865 | 2.34E-09 | 0.438454 |
| 0.673462 | 5.23E-63 | 0.796499 | #####    | 0.525979 | 1.39E-34 | 0.497999 | 1.23E-30 | 0.590525 |
| 0.478364 | 4.44E-28 | 0.597906 | 1.32E-46 | 0.298749 | 4.40E-11 | 0.308519 | 9.34E-12 | 0.433839 |
| 0.347129 | 1.14E-14 | 0.472691 | 2.27E-27 | 0.213879 | 3.11E-06 | 0.335364 | 9.73E-14 | 0.468087 |
| 0.678798 | 2.36E-64 | 0.46849  | 7.46E-27 | 0.452617 | 5.77E-25 | 0.284562 | 3.78E-10 | 0.266313 |
| 0.622355 | 2.01E-51 | 0.540197 | 9.83E-37 | 0.37653  | 3.54E-17 | 0.491045 | 1.03E-29 | 0.465579 |



|          |          |          |          |          |          |          |          |          |
|----------|----------|----------|----------|----------|----------|----------|----------|----------|
| 0.618418 | 1.28E-50 | 0.584054 | 4.70E-44 | 0.555329 | 3.88E-39 | 0.432324 | 1.09E-22 | 0.357573 |
| 0.498102 | 1.19E-30 | 0.239247 | 1.67E-07 | 0.122168 | 0.00822  | 0.354092 | 3.06E-15 | 0.308845 |
| 0.295671 | 7.09E-11 | 0.432853 | 9.52E-23 | 0.180425 | 8.83E-05 | 0.300776 | 3.21E-11 | 0.478229 |
| 0.619305 | 8.46E-51 | 0.665075 | 5.99E-61 | 0.500985 | 4.83E-31 | 0.4528   | 5.50E-25 | 0.48282  |
| 0.632373 | 1.60E-53 | 0.71573  | 1.64E-74 | 0.443231 | 6.80E-24 | 0.533369 | 1.09E-35 | 0.668131 |
| 0.588457 | 7.49E-45 | 0.602738 | 1.59E-47 | 0.441161 | 1.16E-23 | 0.483859 | 8.86E-29 | 0.571886 |
| 0.619863 | 6.52E-51 | 0.436662 | 3.65E-23 | 0.196084 | 1.98E-05 | 0.359037 | 1.18E-15 | 0.462968 |
| -0.24695 | 6.44E-08 | -0.28035 | 6.99E-10 | -0.09357 | 0.04327  | -0.25193 | 3.41E-08 | -0.41596 |
| 0.659284 | 1.45E-59 | 0.661079 | 5.43E-60 | 0.562275 | 2.78E-40 | 0.450069 | 1.14E-24 | 0.593519 |
| 0.634146 | 6.66E-54 | 0.498073 | 1.20E-30 | 0.411422 | 1.67E-20 | 0.449106 | 1.47E-24 | 0.562901 |
| -0.39934 | 2.63E-19 | -0.34748 | 1.07E-14 | -0.33694 | 7.34E-14 | -0.19778 | 1.67E-05 | -0.32347 |
| 0.67356  | 4.95E-63 | 0.568247 | 2.74E-41 | 0.534598 | 7.10E-36 | 0.333926 | 1.26E-13 | 0.577739 |
| 0.330163 | 2.44E-13 | 0.366391 | 2.77E-16 | 0.160227 | 0.00051  | 0.284244 | 3.96E-10 | 0.369663 |
| 0.456381 | 2.10E-25 | 0.243603 | 9.78E-08 | 0.090543 | 0.05053  | 0.18468  | 5.95E-05 | 0.170232 |
| 0.756918 | 6.03E-88 | 0.642297 | 1.11E-55 | 0.457504 | 1.55E-25 | 0.491675 | 8.52E-30 | 0.647428 |
| 0.457447 | 1.57E-25 | 0.429167 | 2.38E-22 | 0.126392 | 0.00624  | 0.306371 | 1.32E-11 | 0.469705 |
| 0.415818 | 5.98E-21 | 0.375578 | 4.31E-17 | 0.144371 | 0.00176  | 0.208047 | 5.80E-06 | 0.130656 |
| 0.393346 | 9.90E-19 | 0.605637 | 4.40E-48 | 0.353967 | 3.13E-15 | 0.471325 | 3.35E-27 | 0.660005 |
| 0.583289 | 6.45E-44 | 0.57768  | 6.39E-43 | 0.30471  | 1.72E-11 | 0.496332 | 2.05E-30 | 0.580004 |
| 0.335864 | 8.90E-14 | 0.311855 | 5.43E-12 | 0.111791 | 0.01565  | 0.276923 | 1.14E-09 | 0.588829 |
| 0.6994   | 7.91E-70 | 0.664055 | 1.06E-60 | 0.551071 | 1.90E-38 | 0.510814 | 2.12E-32 | 0.618729 |
| 0.699369 | 8.07E-70 | 0.584845 | 3.39E-44 | 0.363811 | 4.63E-16 | 0.461317 | 5.48E-26 | 0.639255 |
| 0.511179 | 1.88E-32 | 0.452005 | 6.80E-25 | 0.291008 | 1.44E-10 | 0.402201 | 1.38E-19 | 0.381887 |
| 0.604745 | 6.54E-48 | 0.276184 | 1.27E-09 | 0.253869 | 2.65E-08 | 0.180275 | 8.95E-05 | 0.102676 |
| 0.432145 | 1.14E-22 | 0.221667 | 1.31E-06 | 0.266432 | 4.97E-09 | 0.257046 | 1.75E-08 | 0.196597 |
| 0.547038 | 8.34E-38 | 0.498822 | 9.49E-31 | 0.174007 | 0.00016  | 0.321251 | 1.13E-12 | 0.463558 |
| 0.444317 | 5.13E-24 | 0.446889 | 2.63E-24 | 0.085799 | 0.06394  | 0.449742 | 1.24E-24 | 0.614785 |
| 0.745371 | 6.42E-84 | 0.65069  | 1.44E-57 | 0.513714 | 8.26E-33 | 0.513384 | 9.20E-33 | 0.712634 |
| 0.586029 | 2.07E-44 | 0.423613 | 9.26E-22 | 0.418102 | 3.48E-21 | 0.316885 | 2.36E-12 | 0.523012 |
| 0.571831 | 6.66E-42 | 0.384406 | 6.80E-18 | 0.230595 | 4.71E-07 | 0.397527 | 3.94E-19 | 0.379668 |
| 0.635319 | 3.72E-54 | 0.473681 | 1.71E-27 | 0.274289 | 1.66E-09 | 0.556416 | 2.58E-39 | 0.473836 |
| 0.574054 | 2.75E-42 | 0.570684 | 1.05E-41 | 0.284375 | 3.88E-10 | 0.455165 | 2.92E-25 | 0.392929 |
| 0.368439 | 1.84E-16 | 0.534862 | 6.48E-36 | 0.291001 | 1.45E-10 | 0.34208  | 2.89E-14 | 0.632286 |
| 0.498229 | 1.14E-30 | 0.259739 | 1.23E-08 | 0.185557 | 5.48E-05 | 0.455996 | 2.33E-25 | 0.433622 |
| 0.604409 | 7.60E-48 | 0.572453 | 5.21E-42 | 0.295763 | 6.99E-11 | 0.386212 | 4.63E-18 | 0.546795 |
| 0.445695 | 3.59E-24 | 0.321089 | 1.17E-12 | 0.226974 | 7.17E-07 | 0.384918 | 6.10E-18 | 0.450284 |
| 0.504191 | 1.76E-31 | 0.480039 | 2.73E-28 | 0.298473 | 4.60E-11 | 0.28918  | 1.90E-10 | 0.440778 |
| 0.684747 | 6.90E-66 | 0.594706 | 5.27E-46 | 0.47312  | 2.01E-27 | 0.479281 | 3.40E-28 | 0.559416 |
| 0.483877 | 8.82E-29 | 0.377457 | 2.92E-17 | 0.251875 | 3.43E-08 | 0.291521 | 1.34E-10 | 0.413919 |
| 0.286686 | 2.76E-10 | 0.463315 | 3.16E-26 | 0.260585 | 1.10E-08 | 0.253689 | 2.72E-08 | 0.289377 |
| 0.473404 | 1.85E-27 | 0.428255 | 2.98E-22 | 0.231856 | 4.06E-07 | 0.262338 | 8.66E-09 | 0.277445 |
| 0.670673 | 2.58E-62 | 0.718477 | 2.47E-75 | 0.52122  | 6.91E-34 | 0.488869 | 1.99E-29 | 0.518517 |
| 0.715008 | 2.68E-74 | 0.50199  | 3.53E-31 | 0.45291  | 5.34E-25 | 0.371933 | 9.08E-17 | 0.242849 |
| 0.422632 | 1.17E-21 | 0.393533 | 9.51E-19 | 0.337144 | 7.07E-14 | 0.348706 | 8.47E-15 | 0.310444 |
| -0.57346 | 3.48E-42 | -0.56878 | 2.23E-41 | -0.47136 | 3.31E-27 | -0.37914 | 2.06E-17 | -0.3234  |

|          |          |          |          |          |          |          |          |          |
|----------|----------|----------|----------|----------|----------|----------|----------|----------|
| 0.605261 | 5.20E-48 | 0.504536 | 1.58E-31 | 0.33741  | 6.74E-14 | 0.444371 | 5.06E-24 | 0.48971  |
| 0.343329 | 2.30E-14 | 0.41955  | 2.46E-21 | 0.148095 | 0.00133  | 0.390122 | 2.00E-18 | 0.438818 |
| 0.553532 | 7.60E-39 | 0.535359 | 5.44E-36 | 0.270946 | 2.66E-09 | 0.498229 | 1.14E-30 | 0.493615 |
| 0.380178 | 1.66E-17 | 0.339828 | 4.36E-14 | 0.211604 | 3.97E-06 | 0.235146 | 2.74E-07 | 0.30281  |
| 0.704454 | 3.04E-71 | 0.685113 | 5.54E-66 | 0.462728 | 3.72E-26 | 0.613109 | 1.50E-49 | 0.653463 |
| 0.721913 | 2.26E-76 | 0.55868  | 1.10E-39 | 0.464331 | 2.38E-26 | 0.399563 | 2.50E-19 | 0.470938 |
| 0.694247 | 2.05E-68 | 0.561461 | 3.80E-40 | 0.421154 | 1.68E-21 | 0.391106 | 1.61E-18 | 0.538558 |
| 0.685497 | 4.39E-66 | 0.817346 | #####    | 0.616225 | 3.56E-50 | 0.548471 | 4.94E-38 | 0.61423  |
| 0.639725 | 4.10E-55 | 0.713483 | 7.56E-74 | 0.350822 | 5.69E-15 | 0.434474 | 6.34E-23 | 0.53301  |
| 0.53559  | 5.02E-36 | 0.388318 | 2.95E-18 | 0.062033 | 0.18082  | 0.425615 | 5.69E-22 | 0.362418 |
| 0.375614 | 4.28E-17 | 0.295053 | 7.80E-11 | 0.174889 | 0.00015  | 0.320172 | 1.36E-12 | 0.449995 |
| 0.637112 | 1.52E-54 | 0.434702 | 5.99E-23 | 0.312201 | 5.13E-12 | 0.331499 | 1.93E-13 | 0.246112 |
| 0.529608 | 4.01E-35 | 0.599985 | 5.34E-47 | 0.392854 | 1.10E-18 | 0.543786 | 2.71E-37 | 0.715339 |
| -0.29427 | 8.79E-11 | -0.40223 | 1.38E-19 | -0.31283 | 4.63E-12 | -0.24313 | 1.04E-07 | -0.27072 |
| 0.609649 | 7.24E-49 | 0.666875 | 2.19E-61 | 0.491411 | 9.23E-30 | 0.517332 | 2.52E-33 | 0.64981  |
| 0.749514 | 2.44E-85 | 0.477072 | 6.46E-28 | 0.452083 | 6.66E-25 | 0.4384   | 2.35E-23 | 0.503135 |
| 0.796705 | #####    | 0.687794 | 1.09E-66 | 0.469039 | 6.39E-27 | 0.534882 | 6.43E-36 | 0.628147 |
| 0.680854 | 7.03E-65 | 0.570935 | 9.51E-42 | 0.455965 | 2.35E-25 | 0.470572 | 4.15E-27 | 0.498123 |
| 0.567956 | 3.07E-41 | 0.377857 | 2.69E-17 | 0.171939 | 0.00019  | 0.366085 | 2.95E-16 | 0.316133 |
| 0.662919 | 1.98E-60 | 0.52388  | 2.83E-34 | 0.28992  | 1.70E-10 | 0.461697 | 4.94E-26 | 0.388893 |
| 0.765473 | 4.45E-91 | 0.685938 | 3.37E-66 | 0.498388 | 1.09E-30 | 0.420431 | 1.99E-21 | 0.464329 |
| 0.552274 | 1.21E-38 | 0.329478 | 2.75E-13 | 0.219174 | 1.74E-06 | 0.333439 | 1.37E-13 | 0.283099 |
| 0.77947  | 1.68E-96 | 0.633778 | 7.99E-54 | 0.546707 | 9.41E-38 | 0.503184 | 2.42E-31 | 0.525147 |
| 0.80441  | #####    | 0.835939 | #####    | 0.680906 | 6.82E-65 | 0.58482  | 3.42E-44 | 0.706585 |
| 0.796045 | #####    | 0.670313 | 3.16E-62 | 0.506743 | 7.84E-32 | 0.439682 | 1.69E-23 | 0.492026 |
| 0.59331  | 9.59E-46 | 0.469381 | 5.81E-27 | 0.231336 | 4.31E-07 | 0.408721 | 3.13E-20 | 0.289248 |
| 0.365645 | 3.22E-16 | 0.306079 | 1.38E-11 | 0.192186 | 2.90E-05 | 0.173289 | 0.00017  | 0.202279 |
| 0.689581 | 3.67E-67 | 0.564696 | 1.09E-40 | 0.353677 | 3.31E-15 | 0.373265 | 6.92E-17 | 0.305221 |
| 0.401364 | 1.67E-19 | 0.337253 | 6.94E-14 | 0.109326 | 0.01811  | 0.296438 | 6.30E-11 | 0.454278 |
| 0.32258  | 9.05E-13 | 0.153776 | 0.00086  | 0.082136 | 0.07619  | 0.213388 | 3.28E-06 | 0.291696 |
| 0.476931 | 6.73E-28 | 0.326388 | 4.71E-13 | 0.322262 | 9.56E-13 | 0.352179 | 4.40E-15 | 0.399064 |
| 0.717608 | 4.51E-75 | 0.696114 | 6.35E-69 | 0.48558  | 5.32E-29 | 0.564585 | 1.14E-40 | 0.703987 |
| 0.412281 | 1.37E-20 | 0.344155 | 1.97E-14 | 0.275199 | 1.46E-09 | 0.329615 | 2.69E-13 | 0.468989 |
| 0.633016 | 1.16E-53 | 0.736332 | 6.46E-81 | 0.534821 | 6.57E-36 | 0.456272 | 2.16E-25 | 0.565669 |
| 0.752702 | 1.89E-86 | 0.558124 | 1.35E-39 | 0.454507 | 3.48E-25 | 0.496059 | 2.23E-30 | 0.58169  |
| 0.692472 | 6.18E-68 | 0.493451 | 4.96E-30 | 0.355554 | 2.31E-15 | 0.488832 | 2.01E-29 | 0.532376 |
| 0.619307 | 8.46E-51 | 0.419348 | 2.58E-21 | 0.214177 | 3.01E-06 | 0.364062 | 4.40E-16 | 0.480335 |
| 0.545572 | 1.42E-37 | 0.240614 | 1.41E-07 | 0.137985 | 0.00281  | 0.291695 | 1.30E-10 | 0.215865 |
| 0.372542 | 8.02E-17 | 0.477718 | 5.35E-28 | 0.178947 | 0.0001   | 0.430512 | 1.71E-22 | 0.601641 |
| 0.619161 | 9.06E-51 | 0.620651 | 4.50E-51 | 0.387086 | 3.84E-18 | 0.37293  | 7.41E-17 | 0.480445 |
| 0.240058 | 1.51E-07 | 0.275587 | 1.38E-09 | 0.073702 | 0.1117   | 0.224224 | 9.83E-07 | 0.212855 |
| 0.549246 | 3.72E-38 | 0.589885 | 4.11E-45 | 0.389416 | 2.33E-18 | 0.324862 | 6.13E-13 | 0.374989 |
| 0.499719 | 7.18E-31 | 0.523551 | 3.16E-34 | 0.300857 | 3.17E-11 | 0.336295 | 8.24E-14 | 0.34292  |
| 0.614543 | 7.74E-50 | 0.471776 | 2.95E-27 | 0.207356 | 6.24E-06 | 0.352157 | 4.42E-15 | 0.338615 |
| 0.478157 | 4.71E-28 | 0.556592 | 2.42E-39 | 0.351857 | 4.68E-15 | 0.530938 | 2.54E-35 | 0.577446 |

|          |          |          |          |          |          |          |          |          |
|----------|----------|----------|----------|----------|----------|----------|----------|----------|
| 0.735556 | 1.16E-80 | 0.806249 | #####    | 0.578883 | 3.92E-43 | 0.464197 | 2.47E-26 | 0.557933 |
| -0.34104 | 3.49E-14 | -0.24262 | 1.11E-07 | -0.13695 | 0.00302  | -0.29946 | 3.94E-11 | -0.36814 |
| 0.441905 | 9.58E-24 | 0.23897  | 1.73E-07 | 0.261037 | 1.03E-08 | 0.217046 | 2.20E-06 | 0.297506 |
| 0.615535 | 4.90E-50 | 0.374665 | 5.20E-17 | 0.39421  | 8.19E-19 | 0.317665 | 2.08E-12 | 0.451289 |
| 0.48648  | 4.07E-29 | 0.55854  | 1.16E-39 | 0.237527 | 2.06E-07 | 0.487284 | 3.20E-29 | 0.637    |
| 0.459738 | 8.44E-26 | 0.544605 | 2.02E-37 | 0.282963 | 4.78E-10 | 0.35697  | 1.76E-15 | 0.404362 |
| -0.41859 | 3.09E-21 | -0.43318 | 8.78E-23 | -0.38604 | 4.80E-18 | -0.20844 | 5.56E-06 | -0.19261 |
| 0.323299 | 8.01E-13 | 0.390017 | 2.04E-18 | 0.085248 | 0.06567  | 0.423366 | 9.83E-22 | 0.550353 |
| -0.40256 | 1.28E-19 | -0.56041 | 5.68E-40 | -0.38809 | 3.10E-18 | -0.3206  | 1.27E-12 | -0.44158 |
| 0.784961 | 9.70E-99 | 0.610303 | 5.38E-49 | 0.453694 | 4.33E-25 | 0.563142 | 1.99E-40 | 0.660788 |
| 0.622248 | 2.12E-51 | 0.536051 | 4.27E-36 | 0.363634 | 4.79E-16 | 0.426424 | 4.67E-22 | 0.499167 |
| 0.341371 | 3.29E-14 | 0.394435 | 7.80E-19 | 0.16513  | 0.00034  | 0.275474 | 1.41E-09 | 0.385066 |
| 0.657047 | 4.86E-59 | 0.389221 | 2.43E-18 | 0.303344 | 2.14E-11 | 0.490297 | 1.29E-29 | 0.506194 |
| 0.412086 | 1.43E-20 | 0.196012 | 1.99E-05 | 0.030041 | 0.51724  | 0.382235 | 1.08E-17 | 0.392361 |
| 0.632612 | 1.42E-53 | 0.668145 | 1.08E-61 | 0.601997 | 2.21E-47 | 0.458052 | 1.34E-25 | 0.619013 |
| 0.69988  | 5.83E-70 | 0.487393 | 3.10E-29 | 0.304702 | 1.72E-11 | 0.539927 | 1.08E-36 | 0.413271 |
| 0.462522 | 3.93E-26 | 0.448366 | 1.78E-24 | 0.28502  | 3.53E-10 | 0.34622  | 1.35E-14 | 0.424328 |
| 0.572487 | 5.14E-42 | 0.484111 | 8.23E-29 | 0.205829 | 7.32E-06 | 0.452142 | 6.56E-25 | 0.534652 |
| 0.567891 | 3.15E-41 | 0.591164 | 2.39E-45 | 0.319923 | 1.42E-12 | 0.560152 | 6.26E-40 | 0.654244 |
| 0.589066 | 5.80E-45 | 0.526337 | 1.23E-34 | 0.477913 | 5.06E-28 | 0.453994 | 4.00E-25 | 0.33123  |
| 0.795666 | #####    | 0.720204 | 7.46E-76 | 0.590002 | 3.91E-45 | 0.626546 | 2.72E-52 | 0.673402 |
| 0.675116 | 2.02E-63 | 0.586499 | 1.70E-44 | 0.49414  | 4.02E-30 | 0.37771  | 2.77E-17 | 0.399788 |
| 0.355935 | 2.15E-15 | 0.238484 | 1.84E-07 | -0.01582 | 0.73307  | 0.286509 | 2.83E-10 | 0.300183 |
| 0.507826 | 5.55E-32 | 0.313973 | 3.83E-12 | 0.199985 | 1.34E-05 | 0.453739 | 4.28E-25 | 0.55508  |
| 0.388957 | 2.57E-18 | 0.273534 | 1.85E-09 | 0.199491 | 1.40E-05 | 0.279725 | 7.65E-10 | 0.507732 |
| 0.572931 | 4.30E-42 | 0.615429 | 5.14E-50 | 0.416122 | 5.56E-21 | 0.408217 | 3.52E-20 | 0.502051 |
| 0.455325 | 2.79E-25 | 0.551307 | 1.74E-38 | 0.236003 | 2.48E-07 | 0.38851  | 2.83E-18 | 0.585925 |
| 0.374038 | 5.91E-17 | 0.374183 | 5.74E-17 | 0.254787 | 2.36E-08 | 0.615058 | 6.11E-50 | 0.444809 |
| 0.589151 | 5.60E-45 | 0.576546 | 1.01E-42 | 0.374069 | 5.87E-17 | 0.397945 | 3.59E-19 | 0.58302  |
| 0.539449 | 1.28E-36 | 0.425236 | 6.24E-22 | 0.320791 | 1.23E-12 | 0.440949 | 1.22E-23 | 0.5065   |
| 0.732342 | 1.25E-79 | 0.530108 | 3.38E-35 | 0.411329 | 1.71E-20 | 0.437791 | 2.74E-23 | 0.493209 |
| -0.5119  | 1.49E-32 | -0.4395  | 1.78E-23 | -0.40473 | 7.81E-20 | -0.41096 | 1.86E-20 | -0.53642 |
| 0.673541 | 5.00E-63 | 0.625579 | 4.32E-52 | 0.444189 | 5.31E-24 | 0.492161 | 7.35E-30 | 0.573944 |
| -0.39229 | 1.25E-18 | -0.34092 | 3.57E-14 | -0.3508  | 5.72E-15 | -0.20979 | 4.82E-06 | -0.15876 |
| 0.710846 | 4.46E-73 | 0.790692 | #####    | 0.562039 | 3.04E-40 | 0.61656  | 3.05E-50 | 0.672938 |
| 0.517097 | 2.72E-33 | 0.527807 | 7.44E-35 | 0.364322 | 4.18E-16 | 0.470333 | 4.44E-27 | 0.588251 |
| 0.371645 | 9.63E-17 | 0.291095 | 1.43E-10 | 0.245617 | 7.61E-08 | 0.119988 | 0.00945  | 0.053562 |
| 0.703108 | 7.29E-71 | 0.601832 | 2.38E-47 | 0.446458 | 2.94E-24 | 0.455568 | 2.62E-25 | 0.530107 |
| 0.626896 | 2.30E-52 | 0.555891 | 3.14E-39 | 0.442713 | 7.78E-24 | 0.326061 | 4.98E-13 | 0.428702 |
| 0.588479 | 7.43E-45 | 0.418    | 3.56E-21 | 0.309527 | 7.94E-12 | 0.440357 | 1.43E-23 | 0.428627 |
| 0.480383 | 2.46E-28 | 0.391278 | 1.55E-18 | 0.184862 | 5.85E-05 | 0.395324 | 6.41E-19 | 0.517889 |
| -0.30219 | 2.57E-11 | -0.34449 | 1.85E-14 | -0.3245  | 6.52E-13 | -0.27962 | 7.77E-10 | -0.47175 |
| 0.412436 | 1.32E-20 | 0.518871 | 1.51E-33 | 0.31366  | 4.04E-12 | 0.360411 | 9.02E-16 | 0.378315 |
| 0.394129 | 8.34E-19 | 0.460866 | 6.20E-26 | 0.279342 | 8.09E-10 | 0.280771 | 6.58E-10 | 0.458438 |
| 0.691979 | 8.39E-68 | 0.687801 | 1.09E-66 | 0.481095 | 2.00E-28 | 0.446167 | 3.17E-24 | 0.52759  |

|          |          |          |          |          |          |          |          |          |
|----------|----------|----------|----------|----------|----------|----------|----------|----------|
| 0.230221 | 4.92E-07 | 0.311653 | 5.61E-12 | 0.055238 | 0.23349  | 0.300084 | 3.58E-11 | 0.470796 |
| 0.425798 | 5.44E-22 | 0.474891 | 1.21E-27 | 0.265477 | 5.66E-09 | 0.458579 | 1.16E-25 | 0.477634 |
| 0.593999 | 7.14E-46 | 0.720309 | 6.93E-76 | 0.508515 | 4.45E-32 | 0.443351 | 6.59E-24 | 0.674325 |
| 0.303907 | 1.96E-11 | 0.386803 | 4.08E-18 | 0.073239 | 0.11397  | 0.219236 | 1.72E-06 | 0.284506 |
| 0.270468 | 2.85E-09 | 0.422456 | 1.22E-21 | 0.105995 | 0.02197  | 0.322888 | 8.59E-13 | 0.479517 |
| 0.345917 | 1.42E-14 | 0.456963 | 1.80E-25 | 0.153789 | 0.00085  | 0.381085 | 1.37E-17 | 0.426069 |
| 0.578636 | 4.34E-43 | 0.457775 | 1.44E-25 | 0.40422  | 8.77E-20 | 0.246017 | 7.24E-08 | 0.217941 |
| 0.202189 | 1.07E-05 | 0.302067 | 2.62E-11 | 0.04551  | 0.32642  | 0.226294 | 7.76E-07 | 0.204392 |
| 0.239113 | 1.70E-07 | 0.36437  | 4.14E-16 | 0.103898 | 0.02475  | 0.196283 | 1.94E-05 | 0.186863 |
| 0.679272 | 1.79E-64 | 0.539143 | 1.43E-36 | 0.350718 | 5.80E-15 | 0.510493 | 2.35E-32 | 0.402353 |
| 0.392341 | 1.23E-18 | 0.455188 | 2.90E-25 | 0.224125 | 9.94E-07 | 0.2978   | 5.10E-11 | 0.432047 |
| 0.425471 | 5.89E-22 | 0.514868 | 5.67E-33 | 0.226119 | 7.91E-07 | 0.441965 | 9.43E-24 | 0.668238 |
| 0.313045 | 4.47E-12 | 0.314782 | 3.35E-12 | 0.110209 | 0.0172   | 0.280157 | 7.19E-10 | 0.261289 |
| 0.584349 | 4.16E-44 | 0.373424 | 6.70E-17 | 0.316387 | 2.57E-12 | 0.299717 | 3.79E-11 | 0.203842 |
| 0.504702 | 1.50E-31 | 0.357685 | 1.53E-15 | 0.048613 | 0.29448  | 0.348676 | 8.52E-15 | 0.567189 |
| 0.281118 | 6.26E-10 | 0.267874 | 4.08E-09 | 0.140223 | 0.00239  | 0.337728 | 6.37E-14 | 0.397323 |
| 0.662739 | 2.18E-60 | 0.634272 | 6.26E-54 | 0.334242 | 1.19E-13 | 0.53639  | 3.79E-36 | 0.614003 |
| 0.534408 | 7.59E-36 | 0.68884  | 5.78E-67 | 0.470658 | 4.05E-27 | 0.386024 | 4.82E-18 | 0.552158 |
| 0.62038  | 5.11E-51 | 0.388754 | 2.68E-18 | 0.396671 | 4.76E-19 | 0.332559 | 1.60E-13 | 0.330453 |
| 0.492296 | 7.06E-30 | 0.358655 | 1.27E-15 | 0.302574 | 2.42E-11 | 0.403542 | 1.02E-19 | 0.478854 |
| 0.424289 | 7.86E-22 | 0.486901 | 3.59E-29 | 0.371039 | 1.09E-16 | 0.287199 | 2.56E-10 | 0.336829 |
| 0.637087 | 1.54E-54 | 0.577295 | 7.47E-43 | 0.49919  | 8.46E-31 | 0.364552 | 4.00E-16 | 0.610053 |
| 0.309827 | 7.56E-12 | 0.260799 | 1.06E-08 | 0.058972 | 0.20335  | 0.267024 | 4.58E-09 | 0.415916 |
| 0.544359 | 2.21E-37 | 0.384812 | 6.24E-18 | 0.330638 | 2.25E-13 | 0.496349 | 2.04E-30 | 0.477204 |
| 0.449302 | 1.39E-24 | 0.736354 | 6.36E-81 | 0.396974 | 4.45E-19 | 0.381319 | 1.31E-17 | 0.508715 |
| 0.414122 | 8.91E-21 | 0.368166 | 1.94E-16 | 0.233694 | 3.26E-07 | 0.381556 | 1.24E-17 | 0.35649  |
| -0.36912 | 1.61E-16 | -0.33354 | 1.35E-13 | -0.26838 | 3.80E-09 | -0.28121 | 6.17E-10 | -0.32828 |
| 0.698189 | 1.71E-69 | 0.654154 | 2.29E-58 | 0.567342 | 3.90E-41 | 0.543513 | 2.99E-37 | 0.675999 |
| 0.367628 | 2.17E-16 | 0.33812  | 5.93E-14 | 0.308759 | 8.99E-12 | 0.332541 | 1.61E-13 | 0.285768 |
| 0.42046  | 1.98E-21 | 0.457892 | 1.40E-25 | 0.359294 | 1.12E-15 | 0.662233 | 2.88E-60 | 0.473522 |
| 0.789818 | #####    | 0.705462 | 1.57E-71 | 0.539673 | 1.18E-36 | 0.499699 | 7.22E-31 | 0.645711 |
| 0.84155  | #####    | 0.723957 | 5.33E-77 | 0.64131  | 1.83E-55 | 0.584397 | 4.08E-44 | 0.67448  |
| 0.601744 | 2.47E-47 | 0.832697 | #####    | 0.48678  | 3.72E-29 | 0.491208 | 9.82E-30 | 0.588621 |
| 0.493133 | 5.47E-30 | 0.636476 | 2.09E-54 | 0.355066 | 2.54E-15 | 0.336033 | 8.63E-14 | 0.399026 |
| 0.571884 | 6.52E-42 | 0.527952 | 7.08E-35 | 0.342647 | 2.60E-14 | 0.472708 | 2.26E-27 | 0.694475 |
| 0.726966 | 6.23E-78 | 0.381871 | 1.16E-17 | 0.325667 | 5.33E-13 | 0.329956 | 2.53E-13 | 0.2397   |
| 0.506033 | 9.83E-32 | 0.560118 | 6.35E-40 | 0.276828 | 1.16E-09 | 0.472507 | 2.39E-27 | 0.618481 |
| 0.546241 | 1.11E-37 | 0.522918 | 3.91E-34 | 0.365917 | 3.05E-16 | 0.55848  | 1.18E-39 | 0.651318 |
| 0.370823 | 1.14E-16 | 0.385951 | 4.90E-18 | 0.179491 | 9.61E-05 | 0.295806 | 6.95E-11 | 0.529569 |
| 0.400795 | 1.90E-19 | 0.296579 | 6.17E-11 | 0.207757 | 5.98E-06 | 0.377567 | 2.86E-17 | 0.432716 |
| 0.469869 | 5.06E-27 | 0.460507 | 6.84E-26 | 0.360328 | 9.17E-16 | 0.379124 | 2.07E-17 | 0.562036 |
| 0.506071 | 9.71E-32 | 0.219329 | 1.71E-06 | 0.161044 | 0.00048  | 0.298188 | 4.81E-11 | 0.385448 |
| 0.556713 | 2.31E-39 | 0.342364 | 2.74E-14 | 0.128324 | 0.00548  | 0.388518 | 2.82E-18 | 0.394574 |
| 0.407734 | 3.93E-20 | 0.360669 | 8.58E-16 | 0.202021 | 1.09E-05 | 0.208063 | 5.79E-06 | 0.323187 |
| 0.648447 | 4.65E-57 | 0.521362 | 6.59E-34 | 0.340558 | 3.81E-14 | 0.529993 | 3.52E-35 | 0.682624 |

|          |          |          |          |          |          |          |          |          |
|----------|----------|----------|----------|----------|----------|----------|----------|----------|
| 0.634983 | 4.40E-54 | 0.5994   | 6.90E-47 | 0.484696 | 6.92E-29 | 0.450202 | 1.10E-24 | 0.478594 |
| 0.503628 | 2.11E-31 | 0.288052 | 2.25E-10 | 0.172679 | 0.00018  | 0.343156 | 2.37E-14 | 0.388787 |
| 0.406089 | 5.73E-20 | 0.594044 | 7.00E-46 | 0.247035 | 6.37E-08 | 0.397313 | 4.13E-19 | 0.500089 |
| 0.241056 | 1.34E-07 | 0.347261 | 1.11E-14 | 0.125461 | 0.00663  | 0.123042 | 0.00777  | 0.302198 |
| 0.690296 | 2.37E-67 | 0.677861 | 4.09E-64 | 0.49718  | 1.58E-30 | 0.458262 | 1.26E-25 | 0.577921 |
| 0.701506 | 2.05E-70 | 0.728372 | 2.26E-78 | 0.499156 | 8.55E-31 | 0.53322  | 1.15E-35 | 0.611862 |
| 0.558224 | 1.30E-39 | 0.439323 | 1.86E-23 | 0.201497 | 1.15E-05 | 0.384666 | 6.44E-18 | 0.382757 |
| 0.547343 | 7.46E-38 | 0.390891 | 1.69E-18 | 0.277128 | 1.11E-09 | 0.427981 | 3.19E-22 | 0.669377 |
| 0.706828 | 6.42E-72 | 0.786371 | 2.52E-99 | 0.627914 | 1.40E-52 | 0.564148 | 1.35E-40 | 0.676753 |
| 0.569157 | 1.92E-41 | 0.587812 | 9.83E-45 | 0.319899 | 1.43E-12 | 0.388024 | 3.14E-18 | 0.650462 |
| 0.439404 | 1.82E-23 | 0.476214 | 8.27E-28 | 0.261073 | 1.03E-08 | 0.410645 | 2.01E-20 | 0.271032 |
| 0.638278 | 8.49E-55 | 0.6439   | 4.89E-56 | 0.48498  | 6.36E-29 | 0.392633 | 1.16E-18 | 0.682954 |
| 0.495422 | 2.71E-30 | 0.599187 | 7.57E-47 | 0.297279 | 5.53E-11 | 0.370216 | 1.29E-16 | 0.533399 |
| 0.609775 | 6.84E-49 | 0.752334 | 2.54E-86 | 0.504351 | 1.68E-31 | 0.446528 | 2.89E-24 | 0.508058 |
| 0.523449 | 3.27E-34 | 0.519064 | 1.42E-33 | 0.424547 | 7.38E-22 | 0.409182 | 2.81E-20 | 0.265711 |
| 0.634082 | 6.88E-54 | 0.614631 | 7.43E-50 | 0.527942 | 7.11E-35 | 0.458528 | 1.17E-25 | 0.644062 |
| 0.646808 | 1.09E-56 | 0.383233 | 8.72E-18 | 0.170512 | 0.00021  | 0.391985 | 1.33E-18 | 0.277877 |
| 0.61916  | 9.06E-51 | 0.649861 | 2.22E-57 | 0.541026 | 7.31E-37 | 0.466486 | 1.31E-26 | 0.600554 |
| 0.546819 | 9.03E-38 | 0.527011 | 9.77E-35 | 0.294064 | 9.08E-11 | 0.424712 | 7.09E-22 | 0.411985 |
| 0.598461 | 1.04E-46 | 0.44297  | 7.28E-24 | 0.230081 | 5.00E-07 | 0.475305 | 1.07E-27 | 0.547188 |
| 0.520412 | 9.06E-34 | 0.383483 | 8.27E-18 | 0.250583 | 4.06E-08 | 0.438906 | 2.07E-23 | 0.59058  |
| 0.671187 | 1.92E-62 | 0.528584 | 5.70E-35 | 0.382169 | 1.09E-17 | 0.488073 | 2.53E-29 | 0.602244 |
| 0.274728 | 1.56E-09 | 0.355064 | 2.54E-15 | 0.094311 | 0.04163  | 0.329427 | 2.78E-13 | 0.330265 |
| 0.7707   | 4.66E-93 | 0.799863 | #####    | 0.627514 | 1.70E-52 | 0.534076 | 8.53E-36 | 0.605307 |
| 0.710561 | 5.40E-73 | 0.516811 | 2.99E-33 | 0.42674  | 4.32E-22 | 0.330906 | 2.14E-13 | 0.405336 |
| 0.61927  | 8.61E-51 | 0.657302 | 4.23E-59 | 0.461742 | 4.87E-26 | 0.483803 | 9.01E-29 | 0.541849 |
| 0.788649 | #####    | 0.599166 | 7.64E-47 | 0.430936 | 1.54E-22 | 0.484352 | 7.66E-29 | 0.54037  |
| 0.575614 | 1.47E-42 | 0.726195 | 1.08E-77 | 0.442463 | 8.29E-24 | 0.44329  | 6.70E-24 | 0.595475 |
| 0.540579 | 8.58E-37 | 0.458838 | 1.08E-25 | 0.232302 | 3.85E-07 | 0.295627 | 7.14E-11 | 0.324912 |
| 0.383417 | 8.39E-18 | 0.382527 | 1.01E-17 | 0.205921 | 7.25E-06 | 0.343745 | 2.13E-14 | 0.426891 |
| 0.331701 | 1.86E-13 | 0.28848  | 2.11E-10 | 0.170617 | 0.00021  | 0.19896  | 1.48E-05 | 0.299063 |
| 0.35914  | 1.16E-15 | 0.227064 | 7.10E-07 | 0.164002 | 0.00037  | 0.266436 | 4.96E-09 | 0.292043 |
| 0.494567 | 3.53E-30 | 0.349872 | 6.81E-15 | 0.218156 | 1.94E-06 | 0.398596 | 3.11E-19 | 0.528503 |
| 0.794244 | #####    | 0.499827 | 6.94E-31 | 0.357867 | 1.48E-15 | 0.469203 | 6.11E-27 | 0.428584 |
| 0.771253 | 2.85E-93 | 0.61566  | 4.62E-50 | 0.5035   | 2.19E-31 | 0.607058 | 2.33E-48 | 0.567886 |
| 0.452174 | 6.50E-25 | 0.293658 | 9.66E-11 | 0.051524 | 0.26649  | 0.362656 | 5.81E-16 | 0.360983 |
| 0.681939 | 3.70E-65 | 0.586501 | 1.70E-44 | 0.433633 | 7.84E-23 | 0.382912 | 9.33E-18 | 0.315392 |
| 0.649335 | 2.92E-57 | 0.653134 | 3.94E-58 | 0.465864 | 1.56E-26 | 0.520294 | 9.42E-34 | 0.493869 |
| 0.684681 | 7.18E-66 | 0.441395 | 1.09E-23 | 0.250435 | 4.13E-08 | 0.460718 | 6.46E-26 | 0.322606 |
| 0.352882 | 3.85E-15 | 0.457018 | 1.77E-25 | 0.271425 | 2.49E-09 | 0.272951 | 2.01E-09 | 0.18185  |
| 0.426285 | 4.83E-22 | 0.2541   | 2.58E-08 | 0.128289 | 0.0055   | 0.371005 | 1.10E-16 | 0.506772 |
| 0.449559 | 1.30E-24 | 0.630129 | 4.79E-53 | 0.308148 | 9.92E-12 | 0.426086 | 5.07E-22 | 0.492065 |
| 0.286378 | 2.89E-10 | 0.157016 | 0.00066  | -0.01055 | 0.82006  | 0.311733 | 5.54E-12 | 0.432624 |
| -0.41304 | 1.15E-20 | -0.41761 | 3.91E-21 | -0.46747 | 9.95E-27 | -0.28952 | 1.81E-10 | -0.30672 |
| 0.81759  | #####    | 0.822728 | #####    | 0.668558 | 8.53E-62 | 0.552148 | 1.27E-38 | 0.648841 |

|          |          |          |          |          |          |          |          |          |
|----------|----------|----------|----------|----------|----------|----------|----------|----------|
| 0.425106 | 6.44E-22 | 0.429053 | 2.45E-22 | 0.304256 | 1.85E-11 | 0.365265 | 3.47E-16 | 0.493102 |
| 0.295442 | 7.35E-11 | 0.421674 | 1.48E-21 | 0.170647 | 0.00021  | 0.293201 | 1.04E-10 | 0.469366 |
| 0.402851 | 1.20E-19 | 0.408314 | 3.44E-20 | 0.131381 | 0.00446  | 0.341517 | 3.20E-14 | 0.500795 |
| 0.461319 | 5.48E-26 | 0.574926 | 1.94E-42 | 0.374248 | 5.66E-17 | 0.547236 | 7.76E-38 | 0.675799 |
| -0.40695 | 4.70E-20 | -0.33029 | 2.39E-13 | -0.26998 | 3.05E-09 | -0.21966 | 1.65E-06 | -0.30768 |
| 0.375217 | 4.64E-17 | 0.274179 | 1.69E-09 | 0.22476  | 9.25E-07 | 0.281955 | 5.54E-10 | 0.458661 |
| 0.719039 | 1.68E-75 | 0.539489 | 1.26E-36 | 0.491262 | 9.66E-30 | 0.437268 | 3.13E-23 | 0.48291  |
| 0.60396  | 9.27E-48 | 0.506549 | 8.34E-32 | 0.212245 | 3.71E-06 | 0.398017 | 3.53E-19 | 0.408545 |
| 0.480872 | 2.14E-28 | 0.545027 | 1.73E-37 | 0.187997 | 4.35E-05 | 0.442942 | 7.33E-24 | 0.479251 |
| 0.671948 | 1.25E-62 | 0.569365 | 1.77E-41 | 0.321976 | 1.00E-12 | 0.46709  | 1.11E-26 | 0.526339 |
| 0.61011  | 5.87E-49 | 0.470987 | 3.69E-27 | 0.310731 | 6.53E-12 | 0.35162  | 4.89E-15 | 0.205064 |
| 0.737639 | 2.42E-81 | 0.753719 | 8.28E-87 | 0.580421 | 2.10E-43 | 0.543614 | 2.89E-37 | 0.54392  |
| 0.835624 | #####    | 0.662943 | 1.95E-60 | 0.475777 | 9.38E-28 | 0.557561 | 1.68E-39 | 0.510261 |
| 0.78467  | 1.28E-98 | 0.586814 | 1.49E-44 | 0.351115 | 5.38E-15 | 0.52979  | 3.77E-35 | 0.510179 |
| 0.633373 | 9.76E-54 | 0.611174 | 3.62E-49 | 0.554656 | 5.00E-39 | 0.469379 | 5.81E-27 | 0.410857 |
| 0.39475  | 7.28E-19 | 0.391614 | 1.45E-18 | 0.311997 | 5.31E-12 | 0.198442 | 1.56E-05 | 0.454661 |
| 0.689797 | 3.22E-67 | 0.679416 | 1.64E-64 | 0.485689 | 5.15E-29 | 0.566652 | 5.11E-41 | 0.564753 |
| 0.487808 | 2.74E-29 | 0.625935 | 3.65E-52 | 0.384581 | 6.55E-18 | 0.414955 | 7.33E-21 | 0.653949 |
| 0.499337 | 8.09E-31 | 0.62245  | 1.92E-51 | 0.296529 | 6.21E-11 | 0.500994 | 4.82E-31 | 0.414998 |
| 0.468654 | 7.13E-27 | 0.208825 | 5.34E-06 | 0.101904 | 0.02766  | 0.371897 | 9.15E-17 | 0.341667 |
| 0.641474 | 1.69E-55 | 0.716616 | 8.93E-75 | 0.539348 | 1.33E-36 | 0.423414 | 9.72E-22 | 0.478526 |
| 0.382695 | 9.77E-18 | 0.345563 | 1.52E-14 | 0.343216 | 2.35E-14 | 0.425488 | 5.87E-22 | 0.373897 |
| 0.520321 | 9.34E-34 | 0.467279 | 1.05E-26 | 0.30338  | 2.13E-11 | 0.40565  | 6.33E-20 | 0.475617 |
| 0.673954 | 3.95E-63 | 0.447002 | 2.55E-24 | 0.187902 | 4.39E-05 | 0.405378 | 6.74E-20 | 0.347206 |
| 0.466034 | 1.48E-26 | 0.406384 | 5.35E-20 | 0.398117 | 3.46E-19 | 0.360719 | 8.50E-16 | 0.381661 |
| 0.471069 | 3.60E-27 | 0.462417 | 4.05E-26 | 0.371123 | 1.07E-16 | 0.400551 | 2.01E-19 | 0.629388 |
| -0.45321 | 4.94E-25 | -0.68098 | 6.52E-65 | -0.41952 | 2.48E-21 | -0.36307 | 5.35E-16 | -0.43313 |
| 0.532201 | 1.64E-35 | 0.352098 | 4.47E-15 | 0.175902 | 0.00013  | 0.418908 | 2.87E-21 | 0.438012 |
| -0.48627 | 4.34E-29 | -0.35914 | 1.16E-15 | -0.30044 | 3.38E-11 | -0.33869 | 5.35E-14 | -0.21343 |
| 0.301853 | 2.71E-11 | 0.433139 | 8.87E-23 | 0.251231 | 3.73E-08 | 0.309535 | 7.93E-12 | 0.301496 |
| 0.310588 | 6.68E-12 | 0.236685 | 2.28E-07 | -0.04846 | 0.29597  | 0.215013 | 2.75E-06 | 0.351931 |
| 0.537984 | 2.16E-36 | 0.405921 | 5.95E-20 | 0.247112 | 6.30E-08 | 0.252983 | 2.98E-08 | 0.199483 |
| 0.606274 | 3.31E-48 | 0.660258 | 8.51E-60 | 0.424773 | 6.99E-22 | 0.450482 | 1.02E-24 | 0.558952 |
| 0.268486 | 3.75E-09 | 0.35363  | 3.34E-15 | 0.085173 | 0.06591  | 0.211225 | 4.14E-06 | 0.207596 |
| 0.425718 | 5.55E-22 | 0.497661 | 1.36E-30 | 0.327964 | 3.58E-13 | 0.337825 | 6.26E-14 | 0.460839 |
| 0.244171 | 9.12E-08 | 0.448312 | 1.81E-24 | 0.147657 | 0.00137  | 0.266246 | 5.10E-09 | 0.276536 |
| 0.633531 | 9.03E-54 | 0.670003 | 3.77E-62 | 0.448514 | 1.71E-24 | 0.368902 | 1.68E-16 | 0.57481  |
| 0.411469 | 1.66E-20 | 0.151674 | 0.00101  | 0.023231 | 0.61655  | 0.326486 | 4.63E-13 | 0.232049 |
| 0.32579  | 5.22E-13 | 0.263968 | 6.95E-09 | 0.18199  | 7.64E-05 | 0.435087 | 5.44E-23 | 0.430616 |
| 0.529921 | 3.60E-35 | 0.562474 | 2.58E-40 | 0.390571 | 1.81E-18 | 0.395248 | 6.52E-19 | 0.452899 |
| 0.592499 | 1.35E-45 | 0.476804 | 6.98E-28 | 0.227677 | 6.61E-07 | 0.49089  | 1.08E-29 | 0.556604 |
| 0.451964 | 6.87E-25 | 0.331244 | 2.02E-13 | 0.295173 | 7.66E-11 | 0.233597 | 3.30E-07 | 0.211397 |
| 0.554151 | 6.03E-39 | 0.665176 | 5.66E-61 | 0.493383 | 5.07E-30 | 0.471216 | 3.46E-27 | 0.722105 |
| 0.639763 | 4.02E-55 | 0.619372 | 8.21E-51 | 0.526451 | 1.18E-34 | 0.482542 | 1.31E-28 | 0.533442 |
| 0.65766  | 3.49E-59 | 0.540364 | 9.26E-37 | 0.45577  | 2.48E-25 | 0.412443 | 1.32E-20 | 0.39622  |

|          |          |          |          |          |          |          |          |          |
|----------|----------|----------|----------|----------|----------|----------|----------|----------|
| 0.737791 | 2.16E-81 | 0.724937 | 2.66E-77 | 0.56334  | 1.85E-40 | 0.558811 | 1.04E-39 | 0.703459 |
| 0.695612 | 8.71E-69 | 0.707301 | 4.70E-72 | 0.550155 | 2.66E-38 | 0.482208 | 1.44E-28 | 0.564083 |
| 0.836759 | #####    | 0.789275 | #####    | 0.695177 | 1.14E-68 | 0.581129 | 1.57E-43 | 0.658572 |
| 0.672467 | 9.26E-63 | 0.666945 | 2.11E-61 | 0.511743 | 1.57E-32 | 0.501667 | 3.90E-31 | 0.67943  |
| 0.650867 | 1.31E-57 | 0.461513 | 5.19E-26 | 0.25252  | 3.16E-08 | 0.325241 | 5.74E-13 | 0.400304 |
| 0.633011 | 1.17E-53 | 0.634464 | 5.69E-54 | 0.403489 | 1.03E-19 | 0.537647 | 2.43E-36 | 0.735399 |
| 0.611517 | 3.10E-49 | 0.502599 | 2.91E-31 | 0.351785 | 4.74E-15 | 0.323358 | 7.93E-13 | 0.271677 |
| 0.549553 | 3.32E-38 | 0.394732 | 7.31E-19 | 0.205199 | 7.82E-06 | 0.385007 | 5.99E-18 | 0.184862 |
| 0.556612 | 2.40E-39 | 0.34916  | 7.78E-15 | 0.317682 | 2.07E-12 | 0.291411 | 1.36E-10 | 0.289984 |
| 0.386127 | 4.72E-18 | 0.37161  | 9.70E-17 | 0.188488 | 4.15E-05 | 0.209632 | 4.90E-06 | 0.126178 |
| 0.509707 | 3.03E-32 | 0.592822 | 1.18E-45 | 0.364138 | 4.34E-16 | 0.347715 | 1.02E-14 | 0.404009 |
| 0.64504  | 2.72E-56 | 0.50269  | 2.83E-31 | 0.202617 | 1.02E-05 | 0.46505  | 1.95E-26 | 0.377444 |
| 0.527186 | 9.21E-35 | 0.314711 | 3.39E-12 | 0.181061 | 8.32E-05 | 0.345879 | 1.44E-14 | 0.262891 |
| 0.590622 | 3.01E-45 | 0.750887 | 8.15E-86 | 0.418179 | 3.41E-21 | 0.529059 | 4.85E-35 | 0.61816  |
| 0.561414 | 3.87E-40 | 0.538541 | 1.77E-36 | 0.347965 | 9.73E-15 | 0.504526 | 1.59E-31 | 0.555709 |
| 0.715733 | 1.63E-74 | 0.576444 | 1.05E-42 | 0.364201 | 4.28E-16 | 0.568912 | 2.11E-41 | 0.609603 |
| 0.532797 | 1.33E-35 | 0.669744 | 4.36E-62 | 0.438999 | 2.02E-23 | 0.403071 | 1.14E-19 | 0.345851 |
| 0.409268 | 2.76E-20 | 0.388688 | 2.72E-18 | 0.266122 | 5.18E-09 | 0.296029 | 6.71E-11 | 0.593948 |
| 0.625334 | 4.86E-52 | 0.676711 | 8.00E-64 | 0.549616 | 3.24E-38 | 0.512319 | 1.30E-32 | 0.626559 |
| 0.58974  | 4.37E-45 | 0.710033 | 7.68E-73 | 0.506135 | 9.51E-32 | 0.552007 | 1.34E-38 | 0.665393 |
| 0.576371 | 1.08E-42 | 0.588072 | 8.81E-45 | 0.454491 | 3.50E-25 | 0.376583 | 3.50E-17 | 0.278877 |
| 0.635127 | 4.10E-54 | 0.667199 | 1.83E-61 | 0.483044 | 1.13E-28 | 0.476643 | 7.31E-28 | 0.559893 |
| 0.586943 | 1.41E-44 | 0.593569 | 8.58E-46 | 0.468845 | 6.75E-27 | 0.426926 | 4.13E-22 | 0.529919 |
| 0.733476 | 5.42E-80 | 0.75615  | 1.14E-87 | 0.585413 | 2.68E-44 | 0.565704 | 7.39E-41 | 0.696804 |
| 0.764178 | 1.35E-90 | 0.450142 | 1.12E-24 | 0.324249 | 6.81E-13 | 0.538981 | 1.52E-36 | 0.433494 |
| 0.705873 | 1.20E-71 | 0.64919  | 3.16E-57 | 0.531075 | 2.42E-35 | 0.458557 | 1.17E-25 | 0.520923 |
| 0.331517 | 1.92E-13 | 0.541339 | 6.54E-37 | 0.171525 | 0.0002   | 0.29812  | 4.86E-11 | 0.509339 |
| 0.635112 | 4.13E-54 | 0.751205 | 6.32E-86 | 0.449583 | 1.29E-24 | 0.497429 | 1.46E-30 | 0.536232 |
| 0.695473 | 9.50E-69 | 0.705136 | 1.95E-71 | 0.482745 | 1.23E-28 | 0.467056 | 1.12E-26 | 0.565558 |
| 0.539487 | 1.27E-36 | 0.533606 | 1.00E-35 | 0.395014 | 6.87E-19 | 0.45557  | 2.62E-25 | 0.643269 |
| 0.450855 | 9.23E-25 | 0.600116 | 5.05E-47 | 0.411642 | 1.59E-20 | 0.444815 | 4.51E-24 | 0.659695 |
| 0.531921 | 1.81E-35 | 0.501452 | 4.18E-31 | 0.265354 | 5.76E-09 | 0.383836 | 7.68E-18 | 0.507822 |
| 0.566684 | 5.05E-41 | 0.63667  | 1.90E-54 | 0.410573 | 2.04E-20 | 0.423976 | 8.48E-22 | 0.401438 |
| -0.37137 | 1.02E-16 | -0.11134 | 0.01608  | -0.11254 | 0.01496  | -0.08804 | 0.05728  | -0.22592 |
| 0.583714 | 5.41E-44 | 0.32269  | 8.88E-13 | 0.129903 | 0.00493  | 0.449469 | 1.33E-24 | 0.552424 |
| 0.381773 | 1.19E-17 | 0.405315 | 6.83E-20 | 0.245385 | 7.83E-08 | 0.333595 | 1.33E-13 | 0.394278 |
| 0.602147 | 2.07E-47 | 0.552624 | 1.07E-38 | 0.498629 | 1.01E-30 | 0.33707  | 7.17E-14 | 0.559124 |
| -0.36927 | 1.56E-16 | -0.35107 | 5.43E-15 | -0.24537 | 7.85E-08 | -0.20104 | 1.20E-05 | -0.28515 |
| -0.35185 | 4.69E-15 | -0.34062 | 3.77E-14 | -0.28151 | 5.91E-10 | -0.22972 | 5.21E-07 | -0.20072 |
| 0.481733 | 1.66E-28 | 0.532664 | 1.39E-35 | 0.294011 | 9.15E-11 | 0.321183 | 1.15E-12 | 0.310743 |
| 0.631664 | 2.26E-53 | 0.603636 | 1.07E-47 | 0.528873 | 5.17E-35 | 0.387256 | 3.70E-18 | 0.510993 |
| 0.68283  | 2.17E-65 | 0.678395 | 2.99E-64 | 0.59458  | 5.56E-46 | 0.519109 | 1.40E-33 | 0.537252 |
| -0.4487  | 1.63E-24 | -0.2867  | 2.75E-10 | -0.25215 | 3.32E-08 | -0.15622 | 0.00071  | -0.07137 |
| 0.388431 | 2.88E-18 | 0.494244 | 3.89E-30 | 0.241436 | 1.28E-07 | 0.253897 | 2.64E-08 | 0.355738 |
| 0.728433 | 2.16E-78 | 0.530281 | 3.18E-35 | 0.455839 | 2.43E-25 | 0.379617 | 1.86E-17 | 0.347025 |

|          |          |          |          |          |          |          |          |          |
|----------|----------|----------|----------|----------|----------|----------|----------|----------|
| 0.69632  | 5.58E-69 | 0.779006 | 2.57E-96 | 0.505292 | 1.24E-31 | 0.575604 | 1.48E-42 | 0.635894 |
| 0.649745 | 2.36E-57 | 0.645022 | 2.75E-56 | 0.47434  | 1.42E-27 | 0.549139 | 3.86E-38 | 0.676544 |
| -0.36364 | 4.79E-16 | -0.27912 | 8.35E-10 | -0.28912 | 1.92E-10 | -0.13536 | 0.00338  | -0.15822 |
| 0.672586 | 8.65E-63 | 0.559569 | 7.82E-40 | 0.539782 | 1.14E-36 | 0.425057 | 6.52E-22 | 0.567404 |
| 0.608104 | 1.45E-48 | 0.613447 | 1.28E-49 | 0.403744 | 9.77E-20 | 0.512223 | 1.34E-32 | 0.441309 |
| -0.22825 | 6.19E-07 | -0.36035 | 9.13E-16 | -0.3167  | 2.44E-12 | -0.2166  | 2.31E-06 | -0.2878  |
| 0.392624 | 1.16E-18 | 0.253376 | 2.83E-08 | 0.073652 | 0.11194  | 0.248155 | 5.53E-08 | 0.166198 |
| 0.55561  | 3.49E-39 | 0.564412 | 1.22E-40 | 0.259229 | 1.31E-08 | 0.50717  | 6.84E-32 | 0.550713 |
| 0.610787 | 4.32E-49 | 0.554973 | 4.44E-39 | 0.33315  | 1.44E-13 | 0.416786 | 4.75E-21 | 0.450222 |
| 0.667726 | 1.36E-61 | 0.624918 | 5.94E-52 | 0.523508 | 3.21E-34 | 0.422449 | 1.23E-21 | 0.609411 |
| 0.388284 | 2.97E-18 | 0.29356  | 9.80E-11 | 0.23418  | 3.08E-07 | 0.273778 | 1.79E-09 | 0.340653 |
| 0.640664 | 2.55E-55 | 0.481139 | 1.98E-28 | 0.335176 | 1.01E-13 | 0.480351 | 2.49E-28 | 0.549203 |
| 0.654058 | 2.41E-58 | 0.622899 | 1.55E-51 | 0.489886 | 1.46E-29 | 0.472088 | 2.70E-27 | 0.589684 |
| 0.586985 | 1.39E-44 | 0.546423 | 1.04E-37 | 0.429327 | 2.29E-22 | 0.4499   | 1.19E-24 | 0.577449 |
| 0.634364 | 5.98E-54 | 0.439644 | 1.71E-23 | 0.273993 | 1.74E-09 | 0.326493 | 4.62E-13 | 0.245314 |
| 0.652666 | 5.06E-58 | 0.555232 | 4.03E-39 | 0.331184 | 2.04E-13 | 0.520508 | 8.77E-34 | 0.639566 |
| 0.601141 | 3.22E-47 | 0.808356 | #####    | 0.557769 | 1.55E-39 | 0.462156 | 4.35E-26 | 0.563801 |
| 0.375981 | 3.96E-17 | 0.457218 | 1.68E-25 | 0.204933 | 8.04E-06 | 0.385725 | 5.14E-18 | 0.34783  |
| 0.70418  | 3.64E-71 | 0.636562 | 2.01E-54 | 0.398799 | 2.97E-19 | 0.453406 | 4.68E-25 | 0.6517   |
| 0.282549 | 5.08E-10 | 0.322573 | 9.06E-13 | 0.103718 | 0.025    | 0.203667 | 9.16E-06 | 0.232955 |
| 0.340936 | 3.56E-14 | 0.419945 | 2.24E-21 | 0.134997 | 0.00347  | 0.257799 | 1.59E-08 | 0.403414 |
| 0.5108   | 2.13E-32 | 0.566393 | 5.65E-41 | 0.258841 | 1.38E-08 | 0.351594 | 4.92E-15 | 0.441948 |
| -0.31307 | 4.45E-12 | -0.30132 | 2.94E-11 | -0.10753 | 0.02012  | -0.32136 | 1.11E-12 | -0.35572 |
| 0.689631 | 3.56E-67 | 0.669014 | 6.59E-62 | 0.531851 | 1.85E-35 | 0.417285 | 4.22E-21 | 0.432561 |
| 0.473086 | 2.03E-27 | 0.569476 | 1.69E-41 | 0.438092 | 2.54E-23 | 0.341005 | 3.52E-14 | 0.421955 |
| -0.10176 | 0.02789  | -0.39437 | 7.91E-19 | -0.2028  | 1.00E-05 | -0.19921 | 1.44E-05 | -0.33809 |
| 0.325577 | 5.42E-13 | 0.288329 | 2.16E-10 | 0.248638 | 5.20E-08 | 0.100341 | 0.03015  | 0.308884 |
| 0.602408 | 1.84E-47 | 0.567205 | 4.12E-41 | 0.395746 | 5.84E-19 | 0.521375 | 6.56E-34 | 0.667331 |
| 0.801972 | #####    | 0.750331 | 1.27E-85 | 0.609921 | 6.40E-49 | 0.545507 | 1.46E-37 | 0.565364 |
| 0.530148 | 3.33E-35 | 0.642272 | 1.12E-55 | 0.344611 | 1.81E-14 | 0.476446 | 7.73E-28 | 0.534806 |
| 0.343174 | 2.36E-14 | 0.181175 | 8.24E-05 | -0.04483 | 0.33372  | 0.357612 | 1.55E-15 | 0.489343 |
| 0.662847 | 2.06E-60 | 0.489968 | 1.43E-29 | 0.259449 | 1.27E-08 | 0.5045   | 1.60E-31 | 0.425158 |
| 0.251167 | 3.76E-08 | 0.466429 | 1.33E-26 | 0.161363 | 0.00046  | 0.250735 | 3.98E-08 | 0.303042 |
| 0.687776 | 1.11E-66 | 0.78165  | 2.21E-97 | 0.505705 | 1.09E-31 | 0.587345 | 1.20E-44 | 0.660695 |
| 0.427179 | 3.88E-22 | 0.401381 | 1.67E-19 | 0.209343 | 5.06E-06 | 0.268971 | 3.50E-09 | 0.3215   |
| 0.5219   | 5.51E-34 | 0.209849 | 4.79E-06 | 0.076641 | 0.09808  | 0.283682 | 4.30E-10 | 0.263748 |
| 0.521656 | 5.97E-34 | 0.410541 | 2.05E-20 | 0.237364 | 2.10E-07 | 0.270281 | 2.92E-09 | 0.196162 |
| 0.539738 | 1.16E-36 | 0.498149 | 1.17E-30 | 0.441848 | 9.72E-24 | 0.288855 | 2.00E-10 | 0.180887 |
| 0.479165 | 3.52E-28 | 0.488398 | 2.29E-29 | 0.267967 | 4.02E-09 | 0.381377 | 1.29E-17 | 0.529849 |
| 0.619952 | 6.25E-51 | 0.307831 | 1.04E-11 | 0.127372 | 0.00584  | 0.425571 | 5.75E-22 | 0.370543 |
| 0.393369 | 9.85E-19 | 0.256227 | 1.95E-08 | 0.315312 | 3.07E-12 | 0.411085 | 1.81E-20 | 0.23577  |
| 0.471002 | 3.67E-27 | 0.531641 | 1.99E-35 | 0.367726 | 2.12E-16 | 0.34007  | 4.17E-14 | 0.542049 |
| 0.317935 | 1.98E-12 | 0.348079 | 9.53E-15 | 0.242555 | 1.11E-07 | 0.248204 | 5.49E-08 | 0.31223  |
| -0.18381 | 6.45E-05 | -0.31623 | 2.64E-12 | -0.10887 | 0.0186   | -0.28318 | 4.63E-10 | -0.37741 |
| -0.38515 | 5.80E-18 | -0.32964 | 2.68E-13 | -0.26277 | 8.17E-09 | -0.16969 | 0.00023  | -0.04632 |



|          |          |          |          |          |          |          |          |          |
|----------|----------|----------|----------|----------|----------|----------|----------|----------|
| 0.34246  | 2.70E-14 | 0.284974 | 3.56E-10 | 0.152911 | 0.00092  | 0.248255 | 5.46E-08 | 0.288136 |
| 0.544059 | 2.46E-37 | 0.509064 | 3.73E-32 | 0.396989 | 4.44E-19 | 0.284434 | 3.85E-10 | 0.418523 |
| 0.570553 | 1.11E-41 | 0.430488 | 1.72E-22 | 0.247143 | 6.28E-08 | 0.339508 | 4.62E-14 | 0.420017 |
| 0.586736 | 1.54E-44 | 0.553762 | 6.98E-39 | 0.464534 | 2.25E-26 | 0.427247 | 3.82E-22 | 0.496494 |
| 0.456305 | 2.15E-25 | 0.523324 | 3.41E-34 | 0.242212 | 1.16E-07 | 0.324259 | 6.79E-13 | 0.364334 |
| 0.593781 | 7.84E-46 | 0.609897 | 6.47E-49 | 0.456856 | 1.85E-25 | 0.382902 | 9.35E-18 | 0.41967  |
| 0.345087 | 1.66E-14 | 0.335706 | 9.15E-14 | 0.285558 | 3.26E-10 | 0.269771 | 3.13E-09 | 0.018657 |
| 0.733975 | 3.74E-80 | 0.563996 | 1.43E-40 | 0.329048 | 2.97E-13 | 0.49649  | 1.95E-30 | 0.558845 |
| 0.437041 | 3.32E-23 | 0.436749 | 3.57E-23 | 0.319428 | 1.54E-12 | 0.175361 | 0.00014  | 0.254721 |
| 0.70494  | 2.21E-71 | 0.744141 | 1.67E-83 | 0.573222 | 3.83E-42 | 0.443448 | 6.43E-24 | 0.657137 |
| 0.359178 | 1.15E-15 | 0.396526 | 4.92E-19 | 0.036395 | 0.43266  | 0.47598  | 8.85E-28 | 0.501272 |
| 0.668707 | 7.84E-62 | 0.59529  | 4.10E-46 | 0.602795 | 1.55E-47 | 0.465962 | 1.52E-26 | 0.483218 |
| 0.746851 | 2.01E-84 | 0.715275 | 2.23E-74 | 0.64585  | 1.79E-56 | 0.550816 | 2.08E-38 | 0.627496 |
| 0.46801  | 8.54E-27 | 0.222578 | 1.18E-06 | -0.03716 | 0.42299  | 0.393792 | 8.98E-19 | 0.356578 |
| 0.582629 | 8.47E-44 | 0.485433 | 5.56E-29 | 0.232726 | 3.66E-07 | 0.415402 | 6.59E-21 | 0.554228 |
| 0.493949 | 4.26E-30 | 0.359705 | 1.04E-15 | 0.203467 | 9.35E-06 | 0.383458 | 8.32E-18 | 0.437415 |
| 0.605959 | 3.81E-48 | 0.651603 | 8.87E-58 | 0.396422 | 5.03E-19 | 0.528515 | 5.84E-35 | 0.634083 |
| 0.461304 | 5.50E-26 | 0.086149 | 0.06286  | -0.10054 | 0.02983  | 0.145919 | 0.00157  | 0.106242 |
| 0.509096 | 3.69E-32 | 0.310172 | 7.15E-12 | 0.09919  | 0.03211  | 0.450409 | 1.04E-24 | 0.502029 |
| 0.494059 | 4.12E-30 | 0.47007  | 4.78E-27 | 0.35093  | 5.58E-15 | 0.308109 | 9.98E-12 | 0.379681 |
| 0.496069 | 2.22E-30 | 0.263238 | 7.67E-09 | 0.042206 | 0.3628   | 0.261676 | 9.47E-09 | 0.414865 |
| 0.564084 | 1.38E-40 | 0.413178 | 1.11E-20 | 0.275553 | 1.39E-09 | 0.295929 | 6.82E-11 | 0.338189 |
| 0.642992 | 7.79E-56 | 0.666821 | 2.26E-61 | 0.486636 | 3.88E-29 | 0.520095 | 1.01E-33 | 0.653957 |
| 0.60187  | 2.34E-47 | 0.421422 | 1.57E-21 | 0.36564  | 3.22E-16 | 0.254734 | 2.37E-08 | 0.039887 |
| 0.531896 | 1.82E-35 | 0.517095 | 2.72E-33 | 0.280714 | 6.63E-10 | 0.340493 | 3.86E-14 | 0.420832 |
| 0.424827 | 6.89E-22 | 0.37915  | 2.06E-17 | 0.207711 | 6.01E-06 | 0.305041 | 1.63E-11 | 0.37148  |
| 0.400556 | 2.00E-19 | 0.393289 | 1.00E-18 | 0.126804 | 0.00607  | 0.454001 | 3.99E-25 | 0.591284 |
| 0.618324 | 1.34E-50 | 0.58491  | 3.30E-44 | 0.420968 | 1.75E-21 | 0.350633 | 5.90E-15 | 0.378345 |
| 0.37583  | 4.09E-17 | 0.3015   | 2.86E-11 | 0.07298  | 0.11526  | 0.299929 | 3.66E-11 | 0.290238 |
| 0.318931 | 1.68E-12 | 0.44436  | 5.08E-24 | 0.209135 | 5.17E-06 | 0.362353 | 6.17E-16 | 0.479733 |
| 0.652939 | 4.37E-58 | 0.683226 | 1.72E-65 | 0.540414 | 9.10E-37 | 0.46548  | 1.73E-26 | 0.565256 |
| 0.537271 | 2.78E-36 | 0.560678 | 5.12E-40 | 0.418211 | 3.39E-21 | 0.381975 | 1.14E-17 | 0.424107 |
| 0.708881 | 1.65E-72 | 0.710717 | 4.86E-73 | 0.562112 | 2.96E-40 | 0.520985 | 7.48E-34 | 0.559862 |
| 0.229076 | 5.62E-07 | 0.398567 | 3.13E-19 | 0.171673 | 0.00019  | 0.228517 | 6.00E-07 | 0.200573 |
| 0.528193 | 6.52E-35 | 0.383551 | 8.15E-18 | 0.131118 | 0.00454  | 0.323694 | 7.48E-13 | 0.456898 |
| 0.646406 | 1.34E-56 | 0.591501 | 2.07E-45 | 0.39409  | 8.41E-19 | 0.484871 | 6.57E-29 | 0.603513 |
| 0.595358 | 3.98E-46 | 0.558204 | 1.31E-39 | 0.477429 | 5.82E-28 | 0.421396 | 1.58E-21 | 0.380424 |
| -0.21614 | 2.43E-06 | -0.15505 | 0.00077  | -0.02315 | 0.61772  | -0.13471 | 0.00354  | -0.11306 |
| 0.717772 | 4.03E-75 | 0.662872 | 2.03E-60 | 0.496098 | 2.20E-30 | 0.513921 | 7.73E-33 | 0.548759 |
| 0.692684 | 5.42E-68 | 0.716793 | 7.90E-75 | 0.582002 | 1.10E-43 | 0.423875 | 8.69E-22 | 0.446689 |
| 0.670017 | 3.74E-62 | 0.528121 | 6.69E-35 | 0.407437 | 4.21E-20 | 0.381265 | 1.32E-17 | 0.422434 |
| 0.517859 | 2.12E-33 | 0.57232  | 5.49E-42 | 0.371683 | 9.56E-17 | 0.262195 | 8.83E-09 | 0.327822 |
| -0.30026 | 3.48E-11 | -0.29533 | 7.48E-11 | -0.22029 | 1.53E-06 | -0.15679 | 0.00067  | 0.00689  |
| 0.604945 | 5.99E-48 | 0.486814 | 3.68E-29 | 0.226807 | 7.31E-07 | 0.485937 | 4.78E-29 | 0.47159  |
| 0.775243 | 8.01E-95 | 0.74457  | 1.20E-83 | 0.614337 | 8.51E-50 | 0.525965 | 1.40E-34 | 0.575489 |

|          |          |          |          |          |          |          |          |          |
|----------|----------|----------|----------|----------|----------|----------|----------|----------|
| 0.449528 | 1.31E-24 | 0.56041  | 5.68E-40 | 0.45852  | 1.18E-25 | 0.36961  | 1.45E-16 | 0.485874 |
| 0.656308 | 7.23E-59 | 0.475137 | 1.13E-27 | 0.362465 | 6.03E-16 | 0.382076 | 1.11E-17 | 0.595109 |
| 0.684038 | 1.06E-65 | 0.5389   | 1.56E-36 | 0.347623 | 1.04E-14 | 0.385132 | 5.83E-18 | 0.439046 |
| 0.6347   | 5.06E-54 | 0.644413 | 3.76E-56 | 0.523586 | 3.12E-34 | 0.378968 | 2.13E-17 | 0.588551 |
| 0.523766 | 2.94E-34 | 0.301762 | 2.75E-11 | 0.14741  | 0.0014   | 0.24701  | 6.39E-08 | 0.131198 |
| 0.652615 | 5.20E-58 | 0.606243 | 3.35E-48 | 0.472052 | 2.72E-27 | 0.389726 | 2.18E-18 | 0.648551 |
| 0.420325 | 2.05E-21 | 0.298652 | 4.47E-11 | 0.195694 | 2.05E-05 | 0.238566 | 1.82E-07 | 0.135825 |
| 0.63291  | 1.23E-53 | 0.626384 | 2.94E-52 | 0.452036 | 6.74E-25 | 0.552034 | 1.33E-38 | 0.660266 |
| 0.757621 | 3.37E-88 | 0.792662 | #####    | 0.572158 | 5.85E-42 | 0.52647  | 1.18E-34 | 0.580524 |
| 0.454636 | 3.36E-25 | 0.427979 | 3.19E-22 | 0.279385 | 8.04E-10 | 0.376698 | 3.42E-17 | 0.54755  |
| 0.403686 | 9.90E-20 | 0.446756 | 2.72E-24 | 0.333157 | 1.44E-13 | 0.237024 | 2.19E-07 | 0.255304 |
| 0.504651 | 1.52E-31 | 0.448885 | 1.55E-24 | 0.254645 | 2.40E-08 | 0.451534 | 7.71E-25 | 0.519832 |
| 0.648496 | 4.53E-57 | 0.576993 | 8.44E-43 | 0.418805 | 2.94E-21 | 0.423648 | 9.18E-22 | 0.46875  |
| -0.25781 | 1.58E-08 | -0.43652 | 3.79E-23 | -0.26607 | 5.22E-09 | -0.18665 | 4.94E-05 | -0.25049 |
| 0.485442 | 5.54E-29 | 0.287967 | 2.28E-10 | 0.104395 | 0.02406  | 0.295571 | 7.20E-11 | 0.334898 |
| 0.384058 | 7.32E-18 | 0.57415  | 2.65E-42 | 0.277187 | 1.10E-09 | 0.40874  | 3.12E-20 | 0.397203 |
| 0.396744 | 4.69E-19 | 0.460013 | 7.83E-26 | 0.167832 | 0.00027  | 0.313803 | 3.94E-12 | 0.398581 |
| 0.412907 | 1.18E-20 | 0.474281 | 1.44E-27 | 0.34123  | 3.37E-14 | 0.26168  | 9.46E-09 | 0.420885 |
| 0.649207 | 3.13E-57 | 0.376352 | 3.67E-17 | 0.262351 | 8.64E-09 | 0.446047 | 3.27E-24 | 0.449479 |
| 0.528472 | 5.93E-35 | 0.623139 | 1.39E-51 | 0.391713 | 1.41E-18 | 0.388468 | 2.85E-18 | 0.584728 |
| 0.411147 | 1.79E-20 | 0.291617 | 1.32E-10 | 0.174596 | 0.00015  | 0.394835 | 7.14E-19 | 0.452624 |
| 0.579379 | 3.21E-43 | 0.520266 | 9.51E-34 | 0.507341 | 6.48E-32 | 0.353208 | 3.62E-15 | 0.474095 |
| 0.651096 | 1.16E-57 | 0.645094 | 2.65E-56 | 0.43033  | 1.78E-22 | 0.40707  | 4.58E-20 | 0.419487 |
| 0.660902 | 5.99E-60 | 0.464172 | 2.49E-26 | 0.247215 | 6.22E-08 | 0.30504  | 1.63E-11 | 0.299369 |
| 0.74717  | 1.56E-84 | 0.675726 | 1.42E-63 | 0.511717 | 1.58E-32 | 0.519734 | 1.14E-33 | 0.547572 |
| -0.18245 | 7.32E-05 | -0.0387  | 0.40402  | 0.064724 | 0.16259  | -0.15256 | 0.00094  | -0.00884 |
| -0.36099 | 8.06E-16 | -0.18062 | 8.67E-05 | -0.08485 | 0.06695  | -0.23116 | 4.40E-07 | -0.09701 |
| -0.43011 | 1.89E-22 | -0.41858 | 3.10E-21 | -0.42388 | 8.69E-22 | -0.27565 | 1.37E-09 | -0.20045 |
| 0.660345 | 8.12E-60 | 0.556353 | 2.64E-39 | 0.459421 | 9.21E-26 | 0.354152 | 3.02E-15 | 0.432939 |
| 0.516574 | 3.23E-33 | 0.513246 | 9.63E-33 | 0.236079 | 2.45E-07 | 0.360055 | 9.67E-16 | 0.470788 |
| 0.491409 | 9.24E-30 | 0.656829 | 5.47E-59 | 0.305162 | 1.60E-11 | 0.45303  | 5.17E-25 | 0.561121 |
| 0.514514 | 6.36E-33 | 0.580026 | 2.46E-43 | 0.270949 | 2.66E-09 | 0.481732 | 1.66E-28 | 0.67972  |
| 0.755414 | 2.08E-87 | 0.711671 | 2.56E-73 | 0.513032 | 1.03E-32 | 0.602224 | 2.00E-47 | 0.60062  |
| 0.44183  | 9.77E-24 | 0.489075 | 1.87E-29 | 0.361551 | 7.22E-16 | 0.373104 | 7.16E-17 | 0.36365  |
| 0.591377 | 2.18E-45 | 0.491241 | 9.72E-30 | 0.278149 | 9.61E-10 | 0.349829 | 6.86E-15 | 0.337883 |
| 0.481837 | 1.61E-28 | 0.478075 | 4.83E-28 | 0.330992 | 2.11E-13 | 0.366014 | 2.99E-16 | 0.444411 |
| 0.720811 | 4.88E-76 | 0.718665 | 2.17E-75 | 0.434553 | 6.22E-23 | 0.549622 | 3.24E-38 | 0.558466 |
| 0.710489 | 5.66E-73 | 0.783426 | 4.16E-98 | 0.644518 | 3.56E-56 | 0.54694  | 8.64E-38 | 0.630297 |
| 0.630661 | 3.69E-53 | 0.714882 | 2.92E-74 | 0.451437 | 7.91E-25 | 0.508517 | 4.44E-32 | 0.646335 |
| 0.507065 | 7.07E-32 | 0.47859  | 4.16E-28 | 0.306314 | 1.33E-11 | 0.342532 | 2.66E-14 | 0.506632 |
| 0.383704 | 7.89E-18 | 0.333822 | 1.28E-13 | 0.166239 | 0.00031  | 0.449362 | 1.37E-24 | 0.439153 |
| 0.510854 | 2.09E-32 | 0.310086 | 7.25E-12 | 0.059112 | 0.20227  | 0.322987 | 8.45E-13 | 0.281011 |
| 0.563004 | 2.10E-40 | 0.414605 | 7.95E-21 | 0.176951 | 0.00012  | 0.46027  | 7.30E-26 | 0.434903 |
| 0.68274  | 2.29E-65 | 0.627045 | 2.14E-52 | 0.52857  | 5.73E-35 | 0.495084 | 3.01E-30 | 0.719083 |
| 0.317937 | 1.98E-12 | 0.292802 | 1.10E-10 | 0.26381  | 7.10E-09 | 0.118209 | 0.01057  | 0.268551 |

|          |          |          |          |          |          |          |          |          |
|----------|----------|----------|----------|----------|----------|----------|----------|----------|
| 0.473679 | 1.71E-27 | 0.404943 | 7.44E-20 | 0.320325 | 1.33E-12 | 0.463068 | 3.38E-26 | 0.360662 |
| 0.74943  | 2.61E-85 | 0.653509 | 3.23E-58 | 0.558048 | 1.39E-39 | 0.505132 | 1.31E-31 | 0.489763 |
| -0.33451 | 1.13E-13 | -0.3552  | 2.47E-15 | -0.26259 | 8.37E-09 | -0.08213 | 0.07622  | 0.031661 |
| 0.500744 | 5.21E-31 | 0.392747 | 1.13E-18 | 0.224556 | 9.47E-07 | 0.39185  | 1.37E-18 | 0.427904 |
| 0.545762 | 1.33E-37 | 0.628438 | 1.09E-52 | 0.440863 | 1.25E-23 | 0.43182  | 1.23E-22 | 0.497804 |
| 0.539908 | 1.09E-36 | 0.552394 | 1.16E-38 | 0.358028 | 1.43E-15 | 0.437557 | 2.91E-23 | 0.524793 |
| 0.704502 | 2.95E-71 | 0.641713 | 1.50E-55 | 0.354754 | 2.69E-15 | 0.441722 | 1.00E-23 | 0.567029 |
| 0.679503 | 1.56E-64 | 0.568034 | 2.98E-41 | 0.30813  | 9.95E-12 | 0.524476 | 2.31E-34 | 0.52958  |
| 0.574945 | 1.92E-42 | 0.337638 | 6.47E-14 | 0.294933 | 7.94E-11 | 0.388682 | 2.73E-18 | 0.331092 |
| 0.783421 | 4.18E-98 | 0.812946 | #####    | 0.698611 | 1.31E-69 | 0.533234 | 1.14E-35 | 0.614649 |
| 0.619535 | 7.60E-51 | 0.476186 | 8.34E-28 | 0.493597 | 4.75E-30 | 0.276126 | 1.28E-09 | 0.300128 |
| 0.38082  | 1.45E-17 | 0.603366 | 1.21E-47 | 0.392264 | 1.25E-18 | 0.45383  | 4.18E-25 | 0.639979 |
| 0.578153 | 5.28E-43 | 0.645505 | 2.14E-56 | 0.466872 | 1.17E-26 | 0.404623 | 8.00E-20 | 0.525522 |
| 0.321113 | 1.16E-12 | 0.311036 | 6.21E-12 | 0.091961 | 0.04701  | 0.319403 | 1.55E-12 | 0.316772 |
| 0.748205 | 6.91E-85 | 0.810072 | #####    | 0.714039 | 5.18E-74 | 0.616525 | 3.10E-50 | 0.61178  |
| 0.509134 | 3.64E-32 | 0.539483 | 1.27E-36 | 0.252469 | 3.18E-08 | 0.513163 | 9.89E-33 | 0.446682 |
| 0.565245 | 8.83E-41 | 0.460461 | 6.93E-26 | 0.326766 | 4.41E-13 | 0.258069 | 1.53E-08 | 0.247392 |
| 0.579205 | 3.44E-43 | 0.306323 | 1.33E-11 | 0.190442 | 3.44E-05 | 0.37369  | 6.35E-17 | 0.27957  |
| 0.678979 | 2.12E-64 | 0.56136  | 3.95E-40 | 0.35619  | 2.05E-15 | 0.350005 | 6.64E-15 | 0.440555 |
| 0.549686 | 3.16E-38 | 0.517072 | 2.74E-33 | 0.251247 | 3.72E-08 | 0.435067 | 5.47E-23 | 0.357453 |
| 0.687152 | 1.62E-66 | 0.581637 | 1.27E-43 | 0.578374 | 4.82E-43 | 0.475187 | 1.11E-27 | 0.527635 |
| 0.552241 | 1.23E-38 | 0.393859 | 8.85E-19 | 0.298414 | 4.64E-11 | 0.45773  | 1.46E-25 | 0.562732 |
| 0.633509 | 9.13E-54 | 0.671876 | 1.30E-62 | 0.416657 | 4.90E-21 | 0.558564 | 1.15E-39 | 0.6443   |
| 0.490014 | 1.41E-29 | 0.39986  | 2.34E-19 | 0.411379 | 1.69E-20 | 0.409939 | 2.36E-20 | 0.350684 |
| 0.750837 | 8.48E-86 | 0.750458 | 1.15E-85 | 0.568193 | 2.80E-41 | 0.61267  | 1.83E-49 | 0.722563 |
| 0.466587 | 1.27E-26 | 0.310135 | 7.19E-12 | 0.280666 | 6.68E-10 | 0.272137 | 2.25E-09 | 0.434807 |
| 0.457819 | 1.42E-25 | 0.320297 | 1.33E-12 | 0.307327 | 1.13E-11 | 0.262509 | 8.46E-09 | 0.573097 |
| 0.570895 | 9.65E-42 | 0.546983 | 8.51E-38 | 0.497391 | 1.48E-30 | 0.521884 | 5.54E-34 | 0.664429 |
| 0.585854 | 2.23E-44 | 0.608926 | 1.00E-48 | 0.43705  | 3.31E-23 | 0.497477 | 1.44E-30 | 0.691036 |
| 0.628266 | 1.18E-52 | 0.649674 | 2.45E-57 | 0.47642  | 7.79E-28 | 0.477532 | 5.65E-28 | 0.517488 |
| 0.475123 | 1.13E-27 | 0.35673  | 1.84E-15 | 0.296398 | 6.34E-11 | 0.282064 | 5.45E-10 | 0.236299 |
| 0.723372 | 8.07E-77 | 0.639201 | 5.34E-55 | 0.520088 | 1.01E-33 | 0.587925 | 9.37E-45 | 0.644408 |
| 0.436085 | 4.23E-23 | 0.490363 | 1.27E-29 | 0.393117 | 1.04E-18 | 0.433554 | 7.99E-23 | 0.606717 |
| 0.455873 | 2.41E-25 | 0.525678 | 1.54E-34 | 0.252472 | 3.18E-08 | 0.418753 | 2.98E-21 | 0.522325 |
| 0.256043 | 2.00E-08 | 0.42055  | 1.94E-21 | 0.104057 | 0.02453  | 0.366308 | 2.82E-16 | 0.500135 |
| 0.686888 | 1.90E-66 | 0.576997 | 8.42E-43 | 0.307014 | 1.19E-11 | 0.501694 | 3.87E-31 | 0.547947 |
| 0.582257 | 9.87E-44 | 0.700514 | 3.88E-70 | 0.463349 | 3.13E-26 | 0.491074 | 1.02E-29 | 0.414264 |
| 0.518522 | 1.70E-33 | 0.405988 | 5.86E-20 | 0.288742 | 2.03E-10 | 0.356664 | 1.87E-15 | 0.193368 |
| 0.366445 | 2.74E-16 | 0.42388  | 8.68E-22 | 0.204771 | 8.17E-06 | 0.331578 | 1.90E-13 | 0.339829 |
| 0.602539 | 1.74E-47 | 0.623488 | 1.17E-51 | 0.537182 | 2.86E-36 | 0.393305 | 9.99E-19 | 0.315128 |
| 0.437068 | 3.30E-23 | 0.458129 | 1.31E-25 | 0.269429 | 3.29E-09 | 0.30862  | 9.19E-12 | 0.296842 |
| 0.532401 | 1.53E-35 | 0.610412 | 5.12E-49 | 0.418977 | 2.82E-21 | 0.404179 | 8.85E-20 | 0.345779 |
| 0.501342 | 4.32E-31 | 0.546691 | 9.46E-38 | 0.231891 | 4.04E-07 | 0.503622 | 2.11E-31 | 0.755397 |
| 0.433596 | 7.91E-23 | 0.526925 | 1.01E-34 | 0.382204 | 1.08E-17 | 0.415221 | 6.88E-21 | 0.565791 |
| 0.669041 | 6.49E-62 | 0.408113 | 3.60E-20 | 0.327159 | 4.12E-13 | 0.433215 | 8.70E-23 | 0.449506 |

|          |          |          |          |          |          |          |          |          |
|----------|----------|----------|----------|----------|----------|----------|----------|----------|
| 0.62074  | 4.31E-51 | 0.69967  | 6.66E-70 | 0.448044 | 1.94E-24 | 0.404237 | 8.73E-20 | 0.583425 |
| 0.649043 | 3.41E-57 | 0.637787 | 1.09E-54 | 0.517833 | 2.13E-33 | 0.522894 | 3.94E-34 | 0.697001 |
| 0.555866 | 3.17E-39 | 0.413769 | 9.68E-21 | 0.27868  | 8.90E-10 | 0.285122 | 3.48E-10 | 0.30701  |
| 0.544335 | 2.23E-37 | 0.560189 | 6.18E-40 | 0.517829 | 2.14E-33 | 0.321534 | 1.08E-12 | 0.518552 |
| 0.565363 | 8.44E-41 | 0.454571 | 3.42E-25 | 0.417403 | 4.11E-21 | 0.355931 | 2.15E-15 | 0.364628 |
| 0.335291 | 9.86E-14 | 0.399409 | 2.59E-19 | 0.271966 | 2.31E-09 | 0.395293 | 6.46E-19 | 0.444451 |
| 0.666083 | 3.42E-61 | 0.502451 | 3.05E-31 | 0.331791 | 1.83E-13 | 0.449814 | 1.22E-24 | 0.479856 |
| 0.552291 | 1.21E-38 | 0.583038 | 7.16E-44 | 0.567448 | 3.75E-41 | 0.445034 | 4.26E-24 | 0.405395 |
| 0.325699 | 5.30E-13 | 0.406851 | 4.81E-20 | 0.241785 | 1.23E-07 | 0.30931  | 8.22E-12 | 0.484934 |
| 0.579515 | 3.03E-43 | 0.531184 | 2.33E-35 | 0.271283 | 2.54E-09 | 0.454427 | 3.56E-25 | 0.516057 |
| 0.505725 | 1.08E-31 | 0.3384   | 5.64E-14 | 0.340046 | 4.19E-14 | 0.310918 | 6.33E-12 | 0.608197 |
| 0.277925 | 9.92E-10 | 0.428321 | 2.93E-22 | 0.19591  | 2.01E-05 | 0.335783 | 9.03E-14 | 0.413675 |
| 0.615134 | 5.90E-50 | 0.501215 | 4.50E-31 | 0.53964  | 1.20E-36 | 0.376949 | 3.25E-17 | 0.55216  |
| 0.478491 | 4.28E-28 | 0.389556 | 2.26E-18 | 0.127061 | 0.00597  | 0.430834 | 1.57E-22 | 0.506766 |
| 0.469932 | 4.97E-27 | 0.475292 | 1.08E-27 | 0.225093 | 8.90E-07 | 0.361173 | 7.78E-16 | 0.355839 |
| -0.15179 | 0.001    | -0.36056 | 8.77E-16 | -0.17392 | 0.00016  | -0.28773 | 2.36E-10 | -0.31207 |
| -0.22681 | 7.31E-07 | -0.44064 | 1.33E-23 | -0.19525 | 2.15E-05 | -0.22535 | 8.64E-07 | -0.32018 |
| 0.601934 | 2.27E-47 | 0.469303 | 5.94E-27 | 0.291274 | 1.39E-10 | 0.314872 | 3.30E-12 | 0.34558  |
| 0.461638 | 5.02E-26 | 0.652158 | 6.62E-58 | 0.293669 | 9.64E-11 | 0.45447  | 3.52E-25 | 0.574669 |
| 0.677534 | 4.95E-64 | 0.277111 | 1.11E-09 | 0.080604 | 0.08186  | 0.404176 | 8.86E-20 | 0.407879 |
| 0.5119   | 1.49E-32 | 0.285532 | 3.27E-10 | 0.173888 | 0.00016  | 0.323021 | 8.40E-13 | 0.295775 |
| 0.378822 | 2.20E-17 | 0.467255 | 1.06E-26 | 0.202424 | 1.04E-05 | 0.252372 | 3.22E-08 | 0.188317 |
| 0.335812 | 8.98E-14 | 0.27701  | 1.13E-09 | 0.127262 | 0.00589  | 0.27779  | 1.01E-09 | 0.24669  |
| 0.34965  | 7.10E-15 | 0.344907 | 1.72E-14 | 0.172861 | 0.00017  | 0.27657  | 1.20E-09 | 0.480591 |
| 0.649312 | 2.96E-57 | 0.685568 | 4.21E-66 | 0.482032 | 1.52E-28 | 0.450527 | 1.01E-24 | 0.425315 |
| 0.323999 | 7.10E-13 | 0.094161 | 0.04196  | -0.05049 | 0.27618  | 0.187647 | 4.49E-05 | 0.310207 |
| 0.55917  | 9.10E-40 | 0.423081 | 1.05E-21 | 0.293951 | 9.23E-11 | 0.343542 | 2.21E-14 | 0.443323 |
| 0.733749 | 4.43E-80 | 0.530309 | 3.15E-35 | 0.433026 | 9.12E-23 | 0.42398  | 8.47E-22 | 0.382127 |
| 0.673597 | 4.84E-63 | 0.544552 | 2.06E-37 | 0.25092  | 3.88E-08 | 0.536729 | 3.36E-36 | 0.675981 |
| 0.606606 | 2.85E-48 | 0.671753 | 1.39E-62 | 0.378001 | 2.61E-17 | 0.463392 | 3.09E-26 | 0.483914 |
| 0.666152 | 3.29E-61 | 0.771779 | 1.79E-93 | 0.437832 | 2.72E-23 | 0.550635 | 2.23E-38 | 0.645624 |
| 0.572537 | 5.03E-42 | 0.56132  | 4.01E-40 | 0.460222 | 7.40E-26 | 0.286362 | 2.90E-10 | 0.471819 |
| 0.466405 | 1.34E-26 | 0.638089 | 9.34E-55 | 0.39362  | 9.33E-19 | 0.442991 | 7.24E-24 | 0.605301 |
| 0.444524 | 4.87E-24 | 0.580169 | 2.32E-43 | 0.279518 | 7.89E-10 | 0.40778  | 3.89E-20 | 0.546008 |
| 0.43517  | 5.33E-23 | 0.436358 | 3.95E-23 | 0.342719 | 2.57E-14 | 0.448542 | 1.70E-24 | 0.626961 |
| 0.529426 | 4.27E-35 | 0.625194 | 5.20E-52 | 0.374887 | 4.97E-17 | 0.467608 | 9.56E-27 | 0.548969 |
| 0.665274 | 5.36E-61 | 0.721538 | 2.93E-76 | 0.499989 | 6.60E-31 | 0.539092 | 1.46E-36 | 0.582901 |
| 0.620449 | 4.95E-51 | 0.625599 | 4.28E-52 | 0.320424 | 1.31E-12 | 0.445001 | 4.30E-24 | 0.509443 |
| 0.679109 | 1.97E-64 | 0.693561 | 3.14E-68 | 0.602298 | 1.93E-47 | 0.4236   | 9.29E-22 | 0.507406 |
| 0.334893 | 1.06E-13 | 0.380341 | 1.60E-17 | 0.228819 | 5.79E-07 | 0.270198 | 2.95E-09 | 0.271548 |
| 0.656997 | 4.99E-59 | 0.482551 | 1.30E-28 | 0.305484 | 1.52E-11 | 0.49856  | 1.03E-30 | 0.673797 |
| 0.571047 | 9.09E-42 | 0.511355 | 1.78E-32 | 0.512761 | 1.13E-32 | 0.415794 | 6.01E-21 | 0.475885 |
| 0.706326 | 8.94E-72 | 0.651558 | 9.09E-58 | 0.476824 | 6.93E-28 | 0.459378 | 9.31E-26 | 0.537789 |
| 0.626676 | 2.55E-52 | 0.370345 | 1.25E-16 | 0.316242 | 2.63E-12 | 0.205218 | 7.80E-06 | 0.20251  |
| 0.465262 | 1.84E-26 | 0.4515   | 7.78E-25 | 0.126538 | 0.00618  | 0.359001 | 1.19E-15 | 0.424451 |

|          |          |          |          |          |          |          |          |          |
|----------|----------|----------|----------|----------|----------|----------|----------|----------|
| 0.624987 | 5.74E-52 | 0.499784 | 7.03E-31 | 0.231093 | 4.44E-07 | 0.442788 | 7.63E-24 | 0.339248 |
| 0.799659 | #####    | 0.700492 | 3.94E-70 | 0.535487 | 5.20E-36 | 0.486747 | 3.76E-29 | 0.487849 |
| 0.453799 | 4.21E-25 | 0.39896  | 2.86E-19 | 0.253235 | 2.88E-08 | 0.426761 | 4.30E-22 | 0.420839 |
| 0.598821 | 8.88E-47 | 0.407008 | 4.64E-20 | 0.151238 | 0.00104  | 0.48767  | 2.85E-29 | 0.398111 |
| 0.508191 | 4.93E-32 | 0.51388  | 7.83E-33 | 0.45836  | 1.23E-25 | 0.310373 | 6.92E-12 | 0.472215 |
| 0.558187 | 1.32E-39 | 0.348107 | 9.48E-15 | 0.178074 | 0.00011  | 0.327627 | 3.80E-13 | 0.312159 |
| 0.669565 | 4.83E-62 | 0.501751 | 3.80E-31 | 0.297989 | 4.96E-11 | 0.455995 | 2.33E-25 | 0.549586 |
| 0.600222 | 4.82E-47 | 0.535744 | 4.75E-36 | 0.288395 | 2.14E-10 | 0.368643 | 1.77E-16 | 0.52482  |
| 0.465849 | 1.56E-26 | 0.459142 | 9.93E-26 | 0.450338 | 1.06E-24 | 0.273164 | 1.95E-09 | 0.337482 |
| -0.34551 | 1.54E-14 | -0.42107 | 1.71E-21 | -0.26686 | 4.68E-09 | -0.28471 | 3.69E-10 | -0.46691 |
| 0.544646 | 1.99E-37 | 0.369543 | 1.47E-16 | 0.179935 | 9.23E-05 | 0.399282 | 2.67E-19 | 0.432349 |
| 0.502403 | 3.10E-31 | 0.228832 | 5.78E-07 | 0.125175 | 0.00676  | 0.368871 | 1.69E-16 | 0.316883 |
| 0.64405  | 4.53E-56 | 0.627734 | 1.53E-52 | 0.484526 | 7.28E-29 | 0.51061  | 2.26E-32 | 0.698454 |
| 0.653924 | 2.59E-58 | 0.585303 | 2.80E-44 | 0.423671 | 9.13E-22 | 0.445039 | 4.26E-24 | 0.447844 |
| 0.44782  | 2.06E-24 | 0.527312 | 8.82E-35 | 0.391747 | 1.40E-18 | 0.348792 | 8.34E-15 | 0.640601 |
| 0.574908 | 1.95E-42 | 0.467587 | 9.62E-27 | 0.15504  | 0.00077  | 0.478328 | 4.48E-28 | 0.500935 |
| 0.504817 | 1.45E-31 | 0.614247 | 8.87E-50 | 0.471305 | 3.37E-27 | 0.478006 | 4.92E-28 | 0.638341 |
| 0.32991  | 2.55E-13 | 0.313344 | 4.25E-12 | 0.202462 | 1.04E-05 | 0.181931 | 7.68E-05 | 0.269434 |
| 0.716159 | 1.22E-74 | 0.6186   | 1.18E-50 | 0.519489 | 1.23E-33 | 0.435119 | 5.39E-23 | 0.572122 |
| 0.81519  | #####    | 0.791088 | #####    | 0.682154 | 3.25E-65 | 0.559417 | 8.29E-40 | 0.611841 |
| 0.458895 | 1.06E-25 | 0.224712 | 9.30E-07 | 0.070527 | 0.12803  | 0.328773 | 3.11E-13 | 0.133134 |
| 0.38775  | 3.33E-18 | 0.373339 | 6.82E-17 | 0.264636 | 6.35E-09 | 0.257619 | 1.62E-08 | 0.240979 |
| -0.49057 | 1.19E-29 | -0.49076 | 1.12E-29 | -0.45597 | 2.35E-25 | -0.32361 | 7.60E-13 | -0.24841 |
| 0.424389 | 7.67E-22 | 0.363444 | 4.98E-16 | 0.245692 | 7.54E-08 | 0.339588 | 4.55E-14 | 0.433019 |
| 0.599684 | 6.10E-47 | 0.527218 | 9.11E-35 | 0.47794  | 5.02E-28 | 0.377379 | 2.97E-17 | 0.369841 |
| 0.687911 | 1.02E-66 | 0.592764 | 1.21E-45 | 0.41965  | 2.40E-21 | 0.451023 | 8.83E-25 | 0.5967   |
| 0.397186 | 4.25E-19 | 0.601888 | 2.32E-47 | 0.306101 | 1.38E-11 | 0.27047  | 2.84E-09 | 0.334267 |
| 0.637391 | 1.32E-54 | 0.789375 | #####    | 0.509162 | 3.61E-32 | 0.557812 | 1.52E-39 | 0.731371 |
| 0.71411  | 4.94E-74 | 0.583174 | 6.76E-44 | 0.369985 | 1.35E-16 | 0.492979 | 5.73E-30 | 0.691837 |
| 0.513589 | 8.61E-33 | 0.739227 | 7.28E-82 | 0.471519 | 3.17E-27 | 0.453886 | 4.11E-25 | 0.603284 |
| 0.331085 | 2.08E-13 | 0.304797 | 1.70E-11 | 0.267387 | 4.36E-09 | 0.257415 | 1.67E-08 | 0.41393  |
| 0.537961 | 2.18E-36 | 0.675367 | 1.74E-63 | 0.367417 | 2.26E-16 | 0.509516 | 3.22E-32 | 0.572676 |
| 0.184236 | 6.20E-05 | 0.086392 | 0.06212  | 0.011804 | 0.79918  | 0.057038 | 0.21858  | -0.06477 |
| 0.486519 | 4.02E-29 | 0.38367  | 7.95E-18 | 0.333406 | 1.38E-13 | 0.245173 | 8.04E-08 | 0.369849 |
| 0.401644 | 1.57E-19 | 0.461411 | 5.34E-26 | 0.263018 | 7.90E-09 | 0.249944 | 4.40E-08 | 0.352685 |
| 0.654572 | 1.83E-58 | 0.636149 | 2.46E-54 | 0.426371 | 4.73E-22 | 0.470104 | 4.73E-27 | 0.568763 |
| 0.455262 | 2.84E-25 | 0.303797 | 1.99E-11 | 0.207271 | 6.29E-06 | 0.193565 | 2.53E-05 | 0.284404 |
| 0.389235 | 2.42E-18 | 0.31282  | 4.64E-12 | 0.159496 | 0.00054  | 0.259383 | 1.29E-08 | 0.391722 |
| 0.303131 | 2.21E-11 | 0.440139 | 1.51E-23 | 0.177708 | 0.00011  | 0.217569 | 2.07E-06 | 0.383766 |
| 0.61115  | 3.66E-49 | 0.643304 | 6.64E-56 | 0.412831 | 1.21E-20 | 0.508194 | 4.93E-32 | 0.635903 |
| 0.634379 | 5.94E-54 | 0.508825 | 4.03E-32 | 0.356985 | 1.75E-15 | 0.380826 | 1.45E-17 | 0.345385 |
| 0.468897 | 6.66E-27 | 0.221003 | 1.41E-06 | 0.002748 | 0.95278  | 0.248615 | 5.21E-08 | 0.137944 |
| 0.500811 | 5.10E-31 | 0.316782 | 2.41E-12 | 0.143853 | 0.00183  | 0.317934 | 1.98E-12 | 0.212382 |
| 0.404511 | 8.21E-20 | 0.46425  | 2.44E-26 | 0.297673 | 5.21E-11 | 0.268174 | 3.91E-09 | 0.408498 |
| 0.695383 | 1.01E-68 | 0.685573 | 4.20E-66 | 0.561564 | 3.65E-40 | 0.541169 | 6.95E-37 | 0.545528 |

|          |          |          |          |          |          |          |          |          |
|----------|----------|----------|----------|----------|----------|----------|----------|----------|
| 0.430961 | 1.53E-22 | 0.676993 | 6.79E-64 | 0.340443 | 3.90E-14 | 0.433297 | 8.52E-23 | 0.595035 |
| 0.5426   | 4.16E-37 | 0.388651 | 2.74E-18 | 0.294137 | 8.97E-11 | 0.535617 | 4.97E-36 | 0.485228 |
| 0.703697 | 4.98E-71 | 0.72723  | 5.15E-78 | 0.649087 | 3.33E-57 | 0.471585 | 3.11E-27 | 0.474984 |
| 0.545167 | 1.65E-37 | 0.533344 | 1.10E-35 | 0.285914 | 3.09E-10 | 0.51627  | 3.58E-33 | 0.484655 |
| 0.630555 | 3.89E-53 | 0.503832 | 1.97E-31 | 0.335448 | 9.58E-14 | 0.458501 | 1.18E-25 | 0.515145 |
| 0.639028 | 5.82E-55 | 0.553204 | 8.59E-39 | 0.501689 | 3.88E-31 | 0.45527  | 2.84E-25 | 0.466601 |
| 0.423696 | 9.07E-22 | 0.315707 | 2.88E-12 | 0.060561 | 0.19141  | 0.254911 | 2.32E-08 | 0.217106 |
| 0.574897 | 1.96E-42 | 0.747261 | 1.46E-84 | 0.401981 | 1.45E-19 | 0.434647 | 6.07E-23 | 0.591331 |
| 0.498283 | 1.12E-30 | 0.408525 | 3.27E-20 | 0.233174 | 3.47E-07 | 0.290343 | 1.60E-10 | 0.263456 |
| 0.536718 | 3.37E-36 | 0.527408 | 8.53E-35 | 0.249655 | 4.57E-08 | 0.376435 | 3.61E-17 | 0.479408 |
| 0.48986  | 1.48E-29 | 0.594198 | 6.55E-46 | 0.376865 | 3.30E-17 | 0.470815 | 3.87E-27 | 0.582102 |
| 0.660022 | 9.69E-60 | 0.566992 | 4.47E-41 | 0.326836 | 4.36E-13 | 0.439483 | 1.78E-23 | 0.30217  |
| 0.563375 | 1.82E-40 | 0.36914  | 1.60E-16 | 0.267753 | 4.14E-09 | 0.321193 | 1.15E-12 | 0.202933 |
| 0.642755 | 8.79E-56 | 0.506173 | 9.40E-32 | 0.25005  | 4.34E-08 | 0.469868 | 5.06E-27 | 0.492559 |
| 0.735012 | 1.73E-80 | 0.749729 | 2.06E-85 | 0.594618 | 5.47E-46 | 0.565049 | 9.53E-41 | 0.653655 |
| 0.50435  | 1.68E-31 | 0.658277 | 2.50E-59 | 0.426433 | 4.66E-22 | 0.498623 | 1.01E-30 | 0.673597 |
| 0.342104 | 2.88E-14 | 0.364429 | 4.10E-16 | 0.199973 | 1.34E-05 | 0.4006   | 1.98E-19 | 0.440678 |
| 0.480234 | 2.57E-28 | 0.467899 | 8.81E-27 | 0.217699 | 2.04E-06 | 0.450859 | 9.22E-25 | 0.613948 |
| 0.556995 | 2.07E-39 | 0.38815  | 3.06E-18 | 0.338821 | 5.23E-14 | 0.224528 | 9.50E-07 | 0.350614 |
| 0.608875 | 1.03E-48 | 0.620593 | 4.62E-51 | 0.39643  | 5.02E-19 | 0.474537 | 1.34E-27 | 0.516634 |
| 0.249779 | 4.49E-08 | 0.354316 | 2.93E-15 | 0.161268 | 0.00047  | 0.295837 | 6.91E-11 | 0.335469 |
| 0.424825 | 6.90E-22 | 0.404502 | 8.22E-20 | 0.063    | 0.1741   | 0.40753  | 4.12E-20 | 0.408707 |
| 0.461325 | 5.47E-26 | 0.32234  | 9.43E-13 | 0.129789 | 0.00497  | 0.431572 | 1.31E-22 | 0.424308 |
| 0.649096 | 3.31E-57 | 0.731819 | 1.84E-79 | 0.475828 | 9.24E-28 | 0.527587 | 8.03E-35 | 0.651349 |
| 0.646352 | 1.38E-56 | 0.415987 | 5.74E-21 | 0.25056  | 4.07E-08 | 0.338348 | 5.69E-14 | 0.163688 |
| 0.455229 | 2.87E-25 | 0.589872 | 4.13E-45 | 0.409432 | 2.66E-20 | 0.25809  | 1.53E-08 | 0.540186 |
| 0.669939 | 3.91E-62 | 0.528471 | 5.93E-35 | 0.335112 | 1.02E-13 | 0.54236  | 4.53E-37 | 0.613021 |
| 0.675872 | 1.30E-63 | 0.717959 | 3.54E-75 | 0.458585 | 1.16E-25 | 0.450114 | 1.12E-24 | 0.609915 |
| 0.594168 | 6.64E-46 | 0.394543 | 7.62E-19 | 0.329528 | 2.73E-13 | 0.446295 | 3.07E-24 | 0.459929 |
| 0.158937 | 0.00057  | 0.32161  | 1.07E-12 | 0.137562 | 0.00289  | 0.18974  | 3.68E-05 | 0.352868 |
| 0.460126 | 7.59E-26 | 0.383732 | 7.85E-18 | 0.224636 | 9.38E-07 | 0.230053 | 5.02E-07 | 0.353657 |
| 0.629138 | 7.76E-53 | 0.664725 | 7.28E-61 | 0.383295 | 8.61E-18 | 0.425396 | 6.00E-22 | 0.45817  |
| 0.45711  | 1.73E-25 | 0.531495 | 2.09E-35 | 0.263134 | 7.78E-09 | 0.396902 | 4.53E-19 | 0.654386 |
| 0.69941  | 7.86E-70 | 0.682448 | 2.73E-65 | 0.515821 | 4.14E-33 | 0.528691 | 5.50E-35 | 0.445548 |
| -0.29064 | 1.53E-10 | -0.47157 | 3.12E-27 | -0.3371  | 7.12E-14 | -0.2333  | 3.42E-07 | -0.2176  |
| -0.28756 | 2.42E-10 | -0.16919 | 0.00024  | -0.03818 | 0.41043  | -0.25354 | 2.77E-08 | -0.1342  |
| 0.338668 | 5.37E-14 | 0.151083 | 0.00106  | 0.015505 | 0.73823  | 0.220275 | 1.54E-06 | 0.166758 |
| 0.630104 | 4.85E-53 | 0.583017 | 7.22E-44 | 0.275002 | 1.50E-09 | 0.418253 | 3.36E-21 | 0.480142 |
| 0.640784 | 2.40E-55 | 0.633981 | 7.23E-54 | 0.449336 | 1.38E-24 | 0.322814 | 8.70E-13 | 0.48585  |
| 0.709834 | 8.77E-73 | 0.435614 | 4.76E-23 | 0.285129 | 3.48E-10 | 0.393387 | 9.82E-19 | 0.344683 |
| 0.722462 | 1.53E-76 | 0.671534 | 1.58E-62 | 0.509449 | 3.29E-32 | 0.434315 | 6.60E-23 | 0.547226 |
| 0.555448 | 3.71E-39 | 0.680966 | 6.58E-65 | 0.394505 | 7.68E-19 | 0.353819 | 3.22E-15 | 0.502042 |
| 0.45663  | 1.97E-25 | 0.410964 | 1.86E-20 | 0.267598 | 4.23E-09 | 0.316118 | 2.69E-12 | 0.231657 |
| -0.48041 | 2.44E-28 | -0.34118 | 3.40E-14 | -0.35214 | 4.44E-15 | -0.38797 | 3.18E-18 | -0.40533 |
| 0.473784 | 1.66E-27 | 0.51719  | 2.64E-33 | 0.287183 | 2.56E-10 | 0.316678 | 2.45E-12 | 0.388918 |

|          |          |          |          |          |          |          |          |          |
|----------|----------|----------|----------|----------|----------|----------|----------|----------|
| 0.58221  | 1.01E-43 | 0.666265 | 3.09E-61 | 0.468993 | 6.48E-27 | 0.546839 | 8.97E-38 | 0.650502 |
| 0.658371 | 2.38E-59 | 0.5975   | 1.58E-46 | 0.309098 | 8.51E-12 | 0.448058 | 1.93E-24 | 0.541003 |
| 0.650768 | 1.38E-57 | 0.385558 | 5.32E-18 | 0.353994 | 3.12E-15 | 0.269875 | 3.09E-09 | 0.103462 |
| 0.400894 | 1.86E-19 | 0.447333 | 2.34E-24 | 0.218836 | 1.80E-06 | 0.430449 | 1.73E-22 | 0.496513 |
| 0.444139 | 5.38E-24 | 0.344318 | 1.92E-14 | 0.134482 | 0.0036   | 0.388029 | 3.14E-18 | 0.513194 |
| 0.495004 | 3.09E-30 | 0.413275 | 1.09E-20 | 0.225224 | 8.77E-07 | 0.465235 | 1.86E-26 | 0.416011 |
| 0.441766 | 9.93E-24 | 0.271181 | 2.58E-09 | 0.087927 | 0.0576   | 0.2569   | 1.79E-08 | 0.331429 |
| 0.277883 | 9.98E-10 | 0.377507 | 2.89E-17 | 0.169823 | 0.00023  | 0.24316  | 1.03E-07 | 0.342074 |
| 0.385213 | 5.73E-18 | 0.518231 | 1.87E-33 | 0.138029 | 0.0028   | 0.292621 | 1.13E-10 | 0.447503 |
| 0.397099 | 4.33E-19 | 0.457675 | 1.48E-25 | 0.219912 | 1.60E-06 | 0.401456 | 1.64E-19 | 0.384445 |
| 0.491337 | 9.44E-30 | 0.669462 | 5.12E-62 | 0.382004 | 1.13E-17 | 0.402204 | 1.38E-19 | 0.523172 |
| 0.398595 | 3.11E-19 | 0.506523 | 8.41E-32 | 0.221755 | 1.30E-06 | 0.274054 | 1.72E-09 | 0.35967  |
| 0.58571  | 2.37E-44 | 0.559167 | 9.11E-40 | 0.405632 | 6.36E-20 | 0.365067 | 3.61E-16 | 0.480799 |
| 0.512958 | 1.06E-32 | 0.597228 | 1.78E-46 | 0.420999 | 1.74E-21 | 0.498872 | 9.34E-31 | 0.601862 |
| 0.465876 | 1.55E-26 | 0.615142 | 5.87E-50 | 0.263053 | 7.86E-09 | 0.453676 | 4.35E-25 | 0.639949 |
| 0.569564 | 1.63E-41 | 0.360455 | 8.95E-16 | 0.295245 | 7.57E-11 | 0.451701 | 7.37E-25 | 0.419188 |
| 0.713088 | 9.87E-74 | 0.777208 | 1.34E-95 | 0.610339 | 5.29E-49 | 0.562052 | 3.03E-40 | 0.747289 |
| 0.461375 | 5.39E-26 | 0.623536 | 1.15E-51 | 0.367696 | 2.14E-16 | 0.484881 | 6.55E-29 | 0.627716 |
| 0.643974 | 4.71E-56 | 0.673722 | 4.51E-63 | 0.502904 | 2.65E-31 | 0.460574 | 6.72E-26 | 0.701624 |
| 0.675739 | 1.41E-63 | 0.65065  | 1.47E-57 | 0.519408 | 1.27E-33 | 0.55751  | 1.71E-39 | 0.492763 |
| 0.758061 | 2.34E-88 | 0.722137 | 1.93E-76 | 0.58112  | 1.57E-43 | 0.515756 | 4.23E-33 | 0.668515 |
| 0.206802 | 6.61E-06 | 0.472572 | 2.35E-27 | 0.211862 | 3.86E-06 | 0.108632 | 0.01886  | 0.327843 |
| 0.602939 | 1.46E-47 | 0.734057 | 3.52E-80 | 0.443328 | 6.63E-24 | 0.511629 | 1.63E-32 | 0.646181 |
| 0.608904 | 1.01E-48 | 0.46878  | 6.88E-27 | 0.309808 | 7.58E-12 | 0.334864 | 1.06E-13 | 0.311601 |
| -0.46906 | 6.35E-27 | -0.56793 | 3.10E-41 | -0.47951 | 3.18E-28 | -0.23899 | 1.73E-07 | -0.30522 |
| 0.506771 | 7.77E-32 | 0.499858 | 6.87E-31 | 0.317478 | 2.14E-12 | 0.342952 | 2.46E-14 | 0.53965  |
| 0.64423  | 4.13E-56 | 0.79582  | #####    | 0.482833 | 1.20E-28 | 0.552386 | 1.16E-38 | 0.58659  |
| 0.693098 | 4.19E-68 | 0.470546 | 4.18E-27 | 0.253752 | 2.69E-08 | 0.457503 | 1.55E-25 | 0.427122 |
| 0.487437 | 3.06E-29 | 0.404217 | 8.77E-20 | 0.228793 | 5.81E-07 | 0.304068 | 1.91E-11 | 0.224729 |
| 0.170474 | 0.00021  | 0.238156 | 1.91E-07 | 0.053158 | 0.25159  | 0.182025 | 7.62E-05 | 0.461383 |
| 0.718658 | 2.18E-75 | 0.415863 | 5.91E-21 | 0.16473  | 0.00035  | 0.424496 | 7.47E-22 | 0.400349 |
| 0.422676 | 1.16E-21 | 0.5037   | 2.06E-31 | 0.236691 | 2.28E-07 | 0.334765 | 1.08E-13 | 0.512641 |
| 0.410697 | 1.98E-20 | 0.341936 | 2.97E-14 | 0.156568 | 0.00069  | 0.366062 | 2.96E-16 | 0.466518 |
| -0.26384 | 7.07E-09 | -0.34188 | 3.00E-14 | -0.31535 | 3.05E-12 | -0.13551 | 0.00335  | -0.17812 |
| 0.580187 | 2.31E-43 | 0.579341 | 3.26E-43 | 0.410763 | 1.95E-20 | 0.435902 | 4.43E-23 | 0.577713 |
| 0.392165 | 1.28E-18 | 0.328846 | 3.07E-13 | 0.310462 | 6.82E-12 | 0.285757 | 3.17E-10 | 0.385939 |
| 0.367984 | 2.02E-16 | 0.334111 | 1.22E-13 | 0.290313 | 1.60E-10 | 0.110031 | 0.01738  | 0.261266 |
| 0.731483 | 2.35E-79 | 0.748758 | 4.46E-85 | 0.477849 | 5.15E-28 | 0.560693 | 5.10E-40 | 0.674432 |
| 0.578762 | 4.12E-43 | 0.46396  | 2.64E-26 | 0.432637 | 1.01E-22 | 0.42769  | 3.42E-22 | 0.546542 |
| 0.630449 | 4.10E-53 | 0.397235 | 4.20E-19 | 0.351969 | 4.58E-15 | 0.333508 | 1.35E-13 | 0.414864 |
| 0.45561  | 2.59E-25 | 0.428223 | 3.00E-22 | 0.183506 | 6.64E-05 | 0.433675 | 7.75E-23 | 0.491696 |
| 0.733133 | 6.98E-80 | 0.717628 | 4.45E-75 | 0.568354 | 2.63E-41 | 0.478228 | 4.62E-28 | 0.679181 |
| 0.632884 | 1.24E-53 | 0.716616 | 8.93E-75 | 0.450132 | 1.12E-24 | 0.57262  | 4.87E-42 | 0.707429 |
| 0.716479 | 9.80E-75 | 0.669423 | 5.23E-62 | 0.485782 | 5.01E-29 | 0.565441 | 8.18E-41 | 0.654966 |
| 0.443732 | 5.97E-24 | 0.5854   | 2.69E-44 | 0.41527  | 6.80E-21 | 0.292288 | 1.19E-10 | 0.616774 |

|          |          |          |          |          |          |          |          |          |
|----------|----------|----------|----------|----------|----------|----------|----------|----------|
| 0.660253 | 8.53E-60 | 0.789708 | #####    | 0.503134 | 2.46E-31 | 0.544684 | 1.96E-37 | 0.709078 |
| 0.528207 | 6.49E-35 | 0.552247 | 1.23E-38 | 0.363365 | 5.05E-16 | 0.330559 | 2.28E-13 | 0.557431 |
| 0.532985 | 1.25E-35 | 0.441746 | 9.98E-24 | 0.325173 | 5.81E-13 | 0.472563 | 2.36E-27 | 0.376847 |
| 0.631265 | 2.75E-53 | 0.568431 | 2.55E-41 | 0.486849 | 3.64E-29 | 0.495438 | 2.70E-30 | 0.667594 |
| 0.606553 | 2.92E-48 | 0.443276 | 6.72E-24 | 0.209692 | 4.87E-06 | 0.311694 | 5.58E-12 | 0.305742 |
| -0.42814 | 3.06E-22 | -0.44589 | 3.41E-24 | -0.43356 | 7.98E-23 | -0.27909 | 8.39E-10 | -0.13302 |
| 0.624775 | 6.36E-52 | 0.481184 | 1.95E-28 | 0.318752 | 1.73E-12 | 0.351693 | 4.83E-15 | 0.457821 |
| 0.319158 | 1.62E-12 | 0.25385  | 2.66E-08 | 0.284664 | 3.72E-10 | 0.172274 | 0.00018  | 0.066913 |
| 0.539494 | 1.26E-36 | 0.592624 | 1.28E-45 | 0.37746  | 2.92E-17 | 0.440007 | 1.56E-23 | 0.411868 |
| 0.809533 | #####    | 0.743321 | 3.16E-83 | 0.551718 | 1.49E-38 | 0.589623 | 4.59E-45 | 0.637518 |
| 0.331345 | 1.98E-13 | 0.477303 | 6.04E-28 | 0.105858 | 0.02214  | 0.41186  | 1.51E-20 | 0.454615 |
| 0.59996  | 5.40E-47 | 0.751195 | 6.37E-86 | 0.469629 | 5.41E-27 | 0.447658 | 2.15E-24 | 0.629026 |
| 0.715899 | 1.46E-74 | 0.802826 | #####    | 0.555583 | 3.53E-39 | 0.46671  | 1.23E-26 | 0.700644 |
| -0.36863 | 1.77E-16 | -0.38847 | 2.85E-18 | -0.32932 | 2.83E-13 | -0.32176 | 1.04E-12 | -0.36358 |
| 0.669933 | 3.92E-62 | 0.694042 | 2.33E-68 | 0.386993 | 3.92E-18 | 0.477842 | 5.16E-28 | 0.537053 |
| 0.606539 | 2.94E-48 | 0.400483 | 2.04E-19 | 0.254215 | 2.54E-08 | 0.378003 | 2.61E-17 | 0.271493 |
| 0.550257 | 2.56E-38 | 0.644526 | 3.55E-56 | 0.440406 | 1.41E-23 | 0.49854  | 1.04E-30 | 0.656458 |
| 0.645156 | 2.56E-56 | 0.678656 | 2.57E-64 | 0.513833 | 7.95E-33 | 0.502481 | 3.02E-31 | 0.418986 |
| 0.420628 | 1.90E-21 | 0.581626 | 1.28E-43 | 0.294818 | 8.09E-11 | 0.467217 | 1.07E-26 | 0.671538 |
| 0.635117 | 4.12E-54 | 0.51882  | 1.54E-33 | 0.346557 | 1.27E-14 | 0.299365 | 4.00E-11 | 0.438909 |
| 0.30241  | 2.48E-11 | 0.315784 | 2.84E-12 | 0.154254 | 0.00082  | 0.086435 | 0.06199  | 0.321832 |
| 0.435323 | 5.12E-23 | 0.51727  | 2.57E-33 | 0.355234 | 2.46E-15 | 0.451433 | 7.92E-25 | 0.554205 |
| 0.469844 | 5.10E-27 | 0.518935 | 1.48E-33 | 0.208417 | 5.58E-06 | 0.494099 | 4.07E-30 | 0.562451 |
| 0.664897 | 6.62E-61 | 0.642202 | 1.17E-55 | 0.402186 | 1.39E-19 | 0.411455 | 1.66E-20 | 0.609893 |
| 0.472525 | 2.38E-27 | 0.453069 | 5.12E-25 | 0.268633 | 3.67E-09 | 0.252332 | 3.24E-08 | 0.300277 |
| 0.747425 | 1.28E-84 | 0.690953 | 1.58E-67 | 0.439241 | 1.90E-23 | 0.488083 | 2.52E-29 | 0.616448 |
| 0.494565 | 3.53E-30 | 0.421913 | 1.40E-21 | 0.251795 | 3.47E-08 | 0.381755 | 1.19E-17 | 0.476707 |
| 0.628752 | 9.36E-53 | 0.798306 | #####    | 0.610481 | 4.96E-49 | 0.492021 | 7.67E-30 | 0.648049 |
| 0.398103 | 3.47E-19 | 0.209008 | 5.24E-06 | 0.309049 | 8.58E-12 | 0.146917 | 0.00145  | 0.360941 |
| 0.307891 | 1.03E-11 | 0.293931 | 9.26E-11 | 0.18991  | 3.62E-05 | 0.30231  | 2.52E-11 | 0.26551  |
| 0.458643 | 1.14E-25 | 0.310437 | 6.84E-12 | 0.100201 | 0.03039  | 0.422164 | 1.31E-21 | 0.485918 |
| 0.291555 | 1.33E-10 | 0.242378 | 1.14E-07 | 0.127058 | 0.00597  | 0.34387  | 2.08E-14 | 0.401999 |
| 0.551454 | 1.65E-38 | 0.38322  | 8.75E-18 | 0.158233 | 0.0006   | 0.399669 | 2.45E-19 | 0.443624 |
| 0.63668  | 1.89E-54 | 0.562477 | 2.57E-40 | 0.520829 | 7.88E-34 | 0.422732 | 1.15E-21 | 0.467539 |
| 0.360338 | 9.16E-16 | 0.506942 | 7.35E-32 | 0.124383 | 0.00712  | 0.333269 | 1.41E-13 | 0.462129 |
| 0.289822 | 1.73E-10 | 0.259947 | 1.19E-08 | 0.060584 | 0.19124  | 0.193908 | 2.45E-05 | 0.101359 |
| 0.469883 | 5.04E-27 | 0.409559 | 2.58E-20 | 0.370606 | 1.19E-16 | 0.232883 | 3.59E-07 | 0.399756 |
| 0.382603 | 9.96E-18 | 0.381874 | 1.16E-17 | 0.17236  | 0.00018  | 0.397486 | 3.98E-19 | 0.462244 |
| 0.759504 | 7.04E-89 | 0.700748 | 3.34E-70 | 0.608007 | 1.52E-48 | 0.50466  | 1.52E-31 | 0.645228 |
| 0.758642 | 1.44E-88 | 0.700658 | 3.54E-70 | 0.538677 | 1.69E-36 | 0.461718 | 4.91E-26 | 0.651913 |
| 0.774312 | 1.86E-94 | 0.76445  | 1.07E-90 | 0.589275 | 5.31E-45 | 0.541295 | 6.64E-37 | 0.751676 |
| 0.339021 | 5.04E-14 | 0.181727 | 7.83E-05 | -0.03418 | 0.46125  | 0.298993 | 4.24E-11 | 0.261891 |
| 0.713923 | 5.61E-74 | 0.523273 | 3.47E-34 | 0.313474 | 4.16E-12 | 0.52741  | 8.53E-35 | 0.642631 |
| 0.686822 | 1.97E-66 | 0.624407 | 7.58E-52 | 0.447371 | 2.31E-24 | 0.502974 | 2.59E-31 | 0.583798 |
| 0.72004  | 8.36E-76 | 0.510151 | 2.63E-32 | 0.426826 | 4.23E-22 | 0.431739 | 1.26E-22 | 0.385776 |



|          |          |          |          |          |          |          |          |          |
|----------|----------|----------|----------|----------|----------|----------|----------|----------|
| 0.667132 | 1.90E-61 | 0.624574 | 6.99E-52 | 0.508712 | 4.17E-32 | 0.565611 | 7.66E-41 | 0.597213 |
| 0.718976 | 1.75E-75 | 0.698847 | 1.13E-69 | 0.546596 | 9.80E-38 | 0.53381  | 9.35E-36 | 0.559156 |
| 0.432352 | 1.08E-22 | 0.433393 | 8.32E-23 | 0.160077 | 0.00052  | 0.347525 | 1.06E-14 | 0.416529 |
| 0.567151 | 4.21E-41 | 0.557443 | 1.75E-39 | 0.390583 | 1.81E-18 | 0.442563 | 8.08E-24 | 0.628365 |
| 0.258804 | 1.39E-08 | 0.375877 | 4.05E-17 | 0.159184 | 0.00055  | 0.282692 | 4.97E-10 | 0.462112 |
| 0.349891 | 6.78E-15 | 0.516213 | 3.64E-33 | 0.328427 | 3.31E-13 | 0.310715 | 6.54E-12 | 0.288735 |
| 0.713569 | 7.13E-74 | 0.708731 | 1.83E-72 | 0.592488 | 1.36E-45 | 0.487816 | 2.73E-29 | 0.571615 |
| 0.548688 | 4.56E-38 | 0.588664 | 6.87E-45 | 0.351362 | 5.14E-15 | 0.473577 | 1.76E-27 | 0.544416 |
| 0.483883 | 8.80E-29 | 0.540588 | 8.55E-37 | 0.388988 | 2.55E-18 | 0.385492 | 5.40E-18 | 0.469907 |
| 0.6631   | 1.79E-60 | 0.501345 | 4.32E-31 | 0.459786 | 8.33E-26 | 0.322271 | 9.54E-13 | 0.402783 |
| 0.417781 | 3.75E-21 | 0.471557 | 3.14E-27 | 0.314863 | 3.31E-12 | 0.371167 | 1.06E-16 | 0.471227 |
| 0.564025 | 1.42E-40 | 0.694982 | 1.29E-68 | 0.509234 | 3.53E-32 | 0.434265 | 6.69E-23 | 0.492126 |
| 0.297599 | 5.27E-11 | 0.434923 | 5.67E-23 | 0.21107  | 4.21E-06 | 0.268593 | 3.69E-09 | 0.339746 |
| 0.669437 | 5.19E-62 | 0.37689  | 3.29E-17 | 0.250866 | 3.91E-08 | 0.409909 | 2.38E-20 | 0.337609 |
| 0.53002  | 3.48E-35 | 0.372496 | 8.10E-17 | 0.255185 | 2.24E-08 | 0.390408 | 1.88E-18 | 0.556592 |
| 0.667722 | 1.36E-61 | 0.64252  | 9.91E-56 | 0.426719 | 4.34E-22 | 0.54052  | 8.76E-37 | 0.617328 |
| 0.370464 | 1.22E-16 | 0.296227 | 6.51E-11 | 0.280419 | 6.92E-10 | 0.179145 | 9.92E-05 | 0.400235 |
| 0.552699 | 1.04E-38 | 0.781711 | 2.08E-97 | 0.45554  | 2.64E-25 | 0.395946 | 5.59E-19 | 0.643941 |
| 0.510419 | 2.41E-32 | 0.62568  | 4.12E-52 | 0.430217 | 1.84E-22 | 0.47313  | 2.00E-27 | 0.512315 |
| 0.698246 | 1.65E-69 | 0.606565 | 2.90E-48 | 0.438034 | 2.58E-23 | 0.476328 | 8.00E-28 | 0.645688 |
| 0.550342 | 2.48E-38 | 0.613508 | 1.25E-49 | 0.389584 | 2.24E-18 | 0.482451 | 1.34E-28 | 0.645583 |
| 0.646891 | 1.05E-56 | 0.453117 | 5.05E-25 | 0.416288 | 5.35E-21 | 0.387932 | 3.20E-18 | 0.28675  |
| 0.365137 | 3.56E-16 | 0.549732 | 3.11E-38 | 0.257328 | 1.69E-08 | 0.422544 | 1.20E-21 | 0.46383  |
| 0.231653 | 4.16E-07 | -0.00356 | 0.93891  | -0.14675 | 0.00147  | -0.03166 | 0.49488  | -0.00379 |
| 0.686795 | 2.01E-66 | 0.699685 | 6.60E-70 | 0.434465 | 6.36E-23 | 0.509999 | 2.76E-32 | 0.61325  |
| 0.711893 | 2.21E-73 | 0.681176 | 5.81E-65 | 0.428957 | 2.51E-22 | 0.554398 | 5.50E-39 | 0.548958 |
| 0.582744 | 8.08E-44 | 0.646786 | 1.10E-56 | 0.388665 | 2.74E-18 | 0.479662 | 3.04E-28 | 0.678391 |
| 0.38132  | 1.31E-17 | 0.342775 | 2.54E-14 | 0.145689 | 0.0016   | 0.347446 | 1.07E-14 | 0.549823 |
| 0.690691 | 1.86E-67 | 0.640308 | 3.05E-55 | 0.522414 | 4.63E-34 | 0.363327 | 5.09E-16 | 0.324316 |
| 0.197383 | 1.74E-05 | 0.46628  | 1.39E-26 | 0.162063 | 0.00044  | 0.19124  | 3.18E-05 | 0.341081 |
| 0.33903  | 5.03E-14 | 0.423864 | 8.71E-22 | 0.212624 | 3.56E-06 | 0.301621 | 2.81E-11 | 0.261709 |
| 0.552472 | 1.13E-38 | 0.498087 | 1.19E-30 | 0.168958 | 0.00024  | 0.434632 | 6.10E-23 | 0.531733 |
| -0.16401 | 0.00037  | -0.34242 | 2.72E-14 | -0.04531 | 0.32856  | -0.23282 | 3.62E-07 | -0.30545 |
| 0.517221 | 2.61E-33 | 0.611854 | 2.66E-49 | 0.383635 | 8.01E-18 | 0.436008 | 4.31E-23 | 0.674558 |
| -0.31401 | 3.81E-12 | -0.27855 | 9.07E-10 | -0.20542 | 7.64E-06 | -0.26224 | 8.78E-09 | -0.30595 |
| 0.614794 | 6.90E-50 | 0.735343 | 1.35E-80 | 0.424771 | 6.99E-22 | 0.533924 | 8.99E-36 | 0.678097 |
| 0.642574 | 9.64E-56 | 0.447816 | 2.06E-24 | 0.379617 | 1.86E-17 | 0.310708 | 6.55E-12 | 0.201544 |
| 0.536745 | 3.34E-36 | 0.552904 | 9.61E-39 | 0.25419  | 2.55E-08 | 0.421502 | 1.54E-21 | 0.400569 |
| 0.288194 | 2.20E-10 | 0.462865 | 3.58E-26 | 0.094036 | 0.04224  | 0.30269  | 2.37E-11 | 0.402628 |
| 0.589202 | 5.48E-45 | 0.47613  | 8.47E-28 | 0.295837 | 6.91E-11 | 0.426559 | 4.52E-22 | 0.444018 |
| -0.50377 | 2.02E-31 | -0.49104 | 1.03E-29 | -0.39142 | 1.51E-18 | -0.3239  | 7.23E-13 | -0.2114  |
| 0.602817 | 1.54E-47 | 0.359898 | 9.98E-16 | 0.195593 | 2.08E-05 | 0.471914 | 2.83E-27 | 0.364244 |
| 0.428496 | 2.81E-22 | 0.323798 | 7.35E-13 | 0.176802 | 0.00012  | 0.402253 | 1.37E-19 | 0.462842 |
| 0.561368 | 3.94E-40 | 0.493732 | 4.56E-30 | 0.34716  | 1.13E-14 | 0.493239 | 5.30E-30 | 0.515467 |
| 0.527203 | 9.15E-35 | 0.492888 | 5.89E-30 | 0.218861 | 1.80E-06 | 0.389386 | 2.34E-18 | 0.428372 |

|          |          |          |          |          |          |          |          |          |
|----------|----------|----------|----------|----------|----------|----------|----------|----------|
| 0.580208 | 2.29E-43 | 0.527013 | 9.77E-35 | 0.311413 | 5.84E-12 | 0.379347 | 1.97E-17 | 0.27928  |
| 0.561406 | 3.88E-40 | 0.387008 | 3.91E-18 | 0.230721 | 4.64E-07 | 0.407696 | 3.96E-20 | 0.410606 |
| 0.339908 | 4.29E-14 | 0.381984 | 1.14E-17 | 0.284714 | 3.70E-10 | 0.175381 | 0.00014  | 0.431219 |
| 0.61425  | 8.86E-50 | 0.469987 | 4.89E-27 | 0.337378 | 6.78E-14 | 0.359031 | 1.18E-15 | 0.25514  |
| 0.727949 | 3.07E-78 | 0.615221 | 5.66E-50 | 0.402795 | 1.21E-19 | 0.434693 | 6.00E-23 | 0.486697 |
| 0.383128 | 8.92E-18 | 0.374303 | 5.60E-17 | 0.266609 | 4.85E-09 | 0.236264 | 2.40E-07 | 0.32829  |
| 0.702458 | 1.11E-70 | 0.675481 | 1.63E-63 | 0.395759 | 5.83E-19 | 0.451306 | 8.19E-25 | 0.604258 |
| 0.64855  | 4.41E-57 | 0.640976 | 2.17E-55 | 0.365511 | 3.30E-16 | 0.545627 | 1.39E-37 | 0.511136 |
| 0.60055  | 4.17E-47 | 0.600138 | 5.00E-47 | 0.372893 | 7.47E-17 | 0.391941 | 1.35E-18 | 0.517912 |
| 0.529265 | 4.52E-35 | 0.737483 | 2.72E-81 | 0.435901 | 4.43E-23 | 0.502234 | 3.27E-31 | 0.612831 |
| 0.464374 | 2.36E-26 | 0.42867  | 2.69E-22 | 0.222503 | 1.20E-06 | 0.243211 | 1.03E-07 | 0.280768 |
| 0.579628 | 2.90E-43 | 0.435394 | 5.03E-23 | 0.277641 | 1.03E-09 | 0.38823  | 3.00E-18 | 0.486272 |
| 0.467181 | 1.08E-26 | 0.568872 | 2.14E-41 | 0.326128 | 4.93E-13 | 0.37222  | 8.57E-17 | 0.419914 |
| 0.502016 | 3.50E-31 | 0.446653 | 2.79E-24 | 0.262892 | 8.04E-09 | 0.501962 | 3.56E-31 | 0.669904 |
| 0.390703 | 1.76E-18 | 0.374365 | 5.53E-17 | 0.264765 | 6.24E-09 | 0.466116 | 1.45E-26 | 0.562795 |
| 0.352107 | 4.46E-15 | 0.465953 | 1.52E-26 | 0.251808 | 3.46E-08 | 0.399041 | 2.81E-19 | 0.456167 |
| 0.651704 | 8.41E-58 | 0.416387 | 5.22E-21 | 0.193447 | 2.56E-05 | 0.415207 | 6.90E-21 | 0.390608 |
| 0.619869 | 6.50E-51 | 0.834251 | #####    | 0.596577 | 2.35E-46 | 0.482266 | 1.42E-28 | 0.665953 |
| 0.552289 | 1.21E-38 | 0.533035 | 1.23E-35 | 0.26252  | 8.45E-09 | 0.346838 | 1.20E-14 | 0.308707 |
| 0.605254 | 5.21E-48 | 0.719569 | 1.16E-75 | 0.475677 | 9.66E-28 | 0.40569  | 6.27E-20 | 0.548841 |
| 0.304212 | 1.86E-11 | 0.329826 | 2.59E-13 | 0.130479 | 0.00474  | 0.326343 | 4.75E-13 | 0.408256 |
| 0.566163 | 6.18E-41 | 0.344773 | 1.76E-14 | 0.321435 | 1.10E-12 | 0.412603 | 1.27E-20 | 0.462871 |
| 0.663772 | 1.23E-60 | 0.580231 | 2.26E-43 | 0.431295 | 1.40E-22 | 0.393405 | 9.78E-19 | 0.596642 |
| 0.494418 | 3.69E-30 | 0.659684 | 1.16E-59 | 0.383409 | 8.40E-18 | 0.476027 | 8.73E-28 | 0.709197 |
| 0.562383 | 2.67E-40 | 0.499829 | 6.94E-31 | 0.229128 | 5.59E-07 | 0.527586 | 8.03E-35 | 0.713292 |
| 0.598963 | 8.35E-47 | 0.636086 | 2.54E-54 | 0.454169 | 3.81E-25 | 0.488601 | 2.16E-29 | 0.695594 |
| 0.345101 | 1.66E-14 | 0.366753 | 2.58E-16 | 0.247148 | 6.28E-08 | 0.243365 | 1.01E-07 | 0.371034 |
| 0.610531 | 4.85E-49 | 0.717117 | 6.32E-75 | 0.485969 | 4.74E-29 | 0.491436 | 9.16E-30 | 0.685655 |
| 0.295792 | 6.96E-11 | 0.477032 | 6.53E-28 | 0.065206 | 0.15948  | 0.314612 | 3.45E-12 | 0.519793 |
| 0.589175 | 5.54E-45 | 0.495707 | 2.49E-30 | 0.220589 | 1.48E-06 | 0.403006 | 1.15E-19 | 0.500588 |
| 0.484514 | 7.30E-29 | 0.688606 | 6.67E-67 | 0.462731 | 3.71E-26 | 0.439003 | 2.02E-23 | 0.677315 |
| 0.539541 | 1.24E-36 | 0.404561 | 8.11E-20 | 0.158087 | 0.00061  | 0.384101 | 7.26E-18 | 0.378668 |
| 0.595592 | 3.60E-46 | 0.635916 | 2.77E-54 | 0.361132 | 7.84E-16 | 0.491292 | 9.57E-30 | 0.692451 |
| -0.29136 | 1.37E-10 | -0.3557  | 2.25E-15 | -0.20097 | 1.21E-05 | -0.19804 | 1.63E-05 | -0.12877 |
| 0.571507 | 7.58E-42 | 0.54248  | 4.34E-37 | 0.46972  | 5.28E-27 | 0.352817 | 3.90E-15 | 0.465859 |
| 0.796467 | #####    | 0.769961 | 8.94E-93 | 0.695163 | 1.15E-68 | 0.513913 | 7.74E-33 | 0.652102 |
| 0.404115 | 8.98E-20 | 0.394485 | 7.71E-19 | 0.321141 | 1.16E-12 | 0.166327 | 0.00031  | 0.29095  |
| 0.401586 | 1.59E-19 | 0.421874 | 1.41E-21 | 0.142677 | 0.002    | 0.39001  | 2.05E-18 | 0.498118 |
| 0.24834  | 5.40E-08 | 0.374775 | 5.08E-17 | 0.124547 | 0.00704  | 0.201454 | 1.15E-05 | 0.389495 |
| 0.321195 | 1.15E-12 | 0.2222   | 1.24E-06 | -0.05507 | 0.23491  | 0.243201 | 1.03E-07 | 0.393478 |
| 0.423252 | 1.01E-21 | 0.607466 | 1.94E-48 | 0.356606 | 1.89E-15 | 0.350722 | 5.80E-15 | 0.526638 |
| 0.721693 | 2.63E-76 | 0.616739 | 2.80E-50 | 0.512033 | 1.43E-32 | 0.510268 | 2.53E-32 | 0.687294 |
| 0.346021 | 1.40E-14 | 0.367943 | 2.03E-16 | 0.244576 | 8.67E-08 | 0.232615 | 3.71E-07 | 0.219684 |
| 0.506558 | 8.31E-32 | 0.419537 | 2.47E-21 | 0.154031 | 0.00084  | 0.279698 | 7.68E-10 | 0.397781 |
| 0.366546 | 2.69E-16 | 0.500946 | 4.89E-31 | 0.231583 | 4.19E-07 | 0.318335 | 1.86E-12 | 0.434792 |

|          |          |          |          |          |          |          |          |          |
|----------|----------|----------|----------|----------|----------|----------|----------|----------|
| 0.404729 | 7.81E-20 | 0.458625 | 1.14E-25 | 0.221598 | 1.32E-06 | 0.395686 | 5.92E-19 | 0.480847 |
| 0.419598 | 2.43E-21 | 0.363427 | 4.99E-16 | 0.068287 | 0.14063  | 0.306556 | 1.28E-11 | 0.37192  |
| 0.606649 | 2.80E-48 | 0.419242 | 2.65E-21 | 0.396628 | 4.81E-19 | 0.46308  | 3.37E-26 | 0.556418 |
| 0.623245 | 1.32E-51 | 0.808258 | #####    | 0.601181 | 3.16E-47 | 0.588663 | 6.87E-45 | 0.730148 |
| 0.46822  | 8.05E-27 | 0.40094  | 1.84E-19 | 0.323238 | 8.09E-13 | 0.238635 | 1.80E-07 | 0.373291 |
| 0.702211 | 1.30E-70 | 0.615871 | 4.19E-50 | 0.376317 | 3.70E-17 | 0.582334 | 9.56E-44 | 0.623516 |
| 0.798028 | #####    | 0.799156 | #####    | 0.669336 | 5.50E-62 | 0.613598 | 1.20E-49 | 0.700034 |
| 0.48503  | 6.27E-29 | 0.5204   | 9.09E-34 | 0.303712 | 2.02E-11 | 0.320065 | 1.39E-12 | 0.351261 |
| 0.781424 | 2.72E-97 | 0.612109 | 2.37E-49 | 0.44338  | 6.55E-24 | 0.542816 | 3.85E-37 | 0.619023 |
| 0.798806 | #####    | 0.728019 | 2.92E-78 | 0.502947 | 2.61E-31 | 0.548583 | 4.74E-38 | 0.573148 |
| 0.42464  | 7.22E-22 | 0.436858 | 3.48E-23 | 0.26275  | 8.19E-09 | 0.231482 | 4.24E-07 | 0.219066 |
| 0.381896 | 1.16E-17 | 0.584554 | 3.82E-44 | 0.33907  | 5.00E-14 | 0.316197 | 2.65E-12 | 0.546753 |
| -0.38291 | 9.34E-18 | -0.29306 | 1.06E-10 | -0.2125  | 3.61E-06 | -0.22395 | 1.01E-06 | -0.16849 |
| 0.556956 | 2.11E-39 | 0.665029 | 6.15E-61 | 0.379088 | 2.08E-17 | 0.470063 | 4.79E-27 | 0.713335 |
| 0.322767 | 8.77E-13 | 0.456703 | 1.93E-25 | 0.21189  | 3.85E-06 | 0.402241 | 1.37E-19 | 0.506433 |
| 0.339383 | 4.72E-14 | 0.490024 | 1.41E-29 | 0.217677 | 2.05E-06 | 0.45312  | 5.05E-25 | 0.42679  |
| 0.51988  | 1.08E-33 | 0.503989 | 1.88E-31 | 0.35497  | 2.59E-15 | 0.459093 | 1.01E-25 | 0.451068 |
| 0.35251  | 4.13E-15 | 0.357216 | 1.68E-15 | 0.031374 | 0.49882  | 0.377102 | 3.15E-17 | 0.596931 |
| 0.492079 | 7.54E-30 | 0.495824 | 2.40E-30 | 0.239467 | 1.63E-07 | 0.502005 | 3.51E-31 | 0.69346  |
| 0.563476 | 1.75E-40 | 0.668442 | 9.11E-62 | 0.382028 | 1.12E-17 | 0.407881 | 3.80E-20 | 0.620547 |
| 0.418654 | 3.05E-21 | 0.353083 | 3.71E-15 | 0.291008 | 1.44E-10 | 0.342684 | 2.59E-14 | 0.446496 |
| 0.555716 | 3.36E-39 | 0.34211  | 2.87E-14 | 0.183805 | 6.46E-05 | 0.257442 | 1.66E-08 | 0.192809 |
| 0.757467 | 3.83E-88 | 0.76594  | 2.98E-91 | 0.554973 | 4.44E-39 | 0.532069 | 1.71E-35 | 0.674937 |
| 0.544268 | 2.28E-37 | 0.287151 | 2.58E-10 | 0.141801 | 0.00213  | 0.28665  | 2.77E-10 | 0.383893 |
| 0.625663 | 4.15E-52 | 0.505096 | 1.32E-31 | 0.261568 | 9.60E-09 | 0.364166 | 4.31E-16 | 0.332243 |
| 0.318003 | 1.96E-12 | 0.413728 | 9.77E-21 | 0.172492 | 0.00018  | 0.178362 | 0.00011  | 0.327202 |
| 0.367541 | 2.20E-16 | 0.294865 | 8.03E-11 | 0.157188 | 0.00065  | 0.210367 | 4.53E-06 | 0.283002 |
| 0.432878 | 9.46E-23 | 0.382437 | 1.03E-17 | 0.212751 | 3.51E-06 | 0.531654 | 1.98E-35 | 0.545785 |
| 0.452612 | 5.78E-25 | 0.318191 | 1.90E-12 | 0.134264 | 0.00365  | 0.236834 | 2.24E-07 | 0.210411 |
| 0.284803 | 3.65E-10 | 0.421484 | 1.55E-21 | 0.159104 | 0.00056  | 0.205609 | 7.49E-06 | 0.265317 |
| 0.59556  | 3.65E-46 | 0.472313 | 2.53E-27 | 0.218681 | 1.83E-06 | 0.3547   | 2.72E-15 | 0.335227 |
| 0.504    | 1.87E-31 | 0.455819 | 2.45E-25 | 0.201865 | 1.10E-05 | 0.26218  | 8.85E-09 | 0.307678 |
| 0.644263 | 4.06E-56 | 0.480001 | 2.76E-28 | 0.412156 | 1.41E-20 | 0.433659 | 7.78E-23 | 0.459921 |
| 0.394604 | 7.51E-19 | 0.369512 | 1.48E-16 | 0.216374 | 2.37E-06 | 0.346284 | 1.33E-14 | 0.356194 |
| 0.545019 | 1.74E-37 | 0.669891 | 4.01E-62 | 0.469035 | 6.40E-27 | 0.46066  | 6.56E-26 | 0.504107 |
| 0.613344 | 1.34E-49 | 0.595045 | 4.56E-46 | 0.404926 | 7.47E-20 | 0.436473 | 3.83E-23 | 0.456177 |
| 0.622974 | 1.50E-51 | 0.666187 | 3.22E-61 | 0.498031 | 1.21E-30 | 0.442757 | 7.69E-24 | 0.546445 |
| 0.563785 | 1.55E-40 | 0.385713 | 5.15E-18 | 0.369168 | 1.59E-16 | 0.397199 | 4.24E-19 | 0.431958 |
| 0.639611 | 4.34E-55 | 0.554058 | 6.25E-39 | 0.422602 | 1.18E-21 | 0.324213 | 6.85E-13 | 0.372166 |
| 0.512728 | 1.14E-32 | 0.536752 | 3.33E-36 | 0.318829 | 1.71E-12 | 0.43383  | 7.46E-23 | 0.492741 |
| 0.3928   | 1.12E-18 | 0.577133 | 7.97E-43 | 0.294479 | 8.52E-11 | 0.335889 | 8.86E-14 | 0.507472 |
| 0.548012 | 5.84E-38 | 0.358059 | 1.43E-15 | 0.24939  | 4.72E-08 | 0.345506 | 1.54E-14 | 0.385404 |
| 0.455849 | 2.43E-25 | 0.50076  | 5.19E-31 | 0.192115 | 2.92E-05 | 0.470358 | 4.41E-27 | 0.63858  |
| 0.544908 | 1.81E-37 | 0.626549 | 2.71E-52 | 0.339095 | 4.97E-14 | 0.462439 | 4.02E-26 | 0.587047 |
| 0.584909 | 3.30E-44 | 0.664781 | 7.06E-61 | 0.386138 | 4.71E-18 | 0.539919 | 1.09E-36 | 0.639755 |

|          |          |          |          |          |          |          |          |          |
|----------|----------|----------|----------|----------|----------|----------|----------|----------|
| 0.58092  | 1.71E-43 | 0.530633 | 2.82E-35 | 0.222104 | 1.25E-06 | 0.408753 | 3.11E-20 | 0.470957 |
| 0.453114 | 5.06E-25 | 0.357668 | 1.54E-15 | 0.160456 | 0.0005   | 0.352385 | 4.23E-15 | 0.406963 |
| 0.791842 | #####    | 0.636119 | 2.50E-54 | 0.512263 | 1.33E-32 | 0.584991 | 3.19E-44 | 0.625116 |
| 0.416117 | 5.57E-21 | 0.367556 | 2.20E-16 | 0.29269  | 1.12E-10 | 0.305834 | 1.44E-11 | 0.423287 |
| 0.66758  | 1.48E-61 | 0.541718 | 5.71E-37 | 0.411452 | 1.66E-20 | 0.541822 | 5.50E-37 | 0.619112 |
| 0.543808 | 2.69E-37 | 0.449267 | 1.40E-24 | 0.106905 | 0.02085  | 0.508043 | 5.17E-32 | 0.541023 |
| 0.543136 | 3.43E-37 | 0.698124 | 1.78E-69 | 0.44898  | 1.52E-24 | 0.546291 | 1.09E-37 | 0.67533  |
| 0.455481 | 2.68E-25 | 0.211568 | 3.99E-06 | 0.063963 | 0.1676   | 0.263679 | 7.23E-09 | 0.174967 |
| 0.761855 | 9.75E-90 | 0.695837 | 7.56E-69 | 0.585556 | 2.52E-44 | 0.471949 | 2.81E-27 | 0.443227 |
| 0.612129 | 2.34E-49 | 0.451885 | 7.02E-25 | 0.308776 | 8.96E-12 | 0.467097 | 1.10E-26 | 0.462008 |
| 0.687287 | 1.49E-66 | 0.684764 | 6.83E-66 | 0.449661 | 1.27E-24 | 0.492007 | 7.71E-30 | 0.47075  |
| 0.687969 | 9.83E-67 | 0.572427 | 5.26E-42 | 0.457841 | 1.42E-25 | 0.442208 | 8.86E-24 | 0.346318 |
| 0.438018 | 2.59E-23 | 0.396696 | 4.74E-19 | 0.197032 | 1.80E-05 | 0.455094 | 2.97E-25 | 0.370608 |
| 0.650647 | 1.47E-57 | 0.537695 | 2.39E-36 | 0.305434 | 1.53E-11 | 0.323419 | 7.84E-13 | 0.474777 |
| 0.653622 | 3.04E-58 | 0.649878 | 2.20E-57 | 0.500481 | 5.66E-31 | 0.436251 | 4.05E-23 | 0.4519   |
| 0.424671 | 7.16E-22 | 0.577943 | 5.75E-43 | 0.324154 | 6.92E-13 | 0.429237 | 2.34E-22 | 0.631306 |
| 0.785512 | 5.73E-99 | 0.610323 | 5.33E-49 | 0.461327 | 5.46E-26 | 0.452349 | 6.20E-25 | 0.373157 |
| 0.629101 | 7.90E-53 | 0.517058 | 2.76E-33 | 0.411325 | 1.71E-20 | 0.350989 | 5.51E-15 | 0.38617  |
| 0.664072 | 1.05E-60 | 0.768395 | 3.53E-92 | 0.466943 | 1.15E-26 | 0.521765 | 5.76E-34 | 0.687658 |
| 0.570156 | 1.29E-41 | 0.532448 | 1.50E-35 | 0.513174 | 9.86E-33 | 0.300889 | 3.15E-11 | 0.33922  |
| 0.704731 | 2.54E-71 | 0.749168 | 3.22E-85 | 0.69091  | 1.62E-67 | 0.448995 | 1.51E-24 | 0.604231 |
| 0.56406  | 1.40E-40 | 0.571516 | 7.55E-42 | 0.404009 | 9.20E-20 | 0.40759  | 4.06E-20 | 0.463922 |
| 0.576593 | 9.91E-43 | 0.458539 | 1.17E-25 | 0.352866 | 3.86E-15 | 0.44568  | 3.60E-24 | 0.517621 |
| 0.5993   | 7.21E-47 | 0.580517 | 2.02E-43 | 0.338313 | 5.73E-14 | 0.480784 | 2.19E-28 | 0.580706 |
| 0.644053 | 4.52E-56 | 0.379792 | 1.80E-17 | 0.145499 | 0.00162  | 0.393819 | 8.93E-19 | 0.35239  |
| 0.473143 | 2.00E-27 | 0.234869 | 2.84E-07 | 0.063404 | 0.17135  | 0.275332 | 1.44E-09 | 0.232277 |
| 0.366024 | 2.98E-16 | 0.267418 | 4.34E-09 | 0.009755 | 0.83347  | 0.255804 | 2.06E-08 | 0.278167 |
| 0.49589  | 2.35E-30 | 0.316363 | 2.58E-12 | 0.243214 | 1.03E-07 | 0.208215 | 5.70E-06 | 0.338557 |
| 0.644929 | 2.88E-56 | 0.755439 | 2.04E-87 | 0.512414 | 1.26E-32 | 0.569441 | 1.71E-41 | 0.743554 |
| 0.554292 | 5.72E-39 | 0.487245 | 3.24E-29 | 0.498476 | 1.06E-30 | 0.324164 | 6.91E-13 | 0.24249  |
| 0.436047 | 4.27E-23 | 0.444711 | 4.63E-24 | 0.347761 | 1.01E-14 | 0.33011  | 2.46E-13 | 0.196998 |
| 0.426877 | 4.18E-22 | 0.173677 | 0.00016  | 0.042512 | 0.35933  | 0.173253 | 0.00017  | 0.152777 |
| 0.65661  | 6.15E-59 | 0.756812 | 6.58E-88 | 0.539757 | 1.15E-36 | 0.615946 | 4.05E-50 | 0.683743 |
| 0.52531  | 1.74E-34 | 0.361313 | 7.56E-16 | 0.299799 | 3.74E-11 | 0.291955 | 1.25E-10 | 0.226653 |
| 0.670857 | 2.32E-62 | 0.511417 | 1.74E-32 | 0.411301 | 1.72E-20 | 0.347904 | 9.84E-15 | 0.345356 |
| 0.533377 | 1.09E-35 | 0.586054 | 2.05E-44 | 0.484618 | 7.08E-29 | 0.367914 | 2.04E-16 | 0.442026 |
| 0.627048 | 2.13E-52 | 0.590748 | 2.85E-45 | 0.306268 | 1.34E-11 | 0.479709 | 3.00E-28 | 0.534609 |
| 0.605701 | 4.27E-48 | 0.63181  | 2.11E-53 | 0.369594 | 1.46E-16 | 0.56419  | 1.33E-40 | 0.721792 |
| 0.754193 | 5.64E-87 | 0.708811 | 1.73E-72 | 0.569147 | 1.92E-41 | 0.511401 | 1.75E-32 | 0.653709 |
| -0.45996 | 7.94E-26 | -0.38829 | 2.96E-18 | -0.37728 | 3.03E-17 | -0.18875 | 4.05E-05 | -0.18125 |
| 0.72252  | 1.47E-76 | 0.695951 | 7.04E-69 | 0.499274 | 8.25E-31 | 0.481575 | 1.74E-28 | 0.576236 |
| 0.735021 | 1.72E-80 | 0.624811 | 6.25E-52 | 0.420204 | 2.11E-21 | 0.504282 | 1.71E-31 | 0.522094 |
| 0.51777  | 2.18E-33 | 0.485888 | 4.85E-29 | 0.396898 | 4.53E-19 | 0.361506 | 7.28E-16 | 0.386942 |
| 0.42338  | 9.80E-22 | 0.3043   | 1.84E-11 | 0.044898 | 0.33298  | 0.378368 | 2.42E-17 | 0.349611 |
| -0.36742 | 2.26E-16 | -0.35326 | 3.58E-15 | -0.23751 | 2.07E-07 | -0.28411 | 4.04E-10 | -0.14267 |

|          |          |          |          |          |          |          |          |          |
|----------|----------|----------|----------|----------|----------|----------|----------|----------|
| 0.65835  | 2.40E-59 | 0.330393 | 2.35E-13 | 0.194662 | 2.28E-05 | 0.434152 | 6.88E-23 | 0.487288 |
| 0.768782 | 2.52E-92 | 0.769506 | 1.33E-92 | 0.637729 | 1.12E-54 | 0.53645  | 3.71E-36 | 0.558705 |
| 0.66922  | 5.87E-62 | 0.680469 | 8.83E-65 | 0.592292 | 1.48E-45 | 0.458887 | 1.06E-25 | 0.525252 |
| 0.370007 | 1.34E-16 | 0.338754 | 5.29E-14 | 0.183384 | 6.71E-05 | 0.230037 | 5.02E-07 | 0.473469 |
| 0.410629 | 2.01E-20 | 0.562464 | 2.59E-40 | 0.221847 | 1.29E-06 | 0.471245 | 3.43E-27 | 0.467116 |
| 0.271823 | 2.36E-09 | 0.390321 | 1.91E-18 | 0.053822 | 0.24571  | 0.226537 | 7.54E-07 | 0.195176 |
| 0.651629 | 8.75E-58 | 0.407333 | 4.31E-20 | 0.335331 | 9.79E-14 | 0.35653  | 1.92E-15 | 0.324051 |
| -0.52605 | 1.35E-34 | -0.5191  | 1.40E-33 | -0.37241 | 8.24E-17 | -0.37396 | 6.00E-17 | -0.4625  |
| -0.27964 | 7.75E-10 | -0.55075 | 2.13E-38 | -0.26435 | 6.60E-09 | -0.30101 | 3.09E-11 | -0.36877 |
| 0.809544 | #####    | 0.557482 | 1.73E-39 | 0.482823 | 1.20E-28 | 0.400951 | 1.83E-19 | 0.373606 |
| 0.494786 | 3.30E-30 | 0.508675 | 4.22E-32 | 0.286996 | 2.64E-10 | 0.425142 | 6.39E-22 | 0.535262 |
| 0.673256 | 5.89E-63 | 0.554484 | 5.33E-39 | 0.468296 | 7.88E-27 | 0.2887   | 2.04E-10 | 0.239358 |
| 0.579791 | 2.71E-43 | 0.562859 | 2.22E-40 | 0.426402 | 4.70E-22 | 0.318106 | 1.93E-12 | 0.469965 |
| 0.407726 | 3.94E-20 | 0.165099 | 0.00034  | 0.120958 | 0.00888  | 0.291221 | 1.40E-10 | 0.003123 |
| 0.577947 | 5.74E-43 | 0.613089 | 1.51E-49 | 0.465979 | 1.51E-26 | 0.531736 | 1.92E-35 | 0.562914 |
| 0.417779 | 3.76E-21 | 0.210298 | 4.57E-06 | 0.196678 | 1.86E-05 | 0.447446 | 2.27E-24 | 0.424041 |
| 0.480445 | 2.42E-28 | 0.577553 | 6.73E-43 | 0.320761 | 1.23E-12 | 0.4177   | 3.83E-21 | 0.384112 |
| -0.36999 | 1.35E-16 | -0.57393 | 2.89E-42 | -0.4388  | 2.12E-23 | -0.32604 | 5.00E-13 | -0.44929 |
| 0.424561 | 7.35E-22 | 0.188172 | 4.27E-05 | 0.191508 | 3.10E-05 | 0.432126 | 1.14E-22 | 0.359617 |
| 0.71184  | 2.29E-73 | 0.562351 | 2.70E-40 | 0.413637 | 9.98E-21 | 0.442274 | 8.71E-24 | 0.468972 |
| 0.585515 | 2.56E-44 | 0.408125 | 3.59E-20 | 0.141207 | 0.00222  | 0.324703 | 6.30E-13 | 0.449788 |
| 0.717829 | 3.87E-75 | 0.480262 | 2.55E-28 | 0.320129 | 1.37E-12 | 0.431607 | 1.30E-22 | 0.394735 |
| 0.723575 | 6.99E-77 | 0.483252 | 1.06E-28 | 0.169596 | 0.00023  | 0.520389 | 9.13E-34 | 0.542609 |
| 0.678072 | 3.61E-64 | 0.698795 | 1.16E-69 | 0.526074 | 1.34E-34 | 0.471974 | 2.79E-27 | 0.57727  |
| 0.310662 | 6.60E-12 | 0.578147 | 5.29E-43 | 0.311916 | 5.38E-12 | 0.164623 | 0.00035  | 0.307206 |
| 0.726568 | 8.29E-78 | 0.698892 | 1.09E-69 | 0.467731 | 9.24E-27 | 0.488526 | 2.21E-29 | 0.664673 |
| 0.552327 | 1.19E-38 | 0.707901 | 3.17E-72 | 0.49179  | 8.23E-30 | 0.493458 | 4.95E-30 | 0.70136  |
| 0.804728 | #####    | 0.689658 | 3.50E-67 | 0.511568 | 1.66E-32 | 0.555777 | 3.28E-39 | 0.61987  |
| -0.45586 | 2.42E-25 | -0.30692 | 1.21E-11 | -0.30068 | 3.26E-11 | -0.45112 | 8.61E-25 | -0.38746 |
| 0.546702 | 9.43E-38 | 0.409737 | 2.48E-20 | 0.228526 | 5.99E-07 | 0.441995 | 9.36E-24 | 0.438889 |
| 0.571434 | 7.80E-42 | 0.423733 | 8.99E-22 | 0.299432 | 3.96E-11 | 0.289369 | 1.85E-10 | 0.295249 |
| 0.37701  | 3.21E-17 | 0.348112 | 9.47E-15 | 0.217851 | 2.01E-06 | 0.281868 | 5.61E-10 | 0.387912 |
| 0.611509 | 3.11E-49 | 0.526971 | 9.90E-35 | 0.405094 | 7.19E-20 | 0.401769 | 1.53E-19 | 0.33185  |
| 0.715804 | 1.56E-74 | 0.584494 | 3.92E-44 | 0.372321 | 8.39E-17 | 0.423116 | 1.04E-21 | 0.48613  |
| 0.714543 | 3.68E-74 | 0.738433 | 1.33E-81 | 0.608924 | 1.00E-48 | 0.56311  | 2.02E-40 | 0.727109 |
| 0.337046 | 7.20E-14 | 0.397701 | 3.79E-19 | 0.159018 | 0.00056  | 0.357007 | 1.75E-15 | 0.498904 |
| 0.807098 | #####    | 0.786329 | 2.62E-99 | 0.599409 | 6.88E-47 | 0.592248 | 1.51E-45 | 0.70196  |
| -0.34808 | 9.53E-15 | -0.36617 | 2.90E-16 | -0.25808 | 1.53E-08 | -0.22035 | 1.52E-06 | -0.36538 |
| 0.541746 | 5.65E-37 | 0.627934 | 1.39E-52 | 0.359501 | 1.08E-15 | 0.344783 | 1.76E-14 | 0.544189 |
| 0.284232 | 3.97E-10 | 0.221345 | 1.36E-06 | 0.008175 | 0.86015  | 0.11435  | 0.01341  | 0.108458 |
| 0.671029 | 2.10E-62 | 0.784522 | 1.47E-98 | 0.605581 | 4.51E-48 | 0.50505  | 1.34E-31 | 0.605203 |
| 0.32478  | 6.21E-13 | 0.271617 | 2.42E-09 | 0.245527 | 7.69E-08 | 0.214575 | 2.88E-06 | 0.302673 |
| 0.450092 | 1.13E-24 | 0.550369 | 2.46E-38 | 0.313443 | 4.18E-12 | 0.351169 | 5.33E-15 | 0.331862 |
| 0.403449 | 1.04E-19 | 0.259598 | 1.25E-08 | 0.071142 | 0.12473  | 0.380577 | 1.53E-17 | 0.273096 |
| 0.724078 | 4.89E-77 | 0.67295  | 7.02E-63 | 0.489609 | 1.59E-29 | 0.444626 | 4.74E-24 | 0.505857 |

|          |          |          |          |          |          |          |          |          |
|----------|----------|----------|----------|----------|----------|----------|----------|----------|
| 0.429491 | 2.20E-22 | 0.562158 | 2.91E-40 | 0.287928 | 2.29E-10 | 0.436445 | 3.86E-23 | 0.556342 |
| 0.607842 | 1.64E-48 | 0.561808 | 3.32E-40 | 0.484647 | 7.02E-29 | 0.36799  | 2.01E-16 | 0.441913 |
| 0.687707 | 1.15E-66 | 0.735325 | 1.37E-80 | 0.615087 | 6.02E-50 | 0.389262 | 2.41E-18 | 0.412139 |
| 0.555267 | 3.97E-39 | 0.472891 | 2.15E-27 | 0.319617 | 1.50E-12 | 0.406954 | 4.70E-20 | 0.474357 |
| -0.19569 | 2.05E-05 | -0.31874 | 1.73E-12 | -0.16598 | 0.00032  | -0.15507 | 0.00077  | -0.25141 |
| 0.361796 | 6.88E-16 | 0.375294 | 4.57E-17 | 0.275092 | 1.49E-09 | 0.283584 | 4.36E-10 | 0.256579 |
| 0.254671 | 2.39E-08 | 0.3817   | 1.20E-17 | 0.213353 | 3.29E-06 | 0.305407 | 1.54E-11 | 0.368646 |
| 0.321965 | 1.01E-12 | 0.317057 | 2.30E-12 | 0.174823 | 0.00015  | 0.361608 | 7.14E-16 | 0.453329 |
| 0.68979  | 3.23E-67 | 0.601547 | 2.69E-47 | 0.41936  | 2.58E-21 | 0.501684 | 3.88E-31 | 0.629348 |
| 0.592169 | 1.56E-45 | 0.599484 | 6.65E-47 | 0.461863 | 4.71E-26 | 0.334149 | 1.21E-13 | 0.368538 |
| 0.480797 | 2.18E-28 | 0.384625 | 6.49E-18 | 0.073407 | 0.11314  | 0.347622 | 1.04E-14 | 0.321209 |
| -0.21826 | 1.92E-06 | -0.34469 | 1.79E-14 | -0.30019 | 3.52E-11 | -0.16304 | 0.0004   | -0.22388 |
| 0.405125 | 7.14E-20 | 0.173565 | 0.00016  | 0.00777  | 0.867    | 0.254834 | 2.34E-08 | 0.181976 |
| 0.714128 | 4.88E-74 | 0.769165 | 1.80E-92 | 0.594206 | 6.53E-46 | 0.412547 | 1.29E-20 | 0.467622 |
| 0.370667 | 1.17E-16 | 0.486573 | 3.96E-29 | 0.280619 | 6.72E-10 | 0.293951 | 9.23E-11 | 0.53427  |
| 0.588721 | 6.71E-45 | 0.566074 | 6.40E-41 | 0.50841  | 4.60E-32 | 0.316875 | 2.37E-12 | 0.304444 |
| 0.559605 | 7.71E-40 | 0.573435 | 3.52E-42 | 0.361403 | 7.43E-16 | 0.467565 | 9.68E-27 | 0.525343 |
| 0.777234 | 1.31E-95 | 0.531783 | 1.89E-35 | 0.419913 | 2.26E-21 | 0.488927 | 1.96E-29 | 0.444289 |
| 0.11012  | 0.01729  | -0.06029 | 0.19341  | 0.120764 | 0.00899  | -0.05754 | 0.21454  | -0.07011 |
| 0.539681 | 1.18E-36 | 0.259345 | 1.29E-08 | 0.417618 | 3.90E-21 | 0.27711  | 1.11E-09 | 0.268386 |
| 0.561898 | 3.21E-40 | 0.302075 | 2.61E-11 | 0.344063 | 2.01E-14 | 0.439082 | 1.98E-23 | 0.523093 |
| 0.553047 | 9.11E-39 | 0.124458 | 0.00708  | 0.323299 | 8.01E-13 | 0.254195 | 2.54E-08 | 0.264829 |
| 0.178998 | 0.0001   | -0.14651 | 0.0015   | -0.05222 | 0.26003  | 0.03034  | 0.51308  | -0.0738  |
| 0.23264  | 3.70E-07 | 0.100373 | 0.0301   | 0.24534  | 7.88E-08 | -0.06605 | 0.15416  | -0.00065 |
| 0.33077  | 2.19E-13 | 0.168152 | 0.00026  | 0.431995 | 1.18E-22 | 0.160895 | 0.00048  | 0.137955 |
| 0.426384 | 4.72E-22 | 0.406441 | 5.28E-20 | 0.424932 | 6.72E-22 | 0.310423 | 6.86E-12 | 0.263026 |
| 0.562491 | 2.56E-40 | 0.392534 | 1.18E-18 | 0.613237 | 1.41E-49 | 0.206599 | 6.75E-06 | 0.116501 |
| 0.466305 | 1.38E-26 | 0.177586 | 0.00011  | 0.217877 | 2.00E-06 | 0.260116 | 1.17E-08 | 0.272239 |
| 0.192537 | 2.80E-05 | -0.12954 | 0.00505  | 0.085613 | 0.06452  | 0.062848 | 0.17514  | -0.01486 |
| 0.536721 | 3.37E-36 | 0.307313 | 1.14E-11 | 0.495591 | 2.58E-30 | 0.227965 | 6.40E-07 | 0.167982 |
| 0.26063  | 1.09E-08 | 0.246305 | 6.98E-08 | 0.296164 | 6.57E-11 | 0.274403 | 1.64E-09 | 0.270633 |
| 0.67806  | 3.64E-64 | 0.533097 | 1.20E-35 | 0.690356 | 2.28E-67 | 0.429451 | 2.22E-22 | 0.42007  |
| 0.404842 | 7.61E-20 | 0.29263  | 1.13E-10 | 0.489759 | 1.52E-29 | 0.255795 | 2.06E-08 | 0.213876 |
| 0.515835 | 4.13E-33 | 0.212227 | 3.71E-06 | 0.489102 | 1.85E-29 | 0.195436 | 2.11E-05 | 0.042606 |
| 0.300413 | 3.40E-11 | -0.08857 | 0.0558   | 0.176885 | 0.00012  | 0.090743 | 0.05002  | -0.12487 |
| 0.499518 | 7.64E-31 | 0.289042 | 1.94E-10 | 0.335346 | 9.76E-14 | 0.404448 | 8.33E-20 | 0.386583 |
| 0.499795 | 7.01E-31 | 0.319787 | 1.45E-12 | 0.36357  | 4.85E-16 | 0.339662 | 4.49E-14 | 0.356995 |
| 0.535894 | 4.51E-36 | 0.381094 | 1.37E-17 | 0.570503 | 1.13E-41 | 0.294092 | 9.04E-11 | 0.117288 |
| 0.561406 | 3.88E-40 | 0.328934 | 3.03E-13 | 0.336747 | 7.60E-14 | 0.357447 | 1.61E-15 | 0.391306 |
| 0.615207 | 5.70E-50 | 0.410959 | 1.87E-20 | 0.578978 | 3.77E-43 | 0.31669  | 2.44E-12 | 0.279009 |
| -0.55702 | 2.05E-39 | -0.45866 | 1.13E-25 | -0.62357 | 1.13E-51 | -0.27512 | 1.48E-09 | -0.37534 |
| 0.436826 | 3.51E-23 | 0.156223 | 0.0007   | 0.119227 | 0.00991  | 0.107587 | 0.02005  | 0.132837 |
| 0.223743 | 1.04E-06 | -0.11838 | 0.01045  | 0.207782 | 5.96E-06 | -0.06372 | 0.16922  | -0.22145 |
| 0.136415 | 0.00314  | -0.01485 | 0.74895  | 0.058856 | 0.20423  | 0.010728 | 0.81714  | -0.08035 |
| 0.316604 | 2.48E-12 | 0.238254 | 1.89E-07 | 0.480482 | 2.39E-28 | 0.11038  | 0.01702  | 0.263603 |

|          |          |          |          |          |          |          |          |          |
|----------|----------|----------|----------|----------|----------|----------|----------|----------|
| 0.627009 | 2.17E-52 | 0.460408 | 7.03E-26 | 0.599359 | 7.03E-47 | 0.388604 | 2.77E-18 | 0.521735 |
| 0.443774 | 5.91E-24 | 0.401759 | 1.53E-19 | 0.503362 | 2.29E-31 | 0.135936 | 0.00325  | 0.267823 |
| 0.627026 | 2.16E-52 | 0.409553 | 2.58E-20 | 0.255259 | 2.21E-08 | 0.481399 | 1.83E-28 | 0.483957 |
| 0.617143 | 2.32E-50 | 0.642944 | 7.98E-56 | 0.738152 | 1.64E-81 | 0.367476 | 2.23E-16 | 0.436026 |
| 0.303314 | 2.15E-11 | 0.322168 | 9.71E-13 | 0.545769 | 1.32E-37 | 0.167486 | 0.00028  | 0.165305 |
| 0.50252  | 2.99E-31 | 0.123558 | 0.00751  | 0.341786 | 3.05E-14 | 0.107696 | 0.01992  | 0.074195 |
| 0.349442 | 7.38E-15 | 0.12761  | 0.00575  | 0.143084 | 0.00194  | 0.122287 | 0.00816  | 0.082929 |
| 0.243747 | 9.61E-08 | -0.037   | 0.42507  | 0.272271 | 2.21E-09 | 0.028163 | 0.54379  | -0.11324 |
| 0.079111 | 0.08769  | -0.22382 | 1.03E-06 | -0.10056 | 0.0298   | -0.04535 | 0.32812  | -0.29507 |
| 0.639479 | 4.64E-55 | 0.446701 | 2.76E-24 | 0.613441 | 1.29E-49 | 0.264703 | 6.29E-09 | 0.194067 |
| 0.464278 | 2.42E-26 | 0.518659 | 1.62E-33 | 0.338129 | 5.92E-14 | 0.438834 | 2.10E-23 | 0.509919 |
| 0.59494  | 4.77E-46 | 0.266392 | 4.99E-09 | 0.25431  | 2.51E-08 | 0.232588 | 3.72E-07 | 0.237228 |
| -0.45314 | 5.02E-25 | -0.44876 | 1.61E-24 | -0.60127 | 3.05E-47 | -0.30208 | 2.61E-11 | -0.44175 |
| 0.571183 | 8.62E-42 | 0.360919 | 8.17E-16 | 0.624105 | 8.75E-52 | 0.182124 | 7.55E-05 | 0.167209 |
| 0.698467 | 1.43E-69 | 0.422058 | 1.35E-21 | 0.43953  | 1.76E-23 | 0.436715 | 3.61E-23 | 0.515395 |
| 0.667983 | 1.18E-61 | 0.400532 | 2.02E-19 | 0.368798 | 1.71E-16 | 0.391848 | 1.37E-18 | 0.31974  |
| 0.690887 | 1.65E-67 | 0.445258 | 4.02E-24 | 0.566389 | 5.66E-41 | 0.296585 | 6.16E-11 | 0.252402 |
| 0.569376 | 1.76E-41 | 0.213509 | 3.23E-06 | 0.332677 | 1.57E-13 | 0.534552 | 7.22E-36 | 0.141198 |
| 0.495383 | 2.75E-30 | 0.221087 | 1.40E-06 | 0.343939 | 2.05E-14 | 0.201319 | 1.17E-05 | -0.00995 |
| 0.690806 | 1.73E-67 | 0.551548 | 1.59E-38 | 0.654979 | 1.48E-58 | 0.29616  | 6.58E-11 | 0.281299 |
| 0.487654 | 2.87E-29 | 0.429284 | 2.31E-22 | 0.384906 | 6.12E-18 | 0.250448 | 4.13E-08 | 0.264233 |
| 0.120382 | 0.00921  | -0.16755 | 0.00028  | 0.08539  | 0.06522  | -0.19612 | 1.97E-05 | -0.21917 |
| 0.602722 | 1.60E-47 | 0.367261 | 2.33E-16 | 0.432723 | 9.84E-23 | 0.25294  | 2.99E-08 | 0.324007 |
| 0.568312 | 2.67E-41 | 0.36689  | 2.51E-16 | 0.464199 | 2.47E-26 | 0.294054 | 9.09E-11 | 0.342985 |
| 0.60403  | 8.99E-48 | 0.401481 | 1.63E-19 | 0.318519 | 1.80E-12 | 0.390605 | 1.80E-18 | 0.499325 |
| 0.412874 | 1.19E-20 | -0.01915 | 0.67973  | 0.283702 | 4.29E-10 | -0.04105 | 0.37615  | -0.32525 |
| 0.300501 | 3.35E-11 | 0.204853 | 8.10E-06 | 0.097974 | 0.03429  | 0.191848 | 3.00E-05 | 0.019948 |
| 0.107161 | 0.02055  | 0.103881 | 0.02477  | 0.118676 | 0.01026  | 0.073046 | 0.11493  | 0.11943  |
| 0.492951 | 5.78E-30 | 0.113921 | 0.01377  | 0.30212  | 2.60E-11 | 0.137898 | 0.00282  | 0.080936 |
| 0.12874  | 0.00533  | -0.26606 | 5.23E-09 | -0.16897 | 0.00024  | -0.06172 | 0.18305  | -0.20979 |
| 0.502059 | 3.45E-31 | 0.272209 | 2.23E-09 | 0.416767 | 4.77E-21 | 0.142959 | 0.00195  | 0.030598 |
| 0.487297 | 3.19E-29 | 0.278185 | 9.56E-10 | 0.543299 | 3.23E-37 | 0.121437 | 0.00861  | 0.062338 |
| 0.600435 | 4.39E-47 | 0.375815 | 4.10E-17 | 0.401391 | 1.66E-19 | 0.29716  | 5.64E-11 | 0.220416 |
| 0.233138 | 3.49E-07 | -0.04989 | 0.28193  | 0.185915 | 5.30E-05 | -0.00492 | 0.91549  | -0.01232 |
| 0.328435 | 3.30E-13 | 0.183818 | 6.45E-05 | 0.202541 | 1.03E-05 | 0.314257 | 3.66E-12 | 0.274476 |
| 0.646798 | 1.10E-56 | 0.429234 | 2.34E-22 | 0.613432 | 1.29E-49 | 0.321848 | 1.03E-12 | 0.170298 |
| -0.50639 | 8.77E-32 | -0.26785 | 4.09E-09 | -0.43238 | 1.07E-22 | -0.20036 | 1.29E-05 | -0.19299 |
| 0.645179 | 2.53E-56 | 0.374292 | 5.61E-17 | 0.291217 | 1.40E-10 | 0.425635 | 5.66E-22 | 0.418387 |
| 0.393372 | 9.85E-19 | 0.153483 | 0.00088  | 0.329341 | 2.82E-13 | 0.050224 | 0.27876  | -0.13979 |
| 0.308872 | 8.82E-12 | -0.0137  | 0.76772  | 0.065467 | 0.15781  | 0.10765  | 0.01997  | -0.07144 |
| 0.384685 | 6.41E-18 | 0.289273 | 1.88E-10 | 0.303967 | 1.94E-11 | 0.213209 | 3.34E-06 | 0.144331 |
| 0.171367 | 0.0002   | -0.15957 | 0.00054  | 0.127046 | 0.00597  | -0.05077 | 0.27355  | -0.07944 |
| -0.33721 | 6.99E-14 | -0.23207 | 3.96E-07 | -0.38418 | 7.14E-18 | -0.08874 | 0.05533  | -0.20093 |
| 0.415034 | 7.19E-21 | 0.406185 | 5.60E-20 | 0.497265 | 1.54E-30 | 0.365694 | 3.19E-16 | 0.425668 |
| 0.435094 | 5.43E-23 | 0.369957 | 1.36E-16 | 0.618776 | 1.08E-50 | 0.175302 | 0.00014  | 0.118644 |

|          |          |          |          |          |          |          |          |          |
|----------|----------|----------|----------|----------|----------|----------|----------|----------|
| 0.381664 | 1.21E-17 | 0.020618 | 0.65674  | 0.234319 | 3.03E-07 | 0.013083 | 0.77796  | -0.04433 |
| 0.291163 | 1.41E-10 | -0.12908 | 0.00521  | 0.100384 | 0.03008  | 0.055875 | 0.22814  | -0.15009 |
| 0.475817 | 9.27E-28 | 0.445588 | 3.69E-24 | 0.662201 | 2.94E-60 | 0.257471 | 1.66E-08 | 0.166417 |
| 0.704911 | 2.26E-71 | 0.595424 | 3.87E-46 | 0.626551 | 2.71E-52 | 0.294262 | 8.80E-11 | 0.292029 |
| 0.221231 | 1.38E-06 | -0.07449 | 0.10789  | 0.069657 | 0.13281  | -0.08561 | 0.06453  | -0.10844 |
| 0.166228 | 0.00031  | 0.061432 | 0.18509  | 0.05189  | 0.2631   | 0.103316 | 0.02557  | 0.118387 |
| -0.03599 | 0.43781  | -0.27246 | 2.15E-09 | -0.21554 | 2.59E-06 | -0.0982  | 0.03387  | -0.17487 |
| 0.519787 | 1.12E-33 | 0.290791 | 1.49E-10 | 0.472863 | 2.16E-27 | 0.118986 | 0.01007  | 0.119219 |
| 0.521037 | 7.35E-34 | 0.442772 | 7.66E-24 | 0.531572 | 2.04E-35 | 0.155565 | 0.00074  | 0.057966 |
| 0.616479 | 3.16E-50 | 0.312056 | 5.25E-12 | 0.324884 | 6.10E-13 | 0.412486 | 1.31E-20 | 0.519698 |
| 0.183345 | 6.74E-05 | -0.04318 | 0.35186  | 0.117994 | 0.01071  | -0.14517 | 0.00166  | -0.27729 |
| 0.353867 | 3.19E-15 | 0.097449 | 0.03527  | 0.226824 | 7.30E-07 | 0.146392 | 0.00151  | 0.169097 |
| 0.504288 | 1.71E-31 | 0.391983 | 1.33E-18 | 0.374501 | 5.38E-17 | 0.346589 | 1.26E-14 | 0.374424 |
| 0.514302 | 6.82E-33 | 0.252227 | 3.28E-08 | 0.415257 | 6.82E-21 | 0.316735 | 2.42E-12 | 0.394676 |
| 0.50414  | 1.79E-31 | 0.202247 | 1.06E-05 | 0.439695 | 1.69E-23 | 0.247563 | 5.95E-08 | 0.14644  |
| 0.584887 | 3.33E-44 | 0.222442 | 1.20E-06 | 0.401504 | 1.62E-19 | 0.202036 | 1.08E-05 | 0.151948 |
| 0.232882 | 3.59E-07 | -0.09579 | 0.03853  | -0.01197 | 0.79649  | 0.040927 | 0.37754  | -0.01242 |
| 0.416886 | 4.64E-21 | 0.199792 | 1.36E-05 | 0.329722 | 2.64E-13 | 0.187034 | 4.76E-05 | 0.103045 |
| 0.593235 | 9.90E-46 | 0.200498 | 1.27E-05 | 0.375151 | 4.70E-17 | 0.201877 | 1.10E-05 | 0.071142 |
| 0.496094 | 2.21E-30 | 0.323354 | 7.93E-13 | 0.234956 | 2.81E-07 | 0.362378 | 6.14E-16 | 0.259775 |
| 0.204518 | 8.39E-06 | -0.12764 | 0.00574  | 0.025423 | 0.58368  | 0.018936 | 0.68317  | -0.05599 |
| 0.20793  | 5.87E-06 | -0.2323  | 3.85E-07 | -0.00263 | 0.95482  | 0.010029 | 0.82886  | -0.27617 |
| 0.417273 | 4.24E-21 | 0.106349 | 0.02153  | 0.262911 | 8.02E-09 | 0.201814 | 1.11E-05 | 0.089468 |
| 0.628785 | 9.21E-53 | 0.251036 | 3.83E-08 | 0.392422 | 1.21E-18 | 0.350666 | 5.86E-15 | 0.229601 |
| 0.29454  | 8.44E-11 | 0.343908 | 2.07E-14 | 0.516132 | 3.74E-33 | 0.180758 | 8.56E-05 | 0.181383 |
| 0.520949 | 7.57E-34 | 0.380297 | 1.62E-17 | 0.568984 | 2.05E-41 | 0.313126 | 4.41E-12 | 0.266622 |
| 0.596135 | 2.85E-46 | 0.275912 | 1.32E-09 | 0.347958 | 9.74E-15 | 0.347509 | 1.06E-14 | 0.2192   |
| 0.530152 | 3.33E-35 | 0.118977 | 0.01007  | 0.257816 | 1.58E-08 | 0.235023 | 2.79E-07 | 0.212659 |
| 0.526301 | 1.24E-34 | 0.119226 | 0.00991  | 0.195434 | 2.11E-05 | 0.25289  | 3.01E-08 | 0.212814 |
| 0.356567 | 1.90E-15 | 0.153739 | 0.00086  | 0.227856 | 6.48E-07 | 0.149113 | 0.00123  | 0.208813 |
| 0.226443 | 7.62E-07 | -0.0538  | 0.24591  | 0.167446 | 0.00028  | -0.14039 | 0.00236  | -0.06084 |
| 0.382684 | 9.79E-18 | 0.094845 | 0.04049  | 0.155728 | 0.00073  | 0.138067 | 0.00279  | -0.12556 |
| 0.38141  | 1.28E-17 | 0.14305  | 0.00194  | 0.224284 | 9.76E-07 | 0.194198 | 2.38E-05 | 0.16141  |
| 0.172386 | 0.00018  | 0.01542  | 0.73962  | 0.045456 | 0.327    | 0.206651 | 6.72E-06 | 0.144967 |
| 0.371835 | 9.27E-17 | 0.13226  | 0.0042   | 0.493853 | 4.39E-30 | 0.153681 | 0.00086  | -0.00591 |
| 0.435535 | 4.86E-23 | 0.107637 | 0.01999  | 0.181411 | 8.06E-05 | 0.180672 | 8.63E-05 | 0.215055 |
| 0.622    | 2.38E-51 | 0.283079 | 4.70E-10 | 0.47076  | 3.93E-27 | 0.316755 | 2.42E-12 | 0.278529 |
| 0.461113 | 5.79E-26 | 0.262316 | 8.69E-09 | 0.228455 | 6.04E-07 | 0.290935 | 1.46E-10 | 0.274569 |
| -0.46541 | 1.77E-26 | -0.33351 | 1.35E-13 | -0.50161 | 3.98E-31 | -0.24493 | 8.29E-08 | -0.31204 |
| 0.479893 | 2.84E-28 | -0.06855 | 0.1391   | 0.070945 | 0.12578  | 0.129376 | 0.00511  | -0.02647 |
| -0.49964 | 7.36E-31 | -0.44245 | 8.32E-24 | -0.45445 | 3.53E-25 | -0.34576 | 1.47E-14 | -0.52404 |
| 0.617269 | 2.19E-50 | 0.352612 | 4.05E-15 | 0.400813 | 1.89E-19 | 0.260887 | 1.05E-08 | 0.300576 |
| 0.674861 | 2.34E-63 | 0.45941  | 9.23E-26 | 0.49681  | 1.77E-30 | 0.395908 | 5.64E-19 | 0.396172 |
| 0.557924 | 1.46E-39 | 0.560655 | 5.17E-40 | 0.337333 | 6.84E-14 | 0.445176 | 4.11E-24 | 0.481922 |
| 0.544576 | 2.04E-37 | 0.403142 | 1.12E-19 | 0.430599 | 1.67E-22 | 0.190654 | 3.37E-05 | 0.128355 |



|          |          |          |          |          |          |          |          |          |
|----------|----------|----------|----------|----------|----------|----------|----------|----------|
| 0.732204 | 1.38E-79 | 0.408846 | 3.04E-20 | 0.309988 | 7.36E-12 | 0.449841 | 1.21E-24 | 0.360175 |
| 0.221229 | 1.38E-06 | 0.084304 | 0.06873  | 0.167066 | 0.00029  | 0.017693 | 0.70294  | -0.05028 |
| 0.639248 | 5.21E-55 | 0.605633 | 4.40E-48 | 0.745887 | 4.29E-84 | 0.316944 | 2.34E-12 | 0.320284 |
| 0.614617 | 7.48E-50 | 0.590833 | 2.75E-45 | 0.750278 | 1.33E-85 | 0.342497 | 2.68E-14 | 0.424986 |
| 0.535828 | 4.62E-36 | 0.448709 | 1.63E-24 | 0.635375 | 3.62E-54 | 0.309167 | 8.41E-12 | 0.221064 |
| 0.369394 | 1.52E-16 | 0.091848 | 0.04729  | 0.142151 | 0.00207  | 0.009535 | 0.83718  | -0.09423 |
| 0.437372 | 3.05E-23 | 0.320386 | 1.31E-12 | 0.506813 | 7.66E-32 | 0.136173 | 0.00319  | 0.081904 |
| 0.686851 | 1.94E-66 | 0.530014 | 3.49E-35 | 0.6039   | 9.52E-48 | 0.30676  | 1.24E-11 | 0.174091 |
| 0.619475 | 7.82E-51 | 0.53562  | 4.97E-36 | 0.508621 | 4.30E-32 | 0.450578 | 9.93E-25 | 0.485366 |
| 0.223314 | 1.09E-06 | 0.146429 | 0.00151  | 0.177036 | 0.00012  | -0.06297 | 0.17433  | -0.03903 |
| 0.566565 | 5.29E-41 | 0.204493 | 8.41E-06 | 0.458402 | 1.22E-25 | 0.138515 | 0.0027   | 0.140478 |
| 0.3957   | 5.90E-19 | 0.167202 | 0.00028  | 0.539975 | 1.06E-36 | 0.108878 | 0.01859  | -0.05685 |
| 0.665887 | 3.81E-61 | 0.492875 | 5.92E-30 | 0.541963 | 5.23E-37 | 0.336397 | 8.09E-14 | 0.287735 |
| 0.566423 | 5.59E-41 | 0.401393 | 1.66E-19 | 0.518132 | 1.93E-33 | 0.188747 | 4.05E-05 | 0.168927 |
| 0.484774 | 6.76E-29 | 0.286991 | 2.64E-10 | 0.383403 | 8.41E-18 | 0.249111 | 4.89E-08 | 0.150269 |
| 0.280786 | 6.56E-10 | -0.0792  | 0.08734  | 0.159949 | 0.00052  | 0.09278  | 0.04508  | 0.033254 |
| -0.34082 | 3.63E-14 | -0.29158 | 1.32E-10 | -0.43385 | 7.41E-23 | -0.21956 | 1.66E-06 | -0.39374 |
| 0.4631   | 3.35E-26 | 0.381725 | 1.20E-17 | 0.537122 | 2.93E-36 | 0.190226 | 3.51E-05 | 0.02201  |
| 0.171473 | 0.0002   | -0.06727 | 0.14664  | 0.075562 | 0.10292  | -0.17147 | 0.0002   | -0.25386 |
| 0.386842 | 4.05E-18 | 0.023918 | 0.60616  | 0.183228 | 6.81E-05 | 0.082225 | 0.07587  | 0.088166 |
| 0.46803  | 8.49E-27 | 0.558617 | 1.12E-39 | 0.547438 | 7.21E-38 | 0.445007 | 4.29E-24 | 0.46177  |
| 0.411169 | 1.78E-20 | 0.244964 | 8.26E-08 | 0.599645 | 6.20E-47 | 0.108293 | 0.01924  | -0.00592 |
| 0.217797 | 2.02E-06 | -0.00509 | 0.91259  | 0.096514 | 0.03707  | 0.057572 | 0.2143   | -0.02698 |
| 0.408923 | 2.99E-20 | 0.256153 | 1.97E-08 | 0.451521 | 7.73E-25 | 0.26312  | 7.79E-09 | 0.356047 |
| 0.674653 | 2.64E-63 | 0.346782 | 1.21E-14 | 0.365005 | 3.65E-16 | 0.418051 | 3.52E-21 | 0.347406 |
| 0.454466 | 3.52E-25 | 0.081784 | 0.07746  | 0.341933 | 2.97E-14 | 0.096107 | 0.03788  | -0.09579 |
| 0.380825 | 1.45E-17 | 0.23684  | 2.24E-07 | 0.304484 | 1.79E-11 | 0.219691 | 1.64E-06 | 0.17592  |
| -0.04023 | 0.38571  | -0.09404 | 0.04224  | -0.02947 | 0.52526  | -0.02066 | 0.65603  | -0.10793 |
| 0.62056  | 4.69E-51 | 0.449608 | 1.28E-24 | 0.448584 | 1.68E-24 | 0.360033 | 9.72E-16 | 0.484769 |
| 0.451289 | 8.23E-25 | 0.23389  | 3.19E-07 | 0.085325 | 0.06543  | 0.231028 | 4.47E-07 | 0.305888 |
| 0.310449 | 6.83E-12 | 0.078313 | 0.09095  | 0.152899 | 0.00092  | 0.286367 | 2.89E-10 | 0.157392 |
| 0.5618   | 3.33E-40 | 0.379008 | 2.12E-17 | 0.48068  | 2.26E-28 | 0.3989   | 2.90E-19 | 0.191978 |
| 0.574629 | 2.18E-42 | 0.342107 | 2.88E-14 | 0.683679 | 1.31E-65 | 0.244352 | 8.91E-08 | 0.171676 |
| 0.539317 | 1.34E-36 | 0.181834 | 7.75E-05 | 0.336923 | 7.36E-14 | 0.197603 | 1.70E-05 | 0.265142 |
| 0.485825 | 4.95E-29 | 0.375695 | 4.21E-17 | 0.415161 | 6.98E-21 | 0.252955 | 2.99E-08 | 0.320213 |
| 0.342802 | 2.53E-14 | 0.072515 | 0.1176   | 0.267655 | 4.20E-09 | 0.086818 | 0.06084  | -0.03028 |
| 0.397326 | 4.12E-19 | 0.103601 | 0.02516  | 0.202514 | 1.03E-05 | 0.190417 | 3.44E-05 | 0.232532 |
| -0.53484 | 6.54E-36 | -0.49179 | 8.23E-30 | -0.54633 | 1.08E-37 | -0.30423 | 1.86E-11 | -0.51197 |
| 0.550283 | 2.54E-38 | 0.111151 | 0.01626  | 0.465241 | 1.85E-26 | 0.143778 | 0.00184  | -0.05036 |
| 0.449633 | 1.28E-24 | 0.561991 | 3.10E-40 | 0.734634 | 2.30E-80 | 0.32177  | 1.04E-12 | 0.348396 |
| 0.492261 | 7.13E-30 | 0.349257 | 7.64E-15 | 0.571487 | 7.64E-42 | 0.165044 | 0.00034  | 0.143212 |
| 0.391478 | 1.49E-18 | 0.078957 | 0.08831  | 0.20642  | 6.88E-06 | 0.032106 | 0.48886  | 0.048176 |
| 0.366655 | 2.63E-16 | 0.25552  | 2.14E-08 | 0.384973 | 6.03E-18 | 0.023955 | 0.6056   | -0.12983 |
| 0.531303 | 2.24E-35 | 0.194733 | 2.26E-05 | 0.282595 | 5.04E-10 | 0.174562 | 0.00015  | 0.085191 |
| 0.684394 | 8.53E-66 | 0.46394  | 2.66E-26 | 0.738137 | 1.66E-81 | 0.323303 | 8.00E-13 | 0.190321 |

|          |          |          |          |          |          |          |          |          |
|----------|----------|----------|----------|----------|----------|----------|----------|----------|
| 0.601762 | 2.45E-47 | 0.429081 | 2.43E-22 | 0.653879 | 2.65E-58 | 0.344932 | 1.71E-14 | 0.298852 |
| 0.544519 | 2.08E-37 | 0.306454 | 1.30E-11 | 0.235566 | 2.61E-07 | 0.255451 | 2.16E-08 | 0.22881  |
| 0.447734 | 2.10E-24 | 0.341166 | 3.41E-14 | 0.308984 | 8.67E-12 | 0.297039 | 5.74E-11 | 0.181198 |
| 0.62269  | 1.72E-51 | 0.529231 | 4.57E-35 | 0.608246 | 1.36E-48 | 0.378615 | 2.30E-17 | 0.417233 |
| 0.286091 | 3.01E-10 | 0.16638  | 0.0003   | 0.332844 | 1.52E-13 | 0.111908 | 0.01554  | -0.06468 |
| 0.699878 | 5.83E-70 | 0.424213 | 8.00E-22 | 0.618734 | 1.11E-50 | 0.353573 | 3.38E-15 | 0.358071 |
| 0.408942 | 2.97E-20 | 0.428724 | 2.65E-22 | 0.332013 | 1.76E-13 | 0.323453 | 7.80E-13 | 0.593441 |
| 0.426609 | 4.46E-22 | 0.206063 | 7.14E-06 | 0.365628 | 3.23E-16 | 0.032897 | 0.4782   | -0.12182 |
| 0.52738  | 8.61E-35 | 0.21084  | 4.31E-06 | 0.308799 | 8.93E-12 | 0.227117 | 7.06E-07 | 0.157275 |
| 0.630956 | 3.20E-53 | 0.389252 | 2.41E-18 | 0.527104 | 9.47E-35 | 0.325429 | 5.56E-13 | 0.325112 |
| 0.496472 | 1.96E-30 | 0.142573 | 0.00201  | 0.101547 | 0.02822  | 0.31174  | 5.53E-12 | 0.269148 |
| 0.520552 | 8.64E-34 | 0.224658 | 9.36E-07 | 0.382613 | 9.94E-18 | 0.26997  | 3.05E-09 | 0.209975 |
| 0.565705 | 7.39E-41 | 0.43674  | 3.58E-23 | 0.524974 | 1.95E-34 | 0.25508  | 2.27E-08 | 0.205594 |
| 0.246879 | 6.49E-08 | -0.00338 | 0.942    | 0.152368 | 0.00096  | 0.050126 | 0.27969  | 0.005681 |
| 0.586418 | 1.76E-44 | 0.404834 | 7.62E-20 | 0.538499 | 1.80E-36 | 0.185793 | 5.36E-05 | 0.181384 |
| 0.603374 | 1.20E-47 | 0.583261 | 6.53E-44 | 0.502666 | 2.85E-31 | 0.302091 | 2.61E-11 | 0.4195   |
| 0.250057 | 4.34E-08 | 0.023391 | 0.61413  | 0.131118 | 0.00454  | 0.03093  | 0.50491  | -0.05539 |
| 0.209208 | 5.13E-06 | 0.265016 | 6.03E-09 | 0.436166 | 4.14E-23 | 0.143192 | 0.00192  | 0.128727 |
| 0.299765 | 3.76E-11 | 0.115015 | 0.01288  | 0.325127 | 5.85E-13 | -0.03841 | 0.4076   | -0.1094  |
| 0.492469 | 6.70E-30 | 0.47306  | 2.04E-27 | 0.709437 | 1.14E-72 | 0.229847 | 5.14E-07 | 0.19451  |
| 0.686432 | 2.50E-66 | 0.298257 | 4.75E-11 | 0.410424 | 2.11E-20 | 0.425908 | 5.30E-22 | 0.338671 |
| 0.549265 | 3.69E-38 | 0.329944 | 2.54E-13 | 0.434066 | 7.03E-23 | 0.255853 | 2.05E-08 | 0.133094 |
| 0.687243 | 1.53E-66 | 0.409691 | 2.50E-20 | 0.531849 | 1.85E-35 | 0.369226 | 1.57E-16 | 0.215117 |
| 0.606567 | 2.90E-48 | 0.327152 | 4.13E-13 | 0.347582 | 1.05E-14 | 0.337488 | 6.65E-14 | 0.283857 |
| 0.544546 | 2.06E-37 | 0.183221 | 6.82E-05 | 0.391588 | 1.45E-18 | 0.230243 | 4.90E-07 | -0.07396 |
| 0.60952  | 7.68E-49 | 0.350668 | 5.86E-15 | 0.522763 | 4.12E-34 | 0.287184 | 2.56E-10 | 0.326676 |
| 0.383536 | 8.18E-18 | 0.211624 | 3.96E-06 | 0.410185 | 2.23E-20 | 0.107222 | 0.02047  | 0.099252 |
| 0.170175 | 0.00022  | -0.12129 | 0.0087   | 0.07426  | 0.109    | -0.0367  | 0.42883  | -0.19573 |
| 0.14866  | 0.00127  | -0.08423 | 0.06897  | 0.060379 | 0.19275  | -0.02111 | 0.64911  | -0.15949 |
| 0.205975 | 7.21E-06 | -0.07106 | 0.12516  | 0.195722 | 2.05E-05 | -0.02043 | 0.65971  | -0.04295 |
| 0.428346 | 2.91E-22 | 0.017372 | 0.70807  | 0.069155 | 0.13564  | 0.204184 | 8.68E-06 | 0.386695 |
| 0.788757 | #####    | 0.46826  | 7.96E-27 | 0.568808 | 2.20E-41 | 0.37752  | 2.88E-17 | 0.377693 |
| 0.326133 | 4.92E-13 | -0.05675 | 0.2209   | 0.139812 | 0.00246  | 0.024549 | 0.59669  | -0.03323 |
| 0.429604 | 2.14E-22 | 0.275813 | 1.34E-09 | 0.434745 | 5.93E-23 | 0.170157 | 0.00022  | 0.015119 |
| 0.508726 | 4.16E-32 | 0.329202 | 2.89E-13 | 0.479621 | 3.08E-28 | 0.177403 | 0.00012  | 0.21461  |
| 0.260499 | 1.11E-08 | 0.094472 | 0.04128  | 0.171323 | 0.0002   | 0.196172 | 1.96E-05 | 0.007619 |
| 0.578799 | 4.06E-43 | 0.066506 | 0.1513   | 0.266646 | 4.82E-09 | 0.166165 | 0.00031  | 0.058908 |
| 0.549874 | 2.95E-38 | 0.344504 | 1.85E-14 | 0.418804 | 2.94E-21 | 0.207419 | 6.20E-06 | 0.198179 |
| 0.525648 | 1.55E-34 | 0.443494 | 6.35E-24 | 0.367657 | 2.15E-16 | 0.417834 | 3.71E-21 | 0.518785 |
| 0.610404 | 5.14E-49 | 0.420222 | 2.10E-21 | 0.547199 | 7.86E-38 | 0.258072 | 1.53E-08 | 0.234637 |
| 0.379958 | 1.74E-17 | 0.24999  | 4.37E-08 | 0.500968 | 4.86E-31 | 0.092184 | 0.04648  | 0.009047 |
| 0.593733 | 8.00E-46 | 0.308056 | 1.01E-11 | 0.318648 | 1.76E-12 | 0.282349 | 5.23E-10 | 0.286681 |
| 0.467881 | 8.86E-27 | 0.3087   | 9.07E-12 | 0.474141 | 1.50E-27 | 0.28096  | 6.40E-10 | 0.147604 |
| 0.440044 | 1.54E-23 | 0.212932 | 3.44E-06 | 0.317445 | 2.15E-12 | 0.264557 | 6.42E-09 | 0.244061 |
| 0.473853 | 1.63E-27 | 0.155864 | 0.00073  | 0.049163 | 0.28905  | 0.448685 | 1.64E-24 | 0.455596 |

|          |          |          |          |          |          |          |          |          |
|----------|----------|----------|----------|----------|----------|----------|----------|----------|
| 0.253188 | 2.90E-08 | 0.189916 | 3.62E-05 | 0.295709 | 7.05E-11 | 0.172219 | 0.00018  | 0.24443  |
| 0.70256  | 1.04E-70 | 0.597044 | 1.92E-46 | 0.542197 | 4.81E-37 | 0.462512 | 3.94E-26 | 0.416174 |
| 0.305586 | 1.50E-11 | 0.124892 | 0.00689  | 0.426753 | 4.31E-22 | 0.056958 | 0.21923  | -0.07122 |
| 0.447899 | 2.01E-24 | 0.318146 | 1.92E-12 | 0.340729 | 3.70E-14 | 0.235314 | 2.69E-07 | 0.455097 |
| 0.456583 | 1.99E-25 | 0.154326 | 0.00082  | 0.136952 | 0.00302  | 0.250852 | 3.92E-08 | 0.180505 |
| 0.438032 | 2.58E-23 | 0.190811 | 3.32E-05 | 0.299752 | 3.77E-11 | 0.272241 | 2.22E-09 | 0.32569  |
| 0.50011  | 6.36E-31 | 0.322323 | 9.46E-13 | 0.425979 | 5.21E-22 | 0.185291 | 5.62E-05 | 0.172922 |
| 0.477414 | 5.85E-28 | 0.281649 | 5.79E-10 | 0.354337 | 2.92E-15 | 0.344037 | 2.02E-14 | 0.348893 |
| 0.257974 | 1.55E-08 | 0.394373 | 7.91E-19 | 0.468318 | 7.83E-27 | 0.202458 | 1.04E-05 | 0.286786 |
| 0.259699 | 1.23E-08 | 0.007181 | 0.87701  | 0.075464 | 0.10337  | 0.169799 | 0.00023  | 0.232194 |
| 0.435883 | 4.45E-23 | 0.237227 | 2.14E-07 | 0.322993 | 8.44E-13 | 0.201259 | 1.17E-05 | 0.154256 |
| 0.570781 | 1.01E-41 | 0.357541 | 1.58E-15 | 0.510055 | 2.71E-32 | 0.225817 | 8.19E-07 | 0.113904 |
| 0.251592 | 3.56E-08 | -0.10463 | 0.02374  | -0.03166 | 0.49498  | 0.042592 | 0.35842  | -0.07125 |
| 0.122925 | 0.00783  | -0.08518 | 0.0659   | 0.092083 | 0.04672  | 0.015867 | 0.73235  | -0.19251 |
| 0.383159 | 8.86E-18 | 0.268858 | 3.56E-09 | 0.224769 | 9.24E-07 | 0.17397  | 0.00016  | 0.253692 |
| 0.148801 | 0.00126  | -0.04768 | 0.30385  | 0.032089 | 0.48908  | -0.09422 | 0.04184  | -0.11714 |
| 0.010018 | 0.82906  | 0.001317 | 0.97736  | 0.152877 | 0.00092  | 0.067476 | 0.14542  | -0.12316 |
| 0.4148   | 7.60E-21 | 0.090094 | 0.05169  | 0.091914 | 0.04713  | 0.163896 | 0.00038  | 0.117935 |
| 0.55391  | 6.60E-39 | 0.286824 | 2.70E-10 | 0.19569  | 2.06E-05 | 0.348408 | 8.96E-15 | 0.466434 |
| 0.644157 | 4.29E-56 | 0.377741 | 2.75E-17 | 0.546318 | 1.08E-37 | 0.267815 | 4.11E-09 | 0.244306 |
| 0.516049 | 3.85E-33 | 0.347475 | 1.07E-14 | 0.521409 | 6.49E-34 | 0.193169 | 2.64E-05 | 0.18162  |
| 0.564685 | 1.10E-40 | 0.194546 | 2.30E-05 | 0.286513 | 2.83E-10 | 0.227556 | 6.71E-07 | 0.026255 |
| 0.334085 | 1.22E-13 | 0.067147 | 0.14739  | 0.331909 | 1.80E-13 | 0.033281 | 0.47308  | -0.0571  |
| 0.538715 | 1.67E-36 | 0.305923 | 1.42E-11 | 0.298113 | 4.86E-11 | 0.424188 | 8.05E-22 | 0.554111 |
| 0.445536 | 3.74E-24 | 0.365424 | 3.36E-16 | 0.384857 | 6.18E-18 | 0.259121 | 1.33E-08 | 0.261764 |
| 0.280587 | 6.76E-10 | 0.033028 | 0.47645  | 0.284491 | 3.82E-10 | 0.103816 | 0.02486  | 0.095896 |
| 0.284165 | 4.01E-10 | 0.128317 | 0.00549  | 0.127562 | 0.00577  | 0.108628 | 0.01887  | -0.16418 |
| 0.516189 | 3.67E-33 | 0.363604 | 4.82E-16 | 0.445419 | 3.85E-24 | 0.188227 | 4.25E-05 | 0.24975  |
| 0.616344 | 3.37E-50 | 0.572575 | 4.96E-42 | 0.553243 | 8.47E-39 | 0.4815   | 1.78E-28 | 0.412616 |
| 0.593755 | 7.92E-46 | 0.179188 | 9.88E-05 | 0.256836 | 1.80E-08 | 0.244415 | 8.84E-08 | 0.230298 |
| 0.202936 | 9.88E-06 | -0.03868 | 0.40431  | -0.00866 | 0.85199  | -0.08585 | 0.06379  | -0.24231 |
| 0.477957 | 5.00E-28 | 0.274465 | 1.62E-09 | 0.36094  | 8.14E-16 | 0.265938 | 5.31E-09 | 0.197842 |
| 0.559058 | 9.50E-40 | 0.335556 | 9.40E-14 | 0.595632 | 3.54E-46 | 0.247136 | 6.29E-08 | 0.187983 |
| 0.467243 | 1.06E-26 | 0.239228 | 1.68E-07 | 0.340144 | 4.11E-14 | 0.256372 | 1.91E-08 | 0.240665 |
| 0.593913 | 7.41E-46 | 0.250804 | 3.94E-08 | 0.299817 | 3.73E-11 | 0.255298 | 2.20E-08 | 0.058045 |
| 0.143228 | 0.00192  | 0.074015 | 0.11018  | 0.149289 | 0.00121  | 0.112982 | 0.01457  | 0.0855   |
| 0.13627  | 0.00317  | -0.18461 | 5.99E-05 | 0.023685 | 0.60967  | -0.08871 | 0.0554   | -0.30708 |
| 0.106202 | 0.02171  | -0.06672 | 0.14996  | 0.196385 | 1.92E-05 | -0.10473 | 0.02361  | -0.25729 |
| 0.616926 | 2.57E-50 | 0.286789 | 2.72E-10 | 0.316623 | 2.47E-12 | 0.298466 | 4.60E-11 | 0.439816 |
| 0.5281   | 6.73E-35 | 0.242072 | 1.18E-07 | 0.254613 | 2.41E-08 | 0.339394 | 4.71E-14 | 0.221686 |
| 0.545704 | 1.36E-37 | 0.235678 | 2.58E-07 | 0.396603 | 4.84E-19 | 0.247862 | 5.73E-08 | 0.164688 |
| 0.578223 | 5.13E-43 | 0.246884 | 6.49E-08 | 0.469563 | 5.52E-27 | 0.213694 | 3.17E-06 | 0.010509 |
| 0.592282 | 1.49E-45 | 0.258589 | 1.43E-08 | 0.479128 | 3.55E-28 | 0.255621 | 2.11E-08 | 0.185376 |
| 0.460426 | 7.00E-26 | 0.164668 | 0.00035  | 0.356071 | 2.09E-15 | 0.063895 | 0.16805  | 0.078791 |
| 0.733614 | 4.89E-80 | 0.460554 | 6.75E-26 | 0.599613 | 6.29E-47 | 0.363564 | 4.86E-16 | 0.209034 |

|          |          |          |          |          |          |          |          |          |
|----------|----------|----------|----------|----------|----------|----------|----------|----------|
| 0.520739 | 8.12E-34 | 0.210616 | 4.41E-06 | 0.337159 | 7.05E-14 | 0.306743 | 1.24E-11 | 0.027976 |
| 0.270575 | 2.80E-09 | 0.027514 | 0.55312  | 0.112905 | 0.01464  | 0.073238 | 0.11398  | 0.158611 |
| 0.443945 | 5.65E-24 | 0.045552 | 0.32597  | 0.206037 | 7.16E-06 | 0.133053 | 0.00397  | 0.178907 |
| 0.674822 | 2.39E-63 | 0.521469 | 6.36E-34 | 0.535532 | 5.12E-36 | 0.468201 | 8.10E-27 | 0.340821 |
| 0.755005 | 2.91E-87 | 0.280716 | 6.63E-10 | 0.343757 | 2.12E-14 | 0.332994 | 1.48E-13 | 0.181612 |
| 0.498474 | 1.06E-30 | 0.17613  | 0.00013  | 0.428753 | 2.64E-22 | 0.259325 | 1.30E-08 | 0.108454 |
| 0.63083  | 3.40E-53 | 0.293123 | 1.05E-10 | 0.24521  | 8.01E-08 | 0.309611 | 7.83E-12 | 0.142746 |
| 0.401803 | 1.51E-19 | 0.163251 | 0.0004   | 0.318302 | 1.87E-12 | 0.144406 | 0.00176  | 0.057537 |
| 0.757239 | 4.63E-88 | 0.501943 | 3.58E-31 | 0.681212 | 5.69E-65 | 0.332566 | 1.60E-13 | 0.301305 |
| 0.318882 | 1.69E-12 | 0.098279 | 0.03373  | 0.255586 | 2.12E-08 | 0.150125 | 0.00114  | 0.013313 |
| 0.616413 | 3.26E-50 | 0.249161 | 4.86E-08 | 0.267321 | 4.40E-09 | 0.372441 | 8.19E-17 | 0.39219  |
| 0.47561  | 9.84E-28 | 0.361548 | 7.23E-16 | 0.377011 | 3.20E-17 | 0.367347 | 2.29E-16 | 0.404944 |
| 0.192636 | 2.78E-05 | -0.06781 | 0.1434   | 0.216676 | 2.29E-06 | 0.003425 | 0.94116  | -0.05893 |
| 0.661894 | 3.48E-60 | 0.459412 | 9.23E-26 | 0.484431 | 7.49E-29 | 0.448722 | 1.62E-24 | 0.452459 |
| 0.737733 | 2.26E-81 | 0.484383 | 7.59E-29 | 0.524215 | 2.53E-34 | 0.409581 | 2.57E-20 | 0.322052 |
| 0.28756  | 2.42E-10 | 0.056583 | 0.22229  | 0.295401 | 7.39E-11 | 0.153641 | 0.00086  | 0.311179 |
| 0.446948 | 2.59E-24 | 0.014255 | 0.75866  | 0.139724 | 0.00248  | 0.23991  | 1.54E-07 | 0.073704 |
| 0.398238 | 3.36E-19 | 0.159059 | 0.00056  | 0.338593 | 5.45E-14 | 0.049022 | 0.29043  | 0.058877 |
| 0.48267  | 1.26E-28 | 0.076561 | 0.09843  | 0.11406  | 0.01365  | 0.261016 | 1.03E-08 | 0.140717 |
| 0.588614 | 7.02E-45 | 0.322905 | 8.57E-13 | 0.453949 | 4.04E-25 | 0.319483 | 1.53E-12 | 0.278082 |
| 0.212906 | 3.45E-06 | 0.252631 | 3.12E-08 | 0.314882 | 3.30E-12 | 0.218858 | 1.80E-06 | 0.286072 |
| 0.543865 | 2.64E-37 | 0.340215 | 4.06E-14 | 0.482084 | 1.50E-28 | 0.221961 | 1.27E-06 | 0.214076 |
| 0.620361 | 5.16E-51 | 0.230237 | 4.91E-07 | 0.431502 | 1.33E-22 | 0.162453 | 0.00042  | 0.148422 |
| 0.516988 | 2.82E-33 | 0.126114 | 0.00635  | 0.257624 | 1.62E-08 | 0.238947 | 1.73E-07 | 0.049372 |
| 0.495919 | 2.33E-30 | 0.270646 | 2.78E-09 | 0.319917 | 1.42E-12 | 0.288864 | 1.99E-10 | 0.134895 |
| 0.820683 | #####    | 0.667231 | 1.80E-61 | 0.680091 | 1.10E-64 | 0.41866  | 3.05E-21 | 0.413663 |
| 0.379312 | 1.99E-17 | 0.165762 | 0.00032  | 0.23217  | 3.91E-07 | 0.273668 | 1.82E-09 | 0.4104   |
| 0.672645 | 8.36E-63 | 0.493312 | 5.18E-30 | 0.541943 | 5.27E-37 | 0.446346 | 3.03E-24 | 0.535725 |
| 0.117904 | 0.01077  | -0.08084 | 0.08097  | 0.152987 | 0.00091  | -0.11709 | 0.01134  | -0.18592 |
| 0.617233 | 2.23E-50 | 0.374467 | 5.41E-17 | 0.477045 | 6.51E-28 | 0.247957 | 5.67E-08 | 0.105974 |
| 0.552017 | 1.34E-38 | 0.252746 | 3.07E-08 | 0.46184  | 4.74E-26 | 0.266047 | 5.24E-09 | 0.236051 |
| 0.498844 | 9.43E-31 | 0.17806  | 0.00011  | 0.364021 | 4.44E-16 | 0.195775 | 2.04E-05 | 0.148977 |
| 0.454954 | 3.09E-25 | 0.332469 | 1.63E-13 | 0.384071 | 7.30E-18 | 0.237845 | 1.98E-07 | 0.050822 |
| 0.631177 | 2.87E-53 | 0.316903 | 2.36E-12 | 0.501928 | 3.60E-31 | 0.202189 | 1.07E-05 | 0.124825 |
| 0.695566 | 8.96E-69 | 0.329491 | 2.75E-13 | 0.451065 | 8.73E-25 | 0.266374 | 5.01E-09 | 0.229897 |
| 0.473807 | 1.65E-27 | 0.241076 | 1.34E-07 | 0.377167 | 3.10E-17 | 0.071511 | 0.12278  | 0.083524 |
| 0.4419   | 9.59E-24 | 0.074589 | 0.10744  | 0.213368 | 3.28E-06 | 0.173031 | 0.00017  | 0.129897 |
| 0.376834 | 3.32E-17 | 0.110264 | 0.01714  | 0.394538 | 7.63E-19 | 0.002166 | 0.96276  | -0.10673 |
| 0.583603 | 5.67E-44 | 0.224602 | 9.42E-07 | 0.484363 | 7.64E-29 | 0.219695 | 1.64E-06 | 0.030691 |
| 0.215916 | 2.49E-06 | 0.024468 | 0.59791  | 0.264683 | 6.31E-09 | 0.054764 | 0.23753  | -0.08061 |
| 0.027707 | 0.55033  | -0.33416 | 1.21E-13 | -0.0245  | 0.5974   | -0.16192 | 0.00044  | -0.37501 |
| 0.466201 | 1.42E-26 | 0.356012 | 2.12E-15 | 0.438302 | 2.41E-23 | 0.122054 | 0.00828  | 0.019413 |
| 0.346525 | 1.27E-14 | 0.284342 | 3.90E-10 | 0.395275 | 6.48E-19 | 0.261302 | 9.95E-09 | 0.407448 |
| 0.739899 | 4.37E-82 | 0.501479 | 4.14E-31 | 0.708069 | 2.83E-72 | 0.369312 | 1.54E-16 | 0.395514 |
| 0.429187 | 2.37E-22 | 0.215159 | 2.70E-06 | 0.311886 | 5.40E-12 | 0.161287 | 0.00047  | -0.02736 |

|          |          |          |          |          |          |          |          |          |
|----------|----------|----------|----------|----------|----------|----------|----------|----------|
| 0.526127 | 1.32E-34 | 0.337532 | 6.60E-14 | 0.444549 | 4.83E-24 | 0.242076 | 1.18E-07 | 0.218041 |
| 0.305755 | 1.46E-11 | -0.10812 | 0.01943  | 0.105833 | 0.02217  | 0.107933 | 0.01965  | 0.0076   |
| 0.071704 | 0.12177  | -0.19737 | 1.74E-05 | 0.033379 | 0.47177  | -0.2265  | 7.58E-07 | -0.39202 |
| 0.357714 | 1.52E-15 | 0.284998 | 3.54E-10 | 0.426702 | 4.36E-22 | 0.180702 | 8.60E-05 | 0.153194 |
| 0.542069 | 5.03E-37 | 0.269568 | 3.22E-09 | 0.361388 | 7.46E-16 | 0.278692 | 8.88E-10 | 0.085427 |
| 0.711729 | 2.47E-73 | 0.362582 | 5.90E-16 | 0.489614 | 1.59E-29 | 0.276256 | 1.26E-09 | 0.189502 |
| 0.329427 | 2.78E-13 | 0.090483 | 0.05069  | 0.147674 | 0.00137  | 0.102343 | 0.027    | -0.01025 |
| 0.445723 | 3.56E-24 | 0.387014 | 3.90E-18 | 0.444063 | 5.48E-24 | 0.336722 | 7.63E-14 | 0.242799 |
| 0.173241 | 0.00017  | -0.15959 | 0.00054  | -0.23579 | 2.54E-07 | 0.122111 | 0.00825  | 0.180956 |
| 0.443136 | 6.97E-24 | 0.288994 | 1.96E-10 | 0.342936 | 2.47E-14 | 0.342336 | 2.76E-14 | 0.447108 |
| 0.62305  | 1.45E-51 | 0.442402 | 8.43E-24 | 0.585538 | 2.54E-44 | 0.275603 | 1.38E-09 | 0.249696 |
| 0.629641 | 6.08E-53 | 0.536196 | 4.05E-36 | 0.691772 | 9.54E-68 | 0.399496 | 2.54E-19 | 0.315526 |
| 0.471515 | 3.17E-27 | 0.433685 | 7.73E-23 | 0.463249 | 3.22E-26 | 0.351651 | 4.86E-15 | 0.259605 |
| 0.614121 | 9.40E-50 | 0.229376 | 5.43E-07 | 0.522025 | 5.28E-34 | 0.120463 | 0.00917  | -0.03912 |
| 0.569063 | 1.99E-41 | 0.401233 | 1.72E-19 | 0.264661 | 6.32E-09 | 0.39631  | 5.16E-19 | 0.264268 |
| 0.536393 | 3.78E-36 | 0.414186 | 8.78E-21 | 0.50328  | 2.35E-31 | 0.199505 | 1.40E-05 | 0.046453 |
| 0.433106 | 8.94E-23 | 0.325451 | 5.54E-13 | 0.492649 | 6.34E-30 | 0.014195 | 0.75964  | -0.08282 |
| 0.636743 | 1.83E-54 | 0.288495 | 2.11E-10 | 0.411043 | 1.83E-20 | 0.312132 | 5.19E-12 | 0.26552  |
| 0.656021 | 8.44E-59 | 0.565856 | 6.96E-41 | 0.758544 | 1.57E-88 | 0.356534 | 1.91E-15 | 0.304917 |
| 0.431634 | 1.29E-22 | 0.132617 | 0.00409  | 0.334286 | 1.18E-13 | 0.014597 | 0.75305  | -0.03726 |
| 0.419852 | 2.29E-21 | 0.240603 | 1.42E-07 | 0.388306 | 2.96E-18 | 0.192097 | 2.93E-05 | 0.059144 |
| 0.638432 | 7.86E-55 | 0.430208 | 1.84E-22 | 0.428978 | 2.49E-22 | 0.441966 | 9.43E-24 | 0.319712 |
| 0.436156 | 4.15E-23 | 0.399691 | 2.43E-19 | 0.548971 | 4.11E-38 | 0.257455 | 1.66E-08 | 0.257351 |
| 0.513828 | 7.96E-33 | 0.350627 | 5.90E-15 | 0.486602 | 3.92E-29 | 0.224868 | 9.13E-07 | 0.085587 |
| 0.084766 | 0.06722  | -0.2134  | 3.27E-06 | -0.08542 | 0.06513  | -0.00216 | 0.96282  | -0.10767 |
| 0.407209 | 4.43E-20 | 0.225308 | 8.69E-07 | 0.263186 | 7.72E-09 | 0.254108 | 2.57E-08 | 0.17995  |
| 0.654528 | 1.88E-58 | 0.374663 | 5.20E-17 | 0.293021 | 1.06E-10 | 0.286327 | 2.91E-10 | 0.105652 |
| 0.453911 | 4.09E-25 | 0.389217 | 2.43E-18 | 0.503141 | 2.46E-31 | 0.322126 | 9.78E-13 | 0.514558 |
| 0.198322 | 1.58E-05 | -0.0811  | 0.07999  | -0.0114  | 0.80596  | 0.063368 | 0.17159  | -0.07205 |
| 0.623511 | 1.16E-51 | 0.298803 | 4.37E-11 | 0.349212 | 7.71E-15 | 0.284241 | 3.96E-10 | 0.252174 |
| 0.158145 | 0.0006   | 0.028431 | 0.53995  | 0.162976 | 0.00041  | 0.06258  | 0.177    | 0.020556 |
| 0.409406 | 2.67E-20 | 0.119301 | 0.00987  | 0.282881 | 4.84E-10 | 0.161337 | 0.00047  | 0.181147 |
| 0.697193 | 3.21E-69 | 0.379859 | 1.77E-17 | 0.444782 | 4.55E-24 | 0.334924 | 1.05E-13 | 0.319307 |
| 0.550137 | 2.68E-38 | 0.229636 | 5.27E-07 | 0.216686 | 2.29E-06 | 0.277012 | 1.13E-09 | 0.208475 |
| 0.192676 | 2.77E-05 | 0.315933 | 2.77E-12 | 0.356926 | 1.78E-15 | 0.067003 | 0.14827  | 0.07213  |
| 0.5095   | 3.24E-32 | 0.241268 | 1.31E-07 | 0.145385 | 0.00163  | 0.323584 | 7.63E-13 | 0.216038 |
| 0.383612 | 8.05E-18 | 0.094005 | 0.0423   | 0.161789 | 0.00045  | 0.171769 | 0.00019  | 0.155835 |
| 0.321831 | 1.03E-12 | 0.113834 | 0.01384  | 0.099031 | 0.03239  | 0.197899 | 1.65E-05 | 0.17773  |
| 0.369121 | 1.60E-16 | 0.147885 | 0.00135  | 0.341203 | 3.39E-14 | 0.088679 | 0.05549  | 0.127812 |
| 0.414842 | 7.52E-21 | 0.054598 | 0.23896  | 0.061626 | 0.1837   | 0.183939 | 6.38E-05 | 0.054276 |
| 0.328076 | 3.51E-13 | 0.117338 | 0.01116  | 0.096618 | 0.03687  | 0.242335 | 1.14E-07 | 0.451895 |
| 0.309361 | 8.15E-12 | 0.155212 | 0.00076  | 0.317893 | 2.00E-12 | 0.120397 | 0.00921  | -0.00657 |
| 0.395844 | 5.72E-19 | 0.392831 | 1.11E-18 | 0.502742 | 2.79E-31 | 0.296432 | 6.31E-11 | 0.389389 |
| 0.584408 | 4.06E-44 | 0.426232 | 4.89E-22 | 0.334647 | 1.11E-13 | 0.365224 | 3.50E-16 | 0.681139 |
| 0.593073 | 1.06E-45 | 0.331965 | 1.78E-13 | 0.321441 | 1.10E-12 | 0.34634  | 1.32E-14 | 0.202034 |

|          |          |          |          |          |          |          |          |          |
|----------|----------|----------|----------|----------|----------|----------|----------|----------|
| 0.158454 | 0.00059  | -0.08233 | 0.07549  | 0.10364  | 0.02511  | -0.06172 | 0.18305  | -0.09775 |
| 0.391711 | 1.42E-18 | 0.259243 | 1.31E-08 | 0.490929 | 1.07E-29 | 0.046138 | 0.31978  | 0.005543 |
| 0.329033 | 2.97E-13 | -0.12891 | 0.00527  | 0.132638 | 0.00409  | 0.022217 | 0.63202  | 0.027553 |
| 0.542436 | 4.41E-37 | 0.487447 | 3.05E-29 | 0.566734 | 4.95E-41 | 0.15711  | 0.00066  | 0.068936 |
| 0.461358 | 5.42E-26 | 0.026834 | 0.56297  | 0.135391 | 0.00337  | 0.260712 | 1.08E-08 | 0.181052 |
| 0.203833 | 9.01E-06 | -0.12024 | 0.0093   | 0.04286  | 0.35541  | -0.01412 | 0.76092  | -0.08036 |
| 0.601135 | 3.23E-47 | 0.286787 | 2.72E-10 | 0.515205 | 5.07E-33 | 0.303021 | 2.25E-11 | 0.232021 |
| 0.081179 | 0.07969  | -0.16677 | 0.00029  | -0.01583 | 0.7329   | -0.17047 | 0.00021  | -0.09159 |
| 0.496167 | 2.16E-30 | 0.473701 | 1.70E-27 | 0.539317 | 1.35E-36 | 0.379598 | 1.87E-17 | 0.404397 |
| 0.654677 | 1.73E-58 | 0.35084  | 5.67E-15 | 0.478755 | 3.96E-28 | 0.315216 | 3.12E-12 | 0.280996 |
| 0.10283  | 0.02628  | 0.000333 | 0.99428  | 0.118683 | 0.01026  | -0.01749 | 0.70612  | -0.19628 |
| 0.397222 | 4.22E-19 | 0.374077 | 5.86E-17 | 0.379864 | 1.77E-17 | 0.206127 | 7.09E-06 | 0.133823 |
| 0.540784 | 7.97E-37 | 0.275876 | 1.33E-09 | 0.233324 | 3.41E-07 | 0.285145 | 3.47E-10 | 0.38979  |
| 0.451568 | 7.64E-25 | 0.458826 | 1.08E-25 | 0.571366 | 8.01E-42 | 0.278127 | 9.63E-10 | 0.362157 |
| 0.4417   | 1.01E-23 | 0.098101 | 0.03406  | 0.271263 | 2.55E-09 | 0.099737 | 0.03117  | -0.01389 |
| 0.586928 | 1.42E-44 | 0.377023 | 3.20E-17 | 0.471993 | 2.77E-27 | 0.311046 | 6.20E-12 | 0.167826 |
| -0.38848 | 2.85E-18 | -0.39407 | 8.46E-19 | -0.594   | 7.12E-46 | -0.10942 | 0.01801  | -0.21671 |
| 0.768027 | 4.87E-92 | 0.4758   | 9.32E-28 | 0.621301 | 3.31E-51 | 0.408179 | 3.55E-20 | 0.316991 |
| 0.231409 | 4.28E-07 | 0.050413 | 0.27694  | 0.077277 | 0.09532  | 0.165123 | 0.00034  | 0.241813 |
| 0.164198 | 0.00037  | -0.15939 | 0.00055  | 0.020938 | 0.65177  | -0.03263 | 0.48179  | -0.19453 |
| 0.573273 | 3.76E-42 | 0.278981 | 8.52E-10 | 0.30418  | 1.87E-11 | 0.20427  | 8.61E-06 | 0.217279 |
| 0.469138 | 6.22E-27 | 0.427964 | 3.20E-22 | 0.513691 | 8.33E-33 | 0.205793 | 7.35E-06 | 0.181422 |
| -0.39375 | 9.06E-19 | -0.36659 | 2.66E-16 | -0.49265 | 6.33E-30 | -0.25555 | 2.13E-08 | -0.40815 |
| 0.311327 | 5.92E-12 | -0.02628 | 0.571    | 0.161349 | 0.00046  | 0.169099 | 0.00024  | 0.079149 |
| 0.371671 | 9.58E-17 | 0.10303  | 0.02598  | 0.234783 | 2.87E-07 | 0.180355 | 8.88E-05 | 0.050455 |
| 0.204655 | 8.27E-06 | -0.01583 | 0.73295  | 0.186394 | 5.06E-05 | 0.046011 | 0.32112  | -0.06532 |
| 0.238269 | 1.88E-07 | 0.170117 | 0.00022  | 0.296239 | 6.50E-11 | 0.118102 | 0.01064  | 0.126419 |
| 0.294279 | 8.78E-11 | 0.14214  | 0.00208  | 0.217096 | 2.19E-06 | 0.265715 | 5.48E-09 | 0.336199 |
| 0.630188 | 4.65E-53 | 0.466646 | 1.25E-26 | 0.409992 | 2.33E-20 | 0.439568 | 1.74E-23 | 0.321949 |
| 0.164811 | 0.00035  | -0.22029 | 1.53E-06 | 0.143599 | 0.00186  | -0.09841 | 0.0335   | -0.23294 |
| 0.730847 | 3.74E-79 | 0.584868 | 3.36E-44 | 0.628921 | 8.62E-53 | 0.359764 | 1.02E-15 | 0.185972 |
| 0.400527 | 2.02E-19 | 0.264447 | 6.51E-09 | 0.350834 | 5.68E-15 | 0.177615 | 0.00011  | 0.205383 |
| 0.525718 | 1.52E-34 | 0.308304 | 9.67E-12 | 0.452542 | 5.89E-25 | 0.208235 | 5.69E-06 | 0.209436 |
| 0.474551 | 1.33E-27 | 0.533076 | 1.21E-35 | 0.600881 | 3.61E-47 | 0.342381 | 2.73E-14 | 0.296904 |
| 0.050684 | 0.27437  | -0.06103 | 0.18799  | 0.051374 | 0.26788  | -0.0781  | 0.09181  | -0.19614 |
| 0.587825 | 9.78E-45 | 0.336836 | 7.48E-14 | 0.461595 | 5.08E-26 | 0.27283  | 2.05E-09 | 0.25791  |
| 0.624546 | 7.09E-52 | 0.193174 | 2.63E-05 | 0.402013 | 1.44E-19 | 0.164829 | 0.00035  | -0.02767 |
| 0.367235 | 2.34E-16 | 0.217019 | 2.20E-06 | 0.321955 | 1.01E-12 | 0.20769  | 6.02E-06 | 0.180247 |
| 0.653052 | 4.12E-58 | 0.402471 | 1.30E-19 | 0.573713 | 3.15E-42 | 0.240033 | 1.52E-07 | 0.159909 |
| 0.373959 | 6.01E-17 | 0.259919 | 1.20E-08 | 0.313174 | 4.37E-12 | 0.177694 | 0.00011  | -0.011   |
| 0.14327  | 0.00191  | 0.030887 | 0.50551  | 0.093629 | 0.04314  | 0.059668 | 0.19805  | -0.0509  |
| 0.45355  | 4.50E-25 | 0.254269 | 2.52E-08 | 0.451969 | 6.86E-25 | 0.17605  | 0.00013  | 0.199553 |
| 0.430024 | 1.93E-22 | 0.205486 | 7.59E-06 | 0.390192 | 1.97E-18 | 0.07961  | 0.0857   | -0.01039 |
| 0.447446 | 2.27E-24 | -0.00735 | 0.87421  | 0.256088 | 1.99E-08 | 0.118943 | 0.01009  | -0.01787 |
| 0.435171 | 5.32E-23 | 0.165857 | 0.00032  | 0.406992 | 4.66E-20 | 0.238891 | 1.75E-07 | 0.269889 |

|          |          |          |          |          |          |          |          |          |
|----------|----------|----------|----------|----------|----------|----------|----------|----------|
| 0.330469 | 2.31E-13 | 0.035537 | 0.44359  | 0.17871  | 0.0001   | 0.086757 | 0.06102  | -0.08566 |
| 0.606972 | 2.42E-48 | 0.393165 | 1.03E-18 | 0.39976  | 2.40E-19 | 0.237221 | 2.14E-07 | 0.092066 |
| 0.249498 | 4.66E-08 | -0.17546 | 0.00014  | -0.04211 | 0.36391  | -0.00484 | 0.91692  | -0.18516 |
| 0.28205  | 5.46E-10 | 0.172017 | 0.00019  | 0.327381 | 3.97E-13 | 0.161688 | 0.00045  | 0.137353 |
| 0.375867 | 4.06E-17 | 0.394545 | 7.61E-19 | 0.580336 | 2.17E-43 | 0.276368 | 1.24E-09 | 0.305984 |
| 0.087498 | 0.05884  | 0.245014 | 8.20E-08 | 0.276299 | 1.25E-09 | 0.143977 | 0.00181  | 0.194953 |
| 0.183827 | 6.44E-05 | 0.339875 | 4.32E-14 | 0.402528 | 1.29E-19 | 0.089826 | 0.05239  | 0.038532 |
| 0.069001 | 0.13651  | 0.14148  | 0.00218  | 0.260801 | 1.06E-08 | 0.051191 | 0.26959  | 0.010893 |
| -0.14474 | 0.00171  | -0.01499 | 0.74663  | 0.034127 | 0.4619   | -0.13491 | 0.00349  | -0.28502 |
| 0.167386 | 0.00028  | 0.246029 | 7.23E-08 | 0.260712 | 1.08E-08 | 0.068615 | 0.13873  | -0.04305 |
| 0.350175 | 6.43E-15 | 0.527501 | 8.27E-35 | 0.446128 | 3.20E-24 | 0.289929 | 1.70E-10 | 0.283452 |
| -0.22112 | 1.40E-06 | -0.15787 | 0.00062  | -0.10157 | 0.02818  | -0.07928 | 0.08701  | -0.24441 |
| 0.171762 | 0.00019  | 0.156446 | 0.00069  | 0.175315 | 0.00014  | 0.032853 | 0.47879  | -0.02097 |
| -0.18501 | 5.77E-05 | -0.03302 | 0.47661  | -0.04367 | 0.34636  | -0.09424 | 0.04179  | -0.15699 |
| 0.125219 | 0.00674  | 0.382011 | 1.13E-17 | 0.350801 | 5.71E-15 | 0.201695 | 1.12E-05 | 0.222723 |
| 0.138444 | 0.00272  | 0.150864 | 0.00107  | 0.216097 | 2.44E-06 | 0.048323 | 0.29738  | -0.0754  |
| 0.186733 | 4.90E-05 | 0.248195 | 5.50E-08 | 0.287573 | 2.42E-10 | 0.124722 | 0.00696  | 0.144844 |
| 0.120056 | 0.00941  | 0.335382 | 9.70E-14 | 0.316172 | 2.66E-12 | 0.215323 | 2.65E-06 | 0.227303 |
| 0.013526 | 0.77064  | 0.006155 | 0.89447  | 0.133384 | 0.00388  | 0.002679 | 0.95396  | -0.05996 |
| 0.156957 | 0.00066  | 0.187704 | 4.47E-05 | 0.238036 | 1.94E-07 | 0.145776 | 0.00158  | 0.0958   |
| 0.202476 | 1.04E-05 | 0.298151 | 4.83E-11 | 0.320851 | 1.21E-12 | 0.163561 | 0.00039  | 0.168037 |
| 0.293308 | 1.02E-10 | 0.329333 | 2.82E-13 | 0.390079 | 2.02E-18 | 0.117147 | 0.01129  | 0.163116 |
| 0.136171 | 0.00319  | 0.126435 | 0.00622  | 0.233844 | 3.21E-07 | -0.01905 | 0.68133  | -0.06656 |
| 0.053296 | 0.25037  | 0.209669 | 4.88E-06 | 0.220126 | 1.56E-06 | 0.070916 | 0.12593  | 0.00667  |
| 0.211654 | 3.95E-06 | 0.328256 | 3.41E-13 | 0.326196 | 4.87E-13 | 0.232646 | 3.70E-07 | 0.173518 |
| -0.11413 | 0.01359  | 0.012075 | 0.79467  | 0.056898 | 0.21972  | -0.06718 | 0.14722  | -0.16516 |
| -0.17756 | 0.00011  | -0.0905  | 0.05063  | 0.013163 | 0.77663  | -0.14357 | 0.00187  | -0.28341 |
| 0.143484 | 0.00188  | 0.315795 | 2.84E-12 | 0.35077  | 5.75E-15 | 0.124418 | 0.0071   | 0.062169 |
| 0.190882 | 3.29E-05 | 0.246018 | 7.24E-08 | 0.257695 | 1.61E-08 | 0.167307 | 0.00028  | 0.114063 |
| 0.038397 | 0.40775  | 0.174737 | 0.00015  | 0.18089  | 8.46E-05 | 0.169    | 0.00024  | 0.271344 |
| 0.059905 | 0.19627  | 0.196015 | 1.99E-05 | 0.153238 | 0.00089  | 0.078152 | 0.09162  | -0.03968 |
| -0.18918 | 3.88E-05 | 0.021323 | 0.6458   | -0.0186  | 0.68845  | -0.03228 | 0.48656  | 0.04674  |
| 0.235639 | 2.59E-07 | 0.352754 | 3.95E-15 | 0.248266 | 5.45E-08 | 0.220611 | 1.48E-06 | 0.214907 |
| 0.358538 | 1.30E-15 | 0.422055 | 1.35E-21 | 0.37297  | 7.35E-17 | 0.263031 | 7.89E-09 | 0.275508 |
| 0.160415 | 0.0005   | 0.420716 | 1.86E-21 | 0.350556 | 5.98E-15 | 0.173897 | 0.00016  | 0.167548 |
| 0.16486  | 0.00035  | 0.394594 | 7.53E-19 | 0.415429 | 6.55E-21 | 0.218649 | 1.84E-06 | 0.092739 |
| 0.232937 | 3.57E-07 | 0.243518 | 9.89E-08 | 0.397718 | 3.78E-19 | 0.124501 | 0.00707  | 0.019977 |
| 0.180222 | 8.99E-05 | 0.189407 | 3.80E-05 | 0.318345 | 1.85E-12 | 0.085187 | 0.06587  | 0.166526 |
| 0.243544 | 9.85E-08 | 0.306218 | 1.35E-11 | 0.216366 | 2.37E-06 | 0.348916 | 8.14E-15 | 0.236857 |
| 0.116353 | 0.01186  | 0.315601 | 2.93E-12 | 0.321197 | 1.15E-12 | 0.172554 | 0.00018  | 0.176138 |
| -0.22198 | 1.27E-06 | -0.07177 | 0.12142  | -0.0497  | 0.28378  | -0.12927 | 0.00515  | -0.1491  |
| 0.182108 | 7.56E-05 | 0.228086 | 6.31E-07 | 0.209889 | 4.77E-06 | 0.208075 | 5.78E-06 | 0.218743 |
| 0.13421  | 0.00366  | -0.00486 | 0.91666  | 0.136829 | 0.00305  | 0.196008 | 1.99E-05 | -0.01181 |
| 0.13564  | 0.00331  | 0.362458 | 6.04E-16 | 0.224667 | 9.35E-07 | 0.201488 | 1.15E-05 | 0.28857  |
| -0.10792 | 0.01966  | -0.16296 | 0.00041  | -0.08648 | 0.06185  | -0.10503 | 0.02321  | -0.06715 |

|          |          |          |          |          |          |          |          |          |
|----------|----------|----------|----------|----------|----------|----------|----------|----------|
| 0.28856  | 2.09E-10 | 0.137465 | 0.00291  | 0.191522 | 3.10E-05 | 0.211382 | 4.07E-06 | 0.075328 |
| 0.021578 | 0.64185  | 0.134362 | 0.00363  | 0.090415 | 0.05086  | 0.123239 | 0.00767  | 0.071501 |
| 0.145513 | 0.00162  | 0.211895 | 3.85E-06 | 0.110416 | 0.01699  | 0.268584 | 3.70E-09 | 0.165181 |
| -0.2135  | 3.24E-06 | 0.010158 | 0.8267   | 0.029192 | 0.52916  | -0.18506 | 5.74E-05 | -0.22701 |
| 0.253801 | 2.68E-08 | 0.379907 | 1.76E-17 | 0.417584 | 3.93E-21 | 0.243371 | 1.01E-07 | 0.2163   |
| 0.223691 | 1.04E-06 | 0.238156 | 1.91E-07 | 0.398623 | 3.09E-19 | 0.102588 | 0.02663  | 0.043583 |
| 0.042046 | 0.36463  | 0.054519 | 0.23964  | 0.077468 | 0.0945   | 0.051738 | 0.2645   | 0.01563  |
| -0.01166 | 0.80162  | 0.07312  | 0.11456  | 0.14454  | 0.00174  | 0.094125 | 0.04204  | 0.045279 |
| 0.012284 | 0.79119  | 0.110072 | 0.01733  | 0.138706 | 0.00266  | 0.056147 | 0.22588  | -0.00757 |
| -0.10123 | 0.02872  | 0.147836 | 0.00136  | 0.107689 | 0.01993  | -0.02608 | 0.57404  | 0.113887 |
| -0.21163 | 3.96E-06 | -0.13548 | 0.00335  | -0.17139 | 0.0002   | -0.05838 | 0.20795  | -0.2832  |
| 0.084435 | 0.0683   | 0.084183 | 0.06913  | 0.15033  | 0.00112  | -0.06789 | 0.14296  | -0.04553 |
| 0.051208 | 0.26944  | 0.265729 | 5.47E-09 | 0.31086  | 6.39E-12 | 0.089011 | 0.05458  | 0.097865 |
| -0.13624 | 0.00318  | 0.067343 | 0.14621  | 0.118907 | 0.01012  | 0.000634 | 0.9891   | 0.025106 |
| 0.15907  | 0.00056  | 0.389576 | 2.25E-18 | 0.355004 | 2.57E-15 | 0.22988  | 5.12E-07 | 0.323946 |
| 0.200611 | 1.25E-05 | 0.164597 | 0.00035  | 0.300214 | 3.50E-11 | -0.03612 | 0.43618  | -0.17934 |
| 0.115818 | 0.01226  | 0.23005  | 5.02E-07 | 0.226203 | 7.84E-07 | 0.131241 | 0.0045   | 0.074321 |
| 0.023423 | 0.61364  | 0.170978 | 0.00021  | 0.106328 | 0.02156  | 0.105953 | 0.02202  | 0.092689 |
| -0.14134 | 0.0022   | -0.02464 | 0.59535  | 0.028198 | 0.54329  | -0.04254 | 0.35904  | 0.008985 |
| -0.05107 | 0.27069  | 0.06933  | 0.13465  | 0.132945 | 0.004    | -0.02498 | 0.59027  | 0.009113 |
| 0.265604 | 5.56E-09 | 0.264277 | 6.66E-09 | 0.336104 | 8.52E-14 | 0.209621 | 4.91E-06 | 0.178071 |
| -0.02727 | 0.55659  | 0.126625 | 0.00614  | 0.114505 | 0.01329  | -0.04093 | 0.37754  | -0.18107 |
| 0.127862 | 0.00566  | 0.05446  | 0.24015  | 0.07558  | 0.10284  | 0.13837  | 0.00273  | 0.075026 |
| 0.172963 | 0.00017  | 0.369964 | 1.35E-16 | 0.432244 | 1.11E-22 | 0.182885 | 7.03E-05 | 0.148837 |
| 0.056301 | 0.2246   | 0.21537  | 2.64E-06 | 0.270395 | 2.87E-09 | 0.104929 | 0.02335  | -0.01256 |
| -0.12146 | 0.0086   | -0.08805 | 0.05725  | -0.09875 | 0.03289  | -0.17917 | 9.89E-05 | -0.2607  |
| 0.237048 | 2.18E-07 | 0.201469 | 1.15E-05 | 0.288284 | 2.17E-10 | 0.250706 | 3.99E-08 | 0.213444 |
| 0.170824 | 0.00021  | 0.297997 | 4.95E-11 | 0.319668 | 1.48E-12 | 0.198949 | 1.48E-05 | 0.177979 |
| 0.146249 | 0.00153  | 0.375978 | 3.97E-17 | 0.427768 | 3.36E-22 | 0.167844 | 0.00027  | 0.114538 |
| -0.02745 | 0.55405  | 0.146105 | 0.00155  | 0.115032 | 0.01287  | 0.017532 | 0.70551  | 0.161153 |
| 0.260037 | 1.18E-08 | 0.45439  | 3.59E-25 | 0.368129 | 1.96E-16 | 0.269003 | 3.49E-09 | 0.330825 |
| -0.00075 | 0.98713  | 0.156667 | 0.00068  | 0.247543 | 5.97E-08 | 0.052028 | 0.26183  | 0.012513 |
| -0.28888 | 1.99E-10 | -0.24167 | 1.24E-07 | -0.18848 | 4.15E-05 | -0.16327 | 0.0004   | -0.12755 |
| -0.24805 | 5.60E-08 | -0.3122  | 5.13E-12 | -0.22443 | 9.60E-07 | -0.25965 | 1.24E-08 | -0.24907 |
| -0.09252 | 0.04568  | -0.25024 | 4.24E-08 | -0.03517 | 0.44827  | -0.25876 | 1.40E-08 | -0.17087 |
| -0.05513 | 0.23438  | -0.02312 | 0.61818  | -0.00806 | 0.86215  | 0.003013 | 0.94822  | 0.072524 |
| -0.07867 | 0.08948  | -0.07791 | 0.09264  | -0.05437 | 0.24092  | -0.04898 | 0.29083  | -0.01894 |
| -0.17342 | 0.00017  | -0.1103  | 0.01711  | -0.24087 | 1.37E-07 | -0.05826 | 0.20883  | 0.019303 |
| -0.02009 | 0.66501  | -0.07312 | 0.11455  | -0.00971 | 0.83419  | -0.18828 | 4.23E-05 | -0.18493 |
| 0.09732  | 0.03551  | -0.00827 | 0.85847  | 0.137563 | 0.00289  | -0.10941 | 0.01803  | -0.02089 |
| 0.043131 | 0.35237  | -0.00773 | 0.8677   | 0.103194 | 0.02575  | 0.009786 | 0.83295  | 0.167654 |
| -0.21951 | 1.67E-06 | -0.08431 | 0.0687   | -0.10022 | 0.03036  | -0.08598 | 0.06337  | 0.034095 |
| -0.29452 | 8.46E-11 | -0.32487 | 6.11E-13 | -0.28421 | 3.98E-10 | -0.13983 | 0.00246  | -0.03138 |
| -0.24256 | 1.11E-07 | -0.29293 | 1.08E-10 | -0.39177 | 1.40E-18 | -0.13605 | 0.00322  | -0.13062 |
| -0.18541 | 5.55E-05 | -0.12559 | 0.00658  | -0.15183 | 0.001    | -0.09629 | 0.03751  | -0.03524 |



|          |          |          |          |          |          |          |          |          |
|----------|----------|----------|----------|----------|----------|----------|----------|----------|
| -0.05354 | 0.24818  | -0.01378 | 0.76654  | -0.02583 | 0.57769  | -0.03211 | 0.48875  | 0.013431 |
| -0.23519 | 2.73E-07 | -0.36952 | 1.48E-16 | -0.31033 | 6.96E-12 | -0.30369 | 2.03E-11 | -0.36942 |
| -0.25967 | 1.24E-08 | -0.31973 | 1.47E-12 | -0.29971 | 3.79E-11 | -0.38765 | 3.40E-18 | -0.38645 |
| -0.01745 | 0.70684  | -0.29924 | 4.08E-11 | -0.19089 | 3.29E-05 | -0.04662 | 0.31475  | -0.31341 |
| -0.26388 | 7.03E-09 | -0.10098 | 0.02911  | -0.20112 | 1.19E-05 | -0.14931 | 0.00121  | -0.06558 |
| -0.22828 | 6.17E-07 | -0.17911 | 9.95E-05 | -0.19437 | 2.34E-05 | -0.13555 | 0.00334  | -0.20528 |
| -0.05928 | 0.20097  | -0.03312 | 0.47529  | -0.02425 | 0.60112  | 0.010234 | 0.82543  | 0.138563 |
| -0.03398 | 0.46377  | -0.06368 | 0.16947  | -0.10377 | 0.02493  | -0.05672 | 0.22117  | 0.129188 |
| -0.18679 | 4.88E-05 | -0.10063 | 0.02969  | 0.051204 | 0.26947  | -0.14004 | 0.00242  | -0.08281 |
| -0.24901 | 4.96E-08 | -0.23571 | 2.57E-07 | -0.2843  | 3.93E-10 | -0.21365 | 3.18E-06 | -0.22292 |
| -0.25433 | 2.50E-08 | -0.08779 | 0.05799  | -0.16119 | 0.00047  | -0.08567 | 0.06434  | -0.03317 |
| -0.28706 | 2.61E-10 | -0.10776 | 0.01985  | -0.23359 | 3.30E-07 | -0.00661 | 0.88674  | -0.13085 |
| -0.19933 | 1.43E-05 | -0.27299 | 2.00E-09 | -0.28615 | 2.99E-10 | -0.15595 | 0.00072  | -0.14467 |
| -0.11147 | 0.01595  | -0.25439 | 2.48E-08 | -0.16626 | 0.00031  | -0.11164 | 0.01579  | -0.11684 |
| -0.04461 | 0.33608  | -0.23206 | 3.96E-07 | -0.10142 | 0.02842  | -0.10189 | 0.02769  | -0.10068 |
| -0.2681  | 3.95E-09 | -0.29723 | 5.57E-11 | -0.25782 | 1.58E-08 | -0.2557  | 2.09E-08 | -0.27173 |
| -0.18574 | 5.39E-05 | -0.1136  | 0.01403  | -0.01512 | 0.74457  | -0.15384 | 0.00085  | 0.049421 |
| -0.0945  | 0.04123  | -0.00198 | 0.96593  | 0.114996 | 0.01289  | -0.05297 | 0.25331  | 0.07662  |
| -0.1006  | 0.02973  | -0.01248 | 0.78797  | 0.047622 | 0.30445  | -0.21257 | 3.58E-06 | -0.08816 |
| -0.16484 | 0.00035  | -0.41816 | 3.43E-21 | -0.32827 | 3.40E-13 | -0.31955 | 1.51E-12 | -0.33679 |
| -0.09454 | 0.04114  | -0.13511 | 0.00344  | -0.05409 | 0.24333  | -0.36643 | 2.75E-16 | -0.23418 |
| -0.36687 | 2.52E-16 | -0.21864 | 1.84E-06 | -0.30138 | 2.92E-11 | -0.19583 | 2.03E-05 | -0.06449 |
| -0.14673 | 0.00148  | -0.31063 | 6.64E-12 | -0.20391 | 8.93E-06 | -0.2675  | 4.29E-09 | -0.25515 |
| 0.003578 | 0.93852  | 0.043483 | 0.34845  | -0.01093 | 0.81374  | 0.03298  | 0.47709  | 0.181109 |
| -0.47693 | 6.73E-28 | -0.4239  | 8.64E-22 | -0.47814 | 4.73E-28 | -0.21653 | 2.33E-06 | -0.15582 |
| -0.08558 | 0.06463  | -0.09661 | 0.03689  | -0.05087 | 0.27256  | -0.04721 | 0.30868  | -0.10755 |
| 0.040766 | 0.37942  | -0.0776  | 0.09393  | -0.03163 | 0.49538  | -0.08003 | 0.08406  | -0.00916 |
| -0.07268 | 0.11678  | 0.042807 | 0.356    | -0.02965 | 0.52277  | 0.052026 | 0.26184  | 0.054106 |
| -0.12594 | 0.00643  | -0.23497 | 2.80E-07 | -0.22751 | 6.75E-07 | -0.16465 | 0.00035  | -0.21994 |
| -0.14556 | 0.00161  | -0.25487 | 2.33E-08 | -0.26417 | 6.76E-09 | -0.10508 | 0.02315  | -0.14524 |
| -0.23108 | 4.44E-07 | -0.22132 | 1.36E-06 | -0.21835 | 1.90E-06 | -0.14707 | 0.00144  | -0.15944 |
| -0.02831 | 0.54173  | -0.06664 | 0.1505   | -0.07786 | 0.09282  | -0.03052 | 0.51063  | 0.053744 |
| -0.09003 | 0.05185  | -0.11974 | 0.0096   | -0.13123 | 0.0045   | -0.07522 | 0.10449  | -0.01672 |
| 0.093656 | 0.04308  | -0.03304 | 0.4763   | -0.01605 | 0.72943  | -0.01405 | 0.76206  | -0.0309  |
| 0.048767 | 0.29296  | -0.06094 | 0.18862  | -0.0817  | 0.07777  | 0.011898 | 0.79761  | -0.06922 |
| -0.24086 | 1.37E-07 | -0.32063 | 1.26E-12 | -0.22149 | 1.34E-06 | -0.19055 | 3.40E-05 | -0.16727 |
| 0.052588 | 0.25673  | 0.024442 | 0.59829  | 0.03407  | 0.46265  | -0.01622 | 0.72666  | 0.126077 |
| -0.11972 | 0.00961  | 0.007922 | 0.86443  | -0.00108 | 0.98136  | -0.06764 | 0.14444  | 0.122719 |
| 0.0348   | 0.4531   | 0.096021 | 0.03805  | 0.088637 | 0.05561  | -0.02137 | 0.64504  | 0.179893 |
| -0.13731 | 0.00294  | -0.18922 | 3.87E-05 | -0.10404 | 0.02455  | -0.07821 | 0.09137  | -0.06394 |
| 0.011516 | 0.80397  | -0.148   | 0.00134  | -0.00302 | 0.94808  | -0.07297 | 0.11532  | -0.07783 |
| 0.023131 | 0.61807  | -0.0174  | 0.70758  | 0.031149 | 0.5019   | -0.06428 | 0.1655   | -0.10944 |
| -0.20315 | 9.66E-06 | -0.09034 | 0.05105  | 0.0014   | 0.97593  | -0.12211 | 0.00825  | -0.08618 |
| -0.15081 | 0.00108  | -0.19554 | 2.09E-05 | -0.11807 | 0.01066  | -0.11514 | 0.01278  | -0.07535 |
| -0.04348 | 0.34848  | -0.01205 | 0.79511  | 0.026974 | 0.56093  | -0.05755 | 0.21449  | -0.0095  |

|          |          |          |          |          |          |          |          |          |
|----------|----------|----------|----------|----------|----------|----------|----------|----------|
| -0.02963 | 0.52293  | -0.02967 | 0.52246  | -0.01024 | 0.82528  | -0.22352 | 1.07E-06 | -0.23765 |
| -0.06115 | 0.18713  | -0.17286 | 0.00017  | -0.26928 | 3.36E-09 | -0.04886 | 0.29208  | -0.06325 |
| -0.26325 | 7.65E-09 | -0.31894 | 1.68E-12 | -0.28152 | 5.90E-10 | -0.2381  | 1.92E-07 | -0.3058  |
| -0.30859 | 9.23E-12 | -0.26687 | 4.68E-09 | -0.24987 | 4.44E-08 | -0.19299 | 2.68E-05 | 0.038364 |
| -0.111   | 0.01641  | -0.0913  | 0.04863  | 0.003172 | 0.9455   | -0.07593 | 0.10127  | 0.049222 |
| -0.26381 | 7.10E-09 | -0.18431 | 6.16E-05 | -0.12879 | 0.00531  | -0.16358 | 0.00039  | -0.13425 |
| -0.33303 | 1.47E-13 | -0.34305 | 2.42E-14 | -0.27169 | 2.40E-09 | -0.1991  | 1.46E-05 | -0.2577  |
| -0.03683 | 0.42715  | -0.04247 | 0.35978  | -0.05549 | 0.23135  | -0.05542 | 0.23198  | 0.028594 |
| -0.00586 | 0.89947  | 0.020904 | 0.65229  | 0.135631 | 0.00332  | -0.08936 | 0.05363  | 0.102923 |
| -0.11907 | 0.01001  | -0.02597 | 0.57561  | -0.03326 | 0.47334  | -0.05897 | 0.20333  | 0.042718 |
| -0.06964 | 0.13291  | -0.03378 | 0.46652  | -0.02001 | 0.66631  | -0.10021 | 0.03037  | -0.02467 |
| -0.11935 | 0.00984  | -0.13856 | 0.00269  | -0.1531  | 0.0009   | -0.04386 | 0.34431  | 0.027874 |
| -0.02532 | 0.58519  | -0.17867 | 0.0001   | -0.17987 | 9.28E-05 | 0.054837 | 0.23691  | -0.07986 |
| 0.03194  | 0.49111  | 0.025585 | 0.58129  | 0.076134 | 0.10033  | 0.001631 | 0.97196  | 0.071679 |
| -0.05295 | 0.2535   | -0.05136 | 0.26802  | 0.086292 | 0.06243  | -0.05798 | 0.21103  | 0.001441 |
| -0.11338 | 0.01423  | -0.05077 | 0.2736   | 0.049474 | 0.28601  | -0.10378 | 0.02492  | 0.002688 |
| -0.10907 | 0.01839  | -0.09333 | 0.04381  | -0.10312 | 0.02585  | -0.05452 | 0.23961  | -0.03997 |
| -0.4427  | 7.81E-24 | -0.25451 | 2.44E-08 | -0.26993 | 3.07E-09 | -0.22294 | 1.14E-06 | -0.21617 |
| -0.02691 | 0.56189  | -0.19228 | 2.87E-05 | -0.08831 | 0.05651  | 0.1666   | 0.0003   | 0.073528 |
| -0.17129 | 0.0002   | -0.4796  | 3.10E-28 | -0.3479  | 9.84E-15 | -0.21879 | 1.81E-06 | -0.23636 |
| -0.19228 | 2.87E-05 | -0.4228  | 1.13E-21 | -0.30369 | 2.03E-11 | -0.23559 | 2.60E-07 | -0.18071 |
| 0.015071 | 0.74531  | -0.15829 | 0.0006   | -0.01379 | 0.76623  | -0.17129 | 0.0002   | -0.04432 |
| -0.23399 | 3.15E-07 | -0.18809 | 4.31E-05 | -0.10513 | 0.02309  | -0.13208 | 0.00425  | -0.08624 |
| -0.1618  | 0.00045  | -0.2389  | 1.74E-07 | -0.21699 | 2.21E-06 | -0.07637 | 0.09927  | -0.10518 |
| -0.16399 | 0.00037  | -0.23679 | 2.25E-07 | -0.13323 | 0.00392  | -0.11581 | 0.01227  | -0.08247 |
| -0.2595  | 1.27E-08 | -0.12393 | 0.00734  | -0.08131 | 0.07922  | -0.15857 | 0.00058  | -0.08129 |
| -0.21979 | 1.62E-06 | -0.27728 | 1.09E-09 | -0.16593 | 0.00032  | -0.26687 | 4.68E-09 | -0.18474 |
| -0.27885 | 8.69E-10 | -0.45887 | 1.07E-25 | -0.39464 | 7.46E-19 | -0.26252 | 8.45E-09 | -0.23307 |
| -0.12058 | 0.0091   | -0.09699 | 0.03614  | -0.03614 | 0.43586  | -0.13574 | 0.00329  | -0.13207 |
| -0.07178 | 0.12138  | -0.17757 | 0.00011  | -0.17617 | 0.00013  | -0.09327 | 0.04395  | -0.08598 |
| -0.18024 | 8.98E-05 | -0.20417 | 8.70E-06 | -0.17206 | 0.00019  | -0.02169 | 0.6401   | 0.155882 |
| -0.08643 | 0.062    | 0.162264 | 0.00043  | 0.091081 | 0.04917  | -0.01435 | 0.75718  | 0.141961 |
| -0.12182 | 0.00841  | -0.15574 | 0.00073  | -0.17091 | 0.00021  | -0.06946 | 0.1339   | 0.029666 |
| -0.21631 | 2.38E-06 | -0.2418  | 1.22E-07 | -0.23246 | 3.78E-07 | -0.12149 | 0.00859  | -0.12688 |
| -0.19339 | 2.58E-05 | -0.17489 | 0.00015  | -0.18228 | 7.44E-05 | -0.0909  | 0.04964  | -0.09705 |
| -0.04094 | 0.37744  | -0.03675 | 0.42822  | 0.000279 | 0.9952   | -0.06542 | 0.15813  | 0.061567 |
| -0.08777 | 0.05806  | -0.11743 | 0.0111   | -0.06177 | 0.1827   | -0.12872 | 0.00534  | -0.118   |
| -0.23409 | 3.11E-07 | -0.29869 | 4.45E-11 | -0.19802 | 1.63E-05 | -0.19012 | 3.54E-05 | -0.14364 |
| -0.12714 | 0.00593  | -0.08184 | 0.07727  | -0.02876 | 0.53521  | -0.05273 | 0.25545  | 0.080107 |
| -0.18174 | 7.82E-05 | -0.34043 | 3.90E-14 | -0.21437 | 2.95E-06 | -0.15851 | 0.00059  | -0.18552 |
| -0.33868 | 5.37E-14 | -0.18526 | 5.63E-05 | -0.3441  | 2.00E-14 | -0.16413 | 0.00037  | -0.27741 |
| -0.17158 | 0.00019  | -0.13015 | 0.00485  | -0.1358  | 0.00328  | -0.09371 | 0.04296  | -0.19688 |
| 0.059892 | 0.19637  | -0.03107 | 0.50298  | 0.154963 | 0.00078  | 0.003201 | 0.945    | 0.039908 |
| -0.10321 | 0.02572  | -0.24256 | 1.11E-07 | -0.29329 | 1.02E-10 | -0.04723 | 0.3084   | -0.14654 |
| -0.31833 | 1.86E-12 | -0.38073 | 1.48E-17 | -0.34253 | 2.66E-14 | -0.23381 | 3.22E-07 | -0.2464  |

|          |          |          |          |          |          |          |          |          |
|----------|----------|----------|----------|----------|----------|----------|----------|----------|
| -0.44623 | 3.12E-24 | -0.31716 | 2.26E-12 | -0.27886 | 8.67E-10 | -0.33409 | 1.22E-13 | -0.33767 |
| 0.040883 | 0.37805  | 0.041442 | 0.37157  | 0.082243 | 0.07581  | 0.101853 | 0.02774  | -0.12157 |
| -0.14145 | 0.00218  | -0.09877 | 0.03285  | -0.14083 | 0.00228  | -0.13424 | 0.00366  | 0.047523 |
| 0.054104 | 0.24324  | -0.10224 | 0.02716  | -0.05366 | 0.24715  | 0.084381 | 0.06848  | 0.041004 |
| -0.22946 | 5.38E-07 | -0.31589 | 2.79E-12 | -0.17156 | 0.0002   | -0.13478 | 0.00352  | -0.04718 |
| -0.04323 | 0.35127  | -0.18108 | 8.31E-05 | -0.03225 | 0.4869   | -0.09835 | 0.03361  | -0.02592 |
| -0.30759 | 1.08E-11 | -0.27716 | 1.11E-09 | -0.20895 | 5.27E-06 | -0.17381 | 0.00016  | -0.11132 |
| -0.01505 | 0.74572  | -0.04875 | 0.29313  | -0.02972 | 0.52169  | -0.02012 | 0.66455  | 0.088421 |
| -0.05415 | 0.24281  | -0.14659 | 0.00149  | -0.02687 | 0.5625   | -0.12045 | 0.00917  | -0.09666 |
| -0.09388 | 0.04259  | -0.27411 | 1.71E-09 | -0.1351  | 0.00344  | -0.14161 | 0.00216  | -0.18211 |
| -0.28232 | 5.25E-10 | -0.22127 | 1.37E-06 | -0.26225 | 8.76E-09 | -0.13836 | 0.00273  | 0.104016 |
| 0.017949 | 0.69885  | -0.04363 | 0.34687  | -0.07914 | 0.08759  | 0.014    | 0.76284  | 0.255953 |
| 0.091243 | 0.04877  | 0.07033  | 0.1291   | 0.103357 | 0.02551  | -0.10005 | 0.03063  | 0.043819 |
| -0.05188 | 0.2632   | -0.00209 | 0.96411  | -0.0099  | 0.83106  | -0.02045 | 0.65939  | 0.171609 |
| -0.18414 | 6.26E-05 | -0.17508 | 0.00014  | -0.16516 | 0.00034  | -0.14076 | 0.0023   | 0.024454 |
| -0.06505 | 0.16046  | -0.0833  | 0.07209  | -0.08159 | 0.07816  | -0.07955 | 0.08596  | 0.096242 |
| -0.04649 | 0.31613  | -0.01178 | 0.79964  | 0.010054 | 0.82845  | -0.05901 | 0.20306  | 0.063248 |
| -0.19058 | 3.39E-05 | -0.23628 | 2.39E-07 | -0.23687 | 2.23E-07 | -0.12856 | 0.0054   | 0.018564 |
| -0.07187 | 0.12092  | -0.09054 | 0.05054  | -0.05134 | 0.26824  | -0.08608 | 0.06307  | 0.069614 |
| -0.02675 | 0.5642   | -0.01836 | 0.69233  | -0.01933 | 0.67687  | -0.03226 | 0.48677  | 0.195224 |
| -0.19785 | 1.66E-05 | -0.20827 | 5.66E-06 | -0.22492 | 9.08E-07 | -0.14851 | 0.00129  | 0.033712 |
| -0.07082 | 0.12644  | -0.10133 | 0.02857  | -0.11056 | 0.01685  | -0.05321 | 0.25111  | 0.109323 |
| -0.29112 | 1.42E-10 | -0.42594 | 5.26E-22 | -0.29242 | 1.17E-10 | -0.21539 | 2.64E-06 | -0.15175 |
| 0.012506 | 0.78751  | -0.05806 | 0.21045  | -0.04066 | 0.38068  | 0.051778 | 0.26413  | 0.035482 |
| -0.09349 | 0.04345  | -0.02963 | 0.52302  | -0.00267 | 0.95414  | -0.06512 | 0.16001  | -0.04551 |
| -0.13972 | 0.00248  | -0.23433 | 3.03E-07 | -0.19926 | 1.44E-05 | -0.15368 | 0.00086  | -0.14432 |
| -0.36366 | 4.77E-16 | -0.37328 | 6.90E-17 | -0.36816 | 1.95E-16 | -0.28524 | 3.42E-10 | -0.25847 |
| -0.20771 | 6.01E-06 | -0.0288  | 0.53468  | 0.009963 | 0.82998  | -0.06566 | 0.15657  | 0.07106  |
| -0.18834 | 4.21E-05 | -0.09138 | 0.04842  | -0.13492 | 0.00349  | -0.10735 | 0.02032  | 0.129306 |
| -0.12681 | 0.00607  | -0.185   | 5.77E-05 | -0.16178 | 0.00045  | -0.08951 | 0.05323  | -0.06319 |
| -0.33169 | 1.87E-13 | -0.35457 | 2.79E-15 | -0.29395 | 9.23E-11 | -0.29018 | 1.64E-10 | -0.1471  |
| -0.20267 | 1.02E-05 | -0.33657 | 7.83E-14 | -0.17775 | 0.00011  | -0.35793 | 1.46E-15 | -0.22759 |
| -0.13405 | 0.00371  | -0.17249 | 0.00018  | -0.06681 | 0.14946  | -0.24429 | 8.98E-08 | -0.30357 |
| -0.07725 | 0.09542  | -0.12198 | 0.00832  | -0.06194 | 0.18146  | -0.12812 | 0.00556  | 0.025899 |
| -0.07125 | 0.12416  | -0.13487 | 0.0035   | -0.06779 | 0.14357  | -0.21883 | 1.80E-06 | -0.08948 |
| -0.07203 | 0.12007  | -0.11365 | 0.014    | 0.117929 | 0.01076  | -0.14917 | 0.00122  | -0.07475 |
| -0.16038 | 0.0005   | -0.07219 | 0.11926  | 0.032217 | 0.48734  | -0.13834 | 0.00274  | 0.023173 |
| -0.06093 | 0.1887   | -0.17895 | 0.0001   | -0.0369  | 0.42623  | -0.1094  | 0.01803  | -0.0353  |
| -0.20579 | 7.35E-06 | -0.13915 | 0.00258  | -0.01842 | 0.69142  | -0.2964  | 6.34E-11 | -0.28109 |
| -0.10837 | 0.01915  | -0.08446 | 0.0682   | -0.06199 | 0.18112  | -0.10828 | 0.01925  | -0.0942  |
| 0.019424 | 0.67545  | -0.04974 | 0.28346  | 0.03009  | 0.51656  | 0.016305 | 0.72526  | -0.00608 |
| -0.13894 | 0.00262  | -0.24375 | 9.61E-08 | -0.07656 | 0.09845  | -0.22019 | 1.55E-06 | -0.19111 |
| -0.14149 | 0.00218  | -0.11446 | 0.01333  | -0.0335  | 0.47013  | -0.10117 | 0.02881  | -0.03823 |
| -0.22304 | 1.12E-06 | -0.20365 | 9.18E-06 | -0.11584 | 0.01224  | -0.14059 | 0.00233  | -0.03876 |
| -0.18183 | 7.76E-05 | -0.13796 | 0.00281  | -0.11718 | 0.01127  | -0.0781  | 0.09182  | 0.009945 |

|          |          |          |          |          |          |          |          |          |
|----------|----------|----------|----------|----------|----------|----------|----------|----------|
| -0.25735 | 1.68E-08 | -0.23628 | 2.40E-07 | -0.19132 | 3.16E-05 | -0.23526 | 2.71E-07 | -0.21328 |
| -0.04683 | 0.31258  | -0.00188 | 0.9676   | 0.124004 | 0.0073   | -0.02595 | 0.57592  | 0.027293 |
| -0.08363 | 0.07098  | -0.09641 | 0.03728  | 0.034352 | 0.45894  | -0.05067 | 0.27452  | -0.01954 |
| -0.11388 | 0.0138   | -0.16464 | 0.00035  | -0.08707 | 0.0601   | -0.10514 | 0.02307  | -0.15797 |
| -0.1079  | 0.01968  | -0.16727 | 0.00028  | -0.11957 | 0.0097   | -0.04731 | 0.30768  | -0.10478 |
| 0.030549 | 0.51018  | -0.0516  | 0.26575  | -0.00196 | 0.96634  | -0.01047 | 0.82148  | -0.03143 |
| -0.12659 | 0.00616  | -0.12552 | 0.00661  | -0.01675 | 0.71804  | -0.10961 | 0.01781  | -0.06147 |
| -0.09313 | 0.04427  | -0.14128 | 0.00221  | -0.05729 | 0.21655  | -0.07356 | 0.11241  | -0.09201 |
| -0.19108 | 3.23E-05 | -0.11464 | 0.01317  | -0.07922 | 0.08727  | -0.09454 | 0.04114  | -0.06009 |
| -0.00702 | 0.87966  | -0.15038 | 0.00112  | -0.07356 | 0.11238  | -0.07678 | 0.09747  | -0.02839 |
| -0.17971 | 9.42E-05 | -0.30666 | 1.26E-11 | -0.29606 | 6.68E-11 | -0.23451 | 2.96E-07 | -0.31671 |
| -0.0605  | 0.19182  | -0.15073 | 0.00109  | 0.019217 | 0.67872  | -0.18399 | 6.35E-05 | -0.12608 |
| -0.15543 | 0.00075  | -0.20382 | 9.02E-06 | -0.06884 | 0.13744  | -0.15226 | 0.00096  | -0.12101 |
| -0.2509  | 3.90E-08 | -0.19415 | 2.39E-05 | -0.20829 | 5.65E-06 | -0.11773 | 0.01089  | -0.04009 |
| -0.4127  | 1.24E-20 | -0.32895 | 3.02E-13 | -0.34617 | 1.36E-14 | -0.21535 | 2.65E-06 | -0.15825 |
| -0.38173 | 1.20E-17 | -0.40832 | 3.43E-20 | -0.37318 | 7.04E-17 | -0.37414 | 5.79E-17 | -0.28101 |
| -0.19432 | 2.35E-05 | -0.08325 | 0.07229  | -0.18525 | 5.64E-05 | -0.06869 | 0.13831  | 0.012433 |
| -0.02672 | 0.56461  | -0.17754 | 0.00011  | -0.10478 | 0.02355  | -0.07772 | 0.09341  | -0.16209 |
| -0.1151  | 0.01282  | -0.20015 | 1.31E-05 | 0.001203 | 0.97932  | -0.13036 | 0.00478  | -0.09908 |
| -0.13693 | 0.00303  | -0.03453 | 0.45658  | 0.011763 | 0.79986  | -0.04148 | 0.37107  | 0.10122  |
| -0.17415 | 0.00016  | -0.16169 | 0.00045  | -0.04335 | 0.3499   | -0.10556 | 0.02252  | -0.08702 |
| -0.07294 | 0.11547  | -0.29148 | 1.34E-10 | -0.16651 | 0.0003   | -0.13821 | 0.00276  | -0.11529 |
| -0.2431  | 1.04E-07 | -0.21439 | 2.94E-06 | -0.11521 | 0.01273  | -0.15276 | 0.00093  | -0.05134 |
| -0.04245 | 0.36006  | -0.13488 | 0.0035   | -0.11951 | 0.00974  | 0.02203  | 0.63489  | -0.15296 |
| -0.12025 | 0.00929  | -0.2607  | 1.08E-08 | -0.15264 | 0.00094  | -0.16545 | 0.00033  | -0.13129 |
| -0.33834 | 5.70E-14 | -0.32117 | 1.15E-12 | -0.26681 | 4.72E-09 | -0.20317 | 9.65E-06 | -0.1235  |
| -0.09301 | 0.04455  | -0.23993 | 1.54E-07 | -0.0938  | 0.04275  | -0.23065 | 4.67E-07 | -0.14586 |
| -0.09529 | 0.03954  | -0.1838  | 6.46E-05 | -0.09732 | 0.03551  | -0.05479 | 0.23731  | 0.003479 |
| -0.27312 | 1.96E-09 | -0.45093 | 9.06E-25 | -0.37345 | 6.66E-17 | -0.33779 | 6.29E-14 | -0.29351 |
| -0.2807  | 6.65E-10 | -0.3222  | 9.65E-13 | -0.28309 | 4.69E-10 | -0.23297 | 3.56E-07 | -0.25269 |
| -0.17925 | 9.83E-05 | -0.24068 | 1.40E-07 | -0.20152 | 1.14E-05 | -0.14764 | 0.00138  | -0.13077 |
| -0.02845 | 0.53975  | -0.03105 | 0.50332  | 0.010033 | 0.8288   | 0.044584 | 0.33637  | 0.07953  |
| -0.14941 | 0.0012   | -0.27778 | 1.01E-09 | -0.04133 | 0.37288  | -0.2999  | 3.68E-11 | -0.2676  |
| -0.15274 | 0.00093  | -0.2126  | 3.57E-06 | -0.23061 | 4.70E-07 | -0.04313 | 0.35238  | 0.075957 |
| -0.22011 | 1.56E-06 | -0.12887 | 0.00529  | -0.03125 | 0.5005   | -0.18131 | 8.14E-05 | -0.10083 |
| -0.17584 | 0.00013  | -0.22391 | 1.02E-06 | -0.16049 | 0.0005   | -0.27845 | 9.20E-10 | -0.25001 |
| -0.16446 | 0.00036  | -0.17252 | 0.00018  | -0.14665 | 0.00148  | -0.13432 | 0.00364  | -0.1273  |
| -0.12955 | 0.00505  | -0.08438 | 0.06849  | -0.0514  | 0.26765  | -0.17568 | 0.00014  | 0.000391 |
| -0.14857 | 0.00128  | -0.09307 | 0.04441  | -0.00893 | 0.84737  | -0.17669 | 0.00012  | -0.0742  |
| -0.28961 | 1.78E-10 | -0.22341 | 1.08E-06 | -0.34379 | 2.11E-14 | -0.05501 | 0.23544  | -0.3037  |
| -0.21064 | 4.40E-06 | -0.14776 | 0.00136  | -0.08337 | 0.07186  | -0.1972  | 1.77E-05 | -0.2762  |
| -0.24693 | 6.45E-08 | -0.14685 | 0.00146  | -0.09739 | 0.03539  | -0.19177 | 3.02E-05 | -0.19118 |
| -0.36811 | 1.97E-16 | -0.22314 | 1.11E-06 | -0.26278 | 8.16E-09 | -0.19986 | 1.35E-05 | -0.09493 |
| -0.28557 | 3.26E-10 | -0.4148  | 7.60E-21 | -0.34485 | 1.74E-14 | -0.21269 | 3.53E-06 | -0.03528 |
| -0.16727 | 0.00028  | -0.38503 | 5.96E-18 | -0.54319 | 3.36E-37 | -0.14089 | 0.00228  | -0.15464 |

|          |          |          |          |          |          |          |          |          |
|----------|----------|----------|----------|----------|----------|----------|----------|----------|
| -0.36069 | 8.54E-16 | -0.48301 | 1.14E-28 | -0.61237 | 2.10E-49 | -0.21102 | 4.23E-06 | -0.18626 |
| 0.004088 | 0.9298   | -0.12105 | 0.00883  | 0.036334 | 0.43343  | -0.12343 | 0.00758  | -0.00839 |
| -0.17199 | 0.00019  | -0.22728 | 6.92E-07 | -0.15811 | 0.00061  | -0.1255  | 0.00662  | -0.17073 |
| -0.0412  | 0.37442  | -0.01008 | 0.82806  | 0.054489 | 0.2399   | 0.189395 | 3.80E-05 | 0.147666 |
| 0.020459 | 0.65923  | -0.03602 | 0.43738  | 0.002849 | 0.95104  | -0.11951 | 0.00974  | -0.10765 |
| -0.28879 | 2.02E-10 | -0.25679 | 1.81E-08 | -0.2639  | 7.01E-09 | -0.22288 | 1.15E-06 | -0.00369 |
| -0.00856 | 0.85357  | 0.098463 | 0.0334   | 0.230074 | 5.00E-07 | -0.02462 | 0.59561  | -0.00033 |
| -0.18109 | 8.30E-05 | -0.14393 | 0.00182  | -0.11143 | 0.01599  | -0.14939 | 0.0012   | -0.05918 |
| -0.0555  | 0.23127  | -0.28461 | 3.75E-10 | -0.09067 | 0.0502   | -0.2744  | 1.64E-09 | -0.31534 |
| -0.19543 | 2.11E-05 | -0.34827 | 9.20E-15 | -0.25765 | 1.62E-08 | -0.29363 | 9.70E-11 | -0.34266 |
| -0.20746 | 6.17E-06 | -0.24511 | 8.10E-08 | -0.17206 | 0.00019  | -0.18242 | 7.35E-05 | -0.19218 |
| 0.010217 | 0.82571  | -0.25418 | 2.55E-08 | -0.09026 | 0.05125  | -0.19119 | 3.20E-05 | -0.25751 |
| -0.24713 | 6.29E-08 | -0.19867 | 1.53E-05 | -0.01572 | 0.73469  | -0.22011 | 1.56E-06 | -0.24377 |
| -0.07855 | 0.08995  | -0.03007 | 0.5168   | 0.065014 | 0.16071  | -0.03176 | 0.49352  | 0.064636 |
| -0.09026 | 0.05126  | -0.06118 | 0.18687  | -0.11683 | 0.01152  | 0.043053 | 0.35324  | 0.153376 |
| -0.18812 | 4.30E-05 | -0.30729 | 1.14E-11 | -0.27563 | 1.38E-09 | -0.11735 | 0.01115  | -0.28523 |
| -0.13988 | 0.00245  | -0.13719 | 0.00297  | -0.14633 | 0.00152  | -0.13035 | 0.00478  | -0.0741  |
| 0.00633  | 0.89149  | -0.0136  | 0.76938  | -0.00234 | 0.95976  | 0.112527 | 0.01498  | 0.15829  |
| -0.05988 | 0.19649  | -0.19022 | 3.51E-05 | -0.06834 | 0.14034  | -0.09222 | 0.04639  | -0.09601 |
| -0.10057 | 0.02977  | -0.19525 | 2.15E-05 | -0.05893 | 0.2037   | -0.184   | 6.34E-05 | -0.2545  |
| -0.03139 | 0.49855  | -0.07351 | 0.11263  | -0.00782 | 0.86615  | -0.08338 | 0.07183  | -0.00884 |
| -0.09659 | 0.03693  | -0.18962 | 3.72E-05 | -0.07768 | 0.09361  | -0.06633 | 0.15237  | -0.11227 |
| 0.034031 | 0.46316  | -0.07167 | 0.12195  | 0.041881 | 0.36652  | -0.10293 | 0.02613  | -0.02673 |
| -0.05162 | 0.26564  | 0.0065   | 0.88858  | 0.070996 | 0.12551  | -0.00531 | 0.90895  | 0.016431 |
| 0.09012  | 0.05162  | -0.09314 | 0.04425  | 0.016326 | 0.72492  | -0.0441  | 0.34167  | -0.0575  |
| -0.1174  | 0.01112  | -0.08994 | 0.0521   | -0.06483 | 0.16187  | -0.06226 | 0.17922  | -0.0723  |
| -0.05163 | 0.26549  | -0.11627 | 0.01192  | -0.01513 | 0.74428  | -0.04975 | 0.28329  | -0.04313 |
| -0.04548 | 0.32677  | 0.039442 | 0.39511  | 0.064732 | 0.16254  | 0.004019 | 0.93097  | -0.03973 |
| -0.08934 | 0.05368  | -0.18754 | 4.54E-05 | -0.11209 | 0.01537  | -0.12027 | 0.00928  | -0.03935 |
| -0.16799 | 0.00027  | -0.26738 | 4.36E-09 | -0.06738 | 0.14602  | -0.22446 | 9.57E-07 | -0.21359 |
| -0.13282 | 0.00404  | -0.21693 | 2.23E-06 | -0.10565 | 0.02241  | -0.23665 | 2.29E-07 | -0.23556 |
| 0.036595 | 0.43014  | -0.1132  | 0.01438  | -0.01081 | 0.81571  | -0.12204 | 0.00829  | -0.09416 |
| -0.03602 | 0.43739  | -0.09815 | 0.03396  | 0.047387 | 0.30684  | -0.05105 | 0.27095  | -0.03051 |
| -0.03301 | 0.47663  | -0.0729  | 0.11565  | -0.00755 | 0.87068  | -0.10968 | 0.01774  | -0.05961 |
| -0.0674  | 0.14585  | -0.13591 | 0.00325  | -0.1431  | 0.00193  | -0.04255 | 0.35891  | -0.12946 |
| -0.12414 | 0.00723  | -0.34415 | 1.97E-14 | -0.24508 | 8.14E-08 | -0.09036 | 0.05101  | -0.20125 |
| -0.1373  | 0.00295  | -0.1909  | 3.29E-05 | 0.012277 | 0.79132  | -0.16155 | 0.00046  | -0.13924 |
| -0.06879 | 0.13771  | -0.20556 | 7.52E-06 | -0.04002 | 0.38815  | -0.11574 | 0.01232  | -0.33933 |
| -0.22611 | 7.92E-07 | -0.3082  | 9.84E-12 | -0.19609 | 1.98E-05 | -0.17935 | 9.74E-05 | -0.1185  |
| -0.08518 | 0.06591  | -0.0852  | 0.06581  | -0.07802 | 0.09218  | -0.1223  | 0.00815  | -0.07576 |
| -0.2583  | 1.48E-08 | -0.27808 | 9.70E-10 | -0.29744 | 5.40E-11 | -0.00855 | 0.85382  | 0.1897   |
| -0.3463  | 1.33E-14 | -0.19938 | 1.42E-05 | -0.01081 | 0.81583  | -0.21351 | 3.23E-06 | -0.2312  |
| -0.34578 | 1.46E-14 | -0.34755 | 1.05E-14 | -0.45206 | 6.70E-25 | -0.16911 | 0.00024  | -0.12026 |
| -0.16456 | 0.00036  | -0.10363 | 0.02512  | -0.06402 | 0.16722  | -0.17321 | 0.00017  | -0.13032 |
| -0.12799 | 0.00561  | -0.10663 | 0.02118  | -0.07136 | 0.12359  | -0.05797 | 0.21112  | 0.02923  |

|          |          |          |          |          |          |          |          |          |
|----------|----------|----------|----------|----------|----------|----------|----------|----------|
| -0.30318 | 2.20E-11 | -0.28571 | 3.19E-10 | -0.20609 | 7.12E-06 | -0.2339  | 3.18E-07 | -0.24215 |
| -0.05537 | 0.23237  | -0.1386  | 0.00268  | -0.04267 | 0.35753  | -0.10948 | 0.01795  | -0.10834 |
| -0.15689 | 0.00067  | -0.17443 | 0.00015  | -0.10756 | 0.02007  | -0.20651 | 6.82E-06 | -0.16048 |
| -0.02164 | 0.64095  | -0.19657 | 1.88E-05 | -0.09625 | 0.0376   | -0.09823 | 0.03382  | -0.14103 |
| -0.14466 | 0.00172  | -0.16393 | 0.00037  | -0.08071 | 0.08146  | -0.28333 | 4.53E-10 | -0.24105 |
| -0.17603 | 0.00013  | -0.08484 | 0.06697  | -0.04658 | 0.31517  | -0.1791  | 9.96E-05 | -0.1086  |
| -0.33684 | 7.48E-14 | -0.29928 | 4.05E-11 | -0.26694 | 4.63E-09 | -0.20826 | 5.67E-06 | -0.15458 |
| -0.41485 | 7.50E-21 | -0.27232 | 2.20E-09 | -0.31059 | 6.68E-12 | -0.23374 | 3.25E-07 | 0.016892 |
| -0.18551 | 5.50E-05 | -0.10077 | 0.02945  | -0.08083 | 0.081    | -0.06566 | 0.15656  | -0.06465 |
| -0.37424 | 5.67E-17 | -0.42928 | 2.31E-22 | -0.38547 | 5.43E-18 | -0.32983 | 2.59E-13 | -0.31851 |
| -0.28303 | 4.73E-10 | -0.12781 | 0.00567  | -0.02461 | 0.59578  | -0.14555 | 0.00161  | 0.043209 |
| -0.22312 | 1.11E-06 | -0.27495 | 1.52E-09 | -0.26283 | 8.11E-09 | -0.10048 | 0.02992  | -0.07617 |
| -0.17953 | 9.58E-05 | -0.012   | 0.79584  | 0.054464 | 0.24012  | -0.08774 | 0.05815  | 0.010182 |
| -0.22435 | 9.69E-07 | -0.24973 | 4.52E-08 | -0.13527 | 0.0034   | -0.14981 | 0.00117  | -0.22471 |
| -0.246   | 7.25E-08 | -0.38068 | 1.49E-17 | -0.26475 | 6.25E-09 | -0.22567 | 8.33E-07 | -0.11097 |
| -0.30736 | 1.13E-11 | -0.40543 | 6.66E-20 | -0.32384 | 7.31E-13 | -0.22898 | 5.68E-07 | -0.22399 |
| -0.02846 | 0.53951  | -0.08646 | 0.06193  | -0.0992  | 0.0321   | -0.11886 | 0.01015  | 0.065229 |
| -0.16241 | 0.00043  | -0.19662 | 1.87E-05 | -0.11115 | 0.01626  | -0.35937 | 1.11E-15 | -0.2858  |
| -0.44193 | 9.52E-24 | -0.36875 | 1.73E-16 | -0.37601 | 3.94E-17 | -0.27644 | 1.23E-09 | -0.30704 |
| -0.15576 | 0.00073  | -0.21055 | 4.44E-06 | -0.13693 | 0.00302  | -0.21848 | 1.87E-06 | -0.13964 |
| -0.30853 | 9.32E-12 | -0.08838 | 0.05632  | -0.10676 | 0.02103  | -0.16827 | 0.00026  | -0.14063 |
| -0.32603 | 5.01E-13 | -0.39461 | 7.51E-19 | -0.34314 | 2.38E-14 | -0.22839 | 6.09E-07 | -0.30315 |
| -0.15625 | 0.0007   | -0.04747 | 0.30597  | -0.07018 | 0.1299   | -0.09896 | 0.03252  | -0.10414 |
| -0.14263 | 0.002    | -0.19589 | 2.01E-05 | -0.10879 | 0.01869  | -0.2415  | 1.27E-07 | -0.22385 |
| 0.548082 | 5.69E-38 | 0.582023 | 1.09E-43 | 0.209785 | 4.82E-06 | 0.458909 | 1.06E-25 | 0.491085 |
| 0.231737 | 4.12E-07 | 0.33942  | 4.69E-14 | -0.08998 | 0.05198  | 0.320035 | 1.39E-12 | 0.426114 |
| 0.499233 | 8.35E-31 | 0.674867 | 2.33E-63 | 0.340952 | 3.55E-14 | 0.437239 | 3.16E-23 | 0.577477 |
| 0.189942 | 3.61E-05 | 0.168131 | 0.00026  | -0.15833 | 0.00059  | 0.266449 | 4.96E-09 | 0.442422 |
| 0.550782 | 2.11E-38 | 0.668112 | 1.10E-61 | 0.347912 | 9.83E-15 | 0.498377 | 1.09E-30 | 0.588621 |
| 0.339877 | 4.32E-14 | 0.379245 | 2.02E-17 | 0.001451 | 0.97506  | 0.322648 | 8.95E-13 | 0.459357 |
| 0.068269 | 0.14073  | 0.289225 | 1.89E-10 | -0.09318 | 0.04416  | 0.249189 | 4.85E-08 | 0.450464 |
| 0.488609 | 2.15E-29 | 0.563658 | 1.63E-40 | 0.139441 | 0.00253  | 0.506891 | 7.48E-32 | 0.638229 |
| 0.442818 | 7.57E-24 | 0.600425 | 4.41E-47 | 0.265546 | 5.61E-09 | 0.419056 | 2.77E-21 | 0.493336 |
| 0.378525 | 2.34E-17 | 0.563364 | 1.83E-40 | 0.201513 | 1.14E-05 | 0.442626 | 7.95E-24 | 0.490964 |
| 0.388607 | 2.77E-18 | 0.636454 | 2.12E-54 | 0.239565 | 1.61E-07 | 0.488941 | 1.95E-29 | 0.663261 |
| 0.55089  | 2.03E-38 | 0.666852 | 2.22E-61 | 0.293384 | 1.01E-10 | 0.398275 | 3.34E-19 | 0.554832 |
| 0.281366 | 6.03E-10 | 0.351268 | 5.23E-15 | -0.07785 | 0.09287  | 0.356886 | 1.79E-15 | 0.555262 |
| 0.2062   | 7.04E-06 | 0.230889 | 4.55E-07 | -0.12586 | 0.00646  | 0.239723 | 1.58E-07 | 0.327099 |
| 0.105137 | 0.02307  | 0.287155 | 2.57E-10 | -0.02652 | 0.56762  | 0.251002 | 3.84E-08 | 0.339464 |
| 0.251042 | 3.82E-08 | 0.47197  | 2.79E-27 | 0.044939 | 0.33254  | 0.363673 | 4.76E-16 | 0.647431 |
| 0.275299 | 1.44E-09 | 0.138241 | 0.00276  | -0.24202 | 1.19E-07 | 0.260445 | 1.12E-08 | 0.276487 |
| 0.212904 | 3.45E-06 | 0.35021  | 6.39E-15 | -0.05103 | 0.27114  | 0.310163 | 7.16E-12 | 0.399484 |
| 0.548731 | 4.49E-38 | 0.61221  | 2.26E-49 | 0.250881 | 3.90E-08 | 0.450427 | 1.03E-24 | 0.649357 |
| 0.387837 | 3.27E-18 | 0.444507 | 4.89E-24 | 0.10881  | 0.01867  | 0.295767 | 6.99E-11 | 0.380633 |
| 0.168429 | 0.00026  | 0.335468 | 9.55E-14 | -0.07883 | 0.08881  | 0.188417 | 4.18E-05 | 0.273288 |

|          |          |          |          |          |          |          |          |          |
|----------|----------|----------|----------|----------|----------|----------|----------|----------|
| 0.418792 | 2.95E-21 | 0.54416  | 2.37E-37 | 0.276177 | 1.27E-09 | 0.383965 | 7.47E-18 | 0.637833 |
| 0.538251 | 1.96E-36 | 0.557479 | 1.73E-39 | 0.19424  | 2.37E-05 | 0.392546 | 1.18E-18 | 0.516797 |
| 0.480838 | 2.16E-28 | 0.575213 | 1.73E-42 | 0.215039 | 2.74E-06 | 0.402512 | 1.29E-19 | 0.52761  |
| 0.411932 | 1.49E-20 | 0.498718 | 9.80E-31 | 0.18792  | 4.38E-05 | 0.471227 | 3.45E-27 | 0.647832 |
| 0.433116 | 8.92E-23 | 0.590571 | 3.07E-45 | 0.237308 | 2.12E-07 | 0.419882 | 2.27E-21 | 0.597764 |
| 0.444718 | 4.63E-24 | 0.526765 | 1.06E-34 | 0.167962 | 0.00027  | 0.430876 | 1.56E-22 | 0.584801 |
| 0.411616 | 1.60E-20 | 0.415975 | 5.76E-21 | -0.06457 | 0.16361  | 0.417654 | 3.87E-21 | 0.52656  |
| 0.373913 | 6.06E-17 | 0.521202 | 6.96E-34 | 0.186339 | 5.09E-05 | 0.36144  | 7.38E-16 | 0.350595 |
| 0.100728 | 0.02952  | 0.332649 | 1.58E-13 | -0.09721 | 0.03573  | 0.126865 | 0.00605  | 0.280381 |
| 0.493078 | 5.56E-30 | 0.60527  | 5.18E-48 | 0.229102 | 5.60E-07 | 0.447838 | 2.05E-24 | 0.723972 |
| 0.486409 | 4.16E-29 | 0.691718 | 9.86E-68 | 0.296413 | 6.33E-11 | 0.529593 | 4.03E-35 | 0.679906 |
| 0.237009 | 2.19E-07 | 0.304821 | 1.69E-11 | 0.044876 | 0.33321  | 0.178933 | 0.0001   | 0.295127 |
| 0.293582 | 9.77E-11 | 0.500463 | 5.69E-31 | 0.143632 | 0.00186  | 0.354867 | 2.64E-15 | 0.400547 |
| 0.472924 | 2.13E-27 | 0.551496 | 1.62E-38 | 0.205005 | 7.98E-06 | 0.384136 | 7.20E-18 | 0.515106 |
| 0.08672  | 0.06113  | 0.22823  | 6.20E-07 | -0.13538 | 0.00337  | 0.251178 | 3.76E-08 | 0.408406 |
| 0.288227 | 2.19E-10 | 0.400629 | 1.97E-19 | 0.050744 | 0.2738   | 0.34295  | 2.46E-14 | 0.535997 |
| 0.30817  | 9.89E-12 | 0.244798 | 8.43E-08 | -0.06964 | 0.13293  | 0.254401 | 2.48E-08 | 0.274611 |
| 0.502483 | 3.02E-31 | 0.60684  | 2.57E-48 | 0.26277  | 8.17E-09 | 0.363301 | 5.12E-16 | 0.510189 |
| 0.256028 | 2.00E-08 | 0.170842 | 0.00021  | -0.20426 | 8.62E-06 | 0.248536 | 5.26E-08 | 0.239164 |
| 0.390605 | 1.80E-18 | 0.286711 | 2.75E-10 | -0.03802 | 0.41243  | 0.231038 | 4.47E-07 | 0.291508 |
| 0.51071  | 2.19E-32 | 0.546264 | 1.11E-37 | 0.200738 | 1.24E-05 | 0.488142 | 2.48E-29 | 0.510405 |
| 0.472661 | 2.29E-27 | 0.471981 | 2.78E-27 | 0.178212 | 0.00011  | 0.286402 | 2.88E-10 | 0.213028 |
| 0.455498 | 2.67E-25 | 0.61472  | 7.14E-50 | 0.24937  | 4.73E-08 | 0.370098 | 1.32E-16 | 0.544555 |
| 0.315061 | 3.20E-12 | 0.472155 | 2.65E-27 | 0.096345 | 0.03741  | 0.37254  | 8.03E-17 | 0.396392 |
| 0.4192   | 2.68E-21 | 0.578438 | 4.70E-43 | 0.242145 | 1.17E-07 | 0.458301 | 1.25E-25 | 0.618588 |
| 0.457523 | 1.54E-25 | 0.439347 | 1.85E-23 | 0.142557 | 0.00201  | 0.456749 | 1.90E-25 | 0.517639 |
| 0.26657  | 4.87E-09 | 0.251069 | 3.81E-08 | -0.08538 | 0.06525  | 0.299523 | 3.90E-11 | 0.542608 |
| 0.297054 | 5.73E-11 | 0.420351 | 2.03E-21 | 0.041659 | 0.36906  | 0.298645 | 4.48E-11 | 0.385112 |
| 0.567843 | 3.21E-41 | 0.531413 | 2.15E-35 | 0.190269 | 3.49E-05 | 0.432594 | 1.02E-22 | 0.500243 |
| 0.124513 | 0.00706  | 0.35393  | 3.15E-15 | -0.02946 | 0.5254   | 0.310866 | 6.38E-12 | 0.311102 |
| 0.339954 | 4.26E-14 | 0.149723 | 0.00117  | -0.12631 | 0.00627  | 0.364808 | 3.80E-16 | 0.34556  |
| 0.148518 | 0.00129  | 0.356598 | 1.89E-15 | -0.03623 | 0.43481  | 0.300732 | 3.23E-11 | 0.254959 |
| 0.529014 | 4.92E-35 | 0.668464 | 8.99E-62 | 0.319876 | 1.43E-12 | 0.417125 | 4.39E-21 | 0.558085 |
| 0.48996  | 1.43E-29 | 0.43787  | 2.69E-23 | 0.061976 | 0.18122  | 0.450006 | 1.16E-24 | 0.547713 |
| 0.245614 | 7.61E-08 | 0.324468 | 6.56E-13 | -0.09987 | 0.03095  | 0.277986 | 9.83E-10 | 0.48854  |
| 0.542062 | 5.05E-37 | 0.605185 | 5.38E-48 | 0.277308 | 1.08E-09 | 0.490063 | 1.39E-29 | 0.575657 |
| 0.4646   | 2.21E-26 | 0.542124 | 4.94E-37 | 0.101448 | 0.02837  | 0.458666 | 1.13E-25 | 0.585422 |
| 0.178702 | 0.0001   | 0.218909 | 1.79E-06 | -0.05144 | 0.26727  | 0.216269 | 2.39E-06 | 0.199107 |
| 0.36807  | 1.98E-16 | 0.499661 | 7.31E-31 | 0.121285 | 0.0087   | 0.380349 | 1.60E-17 | 0.577507 |
| 0.391737 | 1.41E-18 | 0.416216 | 5.44E-21 | 0.137728 | 0.00286  | 0.366291 | 2.83E-16 | 0.549756 |
| 0.452774 | 5.54E-25 | 0.511772 | 1.55E-32 | 0.127957 | 0.00562  | 0.393414 | 9.76E-19 | 0.527576 |
| 0.312053 | 5.26E-12 | 0.248226 | 5.48E-08 | -0.09113 | 0.04904  | 0.383284 | 8.63E-18 | 0.446351 |
| 0.133074 | 0.00397  | 0.344498 | 1.85E-14 | -0.06693 | 0.14868  | 0.213056 | 3.40E-06 | 0.387068 |
| 0.289958 | 1.69E-10 | 0.435506 | 4.89E-23 | 0.133208 | 0.00393  | 0.185462 | 5.53E-05 | 0.273782 |
| 0.582263 | 9.84E-44 | 0.638232 | 8.69E-55 | 0.272462 | 2.15E-09 | 0.468573 | 7.29E-27 | 0.685075 |

|          |          |          |          |          |          |          |          |          |
|----------|----------|----------|----------|----------|----------|----------|----------|----------|
| 0.544375 | 2.19E-37 | 0.68575  | 3.77E-66 | 0.335641 | 9.26E-14 | 0.509759 | 2.98E-32 | 0.596377 |
| 0.601562 | 2.68E-47 | 0.626121 | 3.33E-52 | 0.301358 | 2.93E-11 | 0.504025 | 1.86E-31 | 0.561519 |
| 0.52537  | 1.71E-34 | 0.652848 | 4.59E-58 | 0.276802 | 1.16E-09 | 0.449719 | 1.25E-24 | 0.604334 |
| 0.47382  | 1.65E-27 | 0.49037  | 1.27E-29 | 0.067851 | 0.14319  | 0.488298 | 2.36E-29 | 0.645727 |
| 0.082106 | 0.0763   | 0.081965 | 0.07681  | -0.33377 | 1.29E-13 | 0.26424  | 6.70E-09 | 0.421512 |
| 0.438171 | 2.49E-23 | 0.360273 | 9.27E-16 | 0.057966 | 0.21118  | 0.472763 | 2.23E-27 | 0.482539 |
| 0.314103 | 3.75E-12 | 0.423711 | 9.04E-22 | 0.056785 | 0.22063  | 0.309944 | 7.42E-12 | 0.272187 |
| 0.419437 | 2.53E-21 | 0.558358 | 1.24E-39 | 0.153961 | 0.00084  | 0.46569  | 1.63E-26 | 0.703344 |
| 0.224414 | 9.62E-07 | 0.302638 | 2.39E-11 | -0.01399 | 0.76299  | 0.23083  | 4.58E-07 | 0.323938 |
| 0.208866 | 5.32E-06 | 0.449472 | 1.33E-24 | -0.03957 | 0.39361  | 0.327204 | 4.09E-13 | 0.521377 |
| 0.184264 | 6.18E-05 | 0.076637 | 0.0981   | -0.25588 | 2.04E-08 | 0.310254 | 7.05E-12 | 0.480763 |
| 0.331079 | 2.08E-13 | 0.140015 | 0.00242  | -0.10447 | 0.02396  | 0.267674 | 4.19E-09 | 0.246707 |
| 0.546586 | 9.83E-38 | 0.581797 | 1.19E-43 | 0.211606 | 3.97E-06 | 0.40309  | 1.13E-19 | 0.402899 |
| 0.345437 | 1.56E-14 | 0.330105 | 2.47E-13 | -0.02166 | 0.64055  | 0.278067 | 9.72E-10 | 0.210281 |
| 0.602239 | 1.99E-47 | 0.666788 | 2.30E-61 | 0.329438 | 2.77E-13 | 0.453871 | 4.13E-25 | 0.578109 |
| 0.418607 | 3.08E-21 | 0.314512 | 3.51E-12 | -0.0807  | 0.08149  | 0.346185 | 1.36E-14 | 0.325518 |
| 0.281567 | 5.86E-10 | 0.274845 | 1.54E-09 | -0.10649 | 0.02135  | 0.366016 | 2.99E-16 | 0.426839 |
| 0.341789 | 3.05E-14 | 0.438389 | 2.36E-23 | 0.09307  | 0.04441  | 0.34461  | 1.82E-14 | 0.510767 |
| 0.546043 | 1.20E-37 | 0.406571 | 5.13E-20 | 0.029718 | 0.52176  | 0.370375 | 1.25E-16 | 0.449509 |
| 0.457839 | 1.42E-25 | 0.529634 | 3.98E-35 | 0.083849 | 0.07024  | 0.407558 | 4.09E-20 | 0.651075 |
| 0.268561 | 3.71E-09 | 0.295527 | 7.25E-11 | -0.07326 | 0.11389  | 0.3703   | 1.26E-16 | 0.560329 |
| 0.557602 | 1.65E-39 | 0.743409 | 2.95E-83 | 0.352726 | 3.97E-15 | 0.423094 | 1.05E-21 | 0.549728 |
| 0.163874 | 0.00038  | 0.054813 | 0.23712  | -0.30279 | 2.33E-11 | 0.17714  | 0.00012  | 0.244074 |
| 0.262618 | 8.34E-09 | 0.317636 | 2.09E-12 | -0.02307 | 0.61901  | 0.251913 | 3.42E-08 | 0.407957 |
| 0.029934 | 0.51874  | 0.13175  | 0.00435  | -0.25027 | 4.22E-08 | 0.197636 | 1.69E-05 | 0.319865 |
| 0.537956 | 2.18E-36 | 0.630838 | 3.39E-53 | 0.309298 | 8.24E-12 | 0.40331  | 1.08E-19 | 0.533667 |
| 0.588906 | 6.21E-45 | 0.565144 | 9.18E-41 | 0.248412 | 5.35E-08 | 0.440632 | 1.33E-23 | 0.439629 |
| 0.503616 | 2.11E-31 | 0.477486 | 5.73E-28 | 0.156079 | 0.00071  | 0.406694 | 4.99E-20 | 0.562741 |
| 0.383282 | 8.63E-18 | 0.47228  | 2.55E-27 | 0.164424 | 0.00036  | 0.406354 | 5.39E-20 | 0.414938 |
| 0.525049 | 1.90E-34 | 0.716131 | 1.24E-74 | 0.366565 | 2.68E-16 | 0.514227 | 6.99E-33 | 0.669979 |
| 0.490346 | 1.27E-29 | 0.508221 | 4.89E-32 | 0.156816 | 0.00067  | 0.417606 | 3.91E-21 | 0.417828 |
| 0.546961 | 8.58E-38 | 0.56751  | 3.66E-41 | 0.233805 | 3.22E-07 | 0.408388 | 3.38E-20 | 0.298807 |
| 0.252911 | 3.01E-08 | 0.288426 | 2.13E-10 | -0.01813 | 0.69594  | 0.339127 | 4.95E-14 | 0.391957 |
| 0.440653 | 1.32E-23 | 0.665567 | 4.56E-61 | 0.342878 | 2.50E-14 | 0.428205 | 3.02E-22 | 0.686421 |
| 0.651851 | 7.78E-58 | 0.672166 | 1.10E-62 | 0.326143 | 4.91E-13 | 0.539253 | 1.38E-36 | 0.634481 |
| 0.146309 | 0.00152  | 0.334782 | 1.08E-13 | 0.049722 | 0.28359  | 0.16791  | 0.00027  | 0.27792  |
| 0.505513 | 1.16E-31 | 0.536944 | 3.12E-36 | 0.134435 | 0.00361  | 0.436777 | 3.55E-23 | 0.537736 |
| 0.504866 | 1.42E-31 | 0.585431 | 2.66E-44 | 0.264222 | 6.71E-09 | 0.479774 | 2.94E-28 | 0.729305 |
| -0.02526 | 0.58606  | 0.108623 | 0.01887  | -0.21564 | 2.56E-06 | 0.331452 | 1.95E-13 | 0.477285 |
| 0.309409 | 8.09E-12 | 0.243867 | 9.47E-08 | -0.11063 | 0.01677  | 0.238881 | 1.75E-07 | 0.276112 |
| 0.242799 | 1.08E-07 | 0.419693 | 2.38E-21 | -0.05275 | 0.25525  | 0.345494 | 1.54E-14 | 0.419989 |
| 0.493716 | 4.58E-30 | 0.565597 | 7.70E-41 | 0.199532 | 1.40E-05 | 0.494988 | 3.10E-30 | 0.577097 |
| 0.467783 | 9.10E-27 | 0.633588 | 8.78E-54 | 0.287741 | 2.36E-10 | 0.448656 | 1.65E-24 | 0.724636 |
| 0.499205 | 8.42E-31 | 0.560917 | 4.68E-40 | 0.188686 | 4.07E-05 | 0.372983 | 7.33E-17 | 0.504101 |
| 0.23772  | 2.01E-07 | 0.137824 | 0.00284  | -0.17967 | 9.46E-05 | 0.32846  | 3.29E-13 | 0.440606 |



|          |          |          |          |          |          |          |          |          |
|----------|----------|----------|----------|----------|----------|----------|----------|----------|
| 0.567647 | 3.46E-41 | 0.560935 | 4.64E-40 | 0.196177 | 1.96E-05 | 0.438632 | 2.22E-23 | 0.662273 |
| 0.262315 | 8.69E-09 | 0.392106 | 1.30E-18 | 0.013955 | 0.76359  | 0.320899 | 1.20E-12 | 0.376921 |
| 0.314148 | 3.72E-12 | 0.60543  | 4.82E-48 | 0.238184 | 1.90E-07 | 0.296817 | 5.94E-11 | 0.446992 |
| 0.448237 | 1.84E-24 | 0.394494 | 7.70E-19 | 0.079287 | 0.08699  | 0.392366 | 1.23E-18 | 0.389701 |
| 0.506572 | 8.28E-32 | 0.559784 | 7.21E-40 | 0.20923  | 5.12E-06 | 0.390381 | 1.89E-18 | 0.476085 |
| 0.243733 | 9.63E-08 | 0.164846 | 0.00035  | -0.16052 | 0.0005   | 0.286571 | 2.81E-10 | 0.407283 |
| 0.270672 | 2.77E-09 | 0.374147 | 5.78E-17 | 0.034208 | 0.46083  | 0.264848 | 6.17E-09 | 0.410689 |
| 0.646965 | 1.01E-56 | 0.482608 | 1.28E-28 | 0.124892 | 0.00689  | 0.449965 | 1.17E-24 | 0.462551 |
| 0.214793 | 2.81E-06 | 0.301097 | 3.05E-11 | -0.09968 | 0.03127  | 0.305575 | 1.50E-11 | 0.517766 |
| -0.1139  | 0.01378  | 0.24789  | 5.71E-08 | -0.05723 | 0.21705  | 0.167471 | 0.00028  | 0.281473 |
| 0.086137 | 0.0629   | 0.058349 | 0.20816  | -0.28726 | 2.54E-10 | 0.247872 | 5.73E-08 | 0.362576 |
| 0.488518 | 2.21E-29 | 0.550517 | 2.33E-38 | 0.203152 | 9.66E-06 | 0.46893  | 6.59E-27 | 0.510663 |
| 0.162087 | 0.00044  | 0.286502 | 2.84E-10 | -0.20777 | 5.97E-06 | 0.223641 | 1.05E-06 | 0.35379  |
| 0.221966 | 1.27E-06 | 0.225078 | 8.92E-07 | -0.11807 | 0.01066  | 0.255372 | 2.18E-08 | 0.368259 |
| 0.361519 | 7.27E-16 | 0.244622 | 8.62E-08 | -0.11062 | 0.01678  | 0.44953  | 1.31E-24 | 0.532595 |
| 0.341118 | 3.44E-14 | 0.532734 | 1.36E-35 | 0.260944 | 1.04E-08 | 0.452349 | 6.20E-25 | 0.628285 |
| 0.438221 | 2.46E-23 | 0.486948 | 3.54E-29 | 0.116961 | 0.01142  | 0.395349 | 6.38E-19 | 0.448272 |
| 0.055457 | 0.23164  | 0.370563 | 1.20E-16 | -0.12368 | 0.00745  | 0.284903 | 3.59E-10 | 0.536235 |
| 0.327001 | 4.24E-13 | 0.49229  | 7.07E-30 | 0.130302 | 0.0048   | 0.275387 | 1.42E-09 | 0.463597 |
| 0.510067 | 2.70E-32 | 0.51592  | 4.01E-33 | 0.198772 | 1.51E-05 | 0.360995 | 8.05E-16 | 0.319294 |
| 0.55722  | 1.91E-39 | 0.631784 | 2.13E-53 | 0.366592 | 2.66E-16 | 0.332197 | 1.71E-13 | 0.496237 |
| 0.267232 | 4.45E-09 | 0.293317 | 1.02E-10 | -0.0641  | 0.1667   | 0.358081 | 1.42E-15 | 0.472759 |
| 0.561756 | 3.39E-40 | 0.642206 | 1.16E-55 | 0.322366 | 9.39E-13 | 0.556516 | 2.48E-39 | 0.688084 |
| 0.38065  | 1.50E-17 | 0.561978 | 3.12E-40 | 0.134371 | 0.00362  | 0.345165 | 1.64E-14 | 0.48519  |
| 0.650239 | 1.82E-57 | 0.711629 | 2.64E-73 | 0.344448 | 1.87E-14 | 0.532574 | 1.44E-35 | 0.667648 |
| 0.433771 | 7.57E-23 | 0.65865  | 2.04E-59 | 0.283477 | 4.43E-10 | 0.508624 | 4.29E-32 | 0.763632 |
| 0.417789 | 3.75E-21 | 0.573222 | 3.83E-42 | 0.258633 | 1.42E-08 | 0.413138 | 1.12E-20 | 0.56085  |
| 0.521931 | 5.45E-34 | 0.546845 | 8.95E-38 | 0.264639 | 6.34E-09 | 0.424109 | 8.21E-22 | 0.424861 |
| 0.491972 | 7.79E-30 | 0.629066 | 8.04E-53 | 0.304518 | 1.78E-11 | 0.444709 | 4.64E-24 | 0.617075 |
| 0.347562 | 1.05E-14 | 0.482294 | 1.41E-28 | 0.085029 | 0.06637  | 0.352289 | 4.31E-15 | 0.452968 |
| 0.221886 | 1.28E-06 | 0.306184 | 1.36E-11 | -0.02682 | 0.56314  | 0.31343  | 4.19E-12 | 0.281868 |
| 0.341228 | 3.38E-14 | 0.501315 | 4.36E-31 | 0.044434 | 0.338    | 0.397603 | 3.87E-19 | 0.637218 |
| 0.44656  | 2.86E-24 | 0.601087 | 3.30E-47 | 0.253459 | 2.80E-08 | 0.382471 | 1.02E-17 | 0.444672 |
| 0.436389 | 3.91E-23 | 0.537398 | 2.65E-36 | 0.120252 | 0.00929  | 0.364995 | 3.66E-16 | 0.491275 |
| 0.321841 | 1.03E-12 | 0.29642  | 6.32E-11 | -0.12196 | 0.00833  | 0.338375 | 5.67E-14 | 0.425671 |
| 0.555163 | 4.13E-39 | 0.627714 | 1.55E-52 | 0.338144 | 5.91E-14 | 0.438956 | 2.04E-23 | 0.640058 |
| 0.299174 | 4.12E-11 | 0.413456 | 1.04E-20 | 0.022609 | 0.62602  | 0.193308 | 2.60E-05 | 0.264128 |
| 0.028228 | 0.54286  | 0.064923 | 0.1613   | 0.095782 | 0.03854  | 0.032113 | 0.48876  | 0.032708 |
| 0.038631 | 0.4049   | 0.025091 | 0.58861  | 0.060953 | 0.18854  | 0.102664 | 0.02652  | 0.075653 |
| 0.056631 | 0.2219   | 0.062403 | 0.17822  | 0.072159 | 0.11942  | 0.022432 | 0.62873  | 0.024809 |
| 0.099207 | 0.03208  | 0.050811 | 0.27317  | 0.122171 | 0.00822  | 0.112212 | 0.01526  | 0.104027 |
| -0.05898 | 0.20328  | -0.02276 | 0.62368  | 0.023933 | 0.60593  | -0.00319 | 0.94515  | -0.0464  |
| 0.068108 | 0.14167  | 0.022902 | 0.62156  | 0.068776 | 0.1378   | 0.006012 | 0.8969   | 0.02818  |
| 0.07758  | 0.09402  | 0.009093 | 0.84462  | 0.004826 | 0.91715  | 0.131747 | 0.00435  | 0.051195 |
| 0.021622 | 0.64117  | 0.023152 | 0.61774  | 0.028162 | 0.5438   | 0.040645 | 0.38084  | 0.062135 |

|          |         |           |         |          |         |          |         |          |
|----------|---------|-----------|---------|----------|---------|----------|---------|----------|
| -0.02987 | 0.51969 | 0.053957  | 0.24453 | 0.111729 | 0.01571 | 0.042391 | 0.3607  | -0.02287 |
| 0.001168 | 0.97992 | -0.00761  | 0.86977 | 0.014701 | 0.75134 | 0.023046 | 0.61936 | 0.036454 |
| 0.045636 | 0.32508 | 0.08228   | 0.07568 | 0.045035 | 0.3315  | 0.05335  | 0.24988 | 0.028033 |
| 0.059498 | 0.19933 | 0.019664  | 0.67168 | 0.035547 | 0.44346 | 0.051689 | 0.26495 | 0.067196 |
| 0.058957 | 0.20346 | 0.065402  | 0.15822 | 0.089426 | 0.05346 | 0.050036 | 0.28056 | 0.052637 |
| 0.043006 | 0.35376 | 0.038715  | 0.40388 | 0.05371  | 0.24669 | 0.040507 | 0.38245 | 0.052742 |
| 0.002826 | 0.95144 | -0.05389  | 0.24509 | -0.05037 | 0.27735 | 0.02466  | 0.59503 | -0.0098  |
| 0.046087 | 0.32032 | 0.032996  | 0.47688 | 0.053595 | 0.24771 | 0.018128 | 0.69599 | 0.031808 |
| 0.011209 | 0.8091  | 0.009074  | 0.84495 | 0.014215 | 0.75932 | 0.039644 | 0.39269 | 0.040343 |
| -0.06493 | 0.16124 | -0.05853  | 0.20676 | 0.0299   | 0.51921 | -0.06072 | 0.19023 | -0.07706 |
| -0.01841 | 0.69153 | -0.04898  | 0.29089 | 0.001605 | 0.9724  | 0.013836 | 0.76555 | 0.010832 |
| -0.06382 | 0.16852 | -0.00449  | 0.92293 | 0.070278 | 0.12939 | -0.02132 | 0.64583 | -0.00879 |
| -0.04284 | 0.35562 | -0.01671  | 0.71876 | 0.05669  | 0.22141 | -0.07512 | 0.10496 | -0.09204 |
| 0.058068 | 0.21037 | 0.048164  | 0.29897 | 0.064034 | 0.16713 | 0.001384 | 0.97621 | -0.04951 |
| -0.01461 | 0.75282 | 0.024325  | 0.60005 | 0.048048 | 0.30013 | 0.024498 | 0.59745 | -0.0351  |
| -0.03714 | 0.42333 | 0.051766  | 0.26424 | 0.099424 | 0.0317  | -0.02428 | 0.60071 | -0.00225 |
| -0.02209 | 0.63397 | 0.036687  | 0.42897 | 0.129809 | 0.00496 | -0.02999 | 0.51795 | -0.02432 |
| -0.01823 | 0.69442 | -0.00599  | 0.89736 | 0.001723 | 0.97037 | 0.040329 | 0.38456 | 0.048122 |
| -0.0163  | 0.72528 | -0.00018  | 0.99693 | 0.024382 | 0.59919 | -0.02748 | 0.55358 | 0.021328 |
| 0.025817 | 0.57786 | 0.047739  | 0.30326 | 0.046585 | 0.31511 | 0.028185 | 0.54348 | 0.081416 |
| -0.01721 | 0.71072 | -0.02532  | 0.5852  | 0.035686 | 0.44169 | -0.04099 | 0.37685 | -0.02103 |
| 0.044924 | 0.33269 | 0.12607   | 0.00637 | 0.061853 | 0.18209 | 0.07078  | 0.12666 | 0.071827 |
| 0.065502 | 0.15759 | 0.060294  | 0.19338 | 0.056036 | 0.2268  | 0.07969  | 0.08539 | 0.070694 |
| 0.020852 | 0.6531  | 0.054071  | 0.24353 | 0.066411 | 0.15189 | 0.02531  | 0.58536 | 0.062883 |
| 0.04216  | 0.36332 | -0.01034  | 0.82368 | 0.031563 | 0.49623 | 0.028232 | 0.5428  | -0.00954 |
| 0.023832 | 0.60745 | 0.042762  | 0.35651 | 0.052306 | 0.25928 | 0.019559 | 0.67333 | 0.061737 |
| 0.006272 | 0.89247 | -0.0155   | 0.7383  | 0.014882 | 0.74839 | 0.010953 | 0.81338 | -0.00497 |
| -0.00674 | 0.88457 | -2.18E-05 | 0.99963 | 0.05115  | 0.26998 | 0.001208 | 0.97924 | -0.02568 |
| 0.022561 | 0.62676 | 0.025807  | 0.57801 | 0.041634 | 0.36935 | 0.041827 | 0.36713 | 0.046991 |
| 0.03416  | 0.46146 | 0.054585  | 0.23908 | 0.066311 | 0.15251 | 0.007036 | 0.87947 | 0.064882 |
| 0.011752 | 0.80004 | 0.021965  | 0.63589 | 0.022696 | 0.62469 | 0.006593 | 0.887   | 0.011245 |
| -0.09326 | 0.04396 | -0.08734  | 0.0593  | -0.00721 | 0.87656 | -0.07557 | 0.10287 | -0.04479 |
| 0.008713 | 0.85104 | -0.00762  | 0.8695  | 0.028873 | 0.53367 | 0.038675 | 0.40437 | 0.021473 |
| 0.033684 | 0.46773 | -0.00856  | 0.85356 | -0.00295 | 0.94929 | 0.074505 | 0.10784 | 0.08416  |
| -0.04521 | 0.3296  | -0.1241   | 0.00725 | -0.02225 | 0.63157 | -0.14399 | 0.00181 | -0.15766 |
| -0.00841 | 0.85619 | -0.02609  | 0.57379 | 0.008821 | 0.84922 | 0.051173 | 0.26976 | -0.02614 |
| -0.00277 | 0.95248 | -0.02516  | 0.58758 | 0.030614 | 0.50929 | -0.02075 | 0.65474 | -0.02472 |
| 0.013008 | 0.77919 | -0.00485  | 0.91671 | 0.016857 | 0.71636 | 0.007318 | 0.87467 | 0.017184 |
| 0.005525 | 0.90521 | 0.009423  | 0.83906 | 0.025383 | 0.58428 | 0.011496 | 0.80431 | 0.023509 |
| 0.022187 | 0.63247 | -1.30E-05 | 0.99978 | 0.029414 | 0.52603 | 0.016648 | 0.71972 | 0.017415 |
| 0.008411 | 0.85615 | 0.008846  | 0.84879 | 0.021326 | 0.64574 | 0.015569 | 0.7372  | 0.026409 |
| -0.0069  | 0.88185 | -0.03731  | 0.4212  | 0.015718 | 0.73478 | -0.011   | 0.81254 | -0.02294 |
| 0.030838 | 0.50619 | -0.02024  | 0.6627  | 0.026414 | 0.5691  | 0.046577 | 0.3152  | 0.001779 |
| -0.01733 | 0.70879 | -0.04192  | 0.36607 | 0.011192 | 0.80938 | 0.012373 | 0.78973 | -0.02257 |
| 0.047415 | 0.30656 | -0.01185  | 0.79839 | 0.029893 | 0.51931 | 0.054768 | 0.2375  | 0.014634 |

|          |          |          |          |          |          |          |          |          |
|----------|----------|----------|----------|----------|----------|----------|----------|----------|
| 0.063672 | 0.16954  | 0.143249 | 0.00191  | 0.103579 | 0.0252   | 0.035248 | 0.44731  | 0.158644 |
| -0.02811 | 0.54453  | -0.02371 | 0.60936  | 0.035025 | 0.45019  | -0.04373 | 0.34573  | -0.02779 |
| 0.015978 | 0.73056  | 0.171166 | 0.0002   | 0.287884 | 2.31E-10 | 0.00085  | 0.98539  | 0.041058 |
| 0.039345 | 0.39627  | 0.025855 | 0.57731  | 0.028769 | 0.53514  | 0.023241 | 0.61639  | 0.072959 |
| 0.017115 | 0.7122   | 0.020048 | 0.66565  | 0.040829 | 0.37868  | 0.036145 | 0.43582  | 0.061914 |
| 0.012269 | 0.79144  | 0.012071 | 0.79473  | 0.013616 | 0.76917  | 0.038099 | 0.41141  | 0.055338 |
| -0.06108 | 0.18762  | -0.03788 | 0.41405  | 0.015816 | 0.73319  | -0.03483 | 0.45272  | -0.04614 |
| -0.00805 | 0.86222  | -0.02108 | 0.64951  | 0.013966 | 0.76341  | -0.02527 | 0.58597  | -0.00101 |
| -0.03058 | 0.50977  | -0.01504 | 0.74573  | 0.039405 | 0.39555  | -0.0102  | 0.82606  | -0.00876 |
| 0.011568 | 0.80312  | 0.045048 | 0.33136  | 0.012844 | 0.78191  | 0.013631 | 0.76891  | 0.080399 |
| 0.035405 | 0.44529  | 0.019793 | 0.66965  | 0.034525 | 0.45668  | 0.032645 | 0.48158  | 0.040389 |
| -0.05576 | 0.22907  | -0.06919 | 0.13544  | 0.008293 | 0.85815  | -0.05756 | 0.21442  | -0.06143 |
| -0.01266 | 0.7849   | -0.0253  | 0.58554  | 0.012707 | 0.78418  | -0.03016 | 0.51563  | -0.00073 |
| -0.03786 | 0.41432  | -0.03368 | 0.46778  | -0.00924 | 0.8422   | -0.01006 | 0.82831  | -0.10057 |
| 0.016299 | 0.72536  | 0.012372 | 0.78974  | 0.064065 | 0.16692  | 0.019478 | 0.6746   | 0.016644 |
| -0.06445 | 0.16439  | -0.03508 | 0.44944  | 0.012952 | 0.78012  | -0.0127  | 0.78435  | -0.05101 |
| -0.0487  | 0.29364  | -0.00406 | 0.93035  | 0.036449 | 0.43198  | 0.035362 | 0.44583  | -0.04036 |
| -0.02708 | 0.55946  | -0.07341 | 0.11314  | -0.01848 | 0.69047  | 0.002975 | 0.94887  | -0.07607 |
| -0.11333 | 0.01427  | 0.038287 | 0.4091   | 0.071113 | 0.12488  | -0.01753 | 0.70549  | -0.00671 |
| -0.23207 | 3.96E-07 | -0.43789 | 2.68E-23 | -0.32125 | 1.14E-12 | -0.1158  | 0.01227  | -0.21873 |
| -0.33141 | 1.96E-13 | -0.46488 | 2.05E-26 | -0.35607 | 2.09E-15 | -0.15277 | 0.00093  | -0.24986 |
| -0.25335 | 2.84E-08 | -0.43614 | 4.17E-23 | -0.43496 | 5.62E-23 | -0.03384 | 0.46569  | -0.02042 |
| -0.0541  | 0.24329  | -0.25395 | 2.62E-08 | -0.29944 | 3.96E-11 | 0.020628 | 0.65659  | -0.201   |
| -0.27051 | 2.83E-09 | -0.29373 | 9.54E-11 | -0.26271 | 8.23E-09 | -0.12932 | 0.00513  | -0.13254 |
| -0.08969 | 0.05276  | -0.37961 | 1.87E-17 | -0.15425 | 0.00082  | -0.08866 | 0.05555  | -0.15058 |
| -0.06258 | 0.17696  | -0.39464 | 7.46E-19 | -0.11566 | 0.01238  | -0.21141 | 4.05E-06 | -0.30304 |
| -0.19938 | 1.42E-05 | -0.52862 | 5.64E-35 | -0.45582 | 2.44E-25 | -0.11511 | 0.0128   | -0.07503 |
| -0.35478 | 2.68E-15 | -0.51916 | 1.37E-33 | -0.64631 | 1.41E-56 | -0.16688 | 0.00029  | -0.18484 |
| -0.06418 | 0.16619  | -0.33749 | 6.65E-14 | -0.2229  | 1.14E-06 | -0.11447 | 0.01331  | -0.14789 |
| 0.308287 | 9.70E-12 | -0.05177 | 0.26419  | 0.177608 | 0.00011  | 0.231116 | 4.43E-07 | 0.211469 |
| -0.08351 | 0.07139  | -0.3437  | 2.15E-14 | -0.11855 | 0.01035  | -0.09649 | 0.03712  | -0.19523 |
| -0.40267 | 1.25E-19 | -0.63014 | 4.76E-53 | -0.6952  | 1.12E-68 | -0.24236 | 1.14E-07 | -0.23403 |
| -0.64228 | 1.12E-55 | -0.76089 | 2.20E-89 | -0.71851 | 2.43E-75 | -0.33833 | 5.71E-14 | -0.43847 |
| -0.10709 | 0.02063  | -0.29349 | 9.91E-11 | -0.2601  | 1.17E-08 | 0.070873 | 0.12617  | 0.069134 |
| -0.34961 | 7.16E-15 | -0.52303 | 3.76E-34 | -0.58267 | 8.33E-44 | -0.13502 | 0.00346  | -0.17495 |
| -0.05041 | 0.27693  | -0.36637 | 2.79E-16 | -0.2242  | 9.85E-07 | -0.04161 | 0.36959  | -0.1889  |
| -0.34853 | 8.75E-15 | -0.44271 | 7.78E-24 | -0.53008 | 3.42E-35 | -0.0583  | 0.20852  | -0.09782 |
| -0.53375 | 9.54E-36 | -0.72182 | 2.40E-76 | -0.68867 | 6.41E-67 | -0.25212 | 3.33E-08 | -0.28876 |
| -0.27733 | 1.08E-09 | -0.38924 | 2.42E-18 | -0.44453 | 4.86E-24 | -0.04676 | 0.3133   | -0.11218 |
| -0.53628 | 3.94E-36 | -0.62885 | 8.94E-53 | -0.75355 | 9.50E-87 | -0.26594 | 5.31E-09 | -0.25262 |
| -0.00336 | 0.94228  | -0.35692 | 1.78E-15 | -0.40206 | 1.43E-19 | 0.007012 | 0.87987  | -0.18139 |
| 0.039708 | 0.39193  | -0.38398 | 7.44E-18 | -0.33986 | 4.33E-14 | -0.09197 | 0.04698  | -0.13112 |
| -0.08686 | 0.06073  | -0.30185 | 2.71E-11 | -0.27993 | 7.43E-10 | 0.015767 | 0.73398  | -0.16975 |
| -0.46265 | 3.80E-26 | -0.56893 | 2.09E-41 | -0.65218 | 6.55E-58 | -0.24368 | 9.69E-08 | -0.2746  |
| -0.22382 | 1.03E-06 | -0.53089 | 2.58E-35 | -0.52928 | 4.50E-35 | -0.16413 | 0.00037  | -0.35602 |

|          |          |          |          |          |          |          |          |          |
|----------|----------|----------|----------|----------|----------|----------|----------|----------|
| -0.23557 | 2.61E-07 | -0.56353 | 1.72E-40 | -0.52336 | 3.37E-34 | -0.13735 | 0.00294  | -0.40759 |
| -0.19943 | 1.41E-05 | -0.53184 | 1.86E-35 | -0.3982  | 3.39E-19 | -0.14219 | 0.00207  | -0.18692 |
| -0.12852 | 0.00541  | -0.5865  | 1.70E-44 | -0.47063 | 4.08E-27 | -0.10371 | 0.02501  | -0.24139 |
| -0.13773 | 0.00286  | -0.2796  | 7.79E-10 | -0.24661 | 6.72E-08 | -0.08624 | 0.06257  | -0.08514 |
| -0.56324 | 1.92E-40 | -0.68595 | 3.35E-66 | -0.74965 | 2.19E-85 | -0.26791 | 4.06E-09 | -0.27959 |
| -0.19791 | 1.65E-05 | -0.40335 | 1.07E-19 | -0.38828 | 2.97E-18 | 0.037597 | 0.4176   | 0.069961 |
| 0.00468  | 0.91965  | -0.4383  | 2.41E-23 | -0.26859 | 3.69E-09 | -0.09141 | 0.04835  | -0.17606 |
| 0.158173 | 0.0006   | -0.21187 | 3.86E-06 | -0.12482 | 0.00692  | 0.127587 | 0.00576  | 0.004671 |
| -0.06447 | 0.16427  | -0.37218 | 8.63E-17 | -0.38842 | 2.88E-18 | -0.01209 | 0.7945   | -0.16121 |
| -0.18515 | 5.69E-05 | -0.47444 | 1.38E-27 | -0.47132 | 3.35E-27 | -0.03432 | 0.45931  | -0.18825 |
| 0.002474 | 0.95748  | -0.36516 | 3.55E-16 | -0.35618 | 2.05E-15 | -0.03504 | 0.44996  | 0.01312  |
| -0.2151  | 2.72E-06 | -0.39891 | 2.89E-19 | -0.3118  | 5.48E-12 | -0.06719 | 0.14712  | -0.27335 |
| 0.216389 | 2.36E-06 | -0.21098 | 4.25E-06 | -0.22182 | 1.29E-06 | 0.068411 | 0.13991  | -0.07244 |
| -0.21231 | 3.68E-06 | -0.5742  | 2.60E-42 | -0.55002 | 2.79E-38 | -0.05057 | 0.27543  | -0.2119  |
| -0.13412 | 0.00369  | -0.32397 | 7.14E-13 | -0.32819 | 3.44E-13 | 0.00219  | 0.96235  | 0.006242 |
| 0.224327 | 9.72E-07 | -0.08275 | 0.074    | 0.168107 | 0.00026  | 0.16978  | 0.00023  | 0.030423 |
| -0.01891 | 0.68352  | -0.31775 | 2.05E-12 | -0.30957 | 7.88E-12 | 0.077522 | 0.09427  | -0.05811 |
| -0.11998 | 0.00945  | -0.39654 | 4.90E-19 | -0.3188  | 1.72E-12 | -0.06517 | 0.15971  | -0.20034 |
| -0.01129 | 0.80777  | -0.22917 | 5.56E-07 | -0.33408 | 1.22E-13 | 0.057877 | 0.21188  | -0.13533 |
| -0.35536 | 2.40E-15 | -0.64431 | 3.96E-56 | -0.5473  | 7.58E-38 | -0.20733 | 6.25E-06 | -0.33874 |
| -0.51918 | 1.37E-33 | -0.68949 | 3.88E-67 | -0.64913 | 3.25E-57 | -0.31965 | 1.49E-12 | -0.37682 |
| -0.13868 | 0.00267  | -0.35829 | 1.36E-15 | -0.36946 | 1.50E-16 | 0.013501 | 0.77106  | -0.08351 |
| -0.14149 | 0.00218  | -0.25284 | 3.03E-08 | -0.1775  | 0.00012  | 0.024876 | 0.59181  | 0.070069 |
| -0.11958 | 0.0097   | -0.45401 | 3.98E-25 | -0.24046 | 1.44E-07 | -0.03629 | 0.43404  | -0.26875 |
| 0.079618 | 0.08567  | -0.25638 | 1.91E-08 | -0.34179 | 3.05E-14 | 0.157184 | 0.00065  | 0.108543 |
| -0.47974 | 2.97E-28 | -0.63603 | 2.61E-54 | -0.52414 | 2.59E-34 | -0.32477 | 6.23E-13 | -0.27613 |
| -0.0453  | 0.3287   | -0.31403 | 3.80E-12 | -0.12889 | 0.00528  | 0.014536 | 0.75405  | 0.085419 |
| -0.46152 | 5.19E-26 | -0.68024 | 1.01E-64 | -0.55744 | 1.75E-39 | -0.26525 | 5.84E-09 | -0.30056 |
| -0.014   | 0.76284  | -0.32837 | 3.34E-13 | -0.31493 | 3.27E-12 | -0.0114  | 0.80594  | -0.07275 |
| -0.33792 | 6.15E-14 | -0.42383 | 8.79E-22 | -0.4998  | 6.99E-31 | -0.02823 | 0.54287  | 0.000683 |
| -0.14742 | 0.0014   | -0.30603 | 1.39E-11 | -0.32674 | 4.43E-13 | 0.046256 | 0.31855  | 0.148702 |
| -0.18246 | 7.31E-05 | -0.43274 | 9.79E-23 | -0.39934 | 2.63E-19 | -0.09438 | 0.04147  | -0.20757 |
| -0.35899 | 1.19E-15 | -0.41369 | 9.86E-21 | -0.41164 | 1.59E-20 | -0.18331 | 6.76E-05 | -0.27973 |
| -0.00418 | 0.92816  | -0.49728 | 1.53E-30 | -0.28045 | 6.89E-10 | -0.0439  | 0.34385  | -0.20834 |
| -0.42393 | 8.57E-22 | -0.68773 | 1.14E-66 | -0.61836 | 1.32E-50 | -0.17977 | 9.37E-05 | -0.31738 |
| -0.48228 | 1.41E-28 | -0.71101 | 4.00E-73 | -0.64271 | 9.00E-56 | -0.28741 | 2.48E-10 | -0.38368 |
| -0.34341 | 2.27E-14 | -0.53812 | 2.06E-36 | -0.56368 | 1.62E-40 | -0.09046 | 0.05074  | -0.32347 |
| -0.21408 | 3.04E-06 | -0.4436  | 6.18E-24 | -0.45355 | 4.50E-25 | -0.09793 | 0.03438  | -0.08738 |
| -0.15252 | 0.00094  | -0.47518 | 1.12E-27 | -0.26911 | 3.44E-09 | -0.11411 | 0.01361  | -0.24757 |
| -0.2071  | 6.41E-06 | -0.49911 | 8.66E-31 | -0.28781 | 2.33E-10 | -0.1125  | 0.015    | -0.13095 |
| -0.22984 | 5.14E-07 | -0.24035 | 1.46E-07 | -0.24362 | 9.77E-08 | 0.019502 | 0.67423  | -0.07125 |
| -0.16595 | 0.00032  | -0.17992 | 9.24E-05 | -0.17858 | 0.0001   | 0.096358 | 0.03738  | 0.055623 |
| -0.33216 | 1.72E-13 | -0.56948 | 1.69E-41 | -0.54716 | 7.97E-38 | -0.09139 | 0.04841  | -0.19299 |
| -0.41442 | 8.31E-21 | -0.47283 | 2.18E-27 | -0.68365 | 1.34E-65 | -0.05855 | 0.20662  | -0.05683 |
| -0.3026  | 2.41E-11 | -0.58075 | 1.83E-43 | -0.4726  | 2.33E-27 | -0.12928 | 0.00514  | -0.24577 |

|          |          |          |          |          |          |          |          |          |
|----------|----------|----------|----------|----------|----------|----------|----------|----------|
| -0.24043 | 1.45E-07 | -0.46196 | 4.59E-26 | -0.51266 | 1.17E-32 | -0.00915 | 0.84369  | 0.049742 |
| -0.21668 | 2.29E-06 | -0.58597 | 2.13E-44 | -0.408   | 3.70E-20 | -0.09572 | 0.03866  | -0.2517  |
| -0.59857 | 9.93E-47 | -0.65165 | 8.66E-58 | -0.73309 | 7.22E-80 | -0.24459 | 8.65E-08 | -0.27203 |
| -0.35821 | 1.38E-15 | -0.6604  | 7.89E-60 | -0.56588 | 6.90E-41 | -0.19367 | 2.51E-05 | -0.31836 |
| 0.128415 | 0.00545  | -0.41756 | 3.96E-21 | -0.26985 | 3.10E-09 | -0.10675 | 0.02104  | -0.29943 |
| -0.26485 | 6.17E-09 | -0.46295 | 3.49E-26 | -0.57243 | 5.25E-42 | -0.17499 | 0.00014  | -0.15025 |
| -0.25388 | 2.65E-08 | -0.42049 | 1.96E-21 | -0.4318  | 1.24E-22 | 0.138588 | 0.00269  | 0.05663  |
| -0.29211 | 1.22E-10 | -0.54546 | 1.48E-37 | -0.50936 | 3.39E-32 | -0.14732 | 0.00141  | -0.25154 |
| -0.26548 | 5.66E-09 | -0.46653 | 1.29E-26 | -0.56546 | 8.12E-41 | 0.003365 | 0.94218  | -0.07918 |
| -0.03237 | 0.48529  | -0.31065 | 6.61E-12 | -0.29011 | 1.65E-10 | 0.097696 | 0.03481  | -0.06048 |
| -0.12057 | 0.00911  | -0.24787 | 5.73E-08 | -0.23506 | 2.77E-07 | -0.00758 | 0.8703   | -0.066   |
| -0.3095  | 7.97E-12 | -0.37102 | 1.09E-16 | -0.40557 | 6.45E-20 | -0.10071 | 0.02954  | 0.018465 |
| 0.082285 | 0.07566  | -0.18295 | 6.99E-05 | -0.23623 | 2.41E-07 | 0.154186 | 0.00083  | 0.078402 |
| -0.1102  | 0.0172   | -0.47722 | 6.19E-28 | -0.45202 | 6.77E-25 | 0.033713 | 0.46735  | -0.15122 |
| -0.05698 | 0.21904  | -0.50777 | 5.64E-32 | -0.43556 | 4.82E-23 | 0.011519 | 0.80392  | -0.18656 |
| 0.01915  | 0.67978  | -0.23694 | 2.21E-07 | -0.16314 | 0.0004   | -0.01146 | 0.80491  | -0.08887 |
| -0.2481  | 5.56E-08 | -0.58354 | 5.83E-44 | -0.39508 | 6.76E-19 | -0.23426 | 3.05E-07 | -0.42914 |
| -0.11938 | 0.00982  | -0.36668 | 2.62E-16 | -0.44108 | 1.18E-23 | 0.001428 | 0.97546  | 0.070377 |
| -0.05507 | 0.23489  | -0.4009  | 1.86E-19 | -0.26487 | 6.15E-09 | -0.00797 | 0.86368  | -0.2601  |
| -0.22902 | 5.66E-07 | -0.33794 | 6.13E-14 | -0.29925 | 4.07E-11 | -0.04328 | 0.35073  | -0.10502 |
| -0.0573  | 0.21649  | -0.21082 | 4.32E-06 | -0.35461 | 2.77E-15 | 0.445023 | 4.27E-24 | -0.04908 |
| -0.31145 | 5.80E-12 | -0.41967 | 2.39E-21 | -0.4727  | 2.26E-27 | -0.1023  | 0.02706  | 0.035628 |
| -0.08183 | 0.07728  | -0.36614 | 2.92E-16 | -0.22142 | 1.35E-06 | -0.14967 | 0.00118  | -0.18273 |
| -0.02198 | 0.63564  | -0.19215 | 2.91E-05 | -0.19321 | 2.63E-05 | 0.07761  | 0.09389  | 0.008267 |
| -0.11746 | 0.01107  | -0.49354 | 4.83E-30 | -0.35012 | 6.50E-15 | -0.10193 | 0.02762  | -0.23656 |
| -0.4966  | 1.89E-30 | -0.61974 | 6.89E-51 | -0.64864 | 4.21E-57 | -0.21805 | 1.97E-06 | -0.28021 |
| -0.31368 | 4.02E-12 | -0.48502 | 6.28E-29 | -0.51109 | 1.94E-32 | -0.15189 | 0.00099  | -0.26871 |
| -0.44134 | 1.11E-23 | -0.6915  | 1.13E-67 | -0.52079 | 7.97E-34 | -0.30766 | 1.07E-11 | -0.27086 |
| -0.2977  | 5.18E-11 | -0.36782 | 2.08E-16 | -0.47366 | 1.72E-27 | -0.12888 | 0.00528  | -0.18787 |
| -0.17898 | 0.0001   | -0.35389 | 3.18E-15 | -0.29758 | 5.28E-11 | -0.00373 | 0.93593  | 0.091418 |
| -0.1445  | 0.00174  | -0.4505  | 1.02E-24 | -0.47858 | 4.16E-28 | 0.027531 | 0.55286  | -0.10759 |
| -0.17225 | 0.00018  | -0.4789  | 3.80E-28 | -0.38914 | 2.47E-18 | -0.00965 | 0.83518  | -0.16485 |
| -0.56883 | 2.18E-41 | -0.64136 | 1.79E-55 | -0.60975 | 6.90E-49 | -0.3334  | 1.38E-13 | -0.20311 |
| -0.47103 | 3.64E-27 | -0.62161 | 2.87E-51 | -0.63133 | 2.66E-53 | -0.1882  | 4.26E-05 | -0.2023  |
| -0.1083  | 0.01923  | -0.37266 | 7.83E-17 | -0.33519 | 1.00E-13 | -0.07321 | 0.1141   | -0.23936 |
| -0.29041 | 1.58E-10 | -0.55313 | 8.84E-39 | -0.47751 | 5.69E-28 | -0.16264 | 0.00042  | -0.22796 |
| -0.36115 | 7.81E-16 | -0.57083 | 9.92E-42 | -0.49316 | 5.42E-30 | -0.14815 | 0.00132  | -0.26485 |
| -0.53917 | 1.42E-36 | -0.59741 | 1.64E-46 | -0.61121 | 3.57E-49 | -0.25877 | 1.39E-08 | -0.15022 |
| -0.00536 | 0.90799  | -0.31565 | 2.91E-12 | -0.2339  | 3.18E-07 | 0.028737 | 0.5356   | -0.12507 |
| 0.034173 | 0.46129  | -0.32401 | 7.09E-13 | -0.0582  | 0.20934  | -0.05966 | 0.1981   | -0.21481 |
| -0.06819 | 0.14118  | -0.26439 | 6.56E-09 | -0.22944 | 5.39E-07 | 0.081029 | 0.08025  | 0.000892 |
| -0.42864 | 2.71E-22 | -0.5818  | 1.19E-43 | -0.60625 | 3.34E-48 | -0.17206 | 0.00019  | -0.14031 |
| -0.09174 | 0.04755  | -0.51589 | 4.05E-33 | -0.36408 | 4.38E-16 | -0.03694 | 0.42574  | -0.23935 |
| -0.29521 | 7.62E-11 | -0.66618 | 3.24E-61 | -0.62215 | 2.22E-51 | -0.13862 | 0.00268  | -0.32487 |
| -0.19099 | 3.26E-05 | -0.34903 | 7.97E-15 | -0.33564 | 9.26E-14 | -0.03365 | 0.46817  | 0.095327 |

|          |          |          |          |          |          |          |          |          |
|----------|----------|----------|----------|----------|----------|----------|----------|----------|
| -0.4596  | 8.76E-26 | -0.60983 | 6.66E-49 | -0.69257 | 5.82E-68 | -0.23227 | 3.87E-07 | -0.19198 |
| -0.1223  | 0.00815  | -0.42705 | 4.01E-22 | -0.26332 | 7.58E-09 | -0.1076  | 0.02003  | -0.2398  |
| -0.30116 | 3.02E-11 | -0.60212 | 2.09E-47 | -0.61166 | 2.91E-49 | -0.14501 | 0.00168  | -0.20245 |
| -0.26355 | 7.36E-09 | -0.44088 | 1.25E-23 | -0.45839 | 1.22E-25 | -0.14468 | 0.00172  | -0.21545 |
| -0.18022 | 9.00E-05 | -0.29177 | 1.29E-10 | -0.24696 | 6.43E-08 | -0.12707 | 0.00596  | -0.22288 |
| -0.47321 | 1.96E-27 | -0.62194 | 2.45E-51 | -0.60229 | 1.94E-47 | -0.22791 | 6.43E-07 | -0.32321 |
| 0.121696 | 0.00847  | -0.24368 | 9.69E-08 | -0.2162  | 2.41E-06 | 0.078762 | 0.0891   | -0.00394 |
| 0.11286  | 0.01468  | -0.34681 | 1.21E-14 | -0.24901 | 4.95E-08 | 0.093297 | 0.04389  | -0.0168  |
| -0.04077 | 0.37932  | -0.35565 | 2.27E-15 | -0.16823 | 0.00026  | -0.12607 | 0.00637  | -0.23608 |
| -0.2056  | 7.50E-06 | -0.54463 | 2.00E-37 | -0.57988 | 2.61E-43 | -0.08643 | 0.062    | -0.16644 |
| -0.20599 | 7.20E-06 | -0.4219  | 1.40E-21 | -0.40682 | 4.84E-20 | -0.07236 | 0.1184   | -0.0699  |
| -0.40061 | 1.98E-19 | -0.55299 | 9.32E-39 | -0.6864  | 2.55E-66 | -0.07524 | 0.10441  | -0.12507 |
| -0.01442 | 0.75599  | -0.33417 | 1.20E-13 | -0.14398 | 0.00181  | -0.11018 | 0.01723  | -0.18358 |
| -0.23719 | 2.15E-07 | -0.32483 | 6.15E-13 | -0.36879 | 1.72E-16 | -0.04417 | 0.34089  | -0.19139 |
| -0.15604 | 0.00072  | -0.60635 | 3.20E-48 | -0.44997 | 1.17E-24 | -0.16327 | 0.0004   | -0.33824 |
| -0.54922 | 3.76E-38 | -0.5546  | 5.10E-39 | -0.61269 | 1.81E-49 | -0.30503 | 1.64E-11 | -0.41586 |
| -0.21246 | 3.62E-06 | -0.44135 | 1.10E-23 | -0.38676 | 4.12E-18 | -0.1851  | 5.72E-05 | -0.25114 |
| -0.55813 | 1.35E-39 | -0.58572 | 2.35E-44 | -0.65025 | 1.81E-57 | -0.222   | 1.27E-06 | -0.21281 |
| -0.13514 | 0.00343  | -0.16265 | 0.00042  | -0.3387  | 5.34E-14 | 0.164935 | 0.00034  | 0.129605 |
| -0.11118 | 0.01624  | 0.014131 | 0.7607   | 0.05814  | 0.20981  | -0.09938 | 0.03178  | -0.0467  |
| -0.06129 | 0.18609  | 0.086714 | 0.06115  | 0.058919 | 0.20375  | -0.10567 | 0.02238  | -0.1134  |
| -0.01296 | 0.77995  | 0.148615 | 0.00128  | 0.281887 | 5.59E-10 | 0.032885 | 0.47836  | 0.069718 |
| -0.04484 | 0.33359  | 0.011455 | 0.805    | 0.04703  | 0.3105   | -0.06223 | 0.17942  | -0.04558 |
| -0.0241  | 0.60349  | 0.048726 | 0.29336  | 0.126864 | 0.00605  | 0.019561 | 0.67331  | 0.0034   |
| -0.10353 | 0.02526  | -0.03181 | 0.49283  | 0.010874 | 0.8147   | -0.09419 | 0.04189  | -0.0647  |
| -0.05293 | 0.25362  | -0.02107 | 0.64968  | 0.027606 | 0.55178  | -0.07377 | 0.11138  | -0.03922 |
| -0.04199 | 0.36521  | 0.066868 | 0.14909  | 0.127606 | 0.00575  | -0.04816 | 0.29903  | 0.007296 |
| -0.00651 | 0.88841  | 0.071256 | 0.12413  | 0.154049 | 0.00084  | -0.02726 | 0.55684  | 0.020372 |
| -0.08145 | 0.07867  | 0.098655 | 0.03305  | 0.147739 | 0.00137  | -0.05058 | 0.27531  | 0.005132 |
| -0.12937 | 0.00511  | -0.01152 | 0.80396  | 0.020718 | 0.65519  | -0.06393 | 0.16784  | -0.07061 |
| 0.11069  | 0.01671  | 0.302004 | 2.64E-11 | 0.355447 | 2.36E-15 | 0.05036  | 0.27745  | 0.103031 |
| -0.04593 | 0.32194  | -0.0423  | 0.36176  | -0.0143  | 0.75787  | -0.0118  | 0.79929  | -0.11728 |
| -0.01201 | 0.79567  | 0.08212  | 0.07625  | 0.215064 | 2.73E-06 | -0.06248 | 0.17772  | -0.0361  |
| -0.1096  | 0.01783  | 0.015629 | 0.73622  | 0.068088 | 0.14179  | -0.06165 | 0.18353  | -0.04164 |
| -0.0944  | 0.04144  | 0.046024 | 0.32098  | 0.092386 | 0.046    | -0.07397 | 0.1104   | -0.01392 |
| -0.08056 | 0.08202  | -0.01507 | 0.74527  | 0.047941 | 0.30121  | -0.12672 | 0.0061   | -0.16937 |
| -0.07493 | 0.10584  | 0.026584 | 0.56661  | 0.085644 | 0.06443  | -0.07707 | 0.09622  | -0.02333 |
| -0.10731 | 0.02036  | 0.000146 | 0.99749  | 0.107069 | 0.02066  | -0.01156 | 0.80325  | -0.03992 |
| -0.0901  | 0.05169  | -0.09898 | 0.03247  | -0.021   | 0.65079  | -0.06553 | 0.1574   | -0.13778 |
| -0.06575 | 0.15599  | 0.085459 | 0.06501  | 0.120932 | 0.0089   | 0.003106 | 0.94663  | 0.040862 |
| -0.05755 | 0.2145   | 0.048306 | 0.29754  | 0.133969 | 0.00373  | -0.01512 | 0.74452  | -0.02174 |
| -0.11535 | 0.01262  | -0.07213 | 0.11956  | 0.030894 | 0.50542  | -0.1256  | 0.00657  | -0.14197 |
| -0.12585 | 0.00647  | -0.0271  | 0.5591   | 0.04801  | 0.30052  | -0.0961  | 0.0379   | -0.08436 |
| -0.12084 | 0.00895  | 0.033374 | 0.47184  | 0.040788 | 0.37916  | -0.04382 | 0.34467  | -0.02086 |
| -0.0202  | 0.6633   | -0.12072 | 0.00902  | -0.01455 | 0.75381  | -0.15311 | 0.0009   | -0.14845 |

|          |          |          |          |          |          |          |          |          |
|----------|----------|----------|----------|----------|----------|----------|----------|----------|
| 0.107761 | 0.01984  | 0.208214 | 5.70E-06 | 0.176273 | 0.00013  | 0.015299 | 0.74159  | 0.027928 |
| -0.07904 | 0.08798  | -0.0039  | 0.93297  | 0.020934 | 0.65183  | -0.04502 | 0.33165  | -0.00394 |
| -0.07191 | 0.12072  | -0.0776  | 0.09393  | -0.03961 | 0.3931   | -0.024   | 0.60498  | 0.023222 |
| -0.05073 | 0.27389  | 0.005711 | 0.90205  | 0.035196 | 0.44797  | -0.07335 | 0.11342  | -0.06417 |
| -0.08307 | 0.0729   | 0.091321 | 0.04858  | 0.133281 | 0.00391  | -0.01883 | 0.6848   | 0.015498 |
| -0.0963  | 0.0375   | -0.02456 | 0.59654  | 0.038671 | 0.40442  | -0.11121 | 0.0162   | -0.08067 |
| 0.080627 | 0.08177  | 0.301768 | 2.74E-11 | 0.409391 | 2.68E-20 | 0.062695 | 0.1762   | 0.072686 |
| -0.01956 | 0.67326  | 0.083766 | 0.07052  | 0.15047  | 0.00111  | -0.06666 | 0.15039  | -0.01554 |
| -0.20552 | 7.56E-06 | -0.19654 | 1.89E-05 | -0.07143 | 0.12319  | -0.17391 | 0.00016  | -0.15703 |
| -0.0612  | 0.18677  | -0.01407 | 0.76172  | -0.00598 | 0.89749  | -0.08737 | 0.05921  | -0.18667 |
| -0.03826 | 0.40947  | -0.01205 | 0.79516  | 0.060045 | 0.19522  | -0.01114 | 0.81025  | -0.04489 |
| -0.11152 | 0.01591  | -0.03252 | 0.48324  | -0.00955 | 0.8369   | -0.07873 | 0.08924  | -0.1077  |
| -0.00437 | 0.92493  | 0.015586 | 0.73692  | 0.050989 | 0.27149  | 0.003894 | 0.93311  | -0.10827 |
| -0.05269 | 0.2558   | -0.07981 | 0.08494  | -0.04768 | 0.30383  | -0.08425 | 0.0689   | -0.10985 |
| -0.10875 | 0.01873  | -0.02787 | 0.54799  | 0.016154 | 0.7277   | -0.07217 | 0.11937  | -0.03668 |
| -0.11973 | 0.00961  | -0.01914 | 0.68002  | 0.06675  | 0.1498   | -0.10859 | 0.01891  | -0.09549 |
| 0.009592 | 0.83621  | 0.09991  | 0.03087  | 0.166382 | 0.0003   | -0.00072 | 0.9877   | -0.05825 |
| 0.080884 | 0.08079  | 0.255473 | 2.15E-08 | 0.243094 | 1.04E-07 | -0.04678 | 0.31312  | -0.09607 |
| -0.12025 | 0.00929  | 0.021685 | 0.64021  | 0.043946 | 0.34333  | -0.01542 | 0.73961  | 0.001572 |
| -0.1196  | 0.00968  | 0.021195 | 0.64777  | 0.092265 | 0.04629  | -0.14277 | 0.00198  | -0.11738 |
| -0.10552 | 0.02257  | 0.043342 | 0.35002  | 0.072014 | 0.12016  | -0.05238 | 0.25859  | 0.024501 |
| -0.05846 | 0.20728  | 0.029981 | 0.51808  | 0.08758  | 0.0586   | -0.08629 | 0.06242  | -0.03126 |
| -0.07522 | 0.1045   | 0.060128 | 0.19461  | 0.09577  | 0.03856  | -0.01988 | 0.6683   | 0.069052 |
| -0.04889 | 0.29174  | 0.083588 | 0.07113  | 0.112502 | 0.015    | -0.0012  | 0.97942  | 0.085555 |
| -0.06162 | 0.18374  | 0.051612 | 0.26567  | 0.143841 | 0.00183  | -0.0643  | 0.16534  | -0.0286  |
| 0.000488 | 0.99161  | 0.121051 | 0.00883  | 0.152832 | 0.00092  | 0.003881 | 0.93334  | -0.08279 |
| -0.07665 | 0.09806  | 0.093394 | 0.04367  | 0.122504 | 0.00804  | -0.02278 | 0.62342  | 0.045915 |
| -0.07177 | 0.12141  | -0.06021 | 0.19402  | -0.0292  | 0.5291   | -0.16064 | 0.00049  | -0.14362 |
| -0.14981 | 0.00117  | -0.12061 | 0.00908  | -0.04466 | 0.33556  | -0.10873 | 0.01875  | -0.12264 |
| -0.03282 | 0.47929  | -0.02717 | 0.55808  | 0.05082  | 0.27309  | -0.13728 | 0.00295  | -0.06133 |
| -0.22089 | 1.43E-06 | 0.046925 | 0.31159  | 0.121549 | 0.00855  | -0.18561 | 5.45E-05 | -0.1677  |
| 0.006265 | 0.89259  | 0.049017 | 0.29048  | 0.118068 | 0.01066  | -0.07681 | 0.09736  | 0.007705 |
| -0.07757 | 0.09408  | 0.013242 | 0.77533  | 0.113876 | 0.0138   | -0.07377 | 0.11139  | -0.08796 |
| -0.05282 | 0.25466  | 0.138546 | 0.0027   | 0.168032 | 0.00026  | 0.000927 | 0.98406  | 0.044026 |
| -0.08557 | 0.06465  | -0.00066 | 0.98866  | 0.06357  | 0.17023  | -0.08607 | 0.06312  | -0.04667 |
| -0.02287 | 0.62202  | 0.114531 | 0.01327  | 0.204292 | 8.59E-06 | -0.07576 | 0.10201  | -0.01846 |
| -0.01653 | 0.7217   | 0.047769 | 0.30295  | 0.094486 | 0.04126  | 0.023918 | 0.60616  | 0.06097  |
| -0.04247 | 0.35976  | 0.109111 | 0.01834  | 0.153293 | 0.00089  | -0.00933 | 0.84062  | 0.007184 |
| 0.13679  | 0.00306  | 0.230581 | 4.71E-07 | 0.346021 | 1.40E-14 | 0.045474 | 0.3268   | 0.088383 |
| -0.12412 | 0.00725  | 0.015497 | 0.73837  | 0.04329  | 0.35059  | -0.1679  | 0.00027  | -0.19344 |
| -0.04588 | 0.32253  | 0.132143 | 0.00423  | 0.206131 | 7.09E-06 | -0.02336 | 0.61454  | 0.010672 |
| -0.07047 | 0.12836  | -0.00525 | 0.90995  | 0.018754 | 0.68604  | -0.04922 | 0.28846  | 0.009308 |
| -0.11462 | 0.0132   | -0.08141 | 0.07883  | -0.06188 | 0.18192  | -0.06577 | 0.15589  | -0.09079 |
| -0.02279 | 0.62323  | 0.090723 | 0.05007  | 0.109552 | 0.01787  | 0.092035 | 0.04684  | 0.104475 |
| -0.1137  | 0.01395  | -0.02448 | 0.5977   | 0.021594 | 0.64161  | -0.05829 | 0.20866  | -0.02909 |

|          |          |          |          |          |          |          |          |          |
|----------|----------|----------|----------|----------|----------|----------|----------|----------|
| -0.02159 | 0.64159  | 0.025728 | 0.57917  | 0.054955 | 0.2359   | -0.0133  | 0.77436  | -0.04013 |
| -0.12759 | 0.00576  | -0.02687 | 0.56246  | 0.026849 | 0.56275  | -0.08231 | 0.07555  | -0.05795 |
| -0.09882 | 0.03275  | 0.017142 | 0.71177  | 0.055573 | 0.23066  | -0.02617 | 0.57272  | -0.04602 |
| -0.0144  | 0.75629  | 0.022744 | 0.62396  | 0.018598 | 0.68852  | 0.04321  | 0.35149  | -0.04424 |
| -0.00287 | 0.95063  | 0.043573 | 0.34746  | 0.059425 | 0.19988  | -0.01544 | 0.73924  | -0.00259 |
| -0.31622 | 2.64E-12 | -0.29292 | 1.08E-10 | -0.20483 | 8.12E-06 | -0.25194 | 3.40E-08 | -0.30762 |
| -0.13801 | 0.0028   | -0.05838 | 0.20791  | -0.00517 | 0.91121  | -0.11038 | 0.01702  | -0.09587 |
| -0.05983 | 0.19684  | -0.04961 | 0.28467  | 0.006946 | 0.88099  | -0.05593 | 0.22764  | -0.11634 |
| -0.08869 | 0.05547  | -0.02385 | 0.60718  | 0.063834 | 0.16846  | -0.10357 | 0.02521  | -0.07659 |
| 0.049185 | 0.28883  | 0.174566 | 0.00015  | 0.201365 | 1.16E-05 | -0.032   | 0.49026  | -0.08653 |
| -0.06    | 0.19559  | -0.06785 | 0.14317  | -0.03055 | 0.51018  | -0.08849 | 0.05601  | -0.136   |
| -0.03799 | 0.41279  | 0.236091 | 2.45E-07 | 0.326457 | 4.65E-13 | 0.033685 | 0.46772  | 0.07794  |
| -0.06096 | 0.18852  | -0.01336 | 0.77341  | 0.044816 | 0.33386  | -0.11121 | 0.0162   | -0.11413 |
| -0.09164 | 0.0478   | -0.0049  | 0.91581  | 0.062835 | 0.17524  | -0.10188 | 0.0277   | -0.06021 |
| -0.10001 | 0.03071  | -0.06688 | 0.14902  | 0.026534 | 0.56734  | -0.09164 | 0.04779  | -0.04295 |
| -0.03754 | 0.41835  | 0.026151 | 0.57296  | 0.050636 | 0.27482  | -0.03208 | 0.48915  | -0.01363 |
| -0.17728 | 0.00012  | -0.09698 | 0.03616  | -0.01028 | 0.82464  | -0.10754 | 0.0201   | -0.10311 |
| -0.0864  | 0.0621   | 0.022134 | 0.6333   | 0.097679 | 0.03484  | -0.07972 | 0.08526  | -0.04472 |
| -0.13285 | 0.00403  | -0.16614 | 0.00031  | -0.09831 | 0.03367  | -0.10037 | 0.03011  | -0.22724 |
| -0.07802 | 0.09216  | -0.0373  | 0.42128  | 0.00083  | 0.98573  | -0.15188 | 0.00099  | -0.05408 |
| -0.05425 | 0.24196  | 0.047482 | 0.30587  | 0.086972 | 0.06038  | -0.10668 | 0.02113  | -0.04602 |
| -0.07556 | 0.10291  | -0.06724 | 0.14686  | -0.01386 | 0.76515  | -0.04615 | 0.31968  | 0.009323 |
| -0.22196 | 1.27E-06 | -0.17762 | 0.00011  | -0.09488 | 0.04041  | -0.1709  | 0.00021  | -0.19781 |
| -0.09438 | 0.04149  | 0.036549 | 0.43071  | 0.098502 | 0.03333  | -0.10631 | 0.02157  | -0.1483  |
| -0.12394 | 0.00733  | -0.04956 | 0.28515  | -0.00756 | 0.87051  | -0.08343 | 0.07165  | -0.11605 |
| -0.06238 | 0.17842  | 0.009083 | 0.84479  | 0.039863 | 0.39008  | -0.16267 | 0.00042  | -0.16649 |
| -0.05836 | 0.20804  | -0.02029 | 0.66182  | 0.065881 | 0.15519  | -0.08888 | 0.05494  | -0.037   |
| -0.04508 | 0.33105  | 0.015876 | 0.73221  | 0.100762 | 0.02947  | -0.09033 | 0.05109  | -0.07582 |
| 0.050915 | 0.27219  | 0.062122 | 0.18019  | 0.136847 | 0.00304  | -0.07323 | 0.11403  | -0.1248  |
| -0.05636 | 0.22411  | -0.05077 | 0.27354  | -0.00936 | 0.84005  | -0.17657 | 0.00013  | -0.17408 |
| 0.021757 | 0.63909  | 0.09966  | 0.0313   | 0.142817 | 0.00198  | 0.042107 | 0.36393  | -0.03905 |
| 0.063529 | 0.17051  | 0.144349 | 0.00176  | 0.241815 | 1.22E-07 | -0.09357 | 0.04327  | -0.04685 |
| -0.00316 | 0.94572  | -0.00184 | 0.96832  | 0.093636 | 0.04312  | -0.07189 | 0.12082  | -0.07998 |
| -0.06586 | 0.15533  | 0.106197 | 0.02172  | 0.210071 | 4.68E-06 | -0.01483 | 0.74919  | 0.000908 |
| -0.13321 | 0.00393  | -0.01143 | 0.80537  | 0.023129 | 0.61809  | -0.0718  | 0.12129  | -0.0387  |
| -0.09875 | 0.03288  | -0.02066 | 0.65606  | 0.037055 | 0.42435  | -0.07114 | 0.12472  | -0.0666  |
| -0.14244 | 0.00203  | -0.06198 | 0.18116  | -0.04479 | 0.33414  | -0.14584 | 0.00158  | -0.16545 |
| -0.12088 | 0.00893  | -0.09762 | 0.03494  | -0.01186 | 0.7982   | -0.13119 | 0.00452  | -0.12229 |
| -0.16781 | 0.00027  | -0.13492 | 0.00349  | -0.06311 | 0.17335  | -0.18386 | 6.43E-05 | -0.19501 |
| -0.00537 | 0.90793  | -0.03089 | 0.50548  | 0.023422 | 0.61366  | -0.07494 | 0.1058   | -0.06713 |
| -0.2058  | 7.34E-06 | -0.06957 | 0.13329  | 0.023174 | 0.61741  | -0.18683 | 4.86E-05 | -0.06392 |
| 0.014573 | 0.75345  | 0.197448 | 1.72E-05 | 0.331034 | 2.10E-13 | 0.022733 | 0.62413  | 0.031199 |
| -0.26455 | 6.42E-09 | -0.10698 | 0.02076  | -0.06798 | 0.14241  | -0.19012 | 3.54E-05 | -0.16486 |
| -0.07208 | 0.11983  | 0.045685 | 0.32456  | 0.064783 | 0.1622   | -0.05335 | 0.24991  | 0.020587 |
| -0.09756 | 0.03507  | 0.055835 | 0.22847  | 0.125365 | 0.00668  | -0.06688 | 0.14899  | -0.01079 |



|           |          |          |          |          |          |          |          |          |
|-----------|----------|----------|----------|----------|----------|----------|----------|----------|
| -7.58E-05 | 0.9987   | 0.059529 | 0.19909  | 0.178507 | 0.00011  | -0.05812 | 0.20996  | -0.04066 |
| -0.10072  | 0.02953  | -0.08837 | 0.05635  | 0.002326 | 0.96002  | -0.10067 | 0.02961  | -0.18769 |
| -0.01946  | 0.67493  | -0.06319 | 0.17283  | 0.04567  | 0.32472  | -0.04868 | 0.29379  | -0.14779 |
| -0.08836  | 0.05638  | 0.137402 | 0.00293  | 0.174105 | 0.00016  | -0.06287 | 0.175    | -0.19799 |
| -0.02571  | 0.57944  | -0.03408 | 0.4625   | 0.022897 | 0.62163  | -0.14331 | 0.0019   | -0.15386 |
| -0.11908  | 0.01001  | -0.12087 | 0.00893  | -0.08872 | 0.05537  | -0.068   | 0.14233  | -0.18263 |
| -0.03015  | 0.51577  | -0.00446 | 0.92338  | 0.024805 | 0.59286  | -0.0937  | 0.04299  | -0.02517 |
| -0.00075  | 0.98719  | 0.057184 | 0.21741  | 0.110396 | 0.01701  | 0.017189 | 0.71102  | 0.09506  |
| -0.33789  | 6.19E-14 | -0.14148 | 0.00218  | -0.1973  | 1.75E-05 | -0.09886 | 0.03269  | 0.010206 |
| -0.06265  | 0.17654  | 0.093299 | 0.04388  | 0.102677 | 0.0265   | -0.11261 | 0.0149   | -0.0518  |
| -0.11029  | 0.01711  | 0.034282 | 0.45987  | 0.077671 | 0.09363  | -0.05077 | 0.27356  | 0.005578 |
| -0.09464  | 0.04092  | 0.021269 | 0.64663  | 0.068043 | 0.14206  | -0.027   | 0.56052  | -0.06199 |
| -0.0692   | 0.13541  | 0.028617 | 0.53731  | 0.072417 | 0.1181   | -0.06107 | 0.18767  | -0.02197 |
| -0.043    | 0.35379  | 0.076662 | 0.09799  | 0.167151 | 0.00029  | -0.07683 | 0.09727  | -0.02887 |
| -0.12763  | 0.00575  | -0.08633 | 0.0623   | -0.03417 | 0.46139  | -0.11006 | 0.01735  | -0.10182 |
| -0.02077  | 0.65444  | 0.130783 | 0.00464  | 0.147104 | 0.00143  | 0.050039 | 0.28053  | 0.08395  |
| -0.1161   | 0.01205  | -0.04107 | 0.37591  | 0.008207 | 0.8596   | -0.08512 | 0.06609  | -0.06226 |
| 0.006199  | 0.89372  | 0.126677 | 0.00612  | 0.202824 | 9.99E-06 | -0.18687 | 4.84E-05 | -0.16311 |
| -0.08532  | 0.06546  | 0.106812 | 0.02096  | 0.135166 | 0.00343  | -0.05445 | 0.24028  | -0.07771 |
| -0.02586  | 0.57727  | -0.02539 | 0.58418  | 0.002557 | 0.95604  | -0.01872 | 0.68664  | -0.10599 |
| 0.058793  | 0.20472  | 0.050708 | 0.27414  | 0.124919 | 0.00687  | -0.00347 | 0.94034  | -0.05045 |
| -0.07654  | 0.09851  | -0.07297 | 0.1153   | 0.038635 | 0.40486  | -0.12077 | 0.00899  | -0.11308 |
| -0.10882  | 0.01866  | -0.06533 | 0.1587   | -0.07341 | 0.11315  | -0.03162 | 0.49548  | -0.04867 |
| -0.01153  | 0.80373  | 0.062697 | 0.17619  | 0.15781  | 0.00062  | -0.09498 | 0.0402   | -0.09785 |
| 0.050157  | 0.2794   | 0.265763 | 5.44E-09 | 0.328291 | 3.39E-13 | 0.088699 | 0.05544  | 0.091633 |
| -0.03833  | 0.4086   | -0.03874 | 0.40355  | 0.086566 | 0.0616   | -0.14822 | 0.00132  | -0.12666 |
| -0.08339  | 0.07178  | -0.02411 | 0.60322  | 0.008464 | 0.85526  | -0.05595 | 0.22751  | -0.04902 |
| -0.13755  | 0.0029   | -0.05316 | 0.25156  | -0.03624 | 0.43461  | -0.12271 | 0.00794  | -0.11842 |
| 0.09456   | 0.0411   | 0.079986 | 0.08423  | 0.205502 | 7.57E-06 | -0.02984 | 0.52012  | -0.02031 |
| -0.20114  | 1.19E-05 | -0.04422 | 0.34028  | -0.03584 | 0.43969  | -0.11855 | 0.01035  | -0.1145  |
| 0.033928  | 0.46451  | 0.265672 | 5.51E-09 | 0.366945 | 2.48E-16 | 0.049141 | 0.28927  | 0.072785 |
| -0.23223  | 3.88E-07 | -0.02151 | 0.64288  | -0.04828 | 0.2978   | -0.03197 | 0.49072  | 0.114231 |
| -0.04668  | 0.31416  | 0.106426 | 0.02143  | 0.129505 | 0.00506  | 0.009677 | 0.83479  | 0.066607 |
| -0.05041  | 0.27698  | 0.058384 | 0.2079   | 0.085482 | 0.06494  | -0.01132 | 0.80722  | 0.048864 |
| -0.06542  | 0.15812  | 0.098369 | 0.03357  | 0.22348  | 1.07E-06 | -0.05144 | 0.26729  | -0.03241 |
| -0.01221  | 0.7924   | 0.184962 | 5.79E-05 | 0.21072  | 4.37E-06 | -0.00416 | 0.92862  | 0.066327 |
| -0.08779  | 0.05799  | -0.03799 | 0.41271  | -0.00786 | 0.86556  | -0.08457 | 0.06787  | 0.03931  |
| -0.1271   | 0.00595  | -0.09627 | 0.03755  | -0.01909 | 0.68079  | -0.04585 | 0.32282  | -0.06076 |
| -0.06566  | 0.15658  | 0.049605 | 0.28472  | 0.138296 | 0.00274  | -0.05852 | 0.2068   | -0.02436 |
| -0.05941  | 0.20002  | 0.035111 | 0.44908  | 0.107311 | 0.02037  | -0.107   | 0.02074  | -0.09557 |
| -0.09632  | 0.03746  | -0.03494 | 0.4513   | 0.022391 | 0.62935  | -0.06645 | 0.15162  | -0.08855 |
| 0.027163  | 0.55819  | 0.113289 | 0.0143   | 0.148264 | 0.00131  | 0.024704 | 0.59437  | 0.054234 |
| -0.03231  | 0.48605  | 0.248579 | 5.24E-08 | 0.337259 | 6.93E-14 | 0.024768 | 0.59342  | 0.06841  |
| -0.07278  | 0.11629  | 0.05144  | 0.26727  | 0.088117 | 0.05706  | -0.01874 | 0.68623  | 0.026439 |
| 0.030027  | 0.51744  | 0.134147 | 0.00368  | 0.16762  | 0.00027  | -0.04127 | 0.37359  | -0.01193 |

|          |          |          |          |          |          |          |          |          |
|----------|----------|----------|----------|----------|----------|----------|----------|----------|
| -0.06027 | 0.19357  | 0.085944 | 0.06349  | 0.051579 | 0.26597  | -0.04408 | 0.34185  | -0.07286 |
| -0.07725 | 0.09543  | 0.124417 | 0.0071   | 0.171793 | 0.00019  | -0.0211  | 0.64921  | -0.05865 |
| -0.11062 | 0.01679  | -0.02063 | 0.6566   | 0.008912 | 0.84768  | -0.04884 | 0.29222  | -0.01863 |
| -0.18603 | 5.24E-05 | -0.13173 | 0.00435  | -0.05628 | 0.22479  | -0.19862 | 1.53E-05 | -0.0816  |
| -0.14412 | 0.00179  | -0.09562 | 0.03886  | -0.09419 | 0.0419   | -0.10181 | 0.02781  | -0.03278 |
| -0.08047 | 0.08236  | -0.05873 | 0.2052   | -0.01905 | 0.68139  | -0.10848 | 0.01903  | -0.11165 |
| -0.13216 | 0.00423  | -0.03461 | 0.45552  | 0.010288 | 0.82452  | -0.08449 | 0.06812  | -0.0688  |
| 0.06852  | 0.13927  | 0.003695 | 0.93652  | 0.097641 | 0.03491  | -0.1471  | 0.00143  | -0.15937 |
| -0.03167 | 0.49473  | 0.053977 | 0.24435  | 0.062481 | 0.17768  | 0.019159 | 0.67964  | 0.022497 |
| -0.11037 | 0.01703  | -0.01594 | 0.73115  | 0.022734 | 0.62411  | -0.04752 | 0.3055   | -0.06147 |
| 0.033982 | 0.4638   | -0.03121 | 0.50101  | 0.038059 | 0.4119   | -0.02168 | 0.64025  | -0.16164 |
| -0.04247 | 0.35978  | 0.051663 | 0.26519  | 0.073984 | 0.11033  | -0.04189 | 0.36642  | 0.000662 |
| -0.0066  | 0.88689  | 0.06535  | 0.15856  | 0.107898 | 0.01969  | -0.03308 | 0.47577  | -0.00195 |
| -0.10908 | 0.01838  | -0.08369 | 0.07077  | 0.022216 | 0.63203  | -0.12016 | 0.00934  | -0.11538 |
| -0.04163 | 0.3694   | -0.01117 | 0.80978  | 0.013886 | 0.76471  | -0.11555 | 0.01246  | -0.07501 |
| -0.11227 | 0.01521  | 0.021255 | 0.64685  | 0.094596 | 0.04102  | -0.08264 | 0.0744   | -0.08562 |
| 0.020921 | 0.65203  | 0.08661  | 0.06146  | 0.191789 | 3.02E-05 | -0.06146 | 0.18489  | -0.03565 |
| -0.10551 | 0.02259  | -0.04498 | 0.33209  | 0.031129 | 0.50217  | -0.0806  | 0.08188  | -0.06941 |
| -0.01815 | 0.69568  | 0.004638 | 0.92038  | 0.061816 | 0.18235  | -0.07515 | 0.1048   | -0.14078 |
| -0.08879 | 0.05517  | -0.07012 | 0.13023  | 0.039611 | 0.39309  | -0.12492 | 0.00687  | -0.14538 |
| -0.08996 | 0.05203  | -0.03199 | 0.49039  | 0.077374 | 0.0949   | -0.12476 | 0.00695  | -0.0876  |
| -0.12908 | 0.00521  | -0.08433 | 0.06863  | -0.00083 | 0.98576  | -0.11629 | 0.01191  | -0.10416 |
| -0.01068 | 0.81791  | 0.091857 | 0.04726  | 0.164472 | 0.00036  | -0.04257 | 0.35867  | -0.00251 |
| -0.10319 | 0.02576  | 0.019464 | 0.67483  | 0.083518 | 0.07136  | -0.05081 | 0.27313  | -0.03177 |
| -0.171   | 0.0002   | -0.05814 | 0.20977  | 0.041316 | 0.37302  | -0.09918 | 0.03212  | -0.10664 |
| -0.07211 | 0.11965  | 0.091123 | 0.04907  | 0.125277 | 0.00671  | -0.06143 | 0.1851   | -0.02467 |
| -0.04305 | 0.35328  | 0.053719 | 0.24662  | 0.097949 | 0.03434  | -0.04382 | 0.34472  | 0.005381 |
| -0.02541 | 0.58395  | 0.18962  | 3.72E-05 | 0.275682 | 1.37E-09 | 0.042109 | 0.36391  | 0.04216  |
| 0.050816 | 0.27312  | 0.210708 | 4.37E-06 | 0.235288 | 2.70E-07 | 0.003413 | 0.94136  | 0.045743 |
| 0.023915 | 0.60621  | 0.200809 | 1.23E-05 | 0.232728 | 3.66E-07 | -0.04131 | 0.37303  | -0.0339  |
| -0.11175 | 0.01569  | -0.02941 | 0.52603  | -0.08684 | 0.06077  | -0.03252 | 0.48321  | 0.100207 |
| -0.15218 | 0.00097  | 0.004419 | 0.92413  | 0.058986 | 0.20323  | -0.15894 | 0.00057  | -0.2048  |
| -0.08934 | 0.05369  | 0.072218 | 0.11911  | 0.114687 | 0.01314  | -0.07041 | 0.12868  | -0.02035 |
| -0.04887 | 0.2919   | -0.0252  | 0.58692  | 0.099392 | 0.03176  | -0.10425 | 0.02427  | -0.10966 |
| -0.0977  | 0.0348   | 0.004165 | 0.92848  | 0.010535 | 0.82038  | -0.01406 | 0.76194  | 0.021244 |
| 0.069019 | 0.13641  | 0.139034 | 0.0026   | 0.238928 | 1.74E-07 | -0.02252 | 0.62744  | -0.00602 |
| 0.005125 | 0.91205  | 0.120849 | 0.00894  | 0.230403 | 4.81E-07 | -0.0359  | 0.43892  | -0.02322 |
| -0.10284 | 0.02627  | -0.12004 | 0.00942  | -0.08192 | 0.07698  | -0.15385 | 0.00085  | -0.20307 |
| -0.09097 | 0.04944  | -0.11106 | 0.01634  | -0.07706 | 0.09624  | -0.1406  | 0.00232  | -0.16284 |
| -0.02415 | 0.6027   | -0.0734  | 0.11316  | -0.05484 | 0.23689  | -0.08668 | 0.06125  | -0.14058 |
| 0.073974 | 0.11038  | 0.224153 | 9.91E-07 | 0.292035 | 1.24E-10 | 0.04718  | 0.30896  | 0.004044 |
| -0.11056 | 0.01684  | 0.029503 | 0.52477  | 0.056256 | 0.22497  | -0.05693 | 0.2195   | 0.008465 |
| -0.02516 | 0.58753  | 0.028433 | 0.53993  | 0.097544 | 0.03509  | 0.015707 | 0.73495  | -0.03369 |
| 0.16064  | 0.00049  | 0.121638 | 0.0085   | 0.210753 | 4.35E-06 | -0.02074 | 0.65486  | -0.09572 |
| -0.01709 | 0.71254  | -0.03905 | 0.39981  | -0.01109 | 0.8111   | -0.02795 | 0.54677  | -0.01178 |

|          |          |          |          |          |          |          |          |          |
|----------|----------|----------|----------|----------|----------|----------|----------|----------|
| -0.08943 | 0.05346  | -0.01178 | 0.79957  | 0.060542 | 0.19155  | -0.05951 | 0.19927  | -0.06536 |
| 0.055624 | 0.23023  | 0.004814 | 0.91737  | 0.073041 | 0.11495  | 0.024296 | 0.60047  | 0.05225  |
| -0.21003 | 4.70E-06 | -0.0913  | 0.04862  | -0.00992 | 0.83067  | -0.14545 | 0.00162  | -0.13563 |
| -0.00379 | 0.93488  | 0.009466 | 0.83833  | 0.101756 | 0.02789  | -0.06323 | 0.17255  | -0.09435 |
| -0.04503 | 0.33154  | 0.009962 | 0.82999  | 0.109032 | 0.01843  | -0.07912 | 0.08764  | -0.06055 |
| -0.08743 | 0.05903  | 0.02565  | 0.58033  | 0.071651 | 0.12205  | -0.04902 | 0.29046  | 0.002433 |
| -0.14332 | 0.0019   | -0.04745 | 0.30623  | 0.038996 | 0.40048  | -0.13363 | 0.00381  | -0.09056 |
| 0.143625 | 0.00186  | 0.116271 | 0.01192  | 0.152527 | 0.00094  | 0.098282 | 0.03372  | 0.026553 |
| -0.01012 | 0.82736  | 0.070744 | 0.12686  | 0.161453 | 0.00046  | 0.027875 | 0.54792  | -0.10626 |
| -0.01153 | 0.80382  | -0.02585 | 0.57734  | 0.03586  | 0.43945  | -0.02713 | 0.55871  | -0.12923 |
| -0.00605 | 0.89623  | 0.148442 | 0.00129  | 0.21816  | 1.94E-06 | -0.07834 | 0.09084  | -0.08627 |
| -0.09522 | 0.0397   | -0.01144 | 0.80526  | 0.01546  | 0.73897  | -0.18929 | 3.84E-05 | -0.16413 |
| -0.14504 | 0.00167  | -0.06658 | 0.15083  | -0.00697 | 0.88054  | -0.11916 | 0.00996  | -0.06384 |
| -0.06261 | 0.17676  | 0.038646 | 0.40472  | 0.097338 | 0.03548  | -0.04133 | 0.37283  | 0.016108 |
| -0.13596 | 0.00324  | 0.005723 | 0.90183  | 0.036686 | 0.42899  | -0.05844 | 0.20748  | -0.03925 |
| -0.03971 | 0.39184  | 0.192465 | 2.82E-05 | 0.21222  | 3.72E-06 | 0.018897 | 0.68378  | -0.06137 |
| 0.036398 | 0.43262  | -0.00904 | 0.8455   | 0.054339 | 0.2412   | 0.024098 | 0.60345  | -0.02366 |
| 0.021541 | 0.64243  | -0.03115 | 0.50193  | 0.047182 | 0.30894  | -0.02676 | 0.56409  | -0.04799 |
| -0.09146 | 0.04823  | -0.1039  | 0.02474  | -0.00704 | 0.87938  | -0.10795 | 0.01962  | -0.1144  |
| -0.12037 | 0.00922  | -0.09039 | 0.05094  | 0.011571 | 0.80306  | -0.13732 | 0.00294  | -0.14204 |
| -0.08924 | 0.05396  | -0.08052 | 0.08219  | 0.050926 | 0.27208  | -0.13788 | 0.00283  | -0.15687 |
| -0.08515 | 0.06598  | -0.03303 | 0.47639  | 0.055115 | 0.23454  | -0.06795 | 0.14263  | -0.10469 |
| -0.06755 | 0.14494  | -0.07305 | 0.11489  | 0.015213 | 0.743    | -0.13387 | 0.00375  | -0.12546 |
| -0.08052 | 0.08218  | -0.00054 | 0.9907   | 0.086128 | 0.06293  | -0.06092 | 0.18881  | -0.07478 |
| -0.07174 | 0.12161  | -0.0755  | 0.10319  | 0.05398  | 0.24432  | -0.11167 | 0.01576  | -0.13857 |
| -0.10524 | 0.02294  | -0.09113 | 0.04905  | 0.020112 | 0.66465  | -0.1167  | 0.01161  | -0.14522 |
| -0.05181 | 0.26384  | 0.020331 | 0.66122  | 0.135866 | 0.00326  | -0.04698 | 0.31104  | -0.10178 |
| -0.05644 | 0.22349  | -0.00255 | 0.95625  | 0.073479 | 0.11279  | -0.10028 | 0.03025  | -0.08082 |
| -0.05555 | 0.23087  | -0.02829 | 0.54201  | 0.037727 | 0.416    | -0.02775 | 0.54978  | -0.07052 |
| -0.07614 | 0.10031  | 0.029796 | 0.52067  | 0.086188 | 0.06274  | -0.06122 | 0.18664  | 0.0079   |
| -0.03332 | 0.47259  | 0.065548 | 0.15729  | 0.10414  | 0.02441  | -0.01872 | 0.68657  | 0.046443 |
| -0.05684 | 0.22016  | 0.059572 | 0.19877  | 0.130333 | 0.00479  | -0.02403 | 0.60444  | -0.04356 |
| -0.04454 | 0.33687  | -0.04944 | 0.28629  | 0.039352 | 0.39619  | -0.0984  | 0.03352  | -0.05629 |
| -0.21238 | 3.65E-06 | -0.04992 | 0.28172  | -0.00506 | 0.91324  | -0.11526 | 0.01269  | -0.06765 |
| -0.07638 | 0.09923  | -0.01243 | 0.78872  | 0.046193 | 0.3192   | -0.03831 | 0.40878  | -0.03472 |
| -0.08876 | 0.05526  | -0.02334 | 0.61489  | 0.041872 | 0.36661  | -0.06669 | 0.15017  | -0.04674 |
| -0.09451 | 0.0412   | -0.1174  | 0.01112  | -0.01181 | 0.79908  | -0.14133 | 0.0022   | -0.15529 |
| -0.08812 | 0.05706  | 0.044277 | 0.33971  | 0.135933 | 0.00325  | -0.08649 | 0.06183  | -0.00755 |
| -0.00285 | 0.95107  | 0.005106 | 0.91237  | 0.026679 | 0.56523  | 0.02132  | 0.64584  | -0.00897 |
| -0.10368 | 0.02505  | -0.05994 | 0.19604  | -0.04342 | 0.34915  | -0.03506 | 0.44977  | -0.05901 |
| -0.00587 | 0.89931  | 0.04442  | 0.33815  | 0.015725 | 0.73466  | 0.008121 | 0.86105  | 0.085638 |
| -0.04635 | 0.31753  | 0.029713 | 0.52183  | 0.109849 | 0.01756  | -0.08772 | 0.0582   | -0.04964 |
| -0.08767 | 0.05834  | -0.06463 | 0.1632   | 0.00579  | 0.90069  | -0.10839 | 0.01914  | -0.08037 |
| -0.08473 | 0.06733  | 0.004839 | 0.91694  | 0.074459 | 0.10806  | -0.07658 | 0.09835  | -0.0695  |
| -0.07713 | 0.09593  | -0.06697 | 0.14846  | -0.01044 | 0.82197  | -0.09794 | 0.03435  | -0.07548 |

|          |          |          |          |          |          |          |         |          |
|----------|----------|----------|----------|----------|----------|----------|---------|----------|
| -0.00542 | 0.90708  | -0.01901 | 0.68192  | 0.038233 | 0.40977  | -0.05473 | 0.23785 | -0.05737 |
| -0.06906 | 0.13618  | 0.068    | 0.14231  | 0.133016 | 0.00398  | -0.03583 | 0.4398  | 0.014261 |
| -0.12574 | 0.00651  | 0.161156 | 0.00047  | 0.143131 | 0.00193  | 0.043187 | 0.35174 | 0.159753 |
| 0.016276 | 0.72574  | 0.112017 | 0.01544  | 0.188515 | 4.14E-05 | -0.02508 | 0.58877 | -0.06369 |
| -0.12961 | 0.00503  | 0.014071 | 0.76169  | 0.057383 | 0.2158   | -0.05126 | 0.26897 | -0.01231 |
| -0.08211 | 0.0763   | -0.00337 | 0.94217  | 0.032628 | 0.48181  | -0.06615 | 0.15349 | -0.02822 |
| 0.031386 | 0.49866  | 0.028467 | 0.53944  | 0.177344 | 0.00012  | -0.06821 | 0.14109 | -0.10777 |
| -0.03346 | 0.47064  | -0.01343 | 0.77222  | 0.07282  | 0.11606  | -0.02848 | 0.53928 | -0.10935 |
| -0.07276 | 0.11637  | -0.00999 | 0.82951  | 0.014198 | 0.75959  | -0.04496 | 0.33227 | -0.10158 |
| -0.12363 | 0.00748  | -0.04768 | 0.30385  | 0.007689 | 0.86839  | -0.07504 | 0.10532 | -0.05602 |
| -0.14164 | 0.00215  | -0.00978 | 0.83308  | 0.030982 | 0.50421  | -0.04483 | 0.33376 | 0.024565 |
| -0.02927 | 0.52805  | 0.13961  | 0.0025   | 0.215378 | 2.64E-06 | -0.01341 | 0.7725  | 0.024859 |
| 0.02547  | 0.58299  | 0.111993 | 0.01546  | 0.17949  | 9.61E-05 | -0.08033 | 0.08288 | 0.026943 |
| -0.05497 | 0.23576  | 0.039786 | 0.391    | 0.075484 | 0.10327  | -0.0417  | 0.36863 | -0.02055 |
| -0.02748 | 0.55366  | 0.088324 | 0.05648  | 0.13792  | 0.00282  | -0.00523 | 0.91024 | -0.01219 |
| -0.19819 | 1.60E-05 | -0.06697 | 0.14848  | -0.01792 | 0.69939  | -0.10868 | 0.01881 | -0.07272 |
| -0.09857 | 0.03321  | -0.07579 | 0.10189  | 0.012884 | 0.78125  | -0.09711 | 0.03592 | -0.06164 |
| 0.029208 | 0.52893  | 0.024486 | 0.59763  | 0.076627 | 0.09814  | 0.017409 | 0.70749 | -0.09179 |
| -0.0239  | 0.60639  | 0.030428 | 0.51186  | 0.020129 | 0.66439  | -0.04052 | 0.38225 | -0.0545  |
| -0.06901 | 0.13645  | -0.00413 | 0.92907  | 0.03287  | 0.47857  | -0.08648 | 0.06186 | -0.08927 |
| -0.08548 | 0.06494  | -0.02976 | 0.52118  | 0.016451 | 0.7229   | -0.11639 | 0.01183 | -0.04571 |
| 0.151849 | 0.001    | 0.249341 | 4.75E-08 | 0.354553 | 2.80E-15 | 0.056712 | 0.22123 | -0.01508 |
| 0.040952 | 0.37725  | 0.173775 | 0.00016  | 0.194949 | 2.21E-05 | 0.05153  | 0.26643 | 0.009703 |
| -0.08261 | 0.07449  | -0.02742 | 0.55453  | 0.084273 | 0.06883  | -0.12396 | 0.00732 | -0.12787 |
| -0.05267 | 0.25596  | 0.060269 | 0.19356  | 0.143871 | 0.00183  | -0.06577 | 0.15588 | -0.01158 |
| 0.005965 | 0.8977   | 0.041643 | 0.36924  | 0.058727 | 0.20523  | -0.09662 | 0.03687 | -0.01379 |
| -0.08205 | 0.07651  | -0.01068 | 0.8179   | 0.050736 | 0.27388  | -0.08429 | 0.06879 | -0.03382 |
| -0.21497 | 2.76E-06 | 0.106171 | 0.02175  | 0.105797 | 0.02222  | -0.13951 | 0.00251 | -0.13803 |
| -0.08823 | 0.05673  | 0.037054 | 0.42436  | 0.100141 | 0.03049  | -0.03574 | 0.44094 | -0.03335 |
| -0.04531 | 0.32857  | 0.025439 | 0.58345  | 0.151724 | 0.00101  | -0.11003 | 0.01738 | -0.09025 |
| -0.07964 | 0.08557  | -0.01215 | 0.7934   | 0.067634 | 0.14447  | -0.14319 | 0.00192 | -0.06091 |
| -0.15416 | 0.00083  | -0.10053 | 0.02984  | -0.063   | 0.17408  | -0.14001 | 0.00243 | -0.26497 |
| 0.093928 | 0.04247  | 0.200302 | 1.29E-05 | 0.252126 | 3.33E-08 | 0.021089 | 0.64942 | -0.03344 |
| -0.03262 | 0.48185  | 0.117461 | 0.01107  | 0.121532 | 0.00856  | 0.087941 | 0.05756 | 0.171011 |
| -0.14565 | 0.0016   | -0.00387 | 0.93358  | 0.035018 | 0.45027  | -0.08033 | 0.08288 | -0.06708 |
| -0.03097 | 0.50441  | 0.075751 | 0.10206  | 0.103822 | 0.02485  | -0.01975 | 0.67031 | 0.023554 |
| -0.0846  | 0.06777  | -0.0804  | 0.08265  | -0.01011 | 0.82748  | -0.13606 | 0.00322 | -0.14415 |
| -0.04294 | 0.35447  | -0.06443 | 0.16451  | -0.02983 | 0.52012  | -0.01639 | 0.72396 | -0.0729  |
| -0.02413 | 0.60301  | 0.065821 | 0.15557  | 0.128964 | 0.00525  | -0.07182 | 0.12116 | -0.00273 |
| -0.13609 | 0.00321  | -0.01704 | 0.71343  | 0.058786 | 0.20477  | -0.0922  | 0.04645 | -0.04393 |
| -0.17254 | 0.00018  | -0.03827 | 0.4093   | -0.0016  | 0.97246  | -0.07415 | 0.10954 | -0.05599 |
| -0.0468  | 0.31286  | -0.00556 | 0.90461  | 0.0418   | 0.36744  | -0.03141 | 0.49834 | -0.06185 |
| -0.11177 | 0.01567  | 0.008742 | 0.85055  | 0.047409 | 0.30662  | -0.0722  | 0.11918 | -0.01656 |
| -0.13287 | 0.00402  | 0.072915 | 0.11559  | 0.104646 | 0.02372  | -0.01407 | 0.76174 | 0.010768 |
| -0.10551 | 0.02259  | -0.02788 | 0.5478   | -0.02619 | 0.57231  | -0.07083 | 0.12637 | -0.16744 |

|          |          |          |          |          |          |          |          |          |
|----------|----------|----------|----------|----------|----------|----------|----------|----------|
| 0.004116 | 0.92932  | 0.010709 | 0.81746  | 0.102923 | 0.02614  | -0.09352 | 0.04338  | -0.10316 |
| -0.11854 | 0.01035  | -0.08922 | 0.05401  | -0.02362 | 0.6106   | -0.22031 | 1.53E-06 | -0.22166 |
| -0.14257 | 0.00201  | -0.08584 | 0.06381  | -0.019   | 0.68214  | -0.13868 | 0.00267  | -0.12293 |
| 0.086322 | 0.06233  | 0.071117 | 0.12486  | 0.109142 | 0.01831  | -0.23781 | 1.99E-07 | -0.17936 |
| 0.005655 | 0.90299  | 0.143804 | 0.00184  | 0.186215 | 5.15E-05 | -0.06456 | 0.16365  | -0.08438 |
| -0.09396 | 0.0424   | -0.03331 | 0.47263  | 0.028962 | 0.53241  | -0.07466 | 0.1071   | -0.05708 |
| -0.08244 | 0.0751   | 0.025932 | 0.57616  | 0.097361 | 0.03544  | -0.12188 | 0.00837  | -0.08855 |
| -0.28579 | 3.15E-10 | -0.04785 | 0.30214  | -0.15013 | 0.00114  | -0.12829 | 0.0055   | -0.05613 |
| -0.0931  | 0.04434  | -0.0319  | 0.49163  | 0.042146 | 0.36349  | -0.10479 | 0.02352  | -0.09435 |
| -0.1228  | 0.00789  | -0.01674 | 0.71832  | 0.033926 | 0.46454  | -0.0786  | 0.08978  | -0.06165 |
| -0.13223 | 0.0042   | -0.02311 | 0.61833  | 0.002558 | 0.95603  | -0.08512 | 0.06608  | -0.04845 |
| -0.09173 | 0.04757  | 0.045707 | 0.32432  | 0.043208 | 0.35151  | -0.07113 | 0.12477  | -0.06991 |
| -0.02052 | 0.65833  | -0.02905 | 0.53124  | 0.022538 | 0.62711  | -0.16199 | 0.00044  | -0.1379  |
| -0.06817 | 0.1413   | -0.01466 | 0.75204  | 0.044065 | 0.34203  | -0.10572 | 0.02232  | -0.05872 |
| -0.03143 | 0.49804  | -0.04373 | 0.34572  | 0.012495 | 0.78769  | -0.09451 | 0.0412   | -0.13172 |
| -0.00381 | 0.93453  | 0.189044 | 3.93E-05 | 0.313795 | 3.95E-12 | 0.005912 | 0.89862  | 0.013151 |
| 0.021018 | 0.65052  | 0.246569 | 6.75E-08 | 0.371934 | 9.08E-17 | 0.051417 | 0.26748  | 0.057147 |
| -0.02961 | 0.52328  | -0.05839 | 0.20782  | 0.043508 | 0.34818  | -0.14705 | 0.00144  | -0.10155 |
| -0.08376 | 0.07053  | -0.04674 | 0.31348  | 0.049534 | 0.28541  | -0.07516 | 0.10475  | -0.09269 |
| -0.0671  | 0.1477   | -0.07884 | 0.08878  | 0.028496 | 0.53903  | -0.09333 | 0.04382  | -0.15032 |
| -0.06333 | 0.17187  | -0.06213 | 0.18015  | 0.039409 | 0.3955   | -0.16247 | 0.00042  | -0.10748 |
| 0.048666 | 0.29395  | 0.084941 | 0.06666  | 0.143302 | 0.00191  | -0.08573 | 0.06414  | -0.04997 |
| -0.10804 | 0.01952  | -0.04322 | 0.35139  | 0.042456 | 0.35997  | -0.09682 | 0.03648  | -0.08498 |
| -0.0862  | 0.06271  | -0.00792 | 0.86452  | 0.01089  | 0.81444  | -0.05166 | 0.26522  | -0.00104 |
| -0.04905 | 0.29019  | 0.077662 | 0.09368  | 0.126308 | 0.00627  | -0.02948 | 0.52517  | 0.037349 |
| -0.10116 | 0.02883  | -0.00793 | 0.86422  | 0.070535 | 0.12799  | -0.08702 | 0.06024  | -0.0449  |
| -0.08787 | 0.05776  | -0.05681 | 0.22046  | 0.023962 | 0.6055   | -0.11543 | 0.01256  | -0.10795 |
| -0.04608 | 0.32044  | 0.085021 | 0.0664   | 0.108455 | 0.01906  | -0.05891 | 0.20382  | 0.047936 |
| -0.09959 | 0.03142  | -0.04737 | 0.30703  | 0.024323 | 0.60008  | -0.0987  | 0.03297  | -0.08252 |
| -0.07817 | 0.09154  | 0.006132 | 0.89485  | 0.111414 | 0.01601  | -0.12796 | 0.00562  | -0.09579 |
| -0.10364 | 0.0251   | 0.001117 | 0.98079  | 0.074206 | 0.10926  | -0.08316 | 0.0726   | -0.061   |
| -0.10198 | 0.02755  | -0.00817 | 0.86023  | 0.061549 | 0.18425  | -0.09207 | 0.04676  | -0.04762 |
| -0.07793 | 0.09255  | -0.00423 | 0.92736  | 0.069486 | 0.13377  | -0.08043 | 0.08251  | -0.04946 |
| -0.09154 | 0.04803  | 0.116308 | 0.0119   | 0.164457 | 0.00036  | -0.01177 | 0.79982  | 0.040483 |
| -0.05448 | 0.23997  | 0.071513 | 0.12277  | 0.14877  | 0.00126  | -0.0494  | 0.28676  | 0.011422 |
| -0.0488  | 0.29263  | 0.065299 | 0.15888  | 0.129139 | 0.00519  | -0.05741 | 0.21561  | 0.012125 |
| -0.15417 | 0.00083  | -0.03391 | 0.46479  | -0.01965 | 0.67197  | -0.04597 | 0.32157  | -0.05158 |
| -0.05381 | 0.24585  | 0.017818 | 0.70094  | 0.097363 | 0.03543  | -0.07689 | 0.09699  | -0.05408 |
| -0.08937 | 0.05361  | 0.047427 | 0.30644  | 0.084182 | 0.06914  | -0.03712 | 0.42354  | 0.001793 |
| -0.06784 | 0.14322  | -0.03225 | 0.48691  | 0.037519 | 0.41857  | -0.11182 | 0.01562  | -0.06719 |
| -0.122   | 0.00831  | -0.05057 | 0.27547  | -0.00034 | 0.99418  | -0.11215 | 0.01532  | -0.05715 |
| -0.07454 | 0.10768  | 0.008677 | 0.85166  | 0.091086 | 0.04916  | -0.09665 | 0.0368   | -0.04836 |
| -0.07348 | 0.11277  | -0.03285 | 0.47879  | 0.018388 | 0.69186  | -0.08755 | 0.05868  | -0.08162 |
| -0.03632 | 0.43355  | -0.00325 | 0.94408  | 0.117118 | 0.01131  | -0.08516 | 0.06596  | -0.08849 |
| -0.10352 | 0.02528  | -0.06146 | 0.18486  | 0.054631 | 0.23868  | -0.12528 | 0.00671  | -0.10656 |

|          |         |          |         |          |          |          |          |          |
|----------|---------|----------|---------|----------|----------|----------|----------|----------|
| -0.01811 | 0.69627 | -0.05437 | 0.24096 | 0.004728 | 0.91883  | -0.10128 | 0.02864  | -0.05697 |
| -0.02276 | 0.62366 | 0.03478  | 0.45337 | 0.161911 | 0.00044  | -0.11057 | 0.01683  | -0.08245 |
| -0.0754  | 0.10368 | -0.04968 | 0.28404 | 0.054514 | 0.23968  | -0.09261 | 0.04547  | -0.10289 |
| -0.09614 | 0.03781 | -0.08808 | 0.05717 | 8.26E-05 | 0.99858  | -0.11144 | 0.01599  | -0.12452 |
| -0.10271 | 0.02645 | -0.01898 | 0.68254 | 0.051847 | 0.26349  | -0.07556 | 0.10293  | -0.052   |
| -0.11608 | 0.01206 | -0.04332 | 0.35022 | 0.033535 | 0.4697   | -0.09808 | 0.03409  | -0.0549  |
| -0.06539 | 0.15829 | -0.01349 | 0.77128 | 0.09051  | 0.05062  | -0.08337 | 0.07187  | -0.11418 |
| -0.05713 | 0.21783 | 0.073977 | 0.11036 | 0.123859 | 0.00737  | -0.09931 | 0.0319   | -0.15636 |
| -0.08291 | 0.07347 | -0.10539 | 0.02274 | -0.02646 | 0.56835  | -0.22332 | 1.09E-06 | -0.19792 |
| -0.00166 | 0.9715  | 0.131224 | 0.0045  | 0.189977 | 3.59E-05 | 0.002173 | 0.96264  | 0.049141 |
| -0.03602 | 0.4374  | 0.066409 | 0.1519  | 0.139532 | 0.00251  | -0.00513 | 0.91196  | -0.00185 |
| -0.10321 | 0.02573 | -0.06237 | 0.17844 | 0.032738 | 0.48033  | -0.14814 | 0.00133  | -0.123   |
| -0.06636 | 0.1522  | -0.0187  | 0.68685 | 0.046089 | 0.3203   | -0.08127 | 0.07933  | -0.06373 |
| -0.0765  | 0.09871 | -0.07143 | 0.12318 | 0.028504 | 0.53892  | -0.11729 | 0.01119  | -0.12008 |
| -0.08778 | 0.05804 | -0.09072 | 0.05007 | -0.00902 | 0.84588  | -0.13202 | 0.00426  | -0.10712 |
| -0.04974 | 0.28343 | -0.05994 | 0.19599 | 0.046225 | 0.31887  | -0.09725 | 0.03564  | -0.1187  |
| -0.0841  | 0.0694  | -0.13404 | 0.00371 | -0.03155 | 0.49648  | -0.17673 | 0.00012  | -0.14925 |
| -0.05381 | 0.24586 | -0.02594 | 0.57611 | 0.058135 | 0.20984  | -0.10174 | 0.02793  | -0.05731 |
| -0.12197 | 0.00832 | -0.0521  | 0.26117 | -0.00118 | 0.9797   | -0.11476 | 0.01308  | -0.07772 |
| -0.09676 | 0.03659 | -0.07279 | 0.11621 | 0.025806 | 0.57802  | -0.13597 | 0.00324  | -0.118   |
| -0.04886 | 0.29208 | 0.008542 | 0.85393 | 0.070607 | 0.1276   | -0.10239 | 0.02693  | -0.07308 |
| -0.03891 | 0.40152 | -0.04033 | 0.38453 | 0.008353 | 0.85713  | -0.11487 | 0.01299  | -0.0437  |
| -0.01342 | 0.77244 | 0.051658 | 0.26524 | 0.094824 | 0.04053  | -0.03444 | 0.45778  | -0.00911 |
| -0.07467 | 0.10704 | 0.044532 | 0.33693 | 0.110044 | 0.01736  | -0.06453 | 0.16384  | -0.03452 |
| -0.05541 | 0.23204 | 0.003729 | 0.93594 | 0.087234 | 0.05961  | -0.09535 | 0.03943  | -0.04326 |
| -0.05945 | 0.19966 | 0.02107  | 0.64971 | 0.095737 | 0.03863  | -0.0757  | 0.10228  | -0.02738 |
| -0.03528 | 0.44687 | 0.116309 | 0.01189 | 0.195757 | 2.04E-05 | -0.02016 | 0.66392  | 0.000968 |
| -0.09675 | 0.03662 | -0.06816 | 0.14134 | 0.015302 | 0.74154  | -0.12041 | 0.0092   | -0.10378 |
| -0.10789 | 0.0197  | -0.04541 | 0.32751 | 0.029033 | 0.53141  | -0.12518 | 0.00676  | -0.09979 |
| -0.04753 | 0.30541 | 0.061106 | 0.18744 | 0.118356 | 0.01047  | -0.02186 | 0.63756  | 0.023601 |
| -0.1103  | 0.0171  | -0.04438 | 0.3386  | 0.015568 | 0.73721  | -0.08631 | 0.06236  | -0.05664 |
| -0.05154 | 0.26636 | 0.088706 | 0.05542 | 0.180271 | 8.95E-05 | -0.08278 | 0.0739   | -0.02571 |
| -0.08657 | 0.06157 | 0.009659 | 0.83509 | 0.033346 | 0.47222  | -0.01396 | 0.76345  | 0.004364 |
| -0.11308 | 0.01449 | 0.011239 | 0.8086  | 0.081622 | 0.07806  | -0.09296 | 0.04465  | -0.03686 |
| -0.00316 | 0.94576 | 0.057472 | 0.21509 | 0.125448 | 0.00664  | -0.0442  | 0.3406   | -0.01487 |
| -0.08076 | 0.08125 | 0.062022 | 0.1809  | 0.117381 | 0.01113  | -0.04709 | 0.30993  | 0.004368 |
| -0.07375 | 0.11145 | 0.004706 | 0.91922 | 0.068917 | 0.13699  | -0.08212 | 0.07624  | -0.01773 |
| -0.04966 | 0.28417 | 0.053877 | 0.24523 | 0.141202 | 0.00222  | -0.06168 | 0.18334  | 0.037744 |
| -0.08035 | 0.08281 | -0.05619 | 0.22553 | 0.032262 | 0.48675  | -0.09681 | 0.03649  | -0.10291 |
| -0.11299 | 0.01457 | -0.04569 | 0.32448 | 0.028968 | 0.53233  | -0.0964  | 0.0373   | -0.08761 |
| -0.04257 | 0.35863 | 0.028367 | 0.54087 | 0.050199 | 0.27899  | -0.07251 | 0.11765  | 0.041115 |
| -0.08961 | 0.05296 | -0.01937 | 0.67633 | 0.045952 | 0.32174  | -0.09887 | 0.03267  | -0.07349 |
| -0.11085 | 0.01655 | -0.02382 | 0.60768 | 0.014877 | 0.74848  | -0.07218 | 0.11932  | -0.03586 |
| -0.06157 | 0.18412 | 0.005861 | 0.89948 | 0.085544 | 0.06474  | -0.06345 | 0.17105  | -0.0406  |
| -0.0211  | 0.64917 | 0.058557 | 0.20655 | 0.136682 | 0.00308  | -0.02834 | 0.54125  | -0.01978 |

|          |          |          |          |          |          |          |          |          |
|----------|----------|----------|----------|----------|----------|----------|----------|----------|
| -0.00799 | 0.86327  | 0.09322  | 0.04406  | 0.204726 | 8.21E-06 | -0.06115 | 0.18711  | -0.03512 |
| -0.13559 | 0.00333  | -0.02918 | 0.52926  | 0.014741 | 0.75069  | -0.07154 | 0.12262  | -0.02465 |
| 0.053395 | 0.24948  | 0.215624 | 2.57E-06 | 0.361648 | 7.08E-16 | -0.06781 | 0.1434   | 0.047065 |
| 0.083034 | 0.07303  | 0.178995 | 0.0001   | 0.280799 | 6.55E-10 | -0.0341  | 0.46224  | 0.017518 |
| -0.09888 | 0.03265  | 0.013758 | 0.76683  | 0.084645 | 0.06761  | -0.08208 | 0.0764   | -0.03364 |
| -0.09469 | 0.04082  | 0.062188 | 0.17973  | 0.101889 | 0.02769  | -0.00483 | 0.91711  | 0.012877 |
| -0.05553 | 0.23104  | 0.052672 | 0.25596  | 0.072709 | 0.11662  | -0.01837 | 0.6922   | 0.032705 |
| -0.12034 | 0.00924  | -0.09406 | 0.04218  | 0.020529 | 0.65813  | -0.13525 | 0.00341  | -0.10569 |
| -0.05674 | 0.22099  | 0.020001 | 0.66639  | 0.142876 | 0.00197  | -0.08559 | 0.0646   | -0.07006 |
| 0.022256 | 0.63143  | 0.140605 | 0.00232  | 0.219784 | 1.62E-06 | -0.005   | 0.91418  | 0.06385  |
| -0.04807 | 0.29994  | 0.067065 | 0.14789  | 0.127717 | 0.00571  | -0.07417 | 0.10945  | -0.01065 |
| -0.08774 | 0.05814  | 0.015008 | 0.74634  | 0.084167 | 0.06918  | -0.10314 | 0.02582  | -0.07179 |
| -0.05969 | 0.19787  | 0.08859  | 0.05574  | 0.115936 | 0.01217  | -0.02124 | 0.64713  | 0.038328 |
| -0.09938 | 0.03179  | 0.01023  | 0.82549  | 0.065547 | 0.1573   | -0.1321  | 0.00424  | -0.06799 |
| -0.01278 | 0.7829   | -0.04129 | 0.37332  | 0.028176 | 0.5436   | -0.10451 | 0.02391  | -0.05787 |
| -0.09148 | 0.04817  | -0.03187 | 0.49202  | 0.045954 | 0.32172  | -0.11681 | 0.01153  | -0.07633 |
| -0.03623 | 0.43472  | 0.052384 | 0.25857  | 0.066783 | 0.1496   | -0.03149 | 0.49718  | 0.047393 |
| -0.11738 | 0.01113  | -0.06828 | 0.14064  | 0.028509 | 0.53885  | -0.12861 | 0.00538  | -0.118   |
| -0.08338 | 0.07182  | -0.02479 | 0.59314  | 0.054528 | 0.23956  | -0.09437 | 0.04151  | -0.07009 |
| -0.04848 | 0.2958   | 0.061449 | 0.18497  | 0.13296  | 0.004    | -0.04329 | 0.35059  | -0.05849 |
| -0.08286 | 0.07362  | -0.00497 | 0.91463  | 0.079107 | 0.08771  | -0.0815  | 0.07851  | -0.07059 |
| -0.05313 | 0.25184  | -0.06127 | 0.18624  | 0.03557  | 0.44317  | -0.14145 | 0.00218  | -0.116   |
| -0.06688 | 0.14898  | 0.038052 | 0.41198  | 0.104781 | 0.02354  | -0.07383 | 0.11109  | -0.02584 |
| -0.02643 | 0.56891  | 0.013342 | 0.77368  | 0.068231 | 0.14095  | -0.09323 | 0.04405  | -0.04967 |
| -0.04275 | 0.35665  | 0.012557 | 0.78667  | 0.04811  | 0.29952  | -0.06869 | 0.13827  | -0.02026 |
| -0.05485 | 0.23681  | -0.06355 | 0.17037  | 0.025099 | 0.58849  | -0.14392 | 0.00182  | -0.13212 |
| -0.08898 | 0.05467  | 0.032226 | 0.48723  | 0.042035 | 0.36475  | -0.05177 | 0.26418  | -0.02377 |
| -0.11266 | 0.01486  | -0.01402 | 0.7626   | 0.025419 | 0.58374  | -0.0837  | 0.07076  | -0.0131  |
| -0.1037  | 0.02503  | -0.00131 | 0.97745  | 0.014024 | 0.76246  | -0.02966 | 0.5226   | -0.00715 |
| -0.10497 | 0.0233   | 0.067121 | 0.14755  | 0.104915 | 0.02336  | -0.01867 | 0.68733  | -0.0477  |
| -0.00973 | 0.83388  | 0.146028 | 0.00156  | 0.248313 | 5.42E-08 | -0.00639 | 0.89042  | -0.00169 |
| -0.11167 | 0.01577  | -0.03783 | 0.4147   | 0.058599 | 0.20622  | -0.1063  | 0.02159  | -0.08716 |
| -0.11955 | 0.00971  | -0.09268 | 0.04531  | -0.01291 | 0.78089  | -0.1255  | 0.00662  | -0.12173 |
| 0.044968 | 0.33222  | 0.114453 | 0.01333  | 0.248053 | 5.60E-08 | -0.03679 | 0.42771  | -0.08873 |
| -0.0741  | 0.10977  | 0.140759 | 0.0023   | 0.155182 | 0.00077  | 0.00359  | 0.93832  | -0.00583 |
| -0.08982 | 0.05242  | -0.02512 | 0.58823  | 0.061151 | 0.18711  | -0.11062 | 0.01678  | -0.0871  |
| -0.08073 | 0.08139  | 0.012428 | 0.7888   | 0.064449 | 0.16439  | -0.07341 | 0.1131   | -0.04175 |
| -0.02285 | 0.62241  | 0.031137 | 0.50208  | 0.089349 | 0.05366  | -0.02719 | 0.55777  | -0.0633  |
| -0.08557 | 0.06467  | 0.006978 | 0.88045  | 0.024796 | 0.593    | -0.11868 | 0.01026  | -0.05677 |
| 0.102937 | 0.02612  | 0.207668 | 6.04E-06 | 0.213245 | 3.33E-06 | 0.115798 | 0.01228  | 0.056736 |
| 0.308191 | 9.85E-12 | 0.141389 | 0.00219  | 0.161057 | 0.00048  | 0.199011 | 1.47E-05 | 0.14193  |
| -0.03575 | 0.44082  | 0.054114 | 0.24315  | 0.195863 | 2.02E-05 | -0.05365 | 0.24719  | -0.07985 |
| -0.17063 | 0.00021  | -0.11348 | 0.01414  | -0.02762 | 0.55151  | -0.14485 | 0.0017   | -0.17288 |
| -0.12177 | 0.00843  | -0.02384 | 0.60739  | 0.043469 | 0.3486   | -0.13813 | 0.00278  | -0.09427 |
| -0.1036  | 0.02517  | -0.03209 | 0.48908  | 0.035273 | 0.44698  | -0.11081 | 0.01659  | -0.06813 |

|          |         |          |         |          |          |          |         |          |
|----------|---------|----------|---------|----------|----------|----------|---------|----------|
| -0.10791 | 0.01967 | -0.11057 | 0.01683 | -0.03173 | 0.49397  | -0.06503 | 0.16062 | -0.09489 |
| -0.09387 | 0.04259 | 0.028527 | 0.53859 | 0.07832  | 0.09092  | -0.08755 | 0.05868 | -0.05134 |
| 0.046565 | 0.31531 | 0.098286 | 0.03372 | 0.124373 | 0.00712  | -0.00957 | 0.83656 | 0.001048 |
| -0.11125 | 0.01616 | 0.080123 | 0.0837  | 0.122185 | 0.00821  | -0.0539  | 0.24503 | 0.025008 |
| -0.13816 | 0.00277 | 0.027003 | 0.56052 | 0.022028 | 0.63492  | -0.05204 | 0.26168 | -0.02439 |
| 0.018694 | 0.687   | 0.169254 | 0.00024 | 0.189887 | 3.63E-05 | 0.013278 | 0.77474 | 0.079502 |
| -0.09629 | 0.03751 | 0.043968 | 0.3431  | 0.065074 | 0.16032  | 0.009626 | 0.83565 | 0.018246 |
| -0.12346 | 0.00756 | -0.0248  | 0.593   | -0.00212 | 0.96358  | -0.0686  | 0.1388  | -0.03415 |
| -0.03136 | 0.49899 | -0.00522 | 0.91039 | 0.005322 | 0.90868  | -0.11883 | 0.01016 | -0.0637  |
| -0.06747 | 0.14545 | 0.004052 | 0.93042 | 0.038401 | 0.40771  | -0.03395 | 0.46429 | -0.06649 |
| -0.09063 | 0.05031 | -0.0287  | 0.53612 | 0.043294 | 0.35056  | -0.08985 | 0.05234 | -0.08681 |
| -0.04985 | 0.2824  | -0.04355 | 0.34773 | 0.057919 | 0.21154  | -0.07207 | 0.11985 | -0.06494 |
| -0.04121 | 0.37426 | -0.00959 | 0.83625 | 0.03812  | 0.41115  | -0.00572 | 0.9019  | -0.07745 |
| -0.14456 | 0.00174 | 0.071591 | 0.12236 | 0.117166 | 0.01128  | -0.02593 | 0.57617 | -0.00726 |
| -0.07671 | 0.09779 | -0.02343 | 0.61359 | 0.059638 | 0.19828  | -0.09746 | 0.03524 | -0.07275 |
| -0.10074 | 0.0295  | -0.04819 | 0.29869 | -0.01814 | 0.69578  | -0.16824 | 0.00026 | -0.06672 |
| -0.12293 | 0.00782 | -0.0212  | 0.64769 | 0.05661  | 0.22207  | -0.06757 | 0.14483 | -0.07252 |
| -0.06874 | 0.138   | -0.08584 | 0.06381 | 0.007708 | 0.86805  | -0.11656 | 0.01171 | -0.12496 |
| -0.11808 | 0.01066 | 0.01148  | 0.80457 | 0.008575 | 0.85337  | -0.03216 | 0.48814 | -0.0032  |
| -0.12335 | 0.00762 | -0.00976 | 0.83334 | 0.019922 | 0.66762  | -0.09815 | 0.03396 | -0.06029 |
| -0.09768 | 0.03483 | 0.059257 | 0.20116 | 0.068424 | 0.13983  | -0.06101 | 0.18813 | -0.00403 |
| -0.09907 | 0.03232 | -0.02217 | 0.63274 | 0.029269 | 0.52808  | -0.05859 | 0.20627 | -0.04262 |
| 0.030678 | 0.50839 | 0.04998  | 0.2811  | 0.08363  | 0.07098  | -0.0142  | 0.75948 | -0.00091 |
| -0.11729 | 0.0112  | 0.051864 | 0.26333 | 0.103024 | 0.02599  | -0.05748 | 0.21505 | 0.034744 |
| -0.08828 | 0.05659 | 0.133271 | 0.00391 | 0.175377 | 0.00014  | 0.05806  | 0.21043 | 0.058112 |
| -0.04026 | 0.3854  | 0.131202 | 0.00451 | 0.22027  | 1.54E-06 | -0.00028 | 0.99518 | 0.010709 |
| -0.09613 | 0.03784 | -0.08646 | 0.06191 | 0.002822 | 0.9515   | -0.10037 | 0.0301  | -0.11927 |
| -0.07452 | 0.10778 | 0.082961 | 0.07328 | 0.138286 | 0.00275  | -0.04977 | 0.28309 | -0.00922 |
| 0.039456 | 0.39493 | 0.015285 | 0.74181 | 0.051009 | 0.2713   | 0.091337 | 0.04854 | 0.006679 |
| -0.00017 | 0.99711 | 0.030259 | 0.51421 | 0.077701 | 0.09351  | -0.05549 | 0.23136 | -0.05146 |
| 0.002114 | 0.96366 | -0.01022 | 0.82563 | 0.035604 | 0.44273  | -0.15855 | 0.00058 | -0.17438 |
| -0.04259 | 0.3585  | 0.131154 | 0.00453 | 0.170866 | 0.00021  | -0.02001 | 0.66626 | 0.028188 |
| -0.08416 | 0.06922 | -0.01843 | 0.69126 | 0.033733 | 0.46709  | -0.07346 | 0.11289 | -0.04627 |
| -0.03736 | 0.42059 | -0.00973 | 0.83382 | 0.036362 | 0.43307  | -0.06095 | 0.18854 | -0.06342 |
| -0.08385 | 0.07026 | -0.00124 | 0.97869 | 0.02879  | 0.53486  | -0.05344 | 0.2491  | -0.04227 |
| -0.05969 | 0.19788 | 0.025776 | 0.57847 | 0.038575 | 0.40558  | -0.05184 | 0.26354 | -0.06095 |
| -0.07232 | 0.11859 | 0.089356 | 0.05365 | 0.096146 | 0.0378   | -0.05051 | 0.27603 | 0.040666 |
| 0.026724 | 0.56457 | 0.100667 | 0.02962 | 0.214614 | 2.87E-06 | 0.090583 | 0.05043 | 0.005011 |
| -0.07207 | 0.11988 | 0.021435 | 0.64406 | 0.08465  | 0.0676   | -0.08943 | 0.05344 | -0.14016 |
| 0.029836 | 0.52011 | 0.169084 | 0.00024 | 0.296689 | 6.06E-11 | -0.03184 | 0.49247 | 0.007505 |
| -0.0788  | 0.08895 | 0.040798 | 0.37904 | 0.081623 | 0.07805  | -0.05845 | 0.20738 | -0.04979 |
| -0.10569 | 0.02236 | -0.04936 | 0.28715 | 0.036876 | 0.42659  | -0.10197 | 0.02756 | -0.093   |
| 0.042305 | 0.36168 | 0.035247 | 0.44733 | 0.100628 | 0.02968  | 0.054366 | 0.24096 | 0.041525 |
| -0.04754 | 0.30531 | -0.11528 | 0.01267 | -0.00097 | 0.9833   | -0.13015 | 0.00485 | -0.15775 |
| 0.056277 | 0.2248  | 0.107149 | 0.02056 | 0.117518 | 0.01103  | 0.151722 | 0.00101 | 0.083591 |



|          |          |          |          |          |          |          |          |          |
|----------|----------|----------|----------|----------|----------|----------|----------|----------|
| -0.06057 | 0.19131  | -0.07435 | 0.10858  | -0.02811 | 0.54451  | -0.07677 | 0.09753  | -0.06168 |
| -0.0115  | 0.80418  | 0.002514 | 0.95679  | 0.101323 | 0.02857  | -0.10469 | 0.02366  | -0.11938 |
| -0.19102 | 3.25E-05 | -0.17592 | 0.00013  | -0.19158 | 3.08E-05 | -0.1502  | 0.00113  | -0.21139 |
| -0.13569 | 0.0033   | -0.15378 | 0.00086  | -0.08386 | 0.07021  | -0.10788 | 0.01971  | -0.13533 |
| -0.04793 | 0.30136  | 0.017211 | 0.71067  | 0.096852 | 0.03641  | -0.05368 | 0.24694  | -0.0834  |
| -0.09034 | 0.05106  | 0.011212 | 0.80905  | 0.074966 | 0.10567  | -0.06394 | 0.16778  | -0.04443 |
| -0.17875 | 0.0001   | 0.030664 | 0.50859  | 0.014288 | 0.75811  | -0.05602 | 0.22695  | -0.06993 |
| -0.01734 | 0.70855  | -0.00645 | 0.88952  | 0.069147 | 0.13569  | -0.07691 | 0.09692  | -0.14168 |
| 0.048339 | 0.29722  | 0.077728 | 0.0934   | 0.121907 | 0.00836  | 0.007288 | 0.87519  | -0.00415 |
| -0.09201 | 0.0469   | 0.025181 | 0.58728  | 0.066392 | 0.15201  | -0.05597 | 0.22738  | -0.02323 |
| -0.17353 | 0.00016  | -0.08849 | 0.056    | -0.13089 | 0.00461  | -0.08033 | 0.08289  | -0.01172 |
| 0.114109 | 0.01361  | 0.236784 | 2.25E-07 | 0.377867 | 2.68E-17 | -0.02994 | 0.51871  | 0.005312 |
| -0.03125 | 0.50046  | 0.051268 | 0.26887  | 0.122668 | 0.00796  | -0.03037 | 0.51271  | -0.07259 |
| 0.113708 | 0.01395  | 0.163029 | 0.0004   | 0.234804 | 2.86E-07 | 0.028583 | 0.53779  | -0.0497  |
| -0.07377 | 0.11137  | 0.111009 | 0.0164   | 0.183684 | 6.53E-05 | -0.08317 | 0.07256  | 0.009054 |
| -0.04316 | 0.35207  | 0.1948   | 2.24E-05 | 0.167957 | 0.00027  | 0.023022 | 0.61973  | 0.114073 |
| -0.14269 | 0.00199  | -0.00254 | 0.95631  | 0.026528 | 0.56743  | -0.12182 | 0.00841  | -0.04933 |
| -0.12061 | 0.00908  | -0.04147 | 0.37124  | 0.006296 | 0.89207  | -0.15838 | 0.00059  | -0.13753 |
| 0.014102 | 0.76117  | 0.100873 | 0.02929  | 0.249218 | 4.83E-08 | -0.02381 | 0.60773  | -0.02605 |
| -0.10648 | 0.02137  | -0.03139 | 0.49867  | 0.042191 | 0.36297  | -0.08029 | 0.08306  | -0.0558  |
| -0.11151 | 0.01591  | 0.008559 | 0.85364  | 0.082189 | 0.076    | -0.11915 | 0.00996  | -0.04678 |
| -0.00715 | 0.87749  | 0.030264 | 0.51414  | 0.095605 | 0.0389   | 0.022681 | 0.62491  | -0.07711 |
| -0.13076 | 0.00465  | 0.150655 | 0.00109  | 0.204999 | 7.98E-06 | -0.05832 | 0.20841  | 0.096257 |
| -0.11459 | 0.01321  | -0.01476 | 0.75041  | 0.073048 | 0.11492  | -0.06536 | 0.15852  | 0.034797 |
| -0.05573 | 0.22932  | 0.017372 | 0.70808  | 0.047183 | 0.30893  | -0.06219 | 0.17974  | -0.0509  |
| -0.11372 | 0.01393  | -0.03425 | 0.46029  | 0.000826 | 0.98579  | -0.07667 | 0.09795  | -0.0453  |
| -0.12199 | 0.00831  | -0.04993 | 0.28155  | 0.001548 | 0.97338  | -0.17637 | 0.00013  | -0.11111 |
| -0.09165 | 0.04776  | 0.019901 | 0.66796  | 0.096073 | 0.03795  | -0.07299 | 0.11521  | -0.06124 |
| -0.15123 | 0.00104  | -0.04307 | 0.35303  | 0.031861 | 0.49218  | -0.11058 | 0.01683  | -0.09975 |
| -0.07452 | 0.10776  | 0.04888  | 0.29183  | 0.108609 | 0.01889  | -0.09725 | 0.03565  | -0.04703 |
| -0.11288 | 0.01466  | -0.03158 | 0.49606  | 0.003804 | 0.93466  | -0.158   | 0.00061  | -0.09209 |
| -0.07557 | 0.10286  | 0.158535 | 0.00058  | 0.168741 | 0.00025  | -0.07008 | 0.13046  | 0.063284 |
| -0.09846 | 0.03341  | 0.084688 | 0.06747  | 0.081152 | 0.07979  | -0.06183 | 0.18225  | -0.00382 |
| -0.04402 | 0.34255  | -0.00288 | 0.95049  | -0.01715 | 0.71158  | 0.00625  | 0.89284  | -0.073   |
| -0.07902 | 0.08806  | 0.07374  | 0.11151  | 0.127741 | 0.0057   | -0.05579 | 0.22886  | -0.00426 |
| -0.16733 | 0.00028  | -0.05159 | 0.26585  | -0.00658 | 0.88729  | -0.18658 | 4.97E-05 | -0.17868 |
| -0.21596 | 2.47E-06 | -0.10827 | 0.01926  | -0.0612  | 0.18674  | -0.15894 | 0.00057  | -0.21851 |
| -0.08843 | 0.05617  | -0.0304  | 0.51231  | 0.003199 | 0.94503  | 0.029829 | 0.5202   | -0.03856 |
| -0.11341 | 0.0142   | 0.014763 | 0.75034  | 0.068158 | 0.14138  | -0.0689  | 0.13709  | -0.02677 |
| -0.02267 | 0.62505  | 0.07487  | 0.10612  | 0.099514 | 0.03155  | -0.00539 | 0.90754  | 0.059398 |
| -0.13603 | 0.00323  | -0.05155 | 0.26628  | 0.008899 | 0.84791  | -0.13994 | 0.00244  | -0.07559 |
| -0.0728  | 0.11614  | 0.14427  | 0.00177  | 0.180732 | 8.58E-05 | -0.03307 | 0.47592  | 0.040521 |
| -0.03198 | 0.49062  | 0.051024 | 0.27116  | 0.058351 | 0.20815  | -0.07706 | 0.09626  | -0.02595 |
| -0.017   | 0.71406  | -0.03125 | 0.50056  | -0.02222 | 0.63197  | -0.03398 | 0.46383  | -0.09184 |
| -0.13591 | 0.00325  | -0.06726 | 0.1467   | -0.00097 | 0.98332  | -0.10416 | 0.02438  | -0.12042 |

|          |         |          |          |          |          |          |         |          |
|----------|---------|----------|----------|----------|----------|----------|---------|----------|
| -0.0943  | 0.04166 | -0.02536 | 0.58469  | 0.03659  | 0.4302   | -0.13621 | 0.00318 | -0.0926  |
| 0.049886 | 0.282   | 0.147489 | 0.00139  | 0.16003  | 0.00052  | -0.02452 | 0.59713 | 0.003404 |
| -0.11759 | 0.01099 | -0.03147 | 0.49747  | 0.062654 | 0.17648  | -0.08508 | 0.06621 | -0.08612 |
| -0.05369 | 0.24685 | -0.00298 | 0.94881  | 0.080239 | 0.08325  | -0.05761 | 0.21401 | -0.05295 |
| -0.16048 | 0.0005  | -0.01018 | 0.82632  | 0.035024 | 0.4502   | -0.10056 | 0.0298  | -0.08059 |
| -0.04179 | 0.36756 | 0.043196 | 0.35165  | 0.108377 | 0.01915  | -0.06053 | 0.19162 | -0.03158 |
| 0.056534 | 0.22269 | 0.066005 | 0.15442  | 0.163818 | 0.00038  | -0.09338 | 0.0437  | -0.09181 |
| -0.08329 | 0.07214 | -0.03555 | 0.44344  | 0.056342 | 0.22427  | -0.11938 | 0.00982 | -0.11262 |
| -0.05097 | 0.27165 | 0.018422 | 0.69131  | 0.059384 | 0.2002   | -0.0677  | 0.1441  | -0.00502 |
| -0.09828 | 0.03372 | -0.01513 | 0.74428  | 0.046455 | 0.31647  | -0.05918 | 0.20173 | -0.04478 |
| -0.10412 | 0.02443 | -0.06416 | 0.16631  | -0.00069 | 0.98819  | -0.0758  | 0.10184 | -0.10188 |
| -0.01741 | 0.70746 | -0.07327 | 0.1138   | 0.006379 | 0.89065  | 0.046815 | 0.31273 | -0.09156 |
| -0.06279 | 0.17556 | 0.059491 | 0.19939  | 0.106318 | 0.02157  | -0.03249 | 0.4837  | -0.00367 |
| -0.00293 | 0.9497  | 0.152902 | 0.00092  | 0.181103 | 8.29E-05 | -0.00227 | 0.9609  | -0.00648 |
| -0.09005 | 0.0518  | 0.047174 | 0.30903  | 0.104687 | 0.02367  | -0.02497 | 0.59035 | -0.01986 |
| 0.047347 | 0.30725 | 0.170357 | 0.00022  | 0.292908 | 1.08E-10 | -0.00318 | 0.9453  | -0.0702  |
| 0.101256 | 0.02868 | 0.203788 | 9.05E-06 | 0.241562 | 1.26E-07 | -0.04377 | 0.34532 | -0.0458  |
| -0.17015 | 0.00022 | -0.06523 | 0.15931  | -0.05006 | 0.2803   | -0.10685 | 0.02092 | -0.11991 |
| -0.02963 | 0.52301 | 0.081532 | 0.07839  | 0.15437  | 0.00082  | -0.04987 | 0.28215 | 0.004788 |
| -0.06093 | 0.18875 | 0.08664  | 0.06137  | 0.113888 | 0.01379  | -0.00406 | 0.93031 | -0.00422 |
| -0.144   | 0.00181 | -0.08306 | 0.07292  | -0.02993 | 0.51879  | -0.15918 | 0.00056 | -0.14414 |
| -0.10636 | 0.02151 | 0.040553 | 0.38191  | 0.072343 | 0.11848  | -0.03618 | 0.43538 | 0.000372 |
| -0.02935 | 0.52687 | 0.142403 | 0.00204  | 0.188157 | 4.28E-05 | -0.04452 | 0.33712 | -0.08357 |
| 0.001982 | 0.96593 | 0.018482 | 0.69037  | 0.014883 | 0.74837  | -0.07946 | 0.08629 | -0.06256 |
| -0.08819 | 0.05685 | -0.03255 | 0.48285  | 0.030837 | 0.50621  | -0.07966 | 0.08549 | -0.00397 |
| -0.06719 | 0.14715 | -0.00719 | 0.87681  | 0.114957 | 0.01292  | -0.10356 | 0.02523 | -0.10404 |
| -0.03051 | 0.51066 | 0.122252 | 0.00818  | 0.1778   | 0.00011  | -0.02813 | 0.54424 | 0.03124  |
| -0.03058 | 0.5098  | 0.046571 | 0.31525  | 0.08702  | 0.06024  | -0.03479 | 0.45319 | -0.04056 |
| -0.0666  | 0.1507  | -0.02619 | 0.57245  | 0.062461 | 0.17782  | -0.08849 | 0.05601 | -0.06772 |
| -0.14355 | 0.00187 | -0.08245 | 0.07508  | -0.00329 | 0.94354  | -0.15455 | 0.00081 | -0.1552  |
| -0.00749 | 0.87173 | 0.03343  | 0.47109  | 0.164011 | 0.00037  | -0.08861 | 0.05569 | -0.09354 |
| -0.15996 | 0.00052 | -0.16301 | 0.0004   | -0.10109 | 0.02894  | -0.11792 | 0.01076 | -0.15425 |
| -0.00851 | 0.85439 | 0.114528 | 0.01327  | 0.101953 | 0.02759  | 0.004775 | 0.91803 | 0.058206 |
| -0.01977 | 0.66997 | 0.176244 | 0.00013  | 0.276814 | 1.16E-09 | -0.03828 | 0.40922 | 0.020134 |
| 0.02155  | 0.64228 | -0.03463 | 0.45537  | -0.0147  | 0.7514   | 0.060639 | 0.19083 | 0.074303 |
| -0.05509 | 0.23477 | 0.05265  | 0.25616  | 0.119556 | 0.00971  | -0.08406 | 0.06954 | -0.15561 |
| -0.16174 | 0.00045 | -0.03597 | 0.43808  | -0.02494 | 0.59089  | -0.08487 | 0.06689 | -0.0967  |
| -0.05649 | 0.22301 | 0.069675 | 0.13271  | 0.135594 | 0.00333  | -0.08088 | 0.08079 | -0.04739 |
| -0.13466 | 0.00355 | -0.03858 | 0.4055   | -0.03082 | 0.50645  | -0.06989 | 0.1315  | -0.16817 |
| -0.0318  | 0.49302 | -0.03649 | 0.43151  | 0.010161 | 0.82666  | -0.02467 | 0.59489 | 0.009099 |
| -0.0683  | 0.14058 | -0.0697  | 0.13255  | -0.00847 | 0.85515  | -0.08615 | 0.06286 | -0.04467 |
| -0.08944 | 0.05341 | -0.04377 | 0.34528  | 0.023926 | 0.60604  | -0.13581 | 0.00328 | -0.05949 |
| -0.03443 | 0.4579  | 0.059517 | 0.19919  | 0.127712 | 0.00571  | -0.04165 | 0.36913 | -0.02811 |
| -0.04746 | 0.30605 | -0.0305  | 0.51089  | 0.058622 | 0.20604  | -0.05972 | 0.19764 | -0.10924 |
| -0.02867 | 0.53662 | -0.03887 | 0.40204  | 0.031549 | 0.49643  | -0.05926 | 0.20112 | -0.12632 |

|          |          |          |          |          |          |          |          |          |
|----------|----------|----------|----------|----------|----------|----------|----------|----------|
| -0.18436 | 6.13E-05 | -0.09749 | 0.0352   | -0.03405 | 0.46296  | -0.12537 | 0.00668  | -0.07263 |
| -0.05133 | 0.26828  | -0.08072 | 0.0814   | -0.02844 | 0.53978  | -0.102   | 0.02752  | -0.11616 |
| -0.03992 | 0.38941  | -0.02896 | 0.53247  | 0.025645 | 0.5804   | -0.03605 | 0.43697  | -0.0571  |
| -0.02991 | 0.51908  | 0.104848 | 0.02345  | 0.204686 | 8.24E-06 | -0.11653 | 0.01173  | -0.04506 |
| -0.03369 | 0.46761  | 0.028911 | 0.53313  | 0.056593 | 0.22221  | -0.08334 | 0.07197  | -0.03937 |
| -0.08352 | 0.07136  | 0.05932  | 0.20068  | 0.072064 | 0.11991  | -0.06558 | 0.15709  | 0.028199 |
| -0.00422 | 0.92757  | -0.06495 | 0.16114  | 0.003402 | 0.94154  | -0.06961 | 0.13306  | -0.10246 |
| 0.052853 | 0.25433  | -0.00103 | 0.98229  | 0.033064 | 0.47597  | 0.014204 | 0.75949  | -0.09005 |
| -0.09917 | 0.03214  | -0.02828 | 0.54211  | 0.044769 | 0.33437  | -0.11074 | 0.01667  | -0.06927 |
| -0.07387 | 0.11086  | -0.00364 | 0.93743  | 0.080635 | 0.08174  | -0.08275 | 0.07401  | -0.03532 |
| -0.07316 | 0.11437  | -0.04776 | 0.30304  | -0.01272 | 0.7839   | -0.04356 | 0.3476   | -0.08573 |
| -0.00566 | 0.90289  | 0.219492 | 1.68E-06 | 0.277405 | 1.07E-09 | 0.012685 | 0.78455  | -0.00797 |
| -0.09044 | 0.0508   | 0.033222 | 0.47386  | 0.086808 | 0.06087  | -0.02609 | 0.57391  | -0.0146  |
| 0.018612 | 0.68829  | 0.333119 | 1.45E-13 | 0.36828  | 1.90E-16 | 0.070277 | 0.12939  | 0.041794 |
| 0.056225 | 0.22523  | 0.149919 | 0.00116  | 0.246425 | 6.87E-08 | 0.013217 | 0.77575  | -0.06885 |
| -0.09286 | 0.04488  | -0.05217 | 0.26054  | 0.034598 | 0.45573  | -0.07951 | 0.08609  | -0.054   |
| -0.1208  | 0.00897  | -0.07211 | 0.11969  | 0.017686 | 0.70306  | -0.1348  | 0.00352  | -0.2386  |
| -0.03693 | 0.4259   | 0.070276 | 0.1294   | 0.128952 | 0.00526  | -0.03144 | 0.49791  | -0.00811 |
| -0.09393 | 0.04246  | 0.006621 | 0.88652  | 0.027919 | 0.54728  | -0.04693 | 0.3115   | -0.00789 |
| 0.45981  | 8.28E-26 | 0.635838 | 2.88E-54 | 0.390128 | 2.00E-18 | 0.384972 | 6.03E-18 | 0.339235 |
| 0.663029 | 1.86E-60 | 0.658486 | 2.23E-59 | 0.651334 | 1.02E-57 | 0.434797 | 5.85E-23 | 0.529901 |
| 0.585191 | 2.94E-44 | 0.658129 | 2.71E-59 | 0.402484 | 1.30E-19 | 0.438126 | 2.52E-23 | 0.429401 |
| 0.521547 | 6.20E-34 | 0.562467 | 2.58E-40 | 0.502731 | 2.79E-31 | 0.368074 | 1.98E-16 | 0.352625 |
| 0.467822 | 9.00E-27 | 0.221961 | 1.27E-06 | 0.182387 | 7.37E-05 | 0.384727 | 6.35E-18 | 0.279422 |
| 0.651832 | 7.86E-58 | 0.654448 | 1.96E-58 | 0.487282 | 3.20E-29 | 0.589468 | 4.90E-45 | 0.64401  |
| 0.129355 | 0.00512  | 0.005373 | 0.9078   | -0.18399 | 6.34E-05 | 0.162147 | 0.00043  | -0.02281 |
| 0.430816 | 1.58E-22 | 0.38129  | 1.31E-17 | 0.456732 | 1.91E-25 | 0.22486  | 9.14E-07 | 0.16869  |
| 0.425903 | 5.30E-22 | 0.290663 | 1.52E-10 | 0.076029 | 0.1008   | 0.385261 | 5.67E-18 | 0.283673 |
| 0.684863 | 6.44E-66 | 0.745375 | 6.40E-84 | 0.647012 | 9.82E-57 | 0.530692 | 2.76E-35 | 0.556689 |
| 0.484927 | 6.46E-29 | 0.306737 | 1.25E-11 | 0.189055 | 3.93E-05 | 0.288943 | 1.97E-10 | 0.1882   |
| 0.453261 | 4.86E-25 | 0.365588 | 3.25E-16 | 0.282357 | 5.22E-10 | 0.222292 | 1.22E-06 | 0.199534 |
| 0.604025 | 9.01E-48 | 0.782661 | 8.55E-98 | 0.585688 | 2.39E-44 | 0.451491 | 7.80E-25 | 0.498177 |
| 0.556846 | 2.19E-39 | 0.515358 | 4.83E-33 | 0.401953 | 1.46E-19 | 0.378349 | 2.43E-17 | 0.318553 |
| 0.348441 | 8.90E-15 | 0.409567 | 2.57E-20 | 0.141719 | 0.00214  | 0.343096 | 2.40E-14 | 0.443582 |
| 0.395345 | 6.38E-19 | 0.207841 | 5.93E-06 | 0.053928 | 0.24478  | 0.295418 | 7.37E-11 | 0.185812 |
| 0.566808 | 4.81E-41 | 0.61666  | 2.91E-50 | 0.31092  | 6.33E-12 | 0.540116 | 1.01E-36 | 0.624375 |
| 0.255696 | 2.09E-08 | 0.180282 | 8.94E-05 | -0.07352 | 0.11258  | 0.300817 | 3.19E-11 | 0.142828 |
| 0.369357 | 1.53E-16 | 0.285214 | 3.43E-10 | 0.338612 | 5.43E-14 | 0.089153 | 0.05419  | 0.002128 |
| 0.47741  | 5.85E-28 | 0.376925 | 3.26E-17 | 0.386988 | 3.92E-18 | 0.151234 | 0.00104  | 0.239861 |
| 0.665668 | 4.31E-61 | 0.706272 | 9.26E-72 | 0.60205  | 2.16E-47 | 0.444194 | 5.30E-24 | 0.505838 |
| 0.156307 | 0.0007   | 0.277211 | 1.10E-09 | 0.139084 | 0.00259  | 0.2249   | 9.10E-07 | 0.125174 |
| 0.523712 | 2.99E-34 | 0.709966 | 8.03E-73 | 0.439074 | 1.98E-23 | 0.490185 | 1.34E-29 | 0.575797 |
| 0.620335 | 5.22E-51 | 0.623829 | 9.98E-52 | 0.524615 | 2.21E-34 | 0.439912 | 1.60E-23 | 0.46496  |
| 0.656309 | 7.23E-59 | 0.659465 | 1.31E-59 | 0.594344 | 6.16E-46 | 0.425509 | 5.84E-22 | 0.306008 |
| 0.367988 | 2.01E-16 | 0.311337 | 5.91E-12 | 0.101699 | 0.02798  | 0.193905 | 2.45E-05 | 0.331236 |

|          |          |          |          |          |          |          |          |          |
|----------|----------|----------|----------|----------|----------|----------|----------|----------|
| 0.506366 | 8.84E-32 | 0.523293 | 3.45E-34 | 0.330347 | 2.36E-13 | 0.447587 | 2.19E-24 | 0.583858 |
| 0.472729 | 2.25E-27 | 0.313413 | 4.21E-12 | 0.117645 | 0.01095  | 0.279059 | 8.43E-10 | 0.103864 |
| 0.382631 | 9.90E-18 | 0.061417 | 0.1852   | -0.04746 | 0.30611  | 0.3009   | 3.15E-11 | 0.150932 |
| 0.306908 | 1.21E-11 | 0.138441 | 0.00272  | -0.15855 | 0.00058  | 0.295721 | 7.04E-11 | 0.210256 |
| 0.661315 | 4.78E-60 | 0.636041 | 2.60E-54 | 0.545848 | 1.29E-37 | 0.563169 | 1.97E-40 | 0.545339 |
| 0.355426 | 2.37E-15 | 0.328188 | 3.45E-13 | 0.006894 | 0.88188  | 0.304102 | 1.90E-11 | 0.222379 |
| 0.571213 | 8.51E-42 | 0.507971 | 5.29E-32 | 0.385331 | 5.59E-18 | 0.485105 | 6.13E-29 | 0.518243 |
| 0.657455 | 3.90E-59 | 0.717032 | 6.71E-75 | 0.530526 | 2.93E-35 | 0.534998 | 6.17E-36 | 0.614667 |
| 0.651363 | 1.01E-57 | 0.732862 | 8.53E-80 | 0.763761 | 1.93E-90 | 0.423363 | 9.84E-22 | 0.501924 |
| 0.2719   | 2.33E-09 | 0.257783 | 1.59E-08 | 0.106101 | 0.02184  | 0.222566 | 1.19E-06 | 0.105259 |
| 0.238413 | 1.85E-07 | 0.211121 | 4.18E-06 | 0.053351 | 0.24988  | 0.222603 | 1.18E-06 | 0.032552 |
| 0.496934 | 1.70E-30 | 0.396133 | 5.37E-19 | 0.31597  | 2.75E-12 | 0.368701 | 1.75E-16 | 0.2251   |
| 0.429103 | 2.42E-22 | 0.540825 | 7.86E-37 | 0.394665 | 7.41E-19 | 0.361296 | 7.59E-16 | 0.396351 |
| 0.625601 | 4.28E-52 | 0.70843  | 2.23E-72 | 0.54486  | 1.84E-37 | 0.466298 | 1.38E-26 | 0.441518 |
| 0.326426 | 4.68E-13 | 0.163344 | 0.00039  | 0.207469 | 6.16E-06 | 0.222403 | 1.21E-06 | 0.156132 |
| 0.574188 | 2.61E-42 | 0.584815 | 3.43E-44 | 0.319714 | 1.47E-12 | 0.538849 | 1.59E-36 | 0.589571 |
| 0.512579 | 1.20E-32 | 0.593273 | 9.74E-46 | 0.435432 | 4.98E-23 | 0.446497 | 2.91E-24 | 0.554211 |
| 0.309064 | 8.55E-12 | 0.350968 | 5.54E-15 | 0.041782 | 0.36765  | 0.296134 | 6.60E-11 | 0.327731 |
| 0.620465 | 4.91E-51 | 0.62211  | 2.26E-51 | 0.628127 | 1.27E-52 | 0.445125 | 4.16E-24 | 0.361742 |
| 0.36284  | 5.60E-16 | 0.478955 | 3.74E-28 | 0.245436 | 7.78E-08 | 0.323485 | 7.76E-13 | 0.474852 |
| 0.753516 | 9.77E-87 | 0.582275 | 9.80E-44 | 0.437826 | 2.72E-23 | 0.449224 | 1.42E-24 | 0.373634 |
| 0.5508   | 2.10E-38 | 0.747626 | 1.09E-84 | 0.570277 | 1.23E-41 | 0.37482  | 5.04E-17 | 0.420274 |
| 0.327195 | 4.10E-13 | 0.392505 | 1.19E-18 | 0.151832 | 0.001    | 0.314235 | 3.67E-12 | 0.365885 |
| 0.557899 | 1.47E-39 | 0.571628 | 7.22E-42 | 0.475548 | 1.00E-27 | 0.359763 | 1.02E-15 | 0.326361 |
| 0.566681 | 5.05E-41 | 0.671734 | 1.41E-62 | 0.490798 | 1.11E-29 | 0.426568 | 4.51E-22 | 0.425685 |
| 0.441007 | 1.21E-23 | 0.302389 | 2.49E-11 | 0.229794 | 5.17E-07 | 0.282931 | 4.80E-10 | 0.253563 |
| 0.604986 | 5.88E-48 | 0.629805 | 5.61E-53 | 0.48124  | 1.92E-28 | 0.45195  | 6.90E-25 | 0.471106 |
| 0.473959 | 1.58E-27 | 0.684106 | 1.01E-65 | 0.516543 | 3.27E-33 | 0.431958 | 1.19E-22 | 0.406112 |
| 0.76696  | 1.23E-91 | 0.743283 | 3.25E-83 | 0.705803 | 1.26E-71 | 0.510661 | 2.23E-32 | 0.483665 |
| 0.517202 | 2.63E-33 | 0.46452  | 2.26E-26 | 0.228294 | 6.16E-07 | 0.290172 | 1.64E-10 | 0.244237 |
| 0.596953 | 2.00E-46 | 0.609936 | 6.36E-49 | 0.312399 | 4.97E-12 | 0.488139 | 2.48E-29 | 0.48942  |
| 0.060503 | 0.19183  | -0.13188 | 0.00431  | -0.23464 | 2.92E-07 | 0.0711   | 0.12496  | -0.09879 |
| 0.546861 | 8.90E-38 | 0.574265 | 2.53E-42 | 0.515397 | 4.76E-33 | 0.312486 | 4.90E-12 | 0.339366 |
| 0.482431 | 1.35E-28 | 0.557666 | 1.61E-39 | 0.296483 | 6.26E-11 | 0.472487 | 2.41E-27 | 0.577033 |
| 0.466663 | 1.25E-26 | 0.282562 | 5.07E-10 | 0.119249 | 0.0099   | 0.409269 | 2.76E-20 | 0.305359 |
| 0.401897 | 1.48E-19 | 0.292628 | 1.13E-10 | 0.16129  | 0.00047  | 0.285409 | 3.34E-10 | 0.409351 |
| 0.293779 | 9.48E-11 | 0.161865 | 0.00045  | 0.157041 | 0.00066  | 0.082888 | 0.07353  | 0.061786 |
| 0.484045 | 8.39E-29 | 0.471953 | 2.80E-27 | 0.177067 | 0.00012  | 0.487439 | 3.06E-29 | 0.396179 |
| 0.565772 | 7.20E-41 | 0.749471 | 2.53E-85 | 0.581662 | 1.26E-43 | 0.439914 | 1.60E-23 | 0.52083  |
| 0.637822 | 1.07E-54 | 0.686122 | 3.01E-66 | 0.762964 | 3.81E-90 | 0.399928 | 2.31E-19 | 0.348935 |
| 0.608182 | 1.40E-48 | 0.669215 | 5.89E-62 | 0.491296 | 9.56E-30 | 0.421605 | 1.50E-21 | 0.343469 |
| 0.494325 | 3.80E-30 | 0.46359  | 2.93E-26 | 0.252605 | 3.13E-08 | 0.38527  | 5.66E-18 | 0.361594 |
| 0.474285 | 1.44E-27 | 0.649676 | 2.45E-57 | 0.49582  | 2.40E-30 | 0.312959 | 4.53E-12 | 0.389429 |
| 0.531021 | 2.46E-35 | 0.684672 | 7.22E-66 | 0.415757 | 6.06E-21 | 0.473949 | 1.59E-27 | 0.476663 |
| 0.260375 | 1.13E-08 | 0.170761 | 0.00021  | 0.103158 | 0.0258   | 0.08989  | 0.05223  | -0.05868 |

|          |          |          |          |          |          |          |          |          |
|----------|----------|----------|----------|----------|----------|----------|----------|----------|
| 0.369953 | 1.36E-16 | 0.339329 | 4.77E-14 | 0.397008 | 4.42E-19 | 0.160873 | 0.00048  | -0.04843 |
| 0.340351 | 3.96E-14 | 0.331695 | 1.87E-13 | 0.271916 | 2.32E-09 | 0.036778 | 0.42783  | -0.00557 |
| 0.626158 | 3.27E-52 | 0.539668 | 1.19E-36 | 0.584645 | 3.68E-44 | 0.326636 | 4.51E-13 | 0.16395  |
| 0.230361 | 4.84E-07 | 0.303787 | 1.99E-11 | 0.201236 | 1.18E-05 | 0.158152 | 0.0006   | -0.02321 |
| 0.277408 | 1.07E-09 | 0.321798 | 1.03E-12 | 0.10901  | 0.01845  | 0.328246 | 3.41E-13 | 0.255123 |
| -0.21107 | 4.21E-06 | -0.17713 | 0.00012  | -0.14572 | 0.00159  | -0.21414 | 3.02E-06 | 0.003288 |
| -0.20669 | 6.69E-06 | -0.18069 | 8.61E-05 | -0.16353 | 0.00039  | -0.15409 | 0.00083  | -0.03678 |
| 0.117268 | 0.01121  | 0.236726 | 2.27E-07 | 0.242957 | 1.06E-07 | 0.044585 | 0.33635  | 0.274102 |
| 0.107142 | 0.02057  | 0.155289 | 0.00076  | 0.008042 | 0.8624   | 0.133004 | 0.00399  | 0.357938 |
| -0.0532  | 0.25121  | -0.18789 | 4.39E-05 | -0.15075 | 0.00108  | -0.1065  | 0.02135  | -0.06929 |
| 0.269272 | 3.36E-09 | 0.230282 | 4.88E-07 | 0.220131 | 1.56E-06 | 0.253793 | 2.68E-08 | 0.268259 |
| 0.153516 | 0.00087  | 0.312571 | 4.83E-12 | 0.231301 | 4.33E-07 | 0.160004 | 0.00052  | 0.341906 |
| -0.12071 | 0.00903  | 0.022506 | 0.62759  | -0.03534 | 0.44608  | -0.02698 | 0.56082  | 0.099685 |
| 0.10059  | 0.02975  | 0.251822 | 3.46E-08 | 0.183658 | 6.55E-05 | 0.052744 | 0.25531  | 0.257688 |
| -0.25589 | 2.04E-08 | -0.24686 | 6.51E-08 | -0.17314 | 0.00017  | -0.30532 | 1.56E-11 | -0.24175 |
| -0.16496 | 0.00034  | -0.17401 | 0.00016  | -0.17915 | 9.91E-05 | -0.07968 | 0.08544  | -0.01669 |
| -0.10774 | 0.01987  | -0.25262 | 3.12E-08 | -0.18921 | 3.87E-05 | -0.12766 | 0.00573  | -0.13788 |
| 0.172726 | 0.00018  | 0.2585   | 1.45E-08 | 0.135448 | 0.00336  | 0.192003 | 2.95E-05 | 0.474546 |
| -0.31365 | 4.05E-12 | -0.37152 | 9.88E-17 | -0.31229 | 5.05E-12 | -0.26761 | 4.23E-09 | -0.19371 |
| -0.21056 | 4.44E-06 | -0.25726 | 1.70E-08 | -0.2355  | 2.63E-07 | -0.17186 | 0.00019  | -0.07471 |
| -0.14194 | 0.00211  | -0.27946 | 7.95E-10 | -0.21878 | 1.81E-06 | -0.15648 | 0.00069  | -0.06619 |
| -0.28668 | 2.76E-10 | -0.17776 | 0.00011  | -0.20073 | 1.24E-05 | -0.17815 | 0.00011  | -0.06536 |
| -0.27593 | 1.32E-09 | -0.2704  | 2.87E-09 | -0.26121 | 1.01E-08 | -0.26884 | 3.57E-09 | -0.20639 |
| -0.10484 | 0.02346  | -0.22946 | 5.37E-07 | -0.03013 | 0.51606  | -0.13204 | 0.00426  | -0.11056 |
| -0.01588 | 0.73209  | -0.06525 | 0.15919  | -0.05977 | 0.19731  | -0.00938 | 0.83983  | 0.091515 |
| -0.26689 | 4.66E-09 | -0.35408 | 3.07E-15 | -0.37708 | 3.16E-17 | -0.23107 | 4.45E-07 | -0.25533 |
| -0.11977 | 0.00958  | -0.23422 | 3.07E-07 | -0.18361 | 6.57E-05 | -0.16947 | 0.00023  | -0.20385 |
| -0.34913 | 7.82E-15 | -0.26516 | 5.91E-09 | -0.18263 | 7.20E-05 | -0.28796 | 2.28E-10 | -0.20333 |
| -0.30174 | 2.76E-11 | -0.36809 | 1.97E-16 | -0.29851 | 4.57E-11 | -0.33711 | 7.12E-14 | -0.37629 |
| -0.16424 | 0.00037  | -0.30848 | 9.40E-12 | -0.29364 | 9.68E-11 | -0.2774  | 1.07E-09 | -0.15869 |
| -0.27313 | 1.96E-09 | -0.37124 | 1.04E-16 | -0.30448 | 1.79E-11 | -0.20962 | 4.91E-06 | -0.0999  |
| -0.22519 | 8.81E-07 | -0.31551 | 2.97E-12 | -0.18525 | 5.64E-05 | -0.33548 | 9.53E-14 | -0.13458 |
| -0.11541 | 0.01257  | -0.07461 | 0.10735  | 0.02851  | 0.53883  | -0.10736 | 0.02031  | -0.05907 |
| -0.12481 | 0.00692  | -0.21522 | 2.68E-06 | -0.01641 | 0.72353  | -0.22743 | 6.80E-07 | -0.17564 |
| -0.31445 | 3.54E-12 | -0.37023 | 1.28E-16 | -0.36333 | 5.09E-16 | -0.23606 | 2.46E-07 | -0.1539  |
| -0.22237 | 1.21E-06 | -0.329   | 2.99E-13 | -0.29103 | 1.44E-10 | -0.20746 | 6.17E-06 | -0.16324 |
| -0.18966 | 3.70E-05 | -0.21768 | 2.05E-06 | -0.21084 | 4.31E-06 | -0.10673 | 0.02106  | -0.03448 |
| 0.093725 | 0.04292  | -0.13737 | 0.00293  | -0.0553  | 0.23296  | -0.03792 | 0.41366  | -0.02718 |
| -0.0496  | 0.28475  | -0.10581 | 0.0222   | -0.12734 | 0.00586  | -0.13683 | 0.00305  | -0.11171 |
| -0.28683 | 2.70E-10 | -0.43021 | 1.84E-22 | -0.22637 | 7.69E-07 | -0.3033  | 2.16E-11 | -0.20246 |
| -0.13325 | 0.00392  | -0.21194 | 3.83E-06 | -0.06454 | 0.16382  | -0.23694 | 2.21E-07 | -0.11845 |
| 0.126972 | 0.006    | 0.348706 | 8.47E-15 | 0.252701 | 3.09E-08 | 0.163294 | 0.0004   | 0.362301 |
| -0.30558 | 1.50E-11 | -0.2157  | 2.55E-06 | -0.15128 | 0.00104  | -0.25136 | 3.67E-08 | -0.14562 |
| 0.111033 | 0.01638  | -0.13301 | 0.00398  | -0.02016 | 0.66384  | -0.06818 | 0.14126  | -0.05128 |
| -0.31197 | 5.33E-12 | -0.53139 | 2.17E-35 | -0.44542 | 3.86E-24 | -0.28005 | 7.30E-10 | -0.31067 |

|          |          |          |          |          |          |          |          |          |
|----------|----------|----------|----------|----------|----------|----------|----------|----------|
| -0.32263 | 8.97E-13 | -0.36062 | 8.67E-16 | -0.43632 | 3.99E-23 | -0.05111 | 0.27032  | -0.0623  |
| -0.26891 | 3.53E-09 | -0.4067  | 4.99E-20 | -0.36212 | 6.46E-16 | -0.22785 | 6.48E-07 | -0.12339 |
| -0.0556  | 0.2304   | -0.4064  | 5.34E-20 | -0.4424  | 8.43E-24 | -0.1605  | 0.0005   | -0.25784 |
| 0.336214 | 8.36E-14 | 0.357373 | 1.63E-15 | 0.392642 | 1.15E-18 | 0.045844 | 0.32288  | 0.018569 |
| -0.24785 | 5.74E-08 | -0.40866 | 3.18E-20 | -0.44329 | 6.70E-24 | -0.09592 | 0.03826  | -0.27435 |
| -0.00906 | 0.84513  | -0.2615  | 9.69E-09 | -0.34564 | 1.50E-14 | 0.001692 | 0.97091  | -0.11188 |
| -0.07213 | 0.11954  | -0.4727  | 2.26E-27 | -0.4651  | 1.93E-26 | -0.17468 | 0.00015  | -0.35986 |
| -0.21735 | 2.12E-06 | -0.27975 | 7.63E-10 | -0.43695 | 3.40E-23 | -0.22777 | 6.54E-07 | -0.28229 |
| -0.07377 | 0.11134  | -0.45646 | 2.06E-25 | -0.44525 | 4.03E-24 | -0.13248 | 0.00413  | -0.16009 |
| -0.25661 | 1.85E-08 | -0.35044 | 6.11E-15 | -0.34616 | 1.36E-14 | -0.24153 | 1.26E-07 | -0.36817 |
| -0.47045 | 4.29E-27 | -0.70354 | 5.49E-71 | -0.63369 | 8.33E-54 | -0.35413 | 3.04E-15 | -0.46118 |
| -0.38772 | 3.35E-18 | -0.52576 | 1.49E-34 | -0.64727 | 8.58E-57 | -0.25894 | 1.36E-08 | -0.34573 |
| -0.24873 | 5.14E-08 | -0.53772 | 2.37E-36 | -0.6526  | 5.25E-58 | -0.16077 | 0.00049  | -0.23754 |
| -0.15776 | 0.00062  | -0.26082 | 1.06E-08 | -0.58063 | 1.92E-43 | -0.06517 | 0.15973  | -0.0016  |
| -0.46582 | 1.58E-26 | -0.59643 | 2.51E-46 | -0.71925 | 1.45E-75 | -0.29532 | 7.48E-11 | -0.40778 |
| -0.28653 | 2.82E-10 | -0.53539 | 5.39E-36 | -0.61908 | 9.41E-51 | -0.17316 | 0.00017  | -0.22243 |
| -0.19788 | 1.65E-05 | -0.37943 | 1.94E-17 | -0.59616 | 2.82E-46 | -0.10294 | 0.02611  | -0.13483 |
| -0.22626 | 7.78E-07 | -0.3447  | 1.78E-14 | -0.61466 | 7.33E-50 | -0.11202 | 0.01544  | -0.23441 |
| -0.2754  | 1.42E-09 | -0.32382 | 7.33E-13 | -0.50989 | 2.85E-32 | 0.002074 | 0.96435  | 0.140496 |
| -0.42753 | 3.56E-22 | -0.69352 | 3.23E-68 | -0.77013 | 7.68E-93 | -0.34461 | 1.82E-14 | -0.38928 |
| -0.19457 | 2.30E-05 | -0.47364 | 1.73E-27 | -0.49069 | 1.15E-29 | -0.29565 | 7.12E-11 | -0.44493 |
| -0.33552 | 9.45E-14 | -0.40115 | 1.75E-19 | -0.60592 | 3.88E-48 | -0.11139 | 0.01603  | -0.14255 |
| -0.01717 | 0.71128  | -0.43321 | 8.72E-23 | -0.48128 | 1.90E-28 | 0.078504 | 0.09016  | -0.14216 |
| -0.22126 | 1.38E-06 | -0.448   | 1.96E-24 | -0.42774 | 3.38E-22 | -0.19424 | 2.37E-05 | -0.2424  |
| -0.17363 | 0.00016  | -0.37698 | 3.22E-17 | -0.3841  | 7.26E-18 | -0.25903 | 1.35E-08 | -0.38075 |
| -0.19118 | 3.20E-05 | -0.30549 | 1.52E-11 | -0.49738 | 1.48E-30 | 0.027999 | 0.54614  | 0.064851 |
| -0.15578 | 0.00073  | -0.4473  | 2.36E-24 | -0.44361 | 6.16E-24 | -0.04178 | 0.36769  | -0.29054 |
| -0.14543 | 0.00163  | -0.25256 | 3.14E-08 | -0.21479 | 2.81E-06 | -0.03204 | 0.48971  | -0.18812 |
| -0.274   | 1.73E-09 | -0.29585 | 6.90E-11 | -0.38579 | 5.07E-18 | -0.09415 | 0.04198  | -0.20411 |
| -0.41528 | 6.79E-21 | -0.70365 | 5.12E-71 | -0.69904 | 9.95E-70 | -0.3777  | 2.78E-17 | -0.44921 |
| -0.18022 | 8.99E-05 | -0.34533 | 1.59E-14 | -0.37882 | 2.20E-17 | -0.09356 | 0.04328  | -0.15125 |
| -0.07351 | 0.11264  | -0.41115 | 1.78E-20 | -0.54745 | 7.17E-38 | -0.05623 | 0.2252   | -0.19413 |
| -0.22457 | 9.45E-07 | -0.24955 | 4.63E-08 | -0.48792 | 2.65E-29 | 0.001174 | 0.97982  | 0.076781 |
| -0.33791 | 6.16E-14 | -0.494   | 4.19E-30 | -0.56839 | 2.59E-41 | -0.22639 | 7.67E-07 | -0.21662 |
| -0.62647 | 2.81E-52 | -0.69899 | 1.03E-69 | -0.70956 | 1.05E-72 | -0.35849 | 1.31E-15 | -0.42554 |
| -0.13838 | 0.00273  | -0.30133 | 2.94E-11 | -0.35269 | 4.00E-15 | -0.00835 | 0.85718  | -0.17232 |
| -0.32936 | 2.81E-13 | -0.5522  | 1.25E-38 | -0.55512 | 4.19E-39 | -0.27831 | 9.39E-10 | -0.37669 |
| -0.3304  | 2.34E-13 | -0.42904 | 2.46E-22 | -0.48685 | 3.65E-29 | -0.12118 | 0.00876  | -0.13687 |
| -0.19704 | 1.80E-05 | -0.47802 | 4.91E-28 | -0.48032 | 2.51E-28 | -0.18446 | 6.07E-05 | -0.30583 |
| -0.15414 | 0.00083  | -0.38854 | 2.81E-18 | -0.50933 | 3.43E-32 | -0.11055 | 0.01685  | -0.31258 |
| -0.25759 | 1.63E-08 | -0.40549 | 6.57E-20 | -0.45213 | 6.58E-25 | -0.10713 | 0.02058  | -0.24487 |
| -0.27168 | 2.40E-09 | -0.46852 | 7.39E-27 | -0.47105 | 3.62E-27 | -0.314   | 3.82E-12 | -0.36592 |
| 0.111209 | 0.0162   | -0.17431 | 0.00015  | -0.21245 | 3.63E-06 | 0.115738 | 0.01232  | -0.16231 |
| -0.23262 | 3.71E-07 | -0.46015 | 7.55E-26 | -0.57627 | 1.13E-42 | -0.05036 | 0.2774   | -0.23096 |
| -0.48582 | 4.96E-29 | -0.5159  | 4.03E-33 | -0.68633 | 2.66E-66 | -0.23557 | 2.61E-07 | -0.19339 |

|          |          |          |          |          |          |          |          |          |
|----------|----------|----------|----------|----------|----------|----------|----------|----------|
| -0.1759  | 0.00013  | -0.41425 | 8.64E-21 | -0.42241 | 1.24E-21 | -0.1202  | 0.00932  | -0.27846 |
| -0.28905 | 1.94E-10 | -0.35508 | 2.53E-15 | -0.33599 | 8.70E-14 | -0.16465 | 0.00035  | -0.06705 |
| -0.18217 | 7.52E-05 | -0.36914 | 1.60E-16 | -0.33623 | 8.33E-14 | -0.20548 | 7.59E-06 | -0.20611 |
| -0.11097 | 0.01644  | -0.46579 | 1.59E-26 | -0.47661 | 7.38E-28 | -0.2315  | 4.23E-07 | -0.3413  |
| -0.25078 | 3.95E-08 | -0.5527  | 1.04E-38 | -0.56298 | 2.12E-40 | -0.18907 | 3.92E-05 | -0.31593 |
| -0.22733 | 6.89E-07 | -0.37932 | 1.99E-17 | -0.41099 | 1.85E-20 | -0.18969 | 3.70E-05 | -0.36604 |
| -0.05744 | 0.21533  | -0.45471 | 3.30E-25 | -0.50229 | 3.21E-31 | 0.001693 | 0.9709   | -0.14899 |
| -0.03054 | 0.51033  | -0.208   | 5.83E-06 | -0.46261 | 3.84E-26 | 0.005229 | 0.91026  | -0.10936 |
| -0.0905  | 0.05064  | -0.35345 | 3.45E-15 | -0.34883 | 8.27E-15 | -0.20622 | 7.02E-06 | -0.30662 |
| -0.24778 | 5.80E-08 | -0.25228 | 3.26E-08 | -0.37414 | 5.78E-17 | -0.07485 | 0.1062   | -0.21804 |
| -0.1358  | 0.00328  | -0.32632 | 4.77E-13 | -0.55299 | 9.30E-39 | -0.00361 | 0.93798  | 0.038982 |
| -0.04616 | 0.31952  | -0.37608 | 3.88E-17 | -0.38918 | 2.45E-18 | -0.09662 | 0.03686  | -0.33012 |
| -0.5489  | 4.22E-38 | -0.66893 | 6.90E-62 | -0.74524 | 7.13E-84 | -0.28762 | 2.40E-10 | -0.23599 |
| -0.3695  | 1.49E-16 | -0.5491  | 3.92E-38 | -0.56557 | 7.79E-41 | -0.19161 | 3.07E-05 | -0.31865 |
| -0.11885 | 0.01015  | -0.41134 | 1.71E-20 | -0.47076 | 3.93E-27 | -0.11666 | 0.01164  | -0.19119 |
| -0.39964 | 2.46E-19 | -0.40956 | 2.58E-20 | -0.46768 | 9.37E-27 | -0.07784 | 0.09292  | 0.062549 |
| -0.31261 | 4.80E-12 | -0.46918 | 6.14E-27 | -0.47595 | 8.91E-28 | -0.20607 | 7.14E-06 | -0.16488 |
| -0.24988 | 4.44E-08 | -0.5343  | 7.88E-36 | -0.46897 | 6.53E-27 | -0.14235 | 0.00204  | -0.21035 |
| -0.13916 | 0.00258  | -0.43766 | 2.84E-23 | -0.52809 | 6.75E-35 | -0.12956 | 0.00505  | -0.12214 |
| -0.22568 | 8.33E-07 | -0.35161 | 4.91E-15 | -0.43295 | 9.31E-23 | -0.12805 | 0.00558  | 0.043734 |
| -0.02305 | 0.61929  | -0.39391 | 8.75E-19 | -0.46636 | 1.35E-26 | -0.08138 | 0.07893  | -0.12406 |
| -0.03447 | 0.45736  | -0.41029 | 2.18E-20 | -0.38962 | 2.23E-18 | -0.01707 | 0.71297  | -0.00504 |
| -0.30456 | 1.76E-11 | -0.33817 | 5.88E-14 | -0.58883 | 6.40E-45 | -0.07958 | 0.08583  | -0.15145 |
| -0.39687 | 4.56E-19 | -0.6442  | 4.20E-56 | -0.70113 | 2.62E-70 | -0.24899 | 4.97E-08 | -0.32624 |
| -0.19851 | 1.55E-05 | -0.21269 | 3.53E-06 | -0.41946 | 2.51E-21 | -0.10147 | 0.02834  | -0.11722 |
| -0.1333  | 0.00391  | -0.3056  | 1.49E-11 | -0.33177 | 1.84E-13 | -0.04442 | 0.33811  | -0.04393 |
| -0.07986 | 0.08471  | -0.26127 | 1.00E-08 | -0.46119 | 5.67E-26 | 0.070706 | 0.12706  | 0.012211 |
| -0.24511 | 8.11E-08 | -0.53734 | 2.71E-36 | -0.57956 | 2.98E-43 | -0.13947 | 0.00252  | -0.2484  |
| -0.49924 | 8.34E-31 | -0.63351 | 9.10E-54 | -0.66653 | 2.66E-61 | -0.38882 | 2.65E-18 | -0.38966 |
| -0.30368 | 2.03E-11 | -0.61834 | 1.33E-50 | -0.71938 | 1.32E-75 | -0.1716  | 0.00019  | -0.2548  |
| -0.5621  | 2.98E-40 | -0.71789 | 3.71E-75 | -0.71582 | 1.54E-74 | -0.44062 | 1.33E-23 | -0.49111 |
| -0.10806 | 0.0195   | -0.28626 | 2.94E-10 | -0.51726 | 2.58E-33 | 0.07263  | 0.11702  | 0.045893 |
| -0.2802  | 7.14E-10 | -0.50043 | 5.75E-31 | -0.51641 | 3.41E-33 | -0.20084 | 1.22E-05 | -0.23849 |
| -0.15671 | 0.00068  | -0.24697 | 6.41E-08 | -0.57037 | 1.19E-41 | 0.030836 | 0.50622  | 0.115342 |
| -0.31018 | 7.14E-12 | -0.34287 | 2.50E-14 | -0.35579 | 2.21E-15 | -0.0563  | 0.22463  | 0.053646 |
| -0.28465 | 3.73E-10 | -0.33584 | 8.93E-14 | -0.32155 | 1.08E-12 | -0.1991  | 1.46E-05 | -0.05484 |
| -0.41687 | 4.66E-21 | -0.53552 | 5.14E-36 | -0.69739 | 2.84E-69 | -0.30111 | 3.04E-11 | -0.47055 |
| -0.20838 | 5.60E-06 | -0.30397 | 1.94E-11 | -0.35886 | 1.22E-15 | -0.112   | 0.01546  | -0.00224 |
| -0.13109 | 0.00454  | -0.3088  | 8.94E-12 | -0.34765 | 1.03E-14 | -0.12235 | 0.00812  | -0.36751 |
| -0.2296  | 5.29E-07 | -0.3206  | 1.27E-12 | -0.43839 | 2.36E-23 | -0.09479 | 0.04061  | -0.22195 |
| -0.0386  | 0.40526  | -0.38251 | 1.02E-17 | -0.39731 | 4.14E-19 | -0.21517 | 2.70E-06 | -0.34381 |
| -0.21291 | 3.45E-06 | -0.31582 | 2.83E-12 | -0.35527 | 2.44E-15 | -0.19614 | 1.97E-05 | -0.32155 |
| -0.26963 | 3.20E-09 | -0.58489 | 3.33E-44 | -0.55965 | 7.59E-40 | -0.17698 | 0.00012  | -0.23167 |
| -0.18127 | 8.16E-05 | -0.32137 | 1.11E-12 | -0.40542 | 6.67E-20 | -0.14531 | 0.00164  | -0.25638 |
| -0.20908 | 5.20E-06 | -0.46675 | 1.22E-26 | -0.50705 | 7.10E-32 | -0.05775 | 0.21287  | -0.08061 |

|          |          |          |          |          |          |          |          |          |
|----------|----------|----------|----------|----------|----------|----------|----------|----------|
| -0.44962 | 1.28E-24 | -0.59779 | 1.39E-46 | -0.61093 | 4.05E-49 | -0.22576 | 8.25E-07 | -0.20903 |
| -0.5983  | 1.11E-46 | -0.71829 | 2.81E-75 | -0.84972 | #####    | -0.31693 | 2.35E-12 | -0.37337 |
| -0.14568 | 0.0016   | -0.5054  | 1.20E-31 | -0.56219 | 2.87E-40 | -0.11968 | 0.00963  | -0.20468 |
| -0.14863 | 0.00128  | -0.37968 | 1.84E-17 | -0.53219 | 1.64E-35 | -0.02131 | 0.646    | -0.1053  |
| -0.18253 | 7.27E-05 | -0.52012 | 1.00E-33 | -0.58419 | 4.44E-44 | -0.10856 | 0.01895  | -0.20761 |
| -0.06344 | 0.17109  | -0.39174 | 1.41E-18 | -0.44303 | 7.16E-24 | -0.01528 | 0.74184  | -0.19855 |
| -0.04884 | 0.29221  | -0.46784 | 8.96E-27 | -0.39447 | 7.74E-19 | -0.07508 | 0.10513  | -0.11338 |
| -0.21569 | 2.55E-06 | -0.33152 | 1.92E-13 | -0.37067 | 1.17E-16 | -0.17312 | 0.00017  | -0.35282 |
| -0.27132 | 2.53E-09 | -0.23456 | 2.95E-07 | -0.29514 | 7.69E-11 | -0.27822 | 9.51E-10 | -0.27603 |
| 0.695057 | 1.23E-68 | 0.746736 | 2.20E-84 | 0.753478 | 1.01E-86 | 0.348324 | 9.10E-15 | 0.322001 |
| -0.14169 | 0.00215  | -0.49185 | 8.07E-30 | -0.52323 | 3.52E-34 | -0.29924 | 4.08E-11 | -0.40631 |
| -0.10695 | 0.0208   | -0.44062 | 1.33E-23 | -0.41087 | 1.90E-20 | -0.0912  | 0.04888  | -0.32242 |
| -0.36837 | 1.87E-16 | -0.41009 | 2.28E-20 | -0.40944 | 2.65E-20 | -0.16838 | 0.00026  | -0.0161  |
| -0.09411 | 0.04208  | -0.18613 | 5.19E-05 | -0.39108 | 1.62E-18 | 0.042679 | 0.35744  | 0.020326 |
| -0.51862 | 1.64E-33 | -0.67173 | 1.41E-62 | -0.6319  | 2.02E-53 | -0.386   | 4.84E-18 | -0.37105 |
| -0.47412 | 1.51E-27 | -0.63067 | 3.68E-53 | -0.57817 | 5.23E-43 | -0.27965 | 7.74E-10 | -0.27359 |
| -0.55323 | 8.51E-39 | -0.71106 | 3.88E-73 | -0.68948 | 3.91E-67 | -0.32494 | 6.04E-13 | -0.43697 |
| -0.19406 | 2.42E-05 | -0.31512 | 3.17E-12 | -0.35179 | 4.74E-15 | -0.17896 | 0.0001   | -0.2584  |
| -0.40892 | 2.99E-20 | -0.46628 | 1.38E-26 | -0.60568 | 4.31E-48 | -0.32492 | 6.07E-13 | -0.39539 |
| -0.08153 | 0.0784   | -0.37842 | 2.39E-17 | -0.49353 | 4.85E-30 | -0.15881 | 0.00057  | -0.32251 |
| -0.18787 | 4.40E-05 | -0.40243 | 1.31E-19 | -0.38993 | 2.08E-18 | -0.26652 | 4.91E-09 | -0.4204  |
| -0.55946 | 8.14E-40 | -0.6654  | 5.00E-61 | -0.79868 | #####    | -0.39412 | 8.35E-19 | -0.47831 |
| -0.23367 | 3.27E-07 | -0.45096 | 8.98E-25 | -0.44811 | 1.90E-24 | -0.13139 | 0.00445  | -0.25088 |
| -0.20504 | 7.95E-06 | -0.40284 | 1.20E-19 | -0.50282 | 2.72E-31 | -0.18267 | 7.18E-05 | -0.3105  |
| -0.13952 | 0.00251  | -0.28345 | 4.45E-10 | -0.24244 | 1.13E-07 | -0.11383 | 0.01384  | -0.13877 |
| -0.05797 | 0.21113  | -0.30664 | 1.26E-11 | -0.39933 | 2.64E-19 | -0.06607 | 0.15401  | -0.29898 |
| -0.24819 | 5.50E-08 | -0.40682 | 4.84E-20 | -0.43634 | 3.97E-23 | -0.06996 | 0.13112  | -0.04932 |
| -0.21018 | 4.62E-06 | -0.29724 | 5.57E-11 | -0.45516 | 2.92E-25 | -0.15714 | 0.00065  | -0.12031 |
| -0.11051 | 0.01689  | -0.43204 | 1.17E-22 | -0.57181 | 6.71E-42 | -0.08088 | 0.08081  | -0.29161 |
| -0.28259 | 5.04E-10 | -0.39366 | 9.25E-19 | -0.40795 | 3.74E-20 | -0.10131 | 0.02859  | 0.064392 |
| -0.19954 | 1.40E-05 | -0.0834  | 0.07178  | -0.2937  | 9.59E-11 | 0.052651 | 0.25615  | 0.214766 |
| -0.27685 | 1.16E-09 | -0.34281 | 2.53E-14 | -0.28367 | 4.31E-10 | -0.11564 | 0.01239  | -0.11395 |
| 0.167929 | 0.00027  | 0.336599 | 7.80E-14 | 0.359999 | 9.78E-16 | 0.11734  | 0.01116  | 0.16895  |
| -0.44153 | 1.05E-23 | -0.48605 | 4.62E-29 | -0.70426 | 3.44E-71 | -0.23259 | 3.72E-07 | -0.15815 |
| -0.27632 | 1.25E-09 | -0.48608 | 4.58E-29 | -0.67866 | 2.56E-64 | -0.17367 | 0.00016  | -0.19784 |
| -0.18883 | 4.01E-05 | -0.63137 | 2.61E-53 | -0.56369 | 1.61E-40 | -0.16697 | 0.00029  | -0.4536  |
| -0.05879 | 0.20474  | -0.33611 | 8.51E-14 | -0.48902 | 1.90E-29 | -0.09625 | 0.03759  | -0.05279 |
| 0.168595 | 0.00025  | 0.311025 | 6.22E-12 | 0.385661 | 5.21E-18 | 0.044141 | 0.3412   | 0.153739 |
| -0.12834 | 0.00548  | -0.37157 | 9.77E-17 | -0.59206 | 1.63E-45 | -0.02797 | 0.54657  | -0.00143 |
| -0.20965 | 4.89E-06 | -0.41624 | 5.42E-21 | -0.51908 | 1.41E-33 | -0.27363 | 1.83E-09 | -0.32893 |
| -0.24807 | 5.58E-08 | -0.39461 | 7.50E-19 | -0.48451 | 7.31E-29 | -0.14356 | 0.00187  | -0.29345 |
| -0.21951 | 1.67E-06 | -0.34545 | 1.56E-14 | -0.32997 | 2.53E-13 | -0.08142 | 0.0788   | -0.03284 |
| -0.16894 | 0.00025  | -0.23381 | 3.22E-07 | -0.36541 | 3.37E-16 | -0.08998 | 0.05198  | -0.22351 |
| 0.326598 | 4.54E-13 | 0.360755 | 8.44E-16 | 0.451211 | 8.40E-25 | -0.043   | 0.35385  | -0.13052 |
| -0.21138 | 4.07E-06 | -0.5124  | 1.27E-32 | -0.51183 | 1.52E-32 | -0.16755 | 0.00028  | -0.35433 |



|          |          |          |          |          |          |          |          |          |
|----------|----------|----------|----------|----------|----------|----------|----------|----------|
| -0.45689 | 1.83E-25 | -0.63966 | 4.22E-55 | -0.67571 | 1.43E-63 | -0.22733 | 6.88E-07 | -0.26937 |
| 0.010004 | 0.82929  | -0.37074 | 1.16E-16 | -0.3891  | 2.49E-18 | -0.15204 | 0.00098  | -0.36248 |
| -0.23766 | 2.03E-07 | -0.37809 | 2.56E-17 | -0.40082 | 1.89E-19 | -0.10094 | 0.02918  | -0.09289 |
| 0.624534 | 7.13E-52 | 0.75022  | 1.39E-85 | 0.818614 | #####    | 0.362503 | 5.99E-16 | 0.358144 |
| -0.08645 | 0.06194  | -0.51979 | 1.11E-33 | -0.47646 | 7.71E-28 | -0.23614 | 2.44E-07 | -0.36    |
| -0.1418  | 0.00213  | -0.47799 | 4.95E-28 | -0.56706 | 4.36E-41 | -0.18893 | 3.97E-05 | -0.35144 |
| -0.25016 | 4.28E-08 | -0.37547 | 4.41E-17 | -0.51261 | 1.18E-32 | -0.01222 | 0.79221  | 0.068851 |
| 0.114171 | 0.01356  | -0.1161  | 0.01205  | -0.26253 | 8.44E-09 | 0.121908 | 0.00836  | 0.012449 |
| -0.03473 | 0.45405  | -0.4069  | 4.76E-20 | -0.39197 | 1.34E-18 | -0.09786 | 0.03451  | -0.32845 |
| 0.531127 | 2.38E-35 | 0.76182  | 1.00E-89 | 0.708477 | 2.16E-72 | 0.374991 | 4.86E-17 | 0.512358 |
| -0.29982 | 3.73E-11 | -0.40493 | 7.46E-20 | -0.4008  | 1.90E-19 | -0.25126 | 3.72E-08 | -0.34051 |
| -0.25086 | 3.91E-08 | -0.30042 | 3.39E-11 | -0.24724 | 6.21E-08 | -0.04983 | 0.28255  | -0.01573 |
| -0.28068 | 6.67E-10 | -0.48932 | 1.74E-29 | -0.55242 | 1.15E-38 | -0.25828 | 1.49E-08 | -0.40902 |
| -0.26949 | 3.26E-09 | -0.47023 | 4.56E-27 | -0.49782 | 1.30E-30 | -0.10775 | 0.01986  | -0.30909 |
| -0.10652 | 0.02132  | -0.42427 | 7.89E-22 | -0.4655  | 1.72E-26 | -0.00149 | 0.97443  | 0.022695 |
| -0.10485 | 0.02346  | -0.46042 | 7.00E-26 | -0.38709 | 3.84E-18 | -0.19813 | 1.61E-05 | -0.29037 |
| -0.36837 | 1.87E-16 | -0.65946 | 1.31E-59 | -0.7208  | 4.93E-76 | -0.36838 | 1.86E-16 | -0.46863 |
| -0.24228 | 1.15E-07 | -0.57187 | 6.57E-42 | -0.64313 | 7.27E-56 | -0.21033 | 4.55E-06 | -0.30946 |
| -0.00708 | 0.87876  | -0.21096 | 4.25E-06 | -0.43543 | 4.99E-23 | 0.047788 | 0.30276  | 0.054212 |
| -0.12592 | 0.00643  | -0.3666  | 2.66E-16 | -0.57229 | 5.56E-42 | -0.11591 | 0.01219  | -0.09654 |
| -0.2974  | 5.43E-11 | -0.49286 | 5.95E-30 | -0.52719 | 9.19E-35 | -0.2661  | 5.20E-09 | -0.37148 |
| -0.17774 | 0.00011  | -0.31211 | 5.21E-12 | -0.49245 | 6.73E-30 | -0.06242 | 0.17812  | -0.04315 |
| -0.51769 | 2.24E-33 | -0.68645 | 2.48E-66 | -0.71438 | 4.11E-74 | -0.26985 | 3.10E-09 | -0.29783 |
| -0.38055 | 1.53E-17 | -0.49865 | 1.00E-30 | -0.64884 | 3.79E-57 | -0.19811 | 1.61E-05 | -0.20781 |
| -0.46149 | 5.23E-26 | -0.65962 | 1.20E-59 | -0.72188 | 2.31E-76 | -0.28893 | 1.97E-10 | -0.39261 |
| 0.044614 | 0.33604  | -0.17996 | 9.21E-05 | -0.41676 | 4.78E-21 | -0.02045 | 0.65929  | 0.005115 |
| -0.04334 | 0.35002  | -0.3846  | 6.53E-18 | -0.39544 | 6.25E-19 | -0.20929 | 5.08E-06 | -0.27586 |
| -0.58268 | 8.31E-44 | -0.66084 | 6.19E-60 | -0.70176 | 1.75E-70 | -0.30045 | 3.37E-11 | -0.2596  |
| -0.4052  | 7.02E-20 | -0.51544 | 4.70E-33 | -0.68981 | 3.20E-67 | -0.19854 | 1.55E-05 | -0.29679 |
| -0.18716 | 4.70E-05 | -0.26695 | 4.63E-09 | -0.32699 | 4.24E-13 | -0.15366 | 0.00086  | -0.29187 |
| -0.27871 | 8.86E-10 | -0.43989 | 1.61E-23 | -0.53539 | 5.38E-36 | -0.13301 | 0.00398  | -0.08403 |
| -0.28963 | 1.78E-10 | -0.34934 | 7.52E-15 | -0.59879 | 9.02E-47 | -0.11201 | 0.01545  | -0.05914 |
| -0.2004  | 1.28E-05 | -0.24512 | 8.09E-08 | -0.33746 | 6.69E-14 | -0.0953  | 0.03953  | -0.20244 |
| -0.06965 | 0.13286  | -0.27008 | 3.00E-09 | -0.33121 | 2.03E-13 | -0.16794 | 0.00027  | -0.29962 |
| 0.294839 | 8.06E-11 | 0.287369 | 2.49E-10 | 0.313903 | 3.88E-12 | 0.110111 | 0.0173   | 0.122539 |
| -0.10477 | 0.02356  | -0.33013 | 2.46E-13 | -0.30876 | 8.98E-12 | -0.21265 | 3.55E-06 | -0.37389 |
| -0.15791 | 0.00062  | -0.30797 | 1.02E-11 | -0.32396 | 7.16E-13 | -0.16535 | 0.00033  | -0.17512 |
| -0.15741 | 0.00064  | -0.31933 | 1.57E-12 | -0.33962 | 4.52E-14 | -0.20138 | 1.16E-05 | -0.35154 |
| -0.0881  | 0.05712  | -0.38169 | 1.21E-17 | -0.35599 | 2.12E-15 | -0.04742 | 0.30645  | -0.17504 |
| -0.32114 | 1.16E-12 | -0.46245 | 4.01E-26 | -0.64907 | 3.36E-57 | -0.12994 | 0.00492  | -0.2212  |
| -0.26225 | 8.76E-09 | -0.50004 | 6.49E-31 | -0.63193 | 1.99E-53 | -0.16425 | 0.00037  | -0.41124 |
| -0.58086 | 1.75E-43 | -0.76513 | 5.97E-91 | -0.72051 | 6.04E-76 | -0.46287 | 3.57E-26 | -0.57475 |
| -0.4483  | 1.81E-24 | -0.72749 | 4.29E-78 | -0.68638 | 2.58E-66 | -0.2871  | 2.60E-10 | -0.44448 |
| -0.03498 | 0.45072  | -0.42853 | 2.79E-22 | -0.464   | 2.61E-26 | -0.12124 | 0.00873  | -0.31072 |
| -0.2125  | 3.61E-06 | -0.3739  | 6.08E-17 | -0.4144  | 8.34E-21 | -0.01821 | 0.69469  | 0.176595 |

|          |          |          |          |          |          |          |          |          |
|----------|----------|----------|----------|----------|----------|----------|----------|----------|
| -0.17445 | 0.00015  | -0.33687 | 7.43E-14 | -0.42916 | 2.38E-22 | -0.22802 | 6.35E-07 | -0.213   |
| -0.40792 | 3.76E-20 | -0.42616 | 4.99E-22 | -0.68281 | 2.19E-65 | -0.19015 | 3.54E-05 | -0.13758 |
| -0.05972 | 0.19769  | -0.32948 | 2.75E-13 | -0.45703 | 1.76E-25 | 0.022542 | 0.62705  | -0.05341 |
| -0.61457 | 7.64E-50 | -0.76093 | 2.13E-89 | -0.76964 | 1.19E-92 | -0.39739 | 4.06E-19 | -0.51166 |
| -0.50898 | 3.82E-32 | -0.65831 | 2.45E-59 | -0.80531 | #####    | -0.27582 | 1.34E-09 | -0.23229 |
| -0.66156 | 4.17E-60 | -0.73363 | 4.83E-80 | -0.71395 | 5.52E-74 | -0.38821 | 3.02E-18 | -0.43065 |
| -0.14415 | 0.00179  | -0.36032 | 9.18E-16 | -0.46173 | 4.90E-26 | 0.036351 | 0.43321  | 0.008422 |
| -0.22563 | 8.37E-07 | -0.47704 | 6.51E-28 | -0.68542 | 4.61E-66 | -0.12527 | 0.00672  | -0.1074  |
| -0.28737 | 2.49E-10 | -0.54302 | 3.58E-37 | -0.50192 | 3.60E-31 | -0.25882 | 1.39E-08 | -0.40823 |
| -0.30799 | 1.02E-11 | -0.59912 | 7.79E-47 | -0.59314 | 1.03E-45 | -0.20362 | 9.20E-06 | -0.38272 |
| -0.15969 | 0.00053  | -0.397   | 4.42E-19 | -0.56049 | 5.50E-40 | -0.0012  | 0.9794   | -0.16242 |
| -0.00775 | 0.86727  | -0.11578 | 0.01229  | -0.36881 | 1.71E-16 | 0.089963 | 0.05203  | 0.202556 |
| -0.49375 | 4.53E-30 | -0.76608 | 2.64E-91 | -0.74659 | 2.48E-84 | -0.47543 | 1.04E-27 | -0.59598 |
| -0.15638 | 0.0007   | -0.40349 | 1.03E-19 | -0.4932  | 5.36E-30 | -0.20905 | 5.21E-06 | -0.37427 |
| -0.13559 | 0.00333  | -0.1031  | 0.02588  | -0.44163 | 1.03E-23 | 0.113205 | 0.01438  | 0.275641 |
| -0.50115 | 4.60E-31 | -0.64398 | 4.69E-56 | -0.68966 | 3.49E-67 | -0.23341 | 3.38E-07 | -0.31877 |
| -0.33613 | 8.48E-14 | -0.67288 | 7.30E-63 | -0.63177 | 2.15E-53 | -0.36468 | 3.90E-16 | -0.47945 |
| -0.56647 | 5.49E-41 | -0.80354 | #####    | -0.67644 | 9.34E-64 | -0.46058 | 6.71E-26 | -0.52969 |
| -0.28171 | 5.74E-10 | -0.45291 | 5.34E-25 | -0.45722 | 1.67E-25 | -0.16296 | 0.00041  | -0.21039 |
| -0.21332 | 3.30E-06 | -0.4883  | 2.36E-29 | -0.59924 | 7.41E-47 | -0.21989 | 1.60E-06 | -0.44127 |
| -0.20056 | 1.26E-05 | -0.53243 | 1.51E-35 | -0.61164 | 2.92E-49 | -0.18722 | 4.68E-05 | -0.2647  |
| -0.27766 | 1.03E-09 | -0.27349 | 1.86E-09 | -0.39645 | 5.00E-19 | -0.16549 | 0.00033  | -0.19579 |
| -0.14884 | 0.00126  | -0.4144  | 8.34E-21 | -0.53578 | 4.69E-36 | -0.03339 | 0.47157  | 0.045817 |
| -0.1451  | 0.00167  | -0.41175 | 1.55E-20 | -0.53047 | 2.99E-35 | -0.09243 | 0.04588  | -0.22997 |
| -0.3286  | 3.21E-13 | -0.53268 | 1.39E-35 | -0.50665 | 8.09E-32 | -0.19766 | 1.69E-05 | -0.35843 |
| -0.12067 | 0.00905  | -0.54815 | 5.55E-38 | -0.56722 | 4.09E-41 | -0.22738 | 6.85E-07 | -0.41631 |
| 0.201803 | 1.11E-05 | 0.358635 | 1.28E-15 | 0.353191 | 3.63E-15 | 0.04332  | 0.35026  | 0.233556 |
| -0.15123 | 0.00104  | -0.44687 | 2.64E-24 | -0.57311 | 4.01E-42 | -0.07997 | 0.08431  | -0.14248 |
| -0.14252 | 0.00202  | -0.51315 | 9.95E-33 | -0.53718 | 2.86E-36 | -0.13885 | 0.00264  | -0.40402 |
| 0.244609 | 8.63E-08 | 0.349812 | 6.88E-15 | 0.442701 | 7.80E-24 | 0.121525 | 0.00857  | 0.260274 |
| -0.18516 | 5.69E-05 | -0.282   | 5.50E-10 | -0.43183 | 1.23E-22 | -0.14312 | 0.00193  | -0.22782 |
| -0.27941 | 8.01E-10 | -0.24865 | 5.19E-08 | -0.31192 | 5.38E-12 | -0.08595 | 0.06349  | -0.09169 |
| -0.13408 | 0.0037   | -0.36021 | 9.39E-16 | -0.63609 | 2.54E-54 | -0.03405 | 0.46295  | 0.001028 |
| 0.08153  | 0.07839  | -0.36071 | 8.51E-16 | -0.48348 | 9.92E-29 | -0.04227 | 0.36208  | -0.21879 |
| -0.20389 | 8.95E-06 | -0.2487  | 5.15E-08 | -0.4938  | 4.46E-30 | -0.05817 | 0.20958  | 0.017395 |
| -0.21986 | 1.61E-06 | -0.46801 | 8.55E-27 | -0.53681 | 3.27E-36 | -0.16301 | 0.0004   | -0.38657 |
| -0.38099 | 1.40E-17 | -0.42472 | 7.08E-22 | -0.65666 | 5.99E-59 | -0.26902 | 3.48E-09 | -0.28784 |
| -0.45127 | 8.27E-25 | -0.68082 | 7.16E-65 | -0.68204 | 3.49E-65 | -0.22626 | 7.78E-07 | -0.2917  |
| -0.20542 | 7.64E-06 | -0.40041 | 2.07E-19 | -0.33749 | 6.65E-14 | -0.1586  | 0.00058  | -0.17215 |
| -0.20477 | 8.17E-06 | -0.3623  | 6.23E-16 | -0.34437 | 1.90E-14 | -0.03137 | 0.49892  | -0.17257 |
| -0.09612 | 0.03786  | -0.41391 | 9.37E-21 | -0.38933 | 2.37E-18 | -0.15383 | 0.00085  | -0.37554 |
| -0.21012 | 4.66E-06 | -0.21165 | 3.95E-06 | -0.49324 | 5.29E-30 | -0.05855 | 0.2066   | -0.13347 |
| -0.29278 | 1.10E-10 | -0.39547 | 6.21E-19 | -0.49972 | 7.17E-31 | -0.16837 | 0.00026  | -0.26594 |
| -0.05419 | 0.24252  | -0.48052 | 2.37E-28 | -0.42221 | 1.30E-21 | -0.10877 | 0.01871  | -0.27605 |
| -0.21289 | 3.46E-06 | -0.44522 | 4.06E-24 | -0.52869 | 5.49E-35 | -0.06558 | 0.1571   | -0.17005 |

|          |          |          |          |          |          |          |          |          |
|----------|----------|----------|----------|----------|----------|----------|----------|----------|
| -0.15548 | 0.00075  | -0.26024 | 1.15E-08 | -0.39897 | 2.86E-19 | -0.03846 | 0.40704  | -0.13787 |
| -0.07365 | 0.11197  | -0.35348 | 3.44E-15 | -0.41664 | 4.92E-21 | -0.17923 | 9.84E-05 | -0.34193 |
| -0.58215 | 1.03E-43 | -0.67342 | 5.37E-63 | -0.80597 | #####    | -0.32347 | 7.77E-13 | -0.42283 |
| -0.34712 | 1.14E-14 | -0.55035 | 2.48E-38 | -0.59852 | 1.01E-46 | -0.21102 | 4.23E-06 | -0.30029 |
| -0.21545 | 2.62E-06 | -0.57488 | 1.97E-42 | -0.6592  | 1.51E-59 | -0.19055 | 3.40E-05 | -0.35686 |
| -0.23696 | 2.21E-07 | -0.36196 | 6.66E-16 | -0.50508 | 1.33E-31 | -0.23815 | 1.91E-07 | -0.35853 |
| -0.29348 | 9.92E-11 | -0.35192 | 4.62E-15 | -0.47874 | 3.98E-28 | -0.07927 | 0.08704  | -0.06698 |
| -0.07776 | 0.09327  | -0.29127 | 1.39E-10 | -0.26843 | 3.78E-09 | 0.071631 | 0.12216  | -0.04717 |
| -0.13755 | 0.00289  | -0.36178 | 6.90E-16 | -0.38108 | 1.37E-17 | -0.17935 | 9.74E-05 | -0.31561 |
| -0.21618 | 2.42E-06 | -0.44326 | 6.75E-24 | -0.54619 | 1.14E-37 | -0.18751 | 4.55E-05 | -0.26067 |
| -0.4477  | 2.12E-24 | -0.56959 | 1.61E-41 | -0.71751 | 4.81E-75 | -0.2679  | 4.06E-09 | -0.3269  |
| -0.26909 | 3.44E-09 | -0.43498 | 5.58E-23 | -0.57681 | 9.09E-43 | -0.05797 | 0.21112  | 0.002203 |
| -0.35779 | 1.50E-15 | -0.46367 | 2.86E-26 | -0.5197  | 1.15E-33 | -0.15101 | 0.00106  | -0.20478 |
| -0.22052 | 1.49E-06 | -0.21279 | 3.49E-06 | -0.47186 | 2.88E-27 | -0.0607  | 0.19038  | -0.18867 |
| -0.25503 | 2.28E-08 | -0.47168 | 3.03E-27 | -0.59085 | 2.73E-45 | -0.14602 | 0.00156  | -0.2819  |
| -0.44037 | 1.42E-23 | -0.71437 | 4.14E-74 | -0.69174 | 9.74E-68 | -0.37446 | 5.42E-17 | -0.4557  |
| -0.25385 | 2.66E-08 | -0.64082 | 2.36E-55 | -0.64337 | 6.43E-56 | -0.17146 | 0.0002   | -0.36068 |
| -0.22432 | 9.72E-07 | -0.58734 | 1.20E-44 | -0.60719 | 2.19E-48 | -0.24439 | 8.87E-08 | -0.33955 |
| -0.10931 | 0.01813  | -0.43128 | 1.41E-22 | -0.36197 | 6.66E-16 | -0.36342 | 5.00E-16 | -0.31016 |
| -0.20861 | 5.47E-06 | -0.52395 | 2.76E-34 | -0.63337 | 9.77E-54 | -0.26655 | 4.89E-09 | -0.30584 |
| -0.195   | 2.20E-05 | -0.37621 | 3.78E-17 | -0.58874 | 6.64E-45 | -0.03868 | 0.40436  | -0.12181 |
| -0.42927 | 2.32E-22 | -0.60844 | 1.25E-48 | -0.64277 | 8.70E-56 | -0.19772 | 1.68E-05 | -0.2666  |
| -0.02633 | 0.57038  | -0.27213 | 2.26E-09 | -0.45511 | 2.96E-25 | 0.03734  | 0.4208   | 0.059552 |
| -0.04925 | 0.28821  | -0.1787  | 0.0001   | -0.37389 | 6.09E-17 | -0.09302 | 0.04451  | -0.02702 |
| -0.27403 | 1.73E-09 | -0.50909 | 3.70E-32 | -0.46693 | 1.16E-26 | -0.23056 | 4.73E-07 | -0.32739 |
| -0.2487  | 5.16E-08 | -0.33061 | 2.26E-13 | -0.22611 | 7.92E-07 | -0.1286  | 0.00538  | -0.1363  |
| -0.37285 | 7.53E-17 | -0.45808 | 1.32E-25 | -0.46886 | 6.73E-27 | -0.24174 | 1.23E-07 | -0.16992 |
| -0.12749 | 0.0058   | -0.50851 | 4.45E-32 | -0.46948 | 5.65E-27 | -0.11658 | 0.0117   | -0.21002 |
| -0.26696 | 4.62E-09 | -0.29415 | 8.95E-11 | -0.31545 | 3.00E-12 | -0.25749 | 1.65E-08 | -0.29432 |
| -0.37086 | 1.13E-16 | -0.51981 | 1.11E-33 | -0.48721 | 3.27E-29 | -0.32422 | 6.84E-13 | -0.14916 |
| 0.213185 | 3.35E-06 | 0.435339 | 5.10E-23 | 0.478341 | 4.47E-28 | 0.102266 | 0.02711  | 0.132335 |
| -0.23085 | 4.57E-07 | -0.26971 | 3.16E-09 | -0.54297 | 3.64E-37 | -0.01821 | 0.69469  | 0.026464 |
| 0.004079 | 0.92994  | -0.42526 | 6.20E-22 | -0.41548 | 6.48E-21 | -0.13285 | 0.00403  | -0.32208 |
| -0.25541 | 2.17E-08 | -0.30855 | 9.30E-12 | -0.23134 | 4.31E-07 | -0.13069 | 0.00467  | -0.14739 |
| -0.29594 | 6.81E-11 | -0.54413 | 2.39E-37 | -0.43321 | 8.72E-23 | -0.22471 | 9.31E-07 | -0.3467  |
| -0.49188 | 8.01E-30 | -0.75256 | 2.13E-86 | -0.72501 | 2.52E-77 | -0.38117 | 1.35E-17 | -0.48173 |
| -0.06828 | 0.14069  | -0.39625 | 5.23E-19 | -0.42952 | 2.18E-22 | -0.00458 | 0.92136  | -0.14264 |
| -0.59266 | 1.26E-45 | -0.82777 | #####    | -0.77648 | 2.60E-95 | -0.44764 | 2.16E-24 | -0.57322 |
| -0.1888  | 4.03E-05 | -0.23262 | 3.71E-07 | -0.39513 | 6.70E-19 | -0.051   | 0.27137  | -0.20301 |
| -0.10078 | 0.02944  | -0.17635 | 0.00013  | -0.30222 | 2.55E-11 | 0.010227 | 0.82554  | -0.27467 |
| 0.037889 | 0.41399  | -0.43143 | 1.36E-22 | -0.44225 | 8.76E-24 | -0.03937 | 0.39596  | -0.18265 |
| -0.26365 | 7.26E-09 | -0.43066 | 1.64E-22 | -0.62028 | 5.36E-51 | -0.18627 | 5.12E-05 | -0.3545  |
| -0.14392 | 0.00182  | -0.32938 | 2.80E-13 | -0.36939 | 1.52E-16 | -0.14309 | 0.00194  | -0.16563 |
| -0.39426 | 8.10E-19 | -0.56028 | 5.96E-40 | -0.68208 | 3.40E-65 | -0.20677 | 6.63E-06 | -0.22564 |
| -0.05587 | 0.2282   | -0.44276 | 7.67E-24 | -0.41235 | 1.35E-20 | -0.08034 | 0.08285  | -0.24388 |

|          |          |          |          |          |          |          |          |          |
|----------|----------|----------|----------|----------|----------|----------|----------|----------|
| -0.13505 | 0.00345  | -0.42525 | 6.22E-22 | -0.4394  | 1.82E-23 | -0.11885 | 0.01015  | -0.30513 |
| -0.15427 | 0.00082  | -0.49251 | 6.61E-30 | -0.5141  | 7.29E-33 | -0.22787 | 6.47E-07 | -0.47452 |
| 0.050837 | 0.27292  | 0.031434 | 0.498    | -0.27725 | 1.09E-09 | 0.171254 | 0.0002   | 0.33879  |
| -0.16977 | 0.00023  | -0.39133 | 1.54E-18 | -0.54873 | 4.50E-38 | -0.16501 | 0.00034  | -0.2717  |
| -0.53322 | 1.15E-35 | -0.65929 | 1.44E-59 | -0.56187 | 3.25E-40 | -0.34661 | 1.25E-14 | -0.47407 |
| -0.27082 | 2.71E-09 | -0.2969  | 5.86E-11 | -0.5792  | 3.45E-43 | 0.065397 | 0.15825  | 0.222451 |
| -0.65822 | 2.58E-59 | -0.67948 | 1.58E-64 | -0.75354 | 9.60E-87 | -0.32349 | 7.75E-13 | -0.24729 |
| -0.3499  | 6.77E-15 | -0.4297  | 2.09E-22 | -0.65782 | 3.19E-59 | -0.11029 | 0.01711  | -0.15864 |
| -0.36483 | 3.78E-16 | -0.40626 | 5.51E-20 | -0.61246 | 2.01E-49 | -0.15505 | 0.00077  | -0.20703 |
| 0.204355 | 8.53E-06 | 0.353521 | 3.41E-15 | 0.419489 | 2.50E-21 | 0.056805 | 0.22048  | 0.060368 |
| -0.25007 | 4.33E-08 | -0.4107  | 1.98E-20 | -0.43934 | 1.85E-23 | -0.09816 | 0.03395  | -0.12984 |
| -0.25545 | 2.16E-08 | -0.36928 | 1.56E-16 | -0.46794 | 8.72E-27 | -0.07356 | 0.11239  | -0.1905  |
| -0.1453  | 0.00164  | -0.29814 | 4.84E-11 | -0.44119 | 1.15E-23 | -0.20335 | 9.46E-06 | -0.17877 |
| -0.18139 | 8.07E-05 | -0.46624 | 1.40E-26 | -0.48407 | 8.33E-29 | -0.19366 | 2.51E-05 | -0.33212 |
| -0.29064 | 1.53E-10 | -0.59882 | 8.88E-47 | -0.66011 | 9.21E-60 | -0.26009 | 1.17E-08 | -0.51235 |
| -0.23828 | 1.88E-07 | -0.49982 | 6.96E-31 | -0.6143  | 8.67E-50 | -0.15367 | 0.00086  | -0.31396 |
| -0.14971 | 0.00117  | -0.37814 | 2.54E-17 | -0.54456 | 2.05E-37 | -0.06956 | 0.13337  | -0.20309 |
| -0.37209 | 8.81E-17 | -0.52233 | 4.77E-34 | -0.6061  | 3.57E-48 | -0.16026 | 0.00051  | -0.12029 |
| -0.156   | 0.00072  | -0.25385 | 2.66E-08 | -0.48126 | 1.90E-28 | -0.01452 | 0.75436  | -0.08076 |
| -0.45053 | 1.01E-24 | -0.73466 | 2.25E-80 | -0.76001 | 4.61E-89 | -0.31675 | 2.42E-12 | -0.34116 |
| -0.16535 | 0.00033  | -0.29188 | 1.27E-10 | -0.41022 | 2.21E-20 | -0.00026 | 0.99552  | -0.01238 |
| -0.43415 | 6.89E-23 | -0.68271 | 2.34E-65 | -0.61693 | 2.56E-50 | -0.42432 | 7.81E-22 | -0.50953 |
| -0.1754  | 0.00014  | -0.32394 | 7.17E-13 | -0.48771 | 2.82E-29 | -0.09722 | 0.0357   | -0.0537  |
| -0.30343 | 2.11E-11 | -0.53062 | 2.83E-35 | -0.53361 | 1.00E-35 | -0.26501 | 6.03E-09 | -0.3773  |
| -0.29375 | 9.52E-11 | -0.40094 | 1.84E-19 | -0.48011 | 2.67E-28 | -0.16593 | 0.00032  | -0.14636 |
| -0.20488 | 8.08E-06 | -0.44738 | 2.31E-24 | -0.57809 | 5.41E-43 | -0.15108 | 0.00106  | -0.09931 |
| -0.47639 | 7.85E-28 | -0.67938 | 1.68E-64 | -0.77512 | 8.93E-95 | -0.34161 | 3.15E-14 | -0.43129 |
| 0.195915 | 2.01E-05 | -0.15265 | 0.00093  | -0.30199 | 2.65E-11 | 0.143771 | 0.00184  | -0.02564 |
| 0.078704 | 0.08934  | -0.35549 | 2.34E-15 | -0.39658 | 4.86E-19 | -0.14313 | 0.00193  | -0.21872 |
| -0.50431 | 1.70E-31 | -0.58723 | 1.25E-44 | -0.55709 | 2.00E-39 | -0.30634 | 1.33E-11 | -0.28824 |
| -0.66672 | 2.39E-61 | -0.81801 | #####    | -0.7781  | 5.95E-96 | -0.42695 | 4.11E-22 | -0.53743 |
| -0.43743 | 3.01E-23 | -0.64929 | 2.99E-57 | -0.71237 | 1.60E-73 | -0.26917 | 3.41E-09 | -0.31338 |
| -0.24938 | 4.73E-08 | -0.51764 | 2.27E-33 | -0.50853 | 4.43E-32 | -0.22608 | 7.95E-07 | -0.36256 |
| 0.112094 | 0.01537  | -0.26006 | 1.18E-08 | -0.26679 | 4.73E-09 | 0.077207 | 0.09562  | -0.12484 |
| -0.15923 | 0.00055  | -0.41383 | 9.53E-21 | -0.44979 | 1.22E-24 | -0.16413 | 0.00037  | -0.26769 |
| -0.15261 | 0.00094  | -0.41706 | 4.46E-21 | -0.42061 | 1.91E-21 | -0.30365 | 2.04E-11 | -0.41439 |
| -0.20208 | 1.08E-05 | -0.5158  | 4.17E-33 | -0.53241 | 1.52E-35 | -0.13929 | 0.00256  | -0.22414 |
| -0.30968 | 7.74E-12 | -0.44536 | 3.92E-24 | -0.4784  | 4.39E-28 | -0.15442 | 0.00081  | -0.11062 |
| -0.31155 | 5.71E-12 | -0.38162 | 1.22E-17 | -0.51989 | 1.08E-33 | -0.31798 | 1.97E-12 | -0.27965 |
| -0.28025 | 7.09E-10 | -0.52328 | 3.46E-34 | -0.59877 | 9.09E-47 | -0.1411  | 0.00224  | -0.14306 |
| -0.18122 | 8.21E-05 | -0.34794 | 9.78E-15 | -0.28149 | 5.92E-10 | -0.10281 | 0.0263   | -0.25964 |
| -0.02453 | 0.597    | -0.2044  | 8.49E-06 | -0.36858 | 1.79E-16 | -0.00968 | 0.83479  | -0.01909 |
| -0.31376 | 3.97E-12 | -0.51219 | 1.36E-32 | -0.49634 | 2.04E-30 | -0.26634 | 5.03E-09 | -0.31678 |
| -0.15362 | 0.00087  | -0.26057 | 1.10E-08 | -0.27707 | 1.12E-09 | 0.035189 | 0.44807  | -0.0792  |
| -0.06928 | 0.13493  | -0.37291 | 7.44E-17 | -0.40239 | 1.33E-19 | -0.26279 | 8.15E-09 | -0.29458 |

|          |          |          |          |          |          |          |          |          |
|----------|----------|----------|----------|----------|----------|----------|----------|----------|
| -0.1889  | 3.99E-05 | -0.56832 | 2.67E-41 | -0.60206 | 2.15E-47 | -0.19523 | 2.15E-05 | -0.37429 |
| -0.1389  | 0.00263  | -0.48977 | 1.52E-29 | -0.41814 | 3.45E-21 | -0.14947 | 0.0012   | -0.11818 |
| -0.25628 | 1.94E-08 | -0.42158 | 1.51E-21 | -0.43712 | 3.25E-23 | -0.14188 | 0.00212  | -0.24442 |
| -0.46326 | 3.21E-26 | -0.55994 | 6.79E-40 | -0.66995 | 3.87E-62 | -0.36517 | 3.54E-16 | -0.4229  |
| -0.13699 | 0.00301  | -0.22894 | 5.71E-07 | -0.5015  | 4.12E-31 | 0.121089 | 0.00881  | 0.236963 |
| -0.1179  | 0.01077  | -0.42746 | 3.62E-22 | -0.5064  | 8.74E-32 | 0.021178 | 0.64805  | -0.01792 |
| -0.10327 | 0.02564  | -0.21753 | 2.08E-06 | -0.36292 | 5.52E-16 | 0.018928 | 0.68328  | -0.10906 |
| -0.14673 | 0.00147  | -0.3379  | 6.18E-14 | -0.37308 | 7.19E-17 | -0.21947 | 1.68E-06 | -0.30115 |
| -0.36194 | 6.69E-16 | -0.45418 | 3.80E-25 | -0.62893 | 8.59E-53 | -0.25708 | 1.74E-08 | -0.23335 |
| -0.06565 | 0.15666  | -0.45237 | 6.17E-25 | -0.45831 | 1.25E-25 | -0.16521 | 0.00034  | -0.23417 |
| -0.13959 | 0.0025   | -0.17251 | 0.00018  | -0.37325 | 6.95E-17 | 0.036523 | 0.43104  | 0.104656 |
| -0.26291 | 8.01E-09 | -0.4082  | 3.53E-20 | -0.46019 | 7.47E-26 | -0.13443 | 0.00361  | -0.21179 |
| -0.39721 | 4.22E-19 | -0.47282 | 2.19E-27 | -0.60317 | 1.32E-47 | -0.25486 | 2.33E-08 | -0.40145 |
| -0.47955 | 3.14E-28 | -0.69948 | 7.51E-70 | -0.71822 | 2.96E-75 | -0.39071 | 1.76E-18 | -0.47795 |
| -0.41592 | 5.83E-21 | -0.63047 | 4.06E-53 | -0.73468 | 2.22E-80 | -0.16869 | 0.00025  | -0.15654 |
| -0.10658 | 0.02124  | -0.44207 | 9.19E-24 | -0.49939 | 7.96E-31 | -0.02292 | 0.62127  | -0.12703 |
| -0.15426 | 0.00082  | -0.30308 | 2.23E-11 | -0.39664 | 4.79E-19 | -0.16869 | 0.00025  | -0.15522 |
| -0.14812 | 0.00133  | -0.33461 | 1.11E-13 | -0.30565 | 1.48E-11 | -0.14279 | 0.00198  | -0.28495 |
| 0.140539 | 0.00233  | -0.29428 | 8.78E-11 | -0.27228 | 2.21E-09 | 0.100657 | 0.02964  | 0.019533 |
| -0.21876 | 1.82E-06 | -0.36719 | 2.36E-16 | -0.57278 | 4.58E-42 | -0.12437 | 0.00712  | -0.13355 |
| -0.27146 | 2.48E-09 | -0.56741 | 3.80E-41 | -0.54876 | 4.44E-38 | -0.15499 | 0.00078  | -0.17035 |
| -0.02101 | 0.65061  | -0.44677 | 2.71E-24 | -0.39185 | 1.37E-18 | -0.20676 | 6.64E-06 | -0.464   |
| -0.07788 | 0.09277  | -0.39893 | 2.88E-19 | -0.3726  | 7.93E-17 | -0.25819 | 1.51E-08 | -0.48007 |
| -0.21661 | 2.30E-06 | -0.30556 | 1.50E-11 | -0.60918 | 8.94E-49 | -0.10016 | 0.03045  | 0.000927 |
| -0.10432 | 0.02417  | -0.40093 | 1.84E-19 | -0.41112 | 1.79E-20 | -0.06708 | 0.14783  | -0.20288 |
| 0.40541  | 6.69E-20 | 0.737023 | 3.85E-81 | 0.667746 | 1.35E-61 | 0.340475 | 3.87E-14 | 0.507398 |
| -0.13094 | 0.00459  | -0.1289  | 0.00528  | -0.34839 | 8.98E-15 | 0.038959 | 0.40092  | 0.053915 |
| -0.18288 | 7.04E-05 | -0.36376 | 4.68E-16 | -0.42808 | 3.11E-22 | -0.02213 | 0.63328  | -0.00626 |
| -0.04918 | 0.28884  | -0.39773 | 3.77E-19 | -0.48004 | 2.73E-28 | -0.10898 | 0.01849  | -0.25342 |
| -0.3005  | 3.35E-11 | -0.50067 | 5.34E-31 | -0.42742 | 3.66E-22 | -0.29335 | 1.01E-10 | -0.40566 |
| -0.02331 | 0.61542  | -0.17137 | 0.0002   | -0.12942 | 0.00509  | -0.00348 | 0.94017  | -0.20693 |
| -0.54081 | 7.91E-37 | -0.64088 | 2.28E-55 | -0.69266 | 5.51E-68 | -0.30089 | 3.15E-11 | -0.41438 |
| -0.61118 | 3.61E-49 | -0.55933 | 8.58E-40 | -0.75444 | 4.60E-87 | -0.2716  | 2.43E-09 | -0.25148 |
| 0.027746 | 0.54978  | 0.306961 | 1.20E-11 | 0.36711  | 2.40E-16 | 0.062532 | 0.17733  | 0.115977 |
| 0.139438 | 0.00253  | 0.417898 | 3.65E-21 | 0.495677 | 2.51E-30 | 0.15537  | 0.00075  | 0.213399 |
| 0.134022 | 0.00371  | 0.160586 | 0.00049  | 0.26688  | 4.67E-09 | 0.103959 | 0.02466  | 0.215157 |
| 0.153461 | 0.00088  | 0.32805  | 3.53E-13 | 0.410397 | 2.12E-20 | 0.069522 | 0.13357  | 0.229726 |
| -0.00414 | 0.92895  | 0.30846  | 9.43E-12 | 0.34731  | 1.10E-14 | 0.072679 | 0.11677  | 0.058826 |
| 0.126257 | 0.00629  | 0.411328 | 1.71E-20 | 0.528443 | 5.99E-35 | 0.133708 | 0.0038   | 0.176263 |
| 0.130087 | 0.00487  | 0.441717 | 1.01E-23 | 0.524812 | 2.06E-34 | 0.177315 | 0.00012  | 0.258276 |
| -0.0407  | 0.38018  | 0.101947 | 0.0276   | 0.21192  | 3.84E-06 | -0.00299 | 0.94863  | -0.02803 |
| -0.06624 | 0.15297  | 0.16195  | 0.00044  | 0.25708  | 1.74E-08 | 0.062977 | 0.17426  | -0.02126 |
| -0.14709 | 0.00144  | 0.069398 | 0.13426  | 0.211957 | 3.82E-06 | -0.12892 | 0.00527  | -0.15539 |
| 0.113465 | 0.01415  | 0.393924 | 8.72E-19 | 0.487482 | 3.02E-29 | 0.111467 | 0.01596  | 0.178143 |
| 0.161624 | 0.00045  | 0.449256 | 1.41E-24 | 0.542309 | 4.62E-37 | 0.177296 | 0.00012  | 0.218685 |

|          |          |          |          |          |          |          |          |          |
|----------|----------|----------|----------|----------|----------|----------|----------|----------|
| -0.0123  | 0.79089  | 0.347679 | 1.03E-14 | 0.296284 | 6.45E-11 | 0.043455 | 0.34876  | 0.212638 |
| 0.198404 | 1.57E-05 | 0.33081  | 2.18E-13 | 0.411258 | 1.74E-20 | 0.132489 | 0.00413  | 0.135929 |
| 0.089966 | 0.05203  | 0.235345 | 2.68E-07 | 0.253806 | 2.68E-08 | 0.095937 | 0.03822  | 0.144795 |
| 0.135951 | 0.00324  | 0.444688 | 4.66E-24 | 0.583278 | 6.48E-44 | 0.158606 | 0.00058  | 0.209541 |
| 0.273381 | 1.89E-09 | 0.404891 | 7.53E-20 | 0.565565 | 7.80E-41 | 0.187847 | 4.41E-05 | 0.08588  |
| 0.07518  | 0.10467  | 0.331776 | 1.84E-13 | 0.442267 | 8.73E-24 | 0.078861 | 0.0887   | 0.141821 |
| 0.168419 | 0.00026  | 0.407579 | 4.07E-20 | 0.480067 | 2.70E-28 | 0.145164 | 0.00166  | 0.198787 |
| 0.106448 | 0.02141  | 0.425951 | 5.24E-22 | 0.542877 | 3.76E-37 | 0.129407 | 0.0051   | 0.184566 |
| 0.141292 | 0.00221  | 0.45698  | 1.79E-25 | 0.593323 | 9.53E-46 | 0.172735 | 0.00018  | 0.184466 |
| 0.072272 | 0.11884  | 0.337633 | 6.48E-14 | 0.42887  | 2.56E-22 | 0.146214 | 0.00153  | 0.145001 |
| 0.07792  | 0.09259  | 0.235741 | 2.56E-07 | 0.282982 | 4.77E-10 | 0.071246 | 0.12418  | 0.103761 |
| 0.024463 | 0.59797  | 0.234585 | 2.94E-07 | 0.378253 | 2.48E-17 | 0.040665 | 0.3806   | 0.014447 |
| 0.210593 | 4.43E-06 | 0.417578 | 3.94E-21 | 0.539134 | 1.44E-36 | 0.212182 | 3.73E-06 | 0.247436 |
| 0.092975 | 0.04463  | 0.408352 | 3.41E-20 | 0.506286 | 9.07E-32 | 0.158006 | 0.00061  | 0.216409 |
| 0.153074 | 0.0009   | 0.444302 | 5.15E-24 | 0.558623 | 1.12E-39 | 0.18271  | 7.15E-05 | 0.197742 |
| 0.120824 | 0.00896  | 0.413731 | 9.76E-21 | 0.523933 | 2.78E-34 | 0.137039 | 0.003    | 0.187788 |
| 0.082829 | 0.07374  | 0.174418 | 0.00015  | 0.251432 | 3.64E-08 | 0.040029 | 0.38811  | 0.038372 |
| 0.14482  | 0.0017   | 0.417055 | 4.46E-21 | 0.493095 | 5.53E-30 | 0.170131 | 0.00022  | 0.167371 |
| 0.150952 | 0.00107  | 0.467904 | 8.80E-27 | 0.594551 | 5.63E-46 | 0.173753 | 0.00016  | 0.202258 |
| 0.235361 | 2.68E-07 | 0.343226 | 2.34E-14 | 0.477982 | 4.96E-28 | 0.070968 | 0.12566  | 0.043634 |
| 0.178237 | 0.00011  | 0.414872 | 7.47E-21 | 0.469094 | 6.30E-27 | 0.149466 | 0.0012   | 0.172294 |
| 0.22805  | 6.33E-07 | 0.473796 | 1.66E-27 | 0.512666 | 1.16E-32 | 0.19262  | 2.78E-05 | 0.312781 |
| 0.009215 | 0.84257  | 0.24078  | 1.39E-07 | 0.346607 | 1.25E-14 | 0.070528 | 0.12802  | 0.078922 |
| 0.097791 | 0.03463  | 0.386973 | 3.94E-18 | 0.426795 | 4.26E-22 | 0.112094 | 0.01537  | 0.10083  |
| 0.38711  | 3.82E-18 | 0.557309 | 1.84E-39 | 0.725753 | 1.49E-77 | 0.161533 | 0.00046  | 0.127894 |
| 0.174113 | 0.00016  | 0.502964 | 2.60E-31 | 0.634028 | 7.06E-54 | 0.190431 | 3.44E-05 | 0.226948 |
| 0.107903 | 0.01968  | 0.390472 | 1.85E-18 | 0.485442 | 5.54E-29 | 0.154464 | 0.00081  | 0.184525 |
| 0.11744  | 0.01109  | 0.265367 | 5.75E-09 | 0.399972 | 2.28E-19 | 0.073389 | 0.11323  | 0.144172 |
| 0.219703 | 1.64E-06 | 0.483064 | 1.12E-28 | 0.560115 | 6.35E-40 | 0.193771 | 2.48E-05 | 0.221154 |
| 0.034936 | 0.45134  | 0.320777 | 1.23E-12 | 0.415155 | 6.99E-21 | 0.100984 | 0.02911  | 0.139883 |
| 0.171838 | 0.00019  | 0.420274 | 2.07E-21 | 0.50039  | 5.82E-31 | 0.146144 | 0.00154  | 0.194177 |
| 0.165695 | 0.00032  | 0.448143 | 1.89E-24 | 0.597832 | 1.37E-46 | 0.154668 | 0.0008   | 0.161856 |
| 0.133991 | 0.00372  | 0.339903 | 4.30E-14 | 0.386314 | 4.53E-18 | 0.141461 | 0.00218  | 0.143913 |
| 0.285489 | 3.30E-10 | 0.492518 | 6.60E-30 | 0.545537 | 1.44E-37 | 0.226567 | 7.52E-07 | 0.223516 |
| 0.270244 | 2.94E-09 | 0.590584 | 3.06E-45 | 0.566982 | 4.49E-41 | 0.250274 | 4.22E-08 | 0.323446 |
| 0.041237 | 0.37394  | 0.046837 | 0.3125   | 0.171741 | 0.00019  | -0.06061 | 0.19104  | 0.087681 |
| 0.066704 | 0.15009  | 0.242502 | 1.12E-07 | 0.342703 | 2.58E-14 | 0.095171 | 0.0398   | 0.076728 |
| -0.03712 | 0.42348  | 0.090918 | 0.04958  | 0.164381 | 0.00036  | 0.019675 | 0.6715   | -0.10813 |
| 0.103868 | 0.02479  | 0.140211 | 0.00239  | 0.120016 | 0.00943  | 0.047651 | 0.30415  | -0.12733 |
| 0.080447 | 0.08245  | 0.388257 | 2.99E-18 | 0.515025 | 5.38E-33 | 0.088389 | 0.0563   | 0.114983 |
| 0.127165 | 0.00593  | 0.260866 | 1.06E-08 | 0.295243 | 7.57E-11 | 0.17977  | 9.37E-05 | 0.272587 |
| 0.090865 | 0.04971  | 0.421296 | 1.62E-21 | 0.531145 | 2.36E-35 | 0.12473  | 0.00696  | 0.153374 |
| 0.022113 | 0.63362  | 0.314126 | 3.74E-12 | 0.277544 | 1.05E-09 | 0.165794 | 0.00032  | 0.160356 |
| -0.02576 | 0.57877  | 0.254245 | 2.53E-08 | 0.287913 | 2.30E-10 | 0.061114 | 0.18738  | 0.156619 |
| 0.072815 | 0.11608  | 0.424229 | 7.97E-22 | 0.454838 | 3.19E-25 | 0.138184 | 0.00277  | 0.221119 |

|          |          |          |          |          |          |          |          |          |
|----------|----------|----------|----------|----------|----------|----------|----------|----------|
| 0.037662 | 0.4168   | 0.281683 | 5.76E-10 | 0.30076  | 3.22E-11 | 0.139377 | 0.00254  | 0.351299 |
| 0.149827 | 0.00116  | 0.254024 | 2.60E-08 | 0.34053  | 3.83E-14 | 0.062123 | 0.18018  | 0.092529 |
| 0.172354 | 0.00018  | 0.313143 | 4.40E-12 | 0.364619 | 3.94E-16 | 0.106377 | 0.02149  | 0.182126 |
| 0.219581 | 1.66E-06 | 0.526318 | 1.24E-34 | 0.362848 | 5.60E-16 | 0.233525 | 3.33E-07 | 0.35159  |
| 0.182936 | 7.00E-05 | 0.367589 | 2.18E-16 | 0.41514  | 7.01E-21 | 0.084942 | 0.06665  | 0.099358 |
| 0.08089  | 0.08077  | 0.41125  | 1.74E-20 | 0.488817 | 2.02E-29 | 0.088501 | 0.05599  | 0.074604 |
| 0.041593 | 0.36982  | 0.343961 | 2.05E-14 | 0.491301 | 9.55E-30 | 0.100052 | 0.03064  | 0.109525 |
| 0.180661 | 8.64E-05 | 0.438171 | 2.49E-23 | 0.501994 | 3.52E-31 | 0.198083 | 1.62E-05 | 0.223351 |
| 0.103805 | 0.02488  | 0.422962 | 1.08E-21 | 0.387682 | 3.38E-18 | 0.197121 | 1.78E-05 | 0.251038 |
| 0.109796 | 0.01762  | 0.412397 | 1.33E-20 | 0.490303 | 1.29E-29 | 0.131518 | 0.00441  | 0.205799 |
| 0.266272 | 5.08E-09 | 0.519059 | 1.42E-33 | 0.539039 | 1.48E-36 | 0.27224  | 2.22E-09 | 0.361019 |
| 0.09055  | 0.05052  | 0.367346 | 2.29E-16 | 0.463219 | 3.24E-26 | 0.134212 | 0.00366  | 0.193188 |
| 0.125532 | 0.0066   | 0.392279 | 1.25E-18 | 0.516543 | 3.27E-33 | 0.119925 | 0.00949  | 0.151347 |
| 0.036554 | 0.43064  | 0.233251 | 3.44E-07 | 0.284271 | 3.94E-10 | 0.099076 | 0.03231  | 0.078487 |
| 0.102032 | 0.02747  | 0.308096 | 1.00E-11 | 0.347577 | 1.05E-14 | 0.114547 | 0.01325  | 0.104675 |
| 0.129187 | 0.00517  | 0.443624 | 6.14E-24 | 0.582015 | 1.09E-43 | 0.158163 | 0.0006   | 0.174489 |
| 0.175933 | 0.00013  | 0.383923 | 7.54E-18 | 0.422861 | 1.11E-21 | 0.160756 | 0.00049  | 0.220371 |
| 0.125507 | 0.00661  | 0.428141 | 3.06E-22 | 0.541819 | 5.51E-37 | 0.160504 | 0.0005   | 0.200036 |
| 0.025112 | 0.58829  | 0.289385 | 1.84E-10 | 0.355131 | 2.51E-15 | 0.05757  | 0.21431  | 0.017457 |
| 0.161818 | 0.00045  | 0.490492 | 1.22E-29 | 0.586964 | 1.40E-44 | 0.175978 | 0.00013  | 0.232236 |
| 0.030569 | 0.5099   | 0.246216 | 7.06E-08 | 0.323632 | 7.56E-13 | 0.019074 | 0.68099  | 0.000983 |
| 0.183289 | 6.77E-05 | 0.627663 | 1.59E-52 | 0.573233 | 3.82E-42 | 0.177318 | 0.00012  | 0.299607 |
| 0.047404 | 0.30666  | 0.321304 | 1.12E-12 | 0.247442 | 6.05E-08 | 0.169273 | 0.00024  | 0.225533 |
| -0.10873 | 0.01875  | 0.175328 | 0.00014  | -0.06953 | 0.1335   | 0.235594 | 2.60E-07 | 0.359275 |
| 0.177821 | 0.00011  | 0.425447 | 5.93E-22 | 0.43458  | 6.18E-23 | 0.171661 | 0.00019  | 0.251707 |
| -0.03199 | 0.49043  | 0.245725 | 7.51E-08 | 0.237467 | 2.08E-07 | -0.03344 | 0.47092  | 0.014691 |
| 0.282378 | 5.21E-10 | 0.617238 | 2.22E-50 | 0.679297 | 1.76E-64 | 0.258629 | 1.42E-08 | 0.294885 |
| 0.325863 | 5.16E-13 | 0.588392 | 7.71E-45 | 0.687671 | 1.18E-66 | 0.261453 | 9.75E-09 | 0.282388 |
| 0.26028  | 1.14E-08 | 0.570237 | 1.25E-41 | 0.637474 | 1.27E-54 | 0.253497 | 2.79E-08 | 0.302033 |
| -0.03136 | 0.49904  | 0.20367  | 9.16E-06 | 0.229377 | 5.43E-07 | 0.037572 | 0.41791  | 0.050119 |
| 0.283825 | 4.21E-10 | 0.484585 | 7.15E-29 | 0.669307 | 5.59E-62 | 0.173479 | 0.00016  | 0.202729 |
| 0.172639 | 0.00018  | 0.381467 | 1.27E-17 | 0.510777 | 2.15E-32 | 0.079242 | 0.08717  | 0.09884  |
| 0.085422 | 0.06512  | 0.224005 | 1.01E-06 | 0.262812 | 8.12E-09 | 0.071318 | 0.1238   | 0.209839 |
| 0.086692 | 0.06121  | 0.487618 | 2.90E-29 | 0.381985 | 1.13E-17 | 0.126049 | 0.00638  | 0.199396 |
| 0.351544 | 4.96E-15 | 0.578043 | 5.52E-43 | 0.470287 | 4.50E-27 | 0.216434 | 2.35E-06 | 0.237541 |
| 0.12213  | 0.00824  | 0.295938 | 6.81E-11 | 0.35078  | 5.74E-15 | 0.083013 | 0.0731   | 0.056735 |
| 0.117724 | 0.01089  | 0.415743 | 6.08E-21 | 0.410505 | 2.07E-20 | 0.168941 | 0.00024  | 0.23422  |
| 0.088188 | 0.05686  | 0.112024 | 0.01544  | 0.158095 | 0.00061  | 0.061805 | 0.18243  | -0.05899 |
| 0.061185 | 0.18686  | 0.144548 | 0.00174  | 0.264727 | 6.27E-09 | 0.015309 | 0.74143  | 0.140752 |
| 0.043081 | 0.35293  | -0.39585 | 5.71E-19 | -0.36724 | 2.34E-16 | -0.09418 | 0.04192  | -0.15611 |
| 0.265031 | 6.01E-09 | 0.59034  | 3.39E-45 | 0.652645 | 5.11E-58 | 0.246293 | 6.99E-08 | 0.327974 |
| 0.244305 | 8.96E-08 | 0.512208 | 1.35E-32 | 0.423871 | 8.70E-22 | 0.265266 | 5.83E-09 | 0.31797  |
| -0.00323 | 0.94456  | 0.25955  | 1.26E-08 | 0.165683 | 0.00032  | 0.064107 | 0.16664  | 0.061211 |
| -0.04558 | 0.32569  | 0.393634 | 9.30E-19 | 0.322957 | 8.49E-13 | 0.146536 | 0.0015   | 0.215579 |
| 0.082464 | 0.07502  | 0.254658 | 2.40E-08 | 0.318086 | 1.93E-12 | 0.02206  | 0.63443  | -0.0045  |

|          |          |          |          |          |          |          |          |          |
|----------|----------|----------|----------|----------|----------|----------|----------|----------|
| 0.074033 | 0.11009  | 0.302184 | 2.57E-11 | 0.374973 | 4.88E-17 | 0.080277 | 0.0831   | 0.117561 |
| -0.13326 | 0.00391  | -0.0553  | 0.23295  | 0.066826 | 0.14934  | -0.15579 | 0.00073  | -0.23809 |
| 0.06432  | 0.16524  | 0.264548 | 6.42E-09 | 0.411301 | 1.72E-20 | 0.096593 | 0.03692  | 0.105744 |
| 0.454926 | 3.11E-25 | 0.493039 | 5.63E-30 | 0.648639 | 4.21E-57 | 0.279334 | 8.10E-10 | 0.181139 |
| 0.156513 | 0.00069  | 0.423653 | 9.17E-22 | 0.456157 | 2.23E-25 | 0.24729  | 6.16E-08 | 0.195314 |
| 0.277831 | 1.01E-09 | 0.438354 | 2.38E-23 | 0.445328 | 3.95E-24 | 0.163885 | 0.00038  | 0.142989 |
| 0.213908 | 3.10E-06 | 0.409606 | 2.55E-20 | 0.453768 | 4.25E-25 | 0.136123 | 0.0032   | 0.123671 |
| 0.031703 | 0.49433  | -0.27149 | 2.47E-09 | -0.32259 | 9.03E-13 | 0.043062 | 0.35314  | -0.10186 |
| 0.130818 | 0.00463  | 0.391818 | 1.38E-18 | 0.506909 | 7.43E-32 | 0.115279 | 0.01267  | 0.123399 |
| 0.031315 | 0.49962  | 0.303842 | 1.98E-11 | 0.39335  | 9.89E-19 | 0.068886 | 0.13717  | 0.129898 |
| 0.123138 | 0.00772  | 0.410246 | 2.20E-20 | 0.518835 | 1.53E-33 | 0.136232 | 0.00318  | 0.159691 |
| 0.125136 | 0.00678  | 0.461765 | 4.84E-26 | 0.601612 | 2.62E-47 | 0.159702 | 0.00053  | 0.172627 |
| 0.134107 | 0.00369  | 0.503789 | 2.00E-31 | 0.560649 | 5.18E-40 | 0.103753 | 0.02495  | 0.215558 |
| 0.060304 | 0.1933   | 0.373809 | 6.19E-17 | 0.491009 | 1.04E-29 | 0.117183 | 0.01127  | 0.129695 |
| 0.223275 | 1.09E-06 | 0.420796 | 1.83E-21 | 0.481956 | 1.55E-28 | 0.220209 | 1.55E-06 | 0.155807 |
| 0.186411 | 5.05E-05 | 0.373899 | 6.08E-17 | 0.540709 | 8.19E-37 | 0.132551 | 0.00411  | 0.144715 |
| 0.226503 | 7.57E-07 | 0.446607 | 2.83E-24 | 0.4068   | 4.87E-20 | 0.188481 | 4.15E-05 | 0.327761 |
| -0.13258 | 0.0041   | -0.28111 | 6.26E-10 | -0.28413 | 4.03E-10 | -0.11401 | 0.01369  | -0.30091 |
| 0.141493 | 0.00218  | 0.421892 | 1.40E-21 | 0.528903 | 5.11E-35 | 0.155983 | 0.00072  | 0.190958 |
| 0.17971  | 9.42E-05 | 0.441536 | 1.05E-23 | 0.505035 | 1.35E-31 | 0.174073 | 0.00016  | 0.207249 |
| -0.0262  | 0.57222  | 0.240793 | 1.38E-07 | 0.244167 | 9.12E-08 | 0.146551 | 0.00149  | 0.10327  |
| 0.107232 | 0.02046  | 0.351494 | 5.01E-15 | 0.431795 | 1.24E-22 | 0.05807  | 0.21035  | 0.163983 |
| 0.073327 | 0.11354  | 0.245855 | 7.38E-08 | 0.267957 | 4.03E-09 | 0.064349 | 0.16504  | 0.002919 |
| 0.124323 | 0.00715  | 0.416654 | 4.90E-21 | 0.524944 | 1.97E-34 | 0.121552 | 0.00855  | 0.169422 |
| 0.057582 | 0.21421  | 0.289152 | 1.91E-10 | 0.383174 | 8.83E-18 | 0.035545 | 0.44348  | 0.086721 |
| -0.13859 | 0.00269  | 0.050909 | 0.27224  | 0.013844 | 0.76542  | -0.04986 | 0.28226  | 0.000604 |
| 0.01125  | 0.80842  | 0.296224 | 6.51E-11 | 0.232623 | 3.71E-07 | 0.134798 | 0.00352  | 0.235819 |
| 0.081557 | 0.0783   | 0.290852 | 1.48E-10 | 0.356902 | 1.78E-15 | 0.072978 | 0.11527  | 0.083177 |
| 0.231992 | 3.99E-07 | 0.489663 | 1.57E-29 | 0.651365 | 1.01E-57 | 0.210646 | 4.40E-06 | 0.231987 |
| -0.02307 | 0.61892  | 0.307969 | 1.02E-11 | 0.226258 | 7.79E-07 | 0.101694 | 0.02799  | 0.119581 |
| 0.136356 | 0.00315  | 0.434711 | 5.98E-23 | 0.570239 | 1.25E-41 | 0.152668 | 0.00093  | 0.164003 |
| 0.229555 | 5.32E-07 | 0.39697  | 4.46E-19 | 0.451579 | 7.62E-25 | 0.143476 | 0.00188  | 0.21014  |
| 0.140445 | 0.00235  | 0.180443 | 8.81E-05 | 0.280809 | 6.54E-10 | 0.005554 | 0.90473  | -0.02481 |
| 0.162598 | 0.00042  | 0.255056 | 2.27E-08 | 0.334338 | 1.17E-13 | 0.050738 | 0.27385  | 0.102627 |
| 0.220101 | 1.57E-06 | 0.561637 | 3.55E-40 | 0.654712 | 1.70E-58 | 0.220909 | 1.43E-06 | 0.22733  |
| 0.123922 | 0.00734  | 0.455444 | 2.71E-25 | 0.554158 | 6.02E-39 | 0.153954 | 0.00084  | 0.165164 |
| 0.026077 | 0.57404  | 0.173136 | 0.00017  | 0.197982 | 1.63E-05 | -0.02437 | 0.59938  | 0.037759 |
| 0.113199 | 0.01438  | 0.317701 | 2.06E-12 | 0.412597 | 1.27E-20 | 0.052279 | 0.25953  | 0.102226 |
| -0.12332 | 0.00763  | 0.303454 | 2.10E-11 | 0.199605 | 1.39E-05 | 0.115008 | 0.01288  | 0.231189 |
| 0.268066 | 3.97E-09 | 0.478868 | 3.83E-28 | 0.323215 | 8.12E-13 | 0.24325  | 1.02E-07 | 0.253608 |
| 0.234318 | 3.03E-07 | 0.465069 | 1.94E-26 | 0.506671 | 8.02E-32 | 0.19768  | 1.69E-05 | 0.228546 |
| 0.112565 | 0.01494  | 0.424213 | 8.00E-22 | 0.559123 | 9.27E-40 | 0.140473 | 0.00235  | 0.182579 |
| 0.085981 | 0.06338  | 0.374191 | 5.73E-17 | 0.43007  | 1.90E-22 | 0.088026 | 0.05732  | 0.124545 |
| 0.173424 | 0.00017  | 0.473251 | 1.94E-27 | 0.503904 | 1.93E-31 | 0.199886 | 1.35E-05 | 0.237184 |
| 0.079186 | 0.08739  | 0.437339 | 3.08E-23 | 0.501505 | 4.11E-31 | 0.131071 | 0.00455  | 0.226834 |



|          |          |          |          |          |          |          |          |          |
|----------|----------|----------|----------|----------|----------|----------|----------|----------|
| 0.131595 | 0.00439  | 0.442951 | 7.31E-24 | 0.56724  | 4.06E-41 | 0.165867 | 0.00032  | 0.16722  |
| 0.099621 | 0.03136  | 0.363961 | 4.49E-16 | 0.413047 | 1.15E-20 | 0.192135 | 2.92E-05 | 0.136477 |
| 0.095277 | 0.03958  | 0.223599 | 1.06E-06 | 0.274868 | 1.53E-09 | 0.084665 | 0.06755  | 0.122337 |
| 0.036069 | 0.43679  | -0.13592 | 0.00325  | -0.32319 | 8.16E-13 | 0.129181 | 0.00518  | 0.126626 |
| -0.04117 | 0.37468  | 0.100529 | 0.02985  | 0.179688 | 9.44E-05 | 0.013738 | 0.76715  | -0.06146 |
| 0.113959 | 0.01374  | 0.403191 | 1.11E-19 | 0.487553 | 2.95E-29 | 0.086095 | 0.06303  | 0.107255 |
| 0.214628 | 2.86E-06 | 0.471291 | 3.38E-27 | 0.396464 | 4.99E-19 | 0.210207 | 4.61E-06 | 0.216168 |
| 0.137312 | 0.00294  | 0.544325 | 2.23E-37 | 0.592532 | 1.34E-45 | 0.191522 | 3.10E-05 | 0.231304 |
| 0.167369 | 0.00028  | 0.405419 | 6.67E-20 | 0.467106 | 1.10E-26 | 0.162047 | 0.00044  | 0.237794 |
| 0.129267 | 0.00515  | 0.415804 | 6.00E-21 | 0.348067 | 9.55E-15 | 0.047578 | 0.30489  | 0.17281  |
| 0.183841 | 6.43E-05 | 0.39768  | 3.81E-19 | 0.3931   | 1.05E-18 | 0.180775 | 8.55E-05 | 0.246768 |
| 0.161471 | 0.00046  | 0.450978 | 8.93E-25 | 0.536416 | 3.75E-36 | 0.191678 | 3.05E-05 | 0.237032 |
| 0.182671 | 7.17E-05 | 0.494814 | 3.27E-30 | 0.568176 | 2.82E-41 | 0.136232 | 0.00318  | 0.147778 |
| 0.177616 | 0.00011  | 0.396743 | 4.69E-19 | 0.404146 | 8.92E-20 | 0.156425 | 0.00069  | 0.127254 |
| 0.224273 | 9.78E-07 | 0.440649 | 1.32E-23 | 0.469553 | 5.53E-27 | 0.153221 | 0.00089  | 0.250568 |
| 0.087142 | 0.05988  | 0.465804 | 1.58E-26 | 0.359329 | 1.11E-15 | 0.248313 | 5.42E-08 | 0.414246 |
| 0.060403 | 0.19257  | 0.318843 | 1.70E-12 | 0.414069 | 9.02E-21 | 0.038196 | 0.41022  | 0.114663 |
| -0.01924 | 0.67838  | 0.243048 | 1.05E-07 | 0.266673 | 4.81E-09 | 0.012375 | 0.78968  | 0.0287   |
| 0.009245 | 0.84207  | -0.21249 | 3.61E-06 | -0.31231 | 5.04E-12 | 0.045177 | 0.32998  | -0.11275 |
| 0.113667 | 0.01398  | 0.332303 | 1.68E-13 | 0.420524 | 1.95E-21 | 0.049899 | 0.28188  | 0.210937 |
| 0.379361 | 1.97E-17 | 0.582901 | 7.57E-44 | 0.648732 | 4.01E-57 | 0.292462 | 1.16E-10 | 0.358075 |
| 0.206952 | 6.51E-06 | 0.543991 | 2.52E-37 | 0.629447 | 6.68E-53 | 0.173208 | 0.00017  | 0.269899 |
| 0.107204 | 0.02049  | 0.380072 | 1.70E-17 | 0.493395 | 5.05E-30 | 0.147524 | 0.00139  | 0.160393 |
| -0.14356 | 0.00187  | -0.44526 | 4.02E-24 | -0.41697 | 4.55E-21 | -0.32918 | 2.90E-13 | -0.33734 |
| 0.088372 | 0.05634  | 0.242394 | 1.14E-07 | 0.343405 | 2.27E-14 | 0.051541 | 0.26632  | 0.069793 |
| 0.036811 | 0.42742  | 0.296493 | 6.25E-11 | 0.089953 | 0.05206  | 0.090924 | 0.04957  | 0.127861 |
| 0.154897 | 0.00078  | 0.267322 | 4.40E-09 | 0.248165 | 5.52E-08 | 0.123472 | 0.00756  | 0.166348 |
| 0.145424 | 0.00163  | 0.322681 | 8.90E-13 | 0.418645 | 3.06E-21 | 0.121599 | 0.00853  | 0.085869 |
| 0.097249 | 0.03565  | 0.243059 | 1.05E-07 | 0.330576 | 2.27E-13 | 0.063962 | 0.1676   | 0.053106 |
| -0.08405 | 0.06958  | 0.349579 | 7.19E-15 | 0.318651 | 1.76E-12 | 0.08307  | 0.0729   | 0.253808 |
| -0.00919 | 0.84306  | 0.203681 | 9.15E-06 | 0.281778 | 5.68E-10 | 0.043817 | 0.34475  | 0.093443 |
| 0.087623 | 0.05848  | 0.267324 | 4.40E-09 | 0.304878 | 1.68E-11 | 0.065672 | 0.15651  | -0.0658  |
| 0.103734 | 0.02498  | 0.289686 | 1.76E-10 | 0.370653 | 1.18E-16 | 0.043422 | 0.34912  | 0.060405 |
| -0.00774 | 0.86751  | 0.222081 | 1.25E-06 | 0.203325 | 9.49E-06 | 0.06378  | 0.16882  | 0.135997 |
| 0.129928 | 0.00492  | 0.388647 | 2.75E-18 | 0.508129 | 5.03E-32 | 0.113057 | 0.01451  | 0.139576 |
| 0.068256 | 0.14081  | 0.259954 | 1.19E-08 | 0.343954 | 2.05E-14 | 0.025567 | 0.58155  | 0.106879 |
| -0.07567 | 0.10243  | 0.027005 | 0.56049  | 0.194865 | 2.23E-05 | -0.0246  | 0.59592  | -0.0984  |
| 0.045622 | 0.32522  | 0.11451  | 0.01328  | 0.100667 | 0.02962  | 0.055394 | 0.23217  | 0.050314 |
| 0.076008 | 0.1009   | 0.219085 | 1.75E-06 | 0.264025 | 6.90E-09 | 0.089308 | 0.05377  | 0.051301 |
| 0.205872 | 7.29E-06 | 0.515733 | 4.27E-33 | 0.668981 | 6.72E-62 | 0.183232 | 6.81E-05 | 0.214254 |
| 0.066085 | 0.15391  | -0.33756 | 6.56E-14 | -0.26858 | 3.70E-09 | -0.04578 | 0.32351  | -0.13172 |
| 0.128842 | 0.0053   | 0.362412 | 6.10E-16 | 0.362124 | 6.45E-16 | 0.095254 | 0.03963  | 0.121532 |
| 0.085538 | 0.06476  | 0.415676 | 6.18E-21 | 0.41483  | 7.54E-21 | 0.051932 | 0.26271  | 0.049913 |
| 0.188234 | 4.25E-05 | -0.15061 | 0.0011   | -0.13676 | 0.00306  | 0.003736 | 0.93582  | 0.078923 |
| -0.04734 | 0.30733  | 0.102854 | 0.02624  | 0.179975 | 9.20E-05 | 0.01968  | 0.67143  | -0.07886 |

|          |          |          |          |          |          |          |          |          |
|----------|----------|----------|----------|----------|----------|----------|----------|----------|
| -0.08489 | 0.06682  | -0.32091 | 1.20E-12 | -0.38941 | 2.33E-18 | -0.04301 | 0.35375  | -0.04703 |
| 0.078578 | 0.08986  | 0.337677 | 6.43E-14 | 0.414076 | 9.01E-21 | 0.143634 | 0.00186  | 0.126702 |
| 0.058728 | 0.20522  | 0.159419 | 0.00054  | 0.270905 | 2.68E-09 | -0.01076 | 0.81667  | 0.082545 |
| 0.132286 | 0.00419  | 0.345225 | 1.62E-14 | 0.407048 | 4.60E-20 | 0.081531 | 0.07839  | 0.113494 |
| 0.089686 | 0.05276  | 0.22074  | 1.46E-06 | 0.349912 | 6.75E-15 | 0.064464 | 0.16429  | 0.086481 |
| 0.019758 | 0.6702   | 0.280758 | 6.59E-10 | 0.361239 | 7.68E-16 | 0.075732 | 0.10214  | 0.059139 |
| 0.315664 | 2.90E-12 | 0.522527 | 4.46E-34 | 0.551813 | 1.44E-38 | 0.18841  | 4.18E-05 | 0.288168 |
| 0.148686 | 0.00127  | 0.401392 | 1.66E-19 | 0.54416  | 2.37E-37 | 0.175312 | 0.00014  | 0.183349 |
| 0.296971 | 5.80E-11 | 0.549227 | 3.74E-38 | 0.592197 | 1.54E-45 | 0.216872 | 2.24E-06 | 0.243843 |
| 0.157204 | 0.00065  | 0.466658 | 1.25E-26 | 0.583128 | 6.89E-44 | 0.171705 | 0.00019  | 0.199149 |
| -0.0563  | 0.22459  | 0.13941  | 0.00253  | 0.162095 | 0.00044  | 0.031552 | 0.49639  | 0.019031 |
| 0.117301 | 0.01119  | 0.418916 | 2.86E-21 | 0.530424 | 3.03E-35 | 0.160017 | 0.00052  | 0.173999 |
| -0.09367 | 0.04305  | -0.17293 | 0.00017  | -0.2216  | 1.32E-06 | -0.17251 | 0.00018  | -0.16616 |
| -0.14046 | 0.00235  | 0.060176 | 0.19425  | 0.136683 | 0.00308  | -0.05257 | 0.25684  | -0.11502 |
| 0.098532 | 0.03327  | 0.334511 | 1.13E-13 | 0.429867 | 2.00E-22 | 0.158713 | 0.00058  | 0.100945 |
| -0.04681 | 0.31273  | 0.220392 | 1.52E-06 | 0.315305 | 3.08E-12 | 0.053682 | 0.24694  | 0.010532 |
| 0.070748 | 0.12683  | 0.295474 | 7.31E-11 | 0.349328 | 7.54E-15 | 0.091246 | 0.04876  | 0.172074 |
| 0.133244 | 0.00392  | 0.281144 | 6.23E-10 | 0.365215 | 3.50E-16 | 0.101437 | 0.02839  | 0.133349 |
| 0.173973 | 0.00016  | 0.472182 | 2.63E-27 | 0.488864 | 1.99E-29 | 0.097074 | 0.03598  | 0.154741 |
| 0.024456 | 0.59809  | 0.200842 | 1.22E-05 | 0.317781 | 2.04E-12 | -0.02216 | 0.63288  | 0.071364 |
| 0.165093 | 0.00034  | 0.309216 | 8.35E-12 | 0.342063 | 2.90E-14 | 0.06869  | 0.13829  | 0.176324 |
| 0.034227 | 0.46059  | 0.27784  | 1.00E-09 | 0.343554 | 2.20E-14 | -0.0075  | 0.87162  | 0.031789 |
| 0.090557 | 0.0505   | 0.238344 | 1.87E-07 | 0.18869  | 4.07E-05 | 0.099218 | 0.03206  | 0.061031 |
| 0.130434 | 0.00475  | 0.406848 | 4.81E-20 | 0.507234 | 6.70E-32 | 0.143679 | 0.00185  | 0.190977 |
| 0.016616 | 0.72025  | 0.339211 | 4.87E-14 | 0.427679 | 3.43E-22 | 0.094641 | 0.04092  | 0.113171 |
| 0.034048 | 0.46294  | 0.133663 | 0.00381  | 0.162823 | 0.00041  | 0.035179 | 0.4482   | 0.082072 |
| -0.04055 | 0.38201  | 0.175025 | 0.00014  | 0.259872 | 1.20E-08 | 0.080321 | 0.08294  | 0.030774 |
| 0.025097 | 0.58853  | 0.118735 | 0.01023  | 0.170671 | 0.00021  | 0.044906 | 0.33289  | -0.01759 |
| 0.232838 | 3.61E-07 | 0.660097 | 9.29E-60 | 0.606771 | 2.65E-48 | 0.295895 | 6.85E-11 | 0.504082 |
| 0.070269 | 0.12943  | 0.27706  | 1.12E-09 | 0.3474   | 1.08E-14 | 0.023679 | 0.60977  | 0.092002 |
| -0.00366 | 0.93705  | 0.196174 | 1.96E-05 | 0.288242 | 2.19E-10 | 0.004097 | 0.92963  | 0.069246 |
| 0.312672 | 4.75E-12 | 0.502788 | 2.74E-31 | 0.420002 | 2.21E-21 | 0.291936 | 1.25E-10 | 0.365844 |
| 0.268135 | 3.93E-09 | 0.456991 | 1.78E-25 | 0.548019 | 5.83E-38 | 0.181367 | 8.09E-05 | 0.237635 |
| 0.062302 | 0.17893  | 0.339739 | 4.43E-14 | 0.46563  | 1.66E-26 | 0.077818 | 0.09302  | 0.137534 |
| 0.129617 | 0.00503  | 0.434091 | 6.98E-23 | 0.377945 | 2.64E-17 | 0.174267 | 0.00015  | 0.254431 |
| 0.176049 | 0.00013  | 0.529983 | 3.53E-35 | 0.548824 | 4.34E-38 | 0.165069 | 0.00034  | 0.237776 |
| -0.07781 | 0.09307  | 0.155399 | 0.00075  | 0.250421 | 4.14E-08 | -0.16763 | 0.00027  | -0.04866 |
| 0.196427 | 1.91E-05 | 0.46989  | 5.03E-27 | 0.48011  | 2.67E-28 | 0.154667 | 0.0008   | 0.183894 |
| 0.021869 | 0.63737  | 0.198277 | 1.59E-05 | 0.307413 | 1.12E-11 | 0.078156 | 0.0916   | 0.036291 |
| 0.052709 | 0.25563  | 0.247754 | 5.81E-08 | 0.428328 | 2.93E-22 | 0.049669 | 0.28411  | 0.050289 |
| 0.300594 | 3.30E-11 | 0.583751 | 5.33E-44 | 0.718064 | 3.29E-75 | 0.269756 | 3.14E-09 | 0.29223  |
| 0.025017 | 0.58971  | 0.181917 | 7.69E-05 | 0.202654 | 1.02E-05 | 0.051585 | 0.26591  | 0.046088 |
| 0.240127 | 1.50E-07 | 0.539184 | 1.41E-36 | 0.500835 | 5.07E-31 | 0.173426 | 0.00017  | 0.264126 |
| 0.098116 | 0.03403  | 0.243861 | 9.47E-08 | 0.268921 | 3.53E-09 | 0.074798 | 0.10646  | 0.237781 |
| -0.07359 | 0.11227  | -0.29042 | 1.58E-10 | -0.38045 | 1.57E-17 | -0.06054 | 0.19158  | -0.21969 |

|          |          |          |          |          |          |          |          |           |
|----------|----------|----------|----------|----------|----------|----------|----------|-----------|
| 0.084646 | 0.06761  | 0.315009 | 3.23E-12 | 0.346781 | 1.21E-14 | 0.157738 | 0.00062  | 0.179534  |
| 0.050569 | 0.27546  | 0.28164  | 5.80E-10 | 0.320827 | 1.22E-12 | 0.013464 | 0.77166  | 0.083001  |
| 0.012656 | 0.78502  | 0.289345 | 1.86E-10 | 0.334122 | 1.21E-13 | 0.062879 | 0.17493  | 0.166891  |
| 0.110858 | 0.01655  | 0.304145 | 1.88E-11 | 0.394248 | 8.13E-19 | 0.156488 | 0.00069  | 0.11561   |
| 0.086032 | 0.06322  | 0.358148 | 1.40E-15 | 0.337294 | 6.88E-14 | 0.17133  | 0.0002   | 0.317212  |
| 0.011068 | 0.81145  | 0.25068  | 4.00E-08 | 0.184462 | 6.07E-05 | 0.0076   | 0.86989  | 0.070886  |
| 0.205525 | 7.55E-06 | 0.394563 | 7.58E-19 | 0.403344 | 1.07E-19 | 0.201983 | 1.09E-05 | 0.139482  |
| 0.214124 | 3.03E-06 | 0.510268 | 2.53E-32 | 0.438744 | 2.15E-23 | 0.220411 | 1.51E-06 | 0.407185  |
| 0.076106 | 0.10046  | 0.402392 | 1.33E-19 | 0.520886 | 7.73E-34 | 0.079918 | 0.0845   | 0.084505  |
| 0.07385  | 0.11098  | 0.203214 | 9.60E-06 | 0.277187 | 1.10E-09 | 0.110659 | 0.01674  | 0.08242   |
| 0.105    | 0.02325  | 0.212447 | 3.63E-06 | 0.26987  | 3.09E-09 | 0.151294 | 0.00104  | 0.097712  |
| 0.022545 | 0.62699  | 0.268341 | 3.82E-09 | 0.410795 | 1.94E-20 | 0.067453 | 0.14555  | 0.123337  |
| 0.173947 | 0.00016  | 0.327225 | 4.07E-13 | 0.401253 | 1.71E-19 | 0.055641 | 0.23009  | -0.0602   |
| 0.184758 | 5.90E-05 | 0.507831 | 5.54E-32 | 0.57853  | 4.53E-43 | 0.170137 | 0.00022  | 0.245435  |
| 0.16915  | 0.00024  | 0.306146 | 1.37E-11 | 0.335622 | 9.29E-14 | 0.213585 | 3.21E-06 | 0.149819  |
| 0.17672  | 0.00012  | 0.47472  | 1.27E-27 | 0.570305 | 1.22E-41 | 0.175739 | 0.00013  | 0.212369  |
| -0.16116 | 0.00047  | -0.39088 | 1.69E-18 | -0.36268 | 5.79E-16 | -0.20195 | 1.09E-05 | -0.34895  |
| 0.133364 | 0.00389  | 0.378783 | 2.22E-17 | 0.36737  | 2.28E-16 | 0.102095 | 0.02737  | 0.067348  |
| 0.103144 | 0.02582  | 0.30688  | 1.22E-11 | 0.440045 | 1.54E-23 | 0.079513 | 0.08609  | 0.037595  |
| 0.15937  | 0.00055  | 0.396867 | 4.56E-19 | 0.508129 | 5.03E-32 | 0.226658 | 7.44E-07 | 0.170291  |
| 0.034104 | 0.4622   | 0.375914 | 4.02E-17 | 0.422495 | 1.21E-21 | 0.156671 | 0.00068  | 0.255933  |
| 0.108339 | 0.01919  | 0.348229 | 9.26E-15 | 0.434995 | 5.56E-23 | 0.130115 | 0.00486  | 0.17513   |
| 0.10897  | 0.01849  | 0.296002 | 6.74E-11 | 0.377642 | 2.81E-17 | 0.047666 | 0.304    | 0.087162  |
| 0.028193 | 0.54335  | 0.269824 | 3.11E-09 | 0.337108 | 7.12E-14 | 0.10995  | 0.01746  | 0.137009  |
| 0.133828 | 0.00376  | 0.32152  | 1.08E-12 | 0.404276 | 8.66E-20 | 0.012913 | 0.78076  | -0.0053   |
| 0.01211  | 0.79409  | 0.328979 | 3.00E-13 | 0.421739 | 1.46E-21 | 0.053893 | 0.24509  | 0.047454  |
| 0.01989  | 0.66813  | 0.119945 | 0.00947  | 0.115947 | 0.01216  | 0.07342  | 0.11308  | -2.66E-05 |
| 0.079571 | 0.08586  | 0.35611  | 2.08E-15 | 0.423052 | 1.06E-21 | 0.13062  | 0.00469  | 0.158544  |
| -0.00572 | 0.90193  | 0.11946  | 0.00977  | 0.150578 | 0.0011   | -0.0086  | 0.85291  | -0.0516   |
| 0.116834 | 0.01151  | 0.271347 | 2.52E-09 | 0.34875  | 8.40E-15 | 0.029112 | 0.53029  | 0.07438   |
| 0.102157 | 0.02728  | 0.393126 | 1.04E-18 | 0.514259 | 6.92E-33 | 0.134788 | 0.00352  | 0.156501  |
| 0.02143  | 0.64414  | 0.17283  | 0.00017  | 0.198463 | 1.56E-05 | 0.079053 | 0.08793  | 0.054547  |
| 0.084056 | 0.06955  | 0.215575 | 2.58E-06 | 0.262329 | 8.67E-09 | 0.074921 | 0.10588  | 0.115691  |
| 0.11494  | 0.01294  | 0.345567 | 1.52E-14 | 0.493198 | 5.36E-30 | 0.155911 | 0.00072  | 0.147909  |
| 0.070175 | 0.12995  | 0.488319 | 2.35E-29 | 0.41264  | 1.26E-20 | 0.121746 | 0.00845  | 0.273616  |
| 0.14191  | 0.00211  | 0.429248 | 2.33E-22 | 0.536133 | 4.15E-36 | 0.185589 | 5.46E-05 | 0.198539  |
| 0.158459 | 0.00059  | 0.510522 | 2.33E-32 | 0.602975 | 1.43E-47 | 0.199896 | 1.35E-05 | 0.226191  |
| 0.145324 | 0.00164  | 0.304757 | 1.71E-11 | 0.35873  | 1.25E-15 | 0.158315 | 0.0006   | 0.101346  |
| 0.14438  | 0.00176  | 0.211437 | 4.04E-06 | 0.293894 | 9.32E-11 | 0.084948 | 0.06663  | -0.05416  |
| 0.205609 | 7.49E-06 | 0.354333 | 2.92E-15 | 0.503505 | 2.19E-31 | 0.040675 | 0.38049  | 0.054394  |
| 0.030597 | 0.50952  | 0.219166 | 1.74E-06 | 0.339934 | 4.27E-14 | 0.064485 | 0.16415  | 0.022226  |
| 0.076704 | 0.09781  | 0.310636 | 6.63E-12 | 0.439537 | 1.76E-23 | 0.045744 | 0.32394  | 0.056511  |
| 0.26102  | 1.03E-08 | 0.431066 | 1.49E-22 | 0.482333 | 1.39E-28 | 0.217309 | 2.13E-06 | 0.322753  |
| 0.100973 | 0.02913  | 0.410895 | 1.89E-20 | 0.53576  | 4.73E-36 | 0.088825 | 0.05509  | 0.128366  |
| 0.188812 | 4.02E-05 | 0.495399 | 2.73E-30 | 0.641617 | 1.57E-55 | 0.177211 | 0.00012  | 0.201049  |

|          |          |          |          |          |          |          |          |          |
|----------|----------|----------|----------|----------|----------|----------|----------|----------|
| 0.16323  | 0.0004   | 0.422024 | 1.36E-21 | 0.48599  | 4.71E-29 | 0.162505 | 0.00042  | 0.289985 |
| -0.20943 | 5.01E-06 | -0.29645 | 6.29E-11 | -0.24012 | 1.50E-07 | -0.11555 | 0.01246  | -0.31705 |
| 0.029319 | 0.52738  | 0.201727 | 1.12E-05 | 0.28753  | 2.43E-10 | 0.059124 | 0.20218  | 0.018847 |
| -0.11787 | 0.01079  | 0.039283 | 0.39701  | 0.072261 | 0.11889  | -0.08172 | 0.0777   | -0.06164 |
| -0.04314 | 0.35223  | 0.104076 | 0.0245   | 0.242343 | 1.14E-07 | -0.0568  | 0.22048  | -0.06343 |
| 0.031719 | 0.49411  | 0.287105 | 2.59E-10 | 0.395928 | 5.61E-19 | 0.036614 | 0.42989  | 0.098349 |
| 0.1977   | 1.68E-05 | 0.436759 | 3.56E-23 | 0.524755 | 2.10E-34 | 0.20053  | 1.26E-05 | 0.225529 |
| 0.06689  | 0.14895  | 0.343786 | 2.11E-14 | 0.422959 | 1.08E-21 | 0.088844 | 0.05504  | 0.153235 |
| 0.161426 | 0.00046  | 0.542932 | 3.69E-37 | 0.558494 | 1.18E-39 | 0.218573 | 1.86E-06 | 0.2626   |
| -0.00711 | 0.87828  | -0.4574  | 1.59E-25 | -0.30597 | 1.41E-11 | -0.0802  | 0.08341  | -0.17802 |
| 0.154913 | 0.00078  | 0.4854   | 5.61E-29 | 0.585529 | 2.55E-44 | 0.180755 | 8.56E-05 | 0.218115 |
| 0.157376 | 0.00064  | 0.305195 | 1.59E-11 | 0.272897 | 2.03E-09 | 0.139018 | 0.00261  | 0.200871 |
| 0.157082 | 0.00066  | 0.31854  | 1.79E-12 | 0.414335 | 8.47E-21 | 0.087784 | 0.05801  | 0.035773 |
| 0.178901 | 0.0001   | 0.171212 | 0.0002   | 0.287198 | 2.56E-10 | -0.00418 | 0.92814  | -0.02701 |
| 0.064155 | 0.16633  | 0.33769  | 6.41E-14 | 0.399586 | 2.49E-19 | 0.154655 | 0.0008   | 0.233996 |
| 0.116835 | 0.01151  | 0.432003 | 1.18E-22 | 0.499562 | 7.54E-31 | 0.153873 | 0.00085  | 0.195299 |
| 0.098234 | 0.03381  | 0.49308  | 5.56E-30 | 0.469282 | 5.97E-27 | 0.170023 | 0.00022  | 0.213668 |
| 0.157342 | 0.00064  | 0.45508  | 2.98E-25 | 0.583457 | 6.02E-44 | 0.189974 | 3.60E-05 | 0.196208 |
| -0.0506  | 0.27513  | 0.1309   | 0.00461  | 0.119737 | 0.0096   | -0.12755 | 0.00577  | -0.1225  |
| 0.082512 | 0.07485  | 0.397064 | 4.37E-19 | 0.486359 | 4.22E-29 | 0.138529 | 0.0027   | 0.218482 |
| 0.162813 | 0.00041  | 0.351489 | 5.02E-15 | 0.370957 | 1.11E-16 | 0.246943 | 6.44E-08 | 0.237092 |
| 0.061711 | 0.18309  | 0.290177 | 1.64E-10 | 0.322817 | 8.69E-13 | 0.126369 | 0.00625  | 0.072222 |
| 0.038681 | 0.40429  | 0.21816  | 1.94E-06 | 0.246567 | 6.75E-08 | 0.062318 | 0.17882  | 0.026709 |
| 0.162368 | 0.00043  | 0.220298 | 1.53E-06 | 0.343508 | 2.22E-14 | 0.003796 | 0.9348   | -0.05996 |
| 0.118864 | 0.01014  | 0.258757 | 1.40E-08 | 0.335786 | 9.02E-14 | 0.116848 | 0.0115   | 0.212276 |
| 0.147458 | 0.0014   | 0.426979 | 4.08E-22 | 0.476    | 8.80E-28 | 0.129815 | 0.00496  | 0.243894 |
| 0.048091 | 0.2997   | -0.23001 | 5.04E-07 | -0.30117 | 3.02E-11 | -0.04515 | 0.33027  | -0.18451 |
| 0.162153 | 0.00043  | 0.37016  | 1.30E-16 | 0.42186  | 1.41E-21 | 0.038323 | 0.40867  | 0.211977 |
| -0.00077 | 0.98671  | 0.213841 | 3.12E-06 | 0.292845 | 1.09E-10 | -0.02511 | 0.58826  | -0.0127  |
| 0.075671 | 0.10242  | 0.315049 | 3.21E-12 | 0.38553  | 5.36E-18 | 0.072869 | 0.11582  | 0.098707 |
| 0.113409 | 0.0142   | 0.330885 | 2.15E-13 | 0.336889 | 7.40E-14 | 0.08566  | 0.06438  | 0.093601 |
| -0.07928 | 0.08701  | -0.34085 | 3.62E-14 | -0.40888 | 3.02E-20 | -0.15932 | 0.00055  | -0.31438 |
| 0.008462 | 0.85529  | 0.270249 | 2.93E-09 | 0.381379 | 1.29E-17 | 0.063179 | 0.17288  | 0.021487 |
| 0.122319 | 0.00814  | 0.246261 | 7.02E-08 | 0.346082 | 1.38E-14 | 0.041848 | 0.36689  | 0.032062 |
| 0.102416 | 0.02689  | 0.442023 | 9.29E-24 | 0.528981 | 4.98E-35 | 0.171559 | 0.0002   | 0.188053 |
| 0.091484 | 0.04817  | 0.204414 | 8.48E-06 | 0.268326 | 3.83E-09 | 0.09386  | 0.04262  | 0.099157 |
| 0.123194 | 0.00769  | 0.318662 | 1.76E-12 | 0.428723 | 2.65E-22 | 0.101205 | 0.02876  | 0.155614 |
| 0.094501 | 0.04122  | 0.225097 | 8.90E-07 | 0.36926  | 1.56E-16 | 0.014244 | 0.75884  | 0.106949 |
| 0.256868 | 1.79E-08 | 0.456308 | 2.14E-25 | 0.607764 | 1.70E-48 | 0.126926 | 0.00602  | 0.208773 |
| 0.108281 | 0.01925  | 0.404261 | 8.69E-20 | 0.511175 | 1.89E-32 | 0.110045 | 0.01736  | 0.160675 |
| 0.105116 | 0.0231   | 0.356752 | 1.84E-15 | 0.410429 | 2.11E-20 | -0.00805 | 0.86218  | 0.124236 |
| 0.102379 | 0.02695  | 0.258342 | 1.48E-08 | 0.378273 | 2.47E-17 | 0.007388 | 0.87349  | -0.03497 |
| 0.006532 | 0.88804  | 0.201705 | 1.12E-05 | 0.231291 | 4.34E-07 | -0.06232 | 0.17878  | -0.09124 |
| 0.151094 | 0.00106  | 0.320369 | 1.32E-12 | 0.336664 | 7.71E-14 | 0.148732 | 0.00127  | 0.139625 |
| 0.037842 | 0.41457  | 0.275783 | 1.35E-09 | 0.362479 | 6.02E-16 | 0.031939 | 0.49112  | 0.06697  |

|          |          |          |          |          |          |          |          |          |
|----------|----------|----------|----------|----------|----------|----------|----------|----------|
| 0.128332 | 0.00548  | 0.407186 | 4.46E-20 | 0.525151 | 1.84E-34 | 0.127335 | 0.00586  | 0.127691 |
| 0.080646 | 0.08169  | 0.279195 | 8.26E-10 | 0.331807 | 1.83E-13 | 0.056072 | 0.2265   | 0.118069 |
| 0.131552 | 0.0044   | 0.457767 | 1.44E-25 | 0.568533 | 2.45E-41 | 0.170144 | 0.00022  | 0.215544 |
| 0.116982 | 0.01141  | 0.323408 | 7.86E-13 | 0.354158 | 3.02E-15 | 0.128435 | 0.00544  | 0.130571 |
| 0.281905 | 5.58E-10 | 0.376781 | 3.36E-17 | 0.480617 | 2.30E-28 | 0.125938 | 0.00643  | 0.162405 |
| 0.060467 | 0.1921   | 0.251452 | 3.63E-08 | 0.298925 | 4.28E-11 | 0.117938 | 0.01075  | 0.142899 |
| 0.116454 | 0.01179  | 0.435451 | 4.96E-23 | 0.517265 | 2.57E-33 | 0.142173 | 0.00207  | 0.193549 |
| 0.236175 | 2.43E-07 | 0.516086 | 3.80E-33 | 0.624478 | 7.32E-52 | 0.235441 | 2.65E-07 | 0.267252 |
| 0.122919 | 0.00783  | 0.224342 | 9.70E-07 | 0.269482 | 3.26E-09 | 0.094646 | 0.04091  | 0.072816 |
| -0.04418 | 0.3408   | -0.32735 | 3.99E-13 | -0.32342 | 7.84E-13 | -0.1831  | 6.89E-05 | -0.36549 |
| 0.076816 | 0.09731  | 0.205676 | 7.44E-06 | 0.302768 | 2.34E-11 | -0.00389 | 0.93315  | -0.0059  |
| 0.262835 | 8.10E-09 | 0.512964 | 1.06E-32 | 0.470653 | 4.05E-27 | 0.1201   | 0.00938  | 0.270263 |
| 0.325724 | 5.28E-13 | 0.425861 | 5.36E-22 | 0.544458 | 2.13E-37 | 0.265685 | 5.50E-09 | 0.293047 |
| 0.033203 | 0.47412  | 0.147577 | 0.00138  | 0.261845 | 9.25E-09 | 0.010165 | 0.82659  | -0.07146 |
| 0.149357 | 0.00121  | 0.23215  | 3.92E-07 | 0.270855 | 2.70E-09 | -0.02539 | 0.58414  | 0.082327 |
| 0.152442 | 0.00095  | 0.264317 | 6.63E-09 | 0.301162 | 3.02E-11 | 0.028083 | 0.54494  | -0.02774 |
| 0.148264 | 0.00131  | 0.34649  | 1.28E-14 | 0.415499 | 6.44E-21 | 0.090989 | 0.0494   | 0.080319 |
| 0.099179 | 0.03213  | 0.25422  | 2.54E-08 | 0.274023 | 1.73E-09 | -0.06216 | 0.17992  | -0.00413 |
| 0.093137 | 0.04425  | 0.4632   | 3.26E-26 | 0.50976  | 2.98E-32 | 0.158242 | 0.0006   | 0.127448 |
| 0.134622 | 0.00356  | 0.351834 | 4.70E-15 | 0.539958 | 1.07E-36 | 0.044451 | 0.33781  | 0.048326 |
| 0.137492 | 0.00291  | 0.460966 | 6.03E-26 | 0.58581  | 2.27E-44 | 0.163132 | 0.0004   | 0.190985 |
| 0.017182 | 0.71113  | -0.25283 | 3.04E-08 | -0.29189 | 1.26E-10 | 0.025543 | 0.5819   | 0.017997 |
| 0.13594  | 0.00325  | 0.47973  | 2.98E-28 | 0.541252 | 6.75E-37 | 0.162129 | 0.00044  | 0.177931 |
| 0.147479 | 0.00139  | 0.407892 | 3.79E-20 | 0.573563 | 3.34E-42 | 0.091872 | 0.04723  | 0.061695 |
| 0.347987 | 9.69E-15 | 0.452862 | 5.41E-25 | 0.543944 | 2.56E-37 | 0.158223 | 0.0006   | 0.302305 |
| -0.25539 | 2.18E-08 | -0.01635 | 0.72459  | -0.04111 | 0.37538  | -0.10087 | 0.0293   | -0.24373 |
| 0.072542 | 0.11746  | 0.158122 | 0.0006   | 0.177304 | 0.00012  | 0.016137 | 0.72798  | 0.013902 |
| -0.20322 | 9.59E-06 | 0.163143 | 0.0004   | 0.24021  | 1.49E-07 | -0.02755 | 0.55257  | 0.009286 |
| 0.235181 | 2.73E-07 | 0.357119 | 1.71E-15 | 0.353649 | 3.33E-15 | 0.065051 | 0.16047  | 0.087165 |
| 0.134823 | 0.00351  | 0.396079 | 5.43E-19 | 0.470671 | 4.03E-27 | 0.16986  | 0.00023  | 0.126215 |
| 0.128615 | 0.00538  | 0.402877 | 1.19E-19 | 0.551594 | 1.56E-38 | 0.156406 | 0.00069  | 0.141043 |
| 0.147312 | 0.00141  | 0.289171 | 1.90E-10 | 0.407113 | 4.53E-20 | 0.033038 | 0.47631  | 0.102953 |
| 0.068904 | 0.13707  | 0.225928 | 8.09E-07 | 0.242418 | 1.13E-07 | 0.017277 | 0.7096   | 0.097412 |
| 0.073625 | 0.11207  | 0.338069 | 5.99E-14 | 0.37781  | 2.72E-17 | 0.056331 | 0.22436  | 0.05159  |
| 0.343606 | 2.18E-14 | 0.476791 | 7.00E-28 | 0.526185 | 1.29E-34 | 0.254302 | 2.51E-08 | 0.252745 |
| 0.210531 | 4.45E-06 | 0.576044 | 1.24E-42 | 0.610112 | 5.87E-49 | 0.152674 | 0.00093  | 0.184768 |
| 0.08909  | 0.05436  | 0.298596 | 4.51E-11 | 0.40878  | 3.09E-20 | 0.139888 | 0.00245  | 0.125576 |
| 0.034619 | 0.45546  | 0.289915 | 1.70E-10 | 0.22504  | 8.96E-07 | -0.00479 | 0.91784  | 0.18898  |
| 0.143195 | 0.00192  | 0.354015 | 3.10E-15 | 0.464185 | 2.48E-26 | 0.182352 | 7.39E-05 | 0.104897 |
| -0.00523 | 0.91031  | 0.207576 | 6.09E-06 | 0.290958 | 1.46E-10 | -0.01986 | 0.6686   | 0.072944 |
| 0.077635 | 0.09379  | 0.350932 | 5.57E-15 | 0.299506 | 3.91E-11 | 0.075661 | 0.10247  | 0.149258 |
| 0.310296 | 7.00E-12 | 0.500988 | 4.83E-31 | 0.355714 | 2.24E-15 | 0.25302  | 2.96E-08 | 0.328158 |
| -0.03342 | 0.4712   | 0.268116 | 3.94E-09 | 0.287391 | 2.49E-10 | -0.01633 | 0.7248   | 0.086667 |
| 0.173158 | 0.00017  | 0.379063 | 2.09E-17 | 0.384181 | 7.14E-18 | 0.136254 | 0.00317  | 0.125444 |
| 0.22126  | 1.37E-06 | 0.254865 | 2.33E-08 | 0.352184 | 4.40E-15 | 0.033283 | 0.47305  | -0.18768 |

|          |          |          |          |          |          |          |          |          |
|----------|----------|----------|----------|----------|----------|----------|----------|----------|
| 0.150423 | 0.00111  | 0.356598 | 1.89E-15 | 0.372219 | 8.57E-17 | 0.082174 | 0.07606  | 0.13107  |
| -0.05606 | 0.22663  | 0.270284 | 2.92E-09 | 0.215958 | 2.48E-06 | 0.052022 | 0.26188  | 0.104559 |
| 0.15107  | 0.00106  | 0.298516 | 4.57E-11 | 0.287332 | 2.51E-10 | 0.224156 | 9.91E-07 | 0.101465 |
| 0.152364 | 0.00096  | 0.473338 | 1.89E-27 | 0.579039 | 3.68E-43 | 0.175038 | 0.00014  | 0.177103 |
| 0.108987 | 0.01848  | 0.261864 | 9.23E-09 | 0.332626 | 1.58E-13 | 0.04519  | 0.32984  | 0.007638 |
| -0.07775 | 0.09328  | 0.245253 | 7.96E-08 | 0.124503 | 0.00706  | 0.039633 | 0.39282  | 0.153873 |
| -0.03195 | 0.49102  | 0.109908 | 0.0175   | 0.135352 | 0.00338  | 0.001272 | 0.97812  | 0.02626  |
| -0.08632 | 0.06234  | -0.23387 | 3.20E-07 | -0.28423 | 3.97E-10 | -0.11328 | 0.01431  | -0.27365 |
| 0.145234 | 0.00165  | 0.346351 | 1.31E-14 | 0.383085 | 9.00E-18 | 0.1665   | 0.0003   | 0.009568 |
| 0.130998 | 0.00458  | 0.442593 | 8.02E-24 | 0.572096 | 6.00E-42 | 0.156757 | 0.00068  | 0.164651 |
| 0.219544 | 1.67E-06 | 0.274233 | 1.68E-09 | 0.409501 | 2.61E-20 | 0.079049 | 0.08794  | 0.215232 |
| 0.116534 | 0.01173  | 0.29466  | 8.28E-11 | 0.316687 | 2.44E-12 | -0.0218  | 0.63847  | -0.02578 |
| 0.276036 | 1.30E-09 | 0.474546 | 1.34E-27 | 0.609736 | 6.96E-49 | 0.119825 | 0.00955  | 0.164645 |
| 0.41518  | 6.95E-21 | 0.732487 | 1.12E-79 | 0.698338 | 1.56E-69 | 0.310487 | 6.79E-12 | 0.437188 |
| 0.04418  | 0.34077  | 0.270044 | 3.02E-09 | 0.352499 | 4.14E-15 | -0.04086 | 0.37828  | 0.014314 |
| 0.112927 | 0.01462  | 0.412281 | 1.37E-20 | 0.314077 | 3.77E-12 | 0.142456 | 0.00203  | 0.193477 |
| 0.099917 | 0.03086  | 0.313853 | 3.91E-12 | 0.322238 | 9.59E-13 | 0.08026  | 0.08317  | 0.175628 |
| 0.066624 | 0.15058  | 0.286806 | 2.71E-10 | 0.371356 | 1.02E-16 | 0.062802 | 0.17546  | 0.052159 |
| 0.159625 | 0.00054  | 0.522518 | 4.47E-34 | 0.435401 | 5.02E-23 | 0.201532 | 1.14E-05 | 0.195734 |
| 0.096044 | 0.03801  | 0.278253 | 9.46E-10 | 0.387654 | 3.40E-18 | 0.13933  | 0.00255  | 0.114822 |
| 0.073684 | 0.11179  | 0.403644 | 9.99E-20 | 0.406666 | 5.02E-20 | 0.11151  | 0.01592  | 0.108821 |
| 0.090245 | 0.0513   | 0.228369 | 6.10E-07 | 0.358379 | 1.34E-15 | 0.073179 | 0.11427  | 0.005845 |
| 0.180016 | 9.16E-05 | 0.366321 | 2.81E-16 | 0.367447 | 2.25E-16 | 0.224627 | 9.39E-07 | 0.393091 |
| 0.180321 | 8.91E-05 | 0.428845 | 2.58E-22 | 0.522973 | 3.84E-34 | 0.211772 | 3.90E-06 | 0.188537 |
| 0.013152 | 0.77682  | -0.44476 | 4.57E-24 | -0.4729  | 2.14E-27 | -0.0809  | 0.08074  | -0.27636 |
| 0.084311 | 0.06871  | 0.199393 | 1.42E-05 | 0.300185 | 3.52E-11 | -0.01742 | 0.70736  | -0.09297 |
| 0.051949 | 0.26256  | 0.415729 | 6.10E-21 | 0.404589 | 8.06E-20 | 0.084202 | 0.06907  | 0.15407  |
| -0.16811 | 0.00026  | -0.38408 | 7.29E-18 | -0.34648 | 1.28E-14 | -0.13713 | 0.00298  | -0.28706 |
| -0.05505 | 0.23505  | -0.4065  | 5.21E-20 | -0.47816 | 4.71E-28 | 0.024539 | 0.59684  | 0.002245 |
| 0.117868 | 0.0108   | 0.409702 | 2.50E-20 | 0.504902 | 1.41E-31 | 0.12269  | 0.00795  | 0.14117  |
| 0.087509 | 0.05881  | 0.173988 | 0.00016  | 0.23325  | 3.44E-07 | -0.04882 | 0.29239  | 0.010793 |
| 0.196432 | 1.91E-05 | -0.11422 | 0.01352  | -0.15289 | 0.00092  | 7.21E-05 | 0.99876  | -0.05112 |
| 0.05302  | 0.25283  | 0.219483 | 1.68E-06 | 0.24639  | 6.90E-08 | 0.063197 | 0.17276  | 0.106991 |
| 0.089321 | 0.05374  | 0.312184 | 5.15E-12 | 0.369903 | 1.37E-16 | 0.03937  | 0.39597  | 0.09051  |
| 0.008703 | 0.85121  | 0.33852  | 5.52E-14 | 0.331458 | 1.94E-13 | 0.073903 | 0.11072  | 0.211831 |
| 0.034065 | 0.46271  | 0.254628 | 2.40E-08 | 0.325783 | 5.23E-13 | 0.068581 | 0.13892  | 0.140261 |
| -0.0646  | 0.16339  | 0.085203 | 0.06582  | 0.151756 | 0.001    | -0.07685 | 0.09718  | -0.07856 |
| 0.253715 | 2.71E-08 | 0.535778 | 4.70E-36 | 0.516325 | 3.51E-33 | 0.384531 | 6.62E-18 | 0.222596 |
| 0.118836 | 0.01016  | 0.138367 | 0.00273  | 0.296013 | 6.73E-11 | -0.00562 | 0.90357  | -0.01643 |
| -0.22614 | 7.89E-07 | 0.116269 | 0.01192  | 0.197948 | 1.64E-05 | -0.0372  | 0.4225   | 0.040673 |
| 0.084705 | 0.06742  | 0.342108 | 2.87E-14 | 0.432217 | 1.12E-22 | 0.087429 | 0.05904  | 0.148781 |
| 0.066596 | 0.15075  | 0.315393 | 3.03E-12 | 0.400149 | 2.20E-19 | 0.086617 | 0.06144  | 0.140117 |
| 0.011543 | 0.80352  | 0.231316 | 4.32E-07 | 0.28137  | 6.03E-10 | 0.0581   | 0.21012  | 0.056164 |
| 0.006573 | 0.88734  | 0.224923 | 9.08E-07 | 0.331158 | 2.05E-13 | 0.025473 | 0.58295  | 0.028875 |
| -0.02164 | 0.64088  | 0.159381 | 0.00055  | 0.181913 | 7.70E-05 | -0.03252 | 0.48323  | -0.024   |

|          |          |          |          |          |          |          |          |          |
|----------|----------|----------|----------|----------|----------|----------|----------|----------|
| 0.058541 | 0.20667  | 0.304373 | 1.82E-11 | 0.380304 | 1.62E-17 | 0.076258 | 0.09978  | 0.083835 |
| -0.07726 | 0.09539  | 0.149192 | 0.00122  | 0.170858 | 0.00021  | 0.085722 | 0.06418  | 0.06055  |
| 0.069013 | 0.13644  | 0.141283 | 0.00221  | 0.233266 | 3.43E-07 | 0.032777 | 0.47981  | -0.05484 |
| 0.09586  | 0.03838  | 0.33518  | 1.01E-13 | 0.289952 | 1.69E-10 | -0.00485 | 0.91676  | 0.160608 |
| 0.136962 | 0.00302  | 0.350987 | 5.52E-15 | 0.421485 | 1.55E-21 | 0.169193 | 0.00024  | 0.170313 |
| 0.280703 | 6.64E-10 | 0.611517 | 3.10E-49 | 0.727072 | 5.77E-78 | 0.240469 | 1.44E-07 | 0.399317 |
| 0.336423 | 8.05E-14 | 0.505538 | 1.15E-31 | 0.668701 | 7.86E-62 | 0.218674 | 1.84E-06 | 0.212421 |
| 0.203336 | 9.48E-06 | 0.361612 | 7.13E-16 | 0.454784 | 3.23E-25 | 0.105373 | 0.02276  | 0.155568 |
| 0.155491 | 0.00075  | -0.23289 | 3.59E-07 | -0.42921 | 2.35E-22 | 0.013671 | 0.76826  | -0.02109 |
| 0.22628  | 7.77E-07 | 0.536165 | 4.10E-36 | 0.621852 | 2.55E-51 | 0.202958 | 9.86E-06 | 0.280229 |
| 0.026139 | 0.57312  | 0.303006 | 2.26E-11 | 0.309143 | 8.45E-12 | -0.0042  | 0.9279   | 0.033134 |
| 0.067664 | 0.14429  | 0.21795  | 1.99E-06 | 0.351036 | 5.46E-15 | -0.04212 | 0.3638   | -0.0223  |
| 0.117424 | 0.0111   | 0.243538 | 9.86E-08 | 0.321611 | 1.07E-12 | 0.032724 | 0.48052  | 0.019531 |
| 0.215626 | 2.57E-06 | 0.433696 | 7.71E-23 | 0.516064 | 3.83E-33 | 0.184192 | 6.23E-05 | 0.168713 |
| 0.050901 | 0.27231  | 0.414447 | 8.25E-21 | 0.428474 | 2.82E-22 | 0.080648 | 0.08169  | 0.231239 |
| 0.097894 | 0.03444  | 0.391361 | 1.53E-18 | 0.502201 | 3.30E-31 | 0.12885  | 0.00529  | 0.176237 |
| 0.203084 | 9.73E-06 | 0.405588 | 6.42E-20 | 0.520738 | 8.12E-34 | 0.182303 | 7.42E-05 | 0.228604 |
| -0.33381 | 1.28E-13 | -0.50918 | 3.60E-32 | -0.44736 | 2.32E-24 | -0.23254 | 3.74E-07 | -0.30266 |
| 0.194809 | 2.24E-05 | 0.463699 | 2.84E-26 | 0.341601 | 3.15E-14 | 0.290053 | 1.67E-10 | 0.414176 |
| -0.00606 | 0.89608  | 0.280687 | 6.66E-10 | 0.350831 | 5.68E-15 | 0.032286 | 0.48642  | 0.067238 |
| 0.172396 | 0.00018  | 0.307649 | 1.08E-11 | 0.31207  | 5.24E-12 | 0.178124 | 0.00011  | 0.120775 |
| 0.008355 | 0.8571   | 0.320079 | 1.38E-12 | 0.389044 | 2.52E-18 | 0.113284 | 0.01431  | 0.149363 |
| 0.099484 | 0.0316   | 0.187809 | 4.42E-05 | 0.239483 | 1.62E-07 | 0.017638 | 0.70382  | -0.04971 |
| -0.07003 | 0.13075  | 0.080374 | 0.08273  | 0.136707 | 0.00307  | -0.0502  | 0.27899  | -0.11594 |
| 0.100029 | 0.03067  | 0.417469 | 4.04E-21 | 0.504147 | 1.79E-31 | 0.13115  | 0.00453  | 0.197874 |
| 0.007    | 0.88007  | 0.242587 | 1.11E-07 | 0.25974  | 1.23E-08 | 0.113344 | 0.01426  | 0.234456 |
| 0.268341 | 3.82E-09 | 0.55551  | 3.63E-39 | 0.654867 | 1.57E-58 | 0.255898 | 2.04E-08 | 0.335861 |
| 0.128036 | 0.00559  | 0.411647 | 1.59E-20 | 0.539277 | 1.36E-36 | 0.127743 | 0.0057   | 0.145632 |
| 0.063178 | 0.17289  | 0.145179 | 0.00166  | 0.21555  | 2.59E-06 | 0.015616 | 0.73643  | -0.01589 |
| 0.058714 | 0.20533  | 0.127217 | 0.00591  | 0.219312 | 1.71E-06 | -0.05728 | 0.21659  | 0.012969 |
| 0.054027 | 0.24392  | 0.313516 | 4.13E-12 | 0.444907 | 4.40E-24 | 0.098588 | 0.03317  | 0.096368 |
| 0.060526 | 0.19167  | 0.244412 | 8.85E-08 | 0.381946 | 1.14E-17 | 0.035151 | 0.44855  | 0.073727 |
| 0.111571 | 0.01586  | 0.36893  | 1.67E-16 | 0.453342 | 4.76E-25 | 0.096596 | 0.03691  | 0.191818 |
| 0.151022 | 0.00106  | 0.379188 | 2.04E-17 | 0.470065 | 4.79E-27 | 0.097511 | 0.03515  | 0.168305 |
| 0.050943 | 0.27193  | 0.326914 | 4.30E-13 | 0.395614 | 6.02E-19 | 0.077978 | 0.09234  | 0.155882 |
| 0.109801 | 0.01761  | 0.409708 | 2.49E-20 | 0.536331 | 3.87E-36 | 0.141286 | 0.00221  | 0.151449 |
| 0.096078 | 0.03794  | 0.333445 | 1.37E-13 | 0.415888 | 5.88E-21 | 0.082013 | 0.07664  | 0.154316 |
| 0.058347 | 0.20818  | 0.326061 | 4.98E-13 | 0.404548 | 8.14E-20 | 0.075469 | 0.10335  | 0.160168 |
| 0.150844 | 0.00108  | 0.413252 | 1.09E-20 | 0.516    | 3.91E-33 | 0.144601 | 0.00173  | 0.199798 |
| 0.025972 | 0.57559  | 0.126566 | 0.00617  | 0.194552 | 2.30E-05 | 0.020462 | 0.65917  | -0.04425 |
| 0.035698 | 0.44152  | 0.252003 | 3.38E-08 | 0.292649 | 1.13E-10 | 0.059076 | 0.20254  | 0.139244 |
| 0.073582 | 0.11228  | 0.254735 | 2.37E-08 | 0.429503 | 2.19E-22 | -0.00742 | 0.87302  | 0.022806 |
| 0.174915 | 0.00015  | 0.34627  | 1.33E-14 | 0.462785 | 3.66E-26 | 0.111568 | 0.01586  | 0.1449   |
| 0.001285 | 0.97791  | 0.199065 | 1.47E-05 | 0.32509  | 5.89E-13 | -0.02405 | 0.60419  | -0.01658 |
| 0.099086 | 0.03229  | 0.379994 | 1.72E-17 | 0.472728 | 2.25E-27 | 0.142938 | 0.00196  | 0.144196 |

|          |          |          |          |          |          |          |          |          |
|----------|----------|----------|----------|----------|----------|----------|----------|----------|
| 0.092761 | 0.04512  | 0.363802 | 4.64E-16 | 0.475329 | 1.07E-27 | 0.102349 | 0.02699  | 0.121129 |
| 0.031531 | 0.49667  | 0.223554 | 1.06E-06 | 0.266029 | 5.25E-09 | 0.033135 | 0.47503  | 0.101351 |
| 0.064698 | 0.16276  | 0.229292 | 5.48E-07 | 0.272673 | 2.09E-09 | 0.077667 | 0.09365  | 0.114493 |
| 0.049165 | 0.28903  | 0.254733 | 2.37E-08 | 0.276668 | 1.19E-09 | 0.105431 | 0.02269  | 0.164912 |
| 0.073722 | 0.1116   | 0.229236 | 5.52E-07 | 0.294239 | 8.84E-11 | -0.01491 | 0.74798  | 0.110633 |
| 0.010315 | 0.82407  | 0.116237 | 0.01195  | 0.239765 | 1.57E-07 | 0.002404 | 0.95869  | -0.04249 |
| 0.080354 | 0.08281  | 0.197577 | 1.70E-05 | 0.224669 | 9.34E-07 | 0.052565 | 0.25693  | 0.054177 |
| 0.123203 | 0.00769  | 0.377286 | 3.03E-17 | 0.480076 | 2.70E-28 | 0.109334 | 0.0181   | 0.147673 |
| -0.02582 | 0.57789  | 0.230432 | 4.80E-07 | 0.319343 | 1.57E-12 | 0.000909 | 0.98438  | 0.001218 |
| 0.035563 | 0.44325  | 0.271375 | 2.51E-09 | 0.3985   | 3.17E-19 | 0.045222 | 0.32949  | 0.072032 |
| 0.051041 | 0.271    | 0.320538 | 1.28E-12 | 0.413398 | 1.06E-20 | 0.087668 | 0.05835  | 0.096819 |
| 0.107778 | 0.01982  | 0.344419 | 1.88E-14 | 0.440417 | 1.40E-23 | 0.112643 | 0.01487  | 0.114937 |
| -0.06752 | 0.14518  | 0.188762 | 4.04E-05 | 0.281266 | 6.12E-10 | -0.01567 | 0.73563  | 0.005683 |
| 0.049596 | 0.28482  | 0.297958 | 4.98E-11 | 0.455465 | 2.69E-25 | 0.046547 | 0.3155   | 0.087485 |
| 0.102154 | 0.02728  | 0.391873 | 1.37E-18 | 0.483348 | 1.03E-28 | 0.120191 | 0.00933  | 0.150947 |
| 0.07357  | 0.11234  | 0.312214 | 5.12E-12 | 0.395267 | 6.49E-19 | 0.083315 | 0.07206  | 0.120128 |
| 0.090925 | 0.04956  | 0.335697 | 9.17E-14 | 0.430186 | 1.85E-22 | 0.090785 | 0.04992  | 0.132786 |
| 0.111954 | 0.0155   | 0.33983  | 4.35E-14 | 0.427597 | 3.50E-22 | 0.078823 | 0.08886  | 0.125324 |
| 0.011056 | 0.81166  | 0.223632 | 1.05E-06 | 0.259439 | 1.28E-08 | 0.054029 | 0.2439   | 0.083977 |
| 0.112675 | 0.01484  | 0.388477 | 2.85E-18 | 0.510751 | 2.16E-32 | 0.121097 | 0.0088   | 0.157805 |
| 0.137248 | 0.00296  | 0.36938  | 1.52E-16 | 0.468308 | 7.86E-27 | 0.14266  | 0.002    | 0.210604 |
| 0.106507 | 0.02133  | 0.376667 | 3.44E-17 | 0.480498 | 2.38E-28 | 0.114215 | 0.01352  | 0.143118 |
| 0.009927 | 0.83057  | 0.172169 | 0.00019  | 0.201442 | 1.15E-05 | -0.00353 | 0.93931  | 0.088258 |
| 0.096385 | 0.03733  | 0.357947 | 1.46E-15 | 0.438287 | 2.42E-23 | 0.112715 | 0.01481  | 0.1421   |
| 0.073311 | 0.11362  | 0.192018 | 2.95E-05 | 0.28735  | 2.50E-10 | -0.04382 | 0.34475  | 0.003407 |
| 0.072992 | 0.1152   | 0.337123 | 7.10E-14 | 0.405437 | 6.65E-20 | 0.096607 | 0.03689  | 0.160734 |
| 0.094195 | 0.04189  | 0.311682 | 5.59E-12 | 0.453023 | 5.18E-25 | 0.067154 | 0.14735  | 0.077371 |
| 0.09188  | 0.04721  | 0.204676 | 8.25E-06 | 0.267153 | 4.50E-09 | 0.099618 | 0.03137  | 0.105444 |
| -0.01687 | 0.71613  | 0.17964  | 9.48E-05 | 0.298801 | 4.37E-11 | -0.00331 | 0.94305  | -0.02882 |
| 0.100913 | 0.02922  | 0.406676 | 5.01E-20 | 0.534678 | 6.91E-36 | 0.095754 | 0.0386   | 0.149371 |
| 0.044613 | 0.33605  | 0.295148 | 7.69E-11 | 0.327477 | 3.90E-13 | 0.079955 | 0.08435  | 0.155655 |
| 0.036726 | 0.42849  | 0.196017 | 1.99E-05 | 0.20968  | 4.88E-06 | 0.044226 | 0.34027  | 0.150369 |
| 0.099001 | 0.03244  | 0.287758 | 2.35E-10 | 0.338534 | 5.51E-14 | 0.041826 | 0.36715  | 0.079595 |
| 0.13764  | 0.00288  | 0.226289 | 7.76E-07 | 0.468814 | 6.81E-27 | 0.071394 | 0.1234   | 0.00458  |
| 0.28037  | 6.97E-10 | 0.259229 | 1.31E-08 | 0.324998 | 5.98E-13 | 0.199398 | 1.42E-05 | 0.183766 |
| 0.126779 | 0.00608  | 0.382049 | 1.12E-17 | 0.511546 | 1.67E-32 | 0.163012 | 0.0004   | 0.115042 |
| 0.1212   | 0.00875  | 0.418575 | 3.11E-21 | 0.505078 | 1.33E-31 | 0.117019 | 0.01138  | 0.175923 |
| 0.108447 | 0.01907  | 0.352851 | 3.87E-15 | 0.463986 | 2.62E-26 | 0.103903 | 0.02474  | 0.111337 |
| 0.128004 | 0.0056   | 0.340294 | 4.00E-14 | 0.434097 | 6.97E-23 | 0.077127 | 0.09596  | 0.07102  |
| 0.066491 | 0.1514   | 0.314094 | 3.76E-12 | 0.430647 | 1.65E-22 | 0.062683 | 0.17628  | 0.071948 |
| 0.097508 | 0.03516  | 0.365261 | 3.47E-16 | 0.476812 | 6.96E-28 | 0.103551 | 0.02524  | 0.111524 |
| 0.116831 | 0.01152  | 0.437243 | 3.15E-23 | 0.547649 | 6.67E-38 | 0.164385 | 0.00036  | 0.223412 |
| 0.237635 | 2.03E-07 | 0.310598 | 6.67E-12 | 0.384311 | 6.94E-18 | 0.171175 | 0.0002   | 0.027177 |
| 0.142517 | 0.00202  | 0.363057 | 5.37E-16 | 0.388021 | 3.14E-18 | 0.042618 | 0.35813  | 0.134175 |
| 0.118897 | 0.01012  | 0.20368  | 9.15E-06 | 0.276228 | 1.26E-09 | 0.072057 | 0.11994  | 0.058618 |



|          |          |          |          |          |          |          |          |          |
|----------|----------|----------|----------|----------|----------|----------|----------|----------|
| 0.183428 | 6.69E-05 | 0.226904 | 7.23E-07 | 0.364811 | 3.80E-16 | 0.029686 | 0.52221  | 0.01887  |
| 0.121728 | 0.00846  | 0.416367 | 5.25E-21 | 0.541178 | 6.93E-37 | 0.120162 | 0.00934  | 0.164743 |
| 0.231037 | 4.47E-07 | 0.545624 | 1.40E-37 | 0.615977 | 3.99E-50 | 0.207011 | 6.47E-06 | 0.24461  |
| 0.099074 | 0.03231  | 0.383219 | 8.75E-18 | 0.510319 | 2.49E-32 | 0.128499 | 0.00542  | 0.120204 |
| 0.189345 | 3.82E-05 | 0.441754 | 9.96E-24 | 0.550326 | 2.50E-38 | 0.146968 | 0.00145  | 0.120904 |
| 0.145373 | 0.00163  | 0.443665 | 6.08E-24 | 0.540491 | 8.85E-37 | 0.159803 | 0.00053  | 0.203131 |
| -0.04909 | 0.28975  | 0.338664 | 5.38E-14 | 0.245658 | 7.57E-08 | 0.077258 | 0.0954   | 0.112069 |
| 0.089272 | 0.05387  | 0.441698 | 1.01E-23 | 0.466467 | 1.32E-26 | 0.108761 | 0.01872  | 0.193765 |
| -0.04596 | 0.32166  | -0.30565 | 1.48E-11 | -0.30952 | 7.94E-12 | -0.11191 | 0.01554  | -0.19469 |
| -0.05912 | 0.20221  | 0.043277 | 0.35074  | 0.078917 | 0.08847  | 0.083307 | 0.07208  | 0.082745 |
| 0.125986 | 0.00641  | 0.37509  | 4.76E-17 | 0.326094 | 4.95E-13 | 0.181751 | 7.81E-05 | 0.205416 |
| -0.20947 | 4.99E-06 | 0.08235  | 0.07543  | 0.165478 | 0.00033  | -0.02488 | 0.59176  | -0.06849 |
| 0.14681  | 0.00147  | 0.477493 | 5.72E-28 | 0.537093 | 2.96E-36 | 0.146707 | 0.00148  | 0.231371 |
| 0.067546 | 0.145    | 0.244175 | 9.11E-08 | 0.353373 | 3.51E-15 | -0.05729 | 0.21653  | 0.099845 |
| 0.111801 | 0.01564  | 0.422147 | 1.32E-21 | 0.551675 | 1.52E-38 | 0.151059 | 0.00106  | 0.149968 |
| 0.149506 | 0.00119  | 0.304775 | 1.70E-11 | 0.37597  | 3.97E-17 | -0.08963 | 0.0529   | 0.116599 |
| 0.123845 | 0.00737  | 0.357281 | 1.66E-15 | 0.526203 | 1.29E-34 | 0.111468 | 0.01596  | 0.07223  |
| 0.174164 | 0.00016  | 0.371804 | 9.32E-17 | 0.606898 | 2.50E-48 | 0.115669 | 0.01237  | 0.115077 |
| 0.052258 | 0.25972  | 0.199827 | 1.36E-05 | 0.267035 | 4.57E-09 | 0.075904 | 0.10136  | 0.114793 |
| 0.098363 | 0.03358  | 0.309454 | 8.03E-12 | 0.297388 | 5.44E-11 | 0.115316 | 0.01264  | 0.147339 |
| 0.103024 | 0.02599  | 0.432151 | 1.13E-22 | 0.532977 | 1.25E-35 | 0.144011 | 0.00181  | 0.214463 |
| 0.192174 | 2.90E-05 | 0.213853 | 3.12E-06 | 0.283058 | 4.71E-10 | 0.001844 | 0.9683   | -0.05253 |
| 0.198509 | 1.55E-05 | 0.540076 | 1.03E-36 | 0.614528 | 7.80E-50 | 0.206717 | 6.67E-06 | 0.280754 |
| 0.150926 | 0.00107  | 0.352089 | 4.48E-15 | 0.449325 | 1.38E-24 | 0.125639 | 0.00656  | 0.13653  |
| 0.095997 | 0.0381   | 0.167652 | 0.00027  | 0.245552 | 7.67E-08 | 0.037854 | 0.41443  | 0.052038 |
| 0.039171 | 0.39837  | 0.122456 | 0.00807  | 0.18965  | 3.71E-05 | -0.08041 | 0.08259  | -0.00162 |
| 0.0968   | 0.03651  | 0.19403  | 2.42E-05 | 0.288877 | 1.99E-10 | 0.068295 | 0.14058  | 0.05944  |
| 0.134588 | 0.00357  | 0.348879 | 8.20E-15 | 0.434826 | 5.81E-23 | 0.126606 | 0.00615  | 0.118534 |
| 0.004012 | 0.93109  | -0.32525 | 5.73E-13 | -0.29881 | 4.36E-11 | -0.06962 | 0.133    | -0.22914 |
| 0.013703 | 0.76773  | 0.362763 | 5.69E-16 | 0.367634 | 2.16E-16 | 0.033907 | 0.46479  | 0.071543 |
| 0.06978  | 0.13213  | 0.37819  | 2.51E-17 | 0.439113 | 1.96E-23 | 0.138488 | 0.00271  | 0.177241 |
| 0.227428 | 6.81E-07 | 0.509721 | 3.02E-32 | 0.632996 | 1.18E-53 | 0.184433 | 6.09E-05 | 0.238551 |
| -0.06315 | 0.17308  | 0.233554 | 3.32E-07 | 0.368722 | 1.74E-16 | -0.01433 | 0.75749  | 0.092235 |
| 0.074751 | 0.10668  | 0.280428 | 6.91E-10 | 0.354409 | 2.88E-15 | 0.099314 | 0.03189  | 0.036537 |
| 0.137828 | 0.00284  | 0.508191 | 4.93E-32 | 0.524878 | 2.02E-34 | 0.147321 | 0.00141  | 0.235601 |
| 0.059505 | 0.19928  | 0.19751  | 1.71E-05 | 0.317235 | 2.23E-12 | -0.02353 | 0.61204  | 0.022217 |
| 0.132808 | 0.00404  | 0.419249 | 2.65E-21 | 0.528637 | 5.60E-35 | 0.160723 | 0.00049  | 0.173944 |
| -0.01199 | 0.79604  | 0.229955 | 5.07E-07 | 0.293995 | 9.17E-11 | -0.06841 | 0.13992  | -0.08171 |
| -0.01468 | 0.75168  | 0.145837 | 0.00158  | 0.24505  | 8.17E-08 | -0.12584 | 0.00647  | -0.12299 |
| 0.117375 | 0.01113  | 0.4319   | 1.21E-22 | 0.568181 | 2.81E-41 | 0.147085 | 0.00144  | 0.166756 |
| 0.013529 | 0.77059  | 0.200141 | 1.31E-05 | 0.320312 | 1.33E-12 | -0.0077  | 0.86827  | 0.008387 |
| 0.042149 | 0.36345  | 0.233811 | 3.22E-07 | 0.335953 | 8.76E-14 | 0.015586 | 0.73692  | 0.057002 |
| -0.02241 | 0.62902  | 0.159976 | 0.00052  | 0.247083 | 6.33E-08 | -0.01742 | 0.70732  | 0.005752 |
| 0.04441  | 0.33826  | 0.301201 | 3.00E-11 | 0.397933 | 3.60E-19 | 0.076925 | 0.09684  | 0.085176 |
| 0.006827 | 0.88303  | 0.224609 | 9.41E-07 | 0.331616 | 1.89E-13 | 0.003518 | 0.93956  | 0.034156 |

|          |          |          |          |          |          |          |          |          |
|----------|----------|----------|----------|----------|----------|----------|----------|----------|
| 0.069353 | 0.13452  | 0.279481 | 7.93E-10 | 0.374562 | 5.31E-17 | 0.061925 | 0.18158  | 0.081947 |
| -0.14808 | 0.00133  | -0.38468 | 6.41E-18 | -0.49224 | 7.18E-30 | -0.0897  | 0.05273  | -0.44351 |
| -0.1076  | 0.02002  | 0.223618 | 1.05E-06 | 0.13116  | 0.00452  | 0.09802  | 0.0342   | 0.208019 |
| 0.205129 | 7.87E-06 | 0.498655 | 1.00E-30 | 0.612599 | 1.89E-49 | 0.128919 | 0.00527  | 0.207325 |
| 0.078352 | 0.09079  | 0.231101 | 4.44E-07 | 0.318859 | 1.70E-12 | 0.029618 | 0.52316  | 0.032683 |
| 0.058464 | 0.20727  | -0.34941 | 7.42E-15 | -0.30014 | 3.54E-11 | 0.02746  | 0.55389  | 0.02163  |
| 0.253679 | 2.72E-08 | 0.360266 | 9.28E-16 | 0.4996   | 7.45E-31 | 0.0993   | 0.03192  | 0.114327 |
| 0.023632 | 0.61047  | 0.350732 | 5.79E-15 | 0.299054 | 4.20E-11 | -0.00132 | 0.97738  | -0.05397 |
| 0.122446 | 0.00807  | 0.443498 | 6.35E-24 | 0.556142 | 2.86E-39 | 0.162621 | 0.00042  | 0.140023 |
| 0.111178 | 0.01623  | 0.320517 | 1.28E-12 | 0.38741  | 3.58E-18 | 0.070584 | 0.12772  | 0.115651 |
| 0.198319 | 1.58E-05 | 0.445144 | 4.14E-24 | 0.443893 | 5.73E-24 | 0.135518 | 0.00334  | 0.114846 |
| 0.407673 | 3.98E-20 | 0.524799 | 2.07E-34 | 0.70912  | 1.41E-72 | 0.273085 | 1.97E-09 | 0.39479  |
| 0.369411 | 1.51E-16 | 0.439112 | 1.96E-23 | 0.521753 | 5.78E-34 | 0.204351 | 8.54E-06 | 0.17697  |
| 0.149256 | 0.00122  | 0.514541 | 6.31E-33 | 0.510948 | 2.03E-32 | 0.181839 | 7.75E-05 | 0.265007 |
| 0.042342 | 0.36126  | 0.266613 | 4.85E-09 | 0.377149 | 3.11E-17 | 0.105672 | 0.02238  | 0.053493 |
| 0.078477 | 0.09027  | 0.402148 | 1.40E-19 | 0.486968 | 3.52E-29 | 0.113822 | 0.01385  | 0.180307 |
| 0.111345 | 0.01607  | 0.205388 | 7.66E-06 | 0.276427 | 1.23E-09 | -0.00133 | 0.97715  | 0.004735 |
| 0.07581  | 0.10179  | 0.210466 | 4.49E-06 | 0.243885 | 9.45E-08 | 0.045986 | 0.32138  | 0.088816 |
| -0.00084 | 0.98561  | 0.252087 | 3.34E-08 | 0.33565  | 9.24E-14 | 0.046068 | 0.32051  | 0.121706 |
| 0.033238 | 0.47365  | 0.243277 | 1.02E-07 | 0.298684 | 4.45E-11 | 0.095505 | 0.03911  | 0.092945 |
| 0.087552 | 0.05868  | 0.279751 | 7.62E-10 | 0.310729 | 6.53E-12 | 0.137531 | 0.0029   | 0.117791 |
| 0.077396 | 0.09481  | 0.188816 | 4.02E-05 | 0.222122 | 1.25E-06 | 0.056441 | 0.22345  | 0.025081 |
| 0.272128 | 2.26E-09 | 0.591773 | 1.85E-45 | 0.57704  | 8.28E-43 | 0.188837 | 4.01E-05 | 0.181454 |
| 0.118349 | 0.01048  | 0.40935  | 2.71E-20 | 0.363678 | 4.75E-16 | 0.240057 | 1.51E-07 | 0.215282 |
| -0.03084 | 0.50616  | 0.249935 | 4.41E-08 | 0.248354 | 5.39E-08 | -0.00463 | 0.92047  | 0.023784 |
| -0.1679  | 0.00027  | 0.05972  | 0.19766  | 0.147561 | 0.00138  | -0.09453 | 0.04116  | 0.009792 |
| 0.108073 | 0.01949  | 0.423959 | 8.51E-22 | 0.564846 | 1.03E-40 | 0.14739  | 0.0014   | 0.165726 |
| 0.145803 | 0.00158  | 0.442669 | 7.86E-24 | 0.494111 | 4.06E-30 | 0.198461 | 1.56E-05 | 0.280822 |
| -0.00556 | 0.90468  | 0.273152 | 1.95E-09 | 0.361197 | 7.74E-16 | 0.097181 | 0.03578  | 0.168971 |
| 0.20713  | 6.39E-06 | -0.11495 | 0.01293  | -0.24464 | 8.59E-08 | 0.157926 | 0.00061  | 0.080246 |
| 0.015628 | 0.73623  | 0.338973 | 5.09E-14 | 0.354282 | 2.95E-15 | 0.046679 | 0.31413  | 0.1227   |
| 0.068685 | 0.13832  | -0.26586 | 5.37E-09 | -0.17533 | 0.00014  | 0.017421 | 0.7073   | -0.05696 |
| 0.402286 | 1.36E-19 | 0.65826  | 2.52E-59 | 0.631781 | 2.14E-53 | 0.28796  | 2.28E-10 | 0.357919 |
| 0.218378 | 1.90E-06 | 0.479448 | 3.24E-28 | 0.503153 | 2.45E-31 | 0.178368 | 0.00011  | 0.222667 |
| 0.179778 | 9.36E-05 | 0.381141 | 1.36E-17 | 0.401068 | 1.79E-19 | 0.190547 | 3.40E-05 | 0.250887 |
| -0.07207 | 0.11985  | 0.214864 | 2.79E-06 | 0.321821 | 1.03E-12 | 0.009183 | 0.8431   | 0.121697 |
| 0.118594 | 0.01032  | 0.499977 | 6.62E-31 | 0.595971 | 3.06E-46 | 0.163987 | 0.00037  | 0.18991  |
| 0.144615 | 0.00173  | 0.429722 | 2.07E-22 | 0.444664 | 4.69E-24 | 0.187972 | 4.36E-05 | 0.194463 |
| 0.153321 | 0.00089  | 0.480489 | 2.39E-28 | 0.564543 | 1.16E-40 | 0.170287 | 0.00022  | 0.216042 |
| 0.110843 | 0.01656  | 0.337426 | 6.72E-14 | 0.406594 | 5.10E-20 | 0.050592 | 0.27524  | 0.030287 |
| 0.109221 | 0.01822  | 0.228038 | 6.34E-07 | 0.232973 | 3.56E-07 | 0.076393 | 0.09918  | 0.088675 |
| 0.101812 | 0.02781  | 0.568168 | 2.82E-41 | 0.525325 | 1.73E-34 | 0.16701  | 0.00029  | 0.273309 |
| 0.186199 | 5.16E-05 | 0.453758 | 4.26E-25 | 0.57874  | 4.16E-43 | 0.212184 | 3.73E-06 | 0.240152 |
| 0.216773 | 2.26E-06 | 0.433247 | 8.63E-23 | 0.504376 | 1.66E-31 | 0.198431 | 1.56E-05 | 0.2814   |
| 0.287765 | 2.35E-10 | 0.419437 | 2.53E-21 | 0.477762 | 5.29E-28 | 0.222129 | 1.25E-06 | 0.20556  |

|          |          |          |          |          |          |          |          |          |
|----------|----------|----------|----------|----------|----------|----------|----------|----------|
| 0.330918 | 2.14E-13 | 0.528995 | 4.95E-35 | 0.58012  | 2.37E-43 | 0.277221 | 1.10E-09 | 0.324059 |
| 0.118315 | 0.0105   | 0.24325  | 1.02E-07 | 0.26813  | 3.93E-09 | 0.085583 | 0.06462  | 0.139703 |
| 0.152155 | 0.00097  | 0.44071  | 1.30E-23 | 0.450819 | 9.32E-25 | 0.133672 | 0.0038   | 0.142674 |
| 0.157561 | 0.00063  | 0.493969 | 4.24E-30 | 0.610617 | 4.67E-49 | 0.190259 | 3.50E-05 | 0.242149 |
| 0.156086 | 0.00071  | 0.391097 | 1.62E-18 | 0.46477  | 2.11E-26 | 0.166941 | 0.00029  | 0.180869 |
| 0.346864 | 1.20E-14 | 0.414447 | 8.25E-21 | 0.525709 | 1.52E-34 | 0.306455 | 1.30E-11 | 0.23473  |
| 0.071351 | 0.12363  | 0.156406 | 0.00069  | 0.210112 | 4.66E-06 | 0.084555 | 0.06791  | 0.107652 |
| 0.086461 | 0.06191  | 0.389907 | 2.09E-18 | 0.40311  | 1.13E-19 | 0.161713 | 0.00045  | 0.163564 |
| 0.163473 | 0.00039  | 0.309034 | 8.60E-12 | 0.425084 | 6.48E-22 | 0.139381 | 0.00254  | 0.063809 |
| 0.32991  | 2.55E-13 | 0.507304 | 6.55E-32 | 0.488991 | 1.92E-29 | 0.222809 | 1.15E-06 | 0.228322 |
| 0.07913  | 0.08762  | 0.20754  | 6.12E-06 | 0.273406 | 1.89E-09 | 0.050976 | 0.27161  | 0.041059 |
| 0.009325 | 0.84072  | 0.176615 | 0.00012  | 0.228749 | 5.84E-07 | 0.066175 | 0.15335  | 0.05726  |
| 0.108716 | 0.01877  | 0.383132 | 8.91E-18 | 0.513915 | 7.74E-33 | 0.125454 | 0.00664  | 0.110132 |
| 0.227042 | 7.12E-07 | 0.531666 | 1.97E-35 | 0.561282 | 4.07E-40 | 0.255233 | 2.22E-08 | 0.351634 |
| 0.133539 | 0.00384  | 0.533935 | 8.96E-36 | 0.590919 | 2.65E-45 | 0.186074 | 5.22E-05 | 0.227945 |
| 0.212329 | 3.67E-06 | 0.542556 | 4.23E-37 | 0.628926 | 8.60E-53 | 0.194876 | 2.23E-05 | 0.305076 |
| 0.240714 | 1.40E-07 | 0.326978 | 4.25E-13 | 0.409416 | 2.67E-20 | 0.073599 | 0.1122   | 0.170042 |
| 0.260446 | 1.12E-08 | 0.389278 | 2.40E-18 | 0.413663 | 9.92E-21 | 0.168044 | 0.00026  | 0.112539 |
| 0.068364 | 0.14018  | 0.278975 | 8.53E-10 | 0.26182  | 9.28E-09 | 0.031353 | 0.49911  | 0.013769 |
| 0.228346 | 6.12E-07 | 0.293525 | 9.85E-11 | 0.438158 | 2.50E-23 | 0.013108 | 0.77754  | 0.076331 |
| 0.09228  | 0.04625  | 0.277602 | 1.04E-09 | 0.31654  | 2.50E-12 | 0.064593 | 0.16344  | 0.0743   |
| 0.214861 | 2.79E-06 | 0.464352 | 2.37E-26 | 0.513314 | 9.42E-33 | 0.223275 | 1.10E-06 | 0.23529  |
| 0.099675 | 0.03127  | 0.36482  | 3.79E-16 | 0.333405 | 1.38E-13 | 0.131244 | 0.0045   | 0.224969 |
| 0.137032 | 0.003    | 0.439204 | 1.91E-23 | 0.519843 | 1.10E-33 | 0.15713  | 0.00066  | 0.19781  |
| 0.171518 | 0.0002   | 0.43708  | 3.29E-23 | 0.463955 | 2.65E-26 | 0.148036 | 0.00134  | 0.251678 |
| 0.129649 | 0.00501  | 0.352809 | 3.91E-15 | 0.438081 | 2.55E-23 | 0.107126 | 0.02059  | 0.096381 |
| 0.057913 | 0.21159  | 0.26043  | 1.12E-08 | 0.290765 | 1.50E-10 | 0.030355 | 0.51287  | 0.01079  |
| 0.205061 | 7.93E-06 | 0.338143 | 5.91E-14 | 0.491933 | 7.88E-30 | 0.097728 | 0.03475  | 0.14297  |
| 0.182545 | 7.26E-05 | 0.364022 | 4.44E-16 | 0.380175 | 1.66E-17 | 0.061349 | 0.18568  | 0.228765 |
| 0.030508 | 0.51075  | 0.164769 | 0.00035  | 0.150863 | 0.00107  | 0.080828 | 0.081    | 0.166139 |
| 0.042159 | 0.36334  | 0.270908 | 2.68E-09 | 0.322961 | 8.48E-13 | 0.00751  | 0.87142  | 0.0987   |
| -0.1439  | 0.00182  | 0.143707 | 0.00185  | -0.10249 | 0.02678  | 0.058035 | 0.21063  | 0.010323 |
| -0.04854 | 0.29519  | -0.43925 | 1.89E-23 | -0.31397 | 3.84E-12 | -0.18018 | 9.02E-05 | -0.386   |
| 0.09926  | 0.03199  | 0.229459 | 5.38E-07 | 0.353159 | 3.65E-15 | 0.001725 | 0.97035  | -0.05853 |
| 0.140818 | 0.00229  | 0.370085 | 1.32E-16 | 0.445485 | 3.79E-24 | 0.094867 | 0.04044  | 0.016723 |
| 0.145127 | 0.00166  | 0.069985 | 0.131    | 0.175483 | 0.00014  | 0.078309 | 0.09096  | -0.08034 |
| -0.01734 | 0.7086   | 0.220885 | 1.43E-06 | 0.229798 | 5.17E-07 | -0.12399 | 0.0073   | -0.08162 |
| 0.067136 | 0.14746  | 0.280872 | 6.48E-10 | 0.344262 | 1.94E-14 | 0.00443  | 0.92393  | 0.050854 |
| 0.138252 | 0.00275  | 0.309204 | 8.36E-12 | 0.378645 | 2.28E-17 | 0.152112 | 0.00098  | 0.12539  |
| 0.033533 | 0.46974  | -0.35258 | 4.08E-15 | -0.2837  | 4.29E-10 | -0.11193 | 0.01552  | -0.03326 |
| 0.071272 | 0.12404  | 0.273129 | 1.96E-09 | 0.398572 | 3.12E-19 | 0.086527 | 0.06171  | 0.065075 |
| -0.1425  | 0.00202  | 0.213936 | 3.09E-06 | 0.153068 | 0.0009   | -0.00573 | 0.90169  | 0.17605  |
| 0.060805 | 0.18962  | 0.190077 | 3.56E-05 | 0.255349 | 2.19E-08 | 0.051322 | 0.26836  | 0.010805 |
| 0.123428 | 0.00758  | 0.272357 | 2.19E-09 | 0.36495  | 3.69E-16 | 0.076039 | 0.10076  | 0.036463 |
| 0.053641 | 0.2473   | 0.382037 | 1.12E-17 | 0.479057 | 3.63E-28 | 0.075739 | 0.10211  | 0.138369 |

|          |          |          |          |          |          |          |          |          |
|----------|----------|----------|----------|----------|----------|----------|----------|----------|
| -0.04923 | 0.28836  | -0.27009 | 3.00E-09 | -0.2192  | 1.73E-06 | -0.16187 | 0.00044  | -0.21274 |
| 0.188702 | 4.06E-05 | 0.415557 | 6.36E-21 | 0.371642 | 9.63E-17 | 0.341155 | 3.42E-14 | 0.201618 |
| 0.059208 | 0.20153  | 0.335213 | 9.99E-14 | 0.39287  | 1.10E-18 | 0.061545 | 0.18428  | 0.124885 |
| -0.01889 | 0.68392  | 0.121345 | 0.00867  | 0.189324 | 3.83E-05 | -0.02172 | 0.63971  | -0.03467 |
| 0.090246 | 0.0513   | 0.306516 | 1.29E-11 | 0.280726 | 6.62E-10 | 0.232043 | 3.97E-07 | 0.297711 |
| 0.174688 | 0.00015  | 0.422046 | 1.35E-21 | 0.400027 | 2.26E-19 | 0.062647 | 0.17653  | 0.183631 |
| 0.120379 | 0.00922  | 0.382555 | 1.01E-17 | 0.437986 | 2.61E-23 | 0.046094 | 0.32024  | 0.136345 |
| 0.040706 | 0.38013  | 0.28402  | 4.09E-10 | 0.289808 | 1.73E-10 | 0.13878  | 0.00265  | 0.236321 |
| 0.120676 | 0.00904  | 0.23143  | 4.27E-07 | 0.287308 | 2.52E-10 | 0.065837 | 0.15547  | 0.04609  |
| 0.081179 | 0.07969  | 0.266861 | 4.68E-09 | 0.30138  | 2.92E-11 | 0.096014 | 0.03807  | 0.211696 |
| -0.05546 | 0.23161  | 0.046447 | 0.31655  | 0.149698 | 0.00118  | -0.07702 | 0.09641  | -0.0661  |
| 0.019912 | 0.66779  | -0.376   | 3.95E-17 | -0.25844 | 1.46E-08 | -0.0128  | 0.78256  | -0.02049 |
| 0.07928  | 0.08702  | 0.416611 | 4.95E-21 | 0.462208 | 4.29E-26 | 0.100478 | 0.02993  | 0.074923 |
| 0.150056 | 0.00114  | 0.283222 | 4.60E-10 | 0.29352  | 9.86E-11 | 0.048235 | 0.29825  | 0.011048 |
| 0.005001 | 0.91417  | 0.319486 | 1.53E-12 | 0.164214 | 0.00037  | 0.138067 | 0.00279  | 0.256006 |
| 0.037988 | 0.41277  | 0.189679 | 3.70E-05 | 0.121938 | 0.00834  | -0.00201 | 0.96538  | -0.00496 |
| 0.086567 | 0.06159  | 0.178779 | 0.0001   | 0.292944 | 1.08E-10 | 0.026858 | 0.56261  | 0.000914 |
| 0.042177 | 0.36314  | 0.310887 | 6.36E-12 | 0.399183 | 2.73E-19 | -0.00547 | 0.9062   | 0.088532 |
| -0.04396 | 0.34319  | 0.206393 | 6.90E-06 | 0.215387 | 2.64E-06 | 0.01709  | 0.71261  | 0.162671 |
| -0.06405 | 0.16702  | 0.073605 | 0.11217  | 0.181246 | 8.18E-05 | -0.09111 | 0.04909  | -0.07033 |
| 0.090955 | 0.04949  | 0.396805 | 4.62E-19 | 0.463636 | 2.89E-26 | 0.119388 | 0.00981  | 0.180903 |
| 0.13895  | 0.00262  | 0.201887 | 1.10E-05 | 0.295366 | 7.43E-11 | -0.02009 | 0.66505  | -0.01801 |
| 0.057563 | 0.21437  | 0.193499 | 2.55E-05 | 0.203965 | 8.88E-06 | 0.058104 | 0.21008  | 0.139323 |
| -0.01377 | 0.76669  | 0.202847 | 9.97E-06 | 0.242928 | 1.06E-07 | -0.00946 | 0.83847  | 0.035055 |
| 0.250828 | 3.93E-08 | 0.50041  | 5.79E-31 | 0.660997 | 5.69E-60 | 0.145814 | 0.00158  | 0.134266 |
| -0.03303 | 0.4764   | 0.085246 | 0.06568  | 0.166642 | 0.0003   | -0.03429 | 0.4598   | -0.10208 |
| -0.01484 | 0.74901  | 0.31984  | 1.44E-12 | 0.240655 | 1.41E-07 | 0.029394 | 0.52631  | 0.032443 |
| 0.160918 | 0.00048  | 0.473707 | 1.70E-27 | 0.586248 | 1.89E-44 | 0.228508 | 6.01E-07 | 0.238872 |
| -0.10018 | 0.03043  | -0.17402 | 0.00016  | -0.33642 | 8.05E-14 | 0.033287 | 0.47299  | 0.046112 |
| 0.20495  | 8.02E-06 | 0.40433  | 8.55E-20 | 0.338958 | 5.10E-14 | 0.132774 | 0.00405  | 0.195665 |
| 0.179039 | 0.0001   | -0.20431 | 8.57E-06 | -0.21878 | 1.81E-06 | 0.001487 | 0.97443  | -0.1241  |
| 0.220316 | 1.53E-06 | 0.526355 | 1.22E-34 | 0.53067  | 2.78E-35 | 0.189966 | 3.60E-05 | 0.167113 |
| 0.089035 | 0.05452  | 0.297432 | 5.40E-11 | 0.380621 | 1.51E-17 | 0.080322 | 0.08293  | 0.117333 |
| 0.120927 | 0.0089   | 0.202623 | 1.02E-05 | 0.319994 | 1.40E-12 | 0.102389 | 0.02693  | 0.139218 |
| 0.190833 | 3.31E-05 | 0.227487 | 6.76E-07 | 0.363962 | 4.49E-16 | 0.090141 | 0.05157  | 0.117542 |
| 0.038092 | 0.41149  | 0.44136  | 1.10E-23 | 0.383686 | 7.92E-18 | 0.126122 | 0.00635  | 0.250505 |
| 0.182219 | 7.48E-05 | 0.47477  | 1.25E-27 | 0.599095 | 7.88E-47 | 0.185131 | 5.70E-05 | 0.201011 |
| 0.220445 | 1.51E-06 | 0.469695 | 5.31E-27 | 0.606346 | 3.20E-48 | 0.202582 | 1.02E-05 | 0.194719 |
| 0.109016 | 0.01844  | 0.234713 | 2.89E-07 | 0.290655 | 1.52E-10 | 0.154669 | 0.0008   | 0.083714 |
| 0.065678 | 0.15647  | 0.409587 | 2.56E-20 | 0.542131 | 4.92E-37 | 0.108021 | 0.01955  | 0.129668 |
| 0.022571 | 0.6266   | 0.091317 | 0.04859  | 0.225874 | 8.14E-07 | 0.014539 | 0.754    | -0.0471  |
| 0.23458  | 2.94E-07 | 0.300798 | 3.20E-11 | 0.355454 | 2.36E-15 | 0.127408 | 0.00583  | 0.082677 |
| 0.153834 | 0.00085  | 0.440181 | 1.49E-23 | 0.545271 | 1.59E-37 | 0.128567 | 0.00539  | 0.12461  |
| -0.00299 | 0.94869  | 0.217698 | 2.04E-06 | 0.224871 | 9.13E-07 | 0.130527 | 0.00472  | 0.268964 |
| 0.074098 | 0.10978  | 0.365009 | 3.65E-16 | 0.4644   | 2.34E-26 | 0.103245 | 0.02567  | 0.154346 |

|          |          |          |          |          |          |          |          |          |
|----------|----------|----------|----------|----------|----------|----------|----------|----------|
| 0.034812 | 0.45295  | 0.327276 | 4.04E-13 | 0.436673 | 3.64E-23 | 0.05254  | 0.25716  | 0.101349 |
| 0.12003  | 0.00942  | 0.317771 | 2.04E-12 | 0.437947 | 2.64E-23 | 0.134401 | 0.00362  | 0.104029 |
| 0.034195 | 0.46101  | 0.159328 | 0.00055  | 0.160428 | 0.0005   | -0.09184 | 0.04731  | 0.03019  |
| 0.144008 | 0.00181  | 0.501518 | 4.09E-31 | 0.552781 | 1.01E-38 | 0.173844 | 0.00016  | 0.284574 |
| 0.094467 | 0.0413   | -0.3615  | 7.30E-16 | -0.29329 | 1.02E-10 | -0.01101 | 0.8125   | -0.17615 |
| 0.140806 | 0.00229  | 0.43909  | 1.97E-23 | 0.550729 | 2.15E-38 | 0.153592 | 0.00087  | 0.200622 |
| 0.140478 | 0.00234  | 0.454912 | 3.12E-25 | 0.558661 | 1.10E-39 | 0.18391  | 6.39E-05 | 0.192451 |
| 0.127576 | 0.00577  | 0.250051 | 4.34E-08 | 0.301708 | 2.77E-11 | 0.002321 | 0.96011  | -0.02818 |
| 0.090765 | 0.04997  | 0.220859 | 1.44E-06 | 0.225589 | 8.41E-07 | -0.04194 | 0.36582  | -0.08835 |
| 0.108253 | 0.01928  | 0.455138 | 2.94E-25 | 0.546864 | 8.89E-38 | 0.145892 | 0.00157  | 0.216127 |
| 0.085468 | 0.06498  | 0.143955 | 0.00182  | 0.285265 | 3.41E-10 | -0.07235 | 0.11846  | -0.13831 |
| 0.138305 | 0.00274  | 0.22499  | 9.01E-07 | 0.232655 | 3.69E-07 | 0.001313 | 0.97742  | 0.0211   |
| 0.258577 | 1.43E-08 | 0.45733  | 1.63E-25 | 0.503481 | 2.21E-31 | 0.213765 | 3.15E-06 | 0.15467  |
| -0.01201 | 0.7958   | 0.128631 | 0.00537  | 0.198387 | 1.57E-05 | -0.05863 | 0.20595  | 0.02819  |
| 0.028796 | 0.53476  | 0.188146 | 4.28E-05 | 0.261638 | 9.51E-09 | -0.06343 | 0.17114  | 0.018841 |
| 0.113237 | 0.01435  | -0.15112 | 0.00105  | -0.1265  | 0.00619  | 0.002491 | 0.95718  | -0.03982 |
| 0.083161 | 0.07259  | 0.27313  | 1.96E-09 | 0.36464  | 3.93E-16 | -0.00489 | 0.91598  | 0.12585  |
| 0.044272 | 0.33977  | 0.163315 | 0.00039  | 0.205901 | 7.26E-06 | -0.06995 | 0.13119  | -0.01472 |
| 0.100989 | 0.0291   | 0.424544 | 7.39E-22 | 0.474186 | 1.48E-27 | 0.058281 | 0.20869  | 0.151536 |
| 0.150343 | 0.00112  | 0.474146 | 1.50E-27 | 0.59898  | 8.29E-47 | 0.172287 | 0.00018  | 0.208828 |
| 0.272748 | 2.07E-09 | 0.624009 | 9.16E-52 | 0.518481 | 1.72E-33 | 0.228608 | 5.94E-07 | 0.336269 |
| 0.211597 | 3.97E-06 | 0.520502 | 8.79E-34 | 0.573701 | 3.17E-42 | 0.224986 | 9.01E-07 | 0.179992 |
| 0.323705 | 7.47E-13 | 0.628302 | 1.16E-52 | 0.621394 | 3.17E-51 | 0.241191 | 1.32E-07 | 0.297707 |
| 0.163614 | 0.00038  | 0.477437 | 5.81E-28 | 0.625497 | 4.50E-52 | 0.18342  | 6.69E-05 | 0.195863 |
| 0.148933 | 0.00125  | 0.470243 | 4.55E-27 | 0.601663 | 2.56E-47 | 0.173381 | 0.00017  | 0.191041 |
| 0.264471 | 6.49E-09 | 0.548698 | 4.54E-38 | 0.632459 | 1.53E-53 | 0.23528  | 2.70E-07 | 0.197495 |
| 0.091421 | 0.04833  | 0.490945 | 1.06E-29 | 0.518519 | 1.70E-33 | 0.149438 | 0.0012   | 0.184776 |
| 0.098569 | 0.03321  | 0.389598 | 2.24E-18 | 0.492077 | 7.54E-30 | 0.135764 | 0.00329  | 0.184592 |
| 0.120987 | 0.00887  | 0.37462  | 5.25E-17 | 0.50262  | 2.89E-31 | 0.12772  | 0.00571  | 0.119361 |
| 0.093985 | 0.04235  | 0.382919 | 9.32E-18 | 0.461406 | 5.35E-26 | 0.091966 | 0.047    | 0.175763 |
| 0.14588  | 0.00157  | 0.422051 | 1.35E-21 | 0.534072 | 8.54E-36 | 0.164727 | 0.00035  | 0.132074 |
| 0.15282  | 0.00092  | 0.476382 | 7.88E-28 | 0.596351 | 2.59E-46 | 0.175714 | 0.00014  | 0.205156 |
| 0.171737 | 0.00019  | 0.492377 | 6.89E-30 | 0.617172 | 2.29E-50 | 0.18251  | 7.28E-05 | 0.207283 |
| 0.054349 | 0.24111  | 0.258927 | 1.37E-08 | 0.368493 | 1.82E-16 | 0.079204 | 0.08732  | 0.097546 |
| 0.132075 | 0.00425  | 0.330649 | 2.24E-13 | 0.418719 | 3.00E-21 | 0.067503 | 0.14525  | 0.137267 |
| 0.114812 | 0.01304  | 0.3929   | 1.09E-18 | 0.483907 | 8.74E-29 | 0.12659  | 0.00616  | 0.173037 |
| 0.152854 | 0.00092  | 0.339673 | 4.48E-14 | 0.455092 | 2.98E-25 | 0.069533 | 0.13351  | 0.098187 |
| 0.064158 | 0.1663   | 0.185703 | 5.40E-05 | 0.221259 | 1.37E-06 | 0.106949 | 0.0208   | 0.105996 |
| 0.104341 | 0.02414  | 0.291673 | 1.31E-10 | 0.380767 | 1.47E-17 | 0.105043 | 0.0232   | 0.118205 |
| 0.079119 | 0.08766  | 0.425687 | 5.59E-22 | 0.365327 | 3.43E-16 | 0.105816 | 0.0222   | 0.198741 |
| 0.046696 | 0.31396  | 0.352835 | 3.89E-15 | 0.43992  | 1.59E-23 | 0.081629 | 0.07803  | 0.106279 |
| 0.045867 | 0.32263  | 0.361205 | 7.73E-16 | 0.344208 | 1.95E-14 | 0.069245 | 0.13513  | 0.150343 |
| -0.14934 | 0.00121  | -0.04911 | 0.28961  | 0.033869 | 0.46529  | -0.14688 | 0.00146  | -0.20263 |
| 0.257184 | 1.72E-08 | 0.482197 | 1.45E-28 | 0.463846 | 2.73E-26 | 0.234639 | 2.92E-07 | 0.307851 |
| -0.00266 | 0.95421  | 0.072777 | 0.11628  | 0.044036 | 0.34235  | 0.002929 | 0.94967  | -0.02759 |

|          |          |          |          |          |          |           |          |          |
|----------|----------|----------|----------|----------|----------|-----------|----------|----------|
| 0.167228 | 0.00028  | 0.211579 | 3.98E-06 | 0.263808 | 7.10E-09 | 0.115379  | 0.0126   | -0.09107 |
| -0.15534 | 0.00076  | -0.42873 | 2.65E-22 | -0.45092 | 9.08E-25 | -0.20766  | 6.04E-06 | -0.3297  |
| 0.155582 | 0.00074  | 0.465862 | 1.56E-26 | 0.601175 | 3.17E-47 | 0.17621   | 0.00013  | 0.190919 |
| 0.15837  | 0.00059  | -0.18776 | 4.45E-05 | -0.2748  | 1.55E-09 | -0.02182  | 0.63806  | 0.09644  |
| -0.0294  | 0.52619  | -0.22793 | 6.42E-07 | -0.13521 | 0.00342  | 0.000108  | 0.99814  | 0.149706 |
| 0.103898 | 0.02475  | 0.348812 | 8.30E-15 | 0.47243  | 2.45E-27 | 0.052012  | 0.26197  | 0.102249 |
| 0.073157 | 0.11438  | 0.20402  | 8.83E-06 | 0.252162 | 3.31E-08 | -0.00818  | 0.86001  | 0.00042  |
| 0.03069  | 0.50823  | 0.289603 | 1.78E-10 | 0.341597 | 3.16E-14 | 0.091472  | 0.0482   | 0.105129 |
| 0.048009 | 0.30053  | 0.134222 | 0.00366  | 0.231969 | 4.00E-07 | -2.57E-06 | 0.99996  | 0.030543 |
| 0.115231 | 0.01271  | 0.391402 | 1.51E-18 | 0.50568  | 1.10E-31 | 0.142797  | 0.00198  | 0.166943 |
| 0.064165 | 0.16626  | 0.263361 | 7.54E-09 | 0.39319  | 1.02E-18 | 0.142883  | 0.00197  | 0.139202 |
| 0.055158 | 0.23417  | 0.30813  | 9.95E-12 | 0.42181  | 1.43E-21 | 0.063644  | 0.16973  | 0.080924 |
| 0.054906 | 0.23632  | 0.31113  | 6.11E-12 | 0.392542 | 1.18E-18 | 0.058219  | 0.20918  | 0.103741 |
| 0.150293 | 0.00112  | 0.216133 | 2.43E-06 | 0.302723 | 2.36E-11 | 0.097544  | 0.03509  | 0.005631 |
| -0.00895 | 0.847    | 0.195474 | 2.10E-05 | 0.290668 | 1.52E-10 | 0.058097  | 0.21014  | 0.034063 |
| -0.02073 | 0.65501  | -0.29838 | 4.67E-11 | -0.08821 | 0.05681  | -0.01739  | 0.70772  | -0.146   |
| 0.159498 | 0.00054  | 0.346808 | 1.21E-14 | 0.285795 | 3.15E-10 | 0.196142  | 1.96E-05 | 0.238289 |
| 0.50961  | 3.13E-32 | 0.55921  | 8.96E-40 | 0.642285 | 1.12E-55 | 0.299001  | 4.23E-11 | 0.252713 |
| 0.310698 | 6.56E-12 | 0.469721 | 5.28E-27 | 0.678303 | 3.16E-64 | 0.113074  | 0.01449  | 0.106105 |
| 0.110788 | 0.01662  | 0.33046  | 2.32E-13 | 0.422039 | 1.35E-21 | 0.109314  | 0.01813  | 0.164722 |
| 0.121395 | 0.00864  | 0.38786  | 3.25E-18 | 0.507404 | 6.35E-32 | 0.146574  | 0.00149  | 0.137708 |
| -0.05355 | 0.24814  | 0.310802 | 6.45E-12 | 0.220843 | 1.44E-06 | 0.043462  | 0.34868  | 0.145754 |
| 0.010567 | 0.81984  | 0.284246 | 3.96E-10 | 0.257625 | 1.62E-08 | -0.00478  | 0.91788  | 0.046924 |
| 0.130038 | 0.00488  | 0.206365 | 6.92E-06 | 0.322965 | 8.48E-13 | -0.02837  | 0.54081  | -0.0823  |
| 0.100688 | 0.02959  | 0.292417 | 1.17E-10 | 0.389013 | 2.54E-18 | 0.060983  | 0.18833  | 0.09146  |
| 0.052182 | 0.26042  | 0.24209  | 1.18E-07 | 0.271908 | 2.33E-09 | 0.08123   | 0.0795   | 0.112492 |
| 0.116743 | 0.01158  | 0.368529 | 1.81E-16 | 0.482736 | 1.24E-28 | 0.119821  | 0.00955  | 0.122679 |
| 0.166025 | 0.00031  | 0.346081 | 1.38E-14 | 0.482888 | 1.18E-28 | 0.083641  | 0.07095  | 0.102157 |
| 0.180789 | 8.54E-05 | -0.23719 | 2.15E-07 | -0.2659  | 5.34E-09 | 0.092863  | 0.04488  | -0.11718 |
| 0.154049 | 0.00084  | 0.278256 | 9.46E-10 | 0.27883  | 8.71E-10 | 0.174199  | 0.00015  | 0.180584 |
| 0.060583 | 0.19125  | 0.20438  | 8.51E-06 | 0.361075 | 7.93E-16 | -0.06217  | 0.17985  | 0.006385 |
| 0.106657 | 0.02115  | 0.40829  | 3.46E-20 | 0.549146 | 3.85E-38 | 0.117322  | 0.01117  | 0.141019 |
| -0.00897 | 0.84672  | 0.205663 | 7.45E-06 | 0.182097 | 7.57E-05 | 0.107169  | 0.02054  | 0.191026 |
| 0.33706  | 7.18E-14 | 0.553782 | 6.93E-39 | 0.634907 | 4.57E-54 | 0.232655  | 3.69E-07 | 0.246966 |
| 0.364728 | 3.86E-16 | 0.579975 | 2.51E-43 | 0.727449 | 4.40E-78 | 0.263685  | 7.22E-09 | 0.299838 |
| 0.193607 | 2.52E-05 | 0.526481 | 1.17E-34 | 0.606101 | 3.57E-48 | 0.172682  | 0.00018  | 0.227118 |
| 0.086722 | 0.06113  | 0.100731 | 0.02952  | 0.152775 | 0.00093  | -0.00888  | 0.84822  | -0.09324 |
| 0.136085 | 0.00321  | 0.333283 | 1.41E-13 | 0.475741 | 9.48E-28 | 0.155927  | 0.00072  | 0.117875 |
| -0.14026 | 0.00238  | 0.249887 | 4.43E-08 | 0.175751 | 0.00013  | 0.123882  | 0.00736  | 0.151984 |
| 0.106939 | 0.02081  | 0.381113 | 1.36E-17 | 0.452512 | 5.94E-25 | 0.125206  | 0.00675  | 0.213832 |
| 0.03423  | 0.46054  | 0.248393 | 5.36E-08 | 0.273053 | 1.98E-09 | 0.076327  | 0.09947  | 0.136761 |
| 0.266963 | 4.62E-09 | 0.469196 | 6.12E-27 | 0.531898 | 1.82E-35 | 0.16343   | 0.00039  | 0.136328 |
| 0.146532 | 0.0015   | 0.458055 | 1.34E-25 | 0.593789 | 7.81E-46 | 0.154598  | 0.0008   | 0.189415 |
| -0.02761 | 0.55168  | 0.348009 | 9.65E-15 | 0.33252  | 1.61E-13 | 0.054632  | 0.23867  | 0.130688 |
| 0.09973  | 0.03118  | 0.372836 | 7.56E-17 | 0.487388 | 3.10E-29 | 0.10101   | 0.02907  | 0.127342 |

|          |          |          |          |          |          |          |          |          |
|----------|----------|----------|----------|----------|----------|----------|----------|----------|
| 0.113711 | 0.01394  | 0.29862  | 4.49E-11 | 0.384908 | 6.11E-18 | 0.062522 | 0.1774   | 0.091332 |
| 0.056572 | 0.22238  | -0.30175 | 2.75E-11 | -0.15273 | 0.00093  | -0.06751 | 0.14522  | -0.25846 |
| 0.061376 | 0.18549  | 0.364449 | 4.08E-16 | 0.406251 | 5.52E-20 | 0.159519 | 0.00054  | 0.240115 |
| 0.104426 | 0.02402  | 0.179385 | 9.71E-05 | 0.280217 | 7.13E-10 | 0.111627 | 0.01581  | 0.019619 |
| 0.144977 | 0.00168  | 0.320762 | 1.23E-12 | 0.456888 | 1.83E-25 | 0.126793 | 0.00607  | 0.103529 |
| 0.126804 | 0.00607  | 0.286278 | 2.93E-10 | 0.427923 | 3.23E-22 | 0.079678 | 0.08544  | 0.073731 |
| -0.02685 | 0.56275  | 0.260031 | 1.18E-08 | 0.331235 | 2.02E-13 | 0.047544 | 0.30524  | 0.106371 |
| 0.092808 | 0.04501  | 0.421658 | 1.48E-21 | 0.392597 | 1.17E-18 | 0.117405 | 0.01111  | 0.157467 |
| 0.010818 | 0.81564  | 0.157315 | 0.00065  | 0.242854 | 1.07E-07 | 0.007937 | 0.86418  | 0.006088 |
| 0.120894 | 0.00892  | 0.356714 | 1.85E-15 | 0.347805 | 1.00E-14 | 0.024458 | 0.59806  | 0.045054 |
| 0.084996 | 0.06648  | 0.390007 | 2.05E-18 | 0.477458 | 5.77E-28 | 0.093781 | 0.0428   | 0.148464 |
| -0.10063 | 0.02969  | -0.23755 | 2.05E-07 | -0.20769 | 6.02E-06 | -0.12444 | 0.00709  | -0.07563 |
| -0.06073 | 0.19018  | 0.264062 | 6.86E-09 | 0.183632 | 6.56E-05 | 0.001646 | 0.9717   | 0.078924 |
| 0.367433 | 2.25E-16 | 0.646874 | 1.05E-56 | 0.618183 | 1.43E-50 | 0.299745 | 3.77E-11 | 0.424628 |
| 0.016739 | 0.71826  | 0.318108 | 1.93E-12 | 0.358333 | 1.35E-15 | 0.072306 | 0.11866  | 0.174643 |
| 0.075878 | 0.10148  | 0.163397 | 0.00039  | 0.223608 | 1.05E-06 | -0.06538 | 0.15839  | -0.01704 |
| 0.180784 | 8.54E-05 | 0.46988  | 5.04E-27 | 0.500104 | 6.37E-31 | 0.195955 | 2.00E-05 | 0.250745 |
| 0.035207 | 0.44783  | 0.309231 | 8.33E-12 | 0.40932  | 2.73E-20 | 0.071723 | 0.12168  | 0.110076 |
| 0.285086 | 3.50E-10 | 0.40983  | 2.42E-20 | 0.492156 | 7.36E-30 | 0.152636 | 0.00094  | -0.02928 |
| 0.070481 | 0.12828  | 0.232285 | 3.86E-07 | 0.30837  | 9.57E-12 | 0.053968 | 0.24443  | -0.08311 |
| 0.132064 | 0.00425  | -0.22395 | 1.01E-06 | -0.28886 | 1.99E-10 | -0.02695 | 0.5613   | -0.19198 |
| 0.101699 | 0.02798  | 0.203082 | 9.73E-06 | 0.326752 | 4.42E-13 | 0.115581 | 0.01244  | 0.143793 |
| 0.145218 | 0.00165  | -0.31906 | 1.64E-12 | -0.21333 | 3.30E-06 | -0.06477 | 0.16229  | -0.08726 |
| -0.28188 | 5.59E-10 | -0.02413 | 0.60294  | -0.10991 | 0.0175   | -0.08904 | 0.05449  | -0.16172 |
| 0.133727 | 0.00379  | 0.40589  | 5.99E-20 | 0.601083 | 3.30E-47 | 0.133858 | 0.00376  | 0.14313  |
| -0.00931 | 0.84104  | 0.257503 | 1.65E-08 | 0.311093 | 6.15E-12 | 0.049094 | 0.28973  | 0.104314 |
| 0.091944 | 0.04705  | 0.242353 | 1.14E-07 | 0.296618 | 6.13E-11 | 0.063534 | 0.17047  | 0.028916 |
| 0.097958 | 0.03432  | 0.486396 | 4.17E-29 | 0.556091 | 2.92E-39 | 0.11373  | 0.01393  | 0.202543 |
| 0.139872 | 0.00245  | 0.276467 | 1.22E-09 | 0.353154 | 3.66E-15 | 0.034097 | 0.4623   | 0.099031 |
| 0.079273 | 0.08704  | 0.23102  | 4.48E-07 | 0.204081 | 8.78E-06 | -0.01145 | 0.80507  | 0.102574 |
| 0.155487 | 0.00075  | 0.373609 | 6.45E-17 | 0.371387 | 1.01E-16 | 0.014189 | 0.75975  | 0.056865 |
| 0.434939 | 5.64E-23 | 0.685933 | 3.38E-66 | 0.696311 | 5.61E-69 | 0.314378 | 3.59E-12 | 0.369307 |
| 0.180131 | 9.07E-05 | 0.576395 | 1.07E-42 | 0.59293  | 1.13E-45 | 0.225453 | 8.54E-07 | 0.199501 |
| 0.017699 | 0.70285  | 0.30922  | 8.34E-12 | 0.276947 | 1.14E-09 | -0.00705 | 0.87922  | 0.052449 |
| 0.216669 | 2.29E-06 | 0.570741 | 1.03E-41 | 0.525265 | 1.77E-34 | 0.15277  | 0.00093  | 0.230459 |
| 0.258933 | 1.37E-08 | 0.476554 | 7.50E-28 | 0.453131 | 5.03E-25 | 0.180283 | 8.94E-05 | 0.246832 |
| 0.340271 | 4.02E-14 | 0.560754 | 4.98E-40 | 0.681661 | 4.36E-65 | 0.204219 | 8.65E-06 | 0.240768 |
| 0.125779 | 0.0065   | 0.283124 | 4.67E-10 | 0.347808 | 1.00E-14 | -0.0176  | 0.70443  | -0.05034 |
| 0.299755 | 3.76E-11 | 0.325445 | 5.54E-13 | 0.379229 | 2.02E-17 | 0.265243 | 5.84E-09 | 0.361672 |
| 0.086801 | 0.06089  | 0.215448 | 2.62E-06 | 0.315701 | 2.88E-12 | -0.01718 | 0.71123  | -0.07524 |
| -0.00174 | 0.97009  | 0.30013  | 3.55E-11 | 0.266916 | 4.65E-09 | -0.01328 | 0.77463  | 0.03671  |
| 0.466202 | 1.42E-26 | 0.671349 | 1.75E-62 | 0.800957 | #####    | 0.317827 | 2.02E-12 | 0.350359 |
| 0.468344 | 7.78E-27 | 0.64907  | 3.36E-57 | 0.725909 | 1.33E-77 | 0.316482 | 2.53E-12 | 0.397737 |
| 0.336535 | 7.89E-14 | 0.390443 | 1.86E-18 | 0.423312 | 9.96E-22 | 0.211251 | 4.12E-06 | 0.18516  |
| 0.408346 | 3.41E-20 | 0.675434 | 1.68E-63 | 0.645629 | 2.01E-56 | 0.296102 | 6.64E-11 | 0.327503 |

|          |          |          |          |          |          |          |          |          |
|----------|----------|----------|----------|----------|----------|----------|----------|----------|
| 0.102776 | 0.02635  | 0.289935 | 1.70E-10 | 0.383422 | 8.38E-18 | 0.02141  | 0.64446  | -0.07582 |
| 0.059056 | 0.2027   | 0.289543 | 1.80E-10 | 0.349488 | 7.32E-15 | 0.025122 | 0.58814  | -0.02473 |
| 0.119649 | 0.00965  | 0.322762 | 8.78E-13 | 0.344882 | 1.73E-14 | 0.014238 | 0.75894  | 0.060932 |
| 0.071593 | 0.12235  | 0.364609 | 3.95E-16 | 0.397801 | 3.71E-19 | 0.113978 | 0.01372  | 0.228153 |
| 0.357838 | 1.49E-15 | 0.580558 | 1.98E-43 | 0.64537  | 2.30E-56 | 0.206345 | 6.94E-06 | 0.188414 |
| -0.0038  | 0.93473  | 0.161144 | 0.00047  | 0.209895 | 4.77E-06 | 0.044568 | 0.33655  | 0.08581  |
| -0.41553 | 6.39E-21 | -0.3278  | 3.69E-13 | -0.44202 | 9.29E-24 | -0.23011 | 4.98E-07 | -0.03952 |
| -0.30555 | 1.50E-11 | -0.31176 | 5.52E-12 | -0.26297 | 7.95E-09 | -0.17516 | 0.00014  | 0.080026 |
| -0.41651 | 5.08E-21 | -0.46804 | 8.47E-27 | -0.51042 | 2.41E-32 | -0.12729 | 0.00588  | -0.19019 |
| 0.626981 | 2.20E-52 | 0.597249 | 1.76E-46 | 0.522667 | 4.26E-34 | 0.302313 | 2.52E-11 | 0.382142 |
| 0.361602 | 7.15E-16 | 0.284952 | 3.57E-10 | 0.295944 | 6.80E-11 | 0.133814 | 0.00377  | 0.02881  |
| 0.528058 | 6.83E-35 | 0.349013 | 8.00E-15 | 0.441866 | 9.68E-24 | 0.118662 | 0.01027  | 0.051016 |
| 0.475483 | 1.02E-27 | 0.376646 | 3.46E-17 | 0.313027 | 4.48E-12 | 0.293787 | 9.47E-11 | 0.126409 |
| 0.336171 | 8.42E-14 | 0.426056 | 5.11E-22 | 0.472681 | 2.28E-27 | 0.041615 | 0.36956  | 0.011468 |
| 0.718654 | 2.19E-75 | 0.590967 | 2.60E-45 | 0.427594 | 3.51E-22 | 0.348743 | 8.41E-15 | 0.290455 |
| 0.599842 | 5.69E-47 | 0.675325 | 1.79E-63 | 0.578686 | 4.25E-43 | 0.31225  | 5.09E-12 | 0.329178 |
| -0.33562 | 9.29E-14 | -0.38239 | 1.04E-17 | -0.34083 | 3.63E-14 | -0.10715 | 0.02056  | 0.015101 |
| 0.445857 | 3.44E-24 | 0.450015 | 1.15E-24 | 0.351242 | 5.26E-15 | 0.228199 | 6.22E-07 | 0.108782 |
| 0.58642  | 1.76E-44 | 0.647295 | 8.48E-57 | 0.523313 | 3.42E-34 | 0.298163 | 4.82E-11 | 0.3508   |
| 0.611624 | 2.95E-49 | 0.684416 | 8.42E-66 | 0.604526 | 7.21E-48 | 0.317058 | 2.30E-12 | 0.492943 |
| 0.578497 | 4.59E-43 | 0.503303 | 2.33E-31 | 0.526846 | 1.03E-34 | 0.287409 | 2.48E-10 | 0.183784 |
| -0.23991 | 1.54E-07 | -0.24721 | 6.23E-08 | -0.16206 | 0.00044  | -0.04135 | 0.37262  | -0.08964 |
| 0.359903 | 9.96E-16 | 0.252388 | 3.22E-08 | 0.172069 | 0.00019  | 0.193288 | 2.60E-05 | 0.087342 |
| 0.332578 | 1.60E-13 | 0.287838 | 2.32E-10 | 0.328881 | 3.05E-13 | 0.133566 | 0.00383  | 0.056148 |
| 0.542787 | 3.89E-37 | 0.325428 | 5.56E-13 | 0.242572 | 1.11E-07 | 0.260958 | 1.04E-08 | 0.046157 |
| 0.656144 | 7.90E-59 | 0.704631 | 2.71E-71 | 0.455953 | 2.36E-25 | 0.386212 | 4.63E-18 | 0.430526 |
| 0.458423 | 1.21E-25 | 0.357305 | 1.65E-15 | 0.240217 | 1.49E-07 | 0.159044 | 0.00056  | 0.215402 |
| 0.523844 | 2.86E-34 | 0.548026 | 5.81E-38 | 0.329869 | 2.57E-13 | 0.348177 | 9.35E-15 | 0.356288 |
| 0.256715 | 1.83E-08 | 0.249759 | 4.51E-08 | 0.350714 | 5.81E-15 | 0.097097 | 0.03594  | -0.05    |
| 0.473969 | 1.58E-27 | 0.323655 | 7.53E-13 | 0.328749 | 3.13E-13 | 0.130748 | 0.00465  | 0.246778 |
| 0.29478  | 8.13E-11 | 0.284346 | 3.90E-10 | 0.241124 | 1.33E-07 | -0.01507 | 0.74525  | 0.096846 |
| 0.41584  | 5.95E-21 | 0.4496   | 1.29E-24 | 0.362858 | 5.58E-16 | 0.230071 | 5.00E-07 | 0.181195 |
| 0.344271 | 1.93E-14 | 0.28105  | 6.32E-10 | 0.154997 | 0.00078  | 0.110926 | 0.01648  | 0.142477 |
| 0.340045 | 4.19E-14 | 0.32128  | 1.13E-12 | 0.26809  | 3.96E-09 | 0.055681 | 0.22976  | 0.018484 |
| 0.507987 | 5.27E-32 | 0.30924  | 8.31E-12 | 0.313411 | 4.21E-12 | 0.149371 | 0.00121  | -0.00307 |
| 0.70604  | 1.08E-71 | 0.661287 | 4.85E-60 | 0.429873 | 2.00E-22 | 0.381765 | 1.19E-17 | 0.424363 |
| 0.618116 | 1.48E-50 | 0.693548 | 3.17E-68 | 0.508323 | 4.73E-32 | 0.276873 | 1.15E-09 | 0.429415 |
| 0.418599 | 3.09E-21 | 0.342307 | 2.77E-14 | 0.165892 | 0.00032  | 0.276492 | 1.22E-09 | 0.214511 |
| 0.18898  | 3.96E-05 | 0.255611 | 2.11E-08 | 0.13943  | 0.00253  | -0.00735 | 0.87408  | 0.046413 |
| 0.392895 | 1.09E-18 | 0.399017 | 2.83E-19 | 0.251247 | 3.72E-08 | 0.281505 | 5.91E-10 | 0.294051 |
| 0.749845 | 1.88E-85 | 0.784896 | 1.03E-98 | 0.685636 | 4.04E-66 | 0.386836 | 4.05E-18 | 0.43409  |
| 0.529946 | 3.57E-35 | 0.506588 | 8.23E-32 | 0.385201 | 5.75E-18 | 0.289487 | 1.82E-10 | 0.24251  |
| 0.537948 | 2.19E-36 | 0.397711 | 3.78E-19 | 0.382004 | 1.13E-17 | 0.221386 | 1.36E-06 | 0.373384 |
| 0.549424 | 3.48E-38 | 0.670014 | 3.74E-62 | 0.559155 | 9.15E-40 | 0.294074 | 9.06E-11 | 0.45003  |
| 0.316551 | 2.50E-12 | 0.324984 | 6.00E-13 | 0.378998 | 2.12E-17 | 0.038402 | 0.40769  | 0.053883 |



|          |          |          |          |          |          |          |          |          |
|----------|----------|----------|----------|----------|----------|----------|----------|----------|
| 0.310871 | 6.38E-12 | 0.075051 | 0.10528  | 0.243564 | 9.83E-08 | -0.05115 | 0.26996  | -0.14613 |
| 0.564341 | 1.25E-40 | 0.522841 | 4.01E-34 | 0.585546 | 2.53E-44 | 0.181231 | 8.20E-05 | 0.220021 |
| 0.488202 | 2.43E-29 | 0.454662 | 3.34E-25 | 0.309297 | 8.24E-12 | 0.254595 | 2.42E-08 | 0.15982  |
| 0.395815 | 5.76E-19 | 0.417856 | 3.69E-21 | 0.306645 | 1.26E-11 | 0.299741 | 3.77E-11 | 0.292335 |
| 0.342832 | 2.52E-14 | 0.336294 | 8.24E-14 | 0.234799 | 2.86E-07 | 0.011795 | 0.79933  | 0.191235 |
| 0.330603 | 2.26E-13 | 0.344537 | 1.84E-14 | 0.314117 | 3.74E-12 | 0.081074 | 0.08008  | 0.173067 |
| 0.265725 | 5.47E-09 | 0.30281  | 2.33E-11 | 0.342311 | 2.77E-14 | -0.00197 | 0.96615  | 0.177777 |
| 0.641415 | 1.74E-55 | 0.731191 | 2.91E-79 | 0.47675  | 7.09E-28 | 0.405138 | 7.12E-20 | 0.586367 |
| 0.39013  | 1.99E-18 | 0.253142 | 2.92E-08 | 0.203573 | 9.25E-06 | 0.097353 | 0.03545  | -0.02344 |
| 0.226112 | 7.92E-07 | 0.179534 | 9.58E-05 | 0.145361 | 0.00163  | 0.014886 | 0.74833  | -0.07694 |
| 0.318345 | 1.85E-12 | 0.290331 | 1.60E-10 | 0.162313 | 0.00043  | 0.199306 | 1.43E-05 | -0.05211 |
| 0.72412  | 4.75E-77 | 0.687222 | 1.55E-66 | 0.48608  | 4.58E-29 | 0.337287 | 6.89E-14 | 0.472925 |
| 0.630506 | 3.99E-53 | 0.711916 | 2.18E-73 | 0.614566 | 7.66E-50 | 0.380331 | 1.61E-17 | 0.406895 |
| 0.307078 | 1.18E-11 | 0.364815 | 3.79E-16 | 0.291208 | 1.40E-10 | 0.088523 | 0.05592  | 0.219299 |
| 0.678265 | 3.23E-64 | 0.59251  | 1.35E-45 | 0.498965 | 9.08E-31 | 0.376149 | 3.83E-17 | 0.363817 |
| -0.31814 | 1.92E-12 | -0.27459 | 1.60E-09 | -0.28265 | 5.00E-10 | -0.09817 | 0.03393  | 0.085275 |
| -0.32863 | 3.19E-13 | -0.3704  | 1.24E-16 | -0.36477 | 3.82E-16 | -0.0979  | 0.03442  | -0.10431 |
| 0.368849 | 1.69E-16 | 0.381667 | 1.21E-17 | 0.427369 | 3.70E-22 | 0.109951 | 0.01746  | 0.071632 |
| 0.570866 | 9.77E-42 | 0.660287 | 8.38E-60 | 0.51577  | 4.21E-33 | 0.316452 | 2.54E-12 | 0.389977 |
| 0.356456 | 1.94E-15 | 0.345115 | 1.65E-14 | 0.284469 | 3.83E-10 | 0.152567 | 0.00094  | 0.075956 |
| 0.472469 | 2.42E-27 | 0.461654 | 4.99E-26 | 0.253923 | 2.64E-08 | 0.174659 | 0.00015  | 0.217152 |
| 0.550665 | 2.20E-38 | 0.617839 | 1.68E-50 | 0.481227 | 1.92E-28 | 0.286285 | 2.93E-10 | 0.313549 |
| 0.660361 | 8.05E-60 | 0.743791 | 2.20E-83 | 0.576265 | 1.13E-42 | 0.475868 | 9.14E-28 | 0.467619 |
| 0.697299 | 3.01E-69 | 0.575453 | 1.57E-42 | 0.529921 | 3.60E-35 | 0.313255 | 4.32E-12 | 0.39545  |
| -0.14085 | 0.00228  | -0.24432 | 8.95E-08 | -0.26955 | 3.23E-09 | -0.05135 | 0.26808  | 0.054112 |
| 0.256584 | 1.86E-08 | 0.267634 | 4.21E-09 | 0.119764 | 0.00958  | -0.04032 | 0.38471  | -0.00854 |
| 0.71477  | 3.15E-74 | 0.678496 | 2.82E-64 | 0.535843 | 4.59E-36 | 0.467402 | 1.01E-26 | 0.509877 |
| -0.20084 | 1.22E-05 | -0.28793 | 2.29E-10 | -0.22418 | 9.87E-07 | -0.11472 | 0.01311  | 0.028733 |
| 0.276695 | 1.18E-09 | 0.390281 | 1.93E-18 | 0.300015 | 3.61E-11 | 0.193563 | 2.54E-05 | 0.16455  |
| 0.741479 | 1.31E-82 | 0.705595 | 1.44E-71 | 0.647052 | 9.62E-57 | 0.476415 | 7.80E-28 | 0.515391 |
| 0.663084 | 1.81E-60 | 0.667032 | 2.01E-61 | 0.499218 | 8.39E-31 | 0.474636 | 1.30E-27 | 0.421941 |
| 0.684805 | 6.67E-66 | 0.610933 | 4.04E-49 | 0.491668 | 8.54E-30 | 0.360507 | 8.86E-16 | 0.395815 |
| 0.727697 | 3.68E-78 | 0.609633 | 7.29E-49 | 0.551616 | 1.55E-38 | 0.30636  | 1.32E-11 | 0.443745 |
| 0.261142 | 1.02E-08 | 0.239371 | 1.65E-07 | 0.044819 | 0.33383  | 0.103395 | 0.02546  | 0.16533  |
| 0.759724 | 5.86E-89 | 0.742197 | 7.52E-83 | 0.730625 | 4.40E-79 | 0.373561 | 6.52E-17 | 0.318123 |
| -0.27502 | 1.50E-09 | -0.34626 | 1.34E-14 | -0.25867 | 1.41E-08 | -0.22845 | 6.05E-07 | -0.09273 |
| -0.41601 | 5.72E-21 | -0.37218 | 8.64E-17 | -0.38536 | 5.56E-18 | -0.12591 | 0.00644  | -0.15281 |
| 0.663944 | 1.12E-60 | 0.658022 | 2.87E-59 | 0.605997 | 3.74E-48 | 0.379087 | 2.08E-17 | 0.34277  |
| 0.263443 | 7.46E-09 | 0.146492 | 0.0015   | 0.353986 | 3.12E-15 | -0.01691 | 0.71552  | -0.16236 |
| 0.511593 | 1.65E-32 | 0.64499  | 2.79E-56 | 0.540935 | 7.55E-37 | 0.191179 | 3.20E-05 | 0.35083  |
| 0.598472 | 1.03E-46 | 0.72746  | 4.37E-78 | 0.60959  | 7.44E-49 | 0.375032 | 4.82E-17 | 0.492168 |
| 0.64843  | 4.69E-57 | 0.692911 | 4.71E-68 | 0.547441 | 7.20E-38 | 0.433972 | 7.20E-23 | 0.425328 |
| 0.621409 | 3.15E-51 | 0.600772 | 3.79E-47 | 0.569073 | 1.98E-41 | 0.349248 | 7.65E-15 | 0.35803  |
| -0.25129 | 3.70E-08 | -0.30488 | 1.68E-11 | -0.32928 | 2.85E-13 | -0.09913 | 0.03222  | 0.117572 |
| -0.36552 | 3.30E-16 | -0.38515 | 5.81E-18 | -0.33715 | 7.07E-14 | -0.10246 | 0.02682  | -0.28965 |

|          |          |          |          |          |          |          |          |          |
|----------|----------|----------|----------|----------|----------|----------|----------|----------|
| 0.274745 | 1.56E-09 | 0.280106 | 7.24E-10 | 0.297447 | 5.39E-11 | 0.20881  | 5.35E-06 | 0.056514 |
| -0.27616 | 1.28E-09 | -0.45348 | 4.59E-25 | -0.32249 | 9.19E-13 | -0.10474 | 0.02359  | -0.21256 |
| 0.348964 | 8.07E-15 | 0.315199 | 3.13E-12 | 0.33165  | 1.88E-13 | 0.072614 | 0.1171   | 0.009066 |
| 0.686029 | 3.19E-66 | 0.758624 | 1.47E-88 | 0.619318 | 8.42E-51 | 0.50352  | 2.18E-31 | 0.538667 |
| 0.555136 | 4.17E-39 | 0.565089 | 9.38E-41 | 0.421352 | 1.60E-21 | 0.263202 | 7.71E-09 | 0.297523 |
| 0.422274 | 1.28E-21 | 0.224421 | 9.61E-07 | 0.227475 | 6.77E-07 | 0.062277 | 0.1791   | 0.091071 |
| 0.213982 | 3.07E-06 | 0.307693 | 1.07E-11 | 0.173853 | 0.00016  | -0.00491 | 0.91575  | 0.178083 |
| 0.648974 | 3.53E-57 | 0.472835 | 2.18E-27 | 0.409097 | 2.87E-20 | 0.408392 | 3.38E-20 | 0.30566  |
| -0.31782 | 2.02E-12 | -0.33535 | 9.76E-14 | -0.34568 | 1.49E-14 | -0.15713 | 0.00066  | -0.03824 |
| 0.251153 | 3.77E-08 | 0.251497 | 3.61E-08 | 0.211526 | 4.00E-06 | 0.082802 | 0.07383  | 0.205834 |
| 0.192107 | 2.92E-05 | 0.284315 | 3.92E-10 | 0.251155 | 3.77E-08 | -0.07227 | 0.11884  | -0.12016 |
| 0.29365  | 9.67E-11 | 0.296881 | 5.88E-11 | 0.291566 | 1.33E-10 | 0.107243 | 0.02045  | -0.09479 |
| 0.688322 | 7.93E-67 | 0.775963 | 4.17E-95 | 0.558831 | 1.04E-39 | 0.3805   | 1.55E-17 | 0.51334  |
| 0.439887 | 1.61E-23 | 0.250374 | 4.17E-08 | 0.241253 | 1.31E-07 | 0.15157  | 0.00102  | 0.137101 |
| 0.614622 | 7.47E-50 | 0.416704 | 4.85E-21 | 0.344662 | 1.80E-14 | 0.264023 | 6.90E-09 | 0.237968 |
| 0.528993 | 4.96E-35 | 0.644975 | 2.81E-56 | 0.463905 | 2.68E-26 | 0.286138 | 2.99E-10 | 0.391178 |
| 0.58133  | 1.44E-43 | 0.59765  | 1.48E-46 | 0.514623 | 6.14E-33 | 0.263493 | 7.41E-09 | 0.372102 |
| 0.294974 | 7.89E-11 | 0.354291 | 2.94E-15 | 0.357204 | 1.68E-15 | -0.00363 | 0.93765  | 0.147343 |
| 0.705888 | 1.19E-71 | 0.72792  | 3.14E-78 | 0.551932 | 1.38E-38 | 0.389457 | 2.31E-18 | 0.424383 |
| 0.459734 | 8.45E-26 | 0.371863 | 9.21E-17 | 0.433197 | 8.74E-23 | 0.171145 | 0.0002   | 0.204514 |
| 0.475082 | 1.15E-27 | 0.433357 | 8.40E-23 | 0.396904 | 4.52E-19 | 0.245526 | 7.70E-08 | 0.156489 |
| 0.558294 | 1.27E-39 | 0.685121 | 5.51E-66 | 0.495929 | 2.32E-30 | 0.306017 | 1.40E-11 | 0.35501  |
| 0.284003 | 4.10E-10 | 0.312308 | 5.04E-12 | 0.145842 | 0.00158  | 0.179274 | 9.80E-05 | 0.291496 |
| 0.629073 | 8.01E-53 | 0.605769 | 4.14E-48 | 0.394111 | 8.37E-19 | 0.410697 | 1.98E-20 | 0.432857 |
| 0.434219 | 6.76E-23 | 0.309662 | 7.76E-12 | 0.300835 | 3.18E-11 | 0.229864 | 5.13E-07 | -0.03501 |
| 0.389307 | 2.38E-18 | 0.557008 | 2.06E-39 | 0.323922 | 7.20E-13 | 0.17168  | 0.00019  | 0.280376 |
| 0.68578  | 3.71E-66 | 0.720588 | 5.71E-76 | 0.608679 | 1.12E-48 | 0.438323 | 2.40E-23 | 0.435664 |
| 0.181015 | 8.36E-05 | 0.329482 | 2.75E-13 | 0.110544 | 0.01686  | 0.005907 | 0.89869  | 0.106999 |
| 0.388768 | 2.68E-18 | 0.244337 | 8.93E-08 | 0.255699 | 2.09E-08 | 0.090024 | 0.05187  | -0.08077 |
| 0.394984 | 6.91E-19 | 0.371543 | 9.83E-17 | 0.210423 | 4.51E-06 | 0.205453 | 7.61E-06 | 0.056552 |
| 0.552413 | 1.15E-38 | 0.52071  | 8.20E-34 | 0.277934 | 9.91E-10 | 0.333762 | 1.29E-13 | 0.368043 |
| 0.694924 | 1.34E-68 | 0.689304 | 4.35E-67 | 0.540867 | 7.74E-37 | 0.364933 | 3.71E-16 | 0.454846 |
| 0.710829 | 4.51E-73 | 0.676151 | 1.11E-63 | 0.480644 | 2.28E-28 | 0.486587 | 3.94E-29 | 0.522297 |
| 0.61597  | 4.00E-50 | 0.660931 | 5.89E-60 | 0.472282 | 2.55E-27 | 0.378716 | 2.25E-17 | 0.42987  |
| 0.581958 | 1.12E-43 | 0.566379 | 5.68E-41 | 0.531688 | 1.96E-35 | 0.198231 | 1.59E-05 | 0.323821 |
| 0.315278 | 3.09E-12 | 0.244178 | 9.11E-08 | 0.125894 | 0.00645  | 0.083209 | 0.07242  | 0.015098 |
| 0.615337 | 5.37E-50 | 0.600073 | 5.14E-47 | 0.461292 | 5.52E-26 | 0.298816 | 4.36E-11 | 0.394225 |
| 0.502368 | 3.13E-31 | 0.398154 | 3.43E-19 | 0.365855 | 3.09E-16 | 0.294624 | 8.33E-11 | 0.153228 |
| 0.362915 | 5.52E-16 | 0.357483 | 1.59E-15 | 0.435916 | 4.41E-23 | 0.044709 | 0.33502  | -0.11224 |
| 0.281754 | 5.70E-10 | 0.378069 | 2.57E-17 | 0.413827 | 9.55E-21 | 0.007324 | 0.87457  | 0.18697  |
| 0.427484 | 3.60E-22 | 0.283402 | 4.48E-10 | 0.152655 | 0.00093  | 0.095905 | 0.03829  | -0.05908 |
| 0.401691 | 1.55E-19 | 0.441223 | 1.14E-23 | 0.38667  | 4.20E-18 | 0.176975 | 0.00012  | 0.250134 |
| -0.22388 | 1.02E-06 | -0.35213 | 4.44E-15 | -0.37188 | 9.18E-17 | -0.05763 | 0.21387  | -0.01956 |
| 0.34349  | 2.23E-14 | 0.293453 | 9.96E-11 | 0.158422 | 0.00059  | 0.176764 | 0.00012  | -0.08477 |
| 0.707215 | 4.98E-72 | 0.715942 | 1.42E-74 | 0.532704 | 1.38E-35 | 0.530233 | 3.24E-35 | 0.534949 |

|          |          |          |          |          |          |          |          |          |
|----------|----------|----------|----------|----------|----------|----------|----------|----------|
| 0.551801 | 1.45E-38 | 0.673124 | 6.36E-63 | 0.609696 | 7.09E-49 | 0.186004 | 5.25E-05 | 0.277751 |
| 0.173721 | 0.00016  | 0.330564 | 2.28E-13 | 0.344085 | 2.00E-14 | -0.08267 | 0.07431  | -0.07231 |
| -0.25688 | 1.79E-08 | -0.20504 | 7.95E-06 | -0.28345 | 4.45E-10 | 0.003431 | 0.94106  | 0.158642 |
| 0.342257 | 2.80E-14 | 0.309884 | 7.49E-12 | 0.141746 | 0.00214  | 0.129417 | 0.00509  | 0.043458 |
| 0.271962 | 2.31E-09 | 0.27645  | 1.22E-09 | 0.264651 | 6.33E-09 | 0.186441 | 5.04E-05 | 0.103256 |
| 0.433928 | 7.28E-23 | 0.423317 | 9.95E-22 | 0.369974 | 1.35E-16 | 0.04011  | 0.38714  | 0.130434 |
| 0.534113 | 8.42E-36 | 0.558991 | 9.74E-40 | 0.274555 | 1.60E-09 | 0.434565 | 6.20E-23 | 0.439948 |
| 0.267067 | 4.55E-09 | 0.307882 | 1.04E-11 | 0.19364  | 2.52E-05 | 0.185454 | 5.53E-05 | -0.03184 |
| 0.457275 | 1.65E-25 | 0.390595 | 1.80E-18 | 0.339136 | 4.94E-14 | 0.288749 | 2.03E-10 | 0.252894 |
| 0.399158 | 2.74E-19 | 0.420016 | 2.20E-21 | 0.228651 | 5.91E-07 | 0.1376   | 0.00288  | 0.239342 |
| 0.566877 | 4.68E-41 | 0.710576 | 5.34E-73 | 0.543071 | 3.51E-37 | 0.428553 | 2.77E-22 | 0.429942 |
| 0.34901  | 8.00E-15 | 0.383597 | 8.08E-18 | 0.333227 | 1.42E-13 | 0.125375 | 0.00667  | 0.25089  |
| 0.767654 | 6.74E-92 | 0.702954 | 8.06E-71 | 0.588263 | 8.13E-45 | 0.39504  | 6.83E-19 | 0.496393 |
| 0.632953 | 1.20E-53 | 0.709788 | 9.05E-73 | 0.581976 | 1.11E-43 | 0.406117 | 5.69E-20 | 0.471203 |
| 0.286077 | 3.02E-10 | 0.23378  | 3.23E-07 | 0.208734 | 5.39E-06 | 0.026565 | 0.56689  | -0.07787 |
| 0.642834 | 8.44E-56 | 0.741204 | 1.61E-82 | 0.712365 | 1.61E-73 | 0.338632 | 5.41E-14 | 0.401292 |
| -0.41014 | 2.26E-20 | -0.26269 | 8.26E-09 | -0.29701 | 5.76E-11 | -0.0983  | 0.0337   | -0.03291 |
| 0.731228 | 2.83E-79 | 0.792038 | #####    | 0.686561 | 2.31E-66 | 0.392252 | 1.26E-18 | 0.564968 |
| -0.35526 | 2.44E-15 | -0.30132 | 2.95E-11 | -0.29198 | 1.25E-10 | -0.18258 | 7.24E-05 | -0.14787 |
| 0.297357 | 5.47E-11 | 0.168391 | 0.00026  | 0.117986 | 0.01072  | 0.103847 | 0.02482  | 0.052671 |
| 0.568954 | 2.08E-41 | 0.389972 | 2.06E-18 | 0.523728 | 2.98E-34 | 0.242585 | 1.11E-07 | 0.130191 |
| 0.4203   | 2.06E-21 | 0.344151 | 1.98E-14 | 0.235415 | 2.66E-07 | 0.119088 | 0.01     | 0.137534 |
| 0.353418 | 3.48E-15 | 0.318539 | 1.79E-12 | 0.252484 | 3.18E-08 | 0.232296 | 3.85E-07 | -0.07334 |
| 0.228411 | 6.07E-07 | 0.414294 | 8.56E-21 | 0.139506 | 0.00252  | 0.244231 | 9.05E-08 | 0.218163 |
| 0.588401 | 7.67E-45 | 0.541463 | 6.26E-37 | 0.424764 | 7.00E-22 | 0.210464 | 4.49E-06 | 0.175396 |
| 0.378725 | 2.25E-17 | 0.445819 | 3.47E-24 | 0.466827 | 1.19E-26 | 0.080429 | 0.08252  | 0.057004 |
| 0.736139 | 7.47E-81 | 0.715839 | 1.52E-74 | 0.589632 | 4.57E-45 | 0.424806 | 6.93E-22 | 0.445369 |
| 0.336843 | 7.47E-14 | 0.258725 | 1.40E-08 | 0.124253 | 0.00718  | -0.02777 | 0.54947  | -0.02039 |
| 0.39016  | 1.98E-18 | 0.29475  | 8.17E-11 | 0.174774 | 0.00015  | 0.207911 | 5.88E-06 | -0.02232 |
| 0.282408 | 5.18E-10 | 0.32947  | 2.76E-13 | 0.268098 | 3.95E-09 | 0.132278 | 0.00419  | 0.182377 |
| 0.411467 | 1.66E-20 | 0.312489 | 4.89E-12 | 0.297341 | 5.48E-11 | 0.215355 | 2.65E-06 | 0.074875 |
| 0.670029 | 3.71E-62 | 0.618539 | 1.21E-50 | 0.570069 | 1.34E-41 | 0.267075 | 4.55E-09 | 0.305106 |
| 0.520472 | 8.88E-34 | 0.384071 | 7.30E-18 | 0.376939 | 3.25E-17 | 0.085274 | 0.06559  | 0.145854 |
| 0.367277 | 2.32E-16 | 0.326223 | 4.85E-13 | 0.4112   | 1.76E-20 | 0.215143 | 2.71E-06 | 0.127417 |
| 0.591327 | 2.23E-45 | 0.596385 | 2.56E-46 | 0.416355 | 5.26E-21 | 0.332444 | 1.63E-13 | 0.368725 |
| 0.508633 | 4.28E-32 | 0.538286 | 1.94E-36 | 0.449004 | 1.51E-24 | 0.256715 | 1.83E-08 | 0.135233 |
| 0.612785 | 1.74E-49 | 0.553411 | 7.95E-39 | 0.453182 | 4.97E-25 | 0.417712 | 3.82E-21 | 0.287324 |
| 0.671032 | 2.10E-62 | 0.679765 | 1.34E-64 | 0.439216 | 1.91E-23 | 0.433554 | 7.99E-23 | 0.479132 |
| 0.314759 | 3.37E-12 | 0.286368 | 2.89E-10 | 0.265937 | 5.32E-09 | 0.164542 | 0.00036  | -0.07606 |
| 0.663406 | 1.51E-60 | 0.636735 | 1.84E-54 | 0.46038  | 7.08E-26 | 0.450011 | 1.15E-24 | 0.46477  |
| 0.22444  | 9.59E-07 | 0.216492 | 2.34E-06 | 0.103824 | 0.02485  | 0.071257 | 0.12412  | 0.049482 |
| -0.37199 | 8.98E-17 | -0.26966 | 3.19E-09 | -0.32941 | 2.78E-13 | -0.03638 | 0.43289  | -0.11522 |
| 0.618584 | 1.19E-50 | 0.672432 | 9.45E-63 | 0.518726 | 1.59E-33 | 0.296179 | 6.56E-11 | 0.398926 |
| 0.435811 | 4.53E-23 | 0.440345 | 1.43E-23 | 0.400135 | 2.20E-19 | 0.059308 | 0.20077  | 0.105362 |
| 0.318863 | 1.70E-12 | 0.304183 | 1.87E-11 | 0.28826  | 2.18E-10 | 0.141832 | 0.00212  | 0.206339 |

|          |          |          |          |          |          |          |          |          |
|----------|----------|----------|----------|----------|----------|----------|----------|----------|
| 0.750903 | 8.05E-86 | 0.515824 | 4.14E-33 | 0.474322 | 1.43E-27 | 0.398736 | 3.01E-19 | 0.352312 |
| 0.509368 | 3.38E-32 | 0.584022 | 4.77E-44 | 0.501245 | 4.46E-31 | 0.18041  | 8.84E-05 | 0.30843  |
| 0.27442  | 1.63E-09 | 0.285714 | 3.19E-10 | 0.185438 | 5.54E-05 | 0.132532 | 0.00412  | -0.05943 |
| 0.434309 | 6.61E-23 | 0.449478 | 1.33E-24 | 0.439489 | 1.78E-23 | 0.197587 | 1.70E-05 | 0.091349 |
| -0.10983 | 0.01758  | -0.14086 | 0.00228  | -0.09848 | 0.03337  | 0.045615 | 0.32531  | -0.11675 |
| 0.324618 | 6.39E-13 | 0.357154 | 1.70E-15 | 0.308367 | 9.58E-12 | 0.096187 | 0.03772  | -0.09443 |
| 0.491117 | 1.01E-29 | 0.452661 | 5.71E-25 | 0.448787 | 1.59E-24 | 0.189976 | 3.59E-05 | 0.155625 |
| 0.583173 | 6.77E-44 | 0.549992 | 2.82E-38 | 0.377006 | 3.21E-17 | 0.317576 | 2.11E-12 | 0.190227 |
| 0.372311 | 8.41E-17 | 0.37939  | 1.95E-17 | 0.349508 | 7.29E-15 | 0.262147 | 8.89E-09 | -0.00174 |
| -0.37131 | 1.03E-16 | -0.3946  | 7.53E-19 | -0.32322 | 8.11E-13 | -0.1046  | 0.02378  | 0.025654 |
| -0.27864 | 8.95E-10 | -0.30606 | 1.39E-11 | -0.36516 | 3.54E-16 | -0.04314 | 0.35223  | 0.104107 |
| 0.296812 | 5.95E-11 | 0.344728 | 1.78E-14 | 0.222448 | 1.20E-06 | 0.026751 | 0.56418  | 0.079749 |
| 0.428445 | 2.84E-22 | 0.265629 | 5.54E-09 | 0.100536 | 0.02983  | 0.165852 | 0.00032  | 0.18236  |
| 0.509151 | 3.62E-32 | 0.403615 | 1.01E-19 | 0.384087 | 7.28E-18 | 0.229193 | 5.54E-07 | 0.14815  |
| 0.63592  | 2.76E-54 | 0.539778 | 1.14E-36 | 0.373313 | 6.86E-17 | 0.324755 | 6.24E-13 | 0.278788 |
| 0.311933 | 5.36E-12 | 0.345863 | 1.44E-14 | 0.172634 | 0.00018  | 0.098022 | 0.0342   | 0.068174 |
| 0.516203 | 3.65E-33 | 0.582479 | 9.01E-44 | 0.511717 | 1.58E-32 | 0.28285  | 4.86E-10 | 0.291279 |
| 0.698881 | 1.10E-69 | 0.77027  | 6.81E-93 | 0.705698 | 1.35E-71 | 0.361901 | 6.74E-16 | 0.362467 |
| 0.372483 | 8.12E-17 | 0.295415 | 7.38E-11 | 0.221576 | 1.33E-06 | 0.037964 | 0.41307  | 0.026859 |
| 0.469956 | 4.94E-27 | 0.300868 | 3.16E-11 | 0.310347 | 6.95E-12 | 0.187737 | 4.46E-05 | -0.00924 |
| 0.602213 | 2.01E-47 | 0.569832 | 1.47E-41 | 0.390577 | 1.81E-18 | 0.36905  | 1.63E-16 | 0.314651 |
| 0.291017 | 1.44E-10 | 0.306607 | 1.27E-11 | 0.268902 | 3.54E-09 | -0.01826 | 0.69383  | 0.040339 |
| 0.62699  | 2.19E-52 | 0.644278 | 4.03E-56 | 0.403516 | 1.03E-19 | 0.364606 | 3.95E-16 | 0.373591 |
| 0.650199 | 1.86E-57 | 0.429937 | 1.97E-22 | 0.498352 | 1.10E-30 | 0.220117 | 1.56E-06 | 0.110869 |
| 0.494787 | 3.30E-30 | 0.50036  | 5.88E-31 | 0.441197 | 1.15E-23 | 0.193045 | 2.67E-05 | 0.195146 |
| 0.376729 | 3.40E-17 | 0.405534 | 6.50E-20 | 0.351731 | 4.79E-15 | 0.007905 | 0.86472  | 0.058971 |
| 0.753386 | 1.09E-86 | 0.701165 | 2.56E-70 | 0.583895 | 5.02E-44 | 0.439572 | 1.74E-23 | 0.526987 |
| 0.490682 | 1.15E-29 | 0.534379 | 7.67E-36 | 0.318366 | 1.85E-12 | 0.253782 | 2.68E-08 | 0.23099  |
| 0.383786 | 7.76E-18 | 0.221239 | 1.38E-06 | 0.098995 | 0.03245  | 0.180294 | 8.93E-05 | -0.03663 |
| 0.497956 | 1.24E-30 | 0.444724 | 4.62E-24 | 0.331013 | 2.10E-13 | 0.249241 | 4.81E-08 | 0.355401 |
| 0.459844 | 8.20E-26 | 0.425565 | 5.76E-22 | 0.419174 | 2.69E-21 | 0.166818 | 0.00029  | 0.351592 |
| 0.330917 | 2.14E-13 | 0.459286 | 9.55E-26 | 0.289889 | 1.71E-10 | 0.167002 | 0.00029  | 0.126509 |
| 0.59489  | 4.87E-46 | 0.493779 | 4.49E-30 | 0.340747 | 3.69E-14 | 0.276961 | 1.14E-09 | 0.211547 |
| 0.423479 | 9.56E-22 | 0.320615 | 1.26E-12 | 0.291692 | 1.30E-10 | 0.175721 | 0.00014  | 0.049909 |
| 0.715386 | 2.07E-74 | 0.67987  | 1.26E-64 | 0.480079 | 2.69E-28 | 0.381547 | 1.24E-17 | 0.435605 |
| 0.288799 | 2.01E-10 | 0.255833 | 2.05E-08 | 0.174946 | 0.00014  | 0.024206 | 0.60183  | -0.0444  |
| 0.367838 | 2.08E-16 | 0.299534 | 3.90E-11 | 0.274087 | 1.71E-09 | 0.097424 | 0.03532  | -0.07629 |
| 0.300904 | 3.14E-11 | 0.330786 | 2.19E-13 | 0.151767 | 0.001    | 0.135701 | 0.0033   | 0.195487 |
| 0.246627 | 6.70E-08 | 0.315117 | 3.17E-12 | 0.190417 | 3.44E-05 | -0.00436 | 0.92517  | -0.04698 |
| 0.470815 | 3.87E-27 | 0.508618 | 4.30E-32 | 0.351423 | 5.08E-15 | 0.216806 | 2.26E-06 | 0.234509 |
| 0.446614 | 2.82E-24 | 0.418767 | 2.97E-21 | 0.456046 | 2.30E-25 | 0.257088 | 1.74E-08 | 0.208004 |
| 0.163055 | 0.0004   | -0.10291 | 0.02615  | 0.074421 | 0.10824  | 0.105602 | 0.02247  | 0.196397 |
| -0.08448 | 0.06816  | 0.079864 | 0.08471  | 0.238692 | 1.79E-07 | 0.067721 | 0.14395  | 0.284293 |
| 0.313224 | 4.34E-12 | 0.134172 | 0.00367  | 0.120766 | 0.00899  | 0.017245 | 0.71011  | -0.12362 |
| -0.10829 | 0.01925  | 0.073959 | 0.11045  | -0.03885 | 0.4023   | 0.133951 | 0.00373  | 0.336934 |

|          |          |          |          |          |          |          |          |          |
|----------|----------|----------|----------|----------|----------|----------|----------|----------|
| 0.049833 | 0.28252  | 0.164993 | 0.00034  | 0.096454 | 0.03719  | 0.278775 | 8.78E-10 | 0.436271 |
| -0.05388 | 0.2452   | 0.120175 | 0.00934  | 0.103739 | 0.02497  | 0.154731 | 0.00079  | 0.366428 |
| -0.16748 | 0.00028  | -0.22781 | 6.51E-07 | -0.19177 | 3.02E-05 | -0.02424 | 0.60137  | 0.069576 |
| -0.02525 | 0.58623  | -0.23809 | 1.93E-07 | -0.12184 | 0.0084   | 0.001369 | 0.97647  | 0.135463 |
| 0.040376 | 0.384    | -0.174   | 0.00016  | -0.21623 | 2.40E-06 | 0.155377 | 0.00075  | 0.273811 |
| 0.045984 | 0.3214   | 0.03942  | 0.39537  | -0.01455 | 0.75381  | 0.165751 | 0.00032  | 0.415226 |
| -0.04744 | 0.30627  | -0.08461 | 0.06774  | -0.08415 | 0.06923  | 0.164219 | 0.00037  | 0.308747 |
| -0.18994 | 3.61E-05 | -0.2003  | 1.29E-05 | -0.20154 | 1.14E-05 | 0.001833 | 0.96849  | 0.190837 |
| -0.04714 | 0.30932  | -0.02613 | 0.57326  | -0.03588 | 0.43917  | 0.105495 | 0.02261  | 0.378076 |
| 0.025193 | 0.58709  | 0.052076 | 0.26139  | 0.03175  | 0.49368  | 0.138119 | 0.00278  | 0.296429 |
| -0.08641 | 0.06207  | -0.14239 | 0.00204  | -0.06299 | 0.17419  | -0.24279 | 1.08E-07 | -0.37008 |
| -0.16445 | 0.00036  | -0.0614  | 0.18532  | -0.10541 | 0.02271  | 0.062311 | 0.17887  | 0.234152 |
| -0.04503 | 0.33152  | 0.083448 | 0.0716   | 0.045822 | 0.32311  | 0.086943 | 0.06047  | 0.40435  |
| -0.16384 | 0.00038  | -0.0578  | 0.21248  | -0.08627 | 0.0625   | 0.093684 | 0.04302  | 0.252964 |
| 0.088175 | 0.0569   | 0.080571 | 0.08198  | 0.024884 | 0.59169  | 0.247876 | 5.72E-08 | 0.547853 |
| 0.072469 | 0.11783  | 0.156732 | 0.00068  | 0.060217 | 0.19395  | 0.22257  | 1.19E-06 | 0.396301 |
| -0.03544 | 0.44478  | 0.069023 | 0.13639  | 0.04634  | 0.31767  | 0.061861 | 0.18203  | 0.278771 |
| -0.04006 | 0.38769  | 0.079403 | 0.08653  | 0.060701 | 0.19038  | 0.148755 | 0.00126  | 0.234767 |
| -0.01882 | 0.68508  | 0.045994 | 0.3213   | 0.036631 | 0.42968  | 0.215493 | 2.61E-06 | 0.420197 |
| -0.10521 | 0.02297  | -0.07565 | 0.10251  | -0.14738 | 0.0014   | 0.051715 | 0.26471  | 0.233727 |
| 0.058135 | 0.20984  | 0.014771 | 0.75021  | 0.043925 | 0.34357  | 0.139454 | 0.00253  | 0.291387 |
| -0.09021 | 0.05139  | -0.0927  | 0.04527  | -0.02589 | 0.57686  | 0.108314 | 0.01922  | 0.223778 |
| 0.127939 | 0.00563  | 0.003215 | 0.94476  | 0.066536 | 0.15112  | -0.25134 | 3.68E-08 | -0.30138 |
| 0.11468  | 0.01315  | 0.095312 | 0.03951  | 0.081646 | 0.07797  | -0.13531 | 0.00339  | -0.22251 |
| -0.21087 | 4.30E-06 | -0.01622 | 0.72661  | -0.07679 | 0.09742  | 0.022537 | 0.62713  | 0.311086 |
| -0.06971 | 0.13255  | -0.09273 | 0.04519  | -0.17746 | 0.00012  | 0.047654 | 0.30412  | 0.291372 |
| 0.008167 | 0.86028  | 0.027148 | 0.55841  | -0.02378 | 0.60829  | 0.161231 | 0.00047  | 0.391033 |
| -0.01423 | 0.75911  | -0.21905 | 1.76E-06 | -0.20233 | 1.05E-05 | 0.114542 | 0.01326  | 0.159731 |
| 0.03253  | 0.48313  | -0.13177 | 0.00434  | -0.16828 | 0.00026  | 0.071585 | 0.1224   | 0.367084 |
| -0.06661 | 0.15066  | -0.04786 | 0.302    | -0.09092 | 0.04958  | 0.196502 | 1.90E-05 | 0.243239 |
| -0.0658  | 0.15567  | -0.00102 | 0.98254  | -0.04377 | 0.34527  | 0.028417 | 0.54016  | 0.271997 |
| 0.170437 | 0.00022  | 0.150678 | 0.00109  | 0.141099 | 0.00224  | 0.273577 | 1.84E-09 | 0.379086 |
| -0.10759 | 0.02004  | -0.06854 | 0.13918  | -0.10385 | 0.02481  | -0.06663 | 0.15056  | 0.134057 |
| 0.110469 | 0.01693  | 0.079228 | 0.08722  | 0.032925 | 0.47782  | 0.160974 | 0.00048  | 0.399059 |
| 0.101419 | 0.02842  | 0.071831 | 0.12111  | 0.018944 | 0.68304  | 0.119065 | 0.01002  | 0.394372 |
| -0.09193 | 0.04708  | 0.173897 | 0.00016  | 0.11284  | 0.0147   | 0.252291 | 3.26E-08 | 0.385394 |
| 0.002408 | 0.9586   | 0.08926  | 0.0539   | 0.029971 | 0.51822  | 0.25525  | 2.22E-08 | 0.408442 |
| 0.156397 | 0.00069  | -0.06762 | 0.14455  | 0.110024 | 0.01738  | -0.23505 | 2.78E-07 | -0.37058 |
| -0.06906 | 0.13615  | -0.14301 | 0.00195  | -0.20414 | 8.72E-06 | 0.127578 | 0.00576  | 0.239909 |
| 0.221924 | 1.28E-06 | 0.019366 | 0.67637  | 0.108048 | 0.01952  | 0.105408 | 0.02272  | 0.392351 |
| -0.00707 | 0.87894  | 0.046134 | 0.31983  | -0.00985 | 0.83183  | 0.259869 | 1.21E-08 | 0.329306 |
| 0.030061 | 0.51697  | 0.262018 | 9.04E-09 | 0.147771 | 0.00136  | 0.244629 | 8.61E-08 | 0.485627 |
| -0.12857 | 0.00539  | -0.15108 | 0.00106  | -0.18842 | 4.17E-05 | -0.03586 | 0.43948  | 0.223176 |
| -0.13912 | 0.00259  | 0.10075  | 0.02949  | -0.0047  | 0.91929  | 0.16149  | 0.00046  | 0.308044 |
| 0.09431  | 0.04164  | 0.156597 | 0.00068  | 0.140042 | 0.00242  | 0.283033 | 4.73E-10 | 0.440977 |

|          |          |          |          |          |          |          |          |          |
|----------|----------|----------|----------|----------|----------|----------|----------|----------|
| -0.22512 | 8.88E-07 | -0.1645  | 0.00036  | -0.15514 | 0.00077  | 0.043328 | 0.35017  | -0.0371  |
| 0.027434 | 0.55427  | -0.21354 | 3.22E-06 | -0.08466 | 0.06758  | -0.2954  | 7.40E-11 | -0.36647 |
| 0.035872 | 0.43931  | 0.07991  | 0.08453  | -0.05212 | 0.261    | 0.127246 | 0.00589  | 0.387769 |
| -0.06274 | 0.17587  | -0.0606  | 0.19116  | -0.14153 | 0.00217  | 0.23088  | 4.55E-07 | 0.321135 |
| 0.090898 | 0.04963  | 0.042711 | 0.35709  | 0.02761  | 0.55173  | 0.32861  | 3.20E-13 | 0.399807 |
| 0.144446 | 0.00175  | 0.056917 | 0.21957  | -0.00884 | 0.84898  | 0.10079  | 0.02942  | 0.37223  |
| 0.17568  | 0.00014  | 0.201583 | 1.13E-05 | 0.127308 | 0.00587  | 0.345637 | 1.50E-14 | 0.44556  |
| 0.042189 | 0.363    | 0.11512  | 0.0128   | 0.049903 | 0.28184  | 0.238194 | 1.90E-07 | 0.443457 |
| 0.011397 | 0.80596  | 0.028482 | 0.53923  | 0.06406  | 0.16695  | 0.070509 | 0.12813  | 0.408794 |
| -0.18237 | 7.38E-05 | -0.14244 | 0.00203  | -0.16474 | 0.00035  | 0.045426 | 0.32731  | 0.072145 |
| 0.163877 | 0.00038  | 0.115986 | 0.01213  | 0.172841 | 0.00017  | -0.10852 | 0.01898  | -0.22882 |
| -0.05714 | 0.21773  | 0.012777 | 0.78302  | -0.04596 | 0.32169  | 0.210511 | 4.46E-06 | 0.396287 |
| -0.11459 | 0.01322  | 0.139177 | 0.00258  | 0.074896 | 0.106    | 0.196814 | 1.84E-05 | 0.302162 |
| 0.129804 | 0.00496  | 0.292479 | 1.16E-10 | 0.246291 | 6.99E-08 | 0.263438 | 7.47E-09 | 0.341056 |
| -0.10073 | 0.02952  | -0.12843 | 0.00544  | -0.1064  | 0.02147  | 0.089618 | 0.05294  | 0.191502 |
| 0.21072  | 4.37E-06 | 0.1151   | 0.01281  | -0.00358 | 0.93844  | 0.376586 | 3.50E-17 | 0.394571 |
| -0.07436 | 0.1085   | -0.04458 | 0.33644  | -0.06213 | 0.18014  | 0.113709 | 0.01395  | 0.407625 |
| -0.14882 | 0.00126  | -0.23873 | 1.78E-07 | -0.15874 | 0.00057  | -0.10294 | 0.02611  | 0.124905 |
| 0.073356 | 0.1134   | 0.121457 | 0.0086   | 0.144934 | 0.00169  | -0.23467 | 2.91E-07 | -0.29853 |
| 0.279827 | 7.54E-10 | 0.174865 | 0.00015  | 0.187706 | 4.47E-05 | -0.04229 | 0.36185  | -0.12508 |
| 0.063161 | 0.173    | 0.025386 | 0.58423  | -0.01882 | 0.68508  | -0.18771 | 4.46E-05 | -0.21308 |
| -0.25662 | 1.85E-08 | -0.07681 | 0.09735  | -0.11223 | 0.01525  | -0.08236 | 0.0754   | 0.10765  |
| 0.153359 | 0.00088  | 0.091518 | 0.04809  | 0.101284 | 0.02863  | -0.20919 | 5.14E-06 | -0.21042 |
| -0.17273 | 0.00018  | -0.01286 | 0.78167  | -0.10478 | 0.02354  | 0.099036 | 0.03238  | 0.305657 |
| -0.06721 | 0.14699  | 0.063539 | 0.17044  | -0.03983 | 0.39041  | 0.210909 | 4.28E-06 | 0.426384 |
| 0.215708 | 2.54E-06 | 0.177539 | 0.00011  | 0.247843 | 5.75E-08 | -0.07474 | 0.10675  | -0.17618 |
| 0.180373 | 8.87E-05 | -0.01656 | 0.72113  | 0.040381 | 0.38394  | -0.12371 | 0.00744  | -0.2854  |
| 0.012659 | 0.78498  | -0.00566 | 0.90296  | 0.023453 | 0.61318  | 0.210432 | 4.50E-06 | 0.310906 |
| -0.09129 | 0.04866  | -0.01539 | 0.74012  | -0.05069 | 0.27433  | 0.21864  | 1.84E-06 | 0.41738  |
| 0.071325 | 0.12376  | -0.00292 | 0.94977  | 0.097579 | 0.03502  | -0.27696 | 1.14E-09 | -0.32644 |
| -0.24904 | 4.94E-08 | -0.08586 | 0.06374  | -0.02318 | 0.61727  | -0.11648 | 0.01177  | 0.080604 |
| -0.22492 | 9.08E-07 | -0.19652 | 1.89E-05 | -0.17553 | 0.00014  | -0.00505 | 0.91335  | 0.184306 |
| 0.085223 | 0.06575  | -0.00111 | 0.98094  | 0.084335 | 0.06863  | -0.08588 | 0.06368  | -0.39322 |
| 0.032389 | 0.48503  | -0.14747 | 0.00139  | -0.06444 | 0.16443  | -0.17414 | 0.00016  | -0.25161 |
| 0.229978 | 5.06E-07 | 0.191735 | 3.03E-05 | 0.071864 | 0.12094  | 0.310036 | 7.31E-12 | 0.611158 |
| 0.185457 | 5.53E-05 | 0.136319 | 0.00316  | 0.078482 | 0.09025  | 0.247604 | 5.92E-08 | 0.402759 |
| 0.097554 | 0.03507  | 0.133121 | 0.00395  | 0.176701 | 0.00012  | 0.227729 | 6.57E-07 | 0.305406 |
| -0.24496 | 8.26E-08 | -0.14759 | 0.00138  | -0.15391 | 0.00085  | 0.079112 | 0.08769  | 0.277376 |
| -0.05447 | 0.24005  | 0.107215 | 0.02048  | -0.00164 | 0.97175  | 0.117694 | 0.01091  | 0.219286 |
| -0.10824 | 0.0193   | -0.1497  | 0.00118  | 0.001547 | 0.9734   | -0.12009 | 0.00939  | 0.024285 |
| -0.12868 | 0.00535  | -0.14235 | 0.00204  | -0.02396 | 0.60551  | -0.05512 | 0.23453  | 0.203803 |
| -0.00665 | 0.88601  | 0.100847 | 0.02933  | 0.046236 | 0.31875  | 0.173073 | 0.00017  | 0.333702 |
| -0.01417 | 0.75997  | -0.05996 | 0.19585  | -0.02618 | 0.57248  | 0.052147 | 0.26074  | 0.31554  |
| 0.069793 | 0.13206  | 0.324539 | 6.48E-13 | 0.188521 | 4.13E-05 | 0.277858 | 1.00E-09 | 0.501699 |
| -0.20084 | 1.22E-05 | -0.06558 | 0.15711  | -0.07402 | 0.11015  | 0.081179 | 0.07969  | 0.37039  |

|          |          |          |          |          |          |          |          |          |
|----------|----------|----------|----------|----------|----------|----------|----------|----------|
| 0.176089 | 0.00013  | 0.106072 | 0.02187  | 0.069685 | 0.13266  | 0.373664 | 6.38E-17 | 0.402206 |
| -0.24263 | 1.10E-07 | -0.21647 | 2.34E-06 | -0.2185  | 1.87E-06 | -0.104   | 0.02461  | 0.109718 |
| 0.153257 | 0.00089  | 0.177356 | 0.00012  | 0.229518 | 5.34E-07 | 0.236273 | 2.40E-07 | 0.32565  |
| -0.1502  | 0.00113  | -0.12884 | 0.0053   | -0.05779 | 0.2126   | -0.02107 | 0.64972  | 0.079846 |
| -0.13014 | 0.00485  | -0.20626 | 6.99E-06 | -0.18574 | 5.38E-05 | 0.130057 | 0.00488  | 0.278409 |
| 0.169624 | 0.00023  | 0.056738 | 0.22102  | -0.0472  | 0.30877  | 0.272513 | 2.14E-09 | 0.383337 |
| -0.134   | 0.00372  | -0.11213 | 0.01533  | -0.11359 | 0.01405  | 0.095541 | 0.03903  | 0.242894 |
| 0.002745 | 0.95282  | -0.06999 | 0.13095  | 0.000653 | 0.98877  | -0.26976 | 3.14E-09 | -0.39739 |
| -0.171   | 0.0002   | -0.08574 | 0.06411  | -0.10313 | 0.02584  | 0.058841 | 0.20435  | 0.252665 |
| -0.08322 | 0.07238  | -0.1058  | 0.02222  | -0.14767 | 0.00137  | 0.069836 | 0.13182  | 0.148935 |
| -0.26396 | 6.96E-09 | -0.3262  | 4.87E-13 | -0.23511 | 2.76E-07 | -0.06148 | 0.18473  | 0.146387 |
| 0.134322 | 0.00364  | 0.051723 | 0.26464  | -0.0121  | 0.79419  | 0.399885 | 2.33E-19 | 0.438802 |
| -0.29161 | 1.32E-10 | -0.15875 | 0.00057  | -0.20987 | 4.78E-06 | -0.01986 | 0.66861  | 0.17776  |
| -0.21801 | 1.97E-06 | -0.10245 | 0.02684  | -0.14686 | 0.00146  | 0.056976 | 0.21909  | 0.166895 |
| 0.116967 | 0.01142  | 0.138686 | 0.00267  | 0.070119 | 0.13026  | 0.095321 | 0.03949  | 0.441327 |
| -0.11989 | 0.00951  | 0.01956  | 0.67332  | -0.05854 | 0.20668  | 0.19148  | 3.11E-05 | 0.296745 |
| -0.05472 | 0.23793  | 0.004265 | 0.92676  | 0.012195 | 0.79267  | 0.100358 | 0.03013  | 0.370038 |
| -0.01964 | 0.67208  | -0.05402 | 0.24401  | 0.058799 | 0.20467  | -0.35781 | 1.50E-15 | -0.26808 |
| 0.13144  | 0.00444  | 0.051518 | 0.26654  | 0.164003 | 0.00037  | -0.23899 | 1.73E-07 | -0.25648 |
| -0.17075 | 0.00021  | -0.13502 | 0.00346  | -0.17551 | 0.00014  | 0.144604 | 0.00173  | 0.3642   |
| -0.31128 | 5.97E-12 | -0.1933  | 2.60E-05 | -0.22026 | 1.54E-06 | -0.0249  | 0.59138  | 0.094225 |
| -0.0781  | 0.09183  | -0.10611 | 0.02183  | -0.12264 | 0.00797  | 0.096326 | 0.03744  | 0.342508 |
| -0.00692 | 0.88146  | 0.002203 | 0.96213  | -0.0032  | 0.94498  | 0.024519 | 0.59714  | 0.382909 |
| 0.129827 | 0.00495  | 0.100086 | 0.03058  | 0.018714 | 0.68668  | 0.329323 | 2.83E-13 | 0.421198 |
| -0.05154 | 0.2663   | 0.129037 | 0.00523  | -0.0264  | 0.56933  | 0.149489 | 0.0012   | 0.398328 |
| 0.218513 | 1.87E-06 | 0.112949 | 0.0146   | 0.00893  | 0.84738  | 0.257368 | 1.68E-08 | 0.344519 |
| 0.098269 | 0.03375  | 0.175128 | 0.00014  | 0.100398 | 0.03006  | 0.253221 | 2.89E-08 | 0.503325 |
| -0.19459 | 2.29E-05 | -0.18538 | 5.57E-05 | -0.19187 | 2.99E-05 | 0.063496 | 0.17073  | 0.287668 |
| 0.018882 | 0.68403  | 0.040468 | 0.38292  | 0.067328 | 0.1463   | 0.147899 | 0.00135  | 0.438637 |
| -0.12527 | 0.00672  | -0.12888 | 0.00528  | -0.10915 | 0.0183   | 0.064419 | 0.16458  | 0.171645 |
| -0.12228 | 0.00816  | -0.14208 | 0.00209  | -0.16542 | 0.00033  | -0.00025 | 0.99577  | 0.187888 |
| 0.020956 | 0.65148  | 0.021596 | 0.64157  | -0.09305 | 0.04444  | 0.202692 | 1.01E-05 | 0.476108 |
| -0.15152 | 0.00102  | -0.06605 | 0.15415  | 0.060755 | 0.18999  | -0.07004 | 0.13069  | 0.221305 |
| -0.15895 | 0.00057  | -0.16617 | 0.00031  | -0.12974 | 0.00498  | 0.043302 | 0.35046  | 0.144856 |
| 0.009447 | 0.83866  | -0.18915 | 3.89E-05 | -0.14903 | 0.00124  | -0.21486 | 2.79E-06 | -0.34557 |
| -0.07685 | 0.09715  | -0.02198 | 0.63568  | 0.052005 | 0.26204  | 0.03361  | 0.46871  | 0.185843 |
| -0.22259 | 1.18E-06 | -0.19847 | 1.56E-05 | -0.16475 | 0.00035  | 0.029007 | 0.53177  | 0.261057 |
| 0.016917 | 0.71539  | -0.05154 | 0.26636  | 0.001908 | 0.9672   | 0.133497 | 0.00385  | 0.270424 |
| -0.09459 | 0.04102  | 0.048988 | 0.29077  | -0.05193 | 0.2627   | 0.119206 | 0.00993  | 0.316139 |
| -0.23576 | 2.55E-07 | -0.07113 | 0.1248   | -0.09663 | 0.03685  | 0.001847 | 0.96825  | 0.012513 |
| 0.142936 | 0.00196  | 0.020967 | 0.65132  | 0.049003 | 0.29062  | -0.156   | 0.00072  | -0.29335 |
| -0.15758 | 0.00063  | 0.015281 | 0.74188  | -0.12161 | 0.00852  | 0.202947 | 9.87E-06 | 0.154138 |
| -0.15321 | 0.0009   | -0.04679 | 0.31302  | -0.08266 | 0.07435  | 0.092082 | 0.04672  | 0.354472 |
| -0.16283 | 0.00041  | -0.09975 | 0.03115  | -0.0942  | 0.04188  | 0.009034 | 0.84562  | 0.241952 |
| 0.061932 | 0.18153  | 0.273854 | 1.77E-09 | 0.204314 | 8.57E-06 | 0.306306 | 1.33E-11 | 0.294622 |

|          |          |          |          |          |          |          |          |          |
|----------|----------|----------|----------|----------|----------|----------|----------|----------|
| -0.06778 | 0.1436   | -0.33111 | 2.07E-13 | -0.38026 | 1.63E-17 | -0.14337 | 0.0019   | -0.28286 |
| 0.390832 | 1.71E-18 | 0.544645 | 1.99E-37 | 0.693467 | 3.33E-68 | 0.192982 | 2.68E-05 | 0.16595  |
| 0.307203 | 1.16E-11 | 0.502136 | 3.37E-31 | 0.555668 | 3.42E-39 | 0.152874 | 0.00092  | 0.337382 |
| 0.35199  | 4.56E-15 | 0.457166 | 1.70E-25 | 0.524374 | 2.39E-34 | 0.194381 | 2.34E-05 | 0.276998 |
| 0.27907  | 8.41E-10 | 0.318464 | 1.82E-12 | 0.406158 | 5.64E-20 | 0.21234  | 3.67E-06 | 0.167311 |
| 0.39423  | 8.16E-19 | 0.596995 | 1.96E-46 | 0.656077 | 8.19E-59 | 0.206666 | 6.71E-06 | 0.248854 |
| 0.305567 | 1.50E-11 | 0.326098 | 4.95E-13 | 0.386715 | 4.16E-18 | 0.104379 | 0.02408  | 0.160704 |
| 0.515527 | 4.57E-33 | 0.435549 | 4.84E-23 | 0.654524 | 1.88E-58 | 0.246284 | 7.00E-08 | 0.063766 |
| 0.550879 | 2.04E-38 | 0.518113 | 1.95E-33 | 0.708257 | 2.50E-72 | 0.276904 | 1.15E-09 | 0.117705 |
| 0.52886  | 5.19E-35 | 0.774891 | 1.10E-94 | 0.782877 | 6.98E-98 | 0.366839 | 2.54E-16 | 0.346662 |
| -0.30726 | 1.14E-11 | -0.2979  | 5.03E-11 | -0.41588 | 5.89E-21 | -0.12368 | 0.00746  | -0.09728 |
| 0.386997 | 3.92E-18 | 0.595234 | 4.20E-46 | 0.656396 | 6.90E-59 | 0.332482 | 1.62E-13 | 0.402496 |
| -0.15655 | 0.00069  | -0.46807 | 8.39E-27 | -0.5122  | 1.35E-32 | -0.15081 | 0.00108  | -0.41726 |
| 0.250832 | 3.93E-08 | 0.397677 | 3.81E-19 | 0.418618 | 3.08E-21 | 0.149109 | 0.00123  | 0.134722 |
| -0.21898 | 1.77E-06 | -0.59606 | 2.94E-46 | -0.63386 | 7.66E-54 | -0.09616 | 0.03777  | -0.30412 |
| 0.666757 | 2.35E-61 | 0.692435 | 6.32E-68 | 0.77231  | 1.12E-93 | 0.352623 | 4.05E-15 | 0.50385  |
| 0.357648 | 1.54E-15 | 0.511021 | 1.98E-32 | 0.540034 | 1.04E-36 | 0.371951 | 9.05E-17 | 0.515856 |
| -0.33145 | 1.95E-13 | -0.49671 | 1.82E-30 | -0.65008 | 1.98E-57 | -0.11378 | 0.01388  | -0.23035 |
| 0.271459 | 2.48E-09 | 0.287975 | 2.28E-10 | 0.397174 | 4.26E-19 | -0.04221 | 0.36275  | -0.19539 |
| 0.718811 | 1.96E-75 | 0.788149 | #####    | 0.825052 | #####    | 0.384944 | 6.07E-18 | 0.542486 |
| -0.37243 | 8.21E-17 | -0.51582 | 4.15E-33 | -0.6912  | 1.35E-67 | -0.20005 | 1.33E-05 | -0.13287 |
| -0.29586 | 6.89E-11 | -0.5733  | 3.72E-42 | -0.69178 | 9.51E-68 | -0.16212 | 0.00044  | -0.26919 |
| 0.256659 | 1.84E-08 | 0.318071 | 1.94E-12 | 0.543006 | 3.60E-37 | 0.199403 | 1.42E-05 | 0.237555 |
| -0.16788 | 0.00027  | -0.29705 | 5.73E-11 | -0.43271 | 9.87E-23 | -0.14826 | 0.00131  | -0.16752 |
| 0.687028 | 1.74E-66 | 0.605211 | 5.32E-48 | 0.780554 | 6.14E-97 | 0.430568 | 1.68E-22 | 0.379319 |
| -0.23736 | 2.10E-07 | -0.42574 | 5.51E-22 | -0.4444  | 5.02E-24 | -0.27409 | 1.71E-09 | -0.4446  |
| -0.25785 | 1.58E-08 | -0.43403 | 7.10E-23 | -0.72916 | 1.28E-78 | -0.17311 | 0.00017  | -0.26354 |
| 0.705492 | 1.54E-71 | 0.756791 | 6.70E-88 | 0.898231 | #####    | 0.387822 | 3.28E-18 | 0.478065 |
| 0.548675 | 4.58E-38 | 0.579554 | 2.99E-43 | 0.757118 | 5.11E-88 | 0.3799   | 1.76E-17 | 0.406394 |
| 0.692464 | 6.21E-68 | 0.783302 | 4.67E-98 | 0.798724 | #####    | 0.422532 | 1.20E-21 | 0.476432 |
| 0.588227 | 8.26E-45 | 0.584805 | 3.44E-44 | 0.721486 | 3.04E-76 | 0.380543 | 1.54E-17 | 0.385913 |
| -0.41871 | 3.01E-21 | -0.56008 | 6.43E-40 | -0.64603 | 1.63E-56 | -0.37861 | 2.30E-17 | -0.39416 |
| -0.05348 | 0.24877  | -0.15125 | 0.00104  | -0.40189 | 1.48E-19 | 0.047764 | 0.303    | 0.091313 |
| -0.48801 | 2.57E-29 | -0.60924 | 8.71E-49 | -0.70933 | 1.23E-72 | -0.43192 | 1.20E-22 | -0.43086 |
| 0.295908 | 6.84E-11 | 0.470229 | 4.57E-27 | 0.523901 | 2.81E-34 | 0.249411 | 4.71E-08 | 0.347725 |
| 0.315589 | 2.93E-12 | 0.419803 | 2.32E-21 | 0.487778 | 2.76E-29 | 0.019489 | 0.67443  | 0.066776 |
| 0.502382 | 3.12E-31 | 0.74304  | 3.93E-83 | 0.75199  | 3.36E-86 | 0.269053 | 3.46E-09 | 0.40261  |
| -0.3148  | 3.35E-12 | -0.40032 | 2.11E-19 | -0.65889 | 1.79E-59 | -0.06892 | 0.13698  | -0.18605 |
| 0.667449 | 1.59E-61 | 0.693434 | 3.40E-68 | 0.794417 | #####    | 0.365585 | 3.26E-16 | 0.294443 |
| -0.16685 | 0.00029  | -0.30062 | 3.29E-11 | -0.44783 | 2.05E-24 | -0.07878 | 0.08902  | -0.10673 |
| 0.372784 | 7.64E-17 | 0.217608 | 2.07E-06 | 0.426248 | 4.87E-22 | 0.307674 | 1.07E-11 | 0.267008 |
| -0.42892 | 2.53E-22 | -0.5081  | 5.08E-32 | -0.66694 | 2.12E-61 | -0.17623 | 0.00013  | -0.12619 |
| -0.31142 | 5.83E-12 | -0.31046 | 6.82E-12 | -0.48618 | 4.45E-29 | -0.20604 | 7.16E-06 | -0.16708 |
| 0.299051 | 4.20E-11 | 0.385822 | 5.03E-18 | 0.425858 | 5.36E-22 | 0.094856 | 0.04046  | 0.05854  |
| 0.239356 | 1.65E-07 | 0.3282   | 3.44E-13 | 0.379948 | 1.74E-17 | -0.01607 | 0.729    | 0.064372 |



|          |          |          |          |          |          |          |          |          |
|----------|----------|----------|----------|----------|----------|----------|----------|----------|
| 0.450704 | 9.61E-25 | 0.599385 | 6.95E-47 | 0.630517 | 3.97E-53 | 0.266381 | 5.00E-09 | 0.186293 |
| -0.36952 | 1.48E-16 | -0.35112 | 5.38E-15 | -0.52196 | 5.40E-34 | -0.10324 | 0.02568  | -0.12762 |
| 0.304321 | 1.83E-11 | 0.422686 | 1.16E-21 | 0.439032 | 2.00E-23 | 0.181196 | 8.22E-05 | 0.209927 |
| 0.556789 | 2.24E-39 | 0.598283 | 1.12E-46 | 0.733643 | 4.79E-80 | 0.295694 | 7.07E-11 | 0.2466   |
| -0.38471 | 6.37E-18 | -0.58854 | 7.25E-45 | -0.67276 | 7.84E-63 | -0.35633 | 1.99E-15 | -0.39651 |
| 0.182321 | 7.41E-05 | 0.372581 | 7.96E-17 | 0.408851 | 3.04E-20 | 0.198761 | 1.51E-05 | 0.285978 |
| -0.26478 | 6.23E-09 | -0.55359 | 7.44E-39 | -0.61081 | 4.27E-49 | -0.23217 | 3.91E-07 | -0.38643 |
| 0.447568 | 2.20E-24 | 0.707795 | 3.39E-72 | 0.777999 | 6.50E-96 | 0.315148 | 3.16E-12 | 0.420243 |
| 0.361284 | 7.61E-16 | 0.36243  | 6.08E-16 | 0.411143 | 1.79E-20 | 0.164144 | 0.00037  | 0.193949 |
| 0.529126 | 4.74E-35 | 0.481479 | 1.79E-28 | 0.583939 | 4.93E-44 | 0.348483 | 8.83E-15 | 0.261939 |
| -0.28217 | 5.36E-10 | -0.33532 | 9.81E-14 | -0.45679 | 1.88E-25 | -0.18701 | 4.78E-05 | -0.243   |
| -0.32027 | 1.34E-12 | -0.54611 | 1.17E-37 | -0.67405 | 3.74E-63 | -0.22909 | 5.62E-07 | -0.30606 |
| -0.40957 | 2.57E-20 | -0.5136  | 8.57E-33 | -0.60468 | 6.73E-48 | -0.16947 | 0.00023  | -0.34333 |
| -0.41899 | 2.81E-21 | -0.42024 | 2.09E-21 | -0.60439 | 7.66E-48 | -0.10948 | 0.01795  | -0.13936 |
| 0.28469  | 3.71E-10 | 0.646568 | 1.24E-56 | 0.665763 | 4.08E-61 | 0.280258 | 7.09E-10 | 0.305284 |
| -0.41552 | 6.41E-21 | -0.5928  | 1.19E-45 | -0.73035 | 5.37E-79 | -0.28475 | 3.67E-10 | -0.46828 |
| 0.357218 | 1.68E-15 | 0.551193 | 1.81E-38 | 0.600002 | 5.30E-47 | 0.26334  | 7.57E-09 | 0.216817 |
| -0.61644 | 3.23E-50 | -0.67046 | 2.92E-62 | -0.7409  | 2.04E-82 | -0.41113 | 1.79E-20 | -0.44866 |
| -0.38337 | 8.47E-18 | -0.52669 | 1.09E-34 | -0.59379 | 7.80E-46 | -0.30337 | 2.13E-11 | -0.28629 |
| 0.486359 | 4.22E-29 | 0.551563 | 1.58E-38 | 0.6074   | 2.00E-48 | 0.228963 | 5.70E-07 | 0.399512 |
| 0.662717 | 2.21E-60 | 0.727466 | 4.35E-78 | 0.803684 | #####    | 0.378576 | 2.32E-17 | 0.446673 |
| 0.253507 | 2.78E-08 | 0.356269 | 2.01E-15 | 0.37815  | 2.53E-17 | 0.097863 | 0.03449  | 0.064637 |
| -0.22908 | 5.62E-07 | -0.31051 | 6.77E-12 | -0.43944 | 1.80E-23 | -0.14654 | 0.0015   | -0.21351 |
| -0.08169 | 0.07779  | -0.38526 | 5.67E-18 | -0.5377  | 2.39E-36 | 0.03574  | 0.44099  | -0.03268 |
| 0.481174 | 1.95E-28 | 0.455988 | 2.34E-25 | 0.659537 | 1.26E-59 | 0.293722 | 9.56E-11 | 0.353212 |
| 0.608281 | 1.34E-48 | 0.606337 | 3.21E-48 | 0.62539  | 4.73E-52 | 0.396465 | 4.99E-19 | 0.389021 |
| 0.304983 | 1.65E-11 | 0.340849 | 3.62E-14 | 0.432589 | 1.02E-22 | 0.144778 | 0.00171  | 0.272576 |
| -0.40944 | 2.65E-20 | -0.43954 | 1.76E-23 | -0.61134 | 3.36E-49 | -0.17424 | 0.00015  | -0.36486 |
| -0.62208 | 2.29E-51 | -0.7003  | 4.45E-70 | -0.80309 | #####    | -0.41026 | 2.19E-20 | -0.52055 |
| 0.39429  | 8.05E-19 | 0.433411 | 8.28E-23 | 0.512055 | 1.42E-32 | 0.179847 | 9.31E-05 | 0.436094 |
| 0.450482 | 1.02E-24 | 0.501871 | 3.66E-31 | 0.582591 | 8.60E-44 | 0.356019 | 2.11E-15 | 0.370965 |
| 0.405204 | 7.01E-20 | 0.577026 | 8.32E-43 | 0.645309 | 2.37E-56 | 0.3848   | 6.26E-18 | 0.337545 |
| 0.547258 | 7.70E-38 | 0.687415 | 1.38E-66 | 0.775172 | 8.54E-95 | 0.382006 | 1.13E-17 | 0.361719 |
| 0.272833 | 2.04E-09 | 0.392903 | 1.09E-18 | 0.436161 | 4.15E-23 | 0.237418 | 2.09E-07 | 0.467906 |
| -0.47753 | 5.65E-28 | -0.42923 | 2.34E-22 | -0.50552 | 1.16E-31 | -0.22978 | 5.18E-07 | -0.15127 |
| 0.26835  | 3.82E-09 | 0.163934 | 0.00037  | 0.425138 | 6.39E-22 | 0.18508  | 5.73E-05 | 0.138411 |
| 0.623107 | 1.41E-51 | 0.807    | #####    | 0.847746 | #####    | 0.397289 | 4.15E-19 | 0.365593 |
| 0.279437 | 7.98E-10 | 0.310116 | 7.21E-12 | 0.461411 | 5.34E-26 | 0.015673 | 0.7355   | -0.11703 |
| 0.386062 | 4.78E-18 | 0.506373 | 8.82E-32 | 0.692139 | 7.60E-68 | 0.214562 | 2.88E-06 | 0.181376 |
| -0.29673 | 6.03E-11 | -0.24734 | 6.12E-08 | -0.40781 | 3.86E-20 | -0.07455 | 0.10764  | 0.223069 |
| 0.21114  | 4.17E-06 | 0.4012   | 1.73E-19 | 0.468174 | 8.16E-27 | 0.118586 | 0.01032  | 0.12297  |
| 0.472161 | 2.64E-27 | 0.534575 | 7.16E-36 | 0.661476 | 4.37E-60 | 0.247657 | 5.88E-08 | 0.291476 |
| 0.435981 | 4.34E-23 | 0.644078 | 4.46E-56 | 0.755285 | 2.31E-87 | 0.316219 | 2.64E-12 | 0.347045 |
| -0.36184 | 6.82E-16 | -0.28872 | 2.04E-10 | -0.42546 | 5.91E-22 | -0.10632 | 0.02157  | -0.04816 |
| 0.397211 | 4.23E-19 | 0.402208 | 1.38E-19 | 0.549922 | 2.90E-38 | 0.213108 | 3.38E-06 | 0.223448 |

|          |          |          |          |          |          |          |          |          |
|----------|----------|----------|----------|----------|----------|----------|----------|----------|
| 0.553491 | 7.72E-39 | 0.619872 | 6.49E-51 | 0.804855 | #####    | 0.33666  | 7.71E-14 | 0.39222  |
| 0.35832  | 1.36E-15 | 0.523477 | 3.24E-34 | 0.6048   | 6.38E-48 | 0.054115 | 0.24315  | 0.300351 |
| 0.269743 | 3.15E-09 | 0.324586 | 6.42E-13 | 0.394789 | 7.22E-19 | 0.214361 | 2.95E-06 | 0.152268 |
| -0.28253 | 5.09E-10 | -0.37572 | 4.18E-17 | -0.46826 | 7.97E-27 | -0.04051 | 0.38243  | -0.15947 |
| -0.35785 | 1.49E-15 | -0.27087 | 2.69E-09 | -0.4394  | 1.82E-23 | -0.17966 | 9.46E-05 | -0.30051 |
| 0.346833 | 1.20E-14 | 0.358854 | 1.22E-15 | 0.438849 | 2.10E-23 | 0.064187 | 0.16611  | 0.120012 |
| 0.402346 | 1.34E-19 | 0.276329 | 1.25E-09 | 0.396645 | 4.79E-19 | 0.018865 | 0.68429  | 0.021749 |
| 0.471441 | 3.24E-27 | 0.523202 | 3.55E-34 | 0.643614 | 5.66E-56 | 0.165142 | 0.00034  | 0.074609 |
| 0.374293 | 5.61E-17 | 0.462736 | 3.71E-26 | 0.536663 | 3.44E-36 | 0.266563 | 4.88E-09 | 0.404808 |
| -0.02697 | 0.56098  | -0.36004 | 9.70E-16 | -0.42739 | 3.68E-22 | -0.09454 | 0.04113  | -0.20951 |
| 0.264753 | 6.25E-09 | 0.282927 | 4.80E-10 | 0.459358 | 9.37E-26 | 0.071792 | 0.12132  | -0.15205 |
| 0.306674 | 1.26E-11 | 0.498218 | 1.14E-30 | 0.580163 | 2.33E-43 | 0.140417 | 0.00235  | 0.077593 |
| 0.499015 | 8.94E-31 | 0.51014  | 2.64E-32 | 0.712647 | 1.33E-73 | 0.286992 | 2.64E-10 | 0.154514 |
| 0.599281 | 7.27E-47 | 0.615892 | 4.15E-50 | 0.707958 | 3.05E-72 | 0.313936 | 3.86E-12 | 0.292518 |
| 0.355267 | 2.44E-15 | 0.514861 | 5.68E-33 | 0.641675 | 1.52E-55 | 0.138199 | 0.00276  | 0.16068  |
| 0.640101 | 3.39E-55 | 0.765022 | 6.56E-91 | 0.824209 | #####    | 0.463685 | 2.85E-26 | 0.618618 |
| 0.323359 | 7.93E-13 | 0.28256  | 5.07E-10 | 0.405099 | 7.18E-20 | 0.151666 | 0.00101  | 0.289081 |
| 0.603952 | 9.31E-48 | 0.557955 | 1.44E-39 | 0.842407 | #####    | 0.359809 | 1.01E-15 | 0.306075 |
| 0.4921   | 7.49E-30 | 0.748623 | 4.96E-85 | 0.802835 | #####    | 0.366594 | 2.66E-16 | 0.357569 |
| 0.410779 | 1.94E-20 | 0.441047 | 1.19E-23 | 0.646576 | 1.23E-56 | 0.314226 | 3.68E-12 | 0.212348 |
| -0.48746 | 3.04E-29 | -0.71929 | 1.41E-75 | -0.74602 | 3.87E-84 | -0.35355 | 3.39E-15 | -0.50245 |
| 0.338484 | 5.56E-14 | 0.306745 | 1.24E-11 | 0.390625 | 1.79E-18 | 0.164332 | 0.00036  | 0.357911 |
| -0.42611 | 5.05E-22 | -0.38741 | 3.59E-18 | -0.64086 | 2.30E-55 | -0.19031 | 3.48E-05 | -0.28516 |
| 0.249652 | 4.57E-08 | 0.3359   | 8.84E-14 | 0.440536 | 1.36E-23 | 0.193854 | 2.46E-05 | 0.308338 |
| 0.247975 | 5.65E-08 | 0.354903 | 2.62E-15 | 0.382347 | 1.05E-17 | 0.109597 | 0.01783  | 0.233255 |
| 0.343759 | 2.12E-14 | 0.37014  | 1.31E-16 | 0.493748 | 4.53E-30 | 0.131458 | 0.00443  | 0.027447 |
| 0.250931 | 3.88E-08 | 0.324172 | 6.90E-13 | 0.410651 | 2.00E-20 | 0.036159 | 0.43564  | 0.161131 |
| 0.537093 | 2.96E-36 | 0.704782 | 2.46E-71 | 0.782977 | 6.35E-98 | 0.371612 | 9.69E-17 | 0.36377  |
| 0.372283 | 8.46E-17 | 0.238429 | 1.85E-07 | 0.449818 | 1.21E-24 | 0.218412 | 1.89E-06 | 0.173279 |
| 0.520511 | 8.76E-34 | 0.597369 | 1.67E-46 | 0.776151 | 3.51E-95 | 0.28477  | 3.66E-10 | 0.256308 |
| 0.316375 | 2.57E-12 | 0.238246 | 1.89E-07 | 0.385455 | 5.44E-18 | 0.255983 | 2.01E-08 | 0.281354 |
| 0.293982 | 9.19E-11 | 0.470755 | 3.94E-27 | 0.511473 | 1.71E-32 | 0.170876 | 0.00021  | 0.243265 |
| -0.2087  | 5.41E-06 | -0.31803 | 1.95E-12 | -0.42998 | 1.95E-22 | -0.19209 | 2.93E-05 | -0.12062 |
| 0.556663 | 2.35E-39 | 0.71919  | 1.51E-75 | 0.762711 | 4.72E-90 | 0.362169 | 6.40E-16 | 0.433013 |
| -0.34343 | 2.26E-14 | -0.37001 | 1.34E-16 | -0.62083 | 4.13E-51 | -0.13866 | 0.00267  | -0.05392 |
| -0.30058 | 3.31E-11 | -0.39525 | 6.52E-19 | -0.48403 | 8.43E-29 | -0.31549 | 2.98E-12 | -0.35207 |
| 0.628687 | 9.66E-53 | 0.742029 | 8.56E-83 | 0.817976 | #####    | 0.319059 | 1.64E-12 | 0.401138 |
| -0.2733  | 1.91E-09 | -0.47289 | 2.15E-27 | -0.56601 | 6.56E-41 | -0.15663 | 0.00068  | -0.35711 |
| 0.31209  | 5.23E-12 | 0.503837 | 1.97E-31 | 0.542546 | 4.24E-37 | 0.239033 | 1.72E-07 | 0.219899 |
| -0.43684 | 3.50E-23 | -0.53721 | 2.84E-36 | -0.61284 | 1.69E-49 | -0.26137 | 9.86E-09 | -0.43752 |
| -0.49949 | 7.70E-31 | -0.65056 | 1.53E-57 | -0.7964  | #####    | -0.26873 | 3.62E-09 | -0.4214  |
| 0.347814 | 1.00E-14 | 0.53077  | 2.69E-35 | 0.596752 | 2.18E-46 | 0.254109 | 2.57E-08 | 0.177458 |
| -0.23957 | 1.61E-07 | -0.52571 | 1.52E-34 | -0.60228 | 1.95E-47 | -0.17944 | 9.66E-05 | -0.39432 |
| 0.525818 | 1.47E-34 | 0.748862 | 4.10E-85 | 0.858787 | #####    | 0.378051 | 2.58E-17 | 0.533685 |
| -0.18073 | 8.58E-05 | -0.40231 | 1.35E-19 | -0.58295 | 7.41E-44 | -0.16762 | 0.00027  | -0.39333 |

|          |          |          |          |          |          |          |          |          |
|----------|----------|----------|----------|----------|----------|----------|----------|----------|
| 0.232421 | 3.80E-07 | 0.418616 | 3.08E-21 | 0.590333 | 3.40E-45 | 0.219611 | 1.65E-06 | 0.166657 |
| 0.174991 | 0.00014  | 0.425752 | 5.50E-22 | 0.438633 | 2.21E-23 | 0.161273 | 0.00047  | 0.204997 |
| 0.278001 | 9.81E-10 | 0.234242 | 3.06E-07 | 0.495864 | 2.37E-30 | 0.116601 | 0.01168  | 0.057164 |
| -0.31458 | 3.47E-12 | -0.346   | 1.40E-14 | -0.46291 | 3.53E-26 | -0.20995 | 4.74E-06 | -0.0465  |
| -0.30432 | 1.83E-11 | -0.3392  | 4.88E-14 | -0.36633 | 2.81E-16 | -0.17063 | 0.00021  | -0.15891 |
| -0.35671 | 1.85E-15 | -0.51136 | 1.77E-32 | -0.67698 | 6.82E-64 | -0.25699 | 1.76E-08 | -0.31482 |
| 0.407589 | 4.06E-20 | 0.363965 | 4.49E-16 | 0.516413 | 3.41E-33 | 0.265304 | 5.79E-09 | 0.133315 |
| 0.290613 | 1.53E-10 | 0.302307 | 2.52E-11 | 0.433025 | 9.12E-23 | 0.097333 | 0.03549  | 0.159616 |
| 0.264281 | 6.66E-09 | 0.453161 | 4.99E-25 | 0.583958 | 4.89E-44 | 0.134374 | 0.00362  | 0.076671 |
| 0.242161 | 1.17E-07 | 0.397169 | 4.27E-19 | 0.595863 | 3.20E-46 | 0.164014 | 0.00037  | 0.099812 |
| 0.299522 | 3.90E-11 | 0.285679 | 3.20E-10 | 0.419447 | 2.52E-21 | 0.205306 | 7.73E-06 | 0.071028 |
| 0.33831  | 5.73E-14 | 0.393495 | 9.59E-19 | 0.424085 | 8.26E-22 | 0.231091 | 4.44E-07 | 0.260092 |
| 0.617781 | 1.73E-50 | 0.770319 | 6.52E-93 | 0.797164 | #####    | 0.425437 | 5.94E-22 | 0.403666 |
| 0.24899  | 4.97E-08 | 0.278781 | 8.77E-10 | 0.572643 | 4.83E-42 | 0.118275 | 0.01052  | 0.0784   |
| 0.073083 | 0.11475  | 0.003515 | 0.93961  | -0.26539 | 5.73E-09 | 0.118844 | 0.01016  | 0.38935  |
| 0.210923 | 4.27E-06 | 0.387785 | 3.31E-18 | 0.449973 | 1.17E-24 | 0.136215 | 0.00318  | 0.06517  |
| 0.395799 | 5.78E-19 | 0.641123 | 2.02E-55 | 0.681939 | 3.70E-65 | 0.343562 | 2.20E-14 | 0.357948 |
| -0.19105 | 3.24E-05 | -0.30808 | 1.00E-11 | -0.51122 | 1.86E-32 | -0.03032 | 0.51336  | 0.010462 |
| 0.242552 | 1.11E-07 | 0.44471  | 4.63E-24 | 0.504036 | 1.85E-31 | 0.207038 | 6.45E-06 | 0.376373 |
| -0.35172 | 4.80E-15 | -0.56678 | 4.86E-41 | -0.67691 | 7.14E-64 | -0.22382 | 1.03E-06 | -0.3142  |
| -0.43058 | 1.68E-22 | -0.57422 | 2.57E-42 | -0.60184 | 2.37E-47 | -0.35195 | 4.60E-15 | -0.34318 |
| 0.480476 | 2.40E-28 | 0.705914 | 1.17E-71 | 0.809645 | #####    | 0.193823 | 2.47E-05 | 0.347495 |
| 0.4495   | 1.32E-24 | 0.641144 | 2.00E-55 | 0.68327  | 1.67E-65 | 0.368941 | 1.66E-16 | 0.2797   |
| 0.457828 | 1.42E-25 | 0.623311 | 1.28E-51 | 0.860313 | #####    | 0.221708 | 1.31E-06 | 0.226709 |
| -0.11552 | 0.01248  | -0.26973 | 3.15E-09 | -0.45285 | 5.43E-25 | -0.14142 | 0.00219  | -0.299   |
| 0.506818 | 7.65E-32 | 0.37436  | 5.53E-17 | 0.73915  | 7.72E-82 | 0.30129  | 2.96E-11 | 0.172041 |
| 0.428223 | 3.00E-22 | 0.487525 | 2.98E-29 | 0.579594 | 2.94E-43 | 0.271367 | 2.51E-09 | 0.342505 |
| -0.16273 | 0.00041  | -0.31757 | 2.11E-12 | -0.54701 | 8.44E-38 | 0.036241 | 0.43461  | 0.138966 |
| -0.41372 | 9.79E-21 | -0.62368 | 1.07E-51 | -0.70474 | 2.52E-71 | -0.30799 | 1.02E-11 | -0.31947 |
| 0.338505 | 5.53E-14 | 0.519266 | 1.33E-33 | 0.555538 | 3.59E-39 | 0.132145 | 0.00423  | 0.211774 |
| -0.14532 | 0.00164  | -0.41729 | 4.22E-21 | -0.43908 | 1.98E-23 | -0.22102 | 1.41E-06 | -0.10396 |
| 0.554424 | 5.45E-39 | 0.587346 | 1.19E-44 | 0.690739 | 1.80E-67 | 0.364961 | 3.69E-16 | 0.399218 |
| -0.17881 | 0.0001   | -0.46017 | 7.51E-26 | -0.54456 | 2.05E-37 | -0.1817  | 7.85E-05 | -0.26877 |
| -0.23875 | 1.78E-07 | -0.52194 | 5.44E-34 | -0.54699 | 8.48E-38 | -0.26618 | 5.14E-09 | -0.389   |
| 0.344695 | 1.79E-14 | 0.591719 | 1.89E-45 | 0.680903 | 6.83E-65 | 0.214942 | 2.77E-06 | 0.190271 |
| -0.20633 | 6.95E-06 | -0.4621  | 4.41E-26 | -0.5882  | 8.36E-45 | -0.19239 | 2.84E-05 | -0.24823 |
| -0.21943 | 1.69E-06 | -0.24865 | 5.19E-08 | -0.51747 | 2.40E-33 | -0.03462 | 0.4555   | -0.04696 |
| -0.2201  | 1.56E-06 | -0.30513 | 1.61E-11 | -0.44243 | 8.37E-24 | -0.15219 | 0.00097  | -0.24632 |
| 0.47926  | 3.42E-28 | 0.456762 | 1.90E-25 | 0.636397 | 2.18E-54 | 0.335241 | 9.94E-14 | 0.133604 |
| 0.402702 | 1.24E-19 | 0.400188 | 2.18E-19 | 0.572939 | 4.29E-42 | 0.266634 | 4.83E-09 | 0.458424 |
| 0.493543 | 4.83E-30 | 0.577173 | 7.85E-43 | 0.75872  | 1.35E-88 | 0.206252 | 7.00E-06 | 0.212249 |
| 0.421575 | 1.51E-21 | 0.635711 | 3.07E-54 | 0.829792 | #####    | 0.349169 | 7.77E-15 | 0.427    |
| 0.46175  | 4.86E-26 | 0.448658 | 1.65E-24 | 0.701417 | 2.17E-70 | 0.348426 | 8.93E-15 | 0.323749 |
| -0.25776 | 1.59E-08 | -0.37211 | 8.76E-17 | -0.48786 | 2.69E-29 | -0.01059 | 0.81946  | -0.03808 |
| -0.23355 | 3.32E-07 | -0.23368 | 3.27E-07 | -0.39537 | 6.34E-19 | -0.17482 | 0.00015  | -0.31714 |

|          |          |          |          |          |          |          |          |          |
|----------|----------|----------|----------|----------|----------|----------|----------|----------|
| 0.322894 | 8.58E-13 | 0.432652 | 1.00E-22 | 0.466104 | 1.46E-26 | 0.165909 | 0.00032  | 0.241987 |
| 0.688191 | 8.59E-67 | 0.796589 | #####    | 0.908269 | #####    | 0.433253 | 8.62E-23 | 0.490675 |
| -0.30563 | 1.49E-11 | -0.52917 | 4.66E-35 | -0.60378 | 1.00E-47 | -0.28291 | 4.82E-10 | -0.48803 |
| 0.288515 | 2.10E-10 | 0.316579 | 2.49E-12 | 0.409645 | 2.53E-20 | 0.226124 | 7.91E-07 | 0.237746 |
| 0.367711 | 2.13E-16 | 0.387419 | 3.58E-18 | 0.397188 | 4.25E-19 | 0.220957 | 1.42E-06 | 0.241508 |
| 0.426844 | 4.21E-22 | 0.406988 | 4.66E-20 | 0.594146 | 6.70E-46 | 0.305524 | 1.51E-11 | 0.138859 |
| -0.19594 | 2.01E-05 | -0.50197 | 3.56E-31 | -0.59179 | 1.83E-45 | -0.20028 | 1.30E-05 | -0.31316 |
| -0.36021 | 9.39E-16 | -0.56351 | 1.73E-40 | -0.59786 | 1.35E-46 | -0.40568 | 6.29E-20 | -0.43618 |
| 0.52452  | 2.28E-34 | 0.431925 | 1.20E-22 | 0.630345 | 4.31E-53 | 0.199391 | 1.42E-05 | 0.111181 |
| 0.427454 | 3.63E-22 | 0.517468 | 2.41E-33 | 0.568586 | 2.40E-41 | 0.188975 | 3.96E-05 | 0.368483 |
| -0.28275 | 4.93E-10 | -0.24494 | 8.28E-08 | -0.48383 | 8.94E-29 | 0.096858 | 0.0364   | 0.028777 |
| -0.28017 | 7.18E-10 | -0.34689 | 1.19E-14 | -0.51464 | 6.10E-33 | -0.22506 | 8.94E-07 | -0.30933 |
| -0.37803 | 2.59E-17 | -0.43442 | 6.43E-23 | -0.56137 | 3.93E-40 | -0.16117 | 0.00047  | -0.20344 |
| -0.33913 | 4.95E-14 | -0.23937 | 1.65E-07 | -0.41857 | 3.11E-21 | -0.00353 | 0.93935  | 0.005852 |
| -0.44561 | 3.67E-24 | -0.5747  | 2.13E-42 | -0.5885  | 7.37E-45 | -0.25013 | 4.30E-08 | -0.2363  |
| 0.561878 | 3.24E-40 | 0.782137 | 1.40E-97 | 0.901781 | #####    | 0.390173 | 1.98E-18 | 0.409112 |
| 0.293467 | 9.94E-11 | 0.499704 | 7.21E-31 | 0.569486 | 1.68E-41 | 0.136786 | 0.00306  | 0.127898 |
| 0.493868 | 4.37E-30 | 0.603485 | 1.14E-47 | 0.672668 | 8.26E-63 | 0.3871   | 3.83E-18 | 0.414017 |
| 0.313329 | 4.26E-12 | 0.43389  | 7.35E-23 | 0.571468 | 7.70E-42 | 0.191598 | 3.07E-05 | 0.25404  |
| 0.405938 | 5.93E-20 | 0.401538 | 1.61E-19 | 0.587185 | 1.28E-44 | 0.189665 | 3.70E-05 | 0.215968 |
| 0.245394 | 7.82E-08 | 0.370643 | 1.18E-16 | 0.386772 | 4.11E-18 | 0.094181 | 0.04192  | 0.100681 |
| 0.274735 | 1.56E-09 | 0.433803 | 7.51E-23 | 0.459927 | 8.02E-26 | 0.191429 | 3.12E-05 | 0.364169 |
| -0.1879  | 4.38E-05 | -0.32627 | 4.81E-13 | -0.5404  | 9.14E-37 | -0.05787 | 0.21195  | -0.12379 |
| 0.393592 | 9.38E-19 | 0.401719 | 1.54E-19 | 0.500081 | 6.41E-31 | 0.139058 | 0.0026   | 0.12372  |
| 0.302053 | 2.62E-11 | 0.283528 | 4.40E-10 | 0.475296 | 1.08E-27 | 0.029036 | 0.53137  | 0.085192 |
| 0.539053 | 1.48E-36 | 0.613069 | 1.52E-49 | 0.622192 | 2.17E-51 | 0.33116  | 2.05E-13 | 0.287499 |
| -0.20351 | 9.31E-06 | -0.31169 | 5.58E-12 | -0.36299 | 5.44E-16 | -0.18047 | 8.79E-05 | -0.31831 |
| -0.26018 | 1.16E-08 | -0.21506 | 2.73E-06 | -0.44047 | 1.38E-23 | 0.057028 | 0.21867  | 0.004257 |
| -0.26491 | 6.11E-09 | -0.34467 | 1.80E-14 | -0.451   | 8.89E-25 | -0.36426 | 4.24E-16 | -0.24595 |
| 0.355043 | 2.55E-15 | 0.585982 | 2.11E-44 | 0.659494 | 1.29E-59 | 0.154831 | 0.00079  | 0.195199 |
| 0.406549 | 5.16E-20 | 0.527282 | 8.91E-35 | 0.615141 | 5.88E-50 | 0.251333 | 3.68E-08 | 0.400909 |
| 0.185249 | 5.64E-05 | 0.364225 | 4.26E-16 | 0.400035 | 2.25E-19 | 0.071529 | 0.12269  | -0.02789 |
| 0.342465 | 2.69E-14 | 0.494536 | 3.56E-30 | 0.560323 | 5.87E-40 | 0.308466 | 9.42E-12 | 0.397521 |
| 0.048766 | 0.29296  | 0.256971 | 1.77E-08 | 0.445153 | 4.13E-24 | -0.0957  | 0.0387   | -0.06214 |
| -0.21747 | 2.10E-06 | -0.37204 | 8.90E-17 | -0.5656  | 7.70E-41 | -0.10766 | 0.01996  | -0.18249 |
| 0.544372 | 2.20E-37 | 0.712163 | 1.84E-73 | 0.768996 | 2.09E-92 | 0.398281 | 3.33E-19 | 0.473169 |
| 0.323667 | 7.52E-13 | 0.382836 | 9.48E-18 | 0.469614 | 5.44E-27 | 0.080711 | 0.08145  | -0.0373  |
| 0.462298 | 4.18E-26 | 0.501633 | 3.95E-31 | 0.626703 | 2.52E-52 | 0.303301 | 2.15E-11 | 0.384426 |
| 0.382394 | 1.04E-17 | 0.425697 | 5.58E-22 | 0.496378 | 2.02E-30 | 0.287591 | 2.41E-10 | 0.154099 |
| 0.441234 | 1.14E-23 | 0.586778 | 1.51E-44 | 0.733536 | 5.18E-80 | 0.249249 | 4.81E-08 | 0.382193 |
| 0.256342 | 1.92E-08 | 0.373475 | 6.63E-17 | 0.429168 | 2.38E-22 | 0.212934 | 3.44E-06 | 0.465922 |
| 0.465978 | 1.51E-26 | 0.519067 | 1.42E-33 | 0.592184 | 1.55E-45 | 0.280817 | 6.53E-10 | 0.156258 |
| -0.33751 | 6.62E-14 | -0.36265 | 5.82E-16 | -0.60661 | 2.84E-48 | -0.1343  | 0.00364  | -0.25312 |
| -0.41439 | 8.36E-21 | -0.48862 | 2.14E-29 | -0.57766 | 6.43E-43 | -0.26012 | 1.17E-08 | -0.36822 |
| -0.2988  | 4.37E-11 | -0.52258 | 4.38E-34 | -0.60424 | 8.18E-48 | -0.21038 | 4.53E-06 | -0.17179 |

|          |          |          |          |          |          |          |          |          |
|----------|----------|----------|----------|----------|----------|----------|----------|----------|
| -0.34931 | 7.57E-15 | -0.32502 | 5.96E-13 | -0.62044 | 4.96E-51 | -0.03931 | 0.39666  | -0.10177 |
| 0.378781 | 2.22E-17 | 0.407581 | 4.07E-20 | 0.711761 | 2.41E-73 | 0.222326 | 1.22E-06 | 0.220694 |
| 0.630053 | 4.97E-53 | 0.711686 | 2.54E-73 | 0.847121 | #####    | 0.359708 | 1.04E-15 | 0.42343  |
| -0.45316 | 4.99E-25 | -0.6755  | 1.62E-63 | -0.72204 | 2.07E-76 | -0.27533 | 1.44E-09 | -0.3405  |
| -0.32931 | 2.84E-13 | -0.52157 | 6.15E-34 | -0.56828 | 2.70E-41 | -0.21026 | 4.59E-06 | -0.26864 |
| 0.484298 | 7.78E-29 | 0.579958 | 2.53E-43 | 0.760691 | 2.60E-89 | 0.218506 | 1.87E-06 | 0.162638 |
| -0.26978 | 3.13E-09 | -0.40852 | 3.28E-20 | -0.65594 | 8.80E-59 | -0.16717 | 0.00029  | -0.29307 |
| 0.259322 | 1.30E-08 | 0.43397  | 7.20E-23 | 0.44394  | 5.66E-24 | 0.27645  | 1.22E-09 | 0.288507 |
| 0.544006 | 2.51E-37 | 0.620655 | 4.49E-51 | 0.742108 | 8.06E-83 | 0.451276 | 8.25E-25 | 0.486219 |
| -0.4024  | 1.32E-19 | -0.57785 | 5.97E-43 | -0.7226  | 1.40E-76 | -0.33589 | 8.86E-14 | -0.42651 |
| -0.3555  | 2.33E-15 | -0.46136 | 5.42E-26 | -0.59099 | 2.57E-45 | -0.37406 | 5.88E-17 | -0.45941 |
| 0.562362 | 2.69E-40 | 0.594875 | 4.90E-46 | 0.655662 | 1.02E-58 | 0.30845  | 9.45E-12 | 0.295133 |
| 0.392065 | 1.31E-18 | 0.561123 | 4.32E-40 | 0.699683 | 6.61E-70 | 0.161338 | 0.00046  | 0.168806 |
| 0.740101 | 3.75E-82 | 0.800963 | #####    | 0.940028 | #####    | 0.420624 | 1.90E-21 | 0.478448 |
| 0.708683 | 1.89E-72 | 0.73619  | 7.19E-81 | 0.870315 | #####    | 0.44693  | 2.60E-24 | 0.450642 |
| 0.5666   | 5.21E-41 | 0.784204 | 1.99E-98 | 0.877815 | #####    | 0.42947  | 2.21E-22 | 0.396472 |
| 0.573836 | 3.00E-42 | 0.68352  | 1.44E-65 | 0.739579 | 5.58E-82 | 0.419428 | 2.53E-21 | 0.547815 |
| 0.534004 | 8.74E-36 | 0.692779 | 5.11E-68 | 0.882015 | #####    | 0.372369 | 8.31E-17 | 0.430315 |
| 0.59245  | 1.38E-45 | 0.521366 | 6.59E-34 | 0.720386 | 6.57E-76 | 0.316172 | 2.66E-12 | 0.311169 |
| 0.641663 | 1.53E-55 | 0.721749 | 2.53E-76 | 0.80292  | #####    | 0.389968 | 2.07E-18 | 0.335765 |
| 0.413035 | 1.15E-20 | 0.478662 | 4.07E-28 | 0.534375 | 7.68E-36 | 0.430339 | 1.78E-22 | 0.468898 |
| 0.466472 | 1.31E-26 | 0.42202  | 1.36E-21 | 0.579865 | 2.63E-43 | 0.242681 | 1.10E-07 | 0.167161 |
| 0.231411 | 4.28E-07 | 0.285327 | 3.38E-10 | 0.365718 | 3.17E-16 | 0.101427 | 0.02841  | -0.0185  |
| -0.25895 | 1.36E-08 | -0.34196 | 2.96E-14 | -0.52889 | 5.14E-35 | -0.1503  | 0.00112  | -0.12134 |
| 0.404566 | 8.11E-20 | 0.532242 | 1.61E-35 | 0.664735 | 7.24E-61 | 0.32284  | 8.66E-13 | 0.341963 |
| 0.532055 | 1.72E-35 | 0.625324 | 4.89E-52 | 0.703518 | 5.59E-71 | 0.319969 | 1.41E-12 | 0.393322 |
| 0.394536 | 7.63E-19 | 0.576855 | 8.92E-43 | 0.605284 | 5.15E-48 | 0.332634 | 1.58E-13 | 0.484584 |
| 0.27708  | 1.12E-09 | 0.422921 | 1.09E-21 | 0.456759 | 1.90E-25 | 0.202953 | 9.86E-06 | 0.17218  |
| 0.607349 | 2.04E-48 | 0.661072 | 5.46E-60 | 0.81595  | #####    | 0.358934 | 1.20E-15 | 0.326125 |
| 0.166829 | 0.00029  | 0.469397 | 5.78E-27 | 0.506327 | 8.95E-32 | 0.193121 | 2.65E-05 | 0.219681 |
| 0.397762 | 3.74E-19 | 0.542949 | 3.67E-37 | 0.820591 | #####    | 0.259489 | 1.27E-08 | 0.234069 |
| 0.426196 | 4.94E-22 | 0.504502 | 1.60E-31 | 0.570313 | 1.22E-41 | 0.246195 | 7.08E-08 | 0.214555 |
| 0.512648 | 1.17E-32 | 0.560457 | 5.58E-40 | 0.798038 | #####    | 0.249304 | 4.77E-08 | 0.305596 |
| 0.660786 | 6.38E-60 | 0.62153  | 2.97E-51 | 0.728259 | 2.46E-78 | 0.409969 | 2.35E-20 | 0.361868 |
| 0.732561 | 1.06E-79 | 0.635159 | 4.03E-54 | 0.70361  | 5.27E-71 | 0.409084 | 2.88E-20 | 0.331775 |
| 0.409549 | 2.59E-20 | 0.453223 | 4.91E-25 | 0.483043 | 1.13E-28 | 0.285709 | 3.19E-10 | 0.337283 |
| 0.386147 | 4.70E-18 | 0.446993 | 2.55E-24 | 0.59176  | 1.86E-45 | 0.219727 | 1.63E-06 | 0.337861 |
| 0.408725 | 3.13E-20 | 0.588674 | 6.84E-45 | 0.700764 | 3.31E-70 | 0.285983 | 3.06E-10 | 0.35734  |
| 0.543241 | 3.30E-37 | 0.494782 | 3.30E-30 | 0.560132 | 6.31E-40 | 0.291686 | 1.30E-10 | 0.273335 |
| 0.567098 | 4.29E-41 | 0.724266 | 4.28E-77 | 0.817431 | #####    | 0.388167 | 3.05E-18 | 0.369113 |
| 0.307054 | 1.18E-11 | 0.377294 | 3.02E-17 | 0.500244 | 6.10E-31 | 0.162995 | 0.00041  | 0.145968 |
| 0.617635 | 1.85E-50 | 0.517847 | 2.12E-33 | 0.711708 | 2.50E-73 | 0.304462 | 1.79E-11 | 0.257683 |
| 0.212943 | 3.44E-06 | 0.44103  | 1.20E-23 | 0.470747 | 3.95E-27 | 0.050365 | 0.27741  | 0.014631 |
| 0.540407 | 9.12E-37 | 0.360818 | 8.34E-16 | 0.550054 | 2.76E-38 | 0.332908 | 1.51E-13 | 0.230497 |
| 0.573285 | 3.74E-42 | 0.5681   | 2.90E-41 | 0.640004 | 3.56E-55 | 0.373247 | 6.95E-17 | 0.341682 |

|          |          |          |          |          |          |          |          |          |
|----------|----------|----------|----------|----------|----------|----------|----------|----------|
| 0.26087  | 1.05E-08 | 0.256176 | 1.96E-08 | 0.451344 | 8.11E-25 | 0.09299  | 0.04459  | 0.058441 |
| 0.532436 | 1.51E-35 | 0.453099 | 5.08E-25 | 0.606    | 3.74E-48 | 0.27549  | 1.40E-09 | 0.146047 |
| 0.543424 | 3.09E-37 | 0.62732  | 1.87E-52 | 0.854936 | #####    | 0.308848 | 8.86E-12 | 0.332571 |
| 0.370434 | 1.23E-16 | 0.56038  | 5.74E-40 | 0.659634 | 1.20E-59 | 0.304788 | 1.70E-11 | 0.340822 |
| 0.48028  | 2.54E-28 | 0.320509 | 1.29E-12 | 0.391013 | 1.65E-18 | 0.262866 | 8.07E-09 | 0.153819 |
| 0.436765 | 3.56E-23 | 0.629143 | 7.74E-53 | 0.653294 | 3.62E-58 | 0.343042 | 2.42E-14 | 0.406085 |
| 0.682141 | 3.28E-65 | 0.672015 | 1.20E-62 | 0.720056 | 8.27E-76 | 0.429492 | 2.20E-22 | 0.441372 |
| -0.24109 | 1.33E-07 | -0.49572 | 2.48E-30 | -0.54871 | 4.52E-38 | -0.21639 | 2.36E-06 | -0.43807 |
| 0.401032 | 1.80E-19 | 0.307971 | 1.02E-11 | 0.531905 | 1.81E-35 | 0.214443 | 2.92E-06 | 0.148204 |
| 0.529606 | 4.02E-35 | 0.643196 | 7.02E-56 | 0.705683 | 1.36E-71 | 0.314899 | 3.29E-12 | 0.263875 |
| 0.005487 | 0.90586  | 0.169712 | 0.00023  | 0.153594 | 0.00087  | -0.00647 | 0.88904  | 0.083548 |
| 0.039783 | 0.39103  | -0.02465 | 0.59513  | 0.025844 | 0.57746  | -0.01626 | 0.72604  | -0.0659  |
| 0.015775 | 0.73386  | 0.186422 | 5.05E-05 | 0.127876 | 0.00565  | 0.018489 | 0.69025  | -0.00081 |
| 0.022637 | 0.62559  | 0.039871 | 0.38999  | 0.04916  | 0.28908  | 0.026872 | 0.56241  | -0.02765 |
| -0.03402 | 0.4633   | -0.11422 | 0.01352  | -0.05437 | 0.24093  | -0.10776 | 0.01984  | -0.23006 |
| -0.02269 | 0.62483  | 0.055562 | 0.23075  | 0.118636 | 0.01029  | -0.04023 | 0.38571  | -0.0744  |
| -0.03011 | 0.51633  | -0.03432 | 0.45939  | -0.01951 | 0.67413  | -0.05356 | 0.24806  | 0.021894 |
| 0.021342 | 0.6455   | 0.031489 | 0.49725  | 0.039423 | 0.39533  | -0.05767 | 0.21352  | -0.06719 |
| -0.13708 | 0.00299  | -0.01419 | 0.75975  | -0.00395 | 0.93217  | -0.13181 | 0.00433  | -0.08524 |
| 0.078347 | 0.09081  | 0.166615 | 0.0003   | 0.119374 | 0.00982  | -0.11479 | 0.01306  | -0.09915 |
| 0.03717  | 0.42291  | 0.213458 | 3.25E-06 | 0.217123 | 2.18E-06 | -0.08264 | 0.07439  | 0.011855 |
| 0.032005 | 0.49023  | -0.01357 | 0.76997  | 0.00599  | 0.89727  | 0.016523 | 0.72174  | 0.001821 |
| -0.01055 | 0.82018  | -0.08081 | 0.08108  | -0.05286 | 0.25426  | -0.15262 | 0.00094  | -0.19826 |
| 0.019998 | 0.66644  | 0.032287 | 0.4864   | 0.030035 | 0.51734  | -0.02594 | 0.57601  | 0.03554  |
| 0.026835 | 0.56296  | 0.061599 | 0.1839   | 0.026681 | 0.5652   | 0.007045 | 0.87931  | 0.029908 |
| -0.04771 | 0.30356  | -0.03935 | 0.39617  | -0.02003 | 0.66597  | -0.02378 | 0.60831  | -0.09752 |
| 0.140983 | 0.00226  | 0.24889  | 5.03E-08 | 0.291118 | 1.42E-10 | 0.014246 | 0.75881  | 0.092616 |
| 0.019417 | 0.67557  | -0.01213 | 0.79368  | 0.018864 | 0.68431  | -0.02568 | 0.57987  | -0.0719  |
| 0.13186  | 0.00431  | -0.01508 | 0.74513  | 0.036844 | 0.42699  | 0.004264 | 0.92677  | -0.182   |
| 0.104017 | 0.02458  | 0.099697 | 0.03123  | 0.099403 | 0.03174  | 0.136399 | 0.00314  | 0.016302 |
| 0.072074 | 0.11985  | 0.075448 | 0.10344  | 0.070396 | 0.12874  | 0.085818 | 0.06388  | -0.00687 |
| 0.075106 | 0.10502  | 0.086917 | 0.06055  | 0.091394 | 0.0484   | -0.02957 | 0.52385  | 0.016986 |
| -0.01886 | 0.68435  | 0.134505 | 0.00359  | 0.114622 | 0.01319  | -0.02256 | 0.62671  | 0.064423 |
| 0.022646 | 0.62545  | 0.073484 | 0.11276  | 0.038896 | 0.40168  | -0.00057 | 0.9902   | 0.022529 |
| 0.013109 | 0.77752  | 0.009937 | 0.83041  | 0.023609 | 0.61082  | -0.0383  | 0.40895  | -0.02827 |
| 0.089937 | 0.0521   | 0.160237 | 0.00051  | 0.194017 | 2.42E-05 | -0.04458 | 0.33641  | -0.04695 |
| 0.035186 | 0.4481   | 0.190204 | 3.52E-05 | 0.140273 | 0.00238  | 0.096704 | 0.0367   | 0.065092 |
| 0.011891 | 0.79772  | -0.03303 | 0.47647  | -0.06804 | 0.14206  | 0.00194  | 0.96665  | -0.02253 |
| 0.099747 | 0.03115  | 0.320572 | 1.27E-12 | 0.299314 | 4.03E-11 | 0.116171 | 0.012    | 0.121927 |
| 0.166897 | 0.00029  | 0.349189 | 7.74E-15 | 0.264367 | 6.58E-09 | 0.196841 | 1.83E-05 | 0.225887 |
| 0.096657 | 0.03679  | 0.085922 | 0.06356  | 0.090753 | 0.05     | 0.072628 | 0.11703  | 0.036871 |
| 0.017484 | 0.70629  | 0.031141 | 0.50201  | -0.01004 | 0.82863  | -0.02342 | 0.61369  | 0.022117 |
| -0.01218 | 0.79298  | 0.001778 | 0.96943  | -0.06772 | 0.14396  | -0.00519 | 0.91093  | -0.01632 |
| -0.04471 | 0.33503  | -0.08653 | 0.06169  | -0.09425 | 0.04177  | -0.04412 | 0.34143  | -0.10972 |
| 0.004705 | 0.91923  | -0.02811 | 0.54449  | 0.028648 | 0.53687  | -0.07061 | 0.1276   | -0.06538 |

|          |          |          |          |          |          |          |         |          |
|----------|----------|----------|----------|----------|----------|----------|---------|----------|
| 0.01291  | 0.78081  | 0.168209 | 0.00026  | 0.129705 | 0.005    | -0.09111 | 0.04909 | -0.08273 |
| -0.03244 | 0.48434  | -0.10046 | 0.02997  | -0.03722 | 0.4223   | -0.12472 | 0.00697 | -0.17892 |
| 0.025233 | 0.5865   | 0.050827 | 0.27302  | 0.069769 | 0.13219  | -0.04558 | 0.32563 | -0.03235 |
| 0.136416 | 0.00314  | 0.115516 | 0.01249  | 0.159774 | 0.00053  | 0.012682 | 0.7846  | -0.04235 |
| 0.083847 | 0.07025  | 0.04207  | 0.36435  | 0.020923 | 0.652    | 0.053829 | 0.24565 | 0.009655 |
| 0.010144 | 0.82695  | 0.002608 | 0.95518  | 0.004383 | 0.92473  | 0.062658 | 0.17645 | -0.03742 |
| 0.091324 | 0.04857  | 0.005209 | 0.91062  | 0.00723  | 0.87617  | -0.03865 | 0.40469 | -0.10725 |
| 0.013656 | 0.7685   | 0.022526 | 0.62729  | 0.021491 | 0.64319  | -0.08745 | 0.05899 | -0.2259  |
| -0.04013 | 0.38685  | -0.05839 | 0.20788  | -0.00557 | 0.90444  | -0.08553 | 0.0648  | -0.11992 |
| -0.03427 | 0.46006  | -0.04006 | 0.38768  | 0.038972 | 0.40076  | -0.08057 | 0.082   | -0.11522 |
| -0.06716 | 0.14729  | -0.05741 | 0.21557  | -0.02001 | 0.6663   | -0.0574  | 0.21569 | -0.13025 |
| 0.059051 | 0.20274  | 0.205739 | 7.39E-06 | 0.251935 | 3.41E-08 | 0.042853 | 0.35549 | 0.10972  |
| -0.03065 | 0.50877  | -0.00058 | 0.99006  | -0.0228  | 0.62318  | -0.08866 | 0.05555 | -0.05858 |
| -0.00986 | 0.83173  | 0.009258 | 0.84185  | -0.00091 | 0.98431  | -0.05033 | 0.27778 | -0.00126 |
| 0.014135 | 0.76062  | -0.03178 | 0.49329  | 0.00349  | 0.94004  | -0.05271 | 0.25563 | -0.10879 |
| 0.083041 | 0.073    | -0.00414 | 0.92882  | 0.024032 | 0.60444  | -0.0736  | 0.1122  | -0.10424 |
| 0.115134 | 0.01279  | 0.154785 | 0.00079  | 0.190983 | 3.26E-05 | 0.067868 | 0.14308 | -0.00702 |
| 0.09018  | 0.05147  | 0.08074  | 0.08134  | 0.092682 | 0.0453   | -0.12432 | 0.00715 | -0.11913 |
| -0.00801 | 0.86301  | -0.06509 | 0.16023  | -0.00442 | 0.92411  | -0.08457 | 0.06786 | -0.02434 |
| 0.0834   | 0.07177  | 0.197057 | 1.79E-05 | 0.16465  | 0.00035  | 0.070978 | 0.12561 | 0.14798  |
| 0.055825 | 0.22855  | 0.210984 | 4.24E-06 | 0.182864 | 7.05E-05 | 0.050984 | 0.27154 | 0.062461 |
| 0.012878 | 0.78134  | 0.189719 | 3.68E-05 | 0.151815 | 0.001    | 0.031256 | 0.50044 | 0.173327 |
| 0.101274 | 0.02865  | 0.028914 | 0.53309  | 0.017698 | 0.70285  | -0.03424 | 0.46044 | 0.016444 |
| 0.047294 | 0.30779  | 0.001574 | 0.97293  | -0.00662 | 0.88651  | -0.04175 | 0.36807 | -0.03977 |
| -0.05735 | 0.21603  | 0.005431 | 0.90681  | -0.00625 | 0.89288  | -0.11257 | 0.01494 | -0.11782 |
| 0.074465 | 0.10803  | 0.051758 | 0.26431  | 0.072288 | 0.11876  | -0.03367 | 0.46788 | -0.00038 |
| 0.037702 | 0.4163   | -0.02503 | 0.5895   | -0.0239  | 0.6064   | -0.00062 | 0.98936 | -0.12435 |
| 0.109679 | 0.01774  | 0.214038 | 3.05E-06 | 0.206622 | 6.74E-06 | -0.01002 | 0.82896 | 0.098681 |
| -0.12574 | 0.00651  | -0.11044 | 0.01696  | -0.06987 | 0.13163  | -0.1295  | 0.00507 | -0.15006 |
| 0.220399 | 1.51E-06 | 0.329899 | 2.56E-13 | 0.440538 | 1.36E-23 | 0.103647 | 0.0251  | 0.219777 |
| 0.010298 | 0.82435  | 0.040205 | 0.38602  | 0.056248 | 0.22504  | -0.00127 | 0.97823 | 0.008585 |
| 0.065085 | 0.16025  | 0.023722 | 0.60911  | 0.032713 | 0.48067  | 0.016154 | 0.72771 | -0.04073 |
| -0.00912 | 0.84421  | -0.02146 | 0.64364  | 0.10361  | 0.02515  | -0.12551 | 0.00661 | -0.14318 |
| 0.06628  | 0.1527   | -0.00011 | 0.99805  | 0.033072 | 0.47586  | -0.1146  | 0.01321 | -0.14565 |
| 0.097814 | 0.03459  | 0.024691 | 0.59456  | 0.020041 | 0.66577  | 0.117808 | 0.01084 | -0.05353 |
| 0.11123  | 0.01618  | 0.007318 | 0.87468  | 0.016634 | 0.71995  | 0.103737 | 0.02497 | -0.04222 |
| 0.091141 | 0.04902  | 0.059509 | 0.19925  | 0.051804 | 0.26389  | 0.067514 | 0.14519 | -0.0028  |
| 0.024269 | 0.60088  | 0.123653 | 0.00747  | 0.162449 | 0.00042  | -0.00336 | 0.94234 | 0.008039 |
| 0.046719 | 0.31372  | 0.02195  | 0.63613  | 0.020828 | 0.65347  | -0.02567 | 0.58    | -0.01954 |
| 0.00144  | 0.97524  | 0.103536 | 0.02526  | 0.141391 | 0.00219  | 0.038319 | 0.40871 | -0.04688 |
| 0.063012 | 0.17402  | 0.177237 | 0.00012  | 0.185246 | 5.64E-05 | 0.032676 | 0.48117 | 0.050171 |
| 0.055621 | 0.23026  | 0.082847 | 0.07368  | 0.102291 | 0.02708  | 0.000933 | 0.98395 | 0.016585 |
| 0.067004 | 0.14826  | 0.019434 | 0.6753   | 0.043926 | 0.34356  | -0.11024 | 0.01716 | -0.08188 |
| -0.04222 | 0.36266  | -0.08929 | 0.05383  | -0.07561 | 0.10268  | -0.07193 | 0.1206  | -0.10577 |
| 0.132823 | 0.00404  | 0.105886 | 0.02211  | 0.140763 | 0.0023   | 0.036233 | 0.4347  | -0.04121 |

|          |          |          |          |          |          |          |          |          |
|----------|----------|----------|----------|----------|----------|----------|----------|----------|
| -0.03371 | 0.46735  | -0.03157 | 0.49609  | 0.073421 | 0.11307  | -0.08573 | 0.06414  | -0.10055 |
| -0.03268 | 0.48111  | 0.033192 | 0.47427  | 0.078861 | 0.0887   | -0.07819 | 0.09146  | -0.09974 |
| 0.08523  | 0.06573  | 0.109967 | 0.01744  | 0.129134 | 0.00519  | 0.061779 | 0.18262  | 0.041507 |
| 0.027392 | 0.55487  | -0.01308 | 0.77801  | 0.005948 | 0.89799  | -0.03195 | 0.49098  | -0.07508 |
| 0.018199 | 0.69486  | -0.00684 | 0.88284  | 0.031175 | 0.50155  | 0.024134 | 0.60292  | -0.02672 |
| 0.052489 | 0.25762  | 0.02696  | 0.56113  | 0.06746  | 0.14551  | 0.03512  | 0.44896  | -0.00446 |
| 0.147878 | 0.00135  | 0.07869  | 0.0894   | 0.19448  | 2.32E-05 | -0.04624 | 0.31873  | -0.1696  |
| 0.023327 | 0.61509  | -0.04124 | 0.37385  | -0.04728 | 0.30798  | -0.05448 | 0.23994  | -0.07542 |
| 0.092995 | 0.04458  | 0.156044 | 0.00071  | 0.212848 | 3.47E-06 | 0.062192 | 0.1797   | 0.010358 |
| 0.091481 | 0.04818  | 0.052353 | 0.25885  | 0.069493 | 0.13373  | 0.027114 | 0.5589   | 0.029491 |
| 0.051101 | 0.27043  | 0.040246 | 0.38553  | 0.041674 | 0.36888  | -0.05619 | 0.22553  | -0.0036  |
| 0.031282 | 0.50008  | -0.019   | 0.68207  | -0.03593 | 0.43862  | -0.01846 | 0.69072  | 0.02167  |
| 0.029646 | 0.52277  | -0.10914 | 0.01831  | -0.08429 | 0.06879  | 0.015352 | 0.74072  | -0.19088 |
| 0.004109 | 0.92943  | 0.013079 | 0.77802  | 0.029218 | 0.52879  | -0.0368  | 0.42754  | 0.012228 |
| 0.002455 | 0.95781  | -0.08846 | 0.05611  | -0.03972 | 0.39179  | -0.2169  | 2.23E-06 | -0.22661 |
| 0.181255 | 8.18E-05 | 0.016848 | 0.71651  | 0.036732 | 0.42841  | 0.070056 | 0.1306   | 0.018451 |
| 0.01087  | 0.81477  | 0.015339 | 0.74094  | 0.01664  | 0.71986  | 0.069496 | 0.13372  | -0.04631 |
| 0.060751 | 0.19001  | 0.023953 | 0.60564  | 0.019846 | 0.66881  | -0.15858 | 0.00058  | -0.13834 |
| 0.089862 | 0.0523   | 0.100724 | 0.02953  | 0.101712 | 0.02796  | -0.01999 | 0.66663  | -0.14715 |
| 0.105994 | 0.02197  | 0.078934 | 0.0884   | 0.063588 | 0.17011  | 0.006246 | 0.89291  | -0.0067  |
| 0.00449  | 0.9229   | 0.052287 | 0.25946  | 0.099994 | 0.03073  | -0.02932 | 0.52735  | -0.02925 |
| -0.39524 | 6.53E-19 | -0.33155 | 1.92E-13 | -0.48039 | 2.46E-28 | -0.19012 | 3.55E-05 | -0.3062  |
| 0.037504 | 0.41876  | -0.05203 | 0.26178  | 0.148271 | 0.00131  | -0.04633 | 0.31774  | 0.02212  |
| 0.086995 | 0.06031  | 0.257864 | 1.57E-08 | -0.074   | 0.11024  | 0.304386 | 1.81E-11 | 0.334706 |
| -0.12056 | 0.00911  | -0.27641 | 1.23E-09 | -0.49325 | 5.27E-30 | -0.12009 | 0.00939  | -0.30244 |
| 0.00571  | 0.90205  | 0.020126 | 0.66443  | -0.20033 | 1.29E-05 | 0.038827 | 0.40252  | 0.14326  |
| 0.298549 | 4.54E-11 | 0.227033 | 7.12E-07 | 0.21074  | 4.36E-06 | 0.13103  | 0.00456  | 0.246179 |
| -0.00153 | 0.97374  | -0.00146 | 0.97483  | -0.14284 | 0.00197  | -0.07338 | 0.11327  | -0.09091 |
| 0.192319 | 2.86E-05 | 0.173325 | 0.00017  | -0.06314 | 0.17317  | 0.162051 | 0.00044  | 0.075326 |
| 0.13648  | 0.00312  | 0.069135 | 0.13575  | 0.301467 | 2.88E-11 | -0.11124 | 0.01617  | -0.01037 |
| -0.1198  | 0.00956  | -0.08204 | 0.07654  | -0.36367 | 4.76E-16 | -0.00537 | 0.90778  | -0.05362 |
| -0.00746 | 0.87226  | -0.25301 | 2.96E-08 | -0.50762 | 5.92E-32 | 0.07575  | 0.10206  | -0.09338 |
| 0.147623 | 0.00138  | 0.021386 | 0.64482  | -0.21039 | 4.52E-06 | 0.086289 | 0.06243  | -0.04545 |
| 0.201192 | 1.18E-05 | -0.09239 | 0.04598  | 0.178858 | 0.0001   | -0.02553 | 0.58207  | -0.12334 |
| -0.26147 | 9.73E-09 | -0.13936 | 0.00254  | -0.40802 | 3.68E-20 | -0.05627 | 0.22484  | -0.00428 |
| 0.109066 | 0.01839  | -0.06948 | 0.13379  | -0.2633  | 7.60E-09 | 0.069858 | 0.1317   | 0.038229 |
| 0.100837 | 0.02934  | -0.08612 | 0.06295  | -0.20668 | 6.70E-06 | 0.017315 | 0.709    | -0.22866 |
| -0.01653 | 0.72171  | -0.10707 | 0.02065  | -0.30859 | 9.24E-12 | 0.052029 | 0.26182  | 0.037861 |
| 0.109885 | 0.01753  | -0.21271 | 3.52E-06 | -0.16831 | 0.00026  | -0.0577  | 0.21327  | -0.10477 |
| 0.072907 | 0.11562  | -0.15518 | 0.00077  | -0.20833 | 5.63E-06 | 0.059302 | 0.20082  | -0.06704 |
| -0.38454 | 6.61E-18 | -0.28344 | 4.46E-10 | -0.52354 | 3.18E-34 | -0.14115 | 0.00223  | -0.08666 |
| -0.34521 | 1.62E-14 | -0.49057 | 1.19E-29 | -0.46511 | 1.92E-26 | -0.23887 | 1.75E-07 | -0.30589 |
| 0.322218 | 9.63E-13 | 0.144646 | 0.00172  | -0.11399 | 0.01371  | 0.289852 | 1.72E-10 | 0.20168  |
| -0.29434 | 8.71E-11 | -0.2089  | 5.30E-06 | -0.47274 | 2.24E-27 | -0.05524 | 0.23345  | 0.014236 |
| 0.06573  | 0.15614  | 0.098986 | 0.03247  | -0.18179 | 7.79E-05 | 0.106158 | 0.02177  | 0.209596 |



|          |          |          |          |          |          |          |          |          |
|----------|----------|----------|----------|----------|----------|----------|----------|----------|
| -0.10159 | 0.02816  | -0.27983 | 7.54E-10 | -0.32335 | 7.93E-13 | -0.10728 | 0.0204   | -0.29603 |
| -0.06403 | 0.16714  | -0.17574 | 0.00013  | -0.29617 | 6.57E-11 | -0.14625 | 0.00153  | -0.33557 |
| 0.177238 | 0.00012  | 0.01573  | 0.73458  | 0.220902 | 1.43E-06 | 0.092463 | 0.04582  | 0.11157  |
| -0.23971 | 1.58E-07 | -0.26971 | 3.16E-09 | -0.29573 | 7.03E-11 | -0.18952 | 3.76E-05 | -0.2774  |
| -0.17977 | 9.37E-05 | -0.01001 | 0.82915  | -0.46054 | 6.77E-26 | 0.100481 | 0.02992  | 0.303915 |
| -0.05983 | 0.19682  | -0.04487 | 0.33325  | -0.45412 | 3.86E-25 | 0.092939 | 0.04471  | 0.129899 |
| -0.00218 | 0.96248  | -0.06987 | 0.13164  | -0.42739 | 3.69E-22 | 0.154118 | 0.00083  | 0.096197 |
| 0.002096 | 0.96397  | 0.020882 | 0.65264  | 0.170424 | 0.00022  | -0.01565 | 0.73586  | 0.035015 |
| 0.341836 | 3.02E-14 | 0.328843 | 3.07E-13 | 0.495317 | 2.80E-30 | 0.1151   | 0.01281  | 0.211564 |
| -0.05448 | 0.23996  | -0.09141 | 0.04835  | -0.30935 | 8.17E-12 | 0.170882 | 0.00021  | 0.113692 |
| -0.57596 | 1.28E-42 | -0.49114 | 1.00E-29 | -0.71321 | 9.09E-74 | -0.32828 | 3.39E-13 | -0.35216 |
| 0.103803 | 0.02488  | -0.28788 | 2.31E-10 | -0.4048  | 7.68E-20 | -0.06621 | 0.15316  | -0.22256 |
| 0.199979 | 1.34E-05 | 0.039546 | 0.39386  | 0.181152 | 8.26E-05 | 0.145973 | 0.00156  | 0.059644 |
| 0.199711 | 1.37E-05 | -0.07487 | 0.10611  | 0.244029 | 9.28E-08 | -0.08297 | 0.07325  | -0.3201  |
| -0.22892 | 5.72E-07 | -0.24886 | 5.05E-08 | -0.32145 | 1.10E-12 | -0.11784 | 0.01081  | -0.19017 |
| 0.160857 | 0.00048  | 0.085583 | 0.06462  | -0.25211 | 3.33E-08 | 0.274177 | 1.69E-09 | 0.309419 |
| 0.187944 | 4.37E-05 | 0.072294 | 0.11873  | -0.09168 | 0.0477   | 0.157581 | 0.00063  | -0.08423 |
| 0.063365 | 0.17161  | -0.06287 | 0.175    | 0.098822 | 0.03276  | 0.096846 | 0.03642  | -0.0082  |
| -0.51631 | 3.53E-33 | -0.60824 | 1.37E-48 | -0.62017 | 5.63E-51 | -0.40658 | 5.12E-20 | -0.5938  |
| -0.41993 | 2.25E-21 | -0.41507 | 7.12E-21 | -0.43315 | 8.84E-23 | -0.33531 | 9.82E-14 | -0.48054 |
| 0.042149 | 0.36345  | 0.012081 | 0.79458  | -0.1368  | 0.00305  | -0.06338 | 0.1715   | -0.30067 |
| -0.01589 | 0.73205  | 0.032588 | 0.48234  | -0.16212 | 0.00044  | 0.144672 | 0.00172  | 0.117277 |
| -0.28684 | 2.70E-10 | -0.3902  | 1.97E-18 | -0.57547 | 1.56E-42 | -0.1678  | 0.00027  | -0.15746 |
| -0.23547 | 2.64E-07 | -0.26073 | 1.07E-08 | -0.45613 | 2.25E-25 | -0.10083 | 0.02935  | -0.10767 |
| 0.127745 | 0.0057   | -0.0913  | 0.04862  | -0.234   | 3.15E-07 | 0.103366 | 0.0255   | -0.01891 |
| -0.2349  | 2.83E-07 | -0.20479 | 8.16E-06 | -0.49837 | 1.09E-30 | -0.04399 | 0.34286  | -0.04695 |
| -0.41928 | 2.63E-21 | -0.36608 | 2.95E-16 | -0.5408  | 7.93E-37 | -0.18824 | 4.25E-05 | -0.16201 |
| -0.58256 | 8.71E-44 | -0.54751 | 7.01E-38 | -0.65492 | 1.52E-58 | -0.28732 | 2.51E-10 | -0.27816 |
| -0.29537 | 7.43E-11 | -0.39859 | 3.11E-19 | -0.55464 | 5.02E-39 | -0.15958 | 0.00054  | -0.24592 |
| -0.3327  | 1.56E-13 | -0.24868 | 5.17E-08 | -0.58188 | 1.15E-43 | -0.07749 | 0.09441  | -0.10983 |
| -0.10282 | 0.02629  | 0.012017 | 0.79563  | -0.30519 | 1.60E-11 | 0.070134 | 0.13017  | 0.125905 |
| 0.257483 | 1.65E-08 | 0.154968 | 0.00078  | -0.01999 | 0.66654  | 0.15877  | 0.00057  | 0.089009 |
| -0.62429 | 8.00E-52 | -0.62106 | 3.71E-51 | -0.70501 | 2.11E-71 | -0.33906 | 5.00E-14 | -0.37803 |
| -0.37899 | 2.12E-17 | -0.51273 | 1.14E-32 | -0.54023 | 9.71E-37 | -0.33617 | 8.42E-14 | -0.4507  |
| -0.35471 | 2.72E-15 | -0.41684 | 4.70E-21 | -0.62623 | 3.16E-52 | -0.23994 | 1.54E-07 | -0.2164  |
| 0.011533 | 0.8037   | 0.082859 | 0.07364  | -0.16996 | 0.00022  | 0.088655 | 0.05556  | 0.039039 |
| 0.07937  | 0.08665  | 0.200163 | 1.31E-05 | -0.20516 | 7.85E-06 | 0.147154 | 0.00143  | 0.174873 |
| -0.07328 | 0.11375  | -0.10384 | 0.02483  | -0.38479 | 6.26E-18 | 0.081914 | 0.07699  | 0.123915 |
| -0.20484 | 8.11E-06 | -0.20191 | 1.10E-05 | -0.46657 | 1.28E-26 | -0.07218 | 0.11932  | -0.08801 |
| -0.13804 | 0.0028   | -0.3311  | 2.07E-13 | -0.49362 | 4.72E-30 | -0.10317 | 0.02578  | -0.18558 |
| -0.28391 | 4.16E-10 | -0.16264 | 0.00042  | -0.5781  | 5.39E-43 | -0.05133 | 0.26827  | -0.05868 |
| 0.020512 | 0.6584   | -0.06103 | 0.18802  | -0.36669 | 2.61E-16 | 0.139158 | 0.00258  | 0.060164 |
| -0.19788 | 1.65E-05 | -0.35019 | 6.41E-15 | -0.55    | 2.81E-38 | -0.02974 | 0.52144  | -0.13994 |
| -0.4465  | 2.91E-24 | -0.40387 | 9.49E-20 | -0.66502 | 6.19E-61 | -0.21526 | 2.67E-06 | -0.22393 |
| -0.65449 | 1.91E-58 | -0.78732 | 1.01E-99 | -0.69218 | 7.40E-68 | -0.4623  | 4.19E-26 | -0.56657 |

|          |          |          |          |          |          |          |          |          |
|----------|----------|----------|----------|----------|----------|----------|----------|----------|
| -0.42532 | 6.12E-22 | -0.48451 | 7.31E-29 | -0.65511 | 1.37E-58 | -0.17085 | 0.00021  | -0.21732 |
| -0.22659 | 7.50E-07 | -0.3439  | 2.07E-14 | -0.45861 | 1.15E-25 | -0.12056 | 0.00911  | -0.11065 |
| -0.04622 | 0.3189   | -0.16252 | 0.00042  | -0.38269 | 9.77E-18 | 0.014607 | 0.75288  | -0.17668 |
| -0.30107 | 3.06E-11 | -0.22341 | 1.08E-06 | -0.48376 | 9.14E-29 | -0.15321 | 0.00089  | -0.14905 |
| -0.42046 | 1.98E-21 | -0.38045 | 1.57E-17 | -0.63044 | 4.12E-53 | -0.17816 | 0.00011  | -0.25564 |
| -0.40977 | 2.46E-20 | -0.25845 | 1.46E-08 | -0.53322 | 1.15E-35 | -0.07899 | 0.08816  | -0.06926 |
| -0.49276 | 6.14E-30 | -0.52925 | 4.53E-35 | -0.76469 | 8.69E-91 | -0.28185 | 5.62E-10 | -0.32772 |
| -0.15261 | 0.00094  | -0.15519 | 0.00077  | -0.43423 | 6.75E-23 | -0.12019 | 0.00933  | -0.17279 |
| -0.50031 | 5.97E-31 | -0.61307 | 1.52E-49 | -0.70803 | 2.90E-72 | -0.24244 | 1.13E-07 | -0.32836 |
| -0.42473 | 7.07E-22 | -0.27691 | 1.15E-09 | -0.58487 | 3.35E-44 | -0.19167 | 3.05E-05 | -0.23039 |
| -0.17726 | 0.00012  | -0.16326 | 0.0004   | -0.29032 | 1.60E-10 | -0.10584 | 0.02217  | -0.21397 |
| -0.34302 | 2.43E-14 | -0.36893 | 1.67E-16 | -0.62555 | 4.38E-52 | -0.07708 | 0.09618  | -0.08152 |
| -0.43086 | 1.56E-22 | -0.47453 | 1.34E-27 | -0.59665 | 2.28E-46 | -0.36102 | 8.01E-16 | -0.39997 |
| -0.23815 | 1.91E-07 | -0.35486 | 2.64E-15 | -0.52973 | 3.84E-35 | -0.13898 | 0.00261  | -0.27398 |
| -0.40149 | 1.63E-19 | -0.45178 | 7.22E-25 | -0.65355 | 3.16E-58 | -0.27851 | 9.12E-10 | -0.34748 |
| -0.16548 | 0.00033  | -0.04944 | 0.2863   | -0.4076  | 4.05E-20 | -0.01228 | 0.79124  | -0.05567 |
| -0.18607 | 5.22E-05 | -0.11833 | 0.01049  | -0.45181 | 7.17E-25 | -0.01238 | 0.78962  | 0.039917 |
| 0.067877 | 0.14303  | -0.14104 | 0.00225  | -0.3531  | 3.69E-15 | 0.018742 | 0.68624  | -0.11529 |
| -0.08585 | 0.0638   | -0.02887 | 0.53374  | -0.35392 | 3.16E-15 | 0.01982  | 0.66923  | -0.03387 |
| -0.04529 | 0.32873  | -0.00151 | 0.97403  | -0.44024 | 1.47E-23 | 0.1071   | 0.02062  | 0.109877 |
| 0.165046 | 0.00034  | 0.079033 | 0.08801  | -0.15745 | 0.00064  | 0.141047 | 0.00225  | 0.044022 |
| -0.21731 | 2.14E-06 | -0.38872 | 2.70E-18 | -0.49746 | 1.45E-30 | -0.08787 | 0.05777  | -0.11772 |
| -0.19449 | 2.31E-05 | 0.026058 | 0.57432  | -0.37818 | 2.52E-17 | 0.044656 | 0.33559  | 0.122503 |
| -0.16113 | 0.00047  | -0.45832 | 1.24E-25 | -0.43676 | 3.57E-23 | -0.11862 | 0.0103   | -0.21052 |
| -0.56549 | 8.03E-41 | -0.66467 | 7.51E-61 | -0.70358 | 5.36E-71 | -0.38673 | 4.15E-18 | -0.41234 |
| -0.59748 | 1.59E-46 | -0.69417 | 2.15E-68 | -0.72258 | 1.41E-76 | -0.3975  | 3.97E-19 | -0.48304 |
| -0.32529 | 5.69E-13 | -0.37971 | 1.83E-17 | -0.60545 | 4.78E-48 | -0.22223 | 1.23E-06 | -0.32877 |
| -0.47707 | 6.46E-28 | -0.56042 | 5.65E-40 | -0.64071 | 2.48E-55 | -0.2633  | 7.60E-09 | -0.38704 |
| 0.010918 | 0.81396  | -0.19824 | 1.59E-05 | -0.26464 | 6.34E-09 | -0.04288 | 0.35513  | -0.19168 |
| -0.1721  | 0.00019  | -0.1695  | 0.00023  | -0.41478 | 7.64E-21 | -0.03808 | 0.41163  | -0.01423 |
| -0.37847 | 2.37E-17 | -0.52899 | 4.97E-35 | -0.60024 | 4.78E-47 | -0.24646 | 6.84E-08 | -0.30182 |
| -0.07272 | 0.11659  | -0.13245 | 0.00414  | -0.40023 | 2.16E-19 | -0.01606 | 0.72915  | -0.11257 |
| -0.25378 | 2.69E-08 | -0.24024 | 1.48E-07 | -0.53229 | 1.59E-35 | -0.10524 | 0.02294  | -0.10751 |
| -0.3234  | 7.86E-13 | -0.44785 | 2.04E-24 | -0.53955 | 1.24E-36 | -0.28292 | 4.81E-10 | -0.36897 |
| -0.46267 | 3.78E-26 | -0.54827 | 5.31E-38 | -0.71801 | 3.41E-75 | -0.29581 | 6.94E-11 | -0.39953 |
| -0.39661 | 4.83E-19 | -0.62846 | 1.08E-52 | -0.54805 | 5.77E-38 | -0.25523 | 2.22E-08 | -0.36889 |
| -0.30694 | 1.20E-11 | -0.17641 | 0.00013  | -0.52318 | 3.58E-34 | -0.08533 | 0.06541  | -0.16847 |
| -0.01044 | 0.82203  | -0.01451 | 0.75447  | -0.37046 | 1.22E-16 | 0.057462 | 0.21518  | 0.041923 |
| -0.20758 | 6.09E-06 | -0.18471 | 5.93E-05 | -0.48807 | 2.53E-29 | -0.07988 | 0.08464  | -0.11797 |
| 0.036522 | 0.43105  | 0.140076 | 0.00241  | -0.30782 | 1.05E-11 | 0.140887 | 0.00228  | 0.220485 |
| -0.34008 | 4.16E-14 | -0.47173 | 2.98E-27 | -0.55237 | 1.17E-38 | -0.25423 | 2.53E-08 | -0.26191 |
| -0.08777 | 0.05806  | -0.06097 | 0.18842  | -0.3165  | 2.52E-12 | 0.01569  | 0.73523  | -0.08778 |
| -0.07935 | 0.08674  | -0.16004 | 0.00052  | -0.33636 | 8.14E-14 | -0.10137 | 0.0285   | -0.17028 |
| -0.46579 | 1.59E-26 | -0.64205 | 1.26E-55 | -0.55995 | 6.77E-40 | -0.3122  | 5.13E-12 | -0.36899 |
| -0.10679 | 0.02098  | -0.29679 | 5.97E-11 | -0.4072  | 4.44E-20 | -0.09262 | 0.04546  | -0.22586 |

|          |          |          |          |          |          |          |          |          |
|----------|----------|----------|----------|----------|----------|----------|----------|----------|
| -0.31381 | 3.94E-12 | -0.48146 | 1.80E-28 | -0.54909 | 3.94E-38 | -0.24887 | 5.05E-08 | -0.36531 |
| 0.11743  | 0.0111   | 0.165415 | 0.00033  | -0.2008  | 1.23E-05 | 0.191665 | 3.05E-05 | 0.181363 |
| -0.18417 | 6.24E-05 | -0.23955 | 1.61E-07 | -0.46872 | 6.99E-27 | -0.02667 | 0.56533  | -0.03978 |
| -0.23983 | 1.56E-07 | -0.50355 | 2.16E-31 | -0.42512 | 6.42E-22 | -0.20542 | 7.64E-06 | -0.40848 |
| -0.18746 | 4.57E-05 | -0.20363 | 9.19E-06 | -0.47513 | 1.13E-27 | -0.04768 | 0.30384  | -0.036   |
| -0.08615 | 0.06285  | -0.02439 | 0.599    | -0.42409 | 8.25E-22 | 0.047325 | 0.30747  | 0.065937 |
| -0.30254 | 2.43E-11 | -0.29556 | 7.21E-11 | -0.54098 | 7.45E-37 | -0.13204 | 0.00426  | -0.16819 |
| -0.4783  | 4.52E-28 | -0.55469 | 4.93E-39 | -0.72566 | 1.59E-77 | -0.25533 | 2.19E-08 | -0.30801 |
| -0.41036 | 2.14E-20 | -0.53231 | 1.58E-35 | -0.60711 | 2.27E-48 | -0.24868 | 5.17E-08 | -0.34537 |
| 0.004861 | 0.91656  | -0.05713 | 0.21785  | -0.31341 | 4.20E-12 | 0.062532 | 0.17733  | 0.081486 |
| 0.091511 | 0.04811  | -0.11666 | 0.01164  | 0.19184  | 3.00E-05 | -0.13195 | 0.00428  | -0.05827 |
| 0.074689 | 0.10697  | -0.19275 | 2.75E-05 | 0.002097 | 0.96396  | 0.043514 | 0.3481   | 0.098218 |
| 0.066913 | 0.14881  | -0.00323 | 0.94454  | -0.17924 | 9.84E-05 | 0.098593 | 0.03316  | 0.093618 |
| -0.088   | 0.05739  | -0.09303 | 0.04449  | -0.40231 | 1.35E-19 | 0.097339 | 0.03548  | 0.021946 |
| 0.127103 | 0.00595  | 0.053558 | 0.24804  | -0.11481 | 0.01304  | 0.178778 | 0.0001   | 0.139803 |
| 0.25248  | 3.18E-08 | -0.08782 | 0.0579   | 0.135573 | 0.00333  | 0.005233 | 0.9102   | 0.042217 |
| -0.13114 | 0.00453  | -0.18807 | 4.32E-05 | -0.39645 | 5.00E-19 | -0.00017 | 0.99714  | -0.07013 |
| -0.21836 | 1.90E-06 | 0.053558 | 0.24804  | -0.27262 | 2.11E-09 | 0.036005 | 0.43761  | 0.291579 |
| -0.422   | 1.37E-21 | -0.68306 | 1.90E-65 | -0.60018 | 4.92E-47 | -0.35939 | 1.10E-15 | -0.56493 |
| -0.33635 | 8.15E-14 | -0.33148 | 1.94E-13 | -0.56142 | 3.87E-40 | -0.08899 | 0.05464  | -0.11975 |
| -0.31066 | 6.60E-12 | -0.2668  | 4.73E-09 | -0.35192 | 4.62E-15 | -0.29918 | 4.12E-11 | -0.29523 |
| -0.35026 | 6.33E-15 | -0.32029 | 1.34E-12 | -0.48492 | 6.47E-29 | -0.09785 | 0.03453  | -0.10391 |
| -0.12257 | 0.00801  | -0.06489 | 0.16154  | -0.41282 | 1.21E-20 | 0.016058 | 0.72927  | -0.03244 |
| -0.20976 | 4.84E-06 | -0.52429 | 2.46E-34 | -0.48597 | 4.74E-29 | -0.22238 | 1.21E-06 | -0.43326 |
| -0.04379 | 0.34504  | -0.07888 | 0.08863  | -0.29105 | 1.43E-10 | -0.06626 | 0.15284  | -0.18852 |
| 0.0744   | 0.10834  | -0.25623 | 1.95E-08 | -0.18405 | 6.31E-05 | -0.16559 | 0.00033  | -0.27769 |
| -0.42572 | 5.55E-22 | -0.53321 | 1.15E-35 | -0.44812 | 1.90E-24 | -0.30241 | 2.48E-11 | -0.43449 |
| -0.20968 | 4.88E-06 | -0.56364 | 1.65E-40 | -0.38042 | 1.58E-17 | -0.44331 | 6.66E-24 | -0.47049 |
| -0.09965 | 0.03131  | -0.43249 | 1.04E-22 | -0.31025 | 7.06E-12 | -0.27813 | 9.63E-10 | -0.47847 |
| 0.154109 | 0.00083  | -0.0833  | 0.07211  | 0.071865 | 0.12093  | 0.011738 | 0.80028  | -0.08614 |
| -0.14604 | 0.00155  | -0.59028 | 3.47E-45 | -0.42905 | 2.45E-22 | -0.23059 | 4.71E-07 | -0.35166 |
| -0.16248 | 0.00042  | -0.60334 | 1.22E-47 | -0.38548 | 5.42E-18 | -0.25186 | 3.44E-08 | -0.56758 |
| -0.1656  | 0.00033  | -0.42092 | 1.77E-21 | -0.40192 | 1.47E-19 | -0.1321  | 0.00424  | -0.40687 |
| 0.2122   | 3.72E-06 | 0.501277 | 4.41E-31 | 0.403788 | 9.67E-20 | 0.353219 | 3.61E-15 | 0.480331 |
| 0.094411 | 0.04142  | -0.42315 | 1.03E-21 | -0.14476 | 0.00171  | -0.09906 | 0.03234  | -0.26926 |
| -0.21343 | 3.26E-06 | -0.49986 | 6.87E-31 | -0.4932  | 5.35E-30 | -0.15156 | 0.00102  | -0.30952 |
| -0.12642 | 0.00623  | -0.39391 | 8.75E-19 | -0.15427 | 0.00082  | -0.16756 | 0.00028  | -0.42387 |
| 0.046239 | 0.31873  | -0.47323 | 1.95E-27 | -0.28083 | 6.53E-10 | -0.08411 | 0.06936  | -0.33708 |
| -0.31596 | 2.76E-12 | -0.54913 | 3.88E-38 | -0.41715 | 4.36E-21 | -0.29253 | 1.15E-10 | -0.58529 |
| -0.35925 | 1.13E-15 | -0.55358 | 7.48E-39 | -0.38364 | 8.01E-18 | -0.28521 | 3.44E-10 | -0.42219 |
| -0.00079 | 0.98644  | -0.40195 | 1.47E-19 | -0.23883 | 1.76E-07 | -0.1807  | 8.60E-05 | -0.30716 |
| -0.04138 | 0.37224  | -0.47004 | 4.81E-27 | -0.30829 | 9.70E-12 | -0.28723 | 2.55E-10 | -0.38725 |
| 0.043794 | 0.34501  | -0.25889 | 1.37E-08 | -0.23663 | 2.30E-07 | -0.09139 | 0.0484   | -0.19955 |
| 0.012777 | 0.78302  | -0.39005 | 2.03E-18 | -0.27042 | 2.86E-09 | -0.05767 | 0.21352  | -0.37528 |
| 0.139169 | 0.00258  | -0.27208 | 2.27E-09 | -0.09586 | 0.03838  | -0.01314 | 0.77694  | -0.01887 |

|          |          |          |          |          |          |          |          |          |
|----------|----------|----------|----------|----------|----------|----------|----------|----------|
| -0.40559 | 6.42E-20 | -0.77216 | 1.28E-93 | -0.61875 | 1.10E-50 | -0.33849 | 5.55E-14 | -0.55058 |
| -0.28748 | 2.45E-10 | -0.1004  | 0.03005  | -0.20575 | 7.38E-06 | -0.07196 | 0.12043  | -0.13081 |
| 0.061336 | 0.18577  | -0.17453 | 0.00015  | -0.11934 | 0.00984  | -0.06056 | 0.19139  | -0.26839 |
| -0.3547  | 2.72E-15 | -0.58685 | 1.47E-44 | -0.51498 | 5.46E-33 | -0.27963 | 7.75E-10 | -0.39252 |
| -0.4073  | 4.34E-20 | -0.38601 | 4.84E-18 | -0.39515 | 6.67E-19 | -0.30932 | 8.21E-12 | -0.40417 |
| -0.13851 | 0.0027   | -0.51991 | 1.07E-33 | -0.29252 | 1.15E-10 | -0.21457 | 2.88E-06 | -0.4533  |
| -0.21683 | 2.25E-06 | -0.49131 | 9.52E-30 | -0.30049 | 3.35E-11 | -0.28771 | 2.37E-10 | -0.34321 |
| -0.13636 | 0.00315  | -0.2541  | 2.57E-08 | -0.15628 | 0.0007   | -0.16768 | 0.00027  | -0.19249 |
| -0.02695 | 0.56121  | -0.37612 | 3.86E-17 | -0.1056  | 0.02247  | -0.06444 | 0.16443  | -0.21944 |
| 0.114527 | 0.01327  | -0.32616 | 4.90E-13 | -0.18589 | 5.31E-05 | -0.03973 | 0.39164  | -0.26925 |
| -0.20114 | 1.19E-05 | -0.5227  | 4.21E-34 | -0.44394 | 5.66E-24 | -0.13994 | 0.00244  | -0.32219 |
| 0.006361 | 0.89095  | -0.33813 | 5.92E-14 | -0.17434 | 0.00015  | -0.13298 | 0.00399  | -0.33729 |
| 0.040785 | 0.37919  | -0.3902  | 1.96E-18 | -0.25177 | 3.48E-08 | -0.20229 | 1.06E-05 | -0.46647 |
| -0.14841 | 0.0013   | -0.60039 | 4.47E-47 | -0.40911 | 2.86E-20 | -0.31121 | 6.04E-12 | -0.45204 |
| 0.013152 | 0.77682  | -0.35237 | 4.24E-15 | -0.03032 | 0.5133   | -0.12838 | 0.00546  | -0.36643 |
| 0.103505 | 0.0253   | -0.21431 | 2.97E-06 | 0.003518 | 0.93956  | -0.00672 | 0.88488  | -0.18873 |
| 0.049789 | 0.28294  | -0.09811 | 0.03404  | -0.08701 | 0.06028  | 0.019422 | 0.67549  | -0.08418 |
| -0.03076 | 0.50722  | -0.42716 | 3.90E-22 | -0.27918 | 8.28E-10 | -0.2291  | 5.61E-07 | -0.38852 |
| 0.058556 | 0.20655  | -0.18383 | 6.44E-05 | -0.07021 | 0.12974  | -0.02039 | 0.66038  | -0.28662 |
| -0.16464 | 0.00035  | -0.46116 | 5.72E-26 | -0.3941  | 8.39E-19 | -0.2446  | 8.64E-08 | -0.46836 |
| -0.2822  | 5.34E-10 | -0.49857 | 1.03E-30 | -0.29636 | 6.38E-11 | -0.28929 | 1.87E-10 | -0.37916 |
| 0.201104 | 1.19E-05 | -0.26504 | 6.00E-09 | -0.20335 | 9.47E-06 | -0.03274 | 0.48031  | -0.24531 |
| -0.13794 | 0.00282  | -0.57758 | 6.65E-43 | -0.42789 | 3.26E-22 | -0.18332 | 6.76E-05 | -0.34975 |
| -0.09439 | 0.04145  | -0.261   | 1.04E-08 | 0.034783 | 0.45333  | -0.11075 | 0.01665  | -0.17962 |
| 0.344719 | 1.78E-14 | -0.13677 | 0.00306  | -0.00873 | 0.85082  | 0.060099 | 0.19482  | -0.11888 |
| -0.34725 | 1.11E-14 | -0.47284 | 2.18E-27 | -0.39389 | 8.78E-19 | -0.18756 | 4.53E-05 | -0.32181 |
| 0.092087 | 0.04671  | -0.21179 | 3.89E-06 | 0.02007  | 0.66531  | -0.16747 | 0.00028  | -0.41055 |
| -0.23565 | 2.58E-07 | -0.63682 | 1.77E-54 | -0.42712 | 3.94E-22 | -0.37684 | 3.32E-17 | -0.56399 |
| 0.056821 | 0.22034  | -0.23399 | 3.15E-07 | -0.05082 | 0.27307  | -0.07597 | 0.10109  | -0.13652 |
| -0.07066 | 0.12734  | -0.53569 | 4.84E-36 | -0.35791 | 1.47E-15 | -0.27828 | 9.43E-10 | -0.36502 |
| 0.06819  | 0.1412   | -0.43949 | 1.78E-23 | -0.34068 | 3.73E-14 | -0.08125 | 0.07944  | -0.34265 |
| -0.26609 | 5.20E-09 | -0.54077 | 8.01E-37 | -0.51799 | 2.03E-33 | -0.35283 | 3.89E-15 | -0.43243 |
| -0.30833 | 9.64E-12 | -0.55617 | 2.83E-39 | -0.41818 | 3.41E-21 | -0.27432 | 1.66E-09 | -0.40266 |
| 0.016534 | 0.72157  | -0.45833 | 1.24E-25 | -0.3981  | 3.47E-19 | -0.17512 | 0.00014  | -0.40617 |
| 0.032712 | 0.48068  | -0.45877 | 1.10E-25 | -0.24981 | 4.48E-08 | -0.20183 | 1.11E-05 | -0.48744 |
| -0.22741 | 6.82E-07 | -0.57677 | 9.22E-43 | -0.41372 | 9.78E-21 | -0.25545 | 2.16E-08 | -0.40577 |
| -0.01207 | 0.79478  | -0.53669 | 3.40E-36 | -0.32522 | 5.76E-13 | -0.2335  | 3.34E-07 | -0.39884 |
| 0.036838 | 0.42707  | -0.23182 | 4.08E-07 | -0.09348 | 0.04348  | -0.26294 | 7.99E-09 | -0.3435  |
| -0.24088 | 1.37E-07 | -0.44487 | 4.45E-24 | -0.33471 | 1.09E-13 | -0.24149 | 1.27E-07 | -0.22768 |
| 0.08435  | 0.06858  | -0.28824 | 2.19E-10 | -0.25775 | 1.60E-08 | -0.1058  | 0.02222  | -0.29876 |
| 0.202714 | 1.01E-05 | -0.22789 | 6.45E-07 | -0.02421 | 0.60181  | -0.04386 | 0.34433  | -0.30212 |
| -0.16747 | 0.00028  | -0.52027 | 9.49E-34 | -0.34324 | 2.33E-14 | -0.2491  | 4.90E-08 | -0.42426 |
| -0.47169 | 3.02E-27 | -0.68792 | 1.01E-66 | -0.55782 | 1.52E-39 | -0.35772 | 1.52E-15 | -0.52562 |
| 0.095193 | 0.03975  | -0.27872 | 8.85E-10 | -0.059   | 0.20311  | -0.19343 | 2.57E-05 | -0.37052 |
| 0.0544   | 0.24067  | -0.34626 | 1.34E-14 | -0.12609 | 0.00636  | -0.13653 | 0.00311  | -0.25521 |

|          |          |          |          |          |          |          |          |          |
|----------|----------|----------|----------|----------|----------|----------|----------|----------|
| -0.30864 | 9.17E-12 | -0.55223 | 1.23E-38 | -0.4073  | 4.34E-20 | -0.33509 | 1.02E-13 | -0.42299 |
| 0.038612 | 0.40514  | -0.05453 | 0.23958  | 0.147813 | 0.00136  | -0.1517  | 0.00101  | -0.13546 |
| -0.15268 | 0.00093  | -0.60457 | 7.08E-48 | -0.38177 | 1.19E-17 | -0.22462 | 9.40E-07 | -0.37306 |
| 0.047532 | 0.30536  | -0.17523 | 0.00014  | -0.20262 | 1.02E-05 | -0.06984 | 0.13178  | -0.2776  |
| -0.05648 | 0.2231   | -0.48258 | 1.29E-28 | -0.34978 | 6.93E-15 | -0.24739 | 6.08E-08 | -0.46647 |
| 0.12227  | 0.00817  | -0.28628 | 2.93E-10 | -0.15175 | 0.001    | 0.037181 | 0.42278  | -0.04483 |
| -0.07494 | 0.10577  | -0.35362 | 3.34E-15 | -0.20988 | 4.77E-06 | -0.15363 | 0.00087  | -0.49729 |
| -0.15334 | 0.00089  | -0.1604  | 0.0005   | -0.19147 | 3.11E-05 | -0.05717 | 0.21753  | -0.28884 |
| 0.179865 | 9.29E-05 | -0.07754 | 0.09421  | 0.205784 | 7.35E-06 | 0.022034 | 0.63482  | -0.16333 |
| -0.09987 | 0.03095  | -0.14631 | 0.00152  | -0.09036 | 0.05101  | -0.2171  | 2.18E-06 | -0.31697 |
| -0.26471 | 6.28E-09 | -0.63519 | 3.98E-54 | -0.42705 | 4.00E-22 | -0.23588 | 2.51E-07 | -0.38298 |
| 0.229184 | 5.55E-07 | -0.19858 | 1.54E-05 | -0.02763 | 0.5515   | 0.078446 | 0.0904   | -0.05508 |
| 0.097507 | 0.03516  | -0.41176 | 1.55E-20 | -0.18932 | 3.83E-05 | -0.14688 | 0.00146  | -0.32287 |
| -0.51031 | 2.49E-32 | -0.68963 | 3.56E-67 | -0.62774 | 1.53E-52 | -0.31582 | 2.82E-12 | -0.50011 |
| 0.121006 | 0.00886  | -0.27518 | 1.47E-09 | -0.06668 | 0.15023  | -0.06654 | 0.15111  | -0.20744 |
| -0.0827  | 0.0742   | -0.28341 | 4.48E-10 | -0.08052 | 0.08215  | -0.18772 | 4.46E-05 | -0.30917 |
| -0.02579 | 0.57829  | -0.25111 | 3.79E-08 | -0.06964 | 0.13292  | -0.14803 | 0.00134  | -0.47111 |
| -0.03542 | 0.44505  | -0.10299 | 0.02605  | -0.05238 | 0.25858  | -0.09416 | 0.04197  | -0.35486 |
| 0.357649 | 1.54E-15 | 0.092984 | 0.0446   | 0.101111 | 0.02891  | 0.098064 | 0.03412  | -0.18711 |
| 0.235887 | 2.51E-07 | -0.04141 | 0.37193  | 0.054857 | 0.23673  | -0.07357 | 0.11235  | -0.26369 |
| -0.21884 | 1.80E-06 | -0.44341 | 6.50E-24 | -0.44428 | 5.18E-24 | -0.15336 | 0.00088  | -0.27135 |
| -0.17927 | 9.81E-05 | -0.50456 | 1.57E-31 | -0.43868 | 2.19E-23 | -0.26103 | 1.03E-08 | -0.33627 |
| -0.33451 | 1.13E-13 | -0.74816 | 7.19E-85 | -0.55112 | 1.86E-38 | -0.33075 | 2.20E-13 | -0.45651 |
| 0.101083 | 0.02895  | -0.32    | 1.40E-12 | -0.35043 | 6.12E-15 | 0.04888  | 0.29184  | -0.08281 |
| -0.31693 | 2.35E-12 | -0.68051 | 8.62E-65 | -0.53465 | 6.98E-36 | -0.19742 | 1.73E-05 | -0.35242 |
| 0.059821 | 0.1969   | -0.43806 | 2.56E-23 | -0.26292 | 8.01E-09 | -0.16683 | 0.00029  | -0.3781  |
| -0.25024 | 4.24E-08 | -0.43646 | 3.84E-23 | -0.33424 | 1.19E-13 | -0.25635 | 1.92E-08 | -0.22239 |
| -0.33757 | 6.55E-14 | -0.42744 | 3.64E-22 | -0.4504  | 1.04E-24 | -0.25047 | 4.12E-08 | -0.32034 |
| -0.384   | 7.41E-18 | -0.57599 | 1.27E-42 | -0.61946 | 7.87E-51 | -0.27072 | 2.75E-09 | -0.33239 |
| -0.36241 | 6.10E-16 | -0.64193 | 1.34E-55 | -0.60778 | 1.68E-48 | -0.23518 | 2.73E-07 | -0.38719 |
| -0.14576 | 0.00159  | -0.47815 | 4.72E-28 | -0.4208  | 1.83E-21 | -0.09249 | 0.04576  | -0.39157 |
| 0.028119 | 0.54442  | -0.37035 | 1.25E-16 | -0.16712 | 0.00029  | -0.11185 | 0.0156   | -0.22435 |
| -0.25623 | 1.95E-08 | -0.59833 | 1.10E-46 | -0.52897 | 4.99E-35 | -0.25703 | 1.76E-08 | -0.42165 |
| -0.26901 | 3.48E-09 | -0.49429 | 3.83E-30 | -0.30804 | 1.01E-11 | -0.2974  | 5.43E-11 | -0.29903 |
| -0.16305 | 0.0004   | -0.42664 | 4.43E-22 | -0.2651  | 5.96E-09 | -0.25583 | 2.05E-08 | -0.33803 |
| -0.1386  | 0.00269  | -0.52986 | 3.68E-35 | -0.40712 | 4.52E-20 | -0.18377 | 6.48E-05 | -0.43143 |
| -0.39241 | 1.22E-18 | -0.61714 | 2.32E-50 | -0.58729 | 1.22E-44 | -0.31082 | 6.43E-12 | -0.4771  |
| -0.28191 | 5.57E-10 | -0.45001 | 1.15E-24 | -0.51524 | 5.01E-33 | -0.16955 | 0.00023  | -0.16558 |
| -0.24759 | 5.93E-08 | -0.43389 | 7.35E-23 | -0.51658 | 3.23E-33 | -0.12827 | 0.0055   | -0.25139 |
| -0.11267 | 0.01485  | -0.49575 | 2.45E-30 | -0.3968  | 4.62E-19 | -0.08946 | 0.05336  | -0.16514 |
| -0.12998 | 0.0049   | -0.48475 | 6.81E-29 | -0.44496 | 4.35E-24 | -0.20155 | 1.14E-05 | -0.46414 |
| -0.01151 | 0.80404  | -0.49339 | 5.05E-30 | -0.44632 | 3.04E-24 | -0.08607 | 0.06311  | -0.248   |
| -0.44323 | 6.80E-24 | -0.56292 | 2.17E-40 | -0.52202 | 5.28E-34 | -0.33707 | 7.16E-14 | -0.34109 |
| -0.20609 | 7.13E-06 | -0.48793 | 2.63E-29 | -0.36111 | 7.88E-16 | -0.31198 | 5.32E-12 | -0.4993  |
| -0.40822 | 3.51E-20 | -0.63777 | 1.09E-54 | -0.56012 | 6.33E-40 | -0.36623 | 2.86E-16 | -0.38952 |

|          |          |          |          |          |          |          |          |          |
|----------|----------|----------|----------|----------|----------|----------|----------|----------|
| -0.22719 | 7.00E-07 | -0.65762 | 3.57E-59 | -0.55166 | 1.53E-38 | -0.19666 | 1.87E-05 | -0.36502 |
| -0.28609 | 3.02E-10 | -0.48664 | 3.89E-29 | -0.36973 | 1.42E-16 | -0.31037 | 6.92E-12 | -0.49799 |
| -0.42281 | 1.13E-21 | -0.65098 | 1.23E-57 | -0.5966  | 2.33E-46 | -0.30222 | 2.56E-11 | -0.41774 |
| -0.12148 | 0.00859  | -0.49526 | 2.85E-30 | -0.40967 | 2.51E-20 | -0.2702  | 2.95E-09 | -0.41565 |
| -0.15526 | 0.00076  | -0.33737 | 6.79E-14 | -0.19141 | 3.13E-05 | -0.22646 | 7.61E-07 | -0.38415 |
| -0.29332 | 1.02E-10 | -0.60257 | 1.72E-47 | -0.56173 | 3.42E-40 | -0.30665 | 1.26E-11 | -0.34482 |
| -0.30116 | 3.02E-11 | -0.56258 | 2.47E-40 | -0.54227 | 4.68E-37 | -0.28616 | 2.98E-10 | -0.24298 |
| -0.33583 | 8.95E-14 | -0.56326 | 1.91E-40 | -0.47284 | 2.18E-27 | -0.09038 | 0.05096  | -0.35801 |
| -0.37669 | 3.43E-17 | -0.67888 | 2.25E-64 | -0.60028 | 4.70E-47 | -0.27705 | 1.12E-09 | -0.44399 |
| -0.00047 | 0.99199  | -0.37791 | 2.66E-17 | -0.30021 | 3.51E-11 | -0.14495 | 0.00169  | -0.35625 |
| -0.40322 | 1.10E-19 | -0.51165 | 1.62E-32 | -0.59933 | 7.11E-47 | -0.26996 | 3.05E-09 | -0.44547 |
| -0.12287 | 0.00785  | -0.57097 | 9.36E-42 | -0.49727 | 1.53E-30 | -0.20884 | 5.33E-06 | -0.3462  |
| -0.37447 | 5.41E-17 | -0.47441 | 1.39E-27 | -0.55672 | 2.30E-39 | -0.21117 | 4.16E-06 | -0.21466 |
| 0.026636 | 0.56585  | -0.29938 | 3.99E-11 | -0.23775 | 2.01E-07 | -0.07281 | 0.11609  | -0.21053 |
| -0.27883 | 8.71E-10 | -0.62451 | 7.20E-52 | -0.48769 | 2.84E-29 | -0.28873 | 2.03E-10 | -0.44061 |
| -0.35446 | 2.85E-15 | -0.6325  | 1.50E-53 | -0.62611 | 3.35E-52 | -0.14831 | 0.00131  | -0.3071  |
| -0.24045 | 1.44E-07 | -0.606   | 3.74E-48 | -0.46395 | 2.65E-26 | -0.4087  | 3.14E-20 | -0.51041 |
| -0.31018 | 7.13E-12 | -0.54564 | 1.39E-37 | -0.47166 | 3.05E-27 | -0.18969 | 3.69E-05 | -0.19766 |
| -0.04499 | 0.33199  | -0.48942 | 1.69E-29 | -0.43465 | 6.07E-23 | -0.13688 | 0.00304  | -0.2376  |
| -0.2807  | 6.65E-10 | -0.53875 | 1.64E-36 | -0.50002 | 6.54E-31 | -0.06496 | 0.16107  | -0.09558 |
| -0.41666 | 4.90E-21 | -0.69161 | 1.05E-67 | -0.62421 | 8.32E-52 | -0.25958 | 1.25E-08 | -0.46251 |
| -0.4262  | 4.93E-22 | -0.64291 | 8.12E-56 | -0.59747 | 1.60E-46 | -0.34662 | 1.25E-14 | -0.41137 |
| -0.38432 | 6.92E-18 | -0.53087 | 2.59E-35 | -0.57097 | 9.39E-42 | -0.32309 | 8.30E-13 | -0.47428 |
| -0.36623 | 2.86E-16 | -0.65439 | 2.02E-58 | -0.57701 | 8.39E-43 | -0.32316 | 8.20E-13 | -0.40647 |
| -0.17722 | 0.00012  | -0.38848 | 2.85E-18 | -0.53017 | 3.31E-35 | -0.2088  | 5.35E-06 | -0.20551 |
| -0.26901 | 3.48E-09 | -0.42462 | 7.25E-22 | -0.45353 | 4.52E-25 | -0.14696 | 0.00145  | -0.33389 |
| -0.07122 | 0.12431  | -0.48755 | 2.96E-29 | -0.42702 | 4.04E-22 | -0.04861 | 0.29456  | -0.17652 |
| -0.21017 | 4.63E-06 | -0.50252 | 2.99E-31 | -0.49779 | 1.31E-30 | -0.15066 | 0.00109  | -0.19476 |
| -0.24136 | 1.29E-07 | -0.63693 | 1.67E-54 | -0.59981 | 5.76E-47 | -0.17997 | 9.20E-05 | -0.36078 |
| -0.09769 | 0.03481  | -0.58124 | 1.50E-43 | -0.41385 | 9.49E-21 | -0.14269 | 0.00199  | -0.35633 |
| -0.22643 | 7.63E-07 | -0.55968 | 7.48E-40 | -0.60759 | 1.83E-48 | -0.14692 | 0.00145  | -0.22297 |
| -0.44682 | 2.68E-24 | -0.74025 | 3.34E-82 | -0.73084 | 3.76E-79 | -0.33748 | 6.66E-14 | -0.48452 |
| 0.107082 | 0.02064  | -0.32519 | 5.79E-13 | -0.33663 | 7.75E-14 | 0.06653  | 0.15116  | -0.05476 |
| -0.17021 | 0.00022  | -0.61688 | 2.63E-50 | -0.52211 | 5.13E-34 | -0.32327 | 8.04E-13 | -0.45659 |
| -0.35651 | 1.92E-15 | -0.65018 | 1.88E-57 | -0.65992 | 1.02E-59 | -0.30083 | 3.18E-11 | -0.40649 |
| -0.28455 | 3.78E-10 | -0.71898 | 1.74E-75 | -0.60854 | 1.19E-48 | -0.22562 | 8.38E-07 | -0.34644 |
| -0.22571 | 8.30E-07 | -0.42597 | 5.22E-22 | -0.50056 | 5.52E-31 | -0.16172 | 0.00045  | -0.2977  |
| -0.13578 | 0.00328  | -0.4154  | 6.59E-21 | -0.37969 | 1.84E-17 | -0.1212  | 0.00875  | -0.24601 |
| -0.3803  | 1.62E-17 | -0.50061 | 5.44E-31 | -0.57583 | 1.35E-42 | -0.24449 | 8.76E-08 | -0.22871 |
| -0.31668 | 2.45E-12 | -0.41924 | 2.65E-21 | -0.50989 | 2.85E-32 | -0.17925 | 9.82E-05 | -0.37323 |
| -0.19598 | 2.00E-05 | -0.47236 | 2.49E-27 | -0.43447 | 6.34E-23 | -0.10292 | 0.02615  | -0.3892  |
| -0.49675 | 1.80E-30 | -0.7501  | 1.53E-85 | -0.72557 | 1.70E-77 | -0.32359 | 7.63E-13 | -0.44047 |
| -0.27702 | 1.13E-09 | -0.58732 | 1.21E-44 | -0.64347 | 6.10E-56 | -0.19706 | 1.79E-05 | -0.33546 |
| -0.47657 | 7.46E-28 | -0.61846 | 1.26E-50 | -0.59192 | 1.74E-45 | -0.23527 | 2.70E-07 | -0.29955 |
| -0.31075 | 6.51E-12 | -0.67824 | 3.28E-64 | -0.61452 | 7.83E-50 | -0.31189 | 5.40E-12 | -0.46085 |

|          |          |          |          |          |          |          |          |          |
|----------|----------|----------|----------|----------|----------|----------|----------|----------|
| -0.51648 | 3.33E-33 | -0.76923 | 1.70E-92 | -0.6004  | 4.45E-47 | -0.46855 | 7.34E-27 | -0.6791  |
| -0.37489 | 4.96E-17 | -0.6832  | 1.75E-65 | -0.63645 | 2.12E-54 | -0.32279 | 8.73E-13 | -0.48842 |
| -0.25582 | 2.06E-08 | -0.62806 | 1.31E-52 | -0.60791 | 1.59E-48 | -0.16311 | 0.0004   | -0.30344 |
| -0.04799 | 0.30072  | -0.49165 | 8.60E-30 | -0.39547 | 6.22E-19 | -0.1319  | 0.0043   | -0.27838 |
| -0.45696 | 1.80E-25 | -0.65114 | 1.13E-57 | -0.63891 | 6.17E-55 | -0.46607 | 1.47E-26 | -0.45734 |
| -0.24125 | 1.31E-07 | -0.63924 | 5.24E-55 | -0.57466 | 2.16E-42 | -0.22373 | 1.04E-06 | -0.40374 |
| 0.43826  | 2.44E-23 | 0.698164 | 1.74E-69 | 0.624819 | 6.22E-52 | 0.252059 | 3.35E-08 | 0.379089 |
| -0.26587 | 5.36E-09 | -0.4649  | 2.04E-26 | -0.49763 | 1.37E-30 | -0.1319  | 0.0043   | -0.21013 |
| -0.37033 | 1.26E-16 | -0.54034 | 9.33E-37 | -0.48876 | 2.06E-29 | -0.33904 | 5.03E-14 | -0.32946 |
| -0.25931 | 1.30E-08 | -0.60542 | 4.84E-48 | -0.49423 | 3.91E-30 | -0.23639 | 2.37E-07 | -0.37127 |
| -0.15403 | 0.00084  | -0.51297 | 1.05E-32 | -0.56618 | 6.14E-41 | -0.14337 | 0.0019   | -0.29439 |
| -0.36579 | 3.12E-16 | -0.52354 | 3.17E-34 | -0.47745 | 5.79E-28 | -0.24024 | 1.48E-07 | -0.32619 |
| -0.0085  | 0.85467  | -0.46729 | 1.05E-26 | -0.40296 | 1.17E-19 | -0.07805 | 0.09202  | -0.23103 |
| -0.52183 | 5.63E-34 | -0.76528 | 5.27E-91 | -0.59695 | 2.00E-46 | -0.42507 | 6.50E-22 | -0.5635  |
| -0.33007 | 2.48E-13 | -0.74504 | 8.34E-84 | -0.58636 | 1.81E-44 | -0.32374 | 7.42E-13 | -0.47531 |
| 0.060763 | 0.18993  | -0.41016 | 2.24E-20 | -0.32512 | 5.86E-13 | -0.00279 | 0.95209  | -0.12159 |
| -0.0584  | 0.2078   | -0.5609  | 4.71E-40 | -0.45974 | 8.44E-26 | -0.21807 | 1.96E-06 | -0.26196 |
| -0.24206 | 1.18E-07 | -0.65743 | 3.95E-59 | -0.47956 | 3.13E-28 | -0.30471 | 1.72E-11 | -0.38335 |
| -0.31181 | 5.47E-12 | -0.5964  | 2.54E-46 | -0.43923 | 1.90E-23 | -0.23527 | 2.70E-07 | -0.37069 |
| -0.36544 | 3.35E-16 | -0.65713 | 4.64E-59 | -0.67713 | 6.26E-64 | -0.26953 | 3.24E-09 | -0.48566 |
| -0.29619 | 6.54E-11 | -0.6533  | 3.62E-58 | -0.60034 | 4.57E-47 | -0.2634  | 7.51E-09 | -0.4638  |
| 0.13956  | 0.00251  | -0.34753 | 1.05E-14 | -0.22083 | 1.44E-06 | -0.09295 | 0.04469  | -0.24588 |
| -0.21314 | 3.37E-06 | -0.65331 | 3.60E-58 | -0.48262 | 1.28E-28 | -0.24143 | 1.28E-07 | -0.40953 |
| -0.45473 | 3.28E-25 | -0.62747 | 1.74E-52 | -0.61446 | 8.06E-50 | -0.27607 | 1.29E-09 | -0.4823  |
| -0.14843 | 0.0013   | -0.39116 | 1.59E-18 | -0.27178 | 2.37E-09 | -0.06558 | 0.15711  | -0.10404 |
| -0.3498  | 6.90E-15 | -0.50034 | 5.91E-31 | -0.55983 | 7.09E-40 | -0.28729 | 2.52E-10 | -0.41789 |
| -0.16812 | 0.00026  | -0.51669 | 3.11E-33 | -0.41917 | 2.70E-21 | -0.09338 | 0.04369  | -0.1634  |
| -0.0258  | 0.57813  | -0.44359 | 6.20E-24 | -0.29102 | 1.44E-10 | -0.09596 | 0.03818  | -0.24603 |
| -0.26568 | 5.51E-09 | -0.64246 | 1.02E-55 | -0.46048 | 6.88E-26 | -0.3379  | 6.17E-14 | -0.48437 |
| -0.31382 | 3.93E-12 | -0.65105 | 1.19E-57 | -0.51164 | 1.62E-32 | -0.28131 | 6.08E-10 | -0.37045 |
| -0.27602 | 1.30E-09 | -0.71498 | 2.74E-74 | -0.58209 | 1.06E-43 | -0.29994 | 3.66E-11 | -0.57823 |
| -0.11771 | 0.0109   | -0.356   | 2.12E-15 | -0.39619 | 5.30E-19 | -0.14414 | 0.00179  | -0.26738 |
| -0.49662 | 1.88E-30 | -0.73034 | 5.40E-79 | -0.7294  | 1.08E-78 | -0.39248 | 1.20E-18 | -0.46478 |
| 0.017144 | 0.71174  | -0.39249 | 1.19E-18 | -0.23775 | 2.00E-07 | -0.06939 | 0.13429  | -0.12423 |
| -0.27494 | 1.52E-09 | -0.69838 | 1.51E-69 | -0.59318 | 1.01E-45 | -0.1761  | 0.00013  | -0.39813 |
| -0.20481 | 8.14E-06 | -0.37774 | 2.76E-17 | -0.29763 | 5.24E-11 | -0.2531  | 2.93E-08 | -0.19861 |
| -0.25691 | 1.78E-08 | -0.61888 | 1.03E-50 | -0.43587 | 4.46E-23 | -0.27499 | 1.51E-09 | -0.53497 |
| -0.35587 | 2.17E-15 | -0.59832 | 1.11E-46 | -0.54992 | 2.90E-38 | -0.24258 | 1.11E-07 | -0.25417 |
| -0.22441 | 9.62E-07 | -0.63961 | 4.33E-55 | -0.52817 | 6.57E-35 | -0.24179 | 1.22E-07 | -0.32176 |
| 0.018067 | 0.69698  | -0.46719 | 1.07E-26 | -0.284   | 4.10E-10 | -0.073   | 0.11518  | -0.22212 |
| 0.095257 | 0.03962  | -0.23864 | 1.80E-07 | -0.21258 | 3.58E-06 | -0.05185 | 0.26348  | -0.03597 |
| -0.24284 | 1.08E-07 | -0.58451 | 3.90E-44 | -0.57729 | 7.48E-43 | -0.08857 | 0.0558   | -0.25731 |
| -0.28435 | 3.90E-10 | -0.42762 | 3.48E-22 | -0.49109 | 1.02E-29 | -0.16966 | 0.00023  | -0.32962 |
| -0.32347 | 7.78E-13 | -0.56858 | 2.41E-41 | -0.67238 | 9.73E-63 | -0.19755 | 1.71E-05 | -0.38162 |
| -0.30203 | 2.63E-11 | -0.61986 | 6.53E-51 | -0.50252 | 2.99E-31 | -0.33012 | 2.46E-13 | -0.49331 |

|          |          |          |          |          |          |          |          |          |
|----------|----------|----------|----------|----------|----------|----------|----------|----------|
| -0.2283  | 6.15E-07 | -0.58128 | 1.47E-43 | -0.53837 | 1.88E-36 | -0.16109 | 0.00047  | -0.28502 |
| -0.10376 | 0.02493  | -0.30471 | 1.72E-11 | -0.2374  | 2.09E-07 | -0.11121 | 0.0162   | -0.41245 |
| -0.32412 | 6.95E-13 | -0.69132 | 1.26E-67 | -0.43879 | 2.13E-23 | -0.36539 | 3.38E-16 | -0.55931 |
| -0.20607 | 7.14E-06 | -0.4986  | 1.02E-30 | -0.45594 | 2.37E-25 | -0.13352 | 0.00384  | -0.28743 |
| -0.3693  | 1.55E-16 | -0.58593 | 2.16E-44 | -0.61426 | 8.81E-50 | -0.25145 | 3.63E-08 | -0.41749 |
| -0.15536 | 0.00076  | -0.57179 | 6.77E-42 | -0.5795  | 3.05E-43 | -0.16551 | 0.00033  | -0.34039 |
| -0.25834 | 1.48E-08 | -0.55879 | 1.05E-39 | -0.52668 | 1.09E-34 | -0.1688  | 0.00025  | -0.2327  |
| -0.25568 | 2.10E-08 | -0.64552 | 2.12E-56 | -0.45589 | 2.40E-25 | -0.36041 | 9.03E-16 | -0.51588 |
| -0.43538 | 5.05E-23 | -0.69273 | 5.26E-68 | -0.54812 | 5.62E-38 | -0.35359 | 3.37E-15 | -0.51869 |
| -0.19412 | 2.40E-05 | -0.37665 | 3.45E-17 | -0.36216 | 6.40E-16 | -0.07645 | 0.09891  | -0.26304 |
| -0.04232 | 0.36153  | -0.55814 | 1.34E-39 | -0.43738 | 3.05E-23 | -0.25161 | 3.55E-08 | -0.30617 |
| -0.24666 | 6.67E-08 | -0.60469 | 6.71E-48 | -0.55603 | 2.98E-39 | -0.17573 | 0.00014  | -0.42473 |
| -0.42581 | 5.43E-22 | -0.65046 | 1.62E-57 | -0.60395 | 9.32E-48 | -0.27306 | 1.98E-09 | -0.26962 |
| 0.041519 | 0.37067  | -0.34645 | 1.29E-14 | -0.33991 | 4.29E-14 | 0.010059 | 0.82836  | -0.1305  |
| -0.26464 | 6.35E-09 | -0.53583 | 4.61E-36 | -0.52053 | 8.70E-34 | -0.36292 | 5.51E-16 | -0.34071 |
| -0.30976 | 7.64E-12 | -0.71207 | 1.97E-73 | -0.51396 | 7.64E-33 | -0.35541 | 2.38E-15 | -0.42507 |
| -0.16518 | 0.00034  | -0.57353 | 3.38E-42 | -0.39209 | 1.30E-18 | -0.22729 | 6.92E-07 | -0.35002 |
| -0.29694 | 5.83E-11 | -0.52811 | 6.71E-35 | -0.65088 | 1.30E-57 | -0.17399 | 0.00016  | -0.33981 |
| -0.39545 | 6.23E-19 | -0.43795 | 2.64E-23 | -0.52348 | 3.23E-34 | -0.20515 | 7.85E-06 | -0.29401 |
| 0.222595 | 1.18E-06 | -0.27193 | 2.32E-09 | -0.06009 | 0.1949   | -0.04742 | 0.30655  | -0.26865 |
| -0.23197 | 4.00E-07 | -0.4204  | 2.01E-21 | -0.38994 | 2.08E-18 | -0.17791 | 0.00011  | -0.42136 |
| -0.28388 | 4.18E-10 | -0.47166 | 3.05E-27 | -0.50537 | 1.21E-31 | -0.26865 | 3.66E-09 | -0.34243 |
| -0.44422 | 5.26E-24 | -0.63461 | 5.29E-54 | -0.64312 | 7.30E-56 | -0.38045 | 1.57E-17 | -0.34322 |
| 0.001529 | 0.97371  | 0.075096 | 0.10507  | -0.17087 | 0.00021  | 0.096172 | 0.03775  | 0.043971 |
| 0.092103 | 0.04667  | 0.045844 | 0.32288  | -0.20074 | 1.24E-05 | 0.160002 | 0.00052  | 0.238824 |
| 0.243163 | 1.03E-07 | 0.142586 | 0.00201  | -0.09901 | 0.03243  | 0.19661  | 1.88E-05 | 0.143357 |
| 0.212592 | 3.57E-06 | -0.06369 | 0.16942  | 0.247337 | 6.13E-08 | 0.063886 | 0.16811  | 0.056929 |
| 0.358224 | 1.38E-15 | 0.049881 | 0.28205  | -0.20518 | 7.83E-06 | 0.193205 | 2.63E-05 | 0.145968 |
| -0.00705 | 0.87928  | 0.012085 | 0.79451  | -0.35948 | 1.08E-15 | 0.123599 | 0.00749  | 0.171503 |
| -0.00116 | 0.98     | -0.11818 | 0.01059  | -0.31165 | 5.61E-12 | 0.012837 | 0.78203  | -0.04225 |
| -0.09825 | 0.03378  | -0.05383 | 0.24567  | -0.4478  | 2.07E-24 | 0.096494 | 0.03711  | 0.296658 |
| 0.106318 | 0.02157  | -0.02507 | 0.58896  | -0.39182 | 1.38E-18 | 0.131352 | 0.00447  | 0.096257 |
| -0.08107 | 0.08009  | -0.27565 | 1.37E-09 | -0.05505 | 0.23512  | -0.09445 | 0.04132  | -0.11641 |
| 0.364647 | 3.92E-16 | 0.226034 | 7.99E-07 | -0.10648 | 0.02136  | 0.306016 | 1.40E-11 | 0.279212 |
| 0.303476 | 2.10E-11 | 0.231364 | 4.30E-07 | -0.04324 | 0.3512   | 0.299302 | 4.04E-11 | 0.346426 |
| 0.088535 | 0.05589  | 0.105331 | 0.02282  | -0.1355  | 0.00335  | 0.053607 | 0.24761  | 0.098385 |
| 0.430492 | 1.71E-22 | 0.343513 | 2.22E-14 | 0.020945 | 0.65166  | 0.221547 | 1.33E-06 | 0.257683 |
| 0.142583 | 0.00201  | -0.06702 | 0.14815  | -0.24132 | 1.30E-07 | 0.156452 | 0.00069  | 0.087615 |
| 0.475451 | 1.03E-27 | 0.533434 | 1.07E-35 | 0.145147 | 0.00166  | 0.357702 | 1.53E-15 | 0.470538 |
| 0.116769 | 0.01156  | 0.003468 | 0.94041  | -0.38527 | 5.66E-18 | 0.122977 | 0.0078   | 0.155879 |
| 0.144653 | 0.00172  | 0.144829 | 0.0017   | -0.15119 | 0.00105  | 0.144326 | 0.00177  | 0.057337 |
| -0.08983 | 0.05239  | -0.22554 | 8.45E-07 | -0.50446 | 1.62E-31 | -0.04918 | 0.28892  | -0.11541 |
| 0.007683 | 0.86848  | -0.02322 | 0.61669  | -0.40272 | 1.23E-19 | 0.191246 | 3.18E-05 | 0.17857  |
| 0.037366 | 0.42047  | 0.103676 | 0.02506  | -0.30187 | 2.70E-11 | 0.060866 | 0.18918  | 0.109373 |
| 0.246829 | 6.53E-08 | 0.21072  | 4.37E-06 | -0.21973 | 1.63E-06 | 0.382905 | 9.35E-18 | 0.274009 |



|          |          |          |          |          |          |          |          |          |
|----------|----------|----------|----------|----------|----------|----------|----------|----------|
| -0.06827 | 0.14074  | 0.00529  | 0.90922  | -0.39908 | 2.79E-19 | 0.059002 | 0.20311  | 0.116547 |
| 0.206778 | 6.63E-06 | 0.151444 | 0.00103  | -0.13749 | 0.00291  | 0.227053 | 7.11E-07 | 0.259794 |
| 0.022516 | 0.62744  | 0.113412 | 0.0142   | -0.28129 | 6.10E-10 | 0.189947 | 3.60E-05 | 0.082542 |
| 0.031415 | 0.49826  | 0.059563 | 0.19884  | -0.14065 | 0.00232  | -0.01592 | 0.73148  | -0.05126 |
| 0.250452 | 4.12E-08 | 0.235827 | 2.53E-07 | 0.100605 | 0.02972  | 0.15236  | 0.00096  | 0.110178 |
| 0.46505  | 1.95E-26 | 0.378449 | 2.38E-17 | 0.053028 | 0.25276  | 0.31281  | 4.64E-12 | 0.281365 |
| 0.098234 | 0.03381  | 0.086494 | 0.06181  | -0.25627 | 1.94E-08 | 0.061921 | 0.18161  | -0.0525  |
| 0.512946 | 1.06E-32 | 0.397902 | 3.63E-19 | 0.090285 | 0.0512   | 0.435394 | 5.03E-23 | 0.498374 |
| 0.11436  | 0.0134   | 0.055695 | 0.22964  | -0.26271 | 8.23E-09 | 0.091235 | 0.04879  | 0.080873 |
| 0.368904 | 1.68E-16 | 0.331885 | 1.80E-13 | -0.03792 | 0.41356  | 0.296424 | 6.32E-11 | 0.239984 |
| 0.504045 | 1.85E-31 | 0.220386 | 1.52E-06 | -0.06495 | 0.16116  | 0.351252 | 5.25E-15 | 0.317822 |
| 0.319924 | 1.42E-12 | 0.098712 | 0.03295  | -0.16679 | 0.00029  | 0.268907 | 3.53E-09 | 0.201434 |
| 0.551754 | 1.47E-38 | 0.538325 | 1.91E-36 | 0.229064 | 5.63E-07 | 0.361967 | 6.65E-16 | 0.354366 |
| 0.040928 | 0.37753  | 0.074247 | 0.10907  | -0.30582 | 1.44E-11 | 0.222748 | 1.16E-06 | 0.184939 |
| 0.260421 | 1.12E-08 | -0.00076 | 0.98694  | -0.21272 | 3.52E-06 | 0.153215 | 0.00089  | 0.115727 |
| 0.099429 | 0.03169  | 0.039709 | 0.39191  | -0.04219 | 0.36296  | -0.06666 | 0.15033  | -0.13906 |
| 0.211402 | 4.06E-06 | 0.037725 | 0.41601  | -0.16724 | 0.00028  | 0.185434 | 5.54E-05 | 0.19429  |
| 0.240294 | 1.47E-07 | 0.10395  | 0.02468  | -0.15796 | 0.00061  | 0.246953 | 6.43E-08 | 0.324383 |
| -0.08677 | 0.06098  | -0.12814 | 0.00555  | -0.31344 | 4.19E-12 | 0.037256 | 0.42184  | -0.00952 |
| 0.307521 | 1.10E-11 | 0.244074 | 9.23E-08 | -0.06701 | 0.1482   | 0.279724 | 7.65E-10 | 0.350204 |
| 0.391829 | 1.38E-18 | 0.17587  | 0.00013  | -0.02279 | 0.62329  | 0.160384 | 0.0005   | -0.02781 |
| 0.187127 | 4.72E-05 | 0.333632 | 1.32E-13 | -0.00814 | 0.86071  | 0.049914 | 0.28174  | 0.200422 |
| 0.019807 | 0.66944  | -0.03614 | 0.43586  | -0.39249 | 1.19E-18 | 0.120397 | 0.00921  | 0.236404 |
| -0.0225  | 0.62773  | 0.068702 | 0.13822  | -0.31909 | 1.63E-12 | 0.147953 | 0.00134  | 0.171133 |
| 0.127322 | 0.00586  | 0.031477 | 0.49741  | -0.34975 | 6.96E-15 | 0.267853 | 4.09E-09 | 0.297334 |
| -0.19128 | 3.17E-05 | -0.16355 | 0.00039  | -0.47769 | 5.40E-28 | -0.01994 | 0.66741  | 0.034343 |
| -0.32724 | 4.07E-13 | -0.32103 | 1.18E-12 | -0.55411 | 6.13E-39 | -0.096   | 0.0381   | -0.21141 |
| 0.343273 | 2.32E-14 | 0.293505 | 9.88E-11 | -0.02585 | 0.57734  | 0.253425 | 2.81E-08 | 0.32101  |
| -0.15773 | 0.00062  | -0.17702 | 0.00012  | 0.133739 | 0.00379  | -0.14492 | 0.00169  | -0.16793 |
| 0.243761 | 9.59E-08 | 0.35971  | 1.03E-15 | -0.00491 | 0.91576  | 0.177149 | 0.00012  | 0.268798 |
| 0.091256 | 0.04874  | 0.184473 | 6.06E-05 | -0.0285  | 0.53903  | 0.133779 | 0.00378  | 0.198156 |
| 0.431005 | 1.51E-22 | 0.378628 | 2.29E-17 | 0.061548 | 0.18426  | 0.374678 | 5.18E-17 | 0.387067 |
| -0.00103 | 0.98237  | -0.16578 | 0.00032  | -0.29707 | 5.71E-11 | -0.1267  | 0.00611  | -0.35762 |
| 0.157283 | 0.00065  | 0.144325 | 0.00177  | -0.1555  | 0.00075  | 0.173606 | 0.00016  | 0.1504   |
| -0.04182 | 0.36722  | 0.07786  | 0.09284  | -0.34566 | 1.50E-14 | 0.098174 | 0.03392  | 0.145377 |
| 0.233243 | 3.44E-07 | 0.192587 | 2.79E-05 | -0.09649 | 0.03712  | 0.19773  | 1.68E-05 | 0.24266  |
| 0.085158 | 0.06596  | -0.07982 | 0.08488  | -0.38421 | 7.09E-18 | 0.175607 | 0.00014  | 0.205742 |
| -0.05423 | 0.2421   | -0.27438 | 1.64E-09 | -0.49632 | 2.06E-30 | -0.05474 | 0.23771  | -0.12312 |
| 0.083744 | 0.0706   | 0.080248 | 0.08322  | -0.23104 | 4.47E-07 | 0.303875 | 1.97E-11 | 0.319881 |
| 0.519557 | 1.20E-33 | 0.401219 | 1.73E-19 | 0.127388 | 0.00584  | 0.379966 | 1.73E-17 | 0.338325 |
| -0.08838 | 0.05632  | -0.18677 | 4.88E-05 | -0.49801 | 1.22E-30 | -0.00079 | 0.98635  | -0.04038 |
| 0.408322 | 3.43E-20 | 0.434934 | 5.65E-23 | 0.103062 | 0.02594  | 0.313403 | 4.21E-12 | 0.344959 |
| 0.39371  | 9.14E-19 | 0.162809 | 0.00041  | -0.11963 | 0.00967  | 0.384434 | 6.76E-18 | 0.367235 |
| 0.251034 | 3.83E-08 | 0.089837 | 0.05237  | -0.19559 | 2.07E-05 | 0.269594 | 3.21E-09 | 0.113213 |
| 0.451628 | 7.52E-25 | 0.370595 | 1.19E-16 | 0.020432 | 0.65964  | 0.348484 | 8.83E-15 | 0.346796 |

|          |          |          |          |          |          |          |          |          |
|----------|----------|----------|----------|----------|----------|----------|----------|----------|
| 0.075826 | 0.10172  | 0.024073 | 0.60383  | -0.29343 | 1.00E-10 | 0.086138 | 0.06289  | 0.189458 |
| 0.284433 | 3.85E-10 | -0.11699 | 0.0114   | -0.26251 | 8.46E-09 | 0.082925 | 0.0734   | -0.0568  |
| 0.080425 | 0.08254  | 0.017331 | 0.70874  | -0.27907 | 8.42E-10 | 0.173381 | 0.00017  | 0.227679 |
| 0.147132 | 0.00143  | 0.107154 | 0.02055  | -0.15029 | 0.00112  | 0.054452 | 0.24022  | 0.117217 |
| 0.104405 | 0.02405  | -0.09549 | 0.03914  | 0.024658 | 0.59506  | 0.116356 | 0.01186  | 0.126858 |
| 0.244207 | 9.07E-08 | 0.172135 | 0.00019  | -0.10606 | 0.02189  | 0.107852 | 0.01974  | 0.167974 |
| 0.240529 | 1.43E-07 | 0.202595 | 1.02E-05 | -0.13188 | 0.00431  | 0.193474 | 2.56E-05 | 0.171127 |
| 0.058119 | 0.20997  | 0.133761 | 0.00378  | -0.14211 | 0.00208  | 0.072328 | 0.11855  | 0.125211 |
| -0.06207 | 0.18059  | -0.21364 | 3.19E-06 | -0.31427 | 3.65E-12 | 0.034288 | 0.45979  | 0.027476 |
| 0.119924 | 0.00949  | 0.185242 | 5.64E-05 | -0.11673 | 0.01159  | 0.176528 | 0.00013  | 0.210661 |
| 0.324888 | 6.10E-13 | 0.211031 | 4.22E-06 | -0.10675 | 0.02104  | 0.280071 | 7.28E-10 | 0.191992 |
| 0.345863 | 1.44E-14 | 0.241494 | 1.27E-07 | -0.04855 | 0.2951   | 0.279572 | 7.83E-10 | 0.437256 |
| -0.05246 | 0.25791  | -0.03817 | 0.41056  | -0.20796 | 5.85E-06 | 0.008383 | 0.85661  | -0.10765 |
| 0.325443 | 5.54E-13 | 0.161284 | 0.00047  | -0.2224  | 1.21E-06 | 0.269319 | 3.34E-09 | 0.240048 |
| 0.098078 | 0.0341   | 0.094376 | 0.04149  | -0.28062 | 6.72E-10 | 0.219844 | 1.61E-06 | 0.134254 |
| 0.472258 | 2.57E-27 | 0.138999 | 0.00261  | -0.06436 | 0.16498  | 0.296138 | 6.60E-11 | 0.129563 |
| 0.129775 | 0.00497  | 0.074683 | 0.107    | -0.11117 | 0.01624  | 0.173891 | 0.00016  | 0.26253  |
| 0.259859 | 1.21E-08 | 0.189479 | 3.77E-05 | -0.14809 | 0.00133  | 0.196089 | 1.98E-05 | 0.278223 |
| 0.164083 | 0.00037  | 0.113481 | 0.01414  | -0.10996 | 0.01745  | 0.09987  | 0.03094  | -0.00459 |
| 0.075475 | 0.10331  | 0.074831 | 0.1063   | -0.34447 | 1.86E-14 | 0.202336 | 1.05E-05 | 0.188242 |
| 0.123185 | 0.0077   | -0.09748 | 0.03522  | -0.32957 | 2.71E-13 | 0.162877 | 0.00041  | 0.070578 |
| 0.15474  | 0.00079  | 0.062983 | 0.17422  | -0.18366 | 6.55E-05 | 0.151813 | 0.001    | 0.047103 |
| -0.06774 | 0.14386  | -0.10463 | 0.02374  | -0.40609 | 5.72E-20 | -0.13434 | 0.00363  | -0.11547 |
| 0.095867 | 0.03837  | -0.04059 | 0.38148  | -0.29613 | 6.61E-11 | 0.190083 | 3.56E-05 | 0.249267 |
| 0.471506 | 3.18E-27 | 0.397644 | 3.84E-19 | 0.101583 | 0.02816  | 0.298091 | 4.88E-11 | 0.265119 |
| 0.406111 | 5.70E-20 | 0.221225 | 1.38E-06 | 0.039711 | 0.39189  | 0.322103 | 9.82E-13 | 0.222856 |
| 0.253978 | 2.62E-08 | -0.03859 | 0.4054   | -0.20134 | 1.16E-05 | 0.095415 | 0.03929  | -0.01946 |
| 0.150038 | 0.00115  | 0.013541 | 0.7704   | -0.26734 | 4.39E-09 | 0.134246 | 0.00366  | 0.187296 |
| 0.131378 | 0.00446  | 0.080117 | 0.08372  | -0.214   | 3.06E-06 | 0.135376 | 0.00338  | 0.086181 |
| 0.52946  | 4.22E-35 | 0.283122 | 4.67E-10 | 0.06488  | 0.16158  | 0.326282 | 4.80E-13 | 0.309805 |
| 0.071269 | 0.12406  | -0.16401 | 0.00037  | -0.3411  | 3.46E-14 | -0.07382 | 0.11114  | -0.27007 |
| 0.262285 | 8.72E-09 | -0.07317 | 0.11429  | -0.21243 | 3.63E-06 | 0.192486 | 2.82E-05 | 0.142616 |
| 0.164876 | 0.00035  | 0.208489 | 5.53E-06 | -0.23314 | 3.49E-07 | 0.342767 | 2.55E-14 | 0.470821 |
| 0.277371 | 1.07E-09 | 0.299176 | 4.12E-11 | -0.06081 | 0.18961  | 0.350407 | 6.15E-15 | 0.356431 |
| 0.105035 | 0.02321  | 0.103576 | 0.0252   | -0.14329 | 0.00191  | 0.031048 | 0.5033   | -0.04015 |
| -0.08689 | 0.06062  | -0.02715 | 0.55842  | -0.37741 | 2.95E-17 | 0.148051 | 0.00133  | 0.201437 |
| -0.00094 | 0.98385  | -0.09827 | 0.03375  | -0.38905 | 2.52E-18 | 0.150284 | 0.00112  | 0.2252   |
| 0.335925 | 8.80E-14 | 0.396366 | 5.10E-19 | 0.011206 | 0.80915  | 0.328502 | 3.26E-13 | 0.412763 |
| 0.309737 | 7.67E-12 | 0.221858 | 1.29E-06 | -0.04465 | 0.33568  | 0.19477  | 2.25E-05 | 0.193476 |
| 0.40882  | 3.06E-20 | 0.183209 | 6.82E-05 | -0.05578 | 0.22891  | 0.260917 | 1.05E-08 | 0.275562 |
| 0.393863 | 8.84E-19 | 0.244072 | 9.23E-08 | -0.08429 | 0.06878  | 0.341282 | 3.34E-14 | 0.264844 |
| 0.045896 | 0.32233  | 0.022809 | 0.62297  | -0.24878 | 5.10E-08 | 0.207957 | 5.85E-06 | 0.131388 |
| 0.261721 | 9.41E-09 | 0.306722 | 1.25E-11 | 0.058922 | 0.20373  | 0.188297 | 4.22E-05 | 0.214687 |
| 0.421544 | 1.53E-21 | 0.43856  | 2.26E-23 | -0.0037  | 0.93646  | 0.356735 | 1.84E-15 | 0.378204 |
| 0.362635 | 5.84E-16 | 0.193882 | 2.46E-05 | -0.07682 | 0.09728  | 0.246876 | 6.49E-08 | 0.217642 |

|          |          |          |          |          |          |          |          |          |
|----------|----------|----------|----------|----------|----------|----------|----------|----------|
| 0.075317 | 0.10404  | 0.176308 | 0.00013  | -0.19563 | 2.07E-05 | 0.202199 | 1.07E-05 | 0.222596 |
| 0.596764 | 2.17E-46 | 0.423879 | 8.68E-22 | 0.123948 | 0.00732  | 0.435318 | 5.13E-23 | 0.449963 |
| 0.590155 | 3.66E-45 | 0.396814 | 4.62E-19 | 0.044707 | 0.33504  | 0.414699 | 7.78E-21 | 0.386112 |
| 0.476964 | 6.66E-28 | 0.268195 | 3.90E-09 | -0.01286 | 0.7816   | 0.357838 | 1.49E-15 | 0.272415 |
| 0.582426 | 9.21E-44 | 0.30066  | 3.27E-11 | 0.021265 | 0.6467   | 0.322434 | 9.28E-13 | 0.26873  |
| -0.00023 | 0.99606  | 0.026332 | 0.57029  | -0.22281 | 1.15E-06 | -0.01351 | 0.77095  | -0.07725 |
| 0.138948 | 0.00262  | 0.142561 | 0.00201  | -0.15235 | 0.00096  | 0.293163 | 1.04E-10 | 0.274816 |
| 0.305776 | 1.45E-11 | 0.13552  | 0.00334  | -0.10125 | 0.02868  | 0.236803 | 2.25E-07 | 0.254524 |
| 0.410379 | 2.13E-20 | 0.166079 | 0.00031  | -0.02336 | 0.61462  | 0.27323  | 1.93E-09 | 0.306991 |
| 0.134148 | 0.00368  | 0.189337 | 3.82E-05 | -0.18187 | 7.72E-05 | 0.22215  | 1.24E-06 | 0.248816 |
| 0.015864 | 0.7324   | -0.18959 | 3.73E-05 | -0.42732 | 3.75E-22 | 0.060185 | 0.19418  | 0.006076 |
| 0.215471 | 2.61E-06 | 0.085746 | 0.06411  | -0.08994 | 0.05209  | 0.121078 | 0.00882  | 0.087783 |
| 0.080119 | 0.08372  | 0.207847 | 5.92E-06 | -0.11343 | 0.01419  | 0.235097 | 2.76E-07 | 0.245439 |
| 0.077446 | 0.0946   | -0.06053 | 0.19167  | -0.2602  | 1.15E-08 | -0.0269  | 0.56202  | -0.06209 |
| 0.264501 | 6.46E-09 | 0.079119 | 0.08766  | -0.18135 | 8.10E-05 | 0.194287 | 2.36E-05 | 0.219654 |
| 0.049515 | 0.2856   | 0.071376 | 0.12349  | -0.12581 | 0.00648  | 0.02449  | 0.59757  | -0.12553 |
| 0.244774 | 8.45E-08 | 0.341538 | 3.19E-14 | -0.00676 | 0.88416  | 0.276534 | 1.21E-09 | 0.376861 |
| -0.0862  | 0.06271  | -0.12605 | 0.00638  | -0.47814 | 4.74E-28 | 0.018599 | 0.68851  | 0.004216 |
| 0.385908 | 4.94E-18 | 0.19501  | 2.20E-05 | -0.06388 | 0.16816  | 0.236515 | 2.33E-07 | 0.17263  |
| 0.529858 | 3.68E-35 | 0.395827 | 5.74E-19 | 0.118708 | 0.01024  | 0.393744 | 9.08E-19 | 0.472292 |
| 0.22687  | 7.26E-07 | 0.041196 | 0.37441  | -0.2563  | 1.93E-08 | 0.218382 | 1.90E-06 | 0.152219 |
| 0.183338 | 6.74E-05 | 0.09997  | 0.03077  | -0.19054 | 3.40E-05 | 0.154807 | 0.00079  | 0.073148 |
| 0.410714 | 1.97E-20 | 0.324373 | 6.66E-13 | 0.000578 | 0.99007  | 0.314477 | 3.53E-12 | 0.248978 |
| 0.458147 | 1.30E-25 | 0.387754 | 3.33E-18 | 0.023911 | 0.60627  | 0.354742 | 2.70E-15 | 0.313628 |
| 0.396752 | 4.68E-19 | 0.133673 | 0.0038   | -0.10399 | 0.02462  | 0.226763 | 7.35E-07 | 0.069382 |
| 0.135784 | 0.00328  | 0.167243 | 0.00028  | -0.10472 | 0.02363  | 0.128236 | 0.00552  | 0.180852 |
| 0.109978 | 0.01743  | -0.04617 | 0.31945  | -0.28491 | 3.59E-10 | 0.122364 | 0.00812  | 0.16437  |
| -0.11241 | 0.01508  | -0.21154 | 4.00E-06 | 0.006258 | 0.89271  | -0.16996 | 0.00022  | -0.06655 |
| 0.356639 | 1.88E-15 | 0.482322 | 1.40E-28 | 0.04217  | 0.36322  | 0.354922 | 2.61E-15 | 0.469901 |
| 0.414231 | 8.68E-21 | 0.39678  | 4.65E-19 | 0.091719 | 0.0476   | 0.30543  | 1.54E-11 | 0.227878 |
| 0.029793 | 0.52071  | -0.00023 | 0.99608  | -0.29927 | 4.06E-11 | -0.01673 | 0.71837  | 0.116219 |
| 0.259664 | 1.24E-08 | 0.052563 | 0.25695  | -0.20391 | 8.94E-06 | 0.221759 | 1.30E-06 | 0.160639 |
| 0.080888 | 0.08078  | -0.166   | 0.00032  | 0.152505 | 0.00095  | -0.03382 | 0.46592  | -0.05315 |
| 0.294326 | 8.72E-11 | 0.17224  | 0.00018  | -0.06518 | 0.15963  | 0.223334 | 1.09E-06 | 0.141524 |
| -0.02422 | 0.60158  | -0.1283  | 0.00549  | 0.13568  | 0.00331  | -0.09283 | 0.04496  | -0.14594 |
| 0.381336 | 1.30E-17 | 0.368907 | 1.68E-16 | 0.054309 | 0.24146  | 0.407132 | 4.51E-20 | 0.484188 |
| 0.348198 | 9.32E-15 | 0.427011 | 4.04E-22 | -0.00904 | 0.84555  | 0.312691 | 4.74E-12 | 0.401898 |
| 0.411809 | 1.53E-20 | 0.316951 | 2.34E-12 | 0.010567 | 0.81983  | 0.340257 | 4.03E-14 | 0.31259  |
| 0.196899 | 1.82E-05 | 0.173103 | 0.00017  | -0.22937 | 5.43E-07 | 0.294872 | 8.02E-11 | 0.290558 |
| 0.014993 | 0.74658  | -0.03691 | 0.42615  | -0.38221 | 1.08E-17 | 0.144737 | 0.00171  | 0.258025 |
| 0.310655 | 6.61E-12 | 0.294817 | 8.09E-11 | -0.09894 | 0.03255  | 0.320521 | 1.28E-12 | 0.384045 |
| 0.204193 | 8.68E-06 | 0.148318 | 0.00131  | -0.12262 | 0.00798  | 0.143859 | 0.00183  | 0.12444  |
| 0.487946 | 2.62E-29 | 0.377597 | 2.84E-17 | 0.061409 | 0.18525  | 0.382753 | 9.65E-18 | 0.432201 |
| 0.386038 | 4.81E-18 | 0.198856 | 1.50E-05 | -0.08527 | 0.06561  | 0.357822 | 1.49E-15 | 0.352559 |
| 0.132467 | 0.00414  | -0.0214  | 0.64461  | -0.1551  | 0.00077  | 0.071812 | 0.12121  | -0.04009 |

|          |          |          |          |          |          |          |          |          |
|----------|----------|----------|----------|----------|----------|----------|----------|----------|
| 0.013284 | 0.77464  | -0.25989 | 1.20E-08 | -0.49643 | 1.99E-30 | -0.01422 | 0.75921  | -0.13535 |
| 0.456361 | 2.11E-25 | 0.350074 | 6.55E-15 | 0.076864 | 0.09711  | 0.397184 | 4.25E-19 | 0.373655 |
| 0.05077  | 0.27356  | -0.0714  | 0.12338  | -0.29263 | 1.13E-10 | 0.098397 | 0.03352  | -0.08349 |
| 0.281027 | 6.34E-10 | 0.135311 | 0.00339  | -0.09966 | 0.0313   | 0.250893 | 3.90E-08 | 0.159502 |
| 0.379666 | 1.85E-17 | 0.285527 | 3.28E-10 | 0.001136 | 0.98046  | 0.220321 | 1.53E-06 | 0.204041 |
| 0.102364 | 0.02697  | 0.315075 | 3.20E-12 | -0.06941 | 0.13421  | 0.163921 | 0.00038  | 0.280618 |
| 0.141557 | 0.00217  | -0.01854 | 0.68941  | -0.28522 | 3.43E-10 | 0.122349 | 0.00812  | 0.137738 |
| 0.182328 | 7.41E-05 | 0.173937 | 0.00016  | -0.0923  | 0.0462   | 0.159351 | 0.00055  | 0.04138  |
| 0.135712 | 0.0033   | -0.01145 | 0.80499  | -0.29523 | 7.59E-11 | 0.062823 | 0.17532  | 0.035748 |
| 0.505631 | 1.12E-31 | 0.461839 | 4.75E-26 | 0.114693 | 0.01314  | 0.392991 | 1.07E-18 | 0.493041 |
| 0.283627 | 4.34E-10 | 0.287244 | 2.54E-10 | -0.036   | 0.43768  | 0.231228 | 4.37E-07 | 0.397328 |
| 0.198405 | 1.57E-05 | -0.03063 | 0.50902  | 0.294334 | 8.71E-11 | -0.02896 | 0.53249  | -0.12699 |
| 0.102213 | 0.02719  | -0.0081  | 0.86135  | -0.31099 | 6.25E-12 | 0.205922 | 7.25E-06 | 0.166683 |
| 0.13716  | 0.00298  | -0.21601 | 2.46E-06 | -0.35793 | 1.46E-15 | 0.064419 | 0.16458  | -0.00388 |
| 0.240816 | 1.38E-07 | 0.108572 | 0.01893  | -0.16534 | 0.00033  | 0.21625  | 2.40E-06 | 0.062582 |
| 0.219802 | 1.62E-06 | -0.01559 | 0.73688  | -0.27453 | 1.61E-09 | 0.166434 | 0.0003   | 0.210649 |
| 0.188138 | 4.29E-05 | -0.03625 | 0.43455  | -0.37491 | 4.95E-17 | 0.194667 | 2.27E-05 | 0.13582  |
| -0.09906 | 0.03234  | -0.09139 | 0.0484   | -0.38215 | 1.10E-17 | 0.064347 | 0.16506  | 0.046304 |
| 0.238178 | 1.90E-07 | 0.117632 | 0.01096  | -0.18925 | 3.85E-05 | 0.229528 | 5.33E-07 | 0.352166 |
| 0.290563 | 1.54E-10 | 0.063784 | 0.1688   | -0.13909 | 0.00259  | 0.045234 | 0.32936  | -0.09071 |
| 0.440834 | 1.26E-23 | 0.3724   | 8.26E-17 | 0.028401 | 0.54039  | 0.305275 | 1.57E-11 | 0.306206 |
| 0.024274 | 0.6008   | 0.026931 | 0.56155  | -0.24152 | 1.27E-07 | -0.02611 | 0.57355  | 0.035431 |
| 0.37975  | 1.81E-17 | 0.220904 | 1.43E-06 | 0.032271 | 0.48663  | 0.209286 | 5.09E-06 | 0.142951 |
| 0.16656  | 0.0003   | 0.064096 | 0.16672  | -0.31138 | 5.86E-12 | 0.129403 | 0.0051   | 0.085039 |
| 0.368686 | 1.75E-16 | 0.235452 | 2.65E-07 | -0.05517 | 0.23411  | 0.221769 | 1.30E-06 | 0.188809 |
| -0.13745 | 0.00291  | -0.02091 | 0.65227  | -0.36139 | 7.45E-16 | 0.087885 | 0.05772  | 0.105052 |
| 0.309738 | 7.67E-12 | 0.290685 | 1.52E-10 | -0.01562 | 0.73639  | 0.285328 | 3.37E-10 | 0.272583 |
| 0.34274  | 2.56E-14 | 0.276489 | 1.22E-09 | -0.00814 | 0.8608   | 0.211787 | 3.89E-06 | 0.240359 |
| 0.009962 | 0.82999  | -0.05044 | 0.27665  | -0.42085 | 1.80E-21 | 0.188069 | 4.32E-05 | 0.1694   |
| 0.323227 | 8.11E-13 | 0.237262 | 2.13E-07 | -0.00781 | 0.86631  | 0.169427 | 0.00023  | 0.093528 |
| 0.37247  | 8.14E-17 | 0.309661 | 7.77E-12 | 0.036921 | 0.42603  | 0.289202 | 1.90E-10 | 0.325965 |
| 0.211304 | 4.10E-06 | -0.03168 | 0.4946   | -0.29963 | 3.84E-11 | 0.161944 | 0.00044  | 0.145486 |
| 0.300658 | 3.27E-11 | 0.081068 | 0.08011  | -0.13589 | 0.00326  | 0.213365 | 3.28E-06 | 0.268063 |
| 0.00977  | 0.83322  | -0.01967 | 0.67151  | -0.28333 | 4.53E-10 | 0.090709 | 0.05011  | 0.068051 |
| 0.03184  | 0.49246  | 0.114543 | 0.01326  | -0.21088 | 4.29E-06 | 0.001011 | 0.98262  | -0.06709 |
| -0.02634 | 0.5702   | -0.13852 | 0.0027   | -0.37858 | 2.32E-17 | 0.429741 | 2.07E-22 | 0.005469 |
| -0.10581 | 0.02221  | -0.10115 | 0.02885  | 0.016009 | 0.73005  | 0.025366 | 0.58453  | -0.02584 |
| 0.259446 | 1.28E-08 | 0.078041 | 0.09208  | -0.11898 | 0.01007  | 0.228197 | 6.23E-07 | 0.067191 |
| -0.13885 | 0.00264  | -0.13932 | 0.00255  | 0.195444 | 2.11E-05 | -0.27984 | 7.53E-10 | -0.28481 |
| 0.394052 | 8.48E-19 | 0.208066 | 5.79E-06 | -0.10379 | 0.02489  | 0.327421 | 3.94E-13 | 0.373391 |
| 0.030918 | 0.50508  | -0.19854 | 1.55E-05 | 0.047966 | 0.30096  | -0.05671 | 0.22129  | 0.03958  |
| 0.210349 | 4.54E-06 | 0.171778 | 0.00019  | -0.00805 | 0.86222  | 0.265048 | 6.00E-09 | 0.0505   |
| 0.031022 | 0.50365  | -0.08075 | 0.08131  | -0.39975 | 2.40E-19 | 0.128476 | 0.00543  | 0.195285 |
| 0.215919 | 2.49E-06 | 0.158129 | 0.0006   | -0.08281 | 0.07379  | 0.357579 | 1.56E-15 | 0.459234 |
| 0.319156 | 1.62E-12 | 0.246147 | 7.12E-08 | -0.08197 | 0.07678  | 0.246618 | 6.71E-08 | 0.491849 |

|          |          |          |          |          |          |          |          |          |
|----------|----------|----------|----------|----------|----------|----------|----------|----------|
| 0.216745 | 2.27E-06 | 0.175855 | 0.00013  | -0.00013 | 0.99772  | 0.026238 | 0.57167  | -0.10681 |
| 0.255249 | 2.22E-08 | -0.06151 | 0.18455  | -0.21911 | 1.75E-06 | 0.244102 | 9.19E-08 | 0.242711 |
| 0.074903 | 0.10596  | -0.01886 | 0.68432  | -0.2623  | 8.71E-09 | 0.040134 | 0.38686  | -0.03808 |
| 0.24446  | 8.79E-08 | 0.152177 | 0.00097  | -0.14852 | 0.00129  | 0.233523 | 3.33E-07 | 0.223605 |
| 0.006114 | 0.89516  | 0.080882 | 0.0808   | -0.2685  | 3.74E-09 | 0.141448 | 0.00218  | 0.105991 |
| 0.188046 | 4.33E-05 | 0.034041 | 0.46302  | -0.21531 | 2.66E-06 | 0.215144 | 2.71E-06 | 0.24562  |
| 0.143452 | 0.00188  | -0.05541 | 0.232    | -0.35252 | 4.13E-15 | 0.172336 | 0.00018  | 0.170165 |
| 0.489498 | 1.65E-29 | 0.481806 | 1.62E-28 | 0.121252 | 0.00872  | 0.39324  | 1.01E-18 | 0.487853 |
| 0.412044 | 1.45E-20 | 0.277128 | 1.11E-09 | 0.07823  | 0.09129  | 0.344039 | 2.02E-14 | 0.347073 |
| 0.198855 | 1.50E-05 | 0.030867 | 0.50578  | -0.22799 | 6.38E-07 | 0.232763 | 3.65E-07 | 0.175842 |
| 0.133568 | 0.00383  | 0.216088 | 2.44E-06 | -0.19009 | 3.55E-05 | 0.151492 | 0.00102  | 0.318708 |
| 0.123551 | 0.00752  | 0.161515 | 0.00046  | -0.09696 | 0.0362   | 0.243671 | 9.70E-08 | 0.38378  |
| -0.13731 | 0.00294  | 0.124753 | 0.00695  | -0.29705 | 5.73E-11 | 0.102901 | 0.02617  | 0.145078 |
| 0.439521 | 1.77E-23 | 0.193165 | 2.64E-05 | 0.003529 | 0.93938  | 0.247742 | 5.82E-08 | 0.276114 |
| 0.323322 | 7.98E-13 | 0.175019 | 0.00014  | -0.08776 | 0.05808  | 0.141888 | 0.00212  | 0.02605  |
| 0.315206 | 3.13E-12 | 0.02181  | 0.63827  | -0.14167 | 0.00215  | 0.180586 | 8.70E-05 | 0.05034  |
| -0.04266 | 0.35766  | 0.076626 | 0.09815  | -0.28013 | 7.22E-10 | 0.154464 | 0.00081  | 0.062786 |
| 0.375411 | 4.46E-17 | 0.333218 | 1.43E-13 | -0.04396 | 0.34323  | 0.23925  | 1.67E-07 | 0.365818 |
| 0.215227 | 2.68E-06 | 0.167158 | 0.00029  | -0.04058 | 0.38154  | 0.265066 | 5.99E-09 | 0.154472 |
| 0.20522  | 7.80E-06 | 0.375408 | 4.46E-17 | 0.058034 | 0.21063  | 0.205978 | 7.21E-06 | 0.25324  |
| 0.235499 | 2.63E-07 | -0.05682 | 0.22033  | -0.27455 | 1.61E-09 | 0.068249 | 0.14085  | -0.05649 |
| -0.05876 | 0.20498  | -0.08975 | 0.05259  | -0.3537  | 3.30E-15 | -0.04196 | 0.36562  | 0.050328 |
| 0.427909 | 3.24E-22 | 0.189825 | 3.65E-05 | -0.0579  | 0.21173  | 0.28373  | 4.27E-10 | 0.146153 |
| 0.466014 | 1.49E-26 | 0.334732 | 1.09E-13 | -0.01255 | 0.78679  | 0.317728 | 2.05E-12 | 0.305999 |
| 0.10808  | 0.01948  | 0.159048 | 0.00056  | -0.14845 | 0.00129  | 0.168123 | 0.00026  | 0.125472 |
| 0.088549 | 0.05585  | 0.163837 | 0.00038  | -0.19352 | 2.55E-05 | 0.112519 | 0.01498  | 0.123869 |
| 0.096888 | 0.03634  | 0.176915 | 0.00012  | -0.06628 | 0.15268  | 0.127775 | 0.00569  | 0.077015 |
| 0.263766 | 7.14E-09 | 0.093247 | 0.044    | -0.08119 | 0.07966  | 0.030323 | 0.51331  | -0.10335 |
| 0.010807 | 0.81582  | 0.106746 | 0.02104  | -0.23653 | 2.32E-07 | 0.222843 | 1.15E-06 | 0.12089  |
| 0.307696 | 1.07E-11 | 0.109864 | 0.01755  | -0.11735 | 0.01115  | 0.248767 | 5.11E-08 | 0.15263  |
| -0.07586 | 0.10157  | -0.18407 | 6.30E-05 | -0.42151 | 1.54E-21 | 0.104799 | 0.02352  | 0.108997 |
| 0.229417 | 5.40E-07 | 0.015905 | 0.73174  | -0.26854 | 3.72E-09 | 0.126963 | 0.00601  | 0.0523   |
| 0.527644 | 7.87E-35 | 0.403532 | 1.02E-19 | 0.268038 | 3.98E-09 | 0.332677 | 1.57E-13 | 0.250355 |
| 0.277717 | 1.02E-09 | 0.170823 | 0.00021  | -0.03913 | 0.39882  | 0.243239 | 1.02E-07 | 0.39184  |
| 0.425946 | 5.25E-22 | 0.329352 | 2.81E-13 | 0.02106  | 0.64987  | 0.235717 | 2.56E-07 | 0.277091 |
| -0.01948 | 0.67456  | 0.009195 | 0.8429   | -0.29068 | 1.52E-10 | 0.007166 | 0.87726  | 0.057383 |
| 0.182862 | 7.05E-05 | 0.230018 | 5.04E-07 | -0.18351 | 6.64E-05 | 0.199781 | 1.36E-05 | 0.323102 |
| 0.09276  | 0.04512  | 0.00207  | 0.96442  | -0.17156 | 0.0002   | 0.280985 | 6.38E-10 | 0.154117 |
| 0.527809 | 7.44E-35 | 0.554478 | 5.34E-39 | 0.157343 | 0.00064  | 0.408578 | 3.24E-20 | 0.471178 |
| 0.219146 | 1.74E-06 | 0.171066 | 0.0002   | -0.17615 | 0.00013  | 0.155236 | 0.00076  | 0.053708 |
| 0.151327 | 0.00104  | -0.04961 | 0.28464  | -0.31641 | 2.56E-12 | 0.153693 | 0.00086  | -0.01518 |
| 0.118244 | 0.01055  | -0.11863 | 0.01029  | -0.39684 | 4.59E-19 | 0.112318 | 0.01517  | 0.029749 |
| 0.258616 | 1.42E-08 | 0.087476 | 0.0589   | -0.14724 | 0.00142  | 0.213855 | 3.11E-06 | 0.245819 |
| 0.386539 | 4.32E-18 | 0.124512 | 0.00706  | -0.12944 | 0.00509  | 0.331227 | 2.03E-13 | 0.421142 |
| 0.037747 | 0.41574  | 0.121137 | 0.00878  | -0.30575 | 1.46E-11 | 0.201908 | 1.10E-05 | 0.361183 |

|          |          |          |          |          |          |          |          |          |
|----------|----------|----------|----------|----------|----------|----------|----------|----------|
| 0.569692 | 1.55E-41 | 0.482555 | 1.30E-28 | 0.174972 | 0.00014  | 0.373769 | 6.25E-17 | 0.428825 |
| 0.509619 | 3.12E-32 | 0.360177 | 9.45E-16 | 0.046691 | 0.31401  | 0.278296 | 9.40E-10 | 0.309735 |
| 0.515022 | 5.39E-33 | 0.397422 | 4.03E-19 | 0.036283 | 0.43408  | 0.386053 | 4.79E-18 | 0.291326 |
| 0.501309 | 4.37E-31 | 0.278493 | 9.14E-10 | 0.143978 | 0.00181  | 0.246586 | 6.74E-08 | 0.175357 |
| 0.525703 | 1.53E-34 | 0.4155   | 6.44E-21 | 0.042638 | 0.3579   | 0.355519 | 2.33E-15 | 0.375092 |
| 0.067067 | 0.14787  | -0.10292 | 0.02615  | -0.39581 | 5.76E-19 | 0.174217 | 0.00015  | 0.11836  |
| 0.275367 | 1.43E-09 | 0.359503 | 1.08E-15 | -0.02135 | 0.64531  | 0.296373 | 6.37E-11 | 0.405416 |
| 0.179729 | 9.41E-05 | -0.09755 | 0.03509  | -0.26813 | 3.94E-09 | 0.065442 | 0.15797  | 0.056864 |
| 0.370301 | 1.26E-16 | 0.319608 | 1.50E-12 | -0.05249 | 0.25765  | 0.23565  | 2.58E-07 | 0.284266 |
| 0.341985 | 2.94E-14 | 0.291039 | 1.44E-10 | -0.0873  | 0.05941  | 0.197058 | 1.79E-05 | 0.19407  |
| 0.185888 | 5.31E-05 | 0.064403 | 0.16469  | -0.05699 | 0.21895  | 0.151827 | 0.001    | -0.06407 |
| 0.413271 | 1.09E-20 | 0.225482 | 8.51E-07 | -0.07727 | 0.09537  | 0.23908  | 1.71E-07 | 0.146994 |
| 0.273653 | 1.82E-09 | 0.189124 | 3.90E-05 | -0.27903 | 8.46E-10 | 0.329271 | 2.85E-13 | 0.342718 |
| 0.341421 | 3.26E-14 | 0.43021  | 1.84E-22 | 0.099848 | 0.03098  | 0.307627 | 1.08E-11 | 0.4109   |
| 0.147193 | 0.00142  | 0.022516 | 0.62744  | 0.340596 | 3.79E-14 | 0.009718 | 0.83409  | -0.13747 |
| 0.3213   | 1.13E-12 | 0.2507   | 3.99E-08 | -0.03846 | 0.40699  | 0.220669 | 1.47E-06 | 0.178113 |
| 0.073887 | 0.1108   | 0.173865 | 0.00016  | -0.27925 | 8.20E-10 | 0.262799 | 8.14E-09 | 0.387338 |
| 0.08656  | 0.06161  | 0.157918 | 0.00061  | -0.2806  | 6.74E-10 | 0.201834 | 1.11E-05 | 0.230465 |
| 0.3465   | 1.28E-14 | 0.176638 | 0.00012  | -0.0477  | 0.30369  | 0.106398 | 0.02147  | 0.240349 |
| -0.17542 | 0.00014  | -0.12108 | 0.00882  | -0.51854 | 1.69E-33 | 0.06227  | 0.17915  | 0.022812 |
| 0.01791  | 0.69948  | 0.024839 | 0.59236  | -0.23508 | 2.77E-07 | 0.140368 | 0.00236  | 0.222348 |
| 0.312292 | 5.05E-12 | 0.165726 | 0.00032  | -0.08802 | 0.05735  | 0.195634 | 2.07E-05 | 0.156391 |
| 0.202714 | 1.01E-05 | 0.055486 | 0.2314   | -0.20263 | 1.02E-05 | 0.05943  | 0.19984  | 0.021593 |
| 0.288758 | 2.03E-10 | 0.117289 | 0.01119  | -0.10206 | 0.02742  | 0.11184  | 0.01561  | 0.109951 |
| 0.17972  | 9.41E-05 | 0.289315 | 1.86E-10 | -0.08382 | 0.07033  | 0.336899 | 7.39E-14 | 0.2969   |
| 0.073462 | 0.11287  | 0.085436 | 0.06508  | -0.27887 | 8.66E-10 | 0.135888 | 0.00326  | 0.177582 |
| 0.19246  | 2.82E-05 | -0.14939 | 0.0012   | -0.30568 | 1.47E-11 | 0.058836 | 0.20439  | -0.01617 |
| 0.114852 | 0.01301  | 0.086584 | 0.06154  | -0.0824  | 0.07524  | 0.087765 | 0.05807  | -0.01825 |
| 0.137954 | 0.00281  | 0.211133 | 4.18E-06 | -0.20795 | 5.86E-06 | 0.173174 | 0.00017  | 0.199144 |
| 0.298664 | 4.46E-11 | 0.017968 | 0.69855  | -0.27781 | 1.01E-09 | 0.265371 | 5.74E-09 | 0.213848 |
| 0.387954 | 3.19E-18 | 0.409635 | 2.53E-20 | 0.116381 | 0.01184  | 0.191079 | 3.23E-05 | 0.214716 |
| 0.438938 | 2.05E-23 | 0.342238 | 2.81E-14 | 0.027783 | 0.54924  | 0.248517 | 5.28E-08 | 0.260947 |
| -0.02733 | 0.55582  | -0.18509 | 5.73E-05 | 0.066963 | 0.14851  | -0.12275 | 0.00792  | -0.13634 |
| 0.115365 | 0.01261  | -0.21585 | 2.51E-06 | -0.42163 | 1.50E-21 | 0.033556 | 0.46943  | -0.04859 |
| -0.02934 | 0.5271   | -0.12393 | 0.00734  | -0.43184 | 1.23E-22 | 0.015002 | 0.74643  | 0.051878 |
| 0.252493 | 3.17E-08 | 0.148417 | 0.0013   | 0.024095 | 0.60349  | 0.037637 | 0.4171   | -0.07591 |
| 0.20067  | 1.25E-05 | 0.095778 | 0.03855  | -0.1742  | 0.00015  | 0.135841 | 0.00327  | 0.293154 |
| 0.436657 | 3.66E-23 | 0.47307  | 2.04E-27 | 0.171791 | 0.00019  | 0.318779 | 1.72E-12 | 0.430593 |
| 0.407996 | 3.70E-20 | 0.369125 | 1.60E-16 | 0.097889 | 0.03445  | 0.278704 | 8.87E-10 | 0.232739 |
| -0.1226  | 0.00799  | -0.02498 | 0.59024  | -0.41491 | 7.40E-21 | 0.141255 | 0.00222  | 0.056831 |
| 0.323261 | 8.06E-13 | 0.296868 | 5.90E-11 | -0.10873 | 0.01875  | 0.336789 | 7.54E-14 | 0.303971 |
| 0.3527   | 3.99E-15 | 0.222622 | 1.18E-06 | -0.05949 | 0.19942  | 0.205903 | 7.26E-06 | 0.155814 |
| 0.630054 | 4.97E-53 | 0.495512 | 2.64E-30 | 0.18109  | 8.30E-05 | 0.494773 | 3.31E-30 | 0.470876 |
| 0.284191 | 3.99E-10 | 0.308231 | 9.79E-12 | -0.0578  | 0.21249  | 0.277135 | 1.11E-09 | 0.354445 |
| 0.216911 | 2.23E-06 | 0.149957 | 0.00115  | -0.11862 | 0.0103   | 0.204917 | 8.05E-06 | 0.118735 |

|          |          |          |          |          |          |          |          |          |
|----------|----------|----------|----------|----------|----------|----------|----------|----------|
| 0.156755 | 0.00068  | 0.298963 | 4.26E-11 | -0.07539 | 0.10369  | 0.243648 | 9.73E-08 | 0.25366  |
| -0.17865 | 0.0001   | -0.32353 | 7.70E-13 | -0.06414 | 0.16639  | -0.12767 | 0.00573  | -0.17012 |
| 0.222804 | 1.16E-06 | 0.553992 | 6.40E-39 | 0.43435  | 6.55E-23 | 0.304288 | 1.84E-11 | 0.298503 |
| -0.0802  | 0.0834   | 0.345768 | 1.46E-14 | 0.21209  | 3.77E-06 | 0.134563 | 0.00358  | 0.204332 |
| 0.000731 | 0.98743  | 0.401873 | 1.49E-19 | 0.33829  | 5.75E-14 | 0.125088 | 0.0068   | 0.14246  |
| 0.009025 | 0.84577  | 0.364334 | 4.17E-16 | 0.263884 | 7.03E-09 | 0.091466 | 0.04822  | 0.100319 |
| -0.01845 | 0.69094  | 0.357254 | 1.67E-15 | 0.249647 | 4.57E-08 | 0.116319 | 0.01189  | 0.148833 |
| 0.32995  | 2.53E-13 | 0.103045 | 0.02596  | 0.225875 | 8.14E-07 | 0.10579  | 0.02223  | 0.114888 |
| 0.04363  | 0.34682  | 0.448729 | 1.62E-24 | 0.373881 | 6.10E-17 | 0.143839 | 0.00183  | 0.162442 |
| 0.022787 | 0.62331  | 0.343359 | 2.29E-14 | 0.246563 | 6.76E-08 | 0.073047 | 0.11493  | 0.165016 |
| -0.24406 | 9.24E-08 | -0.43831 | 2.41E-23 | -0.40126 | 1.71E-19 | -0.28109 | 6.28E-10 | -0.18133 |
| 0.250533 | 4.08E-08 | 0.069119 | 0.13584  | 0.092661 | 0.04535  | 0.170008 | 0.00022  | 0.421239 |
| 0.049889 | 0.28197  | 0.401586 | 1.59E-19 | 0.300802 | 3.19E-11 | 0.086374 | 0.06218  | 0.145043 |
| -0.02429 | 0.60058  | 0.18706  | 4.75E-05 | 0.202962 | 9.85E-06 | -0.0397  | 0.39206  | -0.05046 |
| 0.21618  | 2.42E-06 | 0.055868 | 0.22819  | -0.10531 | 0.02285  | 0.256936 | 1.78E-08 | 0.381792 |
| 0.020736 | 0.6549   | 0.208159 | 5.73E-06 | 0.234355 | 3.02E-07 | -0.02664 | 0.56575  | -0.23564 |
| 0.067042 | 0.14803  | 0.339709 | 4.45E-14 | 0.338172 | 5.88E-14 | 0.072629 | 0.11703  | 0.164851 |
| -0.02235 | 0.63005  | 0.09683  | 0.03646  | 0.044426 | 0.33808  | 0.016842 | 0.71659  | 0.017032 |
| 0.184866 | 5.85E-05 | 0.348174 | 9.36E-15 | 0.247657 | 5.88E-08 | 0.137563 | 0.00289  | 0.122514 |
| -0.08986 | 0.05231  | 0.10282  | 0.02629  | 0.049494 | 0.2858   | 0.080364 | 0.08277  | -0.02773 |
| -0.04437 | 0.33866  | 0.052974 | 0.25324  | 0.00998  | 0.8297   | -0.02452 | 0.59714  | -0.13912 |
| -0.12631 | 0.00627  | 0.082689 | 0.07423  | 0.031571 | 0.49613  | 0.01969  | 0.67127  | -0.05756 |
| 0.335279 | 9.88E-14 | 0.26656  | 4.88E-09 | 0.362016 | 6.59E-16 | 0.173873 | 0.00016  | 0.092532 |
| 0.246148 | 7.12E-08 | -0.00297 | 0.94903  | -0.00062 | 0.98934  | 0.13137  | 0.00446  | -0.00341 |
| -0.12996 | 0.00491  | -0.29129 | 1.38E-10 | -0.26594 | 5.31E-09 | -0.15337 | 0.00088  | -0.168   |
| -0.04172 | 0.36839  | 0.014844 | 0.74901  | -0.01638 | 0.72407  | -0.06223 | 0.17946  | -0.32284 |
| 0.27709  | 1.12E-09 | 0.452014 | 6.78E-25 | 0.373658 | 6.39E-17 | 0.272362 | 2.18E-09 | 0.137066 |
| -0.17338 | 0.00017  | 0.094207 | 0.04186  | 0.061683 | 0.1833   | -0.21301 | 3.41E-06 | -0.25955 |
| 0.223837 | 1.03E-06 | 0.380281 | 1.62E-17 | 0.360899 | 8.20E-16 | 0.054834 | 0.23693  | 0.1052   |
| -0.08064 | 0.08171  | 0.112496 | 0.015    | 0.147025 | 0.00144  | -0.01108 | 0.81132  | -0.15357 |
| 0.117493 | 0.01105  | 0.432334 | 1.08E-22 | 0.359003 | 1.19E-15 | 0.169301 | 0.00024  | 0.082687 |
| -0.05856 | 0.20653  | 0.174313 | 0.00015  | 0.174785 | 0.00015  | 0.038509 | 0.40639  | 0.068551 |
| 0.089883 | 0.05225  | 0.272073 | 2.27E-09 | 0.272826 | 2.05E-09 | 0.075205 | 0.10456  | 0.123779 |
| 0.073062 | 0.11485  | 0.284385 | 3.88E-10 | 0.286643 | 2.78E-10 | 4.98E-05 | 0.99914  | -0.09086 |
| -0.17558 | 0.00014  | 0.062056 | 0.18066  | 0.033616 | 0.46863  | -0.08473 | 0.06732  | -0.10446 |
| 0.069084 | 0.13604  | 0.273041 | 1.99E-09 | 0.29364  | 9.68E-11 | -0.03379 | 0.46631  | -0.15702 |
| 0.017257 | 0.70993  | 0.188891 | 3.99E-05 | 0.186477 | 5.02E-05 | -0.07536 | 0.10386  | -0.0598  |
| 0.332342 | 1.66E-13 | 0.243004 | 1.05E-07 | 0.427939 | 3.22E-22 | 0.069859 | 0.13169  | -0.13477 |
| 0.102191 | 0.02723  | 0.091715 | 0.04761  | 0.155658 | 0.00074  | -0.13203 | 0.00426  | -0.16327 |
| 0.025893 | 0.57675  | 0.144121 | 0.00179  | 0.207621 | 6.07E-06 | -0.07156 | 0.12254  | -0.14929 |
| 0.063182 | 0.17286  | 0.183672 | 6.54E-05 | 0.117208 | 0.01125  | 0.1089   | 0.01857  | 0.005486 |
| -0.06543 | 0.15802  | 0.256464 | 1.89E-08 | 0.15044  | 0.00111  | 0.051742 | 0.26447  | 0.041448 |
| -0.1417  | 0.00214  | 0.185814 | 5.35E-05 | 0.081918 | 0.07698  | -0.09205 | 0.04681  | -0.06116 |
| -0.07867 | 0.08947  | -0.24601 | 7.24E-08 | -0.1222  | 0.0082   | -0.10951 | 0.01791  | -0.04164 |
| -0.0096  | 0.83612  | 0.191294 | 3.16E-05 | 0.128026 | 0.00559  | -0.05096 | 0.2718   | -0.11881 |

|          |          |          |          |          |          |          |          |           |
|----------|----------|----------|----------|----------|----------|----------|----------|-----------|
| -0.05557 | 0.23068  | 0.083835 | 0.07029  | 0.063721 | 0.16921  | 0.067391 | 0.14592  | 0.197653  |
| -0.20134 | 1.16E-05 | -0.14594 | 0.00157  | -0.09679 | 0.03653  | -0.21853 | 1.86E-06 | -0.28186  |
| 0.045604 | 0.32541  | 0.287681 | 2.38E-10 | 0.253343 | 2.84E-08 | 0.067725 | 0.14393  | 0.087292  |
| 0.152359 | 0.00096  | 0.250569 | 4.06E-08 | 0.243386 | 1.01E-07 | -0.05982 | 0.19691  | 0.010744  |
| 0.066769 | 0.14969  | 0.284517 | 3.80E-10 | 0.255939 | 2.03E-08 | 0.279869 | 7.50E-10 | 0.189586  |
| 0.134752 | 0.00353  | -0.07111 | 0.1249   | -0.05332 | 0.25018  | 0.055026 | 0.23529  | 0.196864  |
| 0.108999 | 0.01846  | -0.2053  | 7.74E-06 | 0.056365 | 0.22408  | -0.19845 | 1.56E-05 | -0.15495  |
| 0.15886  | 0.00057  | -0.35021 | 6.38E-15 | -0.21305 | 3.40E-06 | -0.13062 | 0.0047   | -0.24804  |
| 0.306342 | 1.33E-11 | 0.510961 | 2.02E-32 | 0.541529 | 6.11E-37 | 0.173953 | 0.00016  | 0.24803   |
| 0.162759 | 0.00041  | -0.10905 | 0.01841  | -0.17306 | 0.00017  | -0.03016 | 0.51563  | 0.185327  |
| 0.16592  | 0.00032  | 0.490001 | 1.41E-29 | 0.536405 | 3.77E-36 | 0.158408 | 0.00059  | 0.147144  |
| -0.02866 | 0.53675  | 0.266034 | 5.25E-09 | 0.191116 | 3.22E-05 | 0.011207 | 0.80913  | 0.021311  |
| 0.076728 | 0.0977   | 0.458606 | 1.15E-25 | 0.373055 | 7.23E-17 | 0.115471 | 0.01252  | 0.159501  |
| 0.28736  | 2.50E-10 | 0.111355 | 0.01606  | 0.110711 | 0.01669  | 0.318347 | 1.85E-12 | 0.460985  |
| 0.153604 | 0.00087  | 0.288738 | 2.03E-10 | 0.168741 | 0.00025  | 0.152694 | 0.00093  | 0.203083  |
| 0.001948 | 0.96651  | 0.312526 | 4.87E-12 | 0.231664 | 4.15E-07 | 0.027251 | 0.55692  | 0.073904  |
| -0.01649 | 0.7222   | 0.229542 | 5.32E-07 | 0.16779  | 0.00027  | 0.137323 | 0.00294  | 0.225914  |
| 0.356553 | 1.91E-15 | 0.183084 | 6.90E-05 | 0.158346 | 0.00059  | 0.177715 | 0.00011  | 0.023146  |
| -0.00893 | 0.84744  | -0.48022 | 2.58E-28 | -0.29761 | 5.26E-11 | -0.16823 | 0.00026  | -0.22199  |
| 0.22187  | 1.28E-06 | 0.240323 | 1.47E-07 | 0.212745 | 3.51E-06 | 0.06013  | 0.1946   | -2.65E-05 |
| 0.044505 | 0.33722  | 0.240772 | 1.39E-07 | 0.137858 | 0.00283  | 0.129305 | 0.00513  | 0.147107  |
| -0.24598 | 7.27E-08 | -0.08575 | 0.06408  | -0.20238 | 1.05E-05 | 0.039824 | 0.39054  | 0.146951  |
| 0.210816 | 4.32E-06 | 0.436671 | 3.65E-23 | 0.41053  | 2.06E-20 | 0.122476 | 0.00806  | 0.141585  |
| 0.125885 | 0.00645  | 0.366671 | 2.62E-16 | 0.282752 | 4.93E-10 | 0.140107 | 0.00241  | 0.117161  |
| 0.168018 | 0.00027  | 0.421228 | 1.65E-21 | 0.366755 | 2.58E-16 | 0.194365 | 2.34E-05 | 0.213023  |
| -0.00303 | 0.94786  | 0.277323 | 1.08E-09 | 0.272417 | 2.17E-09 | -0.04946 | 0.28614  | -0.12242  |
| -0.03387 | 0.46533  | 0.298399 | 4.65E-11 | 0.188443 | 4.16E-05 | 0.014766 | 0.75029  | 0.070105  |
| 0.144719 | 0.00172  | 0.208943 | 5.27E-06 | 0.268489 | 3.74E-09 | -0.10168 | 0.028    | -0.17842  |
| 0.001797 | 0.96911  | 0.224719 | 9.29E-07 | 0.137301 | 0.00295  | 0.082225 | 0.07587  | 0.118655  |
| -0.02569 | 0.5798   | -0.12907 | 0.00522  | -0.20698 | 6.49E-06 | -0.07555 | 0.10297  | 0.028048  |
| 0.031278 | 0.50014  | 0.292309 | 1.19E-10 | 0.239704 | 1.58E-07 | 0.055865 | 0.22822  | 0.130648  |
| 0.123894 | 0.00735  | 0.40409  | 9.03E-20 | 0.32257  | 9.07E-13 | 0.014499 | 0.75465  | 0.056812  |
| -0.16359 | 0.00039  | -0.28909 | 1.93E-10 | -0.18676 | 4.89E-05 | -0.22681 | 7.31E-07 | -0.13281  |
| 0.119192 | 0.00994  | 0.444151 | 5.36E-24 | 0.296521 | 6.22E-11 | 0.245765 | 7.47E-08 | 0.300132  |
| 0.001369 | 0.97646  | 0.057983 | 0.21104  | -0.00101 | 0.98262  | 0.032325 | 0.4859   | -0.06547  |
| -0.04799 | 0.30074  | 0.210643 | 4.40E-06 | 0.132899 | 0.00401  | 0.081756 | 0.07757  | 0.030262  |
| 0.034914 | 0.45163  | 0.317198 | 2.24E-12 | 0.22671  | 7.39E-07 | 0.100038 | 0.03066  | 0.057003  |
| 0.176175 | 0.00013  | -0.32215 | 9.75E-13 | -0.30814 | 9.93E-12 | 0.145814 | 0.00158  | 0.003339  |
| 0.139519 | 0.00251  | 0.379091 | 2.08E-17 | 0.212946 | 3.44E-06 | 0.160499 | 0.0005   | 0.101542  |
| 0.089473 | 0.05333  | 0.322735 | 8.82E-13 | 0.322719 | 8.84E-13 | 0.090936 | 0.04954  | 0.102725  |
| 0.014104 | 0.76114  | 0.119701 | 0.00962  | 0.106049 | 0.0219   | -0.04974 | 0.28344  | -0.27762  |
| 0.117654 | 0.01094  | -0.40738 | 4.26E-20 | -0.18251 | 7.28E-05 | -0.04754 | 0.30528  | -0.23156  |
| 0.202251 | 1.06E-05 | -0.21266 | 3.54E-06 | -0.14163 | 0.00216  | 0.149274 | 0.00122  | 0.017641  |
| -0.25882 | 1.39E-08 | 0.045367 | 0.32795  | -0.07788 | 0.09276  | -0.04128 | 0.37346  | 0.034244  |
| 0.134852 | 0.0035   | 0.382425 | 1.03E-17 | 0.287733 | 2.36E-10 | 0.124308 | 0.00715  | 0.098173  |



|          |          |          |          |          |          |          |          |          |
|----------|----------|----------|----------|----------|----------|----------|----------|----------|
| -0.17483 | 0.00015  | 0.022748 | 0.6239   | -0.02448 | 0.59767  | -0.07553 | 0.10308  | -0.13753 |
| 0.100032 | 0.03067  | 0.342618 | 2.62E-14 | 0.252325 | 3.24E-08 | 0.151048 | 0.00106  | 0.284402 |
| -0.00247 | 0.95753  | 0.249563 | 4.62E-08 | 0.192787 | 2.74E-05 | 0.118641 | 0.01029  | 0.126595 |
| 0.020956 | 0.65149  | 0.386528 | 4.33E-18 | 0.271676 | 2.40E-09 | 0.083843 | 0.07027  | 0.122833 |
| 0.075471 | 0.10334  | 0.163952 | 0.00037  | 0.214761 | 2.82E-06 | -0.19379 | 2.48E-05 | -0.24037 |
| 0.157102 | 0.00066  | 0.378759 | 2.23E-17 | 0.327852 | 3.65E-13 | 0.098379 | 0.03355  | 0.130695 |
| 0.048487 | 0.29573  | 0.364041 | 4.42E-16 | 0.279568 | 7.83E-10 | 0.063758 | 0.16896  | 0.020084 |
| 0.208215 | 5.70E-06 | 0.376776 | 3.36E-17 | 0.394967 | 6.94E-19 | 0.369667 | 1.44E-16 | 0.086588 |
| 0.235761 | 2.55E-07 | 0.295484 | 7.30E-11 | 0.437416 | 3.02E-23 | 0.007283 | 0.87528  | -0.09833 |
| 0.117163 | 0.01128  | -0.16397 | 0.00037  | -0.14758 | 0.00138  | 0.046174 | 0.3194   | -0.0318  |
| 0.000433 | 0.99256  | 0.192265 | 2.88E-05 | 0.06182  | 0.18232  | 0.071772 | 0.12142  | -0.18439 |
| 0.257873 | 1.57E-08 | 0.426967 | 4.09E-22 | 0.358181 | 1.39E-15 | 0.272787 | 2.06E-09 | 0.149041 |
| 0.163275 | 0.0004   | 0.233052 | 3.52E-07 | 0.244804 | 8.42E-08 | 0.063676 | 0.16951  | -0.04059 |
| 0.217747 | 2.03E-06 | -0.07054 | 0.12798  | -0.05957 | 0.19883  | 0.089519 | 0.05321  | 0.113149 |
| 0.281842 | 5.63E-10 | 0.401215 | 1.73E-19 | 0.395021 | 6.86E-19 | 0.12667  | 0.00612  | -0.09269 |
| 0.294858 | 8.04E-11 | 0.357427 | 1.61E-15 | 0.310584 | 6.68E-12 | 0.248473 | 5.31E-08 | 0.154664 |
| 0.172098 | 0.00019  | 0.399155 | 2.74E-19 | 0.284342 | 3.90E-10 | 0.048077 | 0.29984  | -0.01497 |
| 0.185989 | 5.26E-05 | 0.411801 | 1.53E-20 | 0.35996  | 9.85E-16 | 0.110233 | 0.01717  | -0.04369 |
| -0.04397 | 0.34311  | 0.025453 | 0.58324  | 0.150119 | 0.00114  | -0.14487 | 0.0017   | -0.15637 |
| -0.11367 | 0.01398  | -0.03573 | 0.44108  | 0.042005 | 0.36509  | -0.12521 | 0.00674  | -0.33053 |
| 0.039632 | 0.39283  | 0.411504 | 1.64E-20 | 0.391955 | 1.34E-18 | 0.114921 | 0.01295  | 0.130103 |
| -0.10835 | 0.01918  | -0.22924 | 5.51E-07 | -0.20642 | 6.88E-06 | 0.072058 | 0.11994  | -0.01068 |
| 0.018587 | 0.6887   | -0.2265  | 7.57E-07 | -0.111   | 0.01641  | 0.025048 | 0.58925  | -0.13164 |
| 0.285368 | 3.36E-10 | 0.212556 | 3.58E-06 | 0.31366  | 4.04E-12 | 0.07648  | 0.09879  | -0.22213 |
| -0.19074 | 3.34E-05 | 0.00655  | 0.88773  | 0.002401 | 0.95873  | -0.09062 | 0.05032  | -0.07713 |
| -0.00473 | 0.91883  | 0.236571 | 2.31E-07 | 0.161069 | 0.00048  | 0.03757  | 0.41793  | 0.036829 |
| -0.02834 | 0.5412   | 0.298361 | 4.68E-11 | 0.174149 | 0.00016  | 0.055674 | 0.22982  | 0.034053 |
| -0.04303 | 0.35355  | 0.33438  | 1.16E-13 | 0.191751 | 3.03E-05 | 0.162093 | 0.00044  | 0.207074 |
| 0.128182 | 0.00554  | -0.26382 | 7.09E-09 | -0.23041 | 4.81E-07 | -0.08981 | 0.05245  | -0.14605 |
| 0.456331 | 2.13E-25 | 0.492729 | 6.19E-30 | 0.431878 | 1.21E-22 | 0.367959 | 2.03E-16 | 0.312952 |
| -0.08422 | 0.06902  | 0.134334 | 0.00363  | 0.070518 | 0.12808  | -0.11337 | 0.01424  | -0.14132 |
| -0.15784 | 0.00062  | -0.44235 | 8.55E-24 | -0.23923 | 1.68E-07 | -0.19748 | 1.72E-05 | -0.2768  |
| 0.060157 | 0.1944   | -0.35199 | 4.57E-15 | -0.09024 | 0.05132  | 0.005139 | 0.91181  | -0.12558 |
| -0.06832 | 0.14042  | 0.200612 | 1.25E-05 | 0.1156   | 0.01243  | 0.004518 | 0.92242  | -0.07496 |
| 0.027738 | 0.54989  | -0.31453 | 3.49E-12 | -0.17451 | 0.00015  | -0.07273 | 0.11651  | -0.07665 |
| -0.27715 | 1.11E-09 | -0.60711 | 2.28E-48 | -0.47689 | 6.81E-28 | -0.19696 | 1.81E-05 | -0.28822 |
| 0.168611 | 0.00025  | 0.292776 | 1.10E-10 | 0.181948 | 7.67E-05 | 0.030005 | 0.51774  | -0.08332 |
| 0.29518  | 7.65E-11 | 0.402535 | 1.28E-19 | 0.441653 | 1.02E-23 | 0.080823 | 0.08102  | -0.03941 |
| 0.054736 | 0.23777  | 0.48212  | 1.48E-28 | 0.426662 | 4.41E-22 | 0.160386 | 0.0005   | 0.234632 |
| 0.113636 | 0.01401  | 0.354672 | 2.74E-15 | 0.317778 | 2.04E-12 | 0.100588 | 0.02975  | 0.061677 |
| 0.059358 | 0.2004   | 0.406634 | 5.06E-20 | 0.349015 | 8.00E-15 | 0.057994 | 0.21095  | 0.115712 |
| -0.14845 | 0.00129  | 0.007279 | 0.87534  | 0.012231 | 0.79207  | -0.25757 | 1.64E-08 | -0.26111 |
| 0.124371 | 0.00713  | -0.26718 | 4.48E-09 | -0.10392 | 0.02472  | -0.02153 | 0.64252  | -0.08159 |
| -0.04159 | 0.36981  | 0.195084 | 2.18E-05 | 0.25255  | 3.15E-08 | -0.04789 | 0.30175  | -0.10056 |
| 0.255743 | 2.08E-08 | 0.484191 | 8.04E-29 | 0.302185 | 2.57E-11 | 0.31838  | 1.84E-12 | 0.342644 |

|          |          |          |          |          |          |          |          |          |
|----------|----------|----------|----------|----------|----------|----------|----------|----------|
| 0.03751  | 0.41868  | -0.17062 | 0.00021  | -0.0903  | 0.05115  | 0.050414 | 0.27694  | -0.0801  |
| 0.09135  | 0.0485   | 0.030493 | 0.51096  | -0.04484 | 0.33361  | -0.01432 | 0.75754  | -0.20383 |
| 0.218266 | 1.92E-06 | 0.400671 | 1.95E-19 | 0.391385 | 1.52E-18 | 0.066826 | 0.14934  | -0.05405 |
| 0.292879 | 1.09E-10 | 0.456835 | 1.86E-25 | 0.264091 | 6.83E-09 | 0.357266 | 1.66E-15 | 0.286344 |
| 0.110189 | 0.01721  | 0.317146 | 2.26E-12 | 0.223487 | 1.07E-06 | 0.046844 | 0.31243  | -0.00166 |
| 0.012528 | 0.78715  | -0.24139 | 1.29E-07 | -0.16177 | 0.00045  | -0.04228 | 0.36195  | 0.088099 |
| -0.10998 | 0.01743  | 0.027902 | 0.54753  | 0.023537 | 0.61191  | 0.010198 | 0.82603  | -0.10336 |
| 0.060264 | 0.1936   | 0.331289 | 2.00E-13 | 0.202056 | 1.08E-05 | 0.076976 | 0.09662  | 0.03844  |
| 0.221961 | 1.27E-06 | 0.437829 | 2.72E-23 | 0.283994 | 4.11E-10 | 0.300728 | 3.23E-11 | 0.275784 |
| 0.0133   | 0.77437  | -0.18883 | 4.01E-05 | -0.08544 | 0.06507  | -0.07967 | 0.08549  | -0.01047 |
| -0.00855 | 0.8538   | 0.050723 | 0.27399  | 0.062971 | 0.1743   | -0.00169 | 0.97088  | -0.20397 |
| 0.144742 | 0.00171  | 0.370406 | 1.24E-16 | 0.322632 | 8.97E-13 | 0.02797  | 0.54655  | -0.04444 |
| -0.05931 | 0.20077  | 0.159855 | 0.00053  | 0.188216 | 4.26E-05 | -0.06674 | 0.14989  | -0.10423 |
| 0.081304 | 0.07923  | 0.152618 | 0.00094  | 0.138416 | 0.00272  | -0.02928 | 0.52789  | 0.114258 |
| 0.025737 | 0.57904  | 0.260243 | 1.15E-08 | 0.20023  | 1.30E-05 | -0.08876 | 0.05527  | -0.03971 |
| -0.2794  | 8.03E-10 | -0.29956 | 3.88E-11 | -0.30545 | 1.53E-11 | -0.21445 | 2.92E-06 | 0.010533 |
| 0.044051 | 0.34219  | 0.180557 | 8.72E-05 | 0.176955 | 0.00012  | 0.020261 | 0.66232  | -0.02515 |
| 0.06938  | 0.13437  | 0.374913 | 4.94E-17 | 0.307942 | 1.03E-11 | 0.078192 | 0.09145  | 0.011274 |
| 0.24631  | 6.97E-08 | 0.318197 | 1.90E-12 | 0.346889 | 1.19E-14 | 0.058    | 0.2109   | -0.01315 |
| -0.15106 | 0.00106  | 0.070503 | 0.12816  | 0.05296  | 0.25336  | -0.01992 | 0.66766  | -0.12175 |
| -0.00998 | 0.82964  | 0.209103 | 5.19E-06 | 0.087492 | 0.05885  | 0.002715 | 0.95335  | 0.079709 |
| 0.064069 | 0.16689  | 0.318492 | 1.81E-12 | 0.342218 | 2.82E-14 | -0.0058  | 0.90053  | -0.02313 |
| 0.195714 | 2.05E-05 | 0.496806 | 1.77E-30 | 0.212209 | 3.72E-06 | 0.335971 | 8.73E-14 | 0.508073 |
| 0.234149 | 3.09E-07 | 0.335564 | 9.39E-14 | 0.284111 | 4.04E-10 | 0.154746 | 0.00079  | 0.079772 |
| 0.263331 | 7.57E-09 | 0.438831 | 2.11E-23 | 0.314924 | 3.28E-12 | 0.141602 | 0.00216  | -0.00343 |
| -0.26021 | 1.15E-08 | 0.031403 | 0.49843  | -0.02851 | 0.53887  | 0.008118 | 0.86111  | -0.08512 |
| 0.039771 | 0.39117  | 0.453516 | 4.54E-25 | 0.108164 | 0.01939  | 0.203764 | 9.07E-06 | 0.357708 |
| 0.025705 | 0.57952  | 0.170281 | 0.00022  | 0.168729 | 0.00025  | -0.14374 | 0.00184  | -0.0201  |
| -0.06689 | 0.14898  | 0.190497 | 3.42E-05 | 0.150088 | 0.00114  | -0.03543 | 0.445    | -0.07247 |
| -0.15768 | 0.00063  | -0.07628 | 0.09966  | -0.18379 | 6.46E-05 | -0.07423 | 0.10913  | -0.1665  |
| 0.197694 | 1.68E-05 | 0.305352 | 1.55E-11 | 0.311643 | 5.62E-12 | 0.06826  | 0.14078  | -0.11418 |
| 0.176362 | 0.00013  | 0.19934  | 1.43E-05 | 0.115506 | 0.0125   | 0.205787 | 7.35E-06 | 0.067655 |
| -0.0862  | 0.06271  | -0.3669  | 2.51E-16 | -0.27391 | 1.76E-09 | -0.12295 | 0.00782  | -0.15118 |
| -0.21708 | 2.19E-06 | -0.33516 | 1.01E-13 | -0.31903 | 1.65E-12 | -0.15105 | 0.00106  | -0.2017  |
| -0.01812 | 0.69613  | 0.28771  | 2.37E-10 | 0.093698 | 0.04298  | 0.124233 | 0.00719  | 0.200491 |
| -0.08659 | 0.06152  | -0.2099  | 4.77E-06 | -0.22287 | 1.15E-06 | -0.1366  | 0.0031   | -0.05941 |
| -0.24238 | 1.14E-07 | 0.007592 | 0.87003  | -0.0232  | 0.61702  | -0.14305 | 0.00194  | -0.17735 |
| -0.17493 | 0.00015  | 0.100518 | 0.02986  | 0.014421 | 0.75594  | -0.03188 | 0.49191  | -0.14034 |
| -0.22437 | 9.67E-07 | -0.06548 | 0.15773  | -0.02953 | 0.52446  | -0.18628 | 5.12E-05 | -0.27605 |
| 0.026299 | 0.57078  | 0.434051 | 7.06E-23 | 0.30129  | 2.96E-11 | 0.097467 | 0.03523  | 0.176593 |
| -0.14006 | 0.00242  | -0.08813 | 0.05702  | -0.08116 | 0.07974  | -0.15882 | 0.00057  | -0.24947 |
| -0.04437 | 0.33872  | 0.155439 | 0.00075  | 0.097692 | 0.03481  | -0.06487 | 0.16161  | 0.00086  |
| -0.12828 | 0.0055   | -0.00132 | 0.97737  | -0.05616 | 0.22575  | -0.05226 | 0.25968  | -0.14039 |
| 0.268295 | 3.85E-09 | 0.172501 | 0.00018  | 0.045874 | 0.32256  | 0.093207 | 0.04409  | 0.202164 |
| 0.078829 | 0.08883  | 0.181379 | 8.08E-05 | 0.107912 | 0.01967  | 0.055083 | 0.2348   | -0.04051 |

|          |          |          |          |          |          |          |          |          |
|----------|----------|----------|----------|----------|----------|----------|----------|----------|
| 0.07072  | 0.12699  | 0.221673 | 1.31E-06 | 0.076079 | 0.10058  | -0.04509 | 0.33095  | 0.01837  |
| 0.012584 | 0.78621  | 0.151056 | 0.00106  | 0.061412 | 0.18523  | 0.048876 | 0.29188  | -0.12594 |
| 0.00613  | 0.89489  | 0.308465 | 9.43E-12 | 0.23748  | 2.07E-07 | 0.05725  | 0.21687  | 0.014081 |
| 0.038583 | 0.40549  | 0.354585 | 2.78E-15 | 0.160387 | 0.0005   | 0.246887 | 6.49E-08 | 0.352943 |
| -0.04151 | 0.37075  | 0.250895 | 3.90E-08 | 0.16566  | 0.00032  | 0.048898 | 0.29166  | -0.0114  |
| 0.135055 | 0.00345  | 0.308456 | 9.44E-12 | 0.143196 | 0.00192  | 0.016419 | 0.72343  | -0.03435 |
| -0.08593 | 0.06355  | 0.244453 | 8.80E-08 | 0.142707 | 0.00199  | -0.00705 | 0.87922  | -0.03126 |
| 0.118469 | 0.0104   | 0.351657 | 4.86E-15 | 0.249174 | 4.85E-08 | 0.063659 | 0.16963  | -0.02791 |
| -0.01984 | 0.66896  | 0.278498 | 9.13E-10 | 0.156691 | 0.00068  | 0.025971 | 0.57559  | -0.01279 |
| -0.09219 | 0.04647  | 0.022508 | 0.62757  | -0.10363 | 0.02513  | 0.06182  | 0.18233  | -0.16962 |
| -0.01152 | 0.80388  | 0.294907 | 7.98E-11 | 0.191117 | 3.22E-05 | 0.020216 | 0.66303  | -0.01251 |
| 0.141108 | 0.00224  | 0.37479  | 5.07E-17 | 0.24831  | 5.42E-08 | 0.233096 | 3.50E-07 | 0.25412  |
| -0.20613 | 7.09E-06 | 0.052381 | 0.2586   | -0.00511 | 0.91233  | -0.1158  | 0.01227  | -0.15824 |
| 0.011553 | 0.80336  | 0.308932 | 8.74E-12 | 0.272239 | 2.22E-09 | 0.088991 | 0.05464  | 0.061926 |
| -0.01975 | 0.67025  | 0.170918 | 0.00021  | 0.123945 | 0.00733  | 0.035257 | 0.44719  | -0.06807 |
| -0.10023 | 0.03034  | 0.168024 | 0.00027  | 0.169577 | 0.00023  | -0.0311  | 0.50261  | -0.03408 |
| 0.129289 | 0.00514  | 0.404349 | 8.52E-20 | 0.310118 | 7.21E-12 | 0.125779 | 0.0065   | 0.073842 |
| -0.026   | 0.57521  | 0.413285 | 1.08E-20 | 0.336562 | 7.85E-14 | 0.073537 | 0.11251  | 0.034108 |
| -0.10692 | 0.02084  | 0.091069 | 0.0492   | 0.071464 | 0.12303  | -0.08956 | 0.05311  | -0.10699 |
| 0.317957 | 1.98E-12 | 0.435489 | 4.91E-23 | 0.378151 | 2.53E-17 | 0.155939 | 0.00072  | 0.20023  |
| 0.205062 | 7.93E-06 | 0.516961 | 2.85E-33 | 0.357777 | 1.51E-15 | 0.280831 | 6.52E-10 | 0.273371 |
| 0.023212 | 0.61684  | 0.109377 | 0.01806  | 0.140527 | 0.00234  | 0.021921 | 0.63657  | -0.14934 |
| -0.04763 | 0.30435  | -0.44677 | 2.71E-24 | -0.37739 | 2.96E-17 | -0.1689  | 0.00025  | -0.23647 |
| -0.03828 | 0.40921  | 0.257464 | 1.66E-08 | 0.175447 | 0.00014  | 0.049229 | 0.2884   | -0.01524 |
| 0.357903 | 1.47E-15 | 0.385165 | 5.79E-18 | 0.355119 | 2.51E-15 | 0.187428 | 4.59E-05 | 0.089516 |
| 0.104768 | 0.02356  | 0.151258 | 0.00104  | -0.02148 | 0.64344  | 0.090478 | 0.0507   | 0.278966 |
| 0.258172 | 1.51E-08 | 0.228414 | 6.07E-07 | 0.234188 | 3.08E-07 | 0.072661 | 0.11686  | -0.13518 |
| -0.10067 | 0.02962  | -0.31591 | 2.78E-12 | -0.08679 | 0.06091  | -0.16884 | 0.00025  | -0.20064 |
| 0.210634 | 4.41E-06 | 0.06225  | 0.17929  | 0.15779  | 0.00062  | -0.07975 | 0.08514  | -0.16962 |
| 0.234453 | 2.98E-07 | 0.047482 | 0.30587  | -0.07507 | 0.10521  | 0.291026 | 1.44E-10 | 0.349575 |
| 0.009395 | 0.83954  | 0.275662 | 1.37E-09 | 0.178784 | 0.0001   | 0.078526 | 0.09007  | 0.043666 |
| 0.045182 | 0.32992  | 0.357607 | 1.56E-15 | 0.241264 | 1.31E-07 | 0.088226 | 0.05676  | 0.137504 |
| -0.02331 | 0.61537  | 0.32914  | 2.92E-13 | 0.225009 | 8.99E-07 | 0.029744 | 0.5214   | 0.150007 |
| -0.04663 | 0.31464  | 0.109171 | 0.01828  | 0.01422  | 0.75924  | 0.029505 | 0.52476  | -0.01535 |
| -0.04651 | 0.31594  | 0.246353 | 6.94E-08 | 0.091782 | 0.04745  | 0.030136 | 0.51592  | 0.076117 |
| 0.057753 | 0.21286  | 0.141222 | 0.00222  | 0.17422  | 0.00015  | -0.04132 | 0.37295  | -0.21518 |
| -0.06552 | 0.15749  | 0.237783 | 2.00E-07 | 0.1443   | 0.00177  | -0.02362 | 0.61068  | 0.034581 |
| 0.098498 | 0.03333  | -0.1677  | 0.00027  | -0.28317 | 4.64E-10 | 0.034971 | 0.45088  | -0.00692 |
| -0.0207  | 0.6555   | 0.238862 | 1.75E-07 | 0.121565 | 0.00854  | 0.053052 | 0.25255  | 0.026017 |
| 0.054667 | 0.23837  | -0.18384 | 6.44E-05 | -0.06881 | 0.1376   | 0.047462 | 0.30607  | -0.03585 |
| -0.03375 | 0.4669   | 0.209511 | 4.97E-06 | 0.14146  | 0.00218  | 0.014058 | 0.7619   | -0.12075 |
| 0.053311 | 0.25023  | 0.339804 | 4.37E-14 | 0.345621 | 1.51E-14 | 0.112073 | 0.01539  | 0.105039 |
| 0.097463 | 0.03524  | 0.33921  | 4.87E-14 | 0.191688 | 3.05E-05 | 0.202616 | 1.02E-05 | 0.396919 |
| 0.027291 | 0.55633  | 0.313811 | 3.94E-12 | 0.170927 | 0.00021  | -0.02436 | 0.59953  | 0.062556 |
| 0.084261 | 0.06887  | 0.285036 | 3.52E-10 | 0.162488 | 0.00042  | 0.013574 | 0.76986  | 0.005176 |

|          |          |          |          |          |          |          |          |          |
|----------|----------|----------|----------|----------|----------|----------|----------|----------|
| -0.13208 | 0.00425  | 0.131343 | 0.00447  | 0.000399 | 0.99314  | -0.054   | 0.24412  | -0.05691 |
| -0.0546  | 0.23896  | 0.065915 | 0.15498  | 0.04146  | 0.37135  | -0.11761 | 0.01097  | -0.19215 |
| 0.001568 | 0.97304  | 0.363127 | 5.30E-16 | 0.358496 | 1.31E-15 | 0.048881 | 0.29183  | 0.004425 |
| -0.17286 | 0.00017  | -0.24473 | 8.51E-08 | -0.17416 | 0.00016  | -0.14769 | 0.00137  | -0.01202 |
| 0.040175 | 0.38637  | 0.270998 | 2.64E-09 | 0.233756 | 3.24E-07 | 0.118171 | 0.01059  | 0.002322 |
| 0.11303  | 0.01453  | 0.276894 | 1.15E-09 | 0.249397 | 4.72E-08 | 0.133632 | 0.00382  | 0.090203 |
| -0.02719 | 0.55781  | 0.105907 | 0.02208  | 0.152206 | 0.00097  | -0.11674 | 0.01158  | -0.23348 |
| -0.07779 | 0.09314  | 0.245113 | 8.10E-08 | 0.097045 | 0.03604  | 0.028581 | 0.53783  | 0.019391 |
| -0.10284 | 0.02626  | 0.22174  | 1.30E-06 | 0.130599 | 0.0047   | 0.000315 | 0.99458  | 0.017556 |
| -0.24859 | 5.23E-08 | 0.027663 | 0.55097  | -0.04771 | 0.30358  | -0.05555 | 0.23085  | -0.00522 |
| -0.11768 | 0.01093  | 0.126902 | 0.00603  | 0.050145 | 0.27951  | -0.0345  | 0.45705  | -0.0532  |
| 0.04259  | 0.35845  | 0.315709 | 2.88E-12 | 0.260851 | 1.06E-08 | 0.069779 | 0.13213  | 0.138053 |
| 0.058655 | 0.20578  | 0.291948 | 1.25E-10 | 0.172926 | 0.00017  | 0.112778 | 0.01475  | 0.243922 |
| -0.05967 | 0.19804  | 0.207963 | 5.85E-06 | 0.125369 | 0.00667  | 0.030256 | 0.51425  | 0.022462 |
| 0.186921 | 4.81E-05 | 0.608672 | 1.13E-48 | 0.495613 | 2.56E-30 | 0.239543 | 1.61E-07 | 0.309644 |
| 0.017596 | 0.70449  | 0.114831 | 0.01303  | 0.069714 | 0.1325   | 0.00567  | 0.90274  | -0.14823 |
| 0.199942 | 1.34E-05 | 0.493974 | 4.23E-30 | 0.324685 | 6.32E-13 | 0.251431 | 3.64E-08 | 0.221377 |
| -0.26639 | 4.99E-09 | -0.14006 | 0.00242  | -0.22794 | 6.41E-07 | -0.19957 | 1.39E-05 | -0.20808 |
| 0.012744 | 0.78356  | 0.28756  | 2.42E-10 | 0.221799 | 1.29E-06 | 0.134817 | 0.00351  | 0.099287 |
| -0.02753 | 0.55293  | 0.035131 | 0.44881  | 0.120859 | 0.00894  | -0.05384 | 0.24557  | -0.255   |
| 0.017745 | 0.70212  | 0.053029 | 0.25275  | 0.094197 | 0.04188  | -0.0055  | 0.90565  | -0.2351  |
| 0.01322  | 0.7757   | 0.257046 | 1.75E-08 | 0.120048 | 0.00941  | 0.021272 | 0.64658  | 0.037693 |
| 0.287921 | 2.30E-10 | 0.440962 | 1.22E-23 | 0.42524  | 6.23E-22 | 0.162546 | 0.00042  | -0.04552 |
| 0.176241 | 0.00013  | 0.369737 | 1.42E-16 | 0.28075  | 6.60E-10 | 0.294334 | 8.71E-11 | 0.310079 |
| 0.307766 | 1.06E-11 | 0.561554 | 3.66E-40 | 0.377002 | 3.21E-17 | 0.245183 | 8.03E-08 | 0.285992 |
| 0.027008 | 0.56044  | 0.114058 | 0.01365  | 0.038807 | 0.40276  | 0.089499 | 0.05326  | 0.050389 |
| 0.199895 | 1.35E-05 | 0.474499 | 1.35E-27 | 0.241637 | 1.25E-07 | 0.268097 | 3.95E-09 | 0.183568 |
| 0.079055 | 0.08792  | 0.31272  | 4.71E-12 | 0.242365 | 1.14E-07 | 0.14618  | 0.00154  | 0.346875 |
| -0.09889 | 0.03263  | -0.04813 | 0.29927  | -0.0821  | 0.07632  | -0.03731 | 0.42113  | -0.00481 |
| 0.004774 | 0.91805  | -0.26138 | 9.85E-09 | -0.11524 | 0.01271  | -0.01043 | 0.8221   | -0.05648 |
| 0.226882 | 7.25E-07 | 0.329445 | 2.77E-13 | 0.190926 | 3.28E-05 | 0.152478 | 0.00095  | 0.178851 |
| -0.1802  | 9.01E-05 | 0.054062 | 0.24361  | 0.027976 | 0.54647  | -0.18817 | 4.27E-05 | -0.11888 |
| 0.056062 | 0.22658  | 0.281357 | 6.04E-10 | 0.160811 | 0.00049  | 0.098381 | 0.03355  | 0.004849 |
| -0.06491 | 0.16139  | 0.158751 | 0.00057  | 0.095995 | 0.03811  | 0.01836  | 0.69231  | -0.04072 |
| 0.221502 | 1.34E-06 | 0.371807 | 9.32E-17 | 0.323761 | 7.40E-13 | 0.131693 | 0.00436  | 0.119272 |
| 0.141704 | 0.00214  | 0.223622 | 1.05E-06 | 0.076497 | 0.09872  | 0.098172 | 0.03393  | 0.088773 |
| -0.02003 | 0.66593  | 0.079279 | 0.08702  | 0.101488 | 0.02831  | -0.11705 | 0.01136  | -0.07791 |
| 0.066532 | 0.15114  | 0.161648 | 0.00045  | 0.127482 | 0.0058   | -0.00611 | 0.89517  | -0.13922 |
| -0.11385 | 0.01383  | 0.007773 | 0.86695  | 0.007637 | 0.86926  | -0.06991 | 0.13143  | -0.09057 |
| -0.02811 | 0.54451  | 0.164407 | 0.00036  | 0.107511 | 0.02013  | 0.007612 | 0.86968  | -0.03643 |
| 0.050368 | 0.27737  | -0.00852 | 0.85433  | 0.160607 | 0.00049  | -0.06482 | 0.16198  | -0.33566 |
| -0.1281  | 0.00557  | 0.170056 | 0.00022  | 0.126158 | 0.00634  | -0.12925 | 0.00515  | -0.17271 |
| 0.040734 | 0.3798   | 0.373925 | 6.05E-17 | 0.260018 | 1.18E-08 | 0.126218 | 0.00631  | 0.097393 |
| 0.189594 | 3.73E-05 | 0.327488 | 3.89E-13 | 0.350996 | 5.51E-15 | 0.067679 | 0.14421  | 0.003938 |
| 0.035189 | 0.44807  | 0.186855 | 4.84E-05 | 0.102885 | 0.0262   | 0.099305 | 0.03191  | 0.040783 |

|          |          |          |          |          |          |          |          |          |
|----------|----------|----------|----------|----------|----------|----------|----------|----------|
| -0.03078 | 0.50705  | 0.206786 | 6.62E-06 | 0.164499 | 0.00036  | -0.00031 | 0.99469  | -0.00456 |
| -0.00021 | 0.99643  | 0.060853 | 0.18927  | -0.03443 | 0.45788  | 0.006798 | 0.88352  | -0.08407 |
| -0.09155 | 0.04802  | 0.079135 | 0.0876   | 0.014065 | 0.76178  | -0.1345  | 0.00359  | -0.19049 |
| 0.119622 | 0.00967  | 0.460536 | 6.79E-26 | 0.451518 | 7.74E-25 | 0.155891 | 0.00072  | 0.112682 |
| -0.13685 | 0.00304  | 0.124957 | 0.00686  | 0.041203 | 0.37433  | 0.000192 | 0.99669  | -0.06389 |
| 0.019982 | 0.66668  | 0.19516  | 2.17E-05 | 0.164725 | 0.00035  | -0.05266 | 0.25605  | -0.06629 |
| 0.046007 | 0.32116  | 0.088127 | 0.05704  | -0.1214  | 0.00863  | 0.182519 | 7.28E-05 | 0.018431 |
| -0.13262 | 0.00409  | 0.26783  | 4.10E-09 | 0.145596 | 0.00161  | 0.035837 | 0.43975  | 0.041355 |
| 0.180716 | 8.59E-05 | 0.378277 | 2.46E-17 | 0.286949 | 2.65E-10 | 0.198213 | 1.60E-05 | 0.272453 |
| 0.036459 | 0.43184  | 0.356641 | 1.88E-15 | 0.241809 | 1.22E-07 | 0.09237  | 0.04604  | 0.144487 |
| 0.153268 | 0.00089  | 0.253406 | 2.82E-08 | 0.255926 | 2.03E-08 | 0.106023 | 0.02193  | -0.00831 |
| 0.179972 | 9.20E-05 | 0.371822 | 9.29E-17 | 0.336855 | 7.45E-14 | 0.248669 | 5.18E-08 | 0.31075  |
| 0.052004 | 0.26205  | 0.280694 | 6.65E-10 | 0.214614 | 2.87E-06 | 0.174516 | 0.00015  | 0.119087 |
| -0.09471 | 0.04078  | 0.157236 | 0.00065  | 0.077815 | 0.09303  | -0.00752 | 0.87131  | -0.10887 |
| 0.069247 | 0.13512  | 0.319896 | 1.43E-12 | 0.222652 | 1.18E-06 | 0.085089 | 0.06618  | 0.028373 |
| 0.086678 | 0.06126  | 0.283112 | 4.68E-10 | 0.215535 | 2.59E-06 | 0.095516 | 0.03908  | -0.02749 |
| 0.16049  | 0.0005   | -0.14453 | 0.00174  | 0.000255 | 0.99561  | 0.004329 | 0.92566  | 0.164805 |
| 0.051512 | 0.26659  | -0.13661 | 0.00309  | -0.32936 | 2.81E-13 | 0.129248 | 0.00515  | 0.2365   |
| -0.24408 | 9.21E-08 | 0.003984 | 0.93157  | -0.07969 | 0.0854   | -0.1348  | 0.00352  | -0.21095 |
| 0.005128 | 0.912    | -0.26357 | 7.33E-09 | -0.23232 | 3.84E-07 | -0.01525 | 0.74232  | 0.09424  |
| -0.00944 | 0.83874  | 0.198095 | 1.62E-05 | 0.121797 | 0.00842  | 0.011076 | 0.81133  | -0.02531 |
| -0.28845 | 2.12E-10 | -0.10258 | 0.02664  | -0.17667 | 0.00012  | -0.24709 | 6.32E-08 | -0.35705 |
| -0.05646 | 0.22331  | -0.37594 | 4.00E-17 | -0.47402 | 1.55E-27 | -0.03336 | 0.472    | 0.042728 |
| -0.49591 | 2.34E-30 | -0.11535 | 0.01262  | -0.18458 | 6.00E-05 | -0.20355 | 9.28E-06 | -0.26568 |
| 0.029777 | 0.52094  | 0.29014  | 1.65E-10 | 0.229733 | 5.21E-07 | 0.087413 | 0.05909  | 0.140239 |
| 0.189418 | 3.79E-05 | 0.349868 | 6.81E-15 | 0.247931 | 5.68E-08 | 0.130139 | 0.00485  | 0.055461 |
| -0.03494 | 0.45128  | 0.246622 | 6.71E-08 | 0.154848 | 0.00079  | -0.00291 | 0.95007  | -0.08465 |
| 0.081177 | 0.0797   | 0.471637 | 3.07E-27 | 0.383529 | 8.19E-18 | 0.178203 | 0.00011  | 0.227399 |
| 0.03242  | 0.48461  | 0.349903 | 6.77E-15 | 0.210586 | 4.43E-06 | 0.142393 | 0.00204  | 0.203738 |
| -0.14266 | 0.002    | -0.075   | 0.10552  | -0.05179 | 0.26406  | -0.1873  | 4.65E-05 | -0.24768 |
| -0.02648 | 0.56806  | 0.082957 | 0.07329  | 0.157748 | 0.00062  | 0.001032 | 0.98225  | -0.05099 |
| 0.202896 | 9.92E-06 | 0.666817 | 2.27E-61 | 0.48698  | 3.51E-29 | 0.166199 | 0.00031  | 0.337298 |
| 0.003313 | 0.94307  | 0.31459  | 3.46E-12 | 0.19746  | 1.72E-05 | 0.042583 | 0.35853  | 0.010583 |
| 0.307186 | 1.16E-11 | 0.527315 | 8.81E-35 | 0.521576 | 6.14E-34 | 0.16065  | 0.00049  | 0.242659 |
| 0.030051 | 0.5171   | 0.317385 | 2.18E-12 | 0.254064 | 2.59E-08 | 0.111347 | 0.01607  | 0.093924 |
| 0.022309 | 0.6306   | 0.142498 | 0.00202  | 0.123079 | 0.00775  | -0.0514  | 0.26761  | -0.22193 |
| 0.112803 | 0.01473  | 0.272479 | 2.15E-09 | 0.105015 | 0.02323  | 0.143461 | 0.00188  | 0.164163 |
| -0.11126 | 0.01615  | 0.175372 | 0.00014  | 0.130508 | 0.00473  | -0.03653 | 0.43096  | -0.12414 |
| 0.037613 | 0.4174   | 0.332003 | 1.77E-13 | 0.279822 | 7.55E-10 | 0.248621 | 5.21E-08 | 0.218388 |
| -0.00332 | 0.94288  | 0.197767 | 1.67E-05 | 0.188169 | 4.28E-05 | 0.134642 | 0.00356  | 0.201766 |
| -0.04266 | 0.35766  | 0.181908 | 7.70E-05 | 0.062796 | 0.1755   | 0.078973 | 0.08825  | 0.07825  |
| -0.22245 | 1.20E-06 | -0.46366 | 2.87E-26 | -0.39983 | 2.36E-19 | -0.1184  | 0.01044  | -0.09866 |
| 0.034335 | 0.45917  | 0.352917 | 3.83E-15 | 0.332386 | 1.65E-13 | 0.081219 | 0.07954  | 0.10972  |
| -0.02172 | 0.63966  | 0.177259 | 0.00012  | 0.102514 | 0.02674  | 0.029514 | 0.52463  | 0.004793 |
| -0.04763 | 0.30442  | 0.004737 | 0.91868  | -0.01568 | 0.73532  | -0.0827  | 0.07419  | -0.01296 |

|          |          |          |          |          |          |          |          |          |
|----------|----------|----------|----------|----------|----------|----------|----------|----------|
| 0.126078 | 0.00637  | 0.329939 | 2.54E-13 | 0.344788 | 1.76E-14 | 0.151383 | 0.00103  | 0.182719 |
| -0.04002 | 0.38815  | 0.11171  | 0.01573  | 0.144319 | 0.00177  | 0.053936 | 0.24471  | -0.09399 |
| 0.049567 | 0.2851   | 0.359646 | 1.05E-15 | 0.269778 | 3.13E-09 | 0.068851 | 0.13737  | 0.027868 |
| -0.08337 | 0.07186  | 0.021429 | 0.64415  | -0.04157 | 0.37012  | -0.11272 | 0.01481  | -0.27183 |
| -0.11599 | 0.01213  | 0.097425 | 0.03531  | 0.060452 | 0.19221  | -0.07332 | 0.11359  | -0.10982 |
| 0.01776  | 0.70186  | 0.274438 | 1.63E-09 | 0.159152 | 0.00056  | 0.098284 | 0.03372  | 0.136179 |
| 0.291172 | 1.41E-10 | 0.522045 | 5.24E-34 | 0.318131 | 1.92E-12 | 0.25426  | 2.52E-08 | 0.486962 |
| 0.174201 | 0.00015  | 0.321915 | 1.01E-12 | 0.340683 | 3.73E-14 | 0.140153 | 0.0024   | 0.092932 |
| -0.03637 | 0.43302  | 0.278331 | 9.36E-10 | 0.186741 | 4.90E-05 | 0.019212 | 0.6788   | 0.036974 |
| 0.097322 | 0.03551  | 0.279663 | 7.72E-10 | 0.207305 | 6.27E-06 | 0.095178 | 0.03978  | 0.028938 |
| 0.18427  | 6.18E-05 | 0.507293 | 6.58E-32 | 0.377072 | 3.16E-17 | 0.125692 | 0.00653  | 0.17481  |
| 0.067216 | 0.14698  | 0.348969 | 8.06E-15 | 0.299564 | 3.88E-11 | 0.018012 | 0.69785  | 0.107647 |
| 0.240194 | 1.49E-07 | 0.502863 | 2.68E-31 | 0.346728 | 1.23E-14 | 0.322936 | 8.52E-13 | 0.295017 |
| 0.076259 | 0.09977  | 0.293257 | 1.03E-10 | 0.218076 | 1.96E-06 | 0.167604 | 0.00027  | 0.10691  |
| -0.07658 | 0.09835  | 0.089132 | 0.05425  | 0.07564  | 0.10256  | -0.16965 | 0.00023  | -0.11139 |
| 0.030127 | 0.51605  | 0.132718 | 0.00406  | 0.108894 | 0.01858  | -0.01786 | 0.70034  | -0.18674 |
| 0.325457 | 5.53E-13 | 0.380007 | 1.72E-17 | 0.388343 | 2.93E-18 | 0.238565 | 1.82E-07 | 0.104229 |
| 0.076395 | 0.09917  | 0.435399 | 5.03E-23 | 0.342778 | 2.54E-14 | 0.179247 | 9.83E-05 | 0.330401 |
| 0.078197 | 0.09143  | 0.307467 | 1.11E-11 | 0.212055 | 3.78E-06 | 0.238407 | 1.85E-07 | 0.16463  |
| -0.03042 | 0.51197  | 0.238074 | 1.93E-07 | 0.102589 | 0.02663  | 0.062905 | 0.17475  | -0.05241 |
| 0.024029 | 0.60449  | -0.26611 | 5.19E-09 | -0.15853 | 0.00059  | 0.003494 | 0.93998  | -0.17052 |
| 0.083641 | 0.07095  | -0.20694 | 6.51E-06 | -0.28283 | 4.87E-10 | 0.138778 | 0.00265  | 0.104814 |
| 0.069138 | 0.13573  | -0.24644 | 6.86E-08 | -0.19456 | 2.30E-05 | 0.04412  | 0.34143  | 0.020353 |
| 0.276012 | 1.30E-09 | 0.263837 | 7.07E-09 | 0.19018  | 3.52E-05 | 0.055457 | 0.23164  | 0.077749 |
| 0.05054  | 0.27573  | 0.216438 | 2.35E-06 | 0.187634 | 4.50E-05 | -0.00831 | 0.85779  | -0.0291  |
| 0.197709 | 1.68E-05 | 0.317687 | 2.07E-12 | 0.417368 | 4.14E-21 | 0.120579 | 0.0091   | -0.06638 |
| 0.249246 | 4.81E-08 | 0.33125  | 2.02E-13 | 0.322716 | 8.84E-13 | 0.327803 | 3.69E-13 | 0.050904 |
| 0.191706 | 3.04E-05 | 0.368079 | 1.98E-16 | 0.314313 | 3.62E-12 | 0.109175 | 0.01827  | -0.01429 |
| 0.025143 | 0.58783  | 0.335898 | 8.84E-14 | 0.211832 | 3.87E-06 | 0.104565 | 0.02383  | 0.15709  |
| 0.237538 | 2.06E-07 | 0.289823 | 1.73E-10 | 0.139552 | 0.00251  | 0.132023 | 0.00426  | 0.114993 |
| 0.175558 | 0.00014  | 0.471501 | 3.19E-27 | 0.415268 | 6.80E-21 | 0.180461 | 8.80E-05 | 0.118718 |
| 0.148868 | 0.00125  | -0.41191 | 1.49E-20 | -0.31393 | 3.86E-12 | -0.04655 | 0.31545  | -0.22018 |
| -0.19862 | 1.53E-05 | 0.059868 | 0.19655  | -0.0361  | 0.43636  | -0.13799 | 0.0028   | -0.07558 |
| -0.03094 | 0.50479  | 0.186903 | 4.82E-05 | 0.168352 | 0.00026  | 0.01514  | 0.74418  | -0.09337 |
| -0.03271 | 0.48067  | -0.06917 | 0.13557  | -0.04648 | 0.31617  | -0.14716 | 0.00143  | 0.185668 |
| -0.1319  | 0.0043   | 0.06477  | 0.16229  | 0.001998 | 0.96566  | -0.05733 | 0.21619  | -0.14245 |
| 0.332586 | 1.59E-13 | 0.454022 | 3.97E-25 | 0.339013 | 5.05E-14 | 0.249891 | 4.43E-08 | 0.307626 |
| 0.148024 | 0.00134  | 0.338795 | 5.25E-14 | 0.310277 | 7.03E-12 | 0.111576 | 0.01585  | -0.02158 |
| 0.013756 | 0.76686  | 0.307039 | 1.19E-11 | 0.213786 | 3.14E-06 | 0.081989 | 0.07672  | 0.046702 |
| -0.14361 | 0.00186  | 0.06995  | 0.13119  | 0.076357 | 0.09934  | 0.001661 | 0.97144  | -0.08189 |
| 0.308073 | 1.00E-11 | 0.424283 | 7.87E-22 | 0.457044 | 1.76E-25 | 0.212387 | 3.65E-06 | 0.063706 |
| -0.1034  | 0.02545  | 0.115007 | 0.01289  | 0.055734 | 0.22932  | 0.014262 | 0.75854  | -0.12288 |
| 0.273952 | 1.75E-09 | 0.605837 | 4.02E-48 | 0.488687 | 2.10E-29 | 0.258476 | 1.45E-08 | 0.295996 |
| 0.122555 | 0.00802  | 0.482262 | 1.42E-28 | 0.395821 | 5.75E-19 | 0.324025 | 7.07E-13 | 0.338311 |
| 0.097858 | 0.0345   | 0.195103 | 2.18E-05 | 0.16046  | 0.0005   | 0.154585 | 0.0008   | -0.03481 |

|          |          |          |          |          |          |          |          |          |
|----------|----------|----------|----------|----------|----------|----------|----------|----------|
| 0.102814 | 0.0263   | 0.180359 | 8.88E-05 | 0.171303 | 0.0002   | 0.112377 | 0.01511  | 0.045648 |
| 0.196776 | 1.84E-05 | 0.542786 | 3.89E-37 | 0.467486 | 9.89E-27 | 0.260451 | 1.12E-08 | 0.265415 |
| -0.21251 | 3.60E-06 | -0.03277 | 0.47991  | -0.10746 | 0.02019  | -0.06804 | 0.14207  | -0.23402 |
| 0.116786 | 0.01155  | 0.165233 | 0.00034  | 0.145778 | 0.00158  | 0.045099 | 0.33081  | -0.10468 |
| 0.26667  | 4.81E-09 | 0.417543 | 3.97E-21 | 0.273442 | 1.88E-09 | 0.211689 | 3.94E-06 | 0.013809 |
| -0.1058  | 0.02222  | 0.122804 | 0.00789  | 0.0589   | 0.20389  | -0.01067 | 0.81819  | -0.01684 |
| 0.089532 | 0.05318  | 0.376001 | 3.95E-17 | 0.32742  | 3.94E-13 | 0.167069 | 0.00029  | 0.167037 |
| 0.282449 | 5.15E-10 | -0.25247 | 3.18E-08 | -0.07267 | 0.11683  | -0.02198 | 0.63559  | -0.01632 |
| -0.08405 | 0.06959  | 0.185378 | 5.57E-05 | 0.13628  | 0.00317  | 0.005504 | 0.90557  | -0.0221  |
| -0.08477 | 0.0672   | 0.201952 | 1.09E-05 | 0.119858 | 0.00953  | 0.010362 | 0.82328  | -0.02148 |
| 0.172413 | 0.00018  | 0.421661 | 1.48E-21 | 0.37612  | 3.85E-17 | 0.148679 | 0.00127  | 0.23985  |
| 0.19959  | 1.39E-05 | 0.321185 | 1.15E-12 | 0.332663 | 1.57E-13 | 0.31614  | 2.68E-12 | 0.04059  |
| -0.00446 | 0.92335  | 0.158884 | 0.00057  | 0.132632 | 0.00409  | 0.057496 | 0.21491  | 0.022595 |
| 0.012946 | 0.78022  | 0.05219  | 0.26035  | 0.073994 | 0.11028  | 0.057576 | 0.21427  | -0.15667 |
| 0.110803 | 0.0166   | 0.344213 | 1.95E-14 | 0.338225 | 5.82E-14 | 0.036561 | 0.43055  | -0.02345 |
| -0.00366 | 0.93717  | 0.094903 | 0.04036  | 0.152227 | 0.00097  | -0.14984 | 0.00116  | -0.18867 |
| 0.137586 | 0.00289  | 0.30811  | 9.98E-12 | 0.289223 | 1.89E-10 | 0.082114 | 0.07627  | -0.03113 |
| 0.497951 | 1.24E-30 | 0.227656 | 6.63E-07 | 0.337478 | 6.66E-14 | 0.264834 | 6.18E-09 | 0.317825 |
| 0.156508 | 0.00069  | 0.408127 | 3.59E-20 | 0.134585 | 0.00357  | 0.264247 | 6.69E-09 | 0.35992  |
| 0.167602 | 0.00027  | 0.283064 | 4.71E-10 | 0.292126 | 1.22E-10 | -0.04952 | 0.28553  | -0.11687 |
| -0.22654 | 7.54E-07 | -0.37878 | 2.22E-17 | -0.21748 | 2.09E-06 | -0.06835 | 0.14024  | -0.07926 |
| 0.004876 | 0.91631  | 0.268821 | 3.58E-09 | 0.21396  | 3.08E-06 | 0.083171 | 0.07255  | 0.179473 |
| 0.27352  | 1.86E-09 | 0.344959 | 1.70E-14 | 0.334048 | 1.23E-13 | 0.207452 | 6.17E-06 | 0.267167 |
| 0.153243 | 0.00089  | 0.394449 | 7.78E-19 | 0.303327 | 2.15E-11 | 0.079749 | 0.08516  | -0.02866 |
| -0.03993 | 0.38926  | 0.315889 | 2.79E-12 | 0.225091 | 8.90E-07 | 0.193768 | 2.49E-05 | 0.12477  |
| 0.058171 | 0.20956  | 0.182554 | 7.25E-05 | 0.148832 | 0.00126  | 0.073207 | 0.11413  | -0.01314 |
| 0.06879  | 0.13772  | 0.208689 | 5.42E-06 | 0.19636  | 1.92E-05 | 0.025455 | 0.5832   | -0.0605  |
| -0.14173 | 0.00214  | 0.05681  | 0.22044  | 0.051669 | 0.26514  | -0.15869 | 0.00058  | -0.28718 |
| 0.023358 | 0.61462  | 0.459451 | 9.13E-26 | 0.332503 | 1.62E-13 | 0.17552  | 0.00014  | 0.209283 |
| 0.262446 | 8.54E-09 | 0.433152 | 8.84E-23 | 0.372943 | 7.39E-17 | 0.347327 | 1.10E-14 | 0.270021 |
| -0.06887 | 0.13726  | -0.3615  | 7.30E-16 | -0.31236 | 5.00E-12 | -0.13699 | 0.00301  | -0.09357 |
| 0.025468 | 0.58302  | 0.404015 | 9.19E-20 | 0.256726 | 1.83E-08 | 0.130465 | 0.00474  | 0.215328 |
| 0.089496 | 0.05327  | 0.437194 | 3.19E-23 | 0.325745 | 5.26E-13 | 0.178298 | 0.00011  | 0.187263 |
| -0.02292 | 0.62131  | 0.353115 | 3.68E-15 | 0.22545  | 8.55E-07 | 0.111462 | 0.01596  | 0.14186  |
| -0.21862 | 1.85E-06 | 0.024634 | 0.59543  | -0.07982 | 0.08488  | -0.13221 | 0.00421  | -0.01862 |
| -0.0261  | 0.57363  | 0.254224 | 2.53E-08 | 0.168168 | 0.00026  | 0.00045  | 0.99227  | -0.0345  |
| -0.14203 | 0.00209  | -0.08168 | 0.07785  | -0.02779 | 0.54909  | -0.20127 | 1.17E-05 | -0.36773 |
| -0.01365 | 0.76863  | 0.127089 | 0.00596  | 0.130935 | 0.00459  | -0.01075 | 0.81673  | -0.06654 |
| -0.08956 | 0.05311  | -0.17363 | 0.00016  | -0.24827 | 5.45E-08 | -0.06062 | 0.19099  | -0.13998 |
| 0.023083 | 0.6188   | -0.13753 | 0.0029   | -0.27329 | 1.92E-09 | 0.095318 | 0.03949  | 0.016652 |
| 0.068113 | 0.14164  | 0.179348 | 9.74E-05 | 0.180037 | 9.15E-05 | -0.04108 | 0.37572  | -0.18917 |
| 0.201987 | 1.09E-05 | 0.309052 | 8.57E-12 | 0.283236 | 4.59E-10 | 0.184394 | 6.11E-05 | 0.176893 |
| 0.143676 | 0.00185  | 0.288759 | 2.03E-10 | 0.29034  | 1.60E-10 | 0.125043 | 0.00682  | 0.066381 |
| 0.043781 | 0.34515  | 0.006478 | 0.88897  | 0.11353  | 0.0141   | -0.04946 | 0.28614  | -0.16091 |
| -0.2071  | 6.41E-06 | 0.034141 | 0.46172  | 0.049008 | 0.29057  | -0.0648  | 0.16211  | -0.13369 |

|          |          |          |          |          |          |          |          |          |
|----------|----------|----------|----------|----------|----------|----------|----------|----------|
| 0.188337 | 4.21E-05 | 0.387822 | 3.28E-18 | 0.275293 | 1.44E-09 | 0.09994  | 0.03082  | 0.078395 |
| 0.336705 | 7.65E-14 | 0.572517 | 5.07E-42 | 0.451605 | 7.56E-25 | 0.272461 | 2.15E-09 | 0.351382 |
| -0.00494 | 0.91521  | 0.054907 | 0.23631  | 0.089151 | 0.0542   | 0.043483 | 0.34845  | -0.15133 |
| -0.0589  | 0.20388  | 0.090749 | 0.05001  | 0.042451 | 0.36002  | 0.029788 | 0.52078  | -0.08904 |
| 0.103303 | 0.02559  | 0.168416 | 0.00026  | 0.146982 | 0.00145  | 0.081567 | 0.07826  | -0.07947 |
| 0.234265 | 3.05E-07 | 0.357777 | 1.51E-15 | 0.376713 | 3.41E-17 | 0.07048  | 0.12828  | 0.059478 |
| -0.41842 | 3.22E-21 | -0.27852 | 9.10E-10 | -0.28139 | 6.01E-10 | -0.23884 | 1.76E-07 | -0.37109 |
| 0.205852 | 7.30E-06 | -0.30875 | 9.00E-12 | -0.21331 | 3.30E-06 | -0.01141 | 0.80568  | -0.07952 |
| 0.167045 | 0.00029  | 0.292092 | 1.23E-10 | 0.230987 | 4.50E-07 | 0.109111 | 0.01834  | -0.0523  |
| 0.105771 | 0.02225  | 0.439327 | 1.86E-23 | 0.307996 | 1.02E-11 | 0.143072 | 0.00194  | 0.183591 |
| 0.088619 | 0.05566  | 0.390135 | 1.99E-18 | 0.310782 | 6.47E-12 | 0.169365 | 0.00024  | 0.156012 |
| -0.09579 | 0.03852  | -0.40566 | 6.32E-20 | -0.25272 | 3.08E-08 | -0.09989 | 0.03091  | -0.13507 |
| 0.055526 | 0.23106  | 0.357877 | 1.48E-15 | 0.300515 | 3.34E-11 | 0.05701  | 0.21881  | 0.143244 |
| 0.103674 | 0.02506  | 0.325908 | 5.12E-13 | 0.197542 | 1.71E-05 | 0.188892 | 3.99E-05 | 0.249742 |
| 0.118234 | 0.01055  | 0.293303 | 1.02E-10 | 0.267064 | 4.56E-09 | 0.197768 | 1.67E-05 | 0.194817 |
| 0.007643 | 0.86916  | 0.200176 | 1.31E-05 | 0.111773 | 0.01567  | 0.070782 | 0.12665  | 0.00698  |
| -0.05233 | 0.25906  | -0.00585 | 0.89961  | 0.009051 | 0.84534  | -0.13519 | 0.00342  | -0.28555 |
| 0.338562 | 5.48E-14 | 0.535569 | 5.05E-36 | 0.432305 | 1.09E-22 | 0.219674 | 1.64E-06 | 0.142188 |
| -0.20014 | 1.32E-05 | 0.03428  | 0.45988  | -0.06104 | 0.1879   | -0.02805 | 0.54537  | -0.06239 |
| -0.15445 | 0.00081  | -0.35737 | 1.63E-15 | -0.24384 | 9.49E-08 | -0.18184 | 7.75E-05 | -0.10442 |
| 0.038092 | 0.41149  | -0.29972 | 3.78E-11 | -0.27011 | 2.99E-09 | -0.05167 | 0.2651   | -0.01714 |
| 0.183347 | 6.74E-05 | 0.309708 | 7.71E-12 | 0.262942 | 7.98E-09 | 0.039589 | 0.39334  | -0.08998 |
| -0.01701 | 0.71388  | 0.166867 | 0.00029  | 0.125728 | 0.00652  | -0.05463 | 0.23865  | -0.18095 |
| 0.086605 | 0.06148  | 0.370729 | 1.16E-16 | 0.262765 | 8.18E-09 | 0.115092 | 0.01282  | 0.12728  |
| 0.100346 | 0.03015  | -0.09873 | 0.03293  | -0.00026 | 0.9956   | -0.04261 | 0.35821  | 0.118127 |
| -0.25154 | 3.59E-08 | 0.046203 | 0.3191   | -0.00407 | 0.93018  | -0.19339 | 2.58E-05 | -0.18926 |
| -0.04204 | 0.36464  | -0.32373 | 7.43E-13 | -0.24252 | 1.12E-07 | -0.06963 | 0.13295  | -0.13562 |
| 0.101676 | 0.02802  | 0.299064 | 4.19E-11 | 0.278348 | 9.33E-10 | 0.098563 | 0.03322  | 0.201619 |
| 0.209758 | 4.84E-06 | 0.528386 | 6.10E-35 | 0.409868 | 2.40E-20 | 0.22718  | 7.00E-07 | 0.237517 |
| 0.057382 | 0.21581  | 0.007893 | 0.86492  | -0.0117  | 0.80099  | -0.02877 | 0.5352   | 0.169666 |
| 0.136851 | 0.00304  | 0.146228 | 0.00153  | 0.154777 | 0.00079  | 0.127267 | 0.00589  | -0.06959 |
| -0.16389 | 0.00038  | -0.40652 | 5.19E-20 | -0.34878 | 8.36E-15 | -0.07535 | 0.1039   | -0.09362 |
| 0.170819 | 0.00021  | 0.241111 | 1.33E-07 | 0.261331 | 9.91E-09 | -0.02674 | 0.56433  | -0.23349 |
| 0.043928 | 0.34354  | 0.284936 | 3.58E-10 | 0.282229 | 5.32E-10 | 0.193153 | 2.64E-05 | 0.274345 |
| 0.25086  | 3.91E-08 | 0.309588 | 7.86E-12 | 0.166983 | 0.00029  | 0.085415 | 0.06515  | 0.079398 |
| 0.072264 | 0.11888  | 0.282718 | 4.95E-10 | 0.261318 | 9.93E-09 | 0.189949 | 3.60E-05 | 0.255161 |
| -0.00813 | 0.86092  | 0.239411 | 1.64E-07 | 0.190506 | 3.42E-05 | 0.020997 | 0.65085  | -0.00463 |
| 0.14849  | 0.00129  | 0.406459 | 5.26E-20 | 0.296295 | 6.44E-11 | 0.276764 | 1.17E-09 | 0.339741 |
| -0.00668 | 0.88548  | 0.255005 | 2.29E-08 | 0.109247 | 0.0182   | -0.03841 | 0.40763  | -0.00706 |
| 0.032389 | 0.48502  | 0.288561 | 2.09E-10 | 0.238401 | 1.85E-07 | 0.132096 | 0.00424  | 0.036459 |
| -0.09926 | 0.03199  | 0.097944 | 0.03434  | 0.076633 | 0.09812  | -0.06587 | 0.15527  | -0.0886  |
| -0.00403 | 0.93079  | 0.212893 | 3.46E-06 | 0.149974 | 0.00115  | 0.11653  | 0.01173  | 0.059232 |
| 0.098228 | 0.03382  | 0.452563 | 5.86E-25 | 0.285667 | 3.21E-10 | 0.255356 | 2.19E-08 | 0.455512 |
| -0.09929 | 0.03194  | 0.030908 | 0.50522  | -0.03797 | 0.41296  | -0.07903 | 0.08803  | -0.11226 |
| 0.054545 | 0.23941  | 0.198905 | 1.49E-05 | 0.176389 | 0.00013  | 0.177675 | 0.00011  | 0.062406 |



|          |          |          |          |          |          |          |          |          |
|----------|----------|----------|----------|----------|----------|----------|----------|----------|
| 0.256698 | 1.83E-08 | 0.22504  | 8.96E-07 | 0.29286  | 1.09E-10 | 0.03648  | 0.43158  | -0.10949 |
| -0.17872 | 0.0001   | 0.254623 | 2.41E-08 | -0.02544 | 0.5834   | 0.020766 | 0.65444  | 0.045616 |
| 0.070648 | 0.12738  | 0.334863 | 1.06E-13 | 0.253392 | 2.82E-08 | 0.122077 | 0.00827  | 0.085839 |
| -0.00739 | 0.87342  | 0.005188 | 0.91096  | 0.06712  | 0.14756  | -0.07382 | 0.11111  | -0.20628 |
| 0.102402 | 0.02691  | 0.383927 | 7.53E-18 | 0.295981 | 6.76E-11 | 0.136623 | 0.00309  | 0.110991 |
| 0.058259 | 0.20887  | 0.117054 | 0.01136  | 0.155063 | 0.00077  | 0.110373 | 0.01703  | 0.02608  |
| 0.013362 | 0.77334  | 0.35388  | 3.18E-15 | 0.251255 | 3.72E-08 | 0.118308 | 0.0105   | 0.167895 |
| -0.01495 | 0.74733  | 0.293642 | 9.68E-11 | 0.265509 | 5.64E-09 | -0.0307  | 0.50808  | -0.07016 |
| 0.191342 | 3.15E-05 | 0.41773  | 3.80E-21 | 0.296486 | 6.26E-11 | 0.133956 | 0.00373  | 0.109415 |
| -0.17904 | 0.0001   | -0.34001 | 4.21E-14 | -0.34667 | 1.24E-14 | -0.25576 | 2.07E-08 | -0.32004 |
| -0.02403 | 0.60447  | 0.172007 | 0.00019  | 0.110605 | 0.0168   | 0.104541 | 0.02387  | 0.056731 |
| 0.140111 | 0.00241  | -0.08318 | 0.07254  | -0.00682 | 0.88315  | 0.08307  | 0.0729   | 0.047204 |
| -0.04249 | 0.35955  | 0.160155 | 0.00051  | 0.056997 | 0.21892  | -0.06267 | 0.17637  | -0.10876 |
| 0.246613 | 6.71E-08 | 0.494485 | 3.62E-30 | 0.497816 | 1.30E-30 | 0.30338  | 2.13E-11 | 0.196901 |
| 0.046853 | 0.31233  | 0.319968 | 1.41E-12 | 0.22823  | 6.20E-07 | 0.032438 | 0.48437  | 0.00923  |
| -0.11402 | 0.01369  | 0.146694 | 0.00148  | 0.143717 | 0.00185  | -0.07062 | 0.12752  | -0.10078 |
| -0.0438  | 0.34493  | 0.225374 | 8.62E-07 | 0.102982 | 0.02605  | 0.056901 | 0.2197   | 0.014192 |
| -0.10783 | 0.01977  | 0.254679 | 2.39E-08 | 0.189479 | 3.77E-05 | 0.075061 | 0.10523  | 0.078867 |
| -0.02791 | 0.54739  | 0.092424 | 0.04591  | 0.079296 | 0.08695  | -0.21421 | 3.00E-06 | -0.31454 |
| 0.059148 | 0.20199  | 0.332742 | 1.55E-13 | 0.278125 | 9.64E-10 | 0.073529 | 0.11254  | 0.120404 |
| 0.33339  | 1.38E-13 | 0.554218 | 5.89E-39 | 0.43493  | 5.66E-23 | 0.290385 | 1.59E-10 | 0.18062  |
| -0.14892 | 0.00125  | -0.09694 | 0.03625  | -0.10968 | 0.01774  | -0.23871 | 1.78E-07 | -0.25993 |
| -0.09628 | 0.03755  | 0.12001  | 0.00944  | 0.020716 | 0.65521  | 0.047486 | 0.30583  | -0.07812 |
| 0.050179 | 0.27919  | 0.253379 | 2.83E-08 | 0.217344 | 2.13E-06 | -0.02629 | 0.57092  | 0.144473 |
| 0.006612 | 0.88668  | 0.311722 | 5.55E-12 | 0.196186 | 1.96E-05 | 0.104742 | 0.0236   | 0.051819 |
| 0.166512 | 0.0003   | 0.39239  | 1.22E-18 | 0.265285 | 5.81E-09 | 0.255634 | 2.11E-08 | 0.174991 |
| 0.083777 | 0.07049  | 0.439062 | 1.99E-23 | 0.320522 | 1.28E-12 | 0.176092 | 0.00013  | 0.149192 |
| 0.002076 | 0.96432  | 0.354445 | 2.86E-15 | 0.234154 | 3.09E-07 | 0.144766 | 0.00171  | 0.121377 |
| -0.02007 | 0.66535  | 0.281537 | 5.89E-10 | 0.18741  | 4.60E-05 | 0.015612 | 0.7365   | -0.01177 |
| -0.13323 | 0.00392  | -0.10803 | 0.01953  | -0.15211 | 0.00098  | -0.05524 | 0.23344  | -0.31569 |
| -0.03172 | 0.49407  | 0.33694  | 7.34E-14 | 0.229205 | 5.54E-07 | 0.120163 | 0.00934  | 0.110862 |
| 0.028557 | 0.53817  | 0.213602 | 3.20E-06 | 0.182556 | 7.25E-05 | 0.128879 | 0.00528  | 0.028097 |
| -0.02889 | 0.53343  | 0.226462 | 7.61E-07 | 0.075775 | 0.10195  | 0.08281  | 0.07381  | 0.058353 |
| 0.05401  | 0.24406  | 0.321769 | 1.04E-12 | 0.213121 | 3.37E-06 | 0.113572 | 0.01406  | 0.15508  |
| 0.107609 | 0.02002  | 0.433613 | 7.87E-23 | 0.351873 | 4.66E-15 | 0.155343 | 0.00076  | 0.16197  |
| 0.229643 | 5.26E-07 | 0.482022 | 1.52E-28 | 0.216236 | 2.40E-06 | 0.233045 | 3.53E-07 | 0.203551 |
| -0.05694 | 0.21939  | -0.39956 | 2.50E-19 | -0.32952 | 2.73E-13 | -0.12318 | 0.0077   | -0.18059 |
| 0.256921 | 1.78E-08 | 0.192096 | 2.93E-05 | 0.351794 | 4.74E-15 | 0.084456 | 0.06823  | -0.15338 |
| -0.01382 | 0.76579  | 0.204926 | 8.04E-06 | 0.219249 | 1.72E-06 | -0.00198 | 0.96604  | -0.1294  |
| 0.043752 | 0.34548  | 0.348482 | 8.83E-15 | 0.258657 | 1.42E-08 | 0.112837 | 0.0147   | 0.055404 |
| 0.185657 | 5.43E-05 | 0.262363 | 8.63E-09 | 0.367708 | 2.13E-16 | 0.057991 | 0.21098  | -0.1885  |
| 0.031064 | 0.50308  | 0.198345 | 1.58E-05 | 0.129439 | 0.00509  | 0.029544 | 0.5242   | 0.06401  |
| 0.024172 | 0.60235  | 0.17859  | 0.0001   | 0.129022 | 0.00523  | 0.034747 | 0.45379  | 0.161262 |
| 0.176193 | 0.00013  | 0.309882 | 7.49E-12 | 0.284153 | 4.01E-10 | -0.01471 | 0.75123  | 0.049321 |
| 0.075604 | 0.10273  | 0.185876 | 5.32E-05 | 0.095485 | 0.03915  | 0.074822 | 0.10634  | -0.15796 |

|          |          |          |          |          |          |          |          |          |
|----------|----------|----------|----------|----------|----------|----------|----------|----------|
| 0.059026 | 0.20293  | 0.249117 | 4.89E-08 | 0.182284 | 7.44E-05 | 0.147772 | 0.00136  | 0.217682 |
| -0.01973 | 0.67062  | 0.229717 | 5.22E-07 | 0.147396 | 0.0014   | 0.09434  | 0.04157  | 0.086247 |
| 0.081307 | 0.07921  | 0.26065  | 1.09E-08 | 0.305182 | 1.60E-11 | -0.00087 | 0.98511  | 0.076341 |
| -0.06069 | 0.19044  | -0.01322 | 0.77565  | 0.104419 | 0.02403  | -0.11955 | 0.00972  | -0.18313 |
| 0.22272  | 1.17E-06 | 0.333992 | 1.24E-13 | 0.360758 | 8.43E-16 | 0.142182 | 0.00207  | 0.087432 |
| -0.15297 | 0.00091  | 0.136723 | 0.00307  | 0.029033 | 0.53141  | -0.02383 | 0.60743  | -0.01348 |
| 0.079899 | 0.08457  | 0.371494 | 9.93E-17 | 0.318883 | 1.69E-12 | 0.116114 | 0.01204  | 0.151357 |
| 0.349656 | 7.09E-15 | 0.607653 | 1.78E-48 | 0.548849 | 4.30E-38 | 0.378238 | 2.49E-17 | 0.321547 |
| 0.256041 | 2.00E-08 | 0.482633 | 1.27E-28 | 0.465369 | 1.79E-26 | 0.225059 | 8.94E-07 | 0.33134  |
| 0.164875 | 0.00035  | 0.321186 | 1.15E-12 | 0.21451  | 2.90E-06 | 0.082404 | 0.07524  | 0.085297 |
| -0.08976 | 0.05258  | 0.340749 | 3.68E-14 | 0.203748 | 9.09E-06 | 0.15404  | 0.00084  | 0.293896 |
| 0.007333 | 0.87443  | 0.30152  | 2.85E-11 | 0.195144 | 2.17E-05 | 0.096433 | 0.03723  | 0.087257 |
| 0.187534 | 4.54E-05 | -0.08978 | 0.05253  | -0.17357 | 0.00016  | 0.065741 | 0.15607  | 0.118235 |
| 0.098835 | 0.03273  | 0.390797 | 1.73E-18 | 0.341897 | 2.99E-14 | 0.128533 | 0.00541  | 0.124792 |
| 0.160774 | 0.00049  | 0.409466 | 2.64E-20 | 0.352268 | 4.33E-15 | 0.158476 | 0.00059  | 0.22594  |
| 0.235046 | 2.78E-07 | 0.5107   | 2.20E-32 | 0.390437 | 1.87E-18 | 0.311029 | 6.22E-12 | 0.226643 |
| 0.017925 | 0.69924  | 0.282532 | 5.09E-10 | 0.211865 | 3.86E-06 | 0.072977 | 0.11527  | 0.045806 |
| 0.121684 | 0.00848  | 0.476851 | 6.88E-28 | 0.456535 | 2.02E-25 | 0.089245 | 0.05395  | 0.238465 |
| 0.329657 | 2.67E-13 | 0.455024 | 3.03E-25 | 0.400004 | 2.27E-19 | 0.250101 | 4.31E-08 | 0.194293 |
| -0.24095 | 1.36E-07 | -0.18764 | 4.50E-05 | -0.11487 | 0.01299  | -0.23306 | 3.52E-07 | -0.4184  |
| -0.1774  | 0.00012  | 0.097446 | 0.03527  | -0.00693 | 0.88132  | -0.13194 | 0.00429  | -0.2153  |
| -0.04717 | 0.30908  | 0.066203 | 0.15318  | 0.070799 | 0.12656  | -0.11428 | 0.01347  | -0.38441 |
| 0.311957 | 5.34E-12 | 0.529509 | 4.15E-35 | 0.519652 | 1.17E-33 | 0.292991 | 1.07E-10 | 0.367517 |
| 0.181817 | 7.76E-05 | 0.286952 | 2.65E-10 | 0.203532 | 9.29E-06 | 0.162069 | 0.00044  | -0.03084 |
| 0.119303 | 0.00987  | 0.391672 | 1.43E-18 | 0.343742 | 2.13E-14 | 0.090759 | 0.04998  | 0.082322 |
| 0.301482 | 2.87E-11 | 0.247    | 6.39E-08 | 0.266174 | 5.15E-09 | 0.127251 | 0.00589  | -0.11632 |
| 0.36447  | 4.06E-16 | 0.345158 | 1.64E-14 | 0.391953 | 1.34E-18 | 0.095256 | 0.03962  | 0.026611 |
| 0.073705 | 0.11168  | 0.260795 | 1.07E-08 | 0.209199 | 5.13E-06 | 0.0093   | 0.84114  | 0.154959 |
| -0.0375  | 0.41885  | 0.226032 | 7.99E-07 | 0.184662 | 5.96E-05 | -0.11518 | 0.01275  | -0.18204 |
| 0.136475 | 0.00312  | 0.267718 | 4.16E-09 | 0.199842 | 1.36E-05 | 0.088669 | 0.05552  | 0.056936 |
| -0.17559 | 0.00014  | -0.38782 | 3.28E-18 | -0.34563 | 1.50E-14 | -0.1673  | 0.00028  | 0.003005 |
| -0.02651 | 0.56773  | 0.213583 | 3.21E-06 | 0.160322 | 0.00051  | 0.055307 | 0.2329   | 0.015072 |
| 0.052091 | 0.26125  | 0.032996 | 0.47688  | 0.087941 | 0.05756  | -0.0938  | 0.04275  | -0.13311 |
| -0.1817  | 7.85E-05 | -0.23409 | 3.11E-07 | -0.17651 | 0.00013  | -0.20836 | 5.61E-06 | 0.054879 |
| -0.00944 | 0.83884  | -0.52441 | 2.36E-34 | -0.36862 | 1.77E-16 | -0.11975 | 0.00959  | -0.22776 |
| 0.104495 | 0.02393  | 0.415948 | 5.80E-21 | 0.318758 | 1.73E-12 | 0.100863 | 0.0293   | 0.037835 |
| 0.10001  | 0.03071  | 0.30987  | 7.51E-12 | 0.228668 | 5.89E-07 | 0.097901 | 0.03442  | -0.0157  |
| -0.1565  | 0.00069  | 0.014351 | 0.75709  | -0.02237 | 0.6296   | -0.16654 | 0.0003   | -0.17351 |
| 0.09738  | 0.0354   | 0.291714 | 1.30E-10 | 0.2736   | 1.83E-09 | 0.069612 | 0.13307  | 0.07604  |
| 0.036322 | 0.43358  | 0.257174 | 1.72E-08 | 0.156212 | 0.00071  | 0.05048  | 0.27631  | 0.041282 |
| 0.132631 | 0.00409  | 0.379003 | 2.12E-17 | 0.383209 | 8.77E-18 | 0.134491 | 0.00359  | 0.165306 |
| 0.057692 | 0.21334  | 0.408816 | 3.06E-20 | 0.375671 | 4.23E-17 | 0.120206 | 0.00932  | 0.121964 |
| -0.05969 | 0.19787  | 0.125751 | 0.00651  | 0.143868 | 0.00183  | -0.05612 | 0.22608  | -0.15011 |
| 0.07104  | 0.12527  | 0.141406 | 0.00219  | 0.107474 | 0.02018  | 0.104497 | 0.02392  | -0.01255 |
| -0.0907  | 0.05013  | -0.24145 | 1.28E-07 | -0.18042 | 8.83E-05 | 0.067015 | 0.14819  | 0.119383 |

|          |          |          |          |          |          |          |          |          |
|----------|----------|----------|----------|----------|----------|----------|----------|----------|
| 0.016129 | 0.72811  | 0.282311 | 5.26E-10 | 0.245448 | 7.77E-08 | 0.025484 | 0.58277  | 0.093451 |
| 0.083705 | 0.07073  | 0.384394 | 6.82E-18 | 0.316427 | 2.55E-12 | 0.205265 | 7.76E-06 | 0.212174 |
| -0.03441 | 0.45813  | 0.126988 | 0.006    | 0.106711 | 0.02109  | -0.00248 | 0.9573   | -0.1295  |
| 0.077502 | 0.09435  | 0.186015 | 5.25E-05 | 0.120317 | 0.00925  | 0.022029 | 0.63491  | -0.0825  |
| -0.33202 | 1.76E-13 | -0.18673 | 4.90E-05 | -0.17976 | 9.38E-05 | -0.13647 | 0.00313  | -0.18452 |
| 0.122202 | 0.0082   | 0.429093 | 2.42E-22 | 0.353778 | 3.25E-15 | 0.132058 | 0.00425  | 0.080339 |
| -0.17435 | 0.00015  | -0.52576 | 1.50E-34 | -0.39751 | 3.96E-19 | -0.36913 | 1.60E-16 | -0.31077 |
| 0.100648 | 0.02965  | 0.334367 | 1.16E-13 | 0.293924 | 9.27E-11 | 0.130207 | 0.00483  | 0.008415 |
| -0.18359 | 6.59E-05 | -0.12151 | 0.00858  | -0.10051 | 0.02987  | -0.12608 | 0.00637  | -0.33158 |
| -0.07642 | 0.09906  | 0.130947 | 0.00459  | 0.069672 | 0.13273  | 0.043687 | 0.34619  | 0.034188 |
| 0.008894 | 0.84798  | 0.177279 | 0.00012  | 0.205043 | 7.94E-06 | 0.008549 | 0.85382  | -0.17917 |
| 0.199162 | 1.45E-05 | 0.330976 | 2.12E-13 | 0.334675 | 1.10E-13 | 0.092953 | 0.04468  | -0.1051  |
| 0.117295 | 0.01119  | 0.46699  | 1.14E-26 | 0.313973 | 3.83E-12 | 0.166401 | 0.0003   | 0.246261 |
| 0.054388 | 0.24077  | 0.294822 | 8.08E-11 | 0.106469 | 0.02138  | 0.07951  | 0.0861   | 0.173934 |
| -0.21477 | 2.82E-06 | -0.04332 | 0.3503   | -0.09021 | 0.05138  | -0.05513 | 0.23445  | -0.19633 |
| -0.09252 | 0.04569  | 0.057463 | 0.21516  | 0.059091 | 0.20243  | -0.11978 | 0.00957  | -0.1984  |
| -0.01457 | 0.75349  | 0.205828 | 7.32E-06 | 0.17461  | 0.00015  | 0.024537 | 0.59687  | -0.0097  |
| -0.02356 | 0.61162  | 0.189648 | 3.71E-05 | 0.140353 | 0.00237  | 0.016975 | 0.71445  | -0.01982 |
| -0.0167  | 0.71884  | 0.154437 | 0.00081  | 0.093291 | 0.0439   | -0.05292 | 0.25375  | -0.06658 |
| 0.10005  | 0.03064  | 0.415857 | 5.92E-21 | 0.276452 | 1.22E-09 | 0.145492 | 0.00162  | 0.095585 |
| -0.04823 | 0.29835  | -0.24944 | 4.69E-08 | -0.24978 | 4.49E-08 | 0.105902 | 0.02209  | 0.187289 |
| 0.067734 | 0.14388  | -0.24444 | 8.81E-08 | -0.09091 | 0.04959  | 0.000827 | 0.98578  | 0.029977 |
| -0.01125 | 0.80834  | 0.315865 | 2.80E-12 | 0.207725 | 6.00E-06 | 0.152901 | 0.00092  | 0.279592 |
| 0.009029 | 0.8457   | 0.204621 | 8.30E-06 | 0.20165  | 1.13E-05 | -0.00558 | 0.90432  | -0.11825 |
| 0.002433 | 0.95818  | 0.225419 | 8.58E-07 | 0.191423 | 3.12E-05 | 0.083332 | 0.072    | 0.011394 |
| 0.131307 | 0.00448  | 0.143298 | 0.00191  | 0.182482 | 7.30E-05 | 0.00623  | 0.89319  | -0.23212 |
| -0.07818 | 0.09148  | 0.262543 | 8.42E-09 | -0.02515 | 0.58779  | 0.162953 | 0.00041  | 0.232402 |
| 0.07523  | 0.10444  | 0.34314  | 2.38E-14 | 0.193691 | 2.50E-05 | 0.199482 | 1.41E-05 | 0.167779 |
| -0.12933 | 0.00512  | 0.12497  | 0.00685  | 0.014692 | 0.75149  | -0.03713 | 0.42336  | -0.0754  |
| -0.15366 | 0.00086  | -0.18237 | 7.38E-05 | -0.23074 | 4.63E-07 | 0.029583 | 0.52365  | 0.148337 |
| 0.125091 | 0.0068   | -0.22397 | 1.01E-06 | -0.24687 | 6.50E-08 | 0.014163 | 0.76018  | 0.06952  |
| 0.15128  | 0.00104  | -0.33563 | 9.27E-14 | -0.17236 | 0.00018  | -0.06396 | 0.16765  | -0.16024 |
| -0.1368  | 0.00305  | 0.135319 | 0.00339  | 0.060977 | 0.18837  | -0.03361 | 0.46871  | -0.09051 |
| -0.01483 | 0.74932  | 0.237709 | 2.02E-07 | 0.126726 | 0.0061   | 0.071925 | 0.12062  | -0.01011 |
| 0.051527 | 0.26646  | 0.394622 | 7.49E-19 | 0.369405 | 1.51E-16 | 0.111467 | 0.01596  | 0.061983 |
| 0.101686 | 0.028    | 0.290293 | 1.61E-10 | 0.31178  | 5.50E-12 | 0.132449 | 0.00414  | 0.072125 |
| 0.003695 | 0.93653  | 0.264904 | 6.12E-09 | 0.203138 | 9.68E-06 | 0.007027 | 0.87962  | -0.01023 |
| 0.167323 | 0.00028  | 0.34229  | 2.78E-14 | 0.349071 | 7.91E-15 | 0.123776 | 0.00741  | 0.143989 |
| 0.059704 | 0.19778  | 0.173905 | 0.00016  | 0.361643 | 7.09E-16 | 0.050126 | 0.2797   | -0.00849 |
| 0.047337 | 0.30735  | 0.037473 | 0.41915  | 0.183177 | 6.85E-05 | -0.106   | 0.02196  | -0.30419 |
| 0.329328 | 2.83E-13 | 0.370037 | 1.33E-16 | 0.355768 | 2.22E-15 | 0.21533  | 2.65E-06 | -0.05141 |
| 0.019805 | 0.66946  | 0.251996 | 3.38E-08 | 0.273023 | 1.99E-09 | -0.0402  | 0.38609  | -0.06017 |
| 0.198338 | 1.58E-05 | 0.170583 | 0.00021  | 0.180139 | 9.06E-05 | -0.07385 | 0.111    | -0.26532 |
| 0.075182 | 0.10467  | 0.202608 | 1.02E-05 | 0.235427 | 2.65E-07 | -0.02332 | 0.61523  | -0.0588  |
| -0.02998 | 0.51811  | 0.303542 | 2.07E-11 | 0.279269 | 8.17E-10 | 0.035881 | 0.43919  | 0.025311 |

|          |          |          |          |          |          |          |          |          |
|----------|----------|----------|----------|----------|----------|----------|----------|----------|
| 0.02995  | 0.51851  | 0.13911  | 0.00259  | 0.27583  | 1.34E-09 | -0.13152 | 0.00441  | -0.18023 |
| -0.07747 | 0.0945   | 0.178392 | 0.00011  | 0.18703  | 4.77E-05 | -0.0352  | 0.44796  | -0.03952 |
| 0.035788 | 0.44038  | 0.477107 | 6.39E-28 | 0.325965 | 5.07E-13 | 0.133963 | 0.00373  | 0.144196 |
| 0.333551 | 1.34E-13 | 0.555948 | 3.08E-39 | 0.397397 | 4.06E-19 | 0.273754 | 1.80E-09 | 0.183532 |
| 0.063757 | 0.16898  | -0.2437  | 9.67E-08 | -0.19038 | 3.46E-05 | 0.082372 | 0.07535  | 0.076309 |
| -0.14795 | 0.00134  | 0.022184 | 0.63252  | -0.05277 | 0.25506  | -0.09516 | 0.03982  | -0.33315 |
| 0.133393 | 0.00388  | 0.327852 | 3.65E-13 | 0.298814 | 4.36E-11 | 0.171459 | 0.0002   | 0.118818 |
| 0.10178  | 0.02786  | 0.407916 | 3.77E-20 | 0.39541  | 6.29E-19 | 0.113884 | 0.0138   | 0.045771 |
| -0.07476 | 0.10664  | 0.166479 | 0.0003   | 0.140997 | 0.00226  | -0.04654 | 0.31563  | -0.07941 |
| 0.025938 | 0.57609  | 0.238682 | 1.79E-07 | 0.155725 | 0.00073  | 0.119732 | 0.0096   | 0.02196  |
| -0.05025 | 0.27851  | 0.261493 | 9.70E-09 | 0.21905  | 1.76E-06 | 0.000255 | 0.99562  | 0.018918 |
| 0.163734 | 0.00038  | 0.219825 | 1.61E-06 | 0.087063 | 0.06011  | 0.114822 | 0.01303  | 0.091505 |
| -0.00779 | 0.86668  | -0.00259 | 0.95541  | 0.033521 | 0.46989  | 0.037216 | 0.42234  | -0.00756 |
| 0.085341 | 0.06538  | 0.276841 | 1.16E-09 | 0.209788 | 4.82E-06 | -0.04927 | 0.28798  | -0.05826 |
| -0.09479 | 0.04061  | -0.44144 | 1.08E-23 | -0.40117 | 1.75E-19 | -0.03107 | 0.50294  | -0.09199 |
| -0.06089 | 0.189    | 0.190949 | 3.27E-05 | 0.037243 | 0.422    | -0.12779 | 0.00568  | -0.13019 |
| -0.1199  | 0.0095   | 0.233865 | 3.20E-07 | 0.097842 | 0.03453  | -0.00063 | 0.98908  | -0.01073 |
| 0.009691 | 0.83455  | 0.319348 | 1.56E-12 | -0.01096 | 0.81326  | 0.139256 | 0.00256  | 0.226305 |
| 0.048195 | 0.29865  | 0.491964 | 7.81E-30 | 0.388053 | 3.12E-18 | 0.125246 | 0.00673  | 0.225076 |
| 0.183843 | 6.43E-05 | 0.357072 | 1.73E-15 | 0.295168 | 7.66E-11 | 0.098203 | 0.03387  | 0.275632 |
| 0.04252  | 0.35924  | -0.23619 | 2.42E-07 | -0.09551 | 0.0391   | 0.054232 | 0.24213  | -0.07439 |
| 0.254857 | 2.33E-08 | 0.298715 | 4.43E-11 | 0.355368 | 2.40E-15 | 0.080438 | 0.08249  | 0.149899 |
| -0.23804 | 1.94E-07 | 0.019711 | 0.67094  | 0.03373  | 0.46712  | -0.14599 | 0.00156  | -0.21614 |
| 0.227786 | 6.53E-07 | 0.262876 | 8.05E-09 | 0.049983 | 0.28107  | 0.309776 | 7.62E-12 | 0.121519 |
| -0.0695  | 0.13368  | 0.26434  | 6.61E-09 | 0.10113  | 0.02887  | 0.030171 | 0.51544  | 0.0531   |
| -0.18876 | 4.04E-05 | 0.021119 | 0.64895  | -0.02865 | 0.53681  | -0.12079 | 0.00898  | -0.17037 |
| -0.04696 | 0.31126  | 0.108452 | 0.01906  | 0.114335 | 0.01342  | 0.007201 | 0.87666  | -0.09028 |
| 0.023979 | 0.60524  | 0.199013 | 1.47E-05 | 0.153669 | 0.00086  | 0.119551 | 0.00971  | 0.150463 |
| -0.03016 | 0.51556  | -0.01913 | 0.68005  | 0.034582 | 0.45594  | -0.18132 | 8.13E-05 | -0.27028 |
| 0.033066 | 0.47594  | 0.251432 | 3.64E-08 | 0.209517 | 4.96E-06 | 0.091552 | 0.04801  | 0.049158 |
| -0.09059 | 0.05041  | -0.26357 | 7.33E-09 | -0.32533 | 5.65E-13 | 0.116375 | 0.01185  | 0.08205  |
| 0.073418 | 0.11309  | 0.435478 | 4.93E-23 | 0.371118 | 1.07E-16 | 0.186208 | 5.15E-05 | 0.17084  |
| -0.12026 | 0.00928  | -0.02765 | 0.55117  | 0.042724 | 0.35693  | -0.12591 | 0.00644  | -0.3109  |
| -0.21994 | 1.59E-06 | 0.058309 | 0.20847  | 0.056803 | 0.22049  | -0.07887 | 0.08868  | -0.09791 |
| 0.22411  | 9.96E-07 | 0.002984 | 0.94872  | -0.04654 | 0.31556  | 0.2748   | 1.55E-09 | 0.235309 |
| -0.01817 | 0.69527  | -0.21805 | 1.97E-06 | -0.11505 | 0.01285  | -0.00546 | 0.90625  | 0.025397 |
| 0.434435 | 6.41E-23 | 0.104206 | 0.02432  | 0.209883 | 4.77E-06 | 0.248569 | 5.24E-08 | 0.297582 |
| 0.071389 | 0.12342  | 0.358706 | 1.26E-15 | 0.261523 | 9.66E-09 | 0.057517 | 0.21473  | 0.084993 |
| -0.08346 | 0.07155  | 0.137323 | 0.00294  | 0.156314 | 0.0007   | -0.09373 | 0.04292  | -0.11898 |
| 0.255385 | 2.18E-08 | 0.072257 | 0.11892  | -0.02975 | 0.52131  | 0.222342 | 1.22E-06 | 0.447929 |
| -0.08304 | 0.07302  | 0.317652 | 2.08E-12 | 0.101184 | 0.02879  | 0.0028   | 0.95188  | 0.384258 |
| 0.014922 | 0.74775  | -0.17586 | 0.00013  | -0.11687 | 0.01149  | -0.08188 | 0.07711  | -0.14428 |
| -0.04772 | 0.3035   | 0.154508 | 0.00081  | 0.050411 | 0.27696  | 0.008176 | 0.86013  | 0.037335 |
| 0.078188 | 0.09146  | 0.201212 | 1.18E-05 | 0.03687  | 0.42666  | 0.229055 | 5.64E-07 | 0.213271 |
| -0.04518 | 0.3299   | 0.108845 | 0.01863  | -0.00666 | 0.88587  | 0.144583 | 0.00173  | 0.148507 |

|          |          |          |          |          |          |          |          |          |
|----------|----------|----------|----------|----------|----------|----------|----------|----------|
| 0.035232 | 0.44751  | 0.142142 | 0.00208  | 0.1188   | 0.01018  | 0.0723   | 0.1187   | -0.01553 |
| -0.05345 | 0.24898  | 0.241218 | 1.31E-07 | 0.111545 | 0.01588  | 0.033696 | 0.46758  | 0.168049 |
| 0.003028 | 0.94796  | 0.274197 | 1.69E-09 | 0.168369 | 0.00026  | 0.073867 | 0.1109   | 0.053694 |
| -0.1993  | 1.43E-05 | -0.00763 | 0.86938  | -0.05922 | 0.20146  | -0.12667 | 0.00612  | -0.133   |
| -0.22875 | 5.84E-07 | -0.16526 | 0.00034  | -0.1506  | 0.0011   | -0.12913 | 0.00519  | -0.26887 |
| 0.092007 | 0.0469   | -0.12719 | 0.00592  | -0.01467 | 0.75191  | -0.04221 | 0.3628   | -0.12263 |
| 0.083514 | 0.07138  | 0.328234 | 3.42E-13 | 0.287314 | 2.51E-10 | 0.21152  | 4.01E-06 | 0.172114 |
| 0.205799 | 7.34E-06 | 0.391965 | 1.34E-18 | 0.165096 | 0.00034  | 0.113662 | 0.01399  | 0.22039  |
| 0.026607 | 0.56628  | 0.273452 | 1.87E-09 | 0.138923 | 0.00262  | 0.060362 | 0.19287  | 0.043294 |
| 0.090655 | 0.05025  | 0.28967  | 1.77E-10 | 0.172965 | 0.00017  | 0.092546 | 0.04562  | 0.007775 |
| -0.1666  | 0.0003   | 0.06179  | 0.18253  | 0.026732 | 0.56445  | -0.11236 | 0.01513  | -0.22063 |
| -0.21078 | 4.34E-06 | 0.028764 | 0.53522  | -0.05992 | 0.19616  | -0.1903  | 3.48E-05 | -0.27158 |
| -0.02954 | 0.52426  | 0.176779 | 0.00012  | 0.061942 | 0.18146  | 0.073422 | 0.11307  | 0.029149 |
| -0.07943 | 0.08642  | 0.162117 | 0.00044  | 0.06183  | 0.18225  | -0.0253  | 0.58552  | -0.06238 |
| -0.18452 | 6.04E-05 | 0.063501 | 0.17069  | -0.03051 | 0.51077  | -0.13487 | 0.0035   | -0.21835 |
| -0.05891 | 0.20378  | 0.233667 | 3.27E-07 | 0.15341  | 0.00088  | 0.046784 | 0.31304  | -0.02646 |
| -0.09775 | 0.0347   | 0.203074 | 9.74E-06 | 0.132342 | 0.00417  | 0.051215 | 0.26937  | 0.170874 |
| 0.104648 | 0.02372  | 0.139141 | 0.00258  | 0.215627 | 2.57E-06 | 0.053831 | 0.24563  | -0.03561 |
| -0.00828 | 0.85844  | 0.228122 | 6.28E-07 | 0.204052 | 8.80E-06 | 0.04047  | 0.38289  | 0.002607 |
| 0.079114 | 0.08768  | 0.383372 | 8.47E-18 | 0.325313 | 5.67E-13 | 0.139691 | 0.00248  | 0.166799 |
| -0.04934 | 0.28734  | 0.09092  | 0.04958  | -0.00469 | 0.91949  | 0.182221 | 7.48E-05 | 0.079002 |
| -0.26447 | 6.49E-09 | -0.14484 | 0.0017   | -0.13164 | 0.00438  | -0.12472 | 0.00696  | -0.21615 |
| -0.02086 | 0.65297  | -0.33305 | 1.47E-13 | -0.21848 | 1.87E-06 | 0.011316 | 0.80731  | 0.06082  |
| 0.125314 | 0.0067   | 0.307319 | 1.13E-11 | 0.357265 | 1.66E-15 | -0.01604 | 0.72948  | -0.06866 |
| -0.02697 | 0.56102  | 0.032072 | 0.48932  | 0.181906 | 7.70E-05 | -0.21582 | 2.51E-06 | -0.27347 |
| 0.122756 | 0.00791  | 0.25581  | 2.06E-08 | 0.242929 | 1.06E-07 | 0.1922   | 2.90E-05 | 0.05295  |
| -0.32091 | 1.20E-12 | -0.11154 | 0.01589  | -0.13961 | 0.0025   | -0.29063 | 1.53E-10 | -0.3857  |
| -0.07436 | 0.10854  | 0.120726 | 0.00902  | 0.077569 | 0.09407  | -0.02652 | 0.56758  | -0.06968 |
| 0.064857 | 0.16173  | 0.51107  | 1.95E-32 | 0.30791  | 1.03E-11 | 0.206617 | 6.74E-06 | 0.387078 |
| -0.02455 | 0.59667  | -0.31337 | 4.23E-12 | -0.23458 | 2.94E-07 | 0.002738 | 0.95294  | -0.1471  |
| 0.215729 | 2.54E-06 | -0.04528 | 0.32891  | 0.029603 | 0.52338  | 0.032059 | 0.48949  | -0.09506 |
| 0.01871  | 0.68674  | 0.215884 | 2.50E-06 | 0.228824 | 5.79E-07 | -0.02336 | 0.61456  | -0.09262 |
| -0.12641 | 0.00623  | -0.31763 | 2.09E-12 | -0.15055 | 0.0011   | -0.19871 | 1.52E-05 | -0.07479 |
| -0.06439 | 0.1648   | 0.081595 | 0.07815  | -0.01154 | 0.80359  | -0.10046 | 0.02995  | -0.28452 |
| 0.10092  | 0.02921  | 0.205334 | 7.71E-06 | 0.086518 | 0.06174  | 0.066294 | 0.15262  | -0.0769  |
| -0.22452 | 9.50E-07 | 0.045187 | 0.32987  | 0.024912 | 0.59127  | -0.04084 | 0.37855  | -0.09667 |
| 0.033484 | 0.47038  | 0.271876 | 2.34E-09 | 0.222007 | 1.26E-06 | 0.06503  | 0.16061  | 0.066706 |
| 0.355042 | 2.55E-15 | 0.423399 | 9.75E-22 | 0.40465  | 7.95E-20 | 0.171973 | 0.00019  | 0.074045 |
| 0.019154 | 0.67971  | 0.18062  | 8.67E-05 | 0.274753 | 1.56E-09 | -0.00278 | 0.9523   | -0.04053 |
| 0.011066 | 0.81149  | 0.123117 | 0.00773  | 0.132444 | 0.00414  | -0.19286 | 2.72E-05 | -0.2276  |
| 0.254517 | 2.44E-08 | 0.398646 | 3.07E-19 | 0.431874 | 1.22E-22 | 0.216776 | 2.26E-06 | 0.131197 |
| 0.133463 | 0.00386  | 0.246235 | 7.04E-08 | 0.210109 | 4.66E-06 | -0.13879 | 0.00265  | -0.15765 |
| 0.065676 | 0.15648  | 0.269978 | 3.05E-09 | 0.205563 | 7.53E-06 | 0.080508 | 0.08222  | 0.0335   |
| 0.169245 | 0.00024  | 0.283627 | 4.34E-10 | 0.015145 | 0.74411  | 0.163098 | 0.0004   | 0.22582  |
| -0.03534 | 0.44611  | 0.143422 | 0.00189  | 0.183745 | 6.49E-05 | 0.079082 | 0.08781  | -0.00368 |

|          |          |          |          |          |          |          |          |          |
|----------|----------|----------|----------|----------|----------|----------|----------|----------|
| -0.01573 | 0.73452  | 0.111836 | 0.01561  | 0.129031 | 0.00523  | -0.1431  | 0.00193  | -0.26013 |
| 0.039797 | 0.39086  | 0.384869 | 6.17E-18 | 0.257301 | 1.69E-08 | 0.129681 | 0.005    | 0.166531 |
| 0.075468 | 0.10335  | 0.254076 | 2.58E-08 | 0.250697 | 4.00E-08 | 0.244095 | 9.20E-08 | 0.121177 |
| -0.10859 | 0.01891  | 0.172059 | 0.00019  | 0.089167 | 0.05416  | 0.010397 | 0.82269  | -0.09822 |
| 0.065365 | 0.15846  | 0.119506 | 0.00974  | 0.129015 | 0.00523  | 0.090909 | 0.0496   | 0.054028 |
| 0.046572 | 0.31524  | 0.310074 | 7.26E-12 | 0.166545 | 0.0003   | 0.068376 | 0.14011  | 0.127732 |
| 0.133768 | 0.00378  | 0.287906 | 2.30E-10 | 0.237211 | 2.14E-07 | 0.2956   | 7.17E-11 | 0.202359 |
| 0.185529 | 5.49E-05 | 0.522785 | 4.09E-34 | 0.466994 | 1.14E-26 | 0.282417 | 5.18E-10 | 0.293843 |
| 0.081129 | 0.07988  | 0.266858 | 4.69E-09 | 0.230471 | 4.78E-07 | 0.198092 | 1.62E-05 | 0.123304 |
| 0.041271 | 0.37354  | 0.122169 | 0.00822  | 0.207817 | 5.94E-06 | -0.07881 | 0.08892  | -0.02016 |
| 0.003934 | 0.93243  | 0.354487 | 2.84E-15 | 0.200157 | 1.31E-05 | 0.19133  | 3.15E-05 | 0.138508 |
| -0.01902 | 0.68176  | 0.284946 | 3.57E-10 | 0.165497 | 0.00033  | 0.067661 | 0.14431  | -0.03004 |
| 0.085753 | 0.06409  | 0.479897 | 2.84E-28 | 0.277018 | 1.13E-09 | 0.26468  | 6.31E-09 | 0.386154 |
| -0.07004 | 0.1307   | 0.178053 | 0.00011  | 0.127922 | 0.00563  | -0.05342 | 0.24922  | -0.10034 |
| -0.03971 | 0.3919   | 0.265047 | 6.00E-09 | 0.151237 | 0.00104  | 0.011838 | 0.79861  | -0.02449 |
| 0.164788 | 0.00035  | 0.307498 | 1.10E-11 | 0.299323 | 4.03E-11 | 0.086033 | 0.06322  | 0.010767 |
| 0.273766 | 1.79E-09 | 0.583248 | 6.56E-44 | 0.470534 | 4.19E-27 | 0.272156 | 2.25E-09 | 0.231962 |
| -0.06168 | 0.18331  | 0.089884 | 0.05224  | 0.093976 | 0.04237  | -0.03287 | 0.47854  | -0.06734 |
| 0.016505 | 0.72203  | 0.294368 | 8.66E-11 | 0.305336 | 1.56E-11 | -0.02005 | 0.66566  | -0.00185 |
| -0.01189 | 0.79773  | 0.182577 | 7.24E-05 | 0.167539 | 0.00028  | 0.015661 | 0.7357   | -0.0213  |
| -0.03403 | 0.46322  | 0.117602 | 0.01098  | 0.080954 | 0.08053  | -0.08718 | 0.05976  | -0.13324 |
| 0.099161 | 0.03216  | 0.530206 | 3.27E-35 | 0.412112 | 1.43E-20 | 0.205267 | 7.76E-06 | 0.27917  |
| -0.12201 | 0.00831  | 0.192129 | 2.92E-05 | 0.057409 | 0.2156   | 0.012194 | 0.79269  | -0.0558  |
| -0.01991 | 0.66781  | 0.274188 | 1.69E-09 | 0.184623 | 5.98E-05 | 0.054423 | 0.24047  | 0.078488 |
| 0.136479 | 0.00312  | 0.381105 | 1.37E-17 | 0.364014 | 4.45E-16 | 0.071138 | 0.12475  | 0.15038  |
| -0.052   | 0.26207  | 0.242822 | 1.08E-07 | 0.186729 | 4.90E-05 | 0.065035 | 0.16057  | 0.142231 |
| -0.01919 | 0.67915  | 0.282512 | 5.11E-10 | 0.151313 | 0.00104  | 0.141593 | 0.00216  | 0.153547 |
| 0.075422 | 0.10356  | 0.066037 | 0.15422  | 0.109317 | 0.01812  | -0.03604 | 0.43718  | -0.21795 |
| -0.00674 | 0.88455  | 0.244051 | 9.25E-08 | 0.138226 | 0.00276  | 0.093082 | 0.04438  | 0.01184  |
| -0.07021 | 0.12974  | 0.056172 | 0.22567  | 0.060223 | 0.1939   | -0.03484 | 0.45253  | -0.11175 |
| 5.80E-06 | 0.9999   | 0.23963  | 1.60E-07 | 0.176899 | 0.00012  | 0.058633 | 0.20596  | 0.068052 |
| -0.09535 | 0.03943  | 0.154305 | 0.00082  | 0.089827 | 0.05239  | 0.019317 | 0.67715  | -0.03944 |
| 0.096195 | 0.03771  | 0.168841 | 0.00025  | 0.085347 | 0.06536  | 0.086802 | 0.06089  | 0.127349 |
| 0.42912  | 2.41E-22 | 0.465337 | 1.80E-26 | 0.491094 | 1.02E-29 | 0.287453 | 2.46E-10 | 0.145549 |
| 0.232183 | 3.90E-07 | 0.462838 | 3.60E-26 | 0.365793 | 3.12E-16 | 0.060627 | 0.19092  | 0.155626 |
| 0.10658  | 0.02124  | 0.171146 | 0.0002   | 0.126843 | 0.00605  | 0.010468 | 0.8215   | -0.13016 |
| -0.00499 | 0.91436  | -0.10224 | 0.02716  | -0.07391 | 0.11067  | -0.08696 | 0.06042  | -0.3833  |
| 0.335882 | 8.87E-14 | 0.527171 | 9.25E-35 | 0.496197 | 2.14E-30 | 0.214021 | 3.06E-06 | 0.180878 |
| -0.02592 | 0.57629  | 0.287444 | 2.47E-10 | 0.213802 | 3.13E-06 | 0.051441 | 0.26726  | -0.00152 |
| -0.00057 | 0.9902   | 0.247961 | 5.66E-08 | 0.14532  | 0.00164  | -0.00764 | 0.86925  | 0.064916 |
| 0.076232 | 0.0999   | 0.378897 | 2.17E-17 | 0.280347 | 7.00E-10 | 0.179194 | 9.88E-05 | 0.117526 |
| 0.026131 | 0.57325  | 0.276818 | 1.16E-09 | 0.267286 | 4.42E-09 | 0.163018 | 0.0004   | 0.075243 |
| 0.012714 | 0.78406  | 0.276627 | 1.19E-09 | 0.223219 | 1.10E-06 | 0.062994 | 0.17414  | 0.051235 |
| -0.22114 | 1.39E-06 | 0.119876 | 0.00952  | 0.050172 | 0.27925  | -0.01731 | 0.7091   | -0.03416 |
| 0.094403 | 0.04144  | 0.155988 | 0.00072  | 0.137611 | 0.00288  | 0.057812 | 0.21239  | -0.11596 |

|          |          |          |          |          |          |          |          |          |
|----------|----------|----------|----------|----------|----------|----------|----------|----------|
| 0.217655 | 2.05E-06 | 0.344677 | 1.79E-14 | 0.308944 | 8.72E-12 | 0.139018 | 0.00261  | 0.132473 |
| -0.06903 | 0.13635  | 0.215767 | 2.53E-06 | 0.17001  | 0.00022  | 0.002293 | 0.96059  | -0.00051 |
| -0.22277 | 1.16E-06 | 0.050507 | 0.27605  | 0.01681  | 0.71711  | -0.02884 | 0.53411  | -0.03658 |
| 0.285725 | 3.18E-10 | 0.378898 | 2.17E-17 | 0.352344 | 4.27E-15 | 0.317569 | 2.11E-12 | 0.343596 |
| 0.287092 | 2.60E-10 | 0.571323 | 8.15E-42 | 0.530263 | 3.20E-35 | 0.250087 | 4.32E-08 | 0.224491 |
| 0.229717 | 5.22E-07 | 0.549046 | 4.00E-38 | 0.367017 | 2.45E-16 | 0.243367 | 1.01E-07 | 0.390874 |
| 0.120264 | 0.00928  | 0.586211 | 1.92E-44 | 0.373805 | 6.20E-17 | 0.194873 | 2.23E-05 | 0.316813 |
| 0.109702 | 0.01772  | 0.362638 | 5.83E-16 | 0.285176 | 3.45E-10 | 0.164997 | 0.00034  | 0.261663 |
| 0.214746 | 2.83E-06 | 0.255025 | 2.28E-08 | 0.328203 | 3.44E-13 | 0.10682  | 0.02095  | 0.101149 |
| -0.03322 | 0.47388  | 0.203548 | 9.27E-06 | 0.17087  | 0.00021  | 0.018157 | 0.69554  | -0.0115  |
| -0.01366 | 0.76847  | 0.260058 | 1.18E-08 | 0.19013  | 3.54E-05 | 0.038656 | 0.4046   | 0.027674 |
| 0.010561 | 0.81995  | 0.308648 | 9.15E-12 | 0.195085 | 2.18E-05 | 0.075459 | 0.10339  | 0.020044 |
| 0.019125 | 0.68017  | 0.21177  | 3.90E-06 | 0.108057 | 0.01951  | 0.085667 | 0.06435  | 0.113135 |
| -0.09944 | 0.03168  | -0.29018 | 1.64E-10 | -0.20129 | 1.17E-05 | -0.24962 | 4.59E-08 | -0.23414 |
| 0.091391 | 0.0484   | 0.323341 | 7.95E-13 | 0.36697  | 2.47E-16 | -0.01001 | 0.82918  | 0.029505 |
| 0.055621 | 0.23026  | 0.227065 | 7.10E-07 | 0.252622 | 3.12E-08 | 0.07282  | 0.11606  | 0.024165 |
| 0.127196 | 0.00591  | 0.375015 | 4.84E-17 | 0.404674 | 7.91E-20 | 0.104641 | 0.02373  | 0.067299 |
| 0.038513 | 0.40634  | 0.342942 | 2.47E-14 | 0.298489 | 4.59E-11 | 0.152491 | 0.00095  | 0.130351 |
| -0.18806 | 4.32E-05 | -0.3588  | 1.24E-15 | -0.49935 | 8.06E-31 | -0.11153 | 0.0159   | -0.06211 |
| 0.293416 | 1.00E-10 | 0.535955 | 4.41E-36 | 0.554746 | 4.83E-39 | 0.12301  | 0.00779  | 0.183485 |
| -0.06125 | 0.18643  | 0.213234 | 3.33E-06 | 0.129695 | 0.005    | -0.10398 | 0.02463  | -0.1105  |
| 0.120858 | 0.00894  | 0.152552 | 0.00094  | 0.196707 | 1.86E-05 | -0.01144 | 0.80526  | -0.04248 |
| 0.03249  | 0.48366  | 0.232165 | 3.91E-07 | 0.15021  | 0.00113  | 0.031568 | 0.49617  | 0.003085 |
| -0.03814 | 0.41085  | 0.2006   | 1.25E-05 | 0.105575 | 0.0225   | 0.045001 | 0.33186  | -0.00852 |
| 0.02363  | 0.6105   | 0.419119 | 2.73E-21 | 0.275605 | 1.38E-09 | 0.144242 | 0.00178  | 0.215542 |
| -0.02617 | 0.57265  | 0.162677 | 0.00042  | 0.087565 | 0.05864  | 0.084139 | 0.06928  | 0.013703 |
| -0.16779 | 0.00027  | 0.13441  | 0.00361  | 0.153107 | 0.0009   | -0.14548 | 0.00162  | -0.07525 |
| 0.131717 | 0.00435  | 0.467433 | 1.00E-26 | 0.410906 | 1.89E-20 | 0.165133 | 0.00034  | 0.359103 |
| -0.07544 | 0.10348  | 0.119555 | 0.00971  | 0.044003 | 0.3427   | 0.020324 | 0.66133  | -0.03482 |
| 0.125718 | 0.00652  | 0.502396 | 3.11E-31 | 0.359964 | 9.85E-16 | 0.126252 | 0.0063   | 0.213915 |
| 0.057738 | 0.21297  | 0.226579 | 7.51E-07 | 0.178232 | 0.00011  | -0.07676 | 0.09757  | -0.10662 |
| -0.06327 | 0.17227  | 0.054123 | 0.24308  | 0.041682 | 0.36879  | -0.04541 | 0.3275   | -0.09352 |
| -0.18491 | 5.82E-05 | 0.136426 | 0.00314  | 0.059314 | 0.20073  | -0.0487  | 0.29359  | -0.08023 |
| 0.134602 | 0.00357  | 0.364842 | 3.77E-16 | 0.278531 | 9.09E-10 | 0.177415 | 0.00012  | 0.107276 |
| 0.240514 | 1.43E-07 | 0.602213 | 2.01E-47 | 0.498212 | 1.15E-30 | 0.173582 | 0.00016  | 0.26044  |
| -0.33661 | 7.79E-14 | -0.08118 | 0.07971  | -0.08122 | 0.07955  | -0.17238 | 0.00018  | -0.27902 |
| 0.138743 | 0.00266  | 0.37488  | 4.97E-17 | 0.280524 | 6.82E-10 | 0.233098 | 3.50E-07 | 0.180464 |
| 0.090834 | 0.04979  | 0.225915 | 8.10E-07 | 0.173829 | 0.00016  | 0.01677  | 0.71775  | -0.08119 |
| 0.105528 | 0.02256  | 0.410366 | 2.14E-20 | 0.237399 | 2.09E-07 | 0.260539 | 1.10E-08 | 0.28183  |
| -0.0355  | 0.44411  | 0.210188 | 4.62E-06 | 0.146257 | 0.00153  | -0.02575 | 0.57882  | -0.0111  |
| -0.09573 | 0.03865  | 0.198398 | 1.57E-05 | 0.119876 | 0.00952  | 0.037073 | 0.42413  | -0.01253 |
| 0.186504 | 5.01E-05 | 0.255603 | 2.12E-08 | 0.131038 | 0.00456  | 0.033341 | 0.47228  | -0.03037 |
| 0.199243 | 1.44E-05 | 0.508665 | 4.24E-32 | 0.451311 | 8.18E-25 | 0.162727 | 0.00041  | 0.237786 |
| 0.033666 | 0.46797  | 0.144822 | 0.0017   | 0.173462 | 0.00017  | -0.07092 | 0.12589  | -0.07792 |
| 0.200018 | 1.33E-05 | 0.339601 | 4.54E-14 | 0.241807 | 1.22E-07 | 0.376613 | 3.48E-17 | 0.397228 |

|          |          |          |          |          |          |          |          |          |
|----------|----------|----------|----------|----------|----------|----------|----------|----------|
| -0.14216 | 0.00207  | -0.48058 | 2.33E-28 | -0.29262 | 1.13E-10 | -0.20536 | 7.69E-06 | -0.30529 |
| 0.122241 | 0.00818  | 0.365399 | 3.38E-16 | 0.345788 | 1.46E-14 | 0.098024 | 0.0342   | 0.005004 |
| 0.000616 | 0.98941  | 0.44754  | 2.21E-24 | 0.228015 | 6.36E-07 | 0.187488 | 4.56E-05 | 0.383216 |
| 0.321966 | 1.00E-12 | 0.68134  | 5.27E-65 | 0.628857 | 8.90E-53 | 0.315104 | 3.18E-12 | 0.411223 |
| 0.141704 | 0.00214  | 0.437874 | 2.69E-23 | 0.357252 | 1.67E-15 | 0.032357 | 0.48546  | 0.012358 |
| 0.083478 | 0.0715   | 0.264482 | 6.48E-09 | 0.228561 | 5.97E-07 | 0.009649 | 0.83525  | -0.02468 |
| 0.157681 | 0.00063  | 0.268369 | 3.81E-09 | 0.459421 | 9.21E-26 | 0.10848  | 0.01903  | -0.08325 |
| -0.00367 | 0.93696  | 0.273248 | 1.93E-09 | 0.122704 | 0.00794  | 0.158223 | 0.0006   | 0.184351 |
| -0.06394 | 0.16778  | 0.116339 | 0.01187  | 0.155477 | 0.00075  | -0.01883 | 0.68487  | -0.11335 |
| -0.21016 | 4.64E-06 | -0.00696 | 0.88083  | 0.019965 | 0.66695  | -0.18425 | 6.19E-05 | -0.21631 |
| 0.12763  | 0.00574  | 0.586487 | 1.71E-44 | 0.465907 | 1.54E-26 | 0.220997 | 1.42E-06 | 0.284964 |
| 0.240621 | 1.41E-07 | 0.521166 | 7.04E-34 | 0.406089 | 5.73E-20 | 0.194088 | 2.41E-05 | 0.234764 |
| 0.103306 | 0.02558  | 0.474836 | 1.23E-27 | 0.465015 | 1.97E-26 | 0.10231  | 0.02705  | 0.187921 |
| -0.15994 | 0.00052  | 0.201094 | 1.19E-05 | 0.056886 | 0.21982  | -0.00679 | 0.88362  | 0.040581 |
| 0.066079 | 0.15395  | 0.222045 | 1.26E-06 | 0.182733 | 7.13E-05 | 0.027929 | 0.54714  | -0.05061 |
| 0.019058 | 0.68123  | 0.196853 | 1.83E-05 | 0.203942 | 8.90E-06 | 0.038295 | 0.40901  | -0.02567 |
| 0.11536  | 0.01261  | 0.177198 | 0.00012  | 0.2917   | 1.30E-10 | -0.02832 | 0.54147  | -0.10081 |
| -0.10777 | 0.01983  | 0.081413 | 0.07882  | 0.089682 | 0.05277  | -0.12764 | 0.00574  | -0.14064 |
| -0.1084  | 0.01912  | 0.094213 | 0.04185  | -0.00882 | 0.84928  | -0.02683 | 0.56297  | -0.02795 |
| 0.052709 | 0.25563  | 0.179187 | 9.88E-05 | 0.147622 | 0.00138  | 0.051204 | 0.26947  | -0.10548 |
| -0.09491 | 0.04034  | -0.46548 | 1.73E-26 | -0.41051 | 2.07E-20 | -0.17185 | 0.00019  | -0.16844 |
| -0.04967 | 0.2841   | 0.238764 | 1.77E-07 | 0.092228 | 0.04638  | 0.090866 | 0.04971  | 0.089981 |
| 0.125917 | 0.00644  | 0.196053 | 1.98E-05 | 0.109601 | 0.01782  | 0.037296 | 0.42135  | -0.09502 |
| 0.011486 | 0.80448  | 0.34645  | 1.29E-14 | 0.282295 | 5.27E-10 | 0.084671 | 0.06753  | 0.095033 |
| 0.088739 | 0.05533  | 0.385603 | 5.27E-18 | 0.248747 | 5.13E-08 | 0.190299 | 3.48E-05 | 0.174026 |
| 0.315963 | 2.76E-12 | 0.330997 | 2.11E-13 | 0.274715 | 1.57E-09 | 0.106731 | 0.02106  | -0.04521 |
| 0.10847  | 0.01904  | 0.324555 | 6.46E-13 | 0.327758 | 3.71E-13 | 0.088706 | 0.05542  | 0.007605 |
| 0.075447 | 0.10345  | 0.252706 | 3.09E-08 | 0.156915 | 0.00067  | -0.11267 | 0.01485  | -0.1231  |
| 0.067288 | 0.14654  | 0.200742 | 1.24E-05 | 0.182335 | 7.40E-05 | -0.10409 | 0.02449  | -0.1415  |
| 0.128137 | 0.00555  | 0.457332 | 1.63E-25 | 0.310152 | 7.17E-12 | 0.08989  | 0.05223  | 0.068687 |
| 0.02985  | 0.51991  | 0.38697  | 3.94E-18 | 0.264735 | 6.26E-09 | 0.073945 | 0.11052  | 0.078032 |
| 0.17917  | 9.90E-05 | 0.320502 | 1.29E-12 | 0.340767 | 3.67E-14 | 0.104057 | 0.02453  | -0.02312 |
| 0.216408 | 2.36E-06 | 0.470713 | 3.99E-27 | 0.348147 | 9.41E-15 | 0.286683 | 2.76E-10 | 0.402566 |
| -0.03261 | 0.48205  | 0.245054 | 8.16E-08 | 0.118591 | 0.01032  | 0.128357 | 0.00547  | 0.183849 |
| -0.07185 | 0.12101  | -0.25295 | 2.99E-08 | -0.36894 | 1.66E-16 | 0.034796 | 0.45316  | 0.033425 |
| -0.00854 | 0.85389  | 0.26355  | 7.35E-09 | 0.137637 | 0.00288  | 0.124442 | 0.00709  | 0.197979 |
| 0.106893 | 0.02087  | 0.274287 | 1.67E-09 | 0.223607 | 1.05E-06 | 0.028238 | 0.54271  | 0.006424 |
| 0.2112   | 4.15E-06 | 0.380254 | 1.63E-17 | 0.347346 | 1.09E-14 | 0.357712 | 1.53E-15 | 0.250365 |
| 0.09177  | 0.04748  | -0.19786 | 1.66E-05 | -0.15845 | 0.00059  | 0.093021 | 0.04452  | 0.171657 |
| 0.110427 | 0.01697  | 0.305239 | 1.58E-11 | 0.300312 | 3.45E-11 | 0.014883 | 0.74838  | -0.1123  |
| 0.318538 | 1.79E-12 | 0.4295   | 2.19E-22 | 0.414678 | 7.82E-21 | 0.088318 | 0.0565   | 0.113005 |
| -0.10943 | 0.01801  | 0.252218 | 3.29E-08 | 0.123031 | 0.00777  | -0.01384 | 0.76543  | 0.058057 |
| 0.233466 | 3.35E-07 | 0.394837 | 7.14E-19 | 0.276404 | 1.23E-09 | 0.079448 | 0.08635  | -0.02077 |
| 0.078335 | 0.09086  | 0.40342  | 1.05E-19 | 0.323627 | 7.57E-13 | 0.13907  | 0.0026   | 0.103911 |
| -0.07402 | 0.11013  | -0.17637 | 0.00013  | -0.07648 | 0.09881  | -0.19759 | 1.70E-05 | -0.28225 |



|          |          |          |          |          |          |          |          |          |
|----------|----------|----------|----------|----------|----------|----------|----------|----------|
| 0.044224 | 0.34028  | -0.31522 | 3.12E-12 | -0.12827 | 0.0055   | -0.10686 | 0.0209   | -0.22815 |
| 0.225435 | 8.56E-07 | 0.386273 | 4.57E-18 | 0.422638 | 1.17E-21 | 0.293047 | 1.06E-10 | 0.215716 |
| 0.244352 | 8.91E-08 | 0.329043 | 2.97E-13 | 0.282747 | 4.93E-10 | 0.197177 | 1.77E-05 | 0.218114 |
| 0.170063 | 0.00022  | -0.17347 | 0.00017  | -0.20221 | 1.06E-05 | 0.16998  | 0.00022  | 0.00024  |
| 0.158994 | 0.00056  | 0.117922 | 0.01076  | 0.11284  | 0.0147   | 0.058664 | 0.20572  | -0.12463 |
| -0.04849 | 0.29568  | 0.260362 | 1.13E-08 | 0.241561 | 1.26E-07 | 0.027261 | 0.55678  | 0.030929 |
| 0.006094 | 0.8955   | 0.276373 | 1.24E-09 | 0.242992 | 1.06E-07 | 0.030343 | 0.51304  | 0.059315 |
| -0.05027 | 0.27834  | 0.274064 | 1.72E-09 | 0.178148 | 0.00011  | 0.06301  | 0.17403  | 0.061177 |
| 0.07706  | 0.09626  | 0.40505  | 7.26E-20 | 0.334751 | 1.09E-13 | 0.278383 | 9.29E-10 | 0.458381 |
| 0.026689 | 0.56509  | 0.188616 | 4.10E-05 | 0.127135 | 0.00594  | 0.106515 | 0.02132  | 0.059878 |
| 0.008844 | 0.84882  | -0.33787 | 6.20E-14 | -0.21675 | 2.27E-06 | -0.03545 | 0.44476  | -0.16177 |
| 0.044233 | 0.34019  | 0.148943 | 0.00125  | 0.129142 | 0.00519  | 0.059845 | 0.19672  | -0.03999 |
| 0.023118 | 0.61827  | 0.400298 | 2.12E-19 | 0.242528 | 1.12E-07 | 0.147258 | 0.00142  | 0.262565 |
| 0.006792 | 0.88362  | 0.122878 | 0.00785  | 0.188472 | 4.15E-05 | -0.04227 | 0.36206  | -0.23993 |
| 0.285864 | 3.12E-10 | 0.491839 | 8.11E-30 | 0.474388 | 1.40E-27 | 0.209581 | 4.93E-06 | 0.111922 |
| -0.00477 | 0.91816  | 0.281203 | 6.18E-10 | 0.19393  | 2.45E-05 | 0.095976 | 0.03815  | 0.042082 |
| 0.023615 | 0.61074  | 0.449348 | 1.38E-24 | 0.325817 | 5.20E-13 | 0.107327 | 0.02035  | 0.205807 |
| 0.149371 | 0.00121  | 0.252054 | 3.36E-08 | 0.346149 | 1.36E-14 | 0.065465 | 0.15782  | 0.075751 |
| 0.023762 | 0.60851  | 0.2799   | 7.46E-10 | 0.157291 | 0.00065  | 0.199718 | 1.37E-05 | 0.243892 |
| -0.17903 | 0.0001   | 0.103261 | 0.02565  | 0.048782 | 0.2928   | -0.04954 | 0.28536  | -0.11669 |
| 0.101357 | 0.02852  | 0.103425 | 0.02541  | 0.102037 | 0.02746  | -0.13809 | 0.00278  | -0.21654 |
| 0.016262 | 0.72595  | 0.158828 | 0.00057  | 0.067004 | 0.14826  | 0.058353 | 0.20813  | -0.05894 |
| 0.162519 | 0.00042  | 0.29241  | 1.17E-10 | 0.135946 | 0.00324  | 0.226122 | 7.91E-07 | 0.306774 |
| 0.273232 | 1.93E-09 | 0.350641 | 5.89E-15 | 0.318981 | 1.66E-12 | 0.307512 | 1.10E-11 | 0.132414 |
| -0.05175 | 0.26441  | 0.168451 | 0.00026  | 0.143169 | 0.00192  | 0.009062 | 0.84514  | -0.13647 |
| -0.05673 | 0.22109  | 0.165484 | 0.00033  | 0.103657 | 0.02509  | -0.13694 | 0.00302  | -0.0295  |
| 0.01724  | 0.7102   | 0.289069 | 1.93E-10 | 0.101666 | 0.02803  | 0.115272 | 0.01268  | 0.123397 |
| 0.221695 | 1.31E-06 | -0.18903 | 3.94E-05 | -0.02077 | 0.65438  | -0.07047 | 0.12835  | -0.03741 |
| -0.09296 | 0.04467  | 0.125852 | 0.00646  | 0.028115 | 0.54447  | 0.057848 | 0.2121   | 0.022114 |
| 0.200221 | 1.30E-05 | 0.239639 | 1.59E-07 | 0.406432 | 5.30E-20 | 0.143964 | 0.00181  | 0.09745  |
| 0.074201 | 0.10928  | 0.526487 | 1.17E-34 | 0.359084 | 1.17E-15 | 0.290916 | 1.46E-10 | 0.271218 |
| 0.151256 | 0.00104  | 0.492643 | 6.35E-30 | 0.412269 | 1.37E-20 | 0.188482 | 4.15E-05 | 0.334265 |
| 0.099031 | 0.03239  | 0.295149 | 7.69E-11 | 0.250419 | 4.14E-08 | 0.049361 | 0.2871   | 0.111704 |
| -0.1248  | 0.00693  | -0.36916 | 1.59E-16 | -0.27321 | 1.94E-09 | -0.16593 | 0.00032  | -0.09351 |
| 0.174143 | 0.00016  | 0.428332 | 2.92E-22 | 0.35172  | 4.80E-15 | 0.201613 | 1.13E-05 | 0.107508 |
| -0.0711  | 0.12495  | 0.209726 | 4.85E-06 | 0.192465 | 2.82E-05 | -0.00461 | 0.9208   | -0.02976 |
| 0.151282 | 0.00104  | 0.238141 | 1.91E-07 | 0.318026 | 1.95E-12 | 0.001296 | 0.97772  | 0.036412 |
| -0.15175 | 0.001    | 0.109792 | 0.01762  | 0.047241 | 0.30833  | -0.03697 | 0.42546  | -0.04254 |
| 0.154212 | 0.00083  | 0.23091  | 4.54E-07 | 0.204639 | 8.28E-06 | 0.071873 | 0.12089  | -0.00188 |
| 0.02565  | 0.58033  | 0.102699 | 0.02647  | 0.140405 | 0.00236  | -0.03696 | 0.42555  | -0.11886 |
| 0.003673 | 0.9369   | -0.37906 | 2.09E-17 | -0.30134 | 2.94E-11 | -0.12512 | 0.00679  | -0.13401 |
| -0.11614 | 0.01202  | -0.30524 | 1.58E-11 | -0.19975 | 1.37E-05 | -0.17267 | 0.00018  | -0.25765 |
| 0.245041 | 8.18E-08 | 0.414809 | 7.58E-21 | 0.405289 | 6.88E-20 | 0.248435 | 5.33E-08 | 0.086839 |
| 0.138678 | 0.00267  | 0.237874 | 1.98E-07 | 0.2978   | 5.10E-11 | 0.039231 | 0.39764  | -0.13461 |
| 0.020108 | 0.66471  | 0.047903 | 0.3016   | 0.054407 | 0.24061  | 0.02485  | 0.59219  | -0.19603 |

|          |          |          |          |          |          |          |          |          |
|----------|----------|----------|----------|----------|----------|----------|----------|----------|
| 0.280589 | 6.75E-10 | 0.155436 | 0.00075  | 0.124771 | 0.00694  | 0.173163 | 0.00017  | 0.392397 |
| 0.06644  | 0.15171  | 0.206146 | 7.08E-06 | 0.193068 | 2.66E-05 | 0.06435  | 0.16504  | 0.007084 |
| -0.13074 | 0.00465  | 0.132628 | 0.00409  | 0.081084 | 0.08005  | -0.04382 | 0.34476  | -0.08869 |
| -0.04946 | 0.2861   | 0.299138 | 4.15E-11 | 0.231996 | 3.99E-07 | 0.072711 | 0.11661  | 0.095768 |
| -0.00976 | 0.83335  | 0.365536 | 3.29E-16 | 0.303686 | 2.03E-11 | 0.089081 | 0.05439  | 0.113241 |
| -0.2659  | 5.34E-09 | -0.08042 | 0.08257  | -0.11247 | 0.01503  | -0.0724  | 0.11819  | -0.08602 |
| 0.115319 | 0.01264  | 0.377178 | 3.10E-17 | 0.275005 | 1.50E-09 | 0.179563 | 9.55E-05 | 0.099067 |
| -0.1885  | 4.14E-05 | -0.31269 | 4.74E-12 | -0.32162 | 1.07E-12 | -0.09986 | 0.03096  | -0.15996 |
| -0.26408 | 6.84E-09 | -0.40508 | 7.22E-20 | -0.34505 | 1.67E-14 | -0.13699 | 0.00301  | -0.19146 |
| -0.15045 | 0.00111  | -0.50976 | 2.98E-32 | -0.47635 | 7.94E-28 | -0.16501 | 0.00034  | -0.20382 |
| 0.200116 | 1.32E-05 | 0.012311 | 0.79075  | 0.005625 | 0.90351  | -0.07967 | 0.08548  | -0.0501  |
| 0.153203 | 0.0009   | 0.397729 | 3.77E-19 | 0.313544 | 4.12E-12 | 0.136307 | 0.00316  | 0.12442  |
| 0.099828 | 0.03101  | 0.215873 | 2.50E-06 | 0.189776 | 3.66E-05 | 0.044979 | 0.33211  | 0.026798 |
| 0.23417  | 3.08E-07 | -0.11482 | 0.01303  | -0.17542 | 0.00014  | 0.014762 | 0.75035  | 0.108294 |
| -0.09224 | 0.04636  | 0.047805 | 0.30259  | 0.013668 | 0.76831  | 0.135586 | 0.00333  | -0.0088  |
| 0.076344 | 0.0994   | 0.388179 | 3.04E-18 | 0.307463 | 1.11E-11 | 0.089973 | 0.05201  | 0.084075 |
| -0.07004 | 0.13068  | 0.131888 | 0.0043   | -0.0226  | 0.62609  | 0.041864 | 0.36671  | 0.018291 |
| 0.226503 | 7.57E-07 | 0.25484  | 2.34E-08 | 0.23738  | 2.10E-07 | 0.145226 | 0.00165  | 0.036944 |
| 0.208058 | 5.79E-06 | 0.320551 | 1.28E-12 | 0.196018 | 1.99E-05 | 0.125186 | 0.00675  | 0.1108   |
| 0.17005  | 0.00022  | 0.26462  | 6.36E-09 | 0.276033 | 1.30E-09 | 0.125398 | 0.00666  | 0.16628  |
| -0.08052 | 0.08218  | 0.196356 | 1.92E-05 | 0.122044 | 0.00829  | 0.060447 | 0.19225  | 0.028553 |
| -0.22145 | 1.34E-06 | -0.07648 | 0.09879  | -0.09278 | 0.04508  | -0.12095 | 0.00889  | -0.21247 |
| -0.26532 | 5.78E-09 | -0.03756 | 0.41811  | -0.12052 | 0.00913  | -0.14528 | 0.00165  | -0.27161 |
| 0.072984 | 0.11524  | 0.390992 | 1.65E-18 | 0.314113 | 3.75E-12 | 0.1138   | 0.01387  | 0.128461 |
| 0.374491 | 5.39E-17 | 0.186269 | 5.12E-05 | 0.346389 | 1.31E-14 | 0.176523 | 0.00013  | 0.22878  |
| -0.04069 | 0.38034  | 0.288947 | 1.97E-10 | 0.178805 | 0.0001   | 0.068599 | 0.13882  | 0.038262 |
| -0.04871 | 0.29354  | 0.195324 | 2.13E-05 | 0.12811  | 0.00556  | -0.08767 | 0.05835  | -0.06397 |
| -0.08449 | 0.06811  | 0.002074 | 0.96434  | -0.03768 | 0.41663  | 0.071937 | 0.12056  | -0.033   |
| -0.04616 | 0.31955  | 0.236175 | 2.43E-07 | 0.136894 | 0.00303  | 0.030865 | 0.50581  | 0.037769 |
| 0.078005 | 0.09223  | 0.17969  | 9.44E-05 | 0.136345 | 0.00315  | -0.01847 | 0.6906   | -0.18583 |
| -0.05561 | 0.23038  | 0.272917 | 2.02E-09 | 0.099057 | 0.03234  | 0.066656 | 0.15038  | 0.155114 |
| -0.0016  | 0.97243  | 0.389424 | 2.32E-18 | 0.184552 | 6.02E-05 | 0.077128 | 0.09596  | 0.119971 |
| 0.1033   | 0.02559  | 0.47775  | 5.30E-28 | 0.361508 | 7.28E-16 | 0.057071 | 0.21832  | 0.060966 |
| -0.15261 | 0.00094  | 0.018571 | 0.68895  | -0.01514 | 0.74418  | -0.09208 | 0.04673  | -0.26708 |
| 0.025039 | 0.58938  | 0.080959 | 0.08051  | 0.07851  | 0.09014  | -0.04209 | 0.36413  | -0.32213 |
| 0.091998 | 0.04693  | -0.32893 | 3.03E-13 | -0.14709 | 0.00144  | -0.16321 | 0.0004   | -0.26137 |
| 0.091999 | 0.04692  | 0.117756 | 0.01087  | 0.266991 | 4.60E-09 | -0.02532 | 0.58524  | 0.046895 |
| 0.130374 | 0.00477  | 0.35903  | 1.18E-15 | 0.200613 | 1.25E-05 | 0.092339 | 0.04611  | 0.098657 |
| 0.162205 | 0.00043  | 0.416502 | 5.08E-21 | 0.25825  | 1.49E-08 | 0.117571 | 0.011    | 0.047466 |
| 0.163396 | 0.00039  | 0.460253 | 7.33E-26 | 0.245289 | 7.93E-08 | 0.257992 | 1.55E-08 | 0.32055  |
| 0.064447 | 0.1644   | 0.238449 | 1.84E-07 | 0.126008 | 0.0064   | 0.113728 | 0.01393  | 0.049466 |
| 0.130155 | 0.00485  | 0.405883 | 6.00E-20 | 0.346785 | 1.21E-14 | 0.118349 | 0.01048  | 0.084731 |
| 0.286292 | 2.93E-10 | 0.542196 | 4.81E-37 | 0.5382   | 2.00E-36 | 0.282553 | 5.07E-10 | 0.16102  |
| -0.02485 | 0.59214  | -0.12686 | 0.00605  | 0.073594 | 0.11222  | -0.01582 | 0.73314  | 0.015266 |
| -0.40704 | 4.61E-20 | -0.2296  | 5.29E-07 | -0.2503  | 4.20E-08 | -0.27545 | 1.41E-09 | -0.29844 |

|          |          |          |          |          |          |          |          |          |
|----------|----------|----------|----------|----------|----------|----------|----------|----------|
| 0.081443 | 0.07871  | 0.247145 | 6.28E-08 | 0.182437 | 7.33E-05 | 0.031449 | 0.49779  | -0.08026 |
| 0.159757 | 0.00053  | 0.081296 | 0.07926  | 0.082694 | 0.07421  | 0.005741 | 0.90152  | -0.16541 |
| -0.1546  | 0.0008   | 0.160328 | 0.00051  | 0.03553  | 0.44368  | -0.0262  | 0.57229  | 0.027034 |
| 0.126143 | 0.00634  | 0.359517 | 1.07E-15 | 0.280326 | 7.02E-10 | 0.085172 | 0.06592  | 0.193636 |
| 0.0101   | 0.82768  | 0.161996 | 0.00044  | 0.073203 | 0.11415  | 0.069375 | 0.1344   | 0.183775 |
| 0.15621  | 0.00071  | 0.228595 | 5.94E-07 | 0.231218 | 4.37E-07 | 0.037384 | 0.42024  | -0.12922 |
| 0.013196 | 0.77608  | 0.317488 | 2.14E-12 | 0.164504 | 0.00036  | 0.052247 | 0.25982  | -0.04816 |
| -0.11936 | 0.00983  | -0.2845  | 3.81E-10 | -0.26667 | 4.81E-09 | -0.06127 | 0.18625  | -0.28579 |
| 0.278486 | 9.15E-10 | 0.61574  | 4.45E-50 | 0.506161 | 9.44E-32 | 0.30084  | 3.18E-11 | 0.349303 |
| 0.002863 | 0.95079  | 0.250297 | 4.21E-08 | 0.147106 | 0.00143  | 0.056374 | 0.22401  | 0.039237 |
| -0.11553 | 0.01248  | 0.214064 | 3.04E-06 | 0.114594 | 0.01322  | 0.044329 | 0.33914  | 0.004414 |
| 0.286905 | 2.67E-10 | -0.00511 | 0.91231  | 0.16913  | 0.00024  | 0.182951 | 6.99E-05 | 0.29291  |
| 0.038398 | 0.40774  | 0.087145 | 0.05987  | 0.021929 | 0.63645  | 0.070291 | 0.12932  | -0.16956 |
| 0.067513 | 0.14519  | -0.27604 | 1.30E-09 | -0.20915 | 5.16E-06 | -0.06081 | 0.1896   | -0.01415 |
| -0.00284 | 0.95113  | 0.051488 | 0.26682  | 0.067296 | 0.14649  | -0.13009 | 0.00487  | -0.24397 |
| 0.17985  | 9.30E-05 | 0.257755 | 1.60E-08 | 0.218988 | 1.77E-06 | 0.17374  | 0.00016  | 0.075235 |
| 0.046007 | 0.32115  | 0.364237 | 4.25E-16 | 0.210241 | 4.59E-06 | 0.125043 | 0.00682  | 0.054383 |
| -0.07948 | 0.08622  | 0.22178  | 1.30E-06 | 0.157409 | 0.00064  | 0.103145 | 0.02582  | 0.094167 |
| 0.153042 | 0.00091  | 0.414507 | 8.14E-21 | 0.378536 | 2.34E-17 | 0.097389 | 0.03538  | 0.200818 |
| -0.19724 | 1.76E-05 | 0.010816 | 0.81567  | -0.08044 | 0.08248  | -0.04742 | 0.30653  | -0.21799 |
| -0.13797 | 0.00281  | 0.11754  | 0.01102  | 0.069197 | 0.1354   | -0.01432 | 0.75759  | -0.16554 |
| -0.03052 | 0.51062  | 0.031623 | 0.49541  | 0.038926 | 0.40132  | 0.023    | 0.62005  | -0.17816 |
| 0.073355 | 0.1134   | 0.409933 | 2.37E-20 | 0.306896 | 1.21E-11 | 0.15758  | 0.00063  | 0.359842 |
| -0.08505 | 0.0663   | 0.264813 | 6.20E-09 | 0.123978 | 0.00731  | 0.052421 | 0.25824  | 0.020039 |
| 0.096326 | 0.03744  | 0.265141 | 5.93E-09 | 0.267955 | 4.03E-09 | -0.00653 | 0.88812  | -0.08684 |
| 0.07093  | 0.12586  | 0.112111 | 0.01535  | 0.132256 | 0.0042   | 0.029212 | 0.52888  | -0.25858 |
| 0.018051 | 0.69722  | 0.200228 | 1.30E-05 | 0.14855  | 0.00128  | 0.036181 | 0.43537  | -0.1101  |
| -0.01179 | 0.79938  | 0.194402 | 2.33E-05 | 0.089343 | 0.05368  | -0.01413 | 0.76074  | -0.12538 |
| 0.268336 | 3.82E-09 | 0.437351 | 3.07E-23 | 0.287592 | 2.41E-10 | 0.139577 | 0.0025   | -0.00636 |
| -0.09114 | 0.04902  | 0.067044 | 0.14802  | 0.015993 | 0.73032  | -0.06641 | 0.15191  | -0.06335 |
| 0.009889 | 0.83122  | 0.311319 | 5.93E-12 | 0.379063 | 2.09E-17 | 0.014564 | 0.75359  | -0.0006  |
| -0.08829 | 0.05658  | 0.368872 | 1.69E-16 | 0.170654 | 0.00021  | 0.082778 | 0.07392  | 0.265762 |
| -0.01812 | 0.69614  | 0.263923 | 6.99E-09 | 0.183811 | 6.45E-05 | -0.05522 | 0.23362  | -0.15165 |
| -0.09803 | 0.03419  | 0.178682 | 0.0001   | 0.113086 | 0.01448  | -0.00904 | 0.84547  | -0.05895 |
| -0.03731 | 0.42115  | 0.039206 | 0.39794  | 0.095132 | 0.03988  | -0.29481 | 8.10E-11 | -0.28172 |
| 0.040864 | 0.37828  | 0.314628 | 3.44E-12 | 0.187002 | 4.78E-05 | 0.03739  | 0.42017  | 0.008168 |
| 0.151432 | 0.00103  | 0.340107 | 4.14E-14 | 0.299532 | 3.90E-11 | 0.157942 | 0.00061  | 0.18752  |
| 0.021754 | 0.63914  | 0.26579  | 5.42E-09 | 0.173453 | 0.00017  | -0.00144 | 0.9753   | 0.021674 |
| 0.024217 | 0.60166  | 0.211553 | 3.99E-06 | 0.164966 | 0.00034  | 0.020965 | 0.65134  | 0.005329 |
| 0.055383 | 0.23227  | 0.194114 | 2.40E-05 | 0.133539 | 0.00384  | 0.050113 | 0.27982  | -0.03432 |
| 0.143458 | 0.00188  | 0.35076  | 5.76E-15 | 0.267964 | 4.03E-09 | 0.157205 | 0.00065  | 0.234105 |
| -0.1313  | 0.00448  | -0.40423 | 8.74E-20 | -0.27651 | 1.21E-09 | -0.32851 | 3.26E-13 | -0.37326 |
| 0.15517  | 0.00077  | 0.435601 | 4.78E-23 | 0.366243 | 2.86E-16 | 0.034331 | 0.45922  | 0.076933 |
| 0.248632 | 5.20E-08 | 0.518255 | 1.86E-33 | 0.48674  | 3.77E-29 | 0.175622 | 0.00014  | 0.288327 |
| 0.109575 | 0.01785  | 0.268791 | 3.59E-09 | 0.235016 | 2.79E-07 | 0.183673 | 6.54E-05 | 0.198701 |

|          |          |          |          |          |          |          |          |          |
|----------|----------|----------|----------|----------|----------|----------|----------|----------|
| 0.134795 | 0.00352  | 0.332867 | 1.52E-13 | 0.227997 | 6.37E-07 | 0.291247 | 1.39E-10 | 0.411582 |
| 0.071622 | 0.1222   | 0.34425  | 1.94E-14 | 0.323307 | 8.00E-13 | 0.169997 | 0.00022  | 0.164838 |
| -0.12544 | 0.00664  | 0.253793 | 2.68E-08 | 0.18566  | 5.42E-05 | 0.03759  | 0.4177   | 0.059552 |
| 0.27654  | 1.21E-09 | 0.325646 | 5.35E-13 | 0.30914  | 8.45E-12 | 0.188026 | 4.33E-05 | 0.128902 |
| -0.12344 | 0.00757  | 0.06761  | 0.14461  | 0.044011 | 0.34263  | -0.09269 | 0.04528  | -0.18781 |
| 0.202334 | 1.05E-05 | 0.394237 | 8.15E-19 | 0.412833 | 1.20E-20 | 0.229739 | 5.20E-07 | 0.192161 |
| 0.079504 | 0.08612  | 0.275074 | 1.49E-09 | 0.174438 | 0.00015  | 0.226633 | 7.46E-07 | 0.464901 |
| 0.300242 | 3.49E-11 | 0.232729 | 3.66E-07 | 0.115209 | 0.01273  | 0.306547 | 1.28E-11 | 0.106715 |
| 0.00018  | 0.9969   | 0.288106 | 2.23E-10 | 0.261575 | 9.60E-09 | -0.01949 | 0.67441  | -0.04587 |
| 0.301645 | 2.80E-11 | 0.340266 | 4.02E-14 | 0.382513 | 1.02E-17 | 0.144171 | 0.00179  | -0.04484 |
| 0.170946 | 0.00021  | -0.03188 | 0.49195  | 0.084851 | 0.06695  | -0.10785 | 0.01974  | -0.05627 |
| 0.014421 | 0.75594  | 0.289711 | 1.76E-10 | 0.139344 | 0.00255  | -0.0164  | 0.72365  | -0.03055 |
| 0.124502 | 0.00706  | 0.310699 | 6.56E-12 | 0.211805 | 3.89E-06 | 0.008403 | 0.85628  | -0.09801 |
| 0.11643  | 0.01181  | 0.263824 | 7.09E-09 | 0.004783 | 0.9179   | 0.18517  | 5.68E-05 | 0.359013 |
| -0.07094 | 0.1258   | 0.037352 | 0.42065  | 0.069127 | 0.13579  | -0.03855 | 0.40594  | -0.24029 |
| 0.253582 | 2.75E-08 | 0.423322 | 9.94E-22 | 0.35196  | 4.59E-15 | 0.106539 | 0.02129  | 0.042605 |
| -0.03638 | 0.4328   | 0.19163  | 3.06E-05 | 0.123434 | 0.00757  | 0.037449 | 0.41944  | -0.02991 |
| 0.097218 | 0.03571  | 0.192106 | 2.92E-05 | 0.117435 | 0.01109  | -0.05376 | 0.24627  | -0.21835 |
| -0.17294 | 0.00017  | -0.04138 | 0.37222  | -0.12283 | 0.00788  | -0.1111  | 0.01631  | -0.16281 |
| -0.06875 | 0.13793  | -0.22715 | 7.03E-07 | -0.3545  | 2.83E-15 | 0.068849 | 0.13738  | 0.201486 |
| -0.04213 | 0.36367  | 0.364739 | 3.85E-16 | 0.230995 | 4.49E-07 | 0.112208 | 0.01527  | 0.130885 |
| -0.02983 | 0.52013  | 0.110528 | 0.01687  | 0.065137 | 0.15992  | 0.022878 | 0.62192  | -0.06227 |
| -0.01212 | 0.79399  | 0.305172 | 1.60E-11 | 0.198901 | 1.49E-05 | 0.02419  | 0.60206  | 0.038277 |
| 0.05227  | 0.25961  | 0.261797 | 9.31E-09 | 0.247312 | 6.15E-08 | 0.069431 | 0.13408  | 0.033279 |
| -0.13395 | 0.00373  | 0.094318 | 0.04162  | -0.0088  | 0.84956  | 0.080045 | 0.084    | 0.062665 |
| 0.009952 | 0.83015  | 0.443707 | 6.01E-24 | 0.337091 | 7.14E-14 | 0.149427 | 0.0012   | 0.160829 |
| -0.02272 | 0.62434  | 0.220573 | 1.48E-06 | 0.102435 | 0.02686  | 0.049891 | 0.28195  | 0.067478 |
| 0.324814 | 6.18E-13 | 0.405066 | 7.23E-20 | 0.252218 | 3.29E-08 | 0.293546 | 9.82E-11 | 0.173248 |
| 0.044688 | 0.33525  | 0.35855  | 1.30E-15 | 0.222587 | 1.18E-06 | 0.091317 | 0.04859  | 0.143212 |
| -0.20159 | 1.13E-05 | -0.52116 | 7.05E-34 | -0.44174 | 9.98E-24 | -0.22068 | 1.47E-06 | -0.16418 |
| 0.37168  | 9.56E-17 | 0.594506 | 5.74E-46 | 0.426949 | 4.11E-22 | 0.279221 | 8.23E-10 | 0.287446 |
| -0.04707 | 0.31005  | 0.088164 | 0.05693  | 0.111516 | 0.01591  | 0.039592 | 0.39331  | -0.02382 |
| -0.04538 | 0.3278   | 0.141775 | 0.00213  | 0.080471 | 0.08236  | 0.038196 | 0.41022  | -0.00793 |
| -0.04421 | 0.34048  | 0.207296 | 6.28E-06 | 0.128398 | 0.00546  | 0.027933 | 0.54708  | -0.05489 |
| -0.00438 | 0.92473  | 0.146472 | 0.0015   | 0.105025 | 0.02322  | -0.06313 | 0.17324  | -0.07287 |
| -0.0117  | 0.80085  | 0.09477  | 0.04065  | 0.119698 | 0.00962  | -0.01601 | 0.73008  | -0.08523 |
| 0.05151  | 0.26661  | 0.220823 | 1.44E-06 | 0.224733 | 9.28E-07 | 0.014606 | 0.7529   | -0.11994 |
| 0.268729 | 3.62E-09 | -0.00834 | 0.8573   | 0.120731 | 0.00901  | 0.028155 | 0.54391  | -0.04936 |
| -0.21697 | 2.22E-06 | -0.00687 | 0.88227  | 0.017493 | 0.70614  | -0.16636 | 0.00031  | -0.24674 |
| 0.072297 | 0.11871  | 0.002867 | 0.95073  | -0.20607 | 7.14E-06 | 0.084027 | 0.06965  | 0.303274 |
| 0.083982 | 0.0698   | 0.462152 | 4.35E-26 | 0.340712 | 3.71E-14 | 0.221556 | 1.33E-06 | 0.321912 |
| -0.04055 | 0.38197  | 0.285102 | 3.49E-10 | 0.149058 | 0.00124  | 0.139634 | 0.00249  | 0.239162 |
| 0.156389 | 0.0007   | 0.260252 | 1.15E-08 | 0.221514 | 1.34E-06 | 0.021222 | 0.64736  | -0.05623 |
| -0.08916 | 0.05418  | -0.07479 | 0.10648  | -0.10756 | 0.02008  | -0.10679 | 0.02099  | -0.3141  |
| 0.039676 | 0.39231  | 0.420174 | 2.12E-21 | 0.250174 | 4.27E-08 | 0.114751 | 0.01309  | 0.111853 |

|          |          |          |          |          |          |          |          |          |
|----------|----------|----------|----------|----------|----------|----------|----------|----------|
| 0.139356 | 0.00254  | -0.02566 | 0.58013  | -0.0252  | 0.587    | 0.086029 | 0.06323  | 0.132558 |
| -0.09168 | 0.04769  | 0.141097 | 0.00224  | 0.006899 | 0.88181  | -0.08246 | 0.07504  | -0.08235 |
| 0.144129 | 0.00179  | 0.338992 | 5.07E-14 | 0.283288 | 4.56E-10 | 0.070777 | 0.12668  | -0.00064 |
| 0.281151 | 6.23E-10 | 0.479094 | 3.59E-28 | 0.394727 | 7.31E-19 | 0.430809 | 1.58E-22 | 0.433673 |
| -0.08054 | 0.08208  | -0.0056  | 0.90393  | -0.02381 | 0.60783  | -0.10506 | 0.02317  | -0.30621 |
| 0.242877 | 1.07E-07 | 0.443344 | 6.61E-24 | 0.443682 | 6.05E-24 | 0.191039 | 3.24E-05 | 0.131489 |
| -0.03059 | 0.50961  | 0.147701 | 0.00137  | 0.199175 | 1.45E-05 | -0.20584 | 7.31E-06 | -0.18637 |
| 0.05365  | 0.24722  | 0.405597 | 6.41E-20 | 0.386029 | 4.82E-18 | 0.134084 | 0.0037   | 0.087804 |
| 0.223476 | 1.07E-06 | -0.13385 | 0.00376  | -0.05919 | 0.20165  | 0.227275 | 6.93E-07 | 0.209615 |
| 0.072379 | 0.11829  | 0.284098 | 4.05E-10 | 0.183816 | 6.45E-05 | 0.193033 | 2.67E-05 | 0.189647 |
| 0.044874 | 0.33323  | 0.276317 | 1.25E-09 | 0.220091 | 1.57E-06 | 0.234561 | 2.94E-07 | 0.221217 |
| 0.148506 | 0.00129  | 0.386532 | 4.33E-18 | 0.2997   | 3.80E-11 | 0.176804 | 0.00012  | 0.320882 |
| -0.06073 | 0.19019  | -0.14354 | 0.00187  | -0.0757  | 0.10228  | -0.1858  | 5.36E-05 | -0.0475  |
| 0.159815 | 0.00053  | 0.318294 | 1.87E-12 | 0.222975 | 1.13E-06 | 0.087149 | 0.05986  | 0.037822 |
| -0.01333 | 0.77381  | -0.23018 | 4.94E-07 | -0.30961 | 7.83E-12 | 0.039631 | 0.39284  | 0.111221 |
| -0.20343 | 9.39E-06 | 0.045482 | 0.32672  | -0.00657 | 0.88743  | -0.11098 | 0.01643  | -0.20974 |
| 0.19657  | 1.88E-05 | 0.441975 | 9.41E-24 | 0.368897 | 1.68E-16 | 0.242164 | 1.17E-07 | 0.223147 |
| 0.045782 | 0.32354  | 0.210103 | 4.66E-06 | 0.073388 | 0.11323  | 0.048872 | 0.29191  | 0.094419 |
| 0.184999 | 5.77E-05 | 0.348827 | 8.28E-15 | 0.297864 | 5.05E-11 | 0.121896 | 0.00836  | 0.124251 |
| 0.251793 | 3.47E-08 | 0.225625 | 8.38E-07 | 0.283237 | 4.59E-10 | 0.163792 | 0.00038  | 0.102695 |
| 0.239806 | 1.56E-07 | 0.461122 | 5.78E-26 | 0.445659 | 3.62E-24 | 0.175772 | 0.00013  | 0.125791 |
| 0.243027 | 1.05E-07 | 0.368495 | 1.82E-16 | 0.313088 | 4.44E-12 | 0.186459 | 5.03E-05 | 0.214042 |
| 0.016544 | 0.7214   | 0.312082 | 5.23E-12 | 0.225125 | 8.87E-07 | 0.014721 | 0.75102  | -0.01682 |
| 0.095238 | 0.03966  | 0.412452 | 1.32E-20 | 0.294774 | 8.14E-11 | 0.089527 | 0.05319  | 0.118643 |
| 0.008224 | 0.85931  | 0.216287 | 2.39E-06 | 0.170665 | 0.00021  | -0.0103  | 0.82428  | 0.009102 |
| 0.03425  | 0.46028  | 0.18507  | 5.73E-05 | 0.222776 | 1.16E-06 | -0.00846 | 0.85526  | -0.08673 |
| 0.049488 | 0.28587  | 0.125646 | 0.00655  | 0.16313  | 0.0004   | -0.00414 | 0.92887  | -0.04303 |
| 0.142259 | 0.00206  | 0.370421 | 1.23E-16 | 0.434066 | 7.03E-23 | 0.120497 | 0.00915  | 0.072075 |
| 0.112528 | 0.01498  | 0.404373 | 8.47E-20 | 0.388207 | 3.02E-18 | 0.097707 | 0.03478  | 0.038759 |
| 0.124261 | 0.00718  | 0.386774 | 4.11E-18 | 0.416819 | 4.72E-21 | 0.089523 | 0.0532   | 0.014322 |
| 0.14437  | 0.00176  | 0.436963 | 3.39E-23 | 0.499045 | 8.85E-31 | 0.101973 | 0.02756  | 0.095814 |
| 0.113688 | 0.01396  | 0.413604 | 1.01E-20 | 0.436347 | 3.96E-23 | 0.105299 | 0.02286  | 0.10934  |
| 0.120622 | 0.00908  | 0.312037 | 5.27E-12 | 0.390227 | 1.95E-18 | 0.029681 | 0.52228  | 0.062462 |
| 0.217147 | 2.17E-06 | 0.357211 | 1.68E-15 | 0.425332 | 6.10E-22 | 0.117534 | 0.01102  | 0.123358 |
| 0.176616 | 0.00012  | 0.307199 | 1.16E-11 | 0.323477 | 7.77E-13 | 0.092126 | 0.04662  | 0.110952 |
| 0.205663 | 7.45E-06 | 0.294378 | 8.65E-11 | 0.41836  | 3.27E-21 | 0.104389 | 0.02407  | 0.059478 |
| 0.078538 | 0.09002  | -0.15381 | 0.00085  | -0.03889 | 0.40176  | -0.14696 | 0.00145  | -0.03026 |
| 0.130846 | 0.00462  | 0.430257 | 1.82E-22 | 0.414261 | 8.62E-21 | 0.226642 | 7.45E-07 | 0.180025 |
| 0.001857 | 0.96807  | 0.348794 | 8.33E-15 | 0.213284 | 3.31E-06 | 0.064596 | 0.16343  | 0.164951 |
| -0.09287 | 0.04486  | 0.126815 | 0.00607  | 0.064672 | 0.16293  | -0.02804 | 0.54562  | -0.1152  |
| 0.00837  | 0.85683  | 0.209458 | 4.99E-06 | 0.137412 | 0.00292  | 0.047652 | 0.30414  | 0.005466 |
| -0.0824  | 0.07526  | 0.221029 | 1.41E-06 | 0.138207 | 0.00276  | 0.010544 | 0.82022  | -0.02252 |
| 0.179604 | 9.51E-05 | 0.558596 | 1.13E-39 | 0.458084 | 1.32E-25 | 0.289333 | 1.86E-10 | 0.310082 |
| 0.116677 | 0.01163  | 0.439193 | 1.92E-23 | 0.370232 | 1.28E-16 | 0.123599 | 0.00749  | 0.103548 |
| 0.110875 | 0.01653  | 0.444099 | 5.43E-24 | 0.310759 | 6.50E-12 | 0.214768 | 2.82E-06 | 0.225104 |

|          |          |          |          |          |          |          |          |          |
|----------|----------|----------|----------|----------|----------|----------|----------|----------|
| 0.201141 | 1.19E-05 | 0.486683 | 3.83E-29 | 0.324866 | 6.12E-13 | 0.206837 | 6.59E-06 | 0.382483 |
| 0.085528 | 0.06479  | 0.396221 | 5.26E-19 | 0.303642 | 2.04E-11 | 0.191565 | 3.08E-05 | 0.185327 |
| 0.142278 | 0.00206  | 0.223811 | 1.03E-06 | 0.108903 | 0.01857  | 0.21305  | 3.40E-06 | 0.076129 |
| 0.303609 | 2.05E-11 | -0.05026 | 0.27838  | -0.07187 | 0.12089  | 0.165436 | 0.00033  | 0.242383 |
| 0.235399 | 2.66E-07 | 0.516044 | 3.85E-33 | 0.35503  | 2.56E-15 | 0.239218 | 1.68E-07 | 0.403467 |
| -0.18781 | 4.42E-05 | -0.1129  | 0.01465  | -0.06675 | 0.1498   | 0.130168 | 0.00484  | -0.24753 |
| -0.00528 | 0.90942  | 0.253654 | 2.73E-08 | 0.175384 | 0.00014  | 0.079647 | 0.08556  | 0.012325 |
| -0.23069 | 4.65E-07 | -0.22358 | 1.06E-06 | -0.17189 | 0.00019  | -0.21189 | 3.85E-06 | -0.5188  |
| 0.027708 | 0.55032  | 0.163934 | 0.00037  | 0.134512 | 0.00359  | -0.11732 | 0.01117  | -0.14671 |
| -0.10741 | 0.02025  | 0.055726 | 0.22938  | 0.007184 | 0.87695  | -0.04384 | 0.34449  | -0.19236 |
| 0.095248 | 0.03964  | 0.263934 | 6.98E-09 | 0.167473 | 0.00028  | 0.172086 | 0.00019  | 0.168982 |
| -0.00792 | 0.86449  | 0.230175 | 4.94E-07 | 0.13937  | 0.00254  | 0.053738 | 0.24645  | -0.02572 |
| -0.05137 | 0.26795  | 0.270687 | 2.76E-09 | 0.257133 | 1.73E-08 | 0.037845 | 0.41454  | 0.066804 |
| 0.321418 | 1.10E-12 | 0.162079 | 0.00044  | 0.164182 | 0.00037  | 0.130331 | 0.00479  | -0.01157 |
| 0.026459 | 0.56844  | 0.347597 | 1.04E-14 | 0.26359  | 7.31E-09 | 0.070743 | 0.12686  | 0.04097  |
| -0.04511 | 0.33073  | -0.13357 | 0.00383  | -0.05388 | 0.24521  | -0.04775 | 0.30312  | -0.34319 |
| 0.038616 | 0.40509  | 0.145133 | 0.00166  | 0.055972 | 0.22733  | 0.086535 | 0.06169  | -0.02975 |
| 0.059816 | 0.19694  | 0.207455 | 6.17E-06 | 0.203883 | 8.96E-06 | 0.078831 | 0.08883  | 0.016757 |
| 0.181275 | 8.16E-05 | 0.39371  | 9.14E-19 | 0.350468 | 6.08E-15 | -0.00128 | 0.97796  | 0.100615 |
| 0.219399 | 1.69E-06 | -0.04759 | 0.30476  | 0.081058 | 0.08014  | 0.18293  | 7.00E-05 | -0.0006  |
| 0.141471 | 0.00218  | -0.16928 | 0.00024  | -0.10688 | 0.02088  | 0.07881  | 0.08891  | 0.068149 |
| 0.279031 | 8.46E-10 | -0.22305 | 1.12E-06 | -0.10192 | 0.02764  | 0.088113 | 0.05707  | 0.036254 |
| 0.034036 | 0.46309  | 0.26255  | 8.42E-09 | 0.172425 | 0.00018  | 0.095803 | 0.0385   | 0.026594 |
| -0.11551 | 0.0125   | 0.06267  | 0.17637  | -0.13143 | 0.00444  | 0.004553 | 0.92184  | -0.11897 |
| -0.09867 | 0.03303  | 0.122495 | 0.00805  | 0.047612 | 0.30455  | -0.00421 | 0.92765  | -0.08849 |
| -0.03323 | 0.47373  | -0.29552 | 7.26E-11 | -0.20391 | 8.94E-06 | 0.013722 | 0.76742  | 0.008309 |
| 0.176146 | 0.00013  | 0.420175 | 2.12E-21 | 0.380237 | 1.64E-17 | 0.193531 | 2.54E-05 | 0.168644 |
| -0.20247 | 1.04E-05 | 0.118099 | 0.01064  | 0.036494 | 0.4314   | -0.01001 | 0.8292   | -0.10902 |
| 0.107352 | 0.02032  | 0.437746 | 2.78E-23 | 0.361743 | 6.95E-16 | 0.174502 | 0.00015  | 0.116991 |
| -0.07384 | 0.11103  | 0.15901  | 0.00056  | 0.089884 | 0.05224  | -0.02368 | 0.60977  | -0.05561 |
| -0.03732 | 0.42099  | 0.116467 | 0.01178  | 0.091016 | 0.04933  | -0.03943 | 0.39524  | -0.16402 |
| 0.029586 | 0.52361  | 0.297109 | 5.68E-11 | 0.202957 | 9.86E-06 | 0.061163 | 0.18702  | 0.009781 |
| 0.112209 | 0.01527  | 0.358031 | 1.43E-15 | 0.373292 | 6.89E-17 | 0.097122 | 0.03589  | 0.104135 |
| 0.120322 | 0.00925  | 0.207091 | 6.41E-06 | 0.130193 | 0.00483  | -0.04251 | 0.3593   | 0.150132 |
| -0.19264 | 2.78E-05 | 0.077743 | 0.09333  | 0.038459 | 0.40699  | -0.09199 | 0.04695  | -0.12478 |
| 0.011386 | 0.80614  | -0.24387 | 9.46E-08 | -0.07748 | 0.09445  | -0.04822 | 0.29841  | -0.09501 |
| -0.04197 | 0.36554  | 0.228193 | 6.23E-07 | 0.1607   | 0.00049  | 0.167273 | 0.00028  | 0.080908 |
| 0.352396 | 4.22E-15 | 0.617274 | 2.19E-50 | 0.456397 | 2.09E-25 | 0.408858 | 3.03E-20 | 0.386083 |
| -0.17074 | 0.00021  | 0.01525  | 0.74239  | 0.142154 | 0.00207  | -0.14156 | 0.00217  | -0.2688  |
| 0.323977 | 7.13E-13 | 0.698381 | 1.51E-69 | 0.559757 | 7.28E-40 | 0.322831 | 8.67E-13 | 0.406267 |
| -0.18944 | 3.79E-05 | 0.094025 | 0.04226  | -0.10806 | 0.0195   | -0.00483 | 0.91704  | 0.083778 |
| 0.143011 | 0.00195  | -0.34976 | 6.96E-15 | -0.15065 | 0.00109  | -0.09706 | 0.036    | -0.06585 |
| 0.050428 | 0.27681  | 0.193936 | 2.44E-05 | 0.155359 | 0.00075  | -0.0109  | 0.81424  | -0.07215 |
| 0.092287 | 0.04623  | 0.47971  | 3.00E-28 | 0.39451  | 7.67E-19 | 0.162867 | 0.00041  | 0.379844 |
| -0.2201  | 1.57E-06 | 0.147298 | 0.00141  | 0.070225 | 0.12968  | -0.07414 | 0.10956  | -0.12691 |

|          |          |          |          |          |          |          |          |          |
|----------|----------|----------|----------|----------|----------|----------|----------|----------|
| -0.00298 | 0.94871  | 0.155167 | 0.00077  | 0.146153 | 0.00154  | -0.02296 | 0.6207   | -0.01165 |
| 0.05956  | 0.19886  | 0.364069 | 4.40E-16 | 0.263287 | 7.62E-09 | 0.071576 | 0.12244  | 0.06776  |
| 0.09903  | 0.03239  | -0.11646 | 0.01178  | 0.020843 | 0.65324  | -0.12206 | 0.00827  | -0.13976 |
| 0.122873 | 0.00785  | 0.440024 | 1.55E-23 | 0.348977 | 8.05E-15 | 0.113231 | 0.01435  | 0.176308 |
| -0.16239 | 0.00043  | 0.128624 | 0.00537  | 0.086938 | 0.06048  | -0.01534 | 0.741    | -0.05576 |
| -0.19955 | 1.40E-05 | 0.08498  | 0.06653  | 0.007058 | 0.87909  | -0.06192 | 0.18163  | -0.08723 |
| 0.007014 | 0.87984  | 0.343422 | 2.26E-14 | 0.216025 | 2.46E-06 | 0.133093 | 0.00396  | 0.113914 |
| -0.04179 | 0.36753  | -0.32315 | 8.21E-13 | -0.25976 | 1.22E-08 | -0.02412 | 0.60311  | -0.15663 |
| 0.007013 | 0.87986  | 0.234583 | 2.94E-07 | 0.17144  | 0.0002   | 0.050862 | 0.27268  | -0.02327 |
| 0.159028 | 0.00056  | 0.512008 | 1.44E-32 | 0.382796 | 9.57E-18 | 0.146416 | 0.00151  | 0.214968 |
| -0.08591 | 0.06361  | 0.254887 | 2.32E-08 | 0.235922 | 2.50E-07 | 0.062286 | 0.17904  | 0.002225 |
| 0.19779  | 1.67E-05 | 0.420358 | 2.03E-21 | 0.379217 | 2.03E-17 | 0.124736 | 0.00696  | 0.251678 |
| 0.027976 | 0.54647  | 0.24853  | 5.27E-08 | 0.167751 | 0.00027  | 0.172443 | 0.00018  | 0.050186 |
| -0.2056  | 7.50E-06 | -0.41283 | 1.21E-20 | -0.29719 | 5.61E-11 | -0.32791 | 3.62E-13 | -0.20771 |
| -0.09961 | 0.03138  | 0.005624 | 0.90352  | -0.00433 | 0.92557  | -0.18478 | 5.89E-05 | -0.32367 |
| -0.04749 | 0.30582  | 0.161926 | 0.00044  | 0.165539 | 0.00033  | -0.05775 | 0.21291  | -0.14997 |
| 0.072075 | 0.11985  | -0.19736 | 1.74E-05 | -0.16301 | 0.0004   | 0.029761 | 0.52116  | -0.11553 |
| 0.149013 | 0.00124  | -0.3244  | 6.63E-13 | -0.29772 | 5.17E-11 | -0.07852 | 0.0901   | -0.11836 |
| 0.151824 | 0.001    | 0.008993 | 0.84632  | 0.098831 | 0.03274  | 0.029785 | 0.52082  | -0.17906 |
| -0.14996 | 0.00115  | 0.147447 | 0.0014   | 0.035468 | 0.44448  | -0.02828 | 0.54205  | -0.05935 |
| 0.028494 | 0.53906  | -0.40085 | 1.88E-19 | -0.16281 | 0.00041  | -0.12005 | 0.00941  | -0.18916 |
| 0.239328 | 1.66E-07 | 0.367219 | 2.35E-16 | 0.317364 | 2.18E-12 | 0.204286 | 8.59E-06 | 0.152496 |
| -0.0521  | 0.26121  | 0.199345 | 1.43E-05 | 0.149573 | 0.00119  | 0.040467 | 0.38293  | -0.10807 |
| -0.10714 | 0.02057  | 0.133085 | 0.00396  | 0.084045 | 0.06959  | -0.08339 | 0.0718   | -0.17309 |
| 0.117832 | 0.01082  | 0.089824 | 0.0524   | 0.122045 | 0.00829  | 0.102184 | 0.02724  | 0.05896  |
| -0.04622 | 0.31891  | 0.147127 | 0.00143  | 0.147973 | 0.00134  | -0.04814 | 0.29922  | -0.1807  |
| 0.067416 | 0.14577  | 0.385783 | 5.07E-18 | 0.299414 | 3.97E-11 | 0.194984 | 2.20E-05 | 0.16081  |
| 0.083358 | 0.07191  | 0.440995 | 1.21E-23 | 0.34829  | 9.16E-15 | 0.186135 | 5.19E-05 | 0.178047 |
| -0.16116 | 0.00047  | -0.0031  | 0.94666  | -0.11663 | 0.01166  | -0.0556  | 0.23044  | -0.23937 |
| -0.38451 | 6.66E-18 | -0.19489 | 2.23E-05 | -0.30726 | 1.15E-11 | -0.22031 | 1.53E-06 | -0.28852 |
| 0.089256 | 0.05392  | 0.089577 | 0.05305  | 0.074576 | 0.1075   | 0.106034 | 0.02192  | -0.0997  |
| 0.077281 | 0.0953   | 0.367832 | 2.08E-16 | 0.272621 | 2.11E-09 | 0.067831 | 0.1433   | 0.106419 |
| 0.080886 | 0.08079  | -0.09419 | 0.04191  | -0.09609 | 0.03792  | 0.009519 | 0.83745  | 0.042591 |
| 0.230675 | 4.66E-07 | 0.32578  | 5.23E-13 | 0.383845 | 7.66E-18 | -0.04721 | 0.30867  | -0.11659 |
| 0.213618 | 3.20E-06 | 0.506921 | 7.40E-32 | 0.396215 | 5.27E-19 | 0.12805  | 0.00559  | 0.153726 |
| -0.01018 | 0.82632  | 0.260341 | 1.13E-08 | 0.164768 | 0.00035  | 0.073694 | 0.11174  | 0.010871 |
| -0.09523 | 0.03968  | 0.170668 | 0.00021  | 0.111606 | 0.01583  | 0.008092 | 0.86156  | -0.06062 |
| 0.138244 | 0.00275  | 0.342332 | 2.76E-14 | 0.216394 | 2.36E-06 | 0.123262 | 0.00766  | 0.048643 |
| 0.003983 | 0.9316   | 0.405858 | 6.04E-20 | 0.273612 | 1.83E-09 | 0.093758 | 0.04285  | 0.131189 |
| 0.114842 | 0.01302  | 0.124479 | 0.00708  | 0.148769 | 0.00126  | -0.0879  | 0.05767  | -0.18798 |
| 0.222767 | 1.16E-06 | 0.413794 | 9.62E-21 | 0.328313 | 3.37E-13 | 0.228612 | 5.93E-07 | 0.077962 |
| 0.19389  | 2.46E-05 | 0.352115 | 4.46E-15 | 0.298425 | 4.63E-11 | 0.131805 | 0.00433  | 0.196191 |
| 0.08842  | 0.05621  | -0.15173 | 0.001    | -0.0444  | 0.33841  | -0.05848 | 0.20713  | 0.093359 |
| -0.36378 | 4.65E-16 | -0.16556 | 0.00033  | -0.2166  | 2.31E-06 | -0.28204 | 5.47E-10 | -0.3431  |
| 0.316024 | 2.73E-12 | -0.08038 | 0.0827   | 0.063597 | 0.17005  | 0.107337 | 0.02034  | 0.11958  |

|          |          |          |          |          |          |          |          |          |
|----------|----------|----------|----------|----------|----------|----------|----------|----------|
| 0.231435 | 4.26E-07 | 0.426988 | 4.07E-22 | 0.35895  | 1.20E-15 | 0.195021 | 2.20E-05 | 0.0745   |
| 0.067065 | 0.14789  | 0.412613 | 1.27E-20 | 0.2925   | 1.15E-10 | 0.132867 | 0.00402  | 0.126448 |
| -0.05903 | 0.20292  | 0.162418 | 0.00043  | 0.119835 | 0.00954  | -0.00204 | 0.96485  | -0.01427 |
| 0.107269 | 0.02042  | 0.431553 | 1.32E-22 | 0.349936 | 6.72E-15 | 0.245089 | 8.13E-08 | 0.351568 |
| 0.056184 | 0.22557  | 0.199999 | 1.33E-05 | 0.153981 | 0.00084  | 0.090332 | 0.05108  | -0.03594 |
| 0.175227 | 0.00014  | 0.342144 | 2.86E-14 | 0.260612 | 1.09E-08 | 0.099594 | 0.03141  | -0.03496 |
| 0.022679 | 0.62495  | 0.167193 | 0.00028  | 0.176094 | 0.00013  | -0.02299 | 0.62024  | 0.015635 |
| -0.15466 | 0.0008   | 0.083752 | 0.07057  | -0.06144 | 0.18503  | -0.05435 | 0.2411   | -0.05074 |
| 0.173098 | 0.00017  | 0.469342 | 5.87E-27 | 0.32784  | 3.66E-13 | 0.135124 | 0.00344  | 0.176545 |
| -0.01138 | 0.80618  | -0.11799 | 0.01071  | -0.11131 | 0.01611  | 0.015496 | 0.73839  | 0.150069 |
| 0.036543 | 0.43079  | 0.232745 | 3.65E-07 | 0.25866  | 1.42E-08 | 0.038484 | 0.40669  | -0.04749 |
| 0.046806 | 0.31282  | 0.230831 | 4.58E-07 | 0.174602 | 0.00015  | 0.159784 | 0.00053  | 0.176549 |
| -0.0654  | 0.15826  | -0.25971 | 1.23E-08 | -0.19411 | 2.40E-05 | -0.00048 | 0.99168  | -0.07325 |
| -0.18316 | 6.85E-05 | -0.43004 | 1.92E-22 | -0.32309 | 8.30E-13 | -0.16401 | 0.00037  | -0.2677  |
| 0.052015 | 0.26195  | 0.272767 | 2.06E-09 | 0.239974 | 1.53E-07 | -0.0273  | 0.55614  | -0.07734 |
| -0.14342 | 0.00189  | 0.041149 | 0.37496  | -0.13963 | 0.00249  | -0.00796 | 0.86385  | -0.08161 |
| -0.04714 | 0.30939  | 0.197756 | 1.67E-05 | 0.083819 | 0.07034  | 0.055135 | 0.23437  | -0.05725 |
| 0.152854 | 0.00092  | 0.379248 | 2.01E-17 | 0.25599  | 2.01E-08 | 0.356658 | 1.87E-15 | 0.293432 |
| 0.142957 | 0.00196  | 0.282201 | 5.34E-10 | 0.207737 | 5.99E-06 | 0.156635 | 0.00068  | 0.1533   |
| 0.085369 | 0.06529  | 0.225048 | 8.95E-07 | 0.167012 | 0.00029  | 0.054001 | 0.24414  | -0.04877 |
| 0.115492 | 0.01251  | 0.40708  | 4.57E-20 | 0.324079 | 7.01E-13 | 0.062968 | 0.17432  | 0.196746 |
| -0.00355 | 0.93901  | 0.113897 | 0.01379  | 0.069189 | 0.13544  | -0.06968 | 0.13268  | -0.20641 |
| -0.16321 | 0.0004   | 0.087588 | 0.05858  | -0.01404 | 0.76219  | -0.10892 | 0.01855  | -0.19328 |
| 0.208239 | 5.68E-06 | 0.309781 | 7.62E-12 | 0.303424 | 2.11E-11 | 0.242349 | 1.14E-07 | 0.229628 |
| -0.09293 | 0.04472  | 0.074    | 0.11025  | 0.035246 | 0.44734  | 0.026486 | 0.56805  | 0.008968 |
| 0.068152 | 0.14142  | 0.288426 | 2.13E-10 | 0.256357 | 1.92E-08 | 0.116204 | 0.01197  | 0.052241 |
| -0.06138 | 0.18543  | 0.318621 | 1.77E-12 | 0.263172 | 7.74E-09 | 0.062737 | 0.17591  | 0.105309 |
| -0.10299 | 0.02604  | 0.048303 | 0.29758  | 0.060535 | 0.1916   | -0.05506 | 0.23497  | -0.11862 |
| -0.33976 | 4.41E-14 | -0.1351  | 0.00344  | -0.16944 | 0.00023  | -0.22868 | 5.88E-07 | -0.13213 |
| 0.04703  | 0.3105   | 0.293845 | 9.38E-11 | 0.298534 | 4.55E-11 | 0.085983 | 0.06337  | 0.24679  |
| 0.008754 | 0.85034  | 0.287541 | 2.43E-10 | 0.195627 | 2.07E-05 | 0.057416 | 0.21554  | 0.034951 |
| -0.01281 | 0.78242  | 0.171396 | 0.0002   | 0.023437 | 0.61343  | 0.044647 | 0.33569  | 0.057503 |
| 0.02007  | 0.6653   | 0.337295 | 6.88E-14 | 0.214957 | 2.76E-06 | 0.107967 | 0.01961  | 0.087444 |
| 0.01035  | 0.82347  | 0.238692 | 1.79E-07 | 0.195347 | 2.13E-05 | 0.056806 | 0.22046  | -0.08158 |
| -0.29359 | 9.75E-11 | -0.03075 | 0.50742  | -0.03941 | 0.39544  | -0.16735 | 0.00028  | -0.23645 |
| 0.028009 | 0.54599  | 0.212244 | 3.71E-06 | 0.051832 | 0.26364  | 0.212153 | 3.74E-06 | 0.100234 |
| 0.318234 | 1.89E-12 | 0.548026 | 5.81E-38 | 0.521267 | 6.81E-34 | 0.292134 | 1.22E-10 | 0.197529 |
| -0.27178 | 2.37E-09 | -0.49577 | 2.44E-30 | -0.40707 | 4.58E-20 | -0.29355 | 9.82E-11 | -0.15184 |
| 0.196763 | 1.85E-05 | 0.336343 | 8.17E-14 | 0.307882 | 1.04E-11 | 0.243684 | 9.69E-08 | 0.109866 |
| -0.0002  | 0.99653  | 0.215345 | 2.65E-06 | 0.101257 | 0.02867  | 0.072988 | 0.11522  | 0.096075 |
| 0.118353 | 0.01047  | 0.258264 | 1.49E-08 | 0.237201 | 2.14E-07 | 0.037943 | 0.41332  | 0.047732 |
| 0.060945 | 0.18861  | 0.235618 | 2.59E-07 | 0.165243 | 0.00034  | 0.080642 | 0.08171  | 0.248621 |
| -0.13217 | 0.00422  | 0.088206 | 0.05681  | 0.01655  | 0.7213   | -0.03211 | 0.4888   | -0.1476  |
| 0.061088 | 0.18757  | 0.343383 | 2.28E-14 | 0.2578   | 1.59E-08 | 0.108242 | 0.0193   | -0.06108 |
| 0.215725 | 2.54E-06 | -0.23558 | 2.61E-07 | -0.12811 | 0.00556  | 0.076573 | 0.09838  | 0.024917 |



|          |          |          |          |          |          |          |          |          |
|----------|----------|----------|----------|----------|----------|----------|----------|----------|
| -0.02037 | 0.66065  | 0.114856 | 0.01301  | 0.056552 | 0.22254  | -0.02741 | 0.55455  | -0.12923 |
| 0.230033 | 5.03E-07 | -0.06452 | 0.16395  | 0.037855 | 0.41442  | -0.03573 | 0.44115  | -0.03892 |
| 0.151212 | 0.00105  | 0.270354 | 2.89E-09 | 0.323688 | 7.49E-13 | 0.040377 | 0.38399  | 0.014967 |
| -0.21826 | 1.92E-06 | -0.3126  | 4.81E-12 | -0.30667 | 1.26E-11 | -0.1287  | 0.00535  | 0.01036  |
| -0.03493 | 0.45139  | -0.2392  | 1.68E-07 | -0.22068 | 1.47E-06 | -0.06451 | 0.16397  | 0.183327 |
| 0.532128 | 1.68E-35 | 0.708219 | 2.57E-72 | 0.614547 | 7.73E-50 | 0.377887 | 2.67E-17 | 0.399622 |
| 0.162853 | 0.00041  | 0.393918 | 8.74E-19 | 0.33033  | 2.37E-13 | 0.140477 | 0.00234  | 0.16404  |
| 0.005036 | 0.91356  | 0.186267 | 5.12E-05 | 0.131016 | 0.00457  | 0.045397 | 0.32762  | 0.03141  |
| -0.25086 | 3.91E-08 | -0.07253 | 0.11753  | -0.1125  | 0.015    | -0.19428 | 2.36E-05 | -0.27008 |
| 0.07275  | 0.11641  | 0.34764  | 1.03E-14 | 0.193812 | 2.47E-05 | 0.167848 | 0.00027  | 0.080762 |
| 0.057721 | 0.21311  | 0.280239 | 7.11E-10 | 0.168356 | 0.00026  | 0.0655   | 0.1576   | 0.108377 |
| 0.21527  | 2.67E-06 | 0.480588 | 2.32E-28 | 0.368282 | 1.90E-16 | 0.237472 | 2.07E-07 | 0.073825 |
| 0.062208 | 0.17959  | 0.102198 | 0.02722  | 0.069918 | 0.13137  | 0.032251 | 0.48689  | -0.18029 |
| -0.30038 | 3.41E-11 | -0.07301 | 0.11509  | -0.12386 | 0.00737  | -0.11405 | 0.01366  | -0.13385 |
| 0.186052 | 5.23E-05 | 0.538397 | 1.86E-36 | 0.414709 | 7.76E-21 | 0.226102 | 7.93E-07 | 0.269278 |
| -0.30818 | 9.86E-12 | -0.20706 | 6.43E-06 | -0.22007 | 1.57E-06 | -0.28993 | 1.70E-10 | -0.32927 |
| 0.078557 | 0.08994  | 0.240436 | 1.45E-07 | 0.244897 | 8.33E-08 | 0.030778 | 0.50701  | 0.012621 |
| 0.035212 | 0.44777  | 0.312584 | 4.82E-12 | 0.265886 | 5.35E-09 | 0.054156 | 0.24279  | -0.00589 |
| 0.003371 | 0.94208  | 0.201417 | 1.15E-05 | 0.119578 | 0.0097   | 0.021185 | 0.64793  | 0.027752 |
| -0.10694 | 0.02081  | 0.057298 | 0.21649  | 0.113971 | 0.01373  | -0.02375 | 0.60874  | -0.04028 |
| 0.002758 | 0.9526   | 0.356736 | 1.84E-15 | 0.265218 | 5.86E-09 | 0.125599 | 0.00657  | 0.200497 |
| -0.1135  | 0.01412  | 0.047228 | 0.30847  | -0.04483 | 0.33366  | -0.06538 | 0.15834  | 0.038457 |
| -0.16234 | 0.00043  | 0.137724 | 0.00286  | 0.077089 | 0.09613  | -0.06977 | 0.13216  | -0.07458 |
| 0.097026 | 0.03607  | 0.354529 | 2.81E-15 | 0.272819 | 2.05E-09 | 0.210466 | 4.49E-06 | 0.18965  |
| 0.273225 | 1.93E-09 | 0.580263 | 2.24E-43 | 0.469425 | 5.74E-27 | 0.275663 | 1.37E-09 | 0.20592  |
| 0.496834 | 1.76E-30 | 0.61059  | 4.72E-49 | 0.59571  | 3.42E-46 | 0.34657  | 1.26E-14 | 0.262006 |
| -0.02936 | 0.5268   | 0.172928 | 0.00017  | 0.117271 | 0.01121  | -0.03445 | 0.45762  | -0.09079 |
| 0.026653 | 0.56561  | 0.255665 | 2.10E-08 | 0.151425 | 0.00103  | 0.081908 | 0.07701  | 0.191984 |
| 0.040321 | 0.38465  | 0.358867 | 1.22E-15 | 0.194391 | 2.34E-05 | 0.200047 | 1.33E-05 | 0.329626 |
| 0.12417  | 0.00722  | 0.047238 | 0.30837  | 0.124069 | 0.00727  | 0.086055 | 0.06315  | 0.424045 |
| 0.108318 | 0.01921  | 0.493863 | 4.38E-30 | 0.401906 | 1.48E-19 | 0.141144 | 0.00223  | 0.160071 |
| -0.17398 | 0.00016  | 0.022722 | 0.6243   | -0.13414 | 0.00368  | -0.05365 | 0.2472   | -0.13621 |
| 0.040096 | 0.38731  | 0.091974 | 0.04698  | 0.058742 | 0.20511  | 0.106409 | 0.02145  | -0.03555 |
| 0.133916 | 0.00374  | 0.346971 | 1.17E-14 | 0.276981 | 1.14E-09 | 0.067234 | 0.14687  | 0.100844 |
| 0.239565 | 1.61E-07 | 0.453037 | 5.16E-25 | 0.391036 | 1.64E-18 | 0.060336 | 0.19307  | 0.087825 |
| 0.122298 | 0.00815  | 0.436236 | 4.07E-23 | 0.327643 | 3.79E-13 | 0.16488  | 0.00035  | 0.003003 |
| 0.103307 | 0.02558  | 0.311681 | 5.59E-12 | 0.178457 | 0.00011  | 0.197524 | 1.71E-05 | 0.179589 |
| -0.19617 | 1.96E-05 | 0.050357 | 0.27748  | -0.01313 | 0.77718  | -0.13497 | 0.00347  | -0.16325 |
| 0.023377 | 0.61434  | -0.2484  | 5.35E-08 | -0.22434 | 9.70E-07 | -0.12273 | 0.00793  | -0.01763 |
| 0.039832 | 0.39045  | 0.361264 | 7.64E-16 | 0.250851 | 3.92E-08 | 0.085074 | 0.06623  | 0.063037 |
| -0.04883 | 0.29228  | 0.274209 | 1.68E-09 | 0.111332 | 0.01609  | 0.065908 | 0.15502  | 0.046083 |
| 0.006169 | 0.89422  | 0.459911 | 8.05E-26 | 0.342726 | 2.57E-14 | 0.105795 | 0.02222  | 0.137636 |
| 0.195169 | 2.16E-05 | 0.345239 | 1.62E-14 | 0.292423 | 1.17E-10 | 0.158032 | 0.00061  | 0.01021  |
| 0.144839 | 0.0017   | 0.467424 | 1.01E-26 | 0.346996 | 1.17E-14 | 0.255012 | 2.29E-08 | 0.417526 |
| 0.034687 | 0.45458  | 0.106503 | 0.02134  | 0.118386 | 0.01045  | -0.00945 | 0.83858  | -0.16607 |

|          |          |          |          |          |          |          |          |          |
|----------|----------|----------|----------|----------|----------|----------|----------|----------|
| 0.049255 | 0.28814  | 0.314886 | 3.30E-12 | 0.205439 | 7.62E-06 | -0.04955 | 0.28521  | 0.025898 |
| -0.04099 | 0.37675  | 0.228184 | 6.24E-07 | 0.107022 | 0.02071  | 0.132926 | 0.00401  | 0.023653 |
| 0.187745 | 4.45E-05 | 0.349675 | 7.06E-15 | 0.304137 | 1.89E-11 | 0.133123 | 0.00395  | 0.115876 |
| -0.1042  | 0.02433  | 0.040651 | 0.38077  | 0.003642 | 0.93744  | -0.15313 | 0.0009   | -0.25837 |
| 0.006368 | 0.89084  | 0.189922 | 3.61E-05 | 0.173824 | 0.00016  | 0.171273 | 0.0002   | 0.168418 |
| 0.156682 | 0.00068  | 0.069773 | 0.13217  | 0.04951  | 0.28566  | 0.424867 | 6.83E-22 | -0.09605 |
| -0.15845 | 0.00059  | -0.28268 | 4.98E-10 | -0.26613 | 5.18E-09 | -0.03157 | 0.49607  | 0.058879 |
| 0.273758 | 1.79E-09 | 0.139261 | 0.00256  | 0.199997 | 1.33E-05 | 0.005185 | 0.91103  | 0.306228 |
| 0.034272 | 0.46     | 0.315012 | 3.23E-12 | 0.25026  | 4.23E-08 | -0.00246 | 0.9577   | -0.04239 |
| 0.075146 | 0.10483  | 0.019765 | 0.6701   | 0.031247 | 0.50056  | 0.020532 | 0.65809  | -0.22561 |
| 0.132156 | 0.00423  | 0.223379 | 1.08E-06 | 0.278851 | 8.68E-10 | 0.01935  | 0.67662  | -0.19525 |
| 0.126328 | 0.00626  | -0.27252 | 2.14E-09 | -0.23823 | 1.89E-07 | 0.039281 | 0.39704  | -0.05331 |
| -0.23538 | 2.67E-07 | 0.099919 | 0.03086  | -0.11347 | 0.01415  | 0.046064 | 0.32056  | 0.123493 |
| -0.09369 | 0.04299  | 0.094497 | 0.04123  | 0.028001 | 0.54611  | -0.16959 | 0.00023  | -0.23939 |
| 0.38821  | 3.02E-18 | 0.484532 | 7.26E-29 | 0.465983 | 1.51E-26 | 0.191208 | 3.19E-05 | 0.060766 |
| 0.038049 | 0.41202  | 0.33352  | 1.35E-13 | 0.247218 | 6.22E-08 | 0.054397 | 0.2407   | 0.137446 |
| 0.094118 | 0.04206  | 0.331157 | 2.05E-13 | 0.233091 | 3.51E-07 | 0.136954 | 0.00302  | 0.120008 |
| 0.065399 | 0.15824  | 0.235546 | 2.62E-07 | 0.169004 | 0.00024  | -0.01    | 0.82935  | -0.03386 |
| 0.020762 | 0.6545   | 0.154098 | 0.00083  | 0.100489 | 0.02991  | 0.043921 | 0.34361  | 0.008308 |
| 0.002046 | 0.96483  | 0.306611 | 1.27E-11 | 0.074372 | 0.10847  | 0.067985 | 0.1424   | 0.12246  |
| 0.041164 | 0.37478  | 0.20356  | 9.26E-06 | 0.006759 | 0.88418  | 0.123935 | 0.00733  | 0.118478 |
| 0.067406 | 0.14583  | 0.233912 | 3.18E-07 | 0.120814 | 0.00896  | 0.095954 | 0.03819  | 0.038929 |
| 0.035651 | 0.44213  | -0.32302 | 8.39E-13 | -0.23686 | 2.23E-07 | -0.13669 | 0.00308  | -0.08842 |
| 0.006864 | 0.8824   | 0.178319 | 0.00011  | 0.104849 | 0.02345  | -0.0144  | 0.75624  | -0.06238 |
| -0.02508 | 0.58873  | -0.24567 | 7.56E-08 | -0.16834 | 0.00026  | 0.059465 | 0.19958  | 0.235774 |
| 0.107147 | 0.02056  | 0.332417 | 1.64E-13 | 0.360389 | 9.06E-16 | 0.161459 | 0.00046  | 0.192577 |
| 0.065378 | 0.15837  | 0.274472 | 1.62E-09 | 0.199756 | 1.37E-05 | -0.03826 | 0.40948  | -0.05834 |
| -0.11029 | 0.01711  | 0.163123 | 0.0004   | 0.103917 | 0.02472  | -0.03799 | 0.4127   | -0.06175 |
| 0.059864 | 0.19658  | 0.223205 | 1.10E-06 | 0.126408 | 0.00623  | -0.00499 | 0.91438  | -0.10275 |
| -0.00812 | 0.86114  | -0.34343 | 2.26E-14 | -0.21081 | 4.33E-06 | -0.20483 | 8.12E-06 | -0.1862  |
| 0.047248 | 0.30827  | -0.17542 | 0.00014  | -0.25002 | 4.36E-08 | 0.092622 | 0.04545  | 0.104799 |
| -0.00186 | 0.96809  | 0.337405 | 6.75E-14 | 0.192619 | 2.78E-05 | 0.263105 | 7.81E-09 | 0.233881 |
| -0.01181 | 0.79915  | 0.370659 | 1.18E-16 | 0.276272 | 1.26E-09 | 0.100604 | 0.02972  | 0.082005 |
| 0.052433 | 0.25813  | 0.25108  | 3.80E-08 | 0.215942 | 2.48E-06 | 0.027598 | 0.5519   | -0.04643 |
| 0.075326 | 0.104    | 0.305027 | 1.64E-11 | 0.300486 | 3.36E-11 | 0.088541 | 0.05587  | 0.098943 |
| 0.049065 | 0.29001  | 0.383084 | 9.00E-18 | 0.298208 | 4.79E-11 | 0.136839 | 0.00305  | 0.112022 |
| -0.35596 | 2.14E-15 | -0.39617 | 5.32E-19 | -0.38772 | 3.35E-18 | -0.16273 | 0.00041  | 0.027909 |
| 0.132001 | 0.00427  | 0.308457 | 9.44E-12 | 0.326515 | 4.61E-13 | 0.076486 | 0.09877  | 0.104709 |
| -0.21629 | 2.39E-06 | -0.46891 | 6.63E-27 | -0.34472 | 1.78E-14 | -0.25113 | 3.78E-08 | -0.26258 |
| 0.093058 | 0.04443  | 0.385109 | 5.86E-18 | 0.398714 | 3.03E-19 | 0.028631 | 0.53711  | -0.00914 |
| 0.066162 | 0.15344  | 0.344494 | 1.85E-14 | 0.331132 | 2.06E-13 | 0.059901 | 0.1963   | 0.022847 |
| 0.370593 | 1.19E-16 | 0.505183 | 1.29E-31 | 0.351799 | 4.73E-15 | 0.254418 | 2.47E-08 | 0.250454 |
| 0.077477 | 0.09446  | 0.364021 | 4.44E-16 | 0.306628 | 1.27E-11 | 0.080868 | 0.08085  | 0.278082 |
| 0.246208 | 7.06E-08 | -0.08752 | 0.05878  | -0.01264 | 0.78535  | 0.10648  | 0.02137  | -0.04088 |
| 0.017548 | 0.70527  | 0.061459 | 0.18489  | 0.124938 | 0.00687  | 0.060877 | 0.18909  | -0.02669 |

|          |          |          |          |          |          |          |          |          |
|----------|----------|----------|----------|----------|----------|----------|----------|----------|
| -0.04718 | 0.309    | 0.15266  | 0.00093  | 0.076359 | 0.09933  | 0.044051 | 0.34219  | -0.01583 |
| -0.04241 | 0.36045  | -0.0265  | 0.56781  | 0.051588 | 0.26589  | -0.14421 | 0.00178  | -0.31518 |
| -0.25369 | 2.72E-08 | -0.04728 | 0.30797  | -0.03709 | 0.42389  | -0.2098  | 4.82E-06 | -0.1609  |
| 0.027349 | 0.5555   | 0.219227 | 1.73E-06 | 0.175716 | 0.00014  | -0.0732  | 0.11416  | -0.12644 |
| 0.048932 | 0.29132  | 0.185885 | 5.31E-05 | 0.192233 | 2.89E-05 | -0.04022 | 0.38585  | -0.0902  |
| 0.041731 | 0.36823  | 0.274486 | 1.62E-09 | 0.18251  | 7.28E-05 | 0.133743 | 0.00379  | 0.106995 |
| 0.008175 | 0.86014  | 0.285162 | 3.46E-10 | 0.184378 | 6.12E-05 | 0.075685 | 0.10236  | 0.07426  |
| 0.05853  | 0.20676  | 0.374116 | 5.82E-17 | 0.361886 | 6.76E-16 | 0.121079 | 0.00881  | 0.095085 |
| 0.076058 | 0.10067  | -0.22265 | 1.18E-06 | -0.10312 | 0.02586  | 0.048297 | 0.29764  | 0.07544  |
| 0.034803 | 0.45307  | 0.356488 | 1.93E-15 | 0.224475 | 9.55E-07 | 0.056474 | 0.22318  | 0.066878 |
| 0.044046 | 0.34224  | -0.30845 | 9.44E-12 | -0.12943 | 0.00509  | 0.028091 | 0.54482  | 0.000412 |
| -0.04458 | 0.33644  | 0.234684 | 2.90E-07 | 0.155731 | 0.00073  | 0.025173 | 0.58739  | 0.015719 |
| 0.023639 | 0.61037  | 0.262577 | 8.39E-09 | 0.231478 | 4.24E-07 | 0.121767 | 0.00843  | 0.143727 |
| -0.3583  | 1.36E-15 | -0.15378 | 0.00086  | -0.27584 | 1.34E-09 | -0.18726 | 4.66E-05 | -0.13459 |
| -0.05095 | 0.27182  | -0.14758 | 0.00138  | -0.09046 | 0.05073  | -0.1075  | 0.02014  | 0.037949 |
| 0.186906 | 4.82E-05 | 0.321385 | 1.11E-12 | 0.348312 | 9.12E-15 | 0.168708 | 0.00025  | 0.128615 |
| 0.143697 | 0.00185  | -0.07613 | 0.10036  | -0.0799  | 0.08458  | 0.028022 | 0.5458   | 0.188141 |
| -0.15042 | 0.00111  | 0.016647 | 0.71974  | -0.07619 | 0.1001   | 0.117022 | 0.01138  | -0.08491 |
| -0.02216 | 0.63288  | 0.208397 | 5.59E-06 | 0.092513 | 0.0457   | 0.001213 | 0.97914  | -0.10496 |
| -0.13196 | 0.00428  | 0.111586 | 0.01585  | 0.011374 | 0.80634  | 0.069766 | 0.13221  | -0.00694 |
| -0.15456 | 0.0008   | 0.005849 | 0.89969  | -0.04406 | 0.34211  | -0.17227 | 0.00018  | -0.12091 |
| 0.14325  | 0.00191  | 0.368553 | 1.80E-16 | 0.258231 | 1.50E-08 | 0.307666 | 1.07E-11 | 0.317114 |
| 0.107077 | 0.02065  | 0.268662 | 3.66E-09 | 0.152401 | 0.00095  | 0.137393 | 0.00293  | 0.219384 |
| 0.242606 | 1.11E-07 | 0.528833 | 5.24E-35 | 0.535748 | 4.75E-36 | 0.138938 | 0.00262  | 0.170902 |
| 0.296759 | 6.00E-11 | 0.540729 | 8.13E-37 | 0.489904 | 1.46E-29 | 0.316208 | 2.65E-12 | 0.396162 |
| -0.19964 | 1.38E-05 | -0.43552 | 4.88E-23 | -0.33675 | 7.60E-14 | -0.04675 | 0.31339  | -0.04629 |
| 0.066331 | 0.15238  | 0.303458 | 2.10E-11 | 0.213114 | 3.37E-06 | 0.120732 | 0.00901  | 0.058708 |
| -0.12279 | 0.0079   | 0.144422 | 0.00175  | 0.080319 | 0.08294  | 0.021992 | 0.63547  | 0.12263  |
| -0.12764 | 0.00574  | 0.121636 | 0.00851  | 0.044306 | 0.33939  | -0.00665 | 0.88604  | -0.0601  |
| 0.324923 | 6.06E-13 | 0.369286 | 1.55E-16 | 0.281435 | 5.97E-10 | 0.142899 | 0.00196  | 0.065578 |
| -0.01912 | 0.68028  | 0.361093 | 7.90E-16 | 0.318528 | 1.80E-12 | 0.060628 | 0.19092  | 0.092825 |
| 0.243689 | 9.68E-08 | 0.5966   | 2.33E-46 | 0.269495 | 3.26E-09 | 0.33571  | 9.15E-14 | 0.548732 |
| 0.311465 | 5.79E-12 | 0.382569 | 1.00E-17 | 0.40708  | 4.57E-20 | 0.225522 | 8.48E-07 | 0.124089 |
| 0.201653 | 1.13E-05 | 0.413184 | 1.11E-20 | 0.391543 | 1.47E-18 | 0.18658  | 4.97E-05 | 0.085736 |
| -0.29362 | 9.71E-11 | -0.07793 | 0.09254  | -0.08414 | 0.06926  | -0.12132 | 0.00868  | -0.14975 |
| 0.000926 | 0.98408  | 0.113099 | 0.01447  | -0.03245 | 0.4842   | 0.10556  | 0.02252  | -0.11222 |
| 0.228474 | 6.03E-07 | -0.03907 | 0.39963  | -0.08211 | 0.0763   | 0.181616 | 7.91E-05 | 0.152285 |
| -0.04398 | 0.34292  | 0.039793 | 0.39091  | 0.170974 | 0.00021  | -0.08298 | 0.0732   | -0.14612 |
| 0.007008 | 0.87995  | 0.230361 | 4.84E-07 | 0.296752 | 6.00E-11 | 0.033254 | 0.47344  | -0.00656 |
| 0.11479  | 0.01306  | 0.3562   | 2.04E-15 | 0.411258 | 1.74E-20 | 0.161973 | 0.00044  | 0.157359 |
| 0.13318  | 0.00394  | 0.12516  | 0.00677  | 0.264831 | 6.18E-09 | 0.083153 | 0.07262  | -0.06917 |
| 0.131269 | 0.00449  | 0.028581 | 0.53783  | 0.107877 | 0.01971  | -0.00593 | 0.89823  | 0.237004 |
| 0.187211 | 4.68E-05 | 0.320502 | 1.29E-12 | 0.264671 | 6.32E-09 | 0.209216 | 5.12E-06 | 0.021184 |
| -0.00946 | 0.83845  | -0.32309 | 8.29E-13 | -0.14821 | 0.00132  | -0.12539 | 0.00666  | -0.11514 |
| 0.088717 | 0.05539  | 0.467577 | 9.64E-27 | 0.415091 | 7.09E-21 | 0.105488 | 0.02262  | 0.167967 |

|          |          |          |          |          |          |          |          |          |
|----------|----------|----------|----------|----------|----------|----------|----------|----------|
| -0.02988 | 0.51947  | 0.244408 | 8.85E-08 | 0.158852 | 0.00057  | -0.00517 | 0.91123  | -0.02704 |
| -0.11037 | 0.01703  | 0.006601 | 0.88688  | 0.009033 | 0.84563  | -0.13644 | 0.00313  | -0.34414 |
| -0.04141 | 0.37198  | 0.243857 | 9.48E-08 | 0.158533 | 0.00058  | 0.016545 | 0.72139  | -0.0107  |
| 0.156976 | 0.00066  | 0.380652 | 1.50E-17 | 0.412284 | 1.37E-20 | 0.10099  | 0.0291   | -0.01158 |
| -0.06303 | 0.17391  | 0.224671 | 9.34E-07 | 0.176628 | 0.00012  | 0.036082 | 0.43663  | -0.01354 |
| 0.03742  | 0.4198   | -0.35722 | 1.68E-15 | -0.23178 | 4.10E-07 | -0.0392  | 0.39801  | -0.08823 |
| -0.001   | 0.98281  | 0.053126 | 0.25188  | 0.037371 | 0.4204   | -0.01174 | 0.8002   | -0.17002 |
| 0.154025 | 0.00084  | 0.208093 | 5.77E-06 | 0.199189 | 1.45E-05 | 0.187505 | 4.55E-05 | -0.12219 |
| -0.1411  | 0.00224  | -0.29192 | 1.26E-10 | -0.18338 | 6.72E-05 | -0.03017 | 0.51545  | -0.17919 |
| 0.028635 | 0.53706  | 0.234267 | 3.05E-07 | 0.202338 | 1.05E-05 | 0.005772 | 0.901    | -0.12926 |
| -0.14493 | 0.00169  | -0.36277 | 5.68E-16 | -0.20563 | 7.48E-06 | -0.18269 | 7.16E-05 | -0.24016 |
| 0.101271 | 0.02865  | 0.295591 | 7.18E-11 | 0.232007 | 3.99E-07 | 0.109015 | 0.01845  | -0.0195  |
| 0.140132 | 0.0024   | 0.36026  | 9.29E-16 | 0.306966 | 1.20E-11 | 0.142494 | 0.00202  | 0.079256 |
| -0.00798 | 0.86349  | -0.19095 | 3.27E-05 | -0.04288 | 0.35515  | 0.033397 | 0.47153  | 0.049258 |
| 0.1592   | 0.00055  | 0.018361 | 0.69229  | 0.023938 | 0.60585  | 0.014367 | 0.75682  | 0.372218 |
| -0.17438 | 0.00015  | 0.038935 | 0.40121  | -0.00018 | 0.9969   | -0.10347 | 0.02535  | -0.2262  |
| -0.07461 | 0.10734  | -0.29417 | 8.93E-11 | -0.34375 | 2.13E-14 | -0.16153 | 0.00046  | 0.052404 |
| -0.14074 | 0.0023   | 0.092387 | 0.046    | -0.01358 | 0.76976  | -0.01591 | 0.7316   | 0.12479  |
| 0.012245 | 0.79185  | 0.275317 | 1.44E-09 | 0.241143 | 1.33E-07 | 0.123674 | 0.00746  | 0.105336 |
| 0.017273 | 0.70968  | 0.173607 | 0.00016  | 0.141154 | 0.00223  | 0.015666 | 0.73563  | -0.05005 |
| 0.064395 | 0.16474  | -0.21535 | 2.65E-06 | -0.06148 | 0.18472  | 0.092065 | 0.04676  | 0.09179  |
| 0.138251 | 0.00275  | 0.353246 | 3.59E-15 | 0.326189 | 4.87E-13 | -0.08154 | 0.07836  | -0.0313  |
| -0.0394  | 0.39563  | 0.120528 | 0.00913  | 0.097227 | 0.03569  | -0.01253 | 0.78713  | -0.0906  |
| 0.283507 | 4.41E-10 | 0.47439  | 1.40E-27 | 0.307784 | 1.05E-11 | 0.29696  | 5.81E-11 | 0.262919 |
| 0.093065 | 0.04442  | 0.211594 | 3.98E-06 | 0.222006 | 1.26E-06 | 0.02099  | 0.65096  | -0.01306 |
| -0.02133 | 0.64571  | 0.194951 | 2.21E-05 | 0.127911 | 0.00564  | 0.024376 | 0.59927  | -0.01408 |
| 0.178442 | 0.00011  | 0.421319 | 1.61E-21 | 0.28174  | 5.71E-10 | 0.324021 | 7.08E-13 | 0.470132 |
| 0.270068 | 3.01E-09 | -0.15041 | 0.00111  | 0.04639  | 0.31715  | -0.01576 | 0.73411  | -0.08937 |
| 0.033253 | 0.47345  | 0.256887 | 1.79E-08 | 0.06352  | 0.17057  | 0.022465 | 0.62821  | -0.07441 |
| -0.00277 | 0.95233  | 0.233111 | 3.50E-07 | 0.149088 | 0.00123  | 0.017075 | 0.71285  | 0.085771 |
| 0.106686 | 0.02112  | 0.392198 | 1.27E-18 | 0.201462 | 1.15E-05 | 0.186541 | 4.99E-05 | 0.355696 |
| -0.07758 | 0.09402  | 0.050822 | 0.27306  | 0.062772 | 0.17567  | -0.0279  | 0.54759  | -0.1769  |
| 0.137589 | 0.00289  | 0.402957 | 1.17E-19 | 0.268859 | 3.56E-09 | 0.236225 | 2.41E-07 | 0.182507 |
| 0.09721  | 0.03572  | 0.261709 | 9.42E-09 | 0.241283 | 1.30E-07 | 0.015388 | 0.74015  | -0.14184 |
| 0.120581 | 0.0091   | 0.336031 | 8.64E-14 | 0.231184 | 4.39E-07 | 0.064651 | 0.16306  | -0.01236 |
| 0.069749 | 0.1323   | 0.358032 | 1.43E-15 | 0.272278 | 2.21E-09 | 0.169893 | 0.00023  | 0.167079 |
| -0.02031 | 0.66161  | 0.275169 | 1.47E-09 | 0.273728 | 1.80E-09 | -0.01543 | 0.73943  | -0.03256 |
| -0.06106 | 0.18777  | 0.115379 | 0.0126   | 0.119438 | 0.00978  | -0.05773 | 0.21304  | -0.05848 |
| -0.03903 | 0.40011  | 0.163413 | 0.00039  | 0.160477 | 0.0005   | 0.000756 | 0.987    | -0.0794  |
| -0.13604 | 0.00322  | 0.009456 | 0.83851  | -0.11513 | 0.01279  | -0.03698 | 0.42531  | -0.16809 |
| 0.097975 | 0.03429  | 0.17121  | 0.0002   | 0.310795 | 6.46E-12 | 0.046698 | 0.31394  | 0.132128 |
| -0.01105 | 0.81178  | 0.151889 | 0.00099  | 0.163343 | 0.00039  | -0.01667 | 0.71937  | -0.14268 |
| 0.093503 | 0.04342  | 0.400491 | 2.03E-19 | 0.231338 | 4.31E-07 | 0.144406 | 0.00176  | 0.145966 |
| 0.11742  | 0.0111   | 0.407976 | 3.72E-20 | 0.323069 | 8.33E-13 | 0.175696 | 0.00014  | 0.14607  |
| -0.21299 | 3.42E-06 | -0.11047 | 0.01693  | -0.1507  | 0.00109  | 0.059425 | 0.19989  | -0.17597 |

|          |          |          |          |          |          |          |          |          |
|----------|----------|----------|----------|----------|----------|----------|----------|----------|
| 0.017909 | 0.69948  | 0.201224 | 1.18E-05 | 0.169993 | 0.00022  | 0.022159 | 0.63292  | 0.079626 |
| -0.03274 | 0.48036  | 0.161767 | 0.00045  | 0.089731 | 0.05264  | -0.03677 | 0.42792  | -0.06807 |
| 0.054619 | 0.23878  | 0.328542 | 3.24E-13 | 0.184762 | 5.90E-05 | 0.250852 | 3.92E-08 | 0.175625 |
| -0.30433 | 1.83E-11 | -0.31252 | 4.87E-12 | -0.35036 | 6.21E-15 | -0.074   | 0.11026  | 0.047405 |
| 0.105415 | 0.02271  | 0.395149 | 6.67E-19 | 0.233289 | 3.43E-07 | 0.176907 | 0.00012  | 0.210555 |
| -0.06983 | 0.13186  | 0.154306 | 0.00082  | 0.111137 | 0.01627  | -0.11557 | 0.01245  | -0.26581 |
| 0.167581 | 0.00028  | 0.007119 | 0.87805  | 0.104043 | 0.02455  | 0.040152 | 0.38665  | 0.141539 |
| -0.06101 | 0.18814  | 0.076792 | 0.09742  | 0.095712 | 0.03868  | -0.07922 | 0.08725  | 0.023908 |
| 0.227204 | 6.98E-07 | -0.11776 | 0.01087  | 0.156986 | 0.00066  | -0.10481 | 0.0235   | -0.12858 |
| -0.10643 | 0.02142  | 0.003748 | 0.93562  | 0.005788 | 0.90073  | -0.16029 | 0.00051  | -0.25799 |
| -0.02197 | 0.63575  | -0.24384 | 9.50E-08 | -0.15884 | 0.00057  | 0.079769 | 0.08508  | 0.165761 |
| 0.142815 | 0.00198  | 0.018378 | 0.69202  | 0.138179 | 0.00277  | -0.01829 | 0.69336  | -0.28318 |
| -0.02193 | 0.63648  | 0.19804  | 1.63E-05 | 0.127106 | 0.00595  | -0.02695 | 0.56131  | -0.05174 |
| 0.013697 | 0.76783  | -0.17367 | 0.00016  | -0.29752 | 5.33E-11 | 0.12683  | 0.00606  | 0.207813 |
| 0.018501 | 0.69007  | 0.194194 | 2.38E-05 | 0.144279 | 0.00177  | -0.02282 | 0.62275  | -0.16921 |
| 0.237482 | 2.07E-07 | 0.436376 | 3.93E-23 | 0.292842 | 1.09E-10 | 0.17924  | 9.84E-05 | 0.256606 |
| -0.12912 | 0.0052   | 0.091342 | 0.04852  | 0.144034 | 0.00181  | -0.04049 | 0.38262  | -0.13153 |
| 0.116145 | 0.01202  | 0.379004 | 2.12E-17 | 0.280511 | 6.83E-10 | 0.051007 | 0.27132  | 0.112281 |
| 0.11108  | 0.01633  | 0.215072 | 2.73E-06 | 0.218032 | 1.97E-06 | -0.13462 | 0.00356  | -0.04193 |
| 0.023554 | 0.61166  | 0.134547 | 0.00358  | 0.108477 | 0.01903  | -0.0188  | 0.68529  | -0.13994 |
| 0.148236 | 0.00132  | 0.166582 | 0.0003   | 0.193359 | 2.59E-05 | 0.098427 | 0.03346  | -0.17155 |
| -0.23665 | 2.29E-07 | -0.08364 | 0.07095  | -0.07486 | 0.10616  | -0.10389 | 0.02475  | -0.37018 |
| -0.0247  | 0.59442  | 0.208255 | 5.67E-06 | 0.091521 | 0.04808  | 0.038227 | 0.40984  | 0.045488 |
| 0.331901 | 1.80E-13 | 0.462776 | 3.67E-26 | 0.434787 | 5.86E-23 | 0.250834 | 3.93E-08 | 0.2839   |
| 0.249024 | 4.95E-08 | 0.320982 | 1.19E-12 | 0.283644 | 4.32E-10 | 0.117416 | 0.01111  | 0.074778 |
| 0.053215 | 0.25109  | 0.297581 | 5.28E-11 | 0.197234 | 1.76E-05 | 0.051135 | 0.27011  | 0.007954 |
| -0.08664 | 0.06138  | -0.00448 | 0.92316  | -0.09134 | 0.04853  | -0.03405 | 0.46287  | -0.14937 |
| 0.02275  | 0.62387  | 0.340444 | 3.89E-14 | 0.193553 | 2.54E-05 | 0.013676 | 0.76817  | 0.083508 |
| -0.08121 | 0.07956  | 0.192845 | 2.72E-05 | 0.195133 | 2.17E-05 | 0.015771 | 0.73392  | -0.01525 |
| 0.153159 | 0.0009   | 0.50796  | 5.31E-32 | 0.460756 | 6.39E-26 | 0.249751 | 4.51E-08 | 0.355234 |
| 0.039987 | 0.38861  | 0.267008 | 4.59E-09 | 0.254621 | 2.41E-08 | 0.125254 | 0.00672  | 0.187709 |
| 0.059757 | 0.19738  | 0.454572 | 3.42E-25 | 0.389911 | 2.09E-18 | 0.169503 | 0.00023  | 0.069798 |
| 0.199469 | 1.41E-05 | 0.427909 | 3.24E-22 | 0.332149 | 1.72E-13 | 0.221673 | 1.31E-06 | 0.210948 |
| 0.159049 | 0.00056  | -0.07799 | 0.09231  | -0.03615 | 0.43573  | 0.094992 | 0.04018  | 0.104274 |
| 0.030569 | 0.5099   | 0.321747 | 1.04E-12 | 0.280096 | 7.25E-10 | 0.117056 | 0.01136  | 0.196302 |
| -0.04962 | 0.28453  | -0.0347  | 0.45445  | -0.10747 | 0.02018  | -0.05017 | 0.27926  | -0.24686 |
| 0.142483 | 0.00202  | 0.384145 | 7.19E-18 | 0.285429 | 3.33E-10 | 0.03711  | 0.42366  | -0.06066 |
| -0.08194 | 0.07691  | 0.139782 | 0.00247  | 0.051069 | 0.27074  | -0.0387  | 0.404    | -0.07604 |
| -0.08692 | 0.06054  | 0.009823 | 0.83232  | 0.122692 | 0.00795  | -0.21731 | 2.13E-06 | -0.2685  |
| 0.137608 | 0.00288  | 0.382893 | 9.37E-18 | 0.282366 | 5.21E-10 | 0.187064 | 4.75E-05 | 0.211752 |
| 0.190669 | 3.36E-05 | 0.238332 | 1.87E-07 | 0.214851 | 2.79E-06 | 0.077363 | 0.09495  | -0.08134 |
| -0.07875 | 0.08913  | 0.104095 | 0.02447  | 0.105517 | 0.02258  | 0.120647 | 0.00906  | 0.0128   |
| 0.151043 | 0.00106  | 0.319029 | 1.65E-12 | 0.252837 | 3.03E-08 | 0.06944  | 0.13403  | 0.02034  |
| 0.034763 | 0.45359  | 0.323468 | 7.78E-13 | 0.319139 | 1.62E-12 | 0.117262 | 0.01121  | 0.163546 |
| 0.345011 | 1.69E-14 | 0.501964 | 3.56E-31 | 0.48404  | 8.40E-29 | 0.222069 | 1.26E-06 | 0.192979 |

|          |          |          |          |          |          |          |          |          |
|----------|----------|----------|----------|----------|----------|----------|----------|----------|
| 0.201225 | 1.18E-05 | 0.00966  | 0.83507  | 0.045493 | 0.3266   | 0.152122 | 0.00097  | 0.240326 |
| 0.129015 | 0.00523  | 0.316919 | 2.35E-12 | 0.298868 | 4.32E-11 | 0.117505 | 0.01104  | 0.044604 |
| 0.08734  | 0.0593   | 0.515182 | 5.11E-33 | 0.485705 | 5.13E-29 | 0.165983 | 0.00032  | 0.190742 |
| 0.031708 | 0.49426  | 0.295031 | 7.83E-11 | 0.303633 | 2.04E-11 | 0.116221 | 0.01196  | 0.037103 |
| 0.050705 | 0.27417  | 0.2652   | 5.88E-09 | 0.226539 | 7.54E-07 | 0.071471 | 0.12299  | 0.009613 |
| -0.05807 | 0.21032  | 0.090644 | 0.05027  | 0.156274 | 0.0007   | -0.06077 | 0.18986  | -0.16944 |
| 0.015263 | 0.74217  | 0.377165 | 3.10E-17 | 0.284519 | 3.80E-10 | 0.125164 | 0.00676  | 0.15242  |
| -0.01745 | 0.70677  | 0.195201 | 2.16E-05 | 0.172445 | 0.00018  | 0.036815 | 0.42736  | -0.00037 |
| 0.072086 | 0.1198   | 0.235752 | 2.55E-07 | 0.229496 | 5.35E-07 | 0.111748 | 0.01569  | 0.010313 |
| -0.06046 | 0.19218  | 0.266284 | 5.07E-09 | 0.182871 | 7.04E-05 | -0.00331 | 0.94308  | -0.0166  |
| 0.049049 | 0.29017  | 0.243897 | 9.43E-08 | 0.224195 | 9.86E-07 | -0.02208 | 0.63409  | -0.06966 |
| 0.04839  | 0.29671  | 0.414591 | 7.98E-21 | 0.282513 | 5.10E-10 | 0.190864 | 3.30E-05 | 0.239869 |
| 0.065846 | 0.15541  | 0.292968 | 1.07E-10 | 0.214853 | 2.79E-06 | 0.102758 | 0.02638  | 0.185972 |
| 0.172689 | 0.00018  | 0.528324 | 6.24E-35 | 0.460334 | 7.17E-26 | 0.323422 | 7.84E-13 | 0.299581 |
| -0.04457 | 0.33649  | 0.142011 | 0.0021   | 0.117042 | 0.01137  | -0.04952 | 0.28555  | -0.0339  |
| -0.1048  | 0.02351  | 0.093951 | 0.04242  | 0.0007   | 0.98796  | 0.01601  | 0.73004  | -0.08282 |
| -0.09266 | 0.04535  | 0.284803 | 3.65E-10 | 0.181571 | 7.94E-05 | -0.00202 | 0.96524  | 0.031864 |
| -0.09097 | 0.04945  | -0.4276  | 3.50E-22 | -0.45049 | 1.02E-24 | 0.011176 | 0.80965  | 0.004851 |
| -0.16328 | 0.0004   | -0.52294 | 3.88E-34 | -0.42752 | 3.57E-22 | -0.31557 | 2.94E-12 | -0.47634 |
| 0.115743 | 0.01232  | 0.28724  | 2.54E-10 | 0.201517 | 1.14E-05 | 0.212081 | 3.77E-06 | 0.23186  |
| 0.291685 | 1.30E-10 | 0.459622 | 8.72E-26 | 0.461326 | 5.47E-26 | 0.241706 | 1.24E-07 | 0.176946 |
| 0.030255 | 0.51426  | -0.2608  | 1.06E-08 | -0.19659 | 1.88E-05 | -0.00459 | 0.92124  | -0.11609 |
| 0.337945 | 6.12E-14 | 0.393833 | 8.90E-19 | 0.362245 | 6.30E-16 | 0.189817 | 3.65E-05 | 0.125866 |
| -0.08949 | 0.05329  | 0.026126 | 0.57332  | 0.03613  | 0.43602  | -0.06443 | 0.16451  | -0.16589 |
| 0.075482 | 0.10329  | 0.338993 | 5.07E-14 | 0.243484 | 9.93E-08 | 0.131649 | 0.00438  | 0.132319 |
| 0.073135 | 0.11449  | 0.339567 | 4.57E-14 | 0.299951 | 3.65E-11 | 0.236964 | 2.21E-07 | 0.249209 |
| 0.311585 | 5.68E-12 | 0.552431 | 1.15E-38 | 0.207801 | 5.95E-06 | 0.379288 | 2.00E-17 | 0.410101 |
| 0.089409 | 0.0535   | 0.190227 | 3.51E-05 | 0.064839 | 0.16184  | 0.060119 | 0.19467  | -0.08147 |
| -0.00402 | 0.93091  | 0.16822  | 0.00026  | -0.1049  | 0.02338  | 0.175267 | 0.00014  | 0.087361 |
| 0.027977 | 0.54646  | 0.222378 | 1.21E-06 | -0.16396 | 0.00037  | 0.169321 | 0.00024  | 0.116767 |
| 0.051939 | 0.26265  | 0.172615 | 0.00018  | 0.078058 | 0.09201  | -0.12783 | 0.00567  | -0.21866 |
| 0.009075 | 0.84493  | 0.259218 | 1.31E-08 | 0.140203 | 0.00239  | 0.075381 | 0.10375  | 0.015246 |
| -0.01584 | 0.73282  | 0.364652 | 3.92E-16 | 0.149445 | 0.0012   | 0.089004 | 0.0546   | 0.126225 |
| -0.05544 | 0.2318   | 0.196211 | 1.95E-05 | 0.110844 | 0.01656  | 0.054956 | 0.23589  | -0.00177 |
| -0.05439 | 0.24079  | 0.223229 | 1.10E-06 | 0.133315 | 0.0039   | 0.027356 | 0.5554   | -0.04197 |
| 0.133504 | 0.00385  | 0.501609 | 3.98E-31 | 0.413243 | 1.09E-20 | 0.238336 | 1.87E-07 | 0.228274 |
| 0.169543 | 0.00023  | 0.328927 | 3.03E-13 | 0.32994  | 2.54E-13 | 0.117159 | 0.01128  | 0.105859 |
| -0.0974  | 0.03535  | 0.149317 | 0.00121  | 0.076192 | 0.10007  | -0.04962 | 0.28454  | -0.09412 |
| 0.129255 | 0.00515  | 0.179327 | 9.76E-05 | 0.171077 | 0.0002   | -0.01369 | 0.76796  | -0.06003 |
| 0.059173 | 0.2018   | 0.223779 | 1.03E-06 | 0.140784 | 0.00229  | 0.052039 | 0.26173  | 0.03879  |
| 0.110026 | 0.01738  | 0.377048 | 3.18E-17 | 0.348856 | 8.24E-15 | 0.16293  | 0.00041  | 0.027604 |
| 0.174431 | 0.00015  | -0.01276 | 0.78331  | 0.037065 | 0.42422  | 0.156511 | 0.00069  | 0.123156 |
| -0.02741 | 0.55458  | 0.237452 | 2.08E-07 | 0.147488 | 0.00139  | 0.061736 | 0.18292  | 0.139759 |
| -0.12248 | 0.00806  | 0.086982 | 0.06035  | 0.045119 | 0.3306   | -0.0159  | 0.7318   | -0.13693 |
| 0.12902  | 0.00523  | 0.218228 | 1.93E-06 | 0.233892 | 3.19E-07 | 0.1517   | 0.00101  | 0.052362 |

|          |          |          |          |          |          |          |          |          |
|----------|----------|----------|----------|----------|----------|----------|----------|----------|
| 0.090789 | 0.04991  | 0.403502 | 1.03E-19 | 0.311477 | 5.78E-12 | 0.076442 | 0.09896  | 0.083271 |
| -0.08071 | 0.08146  | 0.088891 | 0.05491  | 0.146268 | 0.00153  | -0.13276 | 0.00405  | 0.01686  |
| 0.119577 | 0.0097   | 0.110418 | 0.01698  | 0.121313 | 0.00868  | 0.06975  | 0.1323   | -0.08518 |
| -0.05973 | 0.19755  | -0.00516 | 0.91145  | 0.003399 | 0.9416   | -0.20448 | 8.42E-06 | -0.18448 |
| 0.176106 | 0.00013  | 0.172568 | 0.00018  | 0.187039 | 4.76E-05 | 0.025987 | 0.57536  | -0.02147 |
| 0.117412 | 0.01111  | 0.314228 | 3.68E-12 | 0.302891 | 2.30E-11 | -0.06818 | 0.14124  | -0.01711 |
| 0.212164 | 3.74E-06 | 0.383917 | 7.55E-18 | 0.335902 | 8.84E-14 | 0.079459 | 0.0863   | 0.067308 |
| 0.086655 | 0.06133  | 0.245374 | 7.84E-08 | 0.218832 | 1.80E-06 | 0.055747 | 0.2292   | -0.1261  |
| 0.119247 | 0.0099   | 0.260135 | 1.16E-08 | 0.309883 | 7.49E-12 | 0.016485 | 0.72235  | -0.07314 |
| 0.10112  | 0.02889  | 0.239078 | 1.71E-07 | 0.157011 | 0.00066  | 0.155549 | 0.00074  | 0.299795 |
| 0.066508 | 0.15129  | -0.32196 | 1.01E-12 | -0.23296 | 3.56E-07 | 0.018295 | 0.69334  | -0.04905 |
| -0.23106 | 4.46E-07 | -0.45793 | 1.38E-25 | -0.40262 | 1.26E-19 | -0.29141 | 1.36E-10 | -0.16924 |
| 0.136749 | 0.00306  | 0.358087 | 1.42E-15 | 0.328977 | 3.00E-13 | 0.037641 | 0.41706  | 0.053748 |
| 0.146367 | 0.00152  | 0.328141 | 3.48E-13 | 0.276905 | 1.15E-09 | 0.089111 | 0.05431  | 0.064726 |
| 0.365452 | 3.34E-16 | 0.307646 | 1.08E-11 | 0.438131 | 2.52E-23 | 0.133589 | 0.00383  | 0.091786 |
| -0.1892  | 3.87E-05 | -0.45411 | 3.87E-25 | -0.3623  | 6.23E-16 | -0.20011 | 1.32E-05 | -0.323   |
| -0.13516 | 0.00343  | -0.36735 | 2.29E-16 | -0.14043 | 0.00235  | -0.35808 | 1.42E-15 | -0.32507 |
| -0.14008 | 0.00241  | 0.098584 | 0.03318  | 0.026174 | 0.57261  | -0.00431 | 0.92605  | -0.01563 |
| -0.13798 | 0.00281  | -0.35268 | 4.00E-15 | -0.23894 | 1.74E-07 | -0.01587 | 0.73237  | -0.05194 |
| -0.02572 | 0.57931  | 0.211524 | 4.01E-06 | 0.121422 | 0.00862  | -0.01264 | 0.78529  | -0.00321 |
| -0.12889 | 0.00528  | -0.00627 | 0.89259  | -0.07057 | 0.1278   | 0.031797 | 0.49305  | -0.08843 |
| 0.298986 | 4.24E-11 | -0.17515 | 0.00014  | -0.17363 | 0.00016  | 0.015991 | 0.73035  | -0.01346 |
| -0.02691 | 0.56191  | 0.194167 | 2.39E-05 | 0.110117 | 0.01729  | 0.035934 | 0.43852  | 0.002937 |
| 0.136208 | 0.00318  | 0.46534  | 1.80E-26 | 0.353107 | 3.69E-15 | 0.12141  | 0.00863  | 0.253714 |
| 0.014309 | 0.75778  | 0.280247 | 7.10E-10 | 0.176364 | 0.00013  | 0.094002 | 0.04231  | 0.056489 |
| 0.079355 | 0.08672  | 0.262765 | 8.18E-09 | 0.231172 | 4.40E-07 | 0.082366 | 0.07537  | 0.08962  |
| -0.03473 | 0.454    | 0.202563 | 1.03E-05 | 0.080687 | 0.08154  | 0.175098 | 0.00014  | 0.285443 |
| -0.15324 | 0.00089  | -0.48689 | 3.60E-29 | -0.27909 | 8.38E-10 | -0.18995 | 3.60E-05 | -0.17971 |
| -0.18638 | 5.07E-05 | 0.025166 | 0.5875   | -0.05016 | 0.2794   | -0.04159 | 0.36986  | -0.23275 |
| 0.120823 | 0.00896  | 0.238517 | 1.83E-07 | 0.186835 | 4.85E-05 | -0.07019 | 0.12984  | -0.04381 |
| 0.0852   | 0.06583  | 0.284177 | 4.00E-10 | 0.254949 | 2.31E-08 | 0.058631 | 0.20597  | 0.062063 |
| 0.24175  | 1.23E-07 | 0.34973  | 6.99E-15 | 0.223214 | 1.10E-06 | 0.279652 | 7.74E-10 | 0.154925 |
| 0.405651 | 6.33E-20 | 0.497037 | 1.65E-30 | 0.377132 | 3.13E-17 | 0.252943 | 2.99E-08 | 0.187468 |
| 0.188129 | 4.29E-05 | 0.471441 | 3.24E-27 | 0.333896 | 1.26E-13 | 0.160372 | 0.0005   | 0.36663  |
| 0.204469 | 8.43E-06 | 0.458104 | 1.32E-25 | 0.31207  | 5.24E-12 | 0.217113 | 2.18E-06 | 0.145962 |
| 0.174373 | 0.00015  | -0.30711 | 1.17E-11 | -0.01848 | 0.69044  | 0.030614 | 0.50928  | -0.08329 |
| -0.30204 | 2.63E-11 | -0.03044 | 0.51171  | -0.19002 | 3.58E-05 | -0.0598  | 0.19703  | -0.14346 |
| -0.03645 | 0.432    | -0.41675 | 4.79E-21 | -0.11707 | 0.01135  | -0.11595 | 0.01216  | -0.10604 |
| -0.00889 | 0.84808  | 0.001855 | 0.96811  | 0.082873 | 0.07359  | 0.054119 | 0.24311  | -0.18035 |
| 0.168976 | 0.00024  | 0.213041 | 3.40E-06 | 0.178329 | 0.00011  | 0.082585 | 0.07459  | 0.127648 |
| 0.194018 | 2.42E-05 | 0.511872 | 1.50E-32 | 0.422486 | 1.22E-21 | 0.210429 | 4.50E-06 | 0.147262 |
| 0.071837 | 0.12108  | -0.129   | 0.00524  | -0.01346 | 0.77172  | -0.08965 | 0.05285  | 0.088645 |
| -0.01962 | 0.67242  | 0.303924 | 1.95E-11 | 0.171025 | 0.0002   | 0.119567 | 0.0097   | 0.136545 |
| 0.071886 | 0.12083  | 0.222249 | 1.23E-06 | 0.265744 | 5.46E-09 | -0.01993 | 0.66751  | -0.11841 |
| 0.12182  | 0.00841  | 0.390413 | 1.88E-18 | 0.423276 | 1.00E-21 | 0.069471 | 0.13386  | 0.044466 |

|          |          |          |          |          |          |          |          |          |
|----------|----------|----------|----------|----------|----------|----------|----------|----------|
| -0.172   | 0.00019  | 0.163874 | 0.00038  | 0.130457 | 0.00475  | -0.01567 | 0.73561  | 0.027422 |
| -0.03292 | 0.47787  | 0.278989 | 8.51E-10 | 0.241737 | 1.23E-07 | 0.053588 | 0.24777  | 0.047728 |
| 0.066178 | 0.15333  | -0.46584 | 1.57E-26 | -0.34622 | 1.35E-14 | -0.02561 | 0.58095  | -0.15462 |
| 0.167461 | 0.00028  | 0.337033 | 7.22E-14 | 0.26597  | 5.29E-09 | 0.131888 | 0.0043   | 0.117729 |
| -0.28044 | 6.90E-10 | -0.13511 | 0.00344  | -0.26948 | 3.27E-09 | -0.12668 | 0.00612  | -0.29639 |
| -0.01242 | 0.78902  | 0.235394 | 2.66E-07 | 0.195336 | 2.13E-05 | -0.00476 | 0.91828  | 0.039889 |
| -0.1363  | 0.00316  | -0.45815 | 1.30E-25 | -0.37586 | 4.06E-17 | -0.23728 | 2.12E-07 | -0.24939 |
| -0.24958 | 4.61E-08 | -0.0537  | 0.24677  | -0.00936 | 0.84011  | -0.12835 | 0.00547  | -0.1107  |
| -0.22906 | 5.63E-07 | -0.00502 | 0.91388  | -0.0156  | 0.73673  | -0.10944 | 0.01799  | -0.1057  |
| -0.0486  | 0.29458  | 0.030851 | 0.506    | 0.087672 | 0.05833  | -0.06694 | 0.14863  | -0.05172 |
| -0.05591 | 0.2278   | 0.22905  | 5.64E-07 | 0.136234 | 0.00318  | 0.013965 | 0.76343  | 0.010619 |
| 0.030554 | 0.51011  | -0.33525 | 9.93E-14 | -0.18856 | 4.12E-05 | -0.0848  | 0.06712  | -0.11112 |
| 0.141776 | 0.00213  | 0.35608  | 2.09E-15 | 0.404983 | 7.37E-20 | 0.083512 | 0.07138  | 0.187271 |
| -0.01366 | 0.76845  | 0.152848 | 0.00092  | 0.102135 | 0.02731  | -0.00402 | 0.93102  | 0.004641 |
| 0.268987 | 3.49E-09 | 0.42217  | 1.31E-21 | 0.398797 | 2.97E-19 | 0.119426 | 0.00979  | 0.054946 |
| -0.11733 | 0.01117  | 0.059321 | 0.20068  | -0.05203 | 0.26178  | -0.0089  | 0.84786  | -0.00318 |
| 0.31997  | 1.41E-12 | 0.424175 | 8.08E-22 | 0.284751 | 3.68E-10 | 0.174794 | 0.00015  | 0.263816 |
| 0.229968 | 5.07E-07 | 0.379229 | 2.02E-17 | 0.322306 | 9.48E-13 | 0.148429 | 0.0013   | 0.219784 |
| -0.08278 | 0.0739   | 0.173017 | 0.00017  | 0.116181 | 0.01199  | -0.0257  | 0.57961  | -0.05754 |
| 0.174315 | 0.00015  | 0.271673 | 2.41E-09 | 0.206344 | 6.94E-06 | 0.178948 | 0.0001   | -0.00441 |
| -0.35153 | 4.98E-15 | -0.11304 | 0.01452  | -0.23823 | 1.89E-07 | -0.17821 | 0.00011  | -0.20906 |
| 0.108894 | 0.01858  | 0.127953 | 0.00562  | 0.137298 | 0.00295  | -0.17679 | 0.00012  | -0.30532 |
| 0.038664 | 0.4045   | 0.454449 | 3.54E-25 | 0.309661 | 7.77E-12 | 0.093547 | 0.04332  | 0.0418   |
| 0.00171  | 0.9706   | 0.317098 | 2.28E-12 | 0.232338 | 3.83E-07 | 0.115384 | 0.01259  | 0.086004 |
| -0.28443 | 3.86E-10 | -0.44743 | 2.28E-24 | -0.37713 | 3.13E-17 | -0.2071  | 6.41E-06 | -0.10148 |
| 0.081044 | 0.08019  | 0.250644 | 4.02E-08 | 0.23824  | 1.89E-07 | 0.074222 | 0.10919  | 0.021866 |
| 0.196929 | 1.82E-05 | -0.24677 | 6.58E-08 | -0.27165 | 2.41E-09 | 0.062319 | 0.17881  | 0.022854 |
| -0.04174 | 0.3681   | -0.03253 | 0.48315  | -0.04205 | 0.3646   | -0.05417 | 0.24268  | -0.02292 |
| 0.026085 | 0.57393  | 0.115129 | 0.01279  | 0.084553 | 0.06791  | -0.18353 | 6.62E-05 | -0.12444 |
| 0.026457 | 0.56846  | 0.364268 | 4.23E-16 | 0.285976 | 3.07E-10 | 0.111459 | 0.01597  | 0.09373  |
| 0.176019 | 0.00013  | 0.409934 | 2.37E-20 | 0.452017 | 6.78E-25 | 0.19996  | 1.34E-05 | 0.121758 |
| -0.01696 | 0.71467  | 0.349009 | 8.00E-15 | 0.277614 | 1.04E-09 | 0.05746  | 0.21519  | 0.0936   |
| 0.04416  | 0.34099  | 0.313271 | 4.30E-12 | 0.144245 | 0.00178  | 0.19753  | 1.71E-05 | 0.160706 |
| 0.124837 | 0.00691  | -0.28487 | 3.61E-10 | -0.19235 | 2.86E-05 | -0.08573 | 0.06415  | -0.14986 |
| 0.014627 | 0.75257  | 0.251302 | 3.70E-08 | 0.230106 | 4.98E-07 | -0.04192 | 0.36609  | -0.12192 |
| 0.072319 | 0.1186   | 0.375188 | 4.67E-17 | 0.232188 | 3.90E-07 | 0.068628 | 0.13865  | 0.022964 |
| -0.1227  | 0.00794  | -0.33207 | 1.75E-13 | -0.20753 | 6.12E-06 | -0.17672 | 0.00012  | -0.22736 |
| -0.19705 | 1.79E-05 | -0.22042 | 1.51E-06 | -0.06882 | 0.13755  | -0.28731 | 2.51E-10 | -0.45015 |
| 0.058473 | 0.2072   | 0.270511 | 2.83E-09 | 0.174027 | 0.00016  | 0.242357 | 1.14E-07 | 0.235466 |
| 0.031381 | 0.49872  | 0.163272 | 0.0004   | 0.096006 | 0.03808  | -0.0625  | 0.17757  | -0.0473  |
| -0.04525 | 0.32915  | 0.020284 | 0.66196  | 0.094625 | 0.04096  | 0.039486 | 0.39458  | -0.04001 |
| -0.11561 | 0.01241  | 0.086499 | 0.0618   | 0.023592 | 0.61107  | -0.02528 | 0.58581  | -0.1384  |
| 0.030989 | 0.5041   | 0.240913 | 1.36E-07 | 0.215085 | 2.72E-06 | -0.02543 | 0.58353  | -0.08344 |
| 0.177958 | 0.00011  | -0.30163 | 2.81E-11 | -0.14386 | 0.00183  | -0.05821 | 0.20924  | -0.07671 |
| 0.178222 | 0.00011  | 0.263633 | 7.27E-09 | 0.254667 | 2.39E-08 | 0.052617 | 0.25646  | -0.09523 |



|          |          |          |          |          |          |          |          |          |
|----------|----------|----------|----------|----------|----------|----------|----------|----------|
| 0.139079 | 0.00259  | 0.361137 | 7.83E-16 | 0.300651 | 3.27E-11 | 0.061367 | 0.18556  | -0.0289  |
| -0.00014 | 0.99762  | -0.01079 | 0.81609  | 0.081816 | 0.07735  | -0.14426 | 0.00177  | -0.3372  |
| -0.07139 | 0.1234   | -0.04081 | 0.37889  | -0.05791 | 0.21157  | -0.01127 | 0.80806  | -0.21054 |
| 0.074428 | 0.1082   | 0.131808 | 0.00433  | 0.049449 | 0.28624  | -0.01227 | 0.7914   | -0.05605 |
| -0.10162 | 0.0281   | 0.183763 | 6.48E-05 | 0.138948 | 0.00262  | -0.04794 | 0.30119  | -0.01005 |
| 0.061429 | 0.18511  | 0.1412   | 0.00222  | 0.044622 | 0.33596  | 0.105237 | 0.02294  | -0.03148 |
| -0.1258  | 0.00649  | 0.085229 | 0.06573  | 0.021342 | 0.6455   | -0.00307 | 0.94726  | -0.11881 |
| 0.087272 | 0.0595   | 0.399988 | 2.28E-19 | 0.276961 | 1.14E-09 | 0.130089 | 0.00487  | 0.197983 |
| 0.150949 | 0.00107  | 0.39291  | 1.09E-18 | 0.11348  | 0.01414  | 0.255841 | 2.05E-08 | 0.374916 |
| 0.1238   | 0.0074   | 0.370052 | 1.33E-16 | 0.223573 | 1.06E-06 | 0.149626 | 0.00118  | 0.371581 |
| -0.06462 | 0.16325  | -0.37171 | 9.51E-17 | -0.37811 | 2.55E-17 | -0.02424 | 0.60128  | -0.14684 |
| -0.05822 | 0.20917  | -0.3277  | 3.75E-13 | -0.31438 | 3.58E-12 | -0.07175 | 0.12156  | -0.20777 |
| 0.01954  | 0.67363  | 0.101104 | 0.02892  | 0.12348  | 0.00755  | 0.066001 | 0.15444  | -0.08    |
| -0.213   | 3.41E-06 | -0.38179 | 1.18E-17 | -0.29422 | 8.87E-11 | -0.23344 | 3.36E-07 | -0.00328 |
| -0.1645  | 0.00036  | -0.4623  | 4.18E-26 | -0.26205 | 9.00E-09 | -0.31856 | 1.79E-12 | -0.2463  |
| -0.27521 | 1.46E-09 | -0.45223 | 6.40E-25 | -0.47095 | 3.73E-27 | -0.14996 | 0.00115  | -0.29771 |
| 0.283685 | 4.30E-10 | 0.388697 | 2.72E-18 | 0.311734 | 5.54E-12 | 0.150669 | 0.00109  | -0.01405 |
| 0.220374 | 1.52E-06 | 0.395185 | 6.61E-19 | 0.303671 | 2.03E-11 | 0.056759 | 0.22085  | -0.03824 |
| 0.218939 | 1.78E-06 | 0.372135 | 8.72E-17 | 0.313253 | 4.32E-12 | 0.137417 | 0.00292  | -0.05381 |
| -0.11777 | 0.01086  | 0.080832 | 0.08099  | -0.0176  | 0.70439  | 0.120262 | 0.00929  | 0.037753 |
| 0.023279 | 0.61582  | 0.118038 | 0.01068  | 0.183166 | 6.85E-05 | -0.03766 | 0.41679  | -0.19951 |
| 0.0107   | 0.81762  | 0.117997 | 0.01071  | 0.072127 | 0.11958  | 0.000588 | 0.98989  | -0.05302 |
| 0.236206 | 2.42E-07 | 0.160897 | 0.00048  | 0.129217 | 0.00516  | 0.183641 | 6.56E-05 | 0.38346  |
| 0.085831 | 0.06384  | 0.435887 | 4.44E-23 | 0.367357 | 2.29E-16 | 0.175833 | 0.00013  | 0.123611 |
| -0.11442 | 0.01336  | 0.285654 | 3.22E-10 | 0.122332 | 0.00813  | 0.028943 | 0.53268  | 0.042884 |
| -0.15513 | 0.00077  | 0.117492 | 0.01105  | 0.115858 | 0.01223  | -0.0539  | 0.24506  | -0.02728 |
| -0.16344 | 0.00039  | -0.31611 | 2.69E-12 | -0.2762  | 1.27E-09 | -0.03527 | 0.44697  | 0.039838 |
| -0.0447  | 0.33512  | 0.27102  | 2.64E-09 | 0.162658 | 0.00042  | 0.09592  | 0.03826  | 0.043977 |
| -0.00469 | 0.91952  | 0.224436 | 9.60E-07 | 0.118092 | 0.01065  | 0.066662 | 0.15035  | -0.01237 |
| 0.034957 | 0.45107  | 0.13914  | 0.00258  | 0.079176 | 0.08743  | -0.04786 | 0.30207  | -0.16012 |
| 0.235209 | 2.72E-07 | 0.476278 | 8.12E-28 | 0.432725 | 9.83E-23 | 0.102146 | 0.0273   | 0.09109  |
| 0.360354 | 9.13E-16 | 0.143979 | 0.00181  | 0.109457 | 0.01797  | 0.230073 | 5.00E-07 | 0.465511 |
| 0.07498  | 0.10561  | 0.199486 | 1.40E-05 | 0.139874 | 0.00245  | 0.012624 | 0.78555  | -0.07294 |
| -0.13894 | 0.00262  | 0.132811 | 0.00404  | 0.088052 | 0.05725  | -0.03911 | 0.3991   | -0.0309  |
| 0.075285 | 0.10419  | 0.351319 | 5.18E-15 | 0.343428 | 2.26E-14 | 0.065858 | 0.15534  | 0.02654  |
| -0.17882 | 0.0001   | 0.032277 | 0.48654  | 0.022099 | 0.63383  | -0.1063  | 0.02158  | -0.15921 |
| 0.050854 | 0.27276  | 0.299958 | 3.65E-11 | 0.319798 | 1.45E-12 | 0.01491  | 0.74794  | 0.007697 |
| 0.015543 | 0.73763  | 0.194555 | 2.30E-05 | 0.178257 | 0.00011  | 0.000667 | 0.98852  | -0.11091 |
| 0.049586 | 0.28491  | 0.185428 | 5.54E-05 | 0.150153 | 0.00114  | -0.09921 | 0.03207  | -0.13784 |
| 0.207011 | 6.47E-06 | 0.313399 | 4.21E-12 | 0.364873 | 3.75E-16 | 0.110147 | 0.01726  | 0.050592 |
| 0.208709 | 5.41E-06 | 0.447137 | 2.46E-24 | 0.358227 | 1.38E-15 | 0.129422 | 0.00509  | 0.179546 |
| 0.249755 | 4.51E-08 | 0.263381 | 7.52E-09 | 0.261663 | 9.48E-09 | 0.213174 | 3.35E-06 | 0.026151 |
| -0.11396 | 0.01373  | 0.048481 | 0.2958   | 0.029257 | 0.52824  | -0.06297 | 0.17433  | -0.11108 |
| 0.100921 | 0.02921  | 0.305176 | 1.60E-11 | 0.303105 | 2.22E-11 | 0.052815 | 0.25467  | 0.002874 |
| 0.060157 | 0.19439  | -0.07511 | 0.10499  | -0.17511 | 0.00014  | 0.060845 | 0.18933  | 0.325074 |

|          |          |          |          |          |          |          |          |          |
|----------|----------|----------|----------|----------|----------|----------|----------|----------|
| -0.04947 | 0.28609  | 0.31872  | 1.74E-12 | 0.302226 | 2.55E-11 | -0.01502 | 0.74616  | -0.11513 |
| 0.15549  | 0.00075  | -0.12266 | 0.00797  | -0.26866 | 3.66E-09 | 0.203236 | 9.58E-06 | 0.1454   |
| -0.04555 | 0.32595  | 0.274502 | 1.62E-09 | 0.22678  | 7.33E-07 | 0.041232 | 0.37399  | 0.025224 |
| 0.159024 | 0.00056  | 0.405579 | 6.44E-20 | 0.282084 | 5.43E-10 | 0.205356 | 7.69E-06 | 0.31343  |
| -0.11383 | 0.01385  | 0.049603 | 0.28474  | 0.115491 | 0.01251  | -0.24864 | 5.19E-08 | -0.35012 |
| 0.219592 | 1.66E-06 | 0.220751 | 1.46E-06 | 0.31358  | 4.09E-12 | 0.124401 | 0.00711  | -0.00774 |
| 0.133123 | 0.00395  | 0.488641 | 2.13E-29 | 0.436314 | 3.99E-23 | 0.097099 | 0.03594  | 0.051289 |
| 0.097923 | 0.03438  | 0.289628 | 1.78E-10 | 0.164613 | 0.00035  | 0.179282 | 9.80E-05 | 0.1255   |
| 0.261284 | 9.98E-09 | 0.344235 | 1.94E-14 | 0.190833 | 3.31E-05 | 0.223898 | 1.02E-06 | -0.00801 |
| 0.029662 | 0.52255  | 0.307874 | 1.04E-11 | 0.257905 | 1.56E-08 | 0.111162 | 0.01625  | -0.01638 |
| -0.01724 | 0.7102   | 0.204813 | 8.14E-06 | 0.175302 | 0.00014  | 0.009288 | 0.84134  | 0.002399 |
| 0.136099 | 0.00321  | 0.4494   | 1.36E-24 | 0.459849 | 8.19E-26 | 0.012126 | 0.79382  | 0.024596 |
| -0.06287 | 0.17503  | 0.114773 | 0.01307  | 0.132035 | 0.00426  | -0.0507  | 0.27425  | -0.17523 |
| 0.165534 | 0.00033  | 0.378121 | 2.55E-17 | 0.290246 | 1.62E-10 | 0.060302 | 0.19332  | 0.006989 |
| 0.007388 | 0.87349  | -0.27582 | 1.34E-09 | -0.18982 | 3.65E-05 | -0.0182  | 0.69481  | -0.03982 |
| 0.083878 | 0.07015  | 0.486737 | 3.77E-29 | 0.381095 | 1.37E-17 | 0.199393 | 1.42E-05 | 0.18847  |
| 0.101447 | 0.02837  | 0.516196 | 3.66E-33 | 0.447341 | 2.33E-24 | 0.183114 | 6.88E-05 | 0.212236 |
| 0.116105 | 0.01205  | 0.4605   | 6.86E-26 | 0.412267 | 1.38E-20 | 0.116072 | 0.01207  | 0.063541 |
| -0.04117 | 0.37469  | 0.049227 | 0.28842  | 0.032203 | 0.48754  | 0.053809 | 0.24583  | 0.081134 |
| 0.01112  | 0.81059  | 0.033937 | 0.46439  | -0.10731 | 0.02037  | -0.01338 | 0.77301  | 0.07096  |
| 0.051606 | 0.26572  | 0.262126 | 8.91E-09 | 0.196143 | 1.96E-05 | 0.027921 | 0.54725  | -0.00464 |
| 0.139022 | 0.0026   | 0.280926 | 6.43E-10 | 0.245804 | 7.43E-08 | -0.0503  | 0.27802  | -0.08539 |
| 0.321883 | 1.02E-12 | 0.708693 | 1.87E-72 | 0.469591 | 5.47E-27 | 0.356854 | 1.80E-15 | 0.425207 |
| 0.039138 | 0.39876  | 0.201318 | 1.17E-05 | 0.10545  | 0.02266  | 0.019847 | 0.66881  | -0.17478 |
| -0.01058 | 0.8196   | 0.331939 | 1.79E-13 | 0.309843 | 7.54E-12 | 0.071703 | 0.12178  | 0.046707 |
| 0.03923  | 0.39765  | 0.263327 | 7.58E-09 | 0.106601 | 0.02122  | 0.130786 | 0.00464  | 0.075247 |
| 0.077179 | 0.09574  | 0.432711 | 9.87E-23 | 0.410435 | 2.11E-20 | 0.094911 | 0.04035  | 0.06678  |
| 0.307223 | 1.15E-11 | 0.444044 | 5.51E-24 | 0.379158 | 2.05E-17 | 0.114204 | 0.01353  | 0.078383 |
| 0.102531 | 0.02672  | 0.33141  | 1.96E-13 | 0.206752 | 6.65E-06 | 0.017209 | 0.7107   | 0.029261 |
| 0.125656 | 0.00655  | 0.360905 | 8.19E-16 | 0.318123 | 1.92E-12 | 0.207272 | 6.29E-06 | 0.091818 |
| -0.10045 | 0.02997  | 0.387585 | 3.45E-18 | 0.219726 | 1.63E-06 | 0.099877 | 0.03093  | 0.151173 |
| 0.189561 | 3.74E-05 | 0.462629 | 3.82E-26 | 0.256728 | 1.83E-08 | 0.137335 | 0.00294  | 0.129933 |
| -0.15336 | 0.00088  | -0.0038  | 0.93479  | 0.011828 | 0.79878  | -0.08785 | 0.05782  | -0.1338  |
| -0.0041  | 0.92956  | 0.236628 | 2.30E-07 | 0.079247 | 0.08715  | 0.012427 | 0.78882  | 0.013157 |
| 0.009342 | 0.84042  | 0.305951 | 1.41E-11 | 0.283505 | 4.41E-10 | -0.08571 | 0.06422  | -0.09229 |
| 0.035429 | 0.44497  | -0.33339 | 1.38E-13 | -0.16211 | 0.00044  | 0.018772 | 0.68576  | -0.06811 |
| 0.026274 | 0.57114  | 0.285927 | 3.09E-10 | 0.224738 | 9.27E-07 | 0.029567 | 0.52388  | 0.029553 |
| 0.142451 | 0.00203  | 0.370397 | 1.24E-16 | 0.281624 | 5.81E-10 | 0.030379 | 0.51254  | 0.033835 |
| 0.073577 | 0.11231  | 0.404868 | 7.57E-20 | 0.219876 | 1.61E-06 | 0.180552 | 8.72E-05 | 0.039734 |
| -0.02135 | 0.64536  | 0.125391 | 0.00666  | 0.117684 | 0.01092  | -0.08421 | 0.06903  | -0.18717 |
| 0.030217 | 0.51479  | 0.18242  | 7.34E-05 | 0.137318 | 0.00294  | -0.08026 | 0.08318  | -0.09267 |
| -0.12106 | 0.00882  | -0.12675 | 0.00609  | -0.05516 | 0.23418  | -0.09029 | 0.05119  | -0.21787 |
| 0.008668 | 0.8518   | 0.167015 | 0.00029  | 0.245265 | 7.95E-08 | 0.024944 | 0.59079  | 0.009233 |
| -0.03711 | 0.42368  | 0.173253 | 0.00017  | 0.213308 | 3.30E-06 | 0.016008 | 0.73008  | 0.091263 |
| 0.034314 | 0.45944  | 0.278473 | 9.17E-10 | 0.359415 | 1.10E-15 | 0.055612 | 0.23034  | 0.095365 |

|          |         |          |          |          |          |          |         |          |
|----------|---------|----------|----------|----------|----------|----------|---------|----------|
| 0.002182 | 0.9625  | 0.209918 | 4.76E-06 | 0.31418  | 3.71E-12 | -0.01423 | 0.7591  | 0.060257 |
| 0.063784 | 0.1688  | 0.177304 | 0.00012  | 0.16709  | 0.00029  | 0.068386 | 0.14005 | 0.088061 |
| 0.004637 | 0.92039 | 0.138093 | 0.00278  | 0.189817 | 3.65E-05 | 0.007245 | 0.87591 | 0.065073 |
| -0.02652 | 0.5675  | 0.114107 | 0.01361  | 0.203218 | 9.60E-06 | -0.02323 | 0.61661 | -0.01063 |
| 0.001817 | 0.96877 | 0.172191 | 0.00018  | 0.19445  | 2.32E-05 | -0.01279 | 0.78284 | 0.055867 |
| 0.035406 | 0.44527 | 0.229496 | 5.35E-07 | 0.281794 | 5.67E-10 | 0.046835 | 0.31252 | 0.103773 |
| 0.093219 | 0.04407 | 0.090676 | 0.05019  | 0.168579 | 0.00025  | -0.04017 | 0.38642 | -0.05919 |
| 0.040558 | 0.38185 | 0.138656 | 0.00267  | 0.090095 | 0.05169  | 0.132901 | 0.00401 | 0.011116 |
| 0.000588 | 0.98989 | 0.181737 | 7.82E-05 | 0.218776 | 1.81E-06 | 0.011374 | 0.80634 | 0.079041 |
| -0.02672 | 0.56458 | 0.070924 | 0.12589  | 0.100822 | 0.02937  | -0.01654 | 0.72151 | -0.0107  |
| -0.07359 | 0.11225 | -0.00858 | 0.85326  | 0.060437 | 0.19232  | -0.16413 | 0.00037 | -0.12911 |
| 0.027647 | 0.55119 | 0.263556 | 7.35E-09 | 0.312172 | 5.16E-12 | 0.032781 | 0.47975 | 0.126187 |
| 0.031266 | 0.5003  | 0.19164  | 3.06E-05 | 0.197975 | 1.64E-05 | -0.01647 | 0.72258 | 0.110969 |
| 0.061802 | 0.18245 | 0.277784 | 1.01E-09 | 0.325976 | 5.06E-13 | 0.05624  | 0.22511 | 0.114657 |
| 0.084651 | 0.06759 | 0.191614 | 3.07E-05 | 0.205616 | 7.48E-06 | 0.058519 | 0.20684 | 0.070114 |
| -0.00587 | 0.89929 | -0.01983 | 0.669    | 0.020183 | 0.66354  | -0.11077 | 0.01663 | -0.06372 |
| -0.02618 | 0.57256 | 0.156757 | 0.00068  | 0.214326 | 2.96E-06 | -0.00072 | 0.98755 | 0.066232 |
| -0.01505 | 0.74573 | 0.22274  | 1.16E-06 | 0.186641 | 4.94E-05 | 0.063146 | 0.1731  | 0.133859 |
| -0.02913 | 0.53006 | 0.150863 | 0.00107  | 0.19283  | 2.72E-05 | -0.00211 | 0.96375 | 0.072907 |
| -0.11582 | 0.01226 | -0.0019  | 0.96735  | 0.017765 | 0.70179  | -0.09655 | 0.03701 | -0.08651 |
| 0.088128 | 0.05703 | 0.189626 | 3.72E-05 | 0.276316 | 1.25E-09 | 0.083704 | 0.07073 | 0.086216 |
| 0.001272 | 0.97814 | 0.143837 | 0.00183  | 0.17514  | 0.00014  | -0.02411 | 0.6033  | 0.0572   |
| -0.02523 | 0.58651 | 0.146869 | 0.00146  | 0.172581 | 0.00018  | 0.019822 | 0.66919 | 0.057872 |
| 0.047553 | 0.30515 | 0.171878 | 0.00019  | 0.246916 | 6.46E-08 | 0.014132 | 0.76068 | 0.020071 |
| 0.010472 | 0.82143 | 0.192139 | 2.91E-05 | 0.306508 | 1.29E-11 | -0.02552 | 0.58217 | 0.003151 |
| 0.046366 | 0.31739 | 0.145792 | 0.00158  | 0.128754 | 0.00533  | 0.097122 | 0.03589 | 0.081892 |
| 0.010459 | 0.82166 | 0.276537 | 1.21E-09 | 0.295458 | 7.33E-11 | 0.045199 | 0.32974 | 0.134252 |
| -0.02155 | 0.64229 | 0.153602 | 0.00087  | 0.192536 | 2.80E-05 | 0.01148  | 0.80458 | 0.054208 |
| 0.058527 | 0.20678 | 0.192221 | 2.89E-05 | 0.233239 | 3.45E-07 | 0.033524 | 0.46985 | 0.073795 |
| -0.02861 | 0.53739 | 0.151577 | 0.00102  | 0.206151 | 7.08E-06 | 0.007805 | 0.86641 | 0.050853 |
| -0.0273  | 0.55624 | 0.164892 | 0.00035  | 0.143134 | 0.00193  | 0.066228 | 0.15302 | 0.012874 |
| 0.167419 | 0.00028 | 0.286246 | 2.95E-10 | 0.367465 | 2.24E-16 | 0.160887 | 0.00048 | 0.326361 |
| -0.0626  | 0.17682 | 0.108718 | 0.01877  | 0.129607 | 0.00503  | -0.05579 | 0.22884 | 0.024321 |
| 0.048976 | 0.29088 | 0.260021 | 1.18E-08 | 0.263885 | 7.03E-09 | 0.066868 | 0.14909 | 0.1677   |
| -0.01164 | 0.80185 | 0.106243 | 0.02166  | 0.126313 | 0.00627  | 0.030251 | 0.51432 | 0.087082 |
| 0.129337 | 0.00512 | 0.18957  | 3.74E-05 | 0.170022 | 0.00022  | 0.118203 | 0.01057 | 0.089943 |
| 0.047036 | 0.31044 | 0.134984 | 0.00347  | 0.15765  | 0.00063  | 0.034285 | 0.45982 | 0.036745 |
| 0.026691 | 0.56505 | 0.281785 | 5.68E-10 | 0.337271 | 6.91E-14 | 0.009566 | 0.83666 | 0.114838 |
| -0.11068 | 0.01672 | 0.063731 | 0.16915  | 0.118086 | 0.01065  | -0.09509 | 0.03998 | 0.003829 |
| -0.00218 | 0.96246 | 0.186029 | 5.24E-05 | 0.200534 | 1.26E-05 | -0.0351  | 0.44926 | 0.040842 |
| 0.084996 | 0.06648 | 0.225554 | 8.44E-07 | 0.259362 | 1.29E-08 | 0.081533 | 0.07838 | 0.095179 |
| -0.09861 | 0.03314 | -0.01232 | 0.79065  | -0.01237 | 0.7898   | -0.06851 | 0.13934 | 0.013685 |
| -0.00751 | 0.87144 | 0.174567 | 0.00015  | 0.145108 | 0.00167  | 0.096377 | 0.03734 | 0.159434 |
| 0.037188 | 0.42269 | 0.22685  | 7.28E-07 | 0.277459 | 1.06E-09 | 0.043868 | 0.3442  | 0.101174 |
| -0.03316 | 0.47465 | 0.118621 | 0.0103   | 0.165103 | 0.00034  | -0.02457 | 0.5964  | 0.073707 |

|           |          |          |          |          |          |          |         |          |
|-----------|----------|----------|----------|----------|----------|----------|---------|----------|
| 0.066945  | 0.14862  | 0.280592 | 6.75E-10 | 0.347957 | 9.75E-15 | 0.070869 | 0.12619 | 0.130306 |
| 0.024156  | 0.60258  | 0.169029 | 0.00024  | 0.202765 | 1.01E-05 | -0.01747 | 0.70647 | 0.103006 |
| 0.009418  | 0.83915  | 0.218847 | 1.80E-06 | 0.260914 | 1.05E-08 | 0.021776 | 0.63879 | 0.100836 |
| 0.03439   | 0.45845  | 0.269021 | 3.48E-09 | 0.300203 | 3.51E-11 | 0.068207 | 0.1411  | 0.158366 |
| 0.043651  | 0.34659  | 0.23776  | 2.00E-07 | 0.230733 | 4.63E-07 | 0.035766 | 0.44066 | 0.11576  |
| -0.0221   | 0.63378  | 0.240283 | 1.47E-07 | 0.270694 | 2.76E-09 | 0.036573 | 0.43041 | 0.076818 |
| 0.189723  | 3.68E-05 | 0.358122 | 1.41E-15 | 0.389799 | 2.14E-18 | 0.054191 | 0.24249 | 0.08209  |
| -0.1856   | 5.45E-05 | 0.085811 | 0.06391  | 0.069259 | 0.13505  | -0.02784 | 0.54849 | 0.068194 |
| -0.08264  | 0.0744   | 0.046048 | 0.32073  | 0.024602 | 0.5959   | 0.003864 | 0.93364 | -0.01602 |
| 0.032205  | 0.48752  | 0.17469  | 0.00015  | 0.210331 | 4.55E-06 | 0.020302 | 0.66167 | 0.05075  |
| -0.11602  | 0.01211  | 0.117517 | 0.01104  | 0.172203 | 0.00018  | -0.01377 | 0.76665 | 0.040827 |
| -0.07308  | 0.11475  | 0.099679 | 0.03127  | 0.157733 | 0.00062  | -0.00932 | 0.8408  | 0.034581 |
| -0.01816  | 0.69553  | 0.139249 | 0.00256  | 0.217344 | 2.13E-06 | -0.1007  | 0.02957 | -0.06948 |
| 0.003975  | 0.93173  | 0.182869 | 7.04E-05 | 0.236668 | 2.29E-07 | -0.00542 | 0.907   | 0.049406 |
| -0.0826   | 0.07454  | 0.12233  | 0.00813  | 0.16791  | 0.00027  | -0.04187 | 0.36659 | 0.022955 |
| 0.042251  | 0.36229  | 0.27833  | 9.36E-10 | 0.303414 | 2.12E-11 | 0.085254 | 0.06565 | 0.196884 |
| 0.018006  | 0.69794  | 0.104544 | 0.02386  | 0.15063  | 0.00109  | 0.060375 | 0.19278 | -0.00542 |
| 0.020487  | 0.65879  | 0.29873  | 4.42E-11 | 0.383728 | 7.85E-18 | 0.063493 | 0.17075 | 0.117932 |
| 0.001416  | 0.97565  | 0.151923 | 0.00099  | 0.21628  | 2.39E-06 | 0.015553 | 0.73746 | 0.03411  |
| 0.009627  | 0.83563  | 0.203135 | 9.68E-06 | 0.235049 | 2.78E-07 | 0.066238 | 0.15296 | 0.127996 |
| 0.023514  | 0.61226  | 0.115276 | 0.01267  | 0.15411  | 0.00083  | -0.06045 | 0.19223 | 0.014931 |
| 0.048579  | 0.29482  | 0.237947 | 1.96E-07 | 0.314652 | 3.43E-12 | -0.02369 | 0.60966 | 0.041054 |
| -0.01346  | 0.77169  | 0.141647 | 0.00215  | 0.177055 | 0.00012  | -0.02173 | 0.63955 | 0.04933  |
| -0.03733  | 0.4209   | 0.087613 | 0.0585   | 0.114069 | 0.01364  | -0.04724 | 0.30837 | 0.036981 |
| -2.37E-05 | 0.99959  | 0.163864 | 0.00038  | 0.216381 | 2.36E-06 | 0.009599 | 0.8361  | 0.068187 |
| 0.000284  | 0.99511  | 0.165548 | 0.00033  | 0.204868 | 8.09E-06 | 0.012357 | 0.78999 | 0.074967 |
| -0.03604  | 0.43719  | 0.119177 | 0.00995  | 0.218887 | 1.79E-06 | 0.020895 | 0.65244 | 0.002127 |
| -0.02762  | 0.55164  | 0.096353 | 0.03739  | 0.140224 | 0.00239  | -0.02993 | 0.51885 | 0.0172   |
| -0.01949  | 0.67438  | 0.122644 | 0.00797  | 0.207732 | 6.00E-06 | -0.01223 | 0.79207 | 0.034535 |
| 0.011037  | 0.81198  | 0.184144 | 6.25E-05 | 0.235314 | 2.69E-07 | 0.036537 | 0.43086 | 0.0928   |
| 0.01936   | 0.67646  | 0.198144 | 1.61E-05 | 0.262295 | 8.71E-09 | 0.046891 | 0.31194 | 0.111284 |
| -0.00678  | 0.88381  | 0.213884 | 3.10E-06 | 0.249812 | 4.48E-08 | 0.074966 | 0.10567 | 0.152447 |
| 0.042784  | 0.35626  | 0.215911 | 2.49E-06 | 0.276034 | 1.30E-09 | 0.057214 | 0.21717 | 0.112161 |
| 0.04305   | 0.35328  | 0.273024 | 1.99E-09 | 0.343684 | 2.15E-14 | 0.087524 | 0.05876 | 0.126482 |
| 0.089069  | 0.05442  | 0.282295 | 5.27E-10 | 0.361618 | 7.13E-16 | 0.046103 | 0.32015 | 0.032477 |
| 0.011089  | 0.81111  | 0.048484 | 0.29577  | 0.075846 | 0.10163  | 0.033623 | 0.46854 | -0.01708 |
| 0.029778  | 0.52092  | 0.212888 | 3.46E-06 | 0.227646 | 6.64E-07 | 0.133317 | 0.0039  | 0.138913 |
| 0.007434  | 0.87271  | 0.106984 | 0.02076  | 0.12173  | 0.00845  | 0.062768 | 0.1757  | 0.0506   |
| -0.00918  | 0.84321  | 0.07159  | 0.12237  | 0.121005 | 0.00886  | -0.02902 | 0.53154 | -0.02955 |
| 0.023078  | 0.61888  | 0.127391 | 0.00584  | 0.156361 | 0.0007   | 0.053603 | 0.24764 | 0.057548 |
| 0.01604   | 0.72956  | 0.155097 | 0.00077  | 0.18378  | 6.47E-05 | 0.068454 | 0.13966 | 0.113403 |
| 0.090501  | 0.05064  | 0.125378 | 0.00667  | 0.233521 | 3.33E-07 | 0.094645 | 0.04091 | 0.057502 |
| -0.00421  | 0.92766  | 0.134573 | 0.00357  | 0.189063 | 3.92E-05 | 0.047601 | 0.30466 | 0.085974 |
| -0.02502  | 0.58967  | 0.177217 | 0.00012  | 0.233899 | 3.19E-07 | -0.02126 | 0.64673 | 0.030735 |
| 0.014871  | 0.74858  | 0.205308 | 7.73E-06 | 0.17758  | 0.00011  | -0.03128 | 0.5001  | 0.054293 |

|          |          |          |          |          |          |          |         |          |
|----------|----------|----------|----------|----------|----------|----------|---------|----------|
| -0.04187 | 0.36667  | 0.005941 | 0.89812  | 0.061661 | 0.18345  | -0.0989  | 0.03261 | -0.06645 |
| -0.02683 | 0.56302  | 0.139232 | 0.00257  | 0.192529 | 2.81E-05 | -0.00293 | 0.94963 | 0.05126  |
| 0.047567 | 0.305    | 0.239946 | 1.54E-07 | 0.255183 | 2.24E-08 | 0.045211 | 0.32961 | 0.134127 |
| -0.00665 | 0.8861   | 0.151903 | 0.00099  | 0.194325 | 2.35E-05 | -0.02076 | 0.65447 | 0.036128 |
| 0.022424 | 0.62885  | 0.211528 | 4.00E-06 | 0.26028  | 1.14E-08 | 0.047054 | 0.31025 | 0.093463 |
| 0.016521 | 0.72177  | 0.136472 | 0.00313  | 0.177172 | 0.00012  | -0.00018 | 0.99695 | 0.076339 |
| 0.016769 | 0.71777  | 0.192611 | 2.78E-05 | 0.165956 | 0.00032  | -0.01634 | 0.72474 | 0.046591 |
| -0.0476  | 0.30468  | 0.11996  | 0.00946  | 0.21586  | 2.50E-06 | -0.08742 | 0.05908 | -0.05249 |
| 0.024028 | 0.6045   | 0.166266 | 0.00031  | 0.20776  | 5.98E-06 | 0.02691  | 0.56186 | 0.056207 |
| 0.019027 | 0.68172  | 0.194821 | 2.24E-05 | 0.274976 | 1.51E-09 | -0.04364 | 0.34673 | 0.025346 |
| 0.026185 | 0.57245  | 0.155688 | 0.00074  | 0.196479 | 1.90E-05 | -0.0324  | 0.48485 | 0.060456 |
| -0.0112  | 0.80917  | 0.220222 | 1.54E-06 | 0.28616  | 2.98E-10 | 0.02079  | 0.65406 | 0.08587  |
| 0.02772  | 0.55014  | 0.208163 | 5.73E-06 | 0.232871 | 3.60E-07 | 0.054658 | 0.23844 | 0.125584 |
| -0.00548 | 0.90596  | 0.183939 | 6.38E-05 | 0.238617 | 1.81E-07 | 0.036472 | 0.43168 | 0.090273 |
| 0.021821 | 0.63811  | 0.160986 | 0.00048  | 0.179059 | 1.00E-04 | 0.03384  | 0.46567 | 0.090036 |
| 0.035691 | 0.44162  | 0.202561 | 1.03E-05 | 0.25296  | 2.99E-08 | 0.011906 | 0.79749 | 0.017304 |
| -0.03195 | 0.491    | 0.147955 | 0.00134  | 0.201304 | 1.17E-05 | -0.01963 | 0.67225 | 0.0504   |
| 0.007463 | 0.87221  | 0.361677 | 7.04E-16 | 0.258148 | 1.51E-08 | 0.090536 | 0.05055 | 0.147333 |
| 0.058932 | 0.20365  | 0.285601 | 3.24E-10 | 0.360038 | 9.71E-16 | 0.07329  | 0.11372 | 0.118426 |
| -0.05235 | 0.25891  | 0.089074 | 0.05441  | 0.098508 | 0.03332  | -0.06609 | 0.15385 | -0.01063 |
| -0.00658 | 0.88729  | 0.219322 | 1.71E-06 | 0.258803 | 1.39E-08 | 0.053831 | 0.24563 | 0.096228 |
| 0.007748 | 0.86738  | 0.245673 | 7.56E-08 | 0.338851 | 5.20E-14 | 0.069903 | 0.13145 | 0.094794 |
| 0.01258  | 0.78629  | 0.241516 | 1.27E-07 | 0.315749 | 2.86E-12 | 0.027025 | 0.5602  | 0.102576 |
| 0.124269 | 0.00717  | 0.241774 | 1.23E-07 | 0.253324 | 2.85E-08 | 0.034718 | 0.45417 | 0.138741 |
| -0.05694 | 0.21937  | 0.159457 | 0.00054  | 0.215422 | 2.63E-06 | -0.00972 | 0.83412 | 0.038551 |
| 0.054221 | 0.24222  | 0.177648 | 0.00011  | 0.199311 | 1.43E-05 | 0.076453 | 0.09891 | 0.047654 |
| 0.077602 | 0.09393  | 0.207314 | 6.26E-06 | 0.169998 | 0.00022  | 0.068691 | 0.13829 | 0.052659 |
| 0.065175 | 0.15967  | 0.226308 | 7.74E-07 | 0.279468 | 7.94E-10 | 0.047476 | 0.30593 | 0.096579 |
| -0.00699 | 0.8803   | 0.087938 | 0.05757  | 0.162293 | 0.00043  | -0.06724 | 0.14685 | -0.06629 |
| -0.0524  | 0.2584   | 0.16485  | 0.00035  | 0.211827 | 3.88E-06 | 0.009492 | 0.83791 | 0.070934 |
| 0.04837  | 0.2969   | 0.219257 | 1.72E-06 | 0.259364 | 1.29E-08 | 0.058913 | 0.2038  | 0.103754 |
| -0.01621 | 0.72677  | 0.171174 | 0.0002   | 0.235764 | 2.55E-07 | -0.01221 | 0.79247 | 0.049016 |
| -0.02138 | 0.64493  | 0.147721 | 0.00137  | 0.219722 | 1.63E-06 | 0.012304 | 0.79086 | 0.013837 |
| 0.006533 | 0.88803  | 0.077721 | 0.09342  | 0.122729 | 0.00793  | -0.03222 | 0.48737 | 0.082447 |
| 0.046822 | 0.31265  | 0.136874 | 0.00304  | 0.159328 | 0.00055  | 0.162565 | 0.00042 | 0.091643 |
| -0.07729 | 0.09527  | 0.035941 | 0.43842  | 0.095946 | 0.03821  | -0.07559 | 0.10277 | -0.01334 |
| -0.05903 | 0.20293  | 0.157833 | 0.00062  | 0.198996 | 1.48E-05 | 0.008109 | 0.86126 | 0.088251 |
| 0.225627 | 8.37E-07 | 0.365568 | 3.27E-16 | 0.384362 | 6.87E-18 | 0.03369  | 0.46765 | 0.045394 |
| 0.076264 | 0.09975  | 0.213349 | 3.29E-06 | 0.2485   | 5.29E-08 | 0.013744 | 0.76706 | 0.04532  |
| -0.00963 | 0.8356   | 0.019405 | 0.67576  | 0.028615 | 0.53734  | 0.012244 | 0.79186 | -0.00406 |
| 0.017226 | 0.71043  | 0.067424 | 0.14572  | 0.019698 | 0.67114  | -0.09193 | 0.04709 | 0.004395 |
| 0.01347  | 0.77156  | 0.163085 | 0.0004   | 0.205996 | 7.19E-06 | 0.037999 | 0.41263 | 0.061773 |
| -0.00575 | 0.90134  | 0.046853 | 0.31233  | -0.00882 | 0.84931  | -0.03316 | 0.47463 | 0.039592 |
| -0.06    | 0.19559  | 0.12387  | 0.00736  | 0.129755 | 0.00498  | -0.01694 | 0.71508 | 0.030508 |
| -0.10943 | 0.01801  | 0.076305 | 0.09957  | 0.119465 | 0.00977  | -0.03853 | 0.40619 | -0.03406 |

|          |          |          |          |          |          |          |         |          |
|----------|----------|----------|----------|----------|----------|----------|---------|----------|
| -0.07136 | 0.12357  | 0.062529 | 0.17735  | 0.067807 | 0.14345  | -0.09949 | 0.03158 | -0.02212 |
| -0.05236 | 0.25876  | 0.09104  | 0.04928  | 0.121618 | 0.00852  | -0.07854 | 0.09003 | -0.00295 |
| -0.08712 | 0.05995  | 0.061114 | 0.18737  | 0.082568 | 0.07466  | -0.04666 | 0.31436 | 0.00018  |
| -0.03057 | 0.50987  | 0.070438 | 0.12852  | 0.085048 | 0.06631  | -0.00965 | 0.8353  | -0.00506 |
| -0.16332 | 0.00039  | 0.003369 | 0.94212  | 0.015967 | 0.73073  | -0.03629 | 0.434   | -0.02727 |
| -0.03995 | 0.38906  | -0.0737  | 0.1117   | -0.10563 | 0.02244  | -0.00586 | 0.89956 | -0.08738 |
| -0.1097  | 0.01772  | 0.009513 | 0.83755  | 0.03897  | 0.40079  | -0.10826 | 0.01928 | -0.06459 |
| -0.02701 | 0.56043  | 0.13583  | 0.00327  | 0.204292 | 8.59E-06 | 0.00069  | 0.98813 | 0.031425 |
| -0.06167 | 0.1834   | 0.16235  | 0.00043  | 0.229118 | 5.59E-07 | 0.043336 | 0.35008 | 0.048791 |
| -0.06758 | 0.14482  | 0.118113 | 0.01063  | 0.159644 | 0.00053  | -0.016   | 0.73025 | 0.044626 |
| -0.03417 | 0.46132  | 0.091576 | 0.04795  | 0.066664 | 0.15033  | -0.0268  | 0.56349 | 0.038959 |
| -0.07226 | 0.11889  | 0.051664 | 0.26519  | 0.06386  | 0.16829  | -0.02405 | 0.60425 | 0.002569 |
| 0.082813 | 0.0738   | 0.291169 | 1.41E-10 | 0.26807  | 3.97E-09 | 0.033699 | 0.46754 | 0.168137 |
| -0.08393 | 0.06996  | 0.10587  | 0.02213  | 0.154642 | 0.0008   | -0.01162 | 0.80219 | -0.05117 |
| -0.02099 | 0.65094  | 0.152585 | 0.00094  | 0.188034 | 4.33E-05 | -0.05771 | 0.21317 | 0.007363 |
| -0.0388  | 0.40289  | 0.125875 | 0.00645  | 0.178407 | 0.00011  | -0.00611 | 0.8952  | 0.046935 |
| -0.04013 | 0.38688  | 0.095985 | 0.03813  | 0.133388 | 0.00388  | 0.002922 | 0.94979 | 0.04362  |
| -0.08755 | 0.05868  | -0.01049 | 0.82116  | 0.016617 | 0.72022  | -0.08216 | 0.07609 | -0.11917 |
| -0.02394 | 0.6058   | 0.154983 | 0.00078  | 0.199301 | 1.43E-05 | 0.032698 | 0.48087 | 0.074029 |
| -0.05409 | 0.24339  | 0.052292 | 0.25941  | 0.05887  | 0.20413  | -0.15095 | 0.00107 | -0.19517 |
| 0.069026 | 0.13637  | 0.162195 | 0.00043  | 0.165124 | 0.00034  | -0.03189 | 0.49179 | -0.00737 |
| 0.03068  | 0.50836  | 0.159824 | 0.00053  | 0.193046 | 2.67E-05 | 0.10143  | 0.0284  | 0.162045 |
| 0.139539 | 0.00251  | 0.092527 | 0.04567  | 0.114528 | 0.01327  | 0.061752 | 0.18281 | 0.067616 |
| -0.02435 | 0.59967  | 0.130512 | 0.00473  | 0.184751 | 5.91E-05 | 0.016176 | 0.72735 | 0.038663 |
| -0.04525 | 0.32918  | 0.111871 | 0.01558  | 0.120453 | 0.00917  | -0.04841 | 0.29655 | 0.010626 |
| -0.02484 | 0.59228  | 0.154647 | 0.0008   | 0.191275 | 3.17E-05 | 0.028211 | 0.5431  | 0.093389 |
| -0.12392 | 0.00734  | 0.023578 | 0.61129  | 0.052452 | 0.25796  | -0.07607 | 0.10062 | -0.01831 |
| -0.01568 | 0.73532  | 0.09485  | 0.04048  | 0.11962  | 0.00967  | 0.04608  | 0.32039 | 0.031254 |
| -0.07775 | 0.09329  | -0.04691 | 0.3117   | -0.02552 | 0.58223  | -0.03664 | 0.4296  | -0.09014 |
| -0.3423  | 2.77E-14 | 0.032643 | 0.48161  | 0.012169 | 0.79311  | -0.14882 | 0.00126 | -0.08069 |
| -0.15938 | 0.00055  | -0.04435 | 0.33892  | -0.02819 | 0.54339  | -0.12781 | 0.00567 | -0.07686 |
| -0.09736 | 0.03545  | 0.04042  | 0.38348  | 0.017058 | 0.71312  | -0.02232 | 0.63044 | 0.056711 |
| -0.20894 | 5.28E-06 | 0.117913 | 0.01077  | 0.08532  | 0.06545  | -0.03759 | 0.41768 | 0.086599 |
| -0.04482 | 0.33383  | 0.08805  | 0.05725  | 0.090081 | 0.05173  | -0.08714 | 0.0599  | 0.024133 |
| 0.021681 | 0.64027  | 0.132428 | 0.00415  | 0.143331 | 0.0019   | -0.05429 | 0.24163 | 0.020581 |
| -0.03425 | 0.4603   | 0.092342 | 0.0461   | 0.144201 | 0.00178  | -0.02094 | 0.65178 | 0.002161 |
| -0.0002  | 0.99651  | 0.104004 | 0.0246   | 0.18374  | 6.50E-05 | -0.03517 | 0.44838 | -0.06325 |
| -0.04222 | 0.36269  | 0.088254 | 0.05668  | 0.117689 | 0.01092  | -0.03901 | 0.40033 | 0.023404 |
| -0.02033 | 0.66117  | 0.114615 | 0.0132   | 0.14184  | 0.00212  | 0.00663  | 0.88637 | 0.0578   |
| -0.0534  | 0.24944  | 0.067174 | 0.14723  | 0.073425 | 0.11305  | -0.05522 | 0.23367 | -0.00115 |
| -0.02376 | 0.6085   | 0.035436 | 0.44489  | 0.048735 | 0.29327  | -0.12876 | 0.00532 | -0.01399 |
| 0.003801 | 0.93471  | 0.13142  | 0.00444  | 0.163257 | 0.0004   | -0.00476 | 0.91825 | 0.048173 |
| -0.0738  | 0.11121  | 0.015509 | 0.73817  | 0.01588  | 0.73215  | -0.03667 | 0.42915 | -0.02977 |
| -0.06172 | 0.18306  | 0.120778 | 0.00899  | 0.182964 | 6.98E-05 | -0.0361  | 0.43637 | -0.01567 |
| -0.06278 | 0.17562  | -0.02951 | 0.52464  | -0.01096 | 0.81318  | -0.09116 | 0.04897 | -0.08471 |

|          |          |          |          |          |          |          |         |          |
|----------|----------|----------|----------|----------|----------|----------|---------|----------|
| 0.016864 | 0.71624  | -0.00494 | 0.91525  | 0.044408 | 0.33828  | -0.05444 | 0.24034 | -0.11815 |
| -0.06214 | 0.18009  | 0.14426  | 0.00178  | 0.123912 | 0.00734  | 0.000254 | 0.99564 | -0.00221 |
| -0.13352 | 0.00384  | -0.10489 | 0.0234   | -0.07189 | 0.1208   | -0.16053 | 0.0005  | -0.1312  |
| -0.19034 | 3.47E-05 | -0.08254 | 0.07476  | -0.00387 | 0.93348  | -0.13118 | 0.00452 | -0.19226 |
| 0.009389 | 0.83964  | 0.029784 | 0.52084  | 0.055251 | 0.23338  | 0.053006 | 0.25295 | -0.02705 |
| 0.069718 | 0.13247  | 0.091076 | 0.04919  | 0.054181 | 0.24257  | 0.037357 | 0.42058 | 0.063945 |
| -0.07965 | 0.08555  | 0.168056 | 0.00026  | 0.205302 | 7.73E-06 | -0.01787 | 0.70014 | -0.06932 |
| -0.05209 | 0.26128  | 0.04661  | 0.31485  | 0.058746 | 0.20508  | -0.04038 | 0.384   | -0.01571 |
| -0.11117 | 0.01624  | -0.00798 | 0.86346  | 0.00675  | 0.88434  | -0.12213 | 0.00824 | -0.09512 |
| -0.04429 | 0.33962  | 0.087877 | 0.05774  | 0.101584 | 0.02816  | 0.012495 | 0.78769 | 0.100855 |
| 0.028422 | 0.54009  | 0.129779 | 0.00497  | 0.13037  | 0.00478  | -0.03891 | 0.4015  | -0.1042  |
| -0.14613 | 0.00154  | -0.01147 | 0.80472  | 0.024539 | 0.59684  | -0.04032 | 0.38468 | -0.0453  |
| -0.00567 | 0.90276  | 0.158108 | 0.00061  | 0.155795 | 0.00073  | 0.00876  | 0.85024 | 0.002823 |
| -0.17543 | 0.00014  | 0.029063 | 0.53099  | -0.03324 | 0.47362  | 0.058132 | 0.20986 | -0.02057 |
| 0.031424 | 0.49814  | 0.041652 | 0.36914  | 0.032027 | 0.48992  | -0.07212 | 0.11964 | -0.07048 |
| 0.014488 | 0.75484  | 0.032421 | 0.48459  | 0.044932 | 0.33261  | 0.009731 | 0.83387 | -0.04282 |
| -0.06803 | 0.14215  | 0.046023 | 0.32099  | 0.060994 | 0.18824  | -0.00966 | 0.83512 | 0.024476 |
| 0.008077 | 0.86181  | 0.11499  | 0.0129   | 0.153877 | 0.00085  | 0.036903 | 0.42626 | 0.141009 |
| 0.09766  | 0.03487  | 0.232897 | 3.59E-07 | 0.292963 | 1.07E-10 | 0.116906 | 0.01146 | 0.080384 |
| -0.04949 | 0.28584  | 0.137687 | 0.00287  | 0.156201 | 0.00071  | 0.02165  | 0.64074 | 0.100955 |
| -0.14266 | 0.002    | 0.038228 | 0.40983  | 0.069628 | 0.13298  | -0.05837 | 0.20797 | -0.00082 |
| 0.032317 | 0.486    | 0.082929 | 0.07339  | 0.142416 | 0.00203  | 0.014345 | 0.75718 | -0.00373 |
| -0.03668 | 0.42909  | 0.171305 | 0.0002   | 0.191108 | 3.22E-05 | 0.091505 | 0.04812 | 0.079819 |
| -0.04792 | 0.30142  | 0.080177 | 0.08349  | 0.112741 | 0.01479  | -0.04679 | 0.31294 | -0.07352 |
| -0.22736 | 6.86E-07 | -0.02423 | 0.60142  | -0.03814 | 0.41086  | -0.05939 | 0.20014 | -0.05049 |
| -0.08325 | 0.07229  | 0.041379 | 0.37228  | 0.074216 | 0.10921  | -0.0385  | 0.40655 | -0.0003  |
| -0.0059  | 0.89876  | 0.01604  | 0.72955  | 0.048985 | 0.2908   | -0.05784 | 0.21217 | -0.03761 |
| -0.02239 | 0.6294   | 0.090984 | 0.04941  | 0.143551 | 0.00187  | -0.02129 | 0.64632 | -0.01237 |
| -0.06287 | 0.17502  | 0.011405 | 0.80582  | 0.021669 | 0.64045  | 0.002462 | 0.95768 | -0.02782 |
| -0.04426 | 0.33988  | 0.127615 | 0.00575  | 0.18821  | 4.26E-05 | -0.01633 | 0.72482 | 0.011903 |
| -0.00892 | 0.84748  | 0.069062 | 0.13617  | 0.096617 | 0.03687  | 0.002822 | 0.95151 | 0.046261 |
| -0.01449 | 0.75477  | 0.11087  | 0.01654  | 0.177557 | 0.00011  | -0.03256 | 0.48274 | 0.016218 |
| -0.02546 | 0.58317  | 0.033353 | 0.47211  | 0.016869 | 0.71616  | -0.01491 | 0.74786 | 0.050834 |
| 0.001808 | 0.96892  | 0.191395 | 3.13E-05 | 0.197259 | 1.76E-05 | 0.010855 | 0.81502 | 0.097462 |
| -0.04496 | 0.33227  | 0.110059 | 0.01735  | 0.165651 | 0.00032  | 0.009702 | 0.83437 | 0.040322 |
| -0.06379 | 0.16873  | 0.045152 | 0.33024  | 0.062645 | 0.17654  | -0.01021 | 0.82579 | 0.017892 |
| -0.04142 | 0.37184  | 0.118986 | 0.01007  | 0.184002 | 6.34E-05 | -0.00137 | 0.97652 | 0.032528 |
| -0.04829 | 0.29771  | 0.062051 | 0.18069  | 0.082332 | 0.07549  | -0.01495 | 0.74725 | 0.021104 |
| -0.08953 | 0.05317  | 0.013351 | 0.77354  | 0.045989 | 0.32135  | -0.05969 | 0.19792 | -0.0141  |
| -0.03255 | 0.48287  | 0.110924 | 0.01648  | 0.166345 | 0.00031  | -0.0026  | 0.9553  | 0.032959 |
| -0.0344  | 0.45826  | 0.032987 | 0.477    | 0.060628 | 0.19092  | -0.05584 | 0.22845 | -0.04438 |
| -0.05823 | 0.20913  | 0.094636 | 0.04093  | 0.119381 | 0.00982  | -0.01224 | 0.79187 | 0.012152 |
| -0.05068 | 0.27441  | 0.116132 | 0.01202  | 0.129805 | 0.00496  | 0.027158 | 0.55826 | 0.069667 |
| -0.06049 | 0.19191  | 0.127637 | 0.00574  | 0.176993 | 0.00012  | 0.01135  | 0.80675 | 0.020551 |
| -0.05785 | 0.21213  | 0.119002 | 0.01006  | 0.192816 | 2.73E-05 | -0.0412  | 0.37441 | 0.000698 |

|          |          |          |          |          |          |          |          |          |
|----------|----------|----------|----------|----------|----------|----------|----------|----------|
| -0.088   | 0.05739  | -0.02571 | 0.57939  | -0.02083 | 0.65342  | -0.07561 | 0.10268  | -0.04583 |
| -0.05927 | 0.20105  | 0.04322  | 0.35138  | 0.094904 | 0.04036  | -0.05608 | 0.22643  | -0.01452 |
| -0.01681 | 0.71711  | 0.122932 | 0.00782  | 0.149385 | 0.0012   | 0.014401 | 0.75627  | 0.052016 |
| -0.00666 | 0.88583  | 0.184011 | 6.33E-05 | 0.278981 | 8.52E-10 | 0.029091 | 0.53059  | 0.029032 |
| -0.02305 | 0.61928  | 0.106826 | 0.02095  | 0.138159 | 0.00277  | -0.00192 | 0.96703  | 0.04229  |
| -0.05231 | 0.25928  | 0.07114  | 0.12474  | 0.093177 | 0.04416  | 0.004478 | 0.92311  | 0.040477 |
| 0.043349 | 0.34993  | 0.008731 | 0.85074  | 0.032615 | 0.48199  | 0.038039 | 0.41215  | -0.02241 |
| 0.025049 | 0.58924  | 0.021274 | 0.64656  | 0.025658 | 0.58021  | -0.02572 | 0.5793   | -0.00493 |
| -0.00964 | 0.83545  | 0.080341 | 0.08286  | 0.086083 | 0.06306  | -0.00315 | 0.94591  | 0.018525 |
| -0.00271 | 0.95347  | 0.088619 | 0.05566  | 0.10802  | 0.01955  | 0.035306 | 0.44656  | 0.044629 |
| -0.02392 | 0.60615  | 0.09595  | 0.0382   | 0.122115 | 0.00825  | 0.045332 | 0.32831  | 0.136318 |
| -0.16495 | 0.00034  | -0.11048 | 0.01693  | -0.04901 | 0.29056  | -0.12215 | 0.00823  | -0.20916 |
| -0.0675  | 0.14527  | 0.198546 | 1.54E-05 | 0.149527 | 0.00119  | 0.05688  | 0.21987  | 0.033424 |
| -0.06245 | 0.17788  | 0.078147 | 0.09164  | 0.095335 | 0.03946  | -0.00516 | 0.91145  | 0.040813 |
| -0.06041 | 0.19249  | 0.02569  | 0.57974  | 0.070986 | 0.12556  | -0.05363 | 0.24738  | -0.07881 |
| -0.06592 | 0.15497  | 0.107578 | 0.02006  | 0.144382 | 0.00176  | -0.01626 | 0.72594  | -0.01452 |
| -0.00375 | 0.93563  | 0.091815 | 0.04737  | 0.020344 | 0.66102  | 0.002952 | 0.94927  | 0.031643 |
| -0.03891 | 0.40155  | 0.084204 | 0.06906  | 0.118013 | 0.0107   | 0.011074 | 0.81136  | 0.025776 |
| 0.038894 | 0.4017   | 0.123091 | 0.00774  | 0.157752 | 0.00062  | 0.135156 | 0.00343  | 0.158006 |
| 0.010207 | 0.82589  | 0.047081 | 0.30998  | 0.016273 | 0.72579  | -0.004   | 0.93131  | 0.070118 |
| 0.030437 | 0.51174  | -0.00637 | 0.89082  | 0.033185 | 0.47436  | 0.03328  | 0.47309  | -0.06773 |
| 0.048269 | 0.29791  | 0.065939 | 0.15483  | 0.057798 | 0.2125   | 0.077543 | 0.09418  | 0.017828 |
| -0.13706 | 0.003    | -0.02147 | 0.64359  | 0.000458 | 0.99212  | -0.06965 | 0.13286  | -0.05264 |
| 0.028975 | 0.53223  | 0.04977  | 0.28313  | 0.097373 | 0.03541  | 0.05764  | 0.21375  | -0.04798 |
| 0.021684 | 0.64022  | 0.169641 | 0.00023  | 0.21326  | 3.32E-06 | 0.023728 | 0.60903  | 0.04534  |
| -0.30714 | 1.17E-11 | -0.01112 | 0.81055  | -0.05243 | 0.25819  | -0.09827 | 0.03374  | -0.07993 |
| -0.00494 | 0.91518  | 0.095185 | 0.03977  | 0.091124 | 0.04906  | 0.005858 | 0.89952  | 0.098737 |
| -0.06944 | 0.13403  | 0.11213  | 0.01534  | 0.12042  | 0.00919  | 0.006054 | 0.89619  | 0.047164 |
| -0.05363 | 0.24736  | 0.045219 | 0.32953  | 0.085043 | 0.06633  | -0.09373 | 0.04291  | -0.04042 |
| -0.0052  | 0.91073  | 0.137258 | 0.00296  | 0.179062 | 1.00E-04 | 0.038775 | 0.40315  | 0.031616 |
| 6.76E-05 | 0.99884  | 0.132614 | 0.00409  | 0.142823 | 0.00197  | -0.01144 | 0.80519  | -0.00693 |
| -0.03193 | 0.49118  | 0.123143 | 0.00772  | 0.164608 | 0.00035  | -0.04272 | 0.35695  | 0.043501 |
| -0.02246 | 0.62832  | 0.069126 | 0.1358   | 0.096048 | 0.038    | -0.14453 | 0.00174  | -0.0597  |
| 0.049096 | 0.2897   | 0.130096 | 0.00487  | 0.126162 | 0.00633  | 0.022899 | 0.6216   | -0.01676 |
| -0.07771 | 0.09348  | 0.121159 | 0.00877  | 0.055534 | 0.23099  | 0.004069 | 0.93011  | 0.132932 |
| -0.00797 | 0.86361  | 0.010442 | 0.82194  | 0.059385 | 0.20019  | -0.0377  | 0.4163   | -0.03004 |
| -0.15549 | 0.00075  | -0.10997 | 0.01744  | -0.0789  | 0.08856  | -0.08855 | 0.05584  | -0.08467 |
| -0.07282 | 0.11604  | 0.047257 | 0.30817  | 0.086708 | 0.06117  | -0.00934 | 0.8405   | 0.015413 |
| -0.15927 | 0.00055  | -0.01072 | 0.8173   | -0.02896 | 0.53244  | -0.09834 | 0.03362  | -0.09694 |
| -0.08987 | 0.05228  | 0.054651 | 0.23851  | 0.110832 | 0.01657  | -0.05449 | 0.23989  | 0.00352  |
| 0.02622  | 0.57194  | 0.132613 | 0.00409  | 0.198098 | 1.62E-05 | -0.04723 | 0.30841  | -0.09705 |
| -0.01428 | 0.75817  | 0.135354 | 0.00338  | 0.175612 | 0.00014  | -0.00177 | 0.96953  | 0.042385 |
| -0.08749 | 0.05885  | 0.041332 | 0.37283  | 0.095025 | 0.04011  | -0.11295 | 0.0146   | -0.05523 |
| -0.07602 | 0.10085  | 0.053114 | 0.25199  | 0.089078 | 0.0544   | -0.04079 | 0.37918  | -0.01778 |
| -0.18745 | 4.58E-05 | -0.11867 | 0.01027  | -0.06788 | 0.14301  | -0.17978 | 9.36E-05 | -0.19495 |



|          |          |          |          |          |          |          |          |          |
|----------|----------|----------|----------|----------|----------|----------|----------|----------|
| -0.05185 | 0.26343  | 0.068999 | 0.13652  | 0.090895 | 0.04964  | 2.30E-06 | 0.99996  | 0.007248 |
| 0.080916 | 0.08067  | 0.236831 | 2.24E-07 | 0.229958 | 5.07E-07 | 0.028982 | 0.53213  | 0.066373 |
| -0.07087 | 0.12618  | 0.058642 | 0.20589  | 0.094795 | 0.04059  | -0.0298  | 0.52064  | 0.000285 |
| 0.617634 | 1.85E-50 | 0.580379 | 2.13E-43 | 0.34224  | 2.81E-14 | 0.431474 | 1.34E-22 | 0.623096 |
| 0.651129 | 1.14E-57 | 0.723644 | 6.65E-77 | 0.526086 | 1.34E-34 | 0.448319 | 1.80E-24 | 0.526174 |
| 0.470403 | 4.35E-27 | 0.444697 | 4.65E-24 | 0.186363 | 5.08E-05 | 0.388257 | 2.99E-18 | 0.447438 |
| 0.33547  | 9.55E-14 | 0.325675 | 5.33E-13 | 0.039769 | 0.39119  | 0.257141 | 1.73E-08 | 0.354499 |
| 0.174194 | 0.00015  | 0.223945 | 1.01E-06 | 0.004874 | 0.91634  | 0.178894 | 0.0001   | 0.392543 |
| 0.209603 | 4.92E-06 | -0.09655 | 0.037    | -0.11077 | 0.01664  | 0.141259 | 0.00221  | 0.055237 |
| 0.465787 | 1.59E-26 | 0.195276 | 2.14E-05 | 0.185416 | 5.55E-05 | 0.328773 | 3.11E-13 | 0.440075 |
| 0.520403 | 9.09E-34 | 0.417759 | 3.77E-21 | 0.147056 | 0.00144  | 0.413101 | 1.13E-20 | 0.5128   |
| 0.423238 | 1.01E-21 | 0.179183 | 9.89E-05 | 0.0329   | 0.47816  | 0.346962 | 1.17E-14 | 0.420526 |
| 0.568272 | 2.71E-41 | 0.339751 | 4.42E-14 | 0.338129 | 5.92E-14 | 0.348136 | 9.43E-15 | 0.257254 |
| 0.333855 | 1.27E-13 | 0.19809  | 1.62E-05 | -0.1311  | 0.00454  | 0.387513 | 3.51E-18 | 0.355261 |
| 0.600267 | 4.72E-47 | 0.510302 | 2.50E-32 | 0.43972  | 1.68E-23 | 0.443887 | 5.74E-24 | 0.37467  |
| 0.441539 | 1.05E-23 | 0.359995 | 9.79E-16 | 0.188322 | 4.21E-05 | 0.296898 | 5.87E-11 | 0.308981 |
| 0.287586 | 2.41E-10 | 0.118186 | 0.01058  | -0.04327 | 0.35084  | 0.111152 | 0.01626  | 0.04192  |
| 0.141916 | 0.00211  | 0.023278 | 0.61583  | 0.012522 | 0.78724  | 0.136098 | 0.00321  | 0.092298 |
| 0.475262 | 1.09E-27 | 0.411215 | 1.76E-20 | 0.244678 | 8.56E-08 | 0.354752 | 2.70E-15 | 0.462475 |
| 0.229163 | 5.56E-07 | 0.252869 | 3.02E-08 | -0.00857 | 0.85348  | 0.228788 | 5.81E-07 | 0.227689 |
| 0.309    | 8.64E-12 | 0.372093 | 8.79E-17 | 0.141238 | 0.00222  | 0.197497 | 1.72E-05 | 0.324582 |
| 0.363122 | 5.30E-16 | 0.084767 | 0.06722  | -0.08079 | 0.08117  | 0.225987 | 8.03E-07 | 0.21789  |
| 0.112371 | 0.01512  | 0.134439 | 0.00361  | -0.08707 | 0.0601   | 0.157836 | 0.00062  | 0.192902 |
| 0.331784 | 1.84E-13 | 0.139647 | 0.00249  | 0.037152 | 0.42313  | 0.123239 | 0.00767  | -0.01525 |
| 0.074167 | 0.10945  | 0.08947  | 0.05334  | -0.20632 | 6.95E-06 | 0.15411  | 0.00083  | 0.171849 |
| 0.724957 | 2.62E-77 | 0.500227 | 6.13E-31 | 0.388371 | 2.92E-18 | 0.502483 | 3.02E-31 | 0.521708 |
| 0.245759 | 7.47E-08 | -0.12368 | 0.00745  | -0.0374  | 0.42002  | -0.02143 | 0.64417  | -0.21392 |
| 0.209327 | 5.06E-06 | -0.10675 | 0.02104  | -0.19054 | 3.41E-05 | 0.199925 | 1.34E-05 | 0.188522 |
| 0.256869 | 1.79E-08 | 0.253755 | 2.69E-08 | 0.23388  | 3.19E-07 | 0.221671 | 1.31E-06 | 0.215347 |
| 0.415631 | 6.25E-21 | 0.128967 | 0.00525  | 0.209239 | 5.11E-06 | 0.185051 | 5.74E-05 | 0.154535 |
| 0.323659 | 7.53E-13 | -0.02099 | 0.65096  | 0.111677 | 0.01576  | 0.071821 | 0.12116  | 0.071833 |
| 0.270047 | 3.02E-09 | 0.432732 | 9.82E-23 | 0.082342 | 0.07546  | 0.371071 | 1.08E-16 | 0.592312 |
| 0.336583 | 7.82E-14 | 0.023805 | 0.60786  | 0.074881 | 0.10607  | 0.032352 | 0.48553  | -0.07396 |
| 0.075794 | 0.10186  | 0.042424 | 0.36032  | -0.21867 | 1.84E-06 | 0.272489 | 2.15E-09 | 0.288478 |
| 0.346854 | 1.20E-14 | 0.377637 | 2.81E-17 | 0.080768 | 0.08123  | 0.412466 | 1.31E-20 | 0.56129  |
| -0.05245 | 0.25794  | -0.13416 | 0.00368  | -0.37241 | 8.24E-17 | 0.084404 | 0.0684   | 0.045029 |
| 0.086563 | 0.0616   | 0.071178 | 0.12454  | -0.04224 | 0.3624   | 0.18762  | 4.51E-05 | 0.229327 |
| 0.757891 | 2.70E-88 | 0.522023 | 5.28E-34 | 0.390367 | 1.89E-18 | 0.503343 | 2.30E-31 | 0.608052 |
| 0.532791 | 1.33E-35 | 0.341189 | 3.40E-14 | 0.308885 | 8.81E-12 | 0.400504 | 2.03E-19 | 0.378014 |
| 0.561981 | 3.11E-40 | 0.200506 | 1.27E-05 | 0.20435  | 8.54E-06 | 0.275188 | 1.47E-09 | 0.13524  |
| -0.10607 | 0.02187  | -0.26576 | 5.45E-09 | -0.40305 | 1.14E-19 | -0.05043 | 0.27678  | 0.030593 |
| 0.020067 | 0.66536  | -0.14241 | 0.00204  | -0.25997 | 1.19E-08 | -0.01168 | 0.80117  | -0.12964 |
| 0.621829 | 2.58E-51 | 0.527163 | 9.28E-35 | 0.31592  | 2.78E-12 | 0.313319 | 4.27E-12 | 0.351998 |
| 0.245142 | 8.07E-08 | 0.055176 | 0.23402  | -0.00996 | 0.83003  | 0.140983 | 0.00226  | 0.146044 |
| 0.487912 | 2.65E-29 | 0.066805 | 0.14947  | 0.201104 | 1.19E-05 | 0.179869 | 9.29E-05 | 0.11336  |

|          |          |          |          |          |          |          |          |          |
|----------|----------|----------|----------|----------|----------|----------|----------|----------|
| 0.258102 | 1.52E-08 | 0.356146 | 2.06E-15 | -0.02074 | 0.65486  | 0.27665  | 1.19E-09 | 0.354317 |
| 0.038656 | 0.4046   | 0.157285 | 0.00065  | -0.13381 | 0.00377  | 0.266795 | 4.73E-09 | 0.428354 |
| 0.409375 | 2.69E-20 | 0.103663 | 0.02508  | -0.08357 | 0.07119  | 0.169984 | 0.00022  | 0.087909 |
| 0.354396 | 2.89E-15 | 0.268612 | 3.68E-09 | 0.016682 | 0.71918  | 0.316051 | 2.72E-12 | 0.379097 |
| 0.256186 | 1.96E-08 | -0.16812 | 0.00026  | -0.15126 | 0.00104  | 0.101381 | 0.02848  | 0.064369 |
| 0.568391 | 2.59E-41 | 0.569122 | 1.94E-41 | 0.220215 | 1.55E-06 | 0.478728 | 3.99E-28 | 0.494091 |
| 0.107527 | 0.02011  | 0.147718 | 0.00137  | -0.0222  | 0.63229  | 0.26417  | 6.76E-09 | 0.339011 |
| 0.702524 | 1.06E-70 | 0.594036 | 7.02E-46 | 0.44405  | 5.50E-24 | 0.511472 | 1.71E-32 | 0.463158 |
| 0.433848 | 7.42E-23 | 0.368396 | 1.86E-16 | 0.205244 | 7.78E-06 | 0.371142 | 1.07E-16 | 0.333069 |
| 0.409514 | 2.61E-20 | 0.252813 | 3.04E-08 | 0.054706 | 0.23803  | 0.323767 | 7.39E-13 | 0.3281   |
| 0.664336 | 9.03E-61 | 0.203234 | 9.58E-06 | 0.217244 | 2.15E-06 | 0.344789 | 1.76E-14 | 0.208998 |
| 0.382057 | 1.12E-17 | 0.263226 | 7.68E-09 | 0.073569 | 0.11235  | 0.271726 | 2.39E-09 | 0.462381 |
| 0.566015 | 6.55E-41 | 0.459007 | 1.03E-25 | 0.300823 | 3.18E-11 | 0.376685 | 3.43E-17 | 0.345938 |
| 0.205758 | 7.37E-06 | 0.16669  | 0.0003   | -0.01125 | 0.80838  | 0.121735 | 0.00845  | 0.159131 |
| 0.361547 | 7.23E-16 | 0.3539   | 3.17E-15 | 0.198113 | 1.61E-05 | 0.308742 | 9.01E-12 | 0.35754  |
| 0.31981  | 1.45E-12 | 0.142262 | 0.00206  | 0.154175 | 0.00083  | 0.040623 | 0.38109  | -0.00049 |
| 0.18822  | 4.25E-05 | -0.04652 | 0.31583  | -0.1809  | 8.45E-05 | 0.041291 | 0.3733   | -0.03872 |
| 0.260872 | 1.05E-08 | 0.264803 | 6.20E-09 | 0.092883 | 0.04484  | 0.111068 | 0.01634  | 0.116451 |
| 0.216354 | 2.37E-06 | 0.000187 | 0.99678  | -0.16362 | 0.00038  | 0.089428 | 0.05345  | 0.035518 |
| 0.43968  | 1.70E-23 | 0.406946 | 4.71E-20 | 0.185476 | 5.52E-05 | 0.452087 | 6.65E-25 | 0.564276 |
| 0.19515  | 2.17E-05 | -0.07032 | 0.12913  | -0.08443 | 0.06832  | 0.228635 | 5.92E-07 | 0.171368 |
| -0.06803 | 0.14212  | 0.14004  | 0.00242  | -0.04781 | 0.30256  | 0.148815 | 0.00126  | 0.12745  |
| 0.386056 | 4.79E-18 | 0.291727 | 1.30E-10 | 0.158057 | 0.00061  | 0.229814 | 5.16E-07 | 0.234583 |
| 0.191024 | 3.25E-05 | -0.05899 | 0.20317  | -0.17471 | 0.00015  | 0.122561 | 0.00801  | 0.292413 |
| 0.627787 | 1.49E-52 | 0.575185 | 1.75E-42 | 0.324669 | 6.33E-13 | 0.463436 | 3.06E-26 | 0.46693  |
| 0.077099 | 0.09608  | -0.34718 | 1.13E-14 | -0.29506 | 7.79E-11 | -0.04891 | 0.29152  | -0.14733 |
| 0.29669  | 6.06E-11 | 0.177453 | 0.00012  | 0.007322 | 0.8746   | 0.231951 | 4.01E-07 | 0.279304 |
| 0.622521 | 1.86E-51 | 0.470904 | 3.78E-27 | 0.291826 | 1.28E-10 | 0.412096 | 1.43E-20 | 0.482959 |
| 0.244845 | 8.38E-08 | -0.05943 | 0.19983  | 0.017951 | 0.69881  | 0.080076 | 0.08388  | 0.036306 |
| 0.403571 | 1.02E-19 | 0.155448 | 0.00075  | 0.292367 | 1.18E-10 | 0.187758 | 4.45E-05 | 0.103826 |
| 0.364452 | 4.08E-16 | 0.25509  | 2.26E-08 | 0.103355 | 0.02552  | 0.397455 | 4.00E-19 | 0.487946 |
| 0.284659 | 3.73E-10 | 0.094944 | 0.04028  | 0.155865 | 0.00073  | 0.169847 | 0.00023  | -0.08032 |
| 0.298557 | 4.54E-11 | 0.177212 | 0.00012  | -0.10113 | 0.02887  | 0.258352 | 1.47E-08 | 0.282048 |
| 0.529991 | 3.52E-35 | 0.466463 | 1.32E-26 | 0.175962 | 0.00013  | 0.503526 | 2.18E-31 | 0.632761 |
| 0.289077 | 1.93E-10 | 0.267262 | 4.43E-09 | 0.145669 | 0.0016   | 0.443102 | 7.03E-24 | 0.477899 |
| 0.264845 | 6.17E-09 | -0.02302 | 0.61978  | -0.08553 | 0.06477  | 0.012722 | 0.78393  | 0.001529 |
| 0.277052 | 1.12E-09 | 0.354477 | 2.84E-15 | 0.044045 | 0.34224  | 0.353651 | 3.33E-15 | 0.508048 |
| 0.487142 | 3.34E-29 | 0.42184  | 1.42E-21 | 0.189774 | 3.67E-05 | 0.394003 | 8.57E-19 | 0.41167  |
| 0.639013 | 5.87E-55 | 0.392708 | 1.14E-18 | 0.220654 | 1.47E-06 | 0.359797 | 1.02E-15 | 0.453549 |
| 0.384064 | 7.31E-18 | 0.188511 | 4.14E-05 | -0.03709 | 0.42389  | 0.34381  | 2.10E-14 | 0.345934 |
| 0.492033 | 7.65E-30 | 0.571012 | 9.22E-42 | 0.20818  | 5.72E-06 | 0.477762 | 5.29E-28 | 0.591307 |
| 0.501022 | 4.78E-31 | 0.284224 | 3.97E-10 | 0.120816 | 0.00896  | 0.467151 | 1.09E-26 | 0.393433 |
| 0.405892 | 5.99E-20 | 0.419608 | 2.43E-21 | 0.170624 | 0.00021  | 0.348267 | 9.20E-15 | 0.434543 |
| 0.199414 | 1.42E-05 | -0.01263 | 0.78538  | -0.17812 | 0.00011  | 0.250598 | 4.05E-08 | 0.321499 |
| 0.4793   | 3.38E-28 | 0.196282 | 1.94E-05 | 0.082399 | 0.07525  | 0.319016 | 1.66E-12 | 0.353236 |

|          |          |          |          |          |          |          |          |          |
|----------|----------|----------|----------|----------|----------|----------|----------|----------|
| 0.439874 | 1.61E-23 | 0.377081 | 3.16E-17 | 0.14018  | 0.0024   | 0.368787 | 1.72E-16 | 0.398579 |
| 0.44995  | 1.17E-24 | 0.516402 | 3.42E-33 | 0.215625 | 2.57E-06 | 0.390036 | 2.04E-18 | 0.469954 |
| 0.290368 | 1.59E-10 | 0.339295 | 4.80E-14 | 0.171972 | 0.00019  | 0.155723 | 0.00073  | 0.240423 |
| 0.402856 | 1.19E-19 | 0.232083 | 3.95E-07 | 0.06704  | 0.14804  | 0.231334 | 4.32E-07 | 0.280901 |
| 0.525649 | 1.55E-34 | 0.17902  | 0.0001   | 0.235843 | 2.52E-07 | 0.184313 | 6.16E-05 | -0.00685 |
| 0.596434 | 2.50E-46 | 0.557882 | 1.48E-39 | 0.330231 | 2.41E-13 | 0.486157 | 4.48E-29 | 0.568996 |
| 0.228436 | 6.06E-07 | 0.139087 | 0.00259  | 0.009264 | 0.84175  | 0.102408 | 0.0269   | 0.071533 |
| 0.281079 | 6.29E-10 | 0.318494 | 1.81E-12 | 0.115853 | 0.01223  | 0.272499 | 2.14E-09 | 0.349352 |
| 0.228897 | 5.74E-07 | -0.0651  | 0.16013  | -0.23698 | 2.20E-07 | 0.065318 | 0.15876  | -0.0535  |

| p.MMdarl | MMgreen  | p.MMgreen | MMdark   | orp.MMdarl | MMdarksl | p.MMdarl | MMdarkol | p.MMdarl |
|----------|----------|-----------|----------|------------|----------|----------|----------|----------|
| 0.01089  | 0.27036  | 2.89E-09  | 0.215894 | 2.49E-06   | 0.30721  | 1.15E-11 | 0.268762 | 3.61E-09 |
| 0.41244  | 0.049371 | 0.28701   | 0.131766 | 0.00434    | 0.164522 | 0.00036  | -0.01535 | 0.74082  |
| 0.0209   | 0.038702 | 0.40404   | 0.045701 | 0.32439    | 0.145547 | 0.00161  | -0.02452 | 0.59719  |
| 0.03647  | 0.138026 | 0.0028    | 0.152875 | 0.00092    | 0.175689 | 0.00014  | 0.064552 | 0.16371  |
| 0.0005   | 0.214357 | 2.95E-06  | 0.136722 | 0.00307    | 0.267918 | 4.05E-09 | -0.06284 | 0.17519  |
| 0.66269  | 0.10761  | 0.02002   | 0.08069  | 0.08153    | 0.278615 | 8.98E-10 | 0.075516 | 0.10313  |
| 0.75881  | 0.103436 | 0.0254    | 0.089383 | 0.05357    | 0.150075 | 0.00114  | 0.094891 | 0.04039  |
| 0.40251  | 0.109329 | 0.01811   | 0.143794 | 0.00184    | 0.203829 | 9.01E-06 | 0.072521 | 0.11757  |
| 0.3919   | 0.060963 | 0.18847   | 0.102135 | 0.02731    | 0.181135 | 8.27E-05 | 0.001826 | 0.9686   |
| 0.00044  | 0.050714 | 0.27408   | 0.12781  | 0.00568    | 0.201452 | 1.15E-05 | -0.02533 | 0.58502  |
| 0.89633  | 0.137268 | 0.00295   | 0.134652 | 0.00355    | 0.203495 | 9.33E-06 | 0.084974 | 0.06655  |
| 0.14326  | 0.071194 | 0.12446   | 0.044672 | 0.33541    | 0.097948 | 0.03434  | 0.089586 | 0.05303  |
| 2.91E-05 | 0.005165 | 0.91137   | 0.104395 | 0.02406    | 0.177329 | 0.00012  | -0.07193 | 0.12058  |
| 0.00105  | 0.181025 | 8.35E-05  | 0.24284  | 1.08E-07   | 0.227096 | 7.07E-07 | 0.205155 | 7.85E-06 |
| 0.73638  | 0.03398  | 0.46383   | 0.083526 | 0.07134    | 0.131271 | 0.00449  | 0.016481 | 0.72241  |
| 0.59499  | 0.107596 | 0.02003   | 0.168402 | 0.00026    | 0.163844 | 0.00038  | 0.043034 | 0.35345  |
| 0.23717  | 0.055237 | 0.2335    | 0.123794 | 0.0074     | 0.185662 | 5.42E-05 | 0.076632 | 0.09812  |
| 0.30837  | 0.176566 | 0.00013   | 0.159806 | 0.00053    | 0.238364 | 1.86E-07 | 0.084851 | 0.06695  |
| 0.00478  | -0.01104 | 0.81187   | -0.04248 | 0.3597     | 0.023091 | 0.61867  | -0.00016 | 0.99725  |
| 0.43504  | 0.024628 | 0.59551   | 0.095375 | 0.03937    | 0.133428 | 0.00387  | 0.059091 | 0.20243  |
| 0.00729  | 0.057721 | 0.21311   | 0.094878 | 0.04042    | 0.222935 | 1.14E-06 | 0.023086 | 0.61874  |
| 1.06E-05 | 0.088402 | 0.05626   | -0.05803 | 0.21069    | 0.10196  | 0.02758  | -0.03416 | 0.46145  |
| 0.41208  | 0.166016 | 0.00031   | 0.196747 | 1.85E-05   | 0.235179 | 2.73E-07 | 0.169572 | 0.00023  |
| 0.55484  | 0.1397   | 0.00248   | 0.181923 | 7.69E-05   | 0.19943  | 1.41E-05 | 0.104455 | 0.02398  |
| 0.01202  | -0.01967 | 0.67157   | 0.075544 | 0.103      | 0.109355 | 0.01808  | -0.08118 | 0.07969  |
| 0.81356  | 0.149035 | 0.00124   | 0.146389 | 0.00151    | 0.29838  | 4.66E-11 | 0.093391 | 0.04368  |
| 0.96244  | 0.026385 | 0.56952   | 0.10134  | 0.02854    | 0.134    | 0.00372  | 0.07367  | 0.11185  |
| 0.01192  | 0.122562 | 0.00801   | 0.134027 | 0.00371    | 0.248023 | 5.62E-08 | 0.027324 | 0.55586  |
| 0.00473  | -0.00691 | 0.88156   | 0.01112  | 0.81058    | 0.11694  | 0.01144  | -0.03039 | 0.51234  |
| 0.09371  | 0.029428 | 0.52583   | 0.043366 | 0.34975    | 0.088154 | 0.05696  | -0.12343 | 0.00758  |
| 0.30453  | 0.008376 | 0.85674   | 0.060268 | 0.19357    | 0.100116 | 0.03053  | -0.04105 | 0.37611  |
| 0.5156   | 0.114111 | 0.01361   | 0.207497 | 6.14E-06   | 0.249706 | 4.54E-08 | 0.078659 | 0.08953  |
| 0.80405  | 0.127741 | 0.0057    | 0.18496  | 5.79E-05   | 0.254777 | 2.36E-08 | 0.019508 | 0.67413  |
| 0.93572  | 0.03604  | 0.43716   | 0.018395 | 0.69175    | 0.04792  | 0.30142  | -0.04524 | 0.3293   |
| 0.15338  | 0.110133 | 0.01727   | 0.211253 | 4.12E-06   | 0.255174 | 2.24E-08 | 0.133073 | 0.00397  |
| 0.68709  | 0.073565 | 0.11237   | 0.125234 | 0.00673    | 0.148624 | 0.00128  | 0.024575 | 0.59629  |
| 0.70185  | 0.141532 | 0.00217   | 0.189714 | 3.69E-05   | 0.245071 | 8.15E-08 | 0.061612 | 0.1838   |
| 0.14534  | -0.01725 | 0.71004   | 0.084392 | 0.06844    | 0.099521 | 0.03154  | -0.08425 | 0.06889  |
| 0.16571  | 0.121761 | 0.00844   | 0.100939 | 0.02918    | 0.112632 | 0.01488  | 0.022736 | 0.62408  |
| 0.08975  | 0.189162 | 3.89E-05  | 0.249777 | 4.50E-08   | 0.297915 | 5.01E-11 | 0.182913 | 7.02E-05 |
| 0.35088  | -0.02427 | 0.60091   | 0.074363 | 0.10851    | 0.116141 | 0.01202  | 0.01039  | 0.82281  |
| 0.20843  | 0.08842  | 0.05621   | 0.196494 | 1.90E-05   | 0.253636 | 2.74E-08 | -0.00763 | 0.86936  |
| 3.82E-05 | 0.235027 | 2.78E-07  | 0.251476 | 3.62E-08   | 0.291463 | 1.35E-10 | 0.26659  | 4.86E-09 |
| 2.14E-06 | 0.368519 | 1.81E-16  | 0.33256  | 1.60E-13   | 0.251976 | 3.39E-08 | 0.40953  | 2.60E-20 |

|          |          |          |          |          |          |          |          |          |
|----------|----------|----------|----------|----------|----------|----------|----------|----------|
| 6.28E-27 | -0.00053 | 0.99089  | 0.199144 | 1.45E-05 | 0.051757 | 0.26432  | 0.308036 | 1.01E-11 |
| 2.03E-13 | 0.189212 | 3.87E-05 | 0.328089 | 3.51E-13 | 0.208727 | 5.40E-06 | 0.291532 | 1.33E-10 |
| 0.74972  | -0.04603 | 0.32091  | 0.077949 | 0.09246  | 0.095808 | 0.03849  | 0.159417 | 0.00054  |
| 1.25E-07 | 0.23905  | 1.71E-07 | 0.267338 | 4.39E-09 | 0.271821 | 2.36E-09 | 0.252988 | 2.98E-08 |
| 2.51E-07 | 0.179653 | 9.47E-05 | 0.307461 | 1.11E-11 | 0.272095 | 2.27E-09 | 0.337954 | 6.11E-14 |
| 3.32E-19 | 0.241977 | 1.20E-07 | 0.346564 | 1.26E-14 | 0.160642 | 0.00049  | 0.340139 | 4.12E-14 |
| 1.20E-05 | 0.181379 | 8.09E-05 | 0.246617 | 6.71E-08 | 0.220355 | 1.52E-06 | 0.362055 | 6.54E-16 |
| 4.34E-18 | 0.109237 | 0.01821  | 0.289072 | 1.93E-10 | 0.158082 | 0.00061  | 0.40632  | 5.43E-20 |
| 2.50E-13 | 0.075539 | 0.10302  | 0.284025 | 4.09E-10 | 0.233094 | 3.50E-07 | 0.363455 | 4.96E-16 |
| 4.43E-32 | 0.230883 | 4.55E-07 | 0.345844 | 1.44E-14 | 0.222216 | 1.23E-06 | 0.435248 | 5.22E-23 |
| 1.59E-08 | 0.178285 | 0.00011  | 0.263477 | 7.43E-09 | 0.129071 | 0.00521  | 0.332273 | 1.68E-13 |
| 2.93E-34 | 0.14547  | 0.00162  | 0.287149 | 2.58E-10 | 0.157018 | 0.00066  | 0.440119 | 1.52E-23 |
| 2.13E-12 | 0.279203 | 8.25E-10 | 0.352888 | 3.85E-15 | 0.346282 | 1.33E-14 | 0.490248 | 1.31E-29 |
| 8.90E-53 | 0.123637 | 0.00747  | 0.20265  | 1.02E-05 | 0.042775 | 0.35636  | 0.475244 | 1.09E-27 |
| 1.86E-06 | 0.158398 | 0.00059  | 0.318402 | 1.83E-12 | 0.242153 | 1.17E-07 | 0.621107 | 3.63E-51 |
| 9.01E-32 | 0.203732 | 9.10E-06 | 0.258371 | 1.47E-08 | 0.08761  | 0.05851  | 0.447107 | 2.48E-24 |
| 2.88E-06 | 0.211203 | 4.15E-06 | 0.217595 | 2.07E-06 | 0.150692 | 0.00109  | 0.300162 | 3.53E-11 |
| 7.12E-12 | 0.566647 | 5.12E-41 | 0.576746 | 9.32E-43 | 0.594015 | 7.09E-46 | 0.623024 | 1.46E-51 |
| 4.09E-07 | 0.07691  | 0.0969   | 0.21467  | 2.85E-06 | 0.168384 | 0.00026  | 0.291583 | 1.32E-10 |
| 8.89E-09 | 0.349136 | 7.82E-15 | 0.043658 | 0.34652  | 0.120008 | 0.00944  | -0.14828 | 0.00131  |
| 1.51E-17 | 0.327232 | 4.07E-13 | 0.292358 | 1.18E-10 | 0.372137 | 8.71E-17 | 0.487299 | 3.19E-29 |
| 1.88E-51 | 0.14298  | 0.00195  | 0.270897 | 2.68E-09 | 0.111999 | 0.01546  | 0.339336 | 4.76E-14 |
| 9.73E-30 | 0.34338  | 2.28E-14 | 0.363793 | 4.64E-16 | 0.2893   | 1.87E-10 | 0.53628  | 3.94E-36 |
| 3.92E-06 | -0.01854 | 0.68951  | -0.23181 | 4.08E-07 | -0.14393 | 0.00182  | -0.12719 | 0.00592  |
| 0.50475  | 0.211394 | 4.06E-06 | 0.313251 | 4.32E-12 | 0.372602 | 7.93E-17 | 0.19399  | 2.43E-05 |
| 0.08825  | 0.139463 | 0.00252  | 0.261742 | 9.38E-09 | 0.337587 | 6.53E-14 | 0.194375 | 2.34E-05 |
| 1.05E-17 | 0.018939 | 0.68311  | 0.18052  | 8.75E-05 | 0.067911 | 0.14283  | 0.226811 | 7.31E-07 |
| 6.28E-07 | 0.238297 | 1.88E-07 | 0.393627 | 9.31E-19 | 0.302315 | 2.52E-11 | 0.294123 | 8.99E-11 |
| 6.55E-06 | 0.428154 | 3.05E-22 | 0.400959 | 1.83E-19 | 0.427112 | 3.94E-22 | 0.460414 | 7.02E-26 |
| 1.07E-05 | 0.10842  | 0.0191   | 0.360955 | 8.11E-16 | 0.285511 | 3.28E-10 | 0.273157 | 1.95E-09 |
| 0.96459  | 0.262452 | 8.53E-09 | 0.324721 | 6.28E-13 | 0.296062 | 6.68E-11 | 0.248788 | 5.10E-08 |
| 1.53E-37 | 0.408709 | 3.14E-20 | 0.476721 | 7.15E-28 | 0.357278 | 1.66E-15 | 0.599095 | 7.88E-47 |
| 2.58E-06 | 0.22064  | 1.47E-06 | 0.355752 | 2.23E-15 | 0.357692 | 1.53E-15 | 0.450462 | 1.02E-24 |
| 8.64E-12 | 0.125166 | 0.00676  | -0.10665 | 0.02116  | -0.05415 | 0.24286  | -0.35351 | 3.42E-15 |
| 1.66E-23 | 0.258746 | 1.40E-08 | 0.398335 | 3.29E-19 | 0.389344 | 2.36E-18 | 0.460153 | 7.54E-26 |
| 8.63E-36 | 0.421767 | 1.45E-21 | 0.52967  | 3.93E-35 | 0.463715 | 2.83E-26 | 0.656782 | 5.61E-59 |
| 8.12E-16 | 0.045993 | 0.32131  | 0.078102 | 0.09182  | 0.03851  | 0.40638  | 0.297804 | 5.10E-11 |
| 0.00514  | 0.024595 | 0.59601  | -0.08791 | 0.05764  | -0.11585 | 0.01224  | -0.22153 | 1.33E-06 |
| 3.25E-07 | 0.288275 | 2.18E-10 | 0.367924 | 2.04E-16 | 0.325201 | 5.78E-13 | 0.401358 | 1.67E-19 |
| 1.73E-17 | 0.293428 | 1.00E-10 | 0.303849 | 1.97E-11 | 0.206969 | 6.50E-06 | 0.219194 | 1.73E-06 |
| 3.97E-20 | 0.313405 | 4.21E-12 | 0.462393 | 4.07E-26 | 0.347033 | 1.16E-14 | 0.535167 | 5.82E-36 |
| 0.15956  | 0.39573  | 5.86E-19 | 0.37036  | 1.25E-16 | 0.295966 | 6.78E-11 | 0.23909  | 1.70E-07 |
| 1.82E-33 | 0.225302 | 8.69E-07 | 0.414127 | 8.90E-21 | 0.298286 | 4.73E-11 | 0.509431 | 3.31E-32 |
| 2.37E-14 | 0.433444 | 8.21E-23 | 0.455023 | 3.03E-25 | 0.472679 | 2.28E-27 | 0.67887  | 2.26E-64 |
| 0.0111   | 0.145619 | 0.0016   | 0.208321 | 5.63E-06 | 0.174961 | 0.00014  | 0.251392 | 3.66E-08 |

|          |          |          |          |          |          |          |          |          |
|----------|----------|----------|----------|----------|----------|----------|----------|----------|
| 0.00027  | 0.25082  | 3.93E-08 | 0.232506 | 3.76E-07 | 0.270154 | 2.97E-09 | 0.256008 | 2.01E-08 |
| 3.31E-13 | 0.072582 | 0.11726  | 0.09537  | 0.03939  | 0.117541 | 0.01102  | 0.30807  | 1.00E-11 |
| 5.47E-06 | 0.379878 | 1.77E-17 | 0.395149 | 6.67E-19 | 0.407655 | 4.00E-20 | 0.467488 | 9.89E-27 |
| 3.72E-06 | 0.101033 | 0.02903  | 0.235619 | 2.59E-07 | 0.212709 | 3.53E-06 | 0.373464 | 6.65E-17 |
| 2.58E-49 | 0.28431  | 3.92E-10 | 0.338631 | 5.41E-14 | 0.25216  | 3.31E-08 | 0.537935 | 2.20E-36 |
| 2.03E-34 | 0.480685 | 2.26E-28 | 0.559905 | 6.88E-40 | 0.510875 | 2.08E-32 | 0.81051  | #####    |
| 3.37E-10 | 0.218824 | 1.80E-06 | 0.228682 | 5.88E-07 | 0.177018 | 0.00012  | 0.377859 | 2.69E-17 |
| 1.75E-18 | 0.287324 | 2.51E-10 | 0.336712 | 7.64E-14 | 0.324297 | 6.75E-13 | 0.456902 | 1.83E-25 |
| 3.98E-09 | 0.243421 | 1.00E-07 | 0.358218 | 1.38E-15 | 0.358315 | 1.36E-15 | 0.484722 | 6.87E-29 |
| 1.89E-10 | 0.372614 | 7.91E-17 | 0.499697 | 7.23E-31 | 0.46179  | 4.81E-26 | 0.463647 | 2.88E-26 |
| 5.31E-07 | 0.056174 | 0.22565  | 0.204287 | 8.59E-06 | 0.106505 | 0.02134  | 0.204061 | 8.80E-06 |
| 2.92E-06 | 0.098519 | 0.0333   | 0.181421 | 8.05E-05 | 0.175124 | 0.00014  | 0.353018 | 3.75E-15 |
| 5.97E-05 | 0.163954 | 0.00037  | 0.363928 | 4.52E-16 | 0.286453 | 2.86E-10 | 0.264399 | 6.55E-09 |
| 2.41E-24 | 0.285481 | 3.30E-10 | 0.426817 | 4.24E-22 | 0.313611 | 4.07E-12 | 0.411962 | 1.48E-20 |
| 2.62E-07 | -0.14288 | 0.00197  | 0.011661 | 0.80155  | -0.03107 | 0.50299  | -0.00253 | 0.95653  |
| 1.34E-06 | 0.018754 | 0.68605  | 0.223162 | 1.11E-06 | 0.09939  | 0.03176  | 0.23062  | 4.69E-07 |
| 2.50E-09 | 0.255823 | 2.06E-08 | 0.295104 | 7.74E-11 | 0.269075 | 3.45E-09 | 0.41698  | 4.54E-21 |
| 2.24E-16 | 0.227706 | 6.59E-07 | 0.297183 | 5.62E-11 | 0.256791 | 1.81E-08 | 0.371559 | 9.80E-17 |
| 2.08E-17 | 0.340996 | 3.52E-14 | 0.367681 | 2.14E-16 | 0.2662   | 5.13E-09 | 0.651341 | 1.02E-57 |
| 0.00694  | 0.067    | 0.14828  | 0.200076 | 1.32E-05 | 0.282708 | 4.96E-10 | 0.217422 | 2.11E-06 |
| 9.44E-10 | 0.191972 | 2.96E-05 | -0.01832 | 0.69293  | 0.024831 | 0.59248  | -0.02135 | 0.64543  |
| 3.38E-06 | 0.135924 | 0.00325  | 0.28584  | 3.13E-10 | 0.258932 | 1.37E-08 | 0.260575 | 1.10E-08 |
| 2.67E-24 | -0.27593 | 1.32E-09 | -0.40207 | 1.43E-19 | -0.37577 | 4.14E-17 | -0.53581 | 4.64E-36 |
| 3.93E-21 | 0.447641 | 2.16E-24 | 0.513846 | 7.92E-33 | 0.506095 | 9.64E-32 | 0.581808 | 1.19E-43 |
| 2.44E-17 | 0.261024 | 1.03E-08 | 0.35141  | 5.09E-15 | 0.204882 | 8.08E-06 | 0.348349 | 9.06E-15 |
| 0.0003   | -0.03036 | 0.51283  | 0.094005 | 0.0423   | 0.153864 | 0.00085  | 0.067257 | 0.14673  |
| 1.30E-22 | 0.000174 | 0.99701  | 0.171151 | 0.0002   | 0.056121 | 0.22609  | 0.29163  | 1.31E-10 |
| 2.80E-24 | 0.374492 | 5.39E-17 | 0.412593 | 1.27E-20 | 0.36274  | 5.72E-16 | 0.403765 | 9.72E-20 |
| 1.68E-07 | 0.033186 | 0.47434  | 0.185722 | 5.39E-05 | 0.165699 | 0.00032  | 0.342898 | 2.49E-14 |
| 6.51E-23 | -0.26521 | 5.87E-09 | -0.32762 | 3.80E-13 | -0.2894  | 1.84E-10 | -0.43333 | 8.45E-23 |
| 0.00049  | 0.147407 | 0.0014   | 0.148946 | 0.00125  | 0.074026 | 0.11013  | 0.229464 | 5.37E-07 |
| 0.01515  | 0.252936 | 3.00E-08 | 0.124405 | 0.00711  | 0.158971 | 0.00056  | -0.23135 | 4.31E-07 |
| 3.23E-08 | -0.17514 | 0.00014  | -0.23231 | 3.85E-07 | -0.18144 | 8.04E-05 | -0.12496 | 0.00685  |
| 2.84E-25 | -0.20352 | 9.30E-06 | -0.24996 | 4.39E-08 | -0.2437  | 9.67E-08 | -0.3592  | 1.14E-15 |
| 1.69E-18 | 0.391778 | 1.39E-18 | 0.415341 | 6.69E-21 | 0.372048 | 8.87E-17 | 0.425877 | 5.34E-22 |
| 0.81665  | 0.359305 | 1.12E-15 | 0.136045 | 0.00322  | 0.139203 | 0.00257  | -0.01388 | 0.76483  |
| 2.16E-09 | 0.168946 | 0.00024  | 0.443107 | 7.02E-24 | 0.299067 | 4.19E-11 | 0.363653 | 4.77E-16 |
| 2.42E-20 | 0.043516 | 0.34809  | -0.03742 | 0.41983  | 0.066258 | 0.15284  | -0.23392 | 3.18E-07 |
| 7.67E-11 | -0.07355 | 0.11246  | -0.15599 | 0.00072  | -0.10218 | 0.02725  | -0.22834 | 6.12E-07 |
| 9.14E-07 | -0.31601 | 2.74E-12 | -0.35296 | 3.79E-15 | -0.40257 | 1.27E-19 | -0.33627 | 8.27E-14 |
| 2.52E-09 | 0.386964 | 3.94E-18 | 0.454778 | 3.24E-25 | 0.405854 | 6.04E-20 | 0.334043 | 1.23E-13 |
| 1.61E-06 | 0.147753 | 0.00136  | 0.3037   | 2.02E-11 | 0.174611 | 0.00015  | 0.254758 | 2.36E-08 |
| 3.67E-12 | 0.27629  | 1.25E-09 | 0.343705 | 2.14E-14 | 0.350152 | 6.46E-15 | 0.469491 | 5.63E-27 |
| 2.03E-16 | 0.283348 | 4.52E-10 | 0.328371 | 3.34E-13 | 0.171336 | 0.0002   | 0.446068 | 3.25E-24 |
| 4.02E-24 | 0.390688 | 1.77E-18 | 0.50545  | 1.18E-31 | 0.425855 | 5.37E-22 | 0.515103 | 5.25E-33 |

|          |          |          |          |          |          |          |          |          |
|----------|----------|----------|----------|----------|----------|----------|----------|----------|
| 1.43E-23 | -0.168   | 0.00027  | -0.16335 | 0.00039  | -0.14969 | 0.00118  | -0.45806 | 1.34E-25 |
| 7.23E-25 | 0.240067 | 1.51E-07 | 0.401909 | 1.48E-19 | 0.31085  | 6.40E-12 | 0.531668 | 1.97E-35 |
| 7.88E-28 | -0.25582 | 2.06E-08 | -0.3586  | 1.28E-15 | -0.34013 | 4.13E-14 | -0.56689 | 4.67E-41 |
| 0.00017  | 0.215579 | 2.58E-06 | 0.006557 | 0.88762  | -0.01018 | 0.82641  | -0.14743 | 0.0014   |
| 0.01877  | 0.087304 | 0.0594   | -0.09274 | 0.04517  | -0.21411 | 3.03E-06 | -0.09137 | 0.04844  |
| 2.68E-21 | -0.02052 | 0.65825  | -0.074   | 0.11027  | -0.02041 | 0.66003  | -0.22237 | 1.21E-06 |
| 7.46E-09 | -0.16832 | 0.00026  | -0.09262 | 0.04545  | -0.15571 | 0.00073  | -0.38741 | 3.59E-18 |
| 1.43E-06 | 0.416758 | 4.78E-21 | 0.464166 | 2.50E-26 | 0.464892 | 2.04E-26 | 0.39504  | 6.83E-19 |
| 5.90E-22 | 0.076923 | 0.09685  | -0.11493 | 0.01295  | 0.039006 | 0.40036  | -0.21567 | 2.56E-06 |
| 1.31E-33 | 0.151158 | 0.00105  | 0.360795 | 8.37E-16 | 0.242516 | 1.12E-07 | 0.415296 | 6.76E-21 |
| 4.23E-33 | 0.406063 | 5.76E-20 | 0.4908   | 1.11E-29 | 0.418062 | 3.51E-21 | 0.618926 | 1.01E-50 |
| 1.76E-28 | -0.20948 | 4.98E-06 | -0.25412 | 2.57E-08 | -0.24087 | 1.37E-07 | -0.42983 | 2.02E-22 |
| 0.00191  | 0.070074 | 0.13051  | -0.09336 | 0.04375  | -0.21251 | 3.60E-06 | -0.20887 | 5.32E-06 |
| 1.39E-27 | 0.392479 | 1.20E-18 | 0.38171  | 1.20E-17 | 0.40265  | 1.25E-19 | 0.5388   | 1.62E-36 |
| 0.00117  | 0.161779 | 0.00045  | 0.2103   | 4.57E-06 | 0.158137 | 0.0006   | 0.293046 | 1.06E-10 |
| 0.77774  | 0.06125  | 0.1864   | 0.234113 | 3.11E-07 | 0.172472 | 0.00018  | 0.16722  | 0.00028  |
| 6.69E-16 | 0.193476 | 2.56E-05 | 0.250679 | 4.01E-08 | 0.209568 | 4.94E-06 | 0.603713 | 1.03E-47 |
| 0.29194  | -0.11813 | 0.01062  | -0.11107 | 0.01634  | -0.20643 | 6.87E-06 | -0.11536 | 0.01261  |
| 5.86E-14 | 0.166048 | 0.00031  | 0.242588 | 1.11E-07 | 0.186626 | 4.95E-05 | 0.374302 | 5.60E-17 |
| 1.57E-05 | 0.141852 | 0.00212  | -0.07277 | 0.11633  | -0.04094 | 0.37736  | -0.2287  | 5.87E-07 |
| 3.61E-41 | 0.313318 | 4.27E-12 | 0.463715 | 2.83E-26 | 0.309355 | 8.16E-12 | 0.494211 | 3.93E-30 |
| 0.00286  | 0.037421 | 0.41979  | 0.194669 | 2.27E-05 | 0.086838 | 0.06078  | 0.164742 | 0.00035  |
| 0.0002   | 0.001331 | 0.97712  | 0.157179 | 0.00065  | 0.225882 | 8.13E-07 | 0.253004 | 2.97E-08 |
| 7.40E-26 | 0.072579 | 0.11728  | -0.00407 | 0.93006  | 0.010992 | 0.81273  | -0.28048 | 6.86E-10 |
| 3.74E-21 | 0.236785 | 2.25E-07 | 0.296676 | 6.07E-11 | 0.217847 | 2.01E-06 | 0.38512  | 5.84E-18 |
| 3.15E-16 | 0.201677 | 1.12E-05 | 0.327253 | 4.05E-13 | 0.296627 | 6.12E-11 | 0.345646 | 1.50E-14 |
| 0.0002   | 0.070845 | 0.12632  | 0.148726 | 0.00127  | 0.144313 | 0.00177  | 0.293135 | 1.05E-10 |
| 1.77E-23 | 0.109389 | 0.01805  | 0.342212 | 2.82E-14 | 0.193401 | 2.58E-05 | 0.453503 | 4.56E-25 |
| 0.00255  | 0.01194  | 0.79692  | -0.18682 | 4.86E-05 | -0.21871 | 1.83E-06 | -0.17461 | 0.00015  |
| 4.11E-11 | 0.003024 | 0.94803  | 0.104199 | 0.02433  | 0.101428 | 0.0284   | 0.182328 | 7.41E-05 |
| 5.71E-08 | -0.25677 | 1.82E-08 | -0.33795 | 6.11E-14 | -0.36879 | 1.71E-16 | -0.41713 | 4.38E-21 |
| 0.00048  | 0.456497 | 2.04E-25 | 0.459829 | 8.24E-26 | 0.446732 | 2.74E-24 | 0.319571 | 1.51E-12 |
| 6.43E-24 | 0.044412 | 0.33824  | 0.162787 | 0.00041  | 0.092868 | 0.04487  | 0.222926 | 1.14E-06 |
| 2.34E-38 | 0.216357 | 2.37E-06 | 0.298323 | 4.71E-11 | 0.225974 | 8.05E-07 | 0.383682 | 7.93E-18 |
| 3.49E-10 | 0.261511 | 9.68E-09 | 0.352644 | 4.03E-15 | 0.251164 | 3.76E-08 | 0.279784 | 7.59E-10 |
| 2.86E-11 | 0.163704 | 0.00038  | 0.288645 | 2.06E-10 | 0.245622 | 7.60E-08 | 0.343109 | 2.39E-14 |
| 2.51E-07 | 0.063455 | 0.171    | -0.12161 | 0.00852  | -0.02671 | 0.56475  | -0.25934 | 1.29E-08 |
| 7.57E-17 | 0.26364  | 7.26E-09 | 0.471945 | 2.81E-27 | 0.409799 | 2.44E-20 | 0.456884 | 1.83E-25 |
| 7.90E-43 | 0.174044 | 0.00016  | 0.38996  | 2.07E-18 | 0.233907 | 3.18E-07 | 0.546284 | 1.10E-37 |
| 4.95E-48 | 0.30655  | 1.28E-11 | 0.411247 | 1.74E-20 | 0.286141 | 2.99E-10 | 0.482384 | 1.37E-28 |
| 0.01121  | 0.154639 | 0.0008   | 0.228255 | 6.18E-07 | 0.286196 | 2.97E-10 | 0.310465 | 6.81E-12 |
| 0.00056  | -0.0837  | 0.07076  | -0.16856 | 0.00025  | -0.09362 | 0.04317  | -0.13553 | 0.00334  |
| 1.32E-17 | 0.330244 | 2.41E-13 | 0.272868 | 2.03E-09 | 0.203154 | 9.66E-06 | 0.441557 | 1.05E-23 |
| 6.20E-13 | 0.060094 | 0.19486  | 0.338065 | 5.99E-14 | 0.215835 | 2.51E-06 | 0.398518 | 3.16E-19 |
| 2.11E-39 | 0.36888  | 1.68E-16 | 0.427589 | 3.51E-22 | 0.338702 | 5.34E-14 | 0.56143  | 3.84E-40 |

|          |          |          |          |          |          |          |          |          |
|----------|----------|----------|----------|----------|----------|----------|----------|----------|
| 0.02112  | 0.200902 | 1.22E-05 | 0.310555 | 6.71E-12 | 0.295547 | 7.23E-11 | 0.221405 | 1.35E-06 |
| 0.05456  | 0.016814 | 0.71705  | 0.137929 | 0.00282  | 0.204734 | 8.20E-06 | 0.050956 | 0.2718   |
| 8.56E-44 | 0.061839 | 0.18219  | 0.213171 | 3.35E-06 | 0.04369  | 0.34616  | 0.388433 | 2.88E-18 |
| 2.19E-08 | 0.31138  | 5.87E-12 | 0.426951 | 4.10E-22 | 0.399729 | 2.41E-19 | 0.439046 | 1.99E-23 |
| 0.00013  | -0.2808  | 6.55E-10 | 0.026499 | 0.56786  | -0.04126 | 0.37365  | -0.09623 | 0.03763  |
| 1.15E-21 | 0.449616 | 1.28E-24 | 0.458776 | 1.10E-25 | 0.42116  | 1.67E-21 | 0.455739 | 2.50E-25 |
| 8.39E-21 | 0.229599 | 5.29E-07 | 0.299992 | 3.63E-11 | 0.218393 | 1.89E-06 | 0.376265 | 3.74E-17 |
| 8.78E-05 | 0.31016  | 7.16E-12 | 0.320297 | 1.33E-12 | 0.269666 | 3.18E-09 | 0.309164 | 8.42E-12 |
| 0.09313  | 0.20419  | 8.68E-06 | 0.244776 | 8.45E-08 | 0.227056 | 7.10E-07 | 0.197385 | 1.74E-05 |
| 0.18012  | 0.469661 | 5.37E-27 | 0.449012 | 1.50E-24 | 0.518798 | 1.55E-33 | 0.326848 | 4.35E-13 |
| 1.18E-11 | -0.02108 | 0.6496   | 0.052347 | 0.25891  | 0.010805 | 0.81586  | 0.277643 | 1.03E-09 |
| 4.45E-08 | 0.397665 | 3.82E-19 | 0.477583 | 5.57E-28 | 0.520971 | 7.52E-34 | 0.463758 | 2.79E-26 |
| 6.74E-31 | 0.294195 | 8.90E-11 | 0.35572  | 2.24E-15 | 0.256035 | 2.00E-08 | 0.523972 | 2.74E-34 |
| 1.15E-27 | 0.042784 | 0.35626  | -0.07297 | 0.11529  | 0.005725 | 0.90179  | -0.36327 | 5.15E-16 |
| 1.98E-19 | 0.403499 | 1.03E-19 | 0.374031 | 5.92E-17 | 0.398633 | 3.08E-19 | 0.427198 | 3.86E-22 |
| 1.99E-36 | 0.405328 | 6.81E-20 | 0.506612 | 8.17E-32 | 0.426055 | 5.11E-22 | 0.592283 | 1.49E-45 |
| 6.30E-22 | 0.171311 | 0.0002   | 0.280731 | 6.62E-10 | 0.181829 | 7.76E-05 | 0.43607  | 4.24E-23 |
| 2.43E-22 | 0.106666 | 0.02114  | 0.113886 | 0.0138   | 0.059806 | 0.19701  | 0.401857 | 1.50E-19 |
| 1.76E-09 | -0.04724 | 0.30837  | 0.064694 | 0.16279  | -0.07868 | 0.08945  | 0.127449 | 0.00581  |
| 2.79E-23 | 0.232273 | 3.86E-07 | 0.381856 | 1.17E-17 | 0.279943 | 7.42E-10 | 0.456056 | 2.29E-25 |
| 0.62978  | -0.0399  | 0.38964  | 0.11528  | 0.01267  | 0.050434 | 0.27675  | 0.064736 | 0.16251  |
| 0.06673  | 0.006506 | 0.88849  | 0.208793 | 5.36E-06 | 0.140798 | 0.00229  | 0.153468 | 0.00088  |
| 5.73E-18 | 0.172196 | 0.00018  | 0.389478 | 2.30E-18 | 0.27883  | 8.71E-10 | 0.325855 | 5.16E-13 |
| 8.18E-22 | 0.246512 | 6.80E-08 | 0.393211 | 1.02E-18 | 0.301634 | 2.80E-11 | 0.471042 | 3.63E-27 |
| 5.70E-55 | 0.408983 | 2.95E-20 | 0.500336 | 5.92E-31 | 0.373654 | 6.39E-17 | 0.600441 | 4.38E-47 |
| 1.80E-54 | 0.252201 | 3.29E-08 | 0.270242 | 2.94E-09 | 0.17044  | 0.00022  | 0.517023 | 2.79E-33 |
| 1.82E-26 | 0.214458 | 2.92E-06 | 0.376356 | 3.67E-17 | 0.255843 | 2.05E-08 | 0.317005 | 2.32E-12 |
| 1.83E-20 | 0.239887 | 1.55E-07 | 0.31123  | 6.01E-12 | 0.290766 | 1.50E-10 | 0.377305 | 3.02E-17 |
| 1.42E-32 | 0.166822 | 0.00029  | 0.240897 | 1.37E-07 | 0.1164   | 0.01183  | 0.424182 | 8.06E-22 |
| 1.82E-07 | 0.076889 | 0.097    | 0.253454 | 2.80E-08 | 0.088034 | 0.0573   | 0.243014 | 1.05E-07 |
| 0.00016  | -0.00337 | 0.94213  | 0.143051 | 0.00194  | 0.093328 | 0.04382  | 0.196651 | 1.87E-05 |
| 1.46E-89 | 0.37663  | 3.47E-17 | 0.417705 | 3.82E-21 | 0.316061 | 2.71E-12 | 0.597647 | 1.48E-46 |
| 0.01607  | 0.142921 | 0.00196  | 0.268426 | 3.78E-09 | 0.257792 | 1.59E-08 | 0.322412 | 9.32E-13 |
| 2.08E-05 | 0.353365 | 3.51E-15 | 0.341788 | 3.05E-14 | 0.422028 | 1.36E-21 | 0.342481 | 2.68E-14 |
| 1.00E-19 | -0.09983 | 0.03102  | -0.20376 | 9.07E-06 | -0.12073 | 0.00901  | -0.32515 | 5.83E-13 |
| 0.00307  | 0.062671 | 0.17637  | 0.104286 | 0.02421  | 0.157935 | 0.00061  | 0.192672 | 2.77E-05 |
| 4.01E-10 | -0.0543  | 0.24157  | 0.128781 | 0.00532  | 0.077203 | 0.09564  | 0.223928 | 1.02E-06 |
| 2.85E-19 | 0.298607 | 4.50E-11 | 0.343785 | 2.11E-14 | 0.36618  | 2.89E-16 | 0.492257 | 7.14E-30 |
| 7.36E-38 | 0.24748  | 6.02E-08 | 0.240061 | 1.51E-07 | 0.169269 | 0.00024  | 0.477249 | 6.13E-28 |
| 0.30787  | 0.13431  | 0.00364  | 0.244002 | 9.31E-08 | 0.253013 | 2.97E-08 | 0.262077 | 8.97E-09 |
| 0.39601  | 0.108397 | 0.01912  | 0.119823 | 0.00955  | 0.144733 | 0.00171  | 0.140523 | 0.00234  |
| 7.39E-33 | 0.194703 | 2.27E-05 | 0.205647 | 7.46E-06 | 0.142874 | 0.00197  | 0.413649 | 9.96E-21 |
| 1.21E-08 | 0.160631 | 0.00049  | 0.400571 | 2.00E-19 | 0.353747 | 3.27E-15 | 0.402122 | 1.41E-19 |
| 0.00024  | 0.354313 | 2.93E-15 | 0.405374 | 6.74E-20 | 0.359064 | 1.17E-15 | 0.393509 | 9.56E-19 |
| 0.00035  | 0.402728 | 1.23E-19 | 0.120206 | 0.00932  | 0.111567 | 0.01586  | 0.01489  | 0.74826  |



|          |          |          |          |          |          |          |          |          |
|----------|----------|----------|----------|----------|----------|----------|----------|----------|
| 3.06E-06 | 0.152456 | 0.00095  | 0.217804 | 2.02E-06 | 0.126576 | 0.00616  | 0.290547 | 1.55E-10 |
| 5.98E-18 | 0.177678 | 0.00011  | 0.213012 | 3.41E-06 | 0.15724  | 0.00065  | 0.337306 | 6.87E-14 |
| 2.40E-31 | 0.2869   | 2.67E-10 | 0.336296 | 8.24E-14 | 0.274497 | 1.62E-09 | 0.488784 | 2.04E-29 |
| 5.45E-14 | -0.13873 | 0.00266  | -0.16455 | 0.00036  | -0.09323 | 0.04404  | -0.33733 | 6.84E-14 |
| 4.04E-29 | 0.406955 | 4.70E-20 | 0.473976 | 1.57E-27 | 0.436965 | 3.38E-23 | 0.817082 | #####    |
| 0.04484  | 0.194647 | 2.28E-05 | 0.372307 | 8.42E-17 | 0.365708 | 3.18E-16 | 0.332325 | 1.67E-13 |
| 1.76E-17 | 0.237919 | 1.97E-07 | 0.341713 | 3.09E-14 | 0.234325 | 3.03E-07 | 0.465744 | 1.61E-26 |
| 0.00016  | -0.03041 | 0.51204  | 0.19185  | 3.00E-05 | 0.117019 | 0.01138  | 0.224029 | 1.01E-06 |
| 5.08E-15 | 0.429027 | 2.46E-22 | 0.554628 | 5.05E-39 | 0.566452 | 5.52E-41 | 0.536017 | 4.32E-36 |
| 0.88494  | 0.108525 | 0.01898  | -0.13296 | 0.004    | -0.10588 | 0.02211  | -0.07345 | 0.11294  |
| 1.19E-16 | 0.361994 | 6.62E-16 | 0.373562 | 6.52E-17 | 0.361234 | 7.68E-16 | 0.394166 | 8.27E-19 |
| 4.99E-12 | 0.27979  | 7.58E-10 | 0.407181 | 4.46E-20 | 0.29331  | 1.02E-10 | 0.391696 | 1.42E-18 |
| 0.00089  | 0.211121 | 4.18E-06 | 0.240653 | 1.41E-07 | 0.131025 | 0.00457  | 0.220134 | 1.56E-06 |
| 1.30E-06 | 0.339903 | 4.30E-14 | 0.083631 | 0.07098  | 0.118848 | 0.01015  | -0.1518  | 0.001    |
| 6.84E-08 | 0.076449 | 0.09893  | 0.063578 | 0.17018  | 0.069091 | 0.136    | 0.339304 | 4.79E-14 |
| 9.91E-24 | 0.518359 | 1.79E-33 | 0.557702 | 1.59E-39 | 0.476136 | 8.46E-28 | 0.538874 | 1.57E-36 |
| 1.81E-17 | 0.289813 | 1.73E-10 | 0.315626 | 2.92E-12 | 0.276251 | 1.26E-09 | 0.448776 | 1.60E-24 |
| 2.78E-18 | 0.259315 | 1.30E-08 | 0.332169 | 1.72E-13 | 0.295741 | 7.02E-11 | 0.509569 | 3.17E-32 |
| 1.90E-11 | 0.100632 | 0.02968  | 0.232334 | 3.84E-07 | 0.175804 | 0.00013  | 0.303284 | 2.16E-11 |
| 1.27E-06 | 0.119395 | 0.00981  | -0.07851 | 0.09012  | -0.02553 | 0.58215  | -0.2596  | 1.25E-08 |
| 4.85E-13 | 0.270225 | 2.94E-09 | 0.297977 | 4.97E-11 | 0.318521 | 1.80E-12 | 0.368054 | 1.99E-16 |
| 1.59E-29 | 0.487189 | 3.29E-29 | 0.556862 | 2.18E-39 | 0.538468 | 1.82E-36 | 0.619502 | 7.72E-51 |
| 1.04E-09 | 0.236491 | 2.34E-07 | 0.356856 | 1.80E-15 | 0.336461 | 8.00E-14 | 0.32896  | 3.01E-13 |
| 1.89E-13 | 0.098059 | 0.03413  | 0.230928 | 4.53E-07 | 0.146411 | 0.00151  | 0.186508 | 5.01E-05 |
| 2.84E-33 | 0.337465 | 6.68E-14 | 0.503179 | 2.43E-31 | 0.478126 | 4.76E-28 | 0.493707 | 4.59E-30 |
| 7.44E-38 | 0.258927 | 1.37E-08 | 0.304768 | 1.71E-11 | 0.121939 | 0.00834  | 0.402595 | 1.27E-19 |
| 2.75E-09 | -0.16358 | 0.00039  | -0.32451 | 6.51E-13 | -0.32883 | 3.08E-13 | -0.43749 | 2.96E-23 |
| 0.02288  | 0.044489 | 0.33741  | 0.281269 | 6.12E-10 | 0.189763 | 3.67E-05 | 0.29735  | 5.47E-11 |
| 3.56E-10 | 0.26428  | 6.66E-09 | 0.312483 | 4.90E-12 | 0.220488 | 1.50E-06 | 0.32849  | 3.27E-13 |
| 0.00279  | -0.06508 | 0.16026  | 0.066112 | 0.15375  | 0.036177 | 0.43541  | 0.108015 | 0.01955  |
| 5.74E-23 | 0.229283 | 5.49E-07 | 0.347259 | 1.11E-14 | 0.193018 | 2.67E-05 | 0.368685 | 1.75E-16 |
| 1.41E-25 | 0.414595 | 7.97E-21 | 0.534616 | 7.06E-36 | 0.476186 | 8.34E-28 | 0.561437 | 3.83E-40 |
| 2.17E-08 | 0.143096 | 0.00194  | 0.221974 | 1.27E-06 | 0.113643 | 0.014    | 0.284334 | 3.91E-10 |
| 0.00298  | 0.240335 | 1.46E-07 | 0.259179 | 1.32E-08 | 0.336191 | 8.39E-14 | 0.2488   | 5.09E-08 |
| 2.09E-26 | 0.146892 | 0.00146  | 0.296526 | 6.22E-11 | 0.181156 | 8.25E-05 | 0.497261 | 1.54E-30 |
| 5.45E-11 | -0.02688 | 0.56226  | 0.160185 | 0.00051  | 0.041948 | 0.36575  | 0.270909 | 2.68E-09 |
| 4.22E-06 | 0.085628 | 0.06448  | 0.086701 | 0.06119  | 0.093239 | 0.04402  | 0.238652 | 1.80E-07 |
| 6.36E-63 | 0.242964 | 1.06E-07 | 0.269654 | 3.19E-09 | 0.175486 | 0.00014  | 0.396045 | 5.47E-19 |
| 2.79E-23 | 0.056149 | 0.22586  | 0.180285 | 8.94E-05 | -0.02193 | 0.63647  | 0.314759 | 3.37E-12 |
| 2.81E-11 | 0.372016 | 8.93E-17 | 0.464627 | 2.20E-26 | 0.415784 | 6.02E-21 | 0.725133 | 2.31E-77 |
| 0.1684   | 0.054014 | 0.24403  | 0.121786 | 0.00842  | 0.205474 | 7.60E-06 | 0.225963 | 8.06E-07 |
| 5.19E-16 | 0.244611 | 8.63E-08 | 0.366923 | 2.49E-16 | 0.29024  | 1.62E-10 | 0.322641 | 8.96E-13 |
| 4.67E-22 | 0.41996  | 2.23E-21 | 0.57436  | 2.43E-42 | 0.476169 | 8.38E-28 | 0.552989 | 9.31E-39 |
| 6.90E-18 | 0.231689 | 4.14E-07 | 0.273857 | 1.77E-09 | 0.249974 | 4.38E-08 | 0.450059 | 1.14E-24 |
| 6.05E-33 | 0.424004 | 8.42E-22 | 0.498316 | 1.11E-30 | 0.427611 | 3.49E-22 | 0.575917 | 1.30E-42 |

|          |          |          |          |          |          |          |          |          |
|----------|----------|----------|----------|----------|----------|----------|----------|----------|
| 3.15E-06 | 0.227821 | 6.50E-07 | 0.272679 | 2.09E-09 | 0.340117 | 4.13E-14 | 0.376782 | 3.36E-17 |
| 8.29E-07 | 0.127026 | 0.00598  | 0.283317 | 4.54E-10 | 0.188376 | 4.19E-05 | 0.266685 | 4.80E-09 |
| 0.00012  | -0.18157 | 7.94E-05 | 0.059648 | 0.1982   | -0.11578 | 0.01229  | 0.13934  | 0.00255  |
| 1.66E-20 | 0.093065 | 0.04442  | 0.175453 | 0.00014  | 0.180046 | 9.14E-05 | 0.283353 | 4.51E-10 |
| 2.78E-29 | 0.100328 | 0.03018  | 0.189157 | 3.89E-05 | 0.122555 | 0.00802  | 0.425911 | 5.29E-22 |
| 5.14E-22 | 0.2595   | 1.27E-08 | 0.273341 | 1.90E-09 | 0.113874 | 0.01381  | 0.342743 | 2.56E-14 |
| 3.83E-19 | 0.447168 | 2.44E-24 | 0.546097 | 1.17E-37 | 0.514376 | 6.66E-33 | 0.541672 | 5.80E-37 |
| 4.24E-18 | 0.192085 | 2.93E-05 | 0.302458 | 2.46E-11 | 0.178462 | 0.00011  | 0.300769 | 3.21E-11 |
| 8.29E-09 | 0.147902 | 0.00135  | 0.179155 | 9.91E-05 | 0.157077 | 0.00066  | 0.319958 | 1.41E-12 |
| 0.51047  | -0.08893 | 0.05481  | -0.24384 | 9.49E-08 | -0.24307 | 1.05E-07 | -0.25979 | 1.22E-08 |
| 1.34E-23 | 0.281537 | 5.89E-10 | 0.445316 | 3.96E-24 | 0.316926 | 2.35E-12 | 0.584952 | 3.24E-44 |
| 0.20481  | -0.1152  | 0.01273  | 0.094562 | 0.04109  | 0.017415 | 0.70739  | 0.12395  | 0.00732  |
| 1.16E-08 | -0.10844 | 0.01908  | -0.24459 | 8.65E-08 | -0.19699 | 1.80E-05 | -0.25876 | 1.40E-08 |
| 4.98E-28 | 0.282095 | 5.43E-10 | 0.457244 | 1.66E-25 | 0.359647 | 1.05E-15 | 0.547977 | 5.92E-38 |
| 8.23E-20 | -0.24012 | 1.50E-07 | -0.31249 | 4.90E-12 | -0.23401 | 3.14E-07 | -0.44182 | 9.79E-24 |
| 0.00013  | -0.07047 | 0.12832  | -0.246   | 7.25E-08 | -0.28869 | 2.05E-10 | -0.30689 | 1.22E-11 |
| 0.49597  | 0.217511 | 2.09E-06 | 0.290084 | 1.66E-10 | 0.278451 | 9.20E-10 | 0.281562 | 5.86E-10 |
| 5.19E-48 | 0.453694 | 4.33E-25 | 0.513494 | 8.88E-33 | 0.417381 | 4.13E-21 | 0.608542 | 1.19E-48 |
| 2.05E-23 | 0.459114 | 1.00E-25 | 0.479324 | 3.36E-28 | 0.467764 | 9.15E-27 | 0.774057 | 2.33E-94 |
| 1.16E-41 | 0.473798 | 1.66E-27 | 0.528146 | 6.63E-35 | 0.420186 | 2.11E-21 | 0.567235 | 4.07E-41 |
| 0.00022  | 0.151293 | 0.00104  | 0.269101 | 3.44E-09 | 0.342369 | 2.74E-14 | 0.249091 | 4.91E-08 |
| 2.62E-15 | 0.22396  | 1.01E-06 | 0.232987 | 3.55E-07 | 0.143102 | 0.00193  | 0.462366 | 4.11E-26 |
| 4.44E-72 | 0.339869 | 4.32E-14 | 0.427723 | 3.40E-22 | 0.329947 | 2.54E-13 | 0.544975 | 1.77E-37 |
| 0.00929  | 0.09937  | 0.0318   | -0.05032 | 0.27782  | 0.003221 | 0.94465  | -0.07883 | 0.08885  |
| 7.19E-35 | 0.399999 | 2.27E-19 | 0.518738 | 1.58E-33 | 0.433217 | 8.69E-23 | 0.591843 | 1.79E-45 |
| 2.50E-07 | -0.0354  | 0.44538  | -0.07439 | 0.1084   | -0.05986 | 0.19659  | -0.12162 | 0.00851  |
| 6.45E-09 | -0.15797 | 0.00061  | -0.28405 | 4.07E-10 | -0.17451 | 0.00015  | -0.19146 | 3.11E-05 |
| 0.01089  | -0.0296  | 0.52345  | 0.188489 | 4.15E-05 | 0.128614 | 0.00538  | 0.213335 | 3.30E-06 |
| 1.63E-13 | -0.03428 | 0.45989  | 0.135046 | 0.00346  | -0.01875 | 0.68608  | 0.33806  | 6.00E-14 |
| 2.27E-15 | -0.05441 | 0.24059  | 0.100773 | 0.02945  | -0.06278 | 0.17565  | 0.20459  | 8.33E-06 |
| 0.0109   | 0.154094 | 0.00083  | 0.090314 | 0.05112  | 0.127744 | 0.0057   | 0.375163 | 4.69E-17 |
| 9.69E-25 | -0.29671 | 6.04E-11 | -0.24205 | 1.19E-07 | -0.24541 | 7.80E-08 | -0.45898 | 1.04E-25 |
| 1.15E-17 | -0.02813 | 0.5442   | -0.21449 | 2.91E-06 | -0.15696 | 0.00066  | -0.36965 | 1.44E-16 |
| 2.86E-05 | 0.221377 | 1.36E-06 | 0.393546 | 9.48E-19 | 0.331854 | 1.81E-13 | 0.282017 | 5.49E-10 |
| 0.0004   | 0.251266 | 3.71E-08 | 0.382251 | 1.07E-17 | 0.307311 | 1.14E-11 | 0.639539 | 4.50E-55 |
| 1.02E-32 | 0.296363 | 6.37E-11 | 0.437424 | 3.01E-23 | 0.301574 | 2.83E-11 | 0.542945 | 3.67E-37 |
| 5.98E-52 | 0.237372 | 2.10E-07 | 0.324178 | 6.89E-13 | 0.268403 | 3.79E-09 | 0.495227 | 2.88E-30 |
| 7.42E-09 | 0.125788 | 0.00649  | 0.01402  | 0.76251  | 0.097871 | 0.03448  | -0.1562  | 0.00071  |
| 2.27E-25 | 0.161711 | 0.00045  | 0.144636 | 0.00173  | 0.123558 | 0.00751  | 0.474113 | 1.51E-27 |
| 2.87E-41 | 0.134057 | 0.0037   | 0.195142 | 2.17E-05 | 0.095227 | 0.03968  | 0.373725 | 6.30E-17 |
| 5.70E-39 | 0.227825 | 6.50E-07 | 0.351036 | 5.47E-15 | 0.244896 | 8.33E-08 | 0.562915 | 2.17E-40 |
| 0.00023  | -0.04442 | 0.3381   | 0.018738 | 0.68629  | -0.07242 | 0.11808  | 0.227998 | 6.37E-07 |
| 1.74E-11 | 0.040573 | 0.38168  | 0.212749 | 3.51E-06 | 0.200483 | 1.27E-05 | 0.343237 | 2.34E-14 |
| 8.46E-09 | 0.050497 | 0.27615  | 0.085149 | 0.06599  | 0.114463 | 0.01332  | 0.186887 | 4.83E-05 |
| 6.39E-11 | 0.212555 | 3.59E-06 | 0.230411 | 4.81E-07 | 0.248647 | 5.19E-08 | 0.365691 | 3.19E-16 |

|          |          |          |          |          |          |          |          |          |
|----------|----------|----------|----------|----------|----------|----------|----------|----------|
| 0.0004   | 0.327256 | 4.05E-13 | 0.372432 | 8.20E-17 | 0.296841 | 5.92E-11 | 0.453676 | 4.35E-25 |
| 8.57E-11 | 0.065487 | 0.15769  | 0.22156  | 1.33E-06 | 0.130261 | 0.00481  | 0.348224 | 9.27E-15 |
| 7.71E-13 | -0.07253 | 0.11755  | -0.18177 | 7.80E-05 | -0.06005 | 0.19519  | -0.29893 | 4.28E-11 |
| 1.19E-05 | 0.212196 | 3.73E-06 | 0.29661  | 6.14E-11 | 0.25189  | 3.43E-08 | 0.290019 | 1.68E-10 |
| 1.05E-20 | 0.481523 | 1.76E-28 | 0.58091  | 1.72E-43 | 0.50605  | 9.77E-32 | 0.555698 | 3.38E-39 |
| 3.65E-10 | 0.449606 | 1.28E-24 | 0.514727 | 5.93E-33 | 0.466926 | 1.16E-26 | 0.440669 | 1.32E-23 |
| 1.86E-22 | 0.358157 | 1.40E-15 | 0.542288 | 4.65E-37 | 0.489687 | 1.56E-29 | 0.538664 | 1.70E-36 |
| 3.99E-38 | 0.443143 | 6.96E-24 | 0.514535 | 6.32E-33 | 0.407981 | 3.71E-20 | 0.577533 | 6.78E-43 |
| 7.21E-25 | 0.353772 | 3.25E-15 | 0.517365 | 2.49E-33 | 0.435182 | 5.31E-23 | 0.602872 | 1.50E-47 |
| 2.14E-06 | 0.236186 | 2.42E-07 | 0.296828 | 5.93E-11 | 0.234381 | 3.01E-07 | 0.342815 | 2.53E-14 |
| 0.09414  | 0.152865 | 0.00092  | 0.307407 | 1.12E-11 | 0.186654 | 4.94E-05 | 0.209018 | 5.23E-06 |
| 7.03E-09 | 0.25685  | 1.80E-08 | 0.423272 | 1.01E-21 | 0.268766 | 3.60E-09 | 0.366586 | 2.67E-16 |
| 5.68E-36 | 0.411298 | 1.72E-20 | 0.486634 | 3.89E-29 | 0.406763 | 4.91E-20 | 0.579438 | 3.13E-43 |
| 3.05E-07 | 0.101467 | 0.02834  | 0.147162 | 0.00143  | 0.020001 | 0.66639  | 0.26838  | 3.80E-09 |
| 0.01142  | -0.03663 | 0.42963  | 0.119267 | 0.00989  | 0.076547 | 0.0985   | 0.219351 | 1.70E-06 |
| 0.00052  | 0.139768 | 0.00247  | 0.252534 | 3.15E-08 | 0.216497 | 2.33E-06 | 0.144214 | 0.00178  |
| 3.95E-32 | 0.320084 | 1.38E-12 | 0.331437 | 1.95E-13 | 0.198384 | 1.57E-05 | 0.551941 | 1.37E-38 |
| 2.62E-05 | 0.164956 | 0.00034  | 0.327289 | 4.03E-13 | 0.289231 | 1.89E-10 | 0.382796 | 9.57E-18 |
| 2.89E-12 | 0.298527 | 4.56E-11 | 0.264744 | 6.25E-09 | 0.202213 | 1.06E-05 | 0.384537 | 6.62E-18 |
| 1.26E-10 | 0.141731 | 0.00214  | 0.27351  | 1.86E-09 | 0.156856 | 0.00067  | 0.372979 | 7.34E-17 |
| 8.48E-07 | 0.229143 | 5.58E-07 | 0.341258 | 3.36E-14 | 0.264666 | 6.32E-09 | 0.3754   | 4.47E-17 |
| 7.52E-45 | 0.215952 | 2.48E-06 | 0.331026 | 2.10E-13 | 0.234803 | 2.86E-07 | 0.38303  | 9.10E-18 |
| 7.98E-24 | 0.381896 | 1.16E-17 | 0.384906 | 6.12E-18 | 0.351447 | 5.06E-15 | 0.504555 | 1.57E-31 |
| 1.12E-23 | 0.488229 | 2.41E-29 | 0.570738 | 1.03E-41 | 0.514225 | 6.99E-33 | 0.595965 | 3.07E-46 |
| 1.35E-12 | 0.328357 | 3.35E-13 | 0.510659 | 2.23E-32 | 0.44832  | 1.80E-24 | 0.448159 | 1.88E-24 |
| 7.89E-32 | 0.006431 | 0.88976  | 0.082075 | 0.07641  | -0.09457 | 0.04107  | 0.270364 | 2.89E-09 |
| 3.44E-11 | 0.378329 | 2.44E-17 | 0.429211 | 2.35E-22 | 0.455575 | 2.61E-25 | 0.446381 | 3.00E-24 |
| 4.00E-05 | 0.055174 | 0.23404  | 0.207608 | 6.07E-06 | 0.28274  | 4.94E-10 | 0.157205 | 0.00065  |
| 2.42E-25 | 0.226536 | 7.54E-07 | 0.309299 | 8.24E-12 | 0.269093 | 3.44E-09 | 0.36771  | 2.13E-16 |
| 5.90E-07 | 0.218608 | 1.85E-06 | 0.351737 | 4.79E-15 | 0.351451 | 5.05E-15 | 0.452499 | 5.96E-25 |
| 2.70E-09 | 0.171994 | 0.00019  | 0.211689 | 3.93E-06 | 0.138371 | 0.00273  | 0.318933 | 1.68E-12 |
| 3.88E-27 | 0.426005 | 5.17E-22 | 0.544564 | 2.05E-37 | 0.453593 | 4.45E-25 | 0.736913 | 4.18E-81 |
| 1.06E-23 | 0.50678  | 7.74E-32 | 0.526777 | 1.06E-34 | 0.450648 | 9.75E-25 | 0.553005 | 9.25E-39 |
| 1.89E-07 | 0.009785 | 0.83297  | -0.20768 | 6.03E-06 | -0.18597 | 5.27E-05 | -0.04872 | 0.2934   |
| 0.23896  | 0.091779 | 0.04745  | 0.092361 | 0.04606  | 0.157281 | 0.00065  | 0.341106 | 3.45E-14 |
| 1.57E-38 | 0.460844 | 6.24E-26 | 0.568091 | 2.91E-41 | 0.540868 | 7.74E-37 | 0.599024 | 8.13E-47 |
| 2.14E-11 | 0.087608 | 0.05852  | 0.278347 | 9.34E-10 | 0.191343 | 3.15E-05 | 0.2564   | 1.91E-08 |
| 0.144    | -0.05996 | 0.19588  | 0.016329 | 0.72487  | 0.070114 | 0.13029  | 0.123274 | 0.00765  |
| 2.34E-08 | -0.09138 | 0.04843  | -0.04164 | 0.36928  | -0.09879 | 0.03281  | 0.182563 | 7.25E-05 |
| 0.05674  | 0.373475 | 6.63E-17 | 0.351442 | 5.06E-15 | 0.300353 | 3.43E-11 | 0.180907 | 8.44E-05 |
| 4.34E-31 | 0.274262 | 1.67E-09 | 0.340304 | 4.00E-14 | 0.184661 | 5.96E-05 | 0.461503 | 5.21E-26 |
| 1.01E-06 | -0.10638 | 0.02149  | -0.08061 | 0.08183  | -0.18036 | 8.88E-05 | -0.24613 | 7.13E-08 |
| 1.49E-06 | 0.212348 | 3.67E-06 | 0.196614 | 1.87E-05 | 0.214154 | 3.02E-06 | 0.246803 | 6.55E-08 |
| 9.19E-16 | 0.259647 | 1.24E-08 | 0.305972 | 1.41E-11 | 0.266459 | 4.95E-09 | 0.483505 | 9.84E-29 |
| 8.89E-45 | 0.298723 | 4.42E-11 | 0.410125 | 2.26E-20 | 0.258409 | 1.46E-08 | 0.534564 | 7.19E-36 |

|          |          |          |          |          |          |          |          |          |
|----------|----------|----------|----------|----------|----------|----------|----------|----------|
| 1.39E-07 | 0.252643 | 3.11E-08 | 0.210513 | 4.46E-06 | 0.245349 | 7.87E-08 | 0.355413 | 2.38E-15 |
| 9.95E-54 | 0.267371 | 4.37E-09 | 0.297692 | 5.19E-11 | 0.152234 | 0.00097  | 0.512189 | 1.36E-32 |
| 2.46E-12 | 0.187715 | 4.46E-05 | 0.380474 | 1.56E-17 | 0.327916 | 3.61E-13 | 0.366668 | 2.62E-16 |
| 0.00105  | -0.38934 | 2.36E-18 | -0.12705 | 0.00597  | -0.29942 | 3.97E-11 | 0.086138 | 0.0629   |
| 2.52E-17 | 0.195296 | 2.14E-05 | 0.205672 | 7.44E-06 | 0.147053 | 0.00144  | 0.370527 | 1.21E-16 |
| 0.00436  | -0.2131  | 3.38E-06 | 0.015491 | 0.73847  | -0.1158  | 0.01227  | 0.054791 | 0.23731  |
| 1.44E-10 | -0.08511 | 0.06612  | 0.08373  | 0.07065  | -0.09322 | 0.04407  | 0.289042 | 1.94E-10 |
| 7.48E-06 | 0.112041 | 0.01542  | 0.258854 | 1.38E-08 | 0.196551 | 1.89E-05 | 0.245916 | 7.33E-08 |
| 0.85696  | 0.469269 | 5.99E-27 | 0.114969 | 0.01292  | 0.136807 | 0.00305  | -0.03325 | 0.47352  |
| 2.76E-13 | 0.258362 | 1.47E-08 | 0.427004 | 4.05E-22 | 0.387028 | 3.89E-18 | 0.426404 | 4.69E-22 |
| 2.15E-05 | 0.344128 | 1.98E-14 | 0.337585 | 6.53E-14 | 0.326871 | 4.33E-13 | 0.559864 | 6.99E-40 |
| 5.94E-06 | -0.04026 | 0.38537  | -0.00723 | 0.8761   | -0.02269 | 0.62476  | 0.149466 | 0.0012   |
| 0.21703  | -0.01844 | 0.691    | -0.18259 | 7.23E-05 | -0.16714 | 0.00029  | -0.1771  | 0.00012  |
| 8.59E-20 | 0.300025 | 3.61E-11 | 0.419064 | 2.77E-21 | 0.373352 | 6.80E-17 | 0.38958  | 2.25E-18 |
| 2.07E-17 | 0.155089 | 0.00077  | 0.293591 | 9.75E-11 | 0.16916  | 0.00024  | 0.313747 | 3.98E-12 |
| 0.00363  | -0.10456 | 0.02385  | -0.15927 | 0.00055  | -0.15541 | 0.00075  | -0.19804 | 1.63E-05 |
| 0.0001   | 0.165236 | 0.00034  | 0.182284 | 7.44E-05 | 0.129767 | 0.00497  | 0.276922 | 1.15E-09 |
| 9.73E-05 | -0.02796 | 0.54664  | 0.227209 | 6.98E-07 | 0.137207 | 0.00297  | 0.168959 | 0.00024  |
| 0.00053  | -0.02912 | 0.53024  | 0.17863  | 0.0001   | 0.115197 | 0.01274  | 0.107201 | 0.0205   |
| 7.65E-08 | 0.218894 | 1.79E-06 | 0.260012 | 1.18E-08 | 0.19566  | 2.06E-05 | 0.355198 | 2.47E-15 |
| 8.54E-48 | 0.267788 | 4.12E-09 | 0.396012 | 5.51E-19 | 0.302682 | 2.38E-11 | 0.51754  | 2.35E-33 |
| 6.54E-08 | 0.228743 | 5.84E-07 | 0.383963 | 7.47E-18 | 0.370081 | 1.32E-16 | 0.365218 | 3.50E-16 |
| 0.09288  | -0.03732 | 0.42105  | 0.040383 | 0.38392  | -0.02157 | 0.64202  | 0.22603  | 8.00E-07 |
| 0.00877  | 0.328985 | 3.00E-13 | 0.377314 | 3.01E-17 | 0.347431 | 1.08E-14 | 0.264887 | 6.13E-09 |
| 1.12E-15 | -0.18298 | 6.97E-05 | -0.19291 | 2.70E-05 | -0.15596 | 0.00072  | -0.28644 | 2.86E-10 |
| 4.79E-25 | 0.278981 | 8.52E-10 | 0.37638  | 3.65E-17 | 0.210631 | 4.41E-06 | 0.391139 | 1.60E-18 |
| 2.24E-30 | 0.154198 | 0.00083  | 0.249506 | 4.65E-08 | 0.136856 | 0.00304  | 0.274511 | 1.61E-09 |
| 1.24E-16 | 0.274897 | 1.53E-09 | 0.379241 | 2.02E-17 | 0.362416 | 6.09E-16 | 0.472883 | 2.15E-27 |
| 1.19E-32 | 0.355966 | 2.14E-15 | 0.34841  | 8.96E-15 | 0.313246 | 4.32E-12 | 0.538221 | 1.98E-36 |
| 0.00287  | 0.192871 | 2.71E-05 | 0.286649 | 2.78E-10 | 0.272329 | 2.19E-09 | 0.20022  | 1.30E-05 |
| 1.92E-07 | 0.447958 | 1.98E-24 | 0.354815 | 2.66E-15 | 0.265271 | 5.82E-09 | 0.313142 | 4.40E-12 |
| 6.15E-37 | 0.306565 | 1.28E-11 | 0.455734 | 2.50E-25 | 0.370185 | 1.29E-16 | 0.602216 | 2.01E-47 |
| 0.00374  | -0.05511 | 0.23458  | 0.171658 | 0.00019  | 0.09117  | 0.04895  | 0.170511 | 0.00021  |
| 8.69E-21 | -0.17056 | 0.00021  | -0.20039 | 1.28E-05 | -0.07792 | 0.09259  | -0.26949 | 3.26E-09 |
| 4.32E-15 | 0.105371 | 0.02277  | 0.171595 | 0.00019  | 0.049227 | 0.28842  | 0.376512 | 3.55E-17 |
| 1.24E-06 | -0.19666 | 1.87E-05 | -0.24911 | 4.89E-08 | -0.23112 | 4.43E-07 | -0.42072 | 1.86E-21 |
| 6.07E-37 | -0.23253 | 3.75E-07 | -0.30098 | 3.11E-11 | -0.30374 | 2.01E-11 | -0.4407  | 1.31E-23 |
| 0.67718  | 0.061586 | 0.18399  | -0.08276 | 0.07399  | -0.0673  | 0.14644  | -0.17175 | 0.00019  |
| 0.3598   | 0.072599 | 0.11718  | 0.097942 | 0.03435  | 0.093135 | 0.04426  | 0.095012 | 0.04013  |
| 4.27E-16 | 0.123875 | 0.00736  | 0.195411 | 2.11E-05 | 0.112904 | 0.01464  | 0.252558 | 3.15E-08 |
| 0.00037  | 0.079467 | 0.08627  | -0.06673 | 0.14991  | -0.00808 | 0.86173  | -0.03789 | 0.41401  |
| 0.0001   | -0.27072 | 2.75E-09 | -0.30631 | 1.33E-11 | -0.36367 | 4.76E-16 | -0.2328  | 3.63E-07 |
| 0.23515  | 0.3506   | 5.93E-15 | 0.432772 | 9.72E-23 | 0.39763  | 3.85E-19 | 0.20946  | 4.99E-06 |
| 3.09E-21 | 0.210226 | 4.60E-06 | 0.333285 | 1.41E-13 | 0.297559 | 5.30E-11 | 0.42895  | 2.51E-22 |
| 0.01626  | 0.248242 | 5.46E-08 | 0.057034 | 0.21862  | 0.069725 | 0.13244  | 0.016861 | 0.7163   |

|          |          |          |          |          |          |          |          |          |
|----------|----------|----------|----------|----------|----------|----------|----------|----------|
| 5.86E-18 | 0.354901 | 2.62E-15 | 0.39524  | 6.53E-19 | 0.330262 | 2.40E-13 | 0.464593 | 2.22E-26 |
| 4.13E-16 | 0.33403  | 1.23E-13 | 0.434726 | 5.95E-23 | 0.412994 | 1.16E-20 | 0.440978 | 1.22E-23 |
| 1.20E-09 | 0.162199 | 0.00043  | 0.249304 | 4.77E-08 | 0.09768  | 0.03484  | 0.345683 | 1.49E-14 |
| 0.38999  | 0.051012 | 0.27127  | 0.133637 | 0.00381  | 0.141558 | 0.00217  | 0.09108  | 0.04918  |
| 0.00676  | 0.209808 | 4.81E-06 | 0.397    | 4.43E-19 | 0.410899 | 1.89E-20 | 0.28211  | 5.41E-10 |
| 2.01E-05 | -0.1334  | 0.00388  | 0.120017 | 0.00943  | 0.014226 | 0.75914  | 0.119448 | 0.00978  |
| 4.50E-05 | 0.064419 | 0.16458  | -0.10579 | 0.02223  | -0.10376 | 0.02494  | -0.18862 | 4.10E-05 |
| 9.08E-36 | 0.100827 | 0.02936  | 0.109486 | 0.01794  | 0.051169 | 0.2698   | 0.314568 | 3.47E-12 |
| 6.03E-34 | 0.132711 | 0.00407  | 0.166497 | 0.0003   | 0.095911 | 0.03828  | 0.286223 | 2.96E-10 |
| 4.07E-05 | -0.04782 | 0.30245  | 0.135133 | 0.00344  | 0.068254 | 0.14082  | 0.158926 | 0.00057  |
| 9.84E-07 | 0.074467 | 0.10802  | 0.091811 | 0.04738  | -0.00717 | 0.87711  | 0.269497 | 3.26E-09 |
| 4.03E-10 | 0.045401 | 0.32758  | 0.245771 | 7.46E-08 | 0.152622 | 0.00094  | 0.305518 | 1.51E-11 |
| 1.67E-19 | 0.337323 | 6.85E-14 | 0.402759 | 1.22E-19 | 0.266115 | 5.19E-09 | 0.469625 | 5.42E-27 |
| 1.50E-14 | 0.367885 | 2.06E-16 | 0.475358 | 1.06E-27 | 0.434173 | 6.84E-23 | 0.503204 | 2.41E-31 |
| 3.42E-58 | 0.292523 | 1.15E-10 | 0.371338 | 1.02E-16 | 0.274487 | 1.62E-09 | 0.570092 | 1.33E-41 |
| 5.36E-11 | 0.290183 | 1.64E-10 | 0.354408 | 2.88E-15 | 0.338251 | 5.79E-14 | 0.466603 | 1.27E-26 |
| 6.71E-26 | 0.273882 | 1.76E-09 | 0.376087 | 3.88E-17 | 0.262707 | 8.24E-09 | 0.449656 | 1.27E-24 |
| 4.93E-25 | 0.186753 | 4.89E-05 | 0.258512 | 1.44E-08 | 0.173488 | 0.00016  | 0.421665 | 1.48E-21 |
| 0.01298  | 0.043784 | 0.34512  | -0.18322 | 6.82E-05 | -0.18383 | 6.44E-05 | -0.24053 | 1.43E-07 |
| 0.0007   | -0.04168 | 0.3688   | -0.21391 | 3.09E-06 | -0.22348 | 1.07E-06 | -0.27492 | 1.52E-09 |
| 8.09E-08 | -0.09026 | 0.05127  | -0.30205 | 2.62E-11 | -0.25306 | 2.95E-08 | -0.38462 | 6.50E-18 |
| 0.71319  | 0.237585 | 2.05E-07 | -0.08436 | 0.06853  | 0.003495 | 0.93996  | -0.08237 | 0.07535  |
| 0.00317  | 0.193239 | 2.62E-05 | 0.258101 | 1.52E-08 | 0.279245 | 8.20E-10 | 0.235192 | 2.73E-07 |
| 0.00044  | -0.15483 | 0.00079  | -0.15835 | 0.00059  | -0.1942  | 2.38E-05 | -0.02808 | 0.54494  |
| 0.11183  | 0.157701 | 0.00063  | 0.25469  | 2.39E-08 | 0.287533 | 2.43E-10 | 0.279904 | 7.46E-10 |
| 9.64E-15 | 0.052748 | 0.25527  | 0.30712  | 1.17E-11 | 0.192948 | 2.69E-05 | 0.36109  | 7.90E-16 |
| 2.98E-28 | 0.043388 | 0.3495   | 0.1812   | 8.22E-05 | 0.059622 | 0.1984   | 0.349349 | 7.51E-15 |
| 0.47814  | 0.162378 | 0.00043  | 0.342464 | 2.69E-14 | 0.234506 | 2.96E-07 | 0.12652  | 0.00619  |
| 5.32E-13 | 0.339295 | 4.80E-14 | 0.501008 | 4.80E-31 | 0.353137 | 3.67E-15 | 0.420943 | 1.76E-21 |
| 5.65E-09 | 0.241092 | 1.33E-07 | 0.243966 | 9.35E-08 | 0.241426 | 1.28E-07 | 0.327136 | 4.14E-13 |
| 1.46E-15 | 0.101687 | 0.028    | 0.249213 | 4.83E-08 | 0.154911 | 0.00078  | 0.320373 | 1.32E-12 |
| 0.0008   | -0.23747 | 2.07E-07 | -0.26587 | 5.36E-09 | -0.34665 | 1.24E-14 | -0.35927 | 1.13E-15 |
| 0.65355  | -0.05692 | 0.21952  | 0.164298 | 0.00036  | 0.076958 | 0.0967   | 0.133341 | 0.00389  |
| 0.00012  | 0.196678 | 1.86E-05 | 0.355183 | 2.48E-15 | 0.308796 | 8.93E-12 | 0.314919 | 3.28E-12 |
| 7.70E-11 | 0.165702 | 0.00032  | 0.378887 | 2.17E-17 | 0.369531 | 1.48E-16 | 0.37427  | 5.64E-17 |
| 0.00264  | -0.05442 | 0.24047  | 0.080138 | 0.08364  | 0.097333 | 0.03549  | 0.097507 | 0.03516  |
| 2.86E-08 | 0.138646 | 0.00268  | -0.15585 | 0.00073  | -0.06175 | 0.18285  | -0.20462 | 8.30E-06 |
| 2.55E-39 | 0.164221 | 0.00037  | 0.262067 | 8.98E-09 | 0.234335 | 3.02E-07 | 0.382593 | 9.98E-18 |
| 2.50E-16 | 0.410327 | 2.16E-20 | 0.448845 | 1.57E-24 | 0.470914 | 3.76E-27 | 0.513008 | 1.04E-32 |
| 2.36E-40 | 0.343789 | 2.11E-14 | 0.369807 | 1.40E-16 | 0.295379 | 7.42E-11 | 0.586135 | 1.98E-44 |
| 7.06E-42 | 0.373584 | 6.49E-17 | 0.304002 | 1.93E-11 | 0.216967 | 2.22E-06 | 0.413655 | 9.94E-21 |
| 4.97E-20 | 0.441963 | 9.44E-24 | 0.518462 | 1.73E-33 | 0.527846 | 7.35E-35 | 0.566733 | 4.95E-41 |
| 3.44E-22 | 0.471069 | 3.60E-27 | 0.494229 | 3.91E-30 | 0.441918 | 9.55E-24 | 0.53647  | 3.68E-36 |
| 0.00907  | -0.08286 | 0.07362  | 0.043659 | 0.3465   | -0.11343 | 0.01418  | 0.113396 | 0.01421  |
| 0.05511  | 0.155805 | 0.00073  | 0.241275 | 1.30E-07 | 0.228601 | 5.94E-07 | 0.236751 | 2.26E-07 |

|          |          |          |          |          |          |          |          |          |
|----------|----------|----------|----------|----------|----------|----------|----------|----------|
| 1.96E-28 | 0.282148 | 5.38E-10 | 0.340941 | 3.56E-14 | 0.273561 | 1.85E-09 | 0.485987 | 4.71E-29 |
| 0.04873  | -0.18259 | 7.23E-05 | -0.21756 | 2.08E-06 | -0.23383 | 3.21E-07 | -0.27776 | 1.02E-09 |
| 0.00728  | -0.03843 | 0.40732  | -0.16585 | 0.00032  | -0.1099  | 0.01752  | -0.24596 | 7.29E-08 |
| 2.54E-34 | 0.168935 | 0.00025  | 0.219802 | 1.62E-06 | 0.13783  | 0.00284  | 0.48004  | 2.72E-28 |
| 3.15E-26 | -0.21039 | 4.52E-06 | -0.24791 | 5.70E-08 | -0.1544  | 0.00081  | -0.3575  | 1.59E-15 |
| 3.38E-05 | 0.004104 | 0.92953  | -0.14568 | 0.0016   | -0.0266  | 0.56638  | -0.15814 | 0.0006   |
| 5.91E-05 | 0.134538 | 0.00358  | 0.120004 | 0.00944  | 0.162049 | 0.00044  | 0.211027 | 4.22E-06 |
| 0.00211  | -0.03734 | 0.42076  | -0.15222 | 0.00097  | -0.18162 | 7.91E-05 | -0.23926 | 1.67E-07 |
| 0.05044  | 0.425825 | 5.41E-22 | 0.066743 | 0.14985  | 0.118849 | 0.01015  | -0.02077 | 0.65435  |
| 3.51E-05 | 0.125957 | 0.00642  | 0.278448 | 9.20E-10 | 0.258767 | 1.40E-08 | 0.291639 | 1.31E-10 |
| 2.08E-47 | 0.295862 | 6.89E-11 | 0.316443 | 2.55E-12 | 0.18988  | 3.63E-05 | 0.536377 | 3.80E-36 |
| 1.36E-14 | 0.215609 | 2.57E-06 | 0.223214 | 1.10E-06 | 0.208013 | 5.82E-06 | 0.372034 | 8.90E-17 |
| 4.93E-13 | 0.098385 | 0.03354  | 0.166551 | 0.0003   | 0.034622 | 0.45542  | 0.327826 | 3.67E-13 |
| 0.02381  | -0.00491 | 0.91567  | 0.155884 | 0.00072  | 0.191375 | 3.14E-05 | 0.152389 | 0.00095  |
| 0.0074   | 0.080257 | 0.08318  | 0.253832 | 2.67E-08 | 0.208128 | 5.75E-06 | 0.163821 | 0.00038  |
| 5.52E-07 | 0.027144 | 0.55846  | 0.271531 | 2.45E-09 | 0.213818 | 3.13E-06 | 0.264987 | 6.05E-09 |
| 1.05E-05 | 0.452848 | 5.43E-25 | 0.337706 | 6.39E-14 | 0.220405 | 1.51E-06 | 0.227096 | 7.07E-07 |
| 0.21188  | 0.125711 | 0.00653  | -0.04058 | 0.38161  | -0.09102 | 0.04932  | -0.10832 | 0.0192   |
| 0.04602  | -0.14167 | 0.00215  | 0.174385 | 0.00015  | 0.153884 | 0.00085  | 0.014632 | 0.75248  |
| 3.20E-22 | 0.276055 | 1.30E-09 | 0.427909 | 3.24E-22 | 0.254054 | 2.59E-08 | 0.431773 | 1.25E-22 |
| 4.79E-10 | -0.07018 | 0.12991  | -0.32743 | 3.93E-13 | -0.23721 | 2.14E-07 | -0.22596 | 8.06E-07 |
| 5.75E-05 | -0.04406 | 0.34213  | -0.19987 | 1.35E-05 | -0.20888 | 5.31E-06 | -0.28758 | 2.41E-10 |
| 9.64E-08 | 0.105212 | 0.02297  | 0.161521 | 0.00046  | 0.150432 | 0.00111  | 0.23906  | 1.71E-07 |
| 0.98682  | -0.00681 | 0.88334  | 0.225714 | 8.29E-07 | 0.162693 | 0.00042  | 0.148231 | 0.00132  |
| 9.25E-05 | 0.234095 | 3.11E-07 | 0.265708 | 5.48E-09 | 0.171521 | 0.0002   | 0.2251   | 8.89E-07 |
| 0.35803  | 0.161889 | 0.00044  | 0.250323 | 4.19E-08 | 0.305946 | 1.41E-11 | 0.152029 | 0.00098  |
| 0.04794  | 0.249228 | 4.82E-08 | 0.217331 | 2.13E-06 | 0.292154 | 1.21E-10 | 0.152391 | 0.00095  |
| 6.72E-17 | 0.315945 | 2.77E-12 | 0.328495 | 3.27E-13 | 0.244046 | 9.26E-08 | 0.380539 | 1.54E-17 |
| 5.28E-05 | 0.486525 | 4.01E-29 | 0.49704  | 1.65E-30 | 0.412026 | 1.45E-20 | 0.406953 | 4.70E-20 |
| 2.23E-07 | 0.334323 | 1.17E-13 | 0.27499  | 1.51E-09 | 0.25639  | 1.91E-08 | 0.366799 | 2.56E-16 |
| 1.63E-20 | 0.292624 | 1.13E-10 | 0.388773 | 2.67E-18 | 0.256187 | 1.96E-08 | 0.403945 | 9.33E-20 |
| 4.11E-16 | 0.194995 | 2.20E-05 | 0.306157 | 1.37E-11 | 0.204604 | 8.31E-06 | 0.426598 | 4.47E-22 |
| 1.72E-17 | 0.273236 | 1.93E-09 | 0.296369 | 6.37E-11 | 0.224904 | 9.10E-07 | 0.380519 | 1.54E-17 |
| 4.93E-14 | 0.027459 | 0.55391  | -0.22021 | 1.55E-06 | -0.12407 | 0.00727  | -0.29192 | 1.26E-10 |
| 0.04395  | 0.228579 | 5.96E-07 | 0.221995 | 1.27E-06 | 0.260757 | 1.07E-08 | 0.29843  | 4.63E-11 |
| 0.02108  | 0.04824  | 0.29821  | 0.150674 | 0.00109  | 0.025844 | 0.57747  | 0.112826 | 0.01471  |
| 0.87595  | 0.015541 | 0.73765  | 0.166675 | 0.0003   | 0.106108 | 0.02183  | 0.432335 | 1.08E-22 |
| 1.23E-36 | 0.377999 | 2.61E-17 | 0.394756 | 7.27E-19 | 0.190555 | 3.40E-05 | 0.581306 | 1.46E-43 |
| 1.66E-14 | 0.290126 | 1.65E-10 | 0.323024 | 8.39E-13 | 0.198879 | 1.49E-05 | 0.326415 | 4.69E-13 |
| 9.19E-05 | -0.121   | 0.00886  | 0.099787 | 0.03108  | -0.02571 | 0.57941  | 0.223586 | 1.06E-06 |
| 0.02613  | 0.000999 | 0.98283  | 0.124658 | 0.00699  | 0.083738 | 0.07062  | 0.268218 | 3.89E-09 |
| 5.30E-14 | -0.01439 | 0.75648  | -0.16309 | 0.0004   | -0.15623 | 0.0007   | -0.36835 | 1.87E-16 |
| 1.54E-18 | 0.40322  | 1.10E-19 | 0.50733  | 6.50E-32 | 0.506021 | 9.86E-32 | 0.572067 | 6.07E-42 |
| 7.47E-12 | 0.055976 | 0.2273   | 0.191986 | 2.96E-05 | 0.111159 | 0.01625  | 0.394817 | 7.17E-19 |
| 4.89E-17 | 0.113446 | 0.01417  | 0.19073  | 3.34E-05 | 0.084174 | 0.06916  | 0.259297 | 1.30E-08 |

|          |          |          |          |          |          |          |          |          |
|----------|----------|----------|----------|----------|----------|----------|----------|----------|
| 1.24E-15 | -0.03663 | 0.42963  | 0.123466 | 0.00756  | -0.0152  | 0.74323  | 0.281535 | 5.89E-10 |
| 7.28E-05 | 0.043226 | 0.3513   | 0.242996 | 1.05E-07 | 0.152155 | 0.00097  | 0.137598 | 0.00289  |
| 1.18E-20 | 0.227422 | 6.81E-07 | 0.286892 | 2.68E-10 | 0.220843 | 1.44E-06 | 0.317717 | 2.06E-12 |
| 0.82776  | 0.145138 | 0.00166  | 0.254881 | 2.33E-08 | 0.31328  | 4.30E-12 | 0.267482 | 4.30E-09 |
| 0.71559  | 0.256872 | 1.79E-08 | 0.300167 | 3.53E-11 | 0.210972 | 4.25E-06 | 0.177672 | 0.00011  |
| 1.20E-14 | 0.110082 | 0.01732  | 0.218164 | 1.94E-06 | 0.154027 | 0.00084  | 0.277661 | 1.03E-09 |
| 1.49E-25 | 0.085458 | 0.06501  | 0.131244 | 0.0045   | 0.093458 | 0.04352  | 0.368945 | 1.66E-16 |
| 2.33E-06 | 0.139629 | 0.00249  | 0.18007  | 9.12E-05 | 0.150008 | 0.00115  | 0.215761 | 2.53E-06 |
| 0.07314  | 0.151352 | 0.00103  | 0.266364 | 5.01E-09 | 0.291619 | 1.32E-10 | 0.145384 | 0.00163  |
| 0.1803   | 0.217752 | 2.03E-06 | 0.328234 | 3.42E-13 | 0.386004 | 4.84E-18 | 0.242475 | 1.13E-07 |
| 0.0029   | -0.21885 | 1.80E-06 | -0.28035 | 6.99E-10 | -0.25897 | 1.36E-08 | -0.27041 | 2.87E-09 |
| 5.77E-12 | 0.255409 | 2.17E-08 | 0.409199 | 2.80E-20 | 0.326744 | 4.43E-13 | 0.438278 | 2.42E-23 |
| 1.72E-07 | 0.16808  | 0.00026  | 0.280561 | 6.78E-10 | 0.259467 | 1.27E-08 | 0.306249 | 1.35E-11 |
| 1.46E-16 | 0.448453 | 1.74E-24 | 0.396781 | 4.65E-19 | 0.383878 | 7.61E-18 | 0.505793 | 1.06E-31 |
| 0.1731   | -0.02032 | 0.66136  | 0.055781 | 0.22892  | 0.045074 | 0.33108  | 0.110862 | 0.01654  |
| 3.19E-42 | 0.552362 | 1.18E-38 | 0.539336 | 1.34E-36 | 0.445736 | 3.55E-24 | 0.639649 | 4.26E-55 |
| 1.36E-06 | 0.048557 | 0.29504  | 0.208949 | 5.27E-06 | 0.051353 | 0.26807  | 0.276477 | 1.22E-09 |
| 5.74E-13 | 0.245552 | 7.67E-08 | 0.259804 | 1.22E-08 | 0.161414 | 0.00046  | 0.408782 | 3.09E-20 |
| 0.01035  | 0.131635 | 0.00438  | 0.257191 | 1.72E-08 | 0.3966   | 4.84E-19 | 0.26739  | 4.36E-09 |
| 5.43E-05 | 0.426455 | 4.63E-22 | 0.356841 | 1.80E-15 | 0.289586 | 1.79E-10 | 0.41037  | 2.14E-20 |
| 2.82E-26 | 0.341383 | 3.28E-14 | 0.402443 | 1.31E-19 | 0.307592 | 1.09E-11 | 0.584361 | 4.14E-44 |
| 0.01048  | 0.047133 | 0.30944  | -0.1815  | 7.99E-05 | -0.1959  | 2.01E-05 | -0.20975 | 4.84E-06 |
| 1.16E-06 | -0.10066 | 0.02963  | -0.21079 | 4.33E-06 | -0.17101 | 0.0002   | -0.29713 | 5.66E-11 |
| 0.04609  | 0.108298 | 0.01923  | 0.265412 | 5.71E-09 | 0.206154 | 7.08E-06 | 0.212555 | 3.58E-06 |
| 2.81E-06 | 0.304711 | 1.72E-11 | 0.378793 | 2.21E-17 | 0.36068  | 8.56E-16 | 0.656387 | 6.93E-59 |
| 5.78E-17 | 0.062768 | 0.1757   | 0.229075 | 5.62E-07 | 0.207008 | 6.47E-06 | 0.341926 | 2.97E-14 |
| 7.37E-10 | 0.135687 | 0.0033   | 0.213182 | 3.35E-06 | 0.282544 | 5.08E-10 | 0.33987  | 4.32E-14 |
| 0.06082  | 0.173894 | 0.00016  | 0.377749 | 2.75E-17 | 0.334008 | 1.24E-13 | 0.26505  | 6.00E-09 |
| 5.62E-08 | 0.05082  | 0.27308  | 0.049832 | 0.28253  | 0.082488 | 0.07494  | 0.275702 | 1.36E-09 |
| 2.14E-20 | 0.206576 | 6.77E-06 | 0.241066 | 1.34E-07 | 0.227666 | 6.62E-07 | 0.429882 | 1.99E-22 |
| 8.43E-24 | 0.445886 | 3.41E-24 | 0.488408 | 2.29E-29 | 0.391252 | 1.56E-18 | 0.500835 | 5.07E-31 |
| 1.09E-27 | 0.056356 | 0.22415  | 0.158156 | 0.0006   | 0.042209 | 0.36277  | 0.379682 | 1.84E-17 |
| 3.99E-06 | -0.10771 | 0.0199   | -0.25519 | 2.24E-08 | -0.18659 | 4.97E-05 | -0.30014 | 3.54E-11 |
| 4.81E-12 | 0.411367 | 1.70E-20 | 0.439556 | 1.75E-23 | 0.372831 | 7.56E-17 | 0.433283 | 8.55E-23 |
| 0.14873  | -0.0076  | 0.8699   | -0.1294  | 0.0051   | -0.24298 | 1.06E-07 | -0.13228 | 0.00419  |
| 1.53E-06 | 0.162153 | 0.00043  | 0.178682 | 0.0001   | 0.229452 | 5.38E-07 | 0.275062 | 1.49E-09 |
| 1.10E-55 | 0.459395 | 9.27E-26 | 0.513648 | 8.45E-33 | 0.422506 | 1.21E-21 | 0.645091 | 2.65E-56 |
| 5.76E-55 | 0.454561 | 3.43E-25 | 0.512457 | 1.24E-32 | 0.400992 | 1.82E-19 | 0.603732 | 1.03E-47 |
| 0.00097  | 0.251209 | 3.74E-08 | 0.459348 | 9.39E-26 | 0.405902 | 5.98E-20 | 0.325108 | 5.87E-13 |
| 5.53E-29 | 0.354797 | 2.67E-15 | 0.455701 | 2.53E-25 | 0.391177 | 1.59E-18 | 0.482688 | 1.25E-28 |
| 7.29E-19 | -0.16688 | 0.00029  | -0.11408 | 0.01364  | -0.07836 | 0.09073  | -0.35372 | 3.28E-15 |
| 3.95E-18 | 0.395257 | 6.51E-19 | 0.417037 | 4.48E-21 | 0.3437   | 2.15E-14 | 0.515323 | 4.88E-33 |
| 2.65E-21 | 0.333116 | 1.45E-13 | 0.436339 | 3.96E-23 | 0.353879 | 3.18E-15 | 0.505072 | 1.33E-31 |
| 0.00525  | 0.242189 | 1.17E-07 | 0.338566 | 5.47E-14 | 0.341309 | 3.33E-14 | 0.300504 | 3.35E-11 |
| 1.22E-18 | 0.233968 | 3.16E-07 | 0.295004 | 7.86E-11 | 0.300867 | 3.16E-11 | 0.34126  | 3.36E-14 |

|          |          |          |          |          |          |          |          |          |
|----------|----------|----------|----------|----------|----------|----------|----------|----------|
| 1.12E-05 | -0.26695 | 4.63E-09 | -0.26164 | 9.51E-09 | -0.22935 | 5.45E-07 | -0.19826 | 1.59E-05 |
| 1.52E-05 | 0.176467 | 0.00013  | 0.260274 | 1.14E-08 | 0.302885 | 2.30E-11 | 0.358673 | 1.27E-15 |
| 1.02E-05 | 0.204089 | 8.77E-06 | 0.308978 | 8.67E-12 | 0.239289 | 1.66E-07 | 0.368546 | 1.80E-16 |
| 1.95E-38 | -0.25824 | 1.50E-08 | -0.2308  | 4.60E-07 | -0.164   | 0.00037  | -0.44165 | 1.02E-23 |
| 0.01824  | 0.044157 | 0.34103  | -0.19054 | 3.41E-05 | -0.11491 | 0.01296  | -0.22876 | 5.83E-07 |
| 2.11E-36 | 0.259572 | 1.25E-08 | 0.384695 | 6.40E-18 | 0.32491  | 6.08E-13 | 0.520168 | 9.83E-34 |
| 1.71E-13 | 0.401315 | 1.69E-19 | 0.401579 | 1.59E-19 | 0.309907 | 7.46E-12 | 0.388478 | 2.85E-18 |
| 5.87E-22 | 0.381815 | 1.18E-17 | 0.539012 | 1.50E-36 | 0.51474  | 5.91E-33 | 0.516382 | 3.45E-33 |
| 1.26E-13 | 0.385191 | 5.76E-18 | 0.525105 | 1.87E-34 | 0.513299 | 9.46E-33 | 0.529542 | 4.11E-35 |
| 2.16E-06 | 0.190152 | 3.53E-05 | 0.248402 | 5.36E-08 | 0.23206  | 3.96E-07 | 0.322993 | 8.44E-13 |
| 0.00269  | -0.20379 | 9.05E-06 | -0.33523 | 9.96E-14 | -0.33311 | 1.45E-13 | -0.31821 | 1.89E-12 |
| 2.60E-07 | 0.181602 | 7.92E-05 | 0.230314 | 4.86E-07 | 0.107467 | 0.02019  | 0.499422 | 7.87E-31 |
| 0.00024  | 0.1273   | 0.00587  | 0.180332 | 8.90E-05 | 0.098352 | 0.0336   | 0.240985 | 1.35E-07 |
| 5.12E-18 | 0.376595 | 3.49E-17 | 0.436589 | 3.72E-23 | 0.380877 | 1.43E-17 | 0.731212 | 2.87E-79 |
| 3.64E-38 | 0.28293  | 4.80E-10 | 0.291262 | 1.39E-10 | 0.163804 | 0.00038  | 0.421582 | 1.51E-21 |
| 2.64E-07 | -0.07538 | 0.10376  | -0.12031 | 0.00926  | -0.01874 | 0.68623  | -0.01588 | 0.73221  |
| 1.58E-10 | -0.15053 | 0.0011   | -0.21428 | 2.97E-06 | -0.15859 | 0.00058  | -0.16582 | 0.00032  |
| 7.54E-22 | 0.170118 | 0.00022  | 0.188082 | 4.31E-05 | 0.03452  | 0.45675  | 0.375787 | 4.13E-17 |
| 0.0246   | 0.082128 | 0.07622  | 0.308851 | 8.85E-12 | 0.299424 | 3.96E-11 | 0.169495 | 0.00023  |
| 1.52E-08 | 0.137375 | 0.00293  | -0.06795 | 0.14258  | -0.00751 | 0.87147  | -0.16104 | 0.00048  |
| 0.00013  | 0.17895  | 0.0001   | 0.27354  | 1.85E-09 | 0.258663 | 1.41E-08 | 0.27693  | 1.14E-09 |
| 2.58E-21 | 0.068149 | 0.14143  | -0.05605 | 0.22664  | 0.118928 | 0.0101   | -0.27214 | 2.25E-09 |
| 4.83E-23 | 0.404616 | 8.01E-20 | 0.499233 | 8.35E-31 | 0.47442  | 1.39E-27 | 0.547423 | 7.25E-38 |
| 0.00068  | 0.324408 | 6.62E-13 | 0.362049 | 6.55E-16 | 0.314888 | 3.30E-12 | 0.340691 | 3.72E-14 |
| 1.08E-21 | 0.091162 | 0.04897  | 0.232709 | 3.67E-07 | 0.03304  | 0.47629  | 0.302933 | 2.28E-11 |
| 4.70E-15 | -0.05722 | 0.21713  | -0.14556 | 0.00161  | -0.02311 | 0.61839  | -0.19917 | 1.45E-05 |
| 5.90E-27 | 0.007094 | 0.87848  | 0.140941 | 0.00227  | -0.07481 | 0.10638  | 0.314284 | 3.64E-12 |
| 1.55E-25 | -0.04947 | 0.286    | 0.149495 | 0.00119  | -0.02584 | 0.57752  | 0.392301 | 1.24E-18 |
| 1.35E-63 | 0.40561  | 6.39E-20 | 0.444235 | 5.24E-24 | 0.348288 | 9.16E-15 | 0.596579 | 2.35E-46 |
| 3.18E-57 | 0.161892 | 0.00044  | 0.268158 | 3.92E-09 | 0.131051 | 0.00456  | 0.507783 | 5.62E-32 |
| 0.15334  | 0.123627 | 0.00748  | -0.10034 | 0.03016  | -0.07887 | 0.08867  | -0.11301 | 0.01455  |
| 0.30431  | -0.06356 | 0.17027  | -0.06005 | 0.19522  | -0.10533 | 0.02282  | -0.08144 | 0.07874  |
| 1.29E-42 | 0.584675 | 3.64E-44 | 0.577547 | 6.74E-43 | 0.509176 | 3.60E-32 | 0.619362 | 8.24E-51 |
| 7.16E-22 | 0.552001 | 1.34E-38 | 0.531757 | 1.91E-35 | 0.450788 | 9.40E-25 | 0.559504 | 8.02E-40 |
| 0.00023  | 0.393223 | 1.02E-18 | 0.395645 | 5.98E-19 | 0.361423 | 7.40E-16 | 0.623636 | 1.09E-51 |
| 0.00036  | 0.023701 | 0.60944  | 0.121198 | 0.00875  | 0.087874 | 0.05775  | 0.162745 | 0.00041  |
| 8.06E-06 | -0.00657 | 0.88742  | 0.229937 | 5.08E-07 | 0.087595 | 0.05856  | 0.228873 | 5.76E-07 |
| 0.80788  | 0.130516 | 0.00473  | -0.0576  | 0.21408  | -0.03823 | 0.4098   | -0.10675 | 0.02103  |
| 2.16E-13 | 0.150207 | 0.00113  | 0.216884 | 2.24E-06 | 0.139645 | 0.00249  | 0.314469 | 3.53E-12 |
| 1.32E-14 | 0.010801 | 0.81593  | 0.144625 | 0.00173  | 0.015928 | 0.73137  | 0.227742 | 6.56E-07 |
| 2.41E-06 | 0.054204 | 0.24237  | 0.22989  | 5.11E-07 | 0.113296 | 0.0143   | 0.298353 | 4.68E-11 |
| 4.06E-26 | 0.174593 | 0.00015  | 0.246493 | 6.82E-08 | 0.150211 | 0.00113  | 0.436662 | 3.65E-23 |
| 3.84E-21 | 0.145678 | 0.0016   | 0.167827 | 0.00027  | 0.088719 | 0.05538  | 0.324757 | 6.24E-13 |
| 8.23E-21 | 0.259259 | 1.31E-08 | 0.40311  | 1.13E-19 | 0.355535 | 2.32E-15 | 0.431473 | 1.34E-22 |
| 0.00553  | 0.31716  | 2.26E-12 | 0.265131 | 5.93E-09 | 0.313656 | 4.04E-12 | 0.110377 | 0.01703  |



|          |          |          |          |          |          |          |          |          |
|----------|----------|----------|----------|----------|----------|----------|----------|----------|
| 1.22E-07 | 0.003861 | 0.93367  | 0.167692 | 0.00027  | 0.205923 | 7.25E-06 | 0.275831 | 1.34E-09 |
| 0.0436   | 0.206247 | 7.01E-06 | 0.350242 | 6.35E-15 | 0.344658 | 1.80E-14 | 0.265901 | 5.34E-09 |
| 3.45E-38 | 0.113026 | 0.01453  | 0.237065 | 2.18E-07 | 0.105747 | 0.02228  | 0.399454 | 2.57E-19 |
| 2.48E-36 | 0.2827   | 4.97E-10 | 0.369671 | 1.44E-16 | 0.304105 | 1.90E-11 | 0.512185 | 1.36E-32 |
| 3.13E-24 | 0.152897 | 0.00092  | 0.285896 | 3.10E-10 | 0.22917  | 5.56E-07 | 0.315615 | 2.92E-12 |
| 1.57E-11 | 0.11377  | 0.01389  | 0.207712 | 6.01E-06 | 0.084582 | 0.06782  | 0.330998 | 2.11E-13 |
| 4.72E-07 | -0.07132 | 0.12379  | -0.23168 | 4.14E-07 | -0.22571 | 8.29E-07 | -0.34704 | 1.16E-14 |
| 3.80E-12 | 0.239813 | 1.56E-07 | 0.341678 | 3.11E-14 | 0.338094 | 5.96E-14 | 0.514239 | 6.96E-33 |
| 2.25E-05 | 0.126377 | 0.00624  | 0.278885 | 8.64E-10 | 0.183533 | 6.62E-05 | 0.233989 | 3.15E-07 |
| 1.94E-10 | -0.0778  | 0.09309  | -0.2009  | 1.22E-05 | -0.06948 | 0.13382  | -0.21151 | 4.01E-06 |
| 2.78E-06 | 0.05125  | 0.26903  | 0.232002 | 3.99E-07 | 0.195538 | 2.09E-05 | 0.335857 | 8.91E-14 |
| 7.86E-13 | 0.415727 | 6.11E-21 | 0.4069   | 4.76E-20 | 0.270767 | 2.73E-09 | 0.36554  | 3.28E-16 |
| 0.00954  | 0.121915 | 0.00835  | 0.187116 | 4.73E-05 | 0.185673 | 5.42E-05 | 0.292046 | 1.23E-10 |
| 0.00907  | -0.14083 | 0.00228  | -0.05573 | 0.22935  | -0.09071 | 0.05012  | 0.363173 | 5.25E-16 |
| 3.63E-06 | 0.106627 | 0.02119  | 0.146946 | 0.00145  | 0.156467 | 0.00069  | 0.324913 | 6.07E-13 |
| 1.20E-39 | 0.192285 | 2.87E-05 | 0.366323 | 2.81E-16 | 0.207966 | 5.85E-06 | 0.458997 | 1.03E-25 |
| 2.05E-09 | 0.154655 | 0.0008   | 0.264999 | 6.04E-09 | 0.216572 | 2.31E-06 | 0.579892 | 2.60E-43 |
| 4.25E-12 | 0.081709 | 0.07774  | 0.120887 | 0.00892  | 0.031411 | 0.49831  | 0.208118 | 5.76E-06 |
| 6.87E-13 | 0.172104 | 0.00019  | 0.30198  | 2.65E-11 | 0.238387 | 1.86E-07 | 0.299839 | 3.72E-11 |
| 3.04E-27 | 0.251022 | 3.83E-08 | 0.409546 | 2.59E-20 | 0.303938 | 1.95E-11 | 0.511551 | 1.67E-32 |
| 0.02115  | 0.173052 | 0.00017  | 0.203702 | 9.13E-06 | 0.220341 | 1.52E-06 | 0.230424 | 4.80E-07 |
| 7.54E-15 | 0.268976 | 3.50E-09 | 0.371691 | 9.54E-17 | 0.27109  | 2.61E-09 | 0.519282 | 1.32E-33 |
| 9.79E-17 | 0.088578 | 0.05577  | 0.287291 | 2.52E-10 | 0.183778 | 6.47E-05 | 0.44211  | 9.09E-24 |
| 0.0032   | -0.12406 | 0.00727  | -0.10259 | 0.02663  | -0.26791 | 4.06E-09 | -0.2103  | 4.57E-06 |
| 0.03439  | -0.0796  | 0.08575  | -0.24095 | 1.36E-07 | -0.30285 | 2.31E-11 | -0.08707 | 0.0601   |
| 3.67E-17 | 0.314153 | 3.72E-12 | 0.224514 | 9.51E-07 | 0.240434 | 1.45E-07 | 0.394005 | 8.57E-19 |
| 0.14391  | 0.112698 | 0.01482  | 0.278545 | 9.07E-10 | 0.238828 | 1.76E-07 | 0.191151 | 3.21E-05 |
| 2.72E-05 | -0.04694 | 0.31139  | -0.15788 | 0.00062  | -0.1932  | 2.63E-05 | -0.28681 | 2.71E-10 |
| 4.98E-36 | 0.273148 | 1.96E-09 | 0.362194 | 6.36E-16 | 0.26518  | 5.89E-09 | 0.366123 | 2.92E-16 |
| 2.62E-28 | 0.220196 | 1.55E-06 | 0.370026 | 1.34E-16 | 0.281111 | 6.26E-10 | 0.434163 | 6.86E-23 |
| 4.42E-35 | 0.247418 | 6.07E-08 | 0.432476 | 1.05E-22 | 0.303499 | 2.09E-11 | 0.492826 | 6.01E-30 |
| 0.00113  | -0.06859 | 0.1389   | -0.21352 | 3.23E-06 | -0.19926 | 1.44E-05 | -0.20247 | 1.04E-05 |
| 2.63E-24 | 0.326033 | 5.01E-13 | 0.336367 | 8.13E-14 | 0.327649 | 3.79E-13 | 0.687365 | 1.42E-66 |
| 5.80E-18 | 0.167879 | 0.00027  | 0.237673 | 2.02E-07 | 0.252061 | 3.35E-08 | 0.324329 | 6.71E-13 |
| 8.15E-29 | 0.22808  | 6.31E-07 | 0.335221 | 9.98E-14 | 0.287036 | 2.62E-10 | 0.46226  | 4.23E-26 |
| 9.74E-25 | 0.420251 | 2.08E-21 | 0.521885 | 5.53E-34 | 0.450625 | 9.81E-25 | 0.577115 | 8.03E-43 |
| 2.80E-17 | 0.122895 | 0.00784  | 0.263173 | 7.74E-09 | 0.15287  | 0.00092  | 0.322997 | 8.43E-13 |
| 4.34E-12 | 0.053777 | 0.24611  | 0.151385 | 0.00103  | 0.050714 | 0.27408  | 0.355407 | 2.38E-15 |
| 5.66E-78 | 0.409226 | 2.79E-20 | 0.379596 | 1.87E-17 | 0.24049  | 1.44E-07 | 0.564035 | 1.41E-40 |
| 0.42886  | 0.062187 | 0.17974  | 0.009394 | 0.83955  | -0.12582 | 0.00648  | -0.16846 | 0.00026  |
| 3.51E-13 | 0.311563 | 5.70E-12 | 0.354976 | 2.58E-15 | 0.282511 | 5.11E-10 | 0.433796 | 7.52E-23 |
| 2.76E-13 | 0.370661 | 1.18E-16 | 0.391082 | 1.62E-18 | 0.399121 | 2.76E-19 | 0.453084 | 5.10E-25 |
| 3.04E-17 | -0.01256 | 0.78657  | -0.1514  | 0.00103  | -0.11423 | 0.01351  | -0.30862 | 9.19E-12 |
| 1.41E-12 | 0.163533 | 0.00039  | 0.191143 | 3.21E-05 | 0.153487 | 0.00088  | 0.231211 | 4.38E-07 |
| 7.67E-08 | 0.020738 | 0.65488  | 0.131317 | 0.00448  | 0.043215 | 0.35143  | 0.156836 | 0.00067  |

|          |          |          |          |          |          |          |          |          |
|----------|----------|----------|----------|----------|----------|----------|----------|----------|
| 1.89E-06 | -0.20212 | 1.07E-05 | -0.28433 | 3.91E-10 | -0.24453 | 8.71E-08 | -0.23613 | 2.44E-07 |
| 6.60E-19 | 0.065365 | 0.15846  | 0.234897 | 2.83E-07 | 0.200144 | 1.31E-05 | 0.355285 | 2.43E-15 |
| 0.97132  | 0.023648 | 0.61024  | 0.106749 | 0.02104  | 0.111548 | 0.01588  | 0.174898 | 0.00015  |
| 2.31E-05 | -0.15104 | 0.00106  | 0.009533 | 0.83722  | -0.1361  | 0.00321  | 0.186984 | 4.79E-05 |
| 1.71E-10 | -0.11707 | 0.01135  | 0.055156 | 0.23419  | -0.10016 | 0.03045  | 0.125968 | 0.00642  |
| 1.12E-08 | 0.233731 | 3.25E-07 | 0.379365 | 1.97E-17 | 0.335775 | 9.04E-14 | 0.370006 | 1.34E-16 |
| 0.37004  | 0.354761 | 2.69E-15 | 0.06944  | 0.13403  | 0.141168 | 0.00223  | 0.041528 | 0.37057  |
| 1.55E-27 | 0.422473 | 1.22E-21 | 0.525001 | 1.94E-34 | 0.483188 | 1.08E-28 | 0.583688 | 5.47E-44 |
| 3.20E-21 | 0.022445 | 0.62852  | 0.146947 | 0.00145  | 0.063971 | 0.16754  | 0.39306  | 1.05E-18 |
| 8.24E-27 | -0.10284 | 0.02626  | 0.026383 | 0.56954  | -0.12874 | 0.00533  | 0.19518  | 2.16E-05 |
| 0.13312  | 0.141697 | 0.00214  | 0.261195 | 1.01E-08 | 0.265662 | 5.52E-09 | 0.327567 | 3.84E-13 |
| 0.48169  | -0.26707 | 4.55E-09 | -0.00141 | 0.97578  | -0.0599  | 0.1963   | 0.033897 | 0.46492  |
| 3.84E-08 | 0.490087 | 1.38E-29 | 0.427403 | 3.67E-22 | 0.440703 | 1.30E-23 | 0.398067 | 3.49E-19 |
| 2.98E-24 | 0.027031 | 0.56011  | 0.240232 | 1.48E-07 | 0.044172 | 0.34086  | 0.267655 | 4.20E-09 |
| 0.00015  | 0.137603 | 0.00288  | 0.229222 | 5.53E-07 | 0.159212 | 0.00055  | 0.298098 | 4.87E-11 |
| 1.45E-20 | -0.04236 | 0.36103  | 0.066549 | 0.15104  | -0.07049 | 0.12823  | 0.283631 | 4.33E-10 |
| 0.0458   | -0.20387 | 8.97E-06 | 0.020908 | 0.65223  | 0.012001 | 0.79591  | 0.012585 | 0.7862   |
| 4.35E-14 | 0.137819 | 0.00284  | 0.169872 | 0.00023  | 0.175106 | 0.00014  | 0.348842 | 8.26E-15 |
| 1.24E-23 | 0.372956 | 7.37E-17 | 0.394457 | 7.76E-19 | 0.394008 | 8.57E-19 | 0.551023 | 1.93E-38 |
| 0.68103  | 0.178438 | 0.00011  | 0.269933 | 3.07E-09 | 0.323252 | 8.07E-13 | 0.246003 | 7.25E-08 |
| 3.90E-17 | 0.138692 | 0.00267  | 0.2096   | 4.92E-06 | 0.153549 | 0.00087  | 0.277349 | 1.08E-09 |
| 8.34E-27 | 0.530219 | 3.25E-35 | 0.631049 | 3.06E-53 | 0.576218 | 1.15E-42 | 0.611416 | 3.24E-49 |
| 0.2068   | 0.229687 | 5.23E-07 | 0.35574  | 2.23E-15 | 0.372718 | 7.74E-17 | 0.310558 | 6.71E-12 |
| 2.45E-11 | -0.02354 | 0.61182  | 0.189822 | 3.65E-05 | 0.061439 | 0.18504  | 0.181336 | 8.12E-05 |
| 0.90325  | 0.073832 | 0.11107  | -0.10452 | 0.0239   | -0.06005 | 0.19519  | -0.09709 | 0.03595  |
| 4.57E-07 | 0.093996 | 0.04232  | -0.22664 | 7.46E-07 | -0.18837 | 4.19E-05 | -0.26941 | 3.30E-09 |
| 4.00E-12 | 0.159939 | 0.00052  | 0.365741 | 3.16E-16 | 0.263989 | 6.93E-09 | 0.453273 | 4.85E-25 |
| 3.31E-32 | 0.391592 | 1.45E-18 | 0.484337 | 7.70E-29 | 0.445582 | 3.69E-24 | 0.541537 | 6.09E-37 |
| 5.34E-24 | -0.03342 | 0.47127  | -0.04718 | 0.30893  | 0.065129 | 0.15997  | -0.16876 | 0.00025  |
| 2.02E-14 | 0.271309 | 2.53E-09 | 0.307553 | 1.09E-11 | 0.202214 | 1.06E-05 | 0.437823 | 2.72E-23 |
| 1.05E-13 | 0.364316 | 4.19E-16 | 0.371717 | 9.49E-17 | 0.251391 | 3.66E-08 | 0.427227 | 3.84E-22 |
| 8.52E-17 | 0.393648 | 9.27E-19 | 0.393588 | 9.39E-19 | 0.351104 | 5.40E-15 | 0.537346 | 2.70E-36 |
| 4.82E-17 | 0.227871 | 6.47E-07 | 0.341506 | 3.21E-14 | 0.322385 | 9.36E-13 | 0.379003 | 2.12E-17 |
| 0.00012  | -0.04425 | 0.34002  | 0.18863  | 4.09E-05 | 0.077894 | 0.0927   | 0.138654 | 0.00267  |
| 0.00106  | 0.002377 | 0.95914  | 0.141468 | 0.00218  | 0.123996 | 0.0073   | 0.1796   | 9.52E-05 |
| 1.17E-07 | 0.128699 | 0.00535  | 0.19815  | 1.61E-05 | 0.186981 | 4.79E-05 | 0.359119 | 1.16E-15 |
| 6.41E-06 | 0.108318 | 0.01921  | 0.359401 | 1.10E-15 | 0.290939 | 1.46E-10 | 0.419281 | 2.63E-21 |
| 2.10E-38 | 0.2076   | 6.08E-06 | 0.295979 | 6.76E-11 | 0.268528 | 3.72E-09 | 0.571965 | 6.32E-42 |
| 2.50E-22 | 0.461769 | 4.84E-26 | 0.387909 | 3.22E-18 | 0.357124 | 1.71E-15 | 0.534854 | 6.49E-36 |
| 1.22E-09 | -0.30391 | 1.96E-11 | -0.37417 | 5.76E-17 | -0.31336 | 4.24E-12 | -0.38523 | 5.72E-18 |
| 1.16E-28 | 0.093826 | 0.0427   | 0.290969 | 1.45E-10 | 0.066352 | 0.15225  | 0.35726  | 1.66E-15 |
| 3.06E-28 | 0.408652 | 3.18E-20 | 0.451012 | 8.85E-25 | 0.422762 | 1.14E-21 | 0.440939 | 1.23E-23 |
| 1.21E-42 | 0.179399 | 9.69E-05 | 0.235521 | 2.62E-07 | 0.074362 | 0.10852  | 0.425124 | 6.41E-22 |
| 0.38314  | 0.112646 | 0.01487  | 0.189486 | 3.77E-05 | 0.262913 | 8.01E-09 | 0.230965 | 4.51E-07 |
| 1.78E-25 | 0.063617 | 0.16991  | 0.274357 | 1.65E-09 | 0.159815 | 0.00053  | 0.265209 | 5.87E-09 |

|          |          |          |          |          |          |          |          |          |
|----------|----------|----------|----------|----------|----------|----------|----------|----------|
| 0.00153  | 0.111981 | 0.01548  | 0.176924 | 0.00012  | 0.124879 | 0.00689  | 0.293402 | 1.00E-10 |
| 0.16943  | 0.16579  | 0.00032  | 0.265757 | 5.45E-09 | 0.287961 | 2.28E-10 | 0.230312 | 4.87E-07 |
| 6.05E-48 | 0.323277 | 8.04E-13 | 0.430156 | 1.86E-22 | 0.270784 | 2.72E-09 | 0.546816 | 9.04E-38 |
| 0.02057  | 0.050219 | 0.2788   | 0.238765 | 1.77E-07 | 0.174233 | 0.00015  | 0.157157 | 0.00065  |
| 0.05985  | 0.060371 | 0.19281  | 0.218541 | 1.86E-06 | 0.258717 | 1.40E-08 | 0.300359 | 3.42E-11 |
| 0.00889  | -0.28589 | 3.10E-10 | -0.34401 | 2.03E-14 | -0.34932 | 7.55E-15 | -0.3663  | 2.83E-16 |
| 9.64E-07 | 0.096168 | 0.03776  | 0.150069 | 0.00114  | 0.074796 | 0.10647  | 0.298191 | 4.80E-11 |
| 6.79E-17 | 0.206074 | 7.13E-06 | 0.369495 | 1.49E-16 | 0.303749 | 2.01E-11 | 0.34136  | 3.30E-14 |
| 6.50E-20 | 0.023664 | 0.61     | -0.11096 | 0.01645  | -0.07537 | 0.10381  | -0.39516 | 6.65E-19 |
| 1.36E-06 | 0.023462 | 0.61304  | -0.04109 | 0.37559  | -0.01151 | 0.80402  | -0.21255 | 3.59E-06 |
| 6.75E-07 | -0.24051 | 1.43E-07 | -0.34613 | 1.37E-14 | -0.37423 | 5.69E-17 | -0.31919 | 1.61E-12 |
| 0.001    | -0.05536 | 0.23243  | -0.00843 | 0.85575  | 0.025861 | 0.57722  | 0.206317 | 6.96E-06 |
| 7.48E-16 | -0.09213 | 0.0466   | -0.06622 | 0.1531   | -0.21699 | 2.21E-06 | 0.221507 | 1.34E-06 |
| 2.71E-16 | -0.06335 | 0.17174  | -0.17768 | 0.00011  | -0.06319 | 0.17278  | -0.27353 | 1.85E-09 |
| 8.36E-25 | 0.115607 | 0.01242  | 0.223476 | 1.07E-06 | 0.09186  | 0.04726  | 0.392876 | 1.10E-18 |
| 3.21E-38 | 0.332883 | 1.51E-13 | 0.417957 | 3.60E-21 | 0.315632 | 2.91E-12 | 0.570682 | 1.05E-41 |
| 3.60E-08 | -0.12063 | 0.00907  | 0.063711 | 0.16929  | -0.0275  | 0.55328  | 0.139219 | 0.00257  |
| 2.22E-28 | 0.482186 | 1.45E-28 | 0.514062 | 7.38E-33 | 0.435385 | 5.04E-23 | 0.792965 | #####    |
| 5.22E-07 | 0.292321 | 1.18E-10 | 0.294111 | 9.01E-11 | 0.240353 | 1.46E-07 | 0.326072 | 4.97E-13 |
| 5.23E-07 | 0.149851 | 0.00116  | 0.280721 | 6.63E-10 | 0.251303 | 3.70E-08 | 0.391508 | 1.48E-18 |
| 0.583    | 0.149605 | 0.00118  | 0.304465 | 1.79E-11 | 0.125493 | 0.00662  | -0.10933 | 0.01811  |
| 4.78E-10 | 0.054778 | 0.23741  | 0.269923 | 3.07E-09 | 0.116313 | 0.01189  | 0.294763 | 8.15E-11 |
| 1.44E-31 | 0.121964 | 0.00833  | 0.261092 | 1.02E-08 | 0.085775 | 0.06402  | 0.346959 | 1.17E-14 |
| 1.76E-34 | 0.361474 | 7.33E-16 | 0.450762 | 9.46E-25 | 0.405184 | 7.04E-20 | 0.622995 | 1.48E-51 |
| 7.32E-08 | 0.212224 | 3.72E-06 | 0.347382 | 1.09E-14 | 0.305724 | 1.46E-11 | 0.40432  | 8.57E-20 |
| 2.40E-10 | 0.156302 | 0.0007   | 0.294701 | 8.23E-11 | 0.242731 | 1.09E-07 | 0.293271 | 1.02E-10 |
| 8.78E-12 | 0.176595 | 0.00012  | 0.272592 | 2.11E-09 | 0.194228 | 2.38E-05 | 0.355175 | 2.49E-15 |
| 3.84E-32 | 0.233449 | 3.36E-07 | 0.401766 | 1.53E-19 | 0.286694 | 2.76E-10 | 0.444838 | 4.48E-24 |
| 1.08E-23 | 0.30562  | 1.49E-11 | 0.448866 | 1.56E-24 | 0.324765 | 6.23E-13 | 0.501422 | 4.22E-31 |
| 5.97E-25 | 0.385885 | 4.97E-18 | 0.466492 | 1.31E-26 | 0.391543 | 1.47E-18 | 0.478496 | 4.27E-28 |
| 0.09968  | 0.074555 | 0.1076   | 0.123908 | 0.00734  | 0.206768 | 6.63E-06 | 0.136813 | 0.00305  |
| 1.68E-34 | 0.367734 | 2.12E-16 | 0.368044 | 1.99E-16 | 0.235791 | 2.54E-07 | 0.441202 | 1.15E-23 |
| 1.16E-05 | 0.131478 | 0.00443  | 0.229063 | 5.63E-07 | 0.153954 | 0.00084  | 0.254391 | 2.48E-08 |
| 0.02801  | 0.003158 | 0.94573  | 0.161414 | 0.00046  | 0.066299 | 0.15258  | 0.139755 | 0.00247  |
| 2.17E-11 | 0.162521 | 0.00042  | -0.00284 | 0.95119  | 0.164957 | 0.00034  | -0.17268 | 0.00018  |
| 0.00555  | 0.139    | 0.00261  | 0.232513 | 3.75E-07 | 0.138684 | 0.00267  | 0.264847 | 6.17E-09 |
| 1.63E-17 | 0.382037 | 1.12E-17 | 0.416367 | 5.25E-21 | 0.357168 | 1.69E-15 | 0.48484  | 6.63E-29 |
| 5.73E-26 | 0.242642 | 1.10E-07 | 0.473891 | 1.61E-27 | 0.422293 | 1.27E-21 | 0.537867 | 2.25E-36 |
| 8.78E-10 | 0.209669 | 4.88E-06 | 0.358472 | 1.32E-15 | 0.287034 | 2.62E-10 | 0.387932 | 3.20E-18 |
| 0.0047   | 0.01341  | 0.77255  | -0.13761 | 0.00288  | -0.14214 | 0.00208  | -0.18202 | 7.62E-05 |
| 5.79E-18 | 0.087679 | 0.05831  | 0.162492 | 0.00042  | 0.092513 | 0.0457   | 0.448241 | 1.84E-24 |
| 4.93E-15 | 0.299948 | 3.65E-11 | 0.358955 | 1.20E-15 | 0.296117 | 6.62E-11 | 0.465981 | 1.51E-26 |
| 3.30E-08 | -0.04392 | 0.34361  | 0.110514 | 0.01689  | -0.00994 | 0.8304   | 0.233588 | 3.31E-07 |
| 3.17E-19 | 0.12531  | 0.0067   | 0.272518 | 2.14E-09 | 0.09177  | 0.04748  | 0.339742 | 4.42E-14 |
| 0.00373  | -0.08485 | 0.06694  | 0.097703 | 0.03479  | -0.0429  | 0.35496  | 0.194593 | 2.29E-05 |

|          |          |          |          |          |          |          |          |          |
|----------|----------|----------|----------|----------|----------|----------|----------|----------|
| 0.38334  | 0.051144 | 0.27003  | 0.1686   | 0.00025  | 0.13894  | 0.00262  | 0.154253 | 0.00082  |
| 0.01185  | -0.01773 | 0.70236  | 0.175586 | 0.00014  | 0.034668 | 0.45482  | 0.112647 | 0.01487  |
| 1.36E-07 | 0.162385 | 0.00043  | 0.287153 | 2.57E-10 | 0.212938 | 3.44E-06 | 0.611441 | 3.21E-49 |
| 0.72709  | 0.089159 | 0.05418  | -0.13313 | 0.00395  | -0.05542 | 0.23193  | -0.06937 | 0.13441  |
| 3.55E-26 | 0.229455 | 5.38E-07 | 0.343452 | 2.25E-14 | 0.184868 | 5.84E-05 | 0.392413 | 1.21E-18 |
| 7.35E-12 | 0.403321 | 1.07E-19 | 0.583722 | 5.40E-44 | 0.491587 | 8.75E-30 | 0.419142 | 2.71E-21 |
| 0.62266  | 0.197199 | 1.77E-05 | 0.278977 | 8.53E-10 | 0.303177 | 2.20E-11 | 0.192745 | 2.75E-05 |
| 1.75E-19 | 0.221529 | 1.33E-06 | 0.232481 | 3.77E-07 | 0.118249 | 0.01054  | 0.357695 | 1.53E-15 |
| 7.33E-31 | 0.362112 | 6.47E-16 | 0.323319 | 7.98E-13 | 0.249199 | 4.84E-08 | 0.490169 | 1.34E-29 |
| 2.52E-26 | 0.286311 | 2.92E-10 | 0.390911 | 1.68E-18 | 0.384436 | 6.76E-18 | 0.436733 | 3.59E-23 |
| 1.05E-48 | 0.419345 | 2.59E-21 | 0.563972 | 1.45E-40 | 0.459748 | 8.42E-26 | 0.622597 | 1.79E-51 |
| 7.70E-23 | 0.196477 | 1.90E-05 | 0.312698 | 4.73E-12 | 0.202779 | 1.00E-05 | 0.356474 | 1.94E-15 |
| 1.89E-08 | 0.197265 | 1.76E-05 | 0.282248 | 5.31E-10 | 0.300427 | 3.39E-11 | 0.322624 | 8.98E-13 |
| 3.22E-31 | 0.326969 | 4.26E-13 | 0.525429 | 1.67E-34 | 0.393064 | 1.05E-18 | 0.503309 | 2.33E-31 |
| 1.12E-19 | 0.146096 | 0.00155  | 0.385085 | 5.89E-18 | 0.243323 | 1.01E-07 | 0.480195 | 2.60E-28 |
| 2.68E-23 | 0.234702 | 2.89E-07 | 0.385545 | 5.34E-18 | 0.279498 | 7.91E-10 | 0.470803 | 3.89E-27 |
| 0.01744  | 0.040924 | 0.37758  | 0.226956 | 7.19E-07 | 0.099582 | 0.03143  | 0.036423 | 0.43231  |
| 1.86E-05 | 0.355991 | 2.13E-15 | 0.367366 | 2.28E-16 | 0.38192  | 1.15E-17 | 0.39373  | 9.10E-19 |
| 6.17E-28 | 0.193274 | 2.61E-05 | 0.217641 | 2.06E-06 | 0.07359  | 0.11224  | 0.297584 | 5.28E-11 |
| 5.64E-33 | 0.348724 | 8.44E-15 | 0.450159 | 1.11E-24 | 0.27483  | 1.54E-09 | 0.480699 | 2.25E-28 |
| 2.81E-28 | -0.13324 | 0.00392  | -0.16962 | 0.00023  | -0.1282  | 0.00553  | -0.41757 | 3.95E-21 |
| 9.71E-24 | 0.21338  | 3.28E-06 | 0.26411  | 6.82E-09 | 0.201378 | 1.16E-05 | 0.392681 | 1.15E-18 |
| 0.00124  | 0.174265 | 0.00015  | 0.323632 | 7.56E-13 | 0.269655 | 3.19E-09 | 0.230387 | 4.82E-07 |
| 5.01E-20 | 0.303554 | 2.07E-11 | 0.385345 | 5.57E-18 | 0.339649 | 4.50E-14 | 0.488245 | 2.40E-29 |
| 1.30E-16 | 0.304174 | 1.88E-11 | 0.516607 | 3.20E-33 | 0.405536 | 6.50E-20 | 0.509456 | 3.29E-32 |
| 5.02E-17 | 0.230067 | 5.01E-07 | 0.273777 | 1.79E-09 | 0.177309 | 0.00012  | 0.244446 | 8.81E-08 |
| 9.64E-15 | 0.133223 | 0.00393  | 0.251895 | 3.43E-08 | 0.097107 | 0.03592  | 0.372579 | 7.96E-17 |
| 4.08E-14 | 0.436973 | 3.38E-23 | 0.451634 | 7.50E-25 | 0.348465 | 8.86E-15 | 0.42676  | 4.30E-22 |
| 3.10E-20 | 0.012357 | 0.78998  | -0.11788 | 0.01079  | -0.12829 | 0.0055   | -0.32454 | 6.48E-13 |
| 0.00145  | 0.416983 | 4.54E-21 | 0.47481  | 1.24E-27 | 0.378028 | 2.60E-17 | 0.293695 | 9.60E-11 |
| 1.63E-11 | -0.08814 | 0.05701  | -0.12337 | 0.0076   | -0.05448 | 0.23994  | -0.23364 | 3.28E-07 |
| 2.58E-24 | 0.400167 | 2.19E-19 | 0.476697 | 7.19E-28 | 0.333889 | 1.27E-13 | 0.497707 | 1.34E-30 |
| 6.96E-18 | 0.325814 | 5.20E-13 | 0.417077 | 4.44E-21 | 0.378139 | 2.54E-17 | 0.522253 | 4.89E-34 |
| 0.0777   | -0.00832 | 0.85773  | 0.150974 | 0.00107  | 0.141334 | 0.0022   | 0.165553 | 0.00033  |
| 1.05E-15 | 0.006932 | 0.88123  | 0.075645 | 0.10254  | -0.02489 | 0.59158  | 0.29623  | 6.51E-11 |
| 2.69E-16 | 0.02974  | 0.52145  | 0.127987 | 0.00561  | -0.02183 | 0.63796  | 0.179956 | 9.21E-05 |
| 0.24157  | 0.065632 | 0.15677  | 0.184231 | 6.20E-05 | 0.210558 | 4.44E-06 | 0.20258  | 1.02E-05 |
| 3.63E-18 | 0.218334 | 1.91E-06 | 0.303683 | 2.03E-11 | 0.243329 | 1.01E-07 | 0.336499 | 7.94E-14 |
| 1.51E-35 | 0.534331 | 7.80E-36 | 0.595234 | 4.20E-46 | 0.562421 | 2.63E-40 | 0.649314 | 2.96E-57 |
| 0.00534  | -0.08491 | 0.06675  | 0.270758 | 2.73E-09 | 0.120571 | 0.0091   | 0.209077 | 5.20E-06 |
| 7.48E-14 | 0.376594 | 3.49E-17 | 0.561742 | 3.41E-40 | 0.502183 | 3.32E-31 | 0.476359 | 7.93E-28 |
| 9.48E-07 | 0.212367 | 3.66E-06 | -0.01186 | 0.79828  | -0.00022 | 0.99623  | -0.20745 | 6.17E-06 |
| 2.14E-21 | 0.031262 | 0.50036  | -0.09795 | 0.03433  | 0.022723 | 0.62428  | -0.19455 | 2.30E-05 |
| 0.0176   | 0.080661 | 0.08164  | 0.262418 | 8.57E-09 | 0.302334 | 2.51E-11 | 0.269123 | 3.43E-09 |
| 3.90E-05 | 0.203389 | 9.43E-06 | 0.341283 | 3.34E-14 | 0.312465 | 4.91E-12 | 0.318192 | 1.90E-12 |

|          |          |          |          |          |          |          |          |          |
|----------|----------|----------|----------|----------|----------|----------|----------|----------|
| 0.21102  | 0.1912   | 3.19E-05 | 0.322847 | 8.65E-13 | 0.307754 | 1.06E-11 | 0.243644 | 9.73E-08 |
| 0.00078  | 0.027586 | 0.55207  | 0.137215 | 0.00296  | 0.090103 | 0.05167  | 0.070601 | 0.12763  |
| 6.47E-28 | 0.283396 | 4.49E-10 | 0.365606 | 3.24E-16 | 0.285461 | 3.31E-10 | 0.48806  | 2.54E-29 |
| 2.01E-37 | 0.339936 | 4.27E-14 | 0.563663 | 1.63E-40 | 0.39464  | 7.46E-19 | 0.572801 | 4.53E-42 |
| 7.12E-05 | 0.295268 | 7.55E-11 | 0.400486 | 2.04E-19 | 0.303086 | 2.23E-11 | 0.253866 | 2.66E-08 |
| 1.02E-09 | 0.476534 | 7.54E-28 | 0.573587 | 3.31E-42 | 0.523553 | 3.16E-34 | 0.543    | 3.60E-37 |
| 1.54E-17 | 0.151925 | 0.00099  | 0.346665 | 1.24E-14 | 0.152179 | 0.00097  | 0.431996 | 1.18E-22 |
| 0.16321  | 0.101861 | 0.02773  | 0.229712 | 5.22E-07 | 0.104895 | 0.02339  | 0.271467 | 2.48E-09 |
| 2.98E-42 | 0.336303 | 8.23E-14 | 0.48122  | 1.93E-28 | 0.313929 | 3.86E-12 | 0.499982 | 6.61E-31 |
| 3.70E-06 | -0.16328 | 0.0004   | -0.27506 | 1.49E-09 | -0.28889 | 1.99E-10 | -0.31922 | 1.60E-12 |
| 0.02793  | 0.14093  | 0.00227  | 0.228361 | 6.11E-07 | 0.238759 | 1.77E-07 | 0.150999 | 0.00106  |
| 5.19E-08 | 0.429173 | 2.38E-22 | 0.48383  | 8.94E-29 | 0.443481 | 6.38E-24 | 0.414685 | 7.81E-21 |
| 0.00318  | 0.361191 | 7.75E-16 | 0.343871 | 2.08E-14 | 0.35883  | 1.23E-15 | 0.313806 | 3.94E-12 |
| 1.00E-31 | 0.249631 | 4.58E-08 | 0.356272 | 2.01E-15 | 0.272108 | 2.26E-09 | 0.469621 | 5.43E-27 |
| 0.77287  | 0.255872 | 2.04E-08 | 0.331082 | 2.08E-13 | 0.304306 | 1.84E-11 | 0.298978 | 4.25E-11 |
| 1.21E-11 | 0.318667 | 1.75E-12 | 0.523332 | 3.40E-34 | 0.437794 | 2.74E-23 | 0.496584 | 1.90E-30 |
| 0.07962  | 0.047112 | 0.30966  | 0.221305 | 1.37E-06 | 0.150584 | 0.0011   | 0.48581  | 4.97E-29 |
| 0.00292  | -0.05843 | 0.20755  | -0.16184 | 0.00045  | -0.15927 | 0.00055  | -0.29827 | 4.74E-11 |
| 0.10408  | 0.122397 | 0.0081   | 0.295456 | 7.33E-11 | 0.295616 | 7.15E-11 | 0.234095 | 3.11E-07 |
| 0.00371  | 0.282385 | 5.20E-10 | -0.00998 | 0.8297   | -0.04581 | 0.32322  | 0.073152 | 0.11441  |
| 1.23E-15 | 0.214307 | 2.97E-06 | 0.286933 | 2.66E-10 | 0.129205 | 0.00517  | 0.441793 | 9.86E-24 |
| 5.25E-37 | 0.387043 | 3.88E-18 | 0.49251  | 6.61E-30 | 0.442523 | 8.17E-24 | 0.626676 | 2.55E-52 |
| 1.14E-05 | -0.0408  | 0.37898  | -0.08032 | 0.08292  | -0.13879 | 0.00265  | -0.25099 | 3.85E-08 |
| 0.00065  | 0.170947 | 0.00021  | 0.261829 | 9.27E-09 | 0.099242 | 0.03202  | 0.28257  | 5.06E-10 |
| 1.03E-07 | 0.233035 | 3.53E-07 | 0.408689 | 3.15E-20 | 0.23721  | 2.14E-07 | 0.200709 | 1.24E-05 |
| 5.67E-10 | 0.217101 | 2.18E-06 | 0.403752 | 9.75E-20 | 0.468548 | 7.34E-27 | 0.469961 | 4.93E-27 |
| 2.79E-06 | 0.244286 | 8.99E-08 | 0.383749 | 7.82E-18 | 0.248936 | 5.00E-08 | 0.377099 | 3.15E-17 |
| 7.16E-12 | 0.288535 | 2.09E-10 | 0.268405 | 3.79E-09 | 0.235275 | 2.70E-07 | 0.333424 | 1.37E-13 |
| 1.44E-13 | 0.324167 | 6.90E-13 | 0.457605 | 1.51E-25 | 0.458339 | 1.24E-25 | 0.503334 | 2.31E-31 |
| 7.41E-07 | 0.267446 | 4.32E-09 | 0.066492 | 0.15139  | -0.05844 | 0.20746  | -0.00945 | 0.83854  |
| 0.17756  | 0.024937 | 0.5909   | 0.405192 | 7.03E-20 | 0.18931  | 3.83E-05 | 0.215388 | 2.64E-06 |
| 2.26E-05 | 0.409989 | 2.34E-20 | 0.474819 | 1.24E-27 | 0.466165 | 1.43E-26 | 0.364547 | 4.00E-16 |
| 0.18797  | 0.409433 | 2.66E-20 | 0.408664 | 3.17E-20 | 0.461993 | 4.55E-26 | 0.420021 | 2.20E-21 |
| 3.35E-22 | 0.284366 | 3.89E-10 | 0.227066 | 7.10E-07 | 0.273387 | 1.89E-09 | 0.339054 | 5.01E-14 |
| 1.39E-27 | 0.533209 | 1.15E-35 | 0.529833 | 3.71E-35 | 0.433037 | 9.10E-23 | 0.542544 | 4.24E-37 |
| 1.78E-25 | 0.578434 | 4.71E-43 | 0.401043 | 1.80E-19 | 0.366962 | 2.47E-16 | 0.420774 | 1.84E-21 |
| 2.08E-12 | 0.477204 | 6.21E-28 | 0.488645 | 2.13E-29 | 0.537578 | 2.49E-36 | 0.489412 | 1.69E-29 |
| 3.61E-09 | 0.476263 | 8.16E-28 | 0.371071 | 1.08E-16 | 0.396921 | 4.51E-19 | 0.339106 | 4.96E-14 |
| 2.82E-08 | 0.535744 | 4.75E-36 | 0.446889 | 2.63E-24 | 0.527158 | 9.29E-35 | 0.443009 | 7.20E-24 |
| 9.50E-33 | 0.41877  | 2.97E-21 | 0.436862 | 3.47E-23 | 0.387955 | 3.19E-18 | 0.440855 | 1.25E-23 |
| 1.15E-31 | 0.574697 | 2.13E-42 | 0.522165 | 5.04E-34 | 0.553576 | 7.48E-39 | 0.62991  | 5.33E-53 |
| 3.81E-16 | 0.339209 | 4.87E-14 | 0.215042 | 2.74E-06 | 0.221416 | 1.35E-06 | 0.338605 | 5.44E-14 |
| 3.72E-32 | -0.36202 | 6.58E-16 | -0.31732 | 2.20E-12 | -0.24092 | 1.36E-07 | -0.41674 | 4.81E-21 |
| 9.07E-06 | -0.42753 | 3.56E-22 | -0.28148 | 5.94E-10 | -0.3286  | 3.21E-13 | -0.24448 | 8.77E-08 |
| 1.66E-13 | 0.193037 | 2.67E-05 | 0.121318 | 0.00868  | 0.129555 | 0.00505  | 0.346113 | 1.37E-14 |

|          |          |          |          |          |          |          |          |          |
|----------|----------|----------|----------|----------|----------|----------|----------|----------|
| 1.94E-25 | 0.301261 | 2.97E-11 | 0.163915 | 0.00038  | 0.146554 | 0.00149  | 0.458662 | 1.13E-25 |
| 9.23E-11 | -0.20707 | 6.43E-06 | -0.19687 | 1.83E-05 | -0.16503 | 0.00034  | -0.18092 | 8.43E-05 |
| 3.43E-17 | 0.539567 | 1.23E-36 | 0.544164 | 2.37E-37 | 0.573797 | 3.05E-42 | 0.518659 | 1.62E-33 |
| 0.00695  | 0.455007 | 3.04E-25 | 0.432497 | 1.04E-22 | 0.552442 | 1.14E-38 | 0.393773 | 9.02E-19 |
| 0.1784   | 0.259885 | 1.20E-08 | 0.206713 | 6.67E-06 | 0.377395 | 2.96E-17 | 0.277609 | 1.04E-09 |
| 1.51E-05 | -0.17911 | 9.96E-05 | -0.17588 | 0.00013  | -0.29484 | 8.06E-11 | -0.25387 | 2.65E-08 |
| 3.48E-49 | 0.412689 | 1.25E-20 | 0.333056 | 1.47E-13 | 0.277752 | 1.02E-09 | 0.475672 | 9.67E-28 |
| 1.01E-13 | 0.332431 | 1.64E-13 | 0.317494 | 2.14E-12 | 0.316775 | 2.41E-12 | 0.303663 | 2.03E-11 |
| 4.89E-44 | -0.4837  | 9.29E-29 | -0.41803 | 3.54E-21 | -0.37571 | 4.20E-17 | -0.47324 | 1.94E-27 |
| 1.59E-50 | 0.38873  | 2.70E-18 | 0.3642   | 4.28E-16 | 0.343725 | 2.14E-14 | 0.577692 | 6.36E-43 |
| 2.80E-73 | 0.521778 | 5.74E-34 | 0.519926 | 1.07E-33 | 0.477109 | 6.39E-28 | 0.729527 | 9.79E-79 |
| 3.82E-23 | -0.31468 | 3.41E-12 | -0.26562 | 5.55E-09 | -0.30578 | 1.45E-11 | -0.45062 | 9.82E-25 |
| 5.83E-32 | 0.626083 | 3.40E-52 | 0.369078 | 1.62E-16 | 0.344661 | 1.80E-14 | 0.524741 | 2.11E-34 |
| 1.71E-20 | 0.599828 | 5.72E-47 | 0.493175 | 5.40E-30 | 0.495197 | 2.91E-30 | 0.518053 | 1.98E-33 |
| 2.34E-05 | -0.28016 | 7.19E-10 | -0.36794 | 2.03E-16 | -0.36279 | 5.67E-16 | -0.29168 | 1.30E-10 |
| 8.11E-30 | 0.525432 | 1.67E-34 | 0.448636 | 1.66E-24 | 0.457891 | 1.40E-25 | 0.540854 | 7.78E-37 |
| 5.38E-07 | -0.35586 | 2.18E-15 | -0.40579 | 6.14E-20 | -0.39528 | 6.48E-19 | -0.37082 | 1.14E-16 |
| 4.91E-36 | 0.330989 | 2.11E-13 | 0.277992 | 9.82E-10 | 0.225071 | 8.92E-07 | 0.371732 | 9.46E-17 |
| 4.55E-48 | -0.48483 | 6.65E-29 | -0.38503 | 5.95E-18 | -0.34003 | 4.20E-14 | -0.57378 | 3.07E-42 |
| 3.74E-49 | 0.549072 | 3.96E-38 | 0.458098 | 1.32E-25 | 0.429523 | 2.18E-22 | 0.54101  | 7.35E-37 |
| 9.14E-60 | 0.57447  | 2.33E-42 | 0.552754 | 1.02E-38 | 0.535548 | 5.09E-36 | 0.637079 | 1.55E-54 |
| 6.95E-08 | 0.324956 | 6.03E-13 | 0.25278  | 3.06E-08 | 0.305021 | 1.64E-11 | 0.295269 | 7.55E-11 |
| 2.40E-45 | 0.581254 | 1.49E-43 | 0.556262 | 2.73E-39 | 0.521548 | 6.20E-34 | 0.635559 | 3.31E-54 |
| 0.02098  | 0.289446 | 1.83E-10 | 0.320952 | 1.19E-12 | 0.397845 | 3.67E-19 | 0.346717 | 1.23E-14 |
| 7.13E-31 | 0.626805 | 2.40E-52 | 0.507509 | 6.14E-32 | 0.538058 | 2.10E-36 | 0.470189 | 4.62E-27 |
| 7.50E-29 | 0.473173 | 1.98E-27 | 0.510764 | 2.15E-32 | 0.457915 | 1.39E-25 | 0.56682  | 4.79E-41 |
| 1.57E-20 | 0.499338 | 8.08E-31 | 0.554116 | 6.11E-39 | 0.449243 | 1.41E-24 | 0.412458 | 1.32E-20 |
| 1.87E-34 | 0.522433 | 4.60E-34 | 0.568367 | 2.61E-41 | 0.50871  | 4.18E-32 | 0.477845 | 5.16E-28 |
| 8.97E-27 | 0.537975 | 2.16E-36 | 0.544158 | 2.37E-37 | 0.567906 | 3.13E-41 | 0.596696 | 2.23E-46 |
| 8.01E-26 | 0.550413 | 2.42E-38 | 0.498801 | 9.55E-31 | 0.499352 | 8.05E-31 | 0.61714  | 2.33E-50 |
| 1.39E-18 | -0.4726  | 2.33E-27 | -0.36784 | 2.07E-16 | -0.39213 | 1.29E-18 | -0.42247 | 1.22E-21 |
| 1.53E-11 | 0.29319  | 1.04E-10 | 0.277884 | 9.98E-10 | 0.260284 | 1.14E-08 | 0.328887 | 3.05E-13 |
| 6.82E-49 | 0.390458 | 1.86E-18 | 0.379952 | 1.74E-17 | 0.28341  | 4.48E-10 | 0.499292 | 8.20E-31 |
| 1.76E-48 | 0.601458 | 2.80E-47 | 0.529441 | 4.25E-35 | 0.47511  | 1.14E-27 | 0.646909 | 1.04E-56 |
| 4.88E-33 | 0.337059 | 7.18E-14 | 0.412864 | 1.20E-20 | 0.313937 | 3.86E-12 | 0.411997 | 1.46E-20 |
| 3.23E-32 | 0.591136 | 2.42E-45 | 0.505609 | 1.12E-31 | 0.51308  | 1.02E-32 | 0.540754 | 8.06E-37 |
| 7.53E-06 | 0.391429 | 1.50E-18 | 0.270937 | 2.67E-09 | 0.416081 | 5.62E-21 | 0.285877 | 3.11E-10 |
| 3.59E-72 | 0.668894 | 7.05E-62 | 0.566913 | 4.62E-41 | 0.534929 | 6.33E-36 | 0.66     | 9.80E-60 |
| 3.02E-31 | 0.564748 | 1.07E-40 | 0.494194 | 3.95E-30 | 0.503694 | 2.06E-31 | 0.617066 | 2.41E-50 |
| 1.71E-20 | 0.383616 | 8.04E-18 | 0.461053 | 5.89E-26 | 0.451263 | 8.28E-25 | 0.471154 | 3.52E-27 |
| 4.62E-34 | 0.377665 | 2.80E-17 | 0.435447 | 4.97E-23 | 0.373413 | 6.72E-17 | 0.5565   | 2.50E-39 |
| 0.00022  | 0.331547 | 1.91E-13 | 0.332917 | 1.50E-13 | 0.364068 | 4.40E-16 | 0.224082 | 9.99E-07 |
| 6.57E-53 | 0.416077 | 5.62E-21 | 0.408872 | 3.02E-20 | 0.336497 | 7.94E-14 | 0.530366 | 3.09E-35 |
| 1.49E-08 | -0.24589 | 7.35E-08 | -0.18936 | 3.81E-05 | -0.33315 | 1.44E-13 | -0.24439 | 8.87E-08 |
| 0.00011  | 0.426718 | 4.35E-22 | 0.412596 | 1.27E-20 | 0.399409 | 2.59E-19 | 0.416728 | 4.82E-21 |

|          |          |          |          |          |          |          |          |          |
|----------|----------|----------|----------|----------|----------|----------|----------|----------|
| 3.79E-52 | 0.516707 | 3.10E-33 | 0.568989 | 2.05E-41 | 0.533059 | 1.22E-35 | 0.652215 | 6.42E-58 |
| 1.38E-12 | 0.306203 | 1.36E-11 | 0.304993 | 1.65E-11 | 0.349712 | 7.01E-15 | 0.306996 | 1.19E-11 |
| 1.86E-43 | 0.453975 | 4.02E-25 | 0.499981 | 6.62E-31 | 0.482458 | 1.34E-28 | 0.623155 | 1.38E-51 |
| 5.84E-48 | 0.528392 | 6.09E-35 | 0.571346 | 8.08E-42 | 0.556518 | 2.48E-39 | 0.63992  | 3.71E-55 |
| 2.13E-49 | 0.523891 | 2.82E-34 | 0.548762 | 4.44E-38 | 0.481055 | 2.02E-28 | 0.615809 | 4.32E-50 |
| 3.20E-34 | 0.439645 | 1.71E-23 | 0.422043 | 1.35E-21 | 0.358209 | 1.39E-15 | 0.560511 | 5.46E-40 |
| 1.77E-68 | 0.512821 | 1.11E-32 | 0.47871  | 4.01E-28 | 0.390637 | 1.79E-18 | 0.572581 | 4.95E-42 |
| 1.57E-32 | 0.417011 | 4.51E-21 | 0.252994 | 2.97E-08 | 0.258118 | 1.52E-08 | 0.412955 | 1.17E-20 |
| 5.85E-46 | -0.23373 | 3.25E-07 | -0.27118 | 2.58E-09 | -0.16863 | 0.00025  | -0.44025 | 1.47E-23 |
| 4.94E-38 | -0.33299 | 1.48E-13 | -0.29085 | 1.48E-10 | -0.2126  | 3.57E-06 | -0.48707 | 3.41E-29 |
| 8.75E-69 | 0.655941 | 8.81E-59 | 0.439142 | 1.95E-23 | 0.404891 | 7.53E-20 | 0.656863 | 5.37E-59 |
| 4.69E-28 | 0.506983 | 7.26E-32 | 0.435022 | 5.53E-23 | 0.402943 | 1.17E-19 | 0.50383  | 1.98E-31 |
| 0.23204  | 0.406851 | 4.81E-20 | 0.345897 | 1.43E-14 | 0.497895 | 1.27E-30 | 0.290268 | 1.61E-10 |
| 1.67E-22 | 0.369461 | 1.50E-16 | 0.407232 | 4.41E-20 | 0.381071 | 1.38E-17 | 0.386671 | 4.20E-18 |
| 5.11E-50 | 0.639246 | 5.22E-55 | 0.568826 | 2.18E-41 | 0.568006 | 3.01E-41 | 0.70981  | 8.91E-73 |
| 8.35E-66 | 0.455827 | 2.44E-25 | 0.511873 | 1.50E-32 | 0.413312 | 1.08E-20 | 0.632995 | 1.18E-53 |
| 2.40E-12 | 0.526184 | 1.30E-34 | 0.495037 | 3.05E-30 | 0.475758 | 9.43E-28 | 0.389103 | 2.49E-18 |
| 3.46E-11 | 0.305184 | 1.60E-11 | 0.358494 | 1.31E-15 | 0.306702 | 1.25E-11 | 0.301764 | 2.75E-11 |
| 1.61E-26 | 0.59551  | 3.73E-46 | 0.529407 | 4.30E-35 | 0.49669  | 1.84E-30 | 0.618715 | 1.12E-50 |
| 3.39E-37 | 0.645468 | 2.18E-56 | 0.593624 | 8.38E-46 | 0.535028 | 6.11E-36 | 0.59389  | 7.48E-46 |
| 1.11E-12 | 0.396302 | 5.17E-19 | 0.364571 | 3.98E-16 | 0.379271 | 2.00E-17 | 0.375992 | 3.96E-17 |
| 5.21E-53 | 0.500202 | 6.17E-31 | 0.491291 | 9.58E-30 | 0.488357 | 2.32E-29 | 0.609757 | 6.89E-49 |
| 1.28E-40 | 0.616534 | 3.08E-50 | 0.559575 | 7.80E-40 | 0.593849 | 7.61E-46 | 0.530608 | 2.84E-35 |
| 5.65E-44 | -0.38722 | 3.74E-18 | -0.28403 | 4.08E-10 | -0.21234 | 3.67E-06 | -0.56359 | 1.67E-40 |
| 2.28E-41 | 0.447147 | 2.45E-24 | 0.33251  | 1.62E-13 | 0.29353  | 9.85E-11 | 0.457317 | 1.63E-25 |
| 2.90E-24 | -0.28931 | 1.87E-10 | -0.18122 | 8.20E-05 | -0.15627 | 0.0007   | -0.41975 | 2.35E-21 |
| 2.18E-45 | 0.360618 | 8.67E-16 | 0.370254 | 1.28E-16 | 0.288365 | 2.15E-10 | 0.490603 | 1.18E-29 |
| 6.15E-29 | 0.306262 | 1.34E-11 | 0.311797 | 5.48E-12 | 0.220827 | 1.44E-06 | 0.433099 | 8.96E-23 |
| 0.00015  | -0.43662 | 3.69E-23 | -0.448   | 1.96E-24 | -0.48563 | 5.24E-29 | -0.16815 | 0.00026  |
| 5.45E-24 | 0.202782 | 1.00E-05 | 0.274362 | 1.65E-09 | 0.212991 | 3.42E-06 | 0.277269 | 1.09E-09 |
| 6.21E-65 | 0.464005 | 2.61E-26 | 0.454454 | 3.53E-25 | 0.393851 | 8.87E-19 | 0.555923 | 3.11E-39 |
| 0.00683  | -0.25064 | 4.03E-08 | -0.33857 | 5.47E-14 | -0.40441 | 8.40E-20 | -0.29651 | 6.23E-11 |
| 9.82E-57 | 0.386365 | 4.48E-18 | 0.379509 | 1.91E-17 | 0.310795 | 6.46E-12 | 0.53009  | 3.40E-35 |
| 1.10E-23 | 0.489287 | 1.75E-29 | 0.48112  | 1.99E-28 | 0.482968 | 1.15E-28 | 0.505905 | 1.02E-31 |
| 3.53E-23 | 0.380386 | 1.59E-17 | 0.487961 | 2.61E-29 | 0.402545 | 1.28E-19 | 0.443037 | 7.15E-24 |
| 1.15E-41 | 0.72452  | 3.58E-77 | 0.584717 | 3.57E-44 | 0.553562 | 7.52E-39 | 0.679309 | 1.75E-64 |
| 1.50E-45 | 0.476703 | 7.18E-28 | 0.407208 | 4.43E-20 | 0.451645 | 7.48E-25 | 0.564081 | 1.39E-40 |
| 2.45E-57 | 0.64468  | 3.28E-56 | 0.537063 | 2.99E-36 | 0.536347 | 3.84E-36 | 0.656726 | 5.78E-59 |
| 2.08E-40 | 0.312981 | 4.51E-12 | 0.350073 | 6.55E-15 | 0.278523 | 9.10E-10 | 0.498625 | 1.01E-30 |
| 8.26E-22 | 0.581487 | 1.35E-43 | 0.579399 | 3.18E-43 | 0.562551 | 2.50E-40 | 0.583876 | 5.06E-44 |
| 1.41E-31 | 0.668    | 1.17E-61 | 0.56614  | 6.24E-41 | 0.556401 | 2.60E-39 | 0.55667  | 2.34E-39 |
| 2.09E-23 | -0.06074 | 0.1901   | -0.08749 | 0.05885  | -0.09747 | 0.03522  | -0.3249  | 6.08E-13 |
| 3.68E-40 | 0.355272 | 2.44E-15 | 0.366659 | 2.63E-16 | 0.314763 | 3.36E-12 | 0.533394 | 1.08E-35 |
| 3.22E-34 | 0.691082 | 1.46E-67 | 0.586813 | 1.49E-44 | 0.611697 | 2.85E-49 | 0.57904  | 3.68E-43 |
| 3.08E-07 | 0.297837 | 5.08E-11 | 0.32655  | 4.58E-13 | 0.457672 | 1.48E-25 | 0.392355 | 1.23E-18 |

|          |          |          |          |          |          |          |          |          |
|----------|----------|----------|----------|----------|----------|----------|----------|----------|
| 3.93E-22 | 0.432465 | 1.05E-22 | 0.431943 | 1.20E-22 | 0.447785 | 2.08E-24 | 0.499596 | 7.46E-31 |
| 1.02E-26 | 0.497289 | 1.53E-30 | 0.466791 | 1.20E-26 | 0.496382 | 2.02E-30 | 0.544451 | 2.13E-37 |
| 5.79E-12 | 0.219252 | 1.72E-06 | 0.339879 | 4.32E-14 | 0.273191 | 1.94E-09 | 0.462647 | 3.80E-26 |
| 9.94E-57 | 0.528615 | 5.65E-35 | 0.557732 | 1.57E-39 | 0.519428 | 1.26E-33 | 0.672862 | 7.38E-63 |
| 2.74E-22 | 0.421936 | 1.39E-21 | 0.339769 | 4.40E-14 | 0.274169 | 1.69E-09 | 0.341443 | 3.25E-14 |
| 8.50E-31 | 0.659082 | 1.62E-59 | 0.460002 | 7.85E-26 | 0.483476 | 9.93E-29 | 0.584091 | 4.63E-44 |
| 1.31E-45 | 0.630457 | 4.08E-53 | 0.611372 | 3.31E-49 | 0.580327 | 2.18E-43 | 0.66369  | 1.29E-60 |
| 1.90E-29 | 0.388708 | 2.71E-18 | 0.431386 | 1.37E-22 | 0.412662 | 1.25E-20 | 0.46421  | 2.47E-26 |
| 5.40E-57 | 0.593657 | 8.26E-46 | 0.450303 | 1.07E-24 | 0.419814 | 2.31E-21 | 0.668585 | 8.40E-62 |
| 6.80E-25 | 0.462441 | 4.02E-26 | 0.400211 | 2.17E-19 | 0.422351 | 1.26E-21 | 0.561424 | 3.85E-40 |
| 0.00127  | 0.495972 | 2.29E-30 | 0.419268 | 2.63E-21 | 0.585069 | 3.09E-44 | 0.316953 | 2.34E-12 |
| 1.04E-19 | -0.45171 | 7.36E-25 | -0.37839 | 2.41E-17 | -0.40651 | 5.20E-20 | -0.51625 | 3.60E-33 |
| 1.58E-24 | 0.449258 | 1.41E-24 | 0.39714  | 4.29E-19 | 0.479878 | 2.86E-28 | 0.525304 | 1.75E-34 |
| 4.60E-34 | 0.674615 | 2.69E-63 | 0.544327 | 2.23E-37 | 0.566299 | 5.86E-41 | 0.627858 | 1.44E-52 |
| 3.93E-34 | 0.628133 | 1.26E-52 | 0.348937 | 8.11E-15 | 0.405878 | 6.01E-20 | 0.374305 | 5.60E-17 |
| 6.95E-18 | 0.634791 | 4.84E-54 | 0.612048 | 2.43E-49 | 0.634306 | 6.15E-54 | 0.529435 | 4.26E-35 |
| 1.81E-29 | 0.474393 | 1.40E-27 | 0.540927 | 7.58E-37 | 0.447709 | 2.12E-24 | 0.487372 | 3.12E-29 |
| 3.52E-58 | 0.512545 | 1.21E-32 | 0.548359 | 5.15E-38 | 0.518546 | 1.69E-33 | 0.678099 | 3.56E-64 |
| 7.20E-34 | 0.409529 | 2.60E-20 | 0.281852 | 5.62E-10 | 0.245245 | 7.97E-08 | 0.335599 | 9.33E-14 |
| 4.79E-18 | -0.52131 | 6.71E-34 | -0.45026 | 1.08E-24 | -0.44244 | 8.35E-24 | -0.46741 | 1.01E-26 |
| 3.28E-55 | 0.66611  | 3.37E-61 | 0.55014  | 2.67E-38 | 0.553309 | 8.26E-39 | 0.645674 | 1.96E-56 |
| 0.59027  | 0.343073 | 2.41E-14 | 0.31861  | 1.77E-12 | 0.426721 | 4.34E-22 | 0.170467 | 0.00021  |
| 2.79E-07 | 0.483834 | 8.93E-29 | 0.628445 | 1.09E-52 | 0.645205 | 2.50E-56 | 0.482498 | 1.32E-28 |
| 3.33E-09 | 0.451095 | 8.66E-25 | 0.297074 | 5.71E-11 | 0.368204 | 1.93E-16 | 0.335844 | 8.93E-14 |
| 8.45E-11 | 0.570101 | 1.32E-41 | 0.402956 | 1.17E-19 | 0.467908 | 8.79E-27 | 0.268189 | 3.90E-09 |
| 1.16E-66 | 0.501208 | 4.51E-31 | 0.513069 | 1.02E-32 | 0.445052 | 4.24E-24 | 0.59205  | 1.64E-45 |
| 2.32E-11 | -0.52404 | 2.68E-34 | -0.30574 | 1.46E-11 | -0.26161 | 9.55E-09 | -0.40125 | 1.72E-19 |
| 4.47E-28 | 0.477181 | 6.26E-28 | 0.424688 | 7.13E-22 | 0.384318 | 6.93E-18 | 0.504126 | 1.80E-31 |
| 2.15E-35 | 0.439758 | 1.66E-23 | 0.458686 | 1.12E-25 | 0.468791 | 6.86E-27 | 0.575479 | 1.55E-42 |
| 8.64E-44 | 0.585754 | 2.32E-44 | 0.488045 | 2.55E-29 | 0.47223  | 2.59E-27 | 0.533507 | 1.04E-35 |
| 5.90E-29 | -0.41682 | 4.71E-21 | -0.44146 | 1.07E-23 | -0.39149 | 1.49E-18 | -0.51851 | 1.70E-33 |
| 4.03E-35 | 0.573289 | 3.73E-42 | 0.471367 | 3.31E-27 | 0.467469 | 9.94E-27 | 0.645795 | 1.84E-56 |
| 3.87E-09 | -0.437   | 3.35E-23 | -0.3641  | 4.37E-16 | -0.36141 | 7.42E-16 | -0.31396 | 3.84E-12 |
| 2.28E-36 | 0.556639 | 2.37E-39 | 0.475947 | 8.93E-28 | 0.501652 | 3.92E-31 | 0.658974 | 1.71E-59 |
| 1.26E-32 | 0.647218 | 8.82E-57 | 0.491109 | 1.01E-29 | 0.478856 | 3.85E-28 | 0.536673 | 3.43E-36 |
| 3.20E-23 | 0.441875 | 9.65E-24 | 0.349109 | 7.86E-15 | 0.371474 | 9.97E-17 | 0.406969 | 4.68E-20 |
| 4.77E-30 | 0.556601 | 2.41E-39 | 0.503827 | 1.98E-31 | 0.47371  | 1.70E-27 | 0.572103 | 5.98E-42 |
| 1.66E-21 | 0.359625 | 1.05E-15 | 0.245014 | 8.21E-08 | 0.24823  | 5.47E-08 | 0.43236  | 1.08E-22 |
| 8.90E-22 | 0.207283 | 6.29E-06 | 0.191225 | 3.19E-05 | 0.126968 | 0.006    | 0.428981 | 2.49E-22 |
| 6.47E-09 | -0.40651 | 5.20E-20 | -0.28321 | 4.61E-10 | -0.31092 | 6.33E-12 | -0.28463 | 3.74E-10 |
| 1.07E-17 | 0.508495 | 4.47E-32 | 0.502772 | 2.76E-31 | 0.436027 | 4.29E-23 | 0.50039  | 5.82E-31 |
| 3.72E-48 | 0.561791 | 3.35E-40 | 0.453338 | 4.76E-25 | 0.43967  | 1.70E-23 | 0.502743 | 2.78E-31 |
| 3.23E-17 | -0.4715  | 3.19E-27 | -0.32074 | 1.24E-12 | -0.39737 | 4.08E-19 | -0.44894 | 1.53E-24 |
| 0.16254  | 0.255413 | 2.17E-08 | 0.375198 | 4.66E-17 | 0.42327  | 1.01E-21 | 0.301364 | 2.92E-11 |
| 1.85E-16 | 0.526359 | 1.22E-34 | 0.401547 | 1.60E-19 | 0.42478  | 6.97E-22 | 0.33819  | 5.86E-14 |



|          |          |          |          |          |          |          |          |          |
|----------|----------|----------|----------|----------|----------|----------|----------|----------|
| 0.01594  | 0.294112 | 9.01E-11 | 0.200899 | 1.22E-05 | 0.195064 | 2.19E-05 | 0.097559 | 0.03506  |
| 3.93E-06 | 0.468393 | 7.67E-27 | 0.465422 | 1.76E-26 | 0.495128 | 2.97E-30 | 0.303312 | 2.15E-11 |
| 1.00E-29 | 0.606492 | 3.00E-48 | 0.470078 | 4.77E-27 | 0.389516 | 2.28E-18 | 0.517792 | 2.16E-33 |
| 2.95E-30 | 0.48237  | 1.38E-28 | 0.463532 | 2.98E-26 | 0.470251 | 4.54E-27 | 0.524331 | 2.43E-34 |
| 2.03E-13 | 0.509608 | 3.13E-32 | 0.416343 | 5.28E-21 | 0.501514 | 4.10E-31 | 0.375871 | 4.06E-17 |
| 9.22E-19 | 0.555279 | 3.96E-39 | 0.549059 | 3.98E-38 | 0.549759 | 3.08E-38 | 0.501484 | 4.14E-31 |
| 9.22E-06 | 0.467862 | 8.90E-27 | 0.434639 | 6.09E-23 | 0.4531   | 5.08E-25 | 0.343693 | 2.15E-14 |
| 7.77E-21 | 0.384475 | 6.70E-18 | 0.426527 | 4.55E-22 | 0.39294  | 1.08E-18 | 0.403662 | 9.95E-20 |
| 1.76E-54 | 0.630982 | 3.16E-53 | 0.43468  | 6.02E-23 | 0.374749 | 5.11E-17 | 0.493122 | 5.49E-30 |
| 5.10E-19 | -0.33985 | 4.33E-14 | -0.33791 | 6.16E-14 | -0.35092 | 5.59E-15 | -0.39222 | 1.27E-18 |
| 1.69E-64 | 0.625639 | 4.20E-52 | 0.540892 | 7.67E-37 | 0.515963 | 3.96E-33 | 0.64077  | 2.41E-55 |
| 3.01E-14 | -0.3597  | 1.04E-15 | -0.36    | 9.77E-16 | -0.3989  | 2.90E-19 | -0.30462 | 1.75E-11 |
| 1.15E-14 | 0.342682 | 2.59E-14 | 0.346386 | 1.31E-14 | 0.411328 | 1.71E-20 | 0.442274 | 8.71E-24 |
| 5.84E-40 | 0.580008 | 2.48E-43 | 0.553044 | 9.12E-39 | 0.536481 | 3.67E-36 | 0.543537 | 2.97E-37 |
| 4.70E-29 | 0.504307 | 1.70E-31 | 0.464612 | 2.21E-26 | 0.432922 | 9.36E-23 | 0.472137 | 2.66E-27 |
| 1.31E-52 | 0.661694 | 3.88E-60 | 0.482849 | 1.19E-28 | 0.447451 | 2.27E-24 | 0.521954 | 5.41E-34 |
| 4.26E-06 | -0.27539 | 1.42E-09 | -0.34134 | 3.31E-14 | -0.296   | 6.74E-11 | -0.31695 | 2.34E-12 |
| 1.17E-15 | 0.424734 | 7.05E-22 | 0.238728 | 1.78E-07 | 0.280122 | 7.23E-10 | 0.47643  | 7.77E-28 |
| 8.62E-07 | -0.37218 | 8.64E-17 | -0.28483 | 3.63E-10 | -0.3492  | 7.72E-15 | -0.2018  | 1.11E-05 |
| 3.22E-25 | 0.266314 | 5.05E-09 | 0.280791 | 6.56E-10 | 0.263585 | 7.32E-09 | 0.338408 | 5.63E-14 |
| 1.97E-41 | 0.297854 | 5.06E-11 | 0.339785 | 4.39E-14 | 0.279551 | 7.85E-10 | 0.40487  | 7.56E-20 |
| 1.56E-17 | 0.422435 | 1.23E-21 | 0.438647 | 2.21E-23 | 0.414626 | 7.91E-21 | 0.402469 | 1.30E-19 |
| 1.80E-22 | 0.131678 | 0.00437  | 0.200492 | 1.27E-05 | 0.116882 | 0.01148  | 0.38552  | 5.37E-18 |
| 1.72E-50 | 0.618694 | 1.13E-50 | 0.576756 | 9.28E-43 | 0.528077 | 6.79E-35 | 0.646884 | 1.05E-56 |
| 1.73E-08 | -0.48296 | 1.16E-28 | -0.32208 | 9.85E-13 | -0.25112 | 3.79E-08 | -0.47213 | 2.67E-27 |
| 1.50E-35 | 0.666567 | 2.61E-61 | 0.547194 | 7.88E-38 | 0.510784 | 2.14E-32 | 0.521613 | 6.06E-34 |
| 1.16E-71 | 0.647626 | 7.13E-57 | 0.515611 | 4.44E-33 | 0.466294 | 1.38E-26 | 0.606081 | 3.60E-48 |
| 1.73E-29 | 0.695742 | 8.02E-69 | 0.632918 | 1.22E-53 | 0.61318  | 1.45E-49 | 0.693745 | 2.80E-68 |
| 1.68E-33 | 0.542521 | 4.28E-37 | 0.461172 | 5.70E-26 | 0.363774 | 4.66E-16 | 0.49131  | 9.52E-30 |
| 2.41E-36 | 0.513951 | 7.65E-33 | 0.52956  | 4.08E-35 | 0.475104 | 1.14E-27 | 0.5546   | 5.10E-39 |
| 8.11E-38 | 0.586365 | 1.80E-44 | 0.469353 | 5.85E-27 | 0.429413 | 2.24E-22 | 0.441719 | 1.00E-23 |
| 3.98E-32 | -0.40422 | 8.77E-20 | -0.31879 | 1.72E-12 | -0.36422 | 4.27E-16 | -0.54351 | 3.00E-37 |
| 8.59E-55 | 0.658233 | 2.56E-59 | 0.558201 | 1.31E-39 | 0.488746 | 2.06E-29 | 0.671263 | 1.84E-62 |
| 3.58E-11 | 0.450878 | 9.17E-25 | 0.365511 | 3.30E-16 | 0.344635 | 1.81E-14 | 0.400312 | 2.12E-19 |
| 1.00E-20 | 0.512965 | 1.05E-32 | 0.456785 | 1.88E-25 | 0.468526 | 7.39E-27 | 0.391084 | 1.62E-18 |
| 1.46E-75 | 0.511828 | 1.53E-32 | 0.454359 | 3.62E-25 | 0.414723 | 7.74E-21 | 0.663876 | 1.17E-60 |
| 2.60E-16 | 0.610705 | 4.48E-49 | 0.512903 | 1.08E-32 | 0.589124 | 5.66E-45 | 0.467165 | 1.08E-26 |
| 7.79E-08 | 0.231904 | 4.04E-07 | 0.233072 | 3.51E-07 | 0.249031 | 4.94E-08 | 0.175853 | 0.00013  |
| 3.01E-10 | 0.212493 | 3.61E-06 | 0.146918 | 0.00145  | 0.163421 | 0.00039  | 0.374026 | 5.92E-17 |
| 1.68E-44 | 0.732472 | 1.14E-79 | 0.560789 | 4.91E-40 | 0.58654  | 1.67E-44 | 0.551583 | 1.57E-38 |
| 4.83E-39 | -0.35638 | 1.97E-15 | -0.29485 | 8.05E-11 | -0.26558 | 5.58E-09 | -0.46666 | 1.25E-26 |
| 0.0034   | 0.369372 | 1.53E-16 | 0.321114 | 1.16E-12 | 0.434828 | 5.80E-23 | 0.222099 | 1.25E-06 |
| 6.93E-36 | 0.56708  | 4.32E-41 | 0.439772 | 1.66E-23 | 0.518916 | 1.49E-33 | 0.554507 | 5.28E-39 |
| 1.93E-32 | -0.4208  | 1.83E-21 | -0.36593 | 3.04E-16 | -0.36326 | 5.16E-16 | -0.44188 | 9.64E-24 |
| 5.86E-41 | 0.585651 | 2.42E-44 | 0.501302 | 4.38E-31 | 0.480594 | 2.32E-28 | 0.60312  | 1.35E-47 |

|          |          |          |          |          |          |          |          |          |
|----------|----------|----------|----------|----------|----------|----------|----------|----------|
| 1.05E-29 | 0.605837 | 4.02E-48 | 0.6113   | 3.42E-49 | 0.590861 | 2.72E-45 | 0.662268 | 2.83E-60 |
| 3.14E-48 | 0.542467 | 4.36E-37 | 0.508482 | 4.49E-32 | 0.470276 | 4.51E-27 | 0.578489 | 4.60E-43 |
| 1.13E-63 | 0.395198 | 6.59E-19 | 0.375691 | 4.21E-17 | 0.303674 | 2.03E-11 | 0.523919 | 2.79E-34 |
| 1.22E-07 | 0.178188 | 0.00011  | 0.251333 | 3.68E-08 | 0.202082 | 1.08E-05 | 0.207943 | 5.86E-06 |
| 2.30E-09 | -0.5285  | 5.86E-35 | -0.41864 | 3.06E-21 | -0.48622 | 4.40E-29 | -0.46779 | 9.09E-27 |
| 1.94E-56 | 0.525594 | 1.58E-34 | 0.484133 | 8.17E-29 | 0.387461 | 3.54E-18 | 0.469949 | 4.95E-27 |
| 3.18E-21 | 0.420776 | 1.84E-21 | 0.363208 | 5.21E-16 | 0.371368 | 1.02E-16 | 0.453476 | 4.59E-25 |
| 4.01E-29 | 0.684778 | 6.78E-66 | 0.570186 | 1.28E-41 | 0.544331 | 2.23E-37 | 0.611233 | 3.53E-49 |
| 1.60E-12 | 0.270055 | 3.01E-09 | 0.32823  | 3.42E-13 | 0.316988 | 2.32E-12 | 0.322167 | 9.71E-13 |
| 1.01E-35 | 0.620748 | 4.30E-51 | 0.491612 | 8.69E-30 | 0.551012 | 1.94E-38 | 0.553527 | 7.62E-39 |
| 3.16E-13 | 0.512322 | 1.30E-32 | 0.50579  | 1.06E-31 | 0.471847 | 2.89E-27 | 0.574235 | 2.56E-42 |
| 0.00011  | -0.31465 | 3.43E-12 | -0.40954 | 2.59E-20 | -0.42    | 2.21E-21 | -0.36914 | 1.60E-16 |
| 0.00044  | 0.225209 | 8.79E-07 | 0.32411  | 6.97E-13 | 0.442561 | 8.09E-24 | 0.316831 | 2.39E-12 |
| 9.54E-29 | -0.4733  | 1.91E-27 | -0.24651 | 6.80E-08 | -0.27028 | 2.92E-09 | -0.40253 | 1.29E-19 |
| 2.01E-42 | 0.685352 | 4.80E-66 | 0.664069 | 1.05E-60 | 0.627515 | 1.70E-52 | 0.594037 | 7.02E-46 |
| 6.25E-47 | 0.551276 | 1.76E-38 | 0.50068  | 5.32E-31 | 0.481531 | 1.76E-28 | 0.467349 | 1.03E-26 |
| 6.82E-18 | 0.527385 | 8.60E-35 | 0.451681 | 7.41E-25 | 0.483433 | 1.01E-28 | 0.440466 | 1.39E-23 |
| 1.74E-31 | 0.760471 | 3.13E-89 | 0.556719 | 2.30E-39 | 0.58172  | 1.23E-43 | 0.556141 | 2.86E-39 |
| 2.16E-10 | 0.52319  | 3.57E-34 | 0.309167 | 8.41E-12 | 0.288251 | 2.19E-10 | 0.367548 | 2.20E-16 |
| 7.91E-19 | 0.625058 | 5.55E-52 | 0.570684 | 1.05E-41 | 0.582535 | 8.81E-44 | 0.557767 | 1.55E-39 |
| 8.46E-24 | 0.677571 | 4.84E-64 | 0.566707 | 5.00E-41 | 0.560138 | 6.30E-40 | 0.601665 | 2.56E-47 |
| 1.12E-09 | 0.484884 | 6.54E-29 | 0.21703  | 2.20E-06 | 0.337696 | 6.40E-14 | 0.264588 | 6.39E-09 |
| 2.53E-09 | 0.373216 | 6.99E-17 | 0.527824 | 7.40E-35 | 0.469792 | 5.17E-27 | 0.455676 | 2.54E-25 |
| 2.73E-15 | 0.540881 | 7.70E-37 | 0.473099 | 2.02E-27 | 0.499512 | 7.66E-31 | 0.416117 | 5.57E-21 |
| 4.99E-41 | 0.623483 | 1.18E-51 | 0.593007 | 1.09E-45 | 0.572391 | 5.33E-42 | 0.622243 | 2.12E-51 |
| 4.99E-67 | 0.603091 | 1.36E-47 | 0.59125  | 2.31E-45 | 0.527966 | 7.05E-35 | 0.671948 | 1.25E-62 |
| 2.02E-79 | 0.489292 | 1.75E-29 | 0.425562 | 5.76E-22 | 0.343937 | 2.05E-14 | 0.596642 | 2.29E-46 |
| 1.15E-18 | 0.379203 | 2.03E-17 | 0.232301 | 3.85E-07 | 0.24814  | 5.54E-08 | 0.432125 | 1.14E-22 |
| 7.36E-45 | 0.668179 | 1.06E-61 | 0.627287 | 1.90E-52 | 0.575285 | 1.68E-42 | 0.628602 | 1.01E-52 |
| 1.94E-46 | 0.696228 | 5.91E-69 | 0.45608  | 2.28E-25 | 0.501201 | 4.52E-31 | 0.594607 | 5.50E-46 |
| 1.43E-34 | 0.639213 | 5.30E-55 | 0.550304 | 2.52E-38 | 0.516448 | 3.37E-33 | 0.522082 | 5.18E-34 |
| 2.83E-23 | 0.624079 | 8.86E-52 | 0.587527 | 1.11E-44 | 0.564574 | 1.15E-40 | 0.583977 | 4.86E-44 |
| 6.37E-55 | 0.587929 | 9.36E-45 | 0.553761 | 6.98E-39 | 0.503856 | 1.96E-31 | 0.569759 | 1.51E-41 |
| 3.48E-40 | 0.627583 | 1.65E-52 | 0.51791  | 2.08E-33 | 0.512011 | 1.44E-32 | 0.522145 | 5.07E-34 |
| 6.46E-05 | -0.42841 | 2.87E-22 | -0.23774 | 2.01E-07 | -0.33181 | 1.83E-13 | -0.3015  | 2.86E-11 |
| 7.03E-34 | 0.502524 | 2.98E-31 | 0.517201 | 2.63E-33 | 0.519674 | 1.16E-33 | 0.581397 | 1.41E-43 |
| 4.32E-09 | -0.3375  | 6.63E-14 | -0.26756 | 4.26E-09 | -0.23188 | 4.05E-07 | -0.31277 | 4.67E-12 |
| 1.87E-36 | 0.666122 | 3.34E-61 | 0.448519 | 1.71E-24 | 0.472931 | 2.12E-27 | 0.465558 | 1.70E-26 |
| 0.00298  | -0.43516 | 5.34E-23 | -0.32669 | 4.47E-13 | -0.39974 | 2.41E-19 | -0.21509 | 2.72E-06 |
| 1.59E-17 | 0.387981 | 3.17E-18 | 0.389647 | 2.21E-18 | 0.429831 | 2.02E-22 | 0.454226 | 3.76E-25 |
| 6.92E-37 | 0.327219 | 4.08E-13 | 0.426698 | 4.37E-22 | 0.336313 | 8.21E-14 | 0.455585 | 2.61E-25 |
| 0.01502  | -0.37619 | 3.80E-17 | -0.37751 | 2.89E-17 | -0.49236 | 6.93E-30 | -0.29107 | 1.43E-10 |
| 1.95E-46 | 0.727697 | 3.68E-78 | 0.592664 | 1.26E-45 | 0.571159 | 8.70E-42 | 0.662289 | 2.80E-60 |
| 4.53E-07 | 0.459129 | 9.97E-26 | 0.350048 | 6.58E-15 | 0.468975 | 6.51E-27 | 0.396621 | 4.82E-19 |
| 0.52108  | 0.424235 | 7.96E-22 | 0.392679 | 1.15E-18 | 0.415083 | 7.11E-21 | 0.184962 | 5.79E-05 |

|          |          |          |          |          |          |          |          |          |
|----------|----------|----------|----------|----------|----------|----------|----------|----------|
| 2.30E-53 | 0.310238 | 7.07E-12 | 0.270174 | 2.96E-09 | 0.224535 | 9.49E-07 | 0.506802 | 7.69E-32 |
| 1.04E-24 | 0.621975 | 2.41E-51 | 0.485106 | 6.13E-29 | 0.55843  | 1.21E-39 | 0.561353 | 3.96E-40 |
| 1.87E-20 | 0.388957 | 2.57E-18 | 0.400394 | 2.08E-19 | 0.390179 | 1.97E-18 | 0.435226 | 5.25E-23 |
| 1.48E-57 | 0.424472 | 7.52E-22 | 0.370323 | 1.26E-16 | 0.307237 | 1.15E-11 | 0.547747 | 6.44E-38 |
| 0.00029  | 0.305827 | 1.44E-11 | 0.199164 | 1.45E-05 | 0.302846 | 2.32E-11 | 0.202767 | 1.01E-05 |
| 1.05E-58 | 0.545027 | 1.73E-37 | 0.501962 | 3.56E-31 | 0.450355 | 1.05E-24 | 0.613594 | 1.20E-49 |
| 3.26E-14 | -0.52762 | 7.94E-35 | -0.45451 | 3.48E-25 | -0.48933 | 1.73E-29 | -0.53956 | 1.23E-36 |
| 5.48E-44 | 0.563412 | 1.79E-40 | 0.539255 | 1.37E-36 | 0.422381 | 1.25E-21 | 0.512725 | 1.14E-32 |
| 1.48E-08 | -0.2676  | 4.23E-09 | -0.20961 | 4.92E-06 | -0.23695 | 2.21E-07 | -0.18169 | 7.86E-05 |
| 2.93E-10 | 0.30911  | 8.49E-12 | 0.302396 | 2.49E-11 | 0.342632 | 2.61E-14 | 0.328603 | 3.21E-13 |
| 3.49E-17 | 0.64252  | 9.91E-56 | 0.558302 | 1.27E-39 | 0.541191 | 6.89E-37 | 0.528975 | 4.99E-35 |
| 8.62E-34 | 0.624374 | 7.70E-52 | 0.522815 | 4.05E-34 | 0.481291 | 1.89E-28 | 0.58072  | 1.85E-43 |
| 9.96E-64 | 0.495701 | 2.49E-30 | 0.489359 | 1.72E-29 | 0.403744 | 9.77E-20 | 0.580817 | 1.78E-43 |
| 3.99E-18 | 0.488012 | 2.57E-29 | 0.487264 | 3.22E-29 | 0.490479 | 1.22E-29 | 0.371941 | 9.07E-17 |
| 9.51E-41 | 0.544683 | 1.96E-37 | 0.519972 | 1.05E-33 | 0.416027 | 5.69E-21 | 0.468808 | 6.82E-27 |
| 9.96E-48 | 0.442486 | 8.25E-24 | 0.466405 | 1.34E-26 | 0.388174 | 3.04E-18 | 0.621341 | 3.25E-51 |
| 6.46E-51 | 0.317427 | 2.16E-12 | 0.355287 | 2.43E-15 | 0.245157 | 8.06E-08 | 0.42369  | 9.09E-22 |
| 8.29E-15 | 0.402483 | 1.30E-19 | 0.388325 | 2.94E-18 | 0.348013 | 9.64E-15 | 0.400898 | 1.86E-19 |
| 0.13484  | -0.47406 | 1.54E-27 | -0.4055  | 6.55E-20 | -0.51407 | 7.36E-33 | -0.2811  | 6.27E-10 |
| 1.11E-12 | -0.46493 | 2.02E-26 | -0.38809 | 3.09E-18 | -0.47523 | 1.10E-27 | -0.48179 | 1.63E-28 |
| 0.00064  | -0.41914 | 2.72E-21 | -0.32373 | 7.44E-13 | -0.42482 | 6.91E-22 | -0.25708 | 1.74E-08 |
| 6.17E-40 | 0.500135 | 6.31E-31 | 0.340812 | 3.64E-14 | 0.397949 | 3.59E-19 | 0.507148 | 6.89E-32 |
| 5.48E-40 | 0.344364 | 1.90E-14 | 0.260335 | 1.13E-08 | 0.21237  | 3.66E-06 | 0.359447 | 1.09E-15 |
| 1.38E-75 | 0.410565 | 2.04E-20 | 0.344204 | 1.96E-14 | 0.33969  | 4.47E-14 | 0.579445 | 3.12E-43 |
| 0.01989  | 0.318103 | 1.93E-12 | 0.15234  | 0.00096  | 0.319973 | 1.41E-12 | 0.165469 | 0.00033  |
| 3.99E-21 | -0.25472 | 2.38E-08 | -0.25584 | 2.05E-08 | -0.32147 | 1.09E-12 | -0.48484 | 6.64E-29 |
| 1.05E-10 | -0.32783 | 3.67E-13 | -0.3461  | 1.38E-14 | -0.3633  | 5.11E-16 | -0.38297 | 9.22E-18 |
| 1.85E-05 | 0.540651 | 8.36E-37 | 0.450263 | 1.08E-24 | 0.395421 | 6.28E-19 | 0.316717 | 2.43E-12 |
| 8.80E-20 | 0.704294 | 3.37E-71 | 0.575196 | 1.74E-42 | 0.608957 | 9.90E-49 | 0.491271 | 9.63E-30 |
| 7.26E-37 | 0.605138 | 5.49E-48 | 0.615451 | 5.09E-50 | 0.610091 | 5.93E-49 | 0.688999 | 5.24E-67 |
| 1.74E-13 | 0.276664 | 1.19E-09 | 0.25476  | 2.36E-08 | 0.259605 | 1.25E-08 | 0.321803 | 1.03E-12 |
| 2.54E-37 | 0.293    | 1.07E-10 | 0.371045 | 1.09E-16 | 0.290446 | 1.57E-10 | 0.409886 | 2.39E-20 |
| 5.09E-30 | 0.691066 | 1.47E-67 | 0.552625 | 1.07E-38 | 0.539258 | 1.37E-36 | 0.583334 | 6.33E-44 |
| 1.42E-06 | -0.34702 | 1.16E-14 | -0.18174 | 7.82E-05 | -0.28407 | 4.06E-10 | -0.27515 | 1.47E-09 |
| 8.62E-09 | 0.155791 | 0.00073  | 0.197295 | 1.75E-05 | 0.189443 | 3.78E-05 | 0.299522 | 3.90E-11 |
| 1.85E-31 | 0.576314 | 1.11E-42 | 0.34794  | 9.78E-15 | 0.431921 | 1.20E-22 | 0.515716 | 4.29E-33 |
| 1.88E-21 | 0.450393 | 1.04E-24 | 0.476907 | 6.77E-28 | 0.393437 | 9.71E-19 | 0.456597 | 1.98E-25 |
| 1.09E-28 | 0.477866 | 5.13E-28 | 0.422618 | 1.18E-21 | 0.38907  | 2.51E-18 | 0.601168 | 3.18E-47 |
| 1.81E-57 | 0.646309 | 1.41E-56 | 0.515446 | 4.69E-33 | 0.542257 | 4.71E-37 | 0.605592 | 4.49E-48 |
| 8.23E-14 | 0.533904 | 9.05E-36 | 0.389522 | 2.27E-18 | 0.397473 | 3.99E-19 | 0.554012 | 6.35E-39 |
| 8.11E-12 | 0.424394 | 7.66E-22 | 0.444125 | 5.40E-24 | 0.478035 | 4.88E-28 | 0.496295 | 2.07E-30 |
| 7.23E-43 | 0.40491  | 7.50E-20 | 0.28076  | 6.59E-10 | 0.324777 | 6.22E-13 | 0.353579 | 3.37E-15 |
| 0.0004   | 0.335052 | 1.03E-13 | 0.337864 | 6.21E-14 | 0.403973 | 9.27E-20 | 0.237131 | 2.16E-07 |
| 1.43E-52 | 0.672166 | 1.10E-62 | 0.608435 | 1.25E-48 | 0.561285 | 4.06E-40 | 0.644143 | 4.32E-56 |
| 1.66E-22 | 0.416973 | 4.55E-21 | 0.447066 | 2.51E-24 | 0.484494 | 7.35E-29 | 0.55631  | 2.69E-39 |

|          |          |          |          |          |          |          |          |          |
|----------|----------|----------|----------|----------|----------|----------|----------|----------|
| 3.08E-25 | 0.569492 | 1.68E-41 | 0.510796 | 2.13E-32 | 0.516226 | 3.63E-33 | 0.548452 | 4.97E-38 |
| 3.58E-19 | -0.38633 | 4.52E-18 | -0.20009 | 1.32E-05 | -0.26204 | 9.02E-09 | -0.30592 | 1.42E-11 |
| 4.30E-13 | 0.441363 | 1.10E-23 | 0.473332 | 1.89E-27 | 0.478266 | 4.57E-28 | 0.402105 | 1.41E-19 |
| 3.40E-18 | -0.26825 | 3.87E-09 | -0.13658 | 0.0031   | -0.24932 | 4.77E-08 | -0.35195 | 4.60E-15 |
| 0.3381   | -0.45358 | 4.46E-25 | -0.36234 | 6.18E-16 | -0.46615 | 1.44E-26 | -0.23465 | 2.91E-07 |
| 0.00835  | -0.39971 | 2.42E-19 | -0.46326 | 3.21E-26 | -0.51495 | 5.51E-33 | -0.3712  | 1.05E-16 |
| 2.99E-18 | 0.333819 | 1.28E-13 | 0.310298 | 7.00E-12 | 0.307264 | 1.14E-11 | 0.333659 | 1.32E-13 |
| 3.15E-21 | 0.297294 | 5.52E-11 | 0.345685 | 1.49E-14 | 0.232538 | 3.74E-07 | 0.415431 | 6.55E-21 |
| 2.75E-37 | 0.552098 | 1.30E-38 | 0.488353 | 2.32E-29 | 0.38813  | 3.07E-18 | 0.486997 | 3.49E-29 |
| 1.03E-08 | 0.307663 | 1.07E-11 | 0.321572 | 1.07E-12 | 0.282561 | 5.07E-10 | 0.305403 | 1.54E-11 |
| 3.46E-29 | 0.526346 | 1.23E-34 | 0.552483 | 1.12E-38 | 0.522823 | 4.04E-34 | 0.621528 | 2.97E-51 |
| 8.32E-22 | 0.5329   | 1.28E-35 | 0.591333 | 2.22E-45 | 0.513469 | 8.95E-33 | 0.441899 | 9.59E-24 |
| 1.35E-43 | 0.676054 | 1.17E-63 | 0.637278 | 1.40E-54 | 0.604557 | 7.11E-48 | 0.696147 | 6.22E-69 |
| 1.42E-24 | 0.518049 | 1.99E-33 | 0.544654 | 1.98E-37 | 0.391998 | 1.33E-18 | 0.480068 | 2.70E-28 |
| 1.68E-15 | 0.368159 | 1.95E-16 | 0.387174 | 3.77E-18 | 0.338689 | 5.35E-14 | 0.317183 | 2.25E-12 |
| 1.14E-31 | 0.585724 | 2.35E-44 | 0.51055  | 2.31E-32 | 0.5349   | 6.39E-36 | 0.503257 | 2.37E-31 |
| 2.11E-60 | 0.53031  | 3.15E-35 | 0.52259  | 4.37E-34 | 0.445236 | 4.04E-24 | 0.600798 | 3.74E-47 |
| 4.99E-11 | 0.298431 | 4.63E-11 | 0.198216 | 1.60E-05 | 0.308695 | 9.08E-12 | 0.365246 | 3.48E-16 |
| 3.78E-45 | 0.700755 | 3.33E-70 | 0.553448 | 7.84E-39 | 0.488731 | 2.07E-29 | 0.572582 | 4.94E-42 |
| 9.87E-28 | -0.17723 | 0.00012  | -0.09327 | 0.04394  | -0.05452 | 0.23963  | -0.36311 | 5.31E-16 |
| 2.82E-29 | 0.642145 | 1.20E-55 | 0.473325 | 1.90E-27 | 0.448606 | 1.67E-24 | 0.470315 | 4.46E-27 |
| 1.33E-47 | 0.491699 | 8.46E-30 | 0.434033 | 7.09E-23 | 0.314023 | 3.80E-12 | 0.579665 | 2.85E-43 |
| 5.94E-05 | -0.4599  | 8.08E-26 | -0.26078 | 1.07E-08 | -0.35171 | 4.81E-15 | -0.23637 | 2.37E-07 |
| 3.73E-22 | -0.39647 | 4.97E-19 | -0.28011 | 7.24E-10 | -0.3295  | 2.74E-13 | -0.44989 | 1.19E-24 |
| 5.67E-19 | -0.29216 | 1.21E-10 | -0.21762 | 2.06E-06 | -0.27498 | 1.51E-09 | -0.39795 | 3.59E-19 |
| 6.71E-46 | 0.560893 | 4.72E-40 | 0.423305 | 9.98E-22 | 0.333847 | 1.27E-13 | 0.524067 | 2.65E-34 |
| 4.68E-63 | 0.627544 | 1.68E-52 | 0.672424 | 9.49E-63 | 0.57673  | 9.38E-43 | 0.720695 | 5.29E-76 |
| 2.62E-10 | -0.3006  | 3.30E-11 | -0.17953 | 9.58E-05 | -0.28006 | 7.29E-10 | -0.26866 | 3.66E-09 |
| 0.01458  | -0.19665 | 1.87E-05 | -0.3257  | 5.30E-13 | -0.41301 | 1.16E-20 | -0.24019 | 1.49E-07 |
| 5.06E-07 | 0.322892 | 8.58E-13 | 0.340761 | 3.68E-14 | 0.390203 | 1.96E-18 | 0.404578 | 8.08E-20 |
| 2.46E-48 | 0.46094  | 6.08E-26 | 0.431057 | 1.49E-22 | 0.422393 | 1.24E-21 | 0.475476 | 1.02E-27 |
| 1.34E-37 | 0.385513 | 5.38E-18 | 0.490772 | 1.12E-29 | 0.442707 | 7.79E-24 | 0.581466 | 1.37E-43 |
| 0.00532  | 0.398479 | 3.19E-19 | 0.357372 | 1.63E-15 | 0.506864 | 7.54E-32 | 0.264441 | 6.52E-09 |
| 1.93E-27 | 0.511663 | 1.61E-32 | 0.52385  | 2.86E-34 | 0.49476  | 3.33E-30 | 0.50695  | 7.34E-32 |
| 1.97E-25 | 0.436072 | 4.24E-23 | 0.375805 | 4.11E-17 | 0.300881 | 3.16E-11 | 0.322706 | 8.86E-13 |
| 2.37E-22 | -0.35315 | 3.66E-15 | -0.23917 | 1.69E-07 | -0.26036 | 1.13E-08 | -0.33996 | 4.25E-14 |
| 6.92E-30 | 0.389688 | 2.19E-18 | 0.511588 | 1.65E-32 | 0.428371 | 2.90E-22 | 0.397639 | 3.84E-19 |
| 2.65E-12 | -0.20654 | 6.80E-06 | -0.1872  | 4.69E-05 | -0.22979 | 5.17E-07 | -0.31446 | 3.54E-12 |
| 1.08E-09 | -0.28597 | 3.07E-10 | -0.24462 | 8.62E-08 | -0.31486 | 3.31E-12 | -0.36301 | 5.42E-16 |
| 7.36E-06 | -0.34451 | 1.85E-14 | -0.17593 | 0.00013  | -0.29295 | 1.08E-10 | -0.36123 | 7.69E-16 |
| 3.30E-19 | 0.494131 | 4.03E-30 | 0.444651 | 4.71E-24 | 0.392925 | 1.09E-18 | 0.4058   | 6.12E-20 |
| 1.55E-24 | 0.392501 | 1.19E-18 | 0.307773 | 1.05E-11 | 0.347772 | 1.01E-14 | 0.389396 | 2.34E-18 |
| 1.69E-51 | 0.666624 | 2.53E-61 | 0.532256 | 1.61E-35 | 0.54666  | 9.57E-38 | 0.662866 | 2.04E-60 |
| 4.95E-34 | 0.363795 | 4.64E-16 | 0.37582  | 4.10E-17 | 0.221046 | 1.41E-06 | 0.376254 | 3.75E-17 |
| 2.45E-56 | 0.630308 | 4.39E-53 | 0.567528 | 3.63E-41 | 0.565982 | 6.63E-41 | 0.632354 | 1.61E-53 |

|          |          |          |          |          |          |          |          |          |
|----------|----------|----------|----------|----------|----------|----------|----------|----------|
| 1.33E-74 | 0.641786 | 1.44E-55 | 0.501458 | 4.17E-31 | 0.513401 | 9.15E-33 | 0.612634 | 1.86E-49 |
| 5.16E-08 | -0.36073 | 8.48E-16 | -0.29236 | 1.18E-10 | -0.33146 | 1.94E-13 | -0.36968 | 1.43E-16 |
| 8.49E-26 | 0.458654 | 1.13E-25 | 0.410503 | 2.07E-20 | 0.445687 | 3.59E-24 | 0.410376 | 2.14E-20 |
| 2.12E-11 | 0.265433 | 5.69E-09 | 0.244009 | 9.30E-08 | 0.246983 | 6.41E-08 | 0.35347  | 3.44E-15 |
| 3.14E-22 | 0.547715 | 6.51E-38 | 0.505961 | 1.01E-31 | 0.544018 | 2.50E-37 | 0.580581 | 1.96E-43 |
| 6.55E-50 | 0.490058 | 1.39E-29 | 0.468899 | 6.65E-27 | 0.358769 | 1.24E-15 | 0.567584 | 3.55E-41 |
| 1.67E-36 | 0.571385 | 7.95E-42 | 0.52728  | 8.92E-35 | 0.526777 | 1.06E-34 | 0.577794 | 6.10E-43 |
| 5.47E-25 | 0.626686 | 2.54E-52 | 0.584552 | 3.83E-44 | 0.600408 | 4.44E-47 | 0.516055 | 3.84E-33 |
| 9.66E-05 | -0.19595 | 2.00E-05 | -0.20506 | 7.93E-06 | -0.29056 | 1.55E-10 | -0.30547 | 1.52E-11 |
| 1.05E-10 | -0.11526 | 0.01269  | -0.17997 | 9.20E-05 | -0.18122 | 8.21E-05 | -0.28513 | 3.47E-10 |
| 4.44E-07 | 0.177802 | 0.00011  | 0.211036 | 4.22E-06 | 0.243214 | 1.03E-07 | 0.317534 | 2.12E-12 |
| 8.69E-40 | 0.712523 | 1.45E-73 | 0.625098 | 5.44E-52 | 0.579574 | 2.96E-43 | 0.652653 | 5.09E-58 |
| 1.68E-25 | 0.459123 | 9.99E-26 | 0.277379 | 1.07E-09 | 0.321044 | 1.18E-12 | 0.234863 | 2.84E-07 |
| 1.51E-10 | -0.36744 | 2.25E-16 | -0.35785 | 1.48E-15 | -0.44622 | 3.12E-24 | -0.25908 | 1.34E-08 |
| 0.00011  | -0.27055 | 2.81E-09 | -0.23601 | 2.48E-07 | -0.32019 | 1.36E-12 | -0.24058 | 1.42E-07 |
| 1.34E-79 | 0.566003 | 6.58E-41 | 0.511724 | 1.58E-32 | 0.504276 | 1.72E-31 | 0.601963 | 2.24E-47 |
| 5.50E-12 | 0.294491 | 8.50E-11 | 0.357642 | 1.55E-15 | 0.324232 | 6.83E-13 | 0.255319 | 2.20E-08 |
| 5.18E-08 | 0.415486 | 6.46E-21 | 0.511188 | 1.88E-32 | 0.514357 | 6.70E-33 | 0.611886 | 2.62E-49 |
| 4.91E-42 | 0.564544 | 1.16E-40 | 0.44457  | 4.81E-24 | 0.368305 | 1.89E-16 | 0.366999 | 2.46E-16 |
| 1.36E-72 | 0.448971 | 1.52E-24 | 0.423587 | 9.32E-22 | 0.385366 | 5.55E-18 | 0.595144 | 4.37E-46 |
| 0.00211  | -0.36019 | 9.42E-16 | -0.31764 | 2.08E-12 | -0.39596 | 5.57E-19 | -0.27719 | 1.10E-09 |
| 4.94E-16 | -0.22102 | 1.41E-06 | -0.25968 | 1.24E-08 | -0.30425 | 1.85E-11 | -0.33419 | 1.20E-13 |
| 1.27E-30 | 0.54896  | 4.13E-38 | 0.539236 | 1.38E-36 | 0.514798 | 5.80E-33 | 0.564726 | 1.08E-40 |
| 1.74E-14 | -0.27067 | 2.77E-09 | -0.10252 | 0.02673  | -0.12667 | 0.00612  | -0.40876 | 3.10E-20 |
| 1.33E-21 | 0.604844 | 6.26E-48 | 0.402749 | 1.22E-19 | 0.331157 | 2.05E-13 | 0.561449 | 3.82E-40 |
| 1.42E-52 | 0.536275 | 3.94E-36 | 0.47014  | 4.69E-27 | 0.46936  | 5.84E-27 | 0.565495 | 8.02E-41 |
| 1.66E-33 | -0.36718 | 2.37E-16 | -0.15372 | 0.00086  | -0.14816 | 0.00132  | -0.37016 | 1.30E-16 |
| 6.30E-62 | 0.433886 | 7.35E-23 | 0.472375 | 2.49E-27 | 0.364175 | 4.31E-16 | 0.587021 | 1.37E-44 |
| 3.53E-45 | 0.691415 | 1.19E-67 | 0.602257 | 1.97E-47 | 0.555163 | 4.13E-39 | 0.533822 | 9.32E-36 |
| 4.70E-31 | 0.420307 | 2.05E-21 | 0.289416 | 1.84E-10 | 0.300607 | 3.29E-11 | 0.476778 | 7.03E-28 |
| 3.30E-23 | 0.49158  | 8.77E-30 | 0.514619 | 6.15E-33 | 0.516387 | 3.44E-33 | 0.433305 | 8.51E-23 |
| 2.57E-31 | 0.415553 | 6.36E-21 | 0.39034  | 1.91E-18 | 0.342261 | 2.80E-14 | 0.366388 | 2.77E-16 |
| 2.90E-30 | 0.321072 | 1.17E-12 | 0.378962 | 2.14E-17 | 0.282776 | 4.91E-10 | 0.471074 | 3.60E-27 |
| 5.62E-18 | -0.25837 | 1.47E-08 | -0.21279 | 3.49E-06 | -0.27746 | 1.06E-09 | -0.3474  | 1.08E-14 |
| 5.72E-21 | -0.41048 | 2.08E-20 | -0.20671 | 6.68E-06 | -0.19534 | 2.13E-05 | -0.42143 | 1.57E-21 |
| 2.07E-27 | -0.44063 | 1.33E-23 | -0.22168 | 1.31E-06 | -0.05603 | 0.22683  | -0.47547 | 1.03E-27 |
| 3.59E-13 | 0.550894 | 2.02E-38 | 0.34686  | 1.20E-14 | 0.354258 | 2.96E-15 | 0.426702 | 4.36E-22 |
| 1.63E-18 | 0.550746 | 2.14E-38 | 0.475153 | 1.12E-27 | 0.511361 | 1.78E-32 | 0.403531 | 1.03E-19 |
| 2.33E-12 | 0.365443 | 3.35E-16 | 0.312721 | 4.71E-12 | 0.345671 | 1.49E-14 | 0.212689 | 3.53E-06 |
| 4.21E-38 | 0.62558  | 4.32E-52 | 0.484504 | 7.32E-29 | 0.441079 | 1.18E-23 | 0.552657 | 1.05E-38 |
| 9.24E-32 | -0.50282 | 2.71E-31 | -0.45269 | 5.67E-25 | -0.41204 | 1.45E-20 | -0.51919 | 1.36E-33 |
| 6.69E-42 | 0.644876 | 2.96E-56 | 0.592359 | 1.44E-45 | 0.538379 | 1.88E-36 | 0.583934 | 4.94E-44 |
| 3.82E-35 | 0.585735 | 2.34E-44 | 0.439399 | 1.82E-23 | 0.491415 | 9.22E-30 | 0.730183 | 6.08E-79 |
| 2.55E-33 | -0.26565 | 5.53E-09 | -0.23723 | 2.14E-07 | -0.20243 | 1.04E-05 | -0.48689 | 3.60E-29 |
| 3.01E-18 | 0.425593 | 5.72E-22 | 0.444942 | 4.36E-24 | 0.346104 | 1.38E-14 | 0.302203 | 2.56E-11 |

|          |          |          |          |          |          |          |          |          |
|----------|----------|----------|----------|----------|----------|----------|----------|----------|
| 0.01732  | -0.25392 | 2.64E-08 | -0.12705 | 0.00597  | -0.27363 | 1.83E-09 | -0.15547 | 0.00075  |
| 2.69E-12 | 0.44322  | 6.82E-24 | 0.287593 | 2.41E-10 | 0.341583 | 3.16E-14 | 0.429218 | 2.35E-22 |
| 2.09E-39 | 0.387028 | 3.89E-18 | 0.251436 | 3.63E-08 | 0.167051 | 0.00029  | 0.494261 | 3.87E-30 |
| 8.19E-28 | 0.311423 | 5.83E-12 | 0.265359 | 5.75E-09 | 0.174391 | 0.00015  | 0.372713 | 7.75E-17 |
| 1.04E-16 | 0.283958 | 4.13E-10 | 0.328208 | 3.43E-13 | 0.224434 | 9.60E-07 | 0.236101 | 2.45E-07 |
| 9.45E-17 | 0.513108 | 1.01E-32 | 0.358627 | 1.28E-15 | 0.447451 | 2.27E-24 | 0.506929 | 7.39E-32 |
| 6.98E-25 | 0.649059 | 3.38E-57 | 0.575384 | 1.61E-42 | 0.532311 | 1.58E-35 | 0.572399 | 5.32E-42 |
| 0.97461  | 0.361464 | 7.34E-16 | 0.247433 | 6.05E-08 | 0.40412  | 8.97E-20 | 0.061939 | 0.18148  |
| 2.73E-30 | -0.44148 | 1.07E-23 | -0.1556  | 0.00074  | -0.20347 | 9.35E-06 | -0.41423 | 8.70E-21 |
| 1.37E-50 | 0.586686 | 1.57E-44 | 0.527933 | 7.13E-35 | 0.532967 | 1.26E-35 | 0.613583 | 1.20E-49 |
| 1.99E-46 | 0.230332 | 4.85E-07 | 0.26006  | 1.18E-08 | 0.158148 | 0.0006   | 0.449668 | 1.26E-24 |
| 1.05E-26 | -0.34086 | 3.61E-14 | -0.07512 | 0.10494  | -0.13623 | 0.00318  | -0.32959 | 2.70E-13 |
| 2.25E-30 | 0.457477 | 1.56E-25 | 0.523534 | 3.18E-34 | 0.511093 | 1.94E-32 | 0.513006 | 1.04E-32 |
| 3.67E-28 | 0.485275 | 5.83E-29 | 0.440387 | 1.41E-23 | 0.396783 | 4.65E-19 | 0.588359 | 7.81E-45 |
| 2.00E-35 | 0.519087 | 1.41E-33 | 0.556622 | 2.39E-39 | 0.531179 | 2.33E-35 | 0.533779 | 9.46E-36 |
| 1.23E-18 | -0.46009 | 7.67E-26 | -0.29473 | 8.19E-11 | -0.30152 | 2.85E-11 | -0.37016 | 1.30E-16 |
| 1.33E-15 | 0.361896 | 6.75E-16 | 0.403097 | 1.13E-19 | 0.333502 | 1.36E-13 | 0.426181 | 4.96E-22 |
| 1.97E-43 | 0.348124 | 9.45E-15 | 0.262571 | 8.39E-09 | 0.194494 | 2.31E-05 | 0.398279 | 3.33E-19 |
| 3.79E-24 | 0.27281  | 2.05E-09 | 0.171128 | 0.0002   | 0.145803 | 0.00158  | 0.286433 | 2.87E-10 |
| 7.66E-19 | 0.305683 | 1.47E-11 | 0.294094 | 9.03E-11 | 0.231904 | 4.03E-07 | 0.493626 | 4.71E-30 |
| 1.29E-35 | 0.543115 | 3.46E-37 | 0.436597 | 3.71E-23 | 0.382032 | 1.12E-17 | 0.39527  | 6.49E-19 |
| 1.29E-20 | -0.47235 | 2.50E-27 | -0.36038 | 9.08E-16 | -0.4245  | 7.47E-22 | -0.54244 | 4.40E-37 |
| 1.14E-56 | 0.54797  | 5.93E-38 | 0.53562  | 4.97E-36 | 0.539059 | 1.47E-36 | 0.586537 | 1.68E-44 |
| 1.19E-52 | 0.683496 | 1.46E-65 | 0.533027 | 1.23E-35 | 0.443055 | 7.12E-24 | 0.532893 | 1.29E-35 |
| 6.19E-42 | 0.363678 | 4.75E-16 | 0.282868 | 4.85E-10 | 0.18997  | 3.60E-05 | 0.403523 | 1.03E-19 |
| 7.88E-27 | 0.611283 | 3.45E-49 | 0.620616 | 4.57E-51 | 0.567195 | 4.13E-41 | 0.441664 | 1.02E-23 |
| 9.63E-36 | 0.388961 | 2.57E-18 | 0.46015  | 7.54E-26 | 0.364901 | 3.73E-16 | 0.567108 | 4.28E-41 |
| 3.88E-39 | 0.464454 | 2.30E-26 | 0.556182 | 2.82E-39 | 0.434263 | 6.69E-23 | 0.552594 | 1.08E-38 |
| 6.02E-06 | 0.398509 | 3.17E-19 | 0.374502 | 5.37E-17 | 0.388583 | 2.79E-18 | 0.441267 | 1.13E-23 |
| 1.52E-44 | 0.366406 | 2.76E-16 | 0.490222 | 1.32E-29 | 0.375726 | 4.18E-17 | 0.412496 | 1.30E-20 |
| 2.22E-15 | 0.588912 | 6.19E-45 | 0.41851  | 3.16E-21 | 0.441609 | 1.03E-23 | 0.41668  | 4.87E-21 |
| 3.54E-06 | 0.394934 | 6.99E-19 | 0.325961 | 5.07E-13 | 0.368438 | 1.84E-16 | 0.264988 | 6.05E-09 |
| 5.32E-24 | 0.471061 | 3.61E-27 | 0.443397 | 6.52E-24 | 0.437348 | 3.07E-23 | 0.466299 | 1.38E-26 |
| 8.82E-26 | 0.555019 | 4.36E-39 | 0.369232 | 1.57E-16 | 0.469485 | 5.64E-27 | 0.468202 | 8.09E-27 |
| 1.28E-38 | 0.342207 | 2.82E-14 | 0.384991 | 6.01E-18 | 0.272925 | 2.02E-09 | 0.411237 | 1.75E-20 |
| 1.03E-37 | 0.613677 | 1.15E-49 | 0.59479  | 5.08E-46 | 0.513877 | 7.84E-33 | 0.542887 | 3.75E-37 |
| 2.22E-38 | 0.630073 | 4.92E-53 | 0.486889 | 3.60E-29 | 0.426054 | 5.11E-22 | 0.484674 | 6.96E-29 |
| 1.42E-14 | 0.63299  | 1.18E-53 | 0.548664 | 4.60E-38 | 0.585784 | 2.29E-44 | 0.425349 | 6.07E-22 |
| 6.28E-09 | 0.243143 | 1.04E-07 | 0.31648  | 2.53E-12 | 0.289049 | 1.94E-10 | 0.439706 | 1.68E-23 |
| 1.52E-45 | 0.534065 | 8.56E-36 | 0.577654 | 6.46E-43 | 0.506262 | 9.14E-32 | 0.528125 | 6.68E-35 |
| 7.56E-20 | 0.449955 | 1.17E-24 | 0.453317 | 4.79E-25 | 0.459091 | 1.01E-25 | 0.379453 | 1.93E-17 |
| 9.64E-21 | 0.604431 | 7.52E-48 | 0.448956 | 1.53E-24 | 0.464509 | 2.27E-26 | 0.522374 | 4.70E-34 |
| 0.24008  | 0.404272 | 8.66E-20 | 0.406528 | 5.18E-20 | 0.505716 | 1.09E-31 | 0.280202 | 7.14E-10 |
| 3.58E-42 | 0.626676 | 2.55E-52 | 0.539733 | 1.16E-36 | 0.477024 | 6.55E-28 | 0.496465 | 1.97E-30 |
| 5.19E-12 | 0.368347 | 1.87E-16 | 0.310968 | 6.28E-12 | 0.307635 | 1.08E-11 | 0.287499 | 2.45E-10 |

|          |          |          |          |          |          |          |          |          |
|----------|----------|----------|----------|----------|----------|----------|----------|----------|
| 3.11E-31 | -0.45592 | 2.38E-25 | -0.33926 | 4.83E-14 | -0.32901 | 2.99E-13 | -0.45789 | 1.40E-25 |
| 2.12E-41 | 0.667291 | 1.74E-61 | 0.572527 | 5.05E-42 | 0.56396  | 1.45E-40 | 0.669797 | 4.23E-62 |
| 7.61E-34 | 0.615318 | 5.41E-50 | 0.52095  | 7.57E-34 | 0.503237 | 2.38E-31 | 0.654541 | 1.86E-58 |
| 8.81E-79 | 0.565547 | 7.85E-41 | 0.421593 | 1.51E-21 | 0.279342 | 8.09E-10 | 0.499742 | 7.13E-31 |
| 1.85E-07 | 0.398636 | 3.08E-19 | 0.400237 | 2.15E-19 | 0.480137 | 2.65E-28 | 0.402488 | 1.30E-19 |
| 3.22E-35 | 0.492751 | 6.14E-30 | 0.412975 | 1.17E-20 | 0.362537 | 5.95E-16 | 0.320712 | 1.24E-12 |
| 1.63E-22 | -0.35441 | 2.88E-15 | -0.34643 | 1.30E-14 | -0.31193 | 5.37E-12 | -0.45831 | 1.25E-25 |
| 4.73E-33 | -0.44991 | 1.19E-24 | -0.38281 | 9.54E-18 | -0.3422  | 2.83E-14 | -0.50358 | 2.14E-31 |
| 4.39E-25 | 0.490267 | 1.31E-29 | 0.414596 | 7.97E-21 | 0.522944 | 3.88E-34 | 0.428258 | 2.98E-22 |
| 6.31E-29 | 0.547394 | 7.32E-38 | 0.496409 | 2.00E-30 | 0.55079  | 2.10E-38 | 0.484519 | 7.29E-29 |
| 2.45E-40 | 0.595853 | 3.22E-46 | 0.462255 | 4.23E-26 | 0.427375 | 3.70E-22 | 0.481488 | 1.78E-28 |
| 1.80E-47 | 0.568804 | 2.20E-41 | 0.555641 | 3.45E-39 | 0.560227 | 6.09E-40 | 0.584353 | 4.15E-44 |
| 2.00E-24 | 0.181883 | 7.72E-05 | 0.132762 | 0.00405  | 0.047528 | 0.3054   | 0.314404 | 3.57E-12 |
| 3.79E-40 | -0.36301 | 5.41E-16 | -0.14158 | 0.00216  | 0.005722 | 0.90185  | -0.46001 | 7.84E-26 |
| 2.33E-25 | -0.58079 | 1.80E-43 | -0.44807 | 1.93E-24 | -0.49201 | 7.70E-30 | -0.53834 | 1.90E-36 |
| 1.56E-43 | 0.411164 | 1.78E-20 | 0.414553 | 8.05E-21 | 0.367666 | 2.15E-16 | 0.587234 | 1.25E-44 |
| 3.84E-28 | 0.465119 | 1.92E-26 | 0.552277 | 1.21E-38 | 0.526696 | 1.09E-34 | 0.464511 | 2.27E-26 |
| 3.85E-53 | 0.558246 | 1.29E-39 | 0.535409 | 5.35E-36 | 0.486166 | 4.47E-29 | 0.569188 | 1.89E-41 |
| 1.79E-80 | 0.40372  | 9.82E-20 | 0.408882 | 3.02E-20 | 0.260107 | 1.17E-08 | 0.51278  | 1.12E-32 |
| 2.15E-56 | 0.580899 | 1.72E-43 | 0.584214 | 4.40E-44 | 0.536873 | 3.20E-36 | 0.551103 | 1.87E-38 |
| 3.76E-34 | 0.590847 | 2.73E-45 | 0.556576 | 2.43E-39 | 0.564799 | 1.05E-40 | 0.60091  | 3.56E-47 |
| 2.93E-65 | 0.558951 | 9.89E-40 | 0.55874  | 1.07E-39 | 0.50705  | 7.11E-32 | 0.617513 | 1.96E-50 |
| 4.50E-09 | 0.333569 | 1.34E-13 | 0.305633 | 1.49E-11 | 0.192686 | 2.76E-05 | 0.281905 | 5.58E-10 |
| 3.96E-18 | -0.05666 | 0.22162  | -0.06854 | 0.13914  | -0.07615 | 0.10026  | -0.29028 | 1.61E-10 |
| 1.85E-09 | 0.428964 | 2.50E-22 | 0.329966 | 2.53E-13 | 0.373113 | 7.14E-17 | 0.302399 | 2.48E-11 |
| 2.44E-28 | 0.283191 | 4.62E-10 | 0.145057 | 0.00167  | 0.191199 | 3.19E-05 | 0.295077 | 7.77E-11 |
| 4.56E-23 | 0.481369 | 1.85E-28 | 0.437629 | 2.86E-23 | 0.33907  | 5.00E-14 | 0.529965 | 3.55E-35 |
| 6.82E-06 | -0.56124 | 4.14E-40 | -0.3342  | 1.20E-13 | -0.50649 | 8.51E-32 | -0.36028 | 9.26E-16 |
| 5.55E-96 | 0.55856  | 1.15E-39 | 0.425654 | 5.64E-22 | 0.364272 | 4.22E-16 | 0.580957 | 1.68E-43 |
| 1.29E-17 | 0.376432 | 3.61E-17 | 0.406678 | 5.01E-20 | 0.376687 | 3.43E-17 | 0.351377 | 5.12E-15 |
| 8.99E-34 | 0.441618 | 1.03E-23 | 0.526555 | 1.14E-34 | 0.540927 | 7.58E-37 | 0.497672 | 1.36E-30 |
| 5.80E-73 | 0.533798 | 9.39E-36 | 0.424409 | 7.63E-22 | 0.38699  | 3.92E-18 | 0.597173 | 1.82E-46 |
| 1.12E-22 | 0.47269  | 2.27E-27 | 0.464481 | 2.29E-26 | 0.537333 | 2.72E-36 | 0.554305 | 5.70E-39 |
| 6.97E-20 | 0.441527 | 1.06E-23 | 0.417751 | 3.78E-21 | 0.464573 | 2.23E-26 | 0.366915 | 2.50E-16 |
| 1.38E-28 | 0.438828 | 2.11E-23 | 0.351177 | 5.32E-15 | 0.380366 | 1.59E-17 | 0.475263 | 1.09E-27 |
| 3.34E-37 | 0.451511 | 7.75E-25 | 0.37075  | 1.15E-16 | 0.355186 | 2.48E-15 | 0.503223 | 2.39E-31 |
| 5.56E-22 | -0.60862 | 1.15E-48 | -0.3709  | 1.12E-16 | -0.42534 | 6.09E-22 | -0.48116 | 1.96E-28 |
| 2.09E-19 | -0.0792  | 0.08735  | 0.111705 | 0.01573  | 0.038253 | 0.40952  | -0.23817 | 1.91E-07 |
| 2.55E-25 | 0.431256 | 1.42E-22 | 0.332226 | 1.70E-13 | 0.25696  | 1.77E-08 | 0.414616 | 7.93E-21 |
| 5.74E-29 | -0.43612 | 4.19E-23 | -0.30331 | 2.15E-11 | -0.33369 | 1.31E-13 | -0.50979 | 2.95E-32 |
| 7.70E-76 | 0.613185 | 1.45E-49 | 0.562631 | 2.42E-40 | 0.454819 | 3.20E-25 | 0.693356 | 3.57E-68 |
| 3.41E-23 | -0.25791 | 1.56E-08 | -0.27486 | 1.53E-09 | -0.24707 | 6.34E-08 | -0.32268 | 8.90E-13 |
| 2.89E-05 | -0.35737 | 1.63E-15 | -0.34123 | 3.37E-14 | -0.33036 | 2.36E-13 | -0.21525 | 2.68E-06 |
| 9.42E-18 | 0.569633 | 1.59E-41 | 0.400963 | 1.83E-19 | 0.422544 | 1.20E-21 | 0.431497 | 1.34E-22 |
| 5.68E-47 | 0.443282 | 6.71E-24 | 0.406226 | 5.55E-20 | 0.312216 | 5.12E-12 | 0.510678 | 2.22E-32 |

|          |          |          |          |          |          |          |          |          |
|----------|----------|----------|----------|----------|----------|----------|----------|----------|
| 2.19E-31 | 0.343925 | 2.06E-14 | 0.239067 | 1.71E-07 | 0.221054 | 1.41E-06 | 0.499622 | 7.40E-31 |
| 3.97E-58 | 0.561739 | 3.41E-40 | 0.550505 | 2.34E-38 | 0.523219 | 3.53E-34 | 0.62049  | 4.85E-51 |
| 1.72E-39 | 0.386144 | 4.70E-18 | 0.31778  | 2.04E-12 | 0.288164 | 2.21E-10 | 0.514222 | 7.00E-33 |
| 4.49E-34 | 0.577657 | 6.45E-43 | 0.436254 | 4.05E-23 | 0.486782 | 3.72E-29 | 0.62138  | 3.19E-51 |
| 1.33E-39 | 0.516977 | 2.83E-33 | 0.532444 | 1.51E-35 | 0.462128 | 4.38E-26 | 0.599824 | 5.73E-47 |
| 6.06E-08 | -0.3859  | 4.95E-18 | -0.25978 | 1.22E-08 | -0.42474 | 7.04E-22 | -0.34375 | 2.13E-14 |
| 5.69E-40 | 0.511263 | 1.83E-32 | 0.362101 | 6.48E-16 | 0.313876 | 3.90E-12 | 0.495034 | 3.06E-30 |
| 5.87E-45 | 0.590192 | 3.61E-45 | 0.646285 | 1.43E-56 | 0.586206 | 1.92E-44 | 0.675816 | 1.34E-63 |
| 9.43E-55 | 0.602842 | 1.52E-47 | 0.506627 | 8.13E-32 | 0.372813 | 7.59E-17 | 0.528665 | 5.55E-35 |
| 4.26E-10 | 0.125385 | 0.00667  | 0.156453 | 0.00069  | 0.178264 | 0.00011  | 0.33375  | 1.30E-13 |
| 1.73E-40 | 0.398056 | 3.50E-19 | 0.371092 | 1.08E-16 | 0.242189 | 1.17E-07 | 0.561053 | 4.44E-40 |
| 0.00117  | -0.27866 | 8.92E-10 | -0.23411 | 3.11E-07 | -0.29836 | 4.68E-11 | -0.28513 | 3.48E-10 |
| 1.24E-23 | 0.430052 | 1.91E-22 | 0.435177 | 5.32E-23 | 0.436854 | 3.48E-23 | 0.447299 | 2.36E-24 |
| 5.81E-20 | 0.478635 | 4.10E-28 | 0.376163 | 3.82E-17 | 0.367647 | 2.16E-16 | 0.551539 | 1.59E-38 |
| 2.73E-20 | 0.289206 | 1.89E-10 | 0.128635 | 0.00537  | 0.13804  | 0.0028   | 0.374855 | 5.00E-17 |
| 9.70E-31 | 0.313262 | 4.31E-12 | 0.285706 | 3.19E-10 | 0.186907 | 4.82E-05 | 0.353345 | 3.53E-15 |
| 1.29E-48 | 0.410209 | 2.22E-20 | 0.448498 | 1.72E-24 | 0.366918 | 2.50E-16 | 0.54043  | 9.05E-37 |
| 9.32E-13 | 0.171055 | 0.0002   | 0.102303 | 0.02706  | 0.1642   | 0.00037  | 0.273227 | 1.93E-09 |
| 9.17E-54 | 0.668471 | 8.96E-62 | 0.460655 | 6.57E-26 | 0.374338 | 5.56E-17 | 0.515002 | 5.42E-33 |
| 1.98E-68 | 0.615361 | 5.31E-50 | 0.528706 | 5.47E-35 | 0.510384 | 2.44E-32 | 0.684113 | 1.01E-65 |
| 2.10E-19 | 0.312662 | 4.76E-12 | 0.258922 | 1.37E-08 | 0.190041 | 3.57E-05 | 0.253066 | 2.95E-08 |
| 0.29124  | 0.328925 | 3.03E-13 | 0.413597 | 1.01E-20 | 0.488367 | 2.31E-29 | 0.291146 | 1.41E-10 |
| 4.75E-35 | 0.503769 | 2.01E-31 | 0.461988 | 4.56E-26 | 0.508212 | 4.90E-32 | 0.604485 | 7.34E-48 |
| 3.52E-31 | 0.563612 | 1.66E-40 | 0.378083 | 2.57E-17 | 0.33184  | 1.82E-13 | 0.547688 | 6.58E-38 |
| 2.25E-16 | 0.550464 | 2.37E-38 | 0.418665 | 3.04E-21 | 0.388846 | 2.63E-18 | 0.451362 | 8.07E-25 |
| 4.00E-07 | 0.394752 | 7.28E-19 | 0.219493 | 1.68E-06 | 0.387588 | 3.45E-18 | 0.37205  | 8.87E-17 |
| 5.20E-26 | 0.457006 | 1.78E-25 | 0.414603 | 7.96E-21 | 0.51082  | 2.12E-32 | 0.566972 | 4.51E-41 |
| 1.28E-11 | 0.298482 | 4.59E-11 | 0.248328 | 5.41E-08 | 0.286703 | 2.75E-10 | 0.348322 | 9.10E-15 |
| 1.21E-45 | 0.421314 | 1.61E-21 | 0.351803 | 4.73E-15 | 0.330977 | 2.12E-13 | 0.513873 | 7.85E-33 |
| 3.46E-25 | -0.3233  | 8.00E-13 | -0.26338 | 7.52E-09 | -0.2488  | 5.09E-08 | -0.36791 | 2.05E-16 |
| 2.52E-50 | 0.378568 | 2.32E-17 | 0.353148 | 3.66E-15 | 0.346833 | 1.20E-14 | 0.517571 | 2.33E-33 |
| 1.41E-34 | 0.573319 | 3.69E-42 | 0.576432 | 1.06E-42 | 0.491375 | 9.34E-30 | 0.582265 | 9.84E-44 |
| 1.27E-36 | 0.236457 | 2.35E-07 | 0.220317 | 1.53E-06 | 0.163261 | 0.0004   | 0.335682 | 9.19E-14 |
| 2.26E-38 | 0.32684  | 4.35E-13 | 0.381304 | 1.31E-17 | 0.194297 | 2.36E-05 | 0.372733 | 7.72E-17 |
| 3.32E-11 | 0.522871 | 3.97E-34 | 0.328372 | 3.34E-13 | 0.379756 | 1.81E-17 | 0.227963 | 6.40E-07 |
| 1.34E-09 | 0.376667 | 3.44E-17 | 0.362095 | 6.49E-16 | 0.325987 | 5.05E-13 | 0.289847 | 1.72E-10 |
| 1.53E-50 | 0.561132 | 4.31E-40 | 0.526589 | 1.13E-34 | 0.493755 | 4.52E-30 | 0.639689 | 4.17E-55 |
| 7.63E-18 | 0.386922 | 3.98E-18 | 0.428259 | 2.98E-22 | 0.338953 | 5.10E-14 | 0.391685 | 1.42E-18 |
| 1.31E-55 | 0.468565 | 7.31E-27 | 0.445176 | 4.11E-24 | 0.42907  | 2.44E-22 | 0.558988 | 9.75E-40 |
| 1.84E-45 | 0.475581 | 9.93E-28 | 0.461887 | 4.68E-26 | 0.391912 | 1.35E-18 | 0.574959 | 1.91E-42 |
| 7.86E-06 | 0.214716 | 2.84E-06 | 0.344299 | 1.92E-14 | 0.322103 | 9.82E-13 | 0.327196 | 4.09E-13 |
| 2.44E-31 | 0.2392   | 1.68E-07 | 0.293212 | 1.03E-10 | 0.173483 | 0.00016  | 0.359399 | 1.10E-15 |
| 1.19E-15 | 0.327848 | 3.66E-13 | 0.265375 | 5.74E-09 | 0.220272 | 1.54E-06 | 0.357584 | 1.56E-15 |
| 1.06E-12 | 0.579977 | 2.51E-43 | 0.550669 | 2.20E-38 | 0.538053 | 2.11E-36 | 0.422634 | 1.17E-21 |
| 3.86E-08 | 0.231863 | 4.05E-07 | 0.173062 | 0.00017  | 0.282905 | 4.82E-10 | 0.330232 | 2.41E-13 |



|          |          |          |          |          |          |          |          |          |
|----------|----------|----------|----------|----------|----------|----------|----------|----------|
| 5.61E-10 | -0.44007 | 1.53E-23 | -0.44321 | 6.85E-24 | -0.46091 | 6.13E-26 | -0.46534 | 1.80E-26 |
| 6.53E-08 | 0.297444 | 5.39E-11 | 0.318142 | 1.92E-12 | 0.362672 | 5.79E-16 | 0.252176 | 3.30E-08 |
| 2.55E-26 | 0.455335 | 2.79E-25 | 0.394666 | 7.41E-19 | 0.33322  | 1.42E-13 | 0.487645 | 2.87E-29 |
| 1.36E-06 | -0.50345 | 2.23E-31 | -0.26329 | 7.62E-09 | -0.31437 | 3.59E-12 | -0.16562 | 0.00033  |
| 3.00E-12 | -0.38422 | 7.07E-18 | -0.3897  | 2.19E-18 | -0.44798 | 1.97E-24 | -0.37307 | 7.20E-17 |
| 3.57E-20 | -0.42518 | 6.32E-22 | -0.4191  | 2.74E-21 | -0.37641 | 3.63E-17 | -0.50115 | 4.60E-31 |
| 1.20E-22 | 0.552776 | 1.01E-38 | 0.49237  | 6.90E-30 | 0.447876 | 2.03E-24 | 0.51653  | 3.28E-33 |
| 6.77E-05 | -0.23816 | 1.91E-07 | -0.19778 | 1.67E-05 | -0.29927 | 4.06E-11 | -0.18089 | 8.45E-05 |
| 1.79E-16 | -0.44353 | 6.30E-24 | -0.22347 | 1.07E-06 | -0.32809 | 3.51E-13 | -0.43441 | 6.45E-23 |
| 3.02E-20 | -0.57733 | 7.35E-43 | -0.44874 | 1.61E-24 | -0.54776 | 6.40E-38 | -0.31638 | 2.57E-12 |
| 1.31E-36 | 0.352422 | 4.20E-15 | 0.388559 | 2.80E-18 | 0.344642 | 1.80E-14 | 0.32813  | 3.48E-13 |
| 0.0004   | 0.334294 | 1.18E-13 | 0.402531 | 1.29E-19 | 0.372681 | 7.80E-17 | 0.330346 | 2.36E-13 |
| 6.15E-06 | 0.272589 | 2.12E-09 | 0.34735  | 1.09E-14 | 0.33287  | 1.52E-13 | 0.21838  | 1.90E-06 |
| 4.89E-08 | 0.381315 | 1.31E-17 | 0.459898 | 8.08E-26 | 0.421246 | 1.64E-21 | 0.400502 | 2.03E-19 |
| 9.68E-22 | 0.662547 | 2.43E-60 | 0.572938 | 4.29E-42 | 0.577318 | 7.40E-43 | 0.613269 | 1.39E-49 |
| 1.86E-33 | 0.500836 | 5.06E-31 | 0.541398 | 6.40E-37 | 0.530311 | 3.15E-35 | 0.498827 | 9.48E-31 |
| 2.88E-25 | 0.261338 | 9.91E-09 | 0.268645 | 3.66E-09 | 0.184775 | 5.90E-05 | 0.383581 | 8.10E-18 |
| 0.25961  | 0.352978 | 3.78E-15 | 0.358548 | 1.30E-15 | 0.489299 | 1.75E-29 | 0.328286 | 3.39E-13 |
| 4.69E-57 | 0.431122 | 1.47E-22 | 0.398382 | 3.26E-19 | 0.294845 | 8.05E-11 | 0.545875 | 1.27E-37 |
| 2.71E-66 | 0.541193 | 6.89E-37 | 0.514819 | 5.76E-33 | 0.409941 | 2.36E-20 | 0.674291 | 3.25E-63 |
| 5.63E-08 | 0.466767 | 1.21E-26 | 0.475254 | 1.09E-27 | 0.47354  | 1.78E-27 | 0.386479 | 4.37E-18 |
| 6.10E-30 | 0.382974 | 9.21E-18 | 0.401944 | 1.47E-19 | 0.415446 | 6.53E-21 | 0.52061  | 8.48E-34 |
| 6.88E-19 | 0.675575 | 1.55E-63 | 0.469575 | 5.50E-27 | 0.56919  | 1.89E-41 | 0.475958 | 8.90E-28 |
| 2.63E-37 | 0.591602 | 1.99E-45 | 0.61222  | 2.25E-49 | 0.611271 | 3.47E-49 | 0.643219 | 6.93E-56 |
| 5.11E-42 | 0.289082 | 1.93E-10 | 0.321111 | 1.16E-12 | 0.222793 | 1.16E-06 | 0.473523 | 1.79E-27 |
| 9.67E-52 | 0.714198 | 4.65E-74 | 0.421069 | 1.71E-21 | 0.469709 | 5.29E-27 | 0.626423 | 2.88E-52 |
| 6.52E-29 | 0.498563 | 1.03E-30 | 0.479243 | 3.44E-28 | 0.413401 | 1.05E-20 | 0.496033 | 2.25E-30 |
| 0.88457  | 0.478907 | 3.79E-28 | 0.429231 | 2.34E-22 | 0.56916  | 1.91E-41 | 0.243122 | 1.04E-07 |
| 1.42E-16 | 0.34103  | 3.50E-14 | 0.300821 | 3.19E-11 | 0.237462 | 2.08E-07 | 0.353923 | 3.16E-15 |
| 2.40E-41 | 0.48023  | 2.58E-28 | 0.43761  | 2.87E-23 | 0.467965 | 8.65E-27 | 0.465033 | 1.96E-26 |
| 3.09E-15 | -0.40491 | 7.50E-20 | -0.38082 | 1.45E-17 | -0.29781 | 5.10E-11 | -0.39045 | 1.86E-18 |
| 1.44E-14 | 0.486032 | 4.65E-29 | 0.409516 | 2.61E-20 | 0.417165 | 4.34E-21 | 0.458102 | 1.32E-25 |
| 1.75E-31 | 0.682015 | 3.53E-65 | 0.603621 | 1.08E-47 | 0.558107 | 1.36E-39 | 0.563889 | 1.49E-40 |
| 9.52E-42 | 0.524428 | 2.35E-34 | 0.404284 | 8.64E-20 | 0.410626 | 2.01E-20 | 0.517569 | 2.33E-33 |
| 1.17E-08 | 0.181019 | 8.36E-05 | 0.221826 | 1.29E-06 | 0.241722 | 1.23E-07 | 0.293992 | 9.18E-11 |
| 9.94E-11 | -0.26991 | 3.07E-09 | -0.12659 | 0.00616  | -0.19079 | 3.32E-05 | -0.3356  | 9.33E-14 |
| 1.14E-06 | -0.4295  | 2.19E-22 | -0.41468 | 7.82E-21 | -0.48088 | 2.13E-28 | -0.48742 | 3.07E-29 |
| 2.00E-12 | -0.34222 | 2.81E-14 | -0.24962 | 4.59E-08 | -0.30863 | 9.18E-12 | -0.28154 | 5.88E-10 |
| 1.62E-73 | 0.579705 | 2.81E-43 | 0.431034 | 1.50E-22 | 0.401447 | 1.64E-19 | 0.56643  | 5.57E-41 |
| 1.15E-67 | 0.652727 | 4.89E-58 | 0.570558 | 1.10E-41 | 0.456967 | 1.79E-25 | 0.572648 | 4.82E-42 |
| 8.13E-60 | 0.434239 | 6.73E-23 | 0.498406 | 1.08E-30 | 0.378463 | 2.37E-17 | 0.648841 | 3.79E-57 |
| 3.41E-20 | 0.515902 | 4.04E-33 | 0.396082 | 5.43E-19 | 0.439407 | 1.82E-23 | 0.492233 | 7.19E-30 |
| 4.35E-28 | 0.260953 | 1.04E-08 | 0.292884 | 1.09E-10 | 0.26617  | 5.15E-09 | 0.368777 | 1.72E-16 |
| 4.78E-43 | 0.383008 | 9.15E-18 | 0.282085 | 5.43E-10 | 0.275219 | 1.46E-09 | 0.391849 | 1.37E-18 |
| 7.83E-43 | 0.478558 | 4.20E-28 | 0.340167 | 4.10E-14 | 0.301017 | 3.09E-11 | 0.537232 | 2.81E-36 |

|          |          |          |          |          |          |          |          |          |
|----------|----------|----------|----------|----------|----------|----------|----------|----------|
| 0.00015  | 0.446913 | 2.61E-24 | 0.362723 | 5.74E-16 | 0.373968 | 6.00E-17 | 0.350341 | 6.23E-15 |
| 2.06E-51 | 0.703458 | 5.81E-71 | 0.582773 | 7.98E-44 | 0.544271 | 2.28E-37 | 0.591379 | 2.18E-45 |
| 1.11E-29 | 0.275615 | 1.38E-09 | 0.243358 | 1.01E-07 | 0.221212 | 1.38E-06 | 0.359537 | 1.07E-15 |
| 4.97E-15 | 0.32216  | 9.72E-13 | 0.314109 | 3.75E-12 | 0.361684 | 7.04E-16 | 0.409255 | 2.77E-20 |
| 2.12E-56 | 0.466065 | 1.47E-26 | 0.421786 | 1.44E-21 | 0.390649 | 1.78E-18 | 0.58736  | 1.19E-44 |
| 0.00438  | -0.29519 | 7.64E-11 | -0.27231 | 2.20E-09 | -0.36827 | 1.90E-16 | -0.12275 | 0.00791  |
| 2.63E-32 | 0.35906  | 1.17E-15 | 0.278933 | 8.58E-10 | 0.227008 | 7.14E-07 | 0.514578 | 6.23E-33 |
| 2.83E-36 | 0.586934 | 1.42E-44 | 0.499929 | 6.72E-31 | 0.441898 | 9.60E-24 | 0.556973 | 2.09E-39 |
| 6.39E-52 | 0.696053 | 6.60E-69 | 0.550232 | 2.58E-38 | 0.6025   | 1.77E-47 | 0.648709 | 4.06E-57 |
| 1.14E-17 | 0.242614 | 1.11E-07 | 0.21199  | 3.81E-06 | 0.195091 | 2.18E-05 | 0.286621 | 2.79E-10 |
| 5.96E-19 | 0.370653 | 1.18E-16 | 0.368513 | 1.81E-16 | 0.369758 | 1.41E-16 | 0.422858 | 1.11E-21 |
| 4.77E-39 | 0.697138 | 3.33E-69 | 0.510814 | 2.12E-32 | 0.535635 | 4.94E-36 | 0.628026 | 1.33E-52 |
| 1.02E-22 | 0.540846 | 7.80E-37 | 0.463475 | 3.02E-26 | 0.413054 | 1.14E-20 | 0.446524 | 2.89E-24 |
| 1.16E-15 | 0.472    | 2.77E-27 | 0.534147 | 8.32E-36 | 0.476041 | 8.69E-28 | 0.443167 | 6.92E-24 |
| 4.67E-42 | 0.449547 | 1.30E-24 | 0.339421 | 4.69E-14 | 0.174193 | 0.00015  | 0.401627 | 1.58E-19 |
| 8.90E-46 | 0.544734 | 1.93E-37 | 0.437688 | 2.82E-23 | 0.498729 | 9.77E-31 | 0.617941 | 1.60E-50 |
| 1.16E-14 | -0.40015 | 2.20E-19 | -0.41367 | 9.90E-21 | -0.44311 | 7.02E-24 | -0.46549 | 1.73E-26 |
| 2.36E-32 | 0.356311 | 2.00E-15 | 0.314676 | 3.41E-12 | 0.384546 | 6.60E-18 | 0.563675 | 1.62E-40 |
| 3.12E-15 | 0.388889 | 2.61E-18 | 0.278381 | 9.29E-10 | 0.333658 | 1.32E-13 | 0.39721  | 4.23E-19 |
| 1.77E-21 | 0.306729 | 1.25E-11 | 0.319289 | 1.58E-12 | 0.351345 | 5.16E-15 | 0.42666  | 4.41E-22 |
| 1.40E-07 | 0.43184  | 1.23E-22 | 0.469046 | 6.38E-27 | 0.543986 | 2.52E-37 | 0.425185 | 6.32E-22 |
| 7.10E-44 | 0.467248 | 1.06E-26 | 0.307557 | 1.09E-11 | 0.286814 | 2.71E-10 | 0.532621 | 1.42E-35 |
| 3.43E-40 | 0.488365 | 2.31E-29 | 0.440517 | 1.37E-23 | 0.412503 | 1.30E-20 | 0.475018 | 1.17E-27 |
| 6.98E-46 | 0.594856 | 4.94E-46 | 0.521093 | 7.21E-34 | 0.528901 | 5.12E-35 | 0.62759  | 1.64E-52 |
| 1.59E-11 | 0.470574 | 4.15E-27 | 0.41225  | 1.38E-20 | 0.275909 | 1.32E-09 | 0.397653 | 3.83E-19 |
| 8.19E-11 | -0.46754 | 9.74E-27 | -0.35328 | 3.57E-15 | -0.45285 | 5.42E-25 | -0.43366 | 7.78E-23 |
| 7.88E-23 | 0.552257 | 1.22E-38 | 0.479346 | 3.34E-28 | 0.519803 | 1.11E-33 | 0.482593 | 1.29E-28 |
| 3.17E-16 | -0.44933 | 1.38E-24 | -0.31668 | 2.45E-12 | -0.34208 | 2.89E-14 | -0.401   | 1.81E-19 |
| 3.74E-63 | 0.626681 | 2.55E-52 | 0.573767 | 3.08E-42 | 0.503301 | 2.34E-31 | 0.625171 | 5.26E-52 |
| 6.93E-28 | 0.648454 | 4.64E-57 | 0.491441 | 9.15E-30 | 0.598321 | 1.10E-46 | 0.576016 | 1.25E-42 |
| 0.99856  | 0.530462 | 2.99E-35 | 0.453763 | 4.25E-25 | 0.55086  | 2.05E-38 | 0.246945 | 6.44E-08 |
| 2.76E-35 | 0.44474  | 4.60E-24 | 0.406087 | 5.73E-20 | 0.343057 | 2.42E-14 | 0.387771 | 3.32E-18 |
| 6.99E-18 | 0.572494 | 5.12E-42 | 0.450529 | 1.01E-24 | 0.459839 | 8.21E-26 | 0.529081 | 4.81E-35 |
| 5.54E-29 | 0.415028 | 7.20E-21 | 0.428919 | 2.53E-22 | 0.347337 | 1.09E-14 | 0.404458 | 8.31E-20 |
| 8.43E-09 | 0.337608 | 6.51E-14 | 0.357737 | 1.52E-15 | 0.246395 | 6.90E-08 | 0.180328 | 8.90E-05 |
| 1.50E-39 | 0.445711 | 3.57E-24 | 0.514395 | 6.61E-33 | 0.369171 | 1.59E-16 | 0.470163 | 4.66E-27 |
| 5.24E-05 | 0.449311 | 1.39E-24 | 0.411196 | 1.76E-20 | 0.469769 | 5.20E-27 | 0.301214 | 2.99E-11 |
| 0.8016   | 0.313282 | 4.30E-12 | 0.249113 | 4.89E-08 | 0.488051 | 2.54E-29 | 0.252752 | 3.07E-08 |
| 3.63E-13 | 0.495781 | 2.43E-30 | 0.319788 | 1.45E-12 | 0.34947  | 7.34E-15 | 0.339539 | 4.59E-14 |
| 9.60E-39 | 0.33921  | 4.87E-14 | 0.353896 | 3.18E-15 | 0.288817 | 2.01E-10 | 0.369356 | 1.53E-16 |
| 2.70E-20 | 0.512709 | 1.15E-32 | 0.489248 | 1.78E-29 | 0.473444 | 1.83E-27 | 0.514751 | 5.89E-33 |
| 5.48E-44 | 0.576089 | 1.21E-42 | 0.493174 | 5.40E-30 | 0.370209 | 1.29E-16 | 0.502181 | 3.32E-31 |
| 5.70E-69 | 0.380993 | 1.40E-17 | 0.35099  | 5.51E-15 | 0.152501 | 0.00095  | 0.597582 | 1.52E-46 |
| 3.87E-52 | 0.434885 | 5.72E-23 | 0.507707 | 5.76E-32 | 0.369487 | 1.49E-16 | 0.517104 | 2.72E-33 |
| 1.45E-36 | 0.536239 | 3.99E-36 | 0.451297 | 8.21E-25 | 0.300067 | 3.58E-11 | 0.463692 | 2.85E-26 |

|          |          |          |          |          |          |          |          |          |
|----------|----------|----------|----------|----------|----------|----------|----------|----------|
| 2.69E-20 | 0.390676 | 1.77E-18 | 0.505241 | 1.26E-31 | 0.430749 | 1.61E-22 | 0.444769 | 4.56E-24 |
| 1.13E-37 | 0.466742 | 1.22E-26 | 0.530842 | 2.62E-35 | 0.381606 | 1.23E-17 | 0.56875  | 2.25E-41 |
| 6.71E-29 | 0.60936  | 8.25E-49 | 0.535757 | 4.73E-36 | 0.476126 | 8.48E-28 | 0.53131  | 2.23E-35 |
| 3.77E-38 | 0.499992 | 6.59E-31 | 0.40198  | 1.46E-19 | 0.368012 | 2.00E-16 | 0.489669 | 1.56E-29 |
| 6.17E-05 | 0.395159 | 6.65E-19 | 0.299327 | 4.02E-11 | 0.26318  | 7.73E-09 | 0.321184 | 1.15E-12 |
| 3.49E-63 | 0.715591 | 1.80E-74 | 0.494354 | 3.77E-30 | 0.509595 | 3.14E-32 | 0.641162 | 1.98E-55 |
| 2.60E-46 | 0.575559 | 1.50E-42 | 0.565645 | 7.56E-41 | 0.502841 | 2.70E-31 | 0.609147 | 9.09E-49 |
| 0.29986  | 0.298137 | 4.84E-11 | 0.303576 | 2.06E-11 | 0.376905 | 3.28E-17 | 0.231816 | 4.08E-07 |
| 1.07E-07 | 0.509783 | 2.96E-32 | 0.519581 | 1.19E-33 | 0.583726 | 5.39E-44 | 0.369295 | 1.55E-16 |
| 1.27E-61 | 0.640755 | 2.43E-55 | 0.487169 | 3.31E-29 | 0.352422 | 4.20E-15 | 0.608248 | 1.36E-48 |
| 1.88E-22 | 0.569366 | 1.76E-41 | 0.463406 | 3.08E-26 | 0.427268 | 3.80E-22 | 0.345397 | 1.57E-14 |
| 5.37E-10 | -0.52265 | 4.27E-34 | -0.35624 | 2.03E-15 | -0.50617 | 9.41E-32 | -0.33469 | 1.10E-13 |
| 1.00E-32 | 0.585608 | 2.47E-44 | 0.573446 | 3.50E-42 | 0.54361  | 2.89E-37 | 0.607643 | 1.79E-48 |
| 4.31E-35 | 0.367512 | 2.22E-16 | 0.348741 | 8.42E-15 | 0.351021 | 5.48E-15 | 0.581758 | 1.21E-43 |
| 3.22E-39 | 0.363464 | 4.96E-16 | 0.282736 | 4.94E-10 | 0.271596 | 2.43E-09 | 0.462188 | 4.31E-26 |
| 1.86E-60 | 0.582064 | 1.07E-43 | 0.502229 | 3.27E-31 | 0.496724 | 1.82E-30 | 0.636737 | 1.84E-54 |
| 9.79E-13 | 0.271513 | 2.46E-09 | 0.172855 | 0.00017  | 0.246148 | 7.12E-08 | 0.385451 | 5.45E-18 |
| 0.00924  | 0.431224 | 1.43E-22 | 0.450216 | 1.09E-24 | 0.516719 | 3.08E-33 | 0.414038 | 9.09E-21 |
| 5.66E-53 | 0.355524 | 2.32E-15 | 0.370217 | 1.29E-16 | 0.277658 | 1.03E-09 | 0.452486 | 5.98E-25 |
| 5.05E-14 | 0.233855 | 3.20E-07 | 0.158523 | 0.00059  | 0.262669 | 8.28E-09 | 0.2953   | 7.51E-11 |
| 0.03487  | 0.371025 | 1.09E-16 | 0.304033 | 1.92E-11 | 0.452171 | 6.50E-25 | 0.310577 | 6.69E-12 |
| 6.94E-20 | 0.425211 | 6.28E-22 | 0.404235 | 8.74E-20 | 0.37337  | 6.78E-17 | 0.472301 | 2.54E-27 |
| 1.50E-49 | -0.35383 | 3.21E-15 | -0.19442 | 2.33E-05 | -0.18877 | 4.04E-05 | -0.35707 | 1.73E-15 |
| 1.03E-24 | 0.499078 | 8.77E-31 | 0.467091 | 1.11E-26 | 0.514365 | 6.68E-33 | 0.576861 | 8.90E-43 |
| 1.97E-71 | 0.579123 | 3.56E-43 | 0.619703 | 7.02E-51 | 0.526964 | 9.93E-35 | 0.654702 | 1.71E-58 |
| 3.29E-09 | 0.40639  | 5.35E-20 | 0.395567 | 6.08E-19 | 0.406029 | 5.81E-20 | 0.407009 | 4.64E-20 |
| 7.14E-08 | 0.273385 | 1.89E-09 | 0.289726 | 1.75E-10 | 0.366759 | 2.58E-16 | 0.348977 | 8.05E-15 |
| 2.94E-48 | 0.538795 | 1.62E-36 | 0.623006 | 1.48E-51 | 0.551322 | 1.73E-38 | 0.634439 | 5.76E-54 |
| 8.17E-52 | 0.460705 | 6.48E-26 | 0.429956 | 1.96E-22 | 0.352936 | 3.81E-15 | 0.562454 | 2.60E-40 |
| 2.27E-25 | 0.717158 | 6.15E-75 | 0.558658 | 1.11E-39 | 0.593452 | 9.02E-46 | 0.473502 | 1.80E-27 |
| 0.00328  | 0.620187 | 5.60E-51 | 0.452179 | 6.49E-25 | 0.536679 | 3.42E-36 | 0.286928 | 2.66E-10 |
| 4.11E-41 | 0.721326 | 3.41E-76 | 0.603655 | 1.06E-47 | 0.591651 | 1.94E-45 | 0.657691 | 3.43E-59 |
| 1.85E-18 | 0.464616 | 2.20E-26 | 0.425642 | 5.65E-22 | 0.387228 | 3.73E-18 | 0.395212 | 6.57E-19 |
| 3.20E-07 | 0.369838 | 1.39E-16 | 0.316606 | 2.48E-12 | 0.323626 | 7.57E-13 | 0.39986  | 2.34E-19 |
| 4.01E-23 | 0.570312 | 1.22E-41 | 0.365022 | 3.64E-16 | 0.423482 | 9.56E-22 | 0.488737 | 2.07E-29 |
| 3.35E-16 | 0.176489 | 0.00013  | 0.313468 | 4.17E-12 | 0.285925 | 3.09E-10 | 0.252286 | 3.26E-08 |
| 6.83E-49 | 0.554941 | 4.49E-39 | 0.426391 | 4.71E-22 | 0.431488 | 1.34E-22 | 0.620207 | 5.54E-51 |
| 3.02E-68 | 0.623379 | 1.24E-51 | 0.597203 | 1.79E-46 | 0.546083 | 1.18E-37 | 0.726139 | 1.13E-77 |
| 1.06E-11 | -0.25742 | 1.67E-08 | -0.12268 | 0.00795  | -0.11743 | 0.0111   | -0.39631 | 5.16E-19 |
| 3.43E-35 | 0.581615 | 1.28E-43 | 0.423242 | 1.01E-21 | 0.516948 | 2.86E-33 | 0.577362 | 7.27E-43 |
| 0.02012  | 0.265011 | 6.03E-09 | 0.257828 | 1.58E-08 | 0.3059   | 1.42E-11 | 0.372246 | 8.52E-17 |
| 1.68E-49 | 0.631435 | 2.53E-53 | 0.609677 | 7.15E-49 | 0.542379 | 4.50E-37 | 0.667732 | 1.36E-61 |
| 2.10E-45 | 0.411787 | 1.54E-20 | 0.371573 | 9.77E-17 | 0.348826 | 8.28E-15 | 0.434194 | 6.81E-23 |
| 1.53E-22 | 0.218713 | 1.83E-06 | 0.264061 | 6.86E-09 | 0.237323 | 2.11E-07 | 0.264225 | 6.71E-09 |
| 2.03E-57 | 0.660851 | 6.16E-60 | 0.471003 | 3.67E-27 | 0.42105  | 1.72E-21 | 0.573053 | 4.10E-42 |

|          |          |          |          |          |          |          |          |          |
|----------|----------|----------|----------|----------|----------|----------|----------|----------|
| 1.13E-65 | 0.330345 | 2.36E-13 | 0.332164 | 1.72E-13 | 0.225876 | 8.14E-07 | 0.474245 | 1.46E-27 |
| 1.81E-12 | 0.333405 | 1.38E-13 | 0.299967 | 3.64E-11 | 0.282811 | 4.89E-10 | 0.470198 | 4.61E-27 |
| 8.33E-42 | 0.406678 | 5.01E-20 | 0.323296 | 8.01E-13 | 0.249942 | 4.40E-08 | 0.448345 | 1.79E-24 |
| 1.31E-21 | 0.48241  | 1.36E-28 | 0.364252 | 4.24E-16 | 0.316438 | 2.55E-12 | 0.354711 | 2.72E-15 |
| 1.18E-10 | -0.57404 | 2.76E-42 | -0.4112  | 1.77E-20 | -0.46695 | 1.15E-26 | -0.3559  | 2.16E-15 |
| 6.39E-57 | 0.493481 | 4.92E-30 | 0.477691 | 5.40E-28 | 0.417962 | 3.60E-21 | 0.619162 | 9.05E-51 |
| 4.35E-35 | 0.480611 | 2.31E-28 | 0.442561 | 8.09E-24 | 0.520445 | 8.96E-34 | 0.549381 | 3.54E-38 |
| 1.18E-59 | 0.330888 | 2.15E-13 | 0.389014 | 2.54E-18 | 0.247608 | 5.92E-08 | 0.46505  | 1.95E-26 |
| 8.54E-08 | 0.336474 | 7.98E-14 | 0.307782 | 1.05E-11 | 0.270114 | 2.99E-09 | 0.286224 | 2.96E-10 |
| 5.07E-27 | 0.344829 | 1.74E-14 | 0.423699 | 9.07E-22 | 0.389541 | 2.27E-18 | 0.403149 | 1.12E-19 |
| 0.0006   | 0.465982 | 1.51E-26 | 0.399158 | 2.74E-19 | 0.48876  | 2.06E-29 | 0.34764  | 1.03E-14 |
| 2.88E-07 | 0.689138 | 4.82E-67 | 0.641427 | 1.73E-55 | 0.684914 | 6.24E-66 | 0.446813 | 2.68E-24 |
| 4.43E-13 | 0.451578 | 7.62E-25 | 0.468911 | 6.63E-27 | 0.49355  | 4.82E-30 | 0.528134 | 6.66E-35 |
| 2.82E-21 | 0.501792 | 3.75E-31 | 0.568774 | 2.23E-41 | 0.539649 | 1.20E-36 | 0.586981 | 1.39E-44 |
| 8.83E-06 | 0.582873 | 7.66E-44 | 0.49682  | 1.76E-30 | 0.508895 | 3.94E-32 | 0.363354 | 5.06E-16 |
| 2.56E-45 | 0.273373 | 1.89E-09 | 0.259292 | 1.30E-08 | 0.184543 | 6.02E-05 | 0.374563 | 5.31E-17 |
| 1.77E-28 | 0.414957 | 7.32E-21 | 0.278889 | 8.64E-10 | 0.266434 | 4.97E-09 | 0.333766 | 1.29E-13 |
| 7.03E-13 | 0.364326 | 4.18E-16 | 0.4298   | 2.04E-22 | 0.437715 | 2.80E-23 | 0.320206 | 1.35E-12 |
| 1.09E-46 | 0.722581 | 1.41E-76 | 0.620679 | 4.44E-51 | 0.628896 | 8.73E-53 | 0.685075 | 5.67E-66 |
| 1.00E-37 | 0.475081 | 1.15E-27 | 0.484192 | 8.03E-29 | 0.430864 | 1.56E-22 | 0.477107 | 6.39E-28 |
| #####    | 0.53945  | 1.28E-36 | 0.505166 | 1.29E-31 | 0.429326 | 2.29E-22 | 0.589154 | 5.59E-45 |
| 9.82E-34 | 0.410343 | 2.15E-20 | 0.348358 | 9.04E-15 | 0.320867 | 1.21E-12 | 0.631991 | 1.93E-53 |
| 0.00018  | -0.21631 | 2.38E-06 | -0.19377 | 2.48E-05 | -0.28275 | 4.93E-10 | -0.32636 | 4.73E-13 |
| 1.49E-20 | -0.27597 | 1.31E-09 | -0.21197 | 3.82E-06 | -0.23418 | 3.08E-07 | -0.40281 | 1.21E-19 |
| 8.14E-41 | 0.462871 | 3.57E-26 | 0.504755 | 1.47E-31 | 0.497041 | 1.65E-30 | 0.594515 | 5.72E-46 |
| 6.02E-05 | 0.294141 | 8.97E-11 | 0.22756  | 6.70E-07 | 0.300159 | 3.53E-11 | 0.348477 | 8.84E-15 |
| 6.48E-81 | 0.545447 | 1.49E-37 | 0.537879 | 2.24E-36 | 0.475355 | 1.06E-27 | 0.728384 | 2.24E-78 |
| 0.00031  | -0.3649  | 3.73E-16 | -0.24842 | 5.34E-08 | -0.3791  | 2.08E-17 | -0.23119 | 4.39E-07 |
| 3.24E-60 | 0.301987 | 2.65E-11 | 0.274929 | 1.52E-09 | 0.202776 | 1.00E-05 | 0.51225  | 1.33E-32 |
| 1.75E-68 | 0.577809 | 6.07E-43 | 0.538677 | 1.69E-36 | 0.496361 | 2.03E-30 | 0.699674 | 6.65E-70 |
| 5.02E-19 | -0.32948 | 2.75E-13 | -0.20059 | 1.26E-05 | -0.21146 | 4.03E-06 | -0.19484 | 2.24E-05 |
| 3.88E-52 | 0.463117 | 3.34E-26 | 0.423285 | 1.00E-21 | 0.352773 | 3.93E-15 | 0.52141  | 6.49E-34 |
| 7.85E-36 | 0.548725 | 4.50E-38 | 0.413452 | 1.04E-20 | 0.437473 | 2.97E-23 | 0.464057 | 2.57E-26 |
| 5.07E-67 | 0.622824 | 1.61E-51 | 0.504834 | 1.44E-31 | 0.520402 | 9.09E-34 | 0.680941 | 6.68E-65 |
| 9.99E-11 | 0.388436 | 2.87E-18 | 0.421153 | 1.68E-21 | 0.300587 | 3.30E-11 | 0.323209 | 8.13E-13 |
| 6.44E-12 | 0.115267 | 0.01268  | 0.094416 | 0.04141  | 0.060207 | 0.19402  | 0.204134 | 8.73E-06 |
| 4.62E-22 | 0.609786 | 6.80E-49 | 0.521347 | 6.63E-34 | 0.549608 | 3.25E-38 | 0.499853 | 6.88E-31 |
| 5.72E-44 | 0.741127 | 1.71E-82 | 0.570658 | 1.06E-41 | 0.576638 | 9.74E-43 | 0.661241 | 4.97E-60 |
| 1.45E-43 | 0.707929 | 3.11E-72 | 0.597617 | 1.50E-46 | 0.560248 | 6.04E-40 | 0.586301 | 1.85E-44 |
| 3.82E-45 | 0.568931 | 2.09E-41 | 0.453749 | 4.27E-25 | 0.450138 | 1.12E-24 | 0.54373  | 2.77E-37 |
| 6.39E-10 | 0.336399 | 8.08E-14 | 0.470128 | 4.70E-27 | 0.449355 | 1.37E-24 | 0.466774 | 1.21E-26 |
| 4.76E-43 | 0.608434 | 1.25E-48 | 0.488281 | 2.37E-29 | 0.394088 | 8.42E-19 | 0.609307 | 8.45E-49 |
| 2.13E-34 | 0.43748  | 2.97E-23 | 0.487864 | 2.69E-29 | 0.405218 | 6.99E-20 | 0.425474 | 5.89E-22 |
| 1.81E-38 | 0.493424 | 5.00E-30 | 0.427161 | 3.90E-22 | 0.450014 | 1.15E-24 | 0.470938 | 3.74E-27 |
| 1.17E-15 | 0.451365 | 8.06E-25 | 0.404167 | 8.87E-20 | 0.46631  | 1.37E-26 | 0.349563 | 7.21E-15 |

|          |          |          |          |          |          |          |          |          |
|----------|----------|----------|----------|----------|----------|----------|----------|----------|
| 5.23E-23 | 0.420965 | 1.75E-21 | 0.339737 | 4.43E-14 | 0.386072 | 4.77E-18 | 0.485029 | 6.27E-29 |
| 1.23E-21 | 0.343849 | 2.09E-14 | 0.447274 | 2.37E-24 | 0.42839  | 2.88E-22 | 0.574546 | 2.26E-42 |
| 2.52E-14 | 0.329577 | 2.71E-13 | 0.391881 | 1.36E-18 | 0.289021 | 1.95E-10 | 0.320791 | 1.23E-12 |
| 4.71E-38 | 0.574861 | 1.99E-42 | 0.50213  | 3.38E-31 | 0.429012 | 2.47E-22 | 0.638246 | 8.63E-55 |
| 1.83E-08 | -0.17263 | 0.00018  | -0.06137 | 0.18554  | -0.14353 | 0.00187  | -0.14015 | 0.0024   |
| 3.94E-11 | 0.569931 | 1.41E-41 | 0.573965 | 2.85E-42 | 0.579232 | 3.40E-43 | 0.506399 | 8.75E-32 |
| 6.23E-14 | 0.384285 | 6.98E-18 | 0.277578 | 1.04E-09 | 0.243345 | 1.01E-07 | 0.349495 | 7.31E-15 |
| 1.24E-31 | 0.484159 | 8.11E-29 | 0.516541 | 3.27E-33 | 0.520352 | 9.24E-34 | 0.618839 | 1.05E-50 |
| 2.44E-24 | 0.457402 | 1.59E-25 | 0.451038 | 8.79E-25 | 0.453306 | 4.80E-25 | 0.479218 | 3.46E-28 |
| 2.40E-56 | 0.670852 | 2.33E-62 | 0.609165 | 9.01E-49 | 0.495866 | 2.37E-30 | 0.700346 | 4.32E-70 |
| 1.88E-09 | 0.431175 | 1.45E-22 | 0.496202 | 2.14E-30 | 0.439128 | 1.95E-23 | 0.395004 | 6.88E-19 |
| 4.72E-16 | 0.36805  | 1.99E-16 | 0.346858 | 1.20E-14 | 0.25795  | 1.55E-08 | 0.420924 | 1.77E-21 |
| 2.42E-53 | 0.510433 | 2.40E-32 | 0.40464  | 7.97E-20 | 0.342132 | 2.86E-14 | 0.415307 | 6.74E-21 |
| 2.09E-28 | 0.251112 | 3.79E-08 | 0.414118 | 8.92E-21 | 0.277742 | 1.02E-09 | 0.367954 | 2.03E-16 |
| 1.09E-33 | 0.550853 | 2.06E-38 | 0.40197  | 1.46E-19 | 0.339167 | 4.91E-14 | 0.437071 | 3.29E-23 |
| 7.22E-31 | 0.493381 | 5.07E-30 | 0.499647 | 7.34E-31 | 0.480051 | 2.72E-28 | 0.610278 | 5.44E-49 |
| 2.22E-07 | -0.29642 | 6.32E-11 | -0.28514 | 3.47E-10 | -0.36411 | 4.36E-16 | -0.29658 | 6.16E-11 |
| 2.08E-09 | -0.44647 | 2.93E-24 | -0.2998  | 3.74E-11 | -0.3495  | 7.30E-15 | -0.26496 | 6.07E-09 |
| 1.97E-45 | 0.719251 | 1.45E-75 | 0.507734 | 5.71E-32 | 0.497789 | 1.31E-30 | 0.509825 | 2.92E-32 |
| 2.80E-39 | 0.614927 | 6.49E-50 | 0.576212 | 1.16E-42 | 0.606236 | 3.36E-48 | 0.660794 | 6.35E-60 |
| 1.29E-27 | 0.719612 | 1.13E-75 | 0.515972 | 3.94E-33 | 0.499478 | 7.74E-31 | 0.536498 | 3.65E-36 |
| 6.31E-37 | 0.526045 | 1.36E-34 | 0.553373 | 8.07E-39 | 0.555929 | 3.10E-39 | 0.616921 | 2.58E-50 |
| 7.00E-14 | 0.327782 | 3.70E-13 | 0.381141 | 1.36E-17 | 0.345878 | 1.44E-14 | 0.388632 | 2.76E-18 |
| 7.62E-59 | 0.61657  | 3.03E-50 | 0.562949 | 2.14E-40 | 0.523515 | 3.20E-34 | 0.612221 | 2.25E-49 |
| 5.95E-54 | 0.649652 | 2.48E-57 | 0.557786 | 1.54E-39 | 0.538485 | 1.81E-36 | 0.63045  | 4.10E-53 |
| 4.28E-10 | -0.36427 | 4.23E-16 | -0.34975 | 6.97E-15 | -0.45504 | 3.02E-25 | -0.3605  | 8.88E-16 |
| 7.23E-29 | 0.482408 | 1.36E-28 | 0.43686  | 3.47E-23 | 0.449001 | 1.51E-24 | 0.586169 | 1.95E-44 |
| 7.19E-17 | 0.663943 | 1.12E-60 | 0.551822 | 1.44E-38 | 0.580676 | 1.89E-43 | 0.559163 | 9.13E-40 |
| 6.43E-20 | 0.513652 | 8.43E-33 | 0.413225 | 1.10E-20 | 0.434382 | 6.49E-23 | 0.511811 | 1.54E-32 |
| 3.95E-42 | 0.482418 | 1.36E-28 | 0.390237 | 1.95E-18 | 0.325228 | 5.75E-13 | 0.563463 | 1.76E-40 |
| 2.66E-48 | 0.637857 | 1.05E-54 | 0.471787 | 2.94E-27 | 0.495704 | 2.49E-30 | 0.55224  | 1.23E-38 |
| 1.12E-14 | -0.41264 | 1.26E-20 | -0.244   | 9.31E-08 | -0.3153  | 3.08E-12 | -0.48155 | 1.75E-28 |
| 1.11E-05 | 0.327354 | 3.98E-13 | 0.400409 | 2.07E-19 | 0.406935 | 4.72E-20 | 0.201958 | 1.09E-05 |
| 1.11E-06 | -0.39929 | 2.66E-19 | -0.22285 | 1.15E-06 | -0.37334 | 6.82E-17 | -0.28146 | 5.95E-10 |
| 1.54E-45 | 0.797834 | #####    | 0.633888 | 7.57E-54 | 0.617009 | 2.47E-50 | 0.625685 | 4.11E-52 |
| 2.81E-43 | 0.649226 | 3.10E-57 | 0.56073  | 5.02E-40 | 0.591017 | 2.54E-45 | 0.591311 | 2.25E-45 |
| 7.19E-21 | 0.424953 | 6.69E-22 | 0.336866 | 7.43E-14 | 0.369801 | 1.40E-16 | 0.324874 | 6.11E-13 |
| 4.60E-68 | 0.494675 | 3.41E-30 | 0.491207 | 9.82E-30 | 0.365228 | 3.49E-16 | 0.626353 | 2.98E-52 |
| 1.96E-21 | 0.457724 | 1.46E-25 | 0.509712 | 3.03E-32 | 0.49095  | 1.06E-29 | 0.49265  | 6.34E-30 |
| 1.05E-25 | 0.401336 | 1.68E-19 | 0.387622 | 3.42E-18 | 0.298784 | 4.38E-11 | 0.337512 | 6.62E-14 |
| 1.03E-18 | 0.193261 | 2.61E-05 | 0.221846 | 1.29E-06 | 0.202959 | 9.86E-06 | 0.34358  | 2.19E-14 |
| 4.92E-06 | -0.32221 | 9.65E-13 | -0.37368 | 6.36E-17 | -0.43525 | 5.22E-23 | -0.481   | 2.06E-28 |
| 1.98E-53 | -0.36509 | 3.59E-16 | -0.29209 | 1.23E-10 | -0.23081 | 4.59E-07 | -0.51854 | 1.69E-33 |
| 0.0004   | -0.3203  | 1.33E-12 | -0.26728 | 4.42E-09 | -0.32096 | 1.19E-12 | -0.35411 | 3.05E-15 |
| 2.71E-30 | -0.43468 | 6.02E-23 | -0.3872  | 3.75E-18 | -0.41801 | 3.55E-21 | -0.32267 | 8.92E-13 |

|          |          |          |          |          |          |          |          |          |
|----------|----------|----------|----------|----------|----------|----------|----------|----------|
| 4.92E-18 | -0.51235 | 1.29E-32 | -0.34452 | 1.85E-14 | -0.41121 | 1.76E-20 | -0.46618 | 1.42E-26 |
| 1.63E-09 | 0.221153 | 1.39E-06 | 0.218639 | 1.84E-06 | 0.191799 | 3.01E-05 | 0.298589 | 4.51E-11 |
| 1.69E-14 | 0.420513 | 1.96E-21 | 0.399278 | 2.67E-19 | 0.452579 | 5.83E-25 | 0.389729 | 2.18E-18 |
| 9.01E-53 | 0.454955 | 3.09E-25 | 0.483056 | 1.12E-28 | 0.396967 | 4.46E-19 | 0.595166 | 4.32E-46 |
| 1.66E-19 | 0.595995 | 3.03E-46 | 0.637592 | 1.20E-54 | 0.616366 | 3.33E-50 | 0.576988 | 8.45E-43 |
| 3.30E-06 | -0.35346 | 3.45E-15 | -0.43301 | 9.15E-23 | -0.40347 | 1.04E-19 | -0.38908 | 2.50E-18 |
| 7.71E-07 | -0.24293 | 1.06E-07 | -0.28957 | 1.79E-10 | -0.28198 | 5.51E-10 | -0.2772  | 1.10E-09 |
| 8.38E-12 | -0.41005 | 2.30E-20 | -0.41823 | 3.37E-21 | -0.40649 | 5.23E-20 | -0.41248 | 1.31E-20 |
| 7.13E-12 | 0.490445 | 1.24E-29 | 0.199774 | 1.36E-05 | 0.244166 | 9.12E-08 | 0.283905 | 4.16E-10 |
| 2.19E-35 | 0.343775 | 2.12E-14 | 0.345199 | 1.63E-14 | 0.309777 | 7.62E-12 | 0.470887 | 3.79E-27 |
| 1.32E-11 | 0.433141 | 8.86E-23 | 0.373041 | 7.25E-17 | 0.377409 | 2.95E-17 | 0.272706 | 2.08E-09 |
| 4.22E-09 | 0.353944 | 3.15E-15 | 0.302097 | 2.61E-11 | 0.329222 | 2.88E-13 | 0.291133 | 1.42E-10 |
| 2.34E-83 | 0.422391 | 1.24E-21 | 0.467038 | 1.12E-26 | 0.369072 | 1.62E-16 | 0.586046 | 2.06E-44 |
| 1.22E-29 | 0.567966 | 3.06E-41 | 0.57075  | 1.02E-41 | 0.53181  | 1.88E-35 | 0.730521 | 4.75E-79 |
| 1.36E-19 | 0.59122  | 2.33E-45 | 0.46611  | 1.45E-26 | 0.543424 | 3.09E-37 | 0.494331 | 3.79E-30 |
| 9.08E-07 | 0.275738 | 1.36E-09 | 0.355147 | 2.50E-15 | 0.326542 | 4.59E-13 | 0.268113 | 3.94E-09 |
| 2.82E-60 | 0.281557 | 5.87E-10 | 0.367756 | 2.11E-16 | 0.172166 | 0.00019  | 0.486481 | 4.07E-29 |
| 1.50E-28 | 0.623824 | 1.00E-51 | 0.610556 | 4.80E-49 | 0.608112 | 1.45E-48 | 0.595505 | 3.74E-46 |
| 3.50E-18 | 0.240399 | 1.45E-07 | 0.147549 | 0.00139  | 0.185865 | 5.32E-05 | 0.438573 | 2.25E-23 |
| 2.02E-15 | 0.383625 | 8.03E-18 | 0.408472 | 3.32E-20 | 0.391152 | 1.60E-18 | 0.358479 | 1.31E-15 |
| 2.45E-26 | 0.609479 | 7.82E-49 | 0.392243 | 1.26E-18 | 0.377199 | 3.08E-17 | 0.520481 | 8.85E-34 |
| 2.78E-23 | 0.259714 | 1.23E-08 | 0.343513 | 2.22E-14 | 0.255807 | 2.06E-08 | 0.392591 | 1.17E-18 |
| 3.67E-38 | 0.455942 | 2.37E-25 | 0.265315 | 5.79E-09 | 0.245485 | 7.74E-08 | 0.571192 | 8.58E-42 |
| 1.70E-22 | 0.52898  | 4.98E-35 | 0.489217 | 1.79E-29 | 0.561275 | 4.08E-40 | 0.477241 | 6.15E-28 |
| 9.16E-18 | 0.2677   | 4.17E-09 | 0.365884 | 3.07E-16 | 0.244326 | 8.94E-08 | 0.349072 | 7.91E-15 |
| 2.91E-46 | 0.598552 | 9.99E-47 | 0.551452 | 1.65E-38 | 0.517346 | 2.51E-33 | 0.581605 | 1.29E-43 |
| 1.07E-09 | 0.404856 | 7.59E-20 | 0.409832 | 2.42E-20 | 0.34144  | 3.25E-14 | 0.295696 | 7.07E-11 |
| 6.62E-06 | -0.30109 | 3.05E-11 | -0.3305  | 2.30E-13 | -0.43235 | 1.08E-22 | -0.41701 | 4.50E-21 |
| 1.47E-31 | 0.397356 | 4.09E-19 | 0.307425 | 1.11E-11 | 0.282457 | 5.15E-10 | 0.412809 | 1.21E-20 |
| 1.02E-10 | 0.505748 | 1.08E-31 | 0.390727 | 1.75E-18 | 0.488492 | 2.23E-29 | 0.427262 | 3.80E-22 |
| 0.00102  | -0.40282 | 1.20E-19 | -0.31554 | 2.96E-12 | -0.40758 | 4.07E-20 | -0.32096 | 1.19E-12 |
| 2.69E-14 | -0.32888 | 3.06E-13 | -0.28288 | 4.84E-10 | -0.31708 | 2.29E-12 | -0.38408 | 7.29E-18 |
| 6.50E-55 | 0.487642 | 2.88E-29 | 0.445982 | 3.33E-24 | 0.342025 | 2.92E-14 | 0.525735 | 1.51E-34 |
| 4.33E-47 | 0.53887  | 1.58E-36 | 0.382741 | 9.68E-18 | 0.425917 | 5.29E-22 | 0.563719 | 1.59E-40 |
| 2.84E-15 | 0.401799 | 1.52E-19 | 0.494339 | 3.78E-30 | 0.442625 | 7.96E-24 | 0.370182 | 1.30E-16 |
| 3.09E-13 | 0.298997 | 4.24E-11 | 0.416078 | 5.62E-21 | 0.303945 | 1.95E-11 | 0.483412 | 1.01E-28 |
| 1.06E-09 | 0.690403 | 2.22E-67 | 0.491858 | 8.06E-30 | 0.419403 | 2.55E-21 | 0.581489 | 1.35E-43 |
| 4.14E-13 | 0.666924 | 2.14E-61 | 0.606359 | 3.18E-48 | 0.547017 | 8.40E-38 | 0.665668 | 4.31E-61 |
| 0.00242  | 0.174488 | 0.00015  | 0.241689 | 1.24E-07 | 0.203423 | 9.40E-06 | 0.287231 | 2.54E-10 |
| 7.43E-19 | 0.301453 | 2.88E-11 | 0.292781 | 1.10E-10 | 0.166764 | 0.0003   | 0.458353 | 1.23E-25 |
| 1.68E-20 | 0.557066 | 2.02E-39 | 0.476726 | 7.13E-28 | 0.435524 | 4.87E-23 | 0.556004 | 3.01E-39 |
| 2.62E-05 | 0.49986  | 6.87E-31 | 0.442517 | 8.18E-24 | 0.449267 | 1.41E-24 | 0.465561 | 1.69E-26 |
| 2.47E-59 | 0.342291 | 2.78E-14 | 0.460299 | 7.24E-26 | 0.336641 | 7.74E-14 | 0.486789 | 3.71E-29 |
| 8.89E-54 | 0.451233 | 8.35E-25 | 0.441555 | 1.05E-23 | 0.40503  | 7.29E-20 | 0.654045 | 2.43E-58 |
| 3.51E-09 | 0.286802 | 2.71E-10 | 0.303384 | 2.13E-11 | 0.283953 | 4.13E-10 | 0.3273   | 4.02E-13 |

|          |          |          |          |          |          |          |          |          |
|----------|----------|----------|----------|----------|----------|----------|----------|----------|
| 1.01E-22 | 0.377596 | 2.84E-17 | 0.318824 | 1.71E-12 | 0.35916  | 1.15E-15 | 0.508726 | 4.16E-32 |
| 1.46E-06 | 0.17934  | 9.75E-05 | -0.01122 | 0.80893  | 0.121398 | 0.00864  | 0.325492 | 5.50E-13 |
| 3.25E-10 | -0.27726 | 1.09E-09 | -0.36828 | 1.90E-16 | -0.34591 | 1.43E-14 | -0.45651 | 2.03E-25 |
| 3.31E-59 | 0.498732 | 9.76E-31 | 0.522152 | 5.06E-34 | 0.438996 | 2.02E-23 | 0.553402 | 7.98E-39 |
| 1.07E-54 | 0.557398 | 1.78E-39 | 0.474399 | 1.39E-27 | 0.463382 | 3.10E-26 | 0.736476 | 5.80E-81 |
| 3.52E-11 | 0.402034 | 1.44E-19 | 0.39517  | 6.64E-19 | 0.422563 | 1.19E-21 | 0.199179 | 1.45E-05 |
| 4.58E-36 | 0.590482 | 3.19E-45 | 0.524106 | 2.62E-34 | 0.463618 | 2.90E-26 | 0.624322 | 7.89E-52 |
| 0.0317   | 0.408193 | 3.53E-20 | 0.369674 | 1.44E-16 | 0.354865 | 2.64E-15 | 0.291793 | 1.28E-10 |
| 1.04E-34 | 0.494322 | 3.80E-30 | 0.421725 | 1.46E-21 | 0.477298 | 6.05E-28 | 0.611823 | 2.69E-49 |
| 1.77E-56 | 0.400231 | 2.16E-19 | 0.405344 | 6.79E-20 | 0.347579 | 1.05E-14 | 0.592372 | 1.43E-45 |
| 1.75E-20 | 0.296256 | 6.48E-11 | 0.423865 | 8.71E-22 | 0.264552 | 6.42E-09 | 0.331439 | 1.95E-13 |
| 7.91E-11 | -0.23957 | 1.61E-07 | -0.42891 | 2.53E-22 | -0.32325 | 8.07E-13 | -0.30604 | 1.39E-11 |
| 4.37E-14 | -0.42718 | 3.88E-22 | -0.27465 | 1.58E-09 | -0.22679 | 7.33E-07 | -0.41232 | 1.36E-20 |
| 1.50E-33 | 0.481276 | 1.90E-28 | 0.447065 | 2.51E-24 | 0.333242 | 1.42E-13 | 0.523381 | 3.35E-34 |
| 9.74E-53 | 0.65353  | 3.20E-58 | 0.537587 | 2.48E-36 | 0.544365 | 2.20E-37 | 0.635677 | 3.12E-54 |
| 3.73E-51 | 0.620109 | 5.81E-51 | 0.458694 | 1.12E-25 | 0.448894 | 1.55E-24 | 0.573578 | 3.32E-42 |
| 6.22E-20 | 0.39509  | 6.75E-19 | 0.264412 | 6.54E-09 | 0.201158 | 1.19E-05 | 0.272849 | 2.04E-09 |
| 9.58E-29 | 0.410626 | 2.01E-20 | 0.402779 | 1.22E-19 | 0.349371 | 7.48E-15 | 0.514433 | 6.53E-33 |
| 3.24E-28 | 0.342969 | 2.45E-14 | 0.256755 | 1.82E-08 | 0.211026 | 4.22E-06 | 0.53161  | 2.01E-35 |
| 5.16E-27 | 0.613154 | 1.47E-49 | 0.608165 | 1.42E-48 | 0.650331 | 1.73E-57 | 0.615427 | 5.15E-50 |
| 0.00526  | -0.22251 | 1.19E-06 | -0.22884 | 5.78E-07 | -0.32218 | 9.69E-13 | -0.22109 | 1.40E-06 |
| 3.14E-41 | 0.577537 | 6.77E-43 | 0.595791 | 3.30E-46 | 0.555473 | 3.68E-39 | 0.657688 | 3.44E-59 |
| 1.89E-15 | -0.32791 | 3.62E-13 | -0.31869 | 1.75E-12 | -0.31062 | 6.65E-12 | -0.38574 | 5.12E-18 |
| 3.84E-06 | -0.36188 | 6.77E-16 | -0.26246 | 8.52E-09 | -0.31713 | 2.27E-12 | -0.29032 | 1.60E-10 |
| 7.20E-31 | 0.503211 | 2.40E-31 | 0.526966 | 9.92E-35 | 0.493272 | 5.24E-30 | 0.471548 | 3.14E-27 |
| 5.19E-24 | 0.654504 | 1.90E-58 | 0.574078 | 2.72E-42 | 0.54927  | 3.68E-38 | 0.638635 | 7.10E-55 |
| 1.68E-09 | 0.474697 | 1.28E-27 | 0.459959 | 7.95E-26 | 0.413413 | 1.05E-20 | 0.352353 | 4.26E-15 |
| 2.83E-56 | 0.402717 | 1.23E-19 | 0.411831 | 1.52E-20 | 0.359641 | 1.05E-15 | 0.582904 | 7.56E-44 |
| 5.07E-09 | -0.44736 | 2.32E-24 | -0.27719 | 1.10E-09 | -0.34569 | 1.49E-14 | -0.33354 | 1.35E-13 |
| 8.04E-15 | 0.470105 | 4.73E-27 | 0.376244 | 3.76E-17 | 0.327664 | 3.78E-13 | 0.421691 | 1.47E-21 |
| 1.70E-19 | -0.42807 | 3.12E-22 | -0.33712 | 7.10E-14 | -0.35599 | 2.13E-15 | -0.52108 | 7.25E-34 |
| 8.41E-62 | 0.64114  | 2.00E-55 | 0.588763 | 6.59E-45 | 0.546315 | 1.09E-37 | 0.659056 | 1.64E-59 |
| 1.07E-15 | 0.401874 | 1.49E-19 | 0.442667 | 7.87E-24 | 0.385982 | 4.86E-18 | 0.323541 | 7.68E-13 |
| 5.85E-18 | -0.27257 | 2.12E-09 | -0.25215 | 3.32E-08 | -0.2929  | 1.08E-10 | -0.41157 | 1.62E-20 |
| 4.03E-05 | -0.45409 | 3.89E-25 | -0.34101 | 3.51E-14 | -0.48813 | 2.49E-29 | -0.29632 | 6.42E-11 |
| 1.52E-08 | -0.40791 | 3.77E-20 | -0.43292 | 9.36E-23 | -0.44964 | 1.27E-24 | -0.44097 | 1.22E-23 |
| 1.67E-45 | 0.587318 | 1.21E-44 | 0.416874 | 4.66E-21 | 0.46017  | 7.50E-26 | 0.657246 | 4.37E-59 |
| 1.35E-11 | 0.21334  | 3.29E-06 | 0.204872 | 8.09E-06 | 0.220315 | 1.53E-06 | 0.398808 | 2.96E-19 |
| 9.54E-27 | 0.410904 | 1.89E-20 | 0.465729 | 1.62E-26 | 0.432685 | 9.93E-23 | 0.607204 | 2.18E-48 |
| 2.89E-09 | -0.39806 | 3.50E-19 | -0.20757 | 6.10E-06 | -0.29434 | 8.70E-11 | -0.36172 | 6.98E-16 |
| 1.68E-26 | 0.435709 | 4.65E-23 | 0.360771 | 8.41E-16 | 0.42467  | 7.16E-22 | 0.466988 | 1.14E-26 |
| 2.60E-21 | 0.366188 | 2.89E-16 | 0.384389 | 6.83E-18 | 0.376976 | 3.23E-17 | 0.494296 | 3.83E-30 |
| 2.61E-12 | 0.364703 | 3.88E-16 | 0.196232 | 1.95E-05 | 0.196899 | 1.82E-05 | 0.389851 | 2.12E-18 |
| 2.18E-47 | 0.532001 | 1.76E-35 | 0.552834 | 9.86E-39 | 0.531025 | 2.46E-35 | 0.635812 | 2.91E-54 |
| 1.38E-37 | 0.678672 | 2.54E-64 | 0.604857 | 6.22E-48 | 0.567359 | 3.88E-41 | 0.557411 | 1.77E-39 |

|          |          |          |          |          |          |          |          |          |
|----------|----------|----------|----------|----------|----------|----------|----------|----------|
| 1.55E-13 | -0.38197 | 1.14E-17 | -0.3438  | 2.11E-14 | -0.32862 | 3.20E-13 | -0.34976 | 6.95E-15 |
| 2.36E-34 | 0.34942  | 7.41E-15 | 0.26628  | 5.07E-09 | 0.263715 | 7.19E-09 | 0.42392  | 8.59E-22 |
| 0.00517  | 0.273318 | 1.91E-09 | 0.208118 | 5.76E-06 | 0.394193 | 8.23E-19 | 0.286614 | 2.79E-10 |
| 3.87E-13 | 0.564912 | 1.00E-40 | 0.541214 | 6.84E-37 | 0.589899 | 4.08E-45 | 0.501748 | 3.81E-31 |
| 4.00E-53 | 0.623329 | 1.27E-51 | 0.481618 | 1.72E-28 | 0.510216 | 2.57E-32 | 0.584439 | 4.01E-44 |
| 1.03E-53 | 0.537042 | 3.01E-36 | 0.487454 | 3.04E-29 | 0.427482 | 3.60E-22 | 0.574642 | 2.17E-42 |
| 0.18908  | -0.30766 | 1.07E-11 | -0.25947 | 1.27E-08 | -0.3953  | 6.45E-19 | -0.1136  | 0.01404  |
| 1.27E-05 | 0.419169 | 2.70E-21 | 0.418868 | 2.90E-21 | 0.459709 | 8.51E-26 | 0.211708 | 3.93E-06 |
| 0.00132  | 0.325242 | 5.74E-13 | 0.382859 | 9.44E-18 | 0.391008 | 1.65E-18 | 0.339808 | 4.37E-14 |
| 2.39E-75 | 0.708217 | 2.57E-72 | 0.552312 | 1.20E-38 | 0.496653 | 1.86E-30 | 0.595475 | 3.79E-46 |
| 2.94E-28 | 0.6937   | 2.88E-68 | 0.613433 | 1.29E-49 | 0.646012 | 1.65E-56 | 0.615927 | 4.09E-50 |
| 6.21E-52 | 0.560937 | 4.64E-40 | 0.524035 | 2.68E-34 | 0.483852 | 8.88E-29 | 0.626815 | 2.39E-52 |
| 0.00565  | 0.250642 | 4.02E-08 | 0.405875 | 6.01E-20 | 0.332825 | 1.53E-13 | 0.251127 | 3.78E-08 |
| 1.33E-08 | -0.18693 | 4.81E-05 | -0.20181 | 1.11E-05 | -0.27508 | 1.49E-09 | -0.16787 | 0.00027  |
| 7.44E-09 | 0.406135 | 5.67E-20 | 0.453621 | 4.42E-25 | 0.526954 | 9.96E-35 | 0.24521  | 8.01E-08 |
| 9.71E-26 | 0.377319 | 3.01E-17 | 0.252906 | 3.01E-08 | 0.203527 | 9.29E-06 | 0.374605 | 5.26E-17 |
| 1.81E-34 | 0.602528 | 1.75E-47 | 0.441634 | 1.03E-23 | 0.463183 | 3.28E-26 | 0.538915 | 1.55E-36 |
| 3.40E-12 | 0.348549 | 8.72E-15 | 0.500644 | 5.38E-31 | 0.452049 | 6.72E-25 | 0.496278 | 2.09E-30 |
| 2.29E-13 | 0.424165 | 8.10E-22 | 0.31096  | 6.29E-12 | 0.364463 | 4.07E-16 | 0.258615 | 1.42E-08 |
| 8.73E-13 | -0.18431 | 6.16E-05 | -0.15469 | 0.0008   | -0.19828 | 1.59E-05 | -0.26446 | 6.50E-09 |
| 1.36E-34 | 0.360324 | 9.18E-16 | 0.263257 | 7.65E-09 | 0.259139 | 1.33E-08 | 0.394358 | 7.93E-19 |
| 5.16E-53 | 0.696915 | 3.83E-69 | 0.661312 | 4.78E-60 | 0.596129 | 2.86E-46 | 0.608981 | 9.79E-49 |
| 5.32E-21 | 0.27805  | 9.74E-10 | 0.36783  | 2.08E-16 | 0.372025 | 8.91E-17 | 0.512151 | 1.38E-32 |
| 2.44E-30 | 0.355245 | 2.45E-15 | 0.352497 | 4.14E-15 | 0.292496 | 1.15E-10 | 0.333476 | 1.36E-13 |
| 1.09E-82 | 0.508414 | 4.59E-32 | 0.47111  | 3.56E-27 | 0.388253 | 2.99E-18 | 0.574938 | 1.93E-42 |
| 7.14E-09 | 0.308897 | 8.79E-12 | 0.410645 | 2.01E-20 | 0.419721 | 2.36E-21 | 0.236443 | 2.35E-07 |
| 1.40E-11 | 0.164878 | 0.00035  | 0.131704 | 0.00436  | 0.195931 | 2.01E-05 | 0.29725  | 5.56E-11 |
| 1.48E-19 | 0.429523 | 2.18E-22 | 0.211067 | 4.21E-06 | 0.243249 | 1.02E-07 | 0.306541 | 1.28E-11 |
| 8.26E-19 | 0.235669 | 2.58E-07 | 0.331261 | 2.01E-13 | 0.315822 | 2.82E-12 | 0.320908 | 1.20E-12 |
| 2.53E-41 | 0.17534  | 0.00014  | 0.193718 | 2.50E-05 | 0.156867 | 0.00067  | 0.305709 | 1.47E-11 |
| 4.09E-36 | 0.406472 | 5.25E-20 | 0.300076 | 3.58E-11 | 0.22368  | 1.05E-06 | 0.493916 | 4.31E-30 |
| 1.25E-38 | 0.413669 | 9.91E-21 | 0.434002 | 7.14E-23 | 0.352139 | 4.43E-15 | 0.511778 | 1.55E-32 |
| 0.00189  | 0.349762 | 6.95E-15 | 0.371956 | 9.04E-17 | 0.357146 | 1.70E-15 | 0.229606 | 5.28E-07 |
| 6.50E-28 | 0.553707 | 7.12E-39 | 0.604193 | 8.36E-48 | 0.587554 | 1.09E-44 | 0.525896 | 1.43E-34 |
| 2.74E-15 | -0.34286 | 2.51E-14 | -0.27736 | 1.08E-09 | -0.21049 | 4.47E-06 | -0.31259 | 4.81E-12 |
| 3.65E-33 | 0.480643 | 2.28E-28 | 0.358397 | 1.34E-15 | 0.375291 | 4.57E-17 | 0.54158  | 6.00E-37 |
| 0.0199   | 0.398581 | 3.12E-19 | 0.426312 | 4.80E-22 | 0.53861  | 1.73E-36 | 0.286845 | 2.70E-10 |
| 1.37E-70 | 0.550426 | 2.41E-38 | 0.502375 | 3.13E-31 | 0.372902 | 7.46E-17 | 0.649323 | 2.94E-57 |
| 9.76E-24 | 0.272974 | 2.00E-09 | 0.413757 | 9.71E-21 | 0.392113 | 1.30E-18 | 0.298036 | 4.92E-11 |
| 8.21E-12 | -0.30169 | 2.78E-11 | -0.22747 | 6.78E-07 | -0.27207 | 2.28E-09 | -0.37555 | 4.33E-17 |
| 6.22E-17 | -0.47573 | 9.51E-28 | -0.41237 | 1.34E-20 | -0.44097 | 1.22E-23 | -0.50374 | 2.03E-31 |
| 1.40E-07 | -0.44459 | 4.78E-24 | -0.24631 | 6.97E-08 | -0.37855 | 2.33E-17 | -0.24483 | 8.40E-08 |
| 1.11E-12 | -0.57971 | 2.80E-43 | -0.47559 | 9.89E-28 | -0.57172 | 6.97E-42 | -0.44297 | 7.29E-24 |
| 2.54E-09 | 0.504977 | 1.37E-31 | 0.553463 | 7.80E-39 | 0.538618 | 1.72E-36 | 0.470652 | 4.05E-27 |
| 3.46E-14 | 0.4706   | 4.11E-27 | 0.369256 | 1.56E-16 | 0.327838 | 3.66E-13 | 0.258312 | 1.48E-08 |



|          |          |          |          |          |          |          |          |          |
|----------|----------|----------|----------|----------|----------|----------|----------|----------|
| 1.82E-23 | 0.252074 | 3.35E-08 | 0.261695 | 9.44E-09 | 0.203803 | 9.03E-06 | 0.390128 | 1.99E-18 |
| 7.06E-27 | 0.503483 | 2.20E-31 | 0.479764 | 2.95E-28 | 0.492017 | 7.68E-30 | 0.440514 | 1.37E-23 |
| 7.28E-22 | 0.618094 | 1.49E-50 | 0.503461 | 2.22E-31 | 0.492066 | 7.57E-30 | 0.571454 | 7.74E-42 |
| 4.29E-05 | 0.438644 | 2.21E-23 | 0.432271 | 1.10E-22 | 0.441474 | 1.07E-23 | 0.379593 | 1.87E-17 |
| 8.05E-43 | 0.652549 | 5.38E-58 | 0.660738 | 6.55E-60 | 0.645708 | 1.93E-56 | 0.661337 | 4.72E-60 |
| 8.64E-27 | 0.764854 | 7.58E-91 | 0.629661 | 6.02E-53 | 0.662879 | 2.02E-60 | 0.654696 | 1.72E-58 |
| 1.29E-70 | 0.281984 | 5.51E-10 | 0.317342 | 2.19E-12 | 0.126798 | 0.00607  | 0.454572 | 3.42E-25 |
| 9.78E-25 | 0.450858 | 9.22E-25 | 0.497078 | 1.63E-30 | 0.524985 | 1.95E-34 | 0.460175 | 7.49E-26 |
| 4.03E-48 | 0.494646 | 3.44E-30 | 0.434125 | 6.93E-23 | 0.446036 | 3.28E-24 | 0.551698 | 1.50E-38 |
| 9.58E-10 | -0.39044 | 1.86E-18 | -0.3229  | 8.57E-13 | -0.4156  | 6.29E-21 | -0.35234 | 4.27E-15 |
| 1.09E-75 | 0.65169  | 8.48E-58 | 0.558468 | 1.19E-39 | 0.510497 | 2.35E-32 | 0.701124 | 2.62E-70 |
| 3.03E-22 | 0.527377 | 8.62E-35 | 0.553419 | 7.93E-39 | 0.564985 | 9.77E-41 | 0.532474 | 1.49E-35 |
| 2.95E-46 | 0.686212 | 2.85E-66 | 0.597107 | 1.87E-46 | 0.588846 | 6.37E-45 | 0.702668 | 9.70E-71 |
| 1.66E-07 | -0.26974 | 3.15E-09 | -0.09569 | 0.03873  | -0.1441  | 0.0018   | -0.28018 | 7.16E-10 |
| 2.08E-68 | 0.412518 | 1.30E-20 | 0.493814 | 4.44E-30 | 0.43135  | 1.39E-22 | 0.597664 | 1.47E-46 |
| 4.99E-59 | 0.741846 | 9.85E-83 | 0.619832 | 6.61E-51 | 0.597911 | 1.32E-46 | 0.652685 | 5.01E-58 |
| 1.97E-06 | 0.449947 | 1.17E-24 | 0.243227 | 1.03E-07 | 0.204352 | 8.54E-06 | 0.218405 | 1.89E-06 |
| 0.05972  | 0.464886 | 2.04E-26 | 0.322697 | 8.87E-13 | 0.45745  | 1.57E-25 | 0.265522 | 5.63E-09 |
| 1.22E-37 | 0.38966  | 2.21E-18 | 0.319338 | 1.57E-12 | 0.26841  | 3.78E-09 | 0.347857 | 9.93E-15 |
| 1.37E-32 | 0.344053 | 2.01E-14 | 0.282374 | 5.21E-10 | 0.168828 | 0.00025  | 0.386386 | 4.46E-18 |
| 3.38E-21 | 0.218524 | 1.87E-06 | 0.285484 | 3.30E-10 | 0.195101 | 2.18E-05 | 0.196879 | 1.83E-05 |
| 7.59E-11 | 0.268222 | 3.88E-09 | 0.376046 | 3.91E-17 | 0.340057 | 4.18E-14 | 0.352505 | 4.14E-15 |
| 0.00093  | 0.178335 | 0.00011  | 0.088458 | 0.05611  | 0.253856 | 2.66E-08 | 0.198264 | 1.59E-05 |
| 1.08E-39 | 0.403095 | 1.13E-19 | 0.238936 | 1.74E-07 | 0.231044 | 4.46E-07 | 0.50425  | 1.73E-31 |
| 1.34E-46 | 0.600193 | 4.88E-47 | 0.516196 | 3.66E-33 | 0.567184 | 4.15E-41 | 0.651112 | 1.15E-57 |
| 1.91E-41 | 0.446433 | 2.96E-24 | 0.382225 | 1.08E-17 | 0.307789 | 1.05E-11 | 0.497998 | 1.23E-30 |
| 1.47E-19 | -0.26192 | 9.17E-09 | -0.27357 | 1.84E-09 | -0.15519 | 0.00077  | -0.41179 | 1.54E-20 |
| 1.72E-23 | 0.357603 | 1.56E-15 | 0.387898 | 3.23E-18 | 0.278711 | 8.86E-10 | 0.42214  | 1.32E-21 |
| 1.03E-10 | -0.47106 | 3.62E-27 | -0.31189 | 5.40E-12 | -0.35586 | 2.18E-15 | -0.17523 | 0.00014  |
| 2.82E-11 | 0.49954  | 7.59E-31 | 0.434264 | 6.69E-23 | 0.482444 | 1.35E-28 | 0.397395 | 4.06E-19 |
| 2.35E-20 | 0.506169 | 9.41E-32 | 0.38367  | 7.95E-18 | 0.474226 | 1.47E-27 | 0.464362 | 2.36E-26 |
| 2.13E-08 | 0.604686 | 6.72E-48 | 0.513579 | 8.64E-33 | 0.575076 | 1.83E-42 | 0.456259 | 2.17E-25 |
| 4.96E-93 | 0.619459 | 7.88E-51 | 0.511876 | 1.50E-32 | 0.450475 | 1.02E-24 | 0.666842 | 2.24E-61 |
| 2.37E-35 | 0.496176 | 2.15E-30 | 0.452977 | 5.25E-25 | 0.464166 | 2.50E-26 | 0.402188 | 1.39E-19 |
| 3.68E-12 | 0.570685 | 1.05E-41 | 0.469295 | 5.95E-27 | 0.510708 | 2.19E-32 | 0.665803 | 4.00E-61 |
| 8.48E-19 | -0.35504 | 2.55E-15 | -0.3092  | 8.37E-12 | -0.31672 | 2.43E-12 | -0.35778 | 1.51E-15 |
| 0.00358  | 0.360012 | 9.76E-16 | 0.298592 | 4.51E-11 | 0.448197 | 1.86E-24 | 0.332051 | 1.75E-13 |
| 8.41E-68 | 0.725384 | 1.93E-77 | 0.627129 | 2.05E-52 | 0.597115 | 1.86E-46 | 0.669571 | 4.81E-62 |
| 6.18E-57 | 0.551153 | 1.84E-38 | 0.548441 | 4.99E-38 | 0.486455 | 4.10E-29 | 0.646238 | 1.47E-56 |
| 3.94E-22 | 0.393739 | 9.09E-19 | 0.483859 | 8.87E-29 | 0.460889 | 6.16E-26 | 0.434925 | 5.66E-23 |
| 1.81E-23 | 0.296353 | 6.38E-11 | 0.33458  | 1.12E-13 | 0.311207 | 6.04E-12 | 0.324267 | 6.78E-13 |
| 2.46E-32 | 0.540656 | 8.35E-37 | 0.533117 | 1.19E-35 | 0.528005 | 6.96E-35 | 0.543886 | 2.62E-37 |
| 1.72E-19 | 0.56618  | 6.14E-41 | 0.546213 | 1.13E-37 | 0.526528 | 1.15E-34 | 0.521118 | 7.15E-34 |
| 6.17E-19 | 0.13258  | 0.0041   | 0.126068 | 0.00637  | 0.05814  | 0.20981  | 0.312222 | 5.11E-12 |
| 2.40E-29 | 0.254041 | 2.60E-08 | 0.280032 | 7.32E-10 | 0.255492 | 2.15E-08 | 0.481453 | 1.80E-28 |

|          |          |          |          |          |          |          |          |          |
|----------|----------|----------|----------|----------|----------|----------|----------|----------|
| 3.30E-40 | 0.541045 | 7.26E-37 | 0.396873 | 4.56E-19 | 0.372148 | 8.69E-17 | 0.544229 | 2.31E-37 |
| 5.32E-14 | -0.49133 | 9.47E-30 | -0.09581 | 0.03849  | -0.2986  | 4.51E-11 | -0.35557 | 2.31E-15 |
| 1.30E-05 | 0.484328 | 7.72E-29 | 0.424285 | 7.87E-22 | 0.572102 | 5.99E-42 | 0.479719 | 2.99E-28 |
| 4.71E-23 | -0.04834 | 0.29721  | -0.10659 | 0.02124  | -0.07407 | 0.10994  | -0.38486 | 6.18E-18 |
| 2.59E-31 | 0.334726 | 1.09E-13 | 0.355217 | 2.47E-15 | 0.311522 | 5.73E-12 | 0.501644 | 3.93E-31 |
| 1.81E-28 | 0.51439  | 6.63E-33 | 0.460839 | 6.25E-26 | 0.468218 | 8.06E-27 | 0.482759 | 1.23E-28 |
| 3.52E-13 | 0.365055 | 3.62E-16 | 0.314555 | 3.48E-12 | 0.358805 | 1.23E-15 | 0.32769  | 3.76E-13 |
| 8.46E-20 | 0.530234 | 3.23E-35 | 0.451983 | 6.84E-25 | 0.460942 | 6.07E-26 | 0.433527 | 8.05E-23 |
| 2.18E-17 | 0.142826 | 0.00197  | 0.1622   | 0.00043  | 0.13764  | 0.00288  | 0.181596 | 7.92E-05 |
| 6.17E-25 | 0.523261 | 3.48E-34 | 0.581554 | 1.32E-43 | 0.501272 | 4.42E-31 | 0.581424 | 1.39E-43 |
| 5.77E-53 | 0.559892 | 6.92E-40 | 0.540629 | 8.43E-37 | 0.53667  | 3.43E-36 | 0.63901  | 5.87E-55 |
| 1.74E-14 | 0.361009 | 8.03E-16 | 0.248844 | 5.06E-08 | 0.245424 | 7.79E-08 | 0.230563 | 4.72E-07 |
| 8.78E-68 | 0.608009 | 1.52E-48 | 0.463484 | 3.01E-26 | 0.493402 | 5.04E-30 | 0.639255 | 5.19E-55 |
| 2.29E-15 | 0.443302 | 6.68E-24 | 0.338529 | 5.51E-14 | 0.426719 | 4.34E-22 | 0.364506 | 4.03E-16 |
| 2.21E-16 | 0.481077 | 2.01E-28 | 0.560327 | 5.86E-40 | 0.464173 | 2.49E-26 | 0.644496 | 3.60E-56 |
| 9.55E-28 | 0.412219 | 1.39E-20 | 0.502165 | 3.34E-31 | 0.45697  | 1.79E-25 | 0.419962 | 2.23E-21 |
| 3.14E-47 | 0.39534  | 6.39E-19 | 0.450062 | 1.14E-24 | 0.44301  | 7.20E-24 | 0.543278 | 3.26E-37 |
| 7.71E-22 | -0.28985 | 1.72E-10 | -0.16152 | 0.00046  | -0.1547  | 0.0008   | -0.31062 | 6.64E-12 |
| 1.59E-13 | -0.38805 | 3.12E-18 | -0.06847 | 0.13957  | -0.16462 | 0.00035  | -0.24013 | 1.50E-07 |
| 3.89E-15 | 0.466042 | 1.48E-26 | 0.516807 | 3.00E-33 | 0.522705 | 4.20E-34 | 0.529411 | 4.29E-35 |
| 3.78E-11 | 0.507933 | 5.36E-32 | 0.468022 | 8.51E-27 | 0.460604 | 6.66E-26 | 0.408377 | 3.39E-20 |
| 2.10E-27 | -0.46368 | 2.85E-26 | -0.16489 | 0.00035  | -0.26997 | 3.05E-09 | -0.42826 | 2.98E-22 |
| 2.31E-39 | 0.62783  | 1.46E-52 | 0.49902  | 8.93E-31 | 0.412489 | 1.31E-20 | 0.486695 | 3.82E-29 |
| 8.30E-34 | 0.734759 | 2.09E-80 | 0.667274 | 1.75E-61 | 0.637462 | 1.28E-54 | 0.671533 | 1.58E-62 |
| 5.72E-37 | -0.40006 | 2.24E-19 | -0.20135 | 1.16E-05 | -0.12458 | 0.00703  | -0.39438 | 7.90E-19 |
| 3.86E-06 | 0.35727  | 1.66E-15 | 0.20332  | 9.50E-06 | 0.401599 | 1.59E-19 | 0.401995 | 1.45E-19 |
| 4.58E-07 | 0.41723  | 4.28E-21 | 0.340343 | 3.97E-14 | 0.448282 | 1.82E-24 | 0.390451 | 1.86E-18 |
| 4.71E-11 | 0.320835 | 1.22E-12 | 0.318553 | 1.79E-12 | 0.319878 | 1.43E-12 | 0.37626  | 3.74E-17 |
| 6.17E-58 | 0.640249 | 3.14E-55 | 0.590295 | 3.45E-45 | 0.566273 | 5.92E-41 | 0.682914 | 2.07E-65 |
| 1.36E-24 | -0.21405 | 3.05E-06 | -0.28765 | 2.39E-10 | -0.30729 | 1.14E-11 | -0.35818 | 1.39E-15 |
| 6.33E-37 | -0.44077 | 1.28E-23 | -0.35265 | 4.03E-15 | -0.33211 | 1.73E-13 | -0.59235 | 1.44E-45 |
| 1.43E-25 | 0.434099 | 6.97E-23 | 0.345597 | 1.51E-14 | 0.367997 | 2.01E-16 | 0.377855 | 2.69E-17 |
| 6.90E-16 | 0.609917 | 6.41E-49 | 0.441721 | 1.00E-23 | 0.486174 | 4.46E-29 | 0.532408 | 1.52E-35 |
| 4.60E-58 | 0.594881 | 4.89E-46 | 0.468631 | 7.17E-27 | 0.402926 | 1.18E-19 | 0.595545 | 3.67E-46 |
| 0.0005   | 0.334934 | 1.05E-13 | 0.331158 | 2.05E-13 | 0.456809 | 1.87E-25 | 0.304491 | 1.78E-11 |
| 1.06E-57 | 0.599498 | 6.61E-47 | 0.507487 | 6.18E-32 | 0.481931 | 1.57E-28 | 0.673848 | 4.19E-63 |
| 2.50E-18 | 0.421051 | 1.72E-21 | 0.430677 | 1.64E-22 | 0.462246 | 4.24E-26 | 0.540888 | 7.68E-37 |
| 3.81E-44 | 0.68758  | 1.25E-66 | 0.59272  | 1.23E-45 | 0.578164 | 5.25E-43 | 0.645194 | 2.51E-56 |
| 2.01E-39 | 0.54296  | 3.65E-37 | 0.454941 | 3.10E-25 | 0.468692 | 7.05E-27 | 0.495833 | 2.39E-30 |
| 3.46E-27 | -0.23516 | 2.74E-07 | -0.32629 | 4.79E-13 | -0.31594 | 2.77E-12 | -0.39152 | 1.47E-18 |
| 1.63E-51 | 0.68438  | 8.60E-66 | 0.570214 | 1.26E-41 | 0.547765 | 6.39E-38 | 0.699151 | 9.28E-70 |
| 7.77E-20 | -0.39755 | 3.92E-19 | -0.41905 | 2.77E-21 | -0.40751 | 4.14E-20 | -0.43998 | 1.57E-23 |
| 2.00E-10 | -0.34393 | 2.06E-14 | -0.19192 | 2.98E-05 | -0.13214 | 0.00423  | -0.19645 | 1.91E-05 |
| 1.53E-67 | 0.728402 | 2.21E-78 | 0.559073 | 9.44E-40 | 0.519401 | 1.27E-33 | 0.653871 | 2.67E-58 |
| 4.42E-05 | -0.35409 | 3.06E-15 | -0.22834 | 6.12E-07 | -0.29482 | 8.09E-11 | -0.22512 | 8.87E-07 |

|          |          |          |          |          |          |          |          |          |
|----------|----------|----------|----------|----------|----------|----------|----------|----------|
| 1.41E-14 | 0.37221  | 8.59E-17 | 0.385022 | 5.97E-18 | 0.375762 | 4.15E-17 | 0.403199 | 1.10E-19 |
| 2.22E-06 | 0.442463 | 8.30E-24 | 0.471292 | 3.38E-27 | 0.517436 | 2.43E-33 | 0.394763 | 7.26E-19 |
| 4.25E-10 | -0.32223 | 9.60E-13 | -0.28201 | 5.49E-10 | -0.33746 | 6.68E-14 | -0.31781 | 2.03E-12 |
| 2.66E-18 | 0.471568 | 3.13E-27 | 0.471212 | 3.46E-27 | 0.55412  | 6.10E-39 | 0.478873 | 3.83E-28 |
| 3.79E-29 | 0.525873 | 1.44E-34 | 0.551862 | 1.41E-38 | 0.53991  | 1.09E-36 | 0.593481 | 8.91E-46 |
| 1.75E-37 | -0.13549 | 0.00335  | -0.21032 | 4.56E-06 | -0.16075 | 0.00049  | -0.46153 | 5.17E-26 |
| 3.71E-13 | 0.59802  | 1.26E-46 | 0.418171 | 3.42E-21 | 0.485941 | 4.78E-29 | 0.476351 | 7.95E-28 |
| 9.99E-21 | 0.408435 | 3.34E-20 | 0.387997 | 3.16E-18 | 0.425752 | 5.50E-22 | 0.588762 | 6.59E-45 |
| 1.16E-21 | 0.54154  | 6.08E-37 | 0.474253 | 1.45E-27 | 0.484325 | 7.72E-29 | 0.520416 | 9.05E-34 |
| 1.46E-20 | 0.376664 | 3.44E-17 | 0.449671 | 1.26E-24 | 0.388117 | 3.08E-18 | 0.440592 | 1.34E-23 |
| 1.47E-48 | 0.534449 | 7.48E-36 | 0.498747 | 9.72E-31 | 0.460554 | 6.75E-26 | 0.514316 | 6.79E-33 |
| 1.15E-32 | 0.461732 | 4.89E-26 | 0.497037 | 1.65E-30 | 0.498161 | 1.17E-30 | 0.539201 | 1.40E-36 |
| 1.58E-23 | 0.400693 | 1.94E-19 | 0.375632 | 4.26E-17 | 0.437415 | 3.02E-23 | 0.406758 | 4.91E-20 |
| 5.54E-35 | -0.48574 | 5.07E-29 | -0.28398 | 4.12E-10 | -0.25345 | 2.80E-08 | -0.54795 | 5.98E-38 |
| 8.86E-29 | 0.444785 | 4.55E-24 | 0.443565 | 6.24E-24 | 0.372747 | 7.69E-17 | 0.41867  | 3.04E-21 |
| 1.28E-24 | 0.474133 | 1.50E-27 | 0.561137 | 4.30E-40 | 0.464855 | 2.06E-26 | 0.482504 | 1.32E-28 |
| 1.00E-12 | -0.36376 | 4.67E-16 | -0.34788 | 9.90E-15 | -0.45202 | 6.76E-25 | -0.35469 | 2.73E-15 |
| 7.27E-40 | 0.504107 | 1.81E-31 | 0.484389 | 7.58E-29 | 0.423403 | 9.74E-22 | 0.509408 | 3.34E-32 |
| 4.75E-20 | 0.432491 | 1.04E-22 | 0.425525 | 5.82E-22 | 0.385869 | 4.98E-18 | 0.394155 | 8.29E-19 |
| 0.16814  | 0.367179 | 2.37E-16 | 0.391035 | 1.64E-18 | 0.502832 | 2.71E-31 | 0.209721 | 4.86E-06 |
| 1.10E-09 | 0.341821 | 3.03E-14 | 0.385281 | 5.65E-18 | 0.403483 | 1.04E-19 | 0.354334 | 2.92E-15 |
| 3.56E-08 | 0.260222 | 1.15E-08 | 0.230279 | 4.88E-07 | 0.30921  | 8.36E-12 | 0.236243 | 2.41E-07 |
| 8.95E-37 | 0.667616 | 1.45E-61 | 0.519177 | 1.37E-33 | 0.478723 | 4.00E-28 | 0.614962 | 6.38E-50 |
| 1.87E-06 | 0.272511 | 2.14E-09 | 0.236983 | 2.20E-07 | 0.350797 | 5.72E-15 | 0.318163 | 1.91E-12 |
| 3.13E-36 | -0.37153 | 9.85E-17 | -0.34766 | 1.03E-14 | -0.29387 | 9.35E-11 | -0.48764 | 2.88E-29 |
| 2.31E-61 | 0.616229 | 3.55E-50 | 0.52623  | 1.27E-34 | 0.439083 | 1.97E-23 | 0.709724 | 9.44E-73 |
| 1.83E-46 | 0.597477 | 1.59E-46 | 0.597756 | 1.41E-46 | 0.54211  | 4.96E-37 | 0.634815 | 4.78E-54 |
| 9.30E-33 | 0.448679 | 1.64E-24 | 0.3937   | 9.16E-19 | 0.373946 | 6.02E-17 | 0.457104 | 1.73E-25 |
| 2.74E-24 | 0.50269  | 2.83E-31 | 0.392359 | 1.23E-18 | 0.452665 | 5.70E-25 | 0.472138 | 2.66E-27 |
| 8.80E-52 | 0.537255 | 2.79E-36 | 0.471485 | 3.20E-27 | 0.426765 | 4.30E-22 | 0.594187 | 6.58E-46 |
| 7.61E-11 | 0.30195  | 2.67E-11 | 0.267742 | 4.15E-09 | 0.312672 | 4.75E-12 | 0.449799 | 1.22E-24 |
| 3.55E-35 | 0.69881  | 1.15E-69 | 0.406098 | 5.72E-20 | 0.491044 | 1.03E-29 | 0.446806 | 2.68E-24 |
| 1.53E-09 | 0.289247 | 1.88E-10 | 0.29715  | 5.65E-11 | 0.302103 | 2.60E-11 | 0.189065 | 3.92E-05 |
| 5.92E-14 | 0.22495  | 9.05E-07 | 0.208077 | 5.78E-06 | 0.209466 | 4.99E-06 | 0.287976 | 2.28E-10 |
| 9.01E-09 | 0.309193 | 8.38E-12 | 0.354242 | 2.97E-15 | 0.384273 | 7.00E-18 | 0.233401 | 3.38E-07 |
| 1.91E-24 | 0.520839 | 7.85E-34 | 0.487132 | 3.35E-29 | 0.383848 | 7.66E-18 | 0.473538 | 1.78E-27 |
| 1.23E-43 | 0.683197 | 1.75E-65 | 0.646065 | 1.60E-56 | 0.576631 | 9.77E-43 | 0.63958  | 4.41E-55 |
| 1.80E-25 | -0.24837 | 5.38E-08 | -0.25999 | 1.19E-08 | -0.21231 | 3.68E-06 | -0.34154 | 3.19E-14 |
| 1.87E-25 | -0.28721 | 2.55E-10 | -0.12344 | 0.00757  | -0.2032  | 9.61E-06 | -0.30676 | 1.24E-11 |
| 1.34E-26 | 0.788394 | #####    | 0.626751 | 2.46E-52 | 0.660139 | 9.08E-60 | 0.65353  | 3.20E-58 |
| 1.70E-24 | 0.745553 | 5.56E-84 | 0.576305 | 1.11E-42 | 0.567342 | 3.90E-41 | 0.47788  | 5.11E-28 |
| 8.39E-42 | 0.71386  | 5.85E-74 | 0.517098 | 2.72E-33 | 0.546911 | 8.73E-38 | 0.643167 | 7.12E-56 |
| 9.70E-40 | -0.36204 | 6.55E-16 | -0.24468 | 8.55E-08 | -0.0555  | 0.23129  | -0.49346 | 4.96E-30 |
| 1.92E-33 | 0.457222 | 1.67E-25 | 0.478432 | 4.35E-28 | 0.427287 | 3.78E-22 | 0.50004  | 6.49E-31 |
| 4.71E-20 | 0.550867 | 2.04E-38 | 0.480497 | 2.38E-28 | 0.466493 | 1.31E-26 | 0.580051 | 2.44E-43 |

|          |          |          |          |          |          |          |          |          |
|----------|----------|----------|----------|----------|----------|----------|----------|----------|
| 0.00054  | 0.417527 | 3.99E-21 | 0.347549 | 1.05E-14 | 0.512966 | 1.05E-32 | 0.286107 | 3.01E-10 |
| 1.54E-28 | 0.538471 | 1.82E-36 | 0.590028 | 3.87E-45 | 0.542411 | 4.45E-37 | 0.507926 | 5.37E-32 |
| 6.59E-18 | 0.392797 | 1.12E-18 | 0.369626 | 1.45E-16 | 0.274794 | 1.55E-09 | 0.276132 | 1.28E-09 |
| 2.68E-41 | 0.44986  | 1.20E-24 | 0.47429  | 1.44E-27 | 0.343684 | 2.15E-14 | 0.555081 | 4.26E-39 |
| 1.74E-48 | 0.508505 | 4.46E-32 | 0.566424 | 5.58E-41 | 0.430756 | 1.61E-22 | 0.578442 | 4.69E-43 |
| 7.80E-46 | 0.696759 | 4.23E-69 | 0.5962   | 2.77E-46 | 0.537191 | 2.86E-36 | 0.629007 | 8.27E-53 |
| 3.40E-34 | 0.5306   | 2.85E-35 | 0.544908 | 1.81E-37 | 0.469726 | 5.27E-27 | 0.597379 | 1.66E-46 |
| 1.56E-37 | 0.46046  | 6.93E-26 | 0.517205 | 2.63E-33 | 0.437048 | 3.31E-23 | 0.54898  | 4.10E-38 |
| 1.07E-31 | -0.29865 | 4.47E-11 | -0.32336 | 7.93E-13 | -0.31442 | 3.56E-12 | -0.41319 | 1.11E-20 |
| 1.26E-08 | -0.44053 | 1.36E-23 | -0.31788 | 2.00E-12 | -0.39925 | 2.68E-19 | -0.32418 | 6.88E-13 |
| 5.37E-16 | 0.316464 | 2.54E-12 | 0.368321 | 1.88E-16 | 0.283725 | 4.27E-10 | 0.271202 | 2.57E-09 |
| 0.00217  | 0.297452 | 5.39E-11 | 0.22832  | 6.14E-07 | 0.330536 | 2.29E-13 | 0.336689 | 7.67E-14 |
| 4.46E-17 | -0.64546 | 2.19E-56 | -0.4864  | 4.17E-29 | -0.51244 | 1.25E-32 | -0.51023 | 2.56E-32 |
| 9.07E-11 | 0.421912 | 1.40E-21 | 0.286291 | 2.93E-10 | 0.387888 | 3.23E-18 | 0.330544 | 2.28E-13 |
| 3.10E-19 | 0.243495 | 9.91E-08 | 0.261374 | 9.86E-09 | 0.226373 | 7.69E-07 | 0.419109 | 2.74E-21 |
| 5.50E-25 | 0.537236 | 2.81E-36 | 0.570739 | 1.03E-41 | 0.563557 | 1.70E-40 | 0.574157 | 2.64E-42 |
| 3.67E-17 | 0.567603 | 3.53E-41 | 0.577802 | 6.08E-43 | 0.621751 | 2.68E-51 | 0.530034 | 3.47E-35 |
| 1.81E-21 | 0.671038 | 2.09E-62 | 0.502525 | 2.98E-31 | 0.613298 | 1.37E-49 | 0.534708 | 6.84E-36 |
| 1.47E-22 | 0.635316 | 3.73E-54 | 0.557001 | 2.07E-39 | 0.628735 | 9.44E-53 | 0.623358 | 1.25E-51 |
| 2.65E-37 | 0.611438 | 3.21E-49 | 0.391819 | 1.38E-18 | 0.33126  | 2.01E-13 | 0.526227 | 1.28E-34 |
| 3.43E-27 | 0.596203 | 2.77E-46 | 0.583961 | 4.89E-44 | 0.578266 | 5.04E-43 | 0.576895 | 8.78E-43 |
| 1.30E-54 | 0.625659 | 4.16E-52 | 0.63105  | 3.06E-53 | 0.603803 | 9.94E-48 | 0.701613 | 1.92E-70 |
| 8.41E-15 | 0.563892 | 1.49E-40 | 0.40534  | 6.80E-20 | 0.498471 | 1.06E-30 | 0.448766 | 1.60E-24 |
| 5.96E-35 | 0.490923 | 1.07E-29 | 0.484898 | 6.52E-29 | 0.498156 | 1.17E-30 | 0.573998 | 2.81E-42 |
| 1.57E-28 | 0.277072 | 1.12E-09 | 0.278253 | 9.46E-10 | 0.211699 | 3.93E-06 | 0.507074 | 7.05E-32 |
| 1.01E-06 | 0.329591 | 2.70E-13 | 0.26231  | 8.69E-09 | 0.347979 | 9.71E-15 | 0.24273  | 1.09E-07 |
| 7.11E-56 | 0.54027  | 9.58E-37 | 0.406305 | 5.45E-20 | 0.409746 | 2.47E-20 | 0.530815 | 2.65E-35 |
| 1.43E-57 | 0.468448 | 7.55E-27 | 0.482912 | 1.17E-28 | 0.447495 | 2.24E-24 | 0.610181 | 5.69E-49 |
| 7.34E-21 | 0.240535 | 1.43E-07 | 0.313308 | 4.28E-12 | 0.248003 | 5.63E-08 | 0.26355  | 7.35E-09 |
| 2.50E-56 | 0.484444 | 7.46E-29 | 0.473068 | 2.04E-27 | 0.489264 | 1.77E-29 | 0.581262 | 1.49E-43 |
| 3.11E-59 | 0.320648 | 1.26E-12 | 0.3924   | 1.22E-18 | 0.28338  | 4.50E-10 | 0.528885 | 5.15E-35 |
| 6.11E-22 | 0.628354 | 1.14E-52 | 0.553443 | 7.86E-39 | 0.528315 | 6.26E-35 | 0.577811 | 6.06E-43 |
| 0.0139   | 0.294304 | 8.75E-11 | 0.350221 | 6.37E-15 | 0.372307 | 8.42E-17 | 0.158946 | 0.00057  |
| 2.27E-17 | 0.456135 | 2.25E-25 | 0.385895 | 4.96E-18 | 0.361673 | 7.05E-16 | 0.439068 | 1.98E-23 |
| 2.52E-21 | 0.374904 | 4.95E-17 | 0.333542 | 1.35E-13 | 0.270414 | 2.87E-09 | 0.347554 | 1.05E-14 |
| 3.99E-07 | -0.40147 | 1.63E-19 | -0.13937 | 0.00254  | -0.23752 | 2.06E-07 | 0.060316 | 0.19322  |
| 1.79E-22 | 0.48015  | 2.64E-28 | 0.416988 | 4.53E-21 | 0.426964 | 4.09E-22 | 0.454732 | 3.28E-25 |
| 1.09E-08 | -0.29962 | 3.84E-11 | -0.22722 | 6.97E-07 | -0.30336 | 2.13E-11 | -0.30868 | 9.11E-12 |
| 6.18E-11 | 0.546023 | 1.21E-37 | 0.434379 | 6.50E-23 | 0.497316 | 1.51E-30 | 0.331874 | 1.81E-13 |
| 5.47E-08 | -0.51588 | 4.07E-33 | -0.43591 | 4.42E-23 | -0.49793 | 1.25E-30 | -0.38513 | 5.83E-18 |
| 4.70E-36 | 0.477022 | 6.55E-28 | 0.52632  | 1.24E-34 | 0.485111 | 6.12E-29 | 0.610904 | 4.10E-49 |
| 5.05E-30 | 0.498829 | 9.47E-31 | 0.48725  | 3.23E-29 | 0.510392 | 2.43E-32 | 0.567917 | 3.12E-41 |
| 3.25E-08 | 0.190884 | 3.29E-05 | 0.32959  | 2.70E-13 | 0.284859 | 3.62E-10 | 0.265284 | 5.81E-09 |
| 1.13E-18 | 0.390842 | 1.71E-18 | 0.360054 | 9.68E-16 | 0.357131 | 1.71E-15 | 0.308923 | 8.75E-12 |
| 0.00044  | 0.372605 | 7.92E-17 | 0.341911 | 2.98E-14 | 0.317637 | 2.09E-12 | 0.303041 | 2.24E-11 |

|          |          |          |          |          |          |          |          |          |
|----------|----------|----------|----------|----------|----------|----------|----------|----------|
| 1.06E-61 | 0.515866 | 4.08E-33 | 0.411505 | 1.64E-20 | 0.418914 | 2.87E-21 | 0.582012 | 1.09E-43 |
| 1.63E-30 | 0.691695 | 1.00E-67 | 0.637582 | 1.20E-54 | 0.598028 | 1.25E-46 | 0.661302 | 4.81E-60 |
| 9.25E-38 | -0.47858 | 4.17E-28 | -0.3633  | 5.12E-16 | -0.40122 | 1.73E-19 | -0.54185 | 5.45E-37 |
| 1.85E-09 | 0.515225 | 5.04E-33 | 0.524374 | 2.39E-34 | 0.541594 | 5.97E-37 | 0.374714 | 5.15E-17 |
| 6.13E-09 | 0.432633 | 1.01E-22 | 0.49981  | 6.98E-31 | 0.544077 | 2.44E-37 | 0.489284 | 1.76E-29 |
| 3.54E-50 | -0.43878 | 2.13E-23 | -0.31507 | 3.20E-12 | -0.23512 | 2.75E-07 | -0.52037 | 9.20E-34 |
| 4.42E-28 | 0.352152 | 4.42E-15 | 0.393465 | 9.65E-19 | 0.391778 | 1.39E-18 | 0.499285 | 8.22E-31 |
| 6.99E-12 | -0.42357 | 9.36E-22 | -0.31331 | 4.28E-12 | -0.37947 | 1.92E-17 | -0.33976 | 4.41E-14 |
| 1.31E-30 | 0.374994 | 4.86E-17 | 0.333609 | 1.33E-13 | 0.218702 | 1.83E-06 | 0.413725 | 9.78E-21 |
| 2.35E-05 | 0.41211  | 1.43E-20 | 0.516514 | 3.30E-33 | 0.561906 | 3.20E-40 | 0.356803 | 1.82E-15 |
| 1.03E-24 | -0.35613 | 2.07E-15 | -0.34235 | 2.75E-14 | -0.35647 | 1.94E-15 | -0.42671 | 4.36E-22 |
| 3.80E-51 | 0.645342 | 2.33E-56 | 0.653559 | 3.15E-58 | 0.618509 | 1.23E-50 | 0.650183 | 1.87E-57 |
| 3.33E-41 | 0.560068 | 6.47E-40 | 0.538139 | 2.04E-36 | 0.441607 | 1.03E-23 | 0.574191 | 2.60E-42 |
| 8.52E-25 | 0.579517 | 3.03E-43 | 0.572734 | 4.65E-42 | 0.546074 | 1.18E-37 | 0.571494 | 7.62E-42 |
| 1.00E-79 | 0.453755 | 4.26E-25 | 0.482009 | 1.53E-28 | 0.3171   | 2.28E-12 | 0.568262 | 2.72E-41 |
| 2.84E-28 | 0.262791 | 8.15E-09 | 0.226192 | 7.85E-07 | 0.3008   | 3.20E-11 | 0.378429 | 2.39E-17 |
| 9.04E-18 | 0.528971 | 5.00E-35 | 0.561601 | 3.60E-40 | 0.495405 | 2.73E-30 | 0.490378 | 1.26E-29 |
| 7.61E-47 | 0.750498 | 1.11E-85 | 0.535248 | 5.66E-36 | 0.569967 | 1.39E-41 | 0.622229 | 2.13E-51 |
| 2.66E-07 | 0.570946 | 9.46E-42 | 0.370675 | 1.17E-16 | 0.500881 | 4.99E-31 | 0.396219 | 5.26E-19 |
| 4.65E-42 | 0.529629 | 3.98E-35 | 0.503457 | 2.22E-31 | 0.458653 | 1.14E-25 | 0.616311 | 3.42E-50 |
| 3.76E-21 | 0.58761  | 1.07E-44 | 0.583699 | 5.45E-44 | 0.558704 | 1.09E-39 | 0.585847 | 2.23E-44 |
| 6.71E-14 | 0.653557 | 3.15E-58 | 0.571104 | 8.89E-42 | 0.626977 | 2.21E-52 | 0.529362 | 4.37E-35 |
| 4.82E-73 | 0.665644 | 4.37E-61 | 0.528312 | 6.26E-35 | 0.48441  | 7.53E-29 | 0.661538 | 4.23E-60 |
| 6.10E-11 | 0.456938 | 1.81E-25 | 0.413369 | 1.06E-20 | 0.468242 | 8.00E-27 | 0.439018 | 2.01E-23 |
| 4.39E-30 | 0.535807 | 4.65E-36 | 0.445638 | 3.64E-24 | 0.505233 | 1.27E-31 | 0.53846  | 1.82E-36 |
| 1.20E-43 | -0.34689 | 1.19E-14 | -0.24486 | 8.36E-08 | -0.22056 | 1.49E-06 | -0.56435 | 1.25E-40 |
| 3.69E-16 | 0.340697 | 3.72E-14 | 0.332161 | 1.72E-13 | 0.376156 | 3.82E-17 | 0.470417 | 4.33E-27 |
| 4.51E-58 | 0.509237 | 3.53E-32 | 0.515296 | 4.92E-33 | 0.420137 | 2.14E-21 | 0.597679 | 1.46E-46 |
| 2.81E-54 | 0.647938 | 6.06E-57 | 0.595166 | 4.32E-46 | 0.553524 | 7.62E-39 | 0.703897 | 4.37E-71 |
| 1.19E-37 | 0.678424 | 2.94E-64 | 0.635386 | 3.60E-54 | 0.634668 | 5.14E-54 | 0.700322 | 4.39E-70 |
| 2.92E-18 | 0.662497 | 2.49E-60 | 0.625192 | 5.21E-52 | 0.619247 | 8.70E-51 | 0.5527   | 1.04E-38 |
| 2.54E-95 | 0.550478 | 2.36E-38 | 0.503784 | 2.01E-31 | 0.445663 | 3.62E-24 | 0.592056 | 1.64E-45 |
| 1.40E-19 | 0.370008 | 1.34E-16 | 0.396337 | 5.13E-19 | 0.428991 | 2.49E-22 | 0.496284 | 2.08E-30 |
| 7.34E-15 | -0.43025 | 1.82E-22 | -0.47293 | 2.12E-27 | -0.51374 | 8.21E-33 | -0.45934 | 9.42E-26 |
| 7.80E-67 | 0.520026 | 1.03E-33 | 0.503752 | 2.03E-31 | 0.416125 | 5.56E-21 | 0.58281  | 7.86E-44 |
| 4.05E-05 | 0.192682 | 2.76E-05 | 0.211778 | 3.90E-06 | 0.195156 | 2.17E-05 | 0.313411 | 4.21E-12 |
| 0.00015  | -0.33912 | 4.96E-14 | -0.38469 | 6.41E-18 | -0.40618 | 5.61E-20 | -0.30878 | 8.96E-12 |
| 4.60E-21 | 0.328907 | 3.04E-13 | 0.403054 | 1.14E-19 | 0.373383 | 6.76E-17 | 0.444869 | 4.45E-24 |
| 5.92E-75 | 0.380557 | 1.53E-17 | 0.358684 | 1.26E-15 | 0.296348 | 6.39E-11 | 0.631446 | 2.52E-53 |
| 1.04E-31 | 0.390574 | 1.81E-18 | 0.340752 | 3.68E-14 | 0.315422 | 3.02E-12 | 0.445265 | 4.01E-24 |
| 5.96E-32 | 0.519329 | 1.30E-33 | 0.451957 | 6.89E-25 | 0.392379 | 1.22E-18 | 0.527048 | 9.65E-35 |
| 5.90E-89 | 0.570303 | 1.22E-41 | 0.465618 | 1.67E-26 | 0.386367 | 4.48E-18 | 0.640508 | 2.76E-55 |
| 1.80E-55 | 0.457602 | 1.51E-25 | 0.487167 | 3.31E-29 | 0.436328 | 3.98E-23 | 0.631174 | 2.88E-53 |
| 2.45E-18 | 0.216663 | 2.29E-06 | 0.235304 | 2.69E-07 | 0.156257 | 0.0007   | 0.352886 | 3.85E-15 |
| 1.95E-31 | 0.439283 | 1.88E-23 | 0.385192 | 5.76E-18 | 0.331501 | 1.93E-13 | 0.400401 | 2.08E-19 |

|          |          |          |          |          |          |          |          |          |
|----------|----------|----------|----------|----------|----------|----------|----------|----------|
| 9.45E-13 | 0.292501 | 1.15E-10 | 0.360587 | 8.72E-16 | 0.370551 | 1.20E-16 | 0.391735 | 1.41E-18 |
| 5.14E-29 | 0.386875 | 4.02E-18 | 0.372047 | 8.87E-17 | 0.375734 | 4.17E-17 | 0.456457 | 2.06E-25 |
| 3.15E-16 | 0.303065 | 2.24E-11 | 0.360123 | 9.55E-16 | 0.351117 | 5.38E-15 | 0.436314 | 3.99E-23 |
| 4.42E-52 | 0.48523  | 5.90E-29 | 0.519663 | 1.16E-33 | 0.439463 | 1.79E-23 | 0.579924 | 2.57E-43 |
| 4.25E-48 | 0.45133  | 8.14E-25 | 0.373861 | 6.13E-17 | 0.30182  | 2.72E-11 | 0.510747 | 2.17E-32 |
| 1.63E-30 | 0.329576 | 2.71E-13 | 0.440296 | 1.45E-23 | 0.429888 | 1.99E-22 | 0.476    | 8.80E-28 |
| 7.17E-27 | 0.22264  | 1.18E-06 | 0.253181 | 2.90E-08 | 0.260336 | 1.13E-08 | 0.434575 | 6.18E-23 |
| 3.80E-07 | -0.38596 | 4.89E-18 | -0.19857 | 1.54E-05 | -0.10358 | 0.02519  | -0.2841  | 4.05E-10 |
| 1.30E-10 | 0.269805 | 3.12E-09 | 0.328256 | 3.41E-13 | 0.330271 | 2.40E-13 | 0.455822 | 2.44E-25 |
| 4.30E-44 | 0.400608 | 1.98E-19 | 0.388674 | 2.73E-18 | 0.292901 | 1.08E-10 | 0.403993 | 9.23E-20 |
| 9.73E-39 | 0.412334 | 1.35E-20 | 0.455453 | 2.70E-25 | 0.355281 | 2.44E-15 | 0.539911 | 1.09E-36 |
| 1.87E-36 | 0.335399 | 9.67E-14 | 0.272211 | 2.23E-09 | 0.193665 | 2.51E-05 | 0.493451 | 4.96E-30 |
| 8.96E-30 | 0.558689 | 1.09E-39 | 0.427539 | 3.55E-22 | 0.421978 | 1.37E-21 | 0.378594 | 2.31E-17 |
| 5.93E-11 | 0.41295  | 1.17E-20 | 0.41346  | 1.04E-20 | 0.28238  | 5.20E-10 | 0.296154 | 6.58E-11 |
| 9.80E-39 | 0.434457 | 6.37E-23 | 0.495724 | 2.47E-30 | 0.429536 | 2.17E-22 | 0.595029 | 4.59E-46 |
| 9.46E-38 | 0.757902 | 2.67E-88 | 0.618408 | 1.29E-50 | 0.568243 | 2.74E-41 | 0.652595 | 5.25E-58 |
| 1.26E-24 | 0.385089 | 5.88E-18 | 0.447812 | 2.06E-24 | 0.362571 | 5.91E-16 | 0.706948 | 5.94E-72 |
| 0.02596  | 0.494197 | 3.95E-30 | 0.322641 | 8.96E-13 | 0.375559 | 4.33E-17 | 0.391605 | 1.45E-18 |
| 2.69E-40 | 0.285005 | 3.54E-10 | 0.228744 | 5.84E-07 | 0.245044 | 8.17E-08 | 0.465729 | 1.62E-26 |
| 4.52E-59 | 0.305326 | 1.56E-11 | 0.285187 | 3.45E-10 | 0.259133 | 1.33E-08 | 0.425466 | 5.90E-22 |
| 3.74E-20 | 0.300392 | 3.41E-11 | 0.249749 | 4.51E-08 | 0.287528 | 2.43E-10 | 0.352522 | 4.12E-15 |
| 3.38E-13 | 0.352601 | 4.06E-15 | 0.370488 | 1.22E-16 | 0.409353 | 2.71E-20 | 0.353175 | 3.64E-15 |
| 6.80E-20 | -0.23071 | 4.64E-07 | -0.23136 | 4.30E-07 | -0.16407 | 0.00037  | -0.23375 | 3.24E-07 |
| 2.36E-18 | 0.300288 | 3.46E-11 | 0.358728 | 1.25E-15 | 0.362823 | 5.62E-16 | 0.366975 | 2.47E-16 |
| 9.58E-36 | 0.410197 | 2.23E-20 | 0.392375 | 1.22E-18 | 0.376603 | 3.49E-17 | 0.409073 | 2.89E-20 |
| 0.00068  | -0.34151 | 3.21E-14 | -0.36056 | 8.77E-16 | -0.37214 | 8.71E-17 | -0.23823 | 1.89E-07 |
| 5.76E-08 | -0.47337 | 1.87E-27 | -0.34524 | 1.62E-14 | -0.35278 | 3.93E-15 | -0.23002 | 5.04E-07 |
| 4.77E-20 | -0.31991 | 1.42E-12 | -0.14578 | 0.00158  | -0.01689 | 0.71578  | -0.25967 | 1.24E-08 |
| 1.19E-73 | 0.540952 | 7.51E-37 | 0.404848 | 7.60E-20 | 0.417937 | 3.62E-21 | 0.588898 | 6.23E-45 |
| 0.00043  | -0.23949 | 1.62E-07 | -0.31652 | 2.51E-12 | -0.39095 | 1.67E-18 | -0.35083 | 5.69E-15 |
| 0.38126  | 0.332216 | 1.70E-13 | 0.319857 | 1.44E-12 | 0.430304 | 1.80E-22 | 0.186008 | 5.25E-05 |
| 3.69E-18 | -0.36096 | 8.11E-16 | -0.3517  | 4.82E-15 | -0.36513 | 3.56E-16 | -0.34406 | 2.01E-14 |
| 2.04E-47 | 0.61005  | 6.04E-49 | 0.555483 | 3.66E-39 | 0.54803  | 5.80E-38 | 0.655634 | 1.04E-58 |
| 7.80E-17 | 0.58488  | 3.34E-44 | 0.313647 | 4.05E-12 | 0.441226 | 1.14E-23 | 0.5008   | 5.12E-31 |
| 3.13E-86 | 0.424343 | 7.75E-22 | 0.489575 | 1.61E-29 | 0.339608 | 4.53E-14 | 0.529355 | 4.38E-35 |
| 1.62E-97 | 0.57487  | 1.98E-42 | 0.454474 | 3.51E-25 | 0.384677 | 6.42E-18 | 0.615    | 6.27E-50 |
| 1.09E-21 | 0.259317 | 1.30E-08 | 0.278572 | 9.04E-10 | 0.274183 | 1.69E-09 | 0.384419 | 6.78E-18 |
| 3.59E-05 | 0.229298 | 5.48E-07 | 0.073712 | 0.11165  | 0.256787 | 1.81E-08 | 0.299939 | 3.66E-11 |
| 6.48E-37 | 0.564242 | 1.30E-40 | 0.453629 | 4.41E-25 | 0.464828 | 2.08E-26 | 0.701937 | 1.55E-70 |
| 2.27E-08 | -0.38068 | 1.49E-17 | -0.3163  | 2.61E-12 | -0.36836 | 1.87E-16 | -0.33756 | 6.56E-14 |
| 1.31E-12 | -0.49525 | 2.86E-30 | -0.35303 | 3.75E-15 | -0.4055  | 6.55E-20 | -0.38732 | 3.66E-18 |
| 2.35E-05 | 0.526272 | 1.26E-34 | 0.384436 | 6.76E-18 | 0.461858 | 4.72E-26 | 0.353901 | 3.17E-15 |
| 9.01E-20 | 0.498779 | 9.62E-31 | 0.242485 | 1.12E-07 | 0.304224 | 1.86E-11 | 0.343514 | 2.22E-14 |
| 1.29E-51 | 0.494368 | 3.75E-30 | 0.458877 | 1.07E-25 | 0.378366 | 2.42E-17 | 0.56096  | 4.60E-40 |
| 3.49E-41 | 0.50464  | 1.53E-31 | 0.482206 | 1.44E-28 | 0.480065 | 2.70E-28 | 0.494721 | 3.37E-30 |

|          |          |          |          |          |          |          |          |          |
|----------|----------|----------|----------|----------|----------|----------|----------|----------|
| 6.46E-06 | -0.45839 | 1.22E-25 | -0.27273 | 2.07E-09 | -0.38845 | 2.87E-18 | -0.36972 | 1.42E-16 |
| 2.37E-15 | -0.3008  | 3.19E-11 | -0.22027 | 1.54E-06 | -0.2805  | 6.84E-10 | -0.41629 | 5.35E-21 |
| 3.07E-14 | 0.426405 | 4.69E-22 | 0.309667 | 7.76E-12 | 0.43303  | 9.11E-23 | 0.354777 | 2.68E-15 |
| 2.92E-20 | -0.19418 | 2.39E-05 | -0.22656 | 7.52E-07 | -0.16281 | 0.00041  | -0.24934 | 4.75E-08 |
| 2.49E-18 | 0.419025 | 2.79E-21 | 0.398041 | 3.51E-19 | 0.450092 | 1.13E-24 | 0.401647 | 1.57E-19 |
| 6.75E-75 | 0.563487 | 1.74E-40 | 0.483474 | 9.93E-29 | 0.463894 | 2.69E-26 | 0.661975 | 3.32E-60 |
| 0.04276  | 0.364491 | 4.04E-16 | 0.357221 | 1.68E-15 | 0.385654 | 5.22E-18 | 0.315978 | 2.75E-12 |
| 2.63E-36 | 0.399979 | 2.28E-19 | 0.484555 | 7.21E-29 | 0.459964 | 7.94E-26 | 0.597809 | 1.38E-46 |
| 9.85E-16 | 0.462921 | 3.52E-26 | 0.276526 | 1.21E-09 | 0.436896 | 3.44E-23 | 0.443014 | 7.19E-24 |
| 9.88E-06 | 0.393922 | 8.73E-19 | 0.323133 | 8.24E-13 | 0.434487 | 6.32E-23 | 0.33485  | 1.07E-13 |
| 1.33E-46 | 0.408286 | 3.46E-20 | 0.341956 | 2.96E-14 | 0.199848 | 1.35E-05 | 0.49517  | 2.93E-30 |
| 3.90E-11 | 0.523542 | 3.17E-34 | 0.434644 | 6.08E-23 | 0.4994   | 7.93E-31 | 0.335235 | 9.96E-14 |
| 2.44E-08 | 0.582197 | 1.01E-43 | 0.457837 | 1.42E-25 | 0.581803 | 1.19E-43 | 0.418906 | 2.87E-21 |
| 6.38E-11 | 0.44089  | 1.24E-23 | 0.403112 | 1.13E-19 | 0.475516 | 1.01E-27 | 0.548129 | 5.60E-38 |
| 5.32E-44 | 0.606416 | 3.10E-48 | 0.458306 | 1.25E-25 | 0.396258 | 5.22E-19 | 0.581209 | 1.52E-43 |
| 1.92E-12 | 0.426116 | 5.03E-22 | 0.444951 | 4.35E-24 | 0.492992 | 5.71E-30 | 0.423536 | 9.43E-22 |
| 4.78E-36 | 0.510749 | 2.17E-32 | 0.43191  | 1.20E-22 | 0.423828 | 8.79E-22 | 0.565878 | 6.91E-41 |
| 5.16E-05 | 0.410166 | 2.24E-20 | 0.331048 | 2.09E-13 | 0.348237 | 9.25E-15 | 0.291045 | 1.44E-10 |
| 2.75E-21 | 0.42992  | 1.98E-22 | 0.350409 | 6.15E-15 | 0.334975 | 1.04E-13 | 0.409916 | 2.38E-20 |
| 4.05E-50 | 0.372092 | 8.79E-17 | 0.392847 | 1.10E-18 | 0.339916 | 4.29E-14 | 0.485894 | 4.85E-29 |
| 2.73E-38 | 0.367996 | 2.01E-16 | 0.401018 | 1.81E-19 | 0.376676 | 3.44E-17 | 0.483135 | 1.10E-28 |
| 1.06E-41 | 0.599764 | 5.89E-47 | 0.452329 | 6.24E-25 | 0.412944 | 1.17E-20 | 0.553482 | 7.74E-39 |
| 5.23E-41 | 0.512526 | 1.22E-32 | 0.536522 | 3.62E-36 | 0.530489 | 2.96E-35 | 0.606726 | 2.70E-48 |
| 1.84E-26 | 0.449227 | 1.42E-24 | 0.548655 | 4.62E-38 | 0.502237 | 3.26E-31 | 0.508685 | 4.21E-32 |
| 1.00E-56 | 0.564255 | 1.30E-40 | 0.591885 | 1.76E-45 | 0.531249 | 2.28E-35 | 0.639361 | 4.92E-55 |
| 1.19E-29 | 0.247229 | 6.21E-08 | 0.391826 | 1.38E-18 | 0.269106 | 3.44E-09 | 0.376946 | 3.25E-17 |
| 1.24E-67 | 0.716628 | 8.85E-75 | 0.643525 | 5.93E-56 | 0.542265 | 4.69E-37 | 0.696    | 6.83E-69 |
| 1.13E-61 | 0.618352 | 1.32E-50 | 0.532798 | 1.33E-35 | 0.524229 | 2.51E-34 | 0.631028 | 3.09E-53 |
| 3.41E-25 | 0.6422   | 1.17E-55 | 0.553443 | 7.86E-39 | 0.577244 | 7.62E-43 | 0.608982 | 9.79E-49 |
| 5.98E-28 | 0.630151 | 4.74E-53 | 0.531569 | 2.04E-35 | 0.553262 | 8.41E-39 | 0.58591  | 2.18E-44 |
| 2.26E-05 | 0.485565 | 5.35E-29 | 0.540645 | 8.38E-37 | 0.509254 | 3.51E-32 | 0.365563 | 3.27E-16 |
| 2.97E-51 | 0.566969 | 4.52E-41 | 0.503917 | 1.92E-31 | 0.467338 | 1.03E-26 | 0.592685 | 1.25E-45 |
| 2.26E-29 | 0.470852 | 3.83E-27 | 0.405488 | 6.57E-20 | 0.419024 | 2.79E-21 | 0.418519 | 3.15E-21 |
| 1.08E-13 | 0.352595 | 4.07E-15 | 0.410228 | 2.21E-20 | 0.420017 | 2.20E-21 | 0.361447 | 7.37E-16 |
| 8.81E-64 | 0.667804 | 1.30E-61 | 0.583367 | 6.25E-44 | 0.527428 | 8.47E-35 | 0.630465 | 4.07E-53 |
| 1.03E-30 | 0.621187 | 3.49E-51 | 0.487411 | 3.08E-29 | 0.487776 | 2.76E-29 | 0.516011 | 3.89E-33 |
| 3.63E-21 | -0.44461 | 4.76E-24 | -0.27237 | 2.18E-09 | -0.28087 | 6.49E-10 | -0.35029 | 6.29E-15 |
| 7.72E-24 | 0.294666 | 8.28E-11 | 0.229164 | 5.56E-07 | 0.212461 | 3.62E-06 | 0.372111 | 8.76E-17 |
| 9.81E-22 | 0.49149  | 9.01E-30 | 0.561314 | 4.02E-40 | 0.582648 | 8.40E-44 | 0.594508 | 5.74E-46 |
| 1.56E-59 | 0.42766  | 3.45E-22 | 0.49341  | 5.03E-30 | 0.382738 | 9.68E-18 | 0.550651 | 2.21E-38 |
| 1.91E-21 | 0.620368 | 5.14E-51 | 0.593322 | 9.53E-46 | 0.629888 | 5.39E-53 | 0.590205 | 3.59E-45 |
| 3.04E-41 | 0.540454 | 8.97E-37 | 0.545156 | 1.65E-37 | 0.513161 | 9.90E-33 | 0.634623 | 5.26E-54 |
| 0.00092  | 0.20619  | 7.05E-06 | 0.195534 | 2.09E-05 | 0.318452 | 1.82E-12 | 0.291599 | 1.32E-10 |
| 1.75E-14 | 0.43491  | 5.69E-23 | 0.401647 | 1.57E-19 | 0.338294 | 5.75E-14 | 0.261125 | 1.02E-08 |
| 1.57E-44 | 0.470887 | 3.79E-27 | 0.439886 | 1.61E-23 | 0.413398 | 1.06E-20 | 0.596624 | 2.31E-46 |

|          |          |          |          |          |          |          |          |          |
|----------|----------|----------|----------|----------|----------|----------|----------|----------|
| 1.66E-35 | 0.603087 | 1.37E-47 | 0.579226 | 3.41E-43 | 0.601122 | 3.25E-47 | 0.687081 | 1.69E-66 |
| 3.66E-24 | 0.566198 | 6.10E-41 | 0.637263 | 1.41E-54 | 0.574657 | 2.16E-42 | 0.605458 | 4.76E-48 |
| 2.96E-37 | 0.372905 | 7.45E-17 | 0.437342 | 3.08E-23 | 0.40722  | 4.42E-20 | 0.458875 | 1.07E-25 |
| 1.86E-31 | 0.375216 | 4.64E-17 | 0.260738 | 1.07E-08 | 0.238884 | 1.75E-07 | 0.379205 | 2.03E-17 |
| 5.65E-23 | 0.397638 | 3.84E-19 | 0.407285 | 4.36E-20 | 0.440233 | 1.47E-23 | 0.449312 | 1.39E-24 |
| 4.33E-24 | 0.384545 | 6.60E-18 | 0.403346 | 1.07E-19 | 0.409602 | 2.55E-20 | 0.392021 | 1.32E-18 |
| 3.69E-28 | 0.619506 | 7.70E-51 | 0.47991  | 2.83E-28 | 0.538599 | 1.74E-36 | 0.542229 | 4.75E-37 |
| 3.50E-49 | 0.589386 | 5.07E-45 | 0.546267 | 1.10E-37 | 0.48841  | 2.28E-29 | 0.560579 | 5.32E-40 |
| 2.92E-12 | 0.518939 | 1.48E-33 | 0.4891   | 1.86E-29 | 0.472169 | 2.64E-27 | 0.471385 | 3.29E-27 |
| 2.40E-28 | 0.481284 | 1.89E-28 | 0.470625 | 4.09E-27 | 0.509291 | 3.47E-32 | 0.536677 | 3.42E-36 |
| 1.19E-49 | 0.473079 | 2.03E-27 | 0.426187 | 4.95E-22 | 0.383787 | 7.76E-18 | 0.522927 | 3.90E-34 |
| 4.18E-08 | 0.351779 | 4.75E-15 | 0.300172 | 3.53E-11 | 0.316952 | 2.34E-12 | 0.334255 | 1.19E-13 |
| 1.20E-10 | 0.48746  | 3.04E-29 | 0.367021 | 2.45E-16 | 0.4534   | 4.69E-25 | 0.429851 | 2.01E-22 |
| 5.30E-21 | 0.262025 | 9.03E-09 | 0.313263 | 4.31E-12 | 0.210386 | 4.52E-06 | 0.25215  | 3.32E-08 |
| 2.79E-15 | 0.391539 | 1.47E-18 | 0.327212 | 4.08E-13 | 0.364283 | 4.22E-16 | 0.434783 | 5.87E-23 |
| 0.03598  | 0.547029 | 8.37E-38 | 0.349696 | 7.04E-15 | 0.391107 | 1.61E-18 | 0.349508 | 7.29E-15 |
| 2.28E-42 | 0.257304 | 1.69E-08 | 0.230628 | 4.69E-07 | 0.12356  | 0.00751  | 0.408859 | 3.03E-20 |
| 1.84E-14 | 0.2837   | 4.29E-10 | 0.134645 | 0.00355  | 0.21525  | 2.68E-06 | 0.406802 | 4.87E-20 |
| 9.35E-49 | 0.558396 | 1.22E-39 | 0.546622 | 9.71E-38 | 0.49756  | 1.40E-30 | 0.628645 | 9.86E-53 |
| 0.67434  | -0.28743 | 2.47E-10 | -0.24828 | 5.44E-08 | -0.43996 | 1.58E-23 | -0.19683 | 1.83E-05 |
| 0.00016  | -0.37982 | 1.79E-17 | -0.29573 | 7.03E-11 | -0.36783 | 2.08E-16 | -0.41851 | 3.16E-21 |
| 1.91E-21 | 0.303732 | 2.01E-11 | 0.31     | 7.35E-12 | 0.145427 | 0.00163  | 0.372263 | 8.49E-17 |
| 7.46E-11 | 0.309002 | 8.64E-12 | 0.27641  | 1.23E-09 | 0.318297 | 1.87E-12 | 0.366769 | 2.57E-16 |
| 9.57E-18 | 0.546866 | 8.88E-38 | 0.395598 | 6.04E-19 | 0.528765 | 5.36E-35 | 0.516816 | 2.99E-33 |
| 1.50E-06 | 0.395237 | 6.54E-19 | 0.325429 | 5.56E-13 | 0.395407 | 6.30E-19 | 0.410852 | 1.91E-20 |
| 2.55E-50 | 0.487416 | 3.08E-29 | 0.456724 | 1.92E-25 | 0.456    | 2.33E-25 | 0.640094 | 3.40E-55 |
| 7.32E-47 | 0.552845 | 9.82E-39 | 0.468054 | 8.44E-27 | 0.450359 | 1.05E-24 | 0.559349 | 8.50E-40 |
| 3.65E-58 | 0.530787 | 2.67E-35 | 0.487585 | 2.93E-29 | 0.381362 | 1.29E-17 | 0.667676 | 1.40E-61 |
| 7.38E-22 | -0.26965 | 3.19E-09 | -0.30481 | 1.70E-11 | -0.22264 | 1.18E-06 | -0.44446 | 4.95E-24 |
| 2.30E-06 | -0.47579 | 9.35E-28 | -0.17788 | 0.00011  | -0.23622 | 2.41E-07 | -0.29976 | 3.76E-11 |
| 3.71E-28 | 0.527383 | 8.61E-35 | 0.412815 | 1.21E-20 | 0.463462 | 3.03E-26 | 0.477574 | 5.58E-28 |
| 7.80E-36 | 0.559816 | 7.12E-40 | 0.492793 | 6.07E-30 | 0.55701  | 2.06E-39 | 0.520992 | 7.46E-34 |
| 3.57E-40 | 0.46389  | 2.69E-26 | 0.349648 | 7.10E-15 | 0.304384 | 1.81E-11 | 0.619554 | 7.53E-51 |
| 1.99E-28 | -0.10724 | 0.02046  | -0.11181 | 0.01564  | -0.13452 | 0.00359  | -0.31886 | 1.70E-12 |
| 1.77E-08 | 0.289373 | 1.85E-10 | 0.307683 | 1.07E-11 | 0.33599  | 8.70E-14 | 0.411499 | 1.64E-20 |
| 7.39E-29 | 0.518072 | 1.97E-33 | 0.474132 | 1.50E-27 | 0.353684 | 3.31E-15 | 0.431914 | 1.20E-22 |
| 3.75E-29 | 0.650112 | 1.95E-57 | 0.560667 | 5.15E-40 | 0.50241  | 3.09E-31 | 0.522915 | 3.91E-34 |
| 5.58E-68 | 0.20569  | 7.43E-06 | 0.26313  | 7.78E-09 | 0.139238 | 0.00256  | 0.514288 | 6.85E-33 |
| 3.78E-16 | -0.37728 | 3.03E-17 | -0.2401  | 1.51E-07 | -0.28988 | 1.71E-10 | -0.33759 | 6.52E-14 |
| 1.14E-21 | -0.24505 | 8.17E-08 | -0.11674 | 0.01158  | -0.0915  | 0.04813  | -0.34597 | 1.41E-14 |
| 8.79E-31 | 0.500704 | 5.28E-31 | 0.471237 | 3.43E-27 | 0.476482 | 7.65E-28 | 0.553251 | 8.44E-39 |
| 6.64E-59 | 0.545125 | 1.67E-37 | 0.605348 | 5.00E-48 | 0.49346  | 4.95E-30 | 0.566493 | 5.44E-41 |
| 2.58E-06 | 0.303505 | 2.09E-11 | 0.209552 | 4.94E-06 | 0.282848 | 4.86E-10 | 0.371347 | 1.02E-16 |
| 5.28E-24 | 0.448736 | 1.62E-24 | 0.502224 | 3.28E-31 | 0.515026 | 5.38E-33 | 0.598007 | 1.27E-46 |
| 7.15E-36 | 0.528717 | 5.45E-35 | 0.553847 | 6.76E-39 | 0.545797 | 1.31E-37 | 0.583093 | 7.00E-44 |



|          |          |          |          |          |          |          |          |          |
|----------|----------|----------|----------|----------|----------|----------|----------|----------|
| 0.00076  | 0.41498  | 7.28E-21 | 0.349611 | 7.15E-15 | 0.410324 | 2.16E-20 | 0.386777 | 4.10E-18 |
| 2.72E-20 | 0.472126 | 2.67E-27 | 0.514715 | 5.96E-33 | 0.495896 | 2.35E-30 | 0.479361 | 3.32E-28 |
| 5.39E-50 | 0.583183 | 6.74E-44 | 0.523204 | 3.55E-34 | 0.548287 | 5.28E-38 | 0.690875 | 1.66E-67 |
| 8.14E-09 | 0.130307 | 0.0048   | 0.093759 | 0.04285  | 0.155861 | 0.00073  | 0.287139 | 2.58E-10 |
| 1.29E-32 | 0.411996 | 1.46E-20 | 0.367848 | 2.07E-16 | 0.223497 | 1.07E-06 | 0.401781 | 1.52E-19 |
| 7.06E-12 | 0.397104 | 4.33E-19 | 0.338533 | 5.51E-14 | 0.359643 | 1.05E-15 | 0.327506 | 3.88E-13 |
| 0.00308  | 0.522395 | 4.66E-34 | 0.354909 | 2.62E-15 | 0.450537 | 1.00E-24 | 0.251399 | 3.65E-08 |
| 4.68E-29 | 0.560317 | 5.88E-40 | 0.475185 | 1.11E-27 | 0.526444 | 1.19E-34 | 0.512583 | 1.19E-32 |
| 7.48E-52 | 0.534625 | 7.04E-36 | 0.455866 | 2.42E-25 | 0.4104   | 2.12E-20 | 0.569357 | 1.77E-41 |
| 1.60E-29 | 0.522262 | 4.88E-34 | 0.503535 | 2.17E-31 | 0.509777 | 2.96E-32 | 0.516829 | 2.97E-33 |
| 2.70E-41 | 0.591386 | 2.17E-45 | 0.552925 | 9.53E-39 | 0.484744 | 6.82E-29 | 0.553013 | 9.22E-39 |
| 5.00E-40 | 0.64063  | 2.59E-55 | 0.554875 | 4.60E-39 | 0.569919 | 1.42E-41 | 0.664952 | 6.42E-61 |
| 1.87E-23 | 0.432704 | 9.89E-23 | 0.395584 | 6.06E-19 | 0.335589 | 9.35E-14 | 0.355085 | 2.53E-15 |
| 1.03E-17 | 0.399896 | 2.32E-19 | 0.313079 | 4.44E-12 | 0.380614 | 1.51E-17 | 0.500544 | 5.55E-31 |
| 1.22E-40 | -0.32615 | 4.90E-13 | -0.2176  | 2.07E-06 | -0.01345 | 0.77194  | -0.42777 | 3.36E-22 |
| 1.18E-38 | 0.642609 | 9.47E-56 | 0.596919 | 2.03E-46 | 0.61524  | 5.61E-50 | 0.604528 | 7.20E-48 |
| 1.40E-33 | 0.658351 | 2.40E-59 | 0.46979  | 5.17E-27 | 0.450149 | 1.11E-24 | 0.556104 | 2.90E-39 |
| 1.90E-34 | 0.404669 | 7.92E-20 | 0.410868 | 1.90E-20 | 0.299982 | 3.63E-11 | 0.525035 | 1.91E-34 |
| 1.05E-13 | 0.416775 | 4.77E-21 | 0.467323 | 1.04E-26 | 0.376694 | 3.42E-17 | 0.362932 | 5.50E-16 |
| 1.84E-21 | 0.350339 | 6.23E-15 | 0.460686 | 6.51E-26 | 0.366735 | 2.59E-16 | 0.315623 | 2.92E-12 |
| 2.82E-39 | 0.385034 | 5.95E-18 | 0.478246 | 4.59E-28 | 0.353389 | 3.50E-15 | 0.521288 | 6.76E-34 |
| 4.88E-28 | 0.572774 | 4.58E-42 | 0.415558 | 6.35E-21 | 0.337619 | 6.49E-14 | 0.333863 | 1.27E-13 |
| 5.14E-29 | 0.229777 | 5.18E-07 | 0.245698 | 7.53E-08 | 0.195693 | 2.05E-05 | 0.369417 | 1.51E-16 |
| 5.85E-26 | 0.461632 | 5.02E-26 | 0.495464 | 2.68E-30 | 0.525042 | 1.91E-34 | 0.478377 | 4.42E-28 |
| 1.43E-11 | -0.27645 | 1.23E-09 | -0.27735 | 1.08E-09 | -0.27999 | 7.37E-10 | -0.32766 | 3.78E-13 |
| 2.19E-57 | 0.574434 | 2.36E-42 | 0.514632 | 6.12E-33 | 0.416331 | 5.29E-21 | 0.645103 | 2.63E-56 |
| 5.40E-30 | 0.456029 | 2.31E-25 | 0.457311 | 1.63E-25 | 0.518739 | 1.58E-33 | 0.552739 | 1.02E-38 |
| 5.63E-14 | 0.581427 | 1.39E-43 | 0.527435 | 8.45E-35 | 0.529764 | 3.80E-35 | 0.527099 | 9.48E-35 |
| 3.70E-14 | -0.39171 | 1.42E-18 | -0.22427 | 9.78E-07 | -0.23356 | 3.32E-07 | -0.321   | 1.18E-12 |
| 1.20E-78 | 0.685103 | 5.57E-66 | 0.512379 | 1.28E-32 | 0.472673 | 2.28E-27 | 0.59793  | 1.31E-46 |
| 1.53E-17 | -0.1275  | 0.00579  | 0.017648 | 0.70367  | 0.222401 | 1.21E-06 | -0.18201 | 7.63E-05 |
| 6.19E-12 | 0.280492 | 6.85E-10 | 0.224794 | 9.21E-07 | 0.219777 | 1.62E-06 | 0.34347  | 2.24E-14 |
| 1.95E-76 | 0.623443 | 1.20E-51 | 0.520185 | 9.77E-34 | 0.43863  | 2.22E-23 | 0.555371 | 3.82E-39 |
| 0.06301  | 0.494875 | 3.21E-30 | 0.439375 | 1.83E-23 | 0.508924 | 3.90E-32 | 0.217984 | 1.98E-06 |
| 1.60E-30 | 0.429102 | 2.42E-22 | 0.433652 | 7.80E-23 | 0.481394 | 1.83E-28 | 0.459662 | 8.62E-26 |
| 1.67E-34 | 0.498078 | 1.20E-30 | 0.440144 | 1.51E-23 | 0.375496 | 4.38E-17 | 0.587569 | 1.09E-44 |
| 0.00551  | 0.278576 | 9.03E-10 | 0.296747 | 6.01E-11 | 0.3439   | 2.07E-14 | 0.289291 | 1.87E-10 |
| 6.76E-41 | 0.538706 | 1.67E-36 | 0.518833 | 1.53E-33 | 0.440091 | 1.53E-23 | 0.645332 | 2.34E-56 |
| 0.00084  | -0.3762  | 3.79E-17 | -0.26648 | 4.94E-09 | -0.30585 | 1.43E-11 | -0.2607  | 1.08E-08 |
| 1.10E-50 | 0.535541 | 5.10E-36 | 0.467961 | 8.66E-27 | 0.440529 | 1.36E-23 | 0.608678 | 1.12E-48 |
| 3.38E-11 | -0.40888 | 3.02E-20 | -0.3037  | 2.02E-11 | -0.34697 | 1.17E-14 | -0.39449 | 7.71E-19 |
| 8.36E-29 | 0.361774 | 6.91E-16 | 0.373257 | 6.93E-17 | 0.321709 | 1.05E-12 | 0.341344 | 3.31E-14 |
| 7.48E-13 | -0.31462 | 3.45E-12 | -0.21022 | 4.60E-06 | -0.26914 | 3.42E-09 | -0.33174 | 1.85E-13 |
| 3.02E-54 | 0.710618 | 5.20E-73 | 0.572411 | 5.29E-42 | 0.565808 | 7.10E-41 | 0.619527 | 7.63E-51 |
| 5.42E-58 | 0.664596 | 7.82E-61 | 0.533409 | 1.08E-35 | 0.451539 | 7.70E-25 | 0.641842 | 1.40E-55 |

|          |          |          |          |          |          |          |          |          |
|----------|----------|----------|----------|----------|----------|----------|----------|----------|
| 0.00031  | 0.512349 | 1.29E-32 | 0.549553 | 3.32E-38 | 0.643801 | 5.15E-56 | 0.427577 | 3.52E-22 |
| 1.93E-46 | 0.415674 | 6.18E-21 | 0.34982  | 6.87E-15 | 0.223683 | 1.05E-06 | 0.499099 | 8.71E-31 |
| 0.00035  | -0.46181 | 4.78E-26 | -0.31172 | 5.55E-12 | -0.37925 | 2.01E-17 | -0.23181 | 4.08E-07 |
| 1.23E-35 | 0.282365 | 5.22E-10 | 0.321644 | 1.06E-12 | 0.239265 | 1.67E-07 | 0.381481 | 1.26E-17 |
| 2.84E-08 | -0.33765 | 6.45E-14 | -0.27843 | 9.23E-10 | -0.35194 | 4.61E-15 | -0.37901 | 2.11E-17 |
| 1.96E-08 | -0.44093 | 1.23E-23 | -0.31696 | 2.34E-12 | -0.4288  | 2.61E-22 | -0.49335 | 5.12E-30 |
| 3.62E-22 | 0.360137 | 9.52E-16 | 0.399239 | 2.69E-19 | 0.436571 | 3.74E-23 | 0.425072 | 6.49E-22 |
| 3.97E-66 | 0.458139 | 1.31E-25 | 0.465621 | 1.67E-26 | 0.385791 | 5.07E-18 | 0.545358 | 1.54E-37 |
| 1.22E-20 | 0.524155 | 2.58E-34 | 0.518851 | 1.52E-33 | 0.513033 | 1.03E-32 | 0.596077 | 2.92E-46 |
| 0.1387   | 0.176806 | 0.00012  | 0.20274  | 1.01E-05 | 0.272065 | 2.28E-09 | 0.22669  | 7.41E-07 |
| 0.04867  | -0.36535 | 3.41E-16 | -0.32096 | 1.19E-12 | -0.40263 | 1.26E-19 | -0.22794 | 6.41E-07 |
| 3.41E-08 | -0.35085 | 5.66E-15 | -0.29079 | 1.49E-10 | -0.2903  | 1.61E-10 | -0.30909 | 8.52E-12 |
| 3.42E-45 | 0.376906 | 3.28E-17 | 0.30254  | 2.43E-11 | 0.268317 | 3.83E-09 | 0.453366 | 4.73E-25 |
| 9.75E-26 | 0.619708 | 7.01E-51 | 0.492508 | 6.62E-30 | 0.493176 | 5.40E-30 | 0.483367 | 1.03E-28 |
| 7.06E-09 | 0.300428 | 3.39E-11 | 0.351863 | 4.67E-15 | 0.389775 | 2.15E-18 | 0.401172 | 1.75E-19 |
| 0.04037  | -0.28983 | 1.72E-10 | -0.15587 | 0.00072  | -0.30741 | 1.12E-11 | 0.031073 | 0.50296  |
| #####    | 0.614919 | 6.51E-50 | 0.519513 | 1.22E-33 | 0.441303 | 1.12E-23 | 0.696541 | 4.85E-69 |
| 0.70803  | 0.196642 | 1.87E-05 | 0.252541 | 3.15E-08 | 0.37573  | 4.18E-17 | 0.169957 | 0.00022  |
| 4.12E-38 | 0.371888 | 9.17E-17 | 0.35711  | 1.71E-15 | 0.206105 | 7.11E-06 | 0.503369 | 2.29E-31 |
| 2.25E-60 | 0.646064 | 1.60E-56 | 0.510145 | 2.63E-32 | 0.454813 | 3.21E-25 | 0.59312  | 1.04E-45 |
| 0.00163  | -0.25884 | 1.38E-08 | -0.28254 | 5.08E-10 | -0.34148 | 3.23E-14 | -0.23712 | 2.16E-07 |
| 5.14E-57 | 0.549004 | 4.06E-38 | 0.499994 | 6.59E-31 | 0.439989 | 1.57E-23 | 0.638671 | 6.97E-55 |
| 7.34E-11 | 0.658415 | 2.32E-59 | 0.567584 | 3.55E-41 | 0.588692 | 6.79E-45 | 0.373699 | 6.34E-17 |
| 8.80E-18 | -0.11873 | 0.01023  | -0.12695 | 0.00601  | -0.10794 | 0.01964  | -0.23103 | 4.47E-07 |
| 5.09E-37 | 0.554245 | 5.83E-39 | 0.597522 | 1.56E-46 | 0.525801 | 1.48E-34 | 0.609525 | 7.66E-49 |
| 0.12415  | -0.29145 | 1.35E-10 | -0.22186 | 1.28E-06 | -0.37291 | 7.44E-17 | -0.20762 | 6.07E-06 |
| 3.86E-32 | 0.540116 | 1.01E-36 | 0.467422 | 1.01E-26 | 0.430654 | 1.65E-22 | 0.5382   | 2.00E-36 |
| 2.14E-50 | 0.679925 | 1.22E-64 | 0.532475 | 1.49E-35 | 0.519897 | 1.08E-33 | 0.582505 | 8.91E-44 |
| 1.67E-41 | -0.31512 | 3.17E-12 | -0.27067 | 2.77E-09 | -0.26268 | 8.27E-09 | -0.42354 | 9.41E-22 |
| 0.22673  | 0.242571 | 1.11E-07 | 0.222792 | 1.16E-06 | 0.351211 | 5.29E-15 | 0.136983 | 0.00301  |
| 4.51E-06 | -0.3986  | 3.10E-19 | -0.35731 | 1.65E-15 | -0.49246 | 6.72E-30 | -0.30997 | 7.39E-12 |
| 5.42E-18 | -0.32166 | 1.06E-12 | -0.34084 | 3.63E-14 | -0.36957 | 1.46E-16 | -0.39426 | 8.10E-19 |
| 2.70E-32 | 0.460941 | 6.07E-26 | 0.538856 | 1.58E-36 | 0.479743 | 2.97E-28 | 0.526999 | 9.81E-35 |
| 8.61E-15 | 0.357992 | 1.44E-15 | 0.314991 | 3.24E-12 | 0.326132 | 4.92E-13 | 0.373861 | 6.13E-17 |
| 2.62E-80 | 0.553761 | 6.98E-39 | 0.536821 | 3.25E-36 | 0.416175 | 5.49E-21 | 0.678481 | 2.84E-64 |
| 1.40E-69 | 0.632325 | 1.64E-53 | 0.561004 | 4.52E-40 | 0.515543 | 4.54E-33 | 0.633709 | 8.27E-54 |
| 1.33E-21 | 0.463865 | 2.71E-26 | 0.373179 | 7.05E-17 | 0.26979  | 3.13E-09 | 0.340326 | 3.98E-14 |
| 1.19E-43 | 0.639029 | 5.82E-55 | 0.50462  | 1.54E-31 | 0.433911 | 7.31E-23 | 0.508764 | 4.10E-32 |
| 2.54E-38 | 0.545015 | 1.74E-37 | 0.58697  | 1.40E-44 | 0.573312 | 3.70E-42 | 0.529107 | 4.77E-35 |
| 1.09E-28 | -0.40185 | 1.50E-19 | -0.07319 | 0.1142   | -0.23519 | 2.73E-07 | -0.38037 | 1.59E-17 |
| 1.75E-33 | 0.631247 | 2.77E-53 | 0.537096 | 2.95E-36 | 0.487853 | 2.70E-29 | 0.638726 | 6.78E-55 |
| 1.21E-14 | 0.351076 | 5.42E-15 | 0.437656 | 2.84E-23 | 0.46453  | 2.26E-26 | 0.404398 | 8.42E-20 |
| 1.86E-32 | 0.342024 | 2.92E-14 | 0.337353 | 6.81E-14 | 0.212879 | 3.46E-06 | 0.386863 | 4.03E-18 |
| 5.71E-17 | 0.3118   | 5.48E-12 | 0.232344 | 3.83E-07 | 0.302648 | 2.39E-11 | 0.411116 | 1.80E-20 |
| 3.45E-12 | 0.403519 | 1.03E-19 | 0.281031 | 6.33E-10 | 0.238921 | 1.74E-07 | 0.287007 | 2.63E-10 |

|          |          |          |          |          |          |          |          |          |
|----------|----------|----------|----------|----------|----------|----------|----------|----------|
| 4.90E-55 | 0.506427 | 8.67E-32 | 0.557066 | 2.02E-39 | 0.462098 | 4.42E-26 | 0.657124 | 4.66E-59 |
| 2.30E-47 | 0.571701 | 7.02E-42 | 0.428554 | 2.77E-22 | 0.457679 | 1.48E-25 | 0.498436 | 1.07E-30 |
| 3.05E-34 | 0.00593  | 0.8983   | -0.15371 | 0.00086  | -0.08507 | 0.06624  | -0.34797 | 9.72E-15 |
| 1.89E-20 | 0.657162 | 4.57E-59 | 0.424806 | 6.93E-22 | 0.455951 | 2.36E-25 | 0.470961 | 3.71E-27 |
| 8.46E-43 | -0.37471 | 5.15E-17 | -0.25353 | 2.77E-08 | -0.25021 | 4.25E-08 | -0.53217 | 1.66E-35 |
| 1.01E-82 | 0.664339 | 9.02E-61 | 0.574593 | 2.22E-42 | 0.469462 | 5.68E-27 | 0.638746 | 6.71E-55 |
| 4.16E-33 | 0.303166 | 2.20E-11 | 0.284573 | 3.77E-10 | 0.167685 | 0.00027  | 0.566769 | 4.88E-41 |
| 2.55E-09 | -0.26845 | 3.76E-09 | -0.36761 | 2.17E-16 | -0.42451 | 7.45E-22 | -0.35431 | 2.94E-15 |
| 1.62E-08 | 0.59559  | 3.60E-46 | 0.477654 | 5.45E-28 | 0.479578 | 3.12E-28 | 0.379333 | 1.98E-17 |
| 2.80E-06 | 0.501145 | 4.60E-31 | 0.408147 | 3.57E-20 | 0.59234  | 1.45E-45 | 0.460758 | 6.39E-26 |
| 0.00293  | -0.51937 | 1.28E-33 | -0.42506 | 6.52E-22 | -0.57466 | 2.16E-42 | -0.38406 | 7.32E-18 |
| 1.31E-10 | 0.458814 | 1.09E-25 | 0.578442 | 4.69E-43 | 0.550743 | 2.14E-38 | 0.468644 | 7.15E-27 |
| 8.87E-40 | -0.52386 | 2.84E-34 | -0.3638  | 4.64E-16 | -0.37154 | 9.84E-17 | -0.55587 | 3.17E-39 |
| 0.02827  | -0.31634 | 2.59E-12 | -0.35644 | 1.95E-15 | -0.39714 | 4.29E-19 | -0.40113 | 1.76E-19 |
| 3.99E-32 | 0.574969 | 1.91E-42 | 0.47732  | 6.01E-28 | 0.502206 | 3.30E-31 | 0.46425  | 2.44E-26 |
| 9.16E-12 | 0.622011 | 2.37E-51 | 0.459768 | 8.37E-26 | 0.535526 | 5.13E-36 | 0.442494 | 8.23E-24 |
| 1.76E-27 | 0.586064 | 2.04E-44 | 0.550493 | 2.35E-38 | 0.536664 | 3.44E-36 | 0.571886 | 6.52E-42 |
| 1.27E-30 | 0.570302 | 1.22E-41 | 0.598616 | 9.71E-47 | 0.520454 | 8.93E-34 | 0.545366 | 1.53E-37 |
| 9.82E-52 | 0.601202 | 3.13E-47 | 0.574964 | 1.91E-42 | 0.588393 | 7.70E-45 | 0.593317 | 9.56E-46 |
| 3.85E-55 | 0.596024 | 2.99E-46 | 0.515154 | 5.16E-33 | 0.462387 | 4.08E-26 | 0.640266 | 3.12E-55 |
| 6.73E-21 | 0.386317 | 4.53E-18 | 0.253751 | 2.69E-08 | 0.219784 | 1.62E-06 | 0.29736  | 5.46E-11 |
| 3.05E-14 | 0.43841  | 2.34E-23 | 0.487494 | 3.01E-29 | 0.436962 | 3.39E-23 | 0.399287 | 2.66E-19 |
| 7.82E-09 | -0.45717 | 1.70E-25 | -0.35663 | 1.88E-15 | -0.48392 | 8.70E-29 | -0.33712 | 7.10E-14 |
| 1.26E-13 | 0.389869 | 2.11E-18 | 0.340322 | 3.98E-14 | 0.409065 | 2.89E-20 | 0.371563 | 9.79E-17 |
| 4.28E-09 | -0.28444 | 3.85E-10 | -0.34911 | 7.85E-15 | -0.36748 | 2.23E-16 | -0.29541 | 7.39E-11 |
| 5.03E-15 | 0.450813 | 9.33E-25 | 0.215839 | 2.51E-06 | 0.286294 | 2.93E-10 | 0.289749 | 1.75E-10 |
| 5.48E-49 | 0.644711 | 3.22E-56 | 0.461168 | 5.71E-26 | 0.431536 | 1.32E-22 | 0.5915   | 2.07E-45 |
| 1.33E-24 | -0.34985 | 6.84E-15 | -0.27134 | 2.52E-09 | -0.28705 | 2.61E-10 | -0.40676 | 4.92E-20 |
| 9.73E-25 | -0.44549 | 3.79E-24 | -0.43879 | 2.13E-23 | -0.37393 | 6.04E-17 | -0.36667 | 2.62E-16 |
| 6.92E-06 | 0.359075 | 1.17E-15 | 0.292667 | 1.12E-10 | 0.245348 | 7.87E-08 | 0.310225 | 7.09E-12 |
| 6.92E-60 | 0.555587 | 3.52E-39 | 0.524944 | 1.97E-34 | 0.475153 | 1.12E-27 | 0.587808 | 9.84E-45 |
| 9.82E-24 | 0.416276 | 5.36E-21 | 0.465678 | 1.64E-26 | 0.405813 | 6.10E-20 | 0.520573 | 8.58E-34 |
| 2.73E-63 | 0.472489 | 2.41E-27 | 0.459766 | 8.38E-26 | 0.427973 | 3.19E-22 | 0.505991 | 9.96E-32 |
| 1.14E-88 | 0.456977 | 1.79E-25 | 0.454678 | 3.33E-25 | 0.370779 | 1.15E-16 | 0.630596 | 3.81E-53 |
| 1.66E-27 | 0.652855 | 4.57E-58 | 0.607983 | 1.54E-48 | 0.593164 | 1.02E-45 | 0.619846 | 6.57E-51 |
| 4.54E-63 | 0.573934 | 2.88E-42 | 0.512665 | 1.16E-32 | 0.470215 | 4.59E-27 | 0.686522 | 2.37E-66 |
| 4.52E-13 | -0.4423  | 8.65E-24 | -0.40767 | 3.98E-20 | -0.33491 | 1.05E-13 | -0.33881 | 5.24E-14 |
| #####    | 0.439499 | 1.78E-23 | 0.398537 | 3.15E-19 | 0.302331 | 2.51E-11 | 0.618295 | 1.36E-50 |
| 1.57E-20 | -0.3023  | 2.52E-11 | -0.25582 | 2.06E-08 | -0.26871 | 3.63E-09 | -0.30484 | 1.69E-11 |
| 2.41E-23 | 0.752792 | 1.76E-86 | 0.502298 | 3.20E-31 | 0.54495  | 1.78E-37 | 0.542906 | 3.73E-37 |
| 4.33E-59 | 0.43383  | 7.46E-23 | 0.464379 | 2.35E-26 | 0.377682 | 2.79E-17 | 0.61066  | 4.58E-49 |
| 6.55E-26 | 0.664684 | 7.45E-61 | 0.611956 | 2.54E-49 | 0.588845 | 6.37E-45 | 0.566985 | 4.49E-41 |
| 3.67E-12 | 0.382653 | 9.86E-18 | 0.384286 | 6.98E-18 | 0.327019 | 4.22E-13 | 0.385813 | 5.04E-18 |
| 3.26E-22 | -0.56452 | 1.17E-40 | -0.41881 | 2.94E-21 | -0.4802  | 2.60E-28 | -0.52526 | 1.77E-34 |
| 2.30E-32 | -0.41554 | 6.38E-21 | -0.21428 | 2.97E-06 | -0.22584 | 8.17E-07 | -0.53682 | 3.26E-36 |

|          |          |          |          |          |          |          |          |          |
|----------|----------|----------|----------|----------|----------|----------|----------|----------|
| 1.92E-29 | -0.2168  | 2.26E-06 | -0.11038 | 0.01702  | 0.03586  | 0.43945  | -0.3125  | 4.89E-12 |
| 5.35E-34 | 0.514508 | 6.38E-33 | 0.391451 | 1.50E-18 | 0.445987 | 3.32E-24 | 0.522846 | 4.01E-34 |
| 3.22E-05 | 0.27224  | 2.22E-09 | 0.278243 | 9.48E-10 | 0.281736 | 5.72E-10 | 0.208824 | 5.34E-06 |
| 3.48E-40 | 0.655918 | 8.92E-59 | 0.495421 | 2.71E-30 | 0.46155  | 5.14E-26 | 0.564236 | 1.31E-40 |
| 7.40E-35 | 0.605487 | 4.70E-48 | 0.487865 | 2.69E-29 | 0.525646 | 1.55E-34 | 0.539657 | 1.19E-36 |
| 1.01E-30 | 0.40252  | 1.29E-19 | 0.27868  | 8.90E-10 | 0.211146 | 4.17E-06 | 0.405645 | 6.34E-20 |
| 1.47E-57 | 0.723004 | 1.05E-76 | 0.558572 | 1.14E-39 | 0.560883 | 4.74E-40 | 0.618844 | 1.05E-50 |
| 0.00282  | 0.350437 | 6.12E-15 | 0.33224  | 1.69E-13 | 0.318308 | 1.86E-12 | 0.235368 | 2.67E-07 |
| 1.13E-34 | 0.430599 | 1.67E-22 | 0.484121 | 8.20E-29 | 0.398308 | 3.31E-19 | 0.565865 | 6.94E-41 |
| 1.26E-52 | 0.618955 | 9.98E-51 | 0.527519 | 8.22E-35 | 0.468101 | 8.32E-27 | 0.557785 | 1.54E-39 |
| 0.00082  | 0.587577 | 1.08E-44 | 0.610815 | 4.26E-49 | 0.58816  | 8.49E-45 | 0.503293 | 2.34E-31 |
| 2.42E-45 | 0.482425 | 1.35E-28 | 0.350287 | 6.29E-15 | 0.277316 | 1.08E-09 | 0.436351 | 3.95E-23 |
| 5.15E-86 | 0.535571 | 5.05E-36 | 0.523676 | 3.03E-34 | 0.421907 | 1.40E-21 | 0.620121 | 5.77E-51 |
| 4.18E-26 | 0.348347 | 9.06E-15 | 0.375389 | 4.48E-17 | 0.269895 | 3.08E-09 | 0.3801   | 1.69E-17 |
| 1.27E-30 | 0.381468 | 1.27E-17 | 0.334902 | 1.06E-13 | 0.35204  | 4.52E-15 | 0.452622 | 5.77E-25 |
| 0.00096  | 0.368237 | 1.92E-16 | 0.280245 | 7.10E-10 | 0.438063 | 2.56E-23 | 0.267641 | 4.21E-09 |
| 2.08E-11 | 0.475243 | 1.09E-27 | 0.267067 | 4.55E-09 | 0.218968 | 1.78E-06 | 0.324148 | 6.92E-13 |
| 1.28E-12 | 0.227611 | 6.66E-07 | 0.293039 | 1.06E-10 | 0.276622 | 1.20E-09 | 0.265    | 6.04E-09 |
| 8.83E-22 | -0.20138 | 1.16E-05 | -0.20387 | 8.97E-06 | -0.18065 | 8.65E-05 | -0.27959 | 7.80E-10 |
| 5.63E-40 | 0.565838 | 7.02E-41 | 0.470964 | 3.71E-27 | 0.512964 | 1.06E-32 | 0.6169   | 2.60E-50 |
| 2.83E-15 | -0.38245 | 1.03E-17 | -0.19072 | 3.35E-05 | -0.18881 | 4.02E-05 | -0.35873 | 1.25E-15 |
| 1.13E-09 | 0.495147 | 2.95E-30 | 0.138954 | 0.00262  | 0.313834 | 3.92E-12 | 0.28001  | 7.35E-10 |
| 6.06E-44 | 0.608768 | 1.08E-48 | 0.480625 | 2.30E-28 | 0.485035 | 6.26E-29 | 0.54201  | 5.14E-37 |
| 2.01E-72 | 0.464175 | 2.49E-26 | 0.379972 | 1.73E-17 | 0.305611 | 1.49E-11 | 0.575593 | 1.48E-42 |
| 9.97E-29 | 0.359029 | 1.18E-15 | 0.428476 | 2.82E-22 | 0.341756 | 3.07E-14 | 0.438103 | 2.53E-23 |
| 2.23E-19 | -0.15975 | 0.00053  | -0.0556  | 0.23046  | -0.08958 | 0.05305  | -0.20197 | 1.09E-05 |
| 3.27E-66 | 0.570083 | 1.33E-41 | 0.457759 | 1.45E-25 | 0.385971 | 4.88E-18 | 0.545695 | 1.36E-37 |
| 1.21E-22 | 0.40575  | 6.19E-20 | 0.451415 | 7.96E-25 | 0.377665 | 2.80E-17 | 0.519863 | 1.09E-33 |
| 1.30E-65 | 0.681632 | 4.44E-65 | 0.532174 | 1.65E-35 | 0.475019 | 1.17E-27 | 0.661205 | 5.07E-60 |
| 6.20E-10 | 0.665193 | 5.61E-61 | 0.50203  | 3.48E-31 | 0.571576 | 7.37E-42 | 0.480086 | 2.69E-28 |
| 1.74E-65 | 0.465293 | 1.83E-26 | 0.377467 | 2.92E-17 | 0.250813 | 3.94E-08 | 0.444256 | 5.22E-24 |
| 7.53E-05 | 0.361422 | 7.40E-16 | 0.301819 | 2.72E-11 | 0.30606  | 1.39E-11 | 0.397626 | 3.85E-19 |
| 1.61E-08 | 0.370233 | 1.28E-16 | 0.373739 | 6.28E-17 | 0.444458 | 4.95E-24 | 0.375716 | 4.19E-17 |
| 1.38E-54 | 0.374693 | 5.17E-17 | 0.377134 | 3.12E-17 | 0.289535 | 1.80E-10 | 0.532781 | 1.34E-35 |
| 1.22E-35 | 0.334748 | 1.09E-13 | 0.358245 | 1.38E-15 | 0.355217 | 2.47E-15 | 0.478626 | 4.11E-28 |
| 1.91E-14 | 0.399835 | 2.36E-19 | 0.373147 | 7.09E-17 | 0.326566 | 4.57E-13 | 0.260865 | 1.06E-08 |
| 7.95E-46 | 0.55029  | 2.53E-38 | 0.516806 | 3.00E-33 | 0.444197 | 5.30E-24 | 0.617459 | 2.01E-50 |
| 1.71E-52 | 0.58241  | 9.27E-44 | 0.505856 | 1.04E-31 | 0.486672 | 3.84E-29 | 0.631593 | 2.34E-53 |
| 6.12E-30 | 0.504108 | 1.81E-31 | 0.462173 | 4.33E-26 | 0.389901 | 2.10E-18 | 0.496037 | 2.25E-30 |
| 2.12E-15 | 0.541764 | 5.62E-37 | 0.502585 | 2.93E-31 | 0.4987   | 9.86E-31 | 0.408928 | 2.98E-20 |
| 2.37E-66 | 0.668538 | 8.62E-62 | 0.570616 | 1.08E-41 | 0.530703 | 2.75E-35 | 0.644121 | 4.37E-56 |
| 1.17E-58 | 0.437712 | 2.80E-23 | 0.411691 | 1.57E-20 | 0.387829 | 3.28E-18 | 0.613261 | 1.40E-49 |
| 2.42E-39 | 0.4164   | 5.21E-21 | 0.488594 | 2.16E-29 | 0.468145 | 8.22E-27 | 0.498533 | 1.04E-30 |
| 4.99E-20 | 0.578749 | 4.14E-43 | 0.533302 | 1.12E-35 | 0.517954 | 2.05E-33 | 0.466807 | 1.20E-26 |
| 1.19E-23 | 0.548776 | 4.42E-38 | 0.44792  | 2.00E-24 | 0.433183 | 8.77E-23 | 0.424653 | 7.19E-22 |

|          |          |          |          |          |          |          |          |          |
|----------|----------|----------|----------|----------|----------|----------|----------|----------|
| 3.78E-25 | -0.33235 | 1.66E-13 | -0.24115 | 1.32E-07 | -0.246   | 7.25E-08 | -0.4016  | 1.59E-19 |
| 3.99E-20 | 0.243377 | 1.01E-07 | 0.185216 | 5.66E-05 | 0.150086 | 0.00114  | 0.194832 | 2.24E-05 |
| 5.51E-30 | 0.557935 | 1.45E-39 | 0.548247 | 5.36E-38 | 0.476999 | 6.59E-28 | 0.582547 | 8.76E-44 |
| 1.03E-10 | 0.411065 | 1.82E-20 | 0.304411 | 1.81E-11 | 0.373349 | 6.81E-17 | 0.3192   | 1.60E-12 |
| 4.16E-45 | 0.451991 | 6.82E-25 | 0.410248 | 2.20E-20 | 0.352501 | 4.14E-15 | 0.632454 | 1.54E-53 |
| 1.36E-60 | 0.478487 | 4.28E-28 | 0.434656 | 6.06E-23 | 0.38515  | 5.81E-18 | 0.621718 | 2.72E-51 |
| 3.89E-34 | 0.560958 | 4.61E-40 | 0.529693 | 3.90E-35 | 0.508192 | 4.93E-32 | 0.581597 | 1.29E-43 |
| 1.92E-37 | 0.655563 | 1.08E-58 | 0.53393  | 8.97E-36 | 0.57259  | 4.93E-42 | 0.63711  | 1.52E-54 |
| 4.82E-31 | 0.448084 | 1.92E-24 | 0.49655  | 1.92E-30 | 0.469217 | 6.08E-27 | 0.522502 | 4.50E-34 |
| 5.27E-15 | 0.413527 | 1.02E-20 | 0.408231 | 3.50E-20 | 0.501155 | 4.58E-31 | 0.401856 | 1.50E-19 |
| 1.07E-21 | 0.362015 | 6.59E-16 | 0.29149  | 1.34E-10 | 0.340497 | 3.86E-14 | 0.409122 | 2.85E-20 |
| 1.60E-36 | 0.66233  | 2.73E-60 | 0.656248 | 7.47E-59 | 0.591936 | 1.72E-45 | 0.570941 | 9.48E-42 |
| 5.17E-71 | 0.640324 | 3.02E-55 | 0.491052 | 1.03E-29 | 0.389733 | 2.17E-18 | 0.565391 | 8.35E-41 |
| 2.78E-29 | 0.55794  | 1.45E-39 | 0.536883 | 3.18E-36 | 0.520634 | 8.41E-34 | 0.624537 | 7.12E-52 |
| 2.00E-11 | 0.348116 | 9.46E-15 | 0.374296 | 5.61E-17 | 0.310409 | 6.88E-12 | 0.330276 | 2.39E-13 |
| 1.08E-51 | 0.689419 | 4.05E-67 | 0.592453 | 1.38E-45 | 0.492747 | 6.15E-30 | 0.659264 | 1.46E-59 |
| 2.64E-44 | 0.728119 | 2.72E-78 | 0.643329 | 6.55E-56 | 0.647368 | 8.16E-57 | 0.676849 | 7.38E-64 |
| 8.77E-29 | 0.572935 | 4.30E-42 | 0.595566 | 3.64E-46 | 0.519035 | 1.43E-33 | 0.534325 | 7.82E-36 |
| 4.72E-12 | -0.257   | 1.76E-08 | -0.11207 | 0.01539  | -0.26048 | 1.11E-08 | -0.30736 | 1.13E-11 |
| 2.87E-46 | 0.530172 | 3.30E-35 | 0.514318 | 6.78E-33 | 0.471091 | 3.58E-27 | 0.578861 | 3.96E-43 |
| 1.53E-30 | 0.640561 | 2.68E-55 | 0.611067 | 3.80E-49 | 0.581347 | 1.43E-43 | 0.542113 | 4.95E-37 |
| 3.26E-18 | 0.57164  | 7.19E-42 | 0.508487 | 4.49E-32 | 0.577277 | 7.52E-43 | 0.513879 | 7.83E-33 |
| 9.84E-37 | 0.588918 | 6.17E-45 | 0.506686 | 7.98E-32 | 0.511174 | 1.89E-32 | 0.614887 | 6.61E-50 |
| 9.99E-32 | 0.594101 | 6.83E-46 | 0.525853 | 1.45E-34 | 0.600166 | 4.94E-47 | 0.607708 | 1.74E-48 |
| 5.71E-05 | -0.37902 | 2.11E-17 | 0.027831 | 0.54855  | -0.22956 | 5.31E-07 | -0.15291 | 0.00092  |
| 5.12E-19 | 0.476914 | 6.76E-28 | 0.467063 | 1.11E-26 | 0.457789 | 1.44E-25 | 0.331602 | 1.90E-13 |
| 9.97E-29 | 0.597764 | 1.41E-46 | 0.524709 | 2.14E-34 | 0.503638 | 2.10E-31 | 0.51564  | 4.40E-33 |
| 2.12E-13 | 0.448926 | 1.54E-24 | 0.381183 | 1.34E-17 | 0.478207 | 4.65E-28 | 0.47049  | 4.24E-27 |
| 1.88E-26 | 0.52589  | 1.43E-34 | 0.573159 | 3.93E-42 | 0.493015 | 5.67E-30 | 0.488425 | 2.27E-29 |
| 4.02E-23 | 0.551872 | 1.41E-38 | 0.489857 | 1.48E-29 | 0.460789 | 6.33E-26 | 0.496108 | 2.20E-30 |
| 1.89E-61 | 0.571366 | 8.01E-42 | 0.549832 | 2.99E-38 | 0.478315 | 4.50E-28 | 0.62516  | 5.29E-52 |
| 4.79E-34 | 0.286718 | 2.75E-10 | 0.294745 | 8.18E-11 | 0.217003 | 2.21E-06 | 0.544475 | 2.12E-37 |
| 1.09E-51 | 0.621924 | 2.47E-51 | 0.576628 | 9.78E-43 | 0.466105 | 1.46E-26 | 0.48467  | 6.97E-29 |
| 3.49E-64 | 0.480758 | 2.21E-28 | 0.317098 | 2.28E-12 | 0.245239 | 7.98E-08 | 0.586049 | 2.05E-44 |
| 3.43E-28 | 0.511632 | 1.63E-32 | 0.430325 | 1.79E-22 | 0.392182 | 1.28E-18 | 0.503657 | 2.09E-31 |
| 8.04E-06 | -0.45319 | 4.95E-25 | -0.42816 | 3.05E-22 | -0.51941 | 1.26E-33 | -0.34892 | 8.13E-15 |
| 3.32E-26 | 0.255169 | 2.24E-08 | 0.250051 | 4.34E-08 | 0.179423 | 9.67E-05 | 0.417147 | 4.36E-21 |
| 4.87E-49 | 0.739467 | 6.07E-82 | 0.547744 | 6.44E-38 | 0.560416 | 5.66E-40 | 0.647708 | 6.84E-57 |
| 1.39E-07 | -0.41068 | 1.99E-20 | -0.31953 | 1.52E-12 | -0.38136 | 1.29E-17 | -0.34429 | 1.92E-14 |
| 1.78E-21 | -0.34395 | 2.05E-14 | -0.33691 | 7.38E-14 | -0.37168 | 9.57E-17 | -0.40579 | 6.13E-20 |
| 2.32E-29 | 0.483265 | 1.06E-28 | 0.398271 | 3.34E-19 | 0.390122 | 2.00E-18 | 0.42198  | 1.37E-21 |
| 9.93E-55 | 0.625109 | 5.41E-52 | 0.435925 | 4.40E-23 | 0.461303 | 5.50E-26 | 0.536008 | 4.33E-36 |
| 3.86E-28 | 0.568871 | 2.14E-41 | 0.539724 | 1.16E-36 | 0.458538 | 1.17E-25 | 0.465882 | 1.55E-26 |
| 3.35E-12 | 0.572067 | 6.07E-42 | 0.504717 | 1.49E-31 | 0.466292 | 1.38E-26 | 0.356339 | 1.99E-15 |
| 0.34026  | 0.374419 | 5.47E-17 | 0.358389 | 1.34E-15 | 0.442809 | 7.59E-24 | 0.278128 | 9.63E-10 |

|          |          |          |          |          |          |          |          |          |
|----------|----------|----------|----------|----------|----------|----------|----------|----------|
| 1.03E-11 | 0.300276 | 3.47E-11 | 0.285105 | 3.49E-10 | 0.332897 | 1.51E-13 | 0.305239 | 1.58E-11 |
| 4.96E-21 | 0.515475 | 4.64E-33 | 0.581442 | 1.38E-43 | 0.510008 | 2.75E-32 | 0.46864  | 7.16E-27 |
| 4.51E-11 | 0.428476 | 2.82E-22 | 0.518532 | 1.69E-33 | 0.411319 | 1.72E-20 | 0.303108 | 2.22E-11 |
| 3.42E-33 | 0.583407 | 6.14E-44 | 0.595398 | 3.91E-46 | 0.568389 | 2.59E-41 | 0.590499 | 3.17E-45 |
| 1.58E-70 | 0.712377 | 1.60E-73 | 0.515695 | 4.32E-33 | 0.525636 | 1.56E-34 | 0.625222 | 5.13E-52 |
| 1.02E-25 | 0.48283  | 1.20E-28 | 0.539147 | 1.43E-36 | 0.489906 | 1.46E-29 | 0.547509 | 7.02E-38 |
| 3.39E-34 | 0.616673 | 2.89E-50 | 0.526972 | 9.90E-35 | 0.458986 | 1.04E-25 | 0.569784 | 1.50E-41 |
| 6.14E-07 | 0.512283 | 1.32E-32 | 0.615291 | 5.48E-50 | 0.535672 | 4.88E-36 | 0.481776 | 1.64E-28 |
| 0.1738   | 0.498312 | 1.11E-30 | 0.466137 | 1.44E-26 | 0.534764 | 6.70E-36 | 0.142375 | 0.00204  |
| 3.64E-16 | 0.679673 | 1.41E-64 | 0.71364  | 6.79E-74 | 0.729521 | 9.84E-79 | 0.606379 | 3.16E-48 |
| 4.66E-29 | 0.296215 | 6.52E-11 | 0.354663 | 2.74E-15 | 0.341955 | 2.96E-14 | 0.462185 | 4.32E-26 |
| 4.51E-22 | 0.695591 | 8.82E-69 | 0.616743 | 2.80E-50 | 0.634151 | 6.65E-54 | 0.578116 | 5.36E-43 |
| 7.37E-48 | 0.776286 | 3.11E-95 | 0.54925  | 3.71E-38 | 0.501456 | 4.17E-31 | 0.638793 | 6.55E-55 |
| 2.48E-30 | 0.654585 | 1.82E-58 | 0.619084 | 9.39E-51 | 0.57412  | 2.68E-42 | 0.637983 | 9.85E-55 |
| 1.24E-46 | 0.313718 | 4.00E-12 | 0.472    | 2.77E-27 | 0.394011 | 8.56E-19 | 0.540978 | 7.44E-37 |
| 1.31E-31 | 0.741579 | 1.21E-82 | 0.571128 | 8.81E-42 | 0.55073  | 2.15E-38 | 0.600167 | 4.93E-47 |
| 4.01E-13 | 0.597536 | 1.55E-46 | 0.353153 | 3.66E-15 | 0.344824 | 1.74E-14 | 0.463465 | 3.03E-26 |
| 1.28E-34 | 0.642653 | 9.26E-56 | 0.664201 | 9.73E-61 | 0.621108 | 3.63E-51 | 0.617538 | 1.93E-50 |
| 5.54E-14 | 0.579204 | 3.44E-43 | 0.455973 | 2.35E-25 | 0.457774 | 1.44E-25 | 0.403646 | 9.99E-20 |
| 1.15E-20 | 0.672821 | 7.56E-63 | 0.580475 | 2.05E-43 | 0.578803 | 4.05E-43 | 0.584063 | 4.69E-44 |
| 1.26E-21 | 0.635264 | 3.83E-54 | 0.676844 | 7.40E-64 | 0.663464 | 1.46E-60 | 0.512368 | 1.28E-32 |
| 1.78E-41 | 0.586277 | 1.87E-44 | 0.6004   | 4.46E-47 | 0.601759 | 2.45E-47 | 0.676166 | 1.10E-63 |
| 4.62E-21 | 0.68202  | 3.52E-65 | 0.687887 | 1.03E-66 | 0.562748 | 2.32E-40 | 0.454781 | 3.24E-25 |
| 3.40E-07 | 0.534322 | 7.82E-36 | 0.414978 | 7.28E-21 | 0.399033 | 2.82E-19 | 0.401537 | 1.61E-19 |
| 1.61E-07 | 0.474269 | 1.45E-27 | 0.660703 | 6.67E-60 | 0.555462 | 3.69E-39 | 0.253453 | 2.80E-08 |
| 3.05E-19 | 0.747522 | 1.19E-84 | 0.520481 | 8.85E-34 | 0.571177 | 8.63E-42 | 0.485343 | 5.71E-29 |
| 1.38E-50 | 0.611139 | 3.68E-49 | 0.580099 | 2.39E-43 | 0.491543 | 8.87E-30 | 0.556388 | 2.61E-39 |
| 7.13E-23 | 0.648632 | 4.22E-57 | 0.647334 | 8.30E-57 | 0.600665 | 3.97E-47 | 0.528088 | 6.76E-35 |
| 0.00096  | 0.420575 | 1.93E-21 | 0.565252 | 8.81E-41 | 0.490154 | 1.35E-29 | 0.388836 | 2.64E-18 |
| 5.93E-26 | 0.523762 | 2.94E-34 | 0.462662 | 3.78E-26 | 0.384405 | 6.80E-18 | 0.480168 | 2.62E-28 |
| 3.36E-27 | -0.31163 | 5.63E-12 | -0.2574  | 1.67E-08 | -0.33677 | 7.56E-14 | -0.44186 | 9.69E-24 |
| 1.51E-06 | 0.411095 | 1.81E-20 | 0.413706 | 9.82E-21 | 0.479212 | 3.47E-28 | 0.253793 | 2.68E-08 |
| 1.86E-22 | 0.450948 | 9.00E-25 | 0.313567 | 4.10E-12 | 0.343109 | 2.39E-14 | 0.501755 | 3.80E-31 |
| 6.73E-21 | 0.574113 | 2.68E-42 | 0.536087 | 4.21E-36 | 0.455117 | 2.96E-25 | 0.448166 | 1.88E-24 |
| 2.53E-49 | 0.6338   | 7.91E-54 | 0.554551 | 5.20E-39 | 0.532831 | 1.32E-35 | 0.618293 | 1.36E-50 |
| 0.06602  | 0.645926 | 1.72E-56 | 0.432571 | 1.02E-22 | 0.574032 | 2.77E-42 | 0.293158 | 1.04E-10 |
| 2.14E-38 | 0.595884 | 3.17E-46 | 0.407388 | 4.25E-20 | 0.510074 | 2.69E-32 | 0.49588  | 2.36E-30 |
| 0.00026  | 0.478899 | 3.80E-28 | 0.568974 | 2.06E-41 | 0.500841 | 5.06E-31 | 0.29901  | 4.23E-11 |
| 2.02E-28 | 0.607456 | 1.95E-48 | 0.452074 | 6.67E-25 | 0.414172 | 8.81E-21 | 0.608993 | 9.74E-49 |
| 1.99E-46 | 0.690083 | 2.70E-67 | 0.539056 | 1.48E-36 | 0.484307 | 7.76E-29 | 0.559919 | 6.84E-40 |
| 5.13E-09 | 0.54012  | 1.01E-36 | 0.508167 | 4.97E-32 | 0.483009 | 1.14E-28 | 0.414919 | 7.39E-21 |
| 0.01532  | 0.458759 | 1.10E-25 | 0.422722 | 1.15E-21 | 0.453365 | 4.73E-25 | 0.34838  | 9.00E-15 |
| 1.19E-21 | 0.430645 | 1.65E-22 | 0.517757 | 2.19E-33 | 0.424704 | 7.10E-22 | 0.428774 | 2.62E-22 |
| 4.03E-41 | 0.725192 | 2.22E-77 | 0.624701 | 6.58E-52 | 0.597754 | 1.41E-46 | 0.65838  | 2.36E-59 |
| 5.37E-07 | 0.468396 | 7.66E-27 | 0.457002 | 1.78E-25 | 0.430581 | 1.68E-22 | 0.266973 | 4.61E-09 |

|          |          |          |          |          |          |          |          |          |
|----------|----------|----------|----------|----------|----------|----------|----------|----------|
| 0.00012  | 0.630294 | 4.42E-53 | 0.569261 | 1.84E-41 | 0.573403 | 3.57E-42 | 0.324805 | 6.19E-13 |
| 5.59E-07 | 0.613517 | 1.24E-49 | 0.494491 | 3.61E-30 | 0.502544 | 2.96E-31 | 0.455379 | 2.75E-25 |
| 4.70E-42 | 0.69428  | 2.01E-68 | 0.569108 | 1.95E-41 | 0.537365 | 2.69E-36 | 0.651715 | 8.36E-58 |
| 2.65E-43 | 0.549649 | 3.20E-38 | 0.439792 | 1.65E-23 | 0.377409 | 2.95E-17 | 0.460862 | 6.21E-26 |
| 0.00439  | 0.485459 | 5.52E-29 | 0.556588 | 2.42E-39 | 0.616921 | 2.58E-50 | 0.415906 | 5.85E-21 |
| 1.09E-20 | 0.669319 | 5.55E-62 | 0.654368 | 2.04E-58 | 0.629404 | 6.82E-53 | 0.575916 | 1.30E-42 |
| 4.94E-20 | 0.618675 | 1.14E-50 | 0.636057 | 2.58E-54 | 0.582731 | 8.12E-44 | 0.49389  | 4.34E-30 |
| 6.57E-35 | -0.43967 | 1.70E-23 | -0.23606 | 2.46E-07 | -0.22468 | 9.33E-07 | -0.44125 | 1.13E-23 |
| 1.65E-29 | 0.577879 | 5.90E-43 | 0.5538   | 6.88E-39 | 0.507953 | 5.32E-32 | 0.66126  | 4.92E-60 |
| 1.47E-17 | 0.401168 | 1.75E-19 | 0.607625 | 1.80E-48 | 0.548398 | 5.07E-38 | 0.455665 | 2.55E-25 |
| 9.63E-20 | 0.384119 | 7.23E-18 | 0.507802 | 5.59E-32 | 0.361755 | 6.94E-16 | 0.446596 | 2.83E-24 |
| 3.39E-16 | 0.690556 | 2.02E-67 | 0.630077 | 4.91E-53 | 0.623419 | 1.21E-51 | 0.45039  | 1.04E-24 |
| 2.51E-10 | 0.5215   | 6.30E-34 | 0.495842 | 2.39E-30 | 0.512544 | 1.21E-32 | 0.329561 | 2.71E-13 |
| 1.45E-11 | 0.521764 | 5.76E-34 | 0.635157 | 4.04E-54 | 0.579772 | 2.73E-43 | 0.453173 | 4.98E-25 |
| 7.03E-29 | 0.778775 | 3.18E-96 | 0.630832 | 3.40E-53 | 0.677123 | 6.29E-64 | 0.625058 | 5.55E-52 |
| 7.62E-35 | 0.634093 | 6.84E-54 | 0.534246 | 8.03E-36 | 0.512442 | 1.25E-32 | 0.583612 | 5.65E-44 |
| 5.70E-13 | 0.455724 | 2.51E-25 | 0.556533 | 2.47E-39 | 0.438077 | 2.55E-23 | 0.421259 | 1.63E-21 |
| 4.29E-53 | 0.62349  | 1.17E-51 | 0.679275 | 1.79E-64 | 0.559347 | 8.51E-40 | 0.623202 | 1.35E-51 |
| 5.13E-49 | 0.775365 | 7.17E-95 | 0.515976 | 3.94E-33 | 0.537217 | 2.83E-36 | 0.59294  | 1.12E-45 |
| 3.76E-13 | 0.491979 | 7.77E-30 | 0.536546 | 3.59E-36 | 0.514    | 7.53E-33 | 0.511959 | 1.46E-32 |
| 0.00253  | 0.602642 | 1.66E-47 | 0.541551 | 6.06E-37 | 0.664479 | 8.34E-61 | 0.386602 | 4.26E-18 |
| 2.64E-12 | 0.511763 | 1.56E-32 | 0.669657 | 4.58E-62 | 0.511603 | 1.64E-32 | 0.48351  | 9.83E-29 |
| 4.65E-21 | 0.454457 | 3.53E-25 | 0.578658 | 4.30E-43 | 0.522965 | 3.85E-34 | 0.453142 | 5.02E-25 |
| 1.05E-11 | 0.646967 | 1.00E-56 | 0.526392 | 1.21E-34 | 0.508791 | 4.07E-32 | 0.350638 | 5.89E-15 |
| 4.09E-33 | 0.475731 | 9.51E-28 | 0.549607 | 3.25E-38 | 0.431125 | 1.47E-22 | 0.439869 | 1.62E-23 |
| 2.04E-21 | 0.408573 | 3.24E-20 | 0.40783  | 3.84E-20 | 0.343935 | 2.06E-14 | 0.455242 | 2.86E-25 |
| 1.45E-46 | -0.22262 | 1.18E-06 | -0.14816 | 0.00132  | -0.12157 | 0.00854  | -0.41574 | 6.09E-21 |
| 2.08E-23 | -0.31666 | 2.46E-12 | -0.13872 | 0.00266  | -0.21834 | 1.90E-06 | -0.42604 | 5.13E-22 |
| 1.12E-16 | 0.655184 | 1.32E-58 | 0.67175  | 1.39E-62 | 0.648654 | 4.18E-57 | 0.526652 | 1.10E-34 |
| 1.90E-07 | 0.516805 | 3.00E-33 | 0.511789 | 1.55E-32 | 0.493366 | 5.09E-30 | 0.366207 | 2.88E-16 |
| 3.54E-22 | 0.315121 | 3.17E-12 | 0.407499 | 4.15E-20 | 0.240982 | 1.35E-07 | 0.326647 | 4.50E-13 |
| 1.71E-33 | 0.659658 | 1.18E-59 | 0.573872 | 2.96E-42 | 0.520999 | 7.44E-34 | 0.583582 | 5.72E-44 |
| 3.97E-28 | 0.578777 | 4.09E-43 | 0.52105  | 7.32E-34 | 0.515177 | 5.12E-33 | 0.440743 | 1.29E-23 |
| 4.21E-18 | 0.580888 | 1.73E-43 | 0.61625  | 3.52E-50 | 0.562557 | 2.49E-40 | 0.543996 | 2.52E-37 |
| 1.48E-34 | -0.47089 | 3.79E-27 | -0.16644 | 0.0003   | -0.22913 | 5.59E-07 | -0.33246 | 1.63E-13 |
| 1.40E-14 | 0.509463 | 3.28E-32 | 0.384601 | 6.53E-18 | 0.354688 | 2.73E-15 | 0.420897 | 1.78E-21 |
| 9.07E-30 | 0.542998 | 3.61E-37 | 0.556994 | 2.08E-39 | 0.478368 | 4.43E-28 | 0.609285 | 8.53E-49 |
| 1.40E-37 | 0.709696 | 9.62E-73 | 0.64495  | 2.85E-56 | 0.683775 | 1.24E-65 | 0.646928 | 1.03E-56 |
| 4.15E-54 | 0.387706 | 3.36E-18 | 0.41624  | 5.41E-21 | 0.335045 | 1.03E-13 | 0.490923 | 1.07E-29 |
| 8.60E-15 | -0.20261 | 1.02E-05 | -0.1418  | 0.00213  | -0.1954  | 2.12E-05 | -0.30625 | 1.35E-11 |
| 6.89E-66 | 0.613136 | 1.48E-49 | 0.615968 | 4.01E-50 | 0.530032 | 3.47E-35 | 0.67371  | 4.54E-63 |
| 1.04E-16 | 0.489314 | 1.74E-29 | 0.466439 | 1.33E-26 | 0.450368 | 1.05E-24 | 0.435007 | 5.55E-23 |
| 1.36E-13 | 0.457777 | 1.44E-25 | 0.561797 | 3.34E-40 | 0.477446 | 5.79E-28 | 0.385203 | 5.74E-18 |
| 0.39866  | 0.479423 | 3.26E-28 | 0.466185 | 1.42E-26 | 0.604671 | 6.76E-48 | 0.17195  | 0.00019  |
| 1.34E-10 | 0.586734 | 1.54E-44 | 0.447471 | 2.25E-24 | 0.562849 | 2.23E-40 | 0.451198 | 8.43E-25 |

|          |          |          |          |          |          |          |          |          |
|----------|----------|----------|----------|----------|----------|----------|----------|----------|
| 1.01E-09 | 0.343356 | 2.29E-14 | 0.384763 | 6.31E-18 | 0.450006 | 1.16E-24 | 0.432364 | 1.08E-22 |
| 6.14E-15 | 0.509414 | 3.33E-32 | 0.636728 | 1.85E-54 | 0.514839 | 5.72E-33 | 0.495604 | 2.57E-30 |
| 9.84E-18 | 0.364328 | 4.18E-16 | 0.469269 | 5.99E-27 | 0.33126  | 2.01E-13 | 0.375063 | 4.79E-17 |
| 6.77E-05 | 0.538245 | 1.97E-36 | 0.494133 | 4.03E-30 | 0.543785 | 2.71E-37 | 0.438755 | 2.15E-23 |
| 7.04E-16 | 0.481897 | 1.58E-28 | 0.477793 | 5.24E-28 | 0.448828 | 1.58E-24 | 0.470472 | 4.27E-27 |
| 0.07051  | 0.397441 | 4.02E-19 | 0.329665 | 2.66E-13 | 0.486722 | 3.79E-29 | 0.224482 | 9.55E-07 |
| 8.21E-06 | 0.449917 | 1.18E-24 | 0.435853 | 4.48E-23 | 0.510632 | 2.25E-32 | 0.368775 | 1.72E-16 |
| 4.34E-39 | 0.689154 | 4.77E-67 | 0.512562 | 1.20E-32 | 0.568025 | 2.99E-41 | 0.613032 | 1.55E-49 |
| 0.15205  | 0.386832 | 4.06E-18 | 0.322417 | 9.31E-13 | 0.475104 | 1.14E-27 | 0.290757 | 1.50E-10 |
| 6.82E-24 | 0.455061 | 3.00E-25 | 0.501719 | 3.84E-31 | 0.413757 | 9.71E-21 | 0.425524 | 5.82E-22 |
| 4.93E-28 | 0.624848 | 6.14E-52 | 0.512781 | 1.12E-32 | 0.399292 | 2.66E-19 | 0.468706 | 7.02E-27 |
| 1.56E-18 | 0.579946 | 2.54E-43 | 0.630791 | 3.47E-53 | 0.472439 | 2.44E-27 | 0.480954 | 2.08E-28 |
| 0.00335  | 0.365415 | 3.37E-16 | 0.501545 | 4.06E-31 | 0.459604 | 8.76E-26 | 0.276857 | 1.16E-09 |
| 3.76E-12 | 0.384495 | 6.67E-18 | 0.328249 | 3.41E-13 | 0.322242 | 9.59E-13 | 0.340866 | 3.61E-14 |
| 7.39E-10 | 0.565343 | 8.50E-41 | 0.511276 | 1.83E-32 | 0.553993 | 6.40E-39 | 0.435255 | 5.21E-23 |
| 2.63E-67 | 0.631341 | 2.65E-53 | 0.517645 | 2.27E-33 | 0.461875 | 4.70E-26 | 0.655911 | 8.95E-59 |
| 2.94E-31 | 0.443006 | 7.21E-24 | 0.567964 | 3.06E-41 | 0.369718 | 1.42E-16 | 0.348523 | 8.77E-15 |
| 1.46E-18 | 0.547148 | 8.01E-38 | 0.453976 | 4.02E-25 | 0.282568 | 5.06E-10 | 0.462753 | 3.69E-26 |
| 2.02E-10 | 0.549042 | 4.00E-38 | 0.584496 | 3.92E-44 | 0.488664 | 2.12E-29 | 0.359868 | 1.00E-15 |
| 1.18E-12 | 0.416421 | 5.18E-21 | 0.576931 | 8.65E-43 | 0.485259 | 5.85E-29 | 0.404498 | 8.23E-20 |
| 2.76E-06 | 0.540804 | 7.92E-37 | 0.416467 | 5.13E-21 | 0.514042 | 7.43E-33 | 0.263924 | 6.99E-09 |
| 1.39E-32 | -0.31566 | 2.90E-12 | -0.05776 | 0.21283  | -0.13366 | 0.00381  | -0.36408 | 4.38E-16 |
| 8.49E-25 | 0.693488 | 3.29E-68 | 0.618938 | 1.01E-50 | 0.647928 | 6.10E-57 | 0.557183 | 1.93E-39 |
| 1.79E-14 | -0.2517  | 3.51E-08 | -0.20797 | 5.84E-06 | -0.1791  | 9.96E-05 | -0.18292 | 7.01E-05 |
| 0.00042  | 0.509511 | 3.23E-32 | 0.546385 | 1.06E-37 | 0.65191  | 7.54E-58 | 0.407333 | 4.31E-20 |
| 7.64E-11 | 0.569148 | 1.92E-41 | 0.513539 | 8.75E-33 | 0.449169 | 1.44E-24 | 0.390938 | 1.67E-18 |
| 0.0007   | 0.616412 | 3.26E-50 | 0.655915 | 8.94E-59 | 0.639345 | 4.96E-55 | 0.384649 | 6.46E-18 |
| 8.26E-40 | 0.538933 | 1.54E-36 | 0.483885 | 8.80E-29 | 0.387807 | 3.29E-18 | 0.581528 | 1.33E-43 |
| 9.95E-31 | 0.515723 | 4.28E-33 | 0.489796 | 1.50E-29 | 0.361684 | 7.03E-16 | 0.512663 | 1.16E-32 |
| 4.57E-37 | 0.502644 | 2.87E-31 | 0.362637 | 5.83E-16 | 0.331049 | 2.09E-13 | 0.493357 | 5.11E-30 |
| 2.00E-13 | 0.353558 | 3.39E-15 | 0.507574 | 6.01E-32 | 0.526211 | 1.28E-34 | 0.466449 | 1.32E-26 |
| 2.09E-33 | 0.515915 | 4.02E-33 | 0.621718 | 2.72E-51 | 0.599336 | 7.10E-47 | 0.612982 | 1.59E-49 |
| 4.84E-24 | 0.56088  | 4.74E-40 | 0.589946 | 4.00E-45 | 0.607584 | 1.84E-48 | 0.571285 | 8.27E-42 |
| 7.41E-34 | 0.685664 | 3.97E-66 | 0.623903 | 9.63E-52 | 0.609249 | 8.68E-49 | 0.63483  | 4.75E-54 |
| 1.53E-08 | 0.227456 | 6.78E-07 | 0.268012 | 4.00E-09 | 0.245706 | 7.52E-08 | 0.286    | 3.06E-10 |
| 3.70E-06 | 0.224339 | 9.70E-07 | 0.201791 | 1.11E-05 | 0.19207  | 2.93E-05 | 0.141092 | 0.00224  |
| 0.00124  | 0.065774 | 0.15587  | 0.090638 | 0.05029  | 0.089197 | 0.05407  | 0.126939 | 0.00602  |
| 0.06334  | 0.011243 | 0.80853  | -0.09142 | 0.04833  | 0.010164 | 0.82661  | -0.07836 | 0.09074  |
| 2.42E-19 | -0.23829 | 1.88E-07 | -0.31597 | 2.75E-12 | -0.15506 | 0.00077  | -0.22965 | 5.26E-07 |
| 2.94E-13 | 0.128912 | 0.00527  | 0.174408 | 0.00015  | 0.078196 | 0.09143  | 0.201807 | 1.11E-05 |
| 0.27808  | -0.0387  | 0.40406  | -0.0561  | 0.2263   | -0.08276 | 0.074    | -0.07098 | 0.12558  |
| 0.011    | 0.04317  | 0.35193  | 0.000243 | 0.99583  | 0.007668 | 0.86874  | -0.01696 | 0.71469  |
| 0.03567  | 0.086724 | 0.06112  | -0.01365 | 0.76855  | -0.03549 | 0.44413  | -0.10719 | 0.02051  |
| 1.53E-06 | 0.221476 | 1.34E-06 | 0.167719 | 0.00027  | 0.159789 | 0.00053  | 0.084905 | 0.06677  |
| 1.13E-05 | 0.225824 | 8.19E-07 | 0.219989 | 1.59E-06 | 0.160991 | 0.00048  | 0.111063 | 0.01635  |



|          |          |          |          |          |          |          |          |          |
|----------|----------|----------|----------|----------|----------|----------|----------|----------|
| 0.00043  | 0.241977 | 1.20E-07 | 0.130764 | 0.00465  | 0.168674 | 0.00025  | 0.115122 | 0.01279  |
| 0.00118  | -0.15844 | 0.00059  | -0.05009 | 0.28007  | -0.17643 | 0.00013  | -0.12693 | 0.00602  |
| 2.41E-07 | 0.114993 | 0.0129   | 0.049233 | 0.28836  | -0.00301 | 0.94829  | -0.02003 | 0.66596  |
| 7.95E-05 | 0.300215 | 3.50E-11 | 0.164534 | 0.00036  | 0.081014 | 0.08031  | 0.087787 | 0.058    |
| 0.00558  | -0.04099 | 0.37685  | -0.11703 | 0.01137  | -0.11172 | 0.01572  | -0.0367  | 0.42878  |
| 0.00725  | 0.210042 | 4.69E-06 | 0.081486 | 0.07855  | 0.001278 | 0.97803  | 0.018604 | 0.68843  |
| 3.05E-08 | 0.329822 | 2.59E-13 | 0.253144 | 2.92E-08 | 0.217083 | 2.19E-06 | 0.259817 | 1.21E-08 |
| 0.11788  | 0.306845 | 1.22E-11 | 0.064775 | 0.16226  | 0.106146 | 0.02178  | -0.10458 | 0.02381  |
| 1.52E-18 | -0.40293 | 1.18E-19 | -0.28277 | 4.92E-10 | -0.25634 | 1.92E-08 | -0.29615 | 6.59E-11 |
| 0.34391  | 0.065453 | 0.1579   | 0.07254  | 0.11747  | 0.075922 | 0.10128  | 0.010735 | 0.81702  |
| 6.66E-09 | 0.122995 | 0.00779  | 0.107328 | 0.02035  | 0.05877  | 0.2049   | 0.07356  | 0.11239  |
| 0.93931  | -0.08795 | 0.05753  | -0.00756 | 0.87054  | 0.000931 | 0.98399  | 0.017322 | 0.70889  |
| 0.00024  | 0.313014 | 4.49E-12 | 0.124741 | 0.00695  | 0.192762 | 2.74E-05 | 0.083123 | 0.07272  |
| 0.00037  | 0.295975 | 6.77E-11 | 0.141171 | 0.00223  | 0.093718 | 0.04294  | -0.01354 | 0.77038  |
| 0.00024  | -0.03042 | 0.51198  | 0.009675 | 0.83482  | -0.07884 | 0.08879  | 0.009797 | 0.83277  |
| 7.90E-06 | 0.04273  | 0.35686  | 0.101077 | 0.02896  | -0.00936 | 0.84018  | 0.045462 | 0.32693  |
| 5.54E-14 | 0.241245 | 1.31E-07 | 0.171421 | 0.0002   | 0.132537 | 0.00412  | 0.098701 | 0.03297  |
| 0.00036  | -0.00368 | 0.93685  | 0.05184  | 0.26355  | -0.00631 | 0.89182  | -0.05927 | 0.20108  |
| 1.20E-16 | 0.171657 | 0.00019  | 0.094291 | 0.04168  | 0.052639 | 0.25626  | 0.146086 | 0.00155  |
| 0.01709  | -0.01755 | 0.70522  | -0.03724 | 0.42205  | -0.07555 | 0.10299  | -0.01446 | 0.75522  |
| 0.00036  | 0.043542 | 0.3478   | 0.058358 | 0.2081   | 0.026094 | 0.5738   | 0.045563 | 0.32586  |
| 1.02E-08 | 0.280527 | 6.81E-10 | 0.153558 | 0.00087  | 0.146666 | 0.00148  | 0.057894 | 0.21174  |
| 0.15298  | 0.265396 | 5.72E-09 | 0.228154 | 6.26E-07 | 0.275694 | 1.36E-09 | 0.085766 | 0.06404  |
| 4.63E-07 | -0.0651  | 0.16019  | -0.11181 | 0.01563  | -0.09952 | 0.03154  | -0.08089 | 0.08079  |
| 1.77E-18 | -0.0673  | 0.14644  | -0.04197 | 0.36553  | -0.17385 | 0.00016  | 0.028648 | 0.53687  |
| 7.74E-15 | 0.138468 | 0.00271  | 0.058314 | 0.20844  | 0.014607 | 0.7529   | 0.069837 | 0.13181  |
| 4.83E-20 | 0.143473 | 0.00188  | 0.100483 | 0.02992  | 0.039143 | 0.39869  | 0.09563  | 0.03885  |
| 1.78E-06 | 0.012655 | 0.78504  | 0.02344  | 0.61338  | -0.02693 | 0.56164  | -0.04788 | 0.30179  |
| 3.35E-42 | 0.472935 | 2.12E-27 | 0.359817 | 1.01E-15 | 0.272896 | 2.03E-09 | 0.363902 | 4.55E-16 |
| 8.59E-11 | 0.113282 | 0.01431  | 0.067134 | 0.14747  | 0.028667 | 0.5366   | 0.015914 | 0.7316   |
| 4.45E-10 | 0.079565 | 0.08588  | 0.091915 | 0.04712  | 0.037744 | 0.41578  | 0.078958 | 0.08831  |
| 0.00013  | -0.05084 | 0.27292  | -0.13089 | 0.00461  | -0.13948 | 0.00252  | 0.013725 | 0.76736  |
| 0.00097  | 0.004504 | 0.92267  | -0.08189 | 0.07709  | -0.05461 | 0.23882  | -0.02328 | 0.61588  |
| 0.37008  | -0.15687 | 0.00067  | -0.09339 | 0.04368  | -0.15393 | 0.00085  | -0.1912  | 3.19E-05 |
| 0.21776  | -0.13689 | 0.00303  | -0.12799 | 0.00561  | -0.0596  | 0.19854  | -0.20913 | 5.17E-06 |
| 0.0003   | -0.20509 | 7.91E-06 | -0.11567 | 0.01237  | -0.08379 | 0.07044  | -0.04998 | 0.28113  |
| 1.55E-20 | 0.198663 | 1.53E-05 | 0.172349 | 0.00018  | 0.079327 | 0.08683  | 0.124925 | 0.00687  |
| 0.68642  | -0.09591 | 0.03828  | -0.11801 | 0.0107   | -0.1679  | 0.00027  | -0.07496 | 0.10571  |
| 0.00194  | -0.04385 | 0.34444  | 0.015576 | 0.73709  | -0.04467 | 0.33544  | 0.093096 | 0.04435  |
| 1.05E-26 | 0.42201  | 1.36E-21 | 0.189722 | 3.68E-05 | 0.142714 | 0.00199  | 0.331013 | 2.10E-13 |
| 0.03083  | -0.10213 | 0.02732  | -0.04994 | 0.28151  | -0.14669 | 0.00148  | -0.05444 | 0.2403   |
| 2.77E-12 | 0.328471 | 3.28E-13 | 0.199462 | 1.41E-05 | 0.219968 | 1.59E-06 | 0.184084 | 6.29E-05 |
| 2.10E-26 | 0.280921 | 6.44E-10 | 0.223583 | 1.06E-06 | 0.151062 | 0.00106  | 0.263987 | 6.93E-09 |
| 0.13545  | 0.18315  | 6.86E-05 | 0.08147  | 0.07861  | 0.060264 | 0.1936   | 0.06626  | 0.15282  |
| 1.34E-18 | 0.426644 | 4.42E-22 | 0.221552 | 1.33E-06 | 0.131276 | 0.00449  | 0.152522 | 0.00094  |

|          |          |          |          |          |          |          |          |          |
|----------|----------|----------|----------|----------|----------|----------|----------|----------|
| 2.45E-15 | 0.32464  | 6.36E-13 | 0.16382  | 0.00038  | 0.195928 | 2.01E-05 | 0.123137 | 0.00772  |
| 2.66E-16 | 0.105943 | 0.02204  | 0.063324 | 0.1719   | -0.01919 | 0.67915  | 0.171841 | 0.00019  |
| 0.19595  | 0.086395 | 0.06211  | 0.005906 | 0.89871  | -0.00295 | 0.94936  | -0.11255 | 0.01495  |
| 0.00753  | 0.059768 | 0.1973   | 0.031139 | 0.50205  | -0.01938 | 0.67617  | 0.003904 | 0.93294  |
| 6.47E-11 | 0.445048 | 4.25E-24 | 0.352078 | 4.49E-15 | 0.415975 | 5.76E-21 | 0.332529 | 1.61E-13 |
| 5.37E-05 | 0.050283 | 0.27819  | 0.079279 | 0.08702  | -0.0695  | 0.1337   | 0.067863 | 0.14311  |
| 1.02E-16 | 0.016134 | 0.72803  | -0.00825 | 0.85895  | -0.10813 | 0.01943  | 0.123815 | 0.00739  |
| 2.82E-46 | 0.359029 | 1.18E-15 | 0.280277 | 7.07E-10 | 0.244196 | 9.09E-08 | 0.348074 | 9.53E-15 |
| 1.17E-11 | 0.322846 | 8.65E-13 | 0.281904 | 5.58E-10 | 0.299414 | 3.97E-11 | 0.405223 | 6.98E-20 |
| 0.06883  | 0.077681 | 0.09359  | 0.088273 | 0.05662  | 0.209456 | 5.00E-06 | -0.09237 | 0.04603  |
| 0.93031  | -0.11596 | 0.01215  | -0.15386 | 0.00085  | -0.23419 | 3.08E-07 | -0.23095 | 4.51E-07 |
| 0.42143  | 0.038635 | 0.40485  | 0.092936 | 0.04471  | 0.045606 | 0.3254   | -0.08812 | 0.05707  |
| 2.77E-12 | 0.09779  | 0.03463  | 0.079432 | 0.08641  | 0.028653 | 0.5368   | 0.048979 | 0.29086  |
| 0.09502  | -0.01805 | 0.69717  | -0.13542 | 0.00337  | -0.02173 | 0.63946  | -0.05469 | 0.23818  |
| 1.41E-12 | 0.166323 | 0.00031  | 0.14334  | 0.0019   | 0.107206 | 0.02049  | 0.107183 | 0.02052  |
| 0.11484  | 0.049425 | 0.28649  | 0.043425 | 0.34909  | 0.133487 | 0.00385  | -0.06717 | 0.14724  |
| 0.22226  | -0.08919 | 0.05408  | -0.08429 | 0.06879  | -0.12583 | 0.00647  | -0.06822 | 0.14102  |
| 0.23796  | -0.01718 | 0.71116  | -0.00654 | 0.88787  | -0.01848 | 0.69037  | -0.05161 | 0.26571  |
| 0.00818  | 0.019404 | 0.67577  | 0.056366 | 0.22407  | -0.01856 | 0.68913  | 0.256458 | 1.89E-08 |
| 1.57E-16 | 0.160703 | 0.00049  | 0.122586 | 0.008    | 0.069614 | 0.13305  | 0.140903 | 0.00227  |
| 6.68E-12 | 0.095802 | 0.0385   | -0.00855 | 0.85372  | -0.08547 | 0.06498  | 0.098135 | 0.03399  |
| 0.0004   | 0.119749 | 0.00959  | 0.123181 | 0.0077   | 0.162833 | 0.00041  | 0.101818 | 0.0278   |
| 1.85E-07 | -0.06398 | 0.16747  | 0.030112 | 0.51626  | -0.06699 | 0.14836  | 0.08986  | 0.05231  |
| 0.0008   | 0.052171 | 0.26052  | 0.031914 | 0.49146  | 0.05688  | 0.21986  | -0.05782 | 0.21233  |
| 8.48E-63 | 0.354348 | 2.91E-15 | 0.222748 | 1.16E-06 | 0.190759 | 3.33E-05 | 0.387078 | 3.85E-18 |
| 2.47E-35 | 0.149225 | 0.00122  | 0.134516 | 0.00359  | -0.00958 | 0.83637  | 0.216032 | 2.46E-06 |
| 0.00281  | 0.254557 | 2.43E-08 | 0.264648 | 6.34E-09 | 0.282772 | 4.91E-10 | 0.22357  | 1.06E-06 |
| 0.11283  | 0.460001 | 7.86E-26 | 0.276984 | 1.13E-09 | 0.404054 | 9.10E-20 | 0.1465   | 0.0015   |
| 2.01E-28 | 0.25737  | 1.68E-08 | 0.06523  | 0.15932  | -0.0013  | 0.97772  | 0.250452 | 4.12E-08 |
| 0.00045  | -0.04458 | 0.33643  | 0.084239 | 0.06895  | -0.02248 | 0.62804  | 0.019591 | 0.67283  |
| 1.40E-41 | 0.583088 | 7.01E-44 | 0.460547 | 6.77E-26 | 0.455528 | 2.65E-25 | 0.508416 | 4.59E-32 |
| 1.12E-17 | 0.40452  | 8.19E-20 | 0.2501   | 4.31E-08 | 0.255806 | 2.06E-08 | 0.252885 | 3.02E-08 |
| 5.93E-17 | 0.155328 | 0.00076  | 0.090799 | 0.04988  | 0.033314 | 0.47264  | 0.117992 | 0.01071  |
| 2.41E-13 | 0.148946 | 0.00125  | 0.181501 | 7.99E-05 | 0.140912 | 0.00227  | 0.139828 | 0.00246  |
| 1.22E-11 | 0.119548 | 0.00972  | 0.034855 | 0.45239  | -0.05663 | 0.2219   | 0.224669 | 9.34E-07 |
| 0.04767  | 0.075097 | 0.10506  | 0.027784 | 0.54922  | -0.02574 | 0.57905  | 0.035246 | 0.44733  |
| 2.51E-13 | 0.073328 | 0.11353  | 0.023511 | 0.61231  | -0.13261 | 0.0041   | 0.003022 | 0.94807  |
| 0.27702  | 0.00695  | 0.88094  | 0.119757 | 0.00959  | 0.087938 | 0.05757  | 0.072317 | 0.11861  |
| 0.01203  | 0.313943 | 3.85E-12 | 0.152303 | 0.00096  | 0.219142 | 1.74E-06 | 0.123353 | 0.00761  |
| 0.3267   | 0.133415 | 0.00387  | -0.05413 | 0.24303  | -0.08191 | 0.07702  | -0.11376 | 0.0139   |
| 0.20618  | 0.008707 | 0.85114  | 0.004903 | 0.91584  | 0.028593 | 0.53765  | -0.03566 | 0.44198  |
| 2.83E-07 | 0.137929 | 0.00282  | 0.161731 | 0.00045  | 0.168106 | 0.00026  | 0.171419 | 0.0002   |
| 2.25E-26 | 0.483346 | 1.03E-28 | 0.397797 | 3.71E-19 | 0.378841 | 2.19E-17 | 0.355468 | 2.35E-15 |
| 9.02E-05 | 0.436892 | 3.45E-23 | 0.227105 | 7.06E-07 | 0.209683 | 4.88E-06 | 0.090109 | 0.05165  |
| 5.59E-20 | 0.263518 | 7.39E-09 | 0.261261 | 1.00E-08 | 0.154562 | 0.0008   | 0.278299 | 9.40E-10 |

|          |          |          |          |          |          |          |          |          |
|----------|----------|----------|----------|----------|----------|----------|----------|----------|
| 0.00252  | -0.2319  | 4.04E-07 | -0.23033 | 4.85E-07 | -0.1616  | 0.00045  | -0.21465 | 2.86E-06 |
| 2.03E-06 | 0.221669 | 1.31E-06 | 0.091388 | 0.04841  | 0.089879 | 0.05225  | 0.157058 | 0.00066  |
| 0.00372  | 0.001259 | 0.97835  | -0.06605 | 0.15412  | -0.12319 | 0.0077   | -0.11781 | 0.01084  |
| 2.26E-08 | 0.048812 | 0.29251  | -0.02332 | 0.61523  | -0.02462 | 0.59564  | 0.01585  | 0.73263  |
| 0.15547  | 0.188781 | 4.03E-05 | -0.03602 | 0.43741  | 0.020001 | 0.66638  | -0.08648 | 0.06185  |
| 0.95575  | -0.08388 | 0.07015  | -0.15831 | 0.0006   | -0.19396 | 2.44E-05 | -0.27444 | 1.63E-09 |
| 0.06311  | -0.27528 | 1.45E-09 | -0.1522  | 0.00097  | -0.21428 | 2.97E-06 | -0.29319 | 1.04E-10 |
| 0.00074  | -0.01153 | 0.80367  | -0.05757 | 0.21431  | -0.10996 | 0.01745  | -0.02089 | 0.65256  |
| 4.13E-07 | -0.09615 | 0.0378   | -0.08416 | 0.06922  | 0.00278  | 0.95222  | -0.10988 | 0.01754  |
| 2.30E-07 | 0.090098 | 0.05168  | 0.072536 | 0.11749  | 0.033541 | 0.46963  | 0.267045 | 4.57E-09 |
| 1.53E-33 | 0.338091 | 5.96E-14 | 0.350324 | 6.25E-15 | 0.321893 | 1.02E-12 | 0.330979 | 2.12E-13 |
| 1.68E-48 | 0.447081 | 2.50E-24 | 0.428125 | 3.08E-22 | 0.312465 | 4.91E-12 | 0.369661 | 1.44E-16 |
| 2.80E-10 | 0.315791 | 2.84E-12 | 0.274395 | 1.64E-09 | 0.214947 | 2.77E-06 | 0.176495 | 0.00013  |
| 0.00011  | 0.014779 | 0.75008  | 0.012384 | 0.78954  | 0.042261 | 0.36217  | -0.01612 | 0.72823  |
| 0.00098  | 0.043932 | 0.34349  | 0.303188 | 2.19E-11 | 0.28733  | 2.51E-10 | 0.139202 | 0.00257  |
| 1.37E-11 | 0.414759 | 7.67E-21 | 0.24539  | 7.83E-08 | 0.308038 | 1.01E-11 | 0.102448 | 0.02684  |
| 0.13162  | 0.143713 | 0.00185  | 0.037883 | 0.41407  | 0.024569 | 0.5964   | -0.07877 | 0.08909  |
| 1.35E-05 | 0.074425 | 0.10822  | 0.04939  | 0.28682  | 0.188252 | 4.24E-05 | -0.14522 | 0.00165  |
| 3.60E-10 | 0.153136 | 0.0009   | 0.173782 | 0.00016  | 0.127258 | 0.00589  | 0.173629 | 0.00016  |
| 0.0266   | 0.002441 | 0.95804  | 0.036504 | 0.43127  | 0.027218 | 0.5574   | 0.159782 | 0.00053  |
| 5.51E-26 | 0.238136 | 1.91E-07 | 0.224134 | 9.93E-07 | 0.128915 | 0.00527  | 0.203323 | 9.49E-06 |
| 1.65E-07 | 0.195402 | 2.11E-05 | 0.330311 | 2.38E-13 | 0.328359 | 3.35E-13 | 0.333041 | 1.47E-13 |
| 1.88E-12 | 0.1829   | 7.02E-05 | 0.112514 | 0.01499  | 0.090012 | 0.05191  | 0.125835 | 0.00647  |
| 4.49E-16 | 0.254635 | 2.40E-08 | 0.175663 | 0.00014  | 0.136347 | 0.00315  | 0.116297 | 0.0119   |
| 0.10548  | 0.162154 | 0.00043  | 0.070068 | 0.13054  | 0.179409 | 9.68E-05 | 0.037282 | 0.42152  |
| 0.03054  | 0.176842 | 0.00012  | 0.053052 | 0.25254  | 0.173701 | 0.00016  | 0.102563 | 0.02667  |
| 5.06E-10 | 0.103419 | 0.02542  | 0.068932 | 0.13691  | 0.012266 | 0.79149  | 0.007006 | 0.87999  |
| 0.01126  | 0.008893 | 0.84801  | 0.042608 | 0.35824  | 0.015844 | 0.73273  | -0.01681 | 0.71712  |
| 6.42E-12 | 0.092218 | 0.0464   | 0.038476 | 0.40679  | 0.001714 | 0.97053  | 0.072601 | 0.11717  |
| 1.03E-26 | 0.221521 | 1.34E-06 | 0.202303 | 1.05E-05 | 0.133357 | 0.00389  | 0.269273 | 3.36E-09 |
| 1.74E-14 | 0.265001 | 6.04E-09 | 0.147261 | 0.00142  | 0.15496  | 0.00078  | 0.140971 | 0.00226  |
| 1.15E-07 | 0.272356 | 2.19E-09 | 0.253626 | 2.74E-08 | 0.227086 | 7.08E-07 | 0.071234 | 0.12424  |
| 5.68E-08 | 0.181804 | 7.77E-05 | 0.099517 | 0.03154  | 0.093529 | 0.04336  | 0.01671  | 0.71872  |
| 0.01701  | 0.036498 | 0.43135  | -0.02887 | 0.53373  | -0.01425 | 0.75879  | -0.00306 | 0.94738  |
| 2.27E-06 | 0.42187  | 1.41E-21 | 0.26494  | 6.09E-09 | 0.309589 | 7.86E-12 | 0.141517 | 0.00217  |
| 3.39E-30 | 0.266637 | 4.83E-09 | 0.219156 | 1.74E-06 | 0.148273 | 0.00131  | 0.340033 | 4.20E-14 |
| 1.11E-07 | 0.405454 | 6.62E-20 | 0.381536 | 1.25E-17 | 0.421843 | 1.42E-21 | 0.211056 | 4.21E-06 |
| 0.04304  | 0.19085  | 3.30E-05 | 0.04765  | 0.30417  | 0.213282 | 3.31E-06 | 0.010192 | 0.82613  |
| 5.32E-27 | 0.249299 | 4.78E-08 | 0.177569 | 0.00011  | 0.097859 | 0.0345   | 0.157747 | 0.00062  |
| 0.00039  | 0.028081 | 0.54496  | 0.031807 | 0.49291  | -0.06588 | 0.1552   | -0.12014 | 0.00936  |
| 0.71582  | 0.219675 | 1.64E-06 | 0.058735 | 0.20517  | 0.010515 | 0.82071  | -0.03503 | 0.45009  |
| 0.12353  | 0.201331 | 1.16E-05 | 0.123367 | 0.00761  | 0.100083 | 0.03058  | -0.00149 | 0.97439  |
| 1.58E-14 | 0.139778 | 0.00247  | 0.111176 | 0.01624  | 0.043501 | 0.34825  | 0.063134 | 0.17318  |
| 9.18E-34 | 0.242572 | 1.11E-07 | 0.101473 | 0.02833  | -0.00268 | 0.95402  | 0.154537 | 0.00081  |
| 1.30E-30 | 0.252282 | 3.26E-08 | 0.256722 | 1.83E-08 | 0.145663 | 0.0016   | 0.325423 | 5.56E-13 |

|          |          |          |          |          |          |          |          |          |
|----------|----------|----------|----------|----------|----------|----------|----------|----------|
| 6.72E-10 | 0.064791 | 0.16216  | 0.048684 | 0.29377  | -0.00538 | 0.90772  | -0.00532 | 0.90868  |
| 0.14783  | 0.073395 | 0.1132   | -0.02691 | 0.56191  | -0.05358 | 0.24781  | -0.10153 | 0.02825  |
| 0.01374  | 0.039196 | 0.39806  | 0.03883  | 0.40249  | 0.020517 | 0.65831  | -0.0594  | 0.20007  |
| 9.02E-10 | 0.185129 | 5.70E-05 | 0.099559 | 0.03147  | 0.056315 | 0.22448  | 0.063702 | 0.16935  |
| 1.20E-21 | 0.178119 | 0.00011  | 0.19056  | 3.40E-05 | 0.056329 | 0.22438  | 0.221323 | 1.37E-06 |
| 0.20758  | 0.239177 | 1.69E-07 | 0.189544 | 3.75E-05 | 0.10227  | 0.02711  | -0.11695 | 0.01143  |
| 0.22812  | -0.14481 | 0.0017   | -0.10301 | 0.02601  | -0.15631 | 0.0007   | 0.008635 | 0.85236  |
| 7.41E-06 | 0.133321 | 0.0039   | 0.110956 | 0.01645  | 0.146599 | 0.00149  | -0.06085 | 0.18927  |
| 2.17E-14 | 0.572106 | 5.97E-42 | 0.323717 | 7.45E-13 | 0.386338 | 4.51E-18 | 0.465743 | 1.61E-26 |
| 0.00011  | 0.053345 | 0.24993  | 0.05653  | 0.22272  | 0.036277 | 0.43416  | 0.098955 | 0.03252  |
| 0.00127  | 0.093191 | 0.04413  | -0.02824 | 0.54273  | -0.02235 | 0.63002  | 0.019676 | 0.67149  |
| 2.60E-07 | 0.086247 | 0.06256  | 0.037074 | 0.42412  | -0.01558 | 0.73704  | -0.02742 | 0.55445  |
| 5.36E-19 | 0.345469 | 1.55E-14 | 0.223342 | 1.09E-06 | 0.153974 | 0.00084  | 0.245214 | 8.00E-08 |
| 0.03102  | 0.204651 | 8.27E-06 | -0.06277 | 0.17567  | -0.02269 | 0.62485  | 0.00395  | 0.93216  |
| 2.05E-12 | 0.133909 | 0.00374  | 0.075686 | 0.10236  | 0.030601 | 0.50947  | 0.118407 | 0.01044  |
| 6.37E-09 | 0.126256 | 0.00629  | 0.062116 | 0.18023  | 0.012627 | 0.7855   | -0.02022 | 0.663    |
| 0.7631   | 0.100143 | 0.03048  | -0.01755 | 0.70517  | -0.04631 | 0.31797  | -0.15039 | 0.00112  |
| 7.84E-10 | 0.143475 | 0.00188  | 0.145259 | 0.00165  | 0.110794 | 0.01661  | 0.060752 | 0.19001  |
| 1.14E-11 | -0.11814 | 0.01061  | -0.07758 | 0.09401  | 0.01905  | 0.68137  | -0.0647  | 0.16278  |
| 0.09775  | 0.064869 | 0.16165  | -0.01636 | 0.72441  | -0.05994 | 0.19599  | -0.01643 | 0.72328  |
| 0.02694  | -0.00618 | 0.89402  | -0.07824 | 0.09124  | 0.025039 | 0.58939  | 0.059087 | 0.20246  |
| 6.47E-06 | 0.057462 | 0.21517  | 0.03162  | 0.49546  | 0.002196 | 0.96225  | -0.08214 | 0.07618  |
| 0.08903  | 0.298704 | 4.44E-11 | 0.246998 | 6.40E-08 | 0.180922 | 8.43E-05 | 0.02781  | 0.54885  |
| 0.06588  | 0.144046 | 0.0018   | 0.063126 | 0.17324  | 0.018377 | 0.69204  | -0.01594 | 0.73122  |
| 6.70E-06 | 0.292789 | 1.10E-10 | 0.026336 | 0.57024  | 0.023886 | 0.60664  | 0.018555 | 0.6892   |
| 2.45E-06 | 0.099795 | 0.03107  | 0.036508 | 0.43123  | 0.001865 | 0.96793  | -0.0281  | 0.54462  |
| 3.35E-08 | 0.16424  | 0.00037  | 0.263676 | 7.23E-09 | 0.210404 | 4.52E-06 | 0.14442  | 0.00175  |
| 0.09353  | 0.054896 | 0.23641  | 0.045102 | 0.33078  | 0.089957 | 0.05205  | 0.028968 | 0.53233  |
| 1.80E-06 | -0.09937 | 0.0318   | -0.08226 | 0.07576  | -0.19625 | 1.94E-05 | 0.084726 | 0.06735  |
| 1.23E-05 | 0.040784 | 0.37921  | 0.024824 | 0.59259  | -0.00499 | 0.91443  | -0.013   | 0.7794   |
| 0.62616  | -0.01214 | 0.79367  | -0.08764 | 0.05843  | -0.04528 | 0.32885  | -0.10441 | 0.02405  |
| 1.44E-10 | 0.17943  | 9.67E-05 | 0.113283 | 0.01431  | 0.09755  | 0.03508  | 0.071666 | 0.12197  |
| 0.72355  | 0.007153 | 0.87747  | -0.02322 | 0.61664  | -0.05447 | 0.24009  | -0.09751 | 0.03515  |
| 1.39E-17 | 0.189849 | 3.64E-05 | 0.079286 | 0.08699  | 0.031972 | 0.49067  | 0.03339  | 0.47164  |
| 1.33E-13 | 0.210017 | 4.71E-06 | 0.148236 | 0.00132  | 0.117939 | 0.01075  | 0.104128 | 0.02443  |
| 5.87E-51 | 0.434139 | 6.90E-23 | 0.226886 | 7.25E-07 | 0.130908 | 0.0046   | 0.352322 | 4.28E-15 |
| 2.04E-14 | 0.300427 | 3.39E-11 | 0.12552  | 0.00661  | 0.108129 | 0.01942  | 0.131095 | 0.00454  |
| 4.26E-05 | 0.078069 | 0.09196  | 0.045982 | 0.32142  | 0.045525 | 0.32626  | -0.05089 | 0.27245  |
| 0.00139  | 0.094599 | 0.04101  | 0.038043 | 0.4121   | 0.076544 | 0.09851  | 0.030798 | 0.50675  |
| 5.91E-09 | 0.136256 | 0.00317  | 0.187837 | 4.41E-05 | 0.164084 | 0.00037  | 0.115894 | 0.0122   |
| 3.16E-12 | 0.153028 | 0.00091  | 0.121606 | 0.00852  | 0.088286 | 0.05659  | 0.085395 | 0.06521  |
| 3.82E-15 | 0.375953 | 3.99E-17 | 0.224593 | 9.43E-07 | 0.239567 | 1.61E-07 | 0.22157  | 1.33E-06 |
| 4.05E-12 | 0.320523 | 1.28E-12 | 0.246535 | 6.78E-08 | 0.242772 | 1.08E-07 | 0.279692 | 7.69E-10 |
| 0.20008  | -0.18234 | 7.40E-05 | -0.21566 | 2.56E-06 | -0.24042 | 1.45E-07 | 0.017899 | 0.69966  |
| 3.53E-05 | 0.143291 | 0.00191  | 0.112117 | 0.01535  | 0.088851 | 0.05502  | 0.107269 | 0.02042  |

|          |          |          |          |          |          |          |          |          |
|----------|----------|----------|----------|----------|----------|----------|----------|----------|
| 9.52E-05 | 0.01232  | 0.7906   | -0.01814 | 0.69585  | -0.11038 | 0.01702  | 0.121081 | 0.00881  |
| 0.00016  | 0.194289 | 2.36E-05 | 0.02052  | 0.65828  | -0.00233 | 0.96001  | 0.020236 | 0.66271  |
| 8.85E-16 | 0.173742 | 0.00016  | 0.128949 | 0.00526  | 0.095649 | 0.03881  | 0.140495 | 0.00234  |
| 5.13E-06 | 0.039962 | 0.3889   | -0.01999 | 0.66656  | -0.04496 | 0.33233  | 0.025992 | 0.57528  |
| 7.90E-22 | 0.261561 | 9.61E-09 | 0.229165 | 5.56E-07 | 0.184112 | 6.27E-05 | 0.245629 | 7.60E-08 |
| 0.00134  | 0.244801 | 8.43E-08 | 0.23782  | 1.99E-07 | 0.22794  | 6.41E-07 | 0.188182 | 4.27E-05 |
| 1.17E-07 | -0.01077 | 0.8164   | -0.03924 | 0.39755  | -0.139   | 0.00261  | -0.06709 | 0.14772  |
| 3.93E-07 | 0.17651  | 0.00013  | 0.085731 | 0.06416  | 0.018298 | 0.69329  | 0.008098 | 0.86145  |
| 1.88E-05 | 0.144155 | 0.00179  | 0.095899 | 0.0383   | 0.102773 | 0.02636  | 0.003074 | 0.94718  |
| 2.45E-06 | 0.051301 | 0.26856  | 0.028505 | 0.53891  | -0.00615 | 0.89463  | -0.02682 | 0.56316  |
| 2.24E-05 | -0.00055 | 0.99052  | 0.026027 | 0.57478  | -0.01983 | 0.6691   | -0.0486  | 0.29461  |
| 2.70E-05 | 0.307493 | 1.10E-11 | 0.132629 | 0.00409  | 0.104407 | 0.02405  | 0.028497 | 0.53902  |
| 0.38552  | 0.041951 | 0.36571  | -0.08452 | 0.06801  | -0.00588 | 0.89916  | -0.07948 | 0.08621  |
| 2.30E-06 | -0.00855 | 0.85375  | 0.010212 | 0.8258   | -0.06526 | 0.15916  | -0.01675 | 0.7181   |
| 0.00772  | 0.17873  | 0.0001   | 0.127689 | 0.00572  | 0.085875 | 0.06371  | 0.161878 | 0.00044  |
| 7.48E-12 | 0.044311 | 0.33934  | 0.101911 | 0.02766  | 0.229019 | 5.66E-07 | 0.035116 | 0.44902  |
| 0.55605  | 0.186824 | 4.86E-05 | 0.160112 | 0.00051  | 0.201566 | 1.14E-05 | 0.036259 | 0.43437  |
| 1.09E-16 | 0.061199 | 0.18676  | 0.104841 | 0.02346  | 0.010906 | 0.81417  | 0.145502 | 0.00162  |
| 2.10E-26 | 0.047587 | 0.3048   | 0.025193 | 0.5871   | -0.09728 | 0.03559  | 0.167721 | 0.00027  |
| 3.78E-05 | 0.092914 | 0.04477  | 0.08015  | 0.08359  | -0.00162 | 0.97218  | 0.093923 | 0.04248  |
| 0.04095  | 0.031012 | 0.50379  | 0.001977 | 0.96601  | -0.03161 | 0.49558  | 0.055862 | 0.22824  |
| 1.71E-05 | -0.10593 | 0.02206  | -0.09952 | 0.03154  | -0.24988 | 4.44E-08 | -0.10176 | 0.02788  |
| 2.40E-25 | 0.487857 | 2.70E-29 | 0.388145 | 3.06E-18 | 0.374406 | 5.48E-17 | 0.356435 | 1.95E-15 |
| 9.25E-12 | 0.135493 | 0.00335  | 0.092135 | 0.0466   | 0.048169 | 0.29892  | 0.048984 | 0.29081  |
| 0.30141  | 0.180235 | 8.98E-05 | 0.179428 | 9.67E-05 | 0.078147 | 0.09164  | -0.07227 | 0.11887  |
| 6.72E-19 | 0.249492 | 4.66E-08 | 0.179376 | 9.71E-05 | 0.141327 | 0.0022   | 0.160799 | 0.00049  |
| 0.1306   | 0.264103 | 6.82E-09 | 0.088412 | 0.05623  | 0.124737 | 0.00696  | 0.104381 | 0.02408  |
| 7.09E-05 | 0.043899 | 0.34386  | -0.03974 | 0.39151  | -0.04991 | 0.28175  | -0.09002 | 0.05189  |
| 2.34E-05 | 0.080056 | 0.08396  | 0.037342 | 0.42077  | 0.005079 | 0.91284  | -0.01466 | 0.75203  |
| 1.28E-07 | 0.139123 | 0.00259  | -0.00045 | 0.9922   | -0.12127 | 0.00871  | -0.08082 | 0.08103  |
| 1.23E-27 | 0.35355  | 3.39E-15 | 0.305963 | 1.41E-11 | 0.234913 | 2.82E-07 | 0.299685 | 3.81E-11 |
| 0.00196  | 0.09634  | 0.03742  | 0.072319 | 0.1186   | 0.081887 | 0.07709  | 0.063512 | 0.17062  |
| 9.42E-08 | 0.109281 | 0.01816  | 0.086785 | 0.06094  | 0.040239 | 0.38561  | -0.01504 | 0.74583  |
| 3.76E-23 | 0.138269 | 0.00275  | 0.173683 | 0.00016  | 0.085077 | 0.06622  | 0.19705  | 1.79E-05 |
| 0.00095  | 0.068215 | 0.14105  | 0.012333 | 0.79039  | -0.03495 | 0.45121  | -0.04943 | 0.28642  |
| 9.47E-48 | 0.289595 | 1.79E-10 | 0.215947 | 2.48E-06 | 0.034951 | 0.45115  | 0.329789 | 2.61E-13 |
| 7.22E-08 | 0.16619  | 0.00031  | 0.097819 | 0.03458  | 0.080709 | 0.08146  | 0.045648 | 0.32496  |
| 6.90E-27 | 0.522781 | 4.10E-34 | 0.40766  | 4.00E-20 | 0.383894 | 7.58E-18 | 0.455124 | 2.95E-25 |
| 3.14E-17 | 0.275407 | 1.42E-09 | 0.259524 | 1.26E-08 | 0.180236 | 8.98E-05 | 0.153937 | 0.00085  |
| 1.67E-30 | 0.426275 | 4.84E-22 | 0.225883 | 8.13E-07 | 0.282559 | 5.07E-10 | 0.391467 | 1.49E-18 |
| 0.87522  | 0.07784  | 0.09292  | 0.01131  | 0.80741  | 0.04005  | 0.38786  | -0.07144 | 0.12315  |
| 0.31166  | 0.114392 | 0.01338  | -0.02846 | 0.53958  | 0.009688 | 0.83461  | -0.13377 | 0.00378  |
| 0.31997  | 0.071188 | 0.12449  | -0.02884 | 0.53416  | -0.01696 | 0.71462  | -0.10511 | 0.02311  |
| 1.24E-25 | 0.166393 | 0.0003   | 0.039771 | 0.39117  | -0.07268 | 0.11678  | 0.196728 | 1.85E-05 |
| 2.66E-07 | 0.202934 | 9.88E-06 | 0.106008 | 0.02195  | 0.067949 | 0.14261  | 0.008039 | 0.86245  |

|          |          |          |          |          |          |          |          |          |
|----------|----------|----------|----------|----------|----------|----------|----------|----------|
| 5.58E-19 | 0.197934 | 1.64E-05 | 0.201271 | 1.17E-05 | 0.08392  | 0.07001  | 0.125858 | 0.00646  |
| 2.26E-16 | 0.27642  | 1.23E-09 | 0.167899 | 0.00027  | 0.16682  | 0.00029  | 0.157618 | 0.00063  |
| 1.77E-37 | 0.391416 | 1.51E-18 | 0.283319 | 4.54E-10 | 0.194363 | 2.34E-05 | 0.271886 | 2.33E-09 |
| 3.89E-07 | 0.436093 | 4.22E-23 | 0.233207 | 3.46E-07 | 0.291111 | 1.42E-10 | 0.168236 | 0.00026  |
| 0.04891  | 0.117506 | 0.01104  | -0.13161 | 0.00439  | -0.07846 | 0.09033  | -0.19915 | 1.45E-05 |
| 1.32E-24 | 0.231378 | 4.29E-07 | 0.21621  | 2.41E-06 | 0.122998 | 0.00779  | 0.189719 | 3.68E-05 |
| 2.58E-16 | 0.542083 | 5.01E-37 | 0.373504 | 6.59E-17 | 0.412632 | 1.26E-20 | 0.279574 | 7.82E-10 |
| 1.36E-07 | 0.118709 | 0.01024  | 0.028269 | 0.54228  | -0.00175 | 0.96985  | 0.006521 | 0.88823  |
| 1.82E-05 | 0.163614 | 0.00038  | 0.0594   | 0.20008  | 0.044644 | 0.33572  | 0.01587  | 0.73231  |
| 1.78E-18 | 0.428341 | 2.92E-22 | 0.341701 | 3.10E-14 | 0.360848 | 8.29E-16 | 0.272726 | 2.08E-09 |
| 6.07E-07 | 0.142031 | 0.00209  | 0.079    | 0.08814  | 0.03573  | 0.44111  | 0.036689 | 0.42894  |
| 9.96E-05 | 0.019273 | 0.67784  | -0.02064 | 0.65636  | -0.06587 | 0.15527  | -0.09979 | 0.03107  |
| 0.5621   | 0.276668 | 1.19E-09 | 0.024283 | 0.60067  | 0.004872 | 0.91637  | -0.049   | 0.29061  |
| 1.62E-08 | 0.080711 | 0.08145  | 0.03015  | 0.51572  | 0.000828 | 0.98575  | -0.06744 | 0.1456   |
| 1.22E-14 | 0.2687   | 3.64E-09 | 0.159997 | 0.00052  | 0.165862 | 0.00032  | 0.140707 | 0.00231  |
| 0.00403  | 0.260178 | 1.16E-08 | 0.199747 | 1.37E-05 | 0.26587  | 5.36E-09 | 0.12872  | 0.00534  |
| 0.17856  | 0.142646 | 0.002    | 0.059453 | 0.19968  | 0.05158  | 0.26596  | 0.013539 | 0.77042  |
| 0.02484  | 0.189893 | 3.62E-05 | 0.10771  | 0.0199   | 0.089938 | 0.0521   | 0.006856 | 0.88252  |
| 0.00087  | 0.089439 | 0.05342  | -0.02261 | 0.62595  | -0.06189 | 0.18179  | -0.07547 | 0.10336  |
| 8.09E-06 | 0.215014 | 2.75E-06 | 0.203264 | 9.55E-06 | 0.213889 | 3.10E-06 | 0.032937 | 0.47767  |
| 0.00231  | 0.056583 | 0.22229  | 0.073933 | 0.11057  | 0.093386 | 0.04369  | 0.147759 | 0.00136  |
| 1.90E-14 | 0.12461  | 0.00701  | 0.17597  | 0.00013  | -0.02674 | 0.56433  | 0.240659 | 1.41E-07 |
| 0.00411  | 0.139254 | 0.00256  | 0.219608 | 1.65E-06 | 0.250998 | 3.85E-08 | 9.95E-05 | 0.99829  |
| 1.32E-08 | 0.033304 | 0.47277  | -0.0249  | 0.59143  | -0.08364 | 0.07096  | -0.06112 | 0.18731  |
| 1.60E-05 | 0.102247 | 0.02714  | 0.056205 | 0.2254   | 0.064937 | 0.16121  | -0.00687 | 0.8823   |
| 0.01332  | 0.064436 | 0.16447  | 0.060151 | 0.19443  | 0.046175 | 0.3194   | -0.04467 | 0.33541  |
| 1.29E-11 | -0.04563 | 0.32518  | -0.13676 | 0.00306  | -0.14672 | 0.00148  | 0.048049 | 0.30013  |
| 4.63E-09 | 0.034947 | 0.4512   | 0.047746 | 0.30319  | -0.05394 | 0.24465  | 0.071412 | 0.1233   |
| 0.00106  | -0.08742 | 0.05908  | -0.11013 | 0.01727  | -0.21093 | 4.27E-06 | -0.06876 | 0.1379   |
| 1.91E-15 | 0.280752 | 6.60E-10 | 0.226283 | 7.77E-07 | 0.137459 | 0.00291  | 0.273009 | 1.99E-09 |
| 0.00915  | -0.01226 | 0.79158  | -0.06186 | 0.18207  | -0.09764 | 0.0349   | -0.10157 | 0.02818  |
| 1.96E-11 | 0.056097 | 0.22629  | 0.041895 | 0.36635  | -0.02119 | 0.6478   | 0.042474 | 0.35976  |
| 1.31E-18 | -0.09969 | 0.03125  | -0.1242  | 0.00721  | 0.025108 | 0.58835  | -0.15965 | 0.00053  |
| 0.87356  | -0.05082 | 0.27309  | -0.09313 | 0.04426  | -0.01047 | 0.82138  | -0.10807 | 0.01949  |
| 4.22E-11 | 0.155775 | 0.00073  | 0.119502 | 0.00974  | 0.061969 | 0.18127  | 0.040827 | 0.37871  |
| 3.73E-09 | 0.0813   | 0.07924  | 0.038205 | 0.41011  | -0.0231  | 0.61849  | 0.00527  | 0.90956  |
| 5.84E-10 | 0.109174 | 0.01827  | 0.158072 | 0.00061  | 0.058625 | 0.20602  | 0.130688 | 0.00467  |
| 4.92E-14 | 0.255607 | 2.12E-08 | 0.267686 | 4.18E-09 | 0.287348 | 2.50E-10 | 0.22965  | 5.26E-07 |
| 3.29E-14 | -0.2131  | 3.38E-06 | -0.12475 | 0.00695  | -0.28662 | 2.79E-10 | 0.024747 | 0.59373  |
| 8.09E-12 | 0.334096 | 1.22E-13 | 0.281384 | 6.02E-10 | 0.2627   | 8.25E-09 | 0.192437 | 2.83E-05 |
| 0.00024  | 0.106845 | 0.02092  | -0.01303 | 0.77888  | -0.02997 | 0.5182   | -0.02209 | 0.63404  |
| 1.56E-41 | 0.249249 | 4.81E-08 | 0.158623 | 0.00058  | 0.078899 | 0.08855  | 0.326101 | 4.95E-13 |
| 0.00927  | 0.086844 | 0.06076  | 0.045418 | 0.3274   | -0.00208 | 0.96419  | -0.08963 | 0.05292  |
| 0.0004   | 0.086442 | 0.06197  | 0.030083 | 0.51666  | -0.03399 | 0.46363  | 0.15935  | 0.00055  |
| 0.61064  | 0.136747 | 0.00307  | 0.036807 | 0.42746  | 0.076987 | 0.09657  | 0.009163 | 0.84345  |

|          |          |          |          |          |          |          |          |          |
|----------|----------|----------|----------|----------|----------|----------|----------|----------|
| 0.30049  | 0.372192 | 8.62E-17 | 0.308327 | 9.64E-12 | 0.3247   | 6.30E-13 | 0.155818 | 0.00073  |
| 1.16E-08 | 0.38002  | 1.71E-17 | 0.361003 | 8.04E-16 | 0.408526 | 3.27E-20 | 0.337772 | 6.32E-14 |
| 2.64E-14 | 0.265078 | 5.98E-09 | 0.212841 | 3.48E-06 | 0.154623 | 0.0008   | 0.259105 | 1.33E-08 |
| 3.56E-37 | 0.706583 | 7.55E-72 | 0.434012 | 7.12E-23 | 0.398812 | 2.96E-19 | 0.408541 | 3.26E-20 |
| 7.81E-13 | -0.17747 | 0.00012  | -0.17489 | 0.00015  | -0.17098 | 0.00021  | -0.14503 | 0.00168  |
| 4.82E-37 | 0.207306 | 6.27E-06 | 0.119884 | 0.00951  | 0.059182 | 0.20173  | 0.299793 | 3.74E-11 |
| 0.06095  | 0.249431 | 4.70E-08 | 0.173031 | 0.00017  | 0.20135  | 1.16E-05 | 0.118499 | 0.01038  |
| 6.20E-12 | 0.22929  | 5.48E-07 | 0.145594 | 0.00161  | 0.145854 | 0.00158  | 0.067631 | 0.14449  |
| 6.31E-14 | 0.219433 | 1.69E-06 | 0.114684 | 0.01314  | 0.149075 | 0.00123  | 0.149327 | 0.00121  |
| 8.76E-23 | 0.332759 | 1.55E-13 | 0.216987 | 2.21E-06 | 0.169276 | 0.00024  | 0.194802 | 2.24E-05 |
| 1.13E-17 | 0.266871 | 4.68E-09 | 0.164975 | 0.00034  | 0.139661 | 0.00249  | 0.140481 | 0.00234  |
| 2.71E-07 | 0.047264 | 0.3081   | -0.01261 | 0.78581  | -0.06309 | 0.17351  | 0.031793 | 0.4931   |
| 1.92E-05 | 0.108602 | 0.0189   | 0.080698 | 0.0815   | 0.047266 | 0.30808  | -0.0104  | 0.82263  |
| 8.52E-06 | 0.109674 | 0.01775  | 0.094059 | 0.04218  | 0.073468 | 0.11284  | 0.000575 | 0.99011  |
| 1.07E-12 | 0.191523 | 3.09E-05 | 0.113839 | 0.01384  | 0.074739 | 0.10673  | 0.051979 | 0.26228  |
| 5.71E-15 | 0.396519 | 4.93E-19 | 0.273268 | 1.92E-09 | 0.319334 | 1.57E-12 | 0.254328 | 2.50E-08 |
| 2.11E-09 | 0.133285 | 0.00391  | 0.071682 | 0.12188  | 0.047776 | 0.30289  | 0.024964 | 0.5905   |
| 9.56E-13 | 0.193453 | 2.56E-05 | 0.166028 | 0.00031  | 0.139686 | 0.00248  | 0.147319 | 0.00141  |
| 9.80E-10 | 0.113931 | 0.01376  | 0.126119 | 0.00635  | 0.106268 | 0.02163  | 0.07737  | 0.09492  |
| 1.68E-21 | 0.493158 | 5.43E-30 | 0.272659 | 2.09E-09 | 0.281132 | 6.24E-10 | 0.220115 | 1.56E-06 |
| 2.50E-13 | 0.424976 | 6.65E-22 | 0.216642 | 2.30E-06 | 0.249375 | 4.73E-08 | 0.156838 | 0.00067  |
| 2.74E-06 | 0.055493 | 0.23133  | 0.016721 | 0.71855  | -0.02693 | 0.56159  | -0.03328 | 0.47304  |
| 8.28E-06 | 0.066205 | 0.15317  | 0.024316 | 0.60018  | -0.03412 | 0.46202  | -0.0468  | 0.31288  |
| 6.92E-07 | 0.198344 | 1.58E-05 | 0.096712 | 0.03668  | 0.068862 | 0.13731  | 0.150397 | 0.00111  |
| 0.29381  | -0.10023 | 0.03034  | -0.09682 | 0.03648  | -0.09331 | 0.04386  | -0.19218 | 2.90E-05 |
| 6.89E-05 | -0.01641 | 0.7235   | 0.013825 | 0.76572  | -0.05227 | 0.25958  | 0.023956 | 0.60559  |
| 0.01483  | -0.12154 | 0.00856  | -0.09089 | 0.04965  | -0.12903 | 0.00523  | -0.15602 | 0.00072  |
| 0.00863  | 0.070661 | 0.1273   | 0.044006 | 0.34268  | -0.01231 | 0.7908   | -0.00875 | 0.85044  |
| 3.78E-08 | 0.240622 | 1.41E-07 | 0.26434  | 6.61E-09 | 0.217024 | 2.20E-06 | 0.126473 | 0.0062   |
| 0.59562  | -0.19809 | 1.62E-05 | -0.05361 | 0.24758  | -0.0549  | 0.23636  | -0.0753  | 0.1041   |
| 3.52E-09 | -0.04382 | 0.34468  | 0.018684 | 0.68716  | -0.04034 | 0.38445  | 0.070784 | 0.12664  |
| 0.0084   | 0.233366 | 3.39E-07 | 0.138876 | 0.00263  | 0.154386 | 0.00082  | 0.008979 | 0.84655  |
| 1.65E-08 | -0.15944 | 0.00054  | -0.04731 | 0.30759  | -0.2015  | 1.15E-05 | -0.02614 | 0.57313  |
| 0.00117  | 0.177224 | 0.00012  | 0.281989 | 5.51E-10 | 0.265514 | 5.63E-09 | 0.161336 | 0.00047  |
| 2.07E-07 | 0.326658 | 4.49E-13 | 0.203444 | 9.38E-06 | 0.22972  | 5.21E-07 | 0.170765 | 0.00021  |
| 8.38E-12 | 0.151424 | 0.00103  | 0.170288 | 0.00022  | 0.104077 | 0.0245   | 0.193457 | 2.56E-05 |
| 3.61E-22 | 0.702934 | 8.17E-71 | 0.423171 | 1.03E-21 | 0.385317 | 5.61E-18 | 0.432596 | 1.02E-22 |
| 0.01445  | 0.013092 | 0.77781  | 0.041496 | 0.37094  | -0.01381 | 0.76599  | -0.00183 | 0.9685   |
| 5.67E-25 | 0.256034 | 2.00E-08 | 0.266865 | 4.68E-09 | 0.207902 | 5.89E-06 | 0.466185 | 1.42E-26 |
| 1.69E-18 | 0.282546 | 5.08E-10 | 0.25176  | 3.49E-08 | 0.13513  | 0.00344  | 0.148549 | 0.00128  |
| 2.36E-10 | 0.080024 | 0.08409  | 0.069007 | 0.13648  | 0.007201 | 0.87667  | 0.051497 | 0.26673  |
| 0.71875  | 0.079848 | 0.08477  | 0.087242 | 0.05959  | 0.047142 | 0.30935  | 0.061755 | 0.18279  |
| 1.74E-09 | 0.274138 | 1.70E-09 | 0.173789 | 0.00016  | 0.156158 | 0.00071  | 0.121831 | 0.0084   |
| 1.43E-19 | 0.334607 | 1.11E-13 | 0.289004 | 1.95E-10 | 0.305384 | 1.55E-11 | 0.319489 | 1.53E-12 |
| 1.51E-10 | 0.358238 | 1.38E-15 | 0.328393 | 3.33E-13 | 0.27555  | 1.39E-09 | 0.349042 | 7.95E-15 |

|          |          |          |          |          |          |          |          |          |
|----------|----------|----------|----------|----------|----------|----------|----------|----------|
| 0.00047  | 0.191262 | 3.17E-05 | 0.196423 | 1.91E-05 | 0.162772 | 0.00041  | 0.268108 | 3.95E-09 |
| 2.82E-05 | 0.226577 | 7.51E-07 | 0.192637 | 2.78E-05 | 0.204357 | 8.53E-06 | 0.20384  | 9.00E-06 |
| 0.22535  | 0.116336 | 0.01187  | 0.074956 | 0.10571  | 0.111025 | 0.01638  | 0.029217 | 0.52881  |
| 2.66E-17 | 0.066986 | 0.14837  | 0.106929 | 0.02082  | -0.00157 | 0.97303  | 0.138047 | 0.00279  |
| 7.95E-10 | 0.016063 | 0.72918  | 0.056299 | 0.22462  | -0.05139 | 0.26775  | 0.0672   | 0.14707  |
| 4.53E-12 | 0.214703 | 2.84E-06 | 0.249581 | 4.61E-08 | 0.144412 | 0.00176  | 0.206625 | 6.73E-06 |
| 4.42E-09 | 0.414201 | 8.75E-21 | 0.205002 | 7.98E-06 | 0.146487 | 0.0015   | 0.284163 | 4.01E-10 |
| 8.82E-07 | 0.171694 | 0.00019  | 0.177474 | 0.00012  | 0.105158 | 0.02304  | 0.002018 | 0.9653   |
| 0.90251  | 0.39407  | 8.45E-19 | 0.201363 | 1.16E-05 | 0.27374  | 1.80E-09 | 0.032133 | 0.48849  |
| 0.2048   | 0.245925 | 7.32E-08 | 0.142289 | 0.00205  | 0.174619 | 0.00015  | 0.062037 | 0.18079  |
| 0.06002  | -0.18021 | 9.00E-05 | -0.2206  | 1.48E-06 | -0.31613 | 2.68E-12 | -0.35026 | 6.32E-15 |
| 0.76166  | 0.28535  | 3.36E-10 | 0.146655 | 0.00148  | 0.071227 | 0.12428  | -0.0114  | 0.80586  |
| 3.82E-11 | 0.158999 | 0.00056  | 0.039484 | 0.3946   | 0.003424 | 0.94118  | 0.029175 | 0.5294   |
| 0.00139  | -0.11676 | 0.01157  | 0.003843 | 0.93399  | -0.16718 | 0.00028  | 0.020134 | 0.6643   |
| 3.62E-10 | 0.115781 | 0.01229  | 0.101024 | 0.02904  | 0.060147 | 0.19446  | 0.156478 | 0.00069  |
| 0.00444  | 0.064175 | 0.16619  | -0.07366 | 0.11189  | 0.005177 | 0.91116  | 0.096914 | 0.03629  |
| 0.23657  | 0.128934 | 0.00526  | 0.113951 | 0.01374  | 0.122632 | 0.00798  | 0.046978 | 0.31104  |
| 3.26E-08 | 0.087027 | 0.06022  | 0.11763  | 0.01096  | 0.075627 | 0.10262  | 0.121204 | 0.00874  |
| 0.06757  | -0.01351 | 0.77094  | 0.052805 | 0.25476  | 0.061616 | 0.18377  | -0.03251 | 0.48345  |
| 0.43261  | 0.167779 | 0.00027  | 0.15891  | 0.00057  | 0.098316 | 0.03366  | -0.08478 | 0.06718  |
| 3.75E-23 | 0.545715 | 1.35E-37 | 0.40838  | 3.39E-20 | 0.433996 | 7.15E-23 | 0.407805 | 3.86E-20 |
| 0.09305  | 0.160277 | 0.00051  | 0.140948 | 0.00227  | 0.154613 | 0.0008   | -0.00592 | 0.8984   |
| 0.00519  | 0.140589 | 0.00233  | 0.091794 | 0.04742  | 0.097042 | 0.03605  | 0.086092 | 0.06304  |
| 0.00871  | 0.09753  | 0.03512  | 0.117781 | 0.01086  | 0.017317 | 0.70896  | -0.02227 | 0.63122  |
| 1.98E-06 | -0.24158 | 1.26E-07 | -0.1313  | 0.00448  | -0.20731 | 6.27E-06 | -0.23379 | 3.23E-07 |
| 4.05E-06 | 0.381494 | 1.26E-17 | 0.22762  | 6.66E-07 | 0.174255 | 0.00015  | 0.141003 | 0.00226  |
| 1.62E-07 | -0.07002 | 0.13083  | 0.028768 | 0.53517  | -0.12887 | 0.00528  | 0.07038  | 0.12883  |
| 4.84E-17 | 0.146072 | 0.00155  | 0.117342 | 0.01116  | 0.026093 | 0.5738   | 0.099338 | 0.03185  |
| 0.04702  | -0.00854 | 0.85392  | -0.09339 | 0.04367  | -0.08192 | 0.07697  | 0.021457 | 0.64373  |
| 2.52E-05 | -0.03586 | 0.43947  | -0.04193 | 0.36596  | -0.15324 | 0.00089  | 0.029843 | 0.52001  |
| 2.68E-09 | 0.096726 | 0.03666  | -0.05291 | 0.25383  | -0.02974 | 0.5215   | 0.11302  | 0.01454  |
| 7.80E-09 | 0.011549 | 0.80343  | -0.09792 | 0.03439  | -0.12759 | 0.00576  | 0.060173 | 0.19427  |
| 6.36E-10 | 0.032266 | 0.48668  | -0.01482 | 0.74938  | -0.0307  | 0.50813  | 0.116558 | 0.01171  |
| 2.82E-06 | 0.004781 | 0.91794  | -0.03035 | 0.51297  | -0.03677 | 0.42799  | 0.101904 | 0.02766  |
| 4.81E-18 | 0.384751 | 6.32E-18 | 0.219036 | 1.76E-06 | 0.24016  | 1.50E-07 | 0.205901 | 7.26E-06 |
| 5.34E-16 | 0.327163 | 4.12E-13 | 0.235852 | 2.52E-07 | 0.237378 | 2.10E-07 | 0.272025 | 2.29E-09 |
| 7.34E-19 | 0.32025  | 1.34E-12 | 0.288972 | 1.96E-10 | 0.205109 | 7.89E-06 | 0.3764   | 3.64E-17 |
| 0.6172   | 0.341092 | 3.46E-14 | 0.172115 | 0.00019  | 0.257282 | 1.70E-08 | 0.090385 | 0.05094  |
| 0.01221  | 0.009784 | 0.83298  | 0.097053 | 0.03602  | 0.044014 | 0.34259  | 0.00161  | 0.97232  |
| 2.43E-08 | -0.13897 | 0.00262  | -0.18309 | 6.90E-05 | -0.25092 | 3.89E-08 | -0.13397 | 0.00373  |
| 3.50E-17 | 0.271301 | 2.53E-09 | 0.231631 | 4.17E-07 | 0.110475 | 0.01693  | 0.283199 | 4.62E-10 |
| 0.09654  | 0.080691 | 0.08152  | 0.088298 | 0.05655  | 0.113885 | 0.0138   | -0.00637 | 0.89087  |
| 8.64E-07 | 0.019941 | 0.66733  | 0.143891 | 0.00182  | -0.00537 | 0.90783  | 0.038403 | 0.40768  |
| 6.34E-21 | 0.383325 | 8.55E-18 | 0.284582 | 3.77E-10 | 0.291905 | 1.26E-10 | 0.251492 | 3.61E-08 |
| 7.69E-06 | 0.240911 | 1.36E-07 | 0.128913 | 0.00527  | 0.253318 | 2.85E-08 | 0.098859 | 0.03269  |



|          |          |          |          |          |          |          |          |          |
|----------|----------|----------|----------|----------|----------|----------|----------|----------|
| 5.18E-12 | 0.260329 | 1.13E-08 | 0.198896 | 1.49E-05 | 0.193033 | 2.67E-05 | 0.174423 | 0.00015  |
| 1.70E-10 | 0.103425 | 0.02541  | 0.105079 | 0.02315  | 0.03865  | 0.40468  | 0.03574  | 0.44099  |
| 0.76055  | -0.04369 | 0.34619  | -0.11645 | 0.01179  | -0.18597 | 5.27E-05 | -0.22452 | 9.50E-07 |
| 9.91E-05 | 0.137069 | 0.003    | 0.094236 | 0.0418   | 0.035919 | 0.4387   | 0.17872  | 0.0001   |
| 0.03685  | -0.13373 | 0.00379  | -0.07087 | 0.12616  | -0.18544 | 5.54E-05 | -0.20246 | 1.04E-05 |
| 0.00026  | -0.123   | 0.00779  | -0.21657 | 2.31E-06 | -0.33672 | 7.63E-14 | -0.16364 | 0.00038  |
| 0.00015  | 0.184732 | 5.92E-05 | 0.050421 | 0.27687  | 0.149229 | 0.00122  | 0.123679 | 0.00745  |
| 0.44233  | 0.085397 | 0.0652   | -0.01893 | 0.68321  | -0.04095 | 0.37723  | -0.12575 | 0.00651  |
| 2.37E-06 | 0.198096 | 1.62E-05 | 0.096536 | 0.03703  | 0.061217 | 0.18663  | 0.010916 | 0.81399  |
| 0.00256  | -0.10218 | 0.02724  | -0.12076 | 0.009    | -0.15943 | 0.00054  | 0.007819 | 0.86618  |
| 2.09E-10 | 0.182659 | 7.18E-05 | 0.086073 | 0.06309  | 0.024466 | 0.59794  | 0.018319 | 0.69296  |
| 0.00187  | 0.059946 | 0.19596  | 0.036458 | 0.43186  | -0.05136 | 0.26802  | -0.05097 | 0.27171  |
| 1.98E-13 | 0.188803 | 4.02E-05 | 0.168375 | 0.00026  | 0.122182 | 0.00821  | 0.132335 | 0.00417  |
| 6.54E-23 | 0.333171 | 1.44E-13 | 0.259405 | 1.28E-08 | 0.174724 | 0.00015  | 0.287866 | 2.32E-10 |
| 4.03E-15 | 0.261189 | 1.01E-08 | 0.179487 | 9.62E-05 | 0.127755 | 0.0057   | 0.110536 | 0.01687  |
| 0.05091  | 0.133513 | 0.00385  | 0.135983 | 0.00324  | 0.12842  | 0.00545  | 0.077771 | 0.09321  |
| 2.21E-13 | 0.123918 | 0.00734  | 0.106469 | 0.02138  | 0.063087 | 0.17351  | 0.100988 | 0.0291   |
| 1.92E-21 | 0.255385 | 2.18E-08 | 0.199267 | 1.44E-05 | 0.19001  | 3.58E-05 | 0.231006 | 4.49E-07 |
| 3.22E-16 | 0.334672 | 1.10E-13 | 0.228746 | 5.84E-07 | 0.221812 | 1.29E-06 | 0.192041 | 2.94E-05 |
| 3.00E-19 | 0.374427 | 5.46E-17 | 0.259055 | 1.34E-08 | 0.321625 | 1.06E-12 | 0.273054 | 1.98E-09 |
| 3.36E-14 | 0.122604 | 0.00799  | 0.138125 | 0.00278  | 0.058767 | 0.20492  | 0.090154 | 0.05154  |
| 2.16E-07 | 0.118107 | 0.01064  | 0.05817  | 0.20957  | 0.035601 | 0.44277  | -0.02502 | 0.58971  |
| 1.39E-06 | 0.121649 | 0.0085   | 0.075339 | 0.10394  | 0.04106  | 0.37599  | -0.03038 | 0.51249  |
| 4.83E-19 | 0.202582 | 1.02E-05 | 0.158097 | 0.00061  | 0.113883 | 0.0138   | 0.250173 | 4.27E-08 |
| 6.10E-11 | 0.166031 | 0.00031  | 0.037633 | 0.41715  | -0.00995 | 0.83026  | -0.01452 | 0.75437  |
| 2.02E-45 | 0.395105 | 6.73E-19 | 0.24382  | 9.52E-08 | 0.135558 | 0.00333  | 0.316983 | 2.33E-12 |
| 8.24E-44 | 0.403635 | 1.00E-19 | 0.369403 | 1.52E-16 | 0.318722 | 1.74E-12 | 0.40573  | 6.22E-20 |
| 2.89E-05 | -0.05944 | 0.19978  | -0.00226 | 0.96108  | -0.14062 | 0.00232  | 0.021188 | 0.64789  |
| 0.44419  | 0.020948 | 0.6516   | -0.05081 | 0.27321  | -0.05129 | 0.26869  | -0.08792 | 0.05762  |
| 0.81963  | 0.191031 | 3.25E-05 | -0.00984 | 0.83197  | 0.112321 | 0.01516  | -0.08434 | 0.06863  |
| 0.89287  | -0.19392 | 2.45E-05 | -0.20044 | 1.27E-05 | -0.25751 | 1.65E-08 | -0.24544 | 7.78E-08 |
| 0.00066  | 0.255656 | 2.10E-08 | 0.223331 | 1.09E-06 | 0.152822 | 0.00092  | 0.16893  | 0.00025  |
| 3.97E-07 | 0.093129 | 0.04427  | 0.042941 | 0.3545   | 0.0251   | 0.58847  | -0.00872 | 0.85095  |
| 5.95E-06 | 0.039813 | 0.39068  | -0.00695 | 0.88099  | -0.03517 | 0.44836  | -0.03174 | 0.49384  |
| 0.44958  | 0.241749 | 1.23E-07 | 0.003781 | 0.93505  | 0.017372 | 0.70808  | -0.17069 | 0.00021  |
| 8.10E-18 | 0.221169 | 1.39E-06 | 0.183119 | 6.88E-05 | 0.136537 | 0.00311  | 0.153708 | 0.00086  |
| 0.00014  | 0.082689 | 0.07423  | 0.083452 | 0.07159  | 0.040847 | 0.37848  | 0.191978 | 2.96E-05 |
| 0.31413  | 0.031267 | 0.50029  | 0.058777 | 0.20484  | 0.083353 | 0.07193  | 0.18932  | 3.83E-05 |
| 0.01004  | 0.1107   | 0.0167   | 0.120051 | 0.00941  | 0.090736 | 0.05004  | 0.245143 | 8.07E-08 |
| 0.59339  | -0.10307 | 0.02593  | -0.05741 | 0.21556  | 0.019415 | 0.6756   | 0.006982 | 0.88038  |
| 1.77E-07 | -0.03794 | 0.41338  | -0.05394 | 0.24469  | -0.05135 | 0.26814  | 0.138354 | 0.00273  |
| 0.00127  | 0.135038 | 0.00346  | 0.105852 | 0.02215  | 0.094315 | 0.04163  | 0.090875 | 0.04969  |
| 3.68E-31 | 0.376113 | 3.86E-17 | 0.35787  | 1.48E-15 | 0.343206 | 2.35E-14 | 0.321767 | 1.04E-12 |
| 0.3594   | -0.05898 | 0.20329  | -0.18492 | 5.82E-05 | -0.05561 | 0.23036  | -0.00589 | 0.8989   |
| 1.02E-08 | 0.139839 | 0.00246  | 0.062421 | 0.1781   | 0.037113 | 0.42362  | 0.031647 | 0.49509  |

|          |          |          |          |          |          |          |          |          |
|----------|----------|----------|----------|----------|----------|----------|----------|----------|
| 8.82E-07 | 0.164164 | 0.00037  | 0.066414 | 0.15187  | 0.063031 | 0.17389  | 0.073455 | 0.11291  |
| 1.40E-18 | 0.436479 | 3.83E-23 | 0.436055 | 4.26E-23 | 0.500792 | 5.14E-31 | 0.339326 | 4.77E-14 |
| 2.57E-46 | 0.548817 | 4.35E-38 | 0.422598 | 1.18E-21 | 0.423724 | 9.01E-22 | 0.429925 | 1.97E-22 |
| 0.03104  | -0.10529 | 0.02287  | -0.09556 | 0.03899  | -0.14698 | 0.00145  | -0.11517 | 0.01276  |
| 2.32E-11 | 0.146619 | 0.00149  | 0.104554 | 0.02385  | 0.053139 | 0.25177  | 0.048769 | 0.29293  |
| 1.41E-07 | -0.12768 | 0.00573  | -0.17854 | 0.0001   | -0.32699 | 4.24E-13 | -0.08    | 0.08419  |
| 7.77E-19 | 0.360662 | 8.59E-16 | 0.283367 | 4.50E-10 | 0.265736 | 5.46E-09 | 0.611789 | 2.74E-49 |
| 8.26E-18 | 0.300778 | 3.21E-11 | 0.133123 | 0.00395  | 0.098706 | 0.03296  | 0.11901  | 0.01005  |
| 4.44E-11 | 0.513793 | 8.05E-33 | 0.411139 | 1.79E-20 | 0.401126 | 1.76E-19 | 0.371748 | 9.43E-17 |
| 1.04E-06 | 0.278898 | 8.62E-10 | 0.200239 | 1.30E-05 | 0.237257 | 2.13E-07 | 0.108125 | 0.01943  |
| 6.92E-36 | 0.470696 | 4.00E-27 | 0.39212  | 1.29E-18 | 0.368233 | 1.92E-16 | 0.386558 | 4.30E-18 |
| 0.81145  | -0.18788 | 4.40E-05 | -0.04441 | 0.33828  | -0.18004 | 9.14E-05 | -0.11819 | 0.01058  |
| 0.0377   | 0.312515 | 4.87E-12 | 0.143541 | 0.00187  | 0.126683 | 0.00612  | 0.0683   | 0.14055  |
| 0.00102  | 0.031368 | 0.4989   | 0.080587 | 0.08192  | 0.011213 | 0.80903  | 0.025019 | 0.58969  |
| 2.05E-12 | 0.283432 | 4.46E-10 | 0.235595 | 2.60E-07 | 0.237223 | 2.14E-07 | 0.210974 | 4.25E-06 |
| 0.00302  | -0.09417 | 0.04193  | 0.030913 | 0.50515  | -0.14132 | 0.00221  | 0.031894 | 0.49173  |
| 3.54E-08 | 0.153245 | 0.00089  | 0.139395 | 0.00254  | 0.121337 | 0.00867  | 0.039379 | 0.39586  |
| 7.50E-19 | 0.284008 | 4.10E-10 | 0.165212 | 0.00034  | 0.146366 | 0.00152  | 0.169459 | 0.00023  |
| 1.26E-21 | 0.293321 | 1.02E-10 | 0.215548 | 2.59E-06 | 0.19047  | 3.43E-05 | 0.236585 | 2.31E-07 |
| 0.00011  | 0.104559 | 0.02384  | 0.047995 | 0.30067  | 0.039489 | 0.39454  | -0.01744 | 0.70698  |
| 6.24E-12 | 0.340218 | 4.06E-14 | 0.181185 | 8.23E-05 | 0.210151 | 4.64E-06 | 0.32675  | 4.42E-13 |
| 2.15E-16 | 0.301236 | 2.98E-11 | 0.253231 | 2.88E-08 | 0.237317 | 2.11E-07 | 0.150636 | 0.00109  |
| 2.48E-13 | 0.218592 | 1.85E-06 | 0.165465 | 0.00033  | 0.175745 | 0.00013  | 0.126423 | 0.00623  |
| 5.18E-12 | 0.413922 | 9.34E-21 | 0.248904 | 5.02E-08 | 0.251715 | 3.51E-08 | 0.145977 | 0.00156  |
| 2.47E-18 | 0.329142 | 2.92E-13 | 0.227754 | 6.55E-07 | 0.258927 | 1.37E-08 | 0.24198  | 1.20E-07 |
| 1.10E-11 | -0.01476 | 0.75039  | -0.01365 | 0.76865  | -0.15978 | 0.00053  | 0.04754  | 0.30528  |
| 0.09464  | -0.01663 | 0.72006  | -0.05711 | 0.21803  | -0.00394 | 0.93237  | -0.11218 | 0.01529  |
| 6.64E-11 | 0.081743 | 0.07761  | 0.063345 | 0.17175  | -0.01962 | 0.67229  | 0.205674 | 7.44E-06 |
| 0.00182  | 0.218786 | 1.81E-06 | 0.184607 | 5.99E-05 | 0.231153 | 4.41E-07 | 0.145486 | 0.00162  |
| 9.40E-16 | 0.117014 | 0.01139  | 0.107873 | 0.01972  | -0.08826 | 0.05667  | 0.211699 | 3.93E-06 |
| 0.33306  | -0.06718 | 0.14718  | -0.13281 | 0.00404  | -0.1894  | 3.80E-05 | -0.26459 | 6.38E-09 |
| 9.12E-15 | 0.169727 | 0.00023  | 0.109458 | 0.01797  | 0.066535 | 0.15113  | 0.084282 | 0.0688   |
| 3.23E-11 | 0.132608 | 0.0041   | 0.119254 | 0.0099   | 0.101535 | 0.02824  | 0.106259 | 0.02164  |
| 1.77E-31 | 0.236145 | 2.43E-07 | 0.235892 | 2.51E-07 | 0.141246 | 0.00222  | 0.431962 | 1.19E-22 |
| 4.65E-09 | 0.267976 | 4.02E-09 | 0.171451 | 0.0002   | 0.139087 | 0.00259  | 0.170363 | 0.00022  |
| 0.00016  | 0.24604  | 7.21E-08 | 0.273318 | 1.91E-09 | 0.311216 | 6.03E-12 | 0.128841 | 0.0053   |
| 2.64E-08 | 0.099783 | 0.03109  | -0.02419 | 0.60205  | -0.11051 | 0.01689  | 0.027254 | 0.55687  |
| 3.00E-22 | 0.118439 | 0.01042  | 0.123687 | 0.00745  | 0.021895 | 0.63697  | 0.156678 | 0.00068  |
| 0.14621  | 0.15152  | 0.00102  | 0.126255 | 0.00629  | 0.161126 | 0.00047  | -0.03811 | 0.41132  |
| 0.5065   | 0.346755 | 1.22E-14 | 0.128583 | 0.00539  | 0.139455 | 0.00252  | -0.05751 | 0.21481  |
| 0.93782  | 0.2013   | 1.17E-05 | 0.122342 | 0.00813  | 0.214623 | 2.86E-06 | 0.057053 | 0.21846  |
| 0.00376  | -0.12961 | 0.00503  | -0.13485 | 0.0035   | -0.15878 | 0.00057  | 0.019179 | 0.67933  |
| 0.73296  | -0.02218 | 0.6326   | 0.015088 | 0.74503  | -0.00584 | 0.89979  | 0.15932  | 0.00055  |
| 1.86E-09 | 0.033406 | 0.47142  | 0.087078 | 0.06007  | -0.11457 | 0.01323  | 0.054594 | 0.23899  |
| 0.00037  | -0.07666 | 0.09798  | 0.028754 | 0.53536  | 0.091009 | 0.04935  | -0.11875 | 0.01022  |

|          |          |          |          |          |          |          |          |          |
|----------|----------|----------|----------|----------|----------|----------|----------|----------|
| 0.00976  | 0.02981  | 0.52047  | -0.07557 | 0.10287  | 0.024626 | 0.59554  | -0.14013 | 0.0024   |
| 1.30E-28 | 0.425466 | 5.90E-22 | 0.289144 | 1.91E-10 | 0.273739 | 1.80E-09 | 0.308104 | 9.99E-12 |
| 0.12949  | 0.020882 | 0.65264  | 0.187863 | 4.40E-05 | 0.20861  | 5.46E-06 | -0.07428 | 0.10889  |
| 2.35E-08 | -0.14275 | 0.00198  | -0.03314 | 0.47489  | -0.12332 | 0.00763  | 0.001854 | 0.96813  |
| 1.63E-06 | 0.338462 | 5.58E-14 | 0.227535 | 6.72E-07 | 0.237341 | 2.11E-07 | 0.100808 | 0.02939  |
| 1.74E-15 | 0.233536 | 3.33E-07 | 0.083369 | 0.07187  | 0.068752 | 0.13794  | 0.155415 | 0.00075  |
| 2.82E-12 | 0.077604 | 0.09392  | -0.01783 | 0.70081  | -0.10051 | 0.02988  | 0.02935  | 0.52693  |
| 2.36E-10 | 0.20117  | 1.18E-05 | 0.212889 | 3.46E-06 | 0.140218 | 0.00239  | 0.165998 | 0.00031  |
| 1.69E-20 | 0.353227 | 3.61E-15 | 0.129491 | 0.00507  | 0.136419 | 0.00314  | 0.307177 | 1.16E-11 |
| 0.00011  | 0.136913 | 0.00303  | 0.121583 | 0.00853  | 0.161557 | 0.00046  | 0.182586 | 7.23E-05 |
| 1.03E-19 | 0.226419 | 7.65E-07 | 0.195265 | 2.14E-05 | 0.138427 | 0.00272  | 0.163249 | 0.0004   |
| 1.02E-09 | 0.345192 | 1.63E-14 | 0.270243 | 2.94E-09 | 0.156073 | 0.00071  | 0.217694 | 2.05E-06 |
| 1.19E-16 | 0.291758 | 1.29E-10 | 0.399439 | 2.57E-19 | 0.323489 | 7.75E-13 | 0.351856 | 4.68E-15 |
| 0.16117  | 0.082056 | 0.07648  | 0.103398 | 0.02545  | 0.099578 | 0.03144  | 0.119049 | 0.01003  |
| 1.96E-09 | 0.100098 | 0.03056  | 0.042605 | 0.35828  | -0.00443 | 0.92398  | 0.006007 | 0.89698  |
| 0.36885  | 0.028775 | 0.53507  | -0.076   | 0.10094  | -0.0772  | 0.09564  | -0.0981  | 0.03406  |
| 1.97E-37 | 0.022369 | 0.62969  | 0.060412 | 0.1925   | -0.04661 | 0.31482  | 0.164702 | 0.00035  |
| 1.33E-06 | 0.140305 | 0.00237  | 0.093707 | 0.04297  | 0.073786 | 0.11129  | 0.006026 | 0.89667  |
| 3.39E-17 | 0.530262 | 3.20E-35 | 0.482103 | 1.49E-28 | 0.524444 | 2.34E-34 | 0.420638 | 1.90E-21 |
| 0.43621  | -0.05393 | 0.24476  | -0.02267 | 0.62506  | -0.07761 | 0.09391  | -0.08194 | 0.0769   |
| 0.02146  | 0.043638 | 0.34673  | -0.03186 | 0.49218  | -0.03931 | 0.39675  | 0.010118 | 0.82737  |
| 0.05167  | 0.208508 | 5.52E-06 | 0.25094  | 3.87E-08 | 0.311961 | 5.34E-12 | 0.18702  | 4.77E-05 |
| 5.70E-05 | 0.075954 | 0.10114  | 0.033097 | 0.47553  | 0.001833 | 0.96849  | -0.07033 | 0.12909  |
| 0.858    | 0.115212 | 0.01272  | -0.02959 | 0.52358  | -0.00224 | 0.96142  | -0.0526  | 0.25658  |
| 2.72E-56 | 0.50297  | 2.59E-31 | 0.406004 | 5.84E-20 | 0.329924 | 2.55E-13 | 0.445226 | 4.05E-24 |
| 3.41E-18 | 0.142065 | 0.00209  | 0.126042 | 0.00638  | 0.062382 | 0.17837  | 0.093407 | 0.04364  |
| 5.65E-18 | 0.51021  | 2.58E-32 | 0.323742 | 7.42E-13 | 0.272686 | 2.09E-09 | 0.361749 | 6.95E-16 |
| 0.00014  | -0.11004 | 0.01737  | -0.04476 | 0.3345   | 0.004049 | 0.93047  | 0.033526 | 0.46982  |
| 5.35E-12 | 0.511018 | 1.98E-32 | 0.330297 | 2.38E-13 | 0.339675 | 4.48E-14 | 0.299729 | 3.78E-11 |
| 0.00057  | 0.190626 | 3.38E-05 | 0.187391 | 4.60E-05 | 0.156189 | 0.00071  | 0.033096 | 0.47554  |
| 0.77534  | -0.04371 | 0.34589  | -0.11855 | 0.01035  | -0.10826 | 0.01927  | -0.1129  | 0.01465  |
| 1.25E-22 | 0.314096 | 3.76E-12 | 0.182424 | 7.34E-05 | 0.131959 | 0.00428  | 0.181971 | 7.65E-05 |
| 5.93E-18 | 0.090397 | 0.05091  | 0.035802 | 0.4402   | -0.03846 | 0.40697  | 0.107917 | 0.01967  |
| 1.33E-13 | 0.17834  | 0.00011  | 0.109149 | 0.0183   | 0.082209 | 0.07593  | 0.082252 | 0.07578  |
| 0.29042  | 0.065641 | 0.1567   | 0.107356 | 0.02032  | 0.113053 | 0.01451  | -0.02304 | 0.6195   |
| 0.00993  | 0.106979 | 0.02076  | 0.098843 | 0.03272  | 0.016403 | 0.72369  | 0.037096 | 0.42383  |
| 0.04217  | 0.080095 | 0.08381  | 0.168815 | 0.00025  | 0.095117 | 0.03991  | 0.122015 | 0.0083   |
| 1.16E-09 | 0.063064 | 0.17366  | 0.030942 | 0.50475  | -0.02756 | 0.55245  | -0.01153 | 0.80383  |
| 3.51E-27 | 0.430318 | 1.79E-22 | 0.4004   | 2.08E-19 | 0.30514  | 1.61E-11 | 0.380461 | 1.56E-17 |
| 4.04E-11 | 0.18739  | 4.60E-05 | 0.04872  | 0.29342  | 0.000466 | 0.992    | 0.074531 | 0.10771  |
| 1.07E-22 | 0.460283 | 7.27E-26 | 0.371802 | 9.33E-17 | 0.385989 | 4.86E-18 | 0.354234 | 2.98E-15 |
| 2.15E-06 | 0.461049 | 5.90E-26 | 0.337326 | 6.85E-14 | 0.443471 | 6.39E-24 | 0.194348 | 2.35E-05 |
| 2.50E-06 | 0.178768 | 0.0001   | 0.170318 | 0.00022  | 0.130917 | 0.0046   | 0.10206  | 0.02743  |
| 8.61E-19 | 0.176085 | 0.00013  | 0.091662 | 0.04774  | -0.07222 | 0.11911  | 0.205094 | 7.90E-06 |
| 2.49E-32 | 0.246357 | 6.93E-08 | 0.264276 | 6.66E-09 | 0.190353 | 3.47E-05 | 0.220733 | 1.46E-06 |

|          |          |          |          |          |          |          |          |          |
|----------|----------|----------|----------|----------|----------|----------|----------|----------|
| 0.07311  | 0.138058 | 0.00279  | -0.00638 | 0.89062  | -0.00378 | 0.93502  | -0.02526 | 0.58613  |
| 0.11645  | -0.25894 | 1.36E-08 | -0.10533 | 0.02282  | -0.19028 | 3.49E-05 | -0.17841 | 0.00011  |
| 0.3779   | -0.19767 | 1.69E-05 | -0.08713 | 0.05992  | -0.12045 | 0.00917  | -0.11478 | 0.01307  |
| 9.50E-06 | 0.052096 | 0.2612   | 0.080426 | 0.08253  | 0.03606  | 0.43691  | 0.156108 | 0.00071  |
| 0.87478  | -0.08859 | 0.05575  | -0.02469 | 0.59453  | -0.01619 | 0.72707  | -0.03728 | 0.42154  |
| 1.21E-06 | 0.086005 | 0.0633   | 0.064228 | 0.16584  | 0.040763 | 0.37946  | 0.108392 | 0.01913  |
| 6.09E-17 | 0.689896 | 3.03E-67 | 0.349811 | 6.88E-15 | 0.417074 | 4.44E-21 | 0.26514  | 5.93E-09 |
| 3.89E-12 | 0.029178 | 0.52936  | -0.01538 | 0.7402   | -0.05967 | 0.19803  | 0.134477 | 0.0036   |
| 4.00E-13 | 0.191532 | 3.09E-05 | 0.118897 | 0.01012  | 0.10428  | 0.02422  | 0.118143 | 0.01061  |
| 0.00658  | 0.224963 | 9.04E-07 | 0.030628 | 0.50909  | 0.024371 | 0.59936  | 0.108687 | 0.0188   |
| 0.00327  | 0.122336 | 0.00813  | 0.145312 | 0.00164  | 0.238028 | 1.94E-07 | 0.112909 | 0.01464  |
| 0.03188  | 0.134388 | 0.00362  | 0.102128 | 0.02732  | 0.114059 | 0.01365  | 0.056497 | 0.22299  |
| 5.19E-25 | 0.20174  | 1.12E-05 | 0.154232 | 0.00083  | 0.21351  | 3.23E-06 | 0.356882 | 1.79E-15 |
| 8.27E-09 | 0.165216 | 0.00034  | 0.205385 | 7.67E-06 | 0.159552 | 0.00054  | 0.172012 | 0.00019  |
| 6.28E-20 | 0.462403 | 4.06E-26 | 0.348285 | 9.17E-15 | 0.297277 | 5.54E-11 | 0.390617 | 1.79E-18 |
| 9.91E-05 | 0.124203 | 0.0072   | 0.052923 | 0.2537   | -0.04438 | 0.3386   | 0.038555 | 0.40583  |
| 0.14412  | -0.16666 | 0.0003   | -0.28025 | 7.10E-10 | -0.23993 | 1.54E-07 | -0.1148  | 0.01305  |
| 9.73E-08 | 0.087041 | 0.06018  | 0.157103 | 0.00066  | 0.067513 | 0.14519  | 0.135149 | 0.00343  |
| 0.15588  | -0.01061 | 0.81913  | -0.07919 | 0.08738  | -0.14695 | 0.00145  | -0.11293 | 0.01462  |
| 0.18208  | -0.04336 | 0.34978  | 0.041229 | 0.37402  | 0.032072 | 0.48932  | -0.0765  | 0.09872  |
| 0.00083  | 0.236998 | 2.20E-07 | 0.177806 | 0.00011  | 0.145292 | 0.00164  | 0.188774 | 4.03E-05 |
| 7.46E-05 | -0.00698 | 0.88037  | -0.07379 | 0.11128  | -0.12161 | 0.00852  | -0.04341 | 0.34926  |
| 0.03642  | 0.105158 | 0.02304  | 0.077223 | 0.09555  | 0.049529 | 0.28547  | -0.02877 | 0.53507  |
| 0.34868  | -0.06996 | 0.13114  | 0.010782 | 0.81624  | -0.06715 | 0.14734  | 0.04582  | 0.32313  |
| 3.70E-18 | 0.144625 | 0.00173  | 0.137636 | 0.00288  | 0.05237  | 0.2587   | 0.166086 | 0.00031  |
| 6.93E-43 | 0.510734 | 2.18E-32 | 0.369047 | 1.63E-16 | 0.334912 | 1.05E-13 | 0.419545 | 2.47E-21 |
| 2.10E-15 | 0.339268 | 4.82E-14 | 0.214238 | 2.99E-06 | 0.306228 | 1.35E-11 | 0.249297 | 4.78E-08 |
| 0.0007   | -0.02437 | 0.59942  | 0.016145 | 0.72786  | 0.098868 | 0.03267  | 0.020526 | 0.65817  |
| 6.10E-30 | -0.01224 | 0.79196  | 0.052092 | 0.26124  | -0.08979 | 0.05249  | 0.159382 | 0.00055  |
| 8.71E-07 | -0.00949 | 0.83795  | 0.061626 | 0.1837   | 0.106349 | 0.02153  | -0.21913 | 1.74E-06 |
| 2.26E-08 | 0.061251 | 0.18639  | -0.05977 | 0.19725  | -0.06748 | 0.14542  | -0.02142 | 0.64426  |
| 4.91E-19 | 0.403655 | 9.97E-20 | 0.381664 | 1.21E-17 | 0.395034 | 6.84E-19 | 0.410195 | 2.23E-20 |
| 0.01517  | -0.08681 | 0.06087  | -0.03446 | 0.45755  | -0.10813 | 0.01942  | -0.00017 | 0.99713  |
| 0.00028  | -0.18113 | 8.27E-05 | -0.15335 | 0.00089  | -0.0659  | 0.15506  | -0.17428 | 0.00015  |
| 9.72E-10 | 0.060535 | 0.1916   | 0.049918 | 0.2817   | -0.01704 | 0.71344  | 0.003172 | 0.9455   |
| 1.09E-07 | 0.130963 | 0.00459  | 0.060463 | 0.19213  | -0.08557 | 0.06467  | 0.035589 | 0.44292  |
| 0.52198  | 0.191545 | 3.09E-05 | 0.088949 | 0.05475  | 0.193282 | 2.61E-05 | -0.0084  | 0.85637  |
| 6.96E-09 | 0.138573 | 0.00269  | 0.037091 | 0.4239   | -0.0915  | 0.04814  | 0.091606 | 0.04787  |
| 0.00024  | -0.07421 | 0.10925  | 0.051952 | 0.26253  | -0.09076 | 0.04999  | 0.07846  | 0.09034  |
| 6.55E-05 | 0.114596 | 0.01321  | 0.002854 | 0.95096  | 0.003515 | 0.93961  | -0.04031 | 0.38473  |
| 0.00136  | 0.199553 | 1.40E-05 | 0.122621 | 0.00798  | 0.193797 | 2.48E-05 | 0.046832 | 0.31254  |
| 2.40E-25 | 0.329769 | 2.62E-13 | 0.169229 | 0.00024  | 0.223804 | 1.03E-06 | 0.33601  | 8.67E-14 |
| 0.00025  | 0.126149 | 0.00634  | 0.039311 | 0.39668  | 0.087845 | 0.05784  | 0.044699 | 0.33512  |
| 0.37024  | -0.01793 | 0.6991   | 0.028335 | 0.54132  | -0.02562 | 0.58074  | 0.035378 | 0.44563  |
| 0.01078  | 0.224157 | 9.91E-07 | 0.155229 | 0.00076  | 0.188393 | 4.18E-05 | 0.153538 | 0.00087  |

|          |          |          |          |          |          |          |          |          |
|----------|----------|----------|----------|----------|----------|----------|----------|----------|
| 1.31E-30 | 0.246522 | 6.79E-08 | 0.240982 | 1.35E-07 | 0.121764 | 0.00844  | 0.233989 | 3.15E-07 |
| 1.08E-14 | 0.343911 | 2.06E-14 | 0.337401 | 6.75E-14 | 0.251139 | 3.78E-08 | 0.237795 | 2.00E-07 |
| 3.27E-12 | 0.148665 | 0.00127  | 0.080799 | 0.08111  | 0.026851 | 0.56273  | 0.162117 | 0.00044  |
| 0.64949  | 0.00236  | 0.95944  | -0.11719 | 0.01126  | -0.15267 | 0.00093  | -0.12718 | 0.00592  |
| 7.62E-11 | 0.240475 | 1.44E-07 | 0.209795 | 4.82E-06 | 0.188988 | 3.95E-05 | 0.140849 | 0.00228  |
| 0.10402  | -0.10178 | 0.02786  | -0.0585  | 0.20695  | -0.15774 | 0.00062  | -0.00987 | 0.83156  |
| 1.08E-23 | -0.14954 | 0.00119  | 0.020086 | 0.66505  | 0.051366 | 0.26795  | -0.2426  | 1.11E-07 |
| 0.0211   | 0.036529 | 0.43096  | -0.02669 | 0.56505  | -0.04439 | 0.33844  | -0.16744 | 0.00028  |
| 4.97E-09 | 0.317573 | 2.11E-12 | 0.236968 | 2.21E-07 | 0.24153  | 1.26E-07 | 0.207795 | 5.96E-06 |
| 0.0007   | 0.159469 | 0.00054  | 0.10811  | 0.01945  | 0.161268 | 0.00047  | 0.14005  | 0.00242  |
| 2.56E-05 | 0.25806  | 1.53E-08 | 0.238548 | 1.82E-07 | 0.253377 | 2.83E-08 | 0.206232 | 7.02E-06 |
| 0.00038  | 0.195867 | 2.02E-05 | 0.176194 | 0.00013  | 0.157348 | 0.00064  | 0.134425 | 0.00361  |
| 0.00073  | 0.168057 | 0.00026  | 0.126566 | 0.00617  | 0.195375 | 2.12E-05 | 0.138707 | 0.00266  |
| 5.41E-30 | 0.115381 | 0.01259  | 0.118745 | 0.01022  | -0.00958 | 0.83641  | 0.208201 | 5.71E-06 |
| 1.31E-17 | 0.151855 | 0.001    | 0.191183 | 3.20E-05 | -0.01029 | 0.82456  | 0.204493 | 8.41E-06 |
| 9.94E-05 | -0.04333 | 0.3502   | -0.01957 | 0.67315  | -0.06754 | 0.14506  | 0.020245 | 0.66256  |
| 0.38216  | 0.162133 | 0.00044  | 0.053166 | 0.25152  | 0.141744 | 0.00214  | 0.026339 | 0.5702   |
| 9.57E-13 | -0.22382 | 1.03E-06 | -0.0732  | 0.11418  | -0.03477 | 0.45348  | -0.16114 | 0.00047  |
| 0.94627  | 0.029594 | 0.52349  | 0.062004 | 0.18102  | 0.15741  | 0.00064  | -0.04706 | 0.3102   |
| 2.83E-07 | 0.324906 | 6.08E-13 | 0.28685  | 2.69E-10 | 0.35915  | 1.15E-15 | 0.131113 | 0.00454  |
| 0.21062  | 0.080006 | 0.08415  | 0.009501 | 0.83776  | 0.062981 | 0.17423  | 0.013451 | 0.77188  |
| 1.77E-07 | -0.06718 | 0.14719  | -0.14742 | 0.0014   | -0.08647 | 0.06187  | -0.0215  | 0.64303  |
| 0.01031  | 0.008244 | 0.85898  | -0.11627 | 0.01192  | -0.11349 | 0.01413  | -0.05322 | 0.25104  |
| 1.95E-23 | 0.462704 | 3.74E-26 | 0.230888 | 4.55E-07 | 0.265001 | 6.04E-09 | 0.275939 | 1.32E-09 |
| 0.09387  | 0.17075  | 0.00021  | 0.06899  | 0.13658  | 0.129626 | 0.00502  | 0.024722 | 0.5941   |
| 2.23E-06 | 0.297965 | 4.97E-11 | 0.274454 | 1.63E-09 | 0.239382 | 1.64E-07 | 0.063285 | 0.17216  |
| 0.1749   | 0.00813  | 0.8609   | 0.081037 | 0.08022  | 0.076122 | 0.10039  | 0.007928 | 0.86432  |
| 0.0016   | -0.01206 | 0.79489  | -0.00912 | 0.84414  | 0.018603 | 0.68844  | -0.03661 | 0.42988  |
| 0.00258  | 0.038293 | 0.40903  | 0.077045 | 0.09632  | 0.142852 | 0.00197  | 0.010778 | 0.81631  |
| 1.17E-28 | 0.451402 | 7.98E-25 | 0.25728  | 1.70E-08 | 0.199706 | 1.37E-05 | 0.27901  | 8.49E-10 |
| 0.00797  | 0.093346 | 0.04378  | 0.144878 | 0.0017   | 0.137631 | 0.00288  | 0.030318 | 0.51338  |
| 1.92E-09 | 0.119053 | 0.01002  | 0.100934 | 0.02919  | 0.072652 | 0.11691  | 0.017851 | 0.70042  |
| 0.00015  | 0.462633 | 3.81E-26 | 0.31595  | 2.76E-12 | 0.283508 | 4.41E-10 | 0.158931 | 0.00057  |
| 5.82E-12 | 0.329425 | 2.78E-13 | 0.257304 | 1.69E-08 | 0.253678 | 2.72E-08 | 0.237097 | 2.17E-07 |
| 0.7346   | 0.073726 | 0.11158  | -0.00313 | 0.94613  | 0.07014  | 0.13014  | -0.02871 | 0.53601  |
| 0.00115  | 0.026591 | 0.56651  | -0.09018 | 0.05146  | -0.06757 | 0.14483  | -0.04146 | 0.3713   |
| 0.4946   | 0.103073 | 0.02592  | 0.003244 | 0.94425  | 0.116917 | 0.01145  | 0.102025 | 0.02748  |
| 0.04198  | 0.265181 | 5.89E-09 | 0.108377 | 0.01915  | 0.17773  | 0.00011  | 0.041441 | 0.37157  |
| 0.00287  | -0.04486 | 0.33333  | -0.04292 | 0.35475  | -0.12125 | 0.00872  | -0.04236 | 0.3611   |
| 0.13425  | 0.148687 | 0.00127  | 0.191866 | 2.99E-05 | 0.125333 | 0.00669  | -0.01357 | 0.7699   |
| 1.59E-23 | 0.25061  | 4.04E-08 | 0.270671 | 2.77E-09 | 0.213073 | 3.39E-06 | 0.503677 | 2.07E-31 |
| 0.05668  | 0.120366 | 0.00922  | 0.098487 | 0.03335  | 0.120266 | 0.00928  | -0.005   | 0.91425  |
| 0.00035  | 0.096554 | 0.03699  | -0.00632 | 0.8916   | 0.08624  | 0.06258  | 0.004787 | 0.91783  |
| 0.11291  | 0.035437 | 0.44487  | -0.03061 | 0.50931  | 0.037065 | 0.42423  | 0.222545 | 1.19E-06 |
| 2.07E-06 | 0.272667 | 2.09E-09 | 0.10525  | 0.02292  | 0.019194 | 0.67908  | 0.152799 | 0.00092  |

|          |          |          |          |          |          |          |          |          |
|----------|----------|----------|----------|----------|----------|----------|----------|----------|
| 5.91E-05 | -0.08169 | 0.07781  | -0.0793  | 0.08694  | -0.11095 | 0.01646  | -0.0526  | 0.25666  |
| 8.52E-14 | 0.099055 | 0.03234  | 0.127715 | 0.00571  | -0.01805 | 0.69718  | 0.172831 | 0.00017  |
| 0.03335  | 0.093665 | 0.04306  | 0.012106 | 0.79415  | 0.051245 | 0.26909  | -0.03688 | 0.4265   |
| 0.00423  | 0.103045 | 0.02596  | -0.00023 | 0.99607  | -0.02407 | 0.60386  | 0.090404 | 0.05089  |
| 0.00051  | 0.370495 | 1.22E-16 | 0.145089 | 0.00167  | 0.141336 | 0.0022   | 0.156109 | 0.00071  |
| 0.01017  | 0.195434 | 2.11E-05 | 0.047789 | 0.30275  | 0.055327 | 0.23274  | 0.021993 | 0.63546  |
| 0.19598  | 0.126646 | 0.00613  | 0.015432 | 0.73942  | -0.04006 | 0.38768  | 0.005091 | 0.91263  |
| 0.03326  | 0.108331 | 0.0192   | -0.01401 | 0.76261  | -0.05621 | 0.22538  | -0.00791 | 0.86457  |
| 0.18587  | 0.022531 | 0.62722  | -0.04558 | 0.32569  | -0.03876 | 0.40334  | -0.10359 | 0.02518  |
| 0.01654  | -0.09593 | 0.03823  | -0.10555 | 0.02254  | -0.05031 | 0.27792  | -0.17386 | 0.00016  |
| 1.42E-11 | -0.00978 | 0.83299  | 0.054317 | 0.24139  | -0.13757 | 0.00289  | -0.00574 | 0.90147  |
| 0.73927  | 0.232485 | 3.77E-07 | 0.034863 | 0.45229  | 0.043023 | 0.35358  | -0.14238 | 0.00204  |
| 4.97E-05 | 0.147545 | 0.00139  | 0.234592 | 2.93E-07 | 0.198734 | 1.52E-05 | 0.116358 | 0.01186  |
| 3.23E-09 | 0.211477 | 4.03E-06 | 0.178493 | 0.00011  | 0.175415 | 0.00014  | 0.065354 | 0.15853  |
| 2.35E-15 | 0.534353 | 7.74E-36 | 0.380569 | 1.53E-17 | 0.407849 | 3.83E-20 | 0.225113 | 8.88E-07 |
| 8.38E-23 | 0.202684 | 1.01E-05 | 0.109269 | 0.01817  | 0.0245   | 0.59742  | 0.156828 | 0.00067  |
| 0.01973  | -0.05012 | 0.27971  | 0.019064 | 0.68114  | -0.0003  | 0.99489  | -0.09605 | 0.03799  |
| 0.00017  | 0.099934 | 0.03083  | 0.131337 | 0.00447  | 0.064872 | 0.16163  | 0.034146 | 0.46165  |
| 0.00716  | 0.237647 | 2.03E-07 | 0.15343  | 0.00088  | 0.144806 | 0.0017   | 0.124521 | 0.00706  |
| 0.00317  | -0.00886 | 0.8485   | 0.000313 | 0.99461  | -0.03812 | 0.41112  | -0.04668 | 0.31416  |
| 0.13073  | 0.183156 | 6.86E-05 | 0.034982 | 0.45075  | 0.052257 | 0.25973  | -0.03935 | 0.39617  |
| 0.43467  | 0.012388 | 0.78947  | -0.1466  | 0.00149  | -0.1755  | 0.00014  | -0.28813 | 2.22E-10 |
| 0.00022  | 0.157688 | 0.00063  | 0.270084 | 3.00E-09 | 0.211969 | 3.82E-06 | 0.013416 | 0.77246  |
| 1.76E-10 | 0.314228 | 3.68E-12 | 0.278091 | 9.69E-10 | 0.330624 | 2.25E-13 | 0.253107 | 2.93E-08 |
| 3.41E-32 | 0.538529 | 1.78E-36 | 0.348643 | 8.57E-15 | 0.34541  | 1.57E-14 | 0.355871 | 2.17E-15 |
| 1.35E-43 | 0.575096 | 1.81E-42 | 0.41008  | 2.29E-20 | 0.375112 | 4.74E-17 | 0.383466 | 8.30E-18 |
| 1.26E-08 | 0.182417 | 7.35E-05 | 0.125508 | 0.00661  | 0.114643 | 0.01318  | 0.162381 | 0.00043  |
| 1.18E-10 | 0.158655 | 0.00058  | 0.195839 | 2.03E-05 | 0.115655 | 0.01238  | 0.074998 | 0.10552  |
| 0.10726  | 0.173298 | 0.00017  | 0.150548 | 0.0011   | 0.160078 | 0.00052  | 0.14727  | 0.00142  |
| 5.20E-16 | 0.218553 | 1.86E-06 | 0.185734 | 5.39E-05 | 0.117298 | 0.01119  | 0.210103 | 4.66E-06 |
| 0.0023   | -0.13606 | 0.00322  | -0.20458 | 8.33E-06 | -0.2145  | 2.90E-06 | -0.07807 | 0.09196  |
| 7.80E-05 | 0.085042 | 0.06633  | 0.021472 | 0.6435   | -0.02694 | 0.56145  | 0.015676 | 0.73547  |
| 0.01637  | 0.264944 | 6.09E-09 | 0.073914 | 0.11067  | 0.112302 | 0.01518  | 0.025755 | 0.57877  |
| 1.27E-13 | 0.153719 | 0.00086  | 0.138485 | 0.00271  | 0.097594 | 0.035    | 0.084414 | 0.06837  |
| 6.90E-22 | 0.286036 | 3.04E-10 | 0.188488 | 4.15E-05 | 0.185022 | 5.76E-05 | 0.284282 | 3.94E-10 |
| 0.32123  | 0.234967 | 2.80E-07 | 0.215208 | 2.69E-06 | 0.149778 | 0.00117  | 0.0791   | 0.08774  |
| 0.64945  | 0.217011 | 2.21E-06 | 0.039434 | 0.3952   | 0.085248 | 0.06567  | -0.05762 | 0.21392  |
| 2.27E-37 | 0.675385 | 1.73E-63 | 0.513875 | 7.84E-33 | 0.458095 | 1.32E-25 | 0.497486 | 1.44E-30 |
| 2.44E-14 | 0.257643 | 1.62E-08 | 0.141729 | 0.00214  | 0.112412 | 0.01508  | 0.121494 | 0.00858  |
| 0.44422  | 0.29765  | 5.22E-11 | 0.242987 | 1.06E-07 | 0.192089 | 2.93E-05 | 0.085757 | 0.06407  |
| 0.00398  | -0.03307 | 0.47587  | -0.14644 | 0.00151  | -0.11352 | 0.01411  | -0.06218 | 0.17981  |
| 0.00043  | 0.0756   | 0.10275  | 0.109572 | 0.01785  | 0.007126 | 0.87793  | 0.044984 | 0.33205  |
| 2.07E-15 | 0.239934 | 1.54E-07 | 0.21372  | 3.16E-06 | 0.200736 | 1.24E-05 | 0.190318 | 3.48E-05 |
| 1.38E-20 | 0.289109 | 1.92E-10 | 0.232983 | 3.55E-07 | 0.17898  | 0.0001   | 0.292074 | 1.23E-10 |
| 2.42E-27 | 0.328747 | 3.13E-13 | 0.271271 | 2.54E-09 | 0.244429 | 8.83E-08 | 0.272886 | 2.03E-09 |

|          |          |          |          |          |          |          |          |          |
|----------|----------|----------|----------|----------|----------|----------|----------|----------|
| 3.61E-28 | 0.250534 | 4.08E-08 | 0.300243 | 3.49E-11 | 0.206434 | 6.87E-06 | 0.345297 | 1.60E-14 |
| 1.59E-24 | 0.232685 | 3.68E-07 | 0.144846 | 0.0017   | 0.114512 | 0.01328  | 0.172937 | 0.00017  |
| 0.14363  | -0.05307 | 0.25235  | -0.03834 | 0.40844  | -0.09132 | 0.04858  | -0.04832 | 0.29739  |
| 9.35E-06 | 0.063064 | 0.17366  | 0.080956 | 0.08052  | 0.000862 | 0.98518  | -0.0204  | 0.66016  |
| 0.94244  | 0.387943 | 3.20E-18 | 0.158182 | 0.0006   | 0.185616 | 5.45E-05 | 0.074746 | 0.1067   |
| 0.00062  | 0.358889 | 1.21E-15 | 0.250369 | 4.17E-08 | 0.235243 | 2.71E-07 | 0.241474 | 1.27E-07 |
| 0.06245  | -0.19391 | 2.45E-05 | -0.04834 | 0.29722  | -0.18957 | 3.74E-05 | -0.08655 | 0.06163  |
| 0.43136  | 0.154872 | 0.00078  | 0.068479 | 0.13951  | 0.106802 | 0.02098  | -0.07673 | 0.09769  |
| 1.12E-10 | 0.08389  | 0.07011  | 0.083564 | 0.07121  | 0.049555 | 0.28521  | 0.090656 | 0.05024  |
| 0.35553  | -0.00494 | 0.9152   | 0.049211 | 0.28858  | -0.05615 | 0.22584  | 0.012751 | 0.78346  |
| 0.11616  | 0.096684 | 0.03674  | 0.038805 | 0.40279  | 0.116904 | 0.01146  | 0.077287 | 0.09528  |
| 4.84E-05 | 0.313098 | 4.43E-12 | 0.285496 | 3.29E-10 | 0.39542  | 6.28E-19 | 0.188858 | 4.00E-05 |
| 0.00097  | 0.111756 | 0.01568  | 0.188624 | 4.09E-05 | 0.189226 | 3.86E-05 | 0.188316 | 4.22E-05 |
| 2.55E-14 | 0.188777 | 4.03E-05 | 0.130544 | 0.00472  | 0.073875 | 0.11086  | 0.110353 | 0.01705  |
| 4.20E-14 | -0.2071  | 6.41E-06 | -0.01235 | 0.7901   | 0.041253 | 0.37375  | -0.12977 | 0.00497  |
| 1.00E-10 | 0.164173 | 0.00037  | 0.135602 | 0.00332  | 0.058371 | 0.208    | 0.083413 | 0.07172  |
| 0.01882  | 0.138156 | 0.00277  | 0.147712 | 0.00137  | 0.184706 | 5.93E-05 | 0.074856 | 0.10618  |
| 5.34E-12 | 0.194549 | 2.30E-05 | 0.195132 | 2.17E-05 | 0.160389 | 0.0005   | 0.174321 | 0.00015  |
| 7.75E-35 | 0.45469  | 3.32E-25 | 0.425383 | 6.02E-22 | 0.427077 | 3.98E-22 | 0.432483 | 1.04E-22 |
| 8.27E-07 | 0.134945 | 0.00348  | 0.138763 | 0.00265  | 0.044746 | 0.33461  | 0.085706 | 0.06423  |
| 0.01956  | 0.105078 | 0.02315  | 0.050406 | 0.27701  | 0.032597 | 0.48223  | 0.062712 | 0.17608  |
| 4.86E-19 | 0.351509 | 5.00E-15 | 0.311085 | 6.16E-12 | 0.305789 | 1.45E-11 | 0.220525 | 1.49E-06 |
| 1.17E-19 | 0.538274 | 1.95E-36 | 0.378377 | 2.41E-17 | 0.35221  | 4.38E-15 | 0.289507 | 1.81E-10 |
| 2.04E-10 | 0.400489 | 2.03E-19 | 0.272434 | 2.16E-09 | 0.256961 | 1.77E-08 | 0.273846 | 1.77E-09 |
| 6.54E-17 | 0.399223 | 2.70E-19 | 0.28338  | 4.50E-10 | 0.254398 | 2.48E-08 | 0.331758 | 1.84E-13 |
| 0.00881  | 0.177441 | 0.00012  | 0.024448 | 0.5982   | 0.021265 | 0.64669  | -0.04932 | 0.2875   |
| 1.21E-07 | 0.197906 | 1.65E-05 | 0.149971 | 0.00115  | 0.15622  | 0.0007   | 0.088887 | 0.05492  |
| 0.57476  | 0.044559 | 0.33664  | 0.082534 | 0.07478  | 0.167039 | 0.00029  | -0.04254 | 0.35903  |
| 2.30E-05 | 0.060199 | 0.19408  | 0.054036 | 0.24384  | 0.015399 | 0.73996  | -0.05732 | 0.21631  |
| 1.05E-08 | 0.304541 | 1.77E-11 | 0.260714 | 1.08E-08 | 0.232346 | 3.83E-07 | 0.226153 | 7.88E-07 |
| 1.94E-46 | 0.519397 | 1.27E-33 | 0.462679 | 3.77E-26 | 0.364771 | 3.83E-16 | 0.519824 | 1.10E-33 |
| 7.29E-12 | 0.221572 | 1.33E-06 | 0.173318 | 0.00017  | 0.149476 | 0.0012   | 0.200226 | 1.30E-05 |
| 2.15E-09 | 0.009978 | 0.82972  | 0.012276 | 0.79132  | -0.07465 | 0.10715  | -0.00035 | 0.99393  |
| 9.40E-08 | 0.214646 | 2.86E-06 | 0.141188 | 0.00223  | 0.130276 | 0.00481  | 0.190219 | 3.51E-05 |
| 0.02594  | 0.024774 | 0.59333  | -0.0473  | 0.30775  | -0.1206  | 0.00909  | 0.076693 | 0.09786  |
| 2.25E-07 | 0.358692 | 1.26E-15 | 0.201957 | 1.09E-05 | 0.183905 | 6.40E-05 | 0.244363 | 8.90E-08 |
| 4.13E-07 | 0.288802 | 2.01E-10 | 0.256275 | 1.94E-08 | 0.268847 | 3.56E-09 | 0.217773 | 2.03E-06 |
| 2.04E-08 | 0.404406 | 8.40E-20 | 0.268892 | 3.54E-09 | 0.27437  | 1.65E-09 | 0.190329 | 3.47E-05 |
| 1.70E-12 | 0.149063 | 0.00123  | 0.091687 | 0.04768  | 0.072262 | 0.11889  | 0.127758 | 0.0057   |
| 0.00117  | -0.08197 | 0.0768   | 0.019976 | 0.66678  | -0.05739 | 0.21577  | -0.04698 | 0.31106  |
| 2.56E-22 | 0.19857  | 1.54E-05 | 0.244476 | 8.78E-08 | 0.161985 | 0.00044  | 0.316682 | 2.45E-12 |
| 9.15E-07 | 0.114459 | 0.01332  | 0.037747 | 0.41575  | 0.010885 | 0.81452  | -0.01193 | 0.79705  |
| 0.02712  | 0.069774 | 0.13216  | 0.107647 | 0.01998  | 0.164701 | 0.00035  | 0.008643 | 0.85223  |
| 5.60E-07 | 0.04864  | 0.29421  | -0.01711 | 0.71222  | -0.02195 | 0.63609  | 0.066291 | 0.15263  |
| 5.14E-06 | 0.104473 | 0.02396  | -0.08531 | 0.06548  | -0.01397 | 0.76328  | 0.120014 | 0.00943  |

|          |          |          |          |          |          |          |          |          |
|----------|----------|----------|----------|----------|----------|----------|----------|----------|
| 5.36E-08 | 0.434596 | 6.15E-23 | 0.153386 | 0.00088  | 0.146622 | 0.00149  | 0.12941  | 0.0051   |
| 3.42E-19 | 0.438767 | 2.14E-23 | 0.427584 | 3.51E-22 | 0.466908 | 1.16E-26 | 0.407846 | 3.83E-20 |
| 1.07E-32 | 0.444971 | 4.33E-24 | 0.274629 | 1.59E-09 | 0.244443 | 8.81E-08 | 0.33225  | 1.69E-13 |
| 2.73E-12 | 0.068934 | 0.1369   | 0.047637 | 0.3043   | -0.00543 | 0.90692  | -0.00134 | 0.97688  |
| 9.50E-11 | 0.512243 | 1.33E-32 | 0.343616 | 2.18E-14 | 0.412896 | 1.19E-20 | 0.287787 | 2.34E-10 |
| 0.24751  | 0.043276 | 0.35076  | 0.016491 | 0.72226  | 0.026938 | 0.56146  | -0.08964 | 0.05288  |
| 0.02492  | 0.036591 | 0.43017  | -0.00635 | 0.89106  | 0.063693 | 0.1694   | -0.13395 | 0.00373  |
| 2.29E-16 | 0.415975 | 5.76E-21 | 0.268913 | 3.53E-09 | 0.254087 | 2.58E-08 | 0.330593 | 2.26E-13 |
| 1.71E-15 | 0.171815 | 0.00019  | 0.164098 | 0.00037  | 0.143567 | 0.00187  | 0.178035 | 0.00011  |
| 0.00371  | 0.035395 | 0.44541  | 0.006008 | 0.89697  | 0.068968 | 0.1367   | 0.051368 | 0.26793  |
| 0.51931  | 0.079275 | 0.08704  | 0.113583 | 0.01405  | 0.106677 | 0.02113  | -0.02293 | 0.62109  |
| 0.03411  | 0.168009 | 0.00027  | 0.203516 | 9.31E-06 | 0.218149 | 1.95E-06 | 0.029652 | 0.52268  |
| 0.05233  | -0.06031 | 0.19325  | -0.01138 | 0.80629  | -0.06391 | 0.16796  | -0.10445 | 0.024    |
| 3.09E-15 | 0.344924 | 1.71E-14 | 0.176    | 0.00013  | 0.136147 | 0.0032   | 0.168699 | 0.00025  |
| 1.33E-08 | 0.188319 | 4.21E-05 | 0.213701 | 3.17E-06 | 0.104962 | 0.0233   | 0.155993 | 0.00072  |
| 8.02E-28 | 0.189504 | 3.76E-05 | 0.107438 | 0.02022  | 0.06975  | 0.1323   | 0.263805 | 7.10E-09 |
| 2.23E-17 | 0.349277 | 7.61E-15 | 0.163841 | 0.00038  | 0.155497 | 0.00075  | 0.174493 | 0.00015  |
| 0.00029  | 0.046742 | 0.31348  | 0.028535 | 0.53847  | 0.000827 | 0.98577  | -0.06533 | 0.1587   |
| 2.53E-06 | 0.110031 | 0.01738  | 0.203204 | 9.61E-06 | 0.079948 | 0.08438  | 0.075583 | 0.10282  |
| 3.71E-11 | 0.112798 | 0.01473  | 0.077584 | 0.094    | 0.031609 | 0.49561  | 0.028721 | 0.53583  |
| 0.00072  | 0.015624 | 0.7363   | -0.02227 | 0.63121  | -0.05468 | 0.23827  | -0.12965 | 0.00502  |
| 0.00663  | 0.190883 | 3.29E-05 | 0.090798 | 0.04988  | 0.085318 | 0.06545  | 0.010731 | 0.8171   |
| 2.37E-06 | 0.351708 | 4.81E-15 | 0.304371 | 1.82E-11 | 0.383199 | 8.79E-18 | 0.166574 | 0.0003   |
| 5.39E-10 | 0.143888 | 0.00182  | 0.05456  | 0.23929  | 0.009649 | 0.83526  | 0.110542 | 0.01686  |
| 0.0686   | 0.105552 | 0.02253  | 0.1536   | 0.00087  | 0.106869 | 0.02089  | 0.103341 | 0.02554  |
| 1.24E-07 | 0.075134 | 0.10489  | 0.058167 | 0.20959  | 0.02956  | 0.52397  | 0.025217 | 0.58674  |
| 3.55E-08 | 0.069697 | 0.13259  | 0.018098 | 0.69648  | -0.02701 | 0.56048  | -0.05646 | 0.22331  |
| 7.57E-09 | 0.172356 | 0.00018  | 0.125387 | 0.00667  | 0.070725 | 0.12696  | 0.020606 | 0.65693  |
| 6.23E-26 | 0.407808 | 3.86E-20 | 0.408589 | 3.23E-20 | 0.356865 | 1.80E-15 | 0.312572 | 4.83E-12 |
| 0.00292  | 0.069646 | 0.13288  | 0.057413 | 0.21557  | -0.04485 | 0.33354  | 0.059685 | 0.19792  |
| 7.96E-18 | 0.304487 | 1.78E-11 | 0.176668 | 0.00012  | 0.161008 | 0.00048  | 0.176213 | 0.00013  |
| 5.78E-15 | 0.265926 | 5.32E-09 | 0.194843 | 2.24E-05 | 0.179683 | 9.45E-05 | 0.184866 | 5.85E-05 |
| 9.03E-07 | 0.092031 | 0.04684  | 0.038797 | 0.40289  | -0.01032 | 0.824    | 0.010373 | 0.8231   |
| 0.33187  | -0.15502 | 0.00078  | -0.11567 | 0.01237  | -0.13843 | 0.00272  | -0.16242 | 0.00043  |
| 1.09E-06 | 0.191816 | 3.01E-05 | 0.076992 | 0.09655  | 0.044756 | 0.3345   | -0.00187 | 0.96785  |
| 9.91E-16 | 0.386532 | 4.32E-18 | 0.284777 | 3.66E-10 | 0.314688 | 3.41E-12 | 0.261216 | 1.01E-08 |
| 4.40E-22 | 0.37585  | 4.07E-17 | 0.288753 | 2.03E-10 | 0.253535 | 2.77E-08 | 0.26122  | 1.01E-08 |
| 6.39E-15 | 0.11137  | 0.01605  | 0.141025 | 0.00225  | 0.058754 | 0.20502  | 0.083817 | 0.07035  |
| 0.65577  | -0.17635 | 0.00013  | -0.11635 | 0.01186  | -0.21442 | 2.93E-06 | -0.10601 | 0.02195  |
| 0.00016  | -0.03308 | 0.47577  | -0.03685 | 0.42693  | -0.09481 | 0.04057  | 0.126596 | 0.00615  |
| 0.00423  | 0.015889 | 0.732    | -0.05242 | 0.25826  | -0.15426 | 0.00082  | -0.10641 | 0.02145  |
| 2.46E-24 | 0.212205 | 3.72E-06 | 0.094357 | 0.04153  | 0.084657 | 0.06757  | 0.146473 | 0.0015   |
| 1.17E-53 | 0.552388 | 1.16E-38 | 0.485808 | 4.97E-29 | 0.431443 | 1.35E-22 | 0.480932 | 2.10E-28 |
| 0.0007   | 0.363183 | 5.24E-16 | 0.259968 | 1.19E-08 | 0.342976 | 2.45E-14 | 0.140455 | 0.00235  |
| 9.38E-27 | 0.369698 | 1.43E-16 | 0.364983 | 3.67E-16 | 0.222887 | 1.14E-06 | 0.410702 | 1.98E-20 |



|          |          |          |          |          |          |          |          |          |
|----------|----------|----------|----------|----------|----------|----------|----------|----------|
| 2.27E-17 | 0.344685 | 1.79E-14 | 0.254256 | 2.52E-08 | 0.28694  | 2.66E-10 | 0.285378 | 3.35E-10 |
| 0.00088  | 0.050175 | 0.27922  | 0.119505 | 0.00974  | 0.113599 | 0.01404  | 0.051499 | 0.26672  |
| 2.87E-16 | 0.152335 | 0.00096  | 0.134766 | 0.00352  | 0.082212 | 0.07592  | 0.107983 | 0.01959  |
| 1.62E-05 | 0.200153 | 1.31E-05 | 0.195393 | 2.12E-05 | 0.217361 | 2.12E-06 | 0.065861 | 0.15531  |
| 0.00066  | -0.13374 | 0.00379  | -0.11045 | 0.01695  | -0.11336 | 0.01425  | -0.16294 | 0.00041  |
| 0.11752  | 0.079522 | 0.08605  | -0.0647  | 0.16272  | -0.05362 | 0.24748  | -0.14758 | 0.00138  |
| 0.01161  | -0.0622  | 0.17965  | 0.051928 | 0.26275  | 0.020575 | 0.65742  | -0.05231 | 0.25922  |
| 2.59E-05 | 0.074776 | 0.10656  | 0.054949 | 0.23595  | 0.02453  | 0.59697  | 0.110568 | 0.01683  |
| 0.01998  | 0.128745 | 0.00533  | 0.058617 | 0.20608  | 0.0887   | 0.05543  | -0.0558  | 0.22874  |
| 0.38125  | 0.012968 | 0.77987  | 0.034514 | 0.45683  | 0.053312 | 0.25022  | -0.03691 | 0.4262   |
| 1.09E-08 | -0.01804 | 0.69735  | 0.128062 | 0.00558  | 0.189841 | 3.64E-05 | -0.07562 | 0.10265  |
| 0.00017  | 0.168677 | 0.00025  | 0.099616 | 0.03137  | 0.090786 | 0.04992  | -0.03833 | 0.40854  |
| 1.55E-08 | -0.0438  | 0.34494  | -0.03141 | 0.49831  | -0.11264 | 0.01487  | 0.048353 | 0.29707  |
| 0.23816  | 0.108838 | 0.01864  | 0.026312 | 0.57059  | 0.045315 | 0.3285   | -0.07964 | 0.08558  |
| 0.00015  | 0.184828 | 5.87E-05 | 0.131621 | 0.00438  | 0.132913 | 0.00401  | 0.128191 | 0.00553  |
| 1.88E-09 | 0.109319 | 0.01812  | 0.052204 | 0.26022  | -0.0124  | 0.78931  | 0.056014 | 0.22698  |
| 1.97E-12 | 0.357292 | 1.65E-15 | 0.233985 | 3.15E-07 | 0.223489 | 1.07E-06 | 0.201804 | 1.11E-05 |
| 3.26E-53 | 0.621342 | 3.25E-51 | 0.518191 | 1.90E-33 | 0.430331 | 1.78E-22 | 0.477031 | 6.53E-28 |
| 3.95E-64 | 0.340592 | 3.79E-14 | 0.281446 | 5.96E-10 | 0.128351 | 0.00547  | 0.402889 | 1.19E-19 |
| 1.36E-06 | -0.04102 | 0.37645  | 0.020549 | 0.65782  | -0.00767 | 0.86866  | -0.13683 | 0.00305  |
| 0.00035  | 0.239137 | 1.69E-07 | 0.110943 | 0.01646  | 0.127945 | 0.00562  | 0.0873   | 0.05941  |
| 0.03124  | 0.31605  | 2.72E-12 | 0.272924 | 2.02E-09 | 0.269121 | 3.43E-09 | -0.02656 | 0.56702  |
| 2.85E-31 | 0.46129  | 5.52E-26 | 0.34928  | 7.61E-15 | 0.325283 | 5.70E-13 | 0.397432 | 4.02E-19 |
| 4.05E-23 | 0.190706 | 3.35E-05 | 0.100797 | 0.02941  | 0.027608 | 0.55175  | 0.171536 | 0.0002   |
| 1.21E-06 | 0.107525 | 0.02012  | 0.037976 | 0.41292  | 0.018325 | 0.69286  | 0.015004 | 0.74641  |
| 3.96E-23 | 0.118599 | 0.01031  | -0.07039 | 0.12877  | -0.18331 | 6.76E-05 | 0.028023 | 0.54579  |
| 0.00012  | -0.17107 | 0.0002   | -0.07471 | 0.10689  | -0.12282 | 0.00788  | 0.080444 | 0.08246  |
| 2.55E-14 | 0.016886 | 0.71589  | 0.103308 | 0.02558  | -0.00577 | 0.90108  | 0.137751 | 0.00285  |
| 0.02005  | 0.209399 | 5.03E-06 | 0.22121  | 1.38E-06 | 0.175305 | 0.00014  | -0.01541 | 0.73986  |
| 1.57E-05 | 0.186963 | 4.80E-05 | 0.22954  | 5.33E-07 | 0.187123 | 4.72E-05 | 0.2018   | 1.11E-05 |
| 0.46828  | -0.02727 | 0.55658  | -0.08981 | 0.05243  | 0.010883 | 0.81455  | 0.073942 | 0.11053  |
| 1.86E-19 | 0.391606 | 1.45E-18 | 0.232418 | 3.80E-07 | 0.278349 | 9.33E-10 | 0.23417  | 3.08E-07 |
| 0.07998  | 0.186073 | 5.22E-05 | 0.127806 | 0.00568  | 0.192778 | 2.74E-05 | 0.020989 | 0.65097  |
| 0.00182  | 0.284836 | 3.63E-10 | 0.165323 | 0.00033  | 0.141425 | 0.00219  | 0.023353 | 0.6147   |
| 0.40582  | 0.111148 | 0.01626  | 0.078914 | 0.08849  | 0.104078 | 0.0245   | -0.14168 | 0.00215  |
| 7.54E-14 | 0.220268 | 1.54E-06 | 0.099289 | 0.03194  | 0.06801  | 0.14225  | 0.082645 | 0.07438  |
| 0.02066  | 0.00704  | 0.87941  | -0.00394 | 0.93241  | -0.03328 | 0.47312  | -0.09967 | 0.03129  |
| 0.00063  | 0.214984 | 2.75E-06 | 0.186254 | 5.13E-05 | 0.13145  | 0.00444  | 0.13663  | 0.00309  |
| 2.05E-05 | 0.090755 | 0.04999  | 0.055458 | 0.23163  | 0.035057 | 0.44978  | -0.0646  | 0.16338  |
| 4.38E-14 | 0.214731 | 2.83E-06 | 0.239136 | 1.70E-07 | 0.12602  | 0.00639  | 0.187967 | 4.36E-05 |
| 3.12E-16 | 0.076054 | 0.10069  | 0.092516 | 0.04569  | -0.02766 | 0.55101  | 0.036713 | 0.42865  |
| 4.58E-16 | 0.235583 | 2.60E-07 | 0.177751 | 0.00011  | 0.145892 | 0.00157  | 0.294262 | 8.81E-11 |
| 6.83E-10 | 0.114485 | 0.0133   | 0.132605 | 0.0041   | 0.081444 | 0.07871  | 0.029626 | 0.52306  |
| 0.11372  | 0.22464  | 9.38E-07 | -0.03924 | 0.39752  | 0.027795 | 0.54907  | -0.11886 | 0.01014  |
| 0.01869  | -0.10985 | 0.01756  | -0.0736  | 0.11218  | -0.1468  | 0.00147  | -0.06349 | 0.17075  |

|          |          |          |          |          |          |          |          |          |
|----------|----------|----------|----------|----------|----------|----------|----------|----------|
| 2.06E-08 | 0.078193 | 0.09144  | 0.041204 | 0.37431  | -0.09436 | 0.04152  | 0.080097 | 0.0838   |
| 7.13E-06 | 0.327611 | 3.81E-13 | 0.223152 | 1.11E-06 | 0.091203 | 0.04887  | 0.099683 | 0.03126  |
| 6.96E-19 | 0.26563  | 5.54E-09 | 0.221458 | 1.34E-06 | 0.155436 | 0.00075  | 0.257599 | 1.63E-08 |
| 2.56E-17 | 0.006964 | 0.8807   | -0.07942 | 0.08646  | -0.12358 | 0.0075   | 0.049281 | 0.28789  |
| 0.17562  | -0.03608 | 0.43662  | -0.02299 | 0.62024  | 0.030867 | 0.50578  | -0.10851 | 0.019    |
| 2.54E-16 | 0.136621 | 0.00309  | 0.112091 | 0.01537  | -0.00415 | 0.92877  | 0.193805 | 2.48E-05 |
| 6.48E-38 | 0.198974 | 1.48E-05 | 0.180324 | 8.91E-05 | 0.090049 | 0.05181  | 0.279154 | 8.31E-10 |
| 2.21E-09 | 0.204508 | 8.40E-06 | 0.144122 | 0.00179  | 0.093753 | 0.04286  | 0.135413 | 0.00337  |
| 4.22E-11 | 0.112681 | 0.01484  | 0.110153 | 0.01725  | 0.051525 | 0.26648  | 0.200235 | 1.30E-05 |
| 3.16E-18 | -0.1503  | 0.00112  | -0.09933 | 0.03187  | -0.00315 | 0.94583  | -0.1449  | 0.00169  |
| 0.00368  | 0.130579 | 0.00471  | 0.019663 | 0.67169  | -0.00671 | 0.885    | -0.0296  | 0.52338  |
| 0.00044  | 0.113674 | 0.01397  | 0.119174 | 0.00995  | 0.111161 | 0.01625  | 0.053907 | 0.24496  |
| 0.25828  | 0.186654 | 4.94E-05 | 0.115871 | 0.01222  | 0.117521 | 0.01103  | 0.054535 | 0.2395   |
| 0.56145  | -0.16254 | 0.00042  | -0.06834 | 0.14031  | -0.05242 | 0.25827  | 0.022852 | 0.62231  |
| 4.63E-08 | 0.287148 | 2.58E-10 | 0.077436 | 0.09464  | -0.00753 | 0.87111  | 0.139988 | 0.00243  |
| 9.04E-21 | 0.30654  | 1.29E-11 | 0.210744 | 4.35E-06 | 0.190371 | 3.46E-05 | 0.205231 | 7.79E-06 |
| 5.73E-15 | 0.332571 | 1.60E-13 | 0.260742 | 1.07E-08 | 0.276315 | 1.25E-09 | 0.253687 | 2.72E-08 |
| 2.76E-17 | 0.340952 | 3.55E-14 | 0.251373 | 3.66E-08 | 0.210221 | 4.60E-06 | 0.179198 | 9.87E-05 |
| 0.10374  | 0.033342 | 0.47227  | 0.023563 | 0.61151  | 0.097522 | 0.03513  | -0.05737 | 0.21591  |
| 7.81E-08 | 0.029134 | 0.52998  | 0.061723 | 0.18301  | -0.02815 | 0.54395  | 0.027416 | 0.55453  |
| 0.48186  | 0.030218 | 0.51477  | 0.080113 | 0.08374  | 0.015813 | 0.73323  | -0.01354 | 0.77044  |
| 2.58E-07 | 0.237222 | 2.14E-07 | 0.229175 | 5.56E-07 | 0.289038 | 1.94E-10 | 0.248569 | 5.24E-08 |
| 2.61E-30 | 0.273422 | 1.88E-09 | 0.185154 | 5.69E-05 | 0.105169 | 0.02303  | 0.15934  | 0.00055  |
| 6.89E-27 | 0.34718  | 1.13E-14 | 0.395229 | 6.55E-19 | 0.338503 | 5.54E-14 | 0.561109 | 4.35E-40 |
| 2.63E-09 | 0.247063 | 6.34E-08 | 0.143466 | 0.00188  | 0.137814 | 0.00284  | 0.08448  | 0.06815  |
| 0.11158  | 0.069966 | 0.1311   | 0.050515 | 0.27598  | 0.036011 | 0.43753  | 0.077429 | 0.09467  |
| 5.89E-15 | 0.536363 | 3.82E-36 | 0.373848 | 6.15E-17 | 0.42327  | 1.01E-21 | 0.273598 | 1.84E-09 |
| 9.68E-06 | 0.183362 | 6.73E-05 | 0.19389  | 2.46E-05 | 0.080177 | 0.08349  | 0.045906 | 0.32222  |
| 1.42E-13 | 0.420285 | 2.06E-21 | 0.257573 | 1.63E-08 | 0.267861 | 4.08E-09 | 0.268826 | 3.57E-09 |
| 0.0006   | 0.098092 | 0.03407  | 0.213665 | 3.18E-06 | 0.125909 | 0.00644  | 0.196535 | 1.89E-05 |
| 2.45E-14 | -0.11376 | 0.0139   | -0.15141 | 0.00103  | -0.27267 | 2.09E-09 | 0.129064 | 0.00522  |
| 0.31442  | 0.265899 | 5.34E-09 | 0.062405 | 0.17821  | 0.126596 | 0.00615  | -0.02216 | 0.63296  |
| 0.00605  | 0.165062 | 0.00034  | 0.226159 | 7.88E-07 | 0.168336 | 0.00026  | 0.000762 | 0.98689  |
| 0.00145  | 0.269235 | 3.38E-09 | 0.115649 | 0.01239  | 0.200862 | 1.22E-05 | 0.17508  | 0.00014  |
| 3.95E-24 | -0.18305 | 6.93E-05 | -0.12655 | 0.00617  | -0.09119 | 0.04889  | -0.32063 | 1.26E-12 |
| 0.88465  | -0.17841 | 0.00011  | -0.05192 | 0.26284  | -0.14001 | 0.00243  | -0.15374 | 0.00086  |
| 2.10E-12 | 0.426242 | 4.88E-22 | 0.33484  | 1.07E-13 | 0.302482 | 2.45E-11 | 0.279836 | 7.53E-10 |
| 4.69E-06 | -0.04395 | 0.34334  | 0.131004 | 0.00457  | -0.00614 | 0.89479  | 0.070427 | 0.12858  |
| 3.61E-29 | 0.228321 | 6.14E-07 | 0.128992 | 0.00524  | 0.031391 | 0.49858  | 0.187597 | 4.52E-05 |
| 1.66E-29 | 0.284213 | 3.98E-10 | 0.16551  | 0.00033  | 0.192059 | 2.94E-05 | 0.250478 | 4.11E-08 |
| 2.78E-15 | 0.096789 | 0.03653  | 0.122718 | 0.00793  | 0.012159 | 0.79327  | 0.129581 | 0.00504  |
| 0.0006   | 0.027184 | 0.55789  | 0.040162 | 0.38653  | 0.019185 | 0.67923  | -0.05567 | 0.22982  |
| 4.17E-07 | 0.075004 | 0.10549  | 0.067782 | 0.14359  | -0.00034 | 0.99417  | -0.07493 | 0.10584  |
| 1.39E-16 | 0.218216 | 1.93E-06 | 0.220967 | 1.42E-06 | 0.051357 | 0.26804  | 0.276532 | 1.21E-09 |
| 2.36E-43 | 0.645434 | 2.22E-56 | 0.34673  | 1.23E-14 | 0.308388 | 9.54E-12 | 0.415054 | 7.16E-21 |

|          |          |          |          |          |          |          |          |          |
|----------|----------|----------|----------|----------|----------|----------|----------|----------|
| 0.28456  | -0.10479 | 0.02353  | -0.23685 | 2.24E-07 | -0.25715 | 1.73E-08 | -0.16748 | 0.00028  |
| 0.86348  | 0.025921 | 0.57633  | -0.06711 | 0.14764  | 0.038005 | 0.41257  | -0.0956  | 0.03891  |
| 0.00055  | -0.02806 | 0.54519  | -0.02154 | 0.64243  | -0.07442 | 0.10824  | 4.48E-05 | 0.99923  |
| 1.12E-17 | 0.183636 | 6.56E-05 | 0.119471 | 0.00976  | 0.079083 | 0.08781  | 0.121926 | 0.00835  |
| 0.00542  | 0.114974 | 0.01291  | 0.131491 | 0.00442  | 0.151824 | 0.001    | 0.121381 | 0.00865  |
| 0.00192  | 0.08211  | 0.07629  | 0.093254 | 0.04398  | 0.101403 | 0.02844  | 0.143892 | 0.00182  |
| 1.78E-15 | 0.092602 | 0.04549  | 0.095946 | 0.03821  | 0.019569 | 0.67317  | 0.036698 | 0.42883  |
| 2.76E-13 | 0.053419 | 0.24927  | 0.095207 | 0.03973  | -0.00813 | 0.86083  | 0.159007 | 0.00056  |
| 2.15E-07 | 0.132077 | 0.00425  | 0.038559 | 0.40579  | -0.01697 | 0.71449  | -0.08817 | 0.05691  |
| 0.52193  | 0.205963 | 7.22E-06 | 0.180115 | 9.08E-05 | 0.265483 | 5.66E-09 | 0.100283 | 0.03025  |
| 0.01876  | 0.097748 | 0.03471  | 0.063923 | 0.16787  | 0.146611 | 0.00149  | 0.00653  | 0.88807  |
| 0.14872  | -0.06205 | 0.18072  | -0.11298 | 0.01458  | -0.21197 | 3.82E-06 | -0.09122 | 0.04882  |
| 8.50E-07 | 0.161826 | 0.00045  | 0.148334 | 0.00131  | 0.147495 | 0.00139  | 0.059622 | 0.1984   |
| 1.03E-05 | 0.19139  | 3.13E-05 | 0.1483   | 0.00131  | 0.094785 | 0.04061  | 0.16033  | 0.00051  |
| 7.48E-26 | 0.22729  | 6.92E-07 | 0.26834  | 3.82E-09 | 0.159519 | 0.00054  | 0.123386 | 0.0076   |
| 2.06E-32 | 0.293761 | 9.51E-11 | 0.296829 | 5.93E-11 | 0.205891 | 7.27E-06 | 0.329203 | 2.89E-13 |
| 1.23E-26 | 0.156091 | 0.00071  | 0.14061  | 0.00232  | 0.009738 | 0.83376  | 0.239533 | 1.61E-07 |
| 1.68E-48 | 0.311477 | 5.78E-12 | 0.157367 | 0.00064  | 0.111937 | 0.01552  | 0.365254 | 3.48E-16 |
| 0.39296  | 0.275683 | 1.37E-09 | 0.209283 | 5.09E-06 | 0.365045 | 3.62E-16 | 0.161063 | 0.00048  |
| 4.59E-05 | -0.09981 | 0.03104  | -0.11473 | 0.0131   | -0.13895 | 0.00262  | -0.30584 | 1.44E-11 |
| 0.00433  | 0.22075  | 1.46E-06 | 0.159909 | 0.00052  | 0.125891 | 0.00645  | 0.148263 | 0.00131  |
| 1.38E-07 | 0.113996 | 0.0137   | 0.11435  | 0.01341  | 0.092508 | 0.04571  | 0.138017 | 0.0028   |
| 4.37E-07 | -0.13171 | 0.00436  | -0.11459 | 0.01322  | -0.23851 | 1.83E-07 | -0.1096  | 0.01782  |
| 3.12E-20 | 0.230859 | 4.56E-07 | 0.293745 | 9.53E-11 | 0.155198 | 0.00076  | 0.324642 | 6.36E-13 |
| 1.72E-05 | -0.19628 | 1.94E-05 | -0.08719 | 0.05973  | -0.15764 | 0.00063  | -0.18196 | 7.66E-05 |
| 0.20529  | -0.05785 | 0.21205  | -0.05867 | 0.20566  | -0.10076 | 0.02947  | -0.00932 | 0.84085  |
| 0.19928  | 0.35535  | 2.40E-15 | 0.123386 | 0.0076   | 0.193848 | 2.47E-05 | 0.089939 | 0.0521   |
| 1.01E-09 | -0.12758 | 0.00576  | 0.024638 | 0.59535  | 0.082936 | 0.07337  | -0.16864 | 0.00025  |
| 5.31E-13 | 0.167422 | 0.00028  | 0.112553 | 0.01495  | 0.011162 | 0.80988  | 0.064069 | 0.1669   |
| 5.59E-25 | 0.381693 | 1.21E-17 | 0.249378 | 4.73E-08 | 0.235852 | 2.52E-07 | 0.373165 | 7.07E-17 |
| 7.09E-10 | 0.129571 | 0.00504  | 0.061049 | 0.18785  | 0.031838 | 0.49249  | 0.057497 | 0.2149   |
| 1.08E-12 | 0.149457 | 0.0012   | 0.113495 | 0.01413  | 0.073015 | 0.11509  | 0.062743 | 0.17587  |
| 6.78E-21 | 0.300507 | 3.35E-11 | 0.193295 | 2.60E-05 | 0.163616 | 0.00038  | 0.177339 | 0.00012  |
| 1.48E-14 | 0.155583 | 0.00074  | 0.120367 | 0.00922  | 0.083356 | 0.07192  | 0.054886 | 0.23649  |
| 1.05E-30 | 0.28855  | 2.09E-10 | 0.308111 | 9.98E-12 | 0.173546 | 0.00016  | 0.289479 | 1.82E-10 |
| 1.19E-32 | 0.259348 | 1.29E-08 | 0.217474 | 2.10E-06 | 0.07701  | 0.09647  | 0.297744 | 5.15E-11 |
| 0.68399  | -0.25226 | 3.27E-08 | -0.14887 | 0.00125  | -0.17263 | 0.00018  | -0.11005 | 0.01736  |
| 2.40E-07 | 0.159759 | 0.00053  | 0.12582  | 0.00648  | 0.001497 | 0.97426  | 0.039427 | 0.39529  |
| 4.77E-16 | 0.225522 | 8.48E-07 | 0.101604 | 0.02813  | 0.077297 | 0.09523  | 0.299889 | 3.69E-11 |
| 0.00063  | -0.11086 | 0.01655  | -0.14168 | 0.00215  | -0.19507 | 2.18E-05 | -0.14192 | 0.00211  |
| 4.71E-05 | -0.01813 | 0.69597  | -0.03886 | 0.4021   | -0.03395 | 0.46427  | -0.03643 | 0.43218  |
| 2.51E-09 | -0.22654 | 7.54E-07 | -0.13247 | 0.00413  | -0.21759 | 2.07E-06 | -0.15138 | 0.00103  |
| 7.34E-27 | 0.332857 | 1.52E-13 | 0.245465 | 7.75E-08 | 0.139417 | 0.00253  | 0.346207 | 1.35E-14 |
| 0.08859  | -0.03456 | 0.45627  | -0.04647 | 0.31635  | -0.10047 | 0.02994  | 0.146422 | 0.00151  |
| 7.88E-20 | 0.31152  | 5.74E-12 | 0.143303 | 0.00191  | 0.072117 | 0.11964  | 0.153983 | 0.00084  |

|          |          |          |          |          |          |          |          |          |
|----------|----------|----------|----------|----------|----------|----------|----------|----------|
| 2.36E-16 | 0.453169 | 4.98E-25 | 0.278026 | 9.78E-10 | 0.152424 | 0.00095  | 0.318927 | 1.68E-12 |
| 1.25E-15 | -0.01291 | 0.78076  | -0.07867 | 0.08947  | -0.19833 | 1.58E-05 | 0.151331 | 0.00104  |
| 1.62E-05 | 0.020101 | 0.66483  | 0.062814 | 0.17538  | 0.010179 | 0.82635  | -0.01117 | 0.80977  |
| 0.03148  | -0.06841 | 0.13993  | 0.030662 | 0.50862  | 0.099994 | 0.03073  | 0.148193 | 0.00132  |
| 0.00024  | 0.15166  | 0.00101  | 0.001879 | 0.96769  | 0.010731 | 0.8171   | -0.06618 | 0.15334  |
| 0.152    | 0.154707 | 0.0008   | 0.044826 | 0.33375  | 0.092739 | 0.04517  | 0.083572 | 0.07118  |
| 1.81E-13 | 0.046034 | 0.32087  | 0.127687 | 0.00572  | -0.03243 | 0.48449  | 0.20891  | 5.29E-06 |
| 0.47566  | 0.295746 | 7.01E-11 | 0.254262 | 2.52E-08 | 0.263726 | 7.18E-09 | 0.090805 | 0.04987  |
| 1.16E-24 | 0.249521 | 4.64E-08 | 0.084885 | 0.06684  | -0.05718 | 0.21747  | 0.166778 | 0.00029  |
| 4.00E-16 | 0.194805 | 2.24E-05 | 0.178154 | 0.00011  | 0.130213 | 0.00483  | 0.161623 | 0.00045  |
| 1.12E-10 | 0.25357  | 2.76E-08 | 0.221971 | 1.27E-06 | 0.238714 | 1.78E-07 | 0.208185 | 5.72E-06 |
| 0.41715  | 0.147188 | 0.00142  | 0.049727 | 0.28355  | 0.010726 | 0.81719  | 0.118026 | 0.01069  |
| 0.01741  | 0.145673 | 0.0016   | 0.180172 | 9.03E-05 | 0.09272  | 0.04522  | 0.111192 | 0.01622  |
| 0.04565  | 0.042422 | 0.36035  | -0.08953 | 0.05318  | -0.02025 | 0.66247  | 0.011841 | 0.79856  |
| 5.80E-06 | 0.080004 | 0.08416  | 0.025096 | 0.58853  | -0.00858 | 0.85332  | -0.0622  | 0.17963  |
| 7.02E-13 | 0.15819  | 0.0006   | 0.070607 | 0.1276   | 0.013008 | 0.7792   | 0.08614  | 0.06289  |
| 1.26E-13 | 0.247351 | 6.12E-08 | 0.145587 | 0.00161  | 0.138105 | 0.00278  | 0.101045 | 0.02901  |
| 0.00158  | 0.145179 | 0.00166  | 0.01581  | 0.73328  | 0.023755 | 0.60862  | 0.069408 | 0.13421  |
| 0.06116  | 0.06633  | 0.15239  | 0.056444 | 0.22343  | 0.071123 | 0.12483  | -0.02585 | 0.57735  |
| 0.12479  | -0.10138 | 0.02848  | -0.15112 | 0.00105  | -0.08606 | 0.06312  | -0.24958 | 4.61E-08 |
| 0.00144  | 0.117118 | 0.01131  | 0.126155 | 0.00634  | 0.146726 | 0.00148  | 0.059675 | 0.198    |
| 3.38E-05 | 0.061507 | 0.18455  | 0.031537 | 0.49659  | 0.013036 | 0.77874  | -0.04268 | 0.35744  |
| 0.12841  | 0.069447 | 0.13399  | 0.071325 | 0.12376  | 0.032541 | 0.48299  | 0.11594  | 0.01217  |
| 4.21E-15 | -0.21582 | 2.51E-06 | -0.27202 | 2.29E-09 | -0.13189 | 0.0043   | -0.21664 | 2.30E-06 |
| 0.00167  | 0.128041 | 0.00559  | 0.195756 | 2.04E-05 | 0.171858 | 0.00019  | 0.054817 | 0.23708  |
| 0.28062  | 0.111113 | 0.01628  | -0.07476 | 0.10662  | 0.05632  | 0.22445  | -0.12224 | 0.00818  |
| 1.94E-11 | 0.453042 | 5.16E-25 | 0.213399 | 3.27E-06 | 0.18804  | 4.33E-05 | 0.171038 | 0.0002   |
| 2.34E-29 | 0.347168 | 1.13E-14 | 0.310215 | 7.10E-12 | 0.27889  | 8.63E-10 | 0.339753 | 4.42E-14 |
| 0.00064  | 0.263778 | 7.13E-09 | 0.235419 | 2.66E-07 | 0.279028 | 8.46E-10 | 0.242205 | 1.16E-07 |
| 0.68466  | 0.177641 | 0.00011  | 0.194016 | 2.43E-05 | 0.288845 | 2.00E-10 | 0.099986 | 0.03075  |
| 0.57232  | 0.033364 | 0.47198  | -0.15036 | 0.00112  | -0.13557 | 0.00333  | -0.02507 | 0.58886  |
| 3.79E-09 | 0.095972 | 0.03815  | 0.067638 | 0.14445  | -0.00285 | 0.95109  | 0.133142 | 0.00395  |
| 0.09169  | 0.166604 | 0.0003   | 0.158495 | 0.00059  | 0.097056 | 0.03602  | -0.02022 | 0.66288  |
| 7.61E-05 | 0.023073 | 0.61895  | 0.041182 | 0.37457  | -0.00708 | 0.87874  | 0.036526 | 0.431    |
| 0.00028  | 0.172109 | 0.00019  | 0.140007 | 0.00243  | 0.163133 | 0.0004   | 0.090865 | 0.04971  |
| 0.01199  | 0.376974 | 3.23E-17 | 0.285145 | 3.47E-10 | 0.373919 | 6.06E-17 | 0.206098 | 7.12E-06 |
| 2.64E-18 | 0.233043 | 3.53E-07 | 0.254637 | 2.40E-08 | 0.126775 | 0.00608  | 0.181946 | 7.67E-05 |
| 2.69E-10 | 0.131116 | 0.00454  | 0.070958 | 0.12571  | 0.028302 | 0.54179  | 0.107264 | 0.02042  |
| 3.71E-17 | 0.36966  | 1.44E-16 | 0.326065 | 4.98E-13 | 0.260947 | 1.04E-08 | 0.381015 | 1.39E-17 |
| 0.00161  | 0.023156 | 0.61769  | -0.04306 | 0.35312  | 0.021446 | 0.64389  | 0.029439 | 0.52568  |
| 2.39E-07 | 0.082782 | 0.0739   | -0.03528 | 0.44686  | -0.02383 | 0.60745  | 0.038222 | 0.4099   |
| 1.88E-41 | 0.329279 | 2.85E-13 | 0.242192 | 1.17E-07 | 0.159809 | 0.00053  | 0.369669 | 1.44E-16 |
| 0.16113  | 0.048076 | 0.29985  | -0.01747 | 0.70648  | -0.0237  | 0.60939  | -0.05321 | 0.25116  |
| 0.80732  | 0.120589 | 0.00909  | 0.021354 | 0.64532  | -0.05738 | 0.21582  | 0.03898  | 0.40066  |
| 0.00012  | 0.067044 | 0.14802  | 0.126611 | 0.00615  | 0.107289 | 0.02039  | -0.02939 | 0.52631  |

|          |          |          |          |          |          |          |          |          |
|----------|----------|----------|----------|----------|----------|----------|----------|----------|
| 1.48E-46 | 0.462109 | 4.41E-26 | 0.448207 | 1.86E-24 | 0.356638 | 1.88E-15 | 0.477009 | 6.57E-28 |
| 0.6423   | 0.07892  | 0.08846  | 0.174271 | 0.00015  | 0.091273 | 0.04869  | 0.027682 | 0.5507   |
| 4.54E-09 | 0.286955 | 2.65E-10 | 0.250421 | 4.14E-08 | 0.289491 | 1.82E-10 | 0.182461 | 7.32E-05 |
| 0.00061  | 0.174    | 0.00016  | 0.127872 | 0.00565  | 0.093088 | 0.04437  | 0.06278  | 0.17562  |
| 7.44E-14 | 0.221196 | 1.38E-06 | 0.264431 | 6.53E-09 | 0.182098 | 7.57E-05 | 0.224845 | 9.16E-07 |
| 0.00443  | 0.059664 | 0.19808  | 0.026143 | 0.57307  | 0.059499 | 0.19932  | -0.01145 | 0.80507  |
| 5.53E-07 | 0.057715 | 0.21316  | 0.016685 | 0.71913  | -0.02547 | 0.58292  | -0.04994 | 0.28147  |
| 0.00024  | 0.081479 | 0.07858  | 0.049007 | 0.29058  | -0.01028 | 0.82465  | -0.05444 | 0.24035  |
| 2.23E-08 | 0.146325 | 0.00152  | 0.041611 | 0.36961  | 0.013354 | 0.77348  | 0.049305 | 0.28765  |
| 2.81E-10 | -0.05796 | 0.21124  | 0.012365 | 0.78985  | -0.12042 | 0.00919  | -0.03886 | 0.4021   |
| 0.37527  | 0.015557 | 0.73739  | 0.091139 | 0.04903  | -0.04121 | 0.37424  | -0.01592 | 0.73143  |
| 0.00053  | 0.029148 | 0.52978  | -0.00175 | 0.96987  | -0.04757 | 0.30496  | 0.044317 | 0.33928  |
| 2.68E-06 | 0.423039 | 1.06E-21 | 0.225561 | 8.44E-07 | 0.308343 | 9.61E-12 | 0.282659 | 5.00E-10 |
| 3.43E-12 | 0.223573 | 1.06E-06 | 0.175043 | 0.00014  | 0.084209 | 0.06904  | 0.15143  | 0.00103  |
| 0.01579  | 0.041381 | 0.37227  | 0.020259 | 0.66235  | -0.00036 | 0.99387  | 0.165718 | 0.00032  |
| 1.71E-09 | 0.062123 | 0.18018  | 0.054785 | 0.23735  | 0.007402 | 0.87326  | -0.00894 | 0.8472   |
| 4.47E-13 | 0.284843 | 3.63E-10 | 0.222164 | 1.24E-06 | 0.218357 | 1.90E-06 | 0.246765 | 6.59E-08 |
| 0.00661  | 0.035431 | 0.44495  | 0.025371 | 0.58445  | 9.73E-05 | 0.99833  | 0.148777 | 0.00126  |
| 1.62E-05 | 0.13616  | 0.0032   | 0.163269 | 0.0004   | 0.162389 | 0.00043  | 0.173143 | 0.00017  |
| 0.00018  | 0.460185 | 7.47E-26 | 0.336208 | 8.37E-14 | 0.37226  | 8.50E-17 | 0.205849 | 7.30E-06 |
| 5.34E-05 | 0.216274 | 2.39E-06 | 0.0743   | 0.10882  | 0.110561 | 0.01684  | 0.027747 | 0.54976  |
| 8.09E-15 | 0.292088 | 1.23E-10 | 0.238854 | 1.75E-07 | 0.176751 | 0.00012  | 0.376263 | 3.74E-17 |
| 0.00014  | 0.294209 | 8.88E-11 | 0.106695 | 0.0211   | 0.144791 | 0.00171  | 0.06076  | 0.18995  |
| 1.67E-06 | 0.210724 | 4.36E-06 | 0.159411 | 0.00054  | 0.157515 | 0.00064  | 0.110932 | 0.01647  |
| 8.59E-12 | 0.15681  | 0.00067  | 0.133211 | 0.00393  | 0.058378 | 0.20794  | 0.178218 | 0.00011  |
| 0.00395  | 0.19498  | 2.20E-05 | 0.069638 | 0.13292  | 0.111807 | 0.01564  | 0.03286  | 0.4787   |
| 0.00037  | 0.085837 | 0.06383  | 0.135406 | 0.00337  | 0.117844 | 0.01081  | 0.10129  | 0.02862  |
| 0.07224  | 0.400403 | 2.07E-19 | 0.180652 | 8.64E-05 | 0.159114 | 0.00056  | 0.076408 | 0.09911  |
| 6.06E-27 | 0.521338 | 6.65E-34 | 0.371852 | 9.23E-17 | 0.427254 | 3.81E-22 | 0.330923 | 2.14E-13 |
| 1.57E-36 | 0.487823 | 2.72E-29 | 0.429398 | 2.25E-22 | 0.382658 | 9.85E-18 | 0.439947 | 1.58E-23 |
| 0.37662  | -0.09103 | 0.04929  | -0.09879 | 0.03281  | -0.04066 | 0.3807   | -0.1813  | 8.15E-05 |
| 7.44E-11 | 0.043866 | 0.34422  | 0.005548 | 0.90483  | -0.06141 | 0.18526  | -0.00736 | 0.87397  |
| 1.35E-06 | 0.194899 | 2.22E-05 | 0.115352 | 0.01262  | 0.094361 | 0.04152  | -0.00291 | 0.95001  |
| 3.13E-09 | 0.209976 | 4.73E-06 | 0.17235  | 0.00018  | 0.156008 | 0.00072  | 0.095328 | 0.03947  |
| 0.01115  | 0.040103 | 0.38723  | -0.01147 | 0.80473  | 0.001477 | 0.9746   | -0.11051 | 0.01689  |
| 1.68E-39 | 0.299778 | 3.75E-11 | 0.243047 | 1.05E-07 | 0.220171 | 1.55E-06 | 0.360626 | 8.65E-16 |
| 8.98E-19 | 0.204742 | 8.20E-06 | 0.165306 | 0.00033  | 0.121902 | 0.00836  | 0.141519 | 0.00217  |
| 0.00373  | 0.116724 | 0.01159  | 0.060496 | 0.19189  | 0.087479 | 0.05889  | 0.021618 | 0.64123  |
| 3.25E-05 | 0.026858 | 0.56262  | 0.115178 | 0.01275  | 0.042973 | 0.35414  | 0.112129 | 0.01534  |
| 0.00014  | 0.11039  | 0.01701  | 0.183144 | 6.87E-05 | 0.053504 | 0.24852  | 0.105437 | 0.02268  |
| 4.78E-32 | 0.111974 | 0.01548  | 0.246934 | 6.45E-08 | 0.086033 | 0.06322  | 0.267914 | 4.05E-09 |
| 9.08E-19 | 0.266298 | 5.06E-09 | 0.228199 | 6.22E-07 | 0.210618 | 4.41E-06 | 0.260846 | 1.06E-08 |
| 9.81E-14 | -0.01664 | 0.71981  | -0.12591 | 0.00644  | -0.25511 | 2.26E-08 | -0.00264 | 0.9547   |
| 4.92E-06 | -0.24278 | 1.08E-07 | -0.11102 | 0.01639  | -0.2743  | 1.66E-09 | -0.04978 | 0.28302  |
| 0.14335  | -0.1291  | 0.00521  | -0.07101 | 0.12544  | -0.14362 | 0.00186  | -0.07901 | 0.0881   |

|          |          |          |          |          |          |          |          |          |
|----------|----------|----------|----------|----------|----------|----------|----------|----------|
| 1.04E-05 | 0.000533 | 0.99083  | -0.03762 | 0.41731  | -0.12677 | 0.00608  | -0.12066 | 0.00905  |
| 0.00022  | 0.057789 | 0.21257  | -0.03421 | 0.46075  | -0.08292 | 0.07342  | -0.06092 | 0.1888   |
| 1.30E-12 | 0.010652 | 0.81842  | -0.03814 | 0.41091  | -0.19845 | 1.56E-05 | -0.02653 | 0.56744  |
| 0.00163  | -0.00996 | 0.82998  | 0.049399 | 0.28673  | -0.023   | 0.62     | 0.00116  | 0.98006  |
| 6.39E-08 | 0.241799 | 1.22E-07 | 0.202205 | 1.06E-05 | 0.139732 | 0.00247  | 0.180561 | 8.72E-05 |
| 0.00271  | -0.17392 | 0.00016  | -0.12987 | 0.00494  | -0.24459 | 8.65E-08 | -0.01382 | 0.76577  |
| 3.25E-06 | 0.028543 | 0.53836  | 7.52E-05 | 0.99871  | -0.08687 | 0.06069  | 0.069939 | 0.13125  |
| 1.04E-06 | 0.015653 | 0.73583  | 0.010223 | 0.82562  | 0.073223 | 0.11405  | -0.0674  | 0.14585  |
| 0.04353  | 0.144063 | 0.0018   | 0.051299 | 0.26858  | 0.027016 | 0.56032  | -0.01634 | 0.7247   |
| 2.18E-05 | 0.096824 | 0.03647  | 0.089424 | 0.05346  | 0.055813 | 0.22866  | 0.089635 | 0.0529   |
| 0.22187  | -0.02718 | 0.558    | 0.059064 | 0.20264  | 0.03878  | 0.40309  | -0.0419  | 0.36635  |
| 1.08E-13 | 0.222892 | 1.14E-06 | 0.195685 | 2.06E-05 | 0.127014 | 0.00599  | 0.130615 | 0.0047   |
| 4.32E-06 | 0.154991 | 0.00078  | 0.131969 | 0.00428  | 0.0722   | 0.11921  | 0.055244 | 0.23344  |
| 9.34E-07 | -0.00259 | 0.95544  | -0.01573 | 0.73464  | -0.09313 | 0.04426  | 0.040769 | 0.37939  |
| 0.00234  | -0.1206  | 0.00909  | -0.18914 | 3.89E-05 | -0.21097 | 4.25E-06 | -0.17995 | 9.22E-05 |
| 1.70E-08 | 0.011588 | 0.80277  | 0.001122 | 0.9807   | -0.06592 | 0.15495  | -0.04568 | 0.32459  |
| 0.00026  | 0.06202  | 0.18091  | 0.087716 | 0.05821  | 0.043677 | 0.3463   | -0.0479  | 0.30162  |
| 3.48E-14 | -0.1817  | 7.85E-05 | -0.12115 | 0.00878  | -0.05268 | 0.25589  | -0.18193 | 7.68E-05 |
| 2.07E-05 | 0.349148 | 7.80E-15 | 0.173565 | 0.00016  | 0.238275 | 1.88E-07 | 0.058362 | 0.20807  |
| 0.92983  | 0.217438 | 2.10E-06 | 0.098623 | 0.03311  | 0.057134 | 0.21781  | 0.038677 | 0.40434  |
| 1.58E-34 | 0.525311 | 1.74E-34 | 0.288322 | 2.16E-10 | 0.251847 | 3.45E-08 | 0.341166 | 3.41E-14 |
| 0.00155  | 0.01523  | 0.74271  | 0.001864 | 0.96795  | 0.063735 | 0.16912  | -0.0274  | 0.55471  |
| 7.31E-11 | 0.18602  | 5.24E-05 | 0.152975 | 0.00091  | 0.058298 | 0.20856  | 0.111695 | 0.01574  |
| 1.41E-13 | -0.1793  | 9.78E-05 | -0.16654 | 0.0003   | -0.15126 | 0.00104  | -0.17182 | 0.00019  |
| 0.541    | 0.126019 | 0.00639  | 0.154902 | 0.00078  | 0.173515 | 0.00016  | 0.04235  | 0.36116  |
| 3.54E-11 | 0.039527 | 0.39409  | 0.037716 | 0.41613  | -0.07254 | 0.11746  | -0.01704 | 0.71334  |
| 0.77874  | 0.063915 | 0.16792  | 0.092556 | 0.0456   | 0.073943 | 0.11053  | -0.03687 | 0.42667  |
| 5.78E-48 | 0.45497  | 3.07E-25 | 0.288854 | 2.00E-10 | 0.183081 | 6.91E-05 | 0.427997 | 3.17E-22 |
| 5.08E-17 | 0.285322 | 3.38E-10 | 0.227632 | 6.65E-07 | 0.198686 | 1.52E-05 | 0.319915 | 1.42E-12 |
| 0.90921  | -0.13605 | 0.00322  | -0.15519 | 0.00076  | -0.21811 | 1.95E-06 | -0.18094 | 8.42E-05 |
| 0.00979  | 0.164396 | 0.00036  | 0.231944 | 4.02E-07 | 0.190551 | 3.40E-05 | 0.162101 | 0.00044  |
| 4.78E-10 | -0.01179 | 0.79939  | -0.00636 | 0.891    | -0.15506 | 0.00077  | 0.051405 | 0.26759  |
| 1.82E-13 | 0.154798 | 0.00079  | 0.141513 | 0.00217  | -0.00773 | 0.86762  | 0.245557 | 7.67E-08 |
| 7.50E-19 | 0.337083 | 7.15E-14 | 0.337742 | 6.35E-14 | 0.237555 | 2.05E-07 | 0.254287 | 2.51E-08 |
| 6.75E-26 | 0.209522 | 4.96E-06 | 0.160759 | 0.00049  | 0.021744 | 0.63929  | 0.321168 | 1.15E-12 |
| 0.00034  | 0.094355 | 0.04154  | 0.094209 | 0.04186  | 0.140494 | 0.00234  | 0.196955 | 1.81E-05 |
| 0.00545  | 0.04149  | 0.37101  | 0.133638 | 0.00381  | 0.027766 | 0.54948  | 0.247551 | 5.96E-08 |
| 4.28E-19 | 0.177765 | 0.00011  | 0.117473 | 0.01107  | 0.096733 | 0.03664  | 0.20666  | 6.71E-06 |
| 5.59E-21 | 0.293918 | 9.28E-11 | 0.217541 | 2.08E-06 | 0.100546 | 0.02982  | 0.186536 | 4.99E-05 |
| 4.24E-09 | 0.055123 | 0.23447  | 0.052362 | 0.25877  | 0.040533 | 0.38215  | 0.004227 | 0.92742  |
| 4.20E-12 | 0.444125 | 5.40E-24 | 0.231949 | 4.01E-07 | 0.251091 | 3.80E-08 | 0.222255 | 1.23E-06 |
| 1.08E-14 | -0.01522 | 0.74295  | 0.008533 | 0.85409  | -0.07981 | 0.08492  | 0.142427 | 0.00203  |
| 4.48E-11 | 0.207908 | 5.88E-06 | 0.291696 | 1.30E-10 | 0.257337 | 1.69E-08 | 0.177044 | 0.00012  |
| 3.19E-11 | 0.089765 | 0.05256  | -0.01193 | 0.79704  | -0.04995 | 0.28141  | 0.151401 | 0.00103  |
| 0.41851  | 0.063161 | 0.173    | 0.105672 | 0.02238  | 0.108393 | 0.01913  | 0.095971 | 0.03816  |

|          |          |          |          |          |          |          |          |          |
|----------|----------|----------|----------|----------|----------|----------|----------|----------|
| 0.17762  | 0.062631 | 0.17664  | 0.110618 | 0.01678  | 0.097011 | 0.0361   | 0.101353 | 0.02852  |
| 4.44E-07 | -0.05127 | 0.26884  | -0.06698 | 0.14841  | 0.039784 | 0.39102  | 0.106592 | 0.02123  |
| 0.00043  | -0.20842 | 5.57E-06 | -0.23712 | 2.17E-07 | -0.26204 | 9.01E-09 | -0.1864  | 5.06E-05 |
| 6.28E-30 | 0.15555  | 0.00074  | 0.166341 | 0.00031  | 0.035152 | 0.44855  | 0.244711 | 8.52E-08 |
| 5.70E-07 | -0.00886 | 0.84854  | -0.07032 | 0.12916  | -0.09044 | 0.0508   | 0.043052 | 0.35326  |
| 0.00108  | 0.180405 | 8.84E-05 | 0.158639 | 0.00058  | 0.173393 | 0.00017  | 0.1729   | 0.00017  |
| 2.05E-06 | -0.0357  | 0.44154  | -0.00595 | 0.89802  | -0.06875 | 0.13796  | 0.065919 | 0.15496  |
| 4.40E-08 | 0.071236 | 0.12423  | 0.002133 | 0.96334  | -0.01751 | 0.7058   | 0.068141 | 0.14148  |
| 3.17E-05 | -0.08711 | 0.05996  | 0.000896 | 0.98459  | 0.080639 | 0.08172  | -0.02658 | 0.56664  |
| 2.07E-11 | 0.145355 | 0.00164  | 0.109071 | 0.01838  | 0.12576  | 0.0065   | 0.236345 | 2.38E-07 |
| 1.64E-05 | 0.237771 | 2.00E-07 | 0.186929 | 4.81E-05 | 0.214643 | 2.86E-06 | 0.243178 | 1.03E-07 |
| 0.57543  | 0.053037 | 0.25268  | 0.042194 | 0.36294  | -0.0173  | 0.70929  | -0.00903 | 0.84575  |
| 0.54578  | -0.03467 | 0.45478  | -0.09957 | 0.03146  | -0.09358 | 0.04325  | -0.11145 | 0.01597  |
| 0.47874  | 0.308898 | 8.79E-12 | 0.189054 | 3.93E-05 | 0.242113 | 1.18E-07 | 0.092482 | 0.04577  |
| 0.00116  | -0.22602 | 8.01E-07 | -0.09748 | 0.03521  | -0.1805  | 8.76E-05 | -0.08619 | 0.06274  |
| 3.20E-05 | 0.431285 | 1.41E-22 | 0.309149 | 8.44E-12 | 0.365803 | 3.12E-16 | 0.266508 | 4.92E-09 |
| 0.00427  | -0.16367 | 0.00038  | -0.23137 | 4.30E-07 | -0.15869 | 0.00058  | -0.1323  | 0.00418  |
| 0.00204  | 0.219702 | 1.64E-06 | 0.22663  | 7.46E-07 | 0.250779 | 3.95E-08 | 0.154737 | 0.00079  |
| 0.49117  | 0.065226 | 0.15935  | -0.03004 | 0.51726  | 0.017967 | 0.69857  | -0.02542 | 0.58379  |
| 1.94E-09 | 0.064526 | 0.16388  | -0.05111 | 0.27034  | -0.07176 | 0.1215   | -0.10547 | 0.02263  |
| 0.58754  | 0.100105 | 0.03055  | 0.039798 | 0.39085  | 0.023636 | 0.61042  | 0.041178 | 0.37462  |
| 0.02272  | 0.065924 | 0.15492  | 0.124043 | 0.00728  | 0.130932 | 0.0046   | -0.00903 | 0.84577  |
| 0.00051  | -0.2437  | 9.67E-08 | -0.15796 | 0.00061  | -0.1561  | 0.00071  | -0.16576 | 0.00032  |
| 0.35385  | -0.13792 | 0.00282  | -0.24823 | 5.47E-08 | -0.29935 | 4.01E-11 | -0.26153 | 9.66E-09 |
| 1.33E-13 | -0.02803 | 0.54575  | -0.00112 | 0.98075  | -0.128   | 0.0056   | 0.052162 | 0.2606   |
| 0.00025  | 0.002075 | 0.96432  | 0.033279 | 0.4731   | -0.04185 | 0.36682  | -0.1118  | 0.01564  |
| 2.41E-15 | 0.180249 | 8.97E-05 | 0.151734 | 0.001    | 0.095127 | 0.03989  | 0.100347 | 0.03014  |
| 1.38E-05 | 0.182759 | 7.12E-05 | 0.128142 | 0.00555  | 0.103931 | 0.0247   | 0.096994 | 0.03614  |
| 5.26E-47 | 0.241391 | 1.29E-07 | 0.269931 | 3.07E-09 | 0.087043 | 0.06017  | 0.373673 | 6.37E-17 |
| 0.26328  | 0.034396 | 0.45837  | 0.132989 | 0.00399  | 0.202535 | 1.03E-05 | 0.020553 | 0.65775  |
| 2.69E-06 | 0.096975 | 0.03617  | 0.078843 | 0.08878  | -0.09509 | 0.03998  | 0.061008 | 0.18815  |
| 0.61675  | 0.049053 | 0.29013  | 0.108671 | 0.01882  | 0.132259 | 0.0042   | -0.00582 | 0.90011  |
| 0.85831  | 0.110618 | 0.01678  | 0.088833 | 0.05507  | 0.213395 | 3.27E-06 | 0.076465 | 0.09886  |
| 1.57E-25 | 0.183723 | 6.51E-05 | 0.127874 | 0.00565  | 0.007513 | 0.87136  | 0.135202 | 0.00342  |
| 1.36E-35 | 0.366169 | 2.90E-16 | 0.202192 | 1.07E-05 | 0.216098 | 2.44E-06 | 0.333357 | 1.39E-13 |
| 1.27E-07 | 0.37499  | 4.86E-17 | 0.294319 | 8.73E-11 | 0.411438 | 1.67E-20 | 0.215076 | 2.73E-06 |
| 1.30E-09 | 0.351158 | 5.34E-15 | 0.236083 | 2.45E-07 | 0.280192 | 7.15E-10 | 0.202369 | 1.05E-05 |
| 0.40589  | 0.142846 | 0.00197  | 0.091917 | 0.04712  | 0.153639 | 0.00087  | 0.087982 | 0.05745  |
| 1.85E-07 | 0.174541 | 0.00015  | 0.105677 | 0.02237  | 0.078228 | 0.0913   | 0.004567 | 0.92159  |
| 2.45E-19 | 0.257027 | 1.76E-08 | 0.162355 | 0.00043  | 0.137223 | 0.00296  | 0.287997 | 2.27E-10 |
| 1.03E-33 | 0.153893 | 0.00085  | 0.12534  | 0.00669  | -0.03218 | 0.48788  | 0.187624 | 4.50E-05 |
| 0.00372  | 0.229636 | 5.27E-07 | 0.021979 | 0.63568  | 0.080244 | 0.08323  | 0.018017 | 0.69777  |
| 0.11353  | -0.00052 | 0.99109  | -0.05796 | 0.21125  | -0.13556 | 0.00333  | -0.12853 | 0.00541  |
| 1.61E-08 | 0.191047 | 3.24E-05 | 0.177599 | 0.00011  | 0.197407 | 1.73E-05 | 0.119471 | 0.00976  |
| 1.28E-47 | 0.454191 | 3.79E-25 | 0.402705 | 1.24E-19 | 0.343926 | 2.06E-14 | 0.432309 | 1.09E-22 |

|          |          |          |          |          |          |          |          |          |
|----------|----------|----------|----------|----------|----------|----------|----------|----------|
| 7.69E-13 | 0.396025 | 5.50E-19 | 0.211509 | 4.01E-06 | 0.281124 | 6.25E-10 | 0.186481 | 5.02E-05 |
| 1.45E-13 | 0.532134 | 1.68E-35 | 0.437941 | 2.64E-23 | 0.416381 | 5.23E-21 | 0.290561 | 1.55E-10 |
| 1.18E-07 | 0.07758  | 0.09402  | 0.057061 | 0.2184   | 0.011766 | 0.79982  | 0.052858 | 0.25428  |
| 8.97E-11 | 0.050312 | 0.27791  | -0.05137 | 0.26793  | -0.09884 | 0.03272  | 0.044226 | 0.34027  |
| 0.01764  | 0.015642 | 0.736    | 0.004818 | 0.9173   | -0.00893 | 0.84744  | -0.0887  | 0.05544  |
| 7.71E-19 | 0.503365 | 2.29E-31 | 0.368924 | 1.67E-16 | 0.369426 | 1.51E-16 | 0.250511 | 4.09E-08 |
| 0.00047  | 0.091232 | 0.0488   | 0.005833 | 0.89996  | 0.037057 | 0.42432  | -0.05227 | 0.25957  |
| 0.00833  | -0.16967 | 0.00023  | -0.16514 | 0.00034  | -0.10256 | 0.02667  | -0.27274 | 2.07E-09 |
| 0.0479   | -0.08466 | 0.06758  | -0.1421  | 0.00208  | -0.26704 | 4.57E-09 | -0.23442 | 2.99E-07 |
| 9.43E-34 | 0.371789 | 9.35E-17 | 0.282119 | 5.41E-10 | 0.144343 | 0.00176  | 0.422738 | 1.14E-21 |
| 0.43403  | 0.153915 | 0.00085  | 0.06506  | 0.16042  | 0.116246 | 0.01194  | 0.205002 | 7.98E-06 |
| 2.02E-15 | 0.15289  | 0.00092  | 0.137014 | 0.00301  | 0.087523 | 0.05877  | 0.136516 | 0.00312  |
| 5.59E-06 | 0.304211 | 1.86E-11 | 0.314718 | 3.39E-12 | 0.26048  | 1.11E-08 | 0.268766 | 3.60E-09 |
| 0.19696  | 0.252776 | 3.06E-08 | 0.169503 | 0.00023  | 0.262224 | 8.79E-09 | 0.086043 | 0.06319  |
| 3.69E-06 | 0.312279 | 5.07E-12 | 0.122687 | 0.00795  | 0.188448 | 4.16E-05 | 0.092005 | 0.04691  |
| 8.49E-05 | 0.010538 | 0.82033  | 0.074032 | 0.1101   | -0.02402 | 0.6047   | 0.088095 | 0.05713  |
| 0.01161  | 0.351782 | 4.75E-15 | 0.286955 | 2.65E-10 | 0.381743 | 1.19E-17 | 0.213066 | 3.39E-06 |
| 7.37E-18 | 0.454451 | 3.53E-25 | 0.322887 | 8.59E-13 | 0.338951 | 5.11E-14 | 0.253485 | 2.79E-08 |
| 1.00E-05 | 0.519695 | 1.15E-33 | 0.285363 | 3.36E-10 | 0.276978 | 1.14E-09 | 0.268905 | 3.53E-09 |
| 9.77E-15 | 0.156097 | 0.00071  | 0.133016 | 0.00398  | 0.084444 | 0.06827  | 0.100108 | 0.03054  |
| 1.08E-09 | 0.061857 | 0.18206  | 0.078927 | 0.08844  | 0.026201 | 0.57222  | -0.01174 | 0.8002   |
| 2.54E-15 | 0.303774 | 2.00E-11 | 0.227265 | 6.94E-07 | 0.198238 | 1.59E-05 | 0.289348 | 1.85E-10 |
| 1.28E-21 | 0.145849 | 0.00158  | 0.154103 | 0.00083  | 0.02959  | 0.52355  | 0.177515 | 0.00012  |
| 2.70E-17 | 0.179256 | 9.82E-05 | 0.107322 | 0.02036  | -0.02978 | 0.52084  | 0.098256 | 0.03377  |
| 8.55E-07 | 0.074873 | 0.10611  | 0.025679 | 0.5799   | 0.138926 | 0.00262  | 0.046001 | 0.32122  |
| 0.74163  | 0.058513 | 0.20688  | -0.04926 | 0.28813  | -0.08458 | 0.06781  | -0.08092 | 0.08067  |
| 0.02911  | 0.059881 | 0.19645  | 0.092575 | 0.04556  | -0.04836 | 0.29697  | 0.033625 | 0.46851  |
| 0.0129   | 0.201685 | 1.12E-05 | 0.059051 | 0.20273  | 0.143867 | 0.00183  | 0.120236 | 0.0093   |
| 2.63E-05 | 0.138652 | 0.00268  | 0.157427 | 0.00064  | 0.121623 | 0.00851  | 0.056951 | 0.21929  |
| 0.26023  | 0.034785 | 0.4533   | 0.033664 | 0.468    | 0.176399 | 0.00013  | 0.016841 | 0.71661  |
| 0.08914  | 0.008269 | 0.85855  | -0.09885 | 0.0327   | -0.02395 | 0.60567  | -0.15552 | 0.00075  |
| 0.06412  | -0.0596  | 0.19858  | -0.0099  | 0.83097  | -0.04923 | 0.28843  | -0.02773 | 0.55002  |
| 1.32E-11 | 0.010879 | 0.81462  | -0.08398 | 0.06981  | -0.13763 | 0.00288  | 0.158706 | 0.00058  |
| 0.00266  | 0.087959 | 0.05751  | 0.122258 | 0.00817  | 0.14491  | 0.00169  | 0.058259 | 0.20887  |
| 0.00423  | 0.067184 | 0.14717  | 0.168357 | 0.00026  | 0.226708 | 7.40E-07 | 0.122226 | 0.00819  |
| 1.62E-07 | 0.255651 | 2.10E-08 | 0.158172 | 0.0006   | 0.147915 | 0.00135  | 0.130235 | 0.00482  |
| 5.59E-33 | 0.272497 | 2.14E-09 | 0.141454 | 0.00218  | 0.06884  | 0.13743  | 0.305531 | 1.51E-11 |
| 0.00015  | 0.045571 | 0.32577  | 0.011435 | 0.80532  | -0.03425 | 0.46024  | 0.067145 | 0.1474   |
| 0.03048  | 0.204473 | 8.43E-06 | 0.041634 | 0.36934  | 0.192753 | 2.74E-05 | -0.04388 | 0.34405  |
| 3.87E-07 | 0.037967 | 0.41304  | 0.068362 | 0.14019  | 0.015117 | 0.74457  | 0.017235 | 0.71029  |
| 0.001    | 0.181264 | 8.17E-05 | 0.14503  | 0.00168  | 0.200915 | 1.22E-05 | 0.061865 | 0.18201  |
| 0.01351  | 0.135549 | 0.00334  | 0.056334 | 0.22434  | 0.013282 | 0.77467  | -0.00256 | 0.95604  |
| 0.00021  | 0.035752 | 0.44084  | -0.01127 | 0.80805  | -0.04628 | 0.31834  | -0.08891 | 0.05485  |
| 9.10E-17 | 0.292673 | 1.12E-10 | 0.216566 | 2.32E-06 | 0.201699 | 1.12E-05 | 0.196804 | 1.84E-05 |
| 2.80E-06 | 0.147973 | 0.00134  | 0.259814 | 1.21E-08 | 0.180736 | 8.58E-05 | 0.248004 | 5.63E-08 |



|          |          |          |          |          |          |          |          |          |
|----------|----------|----------|----------|----------|----------|----------|----------|----------|
| 0.02026  | 0.388308 | 2.96E-18 | 0.249716 | 4.53E-08 | 0.325121 | 5.86E-13 | 0.20854  | 5.50E-06 |
| 8.48E-08 | 0.080301 | 0.08301  | 0.059009 | 0.20306  | 0.015014 | 0.74623  | -0.03244 | 0.4844   |
| 0.16145  | 0.003586 | 0.9384   | -0.00941 | 0.83927  | -0.04228 | 0.36199  | -0.10964 | 0.01778  |
| 8.60E-05 | 0.145586 | 0.00161  | 0.04938  | 0.28692  | 0.030163 | 0.51555  | -0.03879 | 0.40295  |
| 0.00013  | -0.00083 | 0.98568  | -0.02763 | 0.55139  | -0.08291 | 0.07345  | -0.09755 | 0.03508  |
| 0.01197  | 0.121037 | 0.00884  | 0.06417  | 0.16622  | 0.080217 | 0.08334  | 0.084573 | 0.06785  |
| 3.01E-42 | 0.499617 | 7.41E-31 | 0.366781 | 2.56E-16 | 0.348167 | 9.37E-15 | 0.42274  | 1.14E-21 |
| 0.00778  | -0.2016  | 1.13E-05 | -0.132   | 0.00427  | -0.20039 | 1.28E-05 | -0.15176 | 0.001    |
| 1.37E-05 | -0.12309 | 0.00774  | -0.15095 | 0.00107  | -0.20659 | 6.76E-06 | 0.034334 | 0.45918  |
| 0.24183  | 0.132091 | 0.00424  | 0.181294 | 8.15E-05 | 0.230365 | 4.84E-07 | 0.008858 | 0.84859  |
| 1.56E-33 | 0.504647 | 1.53E-31 | 0.362712 | 5.75E-16 | 0.236258 | 2.40E-07 | 0.396333 | 5.13E-19 |
| 1.04E-09 | 0.139699 | 0.00248  | 0.123652 | 0.00747  | 0.02158  | 0.64183  | 0.181713 | 7.84E-05 |
| 0.00034  | 0.192358 | 2.85E-05 | 0.069077 | 0.13608  | 0.188442 | 4.17E-05 | 0.155244 | 0.00076  |
| 3.28E-06 | 0.130096 | 0.00487  | 0.032544 | 0.48294  | 0.034181 | 0.46119  | 0.036161 | 0.43563  |
| 6.22E-20 | 0.196392 | 1.92E-05 | 0.148647 | 0.00127  | 0.067806 | 0.14345  | 0.132429 | 0.00415  |
| 0.00392  | 0.088552 | 0.05584  | -0.04005 | 0.38791  | -0.09161 | 0.04786  | -0.04073 | 0.3798   |
| 6.67E-14 | 0.09399  | 0.04234  | 0.092117 | 0.04664  | -0.01921 | 0.67886  | 0.1052   | 0.02299  |
| 0.23726  | -0.11807 | 0.01066  | -0.1053  | 0.02286  | -0.11875 | 0.01022  | -0.12671 | 0.00611  |
| 0.00081  | 0.396145 | 5.35E-19 | 0.208515 | 5.52E-06 | 0.182055 | 7.60E-05 | 0.166226 | 0.00031  |
| 0.31416  | 0.126563 | 0.00617  | -0.02254 | 0.62703  | -0.01643 | 0.72332  | -0.14074 | 0.0023   |
| 0.19318  | 0.113752 | 0.01391  | 0.021151 | 0.64846  | 0.027421 | 0.55446  | -0.06189 | 0.18182  |
| 2.96E-29 | 0.173003 | 0.00017  | 0.073384 | 0.11325  | -0.01538 | 0.74026  | 0.373225 | 6.98E-17 |
| 3.84E-23 | 0.348737 | 8.42E-15 | 0.302992 | 2.26E-11 | 0.309784 | 7.61E-12 | 0.281024 | 6.34E-10 |
| 0.00399  | -0.0802  | 0.0834   | -0.15503 | 0.00078  | -0.03337 | 0.47189  | -0.06917 | 0.13556  |
| 0.19266  | 0.181266 | 8.17E-05 | 0.148056 | 0.00133  | 0.097758 | 0.03469  | 0.001291 | 0.9778   |
| 0.03144  | 0.08244  | 0.07511  | 0.020013 | 0.66621  | 0.028696 | 0.53618  | -0.05504 | 0.23519  |
| 0.81057  | 0.121384 | 0.00864  | 0.132992 | 0.00399  | 0.17636  | 0.00013  | 0.154276 | 0.00082  |
| 1.55E-10 | 0.168674 | 0.00025  | 0.145078 | 0.00167  | 0.120903 | 0.00891  | 0.084135 | 0.06929  |
| 3.98E-14 | 0.119794 | 0.00956  | 0.141879 | 0.00212  | 0.047104 | 0.30975  | 0.081919 | 0.07698  |
| 2.25E-21 | 0.305243 | 1.58E-11 | 0.222484 | 1.20E-06 | 0.195344 | 2.13E-05 | 0.163255 | 0.0004   |
| 0.00026  | 0.126906 | 0.00603  | -0.12761 | 0.00575  | -0.08464 | 0.06763  | -0.22991 | 5.10E-07 |
| 2.51E-33 | 0.232183 | 3.90E-07 | 0.170868 | 0.00021  | 0.023582 | 0.61123  | 0.392956 | 1.08E-18 |
| 0.00034  | 0.181223 | 8.20E-05 | 0.155762 | 0.00073  | 0.158659 | 0.00058  | 0.102805 | 0.02631  |
| 0.4802   | 0.146921 | 0.00145  | 0.000611 | 0.98948  | 0.069356 | 0.1345   | -0.05354 | 0.24819  |
| 0.04152  | -0.0795  | 0.08613  | -0.10786 | 0.01973  | -0.10997 | 0.01744  | -0.10029 | 0.03023  |
| 8.81E-08 | -0.08956 | 0.05311  | -0.09569 | 0.03873  | -0.11319 | 0.01439  | 0.023133 | 0.61803  |
| 5.21E-27 | 0.619609 | 7.34E-51 | 0.465694 | 1.63E-26 | 0.475596 | 9.88E-28 | 0.482914 | 1.17E-28 |
| 1.10E-13 | 0.042663 | 0.35762  | 0.045549 | 0.32601  | -0.04721 | 0.30867  | 0.180881 | 8.46E-05 |
| 0.13217  | -0.06739 | 0.1459   | -0.03282 | 0.47926  | -0.07083 | 0.12639  | -0.02447 | 0.59793  |
| 0.00586  | 0.129045 | 0.00522  | 0.130587 | 0.00471  | 0.145483 | 0.00162  | 0.079113 | 0.08769  |
| 0.00572  | -0.03877 | 0.40316  | 0.030612 | 0.50931  | -0.05623 | 0.22519  | -0.08456 | 0.06788  |
| 0.00053  | -0.03646 | 0.43183  | -0.03006 | 0.51704  | 0.001611 | 0.9723   | -0.14639 | 0.00151  |
| 1.29E-05 | -0.08813 | 0.05702  | -0.10256 | 0.02667  | -0.05295 | 0.25348  | -0.24972 | 4.53E-08 |
| 5.09E-09 | 0.155322 | 0.00076  | 0.087633 | 0.05845  | 0.003147 | 0.94593  | 0.059545 | 0.19898  |
| 5.98E-11 | -0.02182 | 0.63813  | 0.036978 | 0.42531  | -0.11479 | 0.01306  | 0.077464 | 0.09452  |

|          |          |          |          |          |          |          |          |          |
|----------|----------|----------|----------|----------|----------|----------|----------|----------|
| 4.00E-07 | 0.145125 | 0.00166  | 0.068533 | 0.1392   | 0.147601 | 0.00138  | -0.04485 | 0.33348  |
| 0.00347  | 0.057043 | 0.21854  | 0.171164 | 0.0002   | 0.175753 | 0.00013  | 0.055714 | 0.22948  |
| 3.44E-05 | -0.02656 | 0.5669   | -0.02502 | 0.58969  | -0.06857 | 0.13899  | -0.10362 | 0.02514  |
| 0.08904  | 0.054887 | 0.23648  | 0.062716 | 0.17605  | 0.064677 | 0.1629   | 0.095098 | 0.03995  |
| 1.44E-47 | 0.38976  | 2.16E-18 | 0.378586 | 2.31E-17 | 0.316582 | 2.49E-12 | 0.406755 | 4.92E-20 |
| 3.36E-06 | 0.025524 | 0.58218  | -0.10998 | 0.01743  | -0.10359 | 0.02518  | -0.0347  | 0.45436  |
| 2.46E-07 | -0.2284  | 6.08E-07 | -0.20901 | 5.24E-06 | -0.12038 | 0.00922  | -0.10274 | 0.02641  |
| 0.02585  | 0.048493 | 0.29567  | -0.06829 | 0.14061  | 0.007922 | 0.86442  | -0.02772 | 0.55017  |
| 0.57786  | -0.08275 | 0.07403  | -0.17662 | 0.00012  | -0.13494 | 0.00348  | -0.1484  | 0.0013   |
| 1.93E-05 | -0.02819 | 0.54339  | -0.13513 | 0.00344  | -0.12932 | 0.00513  | -0.11177 | 0.01567  |
| 0.9818   | 0.177561 | 0.00011  | 0.124536 | 0.00705  | 0.123088 | 0.00775  | 0.04518  | 0.32994  |
| 2.67E-10 | 0.128887 | 0.00528  | 0.08229  | 0.07564  | 0.100702 | 0.02956  | 0.04681  | 0.31277  |
| 0.54742  | 0.219346 | 1.70E-06 | 0.089754 | 0.05259  | 0.077617 | 0.09387  | -0.02323 | 0.6165   |
| 0.80305  | 0.222801 | 1.16E-06 | 0.074153 | 0.10952  | 0.080145 | 0.08361  | -0.08764 | 0.05842  |
| 4.95E-23 | 0.498764 | 9.66E-31 | 0.375196 | 4.66E-17 | 0.35559  | 2.30E-15 | 0.315557 | 2.95E-12 |
| 9.31E-05 | 0.165328 | 0.00033  | 0.052672 | 0.25596  | -0.00112 | 0.98068  | -0.0417  | 0.36859  |
| 5.59E-05 | -0.18286 | 7.05E-05 | -0.22402 | 1.01E-06 | -0.26614 | 5.17E-09 | -0.09764 | 0.0349   |
| 2.46E-05 | 0.225653 | 8.35E-07 | 0.169935 | 0.00022  | 0.208239 | 5.68E-06 | 0.109993 | 0.01742  |
| 1.46E-21 | 0.200971 | 1.21E-05 | 0.169063 | 0.00024  | 0.162249 | 0.00043  | 0.154837 | 0.00079  |
| 3.46E-16 | 0.136632 | 0.00309  | 0.157893 | 0.00062  | 0.007985 | 0.86336  | 0.121733 | 0.00845  |
| 3.47E-05 | 0.102797 | 0.02632  | 0.070927 | 0.12587  | 0.048971 | 0.29094  | 0.039495 | 0.39446  |
| 0.00018  | 0.227323 | 6.89E-07 | 0.078433 | 0.09045  | 0.052943 | 0.25352  | 0.00061  | 0.9895   |
| 4.22E-14 | 0.337571 | 6.55E-14 | 0.213475 | 3.25E-06 | 0.238845 | 1.76E-07 | 0.214717 | 2.84E-06 |
| 1.16E-10 | 0.181068 | 8.32E-05 | 0.10821  | 0.01933  | 0.073503 | 0.11267  | 0.027244 | 0.55701  |
| 6.40E-44 | 0.402311 | 1.35E-19 | 0.327564 | 3.84E-13 | 0.263907 | 7.01E-09 | 0.408295 | 3.45E-20 |
| 3.02E-14 | 0.154111 | 0.00083  | 0.123271 | 0.00765  | 0.088702 | 0.05543  | 0.088288 | 0.05658  |
| 1.68E-07 | 0.328537 | 3.24E-13 | 0.256118 | 1.98E-08 | 0.332836 | 1.52E-13 | 0.356815 | 1.81E-15 |
| 2.99E-13 | 0.309974 | 7.38E-12 | 0.281708 | 5.74E-10 | 0.288436 | 2.13E-10 | 0.284576 | 3.77E-10 |
| 0.11989  | 0.260483 | 1.11E-08 | 0.191146 | 3.21E-05 | 0.247488 | 6.01E-08 | 0.090778 | 0.04993  |
| 6.77E-12 | 0.359001 | 1.19E-15 | 0.314542 | 3.49E-12 | 0.272273 | 2.21E-09 | 0.255309 | 2.20E-08 |
| 6.39E-06 | 0.313032 | 4.48E-12 | 0.200884 | 1.22E-05 | 0.178646 | 0.0001   | 0.176865 | 0.00012  |
| 8.31E-29 | 0.423369 | 9.82E-22 | 0.362196 | 6.36E-16 | 0.225685 | 8.32E-07 | 0.370764 | 1.15E-16 |
| 0.26135  | -0.18549 | 5.51E-05 | 0.011436 | 0.80531  | -0.15534 | 0.00076  | -0.07994 | 0.08442  |
| 4.67E-06 | 0.111137 | 0.01627  | 0.056804 | 0.22048  | 0.002007 | 0.96549  | -0.01633 | 0.72483  |
| 4.55E-15 | 0.337266 | 6.92E-14 | 0.387633 | 3.42E-18 | 0.293006 | 1.07E-10 | 0.31746  | 2.15E-12 |
| 0.00098  | 0.189634 | 3.72E-05 | 0.081887 | 0.07709  | 0.162094 | 0.00044  | 0.033476 | 0.47049  |
| 1.40E-22 | 0.365799 | 3.12E-16 | 0.36753  | 2.21E-16 | 0.28755  | 2.43E-10 | 0.297307 | 5.51E-11 |
| 8.18E-06 | 0.235995 | 2.48E-07 | 0.134418 | 0.00361  | 0.168638 | 0.00025  | 0.08284  | 0.0737   |
| 0.00059  | -0.36025 | 9.32E-16 | -0.36616 | 2.90E-16 | -0.32798 | 3.57E-13 | -0.24412 | 9.17E-08 |
| 3.36E-09 | 0.553249 | 8.45E-39 | 0.423567 | 9.36E-22 | 0.472189 | 2.62E-27 | 0.321668 | 1.06E-12 |
| 1.23E-27 | 0.135462 | 0.00336  | 0.134069 | 0.0037   | -0.00222 | 0.96179  | 0.153986 | 0.00084  |
| 0.06963  | 0.064942 | 0.16118  | -0.0788  | 0.08896  | -0.1031  | 0.02589  | -0.24145 | 1.28E-07 |
| 0.4347   | -0.02853 | 0.53853  | -0.01086 | 0.81491  | 0.006529 | 0.8881   | -0.05378 | 0.2461   |
| 1.39E-09 | 0.066776 | 0.14964  | 0.008013 | 0.86288  | -0.07966 | 0.08552  | 0.299569 | 3.88E-11 |
| 0.01526  | 0.191686 | 3.05E-05 | 0.021076 | 0.64963  | 0.083454 | 0.07158  | -0.12144 | 0.00861  |

|          |          |          |          |          |          |          |          |          |
|----------|----------|----------|----------|----------|----------|----------|----------|----------|
| 0.52455  | -0.18784 | 4.41E-05 | -0.09218 | 0.04648  | -0.14845 | 0.00129  | 0.112846 | 0.01469  |
| 4.64E-08 | 0.332677 | 1.57E-13 | 0.280698 | 6.65E-10 | 0.317461 | 2.15E-12 | 0.213563 | 3.21E-06 |
| 0.02218  | 0.130016 | 0.00489  | 0.087544 | 0.0587   | 0.063072 | 0.17361  | 0.073696 | 0.11173  |
| 0.11104  | 0.237276 | 2.12E-07 | 0.130688 | 0.00467  | 0.20376  | 9.07E-06 | 0.204462 | 8.44E-06 |
| 6.21E-07 | -0.03136 | 0.49895  | 0.006953 | 0.88089  | -0.10796 | 0.01962  | -0.0433  | 0.35046  |
| 0.67541  | 0.103809 | 0.02487  | 0.002558 | 0.95604  | 0.086218 | 0.06265  | 0.052944 | 0.25351  |
| 0.41554  | -0.0358  | 0.44016  | -0.1598  | 0.00053  | -0.01867 | 0.68733  | -0.04658 | 0.31515  |
| 1.17E-06 | -0.15242 | 0.00095  | -0.0298  | 0.52064  | -0.0059  | 0.89888  | -0.09604 | 0.03802  |
| 0.00524  | 0.106594 | 0.02123  | 0.168323 | 0.00026  | 0.234908 | 2.82E-07 | 0.067375 | 0.14602  |
| 0.00189  | 0.302715 | 2.36E-11 | 0.205846 | 7.31E-06 | 0.152467 | 0.00095  | 0.092716 | 0.04522  |
| 8.44E-06 | 0.279755 | 7.62E-10 | 0.190109 | 3.55E-05 | 0.294981 | 7.89E-11 | 0.203629 | 9.20E-06 |
| 8.53E-05 | -0.0299  | 0.51919  | -0.04185 | 0.36683  | 0.01184  | 0.79858  | 0.015273 | 0.74202  |
| 2.72E-06 | 0.096168 | 0.03776  | -0.0556  | 0.23043  | -0.06038 | 0.19273  | 0.070161 | 0.13003  |
| 0.01897  | -0.12047 | 0.00916  | 0.175339 | 0.00014  | 0.038829 | 0.4025   | 0.033708 | 0.46741  |
| 0.00037  | -0.01915 | 0.67972  | 0.052058 | 0.26155  | 0.124419 | 0.0071   | -0.00441 | 0.92436  |
| 6.39E-06 | 0.172594 | 0.00018  | 0.07103  | 0.12533  | 0.043381 | 0.34958  | -0.03252 | 0.48324  |
| 3.33E-13 | 0.096319 | 0.03746  | 0.075706 | 0.10226  | 0.02951  | 0.52467  | 0.046202 | 0.31911  |
| 0.29428  | 0.119023 | 0.01004  | 0.079028 | 0.08803  | 0.18285  | 7.06E-05 | 0.107954 | 0.01962  |
| 0.09547  | 0.030054 | 0.51706  | 0.016717 | 0.7186   | -0.05522 | 0.23362  | 0.035901 | 0.43893  |
| 0.00035  | 0.026163 | 0.57277  | 0.066377 | 0.1521   | 0.12335  | 0.00762  | 0.071007 | 0.12545  |
| 0.32652  | -0.15862 | 0.00058  | -0.22414 | 9.92E-07 | -0.17336 | 0.00017  | -0.25428 | 2.52E-08 |
| 0.00124  | -0.10859 | 0.01891  | -0.16764 | 0.00027  | -0.12815 | 0.00555  | -0.10682 | 0.02096  |
| 1.07E-18 | 0.545547 | 1.43E-37 | 0.491312 | 9.52E-30 | 0.425228 | 6.25E-22 | 0.364185 | 4.30E-16 |
| 4.83E-34 | 0.14144  | 0.00219  | 0.223386 | 1.08E-06 | 0.055813 | 0.22865  | 0.307894 | 1.03E-11 |
| 3.14E-06 | 0.044711 | 0.335    | 0.02006  | 0.66547  | -0.01243 | 0.78882  | -0.06243 | 0.17804  |
| 1.04E-17 | 0.251649 | 3.54E-08 | 0.165732 | 0.00032  | 0.140006 | 0.00243  | 0.134771 | 0.00352  |
| 0.00075  | -0.17373 | 0.00016  | -0.10961 | 0.01782  | -0.10058 | 0.02976  | -0.28035 | 6.99E-10 |
| 3.19E-22 | 0.592446 | 1.39E-45 | 0.504874 | 1.42E-31 | 0.461291 | 5.52E-26 | 0.426659 | 4.41E-22 |
| 4.16E-21 | 0.493893 | 4.34E-30 | 0.344881 | 1.73E-14 | 0.28946  | 1.82E-10 | 0.322576 | 9.06E-13 |
| 2.07E-15 | 0.234498 | 2.97E-07 | 0.180798 | 8.53E-05 | 0.147276 | 0.00142  | 0.125751 | 0.00651  |
| 8.18E-11 | 0.157276 | 0.00065  | 0.097527 | 0.03512  | 0.054578 | 0.23913  | 0.066214 | 0.15311  |
| 0.05627  | 0.064054 | 0.167    | 0.052551 | 0.25706  | -0.00786 | 0.86556  | -0.08046 | 0.08239  |
| 9.07E-28 | 0.319409 | 1.55E-12 | 0.238217 | 1.90E-07 | 0.182238 | 7.47E-05 | 0.204372 | 8.52E-06 |
| 0.99971  | 0.100687 | 0.02959  | 0.006966 | 0.88066  | -0.09054 | 0.05054  | -0.03846 | 0.40694  |
| 0.00022  | 0.489    | 1.91E-29 | 0.261419 | 9.80E-09 | 0.32027  | 1.34E-12 | 0.131675 | 0.00437  |
| 2.24E-09 | 0.213245 | 3.33E-06 | 0.081135 | 0.07985  | 0.05845  | 0.20738  | 0.060636 | 0.19086  |
| 0.28691  | -0.12146 | 0.0086   | -0.21625 | 2.40E-06 | -0.1409  | 0.00227  | -0.11806 | 0.01067  |
| 4.97E-10 | 0.222691 | 1.17E-06 | 0.131387 | 0.00445  | 0.073354 | 0.11341  | 0.091953 | 0.04703  |
| 0.70801  | -0.09268 | 0.04532  | 0.062376 | 0.17842  | 0.079255 | 0.08712  | 0.072857 | 0.11588  |
| 4.23E-30 | 0.308885 | 8.81E-12 | 0.327666 | 3.77E-13 | 0.283793 | 4.23E-10 | 0.291116 | 1.42E-10 |
| 3.49E-08 | -0.01786 | 0.70029  | -0.07092 | 0.12592  | -0.14539 | 0.00163  | 0.066021 | 0.15431  |
| 3.91E-29 | 0.293921 | 9.28E-11 | 0.264061 | 6.86E-09 | 0.228883 | 5.75E-07 | 0.336293 | 8.24E-14 |
| 1.69E-13 | 0.293789 | 9.47E-11 | 0.165991 | 0.00032  | 0.178082 | 0.00011  | 0.120514 | 0.00914  |
| 4.02E-27 | 0.223588 | 1.06E-06 | 0.166231 | 0.00031  | 0.029692 | 0.52213  | 0.400238 | 2.15E-19 |
| 1.00E-09 | 0.216269 | 2.39E-06 | 0.070367 | 0.1289   | 0.072069 | 0.11988  | 0.073803 | 0.11121  |

|          |          |          |          |          |          |          |          |          |
|----------|----------|----------|----------|----------|----------|----------|----------|----------|
| 0.57316  | 0.305886 | 1.43E-11 | 0.207449 | 6.18E-06 | 0.301887 | 2.69E-11 | 0.051016 | 0.27123  |
| 6.28E-09 | -0.04572 | 0.32424  | -0.00811 | 0.86127  | -0.14586 | 0.00157  | 0.01275  | 0.78347  |
| 0.05874  | 0.185146 | 5.69E-05 | 0.039609 | 0.3931   | 0.182245 | 7.46E-05 | 0.044869 | 0.33329  |
| 0.14925  | 0.183396 | 6.71E-05 | 0.157747 | 0.00062  | 0.276887 | 1.15E-09 | 0.034631 | 0.4553   |
| 0.29406  | -0.14991 | 0.00116  | -0.11321 | 0.01437  | -0.1763  | 0.00013  | -0.01434 | 0.75723  |
| 0.27989  | 0.180029 | 9.15E-05 | 0.151209 | 0.00105  | 0.126195 | 0.00632  | 0.189455 | 3.78E-05 |
| 0.00411  | 0.167053 | 0.00029  | -0.02375 | 0.60871  | -0.01646 | 0.72282  | 0.138448 | 0.00271  |
| 0.05468  | 0.111233 | 0.01618  | 0.011635 | 0.80199  | 0.003874 | 0.93346  | -0.07606 | 0.10068  |
| 0.00079  | -0.03706 | 0.42424  | -0.01933 | 0.67695  | -0.09572 | 0.03867  | -0.09299 | 0.04459  |
| 3.51E-15 | 0.200718 | 1.24E-05 | 0.117149 | 0.01129  | 0.106116 | 0.02182  | 0.163464 | 0.00039  |
| 7.63E-05 | 0.416252 | 5.39E-21 | 0.532029 | 1.74E-35 | 0.513411 | 9.12E-33 | 0.237541 | 2.06E-07 |
| 1.14E-21 | 0.445811 | 3.48E-24 | 0.355248 | 2.45E-15 | 0.283707 | 4.29E-10 | 0.253445 | 2.80E-08 |
| 1.09E-06 | 0.440114 | 1.52E-23 | 0.291057 | 1.43E-10 | 0.293279 | 1.02E-10 | 0.124731 | 0.00696  |
| 2.13E-09 | 0.440081 | 1.53E-23 | 0.325199 | 5.78E-13 | 0.275297 | 1.44E-09 | 0.255418 | 2.17E-08 |
| 1.74E-29 | 0.512166 | 1.37E-32 | 0.535033 | 6.10E-36 | 0.439421 | 1.81E-23 | 0.517854 | 2.12E-33 |
| 1.06E-27 | 0.441188 | 1.15E-23 | 0.383878 | 7.61E-18 | 0.314093 | 3.76E-12 | 0.385313 | 5.61E-18 |
| 4.61E-24 | 0.487234 | 3.25E-29 | 0.439949 | 1.58E-23 | 0.392134 | 1.29E-18 | 0.370576 | 1.20E-16 |
| 0.06752  | -0.00572 | 0.90196  | 0.108219 | 0.01932  | -0.07211 | 0.11969  | -0.11849 | 0.01039  |
| 0.01878  | 0.337027 | 7.22E-14 | 0.457649 | 1.49E-25 | 0.371376 | 1.02E-16 | 0.16346  | 0.00039  |
| 9.05E-18 | 0.15084  | 0.00108  | 0.138271 | 0.00275  | 0.091105 | 0.04911  | 0.121592 | 0.00853  |
| 1.18E-15 | 0.325834 | 5.18E-13 | 0.162125 | 0.00044  | 0.174802 | 0.00015  | 0.128496 | 0.00542  |
| 0.4492   | 0.004797 | 0.91766  | 0.130197 | 0.00483  | -0.03177 | 0.49346  | -0.03975 | 0.39147  |
| 0.47142  | 0.035587 | 0.44295  | 0.328885 | 3.05E-13 | 0.172513 | 0.00018  | 0.006563 | 0.88752  |
| 0.00812  | 0.387494 | 3.52E-18 | 0.447454 | 2.26E-24 | 0.608255 | 1.36E-48 | 0.211332 | 4.09E-06 |
| 0.00045  | 0.228401 | 6.08E-07 | 0.37145  | 1.00E-16 | 0.251376 | 3.66E-08 | 0.014913 | 0.74788  |
| 4.29E-08 | 0.355746 | 2.23E-15 | 0.29875  | 4.40E-11 | 0.248793 | 5.10E-08 | 0.112519 | 0.01498  |
| 4.80E-13 | 0.139448 | 0.00253  | 0.0896   | 0.05299  | 0.03052  | 0.51058  | 0.167169 | 0.00029  |
| 0.19436  | 0.20727  | 6.29E-06 | 0.216385 | 2.36E-06 | 0.200531 | 1.26E-05 | 0.070301 | 0.12926  |
| 0.04541  | 0.306347 | 1.33E-11 | 0.299885 | 3.69E-11 | 0.348038 | 9.60E-15 | 0.024522 | 0.59709  |
| 2.59E-33 | 0.361523 | 7.26E-16 | 0.409145 | 2.84E-20 | 0.279302 | 8.14E-10 | 0.525467 | 1.65E-34 |
| 6.71E-35 | 0.119542 | 0.00972  | 0.232112 | 3.94E-07 | 0.09391  | 0.04251  | 0.476999 | 6.59E-28 |
| 2.14E-09 | 0.176892 | 0.00012  | 0.321969 | 1.00E-12 | 0.164573 | 0.00036  | 0.375962 | 3.98E-17 |
| 4.50E-17 | 0.036078 | 0.43668  | 0.086931 | 0.0605   | -0.08386 | 0.0702   | 0.280394 | 6.95E-10 |
| 1.66E-29 | 0.418409 | 3.23E-21 | 0.427945 | 3.22E-22 | 0.362573 | 5.91E-16 | 0.541938 | 5.28E-37 |
| 1.40E-11 | 0.163494 | 0.00039  | 0.157832 | 0.00062  | 0.027726 | 0.55006  | 0.156799 | 0.00067  |
| 1.22E-39 | 0.294315 | 8.73E-11 | 0.372956 | 7.37E-17 | 0.23107  | 4.45E-07 | 0.420447 | 1.99E-21 |
| 0.00096  | -0.01149 | 0.80445  | 0.086026 | 0.06324  | -0.0821  | 0.07633  | 0.098411 | 0.03349  |
| 1.90E-30 | 0.214816 | 2.81E-06 | 0.284393 | 3.87E-10 | 0.080905 | 0.08071  | 0.332899 | 1.51E-13 |
| 1.71E-05 | -0.08854 | 0.05588  | 0.072119 | 0.11962  | -0.14293 | 0.00196  | 0.100562 | 0.02979  |
| 1.31E-08 | 0.058353 | 0.20813  | 0.156449 | 0.00069  | 0.085018 | 0.06641  | 0.261896 | 9.19E-09 |
| 8.99E-42 | 0.465499 | 1.72E-26 | 0.488595 | 2.16E-29 | 0.367458 | 2.24E-16 | 0.56626  | 5.95E-41 |
| 1.62E-36 | 0.309809 | 7.58E-12 | 0.261682 | 9.46E-09 | 0.146167 | 0.00154  | 0.384463 | 6.72E-18 |
| 2.20E-37 | 0.518235 | 1.87E-33 | 0.537217 | 2.83E-36 | 0.399757 | 2.40E-19 | 0.54564  | 1.39E-37 |
| 5.66E-54 | 0.438927 | 2.05E-23 | 0.320572 | 1.27E-12 | 0.178237 | 0.00011  | 0.547115 | 8.11E-38 |
| 2.66E-08 | 0.279051 | 8.44E-10 | 0.209921 | 4.75E-06 | 0.182324 | 7.41E-05 | 0.286129 | 3.00E-10 |

|          |          |          |          |          |          |          |          |          |
|----------|----------|----------|----------|----------|----------|----------|----------|----------|
| 1.21E-39 | 0.240857 | 1.37E-07 | 0.345275 | 1.60E-14 | 0.160667 | 0.00049  | 0.415183 | 6.94E-21 |
| 2.14E-13 | 0.151117 | 0.00105  | 0.255529 | 2.14E-08 | 0.152097 | 0.00098  | 0.305399 | 1.54E-11 |
| 4.34E-12 | -0.11821 | 0.01057  | 0.002952 | 0.94927  | -0.22167 | 1.31E-06 | 0.184211 | 6.22E-05 |
| 1.47E-23 | 0.244669 | 8.57E-08 | 0.359131 | 1.16E-15 | 0.234033 | 3.13E-07 | 0.422291 | 1.27E-21 |
| 1.08E-08 | 0.086303 | 0.06239  | 0.014989 | 0.74664  | -0.10507 | 0.02316  | 0.100071 | 0.0306   |
| 5.50E-13 | 0.532132 | 1.68E-35 | 0.464029 | 2.59E-26 | 0.42801  | 3.16E-22 | 0.453803 | 4.21E-25 |
| 3.44E-20 | 0.237089 | 2.17E-07 | 0.146051 | 0.00155  | -0.02724 | 0.55704  | 0.209799 | 4.82E-06 |
| 2.43E-07 | 0.051197 | 0.26953  | 0.197489 | 1.72E-05 | -0.05056 | 0.27551  | 0.171    | 0.0002   |
| 1.35E-51 | 0.428478 | 2.82E-22 | 0.352679 | 4.00E-15 | 0.28617  | 2.98E-10 | 0.488429 | 2.27E-29 |
| 1.91E-34 | 0.236358 | 2.37E-07 | 0.199122 | 1.46E-05 | 0.089663 | 0.05282  | 0.287801 | 2.34E-10 |
| 4.80E-29 | 0.446159 | 3.18E-24 | 0.420733 | 1.85E-21 | 0.371548 | 9.82E-17 | 0.513106 | 1.01E-32 |
| 2.01E-17 | 0.141416 | 0.00219  | 0.201601 | 1.13E-05 | 0.0301   | 0.51642  | 0.282748 | 4.93E-10 |
| 2.10E-23 | 0.452573 | 5.84E-25 | 0.375868 | 4.06E-17 | 0.321948 | 1.01E-12 | 0.471027 | 3.65E-27 |
| 5.10E-34 | 0.341341 | 3.31E-14 | 0.379056 | 2.10E-17 | 0.224964 | 9.03E-07 | 0.428528 | 2.79E-22 |
| 1.68E-16 | 0.529615 | 4.00E-35 | 0.512255 | 1.33E-32 | 0.517184 | 2.64E-33 | 0.456288 | 2.16E-25 |
| 0.00223  | -0.17697 | 0.00012  | 0.046881 | 0.31204  | -0.16509 | 0.00034  | 0.033593 | 0.46894  |
| 9.72E-55 | 0.474617 | 1.31E-27 | 0.49254  | 6.55E-30 | 0.337753 | 6.34E-14 | 0.523377 | 3.35E-34 |
| 9.88E-19 | 0.216681 | 2.29E-06 | 0.297397 | 5.43E-11 | 0.164019 | 0.00037  | 0.383671 | 7.95E-18 |
| 0.11598  | -0.08168 | 0.07785  | 0.111315 | 0.0161   | 0.009259 | 0.84182  | 0.189399 | 3.80E-05 |
| 4.70E-34 | 0.187601 | 4.51E-05 | 0.310239 | 7.07E-12 | 0.198398 | 1.57E-05 | 0.398821 | 2.95E-19 |
| 1.09E-33 | 0.307059 | 1.18E-11 | 0.380804 | 1.45E-17 | 0.249669 | 4.56E-08 | 0.527964 | 7.06E-35 |
| 4.12E-13 | 0.204868 | 8.09E-06 | 0.110545 | 0.01686  | 0.071091 | 0.125    | 0.196709 | 1.86E-05 |
| 1.22E-23 | 0.26513  | 5.93E-09 | 0.335905 | 8.83E-14 | 0.195294 | 2.14E-05 | 0.285839 | 3.13E-10 |
| 1.12E-40 | 0.113044 | 0.01452  | 0.230105 | 4.98E-07 | 0.067481 | 0.14538  | 0.312284 | 5.06E-12 |
| 4.03E-09 | 0.003905 | 0.93292  | 0.161622 | 0.00045  | 0.000459 | 0.9921   | 0.227417 | 6.81E-07 |
| 6.34E-17 | 0.124298 | 0.00716  | 0.024031 | 0.60446  | -0.08765 | 0.05839  | 0.245832 | 7.41E-08 |
| 1.78E-32 | 0.405466 | 6.60E-20 | 0.450657 | 9.73E-25 | 0.325695 | 5.31E-13 | 0.557921 | 1.46E-39 |
| 4.46E-20 | 0.074003 | 0.11024  | 0.24761  | 5.92E-08 | 0.040776 | 0.37931  | 0.337874 | 6.20E-14 |
| 6.30E-16 | 0.295243 | 7.57E-11 | 0.242534 | 1.12E-07 | 0.179822 | 9.33E-05 | 0.330599 | 2.26E-13 |
| 6.60E-69 | 0.457508 | 1.55E-25 | 0.395111 | 6.72E-19 | 0.289893 | 1.71E-10 | 0.618438 | 1.27E-50 |
| 2.77E-35 | 0.579213 | 3.43E-43 | 0.506005 | 9.91E-32 | 0.405323 | 6.82E-20 | 0.601337 | 2.95E-47 |
| 5.02E-19 | 0.228927 | 5.72E-07 | 0.379823 | 1.79E-17 | 0.222492 | 1.20E-06 | 0.398685 | 3.05E-19 |
| 0.00053  | 0.048512 | 0.29549  | 0.266811 | 4.72E-09 | 0.134443 | 0.00361  | 0.212947 | 3.44E-06 |
| 0.0018   | 0.243568 | 9.83E-08 | 0.127823 | 0.00567  | 0.187659 | 4.49E-05 | 0.197675 | 1.69E-05 |
| 0.13985  | 0.168139 | 0.00026  | 0.16875  | 0.00025  | 0.154123 | 0.00083  | 0.108536 | 0.01897  |
| 0.00596  | 0.1989   | 1.49E-05 | 0.087849 | 0.05783  | 0.075293 | 0.10415  | 0.165264 | 0.00034  |
| 0.6192   | 0.129514 | 0.00506  | 0.098332 | 0.03363  | 0.083458 | 0.07157  | 0.090547 | 0.05052  |
| 0.35956  | 0.122917 | 0.00783  | -0.02382 | 0.60757  | 0.110425 | 0.01698  | 0.102521 | 0.02673  |
| 0.00428  | 0.220566 | 1.49E-06 | 0.092404 | 0.04596  | 0.070079 | 0.13048  | 0.172778 | 0.00018  |
| 0.0367   | 0.235311 | 2.69E-07 | 0.167377 | 0.00028  | 0.249786 | 4.49E-08 | 0.137678 | 0.00287  |
| 0.08392  | 0.227923 | 6.43E-07 | 0.214249 | 2.98E-06 | 0.202704 | 1.01E-05 | 0.174433 | 0.00015  |
| 0.00389  | 0.182235 | 7.47E-05 | 0.102018 | 0.02749  | 0.104523 | 0.02389  | 0.168308 | 0.00026  |
| 0.01438  | 0.172938 | 0.00017  | 0.099863 | 0.03095  | 0.203074 | 9.74E-06 | 0.149365 | 0.00121  |
| 0.02791  | -0.02612 | 0.57335  | -0.02505 | 0.58928  | 0.052278 | 0.25954  | 0.021783 | 0.6387   |
| 0.00398  | 0.191117 | 3.22E-05 | 0.111163 | 0.01625  | 0.095841 | 0.03842  | 0.156083 | 0.00071  |

|          |          |          |          |          |          |          |          |          |
|----------|----------|----------|----------|----------|----------|----------|----------|----------|
| 0.02814  | 0.234045 | 3.13E-07 | 0.135807 | 0.00328  | 0.168936 | 0.00025  | 0.156508 | 0.00069  |
| 0.5756   | 0.074171 | 0.10943  | 0.023485 | 0.6127   | 0.100835 | 0.02935  | 0.058734 | 0.20517  |
| 0.03386  | 0.207501 | 6.14E-06 | 0.111894 | 0.01556  | 0.21659  | 2.31E-06 | 0.158257 | 0.0006   |
| 0.06862  | 0.188167 | 4.28E-05 | 0.092721 | 0.04521  | 0.1234   | 0.00759  | 0.132886 | 0.00402  |
| 1.47E-13 | 0.368375 | 1.86E-16 | 0.25915  | 1.33E-08 | 0.225105 | 8.89E-07 | 0.339853 | 4.34E-14 |
| 0.00088  | 0.270483 | 2.84E-09 | 0.134977 | 0.00347  | 0.179745 | 9.39E-05 | 0.178422 | 0.00011  |
| 0.757    | 0.143272 | 0.00191  | 0.124949 | 0.00686  | 0.16561  | 0.00033  | 0.130068 | 0.00487  |
| 0.2695   | 0.126772 | 0.00608  | 0.015271 | 0.74205  | 0.077666 | 0.09366  | 0.06082  | 0.18951  |
| 0.41509  | 0.075477 | 0.10331  | 0.010381 | 0.82297  | 0.205052 | 7.94E-06 | 0.057677 | 0.21346  |
| 0.64073  | 0.148393 | 0.0013   | 0.091068 | 0.0492   | 0.184929 | 5.81E-05 | 0.102686 | 0.02649  |
| 0.90135  | 0.225827 | 8.18E-07 | 0.139658 | 0.00249  | 0.297112 | 5.68E-11 | 0.069803 | 0.132    |
| 0.00056  | 0.232645 | 3.70E-07 | 0.10932  | 0.01812  | 0.133758 | 0.00378  | 0.151304 | 0.00104  |
| 0.47432  | 0.166431 | 0.0003   | 0.129357 | 0.00511  | 0.243043 | 1.05E-07 | 0.069898 | 0.13148  |
| 0.00499  | 0.273888 | 1.76E-09 | 0.153856 | 0.00085  | 0.258316 | 1.48E-08 | 0.210969 | 4.25E-06 |
| 0.09608  | 0.176264 | 0.00013  | 0.122342 | 0.00813  | 0.169348 | 0.00024  | 0.13102  | 0.00457  |
| 0.00239  | 0.337163 | 7.05E-14 | 0.270094 | 3.00E-09 | 0.379368 | 1.96E-17 | 0.289402 | 1.84E-10 |
| 0.06514  | 0.210533 | 4.45E-06 | 0.135435 | 0.00336  | 0.238404 | 1.85E-07 | 0.17232  | 0.00018  |
| 0.28036  | 0.030397 | 0.51229  | -0.01697 | 0.71457  | 0.037848 | 0.4145   | 0.016109 | 0.72843  |
| 0.50055  | 0.111227 | 0.01619  | 0.112029 | 0.01543  | 0.116914 | 0.01146  | 0.053975 | 0.24437  |
| 0.0302   | 0.219876 | 1.61E-06 | 0.037507 | 0.41873  | 0.132516 | 0.00412  | 0.101574 | 0.02818  |
| 0.17896  | 0.024012 | 0.60474  | 0.024982 | 0.59022  | 0.060303 | 0.19331  | 0.006161 | 0.89436  |
| 0.0022   | 0.247781 | 5.79E-08 | 0.116144 | 0.01202  | 0.166402 | 0.0003   | 0.165084 | 0.00034  |
| 0.02193  | 0.246403 | 6.89E-08 | 0.214908 | 2.78E-06 | 0.278708 | 8.86E-10 | 0.12377  | 0.00741  |
| 0.046    | 0.081406 | 0.07885  | 0.040128 | 0.38693  | 0.049622 | 0.28456  | 0.122984 | 0.0078   |
| 6.43E-06 | 0.2617   | 9.44E-09 | 0.090163 | 0.05151  | 0.147009 | 0.00144  | 0.271148 | 2.59E-09 |
| 0.00025  | 0.214976 | 2.76E-06 | 0.067431 | 0.14568  | 0.072654 | 0.1169   | 0.167502 | 0.00028  |
| 0.00282  | 0.235743 | 2.56E-07 | 0.151734 | 0.001    | 0.199595 | 1.39E-05 | 0.170569 | 0.00021  |
| 0.12706  | 0.252346 | 3.23E-08 | 0.155049 | 0.00077  | 0.258971 | 1.36E-08 | 0.233061 | 3.52E-07 |
| 0.00477  | 0.231354 | 4.31E-07 | 0.175598 | 0.00014  | 0.203717 | 9.11E-06 | 0.194477 | 2.32E-05 |
| 0.00951  | 0.208224 | 5.69E-06 | 0.134624 | 0.00356  | 0.186885 | 4.83E-05 | 0.17019  | 0.00022  |
| 0.27843  | 0.060435 | 0.19233  | 0.018491 | 0.69021  | 0.118777 | 0.0102   | 0.079258 | 0.0871   |
| 0.00765  | 0.177518 | 0.00011  | 0.104539 | 0.02387  | 0.148107 | 0.00133  | 0.16184  | 0.00045  |
| 0.18773  | 0.175243 | 0.00014  | 0.051803 | 0.2639   | 0.186378 | 5.07E-05 | 0.12658  | 0.00616  |
| 0.49757  | 0.144968 | 0.00168  | 0.03956  | 0.39369  | 0.083283 | 0.07217  | 0.106687 | 0.02111  |
| 0.02146  | 0.167591 | 0.00028  | 0.074934 | 0.10582  | 0.129876 | 0.00494  | 0.111683 | 0.01575  |
| 0.45689  | 0.212717 | 3.52E-06 | 0.124583 | 0.00703  | 0.22343  | 1.08E-06 | 0.14308  | 0.00194  |
| 0.61833  | 0.139217 | 0.00257  | 0.076433 | 0.099    | 0.239215 | 1.68E-07 | 0.117098 | 0.01133  |
| 0.21065  | 0.067902 | 0.14288  | 0.073959 | 0.11045  | 0.216899 | 2.23E-06 | 0.053688 | 0.24689  |
| 0.1113   | 0.239994 | 1.53E-07 | 0.099058 | 0.03234  | 0.15748  | 0.00064  | 0.162049 | 0.00044  |
| 0.01798  | 0.222352 | 1.22E-06 | 0.155179 | 0.00077  | 0.24823  | 5.47E-08 | 0.196962 | 1.81E-05 |
| 0.08558  | 0.154907 | 0.00078  | 0.095006 | 0.04015  | 0.149777 | 0.00117  | 0.112427 | 0.01507  |
| 0.00045  | 0.394997 | 6.89E-19 | 0.277706 | 1.02E-09 | 0.326936 | 4.28E-13 | 0.34095  | 3.55E-14 |
| 0.0859   | 0.076869 | 0.09708  | 0.047283 | 0.3079   | 0.054574 | 0.23917  | 0.060453 | 0.1922   |
| 0.20569  | 0.145543 | 0.00161  | 0.016662 | 0.7195   | 0.132551 | 0.00411  | 0.119941 | 0.00948  |
| 0.77864  | 0.127307 | 0.00587  | 0.035253 | 0.44724  | 0.131823 | 0.00432  | 0.065405 | 0.1582   |

|          |          |          |           |          |          |          |          |          |
|----------|----------|----------|-----------|----------|----------|----------|----------|----------|
| 4.15E-05 | 0.323196 | 8.15E-13 | 0.227153  | 7.03E-07 | 0.270354 | 2.89E-09 | 0.245476 | 7.74E-08 |
| 0.02451  | 0.258934 | 1.36E-08 | 0.163425  | 0.00039  | 0.260064 | 1.17E-08 | 0.180573 | 8.71E-05 |
| 0.12614  | 0.18712  | 4.72E-05 | 0.04754   | 0.30528  | 0.072301 | 0.11869  | 0.098778 | 0.03283  |
| 0.38903  | 0.022482 | 0.62795  | -1.19E-05 | 0.9998   | 0.092658 | 0.04536  | 0.012543 | 0.7869   |
| 0.42212  | -0.12336 | 0.00761  | -0.08478  | 0.06717  | -0.0588  | 0.20468  | 0.006188 | 0.89391  |
| 0.21286  | 0.204323 | 8.56E-06 | 0.077518  | 0.09429  | 0.175771 | 0.00013  | 0.114792 | 0.01306  |
| 0.00409  | 0.279979 | 7.38E-10 | 0.155523  | 0.00075  | 0.215812 | 2.52E-06 | 0.198338 | 1.58E-05 |
| 0.31021  | 0.179031 | 0.0001   | 0.127254  | 0.00589  | 0.181387 | 8.08E-05 | 0.101964 | 0.02757  |
| 0.00519  | -0.057   | 0.21886  | -0.04339  | 0.34948  | -0.01088 | 0.81458  | -0.02838 | 0.5407   |
| 0.35263  | 0.143775 | 0.00184  | 0.098375  | 0.03356  | 0.384274 | 7.00E-18 | 0.056099 | 0.22628  |
| 0.03748  | 0.304392 | 1.81E-11 | 0.204643  | 8.28E-06 | 0.276177 | 1.27E-09 | 0.17561  | 0.00014  |
| 0.06394  | 0.091157 | 0.04898  | 0.141148  | 0.00223  | 0.222979 | 1.13E-06 | 0.070511 | 0.12812  |
| 0.00328  | 0.153935 | 0.00085  | 0.074445  | 0.10812  | 0.120326 | 0.00925  | 0.131128 | 0.00453  |
| 0.13053  | 0.049544 | 0.28532  | 0.091715  | 0.04761  | 0.051562 | 0.26613  | 0.130668 | 0.00468  |
| 0.02037  | 0.237101 | 2.17E-07 | 0.157523  | 0.00063  | 0.217851 | 2.01E-06 | 0.17255  | 0.00018  |
| 0.55245  | 0.086487 | 0.06183  | 0.06774   | 0.14384  | 0.122136 | 0.00824  | 0.04642  | 0.31683  |
| 0.17574  | 0.107905 | 0.01968  | 0.061997  | 0.18107  | 0.071134 | 0.12478  | 0.078527 | 0.09007  |
| 0.00508  | 0.212664 | 3.54E-06 | 0.117607  | 0.01097  | 0.130876 | 0.00461  | 0.176046 | 0.00013  |
| 0.00034  | 0.247448 | 6.04E-08 | 0.146113  | 0.00155  | 0.198279 | 1.59E-05 | 0.21493  | 2.77E-06 |
| 0.0011   | 0.256116 | 1.98E-08 | 0.166875  | 0.00029  | 0.180739 | 8.57E-05 | 0.193362 | 2.59E-05 |
| 0.40316  | 0.036156 | 0.43569  | 0.01889   | 0.68389  | 0.22662  | 7.47E-07 | 0.056457 | 0.22332  |
| 0.12563  | 0.146103 | 0.00155  | 0.094046  | 0.04221  | 0.231529 | 4.22E-07 | 0.106126 | 0.02181  |
| 0.05764  | 0.237947 | 1.96E-07 | 0.172574  | 0.00018  | 0.221454 | 1.35E-06 | 0.179776 | 9.37E-05 |
| 0.60295  | 0.152685 | 0.00093  | 0.133064  | 0.00397  | 0.187284 | 4.65E-05 | 0.112586 | 0.01492  |
| 8.25E-05 | 0.131707 | 0.00436  | 0.068663  | 0.13845  | 0.08734  | 0.0593   | 0.194613 | 2.29E-05 |
| 0.06371  | 0.177134 | 0.00012  | 0.11418   | 0.01355  | 0.168392 | 0.00026  | 0.119814 | 0.00955  |
| 0.18049  | 0.119928 | 0.00948  | 0.070424  | 0.12859  | 0.074921 | 0.10588  | 0.094071 | 0.04216  |
| 0.07225  | 0.171203 | 0.0002   | 0.123071  | 0.00775  | 0.188414 | 4.18E-05 | 0.180222 | 8.99E-05 |
| 0.30576  | 0.242822 | 1.08E-07 | 0.097313  | 0.03553  | 0.242821 | 1.08E-07 | 0.10161  | 0.02812  |
| 0.08585  | 0.189101 | 3.91E-05 | 0.148632  | 0.00128  | 0.176209 | 0.00013  | 0.162644 | 0.00042  |
| 0.98471  | 0.139773 | 0.00247  | 0.053266  | 0.25063  | 0.084338 | 0.06862  | 0.06316  | 0.17301  |
| 0.59937  | 0.013333 | 0.77383  | 0.016823  | 0.7169   | 0.243853 | 9.48E-08 | 0.031248 | 0.50054  |
| 0.44227  | 0.11452  | 0.01327  | 0.055227  | 0.23359  | 0.026238 | 0.57168  | -0.0064  | 0.89032  |
| 0.17189  | 0.204164 | 8.70E-06 | 0.158093  | 0.00061  | 0.254443 | 2.46E-08 | 0.114932 | 0.01294  |
| 0.01053  | 0.179687 | 9.44E-05 | 0.137499  | 0.00291  | 0.144176 | 0.00179  | 0.154048 | 0.00084  |
| 0.0202   | 0.174754 | 0.00015  | 0.135832  | 0.00327  | 0.203145 | 9.67E-06 | 0.141143 | 0.00223  |
| 0.49954  | 0.056318 | 0.22446  | -0.03127  | 0.50024  | 0.092026 | 0.04686  | 0.023421 | 0.61367  |
| 0.85137  | -0.04319 | 0.35167  | -0.07512  | 0.10493  | 0.036786 | 0.42773  | -0.02538 | 0.58433  |
| 0.03824  | 0.161785 | 0.00045  | 0.094241  | 0.04179  | 0.137572 | 0.00289  | 0.102659 | 0.02653  |
| 0.24878  | 0.12702  | 0.00598  | 0.036445  | 0.43202  | 0.076365 | 0.0993   | 0.114359 | 0.01341  |
| 0.05498  | 0.117227 | 0.01124  | 0.093263  | 0.04396  | 0.180121 | 9.08E-05 | 0.105003 | 0.02325  |
| 0.78511  | 0.104901 | 0.02338  | 0.060127  | 0.19461  | 0.15909  | 0.00056  | 0.041464 | 0.37131  |
| 0.65047  | 0.056881 | 0.21985  | 0.051107  | 0.27038  | 0.102825 | 0.02628  | 0.110224 | 0.01718  |
| 0.48781  | 0.027699 | 0.55045  | -0.00636  | 0.89092  | 0.046859 | 0.31227  | 0.022824 | 0.62274  |
| 0.04433  | 0.184571 | 6.01E-05 | 0.09721   | 0.03572  | 0.174387 | 0.00015  | 0.180089 | 9.10E-05 |

|         |          |          |          |          |          |          |          |          |
|---------|----------|----------|----------|----------|----------|----------|----------|----------|
| 0.15263 | 0.19088  | 3.29E-05 | 0.062435 | 0.178    | 0.179753 | 9.39E-05 | 0.173087 | 0.00017  |
| 0.31786 | 0.196048 | 1.98E-05 | 0.089558 | 0.0531   | 0.126216 | 0.00631  | 0.109092 | 0.01836  |
| 0.09732 | 0.221196 | 1.38E-06 | 0.109045 | 0.01841  | 0.232342 | 3.83E-07 | 0.146066 | 0.00155  |
| 0.01184 | 0.180124 | 9.07E-05 | 0.085224 | 0.06575  | 0.092928 | 0.04473  | 0.137614 | 0.00288  |
| 0.16093 | 0.131107 | 0.00454  | 0.046646 | 0.31447  | 0.227716 | 6.58E-07 | 0.142754 | 0.00198  |
| 0.05059 | 0.168035 | 0.00026  | 0.024047 | 0.60423  | 0.093553 | 0.04331  | 0.089509 | 0.05323  |
| 0.44901 | 0.160033 | 0.00052  | 0.139448 | 0.00253  | 0.299396 | 3.98E-11 | 0.136281 | 0.00317  |
| 0.00124 | 0.19345  | 2.56E-05 | 0.130739 | 0.00466  | 0.142429 | 0.00203  | 0.225712 | 8.29E-07 |
| 0.63071 | 0.089646 | 0.05287  | 0.014413 | 0.75607  | 0.030172 | 0.51542  | -0.01815 | 0.6956   |
| 0.00416 | 0.253506 | 2.78E-08 | 0.208299 | 5.65E-06 | 0.260062 | 1.17E-08 | 0.208169 | 5.72E-06 |
| 0.0148  | 0.18971  | 3.69E-05 | 0.101277 | 0.02864  | 0.148729 | 0.00127  | 0.191765 | 3.02E-05 |
| 0.15271 | 0.118018 | 0.0107   | 0.120859 | 0.00894  | 0.134726 | 0.00353  | 0.245056 | 8.16E-08 |
| 0.10216 | 0.087671 | 0.05834  | 0.005893 | 0.89894  | 0.110921 | 0.01648  | 0.05681  | 0.22044  |
| 0.259   | 0.171369 | 0.0002   | 0.093871 | 0.0426   | 0.158199 | 0.0006   | 0.114668 | 0.01315  |
| 0.00268 | 0.20135  | 1.16E-05 | 0.116205 | 0.01197  | 0.139329 | 0.00255  | 0.171208 | 0.0002   |
| 0.01021 | -0.06033 | 0.19314  | -0.03137 | 0.49887  | 0.088597 | 0.05572  | -0.05973 | 0.19762  |
| 0.02057 | 0.183103 | 6.89E-05 | 0.113026 | 0.01453  | 0.179606 | 9.51E-05 | 0.151985 | 0.00099  |
| 0.20474 | 0.129693 | 0.005    | 0.063762 | 0.16894  | 0.122623 | 0.00798  | 0.113049 | 0.01451  |
| 0.00919 | 0.15269  | 0.00093  | 0.090963 | 0.04947  | 0.149467 | 0.0012   | 0.157728 | 0.00062  |
| 0.52653 | 0.183299 | 6.77E-05 | 0.093548 | 0.04332  | 0.106705 | 0.02109  | 0.082739 | 0.07406  |
| 0.05354 | 0.152352 | 0.00096  | 0.088336 | 0.05645  | 0.20638  | 6.91E-06 | 0.132053 | 0.00426  |
| 0.01488 | 0.209165 | 5.15E-06 | 0.101968 | 0.02757  | 0.130477 | 0.00474  | 0.153532 | 0.00087  |
| 0.00155 | 0.276652 | 1.19E-09 | 0.21412  | 3.03E-06 | 0.300066 | 3.59E-11 | 0.211179 | 4.16E-06 |
| 0.00454 | 0.238429 | 1.85E-07 | 0.205105 | 7.89E-06 | 0.233644 | 3.28E-07 | 0.222162 | 1.24E-06 |
| 0.00342 | 0.2319   | 4.04E-07 | 0.161089 | 0.00047  | 0.275346 | 1.43E-09 | 0.197149 | 1.78E-05 |
| 0.04865 | 0.179665 | 9.46E-05 | 0.127889 | 0.00565  | 0.26578  | 5.43E-09 | 0.131673 | 0.00437  |
| 0.56391 | 0.104058 | 0.02453  | 0.072559 | 0.11738  | 0.117598 | 0.01098  | 0.098067 | 0.03412  |
| 0.11552 | 0.257759 | 1.59E-08 | 0.148323 | 0.00131  | 0.229234 | 5.52E-07 | 0.152161 | 0.00097  |
| 0.05474 | 0.183064 | 6.92E-05 | 0.069311 | 0.13476  | 0.092245 | 0.04633  | 0.147584 | 0.00138  |
| 0.04431 | 0.090189 | 0.05145  | 0.042655 | 0.35772  | 0.065362 | 0.15848  | 0.149019 | 0.00124  |
| 0.45131 | 0.132813 | 0.00404  | 0.040346 | 0.38435  | 0.094346 | 0.04156  | 0.036739 | 0.42832  |
| 0.14922 | 0.191361 | 3.14E-05 | 0.102196 | 0.02722  | 0.18309  | 6.90E-05 | 0.129179 | 0.00518  |
| 0.82608 | 0.182437 | 7.33E-05 | 0.13036  | 0.00478  | 0.222001 | 1.26E-06 | 0.129152 | 0.00519  |
| 0.00319 | 0.258953 | 1.36E-08 | 0.153894 | 0.00085  | 0.225048 | 8.95E-07 | 0.190023 | 3.58E-05 |
| 0.41038 | 0.179586 | 9.53E-05 | 0.064081 | 0.16682  | 0.160733 | 0.00049  | 0.122564 | 0.00801  |
| 0.00051 | 0.1097   | 0.01772  | 0.053422 | 0.24924  | 0.048449 | 0.29612  | 0.117927 | 0.01076  |
| 0.00513 | 0.215609 | 2.57E-06 | 0.118713 | 0.01024  | 0.16888  | 0.00025  | 0.187572 | 4.53E-05 |
| 0.51512 | 0.135401 | 0.00337  | 0.077443 | 0.09461  | 0.149626 | 0.00118  | 0.123521 | 0.00753  |
| 0.57283 | 0.033596 | 0.4689   | 0.026068 | 0.57418  | 0.189247 | 3.86E-05 | 0.044488 | 0.33741  |
| 0.81069 | 0.1106   | 0.0168   | 0.049785 | 0.28298  | 0.047939 | 0.30124  | 0.096442 | 0.03721  |
| 0.66132 | 0.183175 | 6.85E-05 | 0.10623  | 0.02168  | 0.238334 | 1.87E-07 | 0.08071  | 0.08145  |
| 0.40256 | 0.115803 | 0.01227  | 0.074642 | 0.10719  | 0.164053 | 0.00037  | 0.097066 | 0.036    |
| 0.83695 | 0.117147 | 0.01129  | 0.028109 | 0.54456  | 0.096244 | 0.03761  | 0.054961 | 0.23585  |
| 0.00073 | 0.260002 | 1.18E-08 | 0.183893 | 6.40E-05 | 0.248087 | 5.57E-08 | 0.193767 | 2.49E-05 |
| 0.03899 | 0.11297  | 0.01458  | 0.086712 | 0.06115  | 0.245405 | 7.81E-08 | 0.132746 | 0.00406  |



|          |          |          |          |          |          |          |          |          |
|----------|----------|----------|----------|----------|----------|----------|----------|----------|
| 0.54544  | 0.12172  | 0.00846  | 0.015706 | 0.73497  | 0.096165 | 0.03777  | 0.079066 | 0.08787  |
| 0.05599  | 0.049866 | 0.2822   | 0.016185 | 0.7272   | 0.142807 | 0.00198  | 0.03257  | 0.48259  |
| 0.75691  | 0.151908 | 0.00099  | 0.131787 | 0.00433  | 0.317756 | 2.04E-12 | 0.092936 | 0.04471  |
| 0.05295  | 0.136559 | 0.00311  | 0.099585 | 0.03143  | 0.220846 | 1.44E-06 | 0.139107 | 0.00259  |
| 0.35805  | 0.143668 | 0.00185  | 0.101302 | 0.0286   | 0.199405 | 1.42E-05 | 0.106427 | 0.02143  |
| 0.01397  | 0.132745 | 0.00406  | 0.052677 | 0.25592  | 0.149087 | 0.00123  | 0.138415 | 0.00272  |
| 0.00137  | 0.223071 | 1.12E-06 | 0.100989 | 0.0291   | 0.168664 | 0.00025  | 0.182575 | 7.24E-05 |
| 0.55903  | 0.108885 | 0.01859  | 0.05743  | 0.21543  | 0.148699 | 0.00127  | 0.067902 | 0.14289  |
| 0.0124   | 0.209033 | 5.22E-06 | 0.143543 | 0.00187  | 0.166851 | 0.00029  | 0.164195 | 0.00037  |
| 0.21355  | 0.155409 | 0.00075  | 0.077865 | 0.09282  | 0.182752 | 7.12E-05 | 0.120496 | 0.00915  |
| 0.14722  | 0.154656 | 0.0008   | 0.130953 | 0.00459  | 0.140754 | 0.0023   | 0.106335 | 0.02155  |
| 0.00456  | 0.193454 | 2.56E-05 | 0.131172 | 0.00452  | 0.199346 | 1.42E-05 | 0.164    | 0.00037  |
| 0.07543  | 0.217802 | 2.02E-06 | 0.11556  | 0.01246  | 0.106252 | 0.02165  | 0.122242 | 0.00818  |
| 0.01036  | 0.189101 | 3.91E-05 | 0.128156 | 0.00555  | 0.126842 | 0.00605  | 0.154375 | 0.00082  |
| 0.49656  | -0.03121 | 0.501    | -0.01363 | 0.769    | 0.230362 | 4.84E-07 | -0.00779 | 0.86666  |
| 0.00457  | 0.221133 | 1.39E-06 | 0.167088 | 0.00029  | 0.263721 | 7.19E-09 | 0.18454  | 6.03E-05 |
| 0.43634  | 0.10325  | 0.02567  | 0.057082 | 0.21823  | 0.10834  | 0.01919  | 0.043303 | 0.35045  |
| 0.06257  | 0.172881 | 0.00017  | 0.0778   | 0.09309  | 0.142699 | 0.00199  | 0.153348 | 0.00089  |
| 0.00142  | 0.2072   | 6.34E-06 | 0.143895 | 0.00182  | 0.125112 | 0.00679  | 0.169258 | 0.00024  |
| 0.00274  | 0.194805 | 2.24E-05 | 0.116048 | 0.01209  | 0.151613 | 0.00101  | 0.16396  | 0.00037  |
| 0.17673  | 0.113808 | 0.01386  | -0.0157  | 0.73509  | 0.074821 | 0.10635  | 0.072587 | 0.11724  |
| 0.00191  | 0.300355 | 3.43E-11 | 0.183816 | 6.45E-05 | 0.249388 | 4.72E-08 | 0.215765 | 2.53E-06 |
| 0.03438  | 0.120191 | 0.00933  | 0.081592 | 0.07817  | 0.169587 | 0.00023  | 0.146182 | 0.00154  |
| 0.00257  | 0.240084 | 1.51E-07 | 0.127844 | 0.00566  | 0.252913 | 3.00E-08 | 0.225331 | 8.66E-07 |
| 0.06571  | 0.153309 | 0.00089  | 0.028626 | 0.53717  | 0.100926 | 0.0292   | 0.098021 | 0.0342   |
| 0.05304  | 0.172202 | 0.00018  | 0.143196 | 0.00192  | 0.227262 | 6.94E-07 | 0.149972 | 0.00115  |
| 0.00341  | 0.248099 | 5.56E-08 | 0.142949 | 0.00196  | 0.227876 | 6.46E-07 | 0.189345 | 3.82E-05 |
| 0.95734  | 0.151719 | 0.00101  | 0.04157  | 0.37009  | 0.231996 | 3.99E-07 | 0.120069 | 0.0094   |
| 0.00366  | 0.304048 | 1.91E-11 | 0.2136   | 3.20E-06 | 0.282036 | 5.47E-10 | 0.193112 | 2.65E-05 |
| 0.08866  | 0.245871 | 7.37E-08 | 0.163713 | 0.00038  | 0.281302 | 6.09E-10 | 0.186141 | 5.18E-05 |
| 0.06851  | 0.185706 | 5.40E-05 | 0.092527 | 0.04567  | 0.177614 | 0.00011  | 0.135042 | 0.00346  |
| 0.04344  | 0.138122 | 0.00278  | 0.059855 | 0.19664  | 0.131243 | 0.0045   | 0.137629 | 0.00288  |
| 0.42643  | 0.138213 | 0.00276  | 0.075992 | 0.10097  | 0.172794 | 0.00018  | 0.109702 | 0.01772  |
| 0.01096  | 0.220749 | 1.46E-06 | 0.136772 | 0.00306  | 0.194465 | 2.32E-05 | 0.17232  | 0.00018  |
| 0.3021   | 0.176258 | 0.00013  | 0.080142 | 0.08363  | 0.155931 | 0.00072  | 0.113203 | 0.01438  |
| 0.02712  | 0.213529 | 3.23E-06 | 0.145571 | 0.00161  | 0.237177 | 2.15E-07 | 0.171447 | 0.0002   |
| 0.12815  | 0.161514 | 0.00046  | 0.084392 | 0.06844  | 0.154527 | 0.00081  | 0.107317 | 0.02036  |
| 0.00941  | 0.242087 | 1.18E-07 | 0.170914 | 0.00021  | 0.244101 | 9.19E-08 | 0.21775  | 2.03E-06 |
| 0.15115  | 0.180272 | 8.95E-05 | 0.077169 | 0.09578  | 0.08333  | 0.07201  | 0.110121 | 0.01728  |
| 8.07E-05 | 0.288194 | 2.20E-10 | 0.188923 | 3.98E-05 | 0.208437 | 5.57E-06 | 0.204558 | 8.35E-06 |
| 0.08998  | 0.087658 | 0.05837  | 0.035948 | 0.43833  | 0.131086 | 0.00455  | 0.092235 | 0.04636  |
| 0.05065  | 0.157569 | 0.00063  | 0.096797 | 0.03652  | 0.131324 | 0.00447  | 0.128825 | 0.0053   |
| 0.16179  | 0.16213  | 0.00044  | 0.112039 | 0.01542  | 0.162825 | 0.00041  | 0.157872 | 0.00062  |
| 0.81799  | -0.03588 | 0.43916  | -0.0343  | 0.45964  | -0.03428 | 0.45994  | -0.0193  | 0.67734  |
| 0.80217  | 0.089112 | 0.0543   | 0.05247  | 0.25779  | 0.138201 | 0.00276  | 0.054562 | 0.23927  |

|          |          |          |          |          |          |          |          |          |
|----------|----------|----------|----------|----------|----------|----------|----------|----------|
| 0.0255   | 0.219837 | 1.61E-06 | 0.131379 | 0.00446  | 0.13456  | 0.00358  | 0.154348 | 0.00082  |
| 0.02798  | 0.210111 | 4.66E-06 | 0.16203  | 0.00044  | 0.224204 | 9.85E-07 | 0.169283 | 0.00024  |
| 0.10332  | 0.136882 | 0.00304  | 0.080036 | 0.08404  | 0.087365 | 0.05922  | 0.10052  | 0.02986  |
| 0.50561  | 0.142691 | 0.00199  | 0.083263 | 0.07224  | 0.101825 | 0.02779  | 0.100982 | 0.02911  |
| 0.08183  | 0.179431 | 9.67E-05 | 0.141074 | 0.00224  | 0.278245 | 9.47E-10 | 0.200199 | 1.31E-05 |
| 0.05162  | 0.144443 | 0.00175  | 0.090675 | 0.0502   | 0.118361 | 0.01047  | 0.14266  | 0.002    |
| 0.33142  | 0.187154 | 4.71E-05 | 0.107499 | 0.02015  | 0.169442 | 0.00023  | 0.095662 | 0.03878  |
| 0.00713  | 0.197596 | 1.70E-05 | 0.107848 | 0.01974  | 0.132913 | 0.00401  | 0.143407 | 0.00189  |
| 1.08E-05 | 0.221684 | 1.31E-06 | 0.151794 | 0.001    | 0.174691 | 0.00015  | 0.297282 | 5.53E-11 |
| 0.00097  | 0.179273 | 9.81E-05 | 0.118884 | 0.01013  | 0.122807 | 0.00789  | 0.178393 | 0.00011  |
| 0.00225  | 0.191743 | 3.03E-05 | 0.107309 | 0.02037  | 0.119892 | 0.00951  | 0.173323 | 0.00017  |
| 0.5065   | 0.108782 | 0.0187   | 0.049621 | 0.28458  | 0.112505 | 0.015    | 0.063472 | 0.17089  |
| 0.00889  | 0.22003  | 1.58E-06 | 0.115748 | 0.01231  | 0.154338 | 0.00082  | 0.144869 | 0.0017   |
| 0.00341  | 0.204586 | 8.33E-06 | 0.127332 | 0.00586  | 0.172049 | 0.00019  | 0.174553 | 0.00015  |
| 0.00337  | 0.208421 | 5.57E-06 | 0.129155 | 0.00519  | 0.127973 | 0.00561  | 0.172486 | 0.00018  |
| 0.42891  | 0.11478  | 0.01307  | 0.074534 | 0.1077   | 0.110716 | 0.01669  | 0.115051 | 0.01285  |
| 0.01295  | 0.174819 | 0.00015  | 0.115195 | 0.01274  | 0.169795 | 0.00023  | 0.133646 | 0.00381  |
| 0.51012  | 0.05007  | 0.28023  | -0.05583 | 0.22855  | 0.125933 | 0.00643  | 0.026364 | 0.56983  |
| 0.00959  | 0.209181 | 5.14E-06 | 0.149403 | 0.0012   | 0.221818 | 1.29E-06 | 0.155633 | 0.00074  |
| 0.00999  | 0.202346 | 1.05E-05 | 0.144186 | 0.00178  | 0.161129 | 0.00047  | 0.183085 | 6.90E-05 |
| 0.08961  | 0.149026 | 0.00124  | 0.108665 | 0.01883  | 0.228314 | 6.14E-07 | 0.107528 | 0.02011  |
| 0.90753  | 0.097932 | 0.03437  | 0.055984 | 0.22723  | 0.168493 | 0.00025  | 0.063509 | 0.17064  |
| 0.68514  | 0.059643 | 0.19824  | 0.005067 | 0.91304  | 0.16645  | 0.0003   | 0.01733  | 0.70876  |
| 0.36046  | 0.135948 | 0.00324  | 0.04823  | 0.2983   | 0.139839 | 0.00246  | 0.118411 | 0.01044  |
| 0.27928  | 0.177083 | 0.00012  | 0.073313 | 0.1136   | 0.259473 | 1.27E-08 | 0.142116 | 0.00208  |
| 0.07559  | 0.1552   | 0.00076  | 0.088778 | 0.05522  | 0.126123 | 0.00635  | 0.113032 | 0.01453  |
| 0.01484  | 0.235292 | 2.70E-07 | 0.144008 | 0.00181  | 0.207895 | 5.89E-06 | 0.167512 | 0.00028  |
| 0.76818  | 0.140453 | 0.00235  | 0.075795 | 0.10186  | 0.163602 | 0.00039  | 0.027918 | 0.5473   |
| 0.09942  | 0.149807 | 0.00117  | 0.079807 | 0.08493  | 0.124181 | 0.00721  | 0.116975 | 0.01141  |
| 0.03589  | 0.139473 | 0.00252  | 0.111856 | 0.01559  | 0.158721 | 0.00058  | 0.166368 | 0.00031  |
| 0.23835  | 0.091853 | 0.04727  | 0.058188 | 0.20942  | 0.052522 | 0.25732  | 0.092035 | 0.04684  |
| 0.03737  | 0.214593 | 2.87E-06 | 0.145458 | 0.00162  | 0.219015 | 1.77E-06 | 0.15597  | 0.00072  |
| 0.0334   | 0.214903 | 2.78E-06 | 0.141776 | 0.00213  | 0.142472 | 0.00203  | 0.131134 | 0.00453  |
| 0.00124  | 0.236636 | 2.30E-07 | 0.115026 | 0.01287  | 0.253401 | 2.82E-08 | 0.232905 | 3.58E-07 |
| 0.75111  | 0.117041 | 0.01137  | 0.076756 | 0.09758  | 0.197757 | 1.67E-05 | 0.113208 | 0.01437  |
| 0.01658  | 0.190115 | 3.55E-05 | 0.147517 | 0.00139  | 0.135385 | 0.00337  | 0.154968 | 0.00078  |
| 0.17031  | 0.097052 | 0.03603  | 0.025116 | 0.58823  | 0.129944 | 0.00492  | 0.011861 | 0.79822  |
| 0.00319  | 0.21305  | 3.40E-06 | 0.064811 | 0.16202  | 0.19805  | 1.62E-05 | 0.161403 | 0.00046  |
| 0.75079  | 0.123948 | 0.00732  | 0.049136 | 0.28931  | 0.193304 | 2.60E-05 | 0.050004 | 0.28087  |
| 0.00353  | 0.21011  | 4.66E-06 | 0.118874 | 0.01014  | 0.152704 | 0.00093  | 0.14688  | 0.00146  |
| 0.65474  | 0.118709 | 0.01024  | 0.06886  | 0.13732  | 0.216304 | 2.38E-06 | 0.080335 | 0.08288  |
| 0.00011  | 0.159479 | 0.00054  | 0.184066 | 6.30E-05 | 0.205543 | 7.54E-06 | 0.2102   | 4.61E-06 |
| 0.00503  | 0.224533 | 9.49E-07 | 0.145435 | 0.00163  | 0.234143 | 3.09E-07 | 0.189944 | 3.61E-05 |
| 0.68237  | -0.01858 | 0.68875  | -0.0987  | 0.03297  | 0.006649 | 0.88605  | -0.01185 | 0.79849  |
| 0.92313  | 0.076306 | 0.09956  | 0.093523 | 0.04338  | 0.119614 | 0.00967  | 0.074136 | 0.1096   |

|          |          |          |          |          |          |          |          |          |
|----------|----------|----------|----------|----------|----------|----------|----------|----------|
| 0.50129  | 0.162373 | 0.00043  | 0.091495 | 0.04815  | 0.201905 | 1.10E-05 | 0.13021  | 0.00483  |
| 0.00126  | 0.210776 | 4.34E-06 | 0.165071 | 0.00034  | 0.170153 | 0.00022  | 0.206115 | 7.10E-06 |
| 0.21746  | 0.141712 | 0.00214  | 0.0901   | 0.05168  | 0.142874 | 0.00197  | 0.142255 | 0.00206  |
| 0.04559  | 0.185989 | 5.26E-05 | 0.139562 | 0.00251  | 0.150379 | 0.00112  | 0.185932 | 5.29E-05 |
| 0.72269  | 0.10115  | 0.02884  | 0.056565 | 0.22243  | 0.102238 | 0.02716  | 0.088067 | 0.0572   |
| 0.09283  | 0.170217 | 0.00022  | 0.063956 | 0.16764  | 0.213935 | 3.09E-06 | 0.181657 | 7.88E-05 |
| 7.95E-05 | 0.205243 | 7.78E-06 | 0.208227 | 5.69E-06 | 0.180742 | 8.57E-05 | 0.242836 | 1.08E-07 |
| 0.00558  | 0.22308  | 1.12E-06 | 0.120107 | 0.00938  | 0.192887 | 2.71E-05 | 0.178798 | 0.0001   |
| 0.23595  | 0.112466 | 0.01503  | 0.066532 | 0.15115  | 0.12426  | 0.00718  | 0.108121 | 0.01943  |
| 0.36301  | 0.139878 | 0.00245  | 0.13833  | 0.00274  | 0.197273 | 1.76E-05 | 0.112312 | 0.01517  |
| 0.02566  | 0.175493 | 0.00014  | 0.089732 | 0.05264  | 0.16441  | 0.00036  | 0.127425 | 0.00582  |
| 0.07173  | -0.00369 | 0.93659  | -0.04497 | 0.33224  | 0.186039 | 5.23E-05 | -0.0151  | 0.74486  |
| 0.04626  | 0.135825 | 0.00327  | 0.065923 | 0.15493  | 0.159587 | 0.00054  | 0.207619 | 6.07E-06 |
| 0.74831  | 0.111839 | 0.01561  | 0.100006 | 0.03071  | 0.155045 | 0.00077  | 0.06911  | 0.13589  |
| 0.27586  | 0.02777  | 0.54942  | -0.0238  | 0.60789  | 0.087063 | 0.06011  | -0.01794 | 0.69901  |
| 0.49656  | -0.03121 | 0.501    | -0.01363 | 0.769    | 0.230362 | 4.84E-07 | -0.00779 | 0.86666  |
| 0.03008  | 0.213261 | 3.32E-06 | 0.132284 | 0.00419  | 0.15138  | 0.00103  | 0.147925 | 0.00135  |
| 0.95521  | 0.150625 | 0.00109  | 0.120589 | 0.00909  | 0.164605 | 0.00035  | 0.121274 | 0.00871  |
| 3.00E-06 | 0.229451 | 5.38E-07 | 0.13133  | 0.00447  | 0.145221 | 0.00165  | 0.215285 | 2.67E-06 |
| 0.00107  | 0.236513 | 2.33E-07 | 0.186979 | 4.79E-05 | 0.210178 | 4.63E-06 | 0.182484 | 7.30E-05 |
| 0.61668  | 0.11854  | 0.01035  | 0.069414 | 0.13417  | 0.143221 | 0.00192  | 0.013068 | 0.7782   |
| 0.04517  | 0.183031 | 6.94E-05 | 0.088247 | 0.0567   | 0.119405 | 0.0098   | 0.125047 | 0.00682  |
| 0.04909  | 0.232444 | 3.79E-07 | 0.167701 | 0.00027  | 0.208148 | 5.74E-06 | 0.147322 | 0.00141  |
| 0.82123  | 0.10819  | 0.01936  | 0.138898 | 0.00263  | 0.166062 | 0.00031  | 0.033077 | 0.4758   |
| 2.84E-05 | 0.221431 | 1.35E-06 | 0.132295 | 0.00419  | 0.14294  | 0.00196  | 0.184069 | 6.30E-05 |
| 0.00041  | 0.183677 | 6.53E-05 | 0.099472 | 0.03162  | 0.076492 | 0.09874  | 0.172421 | 0.00018  |
| 0.01482  | 0.185554 | 5.48E-05 | 0.089307 | 0.05378  | 0.155136 | 0.00077  | 0.149987 | 0.00115  |
| 0.20044  | -0.08518 | 0.06588  | 0.031461 | 0.49763  | -0.01212 | 0.79392  | -0.0326  | 0.48215  |
| 0.00025  | 0.122526 | 0.00803  | 0.230276 | 4.89E-07 | 0.205648 | 7.46E-06 | 0.050986 | 0.27152  |
| 0.0014   | 0.175033 | 0.00014  | 0.250391 | 4.16E-08 | 0.263561 | 7.34E-09 | 0.064414 | 0.16462  |
| 0.54697  | 0.214008 | 3.06E-06 | 0.130386 | 0.00477  | 0.237301 | 2.12E-07 | 0.150352 | 0.00112  |
| 0.07334  | -0.14245 | 0.00203  | -0.08228 | 0.07569  | -0.05902 | 0.20298  | -0.21206 | 3.78E-06 |
| 0.00234  | -0.21988 | 1.61E-06 | -0.13519 | 0.00342  | -0.10239 | 0.02693  | -0.19795 | 1.64E-05 |
| 0.24761  | -0.05425 | 0.24198  | -0.10534 | 0.0228   | -0.06574 | 0.15607  | 0.098484 | 0.03336  |
| 0.46046  | 0.053278 | 0.25052  | 0.019128 | 0.68012  | 0.03321  | 0.47403  | -0.07856 | 0.08993  |
| 0.86361  | 0.06332  | 0.17192  | 0.134495 | 0.00359  | 0.231161 | 4.40E-07 | 0.06812  | 0.1416   |
| 0.00353  | -0.07018 | 0.1299   | 0.02976  | 0.52117  | -0.01309 | 0.77791  | -0.00013 | 0.99773  |
| 0.41189  | -0.19817 | 1.60E-05 | -0.06439 | 0.16478  | -0.15175 | 0.001    | -0.01991 | 0.66788  |
| 0.79801  | -0.05888 | 0.20402  | 0.007396 | 0.87334  | 0.015029 | 0.74599  | -0.06761 | 0.1446   |
| 0.00011  | 0.121373 | 0.00865  | 0.198368 | 1.57E-05 | 0.245291 | 7.93E-08 | 0.209193 | 5.14E-06 |
| 0.47285  | 0.03076  | 0.50727  | 0.088674 | 0.0555   | 0.053046 | 0.2526   | -0.03326 | 0.47339  |
| 7.79E-11 | 0.176606 | 0.00012  | 0.229871 | 5.12E-07 | 0.21209  | 3.77E-06 | 0.241705 | 1.24E-07 |
| 3.15E-12 | -0.07191 | 0.12071  | -0.12487 | 0.0069   | -0.08142 | 0.07879  | -0.2267  | 7.41E-07 |
| 2.75E-48 | 0.354366 | 2.90E-15 | 0.308029 | 1.01E-11 | 0.205468 | 7.60E-06 | 0.42031  | 2.05E-21 |
| 0.18975  | 0.082267 | 0.07573  | 0.143644 | 0.00186  | 0.152212 | 0.00097  | 0.066556 | 0.15099  |

|          |          |          |          |          |          |          |          |          |
|----------|----------|----------|----------|----------|----------|----------|----------|----------|
| 0.35935  | -0.01397 | 0.76338  | 0.031482 | 0.49734  | 0.071211 | 0.12436  | -0.01702 | 0.71381  |
| 0.01919  | -0.16727 | 0.00028  | 0.014519 | 0.75433  | -0.01624 | 0.7263   | -0.04285 | 0.35549  |
| 0.90593  | -0.12693 | 0.00602  | -0.16587 | 0.00032  | -0.08006 | 0.08395  | -0.07527 | 0.10428  |
| 0.01525  | -0.09643 | 0.03724  | -0.0172  | 0.71081  | -0.03438 | 0.45853  | 0.017349 | 0.70846  |
| 0.00067  | -0.32363 | 7.57E-13 | -0.15809 | 0.00061  | -0.10136 | 0.02851  | -0.284   | 4.11E-10 |
| 5.50E-10 | 0.235769 | 2.55E-07 | 0.237445 | 2.08E-07 | 0.232069 | 3.96E-07 | 0.209614 | 4.91E-06 |
| 0.37028  | 0.025805 | 0.57804  | 0.050462 | 0.27648  | 0.091535 | 0.04805  | -0.03165 | 0.49501  |
| 0.00419  | -0.03568 | 0.4418   | 0.07185  | 0.12101  | 0.106899 | 0.02086  | -0.15334 | 0.00089  |
| 0.10618  | -0.02954 | 0.5243   | 0.046568 | 0.31529  | 0.055983 | 0.22724  | -0.13325 | 0.00392  |
| 6.09E-10 | -0.02759 | 0.55199  | 0.00849  | 0.85482  | 0.069009 | 0.13647  | -0.17415 | 0.00016  |
| 0.03063  | -0.00469 | 0.91955  | 0.10355  | 0.02524  | 0.077943 | 0.09249  | 0.034377 | 0.45862  |
| 7.66E-08 | 0.06714  | 0.14743  | 0.158478 | 0.00059  | 0.12847  | 0.00543  | 0.195317 | 2.13E-05 |
| 0.11362  | -0.27962 | 7.77E-10 | -0.17735 | 0.00012  | -0.14774 | 0.00137  | -0.26128 | 9.98E-09 |
| 0.00011  | -0.01122 | 0.80895  | 0.057156 | 0.21763  | 0.002388 | 0.95895  | 0.096478 | 0.03714  |
| 0.04106  | 0.131434 | 0.00444  | 0.098543 | 0.03325  | 0.136771 | 0.00306  | -0.04734 | 0.30734  |
| 3.25E-09 | -0.20926 | 5.10E-06 | -0.10862 | 0.01888  | -0.04417 | 0.34089  | -0.26444 | 6.51E-09 |
| 0.15977  | -0.05732 | 0.21634  | 0.0448   | 0.33403  | 0.012535 | 0.78703  | -0.02469 | 0.59455  |
| 0.0153   | 0.152287 | 0.00096  | 0.154874 | 0.00078  | 0.184443 | 6.08E-05 | 0.063476 | 0.17086  |
| 0.41118  | 0.028365 | 0.54089  | -0.02172 | 0.63959  | 0.025908 | 0.57652  | -0.10544 | 0.02268  |
| 0.32192  | 0.005834 | 0.89994  | 0.050318 | 0.27786  | 0.074135 | 0.1096   | -0.10427 | 0.02424  |
| 0.12668  | 0.101024 | 0.02904  | 0.11436  | 0.0134   | 0.138367 | 0.00273  | -0.0345  | 0.45708  |
| 8.30E-08 | 0.301976 | 2.66E-11 | 0.242772 | 1.08E-07 | 0.256358 | 1.92E-08 | 0.140589 | 0.00233  |
| 0.97185  | 0.052135 | 0.26084  | 0.050369 | 0.27736  | 0.133157 | 0.00394  | 0.071132 | 0.12478  |
| 0.00376  | -0.154   | 0.00084  | -0.03963 | 0.3928   | -0.01372 | 0.76748  | -0.0372  | 0.42256  |
| 0.39815  | 0.044848 | 0.33351  | 0.103609 | 0.02515  | 0.123409 | 0.00759  | -0.03554 | 0.44351  |
| 0.82635  | -0.15469 | 0.0008   | -0.10038 | 0.03009  | -0.11148 | 0.01594  | -0.17139 | 0.0002   |
| 0.06255  | 0.198997 | 1.48E-05 | 0.220671 | 1.47E-06 | 0.270645 | 2.78E-09 | 0.124174 | 0.00722  |
| 0.071    | -0.16703 | 0.00029  | -0.09245 | 0.04586  | -0.08991 | 0.05219  | -0.14047 | 0.00235  |
| 0.62489  | -0.11097 | 0.01644  | -0.04382 | 0.34477  | -0.06525 | 0.15919  | -0.03719 | 0.42265  |
| 0.07093  | -0.16151 | 0.00046  | -0.08159 | 0.07818  | -0.05772 | 0.21309  | 0.018788 | 0.68551  |
| 0.00673  | -0.10762 | 0.02     | -0.08054 | 0.0821   | -0.07761 | 0.09388  | -0.20136 | 1.16E-05 |
| 4.50E-06 | 0.261044 | 1.03E-08 | 0.17498  | 0.00014  | 0.248067 | 5.59E-08 | 0.141081 | 0.00224  |
| 1.25E-12 | -0.16187 | 0.00044  | -0.2041  | 8.76E-06 | -0.11017 | 0.01723  | -0.18769 | 4.48E-05 |
| 0.00015  | -0.16468 | 0.00035  | -0.09397 | 0.04238  | -0.0316  | 0.49575  | -0.17515 | 0.00014  |
| 0.00309  | 0.052378 | 0.25863  | 0.086295 | 0.06242  | 0.116074 | 0.01207  | 0.107762 | 0.01984  |
| 3.84E-09 | 0.19745  | 1.72E-05 | 0.187597 | 4.51E-05 | 0.189027 | 3.94E-05 | 0.181535 | 7.97E-05 |
| 0.00301  | 0.159784 | 0.00053  | 0.175193 | 0.00014  | 0.206023 | 7.17E-06 | 0.053743 | 0.2464   |
| 0.00084  | -0.19842 | 1.56E-05 | -0.14187 | 0.00212  | -0.1663  | 0.00031  | -0.20167 | 1.12E-05 |
| 0.01027  | 0.1362   | 0.00319  | 0.192016 | 2.95E-05 | 0.233969 | 3.16E-07 | 0.084825 | 0.06703  |
| 1.15E-07 | 0.198905 | 1.49E-05 | 0.164428 | 0.00036  | 0.152283 | 0.00096  | 0.266258 | 5.09E-09 |
| 4.82E-18 | -0.00991 | 0.83092  | 0.049784 | 0.28299  | 0.027167 | 0.55813  | 0.266021 | 5.25E-09 |
| 6.15E-07 | 0.195263 | 2.14E-05 | 0.246042 | 7.21E-08 | 0.180733 | 8.58E-05 | 0.197264 | 1.76E-05 |
| 0.61895  | -0.10859 | 0.01891  | -0.00783 | 0.86593  | -0.04139 | 0.37215  | 0.008859 | 0.84857  |
| 2.80E-18 | 0.187168 | 4.70E-05 | 0.201354 | 1.16E-05 | 0.19568  | 2.06E-05 | 0.306677 | 1.26E-11 |
| 0.00072  | -0.25682 | 1.81E-08 | -0.13285 | 0.00403  | -0.22271 | 1.17E-06 | -0.14565 | 0.0016   |

|          |          |          |          |          |          |          |          |          |
|----------|----------|----------|----------|----------|----------|----------|----------|----------|
| 0.11073  | -0.04461 | 0.33604  | -0.02699 | 0.56067  | -0.04577 | 0.32363  | -0.06995 | 0.13116  |
| 0.06111  | -0.06733 | 0.14628  | 0.009006 | 0.84609  | 0.012168 | 0.79312  | -0.14668 | 0.00148  |
| 0.02341  | 0.12869  | 0.00535  | 0.135571 | 0.00333  | 0.122191 | 0.00821  | 0.167251 | 0.00028  |
| 1.61E-13 | -0.25058 | 4.06E-08 | -0.26161 | 9.55E-09 | -0.26919 | 3.40E-09 | -0.3559  | 2.16E-15 |
| 1.61E-18 | -0.20951 | 4.97E-06 | -0.10586 | 0.02214  | -0.06765 | 0.14439  | -0.32878 | 3.11E-13 |
| 0.69198  | 0.044546 | 0.33678  | 0.153862 | 0.00085  | 0.151387 | 0.00103  | 0.023997 | 0.60498  |
| 0.00366  | 0.067335 | 0.14626  | 0.122024 | 0.0083   | 0.123433 | 0.00757  | 0.038796 | 0.40289  |
| 2.08E-17 | 0.231112 | 4.43E-07 | 0.223397 | 1.08E-06 | 0.202677 | 1.01E-05 | 0.394871 | 7.09E-19 |
| 0.19598  | -0.04125 | 0.37374  | 0.040694 | 0.38026  | 0.072381 | 0.11828  | -0.05713 | 0.21785  |
| 3.45E-05 | 0.117618 | 0.01097  | 0.034391 | 0.45844  | 0.02504  | 0.58937  | 0.048595 | 0.29466  |
| 7.66E-07 | -0.18875 | 4.04E-05 | -0.16874 | 0.00025  | -0.1648  | 0.00035  | -0.29294 | 1.08E-10 |
| 0.56669  | -0.06672 | 0.15001  | 0.01931  | 0.67725  | 0.013237 | 0.77541  | -0.16136 | 0.00046  |
| 1.48E-14 | 0.111702 | 0.01574  | 0.105462 | 0.02265  | 0.037165 | 0.42298  | 0.124156 | 0.00723  |
| 0.00048  | 0.056549 | 0.22257  | 0.07023  | 0.12965  | 0.052679 | 0.2559   | -0.0264  | 0.56937  |
| 0.00038  | 0.203261 | 9.55E-06 | 0.22334  | 1.09E-06 | 0.246926 | 6.45E-08 | 0.116034 | 0.0121   |
| 6.93E-05 | 0.05324  | 0.25086  | 0.143126 | 0.00193  | 0.112257 | 0.01522  | 0.037595 | 0.41763  |
| 0.00032  | 0.104667 | 0.0237   | 0.111392 | 0.01603  | 0.082856 | 0.07364  | -0.02843 | 0.54     |
| 0.02555  | 0.052518 | 0.25736  | 0.133455 | 0.00386  | 0.1233   | 0.00764  | -0.01361 | 0.76933  |
| 0.1414   | -0.02019 | 0.66347  | -0.00223 | 0.96168  | 0.038014 | 0.41245  | -0.05441 | 0.24057  |
| 0.0019   | -0.16875 | 0.00025  | -0.08364 | 0.07096  | -0.11208 | 0.01538  | -0.21618 | 2.42E-06 |
| 0.24289  | 0.005663 | 0.90286  | 0.001442 | 0.97521  | -0.02321 | 0.61692  | 0.008782 | 0.84988  |
| 0.00074  | -0.42287 | 1.11E-21 | -0.14267 | 0.002    | -0.27072 | 2.75E-09 | -0.24321 | 1.03E-07 |
| 5.63E-10 | 0.176794 | 0.00012  | 0.20179  | 1.11E-05 | 0.208428 | 5.57E-06 | 0.265888 | 5.35E-09 |
| 0.30269  | -0.20283 | 9.98E-06 | -0.15373 | 0.00086  | -0.18247 | 7.31E-05 | -0.03694 | 0.42584  |
| 0.31445  | 0.183639 | 6.56E-05 | 0.119036 | 0.01003  | 0.196506 | 1.89E-05 | 0.080307 | 0.08299  |
| 1.40E-07 | 0.108086 | 0.01947  | 0.087544 | 0.0587   | 0.004092 | 0.92973  | 0.084899 | 0.06679  |
| 2.89E-21 | 0.165315 | 0.00033  | 0.188735 | 4.05E-05 | 0.117942 | 0.01075  | 0.31685  | 2.38E-12 |
| 0.00011  | -0.1809  | 8.45E-05 | -0.08128 | 0.07932  | -0.06327 | 0.17224  | -0.30702 | 1.19E-11 |
| 5.58E-06 | 0.192811 | 2.73E-05 | 0.262002 | 9.06E-09 | 0.281827 | 5.64E-10 | 0.243063 | 1.05E-07 |
| 0.38064  | -0.02022 | 0.66291  | 0.109666 | 0.01775  | 0.086274 | 0.06248  | 0.013674 | 0.76822  |
| 0.30307  | 0.105798 | 0.02222  | 0.103198 | 0.02574  | 0.196338 | 1.93E-05 | 0.00424  | 0.92719  |
| 0.07515  | 0.00434  | 0.92547  | 0.0372   | 0.42255  | 0.057543 | 0.21452  | -0.11547 | 0.01253  |
| 0.32962  | 0.017481 | 0.70634  | -0.05155 | 0.26623  | 0.096414 | 0.03727  | 0.107518 | 0.02013  |
| 0.08255  | 0.168028 | 0.00026  | 0.123811 | 0.00739  | 0.204162 | 8.70E-06 | 0.121959 | 0.00833  |
| 0.61255  | 0.088667 | 0.05552  | 0.038112 | 0.41124  | 0.148119 | 0.00133  | 0.055194 | 0.23387  |
| 0.74829  | 0.167665 | 0.00027  | 0.076715 | 0.09776  | 0.266997 | 4.60E-09 | 0.088597 | 0.05572  |
| 0.46237  | 0.170074 | 0.00022  | 0.052765 | 0.25512  | 0.192736 | 2.75E-05 | 0.077647 | 0.09374  |
| 0.20939  | 0.132997 | 0.00399  | 0.056565 | 0.22243  | 0.214808 | 2.81E-06 | 0.094716 | 0.04076  |
| 0.01219  | 0.034974 | 0.45085  | -0.02494 | 0.59091  | 0.068441 | 0.13973  | -0.05018 | 0.27918  |
| 3.44E-05 | -0.33385 | 1.27E-13 | -0.30056 | 3.32E-11 | -0.25596 | 2.02E-08 | -0.21792 | 2.00E-06 |
| 0.12051  | 0.061042 | 0.1879   | 0.105461 | 0.02265  | 0.188966 | 3.96E-05 | -0.14778 | 0.00136  |
| 0.00046  | -0.12423 | 0.00719  | -0.13758 | 0.00289  | -0.03051 | 0.51074  | -0.17465 | 0.00015  |
| 0.08971  | -0.09591 | 0.03828  | -0.08874 | 0.05531  | 0.010486 | 0.8212   | -0.08554 | 0.06474  |
| 0.01207  | -0.03696 | 0.4255   | -0.02803 | 0.54575  | -0.0074  | 0.87334  | -0.23491 | 2.82E-07 |
| 0.00011  | 0.056218 | 0.22529  | -0.03575 | 0.44092  | 0.029851 | 0.5199   | -0.03538 | 0.44563  |

|          |          |          |          |          |          |          |          |          |
|----------|----------|----------|----------|----------|----------|----------|----------|----------|
| 8.13E-22 | 0.237897 | 1.97E-07 | 0.233261 | 3.44E-07 | 0.18165  | 7.89E-05 | 0.286456 | 2.86E-10 |
| 1.36E-06 | -0.22264 | 1.18E-06 | -0.11436 | 0.0134   | -0.02988 | 0.51952  | -0.21657 | 2.32E-06 |
| 0.00298  | -0.11489 | 0.01298  | -0.15513 | 0.00077  | -0.13744 | 0.00292  | -0.22626 | 7.79E-07 |
| 0.24665  | 0.091305 | 0.04862  | 0.132503 | 0.00413  | 0.198111 | 1.61E-05 | 0.080182 | 0.08347  |
| 4.77E-05 | 0.192436 | 2.83E-05 | 0.109864 | 0.01755  | 0.251214 | 3.74E-08 | 0.145354 | 0.00164  |
| 2.34E-09 | 0.187277 | 4.65E-05 | 0.126625 | 0.00614  | 0.136502 | 0.00312  | 0.260404 | 1.12E-08 |
| 0.76981  | -0.08857 | 0.05579  | -0.13033 | 0.00479  | -0.05093 | 0.27206  | 0.07631  | 0.09955  |
| 0.00119  | -0.16747 | 0.00028  | -0.04161 | 0.36958  | -0.04858 | 0.29481  | -0.23613 | 2.44E-07 |
| 2.59E-09 | 0.147664 | 0.00137  | 0.250505 | 4.10E-08 | 0.202919 | 9.90E-06 | 0.253345 | 2.84E-08 |
| 0.00129  | 0.188159 | 4.28E-05 | 0.239174 | 1.69E-07 | 0.320105 | 1.38E-12 | 0.160193 | 0.00051  |
| 0.00428  | 0.023574 | 0.61135  | 0.128513 | 0.00541  | 0.189616 | 3.72E-05 | 0.032934 | 0.47771  |
| 3.97E-14 | -0.21926 | 1.72E-06 | -0.17122 | 0.0002   | -0.11466 | 0.01316  | -0.36124 | 7.68E-16 |
| 0.0085   | -0.20289 | 9.92E-06 | -0.13814 | 0.00278  | -0.18843 | 4.17E-05 | -0.2448  | 8.43E-08 |
| 0.49538  | 0.048556 | 0.29505  | 0.176647 | 0.00012  | 0.188898 | 3.99E-05 | 0.13452  | 0.00359  |
| 0.83613  | -0.12462 | 0.00701  | -0.05566 | 0.2299   | -0.1113  | 0.01611  | -0.21348 | 3.24E-06 |
| 3.05E-06 | 0.16625  | 0.00031  | 0.192982 | 2.68E-05 | 0.230747 | 4.62E-07 | 0.104403 | 0.02405  |
| 0.57133  | -0.05708 | 0.21825  | 0.073608 | 0.11216  | 0.087668 | 0.05835  | -0.00042 | 0.99277  |
| 5.20E-06 | 0.212858 | 3.47E-06 | 0.219527 | 1.67E-06 | 0.236217 | 2.41E-07 | 0.142402 | 0.00204  |
| 0.07771  | -0.06837 | 0.14013  | -0.04039 | 0.3838   | -0.08822 | 0.05677  | -0.00609 | 0.89552  |
| 0.95672  | -0.00528 | 0.90939  | 0.035194 | 0.44801  | 0.023675 | 0.60982  | 0.017696 | 0.70289  |
| 0.00021  | 0.030922 | 0.50503  | 0.048141 | 0.2992   | 0.141131 | 0.00224  | -0.0852  | 0.06582  |
| 1.34E-15 | 0.206876 | 6.56E-06 | 0.181141 | 8.26E-05 | 0.166554 | 0.0003   | 0.144225 | 0.00178  |
| 0.00022  | -0.01582 | 0.73307  | -0.04577 | 0.32366  | -0.12475 | 0.00695  | 0.053568 | 0.24795  |
| 0.00076  | -0.03034 | 0.51303  | 0.026268 | 0.57124  | -0.03639 | 0.43276  | 0.094747 | 0.04069  |
| 0.01336  | 0.096515 | 0.03707  | 0.169129 | 0.00024  | 0.165006 | 0.00034  | 0.030224 | 0.51469  |
| 0.53108  | -0.05961 | 0.19849  | 0.035486 | 0.44425  | 0.034347 | 0.45902  | 0.033123 | 0.47518  |
| 7.35E-06 | 0.102531 | 0.02672  | 0.19746  | 1.72E-05 | 0.198482 | 1.55E-05 | 0.211234 | 4.13E-06 |
| 0.09208  | -0.10549 | 0.02261  | -0.0218  | 0.63844  | -0.03917 | 0.39832  | 0.03204  | 0.48975  |
| 0.43214  | 0.007258 | 0.8757   | 0.075072 | 0.10518  | 0.165643 | 0.00032  | -0.05829 | 0.20862  |
| 3.51E-08 | -0.3789  | 2.17E-17 | -0.24629 | 7.00E-08 | -0.31452 | 3.50E-12 | -0.22507 | 8.93E-07 |
| 2.10E-07 | -0.24799 | 5.64E-08 | -0.13436 | 0.00363  | -0.04475 | 0.33457  | -0.1308  | 0.00464  |
| 2.11E-11 | 0.130345 | 0.00478  | 0.148346 | 0.0013   | 0.114102 | 0.01362  | 0.129495 | 0.00507  |
| 0.69984  | -0.00839 | 0.85651  | 0.039924 | 0.38935  | -0.05285 | 0.25439  | -0.03945 | 0.39504  |
| 0.28855  | -0.07107 | 0.12512  | 0.05821  | 0.20925  | 0.065971 | 0.15462  | -0.02167 | 0.64038  |
| 4.37E-31 | 0.106519 | 0.02132  | 0.238443 | 1.84E-07 | 0.112688 | 0.01483  | 0.22311  | 1.12E-06 |
| 3.31E-08 | -0.19555 | 2.08E-05 | -0.18489 | 5.83E-05 | -0.13528 | 0.0034   | -0.20067 | 1.25E-05 |
| 3.98E-09 | 0.206807 | 6.61E-06 | 0.21367  | 3.18E-06 | 0.200679 | 1.24E-05 | 0.194733 | 2.26E-05 |
| 3.73E-06 | -0.08835 | 0.05641  | -0.02653 | 0.56743  | 0.0171   | 0.71244  | -0.16983 | 0.00023  |
| 0.13327  | -0.22281 | 1.15E-06 | -0.17923 | 9.84E-05 | -0.2512  | 3.75E-08 | -0.22975 | 5.20E-07 |
| 0.0009   | -0.06307 | 0.17361  | -0.03854 | 0.40602  | 0.015888 | 0.73201  | -0.21625 | 2.40E-06 |
| 9.63E-09 | -0.20002 | 1.33E-05 | -0.03395 | 0.46424  | -0.0079  | 0.86488  | -0.16186 | 0.00045  |
| 0.00076  | 0.012699 | 0.78431  | 0.000936 | 0.98391  | 0.086657 | 0.06132  | -0.07598 | 0.10103  |
| 0.51432  | 0.03876  | 0.40333  | 0.066596 | 0.15075  | 0.140253 | 0.00238  | -0.02445 | 0.59812  |
| 8.99E-08 | 0.164385 | 0.00036  | 0.078297 | 0.09101  | 0.117219 | 0.01124  | 0.167238 | 0.00028  |
| 2.70E-17 | 0.325346 | 5.64E-13 | 0.261769 | 9.35E-09 | 0.267714 | 4.17E-09 | 0.308498 | 9.38E-12 |

|          |          |          |          |          |          |          |          |          |
|----------|----------|----------|----------|----------|----------|----------|----------|----------|
| 0.56839  | 0.119346 | 0.00984  | 0.166482 | 0.0003   | 0.206724 | 6.67E-06 | 0.01296  | 0.78     |
| 0.58005  | -0.0374  | 0.42007  | 0.049863 | 0.28223  | 0.028089 | 0.54484  | -0.03722 | 0.42227  |
| 4.66E-11 | 0.069002 | 0.13651  | 0.14149  | 0.00218  | 0.125437 | 0.00664  | 0.216852 | 2.24E-06 |
| 0.03549  | 0.004849 | 0.91677  | 0.078911 | 0.0885   | 0.049297 | 0.28773  | 0.088216 | 0.05678  |
| 0.12791  | -0.03899 | 0.40059  | 0.071015 | 0.12541  | 0.060135 | 0.19456  | -0.02424 | 0.60136  |
| 0.14296  | 0.003633 | 0.93759  | 0.032393 | 0.48498  | -0.04636 | 0.31747  | 0.056126 | 0.22605  |
| 7.40E-08 | -0.26225 | 8.77E-09 | -0.15535 | 0.00076  | -0.15038 | 0.00112  | -0.19486 | 2.23E-05 |
| 0.36206  | -0.04658 | 0.31521  | -0.08559 | 0.0646   | 0.011547 | 0.80346  | 0.106111 | 0.02182  |
| 4.54E-06 | 0.212507 | 3.60E-06 | 0.237453 | 2.08E-07 | 0.264671 | 6.32E-09 | 0.103483 | 0.02533  |
| 6.30E-09 | 0.098463 | 0.0334   | 0.139059 | 0.0026   | 0.190699 | 3.35E-05 | 0.250596 | 4.05E-08 |
| 0.01485  | -0.11545 | 0.01254  | -0.05535 | 0.23252  | -0.06074 | 0.19008  | -0.19338 | 2.58E-05 |
| 0.02535  | 0.12475  | 0.00695  | 0.212551 | 3.59E-06 | 0.242825 | 1.08E-07 | 0.126393 | 0.00624  |
| 0.03273  | 0.191766 | 3.02E-05 | 0.343175 | 2.36E-14 | 0.301475 | 2.87E-11 | 0.199934 | 1.34E-05 |
| 0.33974  | -0.16005 | 0.00052  | -0.07888 | 0.08862  | -0.07878 | 0.08902  | 0.034349 | 0.45899  |
| 0.03056  | 0.069637 | 0.13293  | 0.13926  | 0.00256  | 0.193731 | 2.49E-05 | 0.079976 | 0.08427  |
| 7.38E-12 | -0.16598 | 0.00032  | -0.13241 | 0.00415  | -0.03937 | 0.39595  | -0.27247 | 2.15E-09 |
| 0.56812  | 0.004451 | 0.92358  | 0.065494 | 0.15764  | 0.140224 | 0.00239  | 0.06036  | 0.19289  |
| 3.26E-13 | 0.138514 | 0.0027   | 0.110314 | 0.01709  | 0.148946 | 0.00125  | 0.171217 | 0.0002   |
| 4.71E-07 | 0.234709 | 2.89E-07 | 0.141146 | 0.00223  | 0.194173 | 2.39E-05 | 0.183418 | 6.69E-05 |
| 1.62E-05 | 0.088441 | 0.05615  | 0.121914 | 0.00836  | 0.135917 | 0.00325  | 0.051609 | 0.26569  |
| 1.42E-05 | -0.22653 | 7.55E-07 | -0.11416 | 0.01357  | -0.09206 | 0.04677  | -0.19282 | 2.73E-05 |
| 1.79E-09 | 0.109691 | 0.01773  | 0.204243 | 8.63E-06 | 0.169371 | 0.00024  | 0.190583 | 3.39E-05 |
| 0.0014   | -0.25535 | 2.19E-08 | -0.11225 | 0.01523  | -0.07664 | 0.09807  | -0.15628 | 0.0007   |
| 1.92E-17 | 0.130931 | 0.0046   | 0.235674 | 2.58E-07 | 0.245129 | 8.09E-08 | 0.284053 | 4.07E-10 |
| 0.00118  | 0.001019 | 0.98248  | 0.085824 | 0.06386  | 0.117609 | 0.01097  | 0.096515 | 0.03707  |
| 0.03746  | 0.137007 | 0.00301  | 0.158267 | 0.0006   | 0.138938 | 0.00262  | 0.069557 | 0.13337  |
| 0.06596  | -0.05065 | 0.27474  | 0.03756  | 0.41806  | 0.055238 | 0.23349  | -0.08797 | 0.05748  |
| 2.44E-19 | 0.117268 | 0.01121  | 0.161558 | 0.00046  | 0.066924 | 0.14875  | 0.298658 | 4.47E-11 |
| 1.26E-06 | 0.194452 | 2.32E-05 | 0.236949 | 2.21E-07 | 0.260168 | 1.16E-08 | 0.188855 | 4.00E-05 |
| 0.12918  | -0.16342 | 0.00039  | -0.04527 | 0.32896  | -0.06505 | 0.1605   | -0.12229 | 0.00816  |
| 2.77E-06 | -0.10514 | 0.02307  | -0.10996 | 0.01745  | -0.04652 | 0.31583  | -0.23414 | 3.09E-07 |
| 2.13E-09 | 0.048612 | 0.29449  | 0.135299 | 0.0034   | 0.122906 | 0.00784  | 0.221406 | 1.35E-06 |
| 0.00504  | 0.083557 | 0.07123  | 0.0467   | 0.31391  | 0.059231 | 0.20136  | -0.16695 | 0.00029  |
| 1.23E-07 | 0.197155 | 1.78E-05 | 0.180733 | 8.58E-05 | 0.120994 | 0.00886  | 0.101061 | 0.02899  |
| 0.37744  | -0.30006 | 3.59E-11 | -0.03646 | 0.43186  | -0.1242  | 0.00721  | -0.03751 | 0.41872  |
| 0.61235  | 0.016449 | 0.72294  | -0.03826 | 0.40942  | -0.04691 | 0.31175  | -0.12746 | 0.00581  |
| 0.01221  | -0.02273 | 0.62423  | 0.141629 | 0.00216  | 0.11681  | 0.01153  | 0.090123 | 0.05162  |
| 9.05E-14 | 0.203901 | 8.94E-06 | 0.390154 | 1.98E-18 | 0.298697 | 4.44E-11 | 0.355606 | 2.29E-15 |
| 7.76E-64 | 0.343508 | 2.22E-14 | 0.453699 | 4.33E-25 | 0.329837 | 2.58E-13 | 0.550103 | 2.71E-38 |
| 4.07E-26 | 0.287367 | 2.49E-10 | 0.405873 | 6.02E-20 | 0.299924 | 3.67E-11 | 0.537276 | 2.77E-36 |
| 4.04E-08 | 0.432896 | 9.42E-23 | 0.437732 | 2.79E-23 | 0.452693 | 5.66E-25 | 0.485162 | 6.02E-29 |
| 4.07E-15 | 0.30693  | 1.21E-11 | 0.42714  | 3.92E-22 | 0.315796 | 2.84E-12 | 0.447385 | 2.31E-24 |
| 0.00359  | 0.092536 | 0.04565  | 0.216491 | 2.34E-06 | 0.145493 | 0.00162  | 0.176251 | 0.00013  |
| 6.06E-32 | 0.298995 | 4.24E-11 | 0.438507 | 2.29E-23 | 0.300037 | 3.60E-11 | 0.616708 | 2.84E-50 |
| 0.03407  | 0.184083 | 6.29E-05 | 0.239775 | 1.57E-07 | 0.163777 | 0.00038  | 0.266894 | 4.66E-09 |

|          |          |          |          |          |          |          |          |          |
|----------|----------|----------|----------|----------|----------|----------|----------|----------|
| 0.05574  | 0.459576 | 8.83E-26 | 0.407841 | 3.83E-20 | 0.417514 | 4.00E-21 | 0.232456 | 3.78E-07 |
| 1.52E-15 | 0.418258 | 3.35E-21 | 0.504455 | 1.62E-31 | 0.386219 | 4.62E-18 | 0.43453  | 6.26E-23 |
| 2.33E-15 | 0.22897  | 5.69E-07 | 0.342275 | 2.79E-14 | 0.258683 | 1.41E-08 | 0.394975 | 6.93E-19 |
| 1.10E-33 | 0.421855 | 1.42E-21 | 0.524643 | 2.19E-34 | 0.444607 | 4.76E-24 | 0.647353 | 8.22E-57 |
| 1.67E-44 | 0.345958 | 1.41E-14 | 0.433958 | 7.22E-23 | 0.333435 | 1.37E-13 | 0.612332 | 2.14E-49 |
| 0.0572   | -0.09142 | 0.04834  | 0.305031 | 1.64E-11 | 0.175238 | 0.00014  | 0.130742 | 0.00466  |
| 7.62E-26 | 0.486012 | 4.68E-29 | 0.440904 | 1.24E-23 | 0.454719 | 3.29E-25 | 0.503324 | 2.32E-31 |
| 2.10E-35 | 0.46951  | 5.60E-27 | 0.541914 | 5.32E-37 | 0.476126 | 8.48E-28 | 0.612772 | 1.75E-49 |
| 8.35E-05 | 0.270518 | 2.83E-09 | 0.417211 | 4.30E-21 | 0.320966 | 1.19E-12 | 0.314694 | 3.40E-12 |
| 1.21E-35 | 0.369511 | 1.48E-16 | 0.509322 | 3.43E-32 | 0.389715 | 2.18E-18 | 0.576299 | 1.12E-42 |
| 0.01697  | 0.049068 | 0.28998  | 0.176958 | 0.00012  | 0.207475 | 6.16E-06 | 0.205178 | 7.83E-06 |
| 0.88355  | 0.082464 | 0.07502  | 0.225981 | 8.04E-07 | 0.196039 | 1.99E-05 | 0.188853 | 4.00E-05 |
| 2.89E-48 | 0.192775 | 2.74E-05 | 0.345026 | 1.68E-14 | 0.247327 | 6.14E-08 | 0.555224 | 4.04E-39 |
| 7.44E-26 | 0.538406 | 1.86E-36 | 0.56019  | 6.17E-40 | 0.503324 | 2.32E-31 | 0.626894 | 2.30E-52 |
| 1.63E-07 | -0.00868 | 0.85161  | 0.136308 | 0.00316  | 0.013935 | 0.76391  | 0.327878 | 3.64E-13 |
| 5.47E-35 | 0.362394 | 6.12E-16 | 0.505272 | 1.25E-31 | 0.349696 | 7.04E-15 | 0.516193 | 3.67E-33 |
| 4.52E-36 | 0.371598 | 9.72E-17 | 0.474591 | 1.32E-27 | 0.409073 | 2.89E-20 | 0.569814 | 1.48E-41 |
| 2.07E-16 | 0.374013 | 5.94E-17 | 0.485693 | 5.14E-29 | 0.385494 | 5.40E-18 | 0.51646  | 3.36E-33 |
| 1.24E-15 | 0.239209 | 1.68E-07 | 0.389515 | 2.28E-18 | 0.342602 | 2.63E-14 | 0.453521 | 4.54E-25 |
| 9.70E-05 | 0.318079 | 1.94E-12 | 0.299577 | 3.87E-11 | 0.231137 | 4.42E-07 | 0.31063  | 6.63E-12 |
| 3.80E-34 | 0.448368 | 1.78E-24 | 0.480992 | 2.06E-28 | 0.34375  | 2.13E-14 | 0.547553 | 6.91E-38 |
| 0.00194  | 0.343667 | 2.16E-14 | 0.345514 | 1.54E-14 | 0.283415 | 4.47E-10 | 0.335447 | 9.59E-14 |
| 1.21E-18 | 0.254483 | 2.45E-08 | 0.420981 | 1.75E-21 | 0.329016 | 2.98E-13 | 0.607062 | 2.32E-48 |
| 1.10E-14 | 0.280986 | 6.38E-10 | 0.35669  | 1.86E-15 | 0.329539 | 2.72E-13 | 0.393382 | 9.82E-19 |
| 1.30E-10 | 0.187829 | 4.42E-05 | 0.293142 | 1.04E-10 | 0.194235 | 2.37E-05 | 0.391422 | 1.51E-18 |
| 2.36E-19 | 0.206572 | 6.77E-06 | 0.363403 | 5.02E-16 | 0.287173 | 2.57E-10 | 0.490526 | 1.21E-29 |
| 7.83E-17 | 0.193185 | 2.63E-05 | 0.313674 | 4.03E-12 | 0.260072 | 1.17E-08 | 0.371141 | 1.07E-16 |
| 1.44E-35 | 0.265469 | 5.67E-09 | 0.370758 | 1.15E-16 | 0.279908 | 7.45E-10 | 0.513176 | 9.85E-33 |
| 4.49E-22 | 0.340248 | 4.04E-14 | 0.409459 | 2.64E-20 | 0.351102 | 5.40E-15 | 0.464894 | 2.04E-26 |
| 0.14208  | 0.129001 | 0.00524  | 0.228886 | 5.75E-07 | 0.207674 | 6.03E-06 | 0.169425 | 0.00023  |
| 4.93E-32 | 0.266696 | 4.79E-09 | 0.317132 | 2.27E-12 | 0.229149 | 5.57E-07 | 0.491314 | 9.51E-30 |
| 2.37E-16 | 0.371389 | 1.01E-16 | 0.443393 | 6.52E-24 | 0.354683 | 2.73E-15 | 0.460548 | 6.76E-26 |
| 1.02E-32 | 0.349015 | 8.00E-15 | 0.501149 | 4.59E-31 | 0.41001  | 2.32E-20 | 0.494559 | 3.54E-30 |
| 1.64E-21 | 0.222033 | 1.26E-06 | 0.44     | 1.56E-23 | 0.3702   | 1.29E-16 | 0.396477 | 4.97E-19 |
| 2.26E-29 | 0.418203 | 3.40E-21 | 0.476296 | 8.08E-28 | 0.354298 | 2.94E-15 | 0.528435 | 6.00E-35 |
| 4.40E-27 | 0.506167 | 9.42E-32 | 0.49319  | 5.37E-30 | 0.474276 | 1.44E-27 | 0.643944 | 4.78E-56 |
| 2.81E-39 | 0.414923 | 7.38E-21 | 0.471404 | 3.28E-27 | 0.397577 | 3.90E-19 | 0.547213 | 7.82E-38 |
| 0.28456  | -0.10577 | 0.02225  | 0.087307 | 0.05939  | 0.036302 | 0.43383  | 0.091799 | 0.04741  |
| 9.83E-13 | 0.349238 | 7.67E-15 | 0.452327 | 6.24E-25 | 0.398958 | 2.87E-19 | 0.433543 | 8.01E-23 |
| 2.51E-20 | 0.155574 | 0.00074  | 0.190591 | 3.39E-05 | -0.00181 | 0.96893  | 0.311332 | 5.92E-12 |
| 1.25E-14 | 0.131606 | 0.00439  | 0.181019 | 8.36E-05 | 0.105812 | 0.0222   | 0.246475 | 6.83E-08 |
| 4.23E-20 | 0.327346 | 3.99E-13 | 0.47591  | 9.03E-28 | 0.443059 | 7.11E-24 | 0.4637   | 2.84E-26 |
| 4.74E-19 | 0.105166 | 0.02303  | 0.28745  | 2.46E-10 | 0.206421 | 6.88E-06 | 0.36834  | 1.88E-16 |
| 9.37E-06 | -0.01437 | 0.75685  | 0.151642 | 0.00101  | 0.141925 | 0.00211  | 0.196778 | 1.84E-05 |
| 1.64E-44 | 0.417897 | 3.65E-21 | 0.420695 | 1.87E-21 | 0.342424 | 2.71E-14 | 0.578015 | 5.58E-43 |



|          |          |          |          |          |          |          |          |          |
|----------|----------|----------|----------|----------|----------|----------|----------|----------|
| 7.18E-33 | 0.317579 | 2.11E-12 | 0.306092 | 1.38E-11 | 0.219412 | 1.69E-06 | 0.5064   | 8.74E-32 |
| 4.09E-22 | 0.323394 | 7.88E-13 | 0.493515 | 4.87E-30 | 0.376145 | 3.83E-17 | 0.512285 | 1.32E-32 |
| 2.61E-21 | 0.342867 | 2.50E-14 | 0.451248 | 8.32E-25 | 0.402335 | 1.34E-19 | 0.465682 | 1.64E-26 |
| 4.65E-37 | 0.49047  | 1.23E-29 | 0.516786 | 3.02E-33 | 0.435313 | 5.14E-23 | 0.626628 | 2.61E-52 |
| 9.22E-05 | 0.139508 | 0.00252  | 0.304744 | 1.71E-11 | 0.220527 | 1.49E-06 | 0.269783 | 3.13E-09 |
| 8.12E-30 | 0.031486 | 0.49729  | 0.119757 | 0.00959  | -0.05337 | 0.24967  | 0.353634 | 3.34E-15 |
| 9.02E-59 | 0.440281 | 1.45E-23 | 0.463211 | 3.25E-26 | 0.320723 | 1.24E-12 | 0.584832 | 3.41E-44 |
| 0.51601  | 0.132301 | 0.00418  | 0.441519 | 1.06E-23 | 0.366343 | 2.80E-16 | 0.233878 | 3.19E-07 |
| 1.78E-31 | 0.237819 | 1.99E-07 | 0.353747 | 3.27E-15 | 0.237516 | 2.06E-07 | 0.493599 | 4.74E-30 |
| 2.71E-29 | 0.117385 | 0.01113  | 0.209989 | 4.72E-06 | 0.128934 | 0.00526  | 0.422649 | 1.17E-21 |
| 3.41E-26 | 0.46334  | 3.14E-26 | 0.512307 | 1.31E-32 | 0.376182 | 3.80E-17 | 0.509557 | 3.18E-32 |
| 3.73E-59 | 0.366675 | 2.62E-16 | 0.483457 | 9.98E-29 | 0.353106 | 3.69E-15 | 0.575181 | 1.75E-42 |
| 2.87E-35 | 0.443719 | 6.00E-24 | 0.507391 | 6.37E-32 | 0.441967 | 9.43E-24 | 0.550987 | 1.96E-38 |
| 1.03E-26 | 0.360362 | 9.11E-16 | 0.43364  | 7.82E-23 | 0.364472 | 4.06E-16 | 0.545869 | 1.28E-37 |
| 1.17E-45 | 0.370657 | 1.18E-16 | 0.499595 | 7.46E-31 | 0.391512 | 1.48E-18 | 0.595963 | 3.07E-46 |
| 0.35706  | 0.188279 | 4.23E-05 | 0.329315 | 2.83E-13 | 0.345485 | 1.54E-14 | 0.202462 | 1.04E-05 |
| 6.78E-09 | 0.103236 | 0.02568  | 0.225065 | 8.93E-07 | 0.06992  | 0.13136  | 0.260748 | 1.07E-08 |
| 2.03E-17 | 0.27851  | 9.12E-10 | 0.447818 | 2.06E-24 | 0.368084 | 1.98E-16 | 0.520132 | 9.94E-34 |
| 2.88E-42 | 0.265103 | 5.96E-09 | 0.303933 | 1.95E-11 | 0.163436 | 0.00039  | 0.413364 | 1.06E-20 |
| 3.90E-47 | 0.240394 | 1.45E-07 | 0.354433 | 2.87E-15 | 0.230299 | 4.87E-07 | 0.52729  | 8.88E-35 |
| 4.37E-25 | 0.226938 | 7.20E-07 | 0.36302  | 5.41E-16 | 0.287328 | 2.51E-10 | 0.502297 | 3.20E-31 |
| 4.98E-15 | 0.16629  | 0.00031  | 0.249232 | 4.82E-08 | 0.173503 | 0.00016  | 0.348958 | 8.08E-15 |
| 0.02449  | 0.19182  | 3.01E-05 | 0.32057  | 1.27E-12 | 0.248692 | 5.16E-08 | 0.313436 | 4.19E-12 |
| 1.27E-22 | 0.347661 | 1.03E-14 | 0.499156 | 8.55E-31 | 0.406631 | 5.06E-20 | 0.553359 | 8.11E-39 |
| 0.00078  | 0.046009 | 0.32114  | 0.219902 | 1.60E-06 | 0.172624 | 0.00018  | 0.16814  | 0.00026  |
| 7.84E-17 | 0.205559 | 7.53E-06 | 0.264954 | 6.08E-09 | 0.215244 | 2.68E-06 | 0.452135 | 6.57E-25 |
| 1.19E-13 | 0.304107 | 1.90E-11 | 0.391161 | 1.59E-18 | 0.334843 | 1.07E-13 | 0.466025 | 1.49E-26 |
| 2.04E-17 | 0.275273 | 1.45E-09 | 0.334313 | 1.17E-13 | 0.324659 | 6.34E-13 | 0.423974 | 8.48E-22 |
| 0.00052  | 0.048836 | 0.29227  | 0.276958 | 1.14E-09 | 0.19699  | 1.81E-05 | 0.289731 | 1.75E-10 |
| 5.23E-06 | 0.321174 | 1.15E-12 | 0.422562 | 1.19E-21 | 0.333127 | 1.45E-13 | 0.380812 | 1.45E-17 |
| 2.61E-46 | 0.397578 | 3.90E-19 | 0.424515 | 7.44E-22 | 0.305608 | 1.49E-11 | 0.544216 | 2.32E-37 |
| 1.74E-37 | 0.34147  | 3.23E-14 | 0.394872 | 7.09E-19 | 0.279401 | 8.02E-10 | 0.523745 | 2.96E-34 |
| 1.03E-08 | 0.048267 | 0.29793  | 0.204552 | 8.36E-06 | 0.098458 | 0.03341  | 0.249367 | 4.74E-08 |
| 3.64E-41 | 0.273433 | 1.88E-09 | 0.311735 | 5.54E-12 | 0.279944 | 7.42E-10 | 0.517637 | 2.28E-33 |
| 1.78E-58 | 0.444886 | 4.43E-24 | 0.49468  | 3.41E-30 | 0.390157 | 1.98E-18 | 0.618505 | 1.23E-50 |
| 1.28E-09 | 0.419964 | 2.23E-21 | 0.438135 | 2.51E-23 | 0.388409 | 2.89E-18 | 0.559216 | 8.95E-40 |
| 8.02E-37 | 0.178375 | 0.00011  | 0.308605 | 9.22E-12 | 0.191082 | 3.23E-05 | 0.524613 | 2.21E-34 |
| 3.63E-11 | 0.268458 | 3.76E-09 | 0.309787 | 7.61E-12 | 0.248242 | 5.46E-08 | 0.354023 | 3.10E-15 |
| 0.00013  | 0.111088 | 0.01632  | 0.29113  | 1.42E-10 | 0.201443 | 1.15E-05 | 0.299877 | 3.69E-11 |
| 1.29E-16 | 0.340115 | 4.13E-14 | 0.36679  | 2.56E-16 | 0.284968 | 3.56E-10 | 0.494536 | 3.56E-30 |
| 3.78E-14 | 0.4367   | 3.62E-23 | 0.449482 | 1.33E-24 | 0.431903 | 1.21E-22 | 0.50569  | 1.10E-31 |
| 9.98E-26 | 0.315059 | 3.20E-12 | 0.388656 | 2.74E-18 | 0.30507  | 1.63E-11 | 0.499229 | 8.36E-31 |
| 1.66E-13 | 0.314043 | 3.79E-12 | 0.358996 | 1.19E-15 | 0.201968 | 1.09E-05 | 0.440341 | 1.43E-23 |
| 7.63E-61 | 0.438341 | 2.39E-23 | 0.483499 | 9.86E-29 | 0.32308  | 8.31E-13 | 0.547939 | 6.00E-38 |
| 3.72E-16 | 0.389634 | 2.22E-18 | 0.424481 | 7.50E-22 | 0.330318 | 2.38E-13 | 0.477387 | 5.89E-28 |

|          |          |          |          |          |          |          |          |          |
|----------|----------|----------|----------|----------|----------|----------|----------|----------|
| 9.93E-07 | 0.356981 | 1.76E-15 | 0.422616 | 1.18E-21 | 0.438892 | 2.07E-23 | 0.479664 | 3.04E-28 |
| 4.76E-32 | 0.329478 | 2.75E-13 | 0.441444 | 1.08E-23 | 0.317024 | 2.31E-12 | 0.529402 | 4.31E-35 |
| 8.33E-06 | 0.210782 | 4.34E-06 | 0.378883 | 2.17E-17 | 0.321764 | 1.04E-12 | 0.329089 | 2.95E-13 |
| 2.66E-25 | 0.373585 | 6.48E-17 | 0.426232 | 4.89E-22 | 0.312606 | 4.80E-12 | 0.435409 | 5.01E-23 |
| 9.94E-77 | 0.369761 | 1.41E-16 | 0.378764 | 2.23E-17 | 0.25671  | 1.83E-08 | 0.508072 | 5.12E-32 |
| 3.08E-05 | 0.197198 | 1.77E-05 | 0.293309 | 1.02E-10 | 0.302955 | 2.28E-11 | 0.434214 | 6.77E-23 |
| 3.07E-11 | 0.16461  | 0.00035  | 0.339147 | 4.93E-14 | 0.230709 | 4.64E-07 | 0.377722 | 2.77E-17 |
| 2.16E-51 | 0.407244 | 4.40E-20 | 0.352771 | 3.93E-15 | 0.261322 | 9.93E-09 | 0.501572 | 4.02E-31 |
| 5.78E-74 | 0.303486 | 2.09E-11 | 0.421613 | 1.50E-21 | 0.273503 | 1.86E-09 | 0.551081 | 1.89E-38 |
| 2.10E-63 | 0.276347 | 1.24E-09 | 0.341892 | 2.99E-14 | 0.214929 | 2.77E-06 | 0.54597  | 1.23E-37 |
| 1.10E-10 | 0.099651 | 0.03131  | 0.245645 | 7.58E-08 | 0.207165 | 6.36E-06 | 0.36328  | 5.14E-16 |
| 6.02E-34 | 0.514189 | 7.08E-33 | 0.512742 | 1.13E-32 | 0.423218 | 1.02E-21 | 0.560259 | 6.01E-40 |
| 2.03E-32 | 0.447443 | 2.27E-24 | 0.543902 | 2.60E-37 | 0.488508 | 2.22E-29 | 0.628255 | 1.19E-52 |
| 2.09E-70 | 0.406535 | 5.17E-20 | 0.481652 | 1.70E-28 | 0.335517 | 9.47E-14 | 0.551084 | 1.89E-38 |
| 3.39E-29 | 0.390479 | 1.85E-18 | 0.543889 | 2.61E-37 | 0.434758 | 5.91E-23 | 0.484673 | 6.97E-29 |
| 1.26E-28 | 0.235306 | 2.69E-07 | 0.493087 | 5.55E-30 | 0.353327 | 3.54E-15 | 0.46751  | 9.83E-27 |
| 1.45E-23 | 0.163803 | 0.00038  | 0.300098 | 3.57E-11 | 0.148132 | 0.00133  | 0.400219 | 2.16E-19 |
| 8.90E-07 | 0.129245 | 0.00515  | 0.2542   | 2.54E-08 | 0.207401 | 6.21E-06 | 0.407318 | 4.32E-20 |
| 8.86E-09 | 0.042097 | 0.36404  | 0.301206 | 3.00E-11 | 0.168524 | 0.00025  | 0.320459 | 1.30E-12 |
| 3.92E-10 | 0.291901 | 1.26E-10 | 0.45863  | 1.14E-25 | 0.37865  | 2.28E-17 | 0.399106 | 2.77E-19 |
| 5.80E-43 | 0.440662 | 1.32E-23 | 0.497729 | 1.33E-30 | 0.390409 | 1.88E-18 | 0.595412 | 3.89E-46 |
| 5.23E-05 | 0.321002 | 1.18E-12 | 0.331888 | 1.80E-13 | 0.224401 | 9.63E-07 | 0.26366  | 7.24E-09 |
| 6.46E-33 | -0.01769 | 0.70305  | 0.137425 | 0.00292  | -0.0606  | 0.19111  | 0.352571 | 4.09E-15 |
| 6.06E-15 | 0.197812 | 1.66E-05 | 0.336066 | 8.58E-14 | 0.27532  | 1.44E-09 | 0.396983 | 4.45E-19 |
| 1.96E-31 | 0.462791 | 3.65E-26 | 0.468464 | 7.52E-27 | 0.452307 | 6.27E-25 | 0.571752 | 6.88E-42 |
| 5.55E-25 | 0.25191  | 3.42E-08 | 0.439103 | 1.96E-23 | 0.350445 | 6.11E-15 | 0.524591 | 2.22E-34 |
| 4.43E-49 | 0.339506 | 4.62E-14 | 0.447286 | 2.37E-24 | 0.392404 | 1.22E-18 | 0.569382 | 1.75E-41 |
| 3.22E-24 | 0.365797 | 3.12E-16 | 0.366033 | 2.98E-16 | 0.359625 | 1.05E-15 | 0.471796 | 2.93E-27 |
| 5.78E-32 | 0.216277 | 2.39E-06 | 0.32075  | 1.24E-12 | 0.250504 | 4.10E-08 | 0.507247 | 6.67E-32 |
| 1.18E-17 | 0.204014 | 8.84E-06 | 0.30462  | 1.75E-11 | 0.180751 | 8.57E-05 | 0.391424 | 1.51E-18 |
| 5.88E-09 | 0.435061 | 5.47E-23 | 0.434286 | 6.65E-23 | 0.447269 | 2.38E-24 | 0.508012 | 5.22E-32 |
| 6.22E-35 | 0.36802  | 2.00E-16 | 0.506877 | 7.51E-32 | 0.371279 | 1.04E-16 | 0.519648 | 1.17E-33 |
| 0.00625  | 0.035494 | 0.44415  | 0.095706 | 0.03869  | 0.106849 | 0.02092  | 0.265145 | 5.92E-09 |
| 9.66E-29 | 0.39331  | 9.98E-19 | 0.373783 | 6.23E-17 | 0.324919 | 6.07E-13 | 0.574136 | 2.66E-42 |
| 1.46E-11 | 0.152718 | 0.00093  | 0.247828 | 5.76E-08 | 0.148372 | 0.0013   | 0.386139 | 4.70E-18 |
| 6.97E-09 | -0.00758 | 0.87014  | 0.086853 | 0.06073  | -0.02521 | 0.58684  | 0.219808 | 1.62E-06 |
| 3.50E-11 | 0.05063  | 0.27488  | 0.166678 | 0.0003   | 0.097409 | 0.03534  | 0.281512 | 5.91E-10 |
| 2.57E-32 | 0.190185 | 3.52E-05 | 0.429179 | 2.37E-22 | 0.267105 | 4.53E-09 | 0.447988 | 1.97E-24 |
| 1.15E-38 | 0.353823 | 3.22E-15 | 0.485566 | 5.34E-29 | 0.376011 | 3.94E-17 | 0.568679 | 2.31E-41 |
| 3.39E-19 | 0.402896 | 1.18E-19 | 0.436656 | 3.66E-23 | 0.363485 | 4.94E-16 | 0.526296 | 1.25E-34 |
| 1.73E-13 | 0.196172 | 1.96E-05 | 0.299099 | 4.17E-11 | 0.197442 | 1.73E-05 | 0.413666 | 9.92E-21 |
| 7.45E-33 | 0.186716 | 4.91E-05 | 0.288831 | 2.00E-10 | 0.161353 | 0.00046  | 0.502185 | 3.32E-31 |
| 1.57E-15 | 0.220923 | 1.43E-06 | 0.333418 | 1.38E-13 | 0.294455 | 8.55E-11 | 0.409222 | 2.79E-20 |
| 3.28E-54 | 0.337013 | 7.24E-14 | 0.417504 | 4.01E-21 | 0.294617 | 8.34E-11 | 0.575447 | 1.57E-42 |
| 6.89E-23 | 0.476885 | 6.81E-28 | 0.505712 | 1.09E-31 | 0.48276  | 1.23E-28 | 0.620666 | 4.47E-51 |

|          |          |          |          |          |          |          |          |          |
|----------|----------|----------|----------|----------|----------|----------|----------|----------|
| 7.12E-09 | 0.276255 | 1.26E-09 | 0.29363  | 9.70E-11 | 0.344999 | 1.69E-14 | 0.443331 | 6.63E-24 |
| 1.79E-19 | 0.45533  | 2.79E-25 | 0.49558  | 2.59E-30 | 0.437995 | 2.61E-23 | 0.516007 | 3.90E-33 |
| 1.29E-08 | 0.213377 | 3.28E-06 | 0.342877 | 2.50E-14 | 0.359293 | 1.12E-15 | 0.360632 | 8.64E-16 |
| 0.38443  | 0.129212 | 0.00517  | 0.229166 | 5.56E-07 | 0.233026 | 3.53E-07 | 0.189267 | 3.85E-05 |
| 2.05E-19 | 0.344887 | 1.72E-14 | 0.472371 | 2.49E-27 | 0.415827 | 5.96E-21 | 0.561093 | 4.37E-40 |
| 6.68E-24 | 0.204349 | 8.54E-06 | 0.22424  | 9.81E-07 | 0.167467 | 0.00028  | 0.439261 | 1.89E-23 |
| 3.20E-16 | 0.214078 | 3.04E-06 | 0.368337 | 1.88E-16 | 0.295967 | 6.78E-11 | 0.416757 | 4.79E-21 |
| 3.22E-09 | 0.339566 | 4.57E-14 | 0.512391 | 1.27E-32 | 0.437372 | 3.05E-23 | 0.512986 | 1.05E-32 |
| 5.44E-50 | 0.511958 | 1.46E-32 | 0.576586 | 9.94E-43 | 0.492928 | 5.82E-30 | 0.612338 | 2.13E-49 |
| 1.80E-08 | 0.078076 | 0.09193  | 0.203975 | 8.87E-06 | 0.052749 | 0.25527  | 0.219171 | 1.74E-06 |
| 2.03E-18 | 0.386941 | 3.96E-18 | 0.358647 | 1.27E-15 | 0.35582  | 2.20E-15 | 0.496269 | 2.09E-30 |
| 0.00133  | -0.06989 | 0.13151  | 0.001201 | 0.97936  | -0.07647 | 0.09883  | 0.109835 | 0.01758  |
| 0.0893   | -0.07183 | 0.12113  | -0.07734 | 0.09506  | -0.13261 | 0.0041   | 0.006028 | 0.89663  |
| 0.01159  | 0.246791 | 6.56E-08 | 0.178739 | 0.0001   | 0.165561 | 0.00033  | 0.270422 | 2.86E-09 |
| 0.41207  | -0.01314 | 0.77703  | -0.03574 | 0.44105  | -0.01387 | 0.76498  | -0.00434 | 0.92542  |
| 0.63499  | -0.18532 | 5.60E-05 | -0.11742 | 0.0111   | -0.18988 | 3.63E-05 | -0.00606 | 0.89613  |
| 0.03253  | -0.15941 | 0.00054  | -0.10079 | 0.02942  | -0.13102 | 0.00457  | -0.05783 | 0.21222  |
| 0.00028  | -0.17412 | 0.00016  | -0.12581 | 0.00648  | -0.20259 | 1.02E-05 | 0.081326 | 0.07915  |
| 0.39055  | 0.036663 | 0.42927  | -0.07683 | 0.09727  | -0.06734 | 0.14622  | 0.092431 | 0.04589  |
| 0.81067  | -0.0152  | 0.74313  | 0.031285 | 0.50004  | 0.007251 | 0.87581  | 0.06692  | 0.14877  |
| 0.63921  | -0.12016 | 0.00935  | -0.07063 | 0.12745  | -0.04787 | 0.30195  | -0.07837 | 0.09069  |
| 0.09997  | -0.19607 | 1.98E-05 | -0.12646 | 0.00621  | -0.14602 | 0.00156  | -0.14279 | 0.00198  |
| 0.33602  | 0.017473 | 0.70646  | 0.01446  | 0.75529  | -0.00029 | 0.99496  | 0.050919 | 0.27215  |
| 0.28054  | -0.12499 | 0.00684  | -0.10057 | 0.02977  | -0.1327  | 0.00407  | -0.01712 | 0.7121   |
| 0.0194   | 0.016239 | 0.72633  | 0.03544  | 0.44484  | -0.01846 | 0.69071  | 0.119221 | 0.00992  |
| 0.28259  | 0.01636  | 0.72438  | -0.02589 | 0.57677  | -0.02833 | 0.54139  | 0.082388 | 0.07529  |
| 0.06321  | -0.0808  | 0.0811   | -0.02009 | 0.66506  | -0.08035 | 0.08281  | 0.010017 | 0.82907  |
| 0.00475  | 0.163379 | 0.00039  | 0.155573 | 0.00074  | 0.13202  | 0.00427  | 0.204506 | 8.40E-06 |
| 0.89999  | -0.14024 | 0.00239  | -0.15787 | 0.00062  | -0.20287 | 9.94E-06 | -0.09636 | 0.03738  |
| 3.24E-06 | -0.17277 | 0.00018  | -0.10764 | 0.01999  | -0.19835 | 1.58E-05 | 0.034649 | 0.45507  |
| 2.47E-10 | -0.07673 | 0.09769  | -0.00846 | 0.85524  | -0.12933 | 0.00512  | 0.114331 | 0.01343  |
| 0.00127  | 0.033258 | 0.47338  | 0.097004 | 0.03612  | 0.002816 | 0.9516   | 0.105398 | 0.02273  |
| 0.0829   | -0.04075 | 0.37964  | -0.03472 | 0.45412  | -0.03278 | 0.47983  | 0.07882  | 0.08887  |
| 0.87683  | -0.04313 | 0.35242  | 0.081893 | 0.07707  | 0.032416 | 0.48467  | 0.0969   | 0.03632  |
| 0.49096  | -0.23638 | 2.37E-07 | -0.23685 | 2.24E-07 | -0.19804 | 1.63E-05 | -0.08161 | 0.07811  |
| 0.59435  | -0.09048 | 0.05069  | -0.07014 | 0.13014  | -0.07949 | 0.08619  | -0.02777 | 0.54938  |
| 0.56563  | -0.12981 | 0.00496  | -0.06291 | 0.17474  | -0.13307 | 0.00397  | 0.017025 | 0.71365  |
| 0.3085   | 0.018149 | 0.69566  | 0.006366 | 0.89087  | 0.006072 | 0.89588  | 0.040289 | 0.38503  |
| 0.77946  | -0.0064  | 0.89031  | 0.039322 | 0.39654  | 0.054591 | 0.23902  | 0.018803 | 0.68528  |
| 0.92346  | -0.10791 | 0.01968  | -0.02484 | 0.59234  | -0.03203 | 0.48984  | -0.15874 | 0.00058  |
| 0.00117  | -0.16065 | 0.00049  | -0.08372 | 0.07068  | -0.08402 | 0.06968  | -0.12363 | 0.00748  |
| 0.56579  | -0.25806 | 1.53E-08 | -0.21088 | 4.29E-06 | -0.24298 | 1.06E-07 | -0.1047  | 0.02365  |
| 7.35E-07 | -0.1816  | 7.92E-05 | -0.09988 | 0.03092  | -0.0562  | 0.22541  | -0.252   | 3.38E-08 |
| 0.7878   | -0.02434 | 0.59986  | -0.01815 | 0.69563  | -0.04418 | 0.34081  | 0.031733 | 0.49391  |
| 0.11644  | -0.0432  | 0.35157  | -0.03526 | 0.44716  | -0.07764 | 0.09376  | 0.056366 | 0.22407  |

|          |          |          |          |          |          |          |          |          |
|----------|----------|----------|----------|----------|----------|----------|----------|----------|
| 0.31423  | 0.004547 | 0.92193  | 0.002775 | 0.95231  | -0.03852 | 0.40626  | 0.07471  | 0.10687  |
| 0.02901  | -0.13473 | 0.00353  | -0.00717 | 0.87714  | -0.03723 | 0.42214  | -0.05427 | 0.24178  |
| 0.86998  | -0.20696 | 6.51E-06 | -0.12513 | 0.00678  | -0.18999 | 3.59E-05 | -0.05098 | 0.27157  |
| 0.12901  | -0.19142 | 3.13E-05 | -0.11839 | 0.01045  | -0.15697 | 0.00066  | -0.05633 | 0.2244   |
| 0.50906  | -0.11718 | 0.01127  | -0.05895 | 0.2035   | -0.08178 | 0.07747  | -0.03927 | 0.39716  |
| 0.74895  | 0.021788 | 0.63862  | 0.039467 | 0.39481  | 0.031008 | 0.50384  | 0.086282 | 0.06245  |
| 0.44752  | -0.07348 | 0.11279  | -0.04689 | 0.31198  | -0.05502 | 0.23537  | -0.02254 | 0.62706  |
| 0.22326  | -0.19268 | 2.76E-05 | -0.11829 | 0.01051  | -0.14338 | 0.0019   | -0.11768 | 0.01092  |
| 0.92418  | -0.02979 | 0.52077  | 0.017489 | 0.70621  | -0.00217 | 0.96271  | 0.067891 | 0.14295  |
| 0.22948  | -0.12295 | 0.00782  | -0.12123 | 0.00873  | -0.14526 | 0.00165  | -0.03153 | 0.49669  |
| 0.82134  | -0.04742 | 0.30653  | -0.0041  | 0.92962  | -0.02987 | 0.51957  | 0.000272 | 0.99532  |
| 0.6074   | 0.037363 | 0.42051  | 0.033295 | 0.47289  | 0.037192 | 0.42264  | 0.053461 | 0.24889  |
| 0.93898  | -0.06887 | 0.13725  | -0.04327 | 0.35078  | -0.07947 | 0.08626  | -0.01848 | 0.69047  |
| 0.58662  | -0.07274 | 0.11645  | -0.06093 | 0.18874  | -0.086   | 0.06331  | -0.01426 | 0.75856  |
| 0.07353  | -0.09017 | 0.05149  | -0.04014 | 0.38678  | -0.09627 | 0.03756  | 0.041901 | 0.36628  |
| 0.01418  | -0.16347 | 0.00039  | -0.07618 | 0.10012  | -0.10205 | 0.02744  | -0.16992 | 0.00023  |
| 0.06455  | -0.26633 | 5.04E-09 | -0.12689 | 0.00604  | -0.17794 | 0.00011  | -0.02937 | 0.5266   |
| 0.92208  | 0.12578  | 0.0065   | 0.033557 | 0.46941  | 0.054289 | 0.24164  | 0.076641 | 0.09808  |
| 0.05491  | -0.05392 | 0.24488  | -0.05773 | 0.21304  | -0.12125 | 0.00872  | 0.076902 | 0.09694  |
| 0.00447  | -0.163   | 0.00041  | -0.18371 | 6.51E-05 | -0.06486 | 0.16172  | -0.045   | 0.33185  |
| 0.9622   | -0.1229  | 0.00784  | -0.08582 | 0.06388  | -0.11359 | 0.01405  | 0.018317 | 0.69298  |
| 0.14552  | -0.06759 | 0.14474  | -0.09492 | 0.04034  | -0.06321 | 0.17269  | 0.056766 | 0.2208   |
| 0.00457  | -0.25516 | 2.24E-08 | -0.31218 | 5.15E-12 | -0.27433 | 1.66E-09 | -0.14929 | 0.00121  |
| 0.21342  | -0.12053 | 0.00913  | -0.02429 | 0.60061  | -0.0491  | 0.2897   | 0.041405 | 0.37199  |
| 0.17366  | -0.00923 | 0.84239  | -0.07038 | 0.12884  | -0.06562 | 0.15684  | -0.02138 | 0.64499  |
| 7.45E-06 | -0.17428 | 0.00015  | -0.12254 | 0.00803  | -0.14238 | 0.00204  | -0.16929 | 0.00024  |
| 0.29864  | -0.06022 | 0.19393  | -0.05857 | 0.20641  | -0.10133 | 0.02855  | 0.0516   | 0.26577  |
| 0.03324  | -0.15326 | 0.00089  | -0.12224 | 0.00818  | -0.18159 | 7.93E-05 | 0.056033 | 0.22682  |
| 0.00365  | -0.16713 | 0.00029  | -0.09866 | 0.03305  | -0.06051 | 0.19179  | -0.08694 | 0.06048  |
| 0.02095  | -0.10757 | 0.02007  | -0.01852 | 0.68982  | -0.08994 | 0.05211  | 0.032239 | 0.48705  |
| 0.15754  | -0.10756 | 0.02007  | -0.07618 | 0.10013  | -0.13093 | 0.00459  | 0.023896 | 0.60649  |
| 0.94084  | -0.09847 | 0.03339  | -0.17821 | 0.00011  | -0.13321 | 0.00393  | -0.02736 | 0.55532  |
| 0.00053  | -0.2538  | 2.68E-08 | -0.16549 | 0.00033  | -0.19799 | 1.63E-05 | -0.20921 | 5.13E-06 |
| 0.05677  | -0.19947 | 1.41E-05 | -0.18039 | 8.86E-05 | -0.22649 | 7.59E-07 | -0.10281 | 0.0263   |
| 0.26305  | -0.15428 | 0.00082  | -0.17878 | 0.0001   | -0.184   | 6.34E-05 | 0.027731 | 0.54998  |
| 0.27668  | -0.10307 | 0.02592  | -0.10853 | 0.01898  | -0.0941  | 0.04209  | 0.005876 | 0.89922  |
| 0.56787  | -0.16216 | 0.00043  | -0.20705 | 6.44E-06 | -0.21169 | 3.93E-06 | -0.00648 | 0.8889   |
| 0.02146  | -0.28424 | 3.96E-10 | -0.26963 | 3.20E-09 | -0.24942 | 4.71E-08 | -0.02685 | 0.56279  |
| 0.62883  | -0.32233 | 9.45E-13 | -0.26513 | 5.93E-09 | -0.33803 | 6.03E-14 | -0.13099 | 0.00458  |
| 0.02426  | -0.12452 | 0.00706  | -0.09652 | 0.03707  | -0.11221 | 0.01527  | -0.03509 | 0.44932  |
| 0.77036  | 0.003352 | 0.94242  | 0.032135 | 0.48847  | 0.020573 | 0.65745  | 0.019279 | 0.67774  |
| 0.01678  | 0.063974 | 0.16752  | 0.105641 | 0.02242  | 0.067883 | 0.14299  | 0.173339 | 0.00017  |
| 0.02466  | 0.027643 | 0.55125  | 0.022116 | 0.63356  | -0.01029 | 0.82456  | 0.078218 | 0.09134  |
| 0.14277  | -0.00634 | 0.89131  | 0.073983 | 0.11033  | 0.062041 | 0.18076  | 0.103868 | 0.02479  |
| 0.00067  | -0.02276 | 0.62376  | 0.08167  | 0.07788  | 0.025138 | 0.5879   | 0.138522 | 0.0027   |

|          |          |          |          |          |          |          |          |          |
|----------|----------|----------|----------|----------|----------|----------|----------|----------|
| 1.89E-13 | -0.09769 | 0.03482  | -0.08234 | 0.07546  | -0.16847 | 0.00026  | 0.15636  | 0.0007   |
| 0.00264  | -0.16808 | 0.00026  | -0.17055 | 0.00021  | -0.17438 | 0.00015  | -0.11594 | 0.01217  |
| 0.00041  | -0.01137 | 0.80636  | -0.05166 | 0.26518  | -0.06982 | 0.13192  | 0.048305 | 0.29755  |
| 0.0003   | -0.01104 | 0.81196  | -0.0094  | 0.83939  | -0.07216 | 0.11942  | -0.00308 | 0.94702  |
| 0.02074  | -0.05585 | 0.22832  | -0.05691 | 0.21964  | -0.10331 | 0.02557  | 0.073009 | 0.11512  |
| 0.05326  | -0.07396 | 0.11044  | -0.06381 | 0.1686   | -0.11735 | 0.01115  | -0.00552 | 0.90535  |
| 0.01098  | -0.01473 | 0.75086  | -0.04383 | 0.34457  | -0.0769  | 0.09694  | 0.077033 | 0.09637  |
| 0.56621  | -0.18494 | 5.81E-05 | -0.10909 | 0.01836  | -0.16526 | 0.00034  | -0.02439 | 0.59913  |
| 0.92562  | -0.20158 | 1.14E-05 | -0.12525 | 0.00673  | -0.17344 | 0.00017  | -0.02041 | 0.66005  |
| 0.67071  | -0.14555 | 0.00161  | -0.10565 | 0.0224   | -0.13331 | 0.0039   | 0.050205 | 0.27894  |
| 0.73346  | -0.05876 | 0.20495  | -0.03264 | 0.48165  | -0.04554 | 0.32613  | 0.047646 | 0.3042   |
| 0.23582  | -0.1617  | 0.00045  | -0.10709 | 0.02062  | -0.18814 | 4.29E-05 | 0.021143 | 0.64859  |
| 0.95973  | -0.14534 | 0.00164  | -0.10645 | 0.0214   | -0.15219 | 0.00097  | -0.02148 | 0.64333  |
| 0.99359  | -0.10192 | 0.02765  | -0.03489 | 0.45189  | -0.07338 | 0.11327  | 0.031777 | 0.49332  |
| 0.37535  | -0.06672 | 0.14997  | -0.0369  | 0.42631  | -0.05112 | 0.27028  | 0.009458 | 0.83848  |
| 0.41704  | -0.16402 | 0.00037  | -0.09706 | 0.03602  | -0.15691 | 0.00067  | -0.02067 | 0.65596  |
| 7.13E-08 | -0.04341 | 0.34928  | -0.06856 | 0.13903  | -0.15407 | 0.00084  | 0.034517 | 0.45679  |
| 0.60123  | 0.014234 | 0.75901  | 0.036532 | 0.43093  | 0.01728  | 0.70956  | 0.099793 | 0.03107  |
| 0.06621  | -0.01958 | 0.673    | -0.00877 | 0.85013  | -0.03105 | 0.50332  | 0.097357 | 0.03544  |
| 0.87353  | -0.06825 | 0.14084  | -0.08588 | 0.06368  | -0.08977 | 0.05254  | 0.0123   | 0.79094  |
| 0.027    | -0.08231 | 0.07556  | -0.03536 | 0.44587  | -0.07761 | 0.09391  | 0.078736 | 0.08921  |
| 0.51295  | -0.21464 | 2.86E-06 | -0.09832 | 0.03366  | -0.183   | 6.96E-05 | -0.03326 | 0.47341  |
| 0.00407  | -0.21144 | 4.04E-06 | -0.134   | 0.00372  | -0.10508 | 0.02315  | -0.07962 | 0.08565  |
| 0.17771  | -0.03989 | 0.38974  | -0.06319 | 0.17278  | -0.11422 | 0.01352  | 0.079395 | 0.08656  |
| 0.00036  | 0.04135  | 0.37262  | 0.039836 | 0.3904   | -0.02419 | 0.60206  | 0.092817 | 0.04499  |
| 6.43E-08 | -0.04274 | 0.35681  | 0.043031 | 0.35348  | -0.06652 | 0.15122  | 0.210439 | 4.50E-06 |
| 2.12E-55 | 0.448929 | 1.54E-24 | 0.423209 | 1.02E-21 | 0.310942 | 6.30E-12 | 0.738208 | 1.58E-81 |
| 1.80E-14 | 0.456245 | 2.18E-25 | 0.359822 | 1.01E-15 | 0.42676  | 4.30E-22 | 0.737779 | 2.18E-81 |
| 1.59E-60 | 0.354854 | 2.64E-15 | 0.378032 | 2.59E-17 | 0.325512 | 5.48E-13 | 0.808895 | #####    |
| 1.71E-31 | 0.095638 | 0.03883  | 0.060162 | 0.19435  | -0.01936 | 0.67652  | 0.609218 | 8.80E-49 |
| 1.53E-54 | 0.252242 | 3.28E-08 | 0.335689 | 9.18E-14 | 0.141567 | 0.00217  | 0.684674 | 7.21E-66 |
| 2.28E-42 | 0.754308 | 5.13E-87 | 0.584662 | 3.65E-44 | 0.546666 | 9.55E-38 | 0.853648 | #####    |
| 5.08E-14 | 0.297667 | 5.21E-11 | 0.342838 | 2.51E-14 | 0.245444 | 7.77E-08 | 0.678187 | 3.38E-64 |
| 0.93716  | 0.104942 | 0.02333  | 0.208404 | 5.58E-06 | 0.157189 | 0.00065  | 0.482408 | 1.36E-28 |
| 1.55E-46 | 0.656955 | 5.11E-59 | 0.528869 | 5.17E-35 | 0.480704 | 2.24E-28 | 0.847788 | #####    |
| 1.63E-28 | 0.241855 | 1.21E-07 | 0.387964 | 3.18E-18 | 0.299939 | 3.66E-11 | 0.767129 | 1.06E-91 |
| 1.43E-17 | 0.203861 | 8.98E-06 | 0.090533 | 0.05056  | 0.150608 | 0.0011   | 0.494915 | 3.17E-30 |
| 2.21E-52 | 0.61728  | 2.18E-50 | 0.473383 | 1.86E-27 | 0.467337 | 1.03E-26 | 0.831246 | #####    |
| 5.79E-69 | 0.476102 | 8.54E-28 | 0.407955 | 3.73E-20 | 0.328645 | 3.18E-13 | 0.861629 | #####    |
| 4.42E-06 | 0.136213 | 0.00318  | 0.225466 | 8.53E-07 | 0.145654 | 0.0016   | 0.543555 | 2.95E-37 |
| 4.15E-60 | 0.688374 | 7.68E-67 | 0.448579 | 1.68E-24 | 0.414513 | 8.13E-21 | 0.813908 | #####    |
| 2.78E-26 | 0.600784 | 3.77E-47 | 0.507791 | 5.61E-32 | 0.530432 | 3.02E-35 | 0.794163 | #####    |
| 3.76E-93 | 0.510489 | 2.35E-32 | 0.382217 | 1.08E-17 | 0.291247 | 1.39E-10 | 0.786279 | 2.75E-99 |
| 6.21E-28 | 0.38931  | 2.38E-18 | 0.398832 | 2.95E-19 | 0.385113 | 5.85E-18 | 0.675657 | 1.47E-63 |
| 4.29E-21 | 0.355294 | 2.43E-15 | 0.277039 | 1.13E-09 | 0.201188 | 1.18E-05 | 0.728771 | 1.69E-78 |

|          |          |          |          |          |          |          |          |          |
|----------|----------|----------|----------|----------|----------|----------|----------|----------|
| 1.46E-59 | 0.462451 | 4.01E-26 | 0.481867 | 1.60E-28 | 0.39446  | 7.76E-19 | 0.847687 | #####    |
| 1.10E-31 | 0.567633 | 3.48E-41 | 0.453221 | 4.92E-25 | 0.438762 | 2.14E-23 | 0.761488 | 1.33E-89 |
| 6.34E-47 | 0.613623 | 1.18E-49 | 0.542907 | 3.72E-37 | 0.518785 | 1.56E-33 | 0.869625 | #####    |
| 1.07E-37 | 0.474782 | 1.25E-27 | 0.48139  | 1.83E-28 | 0.417622 | 3.90E-21 | 0.810431 | #####    |
| 1.81E-30 | 0.302971 | 2.27E-11 | 0.342075 | 2.89E-14 | 0.237748 | 2.01E-07 | 0.723894 | 5.58E-77 |
| 2.09E-46 | 0.433358 | 8.39E-23 | 0.321262 | 1.13E-12 | 0.270272 | 2.92E-09 | 0.722227 | 1.81E-76 |
| 1.36E-05 | 0.609917 | 6.41E-49 | 0.340554 | 3.82E-14 | 0.399527 | 2.52E-19 | 0.546256 | 1.11E-37 |
| 6.26E-55 | 0.551826 | 1.43E-38 | 0.447074 | 2.50E-24 | 0.376678 | 3.43E-17 | 0.822757 | #####    |
| 3.30E-51 | 0.527999 | 6.97E-35 | 0.389541 | 2.27E-18 | 0.314649 | 3.43E-12 | 0.772476 | 9.62E-94 |
| 1.87E-39 | 0.422787 | 1.13E-21 | 0.455832 | 2.44E-25 | 0.373329 | 6.83E-17 | 0.822502 | #####    |
| 2.72E-17 | 0.344596 | 1.82E-14 | 0.440196 | 1.49E-23 | 0.373876 | 6.11E-17 | 0.767743 | 6.23E-92 |
| 6.92E-10 | 0.227651 | 6.63E-07 | 0.256463 | 1.89E-08 | 0.157046 | 0.00066  | 0.523474 | 3.24E-34 |
| 0.00086  | 0.164212 | 0.00037  | 0.246899 | 6.48E-08 | 0.23101  | 4.48E-07 | 0.450279 | 1.08E-24 |
| 2.14E-78 | 0.531836 | 1.86E-35 | 0.451049 | 8.77E-25 | 0.391112 | 1.61E-18 | 0.884953 | #####    |
| 4.22E-34 | 0.324711 | 6.29E-13 | 0.368467 | 1.83E-16 | 0.326897 | 4.31E-13 | 0.746154 | 3.48E-84 |
| 3.53E-31 | 0.374617 | 5.25E-17 | 0.415879 | 5.89E-21 | 0.37371  | 6.32E-17 | 0.746521 | 2.61E-84 |
| 7.50E-17 | 0.321572 | 1.07E-12 | 0.206975 | 6.49E-06 | 0.247157 | 6.27E-08 | 0.506352 | 8.88E-32 |
| 6.55E-19 | 0.194256 | 2.37E-05 | 0.157808 | 0.00062  | 0.054736 | 0.23777  | 0.455495 | 2.67E-25 |
| 2.43E-51 | 0.513116 | 1.00E-32 | 0.500113 | 6.35E-31 | 0.476155 | 8.41E-28 | 0.849291 | #####    |
| 7.10E-18 | 0.363506 | 4.91E-16 | 0.457796 | 1.43E-25 | 0.42779  | 3.34E-22 | 0.770033 | 8.39E-93 |
| 8.73E-53 | 0.505766 | 1.07E-31 | 0.45437  | 3.61E-25 | 0.388516 | 2.83E-18 | 0.853467 | #####    |
| 4.14E-24 | 0.300483 | 3.36E-11 | 0.284269 | 3.95E-10 | 0.169396 | 0.00024  | 0.52432  | 2.44E-34 |
| 1.22E-25 | 0.129476 | 0.00507  | 0.222765 | 1.16E-06 | 0.102687 | 0.02649  | 0.591396 | 2.17E-45 |
| 5.50E-44 | 0.444829 | 4.49E-24 | 0.40299  | 1.16E-19 | 0.332038 | 1.76E-13 | 0.70803  | 2.91E-72 |
| 5.96E-10 | 0.519019 | 1.44E-33 | 0.48191  | 1.57E-28 | 0.451868 | 7.05E-25 | 0.754874 | 3.23E-87 |
| 6.68E-47 | 0.618362 | 1.32E-50 | 0.464846 | 2.07E-26 | 0.354905 | 2.62E-15 | 0.796283 | #####    |
| 6.76E-41 | 0.6547   | 1.71E-58 | 0.490921 | 1.07E-29 | 0.499494 | 7.70E-31 | 0.832159 | #####    |
| 3.52E-09 | 0.490854 | 1.09E-29 | 0.391659 | 1.43E-18 | 0.366807 | 2.55E-16 | 0.570178 | 1.28E-41 |
| 2.71E-40 | 0.401161 | 1.75E-19 | 0.359671 | 1.04E-15 | 0.303671 | 2.03E-11 | 0.674627 | 2.68E-63 |
| 3.11E-18 | 0.304607 | 1.75E-11 | 0.14728  | 0.00141  | 0.12044  | 0.00918  | 0.595636 | 3.53E-46 |
| 7.47E-46 | 0.484243 | 7.91E-29 | 0.488985 | 1.92E-29 | 0.396024 | 5.50E-19 | 0.767707 | 6.44E-92 |
| 2.18E-25 | 0.367998 | 2.01E-16 | 0.428932 | 2.52E-22 | 0.30377  | 2.00E-11 | 0.76352  | 2.37E-90 |
| 7.76E-29 | 0.325832 | 5.18E-13 | 0.425774 | 5.47E-22 | 0.298713 | 4.43E-11 | 0.726501 | 8.70E-78 |
| 4.19E-19 | 0.251683 | 3.52E-08 | 0.314018 | 3.81E-12 | 0.188128 | 4.29E-05 | 0.703345 | 6.26E-71 |
| 2.24E-35 | 0.430466 | 1.73E-22 | 0.391131 | 1.61E-18 | 0.270864 | 2.69E-09 | 0.626009 | 3.52E-52 |
| 1.17E-37 | 0.322482 | 9.20E-13 | 0.300318 | 3.45E-11 | 0.237803 | 1.99E-07 | 0.754574 | 4.13E-87 |
| 2.46E-16 | 0.362038 | 6.56E-16 | 0.36112  | 7.86E-16 | 0.283415 | 4.47E-10 | 0.469405 | 5.77E-27 |
| 1.58E-14 | 0.667222 | 1.81E-61 | 0.501177 | 4.55E-31 | 0.533062 | 1.21E-35 | 0.707196 | 5.04E-72 |
| 1.64E-54 | 0.465343 | 1.80E-26 | 0.453841 | 4.16E-25 | 0.327775 | 3.70E-13 | 0.793004 | #####    |
| 1.02E-28 | 0.115063 | 0.01284  | 0.202168 | 1.07E-05 | 0.085423 | 0.06512  | 0.684624 | 7.43E-66 |
| 2.88E-25 | 0.17629  | 0.00013  | 0.216531 | 2.33E-06 | 0.124661 | 0.00699  | 0.516687 | 3.12E-33 |
| 2.26E-06 | 0.21403  | 3.06E-06 | 0.166491 | 0.0003   | 0.154379 | 0.00082  | 0.492863 | 5.94E-30 |
| 7.08E-16 | 0.41026  | 2.19E-20 | 0.377857 | 2.69E-17 | 0.28368  | 4.30E-10 | 0.620368 | 5.14E-51 |
| 6.08E-17 | 0.217143 | 2.17E-06 | 0.186029 | 5.24E-05 | 0.083917 | 0.07002  | 0.589932 | 4.03E-45 |
| 1.89E-10 | 0.444814 | 4.51E-24 | 0.450631 | 9.80E-25 | 0.421561 | 1.52E-21 | 0.646449 | 1.31E-56 |

|          |          |          |          |          |          |          |          |          |
|----------|----------|----------|----------|----------|----------|----------|----------|----------|
| 1.11E-23 | 0.348018 | 9.64E-15 | 0.382789 | 9.58E-18 | 0.256378 | 1.91E-08 | 0.622781 | 1.64E-51 |
| 0.02651  | 0.397855 | 3.66E-19 | 0.295377 | 7.42E-11 | 0.292152 | 1.21E-10 | 0.489547 | 1.62E-29 |
| 1.72E-16 | 0.222222 | 1.23E-06 | 0.148658 | 0.00127  | 0.109891 | 0.01752  | 0.531592 | 2.02E-35 |
| 9.21E-27 | 0.218843 | 1.80E-06 | 0.129997 | 0.0049   | 0.090348 | 0.05103  | 0.607999 | 1.52E-48 |
| 5.85E-12 | 0.371897 | 9.15E-17 | 0.294718 | 8.21E-11 | 0.200836 | 1.22E-05 | 0.492593 | 6.45E-30 |
| 1.18E-20 | 0.577487 | 6.91E-43 | 0.442525 | 8.16E-24 | 0.458235 | 1.27E-25 | 0.763835 | 1.81E-90 |
| 3.85E-17 | 0.495234 | 2.88E-30 | 0.458473 | 1.19E-25 | 0.414246 | 8.65E-21 | 0.820332 | #####    |
| 5.88E-06 | 0.601466 | 2.79E-47 | 0.48368  | 9.35E-29 | 0.498034 | 1.21E-30 | 0.647592 | 7.26E-57 |
| 3.18E-52 | 0.506336 | 8.92E-32 | 0.445171 | 4.11E-24 | 0.432344 | 1.08E-22 | 0.830454 | #####    |
| 3.36E-38 | 0.361066 | 7.94E-16 | 0.274702 | 1.57E-09 | 0.20281  | 1.00E-05 | 0.673006 | 6.80E-63 |
| 0.0006   | 0.162919 | 0.00041  | 0.184694 | 5.94E-05 | 0.226406 | 7.66E-07 | 0.541274 | 6.69E-37 |
| 2.34E-50 | 0.576836 | 8.99E-43 | 0.497722 | 1.33E-30 | 0.441143 | 1.17E-23 | 0.892828 | #####    |
| 1.96E-52 | 0.402154 | 1.40E-19 | 0.358517 | 1.30E-15 | 0.299407 | 3.97E-11 | 0.64518  | 2.53E-56 |
| 1.41E-38 | 0.479114 | 3.57E-28 | 0.424812 | 6.92E-22 | 0.381011 | 1.39E-17 | 0.759387 | 7.77E-89 |
| 3.24E-19 | 0.457837 | 1.42E-25 | 0.460512 | 6.83E-26 | 0.396912 | 4.52E-19 | 0.815231 | #####    |
| 7.05E-61 | 0.714816 | 3.06E-74 | 0.587466 | 1.14E-44 | 0.595398 | 3.91E-46 | 0.803923 | #####    |
| 4.47E-26 | 0.688225 | 8.41E-67 | 0.549134 | 3.87E-38 | 0.516402 | 3.42E-33 | 0.807957 | #####    |
| 8.39E-21 | 0.435992 | 4.33E-23 | 0.352873 | 3.86E-15 | 0.292162 | 1.21E-10 | 0.708386 | 2.30E-72 |
| 1.60E-18 | 0.457117 | 1.72E-25 | 0.371277 | 1.04E-16 | 0.363402 | 5.02E-16 | 0.604908 | 6.08E-48 |
| 1.66E-33 | 0.555679 | 3.40E-39 | 0.474133 | 1.50E-27 | 0.508917 | 3.91E-32 | 0.822815 | #####    |
| 6.08E-35 | 0.527561 | 8.10E-35 | 0.553867 | 6.71E-39 | 0.512305 | 1.31E-32 | 0.829132 | #####    |
| 1.52E-41 | 0.545438 | 1.49E-37 | 0.451606 | 7.56E-25 | 0.340131 | 4.12E-14 | 0.810003 | #####    |
| 9.85E-31 | 0.374523 | 5.35E-17 | 0.29638  | 6.36E-11 | 0.237041 | 2.19E-07 | 0.685851 | 3.55E-66 |
| 8.76E-61 | 0.486646 | 3.87E-29 | 0.479076 | 3.61E-28 | 0.425275 | 6.18E-22 | 0.863582 | #####    |
| 0.00032  | 0.12332  | 0.00763  | 0.101818 | 0.0278   | 0.089153 | 0.05419  | 0.472683 | 2.28E-27 |
| 3.43E-16 | 0.108628 | 0.01887  | 0.11886  | 0.01015  | 0.002279 | 0.96082  | 0.509596 | 3.14E-32 |
| 1.24E-74 | 0.319397 | 1.55E-12 | 0.32123  | 1.14E-12 | 0.201861 | 1.10E-05 | 0.698954 | 1.05E-69 |
| 5.73E-14 | 0.364766 | 3.83E-16 | 0.388031 | 3.14E-18 | 0.29681  | 5.95E-11 | 0.738555 | 1.21E-81 |
| 1.50E-44 | 0.529931 | 3.59E-35 | 0.454099 | 3.88E-25 | 0.388661 | 2.74E-18 | 0.861037 | #####    |
| 0.23711  | 0.260322 | 1.13E-08 | 0.241414 | 1.28E-07 | 0.284769 | 3.67E-10 | 0.526852 | 1.03E-34 |
| 1.15E-34 | 0.549167 | 3.82E-38 | 0.456533 | 2.02E-25 | 0.449116 | 1.46E-24 | 0.826376 | #####    |
| 3.97E-35 | 0.624919 | 5.93E-52 | 0.5613   | 4.04E-40 | 0.528085 | 6.77E-35 | 0.81113  | #####    |
| 3.50E-40 | 0.615012 | 6.24E-50 | 0.568368 | 2.61E-41 | 0.509091 | 3.70E-32 | 0.838668 | #####    |
| 5.75E-23 | 0.19173  | 3.03E-05 | 0.278407 | 9.26E-10 | 0.178639 | 0.0001   | 0.745183 | 7.43E-84 |
| 2.61E-64 | 0.475231 | 1.10E-27 | 0.474277 | 1.44E-27 | 0.424612 | 7.26E-22 | 0.798581 | #####    |
| 9.56E-09 | 0.323264 | 8.06E-13 | 0.28113  | 6.24E-10 | 0.368166 | 1.94E-16 | 0.664712 | 7.33E-61 |
| 8.51E-14 | 0.382012 | 1.13E-17 | 0.415494 | 6.45E-21 | 0.441576 | 1.04E-23 | 0.754963 | 3.01E-87 |
| 9.12E-14 | 0.442903 | 7.40E-24 | 0.220687 | 1.47E-06 | 0.155274 | 0.00076  | 0.38619  | 4.65E-18 |
| 7.42E-46 | 0.513445 | 9.02E-33 | 0.580144 | 2.35E-43 | 0.548265 | 5.33E-38 | 0.858256 | #####    |
| 2.15E-09 | 0.183384 | 6.71E-05 | 0.115165 | 0.01276  | 0.110637 | 0.01676  | 0.571557 | 7.43E-42 |
| 5.21E-35 | 0.250283 | 4.21E-08 | 0.234585 | 2.94E-07 | 0.116381 | 0.01184  | 0.664057 | 1.05E-60 |
| 0.00233  | 0.189618 | 3.72E-05 | 0.228868 | 5.76E-07 | 0.177998 | 0.00011  | 0.528933 | 5.06E-35 |
| 8.10E-63 | 0.510541 | 2.32E-32 | 0.400556 | 2.00E-19 | 0.323389 | 7.88E-13 | 0.805026 | #####    |
| 1.41E-47 | 0.613196 | 1.44E-49 | 0.452533 | 5.91E-25 | 0.431728 | 1.26E-22 | 0.791188 | #####    |
| 9.95E-51 | 0.518615 | 1.65E-33 | 0.479504 | 3.19E-28 | 0.451666 | 7.44E-25 | 0.892433 | #####    |

|          |          |          |          |          |          |          |          |          |
|----------|----------|----------|----------|----------|----------|----------|----------|----------|
| 1.30E-26 | 0.353117 | 3.68E-15 | 0.348443 | 8.90E-15 | 0.21769  | 2.05E-06 | 0.637393 | 1.32E-54 |
| 1.62E-42 | 0.590861 | 2.72E-45 | 0.416438 | 5.16E-21 | 0.41263  | 1.26E-20 | 0.807277 | #####    |
| 2.94E-10 | 0.297214 | 5.59E-11 | 0.318069 | 1.94E-12 | 0.197955 | 1.64E-05 | 0.667022 | 2.02E-61 |
| 2.69E-30 | 0.682809 | 2.20E-65 | 0.513329 | 9.37E-33 | 0.556391 | 2.60E-39 | 0.781745 | 2.02E-97 |
| 2.04E-71 | 0.545716 | 1.35E-37 | 0.520398 | 9.10E-34 | 0.433325 | 8.46E-23 | 0.896412 | #####    |
| 1.53E-54 | 0.68614  | 2.98E-66 | 0.587133 | 1.31E-44 | 0.507692 | 5.79E-32 | 0.915698 | #####    |
| 7.13E-18 | 0.571521 | 7.54E-42 | 0.456393 | 2.09E-25 | 0.478858 | 3.85E-28 | 0.708079 | 2.81E-72 |
| 6.83E-35 | 0.540594 | 8.53E-37 | 0.503115 | 2.48E-31 | 0.48118  | 1.95E-28 | 0.821102 | #####    |
| 8.33E-13 | 0.272444 | 2.16E-09 | 0.460824 | 6.27E-26 | 0.331975 | 1.78E-13 | 0.667819 | 1.29E-61 |
| 6.16E-25 | 0.682292 | 3.00E-65 | 0.576148 | 1.19E-42 | 0.587008 | 1.38E-44 | 0.746131 | 3.54E-84 |
| 0.00461  | -0.13368 | 0.0038   | -0.10787 | 0.01972  | -0.24714 | 6.28E-08 | 0.01505  | 0.74564  |
| 0.34656  | -0.10979 | 0.01762  | -0.16033 | 0.00051  | -0.24716 | 6.27E-08 | -0.03332 | 0.47256  |
| 0.00079  | -0.04067 | 0.38055  | -0.13463 | 0.00356  | -0.18839 | 4.19E-05 | 0.062454 | 0.17787  |
| 0.35323  | -0.1274  | 0.00583  | -0.22125 | 1.38E-06 | -0.31799 | 1.96E-12 | -0.03783 | 0.41472  |
| 0.0249   | -0.35645 | 1.95E-15 | -0.13235 | 0.00417  | -0.24512 | 8.10E-08 | -0.08829 | 0.05657  |
| 1.18E-08 | -0.19827 | 1.59E-05 | -0.17989 | 9.27E-05 | -0.37752 | 2.89E-17 | 0.05214  | 0.2608   |
| 0.3161   | -0.0597  | 0.1978   | -0.07059 | 0.1277   | -0.01375 | 0.76703  | 0.091378 | 0.04843  |
| 0.00111  | -0.11636 | 0.01185  | -0.12853 | 0.00541  | -0.21919 | 1.73E-06 | 0.118957 | 0.01008  |
| 0.12411  | -0.07423 | 0.10915  | -0.03753 | 0.41844  | -0.02673 | 0.56442  | 0.018085 | 0.69668  |
| 0.99718  | -0.2012  | 1.18E-05 | -0.1884  | 4.18E-05 | -0.30241 | 2.48E-11 | -0.06377 | 0.16892  |
| 0.07368  | -0.29293 | 1.08E-10 | -0.07399 | 0.11028  | -0.21696 | 2.22E-06 | -0.02519 | 0.58712  |
| 0.00231  | -0.16305 | 0.0004   | -0.24183 | 1.22E-07 | -0.28065 | 6.69E-10 | -0.18491 | 5.82E-05 |
| 0.01648  | 0.0367   | 0.4288   | -0.13104 | 0.00456  | -0.26611 | 5.19E-09 | 0.013187 | 0.77624  |
| 8.15E-17 | 0.202625 | 1.02E-05 | 0.040267 | 0.38529  | -0.0053  | 0.90914  | 0.274363 | 1.65E-09 |
| 0.18761  | -0.36085 | 8.29E-16 | -0.20753 | 6.13E-06 | -0.27969 | 7.70E-10 | -0.07351 | 0.11262  |
| 6.46E-06 | -0.09259 | 0.04553  | 0.038919 | 0.4014   | -0.02318 | 0.61728  | 0.159037 | 0.00056  |
| 0.0038   | -0.13944 | 0.00253  | -0.07383 | 0.11107  | -0.21271 | 3.53E-06 | 0.057405 | 0.21563  |
| 1.12E-09 | -0.15639 | 0.0007   | -0.15401 | 0.00084  | -0.2684  | 3.79E-09 | 0.195376 | 2.12E-05 |
| 5.48E-18 | 0.036517 | 0.43111  | 0.051447 | 0.2672   | -0.08131 | 0.0792   | 0.227664 | 6.62E-07 |
| 2.38E-06 | 0.057011 | 0.2188   | 0.130545 | 0.00472  | 0.0481   | 0.29961  | 0.100316 | 0.0302   |
| 0.13053  | -0.0275  | 0.55334  | 0.097346 | 0.03546  | 0.063255 | 0.17236  | 0.178779 | 0.0001   |
| 0.00035  | 0.149391 | 0.0012   | 0.042293 | 0.36181  | 0.051751 | 0.26438  | 0.25403  | 2.60E-08 |
| 3.19E-12 | 0.141267 | 0.00221  | 0.12139  | 0.00864  | 0.011105 | 0.81083  | 0.290302 | 1.61E-10 |
| 0.00052  | -0.2206  | 1.48E-06 | -0.26103 | 1.03E-08 | -0.26695 | 4.63E-09 | -0.20689 | 6.55E-06 |
| 0.9557   | -0.18888 | 3.99E-05 | -0.18796 | 4.36E-05 | -0.21114 | 4.17E-06 | 0.002275 | 0.96089  |
| 0.1718   | -0.18318 | 6.85E-05 | -0.21409 | 3.04E-06 | -0.27963 | 7.76E-10 | 0.032117 | 0.48871  |
| 3.36E-12 | -0.13389 | 0.00375  | -0.09378 | 0.04281  | -0.21715 | 2.17E-06 | 0.023192 | 0.61714  |
| 0.45053  | 0.061964 | 0.1813   | -0.07641 | 0.09911  | -0.14397 | 0.00181  | -0.03289 | 0.47828  |
| 2.66E-15 | -0.09194 | 0.04706  | -0.02605 | 0.57437  | -0.14996 | 0.00115  | 0.216276 | 2.39E-06 |
| 0.23035  | -0.24223 | 1.16E-07 | -0.24428 | 9.00E-08 | -0.36307 | 5.36E-16 | -0.1045  | 0.02392  |
| 0.00043  | -0.03692 | 0.42599  | 0.008742 | 0.85054  | -0.04408 | 0.34184  | 0.194006 | 2.43E-05 |
| 0.95435  | -0.05712 | 0.21792  | -0.19412 | 2.40E-05 | -0.17401 | 0.00016  | 0.139761 | 0.00247  |
| 0.00296  | 0.004611 | 0.92084  | -0.13522 | 0.00341  | -0.14993 | 0.00115  | 0.127505 | 0.00579  |
| 0.27806  | -0.12739 | 0.00584  | -0.18935 | 3.82E-05 | -0.2392  | 1.68E-07 | -0.09344 | 0.04357  |
| 8.39E-07 | 0.077173 | 0.09577  | -0.09766 | 0.03488  | -0.10865 | 0.01884  | 0.120077 | 0.0094   |



|          |          |          |          |          |          |          |          |          |
|----------|----------|----------|----------|----------|----------|----------|----------|----------|
| 0.69912  | -0.08852 | 0.05593  | -0.10758 | 0.02006  | -0.19819 | 1.60E-05 | -0.01689 | 0.71587  |
| 0.00034  | -0.13372 | 0.00379  | -0.05792 | 0.2115   | -0.20711 | 6.40E-06 | 0.04132  | 0.37297  |
| 0.00016  | -0.08539 | 0.06523  | -0.1338  | 0.00377  | -0.13761 | 0.00288  | -0.21404 | 3.05E-06 |
| 0.06563  | -0.13161 | 0.00439  | -0.24585 | 7.39E-08 | -0.28076 | 6.59E-10 | -0.12714 | 0.00594  |
| 0.09046  | 0.068193 | 0.14117  | -0.07674 | 0.09763  | -0.08424 | 0.06893  | 0.096405 | 0.03729  |
| 2.16E-05 | 0.158133 | 0.0006   | 0.067553 | 0.14495  | 0.01593  | 0.73134  | 0.246533 | 6.78E-08 |
| 0.01506  | -0.00057 | 0.9902   | -0.04648 | 0.31625  | -0.14195 | 0.00211  | 0.034219 | 0.46068  |
| 0.09745  | -0.14355 | 0.00187  | -0.16822 | 0.00026  | -0.21831 | 1.91E-06 | -0.05668 | 0.22148  |
| 6.37E-12 | 0.073444 | 0.11296  | -0.02762 | 0.55154  | -0.09901 | 0.03242  | 0.341    | 3.52E-14 |
| 2.90E-16 | 0.022788 | 0.62329  | -0.04693 | 0.31154  | -0.07845 | 0.0904   | 0.218687 | 1.83E-06 |
| 0.00106  | -0.35705 | 1.73E-15 | -0.1312  | 0.00451  | -0.29971 | 3.79E-11 | 0.000538 | 0.99074  |
| 0.00044  | -0.10133 | 0.02855  | -0.10049 | 0.0299   | -0.15696 | 0.00066  | -0.07737 | 0.0949   |
| 0.00215  | -0.15888 | 0.00057  | -0.20533 | 7.71E-06 | -0.25331 | 2.85E-08 | -0.08417 | 0.06919  |
| 1.39E-06 | -0.20326 | 9.56E-06 | -0.19271 | 2.76E-05 | -0.31324 | 4.32E-12 | 0.060285 | 0.19345  |
| 0.00319  | -0.18782 | 4.42E-05 | -0.21836 | 1.90E-06 | -0.22642 | 7.65E-07 | -0.07595 | 0.10117  |
| 0.55817  | -0.0506  | 0.27519  | -0.02695 | 0.56124  | -0.10468 | 0.02368  | -0.02985 | 0.51994  |
| 0.95943  | -0.11706 | 0.01136  | -0.091   | 0.04938  | -0.14715 | 0.00143  | -0.12951 | 0.00506  |
| 0.04192  | -0.24416 | 9.12E-08 | -0.18594 | 5.28E-05 | -0.2546  | 2.41E-08 | 0.024658 | 0.59506  |
| 5.46E-17 | 0.216778 | 2.26E-06 | 0.180828 | 8.51E-05 | 0.014079 | 0.76154  | 0.356863 | 1.80E-15 |
| 0.16012  | -0.03726 | 0.42184  | -0.08428 | 0.06882  | -0.19549 | 2.10E-05 | 0.143518 | 0.00188  |
| 1.18E-18 | 0.231116 | 4.43E-07 | 0.067686 | 0.14416  | -0.04439 | 0.33845  | 0.305719 | 1.47E-11 |
| 3.16E-17 | -0.00483 | 0.91714  | 0.011327 | 0.80713  | -0.1372  | 0.00297  | 0.197662 | 1.69E-05 |
| 4.44E-18 | 0.12008  | 0.00939  | 0.144641 | 0.00173  | 0.00673  | 0.88467  | 0.415937 | 5.81E-21 |
| 0.01206  | -0.19652 | 1.89E-05 | -0.16048 | 0.0005   | -0.08275 | 0.074    | -0.158   | 0.00061  |
| 0.01664  | -0.31985 | 1.44E-12 | -0.13647 | 0.00313  | -0.16553 | 0.00033  | -0.09396 | 0.04241  |
| 0.06322  | -0.1138  | 0.01387  | -0.09741 | 0.03534  | -0.2238  | 1.03E-06 | 0.033053 | 0.47611  |
| 0.14763  | -0.06729 | 0.14654  | -0.01116 | 0.80986  | -0.06741 | 0.14584  | 0.028137 | 0.54416  |
| 1.71E-15 | 0.184384 | 6.12E-05 | 0.110434 | 0.01697  | 0.095374 | 0.03938  | 0.20875  | 5.38E-06 |
| 0.00033  | -0.31405 | 3.78E-12 | -0.36492 | 3.71E-16 | -0.37056 | 1.20E-16 | -0.33375 | 1.30E-13 |
| 0.0036   | -0.29376 | 9.51E-11 | -0.25885 | 1.38E-08 | -0.22211 | 1.25E-06 | -0.26171 | 9.43E-09 |
| 0.00624  | -0.29837 | 4.67E-11 | -0.29986 | 3.70E-11 | -0.31678 | 2.41E-12 | -0.26882 | 3.58E-09 |
| 0.39701  | -0.14858 | 0.00128  | -0.12619 | 0.00632  | -0.11708 | 0.01134  | 0.009657 | 0.83513  |
| 0.01059  | -0.22364 | 1.05E-06 | -0.28375 | 4.26E-10 | -0.34391 | 2.06E-14 | -0.15773 | 0.00062  |
| 0.00542  | -0.15411 | 0.00083  | -0.20886 | 5.32E-06 | -0.29174 | 1.29E-10 | 0.063862 | 0.16827  |
| 0.73625  | -0.21638 | 2.36E-06 | -0.16676 | 0.0003   | -0.1687  | 0.00025  | -0.07118 | 0.12451  |
| 1.27E-10 | -0.06619 | 0.15324  | -0.03895 | 0.40103  | -0.16212 | 0.00044  | 0.196742 | 1.85E-05 |
| 0.12755  | -0.18232 | 7.41E-05 | -0.28342 | 4.47E-10 | -0.31136 | 5.89E-12 | -0.10744 | 0.02022  |
| 0.67802  | -0.11322 | 0.01436  | -0.17827 | 0.00011  | -0.19924 | 1.44E-05 | -0.09762 | 0.03496  |
| 0.00023  | -0.14618 | 0.00154  | -0.24617 | 7.10E-08 | -0.31918 | 1.61E-12 | -0.03973 | 0.39162  |
| 8.10E-05 | -0.34292 | 2.48E-14 | -0.25436 | 2.49E-08 | -0.20198 | 1.09E-05 | -0.15115 | 0.00105  |
| 0.04713  | 0.097987 | 0.03427  | 0.032103 | 0.4889   | 0.029215 | 0.52883  | 0.210566 | 4.44E-06 |
| 2.97E-05 | 0.198951 | 1.48E-05 | 0.113255 | 0.01433  | 0.120811 | 0.00897  | 0.221866 | 1.28E-06 |
| 5.51E-22 | 0.242812 | 1.08E-07 | 0.124197 | 0.00721  | 0.06847  | 0.13956  | 0.406894 | 4.76E-20 |
| 3.53E-09 | -0.05673 | 0.22108  | -0.08429 | 0.06876  | -0.1846  | 5.99E-05 | 0.138801 | 0.00265  |
| 4.46E-34 | 0.145555 | 0.00161  | 0.141793 | 0.00213  | -0.01846 | 0.6907   | 0.347417 | 1.08E-14 |

|          |          |          |          |          |          |          |          |          |
|----------|----------|----------|----------|----------|----------|----------|----------|----------|
| 9.39E-17 | 0.113577 | 0.01406  | 0.08988  | 0.05225  | -0.05479 | 0.2373   | 0.21975  | 1.63E-06 |
| 0.28867  | -0.20733 | 6.26E-06 | -0.19539 | 2.12E-05 | -0.19878 | 1.51E-05 | -0.18525 | 5.64E-05 |
| 4.95E-31 | 0.304617 | 1.75E-11 | 0.214452 | 2.92E-06 | 0.152555 | 0.00094  | 0.398103 | 3.47E-19 |
| 0.6756   | -0.17849 | 0.00011  | -0.29057 | 1.54E-10 | -0.30299 | 2.26E-11 | 0.027832 | 0.54853  |
| 0.14523  | -0.03333 | 0.47242  | -0.11949 | 0.00975  | -0.039   | 0.40037  | -0.00843 | 0.85588  |
| 0.42496  | -0.19209 | 2.93E-05 | -0.05797 | 0.21113  | -0.1145  | 0.01329  | -0.12166 | 0.0085   |
| 4.12E-14 | 0.03992  | 0.3894   | 0.088163 | 0.05693  | 0.023603 | 0.61092  | 0.272606 | 2.11E-09 |
| 0.00961  | -0.09693 | 0.03627  | -0.04576 | 0.32373  | -0.19676 | 1.85E-05 | -0.06059 | 0.1912   |
| 0.96804  | -0.2348  | 2.86E-07 | -0.33061 | 2.26E-13 | -0.32007 | 1.39E-12 | -0.11958 | 0.0097   |
| 7.83E-31 | 0.060557 | 0.19144  | 0.116663 | 0.01164  | -0.0582  | 0.20936  | 0.231112 | 4.43E-07 |
| 0.56845  | -0.23419 | 3.08E-07 | -0.24142 | 1.28E-07 | -0.36324 | 5.18E-16 | -0.11529 | 0.01266  |
| 0.06673  | -0.09116 | 0.04898  | 0.016859 | 0.71633  | -0.00916 | 0.8435   | 0.068336 | 0.14034  |
| 0.07155  | -0.19964 | 1.38E-05 | -0.06661 | 0.15067  | -0.16981 | 0.00023  | -0.07818 | 0.09148  |
| 0.00082  | -0.06375 | 0.169    | -0.09649 | 0.03711  | -0.18049 | 8.78E-05 | 0.180255 | 8.96E-05 |
| 3.61E-13 | 0.02733  | 0.55577  | -0.01628 | 0.72566  | -0.18749 | 4.56E-05 | 0.184332 | 6.15E-05 |
| 3.39E-08 | -0.02561 | 0.58089  | -0.01154 | 0.80359  | -0.10787 | 0.01972  | 0.114362 | 0.0134   |
| 0.76909  | -0.22787 | 6.47E-07 | -0.1664  | 0.0003   | -0.3152  | 3.13E-12 | -0.13137 | 0.00446  |
| 0.31331  | -0.09464 | 0.04092  | -0.20936 | 5.05E-06 | -0.18862 | 4.09E-05 | -0.02255 | 0.62693  |
| 0.56785  | -0.17827 | 0.00011  | -0.20341 | 9.41E-06 | -0.27463 | 1.59E-09 | -0.03011 | 0.51628  |
| 0.84484  | -0.0639  | 0.16804  | -0.08363 | 0.07097  | -0.17273 | 0.00018  | 0.115252 | 0.01269  |
| 2.77E-30 | 0.077456 | 0.09455  | 0.00435  | 0.9253   | -0.13214 | 0.00423  | 0.214229 | 2.99E-06 |
| 0.03424  | -0.14501 | 0.00168  | 0.08513  | 0.06605  | -0.02656 | 0.567    | 0.175959 | 0.00013  |
| 0.00508  | -0.07828 | 0.09108  | -0.12167 | 0.00849  | -0.19062 | 3.38E-05 | 0.224426 | 9.61E-07 |
| 0.03567  | -0.12005 | 0.00941  | -0.16173 | 0.00045  | -0.26587 | 5.36E-09 | 0.099123 | 0.03223  |
| 8.85E-05 | -0.13993 | 0.00244  | 0.007787 | 0.86672  | -0.07315 | 0.11439  | 0.186242 | 5.13E-05 |
| 5.30E-05 | -0.01263 | 0.78549  | -0.0083  | 0.85796  | -0.12403 | 0.00729  | 0.063124 | 0.17325  |
| 0.02712  | 0.000281 | 0.99516  | -0.10165 | 0.02806  | -0.21021 | 4.61E-06 | -0.09135 | 0.04851  |
| 0.0026   | -0.02416 | 0.60258  | 0.047773 | 0.30291  | -0.00556 | 0.90455  | 0.078042 | 0.09207  |
| 0.00274  | -0.08428 | 0.06882  | -0.08068 | 0.08156  | -0.14684 | 0.00146  | 0.026355 | 0.56996  |
| 8.52E-22 | -0.04395 | 0.34329  | 0.050262 | 0.27838  | -0.1723  | 0.00018  | 0.267062 | 4.56E-09 |
| 0.00834  | -0.22927 | 5.50E-07 | -0.191   | 3.26E-05 | -0.26182 | 9.29E-09 | 0.051034 | 0.27106  |
| 1.12E-09 | -0.08345 | 0.0716   | -0.02618 | 0.57258  | -0.07354 | 0.11249  | 0.24247  | 1.13E-07 |
| 0.88953  | -0.06565 | 0.15663  | -0.14227 | 0.00206  | -0.18562 | 5.45E-05 | -0.10895 | 0.01852  |
| 0.00186  | -0.02931 | 0.52746  | -0.05694 | 0.21938  | -0.09926 | 0.03199  | 0.089893 | 0.05222  |
| 2.00E-16 | -0.10313 | 0.02583  | -0.08183 | 0.07729  | -0.22703 | 7.13E-07 | 0.178554 | 0.0001   |
| 0.0347   | -0.0569  | 0.21974  | -0.11222 | 0.01525  | -0.11395 | 0.01374  | 0.169429 | 0.00023  |
| 0.3352   | -0.19493 | 2.22E-05 | -0.23554 | 2.62E-07 | -0.28597 | 3.07E-10 | -0.10779 | 0.01981  |
| 0.70292  | -0.20505 | 7.94E-06 | -0.18636 | 5.08E-05 | -0.2949  | 7.98E-11 | -0.04534 | 0.32827  |
| 0.15947  | 0.019937 | 0.6674   | -0.04896 | 0.29109  | -0.07212 | 0.1196   | -0.04437 | 0.33866  |
| 0.04537  | -0.29684 | 5.92E-11 | -0.23585 | 2.52E-07 | -0.33364 | 1.32E-13 | -0.03341 | 0.47142  |
| 0.93417  | -0.15737 | 0.00064  | -0.14059 | 0.00233  | -0.10468 | 0.02368  | -0.03961 | 0.3931   |
| 0.74861  | -0.26326 | 7.65E-09 | -0.22267 | 1.17E-06 | -0.31234 | 5.01E-12 | -0.08005 | 0.08396  |
| 0.00712  | -0.3601  | 9.59E-16 | -0.36074 | 8.47E-16 | -0.47886 | 3.84E-28 | -0.28498 | 3.55E-10 |
| 0.02419  | -0.06366 | 0.16962  | -0.18025 | 8.97E-05 | -0.12096 | 0.00888  | -0.10949 | 0.01794  |
| 0.22859  | -0.42729 | 3.78E-22 | -0.35276 | 3.95E-15 | -0.4121  | 1.43E-20 | -0.26104 | 1.03E-08 |

|          |          |          |          |          |          |          |          |          |
|----------|----------|----------|----------|----------|----------|----------|----------|----------|
| 0.01529  | -0.198   | 1.63E-05 | -0.24703 | 6.37E-08 | -0.40406 | 9.09E-20 | -0.18413 | 6.26E-05 |
| 7.77E-05 | -0.02822 | 0.54295  | -0.09752 | 0.03513  | -0.17148 | 0.0002   | 0.108188 | 0.01936  |
| 0.1329   | -0.35632 | 1.99E-15 | -0.30807 | 1.01E-11 | -0.41463 | 7.91E-21 | 0.057056 | 0.21844  |
| 3.29E-05 | -0.21425 | 2.98E-06 | -0.21206 | 3.78E-06 | -0.37411 | 5.83E-17 | -0.043   | 0.35387  |
| 0.00011  | -0.05095 | 0.27185  | -0.06407 | 0.16689  | -0.17438 | 0.00015  | 0.033828 | 0.46584  |
| 0.26026  | -0.30431 | 1.84E-11 | -0.16035 | 0.0005   | -0.28413 | 4.03E-10 | 0.009905 | 0.83095  |
| 0.62188  | -0.19289 | 2.71E-05 | -0.21255 | 3.59E-06 | -0.27798 | 9.83E-10 | -0.1016  | 0.02814  |
| 0.01541  | 0.027055 | 0.55976  | -0.09361 | 0.04318  | -0.15826 | 0.0006   | -0.01781 | 0.70106  |
| 0.00135  | 0.008552 | 0.85377  | -0.12963 | 0.00502  | -0.22024 | 1.54E-06 | 0.001816 | 0.96878  |
| 3.83E-13 | 0.157518 | 0.00063  | 0.148822 | 0.00126  | 0.078231 | 0.09129  | 0.227635 | 6.65E-07 |
| 1.45E-05 | -0.05502 | 0.23535  | -0.01071 | 0.8175   | -0.18227 | 7.44E-05 | 0.134462 | 0.0036   |
| 0.07926  | -0.27726 | 1.09E-09 | -0.32211 | 9.81E-13 | -0.34831 | 9.12E-15 | 0.002542 | 0.9563   |
| 0.28317  | -0.06801 | 0.14223  | -0.12862 | 0.00538  | -0.21692 | 2.23E-06 | 0.060812 | 0.18957  |
| 3.39E-14 | 0.116357 | 0.01186  | -0.01958 | 0.67304  | -0.13592 | 0.00325  | 0.178444 | 0.00011  |
| 0.21542  | -0.29311 | 1.05E-10 | -0.32258 | 9.05E-13 | -0.37555 | 4.34E-17 | -0.21138 | 4.07E-06 |
| 0.00014  | 0.103635 | 0.02512  | 0.008379 | 0.85669  | 0.01342  | 0.7724   | 0.165579 | 0.00033  |
| 0.66984  | -0.08417 | 0.06916  | -0.14134 | 0.0022   | -0.16236 | 0.00043  | -0.04704 | 0.31043  |
| 2.74E-05 | 0.024722 | 0.59411  | -0.04375 | 0.34553  | -0.06189 | 0.18186  | 0.092602 | 0.04549  |
| 0.00122  | -0.27779 | 1.01E-09 | -0.13572 | 0.0033   | -0.18844 | 4.17E-05 | -0.15571 | 0.00073  |
| 0.05132  | -0.21068 | 4.38E-06 | -0.06163 | 0.18367  | -0.14347 | 0.00188  | 0.0098   | 0.83273  |
| 6.40E-06 | -0.01483 | 0.74926  | -0.00764 | 0.86918  | -0.15419 | 0.00083  | 0.404142 | 8.92E-20 |
| 6.94E-09 | 0.597261 | 1.75E-46 | 0.714114 | 4.93E-74 | 0.653657 | 2.99E-58 | 0.347141 | 1.14E-14 |
| 1.34E-21 | 0.526395 | 1.21E-34 | 0.802535 | #####    | 0.657963 | 2.96E-59 | 0.486716 | 3.79E-29 |
| 9.03E-12 | 0.426657 | 4.41E-22 | 0.841403 | #####    | 0.581592 | 1.30E-43 | 0.412727 | 1.24E-20 |
| 1.21E-20 | 0.485016 | 6.29E-29 | 0.750649 | 9.87E-86 | 0.566707 | 5.00E-41 | 0.534258 | 8.00E-36 |
| 1.04E-12 | 0.601134 | 3.23E-47 | 0.830213 | #####    | 0.689334 | 4.27E-67 | 0.457171 | 1.70E-25 |
| 7.78E-19 | 0.65699  | 5.01E-59 | 0.789724 | #####    | 0.701024 | 2.80E-70 | 0.494772 | 3.31E-30 |
| 8.41E-07 | 0.575349 | 1.64E-42 | 0.685513 | 4.35E-66 | 0.494324 | 3.80E-30 | 0.285791 | 3.15E-10 |
| 6.09E-11 | 0.51591  | 4.03E-33 | 0.724585 | 3.41E-77 | 0.564721 | 1.08E-40 | 0.418766 | 2.97E-21 |
| 1.30E-06 | 0.424933 | 6.72E-22 | 0.628256 | 1.19E-52 | 0.527408 | 8.53E-35 | 0.335922 | 8.81E-14 |
| 1.81E-20 | 0.611119 | 3.71E-49 | 0.863634 | #####    | 0.70221  | 1.30E-70 | 0.472896 | 2.14E-27 |
| 1.63E-20 | 0.632344 | 1.62E-53 | 0.746028 | 3.84E-84 | 0.573642 | 3.24E-42 | 0.337642 | 6.47E-14 |
| 2.10E-18 | 0.540724 | 8.15E-37 | 0.829364 | #####    | 0.662615 | 2.34E-60 | 0.477138 | 6.33E-28 |
| 9.59E-20 | 0.559074 | 9.44E-40 | 0.820182 | #####    | 0.667886 | 1.24E-61 | 0.412787 | 1.22E-20 |
| 5.87E-23 | 0.525791 | 1.48E-34 | 0.814139 | #####    | 0.672927 | 7.12E-63 | 0.552742 | 1.02E-38 |
| 1.01E-13 | 0.630515 | 3.97E-53 | 0.760621 | 2.76E-89 | 0.693879 | 2.58E-68 | 0.460982 | 6.01E-26 |
| 0.01906  | 0.422814 | 1.12E-21 | 0.701449 | 2.13E-70 | 0.526106 | 1.33E-34 | 0.232793 | 3.63E-07 |
| 5.91E-19 | 0.547076 | 8.23E-38 | 0.752239 | 2.75E-86 | 0.642976 | 7.85E-56 | 0.478806 | 3.90E-28 |
| 0.00383  | 0.413456 | 1.04E-20 | 0.649255 | 3.05E-57 | 0.52856  | 5.75E-35 | 0.257498 | 1.65E-08 |
| 3.78E-10 | 0.45274  | 5.59E-25 | 0.795773 | #####    | 0.568454 | 2.53E-41 | 0.424453 | 7.55E-22 |
| 2.84E-09 | 0.263927 | 6.99E-09 | 0.739958 | 4.18E-82 | 0.468784 | 6.87E-27 | 0.297358 | 5.47E-11 |
| 1.14E-24 | 0.561451 | 3.81E-40 | 0.787931 | #####    | 0.63648  | 2.09E-54 | 0.582465 | 9.06E-44 |
| 7.85E-11 | 0.559464 | 8.14E-40 | 0.734274 | 3.00E-80 | 0.604742 | 6.55E-48 | 0.404326 | 8.56E-20 |
| 8.44E-18 | 0.459297 | 9.52E-26 | 0.622614 | 1.78E-51 | 0.43053  | 1.70E-22 | 0.405357 | 6.77E-20 |
| 0.00083  | 0.273038 | 1.99E-09 | 0.757529 | 3.64E-88 | 0.519041 | 1.43E-33 | 0.287211 | 2.55E-10 |

|          |          |          |          |          |          |          |          |          |
|----------|----------|----------|----------|----------|----------|----------|----------|----------|
| 0.00055  | 0.593939 | 7.32E-46 | 0.727716 | 3.63E-78 | 0.525479 | 1.65E-34 | 0.281799 | 5.66E-10 |
| 3.22E-18 | 0.489468 | 1.66E-29 | 0.829805 | #####    | 0.645247 | 2.45E-56 | 0.537021 | 3.03E-36 |
| 2.19E-15 | 0.511731 | 1.58E-32 | 0.764743 | 8.34E-91 | 0.572522 | 5.06E-42 | 0.419122 | 2.73E-21 |
| 4.43E-09 | 0.613233 | 1.41E-49 | 0.656468 | 6.64E-59 | 0.605846 | 4.00E-48 | 0.344989 | 1.69E-14 |
| 6.09E-07 | 0.474254 | 1.45E-27 | 0.65164  | 8.70E-58 | 0.496567 | 1.91E-30 | 0.348868 | 8.22E-15 |
| 0.00073  | 0.446046 | 3.27E-24 | 0.508028 | 5.20E-32 | 0.330262 | 2.40E-13 | 0.178284 | 0.00011  |
| 1.13E-18 | 0.642902 | 8.15E-56 | 0.872573 | #####    | 0.701018 | 2.81E-70 | 0.487968 | 2.61E-29 |
| 4.93E-07 | 0.461617 | 5.05E-26 | 0.781585 | 2.34E-97 | 0.534048 | 8.61E-36 | 0.33639  | 8.10E-14 |
| 4.60E-16 | 0.533752 | 9.55E-36 | 0.7997   | #####    | 0.620626 | 4.55E-51 | 0.516704 | 3.10E-33 |
| 1.28E-13 | 0.497133 | 1.60E-30 | 0.743844 | 2.11E-83 | 0.619162 | 9.05E-51 | 0.408416 | 3.36E-20 |
| 1.31E-06 | 0.611133 | 3.69E-49 | 0.741538 | 1.25E-82 | 0.593351 | 9.42E-46 | 0.309115 | 8.49E-12 |
| 7.83E-13 | 0.540787 | 7.97E-37 | 0.728345 | 2.31E-78 | 0.552391 | 1.16E-38 | 0.426864 | 4.19E-22 |
| 7.95E-09 | 0.425383 | 6.02E-22 | 0.696528 | 4.89E-69 | 0.552179 | 1.26E-38 | 0.399841 | 2.35E-19 |
| 2.85E-26 | 0.639012 | 5.87E-55 | 0.840744 | #####    | 0.715756 | 1.61E-74 | 0.589289 | 5.28E-45 |
| 6.09E-22 | 0.611204 | 3.57E-49 | 0.808431 | #####    | 0.684382 | 8.59E-66 | 0.502344 | 3.16E-31 |
| 4.64E-17 | 0.464222 | 2.46E-26 | 0.768074 | 4.67E-92 | 0.550522 | 2.32E-38 | 0.427368 | 3.71E-22 |
| 1.88E-11 | 0.38654  | 4.32E-18 | 0.642547 | 9.77E-56 | 0.489706 | 1.55E-29 | 0.368646 | 1.77E-16 |
| 0.00013  | 0.413512 | 1.03E-20 | 0.639819 | 3.91E-55 | 0.539816 | 1.13E-36 | 0.279774 | 7.60E-10 |
| 4.84E-11 | 0.349492 | 7.31E-15 | 0.701899 | 1.59E-70 | 0.446096 | 3.23E-24 | 0.401691 | 1.55E-19 |
| 0.00037  | 0.403356 | 1.07E-19 | 0.696147 | 6.22E-69 | 0.473778 | 1.67E-27 | 0.259592 | 1.25E-08 |
| 9.14E-38 | 0.587045 | 1.35E-44 | 0.806479 | #####    | 0.572041 | 6.13E-42 | 0.602651 | 1.65E-47 |
| 0.32076  | 0.433084 | 8.99E-23 | 0.418999 | 2.81E-21 | 0.331292 | 2.00E-13 | 0.06433  | 0.16517  |
| 2.59E-06 | 0.367082 | 2.42E-16 | 0.637773 | 1.09E-54 | 0.421187 | 1.66E-21 | 0.357739 | 1.52E-15 |
| 4.66E-13 | 0.325111 | 5.87E-13 | 0.574176 | 2.62E-42 | 0.383486 | 8.27E-18 | 0.346715 | 1.23E-14 |
| 0.91413  | 0.326927 | 4.29E-13 | 0.528854 | 5.20E-35 | 0.410224 | 2.21E-20 | 0.017339 | 0.7086   |
| 7.58E-32 | 0.372843 | 7.55E-17 | 0.269385 | 3.31E-09 | 0.217475 | 2.10E-06 | 0.31715  | 2.26E-12 |
| 8.53E-32 | 0.159328 | 0.00055  | 0.184218 | 6.21E-05 | 0.007509 | 0.87144  | 0.351087 | 5.41E-15 |
| 3.07E-38 | 0.27412  | 1.71E-09 | 0.337451 | 6.69E-14 | 0.174142 | 0.00016  | 0.35632  | 1.99E-15 |
| 4.52E-67 | 0.30939  | 8.11E-12 | 0.291709 | 1.30E-10 | 0.157843 | 0.00062  | 0.327135 | 4.14E-13 |
| 1.94E-72 | 0.546607 | 9.76E-38 | 0.458279 | 1.26E-25 | 0.334277 | 1.18E-13 | 0.487528 | 2.98E-29 |
| 5.13E-41 | 0.144131 | 0.00179  | 0.181307 | 8.14E-05 | 0.092491 | 0.04575  | 0.315261 | 3.10E-12 |
| 7.22E-97 | 0.428294 | 2.95E-22 | 0.410304 | 2.17E-20 | 0.248749 | 5.12E-08 | 0.583731 | 5.37E-44 |
| 1.59E-58 | 0.238643 | 1.80E-07 | 0.190714 | 3.35E-05 | 0.003328 | 0.94282  | 0.351405 | 5.10E-15 |
| #####    | 0.539745 | 1.15E-36 | 0.447845 | 2.04E-24 | 0.293213 | 1.03E-10 | 0.60832  | 1.32E-48 |
| 2.62E-24 | 0.19678  | 1.84E-05 | 0.232273 | 3.86E-07 | 0.094054 | 0.0422   | 0.208794 | 5.36E-06 |
| 1.24E-95 | 0.356575 | 1.90E-15 | 0.356138 | 2.07E-15 | 0.262347 | 8.65E-09 | 0.486563 | 3.97E-29 |
| 1.22E-67 | 0.160858 | 0.00048  | 0.228577 | 5.96E-07 | 0.026228 | 0.57182  | 0.346991 | 1.17E-14 |
| 1.23E-29 | 0.285534 | 3.27E-10 | 0.262949 | 7.98E-09 | 0.192247 | 2.88E-05 | 0.274967 | 1.51E-09 |
| 3.05E-39 | 0.23655  | 2.32E-07 | 0.260697 | 1.08E-08 | 0.107109 | 0.02061  | 0.359663 | 1.04E-15 |
| 7.01E-57 | 0.150883 | 0.00107  | 0.203085 | 9.73E-06 | 0.046839 | 0.31248  | 0.348193 | 9.33E-15 |
| 4.75E-25 | 0.239712 | 1.58E-07 | 0.201813 | 1.11E-05 | 0.116599 | 0.01168  | 0.367667 | 2.15E-16 |
| 2.13E-22 | 0.079346 | 0.08675  | -0.05328 | 0.25047  | -0.0415  | 0.37084  | 0.275161 | 1.47E-09 |
| 3.21E-48 | 0.378351 | 2.43E-17 | 0.293191 | 1.04E-10 | 0.214182 | 3.01E-06 | 0.334831 | 1.07E-13 |
| 6.40E-58 | 0.312352 | 5.01E-12 | 0.300446 | 3.38E-11 | 0.198236 | 1.59E-05 | 0.415771 | 6.04E-21 |
| 2.96E-44 | -0.31849 | 1.81E-12 | -0.13748 | 0.00291  | -0.05115 | 0.26996  | -0.37981 | 1.79E-17 |

|          |          |          |          |          |          |          |          |          |
|----------|----------|----------|----------|----------|----------|----------|----------|----------|
| 2.90E-24 | 0.188389 | 4.19E-05 | 0.222637 | 1.18E-06 | 0.061368 | 0.18555  | 0.234016 | 3.14E-07 |
| 4.71E-26 | 0.167616 | 0.00027  | 0.097696 | 0.03481  | 0.058089 | 0.2102   | 0.258034 | 1.54E-08 |
| #####    | 0.463899 | 2.69E-26 | 0.416006 | 5.72E-21 | 0.381891 | 1.16E-17 | 0.585229 | 2.89E-44 |
| 8.42E-30 | 0.12353  | 0.00753  | 0.173762 | 0.00016  | 0.059293 | 0.20089  | 0.303729 | 2.01E-11 |
| 2.08E-52 | 0.179751 | 9.39E-05 | 0.317479 | 2.14E-12 | 0.129614 | 0.00503  | 0.447596 | 2.18E-24 |
| 6.27E-34 | 0.173456 | 0.00017  | 0.240742 | 1.39E-07 | 0.146444 | 0.00151  | 0.333444 | 1.37E-13 |
| 9.10E-71 | 0.351316 | 5.18E-15 | 0.206248 | 7.01E-06 | 0.205128 | 7.87E-06 | 0.448182 | 1.87E-24 |
| 4.09E-99 | 0.360926 | 8.16E-16 | 0.260571 | 1.10E-08 | 0.172714 | 0.00018  | 0.534752 | 6.73E-36 |
| 5.60E-37 | 0.348538 | 8.74E-15 | 0.121059 | 0.00883  | 0.076644 | 0.09807  | 0.313206 | 4.35E-12 |
| 1.49E-27 | 0.071117 | 0.12486  | 0.077568 | 0.09407  | -0.03991 | 0.38957  | 0.371472 | 9.97E-17 |
| 3.05E-43 | -0.01863 | 0.68802  | 0.014989 | 0.74664  | -0.10221 | 0.0272   | 0.28538  | 3.35E-10 |
| #####    | 0.389587 | 2.24E-18 | 0.407473 | 4.17E-20 | 0.220983 | 1.42E-06 | 0.594988 | 4.67E-46 |
| 2.50E-95 | 0.40299  | 1.16E-19 | 0.305745 | 1.46E-11 | 0.212977 | 3.43E-06 | 0.514675 | 6.04E-33 |
| 1.40E-54 | 0.36755  | 2.20E-16 | 0.258586 | 1.43E-08 | 0.205811 | 7.33E-06 | 0.422297 | 1.27E-21 |
| 6.15E-69 | 0.551356 | 1.71E-38 | 0.47198  | 2.78E-27 | 0.347432 | 1.08E-14 | 0.520172 | 9.81E-34 |
| #####    | 0.561125 | 4.32E-40 | 0.551284 | 1.75E-38 | 0.431228 | 1.43E-22 | 0.663509 | 1.43E-60 |
| 1.72E-56 | 0.275129 | 1.48E-09 | 0.228609 | 5.93E-07 | 0.085091 | 0.06617  | 0.346371 | 1.31E-14 |
| 8.22E-60 | 0.191047 | 3.24E-05 | 0.173951 | 0.00016  | 0.136564 | 0.00311  | 0.518298 | 1.83E-33 |
| 2.52E-35 | -0.15946 | 0.00054  | -0.14852 | 0.00129  | -0.04846 | 0.29602  | -0.30212 | 2.60E-11 |
| 5.11E-51 | 0.407857 | 3.82E-20 | 0.217706 | 2.04E-06 | 0.179032 | 0.0001   | 0.333325 | 1.40E-13 |
| 1.96E-29 | 0.383854 | 7.65E-18 | 0.146773 | 0.00147  | 0.05261  | 0.25652  | 0.280081 | 7.27E-10 |
| 3.71E-32 | 0.233707 | 3.26E-07 | 0.1481   | 0.00133  | 0.062455 | 0.17786  | 0.263096 | 7.82E-09 |
| 8.90E-47 | 0.221634 | 1.32E-06 | 0.171922 | 0.00019  | 0.061866 | 0.182    | 0.296447 | 6.29E-11 |
| 2.09E-90 | 0.489301 | 1.75E-29 | 0.369209 | 1.58E-16 | 0.249723 | 4.53E-08 | 0.500744 | 5.21E-31 |
| 1.31E-71 | 0.279033 | 8.46E-10 | 0.314852 | 3.32E-12 | 0.221445 | 1.35E-06 | 0.476168 | 8.38E-28 |
| #####    | 0.272828 | 2.05E-09 | 0.321581 | 1.07E-12 | 0.168998 | 0.00024  | 0.495594 | 2.57E-30 |
| 1.63E-50 | 0.40327  | 1.09E-19 | 0.230838 | 4.57E-07 | 0.176199 | 0.00013  | 0.310208 | 7.11E-12 |
| 1.22E-64 | 0.428582 | 2.75E-22 | 0.342188 | 2.83E-14 | 0.299807 | 3.73E-11 | 0.501251 | 4.45E-31 |
| 5.65E-40 | -0.26141 | 9.81E-09 | -0.02446 | 0.59798  | -0.07679 | 0.09744  | -0.20701 | 6.46E-06 |
| 6.64E-26 | 0.126932 | 0.00602  | 0.040152 | 0.38664  | 0.078789 | 0.08899  | 0.317095 | 2.28E-12 |
| 2.57E-59 | 0.226955 | 7.19E-07 | 0.273964 | 1.74E-09 | 0.134741 | 0.00353  | 0.391925 | 1.35E-18 |
| 3.91E-72 | 0.334917 | 1.05E-13 | 0.325828 | 5.19E-13 | 0.183112 | 6.89E-05 | 0.5517   | 1.50E-38 |
| #####    | 0.615044 | 6.15E-50 | 0.508127 | 5.04E-32 | 0.439054 | 1.99E-23 | 0.700393 | 4.20E-70 |
| 1.76E-91 | 0.320481 | 1.29E-12 | 0.346895 | 1.19E-14 | 0.249121 | 4.89E-08 | 0.543673 | 2.83E-37 |
| 2.08E-33 | 0.167934 | 0.00027  | 0.004168 | 0.92842  | -0.05164 | 0.26536  | 0.27768  | 1.03E-09 |
| 4.81E-50 | 0.262939 | 7.99E-09 | 0.232031 | 3.97E-07 | 0.044093 | 0.34172  | 0.367912 | 2.05E-16 |
| 1.26E-51 | 0.282387 | 5.20E-10 | 0.175743 | 0.00013  | 0.147753 | 0.00136  | 0.404985 | 7.37E-20 |
| 1.72E-67 | 0.509002 | 3.80E-32 | 0.493068 | 5.58E-30 | 0.41573  | 6.10E-21 | 0.509394 | 3.35E-32 |
| 6.79E-65 | 0.154324 | 0.00082  | 0.138579 | 0.00269  | -0.03961 | 0.39303  | 0.356064 | 2.10E-15 |
| 3.26E-41 | 0.374909 | 4.94E-17 | 0.366268 | 2.84E-16 | 0.269276 | 3.36E-09 | 0.413704 | 9.83E-21 |
| 1.82E-87 | 0.576335 | 1.10E-42 | 0.525398 | 1.69E-34 | 0.415077 | 7.12E-21 | 0.64724  | 8.72E-57 |
| 2.91E-24 | 0.122667 | 0.00796  | 0.194924 | 2.22E-05 | 0.125461 | 0.00663  | 0.208331 | 5.63E-06 |
| 3.07E-37 | 0.320152 | 1.37E-12 | 0.224406 | 9.63E-07 | 0.192178 | 2.90E-05 | 0.488373 | 2.31E-29 |
| 7.06E-98 | 0.329815 | 2.60E-13 | 0.230492 | 4.76E-07 | 0.089428 | 0.05345  | 0.485109 | 6.12E-29 |
| 8.41E-76 | 0.30315  | 2.21E-11 | 0.216267 | 2.39E-06 | 0.200566 | 1.26E-05 | 0.543515 | 2.99E-37 |

|          |          |          |          |          |          |          |          |          |
|----------|----------|----------|----------|----------|----------|----------|----------|----------|
| 1.13E-54 | 0.353817 | 3.22E-15 | 0.247645 | 5.89E-08 | 0.148218 | 0.00132  | 0.393556 | 9.46E-19 |
| 1.77E-36 | 0.129563 | 0.00504  | 0.160601 | 0.00049  | -0.00723 | 0.87618  | 0.161792 | 0.00045  |
| 8.33E-28 | 0.201257 | 1.17E-05 | 0.149113 | 0.00123  | 0.062937 | 0.17453  | 0.342801 | 2.53E-14 |
| 4.96E-81 | 0.447965 | 1.98E-24 | 0.355964 | 2.14E-15 | 0.230525 | 4.75E-07 | 0.477813 | 5.21E-28 |
| 5.25E-85 | 0.404174 | 8.86E-20 | 0.321024 | 1.18E-12 | 0.221467 | 1.34E-06 | 0.604297 | 7.98E-48 |
| 1.39E-31 | 0.228531 | 5.99E-07 | 0.11827  | 0.01053  | 0.066719 | 0.14999  | 0.295168 | 7.66E-11 |
| #####    | 0.348681 | 8.51E-15 | 0.337563 | 6.56E-14 | 0.150796 | 0.00108  | 0.530366 | 3.09E-35 |
| 1.20E-58 | 0.28655  | 2.82E-10 | 0.221645 | 1.32E-06 | 0.056777 | 0.22071  | 0.307358 | 1.13E-11 |
| 5.14E-34 | 0.101885 | 0.02769  | 0.176827 | 0.00012  | -0.02541 | 0.58388  | 0.389467 | 2.30E-18 |
| 1.88E-30 | -0.26744 | 4.33E-09 | -0.15692 | 0.00067  | -0.06252 | 0.17744  | -0.33641 | 8.07E-14 |
| 6.53E-46 | 0.216282 | 2.39E-06 | 0.294159 | 8.95E-11 | 0.159272 | 0.00055  | 0.309393 | 8.11E-12 |
| 1.71E-29 | 0.315174 | 3.14E-12 | 0.361598 | 7.15E-16 | 0.209332 | 5.06E-06 | 0.336138 | 8.47E-14 |
| 8.48E-26 | -0.17071 | 0.00021  | -0.08856 | 0.05583  | -0.05737 | 0.21593  | -0.35308 | 3.71E-15 |
| 9.70E-23 | 0.371535 | 9.85E-17 | 0.216699 | 2.28E-06 | 0.259952 | 1.19E-08 | 0.256064 | 1.99E-08 |
| 3.68E-19 | 0.103759 | 0.02494  | 0.096865 | 0.03639  | 0.042374 | 0.36089  | 0.2366   | 2.30E-07 |
| 3.43E-25 | 0.23586  | 2.52E-07 | 0.20071  | 1.24E-05 | 0.123364 | 0.00761  | 0.232724 | 3.66E-07 |
| 2.33E-40 | 0.133214 | 0.00393  | 0.17568  | 0.00014  | 0.011657 | 0.80162  | 0.372516 | 8.07E-17 |
| 1.70E-61 | 0.27579  | 1.35E-09 | 0.251048 | 3.82E-08 | 0.115412 | 0.01257  | 0.452378 | 6.16E-25 |
| 3.42E-61 | 0.399957 | 2.29E-19 | 0.284981 | 3.55E-10 | 0.216664 | 2.29E-06 | 0.495652 | 2.53E-30 |
| 1.00E-82 | 0.504    | 1.87E-31 | 0.440608 | 1.34E-23 | 0.334676 | 1.10E-13 | 0.477609 | 5.53E-28 |
| 6.46E-82 | 0.522197 | 4.98E-34 | 0.437891 | 2.68E-23 | 0.394811 | 7.18E-19 | 0.557417 | 1.77E-39 |
| 7.57E-47 | 0.242036 | 1.19E-07 | 0.268782 | 3.60E-09 | 0.193735 | 2.49E-05 | 0.389051 | 2.52E-18 |
| 1.59E-81 | 0.487798 | 2.74E-29 | 0.475247 | 1.09E-27 | 0.372529 | 8.05E-17 | 0.621881 | 2.52E-51 |
| 1.71E-68 | 0.473754 | 1.68E-27 | 0.447742 | 2.10E-24 | 0.39218  | 1.28E-18 | 0.535376 | 5.41E-36 |
| 1.10E-36 | 0.15035  | 0.00112  | 0.194791 | 2.25E-05 | 0.014651 | 0.75218  | 0.29753  | 5.32E-11 |
| 2.04E-56 | 0.24912  | 4.89E-08 | 0.285047 | 3.52E-10 | 0.112696 | 0.01483  | 0.399486 | 2.55E-19 |
| 6.04E-39 | 0.19441  | 2.33E-05 | 0.208056 | 5.79E-06 | 0.092435 | 0.04588  | 0.294642 | 8.31E-11 |
| 4.17E-96 | 0.399465 | 2.56E-19 | 0.332355 | 1.66E-13 | 0.223815 | 1.03E-06 | 0.591635 | 1.96E-45 |
| 3.66E-43 | 0.189477 | 3.77E-05 | 0.121294 | 0.00869  | -0.03675 | 0.42823  | 0.320265 | 1.34E-12 |
| 4.38E-42 | 0.476935 | 6.72E-28 | 0.296712 | 6.04E-11 | 0.203795 | 9.04E-06 | 0.413522 | 1.03E-20 |
| 4.76E-64 | 0.283669 | 4.31E-10 | 0.399762 | 2.39E-19 | 0.237053 | 2.18E-07 | 0.474083 | 1.53E-27 |
| 7.80E-61 | 0.394667 | 7.41E-19 | 0.289107 | 1.92E-10 | 0.106645 | 0.02117  | 0.465802 | 1.58E-26 |
| 7.86E-39 | 0.057728 | 0.21305  | 0.191106 | 3.22E-05 | -0.00296 | 0.94906  | 0.445064 | 4.23E-24 |
| 7.88E-33 | 0.116719 | 0.0116   | 0.130155 | 0.00485  | -0.05471 | 0.23796  | 0.34337  | 2.28E-14 |
| 2.20E-35 | 0.426609 | 4.46E-22 | 0.205333 | 7.71E-06 | 0.195021 | 2.20E-05 | 0.386739 | 4.14E-18 |
| 8.24E-32 | 0.359579 | 1.06E-15 | 0.222363 | 1.21E-06 | 0.172331 | 0.00018  | 0.261842 | 9.26E-09 |
| 6.52E-54 | 0.24313  | 1.04E-07 | 0.21785  | 2.01E-06 | 0.049011 | 0.29054  | 0.375628 | 4.26E-17 |
| 1.24E-21 | 0.445089 | 4.20E-24 | 0.19319  | 2.63E-05 | 0.1379   | 0.00282  | 0.248891 | 5.03E-08 |
| 2.32E-26 | -0.09826 | 0.03376  | -0.10222 | 0.02718  | 0.032477 | 0.48384  | -0.2802  | 7.15E-10 |
| 6.21E-69 | 0.248323 | 5.41E-08 | 0.241334 | 1.30E-07 | 0.040769 | 0.37939  | 0.344829 | 1.74E-14 |
| 1.67E-27 | -0.14844 | 0.00129  | -0.14823 | 0.00132  | -0.00811 | 0.86123  | -0.30151 | 2.86E-11 |
| 4.82E-68 | 0.321768 | 1.04E-12 | 0.312329 | 5.02E-12 | 0.119128 | 0.00998  | 0.382541 | 1.01E-17 |
| 1.05E-30 | 0.447027 | 2.53E-24 | 0.345441 | 1.56E-14 | 0.297248 | 5.56E-11 | 0.314701 | 3.40E-12 |
| 5.15E-37 | 0.30028  | 3.47E-11 | 0.181609 | 7.92E-05 | 0.066532 | 0.15114  | 0.220713 | 1.46E-06 |
| 2.17E-65 | 0.515835 | 4.13E-33 | 0.30417  | 1.88E-11 | 0.235171 | 2.74E-07 | 0.416971 | 4.55E-21 |

|          |          |          |          |          |          |          |          |          |
|----------|----------|----------|----------|----------|----------|----------|----------|----------|
| 2.31E-25 | -0.17872 | 0.0001   | -0.01324 | 0.77535  | -0.07264 | 0.11699  | -0.23976 | 1.57E-07 |
| 1.26E-47 | 0.152607 | 0.00094  | 0.124944 | 0.00686  | -0.02981 | 0.52048  | 0.276692 | 1.18E-09 |
| 6.52E-23 | 0.138712 | 0.00266  | 0.027051 | 0.55981  | 0.111342 | 0.01608  | -0.20556 | 7.53E-06 |
| 6.03E-47 | 0.178633 | 0.0001   | 0.177893 | 0.00011  | 0.029207 | 0.52896  | 0.342632 | 2.61E-14 |
| #####    | 0.610999 | 3.92E-49 | 0.501836 | 3.70E-31 | 0.440615 | 1.33E-23 | 0.586242 | 1.90E-44 |
| 6.91E-72 | 0.689758 | 3.30E-67 | 0.554835 | 4.67E-39 | 0.509001 | 3.80E-32 | 0.571428 | 7.82E-42 |
| #####    | 0.576633 | 9.76E-43 | 0.377925 | 2.65E-17 | 0.278477 | 9.16E-10 | 0.616383 | 3.31E-50 |
| 5.76E-26 | 0.143014 | 0.00195  | 0.185153 | 5.69E-05 | 0.093412 | 0.04363  | 0.184139 | 6.26E-05 |
| 2.24E-29 | -0.22615 | 7.89E-07 | -0.15362 | 0.00087  | -0.07217 | 0.11938  | -0.30362 | 2.05E-11 |
| 2.44E-81 | 0.529914 | 3.61E-35 | 0.468817 | 6.81E-27 | 0.394916 | 7.02E-19 | 0.632828 | 1.28E-53 |
| 1.06E-76 | 0.365835 | 3.10E-16 | 0.294424 | 8.59E-11 | 0.108003 | 0.01957  | 0.421628 | 1.50E-21 |
| 8.47E-30 | 0.326652 | 4.50E-13 | 0.158946 | 0.00057  | 0.05253  | 0.25724  | 0.302779 | 2.34E-11 |
| 7.13E-31 | 0.276439 | 1.23E-09 | 0.208302 | 5.65E-06 | 0.109819 | 0.0176   | 0.410274 | 2.19E-20 |
| 1.48E-32 | 0.333291 | 1.41E-13 | 0.222614 | 1.18E-06 | 0.136104 | 0.00321  | 0.407798 | 3.87E-20 |
| #####    | 0.477539 | 5.64E-28 | 0.462116 | 4.40E-26 | 0.348087 | 9.51E-15 | 0.7007   | 3.45E-70 |
| 4.06E-39 | 0.149158 | 0.00123  | 0.097931 | 0.03437  | 0.021308 | 0.64603  | 0.301544 | 2.84E-11 |
| 2.41E-57 | 0.495139 | 2.96E-30 | 0.27332  | 1.91E-09 | 0.199918 | 1.34E-05 | 0.520953 | 7.56E-34 |
| 9.28E-70 | 0.241093 | 1.33E-07 | 0.201306 | 1.17E-05 | 0.115541 | 0.01247  | 0.35122  | 5.28E-15 |
| 3.16E-52 | 0.333677 | 1.31E-13 | 0.307143 | 1.17E-11 | 0.175583 | 0.00014  | 0.533866 | 9.17E-36 |
| 8.04E-34 | 0.169061 | 0.00024  | 0.110053 | 0.01735  | -0.02773 | 0.54999  | 0.312074 | 5.24E-12 |
| 2.63E-96 | 0.483265 | 1.06E-28 | 0.394007 | 8.57E-19 | 0.323717 | 7.46E-13 | 0.616293 | 3.45E-50 |
| 2.22E-31 | 0.09209  | 0.0467   | -0.02846 | 0.53961  | -0.0597  | 0.1978   | 0.102929 | 0.02613  |
| 4.44E-28 | 0.191237 | 3.18E-05 | 0.20716  | 6.37E-06 | 0.084888 | 0.06683  | 0.376152 | 3.83E-17 |
| 6.99E-34 | 0.05828  | 0.20871  | 0.042286 | 0.36189  | -0.09823 | 0.03383  | 0.205262 | 7.77E-06 |
| 1.55E-82 | 0.446747 | 2.72E-24 | 0.37163  | 9.66E-17 | 0.288463 | 2.12E-10 | 0.570505 | 1.13E-41 |
| 5.09E-81 | 0.313009 | 4.49E-12 | 0.205906 | 7.26E-06 | 0.144831 | 0.0017   | 0.399898 | 2.32E-19 |
| #####    | 0.467668 | 9.40E-27 | 0.403486 | 1.04E-19 | 0.267533 | 4.27E-09 | 0.576206 | 1.16E-42 |
| 1.45E-46 | 0.132366 | 0.00416  | 0.174661 | 0.00015  | 0.0452   | 0.32973  | 0.39433  | 7.98E-19 |
| 2.21E-56 | 0.269745 | 3.15E-09 | 0.332109 | 1.73E-13 | 0.121613 | 0.00852  | 0.445758 | 3.53E-24 |
| 1.97E-78 | 0.426741 | 4.32E-22 | 0.406271 | 5.49E-20 | 0.338016 | 6.05E-14 | 0.563582 | 1.68E-40 |
| 1.28E-30 | 0.125876 | 0.00645  | 0.075705 | 0.10227  | -0.0431  | 0.35271  | 0.276953 | 1.14E-09 |
| 6.72E-34 | 0.247164 | 6.26E-08 | 0.210199 | 4.62E-06 | 0.034583 | 0.45593  | 0.454623 | 3.38E-25 |
| 3.16E-31 | 0.450805 | 9.35E-25 | 0.3028   | 2.33E-11 | 0.22423  | 9.82E-07 | 0.452332 | 6.23E-25 |
| 3.93E-30 | 0.218416 | 1.89E-06 | 0.151897 | 0.00099  | 0.037804 | 0.41504  | 0.39869  | 3.04E-19 |
| 8.00E-95 | 0.422986 | 1.08E-21 | 0.442889 | 7.43E-24 | 0.314744 | 3.38E-12 | 0.531315 | 2.23E-35 |
| #####    | 0.489726 | 1.54E-29 | 0.406137 | 5.67E-20 | 0.328511 | 3.26E-13 | 0.576542 | 1.01E-42 |
| 5.40E-37 | 0.310734 | 6.52E-12 | 0.080434 | 0.0825   | 0.067093 | 0.14772  | 0.398587 | 3.11E-19 |
| 5.45E-74 | 0.386553 | 4.31E-18 | 0.319577 | 1.51E-12 | 0.163411 | 0.00039  | 0.512063 | 1.41E-32 |
| 2.58E-59 | 0.325685 | 5.32E-13 | 0.326277 | 4.80E-13 | 0.169274 | 0.00024  | 0.514834 | 5.73E-33 |
| 1.19E-94 | 0.282784 | 4.91E-10 | 0.247229 | 6.21E-08 | 0.113691 | 0.01396  | 0.446958 | 2.58E-24 |
| 1.79E-89 | 0.567399 | 3.82E-41 | 0.386441 | 4.41E-18 | 0.313014 | 4.49E-12 | 0.508268 | 4.81E-32 |
| 2.21E-86 | 0.426124 | 5.02E-22 | 0.363143 | 5.28E-16 | 0.262774 | 8.17E-09 | 0.549935 | 2.88E-38 |
| 2.88E-54 | 0.231072 | 4.45E-07 | 0.174791 | 0.00015  | 0.11813  | 0.01062  | 0.559612 | 7.69E-40 |
| 1.50E-74 | 0.445336 | 3.94E-24 | 0.325202 | 5.78E-13 | 0.233312 | 3.42E-07 | 0.445171 | 4.11E-24 |
| #####    | 0.375148 | 4.71E-17 | 0.276727 | 1.18E-09 | 0.204368 | 8.52E-06 | 0.564717 | 1.08E-40 |

|          |          |          |          |          |          |          |          |          |
|----------|----------|----------|----------|----------|----------|----------|----------|----------|
| 3.39E-29 | 0.280895 | 6.46E-10 | 0.267244 | 4.44E-09 | 0.155021 | 0.00078  | 0.198216 | 1.60E-05 |
| #####    | 0.565916 | 6.80E-41 | 0.498333 | 1.10E-30 | 0.447535 | 2.22E-24 | 0.647196 | 8.92E-57 |
| 1.13E-35 | 0.221021 | 1.41E-06 | 0.147437 | 0.0014   | 0.096541 | 0.03702  | 0.316998 | 2.32E-12 |
| 3.51E-31 | 0.060759 | 0.18996  | 0.127731 | 0.00571  | 0.017919 | 0.69933  | 0.333721 | 1.30E-13 |
| 2.05E-83 | 0.411022 | 1.84E-20 | 0.368663 | 1.76E-16 | 0.272336 | 2.19E-09 | 0.551831 | 1.43E-38 |
| 1.61E-56 | 0.266845 | 4.69E-09 | 0.234906 | 2.82E-07 | 0.127709 | 0.00571  | 0.378833 | 2.20E-17 |
| 8.53E-47 | 0.353056 | 3.73E-15 | 0.28236  | 5.22E-10 | 0.178637 | 0.0001   | 0.4436   | 6.18E-24 |
| 6.85E-41 | 0.178463 | 0.00011  | 0.111267 | 0.01615  | 0.028181 | 0.54352  | 0.313585 | 4.09E-12 |
| 8.03E-27 | 0.138932 | 0.00262  | 0.218935 | 1.78E-06 | -0.00422 | 0.92757  | 0.234717 | 2.89E-07 |
| 1.18E-95 | 0.569064 | 1.99E-41 | 0.370808 | 1.14E-16 | 0.336331 | 8.18E-14 | 0.58087  | 1.74E-43 |
| 5.08E-57 | 0.325718 | 5.29E-13 | 0.265067 | 5.99E-09 | 0.149941 | 0.00115  | 0.486762 | 3.74E-29 |
| 1.16E-37 | -0.09768 | 0.03483  | -0.10179 | 0.02784  | 0.038115 | 0.41121  | -0.31248 | 4.90E-12 |
| 8.34E-26 | 0.294907 | 7.98E-11 | 0.288023 | 2.26E-10 | 0.18221  | 7.49E-05 | 0.287306 | 2.52E-10 |
| 1.92E-39 | 0.195128 | 2.17E-05 | 0.148258 | 0.00131  | 0.050699 | 0.27423  | 0.288274 | 2.18E-10 |
| 9.61E-33 | 0.004089 | 0.92978  | 0.082149 | 0.07615  | -0.01493 | 0.74754  | 0.297826 | 5.08E-11 |
| 7.44E-53 | 0.176211 | 0.00013  | 0.286922 | 2.66E-10 | 0.140205 | 0.00239  | 0.423684 | 9.10E-22 |
| #####    | 0.522283 | 4.84E-34 | 0.408386 | 3.38E-20 | 0.385733 | 5.13E-18 | 0.575541 | 1.51E-42 |
| 2.52E-36 | 0.366241 | 2.86E-16 | 0.355016 | 2.56E-15 | 0.225386 | 8.61E-07 | 0.472171 | 2.63E-27 |
| 3.56E-71 | 0.275301 | 1.44E-09 | 0.195167 | 2.16E-05 | 0.08844  | 0.05615  | 0.489866 | 1.47E-29 |
| 3.71E-51 | 0.361202 | 7.73E-16 | 0.165625 | 0.00033  | 0.057097 | 0.21811  | 0.452464 | 6.02E-25 |
| 7.70E-81 | 0.499011 | 8.95E-31 | 0.481463 | 1.80E-28 | 0.373599 | 6.47E-17 | 0.474924 | 1.20E-27 |
| 6.69E-67 | 0.511769 | 1.56E-32 | 0.469546 | 5.54E-27 | 0.327417 | 3.94E-13 | 0.50866  | 4.24E-32 |
| 8.19E-25 | 0.13791  | 0.00282  | 0.044981 | 0.33208  | -0.01615 | 0.72783  | 0.299418 | 3.97E-11 |
| 2.87E-28 | -0.2172  | 2.16E-06 | -0.06921 | 0.13532  | -0.1064  | 0.02147  | -0.24814 | 5.53E-08 |
| 8.04E-47 | 0.440495 | 1.38E-23 | 0.177186 | 0.00012  | 0.152034 | 0.00098  | 0.374432 | 5.45E-17 |
| 1.83E-44 | 0.295958 | 6.79E-11 | 0.128348 | 0.00547  | 0.035223 | 0.44763  | 0.274018 | 1.73E-09 |
| 5.37E-44 | 0.173771 | 0.00016  | 0.255304 | 2.20E-08 | 0.167344 | 0.00028  | 0.341106 | 3.45E-14 |
| 2.92E-74 | 0.29667  | 6.08E-11 | 0.28021  | 7.14E-10 | 0.122255 | 0.00817  | 0.496415 | 2.00E-30 |
| 6.33E-86 | 0.49497  | 3.12E-30 | 0.359233 | 1.14E-15 | 0.294173 | 8.92E-11 | 0.646086 | 1.59E-56 |
| 4.91E-57 | 0.153046 | 0.00091  | 0.141922 | 0.00211  | 0.000401 | 0.9931   | 0.3413   | 3.33E-14 |
| #####    | 0.401478 | 1.63E-19 | 0.397262 | 4.18E-19 | 0.264238 | 6.70E-09 | 0.572037 | 6.14E-42 |
| 1.60E-39 | 0.206082 | 7.13E-06 | 0.247263 | 6.19E-08 | 0.179428 | 9.67E-05 | 0.441866 | 9.67E-24 |
| 6.67E-30 | 0.177185 | 0.00012  | 0.170188 | 0.00022  | 0.154298 | 0.00082  | 0.356429 | 1.95E-15 |
| 2.02E-71 | 0.293574 | 9.78E-11 | 0.29584  | 6.91E-11 | 0.163977 | 0.00037  | 0.504507 | 1.59E-31 |
| 3.37E-45 | 0.175339 | 0.00014  | 0.152825 | 0.00092  | 0.009462 | 0.8384   | 0.33531  | 9.82E-14 |
| 1.02E-95 | 0.406339 | 5.41E-20 | 0.292198 | 1.21E-10 | 0.191346 | 3.15E-05 | 0.507504 | 6.15E-32 |
| #####    | 0.519487 | 1.23E-33 | 0.361496 | 7.30E-16 | 0.250269 | 4.22E-08 | 0.637273 | 1.41E-54 |
| 9.87E-83 | 0.457145 | 1.71E-25 | 0.343481 | 2.23E-14 | 0.244578 | 8.66E-08 | 0.520777 | 8.02E-34 |
| #####    | 0.663082 | 1.81E-60 | 0.497637 | 1.37E-30 | 0.436883 | 3.46E-23 | 0.694708 | 1.54E-68 |
| 6.31E-39 | -0.19721 | 1.77E-05 | -0.12514 | 0.00677  | -0.08067 | 0.08161  | -0.29017 | 1.64E-10 |
| #####    | 0.642386 | 1.06E-55 | 0.516889 | 2.92E-33 | 0.442102 | 9.10E-24 | 0.660193 | 8.82E-60 |
| 4.37E-39 | 0.428549 | 2.77E-22 | 0.15176  | 0.001    | 0.199596 | 1.39E-05 | 0.313189 | 4.36E-12 |
| 1.69E-46 | 0.203755 | 9.08E-06 | 0.166941 | 0.00029  | 0.077822 | 0.093    | 0.397227 | 4.21E-19 |
| 7.08E-98 | 0.546338 | 1.08E-37 | 0.477345 | 5.96E-28 | 0.390922 | 1.68E-18 | 0.623932 | 9.50E-52 |
| 1.11E-22 | -0.19242 | 2.83E-05 | -0.10094 | 0.02918  | -0.0169  | 0.7156   | -0.22272 | 1.17E-06 |



|          |          |          |          |          |          |          |          |          |
|----------|----------|----------|----------|----------|----------|----------|----------|----------|
| 5.70E-15 | 0.590626 | 3.00E-45 | 0.551346 | 1.71E-38 | 0.697256 | 3.09E-69 | 0.478117 | 4.77E-28 |
| 0.30223  | 0.252594 | 3.13E-08 | 0.29686  | 5.90E-11 | 0.487979 | 2.60E-29 | 0.024507 | 0.59731  |
| 0.04112  | 0.458198 | 1.28E-25 | 0.482957 | 1.16E-28 | 0.700004 | 5.38E-70 | 0.223093 | 1.12E-06 |
| 9.61E-22 | 0.615469 | 5.05E-50 | 0.734237 | 3.08E-80 | 0.832298 | #####    | 0.485149 | 6.05E-29 |
| 2.62E-24 | 0.586083 | 2.02E-44 | 0.697296 | 3.01E-69 | 0.816221 | #####    | 0.541479 | 6.22E-37 |
| 0.06969  | 0.341777 | 3.05E-14 | 0.475204 | 1.11E-27 | 0.695538 | 9.13E-69 | 0.068436 | 0.13976  |
| 3.92E-09 | 0.570554 | 1.10E-41 | 0.663049 | 1.84E-60 | 0.786225 | 2.90E-99 | 0.399755 | 2.40E-19 |
| 1.57E-20 | 0.565668 | 7.49E-41 | 0.649383 | 2.85E-57 | 0.747366 | 1.34E-84 | 0.538364 | 1.89E-36 |
| 3.07E-07 | 0.473874 | 1.62E-27 | 0.564726 | 1.08E-40 | 0.589999 | 3.91E-45 | 0.339603 | 4.54E-14 |
| 0.17707  | 0.575349 | 1.64E-42 | 0.518812 | 1.54E-33 | 0.729119 | 1.32E-78 | 0.248422 | 5.34E-08 |
| 0.00013  | 0.281191 | 6.19E-10 | 0.298881 | 4.31E-11 | 0.510438 | 2.39E-32 | 0.091651 | 0.04776  |
| 0.01174  | 0.328854 | 3.07E-13 | 0.301794 | 2.73E-11 | 0.525185 | 1.82E-34 | 0.101974 | 0.02756  |
| 0.00018  | 0.652585 | 5.28E-58 | 0.628293 | 1.17E-52 | 0.833038 | #####    | 0.347709 | 1.02E-14 |
| 0.00685  | 0.534165 | 8.27E-36 | 0.606296 | 3.27E-48 | 0.808751 | #####    | 0.290037 | 1.67E-10 |
| 7.95E-10 | 0.575088 | 1.82E-42 | 0.679587 | 1.49E-64 | 0.870384 | #####    | 0.366588 | 2.67E-16 |
| 0.99687  | 0.430647 | 1.65E-22 | 0.424618 | 7.25E-22 | 0.498536 | 1.04E-30 | 0.154471 | 0.00081  |
| 9.48E-11 | 0.511175 | 1.89E-32 | 0.744007 | 1.86E-83 | 0.85525  | #####    | 0.403181 | 1.11E-19 |
| 7.10E-13 | 0.695069 | 1.22E-68 | 0.740858 | 2.10E-82 | 0.882051 | #####    | 0.558554 | 1.15E-39 |
| 2.19E-06 | 0.617928 | 1.61E-50 | 0.562859 | 2.22E-40 | 0.765881 | 3.13E-91 | 0.470792 | 3.90E-27 |
| 6.26E-06 | 0.580533 | 2.00E-43 | 0.660582 | 7.13E-60 | 0.888079 | #####    | 0.383358 | 8.49E-18 |
| 3.42E-07 | 0.729561 | 9.55E-79 | 0.663436 | 1.49E-60 | 0.881452 | #####    | 0.406215 | 5.57E-20 |
| 8.51E-05 | 0.581037 | 1.63E-43 | 0.501894 | 3.64E-31 | 0.750041 | 1.60E-85 | 0.370782 | 1.15E-16 |
| 0.01528  | 0.479201 | 3.48E-28 | 0.463509 | 2.99E-26 | 0.681106 | 6.06E-65 | 0.321285 | 1.13E-12 |
| 3.93E-10 | 0.666544 | 2.64E-61 | 0.703249 | 6.66E-71 | 0.901531 | #####    | 0.460369 | 7.11E-26 |
| 9.44E-18 | 0.697736 | 2.28E-69 | 0.72908  | 1.35E-78 | 0.838939 | #####    | 0.581139 | 1.56E-43 |
| 0.10612  | 0.478668 | 4.06E-28 | 0.597356 | 1.68E-46 | 0.827073 | #####    | 0.25792  | 1.56E-08 |
| 2.82E-11 | 0.487073 | 3.41E-29 | 0.617012 | 2.47E-50 | 0.795925 | #####    | 0.437565 | 2.91E-23 |
| 1.64E-17 | 0.495554 | 2.61E-30 | 0.679029 | 2.06E-64 | 0.803962 | #####    | 0.490741 | 1.13E-29 |
| 3.01E-16 | 0.704469 | 3.01E-71 | 0.656017 | 8.46E-59 | 0.869392 | #####    | 0.479644 | 3.06E-28 |
| 1.05E-08 | 0.56314  | 1.99E-40 | 0.659979 | 9.91E-60 | 0.874422 | #####    | 0.491199 | 9.85E-30 |
| 1.38E-06 | 0.473176 | 1.98E-27 | 0.599442 | 6.78E-47 | 0.792618 | #####    | 0.326235 | 4.84E-13 |
| 0.048    | 0.3144   | 3.57E-12 | 0.507559 | 6.04E-32 | 0.683654 | 1.33E-65 | 0.124671 | 0.00699  |
| 0.12298  | 0.422415 | 1.24E-21 | 0.476719 | 7.15E-28 | 0.529024 | 4.91E-35 | 0.172132 | 0.00019  |
| 1.94E-14 | 0.536927 | 3.13E-36 | 0.628968 | 8.43E-53 | 0.72886  | 1.59E-78 | 0.381598 | 1.23E-17 |
| 2.08E-13 | 0.582422 | 9.22E-44 | 0.654635 | 1.77E-58 | 0.771623 | 2.06E-93 | 0.388414 | 2.89E-18 |
| 2.18E-17 | 0.570641 | 1.07E-41 | 0.617629 | 1.85E-50 | 0.780008 | 1.02E-96 | 0.48567  | 5.18E-29 |
| 9.59E-05 | 0.61468  | 7.27E-50 | 0.642868 | 8.30E-56 | 0.834501 | #####    | 0.368714 | 1.74E-16 |
| 0.92873  | 0.416814 | 4.72E-21 | 0.491939 | 7.87E-30 | 0.75208  | 3.12E-86 | 0.225696 | 8.31E-07 |
| 0.24105  | 0.370034 | 1.33E-16 | 0.525984 | 1.39E-34 | 0.706721 | 6.89E-72 | 0.236388 | 2.36E-07 |
| 0.66522  | 0.520159 | 9.86E-34 | 0.504264 | 1.72E-31 | 0.618005 | 1.56E-50 | 0.272907 | 2.02E-09 |
| 0.06229  | 0.113162 | 0.01441  | 0.038433 | 0.40732  | 0.11994  | 0.00948  | 0.141606 | 0.00216  |
| 0.01081  | 0.034757 | 0.45366  | 0.006386 | 0.89052  | -0.04821 | 0.29851  | 0.052025 | 0.26186  |
| 0.61429  | 0.023968 | 0.60541  | 0.021429 | 0.64416  | 0.010816 | 0.81567  | 0.1509   | 0.00107  |
| 0.00071  | 0.112638 | 0.01488  | 0.153523 | 0.00087  | 0.06059  | 0.19119  | 0.218216 | 1.93E-06 |
| 0.00013  | 0.122543 | 0.00802  | 0.163558 | 0.00039  | 0.048272 | 0.29789  | 0.12143  | 0.00862  |

|          |          |         |          |          |          |          |          |          |
|----------|----------|---------|----------|----------|----------|----------|----------|----------|
| 0.00989  | -0.10933 | 0.01811 | -0.09556 | 0.03899  | -0.13255 | 0.00411  | -0.04687 | 0.31213  |
| 0.8885   | 0.018532 | 0.68956 | 0.020261 | 0.66232  | -0.01586 | 0.73242  | 0.050854 | 0.27276  |
| 1.61E-08 | 0.012575 | 0.78636 | 0.130896 | 0.00461  | 0.058849 | 0.20429  | 0.331908 | 1.80E-13 |
| 0.57037  | 0.095846 | 0.03841 | 0.043582 | 0.34735  | 0.030853 | 0.50599  | 0.030173 | 0.51541  |
| 0.22208  | 0.009026 | 0.84575 | 0.051554 | 0.2662   | 0.000316 | 0.99457  | -0.03103 | 0.50351  |
| 0.5737   | -0.02477 | 0.5934  | -0.01805 | 0.69726  | -0.04003 | 0.38804  | 0.044844 | 0.33356  |
| 4.75E-06 | 0.148329 | 0.00131 | 0.224954 | 9.04E-07 | 0.128575 | 0.00539  | 0.165526 | 0.00033  |
| 0.05758  | -0.07257 | 0.1173  | 0.03721  | 0.42241  | -0.06915 | 0.13568  | 0.118171 | 0.01059  |
| 0.41834  | 0.027546 | 0.55265 | 0.015779 | 0.73379  | -0.01923 | 0.67855  | 0.085328 | 0.06542  |
| 0.94966  | -0.02755 | 0.55261 | 0.01404  | 0.76219  | -0.0189  | 0.68372  | -0.02144 | 0.64401  |
| 0.76383  | -0.01886 | 0.68441 | -0.03103 | 0.50358  | -0.05088 | 0.27247  | 0.029144 | 0.52984  |
| 0.22148  | 0.053335 | 0.25001 | 0.021027 | 0.65039  | 0.006953 | 0.88088  | 0.111227 | 0.01619  |
| 0.10262  | -0.01199 | 0.79607 | -0.08682 | 0.06083  | -0.10684 | 0.02093  | 0.086085 | 0.06306  |
| 0.04369  | -0.0653  | 0.1589  | -0.08435 | 0.06857  | -0.11044 | 0.01696  | 0.085648 | 0.06441  |
| 0.73982  | 0.023392 | 0.61411 | -0.03734 | 0.42085  | -0.00819 | 0.85986  | 0.088749 | 0.0553   |
| 0.0909   | -0.049   | 0.29067 | -0.07135 | 0.12361  | -0.07524 | 0.10441  | -0.03841 | 0.40763  |
| 0.21823  | -0.0918  | 0.04739 | -0.0671  | 0.14766  | -0.11998 | 0.00945  | -0.07733 | 0.09509  |
| 0.00364  | 0.110271 | 0.01713 | 0.112196 | 0.01528  | 0.109022 | 0.01844  | 0.165359 | 0.00033  |
| 0.58214  | -0.04628 | 0.31834 | -0.05126 | 0.2689   | -0.06485 | 0.16176  | -0.00699 | 0.88029  |
| 0.00018  | 0.003628 | 0.93767 | 0.087009 | 0.06027  | 0.03646  | 0.43184  | 0.12788  | 0.00565  |
| 0.22059  | -0.01179 | 0.79944 | 0.027167 | 0.55813  | 0.015985 | 0.73044  | -0.04359 | 0.34726  |
| 0.15189  | 0.053667 | 0.24707 | 0.020813 | 0.65371  | 0.028889 | 0.53344  | 0.087364 | 0.05923  |
| 5.09E-05 | -0.03661 | 0.42992 | -0.06956 | 0.13337  | -0.00516 | 0.91141  | -0.07274 | 0.11649  |
| 0.33108  | -0.06895 | 0.13681 | -0.11478 | 0.01307  | -0.15527 | 0.00076  | -0.06219 | 0.17973  |
| 0.1886   | -0.11188 | 0.01557 | -0.10633 | 0.02156  | -0.15496 | 0.00078  | -0.02469 | 0.59451  |
| 0.46302  | -0.04179 | 0.36758 | -0.05681 | 0.22046  | -0.07718 | 0.09574  | -0.00682 | 0.88313  |
| 0.76188  | -0.11284 | 0.01469 | -0.13363 | 0.00382  | -0.12189 | 0.00837  | -0.05076 | 0.27361  |
| 0.79246  | 0.005921 | 0.89845 | -0.03287 | 0.47858  | -0.0444  | 0.33835  | 0.027762 | 0.54954  |
| 0.00046  | -0.15816 | 0.0006  | -0.15319 | 0.0009   | -0.06505 | 0.1605   | -0.13808 | 0.00279  |
| 2.71E-05 | -0.13221 | 0.00421 | -0.09552 | 0.03907  | -0.09978 | 0.0311   | -0.14371 | 0.00185  |
| 0.01132  | -0.05945 | 0.19973 | -0.10508 | 0.02315  | -0.19304 | 2.67E-05 | -0.02452 | 0.59712  |
| 0.51114  | -0.05061 | 0.27506 | -0.05769 | 0.21339  | -0.09697 | 0.03619  | -0.04253 | 0.35915  |
| 2.59E-06 | 0.152259 | 0.00096 | 0.121865 | 0.00838  | 0.087389 | 0.05915  | 0.171737 | 0.00019  |
| 0.39797  | -0.01502 | 0.74614 | -0.03743 | 0.41971  | -0.07056 | 0.12784  | -0.03787 | 0.41424  |
| 0.71771  | -0.03706 | 0.4243  | -0.03357 | 0.46926  | -0.06116 | 0.18705  | -0.00828 | 0.85841  |
| 0.64139  | 0.095058 | 0.04004 | -0.00487 | 0.91649  | 0.082077 | 0.07641  | 0.066041 | 0.15419  |
| 0.04722  | 0.178175 | 0.00011 | 0.123262 | 0.00766  | 0.138902 | 0.00263  | 0.1071   | 0.02062  |
| 0.03027  | -0.00214 | 0.96327 | -0.06431 | 0.16528  | -0.06336 | 0.17168  | 0.127605 | 0.00575  |
| 0.44377  | -0.05929 | 0.20091 | -0.06599 | 0.1545   | -0.13882 | 0.00264  | 0.02051  | 0.65843  |
| 5.86E-07 | 0.039029 | 0.40007 | 0.100807 | 0.02939  | 0.118141 | 0.01061  | 0.067864 | 0.14311  |
| 0.26162  | -0.08042 | 0.08255 | -0.11039 | 0.01701  | -0.11516 | 0.01276  | -0.07338 | 0.1133   |
| 0.78289  | -0.00119 | 0.97955 | 0.091847 | 0.04729  | -0.01726 | 0.70991  | 0.095026 | 0.0401   |
| 2.04E-11 | 0.111785 | 0.01566 | 0.09774  | 0.03472  | -0.04065 | 0.3808   | 0.297803 | 5.10E-11 |
| 0.09534  | 0.024329 | 0.59998 | 0.002944 | 0.94941  | 0.006459 | 0.88929  | 0.092152 | 0.04655  |
| 0.00405  | 0.062416 | 0.17814 | -0.00345 | 0.94067  | -0.0267  | 0.56497  | 0.017941 | 0.69898  |

|          |          |          |          |          |          |          |          |          |
|----------|----------|----------|----------|----------|----------|----------|----------|----------|
| 6.56E-08 | 0.139596 | 0.0025   | 0.130984 | 0.00458  | 0.106306 | 0.02158  | 0.286925 | 2.66E-10 |
| 0.55394  | 0.03671  | 0.42868  | -0.00491 | 0.91572  | -0.00252 | 0.95676  | 0.134263 | 0.00365  |
| 0.22727  | -0.06128 | 0.1862   | -0.00438 | 0.92482  | -0.00634 | 0.89137  | -0.03545 | 0.44468  |
| 0.85071  | -0.0209  | 0.65238  | -0.00972 | 0.83407  | -0.02401 | 0.60481  | -0.05514 | 0.23436  |
| 0.12971  | -0.04965 | 0.28428  | -0.04609 | 0.32032  | -0.05252 | 0.2573   | -0.0379  | 0.41382  |
| 0.00118  | -0.08731 | 0.05937  | -0.12236 | 0.00812  | -0.05096 | 0.27178  | -0.09272 | 0.04522  |
| 0.00014  | 0.016569 | 0.721    | 0.024856 | 0.59211  | -0.06554 | 0.15737  | 0.170042 | 0.00022  |
| 0.68837  | -0.0381  | 0.41137  | -0.0278  | 0.54903  | -0.07159 | 0.12235  | 0.043309 | 0.35038  |
| 0.06001  | 0.036819 | 0.42732  | -0.00475 | 0.91849  | -0.08543 | 0.06509  | 0.042256 | 0.36224  |
| 0.10748  | -0.0895  | 0.05326  | -0.09132 | 0.04858  | -0.11596 | 0.01215  | -0.08437 | 0.06852  |
| 0.79972  | -0.0479  | 0.30163  | -0.04533 | 0.32834  | -0.07537 | 0.10382  | 0.008089 | 0.8616   |
| 0.01116  | -0.05139 | 0.26769  | -0.07081 | 0.1265   | -0.09224 | 0.04634  | -0.09926 | 0.03199  |
| 0.08993  | -0.09639 | 0.03732  | -0.13749 | 0.00291  | -0.18739 | 4.61E-05 | -0.05581 | 0.22864  |
| 0.02836  | 0.027959 | 0.54672  | 0.042474 | 0.35976  | 0.060345 | 0.193    | 0.02591  | 0.57649  |
| 0.00245  | -0.03256 | 0.48272  | 0.01407  | 0.76169  | 0.065969 | 0.15464  | -0.0762  | 0.10005  |
| 0.00012  | -0.04071 | 0.38013  | 0.028619 | 0.53728  | -0.10048 | 0.02993  | 0.095189 | 0.03976  |
| 0.00168  | 0.03471  | 0.45427  | -0.02876 | 0.53534  | -0.14876 | 0.00126  | 0.104835 | 0.02347  |
| 0.1754   | 0.024448 | 0.5982   | 0.0093   | 0.84114  | 0.015967 | 0.73074  | 0.030933 | 0.50487  |
| 0.5384   | 0.068775 | 0.13781  | 0.014162 | 0.76018  | 0.049167 | 0.28901  | 0.120669 | 0.00905  |
| 0.80131  | -0.02416 | 0.60248  | 0.022328 | 0.63032  | 0.007839 | 0.86584  | 0.013358 | 0.77342  |
| 0.17869  | -0.02736 | 0.55541  | -0.05978 | 0.19723  | -0.03962 | 0.39294  | 0.019774 | 0.66995  |
| 3.33E-10 | 0.341676 | 3.11E-14 | 0.215046 | 2.74E-06 | 0.105769 | 0.02226  | 0.249365 | 4.74E-08 |
| 0.21166  | 0.152271 | 0.00096  | 0.108686 | 0.0188   | 0.157088 | 0.00066  | 0.158934 | 0.00057  |
| 0.12532  | 0.041486 | 0.37105  | 0.027088 | 0.55927  | 0.013981 | 0.76316  | 0.016436 | 0.72314  |
| 0.02725  | -0.10591 | 0.02207  | -0.16492 | 0.00035  | -0.18786 | 4.40E-05 | -0.04482 | 0.33383  |
| 8.71E-05 | 0.095321 | 0.03949  | 0.098295 | 0.0337   | 0.012919 | 0.78067  | 0.123386 | 0.0076   |
| 0.71212  | 0.100084 | 0.03058  | 0.10312  | 0.02585  | 0.108313 | 0.01922  | 0.075851 | 0.10161  |
| 0.33853  | -0.00647 | 0.88917  | -0.03251 | 0.48334  | -0.03452 | 0.45678  | 0.092478 | 0.04578  |
| 0.54761  | -0.03069 | 0.50824  | -0.04656 | 0.31537  | -0.0466  | 0.31493  | 0.056991 | 0.21897  |
| 0.20977  | 0.089556 | 0.05311  | 0.017204 | 0.71078  | 0.063879 | 0.16816  | 0.086247 | 0.06256  |
| 3.48E-08 | 0.258613 | 1.42E-08 | 0.203319 | 9.50E-06 | 0.117331 | 0.01116  | 0.287315 | 2.51E-10 |
| 0.28143  | 0.131264 | 0.00449  | 0.040071 | 0.38761  | 0.125781 | 0.0065   | 0.10685  | 0.02092  |
| 0.20452  | 0.007758 | 0.86721  | 0.074087 | 0.10983  | 0.116972 | 0.01142  | 0.162886 | 0.00041  |
| 0.82269  | -0.00992 | 0.83066  | 0.091114 | 0.04909  | 0.092059 | 0.04678  | 0.142483 | 0.00202  |
| 0.59908  | 0.082798 | 0.07385  | 0.059643 | 0.19824  | 0.118365 | 0.01047  | 0.018145 | 0.69572  |
| 0.95553  | 0.011478 | 0.8046   | -0.03967 | 0.39233  | 0.029122 | 0.53015  | 0.086795 | 0.06091  |
| 0.10493  | 0.08835  | 0.05641  | 0.214041 | 3.05E-06 | 0.145785 | 0.00158  | 0.133195 | 0.00393  |
| 0.76743  | 0.006608 | 0.88676  | -0.0519  | 0.26298  | -0.04206 | 0.36447  | 0.029319 | 0.52736  |
| 0.82107  | 0.065915 | 0.15498  | 0.023385 | 0.61421  | 0.052185 | 0.26039  | 0.034329 | 0.45924  |
| 0.34597  | 0.035839 | 0.43973  | 0.024259 | 0.60104  | 0.032973 | 0.47719  | 0.008002 | 0.86308  |
| 0.64991  | 0.065316 | 0.15877  | 0.042115 | 0.36383  | 0.045434 | 0.32723  | 0.104491 | 0.02393  |
| 2.22E-06 | 0.040119 | 0.38704  | 0.145842 | 0.00158  | 0.038804 | 0.4028   | 0.358381 | 1.34E-15 |
| 5.84E-05 | 0.170016 | 0.00022  | 0.048869 | 0.29195  | -0.02786 | 0.5481   | 0.10796  | 0.01962  |
| 0.06893  | 0.07245  | 0.11793  | 0.032543 | 0.48295  | -0.01078 | 0.81622  | 0.014858 | 0.74878  |
| 0.53713  | -0.0563  | 0.22458  | -0.03519 | 0.44803  | -0.07828 | 0.09108  | 0.026704 | 0.56486  |

|          |          |          |          |          |          |          |          |          |
|----------|----------|----------|----------|----------|----------|----------|----------|----------|
| 0.56333  | 0.040751 | 0.3796   | -0.01221 | 0.7924   | -0.01057 | 0.81974  | 0.090091 | 0.0517   |
| 0.23823  | 0.00407  | 0.9301   | 0.029674 | 0.52237  | -0.04384 | 0.34456  | -0.03989 | 0.3897   |
| 3.91E-07 | 0.139309 | 0.00255  | 0.152131 | 0.00097  | 0.007825 | 0.86607  | 0.180875 | 8.47E-05 |
| 0.12208  | -0.01464 | 0.75242  | 0.069526 | 0.13355  | 0.000284 | 0.99512  | 0.206347 | 6.93E-06 |
| 0.45822  | -0.03356 | 0.46944  | -0.01264 | 0.78533  | 0.037031 | 0.42465  | 0.067618 | 0.14457  |
| 0.10711  | -0.11101 | 0.0164   | -0.10378 | 0.02491  | -0.11007 | 0.01734  | -0.03788 | 0.41409  |
| 0.47895  | 0.007478 | 0.87195  | 0.013256 | 0.7751   | 0.014143 | 0.7605   | 0.029492 | 0.52494  |
| 4.81E-05 | 0.075898 | 0.10139  | 0.064569 | 0.1636   | -0.05209 | 0.26122  | 0.057052 | 0.21847  |
| 0.75995  | -0.10579 | 0.02222  | -0.10221 | 0.02719  | -0.1535  | 0.00087  | 0.001297 | 0.9777   |
| 0.13168  | 0.051176 | 0.26974  | -0.02926 | 0.5282   | -0.03635 | 0.43318  | -0.01059 | 0.8194   |
| 0.3251   | 0.072907 | 0.11563  | -0.00405 | 0.93038  | 0.023155 | 0.6177   | 0.120781 | 0.00898  |
| 0.65274  | 0.022007 | 0.63524  | 0.0299   | 0.51921  | -0.0279  | 0.54751  | 0.058134 | 0.20985  |
| 1.76E-15 | -0.15754 | 0.00063  | -0.13705 | 0.003    | -0.08074 | 0.08132  | -0.19602 | 1.99E-05 |
| 0.55954  | 0.019782 | 0.66983  | 0.039791 | 0.39094  | 0.06353  | 0.1705   | 0.024201 | 0.6019   |
| 0.04292  | -0.07126 | 0.12408  | -0.0552  | 0.23377  | -0.09209 | 0.0467   | -0.07671 | 0.09778  |
| 0.77869  | 0.044538 | 0.33686  | 0.016761 | 0.71791  | 0.009976 | 0.82976  | 0.035245 | 0.44735  |
| 0.13205  | 0.114207 | 0.01353  | 0.120926 | 0.0089   | 0.122417 | 0.00809  | 0.116107 | 0.01204  |
| 3.35E-05 | -0.03837 | 0.40807  | -0.07323 | 0.11399  | -0.05604 | 0.22676  | -0.10746 | 0.0202   |
| 0.8325   | 0.075374 | 0.10378  | 0.09326  | 0.04397  | 0.073314 | 0.1136   | 0.136582 | 0.0031   |
| 3.99E-05 | -0.05747 | 0.21511  | -0.05996 | 0.19589  | -0.14731 | 0.00141  | 0.096599 | 0.03691  |
| 0.4352   | -0.04307 | 0.35307  | -0.00334 | 0.94265  | -0.04774 | 0.30325  | 0.056462 | 0.22328  |
| 0.03404  | 0.023925 | 0.60606  | -0.01817 | 0.69525  | -0.05148 | 0.26694  | 0.026687 | 0.56512  |
| 1.08E-05 | 0.097588 | 0.03501  | 0.138614 | 0.00268  | 0.098415 | 0.03348  | 0.273003 | 2.00E-09 |
| 0.34081  | -0.0345  | 0.45696  | -0.02338 | 0.6143   | -0.07262 | 0.11705  | 0.071819 | 0.12118  |
| 0.00092  | 0.107103 | 0.02061  | 0.059577 | 0.19873  | 0.063781 | 0.16881  | 0.161267 | 0.00047  |
| 0.00617  | 0.029997 | 0.51785  | -0.04102 | 0.37646  | -0.09577 | 0.03856  | 0.027307 | 0.5561   |
| 0.25863  | 0.068599 | 0.13882  | 0.111893 | 0.01556  | 0.088457 | 0.05611  | 0.087761 | 0.05808  |
| 0.00223  | 0.087943 | 0.05756  | 0.094469 | 0.04129  | 0.05239  | 0.25852  | 0.206434 | 6.87E-06 |
| 0.00074  | -0.1004  | 0.03006  | -0.07583 | 0.10168  | -0.04448 | 0.33755  | -0.11447 | 0.01331  |
| 0.03869  | 0.145887 | 0.00157  | 0.144574 | 0.00173  | 0.113602 | 0.01404  | 0.137585 | 0.00289  |
| 1.63E-05 | 0.451198 | 8.43E-25 | 0.260487 | 1.11E-08 | 0.265463 | 5.67E-09 | 0.240605 | 1.42E-07 |
| 0.47967  | -0.0483  | 0.29759  | -0.03494 | 0.45128  | -0.06681 | 0.14944  | -0.01414 | 0.76053  |
| 7.05E-05 | 0.102378 | 0.02695  | 0.085661 | 0.06437  | 0.04446  | 0.33772  | 0.098667 | 0.03303  |
| 0.10646  | 0.035446 | 0.44477  | -0.02007 | 0.66523  | -0.00572 | 0.90193  | 0.121376 | 0.00865  |
| 0.43521  | -0.03327 | 0.47319  | -0.04406 | 0.34204  | -0.04897 | 0.29096  | -0.00019 | 0.99665  |
| 6.30E-05 | 0.007834 | 0.86592  | 0.024528 | 0.597    | -0.02542 | 0.5838   | 0.160341 | 0.0005   |
| 0.47064  | 0.063986 | 0.16745  | 0.050109 | 0.27985  | 0.064857 | 0.16173  | 0.074726 | 0.1068   |
| 0.01121  | -0.01742 | 0.70739  | 0.00637  | 0.8908   | -0.0406  | 0.38132  | 0.078618 | 0.08969  |
| 0.0007   | 0.145343 | 0.00164  | 0.166068 | 0.00031  | 0.046482 | 0.31618  | 0.192008 | 2.95E-05 |
| 0.02265  | 0.069956 | 0.13116  | 0.005737 | 0.90159  | -0.00013 | 0.99783  | 0.135555 | 0.00333  |
| 0.03447  | 0.01478  | 0.75005  | 0.030507 | 0.51077  | -0.04847 | 0.2959   | 0.076639 | 0.09809  |
| 0.26282  | -0.04241 | 0.36053  | -0.05492 | 0.23618  | -0.129   | 0.00524  | 0.062373 | 0.17844  |
| 0.07075  | -0.03923 | 0.39769  | 0.023879 | 0.60675  | 0.025698 | 0.57963  | 0.02646  | 0.56843  |
| 0.90736  | 0.02685  | 0.56274  | -0.00558 | 0.90419  | -0.02443 | 0.59849  | 0.082662 | 0.07432  |
| 0.20992  | -0.01655 | 0.72133  | 0.020753 | 0.65464  | 0.037984 | 0.41282  | 0.130511 | 0.00473  |

|          |           |          |          |          |          |          |          |          |
|----------|-----------|----------|----------|----------|----------|----------|----------|----------|
| 0.0358   | 0.113423  | 0.01419  | 0.036705 | 0.42874  | 0.006922 | 0.8814   | 0.120688 | 0.00904  |
| 0.89057  | -0.01943  | 0.67541  | 0.003947 | 0.9322   | -0.00478 | 0.91789  | -0.04441 | 0.33823  |
| 1.69E-05 | 0.012727  | 0.78384  | -0.04193 | 0.36599  | -0.10011 | 0.03053  | 0.12989  | 0.00493  |
| 0.09469  | -9.11E-05 | 0.99843  | -0.06347 | 0.17094  | 0.012618 | 0.78566  | -0.07605 | 0.10072  |
| 0.00216  | 0.067346  | 0.14619  | -0.0685  | 0.13941  | -0.08884 | 0.05504  | -0.12426 | 0.00718  |
| 1.05E-05 | 0.222296  | 1.22E-06 | 0.250125 | 4.30E-08 | 0.206459 | 6.85E-06 | 0.21626  | 2.40E-06 |
| 0.55469  | 0.063166  | 0.17296  | 0.007895 | 0.86489  | 0.013575 | 0.76983  | 0.108513 | 0.019    |
| 0.00929  | -0.18086  | 8.48E-05 | -0.12679 | 0.00607  | -0.24054 | 1.43E-07 | 0.052691 | 0.25579  |
| 7.94E-21 | 0.097837  | 0.03454  | 0.106255 | 0.02164  | -0.05982 | 0.19692  | 0.309836 | 7.55E-12 |
| 0.00476  | -0.07702  | 0.09643  | 0.017362 | 0.70825  | -0.05909 | 0.20245  | 0.020397 | 0.6602   |
| 4.38E-17 | -0.09745  | 0.03527  | -0.00422 | 0.92754  | -0.1978  | 1.67E-05 | 0.152651 | 0.00094  |
| 0.57644  | -0.06977  | 0.13219  | -0.0125  | 0.78767  | -0.04666 | 0.31433  | -0.0309  | 0.50536  |
| 0.00065  | -0.06909  | 0.13602  | 0.080849 | 0.08093  | -0.03266 | 0.48133  | 0.170638 | 0.00021  |
| 0.00736  | -0.00989  | 0.83115  | 0.046408 | 0.31695  | -0.00924 | 0.84222  | 0.090617 | 0.05034  |
| 0.59167  | 0.045587  | 0.32561  | 0.027768 | 0.54945  | 0.083929 | 0.06998  | 0.074007 | 0.11022  |
| 2.63E-09 | -0.0448   | 0.33403  | -0.02139 | 0.64476  | 0.017254 | 0.70998  | -0.10752 | 0.02013  |
| 0.02021  | -0.06615  | 0.15352  | -0.04432 | 0.33922  | -0.04864 | 0.29425  | -0.03943 | 0.3953   |
| 0.28937  | 0.20017   | 1.31E-05 | 0.089479 | 0.05332  | 0.213971 | 3.08E-06 | 0.120839 | 0.00895  |
| 0.87948  | 0.063484  | 0.17081  | -0.0817  | 0.07778  | -0.00072 | 0.98768  | -0.00791 | 0.86469  |
| 0.03242  | 0.260766  | 1.07E-08 | 0.131687 | 0.00436  | 0.272079 | 2.27E-09 | 0.203776 | 9.06E-06 |
| 0.0242   | 0.216751  | 2.27E-06 | 0.075132 | 0.1049   | 0.18936  | 3.81E-05 | 0.161921 | 0.00044  |
| 0.27174  | 0.21132   | 4.09E-06 | 0.136671 | 0.00308  | 0.212375 | 3.66E-06 | 0.18371  | 6.51E-05 |
| 0.80495  | 0.219817  | 1.62E-06 | 0.133492 | 0.00385  | 0.23669  | 2.28E-07 | 0.124567 | 0.00703  |
| 2.33E-07 | 0.092354  | 0.04608  | 0.07656  | 0.09844  | 0.084993 | 0.06649  | 0.261692 | 9.45E-09 |
| 9.15E-06 | 0.158332  | 0.00059  | 0.043255 | 0.35099  | 0.115221 | 0.01272  | 0.206691 | 6.69E-06 |
| 0.48278  | 0.020834  | 0.65338  | -0.10379 | 0.0249   | -0.08111 | 0.07994  | -0.02094 | 0.65176  |
| 5.73E-06 | 0.155596  | 0.00074  | 0.156794 | 0.00067  | 0.201876 | 1.10E-05 | 0.198886 | 1.49E-05 |
| 0.76784  | 0.14565   | 0.0016   | 0.065498 | 0.15761  | 0.192604 | 2.79E-05 | 0.105404 | 0.02272  |
| 0.02611  | 0.194698  | 2.27E-05 | 0.115687 | 0.01236  | 0.212222 | 3.72E-06 | 0.249113 | 4.89E-08 |
| 0.36002  | 0.120055  | 0.00941  | -0.00607 | 0.89597  | 0.112636 | 0.01488  | 0.055641 | 0.23009  |
| 0.03352  | 0.08178   | 0.07748  | 0.002233 | 0.96161  | 0.081184 | 0.07967  | 0.096056 | 0.03798  |
| 0.07771  | 0.178188  | 0.00011  | 0.036578 | 0.43034  | 0.112717 | 0.01481  | 0.116445 | 0.01179  |
| 8.72E-05 | 0.07075   | 0.12683  | -0.02632 | 0.57044  | 0.037725 | 0.41602  | 0.157585 | 0.00063  |
| 0.34457  | 0.046643  | 0.31451  | -0.05374 | 0.24641  | 0.040698 | 0.38022  | 0.049226 | 0.28843  |
| 0.00069  | 0.215729  | 2.54E-06 | 0.075424 | 0.10355  | 0.090104 | 0.05167  | 0.121274 | 0.00871  |
| 0.00558  | 0.197525  | 1.71E-05 | 0.104337 | 0.02414  | 0.181595 | 7.93E-05 | 0.252107 | 3.33E-08 |
| 0.00163  | 0.109767  | 0.01765  | 0.024112 | 0.60324  | 0.053818 | 0.24575  | 0.213784 | 3.14E-06 |
| 0.17547  | 0.039585  | 0.39339  | -0.01258 | 0.78629  | 0.029307 | 0.52754  | -0.00558 | 0.90421  |
| 0.10298  | 0.24008   | 1.51E-07 | 0.132142 | 0.00423  | 0.286792 | 2.72E-10 | 0.188659 | 4.08E-05 |
| 0.48029  | 0.011686  | 0.80115  | -0.00372 | 0.93603  | 0.052846 | 0.25439  | 0.047443 | 0.30627  |
| 0.18349  | -0.07116  | 0.12463  | -0.00446 | 0.92346  | -0.00241 | 0.95855  | 0.10185  | 0.02775  |
| 0.92724  | 0.156883  | 0.00067  | 0.076945 | 0.09675  | 0.193491 | 2.55E-05 | 0.114285 | 0.01347  |
| 0.1024   | 0.180044  | 9.14E-05 | 0.042268 | 0.3621   | 0.203772 | 9.06E-06 | 0.164978 | 0.00034  |
| 0.00015  | 0.27803   | 9.77E-10 | 0.207348 | 6.24E-06 | 0.295003 | 7.86E-11 | 0.244568 | 8.67E-08 |
| 0.93378  | 0.153624  | 0.00087  | 0.083026 | 0.07305  | 0.200789 | 1.23E-05 | 0.178946 | 0.0001   |

|          |          |          |          |          |          |          |          |          |
|----------|----------|----------|----------|----------|----------|----------|----------|----------|
| 0.00415  | 0.171629 | 0.00019  | 0.081359 | 0.07902  | 0.159346 | 0.00055  | 0.102489 | 0.02678  |
| 0.9416   | 0.201767 | 1.11E-05 | 0.100667 | 0.02962  | 0.232023 | 3.98E-07 | 0.115327 | 0.01264  |
| 0.96408  | 0.120668 | 0.00905  | 0.041536 | 0.37048  | 0.086287 | 0.06244  | 0.027244 | 0.55701  |
| 0.70948  | -0.03118 | 0.50153  | -0.1596  | 0.00054  | -0.06116 | 0.18703  | -0.02885 | 0.53398  |
| 0.07226  | 0.139922 | 0.00244  | 0.028868 | 0.53374  | 0.178415 | 0.00011  | 0.028823 | 0.53439  |
| 0.74364  | 0.12892  | 0.00527  | 0.019927 | 0.66754  | 0.160231 | 0.00051  | 0.084288 | 0.06878  |
| 0.18569  | 0.063911 | 0.16794  | 0.003696 | 0.93652  | 0.043131 | 0.35237  | 0.10443  | 0.02402  |
| 0.65361  | 0.140694 | 0.00231  | 0.020705 | 0.65539  | 0.149578 | 0.00119  | 0.054688 | 0.23819  |
| 0.13037  | 0.174856 | 0.00015  | 0.108606 | 0.01889  | 0.175469 | 0.00014  | 0.203084 | 9.73E-06 |
| 0.67357  | 0.186081 | 5.21E-05 | 0.107305 | 0.02038  | 0.217208 | 2.16E-06 | 0.064869 | 0.16165  |
| 0.7359   | 0.191974 | 2.96E-05 | 0.119697 | 0.00962  | 0.244118 | 9.18E-08 | 0.082407 | 0.07523  |
| 0.43056  | 0.287219 | 2.55E-10 | 0.175983 | 0.00013  | 0.337257 | 6.93E-14 | 0.169864 | 0.00023  |
| 0.00135  | 0.278586 | 9.02E-10 | 0.132556 | 0.00411  | 0.232124 | 3.93E-07 | 0.166219 | 0.00031  |
| 0.16759  | 0.1999   | 1.35E-05 | 0.115291 | 0.01266  | 0.205836 | 7.31E-06 | 0.187341 | 4.63E-05 |
| 0.28694  | 0.181798 | 7.78E-05 | 0.155745 | 0.00073  | 0.231251 | 4.36E-07 | 0.142922 | 0.00196  |
| 0.62491  | 0.043263 | 0.3509   | 0.050728 | 0.27395  | 0.130272 | 0.00481  | 0.197349 | 1.74E-05 |
| 0.04129  | 0.04748  | 0.30589  | 0.031329 | 0.49944  | 0.044959 | 0.33231  | 0.10847  | 0.01904  |
| 0.09348  | 0.219714 | 1.63E-06 | 0.057563 | 0.21437  | 0.141886 | 0.00212  | 0.158915 | 0.00057  |
| 0.16947  | 0.207893 | 5.89E-06 | 0.09215  | 0.04656  | 0.222014 | 1.26E-06 | 0.156486 | 0.00069  |
| 0.16658  | 0.238153 | 1.91E-07 | 0.129342 | 0.00512  | 0.266821 | 4.71E-09 | 0.192954 | 2.69E-05 |
| 4.80E-05 | 0.04211  | 0.3639   | -0.08511 | 0.0661   | -0.02385 | 0.60712  | -0.02957 | 0.52382  |
| 3.38E-11 | 0.13505  | 0.00346  | 0.06689  | 0.14895  | 0.039381 | 0.39584  | 0.331457 | 1.95E-13 |
| 3.69E-09 | 0.319012 | 1.66E-12 | 0.171469 | 0.0002   | 0.222966 | 1.13E-06 | 0.395082 | 6.77E-19 |
| 0.15936  | 0.238323 | 1.87E-07 | 0.103596 | 0.02517  | 0.216837 | 2.25E-06 | 0.237825 | 1.99E-07 |
| 0.02753  | 0.156573 | 0.00069  | 0.063614 | 0.16993  | 0.124589 | 0.00702  | 0.28032  | 7.02E-10 |
| 5.24E-05 | 0.100988 | 0.0291   | 0.008226 | 0.85928  | 0.099575 | 0.03144  | 0.02825  | 0.54254  |
| 2.22E-19 | 0.055593 | 0.23049  | 0.123836 | 0.00738  | 0.031478 | 0.4974   | 0.28255  | 5.08E-10 |
| 6.53E-05 | 0.198892 | 1.49E-05 | 0.307694 | 1.07E-11 | 0.264552 | 6.42E-09 | 0.102153 | 0.02729  |
| 6.29E-17 | 0.240152 | 1.50E-07 | 0.099721 | 0.03119  | 0.085874 | 0.06371  | 0.264037 | 6.88E-09 |
| 2.82E-13 | -0.11183 | 0.01561  | -0.08551 | 0.06484  | -0.03078 | 0.50695  | -0.21956 | 1.66E-06 |
| 0.00049  | 0.168018 | 0.00027  | 0.082432 | 0.07514  | 0.066184 | 0.1533   | 0.082276 | 0.07569  |
| 3.25E-09 | -0.15988 | 0.00052  | -0.04223 | 0.36252  | -0.07709 | 0.09611  | -0.22456 | 9.46E-07 |
| 0.31302  | -0.02603 | 0.57477  | 0.040583 | 0.38157  | -0.03594 | 0.43847  | 0.108541 | 0.01896  |
| 0.00016  | 0.166942 | 0.00029  | 0.07897  | 0.08826  | 0.212981 | 3.42E-06 | 0.117738 | 0.01088  |
| 2.92E-12 | 0.234141 | 3.09E-07 | 0.207271 | 6.29E-06 | 0.196528 | 1.89E-05 | 0.24365  | 9.73E-08 |
| 4.78E-08 | 0.383553 | 8.15E-18 | 0.345921 | 1.42E-14 | 0.331213 | 2.03E-13 | 0.400124 | 2.21E-19 |
| 4.77E-14 | -0.05768 | 0.21341  | -0.18882 | 4.02E-05 | -0.04692 | 0.31162  | -0.10649 | 0.02136  |
| 3.70E-10 | 0.033566 | 0.46929  | 0.101995 | 0.02753  | 0.179748 | 9.39E-05 | 0.053009 | 0.25293  |
| 0.6482   | -0.10034 | 0.03015  | -0.02035 | 0.66085  | -0.03829 | 0.40906  | -0.11853 | 0.01036  |
| 0.76508  | 0.096042 | 0.03801  | 0.009378 | 0.83982  | 0.027027 | 0.56017  | -0.00229 | 0.9607   |
| 4.96E-07 | 0.406856 | 4.81E-20 | 0.216302 | 2.38E-06 | 0.269903 | 3.08E-09 | 0.268701 | 3.64E-09 |
| 1.12E-06 | -0.28006 | 7.29E-10 | -0.11959 | 0.00969  | -0.16334 | 0.00039  | -0.15646 | 0.00069  |
| 0.00036  | 0.261505 | 9.69E-09 | 0.268096 | 3.95E-09 | 0.165076 | 0.00034  | 0.139462 | 0.00252  |
| 1.14E-12 | 0.161744 | 0.00045  | 0.160952 | 0.00048  | 0.289672 | 1.77E-10 | 0.037213 | 0.42238  |
| 0.3141   | 0.04584  | 0.32292  | -0.01771 | 0.70266  | -0.00109 | 0.98117  | -0.1511  | 0.00105  |

|          |          |          |          |          |          |          |          |          |
|----------|----------|----------|----------|----------|----------|----------|----------|----------|
| 2.02E-07 | -0.10018 | 0.03042  | -0.07875 | 0.08916  | -0.13855 | 0.0027   | -0.01711 | 0.71236  |
| 4.00E-08 | 0.281452 | 5.96E-10 | 0.188595 | 4.10E-05 | 0.187853 | 4.41E-05 | 0.343594 | 2.19E-14 |
| 0.08646  | -0.26333 | 7.57E-09 | -0.11668 | 0.01162  | -0.17427 | 0.00015  | -0.01642 | 0.72345  |
| 0.13147  | -0.05659 | 0.22222  | 0.143435 | 0.00189  | 0.050128 | 0.27967  | 0.388938 | 2.58E-18 |
| 4.64E-10 | 0.014045 | 0.76211  | 0.015365 | 0.74051  | 0.19149  | 3.10E-05 | -0.0525  | 0.25752  |
| 0.16833  | -0.06372 | 0.16924  | -0.15755 | 0.00063  | -0.09067 | 0.0502   | -0.02611 | 0.57355  |
| 9.20E-08 | 0.328327 | 3.36E-13 | 0.221419 | 1.35E-06 | 0.227446 | 6.79E-07 | 0.307095 | 1.18E-11 |
| 0.18694  | 0.406209 | 5.57E-20 | 0.221607 | 1.32E-06 | 0.27486  | 1.54E-09 | 0.256267 | 1.94E-08 |
| 1.84E-05 | 0.291826 | 1.28E-10 | 0.200205 | 1.31E-05 | 0.338996 | 5.06E-14 | 0.024043 | 0.60428  |
| 1.52E-08 | 0.116705 | 0.01161  | 0.218394 | 1.89E-06 | 0.092734 | 0.04518  | 0.082183 | 0.07602  |
| 0.00086  | 0.090599 | 0.05039  | -0.06178 | 0.18262  | -0.02251 | 0.6276   | -0.06075 | 0.19006  |
| 0.02062  | 0.135283 | 0.0034   | 0.025325 | 0.58514  | 0.110718 | 0.01668  | 0.17145  | 0.0002   |
| 0.01851  | -0.01138 | 0.80622  | 0.064304 | 0.16534  | 0.136125 | 0.0032   | 0.030919 | 0.50507  |
| 5.91E-18 | 0.388989 | 2.55E-18 | 0.261661 | 9.48E-09 | 0.288656 | 2.06E-10 | 0.358105 | 1.41E-15 |
| 0.16488  | 0.062052 | 0.18068  | -0.00309 | 0.94689  | 0.131897 | 0.0043   | 0.020847 | 0.65318  |
| 0.01061  | -0.0437  | 0.34603  | -0.11202 | 0.01544  | -0.10041 | 0.03004  | -0.03736 | 0.42051  |
| 4.31E-07 | -0.38823 | 3.01E-18 | -0.21062 | 4.41E-06 | -0.30494 | 1.66E-11 | -0.24815 | 5.53E-08 |
| 0.08622  | 0.092943 | 0.0447   | 0.048273 | 0.29787  | 0.02317  | 0.61748  | 0.049303 | 0.28767  |
| 2.43E-05 | 0.405439 | 6.64E-20 | 0.32213  | 9.77E-13 | 0.346719 | 1.23E-14 | 0.512575 | 1.20E-32 |
| 0.02865  | 0.311803 | 5.48E-12 | 0.250848 | 3.92E-08 | 0.282141 | 5.39E-10 | 0.342119 | 2.87E-14 |
| 1.11E-08 | 0.580752 | 1.83E-43 | 0.389224 | 2.43E-18 | 0.481993 | 1.54E-28 | 0.477509 | 5.69E-28 |
| 0.19896  | 0.344548 | 1.84E-14 | 0.288248 | 2.19E-10 | 0.220785 | 1.45E-06 | 0.199834 | 1.36E-05 |
| 6.35E-11 | -0.18351 | 6.63E-05 | -0.07771 | 0.09349  | -0.0873  | 0.05941  | -0.21247 | 3.62E-06 |
| 1.53E-05 | -0.16196 | 0.00044  | -0.09188 | 0.04721  | -0.10493 | 0.02334  | -0.13743 | 0.00292  |
| 3.80E-05 | 0.050328 | 0.27776  | 0.007831 | 0.86597  | -0.01254 | 0.7869   | 0.087372 | 0.0592   |
| 0.00633  | 0.055263 | 0.23328  | -0.112   | 0.01546  | -0.12566 | 0.00655  | -0.02878 | 0.53493  |
| 2.85E-07 | 0.28035  | 6.99E-10 | 0.220109 | 1.56E-06 | 0.187452 | 4.58E-05 | 0.229073 | 5.62E-07 |
| 0.336    | 0.11132  | 0.0161   | 0.027101 | 0.5591   | 0.072689 | 0.11672  | 0.065342 | 0.15861  |
| 0.0485   | 0.106428 | 0.02143  | 0.005606 | 0.90384  | 0.098334 | 0.03363  | 0.092411 | 0.04594  |
| 6.24E-11 | -0.15084 | 0.00108  | -0.21728 | 2.14E-06 | -0.19005 | 3.57E-05 | -0.18138 | 8.09E-05 |
| 6.06E-05 | -0.21495 | 2.77E-06 | -0.22225 | 1.23E-06 | -0.17437 | 0.00015  | -0.09439 | 0.04147  |
| 8.13E-16 | 0.449188 | 1.43E-24 | 0.382006 | 1.13E-17 | 0.395392 | 6.32E-19 | 0.566804 | 4.82E-41 |
| 1.85E-16 | -0.22848 | 6.03E-07 | -0.14156 | 0.00217  | -0.17441 | 0.00015  | -0.29098 | 1.45E-10 |
| 0.06759  | 0.17338  | 0.00017  | 0.131997 | 0.00427  | 0.206943 | 6.51E-06 | 0.218258 | 1.92E-06 |
| 0.92472  | 0.16326  | 0.0004   | 0.21177  | 3.90E-06 | 0.198325 | 1.58E-05 | 0.259468 | 1.27E-08 |
| 8.08E-06 | -0.07368 | 0.1118   | -0.08253 | 0.07478  | -0.06851 | 0.13934  | -0.07428 | 0.10892  |
| 0.08927  | 0.327851 | 3.66E-13 | 0.195267 | 2.14E-05 | 0.241946 | 1.20E-07 | 0.203778 | 9.06E-06 |
| 6.57E-12 | 0.142666 | 0.002    | 0.094824 | 0.04053  | 0.038613 | 0.40512  | 0.21812  | 1.95E-06 |
| 0.71246  | 0.041973 | 0.36545  | -0.09707 | 0.03599  | -0.03847 | 0.40691  | -0.04358 | 0.34736  |
| 7.87E-09 | 0.447491 | 2.24E-24 | 0.360708 | 8.52E-16 | 0.323878 | 7.25E-13 | 0.380091 | 1.69E-17 |
| 1.39E-10 | 0.273272 | 1.92E-09 | 0.258176 | 1.51E-08 | 0.226555 | 7.53E-07 | 0.327993 | 3.57E-13 |
| 1.22E-07 | 0.402784 | 1.21E-19 | 0.309197 | 8.37E-12 | 0.387728 | 3.35E-18 | 0.37746  | 2.92E-17 |
| 2.60E-12 | 0.059625 | 0.19837  | 0.089378 | 0.05359  | -0.01432 | 0.75765  | 0.260208 | 1.15E-08 |
| 3.18E-07 | 0.401738 | 1.54E-19 | 0.354775 | 2.68E-15 | 0.375889 | 4.04E-17 | 0.38754  | 3.48E-18 |
| 0.10373  | 0.208437 | 5.56E-06 | 0.143789 | 0.00184  | 0.173208 | 0.00017  | 0.260677 | 1.08E-08 |

|          |          |          |          |          |          |          |          |          |
|----------|----------|----------|----------|----------|----------|----------|----------|----------|
| 2.52E-05 | 0.294462 | 8.54E-11 | 0.201959 | 1.09E-05 | 0.202398 | 1.04E-05 | 0.27258  | 2.12E-09 |
| 5.12E-11 | 0.206469 | 6.85E-06 | 0.184609 | 5.99E-05 | 0.12413  | 0.00724  | 0.263266 | 7.64E-09 |
| 7.55E-14 | -0.18772 | 4.46E-05 | -0.07135 | 0.12363  | -0.07561 | 0.1027   | -0.12691 | 0.00603  |
| 6.16E-06 | 0.184941 | 5.80E-05 | 0.125134 | 0.00678  | 0.091562 | 0.04798  | 0.256494 | 1.88E-08 |
| 1.73E-05 | -0.16814 | 0.00026  | -0.12933 | 0.00513  | -0.16888 | 0.00025  | -0.03264 | 0.48165  |
| 4.63E-09 | -0.08529 | 0.06556  | -0.06664 | 0.15046  | -0.05139 | 0.26772  | -0.04698 | 0.31106  |
| 0.0105   | 0.222102 | 1.25E-06 | 0.059684 | 0.19793  | 0.128946 | 0.00526  | 0.013693 | 0.7679   |
| 2.35E-11 | -0.1256  | 0.00657  | -0.15225 | 0.00096  | -0.16505 | 0.00034  | -0.16877 | 0.00025  |
| 0.36767  | 0.006558 | 0.88761  | 0.067551 | 0.14497  | 0.000378 | 0.9935   | -0.12015 | 0.00935  |
| 1.23E-06 | 0.052894 | 0.25396  | 0.008136 | 0.8608   | 0.084422 | 0.06834  | -0.05388 | 0.24524  |
| 8.15E-17 | -0.03274 | 0.48033  | -0.08755 | 0.05869  | 0.002254 | 0.96125  | -0.19844 | 1.56E-05 |
| 7.53E-05 | 0.434607 | 6.14E-23 | 0.37983  | 1.78E-17 | 0.485243 | 5.88E-29 | 0.308806 | 8.92E-12 |
| 0.00376  | 0.091726 | 0.04758  | 0.096203 | 0.03769  | 0.257568 | 1.64E-08 | 0.006252 | 0.89282  |
| 5.98E-06 | -0.08654 | 0.06166  | -0.03759 | 0.41772  | -0.02171 | 0.63975  | -0.11972 | 0.00961  |
| 7.77E-08 | 0.111007 | 0.0164   | 0.087894 | 0.0577   | 0.19111  | 3.22E-05 | 0.049731 | 0.28351  |
| 4.20E-05 | 0.380582 | 1.52E-17 | 0.367979 | 2.02E-16 | 0.363734 | 4.70E-16 | 0.579187 | 3.47E-43 |
| 4.64E-12 | 0.115363 | 0.01261  | 0.185323 | 5.60E-05 | 0.089949 | 0.05207  | 0.307166 | 1.16E-11 |
| 0.017    | -0.08977 | 0.05253  | -0.1253  | 0.0067   | -0.08734 | 0.05931  | -0.01899 | 0.68237  |
| 5.91E-05 | 0.288395 | 2.14E-10 | 0.217586 | 2.07E-06 | 0.307051 | 1.18E-11 | 0.027538 | 0.55276  |
| 1.02E-14 | 0.432905 | 9.40E-23 | 0.346209 | 1.35E-14 | 0.299425 | 3.96E-11 | 0.372001 | 8.96E-17 |
| 0.06112  | 0.481367 | 1.85E-28 | 0.319131 | 1.62E-12 | 0.423342 | 9.89E-22 | 0.294329 | 8.72E-11 |
| 0.00042  | 0.162801 | 0.00041  | 0.192001 | 2.95E-05 | 0.152737 | 0.00093  | 0.217662 | 2.05E-06 |
| 1.15E-06 | 0.108155 | 0.01939  | 0.167242 | 0.00028  | 0.232165 | 3.91E-07 | 0.203779 | 9.06E-06 |
| 0.00383  | -0.06277 | 0.17568  | 0.135458 | 0.00336  | 0.001861 | 0.96801  | 0.01694  | 0.71503  |
| 1.95E-13 | 0.041448 | 0.37149  | -0.00611 | 0.89531  | -0.03294 | 0.47763  | 0.243626 | 9.76E-08 |
| 0.00019  | 0.028605 | 0.53747  | 0.007365 | 0.87388  | -0.07481 | 0.10641  | 0.068797 | 0.13768  |
| 1.21E-12 | 0.322518 | 9.15E-13 | 0.250714 | 3.99E-08 | 0.229476 | 5.36E-07 | 0.388417 | 2.89E-18 |
| 3.67E-06 | -0.02747 | 0.55373  | -0.01239 | 0.78946  | 0.049251 | 0.28818  | -0.01326 | 0.77499  |
| 0.00038  | 0.012158 | 0.79329  | 0.053813 | 0.24579  | 0.00479  | 0.91778  | 0.047788 | 0.30276  |
| 1.05E-08 | 0.405608 | 6.39E-20 | 0.406399 | 5.34E-20 | 0.442427 | 8.37E-24 | 0.467956 | 8.67E-27 |
| 0.07085  | 0.160267 | 0.00051  | 0.129827 | 0.00495  | 0.113569 | 0.01406  | 0.243241 | 1.02E-07 |
| 0.0173   | 0.266475 | 4.94E-09 | 0.290711 | 1.51E-10 | 0.305061 | 1.63E-11 | 0.232236 | 3.88E-07 |
| 0.05974  | 0.473111 | 2.02E-27 | 0.240922 | 1.36E-07 | 0.380127 | 1.68E-17 | 0.18211  | 7.56E-05 |
| 1.07E-10 | 0.664498 | 8.26E-61 | 0.39875  | 3.00E-19 | 0.447265 | 2.38E-24 | 0.38575  | 5.11E-18 |
| 0.03459  | 0.140447 | 0.00235  | 0.127566 | 0.00577  | 0.100088 | 0.03058  | 0.008519 | 0.85433  |
| 0.11124  | 0.337144 | 7.07E-14 | 0.276025 | 1.30E-09 | 0.323196 | 8.15E-13 | 0.18356  | 6.61E-05 |
| 0.00629  | 0.16305  | 0.0004   | 0.089086 | 0.05438  | 0.078788 | 0.089    | 0.197854 | 1.66E-05 |
| 0.79412  | 0.015717 | 0.73479  | -0.02723 | 0.55716  | -0.04324 | 0.35118  | 0.034035 | 0.46311  |
| 0.10463  | -0.03191 | 0.49155  | -0.05904 | 0.2028   | -0.04338 | 0.34956  | -0.00136 | 0.97659  |
| 1.07E-08 | -0.02544 | 0.58344  | -0.08837 | 0.05636  | 0.022387 | 0.62941  | -0.09818 | 0.03391  |
| 7.16E-06 | 0.376887 | 3.29E-17 | 0.281683 | 5.76E-10 | 0.218754 | 1.82E-06 | 0.350363 | 6.20E-15 |
| 3.42E-07 | -0.10252 | 0.02673  | -0.05633 | 0.22439  | -0.05531 | 0.23284  | -0.04852 | 0.29544  |
| 0.15129  | -0.04321 | 0.35151  | -0.01208 | 0.79451  | -0.06941 | 0.1342   | 0.232389 | 3.81E-07 |
| 1.45E-12 | 0.234492 | 2.97E-07 | 0.181293 | 8.15E-05 | 0.137876 | 0.00283  | 0.317867 | 2.01E-12 |
| 1.32E-07 | 0.040083 | 0.38746  | 0.112261 | 0.01522  | 0.145502 | 0.00162  | -0.04349 | 0.34838  |



|          |          |          |          |          |          |          |          |          |
|----------|----------|----------|----------|----------|----------|----------|----------|----------|
| 1.52E-11 | -0.09607 | 0.03795  | 0.047394 | 0.30677  | -0.01796 | 0.6986   | 0.116813 | 0.01153  |
| 3.65E-10 | -0.36645 | 2.74E-16 | -0.17333 | 0.00017  | -0.18172 | 7.84E-05 | -0.31018 | 7.14E-12 |
| 0.0191   | 0.072828 | 0.11602  | 0.015698 | 0.73509  | -0.02287 | 0.62198  | 0.148105 | 0.00133  |
| 2.03E-11 | -0.16118 | 0.00047  | -0.19028 | 3.49E-05 | -0.17591 | 0.00013  | -0.18193 | 7.68E-05 |
| 0.00151  | 0.061914 | 0.18166  | 0.009669 | 0.83493  | 0.05772  | 0.21312  | 0.04595  | 0.32175  |
| 0.00424  | 0.120164 | 0.00934  | 0.023169 | 0.6175   | 0.078601 | 0.08976  | 0.004304 | 0.92609  |
| 2.26E-05 | -0.08556 | 0.06468  | -0.10161 | 0.02813  | -0.10101 | 0.02907  | -0.08314 | 0.07266  |
| 0.12594  | 0.054394 | 0.24072  | 0.015583 | 0.73697  | -0.01901 | 0.68192  | 0.087058 | 0.06012  |
| 0.13958  | 0.35299  | 3.77E-15 | 0.243303 | 1.02E-07 | 0.273512 | 1.86E-09 | 0.236053 | 2.46E-07 |
| 0.01895  | 0.167078 | 0.00029  | 0.137177 | 0.00297  | 0.088435 | 0.05617  | 0.204938 | 8.03E-06 |
| 2.78E-09 | -0.0285  | 0.53903  | -0.12218 | 0.00821  | -0.08642 | 0.06203  | -0.11683 | 0.01151  |
| 4.99E-08 | 0.001151 | 0.98021  | 0.043745 | 0.34555  | 0.005297 | 0.9091   | -0.039   | 0.40045  |
| 1.18E-06 | -0.09168 | 0.0477   | -0.0566  | 0.22213  | -0.03825 | 0.40957  | -0.06121 | 0.18669  |
| 2.75E-12 | 0.29424  | 8.83E-11 | 0.18618  | 5.16E-05 | 0.084344 | 0.0686   | 0.290926 | 1.46E-10 |
| 0.02806  | -0.00752 | 0.87129  | 0.00331  | 0.94312  | 0.000699 | 0.98798  | 0.050401 | 0.27706  |
| 2.45E-07 | -0.02571 | 0.57947  | 0.022787 | 0.62331  | -0.02609 | 0.57387  | 0.013382 | 0.77302  |
| 8.88E-07 | 0.309074 | 8.54E-12 | 0.113796 | 0.01387  | 0.129822 | 0.00496  | 0.251469 | 3.62E-08 |
| 3.47E-11 | -0.2132  | 3.34E-06 | -0.1531  | 0.0009   | -0.11244 | 0.01505  | -0.15991 | 0.00052  |
| 1.08E-06 | 0.386285 | 4.56E-18 | 0.341976 | 2.95E-14 | 0.346613 | 1.25E-14 | 0.394932 | 6.99E-19 |
| 8.37E-14 | 0.140111 | 0.00241  | 0.019289 | 0.67758  | 0.114069 | 0.01364  | -0.13518 | 0.00342  |
| 1.58E-16 | -0.02262 | 0.62589  | -0.05922 | 0.20144  | 0.097015 | 0.0361   | -0.12752 | 0.00579  |
| 0.2564   | 0.042813 | 0.35594  | -0.01222 | 0.79225  | 0.00845  | 0.85548  | 0.026509 | 0.5677   |
| 0.01158  | -0.09691 | 0.03629  | -0.11353 | 0.0141   | -0.03834 | 0.40847  | -0.08881 | 0.05514  |
| 7.00E-08 | -0.29484 | 8.06E-11 | -0.23451 | 2.96E-07 | -0.29551 | 7.27E-11 | -0.22772 | 6.58E-07 |
| 1.97E-07 | 0.080395 | 0.08265  | 0.056568 | 0.22241  | 0.12028  | 0.00927  | 0.009372 | 0.83993  |
| 0.00512  | 0.109926 | 0.01748  | 0.001012 | 0.98259  | 0.07589  | 0.10143  | 0.036618 | 0.42983  |
| 8.83E-07 | 0.430077 | 1.90E-22 | 0.265765 | 5.44E-09 | 0.300848 | 3.17E-11 | 0.362316 | 6.21E-16 |
| 0.00014  | 0.333356 | 1.39E-13 | 0.24824  | 5.47E-08 | 0.265163 | 5.91E-09 | 0.451833 | 7.12E-25 |
| 0.60749  | 0.160698 | 0.00049  | 0.065318 | 0.15876  | 0.066215 | 0.1531   | 0.076551 | 0.09848  |
| 0.00184  | 0.313319 | 4.27E-12 | 0.254701 | 2.38E-08 | 0.291505 | 1.34E-10 | 0.328204 | 3.44E-13 |
| 2.38E-22 | 0.503522 | 2.18E-31 | 0.30281  | 2.33E-11 | 0.279845 | 7.52E-10 | 0.338566 | 5.47E-14 |
| 0.00094  | 0.385182 | 5.77E-18 | 0.336332 | 8.18E-14 | 0.337502 | 6.63E-14 | 0.560729 | 5.03E-40 |
| 0.03738  | 0.041479 | 0.37113  | 0.001034 | 0.98222  | -0.03154 | 0.49659  | 0.153733 | 0.00086  |
| 1.82E-05 | 0.016023 | 0.72982  | 0.057407 | 0.21562  | 0.086592 | 0.06152  | 0.028762 | 0.53525  |
| 0.01116  | 0.356284 | 2.01E-15 | 0.372398 | 8.26E-17 | 0.417906 | 3.64E-21 | 0.24694  | 6.44E-08 |
| 1.49E-06 | 0.266546 | 4.89E-09 | 0.090446 | 0.05078  | 0.054391 | 0.24075  | 0.194541 | 2.30E-05 |
| 0.00196  | 0.000501 | 0.99138  | -0.09831 | 0.03368  | -0.07461 | 0.10735  | -0.14257 | 0.00201  |
| 0.00143  | 0.212648 | 3.55E-06 | 0.034779 | 0.45338  | 0.05943  | 0.19984  | 0.171405 | 0.0002   |
| 0.13607  | 0.215294 | 2.66E-06 | 0.25399  | 2.61E-08 | 0.297648 | 5.23E-11 | 0.105425 | 0.0227   |
| 1.54E-11 | 0.309252 | 8.30E-12 | 0.304964 | 1.65E-11 | 0.238112 | 1.92E-07 | 0.447297 | 2.36E-24 |
| 0.09081  | 0.137099 | 0.00299  | 0.221036 | 1.41E-06 | 0.366016 | 2.99E-16 | 0.054858 | 0.23673  |
| 7.26E-12 | -0.06388 | 0.16817  | -0.04287 | 0.35524  | -0.02413 | 0.60301  | -0.2107  | 4.38E-06 |
| 0.35084  | -0.07847 | 0.09029  | -0.09484 | 0.04049  | -0.10432 | 0.02417  | -0.06776 | 0.14372  |
| 4.33E-10 | 0.339852 | 4.34E-14 | 0.185964 | 5.27E-05 | 0.187105 | 4.73E-05 | 0.30051  | 3.34E-11 |
| 0.2399   | -0.14569 | 0.00159  | -0.03766 | 0.41678  | -0.13505 | 0.00345  | -0.03362 | 0.46857  |

|          |          |          |          |          |          |          |          |          |
|----------|----------|----------|----------|----------|----------|----------|----------|----------|
| 0.95334  | -0.01257 | 0.78637  | 0.007919 | 0.86448  | -0.03572 | 0.4413   | 0.029755 | 0.52124  |
| 0.07259  | 0.232822 | 3.62E-07 | 0.211846 | 3.87E-06 | 0.212192 | 3.73E-06 | 0.211364 | 4.07E-06 |
| 0.83091  | 0.265911 | 5.33E-09 | 0.123043 | 0.00777  | 0.161988 | 0.00044  | 0.146891 | 0.00146  |
| 0.0608   | 0.24904  | 4.94E-08 | 0.100443 | 0.02999  | 0.190058 | 3.57E-05 | 0.099533 | 0.03152  |
| 0.85127  | 0.06     | 0.19556  | 0.056147 | 0.22588  | 0.097013 | 0.0361   | 0.155615 | 0.00074  |
| 0.35026  | 0.241331 | 1.30E-07 | 0.248371 | 5.38E-08 | 0.312162 | 5.16E-12 | 0.220954 | 1.42E-06 |
| 8.63E-13 | -0.05938 | 0.20024  | 0.045919 | 0.32208  | 0.14612  | 0.00154  | -0.06289 | 0.17484  |
| 0.01878  | 0.123178 | 0.0077   | 0.146604 | 0.00149  | 0.021756 | 0.63911  | -0.03093 | 0.5049   |
| 0.06448  | 0.098221 | 0.03384  | 0.054006 | 0.2441   | 0.10348  | 0.02534  | 0.136615 | 0.00309  |
| 3.09E-10 | 0.370238 | 1.28E-16 | 0.334268 | 1.18E-13 | 0.295243 | 7.58E-11 | 0.433326 | 8.46E-23 |
| 0.01671  | 0.260445 | 1.12E-08 | 0.222495 | 1.20E-06 | 0.246547 | 6.77E-08 | 0.29842  | 4.64E-11 |
| 2.81E-08 | 0.248193 | 5.50E-08 | 0.329329 | 2.83E-13 | 0.322875 | 8.61E-13 | 0.386582 | 4.28E-18 |
| 4.07E-06 | -0.11015 | 0.01726  | -0.05317 | 0.25149  | -0.02559 | 0.58128  | 0.072673 | 0.1168   |
| 0.59985  | 0.032173 | 0.48795  | -0.08231 | 0.07557  | -0.09265 | 0.04538  | -0.04245 | 0.36001  |
| 5.57E-13 | 0.067802 | 0.14347  | -0.04503 | 0.33156  | 0.04898  | 0.29085  | -0.05393 | 0.24476  |
| 0.0016   | -0.35785 | 1.49E-15 | -0.29516 | 7.67E-11 | -0.29681 | 5.95E-11 | -0.23873 | 1.78E-07 |
| 0.00642  | -0.28572 | 3.18E-10 | -0.16618 | 0.00031  | -0.2005  | 1.27E-05 | -0.11157 | 0.01586  |
| 8.38E-05 | -0.27653 | 1.21E-09 | -0.13783 | 0.00284  | -0.09453 | 0.04117  | -0.06477 | 0.1623   |
| 0.00996  | 0.123415 | 0.00758  | 0.209929 | 4.75E-06 | 0.174228 | 0.00015  | 0.278158 | 9.59E-10 |
| 0.3861   | -0.10021 | 0.03036  | -0.05141 | 0.26758  | -0.03087 | 0.50581  | 0.109519 | 0.01791  |
| 0.00014  | 0.137238 | 0.00296  | -0.01372 | 0.76739  | -0.0103  | 0.82427  | 0.109228 | 0.01822  |
| 6.43E-10 | 0.383052 | 9.06E-18 | 0.258974 | 1.36E-08 | 0.213988 | 3.07E-06 | 0.286213 | 2.96E-10 |
| 1.41E-09 | -0.18632 | 5.10E-05 | -0.12602 | 0.00639  | -0.12706 | 0.00597  | -0.10613 | 0.0218   |
| 5.98E-10 | 0.03335  | 0.47217  | 0.0832   | 0.07245  | -0.02057 | 0.65755  | 0.173665 | 0.00016  |
| 0.04107  | 0.014156 | 0.76029  | 0.024106 | 0.60333  | -0.0059  | 0.89881  | 0.018057 | 0.69713  |
| 4.33E-12 | 0.08967  | 0.05281  | -0.01005 | 0.82844  | -0.03826 | 0.40945  | 0.105055 | 0.02318  |
| 0.19347  | 0.233303 | 3.42E-07 | 0.161839 | 0.00045  | 0.124017 | 0.00729  | 0.024284 | 0.60067  |
| 0.47143  | 0.074954 | 0.10573  | 0.048904 | 0.29159  | 0.043986 | 0.3429   | 0.052152 | 0.26069  |
| 2.18E-10 | -0.17366 | 0.00016  | -0.08488 | 0.06686  | -0.13196 | 0.00428  | -0.11265 | 0.01486  |
| 3.74E-06 | 0.018333 | 0.69274  | 0.23226  | 3.87E-07 | 0.167296 | 0.00028  | 0.111553 | 0.01588  |
| 0.27063  | 0.248552 | 5.25E-08 | 0.168291 | 0.00026  | 0.251292 | 3.70E-08 | 0.251935 | 3.41E-08 |
| 0.09833  | 0.040318 | 0.38468  | 0.101673 | 0.02802  | 0.138774 | 0.00265  | 0.069108 | 0.13591  |
| 0.00454  | -0.01372 | 0.76745  | 0.039857 | 0.39015  | 0.031019 | 0.50369  | 0.12986  | 0.00494  |
| 1.55E-07 | 0.070271 | 0.12942  | 0.159843 | 0.00053  | 0.057174 | 0.21749  | 0.218172 | 1.94E-06 |
| 0.57565  | 0.127503 | 0.00579  | 0.121586 | 0.00853  | 0.133957 | 0.00373  | 0.198208 | 1.60E-05 |
| 4.46E-10 | 0.24894  | 5.00E-08 | 0.248773 | 5.11E-08 | 0.165653 | 0.00032  | 0.27779  | 1.01E-09 |
| 0.94642  | 0.213174 | 3.35E-06 | 0.103152 | 0.02581  | 0.182002 | 7.63E-05 | 0.088537 | 0.05588  |
| 6.07E-07 | 0.036042 | 0.43714  | 0.16108  | 0.00047  | 0.116349 | 0.01186  | 0.12982  | 0.00496  |
| 2.37E-05 | -0.04417 | 0.34083  | -0.06605 | 0.15414  | -0.09979 | 0.03107  | -0.01544 | 0.7393   |
| 0.92141  | -0.06788 | 0.14303  | 0.050998 | 0.27141  | 0.016525 | 0.72171  | -0.00585 | 0.89974  |
| 3.12E-16 | 0.265879 | 5.36E-09 | 0.224137 | 9.93E-07 | 0.203037 | 9.78E-06 | 0.585667 | 2.41E-44 |
| 3.63E-10 | -0.16559 | 0.00033  | 0.020589 | 0.65719  | -0.0683  | 0.14055  | -0.11764 | 0.01095  |
| 0.12875  | 0.037296 | 0.42135  | -0.04262 | 0.35807  | -0.11765 | 0.01095  | -0.04373 | 0.34569  |
| 3.19E-09 | 0.466929 | 1.16E-26 | 0.301688 | 2.78E-11 | 0.282137 | 5.39E-10 | 0.325487 | 5.50E-13 |
| 0.16816  | 0.328064 | 3.52E-13 | 0.23699  | 2.20E-07 | 0.291898 | 1.26E-10 | 0.092252 | 0.04632  |

|          |          |          |          |          |          |          |          |          |
|----------|----------|----------|----------|----------|----------|----------|----------|----------|
| 3.50E-10 | -0.14183 | 0.00212  | 0.009195 | 0.84291  | -0.01917 | 0.67949  | -0.12357 | 0.00751  |
| 4.00E-22 | -0.0908  | 0.04988  | -0.0917  | 0.04766  | -0.02005 | 0.66555  | -0.22035 | 1.52E-06 |
| 1.49E-08 | 0.138235 | 0.00276  | 0.306701 | 1.25E-11 | 0.242261 | 1.16E-07 | 0.366605 | 2.66E-16 |
| 0.03427  | 0.145175 | 0.00166  | 0.158313 | 0.0006   | 0.135967 | 0.00324  | 0.176288 | 0.00013  |
| 7.32E-07 | 0.377732 | 2.76E-17 | 0.305828 | 1.44E-11 | 0.311288 | 5.96E-12 | 0.34618  | 1.36E-14 |
| 4.59E-06 | 0.116562 | 0.01171  | -0.01743 | 0.70722  | -0.03539 | 0.44544  | -0.03032 | 0.5133   |
| 6.29E-07 | 0.079541 | 0.08598  | 0.028989 | 0.53203  | 0.155913 | 0.00072  | 0.014333 | 0.75738  |
| 0.00026  | 0.311701 | 5.57E-12 | 0.232436 | 3.79E-07 | 0.252052 | 3.36E-08 | 0.319513 | 1.52E-12 |
| 0.03317  | 0.259724 | 1.23E-08 | 0.13445  | 0.0036   | 0.20494  | 8.03E-06 | 0.222078 | 1.25E-06 |
| 0.68543  | 0.030388 | 0.51242  | 0.129461 | 0.00508  | 0.115398 | 0.01258  | 0.026567 | 0.56686  |
| 1.78E-09 | 0.016474 | 0.72253  | -0.01828 | 0.69357  | 0.109493 | 0.01794  | 0.08255  | 0.07472  |
| 0.44498  | -0.20776 | 5.98E-06 | -0.15056 | 0.0011   | -0.13821 | 0.00276  | 0.064821 | 0.16196  |
| 9.74E-05 | -0.29825 | 4.76E-11 | -0.1187  | 0.01025  | -0.20728 | 6.28E-06 | -0.04555 | 0.32596  |
| 2.05E-12 | 0.244729 | 8.50E-08 | 0.190336 | 3.47E-05 | 0.136114 | 0.00321  | 0.330951 | 2.13E-13 |
| 0.99203  | 0.145709 | 0.00159  | 0.030249 | 0.51435  | 0.038508 | 0.4064   | -0.09629 | 0.03752  |
| 4.10E-06 | -0.2864  | 2.88E-10 | -0.0984  | 0.03352  | -0.16727 | 0.00028  | -0.09456 | 0.04109  |
| 3.88E-07 | 0.238145 | 1.91E-07 | 0.19876  | 1.51E-05 | 0.204731 | 8.21E-06 | 0.28649  | 2.84E-10 |
| 0.08048  | 0.193579 | 2.53E-05 | 0.140283 | 0.00238  | 0.140658 | 0.00231  | 0.192024 | 2.95E-05 |
| 1.90E-08 | 0.489436 | 1.68E-29 | 0.291444 | 1.35E-10 | 0.328546 | 3.24E-13 | 0.459275 | 9.58E-26 |
| 0.9604   | 0.195557 | 2.08E-05 | 0.021843 | 0.63777  | 0.095174 | 0.03979  | 0.11586  | 0.01223  |
| 0.19416  | 0.398387 | 3.25E-19 | 0.254465 | 2.46E-08 | 0.351664 | 4.85E-15 | 0.166883 | 0.00029  |
| 0.0003   | 0.1768   | 0.00012  | 0.229726 | 5.21E-07 | 0.184785 | 5.89E-05 | 0.280411 | 6.93E-10 |
| 0.22079  | -0.26123 | 1.00E-08 | -0.1417  | 0.00214  | -0.26286 | 8.07E-09 | -0.05969 | 0.1979   |
| 0.0525   | 0.045659 | 0.32483  | 0.121581 | 0.00854  | 0.066254 | 0.15286  | 0.173775 | 0.00016  |
| 0.03454  | 0.271664 | 2.41E-09 | 0.276979 | 1.14E-09 | 0.309856 | 7.52E-12 | 0.225493 | 8.50E-07 |
| 0.40766  | 0.244649 | 8.59E-08 | 0.062441 | 0.17796  | 0.125695 | 0.00653  | 0.208786 | 5.36E-06 |
| 0.0038   | 0.388728 | 2.70E-18 | 0.220777 | 1.45E-06 | 0.240962 | 1.36E-07 | 0.274271 | 1.67E-09 |
| 5.56E-07 | 0.00812  | 0.86107  | 0.100468 | 0.02994  | 0.246586 | 6.74E-08 | -0.03414 | 0.46167  |
| 0.07216  | -0.02977 | 0.52101  | 0.06755  | 0.14497  | 0.05384  | 0.24556  | 0.064811 | 0.16203  |
| 0.00888  | -0.10104 | 0.02902  | -0.08236 | 0.07538  | -0.10728 | 0.02041  | -0.12514 | 0.00677  |
| 0.11653  | 0.411536 | 1.63E-20 | 0.443991 | 5.59E-24 | 0.484333 | 7.71E-29 | 0.343705 | 2.14E-14 |
| 0.42986  | 0.239876 | 1.55E-07 | 0.176394 | 0.00013  | 0.181454 | 8.03E-05 | 0.199685 | 1.38E-05 |
| 0.08191  | 0.281604 | 5.83E-10 | 0.147994 | 0.00134  | 0.223308 | 1.09E-06 | 0.149873 | 0.00116  |
| 0.04904  | -0.05585 | 0.22834  | 0.017573 | 0.70485  | -0.00921 | 0.84266  | -0.00179 | 0.96926  |
| 5.97E-05 | 0.225629 | 8.37E-07 | 0.196872 | 1.83E-05 | 0.154099 | 0.00083  | 0.435071 | 5.46E-23 |
| 0.00167  | -0.11909 | 0.01     | -0.09587 | 0.03837  | -0.15765 | 0.00063  | -0.14459 | 0.00173  |
| 3.04E-12 | -0.02647 | 0.56829  | -0.01164 | 0.80191  | 0.178575 | 0.0001   | 0.035537 | 0.44359  |
| 1.80E-18 | -0.15098 | 0.00107  | -0.15047 | 0.00111  | -0.08632 | 0.06233  | -0.15576 | 0.00073  |
| 0.00206  | -0.02165 | 0.64081  | -0.01673 | 0.71846  | -0.02739 | 0.55486  | 0.02805  | 0.54541  |
| 0.00016  | 0.444229 | 5.25E-24 | 0.311729 | 5.54E-12 | 0.339813 | 4.37E-14 | 0.425424 | 5.96E-22 |
| 1.49E-17 | 0.245735 | 7.50E-08 | 0.242802 | 1.08E-07 | 0.141536 | 0.00217  | 0.29686  | 5.90E-11 |
| 3.94E-06 | 0.18203  | 7.61E-05 | 0.208476 | 5.54E-06 | 0.14606  | 0.00155  | 0.280557 | 6.79E-10 |
| 8.21E-09 | -0.16559 | 0.00033  | -0.16354 | 0.00039  | -0.16096 | 0.00048  | -0.15537 | 0.00075  |
| 1.36E-09 | 0.33059  | 2.27E-13 | 0.23835  | 1.87E-07 | 0.257831 | 1.58E-08 | 0.402423 | 1.32E-19 |
| 0.00551  | 0.002798 | 0.95191  | 0.121042 | 0.00884  | 0.130355 | 0.00478  | -0.03322 | 0.47394  |

|          |          |          |          |          |          |          |          |          |
|----------|----------|----------|----------|----------|----------|----------|----------|----------|
| 2.07E-06 | 0.176672 | 0.00012  | 0.115791 | 0.01228  | 0.027453 | 0.554    | 0.21003  | 4.70E-06 |
| 0.7277   | -0.02718 | 0.55799  | -0.0508  | 0.27323  | -0.00608 | 0.8958   | 0.014832 | 0.74921  |
| 1.67E-15 | 0.158824 | 0.00057  | 0.259137 | 1.33E-08 | 0.117396 | 0.01112  | 0.324977 | 6.01E-13 |
| 7.95E-06 | 0.191873 | 2.99E-05 | 0.162131 | 0.00044  | 0.141988 | 0.0021   | 0.2829   | 4.82E-10 |
| 0.10363  | 0.014588 | 0.7532   | 0.17314  | 0.00017  | 0.102731 | 0.02642  | 0.228782 | 5.82E-07 |
| 0.11962  | 0.244317 | 8.95E-08 | 0.112009 | 0.01545  | 0.176155 | 0.00013  | 0.070082 | 0.13046  |
| 0.03669  | -0.06901 | 0.13647  | -0.05896 | 0.20342  | -0.15443 | 0.00081  | 0.004462 | 0.92338  |
| 0.00103  | 0.123515 | 0.00753  | 0.167726 | 0.00027  | 0.12772  | 0.00571  | 0.153993 | 0.00084  |
| 1.25E-12 | 0.297483 | 5.36E-11 | 0.169333 | 0.00024  | 0.212843 | 3.48E-06 | 0.428535 | 2.78E-22 |
| 0.00011  | -0.18386 | 6.42E-05 | -0.12086 | 0.00894  | -0.12418 | 0.00721  | -0.12888 | 0.00528  |
| 0.00043  | 0.298175 | 4.82E-11 | 0.236589 | 2.31E-07 | 0.269836 | 3.11E-09 | 0.279227 | 8.23E-10 |
| 2.65E-05 | 0.246084 | 7.18E-08 | 0.167507 | 0.00028  | 0.087279 | 0.05948  | 0.118003 | 0.01071  |
| 4.66E-14 | 0.260224 | 1.15E-08 | 0.24963  | 4.58E-08 | 0.168085 | 0.00026  | 0.396601 | 4.84E-19 |
| 0.00336  | 0.19509  | 2.18E-05 | 0.057125 | 0.21788  | 0.075002 | 0.1055   | 0.28814  | 2.22E-10 |
| 5.00E-05 | 0.092714 | 0.04523  | 0.05651  | 0.22288  | 0.103186 | 0.02576  | 0.133107 | 0.00396  |
| 0.94758  | 0.015089 | 0.74502  | 0.077039 | 0.09635  | 0.121522 | 0.00857  | -0.07601 | 0.10088  |
| 0.00389  | 0.250447 | 4.13E-08 | 0.215274 | 2.67E-06 | 0.150517 | 0.0011   | 0.09938  | 0.03178  |
| 0.08013  | 0.175327 | 0.00014  | 0.156661 | 0.00068  | 0.145701 | 0.00159  | 0.364471 | 4.06E-16 |
| 0.01386  | 0.27148  | 2.47E-09 | 0.254125 | 2.57E-08 | 0.169317 | 0.00024  | 0.225607 | 8.39E-07 |
| 0.02449  | 0.129134 | 0.00519  | 0.156661 | 0.00068  | 0.135636 | 0.00332  | 0.033402 | 0.47147  |
| 0.00787  | 0.276655 | 1.19E-09 | 0.25402  | 2.60E-08 | 0.280653 | 6.69E-10 | 0.250402 | 4.15E-08 |
| 0.28153  | 0.209547 | 4.95E-06 | 0.060541 | 0.19156  | 0.043345 | 0.34999  | 0.131076 | 0.00455  |
| 0.4623   | 0.02882  | 0.53443  | 0.016721 | 0.71855  | -0.02478 | 0.59322  | 0.085972 | 0.06341  |
| 0.00564  | 0.126559 | 0.00617  | 0.13742  | 0.00292  | 0.119594 | 0.00969  | 0.190461 | 3.43E-05 |
| 0.00279  | -0.12001 | 0.00943  | 0.016779 | 0.71761  | -0.14934 | 0.00121  | 0.10559  | 0.02248  |
| 0.01536  | 0.166733 | 0.0003   | 0.273559 | 1.85E-09 | 0.218873 | 1.80E-06 | 0.119489 | 0.00975  |
| 0.00017  | 0.169388 | 0.00024  | 0.206246 | 7.01E-06 | 0.117151 | 0.01129  | 0.308946 | 8.72E-12 |
| 0.40153  | -0.0247  | 0.59443  | -0.04494 | 0.33256  | -0.00329 | 0.94342  | -0.03108 | 0.50289  |
| 0.97929  | 0.095892 | 0.03832  | 0.020513 | 0.65838  | -0.03009 | 0.51656  | -0.00229 | 0.96059  |
| 0.01542  | 0.039781 | 0.39105  | 0.06304  | 0.17383  | 0.103479 | 0.02534  | -0.06529 | 0.15895  |
| 0.00827  | -0.05111 | 0.27033  | 0.138335 | 0.00274  | 0.051261 | 0.26893  | 0.343148 | 2.38E-14 |
| 0.00142  | 0.00024  | 0.99588  | 0.020086 | 0.66505  | 0.008082 | 0.86171  | 0.058809 | 0.2046   |
| 0.02413  | 0.294037 | 9.11E-11 | 0.181619 | 7.91E-05 | 0.258313 | 1.48E-08 | 0.363458 | 4.96E-16 |
| 0.12386  | 0.285818 | 3.14E-10 | 0.212025 | 3.80E-06 | 0.270164 | 2.97E-09 | 0.248103 | 5.56E-08 |
| 0.28933  | 0.211637 | 3.96E-06 | 0.019306 | 0.67732  | 0.140615 | 0.00232  | 0.064625 | 0.16323  |
| 0.05092  | 0.24993  | 4.41E-08 | 0.030207 | 0.51494  | 0.177362 | 0.00012  | 0.11702  | 0.01138  |
| 0.58244  | 0.038985 | 0.40061  | 0.070633 | 0.12746  | 0.078196 | 0.09143  | 0.179834 | 9.32E-05 |
| 0.64397  | 0.116398 | 0.01183  | 0.079507 | 0.08611  | 0.017701 | 0.70281  | 0.076656 | 0.09802  |
| 1.70E-05 | 0.463565 | 2.95E-26 | 0.374225 | 5.69E-17 | 0.410156 | 2.25E-20 | 0.377463 | 2.92E-17 |
| 6.28E-05 | 0.208838 | 5.33E-06 | 0.284174 | 4.00E-10 | 0.213046 | 3.40E-06 | 0.253535 | 2.77E-08 |
| 0.01098  | 0.289633 | 1.78E-10 | 0.2043   | 8.58E-06 | 0.207218 | 6.33E-06 | 0.279659 | 7.73E-10 |
| 3.40E-07 | -0.00384 | 0.934    | 0.173476 | 0.00016  | 0.175612 | 0.00014  | 0.083705 | 0.07073  |
| 0.00032  | 0.064093 | 0.16674  | 0.114294 | 0.01346  | 0.085941 | 0.0635   | -0.00105 | 0.98186  |
| 0.00021  | 0.228226 | 6.21E-07 | 0.157176 | 0.00065  | 0.130424 | 0.00476  | 0.241261 | 1.31E-07 |
| 1.72E-11 | -0.31024 | 7.07E-12 | -0.16729 | 0.00028  | -0.21017 | 4.63E-06 | -0.23296 | 3.56E-07 |

|          |          |          |          |          |          |          |          |          |
|----------|----------|----------|----------|----------|----------|----------|----------|----------|
| 0.16147  | 0.124347 | 0.00714  | 0.056653 | 0.22171  | 0.00567  | 0.90274  | 0.066315 | 0.15248  |
| 0.02039  | -0.20521 | 7.81E-06 | -0.0682  | 0.14116  | -0.14197 | 0.0021   | 0.11093  | 0.01648  |
| 5.05E-09 | 0.582678 | 8.30E-44 | 0.3225   | 9.18E-13 | 0.34725  | 1.11E-14 | 0.340383 | 3.94E-14 |
| 0.30602  | 0.032179 | 0.48786  | 0.154108 | 0.00083  | 0.134559 | 0.00358  | 0.060715 | 0.19028  |
| 7.46E-06 | 0.007714 | 0.86796  | -0.01628 | 0.72574  | 0.031563 | 0.49624  | 0.009045 | 0.84544  |
| 0.12364  | -0.09409 | 0.04212  | 0.083249 | 0.07229  | -0.04904 | 0.29025  | -0.04211 | 0.36384  |
| 0.00023  | 0.162407 | 0.00043  | 0.147499 | 0.00139  | 0.204932 | 8.04E-06 | 0.116602 | 0.01168  |
| 0.78752  | 0.280854 | 6.50E-10 | 0.168209 | 0.00026  | 0.216127 | 2.43E-06 | 0.143145 | 0.00193  |
| 3.10E-05 | 0.301139 | 3.03E-11 | 0.339084 | 4.98E-14 | 0.351928 | 4.62E-15 | 0.380927 | 1.42E-17 |
| 9.29E-09 | 0.419526 | 2.48E-21 | 0.406517 | 5.19E-20 | 0.379745 | 1.82E-17 | 0.39542  | 6.28E-19 |
| 0.00491  | -0.1941  | 2.40E-05 | -0.08937 | 0.0536   | -0.1583  | 0.0006   | -0.07378 | 0.11133  |
| 8.19E-13 | 0.578606 | 4.39E-43 | 0.542719 | 3.98E-37 | 0.501631 | 3.95E-31 | 0.506203 | 9.31E-32 |
| 6.09E-06 | -0.19683 | 1.83E-05 | -0.12188 | 0.00838  | -0.15339 | 0.00088  | -0.08887 | 0.05497  |
| 0.00017  | 0.008026 | 0.86267  | 0.093302 | 0.04388  | 0.094666 | 0.04087  | 0.064531 | 0.16385  |
| 0.8686   | 0.007407 | 0.87316  | 0.04113  | 0.37518  | 0.019232 | 0.67848  | 0.160546 | 0.0005   |
| 0.92804  | 0.031895 | 0.49171  | 0.155131 | 0.00077  | 0.102055 | 0.02743  | 0.127466 | 0.00581  |
| 0.02951  | 0.005211 | 0.91058  | 0.050603 | 0.27513  | -0.01873 | 0.6865   | 0.096162 | 0.03777  |
| 0.00029  | 0.160458 | 0.0005   | 0.177046 | 0.00012  | 0.209853 | 4.79E-06 | 0.077068 | 0.09622  |
| 0.28889  | -0.1258  | 0.00649  | -0.19947 | 1.41E-05 | -0.21457 | 2.88E-06 | -0.13165 | 0.00437  |
| 0.58146  | -0.15641 | 0.00069  | -0.1025  | 0.02677  | -0.16114 | 0.00047  | -0.20747 | 6.16E-06 |
| 0.56115  | -0.04704 | 0.31039  | -0.05714 | 0.21777  | -0.11336 | 0.01424  | 0.029131 | 0.53002  |
| 0.00091  | 0.370974 | 1.10E-16 | 0.22853  | 5.99E-07 | 0.294437 | 8.57E-11 | 0.353807 | 3.23E-15 |
| 0.77985  | 0.004119 | 0.92926  | 0.089176 | 0.05413  | 0.05578  | 0.22893  | 0.134676 | 0.00355  |
| 0.99378  | 0.085067 | 0.06625  | 0.036129 | 0.43603  | 0.018552 | 0.68925  | -0.09673 | 0.03664  |
| 0.14972  | 0.301829 | 2.72E-11 | 0.157046 | 0.00066  | 0.226649 | 7.45E-07 | 0.188732 | 4.05E-05 |
| 2.19E-13 | -0.12681 | 0.00607  | -0.03745 | 0.41937  | -0.0172  | 0.71088  | -0.23539 | 2.67E-07 |
| 0.00749  | 0.291276 | 1.39E-10 | 0.257794 | 1.59E-08 | 0.213069 | 3.39E-06 | 0.248115 | 5.55E-08 |
| 0.00022  | 0.593469 | 8.96E-46 | 0.315548 | 2.95E-12 | 0.383147 | 8.88E-18 | 0.361567 | 7.20E-16 |
| 0.16792  | 0.127702 | 0.00572  | 0.065016 | 0.1607   | 0.087225 | 0.05963  | 0.203815 | 9.02E-06 |
| 0.00561  | -0.00241 | 0.9585   | 0.178986 | 0.0001   | 0.22774  | 6.56E-07 | 0.11931  | 0.00986  |
| 0.56728  | 0.191817 | 3.01E-05 | 0.145632 | 0.0016   | 0.179562 | 9.55E-05 | 0.209417 | 5.02E-06 |
| 0.1986   | -0.08374 | 0.07062  | -0.04646 | 0.31643  | -0.12638 | 0.00624  | -0.08844 | 0.05615  |
| 7.53E-13 | 0.22136  | 1.36E-06 | 0.217742 | 2.03E-06 | 0.099189 | 0.03211  | 0.25955  | 1.26E-08 |
| 0.7624   | 0.149197 | 0.00122  | 0.19902  | 1.47E-05 | 0.214826 | 2.80E-06 | 0.208507 | 5.52E-06 |
| 0.19396  | 0.007508 | 0.87145  | -0.05212 | 0.26095  | -0.07581 | 0.10179  | -0.07196 | 0.12043  |
| 5.28E-06 | 0.058611 | 0.20613  | 0.060761 | 0.18994  | 0.138851 | 0.00264  | 0.078763 | 0.0891   |
| 2.83E-10 | -0.02626 | 0.57142  | 0.027177 | 0.55799  | 0.066582 | 0.15083  | 0.046275 | 0.31835  |
| 0.41942  | 0.16231  | 0.00043  | 0.159743 | 0.00053  | 0.162369 | 0.00043  | 0.101594 | 0.02814  |
| 4.28E-11 | 0.341419 | 3.26E-14 | 0.375754 | 4.15E-17 | 0.409533 | 2.60E-20 | 0.479483 | 3.20E-28 |
| 0.00587  | 0.075324 | 0.10401  | 0.177901 | 0.00011  | 0.098383 | 0.03354  | 0.130836 | 0.00463  |
| 0.00091  | 0.267798 | 4.12E-09 | 0.22166  | 1.31E-06 | 0.245512 | 7.71E-08 | 0.196245 | 1.94E-05 |
| 0.38729  | -0.08159 | 0.07818  | -0.05176 | 0.26432  | -0.03544 | 0.44482  | -0.13086 | 0.00462  |
| 4.54E-10 | 0.117021 | 0.01138  | 0.028654 | 0.53678  | 0.275262 | 1.45E-09 | 0.015154 | 0.74395  |
| 0.91119  | 0.00586  | 0.8995   | -0.03328 | 0.47315  | 0.002636 | 0.9547   | 0.173928 | 0.00016  |
| 4.52E-09 | 0.344553 | 1.83E-14 | 0.345602 | 1.51E-14 | 0.343007 | 2.44E-14 | 0.426283 | 4.83E-22 |

|          |          |          |           |          |          |          |          |          |
|----------|----------|----------|-----------|----------|----------|----------|----------|----------|
| 2.95E-17 | -0.37172 | 9.48E-17 | -0.25481  | 2.35E-08 | -0.23805 | 1.93E-07 | -0.27922 | 8.23E-10 |
| 0.02365  | 0.029276 | 0.52798  | 0.103145  | 0.02582  | 0.063379 | 0.17152  | 0.194632 | 2.28E-05 |
| 0.04189  | 0.034242 | 0.46038  | 0.030708  | 0.50798  | 0.050512 | 0.27601  | 0.08545  | 0.06503  |
| 0.0048   | 0.257228 | 1.71E-08 | 0.240625  | 1.41E-07 | 0.204486 | 8.42E-06 | 0.293892 | 9.32E-11 |
| 0.0549   | 0.074625 | 0.10727  | 0.015426  | 0.73952  | -0.00413 | 0.92913  | 0.074846 | 0.10623  |
| 1.66E-09 | 0.101916 | 0.02765  | 0.024481  | 0.5977   | 0.081181 | 0.07968  | -0.06475 | 0.16243  |
| 0.00058  | 0.189473 | 3.77E-05 | 0.132448  | 0.00414  | 0.149626 | 0.00118  | 0.299855 | 3.71E-11 |
| 0.73321  | 0.094229 | 0.04181  | 0.053151  | 0.25166  | 0.024728 | 0.59401  | 0.104712 | 0.02364  |
| 0.03172  | 0.130553 | 0.00472  | 0.227208  | 6.98E-07 | 0.165002 | 0.00034  | 0.166269 | 0.00031  |
| 4.25E-07 | -0.15569 | 0.00074  | -0.16781  | 0.00027  | -0.18743 | 4.59E-05 | -0.22489 | 9.12E-07 |
| 6.40E-12 | 0.142266 | 0.00206  | 0.096806  | 0.0365   | 0.024135 | 0.60289  | 0.261145 | 1.02E-08 |
| 0.02201  | -0.0973  | 0.03554  | -0.04974  | 0.28344  | -0.13347 | 0.00386  | 0.026773 | 0.56386  |
| 0.00028  | 0.180461 | 8.80E-05 | 0.083787  | 0.07045  | 0.064508 | 0.164    | 0.234415 | 3.00E-07 |
| 1.02E-06 | 0.23649  | 2.34E-07 | 0.257432  | 1.66E-08 | 0.430542 | 1.69E-22 | 0.004711 | 0.91912  |
| 3.11E-09 | 0.036248 | 0.43452  | -0.07744  | 0.09462  | -0.02655 | 0.56715  | -0.14075 | 0.0023   |
| 0.00909  | 0.11569  | 0.01236  | 0.088918  | 0.05483  | 0.022179 | 0.6326   | 0.019408 | 0.67571  |
| 0.0005   | 0.322665 | 8.92E-13 | 0.160918  | 0.00048  | 0.19855  | 1.54E-05 | 0.193265 | 2.61E-05 |
| 0.56192  | 0.052857 | 0.2543   | 0.059423  | 0.1999   | 0.063343 | 0.17176  | 0.29979  | 3.74E-11 |
| 1.55E-11 | 0.511258 | 1.84E-32 | 0.320469  | 1.30E-12 | 0.365283 | 3.46E-16 | 0.383033 | 9.10E-18 |
| 1.97E-08 | 0.134096 | 0.00369  | 0.078152  | 0.09162  | 0.262233 | 8.78E-09 | -0.00261 | 0.95521  |
| 0.88723  | 0.315239 | 3.11E-12 | 0.355529  | 2.32E-15 | 0.294624 | 8.33E-11 | 0.144156 | 0.00179  |
| 0.00799  | 0.171532 | 0.0002   | 0.056721  | 0.22116  | 0.100695 | 0.02958  | 0.088581 | 0.05576  |
| 0.01414  | -0.08308 | 0.07286  | 0.007073  | 0.87884  | -0.03761 | 0.41744  | -0.01942 | 0.67555  |
| 1.99E-07 | -0.22881 | 5.79E-07 | -0.19902  | 1.47E-05 | -0.15688 | 0.00067  | -0.12599 | 0.0064   |
| 0.56618  | 0.238864 | 1.75E-07 | 0.148501  | 0.00129  | 0.152959 | 0.00091  | 0.092962 | 0.04465  |
| 0.49839  | 0.053537 | 0.24823  | -1.96E-05 | 0.99966  | -0.07109 | 0.12499  | 0.032633 | 0.48175  |
| 3.71E-07 | 0.267838 | 4.10E-09 | 0.127378  | 0.00584  | 0.149538 | 0.00119  | 0.289649 | 1.77E-10 |
| 5.47E-05 | -0.16312 | 0.0004   | -0.26408  | 6.84E-09 | -0.24828 | 5.44E-08 | -0.15238 | 0.00095  |
| 0.10941  | 0.026892 | 0.56212  | -0.07265  | 0.11689  | -0.10881 | 0.01867  | 0.004401 | 0.92443  |
| 7.94E-19 | 0.02233  | 0.63029  | -0.00936  | 0.8401   | 0.115569 | 0.01245  | -0.04675 | 0.31335  |
| 6.56E-12 | 0.325474 | 5.51E-13 | 0.070081  | 0.13046  | 0.136288 | 0.00317  | 0.282684 | 4.98E-10 |
| 0.01926  | 0.181967 | 7.66E-05 | 0.189678  | 3.70E-05 | 0.273717 | 1.80E-09 | 0.179331 | 9.75E-05 |
| 8.43E-18 | 0.386462 | 4.39E-18 | 0.283904  | 4.16E-10 | 0.247099 | 6.31E-08 | 0.531755 | 1.91E-35 |
| 2.74E-14 | 0.134778 | 0.00352  | 0.143555  | 0.00187  | 0.10379  | 0.0249   | 0.288781 | 2.02E-10 |
| 4.25E-06 | 0.166418 | 0.0003   | 0.103754  | 0.02495  | 0.125594 | 0.00658  | 0.196261 | 1.94E-05 |
| 0.85128  | -0.12147 | 0.0086   | 0.061831  | 0.18224  | -0.03049 | 0.51096  | 0.06629  | 0.15264  |
| 0.00381  | -0.24582 | 7.42E-08 | -0.1385   | 0.0027   | -0.23168 | 4.15E-07 | -0.11608 | 0.01206  |
| 0.23458  | -0.13995 | 0.00244  | -0.0387   | 0.40411  | -0.04502 | 0.33164  | -0.21275 | 3.51E-06 |
| 0.04173  | 0.025962 | 0.57572  | 0.144336  | 0.00177  | 0.050552 | 0.27562  | 0.413828 | 9.54E-21 |
| 0.13515  | 0.367089 | 2.41E-16 | 0.309212  | 8.35E-12 | 0.285131 | 3.47E-10 | 0.136804 | 0.00305  |
| 1.71E-19 | -0.02831 | 0.54163  | -0.04202  | 0.36487  | -0.02087 | 0.65279  | -0.28743 | 2.47E-10 |
| 0.84082  | -0.16955 | 0.00023  | -0.11318  | 0.0144   | -0.14289 | 0.00197  | 0.008232 | 0.85918  |
| 0.00705  | 0.10838  | 0.01914  | 0.088391  | 0.05629  | 0.154087 | 0.00084  | 0.096617 | 0.03687  |
| 0.45933  | 0.01187  | 0.79808  | 0.151744  | 0.001    | 0.087671 | 0.05834  | 0.149104 | 0.00123  |
| 7.60E-13 | 0.5354   | 5.36E-36 | 0.331207  | 2.03E-13 | 0.309821 | 7.57E-12 | 0.428041 | 3.14E-22 |

|          |          |          |          |          |          |          |          |          |
|----------|----------|----------|----------|----------|----------|----------|----------|----------|
| 0.07905  | 0.164612 | 0.00035  | 0.035761 | 0.44072  | 0.089746 | 0.05261  | 0.213323 | 3.30E-06 |
| 0.06506  | -0.27737 | 1.07E-09 | -0.16261 | 0.00042  | -0.2133  | 3.31E-06 | -0.02639 | 0.56946  |
| 0.31276  | 0.031021 | 0.50367  | 0.001232 | 0.97882  | 0.077288 | 0.09527  | -0.01946 | 0.67494  |
| 0.0002   | -0.11115 | 0.01626  | -0.15027 | 0.00113  | -0.13413 | 0.00369  | -0.13518 | 0.00342  |
| 0.31357  | 0.268411 | 3.78E-09 | 0.202709 | 1.01E-05 | 0.247661 | 5.88E-08 | 0.150288 | 0.00112  |
| 0.0487   | 0.10867  | 0.01882  | 0.231601 | 4.18E-07 | 0.132768 | 0.00405  | 0.188288 | 4.23E-05 |
| 0.0003   | 0.146805 | 0.00147  | -0.01196 | 0.79654  | -0.05122 | 0.26935  | 0.068816 | 0.13757  |
| 9.23E-05 | 0.376711 | 3.41E-17 | 0.282809 | 4.89E-10 | 0.350082 | 6.54E-15 | 0.368462 | 1.83E-16 |
| 0.00077  | 0.270751 | 2.74E-09 | 0.235317 | 2.69E-07 | 0.225399 | 8.60E-07 | -0.04848 | 0.29585  |
| 0.00055  | 0.244848 | 8.38E-08 | 0.136686 | 0.00308  | 0.147634 | 0.00138  | 0.267037 | 4.57E-09 |
| 3.16E-09 | 0.395019 | 6.86E-19 | 0.304558 | 1.76E-11 | 0.305156 | 1.60E-11 | 0.555189 | 4.09E-39 |
| 0.00183  | 0.325586 | 5.41E-13 | 0.271805 | 2.36E-09 | 0.268132 | 3.93E-09 | 0.304655 | 1.74E-11 |
| 9.75E-05 | 0.331209 | 2.03E-13 | 0.25027  | 4.22E-08 | 0.273303 | 1.91E-09 | 0.291309 | 1.38E-10 |
| 0.00017  | 0.034765 | 0.45356  | 0.026305 | 0.5707   | 0.046842 | 0.31245  | 0.016693 | 0.719    |
| 5.68E-10 | 0.038999 | 0.40044  | 0.046755 | 0.31334  | 0.090612 | 0.05036  | 0.10947  | 0.01796  |
| 0.81349  | 0.145941 | 0.00157  | 0.055674 | 0.22981  | 0.081063 | 0.08012  | 0.123155 | 0.00771  |
| 5.93E-17 | 0.483474 | 9.93E-29 | 0.333511 | 1.35E-13 | 0.366546 | 2.69E-16 | 0.468225 | 8.04E-27 |
| 3.55E-12 | -0.048   | 0.30062  | -0.11221 | 0.01527  | -0.03735 | 0.42069  | -0.19702 | 1.80E-05 |
| 0.2096   | 0.223362 | 1.08E-06 | 0.128084 | 0.00557  | 0.185641 | 5.43E-05 | 0.188049 | 4.32E-05 |
| 2.23E-06 | 0.003929 | 0.93251  | -0.0437  | 0.34609  | 0.003084 | 0.94701  | -0.04418 | 0.34081  |
| 0.79988  | 0.094722 | 0.04075  | 0.088314 | 0.05651  | 0.089089 | 0.05437  | 0.12788  | 0.00565  |
| 0.01413  | 0.117549 | 0.01101  | 0.101061 | 0.02899  | 0.134255 | 0.00365  | 0.151878 | 0.00099  |
| 9.60E-09 | -0.06945 | 0.13399  | -0.05311 | 0.25204  | -0.04445 | 0.33778  | -0.05161 | 0.26573  |
| 1.65E-06 | -0.03011 | 0.51625  | -0.01274 | 0.78361  | 0.079438 | 0.08638  | 0.010575 | 0.8197   |
| 0.00236  | 0.263648 | 7.26E-09 | 0.283573 | 4.37E-10 | 0.271807 | 2.36E-09 | 0.190653 | 3.37E-05 |
| 2.67E-08 | 0.005128 | 0.91199  | -0.00172 | 0.97047  | 0.153561 | 0.00087  | -0.00529 | 0.90928  |
| 0.41112  | 0.109212 | 0.01823  | 0.110036 | 0.01737  | 0.098358 | 0.03359  | 0.153016 | 0.00091  |
| 0.12268  | 0.225526 | 8.47E-07 | 0.083574 | 0.07117  | 0.128774 | 0.00532  | 0.144213 | 0.00178  |
| 0.0025   | 0.513814 | 8.00E-33 | 0.285753 | 3.17E-10 | 0.336195 | 8.39E-14 | 0.345508 | 1.54E-14 |
| 0.0748   | -0.00547 | 0.90619  | -0.02568 | 0.57991  | -0.02524 | 0.58635  | 0.138599 | 0.00269  |
| 3.22E-13 | 0.088268 | 0.05664  | 0.05425  | 0.24197  | 0.095032 | 0.04009  | -0.14505 | 0.00167  |
| 0.00774  | -0.13739 | 0.00293  | -0.08158 | 0.07821  | -0.18908 | 3.92E-05 | -0.21379 | 3.14E-06 |
| 1.22E-14 | 0.335478 | 9.53E-14 | 0.33593  | 8.79E-14 | 0.270999 | 2.64E-09 | 0.454638 | 3.36E-25 |
| 0.04298  | 0.013864 | 0.76508  | 0.053924 | 0.24482  | -0.01263 | 0.78549  | 0.154431 | 0.00081  |
| 2.11E-08 | -0.0823  | 0.07562  | -0.14349 | 0.00188  | -0.1929  | 2.70E-05 | 0.07344  | 0.11298  |
| 9.19E-11 | 0.074469 | 0.10801  | 0.040417 | 0.38352  | 0.091585 | 0.04793  | -0.07375 | 0.11147  |
| 0.02064  | -0.14081 | 0.00229  | -0.05511 | 0.23458  | -0.12522 | 0.00674  | -0.06824 | 0.14088  |
| 0.00053  | 0.009657 | 0.83512  | 0.125546 | 0.0066   | 0.047752 | 0.30312  | -0.04546 | 0.32696  |
| 7.26E-06 | -0.17367 | 0.00016  | -0.18097 | 8.39E-05 | -0.1433  | 0.00191  | -0.03491 | 0.4517   |
| 0.0894   | 0.05632  | 0.22445  | 0.004786 | 0.91784  | 0.07998  | 0.08425  | 0.202466 | 1.04E-05 |
| 0.00012  | 0.156275 | 0.0007   | 0.129028 | 0.00523  | 0.081885 | 0.0771   | 0.225544 | 8.45E-07 |
| 0.00678  | -0.20982 | 4.81E-06 | -0.01898 | 0.68244  | -0.11919 | 0.00994  | -0.04406 | 0.34214  |
| 0.10314  | -0.03941 | 0.39554  | -0.03258 | 0.48248  | 0.013207 | 0.77591  | 0.143147 | 0.00193  |
| 0.84963  | 0.137109 | 0.00299  | 0.088122 | 0.05705  | 0.123495 | 0.00754  | 0.211358 | 4.08E-06 |
| 2.05E-05 | 0.262495 | 8.48E-09 | 0.211148 | 4.17E-06 | 0.166394 | 0.0003   | 0.225394 | 8.60E-07 |

|          |          |          |          |          |          |          |          |          |
|----------|----------|----------|----------|----------|----------|----------|----------|----------|
| 4.75E-12 | 0.349811 | 6.88E-15 | 0.246515 | 6.80E-08 | 0.19223  | 2.89E-05 | 0.364397 | 4.12E-16 |
| 0.00699  | 0.064662 | 0.163    | 0.169456 | 0.00023  | 0.21994  | 1.59E-06 | 0.104204 | 0.02432  |
| 0.66226  | -0.23269 | 3.68E-07 | -0.06178 | 0.18262  | -0.17462 | 0.00015  | -0.01415 | 0.76046  |
| 0.00449  | -0.05247 | 0.25784  | -0.13181 | 0.00433  | -0.12102 | 0.00885  | -0.30106 | 3.07E-11 |
| 7.68E-08 | 0.289301 | 1.87E-10 | 0.265749 | 5.45E-09 | 0.263587 | 7.32E-09 | 0.247709 | 5.85E-08 |
| 0.45527  | 0.230991 | 4.49E-07 | 0.315248 | 3.10E-12 | 0.344272 | 1.93E-14 | 0.226085 | 7.95E-07 |
| 1.36E-13 | -0.29691 | 5.86E-11 | -0.14388 | 0.00183  | -0.2087  | 5.41E-06 | -0.27618 | 1.27E-09 |
| 4.69E-07 | -0.15254 | 0.00094  | -0.19282 | 2.73E-05 | -0.21563 | 2.57E-06 | -0.23811 | 1.92E-07 |
| 0.46239  | 0.2877   | 2.37E-10 | 0.060036 | 0.19529  | 0.139257 | 0.00256  | 0.075326 | 0.104    |
| 1.92E-05 | -0.19977 | 1.36E-05 | 0.010527 | 0.8205   | -0.03715 | 0.42321  | -0.05082 | 0.27307  |
| 7.63E-05 | -0.20192 | 1.10E-05 | -0.11394 | 0.01375  | -0.09092 | 0.04957  | -0.1637  | 0.00038  |
| 0.01723  | 0.210215 | 4.61E-06 | 0.104579 | 0.02381  | 0.079487 | 0.08619  | -0.01889 | 0.68388  |
| 9.00E-08 | 0.204007 | 8.85E-06 | 0.182678 | 7.17E-05 | 0.157261 | 0.00065  | 0.245557 | 7.67E-08 |
| 1.48E-19 | -0.27417 | 1.69E-09 | -0.1406  | 0.00232  | -0.22681 | 7.31E-07 | -0.23187 | 4.05E-07 |
| 0.27938  | 0.146832 | 0.00146  | 0.156447 | 0.00069  | 0.214995 | 2.75E-06 | 0.092302 | 0.0462   |
| 0.25017  | 0.227297 | 6.91E-07 | 0.097118 | 0.0359   | 0.115805 | 0.01227  | -0.07306 | 0.11485  |
| 0.00015  | -0.00525 | 0.90995  | 0.026634 | 0.56588  | 0.008151 | 0.86055  | 0.063488 | 0.17078  |
| 2.79E-17 | 0.018567 | 0.68902  | 0.026612 | 0.56621  | 0.105747 | 0.02228  | -0.19021 | 3.51E-05 |
| 0.03659  | 0.202768 | 1.01E-05 | 0.193142 | 2.64E-05 | 0.292635 | 1.13E-10 | 0.111217 | 0.0162   |
| 0.04982  | -0.11892 | 0.01011  | -0.04943 | 0.28642  | -0.10232 | 0.02703  | 0.049476 | 0.28599  |
| 1.70E-20 | 0.030633 | 0.50902  | 0.068993 | 0.13656  | 0.12054  | 0.00912  | -0.05893 | 0.20368  |
| 4.65E-09 | 0.410321 | 2.16E-20 | 0.245977 | 7.27E-08 | 0.291679 | 1.30E-10 | 0.405364 | 6.76E-20 |
| 0.8011   | 0.155088 | 0.00077  | 0.127216 | 0.00591  | 0.154896 | 0.00078  | 0.222583 | 1.18E-06 |
| 1.94E-05 | -0.12958 | 0.00504  | 0.024559 | 0.59653  | -0.00151 | 0.974    | 0.027181 | 0.55792  |
| 0.0018   | 0.015649 | 0.7359   | 0.135897 | 0.00326  | 0.117675 | 0.01093  | 0.02851  | 0.53883  |
| 0.91123  | 0.056207 | 0.22538  | 0.088326 | 0.05647  | 0.063135 | 0.17318  | 0.161381 | 0.00046  |
| 3.65E-12 | -0.25927 | 1.31E-08 | -0.10121 | 0.02875  | -0.17011 | 0.00022  | -0.22339 | 1.08E-06 |
| 0.8216   | 0.096875 | 0.03637  | 0.170851 | 0.00021  | 0.152397 | 0.00095  | 0.175211 | 0.00014  |
| 5.45E-17 | -0.17697 | 0.00012  | -0.08461 | 0.06773  | -0.11956 | 0.00971  | -0.18413 | 6.26E-05 |
| 0.20208  | 0.373813 | 6.19E-17 | 0.333203 | 1.43E-13 | 0.413377 | 1.06E-20 | 0.356833 | 1.81E-15 |
| 0.05395  | 0.286016 | 3.05E-10 | 0.222476 | 1.20E-06 | 0.288656 | 2.06E-10 | 0.335187 | 1.00E-13 |
| 0.98448  | 0.204478 | 8.42E-06 | 0.31933  | 1.57E-12 | 0.272442 | 2.16E-09 | 0.236412 | 2.36E-07 |
| 0.56179  | 0.195436 | 2.11E-05 | 0.183232 | 6.81E-05 | 0.212098 | 3.77E-06 | 0.122743 | 0.00792  |
| 0.03157  | -0.14075 | 0.0023   | -0.11599 | 0.01213  | -0.09907 | 0.03232  | -0.04373 | 0.34568  |
| 0.00845  | 0.180131 | 9.07E-05 | 0.099502 | 0.03157  | 0.101554 | 0.02821  | 0.189751 | 3.67E-05 |
| 0.74021  | 0.180815 | 8.52E-05 | 0.073465 | 0.11286  | 0.138552 | 0.00269  | 0.154002 | 0.00084  |
| 0.0164   | 0.334386 | 1.16E-13 | 0.147309 | 0.00141  | 0.136373 | 0.00315  | -0.00526 | 0.90972  |
| 0.00037  | 0.233435 | 3.37E-07 | 0.159936 | 0.00052  | 0.108331 | 0.0192   | 0.103235 | 0.02569  |
| 0.31106  | 0.210873 | 4.29E-06 | 0.231639 | 4.16E-07 | 0.164492 | 0.00036  | 0.336932 | 7.35E-14 |
| 1.90E-07 | -0.09091 | 0.04961  | 0.110016 | 0.01739  | -0.05637 | 0.224    | 0.169802 | 0.00023  |
| 8.58E-06 | -0.05142 | 0.26748  | -0.12038 | 0.00921  | -0.08338 | 0.07184  | 0.067293 | 0.14651  |
| 0.29208  | 0.408975 | 2.95E-20 | 0.259591 | 1.25E-08 | 0.329652 | 2.67E-13 | 0.272862 | 2.04E-09 |
| 0.01821  | 0.033501 | 0.47016  | -0.04257 | 0.3587   | -0.04779 | 0.3027   | 0.220703 | 1.46E-06 |
| 0.36268  | 0.248104 | 5.56E-08 | 0.216523 | 2.33E-06 | 0.210511 | 4.46E-06 | 0.152476 | 0.00095  |
| 0.89294  | 0.079341 | 0.08677  | 0.047302 | 0.30771  | 0.053599 | 0.24768  | 0.144795 | 0.00171  |



|          |          |          |          |          |          |          |          |          |
|----------|----------|----------|----------|----------|----------|----------|----------|----------|
| 0.02203  | 0.20202  | 1.09E-05 | 0.226938 | 7.20E-07 | 0.206406 | 6.89E-06 | 0.203786 | 9.05E-06 |
| 1.01E-08 | 0.49553  | 2.63E-30 | 0.334128 | 1.21E-13 | 0.465985 | 1.51E-26 | 0.419592 | 2.44E-21 |
| 0.06046  | 0.128793 | 0.00531  | -0.00424 | 0.92724  | -0.00569 | 0.90236  | 0.095268 | 0.0396   |
| 0.96296  | 0.204107 | 8.75E-06 | 0.298273 | 4.74E-11 | 0.256572 | 1.86E-08 | 0.273108 | 1.97E-09 |
| 7.29E-19 | -0.02029 | 0.66194  | -0.06486 | 0.16173  | 0.083098 | 0.07281  | -0.12612 | 0.00635  |
| 3.49E-16 | -0.22264 | 1.18E-06 | -0.09871 | 0.03295  | -0.07323 | 0.11402  | -0.25447 | 2.45E-08 |
| 0.95489  | 0.063783 | 0.1688   | -0.03501 | 0.45038  | -0.00475 | 0.91853  | 0.097983 | 0.03427  |
| 3.70E-14 | 0.406066 | 5.76E-20 | 0.319532 | 1.52E-12 | 0.332696 | 1.56E-13 | 0.418488 | 3.17E-21 |
| 0.00451  | -0.33286 | 1.52E-13 | -0.12127 | 0.00871  | -0.20409 | 8.77E-06 | -0.15487 | 0.00078  |
| 0.07843  | 0.193977 | 2.43E-05 | 0.018613 | 0.68828  | 0.110591 | 0.01681  | 0.001826 | 0.96861  |
| 0.37314  | 0.11419  | 0.01354  | -0.00403 | 0.93082  | -0.00673 | 0.8847   | -0.0698  | 0.132    |
| 0.85517  | -0.09022 | 0.05135  | -0.04638 | 0.31729  | -0.02944 | 0.52562  | 0.029585 | 0.52363  |
| 0.00054  | -0.25657 | 1.87E-08 | -0.1287  | 0.00535  | -0.15427 | 0.00082  | -0.21518 | 2.70E-06 |
| 4.76E-09 | -0.12974 | 0.00498  | -0.12087 | 0.00894  | -0.16514 | 0.00034  | -0.31233 | 5.02E-12 |
| 5.24E-12 | 0.383674 | 7.94E-18 | 0.401922 | 1.47E-19 | 0.368865 | 1.69E-16 | 0.486029 | 4.65E-29 |
| 0.00139  | 0.0906   | 0.05039  | 0.126574 | 0.00616  | 0.101776 | 0.02786  | -0.03155 | 0.49643  |
| 0.13971  | -0.17643 | 0.00013  | -0.02226 | 0.63138  | -0.19906 | 1.47E-05 | -0.08408 | 0.06947  |
| 0.00341  | 0.61779  | 1.72E-50 | 0.44543  | 3.84E-24 | 0.534878 | 6.44E-36 | 0.4413   | 1.12E-23 |
| 4.13E-08 | -0.08317 | 0.07256  | -0.00595 | 0.89797  | -0.09238 | 0.04601  | 0.123821 | 0.00739  |
| 0.91055  | 0.182423 | 7.34E-05 | 0.024337 | 0.59987  | 0.090515 | 0.0506   | 0.098322 | 0.03365  |
| 0.00148  | 0.063434 | 0.17115  | 0.138672 | 0.00267  | 0.035691 | 0.44162  | 0.175246 | 0.00014  |
| 0.00333  | -0.02829 | 0.54194  | -0.05653 | 0.22274  | -0.02533 | 0.58502  | -0.05174 | 0.26451  |
| 0.00491  | 0.05202  | 0.2619   | 0.031128 | 0.50219  | 0.029432 | 0.52578  | 0.21487  | 2.79E-06 |
| 1.55E-05 | 0.321665 | 1.06E-12 | 0.146423 | 0.00151  | 0.190842 | 3.31E-05 | 0.212579 | 3.58E-06 |
| 0.00782  | 0.396447 | 5.01E-19 | 0.291988 | 1.25E-10 | 0.322603 | 9.02E-13 | 0.267441 | 4.33E-09 |
| 2.71E-09 | -0.16086 | 0.00048  | -0.19518 | 2.16E-05 | -0.14964 | 0.00118  | -0.11195 | 0.01551  |
| 0.02063  | 0.066684 | 0.15021  | 0.116708 | 0.0116   | 0.150549 | 0.0011   | 0.081082 | 0.08005  |
| 0.39097  | 0.212286 | 3.69E-06 | 0.122837 | 0.00787  | 0.104256 | 0.02425  | 0.172062 | 0.00019  |
| 3.46E-13 | -0.10155 | 0.02821  | -0.02059 | 0.65719  | -0.01206 | 0.79485  | -0.08772 | 0.05819  |
| 0.00011  | 0.391287 | 1.55E-18 | 0.250515 | 4.09E-08 | 0.213551 | 3.22E-06 | 0.239127 | 1.70E-07 |
| 3.04E-16 | 0.338115 | 5.94E-14 | 0.371208 | 1.05E-16 | 0.368958 | 1.66E-16 | 0.451303 | 8.19E-25 |
| 0.00099  | 0.148993 | 0.00124  | 0.101733 | 0.02793  | 0.000597 | 0.98973  | 0.052751 | 0.25525  |
| 0.01277  | 0.32226  | 9.56E-13 | 0.164542 | 0.00036  | 0.175949 | 0.00013  | -0.00704 | 0.87946  |
| 0.2997   | 0.069868 | 0.13164  | 0.17631  | 0.00013  | 0.117754 | 0.01087  | 0.065268 | 0.15908  |
| 0.7564   | 0.09593  | 0.03824  | 0.161727 | 0.00045  | 0.159135 | 0.00056  | 0.229575 | 5.30E-07 |
| 4.79E-08 | 0.180699 | 8.61E-05 | 0.247704 | 5.85E-08 | 0.161971 | 0.00044  | 0.356833 | 1.81E-15 |
| 0.16377  | 0.197978 | 1.64E-05 | 0.10349  | 0.02532  | 0.092845 | 0.04492  | 0.176286 | 0.00013  |
| 3.55E-06 | 0.249157 | 4.87E-08 | 0.235584 | 2.60E-07 | 0.203262 | 9.55E-06 | 0.343669 | 2.16E-14 |
| 0.99918  | 0.115229 | 0.01271  | 0.083316 | 0.07206  | 0.09501  | 0.04014  | 0.145195 | 0.00166  |
| 0.01946  | 0.382632 | 9.90E-18 | 0.291633 | 1.31E-10 | 0.368008 | 2.01E-16 | 0.254949 | 2.31E-08 |
| 3.13E-09 | 0.335265 | 9.90E-14 | 0.339925 | 4.28E-14 | 0.324452 | 6.57E-13 | 0.362309 | 6.22E-16 |
| 0.23494  | 0.262921 | 8.01E-09 | 0.119603 | 0.00968  | 0.187629 | 4.50E-05 | 0.129539 | 0.00505  |
| 0.00304  | -0.06582 | 0.1556   | -0.01027 | 0.82483  | -0.06738 | 0.14597  | -0.04857 | 0.29487  |
| 0.00738  | 0.027371 | 0.55519  | 0.152492 | 0.00095  | 0.074737 | 0.10674  | 0.071003 | 0.12547  |
| 0.51415  | 0.40546  | 6.61E-20 | 0.22209  | 1.25E-06 | 0.307466 | 1.11E-11 | 0.14026  | 0.00238  |

|          |          |          |          |          |          |          |          |          |
|----------|----------|----------|----------|----------|----------|----------|----------|----------|
| 1.52E-08 | 0.31936  | 1.56E-12 | 0.218225 | 1.93E-06 | 0.286023 | 3.05E-10 | 0.234858 | 2.84E-07 |
| 0.05679  | 0.282637 | 5.01E-10 | 0.203571 | 9.25E-06 | 0.214017 | 3.06E-06 | 0.226451 | 7.62E-07 |
| 2.21E-07 | 0.185064 | 5.74E-05 | 0.139549 | 0.00251  | 0.099724 | 0.03119  | 0.373243 | 6.95E-17 |
| 0.00099  | 0.092932 | 0.04472  | 0.019244 | 0.67829  | 0.084186 | 0.06912  | 0.024386 | 0.59912  |
| 0.02309  | 0.206976 | 6.49E-06 | 0.214539 | 2.89E-06 | 0.234193 | 3.08E-07 | 0.233389 | 3.38E-07 |
| 0.00011  | -0.05376 | 0.24622  | 0.043483 | 0.34845  | -0.10697 | 0.02078  | 0.016757 | 0.71796  |
| 7.35E-08 | 0.117131 | 0.0113   | 0.081271 | 0.07935  | 0.037817 | 0.41489  | 0.268441 | 3.77E-09 |
| 0.00114  | 0.229054 | 5.64E-07 | 0.261653 | 9.49E-09 | 0.288561 | 2.09E-10 | 0.284062 | 4.07E-10 |
| 0.51527  | -0.07659 | 0.0983   | 0.030255 | 0.51427  | -0.01579 | 0.73369  | 0.058578 | 0.20638  |
| 0.71943  | -0.09145 | 0.04826  | -0.08039 | 0.08266  | -0.10358 | 0.02519  | -0.07061 | 0.1276   |
| 1.86E-07 | 0.002267 | 0.96104  | 0.002431 | 0.95821  | 0.064025 | 0.16719  | -0.01218 | 0.79297  |
| 0.00092  | -0.25253 | 3.16E-08 | -0.12754 | 0.00578  | -0.10592 | 0.02206  | -0.03107 | 0.50299  |
| 6.86E-08 | 0.040785 | 0.3792   | -0.08291 | 0.07346  | -0.05817 | 0.20956  | -0.06334 | 0.1718   |
| 9.12E-11 | 0.023104 | 0.61848  | 0.068278 | 0.14068  | 0.083939 | 0.06994  | -0.05426 | 0.24191  |
| 0.01154  | -0.10002 | 0.03069  | -0.14283 | 0.00197  | -0.27499 | 1.51E-09 | -0.12595 | 0.00642  |
| 7.31E-08 | -0.06608 | 0.15397  | -0.12418 | 0.00722  | -0.00468 | 0.91959  | 0.023501 | 0.61246  |
| 0.3375   | -0.20412 | 8.75E-06 | -0.09837 | 0.03356  | -0.14232 | 0.00205  | -0.11459 | 0.01322  |
| 4.51E-06 | -0.00069 | 0.98818  | -0.08774 | 0.05813  | -0.08737 | 0.05922  | -0.1709  | 0.00021  |
| 0.00064  | 0.17787  | 0.00011  | 0.072071 | 0.11987  | 0.250309 | 4.20E-08 | 0.034225 | 0.46061  |
| 1.20E-06 | 0.418512 | 3.15E-21 | 0.329239 | 2.87E-13 | 0.281343 | 6.05E-10 | 0.311574 | 5.69E-12 |
| 1.29E-07 | 0.317551 | 2.12E-12 | 0.287162 | 2.57E-10 | 0.307956 | 1.02E-11 | 0.383987 | 7.43E-18 |
| 0.00025  | 0.144143 | 0.00179  | 0.169934 | 0.00022  | 0.118532 | 0.01036  | 0.26767  | 4.19E-09 |
| 4.10E-33 | -0.19743 | 1.73E-05 | -0.0547  | 0.23812  | -0.05877 | 0.20487  | -0.30353 | 2.08E-11 |
| 1.12E-16 | 0.344109 | 1.99E-14 | 0.222557 | 1.19E-06 | 0.200074 | 1.32E-05 | 0.222814 | 1.15E-06 |
| 1.18E-07 | 0.214089 | 3.04E-06 | 0.179349 | 9.74E-05 | 0.275563 | 1.39E-09 | 0.187022 | 4.77E-05 |
| 0.5905   | 0.303418 | 2.11E-11 | 0.215651 | 2.56E-06 | 0.252138 | 3.32E-08 | 0.177531 | 0.00011  |
| 0.01244  | 0.110176 | 0.01723  | -0.08485 | 0.06694  | -0.0729  | 0.11564  | 0.097731 | 0.03474  |
| 0.06822  | 0.364847 | 3.77E-16 | 0.164903 | 0.00035  | 0.19947  | 1.41E-05 | 0.346382 | 1.31E-14 |
| 4.74E-08 | 0.535695 | 4.84E-36 | 0.436621 | 3.69E-23 | 0.444302 | 5.15E-24 | 0.394299 | 8.04E-19 |
| 3.61E-05 | 0.288881 | 1.99E-10 | 0.37083  | 1.14E-16 | 0.433746 | 7.62E-23 | 0.431122 | 1.47E-22 |
| 0.34715  | -0.02991 | 0.5191   | -0.02889 | 0.53348  | -0.11537 | 0.0126   | 0.160751 | 0.00049  |
| 9.56E-10 | 0.422512 | 1.21E-21 | 0.357869 | 1.48E-15 | 0.349329 | 7.54E-15 | 0.387855 | 3.26E-18 |
| 0.03484  | -0.08389 | 0.07009  | 0.216612 | 2.30E-06 | 0.083133 | 0.07268  | 0.058877 | 0.20407  |
| 0.00024  | 0.143194 | 0.00192  | 0.155804 | 0.00073  | 0.168181 | 0.00026  | -0.01917 | 0.67943  |
| 3.01E-05 | 0.127858 | 0.00566  | 0.137459 | 0.00291  | 0.050552 | 0.27562  | 0.25497  | 2.30E-08 |
| 0.29908  | -0.03575 | 0.4408   | 0.075176 | 0.1047   | -0.01467 | 0.7518   | 0.064678 | 0.16289  |
| 0.00089  | 0.252023 | 3.37E-08 | 0.142934 | 0.00196  | 0.130111 | 0.00486  | 0.243062 | 1.05E-07 |
| 4.60E-09 | -0.04176 | 0.36787  | 0.03544  | 0.44484  | 0.088926 | 0.05481  | -0.09102 | 0.04933  |
| 3.15E-15 | -0.15426 | 0.00082  | -0.08514 | 0.06602  | -0.04135 | 0.37262  | -0.21615 | 2.42E-06 |
| 0.9334   | 0.084392 | 0.06844  | 0.195443 | 2.11E-05 | 0.212738 | 3.51E-06 | 0.136135 | 0.0032   |
| 0.04432  | 0.07516  | 0.10477  | 0.068745 | 0.13798  | 0.059199 | 0.2016   | 0.100693 | 0.02958  |
| 0.06164  | -0.04537 | 0.32794  | 0.032858 | 0.47873  | -0.01158 | 0.80297  | 0.03833  | 0.40857  |
| 0.1128   | 0.278928 | 8.59E-10 | 0.120948 | 0.00889  | 0.127007 | 0.00599  | 0.136642 | 0.00309  |
| 0.34383  | -0.07251 | 0.1176   | 0.009904 | 0.83097  | -0.02241 | 0.6291   | 0.029844 | 0.52     |
| 0.01926  | 0.271825 | 2.35E-09 | 0.115258 | 0.01269  | 0.242032 | 1.19E-07 | 0.196679 | 1.86E-05 |

|          |          |          |          |          |          |          |          |          |
|----------|----------|----------|----------|----------|----------|----------|----------|----------|
| 1.78E-09 | 0.010707 | 0.81749  | -0.12593 | 0.00643  | -0.10859 | 0.01891  | -0.24328 | 1.02E-07 |
| 5.70E-12 | 0.268236 | 3.88E-09 | 0.204267 | 8.61E-06 | 0.106818 | 0.02096  | 0.24029  | 1.47E-07 |
| 2.11E-10 | 0.079816 | 0.0849   | 0.036355 | 0.43316  | 0.154361 | 0.00082  | -0.12068 | 0.00904  |
| 0.11351  | 0.334336 | 1.17E-13 | 0.299828 | 3.72E-11 | 0.254407 | 2.47E-08 | 0.183987 | 6.35E-05 |
| 1.92E-08 | 0.418923 | 2.86E-21 | 0.306554 | 1.28E-11 | 0.309297 | 8.24E-12 | 0.342826 | 2.52E-14 |
| 0.04833  | 0.340484 | 3.87E-14 | 0.24604  | 7.21E-08 | 0.186889 | 4.83E-05 | 0.197722 | 1.68E-05 |
| 9.49E-05 | 0.144673 | 0.00172  | 0.066615 | 0.15063  | 0.005107 | 0.91236  | 0.193721 | 2.50E-05 |
| 0.85557  | -0.01999 | 0.66659  | 0.095813 | 0.03848  | 0.03174  | 0.49382  | 0.27851  | 9.12E-10 |
| 0.52561  | -0.24007 | 1.51E-07 | -0.11975 | 0.00959  | -0.21686 | 2.24E-06 | -0.00698 | 0.8804   |
| 0.00431  | -0.27766 | 1.03E-09 | -0.24198 | 1.20E-07 | -0.30843 | 9.47E-12 | -0.11197 | 0.01549  |
| 0.26019  | 0.000109 | 0.99812  | 0.067405 | 0.14584  | 0.006296 | 0.89207  | 0.10027  | 0.03027  |
| 0.25259  | 0.222038 | 1.26E-06 | 0.319374 | 1.56E-12 | 0.307335 | 1.13E-11 | 0.235003 | 2.79E-07 |
| 3.65E-12 | -0.32269 | 8.88E-13 | -0.10936 | 0.01808  | -0.14152 | 0.00217  | -0.11631 | 0.01189  |
| 0.00038  | -0.04729 | 0.30784  | -0.025   | 0.58989  | 0.095227 | 0.03968  | -0.08027 | 0.08314  |
| 1.70E-05 | 0.171218 | 0.0002   | -0.00162 | 0.97206  | 0.20812  | 5.75E-06 | -0.07571 | 0.10224  |
| 6.55E-09 | 0.450596 | 9.89E-25 | 0.350915 | 5.59E-15 | 0.285791 | 3.15E-10 | 0.453683 | 4.34E-25 |
| 0.00038  | 0.049976 | 0.28113  | -0.0121  | 0.79418  | 0.047178 | 0.30898  | -0.1268  | 0.00607  |
| 2.23E-05 | 0.00168  | 0.97112  | 0.062768 | 0.1757   | -0.02484 | 0.59239  | 0.159241 | 0.00055  |
| 1.21E-05 | -0.14897 | 0.00124  | -0.07606 | 0.10068  | -0.04318 | 0.35177  | -0.23776 | 2.00E-07 |
| 9.16E-15 | -0.14659 | 0.00149  | -0.06145 | 0.18495  | -0.00328 | 0.94358  | -0.2477  | 5.86E-08 |
| 0.01163  | 0.274434 | 1.63E-09 | 0.115369 | 0.0126   | 0.161626 | 0.00045  | 0.230235 | 4.91E-07 |
| 0.62196  | -0.2127  | 3.53E-06 | -0.05585 | 0.22839  | -0.137   | 0.00301  | 0.035342 | 0.4461   |
| 6.57E-06 | 0.052382 | 0.25859  | 0.115681 | 0.01236  | 0.040908 | 0.37776  | 0.114849 | 0.01301  |
| 2.52E-06 | -0.11227 | 0.01521  | -0.02524 | 0.58634  | -0.02535 | 0.58478  | -0.07847 | 0.09028  |
| 6.61E-10 | 0.139669 | 0.00249  | -0.04086 | 0.37828  | 0.011993 | 0.79603  | -0.10516 | 0.02304  |
| 0.00463  | 0.383467 | 8.30E-18 | 0.275794 | 1.34E-09 | 0.37098  | 1.10E-16 | 0.309056 | 8.57E-12 |
| 3.25E-07 | -0.21945 | 1.68E-06 | -0.20369 | 9.14E-06 | -0.22256 | 1.19E-06 | -0.15018 | 0.00113  |
| 0.00138  | -0.1248  | 0.00693  | -0.06519 | 0.15959  | -0.15093 | 0.00107  | -0.16175 | 0.00045  |
| 0.0067   | -0.11189 | 0.01556  | -0.06307 | 0.17365  | -0.19604 | 1.99E-05 | 0.12551  | 0.00661  |
| 0.00579  | -0.12944 | 0.00509  | 0.056435 | 0.2235   | 5.61E-05 | 0.99904  | -0.09923 | 0.03205  |
| 6.67E-06 | 0.050434 | 0.27674  | 0.066032 | 0.15425  | 0.105567 | 0.02251  | -0.05905 | 0.20272  |
| 3.17E-06 | -0.20617 | 7.06E-06 | -0.13715 | 0.00298  | -0.148   | 0.00134  | -0.07216 | 0.11941  |
| 8.84E-15 | 0.363496 | 4.92E-16 | 0.240125 | 1.50E-07 | 0.203945 | 8.90E-06 | 0.305391 | 1.54E-11 |
| 0.02016  | -0.16006 | 0.00052  | -0.22864 | 5.91E-07 | -0.30494 | 1.66E-11 | 0.134335 | 0.00363  |
| 0.72176  | 0.104335 | 0.02414  | 0.077351 | 0.095    | 0.055056 | 0.23504  | -0.02443 | 0.59849  |
| 6.66E-06 | -0.21814 | 1.95E-06 | -0.20017 | 1.31E-05 | -0.19796 | 1.64E-05 | -0.16125 | 0.00047  |
| 8.95E-16 | 0.392144 | 1.29E-18 | 0.484603 | 7.11E-29 | 0.456435 | 2.07E-25 | 0.498593 | 1.02E-30 |
| 4.22E-09 | -0.18628 | 5.12E-05 | -0.10703 | 0.0207   | -0.16709 | 0.00029  | -0.19874 | 1.51E-05 |
| 5.33E-26 | -0.27469 | 1.57E-09 | -0.06166 | 0.18348  | -0.14752 | 0.00139  | -0.24476 | 8.47E-08 |
| 1.85E-20 | 0.420641 | 1.90E-21 | 0.408802 | 3.07E-20 | 0.351578 | 4.93E-15 | 0.403803 | 9.64E-20 |
| 5.75E-06 | 0.09189  | 0.04719  | 0.06543  | 0.15805  | 0.055391 | 0.2322   | 0.01435  | 0.7571   |
| 0.05186  | 0.38168  | 1.21E-17 | 0.199139 | 1.45E-05 | 0.225075 | 8.92E-07 | 0.20183  | 1.11E-05 |
| 0.0772   | 0.412081 | 1.44E-20 | 0.252008 | 3.38E-08 | 0.351942 | 4.60E-15 | 0.280454 | 6.89E-10 |
| 0.00323  | 0.227246 | 6.95E-07 | 0.298884 | 4.31E-11 | 0.282456 | 5.15E-10 | 0.320488 | 1.29E-12 |
| 0.00426  | 0.104309 | 0.02418  | 0.137391 | 0.00293  | 0.055647 | 0.23004  | 0.03282  | 0.47923  |

|          |          |          |          |          |          |          |          |          |
|----------|----------|----------|----------|----------|----------|----------|----------|----------|
| 0.35896  | 0.272294 | 2.20E-09 | 0.255824 | 2.06E-08 | 0.212048 | 3.79E-06 | 0.218982 | 1.77E-06 |
| 2.29E-05 | -0.00993 | 0.83053  | -0.02943 | 0.52586  | 0.176429 | 0.00013  | -0.09454 | 0.04115  |
| 0.85568  | -0.11563 | 0.0124   | -0.17054 | 0.00021  | -0.26693 | 4.64E-09 | -0.09681 | 0.0365   |
| 0.00011  | -0.29589 | 6.86E-11 | -0.23956 | 1.61E-07 | -0.2548  | 2.35E-08 | -0.16315 | 0.0004   |
| 0.00808  | 0.017236 | 0.71026  | -0.02681 | 0.56333  | -0.03871 | 0.40389  | -0.15049 | 0.00111  |
| 1.57E-10 | -0.38187 | 1.16E-17 | -0.2918  | 1.28E-10 | -0.32615 | 4.90E-13 | -0.30358 | 2.06E-11 |
| 0.09744  | 0.114288 | 0.01346  | 0.082754 | 0.074    | 0.089687 | 0.05276  | 0.217607 | 2.07E-06 |
| 0.01442  | -0.28603 | 3.04E-10 | -0.12767 | 0.00573  | -0.27557 | 1.39E-09 | -0.18198 | 7.65E-05 |
| 1.72E-07 | -0.35235 | 4.26E-15 | -0.27312 | 1.96E-09 | -0.27053 | 2.82E-09 | -0.2986  | 4.50E-11 |
| 0.11614  | -0.11459 | 0.01322  | -0.05222 | 0.26007  | -0.05836 | 0.20804  | 0.046779 | 0.3131   |
| 0.02279  | 0.144544 | 0.00174  | 0.225974 | 8.05E-07 | 0.173819 | 0.00016  | 0.220983 | 1.42E-06 |
| 0.0064   | 0.357685 | 1.53E-15 | 0.389007 | 2.54E-18 | 0.396999 | 4.43E-19 | 0.326674 | 4.48E-13 |
| 3.70E-07 | 0.101516 | 0.02827  | 0.192864 | 2.72E-05 | 0.065839 | 0.15546  | 0.205195 | 7.82E-06 |
| 0.00456  | 0.19263  | 2.78E-05 | 0.319736 | 1.47E-12 | 0.253775 | 2.69E-08 | 0.278577 | 9.03E-10 |
| 0.11975  | 0.068534 | 0.1392   | 0.049799 | 0.28285  | 0.094983 | 0.04019  | 0.090814 | 0.04984  |
| 2.79E-06 | -0.16364 | 0.00038  | -0.11036 | 0.01704  | -0.07128 | 0.12401  | -0.00676 | 0.88421  |
| 0.55296  | 0.09342  | 0.04361  | 0.038985 | 0.40061  | 0.112943 | 0.01461  | 0.083623 | 0.07101  |
| 0.02392  | -0.15146 | 0.00103  | -0.10112 | 0.02889  | -0.17475 | 0.00015  | -0.08377 | 0.0705   |
| 2.62E-12 | -0.42555 | 5.79E-22 | -0.22913 | 5.58E-07 | -0.24523 | 7.99E-08 | -0.23841 | 1.85E-07 |
| 0.03217  | -0.22057 | 1.49E-06 | -0.18147 | 8.02E-05 | -0.20341 | 9.40E-06 | -0.15879 | 0.00057  |
| 3.47E-08 | 0.103253 | 0.02566  | 0.094393 | 0.04146  | -0.0072  | 0.8766   | 0.223689 | 1.04E-06 |
| 0.00142  | 0.201621 | 1.13E-05 | 0.245394 | 7.82E-08 | 0.179714 | 9.42E-05 | 0.172579 | 0.00018  |
| 2.34E-05 | 0.114971 | 0.01291  | 0.084491 | 0.06812  | 0.085605 | 0.06455  | 0.26333  | 7.58E-09 |
| 2.87E-08 | 0.157006 | 0.00066  | 0.078059 | 0.092    | 0.064036 | 0.16711  | 0.253108 | 2.93E-08 |
| 1.52E-08 | -0.30375 | 2.01E-11 | -0.07012 | 0.13023  | -0.09308 | 0.04437  | -0.05985 | 0.19668  |
| 4.04E-06 | 0.029467 | 0.52528  | 0.023145 | 0.61786  | 0.033495 | 0.47023  | 0.017166 | 0.71139  |
| 0.0907   | -0.07982 | 0.08488  | 0.038958 | 0.40093  | -0.08049 | 0.08229  | 0.082505 | 0.07488  |
| 0.76775  | -0.08469 | 0.06747  | 0.093507 | 0.04341  | 0.033477 | 0.47047  | 0.080424 | 0.08254  |
| 0.53953  | 0.042426 | 0.3603   | 0.010437 | 0.82202  | -0.07672 | 0.09774  | -0.03685 | 0.42694  |
| 3.08E-05 | -0.03774 | 0.41586  | -0.16392 | 0.00038  | -0.11426 | 0.01349  | -0.11314 | 0.01443  |
| 2.56E-15 | 0.4907   | 1.15E-29 | 0.345645 | 1.50E-14 | 0.293463 | 9.95E-11 | 0.452356 | 6.19E-25 |
| 0.44104  | -0.10453 | 0.02388  | -0.05358 | 0.24788  | -0.08799 | 0.05743  | 0.023289 | 0.61566  |
| 0.44494  | -0.15702 | 0.00066  | 0.010875 | 0.81468  | -0.10681 | 0.02097  | 0.00966  | 0.83507  |
| 0.76538  | -0.06971 | 0.13251  | 0.062857 | 0.17508  | -0.04154 | 0.37045  | 0.034342 | 0.45908  |
| 1.27E-05 | 0.237807 | 1.99E-07 | 0.259443 | 1.28E-08 | 0.19917  | 1.45E-05 | 0.382505 | 1.02E-17 |
| 0.51989  | 0.04255  | 0.3589   | 0.051196 | 0.26954  | -0.01911 | 0.68047  | 0.254619 | 2.41E-08 |
| 0.01461  | 0.05924  | 0.20129  | 0.080233 | 0.08327  | 0.047662 | 0.30404  | 0.068373 | 0.14013  |
| 2.19E-14 | -0.16239 | 0.00043  | -0.10489 | 0.02339  | -0.1298  | 0.00497  | -0.12229 | 0.00816  |
| 0.22586  | 0.113253 | 0.01434  | 0.152662 | 0.00093  | 0.126686 | 0.00612  | 0.247997 | 5.64E-08 |
| 1.79E-05 | 0.459637 | 8.68E-26 | 0.375744 | 4.16E-17 | 0.416555 | 5.02E-21 | 0.422585 | 1.19E-21 |
| 0.46462  | -0.02868 | 0.53647  | 0.022865 | 0.62211  | 0.025938 | 0.57608  | 0.043356 | 0.34986  |
| 0.22764  | -0.05851 | 0.20692  | -0.05988 | 0.19643  | -0.05819 | 0.20941  | -0.03926 | 0.39732  |
| 4.10E-05 | 0.369113 | 1.61E-16 | 0.269752 | 3.14E-09 | 0.322988 | 8.44E-13 | 0.366592 | 2.66E-16 |
| 0.00101  | 0.51142  | 1.74E-32 | 0.208116 | 5.76E-06 | 0.329335 | 2.82E-13 | 0.245511 | 7.71E-08 |
| 0.08926  | 0.128117 | 0.00556  | 0.106995 | 0.02074  | 0.105824 | 0.02219  | 0.103609 | 0.02515  |

|          |          |          |          |          |          |          |          |          |
|----------|----------|----------|----------|----------|----------|----------|----------|----------|
| 0.01317  | 0.146777 | 0.00147  | 0.221436 | 1.35E-06 | 0.295197 | 7.63E-11 | 0.137411 | 0.00292  |
| 0.00026  | -0.0671  | 0.14767  | -0.05986 | 0.19658  | -0.04676 | 0.31328  | -0.1074  | 0.02026  |
| 0.00753  | -0.09486 | 0.04047  | -0.00776 | 0.86712  | -0.12393 | 0.00733  | 0.009998 | 0.82939  |
| 0.00012  | -0.08088 | 0.08081  | -0.1284  | 0.00545  | -0.17451 | 0.00015  | 0.088917 | 0.05484  |
| 0.00018  | 0.4312   | 1.44E-22 | 0.276302 | 1.25E-09 | 0.34831  | 9.12E-15 | 0.319601 | 1.50E-12 |
| 2.06E-09 | 0.431576 | 1.31E-22 | 0.325875 | 5.15E-13 | 0.380169 | 1.66E-17 | 0.452954 | 5.28E-25 |
| 0.00218  | 0.400978 | 1.82E-19 | 0.37263  | 7.88E-17 | 0.366996 | 2.46E-16 | 0.318438 | 1.82E-12 |
| 0.00014  | 0.051726 | 0.26462  | -0.03778 | 0.41529  | 0.013265 | 0.77494  | -0.01819 | 0.69507  |
| 0.63125  | -0.00432 | 0.92582  | -0.04068 | 0.3804   | -0.09343 | 0.04359  | -0.07274 | 0.11646  |
| 0.02256  | 0.095857 | 0.03839  | 0.088038 | 0.05729  | -0.04293 | 0.3546   | 0.175387 | 0.00014  |
| 0.98925  | 0.11079  | 0.01661  | -0.06294 | 0.17454  | -0.01092 | 0.81389  | -0.01184 | 0.79866  |
| 1.50E-07 | -0.23394 | 3.17E-07 | -0.12632 | 0.00627  | -0.1526  | 0.00094  | -0.11783 | 0.01082  |
| 0.00032  | 0.030907 | 0.50523  | 0.102844 | 0.02626  | 0.080618 | 0.0818   | 0.084689 | 0.06747  |
| 5.41E-07 | 0.047281 | 0.30793  | -0.06807 | 0.14187  | 0.064968 | 0.16101  | -0.09907 | 0.03231  |
| 8.88E-24 | -0.15452 | 0.00081  | -0.18972 | 3.68E-05 | -0.19078 | 3.33E-05 | -0.24261 | 1.11E-07 |
| 1.06E-09 | -0.28819 | 2.21E-10 | -0.26071 | 1.08E-08 | -0.33334 | 1.40E-13 | -0.2514  | 3.65E-08 |
| 1.71E-05 | -0.13495 | 0.00348  | -0.138   | 0.0028   | -0.1245  | 0.00707  | -0.05696 | 0.21923  |
| 1.05E-05 | -0.17905 | 0.0001   | -0.09577 | 0.03856  | -0.17247 | 0.00018  | -0.09102 | 0.04933  |
| 2.87E-19 | 0.352781 | 3.93E-15 | 0.351966 | 4.58E-15 | 0.3044   | 1.81E-11 | 0.409859 | 2.41E-20 |
| 0.00131  | 0.246121 | 7.14E-08 | 0.146195 | 0.00154  | 0.237803 | 1.99E-07 | 0.091996 | 0.04693  |
| 0.00346  | 0.349439 | 7.38E-15 | 0.253924 | 2.64E-08 | 0.278952 | 8.56E-10 | 0.248525 | 5.27E-08 |
| 0.04735  | 0.052588 | 0.25672  | 0.064021 | 0.16721  | 0.081719 | 0.0777   | 0.010598 | 0.81931  |
| 8.18E-16 | 0.243404 | 1.00E-07 | 0.267344 | 4.38E-09 | 0.148869 | 0.00125  | 0.429198 | 2.36E-22 |
| 0.00012  | 0.253001 | 2.97E-08 | 0.147429 | 0.0014   | 0.168305 | 0.00026  | 0.23321  | 3.46E-07 |
| 0.00113  | 0.088238 | 0.05672  | 0.008573 | 0.85341  | 0.083411 | 0.07173  | -0.00142 | 0.97564  |
| 0.5678   | 0.011    | 0.8126   | 0.049882 | 0.28204  | 0.088096 | 0.05712  | 0.152599 | 0.00094  |
| 1.41E-17 | -0.19223 | 2.89E-05 | -0.14699 | 0.00145  | -0.12239 | 0.00811  | -0.26238 | 8.61E-09 |
| 1.44E-07 | 0.159757 | 0.00053  | 0.238606 | 1.81E-07 | 0.129819 | 0.00496  | 0.244372 | 8.89E-08 |
| 1.40E-05 | 0.226496 | 7.58E-07 | 0.284766 | 3.67E-10 | 0.147029 | 0.00144  | 0.22268  | 1.17E-06 |
| 2.27E-05 | -0.04458 | 0.33642  | -0.00603 | 0.89658  | 0.030485 | 0.51106  | -0.02523 | 0.58649  |
| 0.00021  | -0.02935 | 0.52695  | -0.01629 | 0.72554  | -0.02121 | 0.64747  | -0.11793 | 0.01075  |
| 0.53547  | -0.05081 | 0.27321  | -0.10336 | 0.02551  | -0.10335 | 0.02553  | -0.01539 | 0.74004  |
| 0.00813  | 0.083993 | 0.06976  | 0.031233 | 0.50076  | 0.047743 | 0.30322  | 0.025474 | 0.58294  |
| 0.00198  | 0.233279 | 3.43E-07 | 0.224614 | 9.40E-07 | 0.127582 | 0.00576  | 0.195585 | 2.08E-05 |
| 0.00074  | 0.198441 | 1.56E-05 | 0.114444 | 0.01334  | 0.016577 | 0.72087  | 0.1778   | 0.00011  |
| 2.30E-06 | -0.08701 | 0.06026  | -0.03831 | 0.40881  | 0.055032 | 0.23524  | -0.05506 | 0.23497  |
| 0.03607  | 0.154505 | 0.00081  | -0.02512 | 0.5882   | -0.05313 | 0.25181  | 0.034586 | 0.45589  |
| 0.21509  | 0.214015 | 3.06E-06 | 0.110708 | 0.01669  | 0.151545 | 0.00102  | 0.127239 | 0.0059   |
| 2.97E-13 | 0.37004  | 1.33E-16 | 0.324953 | 6.03E-13 | 0.21208  | 3.77E-06 | 0.386091 | 4.75E-18 |
| 8.12E-13 | 0.071507 | 0.1228   | 0.238131 | 1.92E-07 | 0.098478 | 0.03337  | 0.307027 | 1.19E-11 |
| 0.20381  | -0.01359 | 0.76965  | -0.07897 | 0.08825  | -0.07942 | 0.08644  | 0.07492  | 0.10589  |
| 0.08228  | -0.08566 | 0.06437  | -0.0256  | 0.5811   | -0.057   | 0.21888  | 0.027719 | 0.55016  |
| 0.00665  | 0.02917  | 0.52946  | -0.01226 | 0.79164  | -0.00976 | 0.83343  | -0.00537 | 0.90786  |
| 1.97E-05 | 0.40191  | 1.48E-19 | 0.267246 | 4.44E-09 | 0.27518  | 1.47E-09 | 0.323474 | 7.77E-13 |
| 0.00967  | -0.08378 | 0.07048  | -0.00559 | 0.90402  | -0.00172 | 0.97038  | -0.02749 | 0.55343  |

|          |          |          |          |          |          |          |          |          |
|----------|----------|----------|----------|----------|----------|----------|----------|----------|
| 0.85229  | -0.08782 | 0.05791  | -0.1038  | 0.02489  | -0.22668 | 7.42E-07 | -0.05132 | 0.26841  |
| 1.42E-19 | 0.648219 | 5.24E-57 | 0.460665 | 6.55E-26 | 0.482145 | 1.47E-28 | 0.492293 | 7.06E-30 |
| 5.44E-07 | -0.05226 | 0.25968  | -0.05244 | 0.25803  | -0.15094 | 0.00107  | 0.137978 | 0.00281  |
| 0.39034  | 0.027314 | 0.556    | -0.00374 | 0.93569  | -0.10808 | 0.01948  | -0.03516 | 0.4485   |
| 0.0766   | 0.534565 | 7.19E-36 | 0.328539 | 3.24E-13 | 0.411734 | 1.56E-20 | 0.343094 | 2.40E-14 |
| 0.38461  | 0.071685 | 0.12187  | 0.002056 | 0.96465  | 0.023734 | 0.60893  | 0.117801 | 0.01084  |
| 9.10E-18 | 0.545326 | 1.55E-37 | 0.539401 | 1.31E-36 | 0.516676 | 3.13E-33 | 0.606192 | 3.43E-48 |
| 0.25022  | 0.16137  | 0.00046  | 0.178943 | 0.0001   | 0.098729 | 0.03292  | 0.141814 | 0.00213  |
| 0.00237  | 0.050568 | 0.27547  | 0.062046 | 0.18073  | 0.115583 | 0.01244  | 0.197628 | 1.69E-05 |
| 0.21291  | -0.11249 | 0.01501  | -0.08934 | 0.0537   | -0.10516 | 0.02305  | -0.14816 | 0.00132  |
| 0.02046  | 0.187737 | 4.45E-05 | 0.141699 | 0.00214  | 0.07385  | 0.11098  | 0.132971 | 0.00399  |
| 0.29058  | 0.238349 | 1.87E-07 | 0.183192 | 6.83E-05 | 0.239575 | 1.61E-07 | 0.185221 | 5.65E-05 |
| 6.95E-12 | 0.180608 | 8.68E-05 | 0.194941 | 2.21E-05 | 0.168138 | 0.00026  | 0.247311 | 6.15E-08 |
| 0.00452  | -0.0506  | 0.27513  | -0.0416  | 0.36979  | -0.05746 | 0.21518  | -0.00953 | 0.83723  |
| 5.48E-08 | -0.07278 | 0.11625  | -0.10815 | 0.01941  | -0.06681 | 0.14942  | -0.09218 | 0.04648  |
| 0.02667  | 0.310055 | 7.28E-12 | 0.186136 | 5.19E-05 | 0.219942 | 1.59E-06 | 0.25156  | 3.58E-08 |
| 5.07E-11 | 0.420771 | 1.84E-21 | 0.343357 | 2.29E-14 | 0.362144 | 6.43E-16 | 0.415434 | 6.54E-21 |
| 4.94E-05 | 0.179982 | 9.19E-05 | 0.106936 | 0.02081  | 0.071992 | 0.12028  | 0.219701 | 1.64E-06 |
| 8.29E-05 | -0.26006 | 1.17E-08 | -0.1435  | 0.00188  | -0.24105 | 1.34E-07 | -0.12612 | 0.00635  |
| 0.00027  | -0.1692  | 0.00024  | -0.09863 | 0.03309  | -0.14846 | 0.00129  | -0.12691 | 0.00603  |
| 0.22983  | 0.075434 | 0.1035   | 0.003219 | 0.94469  | 0.042918 | 0.35475  | 0.043621 | 0.34692  |
| 0.40656  | 0.194474 | 2.32E-05 | 0.063605 | 0.17     | 0.077117 | 0.09601  | 0.106038 | 0.02192  |
| 3.75E-11 | 0.415699 | 6.15E-21 | 0.3997   | 2.43E-19 | 0.356963 | 1.76E-15 | 0.421403 | 1.58E-21 |
| 6.99E-12 | 0.287256 | 2.54E-10 | 0.259728 | 1.23E-08 | 0.211175 | 4.16E-06 | 0.289248 | 1.88E-10 |
| 0.85864  | 0.282902 | 4.82E-10 | 0.193812 | 2.47E-05 | 0.33941  | 4.70E-14 | 0.15433  | 0.00082  |
| 0.16848  | 0.070579 | 0.12775  | 0.087494 | 0.05885  | 0.148669 | 0.00127  | -0.06137 | 0.18557  |
| 5.16E-07 | 0.258376 | 1.47E-08 | 0.106853 | 0.02091  | 0.074107 | 0.10974  | 0.309853 | 7.53E-12 |
| 0.72061  | 0.160461 | 0.0005   | 0.133127 | 0.00395  | 0.144015 | 0.00181  | 0.070446 | 0.12847  |
| 1.67E-06 | 0.1679   | 0.00027  | 0.028735 | 0.53563  | -0.03021 | 0.5149   | 0.114871 | 0.01299  |
| 0.02107  | -0.1054  | 0.02273  | -0.01639 | 0.72387  | -0.05095 | 0.27187  | -0.12587 | 0.00646  |
| 6.94E-11 | -0.10814 | 0.01941  | -0.1352  | 0.00342  | -0.12218 | 0.00821  | -0.13765 | 0.00287  |
| 0.00013  | -0.09168 | 0.0477   | 0.036353 | 0.43319  | 0.023535 | 0.61194  | 0.160969 | 0.00048  |
| 5.51E-06 | -0.08699 | 0.06033  | -0.01508 | 0.74516  | 0.034979 | 0.45079  | -0.05987 | 0.1965   |
| 5.97E-06 | -0.0999  | 0.03089  | -0.10276 | 0.02638  | -0.04419 | 0.34064  | 0.009809 | 0.83256  |
| 1.89E-12 | 0.179919 | 9.24E-05 | 0.156818 | 0.00067  | 0.255754 | 2.08E-08 | -0.03131 | 0.49966  |
| 0.15168  | 0.104755 | 0.02358  | 0.132984 | 0.00399  | 0.039086 | 0.39939  | 0.141931 | 0.00211  |
| 0.02187  | 0.259951 | 1.19E-08 | 0.262222 | 8.80E-09 | 0.224681 | 9.33E-07 | 0.296743 | 6.01E-11 |
| 9.65E-05 | 0.150143 | 0.00114  | 0.050606 | 0.2751   | 0.189127 | 3.90E-05 | 0.035171 | 0.4483   |
| 1.07E-25 | 0.311245 | 6.00E-12 | 0.353771 | 3.25E-15 | 0.2422   | 1.16E-07 | 0.457608 | 1.51E-25 |
| 1.20E-11 | 0.461542 | 5.15E-26 | 0.384949 | 6.06E-18 | 0.392218 | 1.27E-18 | 0.523745 | 2.96E-34 |
| 9.84E-07 | -0.10519 | 0.023    | -0.01825 | 0.69404  | -0.00675 | 0.88435  | 0.183561 | 6.60E-05 |
| 0.26697  | 0.169524 | 0.00023  | 0.183819 | 6.45E-05 | 0.182973 | 6.98E-05 | 0.178084 | 0.00011  |
| 0.0105   | 0.119219 | 0.00992  | -0.05104 | 0.27101  | -0.088   | 0.0574   | 0.052185 | 0.26039  |
| 3.63E-13 | -0.19402 | 2.42E-05 | -0.20106 | 1.20E-05 | -0.19524 | 2.15E-05 | -0.24241 | 1.13E-07 |
| 4.51E-14 | -0.2072  | 6.34E-06 | -0.1234  | 0.00759  | -0.13161 | 0.00439  | -0.23405 | 3.13E-07 |

|          |          |          |          |          |          |          |          |          |
|----------|----------|----------|----------|----------|----------|----------|----------|----------|
| 0.07481  | 0.017821 | 0.70089  | -0.01469 | 0.75149  | -0.00541 | 0.90717  | -0.06602 | 0.15434  |
| 0.00017  | -0.13065 | 0.00469  | -0.16854 | 0.00025  | -0.16911 | 0.00024  | -0.20025 | 1.30E-05 |
| 0.77565  | -0.14092 | 0.00227  | -0.03827 | 0.40935  | -0.06085 | 0.18929  | -0.08607 | 0.0631   |
| 1.82E-21 | -0.0387  | 0.40405  | 0.04608  | 0.32039  | 0.108407 | 0.01911  | -0.10038 | 0.03009  |
| 0.61348  | 0.167386 | 0.00028  | 0.028355 | 0.54104  | 0.061596 | 0.18391  | 0.119858 | 0.00953  |
| 1.47E-12 | -0.06441 | 0.16462  | -0.12662 | 0.00615  | -0.06699 | 0.14832  | -0.18191 | 7.70E-05 |
| 0.18144  | 0.118619 | 0.0103   | 0.05111  | 0.27035  | 0.11072  | 0.01668  | 0.114492 | 0.0133   |
| 8.49E-05 | 0.403785 | 9.68E-20 | 0.266473 | 4.94E-09 | 0.317819 | 2.02E-12 | 0.284594 | 3.76E-10 |
| 0.00098  | -0.32176 | 1.04E-12 | -0.06314 | 0.17317  | -0.20069 | 1.24E-05 | -0.01983 | 0.66909  |
| 0.16239  | 0.134157 | 0.00368  | 0.107714 | 0.0199   | 0.185773 | 5.37E-05 | 0.175317 | 0.00014  |
| 1.96E-12 | -0.06589 | 0.15514  | -0.04222 | 0.3627   | -0.10491 | 0.02337  | -0.15535 | 0.00076  |
| 1.14E-08 | 0.334083 | 1.22E-13 | 0.213383 | 3.28E-06 | 0.22882  | 5.79E-07 | 0.373084 | 7.18E-17 |
| 0.55033  | -0.15307 | 0.0009   | -0.02603 | 0.57477  | -0.08059 | 0.08191  | -0.03589 | 0.43914  |
| 0.04841  | 0.314959 | 3.26E-12 | 0.254021 | 2.60E-08 | 0.232498 | 3.76E-07 | 0.216227 | 2.40E-06 |
| 9.00E-05 | -0.1096  | 0.01782  | 0.082622 | 0.07447  | 0.117894 | 0.01078  | 0.03272  | 0.48058  |
| 9.60E-14 | -0.15012 | 0.00114  | -0.11515 | 0.01277  | -0.05342 | 0.24924  | -0.16378 | 0.00038  |
| 3.67E-06 | 0.345486 | 1.54E-14 | 0.308801 | 8.93E-12 | 0.299597 | 3.86E-11 | 0.390577 | 1.81E-18 |
| 1.30E-07 | 0.137888 | 0.00283  | 0.051537 | 0.26636  | 0.160147 | 0.00051  | -0.09467 | 0.04085  |
| 2.18E-11 | -0.18499 | 5.78E-05 | -0.19111 | 3.22E-05 | -0.13314 | 0.00395  | -0.15744 | 0.00064  |
| 1.77E-06 | 0.09741  | 0.03534  | 0.071607 | 0.12228  | 0.214562 | 2.88E-06 | 0.059598 | 0.19858  |
| 2.53E-08 | -0.05854 | 0.20664  | -0.1301  | 0.00486  | -0.11017 | 0.01724  | -0.14384 | 0.00183  |
| 0.28196  | 0.393926 | 8.72E-19 | 0.346507 | 1.28E-14 | 0.315277 | 3.09E-12 | 0.238042 | 1.94E-07 |
| 3.84E-05 | 0.436912 | 3.43E-23 | 0.359377 | 1.10E-15 | 0.37437  | 5.52E-17 | 0.336421 | 8.05E-14 |
| 1.08E-09 | 0.209543 | 4.95E-06 | 0.223197 | 1.10E-06 | 0.198246 | 1.59E-05 | 0.336071 | 8.57E-14 |
| 8.46E-05 | 0.0463   | 0.31809  | 0.057623 | 0.21389  | 0.032487 | 0.4837   | -0.06225 | 0.17928  |
| 0.00817  | 0.401151 | 1.75E-19 | 0.352594 | 4.07E-15 | 0.36992  | 1.37E-16 | 0.296116 | 6.62E-11 |
| 0.59756  | -0.01187 | 0.79802  | 0.081184 | 0.07967  | 0.061654 | 0.18351  | 0.109918 | 0.01749  |
| 0.94521  | -0.07995 | 0.08435  | 0.101684 | 0.028    | -0.0734  | 0.11318  | 0.059981 | 0.1957   |
| 1.17E-11 | -0.05846 | 0.20729  | -0.07651 | 0.09865  | -0.00784 | 0.86588  | -0.15542 | 0.00075  |
| 1.47E-11 | 0.307189 | 1.16E-11 | 0.290658 | 1.52E-10 | 0.17317  | 0.00017  | 0.376923 | 3.26E-17 |
| 0.07117  | 0.205955 | 7.22E-06 | 0.171278 | 0.0002   | 0.193975 | 2.43E-05 | 0.477981 | 4.96E-28 |
| 0.48992  | 0.151932 | 0.00099  | 0.297488 | 5.36E-11 | 0.157198 | 0.00065  | 0.215625 | 2.57E-06 |
| 1.60E-21 | -0.34091 | 3.58E-14 | -0.31901 | 1.66E-12 | -0.21538 | 2.64E-06 | -0.27389 | 1.76E-09 |
| 4.19E-06 | 0.005243 | 0.91003  | 0.012069 | 0.79476  | -0.01864 | 0.68783  | -0.07855 | 0.08996  |
| 5.47E-05 | 0.155724 | 0.00073  | 0.135961 | 0.00324  | 0.164471 | 0.00036  | -0.01809 | 0.69663  |
| 3.35E-08 | 0.231008 | 4.48E-07 | 0.226153 | 7.88E-07 | 0.266116 | 5.19E-09 | 0.302174 | 2.57E-11 |
| 6.15E-11 | 0.070424 | 0.12859  | 0.121268 | 0.00871  | 0.079785 | 0.08502  | 0.283133 | 4.66E-10 |
| 0.22753  | 0.037237 | 0.42208  | -0.02978 | 0.52085  | -0.02801 | 0.54594  | -0.0004  | 0.99304  |
| 5.35E-08 | -0.11936 | 0.00983  | 0.032987 | 0.477    | 0.052915 | 0.25377  | -0.03645 | 0.43197  |
| 0.01443  | 0.175605 | 0.00014  | 0.139161 | 0.00258  | 0.183922 | 6.39E-05 | 0.086785 | 0.06094  |
| 2.44E-05 | -0.13126 | 0.0045   | -0.10188 | 0.02771  | -0.11791 | 0.01077  | -0.10599 | 0.02198  |
| 0.53997  | 0.131564 | 0.0044   | 0.128095 | 0.00557  | 0.11117  | 0.01624  | 0.243537 | 9.86E-08 |
| 0.00082  | 0.056684 | 0.22146  | -0.10637 | 0.0215   | -0.15231 | 0.00096  | 0.014033 | 0.76231  |
| 0.02873  | 0.083366 | 0.07188  | 0.0867   | 0.06119  | 0.127149 | 0.00593  | 0.049821 | 0.28263  |
| 5.21E-05 | 0.189156 | 3.89E-05 | 0.132545 | 0.00411  | 0.059291 | 0.2009   | 0.143196 | 0.00192  |

|          |          |          |          |          |          |          |          |          |
|----------|----------|----------|----------|----------|----------|----------|----------|----------|
| 1.08E-09 | -0.22889 | 5.74E-07 | -0.28113 | 6.24E-10 | -0.24387 | 9.47E-08 | -0.22207 | 1.26E-06 |
| 1.49E-05 | -0.30767 | 1.07E-11 | -0.07835 | 0.09079  | -0.13348 | 0.00386  | -0.07105 | 0.12524  |
| 0.20617  | -0.07571 | 0.10225  | 0.04974  | 0.28342  | -0.06555 | 0.15731  | 0.097126 | 0.03588  |
| 0.08936  | -0.0453  | 0.32862  | -0.02781 | 0.54879  | -0.03386 | 0.4654   | -0.02131 | 0.64604  |
| 0.00426  | -0.15076 | 0.00108  | -0.17911 | 9.96E-05 | -0.15731 | 0.00065  | -0.036   | 0.43764  |
| 3.00E-06 | -0.08149 | 0.07855  | -0.27641 | 1.23E-09 | -0.13124 | 0.0045   | -0.17236 | 0.00018  |
| 2.30E-09 | 0.523644 | 3.06E-34 | 0.486723 | 3.79E-29 | 0.515315 | 4.89E-33 | 0.483538 | 9.75E-29 |
| 1.32E-10 | -0.09328 | 0.04392  | -0.02641 | 0.56922  | -0.07546 | 0.10339  | -0.11129 | 0.01613  |
| 0.00031  | 0.171798 | 0.00019  | 0.171986 | 0.00019  | 0.101915 | 0.02765  | 0.480153 | 2.64E-28 |
| 5.60E-11 | -0.11967 | 0.00964  | -0.01458 | 0.75334  | 0.016871 | 0.71614  | -0.04519 | 0.32985  |
| 8.07E-07 | 0.051484 | 0.26685  | 0.073829 | 0.11108  | 0.189764 | 3.67E-05 | 0.036511 | 0.43119  |
| 0.00303  | 0.119097 | 0.01     | 0.139099 | 0.00259  | 0.116675 | 0.01163  | 0.188586 | 4.11E-05 |
| 7.55E-16 | 0.475858 | 9.16E-28 | 0.388493 | 2.84E-18 | 0.361788 | 6.89E-16 | 0.493544 | 4.82E-30 |
| 0.00257  | 0.245112 | 8.11E-08 | 0.297602 | 5.26E-11 | 0.35271  | 3.98E-15 | 0.177191 | 0.00012  |
| 0.29221  | -0.078   | 0.09227  | -0.07824 | 0.09124  | -0.13708 | 0.00299  | -0.06357 | 0.17026  |
| 0.03172  | 0.150113 | 0.00114  | 0.182403 | 7.36E-05 | 0.144281 | 0.00177  | 0.09263  | 0.04543  |
| 0.24705  | 0.043482 | 0.34847  | 0.107842 | 0.01975  | 0.086162 | 0.06282  | 0.029865 | 0.5197   |
| 0.52137  | -0.06296 | 0.1744   | -0.03569 | 0.4416   | -0.04581 | 0.32325  | 0.005465 | 0.90625  |
| 4.25E-26 | -0.29069 | 1.52E-10 | -0.19951 | 1.40E-05 | -0.17487 | 0.00015  | -0.39814 | 3.44E-19 |
| 0.38421  | 0.047658 | 0.30408  | 0.046876 | 0.31209  | 0.040332 | 0.38452  | 0.02374  | 0.60885  |
| 1.13E-13 | -0.077   | 0.09652  | -0.02982 | 0.52037  | -0.07889 | 0.08857  | -0.06147 | 0.18483  |
| 0.00039  | 0.25888  | 1.37E-08 | 0.189246 | 3.86E-05 | 0.186425 | 5.05E-05 | 0.306268 | 1.34E-11 |
| 0.01287  | 0.08126  | 0.07939  | 0.159145 | 0.00056  | 0.064544 | 0.16376  | 0.194893 | 2.22E-05 |
| 1.12E-06 | 0.501732 | 3.83E-31 | 0.441253 | 1.13E-23 | 0.48506  | 6.21E-29 | 0.503134 | 2.46E-31 |
| 0.02111  | 0.041852 | 0.36685  | -0.07617 | 0.10019  | 0.031946 | 0.49103  | -0.07837 | 0.0907   |
| 6.76E-12 | 0.162271 | 0.00043  | 0.250417 | 4.14E-08 | 0.149614 | 0.00118  | 0.254493 | 2.45E-08 |
| 1.77E-14 | 0.279253 | 8.19E-10 | 0.213689 | 3.17E-06 | 0.149044 | 0.00124  | 0.349317 | 7.55E-15 |
| 0.00069  | -0.27644 | 1.23E-09 | 0.040434 | 0.38331  | -0.12588 | 0.00645  | -0.02406 | 0.60408  |
| 0.00629  | 0.076304 | 0.09957  | 0.007005 | 0.87999  | 0.074848 | 0.10622  | 0.076589 | 0.09831  |
| 3.64E-12 | 0.53428  | 7.94E-36 | 0.50786  | 5.48E-32 | 0.507148 | 6.89E-32 | 0.492275 | 7.10E-30 |
| 4.27E-18 | -0.00875 | 0.85041  | -0.04892 | 0.29148  | 0.012068 | 0.79478  | -0.16425 | 0.00037  |
| 3.49E-10 | 0.420623 | 1.90E-21 | 0.32963  | 2.68E-13 | 0.377874 | 2.68E-17 | 0.389409 | 2.33E-18 |
| 0.86351  | 0.168715 | 0.00025  | 0.118939 | 0.0101   | 0.183137 | 6.87E-05 | 0.105628 | 0.02244  |
| 1.20E-08 | 0.090122 | 0.05162  | -0.06939 | 0.1343   | -0.01715 | 0.71161  | -0.06213 | 0.18011  |
| 0.05346  | -0.1492  | 0.00122  | -0.01477 | 0.75028  | -0.07318 | 0.11427  | 0.065438 | 0.15799  |
| 0.00118  | 0.425393 | 6.01E-22 | 0.281474 | 5.94E-10 | 0.261462 | 9.74E-09 | 0.28156  | 5.87E-10 |
| 8.73E-10 | 0.355565 | 2.31E-15 | 0.348148 | 9.40E-15 | 0.287216 | 2.55E-10 | 0.366731 | 2.59E-16 |
| 0.30006  | 0.282801 | 4.89E-10 | 0.297233 | 5.57E-11 | 0.367229 | 2.35E-16 | 0.277115 | 1.11E-09 |
| 0.20388  | 0.361415 | 7.42E-16 | 0.238316 | 1.87E-07 | 0.301468 | 2.88E-11 | 0.278028 | 9.77E-10 |
| 0.13267  | 0.100887 | 0.02926  | 0.221593 | 1.32E-06 | 0.250321 | 4.19E-08 | 0.1736   | 0.00016  |
| 0.03036  | 0.217573 | 2.07E-06 | 0.108828 | 0.01865  | 0.163145 | 0.0004   | 0.257638 | 1.62E-08 |
| 0.59704  | -0.11363 | 0.01401  | 0.000797 | 0.9863   | -0.07918 | 0.08741  | 0.081468 | 0.07862  |
| 0.76043  | -0.20473 | 8.21E-06 | -0.12151 | 0.00857  | -0.19423 | 2.37E-05 | 0.056736 | 0.22103  |
| 4.54E-15 | -0.13588 | 0.00326  | 0.024242 | 0.60129  | -0.01204 | 0.79526  | -0.16491 | 0.00035  |
| 0.08398  | -0.01498 | 0.74676  | -0.0317  | 0.49433  | -0.04273 | 0.35691  | 0.08743  | 0.05904  |



|          |          |          |          |          |          |          |          |          |
|----------|----------|----------|----------|----------|----------|----------|----------|----------|
| 0.84849  | 0.056774 | 0.22072  | 0.057018 | 0.21874  | 0.029429 | 0.52582  | 0.059027 | 0.20292  |
| 0.24269  | -0.00011 | 0.99807  | 0.225158 | 8.84E-07 | 0.061566 | 0.18413  | 0.033709 | 0.4674   |
| 0.00056  | -0.24243 | 1.13E-07 | -0.08157 | 0.07823  | -0.12881 | 0.00531  | -0.07723 | 0.09551  |
| 3.06E-06 | 0.053367 | 0.24974  | -0.12268 | 0.00795  | -0.03458 | 0.45597  | -0.04586 | 0.32271  |
| 0.00932  | -0.0476  | 0.30469  | 0.126574 | 0.00616  | 0.049848 | 0.28238  | 0.029374 | 0.52659  |
| 6.99E-20 | -0.1877  | 4.47E-05 | -0.17501 | 0.00014  | -0.16308 | 0.0004   | -0.22443 | 9.60E-07 |
| 0.12693  | 0.061492 | 0.18466  | -0.02043 | 0.65969  | -0.05272 | 0.2555   | 0.2433   | 1.02E-07 |
| 8.92E-09 | -0.40867 | 3.17E-20 | -0.20066 | 1.25E-05 | -0.24412 | 9.18E-08 | -0.18725 | 4.67E-05 |
| 2.33E-13 | 0.026098 | 0.57372  | -0.00136 | 0.97656  | 0.16451  | 0.00036  | -0.00495 | 0.91497  |
| 0.3716   | 0.018168 | 0.69536  | -0.01847 | 0.69051  | -0.05292 | 0.25377  | 0.28979  | 1.74E-10 |
| 0.02393  | -0.0729  | 0.11566  | -0.12962 | 0.00503  | -0.13158 | 0.0044   | -0.17636 | 0.00013  |
| 0.10833  | -0.07558 | 0.10283  | -0.00311 | 0.94648  | -0.11175 | 0.01569  | 0.072648 | 0.11693  |
| 0.07464  | 0.086427 | 0.06202  | 0.131019 | 0.00457  | 0.061724 | 0.183    | 0.242079 | 1.18E-07 |
| 0.29237  | 0.158507 | 0.00059  | 0.277601 | 1.04E-09 | 0.257234 | 1.71E-08 | 0.263145 | 7.77E-09 |
| 0.00339  | 0.005541 | 0.90495  | -0.01426 | 0.75857  | 0.040035 | 0.38804  | 0.025701 | 0.57957  |
| 0.10267  | 0.16567  | 0.00032  | 0.226385 | 7.68E-07 | 0.200559 | 1.26E-05 | 0.236342 | 2.38E-07 |
| 0.31378  | 0.178722 | 0.0001   | 0.244952 | 8.27E-08 | 0.220377 | 1.52E-06 | 0.256559 | 1.87E-08 |
| 4.22E-18 | 0.042686 | 0.35736  | -0.05469 | 0.23819  | -0.12851 | 0.00542  | 0.170154 | 0.00022  |
| 0.01067  | 0.103796 | 0.02489  | 0.080599 | 0.08187  | -0.00317 | 0.94553  | 0.063944 | 0.16773  |
| 3.69E-05 | 0.341323 | 3.32E-14 | 0.226828 | 7.29E-07 | 0.259789 | 1.22E-08 | 0.258338 | 1.48E-08 |
| 0.9848   | 0.169575 | 0.00023  | 0.144051 | 0.0018   | 0.189733 | 3.68E-05 | -0.01146 | 0.8049   |
| 1.80E-08 | -0.03702 | 0.42478  | 0.119048 | 0.01003  | 0.04395  | 0.34329  | 0.185353 | 5.58E-05 |
| 1.01E-05 | 0.349592 | 7.17E-15 | 0.342233 | 2.81E-14 | 0.306956 | 1.20E-11 | 0.366987 | 2.46E-16 |
| 0.0013   | 0.293522 | 9.86E-11 | 0.189707 | 3.69E-05 | 0.283028 | 4.73E-10 | 0.093896 | 0.04254  |
| 1.48E-12 | -0.12906 | 0.00522  | -0.07012 | 0.13027  | 0.065992 | 0.15449  | -0.11978 | 0.00957  |
| 0.10043  | 0.249644 | 4.57E-08 | 0.317489 | 2.14E-12 | 0.383521 | 8.21E-18 | 0.160949 | 0.00048  |
| 8.60E-06 | 0.144323 | 0.00177  | 0.173523 | 0.00016  | 0.098859 | 0.03269  | 0.269528 | 3.24E-09 |
| 0.60524  | -0.28237 | 5.21E-10 | -0.05889 | 0.20393  | -0.20769 | 6.02E-06 | -0.10487 | 0.02343  |
| 0.00063  | 0.268156 | 3.92E-09 | 0.260448 | 1.12E-08 | 0.197535 | 1.71E-05 | 0.279528 | 7.87E-10 |
| 0.55201  | -0.07745 | 0.09458  | -0.02744 | 0.55418  | -0.19783 | 1.66E-05 | -0.04908 | 0.28985  |
| 0.24295  | 0.136358 | 0.00315  | 0.177379 | 0.00012  | 0.135232 | 0.00341  | 0.161195 | 0.00047  |
| 0.01772  | 0.108447 | 0.01907  | 0.174472 | 0.00015  | 0.202138 | 1.07E-05 | 0.194328 | 2.35E-05 |
| 0.00017  | 0.387969 | 3.18E-18 | 0.23427  | 3.05E-07 | 0.257133 | 1.73E-08 | 0.33444  | 1.15E-13 |
| 3.18E-10 | 0.079908 | 0.08454  | 0.015633 | 0.73616  | 0.014923 | 0.74773  | -0.13775 | 0.00285  |
| 0.01219  | 0.170051 | 0.00022  | 0.218534 | 1.86E-06 | 0.237346 | 2.11E-07 | 0.125011 | 0.00683  |
| 0.06655  | 0.093795 | 0.04277  | 0.119763 | 0.00958  | 0.079295 | 0.08695  | 0.183411 | 6.70E-05 |
| 0.07137  | -0.08171 | 0.07772  | -0.03302 | 0.47654  | -0.11837 | 0.01047  | 0.006294 | 0.89209  |
| 1.68E-14 | 0.205319 | 7.72E-06 | 0.130294 | 0.0048   | 0.076236 | 0.09988  | 0.324673 | 6.33E-13 |
| 0.48414  | -0.03361 | 0.46875  | 0.06146  | 0.18488  | 0.055411 | 0.23202  | -0.01181 | 0.79912  |
| 3.13E-11 | 0.113703 | 0.01395  | 0.017378 | 0.70799  | 0.171726 | 0.00019  | -0.03376 | 0.46674  |
| 0.03018  | -0.16974 | 0.00023  | -0.0113  | 0.80757  | -0.08774 | 0.05813  | -0.04101 | 0.37657  |
| 3.40E-07 | 0.132192 | 0.00421  | 0.130402 | 0.00476  | 0.111504 | 0.01592  | 0.268806 | 3.58E-09 |
| 0.2384   | 0.147876 | 0.00135  | 0.16451  | 0.00036  | 0.209131 | 5.17E-06 | 0.154294 | 0.00082  |
| 0.00027  | 0.485035 | 6.26E-29 | 0.409983 | 2.34E-20 | 0.435663 | 4.70E-23 | 0.42279  | 1.13E-21 |
| 4.98E-05 | -0.21388 | 3.10E-06 | -0.14914 | 0.00123  | -0.27414 | 1.70E-09 | -0.08709 | 0.06002  |

|          |          |          |          |          |          |          |          |          |
|----------|----------|----------|----------|----------|----------|----------|----------|----------|
| 0.00271  | 0.145144 | 0.00166  | 0.073774 | 0.11135  | 0.081639 | 0.07799  | 0.002947 | 0.94935  |
| 0.99616  | -0.01606 | 0.72926  | 0.086473 | 0.06187  | -0.0357  | 0.44144  | -0.10625 | 0.02165  |
| 0.92992  | -0.18671 | 4.91E-05 | -0.02378 | 0.60817  | -0.12448 | 0.00707  | -0.09614 | 0.03782  |
| 1.17E-07 | 0.433974 | 7.19E-23 | 0.43927  | 1.88E-23 | 0.394077 | 8.44E-19 | 0.398343 | 3.29E-19 |
| 2.58E-08 | 0.690593 | 1.97E-67 | 0.396467 | 4.98E-19 | 0.477818 | 5.20E-28 | 0.375119 | 4.73E-17 |
| 1.60E-12 | 0.296299 | 6.44E-11 | 0.260773 | 1.07E-08 | 0.222345 | 1.22E-06 | 0.346193 | 1.35E-14 |
| 2.32E-11 | -0.14037 | 0.00236  | 0.010044 | 0.82861  | -0.00573 | 0.90179  | -0.11163 | 0.01581  |
| 0.06298  | 0.343989 | 2.04E-14 | 0.293356 | 1.01E-10 | 0.437372 | 3.05E-23 | 0.142445 | 0.00203  |
| 0.343    | 0.310415 | 6.87E-12 | 0.610391 | 5.17E-49 | 0.433095 | 8.96E-23 | 0.167621 | 0.00027  |
| 0.30489  | 0.316629 | 2.47E-12 | 0.389446 | 2.31E-18 | 0.384367 | 6.86E-18 | 0.276285 | 1.25E-09 |
| 0.0008   | 0.08485  | 0.06695  | 0.217185 | 2.16E-06 | 0.236164 | 2.43E-07 | 0.008055 | 0.86217  |
| 0.06812  | 0.352883 | 3.85E-15 | 0.303269 | 2.17E-11 | 0.351431 | 5.07E-15 | 0.417148 | 4.36E-21 |
| 0.97426  | 0.368879 | 1.68E-16 | 0.269029 | 3.47E-09 | 0.386168 | 4.67E-18 | 0.079303 | 0.08692  |
| 0.02532  | 0.3816   | 1.23E-17 | 0.217671 | 2.05E-06 | 0.123658 | 0.00746  | 0.215243 | 2.68E-06 |
| 0.32784  | -0.01063 | 0.81878  | 0.114521 | 0.01327  | 0.089556 | 0.05311  | 0.042144 | 0.3635   |
| 0.00069  | 0.370788 | 1.15E-16 | 0.267461 | 4.31E-09 | 0.178918 | 0.0001   | 0.247353 | 6.12E-08 |
| 2.62E-16 | 0.417534 | 3.98E-21 | 0.295159 | 7.67E-11 | 0.289301 | 1.87E-10 | 0.351523 | 4.98E-15 |
| 0.13161  | 0.107607 | 0.02002  | 0.021509 | 0.64292  | -0.0346  | 0.45566  | 0.130159 | 0.00484  |
| 0.00338  | 0.148646 | 0.00127  | 0.066828 | 0.14933  | 0.197926 | 1.64E-05 | 0.160904 | 0.00048  |
| 0.03616  | 0.47416  | 1.49E-27 | 0.252161 | 3.31E-08 | 0.352681 | 4.00E-15 | 0.263386 | 7.52E-09 |
| 0.09457  | 0.507241 | 6.69E-32 | 0.338322 | 5.72E-14 | 0.218404 | 1.89E-06 | 0.229032 | 5.65E-07 |
| 0.00061  | -0.49465 | 3.44E-30 | -0.31467 | 3.41E-12 | -0.38701 | 3.90E-18 | -0.29516 | 7.68E-11 |
| 0.00127  | 0.647343 | 8.27E-57 | 0.282516 | 5.10E-10 | 0.298406 | 4.65E-11 | 0.240797 | 1.38E-07 |
| 0.68362  | 0.367579 | 2.19E-16 | 0.090432 | 0.05082  | 0.102028 | 0.02748  | 0.093304 | 0.04387  |
| 0.21753  | 0.527541 | 8.15E-35 | 0.29996  | 3.65E-11 | 0.287359 | 2.50E-10 | 0.223976 | 1.01E-06 |
| 0.17757  | 0.55422  | 5.88E-39 | 0.172855 | 0.00017  | 0.170405 | 0.00022  | 0.12679  | 0.00608  |
| 3.21E-31 | 0.747258 | 1.46E-84 | 0.521908 | 5.49E-34 | 0.494991 | 3.10E-30 | 0.529616 | 4.00E-35 |
| 0.00738  | 0.724935 | 2.66E-77 | 0.313208 | 4.35E-12 | 0.387212 | 3.74E-18 | 0.221252 | 1.38E-06 |
| 1.30E-30 | 0.638094 | 9.31E-55 | 0.363687 | 4.74E-16 | 0.360377 | 9.08E-16 | 0.329908 | 2.55E-13 |
| 3.71E-05 | 0.61725  | 2.21E-50 | 0.309015 | 8.62E-12 | 0.342429 | 2.71E-14 | 0.24399  | 9.32E-08 |
| 6.59E-28 | 0.693363 | 3.55E-68 | 0.474553 | 1.33E-27 | 0.479163 | 3.52E-28 | 0.542793 | 3.88E-37 |
| 6.76E-16 | 0.735088 | 1.64E-80 | 0.524083 | 2.64E-34 | 0.505339 | 1.23E-31 | 0.352753 | 3.95E-15 |
| 3.23E-12 | 0.75407  | 6.23E-87 | 0.485308 | 5.77E-29 | 0.471067 | 3.61E-27 | 0.328239 | 3.42E-13 |
| 6.75E-15 | -0.57627 | 1.13E-42 | -0.32602 | 5.02E-13 | -0.3827  | 9.76E-18 | -0.30809 | 1.00E-11 |
| 3.17E-14 | 0.704605 | 2.76E-71 | 0.553409 | 7.96E-39 | 0.547287 | 7.62E-38 | 0.449596 | 1.29E-24 |
| 0.13711  | 0.359002 | 1.19E-15 | 0.062922 | 0.17464  | 0.076066 | 0.10064  | -0.15197 | 0.00099  |
| 8.15E-12 | -0.52105 | 7.32E-34 | -0.24612 | 7.14E-08 | -0.2867  | 2.76E-10 | -0.22506 | 8.94E-07 |
| 0.93241  | -0.55333 | 8.19E-39 | -0.2506  | 4.05E-08 | -0.44825 | 1.84E-24 | -0.21715 | 2.17E-06 |
| 1.12E-10 | 0.705894 | 1.19E-71 | 0.529642 | 3.97E-35 | 0.594756 | 5.16E-46 | 0.41025  | 2.20E-20 |
| 2.40E-36 | 0.830521 | #####    | 0.671633 | 1.49E-62 | 0.68347  | 1.48E-65 | 0.620143 | 5.71E-51 |
| 1.01E-33 | 0.609223 | 8.78E-49 | 0.448482 | 1.73E-24 | 0.451452 | 7.88E-25 | 0.546203 | 1.13E-37 |
| 6.72E-28 | 0.689865 | 3.09E-67 | 0.557381 | 1.79E-39 | 0.599922 | 5.49E-47 | 0.504145 | 1.79E-31 |
| 4.04E-10 | 0.698729 | 1.21E-69 | 0.477126 | 6.36E-28 | 0.557469 | 1.73E-39 | 0.315264 | 3.10E-12 |
| 2.14E-33 | 0.785213 | 7.63E-99 | 0.572847 | 4.45E-42 | 0.558437 | 1.20E-39 | 0.575973 | 1.27E-42 |
| 2.65E-34 | 0.617271 | 2.19E-50 | 0.408699 | 3.15E-20 | 0.488638 | 2.13E-29 | 0.487439 | 3.06E-29 |

|          |          |          |          |          |          |          |          |          |
|----------|----------|----------|----------|----------|----------|----------|----------|----------|
| 1.77E-07 | 0.558529 | 1.16E-39 | 0.40921  | 2.80E-20 | 0.395644 | 5.98E-19 | 0.297194 | 5.61E-11 |
| 6.77E-13 | 0.507388 | 6.38E-32 | 0.287204 | 2.56E-10 | 0.261742 | 9.38E-09 | 0.289606 | 1.78E-10 |
| 8.63E-25 | 0.671251 | 1.85E-62 | 0.408258 | 3.48E-20 | 0.386054 | 4.79E-18 | 0.449534 | 1.31E-24 |
| 0.84591  | 0.654229 | 2.20E-58 | 0.300202 | 3.51E-11 | 0.434526 | 6.26E-23 | 0.215986 | 2.47E-06 |
| 2.11E-08 | 0.494997 | 3.09E-30 | 0.266073 | 5.22E-09 | 0.275738 | 1.36E-09 | 0.217239 | 2.15E-06 |
| 0.00081  | 0.713292 | 8.60E-74 | 0.499312 | 8.15E-31 | 0.560362 | 5.78E-40 | 0.353391 | 3.50E-15 |
| 7.82E-16 | 0.667449 | 1.59E-61 | 0.546799 | 9.10E-38 | 0.553309 | 8.26E-39 | 0.416203 | 5.46E-21 |
| 0.3264   | 0.531145 | 2.36E-35 | 0.221405 | 1.35E-06 | 0.29958  | 3.87E-11 | 0.109345 | 0.01809  |
| 0.01719  | 0.59241  | 1.41E-45 | 0.284758 | 3.67E-10 | 0.37728  | 3.03E-17 | 0.275968 | 1.31E-09 |
| 1.61E-33 | 0.692595 | 5.73E-68 | 0.433633 | 7.83E-23 | 0.401641 | 1.57E-19 | 0.52578  | 1.49E-34 |
| 1.97E-13 | 0.829441 | #####    | 0.485229 | 5.91E-29 | 0.502128 | 3.38E-31 | 0.446962 | 2.58E-24 |
| 2.00E-29 | 0.832484 | #####    | 0.556193 | 2.81E-39 | 0.556436 | 2.56E-39 | 0.518542 | 1.69E-33 |
| 0.33686  | 0.632855 | 1.26E-53 | 0.266655 | 4.82E-09 | 0.323176 | 8.18E-13 | 0.121364 | 0.00866  |
| 1.72E-09 | 0.765132 | 5.97E-91 | 0.436448 | 3.86E-23 | 0.533833 | 9.28E-36 | 0.395846 | 5.72E-19 |
| 0.11408  | 0.588536 | 7.25E-45 | 0.211409 | 4.06E-06 | 0.210611 | 4.42E-06 | 0.109176 | 0.01827  |
| 2.99E-29 | 0.854806 | #####    | 0.587956 | 9.25E-45 | 0.608045 | 1.49E-48 | 0.56758  | 3.56E-41 |
| 8.14E-07 | 0.474345 | 1.42E-27 | 0.323307 | 8.00E-13 | 0.315367 | 3.04E-12 | 0.164434 | 0.00036  |
| 1.13E-12 | 0.463503 | 3.00E-26 | 0.252832 | 3.04E-08 | 0.281472 | 5.94E-10 | 0.186136 | 5.19E-05 |
| 1.60E-08 | 0.555008 | 4.38E-39 | 0.350765 | 5.75E-15 | 0.304076 | 1.90E-11 | 0.365501 | 3.31E-16 |
| 3.34E-40 | 0.76962  | 1.21E-92 | 0.536249 | 3.98E-36 | 0.479161 | 3.52E-28 | 0.532039 | 1.73E-35 |
| 3.08E-41 | 0.815532 | #####    | 0.57333  | 3.67E-42 | 0.574581 | 2.23E-42 | 0.533187 | 1.16E-35 |
| 1.29E-17 | 0.636942 | 1.66E-54 | 0.448486 | 1.73E-24 | 0.461324 | 5.47E-26 | 0.460315 | 7.21E-26 |
| 3.22E-13 | 0.808264 | #####    | 0.520612 | 8.47E-34 | 0.586963 | 1.40E-44 | 0.405382 | 6.73E-20 |
| 2.59E-16 | 0.721341 | 3.37E-76 | 0.456414 | 2.08E-25 | 0.438471 | 2.31E-23 | 0.370544 | 1.20E-16 |
| 4.10E-15 | 0.745627 | 5.25E-84 | 0.397897 | 3.63E-19 | 0.463861 | 2.72E-26 | 0.288769 | 2.02E-10 |
| 3.03E-13 | 0.767835 | 5.75E-92 | 0.484415 | 7.52E-29 | 0.551798 | 1.45E-38 | 0.315741 | 2.86E-12 |
| 0.34     | 0.529481 | 4.19E-35 | 0.248703 | 5.15E-08 | 0.270603 | 2.79E-09 | 0.169336 | 0.00024  |
| 7.24E-37 | 0.732777 | 9.08E-80 | 0.536215 | 4.03E-36 | 0.512681 | 1.16E-32 | 0.557418 | 1.77E-39 |
| 2.34E-07 | -0.46127 | 5.55E-26 | -0.22376 | 1.04E-06 | -0.34772 | 1.02E-14 | -0.29211 | 1.22E-10 |
| 1.80E-36 | 0.709785 | 9.06E-73 | 0.561421 | 3.86E-40 | 0.513522 | 8.80E-33 | 0.629134 | 7.78E-53 |
| 2.52E-21 | 0.693904 | 2.54E-68 | 0.60449  | 7.33E-48 | 0.553635 | 7.32E-39 | 0.535296 | 5.56E-36 |
| 1.21E-09 | 0.705908 | 1.18E-71 | 0.497062 | 1.64E-30 | 0.541749 | 5.65E-37 | 0.471236 | 3.44E-27 |
| 6.44E-06 | 0.687332 | 1.45E-66 | 0.475338 | 1.06E-27 | 0.44867  | 1.64E-24 | 0.445929 | 3.37E-24 |
| 1.80E-09 | 0.683432 | 1.52E-65 | 0.386474 | 4.38E-18 | 0.512305 | 1.31E-32 | 0.413823 | 9.56E-21 |
| 0.45687  | 0.488217 | 2.42E-29 | 0.183528 | 6.62E-05 | 0.259258 | 1.31E-08 | 0.004581 | 0.92135  |
| 7.26E-19 | 0.820098 | #####    | 0.553752 | 7.00E-39 | 0.556724 | 2.30E-39 | 0.542233 | 4.75E-37 |
| 2.00E-22 | 0.603174 | 1.31E-47 | 0.397727 | 3.77E-19 | 0.424343 | 7.75E-22 | 0.508019 | 5.21E-32 |
| 0.00503  | 0.51267  | 1.16E-32 | 0.284671 | 3.72E-10 | 0.381835 | 1.17E-17 | 0.216565 | 2.32E-06 |
| 0.74896  | 0.574541 | 2.26E-42 | 0.312051 | 5.26E-12 | 0.364695 | 3.88E-16 | 0.116592 | 0.01169  |
| 8.87E-10 | -0.48728 | 3.21E-29 | -0.31737 | 2.18E-12 | -0.28231 | 5.26E-10 | -0.29482 | 8.09E-11 |
| 2.22E-12 | 0.530476 | 2.98E-35 | 0.235592 | 2.60E-07 | 0.180509 | 8.76E-05 | 0.182718 | 7.14E-05 |
| 0.15111  | 0.506719 | 7.90E-32 | 0.232677 | 3.68E-07 | 0.19872  | 1.52E-05 | 0.197818 | 1.66E-05 |
| 1.42E-20 | 0.587753 | 1.01E-44 | 0.492195 | 7.28E-30 | 0.522342 | 4.75E-34 | 0.515773 | 4.21E-33 |
| 0.00304  | -0.57108 | 8.99E-42 | -0.28378 | 4.24E-10 | -0.42866 | 2.70E-22 | -0.28576 | 3.16E-10 |
| 8.28E-62 | 0.727877 | 3.23E-78 | 0.507875 | 5.46E-32 | 0.533363 | 1.09E-35 | 0.655771 | 9.65E-59 |

|          |          |          |          |          |          |          |          |          |
|----------|----------|----------|----------|----------|----------|----------|----------|----------|
| 1.55E-09 | 0.63968  | 4.19E-55 | 0.427275 | 3.79E-22 | 0.420485 | 1.97E-21 | 0.348173 | 9.36E-15 |
| 2.62E-13 | 0.557401 | 1.78E-39 | 0.417009 | 4.51E-21 | 0.305001 | 1.64E-11 | 0.336235 | 8.33E-14 |
| 9.80E-34 | 0.614626 | 7.45E-50 | 0.459941 | 7.99E-26 | 0.528808 | 5.28E-35 | 0.566312 | 5.83E-41 |
| 1.99E-31 | 0.674281 | 3.27E-63 | 0.491076 | 1.02E-29 | 0.457461 | 1.57E-25 | 0.540309 | 9.45E-37 |
| 2.41E-42 | 0.819638 | #####    | 0.632071 | 1.85E-53 | 0.608468 | 1.23E-48 | 0.602187 | 2.03E-47 |
| 9.87E-19 | 0.679618 | 1.46E-64 | 0.44124  | 1.14E-23 | 0.455402 | 2.74E-25 | 0.360918 | 8.17E-16 |
| 4.38E-17 | 0.689561 | 3.72E-67 | 0.479273 | 3.41E-28 | 0.497712 | 1.34E-30 | 0.46299  | 3.46E-26 |
| 5.12E-21 | 0.704669 | 2.64E-71 | 0.548566 | 4.77E-38 | 0.574285 | 2.51E-42 | 0.515092 | 5.27E-33 |
| 4.35E-25 | 0.647552 | 7.42E-57 | 0.419791 | 2.32E-21 | 0.429012 | 2.47E-22 | 0.421698 | 1.47E-21 |
| 1.68E-15 | 0.810026 | #####    | 0.500409 | 5.79E-31 | 0.513452 | 9.00E-33 | 0.474352 | 1.41E-27 |
| 1.26E-20 | 0.744456 | 1.31E-83 | 0.518584 | 1.66E-33 | 0.583606 | 5.66E-44 | 0.514418 | 6.57E-33 |
| 3.08E-41 | 0.595471 | 3.79E-46 | 0.528498 | 5.88E-35 | 0.472999 | 2.08E-27 | 0.431939 | 1.20E-22 |
| 1.71E-11 | 0.688106 | 9.04E-67 | 0.42111  | 1.69E-21 | 0.439044 | 1.99E-23 | 0.389852 | 2.12E-18 |
| 5.63E-05 | 0.586949 | 1.41E-44 | 0.286448 | 2.86E-10 | 0.346848 | 1.20E-14 | 0.205148 | 7.86E-06 |
| 7.74E-13 | 0.735678 | 1.05E-80 | 0.381807 | 1.18E-17 | 0.374384 | 5.51E-17 | 0.306103 | 1.38E-11 |
| 0.01787  | 0.618528 | 1.22E-50 | 0.255459 | 2.16E-08 | 0.333964 | 1.25E-13 | 0.182712 | 7.15E-05 |
| 0.08581  | 0.583158 | 6.81E-44 | 0.221646 | 1.32E-06 | 0.293049 | 1.06E-10 | 0.123925 | 0.00734  |
| 1.80E-39 | 0.763485 | 2.44E-90 | 0.612552 | 1.93E-49 | 0.621555 | 2.94E-51 | 0.605508 | 4.66E-48 |
| 8.96E-07 | 0.670913 | 2.25E-62 | 0.388063 | 3.11E-18 | 0.455615 | 2.58E-25 | 0.273852 | 1.77E-09 |
| 6.47E-22 | 0.59839  | 1.07E-46 | 0.424343 | 7.75E-22 | 0.466116 | 1.45E-26 | 0.471354 | 3.32E-27 |
| 7.22E-23 | 0.683366 | 1.58E-65 | 0.55169  | 1.51E-38 | 0.522139 | 5.08E-34 | 0.535112 | 5.93E-36 |
| 0.28084  | 0.503826 | 1.98E-31 | 0.409824 | 2.43E-20 | 0.406487 | 5.23E-20 | 0.056038 | 0.22678  |
| 3.29E-17 | 0.674464 | 2.94E-63 | 0.564811 | 1.04E-40 | 0.536667 | 3.44E-36 | 0.514768 | 5.86E-33 |
| 0.38326  | 0.658206 | 2.60E-59 | 0.388201 | 3.02E-18 | 0.50461  | 1.54E-31 | 0.278397 | 9.27E-10 |
| 5.19E-27 | 0.846625 | #####    | 0.532258 | 1.61E-35 | 0.578759 | 4.13E-43 | 0.479808 | 2.92E-28 |
| 3.20E-28 | 0.712063 | 1.97E-73 | 0.567669 | 3.44E-41 | 0.51957  | 1.20E-33 | 0.559878 | 6.95E-40 |
| 1.29E-45 | 0.75388  | 7.27E-87 | 0.436433 | 3.87E-23 | 0.430313 | 1.79E-22 | 0.493586 | 4.76E-30 |
| 3.76E-07 | 0.730404 | 5.17E-79 | 0.445865 | 3.43E-24 | 0.49187  | 8.03E-30 | 0.60667  | 2.77E-48 |
| 1.37E-20 | 0.683161 | 1.79E-65 | 0.544015 | 2.50E-37 | 0.534304 | 7.87E-36 | 0.48247  | 1.34E-28 |
| 6.34E-26 | 0.687044 | 1.72E-66 | 0.430278 | 1.81E-22 | 0.465492 | 1.73E-26 | 0.441091 | 1.18E-23 |
| 4.35E-07 | 0.536394 | 3.78E-36 | 0.401953 | 1.46E-19 | 0.361732 | 6.97E-16 | 0.259354 | 1.29E-08 |
| 2.70E-06 | 0.51657  | 3.24E-33 | 0.288819 | 2.01E-10 | 0.262925 | 8.00E-09 | 0.180091 | 9.10E-05 |
| 0.16119  | 0.578837 | 4.00E-43 | 0.325668 | 5.33E-13 | 0.451291 | 8.22E-25 | 0.194377 | 2.34E-05 |
| 1.24E-50 | 0.68757  | 1.25E-66 | 0.531342 | 2.21E-35 | 0.490001 | 1.41E-29 | 0.578269 | 5.03E-43 |
| 9.87E-11 | 0.619804 | 6.70E-51 | 0.434882 | 5.73E-23 | 0.458888 | 1.06E-25 | 0.356676 | 1.86E-15 |
| 0.00439  | 0.681214 | 5.68E-65 | 0.371326 | 1.03E-16 | 0.432305 | 1.09E-22 | 0.249582 | 4.61E-08 |
| 1.74E-13 | 0.79604  | #####    | 0.491037 | 1.03E-29 | 0.525965 | 1.40E-34 | 0.367915 | 2.04E-16 |
| 7.44E-21 | 0.692068 | 7.94E-68 | 0.568221 | 2.77E-41 | 0.587789 | 9.92E-45 | 0.577239 | 7.64E-43 |
| 0.02497  | 0.516722 | 3.08E-33 | 0.325644 | 5.35E-13 | 0.323967 | 7.14E-13 | 0.22936  | 5.44E-07 |
| 0.31401  | 0.477238 | 6.15E-28 | 0.323029 | 8.39E-13 | 0.308541 | 9.31E-12 | 0.109746 | 0.01767  |
| 1.79E-22 | 0.633723 | 8.21E-54 | 0.536118 | 4.17E-36 | 0.564577 | 1.14E-40 | 0.513206 | 9.75E-33 |
| 5.07E-15 | 0.700259 | 4.57E-70 | 0.35557  | 2.30E-15 | 0.375122 | 4.73E-17 | 0.346414 | 1.30E-14 |
| 5.35E-09 | 0.836977 | #####    | 0.577145 | 7.93E-43 | 0.620575 | 4.66E-51 | 0.419264 | 2.64E-21 |
| 0.09555  | 0.54275  | 3.94E-37 | 0.267348 | 4.38E-09 | 0.35767  | 1.54E-15 | 0.318164 | 1.91E-12 |
| 0.03278  | 0.638364 | 8.13E-55 | 0.287379 | 2.49E-10 | 0.361693 | 7.02E-16 | 0.218504 | 1.87E-06 |

|          |          |          |          |          |          |          |          |          |
|----------|----------|----------|----------|----------|----------|----------|----------|----------|
| 7.65E-17 | 0.630564 | 3.88E-53 | 0.458819 | 1.08E-25 | 0.512982 | 1.05E-32 | 0.43206  | 1.16E-22 |
| 2.90E-15 | 0.624606 | 6.89E-52 | 0.382679 | 9.81E-18 | 0.34361  | 2.18E-14 | 0.374143 | 5.78E-17 |
| 1.21E-16 | 0.806618 | #####    | 0.559378 | 8.41E-40 | 0.635591 | 3.25E-54 | 0.511308 | 1.81E-32 |
| 2.01E-24 | 0.672058 | 1.17E-62 | 0.37297  | 7.35E-17 | 0.34223  | 2.81E-14 | 0.334584 | 1.12E-13 |
| 9.55E-50 | 0.821292 | #####    | 0.591727 | 1.88E-45 | 0.601582 | 2.65E-47 | 0.649494 | 2.69E-57 |
| 1.94E-34 | 0.772138 | 1.30E-93 | 0.548622 | 4.67E-38 | 0.55689  | 2.16E-39 | 0.502223 | 3.28E-31 |
| 1.24E-36 | 0.810688 | #####    | 0.601042 | 3.36E-47 | 0.574955 | 1.92E-42 | 0.50806  | 5.15E-32 |
| 1.48E-09 | 0.70816  | 2.67E-72 | 0.515764 | 4.22E-33 | 0.598285 | 1.12E-46 | 0.401072 | 1.79E-19 |
| 0.01329  | 0.556687 | 2.33E-39 | 0.366213 | 2.87E-16 | 0.394303 | 8.03E-19 | 0.203111 | 9.70E-06 |
| 5.18E-05 | 0.508361 | 4.67E-32 | 0.260574 | 1.10E-08 | 0.308184 | 9.86E-12 | 0.310749 | 6.51E-12 |
| 1.26E-12 | 0.603507 | 1.13E-47 | 0.460387 | 7.07E-26 | 0.42402  | 8.39E-22 | 0.26469  | 6.30E-09 |
| 1.15E-23 | 0.860454 | #####    | 0.544135 | 2.39E-37 | 0.563561 | 1.69E-40 | 0.537473 | 2.58E-36 |
| 6.40E-08 | 0.766719 | 1.52E-91 | 0.44357  | 6.23E-24 | 0.528241 | 6.42E-35 | 0.270863 | 2.69E-09 |
| 5.64E-15 | 0.653939 | 2.57E-58 | 0.415499 | 6.44E-21 | 0.409363 | 2.70E-20 | 0.282747 | 4.93E-10 |
| 6.93E-13 | 0.672641 | 8.38E-63 | 0.41537  | 6.64E-21 | 0.420317 | 2.05E-21 | 0.398837 | 2.94E-19 |
| 1.70E-28 | 0.68672  | 2.10E-66 | 0.432044 | 1.17E-22 | 0.349743 | 6.97E-15 | 0.496263 | 2.09E-30 |
| 1.82E-09 | 0.61434  | 8.50E-50 | 0.279255 | 8.19E-10 | 0.304357 | 1.82E-11 | 0.302548 | 2.43E-11 |
| 1.87E-07 | 0.711868 | 2.25E-73 | 0.450708 | 9.60E-25 | 0.520238 | 9.60E-34 | 0.385052 | 5.93E-18 |
| 1.79E-10 | -0.66601 | 3.55E-61 | -0.42875 | 2.63E-22 | -0.51293 | 1.07E-32 | -0.37007 | 1.33E-16 |
| 2.81E-14 | 0.661133 | 5.28E-60 | 0.522329 | 4.77E-34 | 0.568172 | 2.82E-41 | 0.445205 | 4.07E-24 |
| 3.70E-25 | 0.779553 | 1.55E-96 | 0.418219 | 3.38E-21 | 0.469096 | 6.29E-27 | 0.426663 | 4.40E-22 |
| 1.14E-09 | 0.626991 | 2.19E-52 | 0.458829 | 1.08E-25 | 0.520696 | 8.24E-34 | 0.393127 | 1.04E-18 |
| 1.81E-41 | 0.820699 | #####    | 0.555559 | 3.56E-39 | 0.559541 | 7.90E-40 | 0.552716 | 1.03E-38 |
| 1.32E-22 | 0.864424 | #####    | 0.536808 | 3.27E-36 | 0.549731 | 3.11E-38 | 0.531111 | 2.39E-35 |
| 4.38E-32 | 0.752892 | 1.62E-86 | 0.61806  | 1.52E-50 | 0.585346 | 2.75E-44 | 0.582873 | 7.66E-44 |
| 4.36E-46 | 0.726213 | 1.07E-77 | 0.458486 | 1.19E-25 | 0.481757 | 1.65E-28 | 0.557275 | 1.87E-39 |
| 8.45E-18 | 0.726972 | 6.20E-78 | 0.58365  | 5.56E-44 | 0.651057 | 1.18E-57 | 0.563594 | 1.67E-40 |
| 0.26544  | 0.430685 | 1.63E-22 | 0.146395 | 0.00151  | 0.276535 | 1.21E-09 | 0.021894 | 0.63698  |
| 1.18E-16 | 0.644659 | 3.31E-56 | 0.499975 | 6.63E-31 | 0.498092 | 1.19E-30 | 0.498658 | 9.99E-31 |
| 1.59E-07 | 0.606146 | 3.50E-48 | 0.306274 | 1.34E-11 | 0.332513 | 1.61E-13 | 0.11788  | 0.01079  |
| 7.59E-31 | 0.794568 | #####    | 0.564101 | 1.38E-40 | 0.544778 | 1.90E-37 | 0.550908 | 2.01E-38 |
| 1.96E-20 | 0.885485 | #####    | 0.590965 | 2.60E-45 | 0.607504 | 1.91E-48 | 0.517678 | 2.25E-33 |
| 1.05E-24 | 0.638832 | 6.43E-55 | 0.433072 | 9.02E-23 | 0.419468 | 2.51E-21 | 0.368449 | 1.84E-16 |
| 4.81E-07 | 0.633589 | 8.78E-54 | 0.391026 | 1.64E-18 | 0.453437 | 4.64E-25 | 0.353207 | 3.62E-15 |
| 4.23E-38 | 0.728511 | 2.05E-78 | 0.506281 | 9.08E-32 | 0.446146 | 3.19E-24 | 0.425187 | 6.32E-22 |
| 2.99E-33 | 0.709066 | 1.46E-72 | 0.575497 | 1.54E-42 | 0.506758 | 7.80E-32 | 0.480734 | 2.22E-28 |
| 2.03E-31 | 0.785955 | 3.75E-99 | 0.550797 | 2.10E-38 | 0.527136 | 9.36E-35 | 0.517567 | 2.33E-33 |
| 5.14E-21 | 0.890695 | #####    | 0.552111 | 1.29E-38 | 0.519189 | 1.36E-33 | 0.463715 | 2.83E-26 |
| 0.00019  | 0.727512 | 4.21E-78 | 0.526307 | 1.24E-34 | 0.62406  | 8.94E-52 | 0.353722 | 3.28E-15 |
| 1.93E-41 | 0.70551  | 1.53E-71 | 0.471602 | 3.10E-27 | 0.520021 | 1.03E-33 | 0.616522 | 3.10E-50 |
| 0.92936  | 0.632139 | 1.79E-53 | 0.418192 | 3.40E-21 | 0.484301 | 7.78E-29 | 0.201445 | 1.15E-05 |
| 2.81E-11 | 0.452769 | 5.55E-25 | 0.197714 | 1.68E-05 | 0.186229 | 5.14E-05 | 0.20239  | 1.04E-05 |
| 1.65E-25 | 0.797364 | #####    | 0.502074 | 3.44E-31 | 0.59677  | 2.17E-46 | 0.561556 | 3.66E-40 |
| 2.24E-28 | 0.752905 | 1.60E-86 | 0.663996 | 1.09E-60 | 0.62247  | 1.90E-51 | 0.59802  | 1.26E-46 |
| 1.44E-29 | 0.837182 | #####    | 0.539421 | 1.30E-36 | 0.503519 | 2.18E-31 | 0.537713 | 2.37E-36 |

|          |          |          |          |          |          |          |          |          |
|----------|----------|----------|----------|----------|----------|----------|----------|----------|
| 3.57E-14 | 0.851435 | #####    | 0.521756 | 5.78E-34 | 0.608047 | 1.49E-48 | 0.494631 | 3.46E-30 |
| 8.80E-09 | 0.607457 | 1.95E-48 | 0.428878 | 2.56E-22 | 0.309439 | 8.05E-12 | 0.308208 | 9.83E-12 |
| 0.08972  | 0.593084 | 1.06E-45 | 0.278801 | 8.74E-10 | 0.274557 | 1.60E-09 | 0.113356 | 0.01425  |
| 0.00029  | 0.466689 | 1.24E-26 | 0.19739  | 1.73E-05 | 0.263503 | 7.40E-09 | 0.180548 | 8.73E-05 |
| 4.65E-13 | 0.715202 | 2.35E-74 | 0.556804 | 2.23E-39 | 0.602681 | 1.63E-47 | 0.48162  | 1.72E-28 |
| 0.73425  | 0.488491 | 2.23E-29 | 0.197628 | 1.69E-05 | 0.36251  | 5.98E-16 | 0.093581 | 0.04325  |
| 4.70E-45 | 0.777886 | 7.21E-96 | 0.538901 | 1.56E-36 | 0.538759 | 1.64E-36 | 0.619309 | 8.45E-51 |
| 9.13E-17 | 0.673286 | 5.79E-63 | 0.31905  | 1.65E-12 | 0.30895  | 8.71E-12 | 0.300321 | 3.45E-11 |
| 7.48E-31 | 0.715151 | 2.43E-74 | 0.458104 | 1.32E-25 | 0.485035 | 6.26E-29 | 0.506702 | 7.94E-32 |
| 4.90E-43 | 0.843378 | #####    | 0.652228 | 6.38E-58 | 0.655718 | 9.93E-59 | 0.648735 | 4.00E-57 |
| 6.40E-37 | 0.771476 | 2.34E-93 | 0.607494 | 1.91E-48 | 0.613502 | 1.25E-49 | 0.539126 | 1.44E-36 |
| 1.47E-51 | 0.668777 | 7.54E-62 | 0.555716 | 3.36E-39 | 0.392484 | 1.20E-18 | 0.486462 | 4.09E-29 |
| 0.0009   | 0.632181 | 1.76E-53 | 0.355236 | 2.46E-15 | 0.41351  | 1.03E-20 | 0.233498 | 3.34E-07 |
| 0.12552  | 0.634832 | 4.74E-54 | 0.389969 | 2.07E-18 | 0.445651 | 3.63E-24 | 0.188853 | 4.00E-05 |
| 4.14E-36 | 0.822505 | #####    | 0.585917 | 2.17E-44 | 0.559423 | 8.27E-40 | 0.587798 | 9.89E-45 |
| 1.33E-21 | 0.577398 | 7.16E-43 | 0.353595 | 3.36E-15 | 0.359703 | 1.04E-15 | 0.250252 | 4.23E-08 |
| 7.89E-22 | 0.667371 | 1.66E-61 | 0.47966  | 3.04E-28 | 0.470072 | 4.78E-27 | 0.531352 | 2.20E-35 |
| 1.64E-17 | 0.649585 | 2.57E-57 | 0.510833 | 2.11E-32 | 0.511672 | 1.61E-32 | 0.310269 | 7.04E-12 |
| 0.03289  | 0.527009 | 9.78E-35 | 0.329521 | 2.73E-13 | 0.427337 | 3.73E-22 | 0.290193 | 1.63E-10 |
| 1.26E-56 | 0.841868 | #####    | 0.554832 | 4.68E-39 | 0.528963 | 5.01E-35 | 0.571472 | 7.68E-42 |
| 0.03649  | 0.495554 | 2.61E-30 | 0.319691 | 1.48E-12 | 0.321955 | 1.01E-12 | 0.26551  | 5.63E-09 |
| 2.06E-58 | 0.773751 | 3.07E-94 | 0.586154 | 1.97E-44 | 0.55013  | 2.68E-38 | 0.661556 | 4.18E-60 |
| 1.94E-27 | 0.89644  | #####    | 0.601944 | 2.26E-47 | 0.607316 | 2.07E-48 | 0.575598 | 1.48E-42 |
| 1.04E-11 | 0.58417  | 4.48E-44 | 0.439345 | 1.85E-23 | 0.386225 | 4.62E-18 | 0.242806 | 1.08E-07 |
| 4.62E-06 | 0.70587  | 1.21E-71 | 0.429804 | 2.03E-22 | 0.43635  | 3.95E-23 | 0.386328 | 4.52E-18 |
| 0.0038   | 0.707874 | 3.22E-72 | 0.337436 | 6.71E-14 | 0.476933 | 6.72E-28 | 0.25348  | 2.79E-08 |
| 3.63E-30 | 0.637239 | 1.43E-54 | 0.427232 | 3.83E-22 | 0.393324 | 9.95E-19 | 0.45556  | 2.62E-25 |
| 0.15969  | 0.549861 | 2.96E-38 | 0.360153 | 9.49E-16 | 0.417606 | 3.91E-21 | 0.232701 | 3.67E-07 |
| 1.79E-11 | 0.626827 | 2.37E-52 | 0.321273 | 1.13E-12 | 0.296729 | 6.02E-11 | 0.524689 | 2.15E-34 |
| 1.95E-16 | 0.708125 | 2.73E-72 | 0.503071 | 2.51E-31 | 0.572587 | 4.94E-42 | 0.475014 | 1.17E-27 |
| 1.04E-13 | 0.644399 | 3.79E-56 | 0.41124  | 1.75E-20 | 0.389739 | 2.17E-18 | 0.273968 | 1.74E-09 |
| 1.47E-21 | 0.823351 | #####    | 0.496558 | 1.91E-30 | 0.508109 | 5.06E-32 | 0.508709 | 4.18E-32 |
| 0.00011  | 0.723846 | 5.77E-77 | 0.432895 | 9.43E-23 | 0.538234 | 1.98E-36 | 0.337243 | 6.95E-14 |
| 4.47E-33 | 0.779449 | 1.71E-96 | 0.576043 | 1.24E-42 | 0.550809 | 2.09E-38 | 0.538655 | 1.70E-36 |
| 0.00043  | 0.72305  | 1.01E-76 | 0.410043 | 2.31E-20 | 0.443033 | 7.16E-24 | 0.315228 | 3.12E-12 |
| 8.88E-42 | 0.703903 | 4.35E-71 | 0.574396 | 2.40E-42 | 0.513196 | 9.79E-33 | 0.644547 | 3.51E-56 |
| 2.35E-08 | 0.715895 | 1.46E-74 | 0.377478 | 2.91E-17 | 0.423324 | 9.93E-22 | 0.435668 | 4.70E-23 |
| 8.09E-19 | 0.875391 | #####    | 0.552296 | 1.20E-38 | 0.547301 | 7.58E-38 | 0.507088 | 7.02E-32 |
| 2.42E-11 | 0.624414 | 7.55E-52 | 0.521192 | 6.98E-34 | 0.561251 | 4.12E-40 | 0.416749 | 4.80E-21 |
| 0.60015  | 0.499642 | 7.35E-31 | 0.337542 | 6.58E-14 | 0.360875 | 8.24E-16 | 0.179558 | 9.55E-05 |
| 6.21E-33 | 0.691526 | 1.11E-67 | 0.461619 | 5.04E-26 | 0.350719 | 5.80E-15 | 0.453435 | 4.64E-25 |
| 5.75E-29 | 0.697111 | 3.39E-69 | 0.419586 | 2.44E-21 | 0.324954 | 6.03E-13 | 0.376957 | 3.24E-17 |
| 0.1205   | 0.550184 | 2.63E-38 | 0.449235 | 1.42E-24 | 0.430156 | 1.86E-22 | 0.321376 | 1.11E-12 |
| 6.28E-09 | 0.682637 | 2.44E-65 | 0.49708  | 1.63E-30 | 0.531943 | 1.79E-35 | 0.362345 | 6.18E-16 |
| 8.16E-11 | 0.59982  | 5.74E-47 | 0.489961 | 1.43E-29 | 0.41298  | 1.16E-20 | 0.360441 | 8.97E-16 |

|          |          |          |          |          |          |          |          |          |
|----------|----------|----------|----------|----------|----------|----------|----------|----------|
| 1.73E-34 | 0.873968 | #####    | 0.62969  | 5.93E-53 | 0.624531 | 7.14E-52 | 0.546314 | 1.09E-37 |
| 0.00012  | 0.613133 | 1.48E-49 | 0.381564 | 1.24E-17 | 0.424704 | 7.10E-22 | 0.300553 | 3.32E-11 |
| 5.54E-10 | 0.728259 | 2.45E-78 | 0.498142 | 1.17E-30 | 0.587767 | 1.00E-44 | 0.389247 | 2.41E-18 |
| 0.29833  | 0.529095 | 4.79E-35 | 0.254538 | 2.43E-08 | 0.300119 | 3.56E-11 | 0.125411 | 0.00666  |
| 3.84E-30 | 0.779108 | 2.34E-96 | 0.582664 | 8.35E-44 | 0.557413 | 1.77E-39 | 0.521151 | 7.08E-34 |
| 1.28E-15 | 0.472502 | 2.40E-27 | 0.292862 | 1.09E-10 | 0.201983 | 1.09E-05 | 0.201097 | 1.19E-05 |
| 5.27E-26 | 0.701038 | 2.77E-70 | 0.491034 | 1.03E-29 | 0.537467 | 2.59E-36 | 0.568932 | 2.09E-41 |
| 1.48E-25 | 0.810037 | #####    | 0.582379 | 9.39E-44 | 0.620091 | 5.85E-51 | 0.610438 | 5.06E-49 |
| 2.05E-37 | 0.71086  | 4.42E-73 | 0.47323  | 1.95E-27 | 0.457984 | 1.36E-25 | 0.57155  | 7.45E-42 |
| 0.00014  | 0.543134 | 3.43E-37 | 0.350711 | 5.81E-15 | 0.332647 | 1.58E-13 | 0.235152 | 2.74E-07 |
| 3.04E-31 | 0.780327 | 7.58E-97 | 0.496204 | 2.13E-30 | 0.559952 | 6.76E-40 | 0.537527 | 2.54E-36 |
| 3.87E-33 | 0.726483 | 8.81E-78 | 0.509853 | 2.89E-32 | 0.471815 | 2.92E-27 | 0.464756 | 2.12E-26 |
| 1.99E-13 | 0.747445 | 1.26E-84 | 0.449067 | 1.48E-24 | 0.436397 | 3.91E-23 | 0.364408 | 4.11E-16 |
| 0.10187  | -0.55364 | 7.30E-39 | -0.26014 | 1.16E-08 | -0.41564 | 6.24E-21 | -0.28121 | 6.17E-10 |
| 0.71889  | 0.630142 | 4.76E-53 | 0.293703 | 9.59E-11 | 0.398456 | 3.21E-19 | 0.138791 | 0.00265  |
| 3.41E-13 | 0.635715 | 3.06E-54 | 0.380837 | 1.44E-17 | 0.372562 | 7.99E-17 | 0.391862 | 1.37E-18 |
| 2.80E-13 | 0.684806 | 6.66E-66 | 0.368768 | 1.72E-16 | 0.42982  | 2.02E-22 | 0.373862 | 6.13E-17 |
| 8.81E-34 | 0.674483 | 2.91E-63 | 0.447807 | 2.06E-24 | 0.523494 | 3.22E-34 | 0.503169 | 2.43E-31 |
| 1.24E-15 | 0.723503 | 7.35E-77 | 0.550156 | 2.66E-38 | 0.529538 | 4.11E-35 | 0.434255 | 6.70E-23 |
| 5.81E-16 | 0.615259 | 5.56E-50 | 0.572197 | 5.76E-42 | 0.536796 | 3.28E-36 | 0.390673 | 1.77E-18 |
| 3.41E-24 | 0.664845 | 6.81E-61 | 0.470592 | 4.12E-27 | 0.500393 | 5.82E-31 | 0.473235 | 1.94E-27 |
| 7.35E-24 | 0.747122 | 1.63E-84 | 0.460607 | 6.66E-26 | 0.498082 | 1.19E-30 | 0.474574 | 1.33E-27 |
| 8.23E-29 | 0.804377 | #####    | 0.623545 | 1.14E-51 | 0.664063 | 1.05E-60 | 0.554274 | 5.76E-39 |
| 3.78E-31 | 0.791539 | #####    | 0.572378 | 5.36E-42 | 0.63868  | 6.94E-55 | 0.641215 | 1.93E-55 |
| 4.76E-27 | 0.674322 | 3.19E-63 | 0.611643 | 2.93E-49 | 0.553959 | 6.48E-39 | 0.557417 | 1.77E-39 |
| 5.42E-12 | 0.656731 | 5.76E-59 | 0.429762 | 2.05E-22 | 0.404105 | 9.00E-20 | 0.367157 | 2.38E-16 |
| 1.51E-48 | 0.745924 | 4.16E-84 | 0.498506 | 1.05E-30 | 0.480026 | 2.74E-28 | 0.586206 | 1.92E-44 |
| 4.87E-27 | 0.812995 | #####    | 0.522783 | 4.09E-34 | 0.573846 | 2.99E-42 | 0.421647 | 1.49E-21 |
| 7.95E-15 | 0.737561 | 2.57E-81 | 0.525413 | 1.68E-34 | 0.520142 | 9.91E-34 | 0.351652 | 4.86E-15 |
| 8.67E-20 | 0.726257 | 1.04E-77 | 0.561893 | 3.22E-40 | 0.595519 | 3.72E-46 | 0.513873 | 7.85E-33 |
| 2.00E-29 | 0.678615 | 2.63E-64 | 0.48252  | 1.32E-28 | 0.44764  | 2.16E-24 | 0.542064 | 5.04E-37 |
| 1.90E-43 | 0.662623 | 2.33E-60 | 0.620083 | 5.88E-51 | 0.526513 | 1.16E-34 | 0.579109 | 3.58E-43 |
| 1.57E-09 | 0.692596 | 5.72E-68 | 0.507415 | 6.32E-32 | 0.553009 | 9.24E-39 | 0.382936 | 9.29E-18 |
| 6.68E-16 | 0.520677 | 8.29E-34 | 0.313016 | 4.49E-12 | 0.236032 | 2.47E-07 | 0.255679 | 2.10E-08 |
| 3.85E-16 | 0.709806 | 8.94E-73 | 0.437824 | 2.72E-23 | 0.432431 | 1.06E-22 | 0.435602 | 4.78E-23 |
| 0.00909  | 0.612691 | 1.81E-49 | 0.526789 | 1.05E-34 | 0.529119 | 4.75E-35 | 0.247265 | 6.18E-08 |
| 1.36E-13 | 0.711179 | 3.57E-73 | 0.632045 | 1.88E-53 | 0.526349 | 1.22E-34 | 0.277457 | 1.06E-09 |
| 0.40973  | 0.601042 | 3.36E-47 | 0.440205 | 1.48E-23 | 0.46198  | 4.57E-26 | 0.303352 | 2.14E-11 |
| 1.34E-47 | 0.754181 | 5.69E-87 | 0.624242 | 8.20E-52 | 0.600329 | 4.60E-47 | 0.66104  | 5.55E-60 |
| 6.76E-08 | 0.755841 | 1.46E-87 | 0.522967 | 3.85E-34 | 0.565442 | 8.18E-41 | 0.450913 | 9.09E-25 |
| 1.48E-05 | 0.563668 | 1.63E-40 | 0.431864 | 1.22E-22 | 0.385499 | 5.39E-18 | 0.192848 | 2.72E-05 |
| 1.29E-28 | 0.507781 | 5.62E-32 | 0.563026 | 2.08E-40 | 0.465429 | 1.76E-26 | 0.452453 | 6.03E-25 |
| 8.99E-14 | 0.680716 | 7.63E-65 | 0.540867 | 7.74E-37 | 0.565776 | 7.19E-41 | 0.427424 | 3.65E-22 |
| 4.45E-42 | 0.758935 | 1.13E-88 | 0.61181  | 2.71E-49 | 0.603945 | 9.33E-48 | 0.594411 | 5.98E-46 |
| 0.08916  | 0.519041 | 1.43E-33 | 0.510896 | 2.07E-32 | 0.502783 | 2.75E-31 | 0.230643 | 4.68E-07 |

|          |          |          |          |          |          |          |          |          |
|----------|----------|----------|----------|----------|----------|----------|----------|----------|
| 6.64E-07 | 0.674653 | 2.64E-63 | 0.412171 | 1.41E-20 | 0.512585 | 1.19E-32 | 0.396262 | 5.21E-19 |
| 5.35E-12 | 0.822588 | #####    | 0.552834 | 9.86E-39 | 0.614696 | 7.22E-50 | 0.445756 | 3.53E-24 |
| 9.36E-20 | 0.538967 | 1.52E-36 | 0.494849 | 3.24E-30 | 0.421824 | 1.43E-21 | 0.40766  | 4.00E-20 |
| 9.78E-09 | 0.610594 | 4.72E-49 | 0.492319 | 7.01E-30 | 0.529818 | 3.73E-35 | 0.392814 | 1.11E-18 |
| 5.46E-22 | 0.611069 | 3.80E-49 | 0.575554 | 1.51E-42 | 0.622645 | 1.75E-51 | 0.503312 | 2.33E-31 |
| 2.23E-16 | 0.753915 | 7.07E-87 | 0.603564 | 1.11E-47 | 0.644779 | 3.11E-56 | 0.511166 | 1.89E-32 |
| 5.80E-17 | 0.609712 | 7.03E-49 | 0.630983 | 3.16E-53 | 0.515925 | 4.01E-33 | 0.404331 | 8.55E-20 |
| 9.09E-12 | 0.602391 | 1.86E-47 | 0.448839 | 1.57E-24 | 0.408759 | 3.10E-20 | 0.369668 | 1.44E-16 |
| 0.04657  | 0.583102 | 6.97E-44 | 0.521259 | 6.83E-34 | 0.543377 | 3.14E-37 | 0.373673 | 6.37E-17 |
| 6.02E-10 | 0.713968 | 5.44E-74 | 0.454577 | 3.42E-25 | 0.518763 | 1.57E-33 | 0.333901 | 1.26E-13 |
| 1.05E-25 | 0.683867 | 1.17E-65 | 0.447894 | 2.02E-24 | 0.424028 | 8.37E-22 | 0.475688 | 9.62E-28 |
| 2.22E-25 | 0.712628 | 1.35E-73 | 0.539012 | 1.50E-36 | 0.558607 | 1.13E-39 | 0.465658 | 1.65E-26 |
| 9.69E-20 | 0.795591 | #####    | 0.605477 | 4.72E-48 | 0.642935 | 8.01E-56 | 0.484993 | 6.34E-29 |
| 0.00028  | 0.676033 | 1.19E-63 | 0.463001 | 3.45E-26 | 0.542602 | 4.16E-37 | 0.324481 | 6.54E-13 |
| 0.00784  | 0.649703 | 2.41E-57 | 0.591541 | 2.04E-45 | 0.558046 | 1.39E-39 | 0.20115  | 1.19E-05 |
| 3.31E-12 | 0.582284 | 9.76E-44 | 0.482838 | 1.20E-28 | 0.361875 | 6.78E-16 | 0.420266 | 2.07E-21 |
| 0.00112  | 0.509004 | 3.80E-32 | 0.416736 | 4.81E-21 | 0.363978 | 4.48E-16 | 0.252864 | 3.02E-08 |
| 6.93E-13 | 0.65597  | 8.67E-59 | 0.588458 | 7.49E-45 | 0.554663 | 4.98E-39 | 0.458833 | 1.08E-25 |
| 1.33E-34 | 0.858386 | #####    | 0.609378 | 8.18E-49 | 0.632662 | 1.39E-53 | 0.642115 | 1.22E-55 |
| 2.83E-10 | 0.563878 | 1.50E-40 | 0.462287 | 4.20E-26 | 0.542369 | 4.52E-37 | 0.379101 | 2.08E-17 |
| 5.13E-26 | 0.646973 | 1.00E-56 | 0.538108 | 2.06E-36 | 0.531669 | 1.97E-35 | 0.58729  | 1.22E-44 |
| 3.10E-50 | 0.716376 | 1.05E-74 | 0.570708 | 1.04E-41 | 0.537573 | 2.50E-36 | 0.642584 | 9.59E-56 |
| 2.91E-16 | 0.597422 | 1.63E-46 | 0.550247 | 2.57E-38 | 0.55518  | 4.11E-39 | 0.433663 | 7.78E-23 |
| 4.57E-07 | 0.654467 | 1.94E-58 | 0.488639 | 2.13E-29 | 0.474042 | 1.54E-27 | 0.339795 | 4.38E-14 |
| 1.80E-05 | 0.645872 | 1.77E-56 | 0.470797 | 3.89E-27 | 0.55261  | 1.07E-38 | 0.330608 | 2.26E-13 |
| 1.33E-14 | 0.745133 | 7.72E-84 | 0.508393 | 4.62E-32 | 0.487605 | 2.91E-29 | 0.478631 | 4.11E-28 |
| 1.45E-25 | 0.683603 | 1.37E-65 | 0.660136 | 9.10E-60 | 0.624549 | 7.08E-52 | 0.557167 | 1.94E-39 |
| 0.08802  | 0.500673 | 5.33E-31 | 0.293844 | 9.39E-11 | 0.387535 | 3.49E-18 | 0.14901  | 0.00124  |
| 1.03E-37 | 0.711269 | 3.36E-73 | 0.600582 | 4.11E-47 | 0.550622 | 2.24E-38 | 0.565501 | 8.00E-41 |
| 2.23E-10 | 0.675381 | 1.73E-63 | 0.600679 | 3.94E-47 | 0.635365 | 3.64E-54 | 0.50694  | 7.36E-32 |
| 1.80E-05 | 0.583592 | 5.69E-44 | 0.394376 | 7.90E-19 | 0.479025 | 3.66E-28 | 0.309994 | 7.36E-12 |
| 0.00034  | 0.612233 | 2.24E-49 | 0.458172 | 1.29E-25 | 0.468582 | 7.27E-27 | 0.240913 | 1.36E-07 |
| 0.55206  | 0.475416 | 1.04E-27 | 0.362129 | 6.45E-16 | 0.330146 | 2.45E-13 | 0.143373 | 0.0019   |
| 1.09E-32 | 0.755471 | 1.98E-87 | 0.577579 | 6.66E-43 | 0.569637 | 1.59E-41 | 0.537687 | 2.40E-36 |
| 2.11E-06 | 0.704786 | 2.45E-71 | 0.384517 | 6.64E-18 | 0.413919 | 9.34E-21 | 0.359916 | 9.94E-16 |
| 9.35E-30 | 0.665723 | 4.18E-61 | 0.374718 | 5.14E-17 | 0.396021 | 5.50E-19 | 0.412736 | 1.23E-20 |
| 2.21E-17 | 0.66735  | 1.68E-61 | 0.473449 | 1.83E-27 | 0.499847 | 6.90E-31 | 0.412006 | 1.46E-20 |
| 3.74E-07 | 0.67828  | 3.20E-64 | 0.492276 | 7.10E-30 | 0.440569 | 1.35E-23 | 0.222129 | 1.25E-06 |
| 1.67E-17 | 0.735348 | 1.35E-80 | 0.657611 | 3.58E-59 | 0.564956 | 9.88E-41 | 0.478298 | 4.52E-28 |
| 1.55E-07 | 0.560609 | 5.26E-40 | 0.463089 | 3.36E-26 | 0.526275 | 1.26E-34 | 0.275229 | 1.46E-09 |
| 1.12E-34 | 0.666128 | 3.33E-61 | 0.566368 | 5.71E-41 | 0.526084 | 1.34E-34 | 0.610556 | 4.80E-49 |
| 0.00028  | 0.449145 | 1.45E-24 | 0.418033 | 3.54E-21 | 0.403951 | 9.32E-20 | 0.295635 | 7.13E-11 |
| 1.79E-32 | 0.847126 | #####    | 0.626451 | 2.84E-52 | 0.630096 | 4.87E-53 | 0.559902 | 6.89E-40 |
| 1.92E-19 | 0.762136 | 7.69E-90 | 0.613652 | 1.17E-49 | 0.603103 | 1.36E-47 | 0.582276 | 9.79E-44 |
| 0.0019   | 0.653755 | 2.83E-58 | 0.490615 | 1.17E-29 | 0.454153 | 3.83E-25 | 0.373183 | 7.04E-17 |



|          |          |          |          |          |          |          |          |          |
|----------|----------|----------|----------|----------|----------|----------|----------|----------|
| 0.0002   | 0.165025 | 0.00034  | 0.14129  | 0.00221  | 0.228341 | 6.12E-07 | -0.00827 | 0.85853  |
| 0.08055  | -0.24597 | 7.28E-08 | -0.19099 | 3.26E-05 | -0.26603 | 5.25E-09 | -0.17605 | 0.00013  |
| 0.10267  | 0.152268 | 0.00096  | 0.099062 | 0.03233  | 0.106585 | 0.02124  | 0.075307 | 0.10409  |
| 0.02147  | 0.193138 | 2.64E-05 | 0.142926 | 0.00196  | 0.129926 | 0.00492  | 0.176614 | 0.00012  |
| 5.97E-18 | 0.407209 | 4.43E-20 | 0.328692 | 3.16E-13 | 0.177853 | 0.00011  | 0.276811 | 1.16E-09 |
| 1.05E-12 | 0.040152 | 0.38665  | -0.10376 | 0.02493  | 0.039155 | 0.39856  | -0.184   | 6.34E-05 |
| 0.00478  | 0.110765 | 0.01664  | 0.129669 | 0.00501  | 0.197109 | 1.78E-05 | 0.136851 | 0.00304  |
| 5.25E-06 | -0.13145 | 0.00444  | -0.04762 | 0.30444  | 0.026578 | 0.5667   | -0.13453 | 0.00358  |
| 0.00013  | 0.120042 | 0.00942  | 0.095528 | 0.03906  | 0.17669  | 0.00012  | 0.082479 | 0.07497  |
| 0.00883  | -0.09273 | 0.04519  | -0.04109 | 0.37566  | -0.09087 | 0.04971  | -0.02199 | 0.63548  |
| 2.27E-13 | -0.07712 | 0.09601  | 0.035679 | 0.44176  | 0.124275 | 0.00717  | -0.11107 | 0.01634  |
| 0.00791  | 0.009201 | 0.8428   | -0.00136 | 0.97664  | 0.053354 | 0.24985  | 0.031304 | 0.49978  |
| 0.63741  | 0.136931 | 0.00303  | 0.175673 | 0.00014  | 0.21269  | 3.53E-06 | 0.103147 | 0.02581  |
| 0.00016  | -0.07646 | 0.09888  | -0.14237 | 0.00204  | -0.09632 | 0.03746  | -0.14402 | 0.00181  |
| 0.01763  | -0.09965 | 0.03131  | -0.12039 | 0.00921  | -0.17009 | 0.00022  | -0.06156 | 0.18417  |
| 0.87882  | 0.199772 | 1.36E-05 | 0.08498  | 0.06653  | 0.093267 | 0.04396  | 0.031123 | 0.50226  |
| 0.00475  | 0.099269 | 0.03197  | 0.034841 | 0.45257  | 0.063389 | 0.17145  | 0.102149 | 0.02729  |
| 0.01571  | -0.12192 | 0.00835  | -0.22553 | 8.47E-07 | -0.27641 | 1.23E-09 | -0.09971 | 0.03122  |
| 0.46461  | 0.086132 | 0.06292  | 0.086058 | 0.06314  | 0.128858 | 0.00529  | 0.004504 | 0.92267  |
| 0.08322  | 0.249004 | 4.96E-08 | 0.172945 | 0.00017  | 0.115495 | 0.01251  | -0.00913 | 0.84403  |
| 3.49E-05 | -0.12311 | 0.00773  | 0.006897 | 0.88183  | -0.13372 | 0.00379  | 0.057445 | 0.21531  |
| 2.33E-06 | 0.103916 | 0.02472  | 0.108613 | 0.01888  | 0.231241 | 4.36E-07 | 0.015262 | 0.74219  |
| 1.56E-08 | 0.193982 | 2.43E-05 | 0.091011 | 0.04935  | 0.231438 | 4.26E-07 | 0.038508 | 0.4064   |
| 6.62E-15 | 0.343387 | 2.27E-14 | 0.263404 | 7.50E-09 | 0.213142 | 3.36E-06 | 0.166859 | 0.00029  |
| 0.80535  | 0.188635 | 4.09E-05 | 0.052083 | 0.26133  | 0.079939 | 0.08442  | 0.087816 | 0.05792  |
| 3.13E-08 | 0.000549 | 0.99056  | 0.035122 | 0.44893  | -0.01266 | 0.78501  | 0.08732  | 0.05936  |
| 0.16426  | -0.04612 | 0.32001  | -0.0032  | 0.94495  | -0.04378 | 0.34519  | 0.167055 | 0.00029  |
| 8.51E-17 | -0.19185 | 3.00E-05 | -0.03827 | 0.40935  | -0.0438  | 0.34496  | -0.21571 | 2.54E-06 |
| 7.23E-06 | 0.094293 | 0.04167  | 0.154508 | 0.00081  | 0.136734 | 0.00307  | 0.124065 | 0.00727  |
| 0.11628  | 0.06402  | 0.16722  | 0.078412 | 0.09054  | 0.161574 | 0.00046  | 0.101407 | 0.02844  |
| 1.90E-07 | -0.10963 | 0.01779  | 0.066763 | 0.14973  | -0.10955 | 0.01787  | 0.143197 | 0.00192  |
| 0.60776  | -0.03149 | 0.49723  | -0.06132 | 0.18587  | 0.033447 | 0.47088  | 0.029467 | 0.52528  |
| 0.00077  | -0.11385 | 0.01383  | -0.06556 | 0.15723  | -0.05487 | 0.23661  | -0.10885 | 0.01862  |
| 0.13073  | 0.034292 | 0.45973  | 0.140966 | 0.00226  | 0.07349  | 0.11274  | 0.126527 | 0.00618  |
| 0.4905   | 0.167639 | 0.00027  | 0.370212 | 1.29E-16 | 0.273633 | 1.83E-09 | 0.177113 | 0.00012  |
| 0.00013  | 0.348646 | 8.57E-15 | 0.410531 | 2.06E-20 | 0.307688 | 1.07E-11 | 0.322895 | 8.58E-13 |
| 0.49753  | 0.279594 | 7.80E-10 | 0.371949 | 9.05E-17 | 0.355911 | 2.16E-15 | 0.154936 | 0.00078  |
| 0.70643  | 0.152745 | 0.00093  | 0.066929 | 0.14871  | 0.176883 | 0.00012  | 0.048193 | 0.29867  |
| 6.10E-14 | -0.05381 | 0.24583  | -0.15511 | 0.00077  | -0.05322 | 0.25103  | -0.23006 | 5.01E-07 |
| 0.19555  | 0.016208 | 0.72683  | -0.09129 | 0.04866  | 0.03682  | 0.4273   | 0.001926 | 0.96689  |
| 0.95407  | 0.110174 | 0.01723  | 0.05892  | 0.20374  | 0.126842 | 0.00605  | 0.119155 | 0.00996  |
| 0.00383  | -0.05897 | 0.20338  | -0.06649 | 0.1514   | -0.07655 | 0.09848  | -0.12457 | 0.00703  |
| 0.69528  | 0.013752 | 0.76693  | 0.096425 | 0.03725  | 0.040322 | 0.38464  | 0.033241 | 0.47361  |
| 0.46953  | 0.068557 | 0.13906  | 0.055893 | 0.22799  | 0.042689 | 0.35733  | 0.102933 | 0.02612  |
| 0.2445   | 0.02521  | 0.58685  | 0.010291 | 0.82446  | 0.000998 | 0.98283  | 0.049854 | 0.28231  |

|          |          |          |          |          |          |          |          |          |
|----------|----------|----------|----------|----------|----------|----------|----------|----------|
| 0.01172  | 0.080602 | 0.08186  | 0.064291 | 0.16543  | 0.016482 | 0.7224   | 0.071331 | 0.12373  |
| 0.00796  | 0.10521  | 0.02298  | 0.064095 | 0.16672  | 0.105024 | 0.02322  | 0.001787 | 0.96928  |
| 0.00047  | 0.242715 | 1.09E-07 | 0.194621 | 2.28E-05 | 0.175085 | 0.00014  | 0.212358 | 3.66E-06 |
| 0.0015   | 0.025479 | 0.58285  | -0.07086 | 0.12623  | -0.03754 | 0.41831  | -0.12781 | 0.00568  |
| 0.72362  | 0.062596 | 0.17688  | 0.03495  | 0.45116  | 0.062338 | 0.17868  | 0.014081 | 0.76152  |
| 0.24819  | 0.14225  | 0.00206  | -0.00919 | 0.84305  | 0.07746  | 0.09453  | -0.00883 | 0.84904  |
| 0.85679  | 0.081711 | 0.07773  | 0.020134 | 0.66431  | 0.050825 | 0.27304  | 0.031751 | 0.49368  |
| 0.13838  | 0.002822 | 0.95151  | 0.009135 | 0.84393  | -0.0173  | 0.70924  | 0.044424 | 0.33811  |
| 0.3745   | -0.03873 | 0.40365  | -0.04447 | 0.33756  | -0.03545 | 0.4447   | -0.03651 | 0.43122  |
| 0.12641  | -0.0409  | 0.37783  | -0.03399 | 0.46365  | 0.095139 | 0.03987  | -0.01401 | 0.76268  |
| 0.26284  | 0.051011 | 0.27128  | 0.026541 | 0.56724  | 0.057469 | 0.21512  | -0.01942 | 0.67544  |
| 0.42181  | 0.028858 | 0.53389  | -0.00766 | 0.86879  | 0.107197 | 0.0205   | 0.042277 | 0.36199  |
| 0.32571  | -0.16322 | 0.0004   | -0.12356 | 0.00751  | -0.12946 | 0.00508  | -0.08979 | 0.05249  |
| 0.02334  | 0.015459 | 0.73898  | 0.065653 | 0.15663  | 0.062756 | 0.17578  | -0.02913 | 0.53006  |
| 0.14758  | -0.02976 | 0.5212   | -0.04331 | 0.35041  | -0.05084 | 0.27292  | -0.0675  | 0.14524  |
| 0.02508  | -0.00509 | 0.91271  | -0.04719 | 0.30886  | -0.02987 | 0.51957  | -0.05889 | 0.20397  |
| 0.27906  | -0.00375 | 0.93552  | -0.12178 | 0.00843  | -0.0706  | 0.12763  | -0.03248 | 0.48382  |
| 0.12975  | 0.055903 | 0.2279   | -0.03511 | 0.44911  | -0.02533 | 0.585    | -0.04364 | 0.3467   |
| 0.51758  | 0.079118 | 0.08766  | 0.071851 | 0.12101  | 0.21183  | 3.88E-06 | 0.008996 | 0.84627  |
| 0.02779  | 0.212953 | 3.43E-06 | 0.083161 | 0.07259  | 0.156127 | 0.00071  | -0.03858 | 0.40553  |
| 0.02723  | 0.150381 | 0.00112  | 0.165643 | 0.00032  | 0.132195 | 0.00421  | 0.138801 | 0.00265  |
| 0.38501  | -0.00446 | 0.92347  | 0.01218  | 0.79293  | 0.050489 | 0.27622  | 0.046877 | 0.31209  |
| 0.09796  | 0.083022 | 0.07307  | 0.094241 | 0.04179  | 0.079387 | 0.08659  | 0.077467 | 0.0945   |
| 0.07034  | 0.152478 | 0.00095  | 0.115081 | 0.01283  | 0.091746 | 0.04753  | 0.142546 | 0.00202  |
| 0.22081  | 0.102616 | 0.02659  | 0.005751 | 0.90135  | 0.072044 | 0.12001  | -0.0295  | 0.52482  |
| 3.04E-09 | 0.11851  | 0.01037  | 0.183871 | 6.42E-05 | 0.1377   | 0.00286  | 0.217672 | 2.05E-06 |
| 0.67506  | -0.03888 | 0.40184  | -0.0464  | 0.31701  | 0.099078 | 0.03231  | -0.04488 | 0.33319  |
| 3.82E-08 | 0.244118 | 9.18E-08 | 0.202923 | 9.89E-06 | 0.16299  | 0.00041  | 0.315917 | 2.78E-12 |
| 0.04733  | 0.018337 | 0.69267  | 0.007997 | 0.86315  | 0.121904 | 0.00836  | -0.03958 | 0.3935   |
| 0.40177  | 0.069332 | 0.13464  | 0.084811 | 0.06708  | 0.052902 | 0.25389  | 0.111565 | 0.01587  |
| 0.85067  | 0.041838 | 0.367    | 0.011885 | 0.79782  | -0.00509 | 0.91272  | -0.00434 | 0.9255   |
| 0.30448  | -0.10339 | 0.02547  | -0.07008 | 0.13046  | -0.10647 | 0.02138  | -0.08786 | 0.05781  |
| 0.28262  | 0.027669 | 0.55088  | -0.01152 | 0.80397  | -0.03466 | 0.45498  | -0.03564 | 0.44228  |
| 0.17911  | 0.241273 | 1.30E-07 | 0.065237 | 0.15928  | 0.115203 | 0.01273  | 0.112334 | 0.01515  |
| 0.48752  | 0.055473 | 0.23151  | 0.084334 | 0.06863  | 0.059793 | 0.19711  | 0.008818 | 0.84928  |
| 0.0329   | 0.010399 | 0.82266  | 0.062502 | 0.17754  | 0.058396 | 0.2078   | -0.07167 | 0.12198  |
| 0.46092  | 0.017539 | 0.7054   | -0.00254 | 0.95633  | 0.043079 | 0.35295  | -0.04192 | 0.36607  |
| 0.65486  | -0.00071 | 0.98785  | 0.058188 | 0.20942  | 0.002469 | 0.95756  | 0.014301 | 0.75791  |
| 0.69135  | 0.098905 | 0.03261  | 0.065173 | 0.15969  | 0.04224  | 0.36242  | 0.089173 | 0.05414  |
| 0.87126  | -0.0037  | 0.93638  | -0.04825 | 0.29808  | -0.0304  | 0.51218  | 0.011718 | 0.80061  |
| 0.79363  | 0.039084 | 0.39942  | 0.019432 | 0.67533  | 0.087149 | 0.05986  | 0.033265 | 0.47329  |
| 0.71728  | 0.005119 | 0.91215  | 0.020823 | 0.65355  | 0.020191 | 0.66341  | 0.03031  | 0.5135   |
| 0.54569  | 0.365318 | 3.43E-16 | 0.238299 | 1.88E-07 | 0.295982 | 6.76E-11 | 0.059546 | 0.19897  |
| 0.00666  | 0.018647 | 0.68775  | -0.04048 | 0.38276  | 0.010715 | 0.81736  | -0.01167 | 0.80142  |
| 0.07212  | 0.096782 | 0.03655  | -0.07125 | 0.12418  | 0.052468 | 0.25781  | -0.03024 | 0.51446  |

|          |          |          |          |          |          |          |          |          |
|----------|----------|----------|----------|----------|----------|----------|----------|----------|
| 4.02E-08 | 0.34005  | 4.18E-14 | 0.139796 | 0.00246  | 0.29023  | 1.62E-10 | -0.05215 | 0.26068  |
| 8.31E-06 | 0.409328 | 2.72E-20 | 0.229608 | 5.28E-07 | 0.289945 | 1.70E-10 | 0.249123 | 4.89E-08 |
| 0.23175  | 0.227106 | 7.06E-07 | 0.142149 | 0.00207  | 0.145484 | 0.00162  | 0.013344 | 0.77364  |
| 0.45657  | -0.20857 | 5.49E-06 | -0.11763 | 0.01096  | -0.15353 | 0.00087  | 0.152493 | 0.00095  |
| 0.96121  | -0.04397 | 0.34312  | -0.05347 | 0.2488   | -0.05072 | 0.27399  | 0.07617  | 0.10017  |
| 0.04886  | -0.00457 | 0.92158  | -0.01901 | 0.68195  | -0.02289 | 0.62168  | -0.05952 | 0.19918  |
| 0.00045  | -0.07813 | 0.09171  | -0.07442 | 0.10823  | -0.06727 | 0.14662  | -0.07598 | 0.10102  |
| 0.79848  | 0.085095 | 0.06616  | 0.005465 | 0.90624  | 0.042672 | 0.35752  | -0.00451 | 0.9226   |
| 0.73611  | 0.217062 | 2.19E-06 | 0.085537 | 0.06476  | 0.080319 | 0.08294  | -0.01526 | 0.74215  |
| 6.83E-05 | -0.15691 | 0.00067  | -0.0096  | 0.83609  | -0.00158 | 0.97289  | -0.12122 | 0.00874  |
| 0.54563  | -0.135   | 0.00347  | -0.15967 | 0.00053  | -0.2669  | 4.66E-09 | -0.14907 | 0.00123  |
| 0.5652   | -0.03934 | 0.39628  | -0.06529 | 0.15894  | -0.04566 | 0.32477  | 0.059457 | 0.19964  |
| 7.05E-06 | -0.05239 | 0.25854  | -0.14891 | 0.00125  | -0.17086 | 0.00021  | -0.16493 | 0.00034  |
| 0.00079  | -0.00637 | 0.89086  | -0.04896 | 0.29104  | -0.06478 | 0.16224  | -0.28231 | 5.26E-10 |
| 0.72466  | -0.05979 | 0.19713  | 0.008998 | 0.84622  | -0.06723 | 0.14689  | 0.015755 | 0.73418  |
| 9.48E-09 | -0.03504 | 0.44998  | -0.07137 | 0.12354  | -0.10843 | 0.01909  | 0.063056 | 0.17371  |
| 2.46E-05 | -0.01013 | 0.82718  | -0.04151 | 0.37076  | 0.110833 | 0.01657  | -0.07947 | 0.08624  |
| 0.0011   | -0.00091 | 0.9844   | 0.138629 | 0.00268  | 0.162563 | 0.00042  | 0.004267 | 0.92673  |
| 0.06044  | -0.08374 | 0.07061  | -0.05109 | 0.27052  | -0.08042 | 0.08256  | 0.0249   | 0.59145  |
| 0.46536  | -0.05869 | 0.20553  | -0.04898 | 0.29088  | -0.0135  | 0.77103  | 0.114921 | 0.01295  |
| 0.00037  | -0.03162 | 0.49551  | 0.023112 | 0.61835  | -0.08066 | 0.08163  | 0.066521 | 0.15121  |
| 0.00166  | -0.00731 | 0.87479  | -0.0506  | 0.27521  | -0.07806 | 0.09199  | 0.057223 | 0.21709  |
| 0.00483  | 0.08398  | 0.06981  | 0.047063 | 0.31016  | 0.107595 | 0.02004  | 0.063348 | 0.17173  |
| 0.00056  | -0.06855 | 0.13911  | 0.006971 | 0.88057  | -0.21157 | 3.99E-06 | 0.059865 | 0.19657  |
| 1.82E-09 | 0.249908 | 4.42E-08 | 0.12834  | 0.00548  | -0.00124 | 0.97871  | 0.319969 | 1.41E-12 |
| 0.00264  | 0.06882  | 0.13755  | 0.014155 | 0.7603   | -0.01096 | 0.81333  | 0.154098 | 0.00083  |
| 0.00321  | 0.080915 | 0.08068  | 0.09627  | 0.03756  | 0.182725 | 7.14E-05 | -0.03279 | 0.47968  |
| 0.01655  | -0.01072 | 0.81736  | -0.0038  | 0.93481  | 0.02577  | 0.57856  | -0.00426 | 0.9269   |
| 0.07977  | 0.452098 | 6.63E-25 | 0.194699 | 2.27E-05 | 0.374148 | 5.78E-17 | 0.056509 | 0.22289  |
| 6.26E-10 | -0.14372 | 0.00185  | -0.08638 | 0.06215  | -0.01832 | 0.69294  | -0.24818 | 5.51E-08 |
| 2.60E-16 | 0.271732 | 2.39E-09 | 0.178591 | 0.0001   | 0.186    | 5.25E-05 | 0.153378 | 0.00088  |
| 0.79608  | 0.1794   | 9.69E-05 | 0.123404 | 0.00759  | 0.132392 | 0.00416  | 0.12271  | 0.00794  |
| 0.02286  | -0.08356 | 0.07122  | -0.06653 | 0.15115  | -0.06121 | 0.1867   | -0.02555 | 0.58179  |
| 4.64E-08 | -0.15672 | 0.00068  | -0.12062 | 0.00907  | -0.05123 | 0.26918  | -0.07836 | 0.09075  |
| 0.14982  | -0.11064 | 0.01676  | -0.06158 | 0.18401  | -0.07671 | 0.09777  | 0.030318 | 0.51338  |
| 0.31348  | -0.36243 | 6.07E-16 | -0.13149 | 0.00442  | -0.17468 | 0.00015  | -0.08778 | 0.05802  |
| 1.91E-08 | 0.019529 | 0.6738   | -0.0478  | 0.30265  | 0.07176  | 0.12148  | -0.03875 | 0.40344  |
| 0.00745  | 0.098196 | 0.03388  | 0.06816  | 0.14137  | 0.168413 | 0.00026  | 0.016369 | 0.72423  |
| 0.17511  | -0.28492 | 3.58E-10 | -0.01036 | 0.82333  | 0.052741 | 0.25534  | -0.08898 | 0.05465  |
| 0.34847  | -0.29489 | 7.99E-11 | -0.22533 | 8.67E-07 | -0.30096 | 3.12E-11 | -0.21022 | 4.61E-06 |
| 7.71E-10 | 0.155932 | 0.00072  | 0.072065 | 0.1199   | 0.092285 | 0.04624  | -0.10137 | 0.0285   |
| 0.00258  | 0.008755 | 0.85033  | 0.005392 | 0.90749  | 0.139719 | 0.00248  | -0.02544 | 0.58345  |
| 0.28021  | 0.096688 | 0.03673  | 0.180186 | 9.02E-05 | 0.268284 | 3.85E-09 | 0.172951 | 0.00017  |
| 3.38E-05 | 0.431249 | 1.42E-22 | 0.195555 | 2.08E-05 | 0.203809 | 9.03E-06 | 0.100839 | 0.02934  |
| 0.02122  | 0.227091 | 7.08E-07 | 0.085597 | 0.06457  | 0.104674 | 0.02369  | 0.023885 | 0.60665  |

|          |           |          |          |          |          |          |          |          |
|----------|-----------|----------|----------|----------|----------|----------|----------|----------|
| 0.00299  | -0.00467  | 0.91985  | 0.048257 | 0.29804  | 0.045956 | 0.3217   | -0.07902 | 0.08806  |
| 2.71E-06 | 0.312553  | 4.84E-12 | 0.200015 | 1.33E-05 | 0.238949 | 1.73E-07 | 0.16932  | 0.00024  |
| 0.54968  | -0.24072  | 1.40E-07 | -0.16306 | 0.0004   | -0.29534 | 7.46E-11 | 0.070319 | 0.12916  |
| 0.08944  | 0.240657  | 1.41E-07 | 0.286658 | 2.77E-10 | 0.403749 | 9.76E-20 | 0.17259  | 0.00018  |
| 0.00163  | 0.240412  | 1.45E-07 | 0.034557 | 0.45627  | 0.072426 | 0.11805  | 0.003704 | 0.93638  |
| 5.41E-05 | 0.091729  | 0.04758  | -0.05996 | 0.19588  | -0.00978 | 0.8331   | -0.10502 | 0.02322  |
| 4.66E-06 | 0.086976  | 0.06037  | 0.092753 | 0.04514  | 0.164536 | 0.00036  | 0.076585 | 0.09833  |
| 0.00024  | 0.149225  | 0.00122  | 0.086393 | 0.06212  | 0.342311 | 2.77E-14 | 0.06842  | 0.13985  |
| 0.05586  | 0.122792  | 0.0079   | 0.188033 | 4.33E-05 | 0.176483 | 0.00013  | 0.069392 | 0.1343   |
| 0.51195  | 0.163454  | 0.00039  | 0.028362 | 0.54094  | 0.143735 | 0.00185  | 0.082535 | 0.07477  |
| 0.00198  | 0.016153  | 0.72771  | 0.082604 | 0.07453  | 0.05822  | 0.20918  | 0.039036 | 0.4      |
| 0.39408  | 0.204175  | 8.69E-06 | 0.145131 | 0.00166  | 0.248457 | 5.32E-08 | 0.083953 | 0.0699   |
| 0.06208  | 0.08608   | 0.06307  | 0.093442 | 0.04356  | 0.204524 | 8.38E-06 | -0.04658 | 0.31511  |
| 0.06049  | -0.36099  | 8.05E-16 | -0.15584 | 0.00073  | -0.23527 | 2.70E-07 | -0.05047 | 0.27641  |
| 0.09489  | 0.057522  | 0.21469  | 0.185847 | 5.33E-05 | 0.189184 | 3.88E-05 | 0.17617  | 0.00013  |
| 4.87E-06 | -0.08575  | 0.06411  | 0.041591 | 0.36984  | 0.075963 | 0.1011   | -0.14344 | 0.00189  |
| 0.3963   | 0.053307  | 0.25027  | 0.102592 | 0.02663  | -0.00628 | 0.89232  | 0.027988 | 0.54629  |
| 0.83214  | 0.047554  | 0.30514  | 0.103592 | 0.02518  | 0.153321 | 0.00089  | -0.02282 | 0.62276  |
| 0.00068  | -0.05974  | 0.19752  | 0.00297  | 0.94897  | -0.05135 | 0.26812  | 0.137032 | 0.003    |
| 0.86584  | 0.183219  | 6.82E-05 | 0.091616 | 0.04785  | 0.136928 | 0.00303  | 0.070443 | 0.12849  |
| 0.25639  | -0.00524  | 0.91003  | -0.02586 | 0.5772   | 0.054256 | 0.24192  | -0.03319 | 0.47428  |
| 0.66589  | 0.002432  | 0.9582   | 0.011054 | 0.81168  | -0.00453 | 0.92222  | -0.03519 | 0.44803  |
| 7.96E-07 | -0.08656  | 0.06163  | -0.11204 | 0.01542  | -0.16928 | 0.00024  | 0.08372  | 0.07068  |
| 6.37E-16 | 0.078354  | 0.09078  | -0.04168 | 0.36881  | 0.041099 | 0.37554  | -0.23134 | 4.31E-07 |
| 1.64E-07 | -0.18143  | 8.05E-05 | -0.13548 | 0.00335  | -0.04659 | 0.31506  | -0.01575 | 0.73433  |
| 7.08E-06 | -0.08437  | 0.06852  | 0.03734  | 0.4208   | -0.03682 | 0.42726  | 0.117598 | 0.01098  |
| 0.00045  | 0.038644  | 0.40475  | 0.027234 | 0.55716  | 0.190513 | 3.41E-05 | 0.015034 | 0.74591  |
| 1.19E-14 | -0.06603  | 0.15427  | 0.016129 | 0.7281   | 0.184529 | 6.03E-05 | -0.10852 | 0.01899  |
| 0.7353   | -3.93E-05 | 0.99932  | 0.081543 | 0.07835  | 0.002422 | 0.95836  | 0.030119 | 0.51616  |
| 0.0748   | 0.038215  | 0.40999  | -0.00283 | 0.95136  | -0.01928 | 0.67774  | -0.05914 | 0.20203  |
| 6.54E-06 | -0.13495  | 0.00348  | -0.09369 | 0.04301  | -0.20019 | 1.31E-05 | 0.001258 | 0.97837  |
| 0.07601  | 0.23673   | 2.27E-07 | 0.178506 | 0.00011  | 0.233171 | 3.47E-07 | -0.01493 | 0.74755  |
| 0.69284  | -0.01541  | 0.73983  | -0.02716 | 0.55819  | -0.01011 | 0.82748  | 0.008336 | 0.85742  |
| 8.08E-09 | 0.166646  | 0.0003   | 0.148433 | 0.0013   | 0.076057 | 0.10068  | 0.192525 | 2.81E-05 |
| 0.06442  | 0.143767  | 0.00184  | 0.152078 | 0.00098  | 0.143635 | 0.00186  | 0.031185 | 0.50142  |
| 2.23E-05 | 0.211903  | 3.85E-06 | 0.153707 | 0.00086  | 0.082659 | 0.07433  | 0.171501 | 0.0002   |
| 1.53E-23 | 0.168929  | 0.00025  | 0.113983 | 0.01372  | -0.0482  | 0.29861  | 0.372895 | 7.47E-17 |
| 0.02568  | 0.048839  | 0.29224  | 0.052987 | 0.25312  | 0.116751 | 0.01157  | 0.022121 | 0.6335   |
| 4.32E-05 | -0.03776  | 0.41554  | 0.070271 | 0.12942  | -0.04719 | 0.30891  | 0.18751  | 4.55E-05 |
| 3.63E-05 | 0.017615  | 0.70419  | 0.026301 | 0.57075  | 0.09533  | 0.03947  | 0.020593 | 0.65713  |
| 0.7132   | -0.01999  | 0.6665   | -0.02887 | 0.53368  | 0.081552 | 0.07831  | 0.098986 | 0.03247  |
| 0.00167  | 0.142261  | 0.00206  | 0.160558 | 0.0005   | 0.187505 | 4.55E-05 | 0.051308 | 0.2685   |
| 0.02612  | 0.052179  | 0.26045  | 0.221948 | 1.27E-06 | 0.221922 | 1.28E-06 | 0.065925 | 0.15491  |
| 0.56686  | 0.005548  | 0.90482  | 0.070826 | 0.12642  | 0.113521 | 0.01411  | 0.037642 | 0.41705  |
| 0.34529  | 0.159924  | 0.00052  | 0.164373 | 0.00036  | 0.239353 | 1.65E-07 | 0.05943  | 0.19985  |

|          |          |          |          |          |          |          |          |          |
|----------|----------|----------|----------|----------|----------|----------|----------|----------|
| 4.48E-07 | -0.00124 | 0.97865  | -0.06689 | 0.14893  | 0.054409 | 0.24059  | 0.009892 | 0.83117  |
| 0.69385  | -0.23302 | 3.54E-07 | -0.28717 | 2.57E-10 | -0.35701 | 1.75E-15 | -0.13871 | 0.00266  |
| 0.00116  | 0.261549 | 9.63E-09 | 0.020832 | 0.65342  | 0.124076 | 0.00726  | 0.151799 | 0.001    |
| 1.15E-13 | 0.13658  | 0.0031   | 0.073252 | 0.11391  | 0.065722 | 0.15619  | 0.235033 | 2.78E-07 |
| 0.05226  | -0.15852 | 0.00059  | -0.17378 | 0.00016  | -0.1165  | 0.01176  | -0.08166 | 0.07792  |
| 0.00289  | 0.232522 | 3.75E-07 | 0.072963 | 0.11534  | 0.204432 | 8.46E-06 | -0.03159 | 0.49586  |
| 0.65551  | 0.054681 | 0.23825  | 0.06637  | 0.15214  | 0.226677 | 7.42E-07 | 0.036563 | 0.43054  |
| 3.82E-05 | 0.050239 | 0.27861  | 0.037279 | 0.42155  | 0.13266  | 0.00408  | -0.03337 | 0.47195  |
| 0.44096  | 0.080274 | 0.08312  | 0.050695 | 0.27426  | 0.051058 | 0.27084  | 0.066491 | 0.15139  |
| 0.00204  | 0.261063 | 1.03E-08 | 0.167775 | 0.00027  | 0.06457  | 0.1636   | 0.041747 | 0.36804  |
| 0.98911  | 0.077409 | 0.09475  | 0.130998 | 0.00457  | 0.13034  | 0.00478  | 0.048326 | 0.29734  |
| 4.15E-06 | 0.221101 | 1.40E-06 | 0.254927 | 2.31E-08 | 0.203639 | 9.19E-06 | 0.198455 | 1.56E-05 |
| 0.36989  | 0.385611 | 5.27E-18 | 0.262672 | 8.28E-09 | 0.325023 | 5.96E-13 | 0.192944 | 2.69E-05 |
| 2.16E-15 | 0.234799 | 2.86E-07 | 0.056648 | 0.22176  | 0.141799 | 0.00213  | -0.13902 | 0.0026   |
| 3.65E-10 | -0.05287 | 0.25416  | -0.00217 | 0.96276  | -0.10496 | 0.02331  | 0.086105 | 0.063    |
| 8.89E-12 | -0.00982 | 0.83232  | 2.76E-05 | 0.99953  | 0.093093 | 0.04435  | -0.16153 | 0.00046  |
| 0.00109  | -0.05524 | 0.2335   | -0.14577 | 0.00158  | -0.17527 | 0.00014  | 0.03419  | 0.46108  |
| 0.04273  | -0.0136  | 0.76943  | -0.12031 | 0.00926  | -0.15231 | 0.00096  | 0.065506 | 0.15756  |
| 0.05646  | -0.04862 | 0.29437  | -0.10666 | 0.02114  | -0.11058 | 0.01682  | 0.005623 | 0.90354  |
| 0.02038  | -0.06929 | 0.13486  | -0.10867 | 0.01883  | -0.13908 | 0.00259  | -0.01515 | 0.74395  |
| 0.8964   | 0.124158 | 0.00723  | -0.01219 | 0.7928   | 0.098817 | 0.03276  | 0.020456 | 0.65927  |
| 0.45693  | -0.34053 | 3.83E-14 | -0.07659 | 0.09831  | -0.20461 | 8.31E-06 | -0.1902  | 3.52E-05 |
| 0.00175  | 0.098747 | 0.03289  | -0.07149 | 0.12291  | -0.01226 | 0.79156  | -0.12349 | 0.00755  |
| 1.72E-06 | -0.05799 | 0.21098  | 0.150032 | 0.00115  | 0.33752  | 6.61E-14 | -0.02752 | 0.55307  |
| 0.398    | 0.083724 | 0.07067  | 0.059725 | 0.19762  | 0.06752  | 0.14515  | 0.015546 | 0.73758  |
| 0.00539  | -0.16273 | 0.00041  | -0.05495 | 0.23592  | -0.06078 | 0.18982  | -0.095   | 0.04016  |
| 0.69909  | 0.140549 | 0.00233  | 0.055838 | 0.22844  | 0.096992 | 0.03614  | 0.036993 | 0.42513  |
| 0.03818  | 0.246426 | 6.87E-08 | 0.25256  | 3.14E-08 | 0.265219 | 5.86E-09 | 0.240678 | 1.40E-07 |
| 0.72707  | -0.00628 | 0.89236  | -0.00782 | 0.86617  | 0.018521 | 0.68974  | -0.0097  | 0.83443  |
| 0.20588  | 0.101247 | 0.02869  | 0.084564 | 0.06788  | -0.00215 | 0.963    | -0.05798 | 0.2111   |
| 0.00034  | 0.098313 | 0.03367  | 0.052175 | 0.26048  | 0.076418 | 0.09907  | 0.029124 | 0.53012  |
| 0.13957  | 0.073187 | 0.11423  | -0.06114 | 0.18717  | -0.02251 | 0.62746  | 0.000894 | 0.98462  |
| 0.94957  | 0.07074  | 0.12688  | 0.073656 | 0.11192  | 0.075248 | 0.10436  | 0.011757 | 0.79995  |
| 0.53438  | 0.05962  | 0.19841  | 0.086621 | 0.06143  | 0.070405 | 0.1287   | 0.024104 | 0.60337  |
| 6.29E-17 | -0.00887 | 0.84842  | 0.073816 | 0.11114  | -0.11747 | 0.01107  | 0.21211  | 3.76E-06 |
| 0.48095  | -0.02194 | 0.63634  | -0.01894 | 0.68316  | 0.011457 | 0.80496  | 0.034767 | 0.45354  |
| 1.87E-20 | 0.27093  | 2.67E-09 | 0.349727 | 6.99E-15 | 0.203795 | 9.04E-06 | 0.375421 | 4.45E-17 |
| 0.20502  | -0.06809 | 0.14177  | -0.00991 | 0.83091  | -0.04786 | 0.30207  | 0.092842 | 0.04493  |
| 0.1242   | 0.095018 | 0.04012  | 0.050804 | 0.27323  | 0.116501 | 0.01175  | 0.187394 | 4.60E-05 |
| 0.00014  | -0.0787  | 0.08935  | -0.16442 | 0.00036  | -0.19281 | 2.73E-05 | -0.13291 | 0.00401  |
| 0.01078  | -0.21606 | 2.45E-06 | -0.10165 | 0.02806  | -0.19575 | 2.04E-05 | -0.14927 | 0.00122  |
| 0.00041  | 0.081557 | 0.07829  | 0.131248 | 0.0045   | 0.079477 | 0.08623  | 0.117725 | 0.01089  |
| 0.02421  | 0.214777 | 2.82E-06 | 0.037066 | 0.42421  | 0.104652 | 0.02372  | -0.06157 | 0.18411  |
| 0.0817   | 0.292253 | 1.20E-10 | 0.08391  | 0.07004  | 0.139705 | 0.00248  | -0.01179 | 0.79935  |
| 8.51E-05 | 0.068004 | 0.14228  | 0.110026 | 0.01738  | 0.184534 | 6.03E-05 | 0.068912 | 0.13702  |

|          |          |          |          |          |          |          |          |          |
|----------|----------|----------|----------|----------|----------|----------|----------|----------|
| 2.61E-06 | 0.042212 | 0.36273  | -0.00305 | 0.94763  | 0.144362 | 0.00176  | -0.20226 | 1.06E-05 |
| 0.0008   | 0.37484  | 5.01E-17 | 0.126189 | 0.00632  | 0.373018 | 7.28E-17 | 0.026127 | 0.57331  |
| 0.7291   | 0.088699 | 0.05544  | 0.011716 | 0.80064  | 0.058509 | 0.20692  | -0.01609 | 0.7288   |
| 0.67306  | 0.248528 | 5.27E-08 | 0.169717 | 0.00023  | 0.228959 | 5.70E-07 | 0.130244 | 0.00482  |
| 0.00045  | -0.06868 | 0.13834  | -0.01599 | 0.73034  | 0.020235 | 0.66272  | -0.01924 | 0.6784   |
| 0.93108  | -0.10041 | 0.03004  | -0.11803 | 0.01069  | -0.05163 | 0.26548  | -0.06056 | 0.1914   |
| 0.05054  | 0.053284 | 0.25047  | -0.05214 | 0.2608   | 0.155639 | 0.00074  | 0.064715 | 0.16265  |
| 0.56675  | 0.039555 | 0.39375  | 0.00536  | 0.90804  | -0.02705 | 0.55989  | -0.0137  | 0.76774  |
| 0.25067  | 0.006108 | 0.89526  | 0.034702 | 0.45438  | -0.04128 | 0.37345  | -0.03875 | 0.40343  |
| 0.0241   | -0.10503 | 0.02321  | -0.09124 | 0.04878  | -0.16661 | 0.0003   | -0.02671 | 0.56481  |
| 0.02129  | 0.119141 | 0.00997  | -0.13418 | 0.00367  | -0.07101 | 0.12543  | -0.05759 | 0.21411  |
| 0.08118  | 0.318874 | 1.70E-12 | 0.224182 | 9.88E-07 | 0.376589 | 3.50E-17 | 0.199728 | 1.37E-05 |
| 0.26236  | 0.197611 | 1.70E-05 | 0.151577 | 0.00102  | 0.333478 | 1.36E-13 | 0.089385 | 0.05357  |
| 0.0162   | 0.0778   | 0.09309  | 0.165745 | 0.00032  | 0.221729 | 1.30E-06 | 0.00739  | 0.87345  |
| 0.26218  | 0.010703 | 0.81756  | 0.02811  | 0.54454  | 0.032906 | 0.47808  | -0.03012 | 0.51616  |
| 1.23E-15 | 0.104942 | 0.02333  | 0.095428 | 0.03926  | 0.041411 | 0.37192  | 0.347372 | 1.09E-14 |
| 0.00135  | -0.12126 | 0.00871  | -0.13244 | 0.00414  | -0.16575 | 0.00032  | -0.03707 | 0.4242   |
| 0.47069  | 0.069037 | 0.13631  | 0.083223 | 0.07237  | 0.137777 | 0.00285  | 0.1099   | 0.01751  |
| 0.84714  | 0.092913 | 0.04477  | 0.057284 | 0.2166   | 0.106637 | 0.02118  | 0.068846 | 0.1374   |
| 0.56825  | -0.01432 | 0.75766  | -0.04084 | 0.37851  | -0.053   | 0.25301  | 0.000491 | 0.99155  |
| 0.58239  | 0.078919 | 0.08847  | 0.120521 | 0.00913  | 0.141102 | 0.00224  | 0.049032 | 0.29033  |
| 0.06306  | 0.026606 | 0.56629  | 0.012566 | 0.78651  | 0.109067 | 0.01839  | -0.00977 | 0.83322  |
| 0.16836  | 0.001559 | 0.9732   | -0.02954 | 0.52424  | -0.16744 | 0.00028  | 0.032346 | 0.4856   |
| 1.26E-06 | 0.039247 | 0.39745  | -0.02773 | 0.55003  | 0.003791 | 0.93487  | -0.1316  | 0.00439  |
| 3.58E-10 | -0.11535 | 0.01262  | -0.18333 | 6.75E-05 | -0.04005 | 0.38781  | -0.2254  | 8.59E-07 |
| 5.36E-23 | -0.05517 | 0.23405  | 0.001035 | 0.9822   | 0.077405 | 0.09477  | -0.11521 | 0.01273  |
| 0.22437  | -0.05196 | 0.26246  | 0.041365 | 0.37245  | -0.00261 | 0.95519  | 0.036692 | 0.42891  |
| 0.01441  | 0.14338  | 0.00189  | 0.153742 | 0.00086  | 0.115332 | 0.01263  | 0.086721 | 0.06113  |
| 0.00206  | 0.107612 | 0.02002  | 0.096484 | 0.03713  | 0.051517 | 0.26655  | 0.104008 | 0.0246   |
| 0.32578  | 0.12906  | 0.00522  | 0.039402 | 0.39558  | 0.064003 | 0.16733  | 0.015626 | 0.73627  |
| 0.7561   | 0.429502 | 2.19E-22 | 0.249803 | 4.48E-08 | 0.331398 | 1.97E-13 | 0.038296 | 0.409    |
| 0.02011  | 0.321102 | 1.16E-12 | 0.11979  | 0.00957  | 0.128745 | 0.00533  | 0.0024   | 0.95875  |
| 1.14E-07 | 0.265996 | 5.27E-09 | 0.159173 | 0.00056  | 0.167078 | 0.00029  | 0.282996 | 4.76E-10 |
| 0.14463  | -0.00062 | 0.9894   | -0.00548 | 0.90603  | 0.039929 | 0.38929  | 0.026873 | 0.5624   |
| 0.10135  | -0.18649 | 5.02E-05 | -0.15477 | 0.00079  | -0.21894 | 1.78E-06 | 0.041975 | 0.36544  |
| 0.23989  | 0.079807 | 0.08493  | -0.00583 | 0.90003  | 0.028571 | 0.53796  | 0.031061 | 0.50312  |
| 0.87214  | -0.13041 | 0.00476  | -0.11718 | 0.01127  | -0.15266 | 0.00093  | -0.00177 | 0.9696   |
| 0.03201  | 0.107347 | 0.02033  | 0.288058 | 2.25E-10 | 0.226464 | 7.61E-07 | 0.17446  | 0.00015  |
| 0.29425  | 0.07492  | 0.10588  | 0.011638 | 0.80194  | 0.076681 | 0.0979   | 0.051388 | 0.26775  |
| 0.00012  | 0.036526 | 0.431    | 0.107061 | 0.02066  | 0.110334 | 0.01707  | -0.06113 | 0.18724  |
| 1.81E-07 | -0.05846 | 0.20733  | -0.01518 | 0.7435   | -0.0653  | 0.15888  | -0.12142 | 0.00862  |
| 0.00264  | 0.381247 | 1.33E-17 | 0.242562 | 1.11E-07 | 0.255285 | 2.21E-08 | 0.217561 | 2.08E-06 |
| 2.45E-05 | -0.00451 | 0.92259  | -0.14412 | 0.00179  | -0.01308 | 0.77804  | -0.10823 | 0.01931  |
| 0.39288  | 0.088678 | 0.05549  | 0.091286 | 0.04866  | 0.139641 | 0.00249  | 0.04825  | 0.29811  |
| 0.53469  | 0.125936 | 0.00643  | 0.112638 | 0.01488  | 0.142279 | 0.00206  | 0.047517 | 0.30552  |

|          |          |          |          |          |          |          |          |          |
|----------|----------|----------|----------|----------|----------|----------|----------|----------|
| 0.10736  | 0.262135 | 8.90E-09 | 0.227782 | 6.53E-07 | 0.267284 | 4.42E-09 | 0.121256 | 0.00872  |
| 1.82E-06 | 0.118102 | 0.01064  | 0.000854 | 0.98532  | 0.17463  | 0.00015  | -0.0135  | 0.77111  |
| 0.66957  | 0.106276 | 0.02162  | -0.04062 | 0.38115  | 0.089676 | 0.05279  | 0.13404  | 0.00371  |
| 0.0414   | -0.00829 | 0.85817  | 0.09653  | 0.03704  | 0.142807 | 0.00198  | -0.00796 | 0.86375  |
| 0.00638  | 0.258166 | 1.51E-08 | 0.15411  | 0.00083  | 0.357139 | 1.70E-15 | 0.07612  | 0.1004   |
| 0.03355  | 0.080953 | 0.08053  | 0.157635 | 0.00063  | 0.113198 | 0.01438  | 0.072861 | 0.11585  |
| 9.36E-06 | -0.1012  | 0.02876  | -0.03942 | 0.39535  | -0.11269 | 0.01483  | 0.081444 | 0.07871  |
| 0.00013  | 0.174862 | 0.00015  | 0.190778 | 3.33E-05 | 0.323693 | 7.49E-13 | 0.118016 | 0.0107   |
| 0.00048  | 0.205387 | 7.66E-06 | 0.154898 | 0.00078  | 0.164672 | 0.00035  | 0.208362 | 5.61E-06 |
| 0.00154  | -0.00111 | 0.98098  | -0.01296 | 0.78002  | 0.054444 | 0.24029  | -0.05969 | 0.19786  |
| 0.14557  | 0.263282 | 7.62E-09 | 0.187193 | 4.69E-05 | 0.0419   | 0.36629  | 0.244398 | 8.86E-08 |
| 0.43545  | -0.07854 | 0.09003  | 0.03871  | 0.40394  | 0.043324 | 0.35022  | -0.01785 | 0.7004   |
| 0.42194  | -0.16791 | 0.00027  | -0.12371 | 0.00744  | -0.15367 | 0.00086  | -0.12731 | 0.00587  |
| 0.00385  | 0.004582 | 0.92133  | -0.08069 | 0.08153  | 0.025225 | 0.58662  | -0.00789 | 0.86495  |
| 1.54E-24 | -0.07016 | 0.13006  | -0.02888 | 0.53361  | -0.13723 | 0.00296  | 0.034748 | 0.45378  |
| 0.50762  | -0.16679 | 0.00029  | -0.19814 | 1.61E-05 | -0.14161 | 0.00216  | -0.21727 | 2.14E-06 |
| 5.79E-06 | -0.30524 | 1.58E-11 | -0.28847 | 2.12E-10 | -0.37504 | 4.81E-17 | -0.15294 | 0.00091  |
| 0.74046  | 0.054678 | 0.23828  | 0.019983 | 0.66666  | -0.00291 | 0.94998  | 0.167033 | 0.00029  |
| 1.41E-15 | 0.16453  | 0.00036  | 0.100407 | 0.03005  | 0.087231 | 0.05962  | 0.182025 | 7.62E-05 |
| 6.69E-08 | 0.067383 | 0.14597  | -0.08546 | 0.06499  | -0.00141 | 0.97569  | 0.036739 | 0.42832  |
| 0.51458  | 0.002674 | 0.95405  | 0.051789 | 0.26403  | 0.106609 | 0.02121  | 0.185404 | 5.56E-05 |
| 0.0008   | -0.07298 | 0.11526  | -0.21208 | 3.77E-06 | -0.04766 | 0.30403  | -0.10503 | 0.02321  |
| 0.00126  | 0.282942 | 4.79E-10 | 0.139753 | 0.00247  | 0.16558  | 0.00033  | 0.060339 | 0.19304  |
| 0.33974  | 0.098705 | 0.03296  | -0.01688 | 0.716    | 0.104001 | 0.0246   | -0.02118 | 0.64806  |
| 0.02875  | 0.121011 | 0.00885  | 0.078564 | 0.08991  | 0.088685 | 0.05548  | 0.110125 | 0.01728  |
| 0.71013  | -0.03369 | 0.4676   | 0.019305 | 0.67733  | -0.01075 | 0.8168   | 0.063142 | 0.17313  |
| 0.69878  | 0.064542 | 0.16378  | 0.031179 | 0.50149  | 0.000806 | 0.98614  | 0.024618 | 0.59566  |
| 0.00053  | -0.08684 | 0.06078  | -0.12119 | 0.00875  | -0.1015  | 0.02829  | -0.11777 | 0.01086  |
| 0.17158  | -0.17752 | 0.00011  | -0.05054 | 0.27571  | -0.04629 | 0.31824  | -0.08798 | 0.05746  |
| 0.38575  | -0.0466  | 0.315    | 0.013872 | 0.76495  | -0.01393 | 0.76403  | -0.01707 | 0.713    |
| 0.10416  | 0.288056 | 2.25E-10 | 0.010579 | 0.81964  | 0.001489 | 0.97441  | 0.02884  | 0.53414  |
| 0.20136  | -0.41363 | 1.00E-20 | -0.18747 | 4.57E-05 | -0.34034 | 3.97E-14 | -0.10164 | 0.02807  |
| 0.3473   | 0.1913   | 3.16E-05 | 0.009937 | 0.83041  | -0.0543  | 0.24152  | 0.0782   | 0.09142  |
| 3.39E-18 | -0.24176 | 1.23E-07 | -0.10381 | 0.02488  | -0.00729 | 0.87521  | -0.259   | 1.35E-08 |
| 0.44085  | -0.27984 | 7.53E-10 | -0.15633 | 0.0007   | -0.23711 | 2.17E-07 | -0.13846 | 0.00271  |
| 2.77E-11 | 0.099267 | 0.03197  | 0.085635 | 0.06445  | 0.268225 | 3.88E-09 | -0.00438 | 0.92486  |
| 2.25E-08 | 0.026264 | 0.57129  | 0.110164 | 0.01724  | 0.067294 | 0.14651  | 0.083199 | 0.07245  |
| 0.04888  | 0.20434  | 8.55E-06 | 0.059411 | 0.19999  | -0.04866 | 0.29399  | -0.01809 | 0.69654  |
| 2.34E-05 | -0.20215 | 1.07E-05 | -0.03529 | 0.44678  | 0.040613 | 0.38121  | -0.07732 | 0.09514  |
| 0.47483  | 0.002446 | 0.95795  | -0.02587 | 0.57713  | -0.08164 | 0.07799  | 0.011177 | 0.80964  |
| 0.15     | 0.347731 | 1.02E-14 | 0.12805  | 0.00559  | 0.126289 | 0.00628  | 0.000783 | 0.98654  |
| 0.26353  | -0.03699 | 0.42518  | 0.100082 | 0.03059  | 0.149255 | 0.00122  | 0.067423 | 0.14573  |
| 0.01578  | 0.03533  | 0.44626  | 0.086902 | 0.06059  | 0.182011 | 7.63E-05 | 0.137264 | 0.00295  |
| 0.29137  | 0.011706 | 0.80081  | -0.02669 | 0.56508  | 0.145236 | 0.00165  | -0.0396  | 0.3932   |
| 0.40469  | 0.089943 | 0.05209  | 0.026343 | 0.57014  | 0.09347  | 0.0435   | 0.009483 | 0.83806  |

|          |          |          |          |          |           |          |          |          |
|----------|----------|----------|----------|----------|-----------|----------|----------|----------|
| 2.14E-11 | -0.02121 | 0.64754  | 0.000193 | 0.99668  | 0.125844  | 0.00647  | -0.17244 | 0.00018  |
| 0.69545  | -0.00594 | 0.89816  | 0.021482 | 0.64334  | 0.121848  | 0.00839  | -0.02192 | 0.63653  |
| 0.0179   | -0.10586 | 0.02214  | -0.14524 | 0.00165  | -0.12788  | 0.00565  | -0.15358 | 0.00087  |
| 1.57E-07 | 0.145479 | 0.00162  | 0.129505 | 0.00506  | -0.04247  | 0.35976  | 0.20323  | 9.58E-06 |
| 5.39E-06 | 0.105677 | 0.02237  | -0.05605 | 0.22668  | 0.057554  | 0.21444  | -0.17853 | 0.0001   |
| 4.11E-05 | 0.234364 | 3.01E-07 | 0.163694 | 0.00038  | 0.042274  | 0.36202  | 0.106094 | 0.02185  |
| 0.63405  | 0.288951 | 1.97E-10 | 0.251903 | 3.42E-08 | 0.324897  | 6.09E-13 | 0.216552 | 2.32E-06 |
| 0.83436  | -0.00258 | 0.95563  | -0.02478 | 0.59327  | -5.09E-05 | 0.99913  | -0.00472 | 0.91896  |
| 0.84912  | -0.01661 | 0.72028  | -0.02389 | 0.60651  | -0.02824  | 0.54274  | 0.000277 | 0.99524  |
| 0.03876  | 0.023356 | 0.61465  | 0.05924  | 0.2013   | 0.037184  | 0.42274  | 0.017538 | 0.70542  |
| 0.93408  | 0.020407 | 0.66003  | 0.098336 | 0.03363  | 0.116738  | 0.01158  | 0.08678  | 0.06095  |
| 0.97098  | 0.071315 | 0.12381  | 0.083596 | 0.0711   | 0.02903   | 0.53144  | -0.04778 | 0.30288  |
| 6.83E-06 | -0.34673 | 1.22E-14 | -0.08403 | 0.06964  | -0.12369  | 0.00745  | -0.11992 | 0.00949  |
| 0.01802  | -0.0903  | 0.05116  | 0.054689 | 0.23818  | 0.03617   | 0.43551  | -0.12229 | 0.00815  |
| 0.13576  | 0.128691 | 0.00535  | 0.095942 | 0.03821  | 0.106139  | 0.02179  | 0.035669 | 0.4419   |
| 0.00559  | 0.064215 | 0.16593  | 0.060236 | 0.19381  | 0.15177   | 0.001    | -0.01378 | 0.76648  |
| 0.00583  | -0.02978 | 0.52096  | -0.15455 | 0.00081  | -0.07573  | 0.10216  | 0.096333 | 0.03743  |
| 1.04E-06 | 0.015734 | 0.73452  | 0.014819 | 0.74943  | -0.02852  | 0.53867  | 0.270234 | 2.94E-09 |
| 2.22E-10 | -0.20535 | 7.69E-06 | -0.07182 | 0.12117  | -0.10745  | 0.0202   | -0.25143 | 3.64E-08 |
| 1.03E-05 | 0.026797 | 0.5635   | 0.031992 | 0.4904   | -0.02932  | 0.52738  | 0.225656 | 8.35E-07 |
| 1.80E-05 | -0.24703 | 6.37E-08 | -0.03625 | 0.43445  | -0.11202  | 0.01544  | 0.067124 | 0.14753  |
| 5.01E-09 | -0.03425 | 0.46033  | 0.035172 | 0.44828  | 0.021353  | 0.64533  | -0.13088 | 0.00461  |
| 0.01821  | 0.074126 | 0.10965  | 0.120822 | 0.00896  | 0.257145  | 1.73E-08 | 0.028484 | 0.53921  |
| 0.00334  | 0.068189 | 0.1412   | -0.11557 | 0.01245  | 0.005759  | 0.90122  | -0.01861 | 0.68829  |
| 4.68E-06 | -0.10544 | 0.02268  | -0.06957 | 0.1333   | -0.03752  | 0.41853  | -0.16465 | 0.00035  |
| 0.76375  | -0.0682  | 0.14115  | -0.09224 | 0.04634  | -0.08291  | 0.07346  | -0.06195 | 0.1814   |
| 4.73E-10 | 0.198889 | 1.49E-05 | 0.111463 | 0.01596  | 0.206785  | 6.62E-06 | 0.264974 | 6.06E-09 |
| 9.46E-11 | 0.122875 | 0.00785  | 0.044827 | 0.33374  | -0.00332  | 0.943    | 0.250611 | 4.04E-08 |
| 0.0024   | 0.104487 | 0.02394  | 0.112049 | 0.01541  | 0.17315   | 0.00017  | 0.020171 | 0.66373  |
| 0.2885   | 0.076721 | 0.09773  | -0.08976 | 0.05258  | 0.078435  | 0.09044  | 0.099049 | 0.03236  |
| 0.01821  | 0.117245 | 0.01122  | 0.11783  | 0.01082  | 0.234051  | 3.13E-07 | 0.009413 | 0.83923  |
| 0.4885   | 0.163282 | 0.0004   | 0.109823 | 0.01759  | 0.079     | 0.08814  | -0.10405 | 0.02454  |
| 0.05401  | 0.060973 | 0.1884   | -0.06109 | 0.18756  | 0.031876  | 0.49198  | -0.01255 | 0.78676  |
| 0.03053  | 0.225708 | 8.30E-07 | 0.084336 | 0.06863  | 0.146863  | 0.00146  | 0.074115 | 0.1097   |
| 0.74538  | 0.065163 | 0.15975  | 0.056142 | 0.22592  | 0.102482  | 0.02679  | -0.0121  | 0.79433  |
| 1.44E-13 | 0.116988 | 0.0114   | 0.086387 | 0.06214  | 0.011352  | 0.80671  | 0.137723 | 0.00286  |
| 0.00095  | -0.16378 | 0.00038  | -0.07083 | 0.12639  | -0.17737  | 0.00012  | -0.09996 | 0.0308   |
| 0.05137  | -0.09231 | 0.04618  | -0.01187 | 0.79808  | -0.08493  | 0.06669  | 0.352711 | 3.98E-15 |
| 0.65552  | 0.024275 | 0.6008   | 0.014074 | 0.76163  | -0.06202  | 0.18093  | 0.112111 | 0.01536  |
| 9.43E-09 | 0.103319 | 0.02557  | -0.0245  | 0.59745  | 0.114063  | 0.01365  | -0.0194  | 0.67576  |
| 1.13E-06 | -0.31408 | 3.76E-12 | -0.20391 | 8.93E-06 | -0.17461  | 0.00015  | -0.211   | 4.24E-06 |
| 0.03334  | 0.332329 | 1.67E-13 | 0.254774 | 2.36E-08 | 0.318777  | 1.72E-12 | 0.246173 | 7.10E-08 |
| 0.60624  | 0.045994 | 0.32129  | -0.01383 | 0.76571  | -0.02948  | 0.52515  | -0.09628 | 0.03754  |
| 0.35003  | -0.24614 | 7.12E-08 | -0.10691 | 0.02085  | -0.18071  | 8.60E-05 | -0.04961 | 0.28471  |
| 0.53202  | -0.09531 | 0.03952  | -0.13783 | 0.00284  | -0.10935  | 0.01809  | -0.21498 | 2.76E-06 |



|          |          |          |          |          |          |          |          |          |
|----------|----------|----------|----------|----------|----------|----------|----------|----------|
| 0.02369  | -0.04035 | 0.38426  | -0.02332 | 0.61519  | -0.07648 | 0.09878  | 0.084834 | 0.067    |
| 0.00119  | 0.278009 | 9.80E-10 | 0.260958 | 1.04E-08 | 0.27465  | 1.58E-09 | 0.150933 | 0.00107  |
| 5.75E-10 | -0.01475 | 0.75063  | -0.00345 | 0.94068  | -0.1565  | 0.00069  | 0.206326 | 6.95E-06 |
| 1.87E-14 | 0.206228 | 7.02E-06 | 0.174381 | 0.00015  | 0.142708 | 0.00199  | 0.192144 | 2.91E-05 |
| 1.19E-09 | 0.03847  | 0.40686  | 0.109665 | 0.01776  | 0.239238 | 1.67E-07 | -0.0925  | 0.04572  |
| 0.40805  | 0.052333 | 0.25904  | 0.073794 | 0.11125  | 0.063392 | 0.17143  | 0.160452 | 0.0005   |
| 0.28592  | -0.08192 | 0.07697  | 0.091236 | 0.04879  | -0.04586 | 0.32266  | 0.080165 | 0.08354  |
| 0.01775  | 0.21022  | 4.61E-06 | 0.25094  | 3.87E-08 | 0.311053 | 6.19E-12 | 0.156671 | 0.00068  |
| 0.00186  | 0.019103 | 0.68052  | -0.01027 | 0.82475  | 0.0174   | 0.70764  | 0.048402 | 0.29658  |
| 0.73027  | -0.13919 | 0.00257  | -0.09418 | 0.04191  | -0.16424 | 0.00037  | -0.01551 | 0.73808  |
| 0.57     | 0.197771 | 1.67E-05 | 0.267666 | 4.19E-09 | 0.240611 | 1.42E-07 | 0.174009 | 0.00016  |
| 0.27243  | 0.006184 | 0.89397  | 0.026014 | 0.57497  | 0.062195 | 0.17968  | 0.043791 | 0.34504  |
| 5.51E-11 | -0.16304 | 0.0004   | -0.17305 | 0.00017  | -0.14891 | 0.00125  | -0.24011 | 1.51E-07 |
| 0.20748  | 0.028136 | 0.54418  | 0.036192 | 0.43523  | 0.076348 | 0.09938  | 0.112885 | 0.01466  |
| 0.4962   | 0.036285 | 0.43405  | 0.057326 | 0.21627  | 0.076633 | 0.09812  | 0.047612 | 0.30455  |
| 0.31632  | -0.02822 | 0.54303  | -0.05154 | 0.26638  | -0.12879 | 0.00531  | -0.02437 | 0.59933  |
| 0.33372  | 0.147626 | 0.00138  | 0.111629 | 0.0158   | 0.188596 | 4.10E-05 | 0.093665 | 0.04306  |
| 0.45452  | 0.014124 | 0.76081  | 0.014709 | 0.75122  | -0.00284 | 0.95122  | -0.06219 | 0.17973  |
| 8.29E-16 | -0.07601 | 0.10088  | -0.08948 | 0.05332  | -0.00221 | 0.96195  | -0.22081 | 1.45E-06 |
| 0.4568   | -0.0221  | 0.63389  | 0.112389 | 0.0151   | 0.079767 | 0.08509  | -0.02468 | 0.59466  |
| 0.09877  | -0.01425 | 0.75868  | 0.017961 | 0.69866  | -0.04361 | 0.34707  | 0.05103  | 0.2711   |
| 8.30E-08 | 0.096421 | 0.03726  | -0.07134 | 0.12366  | 0.015426 | 0.73953  | -0.1576  | 0.00063  |
| 0.15656  | -0.27494 | 1.52E-09 | -0.25093 | 3.88E-08 | -0.32627 | 4.81E-13 | -0.13386 | 0.00375  |
| 0.00192  | -0.26467 | 6.31E-09 | -0.06876 | 0.13788  | -0.15654 | 0.00069  | -0.29012 | 1.65E-10 |
| 0.0006   | 0.001163 | 0.98     | -0.05848 | 0.20717  | 0.028174 | 0.54363  | -0.17848 | 0.00011  |
| 2.85E-05 | -0.12573 | 0.00652  | -0.27543 | 1.42E-09 | -0.10822 | 0.01932  | -0.18986 | 3.64E-05 |
| 0.17793  | -0.17949 | 9.61E-05 | -0.17255 | 0.00018  | -0.14571 | 0.00159  | 0.009999 | 0.82937  |
| 0.0258   | 0.145196 | 0.00166  | 0.148088 | 0.00133  | 0.225058 | 8.94E-07 | -0.00439 | 0.92456  |
| 3.24E-09 | -0.13747 | 0.00291  | -0.10883 | 0.01865  | -0.00746 | 0.87224  | -0.12919 | 0.00517  |
| 0.00494  | 0.129708 | 0.00499  | 0.18241  | 7.35E-05 | 0.219893 | 1.60E-06 | 0.040951 | 0.37726  |
| 0.4987   | 0.126643 | 0.00613  | 0.134012 | 0.00372  | 0.155582 | 0.00074  | 0.132787 | 0.00405  |
| 0.38572  | 0.212787 | 3.50E-06 | 0.287028 | 2.62E-10 | 0.409678 | 2.51E-20 | 0.15137  | 0.00103  |
| 6.59E-05 | 0.037948 | 0.41326  | -0.14886 | 0.00125  | -0.06646 | 0.15159  | -0.04521 | 0.32958  |
| 0.07496  | -0.03968 | 0.39222  | -0.01183 | 0.79881  | 0.012561 | 0.7866   | -0.06796 | 0.14254  |
| 2.89E-05 | 0.211817 | 3.88E-06 | 0.073425 | 0.11305  | 0.183968 | 6.36E-05 | 0.192063 | 2.94E-05 |
| 0.74086  | 0.012556 | 0.78669  | -0.10155 | 0.02821  | -0.19152 | 3.09E-05 | -0.11658 | 0.0117   |
| 5.27E-12 | 0.232623 | 3.71E-07 | 0.091714 | 0.04761  | 0.069981 | 0.13102  | 0.20973  | 4.85E-06 |
| 0.00365  | -0.17669 | 0.00012  | -0.02231 | 0.63061  | 0.037784 | 0.41529  | -0.1148  | 0.01305  |
| 4.42E-06 | -0.08781 | 0.05793  | -0.01727 | 0.70974  | -0.1023  | 0.02707  | 0.052571 | 0.25688  |
| 0.01671  | 0.202562 | 1.03E-05 | -0.07673 | 0.09768  | -0.0633  | 0.17204  | -0.01168 | 0.80123  |
| 0.48261  | 0.028308 | 0.54171  | 0.002321 | 0.9601   | 0.057096 | 0.21812  | 0.11173  | 0.01571  |
| 0.01811  | 0.19014  | 3.54E-05 | 0.114102 | 0.01362  | 0.183174 | 6.85E-05 | 0.034558 | 0.45626  |
| 0.00738  | -0.05929 | 0.20094  | -0.07954 | 0.08596  | -0.04317 | 0.35191  | -0.11483 | 0.01303  |
| 0.00165  | 0.042161 | 0.36332  | 0.007645 | 0.86912  | 0.03972  | 0.39178  | 0.1844   | 6.11E-05 |
| 0.03454  | -0.05525 | 0.23336  | -0.01983 | 0.66902  | -0.00328 | 0.94367  | 0.06147  | 0.18481  |

|          |          |          |          |          |          |          |          |          |
|----------|----------|----------|----------|----------|----------|----------|----------|----------|
| 9.20E-05 | 0.151183 | 0.00105  | 0.140509 | 0.00234  | 0.170204 | 0.00022  | 0.178249 | 0.00011  |
| 0.94045  | 0.058152 | 0.20971  | 0.087487 | 0.05887  | 0.105255 | 0.02292  | 0.071446 | 0.12312  |
| 0.00018  | -0.15964 | 0.00053  | -0.03613 | 0.436    | -0.06153 | 0.18436  | 0.188283 | 4.23E-05 |
| 0.89247  | 0.055466 | 0.23156  | 0.224319 | 9.72E-07 | 0.191914 | 2.98E-05 | 0.071155 | 0.12466  |
| 7.96E-07 | -0.08999 | 0.05196  | -0.07275 | 0.1164   | 0.082185 | 0.07602  | -0.13111 | 0.00454  |
| 0.21194  | -0.0468  | 0.31283  | -0.0151  | 0.74478  | -0.03682 | 0.4273   | 0.092725 | 0.04521  |
| 0.85857  | 0.091787 | 0.04743  | -0.01278 | 0.78295  | 0.064673 | 0.16292  | 0.058109 | 0.21005  |
| 0.00132  | 0.018964 | 0.68272  | 0.044444 | 0.33789  | 0.077805 | 0.09307  | -0.05891 | 0.20381  |
| 0.02683  | -0.22365 | 1.05E-06 | -0.16885 | 0.00025  | -0.13825 | 0.00275  | -0.15474 | 0.00079  |
| 1.99E-07 | 0.020972 | 0.65123  | -0.05382 | 0.24573  | 0.023185 | 0.61725  | -0.1424  | 0.00204  |
| 1.08E-06 | -0.2787  | 8.87E-10 | 0.016983 | 0.71432  | -0.02731 | 0.55607  | -0.22918 | 5.55E-07 |
| 0.30341  | -0.17787 | 0.00011  | -0.00174 | 0.97007  | -0.05691 | 0.21959  | -0.03913 | 0.39883  |
| 1.18E-06 | -0.01514 | 0.74411  | -0.04776 | 0.30306  | -0.09786 | 0.03451  | 0.176585 | 0.00013  |
| 0.00016  | -0.33009 | 2.47E-13 | -0.26346 | 7.44E-09 | -0.36157 | 7.20E-16 | -0.16981 | 0.00023  |
| 0.99401  | -0.15247 | 0.00095  | -0.08699 | 0.06034  | -0.23883 | 1.76E-07 | 0.019705 | 0.67103  |
| 3.60E-13 | -0.03668 | 0.42912  | -0.05372 | 0.24662  | 0.046598 | 0.31497  | -0.12609 | 0.00636  |
| 0.00018  | 0.041807 | 0.36736  | -0.08477 | 0.06721  | -0.156   | 0.00072  | -0.00289 | 0.95031  |
| 0.00017  | -0.15964 | 0.00053  | -0.10821 | 0.01933  | -0.1229  | 0.00784  | -0.01399 | 0.76295  |
| 0.07997  | 0.179853 | 9.30E-05 | 0.103825 | 0.02485  | 0.169269 | 0.00024  | 0.247731 | 5.83E-08 |
| 0.30381  | 0.169822 | 0.00023  | 0.097328 | 0.0355   | 0.150126 | 0.00114  | 0.087442 | 0.059    |
| 0.0879   | 0.108648 | 0.01885  | 0.069453 | 0.13396  | 0.041665 | 0.36899  | 0.139668 | 0.00249  |
| 0.00022  | 0.093001 | 0.04457  | 0.183105 | 6.89E-05 | 0.142498 | 0.00202  | 0.153897 | 0.00085  |
| 0.81883  | -0.10096 | 0.02915  | -0.09934 | 0.03185  | -0.11543 | 0.01255  | -0.17659 | 0.00013  |
| 3.39E-12 | 0.334228 | 1.19E-13 | 0.221893 | 1.28E-06 | 0.280472 | 6.87E-10 | -0.00387 | 0.93346  |
| 0.29824  | 0.171476 | 0.0002   | 0.230478 | 4.77E-07 | 0.187543 | 4.54E-05 | 0.183276 | 6.78E-05 |
| 3.80E-06 | -0.00631 | 0.89189  | -0.09049 | 0.05066  | -0.14262 | 0.002    | -0.00348 | 0.94022  |
| 0.06066  | -0.01656 | 0.72121  | 0.028527 | 0.53859  | 0.046045 | 0.32076  | -0.00207 | 0.9644   |
| 0.01097  | 0.119291 | 0.00987  | 0.050626 | 0.27492  | 0.019835 | 0.66899  | 0.299397 | 3.98E-11 |
| 0.91471  | 0.056228 | 0.22521  | 0.037417 | 0.41984  | 0.0488   | 0.29262  | 0.08173  | 0.07766  |
| 0.00738  | -0.0143  | 0.75788  | -0.00894 | 0.84713  | 0.062979 | 0.17424  | -0.0186  | 0.68848  |
| 0.00018  | 0.113455 | 0.01416  | 0.162243 | 0.00043  | 0.183211 | 6.82E-05 | -0.09247 | 0.04579  |
| 0.3357   | 0.144211 | 0.00178  | 0.180235 | 8.98E-05 | 0.231913 | 4.03E-07 | 0.095449 | 0.03922  |
| 0.54358  | -0.18611 | 5.20E-05 | -0.14588 | 0.00157  | -0.16619 | 0.00031  | -0.0978  | 0.03461  |
| 0.0323   | 0.040045 | 0.38791  | 0.024259 | 0.60104  | 0.116905 | 0.01146  | 0.093    | 0.04457  |
| 0.1551   | -0.1701  | 0.00022  | -0.23968 | 1.59E-07 | -0.14135 | 0.0022   | -0.09441 | 0.04141  |
| 0.33211  | -0.05629 | 0.22465  | -0.05758 | 0.2142   | -0.06606 | 0.1541   | -0.02584 | 0.57751  |
| 0.99792  | -0.08108 | 0.08007  | -0.08111 | 0.07993  | -0.04035 | 0.3843   | 0.00771  | 0.86803  |
| 4.32E-05 | -0.02813 | 0.54423  | -0.03217 | 0.48802  | 0.056157 | 0.22579  | 0.098856 | 0.03269  |
| 0.01397  | -0.01398 | 0.76311  | 0.058442 | 0.20744  | 0.050446 | 0.27663  | 0.069867 | 0.13165  |
| 2.91E-09 | 0.085831 | 0.06384  | 0.128852 | 0.00529  | 0.097379 | 0.0354   | -0.07286 | 0.11586  |
| 7.95E-26 | 0.117457 | 0.01108  | 0.16231  | 0.00043  | 0.088182 | 0.05688  | 0.194481 | 2.32E-05 |
| 0.42343  | 0.083029 | 0.07304  | 0.141264 | 0.00221  | 0.168458 | 0.00026  | 0.096185 | 0.03773  |
| 0.23894  | 0.036439 | 0.4321   | 0.045392 | 0.32768  | 0.052759 | 0.25517  | 0.03604  | 0.43716  |
| 0.15494  | -0.21396 | 3.08E-06 | -0.05212 | 0.26098  | -0.23402 | 3.14E-07 | -0.14182 | 0.00213  |
| 1.34E-13 | -0.04935 | 0.28719  | 0.000218 | 0.99626  | -0.05672 | 0.22114  | 0.194655 | 2.28E-05 |

|          |          |          |          |          |          |          |          |          |
|----------|----------|----------|----------|----------|----------|----------|----------|----------|
| 0.09761  | 0.093613 | 0.04317  | 0.133775 | 0.00378  | 0.11363  | 0.01401  | 0.256687 | 1.84E-08 |
| 3.73E-05 | 0.003152 | 0.94584  | 0.04136  | 0.37251  | 0.087117 | 0.05995  | -0.08478 | 0.06717  |
| 3.13E-08 | -0.04899 | 0.29073  | 0.017124 | 0.71206  | 0.062431 | 0.17803  | -0.09888 | 0.03266  |
| 1.00E-05 | -0.21287 | 3.46E-06 | -0.13505 | 0.00345  | -0.02504 | 0.5893   | -0.26591 | 5.33E-09 |
| 0.12418  | -0.01734 | 0.70865  | -0.20919 | 5.14E-06 | -0.18433 | 6.15E-05 | -0.11177 | 0.01567  |
| 0.7353   | 0.031622 | 0.49543  | 0.056472 | 0.2232   | 0.071853 | 0.121    | 0.026956 | 0.56119  |
| 0.03961  | 0.041608 | 0.36964  | 0.123082 | 0.00775  | 0.185145 | 5.69E-05 | 0.003738 | 0.93579  |
| 0.08141  | 0.065325 | 0.15872  | 0.112605 | 0.01491  | 0.250579 | 4.06E-08 | 0.044815 | 0.33386  |
| 3.57E-07 | 0.19744  | 1.73E-05 | 0.159501 | 0.00054  | 0.093895 | 0.04255  | 0.273011 | 1.99E-09 |
| 0.00041  | -0.06956 | 0.13335  | -0.21696 | 2.22E-06 | -0.10342 | 0.02542  | -0.10675 | 0.02103  |
| 0.00027  | -0.17547 | 0.00014  | -0.13081 | 0.00464  | -0.27911 | 8.36E-10 | -0.06256 | 0.17713  |
| 5.89E-17 | -0.07142 | 0.12327  | 0.024499 | 0.59743  | 0.155798 | 0.00073  | -0.09914 | 0.03219  |
| 5.93E-06 | -0.01305 | 0.77846  | 0.090608 | 0.05037  | -0.02213 | 0.63343  | 0.191967 | 2.96E-05 |
| 0.00011  | 0.21679  | 2.26E-06 | 0.150914 | 0.00107  | 0.147148 | 0.00143  | 0.198372 | 1.57E-05 |
| 0.7709   | 0.206551 | 6.79E-06 | 0.184741 | 5.91E-05 | 0.220068 | 1.57E-06 | 0.048238 | 0.29823  |
| 0.00018  | -0.22145 | 1.35E-06 | -0.13861 | 0.00268  | -0.04246 | 0.35994  | -0.21317 | 3.35E-06 |
| 0.0013   | 0.166245 | 0.00031  | 0.079113 | 0.08768  | 0.051492 | 0.26678  | 0.064322 | 0.16522  |
| 3.06E-13 | 0.001593 | 0.97262  | -0.10819 | 0.01936  | -0.16462 | 0.00035  | 0.032986 | 0.47701  |
| 0.01458  | 0.024579 | 0.59625  | -0.06162 | 0.18376  | -0.04114 | 0.37511  | -0.03498 | 0.45083  |
| 0.01202  | 0.041743 | 0.36809  | -0.015   | 0.74641  | 0.111076 | 0.01633  | -0.06727 | 0.14664  |
| 0.00076  | 0.0801   | 0.08379  | 0.121096 | 0.00881  | 0.028915 | 0.53308  | 0.10741  | 0.02025  |
| 0.07735  | -0.05728 | 0.2166   | -0.03662 | 0.42975  | 0.03818  | 0.41041  | -0.06139 | 0.18537  |
| 0.75398  | 0.111927 | 0.01553  | 0.115768 | 0.0123   | 0.151009 | 0.00106  | 0.127043 | 0.00597  |
| 0.00809  | 0.231161 | 4.40E-07 | 0.319129 | 1.62E-12 | 0.274219 | 1.68E-09 | 0.003271 | 0.9438   |
| 5.74E-05 | -0.18706 | 4.75E-05 | 0.002542 | 0.9563   | -0.16788 | 0.00027  | -0.05243 | 0.25817  |
| 9.35E-05 | 0.104192 | 0.02434  | 0.177645 | 0.00011  | 0.254546 | 2.43E-08 | -0.03248 | 0.48384  |
| 3.65E-08 | 0.130725 | 0.00466  | 0.132205 | 0.00421  | 0.247638 | 5.90E-08 | 0.029845 | 0.51998  |
| 0.30397  | 0.29819  | 4.80E-11 | 0.219616 | 1.65E-06 | 0.313485 | 4.15E-12 | 0.105187 | 0.02301  |
| 9.89E-06 | 0.07701  | 0.09647  | 0.120349 | 0.00923  | -0.01853 | 0.68967  | 0.193323 | 2.60E-05 |
| 0.00912  | 0.082175 | 0.07605  | 0.047211 | 0.30864  | 0.003108 | 0.94659  | 0.032552 | 0.48283  |
| 1.68E-09 | -0.12218 | 0.00821  | -0.00053 | 0.99089  | -0.13403 | 0.00371  | 0.17822  | 0.00011  |
| 0.00043  | -0.06016 | 0.19439  | -0.0295  | 0.52489  | 0.026361 | 0.56987  | -0.09046 | 0.05075  |
| 0.01555  | 0.017256 | 0.70995  | -0.05882 | 0.20452  | -0.03897 | 0.40075  | 0.019291 | 0.67755  |
| 0.28882  | 0.035077 | 0.44951  | -0.00533 | 0.90861  | 0.009211 | 0.84264  | 0.074164 | 0.10946  |
| 0.36938  | 0.242114 | 1.18E-07 | 0.068986 | 0.1366   | 0.207292 | 6.28E-06 | 0.047567 | 0.305    |
| 0.04403  | 0.168512 | 0.00025  | 0.079088 | 0.08778  | 0.259999 | 1.18E-08 | 0.098549 | 0.03324  |
| 0.09872  | -0.15296 | 0.00091  | -0.14009 | 0.00241  | -0.13955 | 0.00251  | -0.11258 | 0.01493  |
| 2.90E-07 | -0.11384 | 0.01384  | -0.15626 | 0.0007   | -0.0259  | 0.57659  | -0.23492 | 2.82E-07 |
| 2.73E-12 | -0.09012 | 0.05161  | -0.19843 | 1.56E-05 | 0.000858 | 0.98525  | -0.16988 | 0.00023  |
| 0.00084  | 0.172429 | 0.00018  | 0.141188 | 0.00223  | 0.154038 | 0.00084  | 0.206854 | 6.57E-06 |
| 0.90243  | 0.087667 | 0.05835  | 0.072502 | 0.11767  | 0.111065 | 0.01634  | 0.085866 | 0.06374  |
| 0.35618  | 0.086711 | 0.06116  | 0.161351 | 0.00046  | 0.171587 | 0.00019  | 0.05893  | 0.20366  |
| 5.09E-15 | 0.196091 | 1.98E-05 | -0.04318 | 0.35179  | -0.062   | 0.18109  | 0.171957 | 0.00019  |
| 7.28E-06 | -0.11958 | 0.00969  | 0.076076 | 0.10059  | 0.061312 | 0.18595  | -0.11105 | 0.01636  |
| 0.00618  | -0.26881 | 3.58E-09 | -0.13274 | 0.00406  | -0.23059 | 4.71E-07 | -0.15761 | 0.00063  |

|          |          |          |          |          |          |          |          |          |
|----------|----------|----------|----------|----------|----------|----------|----------|----------|
| 0.01053  | 0.104982 | 0.02328  | 0.009227 | 0.84237  | 0.089078 | 0.0544   | -0.05925 | 0.20119  |
| 0.04018  | -0.04622 | 0.31896  | -0.05025 | 0.2785   | -0.11035 | 0.01705  | 0.023407 | 0.61388  |
| 0.10408  | 0.251167 | 3.76E-08 | 0.242652 | 1.10E-07 | 0.234173 | 3.08E-07 | 0.180019 | 9.16E-05 |
| 3.67E-07 | 0.001134 | 0.9805   | -0.04146 | 0.37141  | -0.0366  | 0.43005  | -0.07647 | 0.09881  |
| 0.38925  | 0.196563 | 1.88E-05 | 0.132018 | 0.00427  | 0.265388 | 5.73E-09 | 0.165126 | 0.00034  |
| 0.21742  | 0.036715 | 0.42862  | 0.115391 | 0.01259  | 0.048472 | 0.29589  | 0.119789 | 0.00957  |
| 6.58E-17 | -0.02982 | 0.52034  | -0.00858 | 0.85337  | 0.125758 | 0.0065   | -0.11879 | 0.01019  |
| 0.02105  | 0.040299 | 0.38491  | 0.119852 | 0.00953  | 0.141002 | 0.00226  | 0.112511 | 0.01499  |
| 2.41E-06 | 0.095921 | 0.03826  | 0.121295 | 0.00869  | 0.040625 | 0.38108  | 0.165557 | 0.00033  |
| 0.06102  | 0.070486 | 0.12825  | 0.018274 | 0.69367  | 0.175969 | 0.00013  | 0.034809 | 0.45299  |
| 0.53714  | 0.109966 | 0.01744  | 0.090663 | 0.05023  | 0.075074 | 0.10517  | 0.249051 | 4.93E-08 |
| 0.06163  | -0.02627 | 0.57125  | -0.07255 | 0.11745  | -0.11696 | 0.01142  | 0.096901 | 0.03632  |
| 0.28766  | -0.13299 | 0.00399  | -0.03895 | 0.40097  | -0.02182 | 0.63815  | -0.0403  | 0.38488  |
| 6.14E-05 | -0.07998 | 0.08427  | -0.00979 | 0.83284  | 0.04027  | 0.38525  | -0.06174 | 0.18292  |
| 0.18205  | -0.18492 | 5.81E-05 | -0.03227 | 0.48662  | -0.05338 | 0.2496   | -0.04283 | 0.35573  |
| 5.23E-05 | -0.10207 | 0.02741  | -0.05933 | 0.20057  | -0.13082 | 0.00463  | 0.152193 | 0.00097  |
| 0.13724  | 0.033275 | 0.47315  | 0.066251 | 0.15288  | 0.100573 | 0.02977  | -0.00647 | 0.88902  |
| 0.07673  | -0.0545  | 0.23984  | 0.01375  | 0.76696  | 0.170083 | 0.00022  | 0.047205 | 0.3087   |
| 0.16281  | -0.02087 | 0.65288  | -0.03677 | 0.42799  | -0.03642 | 0.43228  | 0.132843 | 0.00403  |
| 1.10E-09 | 0.11129  | 0.01613  | 0.141662 | 0.00215  | 0.19568  | 2.06E-05 | -0.02285 | 0.62232  |
| 0.23392  | 0.084451 | 0.06825  | 0.05065  | 0.27469  | 0.190943 | 3.27E-05 | 0.088292 | 0.05657  |
| 0.00283  | 0.101315 | 0.02858  | 0.122214 | 0.0082   | 0.278111 | 9.66E-10 | 0.022033 | 0.63485  |
| 0.13024  | 0.084397 | 0.06842  | 0.090613 | 0.05036  | 0.025581 | 0.58135  | 0.2142   | 3.00E-06 |
| 0.70805  | 0.034324 | 0.45932  | 0.065631 | 0.15677  | 0.095332 | 0.03946  | 0.10845  | 0.01907  |
| 1.32E-06 | 0.193865 | 2.46E-05 | 0.167616 | 0.00027  | 0.17431  | 0.00015  | 0.099932 | 0.03084  |
| 0.00281  | 0.003487 | 0.9401   | 0.005119 | 0.91214  | 0.107691 | 0.01993  | -0.01939 | 0.67596  |
| 0.21831  | -0.04138 | 0.3723   | 0.022475 | 0.62806  | -0.07342 | 0.11307  | 0.047723 | 0.30342  |
| 2.75E-05 | 0.160844 | 0.00048  | 0.226923 | 7.21E-07 | 0.353702 | 3.29E-15 | 0.098482 | 0.03336  |
| 0.57625  | 0.087298 | 0.05942  | -0.00382 | 0.93435  | 0.069185 | 0.13547  | 0.080103 | 0.08378  |
| 0.10451  | -0.06188 | 0.18191  | 0.014939 | 0.74747  | -0.04428 | 0.33969  | 0.015421 | 0.73961  |
| 0.11319  | 0.057134 | 0.21781  | -0.14603 | 0.00156  | -0.07171 | 0.12175  | -0.03929 | 0.3969   |
| 7.91E-09 | -0.00775 | 0.86738  | 0.035577 | 0.44307  | 0.154738 | 0.00079  | 0.026061 | 0.57427  |
| 0.85966  | 0.012547 | 0.78684  | -0.02466 | 0.59501  | 0.130869 | 0.00462  | 0.001074 | 0.98154  |
| 0.02685  | 0.140613 | 0.00232  | 0.061556 | 0.1842   | 0.14628  | 0.00153  | 0.109892 | 0.01752  |
| 0.51008  | 0.384431 | 6.77E-18 | 0.32644  | 4.67E-13 | 0.318062 | 1.94E-12 | 0.091772 | 0.04747  |
| 0.14122  | 0.09639  | 0.03732  | -0.04128 | 0.3734   | -0.00116 | 0.97998  | 0.072189 | 0.11926  |
| 0.7583   | 0.070899 | 0.12603  | -0.02464 | 0.59534  | -0.01365 | 0.76857  | -0.01113 | 0.81049  |
| 0.18392  | 0.037934 | 0.41344  | -0.08794 | 0.05757  | 0.005038 | 0.91353  | 0.049654 | 0.28425  |
| 0.45445  | -0.05867 | 0.20564  | 0.071812 | 0.12121  | 0.023413 | 0.61379  | 0.081075 | 0.08008  |
| 0.00468  | 0.135814 | 0.00327  | 0.086419 | 0.06204  | 0.122915 | 0.00783  | -0.02063 | 0.65661  |
| 0.50763  | 0.037733 | 0.41591  | -0.04143 | 0.37164  | 0.01751  | 0.70586  | 0.101279 | 0.02864  |
| 0.29226  | -0.05628 | 0.22474  | -0.22559 | 8.41E-07 | -0.1654  | 0.00033  | -0.06631 | 0.15251  |
| 0.06346  | 0.094368 | 0.04151  | -0.00606 | 0.89614  | 0.089935 | 0.05211  | 0.110527 | 0.01687  |
| 1.31E-15 | 0.354298 | 2.94E-15 | 0.202075 | 1.08E-05 | 0.158432 | 0.00059  | 0.154356 | 0.00082  |
| 0.74852  | 0.21625  | 2.40E-06 | 0.045998 | 0.32125  | 0.061644 | 0.18357  | 0.082508 | 0.07487  |

|          |          |          |          |          |          |          |          |          |
|----------|----------|----------|----------|----------|----------|----------|----------|----------|
| 0.00189  | 0.106588 | 0.02123  | -0.06064 | 0.19081  | 0.069427 | 0.1341   | 0.000289 | 0.99503  |
| 0.01996  | -0.12053 | 0.00913  | -0.10701 | 0.02072  | -0.0674  | 0.14586  | -0.07332 | 0.11356  |
| 0.23403  | 0.008475 | 0.85506  | 0.016048 | 0.72942  | 0.025157 | 0.58763  | -0.02327 | 0.61599  |
| 0.0051   | -0.0422  | 0.36283  | 0.05098  | 0.27157  | 0.035429 | 0.44497  | -0.15591 | 0.00072  |
| 0.02907  | 0.187306 | 4.64E-05 | 0.076835 | 0.09723  | 0.123536 | 0.00752  | 0.016502 | 0.72209  |
| 0.03206  | 0.215969 | 2.47E-06 | 0.080415 | 0.08257  | 0.106439 | 0.02142  | 0.040198 | 0.3861   |
| 0.01211  | 0.26327  | 7.64E-09 | 0.190169 | 3.53E-05 | 0.126969 | 0.006    | -0.02903 | 0.53141  |
| 5.68E-13 | 0.120739 | 0.00901  | -0.06631 | 0.1525   | -0.0554  | 0.23215  | 0.167984 | 0.00027  |
| 0.23923  | -0.09518 | 0.03978  | -0.02948 | 0.52516  | -0.10062 | 0.02969  | -0.09036 | 0.05101  |
| 0.18082  | 0.034485 | 0.4572   | -0.03283 | 0.47911  | 0.002832 | 0.95133  | 0.022794 | 0.62319  |
| 0.00166  | 0.100421 | 0.03002  | -0.00897 | 0.84662  | 0.047129 | 0.30949  | -0.04001 | 0.38836  |
| 0.45317  | 0.082368 | 0.07536  | 0.089577 | 0.05306  | 0.153824 | 0.00085  | 0.060227 | 0.19387  |
| 0.01015  | 0.168653 | 0.00025  | 0.089366 | 0.05362  | 0.213809 | 3.13E-06 | 0.072734 | 0.11649  |
| 4.08E-08 | 0.086103 | 0.063    | 0.176496 | 0.00013  | 0.060528 | 0.19165  | 0.241529 | 1.26E-07 |
| 1.05E-08 | 0.332779 | 1.54E-13 | 0.29165  | 1.31E-10 | 0.274369 | 1.65E-09 | 0.187204 | 4.69E-05 |
| 0.7868   | 0.074916 | 0.1059   | 0.128048 | 0.00559  | 0.185715 | 5.40E-05 | 0.034457 | 0.45758  |
| 0.00032  | -0.2597  | 1.23E-08 | -0.10044 | 0.02998  | -0.11262 | 0.0149   | -0.14196 | 0.0021   |
| 2.49E-08 | 0.170419 | 0.00022  | 0.192722 | 2.75E-05 | 0.182083 | 7.58E-05 | 0.207104 | 6.40E-06 |
| 1.50E-08 | -0.12374 | 0.00743  | -0.14936 | 0.00121  | -0.09462 | 0.04097  | -0.21345 | 3.25E-06 |
| 0.00379  | 0.047986 | 0.30076  | 0.021356 | 0.64528  | 0.046891 | 0.31193  | -0.03665 | 0.42946  |
| 0.21841  | 0.011785 | 0.79949  | 0.079702 | 0.08534  | 0.109418 | 0.01802  | 0.016374 | 0.72415  |
| 0.3764   | 0.148662 | 0.00127  | 0.01416  | 0.76021  | -0.03885 | 0.40222  | -0.06324 | 0.17246  |
| 9.48E-07 | 0.209228 | 5.12E-06 | 0.16123  | 0.00047  | 0.199334 | 1.43E-05 | 0.029881 | 0.51948  |
| 0.00098  | 0.0552   | 0.23381  | -0.00255 | 0.95621  | 0.102592 | 0.02663  | 0.006034 | 0.89654  |
| 0.17931  | 0.004138 | 0.92894  | 0.049464 | 0.2861   | 0.035735 | 0.44105  | -0.01201 | 0.79581  |
| 0.05285  | 0.174045 | 0.00016  | 0.134452 | 0.0036   | 0.353541 | 3.40E-15 | 0.052196 | 0.26029  |
| 4.87E-07 | -0.07295 | 0.1154   | -0.1809  | 8.45E-05 | -0.02203 | 0.63487  | -0.24462 | 8.62E-08 |
| 0.97074  | 0.051376 | 0.26786  | -0.02031 | 0.66152  | -0.11904 | 0.01003  | -0.0419  | 0.36633  |
| 4.92E-16 | -0.18846 | 4.16E-05 | -0.00768 | 0.86856  | 0.153545 | 0.00087  | -0.23488 | 2.83E-07 |
| 8.43E-11 | -0.09422 | 0.04184  | 0.148697 | 0.00127  | 0.097265 | 0.03562  | -0.22456 | 9.46E-07 |
| 9.69E-10 | -0.02173 | 0.63957  | -0.05599 | 0.22715  | -0.00803 | 0.86252  | -0.28581 | 3.14E-10 |
| 0.00056  | -0.09533 | 0.03947  | -0.13409 | 0.00369  | -0.08839 | 0.05629  | -0.1547  | 0.0008   |
| 1.76E-09 | 0.030028 | 0.51743  | -0.04012 | 0.38705  | 0.148388 | 0.0013   | -0.1216  | 0.00852  |
| 1.24E-05 | -0.07429 | 0.10885  | -0.06629 | 0.15263  | -0.09536 | 0.03941  | 0.151133 | 0.00105  |
| 0.11718  | 0.060859 | 0.18923  | -0.01984 | 0.66892  | -0.02402 | 0.60459  | 0.026018 | 0.57491  |
| 0.00093  | 0.294461 | 8.54E-11 | 0.134451 | 0.0036   | 0.23555  | 2.62E-07 | 0.245881 | 7.36E-08 |
| 2.78E-05 | -0.1457  | 0.00159  | 0.098454 | 0.03341  | 0.088579 | 0.05577  | 0.017209 | 0.71069  |
| 0.12135  | 0.044004 | 0.3427   | 0.009324 | 0.84073  | 0.043217 | 0.3514   | 0.372212 | 8.58E-17 |
| 0.77165  | 0.189324 | 3.83E-05 | 0.101521 | 0.02826  | 0.140976 | 0.00226  | 0.068446 | 0.1397   |
| 0.30863  | 0.102589 | 0.02663  | 0.009345 | 0.84037  | 0.038957 | 0.40094  | 0.253169 | 2.91E-08 |
| 0.0023   | 0.055524 | 0.23107  | -0.0498  | 0.28286  | 0.085778 | 0.06401  | -0.00457 | 0.92161  |
| 0.2527   | 0.021618 | 0.64123  | -0.02453 | 0.59704  | 0.035154 | 0.44852  | 0.00822  | 0.85938  |
| 0.41504  | 0.171908 | 0.00019  | 0.022951 | 0.62081  | 0.170295 | 0.00022  | 0.14887  | 0.00125  |
| 0.00196  | -0.05828 | 0.20867  | -0.05506 | 0.23499  | 0.050487 | 0.27624  | 0.008958 | 0.8469   |
| 4.18E-06 | 0.009886 | 0.83127  | 0.016971 | 0.71451  | 0.083221 | 0.07238  | -0.07502 | 0.10544  |

|          |          |          |          |          |          |          |          |          |
|----------|----------|----------|----------|----------|----------|----------|----------|----------|
| 0.03158  | 0.450491 | 1.02E-24 | 0.231813 | 4.08E-07 | 0.369641 | 1.44E-16 | 0.226274 | 7.77E-07 |
| 0.59224  | -0.10441 | 0.02404  | -0.21268 | 3.54E-06 | -0.27507 | 1.49E-09 | -0.15852 | 0.00059  |
| 0.01356  | 0.014415 | 0.75604  | 0.02028  | 0.66203  | 0.097545 | 0.03509  | -0.00589 | 0.89893  |
| 0.00742  | 0.070122 | 0.13024  | -0.00181 | 0.96896  | 0.036203 | 0.43508  | -0.067   | 0.1483   |
| 0.00115  | 0.084026 | 0.06965  | 0.016167 | 0.72749  | -0.0312  | 0.50118  | 0.185286 | 5.62E-05 |
| 5.70E-05 | -0.05786 | 0.21199  | -0.09924 | 0.03202  | -0.01437 | 0.75684  | -0.12784 | 0.00566  |
| 0.01933  | 0.087397 | 0.05913  | 0.067236 | 0.14686  | 0.006653 | 0.88599  | 0.025422 | 0.5837   |
| 0.26862  | 0.089424 | 0.05346  | 0.042695 | 0.35726  | 0.089774 | 0.05253  | 0.068059 | 0.14196  |
| 0.59104  | -0.01236 | 0.78992  | -0.04587 | 0.32258  | -0.03714 | 0.42326  | 0.028803 | 0.53467  |
| 1.96E-05 | -0.11326 | 0.01433  | -0.10671 | 0.02109  | -0.09735 | 0.03546  | -0.11366 | 0.01398  |
| 0.06263  | -0.01704 | 0.71347  | 0.147667 | 0.00137  | 0.092263 | 0.04629  | 0.071871 | 0.12091  |
| 0.64358  | -0.07326 | 0.11385  | 0.105542 | 0.02255  | 0.07505  | 0.10528  | -0.17675 | 0.00012  |
| 1.46E-05 | 0.203438 | 9.38E-06 | 0.195928 | 2.01E-05 | 0.089455 | 0.05338  | 0.099549 | 0.03149  |
| 0.00251  | 0.221661 | 1.31E-06 | 0.239928 | 1.54E-07 | 0.168394 | 0.00026  | 0.219837 | 1.61E-06 |
| 0.00848  | -0.06525 | 0.15921  | -0.21911 | 1.75E-06 | -0.23542 | 2.65E-07 | 0.079337 | 0.08679  |
| 0.70884  | 0.037631 | 0.41719  | -0.14219 | 0.00207  | -0.12571 | 0.00653  | -0.06246 | 0.17786  |
| 0.02937  | 0.007176 | 0.87709  | -0.09222 | 0.04638  | -0.06016 | 0.19436  | 0.180792 | 8.53E-05 |
| 0.33683  | 0.185379 | 5.57E-05 | 0.135437 | 0.00336  | 0.311688 | 5.58E-12 | 0.044533 | 0.33692  |
| 0.00606  | -0.12714 | 0.00594  | -0.0915  | 0.04814  | -0.0444  | 0.33836  | -0.09826 | 0.03376  |
| 0.00123  | 0.350392 | 6.17E-15 | 0.259813 | 1.21E-08 | 0.216799 | 2.26E-06 | 0.204463 | 8.44E-06 |
| 0.02684  | -0.04929 | 0.28785  | -0.09331 | 0.04386  | 0.005474 | 0.90608  | -0.0401  | 0.3872   |
| 0.07099  | 0.074726 | 0.10679  | -0.01644 | 0.72304  | 0.038971 | 0.40077  | 0.094246 | 0.04178  |
| 1.04E-13 | -0.0465  | 0.316    | -0.12369 | 0.00745  | -0.0615  | 0.18459  | -0.16575 | 0.00032  |
| 0.0153   | 0.084159 | 0.06921  | 0.006479 | 0.88894  | -0.01775 | 0.70208  | 0.117134 | 0.0113   |
| 0.5911   | 0.249611 | 4.59E-08 | 0.201124 | 1.19E-05 | 0.28137  | 6.03E-10 | 0.109424 | 0.01801  |
| 3.97E-13 | 0.139726 | 0.00248  | 0.053741 | 0.24642  | 0.081283 | 0.0793   | 0.291909 | 1.26E-10 |
| 0.08325  | 0.012825 | 0.78222  | 0.007322 | 0.87462  | 0.122638 | 0.00797  | -0.01765 | 0.70359  |
| 0.76719  | 0.290732 | 1.51E-10 | 0.171732 | 0.00019  | 0.345107 | 1.66E-14 | 0.202398 | 1.04E-05 |
| 0.14899  | -0.09353 | 0.04336  | -0.06035 | 0.19296  | -0.04442 | 0.33818  | 0.04228  | 0.36196  |
| 0.34844  | -0.12673 | 0.0061   | -0.06297 | 0.17432  | -0.06483 | 0.16187  | 0.031489 | 0.49725  |
| 3.05E-05 | -0.0547  | 0.23806  | -0.06959 | 0.13318  | -0.14633 | 0.00152  | 0.048416 | 0.29645  |
| 3.92E-23 | 0.169166 | 0.00024  | 0.044217 | 0.34036  | 0.011598 | 0.8026   | 0.252678 | 3.10E-08 |
| 0.00012  | 0.241999 | 1.19E-07 | 0.180657 | 8.64E-05 | 0.237032 | 2.19E-07 | 0.174909 | 0.00015  |
| 1.07E-06 | 0.243308 | 1.01E-07 | 0.218654 | 1.84E-06 | 0.231945 | 4.02E-07 | 0.230061 | 5.01E-07 |
| 0.01392  | 0.001383 | 0.97622  | -0.00649 | 0.88875  | 0.068966 | 0.13671  | -0.08445 | 0.06824  |
| 0.00136  | -0.15115 | 0.00105  | -0.14346 | 0.00188  | -0.16317 | 0.0004   | -0.09971 | 0.03122  |
| 0.00021  | 0.202396 | 1.04E-05 | 0.134014 | 0.00372  | 0.041293 | 0.37329  | 0.073626 | 0.11207  |
| 0.07446  | 0.307527 | 1.10E-11 | 0.27629  | 1.25E-09 | 0.380242 | 1.64E-17 | 0.186226 | 5.14E-05 |
| 0.22317  | 0.017639 | 0.70381  | -0.09088 | 0.04967  | 0.077349 | 0.09501  | 0.02277  | 0.62357  |
| 0.17231  | 0.13976  | 0.00247  | 0.11441  | 0.01336  | 0.245173 | 8.04E-08 | 0.095667 | 0.03877  |
| 0.00022  | 0.269825 | 3.11E-09 | 0.179966 | 9.20E-05 | 0.208163 | 5.73E-06 | 0.149082 | 0.00123  |
| 0.57595  | 0.057859 | 0.21202  | -0.12155 | 0.00855  | -0.16895 | 0.00024  | 0.037714 | 0.41616  |
| 0.6577   | 0.018484 | 0.69033  | 0.058005 | 0.21086  | 0.064368 | 0.16492  | 0.030674 | 0.50846  |
| 2.69E-17 | 0.271151 | 2.59E-09 | 0.017217 | 0.71057  | 0.008629 | 0.85246  | 0.28658  | 2.80E-10 |
| 0.72107  | 0.079003 | 0.08813  | 0.005419 | 0.90702  | -0.01977 | 0.67004  | -0.00062 | 0.98933  |

|          |          |          |          |          |          |          |          |          |
|----------|----------|----------|----------|----------|----------|----------|----------|----------|
| 0.92541  | 0.071182 | 0.12452  | 0.042532 | 0.3591   | 0.040677 | 0.38046  | 0.043084 | 0.3529   |
| 0.11541  | 0.241375 | 1.29E-07 | 0.141372 | 0.0022   | 0.217892 | 2.00E-06 | 0.028607 | 0.53744  |
| 0.19069  | 0.062163 | 0.17991  | -0.07058 | 0.12775  | 0.055413 | 0.23201  | 0.012162 | 0.79321  |
| 0.35602  | 0.068679 | 0.13836  | 0.134942 | 0.00348  | 0.138195 | 0.00276  | 0.081061 | 0.08013  |
| 0.96822  | -0.14288 | 0.00197  | -0.13873 | 0.00266  | -0.20252 | 1.03E-05 | 0.005743 | 0.90149  |
| 0.00598  | 0.098618 | 0.03312  | -0.11455 | 0.01325  | -0.02952 | 0.52459  | 0.00251  | 0.95685  |
| 0.91499  | 0.234964 | 2.81E-07 | 0.18495  | 5.80E-05 | 0.227409 | 6.82E-07 | 0.158383 | 0.00059  |
| 0.00074  | 0.10254  | 0.0267   | 0.1579   | 0.00062  | 0.062635 | 0.17661  | 0.061407 | 0.18527  |
| 2.03E-26 | 0.169237 | 0.00024  | 0.23131  | 4.33E-07 | 0.075945 | 0.10118  | 0.361046 | 7.97E-16 |
| 0.00825  | 0.063969 | 0.16756  | 0.027837 | 0.54846  | 0.125112 | 0.00679  | 0.025075 | 0.58885  |
| 0.0215   | 0.019002 | 0.68212  | 0.033903 | 0.46484  | -0.03197 | 0.49073  | 0.114157 | 0.01357  |
| 6.76E-16 | 0.00187  | 0.96786  | -0.09917 | 0.03214  | -0.13709 | 0.00299  | 0.098837 | 0.03273  |
| 0.74668  | 0.158323 | 0.00059  | 0.171437 | 0.0002   | 0.159415 | 0.00054  | 0.264287 | 6.65E-09 |
| 0.01109  | -0.03243 | 0.48453  | -0.10067 | 0.02962  | -0.05654 | 0.22267  | 0.156422 | 0.00069  |
| 0.12417  | 0.024513 | 0.59723  | -0.01188 | 0.79789  | 0.125217 | 0.00674  | 0.008154 | 0.86049  |
| 0.55172  | -0.1352  | 0.00342  | -0.12471 | 0.00697  | -0.18913 | 3.90E-05 | -0.06052 | 0.19171  |
| 0.00141  | -0.01197 | 0.79647  | 0.061113 | 0.18739  | -0.03063 | 0.50902  | 0.089242 | 0.05395  |
| 0.17749  | 0.045987 | 0.32137  | 0.077352 | 0.095    | 0.064565 | 0.16363  | 0.035372 | 0.44572  |
| 0.02181  | 0.15315  | 0.0009   | -0.03161 | 0.49561  | -0.04231 | 0.36163  | 0.096294 | 0.03751  |
| 0.00065  | 0.030288 | 0.5138   | -0.00603 | 0.89657  | 0.047164 | 0.30913  | -0.01804 | 0.69743  |
| 1.53E-11 | 0.145206 | 0.00165  | 0.034048 | 0.46294  | 0.178035 | 0.00011  | -0.0616  | 0.18387  |
| 2.11E-05 | 0.118516 | 0.01037  | 0.17224  | 0.00018  | 0.277629 | 1.03E-09 | 0.069746 | 0.13232  |
| 0.0012   | 0.199216 | 1.44E-05 | 0.106743 | 0.02105  | 0.189913 | 3.62E-05 | 0.260075 | 1.17E-08 |
| 4.17E-06 | 0.060544 | 0.19153  | -0.06599 | 0.15449  | 0.056507 | 0.22291  | -0.11492 | 0.01296  |
| 0.00036  | 0.064761 | 0.16235  | -0.06895 | 0.1368   | -0.03873 | 0.40373  | -0.07579 | 0.10189  |
| 1.34E-05 | 0.083623 | 0.07101  | 0.069986 | 0.13099  | 0.213681 | 3.17E-06 | 0.010886 | 0.8145   |
| 0.00285  | 0.104422 | 0.02403  | 0.034385 | 0.45852  | 0.065021 | 0.16066  | -0.04359 | 0.34726  |
| 0.08197  | 0.15001  | 0.00115  | 0.141605 | 0.00216  | 0.046971 | 0.31111  | 0.184408 | 6.10E-05 |
| 0.00071  | -0.01611 | 0.72844  | -0.02415 | 0.6027   | 0.108873 | 0.0186   | -0.09883 | 0.03274  |
| 0.15654  | 0.069557 | 0.13337  | 0.060936 | 0.18867  | 0.107549 | 0.02009  | -0.00288 | 0.95045  |
| 4.54E-07 | 0.007197 | 0.87673  | -0.00994 | 0.83031  | 0.086901 | 0.06059  | -0.06603 | 0.15424  |
| 0.01358  | -0.02989 | 0.51936  | 0.023704 | 0.60939  | -0.01029 | 0.82448  | 0.026458 | 0.56846  |
| 0.00053  | 0.012397 | 0.78931  | 0.027758 | 0.5496   | 0.084921 | 0.06672  | -0.02842 | 0.54011  |
| 9.90E-07 | 0.071433 | 0.12319  | 0.107234 | 0.02046  | 0.148748 | 0.00126  | -0.03645 | 0.4319   |
| 1.34E-08 | 0.063417 | 0.17127  | 0.114702 | 0.01313  | 0.000351 | 0.99396  | 0.203865 | 8.98E-06 |
| 0.80032  | 0.084748 | 0.06728  | 0.115066 | 0.01284  | 0.137597 | 0.00289  | 0.010242 | 0.82529  |
| 0.26326  | 0.126342 | 0.00626  | 0.067334 | 0.14627  | 0.093456 | 0.04353  | 0.049713 | 0.28368  |
| 0.13324  | 0.139939 | 0.00244  | 0.071331 | 0.12373  | 0.112353 | 0.01513  | 0.18136  | 8.10E-05 |
| 0.29044  | 0.098117 | 0.03403  | 0.121451 | 0.00861  | 0.135027 | 0.00346  | 0.029989 | 0.51798  |
| 1.82E-05 | -0.10963 | 0.01779  | -0.03617 | 0.43555  | 0.029274 | 0.528    | -0.04934 | 0.28728  |
| 0.00268  | 0.023533 | 0.61198  | -0.02414 | 0.60281  | 0.077293 | 0.09525  | 0.095357 | 0.03941  |
| 0.02542  | 0.085192 | 0.06585  | 0.052929 | 0.25364  | 0.139471 | 0.00252  | 0.123174 | 0.0077   |
| 0.00016  | -0.05473 | 0.23779  | -0.13129 | 0.00448  | -0.0288  | 0.53469  | -0.05108 | 0.27063  |
| 0.00893  | 0.173429 | 0.00017  | -0.07138 | 0.12346  | -0.07897 | 0.08825  | -0.05262 | 0.25642  |
| 9.42E-06 | -0.02955 | 0.52415  | -0.03381 | 0.46601  | 0.059729 | 0.19759  | -0.08237 | 0.07534  |

|          |          |          |          |          |          |          |          |          |
|----------|----------|----------|----------|----------|----------|----------|----------|----------|
| 0.83698  | 0.072342 | 0.11848  | 0.207088 | 6.42E-06 | 0.194718 | 2.26E-05 | 0.203519 | 9.30E-06 |
| 0.01006  | 0.039197 | 0.39805  | 0.090657 | 0.05024  | 0.153051 | 0.00091  | 0.11851  | 0.01037  |
| 1.43E-05 | 0.10198  | 0.02755  | 0.11662  | 0.01167  | 0.092776 | 0.04509  | -0.01726 | 0.70989  |
| 2.71E-07 | -0.11347 | 0.01415  | -0.07055 | 0.12791  | -0.01374 | 0.7671   | -0.07236 | 0.11838  |
| 0.14511  | 0.201379 | 1.16E-05 | 0.19106  | 3.24E-05 | 0.215087 | 2.72E-06 | 0.208897 | 5.30E-06 |
| 0.15294  | 0.035283 | 0.44686  | 0.022704 | 0.62456  | 0.078119 | 0.09176  | 0.055527 | 0.23105  |
| 3.21E-06 | 0.0556   | 0.23043  | 0.08554  | 0.06475  | 0.205039 | 7.95E-06 | 0.030517 | 0.51062  |
| 0.22049  | -0.19675 | 1.85E-05 | -0.15055 | 0.0011   | -0.18552 | 5.50E-05 | -0.02246 | 0.62826  |
| 2.22E-10 | -0.17464 | 0.00015  | 0.085733 | 0.06415  | -0.07009 | 0.13039  | 0.278728 | 8.84E-10 |
| 8.17E-06 | 0.126342 | 0.00626  | -0.07105 | 0.12521  | -0.08518 | 0.06589  | -0.1295  | 0.00506  |
| 0.62167  | 0.170462 | 0.00021  | -0.05133 | 0.26828  | 0.055385 | 0.23225  | -0.10265 | 0.02654  |
| 0.00259  | -0.02524 | 0.58635  | -0.05822 | 0.20918  | -0.13871 | 0.00266  | 0.124745 | 0.00695  |
| 0.04641  | 0.047084 | 0.30994  | -0.09499 | 0.04018  | -0.03079 | 0.50682  | 0.055347 | 0.23257  |
| 5.99E-09 | -0.08915 | 0.05421  | -0.03304 | 0.47626  | 0.082347 | 0.07544  | -0.10615 | 0.02178  |
| 0.00155  | -0.09143 | 0.0483   | -0.1622  | 0.00043  | -0.19978 | 1.36E-05 | 0.027513 | 0.55313  |
| 0.1338   | 0.030348 | 0.51297  | 0.032302 | 0.4862   | -0.03452 | 0.45681  | -0.01185 | 0.79842  |
| 0.08021  | 0.111429 | 0.01599  | 0.015177 | 0.74357  | 0.044881 | 0.33315  | 0.003066 | 0.94731  |
| 1.32E-05 | -0.22298 | 1.13E-06 | -0.16633 | 0.00031  | -0.29815 | 4.83E-11 | -0.12895 | 0.00526  |
| 0.12574  | 0.046535 | 0.31563  | -0.02399 | 0.6051   | 0.009981 | 0.82968  | 0.1369   | 0.00303  |
| 1.20E-21 | 0.176202 | 0.00013  | 0.114646 | 0.01317  | 0.090391 | 0.05092  | 0.322793 | 8.73E-13 |
| 9.60E-08 | -0.00227 | 0.96099  | -0.14728 | 0.00142  | 0.032136 | 0.48844  | -0.09543 | 0.03925  |
| 0.01159  | 0.008392 | 0.85647  | 0.072329 | 0.11855  | 0.089882 | 0.05225  | -0.02107 | 0.64975  |
| 3.84E-05 | 0.016115 | 0.72833  | 0.036716 | 0.42861  | 0.254849 | 2.34E-08 | -0.0058  | 0.9006   |
| 0.21103  | 0.129534 | 0.00505  | 0.098949 | 0.03253  | 0.05373  | 0.24652  | 0.11183  | 0.01562  |
| 0.54069  | -0.01533 | 0.7411   | -0.00619 | 0.89386  | -0.04666 | 0.31437  | 0.159851 | 0.00053  |
| 0.04504  | 0.17474  | 0.00015  | 0.136937 | 0.00302  | 0.108572 | 0.01893  | 0.071562 | 0.12251  |
| 0.12652  | 0.048881 | 0.29182  | 0.11919  | 0.00994  | 0.11575  | 0.01231  | 0.133771 | 0.00378  |
| 0.16534  | 0.090737 | 0.05004  | 0.013051 | 0.77849  | 0.232108 | 3.94E-07 | 0.069075 | 0.13609  |
| 5.13E-13 | 0.146422 | 0.00151  | 0.155918 | 0.00072  | 0.0259   | 0.57664  | 0.306895 | 1.21E-11 |
| 0.08246  | 0.213367 | 3.28E-06 | 0.000487 | 0.99162  | 0.046075 | 0.32044  | -0.17668 | 0.00012  |
| 0.00023  | 0.211038 | 4.22E-06 | 0.026397 | 0.56935  | 0.010219 | 0.82568  | 0.124462 | 0.00708  |
| 0.06859  | 0.158767 | 0.00057  | 0.035866 | 0.43938  | 0.298974 | 4.25E-11 | 0.064478 | 0.1642   |
| 0.2901   | 0.122973 | 0.0078   | 0.13295  | 0.004    | 0.157594 | 0.00063  | 0.068337 | 0.14033  |
| 0.00025  | 0.068682 | 0.13834  | 0.039188 | 0.39816  | 0.10658  | 0.02124  | -0.13826 | 0.00275  |
| 0.06802  | -0.14446 | 0.00175  | -0.11915 | 0.00996  | -0.07316 | 0.11437  | -0.23612 | 2.44E-07 |
| 0.33974  | -0.20229 | 1.06E-05 | -0.19582 | 2.03E-05 | -0.21203 | 3.79E-06 | -0.1453  | 0.00164  |
| 0.0004   | -0.06063 | 0.19093  | -0.05803 | 0.21069  | -0.13738 | 0.00293  | 0.119371 | 0.00982  |
| 2.93E-08 | -0.04606 | 0.32059  | 0.081379 | 0.07895  | 0.119107 | 0.00999  | -0.06727 | 0.14662  |
| 0.49984  | 0.089008 | 0.05459  | -0.0644  | 0.16468  | -0.0932  | 0.04411  | -0.04146 | 0.37136  |
| 0.62927  | 0.051696 | 0.26489  | 0.060236 | 0.19381  | 0.001866 | 0.96792  | 0.006599 | 0.8869   |
| 0.0015   | -0.05552 | 0.23111  | 0.015734 | 0.73451  | 0.015053 | 0.7456   | -0.11442 | 0.01335  |
| 0.01118  | 0.025884 | 0.57688  | 0.070506 | 0.12814  | 0.066004 | 0.15442  | 0.069038 | 0.1363   |
| 2.53E-06 | 0.243446 | 9.98E-08 | 0.182303 | 7.42E-05 | 0.22851  | 6.00E-07 | 0.218528 | 1.87E-06 |
| 0.00032  | -0.01477 | 0.7503   | -0.04834 | 0.29721  | -0.02164 | 0.64082  | -0.18761 | 4.51E-05 |
| 0.88028  | 0.140509 | 0.00234  | 0.234113 | 3.11E-07 | 0.324005 | 7.10E-13 | 0.099522 | 0.03153  |



|          |          |          |          |          |          |          |          |          |
|----------|----------|----------|----------|----------|----------|----------|----------|----------|
| 0.11681  | 0.079026 | 0.08804  | 0.069949 | 0.13119  | 0.118188 | 0.01058  | 0.033582 | 0.46908  |
| 9.32E-05 | 0.1095   | 0.01793  | -0.04805 | 0.30013  | -0.0571  | 0.21805  | -0.18223 | 7.47E-05 |
| 0.00014  | -0.00147 | 0.97467  | 0.001991 | 0.96577  | 0.089895 | 0.05221  | -0.05434 | 0.2412   |
| 0.35164  | 0.120303 | 0.00926  | 0.111991 | 0.01547  | 0.107154 | 0.02055  | -0.02775 | 0.54969  |
| 0.00019  | 0.032293 | 0.48633  | -0.04764 | 0.30429  | 0.018218 | 0.69456  | 0.005643 | 0.90319  |
| 0.00267  | 0.268685 | 3.64E-09 | 0.231579 | 4.19E-07 | 0.223232 | 1.10E-06 | 0.253506 | 2.78E-08 |
| 5.59E-05 | 0.444861 | 4.46E-24 | 0.286912 | 2.67E-10 | 0.242744 | 1.09E-07 | 0.219822 | 1.62E-06 |
| 0.82641  | 0.102821 | 0.02629  | 0.168826 | 0.00025  | 0.194393 | 2.34E-05 | 0.043598 | 0.34718  |
| 0.0477   | 0.078176 | 0.09151  | -0.02794 | 0.54693  | -0.02534 | 0.58497  | -0.06431 | 0.16532  |
| 0.02062  | 0.00502  | 0.91385  | 0.015048 | 0.74568  | 0.063955 | 0.16765  | 0.084847 | 0.06696  |
| 3.34E-08 | -0.07305 | 0.1149   | -0.05512 | 0.2345   | 0.071812 | 0.12121  | -0.17861 | 0.0001   |
| 2.42E-10 | 0.214436 | 2.92E-06 | 0.093226 | 0.04405  | 0.092949 | 0.04468  | 0.048291 | 0.2977   |
| 6.04E-08 | 0.013207 | 0.77591  | 0.178633 | 0.0001   | 0.233042 | 3.53E-07 | -0.17457 | 0.00015  |
| 0.6669   | 0.000608 | 0.98955  | 0.052108 | 0.26109  | -0.04052 | 0.38235  | 0.001147 | 0.98029  |
| 8.00E-05 | -0.02176 | 0.63912  | 0.024282 | 0.60069  | 0.162303 | 0.00043  | -0.05926 | 0.20111  |
| 6.01E-05 | -0.05324 | 0.25086  | -0.00604 | 0.89639  | 0.016375 | 0.72414  | -0.03407 | 0.46268  |
| 0.31189  | -0.06291 | 0.17474  | -0.09363 | 0.04314  | -0.07259 | 0.11723  | -0.04724 | 0.30836  |
| 0.20129  | -0.27695 | 1.14E-09 | -0.21282 | 3.48E-06 | -0.29852 | 4.56E-11 | -0.04577 | 0.32369  |
| 0.92494  | -0.03202 | 0.48997  | 0.015342 | 0.74089  | 0.028165 | 0.54376  | -0.0292  | 0.52898  |
| 0.96077  | -0.0093  | 0.84116  | 0.063791 | 0.16875  | 0.07266  | 0.11687  | -0.01658 | 0.72083  |
| 8.81E-08 | 0.231451 | 4.26E-07 | 0.161151 | 0.00047  | 0.24998  | 4.38E-08 | 0.3021   | 2.60E-11 |
| 0.00198  | 0.266138 | 5.17E-09 | 0.189421 | 3.79E-05 | 0.308826 | 8.89E-12 | 0.290121 | 1.65E-10 |
| 0.00424  | -0.12032 | 0.00925  | -0.00257 | 0.95587  | -0.08084 | 0.08095  | 0.040739 | 0.37974  |
| 1.88E-10 | -0.22552 | 8.48E-07 | -0.084   | 0.06975  | -0.05098 | 0.27153  | -0.21893 | 1.78E-06 |
| 0.00114  | 0.025563 | 0.58162  | -0.03771 | 0.41616  | 0.146956 | 0.00145  | -0.01006 | 0.82837  |
| 0.01413  | -0.07069 | 0.12714  | -0.04259 | 0.35845  | -0.01177 | 0.79983  | 0.132203 | 0.00421  |
| 0.00031  | -0.12398 | 0.00731  | 0.016871 | 0.71613  | -0.01385 | 0.76534  | -0.21469 | 2.85E-06 |
| 0.00075  | 0.092962 | 0.04465  | 0.130117 | 0.00486  | 0.095947 | 0.0382   | 0.14536  | 0.00164  |
| 0.00968  | -0.12789 | 0.00565  | -0.09185 | 0.04728  | -0.07289 | 0.11569  | -0.11422 | 0.01352  |
| 0.5853   | -0.14444 | 0.00175  | -0.12725 | 0.00589  | -0.1092  | 0.01825  | -0.03797 | 0.41295  |
| 0.96128  | -0.10216 | 0.02727  | -0.03904 | 0.39995  | -0.03847 | 0.40686  | -0.00882 | 0.84921  |
| 2.40E-05 | 0.075046 | 0.1053   | 0.123465 | 0.00756  | 0.245636 | 7.59E-08 | -0.13233 | 0.00417  |
| 0.99086  | -0.3702  | 1.29E-16 | -0.16447 | 0.00036  | -0.24403 | 9.28E-08 | -0.04075 | 0.37959  |
| 0.00038  | -0.1474  | 0.0014   | -0.13286 | 0.00402  | -0.12386 | 0.00737  | -0.22817 | 6.24E-07 |
| 4.44E-13 | -0.05703 | 0.21869  | 0.002802 | 0.95185  | -0.04916 | 0.28904  | 0.10686  | 0.0209   |
| 3.24E-15 | 0.136974 | 0.00302  | 0.135699 | 0.0033   | 0.086536 | 0.06168  | 0.352149 | 4.43E-15 |
| 5.78E-23 | 0.212126 | 3.75E-06 | -0.04248 | 0.35966  | -0.06095 | 0.18855  | 0.289498 | 1.81E-10 |
| 0.87108  | 0.015038 | 0.74584  | -0.03356 | 0.46944  | -0.01156 | 0.80328  | 0.023057 | 0.6192   |
| 0.40393  | 0.175344 | 0.00014  | 0.119919 | 0.00949  | 0.152297 | 0.00096  | 0.222382 | 1.21E-06 |
| 0.01433  | -0.1253  | 0.00671  | -0.00502 | 0.91392  | -0.05902 | 0.20301  | -0.11468 | 0.01315  |
| 0.00163  | -0.2104  | 4.52E-06 | -0.29137 | 1.37E-10 | -0.24968 | 4.55E-08 | -0.25498 | 2.30E-08 |
| 0.71062  | 0.27834  | 9.34E-10 | 0.24436  | 8.90E-08 | 0.176399 | 0.00013  | 0.022548 | 0.62695  |
| 0.2081   | -0.33018 | 2.44E-13 | -0.20648 | 6.84E-06 | -0.22279 | 1.16E-06 | -0.05648 | 0.22312  |
| 0.46045  | -0.16169 | 0.00045  | 0.104687 | 0.02367  | 0.120418 | 0.00919  | 0.056886 | 0.21982  |
| 0.74124  | 0.164617 | 0.00035  | 0.188315 | 4.22E-05 | 0.223269 | 1.10E-06 | 0.112008 | 0.01545  |

|          |          |          |          |          |          |          |          |          |
|----------|----------|----------|----------|----------|----------|----------|----------|----------|
| 0.13239  | 0.095829 | 0.03844  | 0.207164 | 6.36E-06 | 0.22235  | 1.22E-06 | 0.086298 | 0.06241  |
| 0.00454  | -0.12018 | 0.00933  | -0.14251 | 0.00202  | -0.12345 | 0.00757  | -0.1391  | 0.00259  |
| 0.06351  | -0.00458 | 0.92129  | -0.09712 | 0.03589  | 0.048591 | 0.2947   | -0.11896 | 0.01008  |
| 0.27459  | 0.056128 | 0.22604  | -0.01555 | 0.73758  | 0.106646 | 0.02116  | 0.030402 | 0.51222  |
| 0.26389  | 0.112485 | 0.01501  | 0.109169 | 0.01828  | 0.126991 | 0.00599  | 0.085735 | 0.06414  |
| 0.93489  | 0.152351 | 0.00096  | 0.135382 | 0.00338  | 0.195661 | 2.06E-05 | 0.078858 | 0.08871  |
| 0.38607  | 0.137686 | 0.00287  | 0.227945 | 6.41E-07 | 0.267579 | 4.24E-09 | 0.198198 | 1.60E-05 |
| 0.00755  | 0.035574 | 0.44312  | 0.009357 | 0.84017  | 0.081905 | 0.07703  | 0.059244 | 0.20126  |
| 0.00112  | -0.05388 | 0.24519  | 0.04167  | 0.36894  | 0.058922 | 0.20373  | -0.11142 | 0.016    |
| 4.47E-06 | 0.08728  | 0.05947  | 0.01613  | 0.7281   | -0.00935 | 0.84021  | 0.104046 | 0.02454  |
| 0.00543  | -0.08344 | 0.07162  | 0.01482  | 0.74941  | -0.02108 | 0.64959  | 0.053059 | 0.25248  |
| 0.14584  | 0.065419 | 0.15812  | 0.060266 | 0.19358  | 0.093545 | 0.04333  | -0.01669 | 0.71905  |
| 0.00014  | 0.128281 | 0.0055   | 0.155185 | 0.00077  | 0.304813 | 1.69E-11 | 0.056459 | 0.2233   |
| 0.08545  | 0.093011 | 0.04454  | -0.01587 | 0.73238  | -0.0081  | 0.86143  | 0.02248  | 0.62799  |
| 0.96725  | 0.025478 | 0.58288  | -0.05435 | 0.24111  | 0.084145 | 0.06926  | 0.047693 | 0.30372  |
| 4.36E-10 | -0.26046 | 1.11E-08 | -0.11025 | 0.01715  | 0.000937 | 0.9839   | -0.22557 | 8.43E-07 |
| 0.50358  | 0.296372 | 6.37E-11 | 0.040999 | 0.3767   | 0.025987 | 0.57537  | 0.000963 | 0.98344  |
| 0.5965   | 0.036538 | 0.43085  | 0.070545 | 0.12794  | -0.06298 | 0.17422  | -0.02769 | 0.55064  |
| 0.11728  | -0.04565 | 0.32493  | -0.13565 | 0.00331  | -0.16717 | 0.00029  | 0.156889 | 0.00067  |
| 0.0883   | 0.535844 | 4.59E-36 | 0.296071 | 6.67E-11 | 0.304829 | 1.69E-11 | 0.252427 | 3.20E-08 |
| 6.53E-06 | 0.009621 | 0.83572  | 0.03868  | 0.40431  | 0.134722 | 0.00354  | -0.03607 | 0.43677  |
| 2.78E-06 | 0.070275 | 0.1294   | 0.082352 | 0.07542  | 0.156478 | 0.00069  | -0.06674 | 0.14986  |
| 0.84894  | 0.119663 | 0.00964  | 0.062317 | 0.17882  | 0.20409  | 8.77E-06 | 0.162561 | 0.00042  |
| 0.02427  | 0.048364 | 0.29696  | 0.129992 | 0.0049   | 0.13323  | 0.00392  | -0.06045 | 0.19222  |
| 0.61903  | 0.221691 | 1.31E-06 | 0.080458 | 0.08241  | 0.068104 | 0.1417   | 0.051442 | 0.26725  |
| 0.00113  | 0.015219 | 0.7429   | 0.032204 | 0.48753  | 0.146008 | 0.00156  | -0.15673 | 0.00068  |
| 0.1302   | 0.027259 | 0.55679  | 0.027588 | 0.55204  | 0.025874 | 0.57703  | 0.109281 | 0.01816  |
| 0.84413  | 0.081536 | 0.07837  | 0.075032 | 0.10536  | 0.094641 | 0.04092  | 0.003956 | 0.93206  |
| 1.90E-09 | 0.170639 | 0.00021  | 0.074557 | 0.10759  | 0.186706 | 4.91E-05 | -0.15672 | 0.00068  |
| 0.56897  | -0.04348 | 0.34846  | -0.01264 | 0.78525  | -0.0309  | 0.50527  | 0.003117 | 0.94643  |
| 0.00031  | -0.21994 | 1.59E-06 | -0.13092 | 0.0046   | -0.19166 | 3.05E-05 | -0.05959 | 0.19866  |
| 0.00028  | -0.18218 | 7.51E-05 | -0.08756 | 0.05867  | -0.1323  | 0.00418  | -0.03821 | 0.40999  |
| 0.00425  | -0.09739 | 0.03537  | -0.06959 | 0.1332   | -0.07138 | 0.12346  | -0.05604 | 0.22676  |
| 0.00067  | -0.0363  | 0.4338   | -0.00558 | 0.90428  | 0.119594 | 0.00969  | -0.06742 | 0.14574  |
| 3.65E-05 | -0.15843 | 0.00059  | -0.28275 | 4.93E-10 | -0.11645 | 0.01179  | -0.09043 | 0.05082  |
| 0.84617  | -0.05075 | 0.27373  | -0.19674 | 1.85E-05 | -0.07052 | 0.12807  | -0.05182 | 0.2637   |
| 0.21173  | 0.033237 | 0.47366  | 0.055161 | 0.23414  | 0.025398 | 0.58406  | 0.000376 | 0.99353  |
| 0.04421  | -0.0099  | 0.83103  | 0.004806 | 0.91749  | -0.06415 | 0.16635  | 0.003879 | 0.93338  |
| 0.07812  | -0.0027  | 0.95368  | -0.01451 | 0.75441  | -0.06038 | 0.19272  | -0.0138  | 0.76614  |
| 3.99E-06 | 0.174832 | 0.00015  | 0.103134 | 0.02583  | 0.233829 | 3.21E-07 | 0.030248 | 0.51436  |
| 3.13E-07 | 0.084532 | 0.06798  | 0.123165 | 0.00771  | 0.209802 | 4.81E-06 | -0.08024 | 0.08324  |
| 1.79E-08 | -0.08086 | 0.0809   | -0.11312 | 0.01445  | 0.01464  | 0.75235  | -0.16618 | 0.00031  |
| 3.27E-08 | 0.092387 | 0.046    | 0.17815  | 0.00011  | 0.225303 | 8.69E-07 | -0.14687 | 0.00146  |
| 0.23221  | 0.075002 | 0.1055   | 0.113707 | 0.01395  | 0.012628 | 0.78549  | 0.078586 | 0.08982  |
| 0.97393  | 0.200892 | 1.22E-05 | 0.209854 | 4.79E-06 | 0.257172 | 1.72E-08 | 0.105183 | 0.02301  |

|          |          |          |          |          |          |          |          |          |
|----------|----------|----------|----------|----------|----------|----------|----------|----------|
| 0.03199  | -0.00739 | 0.87343  | 0.024531 | 0.59695  | -0.0173  | 0.70918  | 0.041691 | 0.36869  |
| 6.09E-10 | 0.251849 | 3.45E-08 | 0.140939 | 0.00227  | 0.293439 | 9.98E-11 | 0.015363 | 0.74055  |
| 0.00033  | -0.06431 | 0.16532  | -0.09258 | 0.04554  | -0.09045 | 0.05076  | -0.18735 | 4.62E-05 |
| 0.11593  | 0.087129 | 0.05992  | 0.059532 | 0.19908  | 0.13478  | 0.00352  | -0.05452 | 0.2396   |
| 0.11073  | 0.098364 | 0.03358  | 0.063236 | 0.17249  | 0.100773 | 0.02945  | 0.001018 | 0.9825   |
| 1.18E-06 | 0.032525 | 0.4832   | 0.111498 | 0.01593  | 0.055972 | 0.22733  | 0.206255 | 7.00E-06 |
| 0.18665  | 0.042577 | 0.35859  | 0.017243 | 0.71015  | 0.091117 | 0.04908  | 0.110612 | 0.01679  |
| 0.00207  | 0.047171 | 0.30905  | 0.016841 | 0.71662  | 0.016999 | 0.71407  | 0.174418 | 0.00015  |
| 1.99E-06 | 0.306047 | 1.39E-11 | 0.219683 | 1.64E-06 | 0.295294 | 7.52E-11 | 0.292374 | 1.17E-10 |
| 0.00386  | 0.100235 | 0.03033  | 0.056522 | 0.22279  | 0.093419 | 0.04361  | 0.197559 | 1.71E-05 |
| 0.02233  | 0.158894 | 0.00057  | 0.045002 | 0.33186  | 0.102365 | 0.02697  | 0.0333   | 0.47282  |
| 0.5668   | -0.01511 | 0.74467  | -0.05294 | 0.25359  | -0.03499 | 0.45063  | 0.144524 | 0.00174  |
| 0.1983   | 0.017602 | 0.7044   | -0.00383 | 0.93416  | -0.00995 | 0.83016  | -0.05811 | 0.21     |
| 0.00225  | 0.008589 | 0.85314  | 5.31E-05 | 0.99909  | 0.084912 | 0.06675  | -0.09304 | 0.04448  |
| 1.80E-09 | -0.07973 | 0.08523  | -0.03151 | 0.49702  | 0.059919 | 0.19617  | -0.11577 | 0.0123   |
| 0.99079  | -0.042   | 0.36518  | -0.03437 | 0.45873  | -0.0759  | 0.10138  | -0.09448 | 0.04126  |
| 0.92741  | -0.03602 | 0.43736  | -0.04061 | 0.3813   | -0.0608  | 0.18966  | -0.08214 | 0.07619  |
| 0.00144  | 0.019552 | 0.67344  | 0.03279  | 0.47963  | 0.073236 | 0.11398  | 0.045215 | 0.32956  |
| 0.01589  | 0.135961 | 0.00324  | 0.155596 | 0.00074  | 0.121727 | 0.00846  | 0.089966 | 0.05203  |
| 0.15715  | 0.071816 | 0.12119  | 0.118457 | 0.01041  | 0.081219 | 0.07954  | 0.069987 | 0.13098  |
| 0.07913  | -0.02254 | 0.62702  | -0.08414 | 0.06927  | 0.0273   | 0.55621  | -0.0676  | 0.14467  |
| 0.0161   | 0.113918 | 0.01377  | -0.01374 | 0.76706  | 0.09641  | 0.03728  | 0.156577 | 0.00068  |
| 0.98269  | 0.045489 | 0.32664  | -0.00188 | 0.9677   | -0.02439 | 0.599    | -0.00992 | 0.83076  |
| 1.38E-06 | -0.3237  | 7.47E-13 | -0.17238 | 0.00018  | -0.22298 | 1.13E-06 | -0.22689 | 7.24E-07 |
| 0.31723  | -0.00573 | 0.9017   | 0.000326 | 0.9944   | 0.007699 | 0.8682   | 0.065735 | 0.15611  |
| 0.96435  | -0.00947 | 0.83823  | 0.056507 | 0.22291  | 0.007488 | 0.87179  | 0.053425 | 0.24922  |
| 3.74E-05 | 0.420582 | 1.92E-21 | 0.094103 | 0.04209  | 0.149    | 0.00124  | 0.065234 | 0.1593   |
| 0.01133  | -0.14386 | 0.00183  | -0.1531  | 0.0009   | -0.15579 | 0.00073  | -0.13948 | 0.00252  |
| 0.23744  | 0.197444 | 1.73E-05 | 0.23132  | 4.32E-07 | 0.230207 | 4.93E-07 | 0.178572 | 0.0001   |
| 0.79801  | -0.0052  | 0.91074  | -0.01914 | 0.67999  | -0.00823 | 0.85923  | 0.116493 | 0.01176  |
| 2.63E-12 | -0.22154 | 1.33E-06 | -0.21456 | 2.88E-06 | -0.09625 | 0.03759  | -0.19069 | 3.36E-05 |
| 6.39E-05 | 0.162726 | 0.00041  | 0.279356 | 8.07E-10 | 0.07006  | 0.13058  | 0.123194 | 0.00769  |
| 1.53E-05 | 0.098577 | 0.03319  | 0.031634 | 0.49527  | 0.174855 | 0.00015  | -0.05719 | 0.21738  |
| 0.14402  | 0.121393 | 0.00864  | 0.064069 | 0.1669   | 0.03904  | 0.39994  | 0.112374 | 0.01511  |
| 0.21165  | 0.025367 | 0.58452  | 0.102418 | 0.02689  | 0.182584 | 7.23E-05 | -0.00259 | 0.95555  |
| 0.9682   | -0.10686 | 0.0209   | -0.15468 | 0.0008   | -0.12695 | 0.00601  | 0.031276 | 0.50017  |
| 0.36441  | -0.067   | 0.14826  | -0.13423 | 0.00366  | -0.12116 | 0.00877  | 0.032561 | 0.4827   |
| 2.67E-09 | 0.46314  | 3.32E-26 | 0.219382 | 1.70E-06 | 0.101459 | 0.02836  | 0.282642 | 5.01E-10 |
| 0.91523  | 0.226804 | 7.31E-07 | 0.172218 | 0.00018  | 0.237815 | 1.99E-07 | 0.093755 | 0.04286  |
| 0.00099  | -0.33322 | 1.43E-13 | -0.15728 | 0.00065  | -0.22018 | 1.55E-06 | -0.29547 | 7.31E-11 |
| 0.00102  | 0.09758  | 0.03502  | 0.101001 | 0.02908  | 0.191809 | 3.01E-05 | 0.049734 | 0.28348  |
| 0.0527   | -0.05094 | 0.27192  | -0.07432 | 0.10874  | 0.004008 | 0.93117  | -0.04061 | 0.38127  |
| 0.86407  | 0.201354 | 1.16E-05 | 0.225836 | 8.18E-07 | 0.232659 | 3.69E-07 | 0.16624  | 0.00031  |
| 0.41344  | 0.035423 | 0.44506  | 0.040316 | 0.38471  | 0.124347 | 0.00714  | 0.030368 | 0.51269  |
| 0.00066  | 0.207187 | 6.35E-06 | 0.181787 | 7.79E-05 | 0.145355 | 0.00164  | 0.151428 | 0.00103  |

|          |          |          |          |          |          |          |          |          |
|----------|----------|----------|----------|----------|----------|----------|----------|----------|
| 0.04531  | 0.084566 | 0.06787  | 0.103859 | 0.0248   | 0.107822 | 0.01977  | 0.305424 | 1.54E-11 |
| 0.87444  | -0.04353 | 0.34788  | -0.03167 | 0.49478  | -0.03584 | 0.43972  | 0.049642 | 0.28437  |
| 0.09625  | 0.224525 | 9.50E-07 | 0.036499 | 0.43134  | 0.008376 | 0.85673  | -0.06661 | 0.15067  |
| 0.30043  | -0.02641 | 0.56914  | 0.009517 | 0.83748  | 0.006437 | 0.88967  | 0.006297 | 0.89205  |
| 0.30877  | 0.00327  | 0.94381  | 0.066717 | 0.15     | 0.139464 | 0.00252  | -0.03723 | 0.42216  |
| 0.28239  | 0.13425  | 0.00365  | 0.098496 | 0.03334  | 0.123981 | 0.00731  | 0.088332 | 0.05646  |
| 0.04046  | 0.107275 | 0.02041  | 0.12649  | 0.0062   | 0.244107 | 9.19E-08 | 0.095302 | 0.03953  |
| 0.02988  | 0.000653 | 0.98878  | 0.02289  | 0.62174  | -0.03804 | 0.41218  | 0.158984 | 0.00056  |
| 0.03114  | 0.045636 | 0.32508  | 0.025628 | 0.58066  | 0.089901 | 0.0522   | 0.02463  | 0.59547  |
| 0.84188  | 0.10198  | 0.02755  | 0.15136  | 0.00103  | 0.188568 | 4.12E-05 | 0.124624 | 0.00701  |
| 0.00576  | -0.03197 | 0.49065  | -0.02173 | 0.63946  | 0.081222 | 0.07953  | -0.00353 | 0.93943  |
| 0.50312  | 0.095179 | 0.03978  | 0.081259 | 0.07939  | 0.120765 | 0.00899  | -0.04808 | 0.2998   |
| 0.0648   | 0.025765 | 0.57863  | 0.0162   | 0.72696  | 0.0476   | 0.30467  | -0.06802 | 0.14218  |
| 0.35747  | -0.12453 | 0.00705  | -0.0029  | 0.95008  | -0.06772 | 0.14395  | 0.024138 | 0.60285  |
| 0.01194  | 0.161935 | 0.00044  | 0.245809 | 7.43E-08 | 0.221964 | 1.27E-06 | 0.101245 | 0.02869  |
| 2.03E-13 | -0.07361 | 0.11216  | -0.07446 | 0.10804  | 0.069846 | 0.13176  | -0.14329 | 0.00191  |
| 0.59274  | 0.016097 | 0.72863  | 0.099218 | 0.03206  | 0.065386 | 0.15833  | 0.064049 | 0.16703  |
| 0.98905  | 0.054023 | 0.24395  | 0.089509 | 0.05324  | 0.141056 | 0.00225  | 0.121023 | 0.00885  |
| 0.00044  | -0.10531 | 0.02285  | -0.04431 | 0.33937  | -0.0685  | 0.13938  | 0.255834 | 2.05E-08 |
| 1.13E-05 | -0.04023 | 0.38575  | 0.119376 | 0.00982  | 0.008622 | 0.85258  | 0.127743 | 0.0057   |
| 0.65592  | -0.12242 | 0.00809  | 0.000286 | 0.99508  | -0.00782 | 0.8661   | -0.03005 | 0.51707  |
| 0.00021  | -0.06051 | 0.19176  | -0.01971 | 0.67095  | 0.058962 | 0.20342  | -0.08064 | 0.08172  |
| 0.00303  | 0.149481 | 0.0012   | 0.181625 | 7.90E-05 | 0.121303 | 0.00869  | 0.159103 | 0.00056  |
| 0.62448  | 0.171187 | 0.0002   | 0.213435 | 3.26E-06 | 0.1216   | 0.00853  | 0.288888 | 1.99E-10 |
| 6.27E-07 | -0.16332 | 0.00039  | 0.001794 | 0.96916  | 0.002009 | 0.96546  | -0.03232 | 0.48593  |
| 0.00722  | -0.01427 | 0.75842  | -0.00348 | 0.9402   | 0.102099 | 0.02737  | -0.06782 | 0.14335  |
| 0.01069  | -0.07276 | 0.11638  | -0.06939 | 0.1343   | -0.06079 | 0.18975  | -0.00094 | 0.98383  |
| 4.70E-06 | -0.07446 | 0.10806  | -0.01077 | 0.81643  | -0.1038  | 0.02488  | 0.13383  | 0.00376  |
| 1.66E-06 | -0.2422  | 1.16E-07 | -0.08045 | 0.08245  | -0.05547 | 0.23153  | -0.28731 | 2.51E-10 |
| 3.36E-05 | -0.11289 | 0.01465  | -0.04711 | 0.30964  | -0.02711 | 0.55892  | -0.20817 | 5.72E-06 |
| 0.0111   | -0.14087 | 0.00228  | -0.26886 | 3.56E-09 | -0.20619 | 7.05E-06 | -0.17708 | 0.00012  |
| 0.02251  | -0.10084 | 0.02934  | -0.24196 | 1.20E-07 | -0.19411 | 2.40E-05 | -0.10526 | 0.02291  |
| 0.23309  | 0.092221 | 0.04639  | -0.0039  | 0.93302  | 0.1115   | 0.01593  | -0.01543 | 0.73943  |
| 0.08484  | 0.020169 | 0.66376  | -0.06463 | 0.1632   | 0.094537 | 0.04114  | -0.03207 | 0.48933  |
| 7.48E-10 | 0.009346 | 0.84036  | 0.028877 | 0.53361  | -0.06939 | 0.13432  | 0.113488 | 0.01413  |
| 0.18876  | 0.114495 | 0.01329  | -0.0056  | 0.90388  | 0.106685 | 0.02112  | 0.011401 | 0.80589  |
| 0.16011  | 0.17466  | 0.00015  | 0.176767 | 0.00012  | 0.309497 | 7.98E-12 | 0.234575 | 2.94E-07 |
| 0.00053  | 0.192549 | 2.80E-05 | 0.049301 | 0.2877   | 0.135277 | 0.0034   | 0.052852 | 0.25434  |
| 2.95E-12 | 0.067884 | 0.14299  | 0.057011 | 0.2188   | 0.18862  | 4.09E-05 | -0.04829 | 0.29771  |
| 0.99576  | 0.05352  | 0.24837  | 0.034691 | 0.45452  | 0.174326 | 0.00015  | 0.073978 | 0.11036  |
| 0.07645  | -0.03437 | 0.45872  | -0.09038 | 0.05094  | -0.07588 | 0.10146  | -0.15737 | 0.00064  |
| 0.10191  | -0.13096 | 0.00459  | -0.27737 | 1.07E-09 | -0.18098 | 8.39E-05 | -0.10177 | 0.02787  |
| 0.01719  | 0.041577 | 0.37     | 0.003868 | 0.93357  | 0.084351 | 0.06858  | 0.018735 | 0.68634  |
| 0.06218  | -0.01909 | 0.68065  | 0.005936 | 0.89821  | -0.05024 | 0.27862  | 0.002831 | 0.95134  |
| 5.89E-09 | 0.026575 | 0.56674  | -0.04797 | 0.30092  | 0.200436 | 1.28E-05 | -0.04326 | 0.3509   |

|          |          |          |          |          |          |          |          |          |
|----------|----------|----------|----------|----------|----------|----------|----------|----------|
| 0.86658  | 0.01305  | 0.7785   | -0.01244 | 0.78853  | 0.046454 | 0.31647  | -0.07807 | 0.09197  |
| 0.01     | -0.01752 | 0.7057   | -0.10191 | 0.02765  | -0.11475 | 0.01309  | 0.254248 | 2.53E-08 |
| 0.42267  | 0.21707  | 2.19E-06 | 0.110913 | 0.01649  | 0.166949 | 0.00029  | 0.051727 | 0.2646   |
| 5.04E-07 | 0.150918 | 0.00107  | 0.119904 | 0.0095   | 0.2074   | 6.21E-06 | 0.285558 | 3.26E-10 |
| 1.03E-12 | -0.05248 | 0.25766  | -0.0424  | 0.36061  | 0.07498  | 0.10561  | -0.11948 | 0.00976  |
| 0.00018  | 0.116639 | 0.01165  | 0.003108 | 0.9466   | 0.122287 | 0.00816  | -0.05465 | 0.2385   |
| 8.04E-05 | 0.062076 | 0.18051  | 0.016786 | 0.71751  | 0.094686 | 0.04083  | -0.01432 | 0.75755  |
| 2.79E-05 | 0.02843  | 0.53997  | 0.017875 | 0.70003  | 0.104628 | 0.02375  | -0.08915 | 0.0542   |
| 0.15316  | 0.035708 | 0.4414   | 0.027352 | 0.55545  | 0.024652 | 0.59515  | 0.058969 | 0.20337  |
| 0.02993  | 0.03904  | 0.39994  | -0.02415 | 0.60261  | 0.074967 | 0.10567  | 0.02016  | 0.66389  |
| 0.77368  | -0.00937 | 0.83991  | 0.043212 | 0.35146  | 0.02422  | 0.60163  | 0.028947 | 0.53263  |
| 0.0035   | 0.084986 | 0.06651  | -0.0202  | 0.66324  | -0.02327 | 0.61596  | -0.06229 | 0.17901  |
| 0.00029  | -0.31024 | 7.07E-12 | -0.18955 | 3.75E-05 | -0.2386  | 1.81E-07 | -0.24214 | 1.17E-07 |
| 0.00019  | 0.034347 | 0.45901  | 0.143583 | 0.00187  | 0.108018 | 0.01955  | 0.118363 | 0.01047  |
| 0.74255  | 0.431789 | 1.24E-22 | 0.228673 | 5.89E-07 | 0.184545 | 6.02E-05 | 0.364891 | 3.74E-16 |
| 0.25492  | 0.176855 | 0.00012  | 0.01487  | 0.74858  | 0.021404 | 0.64454  | -0.06608 | 0.15393  |
| 0.00751  | 0.148119 | 0.00133  | 0.069833 | 0.13184  | 0.069837 | 0.13181  | 0.082975 | 0.07323  |
| 0.16598  | 0.036348 | 0.43325  | -0.03551 | 0.44397  | -0.02621 | 0.57203  | 0.192421 | 2.84E-05 |
| 0.14957  | -0.10802 | 0.01955  | -0.17541 | 0.00014  | -0.20704 | 6.45E-06 | 0.135663 | 0.00331  |
| 0.35432  | -0.06111 | 0.18744  | -0.13232 | 0.00418  | -0.1285  | 0.00542  | 0.173897 | 0.00016  |
| 2.54E-06 | -0.31898 | 1.66E-12 | -0.03072 | 0.50787  | -0.06987 | 0.13162  | -0.18523 | 5.65E-05 |
| 0.0804   | -0.08183 | 0.07731  | -0.17206 | 0.00019  | -0.10422 | 0.0243   | -0.05955 | 0.19892  |
| 0.09621  | -0.20063 | 1.25E-05 | -0.05949 | 0.19939  | -0.11636 | 0.01186  | 0.029972 | 0.5182   |
| 0.00017  | 0.056359 | 0.22413  | 0.135083 | 0.00345  | 0.125653 | 0.00655  | 0.222896 | 1.14E-06 |
| 1.01E-05 | 0.125436 | 0.00664  | 0.177013 | 0.00012  | 0.249401 | 4.72E-08 | -0.00131 | 0.97748  |
| 0.00019  | 0.226693 | 7.41E-07 | 0.245892 | 7.35E-08 | 0.134888 | 0.00349  | 0.27102  | 2.63E-09 |
| 0.03324  | 0.104196 | 0.02433  | 0.002117 | 0.96361  | 0.018795 | 0.6854   | -0.01603 | 0.72968  |
| 2.19E-08 | 0.101483 | 0.02832  | 0.176662 | 0.00012  | 0.104562 | 0.02384  | 0.124076 | 0.00726  |
| 0.03875  | -0.13176 | 0.00434  | -0.06256 | 0.17715  | -0.06602 | 0.15434  | -0.09693 | 0.03626  |
| 0.99356  | 0.093272 | 0.04394  | -0.07376 | 0.11141  | -0.05786 | 0.21203  | -0.09553 | 0.03905  |
| 0.14797  | -0.01351 | 0.77088  | -0.09732 | 0.03551  | -0.10678 | 0.021    | -0.12403 | 0.00729  |
| 2.62E-15 | 0.060074 | 0.19501  | 0.013497 | 0.77113  | -0.05091 | 0.27225  | 0.241884 | 1.21E-07 |
| 4.09E-08 | 0.180796 | 8.53E-05 | 0.103908 | 0.02473  | 0.091172 | 0.04895  | 0.356812 | 1.81E-15 |
| 0.33257  | -0.00461 | 0.92084  | 0.056555 | 0.22252  | 0.079813 | 0.08491  | 0.013655 | 0.76852  |
| 0.44499  | 0.044866 | 0.33332  | -0.12098 | 0.00887  | -0.0211  | 0.64919  | 0.049568 | 0.28508  |
| 0.90351  | 0.262141 | 8.89E-09 | 0.288196 | 2.20E-10 | 0.346019 | 1.40E-14 | 0.148844 | 0.00126  |
| 0.004    | -0.09742 | 0.03533  | -0.0355  | 0.44408  | -0.07612 | 0.1004   | 0.026439 | 0.56874  |
| 0.00019  | 0.010426 | 0.82221  | 0.106774 | 0.02101  | 0.110862 | 0.01654  | 0.165028 | 0.00034  |
| 0.3182   | 0.04489  | 0.33306  | 0.047301 | 0.30772  | 0.039617 | 0.39301  | 0.034461 | 0.45752  |
| 0.99521  | 0.168333 | 0.00026  | 0.206939 | 6.52E-06 | 0.251305 | 3.70E-08 | 0.143772 | 0.00184  |
| 0.04919  | -0.13674 | 0.00307  | -0.14591 | 0.00157  | -0.012   | 0.79589  | -0.0745  | 0.10785  |
| 1.70E-08 | 0.091343 | 0.04852  | 0.168884 | 0.00025  | 0.290137 | 1.65E-10 | -0.04851 | 0.29548  |
| 0.62744  | 0.157001 | 0.00066  | 0.131835 | 0.00432  | 0.215486 | 2.61E-06 | 0.106191 | 0.02172  |
| 0.2052   | 0.094252 | 0.04176  | 0.054267 | 0.24182  | 0.02258  | 0.62646  | 0.066282 | 0.15269  |
| 0.45689  | 0.173355 | 0.00017  | 0.100985 | 0.02911  | 0.166971 | 0.00029  | 0.102716 | 0.02644  |

|          |          |          |          |          |          |          |          |          |
|----------|----------|----------|----------|----------|----------|----------|----------|----------|
| 0.00026  | 0.076115 | 0.10042  | 0.116191 | 0.01198  | 0.045333 | 0.3283   | -0.098   | 0.03424  |
| 0.28313  | 0.091719 | 0.0476   | 0.089226 | 0.054    | 0.048414 | 0.29646  | 0.021333 | 0.64564  |
| 6.62E-16 | 0.177304 | 0.00012  | 0.17785  | 0.00011  | 0.093745 | 0.04288  | 0.208831 | 5.34E-06 |
| 0.57826  | 0.12059  | 0.00909  | 0.13206  | 0.00425  | 0.236189 | 2.42E-07 | 0.091585 | 0.04793  |
| 1.64E-06 | 0.270666 | 2.77E-09 | 0.239724 | 1.58E-07 | 0.319761 | 1.46E-12 | 0.10594  | 0.02204  |
| 0.58793  | 0.035272 | 0.44699  | 0.017662 | 0.70343  | 0.058926 | 0.2037   | 0.061618 | 0.18376  |
| 2.73E-06 | -0.14092 | 0.00227  | -0.10142 | 0.02842  | -0.20167 | 1.12E-05 | 0.06899  | 0.13657  |
| 0.00022  | -0.01243 | 0.78871  | -0.02384 | 0.60733  | -0.00477 | 0.91813  | -0.06094 | 0.18862  |
| 0.81808  | 0.131784 | 0.00433  | 0.110347 | 0.01706  | 0.172402 | 0.00018  | 0.095879 | 0.03834  |
| 1.52E-05 | 0.124888 | 0.00689  | 0.092829 | 0.04496  | 0.260929 | 1.05E-08 | 0.029751 | 0.5213   |
| 1.81E-06 | 0.076951 | 0.09673  | 0.031047 | 0.5033   | 0.11786  | 0.0108   | 0.001627 | 0.97202  |
| 0.05874  | 0.132585 | 0.0041   | 0.065982 | 0.15456  | 0.119244 | 0.0099   | 0.153831 | 0.00085  |
| 1.32E-13 | -0.0364  | 0.43263  | -0.05123 | 0.26924  | 0.036022 | 0.43738  | -0.14442 | 0.00175  |
| 0.30948  | 0.403684 | 9.90E-20 | 0.13067  | 0.00468  | 0.172092 | 0.00019  | 0.116179 | 0.01199  |
| 0.96289  | 0.025153 | 0.58769  | 0.082744 | 0.07404  | 0.087268 | 0.05951  | -0.00728 | 0.87537  |
| 0.14791  | 0.185429 | 5.54E-05 | -0.03261 | 0.482    | 0.20404  | 8.81E-06 | 0.109123 | 0.01833  |
| 0.11322  | 0.139312 | 0.00255  | -0.0408  | 0.37904  | 0.208588 | 5.48E-06 | 0.118041 | 0.01068  |
| 9.48E-05 | 0.14375  | 0.00184  | -0.02708 | 0.55946  | 0.093915 | 0.0425   | -0.11736 | 0.01114  |
| 3.27E-08 | 0.042961 | 0.35427  | 0.129323 | 0.00513  | 0.305879 | 1.43E-11 | -0.0139  | 0.76443  |
| 0.03345  | 0.210236 | 4.60E-06 | 0.12463  | 0.00701  | 0.268632 | 3.67E-09 | 0.011091 | 0.81107  |
| 1.49E-05 | 0.100358 | 0.03013  | 0.069907 | 0.13142  | 0.128784 | 0.00532  | -0.0051  | 0.91256  |
| 1.43E-07 | 0.06646  | 0.15159  | 0.053971 | 0.24441  | 0.18977  | 3.67E-05 | 0.020189 | 0.66344  |
| 0.63089  | 0.067864 | 0.14311  | 0.003411 | 0.94139  | 0.07525  | 0.10435  | 0.09101  | 0.04935  |
| 0.10859  | 0.024107 | 0.60332  | -0.01186 | 0.79818  | 0.034283 | 0.45984  | -0.05801 | 0.21086  |
| 0.11207  | 0.041585 | 0.36991  | 0.120248 | 0.00929  | 0.010833 | 0.81539  | 0.157634 | 0.00063  |
| 0.14653  | 0.072031 | 0.12008  | 0.122272 | 0.00816  | 0.070732 | 0.12693  | 0.143831 | 0.00183  |
| 5.93E-11 | -0.09089 | 0.04964  | -0.11685 | 0.01151  | -0.0023  | 0.9604   | -0.12754 | 0.00578  |
| 9.92E-09 | 0.153173 | 0.0009   | 0.121828 | 0.0084   | 0.046119 | 0.31998  | 0.101611 | 0.02812  |
| 0.50689  | 0.15438  | 0.00082  | -0.0232  | 0.61708  | -0.07036 | 0.12893  | -0.01879 | 0.68548  |
| 8.58E-07 | 0.06922  | 0.13527  | -0.16111 | 0.00047  | 0.006418 | 0.88999  | -0.12085 | 0.00894  |
| 0.15013  | -0.05967 | 0.19805  | -0.08819 | 0.05685  | -0.11588 | 0.01221  | -0.23009 | 4.99E-07 |
| 2.66E-06 | 0.123264 | 0.00766  | -0.03025 | 0.51438  | 0.038871 | 0.40199  | -0.17069 | 0.00021  |
| 1.89E-09 | 0.040013 | 0.3883   | 0.043187 | 0.35175  | 0.153045 | 0.00091  | -0.09098 | 0.04943  |
| 0.00244  | -0.0262  | 0.57217  | -0.11197 | 0.01548  | 0.04075  | 0.37961  | -0.14945 | 0.0012   |
| 0.35434  | 0.069589 | 0.1332   | 0.049078 | 0.28988  | 0.086176 | 0.06278  | 0.048036 | 0.30026  |
| 0.08708  | 0.053539 | 0.24821  | -0.01389 | 0.76473  | 0.086553 | 0.06163  | 0.03062  | 0.5092   |
| 1.46E-05 | 0.113312 | 0.01428  | 0.059733 | 0.19756  | 0.010777 | 0.81632  | 0.241711 | 1.24E-07 |
| 0.01671  | 0.023062 | 0.61912  | 0.083319 | 0.07204  | 0.178853 | 0.0001   | -0.03524 | 0.44735  |
| 0.00066  | 0.088337 | 0.05644  | 0.038246 | 0.40961  | 0.111845 | 0.0156   | 0.043646 | 0.34664  |
| 0.02106  | -0.12043 | 0.00919  | -0.15979 | 0.00053  | -0.12069 | 0.00904  | -0.02884 | 0.53419  |
| 0.00586  | -0.10391 | 0.02473  | -0.15299 | 0.00091  | -0.12905 | 0.00522  | -0.19595 | 2.00E-05 |
| 0.17531  | 0.034879 | 0.45208  | 0.041443 | 0.37155  | 0.0244   | 0.59892  | 0.050468 | 0.27642  |
| 3.29E-07 | 0.0976   | 0.03499  | 0.053721 | 0.2466   | 0.159197 | 0.00055  | -0.0352  | 0.44786  |
| 9.71E-06 | 0.276016 | 1.30E-09 | 0.166291 | 0.00031  | 0.208376 | 5.60E-06 | 0.150948 | 0.00107  |
| 0.11209  | 0.008905 | 0.84781  | -0.03294 | 0.47757  | -0.06715 | 0.14734  | -0.11134 | 0.01608  |

|          |          |          |          |          |          |          |          |          |
|----------|----------|----------|----------|----------|----------|----------|----------|----------|
| 0.05593  | -0.10714 | 0.02058  | -0.09333 | 0.04382  | -0.04686 | 0.31225  | -0.07657 | 0.09841  |
| 0.14162  | -0.05989 | 0.19638  | -0.05866 | 0.20576  | -0.04743 | 0.30644  | -0.05144 | 0.2673   |
| 0.03616  | 0.008827 | 0.84912  | -0.03591 | 0.43879  | 0.033228 | 0.47379  | 0.125475 | 0.00663  |
| 0.02704  | 0.154875 | 0.00078  | 0.156911 | 0.00067  | 0.190449 | 3.43E-05 | 0.248158 | 5.52E-08 |
| 0.29914  | 0.017048 | 0.71329  | -0.09547 | 0.03918  | -0.15125 | 0.00104  | -0.01789 | 0.69982  |
| 0.82806  | 0.234549 | 2.95E-07 | 0.089475 | 0.05333  | 0.179054 | 0.0001   | 0.064056 | 0.16698  |
| 0.00044  | 0.019082 | 0.68085  | -0.04463 | 0.33585  | 0.015606 | 0.73659  | 0.187413 | 4.59E-05 |
| 0.86377  | 0.099435 | 0.03168  | 0.116935 | 0.01144  | 0.218203 | 1.93E-06 | 0.037259 | 0.4218   |
| 0.06209  | 0.087421 | 0.05906  | 0.083734 | 0.07063  | 0.123932 | 0.00733  | 0.071125 | 0.12482  |
| 0.0015   | -0.00029 | 0.99504  | 0.184762 | 5.90E-05 | 0.099877 | 0.03093  | 0.152637 | 0.00094  |
| 0.3543   | 0.274289 | 1.66E-09 | -0.04601 | 0.32113  | -0.0765  | 0.09869  | -0.0276  | 0.55191  |
| 2.69E-13 | 0.025768 | 0.57858  | 0.110208 | 0.0172   | 0.195949 | 2.00E-05 | -0.00619 | 0.89395  |
| 0.00136  | 0.024096 | 0.60348  | 0.055971 | 0.22734  | 0.134863 | 0.0035   | -0.0455  | 0.32656  |
| 0.21712  | 0.138871 | 0.00263  | 0.175345 | 0.00014  | 0.200967 | 1.21E-05 | 0.226085 | 7.94E-07 |
| 1.76E-08 | -0.075   | 0.10549  | -0.03933 | 0.3964   | 0.015118 | 0.74454  | 0.026744 | 0.56429  |
| 1.38E-12 | -0.01782 | 0.70088  | -0.03663 | 0.42964  | 0.083765 | 0.07053  | -0.04098 | 0.37691  |
| 0.18832  | 0.025536 | 0.58201  | 0.069356 | 0.1345   | 0.103427 | 0.02541  | 0.044734 | 0.33475  |
| 0.00308  | -0.35166 | 4.85E-15 | -0.24358 | 9.81E-08 | -0.37747 | 2.91E-17 | -0.05097 | 0.2717   |
| 3.58E-08 | 0.006695 | 0.88527  | 0.109748 | 0.01767  | 0.24486  | 8.36E-08 | -0.05204 | 0.26175  |
| 0.0011   | 0.013105 | 0.77759  | 0.042943 | 0.35447  | 0.042877 | 0.35522  | 0.082174 | 0.07606  |
| 0.00974  | -0.10389 | 0.02475  | -0.12595 | 0.00642  | -0.14551 | 0.00162  | -0.1275  | 0.0058   |
| 0.50384  | 0.002834 | 0.95129  | 0.0027   | 0.95359  | 0.010706 | 0.81752  | 0.030216 | 0.51481  |
| 0.00053  | -0.03034 | 0.51313  | 0.099827 | 0.03101  | 0.168016 | 0.00027  | -0.03615 | 0.4358   |
| 9.05E-12 | 0.115279 | 0.01267  | 0.087854 | 0.05781  | 0.124211 | 0.0072   | -0.05935 | 0.20048  |
| 0.59623  | 0.099661 | 0.0313   | 0.089457 | 0.05337  | 0.090864 | 0.04972  | 0.037801 | 0.41507  |
| 0.00667  | -0.04955 | 0.28529  | -0.00286 | 0.95082  | 0.057114 | 0.21797  | -0.05478 | 0.23739  |
| 0.22626  | -0.01464 | 0.75242  | -0.03748 | 0.419    | 0.026338 | 0.57021  | -0.01111 | 0.81069  |
| 7.80E-08 | 0.027318 | 0.55594  | 0.09562  | 0.03887  | 0.2865   | 2.84E-10 | -0.05698 | 0.21907  |
| 1.36E-11 | 0.007498 | 0.87162  | 0.071728 | 0.12165  | 0.106377 | 0.02149  | -0.07301 | 0.11513  |
| 1.23E-08 | -0.08065 | 0.08166  | -0.07284 | 0.11596  | -0.06021 | 0.19397  | 0.20034  | 1.29E-05 |
| 0.00975  | -0.06558 | 0.15711  | -0.06309 | 0.17347  | 0.044478 | 0.33752  | -0.09138 | 0.04844  |
| 0.22449  | 0.005906 | 0.89871  | 0.027786 | 0.54919  | 0.044877 | 0.3332   | 0.016056 | 0.72929  |
| 0.00342  | -0.06942 | 0.13415  | -0.05883 | 0.20442  | -0.04525 | 0.32922  | -0.19922 | 1.44E-05 |
| 0.05107  | 0.015991 | 0.73035  | 0.044267 | 0.33982  | 0.050901 | 0.27232  | -0.05854 | 0.20667  |
| 0.01414  | -0.06084 | 0.18937  | -0.02535 | 0.58482  | -0.02739 | 0.55488  | -0.09494 | 0.04029  |
| 1.89E-06 | 0.048294 | 0.29767  | 0.025337 | 0.58496  | 0.078739 | 0.0892   | -0.07514 | 0.10487  |
| 0.36468  | 0.355904 | 2.16E-15 | 0.101393 | 0.02846  | 0.120577 | 0.0091   | -0.04079 | 0.37908  |
| 0.62319  | -0.03132 | 0.49958  | -0.05263 | 0.25634  | 0.013508 | 0.77094  | -0.05311 | 0.25202  |
| 0.08378  | 0.027134 | 0.55862  | -0.01787 | 0.70008  | 0.010724 | 0.81722  | -0.0251  | 0.58854  |
| 0.88644  | -0.06605 | 0.15411  | -0.13272 | 0.00406  | -0.10907 | 0.01839  | -0.05059 | 0.27529  |
| 0.0037   | -0.0957  | 0.03871  | -0.10597 | 0.022    | -0.17795 | 0.00011  | -0.01829 | 0.69336  |
| 0.00525  | -0.04671 | 0.31379  | -0.14349 | 0.00188  | -0.0793  | 0.08692  | -0.08988 | 0.05225  |
| 0.00035  | -0.01937 | 0.6763   | -0.12438 | 0.00712  | -0.06105 | 0.18786  | -0.10626 | 0.02164  |
| 0.01636  | 0.023401 | 0.61397  | 0.024703 | 0.59438  | 0.062919 | 0.17466  | -0.06223 | 0.17946  |
| 0.11298  | -0.01413 | 0.7607   | -0.01481 | 0.74953  | -0.04452 | 0.33708  | 0.103917 | 0.02472  |

|          |          |          |          |          |          |          |          |          |
|----------|----------|----------|----------|----------|----------|----------|----------|----------|
| 0.33138  | -0.03137 | 0.49891  | 0.016202 | 0.72693  | 0.037292 | 0.42139  | 0.033023 | 0.47652  |
| 0.02151  | 0.069488 | 0.13376  | 0.149156 | 0.00123  | 0.080243 | 0.08323  | 0.20196  | 1.09E-05 |
| 0.0215   | 0.256678 | 1.84E-08 | 0.421862 | 1.41E-21 | 0.285905 | 3.10E-10 | 0.187184 | 4.70E-05 |
| 0.72766  | 0.160397 | 0.0005   | 0.090519 | 0.05059  | 0.141434 | 0.00219  | 0.144512 | 0.00174  |
| 5.24E-05 | -0.28314 | 4.66E-10 | -0.16942 | 0.00024  | -0.17194 | 0.00019  | -0.26183 | 9.28E-09 |
| 0.20993  | 0.008155 | 0.86047  | -0.03059 | 0.5096   | -0.03338 | 0.4717   | 0.070872 | 0.12617  |
| 0.12258  | -0.01706 | 0.71315  | -0.00257 | 0.9559   | 0.055324 | 0.23276  | 0.025665 | 0.5801   |
| 0.00129  | -0.0129  | 0.78091  | 0.003946 | 0.93223  | 0.080602 | 0.08186  | -0.02277 | 0.6236   |
| 0.41082  | -0.01302 | 0.77907  | -0.0583  | 0.20856  | -0.06916 | 0.1356   | 0.015018 | 0.74618  |
| 0.2208   | 0.029693 | 0.52211  | 0.0212   | 0.64771  | 0.091662 | 0.04774  | 0.011886 | 0.79781  |
| 0.12679  | -0.03772 | 0.41605  | -0.01812 | 0.69613  | 0.014305 | 0.75784  | -0.0141  | 0.76122  |
| 0.20246  | -0.03691 | 0.42622  | 0.011239 | 0.8086   | -0.01958 | 0.67304  | -0.07244 | 0.11796  |
| 0.9923   | 0.01732  | 0.70891  | 0.074367 | 0.10849  | 0.044385 | 0.33853  | 0.011141 | 0.81023  |
| 0.05863  | 0.072321 | 0.11859  | 0.061125 | 0.1873   | 0.180659 | 8.64E-05 | 0.026725 | 0.56455  |
| 0.94455  | -0.03413 | 0.46181  | -0.07341 | 0.11314  | -0.0559  | 0.22793  | -0.00557 | 0.90438  |
| 0.27765  | 0.037091 | 0.4239   | 0.059382 | 0.20021  | 0.096713 | 0.03668  | 0.027961 | 0.54668  |
| 0.1614   | 0.022965 | 0.62059  | 0.017512 | 0.70584  | 0.041444 | 0.37153  | 0.019493 | 0.67436  |
| 0.23218  | 0.028449 | 0.53971  | 0.072869 | 0.11582  | 0.107977 | 0.0196   | -0.01446 | 0.75535  |
| 2.49E-06 | 0.207286 | 6.28E-06 | 0.047002 | 0.31079  | -0.00358 | 0.93853  | 0.211496 | 4.02E-06 |
| 0.13994  | 0.117338 | 0.01116  | 0.018832 | 0.68481  | -0.03101 | 0.50378  | 0.061346 | 0.1857   |
| 0.73995  | 0.162523 | 0.00042  | -0.02553 | 0.58205  | -0.02827 | 0.54229  | 0.057052 | 0.21847  |
| 9.90E-06 | 0.252535 | 3.15E-08 | 0.228297 | 6.15E-07 | 0.14967  | 0.00118  | 0.341546 | 3.19E-14 |
| 1.40E-05 | 0.066771 | 0.14968  | 0.066019 | 0.15433  | 0.023113 | 0.61835  | 0.099092 | 0.03228  |
| 0.50105  | 0.029328 | 0.52724  | -0.00049 | 0.99158  | 0.006615 | 0.88663  | 0.045913 | 0.32215  |
| 0.27659  | -0.02773 | 0.54995  | -0.05987 | 0.19652  | -0.0327  | 0.48086  | -0.05777 | 0.21276  |
| 1.24E-11 | 0.030442 | 0.51167  | -0.03741 | 0.4199   | 0.038091 | 0.41151  | -0.14586 | 0.00157  |
| 0.72508  | 0.016781 | 0.71758  | 0.048071 | 0.2999   | 0.008273 | 0.85849  | 0.071032 | 0.12531  |
| 0.32164  | 0.004196 | 0.92794  | 0.034454 | 0.45761  | 0.013886 | 0.76472  | -0.01227 | 0.79148  |
| 0.00223  | 0.000182 | 0.99687  | -0.01109 | 0.81111  | 0.175193 | 0.00014  | -0.0487  | 0.29364  |
| 0.95448  | 0.071134 | 0.12477  | 0.095852 | 0.0384   | 0.021868 | 0.63739  | 0.05556  | 0.23078  |
| 0.32725  | 0.036923 | 0.42601  | 0.041411 | 0.37192  | 0.066774 | 0.14966  | 0.085818 | 0.06388  |
| 0.39845  | 0.034282 | 0.45986  | 0.071666 | 0.12197  | 0.081516 | 0.07844  | 0.06248  | 0.17769  |
| 0.9204   | -0.06298 | 0.17421  | -0.06854 | 0.13916  | -0.04764 | 0.30428  | 0.009016 | 0.84593  |
| 0.89609  | -0.00477 | 0.91805  | 0.018081 | 0.69675  | -0.00486 | 0.9166   | 0.07004  | 0.13069  |
| 1.02E-06 | 0.234919 | 2.82E-07 | 0.194487 | 2.31E-05 | 0.065486 | 0.15769  | 0.167004 | 0.00029  |
| 2.50E-07 | 0.113977 | 0.01372  | 0.180086 | 9.10E-05 | 0.264558 | 6.41E-09 | 0.029911 | 0.51906  |
| 0.03705  | -0.02416 | 0.60259  | -0.05348 | 0.24877  | -0.02258 | 0.62649  | -0.0863  | 0.0624   |
| 1.88E-05 | 0.402122 | 1.41E-19 | 0.292564 | 1.14E-10 | 0.319922 | 1.42E-12 | 0.248713 | 5.15E-08 |
| 0.0094   | 0.032541 | 0.48298  | -0.04739 | 0.30679  | 0.039058 | 0.39973  | -0.10546 | 0.02265  |
| 0.89584  | -0.09506 | 0.04003  | -0.02665 | 0.56571  | -0.07117 | 0.12456  | -0.01938 | 0.67614  |
| 0.00093  | 0.149513 | 0.00119  | 0.169786 | 0.00023  | 0.138064 | 0.00279  | 0.139138 | 0.00258  |
| 0.04427  | -0.09412 | 0.04206  | -0.06046 | 0.19218  | -0.05851 | 0.20694  | -0.09705 | 0.03604  |
| 0.1824   | -0.24122 | 1.31E-07 | -0.06864 | 0.13859  | -0.07553 | 0.10306  | -0.10057 | 0.02978  |
| 0.17049  | -0.1157  | 0.01235  | -0.04699 | 0.31095  | -0.05522 | 0.23368  | -0.05817 | 0.20954  |
| 0.51868  | -0.08389 | 0.07011  | -0.02154 | 0.6425   | 0.001908 | 0.9672   | -0.00787 | 0.86534  |



|          |          |          |          |          |          |          |          |          |
|----------|----------|----------|----------|----------|----------|----------|----------|----------|
| 0.72847  | 0.013444 | 0.772    | 0.083887 | 0.07012  | 0.114512 | 0.01328  | 0.058373 | 0.20798  |
| 0.491    | 0.092715 | 0.04523  | 0.068301 | 0.14054  | 0.071373 | 0.12351  | 0.039124 | 0.39894  |
| 0.70352  | 0.051368 | 0.26793  | 0.051277 | 0.26878  | 0.074225 | 0.10917  | -0.01752 | 0.70574  |
| 0.22752  | 0.359086 | 1.17E-15 | 0.2086   | 5.47E-06 | 0.169368 | 0.00024  | 0.094503 | 0.04122  |
| 1.32E-08 | -0.04009 | 0.3874   | -0.01776 | 0.7018   | -0.02891 | 0.53318  | -0.17382 | 0.00016  |
| 0.07028  | 0.068622 | 0.13869  | 0.131409 | 0.00445  | 0.075029 | 0.10538  | 0.097491 | 0.03519  |
| 0.85947  | -0.00409 | 0.92981  | 0.033838 | 0.4657   | -0.00793 | 0.8643   | -0.00509 | 0.91261  |
| 0.47723  | -0.06598 | 0.15458  | 0.001461 | 0.97488  | -0.05142 | 0.2675   | -0.01861 | 0.68825  |
| 0.9102   | 0.017591 | 0.70457  | 0.027465 | 0.55382  | 0.021837 | 0.63786  | -0.01347 | 0.77162  |
| 0.24207  | 0.097845 | 0.03453  | 0.045953 | 0.32172  | 0.059892 | 0.19637  | 0.122396 | 0.0081   |
| 0.22527  | -0.03389 | 0.46507  | 0.067707 | 0.14404  | 0.003887 | 0.93324  | -0.04398 | 0.343    |
| 0.57312  | -0.0439  | 0.34389  | -0.09901 | 0.03243  | -0.06216 | 0.17992  | -0.11198 | 0.01548  |
| 3.00E-05 | -0.14157 | 0.00217  | -0.09425 | 0.04177  | -0.12401 | 0.00729  | -0.21923 | 1.72E-06 |
| 0.04789  | 0.120961 | 0.00888  | 0.072061 | 0.11992  | 0.087337 | 0.05931  | 0.115118 | 0.0128   |
| 0.72928  | -0.00756 | 0.87057  | -0.01022 | 0.82574  | -0.00401 | 0.93107  | 0.028787 | 0.5349   |
| 0.85108  | -0.05959 | 0.19867  | -0.06912 | 0.13581  | -0.08222 | 0.0759   | -0.01741 | 0.70755  |
| 0.11116  | 0.188808 | 4.02E-05 | 0.108398 | 0.01912  | 0.089428 | 0.05345  | 0.09006  | 0.05178  |
| 0.34791  | -0.18924 | 3.86E-05 | 0.022663 | 0.6252   | -0.14195 | 0.00211  | -0.09264 | 0.04541  |
| 2.26E-05 | -0.04123 | 0.37403  | 0.074438 | 0.10816  | 0.01823  | 0.69437  | 0.15933  | 0.00055  |
| 3.27E-17 | 0.14745  | 0.0014   | 0.098103 | 0.03405  | 0.009096 | 0.84458  | 0.283065 | 4.71E-10 |
| 0.60575  | 0.056139 | 0.22595  | 0.059192 | 0.20166  | 0.094586 | 0.04104  | 0.173079 | 0.00017  |
| 0.04548  | 0.009404 | 0.83939  | 0.113612 | 0.01403  | 0.071615 | 0.12224  | 0.122769 | 0.00791  |
| 0.87973  | -0.06139 | 0.18537  | -0.03798 | 0.41292  | -0.05619 | 0.2255   | -0.0031  | 0.94681  |
| 0.71721  | 0.001613 | 0.97228  | 0.049561 | 0.28516  | 0.02055  | 0.6578   | 0.013806 | 0.76603  |
| 0.34076  | 0.027809 | 0.54887  | 0.031632 | 0.49529  | 0.057471 | 0.21511  | 0.015667 | 0.7356   |
| 1.52E-05 | -0.30817 | 9.89E-12 | -0.35698 | 1.76E-15 | -0.29396 | 9.22E-11 | -0.18153 | 7.97E-05 |
| 0.0332   | -0.12772 | 0.00571  | -0.1429  | 0.00196  | -0.13985 | 0.00245  | -0.02684 | 0.56293  |
| 0.00088  | -0.09199 | 0.04696  | -0.09013 | 0.05161  | -0.18716 | 4.71E-05 | 0.027272 | 0.5566   |
| 2.88E-06 | -0.0407  | 0.38025  | -0.00768 | 0.86854  | -0.13336 | 0.00389  | 0.015012 | 0.74627  |
| 0.04004  | -0.12996 | 0.00491  | -0.22947 | 5.37E-07 | -0.22629 | 7.76E-07 | -0.0908  | 0.04987  |
| 0.06574  | 0.263324 | 7.58E-09 | 0.205183 | 7.83E-06 | 0.334429 | 1.15E-13 | 0.134396 | 0.00362  |
| 0.00259  | 0.119039 | 0.01003  | 0.110098 | 0.01731  | 0.069571 | 0.13329  | 0.229483 | 5.36E-07 |
| 0.00141  | 0.086237 | 0.06259  | 0.124532 | 0.00705  | 0.054458 | 0.24017  | 0.035435 | 0.44489  |
| 0.06176  | 0.152257 | 0.00096  | 0.155942 | 0.00072  | 0.184007 | 6.33E-05 | 0.080787 | 0.08116  |
| 8.44E-06 | 0.284473 | 3.83E-10 | 0.168954 | 0.00024  | 0.321229 | 1.14E-12 | 0.032662 | 0.48135  |
| 0.00117  | 0.415902 | 5.86E-21 | 0.191123 | 3.22E-05 | 0.288594 | 2.08E-10 | 0.15197  | 0.00099  |
| 0.00423  | -0.20404 | 8.82E-06 | -0.16105 | 0.00048  | -0.2224  | 1.21E-06 | 0.085671 | 0.06434  |
| 0.00421  | 0.077914 | 0.09261  | 0.049778 | 0.28305  | 0.086971 | 0.06038  | 0.11442  | 0.01336  |
| 2.38E-15 | 0.084268 | 0.06885  | -0.02938 | 0.52644  | -0.06446 | 0.16433  | 0.208391 | 5.59E-06 |
| 0.03512  | -0.11529 | 0.01267  | -0.13123 | 0.0045   | -0.13796 | 0.00281  | -0.0258  | 0.57809  |
| 0.7239   | -0.09279 | 0.04504  | -0.09484 | 0.04049  | -0.11647 | 0.01178  | 0.014393 | 0.7564   |
| 3.64E-06 | 0.230317 | 4.86E-07 | 0.144885 | 0.00169  | 0.203118 | 9.70E-06 | 0.176064 | 0.00013  |
| 0.03418  | -0.05396 | 0.24452  | -0.05495 | 0.23595  | -0.07265 | 0.11691  | -0.00056 | 0.99039  |
| 0.00046  | -0.06518 | 0.15962  | -0.08613 | 0.06291  | -0.04653 | 0.31569  | -0.13178 | 0.00434  |
| 0.00017  | -0.04752 | 0.30548  | -0.03652 | 0.43113  | 0.093576 | 0.04326  | -0.06869 | 0.1383   |

|          |          |          |          |          |          |          |          |          |
|----------|----------|----------|----------|----------|----------|----------|----------|----------|
| 5.78E-05 | 0.002716 | 0.95333  | -0.04236 | 0.36101  | 0.104037 | 0.02455  | -0.03758 | 0.41785  |
| 0.05943  | 0.038077 | 0.41168  | 0.178517 | 0.00011  | 0.157947 | 0.00061  | 0.059417 | 0.19994  |
| 5.76E-24 | 0.075886 | 0.10145  | 0.120815 | 0.00896  | 0.004932 | 0.91535  | 0.343852 | 2.09E-14 |
| 3.80E-20 | 0.184441 | 6.08E-05 | 0.073376 | 0.1133   | 0.029861 | 0.51975  | 0.172951 | 0.00017  |
| 0.25908  | -0.11702 | 0.01138  | -0.09734 | 0.03547  | -0.12569 | 0.00653  | -0.18363 | 6.56E-05 |
| 0.72628  | -0.30871 | 9.06E-12 | -0.09955 | 0.03149  | -0.17824 | 0.00011  | -0.11453 | 0.01327  |
| 2.17E-06 | -0.02275 | 0.62381  | 0.109876 | 0.01754  | 0.152563 | 0.00094  | 0.053495 | 0.2486   |
| 0.57603  | 0.024629 | 0.5955   | 0.040824 | 0.37875  | 0.029125 | 0.53011  | 0.008418 | 0.85602  |
| 0.31486  | 0.017524 | 0.70564  | -0.01162 | 0.80217  | 0.026442 | 0.56869  | 0.03201  | 0.49015  |
| 0.0021   | 0.062337 | 0.17869  | 0.079882 | 0.08464  | 0.131762 | 0.00434  | 0.035745 | 0.44092  |
| 0.04409  | 0.00571  | 0.90205  | -0.05931 | 0.20078  | -0.00058 | 0.99001  | 0.074394 | 0.10836  |
| 4.00E-06 | -0.03266 | 0.48143  | -0.02631 | 0.57055  | -0.03973 | 0.39168  | 0.126164 | 0.00633  |
| 0.0597   | 0.033954 | 0.46417  | 0.048772 | 0.2929   | 0.051725 | 0.26462  | 0.078426 | 0.09048  |
| 0.10424  | -0.01252 | 0.78731  | 0.090483 | 0.05069  | 0.203239 | 9.58E-06 | 0.053743 | 0.2464   |
| 5.77E-06 | 0.054213 | 0.2423   | 0.086177 | 0.06277  | 0.155432 | 0.00075  | 0.024679 | 0.59474  |
| 0.01983  | 0.082986 | 0.07319  | 0.03751  | 0.41868  | 0.03696  | 0.42555  | 0.145271 | 0.00165  |
| 0.49027  | 0.138386 | 0.00273  | 0.085438 | 0.06507  | 0.131758 | 0.00434  | 0.013483 | 0.77136  |
| 0.32146  | 0.004921 | 0.91554  | 0.077168 | 0.09579  | 0.076206 | 0.10001  | -0.00149 | 0.97437  |
| 0.48781  | -0.0081  | 0.86139  | -0.12981 | 0.00496  | -0.01187 | 0.79801  | 0.01976  | 0.67016  |
| 0.45614  | 0.017912 | 0.69945  | -0.15279 | 0.00092  | -0.04948 | 0.28591  | -0.03033 | 0.51325  |
| 0.37915  | 0.068124 | 0.14158  | -0.12651 | 0.00619  | -0.03704 | 0.42459  | -0.05984 | 0.19673  |
| 0.08018  | 0.013202 | 0.77599  | -0.07627 | 0.09971  | -0.1437  | 0.00185  | -0.12254 | 0.00803  |
| 0.52336  | 0.301044 | 3.08E-11 | 0.039977 | 0.38872  | 0.100917 | 0.02922  | 0.080511 | 0.08221  |
| 0.45361  | 0.410797 | 1.94E-20 | 0.266338 | 5.03E-09 | 0.318149 | 1.91E-12 | 0.294816 | 8.09E-11 |
| 2.63E-09 | -0.07807 | 0.09198  | -0.01902 | 0.68183  | 0.108093 | 0.01946  | -0.19884 | 1.50E-05 |
| 3.39E-05 | 0.03339  | 0.47163  | 0.107281 | 0.0204   | 0.233932 | 3.17E-07 | -0.06539 | 0.15827  |
| 0.03443  | 0.108833 | 0.01864  | -0.02491 | 0.59138  | 0.047686 | 0.3038   | -0.00615 | 0.89453  |
| 0.00795  | 0.115558 | 0.01246  | 0.062902 | 0.17477  | 0.096594 | 0.03691  | 0.151346 | 0.00104  |
| 0.2444   | 0.001508 | 0.97407  | 0.034255 | 0.46022  | 0.018635 | 0.68793  | -0.01607 | 0.72913  |
| 0.22916  | -0.09517 | 0.03979  | -0.13676 | 0.00306  | -0.15521 | 0.00076  | -0.03769 | 0.41641  |
| 0.19159  | -0.0353  | 0.44663  | 0.034651 | 0.45505  | 0.080713 | 0.08144  | -0.12092 | 0.0089   |
| 0.34657  | -0.11296 | 0.01459  | -0.11217 | 0.01531  | -0.07488 | 0.10605  | -0.0752  | 0.1046   |
| 0.00492  | 0.056399 | 0.2238   | 0.0062   | 0.89369  | 0.053607 | 0.2476   | 0.054767 | 0.23751  |
| 0.01464  | 0.158505 | 0.00059  | 0.138594 | 0.00269  | 0.065034 | 0.16058  | 0.200224 | 1.30E-05 |
| 0.00056  | 0.104335 | 0.02414  | 0.129095 | 0.00521  | 0.11634  | 0.01187  | 0.031039 | 0.50341  |
| 0.00107  | -0.16539 | 0.00033  | -0.1967  | 1.86E-05 | -0.25109 | 3.80E-08 | -0.22966 | 5.25E-07 |
| 0.86072  | 0.216008 | 2.46E-06 | 0.111487 | 0.01594  | 0.000254 | 0.99563  | 0.071228 | 0.12427  |
| 0.18727  | 0.075715 | 0.10222  | 0.230267 | 4.89E-07 | 0.19369  | 2.50E-05 | 0.044911 | 0.33283  |
| 0.43773  | 0.207184 | 6.35E-06 | 0.241774 | 1.23E-07 | 0.319427 | 1.54E-12 | 0.168358 | 0.00026  |
| 0.03741  | 0.00416  | 0.92855  | 0.089615 | 0.05295  | 0.033383 | 0.47172  | 0.031927 | 0.49129  |
| 0.16307  | 0.147802 | 0.00136  | 0.162795 | 0.00041  | 0.201878 | 1.10E-05 | 0.080172 | 0.08351  |
| 3.65E-17 | -0.15351 | 0.00087  | 0.039875 | 0.38994  | -0.10049 | 0.02992  | 0.176443 | 0.00013  |
| 1.08E-07 | 0.171927 | 0.00019  | 0.148367 | 0.0013   | 0.141977 | 0.0021   | 0.205187 | 7.83E-06 |
| 0.00016  | 0.003359 | 0.9423   | -0.00967 | 0.83497  | -0.08755 | 0.0587   | 0.091746 | 0.04753  |
| 0.37873  | -0.00882 | 0.84923  | 0.017368 | 0.70815  | 0.024972 | 0.59037  | -0.001   | 0.98274  |

|          |          |          |          |          |          |          |          |          |
|----------|----------|----------|----------|----------|----------|----------|----------|----------|
| 0.84311  | 0.00517  | 0.91128  | -0.06224 | 0.17939  | 0.030779 | 0.507    | -0.00642 | 0.88998  |
| 0.96403  | -0.02025 | 0.66246  | -0.10747 | 0.02019  | 0.0065   | 0.8886   | -0.03474 | 0.45383  |
| 1.02E-11 | -0.08799 | 0.05744  | 0.062627 | 0.17667  | 0.051407 | 0.26757  | -0.24068 | 1.40E-07 |
| 0.1834   | -0.00716 | 0.87729  | 0.043672 | 0.34636  | 0.096275 | 0.03755  | 0.00295  | 0.94931  |
| 0.00538  | 0.153578 | 0.00087  | 0.176269 | 0.00013  | 0.158216 | 0.0006   | 0.154043 | 0.00084  |
| 0.06755  | 0.171781 | 0.00019  | 0.126868 | 0.00604  | 0.280506 | 6.84E-10 | 0.050329 | 0.27775  |
| 0.3767   | 0.177225 | 0.00012  | 0.200879 | 1.22E-05 | 0.1948   | 2.24E-05 | 0.163881 | 0.00038  |
| 0.00237  | -0.04706 | 0.31024  | -0.02539 | 0.58422  | 0.013191 | 0.77617  | -0.07032 | 0.12917  |
| 0.65879  | 0.186987 | 4.78E-05 | 0.143321 | 0.0019   | 0.191048 | 3.24E-05 | 0.059875 | 0.1965   |
| 0.40438  | -0.01283 | 0.78217  | -0.04939 | 0.28686  | -0.04636 | 0.31749  | -0.02021 | 0.6631   |
| 9.30E-21 | 0.244619 | 8.62E-08 | 0.173145 | 0.00017  | 0.0343   | 0.45963  | 0.307029 | 1.19E-11 |
| 0.4294   | 0.107158 | 0.02055  | 0.140959 | 0.00226  | 0.15944  | 0.00054  | 0.081079 | 0.08006  |
| 0.81947  | 0.051324 | 0.26835  | -0.02865 | 0.53689  | -0.00222 | 0.96185  | 0.030652 | 0.50875  |
| 0.3131   | 0.14187  | 0.00212  | 0.152924 | 0.00092  | 0.10984  | 0.01757  | 0.156049 | 0.00071  |
| 0.08677  | -0.24329 | 1.02E-07 | -0.22885 | 5.77E-07 | -0.29614 | 6.60E-11 | -0.19217 | 2.91E-05 |
| 0.21219  | 0.167891 | 0.00027  | 0.172114 | 0.00019  | 0.203269 | 9.55E-06 | 0.03184  | 0.49246  |
| 2.79E-16 | 0.002622 | 0.95494  | 0.054921 | 0.23619  | -0.1048  | 0.02351  | 0.207322 | 6.26E-06 |
| 0.00011  | 0.45234  | 6.22E-25 | 0.270553 | 2.81E-09 | 0.355456 | 2.36E-15 | -0.0002  | 0.99654  |
| 0.1083   | 0.067078 | 0.14781  | 0.107772 | 0.01983  | 0.131291 | 0.00448  | 0.129657 | 0.00501  |
| 8.96E-11 | -0.1286  | 0.00538  | -0.17232 | 0.00018  | -0.10073 | 0.02952  | -0.17005 | 0.00022  |
| 0.14384  | -0.18169 | 7.86E-05 | -0.03722 | 0.4223   | -0.15903 | 0.00056  | -0.1962  | 1.95E-05 |
| 0.88991  | 0.013297 | 0.77443  | -0.07957 | 0.08584  | 0.065978 | 0.15458  | 0.064538 | 0.1638   |
| 0.05501  | 0.008269 | 0.85855  | -0.14692 | 0.00145  | -0.09937 | 0.03179  | -0.1433  | 0.00191  |
| 2.69E-05 | -0.21171 | 3.93E-06 | -0.1192  | 0.00993  | -0.21947 | 1.68E-06 | -0.00764 | 0.86924  |
| 3.76E-10 | -0.00167 | 0.97125  | 0.054341 | 0.24118  | -0.06191 | 0.18165  | 0.20116  | 1.19E-05 |
| 0.57509  | 0.05652  | 0.2228   | 0.101696 | 0.02799  | 0.07175  | 0.12153  | 0.040478 | 0.3828   |
| 3.29E-05 | 0.274341 | 1.65E-09 | 0.064464 | 0.16429  | 0.19561  | 2.07E-05 | -0.05666 | 0.22162  |
| 0.05715  | 0.039084 | 0.39941  | -0.00568 | 0.90261  | -0.11003 | 0.01738  | -0.13472 | 0.00354  |
| 0.01041  | 0.209055 | 5.21E-06 | 0.243188 | 1.03E-07 | 0.350683 | 5.84E-15 | 0.084719 | 0.06737  |
| 0.80402  | 0.174882 | 0.00015  | 0.059952 | 0.19592  | 0.128848 | 0.00529  | 0.048678 | 0.29384  |
| 0.51199  | 0.149787 | 0.00117  | 0.098472 | 0.03338  | 0.144917 | 0.00169  | 0.031583 | 0.49596  |
| 5.10E-05 | -0.22629 | 7.76E-07 | 0.031609 | 0.49561  | -0.01961 | 0.67256  | -0.23311 | 3.50E-07 |
| 0.00605  | 0.031879 | 0.49193  | 0.072547 | 0.11744  | 0.009299 | 0.84115  | -0.07034 | 0.12903  |
| 0.09635  | -0.07714 | 0.09592  | -0.10459 | 0.0238   | -0.08179 | 0.07744  | -0.07594 | 0.10119  |
| 0.03904  | -0.08088 | 0.0808   | -0.04896 | 0.29103  | -0.05993 | 0.19607  | -0.04976 | 0.28318  |
| 0.02065  | -0.1944  | 2.33E-05 | -0.22464 | 9.38E-07 | -0.23777 | 2.00E-07 | 0.000144 | 0.99752  |
| 0.60433  | 0.062202 | 0.17963  | 0.012868 | 0.78151  | 0.005991 | 0.89726  | 0.028316 | 0.5416   |
| 0.22846  | 0.084533 | 0.06798  | -0.00585 | 0.89965  | 0.051667 | 0.26516  | 0.02466  | 0.59503  |
| 0.01866  | 0.07093  | 0.12586  | 0.037622 | 0.4173   | 0.001279 | 0.97801  | 0.007752 | 0.86731  |
| 0.07091  | 0.041428 | 0.37173  | 0.05227  | 0.25961  | 0.030101 | 0.51641  | 0.100606 | 0.02972  |
| 0.18552  | 0.031599 | 0.49574  | 0.00616  | 0.89438  | 0.013617 | 0.76914  | 0.100439 | 0.02999  |
| 0.8893   | -0.00285 | 0.95096  | 0.002669 | 0.95413  | -0.02195 | 0.63609  | 0.001645 | 0.97172  |
| 0.12762  | 0.048592 | 0.29469  | 0.017771 | 0.70169  | 0.021674 | 0.64037  | 0.02666  | 0.5655   |
| 0.31136  | -0.03018 | 0.51532  | -0.00342 | 0.9413   | -0.02195 | 0.63613  | -0.01017 | 0.82652  |
| 8.77E-06 | 0.030177 | 0.51535  | -0.01892 | 0.68338  | 0.060682 | 0.19052  | -0.15871 | 0.00058  |

|          |          |          |          |          |          |          |          |          |
|----------|----------|----------|----------|----------|----------|----------|----------|----------|
| 0.12652  | 0.075708 | 0.10225  | 0.053361 | 0.24979  | 0.085407 | 0.06517  | 0.152934 | 0.00091  |
| 0.80823  | 0.063341 | 0.17178  | 0.013855 | 0.76523  | 0.041364 | 0.37246  | 0.024557 | 0.59658  |
| 3.17E-05 | -0.14715 | 0.00143  | -0.15918 | 0.00055  | -0.25162 | 3.55E-08 | 0.064397 | 0.16473  |
| 0.11224  | -0.02758 | 0.55209  | -0.03811 | 0.41125  | -0.08428 | 0.06879  | 0.095078 | 0.03999  |
| 0.3299   | -0.2307  | 4.65E-07 | -0.16417 | 0.00037  | -0.26692 | 4.65E-09 | -0.10673 | 0.02106  |
| 0.36193  | -0.10754 | 0.0201   | 0.10581  | 0.0222   | 0.025645 | 0.58041  | 0.054109 | 0.2432   |
| 0.00342  | 0.23682  | 2.24E-07 | 0.199974 | 1.34E-05 | 0.186174 | 5.17E-05 | 0.341621 | 3.14E-14 |
| 4.92E-07 | 0.091101 | 0.04912  | -0.10091 | 0.02922  | -0.10182 | 0.02779  | 0.1072   | 0.0205   |
| 0.00776  | -0.0929  | 0.0448   | -0.14855 | 0.00128  | -0.08818 | 0.0569   | -0.01795 | 0.69879  |
| 0.00095  | 0.199337 | 1.43E-05 | 0.191808 | 3.01E-05 | 0.139525 | 0.00251  | 0.005876 | 0.89922  |
| 0.0097   | 0.031098 | 0.50261  | -0.06439 | 0.16476  | -0.12441 | 0.00711  | 0.104787 | 0.02354  |
| 0.29012  | 0.080345 | 0.08284  | 0.102782 | 0.02635  | 0.253095 | 2.93E-08 | 0.045834 | 0.32298  |
| 0.34944  | 0.058038 | 0.2106   | 0.000125 | 0.99785  | 0.167247 | 0.00028  | 0.117164 | 0.01128  |
| 0.44154  | -0.11006 | 0.01735  | -0.11696 | 0.01142  | -0.22944 | 5.39E-07 | 0.002402 | 0.95871  |
| 1.70E-05 | -0.09808 | 0.03409  | 0.093883 | 0.04257  | -0.06397 | 0.16757  | 0.095573 | 0.03897  |
| 5.41E-08 | -0.10363 | 0.02513  | -0.06804 | 0.14207  | -0.04614 | 0.31976  | -0.06034 | 0.19304  |
| 0.00515  | 0.091387 | 0.04841  | 0.076729 | 0.0977   | -0.04216 | 0.36337  | -0.01828 | 0.69354  |
| 0.00369  | -0.09035 | 0.05103  | -0.08651 | 0.06175  | -0.05295 | 0.25348  | -0.11785 | 0.01081  |
| 0.00017  | -0.10657 | 0.02126  | -0.05432 | 0.24138  | -0.04101 | 0.37659  | -0.18714 | 4.72E-05 |
| 1.46E-12 | -0.05506 | 0.23496  | 0.06703  | 0.1481   | -0.11517 | 0.01276  | 0.134484 | 0.00359  |
| 0.00961  | -0.08358 | 0.07115  | -0.01745 | 0.70684  | -0.03429 | 0.45976  | -0.01442 | 0.75601  |
| 1.52E-05 | -0.20063 | 1.25E-05 | -0.06215 | 0.17998  | -0.20516 | 7.85E-06 | 0.032387 | 0.48506  |
| 3.50E-08 | 0.141032 | 0.00225  | 0.140388 | 0.00236  | 0.143351 | 0.0019   | 0.223423 | 1.08E-06 |
| 0.04462  | 0.098146 | 0.03397  | 0.144096 | 0.0018   | 0.105872 | 0.02212  | 0.15366  | 0.00086  |
| 0.11189  | 0.237071 | 2.18E-07 | 0.185178 | 5.68E-05 | 0.331772 | 1.84E-13 | 0.13664  | 0.00309  |
| 0.00116  | -0.01845 | 0.69092  | 0.106128 | 0.0218   | 0.135195 | 0.00342  | -0.00483 | 0.91711  |
| 0.00014  | 0.376922 | 3.26E-17 | 0.22958  | 5.30E-07 | 0.266531 | 4.90E-09 | 0.261666 | 9.48E-09 |
| 0.6643   | 0.108985 | 0.01848  | 0.13542  | 0.00337  | 0.164493 | 0.00036  | 0.044205 | 0.34049  |
| 0.00036  | 0.102062 | 0.02742  | 0.152612 | 0.00094  | 0.156698 | 0.00068  | -0.03644 | 0.43209  |
| 0.0001   | -0.06217 | 0.17986  | -0.00753 | 0.87113  | -0.12902 | 0.00523  | -0.01109 | 0.81117  |
| 0.00516  | 0.142787 | 0.00198  | 0.103437 | 0.0254   | 0.150507 | 0.0011   | 0.174877 | 0.00015  |
| 0.92622  | 0.100321 | 0.03019  | 0.117974 | 0.01073  | 0.153262 | 0.00089  | 0.098204 | 0.03387  |
| 9.30E-14 | 0.084071 | 0.0695   | 0.055242 | 0.23345  | 0.257182 | 1.72E-08 | 0.015519 | 0.73801  |
| 0.12619  | 0.074532 | 0.10771  | 0.098596 | 0.03316  | 0.098869 | 0.03267  | 0.121659 | 0.00849  |
| 0.00028  | -0.01641 | 0.72355  | 0.050027 | 0.28065  | 0.160279 | 0.00051  | -0.03545 | 0.44475  |
| 1.04E-13 | 0.035503 | 0.44403  | 0.144677 | 0.00172  | 0.230015 | 5.04E-07 | -0.07231 | 0.11863  |
| 6.41E-14 | -0.04167 | 0.36891  | -0.00512 | 0.91211  | 0.195358 | 2.12E-05 | -0.07993 | 0.08445  |
| 0.01346  | -0.00445 | 0.92366  | 0.087378 | 0.05919  | 0.069754 | 0.13227  | 0.033635 | 0.46838  |
| 0.01581  | -0.02203 | 0.63485  | 0.084743 | 0.06729  | 0.074187 | 0.10935  | 0.015904 | 0.73176  |
| 1.20E-05 | 0.075458 | 0.10339  | 0.067222 | 0.14694  | 0.175737 | 0.00013  | 0.045446 | 0.3271   |
| 9.92E-09 | 0.10671  | 0.02109  | 0.044874 | 0.33323  | -0.13602 | 0.00323  | 0.183657 | 6.55E-05 |
| 7.26E-10 | 0.188093 | 4.31E-05 | 0.129522 | 0.00506  | -0.04006 | 0.38777  | 0.260593 | 1.09E-08 |
| 0.00291  | -0.05865 | 0.20583  | -0.02078 | 0.65424  | -0.00051 | 0.9913   | 0.020312 | 0.66151  |
| 0.87803  | 0.143426 | 0.00189  | 0.064437 | 0.16447  | 0.102213 | 0.02719  | 0.064368 | 0.16492  |
| 0.074    | 0.349664 | 7.08E-15 | 0.18432  | 6.15E-05 | 0.325584 | 5.41E-13 | 0.106177 | 0.02174  |

|          |          |          |          |          |          |          |          |          |
|----------|----------|----------|----------|----------|----------|----------|----------|----------|
| 3.25E-06 | -0.00466 | 0.92002  | -0.03725 | 0.42191  | 0.078324 | 0.0909   | -0.20284 | 9.97E-06 |
| 0.03017  | 0.095059 | 0.04003  | 0.133547 | 0.00384  | 0.152365 | 0.00096  | 0.119525 | 0.00973  |
| 0.06744  | 0.006494 | 0.88869  | 0.095736 | 0.03863  | 0.058306 | 0.2085   | 0.067584 | 0.14477  |
| 0.0047   | 0.045093 | 0.33088  | 0.104691 | 0.02366  | 0.1071   | 0.02062  | 0.075696 | 0.10231  |
| 1.05E-07 | 0.211915 | 3.84E-06 | 0.244492 | 8.76E-08 | 0.184081 | 6.29E-05 | 0.333804 | 1.28E-13 |
| 0.46528  | -0.07771 | 0.09347  | -0.02022 | 0.66294  | -0.08318 | 0.07254  | -0.04068 | 0.38037  |
| 0.28122  | 0.022116 | 0.63357  | -0.03168 | 0.49463  | -0.01009 | 0.82783  | 0.038889 | 0.40177  |
| 0.0056   | 0.020176 | 0.66365  | 0.031299 | 0.49985  | 0.083528 | 0.07133  | -0.03491 | 0.4517   |
| 0.71501  | 0.135792 | 0.00328  | 0.15245  | 0.00095  | 0.237329 | 2.11E-07 | 0.062191 | 0.17971  |
| 0.00014  | 0.007821 | 0.86615  | 0.026523 | 0.5675   | -0.08674 | 0.06108  | 0.091969 | 0.04699  |
| 3.31E-21 | -0.18064 | 8.65E-05 | 0.095896 | 0.03831  | 0.201053 | 1.20E-05 | -0.14389 | 0.00182  |
| 0.01185  | 0.367338 | 2.29E-16 | 0.168135 | 0.00026  | 0.187002 | 4.78E-05 | 0.122532 | 0.00803  |
| 0.08995  | 0.127819 | 0.00567  | 0.126084 | 0.00637  | 0.169975 | 0.00022  | 0.36914  | 1.60E-16 |
| 0.02016  | -0.0598  | 0.19704  | -0.00734 | 0.87437  | -0.02634 | 0.57015  | 0.077663 | 0.09367  |
| 0.41303  | -0.1299  | 0.00493  | -0.20077 | 1.23E-05 | -0.2113  | 4.10E-06 | -0.08013 | 0.08367  |
| 7.03E-12 | 0.050083 | 0.28011  | 0.028868 | 0.53374  | -0.05871 | 0.20534  | 0.140094 | 0.00241  |
| 0.00029  | 0.227207 | 6.98E-07 | 0.113656 | 0.01399  | 0.195344 | 2.13E-05 | 0.141059 | 0.00225  |
| 1.12E-07 | 0.158377 | 0.00059  | -0.03988 | 0.38987  | -0.06505 | 0.16049  | 0.087066 | 0.0601   |
| 0.97478  | 0.103096 | 0.02589  | 0.099638 | 0.03134  | 0.179402 | 9.69E-05 | 0.108363 | 0.01916  |
| 0.80614  | -0.03494 | 0.45127  | -0.06878 | 0.1378   | -0.10714 | 0.02057  | -0.16111 | 0.00047  |
| 0.00231  | 0.286875 | 2.68E-10 | 0.136502 | 0.00312  | 0.130468 | 0.00474  | 0.007867 | 0.86536  |
| 0.27556  | 0.050638 | 0.27481  | -0.04755 | 0.30522  | 0.14218  | 0.00207  | 0.065757 | 0.15597  |
| 9.01E-07 | 0.102189 | 0.02723  | -0.08081 | 0.08106  | 0.036761 | 0.42803  | -0.14606 | 0.00155  |
| 3.48E-14 | 0.056879 | 0.21988  | 0.011292 | 0.80772  | 0.160827 | 0.00048  | -0.13237 | 0.00416  |
| 1.44E-26 | 0.212002 | 3.80E-06 | 0.144875 | 0.0017   | 0.083292 | 0.07214  | 0.253063 | 2.95E-08 |
| 0.48748  | -0.00745 | 0.87243  | 0.029161 | 0.5296   | 0.084691 | 0.06747  | 0.082146 | 0.07616  |
| 5.81E-06 | 0.201944 | 1.09E-05 | 0.190487 | 3.42E-05 | 0.323557 | 7.66E-13 | 0.053485 | 0.24868  |
| 7.19E-05 | -0.04657 | 0.31521  | 0.010426 | 0.8222   | 0.019542 | 0.6736   | -0.08644 | 0.06197  |
| 0.01906  | -0.12852 | 0.00541  | -0.156   | 0.00072  | -0.11882 | 0.01017  | -0.05124 | 0.26917  |
| 1.16E-05 | 0.093379 | 0.0437   | 0.071462 | 0.12304  | 0.266768 | 4.74E-09 | -0.02955 | 0.52412  |
| 0.01858  | -0.08632 | 0.06235  | -0.07449 | 0.10789  | -0.05122 | 0.26928  | -0.1773  | 0.00012  |
| 0.0445   | 0.091651 | 0.04777  | -0.02603 | 0.5747   | 0.053127 | 0.25187  | 0.077942 | 0.09249  |
| 0.27875  | 0.001563 | 0.97312  | 0.047349 | 0.30723  | 0.04798  | 0.30082  | 0.009577 | 0.83647  |
| 0.00018  | 0.054009 | 0.24407  | -0.04445 | 0.33786  | 0.021251 | 0.64692  | 0.059955 | 0.19589  |
| 0.18738  | -0.04527 | 0.32898  | -0.1663  | 0.00031  | -0.0399  | 0.38959  | -0.06433 | 0.16514  |
| 0.07065  | 0.055491 | 0.23135  | -0.02001 | 0.66632  | 0.040496 | 0.38259  | -0.04805 | 0.30014  |
| 0.74591  | 0.072984 | 0.11524  | -0.00553 | 0.90515  | 0.076985 | 0.09658  | 0.084183 | 0.06913  |
| 0.12913  | 0.055074 | 0.23488  | -0.04096 | 0.37718  | 0.034035 | 0.4631   | -0.04067 | 0.38052  |
| 0.83139  | 0.109271 | 0.01817  | 0.082691 | 0.07422  | 0.121839 | 0.0084   | -0.01381 | 0.76594  |
| 0.73655  | 0.084278 | 0.06882  | 0.046807 | 0.31281  | 0.116237 | 0.01195  | 0.028959 | 0.53246  |
| 1.53E-06 | 0.052423 | 0.25822  | 0.107105 | 0.02061  | 0.296526 | 6.22E-11 | 0.020711 | 0.6553   |
| 0.93397  | 0.131308 | 0.00448  | 0.04717  | 0.30907  | 0.066576 | 0.15087  | 0.03798  | 0.41288  |
| 0.4653   | 0.051469 | 0.267    | 0.089494 | 0.05328  | 0.183788 | 6.47E-05 | 0.037538 | 0.41833  |
| 2.86E-08 | -0.01964 | 0.672    | 0.018625 | 0.68809  | 0.104138 | 0.02442  | -0.12383 | 0.00738  |
| 0.00218  | 0.032411 | 0.48474  | 0.115419 | 0.01256  | 0.233699 | 3.26E-07 | -0.02245 | 0.62841  |

|          |          |          |          |          |          |          |          |          |
|----------|----------|----------|----------|----------|----------|----------|----------|----------|
| 0.34455  | 0.090172 | 0.05149  | 0.038078 | 0.41167  | 0.082601 | 0.07454  | -0.02784 | 0.54839  |
| 0.90079  | 0.057273 | 0.21669  | 0.090902 | 0.04962  | 0.121106 | 0.0088   | 0.08751  | 0.0588   |
| 0.04271  | 0.002672 | 0.95407  | 0.106305 | 0.02158  | 0.210882 | 4.29E-06 | 0.004122 | 0.9292   |
| 0.19292  | 0.161596 | 0.00046  | 0.007496 | 0.87165  | 0.202344 | 1.05E-05 | 0.07784  | 0.09292  |
| 0.00253  | 0.057479 | 0.21504  | -0.0594  | 0.20009  | 0.066757 | 0.14976  | -0.01318 | 0.77633  |
| 2.92E-05 | -0.14443 | 0.00175  | 0.034978 | 0.45079  | 0.000688 | 0.98817  | -0.08372 | 0.07066  |
| 3.57E-05 | -0.08889 | 0.05491  | -0.04479 | 0.33409  | 0.04624  | 0.31872  | -0.20962 | 4.91E-06 |
| 0.00651  | 0.248696 | 5.16E-08 | 0.195027 | 2.19E-05 | 0.236333 | 2.38E-07 | 0.035646 | 0.44219  |
| 0.81916  | 0.046326 | 0.31781  | 0.092441 | 0.04587  | 0.081011 | 0.08032  | 0.069096 | 0.13597  |
| 0.07994  | -0.00257 | 0.95584  | -0.00029 | 0.99508  | 0.002506 | 0.95692  | -0.1003  | 0.03023  |
| 9.07E-16 | 0.02729  | 0.55635  | 0.031739 | 0.49384  | -0.04121 | 0.37423  | 0.332491 | 1.62E-13 |
| 0.19687  | -0.06483 | 0.16189  | -0.13275 | 0.00406  | -0.04111 | 0.37546  | -0.08372 | 0.07068  |
| 4.80E-24 | -0.01234 | 0.79024  | 0.015188 | 0.7434   | 0.190522 | 3.41E-05 | -0.16616 | 0.00031  |
| 0.05721  | 0.088918 | 0.05483  | 0.036249 | 0.4345   | 0.050907 | 0.27226  | 0.012165 | 0.79318  |
| 0.60215  | 0.076481 | 0.09879  | 0.041435 | 0.37164  | 0.198471 | 1.56E-05 | 0.128609 | 0.00538  |
| 0.83576  | -0.04546 | 0.3269   | -0.10124 | 0.0287   | -0.05599 | 0.22721  | 0.010528 | 0.8205   |
| 0.71571  | 0.367288 | 2.32E-16 | 0.146609 | 0.00149  | 0.20504  | 7.95E-06 | 0.13563  | 0.00332  |
| 2.33E-08 | -0.1057  | 0.02234  | -0.01228 | 0.79123  | -0.18049 | 8.77E-05 | 0.166775 | 0.00029  |
| 8.19E-20 | 0.153443 | 0.00088  | 0.077446 | 0.0946   | -0.04556 | 0.32585  | 0.233248 | 3.44E-07 |
| 0.00017  | -0.0377  | 0.41638  | -0.04425 | 0.34004  | -0.09349 | 0.04346  | 0.089413 | 0.05349  |
| 0.0008   | 0.159952 | 0.00052  | 0.132414 | 0.00415  | 0.095817 | 0.03847  | 0.162606 | 0.00042  |
| 0.45251  | -0.04236 | 0.36111  | 0.203276 | 9.54E-06 | 0.135198 | 0.00342  | 0.08346  | 0.07156  |
| 1.15E-07 | -0.00737 | 0.87378  | 0.032637 | 0.48169  | 0.173031 | 0.00017  | -0.16055 | 0.0005   |
| 0.75133  | -0.01407 | 0.7617   | 0.016283 | 0.72562  | -0.05341 | 0.24937  | -0.01643 | 0.72316  |
| 0.06297  | -0.25079 | 3.95E-08 | -0.1313  | 0.00448  | -0.22916 | 5.56E-07 | -0.02193 | 0.63646  |
| 0.035    | -0.04687 | 0.3122   | 0.015545 | 0.73759  | 0.057669 | 0.21352  | 0.009869 | 0.83155  |
| 0.15785  | 0.12148  | 0.00859  | 0.127624 | 0.00575  | 0.093139 | 0.04425  | 0.11744  | 0.01109  |
| 0.0008   | -0.03    | 0.51779  | 0.109739 | 0.01768  | 0.095421 | 0.03928  | 0.016867 | 0.7162   |
| 0.99458  | 0.133863 | 0.00375  | 0.192954 | 2.69E-05 | 0.181135 | 8.27E-05 | 0.083034 | 0.07303  |
| 0.64797  | 0.155366 | 0.00075  | 0.059681 | 0.19795  | 0.086792 | 0.06092  | 0.104921 | 0.02336  |
| 0.13584  | -0.05212 | 0.26103  | -0.06285 | 0.17514  | -0.02941 | 0.52603  | -0.09352 | 0.04339  |
| 9.08E-09 | -0.09774 | 0.03473  | -0.19792 | 1.65E-05 | -0.02721 | 0.55755  | -0.1327  | 0.00407  |
| 0.69971  | 0.017441 | 0.70697  | 0.083978 | 0.06981  | 0.116184 | 0.01199  | 0.02843  | 0.53997  |
| 0.00039  | -0.0321  | 0.48891  | -0.00414 | 0.92886  | 0.133053 | 0.00397  | -0.05323 | 0.251    |
| 0.35003  | 0.01043  | 0.82214  | -0.04194 | 0.36583  | 0.082626 | 0.07445  | 0.15383  | 0.00085  |
| 1.96E-14 | -0.03961 | 0.39307  | 0.016186 | 0.72719  | 0.166123 | 0.00031  | -0.15233 | 0.00096  |
| 0.88117  | 0.234032 | 3.14E-07 | 0.268275 | 3.86E-09 | 0.355097 | 2.52E-15 | 0.100357 | 0.03013  |
| 6.13E-05 | 0.105803 | 0.02221  | 0.212896 | 3.46E-06 | 0.233238 | 3.45E-07 | 0.034884 | 0.45202  |
| 0.17389  | 0.037639 | 0.41708  | 0.146788 | 0.00147  | 0.148458 | 0.00129  | 0.183362 | 6.73E-05 |
| 0.00187  | 0.046208 | 0.31904  | -0.06978 | 0.13212  | -0.05636 | 0.22415  | 0.167986 | 0.00027  |
| 0.54388  | 0.208707 | 5.41E-06 | 0.240316 | 1.47E-07 | 0.296833 | 5.93E-11 | 0.132744 | 0.00406  |
| 0.07981  | 0.09651  | 0.03708  | 0.153805 | 0.00085  | 0.282194 | 5.35E-10 | 0.11606  | 0.01208  |
| 6.17E-07 | 0.131619 | 0.00438  | 0.127601 | 0.00576  | 0.085245 | 0.06568  | 0.178749 | 0.0001   |
| 0.9868   | 0.058096 | 0.21014  | -0.07052 | 0.12809  | 0.048365 | 0.29696  | 0.080748 | 0.08131  |
| 0.09864  | 0.014255 | 0.75865  | 0.101436 | 0.02839  | 0.198026 | 1.63E-05 | 0.059243 | 0.20127  |

|          |          |          |          |          |          |          |          |          |
|----------|----------|----------|----------|----------|----------|----------|----------|----------|
| 1.89E-11 | -0.18173 | 7.83E-05 | -0.08024 | 0.08323  | -0.156   | 0.00072  | 0.061505 | 0.18457  |
| 0.68587  | 0.052913 | 0.25379  | 0.003537 | 0.93923  | 0.12465  | 0.007    | 0.003064 | 0.94734  |
| 3.14E-17 | 0.234752 | 2.88E-07 | 0.210662 | 4.39E-06 | 0.086964 | 0.06041  | 0.36165  | 7.08E-16 |
| 0.30733  | 0.028153 | 0.54393  | -0.01981 | 0.66946  | 0.01098  | 0.81293  | -0.00341 | 0.94149  |
| 0.04769  | 0.247891 | 5.71E-08 | 0.176845 | 0.00012  | 0.304719 | 1.72E-11 | 0.233499 | 3.34E-07 |
| 0.20255  | -0.03105 | 0.50332  | -0.10008 | 0.03059  | -0.09914 | 0.03219  | -0.09291 | 0.04477  |
| 0.30649  | -0.17001 | 0.00022  | -0.03638 | 0.43279  | -0.18316 | 6.86E-05 | -0.07362 | 0.11207  |
| 2.36E-05 | -0.01744 | 0.70696  | -0.05174 | 0.26448  | -0.03899 | 0.40056  | -0.16016 | 0.00051  |
| 0.00033  | 0.207102 | 6.41E-06 | 0.190465 | 3.43E-05 | 0.163474 | 0.00039  | 0.324344 | 6.70E-13 |
| 0.00039  | 0.057763 | 0.21277  | 0.037387 | 0.42022  | 0.159591 | 0.00054  | -0.01505 | 0.74573  |
| 0.42227  | 0.089227 | 0.05399  | 0.095485 | 0.03915  | 0.146228 | 0.00153  | 0.092105 | 0.04667  |
| 0.34854  | 0.088979 | 0.05467  | 0.088897 | 0.05489  | 0.134905 | 0.00349  | 0.125315 | 0.0067   |
| 4.97E-08 | -0.00295 | 0.94925  | 0.009704 | 0.83434  | -0.13769 | 0.00287  | 0.144204 | 0.00178  |
| 0.00016  | -0.04268 | 0.35749  | -0.12038 | 0.00922  | -0.02038 | 0.6605   | -0.06824 | 0.1409   |
| 0.03273  | 0.480448 | 2.42E-28 | 0.262218 | 8.80E-09 | 0.257772 | 1.59E-08 | 0.132324 | 0.00418  |
| 0.00162  | 0.192844 | 2.72E-05 | 0.223989 | 1.01E-06 | 0.40393  | 9.36E-20 | 0.140547 | 0.00233  |
| 6.72E-09 | 0.002335 | 0.95986  | -0.07765 | 0.0937   | 0.086713 | 0.06115  | -0.00631 | 0.89181  |
| 0.00079  | 0.18782  | 4.42E-05 | 0.19504  | 2.19E-05 | 0.387691 | 3.37E-18 | 0.126322 | 0.00627  |
| 0.21098  | 0.036757 | 0.42809  | -0.06694 | 0.14866  | 0.072797 | 0.11618  | 0.043535 | 0.34787  |
| 5.87E-07 | 0.121757 | 0.00844  | 0.111137 | 0.01627  | 0.075014 | 0.10544  | 0.032434 | 0.48442  |
| 1.71E-16 | 0.037888 | 0.41401  | -0.07094 | 0.12581  | -0.12539 | 0.00666  | 0.002719 | 0.95326  |
| 0.43121  | 0.2382   | 1.90E-07 | -0.06607 | 0.15402  | -0.07578 | 0.10194  | -0.0349  | 0.4518   |
| 0.00106  | 0.005648 | 0.90311  | 0.021822 | 0.63809  | 0.005418 | 0.90704  | -0.0765  | 0.0987   |
| 0.70602  | 0.019794 | 0.66964  | 0.045981 | 0.32144  | 0.063482 | 0.17082  | -0.11409 | 0.01362  |
| 0.29235  | -0.22334 | 1.09E-06 | -0.18129 | 8.15E-05 | -0.23275 | 3.65E-07 | -0.10525 | 0.02293  |
| 1.07E-06 | -0.15719 | 0.00065  | -0.12645 | 0.00621  | -0.17815 | 0.00011  | -0.2233  | 1.09E-06 |
| 0.03224  | -0.10421 | 0.02431  | -0.03615 | 0.43574  | -0.09387 | 0.0426   | 0.065497 | 0.15762  |
| 0.00014  | -0.04558 | 0.3257   | -0.0609  | 0.18892  | 0.053294 | 0.25038  | -0.08484 | 0.06697  |
| 0.2077   | 0.14476  | 0.00171  | 0.106606 | 0.02121  | 0.132448 | 0.00414  | 0.185927 | 5.29E-05 |
| 4.74E-06 | -0.04818 | 0.29881  | -0.02647 | 0.56828  | 0.028386 | 0.5406   | -0.04132 | 0.37292  |
| 0.00023  | 0.049005 | 0.2906   | 0.063854 | 0.16833  | -0.03042 | 0.51202  | 0.104287 | 0.02421  |
| 3.46E-06 | 0.106614 | 0.0212   | 0.112679 | 0.01484  | 0.038915 | 0.40146  | 0.32697  | 4.26E-13 |
| 2.52E-08 | 0.043848 | 0.34442  | 0.002671 | 0.95409  | 0.140339 | 0.00237  | -0.22447 | 9.56E-07 |
| 0.38864  | 0.318746 | 1.73E-12 | 0.131336 | 0.00447  | 0.089216 | 0.05402  | 0.097977 | 0.03428  |
| 1.73E-14 | 0.038635 | 0.40485  | 0.06909  | 0.13601  | 0.195319 | 2.13E-05 | -0.15338 | 0.00088  |
| 0.04259  | -0.14034 | 0.00237  | -0.08593 | 0.06353  | -0.13431 | 0.00364  | -0.08304 | 0.07301  |
| 1.31E-08 | 0.08473  | 0.06734  | 0.029084 | 0.53069  | -0.04528 | 0.32892  | 0.192696 | 2.76E-05 |
| 0.55103  | -0.02718 | 0.55794  | -0.10177 | 0.02787  | 0.042793 | 0.35616  | -0.02332 | 0.61514  |
| 0.39002  | 0.063614 | 0.16993  | 0.038841 | 0.40236  | 0.090438 | 0.0508   | 0.055638 | 0.23011  |
| 0.77875  | -0.20632 | 6.96E-06 | -0.17635 | 0.00013  | -0.22823 | 6.20E-07 | -0.08993 | 0.05211  |
| 0.92058  | 0.121001 | 0.00886  | 0.106188 | 0.02173  | 0.236566 | 2.31E-07 | 0.1238   | 0.0074   |
| 0.00696  | 0.005289 | 0.90924  | -0.04478 | 0.33429  | 0.067818 | 0.14338  | 0.008058 | 0.86213  |
| 0.41309  | -0.09294 | 0.0447   | -0.08152 | 0.07843  | -0.03935 | 0.39622  | 0.005896 | 0.89888  |
| 0.41063  | -0.0164  | 0.72374  | -0.03141 | 0.4983   | -0.03287 | 0.47857  | 0.058263 | 0.20884  |
| 0.01561  | 0.108059 | 0.0195   | 0.168967 | 0.00024  | 0.251004 | 3.84E-08 | 0.171376 | 0.0002   |

|          |          |          |          |          |          |          |          |          |
|----------|----------|----------|----------|----------|----------|----------|----------|----------|
| 0.14021  | -0.10726 | 0.02043  | 0.024832 | 0.59246  | -0.05938 | 0.20019  | 0.144115 | 0.00179  |
| 0.09472  | -0.17906 | 9.99E-05 | 0.075131 | 0.1049   | -0.04279 | 0.35615  | 0.063447 | 0.17106  |
| 0.00031  | -0.05733 | 0.2162   | -0.06056 | 0.19142  | 0.084821 | 0.06704  | -0.04551 | 0.32645  |
| 0.34723  | 0.128124 | 0.00556  | 0.16705  | 0.00029  | 0.218435 | 1.88E-06 | 0.23165  | 4.16E-07 |
| 0.0018   | 0.347411 | 1.08E-14 | 0.098078 | 0.0341   | 0.15703  | 0.00066  | 0.008688 | 0.85147  |
| 4.35E-06 | -0.02272 | 0.62435  | 0.026801 | 0.56345  | 0.09216  | 0.04654  | 0.002225 | 0.96176  |
| 0.00998  | -0.07117 | 0.1246   | -0.22881 | 5.80E-07 | -0.19115 | 3.21E-05 | -0.08708 | 0.06005  |
| 0.99042  | 0.066761 | 0.14974  | 0.005891 | 0.89897  | 0.055097 | 0.23469  | 0.094067 | 0.04217  |
| 0.17151  | 0.115083 | 0.01283  | 0.045046 | 0.33138  | 0.04831  | 0.29751  | -0.04027 | 0.38522  |
| 0.00021  | 0.116622 | 0.01167  | 0.078872 | 0.08866  | 0.118212 | 0.01057  | -0.06167 | 0.18338  |
| 0.00793  | -0.04061 | 0.38127  | -0.00147 | 0.97476  | 0.063853 | 0.16833  | -0.01929 | 0.67757  |
| 0.05596  | 0.080452 | 0.08243  | -0.02856 | 0.53816  | 0.043392 | 0.34946  | 0.06166  | 0.18346  |
| 0.91123  | 0.183157 | 6.86E-05 | 0.176924 | 0.00012  | 0.22309  | 1.12E-06 | 0.06175  | 0.18282  |
| 0.16932  | -0.12909 | 0.00521  | -0.12856 | 0.0054   | -0.14498 | 0.00168  | -0.07275 | 0.11642  |
| 0.00039  | 0.265358 | 5.75E-09 | 0.276156 | 1.28E-09 | 0.321389 | 1.11E-12 | 0.245246 | 7.97E-08 |
| 0.80987  | 0.019362 | 0.67643  | -0.03191 | 0.4915   | 0.096085 | 0.03793  | 0.064744 | 0.16246  |
| 4.30E-08 | 0.101345 | 0.02853  | 0.14185  | 0.00212  | 0.244402 | 8.86E-08 | -0.01768 | 0.70315  |
| 0.15935  | 0.063145 | 0.17311  | 0.077511 | 0.09432  | 0.121267 | 0.00871  | 0.050489 | 0.27622  |
| 0.14268  | 0.107165 | 0.02054  | 0.099969 | 0.03077  | 0.208795 | 5.36E-06 | 0.030842 | 0.50614  |
| 0.00045  | 0.023679 | 0.60977  | 0.063645 | 0.16973  | 0.134273 | 0.00365  | 0.127434 | 0.00582  |
| 0.00705  | 0.072502 | 0.11767  | -0.00854 | 0.85392  | -0.03791 | 0.41379  | 0.085192 | 0.06585  |
| 3.82E-14 | 0.186098 | 5.20E-05 | 0.169256 | 0.00024  | 0.068544 | 0.13913  | 0.267082 | 4.54E-09 |
| 1.53E-07 | 0.158505 | 0.00059  | 0.079363 | 0.08669  | 0.099522 | 0.03153  | 0.15213  | 0.00097  |
| 0.07206  | -0.22887 | 5.75E-07 | -0.07031 | 0.12923  | -0.1955  | 2.10E-05 | -0.10118 | 0.0288   |
| 0.97797  | 0.273537 | 1.85E-09 | 0.184428 | 6.09E-05 | 0.119448 | 0.00978  | 0.049143 | 0.28925  |
| 0.00103  | 0.067824 | 0.14334  | 0.029915 | 0.519    | 0.063846 | 0.16838  | 0.001359 | 0.97664  |
| 2.43E-14 | -0.30215 | 2.59E-11 | -0.02728 | 0.55653  | -0.01629 | 0.72557  | -0.23989 | 1.55E-07 |
| 5.15E-06 | -0.09326 | 0.04397  | -0.18003 | 9.15E-05 | -0.07429 | 0.10887  | -0.20786 | 5.92E-06 |
| 1.34E-05 | 0.265073 | 5.98E-09 | 0.251441 | 3.63E-08 | 0.211252 | 4.12E-06 | 0.172629 | 0.00018  |
| 0.00601  | -0.14947 | 0.0012   | 0.039905 | 0.38958  | -0.14209 | 0.00208  | 0.023731 | 0.60899  |
| 0.01746  | 0.066066 | 0.15403  | 0.091292 | 0.04865  | 0.043082 | 0.35292  | 0.178737 | 0.0001   |
| 7.53E-06 | 0.1107   | 0.0167   | 0.185143 | 5.70E-05 | 0.366321 | 2.81E-16 | -0.01568 | 0.73536  |
| 0.00434  | 0.050174 | 0.27923  | 0.023503 | 0.61243  | 0.124669 | 0.00699  | 0.123136 | 0.00772  |
| 0.00152  | -0.17906 | 1.00E-04 | -0.21845 | 1.88E-06 | -0.19457 | 2.30E-05 | -0.18244 | 7.33E-05 |
| 1.90E-15 | 0.191935 | 2.97E-05 | 0.100585 | 0.02975  | 0.100391 | 0.03007  | 0.126105 | 0.00636  |
| 2.53E-07 | 0.041763 | 0.36786  | 0.070833 | 0.12638  | 0.026644 | 0.56574  | 0.248166 | 5.52E-08 |
| 0.50346  | 0.016879 | 0.71601  | -0.07819 | 0.09147  | -0.09242 | 0.04593  | -0.05309 | 0.25223  |
| 0.57544  | -0.06515 | 0.15985  | 0.028394 | 0.54049  | -0.01607 | 0.72911  | -0.02849 | 0.53909  |
| 0.06615  | 0.089435 | 0.05343  | 0.011219 | 0.80894  | 0.017223 | 0.71048  | -0.00274 | 0.95286  |
| 0.00119  | -0.17281 | 0.00017  | -0.12367 | 0.00746  | -0.24557 | 7.65E-08 | -0.01265 | 0.78507  |
| 0.04748  | -0.03595 | 0.43826  | -0.00646 | 0.8893   | 0.111894 | 0.01556  | -0.03879 | 0.40303  |
| 0.00074  | 0.129123 | 0.0052   | 0.112465 | 0.01503  | 0.108754 | 0.01873  | 0.143693 | 0.00185  |
| 9.42E-07 | 0.020495 | 0.65866  | -0.00057 | 0.99021  | 0.141667 | 0.00215  | -0.13016 | 0.00484  |
| 0.05362  | -0.03367 | 0.46787  | -0.06274 | 0.17587  | -0.00916 | 0.84351  | 0.060503 | 0.19183  |
| 3.48E-21 | -0.13793 | 0.00282  | -0.22654 | 7.54E-07 | -0.12596 | 0.00642  | -0.28872 | 2.04E-10 |



|          |          |          |          |          |          |          |          |          |
|----------|----------|----------|----------|----------|----------|----------|----------|----------|
| 0.00375  | -0.05791 | 0.21159  | -0.01477 | 0.75025  | 0.004018 | 0.93099  | 0.006221 | 0.89334  |
| 9.86E-05 | -0.27321 | 1.94E-09 | -0.25428 | 2.52E-08 | -0.22967 | 5.25E-07 | -0.24325 | 1.02E-07 |
| 0.15531  | -0.13495 | 0.00348  | -0.08136 | 0.07901  | -0.16414 | 0.00037  | -0.0555  | 0.23131  |
| 7.27E-06 | 0.091364 | 0.04847  | 0.062059 | 0.18064  | 0.055503 | 0.23126  | -0.19202 | 2.95E-05 |
| 3.15E-09 | -0.03782 | 0.4148   | 0.049051 | 0.29015  | 0.093604 | 0.0432   | -0.09832 | 0.03366  |
| 0.0166   | -0.1334  | 0.00388  | -0.05164 | 0.26539  | -0.12097 | 0.00888  | 0.023517 | 0.61222  |
| 0.16166  | 0.065578 | 0.15711  | 0.133143 | 0.00395  | 0.191712 | 3.04E-05 | 0.079028 | 0.08803  |
| 1.14E-05 | -0.20055 | 1.26E-05 | -0.20939 | 5.03E-06 | -0.24613 | 7.14E-08 | -0.15273 | 0.00093  |
| 0.86144  | -0.00149 | 0.97434  | -0.03497 | 0.45096  | -0.05051 | 0.276    | 0.01062  | 0.81896  |
| 0.29738  | 0.28406  | 4.07E-10 | 0.224773 | 9.23E-07 | 0.206634 | 6.73E-06 | 0.017619 | 0.70412  |
| 0.01889  | 0.147486 | 0.00139  | 0.215728 | 2.54E-06 | 0.215949 | 2.48E-06 | 0.12525  | 0.00673  |
| 0.31848  | 0.041881 | 0.36651  | 0.079317 | 0.08687  | 0.058855 | 0.20424  | 0.042463 | 0.35989  |
| 8.03E-12 | -0.02147 | 0.64359  | -0.02097 | 0.65122  | 0.117533 | 0.01102  | -0.0613  | 0.18602  |
| 1.27E-14 | -0.02085 | 0.65315  | -0.11432 | 0.01344  | 0.018012 | 0.69785  | -0.15901 | 0.00056  |
| 0.01849  | 0.100145 | 0.03048  | -0.02305 | 0.61937  | 0.256135 | 1.97E-08 | 0.068387 | 0.14005  |
| 0.03129  | -0.29834 | 4.69E-11 | -0.00582 | 0.9002   | -0.08528 | 0.06557  | -0.00261 | 0.95508  |
| 6.18E-08 | 0.314238 | 3.67E-12 | 0.2708   | 2.72E-09 | 0.30901  | 8.63E-12 | 0.307587 | 1.09E-11 |
| 0.00686  | -0.10996 | 0.01745  | 0.024367 | 0.59941  | -0.11736 | 0.01114  | -0.00551 | 0.90547  |
| 0.0703   | 0.092639 | 0.04541  | 0.063495 | 0.17073  | 0.194151 | 2.39E-05 | 0.046348 | 0.31758  |
| 0.26066  | 0.133642 | 0.00381  | 0.097718 | 0.03476  | 0.118608 | 0.01031  | 0.005437 | 0.90672  |
| 0.81384  | 0.164729 | 0.00035  | 0.106504 | 0.02134  | 0.170972 | 0.00021  | 0.057624 | 0.21388  |
| 2.50E-06 | 0.163387 | 0.00039  | 0.052683 | 0.25586  | 0.009832 | 0.83218  | 0.17831  | 0.00011  |
| 0.23543  | 0.048622 | 0.2944   | 0.088849 | 0.05502  | 0.081437 | 0.07874  | 0.133409 | 0.00387  |
| 0.21952  | 0.126451 | 0.00621  | 0.058359 | 0.20809  | 0.100436 | 0.03     | -0.00561 | 0.90375  |
| 0.61886  | -0.01319 | 0.77622  | -0.05306 | 0.2525   | -0.20509 | 7.90E-06 | 0.008398 | 0.85637  |
| 0.29851  | 0.143636 | 0.00186  | -0.03117 | 0.50164  | -0.0288  | 0.53472  | 0.037745 | 0.41577  |
| 0.02523  | -0.05653 | 0.2227   | -0.0423  | 0.36168  | 0.014589 | 0.75319  | 0.074478 | 0.10797  |
| 0.39887  | 0.013448 | 0.77194  | -0.01415 | 0.76043  | 0.007991 | 0.86327  | 0.075607 | 0.10271  |
| 0.55035  | 0.187078 | 4.74E-05 | 0.245603 | 7.62E-08 | 0.227601 | 6.67E-07 | 0.175897 | 0.00013  |
| 0.00115  | -0.01566 | 0.73564  | 0.160256 | 0.00051  | 0.111245 | 0.01617  | 0.000891 | 0.98467  |
| 0.17815  | -0.1013  | 0.02861  | -0.19554 | 2.09E-05 | -0.1429  | 0.00196  | -0.08003 | 0.08406  |
| 0.73202  | 0.108799 | 0.01868  | -0.0691  | 0.13593  | 0.000567 | 0.99024  | 0.046316 | 0.31791  |
| 0.3338   | -0.03039 | 0.51237  | 0.024313 | 0.60022  | -0.01648 | 0.72239  | 0.001691 | 0.97093  |
| 3.36E-11 | 0.264671 | 6.32E-09 | 0.175783 | 0.00013  | 0.054371 | 0.24092  | 0.123111 | 0.00773  |
| 0.79344  | 0.157981 | 0.00061  | 0.145594 | 0.00161  | 0.191144 | 3.21E-05 | 0.070622 | 0.12752  |
| 4.61E-12 | 0.069279 | 0.13493  | 0.105867 | 0.02213  | 0.232232 | 3.88E-07 | -0.07273 | 0.11653  |
| 0.01248  | 0.033145 | 0.4749   | 0.053154 | 0.25163  | 0.1715   | 0.0002   | 0.031097 | 0.50262  |
| 0.00029  | 0.145493 | 0.00162  | -0.00117 | 0.97988  | 0.152182 | 0.00097  | -0.07443 | 0.1082   |
| 3.08E-06 | 0.028754 | 0.53536  | -0.13006 | 0.00488  | 0.048118 | 0.29943  | -0.18899 | 3.95E-05 |
| 0.00251  | 0.031058 | 0.50316  | -0.04099 | 0.37681  | 0.079465 | 0.08628  | -0.00218 | 0.96257  |
| 7.41E-18 | -0.16307 | 0.0004   | -0.09087 | 0.04969  | -0.01558 | 0.737    | -0.15926 | 0.00055  |
| 1.56E-15 | 0.174968 | 0.00014  | 0.204503 | 8.40E-06 | 0.060639 | 0.19084  | 0.200535 | 1.26E-05 |
| 0.00077  | 0.228552 | 5.97E-07 | 0.118462 | 0.0104   | 0.138723 | 0.00266  | 0.217869 | 2.01E-06 |
| 0.01303  | -0.1494  | 0.0012   | -0.17777 | 0.00011  | -0.17736 | 0.00012  | -0.22142 | 1.35E-06 |
| 0.00243  | -0.14516 | 0.00166  | -0.13472 | 0.00354  | -0.15226 | 0.00096  | -0.08893 | 0.05481  |

|          |          |          |          |          |          |          |          |          |
|----------|----------|----------|----------|----------|----------|----------|----------|----------|
| 0.44715  | 0.088027 | 0.05732  | 0.011815 | 0.799    | 0.063288 | 0.17214  | 0.009158 | 0.84353  |
| 0.04893  | 0.414767 | 7.66E-21 | 0.273302 | 1.91E-09 | 0.45347  | 4.60E-25 | 0.068239 | 0.14091  |
| 0.0928   | 0.189746 | 3.68E-05 | 0.106901 | 0.02086  | 0.176342 | 0.00013  | 0.097815 | 0.03458  |
| 0.30153  | 0.078761 | 0.08911  | 0.022256 | 0.63142  | 0.058965 | 0.2034   | -0.04173 | 0.36824  |
| 0.35447  | 0.078937 | 0.08839  | 0.017725 | 0.70242  | 0.027575 | 0.55224  | 0.074421 | 0.10824  |
| 0.13457  | 0.174016 | 0.00016  | 0.123367 | 0.00761  | 0.091295 | 0.04864  | 0.190741 | 3.34E-05 |
| 3.61E-11 | 0.163863 | 0.00038  | 0.086731 | 0.0611   | 0.263911 | 7.00E-09 | -0.05804 | 0.21063  |
| 0.3498   | 0.037297 | 0.42133  | -0.0033  | 0.94337  | 0.012016 | 0.79565  | -0.08029 | 0.08304  |
| 0.55145  | 0.059221 | 0.20143  | 0.019433 | 0.67531  | 0.037889 | 0.414    | -0.03637 | 0.43302  |
| 0.015    | -0.17212 | 0.00019  | -0.16177 | 0.00045  | -0.19908 | 1.46E-05 | 0.046318 | 0.31789  |
| 0.0002   | -0.0353  | 0.4466   | -0.06218 | 0.17981  | -0.00121 | 0.9792   | -0.13974 | 0.00247  |
| 1.62E-05 | 0.22031  | 1.53E-06 | 0.149606 | 0.00118  | 0.226684 | 7.42E-07 | 0.22738  | 6.84E-07 |
| 0.02081  | -0.26252 | 8.45E-09 | -0.20006 | 1.33E-05 | -0.14402 | 0.00181  | -0.09774 | 0.03473  |
| 0.05704  | -0.01446 | 0.75534  | 0.056789 | 0.22061  | 0.020757 | 0.65458  | 0.035481 | 0.44431  |
| 0.00032  | -0.06145 | 0.18497  | 0.080762 | 0.08125  | 0.113933 | 0.01376  | -0.02366 | 0.61007  |
| 7.84E-05 | 0.15813  | 0.0006   | 0.035902 | 0.43892  | 0.133438 | 0.00387  | 0.098391 | 0.03353  |
| 0.00143  | -0.01047 | 0.8215   | 0.124509 | 0.00706  | 0.063658 | 0.16964  | -0.07946 | 0.08631  |
| 0.00208  | -0.22247 | 1.20E-06 | -0.10126 | 0.02867  | -0.21486 | 2.79E-06 | -0.03777 | 0.41544  |
| 0.00012  | -0.01405 | 0.76209  | -0.0586  | 0.20623  | 0.116819 | 0.01153  | -0.04969 | 0.28394  |
| 1.66E-10 | 0.042183 | 0.36307  | 0.024688 | 0.59461  | 0.028604 | 0.53749  | -0.11413 | 0.0136   |
| 4.60E-05 | -0.18538 | 5.57E-05 | -0.02652 | 0.56752  | -0.03853 | 0.40615  | -0.12391 | 0.00734  |
| 0.1301   | 0.071874 | 0.12089  | -0.0407  | 0.38023  | 0.153173 | 0.0009   | -0.01061 | 0.81915  |
| 0.61745  | 0.169748 | 0.00023  | -0.0109  | 0.8142   | -0.00873 | 0.85076  | 0.061399 | 0.18532  |
| 0.52802  | 0.353206 | 3.62E-15 | 0.130783 | 0.00464  | 0.140185 | 0.00239  | 0.088818 | 0.05511  |
| 0.02917  | -0.23124 | 4.36E-07 | -0.13134 | 0.00447  | -0.12867 | 0.00536  | -0.05371 | 0.24669  |
| 0.63849  | -0.07166 | 0.12202  | -0.10938 | 0.01806  | -0.13407 | 0.0037   | -0.03209 | 0.48914  |
| 0.03492  | -0.08805 | 0.05725  | -0.06057 | 0.19131  | -0.14829 | 0.00131  | -0.16035 | 0.0005   |
| 8.64E-08 | 0.039935 | 0.38923  | 0.027259 | 0.5568   | 0.127924 | 0.00563  | 0.00658  | 0.88723  |
| 0.50373  | 0.209847 | 4.79E-06 | 0.16535  | 0.00033  | 0.168811 | 0.00025  | 0.150729 | 0.00109  |
| 0.18288  | -0.0361  | 0.43634  | -0.0323  | 0.48626  | 0.080817 | 0.08105  | -0.11392 | 0.01377  |
| 0.24171  | -0.0182  | 0.69484  | -0.01443 | 0.75576  | 0.008519 | 0.85433  | -0.04259 | 0.35848  |
| 0.66403  | -0.0974  | 0.03535  | 0.048608 | 0.29453  | -0.01814 | 0.69579  | 0.087116 | 0.05995  |
| 8.64E-06 | -0.07508 | 0.10516  | -0.08965 | 0.05286  | 0.005296 | 0.90913  | -0.11387 | 0.01381  |
| 0.01948  | 0.243465 | 9.95E-08 | 0.279278 | 8.16E-10 | 0.279736 | 7.64E-10 | 0.185775 | 5.37E-05 |
| 0.1107   | 0.03569  | 0.44163  | 0.069487 | 0.13376  | 0.00288  | 0.95051  | 0.086092 | 0.06304  |
| 4.06E-05 | 0.023967 | 0.60542  | 0.028677 | 0.53646  | 0.096872 | 0.03637  | -0.18817 | 4.27E-05 |
| 1.47E-13 | -0.11781 | 0.01084  | 0.01244  | 0.78861  | 0.112807 | 0.01473  | -0.08556 | 0.0647   |
| 0.42377  | -0.01197 | 0.79637  | 0.099721 | 0.03119  | 0.090477 | 0.0507   | 0.066879 | 0.14902  |
| 1.18E-10 | 0.121759 | 0.00844  | 0.191001 | 3.26E-05 | 0.303071 | 2.23E-11 | 0.004763 | 0.91824  |
| 0.71398  | 0.074921 | 0.10588  | 0.071787 | 0.12134  | 0.077699 | 0.09352  | 0.011136 | 0.81031  |
| 0.91118  | 0.21483  | 2.80E-06 | 0.082144 | 0.07616  | 0.14401  | 0.00181  | 0.113484 | 0.01414  |
| 0.00066  | -0.01804 | 0.69743  | -0.02186 | 0.63755  | 0.034101 | 0.46223  | -0.01364 | 0.76884  |
| 9.62E-07 | 0.047606 | 0.30461  | 0.091541 | 0.04803  | 0.107211 | 0.02049  | -0.01513 | 0.74442  |
| 2.60E-16 | -0.06822 | 0.14102  | -0.10674 | 0.02105  | -0.00075 | 0.9871   | -0.23979 | 1.57E-07 |
| 0.13246  | 0.183252 | 6.80E-05 | 0.035797 | 0.44026  | 0.063015 | 0.174    | -0.02399 | 0.60511  |

|          |          |          |          |          |          |          |          |          |
|----------|----------|----------|----------|----------|----------|----------|----------|----------|
| 3.97E-09 | -0.00748 | 0.8719   | -0.0386  | 0.40527  | 0.196431 | 1.91E-05 | -0.03713 | 0.42337  |
| 8.57E-11 | 0.025021 | 0.58965  | 0.162359 | 0.00043  | 0.146937 | 0.00145  | 0.031348 | 0.49917  |
| 2.45E-05 | 0.026393 | 0.56941  | -0.03548 | 0.44431  | -0.01552 | 0.73807  | 0.095668 | 0.03877  |
| 0.00092  | -0.14431 | 0.00177  | 0.034254 | 0.46023  | -0.03758 | 0.41785  | -0.28364 | 4.33E-10 |
| 0.01782  | 0.254296 | 2.51E-08 | 0.089915 | 0.05216  | 0.146802 | 0.00147  | -0.01804 | 0.69743  |
| 0.05815  | 0.006383 | 0.89058  | 0.014152 | 0.76035  | 0.011297 | 0.80763  | -0.00246 | 0.95765  |
| 0.00284  | -0.17687 | 0.00012  | -0.27946 | 7.96E-10 | -0.29228 | 1.19E-10 | -0.19786 | 1.65E-05 |
| 1.53E-06 | 0.048837 | 0.29226  | -0.01359 | 0.76965  | -0.06918 | 0.13547  | 0.143151 | 0.00193  |
| 0.09054  | 0.053761 | 0.24625  | 0.027025 | 0.5602   | 0.147124 | 0.00143  | 0.074134 | 0.10961  |
| 0.6885   | -0.00083 | 0.98579  | 0.044979 | 0.3321   | 0.070776 | 0.12669  | 0.030881 | 0.50559  |
| 0.00014  | 0.249992 | 4.37E-08 | 0.230177 | 4.94E-07 | 0.148333 | 0.00131  | 0.089773 | 0.05254  |
| 0.00395  | -0.09554 | 0.03904  | 0.052695 | 0.25575  | -0.02208 | 0.63413  | -0.09749 | 0.03519  |
| 0.05069  | 0.231954 | 4.01E-07 | 0.085861 | 0.06375  | 0.2959   | 6.85E-11 | 0.069214 | 0.13531  |
| 0.00027  | -0.10429 | 0.0242   | -0.10566 | 0.02239  | -0.0427  | 0.35719  | -0.11116 | 0.01625  |
| 2.28E-06 | 0.043064 | 0.35312  | 0.101214 | 0.02874  | 0.023325 | 0.61512  | 0.135909 | 0.00325  |
| 0.00022  | 0.059881 | 0.19645  | -0.03489 | 0.45195  | -0.04443 | 0.33805  | 0.06626  | 0.15282  |
| 0.03677  | 0.05597  | 0.22735  | 0.093406 | 0.04364  | 0.154294 | 0.00082  | -0.01599 | 0.73044  |
| 0.13371  | -0.01448 | 0.75491  | -0.05106 | 0.27081  | -0.05752 | 0.2147   | -0.01344 | 0.77203  |
| 0.41949  | 0.145923 | 0.00157  | 0.129674 | 0.00501  | 0.14294  | 0.00196  | 0.096424 | 0.03725  |
| 0.00058  | 0.137458 | 0.00291  | 0.142211 | 0.00207  | 0.284996 | 3.54E-10 | -0.04603 | 0.32087  |
| 0.00292  | 0.107846 | 0.01975  | 0.169375 | 0.00024  | 0.187764 | 4.44E-05 | 0.047292 | 0.30782  |
| 0.26313  | 0.124659 | 0.00699  | 0.088625 | 0.05564  | 0.206706 | 6.68E-06 | 0.150616 | 0.0011   |
| 0.02619  | 0.226407 | 7.66E-07 | 0.228072 | 6.32E-07 | 0.367637 | 2.16E-16 | 0.174612 | 0.00015  |
| 0.22515  | 0.05105  | 0.27091  | 0.080937 | 0.0806   | 0.129403 | 0.0051   | 0.014638 | 0.75239  |
| 3.78E-06 | 0.043961 | 0.34318  | 0.032773 | 0.47987  | 0.100339 | 0.03016  | -0.06232 | 0.17878  |
| 0.35078  | 0.082498 | 0.0749   | 0.01293  | 0.7805   | 0.003481 | 0.9402   | 0.072183 | 0.1193   |
| 0.01912  | 0.007338 | 0.87433  | 0.017748 | 0.70207  | 0.048513 | 0.29548  | 0.000775 | 0.98668  |
| 0.36339  | 0.060822 | 0.18949  | 0.109004 | 0.01846  | 0.027766 | 0.54948  | 0.136384 | 0.00315  |
| 0.12581  | -0.0036  | 0.93823  | 0.043774 | 0.34524  | 0.050232 | 0.27868  | -0.0119  | 0.79752  |
| 0.45227  | 0.073752 | 0.11145  | 0.068092 | 0.14177  | 0.084521 | 0.06802  | 0.090834 | 0.04979  |
| 0.09455  | 0.262678 | 8.27E-09 | 0.213643 | 3.19E-06 | 0.176948 | 0.00012  | 0.183055 | 6.92E-05 |
| 0.25786  | -0.0142  | 0.7595   | -0.00861 | 0.85281  | 0.006191 | 0.89385  | 0.053952 | 0.24457  |
| 0.07509  | 0.178977 | 0.0001   | 0.126984 | 0.006    | 0.152789 | 0.00092  | -0.03746 | 0.41928  |
| 0.03383  | 0.068898 | 0.1371   | 0.225191 | 8.80E-07 | 0.08061  | 0.08183  | 0.209174 | 5.15E-06 |
| 0.0003   | 0.261335 | 9.91E-09 | 0.257319 | 1.69E-08 | 0.289584 | 1.79E-10 | 0.165339 | 0.00033  |
| 4.92E-07 | 0.000804 | 0.98618  | -0.05294 | 0.25352  | 0.10737  | 0.0203   | -0.1115  | 0.01593  |
| 7.84E-09 | -0.09099 | 0.0494   | -0.19796 | 1.64E-05 | -0.02839 | 0.54051  | -0.14155 | 0.00217  |
| 9.90E-05 | -0.21198 | 3.81E-06 | -0.03464 | 0.45514  | -0.0913  | 0.04862  | -0.0643  | 0.16534  |
| 8.76E-11 | 0.104492 | 0.02393  | 0.058127 | 0.20991  | -0.03164 | 0.49512  | 0.143957 | 0.00182  |
| 2.16E-06 | 0.206465 | 6.85E-06 | 0.197797 | 1.67E-05 | 0.116007 | 0.01212  | 0.323081 | 8.31E-13 |
| 0.00442  | -0.12009 | 0.00939  | -0.06403 | 0.16716  | -0.12085 | 0.00894  | -0.01896 | 0.68276  |
| 0.00063  | -0.04014 | 0.38675  | -0.13971 | 0.00248  | -0.20958 | 4.93E-06 | -0.11068 | 0.01672  |
| 0.71207  | -0.12131 | 0.00869  | -0.11008 | 0.01732  | -0.13065 | 0.00469  | 0.023647 | 0.61025  |
| 6.75E-21 | -0.03801 | 0.41245  | 0.071481 | 0.12294  | -0.05617 | 0.22566  | 0.240511 | 1.43E-07 |
| 0.00751  | -0.01631 | 0.72511  | -0.04965 | 0.28429  | -0.06819 | 0.14121  | -0.05077 | 0.27353  |

|          |          |          |          |          |          |          |          |          |
|----------|----------|----------|----------|----------|----------|----------|----------|----------|
| 0.00108  | 0.082972 | 0.07324  | 0.099285 | 0.03194  | 0.208109 | 5.76E-06 | -0.10135 | 0.02853  |
| 1.19E-07 | -0.04225 | 0.36227  | -0.00542 | 0.90701  | 0.02629  | 0.57091  | -0.10137 | 0.02849  |
| 0.09098  | 0.091241 | 0.04877  | -0.07943 | 0.08641  | -0.12525 | 0.00673  | -0.03227 | 0.48657  |
| 8.24E-17 | -0.05905 | 0.20276  | -0.04174 | 0.36814  | 0.079531 | 0.08602  | -0.31696 | 2.34E-12 |
| 0.57168  | 0.029553 | 0.52408  | 0.071873 | 0.12089  | 0.111327 | 0.01609  | 0.138731 | 0.00266  |
| 0.07932  | 0.009317 | 0.84085  | 0.075812 | 0.10178  | 0.134617 | 0.00356  | 0.156761 | 0.00067  |
| 0.20823  | 0.213977 | 3.07E-06 | 0.314043 | 3.79E-12 | 0.278467 | 9.18E-10 | 0.159155 | 0.00056  |
| 0.01764  | 0.128357 | 0.00547  | -0.00523 | 0.91025  | 0.065007 | 0.16076  | 0.031909 | 0.49153  |
| 0.85581  | 0.14239  | 0.00204  | 0.001184 | 0.97964  | 0.143743 | 0.00184  | 0.055408 | 0.23205  |
| 3.35E-05 | 0.123773 | 0.00741  | -0.06192 | 0.18163  | 0.083101 | 0.07279  | -0.06676 | 0.14972  |
| 0.32497  | 0.247351 | 6.12E-08 | 0.103695 | 0.02503  | 0.171724 | 0.00019  | 0.065769 | 0.1559   |
| 0.43166  | 0.124392 | 0.00712  | 0.073233 | 0.114    | 0.099262 | 0.03198  | 0.091724 | 0.04759  |
| 0.37112  | 0.070856 | 0.12625  | 0.052144 | 0.26077  | 0.0063   | 0.89199  | -0.00032 | 0.99448  |
| 0.36498  | 0.11236  | 0.01513  | 0.027997 | 0.54616  | 0.06656  | 0.15097  | 0.05581  | 0.22868  |
| 0.73862  | 0.169879 | 0.00023  | 0.062483 | 0.17767  | 0.132841 | 0.00403  | 0.105122 | 0.02309  |
| 0.2189   | 0.053502 | 0.24853  | 0.072569 | 0.11733  | 0.135144 | 0.00343  | 0.066353 | 0.15225  |
| 0.27841  | 0.150928 | 0.00107  | 0.221049 | 1.41E-06 | 0.249763 | 4.50E-08 | 0.14629  | 0.00152  |
| 0.67274  | 0.183066 | 6.92E-05 | 0.168001 | 0.00027  | 0.312046 | 5.26E-12 | 0.180964 | 8.40E-05 |
| 0.01171  | -0.11848 | 0.01039  | -0.06248 | 0.17768  | -0.15978 | 0.00053  | -0.16199 | 0.00044  |
| 0.00317  | 0.148312 | 0.00131  | 0.163647 | 0.00038  | 0.130849 | 0.00462  | 0.171121 | 0.0002   |
| 0.17181  | 0.081601 | 0.07813  | 0.025068 | 0.58896  | -0.00185 | 0.96815  | 0.055115 | 0.23453  |
| 0.24295  | 0.093563 | 0.04329  | -0.04578 | 0.32359  | 0.072081 | 0.11982  | 0.047725 | 0.3034   |
| 0.24916  | -0.17068 | 0.00021  | -0.03773 | 0.4159   | -0.13924 | 0.00256  | -0.07643 | 0.09901  |
| 1.78E-08 | -0.04508 | 0.33106  | 0.025218 | 0.58672  | 0.137795 | 0.00284  | -0.03373 | 0.46718  |
| 0.23982  | 0.116421 | 0.01181  | 0.1797   | 9.43E-05 | 0.192598 | 2.79E-05 | 0.114997 | 0.01289  |
| 0.37262  | 0.123843 | 0.00737  | 0.162978 | 0.00041  | 0.027731 | 0.54999  | -0.03613 | 0.43595  |
| 0.18058  | 0.092588 | 0.04553  | 0.114827 | 0.01303  | 0.131692 | 0.00436  | 0.02564  | 0.58048  |
| 0.22473  | 0.005212 | 0.91056  | -0.01303 | 0.77891  | 0.076938 | 0.09679  | 0.022828 | 0.62268  |
| 0.00339  | -0.06519 | 0.15961  | -0.09271 | 0.04525  | -0.02998 | 0.51811  | -0.13155 | 0.0044   |
| 4.45E-14 | -0.06558 | 0.15708  | -0.18624 | 5.14E-05 | -0.02937 | 0.52663  | -0.17673 | 0.00012  |
| 0.0017   | -0.13404 | 0.00371  | -0.10619 | 0.02173  | -0.03724 | 0.42202  | -0.06069 | 0.19045  |
| 0.00089  | 0.060633 | 0.19088  | 0.152151 | 0.00097  | 0.037789 | 0.41523  | 0.065188 | 0.15959  |
| 0.27892  | -0.12776 | 0.0057   | -0.08448 | 0.06815  | -0.10715 | 0.02056  | -0.06736 | 0.14612  |
| 0.0072   | -0.09192 | 0.04711  | 0.03509  | 0.44935  | 0.064108 | 0.16664  | -0.05682 | 0.22038  |
| 0.33812  | -0.02237 | 0.62975  | -0.00728 | 0.87536  | 0.047858 | 0.30206  | -0.03574 | 0.44095  |
| 2.15E-08 | -0.0855  | 0.06488  | 0.067083 | 0.14778  | 0.127881 | 0.00565  | -0.06008 | 0.195    |
| 0.58113  | 0.171775 | 0.00019  | 0.130032 | 0.00489  | 0.085091 | 0.06618  | 0.08363  | 0.07099  |
| 0.31306  | 0.163653 | 0.00038  | 0.103114 | 0.02586  | 0.13503  | 0.00346  | 0.103521 | 0.02528  |
| 0.15645  | 0.082916 | 0.07343  | 0.034295 | 0.4597   | 0.009758 | 0.83342  | 0.09461  | 0.04099  |
| 0.96294  | 0.091695 | 0.04766  | 0.023881 | 0.60672  | 0.029452 | 0.5255   | 0.062093 | 0.18039  |
| 0.01818  | 0.007629 | 0.86939  | 0.001345 | 0.97688  | 0.13443  | 0.00361  | 0.01968  | 0.67142  |
| 0.13689  | -0.06303 | 0.17392  | -0.05275 | 0.25527  | -0.08639 | 0.06213  | -0.04344 | 0.34896  |
| 0.06429  | 0.034449 | 0.45768  | 0.03675  | 0.42818  | 0.009188 | 0.84302  | 0.008471 | 0.85513  |
| 0.00477  | 0.074698 | 0.10693  | 0.128132 | 0.00555  | 0.135224 | 0.00341  | 0.017475 | 0.70642  |
| 0.79003  | -0.11761 | 0.01098  | -0.05814 | 0.20979  | -0.10108 | 0.02895  | 0.023183 | 0.61728  |

|          |          |          |          |          |          |          |          |          |
|----------|----------|----------|----------|----------|----------|----------|----------|----------|
| 1.58E-06 | 0.013593 | 0.76954  | 0.03396  | 0.46409  | 0.178199 | 0.00011  | 0.000833 | 0.98567  |
| 0.00059  | 0.016719 | 0.71857  | 0.003535 | 0.93927  | 0.140194 | 0.00239  | -0.04357 | 0.34744  |
| 7.84E-13 | -0.01343 | 0.77215  | 0.053218 | 0.25106  | 0.162097 | 0.00044  | -0.04544 | 0.32717  |
| 0.03342  | -0.02181 | 0.6383   | 0.046605 | 0.3149   | -0.02991 | 0.51909  | 0.079751 | 0.08515  |
| 0.17723  | -0.00253 | 0.95649  | 0.017904 | 0.69956  | 0.122148 | 0.00823  | 0.047664 | 0.30402  |
| 0.16976  | 0.13475  | 0.00353  | 0.050145 | 0.27951  | 0.07583  | 0.1017   | 0.087812 | 0.05793  |
| 0.04666  | 0.05538  | 0.23229  | 0.117215 | 0.01125  | 0.046983 | 0.31099  | 0.074273 | 0.10894  |
| 0.19216  | 0.039186 | 0.39819  | 0.040907 | 0.37777  | 0.012485 | 0.78786  | 0.121295 | 0.00869  |
| 0.00396  | 0.058268 | 0.2088   | -0.00594 | 0.89805  | 0.08169  | 0.07781  | -0.00049 | 0.9916   |
| 0.35031  | 0.187542 | 4.54E-05 | 0.154889 | 0.00078  | 0.257075 | 1.75E-08 | 0.241313 | 1.30E-07 |
| 0.49969  | 0.038043 | 0.4121   | 0.067737 | 0.14386  | 0.104158 | 0.02439  | 0.060995 | 0.18824  |
| 0.66241  | 0.120494 | 0.00915  | 0.118789 | 0.01019  | 0.109111 | 0.01834  | 0.116356 | 0.01186  |
| 1.01E-06 | 0.226256 | 7.79E-07 | 0.234997 | 2.79E-07 | 0.235963 | 2.49E-07 | 0.087202 | 0.0597   |
| 2.11E-10 | 0.137117 | 0.00299  | 0.129504 | 0.00506  | 0.125673 | 0.00654  | -0.07228 | 0.11879  |
| 0.84893  | 0.097333 | 0.03549  | 0.143181 | 0.00192  | 0.205544 | 7.54E-06 | 0.092757 | 0.04513  |
| 5.20E-14 | -0.16298 | 0.00041  | 0.001733 | 0.9702   | 0.012396 | 0.78933  | -0.17899 | 0.0001   |
| 0.00493  | -0.12308 | 0.00775  | -0.10548 | 0.02263  | -0.09094 | 0.04954  | -0.0495  | 0.28572  |
| 0.96955  | 0.14206  | 0.00209  | 0.108827 | 0.01865  | 0.167429 | 0.00028  | 0.03434  | 0.4591   |
| 1.04E-23 | -0.01164 | 0.80186  | -0.07207 | 0.11985  | 0.09806  | 0.03413  | -0.14854 | 0.00128  |
| 0.05625  | 0.207103 | 6.40E-06 | 0.072593 | 0.11721  | 0.222778 | 1.16E-06 | 0.148416 | 0.0013   |
| 1.21E-15 | 0.072779 | 0.11627  | -0.00138 | 0.97628  | 0.141539 | 0.00217  | -0.14039 | 0.00236  |
| 3.61E-05 | 0.299818 | 3.73E-11 | 0.163568 | 0.00039  | 0.166647 | 0.0003   | 0.278429 | 9.23E-10 |
| 0.01025  | -0.05949 | 0.19939  | -0.0334  | 0.47153  | 0.069604 | 0.13311  | -0.07004 | 0.13068  |
| 0.31166  | 0.02907  | 0.53088  | -0.0328  | 0.47948  | -0.02004 | 0.66576  | 0.034678 | 0.4547   |
| 0.35454  | -0.27779 | 1.01E-09 | -0.22329 | 1.09E-06 | -0.23946 | 1.63E-07 | 0.024033 | 0.60444  |
| 7.65E-06 | -0.13175 | 0.00435  | 0.022741 | 0.62401  | -0.00584 | 0.89988  | -0.03836 | 0.40826  |
| 7.50E-07 | -0.18941 | 3.80E-05 | -0.19444 | 2.33E-05 | -0.2827  | 4.97E-10 | 0.025067 | 0.58896  |
| 4.70E-06 | 0.115513 | 0.01249  | 0.097895 | 0.03443  | 0.184598 | 5.99E-05 | 0.160136 | 0.00051  |
| 1.25E-10 | -0.26506 | 5.99E-09 | -0.1785  | 0.00011  | -0.18184 | 7.75E-05 | -0.22197 | 1.27E-06 |
| 3.24E-05 | -0.16965 | 0.00023  | -0.15705 | 0.00066  | -0.18547 | 5.52E-05 | -0.00043 | 0.99266  |
| 0.00191  | -0.04678 | 0.31309  | -0.18273 | 7.14E-05 | -0.0154  | 0.73993  | -0.10473 | 0.02361  |
| 3.55E-05 | -0.01989 | 0.66809  | -0.12033 | 0.00925  | -0.08124 | 0.07948  | -0.12836 | 0.00547  |
| 2.81E-14 | 0.030538 | 0.51033  | 0.021668 | 0.64047  | 0.268218 | 3.89E-09 | -0.14675 | 0.00147  |
| 8.55E-14 | -0.15138 | 0.00103  | 0.018498 | 0.69011  | 0.005189 | 0.91096  | -0.13477 | 0.00352  |
| 0.0162   | -0.12555 | 0.0066   | -0.05427 | 0.24182  | -0.11899 | 0.01006  | 0.146332 | 0.00152  |
| 1.16E-11 | -0.17775 | 0.00011  | -0.11841 | 0.01043  | -0.0558  | 0.22872  | -0.10476 | 0.02357  |
| 0.0035   | -0.11937 | 0.00982  | -0.2132  | 3.34E-06 | -0.1922  | 2.90E-05 | -0.0145  | 0.75463  |
| 8.68E-06 | -0.38666 | 4.21E-18 | -0.3058  | 1.45E-11 | -0.34304 | 2.42E-14 | -0.29975 | 3.77E-11 |
| 0.00118  | -0.19237 | 2.85E-05 | -0.1832  | 6.83E-05 | -0.14762 | 0.00138  | -0.08274 | 0.07404  |
| 0.00321  | -0.08866 | 0.05553  | 0.01263  | 0.78546  | 0.055863 | 0.22823  | 0.011913 | 0.79736  |
| 0.63681  | 0.164674 | 0.00035  | 0.158877 | 0.00057  | 0.196219 | 1.95E-05 | 0.078606 | 0.08974  |
| 0.24859  | 0.081656 | 0.07793  | 0.078629 | 0.08965  | 0.132439 | 0.00414  | 0.041663 | 0.36902  |
| 0.02042  | 0.048419 | 0.29642  | 0.104169 | 0.02437  | 0.215929 | 2.48E-06 | 0.080457 | 0.08242  |
| 3.70E-07 | -0.28775 | 2.36E-10 | -0.24818 | 5.51E-08 | -0.25273 | 3.08E-08 | -0.20213 | 1.07E-05 |
| 0.00159  | 0.273017 | 1.99E-09 | 0.107442 | 0.02021  | 0.258527 | 1.44E-08 | 0.068996 | 0.13654  |

|          |          |          |          |          |          |          |          |          |
|----------|----------|----------|----------|----------|----------|----------|----------|----------|
| 0.52918  | 0.133159 | 0.00394  | 0.23151  | 4.23E-07 | 0.218516 | 1.87E-06 | 0.083979 | 0.06981  |
| 0.02136  | 0.075318 | 0.10404  | 0.072144 | 0.1195   | 0.210433 | 4.50E-06 | 0.057271 | 0.21671  |
| 0.00491  | 0.105707 | 0.02234  | 0.08182  | 0.07734  | 0.128118 | 0.00556  | 0.08031  | 0.08298  |
| 0.00379  | 0.183643 | 6.55E-05 | 0.203326 | 9.49E-06 | 0.340267 | 4.02E-14 | 0.09926  | 0.03199  |
| 0.00455  | 0.103132 | 0.02584  | 0.070291 | 0.12931  | 0.17897  | 0.0001   | 0.047423 | 0.30648  |
| 0.73115  | 0.033174 | 0.4745   | 0.003277 | 0.94369  | 0.015431 | 0.73944  | 0.086093 | 0.06303  |
| 4.40E-10 | 0.024506 | 0.59733  | 0.01767  | 0.70331  | -0.03037 | 0.51265  | 0.117943 | 0.01075  |
| 0.2616   | 0.072034 | 0.12006  | 0.000608 | 0.98954  | 0.120325 | 0.00925  | 0.0299   | 0.51922  |
| 0.5596   | 0.184069 | 6.30E-05 | 0.223595 | 1.06E-06 | 0.288551 | 2.09E-10 | 0.110959 | 0.01645  |
| 0.19701  | 0.036951 | 0.42565  | 0.106652 | 0.02116  | 0.095489 | 0.03914  | 0.009019 | 0.84588  |
| 0.27147  | -0.05265 | 0.2562   | -0.02023 | 0.6628   | -0.03726 | 0.42184  | -0.04321 | 0.35147  |
| 0.00463  | 0.054539 | 0.23947  | 0.154939 | 0.00078  | 0.176576 | 0.00013  | 0.026934 | 0.56151  |
| 0.10014  | -0.11843 | 0.01042  | -0.0775  | 0.09437  | -0.2243  | 9.75E-07 | -0.08786 | 0.0578   |
| 1.01E-12 | -0.0929  | 0.0448   | -0.11438 | 0.01339  | 0.023538 | 0.6119   | -0.13356 | 0.00383  |
| 0.00141  | 0.007464 | 0.8722   | -0.14464 | 0.00173  | -0.0338  | 0.46625  | -0.14399 | 0.00181  |
| 0.53659  | -0.05776 | 0.21283  | 0.021581 | 0.6418   | 0.005236 | 0.91016  | 0.03658  | 0.43032  |
| 1.19E-10 | 0.0966   | 0.0369   | 0.118574 | 0.01033  | 0.251503 | 3.60E-08 | 0.000264 | 0.99545  |
| 0.71987  | 0.231788 | 4.09E-07 | 0.18112  | 8.28E-05 | 0.263909 | 7.00E-09 | 0.209759 | 4.84E-06 |
| 0.00029  | -0.15206 | 0.00098  | -0.1967  | 1.86E-05 | -0.09503 | 0.0401   | -0.04659 | 0.31504  |
| 0.32756  | -0.07809 | 0.09189  | -0.0097  | 0.83434  | -0.07837 | 0.09071  | 0.155024 | 0.00078  |
| 4.90E-13 | 0.065482 | 0.15771  | 0.038722 | 0.40379  | -0.03526 | 0.44717  | 0.187413 | 4.59E-05 |
| 8.34E-05 | 0.060502 | 0.19184  | 0.076569 | 0.0984   | 0.273817 | 1.78E-09 | -0.00491 | 0.91572  |
| 5.28E-06 | -0.0539  | 0.24502  | -0.02825 | 0.5425   | 0.014883 | 0.74837  | -0.06783 | 0.14328  |
| 0.54361  | 0.103457 | 0.02537  | 0.051848 | 0.26348  | 0.069353 | 0.13452  | -0.0085  | 0.85458  |
| 0.52328  | 0.096198 | 0.0377   | 0.120905 | 0.00891  | 0.14911  | 0.00123  | 0.063765 | 0.16892  |
| 7.07E-05 | -0.07502 | 0.10542  | -0.01937 | 0.67632  | -0.03969 | 0.39218  | -0.11139 | 0.01603  |
| 2.95E-17 | -0.0563  | 0.22459  | -0.04308 | 0.35291  | 0.016372 | 0.72418  | -0.20239 | 1.04E-05 |
| 2.27E-06 | -0.19713 | 1.78E-05 | -0.12277 | 0.00791  | -0.13997 | 0.00243  | -0.24018 | 1.49E-07 |
| 0.00025  | 0.050838 | 0.27291  | 0.036611 | 0.42992  | 0.208027 | 5.81E-06 | 0.062513 | 0.17746  |
| 2.40E-07 | 0.034641 | 0.45518  | 0.132529 | 0.00412  | 0.193693 | 2.50E-05 | 0.100641 | 0.02966  |
| 3.27E-08 | 0.326256 | 4.82E-13 | 0.314819 | 3.33E-12 | 0.30052  | 3.34E-11 | 0.265994 | 5.27E-09 |
| 0.11151  | -0.33305 | 1.47E-13 | -0.20083 | 1.23E-05 | -0.2628  | 8.14E-09 | -0.12908 | 0.00521  |
| 0.01365  | -0.07256 | 0.1174   | -0.18365 | 6.55E-05 | -0.16654 | 0.0003   | -0.08418 | 0.06916  |
| 0.51561  | 0.142459 | 0.00203  | 0.165194 | 0.00034  | 0.106712 | 0.02108  | 0.145764 | 0.00159  |
| 0.0013   | -0.07589 | 0.10142  | -0.07869 | 0.08938  | -0.00198 | 0.96589  | 0.038292 | 0.40905  |
| 0.00015  | -0.06992 | 0.13133  | -0.04168 | 0.36887  | -0.00486 | 0.91662  | -0.1789  | 0.0001   |
| 1.41E-13 | 0.218537 | 1.86E-06 | 0.223293 | 1.09E-06 | 0.215332 | 2.65E-06 | 0.278377 | 9.30E-10 |
| 4.42E-10 | 0.006143 | 0.89467  | -0.05881 | 0.20462  | -0.01632 | 0.725    | -0.14707 | 0.00144  |
| 3.92E-05 | -0.00553 | 0.90519  | -0.04865 | 0.29408  | 0.102559 | 0.02668  | -0.03339 | 0.47158  |
| 0.01626  | 0.113582 | 0.01405  | 0.08655  | 0.06164  | 0.085029 | 0.06637  | 0.10821  | 0.01933  |
| 0.0002   | 0.08192  | 0.07697  | 0.143784 | 0.00184  | 0.168297 | 0.00026  | 0.023168 | 0.6175   |
| 0.73953  | 0.014515 | 0.7544   | -0.03286 | 0.47872  | 0.000381 | 0.99344  | -0.00257 | 0.95585  |
| 1.43E-06 | 0.081712 | 0.07773  | 0.084018 | 0.06968  | 0.168754 | 0.00025  | -0.00546 | 0.9064   |
| 7.79E-07 | 0.085491 | 0.0649   | 0.099131 | 0.03221  | 0.267774 | 4.13E-09 | 0.028803 | 0.53466  |
| 0.0337   | 0.05171  | 0.26476  | -0.10092 | 0.02921  | -0.01021 | 0.82586  | -0.06909 | 0.13602  |

|          |          |          |          |          |          |          |          |          |
|----------|----------|----------|----------|----------|----------|----------|----------|----------|
| 4.74E-05 | 0.282139 | 5.39E-10 | 0.237759 | 2.00E-07 | 0.285557 | 3.26E-10 | 0.178521 | 0.00011  |
| 1.80E-11 | 0.039425 | 0.3953   | -0.06685 | 0.14918  | -0.09513 | 0.03989  | 0.20515  | 7.86E-06 |
| 0.31299  | 0.193583 | 2.53E-05 | 0.135768 | 0.00329  | 0.141514 | 0.00217  | 0.151019 | 0.00106  |
| 0.15306  | 0.06205  | 0.18069  | 0.052226 | 0.26001  | 0.002622 | 0.95493  | 0.071384 | 0.12345  |
| 0.47279  | 0.134709 | 0.00354  | 0.062688 | 0.17625  | 0.007543 | 0.87085  | 0.017238 | 0.71024  |
| 0.09529  | 0.077801 | 0.09309  | 0.152313 | 0.00096  | 0.237915 | 1.97E-07 | 0.107439 | 0.02022  |
| 0.00035  | 0.440668 | 1.32E-23 | 0.273047 | 1.98E-09 | 0.274213 | 1.68E-09 | 0.211425 | 4.05E-06 |
| 4.25E-09 | -0.05438 | 0.24081  | -0.04067 | 0.38059  | 0.119191 | 0.00994  | -0.07797 | 0.09236  |
| 0.00012  | 0.033107 | 0.4754   | -0.10084 | 0.02934  | -0.01589 | 0.73206  | -0.20205 | 1.08E-05 |
| 1.00E-23 | -0.10268 | 0.0265   | -0.06094 | 0.18866  | 0.07747  | 0.09449  | -0.16773 | 0.00027  |
| 0.01439  | -0.06283 | 0.1753   | -0.06548 | 0.15776  | -0.12275 | 0.00792  | -0.02221 | 0.63219  |
| 6.55E-05 | -0.05855 | 0.20663  | -0.02596 | 0.57573  | 0.105489 | 0.02261  | -0.04944 | 0.28631  |
| 6.22E-11 | 0.022745 | 0.62394  | -0.00686 | 0.88245  | 0.122709 | 0.00794  | -0.02936 | 0.52681  |
| 0.00202  | 0.052409 | 0.25835  | 0.123506 | 0.00754  | 0.188647 | 4.08E-05 | -0.07592 | 0.10128  |
| 0.1906   | -0.05579 | 0.22881  | -0.04092 | 0.37764  | -0.0846  | 0.06777  | -0.08297 | 0.07326  |
| 0.02346  | 6.63E-05 | 0.99886  | -0.06999 | 0.13099  | -0.01849 | 0.6902   | 0.025768 | 0.57859  |
| 0.07071  | -0.10329 | 0.02561  | -0.06314 | 0.17316  | -0.05115 | 0.27001  | -0.07361 | 0.11214  |
| 0.00023  | 0.163505 | 0.00039  | 0.228774 | 5.82E-07 | 0.145158 | 0.00166  | 0.187138 | 4.72E-05 |
| 0.00107  | 0.184364 | 6.13E-05 | 0.206981 | 6.49E-06 | 0.248666 | 5.18E-08 | 0.103182 | 0.02576  |
| 9.25E-12 | -0.01287 | 0.78149  | 0.05169  | 0.26494  | -0.05557 | 0.23068  | 0.156746 | 0.00068  |
| 4.80E-11 | -0.02143 | 0.64419  | -0.05837 | 0.20803  | 0.12646  | 0.00621  | 0.010711 | 0.81743  |
| 0.02394  | -0.14688 | 0.00146  | -0.26892 | 3.53E-09 | -0.27895 | 8.56E-10 | 0.048672 | 0.2939   |
| 0.00794  | 0.012468 | 0.78814  | -0.17072 | 0.00021  | -0.0998  | 0.03106  | -0.00724 | 0.87608  |
| 0.0002   | 0.038217 | 0.40996  | 0.115852 | 0.01223  | 0.136243 | 0.00318  | 0.189374 | 3.81E-05 |
| 0.52899  | 0.012918 | 0.78069  | -0.10789 | 0.0197   | -0.10005 | 0.03064  | 0.03832  | 0.4087   |
| 1.27E-05 | 0.004893 | 0.91602  | 0.052229 | 0.25998  | 0.143569 | 0.00187  | -0.10176 | 0.02789  |
| 0.01764  | -0.01429 | 0.75809  | -0.08046 | 0.0824   | 0.010198 | 0.82603  | -0.06374 | 0.16909  |
| 0.03893  | 0.05614  | 0.22594  | 0.048977 | 0.29088  | 0.084603 | 0.06775  | 0.046161 | 0.31954  |
| 0.55933  | 0.003525 | 0.93944  | 0.047925 | 0.30137  | 0.073407 | 0.11314  | 0.062845 | 0.17516  |
| 7.43E-06 | 0.36853  | 1.81E-16 | 0.20375  | 9.08E-06 | 0.200101 | 1.32E-05 | 0.048503 | 0.29558  |
| 0.67229  | -0.03737 | 0.42047  | -0.0629  | 0.17482  | -0.03876 | 0.40334  | 0.040211 | 0.38594  |
| 1.84E-11 | 0.252517 | 3.16E-08 | 0.188659 | 4.08E-05 | 0.244528 | 8.72E-08 | 0.265282 | 5.81E-09 |
| 2.80E-15 | -0.21515 | 2.71E-06 | -0.1295  | 0.00507  | -0.12946 | 0.00508  | -0.21301 | 3.41E-06 |
| 0.12791  | 0.002013 | 0.9654   | 0.00937  | 0.83996  | 0.043268 | 0.35084  | -0.04509 | 0.33086  |
| 6.62E-05 | -0.17962 | 9.50E-05 | -0.24837 | 5.37E-08 | -0.25244 | 3.19E-08 | -0.10165 | 0.02806  |
| 1.43E-05 | -0.20783 | 5.93E-06 | -0.20141 | 1.16E-05 | -0.14236 | 0.00204  | -0.26746 | 4.31E-09 |
| 0.08676  | -0.25213 | 3.32E-08 | -0.25601 | 2.01E-08 | -0.21233 | 3.67E-06 | -0.21455 | 2.89E-06 |
| 0.45476  | -0.15133 | 0.00104  | -0.14297 | 0.00195  | -0.19709 | 1.79E-05 | -0.05104 | 0.27096  |
| 0.18612  | 0.085335 | 0.0654   | 0.098702 | 0.03297  | 0.145728 | 0.00159  | 0.073231 | 0.11401  |
| 1.18E-13 | -0.09845 | 0.03342  | -0.00552 | 0.90529  | -0.12423 | 0.00719  | 0.255459 | 2.16E-08 |
| 0.38839  | 0.16223  | 0.00043  | 0.074706 | 0.10689  | 0.126595 | 0.00615  | 0.153103 | 0.0009   |
| 0.01327  | -0.0027  | 0.95355  | -0.07967 | 0.08546  | 0.019451 | 0.67503  | -0.06739 | 0.14596  |
| 0.05174  | 0.113443 | 0.01417  | 0.095308 | 0.03951  | 0.08954  | 0.05315  | 0.117957 | 0.01074  |
| 0.01838  | -0.02838 | 0.54062  | -0.22138 | 1.36E-06 | -0.15807 | 0.00061  | 0.054621 | 0.23876  |
| 0.11532  | 0.157737 | 0.00062  | 0.228769 | 5.83E-07 | 0.211324 | 4.09E-06 | 0.234011 | 3.14E-07 |

|          |          |          |          |          |          |          |          |          |
|----------|----------|----------|----------|----------|----------|----------|----------|----------|
| 9.22E-13 | -0.02117 | 0.64821  | -0.01403 | 0.76238  | -0.16663 | 0.0003   | 0.10027  | 0.03027  |
| 0.76393  | -0.04466 | 0.33559  | 0.042761 | 0.35651  | 0.042188 | 0.363    | -0.0045  | 0.92268  |
| 2.75E-06 | -0.00798 | 0.86339  | 0.051713 | 0.26473  | -0.056   | 0.22709  | 0.119619 | 0.00967  |
| 0.3622   | 0.039734 | 0.39162  | 0.019001 | 0.68213  | 0.126749 | 0.00609  | 0.023283 | 0.61576  |
| 0.03383  | 0.071452 | 0.12309  | -0.01394 | 0.76388  | -0.0089  | 0.84794  | -0.03053 | 0.51046  |
| 0.9784   | -0.0154  | 0.73992  | -0.04058 | 0.38158  | -0.05939 | 0.20016  | -0.04472 | 0.33489  |
| 2.94E-07 | 0.1973   | 1.75E-05 | 0.17051  | 0.00021  | 0.246213 | 7.06E-08 | 0.009311 | 0.84095  |
| 0.2167   | 0.209356 | 5.05E-06 | 0.135306 | 0.00339  | 0.214305 | 2.97E-06 | 0.1491   | 0.00123  |
| 0.10727  | 0.022758 | 0.62375  | 0.116092 | 0.01205  | 0.092595 | 0.04551  | 0.112063 | 0.0154   |
| 2.10E-16 | -0.08551 | 0.06486  | -0.08742 | 0.05906  | -0.00758 | 0.87024  | -0.26912 | 3.43E-09 |
| 0.83127  | 0.221042 | 1.41E-06 | 0.115471 | 0.01252  | 0.192728 | 2.75E-05 | 0.106743 | 0.02105  |
| 0.26419  | 0.195872 | 2.02E-05 | 0.080768 | 0.08123  | 0.085376 | 0.06527  | 0.096695 | 0.03672  |
| 0.15039  | 0.096025 | 0.03805  | 0.003921 | 0.93266  | 0.041719 | 0.36837  | -0.00582 | 0.90022  |
| 0.12371  | -0.02909 | 0.53062  | 0.022714 | 0.62442  | 0.01962  | 0.67238  | 0.005409 | 0.9072   |
| 0.00068  | 0.422786 | 1.13E-21 | 0.281722 | 5.73E-10 | 0.246299 | 6.98E-08 | 0.161789 | 0.00045  |
| 0.40113  | -0.02703 | 0.56014  | -0.02643 | 0.5689   | -0.05029 | 0.27813  | -0.04123 | 0.37399  |
| 0.06331  | 0.107903 | 0.01968  | 0.030429 | 0.51184  | 0.004228 | 0.92739  | -0.0679  | 0.14292  |
| 0.01487  | 0.234206 | 3.07E-07 | 0.133124 | 0.00395  | 0.116481 | 0.01177  | 0.220875 | 1.44E-06 |
| 0.00967  | 0.171215 | 0.0002   | 0.153886 | 0.00085  | 0.14853  | 0.00129  | 0.091252 | 0.04875  |
| 2.72E-08 | -0.20622 | 7.02E-06 | -0.04039 | 0.38382  | -0.19825 | 1.59E-05 | -0.02929 | 0.52774  |
| 0.1535   | 0.114206 | 0.01353  | 0.17234  | 0.00018  | 0.211917 | 3.84E-06 | 0.066871 | 0.14907  |
| 0.25074  | 0.012985 | 0.77958  | 0.000963 | 0.98345  | 0.008061 | 0.86207  | -0.14123 | 0.00222  |
| 0.13869  | -0.1142  | 0.01354  | -0.13812 | 0.00278  | -0.09881 | 0.03277  | 0.006396 | 0.89035  |
| 0.06629  | 0.006218 | 0.89339  | 0.067751 | 0.14378  | 0.038529 | 0.40614  | -0.0036  | 0.93812  |
| 1.91E-12 | -0.11331 | 0.01429  | -0.25549 | 2.15E-08 | -0.07551 | 0.10314  | -0.18976 | 3.67E-05 |
| 0.00238  | -0.02666 | 0.56552  | 0.046014 | 0.32108  | 0.200516 | 1.27E-05 | 0.088628 | 0.05563  |
| 1.43E-07 | -0.08857 | 0.0558   | 0.024978 | 0.59029  | -0.09684 | 0.03644  | 0.206618 | 6.74E-06 |
| 0.85009  | 0.002193 | 0.96231  | -0.11803 | 0.01069  | 0.042521 | 0.35923  | 0.05379  | 0.246    |
| 7.01E-10 | -0.04057 | 0.38173  | -0.04504 | 0.33147  | 0.052483 | 0.25767  | -0.06865 | 0.13855  |
| 0.95151  | -0.00558 | 0.9042   | -0.02056 | 0.6576   | -0.01327 | 0.77484  | 0.036582 | 0.4303   |
| 0.03259  | -0.17212 | 0.00019  | 0.002578 | 0.9557   | -0.11419 | 0.01354  | -0.17841 | 0.00011  |
| 0.09804  | 0.028186 | 0.54345  | -0.12375 | 0.00742  | 0.000578 | 0.99006  | 0.131798 | 0.00433  |
| 0.38456  | 0.048121 | 0.2994   | -0.12946 | 0.00508  | 0.055079 | 0.23484  | 0.019747 | 0.67037  |
| 0.50727  | 0.013611 | 0.76925  | -0.14645 | 0.00151  | 0.01219  | 0.79276  | -0.00163 | 0.97205  |
| 0.55566  | -0.0686  | 0.1388   | -0.12114 | 0.00878  | -0.15043 | 0.00111  | -0.12057 | 0.0091   |
| 0.66342  | 0.123863 | 0.00737  | 0.070932 | 0.12585  | 0.099379 | 0.03178  | 0.038488 | 0.40664  |
| 0.00243  | 0.079762 | 0.08511  | 0.088325 | 0.05648  | 0.171823 | 0.00019  | -0.00434 | 0.92542  |
| 0.00329  | -0.00935 | 0.84025  | -0.09257 | 0.04556  | 0.002684 | 0.95387  | -0.00591 | 0.89869  |
| 0.001    | 0.126359 | 0.00625  | 0.048811 | 0.29251  | 0.058313 | 0.20844  | 0.117237 | 0.01123  |
| 0.0191   | -0.02157 | 0.64192  | -0.00038 | 0.99344  | 0.058328 | 0.20833  | -0.03563 | 0.44236  |
| 0.05616  | 0.222845 | 1.15E-06 | 0.286499 | 2.84E-10 | 0.400549 | 2.01E-19 | 0.151154 | 0.00105  |
| 2.05E-11 | -0.0389  | 0.40159  | 0.040611 | 0.38123  | -0.14052 | 0.00234  | 0.191208 | 3.19E-05 |
| 0.01284  | 0.234625 | 2.92E-07 | 0.176712 | 0.00012  | 0.27607  | 1.29E-09 | 0.12934  | 0.00512  |
| 1.86E-10 | 0.314824 | 3.33E-12 | 0.106911 | 0.02084  | 0.173994 | 0.00016  | 0.347412 | 1.08E-14 |
| 0.10007  | 0.267042 | 4.57E-09 | 0.253397 | 2.82E-08 | 0.317832 | 2.02E-12 | 0.082558 | 0.07469  |



|          |          |          |           |          |          |          |          |          |
|----------|----------|----------|-----------|----------|----------|----------|----------|----------|
| 0.58551  | -0.00376 | 0.93533  | -0.0083   | 0.85809  | 0.001533 | 0.97365  | 0.012319 | 0.79062  |
| 0.55899  | -0.12259 | 0.008    | -0.20603  | 7.17E-06 | -0.22091 | 1.43E-06 | -0.17744 | 0.00012  |
| 6.13E-13 | 0.014448 | 0.75549  | 0.094688  | 0.04082  | -0.02511 | 0.58836  | 0.227434 | 6.80E-07 |
| 0.16737  | -0.04789 | 0.30177  | -0.11859  | 0.01032  | 0.029494 | 0.52491  | 0.00261  | 0.95514  |
| 0.78978  | 0.140279 | 0.00238  | 0.114973  | 0.01291  | 0.182676 | 7.17E-05 | 0.122178 | 0.00821  |
| 0.06748  | -0.10016 | 0.03045  | -0.02645  | 0.56859  | -0.03355 | 0.46946  | -0.03278 | 0.47982  |
| 0.38364  | -0.13813 | 0.00278  | -0.02543  | 0.58352  | -0.09861 | 0.03314  | -0.07016 | 0.13004  |
| 0.15289  | -0.00403 | 0.93076  | 0.011338  | 0.80695  | 0.020821 | 0.65358  | -0.00122 | 0.97909  |
| 1.77E-05 | 0.030818 | 0.50647  | 0.112225  | 0.01525  | 0.170151 | 0.00022  | -0.07746 | 0.09453  |
| 0.04223  | 0.254353 | 2.49E-08 | 0.231689  | 4.14E-07 | 0.218641 | 1.84E-06 | 0.172677 | 0.00018  |
| 0.77521  | 0.182598 | 7.22E-05 | 0.151778  | 0.001    | 0.22346  | 1.07E-06 | 0.197329 | 1.75E-05 |
| 0.89446  | 0.309327 | 8.20E-12 | 0.119418  | 0.0098   | 0.176373 | 0.00013  | 0.282742 | 4.94E-10 |
| 0.42385  | 0.469224 | 6.07E-27 | 0.22622   | 7.82E-07 | 0.251314 | 3.69E-08 | 0.333577 | 1.34E-13 |
| 1.13E-08 | 0.190955 | 3.27E-05 | 0.207346  | 6.24E-06 | 0.15432  | 0.00082  | 0.223757 | 1.04E-06 |
| 0.00664  | -0.08551 | 0.06484  | -0.13113  | 0.00453  | -0.14155 | 0.00217  | 0.125332 | 0.00669  |
| 0.00017  | -0.01962 | 0.67244  | 0.065811  | 0.15563  | 0.179277 | 9.80E-05 | -0.02161 | 0.64132  |
| 0.00979  | -0.15638 | 0.0007   | -0.1894   | 3.80E-05 | -0.06868 | 0.13833  | -0.11377 | 0.0139   |
| 7.60E-18 | 0.018555 | 0.68921  | -8.65E-05 | 0.99851  | 0.170555 | 0.00021  | -0.02631 | 0.57063  |
| 0.00269  | 0.360662 | 8.59E-16 | 0.134269  | 0.00365  | 0.154401 | 0.00081  | -0.04304 | 0.35342  |
| 1.28E-09 | 0.032763 | 0.48     | 0.077398  | 0.0948   | 0.131193 | 0.00451  | -0.00674 | 0.88452  |
| 2.95E-06 | -0.14043 | 0.00235  | -0.16499  | 0.00034  | -0.05105 | 0.27093  | -0.08192 | 0.07697  |
| 0.22691  | 0.123898 | 0.00735  | 0.18907   | 3.92E-05 | 0.197651 | 1.69E-05 | 0.021515 | 0.64282  |
| 0.09889  | -0.01814 | 0.69587  | -0.06836  | 0.14021  | 0.069297 | 0.13483  | 0.046235 | 0.31876  |
| 0.34786  | 0.07493  | 0.10584  | 0.062168  | 0.17987  | 0.195733 | 2.05E-05 | 0.056182 | 0.22559  |
| 2.19E-11 | 0.093996 | 0.04232  | 0.106152  | 0.02177  | -0.03783 | 0.41474  | 0.279561 | 7.84E-10 |
| 2.00E-05 | 0.130883 | 0.00461  | 0.093744  | 0.04288  | 0.046184 | 0.3193   | 0.064152 | 0.16634  |
| 0.01499  | 0.204128 | 8.74E-06 | -0.03082  | 0.50637  | 0.007997 | 0.86316  | 0.070372 | 0.12887  |
| 1.43E-06 | -0.03953 | 0.39407  | -0.07655  | 0.09849  | 0.031313 | 0.49966  | 0.002286 | 0.9607   |
| 9.84E-13 | 0.172305 | 0.00018  | 0.156709  | 0.00068  | 0.079445 | 0.08636  | 0.311715 | 5.56E-12 |
| 0.13571  | 0.058615 | 0.2061   | 0.099638  | 0.03134  | 0.139234 | 0.00257  | -0.01237 | 0.78976  |
| 0.72546  | 0.234631 | 2.92E-07 | 0.217401  | 2.11E-06 | 0.287846 | 2.32E-10 | 0.140304 | 0.00237  |
| 5.14E-06 | 0.118343 | 0.01048  | 0.086984  | 0.06034  | 0.158779 | 0.00057  | 0.032807 | 0.47941  |
| 0.12442  | 0.196656 | 1.87E-05 | 0.05258   | 0.25679  | 0.07849  | 0.09022  | 0.08942  | 0.05347  |
| 0.10322  | -0.06676 | 0.14975  | -0.04714  | 0.30937  | -0.04328 | 0.35074  | 0.004418 | 0.92413  |
| 3.27E-11 | 0.122499 | 0.00805  | 0.193254  | 2.61E-05 | 0.363292 | 5.13E-16 | -0.00208 | 0.96423  |
| 0.39657  | 0.091823 | 0.04735  | 0.137563  | 0.00289  | 0.20998  | 4.72E-06 | 0.064605 | 0.16337  |
| 0.00396  | 0.041555 | 0.37026  | 0.089656  | 0.05284  | 0.116804 | 0.01154  | 0.035998 | 0.4377   |
| 0.40625  | -0.16796 | 0.00027  | -0.24268  | 1.10E-07 | -0.28995 | 1.69E-10 | -0.09597 | 0.03815  |
| 0.01461  | 0.133921 | 0.00374  | 0.16502   | 0.00034  | 0.145343 | 0.00164  | 0.181388 | 8.08E-05 |
| 0.04603  | 0.215473 | 2.61E-06 | 0.180683  | 8.62E-05 | 0.138111 | 0.00278  | 0.197548 | 1.71E-05 |
| 1.05E-06 | 0.092718 | 0.04522  | 0.108818  | 0.01866  | 0.207443 | 6.18E-06 | 0.068616 | 0.13872  |
| 0.0489   | 0.324625 | 6.38E-13 | 0.265368  | 5.74E-09 | 0.226454 | 7.62E-07 | 0.141341 | 0.0022   |
| 0.19094  | 0.123963 | 0.00732  | 0.116466  | 0.01178  | 0.154646 | 0.0008   | 0.190957 | 3.27E-05 |
| 0.05127  | -0.06301 | 0.17406  | -0.02156  | 0.64214  | -0.07815 | 0.09163  | -0.04367 | 0.34637  |
| 5.74E-05 | 0.042647 | 0.3578   | 0.120019  | 0.00943  | 0.222564 | 1.19E-06 | 0.033801 | 0.46619  |

|          |          |          |          |          |          |          |          |          |
|----------|----------|----------|----------|----------|----------|----------|----------|----------|
| 0.02903  | 0.220668 | 1.47E-06 | 0.114541 | 0.01326  | 0.192502 | 2.81E-05 | 0.00112  | 0.98075  |
| 0.17658  | -0.06992 | 0.13138  | -0.10841 | 0.01911  | -0.12011 | 0.00937  | -0.03505 | 0.44986  |
| 4.47E-05 | 0.03764  | 0.41707  | 0.153196 | 0.0009   | 0.105353 | 0.02279  | 0.208205 | 5.70E-06 |
| 1.02E-10 | 0.197708 | 1.68E-05 | 0.078639 | 0.08961  | 0.01841  | 0.69151  | 0.237155 | 2.16E-07 |
| 0.01083  | -0.04804 | 0.30018  | -0.11102 | 0.01639  | -0.11237 | 0.01512  | 0.02075  | 0.65469  |
| 0.05443  | 0.301663 | 2.79E-11 | 0.00027  | 0.99535  | 0.124936 | 0.00687  | 0.01723  | 0.71036  |
| 0.15466  | 0.018643 | 0.68781  | -0.07376 | 0.11143  | -0.08806 | 0.05723  | 0.084784 | 0.06716  |
| 8.28E-05 | -0.01784 | 0.70063  | 0.005293 | 0.90918  | 0.100428 | 0.03001  | -0.05761 | 0.21399  |
| 5.03E-26 | -0.0608  | 0.18969  | -0.02263 | 0.62568  | -0.24829 | 5.43E-08 | 0.234164 | 3.09E-07 |
| 0.01838  | 0.025612 | 0.58089  | 0.055255 | 0.23335  | 0.07261  | 0.11712  | 0.090509 | 0.05062  |
| 0.55393  | 0.012507 | 0.7875   | 0.039998 | 0.38848  | 0.027498 | 0.55334  | -0.00616 | 0.89435  |
| 0.00128  | -0.02    | 0.66637  | -0.03722 | 0.42224  | 0.013253 | 0.77515  | -0.11224 | 0.01523  |
| 3.30E-10 | -0.05882 | 0.20449  | -0.05362 | 0.24752  | 0.045664 | 0.32478  | -0.18171 | 7.84E-05 |
| 0.10433  | 0.143968 | 0.00181  | 0.047636 | 0.30431  | 0.068718 | 0.13813  | 0.125749 | 0.00651  |
| 0.00296  | 0.054154 | 0.24281  | 0.085454 | 0.06502  | 0.113688 | 0.01396  | -0.05954 | 0.19904  |
| 0.97883  | -0.01611 | 0.72841  | 0.021896 | 0.63695  | -0.00332 | 0.943    | 0.010995 | 0.81268  |
| 0.00684  | -0.00842 | 0.85601  | 0.00098  | 0.98314  | 0.054307 | 0.24148  | -0.03841 | 0.40758  |
| 0.05578  | 0.150071 | 0.00114  | 0.131185 | 0.00452  | 0.21266  | 3.54E-06 | 0.036976 | 0.42534  |
| 1.45E-10 | 0.278451 | 9.20E-10 | 0.18832  | 4.21E-05 | 0.165849 | 0.00032  | 0.22265  | 1.18E-06 |
| 0.18309  | 0.034263 | 0.46011  | 0.024008 | 0.60481  | 0.085102 | 0.06614  | -0.0182  | 0.69488  |
| 0.00868  | 0.054915 | 0.23624  | -0.13856 | 0.00269  | -0.00399 | 0.9314   | -0.02809 | 0.54476  |
| 0.27651  | 0.222039 | 1.26E-06 | 0.199258 | 1.44E-05 | 0.20776  | 5.98E-06 | -0.11733 | 0.01116  |
| 0.10834  | -0.01531 | 0.74146  | -0.14152 | 0.00217  | -0.0111  | 0.81096  | -0.03061 | 0.50939  |
| 0.0569   | 0.001127 | 0.98062  | -0.00798 | 0.86347  | 0.154106 | 0.00083  | 0.006054 | 0.89618  |
| 0.01998  | -0.02343 | 0.6136   | -0.09734 | 0.03547  | 0.00621  | 0.89353  | -0.0742  | 0.1093   |
| 0.50842  | -0.24383 | 9.51E-08 | -0.10742 | 0.02024  | -0.14964 | 0.00118  | -0.06931 | 0.13474  |
| 3.91E-13 | -0.05931 | 0.20075  | -0.10971 | 0.01771  | -0.00049 | 0.99151  | -0.17374 | 0.00016  |
| 6.39E-06 | -0.2309  | 4.54E-07 | -0.14834 | 0.0013   | -0.22014 | 1.56E-06 | -0.15622 | 0.0007   |
| 0.05665  | 0.045569 | 0.32579  | 0.116752 | 0.01157  | 0.131715 | 0.00436  | 0.041438 | 0.3716   |
| 0.07364  | 0.281972 | 5.52E-10 | 0.182758 | 7.12E-05 | 0.23593  | 2.50E-07 | 0.17596  | 0.00013  |
| 1.55E-08 | 0.130494 | 0.00473  | 0.172476 | 0.00018  | 0.059842 | 0.19674  | 0.250458 | 4.12E-08 |
| 0.36613  | 0.086854 | 0.06073  | -0.01985 | 0.6688   | 0.014323 | 0.75754  | 0.031877 | 0.49195  |
| 0.0055   | -0.05968 | 0.19798  | -0.04781 | 0.30258  | -0.04681 | 0.31281  | -0.09479 | 0.0406   |
| 0.85707  | -0.01084 | 0.81524  | 0.001165 | 0.97997  | -0.00517 | 0.91128  | 0.014169 | 0.76007  |
| 2.86E-05 | -0.15009 | 0.00114  | -0.16218 | 0.00043  | -0.12705 | 0.00597  | -0.3109  | 6.34E-12 |
| 0.52752  | 0.100752 | 0.02948  | 0.17224  | 0.00018  | 0.104113 | 0.02445  | 0.079565 | 0.08588  |
| 1.51E-05 | 0.121187 | 0.00875  | 0.146069 | 0.00155  | 0.255913 | 2.03E-08 | -0.03268 | 0.48112  |
| 0.05374  | 0.018924 | 0.68336  | 0.014442 | 0.7556   | 0.00922  | 0.84248  | 0.043094 | 0.35278  |
| 1.08E-06 | 0.104275 | 0.02423  | 0.135971 | 0.00324  | 0.224943 | 9.06E-07 | -0.07032 | 0.12918  |
| 0.56712  | 0.012709 | 0.78415  | 0.108219 | 0.01932  | 0.125691 | 0.00653  | 0.001493 | 0.97433  |
| 0.0002   | -0.18511 | 5.71E-05 | 0.023834 | 0.60743  | -0.11504 | 0.01286  | 0.01141  | 0.80575  |
| 0.50653  | 0.096352 | 0.03739  | -0.01167 | 0.80141  | 0.028327 | 0.54144  | 0.121948 | 0.00834  |
| 0.22481  | 0.005809 | 0.90037  | 0.020672 | 0.65591  | -0.02281 | 0.62294  | 0.012611 | 0.78577  |
| 0.0017   | 0.021104 | 0.64919  | -0.02697 | 0.56101  | -0.00454 | 0.92198  | 0.150149 | 0.00114  |
| 0.02275  | 0.090601 | 0.05038  | 0.035021 | 0.45024  | 0.076806 | 0.09736  | 0.005557 | 0.90467  |

|          |          |          |          |          |          |          |          |          |
|----------|----------|----------|----------|----------|----------|----------|----------|----------|
| 0.00013  | -0.22188 | 1.28E-06 | -0.18178 | 7.79E-05 | -0.21319 | 3.35E-06 | -0.06452 | 0.16391  |
| 0.07687  | 0.053459 | 0.24891  | 0.1244   | 0.00711  | 0.149172 | 0.00122  | 0.018862 | 0.68433  |
| 0.00642  | -0.01301 | 0.77911  | -0.00667 | 0.88563  | -0.09834 | 0.03362  | -0.0701  | 0.13035  |
| 0.10981  | 0.105127 | 0.02309  | 0.080144 | 0.08362  | 0.103864 | 0.0248   | 0.177018 | 0.00012  |
| 3.54E-05 | -0.06522 | 0.15941  | -0.01009 | 0.82791  | -0.10103 | 0.02904  | 0.09175  | 0.04752  |
| 0.7741   | -0.0559  | 0.22793  | -0.18109 | 8.30E-05 | 0.007484 | 0.87186  | 0.020464 | 0.65914  |
| 0.0355   | -0.16685 | 0.00029  | -0.12166 | 0.00849  | -0.08564 | 0.06444  | -0.12128 | 0.0087   |
| 0.00025  | -0.16278 | 0.00041  | -0.19615 | 1.96E-05 | -0.14937 | 0.00121  | -0.19913 | 1.46E-05 |
| 0.80134  | -0.0853  | 0.06551  | -0.04419 | 0.34071  | -0.0302  | 0.51506  | -0.01605 | 0.72946  |
| 0.67455  | 0.007425 | 0.87287  | 0.012566 | 0.78652  | 0.051186 | 0.26963  | -0.03181 | 0.4928   |
| 0.05019  | 0.094794 | 0.0406   | 0.017698 | 0.70287  | 0.128612 | 0.00538  | -0.01814 | 0.69587  |
| 0.00662  | -0.06552 | 0.15749  | -0.04556 | 0.32583  | -0.02101 | 0.6506   | -0.11029 | 0.01711  |
| 4.60E-09 | -0.11529 | 0.01266  | -0.04549 | 0.32665  | -0.01712 | 0.71211  | -0.22129 | 1.37E-06 |
| 0.05341  | 0.0335   | 0.47017  | 0.034967 | 0.45093  | 0.110704 | 0.0167   | -0.03714 | 0.42326  |
| 0.35235  | 0.117467 | 0.01107  | 0.187551 | 4.53E-05 | 0.257144 | 1.73E-08 | 0.130673 | 0.00468  |
| 0.26779  | -0.08895 | 0.05475  | -0.03981 | 0.39066  | -0.05094 | 0.27194  | -0.00355 | 0.93894  |
| 0.05771  | -0.07913 | 0.08762  | -0.0404  | 0.38377  | -0.05139 | 0.26777  | 0.055259 | 0.23331  |
| 0.01852  | 0.399935 | 2.30E-19 | 0.190884 | 3.29E-05 | 0.215988 | 2.47E-06 | 0.068826 | 0.13751  |
| 0.00239  | 0.116349 | 0.01187  | 0.085201 | 0.06582  | 0.061389 | 0.1854   | 0.110247 | 0.01716  |
| 4.17E-05 | -0.14942 | 0.0012   | -0.09688 | 0.03635  | -0.08659 | 0.06153  | -0.1075  | 0.02015  |
| 0.01718  | 0.219267 | 1.72E-06 | 0.076292 | 0.09962  | 0.053773 | 0.24615  | 0.190252 | 3.50E-05 |
| 0.70708  | 0.152057 | 0.00098  | 0.195564 | 2.08E-05 | 0.143468 | 0.00188  | 0.130656 | 0.00468  |
| 1.89E-07 | -0.0958  | 0.03851  | -0.08496 | 0.06661  | -0.04894 | 0.29121  | -0.14061 | 0.00232  |
| 0.00746  | 0.337607 | 6.51E-14 | 0.26258  | 8.38E-09 | 0.302291 | 2.53E-11 | 0.10892  | 0.01855  |
| 1.54E-07 | 0.126803 | 0.00607  | 0.026725 | 0.56456  | 0.120783 | 0.00898  | -0.04759 | 0.30474  |
| 0.03463  | 0.1443   | 0.00177  | 0.079848 | 0.08477  | 0.128755 | 0.00533  | 0.252754 | 3.07E-08 |
| 0.2105   | -0.13604 | 0.00322  | -0.05609 | 0.22634  | -0.09583 | 0.03843  | -0.1561  | 0.00071  |
| 0.13348  | -0.01742 | 0.70731  | 0.064789 | 0.16217  | 0.036642 | 0.42954  | -0.00035 | 0.99406  |
| 1.04E-06 | -0.00761 | 0.86966  | 0.029715 | 0.52181  | -0.03371 | 0.46739  | 0.029674 | 0.52238  |
| 9.13E-06 | -0.21227 | 3.70E-06 | 0.053932 | 0.24475  | -0.10289 | 0.02618  | 0.128755 | 0.00533  |
| 0.00025  | -0.10161 | 0.02812  | 0.071451 | 0.1231   | 0.087229 | 0.05962  | -0.07347 | 0.11283  |
| 0.01487  | -0.31097 | 6.28E-12 | -0.11404 | 0.01367  | -0.24285 | 1.07E-07 | -0.18847 | 4.15E-05 |
| 0.11783  | 0.090197 | 0.05142  | 0.072151 | 0.11946  | 0.06273  | 0.17596  | 0.140982 | 0.00226  |
| 0.004    | 0.03335  | 0.47217  | 0.074411 | 0.10828  | 0.213735 | 3.16E-06 | -0.01765 | 0.70367  |
| 0.67441  | 0.277254 | 1.09E-09 | 0.134594 | 0.00357  | 0.088944 | 0.05476  | -0.02694 | 0.56144  |
| 0.04016  | 0.000152 | 0.99738  | -0.06961 | 0.13306  | -0.01189 | 0.79767  | 0.074729 | 0.10678  |
| 0.00104  | -0.13959 | 0.0025   | -0.07592 | 0.10128  | -0.21137 | 4.07E-06 | -0.01362 | 0.7691   |
| 0.00124  | -0.00431 | 0.926    | -0.04589 | 0.32236  | 0.022098 | 0.63385  | -0.07526 | 0.10428  |
| 0.02294  | -0.07867 | 0.08948  | -0.16958 | 0.00023  | -0.23941 | 1.64E-07 | -0.15392 | 0.00085  |
| 3.25E-09 | 0.105091 | 0.02313  | 0.136302 | 0.00316  | 0.04993  | 0.28158  | 0.13692  | 0.00303  |
| 0.0023   | 0.156596 | 0.00068  | 0.106145 | 0.02178  | 0.018615 | 0.68825  | 0.029345 | 0.527    |
| 0.01677  | -0.07922 | 0.08725  | 0.001259 | 0.97836  | -0.11605 | 0.01209  | 0.037092 | 0.42388  |
| 0.00976  | 0.161143 | 0.00047  | 0.043934 | 0.34347  | 0.059354 | 0.20042  | -0.02743 | 0.55427  |
| 5.04E-05 | 0.15403  | 0.00084  | 0.200618 | 1.25E-05 | 0.132381 | 0.00416  | 0.109239 | 0.0182   |
| 5.17E-05 | -0.06914 | 0.13574  | -0.00397 | 0.93175  | -0.00054 | 0.9907   | -0.21554 | 2.59E-06 |

|          |          |          |          |          |          |          |          |          |
|----------|----------|----------|----------|----------|----------|----------|----------|----------|
| 0.0001   | 0.053076 | 0.25233  | 0.094261 | 0.04174  | 0.064167 | 0.16624  | 0.13816  | 0.00277  |
| 0.18102  | -0.10806 | 0.0195   | -0.11123 | 0.01619  | -0.12976 | 0.00498  | -0.03064 | 0.50899  |
| 0.22873  | 0.077337 | 0.09506  | 0.009852 | 0.83184  | 0.122452 | 0.00807  | 0.072748 | 0.11642  |
| 0.00013  | -0.04814 | 0.29917  | -0.1317  | 0.00436  | -0.01072 | 0.81725  | -0.07931 | 0.08691  |
| 0.60417  | 0.074665 | 0.10708  | 0.054834 | 0.23693  | 0.030512 | 0.5107   | 0.065873 | 0.15524  |
| 0.28807  | 0.02583  | 0.57767  | -0.02299 | 0.62028  | 0.038784 | 0.40304  | 0.130495 | 0.00473  |
| 0.54723  | 0.085278 | 0.06558  | -0.03869 | 0.40414  | 0.085628 | 0.06447  | 0.078561 | 0.08993  |
| 0.41018  | -0.02643 | 0.56892  | -0.13167 | 0.00437  | -0.13022 | 0.00482  | 0.064764 | 0.16233  |
| 0.77456  | -0.39401 | 8.56E-19 | -0.19472 | 2.26E-05 | -0.29918 | 4.12E-11 | -0.04959 | 0.28489  |
| 0.00136  | -0.03113 | 0.50223  | -0.12005 | 0.00941  | -0.07729 | 0.09526  | 0.033665 | 0.46798  |
| 4.87E-15 | 0.171802 | 0.00019  | 0.196544 | 1.89E-05 | 0.101447 | 0.02837  | 0.331967 | 1.78E-13 |
| 0.0683   | 0.184329 | 6.15E-05 | 0.23665  | 2.29E-07 | 0.264348 | 6.60E-09 | 0.168867 | 0.00025  |
| 0.25733  | -0.03636 | 0.43305  | -0.02217 | 0.63278  | 0.036996 | 0.42509  | 0.014729 | 0.7509   |
| 5.61E-18 | 0.307545 | 1.09E-11 | 0.298622 | 4.49E-11 | 0.212066 | 3.78E-06 | 0.289829 | 1.73E-10 |
| 0.07324  | 0.051941 | 0.26263  | -0.00039 | 0.99325  | 0.010008 | 0.82921  | -0.06263 | 0.17666  |
| 0.17673  | 0.008909 | 0.84774  | 0.050018 | 0.28073  | 0.062928 | 0.1746   | 0.016752 | 0.71804  |
| 0.00025  | 0.000673 | 0.98843  | 0.064515 | 0.16396  | 0.094488 | 0.04125  | -0.02163 | 0.64099  |
| 0.00382  | -0.03408 | 0.46248  | 0.036667 | 0.42923  | 0.062353 | 0.17858  | -0.05811 | 0.21002  |
| 0.06886  | -0.15651 | 0.00069  | -0.02801 | 0.54593  | -0.07876 | 0.0891   | -0.10686 | 0.0209   |
| 0.92389  | -0.10408 | 0.02449  | 0.002683 | 0.95388  | -0.04736 | 0.30708  | -0.01544 | 0.73937  |
| 0.0127   | 0.102264 | 0.02712  | -0.07474 | 0.10671  | -0.00107 | 0.98158  | 0.019916 | 0.66773  |
| 0.70923  | -0.04203 | 0.36483  | -0.11606 | 0.01208  | 0.015057 | 0.74554  | -0.05593 | 0.22769  |
| 0.59541  | 0.104926 | 0.02335  | 0.091287 | 0.04866  | 0.156958 | 0.00066  | 0.041372 | 0.37237  |
| 0.23471  | 0.027481 | 0.55359  | 0.072833 | 0.116    | 0.028769 | 0.53515  | 0.068143 | 0.14147  |
| 0.67277  | 0.091058 | 0.04923  | -0.09271 | 0.04525  | 0.103812 | 0.02487  | -0.05416 | 0.24273  |
| 1.09E-12 | -0.16975 | 0.00023  | -0.11939 | 0.00981  | -0.13584 | 0.00327  | -0.13371 | 0.0038   |
| 0.00514  | 0.012974 | 0.77976  | 0.058923 | 0.20372  | -0.10943 | 0.018    | 0.125525 | 0.00661  |
| 0.08541  | 0.205263 | 7.76E-06 | 0.048546 | 0.29514  | 0.108573 | 0.01893  | 0.17067  | 0.00021  |
| 0.4399   | 0.072088 | 0.11978  | 0.031361 | 0.499    | 0.136649 | 0.00309  | 0.102884 | 0.0262   |
| 7.34E-05 | 0.120198 | 0.00932  | 0.087922 | 0.05762  | 0.035912 | 0.43879  | 0.27324  | 1.93E-09 |
| 0.0021   | 0.200485 | 1.27E-05 | 0.092876 | 0.04485  | 0.223198 | 1.10E-06 | 0.048573 | 0.29488  |
| 0.00664  | 0.101773 | 0.02787  | 0.056982 | 0.21904  | 0.168736 | 0.00025  | -0.01529 | 0.74167  |
| 0.03635  | 0.13219  | 0.00422  | 0.122171 | 0.00822  | 0.198556 | 1.54E-05 | 0.031527 | 0.49673  |
| 0.97918  | 0.141    | 0.00226  | 0.205213 | 7.80E-06 | 0.228487 | 6.02E-07 | 0.196822 | 1.84E-05 |
| 0.1833   | 0.03396  | 0.46409  | 0.111343 | 0.01608  | 0.119169 | 0.00995  | 0.147043 | 0.00144  |
| 0.45042  | 0.081484 | 0.07856  | 0.122613 | 0.00799  | 0.088089 | 0.05714  | 0.153521 | 0.00087  |
| 0.00197  | 0.02167  | 0.64044  | 0.017012 | 0.71386  | -0.00368 | 0.93671  | 0.201256 | 1.17E-05 |
| 0.94536  | 0.130524 | 0.00473  | -0.00802 | 0.86284  | -0.01756 | 0.70502  | -0.00262 | 0.955    |
| 0.27094  | 0.133262 | 0.00391  | 0.034946 | 0.45121  | 0.001911 | 0.96715  | 0.076361 | 0.09932  |
| 0.04969  | 0.026128 | 0.57329  | -0.04399 | 0.34282  | -0.01634 | 0.72464  | 0.093849 | 0.04265  |
| 0.96023  | -0.1062  | 0.02171  | -0.03753 | 0.41842  | -0.05787 | 0.21193  | 0.057442 | 0.21534  |
| 0.77364  | -0.08205 | 0.07649  | -0.04282 | 0.35586  | -0.07371 | 0.11164  | 0.062628 | 0.17666  |
| 0.60771  | 0.012427 | 0.78882  | 0.035086 | 0.44939  | 0.046842 | 0.31244  | 0.030653 | 0.50874  |
| 0.13368  | -0.05643 | 0.22352  | -0.00044 | 0.9924   | 0.015987 | 0.73042  | -0.00852 | 0.85423  |
| 0.62479  | 0.071956 | 0.12046  | 0.075036 | 0.10534  | 0.105624 | 0.02244  | -0.0184  | 0.69173  |

|          |          |          |          |          |          |          |          |          |
|----------|----------|----------|----------|----------|----------|----------|----------|----------|
| 0.81999  | -0.0127  | 0.78427  | 0.037394 | 0.42012  | 0.044468 | 0.33763  | 0.072169 | 0.11936  |
| 0.67827  | 0.007221 | 0.87633  | 0.013094 | 0.77778  | 0.03215  | 0.48826  | 0.051542 | 0.26631  |
| 0.3642   | -0.06858 | 0.13893  | -0.01949 | 0.67435  | -0.04096 | 0.37711  | 0.031619 | 0.49547  |
| 0.81973  | 0.027706 | 0.55035  | 0.040794 | 0.37909  | 0.106171 | 0.02175  | 0.085206 | 0.06581  |
| 0.01963  | -0.0008  | 0.98624  | 0.020533 | 0.65807  | 0.154756 | 0.00079  | 0.044826 | 0.33375  |
| 0.03259  | -0.15936 | 0.00055  | -0.16365 | 0.00038  | -0.20064 | 1.25E-05 | 0.053111 | 0.25202  |
| 1.40E-05 | -0.08532 | 0.06545  | -0.0369  | 0.42626  | 0.069123 | 0.13582  | -0.0756  | 0.10277  |
| 0.00281  | 0.132854 | 0.00403  | 0.126095 | 0.00636  | 0.049135 | 0.28932  | 0.004791 | 0.91776  |
| 0.7765   | 0.095204 | 0.03973  | -0.03738 | 0.4203   | 0.04842  | 0.2964   | 0.143785 | 0.00184  |
| 0.09635  | 0.027207 | 0.55755  | 0.01953  | 0.67378  | 0.012967 | 0.77988  | 0.087978 | 0.05746  |
| 0.4937   | -0.23863 | 1.80E-07 | -0.18546 | 5.53E-05 | -0.28979 | 1.73E-10 | -0.22875 | 5.84E-07 |
| 0.11804  | -0.31236 | 5.00E-12 | -0.15236 | 0.00096  | -0.26469 | 6.30E-09 | -0.18099 | 8.38E-05 |
| 0.55657  | 0.038732 | 0.40367  | 0.038525 | 0.4062   | 0.138289 | 0.00275  | 0.080248 | 0.08322  |
| 0.00043  | -0.06601 | 0.1544   | 0.009541 | 0.83707  | 0.010168 | 0.82653  | -0.02738 | 0.55508  |
| 0.03903  | 0.17403  | 0.00016  | 0.15593  | 0.00072  | 0.219402 | 1.69E-06 | 0.198575 | 1.54E-05 |
| 0.00355  | 0.165848 | 0.00032  | 0.119765 | 0.00958  | 0.173231 | 0.00017  | 0.074564 | 0.10756  |
| 0.00457  | 0.106556 | 0.02127  | 0.061593 | 0.18394  | 0.119738 | 0.0096   | 0.01981  | 0.66939  |
| 0.11552  | 0.021496 | 0.64311  | 0.040688 | 0.38034  | 0.069855 | 0.13171  | 0.03257  | 0.4826   |
| 0.06582  | 0.081622 | 0.07806  | 0.140796 | 0.00229  | 0.20594  | 7.23E-06 | 0.01419  | 0.75972  |
| 0.12595  | -0.14188 | 0.00212  | -0.15431 | 0.00082  | -0.1941  | 2.41E-05 | -0.06041 | 0.19254  |
| 4.41E-05 | -0.06733 | 0.14628  | 0.001899 | 0.96736  | -0.10107 | 0.02898  | 0.081217 | 0.07955  |
| 0.15869  | -0.02598 | 0.57539  | -0.00747 | 0.87208  | -0.10934 | 0.0181   | 0.008076 | 0.86183  |
| 0.00217  | 0.050713 | 0.2741   | 0.127134 | 0.00594  | 0.043119 | 0.3525   | 0.151576 | 0.00102  |
| 0.51103  | -0.0096  | 0.83602  | 0.022752 | 0.62383  | 0.040516 | 0.38235  | -0.00898 | 0.84656  |
| 0.87779  | 0.133491 | 0.00385  | 0.170907 | 0.00021  | 0.255121 | 2.25E-08 | 0.067766 | 0.14369  |
| 0.00464  | 0.232045 | 3.97E-07 | 0.026529 | 0.56742  | -0.02611 | 0.57354  | -0.00495 | 0.91507  |
| 0.18095  | -0.0522  | 0.26022  | -0.05278 | 0.255    | -0.18032 | 8.91E-05 | 0.051775 | 0.26416  |
| 0.00076  | -0.13223 | 0.0042   | -0.02681 | 0.56329  | -0.08956 | 0.05311  | -0.14998 | 0.00115  |
| 4.88E-08 | 0.021974 | 0.63575  | -0.02032 | 0.66146  | 0.092415 | 0.04593  | -0.19632 | 1.93E-05 |
| 0.73372  | -0.11529 | 0.01266  | -0.09438 | 0.04149  | -0.15559 | 0.00074  | -0.04088 | 0.37811  |
| 0.55362  | 0.135114 | 0.00344  | 0.061009 | 0.18814  | 0.13731  | 0.00294  | 0.037589 | 0.41771  |
| 2.53E-10 | 0.186442 | 5.04E-05 | 0.249381 | 4.73E-08 | 0.06683  | 0.14932  | 0.203455 | 9.36E-06 |
| 0.2062   | 0.30359  | 2.06E-11 | 0.01667  | 0.71937  | -0.07193 | 0.12061  | 0.039459 | 0.3949   |
| 0.23272  | 0.083469 | 0.07153  | 0.142491 | 0.00202  | 0.146191 | 0.00154  | 0.118571 | 0.01033  |
| 0.66713  | 0.037928 | 0.41351  | 0.065404 | 0.15821  | 0.044502 | 0.33726  | -0.0062  | 0.89372  |
| 0.21797  | 0.067572 | 0.14484  | 0.025062 | 0.58903  | 0.045556 | 0.32593  | 0.086273 | 0.06248  |
| 0.93202  | 0.012546 | 0.78684  | 0.017408 | 0.7075   | 0.048775 | 0.29288  | -0.00643 | 0.88974  |
| 0.0094   | -0.01698 | 0.71441  | -0.07459 | 0.10742  | -0.01096 | 0.81325  | -0.07746 | 0.09453  |
| 0.1097   | -0.01687 | 0.71618  | -0.0198  | 0.66953  | -0.01489 | 0.74819  | 0.004797 | 0.91765  |
| 0.04354  | -0.0186  | 0.68846  | -0.04181 | 0.36736  | -0.02501 | 0.58982  | 0.079658 | 0.08552  |
| 0.75829  | -0.04042 | 0.38352  | -0.12138 | 0.00865  | -0.11528 | 0.01267  | 0.036841 | 0.42703  |
| 1.42E-16 | 0.008686 | 0.8515   | 0.015912 | 0.73162  | 0.072007 | 0.1202   | -0.16431 | 0.00036  |
| 3.03E-07 | -0.07443 | 0.1082   | -0.13973 | 0.00248  | -0.16643 | 0.0003   | 0.051158 | 0.2699   |
| 0.62421  | -0.05131 | 0.26846  | -0.0332  | 0.47422  | -0.02478 | 0.5933   | 0.021111 | 0.64908  |
| 0.40802  | -0.00884 | 0.84892  | -0.02892 | 0.53295  | 0.013551 | 0.77023  | 0.002287 | 0.96069  |

|          |          |          |          |          |          |          |          |          |
|----------|----------|----------|----------|----------|----------|----------|----------|----------|
| 0.41915  | -0.0259  | 0.57662  | -0.03683 | 0.42715  | -0.05852 | 0.20681  | 0.013917 | 0.76421  |
| 0.21179  | 0.175588 | 0.00014  | 0.139226 | 0.00257  | 0.238778 | 1.77E-07 | 0.074685 | 0.10699  |
| 0.14052  | -0.06101 | 0.18816  | -0.12036 | 0.00923  | -0.04148 | 0.37114  | 0.078163 | 0.09157  |
| 0.46231  | 0.075872 | 0.10151  | -0.02532 | 0.58527  | 0.069778 | 0.13214  | 0.076853 | 0.09715  |
| 0.30397  | -0.03577 | 0.44056  | 0.004511 | 0.92256  | -0.00507 | 0.91298  | -0.00972 | 0.83405  |
| 0.00565  | -0.01813 | 0.69593  | -0.02609 | 0.57391  | 0.140485 | 0.00234  | -0.00387 | 0.93351  |
| 0.00069  | 0.096204 | 0.03769  | 0.083531 | 0.07132  | 0.065182 | 0.15963  | 0.201923 | 1.10E-05 |
| 0.003    | 0.151415 | 0.00103  | 0.008655 | 0.85203  | 0.076086 | 0.10055  | -0.04545 | 0.32703  |
| 4.17E-07 | -0.19992 | 1.35E-05 | -0.16776 | 0.00027  | -0.1721  | 0.00019  | -0.06965 | 0.13284  |
| 0.02398  | 0.108248 | 0.01929  | 0.13283  | 0.00403  | 0.131475 | 0.00443  | 0.059769 | 0.19729  |
| 0.45667  | 0.222996 | 1.13E-06 | 0.165012 | 0.00034  | 0.124415 | 0.0071   | 0.043327 | 0.35019  |
| 7.04E-09 | 0.259978 | 1.19E-08 | 0.258008 | 1.54E-08 | 0.197558 | 1.71E-05 | 0.189324 | 3.83E-05 |
| 9.03E-06 | 0.477719 | 5.35E-28 | 0.179552 | 9.56E-05 | 0.194445 | 2.32E-05 | 0.170781 | 0.00021  |
| 0.01734  | 0.036037 | 0.4372   | -0.05049 | 0.27623  | -0.01378 | 0.76641  | -0.07735 | 0.09502  |
| 1.58E-05 | 0.02132  | 0.64584  | -0.05391 | 0.24492  | -0.04862 | 0.2944   | 0.145618 | 0.0016   |
| 0.41157  | -0.04716 | 0.30915  | 0.11558  | 0.01244  | 0.159092 | 0.00056  | 0.278316 | 9.38E-10 |
| 0.04694  | 0.054197 | 0.24244  | -0.03125 | 0.50051  | -0.02881 | 0.53456  | 0.088807 | 0.05514  |
| 0.00224  | 0.012177 | 0.79297  | 0.011529 | 0.80376  | 0.055692 | 0.22967  | 0.034449 | 0.45767  |
| 0.0017   | -0.00734 | 0.87427  | -0.04282 | 0.3558   | 0.034907 | 0.45172  | -0.00615 | 0.89457  |
| 0.91615  | -0.14113 | 0.00224  | -0.08151 | 0.07846  | -0.12561 | 0.00657  | -0.22414 | 9.92E-07 |
| 1.43E-17 | 0.231383 | 4.29E-07 | 0.237475 | 2.07E-07 | 0.149815 | 0.00117  | 0.208148 | 5.74E-06 |
| 0.00742  | -0.08687 | 0.06067  | 0.060329 | 0.19312  | -0.04246 | 0.35995  | -0.03968 | 0.3922   |
| 6.27E-09 | 0.299242 | 4.08E-11 | 0.269101 | 3.44E-09 | 0.239019 | 1.72E-07 | 0.158305 | 0.0006   |
| 0.64869  | 0.131665 | 0.00437  | -0.02866 | 0.53668  | -0.01659 | 0.72065  | 0.058446 | 0.20741  |
| 0.00129  | -0.04016 | 0.38653  | -0.12456 | 0.00704  | -0.08361 | 0.07105  | -0.14512 | 0.00167  |
| 0.00063  | -0.0996  | 0.0314   | -0.23592 | 2.50E-07 | -0.24318 | 1.03E-07 | 0.079652 | 0.08554  |
| 8.26E-10 | -0.03565 | 0.4421   | -0.05446 | 0.24014  | -0.14552 | 0.00162  | 0.210661 | 4.39E-06 |
| 0.00137  | -0.19844 | 1.56E-05 | -0.2654  | 5.72E-09 | -0.24262 | 1.11E-07 | -0.23804 | 1.94E-07 |
| 0.0002   | 0.050243 | 0.27857  | 0.064228 | 0.16584  | 0.018706 | 0.68681  | 0.143384 | 0.00189  |
| 5.06E-07 | -0.2579  | 1.57E-08 | -0.23583 | 2.53E-07 | -0.15641 | 0.00069  | -0.15456 | 0.0008   |
| 0.67753  | 0.214238 | 2.99E-06 | 0.069521 | 0.13357  | 0.132248 | 0.0042   | 0.179893 | 9.27E-05 |
| 0.8774   | 0.175024 | 0.00014  | 0.050895 | 0.27237  | 0.100847 | 0.02933  | 0.088722 | 0.05537  |
| 0.3179   | 0.228701 | 5.87E-07 | 0.014045 | 0.76211  | 0.099024 | 0.0324   | 0.021623 | 0.64115  |
| 2.13E-09 | 0.137147 | 0.00298  | 0.075019 | 0.10542  | 0.022919 | 0.62129  | 0.213866 | 3.11E-06 |
| 0.00091  | 0.254459 | 2.46E-08 | 0.21954  | 1.67E-06 | 0.168101 | 0.00026  | 0.24067  | 1.41E-07 |
| 6.06E-05 | 0.198199 | 1.60E-05 | 0.167837 | 0.00027  | 0.343382 | 2.28E-14 | 0.04777  | 0.30294  |
| 0.37562  | 0.056696 | 0.22136  | 0.076566 | 0.09841  | 0.015304 | 0.7415   | -0.06878 | 0.13777  |
| 3.00E-06 | 0.050377 | 0.27729  | -0.04702 | 0.31063  | 0.227131 | 7.04E-07 | -0.0172  | 0.7109   |
| 1.44E-07 | -0.04722 | 0.30857  | -0.12636 | 0.00625  | 0.016209 | 0.72682  | -0.14307 | 0.00194  |
| 0.03909  | -0.04187 | 0.36667  | -0.10421 | 0.02432  | -0.0118  | 0.79932  | -0.09794 | 0.03435  |
| 2.32E-06 | -0.05998 | 0.19568  | -0.00303 | 0.94788  | 0.042174 | 0.36317  | -0.09503 | 0.0401   |
| 0.09601  | -0.0086  | 0.85293  | -0.03224 | 0.48709  | 0.000195 | 0.99664  | 0.064487 | 0.16413  |
| 0.06536  | -0.09866 | 0.03304  | -0.04467 | 0.33542  | -0.05447 | 0.24006  | -0.13942 | 0.00253  |
| 0.19279  | -0.12992 | 0.00492  | -0.12448 | 0.00708  | -0.14093 | 0.00227  | -0.06056 | 0.19142  |
| 0.08507  | -0.12075 | 0.009    | -0.08022 | 0.08333  | -0.10207 | 0.02741  | -0.09864 | 0.03307  |

|          |          |          |          |          |          |          |          |          |
|----------|----------|----------|----------|----------|----------|----------|----------|----------|
| 0.03507  | 0.096138 | 0.03782  | 0.093763 | 0.04284  | 0.047972 | 0.3009   | -0.02717 | 0.5581   |
| 1.50E-10 | 0.050558 | 0.27556  | 0.023891 | 0.60657  | 0.203266 | 9.55E-06 | -0.05652 | 0.2228   |
| 0.07303  | 0.11618  | 0.01199  | 0.184128 | 6.26E-05 | 0.266565 | 4.88E-09 | 0.17976  | 9.38E-05 |
| 0.01462  | 0.22273  | 1.16E-06 | 0.278017 | 9.79E-10 | 0.328169 | 3.46E-13 | 0.193739 | 2.49E-05 |
| 0.44664  | 0.175713 | 0.00014  | 0.206281 | 6.98E-06 | 0.273348 | 1.90E-09 | 0.221284 | 1.37E-06 |
| 0.01162  | 0.006092 | 0.89555  | -0.12533 | 0.00669  | -0.01659 | 0.72064  | -0.10141 | 0.02843  |
| 3.35E-05 | 0.041477 | 0.37115  | 0.00419  | 0.92804  | 0.135149 | 0.00343  | -0.06266 | 0.17647  |
| 0.30434  | 0.399521 | 2.53E-19 | 0.23164  | 4.16E-07 | 0.23835  | 1.87E-07 | 0.199766 | 1.37E-05 |
| 0.93456  | -0.02111 | 0.64914  | 0.063929 | 0.16782  | 0.020381 | 0.66044  | -0.06007 | 0.19505  |
| 0.04457  | 0.066235 | 0.15298  | -0.0545  | 0.2398   | 0.108759 | 0.01872  | 0.072143 | 0.1195   |
| 0.11131  | 0.003664 | 0.93706  | -0.05519 | 0.23393  | 0.048023 | 0.30039  | 0.000572 | 0.99017  |
| 0.64295  | 0.093889 | 0.04256  | 0.015889 | 0.732    | 0.166962 | 0.00029  | 0.0156   | 0.73669  |
| 0.06745  | 0.019934 | 0.66744  | 0.004053 | 0.93039  | -0.00528 | 0.90939  | 0.000669 | 0.9885   |
| 0.00055  | -0.13713 | 0.00298  | -0.06939 | 0.13429  | -0.02743 | 0.5544   | -0.16698 | 0.00029  |
| 0.67969  | -0.15002 | 0.00115  | -0.16306 | 0.0004   | -0.16863 | 0.00025  | -0.00896 | 0.8469   |
| 0.0597   | -0.07967 | 0.08548  | 0.064439 | 0.16445  | -0.0435  | 0.34829  | 0.106941 | 0.02081  |
| 1.13E-07 | 0.28628  | 2.93E-10 | 0.175725 | 0.00014  | 0.076864 | 0.0971   | 0.285207 | 3.44E-10 |
| 0.22387  | -0.13215 | 0.00423  | -0.13547 | 0.00336  | -0.20368 | 9.15E-06 | -0.08046 | 0.08239  |
| 0.04251  | -0.18214 | 7.54E-05 | -0.11855 | 0.01035  | -0.21779 | 2.02E-06 | -0.09949 | 0.03159  |
| 0.75466  | 0.060976 | 0.18838  | 0.013673 | 0.76823  | 0.089045 | 0.05449  | 0.122735 | 0.00792  |
| 3.17E-06 | -0.05548 | 0.23142  | -0.01805 | 0.69726  | -0.12188 | 0.00837  | 0.142819 | 0.00198  |
| 9.03E-07 | -0.01856 | 0.68919  | -0.04104 | 0.37624  | -0.06872 | 0.13812  | 0.149021 | 0.00124  |
| 0.0663   | 0.081988 | 0.07673  | 0.030801 | 0.5067   | 0.111024 | 0.01638  | -0.0274  | 0.55471  |
| 0.04276  | 0.051811 | 0.26383  | 0.005043 | 0.91345  | 0.001223 | 0.97896  | 0.146726 | 0.00148  |
| 2.52E-05 | -0.04212 | 0.36376  | -0.1677  | 0.00027  | -0.07244 | 0.11798  | -0.08896 | 0.05472  |
| 0.00559  | -0.04339 | 0.3495   | -0.02482 | 0.5926   | 0.020425 | 0.65976  | -0.03619 | 0.43521  |
| 0.19657  | 0.016807 | 0.71716  | -0.05371 | 0.24672  | 0.013302 | 0.77433  | 0.062522 | 0.17739  |
| 0.0002   | -0.06391 | 0.16796  | -0.01463 | 0.75256  | -0.01326 | 0.7751   | -0.05684 | 0.22022  |
| 0.3724   | -0.04217 | 0.36319  | -0.04607 | 0.32045  | -0.03162 | 0.49544  | 0.069299 | 0.13483  |
| 0.57084  | 0.030925 | 0.50498  | 0.015456 | 0.73903  | 0.102879 | 0.0262   | 0.011546 | 0.80347  |
| 0.75011  | 0.033903 | 0.46484  | -0.13232 | 0.00418  | 0.008006 | 0.863    | 0.057047 | 0.21851  |
| 3.75E-09 | 0.157488 | 0.00064  | 0.147294 | 0.00141  | 0.214261 | 2.98E-06 | 0.289627 | 1.78E-10 |
| 0.35294  | 0.140964 | 0.00226  | 0.074506 | 0.10783  | 0.223232 | 1.10E-06 | 0.26393  | 6.98E-09 |
| 0.40158  | 0.173069 | 0.00017  | 0.146921 | 0.00145  | 0.236396 | 2.36E-07 | 0.042499 | 0.35948  |
| 0.43208  | 0.34179  | 3.05E-14 | 0.300966 | 3.11E-11 | 0.341542 | 3.19E-14 | 0.180494 | 8.77E-05 |
| 2.66E-13 | -0.23311 | 3.50E-07 | -0.26288 | 8.05E-09 | -0.27811 | 9.65E-10 | -0.21678 | 2.26E-06 |
| 0.07543  | 0.173162 | 0.00017  | 0.212061 | 3.78E-06 | 0.165255 | 0.00034  | 0.133269 | 0.00391  |
| 5.01E-05 | 0.048962 | 0.29102  | 0.159688 | 0.00053  | 0.1255   | 0.00662  | 0.02232  | 0.63044  |
| 2.30E-09 | 0.279592 | 7.80E-10 | 0.244592 | 8.65E-08 | 0.262611 | 8.35E-09 | 0.017682 | 0.70312  |
| 0.52013  | -0.05533 | 0.23274  | -0.00729 | 0.87521  | -0.03989 | 0.3897   | -0.06507 | 0.16034  |
| 0.01716  | -0.00957 | 0.83656  | 0.01652  | 0.72179  | 0.042356 | 0.3611   | 0.000142 | 0.99755  |
| 0.62096  | -0.00925 | 0.84198  | 0.022534 | 0.62716  | -0.04771 | 0.30358  | 0.040983 | 0.37689  |
| 0.10114  | 0.084358 | 0.06855  | -0.03282 | 0.47925  | -0.04346 | 0.34872  | -0.13168 | 0.00437  |
| 0.00044  | 0.207015 | 6.46E-06 | 0.070887 | 0.12609  | 0.136603 | 0.0031   | 0.046028 | 0.32094  |
| 0.02058  | -0.02703 | 0.56007  | -0.04453 | 0.33696  | -0.08154 | 0.07834  | 0.019024 | 0.68177  |

|          |          |          |          |          |          |          |          |          |
|----------|----------|----------|----------|----------|----------|----------|----------|----------|
| 0.15065  | -0.25418 | 2.55E-08 | -0.15084 | 0.00108  | -0.22599 | 8.04E-07 | -0.19808 | 1.62E-05 |
| 0.00503  | 0.146007 | 0.00156  | 0.108377 | 0.01915  | 0.108848 | 0.01863  | 0.029997 | 0.51786  |
| 0.03656  | 0.003935 | 0.93242  | 0.072782 | 0.11625  | 0.171561 | 0.0002   | -0.02396 | 0.60546  |
| 0.08459  | 0.027557 | 0.55249  | 0.066574 | 0.15088  | 0.283582 | 4.36E-10 | 0.006902 | 0.88175  |
| 0.97063  | -0.01119 | 0.8095   | -0.03003 | 0.5174   | -0.00891 | 0.84778  | 0.124778 | 0.00694  |
| 0.00652  | -0.02553 | 0.58203  | -0.05934 | 0.20052  | -0.09755 | 0.03509  | 0.069042 | 0.13628  |
| 0.48681  | 0.017961 | 0.69866  | 0.079071 | 0.08785  | 0.099076 | 0.03231  | 0.034862 | 0.4523   |
| 0.56361  | 0.051149 | 0.26998  | 0.022153 | 0.63301  | 0.076446 | 0.09894  | 0.029315 | 0.52743  |
| 0.01109  | 0.074393 | 0.10837  | 0.026594 | 0.56646  | 0.133377 | 0.00388  | 0.048407 | 0.29653  |
| 0.01902  | -0.42262 | 1.18E-21 | -0.07018 | 0.12994  | -0.27    | 3.04E-09 | -0.1425  | 0.00202  |
| 0.0038   | 0.220527 | 1.49E-06 | 0.128327 | 0.00548  | 0.034343 | 0.45906  | -0.07075 | 0.12683  |
| 0.03059  | -0.05572 | 0.2294   | -0.01525 | 0.74231  | 0.149321 | 0.00121  | -0.03262 | 0.48193  |
| 0.03044  | 0.215515 | 2.60E-06 | 0.189606 | 3.73E-05 | 0.289476 | 1.82E-10 | 0.031232 | 0.50076  |
| 0.18655  | 0.014067 | 0.76174  | -0.05908 | 0.20253  | 0.015903 | 0.73177  | -0.0898  | 0.05247  |
| 0.16286  | -0.0191  | 0.68051  | 0.021704 | 0.63991  | -0.0021  | 0.96397  | 0.09992  | 0.03086  |
| 0.49297  | -0.02145 | 0.6438   | -0.06705 | 0.14798  | 0.023541 | 0.61186  | 0.094141 | 0.042    |
| 0.06178  | -0.02396 | 0.60546  | 0.22059  | 1.48E-06 | 0.165457 | 0.00033  | 0.095516 | 0.03908  |
| 0.25762  | 0.030001 | 0.5178   | 0.034618 | 0.45548  | 0.09943  | 0.03169  | -0.04615 | 0.31963  |
| 0.00042  | -0.07267 | 0.11682  | -0.03299 | 0.477    | -0.01288 | 0.78124  | -0.08438 | 0.06847  |
| 0.00253  | 0.047131 | 0.30947  | 0.117413 | 0.01111  | 0.009481 | 0.83809  | 0.117005 | 0.01139  |
| 0.00033  | -0.12203 | 0.00829  | -0.122   | 0.00831  | -0.08487 | 0.06688  | -0.16437 | 0.00036  |
| 0.4368   | -0.04117 | 0.37472  | 0.035662 | 0.44198  | 0.080784 | 0.08117  | 0.043704 | 0.346    |
| 0.0375   | -0.01376 | 0.76673  | 0.002715 | 0.95335  | -0.00691 | 0.88167  | -0.05208 | 0.26132  |
| 0.37853  | -0.04006 | 0.38768  | 0.105152 | 0.02305  | 0.013012 | 0.77914  | 0.072033 | 0.12006  |
| 0.34751  | 0.114037 | 0.01367  | 0.115476 | 0.01252  | 0.115829 | 0.01225  | 0.043351 | 0.34991  |
| 0.00049  | -0.02606 | 0.5743   | 0.045433 | 0.32724  | 0.161629 | 0.00045  | 0.024428 | 0.59851  |
| 0.52487  | 0.01135  | 0.80675  | 0.079771 | 0.08507  | 0.057885 | 0.21181  | 0.024821 | 0.59263  |
| 0.0305   | 0.220305 | 1.53E-06 | 0.266433 | 4.97E-09 | 0.224367 | 9.67E-07 | 0.096693 | 0.03672  |
| 0.00097  | 0.276084 | 1.29E-09 | 0.214307 | 2.97E-06 | 0.174441 | 0.00015  | 0.185506 | 5.50E-05 |
| 4.81E-05 | 0.10916  | 0.01829  | 0.087291 | 0.05944  | 0.100995 | 0.02909  | -0.06159 | 0.18395  |
| 0.86455  | 0.105267 | 0.0229   | 0.01199  | 0.79609  | 0.044806 | 0.33397  | -0.03324 | 0.47367  |
| 0.10803  | -0.05303 | 0.25272  | 0.015071 | 0.74531  | 0.094175 | 0.04193  | 0.070267 | 0.12945  |
| 0.57288  | -0.27438 | 1.64E-09 | -0.15931 | 0.00055  | -0.21499 | 2.75E-06 | -0.10532 | 0.02283  |
| 0.91452  | -0.15773 | 0.00062  | 0.013602 | 0.7694   | -0.06843 | 0.13977  | 0.106377 | 0.02149  |
| 1.18E-08 | 0.040152 | 0.38664  | -0.08723 | 0.05963  | -0.05022 | 0.27875  | 0.253305 | 2.86E-08 |
| 0.00026  | -0.01387 | 0.76492  | 0.065863 | 0.1553   | 0.029416 | 0.526    | 0.013506 | 0.77098  |
| 0.10989  | -0.04767 | 0.30396  | -0.01418 | 0.75988  | 0.128872 | 0.00529  | -0.06564 | 0.15674  |
| 0.24168  | -0.01908 | 0.68086  | -0.00039 | 0.99321  | -0.03163 | 0.49525  | 0.059308 | 0.20077  |
| 3.45E-15 | -0.17859 | 0.0001   | -0.13267 | 0.00408  | -0.06425 | 0.1657   | -0.25249 | 3.17E-08 |
| 0.00014  | -0.12474 | 0.00696  | -0.06877 | 0.13785  | 0.038553 | 0.40585  | -0.14709 | 0.00144  |
| 5.36E-08 | -0.02379 | 0.60807  | 0.056525 | 0.22276  | 0.17366  | 0.00016  | -0.07916 | 0.0875   |
| 0.00104  | -0.06469 | 0.16284  | -0.00091 | 0.98433  | -0.13567 | 0.00331  | -0.09025 | 0.05127  |
| 2.58E-08 | 0.001784 | 0.96932  | -0.04002 | 0.38825  | -0.03612 | 0.4362   | 0.083231 | 0.07235  |
| 0.01347  | 0.065761 | 0.15595  | 0.048028 | 0.30034  | 0.10062  | 0.0297   | -0.05497 | 0.23574  |
| 0.01711  | 0.31924  | 1.59E-12 | 0.208446 | 5.56E-06 | 0.353284 | 3.57E-15 | 0.142996 | 0.00195  |



|          |          |          |          |          |          |          |          |          |
|----------|----------|----------|----------|----------|----------|----------|----------|----------|
| 3.00E-10 | -0.17887 | 0.0001   | -0.06181 | 0.18237  | -0.12053 | 0.00913  | -0.1495  | 0.00119  |
| 0.1485   | 0.147021 | 0.00144  | 0.090837 | 0.04979  | 0.203037 | 9.78E-06 | 0.047291 | 0.30782  |
| 0.11137  | 0.100221 | 0.03035  | 0.080138 | 0.08364  | 0.087907 | 0.05766  | 0.098589 | 0.03317  |
| 0.02697  | 0.071898 | 0.12076  | 0.14286  | 0.00197  | 0.086297 | 0.06241  | 0.053867 | 0.24532  |
| 0.15951  | -0.19638 | 1.92E-05 | -0.04916 | 0.28903  | -0.09679 | 0.03653  | -0.08791 | 0.05764  |
| 0.21134  | 0.155069 | 0.00077  | 0.219577 | 1.66E-06 | 0.254692 | 2.38E-08 | 0.252379 | 3.22E-08 |
| 4.84E-06 | 0.01674  | 0.71824  | -0.0712  | 0.12441  | 0.136931 | 0.00303  | -0.05516 | 0.23416  |
| 0.00518  | 0.143052 | 0.00194  | 0.153031 | 0.00091  | 0.196811 | 1.84E-05 | 0.127077 | 0.00596  |
| 0.71163  | -0.11116 | 0.01626  | -0.1348  | 0.00352  | -0.1023  | 0.02706  | -0.03657 | 0.43039  |
| 0.00551  | 0.087789 | 0.058    | -0.06625 | 0.15288  | 0.1257   | 0.00653  | -0.13722 | 0.00296  |
| 0.918    | 0.058903 | 0.20387  | 0.069799 | 0.13202  | 0.125672 | 0.00654  | 0.243851 | 9.49E-08 |
| 0.43425  | 0.034888 | 0.45197  | 0.102683 | 0.02649  | -0.00198 | 0.96603  | 0.223767 | 1.04E-06 |
| 0.00022  | -0.09868 | 0.033    | -0.04668 | 0.31412  | -0.1814  | 8.07E-05 | -0.08641 | 0.06207  |
| 4.57E-05 | 0.175322 | 0.00014  | 0.137886 | 0.00283  | 0.251639 | 3.54E-08 | -0.17644 | 0.00013  |
| 0.80733  | -0.09585 | 0.03841  | -0.07372 | 0.11162  | -0.16234 | 0.00043  | -0.1678  | 0.00027  |
| 0.60005  | 0.011053 | 0.8117   | 0.037522 | 0.41854  | 0.070887 | 0.12609  | 0.060191 | 0.19414  |
| 0.03465  | 0.092971 | 0.04463  | 0.192882 | 2.71E-05 | 0.217543 | 2.08E-06 | 0.082479 | 0.07497  |
| 0.03705  | 0.14693  | 0.00145  | 0.065292 | 0.15893  | 0.103244 | 0.02567  | -0.00873 | 0.85084  |
| 0.01391  | 0.119517 | 0.00973  | 0.183034 | 6.94E-05 | 0.27167  | 2.41E-09 | 0.056182 | 0.22559  |
| 0.56933  | 0.132902 | 0.00401  | 0.112215 | 0.01526  | 0.142149 | 0.00207  | 0.024171 | 0.60235  |
| 1.20E-05 | 0.164461 | 0.00036  | 0.181438 | 8.04E-05 | 0.306929 | 1.21E-11 | 0.084342 | 0.06861  |
| 1.05E-13 | 0.142673 | 0.002    | 0.043748 | 0.34552  | 0.209382 | 5.03E-06 | -0.08558 | 0.06461  |
| 0.00085  | 0.116488 | 0.01176  | 0.052811 | 0.25471  | 0.038907 | 0.40156  | 0.045173 | 0.33001  |
| 0.00747  | 0.06121  | 0.18668  | 0.011304 | 0.80752  | 0.090815 | 0.04984  | 0.11338  | 0.01423  |
| 0.00012  | -0.07563 | 0.10259  | 0.009133 | 0.84396  | 0.034635 | 0.45526  | -0.09956 | 0.03148  |
| 3.20E-12 | -0.06267 | 0.17635  | 0.045445 | 0.32712  | 0.139379 | 0.00254  | -0.0498  | 0.28287  |
| 0.00018  | -0.05457 | 0.23922  | -0.03522 | 0.44762  | 0.061161 | 0.18704  | -0.07095 | 0.12573  |
| 0.00036  | 0.118791 | 0.01019  | 0.191061 | 3.24E-05 | 0.304192 | 1.87E-11 | 0.039922 | 0.38938  |
| 0.0466   | 0.454159 | 3.82E-25 | 0.188084 | 4.31E-05 | 0.379884 | 1.76E-17 | 0.133146 | 0.00395  |
| 3.85E-17 | 0.037498 | 0.41884  | 0.109074 | 0.01838  | 0.271586 | 2.43E-09 | -0.02265 | 0.62543  |
| 0.79525  | 0.070286 | 0.12934  | 0.008244 | 0.85897  | 0.032694 | 0.48093  | 0.099523 | 0.03153  |
| 0.00021  | -0.17781 | 0.00011  | -0.02274 | 0.62407  | -0.10603 | 0.02193  | -0.02615 | 0.5729   |
| 2.04E-10 | 0.002531 | 0.9565   | 0.119141 | 0.00997  | 0.166695 | 0.0003   | -0.00395 | 0.93215  |
| 1.12E-08 | 0.14124  | 0.00222  | 0.071785 | 0.12135  | 0.088545 | 0.05586  | -0.13845 | 0.00271  |
| 0.02354  | 0.052996 | 0.25305  | -0.00195 | 0.96641  | 0.029032 | 0.53143  | 0.170417 | 0.00022  |
| 0.70485  | 0.129412 | 0.0051   | -0.00323 | 0.94448  | 0.2446   | 8.64E-08 | 0.107412 | 0.02025  |
| 0.01041  | -0.15197 | 0.00099  | -0.1012  | 0.02877  | -0.0989  | 0.03262  | -0.10795 | 0.01963  |
| 4.84E-09 | 0.215179 | 2.70E-06 | 0.154201 | 0.00083  | 0.186431 | 5.04E-05 | 0.222891 | 1.14E-06 |
| 0.46847  | 0.032627 | 0.48182  | 0.022006 | 0.63526  | 0.137921 | 0.00282  | 0.061639 | 0.18361  |
| 7.43E-06 | 0.059069 | 0.2026   | 0.092598 | 0.0455   | 0.207202 | 6.34E-06 | -0.03225 | 0.4869   |
| 0.01015  | -0.02389 | 0.60665  | 0.031986 | 0.49047  | 0.022786 | 0.62332  | 0.045073 | 0.33109  |
| 8.65E-21 | 0.037018 | 0.42482  | 0.02449  | 0.59757  | -0.09383 | 0.04269  | 0.363326 | 5.09E-16 |
| 0.00011  | -0.05302 | 0.25287  | -0.02997 | 0.51829  | 0.039189 | 0.39815  | -0.00551 | 0.90547  |
| 0.03897  | -0.11635 | 0.01187  | -0.11028 | 0.01713  | -0.09801 | 0.03423  | -0.00438 | 0.92484  |
| 0.03901  | 0.064984 | 0.1609   | 0.022993 | 0.62016  | -0.00762 | 0.8696   | 0.161306 | 0.00047  |

|          |          |          |          |          |          |          |          |          |
|----------|----------|----------|----------|----------|----------|----------|----------|----------|
| 0.0099   | 0.041013 | 0.37654  | 0.036029 | 0.4373   | 0.092121 | 0.04663  | 0.025705 | 0.57951  |
| 0.06405  | 0.184607 | 5.99E-05 | 0.135205 | 0.00342  | 0.14149  | 0.00218  | 0.125206 | 0.00675  |
| 0.00588  | 0.082439 | 0.07511  | 0.027044 | 0.55991  | 0.118361 | 0.01047  | 0.113758 | 0.0139   |
| 0.39179  | -0.12094 | 0.00889  | -0.08868 | 0.0555   | -0.11075 | 0.01666  | 0.111203 | 0.01621  |
| 5.07E-19 | -0.15879 | 0.00057  | -0.19293 | 2.70E-05 | -0.12889 | 0.00528  | -0.30142 | 2.90E-11 |
| 9.92E-09 | 0.039032 | 0.40004  | 0.011339 | 0.80692  | 0.133135 | 0.00395  | -0.02103 | 0.65039  |
| 0.30209  | 0.129699 | 0.005    | 0.187741 | 4.45E-05 | 0.251264 | 3.72E-08 | 0.070332 | 0.12909  |
| 0.04795  | 0.024079 | 0.60375  | 0.094398 | 0.04144  | 0.029715 | 0.5218   | -0.05827 | 0.20879  |
| 0.1174   | -0.1854  | 5.56E-05 | -0.11125 | 0.01617  | -0.23346 | 3.36E-07 | -0.05247 | 0.25777  |
| 0.41159  | -0.07118 | 0.1245   | -0.09433 | 0.04159  | -0.13846 | 0.00271  | -0.01504 | 0.74575  |
| 1.86E-05 | -0.06896 | 0.13677  | -0.173   | 0.00017  | -0.03973 | 0.39168  | -0.07931 | 0.08689  |
| 0.60208  | 0.194042 | 2.42E-05 | 0.161197 | 0.00047  | 0.261626 | 9.53E-09 | 0.209298 | 5.08E-06 |
| 0.00035  | -0.0015  | 0.97416  | -0.00664 | 0.88612  | 0.048185 | 0.29876  | -0.04266 | 0.35762  |
| 3.63E-05 | 0.033721 | 0.46724  | 0.025389 | 0.58418  | 0.132856 | 0.00403  | 0.036508 | 0.43122  |
| 0.46212  | 0.096454 | 0.03719  | 0.056792 | 0.22058  | 0.127947 | 0.00562  | 0.144502 | 0.00174  |
| 1.35E-12 | 0.016069 | 0.72908  | 0.00935  | 0.8403   | 0.133864 | 0.00375  | -0.06664 | 0.15049  |
| 0.82446  | 0.101359 | 0.02851  | 0.023875 | 0.6068   | 0.028477 | 0.5393   | 0.049853 | 0.28232  |
| 0.72975  | 0.1119   | 0.01555  | 0.035332 | 0.44623  | 0.175082 | 0.00014  | 0.080864 | 0.08087  |
| 3.26E-06 | 0.029059 | 0.53104  | -0.08779 | 0.05799  | 0.067829 | 0.14331  | -0.10692 | 0.02083  |
| 0.0002   | -0.12651 | 0.00619  | -0.03123 | 0.50079  | -0.13888 | 0.00263  | 0.05214  | 0.2608   |
| 0.93968  | 0.049864 | 0.28222  | -0.13475 | 0.00353  | -0.11387 | 0.01381  | 0.009137 | 0.84388  |
| 5.41E-09 | -0.08684 | 0.06078  | -0.00688 | 0.88208  | -0.17554 | 0.00014  | 0.046571 | 0.31526  |
| 0.15897  | 0.157995 | 0.00061  | 0.155414 | 0.00075  | 0.310766 | 6.49E-12 | 0.105202 | 0.02299  |
| 9.35E-08 | -0.05444 | 0.24029  | 0.140888 | 0.00228  | 0.22635  | 7.71E-07 | -0.05193 | 0.26271  |
| 4.04E-06 | 0.177608 | 0.00011  | 0.235189 | 2.73E-07 | 0.156797 | 0.00067  | 0.262409 | 8.58E-09 |
| 1.93E-11 | 0.100215 | 0.03036  | -0.076   | 0.10092  | -0.07896 | 0.08831  | 0.222328 | 1.22E-06 |
| 0.00376  | 0.006381 | 0.89061  | -0.06017 | 0.19427  | 0.115391 | 0.01259  | -0.06402 | 0.1672   |
| 6.14E-05 | 0.077197 | 0.09566  | 0.110731 | 0.01667  | 0.131406 | 0.00445  | -0.19439 | 2.34E-05 |
| 1.44E-12 | -0.32589 | 5.14E-13 | -0.11385 | 0.01383  | -0.11698 | 0.01141  | -0.24099 | 1.35E-07 |
| 1.40E-07 | 0.046882 | 0.31204  | 0.015834 | 0.7329   | 0.12368  | 0.00745  | -0.13958 | 0.0025   |
| 0.39369  | 0.032752 | 0.48015  | 0.0564   | 0.22379  | 0.073656 | 0.11192  | 0.075594 | 0.10277  |
| 1.19E-13 | 0.170775 | 0.00021  | 0.16769  | 0.00027  | 0.284814 | 3.64E-10 | -0.05738 | 0.2158   |
| 0.0053   | 0.271969 | 2.31E-09 | 0.22551  | 8.49E-07 | 0.28019  | 7.16E-10 | 0.161239 | 0.00047  |
| 0.13606  | 0.142565 | 0.00201  | 0.179829 | 9.32E-05 | 0.168154 | 0.00026  | 0.108903 | 0.01857  |
| 3.42E-09 | 0.109302 | 0.01814  | 0.115949 | 0.01216  | 0.047558 | 0.3051   | 0.334358 | 1.16E-13 |
| 7.73E-10 | 0.023914 | 0.60622  | 0.092701 | 0.04526  | -0.02244 | 0.62858  | 0.258347 | 1.48E-08 |
| 0.86511  | 0.280513 | 6.83E-10 | 0.112643 | 0.01487  | -0.006   | 0.89712  | 0.029968 | 0.51827  |
| 0.01952  | -0.34208 | 2.89E-14 | -0.25102 | 3.83E-08 | -0.28706 | 2.61E-10 | -0.3382  | 5.85E-14 |
| 0.72137  | -0.02538 | 0.58427  | 0.028615 | 0.53733  | 0.035199 | 0.44795  | 0.07113  | 0.12479  |
| 0.8732   | -0.16472 | 0.00035  | 0.084162 | 0.0692   | 0.082639 | 0.07441  | 0.071294 | 0.12393  |
| 0.00106  | 0.071296 | 0.12391  | 0.197103 | 1.79E-05 | 0.192814 | 2.73E-05 | 0.159737 | 0.00053  |
| 1.22E-08 | 0.179604 | 9.51E-05 | 0.314932 | 3.27E-12 | 0.239586 | 1.60E-07 | 0.353258 | 3.59E-15 |
| 0.19004  | 0.104989 | 0.02327  | -0.08399 | 0.06976  | -0.03404 | 0.46305  | -0.06353 | 0.17047  |
| 0.01892  | -0.23022 | 4.92E-07 | -0.05075 | 0.27375  | -0.15522 | 0.00076  | 0.023768 | 0.60842  |
| 2.04E-07 | 0.138561 | 0.00269  | 0.029134 | 0.52998  | 0.0881   | 0.05711  | -0.03358 | 0.4691   |

|          |          |          |          |          |          |          |          |          |
|----------|----------|----------|----------|----------|----------|----------|----------|----------|
| 0.00027  | 0.243984 | 9.33E-08 | 0.258096 | 1.53E-08 | 0.366495 | 2.72E-16 | 0.115418 | 0.01257  |
| 0.18237  | 0.140492 | 0.00234  | 0.166842 | 0.00029  | 0.234718 | 2.89E-07 | 0.225651 | 8.35E-07 |
| 8.58E-13 | 0.182782 | 7.10E-05 | 0.268731 | 3.62E-09 | 0.335265 | 9.90E-14 | -0.02687 | 0.56243  |
| 0.00028  | -0.08592 | 0.06356  | -0.13075 | 0.00465  | -0.06144 | 0.185    | -0.14374 | 0.00184  |
| 0.8521   | 0.032519 | 0.48328  | -0.06711 | 0.14761  | -0.00134 | 0.97701  | -0.04801 | 0.30055  |
| 0.58519  | 0.042851 | 0.3555   | -0.0651  | 0.16019  | -0.00357 | 0.93871  | -0.05653 | 0.22273  |
| 0.75045  | -0.00335 | 0.94237  | -0.07692 | 0.09687  | -0.00098 | 0.98315  | -0.0658  | 0.15568  |
| 0.34767  | 0.014192 | 0.7597   | -0.0397  | 0.39202  | -0.00621 | 0.89356  | -0.02138 | 0.64492  |
| 2.40E-09 | -0.0051  | 0.91243  | 0.002299 | 0.96049  | 0.234655 | 2.91E-07 | -0.08797 | 0.05747  |
| 0.36481  | 0.026787 | 0.56365  | 0.125856 | 0.00646  | 0.104634 | 0.02374  | 0.092037 | 0.04683  |
| 0.92001  | -0.09323 | 0.04405  | -0.12527 | 0.00672  | -0.22271 | 1.17E-06 | 0.033666 | 0.46797  |
| 0.87839  | -0.22156 | 1.33E-06 | -0.1319  | 0.0043   | -0.18669 | 4.92E-05 | -0.05122 | 0.2693   |
| 0.93722  | -0.13856 | 0.00269  | -0.08622 | 0.06264  | -0.14426 | 0.00178  | -0.00425 | 0.92697  |
| 6.66E-06 | -0.01423 | 0.759    | 0.081757 | 0.07756  | 0.065778 | 0.15584  | -0.06767 | 0.14424  |
| 3.79E-10 | -0.10807 | 0.01949  | -0.04567 | 0.32477  | -0.00512 | 0.91221  | -0.08897 | 0.05469  |
| 0.00118  | 0.02048  | 0.65889  | 0.128199 | 0.00553  | 0.195918 | 2.01E-05 | 0.019144 | 0.67988  |
| 0.99455  | 0.165585 | 0.00033  | 0.220865 | 1.44E-06 | 0.259309 | 1.30E-08 | 0.148331 | 0.00131  |
| 2.55E-08 | -0.12617 | 0.00633  | -0.07704 | 0.09635  | -0.18924 | 3.86E-05 | 0.015981 | 0.73051  |
| 0.38818  | 0.048326 | 0.29735  | 0.07585  | 0.10161  | 0.070057 | 0.1306   | 0.173705 | 0.00016  |
| 4.44E-10 | -0.12237 | 0.00812  | 0.002456 | 0.95779  | 0.060762 | 0.18993  | -0.15614 | 0.00071  |
| 0.07664  | 0.1023   | 0.02706  | 0.103351 | 0.02552  | 0.195765 | 2.04E-05 | 0.029103 | 0.53041  |
| 2.37E-06 | 0.076905 | 0.09693  | -0.08887 | 0.05498  | -0.14613 | 0.00154  | -0.14823 | 0.00132  |
| 2.01E-05 | -0.26689 | 4.66E-09 | -0.02607 | 0.57407  | -0.1624  | 0.00043  | -0.16494 | 0.00034  |
| 0.62936  | -0.2165  | 2.33E-06 | -0.0919  | 0.04717  | -0.22924 | 5.51E-07 | -0.08409 | 0.06944  |
| 0.00383  | 0.056239 | 0.22511  | 0.058808 | 0.2046   | 0.144011 | 0.00181  | 0.038257 | 0.40947  |
| 0.06512  | -0.03706 | 0.42426  | -0.03257 | 0.48263  | 0.042808 | 0.356    | -0.01615 | 0.72772  |
| 0.0088   | -0.02178 | 0.6387   | -0.05464 | 0.23864  | 0.084737 | 0.06731  | -0.03679 | 0.42764  |
| 4.65E-11 | -0.04346 | 0.34868  | -0.05675 | 0.22094  | 0.030978 | 0.50426  | -0.02828 | 0.54218  |
| 0.05792  | 0.046522 | 0.31577  | 0.092986 | 0.0446   | 0.153905 | 0.00085  | 0.002834 | 0.9513   |
| 0.02882  | 0.013114 | 0.77745  | 0.023143 | 0.61788  | 0.033523 | 0.46987  | -0.11516 | 0.01276  |
| 0.75334  | -0.10839 | 0.01913  | 0.003284 | 0.94357  | -0.02405 | 0.60415  | -0.10749 | 0.02016  |
| 0.01139  | -0.07206 | 0.11994  | -0.03582 | 0.43997  | -0.12826 | 0.00551  | -0.00892 | 0.84762  |
| 0.54944  | -0.03849 | 0.40656  | -0.01638 | 0.72401  | -0.01101 | 0.81237  | -0.06933 | 0.13464  |
| 0.04757  | -0.00734 | 0.87433  | 0.020924 | 0.65198  | -0.0543  | 0.24153  | 0.017147 | 0.71169  |
| 0.6048   | 0.067769 | 0.14367  | 0.080888 | 0.08078  | 0.052586 | 0.25674  | 0.028241 | 0.54267  |
| 0.17826  | 0.088406 | 0.05625  | 0.085379 | 0.06526  | 0.066069 | 0.15401  | 0.094049 | 0.04221  |
| 0.1056   | 0.071693 | 0.12183  | 0.063234 | 0.1725   | 0.09447  | 0.04129  | -0.00053 | 0.99085  |
| 3.18E-08 | -0.0411  | 0.37547  | 0.082662 | 0.07432  | 0.146898 | 0.00146  | -0.07753 | 0.09426  |
| 8.58E-09 | -0.12221 | 0.0082   | -0.11197 | 0.01548  | 0.04656  | 0.31537  | -0.16817 | 0.00026  |
| 5.54E-06 | -0.03211 | 0.48875  | -0.02117 | 0.64821  | 0.119851 | 0.00953  | -0.08161 | 0.07811  |
| 5.79E-08 | -0.00867 | 0.85169  | -0.04111 | 0.37544  | 0.095688 | 0.03873  | -0.1147  | 0.01313  |
| 0.05465  | -0.09422 | 0.04184  | -0.05339 | 0.24951  | -0.03296 | 0.47738  | -0.06611 | 0.15377  |
| 0.29973  | 0.214666 | 2.85E-06 | 0.021957 | 0.63602  | 0.035632 | 0.44237  | 0.027142 | 0.5585   |
| 0.00502  | 0.233011 | 3.54E-07 | 0.105745 | 0.02229  | 0.167379 | 0.00028  | 0.068038 | 0.14209  |
| 8.16E-10 | 0.186759 | 4.89E-05 | 0.101568 | 0.02818  | 0.075103 | 0.10503  | 0.279515 | 7.89E-10 |

|          |          |          |          |          |          |          |          |          |
|----------|----------|----------|----------|----------|----------|----------|----------|----------|
| 3.85E-06 | 0.109504 | 0.01792  | 0.100187 | 0.03041  | 0.067633 | 0.14448  | 0.049179 | 0.28889  |
| 1.19E-15 | -0.16844 | 0.00026  | -0.15251 | 0.00095  | -0.07202 | 0.12012  | -0.19989 | 1.35E-05 |
| 0.01178  | 0.176401 | 0.00013  | 0.107793 | 0.01981  | 0.120036 | 0.00942  | 0.010322 | 0.82395  |
| 0.37476  | -0.09097 | 0.04946  | -0.02445 | 0.59818  | -0.02624 | 0.57169  | -0.0527  | 0.25569  |
| 0.87429  | 0.004631 | 0.92049  | 0.024852 | 0.59216  | 0.061409 | 0.18525  | 0.009498 | 0.8378   |
| 1.82E-09 | -0.07095 | 0.12576  | -0.06075 | 0.19001  | -0.15079 | 0.00108  | 0.019516 | 0.674    |
| 0.02034  | -0.03746 | 0.41934  | -0.07684 | 0.0972   | -0.0875  | 0.05884  | -0.02555 | 0.58186  |
| 0.94215  | 0.052202 | 0.26023  | 0.051887 | 0.26313  | 0.053851 | 0.24546  | 0.099523 | 0.03153  |
| 0.00394  | -0.03408 | 0.46257  | 0.023134 | 0.61803  | 0.056157 | 0.22579  | -0.05504 | 0.23519  |
| 0.11987  | -0.1103  | 0.0171   | 0.013592 | 0.76955  | 0.048655 | 0.29406  | -0.09993 | 0.03084  |
| 0.01928  | -0.00715 | 0.8775   | 0.048986 | 0.29079  | 0.01187  | 0.79808  | 0.042036 | 0.36474  |
| 0.07656  | -0.03    | 0.51786  | -0.0147  | 0.75144  | 0.010993 | 0.81271  | 0.01394  | 0.76384  |
| 0.78196  | 0.027265 | 0.55671  | 0.039132 | 0.39883  | 0.053297 | 0.25035  | 0.085061 | 0.06627  |
| 0.53486  | -0.09127 | 0.0487   | -0.00988 | 0.83137  | -0.05598 | 0.22725  | 0.031167 | 0.50166  |
| 0.88339  | 0.073034 | 0.11499  | 0.03179  | 0.49314  | 0.085506 | 0.06486  | 0.028421 | 0.54011  |
| 0.12582  | -0.10498 | 0.02328  | -0.02526 | 0.58606  | -0.0655  | 0.15759  | -0.09366 | 0.04307  |
| 1.42E-05 | -0.18711 | 4.73E-05 | -0.14723 | 0.00142  | -0.13071 | 0.00467  | -0.11082 | 0.01658  |
| 0.00507  | -0.13428 | 0.00365  | -0.14632 | 0.00152  | -0.18192 | 7.69E-05 | -0.14558 | 0.00161  |
| 0.01897  | -0.02251 | 0.62751  | -0.06651 | 0.15131  | 0.048871 | 0.29192  | -0.08832 | 0.05649  |
| 2.86E-08 | -0.00219 | 0.96231  | -0.015   | 0.74647  | 0.13805  | 0.00279  | -0.09047 | 0.05072  |
| 0.59168  | -0.00174 | 0.97006  | 0.034076 | 0.46257  | 0.012736 | 0.7837   | 0.010282 | 0.82463  |
| 0.84404  | 0.040451 | 0.38311  | 0.025262 | 0.58606  | 0.088609 | 0.05568  | -0.01499 | 0.74658  |
| 0.29378  | 0.137118 | 0.00299  | 0.06742  | 0.14575  | 0.080477 | 0.08234  | 0.096628 | 0.03685  |
| 0.0182   | -0.02416 | 0.60251  | 0.08357  | 0.07119  | 0.103271 | 0.02564  | -0.03099 | 0.50404  |
| 0.04796  | 0.23438  | 3.01E-07 | 0.03441  | 0.45819  | -0.00529 | 0.90919  | 0.094967 | 0.04023  |
| 2.00E-08 | 0.063455 | 0.171    | -0.08304 | 0.07301  | -0.00432 | 0.92588  | -0.05387 | 0.24526  |
| 6.65E-06 | -0.04617 | 0.31942  | -0.1128  | 0.01473  | 0.022106 | 0.63372  | -0.09874 | 0.0329   |
| 0.0135   | 0.254291 | 2.51E-08 | 0.071672 | 0.12194  | 0.081047 | 0.08018  | 0.035899 | 0.43896  |
| 4.12E-12 | -0.00197 | 0.96609  | -0.05879 | 0.20471  | 0.06303  | 0.17389  | -0.26803 | 3.99E-09 |
| 0.37458  | 0.156915 | 0.00067  | 0.107279 | 0.02041  | 0.183265 | 6.79E-05 | 0.194866 | 2.23E-05 |
| 0.39157  | 0.0735   | 0.11269  | 0.085755 | 0.06408  | 0.069001 | 0.13651  | 0.047568 | 0.30499  |
| 0.71711  | 0.067431 | 0.14569  | 0.100207 | 0.03038  | 0.115868 | 0.01222  | 0.047057 | 0.31022  |
| 0.0023   | -0.14468 | 0.00172  | 0.014978 | 0.74682  | -0.17471 | 0.00015  | -0.0353  | 0.44667  |
| 0.07709  | 0.125391 | 0.00666  | 0.149294 | 0.00121  | 0.118696 | 0.01025  | 0.045844 | 0.32288  |
| 0.69824  | 0.146801 | 0.00147  | 0.131507 | 0.00442  | 0.179359 | 9.73E-05 | 0.167562 | 0.00028  |
| 1.90E-08 | 0.007972 | 0.86358  | 0.012986 | 0.77956  | 0.045435 | 0.32721  | 0.010381 | 0.82295  |
| 1.80E-05 | -0.01764 | 0.70385  | -0.0327  | 0.48079  | 0.039915 | 0.38946  | 0.05724  | 0.21696  |
| 3.22E-08 | -0.24341 | 1.00E-07 | -0.03017 | 0.5155   | -0.04175 | 0.36805  | -0.06792 | 0.1428   |
| 7.58E-06 | -0.03413 | 0.46186  | -0.03631 | 0.43369  | 0.060402 | 0.19258  | -0.1634  | 0.00039  |
| 0.80969  | -0.32977 | 2.61E-13 | -0.08942 | 0.05347  | -0.21463 | 2.86E-06 | -0.039   | 0.40045  |
| 0.62576  | 0.246019 | 7.23E-08 | 0.272648 | 2.10E-09 | 0.270935 | 2.67E-09 | 0.218985 | 1.77E-06 |
| 0.36436  | 0.013336 | 0.77377  | 0.096617 | 0.03687  | 0.102671 | 0.02651  | -0.06441 | 0.16464  |
| 0.01709  | -0.11414 | 0.01358  | -0.2753  | 1.44E-09 | -0.13267 | 0.00408  | -0.03399 | 0.46366  |
| 0.14187  | -0.04614 | 0.31975  | -0.03716 | 0.42299  | -0.03114 | 0.50206  | 0.030933 | 0.50488  |
| 0.10297  | -0.06441 | 0.16462  | -0.11796 | 0.01073  | -0.13576 | 0.00329  | -0.03524 | 0.44737  |

|          |          |          |          |          |          |          |          |          |
|----------|----------|----------|----------|----------|----------|----------|----------|----------|
| 0.48686  | 0.009221 | 0.84247  | -0.00522 | 0.91042  | 0.01645  | 0.72292  | 0.041086 | 0.37568  |
| 0.6772   | -0.00835 | 0.85723  | -0.00018 | 0.99687  | -0.0171  | 0.71242  | -0.02194 | 0.63632  |
| 0.23945  | 0.018275 | 0.69365  | 0.051146 | 0.27001  | 0.008846 | 0.84879  | 0.128944 | 0.00526  |
| 0.9942   | -0.04531 | 0.32855  | -0.05621 | 0.22539  | -0.06674 | 0.14986  | 0.013846 | 0.76538  |
| 0.42927  | 0.052399 | 0.25844  | 0.03109  | 0.50272  | 0.075329 | 0.10399  | 0.03178  | 0.49328  |
| 0.84282  | 0.031596 | 0.49578  | 0.014615 | 0.75276  | 0.027973 | 0.5465   | 0.04437  | 0.3387   |
| 0.59483  | 0.022526 | 0.62729  | -0.0224  | 0.62925  | 0.105225 | 0.02296  | 0.031895 | 0.49171  |
| 0.00327  | 0.155596 | 0.00074  | 0.182946 | 6.99E-05 | 0.284225 | 3.97E-10 | 0.054573 | 0.23917  |
| 8.41E-06 | 0.138119 | 0.00278  | 0.168057 | 0.00026  | 0.131608 | 0.00439  | 0.166978 | 0.00029  |
| 0.03059  | 0.009069 | 0.84503  | -0.02601 | 0.57505  | 0.084527 | 0.068    | -0.09628 | 0.03753  |
| 0.00033  | 0.035672 | 0.44186  | -0.06908 | 0.13605  | -0.00984 | 0.83205  | -0.21355 | 3.22E-06 |
| 0.85529  | -0.04375 | 0.34547  | -0.02986 | 0.51975  | -0.03798 | 0.41285  | -0.00728 | 0.87532  |
| 0.25131  | 0.018045 | 0.69731  | -0.02079 | 0.65414  | -0.0124  | 0.78926  | 0.002374 | 0.95919  |
| 0.0956   | 0.118733 | 0.01023  | 0.033747 | 0.4669   | 0.056449 | 0.22338  | 0.117055 | 0.01136  |
| 0.00096  | 0.085058 | 0.06628  | 0.019789 | 0.66971  | 0.171118 | 0.0002   | -0.04644 | 0.31658  |
| 0.2242   | 0.081582 | 0.0782   | 0.005314 | 0.90882  | 0.124502 | 0.00706  | 0.027434 | 0.55426  |
| 0.00245  | -0.20882 | 5.35E-06 | -0.20623 | 7.02E-06 | -0.29387 | 9.35E-11 | -0.1013  | 0.02861  |
| 0.47498  | -0.17104 | 0.0002   | -0.08403 | 0.06963  | -0.19614 | 1.96E-05 | -0.03969 | 0.39215  |
| 0.00032  | 0.014172 | 0.76002  | 0.063084 | 0.17352  | 0.116497 | 0.01176  | 0.071631 | 0.12215  |
| 0.01841  | 0.41202  | 1.46E-20 | 0.161198 | 0.00047  | 0.197702 | 1.68E-05 | 0.132571 | 0.00411  |
| 0.03008  | 0.086007 | 0.0633   | 0.089546 | 0.05314  | 0.239079 | 1.71E-07 | 0.075216 | 0.10451  |
| 0.00557  | -0.07743 | 0.09464  | -0.1108  | 0.0166   | -0.06553 | 0.1574   | -0.0348  | 0.45313  |
| 0.22745  | -0.09541 | 0.0393   | -0.10993 | 0.01748  | -0.07597 | 0.10107  | 0.110765 | 0.01664  |
| 4.12E-06 | 0.288457 | 2.12E-10 | 0.120036 | 0.00942  | 0.110021 | 0.01739  | 0.201441 | 1.15E-05 |
| 7.81E-07 | 0.357068 | 1.73E-15 | 0.253254 | 2.87E-08 | 0.243568 | 9.83E-08 | 0.058083 | 0.21025  |
| 0.86854  | -0.13981 | 0.00246  | -0.02102 | 0.65047  | -0.12266 | 0.00796  | -0.06968 | 0.1327   |
| 0.22153  | -0.05762 | 0.21393  | -0.06294 | 0.17453  | -0.07512 | 0.10494  | 0.035459 | 0.44459  |
| 0.02244  | -0.03249 | 0.4837   | -0.08869 | 0.05546  | 0.092736 | 0.04518  | -0.05248 | 0.25772  |
| 2.13E-07 | -0.12008 | 0.00939  | -0.1374  | 0.00293  | -0.15613 | 0.00071  | -0.10673 | 0.02107  |
| 0.58663  | 0.025878 | 0.57696  | -0.04038 | 0.3839   | 0.138107 | 0.00278  | -0.03095 | 0.50467  |
| 0.00115  | -0.07756 | 0.09411  | -0.01678 | 0.71761  | -0.02034 | 0.66111  | -0.11574 | 0.01232  |
| 4.94E-11 | -0.12161 | 0.00852  | -0.13088 | 0.00461  | -0.05871 | 0.20535  | -0.17874 | 0.0001   |
| 0.41187  | -0.05294 | 0.25352  | -0.09644 | 0.03722  | -0.09416 | 0.04196  | -0.01004 | 0.82861  |
| 0.44176  | -0.06006 | 0.19509  | -0.13695 | 0.00302  | -0.10703 | 0.0207   | -0.08104 | 0.08022  |
| 0.49489  | 0.082092 | 0.07635  | 0.027929 | 0.54714  | 0.149717 | 0.00117  | 0.04296  | 0.35428  |
| 1.84E-06 | 0.299643 | 3.83E-11 | 0.305303 | 1.57E-11 | 0.230655 | 4.67E-07 | 0.271431 | 2.49E-09 |
| 0.00077  | -0.04519 | 0.32985  | 0.015071 | 0.74531  | 0.04638  | 0.31725  | -0.02855 | 0.5383   |
| 0.14639  | -0.04843 | 0.29629  | -0.03926 | 0.39733  | -0.03584 | 0.43968  | -0.06018 | 0.19425  |
| 0.56097  | 0.198618 | 1.53E-05 | -0.00034 | 0.9942   | 0.193433 | 2.57E-05 | 0.064564 | 0.16363  |
| 0.86654  | 0.087142 | 0.05988  | 0.048583 | 0.29478  | 0.074372 | 0.10847  | 0.050119 | 0.27976  |
| 1.60E-07 | 0.043057 | 0.35319  | 0.003695 | 0.93652  | 0.219934 | 1.59E-06 | 0.008241 | 0.85902  |
| 0.04259  | -0.00313 | 0.94622  | 0.050789 | 0.27338  | 0.050678 | 0.27443  | -0.00991 | 0.83085  |
| 0.17577  | 0.034574 | 0.45604  | 0.059976 | 0.19574  | 0.110771 | 0.01663  | 0.02218  | 0.63259  |
| 0.00988  | -0.0944  | 0.04143  | -0.06365 | 0.16966  | -0.05483 | 0.23698  | -0.08154 | 0.07837  |
| 0.5718   | 0.096292 | 0.03751  | 0.069956 | 0.13116  | 0.087474 | 0.05891  | 0.089082 | 0.05439  |

|          |          |          |          |          |          |          |          |          |
|----------|----------|----------|----------|----------|----------|----------|----------|----------|
| 0.95364  | 0.050275 | 0.27827  | 0.091882 | 0.0472   | 0.080702 | 0.08148  | 0.181718 | 7.84E-05 |
| 0.18972  | -0.06393 | 0.16784  | -0.19737 | 1.74E-05 | -0.11753 | 0.01103  | 0.024948 | 0.59074  |
| 0.01216  | 0.02272  | 0.62433  | 0.051237 | 0.26916  | 0.238228 | 1.89E-07 | -0.01794 | 0.69898  |
| 9.31E-05 | 0.299972 | 3.64E-11 | 0.046495 | 0.31605  | 0.078704 | 0.08934  | -0.06056 | 0.19145  |
| 0.02662  | 0.057592 | 0.21414  | 0.092941 | 0.0447   | 0.007984 | 0.86338  | 0.074685 | 0.10699  |
| 0.57953  | 0.12199  | 0.00831  | -0.02124 | 0.64705  | -0.00913 | 0.84393  | -0.04783 | 0.30229  |
| 0.11335  | 0.033899 | 0.4649   | -0.04859 | 0.29468  | -0.07605 | 0.10073  | -0.10183 | 0.02778  |
| 0.01792  | 0.024218 | 0.60166  | 0.01958  | 0.673    | 0.143115 | 0.00193  | 0.064863 | 0.16169  |
| 8.74E-08 | 0.244649 | 8.59E-08 | 0.119616 | 0.00967  | 0.329066 | 2.96E-13 | -0.09199 | 0.04693  |
| 0.32726  | 0.052048 | 0.26164  | -0.07291 | 0.11563  | -0.06289 | 0.17483  | 0.00899  | 0.84636  |
| 3.34E-08 | -0.05483 | 0.23696  | 0.069449 | 0.13398  | 0.10154  | 0.02823  | -0.04375 | 0.34547  |
| 7.42E-08 | -0.17978 | 9.37E-05 | -0.11707 | 0.01135  | -0.11684 | 0.01151  | -0.14404 | 0.0018   |
| 0.00085  | 0.067463 | 0.14549  | 0.050429 | 0.27679  | -0.01429 | 0.75812  | 0.19026  | 3.50E-05 |
| 0.03001  | -0.06506 | 0.16043  | -0.13063 | 0.00469  | 0.087788 | 0.058    | -0.0888  | 0.05516  |
| 1.56E-05 | -0.06294 | 0.17451  | 0.147729 | 0.00137  | 0.152638 | 0.00094  | -0.09039 | 0.05093  |
| 0.82721  | 0.060765 | 0.18992  | 0.060537 | 0.19159  | 0.078316 | 0.09094  | 0.055636 | 0.23013  |
| 0.93953  | -0.11493 | 0.01294  | -0.12344 | 0.00757  | -0.06651 | 0.15127  | -0.03609 | 0.43658  |
| 2.20E-07 | -0.13815 | 0.00277  | -0.1595  | 0.00054  | -0.25858 | 1.43E-08 | -0.0369  | 0.42628  |
| 2.30E-05 | 0.124852 | 0.0069   | 0.11261  | 0.0149   | 0.240234 | 1.48E-07 | 0.055412 | 0.23202  |
| 0.95366  | -0.06469 | 0.16279  | -0.07849 | 0.0902   | -0.04887 | 0.29189  | 0.007009 | 0.87992  |
| 0.00089  | 0.061681 | 0.18331  | 0.050394 | 0.27713  | 0.011064 | 0.81153  | 0.196872 | 1.83E-05 |
| 0.63788  | 0.131862 | 0.00431  | 0.211675 | 3.94E-06 | 0.259584 | 1.25E-08 | 0.073811 | 0.11117  |
| 2.57E-05 | 0.176343 | 0.00013  | 0.103508 | 0.0253   | 0.066023 | 0.1543   | -0.02849 | 0.53905  |
| 6.90E-09 | -0.42167 | 1.48E-21 | -0.32713 | 4.14E-13 | -0.27603 | 1.30E-09 | -0.20161 | 1.13E-05 |
| 0.09433  | 0.156969 | 0.00066  | -0.04607 | 0.32053  | -0.09925 | 0.032    | -0.00023 | 0.99603  |
| 4.85E-07 | -0.01582 | 0.73312  | -0.09188 | 0.04721  | -0.00832 | 0.85763  | -0.00247 | 0.95758  |
| 0.0652   | 0.0752   | 0.10458  | 0.038142 | 0.41088  | -0.0445  | 0.3373   | 0.043224 | 0.35133  |
| 0.00323  | 0.135626 | 0.00332  | 0.144584 | 0.00173  | 0.25361  | 2.74E-08 | 0.103884 | 0.02477  |
| 0.90241  | 0.02687  | 0.56245  | 0.099267 | 0.03197  | 0.049953 | 0.28136  | -0.00364 | 0.93755  |
| 0.11336  | 0.191194 | 3.20E-05 | 0.128242 | 0.00551  | 0.200951 | 1.21E-05 | 0.039204 | 0.39797  |
| 0.84999  | -0.06449 | 0.1641   | -0.10922 | 0.01823  | -0.15921 | 0.00055  | -0.14175 | 0.00214  |
| 0.00021  | -0.0672  | 0.1471   | -0.03038 | 0.51255  | 0.045496 | 0.32657  | -0.04927 | 0.288    |
| 0.02601  | -0.05151 | 0.2666   | 0.095697 | 0.03871  | 0.020081 | 0.66513  | 0.087375 | 0.05919  |
| 1.09E-06 | 0.063444 | 0.17108  | 0.111562 | 0.01587  | 0.145719 | 0.00159  | 0.20577  | 7.36E-06 |
| 1.59E-12 | -0.14135 | 0.0022   | -0.13192 | 0.00429  | -0.01226 | 0.79166  | -0.21548 | 2.61E-06 |
| 4.55E-09 | 0.09206  | 0.04678  | 0.187898 | 4.39E-05 | 0.246793 | 6.56E-08 | 0.029358 | 0.52682  |
| 0.0325   | -0.13029 | 0.0048   | -0.18759 | 4.52E-05 | -0.13616 | 0.0032   | -0.22895 | 5.70E-07 |
| 1.42E-19 | -0.00175 | 0.9699   | 0.044706 | 0.33505  | 0.130956 | 0.00459  | -0.12653 | 0.00618  |
| 0.0319   | 0.172619 | 0.00018  | 0.289025 | 1.95E-10 | 0.268088 | 3.96E-09 | 0.215804 | 2.52E-06 |
| 0.79929  | 0.269773 | 3.13E-09 | 0.136951 | 0.00302  | 0.151446 | 0.00103  | 0.196175 | 1.96E-05 |
| 0.01472  | 0.174456 | 0.00015  | 0.158293 | 0.0006   | 0.171975 | 0.00019  | 0.126493 | 0.0062   |
| 0.77873  | 0.033008 | 0.47672  | -0.02432 | 0.60012  | 0.05385  | 0.24546  | 0.121677 | 0.00848  |
| 0.09321  | -0.13612 | 0.0032   | -0.08977 | 0.05255  | -0.13944 | 0.00253  | -0.02744 | 0.55415  |
| 9.10E-11 | 0.191453 | 3.12E-05 | 0.150403 | 0.00111  | 0.163504 | 0.00039  | 0.195348 | 2.13E-05 |
| 0.28146  | 0.073057 | 0.11487  | 0.048798 | 0.29264  | 0.145387 | 0.00163  | 0.003498 | 0.9399   |

|          |          |          |          |          |          |          |          |          |
|----------|----------|----------|----------|----------|----------|----------|----------|----------|
| 8.56E-05 | 0.201863 | 1.10E-05 | 0.22429  | 9.76E-07 | 0.162887 | 0.00041  | 0.308681 | 9.10E-12 |
| 8.38E-06 | 0.017808 | 0.7011   | -0.07656 | 0.09845  | -0.04174 | 0.36816  | -0.1597  | 0.00053  |
| 2.14E-20 | 0.023285 | 0.61573  | 0.057432 | 0.21542  | 0.271318 | 2.53E-09 | -0.12804 | 0.00559  |
| 0.00064  | -0.07769 | 0.09357  | -0.03144 | 0.49788  | 0.06673  | 0.14993  | -0.06146 | 0.18486  |
| 0.05701  | 0.119088 | 0.01     | 0.022703 | 0.62459  | 0.031686 | 0.49456  | 0.039811 | 0.3907   |
| 0.17982  | -0.01724 | 0.71019  | 0.104871 | 0.02342  | 0.164554 | 0.00036  | 0.116933 | 0.01144  |
| 0.01357  | -0.35116 | 5.34E-15 | -0.12365 | 0.00747  | -0.19506 | 2.19E-05 | -0.11145 | 0.01597  |
| 1.55E-05 | 0.175296 | 0.00014  | 0.135245 | 0.00341  | 0.172743 | 0.00018  | 0.110799 | 0.0166   |
| 0.35034  | -0.0691  | 0.13593  | 0.029962 | 0.51835  | -0.00449 | 0.92297  | 0.012361 | 0.78992  |
| 0.00189  | 0.072937 | 0.11547  | 0.040704 | 0.38015  | 0.083659 | 0.07089  | 0.100235 | 0.03033  |
| 4.85E-09 | 0.139849 | 0.00245  | 0.039026 | 0.40011  | 0.031693 | 0.49446  | 0.211649 | 3.95E-06 |
| 0.14882  | 0.446188 | 3.15E-24 | 0.21945  | 1.68E-06 | 0.248226 | 5.48E-08 | 0.138545 | 0.0027   |
| 7.35E-05 | 0.008472 | 0.85512  | 0.051289 | 0.26867  | 0.141516 | 0.00217  | -0.0638  | 0.16865  |
| 2.97E-05 | 0.027182 | 0.55791  | 0.126045 | 0.00638  | 0.023854 | 0.60712  | 0.021577 | 0.64187  |
| 0.00039  | 0.189634 | 3.72E-05 | 0.138599 | 0.00269  | 0.124365 | 0.00713  | 0.136918 | 0.00303  |
| 0.49316  | 0.130199 | 0.00483  | 0.12893  | 0.00526  | 0.152435 | 0.00095  | 0.010116 | 0.8274   |
| 0.18878  | 0.039889 | 0.38977  | 0.038319 | 0.40871  | 0.03574  | 0.44098  | 0.11784  | 0.01082  |
| 0.13104  | 0.122571 | 0.00801  | 0.086019 | 0.06326  | 0.056921 | 0.21953  | 0.197264 | 1.76E-05 |
| 0.61845  | -0.10584 | 0.02217  | -0.03221 | 0.48748  | -0.01961 | 0.67256  | -0.02458 | 0.59618  |
| 0.30901  | -0.22462 | 9.40E-07 | -0.14237 | 0.00204  | -0.21335 | 3.29E-06 | -0.12461 | 0.00702  |
| 4.07E-06 | 0.367349 | 2.29E-16 | 0.215406 | 2.63E-06 | 0.133622 | 0.00382  | 0.203002 | 9.81E-06 |
| 0.38854  | 0.226942 | 7.20E-07 | 0.123674 | 0.00746  | 0.200163 | 1.31E-05 | 0.170655 | 0.00021  |
| 0.4391   | 0.093055 | 0.04444  | 0.156187 | 0.00071  | 0.181672 | 7.87E-05 | 0.059263 | 0.20112  |
| 0.07713  | 0.213    | 3.42E-06 | 0.26344  | 7.46E-09 | 0.399993 | 2.27E-19 | 0.210859 | 4.30E-06 |
| 2.84E-09 | 0.005726 | 0.90178  | 0.036594 | 0.43014  | 0.154162 | 0.00083  | 0.085872 | 0.06371  |
| 6.64E-07 | -0.09928 | 0.03196  | -0.11566 | 0.01238  | 0.057301 | 0.21646  | -0.0327  | 0.4809   |
| 0.00389  | 0.053403 | 0.24941  | 0.104191 | 0.02434  | 0.053636 | 0.24735  | -0.00111 | 0.98099  |
| 0.75154  | 0.112793 | 0.01474  | 0.025913 | 0.57645  | 0.107229 | 0.02046  | 0.090951 | 0.0495   |
| 0.5282   | -0.00389 | 0.93311  | 0.027326 | 0.55583  | -0.02157 | 0.64194  | 0.231661 | 4.15E-07 |
| 0.05772  | 0.233223 | 3.45E-07 | 0.018337 | 0.69267  | 0.055304 | 0.23293  | 0.019232 | 0.67848  |
| 1.15E-10 | -0.14106 | 0.00225  | 0.071465 | 0.12302  | 0.08149  | 0.07854  | -0.04903 | 0.29032  |
| 0.15856  | -0.08099 | 0.08039  | -0.24662 | 6.70E-08 | -0.25954 | 1.26E-08 | -0.0231  | 0.61857  |
| 0.0502   | 0.00854  | 0.85396  | -0.0126  | 0.78588  | 0.006675 | 0.88562  | -0.08035 | 0.08282  |
| 0.32302  | -0.04372 | 0.34584  | 0.01457  | 0.75349  | -0.06133 | 0.18582  | 0.047118 | 0.3096   |
| 2.15E-09 | 0.051897 | 0.26303  | 0.051641 | 0.2654   | 0.031744 | 0.49377  | 0.107718 | 0.01989  |
| 0.02956  | 0.165117 | 0.00034  | 0.172392 | 0.00018  | 0.128348 | 0.00547  | 0.170519 | 0.00021  |
| 5.11E-20 | 0.309798 | 7.59E-12 | 0.200498 | 1.27E-05 | 0.212721 | 3.52E-06 | 0.324974 | 6.01E-13 |
| 4.92E-06 | -0.03506 | 0.44972  | 0.027647 | 0.5512   | 0.137209 | 0.00297  | -0.13126 | 0.00449  |
| 1.56E-10 | -0.08767 | 0.05833  | -0.05309 | 0.25223  | -0.0102  | 0.82594  | -0.07767 | 0.09365  |
| 0.00032  | 0.002571 | 0.95581  | -0.09775 | 0.03471  | -0.0413  | 0.37326  | 0.000213 | 0.99635  |
| 0.00517  | 0.213006 | 3.41E-06 | 0.010269 | 0.82484  | 0.059655 | 0.19815  | -0.10282 | 0.02628  |
| 1.84E-05 | -0.04375 | 0.34548  | -0.07817 | 0.09155  | -0.0155  | 0.73834  | -0.04772 | 0.30341  |
| 4.18E-10 | -0.1149  | 0.01297  | -0.02281 | 0.62299  | 0.083214 | 0.0724   | -0.19514 | 2.17E-05 |
| 0.17265  | -0.24602 | 7.23E-08 | -0.14356 | 0.00187  | -0.17273 | 0.00018  | -0.12675 | 0.00609  |
| 5.41E-05 | 0.024745 | 0.59377  | 0.046837 | 0.3125   | 0.174785 | 0.00015  | -0.09539 | 0.03934  |

|          |          |          |          |          |          |          |          |          |
|----------|----------|----------|----------|----------|----------|----------|----------|----------|
| 0.00048  | 0.035785 | 0.44042  | 0.020137 | 0.66426  | 0.127284 | 0.00588  | 0.024825 | 0.59257  |
| 1.08E-16 | 0.296329 | 6.41E-11 | 0.171876 | 0.00019  | 0.199869 | 1.35E-05 | 0.228614 | 5.93E-07 |
| 0.03591  | -0.03368 | 0.46775  | -0.0537  | 0.24681  | 0.000837 | 0.9856   | -0.00565 | 0.90307  |
| 3.26E-05 | 0.071718 | 0.1217   | 0.027515 | 0.5531   | 0.012256 | 0.79166  | -0.05249 | 0.25763  |
| 0.031    | -0.04592 | 0.32204  | -0.03782 | 0.41484  | -0.03869 | 0.40421  | 0.094328 | 0.0416   |
| 0.396    | 0.05879  | 0.20474  | 0.042377 | 0.36086  | 0.022022 | 0.63502  | 0.011483 | 0.80453  |
| 0.94748  | 0.219629 | 1.65E-06 | 0.070926 | 0.12588  | 0.232705 | 3.67E-07 | 0.120797 | 0.00897  |
| 0.0109   | 0.06384  | 0.16842  | -0.01577 | 0.73397  | 0.006892 | 0.88191  | -0.14906 | 0.00123  |
| 0.00409  | -0.08789 | 0.0577   | 0.121456 | 0.0086   | -0.0049  | 0.91592  | 0.094069 | 0.04216  |
| 0.33863  | 0.038371 | 0.40807  | 0.038763 | 0.4033   | 0.033219 | 0.4739   | 0.064828 | 0.16191  |
| 4.07E-10 | -0.08108 | 0.08006  | -0.06947 | 0.13388  | 0.062496 | 0.17758  | -0.03367 | 0.46794  |
| 2.69E-08 | -0.00315 | 0.94579  | -0.13101 | 0.00457  | -0.09312 | 0.04429  | 0.11162  | 0.01581  |
| 2.80E-05 | 0.058063 | 0.21041  | 0.109896 | 0.01752  | 0.219581 | 1.66E-06 | -0.10349 | 0.02532  |
| 0.56982  | 0.082395 | 0.07527  | 0.013234 | 0.77546  | 0.113416 | 0.0142   | 0.068738 | 0.13802  |
| 0.06811  | 0.133934 | 0.00374  | 0.068152 | 0.14141  | 0.156083 | 0.00071  | 0.041088 | 0.37566  |
| 0.00098  | 0.122527 | 0.00803  | 0.066451 | 0.15164  | 0.148345 | 0.0013   | 0.016824 | 0.71689  |
| 0.40527  | 0.025864 | 0.57717  | -0.00904 | 0.8456   | 0.020187 | 0.66348  | -0.01655 | 0.7213   |
| 0.57254  | 0.017352 | 0.7084   | 0.029495 | 0.5249   | 0.033319 | 0.47257  | 7.40E-05 | 0.99873  |
| 0.00114  | 0.109262 | 0.01818  | 0.037055 | 0.42435  | 0.145792 | 0.00158  | 0.032709 | 0.48072  |
| 0.48069  | 0.028949 | 0.53259  | 0.037495 | 0.41887  | 0.043665 | 0.34644  | 0.014954 | 0.74721  |
| 0.72388  | 0.080454 | 0.08243  | -0.01255 | 0.78685  | 0.050434 | 0.27675  | 0.068852 | 0.13736  |
| 0.21756  | 0.106454 | 0.0214   | 0.081708 | 0.07774  | 0.12693  | 0.00602  | 0.063915 | 0.16792  |
| 0.24406  | -0.02137 | 0.64513  | -0.023   | 0.62003  | -0.01755 | 0.70517  | 0.010188 | 0.8262   |
| 0.45993  | 0.137561 | 0.00289  | 0.144092 | 0.0018   | 0.208254 | 5.67E-06 | 0.092903 | 0.04479  |
| 0.9788   | 0.033756 | 0.46679  | 0.051162 | 0.26986  | 0.063498 | 0.17072  | 0.067188 | 0.14714  |
| 0.02549  | 0.22891  | 5.73E-07 | 0.223788 | 1.03E-06 | 0.220975 | 1.42E-06 | 0.230213 | 4.92E-07 |
| 0.26897  | 0.08612  | 0.06295  | 0.018665 | 0.68745  | 0.10944  | 0.01799  | 0.028462 | 0.53951  |
| 0.05506  | -0.01537 | 0.74041  | 0.029697 | 0.52206  | 0.06138  | 0.18546  | 0.018114 | 0.69623  |
| 0.69408  | -0.02332 | 0.61516  | -0.04237 | 0.36096  | -0.05956 | 0.19884  | 0.030369 | 0.51267  |
| 0.92995  | 0.053469 | 0.24883  | 0.017537 | 0.70544  | 0.065261 | 0.15912  | 0.048976 | 0.29089  |
| 0.21742  | 0.040927 | 0.37754  | 0.062944 | 0.17448  | 0.076979 | 0.0966   | 0.069487 | 0.13377  |
| 0.01288  | -0.00832 | 0.85772  | 0.008341 | 0.85733  | 0.053837 | 0.24558  | 0.014566 | 0.75356  |
| 0.52963  | 0.147338 | 0.00141  | 0.092577 | 0.04555  | 0.129884 | 0.00494  | 0.117521 | 0.01103  |
| 0.52872  | 0.0262   | 0.57224  | 0.208416 | 5.58E-06 | 0.195412 | 2.11E-05 | 0.149143 | 0.00123  |
| 0.03599  | 0.127399 | 0.00583  | 0.26195  | 9.12E-09 | 0.306789 | 1.23E-11 | 0.072234 | 0.11903  |
| 0.00017  | 0.043837 | 0.34454  | 0.100112 | 0.03054  | 0.15385  | 0.00085  | 0.028403 | 0.54036  |
| 0.00064  | 0.163731 | 0.00038  | 0.143499 | 0.00188  | 0.19439  | 2.34E-05 | 0.082657 | 0.07434  |
| 0.12733  | -0.14636 | 0.00152  | -0.07553 | 0.10305  | -0.17267 | 0.00018  | -0.05137 | 0.26793  |
| 0.89924  | 0.141554 | 0.00217  | -0.01995 | 0.66717  | -0.07747 | 0.0945   | -0.04332 | 0.35027  |
| 2.50E-15 | -0.00955 | 0.8369   | 0.153113 | 0.0009   | 0.192269 | 2.88E-05 | -0.17481 | 0.00015  |
| 0.90169  | -0.12295 | 0.00781  | -0.01273 | 0.78377  | -0.1054  | 0.02273  | 0.143946 | 0.00182  |
| 4.35E-08 | -0.18666 | 4.94E-05 | 0.02648  | 0.56814  | -0.16932 | 0.00024  | 0.156219 | 0.0007   |
| 0.0012   | 0.304466 | 1.79E-11 | 0.191904 | 2.98E-05 | 0.156479 | 0.00069  | 0.053628 | 0.24742  |
| 1.58E-09 | -0.22741 | 6.82E-07 | -0.07094 | 0.12581  | -0.06264 | 0.17655  | -0.28139 | 6.01E-10 |
| 0.89279  | -0.07084 | 0.12632  | -0.03116 | 0.50181  | -0.02768 | 0.55078  | 0.015309 | 0.74143  |



|          |          |          |          |          |          |          |          |          |
|----------|----------|----------|----------|----------|----------|----------|----------|----------|
| 1.76E-10 | 0.133312 | 0.0039   | 0.232774 | 3.64E-07 | 0.19442  | 2.33E-05 | 0.188797 | 4.03E-05 |
| 0.00554  | 0.166705 | 0.0003   | 0.02189  | 0.63704  | 0.038427 | 0.40739  | 0.107739 | 0.01987  |
| 0.43788  | 0.083893 | 0.0701   | 0.061541 | 0.18431  | 0.183165 | 6.85E-05 | 0.214258 | 2.98E-06 |
| 0.0879   | 0.100959 | 0.02915  | 0.09985  | 0.03098  | 0.007487 | 0.87181  | -0.01929 | 0.6776   |
| 3.36E-05 | 0.038215 | 0.40999  | 0.080339 | 0.08287  | 0.215092 | 2.72E-06 | 0.006272 | 0.89247  |
| 0.88734  | -0.00588 | 0.89919  | 0.073121 | 0.11456  | 0.120734 | 0.00901  | -0.02449 | 0.59759  |
| 4.47E-05 | 0.135171 | 0.00343  | 0.057977 | 0.21108  | 0.297762 | 5.13E-11 | 0.028574 | 0.53792  |
| 0.00012  | -0.2626  | 8.36E-09 | -0.2832  | 4.61E-10 | -0.32724 | 4.06E-13 | -0.19597 | 2.00E-05 |
| 5.19E-06 | 0.304207 | 1.87E-11 | 0.05961  | 0.19848  | 0.145377 | 0.00163  | 0.185196 | 5.67E-05 |
| 0.00593  | 0.102022 | 0.02748  | 0.215235 | 2.68E-06 | 0.271486 | 2.47E-09 | 0.19045  | 3.43E-05 |
| 0.00629  | -0.13505 | 0.00345  | -0.06898 | 0.13664  | -0.04093 | 0.37745  | -0.08846 | 0.05611  |
| 0.00148  | 0.248513 | 5.28E-08 | 0.050689 | 0.27432  | 0.067598 | 0.14469  | -0.06182 | 0.18236  |
| 0.20308  | -0.18409 | 6.28E-05 | -0.10392 | 0.02472  | -0.13706 | 0.003    | 0.311846 | 5.44E-12 |
| 0.03243  | 0.057608 | 0.21401  | 0.138651 | 0.00268  | 0.223228 | 1.10E-06 | 0.058466 | 0.20725  |
| 1.14E-20 | 0.272864 | 2.04E-09 | 0.235403 | 2.66E-07 | 0.121808 | 0.00841  | 0.378155 | 2.53E-17 |
| 1.89E-05 | 0.081707 | 0.07775  | 0.096905 | 0.03631  | 0.203408 | 9.41E-06 | -0.03118 | 0.5015   |
| 1.94E-05 | -0.03748 | 0.41909  | 0.037412 | 0.4199   | -0.00503 | 0.91372  | 0.162083 | 0.00044  |
| 0.27307  | 0.096086 | 0.03792  | 0.146855 | 0.00146  | 0.102146 | 0.0273   | 0.077894 | 0.09269  |
| 0.72796  | -0.04136 | 0.37246  | -0.07155 | 0.1226   | 0.012651 | 0.7851   | 0.068827 | 0.13751  |
| 0.69928  | 0.038166 | 0.41058  | -0.02062 | 0.65673  | -0.04895 | 0.29118  | -0.01709 | 0.71259  |
| 0.15711  | 0.039581 | 0.39344  | 0.044154 | 0.34105  | 0.151066 | 0.00106  | 0.012629 | 0.78548  |
| 1.02E-12 | -0.04305 | 0.35325  | 0.01882  | 0.685    | 0.148578 | 0.00128  | -0.09907 | 0.03232  |
| 0.08633  | 0.167433 | 0.00028  | 0.192195 | 2.90E-05 | 0.289534 | 1.80E-10 | 0.151082 | 0.00106  |
| 5.67E-05 | 0.226098 | 7.93E-07 | 0.120236 | 0.0093   | -0.00066 | 0.98867  | 0.251094 | 3.80E-08 |
| 0.4289   | 0.046765 | 0.31324  | 0.081256 | 0.0794   | 0.088293 | 0.05657  | -0.02704 | 0.56002  |
| 0.14301  | 0.092059 | 0.04678  | 0.110815 | 0.01659  | 0.195313 | 2.13E-05 | 0.127241 | 0.0059   |
| 0.03229  | 0.070623 | 0.12751  | -0.11251 | 0.01499  | 0.009832 | 0.83218  | 0.024511 | 0.59725  |
| 0.0192   | 0.301879 | 2.70E-11 | 0.272033 | 2.29E-09 | 0.441414 | 1.09E-23 | 0.074328 | 0.10868  |
| 7.29E-12 | 0.204635 | 8.29E-06 | 0.167625 | 0.00027  | 0.21212  | 3.76E-06 | 0.294672 | 8.27E-11 |
| 1.51E-10 | -0.11771 | 0.01091  | -0.08702 | 0.06024  | -0.04244 | 0.36013  | -0.09934 | 0.03184  |
| 0.09067  | -0.0275  | 0.55335  | 0.087792 | 0.05799  | 0.005315 | 0.90881  | -0.07546 | 0.10339  |
| 0.01979  | 0.152085 | 0.00098  | 0.102043 | 0.02745  | 0.169632 | 0.00023  | 0.160344 | 0.0005   |
| 0.02184  | 0.156994 | 0.00066  | 0.045964 | 0.32161  | 0.101604 | 0.02813  | -0.04857 | 0.29486  |
| 0.27138  | -0.04305 | 0.35328  | 0.011412 | 0.80572  | -0.08082 | 0.08103  | -0.16271 | 0.00042  |
| 0.18538  | 0.013761 | 0.76677  | 0.136604 | 0.0031   | 0.140621 | 0.00232  | -0.07849 | 0.09021  |
| 0.53634  | 0.145037 | 0.00168  | 0.211707 | 3.93E-06 | 0.184105 | 6.28E-05 | 0.214711 | 2.84E-06 |
| 0.02591  | -0.12077 | 0.00899  | -0.0721  | 0.11973  | -0.16593 | 0.00032  | -0.11238 | 0.01511  |
| 0.00015  | -0.05466 | 0.23841  | 0.132148 | 0.00423  | 0.297789 | 5.11E-11 | -0.16704 | 0.00029  |
| 4.92E-06 | 0.082101 | 0.07632  | 0.107852 | 0.01974  | 0.047502 | 0.30567  | 0.104931 | 0.02334  |
| 0.00015  | 0.176683 | 0.00012  | -0.02161 | 0.64141  | 0.06741  | 0.14581  | -0.17813 | 0.00011  |
| 0.15973  | 0.24082  | 1.38E-07 | 0.157585 | 0.00063  | 0.183052 | 6.92E-05 | 0.025345 | 0.58484  |
| 0.35297  | 0.113105 | 0.01446  | 0.155547 | 0.00074  | 0.175828 | 0.00013  | 0.18376  | 6.48E-05 |
| 0.03863  | 0.043684 | 0.34622  | -0.02623 | 0.57182  | 0.019206 | 0.6789   | 0.157557 | 0.00063  |
| 3.94E-08 | 0.010766 | 0.81651  | 0.065852 | 0.15537  | 0.110314 | 0.01709  | 0.059446 | 0.19973  |
| 1.45E-06 | -0.13214 | 0.00423  | 0.176692 | 0.00012  | 0.150208 | 0.00113  | -0.04618 | 0.3193   |

|          |          |          |          |          |          |          |          |          |
|----------|----------|----------|----------|----------|----------|----------|----------|----------|
| 0.89499  | 0.241008 | 1.35E-07 | 0.216303 | 2.38E-06 | 0.324708 | 6.29E-13 | 0.142363 | 0.00204  |
| 7.71E-16 | -0.16353 | 0.00039  | -0.02601 | 0.57499  | -0.00781 | 0.86638  | -0.10849 | 0.01902  |
| 0.05453  | -0.08909 | 0.05436  | -0.1395  | 0.00252  | -0.11361 | 0.01403  | 0.018882 | 0.68402  |
| 0.36666  | -0.03764 | 0.41702  | -0.04375 | 0.34546  | -0.08244 | 0.07512  | 0.039712 | 0.39187  |
| 7.92E-06 | 0.123531 | 0.00753  | -0.01567 | 0.73551  | 0.025115 | 0.58826  | 0.131978 | 0.00428  |
| 4.05E-05 | -0.22639 | 7.67E-07 | -0.24016 | 1.49E-07 | -0.21639 | 2.36E-06 | -0.1938  | 2.48E-05 |
| 3.52E-21 | -0.21245 | 3.63E-06 | -0.08217 | 0.07608  | 0.058958 | 0.20345  | -0.27481 | 1.55E-09 |
| 0.1478   | 0.11317  | 0.01441  | 0.229655 | 5.25E-07 | 0.209462 | 4.99E-06 | 0.050302 | 0.27801  |
| 3.01E-10 | 0.180937 | 8.42E-05 | 0.141146 | 0.00223  | 0.15101  | 0.00106  | -0.21997 | 1.59E-06 |
| 0.00013  | -0.08205 | 0.07652  | -0.18951 | 3.76E-05 | -0.08405 | 0.06956  | -0.16075 | 0.00049  |
| 8.39E-08 | 0.022287 | 0.63095  | 0.119717 | 0.00961  | 0.079491 | 0.08618  | -0.06052 | 0.1917   |
| 0.00362  | -0.19129 | 3.17E-05 | -0.02835 | 0.54115  | -0.04102 | 0.37648  | -0.07648 | 0.09878  |
| 1.54E-14 | -0.16625 | 0.00031  | -0.15092 | 0.00107  | 0.004312 | 0.92596  | -0.13632 | 0.00316  |
| 0.311    | -0.06759 | 0.14475  | -0.03683 | 0.42719  | -0.08254 | 0.07474  | -0.00927 | 0.84168  |
| 0.24039  | -0.0576  | 0.21406  | -0.15497 | 0.00078  | -0.14384 | 0.00183  | -0.01835 | 0.69252  |
| 1.06E-06 | 0.014707 | 0.75125  | 0.027558 | 0.55247  | -0.02061 | 0.65682  | 0.205784 | 7.35E-06 |
| 0.00101  | 0.030156 | 0.51565  | -0.02115 | 0.64844  | 0.049002 | 0.29063  | -0.00917 | 0.84329  |
| 4.21E-05 | -0.10628 | 0.02162  | -0.13296 | 0.004    | -0.14097 | 0.00226  | -0.22598 | 8.04E-07 |
| 5.25E-05 | -0.35515 | 2.50E-15 | -0.1074  | 0.02027  | -0.16626 | 0.00031  | -0.26838 | 3.80E-09 |
| 0.03375  | -0.005   | 0.9142   | 0.055498 | 0.2313   | 0.082072 | 0.07642  | -0.07649 | 0.09874  |
| 0.01698  | 0.000476 | 0.99181  | 0.053193 | 0.25128  | 0.090945 | 0.04951  | 0.075971 | 0.10106  |
| 3.41E-11 | 0.037762 | 0.41556  | 0.010128 | 0.8272   | -0.045   | 0.33187  | 0.213822 | 3.13E-06 |
| 0.00204  | -0.02505 | 0.58915  | -0.03794 | 0.41338  | -0.08336 | 0.07189  | 0.330039 | 2.50E-13 |
| 0.02983  | -0.1682  | 0.00026  | -0.16634 | 0.00031  | -0.15162 | 0.00101  | -0.08624 | 0.06258  |
| 0.37166  | -0.0028  | 0.95189  | -0.0296  | 0.52337  | -0.04463 | 0.3359   | -0.04312 | 0.3525   |
| 0.04639  | -0.01145 | 0.80516  | 0.011907 | 0.79746  | -0.02025 | 0.66249  | -0.06659 | 0.15077  |
| 0.8427   | -0.23883 | 1.76E-07 | -0.03562 | 0.4425   | -0.10132 | 0.02857  | -0.06855 | 0.13908  |
| 0.00235  | -0.08162 | 0.07807  | -0.1169  | 0.01147  | -0.15747 | 0.00064  | 0.068755 | 0.13792  |
| 0.67554  | -0.10494 | 0.02333  | 0.000104 | 0.99821  | -0.00315 | 0.94589  | -0.0539  | 0.24504  |
| 0.57601  | -0.32115 | 1.15E-12 | -0.04372 | 0.34581  | -0.12768 | 0.00572  | -0.07878 | 0.08903  |
| 0.1951   | 0.070197 | 0.12983  | 0.011031 | 0.81207  | 0.051543 | 0.26631  | 0.020053 | 0.66557  |
| 0.00116  | -0.08977 | 0.05255  | -0.20715 | 6.37E-06 | -0.09823 | 0.03382  | -0.15965 | 0.00053  |
| 4.22E-05 | 0.045729 | 0.32409  | 0.042006 | 0.36508  | 0.191857 | 3.00E-05 | -0.00983 | 0.83224  |
| 0.96476  | 0.22486  | 9.14E-07 | 0.096331 | 0.03743  | 0.067986 | 0.14239  | 0.04723  | 0.30845  |
| 2.19E-10 | -0.25088 | 3.90E-08 | -0.17355 | 0.00016  | -0.35329 | 3.57E-15 | 0.027288 | 0.55637  |
| 3.23E-05 | -0.07208 | 0.11981  | -0.05157 | 0.26602  | -0.11784 | 0.01081  | -0.01553 | 0.73785  |
| 0.0059   | 0.163073 | 0.0004   | 0.113581 | 0.01405  | 0.244324 | 8.94E-08 | 0.1254   | 0.00666  |
| 0.00814  | -0.04742 | 0.30654  | -0.03019 | 0.51511  | 0.037492 | 0.4189   | -0.07267 | 0.11684  |
| 4.52E-05 | 0.002379 | 0.95911  | 0.051323 | 0.26835  | -0.05625 | 0.22499  | 0.144262 | 0.00177  |
| 0.03357  | 0.242152 | 1.17E-07 | 0.173853 | 0.00016  | 0.317848 | 2.01E-12 | 0.160381 | 0.0005   |
| 0.88689  | 0.182738 | 7.13E-05 | 0.122092 | 0.00826  | 0.225906 | 8.11E-07 | 0.023041 | 0.61943  |
| 0.35287  | -0.04614 | 0.3198   | 0.17298  | 0.00017  | 0.061819 | 0.18233  | 0.054872 | 0.2366   |
| 3.48E-18 | 0.282153 | 5.38E-10 | 0.284358 | 3.89E-10 | 0.187495 | 4.56E-05 | 0.305519 | 1.51E-11 |
| 0.36991  | 0.202503 | 1.03E-05 | 0.149589 | 0.00119  | 0.123759 | 0.00742  | 0.145156 | 0.00166  |
| 0.46114  | -0.04615 | 0.31962  | -0.01058 | 0.81954  | -0.05505 | 0.23507  | 0.08187  | 0.07715  |

|          |          |          |          |          |          |          |          |          |
|----------|----------|----------|----------|----------|----------|----------|----------|----------|
| 0.24331  | 0.083965 | 0.06986  | 0.153377 | 0.00088  | 0.116813 | 0.01153  | 0.088483 | 0.05603  |
| 1.08E-13 | 0.028687 | 0.53631  | -0.03807 | 0.41181  | 0.060605 | 0.19109  | -0.18031 | 8.92E-05 |
| 0.43794  | -0.10126 | 0.02867  | -0.17607 | 0.00013  | -0.19582 | 2.03E-05 | -0.12368 | 0.00745  |
| 0.39669  | -0.00388 | 0.93331  | -0.00597 | 0.89764  | 0.018802 | 0.68529  | 0.067786 | 0.14357  |
| 0.21521  | 0.108124 | 0.01943  | 0.05547  | 0.23153  | 0.112877 | 0.01466  | 0.101791 | 0.02784  |
| 1.98E-05 | -0.14883 | 0.00126  | -0.06911 | 0.13587  | -0.05827 | 0.20879  | -0.18551 | 5.50E-05 |
| 0.61824  | 0.139972 | 0.00243  | 0.093471 | 0.04349  | 0.119396 | 0.00981  | 0.068965 | 0.13672  |
| 8.73E-06 | -0.0681  | 0.14175  | 0.017056 | 0.71316  | 0.026269 | 0.57122  | -0.07518 | 0.10467  |
| 0.42235  | 0.048168 | 0.29893  | 0.035673 | 0.44184  | 0.073221 | 0.11406  | 0.021054 | 0.64996  |
| 0.1763   | -0.00811 | 0.86131  | -0.08781 | 0.05793  | -0.0571  | 0.21806  | 0.075541 | 0.10301  |
| 0.23055  | 0.039895 | 0.38969  | -0.0626  | 0.17684  | 0.030546 | 0.51022  | -0.0005  | 0.99135  |
| 0.98807  | 0.071846 | 0.12103  | 0.039357 | 0.39612  | 0.059455 | 0.19966  | 0.06283  | 0.17527  |
| 0.0007   | -0.04315 | 0.35211  | -0.12179 | 0.00842  | -0.20862 | 5.46E-06 | -0.00859 | 0.85315  |
| 4.04E-09 | -0.03824 | 0.40962  | -0.06711 | 0.1476   | -0.19982 | 1.36E-05 | 0.111451 | 0.01597  |
| 0.88785  | 0.022561 | 0.62675  | 0.073737 | 0.11153  | 0.029585 | 0.52363  | 0.055574 | 0.23066  |
| 9.01E-09 | 0.256704 | 1.83E-08 | 0.047059 | 0.31021  | 0.03646  | 0.43183  | 0.149279 | 0.00121  |
| 0.8726   | -0.06891 | 0.13704  | -0.06691 | 0.14882  | -0.02339 | 0.61414  | 0.015793 | 0.73356  |
| 4.96E-13 | -0.09923 | 0.03203  | 0.067709 | 0.14403  | -0.16743 | 0.00028  | 0.169112 | 0.00024  |
| 8.68E-09 | 0.200335 | 1.29E-05 | 0.283193 | 4.62E-10 | 0.219795 | 1.62E-06 | 0.319395 | 1.55E-12 |
| 0.06453  | 0.000147 | 0.99748  | -0.0182  | 0.6949   | 0.022146 | 0.63311  | -0.04751 | 0.30556  |
| 0.01514  | 0.046568 | 0.31529  | -0.01088 | 0.8146   | 0.03341  | 0.47136  | -0.09057 | 0.05045  |
| 8.22E-12 | 0.212912 | 3.45E-06 | 0.095081 | 0.03999  | 0.126231 | 0.0063   | 0.104068 | 0.02451  |
| 0.0109   | -0.17071 | 0.00021  | -0.08636 | 0.06223  | -0.18311 | 6.89E-05 | -0.1734  | 0.00017  |
| 0.02979  | -0.01733 | 0.70874  | 0.058674 | 0.20564  | 0.175291 | 0.00014  | 0.016764 | 0.71786  |
| 6.59E-07 | 0.026917 | 0.56176  | 0.161088 | 0.00047  | 0.240348 | 1.46E-07 | 0.092066 | 0.04676  |
| 0.00031  | 0.271862 | 2.34E-09 | 0.143719 | 0.00185  | 0.325535 | 5.46E-13 | 0.048232 | 0.29829  |
| 0.42125  | 0.15363  | 0.00087  | 0.176827 | 0.00012  | 0.244719 | 8.51E-08 | -0.00807 | 0.86186  |
| 0.49751  | 0.025425 | 0.58366  | -0.10211 | 0.02735  | -0.06328 | 0.17219  | -0.08055 | 0.08205  |
| 0.00022  | 0.097298 | 0.03556  | 0.05681  | 0.22044  | 0.223434 | 1.08E-06 | -0.0393  | 0.39677  |
| 0.00032  | 0.105344 | 0.0228   | 0.106336 | 0.02154  | 0.213865 | 3.11E-06 | 0.0063   | 0.892    |
| 1.10E-05 | 0.31867  | 1.75E-12 | 0.335142 | 1.01E-13 | 0.23399  | 3.15E-07 | 0.130283 | 0.0048   |
| 0.36135  | -0.04964 | 0.28443  | -0.04607 | 0.32055  | -0.02722 | 0.5574   | -0.02316 | 0.61764  |
| 0.01053  | 0.238653 | 1.80E-07 | 0.220746 | 1.46E-06 | 0.16541  | 0.00033  | 0.224412 | 9.62E-07 |
| 0.00674  | -0.12783 | 0.00567  | -0.15323 | 0.00089  | -0.15499 | 0.00078  | -0.17399 | 0.00016  |
| 0.09753  | 0.108326 | 0.0192   | 0.091901 | 0.04716  | 0.135523 | 0.00334  | 0.134014 | 0.00372  |
| 0.88962  | 0.10338  | 0.02548  | 0.044644 | 0.33572  | 0.108189 | 0.01936  | 0.158612 | 0.00058  |
| 1.01E-15 | -0.19881 | 1.50E-05 | -0.24073 | 1.40E-07 | -0.16109 | 0.00047  | -0.24758 | 5.94E-08 |
| 0.34995  | 0.322207 | 9.65E-13 | 0.154307 | 0.00082  | 0.249707 | 4.54E-08 | 0.168275 | 0.00026  |
| 0.43272  | 0.221837 | 1.29E-06 | 0.250152 | 4.29E-08 | 0.241441 | 1.28E-07 | -0.05063 | 0.2749   |
| 1.61E-07 | 0.077747 | 0.09332  | 0.039929 | 0.38929  | 0.046209 | 0.31903  | -0.09363 | 0.04313  |
| 1.66E-08 | 0.030665 | 0.50858  | 0.027078 | 0.55942  | 0.150899 | 0.00107  | -0.03375 | 0.46687  |
| 0.30564  | 0.130047 | 0.00488  | 0.073117 | 0.11458  | 0.192188 | 2.90E-05 | 0.115062 | 0.01284  |
| 0.15336  | 0.036102 | 0.43637  | -0.02145 | 0.64377  | -0.02579 | 0.57833  | 0.047239 | 0.30836  |
| 0.02264  | 0.228759 | 5.83E-07 | 0.168041 | 0.00026  | 0.18911  | 3.91E-05 | 0.085493 | 0.0649   |
| 0.00126  | -0.1059  | 0.02209  | -0.09706 | 0.03601  | -0.03428 | 0.45993  | -0.19451 | 2.31E-05 |

|          |          |          |          |          |          |          |          |          |
|----------|----------|----------|----------|----------|----------|----------|----------|----------|
| 1.10E-05 | 0.047117 | 0.30961  | -0.0734  | 0.11318  | 0.013236 | 0.77543  | -0.09725 | 0.03566  |
| 0.00016  | -0.10314 | 0.02582  | -0.08127 | 0.07936  | -0.19135 | 3.15E-05 | 0.063765 | 0.16892  |
| 7.94E-08 | 0.153161 | 0.0009   | -0.0699  | 0.13148  | -0.00925 | 0.84199  | -0.19731 | 1.75E-05 |
| 0.01412  | -0.11576 | 0.0123   | -0.26076 | 1.07E-08 | -0.32944 | 2.77E-13 | -0.06116 | 0.18701  |
| 0.00678  | 0.206782 | 6.62E-06 | 0.208675 | 5.43E-06 | 0.202008 | 1.09E-05 | 0.098365 | 0.03358  |
| 0.00102  | -0.08303 | 0.07304  | -0.19625 | 1.94E-05 | -0.13537 | 0.00338  | -0.08775 | 0.05812  |
| 0.50652  | -0.05844 | 0.20748  | -0.16296 | 0.00041  | -0.11974 | 0.0096   | -0.07791 | 0.09264  |
| 9.77E-10 | -0.17775 | 0.00011  | -0.25424 | 2.53E-08 | -0.17236 | 0.00018  | -0.34701 | 1.16E-14 |
| 5.22E-05 | -0.1967  | 1.86E-05 | -0.28873 | 2.04E-10 | -0.26203 | 9.03E-09 | -0.23488 | 2.83E-07 |
| 8.72E-07 | -0.14774 | 0.00137  | -0.25031 | 4.20E-08 | -0.16891 | 0.00025  | -0.21215 | 3.75E-06 |
| 0.02029  | -0.07295 | 0.11539  | -0.04495 | 0.33239  | 0.009466 | 0.83833  | -0.00855 | 0.85376  |
| 2.91E-07 | -0.20256 | 1.03E-05 | -0.19198 | 2.96E-05 | -0.15405 | 0.00084  | -0.25195 | 3.40E-08 |
| 0.00423  | -0.13116 | 0.00453  | -0.13135 | 0.00447  | -0.19117 | 3.20E-05 | -0.14893 | 0.00125  |
| 0.00043  | 0.131783 | 0.00434  | 0.172544 | 0.00018  | 0.054788 | 0.23733  | 0.007678 | 0.86857  |
| 0.44225  | 0.140407 | 0.00236  | 0.071508 | 0.1228   | 0.102123 | 0.02733  | 0.067612 | 0.1446   |
| 0.00196  | 0.291873 | 1.27E-10 | 0.258892 | 1.37E-08 | 0.153677 | 0.00086  | -0.02731 | 0.55603  |
| 0.00748  | 0.009325 | 0.84072  | -0.01859 | 0.68859  | -0.00756 | 0.87049  | 0.002757 | 0.95262  |
| 0.49337  | 0.052798 | 0.25483  | -0.01024 | 0.82524  | -0.00539 | 0.90751  | 0.020008 | 0.66628  |
| 0.0084   | 0.078186 | 0.09147  | -0.12371 | 0.00744  | 0.003405 | 0.9415   | -0.09503 | 0.0401   |
| 0.33416  | 0.088464 | 0.05609  | -0.06493 | 0.16127  | 0.051698 | 0.26487  | -0.02632 | 0.5705   |
| 0.57752  | 0.126338 | 0.00626  | -0.08915 | 0.05421  | 0.005498 | 0.90567  | -0.08177 | 0.07753  |
| 0.29801  | 0.044509 | 0.33719  | -0.0862  | 0.0627   | -0.00158 | 0.97288  | -0.04692 | 0.31161  |
| 0.79848  | 0.126082 | 0.00637  | -0.10316 | 0.02579  | 0.019643 | 0.67202  | -0.03241 | 0.48479  |
| 0.6535   | 0.112173 | 0.0153   | 0.00793  | 0.86428  | 0.02875  | 0.53542  | 0.047384 | 0.30687  |
| 0.05358  | 0.103764 | 0.02493  | -0.11114 | 0.01628  | 0.033079 | 0.47577  | -0.08299 | 0.07319  |
| 0.03754  | 0.22828  | 6.17E-07 | 0.22843  | 6.06E-07 | 0.259546 | 1.26E-08 | 0.329814 | 2.60E-13 |
| 0.00811  | -0.03884 | 0.40236  | 0.109511 | 0.01792  | -0.05514 | 0.2343   | 0.017498 | 0.70606  |
| 0.10027  | -0.00203 | 0.96505  | -0.10381 | 0.02487  | -0.04967 | 0.28412  | -0.12274 | 0.00792  |
| 0.05978  | 0.183756 | 6.49E-05 | 0.144161 | 0.00179  | 0.151408 | 0.00103  | 0.20475  | 8.19E-06 |
| 0.08207  | -0.0229  | 0.62151  | -0.04159 | 0.3698   | -0.02012 | 0.66451  | -0.01744 | 0.70695  |
| 0.57286  | -0.12623 | 0.0063   | -0.07179 | 0.12135  | -0.08203 | 0.07657  | -0.02776 | 0.54954  |
| 0.02533  | -0.05828 | 0.20868  | -0.15275 | 0.00093  | 0.004223 | 0.92749  | -0.03355 | 0.46947  |
| 0.00754  | -0.02913 | 0.53004  | 0.022869 | 0.62206  | -0.02623 | 0.57182  | 0.082419 | 0.07518  |
| 0.00165  | -0.02579 | 0.57827  | 0.007605 | 0.86981  | -0.04347 | 0.34854  | 0.043833 | 0.34458  |
| 0.0705   | 0.146014 | 0.00156  | 0.138932 | 0.00262  | 0.076735 | 0.09767  | -0.01059 | 0.8194   |
| 0.00576  | -0.20589 | 7.27E-06 | -0.06237 | 0.17844  | -0.17702 | 0.00012  | -0.1947  | 2.27E-05 |
| 0.21509  | 0.075885 | 0.10145  | 0.211877 | 3.86E-06 | 0.243013 | 1.05E-07 | 0.175732 | 0.00013  |
| 0.25641  | -0.01689 | 0.71589  | -0.00046 | 0.99205  | 0.006224 | 0.89329  | 0.026517 | 0.56759  |
| 0.66372  | 0.039194 | 0.39809  | 0.012169 | 0.7931   | 0.065528 | 0.15742  | -0.00744 | 0.87268  |
| 0.52786  | -0.05274 | 0.25537  | -0.06138 | 0.18548  | -0.06383 | 0.16848  | 0.001262 | 0.97829  |
| 0.34737  | -0.03889 | 0.40179  | -0.09062 | 0.05035  | -0.053   | 0.25298  | -0.0849  | 0.06678  |
| 0.00414  | -0.01192 | 0.79731  | -0.08548 | 0.06494  | 0.005377 | 0.90775  | -0.02284 | 0.62247  |
| 0.07825  | 0.145565 | 0.00161  | 0.071149 | 0.12469  | 0.204984 | 7.99E-06 | 0.080134 | 0.08365  |
| 0.02761  | 0.067497 | 0.14529  | 0.094817 | 0.04055  | -0.02533 | 0.58504  | 0.185059 | 5.74E-05 |
| 0.27587  | -0.2762  | 1.27E-09 | -0.27876 | 8.80E-10 | -0.2922  | 1.21E-10 | -0.10415 | 0.0244   |

|          |          |          |          |          |          |          |          |          |
|----------|----------|----------|----------|----------|----------|----------|----------|----------|
| 0.46194  | -0.0227  | 0.62461  | -0.05609 | 0.22635  | -0.0073  | 0.87498  | -0.00335 | 0.94251  |
| 0.78792  | 0.218562 | 1.86E-06 | 0.177008 | 0.00012  | 0.208572 | 5.49E-06 | 0.199027 | 1.47E-05 |
| 8.70E-06 | 0.290741 | 1.50E-10 | 0.117612 | 0.01097  | 0.252112 | 3.33E-08 | -0.1287  | 0.00535  |
| 0.00414  | 0.062901 | 0.17478  | 0.117411 | 0.01111  | 0.163716 | 0.00038  | -0.01885 | 0.68453  |
| 0.04718  | 0.023647 | 0.61025  | -0.02653 | 0.56736  | 0.028403 | 0.54036  | 0.01911  | 0.68041  |
| 0.75625  | 0.163829 | 0.00038  | 0.10332  | 0.02557  | 0.222706 | 1.17E-06 | 0.111908 | 0.01554  |
| 0.1866   | 0.110947 | 0.01646  | 0.096692 | 0.03672  | 0.152769 | 0.00093  | 0.042872 | 0.35527  |
| 0.0249   | -0.02144 | 0.64398  | 0.019993 | 0.66652  | 0.050659 | 0.2746   | -0.07393 | 0.11057  |
| 1.19E-09 | -0.02872 | 0.53579  | -0.02829 | 0.54202  | -0.07323 | 0.11399  | 0.128146 | 0.00555  |
| 0.47945  | -0.02357 | 0.61139  | -0.10224 | 0.02716  | -0.09946 | 0.03165  | -0.10836 | 0.01916  |
| 0.17601  | -0.02498 | 0.59024  | -0.03376 | 0.46669  | -0.02899 | 0.53196  | -0.05162 | 0.26561  |
| 4.16E-07 | -0.09153 | 0.04805  | -0.07491 | 0.10591  | -0.01918 | 0.67932  | -0.16427 | 0.00036  |
| 1.95E-10 | 0.079768 | 0.08508  | 0.003661 | 0.9371   | 0.109174 | 0.01827  | -0.14961 | 0.00118  |
| 0.16033  | 0.330551 | 2.28E-13 | 0.129288 | 0.00514  | 0.213316 | 3.30E-06 | 0.203084 | 9.73E-06 |
| 0.00049  | 0.211668 | 3.94E-06 | 0.146549 | 0.0015   | 0.259207 | 1.32E-08 | 0.064067 | 0.1669   |
| 0.02219  | -0.00917 | 0.84337  | -0.03374 | 0.46693  | -0.00069 | 0.98818  | -0.11863 | 0.01029  |
| 0.8117   | -0.0001  | 0.99822  | -0.02481 | 0.59276  | 0.029044 | 0.53125  | -0.03406 | 0.46274  |
| 0.00274  | -0.23797 | 1.95E-07 | -0.17805 | 0.00011  | -0.20152 | 1.14E-05 | 0.018922 | 0.68338  |
| 0.02359  | 0.071248 | 0.12417  | 0.079751 | 0.08515  | 0.1572   | 0.00065  | 0.068758 | 0.1379   |
| 3.88E-07 | 0.187562 | 4.53E-05 | 0.110106 | 0.0173   | 0.104264 | 0.02424  | 0.373386 | 6.75E-17 |
| 0.00015  | -0.00136 | 0.97662  | -0.13321 | 0.00393  | 0.10814  | 0.01941  | -0.02509 | 0.58858  |
| 0.55744  | 0.069662 | 0.13278  | 0.046379 | 0.31726  | 0.112917 | 0.01463  | -0.05756 | 0.21439  |
| 2.18E-06 | 0.103258 | 0.02565  | 0.078565 | 0.08991  | 0.184078 | 6.29E-05 | 0.012011 | 0.79573  |
| 0.14091  | 0.13098  | 0.00458  | 0.073363 | 0.11336  | 0.173537 | 0.00016  | 0.071949 | 0.1205   |
| 0.00101  | 0.029011 | 0.53172  | -0.01073 | 0.81706  | 0.158892 | 0.00057  | -0.03058 | 0.50977  |
| 0.08392  | 0.295803 | 6.95E-11 | 0.192426 | 2.83E-05 | 0.289377 | 1.85E-10 | 0.160722 | 0.00049  |
| 1.84E-07 | 0.060578 | 0.19128  | 0.020542 | 0.65794  | 0.2045   | 8.40E-06 | 0.00721  | 0.8765   |
| 3.86E-09 | -0.15931 | 0.00055  | -0.01405 | 0.76199  | -0.03689 | 0.42641  | -0.13432 | 0.00364  |
| 0.09661  | -0.02347 | 0.61285  | -0.0745  | 0.10785  | 0.036181 | 0.43537  | -0.11139 | 0.01603  |
| 0.93991  | 0.314196 | 3.70E-12 | 0.101945 | 0.0276   | 0.167304 | 0.00028  | 0.084732 | 0.06733  |
| 1.42E-11 | 0.085907 | 0.06361  | 0.071401 | 0.12336  | 0.2549   | 2.32E-08 | 0.005366 | 0.90793  |
| 0.3218   | 0.01949  | 0.67442  | -0.00714 | 0.87778  | 0.055596 | 0.23047  | 0.013548 | 0.77029  |
| 2.89E-09 | 0.043406 | 0.34931  | 0.06597  | 0.15464  | 0.178553 | 0.0001   | -0.02793 | 0.54712  |
| 0.91931  | -0.08164 | 0.07798  | -0.00487 | 0.91636  | 0.004271 | 0.92666  | -0.00707 | 0.87895  |
| 0.00094  | -0.23421 | 3.07E-07 | -0.06956 | 0.13338  | -0.16838 | 0.00026  | 0.002788 | 0.95209  |
| 0.43041  | 0.128693 | 0.00535  | 0.028625 | 0.5372   | 0.026984 | 0.56079  | 0.033931 | 0.46447  |
| 0.18761  | -0.29917 | 4.12E-11 | -0.08605 | 0.06316  | -0.25668 | 1.84E-08 | -0.0559  | 0.22796  |
| 0.00299  | 0.148908 | 0.00125  | 0.083119 | 0.07273  | 0.091626 | 0.04783  | 0.18828  | 4.23E-05 |
| 0.32531  | 0.17771  | 0.00011  | 0.168545 | 0.00025  | 0.246664 | 6.67E-08 | 0.287514 | 2.44E-10 |
| 4.84E-09 | -0.08141 | 0.07885  | -0.0669  | 0.1489   | -0.09242 | 0.04591  | -0.21157 | 3.99E-06 |
| 0.04906  | 0.124713 | 0.00697  | 0.130155 | 0.00485  | 0.270808 | 2.71E-09 | 0.043375 | 0.34965  |
| 0.02523  | 0.042618 | 0.35813  | -0.14564 | 0.0016   | 0.003311 | 0.94312  | 0.001046 | 0.98202  |
| 6.42E-30 | 0.198546 | 1.54E-05 | 0.218806 | 1.81E-06 | 0.070075 | 0.1305   | 0.31201  | 5.29E-12 |
| 5.85E-05 | -0.04904 | 0.29026  | -0.05496 | 0.23588  | -0.06207 | 0.18053  | -0.17866 | 0.0001   |
| 0.00389  | 0.088627 | 0.05563  | 0.056361 | 0.22411  | 0.138234 | 0.00276  | 0.059238 | 0.2013   |

|          |          |          |          |          |          |          |          |          |
|----------|----------|----------|----------|----------|----------|----------|----------|----------|
| 0.00996  | 0.134197 | 0.00367  | 0.139557 | 0.00251  | 0.214433 | 2.93E-06 | 0.07792  | 0.09259  |
| 7.35E-12 | 0.098502 | 0.03333  | 0.032874 | 0.47851  | -0.09266 | 0.04537  | 0.251912 | 3.42E-08 |
| 0.00189  | 0.172117 | 0.00019  | 0.206409 | 6.89E-06 | 0.243656 | 9.72E-08 | 0.165007 | 0.00034  |
| 0.03669  | 0.022788 | 0.62329  | -0.04115 | 0.37493  | 0.056134 | 0.22599  | -0.00399 | 0.93143  |
| 0.37335  | -0.08768 | 0.05831  | 0.07003  | 0.13075  | -0.04489 | 0.33307  | 0.032038 | 0.48977  |
| 4.91E-11 | 0.201197 | 1.18E-05 | 0.099255 | 0.032    | 0.117398 | 0.01112  | 0.260416 | 1.12E-08 |
| 2.15E-09 | -0.35405 | 3.08E-15 | -0.17687 | 0.00012  | -0.27515 | 1.47E-09 | -0.22993 | 5.09E-07 |
| 0.15807  | 0.018374 | 0.69207  | 0.022943 | 0.62093  | 0.033191 | 0.47428  | 0.033704 | 0.46747  |
| 0.03928  | 0.134822 | 0.00351  | 0.18621  | 5.15E-05 | 0.221096 | 1.40E-06 | 0.192521 | 2.81E-05 |
| 0.41144  | 0.099719 | 0.0312   | 0.17588  | 0.00013  | 0.205844 | 7.31E-06 | 0.144016 | 0.00181  |
| 0.00708  | -0.09888 | 0.03265  | 0.043853 | 0.34436  | -0.00515 | 0.9116   | -0.0831  | 0.07278  |
| 1.54E-08 | -0.12006 | 0.0094   | -0.08789 | 0.05771  | -0.0743  | 0.1088   | -0.15193 | 0.00099  |
| 0.0413   | 0.175366 | 0.00014  | 0.139037 | 0.0026   | 0.187353 | 4.62E-05 | 0.317361 | 2.18E-12 |
| 0.00036  | -0.00617 | 0.89415  | -0.00794 | 0.86419  | 0.046845 | 0.31242  | -0.10545 | 0.02266  |
| 4.82E-12 | 0.149782 | 0.00117  | 0.197484 | 1.72E-05 | 0.179352 | 9.74E-05 | 0.290743 | 1.50E-10 |
| 0.01127  | -0.0474  | 0.30672  | -0.0535  | 0.24855  | -0.16051 | 0.0005   | 0.033735 | 0.46706  |
| 6.67E-05 | 0.076657 | 0.09801  | 0.032606 | 0.48211  | 0.146811 | 0.00147  | 0.014705 | 0.75128  |
| 0.00015  | -0.05106 | 0.27084  | -0.00766 | 0.86892  | 0.121893 | 0.00837  | -0.0746  | 0.10739  |
| 0.00204  | 0.007656 | 0.86893  | -0.17339 | 0.00017  | -0.1783  | 0.00011  | -0.18614 | 5.19E-05 |
| 0.00992  | 0.038201 | 0.41015  | 0.150126 | 0.00114  | 0.217177 | 2.17E-06 | -0.02597 | 0.57559  |
| 0.03048  | 0.097044 | 0.03604  | 0.181609 | 7.92E-05 | 0.14747  | 0.00139  | 0.179071 | 9.99E-05 |
| 0.8466   | 0.07672  | 0.09774  | 0.028624 | 0.53721  | 0.040817 | 0.37882  | 0.058644 | 0.20587  |
| 1.85E-06 | -0.06231 | 0.17888  | -0.04356 | 0.34762  | 0.086238 | 0.06259  | -0.10324 | 0.02568  |
| 0.42575  | 0.078307 | 0.09097  | 0.127271 | 0.00588  | 0.184691 | 5.94E-05 | 0.060984 | 0.18832  |
| 0.53176  | 0.061935 | 0.18151  | 0.093365 | 0.04373  | 0.122768 | 0.00791  | 0.061773 | 0.18265  |
| 0.53504  | -0.02992 | 0.51896  | 0.021545 | 0.64236  | -0.00346 | 0.94053  | 0.017347 | 0.70848  |
| 0.00146  | 0.026476 | 0.56819  | 0.066134 | 0.15361  | -0.01483 | 0.74928  | 0.060464 | 0.19212  |
| 0.20615  | 0.075454 | 0.10341  | 0.053973 | 0.24438  | 0.103011 | 0.02601  | 0.065107 | 0.16011  |
| 0.95282  | -0.09179 | 0.04742  | -0.01106 | 0.81155  | 0.003623 | 0.93777  | -0.00153 | 0.97363  |
| 0.06712  | -0.13535 | 0.00338  | 0.019027 | 0.68172  | 0.035587 | 0.44295  | -0.07774 | 0.09335  |
| 3.97E-05 | -0.11276 | 0.01477  | -0.20526 | 7.77E-06 | -0.15069 | 0.00109  | -0.03987 | 0.38994  |
| 0.00632  | 0.174005 | 0.00016  | 0.093559 | 0.0433   | 0.116607 | 0.01168  | 0.304729 | 1.72E-11 |
| 2.05E-05 | 0.147523 | 0.00139  | 0.291103 | 1.42E-10 | 0.208512 | 5.52E-06 | 0.28248  | 5.13E-10 |
| 0.02002  | 0.128131 | 0.00555  | 0.259381 | 1.29E-08 | 0.191907 | 2.98E-05 | 0.216215 | 2.41E-06 |
| 0.19671  | -0.00172 | 0.97049  | -0.08723 | 0.05963  | -0.03628 | 0.43408  | 0.060732 | 0.19016  |
| 1.51E-07 | 0.231822 | 4.07E-07 | 0.003935 | 0.93241  | 0.26303  | 7.89E-09 | -0.05531 | 0.23287  |
| 6.37E-14 | 0.249948 | 4.40E-08 | -0.00759 | 0.87002  | 0.094616 | 0.04098  | 0.291829 | 1.28E-10 |
| 0.73771  | 0.166391 | 0.0003   | 0.066232 | 0.153    | 0.132164 | 0.00422  | 0.106454 | 0.0214   |
| 0.32787  | -0.12223 | 0.00819  | -0.06474 | 0.1625   | -0.05857 | 0.20645  | 0.046723 | 0.31368  |
| 0.00033  | 0.062464 | 0.1778   | 0.172322 | 0.00018  | 0.193492 | 2.55E-05 | 0.039574 | 0.39352  |
| 0.04573  | 0.175945 | 0.00013  | 0.102386 | 0.02693  | 0.20559  | 7.50E-06 | 0.04691  | 0.31174  |
| 0.0349   | -0.05371 | 0.24666  | 0.051842 | 0.26353  | 0.144189 | 0.00178  | -0.04368 | 0.34629  |
| 6.21E-06 | 0.063278 | 0.1722   | 0.157152 | 0.00065  | 0.231375 | 4.29E-07 | 0.079718 | 0.08528  |
| 0.04464  | 0.184116 | 6.27E-05 | 0.151515 | 0.00102  | 0.161716 | 0.00045  | 0.128559 | 0.0054   |
| 0.26754  | -0.1761  | 0.00013  | -0.12239 | 0.0081   | -0.17042 | 0.00022  | -0.11397 | 0.01373  |

|          |          |          |          |          |          |          |          |          |
|----------|----------|----------|----------|----------|----------|----------|----------|----------|
| 2.30E-18 | 0.009752 | 0.83353  | 0.028572 | 0.53795  | -0.0355  | 0.44412  | 0.228951 | 5.70E-07 |
| 0.00295  | -0.00309 | 0.94693  | 0.011023 | 0.81221  | 0.159958 | 0.00052  | -0.0014  | 0.97586  |
| 0.06856  | 0.012652 | 0.78509  | -0.06143 | 0.18509  | -0.05539 | 0.23219  | 0.165955 | 0.00032  |
| 1.10E-06 | 0.016237 | 0.72636  | 0.130439 | 0.00475  | 0.166679 | 0.0003   | -0.00274 | 0.95291  |
| 0.15294  | 0.097163 | 0.03581  | 0.112322 | 0.01516  | 0.12655  | 0.00617  | 0.054686 | 0.2382   |
| 0.587    | 0.022627 | 0.62574  | 0.090111 | 0.05165  | 0.083314 | 0.07206  | 0.048583 | 0.29478  |
| 1.03E-11 | 0.036367 | 0.43301  | -0.02697 | 0.56094  | 0.186871 | 4.84E-05 | -0.02477 | 0.59345  |
| 7.94E-07 | -0.03467 | 0.4548   | 0.028962 | 0.53241  | 0.061928 | 0.18156  | -0.01331 | 0.77423  |
| 0.11192  | -0.01715 | 0.71166  | -0.03749 | 0.4189   | -0.01547 | 0.73882  | -0.08921 | 0.05405  |
| 0.0546   | 0.028481 | 0.53925  | 0.043112 | 0.35258  | -0.02532 | 0.58526  | 0.092336 | 0.04612  |
| 0.96767  | 0.03995  | 0.38904  | 0.039954 | 0.38899  | 0.009778 | 0.83309  | 0.183099 | 6.89E-05 |
| 0.02789  | -0.00589 | 0.89903  | 0.027346 | 0.55554  | -0.03226 | 0.48671  | 0.149874 | 0.00116  |
| 0.51049  | 0.007524 | 0.87118  | 0.027066 | 0.5596   | 0.05537  | 0.23238  | 0.028627 | 0.53716  |
| 0.00831  | 0.051093 | 0.27051  | 0.09982  | 0.03103  | 0.156284 | 0.0007   | 0.006122 | 0.89502  |
| 7.51E-08 | -0.10415 | 0.02439  | -0.04786 | 0.30208  | 0.000312 | 0.99463  | -0.12964 | 0.00502  |
| 0.00094  | -0.04989 | 0.28197  | -0.08083 | 0.08099  | 0.0397   | 0.39202  | -0.03387 | 0.46534  |
| 7.93E-09 | 0.078734 | 0.08922  | 0.111956 | 0.0155   | 0.040331 | 0.38453  | 0.212305 | 3.68E-06 |
| 0.01912  | 0.02304  | 0.61945  | 0.134029 | 0.00371  | 0.155366 | 0.00075  | 0.050898 | 0.27234  |
| 0.02161  | 0.003347 | 0.94249  | 0.050851 | 0.27279  | 0.099984 | 0.03075  | 0.025526 | 0.58216  |
| 0.35141  | 0.031004 | 0.5039   | 0.042237 | 0.36245  | 0.109061 | 0.0184   | 0.012801 | 0.78262  |
| 0.87888  | 0.04575  | 0.32387  | 0.057856 | 0.21204  | -0.00562 | 0.90353  | -0.04678 | 0.3131   |
| 0.00028  | -0.26415 | 6.78E-09 | -0.0905  | 0.05064  | -0.13208 | 0.00425  | -0.19982 | 1.36E-05 |
| 3.32E-06 | 0.21674  | 2.27E-06 | 0.204594 | 8.32E-06 | 0.18954  | 3.75E-05 | 0.188428 | 4.17E-05 |
| 0.6694   | 0.005576 | 0.90435  | -0.01388 | 0.76484  | 0.025592 | 0.58118  | 0.022917 | 0.62132  |
| 0.10434  | 0.101956 | 0.02759  | 0.10912  | 0.01833  | 0.148796 | 0.00126  | 0.026319 | 0.57048  |
| 0.20838  | -0.04248 | 0.3597   | -0.09319 | 0.04414  | -0.01238 | 0.78965  | 0.00701  | 0.87991  |
| 0.13421  | 0.058727 | 0.20523  | 0.070516 | 0.12809  | 0.102915 | 0.02615  | -0.0002  | 0.99655  |
| 0.00048  | 0.013518 | 0.77078  | 0.016277 | 0.72571  | 0.068048 | 0.14203  | 0.002562 | 0.95597  |
| 0.01655  | -0.3253  | 5.69E-13 | -0.09921 | 0.03208  | -0.26783 | 4.10E-09 | -0.09096 | 0.04946  |
| 0.00019  | -0.22327 | 1.10E-06 | -0.12472 | 0.00697  | -0.15854 | 0.00058  | -0.10035 | 0.03014  |
| 0.06193  | -0.16872 | 0.00025  | -0.14997 | 0.00115  | -0.19177 | 3.02E-05 | -0.23485 | 2.84E-07 |
| 0.23166  | 0.213689 | 3.17E-06 | 0.18324  | 6.80E-05 | 0.189173 | 3.88E-05 | 0.142192 | 0.00207  |
| 0.05926  | 0.017613 | 0.70423  | 0.004668 | 0.91986  | 0.039106 | 0.39915  | 0.232059 | 3.96E-07 |
| 0.01561  | 0.121511 | 0.00857  | 0.270736 | 2.74E-09 | 0.296728 | 6.03E-11 | 0.040139 | 0.3868   |
| 1.28E-26 | 0.175574 | 0.00014  | 0.063936 | 0.16778  | -0.09593 | 0.03824  | 0.17633  | 0.00013  |
| 0.00151  | 0.050705 | 0.27417  | -0.03017 | 0.51552  | -0.08057 | 0.08197  | 0.022083 | 0.63407  |
| 0.00919  | -0.18872 | 4.06E-05 | -0.25517 | 2.24E-08 | -0.18229 | 7.43E-05 | -0.16874 | 0.00025  |
| 0.00216  | 0.07063  | 0.12747  | 0.068538 | 0.13917  | 0.015215 | 0.74295  | 0.120275 | 0.00928  |
| 0.01195  | 0.047247 | 0.30827  | -0.07565 | 0.1025   | -0.19219 | 2.90E-05 | 0.076967 | 0.09666  |
| 0.65323  | 0.169283 | 0.00024  | 0.195715 | 2.05E-05 | 0.237398 | 2.09E-07 | 0.177519 | 0.00011  |
| 0.00122  | 0.192353 | 2.85E-05 | 0.159073 | 0.00056  | 0.345016 | 1.68E-14 | 0.096612 | 0.03688  |
| 0.00125  | 0.032395 | 0.48494  | -0.03779 | 0.41526  | 0.04229  | 0.36184  | -0.05703 | 0.21865  |
| 0.71488  | -0.09288 | 0.04484  | -0.08429 | 0.06879  | -0.03232 | 0.48598  | -0.03599 | 0.43778  |
| 0.00031  | 0.124365 | 0.00713  | 0.14392  | 0.00182  | 0.148251 | 0.00131  | 0.12093  | 0.0089   |
| 0.15007  | 0.16063  | 0.00049  | 0.084719 | 0.06737  | 0.151552 | 0.00102  | 0.121591 | 0.00853  |

|          |          |          |          |          |          |          |          |          |
|----------|----------|----------|----------|----------|----------|----------|----------|----------|
| 0.39989  | -0.08804 | 0.05729  | -0.01059 | 0.81942  | -0.04274 | 0.35681  | -0.00119 | 0.97955  |
| 0.00032  | -0.10129 | 0.02862  | -0.07602 | 0.10085  | -0.00221 | 0.96209  | -0.18104 | 8.34E-05 |
| 0.2496   | 0.046802 | 0.31286  | 0.025937 | 0.5761   | 0.006868 | 0.88233  | 0.028413 | 0.54022  |
| 0.1822   | -0.01897 | 0.68264  | 0.023259 | 0.61612  | 0.027831 | 0.54854  | -0.01596 | 0.73088  |
| 0.2481   | -0.0268  | 0.56348  | -0.10297 | 0.02606  | 0.008742 | 0.85056  | -0.10002 | 0.03069  |
| 8.35E-05 | 0.058609 | 0.20614  | 0.095224 | 0.03969  | 0.142193 | 0.00207  | -0.00675 | 0.88431  |
| 0.00277  | 0.349133 | 7.82E-15 | 0.130039 | 0.00488  | 0.178555 | 0.0001   | -0.07138 | 0.12348  |
| 0.69391  | 0.008639 | 0.8523   | -0.01565 | 0.73583  | -0.0212  | 0.64771  | -0.02956 | 0.52404  |
| 0.00047  | 0.143125 | 0.00193  | -0.00076 | 0.98687  | 0.058414 | 0.20766  | -0.12117 | 0.00876  |
| 0.09407  | 0.160153 | 0.00051  | 0.050793 | 0.27333  | 0.055245 | 0.23343  | -0.08126 | 0.0794   |
| 0.98129  | 0.064318 | 0.16525  | -0.01001 | 0.82919  | -0.00086 | 0.98514  | -0.01381 | 0.76594  |
| 0.12136  | 0.070409 | 0.12867  | 0.060338 | 0.19305  | 0.060613 | 0.19103  | -0.00455 | 0.92184  |
| 0.01822  | 0.194766 | 2.25E-05 | -0.01228 | 0.79126  | 0.063943 | 0.16773  | -0.08848 | 0.05605  |
| 0.58989  | 0.247757 | 5.81E-08 | 0.023934 | 0.60592  | 0.047279 | 0.30795  | -0.02136 | 0.64526  |
| 0.00041  | 0.181379 | 8.09E-05 | 0.031887 | 0.49182  | 0.114252 | 0.01349  | -0.06907 | 0.13611  |
| 0.77766  | 0.165351 | 0.00033  | 0.130488 | 0.00474  | 0.118053 | 0.01067  | 0.034947 | 0.4512   |
| 0.53958  | 0.202125 | 1.07E-05 | 0.052309 | 0.25925  | 0.193141 | 2.64E-05 | 0.054444 | 0.24029  |
| 0.78832  | 0.007458 | 0.8723   | 0.069067 | 0.13614  | 0.014413 | 0.75607  | -0.06353 | 0.17049  |
| 0.00148  | 0.091867 | 0.04724  | 0.11541  | 0.01257  | 0.13408  | 0.0037   | 0.189822 | 3.65E-05 |
| 0.66954  | 0.228731 | 5.85E-07 | 0.143395 | 0.00189  | 0.19336  | 2.59E-05 | -0.00412 | 0.92923  |
| 0.04318  | -0.00585 | 0.89974  | -0.02014 | 0.66426  | 0.062299 | 0.17895  | -0.04848 | 0.29579  |
| 0.32512  | -0.0494  | 0.28675  | -0.06728 | 0.14659  | -0.03963 | 0.39281  | 0.046993 | 0.31088  |
| 0.03074  | 0.088888 | 0.05492  | 0.102818 | 0.02629  | 0.073271 | 0.11381  | 0.14461  | 0.00173  |
| 0.62713  | 0.002613 | 0.95508  | 0.005508 | 0.9055   | -0.01488 | 0.74845  | -0.02721 | 0.55747  |
| 0.9339   | -0.01789 | 0.69974  | 0.029369 | 0.52667  | 0.05723  | 0.21704  | -0.0253  | 0.58555  |
| 0.00151  | -0.0209  | 0.65228  | -0.05339 | 0.24953  | 0.071755 | 0.12151  | 0.04909  | 0.28977  |
| 1.36E-06 | 0.026193 | 0.57233  | 0.082075 | 0.07641  | 0.183844 | 6.43E-05 | -0.00404 | 0.93058  |
| 0.10627  | 0.048956 | 0.29109  | 0.001296 | 0.97772  | 0.005977 | 0.8975   | 0.052193 | 0.26032  |
| 5.97E-17 | -0.12574 | 0.00651  | -0.10658 | 0.02125  | -0.00907 | 0.84505  | -0.22798 | 6.39E-07 |
| 5.16E-06 | 0.100249 | 0.03031  | 0.126296 | 0.00628  | 0.279557 | 7.84E-10 | 0.007237 | 0.87606  |
| 1.36E-05 | -0.09209 | 0.0467   | -0.09312 | 0.0443   | -0.10974 | 0.01768  | -0.21916 | 1.74E-06 |
| 0.00414  | -0.04782 | 0.30248  | -0.0617  | 0.18316  | 0.067834 | 0.14329  | -0.02233 | 0.63031  |
| 0.02487  | -0.05089 | 0.27238  | -0.12807 | 0.00558  | -0.04042 | 0.38349  | -0.02383 | 0.60751  |
| 0.02979  | -0.04038 | 0.38394  | -0.14925 | 0.00122  | 0.0296   | 0.52342  | -0.07206 | 0.11993  |
| 0.1639   | 0.067412 | 0.1458   | 0.108812 | 0.01867  | 0.154445 | 0.00081  | 0.076737 | 0.09766  |
| 4.59E-06 | 0.141978 | 0.0021   | 0.210097 | 4.67E-06 | 0.129833 | 0.00495  | 0.160836 | 0.00048  |
| 0.83822  | 0.048647 | 0.29415  | -0.00035 | 0.99403  | 0.022387 | 0.62941  | -0.00421 | 0.92774  |
| 0.03872  | -0.14455 | 0.00174  | -0.03775 | 0.41571  | -0.00032 | 0.99451  | 0.004788 | 0.91782  |
| 0.00012  | -0.23481 | 2.86E-07 | -0.05838 | 0.20795  | -0.08583 | 0.06385  | -0.06048 | 0.19199  |
| 0.14706  | 0.349474 | 7.34E-15 | 0.181231 | 8.20E-05 | 0.22464  | 9.38E-07 | 0.088618 | 0.05566  |
| 0.00033  | 0.228825 | 5.79E-07 | 0.207678 | 6.03E-06 | 0.175489 | 0.00014  | 0.265791 | 5.42E-09 |
| 0.59722  | 0.149175 | 0.00122  | 0.088277 | 0.05661  | 0.213829 | 3.12E-06 | 0.115925 | 0.01218  |
| 0.60484  | 0.06522  | 0.15939  | 0.078697 | 0.08937  | 0.100657 | 0.02964  | 0.008332 | 0.85749  |
| 0.37209  | 0.075494 | 0.10323  | 0.062718 | 0.17604  | 0.204815 | 8.13E-06 | 0.029517 | 0.52458  |
| 1.45E-06 | -0.14448 | 0.00175  | -0.09455 | 0.04112  | -0.04086 | 0.37827  | -0.23347 | 3.35E-07 |



|          |          |          |          |          |          |          |          |          |
|----------|----------|----------|----------|----------|----------|----------|----------|----------|
| 0.03036  | 0.142338 | 0.00205  | 0.165357 | 0.00033  | 0.281213 | 6.17E-10 | 0.130576 | 0.00471  |
| 0.00033  | 0.029198 | 0.52908  | 0.005497 | 0.90569  | 0.048605 | 0.29457  | -0.07991 | 0.08454  |
| 0.00467  | -0.00969 | 0.83461  | 0.067919 | 0.14278  | -0.01589 | 0.73192  | 0.186759 | 4.89E-05 |
| 6.02E-12 | -0.05593 | 0.22765  | -0.05756 | 0.21438  | -0.01966 | 0.67176  | -0.09164 | 0.04779  |
| 0.80882  | 0.155167 | 0.00077  | 0.198743 | 1.51E-05 | 0.226814 | 7.31E-07 | 0.060754 | 0.19     |
| 0.4757   | 0.187244 | 4.67E-05 | 0.220649 | 1.47E-06 | 0.247015 | 6.38E-08 | 0.054346 | 0.24113  |
| 0.00054  | -0.1106  | 0.0168   | -0.08335 | 0.07193  | -0.08215 | 0.07615  | -0.06342 | 0.17126  |
| 1.63E-08 | 0.020823 | 0.65355  | 0.056688 | 0.22143  | 0.011407 | 0.80579  | -0.14242 | 0.00203  |
| 0.1216   | -0.08207 | 0.07643  | 0.005762 | 0.90117  | -0.05119 | 0.26958  | -0.03013 | 0.51594  |
| 1.13E-06 | -0.03081 | 0.50663  | 0.043093 | 0.3528   | 0.025558 | 0.58169  | -0.10459 | 0.0238   |
| 1.19E-09 | 0.022525 | 0.6273   | 0.03802  | 0.41238  | 0.085181 | 0.06589  | -0.04372 | 0.34578  |
| 2.04E-08 | 0.116619 | 0.01167  | 0.155239 | 0.00076  | 0.330739 | 2.21E-13 | -0.00951 | 0.83766  |
| 1.89E-05 | 0.115515 | 0.01249  | 0.126936 | 0.00602  | 0.204546 | 8.37E-06 | -0.02292 | 0.62124  |
| 0.00022  | 0.113929 | 0.01376  | 0.192007 | 2.95E-05 | 0.275286 | 1.45E-09 | 0.062669 | 0.17638  |
| 0.00014  | 0.226874 | 7.26E-07 | 0.159214 | 0.00055  | 0.197107 | 1.78E-05 | -0.20508 | 7.91E-06 |
| 0.10232  | 0.142934 | 0.00196  | 0.191804 | 3.01E-05 | 0.376423 | 3.62E-17 | 0.145852 | 0.00158  |
| 0.00033  | 0.037079 | 0.42405  | -0.04423 | 0.34021  | 0.116677 | 0.01163  | -0.02622 | 0.572    |
| 0.00321  | 0.012372 | 0.78974  | 0.049813 | 0.28271  | 0.077695 | 0.09353  | 0.191063 | 3.24E-05 |
| 0.31821  | -0.0354  | 0.44531  | -0.00137 | 0.97651  | 0.08756  | 0.05866  | -0.04179 | 0.36756  |
| 6.68E-05 | 0.038964 | 0.40086  | 0.002612 | 0.9551   | 0.115547 | 0.01247  | 0.054625 | 0.23873  |
| 2.33E-12 | -0.09113 | 0.04906  | -0.02626 | 0.57139  | -0.16628 | 0.00031  | 0.071898 | 0.12077  |
| 0.07614  | -0.13401 | 0.00372  | 0.14939  | 0.0012   | -0.0205  | 0.65852  | 0.013425 | 0.77232  |
| 0.29747  | -0.02112 | 0.64896  | 0.122252 | 0.00818  | 0.124563 | 0.00704  | -0.00867 | 0.85169  |
| 0.0055   | 0.374447 | 5.44E-17 | 0.355332 | 2.41E-15 | 0.324894 | 6.09E-13 | 0.425624 | 5.68E-22 |
| 2.18E-07 | 0.339424 | 4.69E-14 | 0.347659 | 1.03E-14 | 0.273281 | 1.92E-09 | 0.258421 | 1.46E-08 |
| 8.30E-07 | 0.100643 | 0.02966  | 0.023549 | 0.61173  | 0.202724 | 1.01E-05 | -0.02008 | 0.66515  |
| 0.31512  | 0.161381 | 0.00046  | 0.073229 | 0.11402  | 0.108551 | 0.01895  | 0.098644 | 0.03307  |
| 0.02866  | 0.237017 | 2.19E-07 | 0.240463 | 1.44E-07 | 0.278433 | 9.22E-10 | 0.305473 | 1.52E-11 |
| 0.7579   | 0.069084 | 0.13604  | 0.108485 | 0.01903  | 0.064718 | 0.16263  | 0.077553 | 0.09414  |
| 0.465    | 0.134514 | 0.00359  | 0.06289  | 0.17485  | 0.117845 | 0.01081  | 0.024728 | 0.59402  |
| 0.02632  | 0.119983 | 0.00945  | 0.090208 | 0.05139  | 0.073751 | 0.11146  | 0.140562 | 0.00233  |
| 8.98E-06 | 0.258752 | 1.40E-08 | 0.287949 | 2.29E-10 | 0.091673 | 0.04771  | 0.170723 | 0.00021  |
| 0.2229   | 0.223984 | 1.01E-06 | 0.168564 | 0.00025  | 0.165252 | 0.00034  | 0.194303 | 2.36E-05 |
| 0.0863   | -0.07329 | 0.11372  | 0.066008 | 0.15439  | 0.050802 | 0.27325  | -0.04418 | 0.34074  |
| 2.21E-09 | 0.052566 | 0.25692  | 0.054799 | 0.23723  | -0.01545 | 0.73918  | 0.240992 | 1.35E-07 |
| 0.77785  | 0.129046 | 0.00522  | 0.109335 | 0.0181   | 0.106536 | 0.0213   | 0.075829 | 0.1017   |
| 0.00202  | 0.124129 | 0.00724  | 0.12202  | 0.0083   | 0.077002 | 0.0965   | 0.099557 | 0.03147  |
| 0.04858  | 0.083585 | 0.07114  | 0.219589 | 1.66E-06 | 0.25802  | 1.54E-08 | -0.03219 | 0.48766  |
| 0.06902  | -0.0296  | 0.52348  | -0.11234 | 0.01515  | -0.01699 | 0.71427  | -0.04683 | 0.31261  |
| 7.68E-10 | 0.130182 | 0.00484  | 0.223834 | 1.03E-06 | 0.135833 | 0.00327  | 0.167262 | 0.00028  |
| 0.01246  | 0.00957  | 0.83659  | -0.0678  | 0.14351  | -0.16846 | 0.00026  | 0.180804 | 8.52E-05 |
| 1.31E-06 | -0.11888 | 0.01014  | -0.10113 | 0.02887  | -0.1685  | 0.00025  | -0.09482 | 0.04054  |
| 0.56029  | -0.03842 | 0.40748  | -0.0474  | 0.30673  | -0.02659 | 0.56647  | 0.069483 | 0.13379  |
| 0.00703  | -0.00505 | 0.91337  | -0.01553 | 0.73787  | -0.06452 | 0.1639   | 0.158398 | 0.00059  |
| 1.85E-13 | 0.163789 | 0.00038  | 0.067976 | 0.14245  | 0.212111 | 3.76E-06 | 0.134943 | 0.00348  |

|          |          |          |          |          |          |          |          |          |
|----------|----------|----------|----------|----------|----------|----------|----------|----------|
| 2.35E-09 | -0.00877 | 0.85002  | 0.00549  | 0.90581  | 0.051511 | 0.2666   | -0.08033 | 0.08288  |
| 0.43044  | 0.052227 | 0.26     | 0.0763   | 0.09959  | 0.082863 | 0.07362  | 0.043166 | 0.35197  |
| 0.00117  | 0.035466 | 0.44451  | 0.076611 | 0.09821  | 0.185247 | 5.64E-05 | 0.066042 | 0.15418  |
| 0.69397  | -0.00617 | 0.89429  | -0.02296 | 0.62067  | -0.07692 | 0.09688  | -0.02488 | 0.59169  |
| 0.30732  | 0.00796  | 0.86379  | -0.03103 | 0.50352  | -0.03484 | 0.45264  | 0.010939 | 0.81362  |
| 0.00073  | -0.01974 | 0.67054  | -0.11131 | 0.01611  | -0.02639 | 0.56943  | -0.16126 | 0.00047  |
| 0.00013  | 0.121138 | 0.00878  | 0.174399 | 0.00015  | 0.287321 | 2.51E-10 | 0.020716 | 0.65522  |
| 0.57692  | 0.084138 | 0.06928  | 0.110201 | 0.0172   | 0.124483 | 0.00707  | 0.061148 | 0.18713  |
| 0.06612  | -0.07341 | 0.11314  | -0.05049 | 0.27625  | -0.00519 | 0.91092  | -0.04914 | 0.28932  |
| 0.01198  | -0.03447 | 0.45735  | -0.15231 | 0.00096  | -0.07855 | 0.08997  | -0.04332 | 0.35023  |
| 0.05316  | 0.051197 | 0.26953  | 0.060579 | 0.19127  | 0.054902 | 0.23635  | -0.00096 | 0.98343  |
| 0.00359  | 0.002815 | 0.95162  | -0.03071 | 0.50801  | -0.04768 | 0.3039   | 0.130386 | 0.00477  |
| 0.18323  | 0.086224 | 0.06263  | 0.113436 | 0.01418  | 0.175364 | 0.00014  | 0.076049 | 0.10071  |
| 0.03617  | -0.09022 | 0.05137  | -0.0517  | 0.26483  | -0.13719 | 0.00297  | -0.03102 | 0.50371  |
| 0.197    | 0.066582 | 0.15083  | -0.00873 | 0.85078  | 0.03683  | 0.42717  | -0.04789 | 0.30174  |
| 2.43E-05 | -0.16965 | 0.00023  | 0.104412 | 0.02404  | 0.107326 | 0.02035  | -0.10184 | 0.02776  |
| 0.74701  | 0.02836  | 0.54097  | -0.03962 | 0.39293  | -0.02055 | 0.65782  | -0.03646 | 0.43181  |
| 0.08278  | 0.072537 | 0.11749  | -0.08785 | 0.05782  | 0.055076 | 0.23487  | -0.00846 | 0.85528  |
| 0.26403  | 0.072846 | 0.11593  | 0.080212 | 0.08335  | 0.0347   | 0.45441  | 0.181567 | 7.95E-05 |
| 2.89E-06 | -0.00533 | 0.90854  | 0.062798 | 0.17549  | 0.134248 | 0.00365  | 0.072025 | 0.12011  |
| 0.85174  | 0.067165 | 0.14728  | 0.037676 | 0.41662  | 0.037635 | 0.41713  | 0.108082 | 0.01948  |
| 0.60707  | 0.14797  | 0.00134  | 0.073487 | 0.11275  | 0.127117 | 0.00594  | 0.064243 | 0.16574  |
| 0.19979  | -0.03472 | 0.45411  | 0.016234 | 0.72641  | 0.009119 | 0.84419  | -0.04342 | 0.34911  |
| 0.30369  | 0.054179 | 0.24259  | 0.022537 | 0.62713  | 0.088894 | 0.0549   | 0.029692 | 0.52213  |
| 0.21778  | -0.07365 | 0.11197  | -0.07231 | 0.11864  | -0.05845 | 0.20738  | -0.02607 | 0.57416  |
| 0.62393  | -0.00103 | 0.98232  | -0.03954 | 0.39394  | 0.012311 | 0.79074  | -0.0197  | 0.67114  |
| 0.82785  | 0.043145 | 0.35222  | 0.138344 | 0.00274  | 0.100784 | 0.02943  | 0.072278 | 0.11881  |
| 0.01899  | 0.103392 | 0.02546  | 0.01618  | 0.72728  | 0.142564 | 0.00201  | 0.115935 | 0.01217  |
| 0.03125  | 0.262104 | 8.94E-09 | 0.212894 | 3.46E-06 | 0.218286 | 1.92E-06 | 0.115783 | 0.01229  |
| 0.80731  | 0.149415 | 0.0012   | 0.081197 | 0.07962  | 0.162959 | 0.00041  | 0.094246 | 0.04178  |
| 0.34798  | 0.035282 | 0.44688  | 0.053865 | 0.24534  | 0.075449 | 0.10343  | 0.179322 | 9.76E-05 |
| 0.90196  | 0.121572 | 0.00854  | 0.131998 | 0.00427  | 0.154328 | 0.00082  | 0.062664 | 0.17641  |
| 0.00717  | -0.01651 | 0.72193  | 0.03295  | 0.4775   | -0.06595 | 0.15476  | 0.039462 | 0.39487  |
| 0.33524  | 0.049081 | 0.28985  | -0.02531 | 0.58532  | 0.000369 | 0.99365  | -0.04702 | 0.31057  |
| 0.72579  | 0.128888 | 0.00528  | 0.011698 | 0.80095  | 0.022225 | 0.6319   | -0.01023 | 0.82548  |
| 0.03363  | 0.131322 | 0.00447  | 0.077964 | 0.0924   | 0.119958 | 0.00947  | 0.169498 | 0.00023  |
| 0.73859  | 0.079071 | 0.08785  | 0.098094 | 0.03407  | 0.163993 | 0.00037  | -0.00283 | 0.9513   |
| 0.84806  | 0.049934 | 0.28154  | 0.010927 | 0.81381  | 0.123024 | 0.00778  | -0.00765 | 0.86908  |
| 0.00445  | -0.00679 | 0.88357  | -0.04182 | 0.36719  | 0.070114 | 0.13029  | -0.02987 | 0.51958  |
| 0.55326  | 0.131353 | 0.00447  | 0.131138 | 0.00453  | 0.205097 | 7.90E-06 | 0.130919 | 0.0046   |
| 0.6495   | 0.115211 | 0.01273  | 0.138809 | 0.00265  | 0.19231  | 2.87E-05 | 0.151235 | 0.00104  |
| 0.25394  | 0.065744 | 0.15606  | 0.070049 | 0.13064  | 0.138626 | 0.00268  | 0.010359 | 0.82333  |
| 0.05322  | 0.073953 | 0.11048  | 0.133415 | 0.00387  | 0.197669 | 1.69E-05 | 0.119411 | 0.0098   |
| 0.3625   | 0.047775 | 0.3029   | 0.092786 | 0.04506  | 0.108662 | 0.01883  | 0.011975 | 0.79633  |
| 0.36569  | 0.016137 | 0.72798  | 0.009219 | 0.8425   | 0.115932 | 0.01217  | 0.034322 | 0.45934  |

|          |          |          |          |          |          |          |          |          |
|----------|----------|----------|----------|----------|----------|----------|----------|----------|
| 0.68819  | 0.079176 | 0.08743  | 0.079129 | 0.08762  | 0.090969 | 0.04945  | -0.00364 | 0.93752  |
| 0.19835  | 0.048092 | 0.29969  | 0.013216 | 0.77577  | 0.073675 | 0.11183  | 0.039221 | 0.39777  |
| 0.00132  | -0.07933 | 0.08683  | -0.01787 | 0.70006  | -0.02117 | 0.64818  | -0.10266 | 0.02653  |
| 0.80777  | 0.046109 | 0.32009  | 0.111039 | 0.01637  | 0.097288 | 0.03557  | 0.044702 | 0.33509  |
| 0.77361  | 0.029829 | 0.52021  | 0.121206 | 0.00874  | 0.188569 | 4.11E-05 | 0.059487 | 0.19942  |
| 0.3794   | 0.106872 | 0.02089  | 0.056913 | 0.2196   | 0.068108 | 0.14168  | 0.005524 | 0.90522  |
| 0.83354  | -0.00762 | 0.86959  | 0.017024 | 0.71366  | 0.161359 | 0.00046  | 0.06163  | 0.18367  |
| 0.91117  | 0.060301 | 0.19332  | 0.073303 | 0.11366  | 0.080656 | 0.08166  | -0.00941 | 0.83921  |
| 0.13418  | 0.158919 | 0.00057  | 0.08949  | 0.05329  | 0.201643 | 1.13E-05 | 0.057696 | 0.21331  |
| 0.77391  | 0.088144 | 0.05699  | 0.115886 | 0.01221  | 0.186024 | 5.24E-05 | 0.070158 | 0.13004  |
| 0.73234  | -0.05876 | 0.205    | -0.08675 | 0.06104  | -0.13022 | 0.00482  | 0.014163 | 0.76017  |
| 0.08477  | 0.020531 | 0.6581   | 0.045383 | 0.32777  | 0.204922 | 8.04E-06 | -0.00192 | 0.967    |
| 0.10925  | 0.07789  | 0.09271  | 0.025424 | 0.58367  | 0.068157 | 0.14139  | -0.03916 | 0.39848  |
| 0.25827  | 0.11947  | 0.00976  | 0.06193  | 0.18155  | 0.107493 | 0.02016  | 0.082257 | 0.07576  |
| 0.1321   | 0.03136  | 0.49901  | 0.019397 | 0.67588  | -0.00484 | 0.91687  | 0.097461 | 0.03525  |
| 0.77514  | 0.029039 | 0.53132  | -0.01297 | 0.77977  | -0.00664 | 0.88626  | 0.078937 | 0.08839  |
| 0.91137  | 0.06711  | 0.14762  | 0.016435 | 0.72316  | 0.037728 | 0.41598  | 0.002418 | 0.95843  |
| 0.36244  | 0.096675 | 0.03676  | 0.057384 | 0.2158   | 0.037163 | 0.423    | 0.105492 | 0.02261  |
| 0.46291  | 0.068737 | 0.13802  | -0.01347 | 0.7715   | 0.069952 | 0.13118  | 0.043984 | 0.34292  |
| 0.01564  | -0.08074 | 0.08134  | -0.08789 | 0.05771  | -0.08723 | 0.05962  | 0.006515 | 0.88834  |
| 0.00205  | 0.358203 | 1.39E-15 | 0.185092 | 5.72E-05 | 0.254191 | 2.55E-08 | 0.024143 | 0.60278  |
| 5.22E-05 | -0.04858 | 0.29481  | -0.09502 | 0.04012  | -0.1467  | 0.00148  | 0.124372 | 0.00712  |
| 6.68E-07 | -0.02488 | 0.59171  | -0.07995 | 0.08437  | -0.16663 | 0.0003   | 0.149965 | 0.00115  |
| 0.62462  | -0.06851 | 0.13931  | 0.035726 | 0.44117  | -0.00423 | 0.92744  | 0.08297  | 0.07325  |
| 0.19594  | 0.10904  | 0.01842  | 0.161112 | 0.00047  | 0.147778 | 0.00136  | 0.243485 | 9.93E-08 |
| 0.30984  | 0.133298 | 0.0039   | 0.106627 | 0.02119  | 0.211148 | 4.17E-06 | 0.140715 | 0.0023   |
| 0.08509  | 0.080826 | 0.08101  | 0.030963 | 0.50446  | 0.052259 | 0.25972  | -0.11423 | 0.01351  |
| 0.04255  | 0.092243 | 0.04634  | -0.05321 | 0.25112  | -0.13875 | 0.00266  | -0.15221 | 0.00097  |
| 0.16133  | -0.31792 | 1.99E-12 | -0.27014 | 2.98E-09 | -0.39237 | 1.22E-18 | -0.22034 | 1.52E-06 |
| 1.34E-31 | -0.03067 | 0.50847  | -0.04834 | 0.29724  | -0.24492 | 8.30E-08 | 0.1495   | 0.00119  |
| 0.41577  | 0.161487 | 0.00046  | 0.099194 | 0.0321   | 0.190087 | 3.56E-05 | 0.025983 | 0.57542  |
| 0.05906  | -0.11309 | 0.01448  | -0.05993 | 0.19607  | -0.05149 | 0.26685  | -0.02838 | 0.54074  |
| 3.60E-05 | -0.03719 | 0.42262  | 0.011475 | 0.80466  | 0.039216 | 0.39782  | -0.04867 | 0.29391  |
| 0.01083  | -0.01803 | 0.69758  | 0.005005 | 0.91409  | 0.09056  | 0.05049  | 0.031445 | 0.49785  |
| 0.93423  | -0.05873 | 0.20521  | 0.049101 | 0.28966  | -0.00632 | 0.89173  | -0.02241 | 0.62911  |
| 0.80726  | 0.051769 | 0.26421  | -0.00904 | 0.84554  | 0.003484 | 0.94014  | 0.111262 | 0.01615  |
| 0.26695  | -0.04787 | 0.30191  | -0.03018 | 0.51529  | -0.03511 | 0.44907  | 0.168715 | 0.00025  |
| 0.05817  | 0.065412 | 0.15816  | 0.096459 | 0.03718  | 0.194421 | 2.33E-05 | 0.005303 | 0.909    |
| 1.28E-12 | -0.23607 | 2.46E-07 | -0.03249 | 0.48362  | -0.02083 | 0.65343  | -0.18604 | 5.23E-05 |
| 0.00263  | -0.04299 | 0.35397  | 0.053456 | 0.24895  | 0.136571 | 0.0031   | 0.002201 | 0.96216  |
| 0.90804  | 0.178061 | 0.00011  | 0.026143 | 0.57306  | 0.225261 | 8.73E-07 | 0.112179 | 0.01529  |
| 1.95E-13 | 0.039918 | 0.38942  | -0.03406 | 0.46278  | 0.140198 | 0.00239  | -0.1622  | 0.00043  |
| 0.36924  | -0.0699  | 0.13145  | -0.04789 | 0.30169  | -0.08807 | 0.0572   | -0.23571 | 2.56E-07 |
| 2.13E-14 | 0.004872 | 0.91638  | -0.0007  | 0.98797  | 0.109364 | 0.01807  | -0.18552 | 5.50E-05 |
| 0.59357  | 0.145983 | 0.00156  | 0.190621 | 3.38E-05 | 0.2162   | 2.41E-06 | 0.291112 | 1.42E-10 |

|          |          |          |          |          |          |          |          |          |
|----------|----------|----------|----------|----------|----------|----------|----------|----------|
| 2.44E-06 | 0.049489 | 0.28586  | 0.038614 | 0.40511  | 0.171548 | 0.0002   | -0.12185 | 0.00839  |
| 0.3899   | 0.181568 | 7.94E-05 | 0.18442  | 6.09E-05 | 0.199827 | 1.36E-05 | 0.166216 | 0.00031  |
| 0.06595  | -0.24092 | 1.36E-07 | -0.10725 | 0.02044  | -0.14659 | 0.00149  | -0.05194 | 0.26261  |
| 6.12E-11 | -0.10618 | 0.02174  | -0.10425 | 0.02426  | -0.05475 | 0.23768  | -0.17208 | 0.00019  |
| 7.20E-08 | -0.19621 | 1.95E-05 | -0.12538 | 0.00667  | -0.16418 | 0.00037  | -0.20029 | 1.30E-05 |
| 4.17E-12 | -0.15138 | 0.00103  | -0.07634 | 0.09939  | -0.16033 | 0.0005   | 0.043802 | 0.34492  |
| 0.04497  | 0.127878 | 0.00565  | 0.157217 | 0.00065  | 0.06396  | 0.16762  | 0.027895 | 0.54763  |
| 5.58E-05 | 0.43113  | 1.46E-22 | 0.090296 | 0.05117  | 0.213146 | 3.36E-06 | 0.082701 | 0.07419  |
| 0.65483  | 0.142674 | 0.002    | 0.154992 | 0.00078  | 0.283798 | 4.23E-10 | 0.066231 | 0.15301  |
| 0.2712   | 0.057447 | 0.21529  | 0.142401 | 0.00204  | 0.260775 | 1.07E-08 | 0.032642 | 0.48162  |
| 0.01016  | 0.026925 | 0.56165  | 0.107563 | 0.02007  | 0.070685 | 0.12718  | 0.178784 | 0.0001   |
| 0.15214  | 0.18618  | 5.16E-05 | 0.153841 | 0.00085  | 0.212793 | 3.49E-06 | 0.103215 | 0.02572  |
| 0.02697  | 0.041358 | 0.37253  | 0.003805 | 0.93464  | 0.113101 | 0.01447  | -0.03873 | 0.40365  |
| 0.03671  | -0.19322 | 2.62E-05 | -0.04025 | 0.38549  | -0.06298 | 0.17425  | -0.03544 | 0.44483  |
| 2.48E-12 | -0.12079 | 0.00898  | 0.037423 | 0.41977  | -0.08904 | 0.05449  | 0.079566 | 0.08588  |
| 4.89E-08 | -0.27574 | 1.36E-09 | -0.17704 | 0.00012  | -0.2357  | 2.57E-07 | -0.24182 | 1.22E-07 |
| 0.95059  | -0.13043 | 0.00475  | -0.21117 | 4.16E-06 | -0.21088 | 4.29E-06 | -0.12244 | 0.00808  |
| 0.14713  | -0.11119 | 0.01622  | -0.09143 | 0.04831  | -0.11236 | 0.01512  | 0.104453 | 0.02398  |
| 0.24478  | 0.025461 | 0.58311  | -0.03506 | 0.4498   | 0.015287 | 0.74178  | 0.00371  | 0.93627  |
| 0.15687  | 0.006502 | 0.88856  | -0.09608 | 0.03793  | -0.03772 | 0.41604  | -0.05323 | 0.25097  |
| 3.48E-16 | -0.36533 | 3.42E-16 | -0.1324  | 0.00416  | -0.01927 | 0.67783  | -0.36507 | 3.61E-16 |
| 0.19162  | 0.081186 | 0.07966  | -0.01081 | 0.81575  | 0.069298 | 0.13483  | 0.060156 | 0.1944   |
| 0.00011  | 0.029908 | 0.5191   | 0.076412 | 0.09909  | 0.159986 | 0.00052  | -0.03624 | 0.43456  |
| 5.49E-05 | 0.0282   | 0.54325  | -0.03171 | 0.49417  | 0.142742 | 0.00199  | -0.01714 | 0.71178  |
| 0.76177  | 0.136101 | 0.00321  | 0.136826 | 0.00305  | 0.19799  | 1.63E-05 | 0.086981 | 0.06036  |
| 1.06E-05 | -0.047   | 0.31078  | -0.01499 | 0.74661  | 0.068854 | 0.13735  | -0.07276 | 0.11634  |
| 0.05215  | 0.144649 | 0.00172  | 0.112201 | 0.01527  | 0.112985 | 0.01457  | 0.073588 | 0.11225  |
| 3.58E-24 | 0.188541 | 4.13E-05 | 0.214405 | 2.93E-06 | 0.062308 | 0.17889  | 0.30362  | 2.05E-11 |
| 0.01313  | -0.17337 | 0.00017  | 0.032079 | 0.48922  | 0.129041 | 0.00523  | -0.08714 | 0.05989  |
| 3.65E-05 | -0.06302 | 0.17393  | 0.005285 | 0.90931  | 0.012108 | 0.79411  | -0.07308 | 0.11475  |
| 8.99E-06 | 0.09209  | 0.0467   | -0.02751 | 0.55316  | 0.021238 | 0.64712  | -0.03183 | 0.49264  |
| 0.19917  | 0.454346 | 3.64E-25 | 0.276436 | 1.23E-09 | 0.293956 | 9.23E-11 | 0.170607 | 0.00021  |
| 0.18676  | -0.04409 | 0.34173  | 0.118423 | 0.01043  | 0.012788 | 0.78283  | -0.0384  | 0.40766  |
| 0.01582  | -0.12304 | 0.00777  | -0.12254 | 0.00803  | -0.12255 | 0.00802  | -0.07986 | 0.08471  |
| 1.04E-05 | -0.29514 | 7.70E-11 | -0.14797 | 0.00134  | -0.18923 | 3.86E-05 | -0.28356 | 4.38E-10 |
| 0.01278  | 0.011495 | 0.80432  | 0.013192 | 0.77616  | 0.066465 | 0.15155  | 0.066854 | 0.14917  |
| 0.51761  | 0.111305 | 0.01611  | 0.08453  | 0.06799  | 0.097028 | 0.03607  | 0.142104 | 0.00208  |
| 9.83E-10 | 0.061175 | 0.18694  | 0.004322 | 0.92579  | 0.061026 | 0.18802  | 0.164738 | 0.00035  |
| 0.09073  | 0.187832 | 4.41E-05 | 0.071441 | 0.12315  | 0.203293 | 9.52E-06 | 0.160387 | 0.0005   |
| 0.14768  | 0.120575 | 0.0091   | -0.08989 | 0.05222  | -0.13015 | 0.00485  | 0.096596 | 0.03691  |
| 0.19855  | -0.02399 | 0.60502  | -0.06096 | 0.1885   | -0.01595 | 0.73106  | -0.14566 | 0.0016   |
| 0.32234  | 0.156886 | 0.00067  | 0.193212 | 2.62E-05 | 0.248599 | 5.22E-08 | 0.13104  | 0.00456  |
| 0.18758  | -0.02888 | 0.5336   | 0.043245 | 0.35109  | 0.033467 | 0.47061  | 0.042638 | 0.35791  |
| 0.42599  | -0.12917 | 0.00518  | -0.14049 | 0.00234  | -0.16432 | 0.00036  | -0.07619 | 0.10009  |
| 6.15E-05 | 0.286268 | 2.94E-10 | 0.157482 | 0.00064  | 0.219312 | 1.71E-06 | 0.015568 | 0.73722  |

|          |          |          |          |          |          |          |          |          |
|----------|----------|----------|----------|----------|----------|----------|----------|----------|
| 6.29E-05 | -0.22668 | 7.42E-07 | -0.19632 | 1.93E-05 | -0.15644 | 0.00069  | -0.18054 | 8.73E-05 |
| 0.54021  | 0.008753 | 0.85036  | 0.041857 | 0.36679  | 0.046468 | 0.31633  | 0.020255 | 0.66241  |
| 0.01206  | 0.152761 | 0.00093  | 0.269332 | 3.33E-09 | 0.102629 | 0.02657  | 0.21742  | 2.11E-06 |
| 0.22216  | 0.18912  | 3.90E-05 | 0.103942 | 0.02469  | 0.166767 | 0.0003   | 0.229895 | 5.11E-07 |
| 0.07329  | 0.103388 | 0.02547  | 0.1009   | 0.02924  | 0.149884 | 0.00116  | 0.047381 | 0.3069   |
| 0.1183   | 0.138756 | 0.00266  | 0.142786 | 0.00198  | 0.147515 | 0.00139  | 0.132528 | 0.00412  |
| 0.012    | -0.04951 | 0.28569  | -0.02067 | 0.65587  | 0.01187  | 0.79809  | -0.02568 | 0.57988  |
| 0.00019  | 0.084755 | 0.06726  | 0.135614 | 0.00332  | 0.053632 | 0.24739  | 0.197515 | 1.71E-05 |
| 0.61335  | 0.086818 | 0.06084  | 0.050283 | 0.27819  | 0.036978 | 0.42532  | 0.038183 | 0.41038  |
| 0.00037  | -0.09812 | 0.03402  | 0.002874 | 0.95062  | -0.11326 | 0.01433  | -0.00175 | 0.96989  |
| 5.20E-19 | 0.1245   | 0.00707  | -0.02425 | 0.60121  | 0.088712 | 0.0554   | -0.20178 | 1.11E-05 |
| 0.0002   | -0.26119 | 1.01E-08 | -0.04249 | 0.35959  | -0.11936 | 0.00983  | -0.0543  | 0.24152  |
| 9.61E-18 | 0.094263 | 0.04174  | 0.109679 | 0.01774  | -0.00404 | 0.93058  | 0.236319 | 2.38E-07 |
| 0.62622  | -0.26747 | 4.31E-09 | -0.13504 | 0.00346  | -0.16587 | 0.00032  | 0.009367 | 0.84     |
| 0.07173  | 0.183362 | 6.73E-05 | 0.231623 | 4.17E-07 | 0.318016 | 1.96E-12 | 0.060481 | 0.192    |
| 0.0934   | 0.189196 | 3.87E-05 | 0.28308  | 4.70E-10 | 0.258819 | 1.39E-08 | 0.248089 | 5.57E-08 |
| 0.28312  | 0.129527 | 0.00506  | 0.157198 | 0.00065  | 0.239002 | 1.72E-07 | 0.177449 | 0.00012  |
| 0.24784  | 0.075865 | 0.10154  | 0.096421 | 0.03726  | 0.112227 | 0.01525  | 0.0513   | 0.26857  |
| 6.81E-05 | 0.076905 | 0.09693  | 0.188048 | 4.33E-05 | 0.07145  | 0.1231   | 0.107372 | 0.0203   |
| 0.03691  | 0.000785 | 0.9865   | 0.155962 | 0.00072  | 0.172373 | 0.00018  | 0.01579  | 0.73361  |
| 0.06751  | 0.059387 | 0.20017  | 0.101995 | 0.02753  | 0.116759 | 0.01157  | 0.137877 | 0.00283  |
| 0.36267  | 0.097076 | 0.03598  | 0.113733 | 0.01393  | 0.250329 | 4.19E-08 | 0.109483 | 0.01795  |
| 0.05642  | -0.0076  | 0.86981  | 0.025089 | 0.58864  | 0.187222 | 4.68E-05 | 0.010905 | 0.81419  |
| 0.4941   | 0.048078 | 0.29984  | 0.065765 | 0.15592  | 0.154408 | 0.00081  | 0.058631 | 0.20597  |
| 0.07423  | 0.039222 | 0.39775  | 0.16028  | 0.00051  | 0.178321 | 0.00011  | 0.039643 | 0.3927   |
| 0.87436  | 0.037503 | 0.41877  | 0.14494  | 0.00169  | 0.228488 | 6.02E-07 | 0.093015 | 0.04453  |
| 0.00241  | 0.014419 | 0.75596  | 0.136508 | 0.00312  | 0.102516 | 0.02674  | 0.213334 | 3.30E-06 |
| 0.13634  | 0.068344 | 0.1403   | 0.154425 | 0.00081  | 0.149883 | 0.00116  | 0.161358 | 0.00046  |
| 0.38294  | 0.055787 | 0.22887  | 0.12038  | 0.00922  | 0.117699 | 0.01091  | -0.01693 | 0.71515  |
| 9.75E-07 | 0.199874 | 1.35E-05 | 0.223353 | 1.09E-06 | 0.224951 | 9.05E-07 | 0.211221 | 4.14E-06 |
| 0.00656  | 0.205512 | 7.57E-06 | 0.246804 | 6.55E-08 | 0.289529 | 1.80E-10 | 0.063097 | 0.17344  |
| 0.25526  | 0.110344 | 0.01706  | 0.184216 | 6.21E-05 | 0.169956 | 0.00022  | 0.213182 | 3.35E-06 |
| 0.09919  | 0.188475 | 4.15E-05 | 0.261067 | 1.03E-08 | 0.294832 | 8.07E-11 | 0.222795 | 1.16E-06 |
| 0.02298  | 0.204356 | 8.53E-06 | 0.258216 | 1.50E-08 | 0.37398  | 5.98E-17 | 0.097651 | 0.03489  |
| 0.47582  | 0.000685 | 0.98823  | 0.145859 | 0.00157  | 0.094695 | 0.04081  | 0.049103 | 0.28963  |
| 0.17115  | 0.119333 | 0.00985  | 0.214176 | 3.01E-06 | 0.267628 | 4.22E-09 | 0.090958 | 0.04948  |
| 1.56E-07 | 0.14087  | 0.00228  | 0.201961 | 1.09E-05 | 0.140184 | 0.0024   | 0.262968 | 7.95E-09 |
| 0.34468  | 0.065331 | 0.15868  | 0.183378 | 6.72E-05 | 0.187156 | 4.71E-05 | 0.17449  | 0.00015  |
| 0.04329  | 0.081834 | 0.07728  | 0.112844 | 0.01469  | 0.08788  | 0.05774  | 0.138555 | 0.00269  |
| 0.00312  | 0.022817 | 0.62285  | 0.131444 | 0.00444  | 0.069324 | 0.13468  | 0.140113 | 0.00241  |
| 4.33E-10 | -0.10251 | 0.02675  | -0.16148 | 0.00046  | -0.10045 | 0.02998  | -0.16202 | 0.00044  |
| 0.00555  | 0.001371 | 0.97643  | -0.00141 | 0.97575  | 0.113571 | 0.01406  | -0.00138 | 0.97623  |
| 0.02733  | 0.11312  | 0.01445  | 0.156216 | 0.00071  | 0.269969 | 3.05E-09 | 0.078855 | 0.08873  |
| 0.37868  | 0.036181 | 0.43537  | 0.106009 | 0.02195  | 0.124702 | 0.00697  | 0.084927 | 0.0667   |
| 0.02457  | -0.02356 | 0.61161  | 0.022957 | 0.62071  | -0.01759 | 0.70457  | 0.123281 | 0.00765  |

|          |          |          |          |          |          |          |          |          |
|----------|----------|----------|----------|----------|----------|----------|----------|----------|
| 0.51284  | 0.071296 | 0.12391  | -0.04711 | 0.30971  | 0.092359 | 0.04606  | 0.123035 | 0.00777  |
| 2.00E-27 | -0.0594  | 0.20004  | -0.06143 | 0.18511  | 0.09102  | 0.04932  | -0.18422 | 6.21E-05 |
| 0.11531  | 0.17705  | 0.00012  | 0.147582 | 0.00138  | 0.235007 | 2.79E-07 | 0.144767 | 0.00171  |
| 0.21527  | -0.04857 | 0.29486  | -0.06402 | 0.16721  | -0.00127 | 0.97809  | 0.107794 | 0.01981  |
| 0.00108  | -0.16304 | 0.0004   | -0.12143 | 0.00862  | -0.20807 | 5.79E-06 | -0.07853 | 0.09004  |
| 3.46E-16 | 0.025243 | 0.58635  | 0.060308 | 0.19327  | 0.020843 | 0.65325  | 0.253221 | 2.89E-08 |
| 1.09E-05 | 0.08334  | 0.07197  | 0.057227 | 0.21706  | 0.205068 | 7.92E-06 | -0.06486 | 0.16174  |
| 0.63768  | 0.156442 | 0.00069  | 0.075249 | 0.10435  | 0.118043 | 0.01068  | 0.135529 | 0.00334  |
| 0.29384  | 0.260588 | 1.10E-08 | 0.20774  | 5.99E-06 | 0.334722 | 1.09E-13 | 0.230828 | 4.58E-07 |
| 0.10051  | 0.011219 | 0.80894  | 0.007858 | 0.86552  | 0.088281 | 0.0566   | 0.025698 | 0.57962  |
| 0.41224  | -0.0175  | 0.706    | -0.07691 | 0.09692  | -0.00411 | 0.9294   | -0.12422 | 0.0072   |
| 0.82472  | 0.051097 | 0.27047  | -0.026   | 0.57518  | -0.00876 | 0.85026  | 0.049714 | 0.28367  |
| 1.74E-13 | 0.089933 | 0.05211  | 0.050424 | 0.27684  | 0.233678 | 3.27E-07 | -0.09533 | 0.03947  |
| 4.75E-05 | 0.204267 | 8.61E-06 | 0.183592 | 6.59E-05 | 0.186194 | 5.16E-05 | 0.223405 | 1.08E-06 |
| 1.25E-06 | 0.063486 | 0.1708   | 0.019115 | 0.68033  | 0.206287 | 6.98E-06 | -0.08321 | 0.07241  |
| 0.00058  | -0.02041 | 0.66004  | -0.14274 | 0.00199  | -0.04294 | 0.35451  | -0.07978 | 0.08505  |
| 0.32482  | 0.035704 | 0.44145  | 0.003873 | 0.93348  | 0.054969 | 0.23578  | -0.02596 | 0.57572  |
| 0.24265  | -0.02019 | 0.66335  | 0.032762 | 0.48     | -0.02787 | 0.54797  | -0.11324 | 0.01435  |
| 3.93E-08 | 0.009797 | 0.83277  | 0.046917 | 0.31167  | -0.08632 | 0.06235  | 0.224486 | 9.54E-07 |
| 0.80372  | 0.033077 | 0.47579  | 0.064524 | 0.16389  | 0.087783 | 0.05802  | 0.021249 | 0.64694  |
| 0.18468  | -0.06279 | 0.17553  | -0.09597 | 0.03816  | -0.03738 | 0.42028  | -0.05623 | 0.22521  |
| 0.00032  | 0.022589 | 0.62633  | -0.03617 | 0.43555  | 0.083888 | 0.07011  | -0.03117 | 0.50156  |
| 0.00344  | 0.026866 | 0.5625   | -0.00907 | 0.84506  | 0.065616 | 0.15687  | -0.00701 | 0.87986  |
| 0.00034  | 0.223246 | 1.10E-06 | 0.081998 | 0.07669  | 0.181261 | 8.17E-05 | 0.265736 | 5.46E-09 |
| 0.09827  | 0.023346 | 0.61481  | 0.110829 | 0.01658  | 0.049874 | 0.28212  | 0.332517 | 1.61E-13 |
| 0.36926  | 0.045107 | 0.33072  | 0.060021 | 0.1954   | 0.032478 | 0.48382  | 0.119521 | 0.00973  |
| 9.26E-07 | 0.125009 | 0.00683  | 0.013069 | 0.77819  | 0.106136 | 0.02179  | 0.202539 | 1.03E-05 |
| 4.64E-07 | -0.25531 | 2.20E-08 | -0.04951 | 0.28569  | 0.064863 | 0.16169  | -0.13216 | 0.00422  |
| 0.02449  | -0.10127 | 0.02866  | -0.17664 | 0.00012  | -0.0832  | 0.07246  | -0.10913 | 0.01832  |
| 2.77E-12 | 0.048874 | 0.29189  | 0.041065 | 0.37593  | 0.023722 | 0.60912  | 0.22161  | 1.32E-06 |
| 0.00744  | -0.29289 | 1.09E-10 | -0.22469 | 9.33E-07 | -0.28275 | 4.93E-10 | -0.03489 | 0.45194  |
| 0.00087  | 0.014692 | 0.7515   | 0.031475 | 0.49744  | 0.114113 | 0.01361  | 0.003203 | 0.94497  |
| 0.60495  | 0.042557 | 0.35882  | 0.073656 | 0.11192  | 0.04189  | 0.36641  | -0.00319 | 0.94521  |
| 6.96E-06 | -0.02814 | 0.54409  | 0.050541 | 0.27573  | 0.121543 | 0.00856  | -0.08423 | 0.06898  |
| 0.00033  | -0.11819 | 0.01058  | -0.08455 | 0.06793  | -0.04758 | 0.30484  | -0.10707 | 0.02065  |
| 0.08136  | 0.006305 | 0.89191  | -0.08236 | 0.07538  | 0.096206 | 0.03768  | 0.008296 | 0.85809  |
| 7.73E-12 | -0.09476 | 0.04067  | -0.08146 | 0.07864  | 0.069033 | 0.13633  | -0.16257 | 0.00042  |
| 0.27843  | 0.164481 | 0.00036  | 0.045155 | 0.33021  | 0.022406 | 0.62912  | 0.081948 | 0.07687  |
| 0.18469  | -0.00201 | 0.96547  | 0.036193 | 0.43522  | -0.01898 | 0.68253  | 0.009308 | 0.841    |
| 0.0032   | 0.036795 | 0.42761  | 0.020701 | 0.65545  | 0.115658 | 0.01238  | -0.02269 | 0.6248   |
| 0.47134  | 0.169412 | 0.00024  | 0.190148 | 3.54E-05 | 0.231133 | 4.42E-07 | 0.273111 | 1.97E-09 |
| 0.00992  | 0.105497 | 0.0226   | 0.050409 | 0.27698  | 0.290074 | 1.66E-10 | 0.039331 | 0.39644  |
| 0.03255  | -0.16402 | 0.00037  | -0.01329 | 0.77449  | -0.08969 | 0.05275  | -0.09316 | 0.0442   |
| 0.00021  | 0.102659 | 0.02653  | 0.100588 | 0.02975  | 0.092667 | 0.04534  | 0.257601 | 1.63E-08 |
| 9.39E-25 | 0.442239 | 8.79E-24 | 0.188443 | 4.16E-05 | 0.107152 | 0.02056  | 0.234124 | 3.10E-07 |

|          |          |          |          |          |          |          |          |          |
|----------|----------|----------|----------|----------|----------|----------|----------|----------|
| 0.44641  | -0.02402 | 0.60458  | -0.01059 | 0.81947  | 0.156021 | 0.00072  | -0.00024 | 0.99591  |
| 0.01609  | 0.289717 | 1.75E-10 | 0.256051 | 2.00E-08 | 0.276312 | 1.25E-09 | 0.080482 | 0.08232  |
| 0.41275  | -0.32105 | 1.17E-12 | -0.25974 | 1.23E-08 | -0.34468 | 1.79E-14 | -0.09861 | 0.03313  |
| 0.15481  | -0.03205 | 0.48968  | 0.064685 | 0.16284  | -0.05643 | 0.2235   | -0.05853 | 0.20679  |
| 2.45E-08 | 0.061221 | 0.18661  | 0.200352 | 1.29E-05 | 0.034512 | 0.45685  | 0.227098 | 7.07E-07 |
| 3.30E-10 | -0.05732 | 0.21631  | -0.00599 | 0.89726  | 0.069774 | 0.13216  | -0.09718 | 0.03578  |
| 9.64E-05 | 0.059057 | 0.20269  | 0.06726  | 0.14671  | 0.195448 | 2.11E-05 | -0.00734 | 0.87436  |
| 0.20857  | 0.052427 | 0.25818  | 0.105249 | 0.02293  | 0.110536 | 0.01687  | 0.027192 | 0.55777  |
| 0.00023  | 0.100993 | 0.02909  | 0.037137 | 0.42332  | 0.044025 | 0.34246  | 0.257701 | 1.61E-08 |
| 0.01379  | -0.00365 | 0.93733  | -0.07844 | 0.0904   | -0.1447  | 0.00172  | -0.09818 | 0.03391  |
| 0.29695  | -0.13943 | 0.00253  | -0.15811 | 0.00061  | -0.1193  | 0.00987  | -0.11486 | 0.013    |
| 3.22E-10 | -0.23449 | 2.97E-07 | -0.18764 | 4.49E-05 | -0.12098 | 0.00887  | -0.18909 | 3.91E-05 |
| 1.62E-05 | 0.132705 | 0.00407  | -0.00378 | 0.93506  | -0.03519 | 0.44808  | -0.04966 | 0.2842   |
| 2.23E-20 | 0.192948 | 2.69E-05 | 0.257466 | 1.66E-08 | 0.108034 | 0.01953  | 0.256476 | 1.89E-08 |
| 0.02035  | 0.047325 | 0.30747  | 0.039855 | 0.39018  | 0.0887   | 0.05543  | 0.002723 | 0.95319  |
| 0.00114  | 0.172629 | 0.00018  | 0.116596 | 0.01169  | 0.126823 | 0.00606  | 0.190217 | 3.51E-05 |
| 0.25834  | 0.462696 | 3.75E-26 | 0.224086 | 9.99E-07 | 0.273799 | 1.78E-09 | 0.200935 | 1.21E-05 |
| 0.00159  | 0.043517 | 0.34807  | 0.055393 | 0.23218  | 0.131346 | 0.00447  | -0.03694 | 0.42579  |
| 0.24886  | -0.18328 | 6.78E-05 | -0.2544  | 2.48E-08 | -0.25272 | 3.08E-08 | -0.0822  | 0.07595  |
| 1.21E-05 | -0.04024 | 0.38564  | -0.02255 | 0.62697  | -0.06556 | 0.15725  | 0.092224 | 0.04638  |
| 0.80134  | 0.23266  | 3.69E-07 | 0.263069 | 7.85E-09 | 0.307242 | 1.15E-11 | 0.177032 | 0.00012  |
| 3.30E-07 | 0.095284 | 0.03956  | 0.04604  | 0.32081  | 0.105379 | 0.02276  | -0.00259 | 0.95549  |
| 0.1082   | -0.00204 | 0.96485  | 0.017534 | 0.70548  | 0.115924 | 0.01218  | -0.06462 | 0.16325  |
| 1.08E-10 | 0.011904 | 0.79752  | -0.02182 | 0.6381   | -0.16053 | 0.0005   | 0.117539 | 0.01102  |
| 0.03124  | 0.12985  | 0.00495  | 0.005563 | 0.90456  | 0.082126 | 0.07623  | 0.014125 | 0.76079  |
| 8.72E-12 | 0.034672 | 0.45477  | 0.055346 | 0.23257  | -0.03385 | 0.4656   | 0.128151 | 0.00555  |
| 0.0919   | 0.0255   | 0.58255  | 0.018128 | 0.696    | 0.05924  | 0.20129  | -0.05341 | 0.24932  |
| 1.54E-05 | 0.019213 | 0.67879  | 0.015688 | 0.73527  | -0.12702 | 0.00598  | 0.067843 | 0.14323  |
| 0.20087  | 0.073737 | 0.11153  | -0.02617 | 0.5727   | 0.138587 | 0.00269  | 0.003886 | 0.93326  |
| 9.37E-06 | -0.04686 | 0.31225  | -0.07034 | 0.12905  | 0.028245 | 0.54261  | -0.06592 | 0.15492  |
| 0.77471  | 0.045071 | 0.33111  | 0.009668 | 0.83493  | 0.030053 | 0.51708  | 0.106982 | 0.02076  |
| 0.54611  | 0.250843 | 3.92E-08 | 0.111863 | 0.01559  | 0.238939 | 1.74E-07 | 0.076006 | 0.1009   |
| 0.00118  | 0.124102 | 0.00725  | 0.092695 | 0.04527  | 0.053945 | 0.24463  | 0.215007 | 2.75E-06 |
| 0.002    | -0.07465 | 0.10716  | -0.03697 | 0.42538  | -0.11084 | 0.01657  | 0.073474 | 0.11281  |
| 0.00018  | 0.282353 | 5.23E-10 | 0.312345 | 5.01E-12 | 0.29268  | 1.12E-10 | 0.326471 | 4.64E-13 |
| 0.01005  | 0.241799 | 1.22E-07 | 0.303794 | 1.99E-11 | 0.411698 | 1.57E-20 | 0.220832 | 1.44E-06 |
| 0.00506  | 0.128902 | 0.00527  | 0.06251  | 0.17748  | 0.104065 | 0.02452  | 0.086155 | 0.06284  |
| 0.32942  | 0.224107 | 9.96E-07 | 0.14663  | 0.00149  | 0.215303 | 2.66E-06 | 0.152258 | 0.00096  |
| 0.0181   | 0.057604 | 0.21404  | -0.00512 | 0.91216  | 0.036256 | 0.43442  | -0.07787 | 0.09279  |
| 5.42E-05 | -0.28024 | 7.10E-10 | -0.17816 | 0.00011  | -0.18241 | 7.35E-05 | -0.12642 | 0.00622  |
| 0.0007   | -0.15707 | 0.00066  | -0.24012 | 1.50E-07 | -0.10558 | 0.0225   | -0.25553 | 2.14E-08 |
| 0.06279  | -0.03445 | 0.45762  | -0.03587 | 0.43935  | 0.078088 | 0.09188  | -0.03845 | 0.40714  |
| 0.00017  | 0.122966 | 0.00781  | 0.007993 | 0.86323  | -0.03377 | 0.46653  | 0.157633 | 0.00063  |
| 9.38E-24 | 0.049162 | 0.28906  | 0.101756 | 0.02789  | -0.04226 | 0.36221  | 0.361396 | 7.44E-16 |
| 0.42048  | 0.03878  | 0.40309  | -0.05548 | 0.23146  | -0.02687 | 0.56242  | 0.161718 | 0.00045  |

|          |          |          |          |          |          |          |          |          |
|----------|----------|----------|----------|----------|----------|----------|----------|----------|
| 0.62633  | 0.293547 | 9.82E-11 | 0.059024 | 0.20294  | 0.008594 | 0.85306  | -0.02667 | 0.56532  |
| 5.20E-05 | 0.037196 | 0.42259  | -0.06546 | 0.15783  | 0.188751 | 4.04E-05 | -0.01179 | 0.79947  |
| 0.00097  | 0.260924 | 1.05E-08 | 0.079276 | 0.08703  | 0.171351 | 0.0002   | -0.15643 | 0.00069  |
| 0.32925  | -0.16214 | 0.00044  | -0.21981 | 1.62E-06 | -0.21968 | 1.64E-06 | -0.06266 | 0.17643  |
| 0.01392  | -0.32211 | 9.81E-13 | -0.27344 | 1.88E-09 | -0.34744 | 1.07E-14 | -0.03711 | 0.42364  |
| 0.4051   | 0.105106 | 0.02311  | 0.021222 | 0.64736  | 0.034464 | 0.45749  | 0.127022 | 0.00598  |
| 0.21578  | 0.006437 | 0.88965  | -0.00196 | 0.96638  | 0.19211  | 2.92E-05 | -0.08179 | 0.07744  |
| 5.03E-14 | -0.1634  | 0.00039  | -0.11705 | 0.01136  | -0.0081  | 0.86138  | -0.29852 | 4.57E-11 |
| 0.80648  | 0.267943 | 4.04E-09 | 0.217853 | 2.01E-06 | 0.311944 | 5.35E-12 | 0.160391 | 0.0005   |
| 0.76598  | 0.033504 | 0.47011  | 0.087415 | 0.05908  | 0.081096 | 0.08     | 0.148407 | 0.0013   |
| 0.00276  | 0.052906 | 0.25385  | 0.017599 | 0.70444  | 0.067438 | 0.14564  | -0.04108 | 0.37576  |
| 0.87043  | 0.0119   | 0.79758  | -0.00411 | 0.92939  | 0.104829 | 0.02348  | 0.052938 | 0.25356  |
| 3.76E-14 | -0.20634 | 6.94E-06 | -0.02297 | 0.62045  | 0.103935 | 0.0247   | -0.15018 | 0.00113  |
| 0.00292  | 0.171306 | 0.0002   | 0.25653  | 1.87E-08 | 0.197057 | 1.79E-05 | 0.25972  | 1.23E-08 |
| 1.62E-06 | 0.177835 | 0.00011  | 0.2327   | 3.67E-07 | 0.115392 | 0.01258  | 0.231009 | 4.48E-07 |
| 0.96034  | -0.04597 | 0.32156  | -0.18196 | 7.67E-05 | -0.18247 | 7.31E-05 | 0.010993 | 0.81271  |
| 1.86E-11 | -0.08766 | 0.05835  | 0.008795 | 0.84966  | 0.028642 | 0.53696  | -0.16605 | 0.00031  |
| 4.28E-08 | 0.01087  | 0.81476  | -0.07551 | 0.10316  | -0.07627 | 0.09974  | 0.223049 | 1.12E-06 |
| 0.4152   | 0.073348 | 0.11343  | 0.086805 | 0.06088  | -0.0202  | 0.66332  | 0.199248 | 1.44E-05 |
| 5.28E-06 | 0.110572 | 0.01683  | 0.118592 | 0.01032  | 0.288753 | 2.03E-10 | -0.03741 | 0.41998  |
| 0.49534  | 0.090618 | 0.05034  | 0.171636 | 0.00019  | 0.125462 | 0.00663  | 0.1143   | 0.01345  |
| 7.54E-05 | 0.142658 | 0.002    | 0.173033 | 0.00017  | 0.251431 | 3.64E-08 | 0.125533 | 0.0066   |
| 0.00297  | 0.223075 | 1.12E-06 | 0.229391 | 5.42E-07 | 0.196504 | 1.90E-05 | 0.021675 | 0.64035  |
| 0.82897  | 0.029545 | 0.52419  | 0.040256 | 0.38541  | -0.1184  | 0.01045  | 0.020793 | 0.65402  |
| 0.08996  | -0.05563 | 0.23015  | 0.090479 | 0.0507   | -0.1402  | 0.00239  | 0.077175 | 0.09576  |
| 1.19E-06 | -0.17833 | 0.00011  | 0.014269 | 0.75844  | -0.13906 | 0.0026   | 0.066075 | 0.15398  |
| 0.0002   | -0.07671 | 0.0978   | -0.23775 | 2.01E-07 | -0.2159  | 2.49E-06 | -0.06657 | 0.15092  |
| 0.10133  | 0.486501 | 4.04E-29 | 0.229195 | 5.54E-07 | 0.243737 | 9.62E-08 | 0.180835 | 8.50E-05 |
| 1.34E-05 | 0.313683 | 4.02E-12 | 0.199066 | 1.47E-05 | 0.168144 | 0.00026  | 0.239844 | 1.55E-07 |
| 0.36191  | 0.141318 | 0.00221  | 0.047672 | 0.30394  | 0.099758 | 0.03113  | 0.043635 | 0.34676  |
| 6.29E-09 | -0.34766 | 1.03E-14 | -0.10125 | 0.02868  | -0.33198 | 1.77E-13 | 0.053372 | 0.24969  |
| 0.6762   | 0.177818 | 0.00011  | 0.015409 | 0.73981  | -0.01562 | 0.7364   | 0.059345 | 0.2005   |
| 0.39177  | -0.0726  | 0.11718  | -0.16275 | 0.00041  | -0.05888 | 0.20404  | -0.1181  | 0.01064  |
| 0.00055  | -0.19778 | 1.67E-05 | -0.10688 | 0.02088  | -0.06323 | 0.1725   | -0.14591 | 0.00157  |
| 1.46E-08 | -0.07303 | 0.11503  | -0.14046 | 0.00235  | 0.004065 | 0.93018  | -0.23241 | 3.80E-07 |
| 4.84E-06 | 0.046337 | 0.3177   | 0.184705 | 5.93E-05 | 0.101797 | 0.02783  | 0.250928 | 3.88E-08 |
| 0.00125  | 0.070577 | 0.12776  | 0.105862 | 0.02214  | 0.150185 | 0.00113  | 0.139955 | 0.00244  |
| 0.30043  | -0.03951 | 0.39429  | 0.000299 | 0.99485  | -0.08443 | 0.0683   | 0.137163 | 0.00298  |
| 2.59E-14 | 0.191781 | 3.02E-05 | 0.013464 | 0.77168  | -0.02776 | 0.5496   | 0.21631  | 2.38E-06 |
| 0.04849  | -0.01051 | 0.82082  | -0.04081 | 0.37887  | 0.028053 | 0.54537  | -0.06132 | 0.1859   |
| 0.13431  | 0.412368 | 1.34E-20 | 0.212694 | 3.53E-06 | 0.249364 | 4.74E-08 | 0.066115 | 0.15373  |
| 5.29E-09 | -0.02373 | 0.60894  | -0.03917 | 0.3984   | 0.063008 | 0.17404  | -0.07671 | 0.0978   |
| 0.05267  | 0.147536 | 0.00139  | 0.168701 | 0.00025  | 0.305152 | 1.60E-11 | 0.050042 | 0.2805   |
| 2.33E-19 | 0.149421 | 0.0012   | 0.093864 | 0.04261  | 0.319714 | 1.47E-12 | -0.02769 | 0.5506   |
| 4.02E-15 | 0.015078 | 0.7452   | -0.00409 | 0.92982  | 0.120199 | 0.00932  | -0.1226  | 0.00799  |



|          |          |          |          |          |          |          |          |          |
|----------|----------|----------|----------|----------|----------|----------|----------|----------|
| 0.07966  | 0.18779  | 4.43E-05 | 0.324423 | 6.61E-13 | 0.374747 | 5.11E-17 | 0.064497 | 0.16407  |
| 1.44E-08 | -0.01261 | 0.78581  | 0.040888 | 0.378    | 0.135784 | 0.00328  | -0.07369 | 0.11175  |
| 3.98E-08 | 0.077748 | 0.09331  | 0.054924 | 0.23616  | 0.191966 | 2.96E-05 | 0.049098 | 0.28969  |
| 0.02489  | 0.041676 | 0.36886  | 0.078802 | 0.08894  | -0.00997 | 0.82981  | 0.215346 | 2.65E-06 |
| 0.00063  | -0.03574 | 0.44097  | 0.048802 | 0.29261  | 0.031662 | 0.49488  | -0.05458 | 0.23909  |
| 1.04E-06 | 0.009455 | 0.83853  | -0.0512  | 0.26953  | 0.068637 | 0.1386   | -0.03124 | 0.50068  |
| 1.27E-13 | -0.25886 | 1.38E-08 | -0.24412 | 9.17E-08 | -0.18862 | 4.09E-05 | -0.24931 | 4.77E-08 |
| 3.15E-06 | 0.091941 | 0.04706  | 0.075176 | 0.1047   | 0.100243 | 0.03032  | 0.165455 | 0.00033  |
| 0.00106  | 0.202001 | 1.09E-05 | 0.030114 | 0.51623  | 0.037705 | 0.41627  | -0.00315 | 0.94592  |
| 0.16983  | 0.230013 | 5.04E-07 | 0.15019  | 0.00113  | 0.166625 | 0.0003   | 0.027971 | 0.54654  |
| 0.04579  | 0.105696 | 0.02235  | 0.092445 | 0.04586  | 0.178594 | 0.0001   | -0.02652 | 0.56757  |
| 0.16531  | 0.029205 | 0.52898  | 0.04591  | 0.32219  | 0.001204 | 0.97931  | 0.050831 | 0.27298  |
| 0.0012   | 0.180473 | 8.79E-05 | 0.072645 | 0.11694  | 0.216446 | 2.35E-06 | 0.030964 | 0.50446  |
| 0.63619  | -0.05132 | 0.26842  | -0.03914 | 0.39868  | 0.01202  | 0.79558  | -0.07457 | 0.10754  |
| 0.75924  | 0.029593 | 0.52352  | -0.03026 | 0.51419  | 0.073173 | 0.1143   | 0.0144   | 0.75628  |
| 0.00709  | 0.105091 | 0.02313  | 0.056117 | 0.22613  | 0.037487 | 0.41897  | 0.121727 | 0.00846  |
| 0.00065  | -0.09821 | 0.03385  | -0.06031 | 0.19329  | -0.06415 | 0.16636  | -0.09305 | 0.04446  |
| 0.00777  | -0.08204 | 0.07653  | -0.07231 | 0.11866  | -0.12709 | 0.00595  | -0.02185 | 0.63768  |
| 2.29E-05 | -0.16423 | 0.00037  | -0.01743 | 0.70723  | -0.11861 | 0.01031  | -0.19715 | 1.78E-05 |
| 0.02743  | -0.06091 | 0.18882  | -0.00158 | 0.97288  | -0.05083 | 0.27301  | -0.1301  | 0.00486  |
| 0.38473  | 0.067152 | 0.14736  | 0.057343 | 0.21613  | 0.128086 | 0.00557  | 0.097926 | 0.03438  |
| 0.28537  | 0.086891 | 0.06062  | 0.096221 | 0.03765  | 0.133291 | 0.00391  | 0.179889 | 9.27E-05 |
| 0.65986  | -0.00062 | 0.98936  | -0.01003 | 0.82883  | -0.04536 | 0.32807  | 0.013784 | 0.76639  |
| 0.31108  | 0.040815 | 0.37885  | 0.074494 | 0.10789  | 0.122177 | 0.00822  | 0.05697  | 0.21914  |
| 0.00505  | -0.01455 | 0.7539   | -0.06469 | 0.16283  | 0.02313  | 0.61808  | 0.068387 | 0.14004  |
| 0.40611  | 0.06125  | 0.18639  | 0.057011 | 0.21881  | 0.089332 | 0.05371  | 0.050533 | 0.2758   |
| 0.5712   | 0.057896 | 0.21172  | 0.095502 | 0.03911  | 0.157492 | 0.00064  | 0.008599 | 0.85297  |
| 0.10294  | 0.009399 | 0.83947  | 0.091153 | 0.04899  | 0.087299 | 0.05942  | 0.028116 | 0.54446  |
| 0.03529  | 0.353549 | 3.39E-15 | 0.075285 | 0.10419  | 0.128299 | 0.00549  | 0.026087 | 0.57389  |
| 2.04E-05 | 0.259594 | 1.25E-08 | 0.076893 | 0.09698  | 0.043899 | 0.34385  | 0.15164  | 0.00101  |
| 0.00199  | 0.035695 | 0.44156  | 0.062614 | 0.17676  | -0.02213 | 0.63329  | 0.144403 | 0.00176  |
| 1.24E-08 | -0.05467 | 0.23836  | -0.0849  | 0.06678  | 0.02635  | 0.57004  | -0.08523 | 0.06572  |
| 0.00907  | 0.103409 | 0.02544  | 0.051361 | 0.268    | 0.027701 | 0.55042  | 0.256    | 2.01E-08 |
| 0.0758   | 0.226437 | 7.63E-07 | 0.159648 | 0.00053  | 0.353625 | 3.34E-15 | 0.072941 | 0.11545  |
| 0.01773  | 0.205302 | 7.73E-06 | 0.243954 | 9.37E-08 | 0.264042 | 6.88E-09 | 0.109054 | 0.0184   |
| 0.90391  | -0.13291 | 0.00401  | -0.12596 | 0.00642  | -0.08977 | 0.05254  | -0.05013 | 0.27964  |
| 0.87961  | 0.143028 | 0.00194  | 0.14133  | 0.0022   | 0.161614 | 0.00045  | 0.094035 | 0.04224  |
| 0.02913  | -0.03299 | 0.47691  | 0.024763 | 0.59349  | -0.03792 | 0.41365  | 0.012417 | 0.78899  |
| 0.86719  | -0.00368 | 0.93674  | -0.01881 | 0.68513  | -0.03486 | 0.45233  | -0.01269 | 0.78439  |
| 0.92289  | 0.144526 | 0.00174  | 0.027584 | 0.5521   | 0.012368 | 0.78981  | 0.073607 | 0.11216  |
| 0.60729  | 0.02527  | 0.58595  | -0.02619 | 0.5724   | -0.03199 | 0.4904   | -0.01437 | 0.75682  |
| 0.90484  | -0.02801 | 0.54591  | -0.01068 | 0.81798  | -0.02252 | 0.6274   | -0.07857 | 0.08991  |
| 0.00256  | -0.11291 | 0.01464  | -0.10625 | 0.02165  | -0.07687 | 0.0971   | -0.0428  | 0.3561   |
| 9.80E-14 | 0.446891 | 2.62E-24 | 0.313899 | 3.88E-12 | 0.286563 | 2.81E-10 | 0.21994  | 1.59E-06 |
| 0.41651  | 0.053056 | 0.25251  | -0.03164 | 0.49521  | -0.05342 | 0.24923  | 0.087827 | 0.05789  |

|          |          |          |          |          |          |          |          |          |
|----------|----------|----------|----------|----------|----------|----------|----------|----------|
| 9.87E-05 | -0.12388 | 0.00736  | -0.14751 | 0.00139  | -0.05869 | 0.20548  | -0.1599  | 0.00052  |
| 1.64E-06 | -0.04259 | 0.35846  | 0.044747 | 0.3346   | -0.09523 | 0.03968  | 0.076136 | 0.10032  |
| 0.03314  | 0.113674 | 0.01398  | 0.078025 | 0.09214  | 0.017366 | 0.70817  | 0.125091 | 0.0068   |
| 1.45E-10 | 0.252425 | 3.20E-08 | 0.247949 | 5.67E-08 | 0.218508 | 1.87E-06 | 0.282117 | 5.41E-10 |
| 0.24098  | 0.026432 | 0.56884  | -0.01931 | 0.67721  | 0.054223 | 0.24221  | -0.06254 | 0.17729  |
| 0.01064  | 0.056452 | 0.22336  | 0.066466 | 0.15155  | 0.052437 | 0.25809  | -0.01812 | 0.69605  |
| 0.66841  | 0.122315 | 0.00814  | 0.140811 | 0.00229  | 0.212566 | 3.58E-06 | 0.102423 | 0.02688  |
| 0.00058  | -0.05136 | 0.26796  | -0.06731 | 0.1464   | 0.070758 | 0.12678  | -0.01151 | 0.804    |
| 0.00205  | -0.02733 | 0.55573  | -0.00149 | 0.97445  | -0.04449 | 0.33743  | 0.124917 | 0.00687  |
| 0.68553  | 0.145877 | 0.00157  | 0.033588 | 0.469    | 0.101031 | 0.02903  | 0.029083 | 0.5307   |
| 0.03144  | 0.075286 | 0.10419  | 0.120385 | 0.00921  | 0.019231 | 0.6785   | 0.175537 | 0.00014  |
| 6.06E-05 | -0.22468 | 9.34E-07 | -0.02082 | 0.65368  | -0.10834 | 0.01919  | -0.17616 | 0.00013  |
| 0.48495  | 0.401832 | 1.50E-19 | 0.211694 | 3.93E-06 | 0.232419 | 3.80E-07 | 0.085768 | 0.06404  |
| 0.00331  | 0.082375 | 0.07534  | 0.059579 | 0.19872  | 0.131971 | 0.00428  | 0.034087 | 0.46242  |
| 0.24249  | -0.03012 | 0.51611  | 0.041518 | 0.37068  | 0.06586  | 0.15532  | 0.06591  | 0.15501  |
| 0.57298  | -0.07669 | 0.09788  | 0.0431   | 0.35272  | -0.02042 | 0.65988  | 0.005844 | 0.89976  |
| 0.22182  | 0.169098 | 0.00024  | 0.200507 | 1.27E-05 | 0.241573 | 1.26E-07 | 0.015099 | 0.74486  |
| 0.00159  | -0.00693 | 0.88121  | 0.013648 | 0.76864  | -0.06507 | 0.16035  | -0.00566 | 0.90296  |
| 1.70E-05 | 0.069636 | 0.13293  | -0.01081 | 0.81585  | 0.098239 | 0.0338   | -0.09879 | 0.03281  |
| 0.00267  | 0.030038 | 0.51728  | -0.05948 | 0.19946  | -0.10042 | 0.03002  | 0.072985 | 0.11523  |
| 0.0103   | 0.175961 | 0.00013  | 0.188402 | 4.18E-05 | 0.205897 | 7.27E-06 | 0.077147 | 0.09588  |
| 0.03573  | -0.17074 | 0.00021  | -0.08333 | 0.07199  | -0.22559 | 8.41E-07 | -0.16128 | 0.00047  |
| 0.17181  | 0.394872 | 7.09E-19 | 0.296579 | 6.17E-11 | 0.353216 | 3.61E-15 | 0.222901 | 1.14E-06 |
| 5.25E-07 | -0.06468 | 0.16288  | -0.09836 | 0.03359  | 0.002511 | 0.95685  | -0.1056  | 0.02247  |
| 0.34884  | 0.150165 | 0.00113  | -0.00763 | 0.86944  | 0.08649  | 0.06182  | 0.125941 | 0.00643  |
| 0.10656  | 0.042434 | 0.36021  | 0.04331  | 0.35037  | 0.087108 | 0.05998  | 0.0671   | 0.14768  |
| 0.37711  | 0.053168 | 0.25151  | -0.00488 | 0.91623  | -0.01383 | 0.76567  | 0.185504 | 5.50E-05 |
| 0.05161  | 0.009997 | 0.82941  | -0.01963 | 0.67221  | 0.050962 | 0.27174  | -0.00542 | 0.907    |
| 3.77E-09 | -0.01201 | 0.79573  | -0.09707 | 0.03598  | 0.040661 | 0.38065  | -0.03659 | 0.43015  |
| 0.49068  | 0.107705 | 0.01991  | 0.118052 | 0.01067  | 0.136284 | 0.00317  | 0.039533 | 0.39402  |
| 0.05136  | 0.044437 | 0.33797  | -0.02306 | 0.61918  | 0.047076 | 0.31004  | -0.03806 | 0.41186  |
| 0.92933  | 0.005274 | 0.90951  | 0.014382 | 0.75658  | -0.03683 | 0.42714  | 0.035193 | 0.44802  |
| 1.85E-08 | 0.227205 | 6.98E-07 | 0.182416 | 7.35E-05 | 0.233514 | 3.33E-07 | 0.074423 | 0.10823  |
| 0.56067  | 0.065331 | 0.15868  | 0.124583 | 0.00703  | 0.104985 | 0.02327  | 0.144013 | 0.00181  |
| 0.58664  | 0.2753   | 1.44E-09 | 0.18636  | 5.08E-05 | 0.297049 | 5.73E-11 | 0.044327 | 0.33916  |
| 0.03008  | 0.083333 | 0.072    | -0.0206  | 0.65709  | 0.069351 | 0.13453  | -0.00448 | 0.92301  |
| 0.53467  | 0.156096 | 0.00071  | 0.07751  | 0.09432  | 0.15665  | 0.00068  | 0.075891 | 0.10142  |
| 0.08338  | 0.267482 | 4.30E-09 | 0.210699 | 4.38E-06 | 0.179021 | 0.0001   | 0.20634  | 6.94E-06 |
| 0.66272  | 0.418251 | 3.36E-21 | 0.30587  | 1.43E-11 | 0.316682 | 2.45E-12 | 0.121032 | 0.00884  |
| 1.20E-09 | 0.066738 | 0.14988  | -0.02456 | 0.59647  | -0.08194 | 0.07689  | 0.08217  | 0.07607  |
| 0.52162  | 0.116299 | 0.0119   | 0.12886  | 0.00529  | 0.171183 | 0.0002   | 0.07773  | 0.09339  |
| 6.16E-18 | -0.21952 | 1.67E-06 | -0.13271 | 0.00407  | -0.07596 | 0.10113  | -0.30896 | 8.70E-12 |
| 3.76E-06 | 0.064677 | 0.1629   | 0.02013  | 0.66436  | 0.070205 | 0.12979  | -0.0988  | 0.0328   |
| 0.30468  | 0.092448 | 0.04585  | 0.102276 | 0.0271   | 0.172742 | 0.00018  | 0.006632 | 0.88634  |
| 2.10E-09 | 0.32513  | 5.85E-13 | 0.307338 | 1.13E-11 | 0.280256 | 7.09E-10 | 0.277003 | 1.13E-09 |

|          |          |          |          |          |          |          |          |          |
|----------|----------|----------|----------|----------|----------|----------|----------|----------|
| 6.33E-07 | 0.137607 | 0.00288  | 0.203328 | 9.49E-06 | 0.117282 | 0.0112   | 0.164569 | 0.00036  |
| 0.03744  | 0.112937 | 0.01461  | 0.104186 | 0.02435  | 0.145487 | 0.00162  | -0.00557 | 0.90443  |
| 0.12788  | -0.13658 | 0.0031   | -0.11759 | 0.01098  | -0.2078  | 5.95E-06 | -0.09665 | 0.0368   |
| 0.29862  | 0.114782 | 0.01306  | 0.050747 | 0.27377  | 0.180643 | 8.65E-05 | 0.000945 | 0.98375  |
| 1.87E-06 | -0.27093 | 2.67E-09 | -0.02047 | 0.65898  | -0.02828 | 0.5421   | -0.16266 | 0.00042  |
| 2.22E-08 | 0.158631 | 0.00058  | 0.035442 | 0.44481  | 0.143616 | 0.00186  | -0.07969 | 0.08538  |
| 0.83892  | -0.13366 | 0.00381  | -0.17572 | 0.00014  | -0.141   | 0.00226  | -0.03852 | 0.4063   |
| 0.32197  | 0.152644 | 0.00094  | 0.112926 | 0.01462  | 0.214405 | 2.93E-06 | 0.064077 | 0.16684  |
| 0.95127  | 0.191917 | 2.98E-05 | 0.217711 | 2.04E-06 | 0.222131 | 1.25E-06 | 0.19267  | 2.77E-05 |
| 0.00053  | -0.01496 | 0.74716  | 0.104023 | 0.02457  | 0.088863 | 0.05498  | 0.007267 | 0.87554  |
| 0.27085  | 0.066047 | 0.15415  | 0.007348 | 0.87417  | -0.01384 | 0.7654   | 0.133834 | 0.00376  |
| 1.78E-08 | 0.14452  | 0.00174  | 0.078195 | 0.09144  | 0.035075 | 0.44954  | 0.206065 | 7.14E-06 |
| 0.09179  | -0.0326  | 0.4822   | 0.016681 | 0.71919  | 0.02615  | 0.57296  | -0.0627  | 0.17615  |
| 0.37997  | 0.257776 | 1.59E-08 | 0.103339 | 0.02554  | 0.097459 | 0.03525  | -0.03457 | 0.45606  |
| 0.4027   | 0.001161 | 0.98004  | 0.015999 | 0.73022  | 0.031538 | 0.49658  | 0.042489 | 0.35959  |
| 0.35538  | 0.036555 | 0.43064  | 0.006061 | 0.89607  | 0.072408 | 0.11814  | 0.048027 | 0.30034  |
| 0.00445  | 0.078409 | 0.09055  | 0.002922 | 0.94978  | 0.015991 | 0.73035  | -0.03928 | 0.39706  |
| 0.13267  | 0.068411 | 0.13991  | 0.042849 | 0.35553  | 0.040973 | 0.377    | -0.04114 | 0.37504  |
| 0.71354  | 0.051351 | 0.26809  | 0.070431 | 0.12855  | 0.075167 | 0.10474  | 0.037317 | 0.42108  |
| 0.32458  | -0.02227 | 0.63124  | 0.013357 | 0.77343  | 0.001339 | 0.97697  | -0.01462 | 0.75267  |
| 0.03759  | -0.00696 | 0.88078  | 0.017655 | 0.70354  | 0.029107 | 0.53036  | -0.01029 | 0.82449  |
| 2.21E-07 | -0.02715 | 0.55835  | 0.043834 | 0.34457  | -0.08478 | 0.06718  | -0.02213 | 0.63336  |
| 0.00052  | -0.04732 | 0.30754  | 0.083828 | 0.07032  | 0.044527 | 0.33698  | -0.01082 | 0.81564  |
| 0.00039  | 0.074813 | 0.10638  | 0.060888 | 0.18902  | 0.151285 | 0.00104  | 0.112758 | 0.01477  |
| 2.55E-08 | -0.03173 | 0.49396  | -0.01818 | 0.69525  | 0.095085 | 0.03998  | -0.11412 | 0.0136   |
| 1.26E-11 | 0.135938 | 0.00325  | 0.111343 | 0.01608  | 0.083916 | 0.07002  | 0.168178 | 0.00026  |
| 7.47E-08 | 0.021951 | 0.6361   | -0.0215  | 0.643    | 0.064284 | 0.16547  | -0.0456  | 0.32546  |
| 0.00015  | -0.0981  | 0.03406  | -0.12528 | 0.00671  | 0.028777 | 0.53503  | -0.10967 | 0.01775  |
| 0.86881  | -0.07457 | 0.10751  | -0.07929 | 0.08696  | -0.06995 | 0.13118  | -0.0453  | 0.32861  |
| 2.01E-07 | -0.1541  | 0.00083  | -0.15045 | 0.00111  | -0.1388  | 0.00265  | -0.20833 | 5.63E-06 |
| 0.00182  | 0.233803 | 3.22E-07 | 0.012773 | 0.78308  | 0.164988 | 0.00034  | 0.112829 | 0.01471  |
| 2.82E-16 | 0.107498 | 0.02015  | 0.041139 | 0.37507  | 0.160742 | 0.00049  | -0.02132 | 0.64581  |
| 0.05842  | 0.426744 | 4.32E-22 | 0.242423 | 1.13E-07 | 0.299045 | 4.21E-11 | 0.239081 | 1.71E-07 |
| 0.07611  | -0.05641 | 0.22367  | -0.04001 | 0.38836  | -0.12184 | 0.00839  | -0.03707 | 0.4242   |
| 0.00313  | 0.016942 | 0.71498  | -0.03424 | 0.4604   | 0.128482 | 0.00543  | -0.12397 | 0.00731  |
| 0.00074  | -0.06338 | 0.17151  | -0.09604 | 0.03801  | -0.04849 | 0.29575  | -0.14327 | 0.00191  |
| 0.6867   | -0.02326 | 0.61609  | -0.04524 | 0.32926  | -0.03655 | 0.43072  | 0.049101 | 0.28965  |
| 0.88033  | -0.39599 | 5.54E-19 | -0.12065 | 0.00906  | -0.21457 | 2.88E-06 | 0.02423  | 0.60146  |
| 1.02E-05 | -0.02004 | 0.66574  | -0.0469  | 0.31179  | 0.036786 | 0.42773  | -0.07316 | 0.11438  |
| 0.99935  | -0.20244 | 1.04E-05 | -0.13758 | 0.00289  | -0.2042  | 8.67E-06 | -0.01983 | 0.66911  |
| 0.25809  | 0.140159 | 0.0024   | 0.089813 | 0.05243  | 0.18599  | 5.26E-05 | 0.100443 | 0.02999  |
| 0.45983  | -0.1667  | 0.0003   | -0.04026 | 0.38535  | -0.07565 | 0.10251  | 0.165591 | 0.00033  |
| 0.11182  | 0.082926 | 0.0734   | -0.04014 | 0.38677  | 0.00465  | 0.92016  | -0.04058 | 0.38157  |
| 0.00552  | -0.06536 | 0.15852  | 0.041162 | 0.37481  | 0.065614 | 0.15688  | -0.10849 | 0.01902  |
| 0.3697   | 0.06105  | 0.18784  | -0.08516 | 0.06594  | -0.0316  | 0.49574  | -0.08548 | 0.06494  |

|          |          |          |          |          |          |          |          |          |
|----------|----------|----------|----------|----------|----------|----------|----------|----------|
| 0.89555  | -0.12239 | 0.0081   | 0.027782 | 0.54926  | -0.02457 | 0.59635  | -0.1734  | 0.00017  |
| 0.17705  | 0.412621 | 1.27E-20 | 0.235123 | 2.75E-07 | 0.357098 | 1.72E-15 | 0.151722 | 0.00101  |
| 2.64E-10 | 0.196574 | 1.88E-05 | 0.051032 | 0.27109  | 0.052189 | 0.26035  | 0.264908 | 6.12E-09 |
| 0.25791  | -0.05617 | 0.22568  | 0.018045 | 0.69731  | -0.08364 | 0.07095  | -0.07058 | 0.12775  |
| 5.44E-06 | 0.023388 | 0.61417  | 0.074297 | 0.10883  | 0.005453 | 0.90644  | 0.188052 | 4.32E-05 |
| 0.01917  | 0.072818 | 0.11607  | 0.038288 | 0.40909  | 0.019213 | 0.67879  | 0.13696  | 0.00302  |
| 6.90E-11 | -0.00921 | 0.84259  | 6.62E-05 | 0.99886  | 0.118095 | 0.01064  | -0.07041 | 0.12865  |
| 1.99E-07 | -0.18141 | 8.06E-05 | -0.22094 | 1.42E-06 | -0.04968 | 0.284    | -0.15889 | 0.00057  |
| 0.18305  | 0.089058 | 0.05445  | 0.045623 | 0.32522  | 0.042893 | 0.35504  | 0.003364 | 0.9422   |
| 1.45E-15 | 0.109356 | 0.01808  | 0.184925 | 5.81E-05 | 0.045533 | 0.32617  | 0.129456 | 0.00508  |
| 0.00017  | 0.012051 | 0.79507  | 0.028086 | 0.54488  | 0.089308 | 0.05377  | -0.01857 | 0.68896  |
| 9.79E-11 | -0.02554 | 0.58191  | -0.00633 | 0.89157  | -0.05168 | 0.26501  | 0.283476 | 4.43E-10 |
| 0.14857  | 0.072162 | 0.11941  | 0.007675 | 0.86861  | 0.077064 | 0.09624  | 0.082582 | 0.07461  |
| 3.90E-05 | -0.17415 | 0.00016  | -0.1348  | 0.00352  | -0.10671 | 0.02109  | -0.1369  | 0.00303  |
| 0.60678  | 0.11731  | 0.01118  | 0.017678 | 0.70318  | 0.090398 | 0.05091  | 0.064176 | 0.16619  |
| 0.00189  | 0.010148 | 0.82686  | -0.07583 | 0.10169  | -0.01245 | 0.7885   | 0.081091 | 0.08002  |
| 0.66828  | -0.13425 | 0.00366  | -0.25373 | 2.70E-08 | -0.2325  | 3.76E-07 | 0.023505 | 0.6124   |
| 0.41008  | -0.03246 | 0.48405  | 0.150392 | 0.00111  | 0.062553 | 0.17718  | 0.108395 | 0.01913  |
| 1.99E-18 | -0.04076 | 0.37945  | -0.09407 | 0.04216  | 0.01192  | 0.79724  | -0.06532 | 0.15877  |
| 0.36491  | 0.067924 | 0.14275  | 0.031662 | 0.49489  | 0.095965 | 0.03817  | -0.09077 | 0.04995  |
| 0.04058  | -0.04616 | 0.31955  | -0.11679 | 0.01155  | -0.19047 | 3.43E-05 | -0.06194 | 0.1815   |
| 0.87607  | 0.249373 | 4.73E-08 | 0.20495  | 8.02E-06 | 0.313773 | 3.96E-12 | 0.154013 | 0.00084  |
| 0.00675  | -0.0083  | 0.85796  | -0.12517 | 0.00676  | 0.103991 | 0.02462  | -0.02853 | 0.53861  |
| 0.00989  | -0.1638  | 0.00038  | -0.19912 | 1.46E-05 | -0.21158 | 3.98E-06 | -0.14345 | 0.00189  |
| 0.02774  | 0.270913 | 2.67E-09 | 0.144269 | 0.00177  | 0.197812 | 1.66E-05 | 0.066184 | 0.1533   |
| 0.00545  | -0.11206 | 0.0154   | -0.03695 | 0.42571  | 0.007364 | 0.87389  | 0.025517 | 0.58229  |
| 0.00019  | -0.07236 | 0.11841  | 0.083552 | 0.07125  | 0.034948 | 0.45119  | -0.02893 | 0.5329   |
| 0.00948  | -0.08082 | 0.08103  | 0.010188 | 0.8262   | 0.039702 | 0.39199  | -0.03871 | 0.40389  |
| 0.28561  | -0.01662 | 0.72018  | -0.02321 | 0.6169   | 0.001757 | 0.9698   | 0.045243 | 0.32927  |
| 0.01081  | 0.014236 | 0.75896  | 0.043218 | 0.3514   | 0.077225 | 0.09554  | 0.034441 | 0.45779  |
| 1.84E-07 | 0.126109 | 0.00636  | 0.057118 | 0.21794  | 0.065202 | 0.1595   | 0.140486 | 0.00234  |
| 4.51E-06 | 0.136348 | 0.00315  | 0.159055 | 0.00056  | 0.332936 | 1.50E-13 | 0.07679  | 0.09743  |
| 4.38E-07 | 7.21E-05 | 0.99876  | -0.05859 | 0.20629  | 0.061063 | 0.18775  | -0.07503 | 0.10536  |
| 0.34328  | 0.037394 | 0.42012  | 0.018096 | 0.6965   | 0.03496  | 0.45103  | 0.088468 | 0.05608  |
| 4.78E-11 | 0.017055 | 0.71318  | -0.00502 | 0.91378  | 0.198344 | 1.58E-05 | -0.0725  | 0.11768  |
| 0.28484  | 0.144711 | 0.00172  | 0.111056 | 0.01635  | 0.150837 | 0.00108  | 0.19321  | 2.62E-05 |
| 0.7232   | -0.04997 | 0.2812   | 0.015005 | 0.74638  | 0.056368 | 0.22405  | -0.15351 | 0.00087  |
| 0.55212  | 0.02293  | 0.62113  | 0.032542 | 0.48296  | 0.046168 | 0.31946  | -0.00591 | 0.89858  |
| 0.64931  | 0.028387 | 0.54059  | -0.1023  | 0.02706  | -0.11996 | 0.00947  | 0.183429 | 6.69E-05 |
| 0.00073  | -0.06238 | 0.17839  | -0.06689 | 0.14896  | 0.023555 | 0.61164  | -0.07661 | 0.09821  |
| 0.03094  | -0.38806 | 3.11E-18 | -0.2075  | 6.14E-06 | -0.24916 | 4.86E-08 | -0.04565 | 0.3249   |
| 9.29E-05 | 0.046944 | 0.31139  | 0.053859 | 0.24539  | -0.05791 | 0.21162  | 0.154481 | 0.00081  |
| 0.8747   | 0.150252 | 0.00113  | 0.065499 | 0.1576   | 0.049531 | 0.28545  | -0.08838 | 0.05633  |
| 0.33957  | -0.02517 | 0.58744  | 0.139704 | 0.00248  | 0.026546 | 0.56717  | 0.009996 | 0.82942  |
| 0.00175  | 0.065621 | 0.15683  | -0.04302 | 0.35366  | 0.03763  | 0.4172   | 0.079274 | 0.08704  |

|          |          |          |          |          |          |          |          |          |
|----------|----------|----------|----------|----------|----------|----------|----------|----------|
| 0.18836  | -0.0246  | 0.59592  | -0.20077 | 1.23E-05 | -0.03446 | 0.4576   | -0.16584 | 0.00032  |
| 0.00597  | 0.127979 | 0.00561  | 0.088716 | 0.05539  | 0.104825 | 0.02349  | -0.01847 | 0.69061  |
| 0.15129  | -0.26694 | 4.63E-09 | -0.1366  | 0.0031   | -0.24604 | 7.21E-08 | 0.140157 | 0.0024   |
| 0.39882  | 0.197125 | 1.78E-05 | 0.172158 | 0.00019  | 0.127737 | 0.0057   | 0.267807 | 4.11E-09 |
| 0.64152  | -0.06229 | 0.17904  | 0.023667 | 0.60995  | -0.13201 | 0.00427  | 0.007742 | 0.86749  |
| 8.65E-06 | -0.26199 | 9.08E-09 | -0.19789 | 1.65E-05 | -0.19765 | 1.69E-05 | -0.29578 | 6.98E-11 |
| 0.00078  | 0.047927 | 0.30136  | 0.141802 | 0.00213  | 0.109937 | 0.01747  | 0.145434 | 0.00163  |
| 0.00165  | -0.13003 | 0.00489  | 0.02475  | 0.59368  | -0.01938 | 0.6762   | 0.002788 | 0.95209  |
| 0.09708  | 0.031401 | 0.49846  | 0.088421 | 0.05621  | 0.1016   | 0.02813  | 0.185116 | 5.71E-05 |
| 0.00064  | 0.202683 | 1.01E-05 | 0.172832 | 0.00017  | 0.133522 | 0.00384  | 0.096256 | 0.03758  |
| 0.26525  | 0.032726 | 0.4805   | 0.033265 | 0.47329  | 0.001538 | 0.97355  | 0.013288 | 0.77457  |
| 0.0009   | 0.019539 | 0.67364  | 0.09962  | 0.03137  | 0.219723 | 1.63E-06 | 0.06373  | 0.16915  |
| 0.91126  | -0.08674 | 0.06106  | -0.0725  | 0.11768  | -0.04846 | 0.29598  | -0.00297 | 0.94893  |
| 0.95129  | 0.164415 | 0.00036  | 0.174292 | 0.00015  | 0.175488 | 0.00014  | 0.091592 | 0.04791  |
| 6.22E-06 | -0.00762 | 0.86954  | -0.05079 | 0.27339  | -0.12128 | 0.0087   | -0.05112 | 0.27022  |
| 0.01418  | 0.208641 | 5.45E-06 | 0.093389 | 0.04368  | 0.082293 | 0.07563  | 0.105462 | 0.02265  |
| 0.00177  | 0.123108 | 0.00774  | 0.118298 | 0.01051  | 0.077411 | 0.09474  | 0.097407 | 0.03535  |
| 0.62166  | -0.0277  | 0.55041  | 0.033801 | 0.46618  | -0.00037 | 0.99362  | 0.035717 | 0.44128  |
| 0.09669  | -0.20756 | 6.10E-06 | -0.11341 | 0.0142   | -0.15476 | 0.00079  | -0.07731 | 0.09518  |
| 0.75428  | 0.167869 | 0.00027  | 0.172537 | 0.00018  | 0.227283 | 6.92E-07 | 0.093601 | 0.0432   |
| 7.09E-05 | 0.195062 | 2.19E-05 | 0.184933 | 5.81E-05 | 0.175572 | 0.00014  | 0.085799 | 0.06394  |
| 0.00141  | 0.071665 | 0.12198  | 0.141869 | 0.00212  | 0.000596 | 0.98975  | 0.17515  | 0.00014  |
| 0.27295  | 0.092893 | 0.04481  | 0.083406 | 0.07175  | 0.139009 | 0.00261  | 0.056001 | 0.22709  |
| 0.01866  | 0.164219 | 0.00037  | 0.113264 | 0.01433  | 0.176804 | 0.00012  | 0.087979 | 0.05746  |
| 0.00018  | -0.01806 | 0.69709  | -0.10667 | 0.02113  | -0.011   | 0.81267  | -0.06564 | 0.15668  |
| 0.47952  | -0.01068 | 0.81791  | -0.05826 | 0.20889  | -0.0854  | 0.06519  | -0.08999 | 0.05196  |
| 2.20E-07 | 0.127844 | 0.00566  | 0.119504 | 0.00974  | 0.224697 | 9.31E-07 | -0.1265  | 0.00619  |
| 6.31E-06 | -0.03525 | 0.44734  | 0.052584 | 0.25676  | 0.084938 | 0.06666  | -0.0051  | 0.91248  |
| 0.74226  | 0.100581 | 0.02976  | 0.051157 | 0.26991  | 0.130585 | 0.00471  | 0.139299 | 0.00255  |
| 8.37E-07 | -0.14756 | 0.00138  | -0.14251 | 0.00202  | -0.07058 | 0.12776  | -0.11822 | 0.01056  |
| 4.44E-15 | 0.334644 | 1.11E-13 | 0.20317  | 9.64E-06 | 0.243443 | 9.98E-08 | 0.349436 | 7.39E-15 |
| 7.41E-07 | 0.070313 | 0.12919  | 0.087378 | 0.05919  | 0.142554 | 0.00201  | -0.00022 | 0.99617  |
| 0.00029  | 0.085449 | 0.06504  | -0.03978 | 0.39104  | 0.052993 | 0.25307  | -0.10805 | 0.01952  |
| 2.14E-13 | 0.031743 | 0.49378  | 0.097871 | 0.03448  | 0.234497 | 2.97E-07 | -0.03197 | 0.49072  |
| 0.0033   | -0.15528 | 0.00076  | -0.11152 | 0.01591  | -0.16744 | 0.00028  | -0.18892 | 3.98E-05 |
| 0.00082  | 0.028045 | 0.54548  | 0.051162 | 0.26986  | 0.155386 | 0.00075  | -0.09264 | 0.0454   |
| 0.0039   | 0.001825 | 0.96863  | 0.075671 | 0.10242  | 0.105746 | 0.02228  | 0.029381 | 0.5265   |
| 0.0567   | -0.01721 | 0.7107   | 0.069509 | 0.13364  | 0.066371 | 0.15214  | -0.09892 | 0.03258  |
| 0.13552  | 0.089    | 0.05461  | 0.078193 | 0.09145  | 0.073154 | 0.1144   | 0.073698 | 0.11172  |
| 0.06163  | -0.12143 | 0.00862  | -0.0618  | 0.18246  | -0.17201 | 0.00019  | -0.23496 | 2.81E-07 |
| 0.3503   | 0.333759 | 1.29E-13 | 0.249175 | 4.85E-08 | 0.397441 | 4.02E-19 | 0.224442 | 9.59E-07 |
| 0.20959  | 0.118089 | 0.01065  | 0.054378 | 0.24087  | 0.06354  | 0.17043  | -0.03683 | 0.4272   |
| 1.77E-14 | 0.199526 | 1.40E-05 | 0.109446 | 0.01799  | 0.030228 | 0.51463  | 0.233752 | 3.24E-07 |
| 1.12E-06 | 0.441558 | 1.05E-23 | 0.445186 | 4.10E-24 | 0.34217  | 2.84E-14 | 0.294072 | 9.06E-11 |
| 5.95E-09 | -0.14066 | 0.00231  | -0.00375 | 0.93554  | -0.05012 | 0.27971  | -0.29422 | 8.86E-11 |

|          |          |          |          |          |          |          |          |          |
|----------|----------|----------|----------|----------|----------|----------|----------|----------|
| 0.29896  | 0.159201 | 0.00055  | 0.1487   | 0.00127  | 0.248629 | 5.20E-08 | 0.077656 | 0.0937   |
| 0.00016  | -0.09525 | 0.03963  | -0.06875 | 0.13794  | 0.005663 | 0.90286  | -0.02386 | 0.60705  |
| 3.97E-11 | -0.05876 | 0.20494  | 0.001859 | 0.96803  | -0.07003 | 0.13074  | 0.21343  | 3.26E-06 |
| 0.01256  | 0.080739 | 0.08134  | 0.068349 | 0.14027  | 0.10066  | 0.02963  | -0.10673 | 0.02106  |
| 0.08053  | 0.07683  | 0.09726  | 0.083831 | 0.07031  | 0.084689 | 0.06747  | 0.1026   | 0.02662  |
| 8.44E-14 | 0.144118 | 0.00179  | -0.00791 | 0.86457  | -0.06009 | 0.19491  | 0.291566 | 1.33E-10 |
| 1.70E-21 | 0.207135 | 6.38E-06 | 0.099152 | 0.03218  | -0.00989 | 0.83125  | 0.218488 | 1.87E-06 |
| 3.83E-06 | -0.06682 | 0.14939  | 0.020445 | 0.65945  | 0.045422 | 0.32735  | -0.15899 | 0.00056  |
| 1.87E-07 | 0.284798 | 3.65E-10 | 0.101973 | 0.02756  | 0.236428 | 2.35E-07 | -0.06589 | 0.15511  |
| 0.06391  | 0.032754 | 0.48012  | -0.07179 | 0.12133  | 0.012094 | 0.79436  | -0.02207 | 0.6342   |
| 0.42707  | 0.085427 | 0.06511  | 0.01427  | 0.75841  | -0.02472 | 0.59411  | -0.06377 | 0.16888  |
| 2.10E-14 | 0.11377  | 0.01389  | -0.00747 | 0.87203  | 0.106999 | 0.02074  | -0.17806 | 0.00011  |
| 2.15E-20 | -0.03625 | 0.43448  | 0.033539 | 0.46965  | 0.123223 | 0.00768  | -0.16138 | 0.00046  |
| 0.27383  | 0.05023  | 0.2787   | -0.02202 | 0.6351   | 0.078255 | 0.09119  | -0.06403 | 0.16715  |
| 0.59047  | -0.01393 | 0.76398  | -0.07674 | 0.09764  | -0.03016 | 0.5156   | 0.023112 | 0.61836  |
| 0.95161  | 0.036833 | 0.42714  | -0.01495 | 0.74731  | 0.015897 | 0.73187  | -0.01459 | 0.75314  |
| 0.16356  | 0.0158   | 0.73344  | -0.06836 | 0.14018  | -0.0026  | 0.9554   | -0.03915 | 0.3986   |
| 0.44936  | -0.02628 | 0.571    | -0.02691 | 0.56191  | 0.023012 | 0.61988  | 0.013605 | 0.76934  |
| 0.00455  | -0.07103 | 0.12532  | 0.10385  | 0.02481  | -0.03836 | 0.40821  | 0.177208 | 0.00012  |
| 0.5771   | -0.00841 | 0.85621  | 0.022393 | 0.62932  | 0.026261 | 0.57133  | 0.049452 | 0.28622  |
| 0.45707  | 0.019579 | 0.67302  | 0.084851 | 0.06694  | 0.16269  | 0.00042  | 0.094212 | 0.04185  |
| 0.27131  | -0.13361 | 0.00382  | -0.13978 | 0.00247  | -0.14552 | 0.00162  | -0.1339  | 0.00375  |
| 0.00023  | 0.243211 | 1.03E-07 | 0.024915 | 0.59122  | 0.192398 | 2.84E-05 | -0.10036 | 0.03013  |
| 0.0266   | -0.18971 | 3.69E-05 | -0.07276 | 0.11635  | -0.26709 | 4.54E-09 | 0.072678 | 0.11678  |
| 0.62876  | 0.03497  | 0.4509   | 0.075676 | 0.1024   | 0.070304 | 0.12924  | 0.214618 | 2.87E-06 |
| 0.29771  | -0.16417 | 0.00037  | -0.07702 | 0.09642  | -0.13524 | 0.00341  | -0.06779 | 0.14353  |
| 0.66744  | 0.119359 | 0.00983  | 0.079268 | 0.08706  | 0.104334 | 0.02415  | 0.112128 | 0.01534  |
| 0.08144  | 0.132402 | 0.00415  | 0.021252 | 0.64689  | 0.133626 | 0.00382  | 0.04566  | 0.32483  |
| 0.0357   | 0.282357 | 5.22E-10 | 0.051302 | 0.26855  | 0.142413 | 0.00204  | 0.018578 | 0.68883  |
| 0.05285  | 0.070494 | 0.12821  | 0.03684  | 0.42705  | 0.164265 | 0.00036  | 0.055944 | 0.22756  |
| 0.52453  | 0.234873 | 2.84E-07 | 0.020212 | 0.66308  | 0.120178 | 0.00933  | 0.067094 | 0.14771  |
| 0.53316  | 0.264736 | 6.26E-09 | 0.164309 | 0.00036  | 0.022141 | 0.63319  | 0.174475 | 0.00015  |
| 0.44555  | 0.317277 | 2.22E-12 | 0.018957 | 0.68284  | 0.032179 | 0.48787  | 0.125456 | 0.00664  |
| 0.07818  | 0.242438 | 1.13E-07 | 0.060556 | 0.19144  | 0.139488 | 0.00252  | 0.168499 | 0.00025  |
| 0.08427  | 0.148072 | 0.00133  | 0.073694 | 0.11173  | 0.066553 | 0.15101  | 0.152146 | 0.00097  |
| 0.59875  | 0.12069  | 0.00904  | 0.084905 | 0.06677  | 0.087257 | 0.05954  | 0.104799 | 0.02352  |
| 0.03601  | -0.01272 | 0.784    | -0.06051 | 0.19177  | -0.08271 | 0.07414  | 0.142472 | 0.00203  |
| 0.00732  | 0.07901  | 0.0881   | -0.11403 | 0.01368  | -0.15847 | 0.00059  | 0.009746 | 0.83363  |
| 0.00229  | 0.068036 | 0.1421   | -0.0686  | 0.13883  | 0.021193 | 0.6478   | -0.04751 | 0.30558  |
| 0.00402  | -0.14018 | 0.0024   | -0.23267 | 3.69E-07 | -0.21394 | 3.09E-06 | -0.1052  | 0.02298  |
| 0.00132  | 0.15752  | 0.00063  | 0.079286 | 0.08699  | 0.078075 | 0.09194  | 0.24285  | 1.07E-07 |
| 0.90949  | 0.098279 | 0.03373  | -0.01602 | 0.72987  | 0.02741  | 0.55462  | 0.010457 | 0.82168  |
| 5.63E-06 | -0.11067 | 0.01673  | -0.11437 | 0.0134   | -0.23412 | 3.10E-07 | 0.047075 | 0.31005  |
| 0.12097  | 0.14318  | 0.00192  | 0.149758 | 0.00117  | 0.143945 | 0.00182  | 0.231312 | 4.33E-07 |
| 3.78E-05 | -0.04786 | 0.30202  | -0.04382 | 0.34476  | -0.02018 | 0.66351  | -0.10065 | 0.02965  |

|          |          |          |          |          |          |          |          |          |
|----------|----------|----------|----------|----------|----------|----------|----------|----------|
| 0.00119  | -0.02703 | 0.56007  | -0.10192 | 0.02764  | 0.15264  | 0.00094  | -0.01374 | 0.76719  |
| 0.50633  | -0.15527 | 0.00076  | -0.13762 | 0.00288  | -0.17654 | 0.00013  | -0.05215 | 0.26068  |
| 7.59E-06 | -0.19335 | 2.59E-05 | -0.19396 | 2.44E-05 | -0.13685 | 0.00304  | -0.10759 | 0.02004  |
| 2.79E-11 | 0.061171 | 0.18697  | -0.01787 | 0.70015  | -0.06675 | 0.14981  | 0.264946 | 6.08E-09 |
| 0.2054   | 0.04405  | 0.34219  | 0.129382 | 0.00511  | 0.102044 | 0.02745  | 0.018273 | 0.69368  |
| 0.00799  | 0.094367 | 0.04151  | -0.06107 | 0.18768  | 0.149434 | 0.0012   | 0.061629 | 0.18368  |
| 0.00408  | 0.031934 | 0.49119  | 0.038827 | 0.40252  | 0.107626 | 0.02     | 0.099418 | 0.03171  |
| 0.00093  | 0.099756 | 0.03113  | 0.060516 | 0.19174  | 0.123141 | 0.00772  | -0.02217 | 0.63271  |
| 2.62E-06 | -0.30196 | 2.66E-11 | -0.27351 | 1.86E-09 | -0.29103 | 1.44E-10 | -0.27009 | 3.00E-09 |
| 0.00026  | -0.16678 | 0.00029  | -0.16708 | 0.00029  | -0.05958 | 0.19874  | -0.18156 | 7.95E-05 |
| 0.01334  | 0.158515 | 0.00059  | 0.100379 | 0.03009  | 0.212603 | 3.57E-06 | -0.01024 | 0.82531  |
| 0.22684  | 0.003492 | 0.94001  | -0.03488 | 0.4521   | 0.020181 | 0.66357  | -0.00985 | 0.83193  |
| 0.81429  | 0.027315 | 0.55599  | 0.094482 | 0.04126  | 0.083435 | 0.07165  | 0.020956 | 0.65149  |
| 0.13764  | -0.14125 | 0.00222  | 0.108146 | 0.01941  | -0.03946 | 0.39492  | 0.019018 | 0.68186  |
| 0.00244  | -0.01025 | 0.82508  | -0.02411 | 0.60325  | 0.00697  | 0.8806   | 0.030784 | 0.50693  |
| 0.84003  | -0.03259 | 0.48228  | 0.028089 | 0.54485  | -0.00696 | 0.88079  | 0.096982 | 0.03616  |
| 0.06989  | 0.100822 | 0.02937  | 0.099439 | 0.03168  | 0.072971 | 0.11531  | 0.116115 | 0.01204  |
| 0.61369  | 0.024605 | 0.59585  | 0.005514 | 0.90541  | -0.02317 | 0.61751  | -0.01346 | 0.77179  |
| 0.00104  | -0.02962 | 0.52307  | 0.059207 | 0.20154  | -0.05897 | 0.20337  | 0.177997 | 0.00011  |
| 0.67433  | 0.175767 | 0.00013  | 0.097761 | 0.03468  | 0.141083 | 0.00224  | 0.063021 | 0.17396  |
| 3.14E-05 | 0.140086 | 0.00241  | 0.091947 | 0.04705  | 0.077783 | 0.09316  | 0.158257 | 0.0006   |
| 0.16443  | 0.076085 | 0.10055  | 0.200245 | 1.30E-05 | 0.191545 | 3.09E-05 | 0.092647 | 0.04539  |
| 0.09435  | 0.116558 | 0.01171  | 0.036659 | 0.42933  | 0.209785 | 4.82E-06 | 0.028518 | 0.53872  |
| 5.42E-15 | 0.152577 | 0.00094  | -0.04458 | 0.33646  | -0.0426  | 0.35829  | 0.161893 | 0.00044  |
| 0.43828  | 0.026517 | 0.56759  | -0.09122 | 0.04882  | -0.10973 | 0.01769  | 0.018831 | 0.68482  |
| 0.12124  | 0.083897 | 0.07009  | 0.122156 | 0.00823  | 0.269938 | 3.06E-09 | 0.006934 | 0.8812   |
| 0.00199  | 0.060179 | 0.19423  | 0.072717 | 0.11658  | 0.124315 | 0.00715  | -0.01486 | 0.74876  |
| 0.03432  | 0.105072 | 0.02316  | 0.024155 | 0.6026   | -0.01344 | 0.77211  | 0.017764 | 0.70181  |
| 0.68609  | -0.04797 | 0.30093  | -0.08633 | 0.06231  | -0.0085  | 0.85463  | 0.033783 | 0.46642  |
| 0.7583   | 0.200294 | 1.29E-05 | 0.162855 | 0.00041  | 0.223222 | 1.10E-06 | 0.045249 | 0.32921  |
| 0.91321  | 0.192894 | 2.71E-05 | 0.236488 | 2.34E-07 | 0.287488 | 2.45E-10 | 0.102503 | 0.02676  |
| 2.84E-06 | -0.16288 | 0.00041  | -0.02815 | 0.54402  | -0.02934 | 0.52705  | -0.1447  | 0.00172  |
| 0.00048  | -0.20045 | 1.27E-05 | -0.1372  | 0.00297  | -0.15534 | 0.00076  | -0.2325  | 3.76E-07 |
| 0.03448  | -0.03443 | 0.45792  | -0.08836 | 0.05638  | -0.07711 | 0.09605  | -0.02457 | 0.59635  |
| 0.00972  | 0.144922 | 0.00169  | 0.053904 | 0.245    | 0.159255 | 0.00055  | -0.01349 | 0.7713   |
| 0.00057  | -0.05197 | 0.26234  | -0.1025  | 0.02676  | -0.22878 | 5.82E-07 | -0.03355 | 0.46953  |
| 0.90272  | -0.1837  | 6.52E-05 | -0.15844 | 0.00059  | -0.21904 | 1.76E-06 | -0.17055 | 0.00021  |
| 0.00118  | -0.02659 | 0.56654  | -0.11767 | 0.01093  | -0.14446 | 0.00175  | 0.044161 | 0.34098  |
| 1.23E-06 | -0.01513 | 0.74433  | 0.029936 | 0.51871  | 0.096746 | 0.03662  | -0.07571 | 0.10224  |
| 7.86E-07 | 0.022812 | 0.62292  | 0.04127  | 0.37355  | -0.06939 | 0.1343   | 0.116504 | 0.01175  |
| 0.11579  | 0.157808 | 0.00062  | 0.107574 | 0.02006  | 0.188761 | 4.04E-05 | 0.092141 | 0.04658  |
| 0.0057   | 0.031404 | 0.49841  | -0.06931 | 0.13476  | 0.06716  | 0.14731  | 0.204431 | 8.47E-06 |
| 0.0004   | 0.107057 | 0.02067  | 0.215141 | 2.71E-06 | 0.177656 | 0.00011  | 0.162735 | 0.00041  |
| 3.21E-09 | 0.17876  | 0.0001   | 0.152957 | 0.00091  | 0.145404 | 0.00163  | 0.330188 | 2.43E-13 |
| 0.00061  | 0.135327 | 0.00339  | 0.008302 | 0.858    | 0.065962 | 0.15468  | -0.04097 | 0.37707  |

|          |          |          |          |          |          |          |          |          |
|----------|----------|----------|----------|----------|----------|----------|----------|----------|
| 0.02741  | 0.113674 | 0.01398  | 0.051042 | 0.27099  | 0.213631 | 3.19E-06 | 0.096464 | 0.03717  |
| 3.50E-05 | 0.164685 | 0.00035  | 0.185218 | 5.65E-05 | 0.285899 | 3.10E-10 | 0.081601 | 0.07813  |
| 0.05609  | 0.119432 | 0.00979  | 0.090445 | 0.05078  | 0.092943 | 0.0447   | 0.130239 | 0.00482  |
| 0.12962  | 0.232709 | 3.67E-07 | 0.174248 | 0.00015  | 0.149319 | 0.00121  | 0.103391 | 0.02546  |
| 0.00048  | 0.154063 | 0.00084  | 0.083232 | 0.07234  | 0.186338 | 5.09E-05 | 0.115716 | 0.01234  |
| 0.25081  | -0.04124 | 0.37386  | -0.04471 | 0.33498  | 0.056125 | 0.22606  | -0.12236 | 0.00812  |
| 0.26571  | 0.328673 | 3.17E-13 | 0.012803 | 0.78259  | 0.098553 | 0.03323  | 0.011745 | 0.80016  |
| 7.14E-10 | 0.105616 | 0.02245  | 0.117484 | 0.01106  | 0.247525 | 5.98E-08 | -0.06897 | 0.13669  |
| 2.61E-07 | 0.149457 | 0.0012   | -0.02563 | 0.5806   | 0.034933 | 0.45138  | -0.08193 | 0.07692  |
| 0.00591  | -0.14695 | 0.00145  | -0.20635 | 6.93E-06 | -0.3227  | 8.88E-13 | -0.1595  | 0.00054  |
| 0.00163  | -0.05729 | 0.21653  | -0.08475 | 0.06727  | -0.06223 | 0.1794   | -0.14149 | 0.00218  |
| 0.43844  | -0.08147 | 0.07862  | 0.036084 | 0.4366   | -0.04651 | 0.31588  | 0.140347 | 0.00237  |
| 0.00064  | 0.16015  | 0.00051  | 0.18869  | 4.07E-05 | 0.166914 | 0.00029  | 0.360366 | 9.10E-16 |
| 4.96E-12 | 0.061592 | 0.18395  | 0.092246 | 0.04633  | 0.024903 | 0.5914   | 0.127458 | 0.00581  |
| 0.38107  | 0.201289 | 1.17E-05 | 0.150721 | 0.00109  | 0.30211  | 2.60E-11 | 0.110167 | 0.01724  |
| 5.92E-15 | 0.100023 | 0.03068  | 0.138856 | 0.00264  | 0.271045 | 2.63E-09 | -0.12825 | 0.00551  |
| 9.37E-07 | -0.08746 | 0.05895  | -0.08505 | 0.06632  | -0.05896 | 0.20347  | -0.18954 | 3.75E-05 |
| 0.19258  | 0.014459 | 0.75531  | -0.02362 | 0.61064  | 0.005594 | 0.90404  | 0.124213 | 0.0072   |
| 0.00029  | 0.110696 | 0.01671  | 0.181672 | 7.87E-05 | 0.146962 | 0.00145  | 0.114303 | 0.01345  |
| 6.76E-08 | 0.116959 | 0.01142  | 0.021803 | 0.63839  | -0.04948 | 0.28593  | 0.263748 | 7.16E-09 |
| 0.03298  | 0.054126 | 0.24305  | 0.008534 | 0.85407  | 0.051139 | 0.27008  | 0.208952 | 5.27E-06 |
| 0.16205  | 0.233902 | 3.18E-07 | 0.07736  | 0.09496  | 0.089672 | 0.0528   | -0.01695 | 0.71493  |
| 0.74481  | 0.075094 | 0.10507  | 0.056806 | 0.22047  | 0.108896 | 0.01857  | 0.075479 | 0.1033   |
| 0.51667  | -0.04626 | 0.31853  | -0.04687 | 0.3121   | -0.03617 | 0.43549  | -0.01437 | 0.75676  |
| 0.79155  | -0.13058 | 0.00471  | -0.03773 | 0.41596  | -0.07592 | 0.1013   | -0.00829 | 0.85818  |
| 0.42008  | -0.07509 | 0.10509  | 0.030006 | 0.51773  | -0.04081 | 0.37887  | 0.021493 | 0.64317  |
| 0.19793  | -0.0109  | 0.81431  | -0.00471 | 0.91908  | -0.0337  | 0.46756  | 0.078481 | 0.09026  |
| 0.22773  | 0.035574 | 0.44312  | 0.019126 | 0.68015  | 0.002326 | 0.96002  | 0.019277 | 0.67777  |
| 0.45825  | 0.129729 | 0.00499  | 0.126376 | 0.00624  | 0.090741 | 0.05003  | -0.01537 | 0.74049  |
| 0.15707  | -0.04005 | 0.38783  | -0.07765 | 0.09375  | -0.1011  | 0.02892  | 0.054618 | 0.23879  |
| 0.46387  | 0.015062 | 0.74545  | 0.064429 | 0.16452  | 0.06789  | 0.14295  | 0.104188 | 0.02435  |
| 0.76035  | 0.048476 | 0.29585  | 0.037047 | 0.42445  | 0.031395 | 0.49853  | 0.065739 | 0.15608  |
| 0.17067  | 0.223222 | 1.10E-06 | 0.133263 | 0.00391  | 0.141276 | 0.00221  | 0.03174  | 0.49382  |
| 0.23889  | 0.02033  | 0.66124  | -0.01807 | 0.6969   | 0.075659 | 0.10248  | 0.09546  | 0.0392   |
| 0.00797  | -0.01032 | 0.82395  | -0.06494 | 0.1612   | -0.10509 | 0.02314  | 0.013545 | 0.77034  |
| 0.0124   | 0.08655  | 0.06164  | 0.023849 | 0.6072   | 0.04234  | 0.36128  | 0.103957 | 0.02467  |
| 0.15951  | 0.035079 | 0.44949  | 0.017974 | 0.69846  | -0.0083  | 0.85806  | 0.048332 | 0.29729  |
| 0.35808  | 0.003368 | 0.94214  | 0.05772  | 0.21311  | 0.013243 | 0.77532  | -0.03038 | 0.51255  |
| 0.55931  | -0.04639 | 0.31709  | -0.02378 | 0.60827  | -0.0017  | 0.97074  | 0.04614  | 0.31976  |
| 0.97897  | -0.03656 | 0.43058  | 0.001496 | 0.97427  | -0.00583 | 0.89996  | 0.02172  | 0.63966  |
| 0.37028  | 0.199332 | 1.43E-05 | 0.009441 | 0.83876  | 0.037907 | 0.41377  | -0.07331 | 0.11363  |
| 0.00149  | 0.053217 | 0.25107  | 0.09706  | 0.03601  | 0.037718 | 0.4161   | 0.1096   | 0.01782  |
| 0.66535  | 0.147599 | 0.00138  | 0.063292 | 0.17211  | 0.139463 | 0.00252  | -0.06151 | 0.18453  |
| 0.00722  | 0.080491 | 0.08228  | 0.090932 | 0.04955  | 0.152466 | 0.00095  | -0.08552 | 0.06481  |
| 0.25883  | -0.01682 | 0.717    | -0.08856 | 0.05581  | -0.09013 | 0.05159  | 0.029642 | 0.52282  |



|          |          |          |          |          |          |          |          |          |
|----------|----------|----------|----------|----------|----------|----------|----------|----------|
| 0.03355  | -0.10886 | 0.01862  | -0.08641 | 0.06207  | -0.15218 | 0.00097  | -0.01328 | 0.77471  |
| 0.06061  | 0.350594 | 5.94E-15 | 0.098909 | 0.0326   | 0.128907 | 0.00527  | 0.05865  | 0.20583  |
| 0.61934  | 0.051958 | 0.26247  | 0.085797 | 0.06395  | 0.085568 | 0.06466  | 0.00198  | 0.96595  |
| 6.91E-09 | -0.03446 | 0.45759  | -0.04211 | 0.36388  | -0.00064 | 0.98895  | -0.18755 | 4.54E-05 |
| 0.05187  | -0.04717 | 0.30908  | 0.025182 | 0.58726  | -0.05236 | 0.25875  | 0.095685 | 0.03874  |
| 0.08061  | -0.04033 | 0.38453  | -0.15268 | 0.00093  | -0.08646 | 0.06193  | 0.061701 | 0.18317  |
| 0.41969  | -0.04459 | 0.33636  | -0.10875 | 0.01873  | -0.08785 | 0.05783  | -0.08765 | 0.05841  |
| 0.90239  | -0.09432 | 0.04162  | -0.06391 | 0.16798  | -0.12743 | 0.00582  | -0.01539 | 0.74017  |
| 0.45837  | 0.151208 | 0.00105  | 0.078347 | 0.09081  | 0.137886 | 0.00283  | 0.134387 | 0.00362  |
| 0.09195  | 0.032126 | 0.48859  | -0.03556 | 0.44331  | -0.02686 | 0.5626   | -0.08713 | 0.05993  |
| 0.46982  | 0.003011 | 0.94827  | 0.000504 | 0.99133  | 0.108135 | 0.01942  | -0.03698 | 0.42528  |
| 0.21349  | 0.015457 | 0.73901  | 0.040535 | 0.38213  | -0.00766 | 0.86881  | 0.036977 | 0.42533  |
| 0.84991  | -0.00017 | 0.99714  | -0.03472 | 0.4541   | -0.02301 | 0.61989  | -0.02608 | 0.57396  |
| 0.19307  | -0.05698 | 0.21905  | -0.04406 | 0.3421   | -0.07694 | 0.09679  | -0.02934 | 0.52714  |
| 0.60643  | 0.01732  | 0.70891  | 0.052212 | 0.26015  | 0.147839 | 0.00136  | 0.017986 | 0.69826  |
| 0.8261   | 0.005912 | 0.89861  | -0.06616 | 0.15342  | -0.05176 | 0.26432  | -0.05307 | 0.25239  |
| 0.01984  | -0.02867 | 0.5366   | -0.08341 | 0.07174  | -0.00569 | 0.9024   | -0.07837 | 0.0907   |
| 0.00026  | 0.141985 | 0.0021   | 0.068589 | 0.13887  | 0.044705 | 0.33506  | 0.256304 | 1.93E-08 |
| 0.01647  | 0.061861 | 0.18203  | -0.01098 | 0.81297  | -0.03463 | 0.45533  | 0.031055 | 0.50319  |
| 0.79698  | -0.11693 | 0.01145  | -0.09863 | 0.03309  | -0.06798 | 0.1424   | 0.046196 | 0.31918  |
| 0.05991  | 0.051435 | 0.26731  | 0.011428 | 0.80544  | 0.007968 | 0.86364  | 0.098643 | 0.03307  |
| 0.21636  | 0.186885 | 4.83E-05 | 0.066961 | 0.14852  | 0.083724 | 0.07066  | 0.01566  | 0.73572  |
| 0.96765  | 0.077013 | 0.09646  | 0.040993 | 0.37677  | 0.027184 | 0.55789  | 0.07585  | 0.10161  |
| 0.44133  | -0.05344 | 0.24905  | -0.04007 | 0.38759  | 0.01084  | 0.81527  | -0.09095 | 0.04951  |
| 0.46967  | 0.032275 | 0.48657  | -0.02055 | 0.65774  | -0.00177 | 0.96958  | -0.02736 | 0.55537  |
| 0.20391  | -0.01989 | 0.66806  | -0.06893 | 0.13695  | -0.10477 | 0.02356  | -0.11929 | 0.00987  |
| 0.47908  | 0.017598 | 0.70446  | 0.124441 | 0.00709  | 0.087765 | 0.05807  | 0.100639 | 0.02967  |
| 0.14305  | -0.013   | 0.77935  | 0.093109 | 0.04432  | 0.01807  | 0.69691  | 0.04699  | 0.31092  |
| 5.05E-05 | 0.063988 | 0.16743  | 0.092207 | 0.04642  | 0.016281 | 0.72565  | 0.129561 | 0.00504  |
| 0.93795  | 0.010532 | 0.82043  | 0.021234 | 0.64718  | 0.041093 | 0.37561  | -0.02092 | 0.65209  |
| 0.08245  | -0.10638 | 0.02149  | -0.1192  | 0.00993  | -0.04573 | 0.32404  | -0.19485 | 2.23E-05 |
| 0.16122  | -0.04187 | 0.36664  | -0.02067 | 0.65595  | -0.04774 | 0.30323  | -0.03262 | 0.48185  |
| 0.00031  | 0.048039 | 0.30023  | 0.046248 | 0.31863  | 0.042879 | 0.3552   | 0.180807 | 8.52E-05 |
| 0.01408  | 0.237368 | 2.10E-07 | 0.05705  | 0.21848  | 0.050659 | 0.27461  | 0.069137 | 0.13574  |
| 0.27108  | 0.201619 | 1.13E-05 | 0.054156 | 0.24279  | 0.057177 | 0.21747  | -0.06103 | 0.18802  |
| 0.00018  | 0.163127 | 0.0004   | 0.130674 | 0.00468  | 0.130592 | 0.0047   | 0.188648 | 4.08E-05 |
| 0.95513  | 0.005    | 0.91419  | 0.049594 | 0.28483  | 0.01245  | 0.78843  | 0.000462 | 0.99205  |
| 1.23E-16 | 0.177077 | 0.00012  | 0.058065 | 0.21039  | 0.08394  | 0.06994  | 0.251915 | 3.42E-08 |
| 0.03122  | 0.233632 | 3.29E-07 | 0.084669 | 0.06753  | 0.072827 | 0.11602  | 0.082013 | 0.07664  |
| 0.00678  | 0.166606 | 0.0003   | 0.06692  | 0.14877  | 0.061628 | 0.18369  | 0.217086 | 2.19E-06 |
| 0.76045  | 0.227916 | 6.43E-07 | 0.133727 | 0.00379  | 0.087037 | 0.06019  | -0.03738 | 0.42034  |
| 0.34067  | 0.021502 | 0.64302  | 0.038516 | 0.40631  | 0.04904  | 0.29026  | 0.023243 | 0.61637  |
| 0.03127  | 0.096743 | 0.03662  | 0.127957 | 0.00562  | 0.087248 | 0.05957  | 0.086126 | 0.06293  |
| 0.01216  | 0.252997 | 2.97E-08 | 0.204516 | 8.39E-06 | 0.188932 | 3.97E-05 | 0.120821 | 0.00896  |
| 0.94526  | -0.01167 | 0.80137  | -0.05366 | 0.2471   | -0.01535 | 0.74074  | 0.04868  | 0.29381  |

|          |          |          |          |          |          |          |           |          |
|----------|----------|----------|----------|----------|----------|----------|-----------|----------|
| 0.70474  | -0.0853  | 0.06551  | 0.016101 | 0.72857  | -0.02735 | 0.55552  | -0.07187  | 0.12089  |
| 0.06013  | 0.279038 | 8.45E-10 | 0.135614 | 0.00332  | 0.196485 | 1.90E-05 | 0.174181  | 0.00015  |
| 0.16569  | -0.07767 | 0.09364  | 0.016086 | 0.7288   | -0.08244 | 0.07511  | -0.0137   | 0.7677   |
| 0.02157  | -0.09596 | 0.03817  | 0.076329 | 0.09946  | -0.02737 | 0.55519  | 0.097423  | 0.03532  |
| 0.22642  | 0.005976 | 0.89751  | 0.012623 | 0.78557  | -0.02485 | 0.59219  | 0.009866  | 0.83161  |
| 0.73027  | 0.031773 | 0.49337  | 0.03192  | 0.49137  | 0.041208 | 0.37427  | 0.046549  | 0.31548  |
| 0.79302  | 0.082069 | 0.07644  | 0.109027 | 0.01843  | 0.12806  | 0.00558  | 0.065953  | 0.15474  |
| 0.00774  | -0.09856 | 0.03322  | 0.026476 | 0.56819  | -0.0081  | 0.86138  | -0.09642  | 0.03727  |
| 0.29202  | 0.037415 | 0.41986  | 0.008325 | 0.85761  | 0.001269 | 0.97818  | 0.099314  | 0.03189  |
| 0.24096  | 0.000349 | 0.994    | 0.006229 | 0.89321  | -0.03941 | 0.39552  | 0.077155  | 0.09584  |
| 0.0116   | 0.013741 | 0.76711  | 0.032279 | 0.48651  | -0.06736 | 0.1461   | 0.203821  | 9.02E-06 |
| 0.42466  | 0.140535 | 0.00233  | 0.096755 | 0.0366   | 0.051203 | 0.26948  | 0.056839  | 0.2202   |
| 0.11784  | 0.015889 | 0.732    | 0.000286 | 0.99508  | -0.01816 | 0.69548  | 0.007968  | 0.86365  |
| 0.04678  | 0.109383 | 0.01805  | 0.030782 | 0.50696  | 0.133603 | 0.00382  | 0.026724  | 0.56457  |
| 0.32341  | 0.208616 | 5.46E-06 | 0.089896 | 0.05221  | 0.093257 | 0.04398  | 0.071498  | 0.12285  |
| 0.06275  | 0.125769 | 0.0065   | 0.074667 | 0.10707  | 0.035795 | 0.44029  | 0.25448   | 2.45E-08 |
| 4.82E-07 | 0.33865  | 5.39E-14 | 0.27082  | 2.71E-09 | 0.249669 | 4.56E-08 | 0.351523  | 4.98E-15 |
| 0.10469  | 0.071342 | 0.12367  | 0.073143 | 0.11445  | 0.027682 | 0.55069  | 0.090787  | 0.04991  |
| 0.00638  | 0.083577 | 0.07116  | 0.009945 | 0.83028  | -0.00429 | 0.92626  | 0.058139  | 0.20981  |
| 0.17283  | 0.028464 | 0.53948  | 0.039048 | 0.39985  | 0.007712 | 0.86799  | 0.061024  | 0.18803  |
| 0.00179  | 0.177805 | 0.00011  | 0.247641 | 5.90E-08 | 0.180256 | 8.96E-05 | 0.190944  | 3.27E-05 |
| 0.65465  | 0.002255 | 0.96124  | 0.06743  | 0.14569  | 0.076256 | 0.09979  | 0.043381  | 0.34958  |
| 0.81557  | 0.080827 | 0.08101  | 0.00452  | 0.92239  | 0.012891 | 0.78113  | 0.050071  | 0.28022  |
| 0.01667  | 0.19064  | 3.37E-05 | 0.078039 | 0.09209  | 0.177602 | 0.00011  | -0.04701  | 0.31073  |
| 0.15525  | 0.167985 | 0.00027  | 0.143431 | 0.00189  | 0.143596 | 0.00186  | 0.119395  | 0.00981  |
| 0.11672  | -0.00538 | 0.90765  | -0.03875 | 0.40345  | -0.01872 | 0.68662  | -0.00751  | 0.87135  |
| 0.00183  | 0.07306  | 0.11486  | 0.046546 | 0.31551  | -0.0127  | 0.78436  | 0.05185   | 0.26347  |
| 0.22352  | 0.113361 | 0.01424  | 0.083763 | 0.07053  | 0.052617 | 0.25646  | 0.149233  | 0.00122  |
| 0.38573  | 0.082042 | 0.07653  | 0.023746 | 0.60876  | 0.06797  | 0.14248  | 0.049775  | 0.28308  |
| 0.17     | 0.006791 | 0.88364  | 0.005723 | 0.90183  | -0.04952 | 0.28553  | -0.03931  | 0.39668  |
| 0.68258  | 0.197278 | 1.75E-05 | 0.021247 | 0.64697  | -0.00965 | 0.83519  | -0.06346  | 0.17096  |
| 0.07446  | 0.354653 | 2.75E-15 | 0.237514 | 2.06E-07 | 0.261303 | 9.95E-09 | 0.092775  | 0.04509  |
| 0.27129  | 0.021664 | 0.64052  | -0.05004 | 0.28054  | 0.029314 | 0.52745  | 0.04388   | 0.34406  |
| 0.7448   | -0.01242 | 0.789    | 0.024662 | 0.595    | -0.00878 | 0.84992  | 0.033303  | 0.47279  |
| 0.90608  | -0.04236 | 0.36102  | -0.04148 | 0.37116  | -0.1176  | 0.01098  | -0.11789  | 0.01078  |
| 0.30023  | 0.063496 | 0.17073  | 0.032269 | 0.48664  | 0.115926 | 0.01218  | 0.091069  | 0.0492   |
| 0.21619  | 0.295779 | 6.98E-11 | 0.023146 | 0.61783  | 0.09996  | 0.03079  | -0.04303  | 0.35353  |
| 0.03422  | 0.011328 | 0.80712  | 0.034415 | 0.45813  | 0.023422 | 0.61365  | 0.102961  | 0.02608  |
| 0.88401  | 0.031091 | 0.50271  | -0.05416 | 0.24279  | -0.03499 | 0.45062  | 0.028594  | 0.53764  |
| 0.74941  | 0.041993 | 0.36523  | 0.056992 | 0.21895  | 0.061328 | 0.18583  | 0.011383  | 0.8062   |
| 0.1007   | 0.007706 | 0.86809  | 0.010286 | 0.82455  | -0.01662 | 0.72021  | 0.089753  | 0.05259  |
| 0.00031  | 0.074357 | 0.10854  | 0.160151 | 0.00051  | 0.065212 | 0.15944  | 0.198725  | 1.52E-05 |
| 0.9056   | 0.02339  | 0.61413  | 0.065128 | 0.15998  | 0.071113 | 0.12488  | -0.00237  | 0.9592   |
| 6.67E-08 | -0.22886 | 5.76E-07 | -0.12389 | 0.00735  | -0.17615 | 0.00013  | -0.17753  | 0.00011  |
| 0.16211  | 0.160751 | 0.00049  | 0.005153 | 0.91156  | 0.10412  | 0.02444  | -9.89E-05 | 0.9983   |

|          |          |          |          |          |          |          |          |          |
|----------|----------|----------|----------|----------|----------|----------|----------|----------|
| 0.8586   | 0.051946 | 0.26258  | 0.043874 | 0.34412  | 0.012864 | 0.78157  | -0.01694 | 0.71496  |
| 0.1945   | -0.01853 | 0.68966  | 0.052626 | 0.25638  | 0.087535 | 0.05873  | 0.00118  | 0.9797   |
| 0.99211  | -0.02173 | 0.63958  | -0.00797 | 0.86357  | 0.050132 | 0.27964  | 0.006904 | 0.88171  |
| 0.127    | 0.073108 | 0.11462  | 0.051069 | 0.27073  | 0.068731 | 0.13806  | -0.06125 | 0.18636  |
| 0.23262  | 0.282382 | 5.20E-10 | 0.12608  | 0.00637  | 0.145872 | 0.00157  | 0.096672 | 0.03676  |
| 0.00017  | 0.137907 | 0.00282  | -0.00342 | 0.94118  | -0.04159 | 0.3698   | 0.11721  | 0.01125  |
| 0.73228  | 0.182796 | 7.09E-05 | 0.120282 | 0.00927  | 0.136984 | 0.00301  | 0.087424 | 0.05905  |
| 0.00382  | 0.270144 | 2.98E-09 | 0.1065   | 0.02134  | 0.026342 | 0.57016  | 0.073173 | 0.1143   |
| 0.02638  | -0.04296 | 0.35423  | -0.04592 | 0.3221   | 0.012497 | 0.78766  | 0.028525 | 0.53862  |
| 0.00038  | 0.24507  | 8.15E-08 | 0.237876 | 1.98E-07 | 0.199674 | 1.38E-05 | 0.308974 | 8.68E-12 |
| 0.30878  | 0.066796 | 0.14953  | -0.03753 | 0.41841  | -0.01736 | 0.70828  | -0.01192 | 0.7973   |
| 0.01444  | 0.217236 | 2.15E-06 | 0.079719 | 0.08528  | 0.123421 | 0.00758  | 0.209194 | 5.14E-06 |
| 0.00189  | -0.04931 | 0.28764  | -0.07498 | 0.1056   | -0.10991 | 0.0175   | -0.0164  | 0.72374  |
| 0.42474  | 0.136289 | 0.00317  | 0.088884 | 0.05493  | 0.066309 | 0.15252  | 0.057841 | 0.21216  |
| 0.09199  | 0.078494 | 0.0902   | 0.07415  | 0.10953  | 0.032605 | 0.48212  | 0.024848 | 0.59223  |
| 0.00593  | -0.07886 | 0.08869  | -0.01009 | 0.82786  | 0.073858 | 0.11094  | -0.05173 | 0.26458  |
| 3.13E-07 | -0.08324 | 0.07231  | -0.05328 | 0.25052  | -0.05442 | 0.24046  | -0.17668 | 0.00012  |
| 0.02334  | -0.0561  | 0.22629  | -0.07579 | 0.10189  | -0.06346 | 0.17095  | -0.0646  | 0.16342  |
| 0.55361  | -0.05284 | 0.2544   | -0.04288 | 0.35521  | 0.091116 | 0.04908  | -0.01084 | 0.81533  |
| 0.00457  | -0.00562 | 0.90352  | -0.11456 | 0.01325  | -0.02809 | 0.54481  | -0.08593 | 0.06353  |
| 0.05124  | 0.032931 | 0.47775  | 0.102064 | 0.02742  | 0.116308 | 0.01189  | 0.092679 | 0.04531  |
| 2.87E-05 | 0.102114 | 0.02734  | 0.14599  | 0.00156  | 0.205371 | 7.68E-06 | 0.242526 | 1.12E-07 |
| 0.01482  | -0.0959  | 0.03829  | -0.09694 | 0.03625  | -0.19171 | 3.04E-05 | 0.035243 | 0.44738  |
| 0.73755  | 0.033443 | 0.47093  | -0.06556 | 0.1572   | -0.11153 | 0.0159   | 0.160526 | 0.0005   |
| 2.32E-05 | 0.136877 | 0.00304  | 0.151815 | 0.001    | 0.080423 | 0.08254  | 0.055074 | 0.23489  |
| 0.9899   | 0.057562 | 0.21437  | 0.055214 | 0.23369  | 0.087271 | 0.0595   | 0.05143  | 0.26736  |
| 0.8055   | -0.28456 | 3.78E-10 | -0.00181 | 0.96882  | -0.13541 | 0.00337  | -0.08689 | 0.06063  |
| 0.82165  | 0.069066 | 0.13614  | 0.138459 | 0.00271  | 0.113084 | 0.01448  | 0.126222 | 0.00631  |
| 4.34E-06 | -0.02969 | 0.5222   | -0.12854 | 0.00541  | 0.027455 | 0.55396  | -0.06552 | 0.15748  |
| 0.05755  | 0.302923 | 2.29E-11 | 0.102094 | 0.02737  | 0.217284 | 2.14E-06 | 0.147262 | 0.00142  |
| 0.04128  | -0.0012  | 0.97942  | 0.069374 | 0.1344   | 0.057097 | 0.21811  | 0.045019 | 0.33167  |
| 2.37E-10 | -0.15615 | 0.00071  | -0.09949 | 0.03159  | 0.013989 | 0.76302  | -0.1676  | 0.00027  |
| 2.50E-11 | -0.24584 | 7.40E-08 | 0.010846 | 0.81518  | 0.020455 | 0.65929  | -0.09155 | 0.04801  |
| 0.80644  | -0.08134 | 0.0791   | 0.028446 | 0.53975  | -0.00498 | 0.91447  | 0.001382 | 0.97624  |
| 0.11511  | -0.03956 | 0.39372  | 0.063367 | 0.1716   | 0.043822 | 0.3447   | 0.138792 | 0.00265  |
| 0.11542  | 0.041154 | 0.3749   | 0.022089 | 0.63399  | -0.01184 | 0.79859  | 0.083142 | 0.07265  |
| 0.17278  | 0.001109 | 0.98094  | -0.00784 | 0.86574  | -0.00259 | 0.95541  | 0.012179 | 0.79293  |
| 1.14E-06 | -0.01994 | 0.66736  | -0.04229 | 0.3618   | 0.101838 | 0.02777  | -0.0552  | 0.23381  |
| 5.69E-08 | 0.009171 | 0.84331  | -0.02372 | 0.60917  | -0.08314 | 0.07267  | 0.279295 | 8.14E-10 |
| 0.0021   | -0.14873 | 0.00127  | -0.01532 | 0.74129  | -0.01007 | 0.82823  | -0.12136 | 0.00866  |
| 0.87449  | -0.05353 | 0.24826  | -0.03054 | 0.51029  | -0.09048 | 0.0507   | 0.296019 | 6.72E-11 |
| 7.45E-05 | 0.149649 | 0.00118  | 0.157009 | 0.00066  | 0.080688 | 0.08153  | 0.063971 | 0.16754  |
| 1.09E-05 | 0.153747 | 0.00086  | -0.02843 | 0.53998  | 0.009924 | 0.83063  | 0.154373 | 0.00082  |
| 0.70264  | -0.01119 | 0.80937  | 0.047487 | 0.30582  | 0.052577 | 0.25682  | 0.060243 | 0.19375  |
| 0.10252  | -0.05013 | 0.27963  | 0.010866 | 0.81483  | 0.017404 | 0.70757  | 0.111483 | 0.01594  |

|          |          |          |          |          |           |          |          |          |
|----------|----------|----------|----------|----------|-----------|----------|----------|----------|
| 0.35263  | -0.02376 | 0.60848  | 0.181807 | 7.77E-05 | 0.118686  | 0.01026  | -0.07513 | 0.10491  |
| 3.57E-07 | 0.085506 | 0.06486  | 0.274198 | 1.69E-09 | 0.189255  | 3.85E-05 | 0.0123   | 0.79093  |
| 0.14844  | 0.086451 | 0.06194  | 0.095274 | 0.03958  | 0.025968  | 0.57564  | 0.101103 | 0.02892  |
| 5.14E-13 | 0.044232 | 0.3402   | 0.091284 | 0.04867  | 0.311299  | 5.95E-12 | -0.02273 | 0.62412  |
| 0.01227  | -0.04675 | 0.31342  | -0.1156  | 0.01243  | -0.08942  | 0.05347  | 0.009675 | 0.83481  |
| 0.03474  | -0.11597 | 0.01214  | -0.16216 | 0.00043  | -0.13724  | 0.00296  | -0.10461 | 0.02378  |
| 0.07221  | -0.19593 | 2.01E-05 | -0.24713 | 6.29E-08 | -0.21302  | 3.41E-06 | -0.15981 | 0.00053  |
| 1.11E-05 | -0.26303 | 7.89E-09 | -0.23775 | 2.01E-07 | -0.21923  | 1.73E-06 | -0.27257 | 2.12E-09 |
| 1.75E-14 | -0.0856  | 0.06458  | -0.07595 | 0.10114  | 0.083188  | 0.07249  | -0.19779 | 1.67E-05 |
| 0.00016  | -0.33182 | 1.83E-13 | -0.33644 | 8.03E-14 | -0.29322  | 1.03E-10 | -0.30843 | 9.48E-12 |
| 3.47E-06 | -0.20576 | 7.37E-06 | -0.13914 | 0.00258  | -0.12125  | 0.00872  | -0.17606 | 0.00013  |
| 1.22E-09 | -0.08127 | 0.07935  | -0.05082 | 0.27308  | 0.125525  | 0.00661  | -0.15048 | 0.00111  |
| 0.75792  | -0.22149 | 1.34E-06 | -0.35887 | 1.22E-15 | -0.29513  | 7.71E-11 | -0.0965  | 0.03709  |
| 0.03127  | -0.18488 | 5.84E-05 | -0.30303 | 2.25E-11 | -0.2552   | 2.23E-08 | -0.04044 | 0.3832   |
| 0.16427  | -0.16316 | 0.0004   | -0.25587 | 2.04E-08 | -0.2221   | 1.25E-06 | -0.03481 | 0.45304  |
| 0.38825  | -0.08826 | 0.05667  | -0.2337  | 3.26E-07 | -0.19244  | 2.83E-05 | -0.07761 | 0.09387  |
| 0.06098  | 0.047611 | 0.30456  | 0.113648 | 0.014    | -0.01113  | 0.81036  | -0.06789 | 0.14296  |
| 0.11408  | 0.138558 | 0.00269  | 0.088936 | 0.05478  | -1.04E-05 | 0.99982  | -0.11252 | 0.01498  |
| 0.24922  | 0.112436 | 0.01506  | 0.003219 | 0.94469  | -0.02383  | 0.60743  | 0.073812 | 0.11116  |
| 0.25699  | -0.00239 | 0.95894  | -0.05305 | 0.25254  | -0.0271   | 0.55917  | 0.092035 | 0.04684  |
| 6.47E-07 | 0.190893 | 3.29E-05 | 0.097818 | 0.03458  | 0.249558  | 4.62E-08 | 0.067366 | 0.14607  |
| 0.00153  | 0.116651 | 0.01165  | 0.139039 | 0.0026   | 0.167278  | 0.00028  | -0.00587 | 0.89938  |
| 6.54E-09 | 0.282178 | 5.36E-10 | 0.291311 | 1.38E-10 | 0.27937   | 8.06E-10 | 0.139187 | 0.00257  |
| 0.02141  | -0.02203 | 0.63491  | -0.02215 | 0.63306  | 0.017342  | 0.70856  | 0.036977 | 0.42533  |
| 0.00037  | 0.033877 | 0.46518  | 0.200067 | 1.32E-05 | 0.417245  | 4.26E-21 | 0.117458 | 0.01108  |
| 5.27E-06 | -0.13986 | 0.00245  | 0.056836 | 0.22022  | -0.18138  | 8.08E-05 | 0.055456 | 0.23165  |
| 2.13E-15 | -0.01327 | 0.77487  | -0.00238 | 0.95905  | 0.109443  | 0.01799  | -0.24001 | 1.52E-07 |
| 0.00014  | 0.289091 | 1.93E-10 | -0.01952 | 0.67387  | 0.050179  | 0.27919  | -0.10504 | 0.02321  |
| 4.69E-05 | -0.01872 | 0.68651  | 0.018418 | 0.69138  | 0.035971  | 0.43804  | -0.05577 | 0.22901  |
| 4.40E-07 | 0.260455 | 1.11E-08 | 0.22249  | 1.20E-06 | 0.134904  | 0.00349  | 0.373206 | 7.01E-17 |
| 0.06634  | 0.290386 | 1.59E-10 | 0.15766  | 0.00063  | 0.162673  | 0.00042  | 0.150814 | 0.00108  |
| 0.00071  | -0.02297 | 0.62055  | 0.009432 | 0.83892  | 0.126277  | 0.00629  | -0.06312 | 0.17326  |
| 0.6217   | -0.24969 | 4.55E-08 | -0.25418 | 2.55E-08 | -0.32609  | 4.96E-13 | 0.007512 | 0.87138  |
| 0.14786  | 0.091592 | 0.04791  | 0.040367 | 0.3841   | 0.040934  | 0.37746  | 0.156686 | 0.00068  |
| 6.28E-07 | -0.26848 | 3.75E-09 | -0.15533 | 0.00076  | -0.25718  | 1.72E-08 | -0.04707 | 0.31009  |
| 2.43E-07 | 0.017447 | 0.70688  | 0.036446 | 0.43201  | 0.146022  | 0.00156  | -0.04904 | 0.29029  |
| 0.05415  | -0.28668 | 2.76E-10 | -0.19314 | 2.64E-05 | -0.21342  | 3.27E-06 | -0.1043  | 0.02419  |
| 6.69E-15 | 0.154876 | 0.00078  | 0.280884 | 6.47E-10 | 0.182311  | 7.42E-05 | 0.20649  | 6.83E-06 |
| 0.01818  | 0.088329 | 0.05647  | 0.066914 | 0.1488   | 0.083279  | 0.07218  | 0.096934 | 0.03625  |
| 0.45041  | 0.082456 | 0.07505  | 0.050283 | 0.27819  | 0.14685   | 0.00146  | 0.068583 | 0.13891  |
| 0.83765  | 0.056437 | 0.22349  | 0.052674 | 0.25594  | 0.122203  | 0.0082   | 0.073329 | 0.11353  |
| 0.25405  | 0.166153 | 0.00031  | 0.093559 | 0.0433   | 0.173602  | 0.00016  | 0.01319  | 0.7762   |
| 0.04397  | -0.01252 | 0.78734  | -0.00913 | 0.84399  | 0.016177  | 0.72734  | -0.02779 | 0.54914  |
| 0.01309  | -0.02669 | 0.56508  | -0.00323 | 0.94447  | 0.008624  | 0.85255  | -0.04654 | 0.31556  |
| 0.00028  | 0.032338 | 0.48572  | 0.030345 | 0.51302  | 0.002463  | 0.95767  | 0.028575 | 0.5379   |

|          |          |          |          |          |          |          |          |          |
|----------|----------|----------|----------|----------|----------|----------|----------|----------|
| 0.30837  | 0.017086 | 0.71268  | -0.04937 | 0.28699  | -0.00136 | 0.97663  | 0.045532 | 0.32619  |
| 0.47181  | 0.054699 | 0.23809  | 0.053686 | 0.24691  | 0.116012 | 0.01211  | 0.101133 | 0.02887  |
| 0.00631  | 0.159738 | 0.00053  | -0.06156 | 0.18417  | 0.114767 | 0.01308  | 0.122623 | 0.00798  |
| 2.35E-08 | 0.290817 | 1.49E-10 | 0.249233 | 4.82E-08 | 0.103393 | 0.02546  | 0.216452 | 2.35E-06 |
| 2.04E-06 | 0.062078 | 0.1805   | 0.069053 | 0.13621  | 0.208108 | 5.76E-06 | 0.038892 | 0.40173  |
| 7.39E-07 | 0.135551 | 0.00334  | 0.127358 | 0.00585  | 0.264053 | 6.87E-09 | -0.08381 | 0.07038  |
| 1.61E-07 | 0.268228 | 3.88E-09 | 0.184643 | 5.97E-05 | 0.388297 | 2.96E-18 | 0.086585 | 0.06154  |
| 0.02897  | 0.132092 | 0.00424  | 0.065758 | 0.15597  | 0.140525 | 0.00234  | 0.188183 | 4.27E-05 |
| 2.36E-18 | 0.050408 | 0.27699  | -0.02768 | 0.55067  | 0.048425 | 0.29635  | -0.1974  | 1.73E-05 |
| 4.96E-11 | 0.141223 | 0.00222  | 0.14497  | 0.00168  | 0.121663 | 0.00849  | 0.270437 | 2.86E-09 |
| 4.14E-05 | 0.02741  | 0.55461  | 0.067458 | 0.14552  | 0.136545 | 0.00311  | -0.04125 | 0.37379  |
| 0.73812  | 0.072188 | 0.11927  | 0.030975 | 0.5043   | 0.090845 | 0.04977  | 0.118636 | 0.01029  |
| 0.70781  | 0.09016  | 0.05152  | -0.00609 | 0.89557  | 0.099218 | 0.03206  | 0.141974 | 0.0021   |
| 0.19031  | 0.018917 | 0.68346  | 0.121067 | 0.00882  | 0.06265  | 0.17651  | 0.070233 | 0.12963  |
| 0.14559  | 0.19687  | 1.83E-05 | 0.163948 | 0.00037  | 0.258041 | 1.54E-08 | 0.338715 | 5.33E-14 |
| 2.88E-21 | 0.015954 | 0.73094  | -0.0677  | 0.14405  | -0.01225 | 0.79181  | -0.09316 | 0.04421  |
| 0.65645  | -0.09874 | 0.0329   | -0.18075 | 8.56E-05 | -0.12456 | 0.00704  | -0.01938 | 0.67619  |
| 0.0004   | -0.24605 | 7.21E-08 | -0.21818 | 1.94E-06 | -0.30469 | 1.73E-11 | -0.12666 | 0.00613  |
| 0.00045  | -0.25803 | 1.54E-08 | -0.11998 | 0.00946  | -0.10737 | 0.0203   | -0.09814 | 0.03399  |
| 0.05398  | 0.094869 | 0.04044  | 0.155678 | 0.00074  | 0.129729 | 0.00499  | 0.149307 | 0.00121  |
| 0.08052  | 0.069214 | 0.1353   | 0.107074 | 0.02065  | 0.198532 | 1.55E-05 | -0.01607 | 0.72909  |
| 0.00265  | -0.03824 | 0.40974  | 0.023745 | 0.60877  | 0.08021  | 0.08336  | 0.008736 | 0.85066  |
| 0.06292  | 0.25169  | 3.52E-08 | 0.291287 | 1.38E-10 | 0.2986   | 4.51E-11 | 0.204929 | 8.04E-06 |
| 2.82E-20 | 0.036029 | 0.4373   | 0.076394 | 0.09917  | -0.08423 | 0.06899  | 0.158219 | 0.0006   |
| 0.21482  | 0.043581 | 0.34736  | -0.12048 | 0.00916  | -0.1512  | 0.00105  | -0.0191  | 0.6806   |
| 0.07215  | 0.001912 | 0.96713  | -0.06468 | 0.16285  | 0.03226  | 0.48677  | 0.073782 | 0.11131  |
| 0.9767   | 0.135357 | 0.00338  | 0.078626 | 0.08966  | 0.16203  | 0.00044  | 0.074924 | 0.10586  |
| 0.07305  | 0.372564 | 7.99E-17 | 0.11246  | 0.01504  | 0.095506 | 0.03911  | -0.00126 | 0.97831  |
| 3.78E-06 | 0.111361 | 0.01606  | 0.138624 | 0.00268  | 0.365143 | 3.55E-16 | 0.037513 | 0.41865  |
| 0.00029  | 0.067155 | 0.14734  | 0.107141 | 0.02057  | 0.004531 | 0.92221  | 0.085826 | 0.06386  |
| 2.49E-10 | -0.17823 | 0.00011  | -0.13221 | 0.00421  | -0.08703 | 0.06021  | -0.33455 | 1.13E-13 |
| 3.73E-07 | -0.22848 | 6.03E-07 | -0.12595 | 0.00642  | -0.13451 | 0.00359  | -0.0719  | 0.12075  |
| 0.15433  | 0.02657  | 0.56682  | 0.164631 | 0.00035  | 0.116217 | 0.01196  | 0.1954   | 2.12E-05 |
| 0.36402  | 0.041294 | 0.37327  | 0.039387 | 0.39577  | 0.15906  | 0.00056  | 0.057059 | 0.21841  |
| 0.03015  | -0.00122 | 0.97905  | 0.041707 | 0.36851  | 0.098722 | 0.03293  | 0.159435 | 0.00054  |
| 0.59302  | 0.252102 | 3.34E-08 | 0.170535 | 0.00021  | 0.28837  | 2.15E-10 | 0.228698 | 5.87E-07 |
| 2.11E-11 | 0.164805 | 0.00035  | 0.186754 | 4.89E-05 | 0.260972 | 1.04E-08 | 0.121915 | 0.00835  |
| 0.18506  | 0.197078 | 1.79E-05 | 0.214599 | 2.87E-06 | 0.341955 | 2.96E-14 | 0.09051  | 0.05062  |
| 0.03695  | -0.20017 | 1.31E-05 | -0.22386 | 1.02E-06 | -0.17522 | 0.00014  | -0.04616 | 0.31959  |
| 0.86884  | -0.01806 | 0.6971   | -0.00786 | 0.86541  | 0.026402 | 0.56927  | 0.00617  | 0.89421  |
| 0.49005  | -0.05467 | 0.23837  | -0.02026 | 0.66234  | -0.01903 | 0.68164  | 0.004807 | 0.91749  |
| 0.00014  | 0.236371 | 2.37E-07 | 0.200341 | 1.29E-05 | 0.110076 | 0.01733  | 0.209811 | 4.81E-06 |
| 0.00012  | -0.11836 | 0.01047  | 0.094529 | 0.04116  | -0.0928  | 0.04503  | 0.180641 | 8.65E-05 |
| 0.86055  | 0.0765   | 0.0987   | -0.03593 | 0.43853  | 0.146057 | 0.00155  | 0.051212 | 0.2694   |
| 0.00014  | -0.00237 | 0.95932  | 0.191086 | 3.23E-05 | 0.189103 | 3.91E-05 | 0.026885 | 0.56222  |

|          |          |          |          |          |          |          |          |          |
|----------|----------|----------|----------|----------|----------|----------|----------|----------|
| 0.59264  | 0.100777 | 0.02944  | 0.043548 | 0.34772  | 0.110753 | 0.01665  | 0.049322 | 0.28748  |
| 0.36037  | 0.074598 | 0.1074   | 0.108999 | 0.01846  | 0.069759 | 0.13225  | 0.064614 | 0.16331  |
| 0.8983   | 0.237237 | 2.13E-07 | 0.17031  | 0.00022  | 0.15403  | 0.00084  | 0.145631 | 0.0016   |
| 0.05767  | 0.051317 | 0.26841  | 0.031609 | 0.4956   | -0.01959 | 0.67277  | 0.102611 | 0.0266   |
| 0.00023  | -0.22295 | 1.14E-06 | -0.26529 | 5.81E-09 | -0.32591 | 5.12E-13 | -0.06085 | 0.18931  |
| 0.28675  | 0.030136 | 0.51592  | 0.001755 | 0.96983  | 0.002375 | 0.95917  | -0.0087  | 0.8512   |
| 5.57E-05 | -0.06533 | 0.15867  | -0.07948 | 0.08621  | -0.12683 | 0.00606  | 0.142227 | 0.00206  |
| 1.41E-09 | -0.05662 | 0.22201  | -0.00945 | 0.83858  | -0.08274 | 0.07406  | 0.136511 | 0.00312  |
| 0.63901  | -0.0566  | 0.22214  | -0.01417 | 0.76003  | -0.02767 | 0.55087  | -0.07178 | 0.12138  |
| 1.70E-16 | -0.07939 | 0.08658  | -0.16218 | 0.00043  | -0.24589 | 7.35E-08 | 0.047107 | 0.30971  |
| 0.01848  | 0.096062 | 0.03797  | 0.087683 | 0.0583   | 0.111058 | 0.01635  | 0.142319 | 0.00205  |
| 0.00281  | -0.04975 | 0.2833   | -0.02496 | 0.59062  | -0.04954 | 0.28534  | 0.138946 | 0.00262  |
| 0.2932   | -0.01901 | 0.68203  | -0.04183 | 0.36707  | -0.03697 | 0.42547  | 0.055367 | 0.2324   |
| 0.29466  | -0.02594 | 0.57599  | -0.04283 | 0.35574  | 0.000416 | 0.99285  | 0.080867 | 0.08086  |
| 5.39E-08 | -0.02736 | 0.5553   | 0.012623 | 0.78557  | -0.02184 | 0.63788  | 0.196724 | 1.85E-05 |
| 0.00259  | -0.19283 | 2.73E-05 | -0.22752 | 6.74E-07 | -0.12715 | 0.00593  | -0.24723 | 6.21E-08 |
| 0.02403  | 0.275648 | 1.37E-09 | 0.272025 | 2.29E-09 | 0.353072 | 3.71E-15 | 0.242105 | 1.18E-07 |
| 0.01895  | 0.036033 | 0.43725  | -0.01794 | 0.69903  | 0.185253 | 5.64E-05 | -0.13208 | 0.00425  |
| 0.00158  | -0.18689 | 4.83E-05 | -0.1176  | 0.01098  | -0.2121  | 3.76E-06 | 0.022854 | 0.62228  |
| 0.00031  | 0.386923 | 3.98E-18 | 0.247868 | 5.73E-08 | 0.235496 | 2.63E-07 | 0.216662 | 2.29E-06 |
| 0.15697  | 0.069358 | 0.13449  | 0.086112 | 0.06297  | 0.152955 | 0.00091  | 0.040056 | 0.38778  |
| 0.02331  | -0.09629 | 0.03752  | -0.12597 | 0.00641  | -0.04847 | 0.2959   | -0.14066 | 0.00231  |
| 0.16153  | 0.035069 | 0.44962  | 0.039371 | 0.39596  | 0.012348 | 0.79014  | 0.246995 | 6.40E-08 |
| 0.05744  | -0.07084 | 0.12633  | 0.013207 | 0.77591  | 0.003622 | 0.93779  | 0.014518 | 0.75434  |
| 0.0004   | 0.070563 | 0.12783  | 0.13341  | 0.00387  | 0.242425 | 1.13E-07 | -0.06365 | 0.16968  |
| 0.00745  | 0.431936 | 1.20E-22 | 0.264622 | 6.36E-09 | 0.334041 | 1.23E-13 | 0.026237 | 0.57169  |
| 0.63706  | -0.11453 | 0.01327  | -0.29728 | 5.53E-11 | -0.25774 | 1.60E-08 | -0.20558 | 7.51E-06 |
| 0.71091  | 0.027097 | 0.55914  | 0.000606 | 0.98959  | -0.01825 | 0.69404  | 0.168805 | 0.00025  |
| 0.56014  | 0.134338 | 0.00363  | 0.078642 | 0.0896   | 0.094428 | 0.04138  | 0.074864 | 0.10615  |
| 0.00238  | 0.025646 | 0.58039  | -0.03145 | 0.49782  | -0.01668 | 0.71915  | 0.135739 | 0.00329  |
| 0.85648  | 0.028331 | 0.54138  | 0.033309 | 0.4727   | 0.040852 | 0.37842  | 0.15125  | 0.00104  |
| 0.56106  | 0.057486 | 0.21498  | 0.086572 | 0.06158  | 0.0832   | 0.07245  | 0.051272 | 0.26883  |
| 0.00386  | -0.05193 | 0.26274  | -0.05906 | 0.20263  | -0.06716 | 0.14733  | 0.081384 | 0.07893  |
| 2.32E-07 | 0.197421 | 1.73E-05 | 0.085789 | 0.06397  | 0.059374 | 0.20028  | 0.20701  | 6.47E-06 |
| 1.63E-13 | 0.29082  | 1.49E-10 | 0.332318 | 1.67E-13 | 0.246221 | 7.05E-08 | 0.280416 | 6.93E-10 |
| 2.86E-05 | 0.12912  | 0.0052   | 0.177993 | 0.00011  | 0.359674 | 1.04E-15 | -0.0216  | 0.64145  |
| 1.41E-08 | 0.203235 | 9.58E-06 | 0.053769 | 0.24617  | 0.126446 | 0.00622  | 0.208291 | 5.65E-06 |
| 0.18746  | 0.099479 | 0.03161  | -0.11165 | 0.01579  | -0.02228 | 0.63107  | -0.01081 | 0.81581  |
| 0.01532  | -0.08803 | 0.0573   | 0.032912 | 0.478    | -0.06059 | 0.19117  | 0.01977  | 0.67001  |
| 0.35352  | -0.12344 | 0.00757  | -0.0872  | 0.0597   | -0.15941 | 0.00054  | -0.10553 | 0.02256  |
| 0.26494  | 0.233088 | 3.51E-07 | 0.200952 | 1.21E-05 | 0.30363  | 2.04E-11 | 0.14334  | 0.0019   |
| 0.07667  | 0.102281 | 0.02709  | 0.037027 | 0.4247   | -0.05589 | 0.22799  | -0.08759 | 0.05856  |
| 0.1151   | 0.27986  | 7.51E-10 | 0.113359 | 0.01424  | 0.091759 | 0.0475   | -0.06767 | 0.14428  |
| 4.54E-06 | 0.092663 | 0.04535  | -0.02378 | 0.60824  | 0.04741  | 0.30661  | -0.06533 | 0.15866  |
| 0.00165  | 0.122705 | 0.00794  | -0.02941 | 0.52607  | 0.040717 | 0.38     | -0.00662 | 0.8866   |

|          |          |          |          |          |          |          |          |          |
|----------|----------|----------|----------|----------|----------|----------|----------|----------|
| 0.99855  | 0.091542 | 0.04803  | 0.174104 | 0.00016  | 0.205373 | 7.68E-06 | 0.031715 | 0.49416  |
| 0.85982  | 0.070375 | 0.12886  | 0.088186 | 0.05687  | 0.167645 | 0.00027  | 0.122169 | 0.00822  |
| 0.00232  | -0.17724 | 0.00012  | -0.28261 | 5.03E-10 | -0.24399 | 9.32E-08 | -0.16916 | 0.00024  |
| 0.05004  | -0.01986 | 0.66862  | 0.018293 | 0.69337  | 0.013557 | 0.77013  | 0.017833 | 0.7007   |
| 0.71306  | 0.052676 | 0.25593  | 0.146775 | 0.00147  | 0.091682 | 0.04769  | -0.05495 | 0.2359   |
| 7.24E-06 | 0.038833 | 0.40245  | -0.03944 | 0.39515  | 0.062314 | 0.17884  | -0.16657 | 0.0003   |
| 0.4805   | 0.091803 | 0.0474   | 0.092897 | 0.0448   | 0.090207 | 0.0514   | 0.095478 | 0.03916  |
| 0.34692  | 0.080355 | 0.0828   | 0.077914 | 0.09261  | 0.065594 | 0.157    | 0.149184 | 0.00122  |
| 0.00187  | 0.019094 | 0.68067  | -0.0554  | 0.2321   | -0.00167 | 0.97127  | -0.0694  | 0.13426  |
| 6.51E-06 | -0.06925 | 0.13507  | -0.06616 | 0.15347  | -0.13185 | 0.00432  | -0.06264 | 0.17657  |
| 0.18151  | 0.110086 | 0.01732  | 0.074425 | 0.10822  | 0.134081 | 0.0037   | 0.156231 | 0.0007   |
| 0.61778  | 0.023251 | 0.61624  | 0.004703 | 0.91926  | 0.026866 | 0.56251  | 0.030155 | 0.51565  |
| 6.70E-06 | -0.11421 | 0.01353  | -0.00537 | 0.90793  | 0.0036   | 0.93816  | 0.146688 | 0.00148  |
| 0.50956  | 0.067378 | 0.146    | 0.126897 | 0.00603  | 0.174371 | 0.00015  | 0.113034 | 0.01453  |
| 0.7248   | 0.121589 | 0.00853  | 0.119532 | 0.00973  | 0.137175 | 0.00297  | 0.162241 | 0.00043  |
| 0.92925  | -0.06453 | 0.16384  | -0.18655 | 4.99E-05 | -0.22307 | 1.12E-06 | -0.15875 | 0.00057  |
| 0.00681  | 0.045828 | 0.32304  | -0.06839 | 0.14003  | -0.03708 | 0.42401  | -0.03776 | 0.41553  |
| 0.00013  | 0.057811 | 0.21239  | 0.152111 | 0.00098  | 0.148489 | 0.00129  | 0.239153 | 1.69E-07 |
| 0.00077  | -0.05323 | 0.25094  | 0.139963 | 0.00243  | 0.033052 | 0.47613  | 0.070367 | 0.1289   |
| 0.06023  | -0.02104 | 0.65018  | 0.014558 | 0.7537   | -0.06002 | 0.19543  | 0.069279 | 0.13494  |
| 0.37705  | 0.008867 | 0.84845  | 0.030799 | 0.50673  | 0.05201  | 0.26199  | 0.103477 | 0.02534  |
| 0.36046  | 0.005564 | 0.90454  | -0.0533  | 0.25036  | -0.03526 | 0.44719  | 0.05901  | 0.20305  |
| 0.02509  | 0.020983 | 0.65107  | -0.02252 | 0.6274   | 0.077011 | 0.09647  | -0.03678 | 0.42777  |
| 0.83111  | -0.00795 | 0.86394  | 0.188796 | 4.03E-05 | 0.256859 | 1.80E-08 | -0.02206 | 0.6345   |
| 0.39758  | 0.097092 | 0.03595  | 0.123473 | 0.00755  | 0.03484  | 0.45259  | -0.06302 | 0.17396  |
| 0.15931  | 0.140579 | 0.00233  | 0.119845 | 0.00953  | 0.132135 | 0.00423  | 0.024797 | 0.59298  |
| 0.4385   | 0.07892  | 0.08846  | 0.201384 | 1.16E-05 | 0.122468 | 0.00806  | 0.193162 | 2.64E-05 |
| 0.00043  | -0.11318 | 0.0144   | 0.009078 | 0.84487  | 0.006042 | 0.8964   | -0.03096 | 0.50456  |
| 8.17E-05 | -0.02429 | 0.60056  | 0.017157 | 0.71153  | 0.066213 | 0.15312  | -0.02907 | 0.53082  |
| 0.1556   | 0.080248 | 0.08322  | -0.06404 | 0.16708  | -0.01925 | 0.67822  | -0.08172 | 0.07771  |
| 0.02134  | 0.09084  | 0.04978  | 0.091265 | 0.04871  | 0.230238 | 4.91E-07 | 0.067031 | 0.14809  |
| 0.19855  | 0.137867 | 0.00283  | 0.137643 | 0.00288  | 0.138412 | 0.00272  | 0.063218 | 0.17261  |
| 0.05467  | -0.12008 | 0.00939  | -0.08198 | 0.07677  | -0.09586 | 0.03837  | -0.0094  | 0.83938  |
| 0.84354  | 0.031958 | 0.49086  | -0.04742 | 0.30652  | 0.022798 | 0.62314  | -0.01    | 0.8293   |
| 0.15519  | 0.065791 | 0.15576  | 0.049025 | 0.2904   | 0.080792 | 0.08114  | 0.019075 | 0.68096  |
| 0.01324  | 0.134395 | 0.00362  | 0.064537 | 0.16381  | 0.105336 | 0.02281  | 0.180892 | 8.46E-05 |
| 0.28996  | 0.088814 | 0.05512  | 0.018131 | 0.69595  | 0.199094 | 1.46E-05 | 0.082676 | 0.07427  |
| 9.44E-26 | -0.07156 | 0.12251  | -0.1335  | 0.00385  | 0.041137 | 0.37509  | -0.28252 | 5.10E-10 |
| 2.10E-11 | -0.19829 | 1.59E-05 | -0.15672 | 0.00068  | -0.23012 | 4.98E-07 | -0.16565 | 0.00032  |
| 0.50763  | -0.10707 | 0.02066  | -0.16026 | 0.00051  | -0.0841  | 0.06942  | 0.077244 | 0.09546  |
| 0.42496  | 0.026883 | 0.56225  | -0.07067 | 0.12728  | 0.054026 | 0.24392  | 0.058847 | 0.20431  |
| 0.00129  | 0.049707 | 0.28374  | 0.099498 | 0.03158  | 0.166297 | 0.00031  | -0.10265 | 0.02655  |
| 0.78283  | 0.120692 | 0.00903  | 0.158554 | 0.00058  | 0.137979 | 0.00281  | 0.055979 | 0.22727  |
| 0.03074  | 0.064986 | 0.16089  | -0.03126 | 0.50037  | 0.193434 | 2.57E-05 | 0.122607 | 0.00799  |
| 0.94969  | 0.098357 | 0.03359  | -0.11923 | 0.00991  | -0.04229 | 0.3619   | -0.00659 | 0.88707  |

|          |          |          |          |          |          |          |          |          |
|----------|----------|----------|----------|----------|----------|----------|----------|----------|
| 2.56E-12 | 0.112745 | 0.01478  | 0.147596 | 0.00138  | 0.041354 | 0.37258  | 0.261665 | 9.48E-09 |
| 0.17511  | -0.08374 | 0.0706   | -0.03187 | 0.49201  | -0.0604  | 0.19261  | 0.146646 | 0.00148  |
| 9.33E-05 | -0.07855 | 0.08998  | -0.10802 | 0.01954  | 0.046247 | 0.31863  | -0.17692 | 0.00012  |
| 0.00125  | 0.233914 | 3.18E-07 | 0.098456 | 0.03341  | 0.17989  | 9.27E-05 | 0.137571 | 0.00289  |
| 0.01449  | 0.240817 | 1.38E-07 | 0.143556 | 0.00187  | 0.115165 | 0.01276  | 0.23568  | 2.57E-07 |
| 0.00015  | 0.263197 | 7.71E-09 | 0.326578 | 4.56E-13 | 0.306007 | 1.40E-11 | 0.130364 | 0.00478  |
| 0.2175   | 0.145613 | 0.0016   | -0.01286 | 0.78169  | 0.121216 | 0.00874  | -0.01048 | 0.82125  |
| 0.44609  | 0.02065  | 0.65625  | -0.04089 | 0.37801  | 0.074306 | 0.10878  | 0.037106 | 0.42371  |
| 0.00035  | -0.10053 | 0.02985  | -0.08663 | 0.06139  | -0.05541 | 0.23204  | -0.0923  | 0.04621  |
| 5.24E-07 | 0.076274 | 0.09971  | -0.09859 | 0.03316  | 0.034586 | 0.45589  | -0.15307 | 0.0009   |
| 0.04938  | -0.04002 | 0.38819  | 0.019916 | 0.66772  | 0.029272 | 0.52803  | -0.00538 | 0.90776  |
| 0.15379  | 0.076498 | 0.09871  | 0.110034 | 0.01737  | 0.075988 | 0.10099  | 0.093615 | 0.04317  |
| 0.11055  | -0.01933 | 0.67699  | -0.05534 | 0.23261  | 0.044425 | 0.3381   | 0.044239 | 0.34013  |
| 0.02703  | 0.034791 | 0.45323  | -0.14672 | 0.00148  | 0.087683 | 0.0583   | -0.04892 | 0.29143  |
| 2.06E-25 | 0.159287 | 0.00055  | 0.186311 | 5.10E-05 | 0.090702 | 0.05013  | 0.253782 | 2.68E-08 |
| 0.64199  | 0.118852 | 0.01015  | 0.14544  | 0.00163  | 0.179697 | 9.43E-05 | 0.123829 | 0.00738  |
| 0.00011  | -0.09477 | 0.04065  | 0.056826 | 0.22031  | -0.04263 | 0.35805  | 0.012909 | 0.78083  |
| 8.65E-08 | -0.38695 | 3.95E-18 | -0.28918 | 1.90E-10 | -0.27464 | 1.58E-09 | -0.32863 | 3.19E-13 |
| 0.00723  | -0.03211 | 0.48877  | -0.09626 | 0.03758  | -0.01526 | 0.74216  | -0.00694 | 0.88109  |
| 0.3754   | -0.02929 | 0.52777  | 0.015398 | 0.73998  | 0.01067  | 0.81811  | 0.12951  | 0.00506  |
| 0.08102  | 0.112025 | 0.01543  | -0.01889 | 0.68386  | 0.053251 | 0.25076  | -0.12502 | 0.00683  |
| 0.03711  | 0.138129 | 0.00278  | -0.02688 | 0.56234  | 0.065403 | 0.15821  | -0.06385 | 0.16837  |
| 0.02654  | 0.104605 | 0.02378  | 0.123413 | 0.00758  | 0.109679 | 0.01774  | 0.050357 | 0.27748  |
| 0.27935  | -0.24923 | 4.82E-08 | -0.30538 | 1.55E-11 | -0.36863 | 1.77E-16 | -0.12848 | 0.00542  |
| 5.04E-05 | -0.10414 | 0.02441  | -0.17552 | 0.00014  | -0.09565 | 0.03881  | -0.10434 | 0.02414  |
| 0.99409  | 0.054169 | 0.24268  | -0.00076 | 0.987    | 0.182423 | 7.34E-05 | 0.036077 | 0.43669  |
| 0.04382  | 0.327727 | 3.73E-13 | 0.017622 | 0.70408  | 0.116672 | 0.01163  | -0.02992 | 0.51898  |
| 0.09142  | 0.090939 | 0.04953  | 0.125669 | 0.00654  | 0.14439  | 0.00176  | 0.008504 | 0.85457  |
| 0.00529  | 0.020093 | 0.66494  | 0.022812 | 0.62293  | 0.117507 | 0.01104  | -0.0885  | 0.05598  |
| 9.44E-10 | -0.03937 | 0.39601  | 0.062732 | 0.17594  | -0.03036 | 0.51281  | 0.106622 | 0.02119  |
| 0.03091  | 0.192245 | 2.88E-05 | 0.266279 | 5.07E-09 | 0.238169 | 1.91E-07 | 0.195766 | 2.04E-05 |
| 0.31732  | -0.01999 | 0.66654  | 0.13798  | 0.00281  | 0.127728 | 0.00571  | 0.063296 | 0.17208  |
| 0.42678  | 0.040618 | 0.38116  | 0.188761 | 4.04E-05 | 0.148887 | 0.00125  | 0.063459 | 0.17098  |
| 0.00209  | 0.23549  | 2.63E-07 | 0.047879 | 0.30184  | 0.037157 | 0.42308  | 0.012869 | 0.78149  |
| 0.08981  | 0.359851 | 1.01E-15 | 0.153352 | 0.00088  | 0.173537 | 0.00016  | -0.00225 | 0.96138  |
| 0.0027   | 0.312494 | 4.89E-12 | 0.0875   | 0.05883  | 0.071176 | 0.12455  | 0.225599 | 8.40E-07 |
| 0.06771  | 0.100241 | 0.03032  | 0.038559 | 0.40578  | -0.04873 | 0.29331  | 0.000905 | 0.98444  |
| 4.17E-14 | -0.05372 | 0.24665  | -0.10869 | 0.0188   | -0.03694 | 0.42577  | -0.23215 | 3.92E-07 |
| 0.14466  | -0.00183 | 0.96854  | -0.1102  | 0.0172   | -0.12676 | 0.00609  | -0.02224 | 0.63165  |
| 0.00212  | -0.10101 | 0.02906  | -0.10341 | 0.02544  | -0.09967 | 0.03127  | -0.10155 | 0.02821  |
| 0.13858  | -0.08483 | 0.06703  | -0.04229 | 0.36186  | -0.08923 | 0.05397  | -0.00899 | 0.84634  |
| 0.75996  | 0.074453 | 0.10809  | 0.025151 | 0.58772  | -0.0042  | 0.92785  | 0.086117 | 0.06296  |
| 0.45012  | 0.199337 | 1.43E-05 | 0.20293  | 9.89E-06 | 0.249818 | 4.47E-08 | 0.210623 | 4.41E-06 |
| 0.09905  | 0.121281 | 0.0087   | 0.086908 | 0.06057  | 0.13301  | 0.00398  | 0.116911 | 0.01146  |
| 3.89E-05 | 0.023776 | 0.6083   | 0.058462 | 0.20729  | 0.051424 | 0.26742  | 0.029138 | 0.52992  |



|          |          |          |          |          |          |          |           |          |
|----------|----------|----------|----------|----------|----------|----------|-----------|----------|
| 0.00988  | 0.314077 | 3.77E-12 | 0.282011 | 5.49E-10 | 0.281439 | 5.97E-10 | 0.237121  | 2.16E-07 |
| 0.03023  | -0.06    | 0.19559  | -0.09469 | 0.04081  | -0.12438 | 0.00712  | 0.048638  | 0.29424  |
| 1.51E-16 | -0.1111  | 0.01631  | -0.0724  | 0.11821  | -0.03331 | 0.47264  | -0.09431  | 0.04164  |
| 0.00125  | 0.132666 | 0.00408  | -0.01171 | 0.80078  | 0.062314 | 0.17885  | 0.08953   | 0.05318  |
| 4.61E-08 | -0.20187 | 1.10E-05 | -0.00251 | 0.95678  | 0.007275 | 0.87541  | -0.16483  | 0.00035  |
| 7.21E-06 | -0.07529 | 0.10415  | -0.11597 | 0.01215  | -0.07831 | 0.09097  | -0.15665  | 0.00068  |
| 0.00476  | 0.210435 | 4.50E-06 | 0.197737 | 1.68E-05 | 0.265145 | 5.92E-09 | 0.236876  | 2.23E-07 |
| 9.08E-05 | 0.236363 | 2.37E-07 | 0.070977 | 0.12561  | 0.163534 | 0.00039  | -0.03908  | 0.39949  |
| 0.91985  | 0.121102 | 0.0088   | 0.098062 | 0.03413  | 0.096603 | 0.0369   | 0.102098  | 0.02737  |
| 2.24E-05 | 0.097017 | 0.03609  | 0.1689   | 0.00025  | 0.112092 | 0.01537  | 0.200798  | 1.23E-05 |
| 7.36E-05 | -0.12223 | 0.00818  | -0.19917 | 1.45E-05 | -0.13067 | 0.00468  | -0.11696  | 0.01142  |
| 0.00012  | -0.00398 | 0.93168  | 0.030349 | 0.51296  | 0.117744 | 0.01088  | 0.046974  | 0.31108  |
| 0.73047  | 0.097915 | 0.0344   | 0.06848  | 0.13951  | 0.166681 | 0.0003   | 0.058503  | 0.20696  |
| 4.13E-05 | -0.00605 | 0.89627  | -0.07029 | 0.12931  | -0.01196 | 0.79665  | -0.0853   | 0.06549  |
| 0.00846  | -0.3358  | 9.00E-14 | -0.13285 | 0.00403  | -0.28897 | 1.96E-10 | -0.05804  | 0.21058  |
| 1.14E-18 | 0.064532 | 0.16384  | 0.040523 | 0.38227  | -0.04264 | 0.35786  | 0.187072  | 4.75E-05 |
| 1.10E-07 | 0.192208 | 2.89E-05 | 0.146957 | 0.00145  | 0.062412 | 0.17816  | 0.156547  | 0.00069  |
| 5.93E-10 | -0.18501 | 5.77E-05 | -0.05178 | 0.26407  | -0.02685 | 0.56267  | -0.14963  | 0.00118  |
| 4.40E-10 | 0.215458 | 2.62E-06 | 0.146915 | 0.00145  | 0.140838 | 0.00228  | 0.109129  | 0.01832  |
| 0.40009  | -0.40134 | 1.68E-19 | -0.26877 | 3.60E-09 | -0.28387 | 4.19E-10 | -0.17496  | 0.00014  |
| 0.00014  | 0.125833 | 0.00647  | -0.00567 | 0.90267  | 0.061988 | 0.18114  | 0.045629  | 0.32516  |
| 0.00521  | 0.133252 | 0.00392  | 0.07555  | 0.10297  | 0.170479 | 0.00021  | 0.045756  | 0.3238   |
| 0.64872  | -0.19469 | 2.27E-05 | -0.13292 | 0.00401  | -0.23667 | 2.29E-07 | -3.93E-05 | 0.99932  |
| 0.07472  | 0.104694 | 0.02366  | 0.046864 | 0.31222  | 0.099946 | 0.03081  | 0.145707  | 0.00159  |
| 0.00836  | -0.04493 | 0.33264  | 0.035317 | 0.44641  | 0.016387 | 0.72394  | -0.10199  | 0.02753  |
| 0.03529  | -0.08436 | 0.06854  | 0.008478 | 0.85501  | -0.00769 | 0.86831  | -0.01253  | 0.78711  |
| 5.40E-16 | -0.13076 | 0.00465  | -0.13934 | 0.00255  | -0.03912 | 0.39897  | -0.26055  | 1.10E-08 |
| 0.661    | 0.022654 | 0.62533  | -0.0496  | 0.28476  | 0.009822 | 0.83234  | -0.06182  | 0.18229  |
| 1.18E-05 | 0.007792 | 0.86663  | -0.13181 | 0.00433  | 0.070864 | 0.12621  | -0.11023  | 0.01717  |
| 1.08E-09 | 0.121179 | 0.00876  | 0.050142 | 0.27954  | 0.001242 | 0.97865  | 0.232775  | 3.64E-07 |
| 0.10849  | 0.065754 | 0.15599  | -0.04823 | 0.29826  | 0.068795 | 0.13769  | 0.049792  | 0.28291  |
| 0.57076  | -0.00852 | 0.85434  | 0.136668 | 0.00308  | 0.079423 | 0.08645  | 0.03046   | 0.51142  |
| 0.79659  | -0.28986 | 1.72E-10 | -0.18811 | 4.30E-05 | -0.23713 | 2.16E-07 | -0.12278  | 0.0079   |
| 1.67E-08 | -0.02066 | 0.65607  | -0.02918 | 0.52939  | 0.075914 | 0.10132  | -0.09294  | 0.04471  |
| 0.07135  | 0.2779   | 9.95E-10 | 0.22553  | 8.47E-07 | 0.279272 | 8.17E-10 | 0.166621  | 0.0003   |
| 0.61351  | 0.178213 | 0.00011  | 0.065001 | 0.16079  | 0.085815 | 0.06389  | 0.067096  | 0.1477   |
| 0.15108  | -0.00641 | 0.89005  | -0.0256  | 0.58099  | 0.018716 | 0.68665  | 0.239491  | 1.62E-07 |
| 0.00013  | -0.18622 | 5.15E-05 | -0.1482  | 0.00132  | -0.08599 | 0.06336  | -0.08683  | 0.06079  |
| 2.78E-14 | 0.05986  | 0.19661  | 0.061061 | 0.18776  | 0.17498  | 0.00014  | -0.01151  | 0.80402  |
| 1.15E-08 | -0.08812 | 0.05707  | -0.10159 | 0.02814  | 0.055279 | 0.23315  | -0.12233  | 0.00814  |
| 0.84079  | -0.08732 | 0.05936  | -0.1145  | 0.01329  | -0.05467 | 0.2383   | -0.02926  | 0.52824  |
| 0.29091  | 0.117022 | 0.01138  | 0.151124 | 0.00105  | 0.116668 | 0.01163  | 0.120598  | 0.00909  |
| 0.96167  | 0.023432 | 0.61349  | 0.019355 | 0.67655  | -0.00708 | 0.87878  | -0.03385  | 0.46559  |
| 1.34E-09 | 0.071408 | 0.12332  | 0.125317 | 0.0067   | 0.256711 | 1.83E-08 | 0.002984  | 0.94873  |
| 3.38E-07 | 0.076843 | 0.0972   | -0.00113 | 0.98064  | 0.196291 | 1.94E-05 | -0.09514  | 0.03987  |

|          |          |          |          |          |          |          |          |          |
|----------|----------|----------|----------|----------|----------|----------|----------|----------|
| 0.00136  | 0.196945 | 1.81E-05 | 0.146022 | 0.00156  | 0.339459 | 4.66E-14 | 0.118491 | 0.01038  |
| 0.21684  | 0.060092 | 0.19488  | -0.00748 | 0.87187  | 0.05367  | 0.24705  | 0.162596 | 0.00042  |
| 0.03343  | -0.1013  | 0.02861  | -0.01958 | 0.67295  | -0.07229 | 0.11873  | 0.061947 | 0.18143  |
| 0.00276  | 0.017433 | 0.70711  | 0.035003 | 0.45047  | 0.099173 | 0.03214  | -0.06464 | 0.16312  |
| 0.05781  | 0.115164 | 0.01276  | 0.123859 | 0.00737  | 0.15714  | 0.00065  | 0.144438 | 0.00175  |
| 1.12E-08 | -0.15116 | 0.00105  | -0.06991 | 0.13139  | -0.08439 | 0.06844  | -0.11958 | 0.0097   |
| 0.00297  | -0.12903 | 0.00523  | -0.00038 | 0.99353  | 0.008406 | 0.85623  | -0.11472 | 0.01311  |
| 1.06E-07 | 0.075095 | 0.10507  | 0.021914 | 0.63668  | 0.344441 | 1.87E-14 | -0.00214 | 0.96315  |
| 1.37E-15 | 0.070792 | 0.1266   | 0.062252 | 0.17928  | -0.0623  | 0.17895  | 0.199231 | 1.44E-05 |
| 0.51261  | 0.038374 | 0.40804  | 0.011126 | 0.81049  | 0.052162 | 0.2606   | 0.031082 | 0.50283  |
| 0.00431  | 0.144052 | 0.0018   | 0.102424 | 0.02688  | 0.188766 | 4.04E-05 | 0.201771 | 1.11E-05 |
| 0.57956  | 0.071766 | 0.12145  | 0.054561 | 0.23928  | 0.077716 | 0.09345  | 0.160352 | 0.0005   |
| 0.00055  | 0.262157 | 8.87E-09 | 0.153604 | 0.00087  | 0.201525 | 1.14E-05 | 0.33457  | 1.12E-13 |
| 0.1391   | 0.028574 | 0.53791  | 0.035744 | 0.44094  | 0.095949 | 0.0382   | 0.071466 | 0.12302  |
| 0.02106  | 0.276016 | 1.30E-09 | 0.0532   | 0.25122  | 0.333891 | 1.26E-13 | -0.00514 | 0.91176  |
| 0.00055  | -0.1453  | 0.00164  | -0.17898 | 0.0001   | -0.13616 | 0.0032   | -0.13297 | 0.00399  |
| 9.18E-07 | 0.120382 | 0.00921  | 0.09062  | 0.05034  | 0.072234 | 0.11903  | 0.248694 | 5.16E-08 |
| 0.79254  | 0.138417 | 0.00272  | 0.225692 | 8.31E-07 | 0.2328   | 3.63E-07 | 0.198796 | 1.51E-05 |
| 0.00312  | 0.034056 | 0.46283  | 0.060499 | 0.19186  | 0.029684 | 0.52224  | 0.225277 | 8.72E-07 |
| 0.00176  | 0.228967 | 5.69E-07 | 0.044468 | 0.33763  | 0.136516 | 0.00312  | 0.010883 | 0.81456  |
| 0.00061  | 0.248836 | 5.07E-08 | 0.113529 | 0.0141   | 0.138749 | 0.00266  | 0.200451 | 1.27E-05 |
| 0.10455  | 0.000971 | 0.9833   | 0.001098 | 0.98113  | -0.04065 | 0.38072  | 0.007412 | 0.87308  |
| 0.4305   | 0.130245 | 0.00482  | 0.124175 | 0.00722  | 0.136557 | 0.00311  | 0.122348 | 0.00812  |
| 0.82379  | 0.183475 | 6.66E-05 | 0.080096 | 0.0838   | 0.291011 | 1.44E-10 | 0.165132 | 0.00034  |
| 2.15E-06 | 0.290405 | 1.58E-10 | 0.217488 | 2.09E-06 | 0.262605 | 8.35E-09 | 0.247228 | 6.21E-08 |
| 0.61668  | 0.197331 | 1.75E-05 | 0.05153  | 0.26642  | 0.203902 | 8.94E-06 | 0.089229 | 0.05399  |
| 3.46E-05 | -0.00873 | 0.85082  | 0.049188 | 0.2888   | 0.099586 | 0.03142  | 0.016737 | 0.71828  |
| 0.65538  | 0.124191 | 0.00721  | 0.135196 | 0.00342  | 0.336577 | 7.83E-14 | 0.146437 | 0.00151  |
| 0.68109  | 0.159824 | 0.00053  | 0.095504 | 0.03911  | 0.172214 | 0.00018  | 0.118939 | 0.0101   |
| 1.18E-07 | 0.113901 | 0.01378  | 0.160693 | 0.00049  | 0.038411 | 0.40759  | 0.167294 | 0.00028  |
| 0.00021  | -0.05538 | 0.23225  | -0.11852 | 0.01037  | -0.00626 | 0.89272  | -0.04798 | 0.30078  |
| 0.0001   | 0.020093 | 0.66495  | -0.04667 | 0.3142   | 0.036567 | 0.43049  | -0.14941 | 0.0012   |
| 0.55204  | 0.30995  | 7.41E-12 | 0.097355 | 0.03545  | 0.20742  | 6.20E-06 | 0.229276 | 5.49E-07 |
| 0.00391  | 0.080033 | 0.08405  | 0.125717 | 0.00652  | 0.185125 | 5.70E-05 | -0.01139 | 0.80607  |
| 0.50336  | -0.14803 | 0.00134  | -0.02742 | 0.55454  | -0.07028 | 0.12937  | -0.01184 | 0.79865  |
| 3.18E-08 | 0.068885 | 0.13717  | 0.020748 | 0.65471  | 0.085829 | 0.06385  | 0.010807 | 0.81582  |
| 0.00288  | 0.046561 | 0.31536  | -0.09149 | 0.04816  | 0.044699 | 0.33512  | -0.1437  | 0.00185  |
| 0.00086  | 0.017478 | 0.70638  | -0.00666 | 0.88584  | 0.077222 | 0.09555  | -0.08437 | 0.0685   |
| 1.21E-06 | 0.212684 | 3.54E-06 | 0.156958 | 0.00066  | 0.043256 | 0.35098  | 0.133542 | 0.00384  |
| 0.02502  | 0.062966 | 0.17433  | -0.03532 | 0.44644  | 0.16548  | 0.00033  | 0.109644 | 0.01778  |
| 0.34221  | 0.153704 | 0.00086  | 0.019321 | 0.67708  | 0.036361 | 0.43309  | 0.022912 | 0.6214   |
| 1.86E-07 | -0.15137 | 0.00103  | -0.22725 | 6.95E-07 | -0.09222 | 0.04638  | -0.17335 | 0.00017  |
| 0.90758  | 0.011368 | 0.80644  | 0.095264 | 0.03961  | 0.120808 | 0.00897  | 0.058298 | 0.20856  |
| 2.54E-05 | 0.339043 | 5.02E-14 | 0.125693 | 0.00653  | 0.174683 | 0.00015  | 0.142594 | 0.00201  |
| 4.69E-06 | 0.101376 | 0.02849  | 0.218557 | 1.86E-06 | 0.195919 | 2.01E-05 | 0.005213 | 0.91054  |

|          |          |          |          |          |          |          |          |          |
|----------|----------|----------|----------|----------|----------|----------|----------|----------|
| 0.83274  | -0.32065 | 1.26E-12 | -0.10249 | 0.02677  | -0.23189 | 4.04E-07 | -0.07095 | 0.12578  |
| 0.00878  | 0.018925 | 0.68334  | -0.00596 | 0.89772  | -0.05084 | 0.27287  | 0.025136 | 0.58794  |
| 0.60772  | 0.061011 | 0.18812  | 0.05126  | 0.26894  | 0.052203 | 0.26023  | 0.020547 | 0.65785  |
| 0.25385  | 0.101285 | 0.02863  | 0.037957 | 0.41315  | 0.100309 | 0.03021  | -0.0841  | 0.06941  |
| 0.70787  | 0.088681 | 0.05549  | 0.070183 | 0.1299   | 0.107355 | 0.02032  | 0.118127 | 0.01062  |
| 0.89076  | 0.153825 | 0.00085  | 0.074779 | 0.10654  | 0.073322 | 0.11356  | 0.265794 | 5.42E-09 |
| 0.00484  | -0.04566 | 0.32484  | -0.05426 | 0.2419   | 0.085565 | 0.06467  | -0.05951 | 0.19921  |
| 6.83E-13 | 0.107231 | 0.02046  | 0.158574 | 0.00058  | 0.087347 | 0.05928  | 0.232622 | 3.71E-07 |
| 0.64938  | 0.178291 | 0.00011  | 0.200249 | 1.30E-05 | 0.253441 | 2.81E-08 | 0.111281 | 0.01614  |
| 0.0099   | 0.126401 | 0.00623  | 0.027078 | 0.55942  | 0.099584 | 0.03143  | -0.08921 | 0.05404  |
| 5.77E-05 | -0.02579 | 0.57819  | -0.08006 | 0.08395  | 0.037246 | 0.42197  | -0.10656 | 0.02126  |
| 1.35E-16 | -0.19616 | 1.96E-05 | -0.14675 | 0.00147  | -0.0132  | 0.77605  | -0.2716  | 2.43E-09 |
| 0.0015   | -0.28187 | 5.61E-10 | -0.09434 | 0.04157  | -0.24412 | 9.17E-08 | -0.027   | 0.56058  |
| 0.92047  | -0.02497 | 0.59047  | -0.02791 | 0.54748  | -0.09936 | 0.03182  | -0.11505 | 0.01285  |
| 3.17E-23 | -0.16331 | 0.00039  | -0.06995 | 0.13121  | 0.012831 | 0.78213  | -0.31956 | 1.51E-12 |
| 2.17E-08 | 0.172633 | 0.00018  | 0.066854 | 0.14917  | 0.069591 | 0.13319  | 0.313992 | 3.82E-12 |
| 0.04597  | 0.036648 | 0.42946  | -0.03937 | 0.39593  | 0.052931 | 0.25363  | 0.009913 | 0.83081  |
| 0.4591   | -0.15837 | 0.00059  | -0.10318 | 0.02577  | -0.17782 | 0.00011  | -0.1105  | 0.0169   |
| 3.36E-05 | 0.330619 | 2.25E-13 | 0.225085 | 8.91E-07 | 0.361472 | 7.33E-16 | 0.062956 | 0.1744   |
| 0.64443  | 0.061361 | 0.1856   | -0.08994 | 0.05211  | 0.062121 | 0.1802   | 0.052509 | 0.25744  |
| 0.02817  | 0.064357 | 0.16499  | 0.108889 | 0.01858  | 0.133785 | 0.00377  | 0.010705 | 0.81753  |
| 0.56122  | 0.253392 | 2.82E-08 | 0.104463 | 0.02397  | 0.139019 | 0.00261  | 0.145884 | 0.00157  |
| 0.00098  | 0.007515 | 0.87132  | 0.106492 | 0.02135  | 0.198207 | 1.60E-05 | -0.03231 | 0.48609  |
| 0.21694  | 0.108544 | 0.01896  | 0.069014 | 0.13644  | 0.291619 | 1.32E-10 | 0.113157 | 0.01442  |
| 9.55E-12 | 0.006408 | 0.89015  | 0.073715 | 0.11163  | -0.13272 | 0.00406  | 0.247741 | 5.82E-08 |
| 0.10054  | 0.043823 | 0.34469  | 0.058178 | 0.2095   | 0.147854 | 0.00135  | 0.029591 | 0.52354  |
| 0.78466  | 0.13818  | 0.00277  | 0.101136 | 0.02887  | 0.205769 | 7.37E-06 | 0.096434 | 0.03723  |
| 0.0096   | 0.033736 | 0.46705  | 0.007931 | 0.86427  | 0.067021 | 0.14815  | -0.04084 | 0.3786   |
| 8.29E-09 | 0.090199 | 0.05142  | 0.173514 | 0.00016  | 0.333671 | 1.32E-13 | 0.014348 | 0.75713  |
| 0.00097  | 0.012874 | 0.78142  | 0.132757 | 0.00405  | 0.000359 | 0.99382  | 0.324913 | 6.07E-13 |
| 0.75573  | -0.01034 | 0.82357  | 0.056555 | 0.22252  | 0.033937 | 0.4644   | 0.029877 | 0.51954  |
| 0.8931   | 0.056321 | 0.22444  | 0.08514  | 0.06602  | 0.018113 | 0.69623  | 0.03559  | 0.44291  |
| 0.00932  | -0.04444 | 0.33794  | -0.01905 | 0.68137  | 0.074484 | 0.10794  | -0.08018 | 0.08346  |
| 0.00011  | 0.052932 | 0.25362  | 0.001714 | 0.97053  | 0.035929 | 0.43858  | 0.265419 | 5.71E-09 |
| 0.71265  | 0.113882 | 0.0138   | 0.162198 | 0.00043  | 0.079451 | 0.08633  | 0.163109 | 0.0004   |
| 0.78723  | 0.041443 | 0.37155  | 0.071267 | 0.12407  | -0.00321 | 0.94486  | 0.078676 | 0.08946  |
| 0.30272  | 0.086206 | 0.06269  | 0.062964 | 0.17435  | 0.060825 | 0.18947  | 0.055863 | 0.22824  |
| 0.85622  | -0.0352  | 0.44787  | -0.05998 | 0.19571  | -0.05944 | 0.19976  | -0.00429 | 0.92638  |
| 0.82262  | -0.06162 | 0.18374  | -0.06893 | 0.13694  | -0.07373 | 0.11155  | -0.01018 | 0.8263   |
| 0.57617  | 0.011735 | 0.80033  | 0.023002 | 0.62003  | 0.01762  | 0.7041   | -0.02037 | 0.66063  |
| 0.71754  | 0.082175 | 0.07605  | -0.02907 | 0.53093  | 0.054127 | 0.24305  | 0.052406 | 0.25838  |
| 0.30149  | -0.04466 | 0.33551  | -0.05406 | 0.24366  | -0.01135 | 0.80668  | 0.00972  | 0.83406  |
| 0.79655  | 0.100645 | 0.02966  | 0.074396 | 0.10836  | 0.07187  | 0.12091  | 0.0741   | 0.10977  |
| 0.50336  | 0.025062 | 0.58903  | 0.023866 | 0.60695  | -0.001   | 0.98281  | 0.048638 | 0.29423  |
| 0.82603  | 0.025607 | 0.58096  | 0.02368  | 0.60975  | 0.078892 | 0.08857  | 0.06541  | 0.15817  |

|          |          |          |          |          |          |          |          |          |
|----------|----------|----------|----------|----------|----------|----------|----------|----------|
| 0.84952  | 0.021776 | 0.6388   | -0.02312 | 0.6182   | 0.037876 | 0.41416  | -0.01398 | 0.76318  |
| 0.39198  | -0.04284 | 0.35565  | -0.11961 | 0.00968  | -0.15333 | 0.00089  | -0.20403 | 8.82E-06 |
| 0.58398  | 0.083403 | 0.07176  | 0.052533 | 0.25722  | 0.077976 | 0.09235  | 0.054503 | 0.23978  |
| 0.00149  | 0.298672 | 4.46E-11 | 0.237121 | 2.16E-07 | 0.377836 | 2.70E-17 | 0.155825 | 0.00073  |
| 0.70763  | 0.103471 | 0.02535  | 0.039846 | 0.39027  | 0.152911 | 0.00092  | 0.096277 | 0.03754  |
| 0.96932  | 0.010263 | 0.82494  | 0.001921 | 0.96697  | -0.00937 | 0.84     | 0.031368 | 0.4989   |
| 0.09013  | 0.072106 | 0.11969  | -0.0012  | 0.97938  | 0.138183 | 0.00277  | 0.012849 | 0.78183  |
| 0.15408  | 0.069027 | 0.13636  | 0.045642 | 0.32501  | 0.06428  | 0.1655   | 0.088853 | 0.05501  |
| 0.31118  | 0.19174  | 3.03E-05 | 0.07974  | 0.08519  | 0.133289 | 0.00391  | 0.199521 | 1.40E-05 |
| 0.19519  | 0.083173 | 0.07255  | 4.71E-07 | 0.99999  | 0.03562  | 0.44252  | -0.03076 | 0.50729  |
| 9.81E-18 | -0.16029 | 0.00051  | -0.13111 | 0.00454  | -0.10721 | 0.02048  | -0.20415 | 8.72E-06 |
| 4.60E-13 | 0.153726 | 0.00086  | 0.135951 | 0.00324  | 0.205562 | 7.53E-06 | 0.20101  | 1.20E-05 |
| 0.19363  | -0.12642 | 0.00623  | -0.18986 | 3.63E-05 | -0.15833 | 0.00059  | -0.05548 | 0.23142  |
| 0.62699  | 0.305507 | 1.52E-11 | 0.187442 | 4.58E-05 | 0.239841 | 1.56E-07 | 0.222554 | 1.19E-06 |
| 0.16989  | 0.073866 | 0.1109   | 0.044301 | 0.33945  | 0.02708  | 0.55939  | 0.059845 | 0.19672  |
| 0.0452   | -0.03911 | 0.39907  | 0.148383 | 0.0013   | 0.071128 | 0.12481  | 0.072354 | 0.11842  |
| 0.01966  | 0.06144  | 0.18503  | 0.028092 | 0.5448   | 0.092491 | 0.04575  | 0.00191  | 0.96717  |
| 0.0041   | 0.027703 | 0.55039  | -0.03219 | 0.48769  | 0.061199 | 0.18676  | -0.11415 | 0.01358  |
| 0.08369  | 0.132881 | 0.00402  | 0.146449 | 0.00151  | 0.178372 | 0.00011  | 0.119736 | 0.0096   |
| 0.01082  | -0.15316 | 0.0009   | 0.110776 | 0.01663  | -0.02165 | 0.64072  | 0.019946 | 0.66725  |
| 0.27241  | -0.05176 | 0.26426  | 0.056765 | 0.2208   | -0.00453 | 0.92224  | -0.01629 | 0.72555  |
| 0.60805  | -0.04048 | 0.38277  | -0.12339 | 0.0076   | -0.02341 | 0.61377  | -0.05281 | 0.25471  |
| 0.09087  | 0.026094 | 0.57379  | 0.021016 | 0.65056  | 0.047664 | 0.30401  | 0.031833 | 0.49256  |
| 0.00012  | 0.138125 | 0.00278  | 0.044718 | 0.33492  | 0.04007  | 0.38762  | 0.143706 | 0.00185  |
| 0.9983   | -0.20312 | 9.69E-06 | -0.12243 | 0.00808  | -0.0774  | 0.09478  | -0.12248 | 0.00806  |
| 0.02597  | -0.08777 | 0.05806  | -0.1849  | 5.83E-05 | -0.1293  | 0.00513  | 0.009316 | 0.84086  |
| 0.58079  | 0.181999 | 7.64E-05 | 0.217998 | 1.98E-06 | 0.285687 | 3.20E-10 | 0.158494 | 0.00059  |
| 0.08531  | 0.075494 | 0.10323  | 0.096248 | 0.0376   | 0.204049 | 8.81E-06 | 0.056112 | 0.22616  |
| 0.56477  | 0.101347 | 0.02853  | 0.074652 | 0.10714  | 0.135107 | 0.00344  | 0.057287 | 0.21658  |
| 0.4273   | -0.19698 | 1.81E-05 | -0.22698 | 7.17E-07 | -0.24065 | 1.41E-07 | -0.15595 | 0.00072  |
| 0.5393   | 0.111949 | 0.0155   | 0.094192 | 0.04189  | 0.199351 | 1.42E-05 | 0.332604 | 1.59E-13 |
| 0.00451  | 0.01375  | 0.76696  | 0.021447 | 0.64388  | -0.04673 | 0.31364  | 0.172644 | 0.00018  |
| 0.94385  | 0.20048  | 1.27E-05 | 0.020494 | 0.65868  | 0.143896 | 0.00182  | 0.086449 | 0.06195  |
| 1.46E-09 | 0.047436 | 0.30634  | 0.107518 | 0.02013  | 0.293317 | 1.02E-10 | 0.009575 | 0.8365   |
| 0.43343  | 0.168906 | 0.00025  | 0.017554 | 0.70516  | -0.01867 | 0.6873   | 0.038362 | 0.40818  |
| 2.70E-06 | 0.197208 | 1.77E-05 | 0.13273  | 0.00406  | 0.160081 | 0.00052  | 0.337668 | 6.44E-14 |
| 2.82E-07 | -0.13195 | 0.00428  | -0.07354 | 0.1125   | -0.11636 | 0.01186  | 0.12829  | 0.0055   |
| 0.8112   | 0.041588 | 0.36988  | 0.031853 | 0.49228  | 0.049561 | 0.28516  | 0.05905  | 0.20275  |
| 0.00551  | -0.09268 | 0.0453   | -0.07019 | 0.12988  | -0.14553 | 0.00161  | 0.189158 | 3.89E-05 |
| 0.07609  | 0.066433 | 0.15175  | 0.019711 | 0.67094  | -0.02309 | 0.61871  | 0.15753  | 0.00063  |
| 2.29E-14 | 0.128402 | 0.00546  | 0.217391 | 2.12E-06 | 0.060862 | 0.18921  | 0.108734 | 0.01875  |
| 0.00552  | -0.08068 | 0.08157  | -0.00541 | 0.9071   | 0.006554 | 0.88766  | -0.1209  | 0.00892  |
| 0.93369  | 0.220242 | 1.54E-06 | 0.162728 | 0.00041  | 0.198454 | 1.56E-05 | -0.01888 | 0.68403  |
| 0.01778  | -0.13608 | 0.00321  | -0.02677 | 0.56392  | -0.12959 | 0.00504  | 0.128511 | 0.00542  |
| 0.04087  | -0.06429 | 0.16544  | -0.04208 | 0.36427  | 0.197839 | 1.66E-05 | -0.05114 | 0.27007  |

|          |          |          |          |          |          |          |          |          |
|----------|----------|----------|----------|----------|----------|----------|----------|----------|
| 7.66E-06 | 0.159305 | 0.00055  | 0.187135 | 4.72E-05 | 0.245448 | 7.77E-08 | -0.00405 | 0.93052  |
| 8.20E-11 | 0.033754 | 0.4668   | 0.033575 | 0.46917  | 0.15001  | 0.00115  | -0.04304 | 0.35341  |
| 0.95634  | -0.13115 | 0.00453  | -0.13169 | 0.00436  | -0.18836 | 4.20E-05 | -0.03594 | 0.43837  |
| 0.00057  | 0.227914 | 6.43E-07 | 0.066293 | 0.15262  | 0.159005 | 0.00056  | 0.119421 | 0.00979  |
| 1.36E-08 | 0.03815  | 0.41078  | -0.05321 | 0.25114  | 0.132757 | 0.00405  | -0.09877 | 0.03285  |
| 0.86854  | -0.0169  | 0.71564  | 0.018208 | 0.69472  | 0.012297 | 0.79098  | -0.01553 | 0.73791  |
| 0.97634  | -0.07737 | 0.09491  | -0.06695 | 0.14857  | -0.04727 | 0.30803  | -0.00866 | 0.85195  |
| 0.88404  | 0.072875 | 0.11578  | 0.111094 | 0.01632  | 0.093491 | 0.04345  | 0.059179 | 0.20175  |
| 0.96379  | 0.121525 | 0.00857  | 0.126427 | 0.00622  | 0.21454  | 2.89E-06 | 0.075324 | 0.10401  |
| 0.87776  | 0.081711 | 0.07773  | 0.102272 | 0.02711  | 0.115326 | 0.01264  | 0.094474 | 0.04128  |
| 0.66262  | 0.074371 | 0.10848  | 0.013804 | 0.76607  | 0.108121 | 0.01943  | 0.057327 | 0.21625  |
| 0.77099  | 0.084547 | 0.06793  | 0.031273 | 0.5002   | 0.038453 | 0.40707  | 0.052097 | 0.26119  |
| 0.80004  | 0.005811 | 0.90033  | 0.01564  | 0.73605  | 0.073759 | 0.11142  | 0.126754 | 0.00609  |
| 0.01695  | -0.09457 | 0.04107  | -0.05364 | 0.24731  | -0.06328 | 0.17221  | -0.0772  | 0.09564  |
| 7.62E-05 | 0.060191 | 0.19414  | 0.170436 | 0.00022  | 0.13421  | 0.00366  | 0.283376 | 4.50E-10 |
| 1.03E-05 | -0.42018 | 2.12E-21 | -0.24305 | 1.05E-07 | -0.27463 | 1.59E-09 | -0.23473 | 2.89E-07 |
| 0.44651  | 0.081668 | 0.07789  | 0.034098 | 0.46227  | 0.13072  | 0.00466  | 0.019588 | 0.67288  |
| 2.26E-09 | 0.21264  | 3.55E-06 | 0.097981 | 0.03428  | 0.090099 | 0.05168  | 0.158388 | 0.00059  |
| 8.58E-05 | 0.073527 | 0.11256  | 0.127408 | 0.00583  | 0.195925 | 2.01E-05 | 0.033173 | 0.47452  |
| 9.42E-06 | 0.115642 | 0.01239  | 0.088699 | 0.05544  | 0.178874 | 0.0001   | 0.004122 | 0.92921  |
| 0.00019  | 0.067709 | 0.14403  | 0.106342 | 0.02154  | 0.009136 | 0.84391  | 0.112303 | 0.01518  |
| 0.00515  | 0.02188  | 0.6372   | 0.06874  | 0.13801  | 0.171607 | 0.00019  | 0.023248 | 0.61629  |
| 0.10617  | -0.06277 | 0.17567  | 0.002311 | 0.96028  | 0.068897 | 0.13711  | 0.105872 | 0.02213  |
| 0.19334  | 0.4475   | 2.24E-24 | 0.06295  | 0.17445  | 0.098987 | 0.03246  | 0.039856 | 0.39016  |
| 2.15E-09 | -0.17487 | 0.00015  | -0.10105 | 0.029    | -0.09672 | 0.03668  | -0.18708 | 4.74E-05 |
| 0.57005  | 0.177188 | 0.00012  | 0.124094 | 0.00726  | 0.215017 | 2.74E-06 | 0.172834 | 0.00017  |
| 0.00022  | 0.074046 | 0.11003  | 0.034679 | 0.45468  | -0.06221 | 0.17954  | 0.126024 | 0.00639  |
| 0.83606  | -0.00306 | 0.94747  | 0.001044 | 0.98204  | 0.025577 | 0.58141  | 0.039356 | 0.39614  |
| 1.51E-09 | 0.010625 | 0.81888  | -0.04936 | 0.2871   | -0.14669 | 0.00148  | 0.25701  | 1.76E-08 |
| 0.00798  | 0.05567  | 0.22985  | 0.049955 | 0.28134  | 0.11495  | 0.01293  | 0.127154 | 0.00593  |
| 0.00375  | -0.17567 | 0.00014  | -0.10017 | 0.03044  | -0.23687 | 2.23E-07 | 0.078054 | 0.09203  |
| 0.26912  | -0.04936 | 0.2871   | 0.028278 | 0.54214  | -0.03573 | 0.44116  | 0.024573 | 0.59633  |
| 0.71208  | -0.35136 | 5.14E-15 | -0.16253 | 0.00042  | -0.27848 | 9.15E-10 | -0.12576 | 0.0065   |
| 3.83E-13 | -0.17722 | 0.00012  | -0.00695 | 0.8809   | -0.10722 | 0.02047  | -0.24458 | 8.66E-08 |
| 0.00057  | 0.124514 | 0.00706  | 0.10356  | 0.02522  | 0.091384 | 0.04842  | 0.156648 | 0.00068  |
| 0.27939  | 0.017939 | 0.69901  | 0.011606 | 0.80247  | 0.015702 | 0.73504  | 0.139676 | 0.00248  |
| 2.19E-19 | -0.14224 | 0.00206  | -0.17089 | 0.00021  | -0.0441  | 0.34167  | -0.21049 | 4.48E-06 |
| 1.55E-20 | 0.166673 | 0.0003   | 0.118158 | 0.0106   | 0.059573 | 0.19877  | 0.290999 | 1.45E-10 |
| 0.59475  | 0.323942 | 7.17E-13 | 0.18984  | 3.64E-05 | 0.254417 | 2.47E-08 | 0.149358 | 0.00121  |
| 0.72896  | 0.019716 | 0.67086  | 0.002996 | 0.94852  | 0.001896 | 0.9674   | 0.011712 | 0.8007   |
| 0.01208  | 0.021459 | 0.64369  | 0.085483 | 0.06493  | 0.166307 | 0.00031  | -0.01765 | 0.70361  |
| 0.80017  | -0.25243 | 3.20E-08 | -0.22074 | 1.46E-06 | -0.24601 | 7.25E-08 | -0.253   | 2.97E-08 |
| 0.08059  | 0.304562 | 1.76E-11 | 0.280908 | 6.45E-10 | 0.338452 | 5.59E-14 | 0.157671 | 0.00063  |
| 0.33747  | -0.11794 | 0.01075  | -0.14151 | 0.00217  | -0.1292  | 0.00517  | -0.13516 | 0.00343  |
| 0.29208  | 0.058753 | 0.20503  | -0.08026 | 0.08317  | 0.012218 | 0.79228  | -0.03528 | 0.4469   |

|          |          |          |          |          |          |          |          |          |
|----------|----------|----------|----------|----------|----------|----------|----------|----------|
| 0.21854  | 0.192168 | 2.91E-05 | -0.02532 | 0.5852   | 0.035159 | 0.44845  | 0.045828 | 0.32305  |
| 0.34288  | 0.363503 | 4.92E-16 | 0.187108 | 4.73E-05 | 0.236881 | 2.23E-07 | 0.18488  | 5.84E-05 |
| 9.75E-19 | -0.03467 | 0.45485  | -0.0741  | 0.10975  | 0.031774 | 0.49336  | -0.21134 | 4.09E-06 |
| 3.18E-15 | 0.16032  | 0.00051  | 0.039822 | 0.39056  | 0.029397 | 0.52627  | 0.275605 | 1.38E-09 |
| 0.08635  | -0.0018  | 0.96909  | -0.08852 | 0.05593  | -0.05319 | 0.25134  | -0.08456 | 0.06788  |
| 0.63598  | 0.323662 | 7.53E-13 | 0.085576 | 0.06464  | 0.177741 | 0.00011  | 0.078272 | 0.09112  |
| 0.33058  | 0.054053 | 0.24368  | -0.01989 | 0.66816  | -0.00979 | 0.8329   | -0.05879 | 0.20477  |
| 0.04822  | 0.317917 | 1.99E-12 | 0.101174 | 0.02881  | 0.229327 | 5.46E-07 | 0.123364 | 0.00761  |
| 0.2659   | 0.067795 | 0.14352  | 0.094109 | 0.04207  | 0.136148 | 0.0032   | 0.039041 | 0.39993  |
| 0.13047  | -0.23951 | 1.62E-07 | -0.20987 | 4.78E-06 | -0.31717 | 2.25E-12 | -0.19257 | 2.79E-05 |
| 0.02841  | 0.260883 | 1.05E-08 | 0.066292 | 0.15262  | 0.131894 | 0.0043   | 0.022432 | 0.62872  |
| 4.73E-09 | 0.162955 | 0.00041  | 0.131339 | 0.00447  | 0.062343 | 0.17864  | 0.236865 | 2.23E-07 |
| 0.13786  | 0.322912 | 8.55E-13 | 0.244408 | 8.85E-08 | 0.304076 | 1.90E-11 | 0.002175 | 0.96262  |
| 2.51E-17 | -0.23874 | 1.78E-07 | -0.00686 | 0.88238  | 0.148843 | 0.00126  | -0.25758 | 1.63E-08 |
| 0.00117  | -0.21504 | 2.74E-06 | -0.19974 | 1.37E-05 | -0.20747 | 6.16E-06 | -0.00137 | 0.97653  |
| 3.70E-09 | -0.10338 | 0.02548  | -0.09593 | 0.03824  | 0.049185 | 0.28883  | -0.18045 | 8.80E-05 |
| 0.00058  | -0.02318 | 0.61731  | 0.004958 | 0.9149   | 0.077268 | 0.09536  | 0.141626 | 0.00216  |
| 8.84E-07 | 0.064785 | 0.16219  | 0.121906 | 0.00836  | 0.221586 | 1.33E-06 | 0.038872 | 0.40198  |
| 0.46258  | 0.07818  | 0.0915   | 0.099033 | 0.03238  | 0.144514 | 0.00174  | 0.064053 | 0.167    |
| 0.61353  | 0.199751 | 1.37E-05 | 0.206301 | 6.97E-06 | 0.289689 | 1.76E-10 | 0.090014 | 0.0519   |
| 0.05146  | -0.03516 | 0.44841  | -0.01149 | 0.80434  | 0.053068 | 0.2524   | -0.00629 | 0.89215  |
| 0.51234  | 0.153529 | 0.00087  | 0.081833 | 0.07729  | 0.109859 | 0.01755  | 0.100437 | 0.03     |
| 0.14218  | -0.23006 | 5.01E-07 | -0.27223 | 2.22E-09 | -0.24647 | 6.84E-08 | -0.13462 | 0.00356  |
| 2.20E-07 | 0.059597 | 0.19859  | 0.111369 | 0.01605  | 0.302951 | 2.28E-11 | -0.07474 | 0.10674  |
| 0.83473  | 0.061558 | 0.18419  | 0.099501 | 0.03157  | 0.102934 | 0.02612  | 0.197007 | 1.80E-05 |
| 3.34E-05 | 0.048696 | 0.29365  | 0.155946 | 0.00072  | 0.228184 | 6.24E-07 | -0.06651 | 0.15125  |
| 0.7117   | 0.091015 | 0.04934  | 0.033441 | 0.47095  | 0.112433 | 0.01506  | -0.05254 | 0.25716  |
| 0.00124  | -0.06639 | 0.152    | 0.098679 | 0.03301  | 0.077719 | 0.09344  | -0.10071 | 0.02956  |
| 0.00893  | -0.03602 | 0.43746  | 0.002863 | 0.95079  | 0.036576 | 0.43037  | -0.08379 | 0.07043  |
| 0.08097  | 0.13997  | 0.00243  | 0.15985  | 0.00053  | 0.110489 | 0.01691  | 0.018159 | 0.6955   |
| 0.00012  | 0.02388  | 0.60673  | 0.09507  | 0.04001  | 0.172462 | 0.00018  | -0.03225 | 0.48692  |
| 8.25E-05 | 0.197315 | 1.75E-05 | 0.171898 | 0.00019  | 0.172456 | 0.00018  | 0.157916 | 0.00061  |
| 4.97E-05 | -0.12933 | 0.00512  | -0.12534 | 0.00668  | -0.03217 | 0.48802  | -0.12632 | 0.00627  |
| 0.72449  | 0.238593 | 1.81E-07 | 0.101916 | 0.02765  | 0.204938 | 8.03E-06 | 0.154443 | 0.00081  |
| 0.34526  | -0.00343 | 0.94104  | -0.07542 | 0.10356  | -0.05138 | 0.26782  | -0.05435 | 0.2411   |
| 0.02253  | 0.098351 | 0.0336   | 0.190357 | 3.46E-05 | 0.147302 | 0.00141  | 0.255502 | 2.15E-08 |
| 0.00018  | -0.0323  | 0.48629  | -0.05752 | 0.21468  | 0.051113 | 0.27032  | -0.11692 | 0.01145  |
| 0.37829  | 0.018724 | 0.68652  | 0.042221 | 0.36264  | 0.134854 | 0.0035   | 0.03389  | 0.46501  |
| 0.78362  | -0.07328 | 0.11378  | -0.00885 | 0.84871  | -0.0356  | 0.44279  | 0.043498 | 0.34828  |
| 0.02899  | -0.07075 | 0.12685  | -0.07486 | 0.10617  | -0.12913 | 0.00519  | -0.03011 | 0.51626  |
| 0.12375  | 0.009936 | 0.83043  | 0.00168  | 0.97111  | 0.021106 | 0.64916  | 0.063383 | 0.17149  |
| 0.53877  | 0.036815 | 0.42736  | -0.09461 | 0.04099  | 0.038492 | 0.4066   | -0.00213 | 0.96341  |
| 0.00457  | 0.068022 | 0.14218  | 0.031247 | 0.50056  | 0.022928 | 0.62115  | 0.117424 | 0.0111   |
| 0.25826  | 0.038376 | 0.40801  | 0.009958 | 0.83006  | -0.00197 | 0.96608  | -0.036   | 0.43765  |
| 0.02063  | 0.343268 | 2.32E-14 | 0.19966  | 1.38E-05 | 0.22039  | 1.52E-06 | 0.174428 | 0.00015  |

|          |          |          |           |          |          |          |          |          |
|----------|----------|----------|-----------|----------|----------|----------|----------|----------|
| 1.65E-05 | 0.025666 | 0.5801   | 0.094329  | 0.04159  | -0.01965 | 0.67194  | 0.065235 | 0.15929  |
| 0.45455  | 0.305432 | 1.53E-11 | 0.194417  | 2.33E-05 | 0.060795 | 0.1897   | -0.0096  | 0.83601  |
| 4.62E-07 | 0.008108 | 0.86128  | 0.003742  | 0.93572  | -0.06357 | 0.1702   | -0.0992  | 0.03209  |
| 0.25363  | 0.188484 | 4.15E-05 | 0.123974  | 0.00731  | 0.128814 | 0.00531  | 0.089619 | 0.05294  |
| 0.04731  | 0.032415 | 0.48468  | 0.109236  | 0.01821  | 0.137641 | 0.00288  | 0.04266  | 0.35766  |
| 0.35773  | 0.251645 | 3.54E-08 | 0.162094  | 0.00044  | 0.206975 | 6.49E-06 | 0.087098 | 0.06001  |
| 0.00016  | 0.390841 | 1.71E-18 | 0.242282  | 1.15E-07 | 0.240372 | 1.46E-07 | 0.201694 | 1.12E-05 |
| 0.07665  | -0.01109 | 0.81106  | -0.0395   | 0.39437  | -0.0737  | 0.11172  | -0.02205 | 0.63453  |
| 0.00069  | -0.10984 | 0.01758  | -0.16628  | 0.00031  | -0.0618  | 0.18249  | -0.07087 | 0.12617  |
| 0.43111  | -0.00565 | 0.90314  | -0.00196  | 0.96629  | 0.022313 | 0.63055  | -0.01546 | 0.73895  |
| 0.9688   | -0.05192 | 0.26282  | 0.061328  | 0.18583  | 0.03356  | 0.46937  | 0.039529 | 0.39407  |
| 4.11E-11 | -0.23745 | 2.08E-07 | -0.1445   | 0.00174  | -0.11553 | 0.01248  | -0.22383 | 1.03E-06 |
| 0.00032  | -0.06004 | 0.19527  | 0.110281  | 0.01712  | 0.059535 | 0.19905  | -0.05138 | 0.26783  |
| 0.40164  | -0.01819 | 0.69493  | 0.083994  | 0.06976  | 0.020208 | 0.66314  | 0.094978 | 0.04021  |
| 0.00095  | -0.29556 | 7.22E-11 | -0.17183  | 0.00019  | -0.3063  | 1.33E-11 | -0.04    | 0.38844  |
| 0.00185  | 0.12534  | 0.00669  | 0.256079  | 1.99E-08 | 0.207878 | 5.90E-06 | 0.272128 | 2.26E-09 |
| 0.54678  | -0.40011 | 2.22E-19 | -0.13306  | 0.00397  | -0.23183 | 4.07E-07 | -0.21716 | 2.17E-06 |
| 0.51727  | 0.084545 | 0.06794  | -0.00365  | 0.93724  | 0.024737 | 0.59388  | 0.125118 | 0.00679  |
| 5.06E-05 | -0.1185  | 0.01038  | 0.020166  | 0.66381  | 0.030548 | 0.51019  | -0.03113 | 0.50213  |
| 0.05162  | 0.168544 | 0.00025  | 0.175258  | 0.00014  | 0.16803  | 0.00026  | 0.083561 | 0.07122  |
| 0.85081  | 0.157595 | 0.00063  | 0.002067  | 0.96446  | 0.063558 | 0.17031  | 0.027716 | 0.5502   |
| 0.29188  | 0.07429  | 0.10886  | 0.010872  | 0.81473  | 0.092644 | 0.04539  | -0.01321 | 0.77584  |
| 0.25155  | 0.049816 | 0.28268  | -0.04061  | 0.38122  | 0.018117 | 0.69616  | -0.02302 | 0.6198   |
| 7.35E-05 | -0.0309  | 0.50528  | -0.14497  | 0.00168  | -0.06114 | 0.18718  | -0.15867 | 0.00058  |
| 0.0605   | 0.012137 | 0.79364  | -0.07749  | 0.09441  | 0.031156 | 0.5018   | -0.09668 | 0.03674  |
| 0.5796   | 0.104915 | 0.02336  | 0.004695  | 0.9194   | 0.016616 | 0.72024  | 0.004133 | 0.92902  |
| 0.56881  | 0.189244 | 3.86E-05 | 0.075211  | 0.10453  | 0.147227 | 0.00142  | 0.072373 | 0.11832  |
| 0.85505  | 0.053026 | 0.25278  | -0.03693  | 0.42597  | -0.02666 | 0.56551  | -0.03543 | 0.44493  |
| 0.46508  | 0.065824 | 0.15555  | 0.022907  | 0.62148  | 0.028473 | 0.53936  | 0.0383   | 0.40894  |
| 0.00079  | -0.02733 | 0.55575  | -0.07728  | 0.09532  | 0.065703 | 0.15631  | -0.10373 | 0.02499  |
| 0.29315  | 0.085783 | 0.06399  | 0.047809  | 0.30255  | 0.033736 | 0.46705  | 0.046261 | 0.31849  |
| 0.02098  | 0.115306 | 0.01265  | -0.07867  | 0.08948  | -0.01068 | 0.81796  | -0.10831 | 0.01922  |
| 0.97061  | 0.18404  | 6.32E-05 | 0.200568  | 1.26E-05 | 0.117575 | 0.011    | 0.095862 | 0.03838  |
| 9.43E-14 | 0.1639   | 0.00038  | 0.122548  | 0.00802  | 0.25317  | 2.91E-08 | -0.08063 | 0.08175  |
| 0.86881  | 0.062893 | 0.17484  | 0.064115  | 0.16659  | 0.082117 | 0.07626  | 0.031976 | 0.49062  |
| 1.87E-05 | -0.01533 | 0.74101  | 0.112735  | 0.01479  | 0.123989 | 0.00731  | -0.05854 | 0.20667  |
| 0.74141  | -0.06634 | 0.15234  | -0.04218  | 0.36312  | -0.03887 | 0.40194  | -0.08638 | 0.06217  |
| 0.8809   | 0.055603 | 0.23041  | -0.00216  | 0.96284  | 0.063496 | 0.17073  | 0.120781 | 0.00898  |
| 1.99E-10 | 0.190476 | 3.43E-05 | 0.22376   | 1.04E-06 | 0.124684 | 0.00698  | 0.303234 | 2.18E-11 |
| 0.60383  | 0.361417 | 7.41E-16 | 0.270641  | 2.78E-09 | 0.241802 | 1.22E-07 | 0.250575 | 4.06E-08 |
| 0.0009   | 0.169557 | 0.00023  | 0.230479  | 4.77E-07 | 0.173568 | 0.00016  | 0.325112 | 5.87E-13 |
| 0.6057   | 0.187939 | 4.37E-05 | 0.135511  | 0.00335  | 0.219856 | 1.61E-06 | 0.136081 | 0.00321  |
| 0.29332  | 0.084003 | 0.06973  | 0.112505  | 0.015    | 0.159228 | 0.00055  | 0.089507 | 0.05324  |
| 5.42E-05 | -0.12383 | 0.00738  | -0.04571  | 0.32433  | -0.01235 | 0.7901   | -0.08279 | 0.07386  |
| 0.00275  | -0.00108 | 0.98148  | -1.83E-05 | 0.99969  | 0.085517 | 0.06482  | -0.12276 | 0.00791  |

|          |          |          |          |          |          |          |          |          |
|----------|----------|----------|----------|----------|----------|----------|----------|----------|
| 5.09E-10 | 0.085177 | 0.0659   | 0.035843 | 0.43968  | 0.119439 | 0.00978  | -0.06294 | 0.17452  |
| 0.48918  | -0.0018  | 0.96901  | 0.031517 | 0.49687  | 0.07151  | 0.12279  | 0.062025 | 0.18088  |
| 0.94321  | 0.0716   | 0.12232  | 0.045971 | 0.32154  | 0.049028 | 0.29037  | 0.116762 | 0.01157  |
| 0.3233   | 0.065861 | 0.15532  | 0.017333 | 0.70871  | 0.110098 | 0.01731  | 0.07453  | 0.10772  |
| 0.03368  | 0.209285 | 5.09E-06 | 0.11453  | 0.01327  | 0.190741 | 3.34E-05 | 0.200735 | 1.24E-05 |
| 0.00154  | 0.031579 | 0.49601  | 0.183705 | 6.52E-05 | 0.168127 | 0.00026  | 0.105248 | 0.02293  |
| 0.85833  | 0.065208 | 0.15946  | 0.023758 | 0.60857  | 0.036136 | 0.43594  | 0.049866 | 0.2822   |
| 7.62E-12 | -0.08339 | 0.07181  | -0.06353 | 0.17048  | -0.14212 | 0.00208  | 0.137502 | 0.0029   |
| 0.13812  | -0.20773 | 6.00E-06 | -0.05417 | 0.24266  | -0.10007 | 0.0306   | -0.01418 | 0.75984  |
| 0.76338  | 0.1762   | 0.00013  | 0.106327 | 0.02156  | 0.176756 | 0.00012  | 0.184996 | 5.77E-05 |
| 0.02042  | 0.024992 | 0.59008  | 0.010512 | 0.82076  | 0.088443 | 0.05615  | -0.0582  | 0.20936  |
| 0.28775  | 0.263437 | 7.47E-09 | 0.18851  | 4.14E-05 | 0.232756 | 3.65E-07 | 0.207689 | 6.02E-06 |
| 4.94E-05 | -0.14671 | 0.00148  | -0.06507 | 0.16035  | -0.16387 | 0.00038  | 0.00332  | 0.94295  |
| 0.14351  | 0.075165 | 0.10474  | -0.00873 | 0.8507   | 0.022072 | 0.63424  | 0.03002  | 0.51753  |
| 0.528    | 0.090289 | 0.05119  | 0.137992 | 0.0028   | 0.271554 | 2.45E-09 | 0.105679 | 0.02237  |
| 0.68747  | 0.313814 | 3.94E-12 | 0.258988 | 1.36E-08 | 0.344049 | 2.01E-14 | 0.354007 | 3.11E-15 |
| 0.86132  | 0.045181 | 0.32993  | -0.03168 | 0.4946   | 0.004132 | 0.92903  | 0.040622 | 0.38111  |
| 2.12E-14 | 0.306006 | 1.40E-11 | 0.23305  | 3.52E-07 | 0.124898 | 0.00688  | 0.140615 | 0.00232  |
| 0.83626  | -0.13399 | 0.00372  | -0.07419 | 0.10933  | -0.21158 | 3.98E-06 | -0.1187  | 0.01025  |
| 0.3499   | 0.392328 | 1.24E-18 | 0.297753 | 5.14E-11 | 0.42468  | 7.14E-22 | 0.157262 | 0.00065  |
| 0.44818  | 0.053007 | 0.25294  | 0.033852 | 0.46551  | 0.039175 | 0.39831  | 0.057158 | 0.21762  |
| 0.00524  | -0.10168 | 0.02801  | -0.19509 | 2.18E-05 | -0.16738 | 0.00028  | -0.10003 | 0.03068  |
| 0.04067  | 0.207059 | 6.44E-06 | 0.141282 | 0.00221  | 0.17257  | 0.00018  | 0.230217 | 4.92E-07 |
| 0.48601  | 0.505823 | 1.05E-31 | 0.307986 | 1.02E-11 | 0.305657 | 1.48E-11 | 0.222503 | 1.20E-06 |
| 0.63458  | 0.241477 | 1.27E-07 | 0.216124 | 2.43E-06 | 0.251448 | 3.63E-08 | 0.236001 | 2.48E-07 |
| 0.08084  | 0.015064 | 0.74543  | 0.013594 | 0.76953  | 0.075575 | 0.10286  | 0.079449 | 0.08634  |
| 0.07092  | 0.043617 | 0.34696  | 0.078591 | 0.0898   | 0.091831 | 0.04733  | 0.1106   | 0.0168   |
| 0.00519  | 0.143053 | 0.00194  | 0.221789 | 1.30E-06 | 0.300671 | 3.26E-11 | 0.094053 | 0.0422   |
| 2.03E-08 | 0.059029 | 0.2029   | 0.016835 | 0.71671  | 0.173638 | 0.00016  | -0.15047 | 0.00111  |
| 0.24689  | -0.17591 | 0.00013  | -0.19818 | 1.60E-05 | -0.24269 | 1.10E-07 | -0.07015 | 0.13009  |
| 0.14927  | -0.04248 | 0.35974  | 0.044727 | 0.33483  | -0.05128 | 0.26876  | 0.060042 | 0.19525  |
| 0.88976  | 0.186806 | 4.87E-05 | 0.26506  | 5.99E-09 | 0.29961  | 3.85E-11 | 0.217961 | 1.99E-06 |
| 0.73811  | 0.07661  | 0.09822  | 0.008321 | 0.85767  | 0.083386 | 0.07181  | 0.144462 | 0.00175  |
| 0.00018  | -0.12663 | 0.00614  | -0.11258 | 0.01493  | -0.06647 | 0.15155  | -0.0941  | 0.0421   |
| 8.26E-05 | 0.125008 | 0.00683  | 0.051175 | 0.26974  | 0.052069 | 0.26145  | 0.066937 | 0.14867  |
| 3.89E-05 | 0.050324 | 0.27779  | -0.08991 | 0.05217  | -0.02968 | 0.52233  | -0.17355 | 0.00016  |
| 0.8951   | 0.113971 | 0.01373  | 0.104797 | 0.02352  | 0.118847 | 0.01015  | 0.069587 | 0.1332   |
| 0.00092  | 0.092744 | 0.04516  | 0.049498 | 0.28577  | -0.02373 | 0.60902  | 0.240751 | 1.39E-07 |
| 0.19588  | 0.178358 | 0.00011  | 0.088764 | 0.05526  | 0.221397 | 1.35E-06 | 0.048431 | 0.2963   |
| 0.00022  | 0.163858 | 0.00038  | 0.100451 | 0.02997  | 0.061691 | 0.18324  | 0.15213  | 0.00097  |
| 0.00058  | 0.167206 | 0.00028  | 0.038444 | 0.40719  | 0.078717 | 0.08929  | -0.05203 | 0.26184  |
| 6.40E-15 | 0.280868 | 6.49E-10 | 0.087557 | 0.05867  | -0.00403 | 0.93083  | 0.100696 | 0.02957  |
| 0.00051  | 0.126464 | 0.00621  | 0.100874 | 0.02929  | 0.095656 | 0.0388   | 0.22642  | 7.64E-07 |
| 0.75739  | -0.08545 | 0.06504  | 0.025056 | 0.58913  | 0.036975 | 0.42535  | -0.00774 | 0.8676   |
| 2.96E-13 | 0.118793 | 0.01019  | 0.039451 | 0.395    | -0.02203 | 0.63487  | 0.182008 | 7.63E-05 |



|          |          |          |          |          |          |          |          |          |
|----------|----------|----------|----------|----------|----------|----------|----------|----------|
| 0.26381  | 0.011763 | 0.79987  | 0.046464 | 0.31637  | 0.018668 | 0.6874   | 0.128277 | 0.0055   |
| 1.49E-11 | -0.03225 | 0.48694  | -0.02941 | 0.52605  | -0.11529 | 0.01266  | 0.180246 | 8.97E-05 |
| 0.00045  | -0.08354 | 0.07129  | -0.08328 | 0.07218  | -0.06225 | 0.17932  | -0.16592 | 0.00032  |
| 2.71E-13 | 0.377715 | 2.77E-17 | 0.158119 | 0.0006   | 0.158201 | 0.0006   | 0.314356 | 3.60E-12 |
| 3.36E-05 | 0.070134 | 0.13018  | 0.191387 | 3.14E-05 | 0.224939 | 9.06E-07 | -0.00031 | 0.99468  |
| 0.28518  | 0.059139 | 0.20207  | 0.130495 | 0.00473  | 0.144691 | 0.00172  | 0.002903 | 0.95011  |
| 0.69926  | 0.010203 | 0.82595  | 0.073934 | 0.11057  | 0.159104 | 0.00056  | 0.003056 | 0.94749  |
| 5.85E-09 | 0.014382 | 0.75658  | -0.00575 | 0.90145  | 0.064921 | 0.16131  | -0.13742 | 0.00292  |
| 0.08203  | -0.05616 | 0.22576  | -0.1426  | 0.00201  | -0.13365 | 0.00381  | 0.096536 | 0.03703  |
| 0.16388  | -0.05585 | 0.22836  | -0.17846 | 0.00011  | -0.13667 | 0.00308  | -0.0521  | 0.26118  |
| 9.29E-09 | -0.06451 | 0.164    | -0.00264 | 0.95465  | 0.089346 | 0.05367  | -0.07335 | 0.11342  |
| 0.34208  | 0.215007 | 2.75E-06 | 0.163568 | 0.00039  | 0.261705 | 9.43E-09 | 0.128588 | 0.00539  |
| 9.91E-18 | 0.105124 | 0.02309  | 0.047265 | 0.30809  | 0.168432 | 0.00026  | 0.045382 | 0.32779  |
| 0.89743  | -0.01388 | 0.76476  | -0.00334 | 0.94266  | 0.020431 | 0.65967  | 0.00253  | 0.95652  |
| 0.03534  | 0.451527 | 7.72E-25 | 0.20799  | 5.83E-06 | 0.296346 | 6.39E-11 | 0.366234 | 2.86E-16 |
| 0.9491   | 0.065726 | 0.15617  | -0.03825 | 0.40956  | 0.013503 | 0.77102  | 0.141465 | 0.00218  |
| 0.00755  | 0.063268 | 0.17228  | 0.023488 | 0.61265  | 0.076804 | 0.09737  | -0.10329 | 0.0256   |
| 0.74372  | 0.005391 | 0.90751  | -0.01325 | 0.77519  | 0.0216   | 0.64151  | 0.0476   | 0.30467  |
| 0.28958  | 0.196706 | 1.86E-05 | 0.155205 | 0.00076  | 0.278451 | 9.20E-10 | 0.171904 | 0.00019  |
| 0.02251  | -0.35256 | 4.09E-15 | -0.24098 | 1.35E-07 | -0.35554 | 2.32E-15 | 0.014829 | 0.74926  |
| 9.54E-09 | 0.129725 | 0.00499  | 0.13691  | 0.00303  | 0.021848 | 0.63769  | 0.179891 | 9.27E-05 |
| 0.20785  | -0.04533 | 0.32837  | 0.044069 | 0.34199  | 0.109394 | 0.01804  | -0.00714 | 0.87762  |
| 0.64115  | -0.03113 | 0.50217  | -0.1177  | 0.01091  | 0.031206 | 0.50112  | -0.0153  | 0.7415   |
| 0.00193  | -0.1387  | 0.00267  | -0.20577 | 7.37E-06 | -0.27209 | 2.27E-09 | 0.00627  | 0.8925   |
| 2.12E-06 | 0.356201 | 2.04E-15 | 0.29719  | 5.61E-11 | 0.36005  | 9.68E-16 | 0.125905 | 0.00644  |
| 3.53E-06 | -0.00208 | 0.96431  | 0.022661 | 0.62522  | 0.08408  | 0.06947  | -0.04916 | 0.28908  |
| 0.15415  | -0.01709 | 0.71255  | 0.04417  | 0.34088  | 0.114587 | 0.01322  | 0.025152 | 0.5877   |
| 5.05E-09 | 0.152041 | 0.00098  | 0.184073 | 6.30E-05 | 0.095285 | 0.03956  | 0.271606 | 2.43E-09 |
| 0.63761  | 0.321553 | 1.08E-12 | 0.151289 | 0.00104  | 0.286722 | 2.75E-10 | 0.13684  | 0.00304  |
| 1.42E-06 | 0.075612 | 0.10269  | 0.143069 | 0.00194  | 0.011298 | 0.80761  | 0.237041 | 2.19E-07 |
| 0.32215  | -0.18052 | 8.75E-05 | -0.07212 | 0.1196   | -0.17105 | 0.0002   | 0.017933 | 0.69911  |
| 0.402    | -0.18507 | 5.73E-05 | -0.1824  | 7.36E-05 | -0.29587 | 6.88E-11 | -0.03178 | 0.49324  |
| 0.02792  | 0.029999 | 0.51783  | 0.009959 | 0.83005  | 0.032595 | 0.48225  | -0.00264 | 0.95471  |
| 0.0681   | 0.063062 | 0.17367  | 0.127237 | 0.0059   | 0.102453 | 0.02683  | 0.102305 | 0.02706  |
| 9.33E-14 | 0.147857 | 0.00135  | 0.147713 | 0.00137  | 0.083165 | 0.07257  | 0.414024 | 9.12E-21 |
| 0.17513  | -0.0542  | 0.24236  | -0.04341 | 0.34921  | -0.05585 | 0.22836  | -0.08065 | 0.08169  |
| 0.31129  | 0.005282 | 0.90937  | -0.02762 | 0.5516   | 0.005055 | 0.91324  | -0.00563 | 0.90345  |
| 0.00026  | 0.02298  | 0.62037  | 0.017528 | 0.70558  | 0.079952 | 0.08436  | -0.04305 | 0.35326  |
| 0.02493  | -0.10329 | 0.02561  | -0.13046 | 0.00475  | -0.05668 | 0.22151  | -0.02218 | 0.63252  |
| 0.01202  | -0.11441 | 0.01336  | -0.09211 | 0.04666  | -0.05751 | 0.2148   | -0.08347 | 0.07152  |
| 0.00948  | -0.01254 | 0.78692  | -0.0406  | 0.38139  | 0.009529 | 0.83728  | -0.07186 | 0.12094  |
| 0.88434  | 0.020551 | 0.65779  | -0.05652 | 0.22282  | 0.041284 | 0.37339  | 0.01397  | 0.76334  |
| 0.04666  | -0.05195 | 0.26251  | -0.12155 | 0.00855  | -0.03598 | 0.43787  | -0.0208  | 0.6539   |
| 1.43E-13 | 0.090432 | 0.05082  | -0.04346 | 0.34866  | 0.10894  | 0.01853  | -0.16302 | 0.0004   |
| 0.76399  | -0.23671 | 2.27E-07 | -0.14352 | 0.00187  | -0.09434 | 0.04156  | -0.09827 | 0.03374  |

|          |          |          |          |          |          |          |          |          |
|----------|----------|----------|----------|----------|----------|----------|----------|----------|
| 0.13653  | 0.198909 | 1.49E-05 | 0.09692  | 0.03628  | 0.212657 | 3.55E-06 | 0.116273 | 0.01192  |
| 8.09E-13 | -0.03287 | 0.47856  | 0.152141 | 0.00097  | 0.223104 | 1.12E-06 | -0.02078 | 0.6543   |
| 3.06E-05 | 0.245791 | 7.44E-08 | 0.212419 | 3.64E-06 | 0.269606 | 3.21E-09 | 0.210396 | 4.52E-06 |
| 0.0192   | -0.06336 | 0.17164  | -0.07504 | 0.10531  | -0.17902 | 0.0001   | 0.013532 | 0.77055  |
| 0.00044  | 0.208362 | 5.61E-06 | 0.112754 | 0.01477  | 0.141893 | 0.00211  | -0.03579 | 0.4403   |
| 0.76716  | 0.158414 | 0.00059  | 0.225394 | 8.60E-07 | 0.293315 | 1.02E-10 | 0.114372 | 0.01339  |
| 0.91101  | -0.05439 | 0.24072  | -0.09202 | 0.04686  | -0.09169 | 0.04766  | 0.039057 | 0.39974  |
| 0.00028  | 0.153694 | 0.00086  | 0.22969  | 5.23E-07 | 0.3092   | 8.37E-12 | 0.13414  | 0.00368  |
| 0.62531  | -0.11862 | 0.0103   | -0.14223 | 0.00206  | -0.20459 | 8.33E-06 | -0.20799 | 5.83E-06 |
| 1.02E-07 | 0.277673 | 1.03E-09 | 0.17932  | 9.76E-05 | 0.180161 | 9.04E-05 | 0.277206 | 1.10E-09 |
| 4.71E-27 | -0.2295  | 5.35E-07 | -0.0497  | 0.28384  | 0.022655 | 0.62532  | -0.15916 | 0.00056  |
| 0.02169  | -0.28659 | 2.80E-10 | -0.16495 | 0.00034  | -0.27446 | 1.63E-09 | -0.24994 | 4.40E-08 |
| 4.66E-06 | 0.053892 | 0.2451   | 0.012729 | 0.78382  | 0.115597 | 0.01243  | -0.05501 | 0.23544  |
| 0.51418  | 0.208086 | 5.78E-06 | 0.187347 | 4.62E-05 | 0.268323 | 3.83E-09 | 0.04535  | 0.32813  |
| 0.25827  | 0.120308 | 0.00926  | 0.02442  | 0.59862  | 0.07916  | 0.08749  | 0.01197  | 0.79642  |
| 0.15936  | -0.05295 | 0.25342  | -0.04522 | 0.32953  | 0.00169  | 0.97094  | 0.038828 | 0.40251  |
| 0.09414  | 0.057577 | 0.21426  | 0.037436 | 0.4196   | 0.069587 | 0.1332   | -0.0737  | 0.11169  |
| 9.28E-05 | -0.03721 | 0.4224   | 0.044384 | 0.33854  | 0.112695 | 0.01483  | -0.02963 | 0.52304  |
| 1.91E-13 | -0.1422  | 0.00207  | -0.17027 | 0.00022  | -0.11084 | 0.01656  | -0.1142  | 0.01353  |
| 7.19E-17 | 0.187519 | 4.55E-05 | 0.212731 | 3.52E-06 | 0.10229  | 0.02708  | 0.261054 | 1.03E-08 |
| 8.90E-05 | -0.07734 | 0.09506  | -0.12031 | 0.00926  | 0.070617 | 0.12755  | -0.0746  | 0.10738  |
| 0.01163  | 0.141128 | 0.00224  | 0.197027 | 1.80E-05 | 0.248333 | 5.40E-08 | 0.093317 | 0.04384  |
| 0.10114  | 0.062869 | 0.175    | 0.022771 | 0.62355  | 0.159232 | 0.00055  | 0.003899 | 0.93304  |
| 2.12E-09 | 0.001223 | 0.97898  | 0.094567 | 0.04108  | 0.061578 | 0.18405  | 0.178053 | 0.00011  |
| 0.08655  | 0.082102 | 0.07632  | 0.013717 | 0.7675   | 0.197051 | 1.79E-05 | 0.155518 | 0.00075  |
| 1.65E-06 | -0.11251 | 0.015    | -0.18406 | 6.30E-05 | 0.001473 | 0.97467  | -0.14121 | 0.00222  |
| 0.46799  | 0.063159 | 0.17301  | 0.040132 | 0.38689  | 0.1514   | 0.00103  | 0.044303 | 0.33943  |
| 0.3087   | 0.019059 | 0.68122  | 0.092992 | 0.04459  | 0.116653 | 0.01164  | 0.053642 | 0.2473   |
| 3.42E-05 | -0.17192 | 0.00019  | -0.292   | 1.24E-10 | -0.22213 | 1.25E-06 | -0.16931 | 0.00024  |
| 1.57E-05 | 0.028617 | 0.53732  | 0.016272 | 0.7258   | 0.066922 | 0.14875  | -0.06698 | 0.14843  |
| 0.09375  | -0.10264 | 0.02656  | 0.084773 | 0.0672   | 0.038681 | 0.4043   | -0.11096 | 0.01645  |
| 0.25733  | -0.02034 | 0.66104  | -0.06718 | 0.14717  | 0.200836 | 1.22E-05 | -0.00943 | 0.83901  |
| 9.52E-08 | -0.02235 | 0.62993  | -0.0545  | 0.23984  | -0.12152 | 0.00857  | 0.147019 | 0.00144  |
| 1.01E-05 | 0.085855 | 0.06377  | 0.150209 | 0.00113  | 0.204299 | 8.58E-06 | -0.08536 | 0.06531  |
| 0.0375   | 0.131712 | 0.00436  | 0.069395 | 0.13428  | 0.092394 | 0.04598  | 0.168984 | 0.00024  |
| 1.17E-06 | 0.111405 | 0.01602  | 0.222237 | 1.23E-06 | 0.292318 | 1.18E-10 | -0.04108 | 0.37579  |
| 0.82845  | 0.080594 | 0.08189  | 0.136171 | 0.00319  | 0.145145 | 0.00166  | 0.071231 | 0.12426  |
| 0.00655  | -0.20829 | 5.65E-06 | -0.15475 | 0.00079  | -0.27065 | 2.78E-09 | 0.042321 | 0.3615   |
| 0.047    | 0.048898 | 0.29166  | -0.02059 | 0.65714  | -0.03582 | 0.44002  | 0.042803 | 0.35604  |
| 0.00026  | 0.145441 | 0.00163  | 0.114625 | 0.01319  | 0.137977 | 0.00281  | 0.12683  | 0.00606  |
| 0.1889   | 0.073576 | 0.11232  | 0.22873  | 5.85E-07 | 0.156957 | 0.00066  | 0.064007 | 0.16731  |
| 0.00051  | 0.084854 | 0.06694  | 0.081661 | 0.07791  | 0.132512 | 0.00412  | 0.107436 | 0.02022  |
| 0.05381  | 0.25423  | 2.53E-08 | 0.16301  | 0.0004   | 0.206436 | 6.87E-06 | 0.221997 | 1.27E-06 |
| 2.35E-06 | 0.20613  | 7.09E-06 | 0.162384 | 0.00043  | 0.110976 | 0.01643  | 0.122434 | 0.00808  |
| 0.01849  | -0.24724 | 6.21E-08 | 0.049059 | 0.29007  | -0.01917 | 0.67945  | -0.13588 | 0.00326  |

|          |          |          |          |          |          |          |          |          |
|----------|----------|----------|----------|----------|----------|----------|----------|----------|
| 0.59353  | 0.402798 | 1.21E-19 | 0.239785 | 1.57E-07 | 0.282349 | 5.23E-10 | 0.126416 | 0.00623  |
| 9.07E-13 | 0.215144 | 2.71E-06 | 0.09097  | 0.04945  | 0.090393 | 0.05092  | 0.177741 | 0.00011  |
| 0.00442  | -0.02017 | 0.66381  | -0.07781 | 0.09304  | -0.05091 | 0.2722   | 0.047666 | 0.304    |
| 0.00453  | 0.187217 | 4.68E-05 | 0.092313 | 0.04617  | 0.140472 | 0.00235  | -0.13749 | 0.00291  |
| 6.70E-08 | 0.146883 | 0.00146  | 0.057007 | 0.21884  | 0.145307 | 0.00164  | -0.10372 | 0.02499  |
| 0.65514  | -0.05597 | 0.22734  | -0.16279 | 0.00041  | -0.13138 | 0.00446  | -0.08196 | 0.07683  |
| 6.59E-06 | 0.110832 | 0.01657  | 0.132666 | 0.00408  | 0.210648 | 4.40E-06 | 0.036948 | 0.42569  |
| 0.21156  | -0.08618 | 0.06278  | -0.05073 | 0.27397  | -0.02707 | 0.55951  | 0.039137 | 0.39877  |
| 1.52E-06 | 0.009999 | 0.82937  | -0.03291 | 0.47799  | 0.061737 | 0.18291  | -0.05044 | 0.27665  |
| 0.25053  | 0.040699 | 0.3802   | -0.05819 | 0.2094   | -0.08902 | 0.05455  | 0.117924 | 0.01076  |
| 0.3997   | 0.091497 | 0.04814  | 0.150156 | 0.00114  | 0.136468 | 0.00313  | 0.11024  | 0.01716  |
| 1.16E-06 | 0.077064 | 0.09624  | -0.02163 | 0.64099  | 0.083381 | 0.07183  | -0.0266  | 0.56642  |
| 0.00333  | -0.05087 | 0.2726   | 0.002724 | 0.95319  | -0.0875  | 0.05883  | 0.218289 | 1.92E-06 |
| 1.89E-09 | 0.288161 | 2.22E-10 | 0.228023 | 6.35E-07 | 0.173196 | 0.00017  | 0.148581 | 0.00128  |
| 0.01044  | 0.18133  | 8.12E-05 | 0.093338 | 0.0438   | 0.093177 | 0.04416  | 0.288234 | 2.19E-10 |
| 0.01958  | -0.0575  | 0.21486  | -0.21816 | 1.94E-06 | -0.03478 | 0.4534   | -0.09676 | 0.03659  |
| 0.00065  | 0.052387 | 0.25855  | 0.039486 | 0.39458  | 0.096265 | 0.03757  | 0.025762 | 0.57868  |
| 0.00148  | 0.019348 | 0.67666  | -0.0993  | 0.03193  | 0.001603 | 0.97243  | -0.03229 | 0.48639  |
| 0.1236   | -0.10199 | 0.02754  | -0.20113 | 1.19E-05 | -0.14221 | 0.00207  | -0.04288 | 0.35514  |
| 0.03887  | 0.139364 | 0.00254  | 0.343006 | 2.44E-14 | 0.25415  | 2.56E-08 | 0.196961 | 1.81E-05 |
| 0.00154  | 0.048874 | 0.29189  | 0.145755 | 0.00159  | 0.143564 | 0.00187  | 0.110984 | 0.01642  |
| 3.46E-15 | -0.02344 | 0.61338  | -0.09645 | 0.0372   | 0.046607 | 0.31489  | -0.12461 | 0.00702  |
| 0.50096  | 0.068652 | 0.13851  | 0.004274 | 0.9266   | 0.06827  | 0.14073  | 0.009402 | 0.83941  |
| 0.47492  | 0.049271 | 0.28798  | -0.02183 | 0.63801  | 0.003267 | 0.94387  | -0.02254 | 0.62712  |
| 0.04235  | 0.03537  | 0.44574  | 0.037382 | 0.42028  | 0.00669  | 0.88536  | 0.014525 | 0.75423  |
| 0.00394  | 0.077943 | 0.09249  | 0.01234  | 0.79027  | 0.066246 | 0.15291  | -0.09957 | 0.03144  |
| 2.19E-07 | -0.00937 | 0.84003  | -0.054   | 0.24419  | 0.088363 | 0.05637  | -0.01509 | 0.74492  |
| 0.2396   | -0.1703  | 0.00022  | -0.09348 | 0.04346  | -0.18153 | 7.98E-05 | -0.11882 | 0.01017  |
| 0.81997  | -0.06604 | 0.15422  | -0.03802 | 0.41234  | -0.04432 | 0.3392   | 0.002127 | 0.96344  |
| 0.01963  | 0.063565 | 0.17027  | 0.117556 | 0.01101  | 0.057853 | 0.21207  | -0.0214  | 0.6446   |
| 0.03273  | 0.121836 | 0.0084   | 0.141036 | 0.00225  | 0.12987  | 0.00494  | 0.106333 | 0.02155  |
| 0.11114  | 0.018319 | 0.69296  | -0.14721 | 0.00142  | -0.03983 | 0.39048  | 0.011162 | 0.80988  |
| 0.73708  | 0.063017 | 0.17398  | -0.09037 | 0.05098  | -0.09856 | 0.03322  | 0.029822 | 0.5203   |
| 2.88E-11 | 0.181667 | 7.87E-05 | 0.102631 | 0.02657  | 0.092621 | 0.04545  | 0.238495 | 1.83E-07 |
| 0.19205  | 0.113767 | 0.0139   | -0.05368 | 0.24695  | 0.076444 | 0.09895  | 0.214369 | 2.95E-06 |
| 0.00186  | -0.11442 | 0.01336  | -0.06764 | 0.14442  | -0.15829 | 0.0006   | 0.034516 | 0.4568   |
| 0.00064  | 0.130538 | 0.00472  | 0.130152 | 0.00485  | 0.124954 | 0.00686  | 0.220654 | 1.47E-06 |
| 0.00019  | 0.135848 | 0.00327  | 0.051003 | 0.27136  | 0.089271 | 0.05387  | 0.18994  | 3.61E-05 |
| 0.07909  | 0.051622 | 0.26557  | -0.01671 | 0.71875  | 0.076376 | 0.09925  | 0.204209 | 8.66E-06 |
| 0.06709  | -0.16814 | 0.00026  | -0.29428 | 8.78E-11 | -0.24628 | 7.00E-08 | -0.11792 | 0.01076  |
| 1.10E-07 | 0.032707 | 0.48075  | -0.02079 | 0.65403  | 0.087328 | 0.05933  | -0.05104 | 0.27102  |
| 0.00646  | -0.25286 | 3.02E-08 | -0.28168 | 5.77E-10 | -0.34126 | 3.35E-14 | -0.15296 | 0.00091  |
| 0.20009  | -0.2766  | 1.20E-09 | -0.21979 | 1.62E-06 | -0.20941 | 5.02E-06 | -0.12875 | 0.00533  |
| 4.56E-08 | -0.02873 | 0.5357   | 0.04579  | 0.32345  | -0.05478 | 0.23742  | 0.109344 | 0.01809  |
| 6.67E-05 | 0.205456 | 7.61E-06 | -0.0258  | 0.57813  | -0.07019 | 0.12989  | -0.14194 | 0.00211  |

|          |          |          |          |          |          |          |          |          |
|----------|----------|----------|----------|----------|----------|----------|----------|----------|
| 0.00142  | 0.051338 | 0.26821  | 0.052308 | 0.25927  | -0.01233 | 0.79051  | 0.050875 | 0.27256  |
| 0.46011  | 0.010947 | 0.81348  | -0.05628 | 0.22477  | -0.05507 | 0.23488  | 0.025974 | 0.57555  |
| 7.49E-19 | 0.154926 | 0.00078  | 0.074168 | 0.10945  | 0.042352 | 0.36114  | 0.274299 | 1.66E-09 |
| 2.75E-05 | 0.127973 | 0.00561  | 0.085411 | 0.06516  | 0.060257 | 0.19365  | 0.234931 | 2.82E-07 |
| 0.19925  | 0.197434 | 1.73E-05 | 0.125876 | 0.00645  | 0.17828  | 0.00011  | 0.212895 | 3.46E-06 |
| 0.73636  | -0.253   | 2.97E-08 | -0.28724 | 2.54E-10 | -0.26731 | 4.41E-09 | -0.12836 | 0.00547  |
| 0.12171  | 0.161204 | 0.00047  | 0.118723 | 0.01023  | 0.297906 | 5.02E-11 | 0.237948 | 1.96E-07 |
| 0.12937  | -0.37162 | 9.67E-17 | -0.28201 | 5.49E-10 | -0.33996 | 4.25E-14 | -0.28712 | 2.59E-10 |
| 9.40E-27 | 0.070863 | 0.12622  | 0.010667 | 0.81816  | 0.119802 | 0.00956  | -0.18443 | 6.09E-05 |
| 6.53E-08 | -0.15258 | 0.00094  | 0.075595 | 0.10277  | -0.07505 | 0.10527  | 0.170445 | 0.00022  |
| 0.04365  | 0.130612 | 0.0047   | 0.152946 | 0.00091  | 0.29177  | 1.29E-10 | 0.043342 | 0.35002  |
| 0.02859  | -0.00056 | 0.99037  | 0.015609 | 0.73655  | 0.081912 | 0.077    | 0.052778 | 0.255    |
| 8.22E-06 | -0.1624  | 0.00043  | -0.15216 | 0.00097  | -0.1827  | 7.15E-05 | -0.24428 | 8.99E-08 |
| 0.87403  | 0.10191  | 0.02766  | 0.123507 | 0.00754  | 0.152339 | 0.00096  | 0.210967 | 4.25E-06 |
| 1.08E-05 | 0.308706 | 9.07E-12 | 0.170832 | 0.00021  | 0.171444 | 0.0002   | 0.208683 | 5.42E-06 |
| 0.01971  | 0.059849 | 0.19669  | -0.03484 | 0.45261  | -0.0082  | 0.85967  | 0.084946 | 0.06664  |
| 0.00457  | 0.051303 | 0.26855  | 0.150617 | 0.0011   | 0.318876 | 1.69E-12 | -0.06323 | 0.17253  |
| 0.50271  | 0.004601 | 0.921    | 0.043984 | 0.34292  | 0.049076 | 0.2899   | 0.298248 | 4.76E-11 |
| 0.42686  | -0.07264 | 0.11698  | -0.11488 | 0.01298  | -0.09123 | 0.0488   | -0.00287 | 0.95068  |
| 0.05631  | 0.121249 | 0.00872  | 0.246085 | 7.17E-08 | 0.220905 | 1.43E-06 | 0.14251  | 0.00202  |
| 4.65E-09 | -0.00172 | 0.97045  | -0.0105  | 0.82099  | 0.088786 | 0.0552   | -0.07125 | 0.12414  |
| 2.42E-11 | 0.045904 | 0.32224  | 0.029207 | 0.52895  | 0.038006 | 0.41255  | 0.198827 | 1.50E-05 |
| 0.00235  | -0.00959 | 0.83623  | 0.066185 | 0.15329  | -0.08232 | 0.07552  | 0.126721 | 0.0061   |
| 0.46835  | -0.08073 | 0.08139  | -0.11403 | 0.01368  | -0.18866 | 4.08E-05 | -0.0737  | 0.1117   |
| 0.65159  | 0.149345 | 0.00121  | 0.129231 | 0.00516  | 0.258536 | 1.44E-08 | 0.088735 | 0.05534  |
| 0.85293  | 0.044585 | 0.33636  | 0.066384 | 0.15206  | 0.064978 | 0.16094  | 0.01469  | 0.75153  |
| 0.00304  | 0.181055 | 8.33E-05 | 0.165093 | 0.00034  | 0.343961 | 2.05E-14 | 0.036787 | 0.42771  |
| 0.02331  | 0.05301  | 0.25291  | 0.134157 | 0.00368  | 0.057083 | 0.21822  | 0.119588 | 0.00969  |
| 2.59E-20 | 0.183717 | 6.51E-05 | 0.212994 | 3.42E-06 | 0.081823 | 0.07732  | 0.359513 | 1.08E-15 |
| 0.00016  | -0.01334 | 0.77378  | -0.02699 | 0.56068  | 0.084106 | 0.06939  | -0.15394 | 0.00084  |
| 9.30E-06 | 0.189532 | 3.75E-05 | 0.125769 | 0.0065   | 0.089949 | 0.05207  | 0.130226 | 0.00482  |
| 1.78E-14 | -0.11298 | 0.01458  | -0.07985 | 0.08477  | 0.044216 | 0.34038  | -0.15673 | 0.00068  |
| 0.07473  | 0.155097 | 0.00077  | 0.092148 | 0.04657  | 0.184888 | 5.83E-05 | 0.068748 | 0.13796  |
| 0.2679   | -0.02292 | 0.62121  | -0.00611 | 0.8953   | 0.047549 | 0.30519  | 0.067772 | 0.14365  |
| 1.99E-05 | 0.201701 | 1.12E-05 | 0.149551 | 0.00119  | 0.107147 | 0.02056  | 0.238828 | 1.76E-07 |
| 0.73674  | 0.15812  | 0.0006   | 0.129522 | 0.00506  | 0.178751 | 0.0001   | 0.121534 | 0.00856  |
| 0.36838  | 0.20869  | 5.42E-06 | 0.054644 | 0.23857  | 0.101674 | 0.02802  | -0.00471 | 0.91914  |
| 0.43978  | 0.054335 | 0.24124  | 0.025854 | 0.57732  | 0.053713 | 0.24667  | 0.064825 | 0.16193  |
| 0.00505  | 0.00708  | 0.87872  | -0.0749  | 0.10596  | 0.056972 | 0.21912  | -0.04437 | 0.33867  |
| 0.0143   | 0.152395 | 0.00095  | 0.183425 | 6.69E-05 | 0.139649 | 0.00249  | 0.120318 | 0.00925  |
| 0.00302  | -0.07171 | 0.12172  | -0.04157 | 0.37004  | -0.05213 | 0.26089  | -0.18353 | 6.62E-05 |
| 0.88788  | -0.14499 | 0.00168  | -0.16544 | 0.00033  | -0.12521 | 0.00674  | 0.042292 | 0.36182  |
| 0.09186  | 0.094084 | 0.04213  | 0.104721 | 0.02362  | 0.133167 | 0.00394  | 0.084659 | 0.06757  |
| 0.04571  | 0.314393 | 3.58E-12 | 0.196752 | 1.85E-05 | 0.165837 | 0.00032  | 0.184688 | 5.94E-05 |
| 4.39E-08 | 0.009982 | 0.82965  | 0.003008 | 0.94832  | -0.02044 | 0.65949  | -0.0806  | 0.08187  |

|          |          |          |          |          |          |          |          |          |
|----------|----------|----------|----------|----------|----------|----------|----------|----------|
| 0.19053  | 0.179086 | 9.97E-05 | 0.110628 | 0.01677  | 0.177552 | 0.00011  | 0.104119 | 0.02444  |
| 0.26749  | 0.111464 | 0.01596  | -0.00559 | 0.90417  | 0.115493 | 0.01251  | 0.159166 | 0.00056  |
| 0.33471  | 0.150249 | 0.00113  | 0.171255 | 0.0002   | 0.193143 | 2.64E-05 | 0.107468 | 0.02018  |
| 0.00654  | 0.00735  | 0.87414  | 0.111319 | 0.0161   | 0.098573 | 0.0332   | 0.080778 | 0.0812   |
| 0.9345   | 0.08923  | 0.05398  | -0.03731 | 0.42118  | -0.07937 | 0.08665  | 0.31762  | 2.09E-12 |
| 6.79E-06 | -0.13144 | 0.00444  | -0.10275 | 0.0264   | -0.1962  | 1.95E-05 | 0.006459 | 0.88929  |
| 2.22E-05 | -0.00078 | 0.98656  | -0.00575 | 0.90134  | -0.09047 | 0.05072  | 0.025162 | 0.58755  |
| 0.01295  | 0.080607 | 0.08184  | -0.05789 | 0.21178  | 0.010663 | 0.81823  | 0.150695 | 0.00109  |
| 1.09E-05 | 0.264112 | 6.81E-09 | 0.261585 | 9.58E-09 | 0.175243 | 0.00014  | 0.247396 | 6.08E-08 |
| 1.88E-08 | 0.070811 | 0.1265   | 0.167777 | 0.00027  | -0.0713  | 0.12387  | 0.155799 | 0.00073  |
| 0.4254   | 0.122601 | 0.00799  | 0.26798  | 4.02E-09 | 0.145867 | 0.00157  | 0.094674 | 0.04085  |
| 1.81E-11 | 0.158472 | 0.00059  | 0.177998 | 0.00011  | 0.092547 | 0.04562  | 0.178343 | 0.00011  |
| 0.74961  | 0.43021  | 1.84E-22 | 0.388437 | 2.87E-18 | 0.431818 | 1.23E-22 | 0.160431 | 0.0005   |
| 0.50954  | 0.071216 | 0.12434  | 0.077305 | 0.0952   | 0.01619  | 0.72712  | 0.000312 | 0.99463  |
| 5.06E-08 | 0.134748 | 0.00353  | 0.112901 | 0.01464  | 0.194304 | 2.36E-05 | 0.226069 | 7.96E-07 |
| 0.03049  | -0.24162 | 1.25E-07 | -0.20502 | 7.96E-06 | -0.17787 | 0.00011  | -0.20874 | 5.39E-06 |
| 0.16553  | 0.025106 | 0.58838  | 0.119874 | 0.00952  | 0.247327 | 6.14E-08 | 0.031305 | 0.49977  |
| 0.00805  | 0.032253 | 0.48687  | 0.004246 | 0.92709  | 0.122152 | 0.00823  | -0.00989 | 0.83115  |
| 6.38E-08 | -0.16926 | 0.00024  | -0.12518 | 0.00676  | -0.0668  | 0.14949  | -0.17248 | 0.00018  |
| 0.63551  | 0.115402 | 0.01258  | 0.209855 | 4.79E-06 | 0.241055 | 1.34E-07 | 0.255252 | 2.22E-08 |
| 0.56439  | 0.058878 | 0.20407  | 0.090224 | 0.05135  | 0.114455 | 0.01333  | 0.06566  | 0.15659  |
| 0.72928  | 0.073232 | 0.11401  | 0.142812 | 0.00198  | 0.107235 | 0.02046  | 0.160835 | 0.00048  |
| 0.73585  | 0.016304 | 0.72529  | 0.013377 | 0.7731   | 0.013623 | 0.76906  | -0.00366 | 0.93714  |
| 0.62926  | -0.0207  | 0.65546  | 0.067857 | 0.14315  | 0.002979 | 0.9488   | -0.0002  | 0.99655  |
| 0.1853   | -0.00248 | 0.95731  | -0.00079 | 0.98643  | 0.01832  | 0.69293  | -0.06425 | 0.1657   |
| 0.03488  | -0.06817 | 0.14129  | -0.05067 | 0.27453  | -0.02616 | 0.57287  | 0.031083 | 0.50282  |
| 0.12447  | -0.09325 | 0.04398  | -0.13819 | 0.00277  | -0.15362 | 0.00087  | -0.22787 | 6.46E-07 |
| 2.77E-08 | -0.15137 | 0.00103  | -0.0308  | 0.50668  | -0.0705  | 0.1282   | -0.14291 | 0.00196  |
| 0.26304  | 0.220354 | 1.52E-06 | 0.271101 | 2.61E-09 | 0.12239  | 0.0081   | 0.049455 | 0.28619  |
| 0.05168  | -0.00311 | 0.9465   | -0.13878 | 0.00265  | -0.02084 | 0.65325  | -0.20575 | 7.38E-06 |
| 0.82788  | 0.064875 | 0.16161  | 0.051502 | 0.26669  | 0.066526 | 0.15118  | 0.034567 | 0.45614  |
| 5.43E-09 | 0.240068 | 1.51E-07 | 0.189481 | 3.77E-05 | 0.219736 | 1.63E-06 | 0.23592  | 2.50E-07 |
| 0.208    | 0.015591 | 0.73684  | -0.03563 | 0.44245  | 0.060891 | 0.189    | 0.019064 | 0.68114  |
| 0.18721  | 0.067765 | 0.1437   | -0.03803 | 0.41221  | 0.013759 | 0.76681  | 0.005651 | 0.90306  |
| 8.59E-05 | 0.129972 | 0.00491  | 0.146722 | 0.00148  | 0.096049 | 0.038    | 0.215204 | 2.69E-06 |
| 0.01149  | -0.02223 | 0.63184  | -0.02646 | 0.56848  | -0.05454 | 0.23945  | 0.176028 | 0.00013  |
| 0.00795  | 0.179119 | 9.94E-05 | 0.075448 | 0.10344  | 0.230836 | 4.58E-07 | 0.093514 | 0.0434   |
| 0.82428  | -0.2426  | 1.11E-07 | -0.15771 | 0.00063  | -0.2232  | 1.10E-06 | -0.08792 | 0.05761  |
| 0.02227  | 0.077105 | 0.09606  | 0.066524 | 0.15119  | 0.057461 | 0.21518  | 0.141701 | 0.00214  |
| 0.00306  | -0.15423 | 0.00083  | -0.07304 | 0.11496  | -0.10444 | 0.024    | -0.0669  | 0.14887  |
| 0.14151  | 0.157331 | 0.00064  | 0.187043 | 4.76E-05 | 0.309732 | 7.68E-12 | 0.112836 | 0.0147   |
| 1.86E-06 | -0.00658 | 0.88717  | -0.00852 | 0.85436  | 0.079847 | 0.08477  | -0.18255 | 7.25E-05 |
| 0.01946  | 0.151424 | 0.00103  | 0.005418 | 0.90703  | 0.114679 | 0.01315  | -0.09479 | 0.04061  |
| 1.24E-05 | 0.208805 | 5.35E-06 | 0.156544 | 0.00069  | 0.217965 | 1.99E-06 | 0.281904 | 5.58E-10 |
| 0.00094  | -0.06716 | 0.14733  | 0.010812 | 0.81573  | -0.09429 | 0.04167  | 0.104945 | 0.02332  |

|          |          |          |          |          |           |          |          |          |
|----------|----------|----------|----------|----------|-----------|----------|----------|----------|
| 0.00011  | 0.18669  | 4.92E-05 | 0.201747 | 1.12E-05 | 0.324707  | 6.29E-13 | 0.076403 | 0.09913  |
| 0.29475  | -0.04905 | 0.29018  | -0.0414  | 0.372    | -0.06603  | 0.15423  | -0.0017  | 0.97071  |
| 0.3348   | -0.07037 | 0.12886  | -0.01806 | 0.69706  | -0.03989  | 0.3897   | -0.05555 | 0.23082  |
| 3.31E-07 | -0.06152 | 0.18449  | 0.004764 | 0.91823  | 0.002921  | 0.9498   | -0.21498 | 2.76E-06 |
| 3.53E-07 | 0.032053 | 0.48957  | -0.00718 | 0.877    | 0.101685  | 0.028    | -0.03878 | 0.40309  |
| 0.06205  | -0.01909 | 0.68065  | -0.04488 | 0.33318  | 0.026239  | 0.57166  | 0.057897 | 0.21171  |
| 0.00092  | 0.138597 | 0.00269  | 0.240109 | 1.51E-07 | 0.144296  | 0.00177  | 0.041268 | 0.37357  |
| 0.47613  | 0.248113 | 5.55E-08 | 0.274222 | 1.68E-09 | 0.270806  | 2.71E-09 | 0.226323 | 7.73E-07 |
| 0.00272  | -0.2094  | 5.02E-06 | -0.09384 | 0.04267  | -0.25297  | 2.98E-08 | -0.00905 | 0.84534  |
| 5.06E-06 | -0.05261 | 0.2565   | -0.12995 | 0.00491  | -0.08684  | 0.06077  | 0.015787 | 0.73365  |
| 0.5767   | -0.26665 | 4.82E-09 | -0.24469 | 8.54E-08 | -0.26159  | 9.58E-09 | -0.15467 | 0.0008   |
| 3.55E-06 | -0.0953  | 0.03952  | -0.11508 | 0.01283  | 0.007457  | 0.87231  | -0.15332 | 0.00089  |
| 3.75E-12 | 0.038868 | 0.40203  | 0.196096 | 1.97E-05 | 0.071535  | 0.12265  | 0.165605 | 0.00033  |
| 0.74602  | 0.159583 | 0.00054  | 0.120791 | 0.00898  | 0.1473    | 0.00141  | 0.093048 | 0.04446  |
| 0.08975  | 0.15714  | 0.00065  | 0.1802   | 9.01E-05 | 0.135787  | 0.00328  | 0.221061 | 1.41E-06 |
| 4.64E-05 | -0.02016 | 0.6639   | 0.078148 | 0.09163  | 0.198554  | 1.54E-05 | -0.09635 | 0.0374   |
| 0.3721   | -0.10333 | 0.02555  | 0.047184 | 0.30893  | -0.0101   | 0.82767  | -0.0858  | 0.06392  |
| 0.50736  | 0.009321 | 0.84079  | -0.00444 | 0.92378  | -9.64E-05 | 0.99834  | -0.00267 | 0.95413  |
| 0.83001  | -0.05799 | 0.21102  | -0.05908 | 0.20248  | -0.1224   | 0.0081   | -0.1188  | 0.01018  |
| 1.55E-08 | -0.15822 | 0.0006   | -0.04772 | 0.30346  | 0.048113  | 0.29948  | -0.12293 | 0.00782  |
| 3.13E-08 | 0.026313 | 0.57057  | 0.078181 | 0.09149  | 0.165648  | 0.00032  | -0.01821 | 0.69476  |
| 0.1512   | 0.220779 | 1.45E-06 | 0.055559 | 0.23078  | 0.050912  | 0.27222  | 0.093234 | 0.04403  |
| 0.72453  | 0.150559 | 0.0011   | 0.081186 | 0.07966  | -0.02233  | 0.63032  | -0.08105 | 0.08017  |
| 3.72E-07 | 0.160952 | 0.00048  | 0.239337 | 1.65E-07 | 0.30452   | 1.78E-11 | 0.074753 | 0.10667  |
| 2.00E-08 | 0.228845 | 5.77E-07 | 0.265982 | 5.28E-09 | 0.216506  | 2.33E-06 | 0.305188 | 1.60E-11 |
| 3.96E-11 | -0.12574 | 0.00651  | -0.10961 | 0.01781  | -0.22766  | 6.63E-07 | 0.008054 | 0.86219  |
| 1.71E-08 | 0.109027 | 0.01843  | 0.193834 | 2.47E-05 | 0.000132  | 0.99773  | 0.140181 | 0.0024   |
| 0.30109  | 0.195803 | 2.03E-05 | 0.203687 | 9.14E-06 | 0.224237  | 9.82E-07 | 0.226701 | 7.40E-07 |
| 0.10124  | 0.010697 | 0.81767  | 0.150577 | 0.0011   | 0.191005  | 3.25E-05 | -0.02476 | 0.5936   |
| 0.90833  | 0.090498 | 0.05065  | 0.149857 | 0.00116  | 0.174429  | 0.00015  | 0.041893 | 0.36637  |
| 6.50E-06 | 0.257519 | 1.65E-08 | 0.20425  | 8.63E-06 | 0.184139  | 6.26E-05 | 0.172061 | 0.00019  |
| 0.00627  | -0.04334 | 0.35002  | -0.02084 | 0.65334  | -0.15359  | 0.00087  | -0.03248 | 0.48378  |
| 0.64172  | -0.12169 | 0.00848  | -0.0214  | 0.64455  | -0.08778  | 0.05802  | -0.1083  | 0.01923  |
| 0.05579  | -0.21536 | 2.64E-06 | -0.18108 | 8.31E-05 | -0.19421  | 2.38E-05 | -0.22143 | 1.35E-06 |
| 0.00082  | -0.02121 | 0.64751  | 0.008901 | 0.84787  | -0.04098  | 0.3769   | 0.05018  | 0.27918  |
| 0.02165  | -0.11138 | 0.01604  | -0.06609 | 0.15391  | -0.20509  | 7.91E-06 | 0.009231 | 0.8423   |
| 0.52646  | -0.20712 | 6.40E-06 | -0.1105  | 0.0169   | -0.2049   | 8.06E-06 | -0.06016 | 0.19433  |
| 0.05326  | -0.43141 | 1.37E-22 | -0.25853 | 1.44E-08 | -0.25709  | 1.74E-08 | -0.22996 | 5.07E-07 |
| 3.57E-22 | 0.311716 | 5.56E-12 | 0.179278 | 9.80E-05 | 0.11361   | 0.01403  | 0.22189  | 1.28E-06 |
| 0.11971  | 0.227874 | 6.46E-07 | 0.089474 | 0.05333  | 0.089564  | 0.05309  | 0.028896 | 0.53335  |
| 0.90119  | 0.197174 | 1.77E-05 | 0.128079 | 0.00557  | 0.295504  | 7.28E-11 | 0.104223 | 0.0243   |
| 0.97672  | -0.06679 | 0.14957  | 0.042914 | 0.3548   | -0.03245  | 0.4842   | -0.07805 | 0.09205  |
| 0.03788  | -0.02789 | 0.54764  | -0.09863 | 0.0331   | -0.15409  | 0.00083  | -0.10089 | 0.02925  |
| 0.04591  | 0.286646 | 2.78E-10 | 0.067998 | 0.14232  | 0.136705  | 0.00307  | 0.140342 | 0.00237  |
| 0.35278  | 0.266584 | 4.87E-09 | 0.199622 | 1.39E-05 | 0.210464  | 4.49E-06 | 0.112688 | 0.01483  |

|          |          |          |          |          |          |          |          |          |
|----------|----------|----------|----------|----------|----------|----------|----------|----------|
| 0.16125  | -0.06414 | 0.16642  | 0.166553 | 0.0003   | -0.01232 | 0.79057  | 0.075811 | 0.10179  |
| 1.16E-10 | -0.08487 | 0.06687  | 0.069293 | 0.13486  | 0.093416 | 0.04362  | -0.09625 | 0.03759  |
| 0.06747  | 0.319893 | 1.43E-12 | 0.133851 | 0.00376  | 0.143986 | 0.00181  | 0.125192 | 0.00675  |
| 0.16312  | -0.01905 | 0.68142  | -0.09917 | 0.03215  | -0.00291 | 0.94992  | 0.019108 | 0.68045  |
| 5.52E-09 | -0.01248 | 0.78787  | -0.16708 | 0.00029  | 0.039925 | 0.38933  | -0.18116 | 8.25E-05 |
| 0.26504  | 0.095775 | 0.03855  | 0.130336 | 0.00479  | 0.17465  | 0.00015  | 0.164721 | 0.00035  |
| 0.21154  | 0.367058 | 2.43E-16 | 0.210957 | 4.26E-06 | 0.230019 | 5.04E-07 | 0.057429 | 0.21544  |
| 0.84449  | -0.00668 | 0.8856   | -0.01738 | 0.70793  | 0.011512 | 0.80405  | 0.014124 | 0.76082  |
| 0.18681  | -0.04528 | 0.32882  | -0.08827 | 0.05664  | -0.06774 | 0.14385  | 0.027966 | 0.54661  |
| 0.57486  | 0.000647 | 0.98887  | 0.003675 | 0.93687  | 0.011902 | 0.79754  | 0.027255 | 0.55685  |
| 0.46427  | 0.042052 | 0.36455  | 0.00798  | 0.86344  | 0.066552 | 0.15102  | -0.00854 | 0.85397  |
| 0.10267  | 0.016375 | 0.72413  | 0.062583 | 0.17697  | 0.067163 | 0.1473   | -0.05197 | 0.26236  |
| 0.36262  | -0.01308 | 0.77798  | -0.14364 | 0.00186  | 0.051709 | 0.26477  | -0.03221 | 0.48745  |
| 0.59665  | 0.111579 | 0.01585  | 0.091584 | 0.04793  | 0.141683 | 0.00215  | 0.085573 | 0.06465  |
| 0.006    | 0.060863 | 0.1892   | -0.02612 | 0.57334  | 0.070351 | 0.12899  | 0.032825 | 0.47916  |
| 0.429    | 0.087629 | 0.05846  | 0.006622 | 0.88651  | 0.099008 | 0.03243  | 0.009157 | 0.84354  |
| 0.0958   | 0.0859   | 0.06363  | -0.0109  | 0.81423  | 0.039425 | 0.3953   | 0.126316 | 0.00627  |
| 0.03032  | 0.073412 | 0.11312  | -0.06076 | 0.18993  | 0.200873 | 1.22E-05 | 0.043073 | 0.35301  |
| 0.05945  | 0.021341 | 0.64551  | 0.047094 | 0.30985  | 0.181904 | 7.70E-05 | 0.065859 | 0.15533  |
| 7.58E-22 | 0.201921 | 1.10E-05 | 0.18454  | 6.03E-05 | 0.095637 | 0.03884  | 0.393212 | 1.02E-18 |
| 0.00119  | 0.220252 | 1.54E-06 | 0.03358  | 0.4691   | -0.06337 | 0.17159  | 0.046933 | 0.31151  |
| 0.00855  | -0.00832 | 0.85761  | -0.07871 | 0.08931  | 0.024267 | 0.60092  | -0.03658 | 0.43033  |
| 0.04352  | 0.020619 | 0.65673  | 0.058707 | 0.20538  | 0.078613 | 0.08971  | -0.05478 | 0.23738  |
| 0.06083  | -0.13317 | 0.00394  | -0.13828 | 0.00275  | -0.05915 | 0.20199  | -0.15722 | 0.00065  |
| 0.00068  | 0.18635  | 5.08E-05 | 0.225227 | 8.77E-07 | 0.211428 | 4.05E-06 | 0.19848  | 1.55E-05 |
| 0.57061  | 0.141337 | 0.0022   | -0.13973 | 0.00248  | 0.019548 | 0.67351  | 0.059125 | 0.20217  |
| 0.94381  | 0.226158 | 7.88E-07 | 0.221061 | 1.41E-06 | 0.327471 | 3.90E-13 | 0.093523 | 0.04338  |
| 0.00453  | -0.09988 | 0.03092  | -0.06277 | 0.17571  | -0.11708 | 0.01134  | 0.10807  | 0.01949  |
| 0.21048  | -0.00261 | 0.9551   | 0.047723 | 0.30342  | 0.109728 | 0.01769  | -0.00531 | 0.9088   |
| 0.51368  | 0.276229 | 1.26E-09 | 0.329047 | 2.97E-13 | 0.359107 | 1.16E-15 | 0.126415 | 0.00623  |
| 3.33E-05 | -0.01012 | 0.8274   | 0.030405 | 0.51217  | 0.082249 | 0.07579  | -0.01517 | 0.74377  |
| 4.08E-08 | 0.04551  | 0.32642  | 0.055439 | 0.23179  | 0.135676 | 0.00331  | -0.06754 | 0.14504  |
| 0.00371  | -0.06983 | 0.13183  | -0.01936 | 0.67639  | -0.04311 | 0.35262  | 0.003559 | 0.93887  |
| 3.29E-09 | -0.04272 | 0.35694  | -0.00762 | 0.86952  | 0.112139 | 0.01533  | -0.11175 | 0.01569  |
| 1.04E-05 | -0.04657 | 0.31522  | -0.07151 | 0.1228   | -0.02018 | 0.66351  | -0.15608 | 0.00071  |
| 0.00127  | -0.26019 | 1.15E-08 | -0.38473 | 6.35E-18 | -0.31707 | 2.29E-12 | -0.19168 | 3.05E-05 |
| 0.18546  | 0.332898 | 1.51E-13 | 0.161886 | 0.00044  | 0.325206 | 5.77E-13 | 0.08485  | 0.06695  |
| 0.0002   | -0.05328 | 0.25048  | -0.01223 | 0.79201  | -0.13281 | 0.00404  | 0.013922 | 0.76412  |
| 0.44007  | -0.09402 | 0.04227  | 0.010411 | 0.82246  | -0.09442 | 0.0414   | -0.01752 | 0.70564  |
| 0.13858  | 0.084628 | 0.06767  | 0.092637 | 0.04541  | 0.227704 | 6.59E-07 | -0.00682 | 0.88314  |
| 0.10592  | 0.254839 | 2.34E-08 | 0.200337 | 1.29E-05 | 0.080683 | 0.08155  | 0.159277 | 0.00055  |
| 0.55716  | -0.13332 | 0.0039   | -0.05413 | 0.24306  | -0.11587 | 0.01222  | -0.15263 | 0.00094  |
| 0.00023  | -0.17621 | 0.00013  | -0.09136 | 0.04848  | -0.21196 | 3.82E-06 | 0.076829 | 0.09726  |
| 0.01015  | 0.096551 | 0.037    | 0.095126 | 0.03989  | 0.097287 | 0.03558  | 0.162145 | 0.00043  |
| 4.39E-09 | 0.006452 | 0.88941  | 0.163994 | 0.00037  | 0.259392 | 1.28E-08 | -0.06248 | 0.17768  |

|          |          |          |          |          |          |          |          |          |
|----------|----------|----------|----------|----------|----------|----------|----------|----------|
| 0.61518  | 0.021983 | 0.63562  | 0.026943 | 0.56138  | 0.011628 | 0.80211  | 0.030894 | 0.50541  |
| 0.53049  | -0.01726 | 0.70993  | -0.00271 | 0.9534   | -0.01304 | 0.77861  | -0.04711 | 0.30971  |
| 0.58582  | 0.002888 | 0.95036  | 0.079184 | 0.0874   | 0.044944 | 0.33248  | 0.042899 | 0.35496  |
| 0.46154  | 0.148521 | 0.00129  | 0.100528 | 0.02985  | 0.190238 | 3.50E-05 | 0.113576 | 0.01406  |
| 0.00721  | -0.10583 | 0.02218  | 0.020452 | 0.65934  | -0.12258 | 0.008    | -0.13208 | 0.00425  |
| 0.49412  | 0.316007 | 2.74E-12 | 0.181515 | 7.98E-05 | 0.199051 | 1.47E-05 | 0.140741 | 0.0023   |
| 0.94017  | 0.311637 | 5.63E-12 | 0.196836 | 1.83E-05 | 0.325621 | 5.38E-13 | 0.146277 | 0.00153  |
| 0.42357  | 0.425922 | 5.28E-22 | 0.32466  | 6.34E-13 | 0.432402 | 1.07E-22 | 0.20097  | 1.21E-05 |
| 0.00531  | -0.07339 | 0.11323  | -0.05271 | 0.25562  | -0.01744 | 0.70702  | -0.11876 | 0.01021  |
| 0.20806  | 0.052061 | 0.26153  | -0.15341 | 0.00088  | -0.05841 | 0.20772  | -0.12483 | 0.00691  |
| 0.00083  | -0.06109 | 0.18754  | 0.056574 | 0.22236  | 0.068042 | 0.14206  | -0.08655 | 0.06164  |
| 0.98048  | 0.296876 | 5.89E-11 | 0.152896 | 0.00092  | 0.205983 | 7.20E-06 | 0.144426 | 0.00175  |
| 0.06269  | 0.241268 | 1.31E-07 | 0.274793 | 1.55E-09 | 0.207132 | 6.39E-06 | 0.419208 | 2.67E-21 |
| 5.68E-18 | -0.22479 | 9.22E-07 | -0.16264 | 0.00042  | -0.04579 | 0.32349  | -0.27398 | 1.74E-09 |
| 0.08547  | -0.20396 | 8.89E-06 | -0.17695 | 0.00012  | -0.13391 | 0.00374  | -0.18826 | 4.24E-05 |
| 0.00314  | -0.27179 | 2.37E-09 | -0.01413 | 0.76077  | -0.0327  | 0.48081  | -0.12773 | 0.00571  |
| 4.86E-05 | 0.003239 | 0.94434  | 0.033861 | 0.46539  | -0.03553 | 0.44367  | 0.057515 | 0.21475  |
| 0.84745  | -0.00514 | 0.91183  | 0.031262 | 0.50035  | -0.00559 | 0.90403  | 0.047882 | 0.30181  |
| 0.61804  | 0.003182 | 0.94532  | -0.0778  | 0.0931   | 0.004855 | 0.91667  | -0.02806 | 0.54519  |
| 0.61039  | -0.00448 | 0.92306  | 0.013563 | 0.77004  | 0.003278 | 0.94367  | -0.02308 | 0.61882  |
| 1.53E-06 | -0.18418 | 6.23E-05 | -0.19958 | 1.39E-05 | -0.27893 | 8.58E-10 | 0.104015 | 0.02459  |
| 0.00475  | 0.262355 | 8.64E-09 | 0.144156 | 0.00179  | 0.140744 | 0.0023   | 0.27382  | 1.78E-09 |
| 7.62E-05 | 0.005943 | 0.89808  | 0.005376 | 0.90776  | 0.115985 | 0.01213  | -0.00609 | 0.89553  |
| 0.31996  | 0.116089 | 0.01206  | 0.045033 | 0.33152  | 0.11481  | 0.01304  | 0.016524 | 0.72172  |
| 0.01902  | 0.012078 | 0.79462  | -0.083   | 0.07315  | -0.02813 | 0.54426  | -0.02134 | 0.64548  |
| 0.00514  | -0.03073 | 0.50764  | 0.023217 | 0.61677  | 0.067236 | 0.14685  | -0.14957 | 0.00119  |
| 1.27E-11 | -0.12897 | 0.00525  | -0.1322  | 0.00421  | -0.21113 | 4.18E-06 | -0.01621 | 0.72672  |
| 0.07334  | -0.07009 | 0.1304   | -0.07701 | 0.09646  | -0.1397  | 0.00248  | 0.058028 | 0.21068  |
| 8.68E-23 | 0.140594 | 0.00232  | 0.207062 | 6.43E-06 | 0.0427   | 0.35721  | 0.246163 | 7.10E-08 |
| 4.08E-06 | 0.050448 | 0.27661  | -0.13513 | 0.00344  | -0.08689 | 0.06063  | 0.068982 | 0.13662  |
| 0.00939  | 0.033859 | 0.46543  | -0.02513 | 0.588    | -0.08714 | 0.05988  | 0.085165 | 0.06594  |
| 0.06984  | -0.1221  | 0.00826  | -0.12884 | 0.0053   | -0.10592 | 0.02206  | -0.09769 | 0.03481  |
| 4.24E-10 | -0.10064 | 0.02966  | 0.151933 | 0.00099  | -0.07694 | 0.09676  | 0.092895 | 0.04481  |
| 0.02756  | 0.082852 | 0.07366  | 0.131142 | 0.00453  | 0.091123 | 0.04907  | -0.02814 | 0.54414  |
| 0.00368  | -0.10894 | 0.01853  | -0.01613 | 0.72802  | -0.06072 | 0.19022  | -0.04704 | 0.31044  |
| 3.65E-08 | 0.159598 | 0.00054  | 0.243845 | 9.49E-08 | 0.100229 | 0.03034  | 0.16698  | 0.00029  |
| 1.84E-06 | -0.02178 | 0.6388   | 0.080607 | 0.08184  | 0.029168 | 0.5295   | 0.153834 | 0.00085  |
| 6.91E-05 | 0.156246 | 0.0007   | 0.098207 | 0.03386  | 0.183733 | 6.50E-05 | 0.13161  | 0.00439  |
| 8.69E-14 | 0.357225 | 1.68E-15 | 0.210352 | 4.54E-06 | 0.150727 | 0.00109  | 0.263822 | 7.09E-09 |
| 0.2018   | -0.04324 | 0.3511   | -0.03528 | 0.44691  | 0.001324 | 0.97724  | -0.05144 | 0.26726  |
| 0.98336  | 0.042205 | 0.36282  | 0.007036 | 0.87946  | 0.025262 | 0.58607  | 0.068063 | 0.14194  |
| 0.0119   | 0.046851 | 0.31235  | 0.128782 | 0.00532  | 0.229632 | 5.27E-07 | 0.02612  | 0.5734   |
| 2.47E-05 | -0.0802  | 0.0834   | 0.063525 | 0.17053  | 0.165761 | 0.00032  | -0.1174  | 0.01111  |
| 0.00701  | 0.153222 | 0.00089  | 0.163937 | 0.00037  | 0.232225 | 3.88E-07 | 0.14776  | 0.00136  |
| 0.71122  | 0.150051 | 0.00114  | 0.130841 | 0.00462  | 0.19027  | 3.49E-05 | 0.097283 | 0.03558  |



|          |          |          |          |          |          |          |          |          |
|----------|----------|----------|----------|----------|----------|----------|----------|----------|
| 0.59414  | 0.047204 | 0.30872  | -0.00308 | 0.947    | 0.07603  | 0.1008   | 0.04299  | 0.35394  |
| 3.82E-13 | 0.087885 | 0.05772  | 0.098365 | 0.03357  | 0.038145 | 0.41085  | 0.220102 | 1.57E-06 |
| 1.31E-07 | 0.078013 | 0.0922   | 0.161196 | 0.00047  | 0.197659 | 1.69E-05 | -0.10765 | 0.01998  |
| 0.00136  | 0.322762 | 8.78E-13 | 0.267014 | 4.59E-09 | 0.125097 | 0.00679  | 0.24851  | 5.28E-08 |
| 2.42E-06 | -0.29267 | 1.12E-10 | -0.17814 | 0.00011  | -0.23273 | 3.66E-07 | -0.27938 | 8.04E-10 |
| 2.91E-06 | 0.332446 | 1.63E-13 | 0.266395 | 4.99E-09 | 0.128674 | 0.00536  | 0.154487 | 0.00081  |
| 6.88E-07 | 0.143379 | 0.0019   | 0.06188  | 0.1819   | 0.074902 | 0.10597  | 0.080059 | 0.08395  |
| 0.00022  | 0.089814 | 0.05243  | 0.08366  | 0.07088  | 0.061251 | 0.18639  | -0.06754 | 0.14506  |
| 0.18926  | 0.272316 | 2.20E-09 | 0.045069 | 0.33114  | 0.07103  | 0.12532  | 0.095264 | 0.03961  |
| 0.00819  | -0.08736 | 0.05923  | -0.17496 | 0.00014  | -0.14615 | 0.00154  | -0.10415 | 0.0244   |
| 0.00183  | 0.006664 | 0.88579  | -0.06541 | 0.15819  | -0.06926 | 0.13504  | -0.07692 | 0.09687  |
| 2.21E-19 | -0.00727 | 0.87544  | 0.041524 | 0.37061  | -0.08956 | 0.05309  | 0.278176 | 9.57E-10 |
| 0.00069  | -0.07801 | 0.09222  | 0.021792 | 0.63855  | 0.022    | 0.63536  | -0.01775 | 0.70199  |
| 0.06486  | 0.059897 | 0.19633  | -0.01748 | 0.70629  | 0.093813 | 0.04273  | -0.04956 | 0.28512  |
| 0.00453  | 0.016785 | 0.71751  | 0.116799 | 0.01154  | 0.043522 | 0.34802  | 0.110726 | 0.01668  |
| 0.58076  | 0.053822 | 0.24571  | 0.053269 | 0.25061  | 0.093865 | 0.04261  | -0.01351 | 0.77085  |
| 0.31189  | 0.09507  | 0.04001  | 0.070087 | 0.13043  | 0.12865  | 0.00536  | 0.098954 | 0.03252  |
| 8.66E-11 | -0.03622 | 0.43487  | -0.05216 | 0.26061  | 0.089279 | 0.05385  | -0.12416 | 0.00722  |
| 0.0288   | 0.092796 | 0.04504  | 0.032031 | 0.48987  | 0.050986 | 0.27152  | -0.03753 | 0.41849  |
| 1.53E-08 | -0.01619 | 0.7271   | 0.04488  | 0.33317  | 0.08766  | 0.05837  | -0.0713  | 0.12392  |
| 0.00269  | 0.084951 | 0.06662  | 0.101873 | 0.02771  | 0.22375  | 1.04E-06 | 0.052975 | 0.25323  |
| 0.19387  | -0.02898 | 0.53221  | -0.07139 | 0.12343  | -0.04648 | 0.31615  | -0.00799 | 0.86334  |
| 1.39E-06 | 0.024942 | 0.59083  | 0.130215 | 0.00483  | 0.19552  | 2.09E-05 | -0.10021 | 0.03037  |
| 7.15E-07 | 0.031711 | 0.49421  | -0.0238  | 0.60786  | 0.093531 | 0.04336  | -0.11256 | 0.01494  |
| 0.0025   | -0.24661 | 6.72E-08 | -0.2075  | 6.15E-06 | -0.2032  | 9.62E-06 | -0.2158  | 2.52E-06 |
| 0.72851  | 0.093755 | 0.04286  | 0.093408 | 0.04364  | 0.141249 | 0.00222  | 0.132291 | 0.00419  |
| 1.26E-05 | -0.05055 | 0.27569  | 0.106635 | 0.02118  | 0.135721 | 0.0033   | -0.07325 | 0.11392  |
| 3.17E-18 | -0.01317 | 0.77647  | 0.119089 | 0.01     | 0.338832 | 5.22E-14 | -0.21202 | 3.80E-06 |
| 4.09E-06 | 0.178259 | 0.00011  | 0.242319 | 1.15E-07 | 0.183605 | 6.58E-05 | 0.11257  | 0.01494  |
| 0.90764  | 0.097244 | 0.03566  | 0.123699 | 0.00744  | 0.123876 | 0.00736  | 0.071031 | 0.12532  |
| 0.72066  | 0.084098 | 0.06941  | 0.067752 | 0.14377  | 0.081772 | 0.07751  | 0.043488 | 0.3484   |
| 1.01E-07 | 0.097485 | 0.0352   | -0.05033 | 0.2777   | 0.204922 | 8.04E-06 | 0.015389 | 0.74013  |
| 0.00882  | 0.018143 | 0.69576  | -0.0705  | 0.12815  | 0.02724  | 0.55707  | -0.00303 | 0.94799  |
| 0.04124  | 0.081623 | 0.07805  | 0.136991 | 0.00301  | 0.198728 | 1.52E-05 | 0.043549 | 0.34772  |
| 0.0252   | 0.156173 | 0.00071  | 0.002366 | 0.95934  | 0.06486  | 0.16171  | -0.14633 | 0.00152  |
| 0.0067   | -0.06066 | 0.1907   | -0.13722 | 0.00296  | -0.14525 | 0.00165  | 0.167572 | 0.00028  |
| 0.65232  | -0.03189 | 0.49174  | -0.08274 | 0.07406  | -0.04022 | 0.38582  | 0.02531  | 0.58536  |
| 2.70E-05 | 0.193893 | 2.45E-05 | 0.212605 | 3.57E-06 | 0.263014 | 7.91E-09 | 0.228823 | 5.79E-07 |
| 0.01835  | 0.118603 | 0.01031  | 0.072118 | 0.11963  | 0.183858 | 6.42E-05 | 0.1371   | 0.00299  |
| 0.00064  | 0.078556 | 0.08995  | 0.152142 | 0.00097  | 0.181485 | 8.01E-05 | 0.032674 | 0.48119  |
| 0.00687  | -0.02115 | 0.64844  | -0.02644 | 0.56869  | -0.01325 | 0.77512  | -0.11872 | 0.01024  |
| 0.59498  | 0.222304 | 1.22E-06 | 0.108327 | 0.0192   | 0.288081 | 2.24E-10 | 0.247922 | 5.69E-08 |
| 7.09E-10 | 0.279951 | 7.41E-10 | 0.17383  | 0.00016  | 0.032084 | 0.48916  | 0.211387 | 4.06E-06 |
| 0.23948  | -0.04771 | 0.30359  | -0.01409 | 0.7613   | -0.01452 | 0.75436  | 0.109388 | 0.01805  |
| 1.68E-05 | -0.18708 | 4.74E-05 | -0.07421 | 0.10927  | -0.16397 | 0.00037  | 0.148777 | 0.00126  |

|          |          |          |          |          |          |          |          |          |
|----------|----------|----------|----------|----------|----------|----------|----------|----------|
| 0.23114  | -0.00796 | 0.86376  | 0.022259 | 0.63138  | -0.01141 | 0.80576  | 0.026349 | 0.57005  |
| 0.0081   | -0.02687 | 0.5624   | -0.03314 | 0.47494  | -0.05898 | 0.20332  | 0.044127 | 0.34135  |
| 0.06992  | -0.19013 | 3.54E-05 | -0.05159 | 0.26585  | -0.1155  | 0.0125   | -0.09818 | 0.03391  |
| 0.11751  | 0.086085 | 0.06306  | -0.01878 | 0.68557  | 0.082401 | 0.07525  | -0.00065 | 0.9889   |
| 0.37809  | 0.201802 | 1.11E-05 | 0.147281 | 0.00141  | 0.190635 | 3.37E-05 | 0.026565 | 0.56689  |
| 0.00169  | 0.364536 | 4.01E-16 | 0.125613 | 0.00657  | 0.19283  | 2.72E-05 | -0.02957 | 0.52382  |
| 0.04151  | 0.168383 | 0.00026  | 0.293754 | 9.52E-11 | 0.286672 | 2.77E-10 | 0.193329 | 2.59E-05 |
| 1.18E-15 | -0.0954  | 0.03931  | -0.0754  | 0.10368  | -0.10608 | 0.02186  | 0.123672 | 0.00746  |
| 0.01097  | 0.014273 | 0.75837  | -0.11598 | 0.01214  | -0.03617 | 0.43549  | -0.04957 | 0.28511  |
| 7.87E-14 | -0.05516 | 0.23418  | 0.119887 | 0.00951  | -0.07233 | 0.11854  | 0.241045 | 1.34E-07 |
| 0.06784  | 0.143537 | 0.00187  | 0.166316 | 0.00031  | 0.094419 | 0.0414   | 0.14009  | 0.00241  |
| 0.00136  | 0.029512 | 0.52465  | 0.217276 | 2.14E-06 | 0.162804 | 0.00041  | 0.080805 | 0.08109  |
| 0.0003   | -0.01267 | 0.78487  | 0.173187 | 0.00017  | 0.122127 | 0.00824  | 0.062854 | 0.1751   |
| 0.12713  | -0.00099 | 0.98305  | 0.182328 | 7.41E-05 | 0.1128   | 0.01473  | -0.0422  | 0.36287  |
| 0.29322  | -0.08962 | 0.05293  | 0.133239 | 0.00392  | 0.076612 | 0.09821  | 0.056437 | 0.22349  |
| 0.00094  | 0.230792 | 4.60E-07 | 0.271483 | 2.47E-09 | 0.317319 | 2.20E-12 | 0.135913 | 0.00325  |
| 0.01374  | 0.057447 | 0.21529  | 0.225312 | 8.68E-07 | 0.198313 | 1.58E-05 | 0.058906 | 0.20385  |
| 4.53E-06 | -0.09496 | 0.04025  | -0.24384 | 9.50E-08 | -0.23345 | 3.36E-07 | 0.051938 | 0.26265  |
| 0.35149  | 0.275663 | 1.37E-09 | 0.365364 | 3.40E-16 | 0.368198 | 1.93E-16 | 0.27306  | 1.98E-09 |
| 1.31E-16 | -0.04568 | 0.32466  | -0.07278 | 0.11628  | 0.07497  | 0.10565  | -0.18063 | 8.66E-05 |
| 1.82E-20 | 0.108264 | 0.01927  | 0.098907 | 0.03261  | -0.01177 | 0.7997   | 0.430281 | 1.81E-22 |
| 0.08421  | -0.12689 | 0.00603  | -0.11893 | 0.0101   | -0.20402 | 8.83E-06 | -0.1699  | 0.00023  |
| 0.20822  | 0.178297 | 0.00011  | 0.282827 | 4.87E-10 | 0.307154 | 1.16E-11 | 0.190442 | 3.44E-05 |
| 4.45E-10 | 0.117644 | 0.01095  | 0.03685  | 0.42692  | 0.1343   | 0.00364  | 0.152447 | 0.00095  |
| 0.05719  | 0.07468  | 0.10701  | 0.082934 | 0.07337  | 0.095248 | 0.03964  | 0.124629 | 0.00701  |
| 0.00176  | 0.156752 | 0.00068  | 0.19046  | 3.43E-05 | 0.271745 | 2.38E-09 | 0.147766 | 0.00136  |
| 4.33E-07 | -0.04667 | 0.31419  | 0.031586 | 0.49592  | 0.092453 | 0.04584  | -0.11332 | 0.01428  |
| 0.38906  | 0.052946 | 0.25349  | -0.00183 | 0.9686   | 0.219038 | 1.76E-06 | 0.046849 | 0.31237  |
| 8.53E-08 | 0.085859 | 0.06375  | 0.023967 | 0.60542  | 0.127378 | 0.00584  | -0.01307 | 0.77813  |
| 0.57315  | 0.056638 | 0.22184  | 0.129164 | 0.00518  | 0.085463 | 0.06499  | 0.196382 | 1.92E-05 |
| 0.14184  | -0.09687 | 0.03638  | -0.0503  | 0.27806  | -0.06437 | 0.16492  | -0.01358 | 0.76975  |
| 0.9167   | 0.087109 | 0.05997  | 0.090511 | 0.05061  | 0.087779 | 0.05803  | 0.080978 | 0.08044  |
| 0.79387  | 0.132128 | 0.00423  | 0.177859 | 0.00011  | 0.130352 | 0.00478  | 0.165111 | 0.00034  |
| 0.73122  | -0.0063  | 0.89205  | -0.00751 | 0.87144  | -0.01306 | 0.77836  | 0.070383 | 0.12882  |
| 0.42404  | 0.195333 | 2.13E-05 | 0.395651 | 5.97E-19 | 0.373712 | 6.32E-17 | 0.087671 | 0.05834  |
| 0.30852  | 0.142331 | 0.00205  | 0.327625 | 3.80E-13 | 0.349644 | 7.10E-15 | 0.070422 | 0.1286   |
| 0.01817  | -0.02979 | 0.52078  | -0.0282  | 0.54322  | -0.15818 | 0.0006   | -0.03767 | 0.4167   |
| 0.00107  | 0.269805 | 3.12E-09 | 0.14435  | 0.00176  | 0.085406 | 0.06517  | 0.190541 | 3.40E-05 |
| 0.0008   | 0.059588 | 0.19866  | 0.085957 | 0.06345  | 0.115916 | 0.01219  | -0.04171 | 0.36852  |
| 1.51E-07 | 0.413736 | 9.75E-21 | 0.265066 | 5.99E-09 | 0.274819 | 1.54E-09 | 0.037991 | 0.41273  |
| 1.01E-05 | 0.257614 | 1.63E-08 | 0.419166 | 2.70E-21 | 0.425774 | 5.47E-22 | -0.02493 | 0.591    |
| 0.26137  | 0.011757 | 0.79996  | 0.134803 | 0.00352  | 0.153675 | 0.00086  | 0.061787 | 0.18255  |
| 0.86186  | 0.138168 | 0.00277  | 0.171274 | 0.0002   | 0.050589 | 0.27527  | 0.140996 | 0.00226  |
| 1.88E-06 | 0.316274 | 2.62E-12 | 0.254519 | 2.44E-08 | 0.341141 | 3.43E-14 | 0.285463 | 3.31E-10 |
| 2.53E-06 | -0.06362 | 0.16992  | 0.126459 | 0.00621  | 0.050339 | 0.27765  | -0.02653 | 0.56747  |

|          |          |          |          |          |          |          |          |          |
|----------|----------|----------|----------|----------|----------|----------|----------|----------|
| 0.00213  | 0.309426 | 8.07E-12 | 0.318293 | 1.87E-12 | 0.255214 | 2.23E-08 | 0.210954 | 4.26E-06 |
| 3.28E-06 | 0.415899 | 5.86E-21 | 0.38077  | 1.46E-17 | 0.365679 | 3.20E-16 | 0.2725   | 2.14E-09 |
| 6.33E-06 | 0.22384  | 1.03E-06 | 0.303464 | 2.10E-11 | 0.144589 | 0.00173  | 0.154935 | 0.00078  |
| 0.72705  | 0.252393 | 3.21E-08 | 0.069192 | 0.13543  | -0.01611 | 0.72845  | 0.036792 | 0.42765  |
| 0.07117  | 0.092619 | 0.04545  | 0.097621 | 0.03495  | 0.059804 | 0.19703  | 0.166402 | 0.0003   |
| 0.05293  | -0.1133  | 0.01429  | -0.01187 | 0.79805  | -0.20571 | 7.41E-06 | 0.060613 | 0.19103  |
| 0.03804  | 0.309824 | 7.56E-12 | 0.415155 | 6.99E-21 | 0.485184 | 5.99E-29 | 0.043757 | 0.34542  |
| 0.74998  | 0.403336 | 1.07E-19 | 0.249193 | 4.84E-08 | 0.400677 | 1.95E-19 | 0.066623 | 0.15059  |
| 0.01419  | 0.024005 | 0.60486  | 0.098768 | 0.03285  | 0.055442 | 0.23177  | 0.064288 | 0.16545  |
| 7.00E-05 | -0.0318  | 0.49296  | 0.282734 | 4.94E-10 | 0.086059 | 0.06314  | -0.08523 | 0.06572  |
| 0.06139  | -0.09274 | 0.04517  | 0.293237 | 1.03E-10 | 0.107296 | 0.02039  | 0.023222 | 0.61668  |
| 3.01E-11 | 0.083046 | 0.07298  | -0.00121 | 0.97921  | 0.041669 | 0.36895  | -0.06943 | 0.13408  |
| 0.00198  | 0.129789 | 0.00497  | 0.221252 | 1.38E-06 | 0.24505  | 8.17E-08 | -0.09275 | 0.04515  |
| 0.01066  | 0.258792 | 1.39E-08 | 0.324023 | 7.07E-13 | 0.300017 | 3.61E-11 | 0.14318  | 0.00192  |
| 0.18382  | 0.152197 | 0.00097  | 0.05305  | 0.25256  | 0.185068 | 5.74E-05 | 0.170475 | 0.00021  |
| 0.00656  | -0.08617 | 0.06281  | -0.16017 | 0.00051  | -0.16649 | 0.0003   | -0.10842 | 0.0191   |
| 7.88E-09 | 0.173778 | 0.00016  | 0.159734 | 0.00053  | 0.082247 | 0.0758   | 0.342591 | 2.63E-14 |
| 0.00592  | 0.229721 | 5.21E-07 | 0.23418  | 3.08E-07 | 0.251397 | 3.65E-08 | 0.102095 | 0.02737  |
| 0.10134  | 0.221212 | 1.38E-06 | 0.083257 | 0.07226  | 0.165599 | 0.00033  | 0.02428  | 0.60073  |
| 0.89313  | 0.343856 | 2.09E-14 | 0.459791 | 8.32E-26 | 0.443745 | 5.95E-24 | 0.179447 | 9.65E-05 |
| 0.02088  | -0.00127 | 0.97819  | 0.217742 | 2.03E-06 | 0.222653 | 1.17E-06 | 0.003487 | 0.9401   |
| 0.00086  | -0.08079 | 0.08113  | -0.19533 | 2.13E-05 | -0.1186  | 0.01032  | -0.04242 | 0.36038  |
| 0.346    | 0.185369 | 5.58E-05 | 0.182761 | 7.11E-05 | 0.1848   | 5.88E-05 | 0.016738 | 0.71828  |
| 1.07E-05 | -0.07631 | 0.09953  | -0.00127 | 0.97808  | 0.063145 | 0.17311  | -0.0275  | 0.55329  |
| 0.11095  | 0.105677 | 0.02237  | 0.151023 | 0.00106  | 0.136495 | 0.00312  | 0.097883 | 0.03446  |
| 0.07257  | 0.163021 | 0.0004   | -0.01264 | 0.7853   | -0.04771 | 0.3036   | -0.01323 | 0.77553  |
| 2.92E-13 | -0.27519 | 1.46E-09 | 0.133739 | 0.00379  | 0.083612 | 0.07104  | -0.15971 | 0.00053  |
| 0.00165  | 0.098278 | 0.03373  | 0.182863 | 7.05E-05 | 0.373946 | 6.02E-17 | 0.010697 | 0.81766  |
| 0.00772  | 0.078296 | 0.09102  | 0.140799 | 0.00229  | 0.169033 | 0.00024  | 0.085076 | 0.06622  |
| 0.01575  | 0.19629  | 1.94E-05 | 0.313597 | 4.08E-12 | 0.296081 | 6.66E-11 | -0.10786 | 0.01974  |
| 2.93E-25 | 0.301033 | 3.08E-11 | 0.418686 | 3.03E-21 | 0.199226 | 1.44E-05 | 0.384969 | 6.04E-18 |
| 0.02694  | 0.443049 | 7.13E-24 | 0.476424 | 7.78E-28 | 0.395393 | 6.32E-19 | 0.256708 | 1.83E-08 |
| 0.04411  | 0.157369 | 0.00064  | 0.257654 | 1.62E-08 | 0.214239 | 2.99E-06 | -0.02325 | 0.61624  |
| 2.00E-06 | 0.405966 | 5.89E-20 | 0.379034 | 2.11E-17 | 0.386642 | 4.22E-18 | 0.217004 | 2.21E-06 |
| 1.86E-18 | -0.2602  | 1.15E-08 | 0.075791 | 0.10188  | 0.03026  | 0.51419  | -0.2402  | 1.49E-07 |
| 2.21E-09 | -0.26382 | 7.09E-09 | 0.129434 | 0.00509  | 0.050086 | 0.28008  | -0.15129 | 0.00104  |
| 4.87E-19 | 0.350104 | 6.52E-15 | 0.479327 | 3.35E-28 | 0.261172 | 1.01E-08 | 0.262774 | 8.17E-09 |
| 0.13512  | 0.26592  | 5.33E-09 | 0.202679 | 1.01E-05 | 0.119589 | 0.00969  | 0.126563 | 0.00617  |
| 0.01748  | 0.260336 | 1.13E-08 | 0.299753 | 3.77E-11 | 0.251966 | 3.39E-08 | 0.160709 | 0.00049  |
| 0.19278  | 0.263415 | 7.49E-09 | 0.277282 | 1.09E-09 | 0.307628 | 1.08E-11 | 0.071486 | 0.12291  |
| 0.25717  | 0.153871 | 0.00085  | 0.106405 | 0.02146  | 0.237308 | 2.12E-07 | 0.231261 | 4.35E-07 |
| 0.39199  | 0.24008  | 1.51E-07 | 0.21319  | 3.35E-06 | 0.314717 | 3.39E-12 | 0.168017 | 0.00027  |
| 0.4382   | -0.05809 | 0.21021  | 0.036663 | 0.42927  | -0.01671 | 0.71871  | -0.14007 | 0.00241  |
| 2.27E-09 | -0.10149 | 0.02831  | 0.323596 | 7.61E-13 | 0.156373 | 0.0007   | -0.00659 | 0.88703  |
| 0.39955  | 0.156124 | 0.00071  | 0.122242 | 0.00818  | 0.164427 | 0.00036  | -0.00567 | 0.90276  |

|          |          |          |          |          |          |          |          |          |
|----------|----------|----------|----------|----------|----------|----------|----------|----------|
| 0.00031  | 0.102996 | 0.02603  | -0.03427 | 0.46     | -0.07271 | 0.11662  | -0.08689 | 0.06063  |
| 0.63298  | 0.215171 | 2.70E-06 | 0.203278 | 9.54E-06 | 0.307166 | 1.16E-11 | 0.148507 | 0.00129  |
| 2.16E-09 | -0.07497 | 0.10567  | -0.05096 | 0.27179  | 0.006763 | 0.88411  | -0.12549 | 0.00662  |
| 2.14E-10 | 0.266312 | 5.05E-09 | 0.323057 | 8.35E-13 | 0.193477 | 2.56E-05 | 0.360282 | 9.26E-16 |
| 1.33E-20 | -0.1564  | 0.00069  | -0.04929 | 0.28782  | 0.004622 | 0.92065  | -0.27432 | 1.66E-09 |
| 3.12E-05 | 0.366883 | 2.51E-16 | 0.26649  | 4.93E-09 | 0.278007 | 9.80E-10 | 0.09228  | 0.04625  |
| 0.00041  | 0.401474 | 1.63E-19 | 0.365484 | 3.32E-16 | 0.385229 | 5.71E-18 | 0.223009 | 1.13E-06 |
| 0.01192  | 0.27887  | 8.66E-10 | 0.38205  | 1.12E-17 | 0.353562 | 3.38E-15 | 0.147634 | 0.00138  |
| 0.8804   | 0.095137 | 0.03987  | 0.032915 | 0.47797  | 0.093165 | 0.04419  | 0.052815 | 0.25467  |
| 5.01E-07 | -0.08924 | 0.05396  | 0.185411 | 5.55E-05 | 0.188853 | 4.00E-05 | -0.11591 | 0.01219  |
| 0.13107  | 0.32238  | 9.37E-13 | 0.172844 | 0.00017  | 0.287405 | 2.48E-10 | -0.05679 | 0.22058  |
| 0.96663  | -0.22437 | 9.67E-07 | -0.12965 | 0.00501  | -0.27323 | 1.93E-09 | -0.14234 | 0.00205  |
| 0.6726   | 0.139857 | 0.00245  | 0.111279 | 0.01614  | 0.201347 | 1.16E-05 | 0.059181 | 0.20174  |
| 0.72882  | 0.010062 | 0.82832  | -0.12911 | 0.0052   | 0.003847 | 0.93392  | 0.026238 | 0.57167  |
| 1.41E-05 | 0.100982 | 0.02911  | 0.170959 | 0.00021  | 0.122919 | 0.00783  | -0.1808  | 8.53E-05 |
| 0.00071  | -0.02319 | 0.61716  | -0.01308 | 0.77799  | 0.046682 | 0.3141   | -0.0632  | 0.17273  |
| 0.92903  | 0.019428 | 0.67539  | 0.249946 | 4.40E-08 | 0.145017 | 0.00168  | 0.139742 | 0.00247  |
| 4.03E-11 | 0.309693 | 7.73E-12 | 0.296164 | 6.57E-11 | 0.165268 | 0.00034  | 0.247289 | 6.16E-08 |
| 0.30049  | 0.044996 | 0.33192  | -0.00134 | 0.977    | 0.034284 | 0.45983  | -0.02475 | 0.59374  |
| 1.07E-07 | 0.033625 | 0.46852  | 0.122222 | 0.00819  | 0.177178 | 0.00012  | 0.021508 | 0.64294  |
| 0.02043  | 0.097051 | 0.03603  | 0.066474 | 0.1515   | 0.093955 | 0.04241  | 0.15373  | 0.00086  |
| 3.89E-06 | 0.064098 | 0.1667   | 0.158999 | 0.00056  | 0.045569 | 0.3258   | 0.168355 | 0.00026  |
| 0.00216  | -0.09569 | 0.03872  | -0.19451 | 2.31E-05 | -0.18091 | 8.44E-05 | -0.31664 | 2.46E-12 |
| 0.01597  | -0.14103 | 0.00225  | -0.12068 | 0.00904  | -0.14544 | 0.00163  | -0.24155 | 1.26E-07 |
| 2.93E-11 | 0.105601 | 0.02247  | 0.123525 | 0.00753  | 0.100985 | 0.02911  | 0.113879 | 0.0138   |
| 0.59733  | 0.043861 | 0.34428  | -0.04824 | 0.29821  | -0.01688 | 0.71596  | -0.04011 | 0.38714  |
| 2.07E-08 | -0.13128 | 0.00449  | -0.18852 | 4.13E-05 | -0.31863 | 1.77E-12 | -0.05724 | 0.21699  |
| 0.22333  | -0.06878 | 0.13777  | -0.06322 | 0.17261  | -0.01986 | 0.66859  | -0.18369 | 6.52E-05 |
| 0.18105  | -0.05689 | 0.21978  | -0.16699 | 0.00029  | -0.09208 | 0.04672  | -0.18308 | 6.91E-05 |
| 0.17682  | -0.02962 | 0.52312  | -0.08265 | 0.07438  | -0.03725 | 0.42197  | -0.19124 | 3.18E-05 |
| 0.44324  | 0.021122 | 0.6489   | -0.11101 | 0.01639  | -0.12874 | 0.00533  | -0.09076 | 0.04998  |
| 0.00159  | 0.062158 | 0.17994  | -0.01828 | 0.69363  | 0.010426 | 0.82221  | -0.00841 | 0.85622  |
| 0.87622  | -0.10012 | 0.03053  | -0.14907 | 0.00123  | -0.18638 | 5.07E-05 | -0.21049 | 4.47E-06 |
| 0.22523  | -0.14295 | 0.00196  | -0.17924 | 9.84E-05 | -0.12652 | 0.00618  | -0.18722 | 4.68E-05 |
| 0.01421  | 0.056833 | 0.22025  | 0.06668  | 0.15023  | -0.01058 | 0.8196   | -0.08412 | 0.06935  |
| 0.4635   | -0.12089 | 0.00892  | -0.17889 | 0.0001   | -0.18717 | 4.70E-05 | -0.1664  | 0.0003   |
| 0.86     | -0.27728 | 1.09E-09 | -0.15788 | 0.00062  | -0.22475 | 9.25E-07 | -0.14402 | 0.00181  |
| 0.00342  | -0.20432 | 8.56E-06 | -0.26983 | 3.11E-09 | -0.28854 | 2.09E-10 | -0.2299  | 5.10E-07 |
| 0.07508  | 0.074667 | 0.10707  | 0.149576 | 0.00119  | 0.138331 | 0.00274  | 0.068377 | 0.1401   |
| 0.01156  | -0.0301  | 0.5164   | -0.15292 | 0.00092  | -0.05667 | 0.22157  | -0.12113 | 0.00879  |
| 0.00395  | 0.04296  | 0.35428  | -0.03224 | 0.487    | -0.04678 | 0.31305  | -0.06153 | 0.18439  |
| 0.02008  | -0.09239 | 0.04598  | -0.07263 | 0.11701  | -0.07142 | 0.12324  | -0.13198 | 0.00428  |
| 0.09066  | 0.079073 | 0.08785  | -0.02037 | 0.66067  | 0.07614  | 0.1003   | -0.13459 | 0.00357  |
| 0.21232  | -0.03432 | 0.4594   | -0.05235 | 0.25888  | -0.05302 | 0.25279  | -0.10869 | 0.0188   |
| 0.86803  | -0.07216 | 0.11939  | -0.10964 | 0.01778  | -0.15244 | 0.00095  | -0.16323 | 0.0004   |

|          |          |          |          |          |          |          |          |          |
|----------|----------|----------|----------|----------|----------|----------|----------|----------|
| 0.01024  | -0.11649 | 0.01176  | -0.08349 | 0.07145  | -0.06349 | 0.17076  | -0.22993 | 5.09E-07 |
| 0.2772   | -0.17467 | 0.00015  | -0.21372 | 3.16E-06 | -0.23334 | 3.40E-07 | -0.31148 | 5.77E-12 |
| 0.04499  | -0.0452  | 0.32974  | -0.0248  | 0.59292  | -0.04649 | 0.3161   | -0.07377 | 0.11135  |
| 0.03768  | -0.07908 | 0.0878   | -0.05146 | 0.26708  | -0.10636 | 0.02151  | -0.11967 | 0.00964  |
| 0.26358  | -0.21953 | 1.67E-06 | -0.14311 | 0.00193  | -0.18366 | 6.54E-05 | -0.20043 | 1.28E-05 |
| 0.21291  | 0.04455  | 0.33674  | 0.007349 | 0.87415  | -0.08583 | 0.06385  | 0.00128  | 0.97798  |
| 0.00472  | -0.06334 | 0.1718   | -0.11925 | 0.0099   | -0.04771 | 0.3036   | -0.19453 | 2.30E-05 |
| 0.03922  | -0.06493 | 0.16126  | -0.10371 | 0.02501  | -0.15387 | 0.00085  | -0.17657 | 0.00013  |
| 0.20797  | -0.00113 | 0.98052  | -0.04612 | 0.32     | -0.03474 | 0.4539   | -0.11373 | 0.01392  |
| 0.5771   | -0.11745 | 0.01108  | -0.13222 | 0.00421  | -0.16928 | 0.00024  | -0.2056  | 7.50E-06 |
| 0.22045  | -0.22517 | 8.83E-07 | -0.2141  | 3.03E-06 | -0.25925 | 1.31E-08 | -0.21746 | 2.10E-06 |
| 0.00011  | 0.098454 | 0.03341  | 0.054316 | 0.2414   | 0.062297 | 0.17897  | 0.041249 | 0.37379  |
| 0.18015  | -0.14976 | 0.00117  | -0.11951 | 0.00974  | -0.10866 | 0.01884  | -0.19467 | 2.27E-05 |
| 0.01327  | -0.01576 | 0.73402  | -0.07393 | 0.11059  | -0.07742 | 0.09471  | -0.03842 | 0.40748  |
| 0.57039  | -0.22832 | 6.14E-07 | -0.22393 | 1.02E-06 | -0.27332 | 1.91E-09 | -0.29524 | 7.58E-11 |
| 0.13961  | -0.13717 | 0.00297  | -0.14289 | 0.00196  | -0.18828 | 4.23E-05 | -0.21105 | 4.21E-06 |
| 0.00013  | -0.03784 | 0.41465  | -0.0282  | 0.54332  | -0.06942 | 0.13413  | -0.02296 | 0.62069  |
| 0.01244  | 0.022707 | 0.62453  | -0.00444 | 0.92371  | -0.02032 | 0.66141  | -0.05269 | 0.25583  |
| 0.26656  | -0.08144 | 0.07873  | -0.10112 | 0.02889  | -0.10654 | 0.02129  | -0.15301 | 0.00091  |
| 0.007    | -0.04816 | 0.29899  | -0.06108 | 0.18759  | -0.11914 | 0.00997  | -0.07232 | 0.1186   |
| 0.17229  | -0.21854 | 1.86E-06 | -0.2039  | 8.94E-06 | -0.24571 | 7.52E-08 | -0.2344  | 3.00E-07 |
| 0.13778  | -0.13965 | 0.00249  | -0.14941 | 0.0012   | -0.16142 | 0.00046  | -0.24178 | 1.23E-07 |
| 0.00055  | -0.25362 | 2.74E-08 | -0.24483 | 8.39E-08 | -0.26141 | 9.81E-09 | -0.3431  | 2.40E-14 |
| 4.25E-05 | -0.23885 | 1.76E-07 | -0.21908 | 1.75E-06 | -0.16818 | 0.00026  | -0.26702 | 4.59E-09 |
| 0.87272  | -0.12023 | 0.0093   | -0.13945 | 0.00253  | -0.15082 | 0.00108  | -0.16788 | 0.00027  |
| 4.37E-07 | -0.1898  | 3.65E-05 | -0.12073 | 0.00901  | -0.08003 | 0.08408  | -0.28088 | 6.47E-10 |
| 0.01604  | -0.06313 | 0.17319  | -0.06912 | 0.13584  | -0.10768 | 0.01994  | -0.12804 | 0.00559  |
| 0.37738  | -0.14261 | 0.00201  | -0.11553 | 0.01248  | -0.15869 | 0.00058  | -0.16529 | 0.00033  |
| 8.46E-07 | 0.123043 | 0.00777  | 0.009191 | 0.84297  | -0.04706 | 0.31024  | -0.02176 | 0.63902  |
| 0.00027  | 0.505857 | 1.04E-31 | 0.255764 | 2.07E-08 | 0.297154 | 5.64E-11 | 0.093375 | 0.04371  |
| 0.72373  | 0.015638 | 0.73607  | -0.01421 | 0.75933  | 0.019825 | 0.66915  | -0.05962 | 0.19842  |
| 0.00028  | -0.30826 | 9.74E-12 | -0.24982 | 4.47E-08 | -0.29249 | 1.15E-10 | -0.36975 | 1.41E-16 |
| 0.00629  | -0.14716 | 0.00143  | -0.03861 | 0.40512  | -0.0245  | 0.59737  | -0.10703 | 0.02071  |
| 0.13601  | -0.03738 | 0.42032  | -0.03779 | 0.41528  | -0.05394 | 0.24472  | -0.07536 | 0.10384  |
| 0.17719  | -0.22593 | 8.08E-07 | -0.22138 | 1.36E-06 | -0.22767 | 6.62E-07 | -0.27014 | 2.98E-09 |
| 0.20936  | -0.0778  | 0.0931   | -0.14636 | 0.00152  | -0.17851 | 0.00011  | -0.12572 | 0.00652  |
| 0.15423  | -0.14551 | 0.00162  | -0.16811 | 0.00026  | -0.2005  | 1.27E-05 | -0.27758 | 1.04E-09 |
| 0.00621  | -0.00262 | 0.95503  | -0.06728 | 0.1466   | -0.09007 | 0.05176  | -0.03268 | 0.48107  |
| 0.00196  | -0.05517 | 0.23408  | -0.03723 | 0.42211  | -0.10032 | 0.03019  | -0.02584 | 0.57748  |
| 0.2093   | -0.18063 | 8.66E-05 | -0.16111 | 0.00047  | -0.20392 | 8.92E-06 | -0.25781 | 1.58E-08 |
| 0.11552  | -0.12144 | 0.00861  | -0.078   | 0.09227  | -0.07018 | 0.1299   | -0.07948 | 0.08621  |
| 0.00244  | -0.04338 | 0.3496   | -0.04534 | 0.3282   | -0.06379 | 0.16873  | -0.09518 | 0.03978  |
| 0.00209  | 0.053039 | 0.25266  | -0.09198 | 0.04696  | -0.06596 | 0.15467  | -0.18385 | 6.43E-05 |
| 4.87E-07 | 0.067718 | 0.14397  | -0.05507 | 0.23492  | -0.03304 | 0.4763   | 0.056161 | 0.22576  |
| 2.59E-05 | -0.16893 | 0.00025  | -0.2103  | 4.57E-06 | -0.30714 | 1.17E-11 | -0.24929 | 4.78E-08 |

|          |          |          |          |          |          |          |          |          |
|----------|----------|----------|----------|----------|----------|----------|----------|----------|
| 7.92E-09 | 0.067704 | 0.14406  | 0.022532 | 0.62719  | -0.07025 | 0.12955  | 0.104194 | 0.02434  |
| 0.58928  | -0.06045 | 0.19222  | -0.16169 | 0.00045  | -0.17907 | 9.99E-05 | -0.14254 | 0.00202  |
| 0.14205  | -0.13257 | 0.00411  | -0.15937 | 0.00055  | -0.2728  | 2.05E-09 | -0.09869 | 0.033    |
| 1.15E-09 | 0.142884 | 0.00197  | 0.050457 | 0.27653  | 0.012457 | 0.78832  | 0.142355 | 0.00204  |
| 0.72977  | 0.056364 | 0.22408  | 0.035968 | 0.43808  | 0.039734 | 0.39162  | -0.05457 | 0.23916  |
| 0.03258  | -0.18953 | 3.75E-05 | -0.07017 | 0.13     | -0.14986 | 0.00116  | 0.008848 | 0.84876  |
| 3.28E-06 | -0.06137 | 0.1855   | -0.15146 | 0.00103  | -0.08428 | 0.06881  | -0.31685 | 2.38E-12 |
| 0.08392  | -0.10468 | 0.02368  | -0.08615 | 0.06285  | -0.06453 | 0.16384  | -0.17016 | 0.00022  |
| 0.01252  | -0.01125 | 0.80836  | -0.06498 | 0.16095  | -0.11319 | 0.01439  | -0.0596  | 0.19853  |
| 0.26291  | -0.20879 | 5.36E-06 | -0.25602 | 2.01E-08 | -0.36432 | 4.18E-16 | -0.14842 | 0.0013   |
| 0.26843  | -0.07262 | 0.11709  | -0.08279 | 0.07388  | -0.05218 | 0.26047  | -0.1256  | 0.00657  |
| 0.08046  | 0.043209 | 0.3515   | -0.0098  | 0.83265  | 0.009735 | 0.83381  | -0.00797 | 0.86363  |
| 0.18722  | -0.03312 | 0.47528  | -0.06205 | 0.18071  | -0.06986 | 0.13166  | -0.04054 | 0.38209  |
| 0.24886  | 0.018609 | 0.68834  | -0.04942 | 0.28649  | -0.02383 | 0.60748  | -0.03703 | 0.42467  |
| 0.55131  | -0.02959 | 0.52352  | -0.10987 | 0.01754  | -0.07713 | 0.09595  | -0.0612  | 0.18675  |
| 0.06518  | 0.066479 | 0.15147  | 0.042432 | 0.36024  | -0.00441 | 0.92424  | 0.109021 | 0.01844  |
| 0.83562  | -0.07432 | 0.1087   | -0.09066 | 0.05023  | -0.07783 | 0.09295  | -0.10457 | 0.02382  |
| 6.23E-06 | -0.17858 | 0.0001   | -0.18594 | 5.28E-05 | -0.15354 | 0.00087  | -0.22355 | 1.06E-06 |
| 0.16381  | -0.15732 | 0.00065  | -0.16486 | 0.00035  | -0.20385 | 8.99E-06 | -0.15104 | 0.00106  |
| 0.00026  | 0.011089 | 0.8111   | -0.04741 | 0.30665  | -0.09951 | 0.03155  | 0.019384 | 0.67609  |
| 0.23832  | -0.03445 | 0.45762  | -0.05613 | 0.22605  | -0.07142 | 0.12325  | -0.09928 | 0.03195  |
| 0.00061  | -0.18718 | 4.70E-05 | -0.22605 | 7.98E-07 | -0.20352 | 9.30E-06 | -0.34364 | 2.17E-14 |
| 3.58E-06 | -0.21088 | 4.29E-06 | -0.22353 | 1.06E-06 | -0.18516 | 5.68E-05 | -0.34224 | 2.81E-14 |
| 0.06322  | -0.0885  | 0.056    | -0.19904 | 1.47E-05 | -0.19892 | 1.49E-05 | -0.26284 | 8.10E-09 |
| 0.37327  | -0.15225 | 0.00096  | -0.15    | 0.00115  | -0.16879 | 0.00025  | -0.10704 | 0.02068  |
| 1.85E-06 | 0.196455 | 1.90E-05 | 0.075768 | 0.10198  | 0.083773 | 0.0705   | 0.061289 | 0.18612  |
| 4.16E-09 | 0.133686 | 0.0038   | 0.13112  | 0.00454  | 0.082025 | 0.07659  | 0.134039 | 0.00371  |
| 0.51214  | -0.20089 | 1.22E-05 | -0.12325 | 0.00766  | -0.17215 | 0.00019  | -0.16313 | 0.0004   |
| 0.86024  | -0.21859 | 1.85E-06 | -0.12782 | 0.00567  | -0.21765 | 2.05E-06 | -0.14282 | 0.00197  |
| 0.05355  | -0.1839  | 6.40E-05 | -0.21663 | 2.30E-06 | -0.18914 | 3.90E-05 | -0.22186 | 1.29E-06 |
| 0.0825   | -0.06988 | 0.13158  | -0.06417 | 0.1662   | -0.05925 | 0.20125  | -0.0878  | 0.05798  |
| 0.00951  | 0.002263 | 0.96109  | -0.09268 | 0.04531  | -0.13632 | 0.00316  | -0.16629 | 0.00031  |
| 0.10129  | -0.15843 | 0.00059  | -0.24572 | 7.51E-08 | -0.24229 | 1.15E-07 | -0.2307  | 4.65E-07 |
| 0.17619  | -0.13892 | 0.00263  | -0.19304 | 2.67E-05 | -0.19227 | 2.88E-05 | -0.27063 | 2.78E-09 |
| 0.03056  | 0.036201 | 0.43512  | 0.010897 | 0.81432  | -0.0079  | 0.86484  | -0.08075 | 0.08129  |
| 0.00052  | -0.20699 | 6.48E-06 | -0.24296 | 1.06E-07 | -0.2346  | 2.93E-07 | -0.333   | 1.48E-13 |
| 9.54E-15 | -0.34047 | 3.87E-14 | -0.32781 | 3.68E-13 | -0.27494 | 1.52E-09 | -0.4936  | 4.74E-30 |
| 0.07731  | 0.026867 | 0.56249  | -0.13587 | 0.00326  | -0.09212 | 0.04664  | 0.024553 | 0.59663  |
| 0.18701  | -0.13437 | 0.00362  | -0.09415 | 0.04198  | -0.13447 | 0.0036   | -0.08228 | 0.07568  |
| 0.00048  | 0.034626 | 0.45537  | -0.0311  | 0.50262  | -0.04151 | 0.37082  | -0.00244 | 0.95805  |
| 0.68588  | -0.06931 | 0.13474  | -0.12117 | 0.00876  | -0.13407 | 0.0037   | -0.1192  | 0.00993  |
| 6.51E-07 | 0.045254 | 0.32915  | -0.06558 | 0.15709  | -0.05176 | 0.26429  | -0.01729 | 0.70942  |
| 0.29035  | -0.04996 | 0.2813   | -0.0903  | 0.05115  | -0.0823  | 0.07561  | -0.12511 | 0.00679  |
| 0.72237  | -0.13614 | 0.0032   | -0.17569 | 0.00014  | -0.18353 | 6.62E-05 | -0.1645  | 0.00036  |
| 0.03876  | 0.11264  | 0.01487  | 0.1181   | 0.01064  | 0.08262  | 0.07447  | 0.192638 | 2.78E-05 |

|          |          |          |          |          |          |          |          |          |
|----------|----------|----------|----------|----------|----------|----------|----------|----------|
| 0.55364  | -0.19843 | 1.56E-05 | -0.21612 | 2.43E-06 | -0.23722 | 2.14E-07 | -0.21535 | 2.65E-06 |
| 0.23801  | -0.03446 | 0.45759  | -0.00313 | 0.94613  | -0.03942 | 0.39538  | -0.13805 | 0.00279  |
| 0.11457  | -0.13363 | 0.00381  | -0.14131 | 0.00221  | -0.13512 | 0.00344  | -0.16388 | 0.00038  |
| 0.1881   | 0.08185  | 0.07723  | -0.07385 | 0.11098  | -0.04933 | 0.28737  | -0.08497 | 0.06657  |
| 0.66433  | -0.16089 | 0.00048  | -0.16078 | 0.00049  | -0.1884  | 4.18E-05 | -0.1363  | 0.00316  |
| 5.65E-05 | -0.08196 | 0.07682  | -0.07478 | 0.10652  | -0.16273 | 0.00041  | -0.05269 | 0.25584  |
| 0.79614  | -0.13345 | 0.00386  | -0.18499 | 5.78E-05 | -0.19251 | 2.81E-05 | -0.22197 | 1.27E-06 |
| 0.13481  | -0.06154 | 0.18432  | -0.08373 | 0.07066  | -0.09435 | 0.04154  | -0.03721 | 0.42245  |
| 0.10213  | -0.01593 | 0.73131  | -0.06466 | 0.16303  | -0.05758 | 0.21425  | -0.04415 | 0.34113  |
| 0.05171  | -0.331   | 2.11E-13 | -0.41475 | 7.69E-21 | -0.39998 | 2.28E-19 | -0.32142 | 1.10E-12 |
| 0.06079  | -0.01203 | 0.79534  | -0.0767  | 0.09783  | -0.15429 | 0.00082  | -0.09856 | 0.03322  |
| 0.0661   | -0.0588  | 0.20463  | -0.08169 | 0.07781  | -0.1184  | 0.01044  | -0.12964 | 0.00502  |
| 9.35E-08 | 0.15186  | 0.00099  | 0.062264 | 0.1792   | 0.06234  | 0.17866  | 0.073945 | 0.11052  |
| 0.22188  | -0.02875 | 0.53538  | -0.07028 | 0.12936  | -0.11646 | 0.01179  | -0.01464 | 0.75233  |
| 0.7906   | 0.031063 | 0.50309  | 0.02459  | 0.59608  | 0.028208 | 0.54314  | 0.206611 | 6.74E-06 |
| 0.16153  | -0.05148 | 0.26691  | -0.1442  | 0.00178  | -0.14984 | 0.00116  | -0.08987 | 0.05227  |
| 0.00135  | 0.06973  | 0.13241  | -0.03452 | 0.45682  | -0.03716 | 0.42302  | -0.13826 | 0.00275  |
| 0.00348  | 0.099874 | 0.03094  | -0.00885 | 0.84868  | -0.01945 | 0.675    | -0.02651 | 0.56768  |
| 0.00164  | 0.107406 | 0.02026  | -0.00639 | 0.89052  | -0.01615 | 0.72785  | -0.00054 | 0.99075  |
| 0.00147  | 0.105475 | 0.02263  | 0.008975 | 0.84662  | 0.015618 | 0.73639  | 0.001604 | 0.97243  |
| 0.00074  | 0.177644 | 0.00011  | 0.113497 | 0.01413  | 0.093472 | 0.04349  | 0.133404 | 0.00388  |
| 5.16E-05 | -0.14752 | 0.00139  | -0.14729 | 0.00141  | -0.13423 | 0.00366  | -0.25962 | 1.25E-08 |
| 0.84294  | -0.09702 | 0.03608  | -0.12766 | 0.00573  | -0.15863 | 0.00058  | -0.10799 | 0.01958  |
| 0.0008   | 0.307809 | 1.05E-11 | 0.017332 | 0.70873  | 0.166106 | 0.00031  | -0.05644 | 0.22344  |
| 0.01     | -0.01794 | 0.69897  | -0.03791 | 0.41377  | -0.03671 | 0.42867  | 0.021113 | 0.64905  |
| 0.76674  | -0.16686 | 0.00029  | -0.1154  | 0.01258  | -0.19144 | 3.12E-05 | -0.202   | 1.09E-05 |
| 1.03E-07 | 0.149866 | 0.00116  | 0.079939 | 0.08441  | 0.040207 | 0.386    | 0.013851 | 0.76529  |
| 0.01404  | -0.2011  | 1.19E-05 | -0.17714 | 0.00012  | -0.21194 | 3.83E-06 | -0.24725 | 6.20E-08 |
| 0.77396  | -0.06621 | 0.15313  | -0.09271 | 0.04523  | -0.0827  | 0.07421  | -0.11841 | 0.01044  |
| 2.40E-12 | -0.0285  | 0.53895  | -0.09453 | 0.04116  | 0.070209 | 0.12976  | -0.21806 | 1.96E-06 |
| 1.67E-08 | -0.16014 | 0.00051  | -0.15092 | 0.00107  | -0.11639 | 0.01183  | -0.36063 | 8.65E-16 |
| 0.00682  | -0.09352 | 0.04339  | -0.15613 | 0.00071  | -0.09646 | 0.03719  | -0.20101 | 1.20E-05 |
| 0.00019  | 0.070435 | 0.12853  | -0.04664 | 0.31451  | 0.0173   | 0.70923  | -0.1518  | 0.001    |
| 2.39E-05 | 0.046835 | 0.31251  | -0.12242 | 0.00809  | -0.1519  | 0.00099  | 0.081069 | 0.0801   |
| 0.07962  | 0.026864 | 0.56254  | -0.00391 | 0.93281  | -0.00328 | 0.94366  | -0.05365 | 0.24723  |
| 0.00553  | -0.23533 | 2.69E-07 | -0.19429 | 2.36E-05 | -0.21562 | 2.57E-06 | -0.18015 | 9.05E-05 |
| 0.00972  | 0.014997 | 0.74652  | -0.07109 | 0.125    | -0.0037  | 0.93642  | -0.08048 | 0.08234  |
| 0.33994  | -0.17061 | 0.00021  | -0.25129 | 3.70E-08 | -0.2446  | 8.64E-08 | -0.24034 | 1.46E-07 |
| 0.53967  | 0.038869 | 0.40202  | -0.04742 | 0.30649  | -0.03872 | 0.40383  | -0.09051 | 0.0506   |
| 0.02864  | -0.21563 | 2.57E-06 | -0.19874 | 1.51E-05 | -0.21421 | 3.00E-06 | -0.30656 | 1.28E-11 |
| 0.01869  | -0.21801 | 1.97E-06 | -0.24025 | 1.48E-07 | -0.24128 | 1.30E-07 | -0.31175 | 5.52E-12 |
| 7.00E-10 | 0.207614 | 6.07E-06 | 0.1422   | 0.00207  | 0.096258 | 0.03758  | 0.047361 | 0.30711  |
| 0.72729  | -0.06239 | 0.17834  | -0.07122 | 0.12431  | -0.02489 | 0.59166  | -0.00502 | 0.91376  |
| 0.06915  | -0.04239 | 0.36071  | -0.10778 | 0.01982  | -0.12301 | 0.00779  | -0.01605 | 0.72947  |
| 0.0187   | -0.07722 | 0.09555  | -0.08676 | 0.061    | -0.02881 | 0.53461  | -0.16239 | 0.00043  |

|          |          |          |          |          |          |          |          |          |
|----------|----------|----------|----------|----------|----------|----------|----------|----------|
| 1.97E-05 | -0.08982 | 0.0524   | -0.18507 | 5.73E-05 | -0.09262 | 0.04545  | -0.16604 | 0.00031  |
| 6.73E-06 | 0.00428  | 0.9265   | 0.00458  | 0.92137  | -0.01283 | 0.78215  | 0.057202 | 0.21726  |
| 0.14631  | -0.17105 | 0.0002   | -0.10652 | 0.02132  | -0.11877 | 0.01021  | -0.14734 | 0.00141  |
| 0.00037  | 0.2214   | 1.35E-06 | 0.10182  | 0.0278   | 0.115532 | 0.01248  | 0.050418 | 0.2769   |
| 1.39E-05 | -0.06977 | 0.13221  | -0.09576 | 0.03858  | -0.18879 | 4.03E-05 | -0.08156 | 0.07829  |
| 0.11226  | -0.17343 | 0.00017  | -0.1919  | 2.98E-05 | -0.20072 | 1.24E-05 | -0.22541 | 8.58E-07 |
| 0.04486  | -0.05342 | 0.24924  | -0.08991 | 0.05216  | -0.07143 | 0.12323  | -0.0138  | 0.76614  |
| 0.0347   | -0.17814 | 0.00011  | -0.1548  | 0.00079  | -0.16027 | 0.00051  | -0.20737 | 6.23E-06 |
| 0.55766  | -0.08487 | 0.06688  | -0.1159  | 0.0122   | -0.11107 | 0.01634  | -0.12154 | 0.00856  |
| 0.87551  | -0.20103 | 1.20E-05 | -0.16682 | 0.00029  | -0.21166 | 3.95E-06 | -0.2018  | 1.11E-05 |
| 5.74E-06 | -0.19674 | 1.85E-05 | -0.24206 | 1.18E-07 | -0.22684 | 7.28E-07 | -0.33729 | 6.88E-14 |
| 0.45348  | -0.12068 | 0.00904  | -0.15544 | 0.00075  | -0.17438 | 0.00015  | -0.21127 | 4.12E-06 |
| 0.00079  | 0.097815 | 0.03458  | 0.015858 | 0.73251  | -0.00464 | 0.92032  | -0.0236  | 0.61096  |
| 2.77E-08 | -0.11642 | 0.01181  | -0.0259  | 0.57669  | 0.019599 | 0.6727   | -0.14677 | 0.00147  |
| 0.27323  | -0.12009 | 0.00938  | -0.10577 | 0.02226  | -0.04181 | 0.36731  | -0.1438  | 0.00184  |
| 0.02143  | -0.19667 | 1.86E-05 | -0.23356 | 3.32E-07 | -0.19957 | 1.39E-05 | -0.23467 | 2.90E-07 |
| 0.05648  | -0.1791  | 9.96E-05 | -0.19416 | 2.39E-05 | -0.23346 | 3.36E-07 | -0.28462 | 3.75E-10 |
| 0.00651  | -0.05035 | 0.27752  | -0.08102 | 0.08029  | -0.08197 | 0.07678  | -0.04718 | 0.30894  |
| 1.16E-06 | -0.00159 | 0.97261  | -0.06407 | 0.1669   | 0.02874  | 0.53556  | -0.1324  | 0.00415  |
| 0.4199   | -0.0597  | 0.1978   | -0.09513 | 0.03989  | -0.08335 | 0.07193  | -0.04656 | 0.31533  |
| 0.11324  | -0.00816 | 0.86042  | -0.04791 | 0.30157  | -0.0023  | 0.96043  | -0.14386 | 0.00183  |
| 0.00059  | -0.30069 | 3.25E-11 | -0.24924 | 4.81E-08 | -0.27558 | 1.39E-09 | -0.37037 | 1.25E-16 |
| 0.5859   | -0.16927 | 0.00024  | -0.13877 | 0.00265  | -0.20094 | 1.21E-05 | -0.18718 | 4.70E-05 |
| 0.84727  | 0.067753 | 0.14377  | -0.01022 | 0.8257   | 0.033554 | 0.46946  | -0.08431 | 0.0687   |
| 0.00211  | 0.031964 | 0.49078  | -0.02631 | 0.57058  | 0.000804 | 0.98617  | 0.053419 | 0.24927  |
| 0.56136  | -0.3122  | 5.14E-12 | -0.24912 | 4.89E-08 | -0.29099 | 1.45E-10 | -0.26582 | 5.40E-09 |
| 0.00046  | -0.1273  | 0.00587  | -0.17395 | 0.00016  | -0.14528 | 0.00164  | -0.32451 | 6.51E-13 |
| 0.00297  | 0.060949 | 0.18857  | -0.01911 | 0.68044  | -0.02996 | 0.51838  | -0.05584 | 0.22843  |
| 3.29E-05 | 0.117335 | 0.01116  | 0.036709 | 0.42869  | 0.026589 | 0.56653  | 0.089894 | 0.05222  |
| 1.16E-11 | -0.06211 | 0.18028  | -0.2091  | 5.19E-06 | -0.10026 | 0.0303   | -0.10226 | 0.02712  |
| 0.91208  | -0.1481  | 0.00133  | -0.17733 | 0.00012  | -0.19815 | 1.61E-05 | -0.20837 | 5.61E-06 |
| 0.74569  | -0.13799 | 0.00281  | -0.11968 | 0.00963  | -0.1684  | 0.00026  | -0.19635 | 1.92E-05 |
| 0.20907  | -0.03247 | 0.48391  | -0.09763 | 0.03493  | -0.10565 | 0.0224   | -0.1168  | 0.01154  |
| 0.14581  | -0.03621 | 0.43496  | -0.09598 | 0.03814  | -0.08946 | 0.05337  | -0.10909 | 0.01836  |
| 0.07302  | -0.00431 | 0.92604  | -0.03925 | 0.39743  | -0.0668  | 0.14952  | -0.08165 | 0.07796  |
| 0.85192  | -0.09202 | 0.04688  | -0.10763 | 0.02     | -0.11711 | 0.01132  | -0.11787 | 0.01079  |
| 3.32E-05 | -0.21206 | 3.78E-06 | -0.1519  | 0.00099  | -0.15291 | 0.00092  | -0.26124 | 1.00E-08 |
| 0.9597   | -0.1481  | 0.00133  | -0.1456  | 0.00161  | -0.18229 | 7.43E-05 | -0.17632 | 0.00013  |
| 1.77E-07 | -0.17867 | 0.0001   | -0.23132 | 4.32E-07 | -0.1677  | 0.00027  | -0.30265 | 2.39E-11 |
| 0.7147   | -0.03427 | 0.46008  | -0.11795 | 0.01074  | -0.09275 | 0.04514  | -0.12523 | 0.00674  |
| 0.10233  | -0.10968 | 0.01774  | -0.08552 | 0.06482  | -0.10196 | 0.02757  | -0.11689 | 0.01147  |
| 5.76E-09 | -0.13559 | 0.00333  | -0.04845 | 0.2961   | -0.02451 | 0.59734  | -0.18189 | 7.71E-05 |
| 5.47E-05 | 0.236077 | 2.45E-07 | 0.038784 | 0.40305  | 0.096691 | 0.03672  | 0.067322 | 0.14634  |
| 1.62E-05 | -0.07834 | 0.09082  | -0.17497 | 0.00014  | -0.13327 | 0.00391  | -0.21406 | 3.05E-06 |
| 0.25731  | -0.11395 | 0.01374  | -0.12485 | 0.00691  | -0.14208 | 0.00209  | -0.22507 | 8.93E-07 |



|          |          |          |          |          |          |          |          |          |
|----------|----------|----------|----------|----------|----------|----------|----------|----------|
| 0.00068  | -0.10364 | 0.02511  | -0.08589 | 0.06366  | -0.01993 | 0.66754  | -0.16188 | 0.00044  |
| 0.3183   | 0.010033 | 0.82879  | 0.01381  | 0.76597  | 0.0152   | 0.7432   | -0.11584 | 0.01224  |
| 1.10E-10 | 0.137172 | 0.00297  | 0.100687 | 0.02959  | 0.068272 | 0.14071  | 0.128839 | 0.0053   |
| 0.007    | -0.04368 | 0.34625  | -0.08536 | 0.06533  | -0.12133 | 0.00867  | -0.06848 | 0.13948  |
| 0.02916  | -0.09677 | 0.03656  | -0.17062 | 0.00021  | -0.16374 | 0.00038  | -0.26115 | 1.02E-08 |
| 0.05192  | 0.059244 | 0.20126  | -0.04402 | 0.34255  | -0.04267 | 0.3576   | -0.07097 | 0.12566  |
| 0.79079  | -0.05458 | 0.23916  | -0.13508 | 0.00345  | -0.15841 | 0.00059  | -0.17628 | 0.00013  |
| 0.05032  | -0.13205 | 0.00426  | -0.15754 | 0.00063  | -0.13383 | 0.00376  | -0.19041 | 3.45E-05 |
| 0.48901  | -0.04938 | 0.2869   | -0.1101  | 0.01731  | -0.10892 | 0.01854  | -0.10536 | 0.02278  |
| 0.00112  | -0.13002 | 0.00489  | -0.04636 | 0.31744  | -0.02855 | 0.53827  | -0.13181 | 0.00433  |
| 0.02073  | -0.02646 | 0.56838  | -0.07498 | 0.1056   | -0.0292  | 0.52906  | 0.020241 | 0.66263  |
| 0.61908  | 0.145283 | 0.00164  | 0.010979 | 0.81295  | 0.024572 | 0.59634  | -0.04279 | 0.35617  |
| 2.78E-05 | 0.106169 | 0.02175  | 0.035521 | 0.4438   | 0.001234 | 0.97877  | 0.020125 | 0.66445  |
| 2.31E-05 | 0.131974 | 0.00428  | 0.042236 | 0.36246  | 0.037032 | 0.42464  | 0.043166 | 0.35198  |
| 2.96E-05 | 0.031466 | 0.49756  | 0.013962 | 0.76348  | 0.134623 | 0.00356  | -0.182   | 7.63E-05 |
| 0.00637  | 0.082264 | 0.07574  | 0.049553 | 0.28523  | 0.019256 | 0.67811  | 0.009275 | 0.84156  |
| 0.89688  | -0.09931 | 0.0319   | -0.11305 | 0.01451  | -0.14199 | 0.0021   | -0.18727 | 4.66E-05 |
| 1.15E-08 | -0.23937 | 1.65E-07 | -0.20348 | 9.34E-06 | -0.17872 | 0.0001   | -0.28925 | 1.88E-10 |
| 0.01134  | -0.21821 | 1.93E-06 | -0.24679 | 6.57E-08 | -0.25694 | 1.78E-08 | -0.26893 | 3.52E-09 |
| 0.91532  | 0.061082 | 0.18761  | -0.03488 | 0.45205  | 0.0127   | 0.7843   | -0.15056 | 0.0011   |
| 0.01588  | -0.1178  | 0.01084  | -0.16475 | 0.00035  | -0.21279 | 3.50E-06 | -0.25972 | 1.23E-08 |
| 0.0439   | -0.1647  | 0.00035  | -0.15129 | 0.00104  | -0.10415 | 0.0244   | -0.1918  | 3.01E-05 |
| 0.00154  | -0.0905  | 0.05064  | -0.1578  | 0.00062  | -0.12257 | 0.00801  | -0.12383 | 0.00738  |
| 0.05467  | 0.049084 | 0.28982  | -0.05606 | 0.22662  | 0.074871 | 0.10611  | -0.05821 | 0.20925  |
| 0.73939  | 0.01254  | 0.78695  | -0.02335 | 0.6147   | 0.016917 | 0.71539  | -0.08254 | 0.07475  |
| 0.64149  | -0.12308 | 0.00775  | -0.14564 | 0.0016   | -0.20016 | 1.31E-05 | -0.2302  | 4.93E-07 |
| 0.00452  | 0.038296 | 0.40899  | 0.006562 | 0.88753  | 9.84E-05 | 0.99831  | -0.01687 | 0.71613  |
| 0.02285  | 0.123517 | 0.00753  | 0.109462 | 0.01797  | 0.170898 | 0.00021  | 0.00162  | 0.97215  |
| 0.71339  | 0.049072 | 0.28994  | 0.13844  | 0.00272  | 0.143094 | 0.00194  | 0.07415  | 0.10953  |
| 0.99057  | 0.144739 | 0.00171  | 0.274518 | 1.61E-09 | 0.354304 | 2.94E-15 | 0.096791 | 0.03653  |
| 0.02635  | 0.026502 | 0.56781  | 0.127113 | 0.00595  | 0.173463 | 0.00017  | -0.01968 | 0.67149  |
| 0.39382  | 0.105369 | 0.02277  | 0.147591 | 0.00138  | 0.151941 | 0.00099  | 0.076701 | 0.09782  |
| 0.01997  | 0.091098 | 0.04913  | 0.107169 | 0.02054  | 0.159054 | 0.00056  | 0.015093 | 0.74495  |
| 0.74604  | 0.16906  | 0.00024  | 0.091013 | 0.04934  | 0.212701 | 3.53E-06 | 0.062456 | 0.17786  |
| 0.94302  | 0.1857   | 5.40E-05 | 0.145736 | 0.00159  | 0.309087 | 8.52E-12 | 0.142392 | 0.00204  |
| 0.07644  | 0.026595 | 0.56646  | 0.102681 | 0.0265   | 0.224606 | 9.41E-07 | 0.008607 | 0.85283  |
| 0.05162  | 0.227636 | 6.64E-07 | 0.228827 | 5.79E-07 | 0.292989 | 1.07E-10 | 0.202348 | 1.05E-05 |
| 0.79664  | 0.243642 | 9.74E-08 | 0.179849 | 9.30E-05 | 0.3559   | 2.16E-15 | 0.150027 | 0.00115  |
| 0.31871  | -0.00155 | 0.97334  | 0.068335 | 0.14035  | 0.072771 | 0.11631  | 0.007151 | 0.87751  |
| 0.00139  | -0.02959 | 0.5235   | -0.01675 | 0.71804  | -0.00793 | 0.8643   | -0.03728 | 0.4215   |
| 0.09888  | 0.136462 | 0.00313  | 0.116291 | 0.01191  | 0.164366 | 0.00036  | 0.117879 | 0.01079  |
| 0.34928  | 0.126256 | 0.00629  | 0.166733 | 0.0003   | 0.204823 | 8.13E-06 | 0.04965  | 0.28429  |
| 0.0271   | 0.097478 | 0.03521  | 0.04379  | 0.34506  | 0.12423  | 0.00719  | -0.06088 | 0.18908  |
| 0.02637  | 0.050471 | 0.27639  | 0.118914 | 0.01011  | 0.164084 | 0.00037  | 0.000589 | 0.98988  |
| 0.0036   | 0.052498 | 0.25754  | 0.009976 | 0.82976  | 0.0875   | 0.05883  | -0.01592 | 0.73151  |

|          |          |          |          |          |          |          |          |          |
|----------|----------|----------|----------|----------|----------|----------|----------|----------|
| 0.11653  | 0.087688 | 0.05829  | 0.06199  | 0.18112  | 0.166162 | 0.00031  | 0.017173 | 0.71128  |
| 0.49336  | 0.058516 | 0.20686  | 0.080763 | 0.08125  | 0.07339  | 0.11323  | 0.013963 | 0.76345  |
| 0.57809  | 0.063391 | 0.17144  | 0.060628 | 0.19092  | 0.089571 | 0.05307  | 0.052475 | 0.25775  |
| 0.52537  | 0.139066 | 0.0026   | 0.133962 | 0.00373  | 0.134794 | 0.00352  | 0.074836 | 0.10628  |
| 0.21724  | -0.09524 | 0.03965  | -0.02007 | 0.66533  | -0.00315 | 0.94581  | -0.08189 | 0.0771   |
| 0.75895  | 0.044144 | 0.34117  | 0.11604  | 0.01209  | 0.102617 | 0.02659  | 0.028265 | 0.54232  |
| 0.92857  | 0.202853 | 9.96E-06 | 0.157609 | 0.00063  | 0.261768 | 9.35E-09 | 0.117134 | 0.0113   |
| 0.25664  | 0.013021 | 0.77898  | 0.094786 | 0.04061  | 0.081847 | 0.07724  | 0.009732 | 0.83386  |
| 0.63884  | 0.117499 | 0.01105  | 0.164774 | 0.00035  | 0.216474 | 2.34E-06 | 0.058179 | 0.20949  |
| 0.14846  | 0.081498 | 0.07851  | 0.092805 | 0.04502  | 0.114881 | 0.01298  | 0.015147 | 0.74408  |
| 0.08616  | 0.037107 | 0.4237   | 0.075263 | 0.10429  | 0.109484 | 0.01795  | -0.02109 | 0.64948  |
| 0.86053  | 0.134417 | 0.00361  | 0.071973 | 0.12038  | 0.084247 | 0.06892  | 0.085064 | 0.06626  |
| 0.35987  | 0.064759 | 0.16237  | 0.087639 | 0.05843  | 0.094886 | 0.0404   | 0.017722 | 0.70248  |
| 0.4532   | 0.105246 | 0.02293  | 0.094232 | 0.04181  | 0.110564 | 0.01684  | 0.048293 | 0.29768  |
| 0.11993  | 0.067312 | 0.14639  | 0.079646 | 0.08556  | 0.102178 | 0.02725  | 0.022857 | 0.62224  |
| 0.01748  | 0.021687 | 0.64018  | 0.028571 | 0.53796  | 0.051264 | 0.26891  | -0.00464 | 0.92029  |
| 0.48533  | 0.072373 | 0.11832  | 0.076894 | 0.09698  | 0.085018 | 0.06641  | 0.037497 | 0.41884  |
| 0.44259  | 0.069171 | 0.13555  | 0.072779 | 0.11627  | 0.100672 | 0.02961  | 0.048504 | 0.29556  |
| 0.2012   | 0.072342 | 0.11848  | 0.079938 | 0.08442  | 0.085109 | 0.06612  | 0.019359 | 0.67649  |
| 0.34669  | 0.104743 | 0.02359  | 0.10701  | 0.02073  | 0.123191 | 0.00769  | 0.040428 | 0.38338  |
| 0.4377   | 0.082667 | 0.07431  | 0.093295 | 0.04389  | 0.09456  | 0.0411   | 0.043462 | 0.34869  |
| 0.95386  | 0.122886 | 0.00785  | 0.116647 | 0.01165  | 0.117028 | 0.01138  | 0.089946 | 0.05208  |
| 0.42637  | 0.053296 | 0.25036  | 0.085168 | 0.06593  | 0.086509 | 0.06177  | 0.029171 | 0.52946  |
| 0.02928  | 0.049692 | 0.28388  | 0.056012 | 0.22699  | 0.10001  | 0.03071  | -0.00162 | 0.97214  |
| 0.00884  | 0.06263  | 0.17665  | 0.089756 | 0.05258  | 0.171362 | 0.0002   | 0.016354 | 0.72447  |
| 0.42041  | 0.178646 | 0.0001   | 0.086635 | 0.06139  | 0.216715 | 2.28E-06 | 0.081508 | 0.07848  |
| 0.93686  | 0.117732 | 0.01089  | 0.183332 | 6.75E-05 | 0.247012 | 6.38E-08 | 0.047093 | 0.30985  |
| 0.39895  | -0.01997 | 0.66692  | 0.02223  | 0.63183  | 0.031066 | 0.50305  | -0.02041 | 0.65997  |
| 0.75813  | 0.077385 | 0.09486  | 0.091544 | 0.04803  | 0.107175 | 0.02053  | 0.026772 | 0.56387  |
| 0.52104  | 0.091807 | 0.04739  | 0.130203 | 0.00483  | 0.146048 | 0.00155  | 0.016646 | 0.71976  |
| 0.97848  | 0.125756 | 0.00651  | 0.128091 | 0.00557  | 0.164084 | 0.00037  | 0.04546  | 0.32695  |
| 0.83139  | 0.065094 | 0.16019  | 0.113503 | 0.01412  | 0.133674 | 0.0038   | 0.047905 | 0.30158  |
| 0.56091  | 0.109265 | 0.01818  | 0.138567 | 0.00269  | 0.151852 | 0.001    | 0.078361 | 0.09075  |
| 0.00281  | -0.04999 | 0.28098  | -0.00603 | 0.89663  | 0.102296 | 0.02707  | -0.04534 | 0.32826  |
| 0.30428  | 0.088076 | 0.05718  | 0.084367 | 0.06852  | 0.142845 | 0.00197  | 0.04995  | 0.28139  |
| 0.00078  | 0.007361 | 0.87394  | 0.076144 | 0.10029  | 0.144273 | 0.00177  | -0.03347 | 0.4705   |
| 0.54991  | 0.127448 | 0.00581  | 0.111058 | 0.01635  | 0.170316 | 0.00022  | 0.118239 | 0.01055  |
| 0.93993  | 0.113065 | 0.0145   | 0.156295 | 0.0007   | 0.181108 | 8.29E-05 | 0.071569 | 0.12248  |
| 0.27263  | 0.013224 | 0.77563  | 0.069246 | 0.13512  | 0.129945 | 0.00492  | -0.03157 | 0.49612  |
| 0.03088  | -0.05108 | 0.27065  | -0.00645 | 0.8894   | -0.01635 | 0.72458  | 0.100534 | 0.02984  |
| 0.01132  | 0.037768 | 0.41549  | 0.00491  | 0.91572  | 0.011181 | 0.80957  | 0.120296 | 0.00927  |
| 0.00413  | 0.228469 | 6.03E-07 | 0.110917 | 0.01649  | 0.211359 | 4.08E-06 | 0.17834  | 0.00011  |
| 0.87295  | -0.03214 | 0.48836  | -0.09289 | 0.04481  | -0.08883 | 0.05508  | -0.02255 | 0.62689  |
| 1.55E-09 | 0.300909 | 3.14E-11 | 0.284386 | 3.88E-10 | 0.306115 | 1.38E-11 | 0.22829  | 6.16E-07 |
| 0.7031   | -0.07177 | 0.12144  | -0.02124 | 0.64703  | 0.038171 | 0.41052  | -0.06916 | 0.13562  |

|          |          |          |          |          |          |          |          |          |
|----------|----------|----------|----------|----------|----------|----------|----------|----------|
| 0.00499  | -0.0282  | 0.54321  | -0.04165 | 0.36921  | -0.04661 | 0.31485  | -0.09072 | 0.05008  |
| 0.89406  | -0.12447 | 0.00708  | -0.07689 | 0.09699  | -0.08602 | 0.06327  | -0.1639  | 0.00038  |
| 2.71E-05 | -0.01262 | 0.78566  | -0.0193  | 0.67745  | -0.00823 | 0.85914  | 0.104849 | 0.02345  |
| 0.55413  | 0.068156 | 0.14139  | 0.079093 | 0.08776  | 0.118092 | 0.01065  | -0.06068 | 0.19057  |
| 0.12152  | -0.10388 | 0.02478  | -0.07739 | 0.09484  | -0.11943 | 0.00979  | -0.0353  | 0.44662  |
| 0.93767  | 0.004745 | 0.91855  | -0.07362 | 0.1121   | 0.009935 | 0.83045  | -0.01445 | 0.75541  |
| 3.43E-06 | 0.009158 | 0.84352  | -0.11632 | 0.01189  | -0.11    | 0.01741  | 0.025121 | 0.58817  |
| 5.43E-10 | 0.096157 | 0.03778  | -0.04811 | 0.29948  | 0.042365 | 0.36099  | 0.172405 | 0.00018  |
| 0.04787  | 0.024949 | 0.59072  | -0.02357 | 0.61142  | -0.01306 | 0.77836  | -0.04311 | 0.35259  |
| 0.00655  | 0.177858 | 0.00011  | 0.084926 | 0.0667   | 0.0912   | 0.04887  | 0.08853  | 0.0559   |
| 0.02548  | -0.08323 | 0.07236  | -0.03168 | 0.49463  | -0.06208 | 0.18051  | -0.01695 | 0.71485  |
| 0.00134  | 0.361143 | 7.82E-16 | 0.138973 | 0.00261  | 0.220628 | 1.48E-06 | 0.089963 | 0.05204  |
| 0.00752  | 0.140921 | 0.00227  | -0.0428  | 0.35611  | 0.083635 | 0.07097  | 0.099663 | 0.03129  |
| 0.55496  | 0.178379 | 0.00011  | 0.033833 | 0.46576  | 0.204567 | 8.35E-06 | 0.132978 | 0.00399  |
| 2.05E-08 | 0.036588 | 0.43022  | -0.00969 | 0.83464  | -0.04029 | 0.38504  | 0.06651  | 0.15128  |
| 0.11877  | -0.04474 | 0.33464  | -0.10651 | 0.02133  | -0.07848 | 0.09026  | 0.012283 | 0.79122  |
| 0.13778  | 0.047461 | 0.30608  | 0.067013 | 0.1482   | 0.098903 | 0.03261  | 0.057351 | 0.21607  |
| 0.93122  | -0.15546 | 0.00075  | -0.10947 | 0.01796  | -0.15014 | 0.00114  | -0.08252 | 0.07484  |
| 0.00065  | 0.059145 | 0.20202  | 0.052197 | 0.26028  | 0.048452 | 0.29609  | 0.10096  | 0.02915  |
| 7.70E-08 | 0.045742 | 0.32396  | 0.057448 | 0.21529  | 0.021953 | 0.63607  | 0.114107 | 0.01361  |
| 0.00061  | 0.028412 | 0.54023  | 0.000296 | 0.99491  | -0.01103 | 0.81215  | 0.161523 | 0.00046  |
| 0.4921   | -0.11297 | 0.01458  | -0.12715 | 0.00593  | -0.08682 | 0.06084  | -0.0861  | 0.06302  |
| 0.89254  | -0.07529 | 0.10419  | -0.03131 | 0.49966  | -0.0157  | 0.73513  | 0.026476 | 0.56819  |
| 0.01287  | -0.00721 | 0.87647  | -0.00225 | 0.96137  | 0.064238 | 0.16578  | -0.01217 | 0.79307  |
| 6.72E-05 | -0.02422 | 0.60156  | 0.000419 | 0.9928   | -0.0751  | 0.10505  | 0.043015 | 0.35367  |
| 0.1764   | -0.01543 | 0.73953  | 0.010998 | 0.81262  | -0.01715 | 0.71168  | -0.03902 | 0.40021  |
| 3.68E-07 | 0.297547 | 5.31E-11 | 0.1789   | 0.0001   | 0.253931 | 2.63E-08 | 0.191238 | 3.18E-05 |
| 0.92959  | -0.08524 | 0.06571  | -0.02093 | 0.65187  | -0.00061 | 0.98953  | -0.03411 | 0.46206  |
| 2.65E-13 | 0.314154 | 3.72E-12 | 0.202454 | 1.04E-05 | 0.239025 | 1.72E-07 | 0.232356 | 3.83E-07 |
| 0.00111  | 0.045698 | 0.32442  | 0.034376 | 0.45863  | 0.052113 | 0.26105  | 0.103112 | 0.02586  |
| 0.01222  | -0.06511 | 0.16009  | -0.05171 | 0.26474  | -0.08106 | 0.08012  | -0.07102 | 0.1254   |
| 2.34E-05 | -0.04795 | 0.30112  | -0.04394 | 0.34338  | -0.07282 | 0.11608  | -0.00269 | 0.95379  |
| 1.62E-10 | 0.107766 | 0.01984  | -0.04932 | 0.28748  | -0.03647 | 0.43166  | 0.104847 | 0.02346  |
| 0.00329  | 0.114675 | 0.01315  | 0.0378   | 0.4151   | 0.108635 | 0.01886  | 0.140771 | 0.0023   |
| 2.29E-05 | 0.100917 | 0.02922  | 0.09097  | 0.04945  | 0.083108 | 0.07277  | 0.1233   | 0.00764  |
| 0.00383  | -0.00168 | 0.97119  | -0.03827 | 0.40932  | -0.02916 | 0.52957  | -0.00677 | 0.884    |
| 1.61E-06 | 0.077448 | 0.09459  | 0.047081 | 0.30998  | -0.04201 | 0.36508  | 0.124961 | 0.00686  |
| 0.83509  | 0.009006 | 0.8461   | -0.05754 | 0.21453  | 0.008132 | 0.86086  | -0.06482 | 0.16197  |
| 0.08643  | 0.200882 | 1.22E-05 | 0.090873 | 0.04969  | 0.206566 | 6.78E-06 | 0.095123 | 0.0399   |
| 0.00037  | 0.128373 | 0.00547  | 0.092925 | 0.04474  | 0.092122 | 0.04663  | 0.042618 | 0.35813  |
| 0.06653  | 0.140513 | 0.00234  | 0.026456 | 0.56848  | 0.050148 | 0.27948  | 0.030892 | 0.50544  |
| 7.57E-06 | 0.098771 | 0.03285  | 0.045897 | 0.32231  | 0.038712 | 0.40392  | 0.135093 | 0.00344  |
| 4.84E-08 | 0.157344 | 0.00064  | 0.089061 | 0.05444  | 0.105931 | 0.02205  | 0.148257 | 0.00131  |
| 2.14E-11 | 0.145646 | 0.0016   | 0.094832 | 0.04051  | 0.060455 | 0.19219  | 0.285883 | 3.11E-10 |
| 0.08978  | 0.046826 | 0.31261  | -0.05424 | 0.24207  | -0.02638 | 0.56959  | -0.07917 | 0.08746  |

|          |          |          |          |          |          |          |          |          |
|----------|----------|----------|----------|----------|----------|----------|----------|----------|
| 0.03404  | -0.12278 | 0.0079   | -0.00102 | 0.98238  | -0.00248 | 0.95742  | -0.15304 | 0.00091  |
| 5.23E-05 | 0.150575 | 0.0011   | 0.165841 | 0.00032  | 0.189756 | 3.67E-05 | 0.216404 | 2.36E-06 |
| 0.2951   | -0.10004 | 0.03066  | -0.10189 | 0.02769  | -0.04476 | 0.33449  | -0.05403 | 0.24387  |
| 2.89E-05 | 0.004392 | 0.92458  | 0.009136 | 0.8439   | 0.007186 | 0.87692  | 0.060393 | 0.19264  |
| 9.38E-07 | -0.0177  | 0.70284  | -0.10795 | 0.01962  | -0.1463  | 0.00152  | 0.016731 | 0.71838  |
| 0.25323  | -0.16643 | 0.0003   | -0.05267 | 0.25601  | -0.00535 | 0.90825  | -0.07482 | 0.10636  |
| 2.61E-21 | 0.036748 | 0.4282   | -0.03863 | 0.40491  | -0.0749  | 0.10596  | 0.218467 | 1.88E-06 |
| 0.01676  | -0.00508 | 0.91283  | -0.03234 | 0.48571  | -0.07466 | 0.10709  | 0.037882 | 0.41408  |
| 0.01688  | 0.007133 | 0.87782  | -0.03753 | 0.41844  | -0.06834 | 0.14032  | 0.029439 | 0.52568  |
| 0.00156  | 0.102143 | 0.0273   | 0.075533 | 0.10305  | 0.080549 | 0.08206  | 0.065742 | 0.15606  |
| 1.65E-08 | 0.027713 | 0.55024  | 0.058288 | 0.20864  | 0.021093 | 0.64936  | 0.11528  | 0.01267  |
| 2.94E-34 | 0.290548 | 1.55E-10 | 0.322934 | 8.52E-13 | 0.221318 | 1.37E-06 | 0.385379 | 5.53E-18 |
| 6.73E-07 | 0.112284 | 0.0152   | 0.099819 | 0.03103  | 0.107663 | 0.01996  | 0.186901 | 4.82E-05 |
| 3.60E-14 | 0.025689 | 0.57975  | 0.043666 | 0.34643  | 0.013747 | 0.76701  | 0.226956 | 7.19E-07 |
| 0.02254  | 0.016935 | 0.7151   | -0.10026 | 0.03029  | 0.03178  | 0.49327  | -0.08521 | 0.06579  |
| 0.69153  | -0.02121 | 0.64752  | -0.04453 | 0.337    | -0.06285 | 0.17512  | -0.06197 | 0.18124  |
| 6.72E-11 | 0.241194 | 1.32E-07 | 0.235942 | 2.49E-07 | 0.247024 | 6.37E-08 | 0.254715 | 2.38E-08 |
| 0.00016  | -0.02375 | 0.60866  | 0.028919 | 0.53302  | 0.007207 | 0.87657  | 0.059959 | 0.19587  |
| 3.23E-08 | 0.205798 | 7.34E-06 | 0.170442 | 0.00022  | 0.148425 | 0.0013   | 0.232837 | 3.61E-07 |
| 6.48E-06 | -0.04565 | 0.32493  | -0.12646 | 0.00621  | -0.14185 | 0.00212  | -0.09341 | 0.04364  |
| 9.33E-10 | 0.258105 | 1.52E-08 | 0.21444  | 2.92E-06 | 0.175733 | 0.00013  | 0.175977 | 0.00013  |
| 0.04154  | 0.000443 | 0.99238  | -0.01818 | 0.69519  | 0.050396 | 0.27711  | 0.107749 | 0.01986  |
| 0.00515  | 0.059702 | 0.1978   | 0.016092 | 0.72871  | 0.064542 | 0.16378  | 0.11699  | 0.0114   |
| 5.20E-11 | 0.256975 | 1.77E-08 | 0.101994 | 0.02753  | 0.164433 | 0.00036  | 0.124468 | 0.00708  |
| 3.69E-09 | 0.141576 | 0.00216  | 0.062511 | 0.17747  | 0.067871 | 0.14306  | 0.064751 | 0.16241  |
| 2.41E-05 | 0.166371 | 0.00031  | 0.217247 | 2.15E-06 | 0.265707 | 5.49E-09 | 0.177084 | 0.00012  |
| 0.07775  | 0.074835 | 0.10628  | 0.005309 | 0.9089   | 0.081064 | 0.08012  | 0.181416 | 8.06E-05 |
| 0.00014  | -0.02706 | 0.55968  | -0.04594 | 0.32183  | -0.06393 | 0.16781  | 0.078124 | 0.09173  |
| 0.08259  | -0.04575 | 0.32384  | -0.05754 | 0.21451  | -0.07236 | 0.11838  | 0.004115 | 0.92932  |
| 0.72381  | -0.01075 | 0.81673  | -0.03756 | 0.41808  | 0.015101 | 0.74483  | -0.08468 | 0.0675   |
| 2.20E-08 | 0.111448 | 0.01598  | 0.167685 | 0.00027  | 0.161797 | 0.00045  | 0.147611 | 0.00138  |
| 0.24817  | -0.05869 | 0.20551  | -0.08905 | 0.05448  | -0.06887 | 0.13727  | -0.12461 | 0.00702  |
| 0.8557   | 0.0895   | 0.05326  | 0.047991 | 0.30071  | 0.149725 | 0.00117  | 0.003614 | 0.93791  |
| 0.67628  | -0.04068 | 0.3804   | -0.04969 | 0.28391  | 0.002678 | 0.95397  | 0.039717 | 0.39182  |
| 0.00224  | 0.052653 | 0.25614  | -0.02663 | 0.56598  | 0.061989 | 0.18113  | 0.143863 | 0.00183  |
| 0.00134  | 0.020332 | 0.66121  | 0.042294 | 0.3618   | 0.037037 | 0.42458  | 0.135259 | 0.0034   |
| 3.28E-11 | 0.163513 | 0.00039  | 0.076022 | 0.10084  | 0.094505 | 0.04121  | 0.165624 | 0.00033  |
| 0.00398  | 0.176403 | 0.00013  | 0.094922 | 0.04032  | 0.146494 | 0.0015   | 0.038896 | 0.40169  |
| 4.58E-07 | 0.182298 | 7.43E-05 | 0.12844  | 0.00544  | 0.139068 | 0.0026   | 0.047665 | 0.30401  |
| 0.00112  | 0.149098 | 0.00123  | 0.098597 | 0.03316  | 0.113735 | 0.01392  | 0.139988 | 0.00243  |
| 0.11841  | -0.05568 | 0.22975  | -0.09411 | 0.04208  | -0.09385 | 0.04265  | -0.05891 | 0.20384  |
| 1.60E-05 | 0.004388 | 0.92465  | 0.019183 | 0.67926  | -0.02478 | 0.59323  | 0.052461 | 0.25787  |
| 1.10E-05 | 0.21923  | 1.73E-06 | 0.14796  | 0.00134  | 0.229373 | 5.43E-07 | 0.186125 | 5.19E-05 |
| 0.28771  | 0.027261 | 0.55677  | 0.055181 | 0.23398  | 0.104484 | 0.02394  | 0.08302  | 0.07308  |
| 1.26E-11 | 0.225818 | 8.19E-07 | 0.055013 | 0.2354   | 0.161459 | 0.00046  | 0.18246  | 7.32E-05 |

|          |          |          |          |          |          |          |          |          |
|----------|----------|----------|----------|----------|----------|----------|----------|----------|
| 2.29E-15 | 0.269818 | 3.11E-09 | 0.25266  | 3.10E-08 | 0.257122 | 1.73E-08 | 0.252782 | 3.06E-08 |
| 0.00019  | 0.118107 | 0.01064  | 0.064996 | 0.16083  | 0.069944 | 0.13122  | 0.04408  | 0.34187  |
| 6.30E-27 | 0.298423 | 4.63E-11 | 0.17483  | 0.00015  | 0.146664 | 0.00148  | 0.220515 | 1.49E-06 |
| 0.60982  | 0.015646 | 0.73595  | -0.05376 | 0.24624  | -0.03889 | 0.40172  | -0.0931  | 0.04434  |
| 0.12088  | -0.04293 | 0.35462  | 0.061928 | 0.18156  | 0.173144 | 0.00017  | 0.011166 | 0.80982  |
| 0.75102  | -0.03211 | 0.48877  | 0.014642 | 0.75232  | 0.052423 | 0.25822  | -0.03972 | 0.39174  |
| 0.88746  | 0.081794 | 0.07743  | -0.02471 | 0.59422  | -0.0058  | 0.9006   | -0.07275 | 0.11639  |
| 0.13097  | -0.15736 | 0.00064  | -0.12536 | 0.00668  | -0.09994 | 0.03083  | 0.138618 | 0.00268  |
| 9.84E-05 | 0.042401 | 0.36059  | 0.047601 | 0.30466  | 0.027233 | 0.55718  | 0.057    | 0.21889  |
| 0.06124  | -0.06673 | 0.14995  | -0.06454 | 0.16379  | -0.07698 | 0.09662  | -0.0361  | 0.4364   |
| 0.02405  | 0.116751 | 0.01157  | 0.046363 | 0.31743  | 0.053969 | 0.24442  | 0.075654 | 0.1025   |
| 7.70E-05 | 0.271796 | 2.36E-09 | 0.092736 | 0.04518  | 0.132283 | 0.00419  | 0.095101 | 0.03995  |
| 0.76145  | -0.1293  | 0.00513  | -0.25001 | 4.36E-08 | -0.1936  | 2.53E-05 | -0.2065  | 6.82E-06 |
| 4.64E-06 | -0.01577 | 0.73394  | -0.05086 | 0.27273  | -0.06985 | 0.13175  | 0.143441 | 0.00189  |
| 2.43E-08 | 0.172357 | 0.00018  | 0.125333 | 0.00669  | 0.121981 | 0.00832  | 0.194622 | 2.28E-05 |
| 0.77784  | 0.004781 | 0.91793  | -0.019   | 0.68208  | 0.049568 | 0.28508  | 0.049253 | 0.28817  |
| 0.01941  | -0.05441 | 0.24057  | -0.07529 | 0.10417  | -0.08041 | 0.0826   | 0.021038 | 0.65021  |
| 0.14792  | -0.16006 | 0.00052  | -0.24062 | 1.41E-07 | -0.20734 | 6.25E-06 | -0.06538 | 0.15838  |
| 7.12E-10 | 0.11182  | 0.01563  | 0.03203  | 0.48988  | 0.044079 | 0.34188  | 0.172386 | 0.00018  |
| 0.08696  | -0.12173 | 0.00845  | -0.05104 | 0.27099  | -0.07754 | 0.09418  | -0.1241  | 0.00725  |
| 0.0196   | -0.04684 | 0.31243  | 0.006602 | 0.88685  | -0.02235 | 0.63005  | -0.0648  | 0.16213  |
| 0.45247  | 0.088469 | 0.05608  | 0.007937 | 0.86418  | 0.119768 | 0.00958  | 0.061035 | 0.18795  |
| 2.73E-05 | -0.20099 | 1.21E-05 | -0.07418 | 0.1094   | -0.20058 | 1.26E-05 | 0.068243 | 0.14088  |
| 3.84E-08 | 0.32104  | 1.18E-12 | 0.270192 | 2.96E-09 | 0.290873 | 1.47E-10 | 0.289497 | 1.81E-10 |
| 0.17915  | -0.05095 | 0.27189  | -0.0407  | 0.38025  | -0.02234 | 0.63007  | 0.021057 | 0.64992  |
| 0.0137   | -0.005   | 0.91419  | -0.09344 | 0.04355  | 0.002397 | 0.95879  | 0.010887 | 0.81449  |
| 0.00624  | -0.13392 | 0.00374  | -0.1053  | 0.02285  | -0.1212  | 0.00875  | -0.01319 | 0.77624  |
| 0.00014  | 0.145466 | 0.00162  | 0.070573 | 0.12778  | 0.090633 | 0.0503   | 0.078175 | 0.09152  |
| 1.09E-09 | 0.281422 | 5.98E-10 | 0.14293  | 0.00196  | 0.17152  | 0.0002   | 0.187936 | 4.37E-05 |
| 1.10E-08 | 0.309194 | 8.38E-12 | 0.169888 | 0.00023  | 0.164233 | 0.00037  | 0.172264 | 0.00018  |
| 0.00253  | 0.310152 | 7.17E-12 | 0.251049 | 3.82E-08 | 0.314458 | 3.54E-12 | 0.231605 | 4.18E-07 |
| 3.29E-06 | 0.277571 | 1.04E-09 | 0.117028 | 0.01138  | 0.119013 | 0.01005  | 0.07849  | 0.09022  |
| 9.14E-12 | 0.025254 | 0.58618  | -0.0957  | 0.0387   | -0.06623 | 0.15301  | 0.08309  | 0.07283  |
| 1.52E-26 | 0.118995 | 0.01006  | 0.014717 | 0.75109  | 0.006152 | 0.89451  | 0.231277 | 4.34E-07 |
| 3.51E-05 | 0.009674 | 0.83484  | 0.005311 | 0.90886  | -0.00683 | 0.88303  | 0.076472 | 0.09883  |
| 4.58E-07 | 0.068939 | 0.13687  | -0.01187 | 0.79811  | -0.01277 | 0.78311  | 0.035212 | 0.44777  |
| 0.03149  | -0.0845  | 0.06807  | -0.00211 | 0.96376  | 0.013412 | 0.77252  | -0.1213  | 0.00869  |
| 1.23E-10 | -0.02033 | 0.66124  | 0.037039 | 0.42456  | 0.093769 | 0.04283  | 0.123793 | 0.0074   |
| 0.35878  | 0.057418 | 0.21553  | -0.02186 | 0.63747  | 0.039134 | 0.39881  | -0.07506 | 0.10521  |
| 1.32E-26 | 0.07786  | 0.09284  | -0.00818 | 0.86013  | -0.05892 | 0.20373  | 0.300875 | 3.16E-11 |
| 1.01E-07 | 0.150661 | 0.00109  | 0.063999 | 0.16736  | 0.111956 | 0.0155   | 0.12685  | 0.00605  |
| 3.74E-09 | -0.0388  | 0.40282  | 0.031565 | 0.49622  | -0.03616 | 0.43563  | 0.118599 | 0.01031  |
| 0.04651  | 0.103986 | 0.02463  | 0.253631 | 2.74E-08 | 0.250954 | 3.87E-08 | 0.215438 | 2.62E-06 |
| 6.71E-12 | 0.458699 | 1.12E-25 | 0.307514 | 1.10E-11 | 0.378522 | 2.34E-17 | 0.33844  | 5.60E-14 |
| 0.11904  | 0.244486 | 8.76E-08 | 0.197997 | 1.63E-05 | 0.246626 | 6.70E-08 | 0.097156 | 0.03583  |

|          |          |          |          |          |          |          |          |          |
|----------|----------|----------|----------|----------|----------|----------|----------|----------|
| 0.75902  | -0.02505 | 0.5892   | -0.09345 | 0.04354  | -0.02054 | 0.65796  | 0.023267 | 0.616    |
| 0.00029  | 0.003043 | 0.94772  | -0.03306 | 0.47606  | -0.05792 | 0.21151  | 0.102944 | 0.02611  |
| 8.54E-06 | 0.003452 | 0.94069  | 0.023017 | 0.61981  | 0.003491 | 0.94002  | 0.065044 | 0.16052  |
| 0.05607  | -0.03379 | 0.46627  | 0.0095   | 0.83777  | -0.00581 | 0.90032  | -0.02288 | 0.62187  |
| 0.90656  | 0.007886 | 0.86503  | 0.063685 | 0.16945  | 0.126411 | 0.00623  | 0.085672 | 0.06434  |
| 0.01028  | 0.070699 | 0.1271   | 0.130533 | 0.00472  | 0.160308 | 0.00051  | 0.069169 | 0.13556  |
| 0.00518  | 0.308601 | 9.22E-12 | 0.076271 | 0.09972  | 0.152987 | 0.00091  | 0.060975 | 0.18838  |
| 0.07318  | -0.04339 | 0.34945  | -0.0311  | 0.50258  | -0.02646 | 0.5684   | -0.03772 | 0.41604  |
| 0.00419  | -0.00944 | 0.83874  | -0.01201 | 0.79572  | -0.03741 | 0.41997  | -0.04368 | 0.34625  |
| 0.00011  | 0.166436 | 0.0003   | 0.090475 | 0.05071  | 0.136379 | 0.00315  | 0.129395 | 0.0051   |
| 8.93E-05 | 0.135881 | 0.00326  | 0.094127 | 0.04204  | 0.115355 | 0.01261  | 0.1637   | 0.00038  |
| 4.76E-09 | -0.06632 | 0.15242  | -0.04857 | 0.29494  | -0.1174  | 0.01111  | 0.08975  | 0.05259  |
| 0.01989  | -0.0719  | 0.12075  | -0.04452 | 0.33709  | -0.07849 | 0.09021  | -0.02751 | 0.5532   |
| 0.00116  | -0.10427 | 0.02424  | 0.003806 | 0.93462  | -0.05961 | 0.19847  | 0.020851 | 0.65312  |
| 0.04234  | 0.248085 | 5.57E-08 | 0.146738 | 0.00147  | 0.253619 | 2.74E-08 | 0.100832 | 0.02935  |
| 0.00292  | 0.037244 | 0.422    | 0.015363 | 0.74055  | 0.089341 | 0.05369  | 0.11048  | 0.01692  |
| 1.35E-06 | -0.01318 | 0.77632  | -0.0802  | 0.08338  | -0.17018 | 0.00022  | 0.035368 | 0.44576  |
| 0.00039  | 0.217389 | 2.12E-06 | 0.082288 | 0.07565  | 0.110572 | 0.01683  | 0.235753 | 2.55E-07 |
| 1.20E-05 | -0.11881 | 0.01018  | 0.040217 | 0.38588  | 0.100496 | 0.0299   | -0.03007 | 0.51682  |
| 0.01139  | -0.03585 | 0.43956  | -0.01427 | 0.75847  | -0.06804 | 0.14206  | 0.053077 | 0.25232  |
| 8.04E-09 | 0.208759 | 5.38E-06 | 0.055605 | 0.2304   | 0.128105 | 0.00556  | 0.177864 | 0.00011  |
| 7.76E-06 | 0.138026 | 0.0028   | 0.212622 | 3.56E-06 | 0.21114  | 4.17E-06 | 0.098833 | 0.03274  |
| 2.59E-06 | 0.070105 | 0.13033  | 0.092951 | 0.04468  | 0.063385 | 0.17148  | 0.024717 | 0.59418  |
| 1.73E-15 | 0.261956 | 9.12E-09 | 0.214132 | 3.02E-06 | 0.228887 | 5.75E-07 | 0.276999 | 1.13E-09 |
| 0.59963  | 0.209821 | 4.81E-06 | -0.02008 | 0.66513  | 0.01718  | 0.71117  | -0.02411 | 0.60326  |
| 0.03471  | 0.056066 | 0.22654  | 0.09386  | 0.04262  | 0.106616 | 0.0212   | 0.076123 | 0.10038  |
| 0.00017  | 0.046913 | 0.31171  | 0.024106 | 0.60333  | 0.063145 | 0.17311  | 0.176926 | 0.00012  |
| 0.03539  | 0.09366  | 0.04307  | 0.011195 | 0.80934  | 0.093091 | 0.04436  | 0.165973 | 0.00032  |
| 0.00091  | -0.01583 | 0.73291  | -0.03715 | 0.42322  | 0.051152 | 0.26996  | -0.16064 | 0.00049  |
| 0.74095  | -0.07081 | 0.12649  | -0.06404 | 0.16706  | -0.03025 | 0.51434  | -0.08398 | 0.06982  |
| 0.29203  | 0.139172 | 0.00258  | 0.07939  | 0.08658  | 0.110076 | 0.01733  | 0.105199 | 0.02299  |
| 1.72E-05 | 0.049708 | 0.28373  | 0.002306 | 0.96037  | 0.008187 | 0.85993  | 0.060716 | 0.19027  |
| 1.08E-08 | 0.258869 | 1.38E-08 | 0.284146 | 4.02E-10 | 0.289018 | 1.95E-10 | 0.22428  | 9.77E-07 |
| 0.00237  | -0.04413 | 0.34133  | 0.009636 | 0.83547  | 0.051896 | 0.26304  | 0.025996 | 0.57522  |
| 0.86728  | -0.07694 | 0.09676  | -0.04316 | 0.35206  | 0.056853 | 0.22008  | -0.07294 | 0.11546  |
| 0.42094  | 0.081981 | 0.07675  | 0.08423  | 0.06897  | 0.107718 | 0.01989  | -0.07976 | 0.08513  |
| 0.6638   | 0.007696 | 0.86826  | 0.154429 | 0.00081  | 0.180736 | 8.58E-05 | 0.083219 | 0.07239  |
| 1.10E-15 | 0.203089 | 9.72E-06 | 0.053284 | 0.25047  | 0.017167 | 0.71137  | 0.15813  | 0.0006   |
| 4.61E-17 | 0.173361 | 0.00017  | 0.130007 | 0.00489  | 0.103025 | 0.02599  | 0.194404 | 2.33E-05 |
| 1.33E-22 | 0.176946 | 0.00012  | 0.095274 | 0.03958  | 0.097876 | 0.03447  | 0.324995 | 5.99E-13 |
| 1.81E-12 | 0.312179 | 5.15E-12 | 0.152326 | 0.00096  | 0.192811 | 2.73E-05 | 0.255453 | 2.16E-08 |
| 4.77E-07 | 0.257317 | 1.69E-08 | 0.155438 | 0.00075  | 0.203786 | 9.05E-06 | 0.250369 | 4.17E-08 |
| 9.66E-09 | 0.073447 | 0.11295  | 0.033787 | 0.46638  | 0.050687 | 0.27434  | 0.165221 | 0.00034  |
| 3.39E-09 | 0.065689 | 0.1564   | 0.097301 | 0.03555  | 0.041037 | 0.37626  | 0.055594 | 0.23048  |
| 3.74E-15 | 0.270724 | 2.75E-09 | 0.069898 | 0.13148  | 0.123345 | 0.00762  | 0.220101 | 1.57E-06 |

|          |          |          |          |          |          |          |          |          |
|----------|----------|----------|----------|----------|----------|----------|----------|----------|
| 1.38E-12 | 0.233757 | 3.24E-07 | 0.16652  | 0.0003   | 0.207542 | 6.12E-06 | 0.180319 | 8.91E-05 |
| 3.07E-05 | 0.348897 | 8.17E-15 | 0.232367 | 3.82E-07 | 0.272551 | 2.13E-09 | 0.09254  | 0.04564  |
| 7.54E-13 | 0.186733 | 4.90E-05 | 0.060283 | 0.19346  | 0.109264 | 0.01818  | 0.173651 | 0.00016  |
| 0.06526  | -0.0383  | 0.40889  | -0.00306 | 0.94748  | -0.02079 | 0.65399  | -0.04622 | 0.3189   |
| 2.44E-05 | 0.158911 | 0.00057  | 0.078189 | 0.09146  | 0.174297 | 0.00015  | 0.177373 | 0.00012  |
| 0.86503  | -0.11853 | 0.01036  | -0.13707 | 0.003    | -0.08973 | 0.05264  | -0.04887 | 0.29189  |
| 0.14733  | -0.04312 | 0.35245  | -0.04942 | 0.28653  | -0.03981 | 0.39066  | 0.051917 | 0.26285  |
| 0.36237  | 0.087662 | 0.05836  | 0.007154 | 0.87746  | 0.091309 | 0.0486   | 0.049781 | 0.28302  |
| 0.00083  | -0.00512 | 0.9121   | -0.02278 | 0.62348  | 0.003918 | 0.93271  | -0.00653 | 0.88804  |
| 0.0149   | 0.015081 | 0.74514  | -0.00026 | 0.9956   | 0.061351 | 0.18567  | 0.06662  | 0.1506   |
| 4.41E-06 | -0.10579 | 0.02223  | 0.026022 | 0.57485  | -0.04744 | 0.30634  | 0.146022 | 0.00156  |
| 4.00E-12 | 0.16645  | 0.0003   | 0.076836 | 0.09723  | 0.088382 | 0.05632  | 0.195965 | 2.00E-05 |
| 0.00878  | -0.06812 | 0.1416   | 0.069604 | 0.13311  | 0.035836 | 0.43976  | 0.037907 | 0.41377  |
| 9.65E-05 | 0.284118 | 4.03E-10 | 0.155784 | 0.00073  | 0.184887 | 5.83E-05 | 0.109413 | 0.01802  |
| 1.13E-07 | -0.12699 | 0.006    | -0.01549 | 0.7385   | -0.15709 | 0.00066  | 0.045513 | 0.32639  |
| 0.09956  | 0.172893 | 0.00017  | 0.029684 | 0.52224  | 0.169505 | 0.00023  | 0.175249 | 0.00014  |
| 1.73E-09 | -0.01043 | 0.82213  | -0.11527 | 0.01268  | -0.08473 | 0.06735  | 0.184651 | 5.96E-05 |
| 1.41E-08 | 0.053592 | 0.24774  | 0.024369 | 0.59938  | 0.068882 | 0.13719  | 0.094494 | 0.04124  |
| 2.29E-06 | 0.204873 | 8.09E-06 | 0.113684 | 0.01397  | 0.222177 | 1.24E-06 | 0.2655   | 5.64E-09 |
| 3.41E-08 | 0.201697 | 1.12E-05 | 0.152633 | 0.00094  | 0.136225 | 0.00318  | 0.210357 | 4.54E-06 |
| 0.54838  | 0.084362 | 0.06854  | -0.04386 | 0.34434  | 0.014845 | 0.74899  | -0.01668 | 0.71929  |
| 0.98929  | -0.2569  | 1.79E-08 | -0.11456 | 0.01324  | -0.13237 | 0.00416  | -0.09956 | 0.03147  |
| 1.75E-23 | 0.30097  | 3.11E-11 | 0.200049 | 1.33E-05 | 0.264192 | 6.74E-09 | 0.374144 | 5.78E-17 |
| 0.09798  | -0.10645 | 0.0214   | -0.11375 | 0.01391  | -0.04052 | 0.38232  | 0.007822 | 0.86612  |
| 0.00255  | 0.067044 | 0.14801  | 0.025731 | 0.57913  | 0.084694 | 0.06746  | 0.110149 | 0.01726  |
| 1.14E-07 | 0.236053 | 2.46E-07 | 0.147948 | 0.00134  | 0.167836 | 0.00027  | 0.201884 | 1.10E-05 |
| 3.76E-26 | 0.298233 | 4.77E-11 | 0.347687 | 1.03E-14 | 0.278239 | 9.48E-10 | 0.340832 | 3.63E-14 |
| 3.26E-06 | 0.141303 | 0.00221  | 0.096195 | 0.03771  | 0.072512 | 0.11762  | 0.017825 | 0.70083  |
| 1.79E-15 | 0.219833 | 1.61E-06 | 0.135291 | 0.0034   | 0.093703 | 0.04297  | 0.307583 | 1.09E-11 |
| 2.79E-14 | 0.29487  | 8.02E-11 | 0.270144 | 2.98E-09 | 0.219314 | 1.71E-06 | 0.295729 | 7.03E-11 |
| 1.32E-07 | 0.154435 | 0.00081  | 0.181575 | 7.94E-05 | 0.154415 | 0.00081  | 0.187428 | 4.59E-05 |
| 0.00365  | 0.054327 | 0.2413   | 0.07163  | 0.12216  | 0.074228 | 0.10916  | 0.109962 | 0.01745  |
| 4.28E-11 | 0.224912 | 9.09E-07 | 0.270641 | 2.78E-09 | 0.292798 | 1.10E-10 | 0.263299 | 7.61E-09 |
| 0.00185  | 0.099828 | 0.03101  | 0.054671 | 0.23834  | 0.08296  | 0.07328  | 0.029777 | 0.52094  |
| 0.02584  | -0.06951 | 0.13363  | 0.023409 | 0.61386  | 0.050336 | 0.27768  | 0.075326 | 0.104    |
| 3.38E-10 | 0.16001  | 0.00052  | 0.077927 | 0.09256  | 0.098848 | 0.03271  | 0.140681 | 0.00231  |
| 1.32E-10 | 0.155289 | 0.00076  | 0.116785 | 0.01155  | 0.203642 | 9.19E-06 | 0.199075 | 1.46E-05 |
| 0.01841  | 0.096022 | 0.03805  | -0.00487 | 0.91639  | 0.021381 | 0.6449   | 0.048075 | 0.29986  |
| 0.00088  | 0.001874 | 0.96778  | -0.0033  | 0.94327  | -0.01988 | 0.66835  | 0.042262 | 0.36216  |
| 0.00195  | -0.01097 | 0.81304  | -0.03342 | 0.47119  | -0.06689 | 0.14893  | 0.100568 | 0.02978  |
| 0.00239  | 0.064074 | 0.16686  | 0.062856 | 0.17509  | 0.154216 | 0.00083  | 0.054741 | 0.23773  |
| 9.46E-09 | 0.025001 | 0.58994  | -0.05493 | 0.23612  | -0.04262 | 0.35812  | 0.053092 | 0.25219  |
| 0.41892  | -0.12401 | 0.00729  | -0.05212 | 0.261    | -0.08338 | 0.07185  | -0.05788 | 0.21187  |
| 0.03791  | -0.0477  | 0.30363  | -0.03487 | 0.45226  | -0.07448 | 0.10793  | 0.092277 | 0.04626  |
| 0.00013  | 0.148064 | 0.00133  | 0.106195 | 0.02172  | 0.153109 | 0.0009   | 0.103556 | 0.02523  |

|         |          |         |          |         |          |          |          |         |
|---------|----------|---------|----------|---------|----------|----------|----------|---------|
| 0.83662 | -0.10012 | 0.03053 | -0.00862 | 0.85264 | -0.02714 | 0.55849  | -0.06214 | 0.18006 |
| 0.17589 | 0.101614 | 0.02811 | 0.003615 | 0.9379  | 0.09257  | 0.04557  | 0.070065 | 0.13055 |
| 0.2447  | 0.051039 | 0.27102 | 0.002542 | 0.9563  | 0.104308 | 0.02418  | 0.063831 | 0.16848 |
| 0.69961 | 0.031711 | 0.49422 | -0.04685 | 0.31241 | 0.135169 | 0.00343  | 0.062983 | 0.17422 |
| 0.06188 | -0.04167 | 0.36893 | -0.00366 | 0.93705 | 0.037451 | 0.41942  | -0.0028  | 0.95186 |
| 0.58401 | -0.01797 | 0.69857 | -0.01496 | 0.74708 | 0.040654 | 0.38074  | -0.01652 | 0.72179 |
| 0.1885  | 0.146086 | 0.00155 | 0.085113 | 0.0661  | 0.11013  | 0.01727  | 0.0447   | 0.33511 |
| 0.51381 | -0.02765 | 0.55109 | -0.00614 | 0.89465 | 0.037356 | 0.4206   | -0.01867 | 0.68737 |
| 0.79258 | 0.011594 | 0.80268 | 0.021705 | 0.6399  | 0.061786 | 0.18256  | -0.02323 | 0.61661 |
| 0.60023 | -0.00958 | 0.83645 | -0.0054  | 0.90743 | 0.023852 | 0.60715  | 0.007489 | 0.87177 |
| 0.6258  | -0.01595 | 0.731   | 0.013743 | 0.76708 | 0.065091 | 0.16021  | -0.03093 | 0.5049  |
| 0.0116  | 0.046783 | 0.31305 | 0.017167 | 0.71136 | 0.008862 | 0.84853  | 0.013109 | 0.77752 |
| 0.02016 | 0.035828 | 0.43986 | 0.013388 | 0.77292 | 0.001987 | 0.96584  | 0.081716 | 0.07771 |
| 0.05678 | 0.021137 | 0.64868 | -0.04549 | 0.32666 | -0.02913 | 0.53009  | 0.041751 | 0.368   |
| 0.8276  | -0.02218 | 0.63261 | -0.02457 | 0.59638 | 0.019965 | 0.66696  | 0.001613 | 0.97227 |
| 0.50639 | 0.011864 | 0.79818 | -0.03045 | 0.51149 | 0.056228 | 0.22521  | -0.02591 | 0.57644 |
| 0.05935 | 0.143669 | 0.00185 | 0.092055 | 0.04679 | 0.152451 | 0.00095  | 0.084583 | 0.06781 |
| 0.0684  | 0.07135  | 0.12363 | 0.013704 | 0.76771 | 0.033328 | 0.47245  | 0.028953 | 0.53254 |
| 0.23957 | 0.066126 | 0.15366 | 0.047171 | 0.30906 | 0.116297 | 0.0119   | 0.007805 | 0.86641 |
| 0.03288 | 0.133147 | 0.00395 | 0.083475 | 0.07151 | 0.097728 | 0.03474  | 0.125535 | 0.0066  |
| 0.60131 | -0.05964 | 0.19829 | -0.12106 | 0.00882 | 0.000978 | 0.98319  | -0.0563  | 0.22459 |
| 0.13774 | -0.12665 | 0.00613 | -0.11525 | 0.0127  | -0.07866 | 0.08953  | -0.08391 | 0.07004 |
| 0.31578 | 0.063009 | 0.17404 | 0.049095 | 0.28972 | 0.065969 | 0.15464  | 0.080503 | 0.08224 |
| 0.0362  | -0.02666 | 0.56545 | -0.03857 | 0.40559 | 0.035158 | 0.44847  | 0.05567  | 0.22985 |
| 0.01891 | -0.00775 | 0.86729 | -0.04381 | 0.34483 | 0.033665 | 0.46798  | 0.091202 | 0.04887 |
| 0.91551 | -0.04358 | 0.34739 | -0.038   | 0.41258 | 0.100504 | 0.02989  | -0.00224 | 0.9615  |
| 0.10287 | 0.017581 | 0.70474 | -0.03925 | 0.39747 | 0.069874 | 0.13161  | -0.00957 | 0.83655 |
| 0.52725 | 0.087008 | 0.06027 | 0.120013 | 0.00943 | 0.161236 | 0.00047  | 0.059992 | 0.19562 |
| 0.69889 | -0.02976 | 0.52124 | -0.0407  | 0.38018 | 0.039025 | 0.40012  | -0.03312 | 0.47523 |
| 0.394   | -0.0111  | 0.81084 | 0.007815 | 0.86624 | 0.060024 | 0.19538  | -0.01649 | 0.72234 |
| 0.32689 | 0.095588 | 0.03893 | 0.005478 | 0.90602 | 0.083071 | 0.0729   | 0.018935 | 0.68318 |
| 0.31013 | -0.00615 | 0.89453 | -0.07199 | 0.1203  | 0.000437 | 0.99249  | -0.02476 | 0.5936  |
| 0.52039 | 0.035247 | 0.44732 | 0.031414 | 0.49827 | 0.106121 | 0.02181  | 0.046759 | 0.31331 |
| 0.57817 | -0.01234 | 0.79029 | 0.004792 | 0.91774 | 0.032653 | 0.48148  | -0.03472 | 0.45414 |
| 0.23298 | 0.02653  | 0.5674  | 0.045089 | 0.33092 | 0.050778 | 0.27348  | -0.04637 | 0.31733 |
| 0.0257  | 0.012651 | 0.78511 | -0.17598 | 0.00013 | -0.00929 | 0.84133  | -0.02948 | 0.5251  |
| 0.66275 | 0.168381 | 0.00026 | 0.141838 | 0.00212 | 0.201593 | 1.13E-05 | 0.056049 | 0.22669 |
| 0.0338  | 0.123724 | 0.00743 | 0.115287 | 0.01267 | 0.170211 | 0.00022  | 0.127947 | 0.00562 |
| 0.21651 | 0.079028 | 0.08803 | 0.015627 | 0.73625 | 0.10063  | 0.02968  | 0.072491 | 0.11772 |
| 0.53225 | 0.010711 | 0.81743 | -0.04595 | 0.32173 | 0.0162   | 0.72696  | -0.05335 | 0.24992 |
| 0.13224 | 0.036506 | 0.43125 | 0.034989 | 0.45066 | 0.098778 | 0.03283  | 0.088409 | 0.05624 |
| 0.39268 | -0.02425 | 0.60123 | -0.03903 | 0.40009 | 0.040234 | 0.38568  | 0.019443 | 0.67515 |
| 0.08143 | 0.029336 | 0.52713 | -0.08327 | 0.07221 | 0.028976 | 0.53221  | -0.03652 | 0.43108 |
| 0.92412 | 0.072258 | 0.11891 | 0.007166 | 0.87725 | 0.206434 | 6.87E-06 | 0.03134  | 0.49928 |
| 0.78464 | 0.082576 | 0.07463 | -0.02512 | 0.5882  | 0.03898  | 0.40067  | 0.025577 | 0.58141 |



|          |          |          |          |          |          |          |          |          |
|----------|----------|----------|----------|----------|----------|----------|----------|----------|
| 0.00125  | 0.215836 | 2.51E-06 | 0.168351 | 0.00026  | 0.193813 | 2.47E-05 | 0.200645 | 1.25E-05 |
| 0.00255  | 0.17349  | 0.00016  | 0.125925 | 0.00643  | 0.188105 | 4.30E-05 | 0.118296 | 0.01051  |
| 0.5998   | 0.055275 | 0.23318  | 0.014589 | 0.75318  | 0.126732 | 0.0061   | 0.057162 | 0.21758  |
| 0.04596  | 0.074466 | 0.10802  | 0.02893  | 0.53287  | 0.051422 | 0.26743  | 0.07905  | 0.08794  |
| 0.00886  | 0.09766  | 0.03487  | 0.106454 | 0.0214   | 0.128973 | 0.00525  | 0.115199 | 0.01274  |
| 0.85441  | 0.062078 | 0.1805   | 0.028432 | 0.53995  | 0.074011 | 0.1102   | 0.03677  | 0.42792  |
| 0.26543  | 0.087044 | 0.06017  | 0.026044 | 0.57453  | 0.211224 | 4.14E-06 | 0.089522 | 0.0532   |
| 0.40242  | -0.04381 | 0.34478  | -0.05365 | 0.24727  | 0.159913 | 0.00052  | 0.021911 | 0.63672  |
| 0.00808  | 0.239884 | 1.55E-07 | 0.109174 | 0.01827  | 0.193773 | 2.48E-05 | 0.124494 | 0.00707  |
| 0.87003  | 0.060859 | 0.18923  | 0.047119 | 0.30959  | 0.099707 | 0.03122  | -0.00547 | 0.90609  |
| 0.31938  | -0.05514 | 0.23431  | -0.00502 | 0.91392  | 0.036476 | 0.43164  | -0.02713 | 0.55866  |
| 0.16257  | -0.00653 | 0.88815  | -0.0296  | 0.52343  | -0.0433  | 0.3505   | 0.119057 | 0.01002  |
| 0.01446  | -0.05539 | 0.23218  | -0.08774 | 0.05814  | 0.018824 | 0.68494  | -0.07767 | 0.09362  |
| 0.09713  | 0.009009 | 0.84604  | 0.022404 | 0.62916  | 0.135442 | 0.00336  | 0.014106 | 0.76111  |
| 0.97077  | -0.01024 | 0.82539  | -0.0333  | 0.47286  | 0.00671  | 0.88501  | 0.009834 | 0.83214  |
| 0.09534  | 0.064277 | 0.16552  | 0.05373  | 0.24652  | 0.075721 | 0.1022   | 0.028363 | 0.54093  |
| 1.98E-05 | 0.01046  | 0.82163  | 0.009576 | 0.83648  | 0.039278 | 0.39708  | -0.0739  | 0.11072  |
| 0.00023  | -0.04191 | 0.36614  | -0.04057 | 0.38175  | -0.00524 | 0.91014  | -0.10467 | 0.0237   |
| 0.00016  | -0.03937 | 0.39597  | -0.04613 | 0.31985  | 0.015123 | 0.74445  | -0.11675 | 0.01158  |
| 0.15297  | 0.027801 | 0.54898  | 0.018542 | 0.68941  | 0.188515 | 4.14E-05 | -0.03089 | 0.50547  |
| 0.00019  | -0.26719 | 4.48E-09 | -0.07475 | 0.10667  | -0.09488 | 0.04042  | -0.10364 | 0.02511  |
| 0.29273  | 0.062728 | 0.17597  | 0.264933 | 6.10E-09 | 0.259473 | 1.27E-08 | 0.156281 | 0.0007   |
| 0.00596  | -0.16446 | 0.00036  | -0.03131 | 0.49967  | -0.14208 | 0.00209  | 0.060724 | 0.19021  |
| 1.89E-11 | -0.22871 | 5.87E-07 | 0.020757 | 0.65458  | -0.004   | 0.93135  | -0.05606 | 0.22661  |
| 0.36466  | -0.22794 | 6.42E-07 | -0.02591 | 0.57646  | -0.1447  | 0.00172  | 0.059798 | 0.19707  |
| 0.00134  | -0.01579 | 0.73358  | 0.123867 | 0.00736  | 0.093348 | 0.04377  | 0.020211 | 0.66311  |
| 0.3074   | -0.17765 | 0.00011  | -0.0432  | 0.35159  | -0.10717 | 0.02054  | -0.061   | 0.18818  |
| 0.3717   | 0.044089 | 0.34177  | 0.17908  | 9.98E-05 | 0.144066 | 0.0018   | 0.119467 | 0.00977  |
| 9.78E-05 | -0.22635 | 7.71E-07 | 0.081006 | 0.08034  | 0.041027 | 0.37638  | 0.043672 | 0.34636  |
| 0.4011   | -0.16515 | 0.00034  | -0.03446 | 0.45747  | -0.13926 | 0.00256  | -0.1568  | 0.00067  |
| 0.00054  | -0.09789 | 0.03444  | 0.026989 | 0.56071  | -0.07588 | 0.10147  | 0.130306 | 0.0048   |
| 3.84E-07 | -0.22435 | 9.69E-07 | -0.09888 | 0.03265  | -0.19798 | 1.64E-05 | 0.12729  | 0.00588  |
| 0.00045  | -0.28184 | 5.63E-10 | -0.10285 | 0.02625  | -0.26098 | 1.04E-08 | 0.006161 | 0.89436  |
| 0.01263  | 0.354372 | 2.90E-15 | 0.104222 | 0.0243   | 0.131391 | 0.00445  | -0.0623  | 0.17896  |
| 0.78507  | -0.09869 | 0.033    | 0.014581 | 0.75331  | -0.08397 | 0.06984  | -0.11154 | 0.01588  |
| 0.2521   | -0.01839 | 0.69189  | 0.109357 | 0.01808  | -0.05705 | 0.21851  | 0.043282 | 0.35069  |
| 0.16327  | -0.02826 | 0.54238  | 0.133045 | 0.00397  | 0.094445 | 0.04134  | 0.252531 | 3.16E-08 |
| 0.00453  | -0.1442  | 0.00178  | -0.00718 | 0.877    | -0.02105 | 0.65006  | 0.151131 | 0.00105  |
| 0.01495  | -0.21783 | 2.02E-06 | 0.003562 | 0.9388   | -0.12621 | 0.00631  | -0.03279 | 0.47964  |
| 0.45669  | -0.29839 | 4.66E-11 | -0.0636  | 0.17002  | -0.1154  | 0.01258  | -0.01125 | 0.80845  |
| 1.45E-15 | 0.066991 | 0.14834  | 0.234428 | 2.99E-07 | 0.099184 | 0.03212  | 0.178285 | 0.00011  |
| 0.95988  | -0.16574 | 0.00032  | -0.06168 | 0.1833   | -0.08235 | 0.07543  | -0.0492  | 0.28873  |
| 0.03631  | -0.15077 | 0.00108  | -0.0795  | 0.08615  | -0.19464 | 2.28E-05 | -0.00716 | 0.87732  |
| 0.15025  | 0.01213  | 0.79375  | 0.078477 | 0.09027  | 0.07981  | 0.08492  | 0.053086 | 0.25224  |
| 0.00026  | -0.32575 | 5.26E-13 | -0.12918 | 0.00518  | -0.20126 | 1.17E-05 | -0.22511 | 8.88E-07 |

|          |          |          |          |          |          |          |          |          |
|----------|----------|----------|----------|----------|----------|----------|----------|----------|
| 0.0003   | -0.09407 | 0.04215  | -0.02493 | 0.59107  | -0.11423 | 0.01351  | 0.071805 | 0.12125  |
| 1.26E-05 | 0.134262 | 0.00365  | 0.16167  | 0.00045  | 0.177118 | 0.00012  | 0.237609 | 2.04E-07 |
| 0.01144  | -0.18393 | 6.38E-05 | 0.03593  | 0.43856  | 0.053926 | 0.2448   | 0.10706  | 0.02067  |
| 0.98964  | -0.04421 | 0.3404   | 0.107722 | 0.01989  | 0.018476 | 0.69046  | 0.052023 | 0.26188  |
| 0.23143  | 0.04631  | 0.31798  | 0.24952  | 4.65E-08 | 0.134652 | 0.00355  | 0.219955 | 1.59E-06 |
| 0.00144  | -0.41276 | 1.23E-20 | -0.03882 | 0.40258  | -0.14619 | 0.00154  | -0.20156 | 1.14E-05 |
| 0.01562  | -0.32404 | 7.06E-13 | -0.1157  | 0.01235  | -0.18928 | 3.84E-05 | -0.14493 | 0.00169  |
| 0.37069  | -0.10603 | 0.02193  | -0.03355 | 0.46946  | -0.09054 | 0.05054  | -0.01975 | 0.67033  |
| 0.77283  | -0.02907 | 0.53083  | 0.066742 | 0.14986  | 0.027061 | 0.55966  | -0.00417 | 0.9284   |
| 2.03E-05 | 0.070891 | 0.12607  | 0.196494 | 1.90E-05 | 0.080588 | 0.08191  | 0.225483 | 8.51E-07 |
| 0.03256  | -0.05153 | 0.26639  | 0.077725 | 0.09341  | 0.019234 | 0.67845  | 0.112329 | 0.01516  |
| 3.87E-06 | -0.36991 | 1.37E-16 | -0.16611 | 0.00031  | -0.25506 | 2.27E-08 | -0.28366 | 4.32E-10 |
| 0.36968  | -0.11763 | 0.01096  | 0.169168 | 0.00024  | 0.060249 | 0.19371  | 0.124866 | 0.0069   |
| 0.36689  | -0.1614  | 0.00046  | 0.022023 | 0.63499  | -0.12435 | 0.00713  | -0.02102 | 0.65052  |
| 0.46626  | -0.30804 | 1.01E-11 | -0.18774 | 4.45E-05 | -0.26355 | 7.36E-09 | -0.12226 | 0.00817  |
| 1.09E-07 | 0.108555 | 0.01895  | 0.17433  | 0.00015  | 0.123099 | 0.00774  | 0.227596 | 6.67E-07 |
| 0.02078  | -0.16145 | 0.00046  | -0.03056 | 0.51009  | -0.15764 | 0.00063  | 0.036573 | 0.4304   |
| 0.36449  | -0.05116 | 0.26984  | 0.210505 | 4.47E-06 | 0.136691 | 0.00308  | 0.168212 | 0.00026  |
| 0.84864  | -0.2294  | 5.41E-07 | -0.06078 | 0.18983  | -0.1863  | 5.10E-05 | 0.035599 | 0.4428   |
| 7.60E-12 | -0.11568 | 0.01237  | -0.00325 | 0.94412  | -0.1786  | 0.0001   | 0.184123 | 6.27E-05 |
| 0.07418  | 0.04562  | 0.32525  | 0.20184  | 1.11E-05 | 0.237208 | 2.14E-07 | 0.15471  | 0.00079  |
| 0.10151  | 0.198457 | 1.56E-05 | 0.029627 | 0.52303  | 0.066544 | 0.15107  | -0.09744 | 0.03528  |
| 0.00033  | -0.15335 | 0.00089  | -0.02935 | 0.52696  | -0.16631 | 0.00031  | 0.063482 | 0.17082  |
| 0.01764  | -0.09521 | 0.03973  | 0.044093 | 0.34172  | -0.08291 | 0.07345  | 0.122305 | 0.00815  |
| 0.72187  | -0.18615 | 5.18E-05 | 0.084836 | 0.06699  | -0.09992 | 0.03086  | 0.044598 | 0.33622  |
| 0.06265  | -0.16261 | 0.00042  | 0.054165 | 0.24271  | -0.04546 | 0.32698  | -0.1094  | 0.01803  |
| 0.00025  | -0.35457 | 2.79E-15 | 0.014095 | 0.76128  | -0.08254 | 0.07474  | -0.18266 | 7.18E-05 |
| 0.3775   | -0.23111 | 4.43E-07 | -0.06015 | 0.19443  | -0.13013 | 0.00485  | 0.008412 | 0.85612  |
| 0.14862  | -0.17979 | 9.35E-05 | 0.00191  | 0.96716  | -0.11173 | 0.01571  | 0.068856 | 0.13734  |
| 0.0472   | -0.12066 | 0.00905  | 0.137398 | 0.00293  | -0.03716 | 0.423    | 0.100717 | 0.02954  |
| 0.00142  | -0.19028 | 3.49E-05 | -0.0421  | 0.36397  | -0.14745 | 0.0014   | 0.109887 | 0.01752  |
| 9.17E-05 | -0.02178 | 0.63866  | 0.169876 | 0.00023  | 0.050915 | 0.27218  | 0.023543 | 0.61183  |
| 0.00301  | 0.175705 | 0.00014  | 0.196895 | 1.82E-05 | 0.14398  | 0.00181  | 0.250663 | 4.01E-08 |
| 0.72347  | -0.35001 | 6.64E-15 | -0.13573 | 0.00329  | -0.29432 | 8.73E-11 | -0.10007 | 0.0306   |
| 4.18E-10 | -0.15593 | 0.00072  | -0.03265 | 0.48154  | -0.21689 | 2.24E-06 | 0.078464 | 0.09032  |
| 0.22787  | -0.31814 | 1.92E-12 | -0.13512 | 0.00344  | -0.27521 | 1.46E-09 | -0.13848 | 0.00271  |
| 0.74303  | 0.073083 | 0.11475  | 0.187689 | 4.48E-05 | 0.140958 | 0.00226  | 0.05495  | 0.23594  |
| 0.05753  | -0.20452 | 8.39E-06 | -0.02053 | 0.65809  | -0.06595 | 0.15479  | -0.14084 | 0.00228  |
| 0.00178  | -0.15913 | 0.00056  | -0.02805 | 0.54537  | -0.0611  | 0.18746  | -0.12108 | 0.00881  |
| 0.15545  | -0.17488 | 0.00015  | 0.041117 | 0.37533  | 0.03476  | 0.45363  | 0.060222 | 0.19391  |
| 0.60048  | -0.11666 | 0.01164  | 0.068436 | 0.13976  | 0.011338 | 0.80695  | 0.19875  | 1.51E-05 |
| 0.84184  | -0.2445  | 8.75E-08 | -0.10472 | 0.02363  | -0.19659 | 1.88E-05 | -0.00563 | 0.90341  |
| 0.52291  | -0.30687 | 1.22E-11 | -0.15243 | 0.00095  | -0.27677 | 1.17E-09 | -0.15774 | 0.00062  |
| 0.9469   | -0.20588 | 7.28E-06 | 0.104051 | 0.02453  | 0.053044 | 0.25262  | 0.12048  | 0.00916  |
| 5.66E-19 | -0.02418 | 0.60223  | 0.027758 | 0.54959  | -0.06419 | 0.16609  | 0.158521 | 0.00059  |

|          |          |          |          |          |          |          |          |          |
|----------|----------|----------|----------|----------|----------|----------|----------|----------|
| 0.4262   | -0.26191 | 9.18E-09 | -0.0624  | 0.17824  | -0.1774  | 0.00012  | 0.016676 | 0.71928  |
| 0.02201  | -0.17318 | 0.00017  | 0.082858 | 0.07364  | 0.011402 | 0.80588  | -0.0862  | 0.0627   |
| 0.05743  | -0.06282 | 0.17534  | 0.030648 | 0.50881  | -0.10988 | 0.01754  | 0.299253 | 4.07E-11 |
| 0.32901  | 0.033613 | 0.46867  | 0.18893  | 3.97E-05 | 0.138197 | 0.00276  | 0.064348 | 0.16505  |
| 0.03668  | -0.24599 | 7.26E-08 | -0.12733 | 0.00586  | -0.24567 | 7.56E-08 | 0.014692 | 0.7515   |
| 0.00987  | -0.1454  | 0.00163  | 0.056056 | 0.22663  | 0.029552 | 0.5241   | -0.01479 | 0.74985  |
| 0.00209  | -0.02165 | 0.6408   | 0.116142 | 0.01202  | -0.02012 | 0.66447  | 0.196775 | 1.84E-05 |
| 4.50E-05 | -0.03037 | 0.51268  | 0.187448 | 4.58E-05 | 0.092525 | 0.04567  | 0.242095 | 1.18E-07 |
| 0.00345  | 0.023874 | 0.60682  | 0.051346 | 0.26814  | 0.016834 | 0.71672  | 0.010194 | 0.8261   |
| 0.19589  | 0.020506 | 0.6585   | 0.211254 | 4.12E-06 | 0.183982 | 6.35E-05 | 0.131379 | 0.00446  |
| 0.20887  | -0.07434 | 0.10861  | 0.081939 | 0.0769   | -0.02831 | 0.5417   | 0.269237 | 3.38E-09 |
| 0.00261  | -0.25315 | 2.91E-08 | -0.01551 | 0.73809  | -0.06376 | 0.16896  | -0.0686  | 0.13881  |
| 0.40571  | 0.097567 | 0.03505  | 0.207174 | 6.36E-06 | 0.235548 | 2.62E-07 | 0.226183 | 7.86E-07 |
| 0.05357  | -0.39974 | 2.41E-19 | -0.11624 | 0.01195  | -0.26364 | 7.27E-09 | -0.21102 | 4.23E-06 |
| 4.89E-08 | 0.006071 | 0.8959   | 0.124347 | 0.00714  | 0.039452 | 0.39498  | 0.185862 | 5.32E-05 |
| 0.70993  | -0.05933 | 0.20064  | 0.172212 | 0.00018  | 0.052832 | 0.25452  | 0.061034 | 0.18796  |
| 1.00E-08 | -0.22214 | 1.24E-06 | -0.05546 | 0.23162  | -0.21333 | 3.30E-06 | 0.005412 | 0.90714  |
| 0.00151  | -0.08057 | 0.08198  | 0.04397  | 0.34307  | 0.012887 | 0.78121  | -0.09304 | 0.04447  |
| 3.74E-05 | 0.098764 | 0.03286  | 0.202179 | 1.07E-05 | 0.088151 | 0.05697  | 0.172269 | 0.00018  |
| 0.74603  | -0.20354 | 9.28E-06 | 0.113719 | 0.01394  | -0.03087 | 0.50573  | 0.047737 | 0.30328  |
| 0.04658  | -0.00602 | 0.89682  | 0.205763 | 7.37E-06 | 0.133745 | 0.00379  | 0.145295 | 0.00164  |
| 7.60E-08 | -0.12425 | 0.00718  | -0.0544  | 0.24068  | -0.16422 | 0.00037  | 0.136861 | 0.00304  |
| 3.93E-07 | -0.14389 | 0.00182  | 0.155662 | 0.00074  | 0.00411  | 0.92941  | 0.233157 | 3.48E-07 |
| 0.00595  | -0.10308 | 0.02591  | 0.058115 | 0.21     | -0.00564 | 0.90327  | -0.07225 | 0.11893  |
| 4.48E-07 | 0.076763 | 0.09755  | 0.170287 | 0.00022  | 0.142466 | 0.00203  | 0.23366  | 3.28E-07 |
| 0.3539   | 0.038674 | 0.40438  | 0.17345  | 0.00017  | 0.115708 | 0.01234  | 0.054621 | 0.23876  |
| 0.18014  | 0.039656 | 0.39254  | 0.090497 | 0.05065  | 0.063573 | 0.17021  | 0.089284 | 0.05384  |
| 0.04893  | -0.2081  | 5.77E-06 | -0.09566 | 0.0388   | -0.11231 | 0.01518  | -0.04341 | 0.34924  |
| 0.00662  | -0.00339 | 0.94182  | 0.166588 | 0.0003   | 0.132197 | 0.00421  | 0.214741 | 2.83E-06 |
| 0.07903  | -0.12709 | 0.00595  | 0.123752 | 0.00742  | 0.002323 | 0.96006  | -0.01725 | 0.71002  |
| 0.67048  | -0.16902 | 0.00024  | -0.00099 | 0.98295  | -0.09871 | 0.03295  | 0.025539 | 0.58197  |
| 2.52E-06 | -0.24902 | 4.95E-08 | -0.02906 | 0.53108  | -0.03847 | 0.40689  | -0.15025 | 0.00113  |
| 3.22E-13 | 0.142937 | 0.00196  | 0.157883 | 0.00062  | 0.141601 | 0.00216  | 0.242909 | 1.07E-07 |
| 0.04369  | -0.50857 | 4.37E-32 | -0.20944 | 5.00E-06 | -0.31938 | 1.56E-12 | -0.14266 | 0.002    |
| 0.126    | -0.23447 | 2.98E-07 | 0.046786 | 0.31303  | -0.05218 | 0.26047  | -0.02054 | 0.65801  |
| 0.6968   | -0.05993 | 0.19606  | 0.008152 | 0.86054  | -0.03404 | 0.463    | -0.08412 | 0.06933  |
| 0.03471  | 0.000199 | 0.99657  | 0.153051 | 0.00091  | 0.243127 | 1.04E-07 | 0.162285 | 0.00043  |
| 7.71E-17 | -0.42663 | 4.44E-22 | -0.20647 | 6.84E-06 | -0.225   | 9.00E-07 | -0.29264 | 1.13E-10 |
| 1.65E-14 | 0.031945 | 0.49104  | 0.128044 | 0.00559  | 0.03907  | 0.39958  | 0.255768 | 2.07E-08 |
| 0.00022  | -0.0247  | 0.59436  | 0.085348 | 0.06536  | 0.088103 | 0.0571   | 0.105072 | 0.02316  |
| 8.68E-09 | -0.07145 | 0.12311  | 0.183137 | 6.87E-05 | 0.053922 | 0.24483  | 0.199331 | 1.43E-05 |
| 0.12676  | -0.26256 | 8.40E-09 | -0.03572 | 0.4412   | -0.10191 | 0.02766  | -0.05319 | 0.25132  |
| 0.3026   | -0.15866 | 0.00058  | -0.00792 | 0.86454  | -0.05965 | 0.19821  | -0.0963  | 0.0375   |
| 6.54E-05 | -0.35377 | 3.25E-15 | -0.15558 | 0.00074  | -0.26431 | 6.64E-09 | -0.1944  | 2.34E-05 |
| 0.13953  | 0.060363 | 0.19287  | -0.08036 | 0.0828   | -0.05641 | 0.22374  | -0.15113 | 0.00105  |

|          |          |          |          |          |          |          |          |          |
|----------|----------|----------|----------|----------|----------|----------|----------|----------|
| 1.16E-08 | 0.316794 | 2.40E-12 | 0.171519 | 0.0002   | 0.187203 | 4.69E-05 | 0.196027 | 1.99E-05 |
| 0.39706  | 0.209292 | 5.08E-06 | -0.01057 | 0.81972  | 0.032727 | 0.48048  | -0.0623  | 0.17895  |
| 1.02E-05 | 0.002216 | 0.9619   | -0.2051  | 7.90E-06 | -0.15477 | 0.00079  | -0.27557 | 1.39E-09 |
| 0.67227  | 0.197775 | 1.67E-05 | -0.0599  | 0.19633  | -0.00466 | 0.92001  | -0.10049 | 0.02991  |
| 0.95011  | 0.182935 | 7.00E-05 | 0.020921 | 0.65203  | 0.04417  | 0.34088  | -0.05579 | 0.22883  |
| 0.55829  | 0.145071 | 0.00167  | -0.01479 | 0.74989  | 0.040735 | 0.37979  | -0.06749 | 0.14535  |
| 0.27913  | 0.186125 | 5.19E-05 | -0.02801 | 0.54599  | 0.024397 | 0.59897  | -0.07068 | 0.12718  |
| 0.25767  | 0.170728 | 0.00021  | -0.04505 | 0.33131  | 0.021998 | 0.63539  | -0.13886 | 0.00263  |
| 0.76398  | 0.13954  | 0.00251  | -0.04042 | 0.38343  | 0.000965 | 0.98341  | -0.07324 | 0.11396  |
| 0.06933  | 0.118016 | 0.0107   | 0.031108 | 0.50246  | 0.052076 | 0.26139  | 0.043949 | 0.34331  |
| 0.49552  | 0.196447 | 1.91E-05 | 0.048774 | 0.29288  | 0.095632 | 0.03885  | -0.01292 | 0.78065  |
| 0.36405  | 0.153864 | 0.00085  | 0.006441 | 0.88958  | 0.041177 | 0.37463  | -0.12351 | 0.00754  |
| 5.79E-06 | -0.20209 | 1.08E-05 | 0.093857 | 0.04263  | 0.047434 | 0.30636  | -0.06889 | 0.13713  |
| 7.24E-05 | 0.025272 | 0.58593  | 0.005584 | 0.90421  | -0.01016 | 0.82672  | 0.092859 | 0.04489  |
| 0.02334  | -0.10966 | 0.01776  | 0.028543 | 0.53836  | -0.12143 | 0.00862  | 0.062183 | 0.17976  |
| 0.11135  | 0.071156 | 0.12466  | 0.192873 | 2.71E-05 | 0.134863 | 0.0035   | 0.134481 | 0.0036   |
| 0.00589  | -0.14844 | 0.00129  | -0.02792 | 0.54728  | -0.07731 | 0.09517  | -0.09396 | 0.0424   |
| 0.05026  | -0.231   | 4.49E-07 | -0.01758 | 0.70468  | -0.2056  | 7.50E-06 | -0.10241 | 0.02689  |
| 1.45E-08 | -0.23886 | 1.75E-07 | -0.12038 | 0.00921  | -0.17434 | 0.00015  | -0.2319  | 4.04E-07 |
| 1.62E-10 | 0.156052 | 0.00071  | 0.187181 | 4.70E-05 | 0.151014 | 0.00106  | 0.325629 | 5.37E-13 |
| 1.21E-07 | -0.01318 | 0.77636  | 0.160678 | 0.00049  | -0.00617 | 0.89423  | 0.202048 | 1.08E-05 |
| 0.04007  | -0.39411 | 8.38E-19 | -0.27703 | 1.13E-09 | -0.34777 | 1.01E-14 | -0.23495 | 2.81E-07 |
| 2.07E-10 | 0.145475 | 0.00162  | 0.17351  | 0.00016  | 0.109976 | 0.01743  | 0.164908 | 0.00035  |
| 0.42722  | 0.015557 | 0.7374   | 0.149963 | 0.00115  | 0.041421 | 0.3718   | 0.110073 | 0.01733  |
| 7.75E-05 | -0.2021  | 1.08E-05 | 0.111667 | 0.01577  | -0.05448 | 0.23994  | 0.152684 | 0.00093  |
| 0.20328  | -0.10117 | 0.02881  | 0.136415 | 0.00314  | 0.10794  | 0.01964  | 0.064612 | 0.16332  |
| 0.06077  | -0.00627 | 0.89256  | 0.102976 | 0.02606  | 0.103994 | 0.02461  | 0.09342  | 0.04361  |
| 0.32414  | -0.30937 | 8.14E-12 | -0.12421 | 0.0072   | -0.20605 | 7.15E-06 | 0.006294 | 0.89209  |
| 2.10E-10 | -0.0381  | 0.41139  | 0.123711 | 0.00744  | 0.028642 | 0.53696  | 0.294749 | 8.17E-11 |
| 0.11634  | -0.20483 | 8.12E-06 | 0.013903 | 0.76444  | -0.08707 | 0.06011  | 0.093976 | 0.04237  |
| 7.62E-10 | -0.36311 | 5.31E-16 | -0.1357  | 0.0033   | -0.20416 | 8.71E-06 | -0.27036 | 2.89E-09 |
| 0.29328  | -0.11557 | 0.01245  | 0.035534 | 0.44362  | -0.04352 | 0.34802  | 0.039484 | 0.3946   |
| 7.70E-14 | -0.09035 | 0.05103  | 0.09718  | 0.03578  | -0.02232 | 0.63048  | 0.21017  | 4.63E-06 |
| 1.40E-11 | -0.09627 | 0.03756  | 0.086965 | 0.0604   | -0.02298 | 0.62041  | 0.239699 | 1.58E-07 |
| 0.00023  | -0.1947  | 2.27E-05 | -0.00737 | 0.87371  | -0.10387 | 0.02479  | 0.116414 | 0.01182  |
| 4.17E-12 | -0.46853 | 7.38E-27 | -0.20389 | 8.95E-06 | -0.26746 | 4.32E-09 | -0.32582 | 5.19E-13 |
| 0.02116  | -0.11562 | 0.01241  | 0.030716 | 0.50787  | -0.1436  | 0.00186  | 0.070238 | 0.1296   |
| 5.18E-05 | -0.23347 | 3.35E-07 | 0.039862 | 0.39008  | -0.07824 | 0.09127  | 0.227064 | 7.10E-07 |
| 0.01465  | -0.28523 | 3.43E-10 | -0.07477 | 0.10657  | -0.11975 | 0.00959  | 0.029491 | 0.52495  |
| 1.57E-07 | 0.218003 | 1.98E-06 | 0.210189 | 4.62E-06 | 0.237572 | 2.05E-07 | 0.332929 | 1.50E-13 |
| 0.74597  | 0.119328 | 0.00985  | 0.193226 | 2.62E-05 | 0.171492 | 0.0002   | 0.213923 | 3.09E-06 |
| 0.00022  | 0.052059 | 0.26155  | 0.201131 | 1.19E-05 | 0.146718 | 0.00148  | 0.209947 | 4.74E-06 |
| 0.80277  | -0.08446 | 0.06822  | 0.218258 | 1.92E-06 | 0.097904 | 0.03442  | 0.107006 | 0.02073  |
| 0.10024  | -0.03144 | 0.49788  | 0.236265 | 2.40E-07 | 0.145495 | 0.00162  | -0.00735 | 0.87419  |
| 0.00992  | -0.21623 | 2.40E-06 | -0.06135 | 0.18571  | -0.19204 | 2.94E-05 | 0.021032 | 0.6503   |

|          |          |          |          |          |          |          |          |          |
|----------|----------|----------|----------|----------|----------|----------|----------|----------|
| 3.43E-16 | 0.078131 | 0.0917   | 0.159473 | 0.00054  | 0.058689 | 0.20552  | 0.262542 | 8.43E-09 |
| 0.03215  | -0.35527 | 2.44E-15 | -0.21336 | 3.29E-06 | -0.33078 | 2.19E-13 | -0.14065 | 0.00232  |
| 0.2534   | -0.08866 | 0.05556  | 0.084615 | 0.06771  | 0.032123 | 0.48862  | 0.157843 | 0.00062  |
| 0.00155  | -0.17629 | 0.00013  | -0.0234  | 0.614    | -0.04625 | 0.31857  | -0.05901 | 0.20308  |
| 1.66E-07 | -0.04096 | 0.37716  | 0.028978 | 0.53219  | -0.15855 | 0.00058  | 0.118698 | 0.01025  |
| 0.06678  | -0.22535 | 8.64E-07 | -0.15181 | 0.001    | -0.20107 | 1.20E-05 | -0.18986 | 3.63E-05 |
| 0.01011  | -0.31511 | 3.18E-12 | -0.14578 | 0.00158  | -0.2522  | 3.30E-08 | -0.18503 | 5.76E-05 |
| 0.22359  | -0.10034 | 0.03016  | 0.039436 | 0.39518  | -0.01647 | 0.72261  | 0.077362 | 0.09495  |
| 0.01759  | -0.02108 | 0.64952  | 0.210176 | 4.63E-06 | 0.102433 | 0.02686  | 0.220503 | 1.50E-06 |
| 8.32E-06 | -0.27222 | 2.23E-09 | 0.044842 | 0.33357  | 0.034479 | 0.45728  | -0.09203 | 0.04685  |
| 0.00478  | -0.1894  | 3.80E-05 | 0.084256 | 0.06889  | 0.045781 | 0.32355  | -0.00476 | 0.91828  |
| 0.02576  | 0.079683 | 0.08542  | 0.0737   | 0.11171  | 0.086602 | 0.06149  | 0.182543 | 7.26E-05 |
| 0.59682  | -0.22786 | 6.47E-07 | -0.06073 | 0.19019  | -0.12273 | 0.00793  | 0.097829 | 0.03456  |
| 0.00027  | 0.072492 | 0.11772  | 0.274088 | 1.71E-09 | 0.127599 | 0.00576  | 0.095613 | 0.03888  |
| 0.00064  | -0.26536 | 5.75E-09 | -0.18544 | 5.54E-05 | -0.1927  | 2.76E-05 | -0.12602 | 0.00639  |
| 0.40744  | -0.31272 | 4.71E-12 | -0.00726 | 0.87559  | -0.16812 | 0.00026  | -0.02439 | 0.59912  |
| 0.53111  | -0.11238 | 0.01511  | 0.230815 | 4.59E-07 | 0.082768 | 0.07395  | 0.055342 | 0.23261  |
| 4.41E-09 | -0.02752 | 0.55305  | 0.044891 | 0.33305  | -0.05933 | 0.20063  | 0.135869 | 0.00326  |
| 0.02452  | -0.40329 | 1.08E-19 | -0.09255 | 0.04561  | -0.19079 | 3.32E-05 | -0.23121 | 4.38E-07 |
| 0.1031   | -0.34696 | 1.17E-14 | -0.12618 | 0.00633  | -0.19859 | 1.54E-05 | -0.16703 | 0.00029  |
| 0.00052  | -0.10137 | 0.0285   | -0.03259 | 0.4823   | -0.10241 | 0.0269   | 0.015259 | 0.74225  |
| 0.30083  | -0.00645 | 0.88947  | 0.055366 | 0.23241  | -0.00801 | 0.86293  | 0.068126 | 0.14157  |
| 0.01923  | 0.068182 | 0.14124  | 0.232607 | 3.71E-07 | 0.19961  | 1.39E-05 | 0.063006 | 0.17406  |
| 0.09984  | -0.06597 | 0.15463  | 0.170278 | 0.00022  | 0.080062 | 0.08393  | 0.045611 | 0.32535  |
| 0.01614  | -0.09326 | 0.04397  | 0.048721 | 0.29341  | 0.013002 | 0.77931  | 0.070634 | 0.12745  |
| 7.40E-08 | -0.20239 | 1.05E-05 | 0.022144 | 0.63314  | -0.1744  | 0.00015  | 0.06347  | 0.17091  |
| 0.96949  | -0.33562 | 9.30E-14 | -0.1092  | 0.01824  | -0.19969 | 1.38E-05 | -0.01438 | 0.75655  |
| 0.20218  | -0.12866 | 0.00536  | 0.125752 | 0.00651  | 0.048356 | 0.29705  | 0.138253 | 0.00275  |
| 0.84953  | -0.18882 | 4.02E-05 | -0.08289 | 0.07352  | -0.2171  | 2.18E-06 | 0.088757 | 0.05528  |
| 0.99719  | -0.32855 | 3.24E-13 | -0.08058 | 0.08193  | -0.23231 | 3.84E-07 | -0.04796 | 0.30103  |
| 0.84236  | -0.08654 | 0.06167  | 0.007077 | 0.87877  | -0.07656 | 0.09844  | 0.075283 | 0.1042   |
| 0.5276   | -0.02114 | 0.6487   | 0.151201 | 0.00105  | 0.14744  | 0.0014   | 0.172536 | 0.00018  |
| 0.07208  | -0.18772 | 4.46E-05 | -0.03735 | 0.42061  | -0.11049 | 0.01691  | -0.12367 | 0.00746  |
| 0.58888  | -0.22261 | 1.18E-06 | -0.08961 | 0.05297  | -0.18197 | 7.66E-05 | 0.05393  | 0.24476  |
| 8.41E-09 | -0.31755 | 2.12E-12 | -0.1385  | 0.0027   | -0.14043 | 0.00235  | -0.22402 | 1.01E-06 |
| 0.00022  | 0.008623 | 0.85257  | 0.242776 | 1.08E-07 | 0.121717 | 0.00846  | 0.196503 | 1.90E-05 |
| 0.00225  | -0.00056 | 0.99038  | 0.085327 | 0.06543  | 0.219239 | 1.72E-06 | 0.137046 | 0.003    |
| 0.90839  | 0.105355 | 0.02279  | 0.102128 | 0.02732  | 0.042735 | 0.35682  | 0.07619  | 0.10008  |
| 2.96E-08 | -0.02096 | 0.65146  | 0.195599 | 2.07E-05 | 0.118959 | 0.01008  | 0.175477 | 0.00014  |
| 0.00141  | -0.16797 | 0.00027  | 0.04358  | 0.34737  | -0.07721 | 0.09561  | 0.120705 | 0.00903  |
| 0.18484  | -0.09247 | 0.04579  | 0.195446 | 2.11E-05 | 0.074792 | 0.10649  | 0.070962 | 0.12569  |
| 0.48279  | 0.105762 | 0.02226  | 0.266415 | 4.98E-09 | 0.246645 | 6.69E-08 | 0.195635 | 2.07E-05 |
| 0.60793  | 0.060378 | 0.19275  | 0.233665 | 3.28E-07 | 0.096387 | 0.03732  | 0.106227 | 0.02168  |
| 6.37E-05 | -0.30879 | 8.94E-12 | -0.09228 | 0.04624  | -0.16618 | 0.00031  | -0.21024 | 4.59E-06 |
| 3.52E-11 | -0.27943 | 7.98E-10 | -0.01415 | 0.76031  | -0.17359 | 0.00016  | 0.1001   | 0.03055  |

|          |          |          |          |          |          |          |          |          |
|----------|----------|----------|----------|----------|----------|----------|----------|----------|
| 5.43E-06 | -0.10947 | 0.01796  | 0.003923 | 0.93262  | -0.12006 | 0.00941  | 0.07578  | 0.10193  |
| 0.14935  | -0.36759 | 2.18E-16 | -0.02645 | 0.56864  | -0.14221 | 0.00207  | -0.12465 | 0.007    |
| 0.06     | -0.22747 | 6.77E-07 | -0.05723 | 0.217    | -0.08858 | 0.05575  | -0.108   | 0.01957  |
| 0.04565  | -0.11364 | 0.01401  | 0.003915 | 0.93275  | -0.07309 | 0.11472  | -0.06473 | 0.16255  |
| 9.69E-05 | 0.000383 | 0.99341  | 0.1213   | 0.00869  | 0.085879 | 0.0637   | 0.124043 | 0.00728  |
| 1.82E-06 | -0.20029 | 1.30E-05 | -0.06602 | 0.15432  | -0.13555 | 0.00334  | -0.15449 | 0.00081  |
| 0.03386  | -0.02645 | 0.5686   | 0.159383 | 0.00055  | 0.101866 | 0.02772  | 0.157082 | 0.00066  |
| 0.00318  | -0.10613 | 0.0218   | 0.104772 | 0.02356  | -0.00467 | 0.91983  | 0.18192  | 7.69E-05 |
| 0.001    | -0.0539  | 0.24501  | 0.121633 | 0.00851  | 0.064631 | 0.1632   | 0.114253 | 0.01349  |
| 0.1568   | -0.02254 | 0.62714  | 0.259265 | 1.31E-08 | 0.065638 | 0.15672  | -0.00769 | 0.86831  |
| 0.06055  | -0.13718 | 0.00297  | -0.02951 | 0.5247   | 0.089822 | 0.0524   | -0.05088 | 0.27249  |
| 5.51E-13 | -0.45028 | 1.08E-24 | -0.1418  | 0.00213  | -0.26123 | 1.00E-08 | -0.17252 | 0.00018  |
| 0.02584  | -0.31217 | 5.16E-12 | -0.03829 | 0.40908  | -0.22776 | 6.55E-07 | -0.01397 | 0.76337  |
| 0.03339  | -0.0224  | 0.62917  | 0.110942 | 0.01646  | 0.019888 | 0.66816  | -0.03108 | 0.50285  |
| 1.80E-12 | 0.029054 | 0.53112  | 0.165517 | 0.00033  | 0.036039 | 0.43718  | 0.124078 | 0.00726  |
| 0.05286  | -0.13599 | 0.00323  | 0.021584 | 0.64176  | -0.11422 | 0.01352  | 0.007567 | 0.87045  |
| 0.01749  | -0.13336 | 0.00389  | 0.136001 | 0.00323  | 0.01317  | 0.77653  | 0.08444  | 0.06828  |
| 0.65791  | -0.24    | 1.53E-07 | 0.023157 | 0.61767  | -0.11309 | 0.01448  | -0.00362 | 0.93779  |
| 0.00162  | 0.027756 | 0.54963  | 0.200577 | 1.26E-05 | 0.134376 | 0.00362  | 0.105025 | 0.02322  |
| 0.0006   | -0.31189 | 5.40E-12 | -0.06434 | 0.16509  | -0.0691  | 0.13595  | -0.13125 | 0.0045   |
| 0.0146   | -0.02271 | 0.62446  | -0.08083 | 0.08098  | 0.00356  | 0.93884  | -0.02745 | 0.55411  |
| 1.64E-10 | -0.18059 | 8.69E-05 | -0.1549  | 0.00078  | -0.16329 | 0.0004   | -0.22597 | 8.05E-07 |
| 2.52E-07 | 0.055088 | 0.23476  | -0.03757 | 0.41788  | 0.050851 | 0.27279  | -0.12544 | 0.00664  |
| 0.18501  | 0.085909 | 0.0636   | 0.107087 | 0.02063  | 0.136267 | 0.00317  | 0.199333 | 1.43E-05 |
| 0.01454  | 0.189141 | 3.90E-05 | 0.222744 | 1.16E-06 | 0.194096 | 2.41E-05 | 0.264497 | 6.47E-09 |
| 8.01E-16 | 0.289872 | 1.71E-10 | 0.288599 | 2.07E-10 | 0.250011 | 4.36E-08 | 0.390462 | 1.86E-18 |
| 2.09E-09 | 0.402374 | 1.33E-19 | 0.243047 | 1.05E-07 | 0.238082 | 1.93E-07 | 0.274592 | 1.59E-09 |
| 3.93E-05 | 0.202299 | 1.05E-05 | 0.150884 | 0.00107  | 0.161657 | 0.00045  | 0.315189 | 3.14E-12 |
| 2.26E-09 | 0.438654 | 2.20E-23 | 0.418038 | 3.53E-21 | 0.457496 | 1.55E-25 | 0.504175 | 1.77E-31 |
| 0.69327  | 0.006312 | 0.89179  | -0.04905 | 0.29015  | 0.026961 | 0.56112  | 0.0002   | 0.99657  |
| 0.69481  | 0.131402 | 0.00445  | 0.117257 | 0.01122  | 0.155019 | 0.00078  | 0.077344 | 0.09503  |
| 7.93E-06 | -0.13365 | 0.00381  | -0.05141 | 0.26756  | -0.00555 | 0.90485  | 0.062396 | 0.17827  |
| 0.0097   | 0.126439 | 0.00622  | 0.131836 | 0.00432  | 0.250945 | 3.87E-08 | 0.080872 | 0.08084  |
| 0.06841  | 0.137635 | 0.00288  | 0.168756 | 0.00025  | 0.134144 | 0.00368  | 0.166437 | 0.0003   |
| 0.47878  | 0.030527 | 0.51049  | -0.18162 | 7.91E-05 | -0.15611 | 0.00071  | -0.09107 | 0.04919  |
| 1.81E-05 | 0.265969 | 5.29E-09 | 0.195703 | 2.05E-05 | 0.211888 | 3.85E-06 | 0.271021 | 2.63E-09 |
| 1.35E-06 | -0.19183 | 3.00E-05 | -0.19708 | 1.79E-05 | -0.18959 | 3.73E-05 | -0.23944 | 1.63E-07 |
| 0.89706  | 0.216544 | 2.32E-06 | 0.169645 | 0.00023  | 0.181061 | 8.32E-05 | 0.143924 | 0.00182  |
| 0.79241  | 0.184901 | 5.83E-05 | 0.125684 | 0.00654  | 0.183988 | 6.35E-05 | 0.122971 | 0.0078   |
| 3.20E-07 | -0.06731 | 0.14641  | -0.07139 | 0.1234   | -0.06297 | 0.17433  | -0.08889 | 0.0549   |
| 3.19E-08 | 0.149338 | 0.00121  | 0.184843 | 5.86E-05 | 0.152505 | 0.00095  | 0.296017 | 6.72E-11 |
| 0.36592  | 0.143838 | 0.00183  | 0.146613 | 0.00149  | 0.192402 | 2.84E-05 | 0.103076 | 0.02592  |
| 0.0067   | 0.177713 | 0.00011  | 0.142081 | 0.00209  | 0.202605 | 1.02E-05 | 0.175924 | 0.00013  |
| 0.53035  | 0.055665 | 0.22989  | 0.050412 | 0.27695  | 0.088889 | 0.05491  | 0.082745 | 0.07403  |
| 3.00E-09 | 0.361922 | 6.71E-16 | 0.282846 | 4.86E-10 | 0.316784 | 2.40E-12 | 0.293916 | 9.28E-11 |

|          |          |          |          |          |          |          |          |          |
|----------|----------|----------|----------|----------|----------|----------|----------|----------|
| 0.56229  | 0.098465 | 0.03339  | 0.013793 | 0.76626  | 0.093156 | 0.04421  | 0.050602 | 0.27515  |
| 4.02E-10 | -0.11784 | 0.01081  | -0.19357 | 2.53E-05 | -0.19684 | 1.83E-05 | -0.18632 | 5.10E-05 |
| 0.70361  | 0.350073 | 6.55E-15 | 0.132927 | 0.00401  | 0.159412 | 0.00054  | 0.159323 | 0.00055  |
| 2.71E-15 | -0.24918 | 4.85E-08 | -0.27556 | 1.39E-09 | -0.28083 | 6.53E-10 | -0.32407 | 7.02E-13 |
| 0.16619  | -0.00195 | 0.96651  | 0.004526 | 0.92229  | 0.062112 | 0.18026  | 0.10791  | 0.01967  |
| 5.36E-06 | -0.08114 | 0.07985  | 0.064332 | 0.16516  | -0.04511 | 0.33067  | 0.137278 | 0.00295  |
| 2.07E-19 | -0.33695 | 7.32E-14 | -0.21003 | 4.70E-06 | -0.16542 | 0.00033  | -0.22469 | 9.32E-07 |
| 0.00044  | -0.04688 | 0.31208  | -0.001   | 0.98278  | 0.032344 | 0.48563  | -0.00086 | 0.9852   |
| 3.07E-08 | 0.118681 | 0.01026  | 0.033078 | 0.47579  | 0.195897 | 2.01E-05 | -0.0009  | 0.98444  |
| 5.37E-10 | 0.183175 | 6.85E-05 | 0.0563   | 0.22461  | 0.059154 | 0.20195  | 0.226751 | 7.36E-07 |
| 0.0039   | -0.09827 | 0.03375  | -0.08736 | 0.05925  | -0.02726 | 0.55675  | -0.04922 | 0.28851  |
| 0.35253  | -0.01193 | 0.79715  | -0.02289 | 0.62179  | -0.01345 | 0.77194  | 0.075021 | 0.10541  |
| 0.38227  | 0.008944 | 0.84713  | 0.045319 | 0.32845  | 0.047032 | 0.31049  | 0.154872 | 0.00078  |
| 0.00011  | -0.09128 | 0.04867  | -0.14029 | 0.00238  | -0.10279 | 0.02633  | -0.10061 | 0.02971  |
| 0.06936  | -0.04928 | 0.2879   | -0.01977 | 0.66999  | 0.075057 | 0.10525  | -0.00917 | 0.84341  |
| 7.29E-09 | -0.13687 | 0.00304  | -0.18316 | 6.85E-05 | -0.16046 | 0.0005   | -0.15986 | 0.00052  |
| 0.00029  | 0.25584  | 2.05E-08 | 0.137514 | 0.0029   | 0.198545 | 1.54E-05 | 0.297846 | 5.07E-11 |
| 1.21E-07 | 0.182103 | 7.56E-05 | 0.143295 | 0.00191  | 0.126014 | 0.0064   | 0.307104 | 1.17E-11 |
| 9.52E-08 | 0.293198 | 1.04E-10 | 0.20774  | 5.99E-06 | 0.274077 | 1.72E-09 | 0.31205  | 5.26E-12 |
| 0.9979   | 0.10739  | 0.02027  | 0.006015 | 0.89685  | 0.130633 | 0.00469  | 0.12061  | 0.00908  |
| 0.22144  | 0.059654 | 0.19816  | 0.092034 | 0.04684  | 0.127754 | 0.0057   | 0.100951 | 0.02916  |
| 0.04236  | 0.007357 | 0.87401  | -0.04887 | 0.29193  | 0.010337 | 0.8237   | -0.12038 | 0.00921  |
| 0.00584  | 0.121743 | 0.00845  | -0.05291 | 0.2538   | 0.006701 | 0.88517  | -0.04764 | 0.30422  |
| 2.89E-06 | 0.285936 | 3.08E-10 | 0.323852 | 7.29E-13 | 0.328249 | 3.41E-13 | 0.349287 | 7.60E-15 |
| 1.13E-07 | 0.292273 | 1.19E-10 | 0.246495 | 6.81E-08 | 0.250178 | 4.27E-08 | 0.272752 | 2.07E-09 |
| 0.01508  | 0.15843  | 0.00059  | 0.065276 | 0.15903  | 0.131416 | 0.00445  | 0.084654 | 0.06758  |
| 7.26E-15 | 0.36857  | 1.79E-16 | 0.278461 | 9.18E-10 | 0.269303 | 3.35E-09 | 0.296692 | 6.06E-11 |
| 0.01776  | 0.140709 | 0.00231  | 0.109879 | 0.01753  | 0.153348 | 0.00089  | 0.012888 | 0.78119  |
| 0.84554  | 0.159663 | 0.00053  | 0.09089  | 0.04965  | 0.15512  | 0.00077  | -0.03219 | 0.48775  |
| 0.04883  | 0.091471 | 0.04821  | 0.107656 | 0.01997  | 0.181071 | 8.32E-05 | 0.24136  | 1.29E-07 |
| 0.30945  | 0.233983 | 3.15E-07 | 0.216128 | 2.43E-06 | 0.225283 | 8.71E-07 | 0.194346 | 2.35E-05 |
| 0.00045  | -0.01682 | 0.71693  | -0.10632 | 0.02156  | 0.012008 | 0.79579  | 0.039502 | 0.39439  |
| 0.92319  | 0.084705 | 0.06742  | 0.040725 | 0.3799   | 0.099961 | 0.03079  | 0.01224  | 0.79192  |
| 7.20E-05 | -0.0437  | 0.34601  | 0.005222 | 0.91039  | -0.07117 | 0.1246   | 0.177297 | 0.00012  |
| 0.00214  | -0.04562 | 0.32521  | 0.050538 | 0.27576  | -0.07483 | 0.1063   | 0.028736 | 0.53561  |
| 1.65E-10 | 0.384276 | 6.99E-18 | 0.281593 | 5.84E-10 | 0.225402 | 8.59E-07 | 0.437529 | 2.93E-23 |
| 0.03186  | 0.087965 | 0.05749  | 0.032687 | 0.48101  | 0.068022 | 0.14218  | 0.059947 | 0.19596  |
| 0.00017  | -0.19319 | 2.63E-05 | -0.11677 | 0.01156  | -0.06769 | 0.14412  | -0.11057 | 0.01683  |
| 0.01825  | -0.05226 | 0.25974  | 0.03875  | 0.40346  | -0.00744 | 0.8726   | 0.225605 | 8.40E-07 |
| 0.08374  | 0.262777 | 8.16E-09 | 0.199409 | 1.42E-05 | 0.209915 | 4.76E-06 | 0.206708 | 6.68E-06 |
| 0.05225  | 0.054358 | 0.24103  | 0.109574 | 0.01785  | 0.185744 | 5.38E-05 | 0.200432 | 1.28E-05 |
| 3.11E-49 | 0.581011 | 1.65E-43 | 0.522347 | 4.74E-34 | 0.496188 | 2.14E-30 | 0.554468 | 5.36E-39 |
| 0.18488  | -0.21594 | 2.48E-06 | -0.28667 | 2.76E-10 | -0.35465 | 2.75E-15 | -0.17716 | 0.00012  |
| 6.11E-85 | 0.401826 | 1.51E-19 | 0.39075  | 1.74E-18 | 0.261744 | 9.38E-09 | 0.6027   | 1.62E-47 |
| 8.32E-44 | 0.576931 | 8.65E-43 | 0.454385 | 3.60E-25 | 0.421639 | 1.49E-21 | 0.549983 | 2.83E-38 |

|          |          |          |          |          |          |          |          |          |
|----------|----------|----------|----------|----------|----------|----------|----------|----------|
| 1.48E-54 | 0.562591 | 2.46E-40 | 0.504692 | 1.50E-31 | 0.506097 | 9.63E-32 | 0.583339 | 6.32E-44 |
| 9.06E-13 | -0.27414 | 1.70E-09 | -0.31611 | 2.69E-12 | -0.33923 | 4.86E-14 | -0.40035 | 2.10E-19 |
| 3.13E-46 | 0.136265 | 0.00317  | 0.20591  | 7.26E-06 | 0.02338  | 0.61429  | 0.482982 | 1.15E-28 |
| 5.77E-79 | 0.468002 | 8.56E-27 | 0.398457 | 3.20E-19 | 0.309744 | 7.66E-12 | 0.622033 | 2.34E-51 |
| 1.50E-46 | 0.470034 | 4.83E-27 | 0.459838 | 8.22E-26 | 0.401488 | 1.63E-19 | 0.577996 | 5.62E-43 |
| 2.25E-14 | -0.01745 | 0.70691  | 0.138629 | 0.00268  | 0.061077 | 0.18764  | 0.156257 | 0.0007   |
| 3.58E-84 | 0.35218  | 4.40E-15 | 0.294932 | 7.95E-11 | 0.169264 | 0.00024  | 0.602314 | 1.92E-47 |
| 3.18E-27 | 0.287983 | 2.28E-10 | 0.220169 | 1.55E-06 | 0.139372 | 0.00254  | 0.345041 | 1.68E-14 |
| 7.43E-68 | 0.291652 | 1.31E-10 | 0.330087 | 2.47E-13 | 0.218582 | 1.85E-06 | 0.572487 | 5.14E-42 |
| 4.67E-60 | 0.481451 | 1.80E-28 | 0.42348  | 9.56E-22 | 0.394435 | 7.80E-19 | 0.664459 | 8.44E-61 |
| 6.13E-17 | 0.24473  | 8.50E-08 | 0.192696 | 2.76E-05 | 0.247259 | 6.19E-08 | 0.425074 | 6.49E-22 |
| 6.77E-49 | 0.425882 | 5.33E-22 | 0.36698  | 2.47E-16 | 0.265738 | 5.46E-09 | 0.520646 | 8.38E-34 |
| 4.92E-49 | 0.34919  | 7.74E-15 | 0.287614 | 2.40E-10 | 0.302516 | 2.44E-11 | 0.524664 | 2.17E-34 |
| 5.25E-41 | 0.083776 | 0.07049  | 0.251523 | 3.59E-08 | 0.065596 | 0.15699  | 0.260373 | 1.13E-08 |
| 4.99E-05 | 0.202271 | 1.06E-05 | 0.288826 | 2.01E-10 | 0.314725 | 3.39E-12 | 0.336268 | 8.28E-14 |
| 1.81E-20 | 0.15913  | 0.00056  | 0.10502  | 0.02323  | -0.0043  | 0.92608  | 0.291828 | 1.28E-10 |
| 1.47E-08 | 0.294475 | 8.52E-11 | 0.317    | 2.32E-12 | 0.334747 | 1.09E-13 | 0.343664 | 2.16E-14 |
| 2.25E-28 | 0.521066 | 7.28E-34 | 0.270159 | 2.97E-09 | 0.237536 | 2.06E-07 | 0.388921 | 2.59E-18 |
| 6.77E-41 | 0.58806  | 8.86E-45 | 0.504114 | 1.81E-31 | 0.579501 | 3.05E-43 | 0.580739 | 1.84E-43 |
| 6.82E-05 | 0.15377  | 0.00086  | 0.247563 | 5.95E-08 | 0.230161 | 4.95E-07 | 0.288848 | 2.00E-10 |
| 5.00E-60 | 0.612992 | 1.58E-49 | 0.390585 | 1.81E-18 | 0.377966 | 2.63E-17 | 0.543901 | 2.60E-37 |
| 7.04E-66 | 0.489635 | 1.58E-29 | 0.512687 | 1.16E-32 | 0.385513 | 5.38E-18 | 0.569443 | 1.71E-41 |
| 9.97E-52 | 0.548015 | 5.84E-38 | 0.503803 | 1.99E-31 | 0.424432 | 7.59E-22 | 0.610121 | 5.85E-49 |
| 2.09E-52 | 0.359202 | 1.14E-15 | 0.344781 | 1.76E-14 | 0.272481 | 2.15E-09 | 0.476299 | 8.07E-28 |
| 9.72E-30 | 0.402341 | 1.34E-19 | 0.417092 | 4.42E-21 | 0.381822 | 1.17E-17 | 0.735796 | 9.65E-81 |
| 1.96E-11 | 0.13947  | 0.00252  | 0.156498 | 0.00069  | 0.120937 | 0.00889  | 0.337554 | 6.57E-14 |
| 5.92E-20 | 0.355079 | 2.53E-15 | 0.369752 | 1.41E-16 | 0.393134 | 1.04E-18 | 0.542544 | 4.24E-37 |
| 0.00351  | 0.228834 | 5.78E-07 | 0.250694 | 4.00E-08 | 0.250958 | 3.86E-08 | 0.30028  | 3.47E-11 |
| 2.02E-24 | 0.298526 | 4.56E-11 | 0.347095 | 1.14E-14 | 0.284    | 4.10E-10 | 0.337775 | 6.31E-14 |
| 9.69E-09 | 0.26998  | 3.05E-09 | 0.372687 | 7.79E-17 | 0.325989 | 5.05E-13 | 0.282759 | 4.92E-10 |
| 5.84E-24 | 0.49679  | 1.78E-30 | 0.332934 | 1.50E-13 | 0.294667 | 8.27E-11 | 0.379441 | 1.93E-17 |
| 6.46E-11 | 0.377481 | 2.91E-17 | 0.455556 | 2.63E-25 | 0.389809 | 2.14E-18 | 0.346193 | 1.35E-14 |
| 7.58E-34 | 0.411881 | 1.50E-20 | 0.353275 | 3.57E-15 | 0.274943 | 1.52E-09 | 0.476109 | 8.53E-28 |
| 5.34E-38 | 0.409826 | 2.43E-20 | 0.322758 | 8.78E-13 | 0.290649 | 1.52E-10 | 0.487194 | 3.29E-29 |
| 6.52E-11 | 0.387101 | 3.83E-18 | 0.274424 | 1.63E-09 | 0.303416 | 2.12E-11 | 0.234866 | 2.84E-07 |
| 6.16E-31 | 0.36376  | 4.67E-16 | 0.348634 | 8.59E-15 | 0.305087 | 1.62E-11 | 0.541134 | 7.04E-37 |
| 1.33E-15 | -0.10147 | 0.02833  | -0.29965 | 3.83E-11 | -0.29359 | 9.76E-11 | -0.29607 | 6.67E-11 |
| 2.48E-30 | 0.566803 | 4.82E-41 | 0.475807 | 9.30E-28 | 0.452432 | 6.07E-25 | 0.399831 | 2.36E-19 |
| 9.06E-44 | 0.223685 | 1.05E-06 | 0.177593 | 0.00011  | 0.113564 | 0.01407  | 0.406435 | 5.29E-20 |
| 4.29E-79 | 0.525489 | 1.64E-34 | 0.403743 | 9.77E-20 | 0.330335 | 2.37E-13 | 0.614133 | 9.35E-50 |
| 3.52E-17 | 0.40799  | 3.70E-20 | 0.356421 | 1.96E-15 | 0.309022 | 8.61E-12 | 0.315155 | 3.15E-12 |
| 2.23E-15 | 0.092815 | 0.045    | 0.075164 | 0.10475  | -0.01132 | 0.80732  | 0.256136 | 1.97E-08 |
| 2.62E-80 | 0.374173 | 5.75E-17 | 0.39874  | 3.01E-19 | 0.282794 | 4.90E-10 | 0.613682 | 1.15E-49 |
| 9.15E-48 | 0.355669 | 2.26E-15 | 0.408262 | 3.48E-20 | 0.323458 | 7.79E-13 | 0.573741 | 3.11E-42 |
| 1.82E-65 | 0.605646 | 4.38E-48 | 0.561608 | 3.59E-40 | 0.487713 | 2.81E-29 | 0.617348 | 2.11E-50 |



|          |          |          |          |          |          |          |          |          |
|----------|----------|----------|----------|----------|----------|----------|----------|----------|
| 2.38E-41 | 0.392514 | 1.19E-18 | 0.393769 | 9.03E-19 | 0.297449 | 5.39E-11 | 0.509662 | 3.08E-32 |
| 3.23E-34 | 0.339764 | 4.41E-14 | 0.280866 | 6.49E-10 | 0.197191 | 1.77E-05 | 0.353578 | 3.37E-15 |
| 4.65E-65 | 0.246641 | 6.69E-08 | 0.363489 | 4.93E-16 | 0.258717 | 1.40E-08 | 0.557162 | 1.95E-39 |
| 1.91E-61 | 0.286673 | 2.77E-10 | 0.252059 | 3.35E-08 | 0.159519 | 0.00054  | 0.487932 | 2.64E-29 |
| 1.10E-28 | 0.175643 | 0.00014  | 0.23096  | 4.51E-07 | 0.146586 | 0.00149  | 0.386237 | 4.61E-18 |
| 2.21E-10 | 0.280344 | 7.00E-10 | 0.356561 | 1.90E-15 | 0.314023 | 3.80E-12 | 0.365932 | 3.04E-16 |
| 3.61E-49 | 0.525969 | 1.39E-34 | 0.494494 | 3.61E-30 | 0.518121 | 1.94E-33 | 0.631041 | 3.07E-53 |
| 1.07E-36 | 0.548862 | 4.28E-38 | 0.434155 | 6.87E-23 | 0.47413  | 1.51E-27 | 0.62074  | 4.31E-51 |
| 5.49E-26 | 0.368236 | 1.92E-16 | 0.269582 | 3.22E-09 | 0.170192 | 0.00022  | 0.314806 | 3.34E-12 |
| 5.98E-37 | 0.531909 | 1.81E-35 | 0.531076 | 2.42E-35 | 0.465919 | 1.53E-26 | 0.528943 | 5.04E-35 |
| 4.37E-11 | 0.265187 | 5.89E-09 | 0.35595  | 2.14E-15 | 0.250631 | 4.03E-08 | 0.376434 | 3.61E-17 |
| 3.30E-39 | 0.458104 | 1.32E-25 | 0.47871  | 4.01E-28 | 0.399738 | 2.41E-19 | 0.464346 | 2.37E-26 |
| 1.16E-21 | 0.414465 | 8.22E-21 | 0.254604 | 2.41E-08 | 0.224814 | 9.19E-07 | 0.373494 | 6.61E-17 |
| 3.76E-09 | 0.179432 | 9.66E-05 | 0.258005 | 1.54E-08 | 0.254825 | 2.34E-08 | 0.284682 | 3.71E-10 |
| 7.96E-22 | 0.400709 | 1.94E-19 | 0.453725 | 4.29E-25 | 0.401089 | 1.78E-19 | 0.436697 | 3.62E-23 |
| 3.92E-31 | 0.22036  | 1.52E-06 | 0.221911 | 1.28E-06 | 0.152728 | 0.00093  | 0.447649 | 2.15E-24 |
| 3.61E-17 | 0.426595 | 4.48E-22 | 0.285385 | 3.35E-10 | 0.305466 | 1.53E-11 | 0.394051 | 8.49E-19 |
| 1.65E-33 | 0.435759 | 4.59E-23 | 0.356252 | 2.02E-15 | 0.361081 | 7.92E-16 | 0.462251 | 4.24E-26 |
| 4.27E-36 | 0.474287 | 1.44E-27 | 0.440316 | 1.44E-23 | 0.422151 | 1.32E-21 | 0.548932 | 4.17E-38 |
| 3.84E-20 | 0.168904 | 0.00025  | 0.219713 | 1.63E-06 | 0.130961 | 0.00459  | 0.297805 | 5.10E-11 |
| 1.36E-34 | 0.376376 | 3.65E-17 | 0.302036 | 2.63E-11 | 0.280774 | 6.57E-10 | 0.507055 | 7.09E-32 |
| 3.38E-39 | 0.365454 | 3.34E-16 | 0.460208 | 7.42E-26 | 0.292693 | 1.12E-10 | 0.504528 | 1.58E-31 |
| 1.77E-48 | 0.42184  | 1.42E-21 | 0.389964 | 2.07E-18 | 0.266586 | 4.86E-09 | 0.620002 | 6.10E-51 |
| 8.57E-25 | 0.290485 | 1.56E-10 | 0.297153 | 5.64E-11 | 0.356789 | 1.82E-15 | 0.394541 | 7.62E-19 |
| 1.65E-57 | 0.330699 | 2.22E-13 | 0.309644 | 7.79E-12 | 0.26292  | 8.01E-09 | 0.579756 | 2.75E-43 |
| 2.24E-33 | 0.165277 | 0.00033  | 0.19825  | 1.59E-05 | 0.07665  | 0.09804  | 0.269816 | 3.12E-09 |
| 1.76E-46 | 0.391865 | 1.37E-18 | 0.268198 | 3.90E-09 | 0.241892 | 1.21E-07 | 0.359892 | 9.99E-16 |
| 1.28E-47 | 0.433774 | 7.56E-23 | 0.432906 | 9.40E-23 | 0.294557 | 8.42E-11 | 0.613208 | 1.43E-49 |
| 1.01E-46 | 0.472178 | 2.63E-27 | 0.523518 | 3.20E-34 | 0.452481 | 5.99E-25 | 0.597581 | 1.52E-46 |
| 1.37E-23 | 0.339275 | 4.81E-14 | 0.419627 | 2.42E-21 | 0.381039 | 1.38E-17 | 0.478143 | 4.73E-28 |
| 5.75E-38 | 0.321106 | 1.16E-12 | 0.323651 | 7.54E-13 | 0.310212 | 7.10E-12 | 0.488209 | 2.43E-29 |
| 2.00E-42 | 0.424891 | 6.79E-22 | 0.267269 | 4.43E-09 | 0.124756 | 0.00695  | 0.469162 | 6.18E-27 |
| 8.58E-37 | 0.489009 | 1.91E-29 | 0.44389  | 5.73E-24 | 0.380275 | 1.62E-17 | 0.460076 | 7.70E-26 |
| 5.15E-27 | 0.376949 | 3.25E-17 | 0.424433 | 7.59E-22 | 0.341214 | 3.38E-14 | 0.461166 | 5.71E-26 |
| 1.22E-47 | 0.474172 | 1.49E-27 | 0.47463  | 1.30E-27 | 0.413308 | 1.08E-20 | 0.52359  | 3.12E-34 |
| 4.28E-69 | 0.359965 | 9.85E-16 | 0.332679 | 1.57E-13 | 0.277812 | 1.01E-09 | 0.528046 | 6.86E-35 |
| 2.90E-34 | 0.238883 | 1.75E-07 | 0.244544 | 8.70E-08 | 0.183648 | 6.55E-05 | 0.440859 | 1.25E-23 |
| 1.92E-07 | 0.348506 | 8.80E-15 | 0.171574 | 0.00019  | 0.192256 | 2.88E-05 | 0.305079 | 1.62E-11 |
| 0.05438  | -0.3009  | 3.14E-11 | -0.33739 | 6.76E-14 | -0.36089 | 8.21E-16 | -0.12101 | 0.00885  |
| 2.02E-82 | 0.729672 | 8.82E-79 | 0.622069 | 2.30E-51 | 0.555115 | 4.21E-39 | 0.721774 | 2.49E-76 |
| 4.31E-19 | 0.225888 | 8.13E-07 | 0.228552 | 5.97E-07 | 0.181886 | 7.72E-05 | 0.20298  | 9.83E-06 |
| 3.23E-54 | 0.574277 | 2.51E-42 | 0.514565 | 6.26E-33 | 0.501314 | 4.36E-31 | 0.630025 | 5.04E-53 |
| 1.97E-07 | 0.402142 | 1.40E-19 | 0.414727 | 7.73E-21 | 0.495322 | 2.80E-30 | 0.385047 | 5.94E-18 |
| 7.12E-26 | 0.570679 | 1.05E-41 | 0.516837 | 2.97E-33 | 0.459266 | 9.60E-26 | 0.58845  | 7.52E-45 |
| 0.0001   | 0.172761 | 0.00018  | 0.203671 | 9.16E-06 | 0.121211 | 0.00874  | 0.282804 | 4.89E-10 |

|          |          |          |          |          |          |          |          |          |
|----------|----------|----------|----------|----------|----------|----------|----------|----------|
| 0.18106  | 0.197756 | 1.67E-05 | 0.35058  | 5.96E-15 | 0.325558 | 5.43E-13 | 0.116391 | 0.01183  |
| 1.06E-18 | 0.208865 | 5.32E-06 | 0.055956 | 0.22746  | 0.023476 | 0.61283  | 0.334164 | 1.20E-13 |
| 2.23E-52 | 0.347651 | 1.03E-14 | 0.310347 | 6.95E-12 | 0.182669 | 7.18E-05 | 0.489963 | 1.43E-29 |
| 3.91E-20 | 0.354378 | 2.90E-15 | 0.317258 | 2.22E-12 | 0.190125 | 3.54E-05 | 0.295584 | 7.19E-11 |
| 1.33E-11 | 0.465949 | 1.52E-26 | 0.442203 | 8.87E-24 | 0.469981 | 4.90E-27 | 0.436506 | 3.80E-23 |
| 1.08E-23 | 0.287687 | 2.38E-10 | 0.377151 | 3.11E-17 | 0.248161 | 5.52E-08 | 0.503095 | 2.49E-31 |
| 1.50E-45 | 0.323628 | 7.57E-13 | 0.373572 | 6.50E-17 | 0.306118 | 1.38E-11 | 0.479027 | 3.66E-28 |
| 1.21E-33 | 0.22368  | 1.05E-06 | 0.290822 | 1.49E-10 | 0.195311 | 2.13E-05 | 0.452692 | 5.66E-25 |
| 5.76E-24 | 0.331424 | 1.96E-13 | 0.264673 | 6.31E-09 | 0.269502 | 3.25E-09 | 0.342733 | 2.56E-14 |
| 0.00136  | 0.140491 | 0.00234  | 0.278847 | 8.69E-10 | 0.139651 | 0.00249  | 0.18826  | 4.24E-05 |
| 8.47E-26 | 0.397681 | 3.81E-19 | 0.376621 | 3.47E-17 | 0.353567 | 3.38E-15 | 0.489668 | 1.56E-29 |
| 9.35E-24 | 0.128161 | 0.00554  | 0.162311 | 0.00043  | 0.100296 | 0.03023  | 0.303639 | 2.04E-11 |
| 3.51E-18 | 0.636663 | 1.91E-54 | 0.442692 | 7.82E-24 | 0.466141 | 1.44E-26 | 0.456516 | 2.03E-25 |
| 1.91E-31 | 0.578943 | 3.83E-43 | 0.572795 | 4.54E-42 | 0.523044 | 3.75E-34 | 0.467194 | 1.07E-26 |
| 2.29E-54 | 0.446357 | 3.02E-24 | 0.48985  | 1.48E-29 | 0.413117 | 1.13E-20 | 0.558852 | 1.03E-39 |
| 7.23E-17 | 0.518762 | 1.57E-33 | 0.435588 | 4.79E-23 | 0.42027  | 2.07E-21 | 0.431537 | 1.32E-22 |
| 9.67E-22 | 0.204008 | 8.84E-06 | 0.202635 | 1.02E-05 | 0.141236 | 0.00222  | 0.367074 | 2.42E-16 |
| 6.17E-22 | 0.429091 | 2.42E-22 | 0.395149 | 6.67E-19 | 0.369161 | 1.59E-16 | 0.485473 | 5.49E-29 |
| 1.53E-41 | 0.333912 | 1.26E-13 | 0.399201 | 2.71E-19 | 0.350545 | 6.00E-15 | 0.569372 | 1.76E-41 |
| 1.15E-35 | 0.419524 | 2.48E-21 | 0.397062 | 4.37E-19 | 0.322725 | 8.83E-13 | 0.443874 | 5.76E-24 |
| 7.07E-12 | 0.38951  | 2.28E-18 | 0.352642 | 4.03E-15 | 0.362877 | 5.56E-16 | 0.260112 | 1.17E-08 |
| 2.41E-22 | 0.311457 | 5.80E-12 | 0.34382  | 2.10E-14 | 0.23408  | 3.12E-07 | 0.332543 | 1.61E-13 |
| 4.09E-25 | 0.386991 | 3.92E-18 | 0.356922 | 1.78E-15 | 0.359436 | 1.09E-15 | 0.41379  | 9.63E-21 |
| 5.64E-38 | 0.498016 | 1.22E-30 | 0.30885  | 8.86E-12 | 0.325576 | 5.42E-13 | 0.433852 | 7.42E-23 |
| 2.68E-41 | 0.171403 | 0.0002   | 0.219914 | 1.60E-06 | 0.081716 | 0.07771  | 0.344486 | 1.86E-14 |
| 5.63E-12 | 0.265898 | 5.34E-09 | 0.332306 | 1.67E-13 | 0.185506 | 5.50E-05 | 0.301487 | 2.87E-11 |
| 6.06E-09 | -0.12436 | 0.00713  | -0.09737 | 0.03542  | -0.12714 | 0.00593  | -0.29783 | 5.08E-11 |
| 7.30E-35 | 0.63732  | 1.37E-54 | 0.592633 | 1.28E-45 | 0.59828  | 1.12E-46 | 0.631608 | 2.33E-53 |
| 1.85E-44 | 0.540472 | 8.91E-37 | 0.451173 | 8.48E-25 | 0.452644 | 5.73E-25 | 0.612243 | 2.22E-49 |
| 3.44E-06 | 0.321938 | 1.01E-12 | 0.294254 | 8.82E-11 | 0.316837 | 2.38E-12 | 0.275458 | 1.41E-09 |
| 4.52E-44 | 0.515049 | 5.34E-33 | 0.536825 | 3.25E-36 | 0.501827 | 3.71E-31 | 0.641288 | 1.86E-55 |
| 3.96E-24 | 0.087354 | 0.05926  | 0.245944 | 7.30E-08 | 0.106788 | 0.02099  | 0.222132 | 1.25E-06 |
| 2.15E-69 | 0.380676 | 1.49E-17 | 0.314079 | 3.77E-12 | 0.276467 | 1.22E-09 | 0.493132 | 5.47E-30 |
| 5.23E-36 | 0.454215 | 3.77E-25 | 0.421814 | 1.43E-21 | 0.40899  | 2.94E-20 | 0.598793 | 8.99E-47 |
| 4.47E-43 | 0.60473  | 6.59E-48 | 0.564267 | 1.29E-40 | 0.574675 | 2.14E-42 | 0.662042 | 3.21E-60 |
| 5.84E-58 | 0.3927   | 1.14E-18 | 0.341373 | 3.29E-14 | 0.233458 | 3.36E-07 | 0.547446 | 7.19E-38 |
| 0.00012  | 0.131535 | 0.00441  | 0.039729 | 0.39168  | 0.043403 | 0.34934  | 0.179232 | 9.84E-05 |
| 1.68E-75 | 0.534227 | 8.09E-36 | 0.393891 | 8.79E-19 | 0.364827 | 3.78E-16 | 0.562632 | 2.42E-40 |
| 7.02E-25 | 0.333922 | 1.26E-13 | 0.414167 | 8.82E-21 | 0.319822 | 1.44E-12 | 0.287291 | 2.52E-10 |
| 3.38E-30 | 0.27255  | 2.13E-09 | 0.35763  | 1.55E-15 | 0.377697 | 2.78E-17 | 0.447274 | 2.37E-24 |
| 3.32E-24 | 0.359825 | 1.01E-15 | 0.303543 | 2.07E-11 | 0.345391 | 1.57E-14 | 0.508875 | 3.96E-32 |
| 1.33E-20 | 0.21549  | 2.61E-06 | 0.308369 | 9.57E-12 | 0.279889 | 7.48E-10 | 0.488502 | 2.22E-29 |
| 1.55E-56 | 0.380417 | 1.58E-17 | 0.381165 | 1.35E-17 | 0.317908 | 1.99E-12 | 0.50449  | 1.60E-31 |
| 1.28E-14 | 0.02729  | 0.55635  | 0.178467 | 0.00011  | 0.110545 | 0.01686  | 0.271084 | 2.61E-09 |
| 5.39E-63 | 0.577063 | 8.20E-43 | 0.393162 | 1.03E-18 | 0.358658 | 1.27E-15 | 0.593494 | 8.86E-46 |

|          |          |          |          |          |          |          |          |          |
|----------|----------|----------|----------|----------|----------|----------|----------|----------|
| 5.04E-42 | 0.323753 | 7.41E-13 | 0.267291 | 4.42E-09 | 0.2256   | 8.40E-07 | 0.439673 | 1.70E-23 |
| 6.45E-07 | 0.134579 | 0.00357  | 0.26604  | 5.24E-09 | 0.229107 | 5.60E-07 | 0.290618 | 1.53E-10 |
| 3.92E-47 | 0.262886 | 8.04E-09 | 0.203245 | 9.57E-06 | 0.101419 | 0.02842  | 0.444699 | 4.65E-24 |
| 2.58E-37 | 0.427317 | 3.75E-22 | 0.25447  | 2.45E-08 | 0.229163 | 5.56E-07 | 0.47573  | 9.51E-28 |
| 3.16E-52 | 0.285579 | 3.25E-10 | 0.259201 | 1.32E-08 | 0.229121 | 5.59E-07 | 0.428391 | 2.88E-22 |
| 2.83E-81 | 0.492073 | 7.55E-30 | 0.357905 | 1.47E-15 | 0.221755 | 1.30E-06 | 0.596698 | 2.23E-46 |
| 9.51E-13 | 0.44938  | 1.36E-24 | 0.375468 | 4.41E-17 | 0.34873  | 8.43E-15 | 0.455894 | 2.40E-25 |
| 3.02E-09 | 0.459043 | 1.02E-25 | 0.325583 | 5.41E-13 | 0.313534 | 4.12E-12 | 0.357303 | 1.65E-15 |
| 1.23E-09 | 0.340183 | 4.08E-14 | 0.402161 | 1.40E-19 | 0.379027 | 2.11E-17 | 0.369909 | 1.37E-16 |
| 3.82E-38 | 0.383261 | 8.67E-18 | 0.315764 | 2.85E-12 | 0.213365 | 3.28E-06 | 0.368375 | 1.86E-16 |
| 2.36E-09 | 0.268447 | 3.77E-09 | 0.359721 | 1.03E-15 | 0.287308 | 2.52E-10 | 0.295299 | 7.51E-11 |
| 2.21E-64 | 0.468741 | 6.95E-27 | 0.463921 | 2.67E-26 | 0.343521 | 2.22E-14 | 0.612275 | 2.19E-49 |
| 6.83E-12 | 0.481466 | 1.79E-28 | 0.500708 | 5.27E-31 | 0.493318 | 5.17E-30 | 0.40871  | 3.14E-20 |
| 1.58E-49 | 0.284102 | 4.04E-10 | 0.332067 | 1.75E-13 | 0.270065 | 3.01E-09 | 0.46889  | 6.67E-27 |
| 3.09E-48 | 0.495764 | 2.44E-30 | 0.386958 | 3.95E-18 | 0.328078 | 3.51E-13 | 0.538368 | 1.88E-36 |
| 3.07E-52 | 0.338404 | 5.64E-14 | 0.365564 | 3.27E-16 | 0.28123  | 6.15E-10 | 0.459639 | 8.68E-26 |
| 4.97E-22 | 0.440294 | 1.45E-23 | 0.324911 | 6.07E-13 | 0.296489 | 6.25E-11 | 0.449758 | 1.23E-24 |
| 4.25E-11 | 0.274578 | 1.60E-09 | 0.292267 | 1.19E-10 | 0.296134 | 6.60E-11 | 0.402778 | 1.22E-19 |
| 7.88E-18 | 0.399072 | 2.79E-19 | 0.314622 | 3.44E-12 | 0.366719 | 2.60E-16 | 0.491718 | 8.41E-30 |
| 0.00022  | 0.004386 | 0.92469  | 0.193593 | 2.53E-05 | 0.124488 | 0.00707  | 0.203084 | 9.73E-06 |
| 5.60E-13 | 0.340211 | 4.06E-14 | 0.277893 | 9.96E-10 | 0.203848 | 8.99E-06 | 0.385641 | 5.23E-18 |
| 2.80E-15 | 0.440612 | 1.34E-23 | 0.344911 | 1.72E-14 | 0.304484 | 1.79E-11 | 0.41302  | 1.15E-20 |
| 7.89E-64 | 0.535217 | 5.72E-36 | 0.413726 | 9.78E-21 | 0.386036 | 4.81E-18 | 0.588458 | 7.49E-45 |
| 8.06E-40 | 0.47039  | 4.37E-27 | 0.314746 | 3.37E-12 | 0.307781 | 1.05E-11 | 0.458675 | 1.13E-25 |
| 2.65E-19 | 0.44168  | 1.02E-23 | 0.390654 | 1.78E-18 | 0.304134 | 1.89E-11 | 0.225962 | 8.06E-07 |
| 7.14E-40 | 0.547916 | 6.05E-38 | 0.495362 | 2.76E-30 | 0.488061 | 2.54E-29 | 0.536184 | 4.07E-36 |
| 1.71E-10 | -0.34976 | 6.95E-15 | -0.27347 | 1.87E-09 | -0.21558 | 2.58E-06 | -0.35336 | 3.51E-15 |
| 2.32E-30 | 0.484545 | 7.24E-29 | 0.525384 | 1.70E-34 | 0.481389 | 1.84E-28 | 0.633587 | 8.78E-54 |
| 0.00087  | 0.271795 | 2.36E-09 | 0.385481 | 5.41E-18 | 0.31893  | 1.68E-12 | 0.359545 | 1.07E-15 |
| 1.11E-23 | 0.200101 | 1.32E-05 | 0.21801  | 1.98E-06 | 0.081834 | 0.07728  | 0.293242 | 1.03E-10 |
| 5.54E-10 | 0.320018 | 1.40E-12 | 0.275914 | 1.32E-09 | 0.266147 | 5.17E-09 | 0.35191  | 4.63E-15 |
| 3.27E-13 | -0.25153 | 3.59E-08 | -0.18016 | 9.04E-05 | -0.24157 | 1.26E-07 | -0.38033 | 1.61E-17 |
| 9.24E-05 | 0.221358 | 1.36E-06 | 0.274798 | 1.55E-09 | 0.260602 | 1.09E-08 | 0.222486 | 1.20E-06 |
| 1.59E-28 | 0.480876 | 2.13E-28 | 0.392981 | 1.07E-18 | 0.377175 | 3.10E-17 | 0.472146 | 2.65E-27 |
| 8.83E-14 | 0.258696 | 1.41E-08 | 0.198661 | 1.53E-05 | 0.245517 | 7.70E-08 | 0.348013 | 9.65E-15 |
| 4.69E-16 | 0.29844  | 4.62E-11 | 0.29365  | 9.67E-11 | 0.346378 | 1.31E-14 | 0.426995 | 4.06E-22 |
| 2.56E-05 | 0.295394 | 7.40E-11 | 0.358013 | 1.44E-15 | 0.389154 | 2.46E-18 | 0.467612 | 9.55E-27 |
| 1.50E-13 | 0.400354 | 2.10E-19 | 0.402318 | 1.35E-19 | 0.417869 | 3.68E-21 | 0.455857 | 2.42E-25 |
| 8.05E-21 | 0.508365 | 4.67E-32 | 0.464601 | 2.21E-26 | 0.458638 | 1.14E-25 | 0.600714 | 3.88E-47 |
| 2.32E-23 | 0.239881 | 1.55E-07 | 0.288457 | 2.12E-10 | 0.126358 | 0.00625  | 0.356101 | 2.08E-15 |
| 3.13E-45 | 0.692544 | 5.91E-68 | 0.62134  | 3.25E-51 | 0.568512 | 2.47E-41 | 0.577224 | 7.69E-43 |
| 7.44E-23 | 0.547002 | 8.45E-38 | 0.496092 | 2.21E-30 | 0.482256 | 1.42E-28 | 0.458614 | 1.15E-25 |
| 8.36E-27 | 0.579338 | 3.26E-43 | 0.439055 | 1.99E-23 | 0.377691 | 2.78E-17 | 0.475182 | 1.11E-27 |
| 5.05E-09 | 0.375289 | 4.57E-17 | 0.344248 | 1.94E-14 | 0.355002 | 2.57E-15 | 0.374294 | 5.61E-17 |
| 1.69E-26 | 0.48173  | 1.66E-28 | 0.49037  | 1.27E-29 | 0.392715 | 1.14E-18 | 0.400436 | 2.06E-19 |

|          |          |          |          |          |          |          |          |          |
|----------|----------|----------|----------|----------|----------|----------|----------|----------|
| 1.57E-15 | 0.311383 | 5.87E-12 | 0.368385 | 1.86E-16 | 0.331817 | 1.83E-13 | 0.562736 | 2.33E-40 |
| 8.86E-12 | 0.06685  | 0.14919  | 0.208121 | 5.75E-06 | 0.10794  | 0.01964  | 0.188298 | 4.22E-05 |
| 4.62E-28 | 0.416597 | 4.97E-21 | 0.327097 | 4.17E-13 | 0.253886 | 2.65E-08 | 0.402419 | 1.32E-19 |
| 1.21E-28 | 0.569255 | 1.84E-41 | 0.541595 | 5.97E-37 | 0.521951 | 5.41E-34 | 0.714798 | 3.09E-74 |
| 1.08E-61 | 0.452457 | 6.03E-25 | 0.444365 | 5.07E-24 | 0.387242 | 3.72E-18 | 0.588368 | 7.78E-45 |
| 6.52E-42 | 0.20802  | 5.82E-06 | 0.386052 | 4.79E-18 | 0.272652 | 2.10E-09 | 0.539091 | 1.46E-36 |
| 3.48E-26 | 0.243437 | 9.99E-08 | 0.299438 | 3.96E-11 | 0.255674 | 2.10E-08 | 0.370783 | 1.15E-16 |
| 5.77E-21 | -0.25303 | 2.96E-08 | -0.20753 | 6.12E-06 | -0.12984 | 0.00495  | -0.26567 | 5.51E-09 |
| 8.77E-46 | 0.4191   | 2.74E-21 | 0.336597 | 7.80E-14 | 0.31689  | 2.36E-12 | 0.578167 | 5.25E-43 |
| 2.18E-40 | 0.289975 | 1.69E-10 | 0.394154 | 8.30E-19 | 0.239221 | 1.68E-07 | 0.514319 | 6.78E-33 |
| 7.77E-13 | -0.26153 | 9.65E-09 | -0.11081 | 0.01659  | -0.15672 | 0.00068  | -0.44385 | 5.79E-24 |
| 6.24E-43 | 0.357003 | 1.75E-15 | 0.299664 | 3.82E-11 | 0.275049 | 1.49E-09 | 0.489338 | 1.73E-29 |
| 1.44E-16 | 0.271781 | 2.37E-09 | 0.312507 | 4.88E-12 | 0.238627 | 1.80E-07 | 0.306498 | 1.29E-11 |
| 0.00022  | 0.254547 | 2.43E-08 | 0.270556 | 2.81E-09 | 0.245967 | 7.28E-08 | 0.275123 | 1.48E-09 |
| 7.91E-57 | 0.357251 | 1.67E-15 | 0.427298 | 3.77E-22 | 0.36185  | 6.81E-16 | 0.491067 | 1.02E-29 |
| 5.30E-27 | 0.373205 | 7.01E-17 | 0.305306 | 1.57E-11 | 0.311528 | 5.73E-12 | 0.44117  | 1.16E-23 |
| 0.00468  | 0.316001 | 2.74E-12 | 0.36235  | 6.17E-16 | 0.360034 | 9.71E-16 | 0.182349 | 7.39E-05 |
| 9.77E-60 | 0.576554 | 1.01E-42 | 0.470212 | 4.59E-27 | 0.377483 | 2.91E-17 | 0.472312 | 2.53E-27 |
| 2.48E-43 | 0.289218 | 1.89E-10 | 0.32896  | 3.01E-13 | 0.265121 | 5.94E-09 | 0.37935  | 1.97E-17 |
| 6.41E-45 | 0.35476  | 2.69E-15 | 0.192545 | 2.80E-05 | 0.133122 | 0.00395  | 0.415503 | 6.44E-21 |
| 1.11E-50 | 0.583903 | 5.01E-44 | 0.541916 | 5.32E-37 | 0.459927 | 8.02E-26 | 0.608908 | 1.01E-48 |
| 5.19E-55 | 0.422186 | 1.31E-21 | 0.430817 | 1.58E-22 | 0.297481 | 5.36E-11 | 0.516673 | 3.13E-33 |
| 1.16E-17 | 0.519094 | 1.40E-33 | 0.379194 | 2.04E-17 | 0.322781 | 8.75E-13 | 0.398683 | 3.05E-19 |
| 0.0265   | 0.221689 | 1.31E-06 | 0.290153 | 1.64E-10 | 0.273819 | 1.78E-09 | 0.28232  | 5.25E-10 |
| 1.88E-05 | 0.033071 | 0.47587  | 0.237563 | 2.05E-07 | 0.136585 | 0.0031   | 0.209017 | 5.23E-06 |
| 2.95E-26 | 0.525771 | 1.49E-34 | 0.45784  | 1.42E-25 | 0.433872 | 7.38E-23 | 0.489703 | 1.55E-29 |
| 6.93E-50 | 0.374158 | 5.77E-17 | 0.271172 | 2.58E-09 | 0.180273 | 8.95E-05 | 0.400796 | 1.90E-19 |
| 1.34E-73 | 0.412304 | 1.36E-20 | 0.436211 | 4.09E-23 | 0.326141 | 4.91E-13 | 0.616562 | 3.04E-50 |
| 3.79E-34 | 0.260337 | 1.13E-08 | 0.328834 | 3.08E-13 | 0.219434 | 1.69E-06 | 0.513484 | 8.91E-33 |
| 1.84E-17 | 0.22822  | 6.21E-07 | 0.228693 | 5.88E-07 | 0.142649 | 0.002    | 0.312886 | 4.59E-12 |
| 1.64E-27 | 0.133299 | 0.0039   | 0.348832 | 8.27E-15 | 0.178743 | 0.0001   | 0.337597 | 6.52E-14 |
| 1.08E-18 | 0.440367 | 1.42E-23 | 0.468986 | 6.49E-27 | 0.453028 | 5.17E-25 | 0.424847 | 6.86E-22 |
| 1.67E-53 | 0.38394  | 7.51E-18 | 0.189974 | 3.60E-05 | 0.214519 | 2.90E-06 | 0.496625 | 1.87E-30 |
| 7.86E-23 | 0.118478 | 0.01039  | 0.183186 | 6.84E-05 | 0.070345 | 0.12902  | 0.304224 | 1.86E-11 |
| 9.11E-38 | 0.471663 | 3.04E-27 | 0.413981 | 9.21E-21 | 0.402505 | 1.29E-19 | 0.43425  | 6.71E-23 |
| 1.07E-24 | 0.136851 | 0.00304  | 0.151335 | 0.00104  | 0.093201 | 0.04411  | 0.251802 | 3.47E-08 |
| 1.28E-23 | 0.416808 | 4.73E-21 | 0.348183 | 9.34E-15 | 0.356596 | 1.89E-15 | 0.409484 | 2.62E-20 |
| 8.29E-40 | 0.38687  | 4.02E-18 | 0.402566 | 1.28E-19 | 0.304414 | 1.81E-11 | 0.524623 | 2.20E-34 |
| 9.34E-21 | 0.307728 | 1.06E-11 | 0.320276 | 1.34E-12 | 0.258076 | 1.53E-08 | 0.45674  | 1.91E-25 |
| 1.85E-10 | 0.354872 | 2.63E-15 | 0.166054 | 0.00031  | 0.268117 | 3.94E-09 | 0.294669 | 8.27E-11 |
| 1.06E-09 | 0.318675 | 1.75E-12 | 0.376112 | 3.86E-17 | 0.397976 | 3.57E-19 | 0.430185 | 1.85E-22 |
| 1.70E-33 | 0.528457 | 5.96E-35 | 0.504072 | 1.83E-31 | 0.510931 | 2.04E-32 | 0.600086 | 5.11E-47 |
| 1.07E-07 | 0.339824 | 4.36E-14 | 0.434104 | 6.96E-23 | 0.465643 | 1.66E-26 | 0.468966 | 6.53E-27 |
| 6.84E-12 | 0.216375 | 2.37E-06 | 0.224543 | 9.48E-07 | 0.213286 | 3.31E-06 | 0.188457 | 4.16E-05 |
| 7.87E-13 | -0.41671 | 4.84E-21 | -0.34849 | 8.82E-15 | -0.34608 | 1.38E-14 | -0.35509 | 2.53E-15 |

|          |          |          |          |          |          |          |          |          |
|----------|----------|----------|----------|----------|----------|----------|----------|----------|
| 1.54E-29 | 0.305435 | 1.53E-11 | 0.395117 | 6.71E-19 | 0.267357 | 4.38E-09 | 0.50099  | 4.83E-31 |
| 2.11E-23 | 0.581915 | 1.14E-43 | 0.420155 | 2.13E-21 | 0.373597 | 6.47E-17 | 0.381009 | 1.39E-17 |
| 4.72E-30 | 0.281613 | 5.82E-10 | 0.35429  | 2.94E-15 | 0.259011 | 1.35E-08 | 0.406473 | 5.25E-20 |
| 2.33E-11 | 0.413512 | 1.03E-20 | 0.359487 | 1.08E-15 | 0.287932 | 2.29E-10 | 0.382603 | 9.96E-18 |
| 3.31E-58 | 0.400379 | 2.09E-19 | 0.470389 | 4.37E-27 | 0.334635 | 1.11E-13 | 0.574545 | 2.26E-42 |
| 3.74E-27 | 0.343287 | 2.32E-14 | 0.294326 | 8.72E-11 | 0.258538 | 1.44E-08 | 0.493429 | 5.00E-30 |
| 1.76E-36 | 0.441477 | 1.07E-23 | 0.42565  | 5.64E-22 | 0.320112 | 1.38E-12 | 0.486187 | 4.44E-29 |
| 8.94E-50 | 0.575155 | 1.77E-42 | 0.558604 | 1.13E-39 | 0.504351 | 1.68E-31 | 0.611552 | 3.05E-49 |
| 1.24E-35 | 0.668998 | 6.65E-62 | 0.533247 | 1.14E-35 | 0.530195 | 3.28E-35 | 0.588664 | 6.87E-45 |
| 6.09E-16 | 0.313644 | 4.05E-12 | 0.363943 | 4.51E-16 | 0.284271 | 3.94E-10 | 0.270441 | 2.86E-09 |
| 1.16E-24 | 0.276542 | 1.21E-09 | 0.255144 | 2.25E-08 | 0.174171 | 0.00016  | 0.430073 | 1.90E-22 |
| 7.15E-08 | 0.232304 | 3.85E-07 | 0.359516 | 1.07E-15 | 0.370427 | 1.23E-16 | 0.32626  | 4.81E-13 |
| 2.14E-74 | 0.430899 | 1.55E-22 | 0.352786 | 3.92E-15 | 0.236351 | 2.38E-07 | 0.524199 | 2.54E-34 |
| 2.75E-09 | -0.10531 | 0.02285  | -0.16969 | 0.00023  | -0.25557 | 2.13E-08 | -0.27683 | 1.16E-09 |
| 2.28E-57 | 0.506383 | 8.79E-32 | 0.519138 | 1.38E-33 | 0.435467 | 4.94E-23 | 0.582505 | 8.91E-44 |
| 2.46E-31 | 0.283786 | 4.24E-10 | 0.381831 | 1.17E-17 | 0.235255 | 2.71E-07 | 0.545794 | 1.31E-37 |
| 1.25E-52 | 0.457736 | 1.46E-25 | 0.440577 | 1.35E-23 | 0.371677 | 9.57E-17 | 0.583905 | 5.00E-44 |
| 1.18E-30 | 0.501624 | 3.96E-31 | 0.458686 | 1.12E-25 | 0.408697 | 3.15E-20 | 0.584555 | 3.82E-44 |
| 2.68E-12 | 0.29414  | 8.97E-11 | 0.290829 | 1.48E-10 | 0.215363 | 2.64E-06 | 0.356205 | 2.04E-15 |
| 2.61E-18 | 0.393855 | 8.86E-19 | 0.42532  | 6.11E-22 | 0.382309 | 1.06E-17 | 0.370472 | 1.22E-16 |
| 2.39E-26 | 0.467166 | 1.08E-26 | 0.473139 | 2.00E-27 | 0.485195 | 5.97E-29 | 0.577573 | 6.67E-43 |
| 4.68E-10 | 0.122907 | 0.00784  | 0.286259 | 2.94E-10 | 0.200616 | 1.25E-05 | 0.227834 | 6.49E-07 |
| 1.84E-34 | 0.364563 | 3.99E-16 | 0.316589 | 2.48E-12 | 0.297227 | 5.58E-11 | 0.574485 | 2.31E-42 |
| 7.54E-72 | 0.517418 | 2.45E-33 | 0.525067 | 1.89E-34 | 0.447934 | 2.00E-24 | 0.655163 | 1.34E-58 |
| 7.66E-30 | 0.52886  | 5.19E-35 | 0.522521 | 4.47E-34 | 0.469451 | 5.69E-27 | 0.583053 | 7.11E-44 |
| 1.88E-10 | 0.280293 | 7.05E-10 | 0.358946 | 1.20E-15 | 0.334337 | 1.17E-13 | 0.333256 | 1.42E-13 |
| 1.06E-05 | 0.318189 | 1.90E-12 | 0.147713 | 0.00137  | 0.220395 | 1.51E-06 | 0.29586  | 6.89E-11 |
| 1.59E-11 | 0.423368 | 9.82E-22 | 0.426761 | 4.30E-22 | 0.437991 | 2.61E-23 | 0.495218 | 2.89E-30 |
| 3.70E-25 | 0.266746 | 4.76E-09 | 0.151391 | 0.00103  | 0.132363 | 0.00417  | 0.35564  | 2.27E-15 |
| 1.30E-10 | 0.240078 | 1.51E-07 | 0.256673 | 1.84E-08 | 0.051794 | 0.26399  | 0.219296 | 1.71E-06 |
| 2.80E-19 | 0.283602 | 4.35E-10 | 0.197142 | 1.78E-05 | 0.12377  | 0.00741  | 0.439309 | 1.86E-23 |
| 4.12E-71 | 0.42885  | 2.57E-22 | 0.482736 | 1.24E-28 | 0.343713 | 2.14E-14 | 0.631657 | 2.27E-53 |
| 6.49E-27 | 0.232623 | 3.71E-07 | 0.169359 | 0.00024  | 0.055839 | 0.22844  | 0.380783 | 1.46E-17 |
| 7.49E-41 | 0.595198 | 4.26E-46 | 0.55938  | 8.41E-40 | 0.508612 | 4.31E-32 | 0.560377 | 5.75E-40 |
| 1.25E-43 | 0.291138 | 1.42E-10 | 0.340106 | 4.14E-14 | 0.241797 | 1.22E-07 | 0.477713 | 5.36E-28 |
| 1.54E-35 | 0.21247  | 3.62E-06 | 0.256415 | 1.90E-08 | 0.16266  | 0.00042  | 0.461816 | 4.78E-26 |
| 2.50E-28 | 0.327795 | 3.69E-13 | 0.33627  | 8.27E-14 | 0.224941 | 9.06E-07 | 0.391551 | 1.47E-18 |
| 2.50E-06 | 0.114944 | 0.01294  | 0.267171 | 4.49E-09 | 0.178435 | 0.00011  | 0.21532  | 2.66E-06 |
| 2.58E-47 | 0.373994 | 5.96E-17 | 0.344073 | 2.00E-14 | 0.207445 | 6.18E-06 | 0.374844 | 5.01E-17 |
| 2.42E-28 | 0.455106 | 2.96E-25 | 0.385791 | 5.07E-18 | 0.40498  | 7.38E-20 | 0.491832 | 8.13E-30 |
| 3.47E-06 | 0.422487 | 1.22E-21 | 0.321692 | 1.05E-12 | 0.29552  | 7.26E-11 | 0.286597 | 2.80E-10 |
| 4.86E-17 | 0.621617 | 2.85E-51 | 0.417279 | 4.23E-21 | 0.504147 | 1.79E-31 | 0.539264 | 1.37E-36 |
| 2.48E-14 | 0.341815 | 3.03E-14 | 0.292914 | 1.08E-10 | 0.38079  | 1.46E-17 | 0.372295 | 8.44E-17 |
| 5.43E-14 | 0.385965 | 4.88E-18 | 0.323143 | 8.22E-13 | 0.398643 | 3.07E-19 | 0.417129 | 4.38E-21 |
| 7.03E-43 | 0.363062 | 5.36E-16 | 0.325854 | 5.16E-13 | 0.25267  | 3.10E-08 | 0.382352 | 1.05E-17 |

|          |          |          |          |          |          |          |          |          |
|----------|----------|----------|----------|----------|----------|----------|----------|----------|
| 1.46E-39 | 0.569149 | 1.92E-41 | 0.556732 | 2.29E-39 | 0.579652 | 2.87E-43 | 0.596885 | 2.06E-46 |
| 1.95E-16 | -0.00445 | 0.92355  | -0.04361 | 0.34709  | 0.074243 | 0.10909  | -0.24524 | 7.98E-08 |
| 5.34E-11 | 0.096106 | 0.03788  | 0.176151 | 0.00013  | 0.126059 | 0.00638  | 0.312489 | 4.89E-12 |
| 8.23E-25 | 0.207647 | 6.05E-06 | 0.271203 | 2.57E-09 | 0.186866 | 4.84E-05 | 0.446177 | 3.16E-24 |
| 1.61E-54 | 0.482854 | 1.19E-28 | 0.412738 | 1.23E-20 | 0.281178 | 6.20E-10 | 0.4579   | 1.39E-25 |
| 8.49E-20 | 0.611026 | 3.87E-49 | 0.388377 | 2.91E-18 | 0.399861 | 2.34E-19 | 0.43575  | 4.60E-23 |
| 2.78E-05 | -0.30599 | 1.40E-11 | -0.26785 | 4.09E-09 | -0.35403 | 3.09E-15 | -0.07521 | 0.10453  |
| 2.47E-38 | 0.38189  | 1.16E-17 | 0.275298 | 1.44E-09 | 0.156322 | 0.0007   | 0.428497 | 2.81E-22 |
| 1.04E-23 | -0.2373  | 2.12E-07 | -0.28275 | 4.93E-10 | -0.30988 | 7.49E-12 | -0.43689 | 3.45E-23 |
| 6.37E-60 | 0.36876  | 1.73E-16 | 0.380156 | 1.67E-17 | 0.294687 | 8.25E-11 | 0.620882 | 4.03E-51 |
| 8.52E-31 | 0.38467  | 6.43E-18 | 0.293261 | 1.03E-10 | 0.31068  | 6.58E-12 | 0.517484 | 2.40E-33 |
| 5.91E-18 | 0.410529 | 2.06E-20 | 0.338223 | 5.82E-14 | 0.330116 | 2.46E-13 | 0.282802 | 4.89E-10 |
| 9.34E-32 | 0.140699 | 0.00231  | 0.31263  | 4.78E-12 | 0.135209 | 0.00342  | 0.421092 | 1.70E-21 |
| 1.23E-18 | 0.065608 | 0.15691  | 0.211026 | 4.23E-06 | 0.040767 | 0.37941  | 0.225654 | 8.35E-07 |
| 9.71E-51 | 0.454257 | 3.72E-25 | 0.408975 | 2.95E-20 | 0.392913 | 1.09E-18 | 0.646867 | 1.06E-56 |
| 1.09E-20 | 0.276641 | 1.19E-09 | 0.370232 | 1.28E-16 | 0.261336 | 9.91E-09 | 0.408954 | 2.97E-20 |
| 7.78E-22 | 0.289444 | 1.83E-10 | 0.291334 | 1.37E-10 | 0.240861 | 1.37E-07 | 0.387848 | 3.26E-18 |
| 6.97E-36 | 0.363082 | 5.34E-16 | 0.254201 | 2.54E-08 | 0.218852 | 1.80E-06 | 0.40896  | 2.96E-20 |
| 2.18E-58 | 0.446038 | 3.28E-24 | 0.34539  | 1.57E-14 | 0.251062 | 3.81E-08 | 0.435894 | 4.44E-23 |
| 2.02E-13 | 0.238848 | 1.76E-07 | 0.342298 | 2.78E-14 | 0.295436 | 7.35E-11 | 0.4755   | 1.02E-27 |
| 5.42E-63 | 0.35632  | 1.99E-15 | 0.464889 | 2.04E-26 | 0.336878 | 7.42E-14 | 0.59205  | 1.64E-45 |
| 2.38E-19 | 0.400064 | 2.24E-19 | 0.450145 | 1.11E-24 | 0.352934 | 3.81E-15 | 0.445039 | 4.26E-24 |
| 3.52E-11 | 0.289759 | 1.74E-10 | 0.285094 | 3.49E-10 | 0.20036  | 1.29E-05 | 0.260642 | 1.09E-08 |
| 4.26E-39 | 0.220425 | 1.51E-06 | 0.17322  | 0.00017  | 0.046411 | 0.31692  | 0.333378 | 1.39E-13 |
| 5.71E-32 | 0.219393 | 1.69E-06 | 0.210544 | 4.45E-06 | 0.110222 | 0.01718  | 0.31677  | 2.41E-12 |
| 3.46E-31 | 0.586418 | 1.76E-44 | 0.491305 | 9.53E-30 | 0.44756  | 2.20E-24 | 0.449951 | 1.17E-24 |
| 2.16E-44 | 0.476097 | 8.55E-28 | 0.339309 | 4.79E-14 | 0.332276 | 1.68E-13 | 0.488653 | 2.12E-29 |
| 4.52E-24 | 0.299855 | 3.71E-11 | 0.137685 | 0.00287  | 0.076917 | 0.09688  | 0.378497 | 2.35E-17 |
| 7.21E-44 | 0.585728 | 2.35E-44 | 0.480136 | 2.65E-28 | 0.384118 | 7.23E-18 | 0.496399 | 2.01E-30 |
| 8.47E-32 | 0.177089 | 0.00012  | 0.221487 | 1.34E-06 | 0.113371 | 0.01423  | 0.344322 | 1.91E-14 |
| 5.34E-30 | 0.24373  | 9.63E-08 | 0.292733 | 1.11E-10 | 0.236687 | 2.28E-07 | 0.451354 | 8.08E-25 |
| 3.75E-36 | -0.30962 | 7.81E-12 | -0.3277  | 3.75E-13 | -0.19192 | 2.98E-05 | -0.42474 | 7.04E-22 |
| 2.87E-42 | 0.478436 | 4.35E-28 | 0.579215 | 3.43E-43 | 0.428147 | 3.06E-22 | 0.569016 | 2.03E-41 |
| 0.00057  | -0.07474 | 0.10672  | -0.20929 | 5.08E-06 | -0.24729 | 6.17E-08 | -0.17214 | 0.00019  |
| 7.07E-63 | 0.5454   | 1.51E-37 | 0.52866  | 5.56E-35 | 0.445733 | 3.55E-24 | 0.620192 | 5.58E-51 |
| 8.17E-45 | 0.280344 | 7.00E-10 | 0.222314 | 1.22E-06 | 0.171263 | 0.0002   | 0.444319 | 5.13E-24 |
| 0.248    | 0.091086 | 0.04916  | 0.229303 | 5.47E-07 | 0.274796 | 1.55E-09 | 0.231851 | 4.06E-07 |
| 3.38E-35 | 0.477398 | 5.87E-28 | 0.463007 | 3.44E-26 | 0.463222 | 3.24E-26 | 0.524719 | 2.13E-34 |
| 2.67E-22 | 0.500752 | 5.20E-31 | 0.471226 | 3.45E-27 | 0.415348 | 6.68E-21 | 0.566169 | 6.17E-41 |
| 2.72E-22 | 0.208478 | 5.54E-06 | 0.303496 | 2.09E-11 | 0.193527 | 2.54E-05 | 0.320936 | 1.20E-12 |
| 2.10E-33 | 0.237162 | 2.15E-07 | 0.277883 | 9.98E-10 | 0.178669 | 0.0001   | 0.331444 | 1.95E-13 |
| 2.97E-27 | -0.23194 | 4.02E-07 | -0.16204 | 0.00044  | -0.05921 | 0.20151  | -0.35638 | 1.97E-15 |
| 2.45E-17 | 0.534154 | 8.30E-36 | 0.348148 | 9.40E-15 | 0.381587 | 1.23E-17 | 0.446611 | 2.82E-24 |
| 1.20E-25 | 0.471865 | 2.87E-27 | 0.356152 | 2.06E-15 | 0.309526 | 7.94E-12 | 0.397659 | 3.83E-19 |
| 8.02E-35 | 0.537822 | 2.28E-36 | 0.482182 | 1.45E-28 | 0.483925 | 8.69E-29 | 0.54831  | 5.24E-38 |

|          |          |          |          |          |          |          |          |          |
|----------|----------|----------|----------|----------|----------|----------|----------|----------|
| 3.89E-27 | 0.237676 | 2.02E-07 | 0.109036 | 0.01842  | 0.067049 | 0.14799  | 0.346965 | 1.17E-14 |
| 5.49E-28 | 0.465987 | 1.50E-26 | 0.279771 | 7.60E-10 | 0.215846 | 2.51E-06 | 0.452718 | 5.62E-25 |
| 3.19E-63 | 0.576067 | 1.23E-42 | 0.429665 | 2.10E-22 | 0.430177 | 1.85E-22 | 0.687211 | 1.56E-66 |
| 3.81E-10 | 0.559697 | 7.45E-40 | 0.516947 | 2.86E-33 | 0.441388 | 1.09E-23 | 0.3904   | 1.88E-18 |
| 3.17E-28 | 0.517806 | 2.15E-33 | 0.409582 | 2.57E-20 | 0.298067 | 4.90E-11 | 0.351109 | 5.39E-15 |
| 5.09E-22 | 0.45983  | 8.23E-26 | 0.307282 | 1.14E-11 | 0.304512 | 1.78E-11 | 0.376251 | 3.75E-17 |
| 1.99E-06 | 0.346376 | 1.31E-14 | 0.334648 | 1.11E-13 | 0.394217 | 8.18E-19 | 0.332017 | 1.76E-13 |
| 8.50E-06 | 0.319553 | 1.51E-12 | 0.198224 | 1.60E-05 | 0.121881 | 0.00837  | 0.20755  | 6.11E-06 |
| 4.84E-05 | 0.397543 | 3.93E-19 | 0.242655 | 1.10E-07 | 0.214093 | 3.04E-06 | 0.2334   | 3.38E-07 |
| 1.34E-19 | 0.313762 | 3.97E-12 | 0.434019 | 7.11E-23 | 0.33601  | 8.67E-14 | 0.490137 | 1.36E-29 |
| 1.16E-22 | 0.42636  | 4.74E-22 | 0.284827 | 3.63E-10 | 0.235019 | 2.79E-07 | 0.366102 | 2.94E-16 |
| 1.02E-61 | 0.303322 | 2.15E-11 | 0.238151 | 1.91E-07 | 0.123088 | 0.00775  | 0.451876 | 7.04E-25 |
| 9.97E-09 | 0.280453 | 6.89E-10 | 0.157142 | 0.00065  | 0.158374 | 0.00059  | 0.342247 | 2.80E-14 |
| 9.00E-06 | 0.297506 | 5.34E-11 | 0.200516 | 1.27E-05 | 0.243499 | 9.91E-08 | 0.403952 | 9.32E-20 |
| 4.14E-41 | 0.383432 | 8.36E-18 | 0.23016  | 4.95E-07 | 0.224336 | 9.71E-07 | 0.397661 | 3.82E-19 |
| 4.12E-19 | 0.174006 | 0.00016  | 0.210402 | 4.52E-06 | 0.083898 | 0.07008  | 0.292068 | 1.23E-10 |
| 9.93E-50 | 0.472582 | 2.34E-27 | 0.475883 | 9.10E-28 | 0.390746 | 1.74E-18 | 0.500607 | 5.44E-31 |
| 1.27E-38 | 0.605488 | 4.70E-48 | 0.487444 | 3.05E-29 | 0.456111 | 2.26E-25 | 0.488949 | 1.94E-29 |
| 2.32E-13 | 0.280757 | 6.59E-10 | 0.346452 | 1.29E-14 | 0.355621 | 2.28E-15 | 0.463398 | 3.09E-26 |
| 3.85E-28 | 0.249662 | 4.56E-08 | 0.154608 | 0.0008   | 0.135753 | 0.00329  | 0.339157 | 4.92E-14 |
| 7.48E-14 | 0.36119  | 7.75E-16 | 0.364368 | 4.14E-16 | 0.314856 | 3.31E-12 | 0.291351 | 1.37E-10 |
| 6.03E-49 | 0.419736 | 2.36E-21 | 0.423469 | 9.59E-22 | 0.336212 | 8.36E-14 | 0.523507 | 3.21E-34 |
| 5.84E-21 | 0.217246 | 2.15E-06 | 0.150964 | 0.00107  | 0.097161 | 0.03582  | 0.222898 | 1.14E-06 |
| 6.21E-28 | 0.165995 | 0.00032  | 0.292589 | 1.14E-10 | 0.104904 | 0.02338  | 0.398771 | 2.99E-19 |
| 4.17E-32 | 0.668477 | 8.92E-62 | 0.482293 | 1.41E-28 | 0.552345 | 1.18E-38 | 0.491128 | 1.01E-29 |
| 1.93E-15 | 0.377322 | 3.00E-17 | 0.363049 | 5.38E-16 | 0.259771 | 1.22E-08 | 0.40271  | 1.23E-19 |
| 3.39E-13 | -0.03352 | 0.46985  | -0.09381 | 0.04274  | -0.08344 | 0.07163  | -0.41176 | 1.55E-20 |
| 1.21E-63 | 0.516621 | 3.18E-33 | 0.519015 | 1.44E-33 | 0.390022 | 2.04E-18 | 0.64113  | 2.01E-55 |
| 3.16E-10 | 0.248263 | 5.45E-08 | 0.190552 | 3.40E-05 | 0.135743 | 0.00329  | 0.369503 | 1.49E-16 |
| 1.79E-27 | 0.416648 | 4.91E-21 | 0.408727 | 3.13E-20 | 0.265625 | 5.55E-09 | 0.451642 | 7.49E-25 |
| 1.93E-56 | 0.508952 | 3.86E-32 | 0.496588 | 1.90E-30 | 0.449463 | 1.33E-24 | 0.62407  | 8.90E-52 |
| 2.91E-63 | 0.322805 | 8.71E-13 | 0.476683 | 7.22E-28 | 0.342551 | 2.65E-14 | 0.614977 | 6.34E-50 |
| 7.00E-45 | 0.683976 | 1.10E-65 | 0.589995 | 3.92E-45 | 0.58737  | 1.18E-44 | 0.604354 | 7.78E-48 |
| 2.82E-19 | 0.627315 | 1.88E-52 | 0.51202  | 1.43E-32 | 0.52829  | 6.31E-35 | 0.406845 | 4.82E-20 |
| 1.78E-68 | 0.311047 | 6.20E-12 | 0.350313 | 6.26E-15 | 0.221988 | 1.27E-06 | 0.486643 | 3.88E-29 |
| 1.58E-07 | 0.252918 | 3.00E-08 | 0.294166 | 8.93E-11 | 0.243815 | 9.53E-08 | 0.401278 | 1.70E-19 |
| 1.24E-50 | 0.509038 | 3.76E-32 | 0.438254 | 2.44E-23 | 0.362258 | 6.29E-16 | 0.507637 | 5.89E-32 |
| 1.03E-57 | 0.256452 | 1.89E-08 | 0.283817 | 4.22E-10 | 0.134409 | 0.00361  | 0.560691 | 5.10E-40 |
| 4.07E-35 | 0.366085 | 2.95E-16 | 0.24029  | 1.47E-07 | 0.223906 | 1.02E-06 | 0.449391 | 1.36E-24 |
| 9.86E-23 | 0.1764   | 0.00013  | 0.122716 | 0.00793  | 0.050892 | 0.2724   | 0.349685 | 7.05E-15 |
| 3.05E-40 | 0.271587 | 2.43E-09 | 0.235942 | 2.49E-07 | 0.181961 | 7.66E-05 | 0.411001 | 1.85E-20 |
| 5.45E-18 | 0.030679 | 0.50839  | 0.122371 | 0.00811  | 0.028204 | 0.5432   | 0.27258  | 2.12E-09 |
| 7.57E-19 | 0.137061 | 0.003    | 0.173079 | 0.00017  | 0.08443  | 0.06832  | 0.334492 | 1.14E-13 |
| 8.16E-13 | 0.326329 | 4.76E-13 | 0.315501 | 2.98E-12 | 0.28761  | 2.41E-10 | 0.371196 | 1.05E-16 |
| 2.46E-65 | 0.364865 | 3.76E-16 | 0.390262 | 1.94E-18 | 0.236307 | 2.39E-07 | 0.486077 | 4.59E-29 |

|          |          |          |          |          |          |          |          |          |
|----------|----------|----------|----------|----------|----------|----------|----------|----------|
| 4.15E-28 | 0.417481 | 4.03E-21 | 0.431207 | 1.44E-22 | 0.42595  | 5.24E-22 | 0.490745 | 1.13E-29 |
| 2.67E-18 | 0.00064  | 0.989    | 0.060583 | 0.19125  | 0.036301 | 0.43384  | 0.236006 | 2.48E-07 |
| 6.40E-31 | 0.4386   | 2.23E-23 | 0.387924 | 3.21E-18 | 0.381027 | 1.39E-17 | 0.432777 | 9.71E-23 |
| 2.56E-11 | 0.199423 | 1.41E-05 | 0.121519 | 0.00857  | 0.152649 | 0.00094  | 0.147078 | 0.00144  |
| 5.80E-43 | 0.567086 | 4.31E-41 | 0.508398 | 4.62E-32 | 0.457576 | 1.52E-25 | 0.655179 | 1.33E-58 |
| 2.65E-49 | 0.575432 | 1.58E-42 | 0.49145  | 9.12E-30 | 0.460048 | 7.76E-26 | 0.64197  | 1.31E-55 |
| 9.64E-18 | 0.216944 | 2.22E-06 | 0.2357   | 2.57E-07 | 0.170925 | 0.00021  | 0.354726 | 2.71E-15 |
| 5.37E-62 | 0.207515 | 6.13E-06 | 0.185636 | 5.44E-05 | 0.040568 | 0.38174  | 0.456653 | 1.95E-25 |
| 7.80E-64 | 0.527    | 9.81E-35 | 0.487621 | 2.89E-29 | 0.421266 | 1.63E-21 | 0.663383 | 1.53E-60 |
| 1.62E-57 | 0.457882 | 1.40E-25 | 0.413389 | 1.06E-20 | 0.31959  | 1.50E-12 | 0.605882 | 3.94E-48 |
| 2.63E-09 | 0.411968 | 1.47E-20 | 0.363375 | 5.04E-16 | 0.383909 | 7.56E-18 | 0.358449 | 1.32E-15 |
| 2.02E-65 | 0.444476 | 4.93E-24 | 0.378326 | 2.44E-17 | 0.367214 | 2.35E-16 | 0.625643 | 4.19E-52 |
| 1.08E-35 | 0.532674 | 1.39E-35 | 0.380635 | 1.51E-17 | 0.409701 | 2.50E-20 | 0.578716 | 4.20E-43 |
| 5.15E-32 | 0.634332 | 6.08E-54 | 0.561852 | 3.27E-40 | 0.540063 | 1.03E-36 | 0.532554 | 1.45E-35 |
| 5.48E-09 | 0.42792  | 3.24E-22 | 0.452669 | 5.70E-25 | 0.40971  | 2.49E-20 | 0.487744 | 2.79E-29 |
| 4.50E-56 | 0.415381 | 6.63E-21 | 0.364073 | 4.39E-16 | 0.326403 | 4.70E-13 | 0.557382 | 1.79E-39 |
| 9.99E-10 | 0.187162 | 4.71E-05 | 0.29134  | 1.37E-10 | 0.269372 | 3.31E-09 | 0.306513 | 1.29E-11 |
| 4.16E-47 | 0.529188 | 4.64E-35 | 0.421949 | 1.38E-21 | 0.376808 | 3.34E-17 | 0.555099 | 4.23E-39 |
| 1.47E-20 | 0.471847 | 2.89E-27 | 0.369721 | 1.42E-16 | 0.378673 | 2.27E-17 | 0.418956 | 2.84E-21 |
| 7.90E-38 | 0.314101 | 3.75E-12 | 0.291264 | 1.39E-10 | 0.164895 | 0.00035  | 0.427874 | 3.27E-22 |
| 3.06E-45 | 0.209768 | 4.83E-06 | 0.147563 | 0.00138  | 0.066616 | 0.15063  | 0.400973 | 1.83E-19 |
| 1.98E-47 | 0.292511 | 1.15E-10 | 0.298995 | 4.24E-11 | 0.232623 | 3.71E-07 | 0.526827 | 1.04E-34 |
| 2.40E-13 | 0.375397 | 4.47E-17 | 0.38905  | 2.52E-18 | 0.323741 | 7.42E-13 | 0.359726 | 1.03E-15 |
| 5.09E-48 | 0.522727 | 4.17E-34 | 0.54946  | 3.43E-38 | 0.477114 | 6.38E-28 | 0.632869 | 1.25E-53 |
| 6.80E-20 | 0.356448 | 1.95E-15 | 0.330223 | 2.42E-13 | 0.346055 | 1.39E-14 | 0.475924 | 8.99E-28 |
| 5.45E-37 | 0.455356 | 2.77E-25 | 0.461201 | 5.66E-26 | 0.398529 | 3.15E-19 | 0.4493   | 1.39E-24 |
| 9.24E-37 | 0.409841 | 2.42E-20 | 0.424068 | 8.29E-22 | 0.371242 | 1.05E-16 | 0.535497 | 5.18E-36 |
| 3.79E-46 | 0.649393 | 2.84E-57 | 0.50509  | 1.33E-31 | 0.493769 | 4.50E-30 | 0.603356 | 1.21E-47 |
| 6.07E-13 | 0.410693 | 1.98E-20 | 0.365151 | 3.55E-16 | 0.380017 | 1.71E-17 | 0.393434 | 9.71E-19 |
| 4.17E-22 | 0.427655 | 3.45E-22 | 0.41628  | 5.36E-21 | 0.308647 | 9.15E-12 | 0.311264 | 5.98E-12 |
| 4.19E-11 | 0.052613 | 0.25649  | 0.18895  | 3.97E-05 | 0.120596 | 0.00909  | 0.194102 | 2.40E-05 |
| 1.23E-10 | 0.085723 | 0.06418  | 0.175853 | 0.00013  | 0.098922 | 0.03258  | 0.188103 | 4.30E-05 |
| 5.87E-35 | 0.124791 | 0.00693  | 0.177715 | 0.00011  | 0.085028 | 0.06638  | 0.35099  | 5.51E-15 |
| 2.75E-22 | 0.279456 | 7.96E-10 | 0.353551 | 3.39E-15 | 0.308975 | 8.68E-12 | 0.439078 | 1.98E-23 |
| 3.15E-41 | 0.318134 | 1.92E-12 | 0.417233 | 4.28E-21 | 0.309598 | 7.85E-12 | 0.504463 | 1.62E-31 |
| 8.07E-16 | 0.129788 | 0.00497  | 0.18098  | 8.39E-05 | 0.065606 | 0.15693  | 0.278628 | 8.97E-10 |
| 3.03E-12 | 0.524605 | 2.21E-34 | 0.459106 | 1.00E-25 | 0.471401 | 3.28E-27 | 0.492151 | 7.38E-30 |
| 4.37E-30 | 0.510699 | 2.20E-32 | 0.453919 | 4.08E-25 | 0.431821 | 1.23E-22 | 0.591792 | 1.83E-45 |
| 9.01E-13 | 0.37251  | 8.08E-17 | 0.381249 | 1.32E-17 | 0.322536 | 9.12E-13 | 0.423076 | 1.05E-21 |
| 7.74E-05 | 0.367086 | 2.41E-16 | 0.378111 | 2.55E-17 | 0.43977  | 1.66E-23 | 0.201779 | 1.11E-05 |
| 7.77E-32 | 0.262967 | 7.96E-09 | 0.187187 | 4.69E-05 | 0.050546 | 0.27568  | 0.364376 | 4.14E-16 |
| 7.57E-30 | 0.518107 | 1.95E-33 | 0.479092 | 3.59E-28 | 0.407585 | 4.07E-20 | 0.428914 | 2.53E-22 |
| 1.01E-22 | -0.06074 | 0.19012  | 0.004583 | 0.92131  | -0.12322 | 0.00768  | 0.236546 | 2.32E-07 |
| 1.25E-11 | -0.04877 | 0.29294  | -0.15041 | 0.00111  | -0.18235 | 7.39E-05 | -0.35506 | 2.54E-15 |
| 3.79E-57 | 0.502373 | 3.13E-31 | 0.566115 | 6.30E-41 | 0.475779 | 9.37E-28 | 0.655323 | 1.23E-58 |



|          |          |          |          |          |          |          |          |          |
|----------|----------|----------|----------|----------|----------|----------|----------|----------|
| 5.52E-30 | 0.21711  | 2.18E-06 | 0.244297 | 8.97E-08 | 0.139494 | 0.00252  | 0.296062 | 6.68E-11 |
| 5.83E-27 | 0.441024 | 1.20E-23 | 0.284784 | 3.66E-10 | 0.264818 | 6.19E-09 | 0.371179 | 1.06E-16 |
| 5.13E-31 | 0.332556 | 1.60E-13 | 0.203669 | 9.16E-06 | 0.222719 | 1.17E-06 | 0.366107 | 2.93E-16 |
| 1.36E-63 | 0.374722 | 5.14E-17 | 0.385803 | 5.05E-18 | 0.226499 | 7.58E-07 | 0.603873 | 9.64E-48 |
| 1.07E-11 | -0.22998 | 5.06E-07 | -0.20712 | 6.39E-06 | -0.17267 | 0.00018  | -0.20794 | 5.87E-06 |
| 1.13E-25 | 0.22941  | 5.41E-07 | 0.153853 | 0.00085  | 0.033469 | 0.47057  | 0.298765 | 4.39E-11 |
| 1.17E-28 | 0.323378 | 7.90E-13 | 0.332541 | 1.61E-13 | 0.327003 | 4.23E-13 | 0.538725 | 1.66E-36 |
| 3.26E-20 | 0.451784 | 7.21E-25 | 0.396362 | 5.10E-19 | 0.360996 | 8.05E-16 | 0.379296 | 1.99E-17 |
| 3.43E-28 | 0.59697  | 1.99E-46 | 0.466724 | 1.22E-26 | 0.405294 | 6.87E-20 | 0.426555 | 4.52E-22 |
| 1.23E-34 | 0.349392 | 7.45E-15 | 0.381475 | 1.26E-17 | 0.293815 | 9.43E-11 | 0.464564 | 2.24E-26 |
| 7.93E-06 | 0.401776 | 1.52E-19 | 0.427004 | 4.05E-22 | 0.410539 | 2.06E-20 | 0.261023 | 1.03E-08 |
| 2.59E-37 | 0.543835 | 2.67E-37 | 0.522735 | 4.16E-34 | 0.47947  | 3.22E-28 | 0.547394 | 7.32E-38 |
| 2.53E-32 | 0.422503 | 1.21E-21 | 0.464335 | 2.38E-26 | 0.397897 | 3.63E-19 | 0.558047 | 1.39E-39 |
| 2.60E-32 | 0.450996 | 8.89E-25 | 0.469982 | 4.90E-27 | 0.399165 | 2.74E-19 | 0.682429 | 2.76E-65 |
| 1.91E-20 | 0.379207 | 2.03E-17 | 0.314597 | 3.46E-12 | 0.340554 | 3.82E-14 | 0.473746 | 1.68E-27 |
| 3.34E-25 | 0.493357 | 5.11E-30 | 0.269421 | 3.29E-09 | 0.286077 | 3.02E-10 | 0.462947 | 3.50E-26 |
| 1.07E-40 | 0.455962 | 2.35E-25 | 0.464467 | 2.30E-26 | 0.431493 | 1.34E-22 | 0.539002 | 1.50E-36 |
| 2.56E-58 | 0.433633 | 7.84E-23 | 0.347884 | 9.88E-15 | 0.299743 | 3.77E-11 | 0.470466 | 4.27E-27 |
| 7.25E-21 | 0.647585 | 7.29E-57 | 0.552663 | 1.05E-38 | 0.528143 | 6.64E-35 | 0.448712 | 1.63E-24 |
| 3.12E-14 | 0.105447 | 0.02267  | 0.184728 | 5.92E-05 | 0.048025 | 0.30037  | 0.255065 | 2.27E-08 |
| 4.23E-28 | 0.463548 | 2.96E-26 | 0.451473 | 7.83E-25 | 0.485801 | 4.98E-29 | 0.546901 | 8.77E-38 |
| 6.08E-17 | 0.173881 | 0.00016  | 0.203242 | 9.57E-06 | 0.144121 | 0.00179  | 0.2904   | 1.58E-10 |
| 9.82E-28 | 0.373972 | 5.99E-17 | 0.328851 | 3.07E-13 | 0.265368 | 5.74E-09 | 0.411739 | 1.56E-20 |
| 1.12E-14 | 0.293556 | 9.81E-11 | 0.402076 | 1.42E-19 | 0.35495  | 2.60E-15 | 0.356745 | 1.84E-15 |
| 1.22E-17 | 0.338826 | 5.22E-14 | 0.282367 | 5.21E-10 | 0.201256 | 1.17E-05 | 0.491308 | 9.53E-30 |
| 6.87E-53 | 0.277535 | 1.05E-09 | 0.171816 | 0.00019  | 0.06417  | 0.16622  | 0.449252 | 1.41E-24 |
| 8.88E-23 | -0.5581  | 1.37E-39 | -0.45066 | 9.73E-25 | -0.49812 | 1.18E-30 | -0.56575 | 7.26E-41 |
| 2.59E-23 | 0.167228 | 0.00028  | 0.147696 | 0.00137  | 0.081958 | 0.07683  | 0.404013 | 9.19E-20 |
| 3.26E-06 | -0.09709 | 0.03595  | -0.1912  | 3.19E-05 | -0.20677 | 6.63E-06 | -0.15065 | 0.00109  |
| 2.86E-11 | 0.494479 | 3.62E-30 | 0.243217 | 1.03E-07 | 0.255846 | 2.05E-08 | 0.29225  | 1.20E-10 |
| 4.61E-15 | 0.303316 | 2.15E-11 | 0.203643 | 9.18E-06 | 0.201936 | 1.09E-05 | 0.253792 | 2.68E-08 |
| 1.41E-05 | 0.282008 | 5.50E-10 | 0.351561 | 4.95E-15 | 0.406949 | 4.70E-20 | 0.285856 | 3.12E-10 |
| 9.89E-40 | 0.591779 | 1.84E-45 | 0.50588  | 1.03E-31 | 0.495278 | 2.84E-30 | 0.531257 | 2.27E-35 |
| 6.08E-06 | 0.31036  | 6.93E-12 | 0.190169 | 3.53E-05 | 0.315805 | 2.83E-12 | 0.178557 | 0.0001   |
| 6.25E-26 | 0.232568 | 3.73E-07 | 0.218811 | 1.81E-06 | 0.197261 | 1.76E-05 | 0.460068 | 7.71E-26 |
| 1.21E-09 | 0.459854 | 8.18E-26 | 0.302021 | 2.64E-11 | 0.307483 | 1.10E-11 | 0.275967 | 1.31E-09 |
| 2.03E-42 | 0.467049 | 1.12E-26 | 0.487061 | 3.42E-29 | 0.442122 | 9.06E-24 | 0.532084 | 1.71E-35 |
| 3.97E-07 | 0.074704 | 0.1069   | 0.111259 | 0.01616  | 0.05555  | 0.23086  | 0.111642 | 0.01579  |
| 1.66E-22 | 0.077187 | 0.09571  | 0.096378 | 0.03734  | -0.04389 | 0.34396  | 0.33396  | 1.25E-13 |
| 5.36E-25 | 0.389246 | 2.41E-18 | 0.38432  | 6.93E-18 | 0.362459 | 6.04E-16 | 0.438642 | 2.21E-23 |
| 2.40E-39 | 0.345712 | 1.48E-14 | 0.358631 | 1.28E-15 | 0.181704 | 7.85E-05 | 0.429833 | 2.02E-22 |
| 4.06E-06 | 0.360425 | 9.00E-16 | 0.352432 | 4.20E-15 | 0.2934   | 1.00E-10 | 0.324281 | 6.77E-13 |
| 1.97E-76 | 0.521025 | 7.38E-34 | 0.366445 | 2.74E-16 | 0.319772 | 1.46E-12 | 0.620776 | 4.24E-51 |
| 1.06E-35 | 0.29773  | 5.16E-11 | 0.395502 | 6.17E-19 | 0.309458 | 8.03E-12 | 0.457499 | 1.55E-25 |
| 5.26E-19 | 0.29635  | 6.39E-11 | 0.425887 | 5.32E-22 | 0.326759 | 4.42E-13 | 0.339064 | 5.00E-14 |

|          |          |          |          |          |          |          |          |          |
|----------|----------|----------|----------|----------|----------|----------|----------|----------|
| 5.81E-71 | 0.401111 | 1.77E-19 | 0.381687 | 1.21E-17 | 0.304562 | 1.76E-11 | 0.544513 | 2.09E-37 |
| 1.38E-40 | 0.436995 | 3.36E-23 | 0.54009  | 1.02E-36 | 0.460957 | 6.05E-26 | 0.559007 | 9.68E-40 |
| 2.13E-59 | 0.484236 | 7.93E-29 | 0.509419 | 3.33E-32 | 0.463475 | 3.02E-26 | 0.604677 | 6.74E-48 |
| 1.63E-64 | 0.287089 | 2.60E-10 | 0.373076 | 7.20E-17 | 0.288864 | 1.99E-10 | 0.535032 | 6.10E-36 |
| 2.12E-19 | 0.417314 | 4.19E-21 | 0.307805 | 1.05E-11 | 0.321268 | 1.13E-12 | 0.443421 | 6.48E-24 |
| 1.30E-80 | 0.418094 | 3.48E-21 | 0.42879  | 2.61E-22 | 0.268429 | 3.78E-09 | 0.529694 | 3.90E-35 |
| 2.40E-09 | 0.551132 | 1.85E-38 | 0.502042 | 3.47E-31 | 0.442744 | 7.71E-24 | 0.427152 | 3.91E-22 |
| 5.85E-05 | 0.262443 | 8.54E-09 | 0.387537 | 3.49E-18 | 0.331814 | 1.83E-13 | 0.317535 | 2.12E-12 |
| 1.69E-10 | 0.17699  | 0.00012  | 0.144474 | 0.00175  | 0.179282 | 9.80E-05 | 0.341653 | 3.12E-14 |
| 0.00633  | 0.272072 | 2.27E-09 | 0.292389 | 1.17E-10 | 0.380393 | 1.59E-17 | 0.218283 | 1.92E-06 |
| 9.20E-20 | 0.316995 | 2.32E-12 | 0.373373 | 6.77E-17 | 0.356483 | 1.93E-15 | 0.401341 | 1.68E-19 |
| 2.93E-17 | 0.394743 | 7.29E-19 | 0.44414  | 5.37E-24 | 0.387105 | 3.83E-18 | 0.39615  | 5.35E-19 |
| 8.04E-09 | 0.284638 | 3.74E-10 | 0.248435 | 5.33E-08 | 0.188276 | 4.23E-05 | 0.332223 | 1.70E-13 |
| 1.45E-50 | 0.586979 | 1.39E-44 | 0.587328 | 1.20E-44 | 0.508326 | 4.72E-32 | 0.566441 | 5.55E-41 |
| 3.37E-39 | 0.329068 | 2.96E-13 | 0.333135 | 1.45E-13 | 0.258918 | 1.37E-08 | 0.448485 | 1.73E-24 |
| 7.39E-49 | 0.299185 | 4.11E-11 | 0.325181 | 5.80E-13 | 0.247143 | 6.28E-08 | 0.500603 | 5.45E-31 |
| 1.44E-14 | 0.603936 | 9.37E-48 | 0.585973 | 2.12E-44 | 0.59527  | 4.14E-46 | 0.526046 | 1.36E-34 |
| 7.30E-46 | 0.391184 | 1.59E-18 | 0.236372 | 2.37E-07 | 0.183974 | 6.35E-05 | 0.483804 | 9.01E-29 |
| 2.70E-52 | 0.381717 | 1.20E-17 | 0.41895  | 2.84E-21 | 0.358628 | 1.28E-15 | 0.56152  | 3.71E-40 |
| 5.02E-61 | 0.431095 | 1.48E-22 | 0.37654  | 3.53E-17 | 0.276025 | 1.30E-09 | 0.593129 | 1.04E-45 |
| 8.65E-10 | 0.45303  | 5.17E-25 | 0.466351 | 1.36E-26 | 0.496329 | 2.05E-30 | 0.393093 | 1.05E-18 |
| 6.91E-40 | 0.502193 | 3.31E-31 | 0.548096 | 5.67E-38 | 0.446695 | 2.76E-24 | 0.579596 | 2.93E-43 |
| 3.61E-35 | 0.378315 | 2.45E-17 | 0.404948 | 7.43E-20 | 0.334238 | 1.19E-13 | 0.582642 | 8.43E-44 |
| 4.11E-69 | 0.510564 | 2.30E-32 | 0.500802 | 5.12E-31 | 0.385887 | 4.96E-18 | 0.596815 | 2.12E-46 |
| 8.11E-23 | 0.27487  | 1.53E-09 | 0.349363 | 7.49E-15 | 0.283513 | 4.41E-10 | 0.436588 | 3.72E-23 |
| 7.64E-34 | 0.447734 | 2.10E-24 | 0.418341 | 3.29E-21 | 0.430423 | 1.74E-22 | 0.601127 | 3.24E-47 |
| 3.41E-32 | 0.543402 | 3.12E-37 | 0.35886  | 1.22E-15 | 0.324397 | 6.63E-13 | 0.496134 | 2.18E-30 |
| 4.00E-36 | 0.645535 | 2.11E-56 | 0.576992 | 8.44E-43 | 0.562586 | 2.47E-40 | 0.550674 | 2.20E-38 |
| 7.82E-41 | 0.482776 | 1.22E-28 | 0.45432  | 3.66E-25 | 0.411914 | 1.49E-20 | 0.570577 | 1.09E-41 |
| 6.76E-56 | 0.276326 | 1.25E-09 | 0.301323 | 2.94E-11 | 0.21953  | 1.67E-06 | 0.568139 | 2.86E-41 |
| 1.16E-59 | 0.570579 | 1.09E-41 | 0.346581 | 1.26E-14 | 0.312055 | 5.26E-12 | 0.475952 | 8.92E-28 |
| 5.55E-32 | 0.492259 | 7.14E-30 | 0.434662 | 6.05E-23 | 0.332232 | 1.70E-13 | 0.462007 | 4.53E-26 |
| 1.64E-19 | 0.494779 | 3.31E-30 | 0.435639 | 4.73E-23 | 0.468763 | 6.91E-27 | 0.640059 | 3.46E-55 |
| 8.09E-07 | 0.104467 | 0.02397  | 0.005866 | 0.89939  | 0.039239 | 0.39755  | -0.23128 | 4.34E-07 |
| 1.15E-38 | 0.171641 | 0.00019  | 0.202717 | 1.01E-05 | 0.057735 | 0.213    | 0.360733 | 8.47E-16 |
| 8.07E-19 | 0.263181 | 7.73E-09 | 0.262174 | 8.85E-09 | 0.204193 | 8.68E-06 | 0.308752 | 9.00E-12 |
| 9.26E-40 | 0.369894 | 1.37E-16 | 0.303836 | 1.98E-11 | 0.291588 | 1.32E-10 | 0.497868 | 1.28E-30 |
| 3.46E-10 | -0.08978 | 0.0525   | -0.12809 | 0.00557  | -0.12359 | 0.0075   | -0.18514 | 5.70E-05 |
| 1.24E-05 | -0.22427 | 9.78E-07 | -0.29705 | 5.73E-11 | -0.26388 | 7.03E-09 | -0.32731 | 4.02E-13 |
| 6.51E-12 | 0.5542   | 5.93E-39 | 0.503977 | 1.89E-31 | 0.468072 | 8.39E-27 | 0.416936 | 4.59E-21 |
| 2.00E-32 | 0.450786 | 9.40E-25 | 0.368965 | 1.66E-16 | 0.351709 | 4.81E-15 | 0.455731 | 2.51E-25 |
| 2.79E-36 | 0.373452 | 6.66E-17 | 0.392534 | 1.18E-18 | 0.291163 | 1.41E-10 | 0.530009 | 3.50E-35 |
| 0.12354  | -0.15223 | 0.00097  | -0.17229 | 0.00018  | -0.21846 | 1.88E-06 | -0.27007 | 3.01E-09 |
| 2.23E-15 | 0.512027 | 1.43E-32 | 0.435222 | 5.26E-23 | 0.460486 | 6.88E-26 | 0.370843 | 1.13E-16 |
| 1.16E-14 | 0.309046 | 8.58E-12 | 0.328474 | 3.28E-13 | 0.328507 | 3.26E-13 | 0.412669 | 1.25E-20 |

|          |          |          |          |          |          |          |          |          |
|----------|----------|----------|----------|----------|----------|----------|----------|----------|
| 2.80E-54 | 0.674944 | 2.23E-63 | 0.566009 | 6.56E-41 | 0.52264  | 4.29E-34 | 0.654146 | 2.30E-58 |
| 8.81E-64 | 0.410368 | 2.14E-20 | 0.457192 | 1.69E-25 | 0.350015 | 6.63E-15 | 0.564909 | 1.01E-40 |
| 0.0006   | 0.006405 | 0.8902   | -0.1025  | 0.02676  | -0.1208  | 0.00897  | -0.04316 | 0.35201  |
| 3.81E-41 | 0.405778 | 6.15E-20 | 0.396334 | 5.13E-19 | 0.320876 | 1.21E-12 | 0.588963 | 6.06E-45 |
| 1.12E-23 | 0.46216  | 4.34E-26 | 0.452813 | 5.48E-25 | 0.374884 | 4.97E-17 | 0.532802 | 1.33E-35 |
| 2.34E-10 | -0.21817 | 1.94E-06 | -0.18033 | 8.91E-05 | -0.20663 | 6.73E-06 | -0.25534 | 2.19E-08 |
| 0.00031  | 0.123719 | 0.00743  | 0.197586 | 1.70E-05 | 0.168914 | 0.00025  | 0.132639 | 0.00409  |
| 2.16E-38 | 0.510647 | 2.24E-32 | 0.478679 | 4.05E-28 | 0.395499 | 6.17E-19 | 0.515027 | 5.38E-33 |
| 1.09E-24 | 0.376278 | 3.73E-17 | 0.416283 | 5.35E-21 | 0.360207 | 9.39E-16 | 0.427176 | 3.88E-22 |
| 8.06E-49 | 0.345746 | 1.47E-14 | 0.39872  | 3.02E-19 | 0.354327 | 2.92E-15 | 0.542165 | 4.86E-37 |
| 3.75E-14 | 0.057276 | 0.21666  | 0.091905 | 0.04715  | 0.047135 | 0.30943  | 0.273255 | 1.93E-09 |
| 3.78E-38 | 0.210239 | 4.60E-06 | 0.201985 | 1.09E-05 | 0.151244 | 0.00104  | 0.437912 | 2.66E-23 |
| 4.47E-45 | 0.450068 | 1.14E-24 | 0.444999 | 4.30E-24 | 0.383055 | 9.06E-18 | 0.518276 | 1.84E-33 |
| 7.02E-43 | 0.35348  | 3.44E-15 | 0.371354 | 1.02E-16 | 0.305727 | 1.46E-11 | 0.527739 | 7.62E-35 |
| 7.90E-08 | 0.245602 | 7.62E-08 | 0.280533 | 6.81E-10 | 0.371103 | 1.07E-16 | 0.396486 | 4.96E-19 |
| 4.44E-55 | 0.414867 | 7.48E-21 | 0.351913 | 4.63E-15 | 0.234254 | 3.05E-07 | 0.515673 | 4.35E-33 |
| 1.54E-40 | 0.688363 | 7.73E-67 | 0.560549 | 5.38E-40 | 0.557116 | 1.98E-39 | 0.668406 | 9.29E-62 |
| 9.98E-15 | 0.357871 | 1.48E-15 | 0.338213 | 5.83E-14 | 0.353136 | 3.67E-15 | 0.369398 | 1.52E-16 |
| 8.43E-58 | 0.341503 | 3.21E-14 | 0.400747 | 1.92E-19 | 0.314516 | 3.51E-12 | 0.479516 | 3.17E-28 |
| 3.56E-07 | 0.228483 | 6.02E-07 | 0.308801 | 8.93E-12 | 0.232215 | 3.89E-07 | 0.147815 | 0.00136  |
| 1.05E-19 | 0.494105 | 4.06E-30 | 0.308297 | 9.69E-12 | 0.282621 | 5.02E-10 | 0.438726 | 2.16E-23 |
| 9.47E-24 | 0.519461 | 1.24E-33 | 0.429559 | 2.16E-22 | 0.389912 | 2.09E-18 | 0.52045  | 8.94E-34 |
| 2.24E-15 | -0.11119 | 0.01622  | -0.2348  | 2.86E-07 | -0.19465 | 2.28E-05 | -0.22196 | 1.27E-06 |
| 1.02E-22 | 0.310103 | 7.23E-12 | 0.420788 | 1.83E-21 | 0.422947 | 1.09E-21 | 0.464326 | 2.39E-26 |
| 1.38E-21 | 0.366718 | 2.60E-16 | 0.260486 | 1.11E-08 | 0.322199 | 9.66E-13 | 0.608243 | 1.37E-48 |
| 5.97E-14 | -0.40917 | 2.82E-20 | -0.17587 | 0.00013  | -0.25487 | 2.33E-08 | -0.27037 | 2.88E-09 |
| 8.81E-12 | 0.211851 | 3.87E-06 | 0.060187 | 0.19417  | 0.134379 | 0.00362  | 0.141095 | 0.00224  |
| 1.70E-61 | 0.406159 | 5.64E-20 | 0.336139 | 8.47E-14 | 0.238534 | 1.82E-07 | 0.551327 | 1.72E-38 |
| 8.43E-41 | 0.550174 | 2.64E-38 | 0.57931  | 3.30E-43 | 0.490527 | 1.21E-29 | 0.623526 | 1.15E-51 |
| 6.60E-36 | 0.529929 | 3.59E-35 | 0.484912 | 6.49E-29 | 0.464155 | 2.50E-26 | 0.536615 | 3.50E-36 |
| 1.72E-29 | 0.11968  | 0.00963  | 0.130215 | 0.00483  | 0.025178 | 0.58732  | 0.230024 | 5.03E-07 |
| 6.36E-22 | 0.328187 | 3.45E-13 | 0.369144 | 1.60E-16 | 0.310586 | 6.68E-12 | 0.47491  | 1.20E-27 |
| 2.24E-11 | 0.598641 | 9.61E-47 | 0.370911 | 1.12E-16 | 0.464594 | 2.22E-26 | 0.261803 | 9.31E-09 |
| 6.70E-60 | 0.53662  | 3.49E-36 | 0.600239 | 4.78E-47 | 0.49912  | 8.65E-31 | 0.604086 | 8.77E-48 |
| 1.09E-12 | 0.457855 | 1.41E-25 | 0.320322 | 1.33E-12 | 0.349739 | 6.98E-15 | 0.378174 | 2.52E-17 |
| 7.16E-09 | 0.190927 | 3.28E-05 | 0.262708 | 8.24E-09 | 0.219948 | 1.59E-06 | 0.26298  | 7.94E-09 |
| 1.96E-05 | 0.414324 | 8.50E-21 | 0.394805 | 7.19E-19 | 0.417712 | 3.82E-21 | 0.346946 | 1.18E-14 |
| 8.46E-05 | 0.411637 | 1.59E-20 | 0.362566 | 5.92E-16 | 0.447464 | 2.26E-24 | 0.371753 | 9.42E-17 |
| 3.69E-35 | 0.262919 | 8.01E-09 | 0.198482 | 1.55E-05 | 0.21841  | 1.89E-06 | 0.379023 | 2.11E-17 |
| 1.20E-16 | 0.072242 | 0.11899  | 0.286128 | 3.00E-10 | 0.13175  | 0.00435  | 0.236835 | 2.24E-07 |
| 2.55E-07 | 0.104735 | 0.0236   | 0.066174 | 0.15336  | 0.033177 | 0.47446  | 0.278613 | 8.99E-10 |
| 5.07E-37 | 0.287082 | 2.60E-10 | 0.333925 | 1.26E-13 | 0.272374 | 2.18E-09 | 0.49711  | 1.61E-30 |
| 5.11E-12 | 0.203088 | 9.73E-06 | 0.193055 | 2.67E-05 | 0.179644 | 9.48E-05 | 0.350466 | 6.09E-15 |
| 2.95E-17 | -0.16568 | 0.00032  | -0.0509  | 0.27232  | -0.09847 | 0.03339  | -0.33636 | 8.14E-14 |
| 0.31786  | -0.0723  | 0.1187   | -0.26376 | 7.14E-09 | -0.3344  | 1.15E-13 | -0.1733  | 0.00017  |

|          |          |          |          |          |          |          |          |          |
|----------|----------|----------|----------|----------|----------|----------|----------|----------|
| 2.22E-10 | 0.14023  | 0.00239  | 0.135149 | 0.00343  | 0.128774 | 0.00532  | 0.174174 | 0.00016  |
| 3.15E-21 | 0.409099 | 2.87E-20 | 0.404598 | 8.05E-20 | 0.405716 | 6.24E-20 | 0.461828 | 4.76E-26 |
| 2.20E-21 | 0.307762 | 1.06E-11 | 0.238895 | 1.75E-07 | 0.231907 | 4.03E-07 | 0.390724 | 1.75E-18 |
| 1.95E-30 | 0.458488 | 1.19E-25 | 0.427585 | 3.51E-22 | 0.32214  | 9.76E-13 | 0.557729 | 1.57E-39 |
| 4.17E-16 | 0.56779  | 3.28E-41 | 0.466015 | 1.49E-26 | 0.474604 | 1.31E-27 | 0.400636 | 1.97E-19 |
| 2.39E-21 | 0.456137 | 2.25E-25 | 0.445618 | 3.66E-24 | 0.40685  | 4.81E-20 | 0.462982 | 3.46E-26 |
| 0.68758  | 0.241106 | 1.33E-07 | 0.228911 | 5.73E-07 | 0.265853 | 5.38E-09 | 0.303067 | 2.24E-11 |
| 1.03E-39 | 0.286804 | 2.71E-10 | 0.319921 | 1.42E-12 | 0.259376 | 1.29E-08 | 0.506197 | 9.33E-32 |
| 2.38E-08 | 0.333485 | 1.36E-13 | 0.209092 | 5.19E-06 | 0.295444 | 7.34E-11 | 0.421725 | 1.46E-21 |
| 4.63E-59 | 0.517366 | 2.49E-33 | 0.437455 | 2.99E-23 | 0.447918 | 2.00E-24 | 0.595629 | 3.54E-46 |
| 4.42E-31 | 0.412228 | 1.39E-20 | 0.299924 | 3.67E-11 | 0.185919 | 5.29E-05 | 0.332815 | 1.53E-13 |
| 1.07E-28 | 0.444695 | 4.65E-24 | 0.400131 | 2.20E-19 | 0.387732 | 3.34E-18 | 0.540828 | 7.85E-37 |
| 1.72E-52 | 0.421571 | 1.52E-21 | 0.490494 | 1.22E-29 | 0.386624 | 4.24E-18 | 0.652023 | 7.11E-58 |
| 1.90E-15 | 0.040185 | 0.38626  | 0.20796  | 5.85E-06 | 0.010843 | 0.81523  | 0.142456 | 0.00203  |
| 5.86E-39 | 0.465656 | 1.65E-26 | 0.284223 | 3.97E-10 | 0.266326 | 5.04E-09 | 0.511911 | 1.49E-32 |
| 3.02E-23 | 0.265232 | 5.85E-09 | 0.310235 | 7.07E-12 | 0.216501 | 2.33E-06 | 0.311237 | 6.01E-12 |
| 6.87E-54 | 0.600393 | 4.47E-47 | 0.461229 | 5.61E-26 | 0.44357  | 6.23E-24 | 0.527568 | 8.08E-35 |
| 0.02166  | 0.049452 | 0.28622  | 0.159351 | 0.00055  | 0.145007 | 0.00168  | 0.110637 | 0.01676  |
| 3.48E-31 | 0.131647 | 0.00438  | 0.222445 | 1.20E-06 | 0.078348 | 0.0908   | 0.27861  | 8.99E-10 |
| 1.84E-17 | 0.363708 | 4.72E-16 | 0.347563 | 1.05E-14 | 0.371914 | 9.12E-17 | 0.416568 | 5.01E-21 |
| 7.48E-21 | 0.216156 | 2.42E-06 | 0.158166 | 0.0006   | 0.147183 | 0.00143  | 0.302769 | 2.34E-11 |
| 5.86E-14 | 0.465305 | 1.82E-26 | 0.375316 | 4.55E-17 | 0.397276 | 4.17E-19 | 0.440602 | 1.34E-23 |
| 2.55E-58 | 0.46316  | 3.30E-26 | 0.432081 | 1.15E-22 | 0.358821 | 1.23E-15 | 0.559578 | 7.80E-40 |
| 0.38979  | 0.268138 | 3.93E-09 | 0.357563 | 1.57E-15 | 0.398226 | 3.37E-19 | 0.340894 | 3.59E-14 |
| 1.81E-21 | 0.512701 | 1.15E-32 | 0.395219 | 6.56E-19 | 0.381199 | 1.34E-17 | 0.445735 | 3.55E-24 |
| 9.96E-17 | 0.434212 | 6.78E-23 | 0.396562 | 4.88E-19 | 0.2776   | 1.04E-09 | 0.41444  | 8.27E-21 |
| 2.27E-45 | 0.278791 | 8.76E-10 | 0.165659 | 0.00032  | 0.104718 | 0.02363  | 0.432625 | 1.01E-22 |
| 2.43E-17 | 0.497647 | 1.37E-30 | 0.459231 | 9.70E-26 | 0.489062 | 1.88E-29 | 0.438286 | 2.42E-23 |
| 1.62E-10 | 0.23026  | 4.90E-07 | 0.223056 | 1.12E-06 | 0.170908 | 0.00021  | 0.161273 | 0.00047  |
| 2.98E-28 | 0.580514 | 2.02E-43 | 0.34568  | 1.49E-14 | 0.306628 | 1.27E-11 | 0.357394 | 1.62E-15 |
| 8.79E-41 | 0.464238 | 2.45E-26 | 0.474424 | 1.38E-27 | 0.422217 | 1.30E-21 | 0.505867 | 1.04E-31 |
| 8.21E-22 | 0.488943 | 1.95E-29 | 0.514268 | 6.90E-33 | 0.374393 | 5.50E-17 | 0.452808 | 5.49E-25 |
| 7.00E-40 | 0.338989 | 5.07E-14 | 0.393669 | 9.23E-19 | 0.352325 | 4.28E-15 | 0.559957 | 6.75E-40 |
| 1.26E-05 | 0.450573 | 9.95E-25 | 0.268451 | 3.76E-09 | 0.322839 | 8.66E-13 | 0.282641 | 5.01E-10 |
| 1.83E-25 | 0.416926 | 4.60E-21 | 0.242195 | 1.16E-07 | 0.266138 | 5.17E-09 | 0.399677 | 2.44E-19 |
| 1.13E-47 | 0.362414 | 6.09E-16 | 0.498135 | 1.17E-30 | 0.35809  | 1.42E-15 | 0.520703 | 8.22E-34 |
| 1.58E-17 | 0.377195 | 3.09E-17 | 0.321208 | 1.14E-12 | 0.328545 | 3.24E-13 | 0.465972 | 1.51E-26 |
| 0.0145   | 0.120724 | 0.00902  | 0.119596 | 0.00969  | 0.016838 | 0.71667  | -0.07373 | 0.11156  |
| 4.44E-38 | 0.492541 | 6.55E-30 | 0.420667 | 1.88E-21 | 0.401063 | 1.79E-19 | 0.560696 | 5.09E-40 |
| 2.77E-24 | 0.417928 | 3.62E-21 | 0.475775 | 9.39E-28 | 0.495432 | 2.71E-30 | 0.511362 | 1.78E-32 |
| 1.23E-21 | 0.342505 | 2.67E-14 | 0.351088 | 5.41E-15 | 0.33479  | 1.08E-13 | 0.480451 | 2.42E-28 |
| 3.67E-13 | 0.505922 | 1.02E-31 | 0.43536  | 5.08E-23 | 0.506767 | 7.78E-32 | 0.431639 | 1.29E-22 |
| 0.88196  | 0.001911 | 0.96715  | -0.12537 | 0.00667  | -0.25908 | 1.34E-08 | -0.21344 | 3.26E-06 |
| 3.11E-27 | 0.424137 | 8.15E-22 | 0.385388 | 5.52E-18 | 0.27538  | 1.43E-09 | 0.421098 | 1.70E-21 |
| 1.55E-42 | 0.459606 | 8.75E-26 | 0.463618 | 2.91E-26 | 0.449353 | 1.37E-24 | 0.551938 | 1.38E-38 |

|          |          |          |          |          |          |          |          |          |
|----------|----------|----------|----------|----------|----------|----------|----------|----------|
| 4.87E-29 | 0.321804 | 1.03E-12 | 0.15641  | 0.00069  | 0.202629 | 1.02E-05 | 0.469839 | 5.10E-27 |
| 4.43E-46 | 0.340207 | 4.07E-14 | 0.329537 | 2.72E-13 | 0.242194 | 1.16E-07 | 0.436487 | 3.82E-23 |
| 1.99E-23 | 0.49868  | 9.92E-31 | 0.453922 | 4.07E-25 | 0.411099 | 1.81E-20 | 0.449606 | 1.28E-24 |
| 7.21E-45 | 0.348737 | 8.42E-15 | 0.352129 | 4.44E-15 | 0.312185 | 5.14E-12 | 0.561778 | 3.36E-40 |
| 0.00451  | 0.334154 | 1.21E-13 | 0.390427 | 1.87E-18 | 0.347132 | 1.14E-14 | 0.349874 | 6.80E-15 |
| 4.41E-57 | 0.396495 | 4.95E-19 | 0.330673 | 2.23E-13 | 0.300014 | 3.61E-11 | 0.539744 | 1.16E-36 |
| 0.00327  | 0.261114 | 1.02E-08 | 0.21041  | 4.51E-06 | 0.184251 | 6.19E-05 | 0.259516 | 1.26E-08 |
| 8.47E-60 | 0.392561 | 1.18E-18 | 0.428552 | 2.77E-22 | 0.299102 | 4.17E-11 | 0.577713 | 6.31E-43 |
| 2.01E-43 | 0.578472 | 4.63E-43 | 0.541578 | 6.00E-37 | 0.526983 | 9.87E-35 | 0.593481 | 8.91E-46 |
| 6.92E-38 | 0.179408 | 9.69E-05 | 0.254486 | 2.45E-08 | 0.120048 | 0.00941  | 0.361009 | 8.03E-16 |
| 2.20E-08 | 0.224615 | 9.40E-07 | 0.20186  | 1.10E-05 | 0.28773  | 2.36E-10 | 0.299298 | 4.04E-11 |
| 1.10E-33 | 0.40637  | 5.37E-20 | 0.364312 | 4.19E-16 | 0.245721 | 7.51E-08 | 0.443481 | 6.38E-24 |
| 6.94E-27 | 0.303204 | 2.19E-11 | 0.412047 | 1.45E-20 | 0.353522 | 3.41E-15 | 0.439727 | 1.68E-23 |
| 4.10E-08 | -0.49718 | 1.58E-30 | -0.34017 | 4.09E-14 | -0.36975 | 1.41E-16 | -0.41244 | 1.32E-20 |
| 1.06E-13 | 0.22539  | 8.60E-07 | 0.189852 | 3.64E-05 | 0.161426 | 0.00046  | 0.264357 | 6.59E-09 |
| 4.23E-19 | 0.469253 | 6.02E-27 | 0.419403 | 2.55E-21 | 0.489593 | 1.60E-29 | 0.458961 | 1.04E-25 |
| 3.12E-19 | 0.6199   | 6.40E-51 | 0.351007 | 5.50E-15 | 0.37572  | 4.18E-17 | 0.419112 | 2.73E-21 |
| 1.79E-21 | 0.457621 | 1.50E-25 | 0.264072 | 6.85E-09 | 0.33067  | 2.23E-13 | 0.488303 | 2.36E-29 |
| 1.33E-24 | 0.244757 | 8.47E-08 | 0.256853 | 1.80E-08 | 0.136319 | 0.00316  | 0.389028 | 2.53E-18 |
| 3.56E-44 | 0.458639 | 1.14E-25 | 0.425015 | 6.59E-22 | 0.38992  | 2.09E-18 | 0.549258 | 3.70E-38 |
| 5.76E-25 | 0.143809 | 0.00184  | 0.246018 | 7.24E-08 | 0.060797 | 0.18968  | 0.217534 | 2.08E-06 |
| 1.52E-27 | 0.326724 | 4.44E-13 | 0.411282 | 1.73E-20 | 0.348119 | 9.46E-15 | 0.50963  | 3.11E-32 |
| 2.50E-21 | 0.560915 | 4.68E-40 | 0.426672 | 4.39E-22 | 0.456699 | 1.93E-25 | 0.481701 | 1.67E-28 |
| 4.00E-11 | 0.427911 | 3.24E-22 | 0.380598 | 1.52E-17 | 0.383219 | 8.75E-18 | 0.417805 | 3.73E-21 |
| 6.86E-38 | 0.459403 | 9.25E-26 | 0.499681 | 7.27E-31 | 0.418536 | 3.14E-21 | 0.547772 | 6.38E-38 |
| 0.84889  | 0.185981 | 5.26E-05 | 0.019409 | 0.67569  | 0.038456 | 0.40704  | -0.00239 | 0.95894  |
| 0.0361   | 0.09522  | 0.0397   | -0.05883 | 0.20444  | -0.02581 | 0.57791  | -0.13478 | 0.00352  |
| 1.27E-05 | -0.25532 | 2.20E-08 | -0.12185 | 0.00839  | -0.24626 | 7.02E-08 | -0.33199 | 1.77E-13 |
| 9.32E-23 | 0.444231 | 5.25E-24 | 0.381779 | 1.19E-17 | 0.411278 | 1.73E-20 | 0.496684 | 1.84E-30 |
| 3.90E-27 | 0.387743 | 3.34E-18 | 0.274613 | 1.59E-09 | 0.260049 | 1.18E-08 | 0.426814 | 4.24E-22 |
| 4.33E-40 | 0.606646 | 2.80E-48 | 0.445453 | 3.82E-24 | 0.434376 | 6.50E-23 | 0.501344 | 4.32E-31 |
| 1.37E-64 | 0.500649 | 5.37E-31 | 0.37764  | 2.81E-17 | 0.27793  | 9.91E-10 | 0.542633 | 4.11E-37 |
| 4.05E-47 | 0.426351 | 4.75E-22 | 0.513978 | 7.58E-33 | 0.4333   | 8.52E-23 | 0.559488 | 8.07E-40 |
| 4.78E-16 | 0.285568 | 3.26E-10 | 0.292575 | 1.14E-10 | 0.281627 | 5.81E-10 | 0.388703 | 2.71E-18 |
| 6.19E-14 | 0.472097 | 2.69E-27 | 0.411808 | 1.53E-20 | 0.38114  | 1.36E-17 | 0.357859 | 1.48E-15 |
| 5.01E-24 | 0.459704 | 8.52E-26 | 0.343068 | 2.41E-14 | 0.298068 | 4.90E-11 | 0.401108 | 1.77E-19 |
| 1.19E-39 | 0.58286  | 7.70E-44 | 0.529816 | 3.74E-35 | 0.451326 | 8.15E-25 | 0.549783 | 3.05E-38 |
| 4.41E-53 | 0.624408 | 7.57E-52 | 0.482619 | 1.28E-28 | 0.439365 | 1.84E-23 | 0.651891 | 7.62E-58 |
| 1.39E-56 | 0.560699 | 5.08E-40 | 0.442038 | 9.26E-24 | 0.419023 | 2.79E-21 | 0.5699   | 1.43E-41 |
| 8.12E-32 | 0.393792 | 8.98E-19 | 0.340655 | 3.75E-14 | 0.303511 | 2.08E-11 | 0.507374 | 6.41E-32 |
| 1.94E-23 | 0.24995  | 4.40E-08 | 0.260842 | 1.06E-08 | 0.11767  | 0.01093  | 0.326668 | 4.49E-13 |
| 6.35E-10 | 0.344817 | 1.75E-14 | 0.231547 | 4.21E-07 | 0.222899 | 1.14E-06 | 0.328583 | 3.22E-13 |
| 5.70E-23 | 0.380506 | 1.55E-17 | 0.377998 | 2.61E-17 | 0.25699  | 1.76E-08 | 0.402654 | 1.25E-19 |
| 1.63E-75 | 0.334091 | 1.22E-13 | 0.420877 | 1.79E-21 | 0.278712 | 8.86E-10 | 0.558353 | 1.24E-39 |
| 3.71E-09 | 0.318384 | 1.84E-12 | 0.183185 | 6.84E-05 | 0.152415 | 0.00095  | 0.231382 | 4.29E-07 |

|          |          |          |          |          |          |          |          |          |
|----------|----------|----------|----------|----------|----------|----------|----------|----------|
| 8.59E-16 | 0.186328 | 5.09E-05 | 0.336248 | 8.31E-14 | 0.198613 | 1.53E-05 | 0.349622 | 7.13E-15 |
| 1.52E-29 | 0.490073 | 1.38E-29 | 0.457058 | 1.75E-25 | 0.421473 | 1.55E-21 | 0.561574 | 3.64E-40 |
| 0.4949   | -0.22213 | 1.25E-06 | -0.22699 | 7.16E-07 | -0.34146 | 3.24E-14 | -0.2048  | 8.15E-06 |
| 3.25E-22 | 0.25682  | 1.80E-08 | 0.192355 | 2.85E-05 | 0.176892 | 0.00012  | 0.369999 | 1.34E-16 |
| 1.30E-30 | 0.577256 | 7.59E-43 | 0.508584 | 4.35E-32 | 0.429533 | 2.17E-22 | 0.453904 | 4.09E-25 |
| 2.08E-34 | 0.36969  | 1.43E-16 | 0.396073 | 5.44E-19 | 0.326779 | 4.40E-13 | 0.447335 | 2.34E-24 |
| 4.41E-41 | 0.505768 | 1.07E-31 | 0.456488 | 2.04E-25 | 0.441594 | 1.04E-23 | 0.597606 | 1.51E-46 |
| 4.05E-35 | 0.311214 | 6.03E-12 | 0.393643 | 9.28E-19 | 0.316903 | 2.36E-12 | 0.438767 | 2.14E-23 |
| 2.07E-13 | 0.183656 | 6.55E-05 | 0.237996 | 1.95E-07 | 0.122766 | 0.00791  | 0.381487 | 1.26E-17 |
| 7.37E-50 | 0.543243 | 3.30E-37 | 0.528806 | 5.29E-35 | 0.538788 | 1.62E-36 | 0.685584 | 4.17E-66 |
| 3.55E-11 | 0.213975 | 3.07E-06 | 0.276086 | 1.29E-09 | 0.315712 | 2.87E-12 | 0.402583 | 1.27E-19 |
| 3.60E-55 | 0.442303 | 8.65E-24 | 0.373334 | 6.83E-17 | 0.278943 | 8.57E-10 | 0.476666 | 7.26E-28 |
| 1.62E-34 | 0.567225 | 4.09E-41 | 0.443388 | 6.53E-24 | 0.427375 | 3.70E-22 | 0.588794 | 6.51E-45 |
| 2.41E-12 | 0.188043 | 4.33E-05 | 0.27836  | 9.32E-10 | 0.188325 | 4.21E-05 | 0.162836 | 0.00041  |
| 2.75E-49 | 0.513358 | 9.28E-33 | 0.594131 | 6.74E-46 | 0.480423 | 2.44E-28 | 0.68445  | 8.25E-66 |
| 2.77E-24 | 0.514614 | 6.16E-33 | 0.371031 | 1.09E-16 | 0.353291 | 3.56E-15 | 0.409904 | 2.38E-20 |
| 6.09E-08 | 0.482845 | 1.20E-28 | 0.445804 | 3.49E-24 | 0.38633  | 4.52E-18 | 0.277067 | 1.12E-09 |
| 7.83E-10 | 0.068274 | 0.1407   | 0.229913 | 5.10E-07 | 0.174216 | 0.00015  | 0.236539 | 2.32E-07 |
| 1.36E-23 | 0.403592 | 1.01E-19 | 0.381851 | 1.17E-17 | 0.407758 | 3.91E-20 | 0.492138 | 7.40E-30 |
| 1.60E-15 | 0.419478 | 2.50E-21 | 0.451177 | 8.47E-25 | 0.405286 | 6.88E-20 | 0.351983 | 4.57E-15 |
| 7.90E-35 | 0.26935  | 3.32E-09 | 0.322357 | 9.40E-13 | 0.264846 | 6.17E-09 | 0.509905 | 2.84E-32 |
| 2.33E-40 | 0.246432 | 6.87E-08 | 0.217233 | 2.15E-06 | 0.146634 | 0.00149  | 0.398327 | 3.30E-19 |
| 3.98E-56 | 0.52546  | 1.66E-34 | 0.498877 | 9.33E-31 | 0.365882 | 3.07E-16 | 0.576409 | 1.07E-42 |
| 5.84E-15 | 0.277885 | 9.98E-10 | 0.207015 | 6.46E-06 | 0.17538  | 0.00014  | 0.409527 | 2.60E-20 |
| 1.43E-76 | 0.575522 | 1.53E-42 | 0.524099 | 2.63E-34 | 0.383888 | 7.59E-18 | 0.631199 | 2.84E-53 |
| 5.83E-23 | 0.116933 | 0.01144  | 0.160879 | 0.00048  | 0.053227 | 0.25098  | 0.345074 | 1.67E-14 |
| 4.03E-42 | 0.214842 | 2.80E-06 | 0.185351 | 5.58E-05 | 0.098272 | 0.03374  | 0.437492 | 2.96E-23 |
| 8.58E-61 | 0.238607 | 1.81E-07 | 0.258999 | 1.35E-08 | 0.158752 | 0.00057  | 0.535505 | 5.17E-36 |
| 1.50E-67 | 0.458467 | 1.19E-25 | 0.369148 | 1.60E-16 | 0.334867 | 1.06E-13 | 0.621441 | 3.10E-51 |
| 2.39E-33 | 0.471112 | 3.56E-27 | 0.415294 | 6.76E-21 | 0.417443 | 4.07E-21 | 0.556689 | 2.33E-39 |
| 2.39E-07 | 0.264036 | 6.89E-09 | 0.351888 | 4.65E-15 | 0.338859 | 5.19E-14 | 0.281849 | 5.62E-10 |
| 3.77E-56 | 0.306354 | 1.32E-11 | 0.369228 | 1.57E-16 | 0.191779 | 3.02E-05 | 0.543036 | 3.56E-37 |
| 2.71E-48 | 0.467341 | 1.03E-26 | 0.37936  | 1.97E-17 | 0.285656 | 3.22E-10 | 0.533162 | 1.17E-35 |
| 4.77E-34 | 0.40063  | 1.97E-19 | 0.408585 | 3.23E-20 | 0.337999 | 6.06E-14 | 0.390745 | 1.75E-18 |
| 6.31E-31 | 0.375607 | 4.28E-17 | 0.36288  | 5.56E-16 | 0.243005 | 1.05E-07 | 0.349867 | 6.81E-15 |
| 5.98E-38 | 0.342103 | 2.88E-14 | 0.438187 | 2.48E-23 | 0.3576   | 1.56E-15 | 0.457447 | 1.58E-25 |
| 8.62E-21 | 0.658934 | 1.75E-59 | 0.590593 | 3.04E-45 | 0.568309 | 2.67E-41 | 0.522693 | 4.22E-34 |
| 2.58E-05 | 0.235474 | 2.64E-07 | 0.30931  | 8.22E-12 | 0.279118 | 8.36E-10 | 0.282513 | 5.10E-10 |
| 4.35E-14 | 0.468266 | 7.95E-27 | 0.386284 | 4.56E-18 | 0.33673  | 7.62E-14 | 0.37756  | 2.86E-17 |
| 3.17E-12 | 0.42565  | 5.64E-22 | 0.47106  | 3.61E-27 | 0.504127 | 1.80E-31 | 0.543469 | 3.04E-37 |
| 5.92E-11 | 0.386327 | 4.52E-18 | 0.350351 | 6.22E-15 | 0.376746 | 3.39E-17 | 0.390586 | 1.81E-18 |
| 1.46E-14 | 0.524841 | 2.04E-34 | 0.446304 | 3.06E-24 | 0.459933 | 8.00E-26 | 0.449817 | 1.22E-24 |
| 2.11E-87 | 0.495706 | 2.49E-30 | 0.376519 | 3.55E-17 | 0.245987 | 7.26E-08 | 0.555421 | 3.75E-39 |
| 7.14E-41 | 0.440164 | 1.50E-23 | 0.293281 | 1.02E-10 | 0.295795 | 6.96E-11 | 0.488895 | 1.97E-29 |
| 1.32E-24 | 0.240608 | 1.42E-07 | 0.267264 | 4.43E-09 | 0.191226 | 3.19E-05 | 0.398913 | 2.89E-19 |

|          |          |          |          |          |          |          |          |          |
|----------|----------|----------|----------|----------|----------|----------|----------|----------|
| 6.10E-44 | 0.469675 | 5.34E-27 | 0.460849 | 6.23E-26 | 0.47345  | 1.83E-27 | 0.557105 | 1.99E-39 |
| 3.63E-69 | 0.418449 | 3.20E-21 | 0.457082 | 1.74E-25 | 0.336084 | 8.55E-14 | 0.633116 | 1.11E-53 |
| 1.19E-11 | 0.401709 | 1.55E-19 | 0.326517 | 4.61E-13 | 0.353992 | 3.12E-15 | 0.33365  | 1.32E-13 |
| 1.68E-33 | 0.331335 | 1.99E-13 | 0.312166 | 5.16E-12 | 0.288442 | 2.12E-10 | 0.49867  | 9.95E-31 |
| 3.94E-16 | 0.24824  | 5.47E-08 | 0.240332 | 1.46E-07 | 0.217583 | 2.07E-06 | 0.282091 | 5.43E-10 |
| 4.96E-24 | 0.36251  | 5.98E-16 | 0.304344 | 1.83E-11 | 0.234742 | 2.88E-07 | 0.304014 | 1.92E-11 |
| 2.87E-28 | 0.334148 | 1.21E-13 | 0.332211 | 1.70E-13 | 0.259706 | 1.23E-08 | 0.524467 | 2.32E-34 |
| 6.71E-20 | 0.449867 | 1.20E-24 | 0.354441 | 2.86E-15 | 0.343084 | 2.40E-14 | 0.529771 | 3.79E-35 |
| 6.45E-29 | 0.366856 | 2.53E-16 | 0.234599 | 2.93E-07 | 0.23264  | 3.70E-07 | 0.462454 | 4.01E-26 |
| 3.84E-33 | 0.398425 | 3.23E-19 | 0.402073 | 1.43E-19 | 0.273754 | 1.80E-09 | 0.41181  | 1.53E-20 |
| 1.39E-48 | 0.188077 | 4.31E-05 | 0.130279 | 0.0048   | 0.015439 | 0.73931  | 0.425688 | 5.59E-22 |
| 9.89E-21 | 0.242281 | 1.15E-07 | 0.228362 | 6.11E-07 | 0.228516 | 6.00E-07 | 0.26888  | 3.55E-09 |
| 1.27E-38 | 0.327616 | 3.81E-13 | 0.28213  | 5.40E-10 | 0.220935 | 1.43E-06 | 0.508029 | 5.20E-32 |
| 7.78E-32 | 0.391957 | 1.34E-18 | 0.28409  | 4.05E-10 | 0.151633 | 0.00101  | 0.390923 | 1.68E-18 |
| 2.19E-15 | 0.649497 | 2.69E-57 | 0.437113 | 3.26E-23 | 0.349351 | 7.51E-15 | 0.435787 | 4.56E-23 |
| 5.24E-12 | -0.31564 | 2.91E-12 | -0.2135  | 3.24E-06 | -0.17746 | 0.00012  | -0.2249  | 9.10E-07 |
| 1.36E-12 | -0.46951 | 5.59E-27 | -0.2346  | 2.93E-07 | -0.32098 | 1.19E-12 | -0.34768 | 1.03E-14 |
| 1.52E-14 | 0.521619 | 6.05E-34 | 0.338446 | 5.59E-14 | 0.37201  | 8.94E-17 | 0.441304 | 1.12E-23 |
| 2.15E-42 | 0.669602 | 4.73E-62 | 0.556563 | 2.44E-39 | 0.505665 | 1.10E-31 | 0.493744 | 4.54E-30 |
| 3.80E-20 | 0.155749 | 0.00073  | 0.281263 | 6.12E-10 | 0.110839 | 0.01657  | 0.287408 | 2.48E-10 |
| 6.98E-11 | 0.1      | 0.03072  | 0.235984 | 2.48E-07 | 0.175886 | 0.00013  | 0.26934  | 3.33E-09 |
| 4.22E-05 | 0.532204 | 1.64E-35 | 0.430061 | 1.91E-22 | 0.491383 | 9.31E-30 | 0.373015 | 7.29E-17 |
| 6.65E-08 | 0.320355 | 1.32E-12 | 0.206248 | 7.01E-06 | 0.17273  | 0.00018  | 0.218975 | 1.77E-06 |
| 2.32E-28 | 0.297473 | 5.37E-11 | 0.154837 | 0.00079  | 0.102704 | 0.02646  | 0.440457 | 1.39E-23 |
| 6.12E-22 | 0.523879 | 2.83E-34 | 0.53115  | 2.36E-35 | 0.490681 | 1.15E-29 | 0.574762 | 2.07E-42 |
| 7.11E-12 | 0.0643   | 0.16537  | 0.016119 | 0.72827  | -0.06124 | 0.18646  | 0.142719 | 0.00199  |
| 6.64E-24 | 0.330626 | 2.25E-13 | 0.424685 | 7.14E-22 | 0.318647 | 1.76E-12 | 0.398151 | 3.43E-19 |
| 1.10E-17 | 0.403877 | 9.48E-20 | 0.346989 | 1.17E-14 | 0.33876  | 5.29E-14 | 0.496742 | 1.81E-30 |
| 1.22E-63 | 0.393118 | 1.04E-18 | 0.356357 | 1.98E-15 | 0.2158   | 2.52E-06 | 0.456808 | 1.87E-25 |
| 8.72E-29 | 0.631547 | 2.40E-53 | 0.532985 | 1.25E-35 | 0.515991 | 3.92E-33 | 0.561923 | 3.18E-40 |
| 2.01E-56 | 0.684172 | 9.75E-66 | 0.548438 | 5.00E-38 | 0.529786 | 3.77E-35 | 0.59924  | 7.40E-47 |
| 2.91E-27 | 0.358637 | 1.27E-15 | 0.294422 | 8.59E-11 | 0.341706 | 3.09E-14 | 0.444607 | 4.76E-24 |
| 5.11E-48 | 0.464342 | 2.38E-26 | 0.372668 | 7.82E-17 | 0.373424 | 6.70E-17 | 0.55678  | 2.25E-39 |
| 1.21E-37 | 0.418574 | 3.11E-21 | 0.329433 | 2.77E-13 | 0.325827 | 5.19E-13 | 0.472952 | 2.11E-27 |
| 2.23E-52 | 0.346209 | 1.35E-14 | 0.277417 | 1.07E-09 | 0.132559 | 0.00411  | 0.455455 | 2.70E-25 |
| 4.11E-38 | 0.453018 | 5.19E-25 | 0.425131 | 6.40E-22 | 0.324692 | 6.31E-13 | 0.464609 | 2.21E-26 |
| 7.57E-44 | 0.510517 | 2.33E-32 | 0.518059 | 1.98E-33 | 0.408053 | 3.65E-20 | 0.586113 | 2.00E-44 |
| 3.30E-32 | 0.474362 | 1.41E-27 | 0.384903 | 6.12E-18 | 0.423048 | 1.06E-21 | 0.531113 | 2.39E-35 |
| 6.34E-32 | 0.382376 | 1.05E-17 | 0.380256 | 1.63E-17 | 0.382855 | 9.45E-18 | 0.484857 | 6.60E-29 |
| 2.45E-09 | 0.149258 | 0.00122  | 0.267072 | 4.55E-09 | 0.219486 | 1.68E-06 | 0.242952 | 1.06E-07 |
| 4.32E-63 | 0.29788  | 5.04E-11 | 0.249324 | 4.76E-08 | 0.17794  | 0.00011  | 0.462824 | 3.62E-26 |
| 9.09E-28 | 0.22119  | 1.39E-06 | 0.308532 | 9.32E-12 | 0.249868 | 4.44E-08 | 0.433263 | 8.60E-23 |
| 2.31E-36 | 0.563588 | 1.68E-40 | 0.464391 | 2.34E-26 | 0.433841 | 7.44E-23 | 0.521291 | 6.75E-34 |
| 1.03E-05 | 0.275546 | 1.39E-09 | 0.396382 | 5.08E-19 | 0.399921 | 2.31E-19 | 0.276252 | 1.26E-09 |
| 7.55E-22 | 0.353994 | 3.12E-15 | 0.268437 | 3.77E-09 | 0.255308 | 2.20E-08 | 0.428508 | 2.80E-22 |

|          |          |          |          |          |          |          |          |          |
|----------|----------|----------|----------|----------|----------|----------|----------|----------|
| 4.84E-14 | 0.464811 | 2.09E-26 | 0.489268 | 1.76E-29 | 0.445857 | 3.44E-24 | 0.376157 | 3.82E-17 |
| 2.70E-29 | 0.538582 | 1.75E-36 | 0.484036 | 8.41E-29 | 0.473269 | 1.93E-27 | 0.616326 | 3.40E-50 |
| 1.81E-21 | 0.283864 | 4.19E-10 | 0.32841  | 3.32E-13 | 0.228238 | 6.20E-07 | 0.294416 | 8.60E-11 |
| 3.46E-19 | 0.343946 | 2.05E-14 | 0.325816 | 5.20E-13 | 0.238487 | 1.83E-07 | 0.387628 | 3.42E-18 |
| 2.60E-27 | 0.377313 | 3.01E-17 | 0.375074 | 4.78E-17 | 0.355448 | 2.36E-15 | 0.452582 | 5.83E-25 |
| 5.17E-12 | 0.27406  | 1.72E-09 | 0.214954 | 2.76E-06 | 0.136506 | 0.00312  | 0.336994 | 7.27E-14 |
| 3.28E-38 | 0.319581 | 1.50E-12 | 0.414984 | 7.28E-21 | 0.330097 | 2.47E-13 | 0.403533 | 1.02E-19 |
| 2.06E-34 | 0.50618  | 9.38E-32 | 0.328032 | 3.54E-13 | 0.363186 | 5.24E-16 | 0.505885 | 1.03E-31 |
| 6.66E-14 | 0.327964 | 3.58E-13 | 0.238464 | 1.84E-07 | 0.246832 | 6.53E-08 | 0.449442 | 1.34E-24 |
| 1.16E-26 | -0.13162 | 0.00438  | -0.18958 | 3.73E-05 | -0.15435 | 0.00082  | -0.40967 | 2.52E-20 |
| 1.08E-22 | 0.383912 | 7.55E-18 | 0.315166 | 3.15E-12 | 0.211202 | 4.15E-06 | 0.345681 | 1.49E-14 |
| 2.37E-12 | 0.135088 | 0.00345  | 0.174801 | 0.00015  | 0.109886 | 0.01753  | 0.265448 | 5.68E-09 |
| 1.45E-69 | 0.392295 | 1.25E-18 | 0.305932 | 1.42E-11 | 0.259649 | 1.24E-08 | 0.622827 | 1.61E-51 |
| 2.04E-24 | 0.455344 | 2.78E-25 | 0.450826 | 9.30E-25 | 0.390317 | 1.92E-18 | 0.455526 | 2.65E-25 |
| 2.63E-55 | 0.396113 | 5.39E-19 | 0.275272 | 1.45E-09 | 0.196382 | 1.92E-05 | 0.524116 | 2.61E-34 |
| 4.91E-31 | 0.319894 | 1.43E-12 | 0.322576 | 9.06E-13 | 0.273016 | 1.99E-09 | 0.408105 | 3.61E-20 |
| 8.23E-55 | 0.408784 | 3.09E-20 | 0.342249 | 2.80E-14 | 0.314496 | 3.52E-12 | 0.501653 | 3.92E-31 |
| 3.28E-09 | 0.212678 | 3.54E-06 | 0.117288 | 0.01119  | 0.19922  | 1.44E-05 | 0.219159 | 1.74E-06 |
| 5.94E-42 | 0.38299  | 9.18E-18 | 0.424033 | 8.36E-22 | 0.360156 | 9.49E-16 | 0.566845 | 4.74E-41 |
| 2.67E-49 | 0.419397 | 2.55E-21 | 0.464338 | 2.38E-26 | 0.43625  | 4.06E-23 | 0.609588 | 7.44E-49 |
| 0.00395  | 0.155635 | 0.00074  | 0.242945 | 1.06E-07 | 0.17245  | 0.00018  | 0.242207 | 1.16E-07 |
| 1.35E-07 | 0.361277 | 7.62E-16 | 0.386876 | 4.02E-18 | 0.370811 | 1.14E-16 | 0.263748 | 7.16E-09 |
| 5.35E-08 | -0.30266 | 2.38E-11 | -0.31094 | 6.31E-12 | -0.29836 | 4.68E-11 | -0.36666 | 2.63E-16 |
| 9.14E-23 | 0.376011 | 3.94E-17 | 0.26697  | 4.61E-09 | 0.182964 | 6.98E-05 | 0.389322 | 2.37E-18 |
| 1.39E-16 | 0.349563 | 7.21E-15 | 0.360787 | 8.39E-16 | 0.340222 | 4.06E-14 | 0.4127   | 1.24E-20 |
| 2.23E-46 | 0.384499 | 6.67E-18 | 0.335248 | 9.93E-14 | 0.295257 | 7.56E-11 | 0.540797 | 7.94E-37 |
| 1.18E-13 | 0.46328  | 3.19E-26 | 0.352965 | 3.79E-15 | 0.456734 | 1.91E-25 | 0.371062 | 1.08E-16 |
| 2.55E-79 | 0.512341 | 1.29E-32 | 0.454066 | 3.92E-25 | 0.410525 | 2.06E-20 | 0.636095 | 2.53E-54 |
| 9.16E-68 | 0.340447 | 3.89E-14 | 0.365904 | 3.06E-16 | 0.286922 | 2.66E-10 | 0.525255 | 1.78E-34 |
| 1.25E-47 | 0.55466  | 4.99E-39 | 0.460887 | 6.17E-26 | 0.466032 | 1.49E-26 | 0.546838 | 8.97E-38 |
| 9.32E-21 | 0.138381 | 0.00273  | 0.154973 | 0.00078  | 0.073786 | 0.11129  | 0.322755 | 8.79E-13 |
| 4.76E-42 | 0.583942 | 4.93E-44 | 0.555874 | 3.16E-39 | 0.451116 | 8.61E-25 | 0.539626 | 1.20E-36 |
| 0.16228  | -0.05095 | 0.27189  | 0.056883 | 0.21984  | 0.119438 | 0.00978  | 0.035183 | 0.44814  |
| 1.39E-16 | 0.386885 | 4.01E-18 | 0.254999 | 2.29E-08 | 0.264    | 6.92E-09 | 0.480022 | 2.74E-28 |
| 4.00E-15 | 0.341049 | 3.49E-14 | 0.346639 | 1.25E-14 | 0.346624 | 1.25E-14 | 0.455474 | 2.68E-25 |
| 2.24E-41 | 0.385408 | 5.50E-18 | 0.365794 | 3.12E-16 | 0.30168  | 2.78E-11 | 0.50422  | 1.75E-31 |
| 3.87E-10 | 0.105505 | 0.02259  | 0.159161 | 0.00056  | 0.165119 | 0.00034  | 0.239329 | 1.66E-07 |
| 1.41E-18 | 0.113082 | 0.01448  | 0.120186 | 0.00933  | 0.093915 | 0.0425   | 0.239333 | 1.65E-07 |
| 7.79E-18 | 0.558753 | 1.07E-39 | 0.230942 | 4.52E-07 | 0.332542 | 1.61E-13 | 0.342861 | 2.50E-14 |
| 2.79E-54 | 0.40496  | 7.41E-20 | 0.41335  | 1.07E-20 | 0.338291 | 5.75E-14 | 0.545497 | 1.46E-37 |
| 1.57E-14 | 0.39297  | 1.08E-18 | 0.396186 | 5.30E-19 | 0.403066 | 1.14E-19 | 0.499263 | 8.27E-31 |
| 0.00281  | 0.234994 | 2.80E-07 | 0.299732 | 3.78E-11 | 0.272697 | 2.08E-09 | 0.189084 | 3.92E-05 |
| 3.65E-06 | 0.227995 | 6.37E-07 | 0.272836 | 2.04E-09 | 0.225268 | 8.73E-07 | 0.301751 | 2.75E-11 |
| 3.30E-20 | 0.159188 | 0.00055  | 0.188195 | 4.26E-05 | 0.198213 | 1.60E-05 | 0.29214  | 1.22E-10 |
| 1.44E-37 | 0.484824 | 6.66E-29 | 0.492214 | 7.24E-30 | 0.427823 | 3.31E-22 | 0.578064 | 5.47E-43 |



|          |          |          |          |          |          |          |          |          |
|----------|----------|----------|----------|----------|----------|----------|----------|----------|
| 4.57E-46 | 0.457224 | 1.67E-25 | 0.401496 | 1.62E-19 | 0.383083 | 9.00E-18 | 0.433692 | 7.72E-23 |
| 5.91E-29 | 0.156958 | 0.00066  | 0.214535 | 2.89E-06 | 0.053339 | 0.24998  | 0.408289 | 3.46E-20 |
| 1.18E-27 | 0.432761 | 9.75E-23 | 0.477003 | 6.59E-28 | 0.455653 | 2.56E-25 | 0.516388 | 3.44E-33 |
| 7.00E-29 | 0.508151 | 5.00E-32 | 0.497448 | 1.45E-30 | 0.387192 | 3.76E-18 | 0.474059 | 1.54E-27 |
| 5.17E-33 | 0.362056 | 6.54E-16 | 0.331317 | 1.99E-13 | 0.270257 | 2.93E-09 | 0.410905 | 1.89E-20 |
| 1.27E-26 | 0.321673 | 1.06E-12 | 0.436894 | 3.45E-23 | 0.332232 | 1.70E-13 | 0.598144 | 1.19E-46 |
| 2.18E-06 | 0.269236 | 3.38E-09 | 0.334303 | 1.18E-13 | 0.300081 | 3.58E-11 | 0.23805  | 1.93E-07 |
| 2.23E-45 | 0.672237 | 1.06E-62 | 0.515901 | 4.04E-33 | 0.565056 | 9.50E-41 | 0.545417 | 1.50E-37 |
| 7.45E-09 | 0.393814 | 8.94E-19 | 0.390382 | 1.89E-18 | 0.314257 | 3.66E-12 | 0.362792 | 5.66E-16 |
| 3.28E-28 | 0.615403 | 5.21E-50 | 0.521861 | 5.58E-34 | 0.437253 | 3.15E-23 | 0.513732 | 8.22E-33 |
| 1.05E-43 | 0.367305 | 2.31E-16 | 0.372688 | 7.79E-17 | 0.280057 | 7.29E-10 | 0.498191 | 1.15E-30 |
| 2.58E-11 | 0.516015 | 3.89E-33 | 0.524268 | 2.48E-34 | 0.480474 | 2.40E-28 | 0.466894 | 1.17E-26 |
| 9.88E-06 | 0.274509 | 1.61E-09 | 0.371931 | 9.09E-17 | 0.34161  | 3.15E-14 | 0.323073 | 8.32E-13 |
| 6.51E-30 | 0.389486 | 2.29E-18 | 0.334768 | 1.08E-13 | 0.282656 | 5.00E-10 | 0.493077 | 5.56E-30 |
| 2.99E-58 | 0.426045 | 5.12E-22 | 0.485923 | 4.80E-29 | 0.413822 | 9.56E-21 | 0.548772 | 4.42E-38 |
| 4.84E-63 | 0.402003 | 1.45E-19 | 0.323675 | 7.51E-13 | 0.275052 | 1.49E-09 | 0.551629 | 1.54E-38 |
| 1.31E-23 | 0.168587 | 0.00025  | 0.21343  | 3.26E-06 | 0.093144 | 0.04424  | 0.325493 | 5.50E-13 |
| 1.02E-49 | 0.278443 | 9.21E-10 | 0.207604 | 6.08E-06 | 0.158804 | 0.00057  | 0.414856 | 7.50E-21 |
| 5.92E-15 | 0.296899 | 5.87E-11 | 0.205033 | 7.95E-06 | 0.186    | 5.25E-05 | 0.533336 | 1.10E-35 |
| 3.17E-33 | 0.47289  | 2.15E-27 | 0.478269 | 4.56E-28 | 0.42408  | 8.27E-22 | 0.467935 | 8.72E-27 |
| 9.55E-14 | 0.29651  | 6.23E-11 | 0.358598 | 1.28E-15 | 0.289597 | 1.79E-10 | 0.381279 | 1.32E-17 |
| 3.14E-20 | 0.360957 | 8.11E-16 | 0.206757 | 6.64E-06 | 0.177714 | 0.00011  | 0.405555 | 6.47E-20 |
| 7.82E-22 | 0.038378 | 0.40799  | 0.170127 | 0.00022  | 0.033729 | 0.46713  | 0.24988  | 4.44E-08 |
| 1.01E-57 | 0.550346 | 2.48E-38 | 0.480623 | 2.30E-28 | 0.449812 | 1.22E-24 | 0.56913  | 1.94E-41 |
| 0.00038  | 0.346286 | 1.33E-14 | 0.383612 | 8.05E-18 | 0.365879 | 3.07E-16 | 0.381429 | 1.28E-17 |
| 9.87E-37 | 0.465801 | 1.58E-26 | 0.353656 | 3.32E-15 | 0.362939 | 5.50E-16 | 0.470377 | 4.38E-27 |
| 1.56E-49 | 0.479811 | 2.91E-28 | 0.438917 | 2.06E-23 | 0.291332 | 1.38E-10 | 0.540373 | 9.23E-37 |
| 6.42E-49 | 0.587012 | 1.37E-44 | 0.536719 | 3.37E-36 | 0.50413  | 1.80E-31 | 0.52815  | 6.62E-35 |
| 8.01E-26 | 0.130226 | 0.00482  | 0.189863 | 3.63E-05 | 0.067962 | 0.14253  | 0.453898 | 4.10E-25 |
| 3.86E-15 | 0.353118 | 3.68E-15 | 0.085325 | 0.06543  | 0.165911 | 0.00032  | 0.289684 | 1.76E-10 |
| 3.32E-15 | 0.160429 | 0.0005   | 0.290344 | 1.60E-10 | 0.177806 | 0.00011  | 0.303226 | 2.18E-11 |
| 1.29E-25 | 0.622624 | 1.77E-51 | 0.603953 | 9.30E-48 | 0.551954 | 1.37E-38 | 0.539457 | 1.28E-36 |
| 2.03E-58 | 0.589895 | 4.09E-45 | 0.375278 | 4.58E-17 | 0.310271 | 7.03E-12 | 0.521144 | 7.09E-34 |
| 3.73E-24 | 0.475101 | 1.14E-27 | 0.504587 | 1.56E-31 | 0.485522 | 5.41E-29 | 0.549004 | 4.06E-38 |
| 2.07E-06 | -0.33176 | 1.84E-13 | -0.29336 | 1.01E-10 | -0.36467 | 3.90E-16 | -0.28542 | 3.33E-10 |
| 0.00367  | 0.048332 | 0.29729  | 0.003481 | 0.94019  | -0.00406 | 0.93031  | -0.14382 | 0.00183  |
| 0.0003   | 0.082399 | 0.07525  | 0.135033 | 0.00346  | 0.06751  | 0.14521  | 0.15235  | 0.00096  |
| 2.64E-28 | 0.528678 | 5.52E-35 | 0.417604 | 3.91E-21 | 0.440131 | 1.51E-23 | 0.498937 | 9.16E-31 |
| 4.91E-29 | 0.490859 | 1.09E-29 | 0.382879 | 9.40E-18 | 0.433676 | 7.75E-23 | 0.497323 | 1.51E-30 |
| 1.79E-14 | 0.380686 | 1.49E-17 | 0.453053 | 5.14E-25 | 0.37847  | 2.37E-17 | 0.429862 | 2.00E-22 |
| 7.79E-38 | 0.510935 | 2.04E-32 | 0.491013 | 1.04E-29 | 0.432248 | 1.11E-22 | 0.64036  | 2.97E-55 |
| 3.47E-31 | 0.64848  | 4.57E-57 | 0.516234 | 3.62E-33 | 0.539147 | 1.43E-36 | 0.490978 | 1.05E-29 |
| 4.15E-07 | 0.241658 | 1.24E-07 | 0.312856 | 4.61E-12 | 0.328473 | 3.28E-13 | 0.308243 | 9.77E-12 |
| 6.81E-20 | -0.28926 | 1.88E-10 | -0.24566 | 7.57E-08 | -0.13079 | 0.00464  | -0.49651 | 1.94E-30 |
| 2.59E-18 | 0.441453 | 1.08E-23 | 0.329058 | 2.96E-13 | 0.382474 | 1.02E-17 | 0.299158 | 4.13E-11 |

|          |          |          |          |          |          |          |          |          |
|----------|----------|----------|----------|----------|----------|----------|----------|----------|
| 1.59E-57 | 0.442778 | 7.65E-24 | 0.37681  | 3.34E-17 | 0.31843  | 1.83E-12 | 0.579274 | 3.35E-43 |
| 7.37E-37 | 0.506341 | 8.91E-32 | 0.449994 | 1.16E-24 | 0.396215 | 5.27E-19 | 0.492082 | 7.53E-30 |
| 0.02536  | 0.253045 | 2.95E-08 | 0.338559 | 5.48E-14 | 0.342018 | 2.92E-14 | 0.330404 | 2.34E-13 |
| 1.94E-30 | 0.214089 | 3.04E-06 | 0.184703 | 5.94E-05 | 0.092301 | 0.0462   | 0.340365 | 3.95E-14 |
| 9.79E-33 | 0.362534 | 5.95E-16 | 0.246569 | 6.75E-08 | 0.202931 | 9.88E-06 | 0.387375 | 3.61E-18 |
| 5.71E-21 | 0.251233 | 3.73E-08 | 0.340848 | 3.62E-14 | 0.221882 | 1.28E-06 | 0.330799 | 2.18E-13 |
| 1.95E-13 | 0.226251 | 7.80E-07 | 0.229641 | 5.26E-07 | 0.20427  | 8.61E-06 | 0.288454 | 2.12E-10 |
| 2.89E-14 | 0.440443 | 1.39E-23 | 0.397526 | 3.94E-19 | 0.333782 | 1.29E-13 | 0.283722 | 4.28E-10 |
| 2.23E-24 | 0.634883 | 4.62E-54 | 0.456395 | 2.09E-25 | 0.448092 | 1.91E-24 | 0.430964 | 1.52E-22 |
| 6.75E-18 | 0.334545 | 1.13E-13 | 0.295292 | 7.52E-11 | 0.290284 | 1.61E-10 | 0.377315 | 3.01E-17 |
| 3.59E-34 | 0.519269 | 1.33E-33 | 0.447264 | 2.38E-24 | 0.410186 | 2.23E-20 | 0.562065 | 3.01E-40 |
| 1.04E-15 | 0.292742 | 1.11E-10 | 0.257914 | 1.56E-08 | 0.27552  | 1.40E-09 | 0.299568 | 3.88E-11 |
| 2.18E-28 | 0.422808 | 1.13E-21 | 0.376856 | 3.31E-17 | 0.400773 | 1.91E-19 | 0.494774 | 3.31E-30 |
| 2.34E-47 | 0.247353 | 6.12E-08 | 0.283178 | 4.63E-10 | 0.203919 | 8.93E-06 | 0.471862 | 2.88E-27 |
| 3.66E-55 | 0.607093 | 2.29E-48 | 0.449456 | 1.34E-24 | 0.378753 | 2.23E-17 | 0.540989 | 7.41E-37 |
| 2.68E-21 | 0.139815 | 0.00246  | 0.251903 | 3.42E-08 | 0.163885 | 0.00038  | 0.31017  | 7.15E-12 |
| 1.42E-84 | 0.541677 | 5.79E-37 | 0.466758 | 1.21E-26 | 0.393487 | 9.60E-19 | 0.699123 | 9.44E-70 |
| 1.55E-52 | 0.434391 | 6.48E-23 | 0.30372  | 2.02E-11 | 0.317434 | 2.16E-12 | 0.5753   | 1.67E-42 |
| 1.90E-70 | 0.500482 | 5.66E-31 | 0.505912 | 1.02E-31 | 0.412478 | 1.31E-20 | 0.64436  | 3.86E-56 |
| 6.12E-30 | 0.358476 | 1.32E-15 | 0.479581 | 3.11E-28 | 0.382556 | 1.01E-17 | 0.509991 | 2.77E-32 |
| 8.74E-62 | 0.46781  | 9.03E-27 | 0.445907 | 3.39E-24 | 0.412357 | 1.35E-20 | 0.664372 | 8.86E-61 |
| 3.66E-13 | 0.424208 | 8.01E-22 | 0.358712 | 1.26E-15 | 0.403882 | 9.47E-20 | 0.347767 | 1.01E-14 |
| 1.51E-56 | 0.575459 | 1.57E-42 | 0.532564 | 1.44E-35 | 0.482314 | 1.40E-28 | 0.581488 | 1.35E-43 |
| 5.66E-12 | 0.425292 | 6.16E-22 | 0.305264 | 1.58E-11 | 0.321103 | 1.16E-12 | 0.4528   | 5.50E-25 |
| 1.59E-11 | -0.277   | 1.13E-09 | -0.28186 | 5.61E-10 | -0.37951 | 1.91E-17 | -0.44372 | 5.99E-24 |
| 1.19E-36 | 0.305325 | 1.56E-11 | 0.307808 | 1.05E-11 | 0.251422 | 3.64E-08 | 0.421992 | 1.37E-21 |
| 1.64E-44 | 0.542312 | 4.61E-37 | 0.541148 | 7.00E-37 | 0.483131 | 1.10E-28 | 0.573862 | 2.97E-42 |
| 3.94E-22 | 0.335614 | 9.30E-14 | 0.37984  | 1.78E-17 | 0.284594 | 3.76E-10 | 0.423947 | 8.54E-22 |
| 9.28E-07 | 0.303454 | 2.10E-11 | 0.316981 | 2.33E-12 | 0.267923 | 4.05E-09 | 0.335092 | 1.02E-13 |
| 5.38E-26 | 0.256127 | 1.98E-08 | 0.216955 | 2.22E-06 | 0.171278 | 0.0002   | 0.281288 | 6.10E-10 |
| 2.10E-19 | 0.292608 | 1.13E-10 | 0.332465 | 1.63E-13 | 0.224502 | 9.52E-07 | 0.363979 | 4.48E-16 |
| 1.17E-32 | 0.357294 | 1.65E-15 | 0.311985 | 5.32E-12 | 0.272909 | 2.02E-09 | 0.346254 | 1.34E-14 |
| 1.30E-26 | 0.299852 | 3.71E-11 | 0.219782 | 1.62E-06 | 0.153002 | 0.00091  | 0.267395 | 4.35E-09 |
| 0.00011  | -0.11551 | 0.01249  | -0.18638 | 5.07E-05 | -0.26712 | 4.52E-09 | -0.25461 | 2.41E-08 |
| 6.31E-43 | 0.543789 | 2.71E-37 | 0.517129 | 2.69E-33 | 0.461878 | 4.70E-26 | 0.518848 | 1.52E-33 |
| 4.91E-18 | 0.362242 | 6.30E-16 | 0.368828 | 1.70E-16 | 0.22358  | 1.06E-06 | 0.428447 | 2.84E-22 |
| 1.00E-08 | 0.17043  | 0.00022  | 0.174803 | 0.00015  | 0.202679 | 1.01E-05 | 0.199104 | 1.46E-05 |
| 2.99E-63 | 0.555811 | 3.24E-39 | 0.505065 | 1.34E-31 | 0.431553 | 1.32E-22 | 0.601511 | 2.74E-47 |
| 9.99E-38 | 0.187897 | 4.39E-05 | 0.24601  | 7.24E-08 | 0.156566 | 0.00069  | 0.519037 | 1.43E-33 |
| 7.48E-21 | 0.290095 | 1.66E-10 | 0.219238 | 1.72E-06 | 0.178949 | 0.0001   | 0.467466 | 9.95E-27 |
| 8.47E-30 | 0.376761 | 3.37E-17 | 0.340678 | 3.73E-14 | 0.235102 | 2.76E-07 | 0.437251 | 3.15E-23 |
| 1.89E-64 | 0.423452 | 9.63E-22 | 0.462105 | 4.41E-26 | 0.378608 | 2.30E-17 | 0.616927 | 2.57E-50 |
| 4.32E-72 | 0.565981 | 6.63E-41 | 0.499108 | 8.68E-31 | 0.388605 | 2.77E-18 | 0.639362 | 4.92E-55 |
| 1.49E-58 | 0.447837 | 2.05E-24 | 0.544694 | 1.95E-37 | 0.391613 | 1.45E-18 | 0.560411 | 5.68E-40 |
| 2.76E-50 | 0.498097 | 1.19E-30 | 0.406393 | 5.34E-20 | 0.381737 | 1.20E-17 | 0.527375 | 8.63E-35 |

|          |          |          |          |          |          |          |          |          |
|----------|----------|----------|----------|----------|----------|----------|----------|----------|
| 1.45E-72 | 0.560081 | 6.44E-40 | 0.571465 | 7.71E-42 | 0.514667 | 6.05E-33 | 0.612517 | 1.96E-49 |
| 1.76E-39 | 0.488022 | 2.57E-29 | 0.470943 | 3.73E-27 | 0.427222 | 3.84E-22 | 0.585359 | 2.74E-44 |
| 3.32E-17 | 0.295635 | 7.13E-11 | 0.298803 | 4.37E-11 | 0.209622 | 4.91E-06 | 0.39208  | 1.31E-18 |
| 1.47E-61 | 0.332313 | 1.67E-13 | 0.435878 | 4.45E-23 | 0.282797 | 4.90E-10 | 0.605895 | 3.92E-48 |
| 1.46E-11 | 0.3662   | 2.88E-16 | 0.344154 | 1.97E-14 | 0.349021 | 7.99E-15 | 0.387028 | 3.89E-18 |
| 0.00398  | -0.36301 | 5.42E-16 | -0.27245 | 2.16E-09 | -0.36528 | 3.46E-16 | -0.33093 | 2.13E-13 |
| 1.42E-25 | 0.375971 | 3.97E-17 | 0.252035 | 3.36E-08 | 0.30729  | 1.14E-11 | 0.523619 | 3.09E-34 |
| 0.14881  | 0.11055  | 0.01685  | 0.188798 | 4.03E-05 | 0.173704 | 0.00016  | 0.186968 | 4.79E-05 |
| 1.51E-20 | 0.41656  | 5.01E-21 | 0.432076 | 1.16E-22 | 0.423212 | 1.02E-21 | 0.4551   | 2.97E-25 |
| 1.24E-54 | 0.485667 | 5.18E-29 | 0.480636 | 2.29E-28 | 0.395474 | 6.20E-19 | 0.60581  | 4.07E-48 |
| 3.38E-25 | 0.438607 | 2.23E-23 | 0.403347 | 1.07E-19 | 0.343157 | 2.37E-14 | 0.34819  | 9.33E-15 |
| 8.20E-53 | 0.731    | 3.35E-79 | 0.584132 | 4.55E-44 | 0.524527 | 2.27E-34 | 0.643133 | 7.24E-56 |
| 3.57E-70 | 0.636782 | 1.80E-54 | 0.569601 | 1.61E-41 | 0.544856 | 1.84E-37 | 0.717676 | 4.30E-75 |
| 4.84E-16 | -0.21796 | 1.99E-06 | -0.21297 | 3.43E-06 | -0.13133 | 0.00447  | -0.23947 | 1.63E-07 |
| 3.00E-36 | 0.600682 | 3.94E-47 | 0.452125 | 6.59E-25 | 0.490557 | 1.20E-29 | 0.551191 | 1.81E-38 |
| 2.47E-09 | 0.239797 | 1.56E-07 | 0.442173 | 8.94E-24 | 0.357164 | 1.70E-15 | 0.324731 | 6.26E-13 |
| 6.67E-59 | 0.516955 | 2.85E-33 | 0.464341 | 2.38E-26 | 0.379578 | 1.88E-17 | 0.613037 | 1.55E-49 |
| 2.82E-21 | 0.609209 | 8.84E-49 | 0.594223 | 6.49E-46 | 0.543803 | 2.70E-37 | 0.561845 | 3.28E-40 |
| 1.57E-62 | 0.600902 | 3.58E-47 | 0.439638 | 1.71E-23 | 0.35615  | 2.06E-15 | 0.552015 | 1.34E-38 |
| 2.06E-23 | 0.324431 | 6.60E-13 | 0.330164 | 2.44E-13 | 0.347157 | 1.13E-14 | 0.405119 | 7.15E-20 |
| 1.03E-12 | 0.353346 | 3.53E-15 | 0.11027  | 0.01713  | 0.249622 | 4.58E-08 | 0.248819 | 5.08E-08 |
| 5.91E-39 | 0.308893 | 8.80E-12 | 0.215916 | 2.49E-06 | 0.162774 | 0.00041  | 0.375257 | 4.60E-17 |
| 2.60E-40 | 0.318225 | 1.89E-12 | 0.316496 | 2.52E-12 | 0.26301  | 7.91E-09 | 0.40166  | 1.56E-19 |
| 6.48E-49 | 0.565499 | 8.00E-41 | 0.453923 | 4.07E-25 | 0.451883 | 7.02E-25 | 0.587625 | 1.06E-44 |
| 3.47E-11 | 0.503124 | 2.47E-31 | 0.348713 | 8.46E-15 | 0.35722  | 1.68E-15 | 0.374149 | 5.78E-17 |
| 3.21E-50 | 0.448124 | 1.90E-24 | 0.417045 | 4.47E-21 | 0.362775 | 5.68E-16 | 0.574295 | 2.50E-42 |
| 7.17E-28 | 0.154157 | 0.00083  | 0.238514 | 1.83E-07 | 0.179878 | 9.28E-05 | 0.319338 | 1.57E-12 |
| 5.73E-57 | 0.698967 | 1.04E-69 | 0.560859 | 4.78E-40 | 0.525238 | 1.79E-34 | 0.690898 | 1.64E-67 |
| 8.14E-16 | 0.030885 | 0.50553  | 0.126414 | 0.00623  | 0.071077 | 0.12507  | 0.365651 | 3.21E-16 |
| 5.63E-09 | 0.295195 | 7.63E-11 | 0.280104 | 7.25E-10 | 0.184869 | 5.84E-05 | 0.358613 | 1.28E-15 |
| 4.81E-29 | 0.269637 | 3.19E-09 | 0.179311 | 9.77E-05 | 0.04986  | 0.28226  | 0.28242  | 5.17E-10 |
| 1.45E-19 | 0.309039 | 8.59E-12 | 0.232198 | 3.90E-07 | 0.071011 | 0.12543  | 0.373782 | 6.23E-17 |
| 6.14E-24 | 0.298313 | 4.71E-11 | 0.320537 | 1.28E-12 | 0.229275 | 5.49E-07 | 0.407636 | 4.02E-20 |
| 9.75E-27 | 0.364095 | 4.37E-16 | 0.413307 | 1.08E-20 | 0.337877 | 6.20E-14 | 0.465694 | 1.63E-26 |
| 4.38E-26 | 0.388922 | 2.59E-18 | 0.424416 | 7.62E-22 | 0.354286 | 2.95E-15 | 0.333044 | 1.47E-13 |
| 0.02851  | 0.247728 | 5.83E-08 | 0.291361 | 1.37E-10 | 0.343607 | 2.18E-14 | 0.222399 | 1.21E-06 |
| 2.40E-19 | 0.241058 | 1.34E-07 | 0.280683 | 6.66E-10 | 0.217731 | 2.04E-06 | 0.350703 | 5.82E-15 |
| 4.25E-26 | 0.256412 | 1.90E-08 | 0.146316 | 0.00152  | 0.119084 | 0.01     | 0.32453  | 6.48E-13 |
| 2.47E-56 | 0.343934 | 2.06E-14 | 0.438083 | 2.55E-23 | 0.366169 | 2.90E-16 | 0.574297 | 2.49E-42 |
| 7.53E-58 | 0.456089 | 2.27E-25 | 0.45666  | 1.95E-25 | 0.392925 | 1.09E-18 | 0.535375 | 5.41E-36 |
| 4.33E-86 | 0.504295 | 1.71E-31 | 0.459564 | 8.85E-26 | 0.39853  | 3.15E-19 | 0.666489 | 2.72E-61 |
| 9.20E-09 | 0.059444 | 0.19974  | 0.171217 | 0.0002   | 0.095024 | 0.04011  | 0.159968 | 0.00052  |
| 9.36E-56 | 0.320533 | 1.28E-12 | 0.353562 | 3.38E-15 | 0.215662 | 2.56E-06 | 0.538037 | 2.12E-36 |
| 5.23E-44 | 0.380892 | 1.43E-17 | 0.44193  | 9.52E-24 | 0.318282 | 1.87E-12 | 0.543778 | 2.72E-37 |
| 5.08E-18 | 0.408553 | 3.25E-20 | 0.350418 | 6.14E-15 | 0.293698 | 9.60E-11 | 0.541443 | 6.30E-37 |

|          |          |          |          |          |          |          |          |          |
|----------|----------|----------|----------|----------|----------|----------|----------|----------|
| 1.79E-46 | 0.403172 | 1.11E-19 | 0.445399 | 3.87E-24 | 0.309909 | 7.46E-12 | 0.677584 | 4.81E-64 |
| 9.15E-40 | 0.598651 | 9.57E-47 | 0.524456 | 2.33E-34 | 0.427067 | 3.99E-22 | 0.57259  | 4.93E-42 |
| 5.05E-21 | 0.505308 | 1.24E-31 | 0.383312 | 8.58E-18 | 0.307646 | 1.08E-11 | 0.241557 | 1.26E-07 |
| 1.13E-52 | 0.368113 | 1.96E-16 | 0.404897 | 7.52E-20 | 0.334318 | 1.17E-13 | 0.51887  | 1.51E-33 |
| 4.40E-26 | 0.242122 | 1.18E-07 | 0.244682 | 8.55E-08 | 0.207406 | 6.20E-06 | 0.301251 | 2.98E-11 |
| 2.03E-10 | 0.577374 | 7.23E-43 | 0.421982 | 1.37E-21 | 0.462569 | 3.88E-26 | 0.386479 | 4.37E-18 |
| 7.26E-42 | 0.453379 | 4.71E-25 | 0.407302 | 4.34E-20 | 0.369808 | 1.40E-16 | 0.575473 | 1.56E-42 |
| 2.16E-37 | 0.414436 | 8.28E-21 | 0.34618  | 1.36E-14 | 0.315088 | 3.19E-12 | 0.477964 | 4.99E-28 |
| 5.01E-27 | 0.418863 | 2.90E-21 | 0.249177 | 4.85E-08 | 0.24871  | 5.15E-08 | 0.433037 | 9.10E-23 |
| 1.21E-19 | 0.258789 | 1.39E-08 | 0.277225 | 1.10E-09 | 0.331629 | 1.89E-13 | 0.479299 | 3.38E-28 |
| 3.44E-27 | 0.365465 | 3.33E-16 | 0.29876  | 4.40E-11 | 0.254814 | 2.35E-08 | 0.379481 | 1.92E-17 |
| 7.43E-30 | 0.509364 | 3.38E-32 | 0.490679 | 1.15E-29 | 0.494383 | 3.73E-30 | 0.505595 | 1.13E-31 |
| 4.42E-14 | 0.586679 | 1.58E-44 | 0.325344 | 5.64E-13 | 0.389822 | 2.13E-18 | 0.409678 | 2.51E-20 |
| 6.50E-14 | 0.152531 | 0.00094  | 0.240102 | 1.51E-07 | 0.214053 | 3.05E-06 | 0.384688 | 6.41E-18 |
| 2.41E-39 | 0.386869 | 4.02E-18 | 0.334449 | 1.15E-13 | 0.183299 | 6.77E-05 | 0.44261  | 7.99E-24 |
| 2.13E-50 | 0.380557 | 1.53E-17 | 0.385948 | 4.90E-18 | 0.301396 | 2.91E-11 | 0.551577 | 1.57E-38 |
| 2.15E-19 | 0.222531 | 1.19E-06 | 0.052832 | 0.25452  | 0.113138 | 0.01444  | 0.391484 | 1.49E-18 |
| 4.79E-56 | 0.706331 | 8.91E-72 | 0.527123 | 9.40E-35 | 0.566037 | 6.49E-41 | 0.600487 | 4.29E-47 |
| 1.30E-32 | 0.463724 | 2.82E-26 | 0.414172 | 8.81E-21 | 0.379503 | 1.91E-17 | 0.528883 | 5.15E-35 |
| 1.95E-56 | 0.30801  | 1.01E-11 | 0.377987 | 2.62E-17 | 0.257578 | 1.63E-08 | 0.45279  | 5.51E-25 |
| 2.06E-56 | 0.544342 | 2.22E-37 | 0.40888  | 3.02E-20 | 0.343681 | 2.15E-14 | 0.591111 | 2.44E-45 |
| 2.73E-10 | 0.450297 | 1.07E-24 | 0.440516 | 1.37E-23 | 0.388362 | 2.92E-18 | 0.3987   | 3.04E-19 |
| 2.74E-26 | 0.511156 | 1.90E-32 | 0.431751 | 1.25E-22 | 0.424974 | 6.65E-22 | 0.335704 | 9.16E-14 |
| 0.93495  | -0.04281 | 0.35592  | 0.110268 | 0.01713  | 0.129723 | 0.00499  | 0.005258 | 0.90977  |
| 1.40E-49 | 0.58985  | 4.17E-45 | 0.437737 | 2.78E-23 | 0.446519 | 2.89E-24 | 0.630586 | 3.83E-53 |
| 4.13E-38 | 0.614368 | 8.39E-50 | 0.544473 | 2.12E-37 | 0.470514 | 4.22E-27 | 0.615502 | 4.97E-50 |
| 3.00E-64 | 0.300377 | 3.41E-11 | 0.343685 | 2.15E-14 | 0.254887 | 2.32E-08 | 0.488353 | 2.32E-29 |
| 3.01E-38 | 0.257326 | 1.69E-08 | 0.160224 | 0.00051  | 0.131182 | 0.00452  | 0.357843 | 1.49E-15 |
| 6.73E-13 | 0.479268 | 3.41E-28 | 0.455353 | 2.77E-25 | 0.475415 | 1.04E-27 | 0.659518 | 1.27E-59 |
| 3.47E-14 | 0.683778 | 1.23E-65 | 0.311556 | 5.70E-12 | 0.405836 | 6.07E-20 | 0.349947 | 6.71E-15 |
| 9.42E-09 | 0.301554 | 2.84E-11 | 0.319614 | 1.50E-12 | 0.30099  | 3.10E-11 | 0.255988 | 2.01E-08 |
| 1.93E-35 | 0.342578 | 2.64E-14 | 0.44478  | 4.55E-24 | 0.313602 | 4.08E-12 | 0.419768 | 2.34E-21 |
| 1.53E-11 | -0.38364 | 8.01E-18 | -0.30611 | 1.38E-11 | -0.30711 | 1.17E-11 | -0.32391 | 7.21E-13 |
| 2.78E-63 | 0.441938 | 9.50E-24 | 0.396853 | 4.58E-19 | 0.30898  | 8.67E-12 | 0.505331 | 1.23E-31 |
| 1.41E-11 | -0.1284  | 0.00546  | 0.033985 | 0.46376  | -0.02078 | 0.65417  | -0.228   | 6.37E-07 |
| 3.56E-64 | 0.630096 | 4.87E-53 | 0.445644 | 3.63E-24 | 0.401965 | 1.46E-19 | 0.635098 | 4.16E-54 |
| 1.14E-05 | 0.396697 | 4.74E-19 | 0.424752 | 7.02E-22 | 0.40561  | 6.39E-20 | 0.385688 | 5.18E-18 |
| 2.00E-19 | 0.514817 | 5.76E-33 | 0.467048 | 1.12E-26 | 0.466528 | 1.29E-26 | 0.463643 | 2.89E-26 |
| 1.26E-19 | 0.400012 | 2.26E-19 | 0.33536  | 9.74E-14 | 0.317044 | 2.30E-12 | 0.388825 | 2.64E-18 |
| 5.55E-24 | 0.421093 | 1.70E-21 | 0.403005 | 1.15E-19 | 0.343643 | 2.17E-14 | 0.467761 | 9.16E-27 |
| 4.06E-06 | -0.25887 | 1.38E-08 | -0.41542 | 6.57E-21 | -0.43262 | 1.01E-22 | -0.33528 | 9.87E-14 |
| 4.25E-16 | 0.219091 | 1.75E-06 | 0.261793 | 9.32E-09 | 0.193945 | 2.44E-05 | 0.319153 | 1.62E-12 |
| 3.60E-26 | 0.130428 | 0.00476  | 0.196986 | 1.81E-05 | 0.06607  | 0.15401  | 0.262413 | 8.57E-09 |
| 4.66E-33 | 0.516942 | 2.87E-33 | 0.35809  | 1.42E-15 | 0.278756 | 8.80E-10 | 0.5308   | 2.66E-35 |
| 2.89E-22 | 0.542231 | 4.75E-37 | 0.34964  | 7.11E-15 | 0.398854 | 2.93E-19 | 0.438586 | 2.24E-23 |

|          |          |          |          |          |          |          |          |          |
|----------|----------|----------|----------|----------|----------|----------|----------|----------|
| 8.16E-10 | 0.453109 | 5.06E-25 | 0.374934 | 4.92E-17 | 0.375157 | 4.70E-17 | 0.436171 | 4.14E-23 |
| 2.02E-20 | 0.174839 | 0.00015  | 0.345288 | 1.60E-14 | 0.207461 | 6.17E-06 | 0.365782 | 3.13E-16 |
| 1.43E-22 | 0.207202 | 6.34E-06 | 0.165522 | 0.00033  | 0.117602 | 0.01098  | 0.246117 | 7.15E-08 |
| 2.25E-08 | 0.429763 | 2.05E-22 | 0.440975 | 1.22E-23 | 0.407173 | 4.47E-20 | 0.369929 | 1.36E-16 |
| 3.81E-29 | 0.477015 | 6.56E-28 | 0.431201 | 1.44E-22 | 0.397874 | 3.65E-19 | 0.521452 | 6.40E-34 |
| 3.39E-13 | 0.321119 | 1.16E-12 | 0.285827 | 3.13E-10 | 0.256093 | 1.99E-08 | 0.35053  | 6.01E-15 |
| 8.12E-48 | 0.613912 | 1.04E-49 | 0.51256  | 1.20E-32 | 0.464243 | 2.44E-26 | 0.519114 | 1.40E-33 |
| 1.91E-32 | 0.440946 | 1.23E-23 | 0.454826 | 3.20E-25 | 0.394077 | 8.44E-19 | 0.549654 | 3.20E-38 |
| 2.08E-33 | 0.465691 | 1.63E-26 | 0.460673 | 6.54E-26 | 0.431947 | 1.19E-22 | 0.456719 | 1.92E-25 |
| 1.70E-49 | 0.528747 | 5.40E-35 | 0.549182 | 3.80E-38 | 0.479655 | 3.05E-28 | 0.553077 | 9.01E-39 |
| 6.58E-10 | 0.418191 | 3.40E-21 | 0.365529 | 3.29E-16 | 0.343764 | 2.12E-14 | 0.42579  | 5.45E-22 |
| 4.33E-29 | 0.394376 | 7.90E-19 | 0.324071 | 7.02E-13 | 0.244697 | 8.54E-08 | 0.470483 | 4.25E-27 |
| 2.26E-21 | 0.678003 | 3.76E-64 | 0.449564 | 1.30E-24 | 0.484176 | 8.07E-29 | 0.483422 | 1.01E-28 |
| 3.99E-62 | 0.304812 | 1.69E-11 | 0.293276 | 1.02E-10 | 0.126056 | 0.00638  | 0.504284 | 1.71E-31 |
| 2.28E-40 | 0.290118 | 1.65E-10 | 0.247914 | 5.70E-08 | 0.122819 | 0.00788  | 0.474501 | 1.35E-27 |
| 2.23E-25 | 0.256857 | 1.80E-08 | 0.323977 | 7.13E-13 | 0.242671 | 1.10E-07 | 0.294184 | 8.91E-11 |
| 1.80E-18 | 0.333279 | 1.41E-13 | 0.410919 | 1.88E-20 | 0.31553  | 2.96E-12 | 0.331063 | 2.08E-13 |
| 3.67E-61 | 0.711275 | 3.35E-73 | 0.560672 | 5.14E-40 | 0.568863 | 2.15E-41 | 0.685504 | 4.38E-66 |
| 9.06E-12 | 0.470832 | 3.85E-27 | 0.417253 | 4.26E-21 | 0.4665   | 1.30E-26 | 0.437024 | 3.33E-23 |
| 4.31E-38 | 0.563328 | 1.85E-40 | 0.503036 | 2.54E-31 | 0.512243 | 1.33E-32 | 0.539782 | 1.14E-36 |
| 3.48E-20 | 0.199775 | 1.36E-05 | 0.242961 | 1.06E-07 | 0.153742 | 0.00086  | 0.23152  | 4.22E-07 |
| 3.57E-26 | 0.123253 | 0.00766  | 0.244368 | 8.89E-08 | 0.126414 | 0.00623  | 0.4626   | 3.85E-26 |
| 2.29E-46 | 0.297524 | 5.33E-11 | 0.397326 | 4.12E-19 | 0.310018 | 7.33E-12 | 0.516819 | 2.98E-33 |
| 1.34E-72 | 0.449222 | 1.42E-24 | 0.359457 | 1.09E-15 | 0.321826 | 1.03E-12 | 0.568779 | 2.22E-41 |
| 8.60E-74 | 0.339797 | 4.38E-14 | 0.337988 | 6.08E-14 | 0.21431  | 2.96E-06 | 0.535617 | 4.97E-36 |
| 8.81E-69 | 0.418339 | 3.29E-21 | 0.332532 | 1.61E-13 | 0.304527 | 1.77E-11 | 0.548369 | 5.13E-38 |
| 1.09E-16 | 0.25606  | 1.99E-08 | 0.187212 | 4.68E-05 | 0.130113 | 0.00486  | 0.330923 | 2.14E-13 |
| 4.00E-66 | 0.434121 | 6.93E-23 | 0.45173  | 7.32E-25 | 0.383098 | 8.97E-18 | 0.59011  | 3.74E-45 |
| 1.11E-33 | 0.603811 | 9.91E-48 | 0.364463 | 4.07E-16 | 0.321688 | 1.05E-12 | 0.404373 | 8.47E-20 |
| 5.47E-31 | 0.377206 | 3.08E-17 | 0.414593 | 7.98E-21 | 0.302889 | 2.30E-11 | 0.391982 | 1.33E-18 |
| 5.62E-64 | 0.552433 | 1.14E-38 | 0.449678 | 1.26E-24 | 0.431949 | 1.19E-22 | 0.57803  | 5.55E-43 |
| 2.27E-17 | 0.303982 | 1.93E-11 | 0.366501 | 2.71E-16 | 0.329479 | 2.75E-13 | 0.445017 | 4.28E-24 |
| 6.26E-68 | 0.531626 | 2.00E-35 | 0.422774 | 1.13E-21 | 0.398092 | 3.48E-19 | 0.596411 | 2.53E-46 |
| 0.00532  | -0.16178 | 0.00045  | -0.12995 | 0.00491  | -0.2378  | 1.99E-07 | -0.24211 | 1.18E-07 |
| 1.56E-26 | 0.414439 | 8.27E-21 | 0.385882 | 4.97E-18 | 0.328652 | 3.18E-13 | 0.581514 | 1.34E-43 |
| 6.81E-58 | 0.466961 | 1.15E-26 | 0.535474 | 5.23E-36 | 0.425075 | 6.49E-22 | 0.625505 | 4.48E-52 |
| 1.46E-10 | 0.300592 | 3.30E-11 | 0.282522 | 5.10E-10 | 0.3114   | 5.85E-12 | 0.316531 | 2.51E-12 |
| 1.18E-30 | 0.366677 | 2.62E-16 | 0.445824 | 3.47E-24 | 0.29286  | 1.09E-10 | 0.346764 | 1.22E-14 |
| 2.29E-18 | 0.377049 | 3.18E-17 | 0.178687 | 0.0001   | 0.217458 | 2.10E-06 | 0.328451 | 3.29E-13 |
| 9.62E-19 | 0.23607  | 2.46E-07 | 0.18808  | 4.31E-05 | 0.120606 | 0.00908  | 0.239134 | 1.70E-07 |
| 1.11E-34 | 0.497117 | 1.61E-30 | 0.424542 | 7.39E-22 | 0.463101 | 3.35E-26 | 0.544467 | 2.12E-37 |
| 1.48E-66 | 0.416001 | 5.72E-21 | 0.420134 | 2.14E-21 | 0.323979 | 7.13E-13 | 0.558633 | 1.12E-39 |
| 1.64E-06 | 0.179751 | 9.39E-05 | 0.19969  | 1.38E-05 | 0.240546 | 1.43E-07 | 0.188729 | 4.05E-05 |
| 3.72E-19 | 0.380965 | 1.41E-17 | 0.349462 | 7.35E-15 | 0.329202 | 2.89E-13 | 0.389559 | 2.26E-18 |
| 5.86E-23 | 0.414404 | 8.34E-21 | 0.406957 | 4.70E-20 | 0.341661 | 3.12E-14 | 0.426958 | 4.10E-22 |

|          |          |          |          |          |          |          |          |          |
|----------|----------|----------|----------|----------|----------|----------|----------|----------|
| 2.15E-28 | 0.404193 | 8.82E-20 | 0.392333 | 1.24E-18 | 0.285887 | 3.11E-10 | 0.460305 | 7.23E-26 |
| 9.11E-17 | 0.496072 | 2.22E-30 | 0.314773 | 3.36E-12 | 0.327469 | 3.91E-13 | 0.346927 | 1.18E-14 |
| 2.58E-39 | 0.146147 | 0.00154  | 0.216587 | 2.31E-06 | 0.080289 | 0.08306  | 0.361428 | 7.40E-16 |
| 6.24E-79 | 0.603458 | 1.16E-47 | 0.509836 | 2.91E-32 | 0.450278 | 1.08E-24 | 0.686209 | 2.86E-66 |
| 6.89E-17 | 0.387656 | 3.40E-18 | 0.303367 | 2.13E-11 | 0.225998 | 8.03E-07 | 0.46691  | 1.16E-26 |
| 1.16E-51 | 0.390297 | 1.92E-18 | 0.409991 | 2.33E-20 | 0.271659 | 2.41E-09 | 0.502963 | 2.60E-31 |
| 5.28E-70 | 0.467506 | 9.84E-27 | 0.506514 | 8.43E-32 | 0.433246 | 8.63E-23 | 0.671817 | 1.34E-62 |
| 5.24E-15 | 0.417885 | 3.66E-21 | 0.417569 | 3.95E-21 | 0.466667 | 1.24E-26 | 0.409998 | 2.33E-20 |
| 9.66E-51 | 0.448909 | 1.54E-24 | 0.393263 | 1.01E-18 | 0.298383 | 4.66E-11 | 0.622868 | 1.58E-51 |
| 3.95E-42 | 0.521495 | 6.31E-34 | 0.554959 | 4.46E-39 | 0.477471 | 5.75E-28 | 0.619635 | 7.25E-51 |
| 1.76E-06 | 0.29558  | 7.19E-11 | 0.248586 | 5.23E-08 | 0.288097 | 2.24E-10 | 0.249724 | 4.53E-08 |
| 9.25E-38 | 0.46628  | 1.39E-26 | 0.325935 | 5.09E-13 | 0.33935  | 4.75E-14 | 0.419754 | 2.34E-21 |
| 0.00025  | -0.04426 | 0.33993  | -0.08069 | 0.08152  | -0.10896 | 0.01851  | -0.15577 | 0.00073  |
| 8.35E-74 | 0.60662  | 2.83E-48 | 0.447239 | 2.40E-24 | 0.334776 | 1.08E-13 | 0.64346  | 6.13E-56 |
| 8.65E-32 | 0.481225 | 1.93E-28 | 0.372132 | 8.72E-17 | 0.305227 | 1.59E-11 | 0.407685 | 3.97E-20 |
| 4.27E-22 | 0.497058 | 1.64E-30 | 0.361618 | 7.13E-16 | 0.294248 | 8.82E-11 | 0.455473 | 2.69E-25 |
| 8.72E-25 | 0.441918 | 9.55E-24 | 0.289906 | 1.71E-10 | 0.245255 | 7.96E-08 | 0.499041 | 8.87E-31 |
| 2.02E-46 | 0.333917 | 1.26E-13 | 0.259122 | 1.33E-08 | 0.15073  | 0.00109  | 0.385471 | 5.42E-18 |
| 3.34E-68 | 0.490503 | 1.22E-29 | 0.369636 | 1.45E-16 | 0.22726  | 6.94E-07 | 0.512675 | 1.16E-32 |
| 4.72E-51 | 0.545238 | 1.61E-37 | 0.447913 | 2.01E-24 | 0.425767 | 5.48E-22 | 0.725245 | 2.14E-77 |
| 2.91E-24 | 0.278958 | 8.55E-10 | 0.258007 | 1.54E-08 | 0.175036 | 0.00014  | 0.429113 | 2.41E-22 |
| 2.73E-05 | 0.348293 | 9.15E-15 | 0.307684 | 1.07E-11 | 0.342375 | 2.74E-14 | 0.396545 | 4.90E-19 |
| 2.24E-63 | 0.563063 | 2.05E-40 | 0.481798 | 1.63E-28 | 0.416519 | 5.06E-21 | 0.644201 | 4.19E-56 |
| 7.58E-18 | 0.06152  | 0.18446  | 0.127331 | 0.00586  | 0.112255 | 0.01522  | 0.275191 | 1.47E-09 |
| 1.69E-13 | 0.399787 | 2.38E-19 | 0.402097 | 1.42E-19 | 0.420257 | 2.08E-21 | 0.45393  | 4.07E-25 |
| 4.09E-13 | 0.260362 | 1.13E-08 | 0.258084 | 1.53E-08 | 0.323103 | 8.28E-13 | 0.138527 | 0.0027   |
| 4.75E-10 | 0.307156 | 1.16E-11 | 0.324263 | 6.79E-13 | 0.309456 | 8.03E-12 | 0.206502 | 6.82E-06 |
| 1.32E-37 | 0.273305 | 1.91E-09 | 0.293238 | 1.03E-10 | 0.113567 | 0.01407  | 0.389536 | 2.27E-18 |
| 4.51E-06 | 0.268432 | 3.77E-09 | 0.322824 | 8.68E-13 | 0.286839 | 2.70E-10 | 0.255112 | 2.26E-08 |
| 5.78E-09 | 0.581192 | 1.53E-43 | 0.34494  | 1.71E-14 | 0.400358 | 2.10E-19 | 0.31484  | 3.32E-12 |
| 9.97E-14 | 0.412865 | 1.20E-20 | 0.430908 | 1.55E-22 | 0.398334 | 3.29E-19 | 0.381775 | 1.19E-17 |
| 1.07E-11 | 0.449897 | 1.19E-24 | 0.416095 | 5.60E-21 | 0.440714 | 1.30E-23 | 0.344944 | 1.71E-14 |
| 8.03E-26 | 0.371274 | 1.04E-16 | 0.347262 | 1.11E-14 | 0.26046  | 1.11E-08 | 0.456107 | 2.26E-25 |
| 2.04E-15 | 0.225165 | 8.83E-07 | 0.16586  | 0.00032  | 0.122367 | 0.00812  | 0.279365 | 8.06E-10 |
| 1.81E-31 | 0.482036 | 1.52E-28 | 0.451542 | 7.69E-25 | 0.399554 | 2.51E-19 | 0.472795 | 2.21E-27 |
| 2.22E-25 | 0.512215 | 1.35E-32 | 0.461508 | 5.20E-26 | 0.409098 | 2.87E-20 | 0.518732 | 1.58E-33 |
| 1.04E-37 | 0.523304 | 3.43E-34 | 0.56665  | 5.11E-41 | 0.479795 | 2.93E-28 | 0.578864 | 3.95E-43 |
| 1.19E-22 | 0.11627  | 0.01192  | 0.169891 | 0.00023  | 0.10698  | 0.02076  | 0.297958 | 4.98E-11 |
| 8.66E-17 | 0.417197 | 4.31E-21 | 0.463469 | 3.03E-26 | 0.380234 | 1.64E-17 | 0.427178 | 3.88E-22 |
| 6.16E-30 | 0.36573  | 3.16E-16 | 0.415381 | 6.63E-21 | 0.31727  | 2.22E-12 | 0.357374 | 1.63E-15 |
| 6.21E-32 | 0.673994 | 3.85E-63 | 0.485422 | 5.58E-29 | 0.474211 | 1.47E-27 | 0.505031 | 1.35E-31 |
| 5.50E-18 | 0.162641 | 0.00042  | 0.24691  | 6.47E-08 | 0.13522  | 0.00341  | 0.339798 | 4.38E-14 |
| 7.29E-55 | 0.471376 | 3.30E-27 | 0.311316 | 5.93E-12 | 0.25042  | 4.14E-08 | 0.493407 | 5.03E-30 |
| 1.35E-44 | 0.488284 | 2.37E-29 | 0.367067 | 2.42E-16 | 0.350599 | 5.94E-15 | 0.512903 | 1.08E-32 |
| 4.03E-55 | 0.463488 | 3.01E-26 | 0.392837 | 1.11E-18 | 0.313733 | 3.99E-12 | 0.485902 | 4.83E-29 |

|          |          |          |          |          |          |          |          |          |
|----------|----------|----------|----------|----------|----------|----------|----------|----------|
| 3.72E-27 | 0.478858 | 3.84E-28 | 0.385274 | 5.66E-18 | 0.397466 | 3.99E-19 | 0.494297 | 3.83E-30 |
| 4.69E-20 | 0.374765 | 5.09E-17 | 0.371038 | 1.09E-16 | 0.278728 | 8.84E-10 | 0.379705 | 1.83E-17 |
| 5.40E-52 | 0.300648 | 3.27E-11 | 0.363239 | 5.18E-16 | 0.278076 | 9.71E-10 | 0.540062 | 1.03E-36 |
| 1.00E-21 | 0.246184 | 7.09E-08 | 0.182758 | 7.12E-05 | 0.125078 | 0.0068   | 0.355409 | 2.38E-15 |
| 9.27E-51 | 0.383628 | 8.02E-18 | 0.347425 | 1.08E-14 | 0.247293 | 6.16E-08 | 0.496227 | 2.12E-30 |
| 7.32E-37 | 0.488069 | 2.53E-29 | 0.351111 | 5.39E-15 | 0.286466 | 2.85E-10 | 0.43933  | 1.85E-23 |
| 1.78E-63 | 0.462282 | 4.20E-26 | 0.439722 | 1.68E-23 | 0.352674 | 4.01E-15 | 0.584375 | 4.12E-44 |
| 0.00014  | 0.060192 | 0.19413  | 0.248959 | 4.99E-08 | 0.188125 | 4.29E-05 | 0.18224  | 7.47E-05 |
| 6.81E-24 | 0.497183 | 1.58E-30 | 0.514294 | 6.84E-33 | 0.451678 | 7.42E-25 | 0.572368 | 5.38E-42 |
| 4.53E-26 | 0.271375 | 2.51E-09 | 0.360991 | 8.06E-16 | 0.236872 | 2.23E-07 | 0.364479 | 4.05E-16 |
| 3.94E-27 | 0.525498 | 1.63E-34 | 0.558624 | 1.12E-39 | 0.547542 | 6.94E-38 | 0.51174  | 1.57E-32 |
| 1.32E-14 | 0.34394  | 2.05E-14 | 0.401129 | 1.76E-19 | 0.378755 | 2.23E-17 | 0.427172 | 3.89E-22 |
| 1.19E-16 | 0.080351 | 0.08282  | 0.240474 | 1.44E-07 | 0.104652 | 0.02372  | 0.227944 | 6.41E-07 |
| 1.25E-27 | 0.430533 | 1.70E-22 | 0.435462 | 4.95E-23 | 0.391775 | 1.40E-18 | 0.457618 | 1.50E-25 |
| 6.99E-25 | 0.476148 | 8.43E-28 | 0.468275 | 7.93E-27 | 0.433211 | 8.71E-23 | 0.556729 | 2.29E-39 |
| 2.70E-53 | 0.517592 | 2.31E-33 | 0.526715 | 1.08E-34 | 0.444621 | 4.74E-24 | 0.542547 | 4.24E-37 |
| 7.08E-17 | 0.393344 | 9.91E-19 | 0.4511   | 8.65E-25 | 0.412919 | 1.18E-20 | 0.507299 | 6.56E-32 |
| 4.67E-18 | 0.394571 | 7.57E-19 | 0.345339 | 1.59E-14 | 0.33621  | 8.36E-14 | 0.478034 | 4.88E-28 |
| 1.19E-66 | 0.622548 | 1.83E-51 | 0.552176 | 1.26E-38 | 0.480684 | 2.26E-28 | 0.606363 | 3.18E-48 |
| 4.86E-14 | 0.410923 | 1.88E-20 | 0.395606 | 6.03E-19 | 0.339397 | 4.71E-14 | 0.491647 | 8.60E-30 |
| 8.22E-48 | 0.409313 | 2.73E-20 | 0.416463 | 5.13E-21 | 0.392563 | 1.18E-18 | 0.613648 | 1.17E-49 |
| 2.67E-26 | 0.519545 | 1.21E-33 | 0.500842 | 5.06E-31 | 0.375956 | 3.99E-17 | 0.443729 | 5.98E-24 |
| 2.29E-33 | 0.277862 | 1.00E-09 | 0.32697  | 4.26E-13 | 0.158017 | 0.00061  | 0.380713 | 1.48E-17 |
| 1.86E-43 | 0.536503 | 3.64E-36 | 0.412774 | 1.22E-20 | 0.357255 | 1.67E-15 | 0.536689 | 3.41E-36 |
| 4.23E-15 | 0.247029 | 6.37E-08 | 0.305197 | 1.59E-11 | 0.259452 | 1.27E-08 | 0.362675 | 5.79E-16 |
| 3.86E-07 | 0.141676 | 0.00215  | 0.206182 | 7.05E-06 | 0.130774 | 0.00465  | 0.17373  | 0.00016  |
| 9.58E-10 | 0.357959 | 1.45E-15 | 0.196211 | 1.95E-05 | 0.23113  | 4.42E-07 | 0.323654 | 7.54E-13 |
| 5.48E-14 | 0.141584 | 0.00216  | 0.131607 | 0.00439  | 0.133258 | 0.00392  | 0.305451 | 1.53E-11 |
| 2.64E-83 | 0.489651 | 1.57E-29 | 0.443175 | 6.90E-24 | 0.371746 | 9.43E-17 | 0.625191 | 5.21E-52 |
| 1.12E-07 | 0.253736 | 2.70E-08 | 0.326529 | 4.60E-13 | 0.36443  | 4.09E-16 | 0.355357 | 2.40E-15 |
| 1.80E-05 | 0.41435  | 8.45E-21 | 0.405011 | 7.32E-20 | 0.380601 | 1.52E-17 | 0.490436 | 1.24E-29 |
| 0.00093  | 0.08322  | 0.07238  | 0.12262  | 0.00798  | 0.097228 | 0.03569  | 0.109346 | 0.01809  |
| 1.26E-65 | 0.577377 | 7.23E-43 | 0.50867  | 4.23E-32 | 0.418348 | 3.28E-21 | 0.622871 | 1.57E-51 |
| 7.44E-07 | 0.245169 | 8.05E-08 | 0.381219 | 1.33E-17 | 0.259169 | 1.32E-08 | 0.326497 | 4.62E-13 |
| 1.58E-14 | 0.295299 | 7.51E-11 | 0.361679 | 7.04E-16 | 0.325153 | 5.83E-13 | 0.436738 | 3.58E-23 |
| 9.28E-24 | 0.445848 | 3.45E-24 | 0.401976 | 1.46E-19 | 0.472989 | 2.09E-27 | 0.448457 | 1.74E-24 |
| 7.08E-36 | 0.408941 | 2.98E-20 | 0.341615 | 3.15E-14 | 0.318078 | 1.94E-12 | 0.509629 | 3.11E-32 |
| 2.46E-76 | 0.409203 | 2.80E-20 | 0.418461 | 3.19E-21 | 0.292188 | 1.21E-10 | 0.52914  | 4.71E-35 |
| 2.91E-58 | 0.361164 | 7.79E-16 | 0.484978 | 6.36E-29 | 0.361302 | 7.58E-16 | 0.588889 | 6.25E-45 |
| 8.18E-05 | -0.11384 | 0.01384  | -0.23307 | 3.51E-07 | -0.29057 | 1.54E-10 | -0.2668  | 4.73E-09 |
| 1.15E-42 | 0.522211 | 4.96E-34 | 0.431339 | 1.39E-22 | 0.372709 | 7.76E-17 | 0.601555 | 2.68E-47 |
| 5.16E-34 | 0.49088  | 1.08E-29 | 0.465805 | 1.58E-26 | 0.443224 | 6.81E-24 | 0.552504 | 1.11E-38 |
| 3.96E-18 | 0.418509 | 3.16E-21 | 0.306004 | 1.40E-11 | 0.338414 | 5.63E-14 | 0.433681 | 7.74E-23 |
| 7.15E-15 | 0.201605 | 1.13E-05 | 0.228472 | 6.03E-07 | 0.144905 | 0.00169  | 0.227318 | 6.89E-07 |
| 0.002    | -0.24673 | 6.61E-08 | -0.3136  | 4.08E-12 | -0.30478 | 1.70E-11 | -0.179   | 0.0001   |

|          |          |          |          |          |          |          |          |          |
|----------|----------|----------|----------|----------|----------|----------|----------|----------|
| 3.20E-29 | 0.15689  | 0.00067  | 0.263167 | 7.74E-09 | 0.13399  | 0.00372  | 0.341136 | 3.43E-14 |
| 1.09E-39 | 0.488917 | 1.96E-29 | 0.505739 | 1.08E-31 | 0.420298 | 2.06E-21 | 0.67803  | 3.70E-64 |
| 1.78E-34 | 0.493418 | 5.01E-30 | 0.424366 | 7.71E-22 | 0.390446 | 1.86E-18 | 0.535901 | 4.50E-36 |
| 1.82E-27 | 0.343617 | 2.18E-14 | 0.251372 | 3.66E-08 | 0.197501 | 1.72E-05 | 0.322971 | 8.47E-13 |
| 1.10E-26 | 0.475781 | 9.37E-28 | 0.415493 | 6.45E-21 | 0.340833 | 3.63E-14 | 0.344024 | 2.02E-14 |
| 2.16E-05 | 0.40389  | 9.45E-20 | 0.308198 | 9.84E-12 | 0.349366 | 7.49E-15 | 0.296752 | 6.00E-11 |
| 7.04E-13 | 0.375568 | 4.32E-17 | 0.33149  | 1.93E-13 | 0.28485  | 3.62E-10 | 0.399322 | 2.64E-19 |
| 3.96E-26 | -0.30759 | 1.09E-11 | -0.259   | 1.35E-08 | -0.2134  | 3.27E-06 | -0.4882  | 2.43E-29 |
| 1.72E-16 | -0.46848 | 7.48E-27 | -0.30258 | 2.42E-11 | -0.35158 | 4.93E-15 | -0.38548 | 5.41E-18 |
| 6.46E-17 | 0.359999 | 9.78E-16 | 0.446358 | 3.02E-24 | 0.39147  | 1.49E-18 | 0.509166 | 3.61E-32 |
| 5.63E-36 | 0.385186 | 5.76E-18 | 0.401242 | 1.72E-19 | 0.34637  | 1.31E-14 | 0.378518 | 2.34E-17 |
| 1.65E-07 | 0.44178  | 9.89E-24 | 0.386865 | 4.03E-18 | 0.427129 | 3.93E-22 | 0.417185 | 4.32E-21 |
| 4.92E-27 | 0.4473   | 2.36E-24 | 0.369755 | 1.41E-16 | 0.357156 | 1.70E-15 | 0.535909 | 4.49E-36 |
| 0.94634  | 0.057728 | 0.21305  | 0.181637 | 7.89E-05 | 0.142362 | 0.00204  | 0.199991 | 1.33E-05 |
| 2.17E-40 | 0.421775 | 1.44E-21 | 0.388221 | 3.01E-18 | 0.314363 | 3.59E-12 | 0.530141 | 3.34E-35 |
| 8.35E-22 | 0.057996 | 0.21093  | 0.086384 | 0.06214  | -0.02048 | 0.65889  | 0.339178 | 4.90E-14 |
| 7.24E-18 | 0.570746 | 1.02E-41 | 0.422985 | 1.08E-21 | 0.434743 | 5.93E-23 | 0.459839 | 8.21E-26 |
| 1.40E-24 | -0.46523 | 1.86E-26 | -0.2209  | 1.43E-06 | -0.29828 | 4.74E-11 | -0.48274 | 1.23E-28 |
| 1.05E-15 | 0.047813 | 0.30251  | 0.089811 | 0.05243  | -0.04441 | 0.33821  | 0.209036 | 5.22E-06 |
| 6.52E-27 | 0.456894 | 1.83E-25 | 0.361108 | 7.87E-16 | 0.316435 | 2.55E-12 | 0.576742 | 9.34E-43 |
| 1.22E-24 | 0.336492 | 7.95E-14 | 0.265928 | 5.32E-09 | 0.269399 | 3.30E-09 | 0.34731  | 1.10E-14 |
| 7.30E-19 | 0.304005 | 1.93E-11 | 0.379215 | 2.03E-17 | 0.315802 | 2.83E-12 | 0.458753 | 1.10E-25 |
| 4.15E-37 | 0.396603 | 4.84E-19 | 0.394878 | 7.08E-19 | 0.302715 | 2.36E-11 | 0.506202 | 9.31E-32 |
| 7.55E-43 | 0.518947 | 1.48E-33 | 0.431004 | 1.51E-22 | 0.408802 | 3.07E-20 | 0.628116 | 1.27E-52 |
| 1.15E-11 | 0.548645 | 4.63E-38 | 0.408879 | 3.02E-20 | 0.54845  | 4.98E-38 | 0.423723 | 9.01E-22 |
| 7.49E-61 | 0.387683 | 3.38E-18 | 0.481944 | 1.56E-28 | 0.41109  | 1.81E-20 | 0.556388 | 2.61E-39 |
| 2.26E-70 | 0.481395 | 1.83E-28 | 0.428658 | 2.70E-22 | 0.407176 | 4.47E-20 | 0.611473 | 3.16E-49 |
| 6.50E-51 | 0.403297 | 1.08E-19 | 0.435443 | 4.97E-23 | 0.341726 | 3.08E-14 | 0.614644 | 7.39E-50 |
| 3.54E-18 | -0.10881 | 0.01867  | -0.15804 | 0.00061  | -0.04483 | 0.33369  | -0.33345 | 1.37E-13 |
| 2.07E-23 | 0.420447 | 1.99E-21 | 0.374456 | 5.43E-17 | 0.241771 | 1.23E-07 | 0.473273 | 1.92E-27 |
| 7.57E-11 | 0.237686 | 2.02E-07 | 0.243126 | 1.04E-07 | 0.297529 | 5.32E-11 | 0.387055 | 3.87E-18 |
| 3.22E-18 | 0.301775 | 2.74E-11 | 0.329928 | 2.54E-13 | 0.212487 | 3.61E-06 | 0.407181 | 4.46E-20 |
| 1.82E-13 | 0.431071 | 1.48E-22 | 0.407658 | 4.00E-20 | 0.392216 | 1.27E-18 | 0.435377 | 5.06E-23 |
| 4.52E-29 | 0.49858  | 1.02E-30 | 0.409033 | 2.91E-20 | 0.401976 | 1.46E-19 | 0.525144 | 1.84E-34 |
| 5.62E-78 | 0.479401 | 3.28E-28 | 0.465974 | 1.51E-26 | 0.351842 | 4.69E-15 | 0.676966 | 6.89E-64 |
| 9.25E-31 | 0.499314 | 8.14E-31 | 0.303022 | 2.25E-11 | 0.261451 | 9.76E-09 | 0.384785 | 6.28E-18 |
| 1.53E-70 | 0.430126 | 1.88E-22 | 0.505584 | 1.13E-31 | 0.413631 | 1.00E-20 | 0.659514 | 1.28E-59 |
| 3.39E-16 | -0.20401 | 8.84E-06 | -0.19417 | 2.39E-05 | -0.18217 | 7.52E-05 | -0.30669 | 1.25E-11 |
| 2.35E-37 | 0.481206 | 1.94E-28 | 0.393672 | 9.22E-19 | 0.412679 | 1.25E-20 | 0.517844 | 2.13E-33 |
| 0.01906  | 0.116982 | 0.01141  | 0.125997 | 0.0064   | 0.104734 | 0.02361  | 0.122483 | 0.00805  |
| 5.34E-48 | 0.490936 | 1.07E-29 | 0.494632 | 3.46E-30 | 0.393896 | 8.78E-19 | 0.603385 | 1.20E-47 |
| 2.38E-11 | 0.289423 | 1.83E-10 | 0.31027  | 7.03E-12 | 0.239451 | 1.63E-07 | 0.334575 | 1.12E-13 |
| 1.81E-13 | 0.573433 | 3.52E-42 | 0.616442 | 3.22E-50 | 0.535864 | 4.56E-36 | 0.40394  | 9.34E-20 |
| 1.97E-09 | 0.107531 | 0.02011  | 0.306547 | 1.28E-11 | 0.100414 | 0.03003  | 0.223123 | 1.11E-06 |
| 1.04E-31 | 0.580292 | 2.21E-43 | 0.662899 | 2.00E-60 | 0.548305 | 5.25E-38 | 0.599916 | 5.51E-47 |



|          |          |          |          |          |          |          |          |          |
|----------|----------|----------|----------|----------|----------|----------|----------|----------|
| 2.65E-39 | 0.385101 | 5.87E-18 | 0.303359 | 2.13E-11 | 0.273597 | 1.84E-09 | 0.322566 | 9.07E-13 |
| 9.56E-24 | 0.451141 | 8.55E-25 | 0.407233 | 4.41E-20 | 0.405253 | 6.93E-20 | 0.572031 | 6.15E-42 |
| 1.42E-20 | 0.519708 | 1.15E-33 | 0.600105 | 5.07E-47 | 0.573916 | 2.91E-42 | 0.603999 | 9.11E-48 |
| 1.41E-27 | 0.258969 | 1.36E-08 | 0.329953 | 2.53E-13 | 0.213277 | 3.32E-06 | 0.275084 | 1.49E-09 |
| 3.65E-08 | -0.03942 | 0.39536  | -0.09517 | 0.03981  | -0.09064 | 0.05028  | -0.12414 | 0.00723  |
| 1.86E-08 | 0.419972 | 2.23E-21 | 0.448816 | 1.58E-24 | 0.368756 | 1.73E-16 | 0.424853 | 6.85E-22 |
| 1.77E-16 | 0.54592  | 1.25E-37 | 0.615341 | 5.36E-50 | 0.419116 | 2.73E-21 | 0.401225 | 1.72E-19 |
| 4.78E-25 | 0.36776  | 2.11E-16 | 0.312358 | 5.00E-12 | 0.185644 | 5.43E-05 | 0.305982 | 1.41E-11 |
| 7.01E-53 | 0.528657 | 5.56E-35 | 0.503296 | 2.34E-31 | 0.383438 | 8.35E-18 | 0.620863 | 4.07E-51 |
| 1.80E-16 | 0.556187 | 2.81E-39 | 0.533979 | 8.82E-36 | 0.531761 | 1.91E-35 | 0.637592 | 1.20E-54 |
| 1.14E-12 | 0.350536 | 6.01E-15 | 0.407229 | 4.41E-20 | 0.363051 | 5.38E-16 | 0.293162 | 1.04E-10 |
| 1.02E-06 | -0.11852 | 0.01037  | -0.03692 | 0.42608  | -0.16757 | 0.00028  | -0.18053 | 8.74E-05 |
| 7.65E-05 | 0.136549 | 0.00311  | 0.224736 | 9.27E-07 | 0.187645 | 4.49E-05 | 0.137226 | 0.00296  |
| 9.52E-27 | 0.592215 | 1.53E-45 | 0.580139 | 2.35E-43 | 0.600997 | 3.43E-47 | 0.590067 | 3.80E-45 |
| 7.97E-36 | 0.456796 | 1.88E-25 | 0.265335 | 5.77E-09 | 0.244634 | 8.60E-08 | 0.533378 | 1.09E-35 |
| 1.80E-11 | 0.498461 | 1.06E-30 | 0.404198 | 8.81E-20 | 0.482515 | 1.32E-28 | 0.451843 | 7.10E-25 |
| 1.72E-34 | 0.62674  | 2.47E-52 | 0.409461 | 2.64E-20 | 0.392827 | 1.11E-18 | 0.56853  | 2.45E-41 |
| 5.17E-24 | 0.315601 | 2.93E-12 | 0.428866 | 2.56E-22 | 0.321871 | 1.02E-12 | 0.490452 | 1.23E-29 |
| 0.13029  | 0.082955 | 0.0733   | 0.044306 | 0.3394   | -0.0219  | 0.63694  | 0.059612 | 0.19847  |
| 3.80E-09 | 0.060964 | 0.18846  | 0.13442  | 0.00361  | 0.060269 | 0.19356  | 0.305133 | 1.61E-11 |
| 3.69E-34 | 0.043208 | 0.35151  | 0.199719 | 1.37E-05 | 0.009943 | 0.83032  | 0.425168 | 6.35E-22 |
| 6.18E-09 | -0.20986 | 4.78E-06 | 0.046888 | 0.31196  | -0.07945 | 0.08634  | 0.151667 | 0.00101  |
| 0.11122  | -0.20456 | 8.35E-06 | 0.022008 | 0.63522  | -0.10023 | 0.03034  | -0.08973 | 0.05265  |
| 0.98883  | 0.167744 | 0.00027  | 0.096403 | 0.03729  | 0.193565 | 2.54E-05 | 0.152312 | 0.00096  |
| 0.00281  | -0.0448  | 0.33407  | 0.110134 | 0.01727  | -0.02206 | 0.63441  | 0.149248 | 0.00122  |
| 7.89E-09 | 0.073012 | 0.1151   | 0.314777 | 3.36E-12 | 0.202971 | 9.84E-06 | 0.243426 | 1.00E-07 |
| 0.01175  | 0.082264 | 0.07573  | 0.26707  | 4.55E-09 | 0.264688 | 6.30E-09 | 0.262194 | 8.83E-09 |
| 2.22E-09 | 0.00022  | 0.99622  | 0.195631 | 2.07E-05 | -0.02046 | 0.65923  | 0.255265 | 2.21E-08 |
| 0.74877  | -0.16481 | 0.00035  | -0.00753 | 0.87114  | -0.20488 | 8.08E-06 | 0.03134  | 0.49928  |
| 0.00027  | 0.041759 | 0.36791  | 0.217344 | 2.13E-06 | 0.208539 | 5.51E-06 | 0.220599 | 1.48E-06 |
| 2.78E-09 | -0.07901 | 0.08811  | 0.117722 | 0.0109   | 0.048101 | 0.2996   | 0.103375 | 0.02549  |
| 2.17E-21 | 0.160657 | 0.00049  | 0.355825 | 2.19E-15 | 0.225826 | 8.19E-07 | 0.424157 | 8.11E-22 |
| 3.11E-06 | 0.065944 | 0.1548   | 0.243694 | 9.67E-08 | 0.085962 | 0.06344  | 0.196532 | 1.89E-05 |
| 0.35826  | 0.006506 | 0.88849  | 0.131304 | 0.00448  | 0.082949 | 0.07332  | 0.273074 | 1.98E-09 |
| 0.0069   | -0.37845 | 2.38E-17 | 0.052276 | 0.25955  | -0.1049  | 0.02339  | -0.05034 | 0.27763  |
| 4.28E-18 | -0.0352  | 0.44792  | 0.204121 | 8.74E-06 | 0.090322 | 0.0511   | 0.248487 | 5.30E-08 |
| 1.75E-15 | -0.00609 | 0.89563  | 0.204999 | 7.98E-06 | 0.083645 | 0.07093  | 0.375271 | 4.59E-17 |
| 0.01119  | 0.087051 | 0.06015  | 0.384142 | 7.19E-18 | 0.290372 | 1.59E-10 | 0.3485   | 8.81E-15 |
| 1.55E-18 | 0.0469   | 0.31185  | 0.250156 | 4.28E-08 | 0.073245 | 0.11394  | 0.318354 | 1.85E-12 |
| 8.49E-10 | 0.179715 | 9.42E-05 | 0.350972 | 5.53E-15 | 0.239072 | 1.71E-07 | 0.399898 | 2.32E-19 |
| 4.53E-17 | 0.027799 | 0.54901  | -0.20152 | 1.14E-05 | -0.14026 | 0.00238  | -0.36671 | 2.60E-16 |
| 0.00403  | 0.104978 | 0.02328  | 0.220901 | 1.43E-06 | 0.108933 | 0.01853  | 0.293223 | 1.03E-10 |
| 1.35E-06 | -0.276   | 1.31E-09 | -0.01633 | 0.72492  | -0.09123 | 0.04881  | -0.07533 | 0.104    |
| 0.08281  | 0.006512 | 0.88838  | 0.095199 | 0.03974  | 0.027042 | 0.55995  | 0.073205 | 0.11414  |
| 7.30E-09 | 0.021771 | 0.63888  | 0.06006  | 0.19511  | -0.02737 | 0.55522  | 0.253362 | 2.83E-08 |

|          |          |          |          |          |          |          |          |          |
|----------|----------|----------|----------|----------|----------|----------|----------|----------|
| 5.82E-34 | 0.151324 | 0.00104  | 0.237951 | 1.96E-07 | 0.141988 | 0.0021   | 0.495255 | 2.86E-30 |
| 4.10E-09 | 0.205821 | 7.33E-06 | 0.294469 | 8.53E-11 | 0.271253 | 2.55E-09 | 0.333064 | 1.46E-13 |
| 8.61E-29 | 0.141898 | 0.00211  | 0.32001  | 1.40E-12 | 0.153005 | 0.00091  | 0.36367  | 4.76E-16 |
| 4.29E-23 | 0.262718 | 8.23E-09 | 0.419086 | 2.75E-21 | 0.334251 | 1.19E-13 | 0.473242 | 1.94E-27 |
| 0.00033  | 0.233346 | 3.40E-07 | 0.210725 | 4.36E-06 | 0.245286 | 7.93E-08 | 0.27353  | 1.85E-09 |
| 0.10932  | 0.029066 | 0.53094  | 0.101032 | 0.02903  | 0.052188 | 0.26036  | 0.197882 | 1.65E-05 |
| 0.07339  | 0.219945 | 1.59E-06 | 0.203051 | 9.76E-06 | 0.208921 | 5.29E-06 | 0.217523 | 2.08E-06 |
| 0.01434  | -0.10687 | 0.02089  | 0.052919 | 0.25374  | -0.04022 | 0.38582  | 0.09109  | 0.04915  |
| 7.77E-11 | -0.16113 | 0.00047  | -0.01736 | 0.70824  | -0.04886 | 0.29202  | -0.15624 | 0.0007   |
| 2.41E-05 | 0.162078 | 0.00044  | 0.261197 | 1.01E-08 | 0.238618 | 1.81E-07 | 0.434318 | 6.60E-23 |
| 2.83E-32 | 0.347923 | 9.81E-15 | 0.370165 | 1.30E-16 | 0.267498 | 4.29E-09 | 0.416602 | 4.97E-21 |
| 2.14E-07 | 0.058815 | 0.20455  | 0.301252 | 2.98E-11 | 0.179932 | 9.23E-05 | 0.294778 | 8.14E-11 |
| 9.98E-24 | -0.14402 | 0.00181  | -0.20346 | 9.36E-06 | -0.12414 | 0.00723  | -0.33667 | 7.70E-14 |
| 0.00028  | -0.05946 | 0.19959  | 0.189131 | 3.90E-05 | 0.13217  | 0.00422  | 0.271636 | 2.42E-09 |
| 4.77E-33 | 0.063253 | 0.17238  | 0.273476 | 1.87E-09 | 0.108022 | 0.01955  | 0.384265 | 7.01E-18 |
| 1.47E-12 | 0.261108 | 1.02E-08 | 0.398533 | 3.15E-19 | 0.25235  | 3.23E-08 | 0.399585 | 2.49E-19 |
| 3.21E-08 | 0.112511 | 0.01499  | 0.360727 | 8.49E-16 | 0.24338  | 1.01E-07 | 0.372867 | 7.51E-17 |
| 0.00222  | -0.11595 | 0.01216  | 0.202285 | 1.06E-05 | 0.019208 | 0.67887  | 0.206056 | 7.15E-06 |
| 0.83024  | 0.125276 | 0.00671  | 0.228634 | 5.92E-07 | 0.171003 | 0.0002   | 0.191433 | 3.12E-05 |
| 6.09E-10 | 0.252661 | 3.10E-08 | 0.388109 | 3.08E-18 | 0.353494 | 3.43E-15 | 0.516791 | 3.01E-33 |
| 6.70E-09 | 0.371949 | 9.05E-17 | 0.38831  | 2.95E-18 | 0.313056 | 4.46E-12 | 0.35279  | 3.92E-15 |
| 1.74E-06 | -0.30398 | 1.93E-11 | -0.1305  | 0.00473  | -0.05806 | 0.2104   | -0.22894 | 5.71E-07 |
| 7.09E-13 | 0.127644 | 0.00574  | 0.305314 | 1.56E-11 | 0.200436 | 1.28E-05 | 0.33049  | 2.31E-13 |
| 2.45E-14 | 0.163265 | 0.0004   | 0.276502 | 1.22E-09 | 0.155598 | 0.00074  | 0.29409  | 9.04E-11 |
| 8.12E-31 | 0.111611 | 0.01582  | 0.239363 | 1.65E-07 | 0.126716 | 0.00611  | 0.318412 | 1.83E-12 |
| 5.73E-13 | -0.11    | 0.0174   | 0.08865  | 0.05557  | 0.098618 | 0.03312  | -0.01126 | 0.80817  |
| 0.66722  | 0.030035 | 0.51733  | 0.139682 | 0.00248  | 0.103622 | 0.02513  | 0.070908 | 0.12598  |
| 0.00979  | 0.06215  | 0.17999  | 0.106218 | 0.02169  | 0.024437 | 0.59836  | 0.099264 | 0.03198  |
| 0.0806   | -0.03    | 0.51777  | 0.128057 | 0.00558  | 0.055774 | 0.22898  | 0.104843 | 0.02346  |
| 4.82E-06 | -0.27715 | 1.11E-09 | -0.06719 | 0.14714  | -0.16472 | 0.00035  | -0.20408 | 8.78E-06 |
| 0.50951  | 0.092856 | 0.0449   | 0.241642 | 1.25E-07 | 0.223719 | 1.04E-06 | 0.19474  | 2.26E-05 |
| 0.17868  | -0.05183 | 0.26363  | 0.15483  | 0.00079  | 0.072324 | 0.11857  | 0.179536 | 9.57E-05 |
| 1.51E-06 | 0.0865   | 0.06179  | 0.325399 | 5.59E-13 | 0.221544 | 1.33E-06 | 0.337743 | 6.35E-14 |
| 0.79063  | -0.07883 | 0.08884  | -0.01438 | 0.75662  | -0.12978 | 0.00497  | 0.052843 | 0.25442  |
| 1.62E-09 | -0.07213 | 0.11959  | 0.164036 | 0.00037  | -0.03021 | 0.51486  | 0.053574 | 0.2479   |
| 0.00022  | 0.178369 | 0.00011  | 0.389531 | 2.27E-18 | 0.293061 | 1.06E-10 | 0.415921 | 5.83E-21 |
| 2.68E-05 | 0.172748 | 0.00018  | -0.13718 | 0.00297  | -0.11499 | 0.0129   | -0.23359 | 3.31E-07 |
| 3.25E-21 | 0.006595 | 0.88697  | 0.249906 | 4.42E-08 | 0.059552 | 0.19893  | 0.389329 | 2.37E-18 |
| 0.00247  | 0.015481 | 0.73863  | 0.29974  | 3.77E-11 | 0.262539 | 8.43E-09 | 0.14311  | 0.00193  |
| 0.12315  | -0.15576 | 0.00073  | 0.136007 | 0.00323  | 0.002111 | 0.96371  | -0.0204  | 0.66022  |
| 0.00177  | 0.169959 | 0.00022  | 0.187637 | 4.50E-05 | 0.147584 | 0.00138  | 0.222385 | 1.21E-06 |
| 0.08636  | -0.27318 | 1.95E-09 | -0.19773 | 1.68E-05 | -0.2757  | 1.36E-09 | -0.08146 | 0.07864  |
| 1.21E-05 | 0.022926 | 0.62119  | -0.05645 | 0.22337  | -0.04868 | 0.29386  | -0.19763 | 1.69E-05 |
| 5.62E-22 | 0.04544  | 0.32717  | 0.185939 | 5.28E-05 | 0.0383   | 0.40894  | 0.30401  | 1.93E-11 |
| 0.01028  | 0.152155 | 0.00097  | 0.267213 | 4.46E-09 | 0.244335 | 8.93E-08 | 0.273383 | 1.89E-09 |

|          |          |          |          |          |          |          |          |          |
|----------|----------|----------|----------|----------|----------|----------|----------|----------|
| 0.33908  | -0.21143 | 4.05E-06 | 0.079463 | 0.08629  | -0.0584  | 0.20779  | 0.032305 | 0.48616  |
| 0.00114  | -0.11769 | 0.01092  | 0.159544 | 0.00054  | -0.01969 | 0.67127  | -0.012   | 0.79596  |
| 0.0003   | 0.137526 | 0.0029   | 0.320425 | 1.31E-12 | 0.228558 | 5.97E-07 | 0.308238 | 9.78E-12 |
| 1.24E-10 | 0.351601 | 4.91E-15 | 0.443091 | 7.05E-24 | 0.453327 | 4.78E-25 | 0.44969  | 1.26E-24 |
| 0.01907  | -0.05159 | 0.26586  | 0.069725 | 0.13244  | 0.043116 | 0.35254  | 0.00663  | 0.88638  |
| 0.01045  | 0.104184 | 0.02435  | 0.097603 | 0.03498  | -0.03582 | 0.43993  | 0.166199 | 0.00031  |
| 0.00015  | -0.08677 | 0.06097  | -0.05905 | 0.20278  | -0.13896 | 0.00262  | -0.20008 | 1.32E-05 |
| 0.00992  | 0.115638 | 0.0124   | 0.322972 | 8.47E-13 | 0.247964 | 5.66E-08 | 0.282072 | 5.44E-10 |
| 0.21117  | 0.10915  | 0.0183   | 0.295769 | 6.99E-11 | 0.325821 | 5.19E-13 | 0.276566 | 1.20E-09 |
| 1.15E-33 | 0.002571 | 0.95582  | 0.185901 | 5.30E-05 | 0.021287 | 0.64636  | 0.306472 | 1.30E-11 |
| 1.09E-09 | -0.00775 | 0.86736  | 0.135726 | 0.00329  | 0.155498 | 0.00075  | -0.07187 | 0.12092  |
| 0.00024  | -0.19963 | 1.38E-05 | 0.046615 | 0.3148   | -0.04655 | 0.31543  | 0.083287 | 0.07215  |
| 5.46E-17 | 0.222604 | 1.18E-06 | 0.353634 | 3.34E-15 | 0.18277  | 7.11E-05 | 0.342117 | 2.87E-14 |
| 7.40E-19 | -0.11343 | 0.01419  | 0.103827 | 0.02485  | -0.07332 | 0.11358  | 0.207832 | 5.93E-06 |
| 0.00151  | -0.1708  | 0.00021  | 0.085014 | 0.06642  | -0.04302 | 0.35366  | 0.260801 | 1.06E-08 |
| 0.00099  | -0.06308 | 0.17355  | 0.15529  | 0.00076  | 0.077567 | 0.09408  | 0.299957 | 3.65E-11 |
| 0.78886  | -0.1405  | 0.00234  | 0.024085 | 0.60365  | -0.03645 | 0.43202  | -0.00956 | 0.83684  |
| 0.02596  | 0.002352 | 0.95957  | 0.196535 | 1.89E-05 | 0.140002 | 0.00243  | 0.201038 | 1.20E-05 |
| 0.12473  | -0.09135 | 0.0485   | 0.23978  | 1.57E-07 | 0.164072 | 0.00037  | 0.151716 | 0.00101  |
| 1.22E-08 | 0.047863 | 0.30201  | 0.289414 | 1.84E-10 | 0.14925  | 0.00122  | 0.21513  | 2.71E-06 |
| 0.22714  | -0.26992 | 3.07E-09 | -0.04212 | 0.36381  | -0.14194 | 0.00211  | -0.07373 | 0.11157  |
| 1.27E-09 | -0.24073 | 1.40E-07 | -0.03396 | 0.46409  | -0.11186 | 0.01559  | -0.11852 | 0.01037  |
| 0.05335  | -0.14886 | 0.00125  | 0.145294 | 0.00164  | -0.03588 | 0.43925  | 0.043022 | 0.35359  |
| 5.29E-07 | -0.07408 | 0.10989  | 0.225964 | 8.06E-07 | 0.080158 | 0.08356  | 0.301968 | 2.66E-11 |
| 8.08E-05 | 0.338566 | 5.47E-14 | 0.293895 | 9.31E-11 | 0.23548  | 2.64E-07 | 0.268157 | 3.92E-09 |
| 4.84E-09 | 0.082785 | 0.07389  | 0.245701 | 7.53E-08 | 0.098746 | 0.03289  | 0.36679  | 2.56E-16 |
| 1.73E-06 | 0.01915  | 0.67979  | 0.213629 | 3.19E-06 | 0.096718 | 0.03667  | 0.225997 | 8.03E-07 |
| 3.54E-06 | -0.0381  | 0.41137  | 0.097441 | 0.03528  | -0.02075 | 0.65474  | 0.163281 | 0.0004   |
| 3.49E-06 | -0.02029 | 0.66188  | 0.081594 | 0.07816  | -0.00404 | 0.93062  | 0.123652 | 0.00747  |
| 5.35E-06 | -0.06706 | 0.1479   | 0.029638 | 0.52288  | -0.03653 | 0.43099  | 0.168484 | 0.00025  |
| 0.18937  | -0.03336 | 0.47204  | -0.02122 | 0.64735  | 0.016992 | 0.71418  | -0.05749 | 0.21496  |
| 0.00659  | -0.03766 | 0.41685  | 0.231241 | 4.36E-07 | 0.159169 | 0.00056  | 0.043078 | 0.35296  |
| 0.00046  | 0.069633 | 0.13295  | 0.203649 | 9.18E-06 | 0.053607 | 0.2476   | 0.162622 | 0.00042  |
| 0.00168  | 0.02304  | 0.61945  | 0.08188  | 0.07711  | -0.0253  | 0.58553  | 0.002247 | 0.96137  |
| 0.89867  | -0.1874  | 4.60E-05 | 0.076752 | 0.0976   | -0.04978 | 0.28303  | 0.070457 | 0.12841  |
| 2.73E-06 | -0.03247 | 0.48391  | 0.086833 | 0.06079  | 0.038195 | 0.41023  | 0.139247 | 0.00256  |
| 9.09E-10 | 0.006005 | 0.89702  | 0.225191 | 8.80E-07 | 0.064952 | 0.16111  | 0.296318 | 6.42E-11 |
| 1.60E-09 | -0.05961 | 0.19852  | 0.173493 | 0.00016  | 0.01666  | 0.71953  | 0.131102 | 0.00454  |
| 5.27E-12 | -0.10913 | 0.01832  | -0.23833 | 1.87E-07 | -0.18268 | 7.17E-05 | -0.32413 | 6.95E-13 |
| 0.56825  | -0.18514 | 5.69E-05 | 0.070032 | 0.13074  | -0.01244 | 0.78859  | 0.001951 | 0.96646  |
| 2.68E-34 | -0.16235 | 0.00043  | -0.15697 | 0.00066  | -0.04376 | 0.34538  | -0.41432 | 8.51E-21 |
| 3.31E-11 | 0.093649 | 0.0431   | 0.299829 | 3.72E-11 | 0.193155 | 2.64E-05 | 0.286984 | 2.64E-10 |
| 5.32E-19 | 0.05665  | 0.22174  | 0.307012 | 1.19E-11 | 0.176229 | 0.00013  | 0.338378 | 5.66E-14 |
| 1.57E-28 | 0.282779 | 4.91E-10 | 0.372223 | 8.56E-17 | 0.292207 | 1.20E-10 | 0.364382 | 4.13E-16 |
| 0.00547  | 0.245227 | 7.99E-08 | 0.348003 | 9.66E-15 | 0.307644 | 1.08E-11 | 0.272545 | 2.13E-09 |

|          |          |          |          |          |          |          |          |          |
|----------|----------|----------|----------|----------|----------|----------|----------|----------|
| 9.45E-16 | 0.107838 | 0.01976  | 0.254689 | 2.39E-08 | 0.120754 | 0.009    | 0.287881 | 2.31E-10 |
| 0.27825  | 0.035131 | 0.44882  | 0.080729 | 0.08138  | 0.069949 | 0.13119  | 0.067894 | 0.14293  |
| 1.34E-12 | 0.279582 | 7.81E-10 | 0.371261 | 1.04E-16 | 0.362631 | 5.84E-16 | 0.407201 | 4.44E-20 |
| 6.63E-22 | 0.284801 | 3.65E-10 | 0.389011 | 2.54E-18 | 0.281405 | 6.00E-10 | 0.497045 | 1.65E-30 |
| 1.41E-06 | 0.237938 | 1.96E-07 | 0.397462 | 4.00E-19 | 0.315781 | 2.84E-12 | 0.344231 | 1.95E-14 |
| 0.0418   | 0.056902 | 0.21969  | 0.228444 | 6.05E-07 | 0.248324 | 5.41E-08 | 0.080612 | 0.08182  |
| 0.07703  | 0.144824 | 0.0017   | 0.325322 | 5.66E-13 | 0.270038 | 3.02E-09 | 0.20603  | 7.17E-06 |
| 0.00016  | 0.197954 | 1.64E-05 | 0.417815 | 3.72E-21 | 0.402885 | 1.19E-19 | 0.358924 | 1.21E-15 |
| 5.67E-29 | 0.265587 | 5.58E-09 | 0.394307 | 8.02E-19 | 0.226027 | 8.00E-07 | 0.44154  | 1.05E-23 |
| 0.40009  | 0.191469 | 3.11E-05 | 0.236194 | 2.42E-07 | 0.279809 | 7.56E-10 | 0.076733 | 0.09768  |
| 0.00234  | -0.13688 | 0.00304  | 0.12373  | 0.00743  | 0.041965 | 0.36555  | 0.268562 | 3.71E-09 |
| 0.22013  | -0.06085 | 0.18932  | 0.076737 | 0.09766  | 0.095333 | 0.03946  | 0.189846 | 3.64E-05 |
| 2.36E-10 | 0.169406 | 0.00024  | 0.273972 | 1.74E-09 | 0.218831 | 1.80E-06 | 0.359609 | 1.06E-15 |
| 0.00025  | 0.193879 | 2.46E-05 | 0.374994 | 4.86E-17 | 0.355328 | 2.41E-15 | 0.289957 | 1.69E-10 |
| 0.00113  | -0.04331 | 0.35034  | 0.204492 | 8.41E-06 | 0.152706 | 0.00093  | 0.274157 | 1.70E-09 |
| 0.47344  | -0.32219 | 9.67E-13 | -0.11416 | 0.01357  | -0.23694 | 2.21E-07 | -0.01233 | 0.7905   |
| 9.09E-19 | 0.09654  | 0.03702  | -0.05324 | 0.25085  | -0.04399 | 0.34282  | -0.22879 | 5.81E-07 |
| 0.6352   | 0.103416 | 0.02543  | 0.257505 | 1.65E-08 | 0.285464 | 3.31E-10 | 0.183257 | 6.79E-05 |
| 2.66E-08 | -0.06187 | 0.18195  | 0.06627  | 0.15276  | 0.123121 | 0.00773  | 0.011496 | 0.80432  |
| 0.05693  | -0.10268 | 0.02649  | 0.068496 | 0.13941  | -0.00211 | 0.96366  | 0.092813 | 0.045    |
| 4.84E-26 | 0.215992 | 2.47E-06 | 0.412115 | 1.42E-20 | 0.309201 | 8.37E-12 | 0.402756 | 1.22E-19 |
| 0.89853  | -0.08382 | 0.07033  | 0.121255 | 0.00872  | 0.16832  | 0.00026  | 0.127642 | 0.00574  |
| 0.56078  | 0.095791 | 0.03852  | 0.186691 | 4.92E-05 | 0.087894 | 0.0577   | 0.099513 | 0.03155  |
| 2.10E-15 | -0.00769 | 0.86838  | 0.156999 | 0.00066  | 0.031868 | 0.49208  | 0.280577 | 6.77E-10 |
| 1.08E-14 | -0.05649 | 0.22305  | 0.200844 | 1.22E-05 | 0.061717 | 0.18305  | 0.365843 | 3.09E-16 |
| 0.03852  | -0.11059 | 0.01681  | 0.099813 | 0.03104  | 0.063515 | 0.1706   | 0.117124 | 0.01131  |
| 0.00013  | -0.0999  | 0.03088  | 0.185782 | 5.36E-05 | 0.048259 | 0.29802  | 0.141615 | 0.00216  |
| 0.01965  | 0.087582 | 0.0586   | 0.214199 | 3.00E-06 | 0.108946 | 0.01852  | 0.063209 | 0.17268  |
| 6.77E-29 | 0.242663 | 1.10E-07 | 0.296483 | 6.26E-11 | 0.166421 | 0.0003   | 0.408475 | 3.31E-20 |
| 1.43E-11 | 0.081844 | 0.07725  | 0.177441 | 0.00012  | 0.072047 | 0.11999  | 0.176882 | 0.00012  |
| 0.00064  | -0.29676 | 6.00E-11 | 0.056303 | 0.22458  | -0.13179 | 0.00433  | 0.022349 | 0.62999  |
| 2.96E-05 | -0.03091 | 0.50515  | 0.240534 | 1.43E-07 | 0.128515 | 0.00541  | 0.278114 | 9.65E-10 |
| 0.00019  | -0.00245 | 0.95791  | 0.23896  | 1.73E-07 | 0.186932 | 4.81E-05 | 0.32447  | 6.55E-13 |
| 5.92E-09 | -0.07803 | 0.09214  | 0.100636 | 0.02967  | 0.007645 | 0.86913  | 0.28302  | 4.74E-10 |
| 1.35E-12 | 0.265909 | 5.34E-09 | 0.25917  | 1.32E-08 | 0.141982 | 0.0021   | 0.352761 | 3.94E-15 |
| 0.51396  | -0.07449 | 0.10793  | 0.131074 | 0.00455  | 0.088011 | 0.05736  | 0.043484 | 0.34843  |
| 3.75E-07 | -0.01817 | 0.69535  | 0.083157 | 0.0726   | 0.039294 | 0.39688  | 0.1745   | 0.00015  |
| 1.46E-32 | -0.14224 | 0.00206  | -0.26974 | 3.15E-09 | -0.19379 | 2.48E-05 | -0.43112 | 1.47E-22 |
| 0.27744  | -0.22134 | 1.36E-06 | 0.103834 | 0.02484  | 0.033561 | 0.46936  | 0.151402 | 0.00103  |
| 8.98E-15 | 0.416615 | 4.95E-21 | 0.41123  | 1.75E-20 | 0.37217  | 8.65E-17 | 0.48717  | 3.31E-29 |
| 0.00192  | 0.125344 | 0.00668  | 0.274696 | 1.57E-09 | 0.249184 | 4.85E-08 | 0.204896 | 8.07E-06 |
| 0.29885  | 0.091757 | 0.04751  | 0.127146 | 0.00593  | 0.079186 | 0.08739  | 0.176389 | 0.00013  |
| 0.00495  | 0.254423 | 2.47E-08 | 0.244608 | 8.63E-08 | 0.391404 | 1.51E-18 | 0.167199 | 0.00028  |
| 0.06586  | -0.00955 | 0.83685  | 0.18694  | 4.81E-05 | 0.076447 | 0.09894  | 0.204558 | 8.35E-06 |
| 3.48E-05 | 0.055989 | 0.22719  | 0.312997 | 4.50E-12 | 0.287979 | 2.28E-10 | 0.352754 | 3.95E-15 |

|          |          |          |          |          |          |          |          |          |
|----------|----------|----------|----------|----------|----------|----------|----------|----------|
| 4.33E-11 | 0.041184 | 0.37455  | 0.185159 | 5.69E-05 | 0.084565 | 0.06787  | 0.388939 | 2.58E-18 |
| 5.80E-07 | 0.076268 | 0.09973  | 0.149672 | 0.00118  | 0.081382 | 0.07894  | 0.249835 | 4.46E-08 |
| 8.22E-05 | -0.03412 | 0.46204  | 0.188264 | 4.24E-05 | 0.075458 | 0.1034   | 0.153552 | 0.00087  |
| 4.28E-21 | 0.263776 | 7.13E-09 | 0.362375 | 6.14E-16 | 0.258837 | 1.38E-08 | 0.372123 | 8.74E-17 |
| 0.16285  | -0.08092 | 0.08067  | 0.164256 | 0.00036  | 0.130164 | 0.00484  | 0.098082 | 0.03409  |
| 1.42E-15 | 0.065297 | 0.1589   | 0.215489 | 2.61E-06 | 0.125984 | 0.00641  | 0.413121 | 1.13E-20 |
| 9.06E-46 | 0.176335 | 0.00013  | 0.184087 | 6.29E-05 | 0.047295 | 0.30778  | 0.34931  | 7.56E-15 |
| 0.00841  | 0.000827 | 0.98578  | 0.143335 | 0.0019   | 0.184598 | 5.99E-05 | 0.056443 | 0.22343  |
| 0.00065  | -0.0563  | 0.22463  | 0.214528 | 2.89E-06 | 0.099529 | 0.03152  | 0.129742 | 0.00498  |
| 5.87E-13 | 0.02998  | 0.5181   | 0.294242 | 8.83E-11 | 0.177233 | 0.00012  | 0.340072 | 4.17E-14 |
| 3.42E-09 | 0.017426 | 0.70721  | 0.035441 | 0.44482  | -0.02763 | 0.55141  | 0.221933 | 1.27E-06 |
| 4.73E-06 | 0.101391 | 0.02846  | 0.215954 | 2.48E-06 | 0.094347 | 0.04156  | 0.25307  | 2.94E-08 |
| 7.50E-06 | 0.203669 | 9.16E-06 | 0.30347  | 2.10E-11 | 0.234855 | 2.84E-07 | 0.308688 | 9.09E-12 |
| 0.90255  | -0.05622 | 0.22528  | 0.128855 | 0.00529  | 0.033878 | 0.46518  | 0.06739  | 0.14593  |
| 8.08E-05 | 0.091186 | 0.04891  | 0.288338 | 2.16E-10 | 0.256837 | 1.80E-08 | 0.32825  | 3.41E-13 |
| 2.49E-21 | 0.435703 | 4.66E-23 | 0.483238 | 1.07E-28 | 0.387594 | 3.44E-18 | 0.506861 | 7.55E-32 |
| 0.23218  | -0.04695 | 0.31136  | 0.141945 | 0.00211  | 0.090698 | 0.05014  | 0.059704 | 0.19778  |
| 0.00534  | 0.075618 | 0.10266  | 0.183437 | 6.68E-05 | 0.07975  | 0.08516  | 0.204187 | 8.68E-06 |
| 0.01803  | 0.160404 | 0.0005   | 0.2396   | 1.60E-07 | 0.367334 | 2.30E-16 | 0.145109 | 0.00167  |
| 2.31E-05 | 0.301079 | 3.06E-11 | 0.337102 | 7.13E-14 | 0.297584 | 5.28E-11 | 0.394152 | 8.30E-19 |
| 5.37E-14 | 0.030846 | 0.50608  | 0.189563 | 3.74E-05 | 0.077447 | 0.09459  | 0.284362 | 3.89E-10 |
| 0.00396  | 0.114187 | 0.01355  | 0.301694 | 2.78E-11 | 0.205785 | 7.35E-06 | 0.280378 | 6.96E-10 |
| 2.71E-06 | -0.00385 | 0.93381  | 0.317862 | 2.01E-12 | 0.188478 | 4.15E-05 | 0.319904 | 1.43E-12 |
| 4.19E-10 | 0.159223 | 0.00055  | 0.306229 | 1.35E-11 | 0.237854 | 1.98E-07 | 0.342981 | 2.45E-14 |
| 0.11044  | -0.10599 | 0.02198  | 0.18314  | 6.87E-05 | 0.130838 | 0.00463  | 0.119498 | 0.00975  |
| 4.48E-13 | 0.040875 | 0.37815  | 0.185296 | 5.61E-05 | 0.080125 | 0.08369  | 0.464839 | 2.07E-26 |
| 0.032    | 0.094253 | 0.04176  | 0.14911  | 0.00123  | 0.081058 | 0.08014  | 0.239623 | 1.60E-07 |
| 2.05E-05 | -0.28971 | 1.76E-10 | 0.030144 | 0.51581  | 0.100784 | 0.02943  | -0.01426 | 0.75853  |
| 0.00054  | -0.19394 | 2.44E-05 | 0.116673 | 0.01163  | 0.090248 | 0.05129  | -0.03725 | 0.4219   |
| 0.35434  | -0.25172 | 3.50E-08 | 0.005421 | 0.90699  | -0.09299 | 0.04459  | -0.01454 | 0.75392  |
| 4.18E-18 | -0.13298 | 0.00399  | -0.0109  | 0.81421  | -0.1567  | 0.00068  | 0.131144 | 0.00453  |
| 2.78E-17 | 0.069741 | 0.13235  | 0.283036 | 4.73E-10 | 0.182279 | 7.44E-05 | 0.424069 | 8.29E-22 |
| 0.47371  | -0.10439 | 0.02407  | 0.082374 | 0.07534  | -0.02272 | 0.62428  | -0.03077 | 0.50719  |
| 0.74453  | -0.02853 | 0.53851  | 0.065514 | 0.15751  | 0.088575 | 0.05578  | 0.158714 | 0.00058  |
| 2.87E-06 | 0.213254 | 3.32E-06 | 0.253754 | 2.69E-08 | 0.188213 | 4.26E-05 | 0.302409 | 2.48E-11 |
| 0.86956  | 0.008808 | 0.84943  | 0.104881 | 0.02341  | 0.038813 | 0.40269  | 0.083497 | 0.07143  |
| 0.20383  | -0.16957 | 0.00023  | 0.053144 | 0.25172  | -0.01322 | 0.7757   | 0.127004 | 0.00599  |
| 1.60E-05 | 0.207239 | 6.31E-06 | 0.363042 | 5.39E-16 | 0.279791 | 7.58E-10 | 0.281722 | 5.73E-10 |
| 1.56E-33 | 0.19901  | 1.47E-05 | 0.370621 | 1.19E-16 | 0.145774 | 0.00159  | 0.372429 | 8.21E-17 |
| 2.92E-07 | 0.195254 | 2.15E-05 | 0.339033 | 5.03E-14 | 0.263495 | 7.41E-09 | 0.368897 | 1.68E-16 |
| 0.8454   | 0.10134  | 0.02854  | 0.270848 | 2.70E-09 | 0.251783 | 3.48E-08 | 0.223328 | 1.09E-06 |
| 2.76E-10 | -0.00151 | 0.97411  | 0.191214 | 3.19E-05 | 0.047524 | 0.30544  | 0.341007 | 3.52E-14 |
| 0.00138  | 0.021889 | 0.63707  | 0.20962  | 4.91E-06 | 0.147973 | 0.00134  | 0.245766 | 7.47E-08 |
| 9.24E-08 | -0.01227 | 0.79144  | 0.097128 | 0.03588  | -0.05416 | 0.24278  | 0.21537  | 2.64E-06 |
| 2.60E-25 | 0.00396  | 0.93199  | 0.105929 | 0.02205  | -0.11726 | 0.01121  | 0.301704 | 2.77E-11 |

|          |          |          |          |          |          |          |          |          |
|----------|----------|----------|----------|----------|----------|----------|----------|----------|
| 8.83E-08 | -0.04544 | 0.32716  | 0.15189  | 0.00099  | 0.010502 | 0.82093  | 0.076266 | 0.09974  |
| 5.49E-21 | 0.147422 | 0.0014   | 0.363076 | 5.35E-16 | 0.302407 | 2.48E-11 | 0.449157 | 1.45E-24 |
| 0.12431  | -0.10721 | 0.02049  | 0.051564 | 0.26611  | 0.024667 | 0.59493  | 0.082151 | 0.07614  |
| 2.97E-25 | 0.120586 | 0.0091   | 0.189722 | 3.68E-05 | 0.029921 | 0.51892  | 0.377965 | 2.63E-17 |
| 8.76E-05 | -0.16581 | 0.00032  | 0.190614 | 3.38E-05 | 0.06443  | 0.16451  | 0.097646 | 0.0349   |
| 5.31E-13 | -0.01749 | 0.70625  | 0.067844 | 0.14323  | -0.09237 | 0.04605  | 0.258309 | 1.48E-08 |
| 0.00017  | 0.028056 | 0.54531  | 0.149605 | 0.00118  | 0.126532 | 0.00618  | 0.187509 | 4.55E-05 |
| 8.18E-15 | -0.08388 | 0.07013  | 0.085049 | 0.06631  | -0.00422 | 0.92747  | 0.342269 | 2.79E-14 |
| 2.72E-10 | 0.174562 | 0.00015  | 0.290026 | 1.67E-10 | 0.20295  | 9.86E-06 | 0.24498  | 8.24E-08 |
| 3.90E-07 | -0.1715  | 0.0002   | 0.115776 | 0.01229  | -0.06633 | 0.15238  | 0.075102 | 0.10504  |
| 0.00082  | 0.027308 | 0.55609  | 0.175397 | 0.00014  | 0.132602 | 0.0041   | 0.186505 | 5.01E-05 |
| 0.01378  | 0.025157 | 0.58763  | 0.251857 | 3.44E-08 | 0.217763 | 2.03E-06 | 0.261754 | 9.37E-09 |
| 0.12418  | -0.02097 | 0.65124  | 0.064771 | 0.16229  | -0.01557 | 0.73719  | -0.02323 | 0.61653  |
| 2.81E-05 | -0.01494 | 0.74737  | 0.098738 | 0.0329   | -0.01338 | 0.77311  | -0.07136 | 0.12357  |
| 2.72E-08 | -0.05139 | 0.26776  | 0.207832 | 5.93E-06 | 0.094583 | 0.04105  | 0.111118 | 0.01629  |
| 0.0113   | 0.048774 | 0.29288  | 0.086987 | 0.06034  | 0.105485 | 0.02262  | -0.00016 | 0.99726  |
| 0.00771  | 0.05927  | 0.20106  | 0.174873 | 0.00015  | 0.044808 | 0.33394  | -0.02256 | 0.62674  |
| 0.01075  | -0.03151 | 0.49699  | 0.131802 | 0.00433  | 0.050674 | 0.27446  | 0.122102 | 0.00825  |
| 1.33E-26 | 0.080001 | 0.08417  | 0.244239 | 9.04E-08 | 0.041796 | 0.36749  | 0.276725 | 1.18E-09 |
| 8.96E-08 | 0.006604 | 0.88682  | 0.172103 | 0.00019  | 0.096153 | 0.03779  | 0.372811 | 7.60E-17 |
| 7.91E-05 | 0.041506 | 0.37082  | 0.228928 | 5.72E-07 | 0.128822 | 0.0053   | 0.297854 | 5.06E-11 |
| 0.57143  | -0.09534 | 0.03944  | 0.177679 | 0.00011  | 0.043584 | 0.34733  | 0.146677 | 0.00148  |
| 0.2181   | -0.153   | 0.00091  | 0.070375 | 0.12886  | -0.00901 | 0.84608  | 0.083392 | 0.07179  |
| 6.12E-39 | 0.056411 | 0.22369  | 0.187899 | 4.39E-05 | 0.025148 | 0.58777  | 0.412632 | 1.26E-20 |
| 9.35E-09 | 0.215038 | 2.74E-06 | 0.3687   | 1.75E-16 | 0.253603 | 2.75E-08 | 0.295488 | 7.29E-11 |
| 0.03831  | -0.23202 | 3.98E-07 | -0.05617 | 0.22569  | -0.16719 | 0.00028  | 0.12453  | 0.00705  |
| 0.00037  | 0.093511 | 0.0434   | 0.145747 | 0.00159  | 0.180128 | 9.07E-05 | 0.058992 | 0.20319  |
| 4.51E-08 | 0.151526 | 0.00102  | 0.260989 | 1.04E-08 | 0.180504 | 8.76E-05 | 0.484986 | 6.35E-29 |
| 1.27E-20 | 0.215209 | 2.69E-06 | 0.352282 | 4.32E-15 | 0.267602 | 4.23E-09 | 0.393297 | 1.00E-18 |
| 4.87E-07 | -0.08541 | 0.06516  | 0.101313 | 0.02859  | -0.00125 | 0.97859  | 0.19548  | 2.10E-05 |
| 1.15E-07 | -0.11229 | 0.01519  | 0.10886  | 0.01861  | 0.137355 | 0.00294  | -0.09639 | 0.03732  |
| 1.66E-05 | -0.1624  | 0.00043  | 0.043702 | 0.34603  | -0.00445 | 0.92357  | 0.172845 | 0.00017  |
| 4.35E-05 | -0.0384  | 0.40774  | 0.202492 | 1.03E-05 | 0.116184 | 0.01199  | 0.25513  | 2.25E-08 |
| 1.41E-07 | -0.19137 | 3.14E-05 | 0.123697 | 0.00745  | -0.01859 | 0.6887   | 0.143737 | 0.00185  |
| 0.21055  | -0.05275 | 0.25524  | 0.223103 | 1.12E-06 | 0.166832 | 0.00029  | 0.212499 | 3.61E-06 |
| 0.06488  | -0.0536  | 0.24764  | 0.030729 | 0.50769  | -0.03089 | 0.50544  | 0.096019 | 0.03806  |
| 1.18E-11 | -0.27794 | 9.89E-10 | -0.08493 | 0.0667   | -0.17229 | 0.00018  | -0.19068 | 3.36E-05 |
| 1.70E-08 | 0.028762 | 0.53525  | 0.000754 | 0.98703  | 0.038283 | 0.40915  | -0.03632 | 0.43361  |
| 1.64E-23 | 0.058848 | 0.20429  | 0.201428 | 1.15E-05 | 0.093743 | 0.04289  | 0.366457 | 2.74E-16 |
| 1.31E-06 | -0.08873 | 0.05535  | 0.225966 | 8.05E-07 | 0.046509 | 0.3159   | 0.15648  | 0.00069  |
| 0.00035  | -0.01261 | 0.78573  | 0.127981 | 0.00561  | 0.036889 | 0.42643  | 0.202088 | 1.08E-05 |
| 0.82082  | 0.04743  | 0.30641  | 0.254156 | 2.56E-08 | 0.191825 | 3.00E-05 | 0.203973 | 8.88E-06 |
| 5.57E-05 | -0.05832 | 0.20837  | 0.218456 | 1.88E-06 | 0.105377 | 0.02276  | 0.264757 | 6.24E-09 |
| 0.08899  | 0.096951 | 0.03622  | 0.170849 | 0.00021  | 0.136163 | 0.00319  | 0.176488 | 0.00013  |
| 5.22E-06 | 0.224646 | 9.37E-07 | 0.363681 | 4.75E-16 | 0.243654 | 9.72E-08 | 0.440244 | 1.47E-23 |

|          |          |          |          |          |          |          |          |          |
|----------|----------|----------|----------|----------|----------|----------|----------|----------|
| 0.54647  | 0.07495  | 0.10574  | 0.212701 | 3.53E-06 | 0.0976   | 0.03499  | 0.291789 | 1.28E-10 |
| 0.00058  | 0.12611  | 0.00636  | 0.140515 | 0.00234  | 0.0412   | 0.37436  | 0.168739 | 0.00025  |
| 0.0001   | -0.11271 | 0.01482  | 0.11715  | 0.01129  | -0.02915 | 0.52969  | 0.108096 | 0.01946  |
| 3.64E-14 | 0.320912 | 1.20E-12 | 0.437078 | 3.29E-23 | 0.343569 | 2.20E-14 | 0.437472 | 2.98E-23 |
| 7.91E-05 | -0.00233 | 0.9599   | 0.237141 | 2.16E-07 | 0.108782 | 0.0187   | 0.239868 | 1.55E-07 |
| 0.01906  | -0.17677 | 0.00012  | 0.106413 | 0.02145  | -0.00062 | 0.98934  | 0.136676 | 0.00308  |
| 0.00199  | 0.03286  | 0.4787   | 0.249904 | 4.42E-08 | 0.214932 | 2.77E-06 | 0.225477 | 8.52E-07 |
| 0.21457  | 0.061247 | 0.18642  | 0.351412 | 5.09E-15 | 0.1766   | 0.00012  | 0.244212 | 9.07E-08 |
| 2.95E-11 | 0.118268 | 0.01053  | 0.370246 | 1.28E-16 | 0.255889 | 2.04E-08 | 0.402252 | 1.37E-19 |
| 0.77417  | -0.19884 | 1.50E-05 | 0.05083  | 0.27299  | -0.02544 | 0.58337  | 0.04821  | 0.2985   |
| 1.27E-18 | 0.058562 | 0.20651  | 0.188393 | 4.18E-05 | 0.055322 | 0.23278  | 0.354319 | 2.93E-15 |
| 7.44E-20 | -0.01386 | 0.76514  | 0.193982 | 2.43E-05 | 0.020722 | 0.65512  | 0.365303 | 3.44E-16 |
| 0.20366  | -0.14431 | 0.00177  | 0.018182 | 0.69513  | -0.07556 | 0.10292  | 0.058884 | 0.20402  |
| 6.02E-25 | 0.068252 | 0.14083  | 0.25219  | 3.30E-08 | 0.144334 | 0.00177  | 0.346485 | 1.28E-14 |
| 9.90E-13 | 0.249994 | 4.37E-08 | 0.384633 | 6.48E-18 | 0.286927 | 2.66E-10 | 0.472785 | 2.21E-27 |
| 6.06E-12 | -0.15764 | 0.00063  | -0.02394 | 0.60581  | -0.15677 | 0.00067  | 0.215195 | 2.69E-06 |
| 0.11169  | -0.32122 | 1.14E-12 | -0.03713 | 0.42338  | -0.17119 | 0.0002   | 0.058847 | 0.2043   |
| 0.20408  | -0.11447 | 0.01332  | 0.037823 | 0.4148   | -0.02913 | 0.53007  | 0.209143 | 5.16E-06 |
| 0.0023   | -0.24927 | 4.80E-08 | 0.044351 | 0.33891  | -0.06177 | 0.18269  | 0.087223 | 0.05964  |
| 9.70E-10 | 0.07715  | 0.09587  | 0.26594  | 5.31E-09 | 0.13791  | 0.00282  | 0.258939 | 1.36E-08 |
| 3.02E-10 | 0.211346 | 4.08E-06 | 0.265716 | 5.48E-09 | 0.096672 | 0.03676  | 0.199248 | 1.44E-05 |
| 3.04E-06 | -0.02092 | 0.65206  | 0.244371 | 8.89E-08 | 0.170604 | 0.00021  | 0.210002 | 4.71E-06 |
| 0.0013   | -0.02438 | 0.59917  | 0.20599  | 7.20E-06 | 0.11683  | 0.01152  | 0.271117 | 2.60E-09 |
| 0.287    | 0.056561 | 0.22247  | 0.232963 | 3.56E-07 | 0.143602 | 0.00186  | 0.193389 | 2.58E-05 |
| 0.00349  | 0.073542 | 0.11248  | 0.284581 | 3.77E-10 | 0.154377 | 0.00082  | 0.191804 | 3.01E-05 |
| 9.92E-21 | 0.260713 | 1.08E-08 | 0.391866 | 1.37E-18 | 0.347679 | 1.03E-14 | 0.537734 | 2.36E-36 |
| 2.12E-20 | -0.16355 | 0.00039  | 0.011766 | 0.79981  | -0.14991 | 0.00116  | 0.286023 | 3.05E-10 |
| 4.79E-36 | 0.138143 | 0.00277  | 0.215509 | 2.60E-06 | 0.130453 | 0.00475  | 0.476166 | 8.39E-28 |
| 5.29E-05 | -0.0975  | 0.03518  | 0.039744 | 0.3915   | 0.032891 | 0.47828  | 0.000602 | 0.98965  |
| 0.022    | 0.040314 | 0.38473  | 0.277893 | 9.96E-10 | 0.232301 | 3.85E-07 | 0.257429 | 1.67E-08 |
| 2.46E-07 | 0.03256  | 0.48273  | 0.200982 | 1.21E-05 | 0.082665 | 0.07431  | 0.296076 | 6.66E-11 |
| 0.00124  | -0.23659 | 2.31E-07 | 0.006649 | 0.88606  | -0.0738  | 0.11122  | 0.101206 | 0.02875  |
| 0.27306  | 0.1129   | 0.01464  | 0.246844 | 6.52E-08 | 0.249109 | 4.89E-08 | 0.141061 | 0.00225  |
| 0.00692  | 0.083366 | 0.07188  | 0.272117 | 2.26E-09 | 0.150772 | 0.00108  | 0.332509 | 1.62E-13 |
| 5.11E-07 | 0.047715 | 0.3035   | 0.245628 | 7.60E-08 | 0.186041 | 5.23E-05 | 0.281709 | 5.74E-10 |
| 0.07135  | 0.195066 | 2.19E-05 | 0.21101  | 4.23E-06 | 0.228849 | 5.77E-07 | 0.285344 | 3.37E-10 |
| 0.00493  | -0.09796 | 0.03431  | 0.145452 | 0.00162  | 0.045956 | 0.32169  | 0.10011  | 0.03054  |
| 0.02106  | -0.13085 | 0.00462  | 0.110148 | 0.01726  | 0.168102 | 0.00026  | 0.009787 | 0.83293  |
| 0.50822  | -0.01831 | 0.69309  | 0.203331 | 9.49E-06 | 0.130908 | 0.0046   | 0.247068 | 6.34E-08 |
| 0.08182  | -0.08752 | 0.05877  | 0.068022 | 0.14218  | -0.00834 | 0.85741  | -0.03452 | 0.45674  |
| 4.85E-17 | -0.37702 | 3.20E-17 | -0.13626 | 0.00317  | -0.20639 | 6.90E-06 | -0.21325 | 3.33E-06 |
| 0.67563  | 0.126233 | 0.0063   | 0.224054 | 1.00E-06 | 0.283613 | 4.34E-10 | 0.139639 | 0.00249  |
| 4.20E-20 | -0.01904 | 0.68156  | 0.159761 | 0.00053  | 0.032489 | 0.48368  | 0.237543 | 2.06E-07 |
| 6.15E-19 | 0.072723 | 0.11655  | 0.27849  | 9.15E-10 | 0.169343 | 0.00024  | 0.464472 | 2.29E-26 |
| 0.55541  | 0.010878 | 0.81464  | 0.166119 | 0.00031  | 0.108316 | 0.01921  | 0.180247 | 8.97E-05 |

|          |          |          |          |          |          |          |          |          |
|----------|----------|----------|----------|----------|----------|----------|----------|----------|
| 1.97E-06 | 0.169979 | 0.00022  | 0.279203 | 8.25E-10 | 0.240296 | 1.47E-07 | 0.324587 | 6.42E-13 |
| 0.86989  | -0.3358  | 9.01E-14 | -0.01294 | 0.78037  | -0.15039 | 0.00111  | -0.01846 | 0.69066  |
| 1.32E-18 | -0.12988 | 0.00494  | -0.0262  | 0.57227  | 0.030543 | 0.51027  | -0.18942 | 3.79E-05 |
| 0.0009   | 0.153366 | 0.00088  | 0.297072 | 5.71E-11 | 0.196462 | 1.90E-05 | 0.247661 | 5.88E-08 |
| 0.06511  | 0.122013 | 0.0083   | 0.336903 | 7.39E-14 | 0.193747 | 2.49E-05 | 0.244181 | 9.10E-08 |
| 3.76E-05 | -0.01666 | 0.71951  | 0.290825 | 1.48E-10 | 0.195283 | 2.14E-05 | 0.287945 | 2.29E-10 |
| 0.82515  | -0.04688 | 0.31207  | 0.229733 | 5.21E-07 | 0.155901 | 0.00072  | 0.154919 | 0.00078  |
| 1.08E-07 | -0.02059 | 0.65715  | 0.183798 | 6.46E-05 | 0.094225 | 0.04182  | 0.179613 | 9.51E-05 |
| 8.41E-05 | -0.09485 | 0.04047  | -0.05363 | 0.24737  | -0.14905 | 0.00124  | -0.00884 | 0.84898  |
| 2.48E-24 | 0.06955  | 0.13341  | 0.156867 | 0.00067  | -0.02805 | 0.54541  | 0.258697 | 1.41E-08 |
| 4.54E-08 | 0.199882 | 1.35E-05 | 0.316136 | 2.68E-12 | 0.254244 | 2.53E-08 | 0.384865 | 6.17E-18 |
| 2.96E-12 | 0.084944 | 0.06664  | 0.347696 | 1.02E-14 | 0.245501 | 7.72E-08 | 0.334271 | 1.18E-13 |
| 1.25E-08 | 0.264416 | 6.54E-09 | 0.400749 | 1.92E-19 | 0.312321 | 5.03E-12 | 0.285666 | 3.21E-10 |
| 0.39901  | -0.03186 | 0.49217  | 0.225172 | 8.82E-07 | 0.203798 | 9.04E-06 | 0.154129 | 0.00083  |
| 6.67E-09 | 0.112393 | 0.0151   | 0.299213 | 4.10E-11 | 0.206282 | 6.98E-06 | 0.358446 | 1.32E-15 |
| 0.31648  | 0.197587 | 1.70E-05 | 0.297647 | 5.23E-11 | 0.366093 | 2.94E-16 | 0.312057 | 5.25E-12 |
| 0.07378  | 0.2091   | 5.19E-06 | 0.307074 | 1.18E-11 | 0.365034 | 3.63E-16 | 0.211312 | 4.10E-06 |
| 5.63E-09 | -0.08348 | 0.0715   | 0.2167   | 2.28E-06 | 0.073866 | 0.1109   | 0.267366 | 4.37E-09 |
| 1.67E-11 | 0.268284 | 3.85E-09 | 0.452185 | 6.48E-25 | 0.36021  | 9.39E-16 | 0.464049 | 2.58E-26 |
| 0.42175  | 0.027121 | 0.5588   | 0.120286 | 0.00927  | 0.164897 | 0.00035  | 0.166323 | 0.00031  |
| 0.20202  | -0.12301 | 0.00779  | 0.17846  | 0.00011  | 0.101378 | 0.02848  | 0.171452 | 0.0002   |
| 1.47E-12 | 0.131019 | 0.00457  | 0.324169 | 6.90E-13 | 0.227632 | 6.65E-07 | 0.374397 | 5.49E-17 |
| 1.68E-08 | 0.308048 | 1.01E-11 | 0.322987 | 8.45E-13 | 0.232878 | 3.60E-07 | 0.326597 | 4.54E-13 |
| 0.0646   | 0.191332 | 3.15E-05 | 0.420406 | 2.01E-21 | 0.323098 | 8.29E-13 | 0.221838 | 1.29E-06 |
| 0.01994  | -0.11315 | 0.01443  | 0.052036 | 0.26176  | -0.06881 | 0.13758  | -0.06792 | 0.14279  |
| 9.22E-05 | -0.12532 | 0.00669  | 0.127199 | 0.00591  | -0.0454  | 0.32761  | 0.220318 | 1.53E-06 |
| 0.02241  | 0.237792 | 2.00E-07 | 0.369106 | 1.61E-16 | 0.316269 | 2.62E-12 | 0.339652 | 4.50E-14 |
| 6.27E-33 | 0.062645 | 0.17655  | 0.201567 | 1.14E-05 | 0.032202 | 0.48755  | 0.382013 | 1.13E-17 |
| 0.11996  | -0.13639 | 0.00314  | -0.01867 | 0.68746  | -0.11858 | 0.01033  | -0.06949 | 0.13372  |
| 3.31E-08 | 0.088563 | 0.05581  | 0.214684 | 2.85E-06 | 0.119689 | 0.00963  | 0.272826 | 2.05E-09 |
| 0.65771  | -0.05675 | 0.2209   | 0.07126  | 0.12411  | 0.007247 | 0.87588  | 0.007919 | 0.86448  |
| 8.26E-05 | -0.0687  | 0.13825  | 0.169584 | 0.00023  | 0.036444 | 0.43203  | 0.150262 | 0.00113  |
| 1.58E-12 | 0.069675 | 0.13272  | 0.298956 | 4.26E-11 | 0.190789 | 3.32E-05 | 0.354715 | 2.71E-15 |
| 5.54E-06 | -0.04111 | 0.3754   | 0.163234 | 0.0004   | 0.033447 | 0.47088  | 0.221183 | 1.39E-06 |
| 0.11957  | 0.351688 | 4.83E-15 | 0.244101 | 9.19E-08 | 0.308923 | 8.75E-12 | 0.164828 | 0.00035  |
| 2.45E-06 | -0.06094 | 0.18867  | 0.191003 | 3.25E-05 | 0.036471 | 0.4317   | 0.224442 | 9.59E-07 |
| 0.00073  | -0.11832 | 0.0105   | 0.054159 | 0.24276  | -0.07307 | 0.1148   | 0.170038 | 0.00022  |
| 0.00011  | -0.26275 | 8.20E-09 | 0.096033 | 0.03803  | -0.05264 | 0.25622  | 0.017594 | 0.70453  |
| 0.00567  | -0.20341 | 9.41E-06 | 0.065006 | 0.16076  | 0.006363 | 0.89092  | 0.130126 | 0.00486  |
| 0.24175  | -0.034   | 0.4636   | 0.0829   | 0.07349  | -0.0211  | 0.64926  | 0.101637 | 0.02808  |
| 7.00E-25 | -0.06636 | 0.15223  | -0.03232 | 0.48596  | -0.2036  | 9.22E-06 | 0.255885 | 2.04E-08 |
| 0.88747  | 0.038684 | 0.40426  | 0.139909 | 0.00244  | 0.066981 | 0.1484   | 0.238912 | 1.74E-07 |
| 2.34E-18 | 0.1374   | 0.00293  | 0.277569 | 1.04E-09 | 0.146384 | 0.00151  | 0.332513 | 1.61E-13 |
| 5.94E-65 | 0.29069  | 1.52E-10 | 0.310559 | 6.71E-12 | 0.15565  | 0.00074  | 0.506623 | 8.14E-32 |
| 1.08E-05 | 0.057827 | 0.21227  | 0.287875 | 2.31E-10 | 0.177609 | 0.00011  | 0.334936 | 1.05E-13 |



|          |          |          |          |          |          |          |          |          |
|----------|----------|----------|----------|----------|----------|----------|----------|----------|
| 0.0347   | -0.18728 | 4.65E-05 | -0.0201  | 0.66492  | -0.03043 | 0.51188  | -0.09787 | 0.03448  |
| 0.9049   | 0.118386 | 0.01045  | 0.232762 | 3.65E-07 | 0.212682 | 3.54E-06 | 0.153671 | 0.00086  |
| 0.55254  | -0.29775 | 5.15E-11 | -0.14327 | 0.00191  | -0.24203 | 1.19E-07 | -0.04044 | 0.38322  |
| 0.13688  | 0.194244 | 2.37E-05 | 0.341461 | 3.24E-14 | 0.383743 | 7.83E-18 | 0.292683 | 1.12E-10 |
| 8.33E-05 | -0.11156 | 0.01587  | -0.00407 | 0.93017  | -0.13905 | 0.0026   | 0.082579 | 0.07462  |
| 0.08277  | -0.11047 | 0.01693  | 0.07593  | 0.10125  | 0.001789 | 0.96925  | 0.030809 | 0.50659  |
| 3.98E-07 | -0.10447 | 0.02395  | 0.148843 | 0.00126  | -0.00167 | 0.97134  | 0.325687 | 5.31E-13 |
| 0.0479   | -0.02513 | 0.58798  | 0.02675  | 0.56419  | -0.00266 | 0.95422  | -0.03991 | 0.38949  |
| 8.42E-20 | 0.315042 | 3.21E-12 | 0.394146 | 8.31E-19 | 0.319891 | 1.43E-12 | 0.471116 | 3.55E-27 |
| 6.37E-10 | 0.067316 | 0.14637  | 0.234608 | 2.93E-07 | 0.157633 | 0.00063  | 0.340188 | 4.08E-14 |
| 1.94E-05 | 0.017788 | 0.70142  | 0.155667 | 0.00074  | 0.082479 | 0.07497  | 0.066263 | 0.15281  |
| 0.00376  | 0.155462 | 0.00075  | 0.330568 | 2.27E-13 | 0.318253 | 1.88E-12 | 0.230028 | 5.03E-07 |
| 2.15E-18 | 0.010924 | 0.81386  | 0.146422 | 0.00151  | 0.058599 | 0.20622  | 0.196854 | 1.83E-05 |
| 6.41E-16 | 0.145549 | 0.00161  | 0.304088 | 1.90E-11 | 0.205154 | 7.85E-06 | 0.324899 | 6.09E-13 |
| 0.76461  | -0.07011 | 0.13028  | 0.179472 | 9.63E-05 | 0.070707 | 0.12706  | 0.109251 | 0.01819  |
| 0.00027  | 0.052202 | 0.26023  | 0.281088 | 6.28E-10 | 0.202739 | 1.01E-05 | 0.274637 | 1.58E-09 |
| 2.28E-06 | -0.22303 | 1.13E-06 | -0.1979  | 1.65E-05 | -0.20042 | 1.28E-05 | -0.26485 | 6.17E-09 |
| 2.32E-12 | 0.15041  | 0.00111  | 0.324087 | 7.00E-13 | 0.219176 | 1.74E-06 | 0.424264 | 7.91E-22 |
| 1.22E-07 | -0.00027 | 0.99538  | 0.040697 | 0.38023  | -0.06446 | 0.1643   | 0.178132 | 0.00011  |
| 2.31E-05 | -0.3832  | 8.78E-18 | -0.02952 | 0.5246   | -0.13791 | 0.00282  | -0.21012 | 4.65E-06 |
| 2.14E-06 | 0.206002 | 7.19E-06 | 0.313333 | 4.26E-12 | 0.206982 | 6.49E-06 | 0.305122 | 1.61E-11 |
| 8.05E-05 | 0.1014   | 0.02845  | 0.311958 | 5.34E-12 | 0.265783 | 5.43E-09 | 0.215433 | 2.62E-06 |
| 3.57E-20 | -0.00337 | 0.94217  | -0.13382 | 0.00377  | -0.09308 | 0.04437  | -0.32826 | 3.40E-13 |
| 0.08754  | -0.38596 | 4.89E-18 | -0.06544 | 0.15798  | -0.2516  | 3.56E-08 | -0.04368 | 0.34624  |
| 0.27655  | 0.03097  | 0.50437  | 0.197686 | 1.68E-05 | 0.050351 | 0.27754  | 0.147185 | 0.00142  |
| 0.15875  | -0.28258 | 5.06E-10 | 0.012718 | 0.784    | -0.10295 | 0.0261   | -0.04918 | 0.28892  |
| 0.00623  | 0.011201 | 0.80923  | 0.170718 | 0.00021  | 0.102013 | 0.0275   | 0.133159 | 0.00394  |
| 8.38E-14 | -0.15967 | 0.00053  | 0.082938 | 0.07336  | -0.11677 | 0.01156  | 0.125755 | 0.00651  |
| 1.01E-12 | 0.156964 | 0.00066  | 0.357557 | 1.57E-15 | 0.201106 | 1.19E-05 | 0.339112 | 4.96E-14 |
| 3.57E-07 | -0.33185 | 1.81E-13 | -0.10654 | 0.02129  | -0.16245 | 0.00042  | -0.15199 | 0.00098  |
| 5.27E-05 | 0.385335 | 5.58E-18 | 0.529727 | 3.85E-35 | 0.518747 | 1.58E-33 | 0.505449 | 1.18E-31 |
| 7.67E-06 | 0.189875 | 3.63E-05 | 0.340893 | 3.59E-14 | 0.218572 | 1.86E-06 | 0.275727 | 1.36E-09 |
| 5.01E-06 | 1.46E-05 | 0.99975  | 0.248502 | 5.29E-08 | 0.105752 | 0.02228  | 0.18395  | 6.37E-05 |
| 5.86E-11 | 0.268391 | 3.79E-09 | 0.34528  | 1.60E-14 | 0.30215  | 2.58E-11 | 0.324414 | 6.62E-13 |
| 1.97E-05 | 0.025712 | 0.57942  | 0.069975 | 0.13105  | 0.058088 | 0.21021  | -0.0986  | 0.03315  |
| 1.56E-08 | 0.047363 | 0.30708  | 0.268993 | 3.49E-09 | 0.235679 | 2.57E-07 | 0.310309 | 6.99E-12 |
| 0.55084  | -0.03482 | 0.45284  | 0.234018 | 3.14E-07 | 0.191678 | 3.05E-05 | 0.263614 | 7.29E-09 |
| 8.97E-05 | -0.06022 | 0.19391  | 0.174129 | 0.00016  | 0.037662 | 0.4168   | 0.181475 | 8.01E-05 |
| 0.00052  | 0.185818 | 5.34E-05 | 0.369021 | 1.64E-16 | 0.258052 | 1.53E-08 | 0.372009 | 8.94E-17 |
| 0.81253  | 0.202559 | 1.03E-05 | 0.398078 | 3.49E-19 | 0.286348 | 2.90E-10 | 0.434732 | 5.95E-23 |
| 0.27234  | 0.006369 | 0.89082  | 0.204434 | 8.46E-06 | 0.082038 | 0.07655  | 0.020341 | 0.66107  |
| 1.40E-05 | -0.02022 | 0.66293  | 0.152763 | 0.00093  | 0.089128 | 0.05426  | 0.193106 | 2.65E-05 |
| 0.82277  | 0.07257  | 0.11732  | 0.237195 | 2.15E-07 | 0.239514 | 1.62E-07 | 0.214229 | 2.99E-06 |
| 0.70008  | -0.19163 | 3.06E-05 | 0.060471 | 0.19207  | -0.05708 | 0.21821  | 0.114047 | 0.01366  |
| 3.08E-09 | -0.06718 | 0.14722  | 0.074164 | 0.10947  | -0.07633 | 0.09944  | 0.291357 | 1.37E-10 |

|          |          |          |          |          |          |          |          |          |
|----------|----------|----------|----------|----------|----------|----------|----------|----------|
| 0.06436  | 0.073901 | 0.11073  | 0.204412 | 8.48E-06 | 0.104607 | 0.02378  | 0.097139 | 0.03586  |
| 0.04676  | 0.271966 | 2.31E-09 | 0.430323 | 1.79E-22 | 0.392809 | 1.11E-18 | 0.354653 | 2.75E-15 |
| 5.68E-05 | -0.22839 | 6.09E-07 | 0.02321  | 0.61687  | -0.11401 | 0.01369  | -0.06528 | 0.15899  |
| 0.00294  | 0.083683 | 0.07081  | 0.15663  | 0.00068  | 0.074823 | 0.10634  | 0.222765 | 1.16E-06 |
| 1.40E-11 | 0.149979 | 0.00115  | 0.271676 | 2.40E-09 | 0.209124 | 5.17E-06 | 0.272229 | 2.23E-09 |
| 2.21E-05 | 0.160389 | 0.0005   | 0.082677 | 0.07427  | 0.120161 | 0.00934  | 0.145565 | 0.00161  |
| 0.40611  | 0.181852 | 7.74E-05 | 0.161383 | 0.00046  | 0.312712 | 4.72E-12 | 0.205808 | 7.34E-06 |
| 0.81438  | -0.08077 | 0.08122  | -0.01785 | 0.70047  | 0.010313 | 0.82411  | -0.00704 | 0.87947  |
| 3.53E-10 | -0.14847 | 0.00129  | -0.05319 | 0.25127  | 0.018845 | 0.6846   | -0.21897 | 1.78E-06 |
| 0.35323  | -0.00128 | 0.97798  | 0.122199 | 0.0082   | 0.12022  | 0.00931  | 0.03716  | 0.42304  |
| 4.45E-10 | 0.251491 | 3.61E-08 | 0.341177 | 3.41E-14 | 0.311533 | 5.72E-12 | 0.264832 | 6.18E-09 |
| 8.84E-08 | -0.19884 | 1.50E-05 | -0.12873 | 0.00533  | -0.1122  | 0.01527  | -0.19756 | 1.71E-05 |
| 0.65129  | 0.007723 | 0.8678   | 0.062583 | 0.17698  | 0.076556 | 0.09846  | 0.105465 | 0.02264  |
| 0.00066  | -0.09527 | 0.0396   | -0.0356  | 0.44277  | 0.010079 | 0.82802  | -0.17395 | 0.00016  |
| 1.17E-06 | 0.161349 | 0.00046  | 0.232193 | 3.90E-07 | 0.205499 | 7.58E-06 | 0.152498 | 0.00095  |
| 0.10366  | -0.01313 | 0.77723  | -0.04422 | 0.34032  | 0.008484 | 0.85491  | 0.051361 | 0.268    |
| 0.0017   | 0.136019 | 0.00323  | 0.06646  | 0.15159  | 0.077281 | 0.0953   | 0.206734 | 6.66E-06 |
| 6.90E-07 | 0.044013 | 0.3426   | 0.117986 | 0.01072  | 0.085067 | 0.06625  | 0.103268 | 0.02564  |
| 0.19583  | -0.14817 | 0.00132  | -0.07922 | 0.08726  | -0.09041 | 0.05087  | -0.07244 | 0.11801  |
| 0.0385   | -0.06353 | 0.1705   | 0.045964 | 0.32161  | -0.0012  | 0.97938  | 0.063894 | 0.16806  |
| 0.00026  | 0.033754 | 0.46681  | 0.118313 | 0.0105   | 0.113512 | 0.01411  | 0.105867 | 0.02213  |
| 0.0004   | 0.15419  | 0.00083  | 0.086308 | 0.06238  | 0.127889 | 0.00565  | 0.303561 | 2.07E-11 |
| 0.15096  | -0.01833 | 0.69285  | 0.003924 | 0.93261  | 0.041795 | 0.3675   | 0.082048 | 0.07651  |
| 0.88569  | 0.049755 | 0.28327  | 0.094496 | 0.04123  | 0.150885 | 0.00107  | 0.028506 | 0.53889  |
| 0.00016  | 0.124915 | 0.00688  | 0.102007 | 0.02751  | 0.101604 | 0.02813  | 0.236771 | 2.26E-07 |
| 0.00034  | -0.04931 | 0.28762  | 0.032952 | 0.47747  | 0.086679 | 0.06126  | -0.19498 | 2.21E-05 |
| 4.47E-10 | -0.18783 | 4.42E-05 | -0.0362  | 0.43517  | 0.013683 | 0.76806  | -0.26763 | 4.22E-09 |
| 0.17986  | 0.044218 | 0.34035  | 0.09862  | 0.03312  | 0.147484 | 0.00139  | 0.06512  | 0.16003  |
| 0.01365  | 0.063014 | 0.174    | 0.072296 | 0.11871  | 0.097079 | 0.03597  | 0.209639 | 4.90E-06 |
| 2.52E-09 | 0.053916 | 0.24489  | 0.002049 | 0.96477  | -0.06654 | 0.15108  | 0.118856 | 0.01015  |
| 0.39223  | 0.002738 | 0.95295  | 0.088842 | 0.05504  | 0.14958  | 0.00119  | 0.003601 | 0.93813  |
| 0.3135   | -0.04195 | 0.36576  | -0.0426  | 0.35838  | -0.08004 | 0.08403  | -0.12365 | 0.00747  |
| 2.78E-06 | 0.230646 | 4.68E-07 | 0.215676 | 2.55E-06 | 0.172735 | 0.00018  | 0.26244  | 8.54E-09 |
| 1.40E-09 | 0.168524 | 0.00025  | 0.198933 | 1.49E-05 | 0.209552 | 4.94E-06 | 0.269651 | 3.19E-09 |
| 0.00028  | 0.189814 | 3.65E-05 | 0.173284 | 0.00017  | 0.208293 | 5.65E-06 | 0.164697 | 0.00035  |
| 0.04517  | 0.086704 | 0.06118  | 0.20222  | 1.06E-05 | 0.230536 | 4.74E-07 | 0.141892 | 0.00211  |
| 0.66676  | -0.06668 | 0.15022  | 0.024322 | 0.60009  | 0.089149 | 0.0542   | 0.183242 | 6.80E-05 |
| 0.0003   | -0.02989 | 0.51931  | 0.054428 | 0.24043  | 0.011851 | 0.7984   | 0.134639 | 0.00356  |
| 2.23E-07 | 0.148619 | 0.00128  | 0.232622 | 3.71E-07 | 0.121872 | 0.00838  | 0.153127 | 0.0009   |
| 0.00013  | 0.11003  | 0.01738  | 0.073283 | 0.11375  | 0.086143 | 0.06288  | 0.230847 | 4.57E-07 |
| 0.00123  | -0.19306 | 2.66E-05 | -0.05648 | 0.22316  | -0.08431 | 0.0687   | -0.25951 | 1.26E-08 |
| 1.82E-06 | 0.103936 | 0.02469  | 0.00186  | 0.96803  | -0.01728 | 0.7095   | 0.182739 | 7.13E-05 |
| 0.799    | -0.20172 | 1.12E-05 | -0.11184 | 0.01561  | -0.15848 | 0.00059  | 0.035997 | 0.43771  |
| 2.08E-10 | 0.158681 | 0.00058  | 0.153603 | 0.00087  | 0.126026 | 0.00639  | 0.123951 | 0.00732  |
| 0.14736  | -0.11105 | 0.01635  | -0.11483 | 0.01303  | -0.19446 | 2.32E-05 | -0.18065 | 8.64E-05 |

|          |          |          |          |          |          |          |          |          |
|----------|----------|----------|----------|----------|----------|----------|----------|----------|
| 0.10399  | -0.10089 | 0.02926  | 0.087166 | 0.05981  | -0.0422  | 0.36283  | 0.089163 | 0.05417  |
| 0.12284  | -0.02741 | 0.55466  | 0.028618 | 0.5373   | -0.02818 | 0.54354  | 0.022163 | 0.63284  |
| 0.00034  | 0.075154 | 0.1048   | 0.143474 | 0.00188  | 0.071926 | 0.12062  | 0.164502 | 0.00036  |
| 7.14E-07 | -0.05533 | 0.23268  | -0.00358 | 0.93852  | 0.126868 | 0.00604  | -0.17796 | 0.00011  |
| 2.39E-06 | 0.060825 | 0.18947  | 0.150384 | 0.00112  | 0.126265 | 0.00629  | 0.221579 | 1.33E-06 |
| 0.34735  | -0.05176 | 0.26434  | 0.034888 | 0.45196  | 0.079379 | 0.08662  | 0.11543  | 0.01256  |
| 0.7362   | 0.007382 | 0.87359  | -0.04672 | 0.31367  | -0.06542 | 0.15811  | 0.043577 | 0.34741  |
| 0.32888  | -0.11544 | 0.01255  | -0.03901 | 0.4003   | -0.05825 | 0.20891  | 0.007895 | 0.86488  |
| 0.87047  | 0.033432 | 0.47107  | 0.063544 | 0.17041  | 0.06823  | 0.14096  | 0.072459 | 0.11789  |
| 0.0138   | 0.010373 | 0.82309  | 0.070912 | 0.12596  | 0.058525 | 0.20679  | -0.08856 | 0.05581  |
| 4.62E-10 | -0.0937  | 0.04298  | -0.07003 | 0.13077  | -0.02315 | 0.6178   | -0.23187 | 4.05E-07 |
| 0.32619  | -0.08326 | 0.07224  | -0.03042 | 0.51203  | -0.00253 | 0.95657  | -0.0148  | 0.74971  |
| 0.03449  | 0.011691 | 0.80107  | 0.115217 | 0.01272  | 0.127734 | 0.0057   | 0.039194 | 0.39809  |
| 0.58839  | -0.09213 | 0.0466   | -0.03556 | 0.44335  | -0.03688 | 0.42648  | -0.01325 | 0.77522  |
| 7.17E-13 | 0.182646 | 7.19E-05 | 0.118759 | 0.01021  | 0.100894 | 0.02925  | 0.204714 | 8.22E-06 |
| 9.75E-05 | -0.00605 | 0.89624  | 0.083702 | 0.07074  | 0.213981 | 3.07E-06 | 0.073397 | 0.11319  |
| 0.10872  | -0.01624 | 0.72625  | 0.075155 | 0.10479  | 0.105585 | 0.02249  | 0.098727 | 0.03292  |
| 0.04529  | 0.063222 | 0.17259  | 0.069625 | 0.133    | 0.081861 | 0.07719  | 0.164547 | 0.00036  |
| 0.84645  | -0.19575 | 2.04E-05 | -0.11752 | 0.01103  | -0.13652 | 0.00311  | -0.13693 | 0.00302  |
| 0.84429  | -0.06694 | 0.14863  | -0.07987 | 0.08468  | -0.08314 | 0.07264  | -0.0942  | 0.04187  |
| 0.00011  | -0.00377 | 0.9352   | 0.077535 | 0.09421  | 0.044142 | 0.34119  | 0.192015 | 2.95E-05 |
| 8.32E-05 | -0.05868 | 0.20556  | 0.047942 | 0.3012   | 0.140562 | 0.00233  | -0.08776 | 0.05807  |
| 0.10539  | -0.1198  | 0.00956  | -0.04849 | 0.29569  | -0.11675 | 0.01157  | 0.098197 | 0.03388  |
| 0.00126  | 0.03247  | 0.48393  | 0.134496 | 0.00359  | 0.14653  | 0.0015   | 0.163025 | 0.0004   |
| 0.78658  | -0.02408 | 0.60378  | 0.00879  | 0.84974  | 0.046096 | 0.32023  | 0.032138 | 0.48842  |
| 1.08E-08 | -0.05594 | 0.22761  | -0.05793 | 0.21142  | 0.019723 | 0.67075  | -0.15104 | 0.00106  |
| 3.26E-06 | -0.07011 | 0.13031  | 0.063638 | 0.16977  | -0.03582 | 0.43994  | 0.153005 | 0.00091  |
| 0.00011  | 0.176449 | 0.00013  | 0.074169 | 0.10944  | 0.136105 | 0.00321  | 0.182841 | 7.06E-05 |
| 0.01326  | 0.061113 | 0.18739  | 0.095936 | 0.03823  | 0.130503 | 0.00473  | 0.147629 | 0.00138  |
| 0.00047  | 0.032753 | 0.48013  | 0.051374 | 0.26788  | 0.056725 | 0.22112  | -0.03235 | 0.4856   |
| 2.17E-13 | 0.319801 | 1.45E-12 | 0.254912 | 2.32E-08 | 0.222899 | 1.14E-06 | 0.315449 | 3.00E-12 |
| 0.7874   | -0.01736 | 0.70823  | -0.03117 | 0.50166  | 0.038035 | 0.4122   | 0.013541 | 0.77041  |
| 0.00578  | -0.33473 | 1.09E-13 | -0.22245 | 1.20E-06 | -0.2703  | 2.91E-09 | -0.33071 | 2.22E-13 |
| 4.92E-08 | -0.2779  | 9.96E-10 | -0.27959 | 7.81E-10 | -0.23185 | 4.06E-07 | -0.28755 | 2.43E-10 |
| 0.00021  | -0.19478 | 2.25E-05 | -0.19677 | 1.85E-05 | -0.20108 | 1.19E-05 | -0.08966 | 0.05282  |
| 0.11756  | -0.04541 | 0.32747  | -0.08075 | 0.0813   | -0.0918  | 0.0474   | 0.009898 | 0.83107  |
| 0.68312  | -0.07915 | 0.08753  | -0.03506 | 0.44969  | -0.05721 | 0.21723  | -0.10241 | 0.0269   |
| 0.67736  | -0.10669 | 0.02112  | -0.12669 | 0.00611  | -0.12674 | 0.0061   | -0.17921 | 9.87E-05 |
| 5.81E-05 | -0.00213 | 0.96339  | -0.05975 | 0.19745  | 0.049921 | 0.28167  | -0.08242 | 0.0752   |
| 0.65253  | -0.11362 | 0.01402  | -0.10958 | 0.01784  | -0.06682 | 0.14936  | -0.0056  | 0.90394  |
| 0.00027  | -0.24889 | 5.03E-08 | -0.12653 | 0.00618  | -0.19269 | 2.76E-05 | -0.04929 | 0.28776  |
| 0.46232  | -0.07883 | 0.08884  | -0.10457 | 0.02383  | -0.11122 | 0.01619  | -0.19432 | 2.35E-05 |
| 0.49873  | -0.25993 | 1.20E-08 | -0.26159 | 9.57E-09 | -0.3156  | 2.93E-12 | -0.26537 | 5.75E-09 |
| 0.0047   | -0.07112 | 0.12482  | -0.16995 | 0.00022  | -0.1602  | 0.00051  | -0.24438 | 8.88E-08 |
| 0.44742  | 0.013909 | 0.76434  | -0.05188 | 0.2632   | -0.03945 | 0.39499  | -0.15172 | 0.00101  |

|          |          |          |          |          |          |          |          |          |
|----------|----------|----------|----------|----------|----------|----------|----------|----------|
| 0.77222  | 0.055704 | 0.22956  | 0.015047 | 0.74571  | 0.017065 | 0.71301  | -0.04227 | 0.36205  |
| 1.51E-16 | -0.22024 | 1.54E-06 | -0.203   | 9.81E-06 | -0.11432 | 0.01344  | -0.33116 | 2.05E-13 |
| 4.40E-18 | -0.08785 | 0.05782  | -0.18734 | 4.63E-05 | -0.06289 | 0.17485  | -0.21286 | 3.47E-06 |
| 4.21E-12 | -0.23916 | 1.69E-07 | -0.14405 | 0.0018   | -0.16761 | 0.00027  | -0.24527 | 7.95E-08 |
| 0.15712  | 0.019725 | 0.67073  | -0.0853  | 0.06551  | -0.07576 | 0.10203  | -0.11057 | 0.01683  |
| 7.75E-06 | 0.059419 | 0.19993  | 0.063013 | 0.17401  | 0.03023  | 0.51461  | -0.18321 | 6.82E-05 |
| 0.00269  | -0.06551 | 0.15752  | -0.1518  | 0.001    | -0.14801 | 0.00134  | -0.06154 | 0.18435  |
| 0.00517  | -0.02891 | 0.53315  | -0.14304 | 0.00194  | -0.10485 | 0.02345  | 0.036073 | 0.43674  |
| 0.07381  | -0.12683 | 0.00606  | -0.07777 | 0.09321  | -0.06277 | 0.17568  | -0.14793 | 0.00135  |
| 1.14E-06 | -0.08571 | 0.06423  | -0.16667 | 0.0003   | -0.07194 | 0.12057  | -0.27317 | 1.95E-09 |
| 0.47455  | 0.002572 | 0.9558   | -0.05323 | 0.25098  | -0.03236 | 0.48536  | -0.22516 | 8.83E-07 |
| 0.00462  | -0.05383 | 0.24565  | -0.04013 | 0.38689  | -0.0668  | 0.14949  | -0.15134 | 0.00104  |
| 0.00172  | -0.25707 | 1.75E-08 | -0.23041 | 4.81E-07 | -0.21727 | 2.14E-06 | -0.29649 | 6.25E-11 |
| 0.01151  | -0.29356 | 9.81E-11 | -0.22682 | 7.30E-07 | -0.23405 | 3.13E-07 | -0.26579 | 5.42E-09 |
| 0.0296   | -0.30177 | 2.74E-11 | -0.20388 | 8.96E-06 | -0.2244  | 9.63E-07 | -0.23308 | 3.51E-07 |
| 2.39E-09 | -0.14952 | 0.00119  | -0.19601 | 1.99E-05 | -0.10066 | 0.02964  | -0.25558 | 2.12E-08 |
| 0.28652  | -0.17798 | 0.00011  | -0.19727 | 1.76E-05 | -0.16563 | 0.00032  | -0.03488 | 0.45212  |
| 0.09817  | -0.04301 | 0.35373  | -0.08824 | 0.05672  | -0.04215 | 0.36348  | -0.03211 | 0.48882  |
| 0.05693  | 0.031331 | 0.4994   | -0.0007  | 0.98793  | 0.049136 | 0.28931  | -0.01331 | 0.77429  |
| 7.54E-14 | -0.3236  | 7.61E-13 | -0.29267 | 1.12E-10 | -0.23936 | 1.65E-07 | -0.30964 | 7.80E-12 |
| 3.08E-07 | -0.0589  | 0.20386  | -0.06286 | 0.17509  | 0.04686  | 0.31226  | -0.20036 | 1.29E-05 |
| 0.16413  | -0.14395 | 0.00182  | -0.21242 | 3.64E-06 | -0.17649 | 0.00013  | -0.26134 | 9.91E-09 |
| 2.25E-08 | -0.17894 | 0.0001   | -0.22948 | 5.36E-07 | -0.17478 | 0.00015  | -0.25451 | 2.44E-08 |
| 8.29E-05 | -0.06542 | 0.15809  | -0.06821 | 0.14106  | -0.09849 | 0.03335  | 0.017535 | 0.70547  |
| 0.00073  | -0.1728  | 0.00018  | -0.28029 | 7.05E-10 | -0.28304 | 4.73E-10 | -0.32252 | 9.14E-13 |
| 0.02009  | -0.10236 | 0.02698  | -0.06949 | 0.13374  | -0.03235 | 0.48559  | -0.12232 | 0.00814  |
| 0.84354  | -0.08919 | 0.0541   | -0.13309 | 0.00396  | -0.13307 | 0.00397  | -0.06492 | 0.16133  |
| 0.24323  | 0.055961 | 0.22742  | -0.01819 | 0.69501  | 0.001482 | 0.97452  | -0.06129 | 0.18613  |
| 1.59E-06 | -0.12254 | 0.00802  | -0.16708 | 0.00029  | -0.07732 | 0.09513  | -0.22035 | 1.52E-06 |
| 0.00165  | -0.17405 | 0.00016  | -0.21271 | 3.52E-06 | -0.21122 | 4.14E-06 | -0.2546  | 2.41E-08 |
| 0.00054  | -0.10558 | 0.0225   | -0.17364 | 0.00016  | -0.12068 | 0.00904  | -0.20947 | 4.99E-06 |
| 0.2464   | -0.09679 | 0.03653  | -0.12302 | 0.00778  | -0.13795 | 0.00281  | -0.13734 | 0.00294  |
| 0.71862  | -0.07894 | 0.0884   | -0.15207 | 0.00098  | -0.12499 | 0.00684  | -0.12946 | 0.00508  |
| 0.50531  | -0.0605  | 0.19189  | -0.09008 | 0.05173  | -0.07129 | 0.12395  | -0.02438 | 0.59925  |
| 0.13525  | -0.02756 | 0.55247  | -0.04817 | 0.29895  | -0.06654 | 0.15111  | -0.03999 | 0.38851  |
| 0.00028  | -0.35299 | 3.78E-15 | -0.25401 | 2.60E-08 | -0.29231 | 1.19E-10 | -0.30644 | 1.31E-11 |
| 0.00637  | -0.05362 | 0.24746  | 0.006629 | 0.88639  | -0.01982 | 0.66916  | -0.03523 | 0.44751  |
| 0.00793  | -0.08143 | 0.07878  | -0.0122  | 0.79253  | -0.04624 | 0.31871  | -0.13703 | 0.003    |
| 9.27E-05 | -0.02235 | 0.62997  | 0.026794 | 0.56355  | 0.008782 | 0.84987  | 0.011571 | 0.80306  |
| 0.16772  | -0.25036 | 4.17E-08 | -0.20318 | 9.63E-06 | -0.22587 | 8.14E-07 | -0.20853 | 5.51E-06 |
| 0.09297  | -0.26603 | 5.25E-09 | -0.17565 | 0.00014  | -0.1774  | 0.00012  | -0.12896 | 0.00525  |
| 0.01799  | -0.04002 | 0.38827  | -0.13271 | 0.00407  | -0.03269 | 0.48094  | -0.01481 | 0.74962  |
| 0.06277  | -0.11038 | 0.01702  | -0.1904  | 3.45E-05 | -0.08688 | 0.06066  | -0.12578 | 0.0065   |
| 0.1039   | -0.18101 | 8.36E-05 | -0.18132 | 8.13E-05 | -0.19793 | 1.64E-05 | -0.19655 | 1.89E-05 |
| 0.8378   | -0.05975 | 0.19746  | -0.019   | 0.68212  | -0.01266 | 0.78488  | -0.08521 | 0.06581  |

|          |          |          |          |          |          |          |          |          |
|----------|----------|----------|----------|----------|----------|----------|----------|----------|
| 2.03E-07 | -0.04429 | 0.3396   | -0.06849 | 0.13946  | 0.083342 | 0.07196  | -0.17734 | 0.00012  |
| 0.17237  | -0.11555 | 0.01246  | -0.1609  | 0.00048  | -0.16997 | 0.00022  | -0.16025 | 0.00051  |
| 1.45E-11 | -0.13665 | 0.00309  | -0.18223 | 7.47E-05 | -0.12827 | 0.0055   | -0.30866 | 9.13E-12 |
| 0.40816  | -0.25043 | 4.14E-08 | -0.27408 | 1.72E-09 | -0.32383 | 7.31E-13 | -0.21623 | 2.40E-06 |
| 0.28847  | -0.12179 | 0.00842  | -0.15135 | 0.00103  | -0.15026 | 0.00113  | -0.08198 | 0.07677  |
| 0.00365  | -0.11186 | 0.01558  | -0.15301 | 0.00091  | -0.09968 | 0.03127  | -0.20716 | 6.37E-06 |
| 1.61E-08 | -0.36423 | 4.26E-16 | -0.24488 | 8.34E-08 | -0.2577  | 1.61E-08 | -0.38574 | 5.12E-18 |
| 0.53763  | -0.00826 | 0.85872  | -0.04471 | 0.33504  | -0.03661 | 0.43     | -0.06609 | 0.15391  |
| 0.02614  | -0.06362 | 0.1699   | -0.09812 | 0.03402  | -0.11026 | 0.01714  | -0.0243  | 0.60037  |
| 0.357    | -0.12353 | 0.00753  | -0.02358 | 0.6112   | -0.06596 | 0.15473  | -0.19019 | 3.52E-05 |
| 0.59487  | -0.0479  | 0.30164  | -0.13961 | 0.0025   | -0.04704 | 0.31043  | -0.07652 | 0.0986   |
| 0.54793  | -0.09909 | 0.03228  | -0.13592 | 0.00325  | -0.13663 | 0.00309  | -0.02037 | 0.66064  |
| 0.08471  | -0.19795 | 1.64E-05 | -0.19969 | 1.38E-05 | -0.25164 | 3.54E-08 | -0.106   | 0.02196  |
| 0.1219   | -0.10471 | 0.02364  | -0.05526 | 0.23331  | -0.0576  | 0.21406  | -0.0478  | 0.30269  |
| 0.97522  | -0.21765 | 2.06E-06 | -0.09845 | 0.03342  | -0.1385  | 0.0027   | -0.12544 | 0.00664  |
| 0.9538   | -0.05639 | 0.2239   | -0.15739 | 0.00064  | -0.08645 | 0.06195  | -0.03083 | 0.50627  |
| 0.38876  | -0.06545 | 0.15789  | -0.08595 | 0.06348  | -0.06245 | 0.1779   | -0.13399 | 0.00372  |
| 2.42E-06 | 0.08892  | 0.05483  | -0.14603 | 0.00155  | -0.08865 | 0.05557  | -0.23748 | 2.07E-07 |
| 0.11255  | -0.31456 | 3.48E-12 | -0.24562 | 7.60E-08 | -0.33402 | 1.24E-13 | -0.0663  | 0.15255  |
| 2.37E-07 | -0.55702 | 2.06E-39 | -0.40754 | 4.11E-20 | -0.43671 | 3.61E-23 | -0.33638 | 8.12E-14 |
| 8.59E-05 | -0.4203  | 2.06E-21 | -0.32115 | 1.15E-12 | -0.36217 | 6.40E-16 | -0.22524 | 8.76E-07 |
| 0.3392   | -0.22154 | 1.33E-06 | -0.21504 | 2.74E-06 | -0.19551 | 2.09E-05 | -0.00234 | 0.9598   |
| 0.0626   | -0.17708 | 0.00012  | -0.18238 | 7.37E-05 | -0.20684 | 6.58E-06 | -0.23889 | 1.75E-07 |
| 0.02301  | -0.24744 | 6.05E-08 | -0.18711 | 4.73E-05 | -0.23204 | 3.97E-07 | -0.28702 | 2.63E-10 |
| 0.07498  | -0.07176 | 0.12147  | -0.15865 | 0.00058  | -0.18612 | 5.19E-05 | -0.18935 | 3.82E-05 |
| 0.07928  | -0.15259 | 0.00094  | -0.0792  | 0.08734  | -0.07494 | 0.10578  | -0.23286 | 3.61E-07 |
| 5.92E-05 | -0.26897 | 3.50E-09 | -0.30143 | 2.90E-11 | -0.23396 | 3.16E-07 | -0.23071 | 4.64E-07 |
| 3.51E-07 | -0.38176 | 1.19E-17 | -0.39689 | 4.54E-19 | -0.41236 | 1.35E-20 | -0.4138  | 9.60E-21 |
| 0.00425  | -0.09335 | 0.04378  | -0.10898 | 0.01848  | -0.03223 | 0.48716  | -0.08076 | 0.08126  |
| 0.06337  | -0.13487 | 0.0035   | -0.14242 | 0.00203  | -0.12337 | 0.00761  | -0.19764 | 1.69E-05 |
| 0.00072  | -0.16539 | 0.00033  | -0.13057 | 0.00471  | -0.28474 | 3.68E-10 | -0.11408 | 0.01363  |
| 0.0021   | 0.028815 | 0.5345   | 0.083973 | 0.06983  | 0.109122 | 0.01833  | 0.007238 | 0.87603  |
| 0.52248  | -0.13483 | 0.00351  | -0.17617 | 0.00013  | -0.17514 | 0.00014  | -0.15877 | 0.00057  |
| 0.00604  | -0.14397 | 0.00181  | -0.18206 | 7.59E-05 | -0.17731 | 0.00012  | -0.20867 | 5.43E-06 |
| 0.03603  | -0.06535 | 0.15855  | -0.14464 | 0.00172  | -0.11705 | 0.01136  | -0.16583 | 0.00032  |
| 0.18412  | -0.08913 | 0.05425  | -0.09575 | 0.03861  | -0.09677 | 0.03658  | -0.06694 | 0.14864  |
| 0.01071  | -0.17815 | 0.00011  | -0.14468 | 0.00172  | -0.10457 | 0.02382  | -0.17019 | 0.00022  |
| 0.00186  | -0.26408 | 6.85E-09 | -0.24283 | 1.08E-07 | -0.27611 | 1.29E-09 | -0.31345 | 4.18E-12 |
| 0.08376  | -0.0718  | 0.12125  | -0.14878 | 0.00126  | -0.12777 | 0.00569  | -0.04802 | 0.30045  |
| 5.50E-05 | -0.25125 | 3.72E-08 | -0.23947 | 1.63E-07 | -0.27612 | 1.28E-09 | -0.2571  | 1.74E-08 |
| 1.07E-09 | -0.05409 | 0.2434   | -0.07336 | 0.11339  | -0.03444 | 0.45774  | -0.30598 | 1.41E-11 |
| 1.83E-05 | -0.198   | 1.63E-05 | -0.107   | 0.02074  | -0.07555 | 0.10298  | -0.24246 | 1.13E-07 |
| 0.38954  | -0.25272 | 3.08E-08 | -0.16969 | 0.00023  | -0.17055 | 0.00021  | -0.00246 | 0.95766  |
| 0.0015   | -0.18454 | 6.03E-05 | -0.152   | 0.00098  | -0.12615 | 0.00634  | -0.17047 | 0.00021  |
| 6.89E-08 | -0.27452 | 1.61E-09 | -0.28374 | 4.27E-10 | -0.26653 | 4.90E-09 | -0.33361 | 1.33E-13 |

|          |          |          |          |          |          |          |          |          |
|----------|----------|----------|----------|----------|----------|----------|----------|----------|
| 6.43E-14 | -0.28046 | 6.88E-10 | -0.3128  | 4.65E-12 | -0.14789 | 0.00135  | -0.35112 | 5.38E-15 |
| 0.00854  | -0.09092 | 0.04959  | 0.031286 | 0.50003  | -0.00439 | 0.92466  | -0.01177 | 0.79978  |
| 0.30545  | 0.059455 | 0.19966  | -0.0519  | 0.26296  | 0.026582 | 0.56665  | -0.13238 | 0.00416  |
| 0.37665  | -0.27067 | 2.77E-09 | -0.103   | 0.02602  | -0.16225 | 0.00043  | -0.04303 | 0.35352  |
| 0.30894  | -0.35593 | 2.15E-15 | -0.33099 | 2.11E-13 | -0.37663 | 3.46E-17 | -0.21818 | 1.94E-06 |
| 0.57639  | -0.21474 | 2.83E-06 | -0.19194 | 2.97E-05 | -0.2286  | 5.94E-07 | -0.11208 | 0.01538  |
| 0.0161   | -0.19721 | 1.77E-05 | -0.18401 | 6.33E-05 | -0.21474 | 2.83E-06 | -0.31555 | 2.95E-12 |
| 0.05621  | -0.08901 | 0.05459  | -0.11746 | 0.01108  | -0.11528 | 0.01267  | -0.08796 | 0.05751  |
| 0.0368   | -0.2138  | 3.13E-06 | -0.17467 | 0.00015  | -0.15019 | 0.00113  | -0.13797 | 0.00281  |
| 7.56E-05 | -0.22294 | 1.14E-06 | -0.22435 | 9.69E-07 | -0.25062 | 4.04E-08 | -0.24492 | 8.30E-08 |
| 0.02458  | -0.21505 | 2.73E-06 | -0.26624 | 5.10E-09 | -0.31516 | 3.15E-12 | -0.16869 | 0.00025  |
| 2.02E-08 | -0.10879 | 0.01869  | -0.162   | 0.00044  | -0.24433 | 8.93E-08 | 0.142295 | 0.00205  |
| 0.34474  | -0.08193 | 0.07692  | -0.04637 | 0.31732  | 0.004992 | 0.91433  | -0.07376 | 0.11143  |
| 0.00019  | -0.14258 | 0.00201  | -0.11774 | 0.01088  | -0.15076 | 0.00108  | -0.05767 | 0.21354  |
| 0.59812  | -0.26795 | 4.04E-09 | -0.21326 | 3.32E-06 | -0.23439 | 3.00E-07 | -0.22038 | 1.52E-06 |
| 0.03761  | -0.17594 | 0.00013  | -0.15119 | 0.00105  | -0.15991 | 0.00052  | -0.15451 | 0.00081  |
| 0.17241  | -0.08364 | 0.07095  | -0.08532 | 0.06544  | -0.06161 | 0.18382  | -0.0618  | 0.18249  |
| 0.68907  | -0.23363 | 3.29E-07 | -0.24073 | 1.39E-07 | -0.2803  | 7.04E-10 | -0.18228 | 7.44E-05 |
| 0.13306  | -0.1659  | 0.00032  | -0.14164 | 0.00215  | -0.13978 | 0.00247  | -0.03244 | 0.48439  |
| 2.15E-05 | -0.14674 | 0.00147  | -0.12309 | 0.00775  | -0.17079 | 0.00021  | -0.03856 | 0.4058   |
| 0.46736  | -0.2632  | 7.71E-09 | -0.22857 | 5.96E-07 | -0.27378 | 1.79E-09 | -0.19385 | 2.47E-05 |
| 0.01812  | -0.17586 | 0.00013  | -0.16235 | 0.00043  | -0.22243 | 1.20E-06 | -0.10284 | 0.02625  |
| 0.001    | -0.38857 | 2.79E-18 | -0.37161 | 9.69E-17 | -0.40109 | 1.78E-19 | -0.34    | 4.22E-14 |
| 0.4443   | -0.13467 | 0.00355  | -0.13844 | 0.00272  | -0.1307  | 0.00467  | -0.05714 | 0.21775  |
| 0.32644  | -0.01679 | 0.71741  | -0.01673 | 0.71839  | -0.0015  | 0.97419  | -0.05142 | 0.26743  |
| 0.00177  | -0.0249  | 0.59147  | -0.21889 | 1.79E-06 | -0.16208 | 0.00044  | -0.15419 | 0.00083  |
| 1.45E-08 | -0.10861 | 0.01888  | -0.2196  | 1.66E-06 | -0.13747 | 0.00291  | -0.23371 | 3.26E-07 |
| 0.12517  | 0.01351  | 0.77091  | -0.07309 | 0.11471  | -0.05282 | 0.25458  | -0.10788 | 0.0197   |
| 0.00513  | -0.04286 | 0.35541  | -0.20943 | 5.01E-06 | -0.16352 | 0.00039  | -0.09224 | 0.04634  |
| 0.17282  | -0.06995 | 0.1312   | -0.13432 | 0.00364  | -0.12429 | 0.00716  | -0.08307 | 0.07291  |
| 0.00143  | -0.22801 | 6.36E-07 | -0.32018 | 1.36E-12 | -0.32436 | 6.68E-13 | -0.31498 | 3.24E-12 |
| 6.68E-07 | -0.20443 | 8.46E-06 | -0.22894 | 5.71E-07 | -0.1675  | 0.00028  | -0.17843 | 0.00011  |
| 2.06E-11 | -0.06905 | 0.13622  | -0.17679 | 0.00012  | 0.012566 | 0.78652  | -0.1971  | 1.79E-05 |
| 0.57666  | -0.15727 | 0.00065  | -0.21391 | 3.10E-06 | -0.20389 | 8.95E-06 | -0.13301 | 0.00398  |
| 0.05332  | -0.01747 | 0.70646  | -0.11197 | 0.01548  | -0.04336 | 0.34978  | -0.04898 | 0.29089  |
| 0.10666  | -0.25003 | 4.35E-08 | -0.158   | 0.00061  | -0.17034 | 0.00022  | -0.18662 | 4.95E-05 |
| 0.61742  | 0.005279 | 0.90942  | -0.13373 | 0.00379  | -0.10161 | 0.02811  | -0.12762 | 0.00575  |
| 0.44664  | -0.27562 | 1.38E-09 | -0.1821  | 7.57E-05 | -0.22283 | 1.15E-06 | -0.20168 | 1.12E-05 |
| 6.28E-10 | -0.05563 | 0.23022  | -0.17966 | 9.46E-05 | -0.00925 | 0.84196  | -0.20049 | 1.27E-05 |
| 0.04188  | -0.0287  | 0.53607  | -0.02229 | 0.63094  | -0.02518 | 0.58722  | -0.10483 | 0.02347  |
| 0.89572  | -0.12333 | 0.00763  | -0.03268 | 0.48117  | -0.05704 | 0.21857  | 0.023774 | 0.60833  |
| 3.22E-05 | -0.22579 | 8.22E-07 | -0.21093 | 4.27E-06 | -0.1833  | 6.77E-05 | -0.17384 | 0.00016  |
| 0.40976  | -0.12907 | 0.00521  | -0.13239 | 0.00416  | -0.13437 | 0.00362  | -0.16381 | 0.00038  |
| 0.40338  | -0.22226 | 1.23E-06 | -0.21348 | 3.24E-06 | -0.22869 | 5.88E-07 | -0.2191  | 1.75E-06 |
| 0.83028  | -0.11849 | 0.01038  | -0.14903 | 0.00124  | -0.16313 | 0.0004   | -0.18936 | 3.81E-05 |

|          |          |          |          |          |          |          |          |          |
|----------|----------|----------|----------|----------|----------|----------|----------|----------|
| 3.31E-06 | -0.22124 | 1.38E-06 | -0.19463 | 2.28E-05 | -0.12815 | 0.00555  | -0.27692 | 1.15E-09 |
| 0.55631  | -0.14376 | 0.00184  | -0.08523 | 0.06572  | -0.09087 | 0.04971  | -0.09444 | 0.04136  |
| 0.67365  | -0.2308  | 4.60E-07 | -0.15147 | 0.00103  | -0.14381 | 0.00184  | -0.12331 | 0.00764  |
| 0.00061  | -0.16519 | 0.00034  | -0.09428 | 0.04171  | -0.10583 | 0.02218  | -0.17769 | 0.00011  |
| 0.02355  | -0.21537 | 2.64E-06 | -0.21159 | 3.98E-06 | -0.17478 | 0.00015  | -0.15759 | 0.00063  |
| 0.49799  | -0.06181 | 0.18242  | -0.08081 | 0.08106  | -0.06003 | 0.19531  | -0.06664 | 0.15046  |
| 0.18481  | -0.13355 | 0.00384  | -0.13779 | 0.00285  | -0.13705 | 0.003    | -0.13742 | 0.00292  |
| 0.0469   | -0.14945 | 0.0012   | -0.17856 | 0.0001   | -0.15788 | 0.00062  | -0.15019 | 0.00113  |
| 0.19492  | -0.05225 | 0.25983  | -0.13984 | 0.00245  | -0.10389 | 0.02475  | -0.1549  | 0.00078  |
| 0.54057  | -0.17502 | 0.00014  | -0.13403 | 0.00371  | -0.16568 | 0.00032  | -0.12349 | 0.00755  |
| 2.44E-12 | -0.06241 | 0.17819  | -0.10088 | 0.02928  | -0.04102 | 0.37651  | -0.23975 | 1.57E-07 |
| 0.00637  | -0.24683 | 6.54E-08 | -0.11477 | 0.01307  | -0.10605 | 0.0219   | -0.16153 | 0.00046  |
| 0.00885  | -0.25746 | 1.66E-08 | -0.21266 | 3.54E-06 | -0.17182 | 0.00019  | -0.22472 | 9.29E-07 |
| 0.38735  | -0.20105 | 1.20E-05 | -0.13969 | 0.00248  | -0.17896 | 0.0001   | -0.28303 | 4.73E-10 |
| 0.0006   | -0.21348 | 3.24E-06 | -0.2567  | 1.83E-08 | -0.23458 | 2.94E-07 | -0.34807 | 9.54E-15 |
| 6.35E-10 | -0.21475 | 2.83E-06 | -0.28454 | 3.79E-10 | -0.24705 | 6.35E-08 | -0.35278 | 3.93E-15 |
| 0.78872  | -0.0442  | 0.3405   | -0.07031 | 0.12919  | -0.04868 | 0.29379  | -0.15702 | 0.00066  |
| 0.00044  | -0.23661 | 2.30E-07 | -0.15604 | 0.00072  | -0.17507 | 0.00014  | -0.20363 | 9.19E-06 |
| 0.0323   | -0.25026 | 4.23E-08 | -0.21903 | 1.76E-06 | -0.23326 | 3.44E-07 | -0.17597 | 0.00013  |
| 0.02873  | -0.08511 | 0.06611  | -0.14525 | 0.00165  | -0.15922 | 0.00055  | -0.06976 | 0.13224  |
| 0.06023  | -0.16183 | 0.00045  | -0.14858 | 0.00128  | -0.17491 | 0.00015  | -0.12575 | 0.00651  |
| 0.01267  | -0.29291 | 1.08E-10 | -0.24649 | 6.82E-08 | -0.30266 | 2.38E-11 | -0.18639 | 5.07E-05 |
| 0.26822  | -0.18482 | 5.87E-05 | -0.20679 | 6.62E-06 | -0.23406 | 3.13E-07 | -0.25172 | 3.51E-08 |
| 0.00091  | -0.01686 | 0.71624  | -0.00841 | 0.85621  | -0.02337 | 0.6145   | -0.03757 | 0.41793  |
| 0.00448  | -0.25609 | 1.99E-08 | -0.21023 | 4.60E-06 | -0.23051 | 4.75E-07 | -0.23542 | 2.66E-07 |
| 0.00754  | -0.22883 | 5.78E-07 | -0.28142 | 5.99E-10 | -0.28057 | 6.78E-10 | -0.30507 | 1.63E-11 |
| 0.00157  | -0.21917 | 1.74E-06 | -0.30705 | 1.18E-11 | -0.2131  | 3.38E-06 | -0.20846 | 5.55E-06 |
| 0.94023  | -0.21275 | 3.51E-06 | -0.20905 | 5.22E-06 | -0.24675 | 6.60E-08 | -0.09656 | 0.03698  |
| 9.88E-11 | -0.29011 | 1.65E-10 | -0.34835 | 9.05E-15 | -0.29175 | 1.29E-10 | -0.31826 | 1.88E-12 |
| 3.09E-08 | -0.20841 | 5.58E-06 | -0.20078 | 1.23E-05 | -0.17063 | 0.00021  | -0.34128 | 3.34E-14 |
| 0.00465  | -0.19494 | 2.21E-05 | -0.15558 | 0.00074  | -0.16678 | 0.00029  | -0.22151 | 1.34E-06 |
| 0.08602  | -0.08389 | 0.07012  | -0.17624 | 0.00013  | -0.15327 | 0.00089  | 0.007859 | 0.86549  |
| 4.23E-09 | -0.32054 | 1.28E-12 | -0.34147 | 3.23E-14 | -0.22762 | 6.65E-07 | -0.2126  | 3.57E-06 |
| 0.10113  | -0.06071 | 0.19029  | -0.09874 | 0.03291  | -0.2115  | 4.02E-06 | -0.11956 | 0.00971  |
| 0.02936  | -0.09679 | 0.03654  | -0.12626 | 0.00629  | -0.09243 | 0.0459   | -0.21481 | 2.81E-06 |
| 4.36E-08 | -0.04787 | 0.30197  | -0.0875  | 0.05883  | -0.01336 | 0.77347  | -0.17002 | 0.00022  |
| 0.00587  | -0.03532 | 0.4464   | -0.12911 | 0.0052   | -0.04246 | 0.35989  | -0.10448 | 0.02395  |
| 0.99328  | 0.007261 | 0.87564  | -0.045   | 0.3319   | -0.05851 | 0.20693  | -0.14699 | 0.00145  |
| 0.10929  | -0.12763 | 0.00574  | -0.00658 | 0.88718  | -0.01686 | 0.71634  | -0.16143 | 0.00046  |
| 2.02E-11 | -0.07434 | 0.1086   | -0.03562 | 0.4425   | -0.06108 | 0.18766  | -0.19091 | 3.28E-05 |
| 1.27E-09 | -0.23607 | 2.46E-07 | -0.16161 | 0.00045  | -0.11952 | 0.00973  | -0.29598 | 6.76E-11 |
| 3.20E-05 | -0.03052 | 0.51063  | -0.06888 | 0.13723  | 0.006101 | 0.89538  | -0.17751 | 0.00012  |
| 0.0403   | 0.000462 | 0.99206  | -0.08452 | 0.06803  | -0.1185  | 0.01038  | -0.29125 | 1.39E-10 |
| 0.44687  | -0.38866 | 2.74E-18 | -0.38291 | 9.34E-18 | -0.46749 | 9.87E-27 | -0.33444 | 1.15E-13 |
| 0.0008   | -0.24717 | 6.26E-08 | -0.29157 | 1.33E-10 | -0.34085 | 3.62E-14 | -0.29466 | 8.28E-11 |

|          |          |          |          |          |          |          |          |          |
|----------|----------|----------|----------|----------|----------|----------|----------|----------|
| 5.13E-05 | -0.17534 | 0.00014  | -0.33533 | 9.78E-14 | -0.37024 | 1.28E-16 | -0.3534  | 3.49E-15 |
| 0.85655  | -0.26808 | 3.96E-09 | -0.25273 | 3.08E-08 | -0.23732 | 2.11E-07 | -0.10461 | 0.02377  |
| 0.00021  | -0.14798 | 0.00134  | -0.13572 | 0.0033   | -0.11716 | 0.01129  | -0.21399 | 3.07E-06 |
| 0.00137  | -0.13411 | 0.00369  | -0.10968 | 0.01773  | -0.20038 | 1.28E-05 | 0.057651 | 0.21367  |
| 0.01997  | 0.006175 | 0.89413  | -0.13495 | 0.00348  | -0.00242 | 0.95833  | -0.05563 | 0.23015  |
| 0.93658  | -0.18859 | 4.11E-05 | -0.23127 | 4.35E-07 | -0.24543 | 7.79E-08 | -0.26581 | 5.40E-09 |
| 0.99437  | -0.08621 | 0.06267  | -0.01258 | 0.78634  | 0.044046 | 0.34224  | -0.01498 | 0.74675  |
| 0.20178  | -0.00654 | 0.88796  | -0.13743 | 0.00292  | -0.09636 | 0.03738  | -0.03396 | 0.4641   |
| 3.06E-12 | -0.35167 | 4.85E-15 | -0.23896 | 1.73E-07 | -0.17993 | 9.24E-05 | -0.19285 | 2.72E-05 |
| 2.60E-14 | -0.2549  | 2.32E-08 | -0.23166 | 4.15E-07 | -0.13975 | 0.00247  | -0.23902 | 1.72E-07 |
| 2.90E-05 | -0.19139 | 3.13E-05 | -0.19503 | 2.19E-05 | -0.18382 | 6.45E-05 | -0.22376 | 1.04E-06 |
| 1.65E-08 | -0.19414 | 2.40E-05 | -0.17881 | 0.0001   | -0.10461 | 0.02377  | -0.11364 | 0.014    |
| 9.58E-08 | -0.29412 | 8.99E-11 | -0.21426 | 2.98E-06 | -0.19482 | 2.24E-05 | -0.2713  | 2.53E-09 |
| 0.16316  | -0.01966 | 0.67179  | -0.08606 | 0.06314  | -0.05532 | 0.2328   | -0.03666 | 0.42937  |
| 0.00088  | -0.18814 | 4.29E-05 | -0.12674 | 0.00609  | -0.17897 | 0.0001   | -0.05057 | 0.27549  |
| 3.42E-10 | -0.21847 | 1.88E-06 | -0.12963 | 0.00502  | -0.22667 | 7.43E-07 | -0.27727 | 1.09E-09 |
| 0.10978  | -0.15895 | 0.00057  | -0.139   | 0.00261  | -0.0848  | 0.06711  | -0.1498  | 0.00117  |
| 0.0006   | -0.02879 | 0.53486  | 0.047067 | 0.31012  | -0.03588 | 0.43916  | -0.00522 | 0.91035  |
| 0.03808  | -0.16175 | 0.00045  | -0.21729 | 2.14E-06 | -0.15722 | 0.00065  | -0.09024 | 0.05131  |
| 2.45E-08 | -0.13616 | 0.0032   | -0.1753  | 0.00014  | -0.10835 | 0.01918  | -0.17121 | 0.0002   |
| 0.84891  | -0.08261 | 0.0745   | -0.12255 | 0.00802  | -0.11431 | 0.01345  | -0.09047 | 0.05071  |
| 0.01521  | -0.25745 | 1.66E-08 | -0.24418 | 9.11E-08 | -0.23393 | 3.17E-07 | -0.15574 | 0.00073  |
| 0.56445  | -0.15756 | 0.00063  | -0.1326  | 0.0041   | -0.13632 | 0.00316  | -0.0677  | 0.14409  |
| 0.72322  | -0.06009 | 0.1949   | -0.04388 | 0.34403  | -0.02116 | 0.64829  | -0.04584 | 0.32288  |
| 0.21486  | -0.19619 | 1.96E-05 | -0.11553 | 0.01248  | -0.13565 | 0.00331  | -0.08815 | 0.05697  |
| 0.11868  | -0.10991 | 0.0175   | -0.05847 | 0.20722  | -0.06903 | 0.13634  | -0.11646 | 0.01178  |
| 0.35235  | -0.16399 | 0.00037  | -0.12724 | 0.0059   | -0.14279 | 0.00198  | -0.12408 | 0.00726  |
| 0.39161  | -0.04739 | 0.3068   | -0.07378 | 0.11133  | -0.03131 | 0.49973  | 0.056828 | 0.22029  |
| 0.3962   | -0.18397 | 6.36E-05 | -0.1731  | 0.00017  | -0.20691 | 6.54E-06 | -0.18059 | 8.70E-05 |
| 3.20E-06 | -0.20668 | 6.70E-06 | -0.25532 | 2.20E-08 | -0.19625 | 1.94E-05 | -0.16729 | 0.00028  |
| 2.61E-07 | -0.26937 | 3.31E-09 | -0.17506 | 0.00014  | -0.11598 | 0.01214  | -0.28419 | 3.99E-10 |
| 0.04197  | -0.13272 | 0.00407  | -0.10477 | 0.02355  | -0.0809  | 0.08074  | -0.11097 | 0.01644  |
| 0.51069  | -0.14617 | 0.00154  | -0.08576 | 0.06407  | -0.12971 | 0.00499  | -0.0978  | 0.03461  |
| 0.19846  | -0.13295 | 0.004    | -0.15985 | 0.00053  | -0.06502 | 0.16065  | -0.09276 | 0.04512  |
| 0.00508  | -0.1305  | 0.00473  | -0.02519 | 0.58711  | 0.019409 | 0.67569  | -0.08534 | 0.06539  |
| 1.17E-05 | -0.27047 | 2.85E-09 | -0.17135 | 0.0002   | -0.20246 | 1.04E-05 | -0.21861 | 1.85E-06 |
| 0.00256  | -0.1383  | 0.00274  | -0.15973 | 0.00053  | -0.16016 | 0.00051  | -0.11595 | 0.01216  |
| 4.77E-14 | -0.32021 | 1.35E-12 | -0.2119  | 3.85E-06 | -0.13694 | 0.00302  | -0.18416 | 6.25E-05 |
| 0.01038  | -0.27259 | 2.12E-09 | -0.25588 | 2.04E-08 | -0.27325 | 1.93E-09 | -0.28539 | 3.34E-10 |
| 0.102    | -0.00882 | 0.84926  | -0.01333 | 0.77396  | 0.033646 | 0.46823  | -0.07077 | 0.12672  |
| 3.69E-05 | -0.36156 | 7.21E-16 | -0.35944 | 1.09E-15 | -0.46395 | 2.65E-26 | -0.12448 | 0.00707  |
| 4.38E-07 | -0.19412 | 2.40E-05 | -0.1864  | 5.06E-05 | -0.17505 | 0.00014  | -0.26376 | 7.15E-09 |
| 0.00928  | -0.00656 | 0.88763  | -0.21863 | 1.84E-06 | -0.22236 | 1.21E-06 | -0.2416  | 1.25E-07 |
| 0.00479  | -0.23004 | 5.02E-07 | -0.10823 | 0.01932  | -0.08009 | 0.08382  | -0.1798  | 9.34E-05 |
| 0.52862  | -0.10847 | 0.01905  | -0.22277 | 1.16E-06 | -0.17242 | 0.00018  | -0.0991  | 0.03226  |



|          |          |          |          |          |          |          |          |          |
|----------|----------|----------|----------|----------|----------|----------|----------|----------|
| 1.17E-07 | -0.29453 | 8.46E-11 | -0.19784 | 1.66E-05 | -0.20939 | 5.03E-06 | -0.21333 | 3.30E-06 |
| 0.01919  | -0.16501 | 0.00034  | -0.10754 | 0.0201   | -0.10454 | 0.02387  | -0.15423 | 0.00083  |
| 0.0005   | -0.14155 | 0.00217  | -0.22926 | 5.50E-07 | -0.08758 | 0.05861  | -0.15436 | 0.00082  |
| 0.00225  | -0.19112 | 3.22E-05 | -0.19997 | 1.34E-05 | -0.16387 | 0.00038  | -0.16382 | 0.00038  |
| 1.34E-07 | -0.18843 | 4.17E-05 | -0.20848 | 5.54E-06 | -0.04897 | 0.29098  | -0.1937  | 2.50E-05 |
| 0.0189   | -0.08559 | 0.06458  | -0.12723 | 0.0059   | -0.03176 | 0.49349  | -0.10845 | 0.01907  |
| 0.0008   | -0.19733 | 1.74E-05 | -0.21512 | 2.71E-06 | -0.21219 | 3.73E-06 | -0.31814 | 1.92E-12 |
| 0.71579  | -0.14385 | 0.00183  | -0.27971 | 7.67E-10 | -0.32535 | 5.63E-13 | -0.26769 | 4.18E-09 |
| 0.16308  | -0.22718 | 7.00E-07 | -0.16691 | 0.00029  | -0.16251 | 0.00042  | -0.22532 | 8.67E-07 |
| 1.80E-12 | -0.26008 | 1.17E-08 | -0.2895  | 1.81E-10 | -0.27323 | 1.93E-09 | -0.35284 | 3.88E-15 |
| 0.35149  | -0.06906 | 0.1362   | -0.14221 | 0.00207  | -0.15233 | 0.00096  | 0.004703 | 0.91926  |
| 0.10015  | -0.17623 | 0.00013  | -0.16776 | 0.00027  | -0.20724 | 6.31E-06 | -0.24405 | 9.25E-08 |
| 0.82629  | 0.11218  | 0.01529  | 0.02874  | 0.53556  | 0.057037 | 0.21859  | -0.07359 | 0.11226  |
| 9.30E-07 | -0.35209 | 4.48E-15 | -0.25227 | 3.26E-08 | -0.25222 | 3.28E-08 | -0.32079 | 1.23E-12 |
| 0.01643  | -0.29277 | 1.10E-10 | -0.36384 | 4.60E-16 | -0.35788 | 1.48E-15 | -0.22678 | 7.34E-07 |
| 1.01E-06 | -0.34772 | 1.02E-14 | -0.29731 | 5.51E-11 | -0.30919 | 8.38E-12 | -0.38218 | 1.09E-17 |
| 0.15933  | -0.07076 | 0.12676  | -0.10925 | 0.01819  | -0.11669 | 0.01162  | -0.06534 | 0.15861  |
| 3.15E-10 | -0.09204 | 0.04683  | -0.15944 | 0.00054  | 0.026974 | 0.56094  | -0.21283 | 3.48E-06 |
| 1.19E-11 | -0.40919 | 2.81E-20 | -0.29556 | 7.22E-11 | -0.2933  | 1.02E-10 | -0.49884 | 9.42E-31 |
| 0.00249  | -0.17536 | 0.00014  | -0.19437 | 2.34E-05 | -0.17266 | 0.00018  | -0.16699 | 0.00029  |
| 0.00232  | -0.02505 | 0.58925  | -0.05648 | 0.22313  | -0.00754 | 0.87088  | -0.16526 | 0.00034  |
| 2.21E-11 | -0.31364 | 4.05E-12 | -0.24067 | 1.41E-07 | -0.22683 | 7.29E-07 | -0.24635 | 6.94E-08 |
| 0.02441  | 0.018302 | 0.69323  | -0.02802 | 0.54578  | 0.049498 | 0.28577  | -0.09837 | 0.03356  |
| 1.03E-06 | -0.07468 | 0.10701  | -0.21676 | 2.27E-06 | -0.13904 | 0.0026   | -0.11332 | 0.01428  |
| 1.02E-29 | 0.419931 | 2.25E-21 | 0.438098 | 2.54E-23 | 0.383928 | 7.53E-18 | 0.448094 | 1.91E-24 |
| 5.04E-22 | 0.431342 | 1.39E-22 | 0.203282 | 9.53E-06 | 0.164238 | 0.00037  | 0.25536  | 2.19E-08 |
| 6.94E-43 | 0.6134   | 1.31E-49 | 0.555498 | 3.64E-39 | 0.467009 | 1.13E-26 | 0.53461  | 7.07E-36 |
| 8.38E-24 | 0.20654  | 6.80E-06 | 0.125407 | 0.00666  | 0.019049 | 0.68138  | 0.165131 | 0.00034  |
| 7.00E-45 | 0.580503 | 2.03E-43 | 0.428149 | 3.06E-22 | 0.440886 | 1.24E-23 | 0.476502 | 7.61E-28 |
| 9.37E-26 | 0.386183 | 4.66E-18 | 0.339568 | 4.57E-14 | 0.301017 | 3.09E-11 | 0.30016  | 3.53E-11 |
| 1.02E-24 | 0.338296 | 5.75E-14 | 0.168685 | 0.00025  | 0.13096  | 0.00459  | 0.219964 | 1.59E-06 |
| 8.70E-55 | 0.474896 | 1.21E-27 | 0.386914 | 3.99E-18 | 0.345409 | 1.57E-14 | 0.414727 | 7.73E-21 |
| 5.14E-30 | 0.492609 | 6.42E-30 | 0.522497 | 4.51E-34 | 0.444301 | 5.15E-24 | 0.420202 | 2.11E-21 |
| 1.06E-29 | 0.651111 | 1.15E-57 | 0.499699 | 7.22E-31 | 0.441952 | 9.46E-24 | 0.469956 | 4.94E-27 |
| 1.64E-60 | 0.658537 | 2.17E-59 | 0.472914 | 2.13E-27 | 0.420303 | 2.06E-21 | 0.511655 | 1.61E-32 |
| 4.68E-39 | 0.565522 | 7.93E-41 | 0.504548 | 1.57E-31 | 0.483888 | 8.79E-29 | 0.470285 | 4.50E-27 |
| 3.98E-39 | 0.384591 | 6.54E-18 | 0.213401 | 3.27E-06 | 0.134385 | 0.00362  | 0.371381 | 1.02E-16 |
| 4.16E-13 | 0.386156 | 4.69E-18 | 0.32009  | 1.38E-12 | 0.217152 | 2.17E-06 | 0.269372 | 3.31E-09 |
| 4.65E-14 | 0.431989 | 1.18E-22 | 0.268263 | 3.86E-09 | 0.164015 | 0.00037  | 0.187386 | 4.61E-05 |
| 7.90E-57 | 0.529983 | 3.53E-35 | 0.350803 | 5.71E-15 | 0.299987 | 3.63E-11 | 0.478957 | 3.74E-28 |
| 1.22E-09 | 0.088528 | 0.05591  | 0.12544  | 0.00664  | 0.031816 | 0.49278  | 0.089566 | 0.05308  |
| 2.55E-19 | 0.451733 | 7.31E-25 | 0.330641 | 2.25E-13 | 0.305723 | 1.46E-11 | 0.343312 | 2.31E-14 |
| 2.89E-57 | 0.6231   | 1.41E-51 | 0.464635 | 2.19E-26 | 0.419536 | 2.47E-21 | 0.563224 | 1.93E-40 |
| 1.51E-17 | 0.374413 | 5.47E-17 | 0.289362 | 1.85E-10 | 0.336667 | 7.70E-14 | 0.340559 | 3.81E-14 |
| 1.92E-09 | 0.313172 | 4.37E-12 | 0.243163 | 1.03E-07 | 0.261395 | 9.83E-09 | 0.173395 | 0.00017  |

|          |          |          |          |          |          |          |          |          |
|----------|----------|----------|----------|----------|----------|----------|----------|----------|
| 1.06E-54 | 0.494009 | 4.19E-30 | 0.278001 | 9.81E-10 | 0.229077 | 5.62E-07 | 0.324419 | 6.61E-13 |
| 3.01E-33 | 0.585693 | 2.38E-44 | 0.440343 | 1.43E-23 | 0.423328 | 9.92E-22 | 0.498946 | 9.13E-31 |
| 7.96E-35 | 0.530207 | 3.26E-35 | 0.455189 | 2.90E-25 | 0.411517 | 1.64E-20 | 0.453094 | 5.08E-25 |
| 6.41E-57 | 0.437865 | 2.69E-23 | 0.291139 | 1.42E-10 | 0.269296 | 3.35E-09 | 0.371307 | 1.03E-16 |
| 1.41E-46 | 0.483636 | 9.47E-29 | 0.453468 | 4.60E-25 | 0.393046 | 1.06E-18 | 0.471999 | 2.77E-27 |
| 3.45E-44 | 0.479179 | 3.50E-28 | 0.429991 | 1.94E-22 | 0.33166  | 1.88E-13 | 0.433791 | 7.53E-23 |
| 1.14E-34 | 0.442185 | 8.91E-24 | 0.317724 | 2.06E-12 | 0.257733 | 1.60E-08 | 0.325807 | 5.21E-13 |
| 5.94E-15 | 0.418602 | 3.09E-21 | 0.434139 | 6.90E-23 | 0.402677 | 1.24E-19 | 0.296987 | 5.79E-11 |
| 6.96E-10 | 0.486763 | 3.74E-29 | 0.316921 | 2.35E-12 | 0.356828 | 1.81E-15 | 0.242951 | 1.06E-07 |
| 5.28E-77 | 0.528073 | 6.80E-35 | 0.392151 | 1.29E-18 | 0.312652 | 4.77E-12 | 0.567425 | 3.78E-41 |
| 1.23E-64 | 0.566323 | 5.81E-41 | 0.438783 | 2.13E-23 | 0.388406 | 2.89E-18 | 0.503966 | 1.89E-31 |
| 7.71E-11 | 0.311796 | 5.48E-12 | 0.213942 | 3.09E-06 | 0.272141 | 2.25E-09 | 0.1595   | 0.00054  |
| 2.01E-19 | 0.553854 | 6.74E-39 | 0.394163 | 8.28E-19 | 0.375057 | 4.80E-17 | 0.348192 | 9.33E-15 |
| 5.24E-33 | 0.568235 | 2.75E-41 | 0.379548 | 1.89E-17 | 0.375202 | 4.65E-17 | 0.448682 | 1.64E-24 |
| 3.37E-20 | 0.412766 | 1.22E-20 | 0.230805 | 4.59E-07 | 0.21044  | 4.50E-06 | 0.268962 | 3.51E-09 |
| 4.35E-36 | 0.503216 | 2.40E-31 | 0.32177  | 1.04E-12 | 0.250155 | 4.28E-08 | 0.284459 | 3.84E-10 |
| 1.59E-09 | 0.247966 | 5.66E-08 | 0.284634 | 3.74E-10 | 0.23605  | 2.46E-07 | 0.101675 | 0.02802  |
| 2.59E-32 | 0.552318 | 1.19E-38 | 0.454074 | 3.91E-25 | 0.455825 | 2.44E-25 | 0.471765 | 2.96E-27 |
| 1.69E-07 | 0.253266 | 2.87E-08 | 0.1646   | 0.00035  | 0.118457 | 0.01041  | 0.122735 | 0.00792  |
| 1.34E-10 | 0.251057 | 3.82E-08 | 0.352266 | 4.33E-15 | 0.244102 | 9.19E-08 | 0.208614 | 5.46E-06 |
| 2.42E-32 | 0.434297 | 6.63E-23 | 0.402243 | 1.37E-19 | 0.312396 | 4.97E-12 | 0.366701 | 2.61E-16 |
| 3.41E-06 | 0.38322  | 8.75E-18 | 0.404214 | 8.78E-20 | 0.465545 | 1.70E-26 | 0.304017 | 1.92E-11 |
| 2.06E-37 | 0.569692 | 1.55E-41 | 0.443339 | 6.62E-24 | 0.432396 | 1.07E-22 | 0.507894 | 5.43E-32 |
| 5.07E-19 | 0.480724 | 2.23E-28 | 0.364196 | 4.29E-16 | 0.323932 | 7.18E-13 | 0.338175 | 5.87E-14 |
| 1.18E-50 | 0.560248 | 6.04E-40 | 0.452557 | 5.87E-25 | 0.368253 | 1.91E-16 | 0.460263 | 7.31E-26 |
| 2.28E-33 | 0.35065  | 5.88E-15 | 0.327709 | 3.75E-13 | 0.238205 | 1.90E-07 | 0.322878 | 8.60E-13 |
| 4.15E-37 | 0.258099 | 1.52E-08 | 0.143687 | 0.00185  | 0.049094 | 0.28973  | 0.305503 | 1.52E-11 |
| 5.86E-18 | 0.33988  | 4.31E-14 | 0.315438 | 3.01E-12 | 0.307857 | 1.04E-11 | 0.252481 | 3.18E-08 |
| 6.10E-31 | 0.421871 | 1.41E-21 | 0.351465 | 5.04E-15 | 0.332515 | 1.61E-13 | 0.435247 | 5.22E-23 |
| 6.14E-12 | 0.474329 | 1.42E-27 | 0.276192 | 1.27E-09 | 0.262343 | 8.65E-09 | 0.257183 | 1.72E-08 |
| 1.52E-14 | 0.151232 | 0.00104  | 0.195028 | 2.19E-05 | 0.062375 | 0.17842  | 0.138061 | 0.00279  |
| 2.30E-08 | 0.541198 | 6.88E-37 | 0.410768 | 1.95E-20 | 0.388278 | 2.97E-18 | 0.280178 | 7.17E-10 |
| 1.37E-39 | 0.646104 | 1.57E-56 | 0.549494 | 3.39E-38 | 0.530445 | 3.01E-35 | 0.507057 | 7.09E-32 |
| 6.52E-38 | 0.388606 | 2.77E-18 | 0.386019 | 4.83E-18 | 0.274446 | 1.63E-09 | 0.36634  | 2.80E-16 |
| 2.20E-29 | 0.433005 | 9.17E-23 | 0.238555 | 1.82E-07 | 0.220146 | 1.56E-06 | 0.323423 | 7.84E-13 |
| 1.45E-42 | 0.407351 | 4.29E-20 | 0.407807 | 3.86E-20 | 0.365704 | 3.18E-16 | 0.443749 | 5.95E-24 |
| 2.67E-44 | 0.583477 | 5.97E-44 | 0.409232 | 2.78E-20 | 0.35512  | 2.51E-15 | 0.438623 | 2.22E-23 |
| 1.46E-05 | 0.306735 | 1.25E-11 | 0.256716 | 1.83E-08 | 0.188185 | 4.27E-05 | 0.014121 | 0.76086  |
| 6.85E-43 | 0.500557 | 5.53E-31 | 0.366247 | 2.85E-16 | 0.309774 | 7.62E-12 | 0.483135 | 1.10E-28 |
| 3.08E-38 | 0.427446 | 3.63E-22 | 0.256125 | 1.98E-08 | 0.220089 | 1.57E-06 | 0.38451  | 6.65E-18 |
| 8.06E-35 | 0.566012 | 6.56E-41 | 0.413886 | 9.42E-21 | 0.394205 | 8.20E-19 | 0.430586 | 1.67E-22 |
| 3.02E-24 | 0.304197 | 1.87E-11 | 0.239999 | 1.53E-07 | 0.145713 | 0.00159  | 0.235384 | 2.67E-07 |
| 3.86E-18 | 0.473377 | 1.87E-27 | 0.281428 | 5.98E-10 | 0.316156 | 2.67E-12 | 0.238714 | 1.78E-07 |
| 1.79E-09 | 0.541469 | 6.24E-37 | 0.324861 | 6.13E-13 | 0.414163 | 8.82E-21 | 0.321765 | 1.04E-12 |
| 5.67E-66 | 0.573578 | 3.32E-42 | 0.434217 | 6.77E-23 | 0.366976 | 2.47E-16 | 0.545966 | 1.23E-37 |

|          |          |          |          |          |          |          |          |          |
|----------|----------|----------|----------|----------|----------|----------|----------|----------|
| 2.57E-46 | 0.484489 | 7.36E-29 | 0.419917 | 2.26E-21 | 0.410135 | 2.26E-20 | 0.52046  | 8.92E-34 |
| 3.71E-40 | 0.364984 | 3.67E-16 | 0.390283 | 1.93E-18 | 0.360135 | 9.52E-16 | 0.434457 | 6.37E-23 |
| 7.85E-48 | 0.626402 | 2.91E-52 | 0.484786 | 6.74E-29 | 0.47812  | 4.76E-28 | 0.52432  | 2.44E-34 |
| 1.91E-56 | 0.48359  | 9.60E-29 | 0.378563 | 2.32E-17 | 0.281488 | 5.93E-10 | 0.419727 | 2.36E-21 |
| 1.54E-21 | 0.225841 | 8.17E-07 | 0.038131 | 0.41101  | -0.01717 | 0.71125  | 0.107374 | 0.02029  |
| 1.31E-28 | 0.275319 | 1.44E-09 | 0.23687  | 2.23E-07 | 0.147258 | 0.00142  | 0.375009 | 4.84E-17 |
| 2.24E-09 | 0.38438  | 6.84E-18 | 0.30296  | 2.27E-11 | 0.351338 | 5.16E-15 | 0.245351 | 7.87E-08 |
| 6.26E-71 | 0.460658 | 6.56E-26 | 0.407489 | 4.16E-20 | 0.328481 | 3.28E-13 | 0.498817 | 9.51E-31 |
| 7.18E-13 | 0.334879 | 1.06E-13 | 0.267551 | 4.26E-09 | 0.268409 | 3.79E-09 | 0.213357 | 3.29E-06 |
| 6.56E-34 | 0.564831 | 1.04E-40 | 0.313179 | 4.37E-12 | 0.303895 | 1.96E-11 | 0.367738 | 2.12E-16 |
| 2.21E-28 | 0.079037 | 0.08799  | 0.082254 | 0.07577  | -0.059   | 0.20314  | 0.120195 | 0.00932  |
| 6.63E-08 | -0.03246 | 0.48408  | 0.133951 | 0.00373  | 0.059197 | 0.20162  | 0.110869 | 0.01654  |
| 1.18E-19 | 0.579392 | 3.19E-43 | 0.490065 | 1.39E-29 | 0.463496 | 3.00E-26 | 0.432014 | 1.17E-22 |
| 4.58E-06 | 0.300487 | 3.36E-11 | 0.309782 | 7.61E-12 | 0.328125 | 3.48E-13 | 0.16097  | 0.00048  |
| 5.37E-43 | 0.670204 | 3.36E-62 | 0.553244 | 8.47E-39 | 0.477278 | 6.08E-28 | 0.539601 | 1.22E-36 |
| 5.47E-13 | 0.302097 | 2.61E-11 | 0.238281 | 1.88E-07 | 0.194642 | 2.28E-05 | 0.195082 | 2.18E-05 |
| 4.22E-22 | 0.219526 | 1.67E-06 | 0.197215 | 1.77E-05 | 0.097917 | 0.03439  | 0.121304 | 0.00869  |
| 2.15E-32 | 0.47026  | 4.53E-27 | 0.269403 | 3.30E-09 | 0.23526  | 2.71E-07 | 0.404141 | 8.93E-20 |
| 1.32E-24 | 0.378286 | 2.46E-17 | 0.310524 | 6.75E-12 | 0.293478 | 9.92E-11 | 0.318914 | 1.68E-12 |
| 1.17E-57 | 0.557453 | 1.75E-39 | 0.417361 | 4.15E-21 | 0.338219 | 5.83E-14 | 0.437019 | 3.34E-23 |
| 5.85E-40 | 0.336024 | 8.65E-14 | 0.199202 | 1.45E-05 | 0.101395 | 0.02846  | 0.268069 | 3.97E-09 |
| 3.11E-38 | 0.668871 | 7.15E-62 | 0.540037 | 1.04E-36 | 0.579131 | 3.55E-43 | 0.529174 | 4.66E-35 |
| 9.23E-08 | 0.202677 | 1.01E-05 | 0.164262 | 0.00036  | 0.133791 | 0.00377  | 0.060325 | 0.19314  |
| 3.73E-20 | 0.336567 | 7.84E-14 | 0.167717 | 0.00027  | 0.195802 | 2.03E-05 | 0.257379 | 1.68E-08 |
| 1.43E-12 | 0.1639   | 0.00038  | 0.176831 | 0.00012  | 0.038999 | 0.40044  | 0.163515 | 0.00039  |
| 9.84E-36 | 0.691774 | 9.52E-68 | 0.491271 | 9.63E-30 | 0.528206 | 6.49E-35 | 0.548911 | 4.20E-38 |
| 1.72E-23 | 0.483565 | 9.67E-29 | 0.434991 | 5.57E-23 | 0.438466 | 2.31E-23 | 0.457412 | 1.59E-25 |
| 2.32E-40 | 0.413734 | 9.76E-21 | 0.284012 | 4.10E-10 | 0.298359 | 4.68E-11 | 0.34991  | 6.76E-15 |
| 7.35E-21 | 0.358926 | 1.21E-15 | 0.331153 | 2.05E-13 | 0.23138  | 4.29E-07 | 0.330715 | 2.22E-13 |
| 3.82E-62 | 0.704357 | 3.24E-71 | 0.504888 | 1.41E-31 | 0.485867 | 4.88E-29 | 0.632432 | 1.55E-53 |
| 3.71E-21 | 0.507285 | 6.59E-32 | 0.404904 | 7.50E-20 | 0.317314 | 2.20E-12 | 0.346883 | 1.19E-14 |
| 4.36E-11 | 0.535082 | 6.00E-36 | 0.503058 | 2.52E-31 | 0.535624 | 4.96E-36 | 0.388743 | 2.69E-18 |
| 1.34E-18 | 0.368367 | 1.87E-16 | 0.339276 | 4.81E-14 | 0.215721 | 2.54E-06 | 0.277224 | 1.10E-09 |
| 2.52E-66 | 0.642679 | 9.14E-56 | 0.442873 | 7.46E-24 | 0.423747 | 8.96E-22 | 0.584203 | 4.42E-44 |
| 5.64E-54 | 0.611175 | 3.62E-49 | 0.546579 | 9.86E-38 | 0.463567 | 2.95E-26 | 0.51576  | 4.23E-33 |
| 9.93E-10 | 0.39157  | 1.46E-18 | 0.305891 | 1.43E-11 | 0.340507 | 3.85E-14 | 0.315355 | 3.05E-12 |
| 2.36E-36 | 0.495378 | 2.75E-30 | 0.422867 | 1.11E-21 | 0.365084 | 3.60E-16 | 0.406346 | 5.40E-20 |
| 1.15E-78 | 0.377752 | 2.75E-17 | 0.374338 | 5.56E-17 | 0.277502 | 1.05E-09 | 0.531326 | 2.22E-35 |
| 6.07E-28 | 0.094142 | 0.042    | 0.045171 | 0.33003  | -0.07148 | 0.12293  | 0.090406 | 0.05088  |
| 1.29E-09 | 0.252802 | 3.05E-08 | 0.226108 | 7.92E-07 | 0.181472 | 8.02E-05 | 0.17753  | 0.00011  |
| 2.22E-21 | 0.421063 | 1.71E-21 | 0.315553 | 2.95E-12 | 0.285324 | 3.38E-10 | 0.240684 | 1.40E-07 |
| 8.09E-43 | 0.517887 | 2.10E-33 | 0.382188 | 1.09E-17 | 0.302638 | 2.39E-11 | 0.445653 | 3.63E-24 |
| 3.29E-77 | 0.531905 | 1.81E-35 | 0.366262 | 2.84E-16 | 0.345805 | 1.45E-14 | 0.494084 | 4.09E-30 |
| 1.81E-31 | 0.47112  | 3.55E-27 | 0.389196 | 2.44E-18 | 0.397231 | 4.21E-19 | 0.383755 | 7.81E-18 |
| 1.34E-23 | 0.126584 | 0.00616  | 0.075181 | 0.10467  | -0.02771 | 0.55023  | 0.142992 | 0.00195  |

|          |          |          |          |          |          |          |          |          |
|----------|----------|----------|----------|----------|----------|----------|----------|----------|
| 2.82E-60 | 0.408665 | 3.17E-20 | 0.382034 | 1.12E-17 | 0.304747 | 1.71E-11 | 0.440827 | 1.26E-23 |
| 3.27E-17 | 0.452323 | 6.25E-25 | 0.23985  | 1.55E-07 | 0.316981 | 2.33E-12 | 0.267148 | 4.50E-09 |
| 2.56E-24 | 0.659433 | 1.33E-59 | 0.478821 | 3.89E-28 | 0.495328 | 2.79E-30 | 0.401723 | 1.54E-19 |
| 2.19E-18 | 0.19988  | 1.35E-05 | 0.271751 | 2.38E-09 | 0.21667  | 2.29E-06 | 0.271968 | 2.31E-09 |
| 8.58E-28 | 0.439249 | 1.89E-23 | 0.468655 | 7.12E-27 | 0.420541 | 1.94E-21 | 0.497443 | 1.46E-30 |
| 4.36E-20 | 0.147156 | 0.00143  | 0.176884 | 0.00012  | 0.020226 | 0.66287  | 0.117611 | 0.01097  |
| 1.99E-20 | 0.418253 | 3.35E-21 | 0.259503 | 1.27E-08 | 0.241216 | 1.31E-07 | 0.325662 | 5.34E-13 |
| 3.90E-26 | 0.37314  | 7.10E-17 | 0.410869 | 1.90E-20 | 0.320866 | 1.21E-12 | 0.425322 | 6.11E-22 |
| 2.18E-33 | 0.388584 | 2.78E-18 | 0.217799 | 2.02E-06 | 0.146052 | 0.00155  | 0.248263 | 5.45E-08 |
| 5.94E-10 | 0.400817 | 1.89E-19 | 0.213201 | 3.34E-06 | 0.210598 | 4.42E-06 | 0.11578  | 0.01229  |
| 5.90E-16 | 0.156672 | 0.00068  | 0.15874  | 0.00058  | 0.047009 | 0.31072  | 0.05264  | 0.25625  |
| 2.23E-32 | 0.317011 | 2.32E-12 | 0.361812 | 6.86E-16 | 0.271971 | 2.31E-09 | 0.355956 | 2.14E-15 |
| 3.24E-15 | 0.368807 | 1.71E-16 | 0.272524 | 2.13E-09 | 0.224743 | 9.27E-07 | 0.22378  | 1.03E-06 |
| 1.91E-16 | 0.353406 | 3.49E-15 | 0.187021 | 4.77E-05 | 0.152675 | 0.00093  | 0.171252 | 0.0002   |
| 1.43E-35 | 0.309778 | 7.62E-12 | 0.196451 | 1.91E-05 | 0.090694 | 0.05015  | 0.215634 | 2.57E-06 |
| 1.17E-52 | 0.538237 | 1.97E-36 | 0.330477 | 2.31E-13 | 0.251428 | 3.64E-08 | 0.538857 | 1.58E-36 |
| 1.83E-24 | 0.441792 | 9.86E-24 | 0.321576 | 1.07E-12 | 0.296434 | 6.31E-11 | 0.333644 | 1.32E-13 |
| 4.00E-36 | 0.478929 | 3.77E-28 | 0.244992 | 8.23E-08 | 0.234131 | 3.10E-07 | 0.32885  | 3.07E-13 |
| 2.92E-26 | 0.586958 | 1.41E-44 | 0.451719 | 7.34E-25 | 0.518976 | 1.46E-33 | 0.424857 | 6.84E-22 |
| 1.58E-12 | 0.577083 | 8.14E-43 | 0.530599 | 2.85E-35 | 0.465719 | 1.62E-26 | 0.417963 | 3.59E-21 |
| 2.11E-30 | 0.623652 | 1.09E-51 | 0.425446 | 5.93E-22 | 0.428326 | 2.93E-22 | 0.531267 | 2.26E-35 |
| 2.23E-27 | 0.305099 | 1.62E-11 | 0.257887 | 1.57E-08 | 0.14946  | 0.0012   | 0.239474 | 1.63E-07 |
| 9.17E-67 | 0.600067 | 5.16E-47 | 0.455456 | 2.70E-25 | 0.340569 | 3.81E-14 | 0.625421 | 4.66E-52 |
| 5.97E-29 | 0.487848 | 2.70E-29 | 0.326142 | 4.91E-13 | 0.393025 | 1.06E-18 | 0.388217 | 3.01E-18 |
| 1.42E-61 | 0.514466 | 6.46E-33 | 0.481433 | 1.81E-28 | 0.415053 | 7.16E-21 | 0.545678 | 1.37E-37 |
| 2.16E-90 | 0.610467 | 5.00E-49 | 0.445603 | 3.67E-24 | 0.353237 | 3.60E-15 | 0.539692 | 1.18E-36 |
| 4.80E-40 | 0.383112 | 8.95E-18 | 0.274783 | 1.55E-09 | 0.295577 | 7.20E-11 | 0.453768 | 4.25E-25 |
| 6.84E-22 | 0.507759 | 5.66E-32 | 0.427455 | 3.63E-22 | 0.399019 | 2.83E-19 | 0.357655 | 1.54E-15 |
| 2.40E-50 | 0.463722 | 2.82E-26 | 0.37091  | 1.12E-16 | 0.386037 | 4.81E-18 | 0.450682 | 9.66E-25 |
| 5.26E-25 | 0.571437 | 7.79E-42 | 0.468381 | 7.70E-27 | 0.379792 | 1.80E-17 | 0.409203 | 2.80E-20 |
| 5.61E-10 | 0.279439 | 7.98E-10 | 0.291729 | 1.29E-10 | 0.226394 | 7.67E-07 | 0.178411 | 0.00011  |
| 1.44E-54 | 0.562586 | 2.47E-40 | 0.360959 | 8.11E-16 | 0.310457 | 6.82E-12 | 0.423445 | 9.64E-22 |
| 4.68E-24 | 0.664519 | 8.16E-61 | 0.529631 | 3.98E-35 | 0.512418 | 1.26E-32 | 0.488036 | 2.55E-29 |
| 9.62E-30 | 0.598305 | 1.11E-46 | 0.367933 | 2.04E-16 | 0.410242 | 2.20E-20 | 0.392869 | 1.10E-18 |
| 5.61E-22 | 0.353676 | 3.31E-15 | 0.296766 | 5.99E-11 | 0.229952 | 5.07E-07 | 0.312263 | 5.08E-12 |
| 3.46E-55 | 0.439444 | 1.80E-23 | 0.363886 | 4.56E-16 | 0.355324 | 2.42E-15 | 0.523567 | 3.14E-34 |
| 6.80E-09 | 0.542604 | 4.15E-37 | 0.44269  | 7.82E-24 | 0.429307 | 2.30E-22 | 0.267168 | 4.49E-09 |
| 0.48074  | 0.04873  | 0.29332  | -0.00498 | 0.91446  | 0.018095 | 0.69653  | 0.0575   | 0.21487  |
| 0.1025   | -0.03981 | 0.39069  | 0.016876 | 0.71605  | -0.05805 | 0.21049  | 0.059208 | 0.20154  |
| 0.5928   | 0.053904 | 0.245    | 0.040378 | 0.38397  | 0.079892 | 0.0846   | 0.005622 | 0.90355  |
| 0.02457  | 0.08295  | 0.07332  | 0.041497 | 0.37092  | 0.003156 | 0.94578  | 0.172026 | 0.00019  |
| 0.31705  | -0.02433 | 0.59998  | -0.07215 | 0.11944  | -0.0363  | 0.43388  | -0.02779 | 0.54914  |
| 0.54354  | -0.02858 | 0.53781  | -0.02418 | 0.6022   | -0.05464 | 0.23864  | 0.012119 | 0.79394  |
| 0.26955  | -0.02681 | 0.56338  | -0.00569 | 0.90239  | -0.03625 | 0.43451  | 0.062749 | 0.17583  |
| 0.1801   | -0.00863 | 0.85243  | -0.00802 | 0.8628   | -0.0174  | 0.70757  | 0.05536  | 0.23246  |

|         |          |         |          |         |          |         |          |         |
|---------|----------|---------|----------|---------|----------|---------|----------|---------|
| 0.62199 | 0.027794 | 0.54908 | -0.05612 | 0.22606 | 0.05016  | 0.27936 | 0.060036 | 0.1953  |
| 0.43191 | -0.05217 | 0.26054 | -0.04952 | 0.28552 | -0.05171 | 0.26478 | 0.031073 | 0.50295 |
| 0.54564 | 0.038972 | 0.40077 | 0.047773 | 0.30291 | 0.033723 | 0.46722 | 0.047183 | 0.30893 |
| 0.14709 | -0.0362  | 0.43515 | -0.02363 | 0.61051 | -0.0326  | 0.48222 | 0.049604 | 0.28474 |
| 0.25628 | 0.035157 | 0.44848 | 0.024569 | 0.59639 | 0.02064  | 0.65639 | 0.074719 | 0.10683 |
| 0.25532 | 0.003652 | 0.93727 | 0.000998 | 0.98284 | 0.002614 | 0.95508 | 0.085143 | 0.06601 |
| 0.83277 | -0.05993 | 0.19605 | -0.02732 | 0.55594 | -0.03664 | 0.42951 | 0.081172 | 0.07972 |
| 0.49289 | -0.02308 | 0.61881 | -0.03178 | 0.49334 | 0.035148 | 0.44859 | 0.028184 | 0.54349 |
| 0.38439 | -0.02729 | 0.55634 | -0.0273  | 0.55622 | -0.03947 | 0.3948  | 0.029911 | 0.51906 |
| 0.09625 | -0.04026 | 0.38539 | -0.05557 | 0.23071 | -0.00345 | 0.94069 | -0.04338 | 0.34955 |
| 0.8154  | -0.07659 | 0.09831 | -0.07543 | 0.10354 | -0.08119 | 0.07965 | -0.01529 | 0.74167 |
| 0.84975 | -0.0246  | 0.59594 | -0.0978  | 0.03461 | -0.0206  | 0.65704 | -0.00565 | 0.903   |
| 0.04683 | 0.047124 | 0.30954 | -0.00657 | 0.88737 | 0.105615 | 0.02245 | -0.05395 | 0.24455 |
| 0.28567 | 0.052592 | 0.25668 | 0.091665 | 0.04773 | 0.10828  | 0.01925 | 0.009991 | 0.82951 |
| 0.44919 | 0.067681 | 0.14419 | 0.0177   | 0.70284 | 0.10915  | 0.0183  | 0.002243 | 0.96144 |
| 0.96139 | 0.08635  | 0.06225 | 0.015065 | 0.74541 | 0.101992 | 0.02753 | 0.006847 | 0.88269 |
| 0.6001  | 0.040718 | 0.37998 | 0.019308 | 0.67728 | 0.107031 | 0.0207  | -0.00979 | 0.83283 |
| 0.29939 | -0.02461 | 0.59583 | -0.03652 | 0.4311  | -0.05831 | 0.20848 | 0.015425 | 0.73954 |
| 0.64572 | 0.010336 | 0.82371 | -0.01929 | 0.67764 | 0.008509 | 0.85448 | 0.005602 | 0.9039  |
| 0.07881 | 0.016542 | 0.72143 | 0.007903 | 0.86475 | 0.004933 | 0.91533 | 0.063667 | 0.16958 |
| 0.65037 | -0.02238 | 0.62956 | -0.01689 | 0.71576 | 0.023865 | 0.60696 | -0.00354 | 0.93924 |
| 0.12113 | 0.096493 | 0.03711 | 0.125646 | 0.00655 | 0.144643 | 0.00173 | 0.040367 | 0.38411 |
| 0.12713 | 0.015975 | 0.73061 | 0.024694 | 0.59453 | 0.015024 | 0.74607 | 0.048069 | 0.29993 |
| 0.1749  | 0.034575 | 0.45604 | 0.02143  | 0.64415 | 0.03285  | 0.47884 | 0.040833 | 0.37864 |
| 0.8371  | -0.06493 | 0.16128 | -0.03064 | 0.5089  | -0.03917 | 0.39843 | -0.03083 | 0.50628 |
| 0.18291 | 0.004707 | 0.9192  | 0.006707 | 0.88507 | 0.015864 | 0.7324  | 0.04052  | 0.38231 |
| 0.91472 | -0.0413  | 0.37317 | -0.02255 | 0.62691 | -0.02164 | 0.64084 | -0.02293 | 0.62119 |
| 0.57994 | -0.02535 | 0.58472 | -0.00075 | 0.98713 | 0.026127 | 0.5733  | -0.00609 | 0.8955  |
| 0.31091 | -0.01163 | 0.80208 | -0.00399 | 0.93148 | -0.0136  | 0.7695  | 0.018796 | 0.68538 |
| 0.16156 | 0.026669 | 0.56537 | 0.033197 | 0.47419 | 0.058979 | 0.20329 | 0.067234 | 0.14687 |
| 0.8085  | 0.010343 | 0.8236  | -0.02153 | 0.64264 | 0.015351 | 0.74075 | 0.019873 | 0.66839 |
| 0.33417 | -0.08651 | 0.06175 | -0.07331 | 0.1136  | -0.04786 | 0.30203 | -0.08001 | 0.08414 |
| 0.64347 | -0.05583 | 0.22851 | -0.02823 | 0.54279 | -0.0486  | 0.29461 | -0.01192 | 0.79725 |
| 0.06921 | -0.0641  | 0.16669 | -0.05389 | 0.2451  | -0.0868  | 0.06089 | 0.049625 | 0.28453 |
| 0.00063 | -0.10604 | 0.02191 | -0.12468 | 0.00698 | -0.00821 | 0.85963 | -0.1058  | 0.02222 |
| 0.57316 | -0.03827 | 0.40931 | 0.044237 | 0.34014 | 0.064605 | 0.16337 | -0.02639 | 0.5694  |
| 0.59414 | -0.05581 | 0.22865 | -0.0419  | 0.36624 | -0.02729 | 0.55628 | -0.04214 | 0.36357 |
| 0.7111  | -0.038   | 0.41258 | -0.02196 | 0.63595 | -0.02444 | 0.59832 | -0.0135  | 0.77108 |
| 0.61233 | -0.01076 | 0.81669 | -0.00349 | 0.94007 | -0.00207 | 0.96442 | -0.00262 | 0.95492 |
| 0.7074  | -0.04154 | 0.37046 | -0.02562 | 0.58073 | -0.02849 | 0.53909 | -0.0099  | 0.83105 |
| 0.56917 | -0.01802 | 0.69765 | -0.00677 | 0.88399 | -0.0084  | 0.85636 | -0.01318 | 0.77628 |
| 0.62094 | -0.06929 | 0.13485 | -0.04598 | 0.32145 | -0.04053 | 0.38214 | -0.04536 | 0.32802 |
| 0.96942 | -0.08313 | 0.07271 | -0.01846 | 0.6907  | -0.04279 | 0.35619 | -0.04786 | 0.302   |
| 0.62664 | -0.07924 | 0.08717 | -0.02715 | 0.55834 | -0.03625 | 0.43452 | -0.06194 | 0.1815  |
| 0.75244 | -0.0845  | 0.06809 | -0.02085 | 0.65318 | -0.05913 | 0.20212 | -0.04697 | 0.31115 |

|          |          |          |          |          |          |          |          |          |
|----------|----------|----------|----------|----------|----------|----------|----------|----------|
| 0.00058  | 0.199748 | 1.37E-05 | 0.147199 | 0.00142  | 0.092847 | 0.04492  | 0.165293 | 0.00033  |
| 0.54916  | -0.00184 | 0.96845  | -0.00464 | 0.92037  | 0.02804  | 0.54555  | -0.01497 | 0.74697  |
| 0.37602  | 0.202359 | 1.05E-05 | 0.113427 | 0.01419  | 0.204221 | 8.65E-06 | 0.163035 | 0.0004   |
| 0.11536  | -0.01447 | 0.75515  | -0.01152 | 0.80387  | -0.01549 | 0.73855  | 0.049583 | 0.28495  |
| 0.18166  | -0.02317 | 0.61749  | -0.02463 | 0.59548  | -0.01873 | 0.68644  | 0.047828 | 0.30236  |
| 0.23264  | -0.02388 | 0.6068   | -0.02147 | 0.64348  | -0.03334 | 0.47225  | 0.021527 | 0.64264  |
| 0.31978  | -0.01441 | 0.75617  | -0.03896 | 0.40097  | 0.009077 | 0.8449   | -0.04698 | 0.31105  |
| 0.98257  | -0.05031 | 0.27793  | -0.04291 | 0.35484  | -0.02403 | 0.60448  | -0.02686 | 0.56259  |
| 0.85031  | -0.02368 | 0.60976  | -0.03546 | 0.44463  | -0.01052 | 0.82057  | -0.00445 | 0.92354  |
| 0.08263  | 0.073255 | 0.11389  | 0.03101  | 0.50381  | 0.01765  | 0.70363  | 0.051558 | 0.26617  |
| 0.38384  | -0.01844 | 0.6911   | 0.000116 | 0.99801  | -0.01615 | 0.72771  | 0.000501 | 0.99139  |
| 0.1851   | -0.06313 | 0.17323  | -0.06945 | 0.13396  | -0.04028 | 0.38512  | -0.07014 | 0.13016  |
| 0.98744  | -0.03956 | 0.39365  | -0.03509 | 0.44935  | -0.01024 | 0.82537  | -0.00679 | 0.88357  |
| 0.02977  | -0.01659 | 0.72067  | -0.00347 | 0.94035  | 0.011919 | 0.79726  | -0.02507 | 0.58895  |
| 0.71979  | -0.02463 | 0.59544  | -0.02073 | 0.65507  | -0.0114  | 0.80591  | 0.008533 | 0.85409  |
| 0.27129  | -0.01043 | 0.82216  | -0.0548  | 0.23719  | -0.00337 | 0.94206  | -0.03484 | 0.45252  |
| 0.38423  | -0.02153 | 0.64266  | -0.07111 | 0.12491  | -0.04782 | 0.3024   | -0.0336  | 0.46885  |
| 0.10061  | -0.13245 | 0.00414  | -0.08229 | 0.07564  | -0.07657 | 0.0984   | -0.07185 | 0.12101  |
| 0.885    | 0.07311  | 0.11461  | -0.01389 | 0.76461  | 0.039166 | 0.39842  | 0.038912 | 0.40149  |
| 1.82E-06 | -0.33136 | 1.98E-13 | -0.27994 | 7.42E-10 | -0.36497 | 3.68E-16 | -0.32525 | 5.73E-13 |
| 4.45E-08 | -0.362   | 6.61E-16 | -0.25544 | 2.16E-08 | -0.35957 | 1.06E-15 | -0.37321 | 7.00E-17 |
| 0.65982  | -0.35669 | 1.86E-15 | -0.22824 | 6.19E-07 | -0.3557  | 2.25E-15 | -0.27117 | 2.58E-09 |
| 1.20E-05 | -0.21853 | 1.86E-06 | -0.06379 | 0.16877  | -0.14287 | 0.00197  | -0.28295 | 4.79E-10 |
| 0.00411  | -0.11184 | 0.0156   | -0.05147 | 0.26699  | -0.16284 | 0.00041  | -0.19609 | 1.97E-05 |
| 0.0011   | -0.35821 | 1.39E-15 | -0.22358 | 1.06E-06 | -0.32617 | 4.89E-13 | -0.17874 | 0.0001   |
| 2.24E-11 | -0.36637 | 2.78E-16 | -0.24672 | 6.62E-08 | -0.33097 | 2.12E-13 | -0.25194 | 3.41E-08 |
| 0.10536  | -0.3834  | 8.42E-18 | -0.31206 | 5.26E-12 | -0.46804 | 8.46E-27 | -0.3639  | 4.54E-16 |
| 5.86E-05 | -0.41267 | 1.25E-20 | -0.2686  | 3.69E-09 | -0.38949 | 2.29E-18 | -0.35571 | 2.24E-15 |
| 0.00135  | -0.19435 | 2.35E-05 | -0.07421 | 0.10925  | -0.21164 | 3.96E-06 | -0.21932 | 1.71E-06 |
| 4.03E-06 | -0.31775 | 2.05E-12 | -0.07043 | 0.12858  | -0.26229 | 8.72E-09 | 0.026887 | 0.56219  |
| 2.15E-05 | -0.32882 | 3.09E-13 | -0.14519 | 0.00166  | -0.28869 | 2.05E-10 | -0.23703 | 2.19E-07 |
| 3.14E-07 | -0.38432 | 6.93E-18 | -0.38818 | 3.04E-18 | -0.49245 | 6.73E-30 | -0.44038 | 1.42E-23 |
| 2.31E-23 | -0.48368 | 9.35E-29 | -0.43817 | 2.49E-23 | -0.49003 | 1.40E-29 | -0.59537 | 3.97E-46 |
| 0.13576  | -0.18211 | 7.56E-05 | -0.17592 | 0.00013  | -0.27117 | 2.58E-09 | -0.16221 | 0.00043  |
| 0.00014  | -0.31364 | 4.05E-12 | -0.33792 | 6.15E-14 | -0.41252 | 1.30E-20 | -0.35436 | 2.91E-15 |
| 3.99E-05 | -0.33588 | 8.87E-14 | -0.14193 | 0.00211  | -0.2412  | 1.32E-07 | -0.27225 | 2.22E-09 |
| 0.03457  | -0.3915  | 1.48E-18 | -0.26817 | 3.91E-09 | -0.41854 | 3.14E-21 | -0.29135 | 1.37E-10 |
| 2.03E-10 | -0.51864 | 1.64E-33 | -0.45938 | 9.30E-26 | -0.55748 | 1.73E-39 | -0.4584  | 1.22E-25 |
| 0.01529  | -0.26029 | 1.14E-08 | -0.16315 | 0.0004   | -0.24905 | 4.93E-08 | -0.35742 | 1.61E-15 |
| 3.12E-08 | -0.38821 | 3.02E-18 | -0.34066 | 3.75E-14 | -0.40066 | 1.96E-19 | -0.44457 | 4.81E-24 |
| 8.08E-05 | -0.15498 | 0.00078  | -0.04156 | 0.37016  | -0.24453 | 8.72E-08 | -0.23319 | 3.47E-07 |
| 0.00454  | -0.39442 | 7.83E-19 | -0.22352 | 1.07E-06 | -0.34694 | 1.18E-14 | -0.23373 | 3.25E-07 |
| 0.00023  | -0.19899 | 1.48E-05 | -0.0221  | 0.63379  | -0.20207 | 1.08E-05 | -0.27236 | 2.19E-09 |
| 1.59E-09 | -0.3093  | 8.24E-12 | -0.24313 | 1.04E-07 | -0.36091 | 8.19E-16 | -0.4511  | 8.65E-25 |
| 2.11E-15 | -0.38859 | 2.78E-18 | -0.25694 | 1.78E-08 | -0.37352 | 6.57E-17 | -0.35251 | 4.14E-15 |

|          |          |          |          |          |          |          |          |          |
|----------|----------|----------|----------|----------|----------|----------|----------|----------|
| 4.06E-20 | -0.44334 | 6.61E-24 | -0.35234 | 4.27E-15 | -0.36082 | 8.33E-16 | -0.47028 | 4.51E-27 |
| 4.81E-05 | -0.5181  | 1.95E-33 | -0.32115 | 1.15E-12 | -0.47725 | 6.14E-28 | -0.36805 | 1.99E-16 |
| 1.29E-07 | -0.6119  | 2.60E-49 | -0.35703 | 1.74E-15 | -0.50951 | 3.23E-32 | -0.37478 | 5.07E-17 |
| 0.06602  | -0.09248 | 0.04579  | -0.0589  | 0.2039   | -0.21582 | 2.51E-06 | -0.15881 | 0.00057  |
| 7.80E-10 | -0.42756 | 3.53E-22 | -0.40699 | 4.65E-20 | -0.4982  | 1.15E-30 | -0.54602 | 1.21E-37 |
| 0.13113  | -0.32233 | 9.44E-13 | -0.25599 | 2.01E-08 | -0.42734 | 3.73E-22 | -0.17061 | 0.00021  |
| 0.00013  | -0.42328 | 1.00E-21 | -0.29019 | 1.63E-10 | -0.39929 | 2.66E-19 | -0.27361 | 1.83E-09 |
| 0.91982  | -0.23672 | 2.27E-07 | -0.09095 | 0.04949  | -0.25372 | 2.70E-08 | -0.06712 | 0.14757  |
| 0.00047  | -0.38705 | 3.87E-18 | -0.19826 | 1.59E-05 | -0.29664 | 6.11E-11 | -0.26968 | 3.18E-09 |
| 4.24E-05 | -0.34138 | 3.28E-14 | -0.21999 | 1.59E-06 | -0.3742  | 5.72E-17 | -0.32517 | 5.81E-13 |
| 0.77734  | -0.26352 | 7.38E-09 | -0.19295 | 2.69E-05 | -0.32916 | 2.91E-13 | -0.2508  | 3.94E-08 |
| 1.90E-09 | -0.47604 | 8.70E-28 | -0.24902 | 4.95E-08 | -0.36961 | 1.45E-16 | -0.36609 | 2.95E-16 |
| 0.11797  | -0.24146 | 1.28E-07 | -0.07778 | 0.09317  | -0.1848  | 5.88E-05 | -0.11897 | 0.01008  |
| 3.85E-06 | -0.49738 | 1.49E-30 | -0.37249 | 8.11E-17 | -0.50281 | 2.73E-31 | -0.3803  | 1.62E-17 |
| 0.89298  | -0.278   | 9.81E-10 | -0.14436 | 0.00176  | -0.3294  | 2.79E-13 | -0.12914 | 0.00519  |
| 0.51193  | -0.11844 | 0.01042  | -0.0337  | 0.46752  | -0.13286 | 0.00402  | 0.029062 | 0.531    |
| 0.21003  | -0.25649 | 1.89E-08 | -0.19378 | 2.48E-05 | -0.3153  | 3.08E-12 | -0.24874 | 5.13E-08 |
| 1.29E-05 | -0.30746 | 1.11E-11 | -0.22201 | 1.26E-06 | -0.36749 | 2.23E-16 | -0.25458 | 2.42E-08 |
| 0.00339  | -0.08992 | 0.05215  | -0.00718 | 0.87709  | -0.04888 | 0.29181  | -0.15348 | 0.00088  |
| 5.30E-14 | -0.50521 | 1.28E-31 | -0.40555 | 6.47E-20 | -0.47728 | 6.07E-28 | -0.50155 | 4.05E-31 |
| 3.33E-17 | -0.3926  | 1.17E-18 | -0.45934 | 9.40E-26 | -0.48974 | 1.53E-29 | -0.43467 | 6.03E-23 |
| 0.07138  | -0.32396 | 7.16E-13 | -0.15585 | 0.00073  | -0.29244 | 1.16E-10 | -0.28941 | 1.84E-10 |
| 0.13053  | -0.14755 | 0.00139  | -0.09605 | 0.03799  | -0.303   | 2.26E-11 | -0.02815 | 0.54395  |
| 3.61E-09 | -0.45583 | 2.44E-25 | -0.21455 | 2.89E-06 | -0.36264 | 5.83E-16 | -0.37614 | 3.84E-17 |
| 0.01896  | -0.28445 | 3.84E-10 | -0.17647 | 0.00013  | -0.32973 | 2.63E-13 | -0.10471 | 0.02363  |
| 1.28E-09 | -0.4063  | 5.46E-20 | -0.39348 | 9.62E-19 | -0.44153 | 1.06E-23 | -0.4313  | 1.40E-22 |
| 0.06513  | -0.31508 | 3.19E-12 | -0.21206 | 3.78E-06 | -0.36967 | 1.44E-16 | -0.15379 | 0.00085  |
| 3.32E-11 | -0.52878 | 5.34E-35 | -0.45028 | 1.07E-24 | -0.51549 | 4.61E-33 | -0.46446 | 2.30E-26 |
| 0.11643  | -0.38223 | 1.08E-17 | -0.11241 | 0.01508  | -0.2895  | 1.81E-10 | -0.2971  | 5.69E-11 |
| 0.98826  | -0.23627 | 2.40E-07 | -0.21957 | 1.66E-06 | -0.41489 | 7.44E-21 | -0.23355 | 3.32E-07 |
| 0.00127  | -0.30426 | 1.85E-11 | -0.20339 | 9.43E-06 | -0.36543 | 3.36E-16 | -0.2305  | 4.76E-07 |
| 6.10E-06 | -0.38696 | 3.94E-18 | -0.40906 | 2.90E-20 | -0.42272 | 1.15E-21 | -0.28765 | 2.39E-10 |
| 7.65E-10 | -0.09864 | 0.03308  | -0.19185 | 3.00E-05 | -0.238   | 1.95E-07 | -0.32327 | 8.05E-13 |
| 5.62E-06 | -0.51877 | 1.56E-33 | -0.32083 | 1.22E-12 | -0.46708 | 1.11E-26 | -0.35045 | 6.10E-15 |
| 2.18E-12 | -0.4342  | 6.80E-23 | -0.3472  | 1.12E-14 | -0.5075  | 6.16E-32 | -0.45402 | 3.97E-25 |
| 7.93E-18 | -0.52053 | 8.70E-34 | -0.46761 | 9.55E-27 | -0.5523  | 1.20E-38 | -0.53745 | 2.61E-36 |
| 7.78E-13 | -0.35471 | 2.72E-15 | -0.24591 | 7.34E-08 | -0.34083 | 3.63E-14 | -0.43157 | 1.31E-22 |
| 0.05918  | -0.29158 | 1.32E-10 | -0.23305 | 3.52E-07 | -0.32651 | 4.61E-13 | -0.36455 | 4.00E-16 |
| 5.95E-08 | -0.53444 | 7.51E-36 | -0.2433  | 1.02E-07 | -0.36877 | 1.72E-16 | -0.37199 | 8.97E-17 |
| 0.00459  | -0.47591 | 9.02E-28 | -0.4355  | 4.90E-23 | -0.5276  | 7.99E-35 | -0.40063 | 1.97E-19 |
| 0.12418  | -0.1872  | 4.69E-05 | -0.11708 | 0.01134  | -0.19845 | 1.56E-05 | -0.15842 | 0.00059  |
| 0.23024  | -0.30415 | 1.88E-11 | -0.13582 | 0.00327  | -0.28007 | 7.28E-10 | -0.14262 | 0.002    |
| 2.68E-05 | -0.46718 | 1.08E-26 | -0.35938 | 1.10E-15 | -0.51918 | 1.37E-33 | -0.45075 | 9.50E-25 |
| 0.2203   | -0.33118 | 2.04E-13 | -0.29745 | 5.39E-11 | -0.42289 | 1.10E-21 | -0.36086 | 8.26E-16 |
| 7.46E-08 | -0.50948 | 3.26E-32 | -0.38494 | 6.08E-18 | -0.54364 | 2.87E-37 | -0.39848 | 3.19E-19 |

|          |          |          |          |          |          |          |          |          |
|----------|----------|----------|----------|----------|----------|----------|----------|----------|
| 0.2834   | -0.44267 | 7.86E-24 | -0.32183 | 1.03E-12 | -0.51192 | 1.48E-32 | -0.219   | 1.77E-06 |
| 3.51E-08 | -0.50917 | 3.60E-32 | -0.34884 | 8.26E-15 | -0.51476 | 5.87E-33 | -0.36465 | 3.92E-16 |
| 2.29E-09 | -0.34532 | 1.59E-14 | -0.34246 | 2.69E-14 | -0.43782 | 2.72E-23 | -0.50084 | 5.06E-31 |
| 1.85E-12 | -0.55999 | 6.66E-40 | -0.38226 | 1.07E-17 | -0.47429 | 1.44E-27 | -0.50811 | 5.06E-32 |
| 3.96E-11 | -0.49446 | 3.65E-30 | -0.19163 | 3.06E-05 | -0.30737 | 1.13E-11 | -0.29344 | 9.98E-11 |
| 0.00113  | -0.24985 | 4.45E-08 | -0.25793 | 1.56E-08 | -0.32474 | 6.25E-13 | -0.33977 | 4.40E-14 |
| 0.2219   | -0.36764 | 2.16E-16 | -0.30691 | 1.21E-11 | -0.50963 | 3.11E-32 | -0.22984 | 5.14E-07 |
| 3.59E-08 | -0.30766 | 1.07E-11 | -0.33343 | 1.37E-13 | -0.39504 | 6.82E-19 | -0.41953 | 2.47E-21 |
| 0.0874   | -0.40803 | 3.67E-20 | -0.32745 | 3.92E-13 | -0.45366 | 4.37E-25 | -0.32973 | 2.63E-13 |
| 0.19201  | -0.33026 | 2.40E-13 | -0.20964 | 4.90E-06 | -0.3283  | 3.38E-13 | -0.14474 | 0.00171  |
| 0.15445  | -0.1497  | 0.00118  | -0.14468 | 0.00172  | -0.22954 | 5.33E-07 | -0.3042  | 1.87E-11 |
| 0.69064  | -0.23169 | 4.14E-07 | -0.21692 | 2.23E-06 | -0.32399 | 7.12E-13 | -0.30056 | 3.32E-11 |
| 0.09058  | -0.13452 | 0.00359  | -0.05419 | 0.2425   | -0.21593 | 2.48E-06 | 0.001591 | 0.97264  |
| 0.00105  | -0.3621  | 6.48E-16 | -0.25814 | 1.52E-08 | -0.385   | 6.00E-18 | -0.30651 | 1.29E-11 |
| 4.98E-05 | -0.51951 | 1.22E-33 | -0.28047 | 6.88E-10 | -0.41508 | 7.11E-21 | -0.4137  | 9.83E-21 |
| 0.05498  | -0.21225 | 3.71E-06 | -0.09273 | 0.04519  | -0.21729 | 2.14E-06 | -0.2419  | 1.21E-07 |
| 2.40E-22 | -0.48122 | 1.93E-28 | -0.27086 | 2.70E-09 | -0.35799 | 1.44E-15 | -0.44732 | 2.34E-24 |
| 0.12885  | -0.36489 | 3.74E-16 | -0.27367 | 1.82E-09 | -0.43491 | 5.68E-23 | -0.1601  | 0.00051  |
| 1.17E-08 | -0.45846 | 1.19E-25 | -0.15078 | 0.00108  | -0.30814 | 9.93E-12 | -0.34683 | 1.20E-14 |
| 0.02322  | -0.11761 | 0.01097  | -0.06139 | 0.1854   | -0.20942 | 5.02E-06 | -0.20888 | 5.31E-06 |
| 0.28981  | -0.20454 | 8.37E-06 | 0.014859 | 0.74877  | -0.17453 | 0.00015  | -0.1634  | 0.00039  |
| 0.44242  | -0.29875 | 4.41E-11 | -0.35859 | 1.29E-15 | -0.43613 | 4.18E-23 | -0.24297 | 1.06E-07 |
| 7.14E-05 | -0.37837 | 2.42E-17 | -0.14714 | 0.00143  | -0.27044 | 2.86E-09 | -0.25697 | 1.77E-08 |
| 0.85858  | -0.18067 | 8.63E-05 | -0.00765 | 0.86912  | -0.17871 | 0.0001   | -0.15859 | 0.00058  |
| 2.32E-07 | -0.41434 | 8.46E-21 | -0.31128 | 5.97E-12 | -0.38833 | 2.94E-18 | -0.35988 | 1.00E-15 |
| 7.13E-10 | -0.42219 | 1.31E-21 | -0.32732 | 4.00E-13 | -0.41181 | 1.53E-20 | -0.47001 | 4.87E-27 |
| 3.63E-09 | -0.29631 | 6.43E-11 | -0.25224 | 3.28E-08 | -0.35299 | 3.77E-15 | -0.40555 | 6.48E-20 |
| 2.70E-09 | -0.52185 | 5.61E-34 | -0.47156 | 3.13E-27 | -0.56634 | 5.76E-41 | -0.45438 | 3.60E-25 |
| 4.40E-05 | -0.12793 | 0.00563  | -0.12132 | 0.00868  | -0.18329 | 6.77E-05 | -0.299   | 4.23E-11 |
| 0.04834  | -0.22818 | 6.24E-07 | -0.19445 | 2.32E-05 | -0.40538 | 6.73E-20 | -0.1841  | 6.28E-05 |
| 0.02005  | -0.36144 | 7.38E-16 | -0.19256 | 2.80E-05 | -0.34349 | 2.23E-14 | -0.36329 | 5.13E-16 |
| 0.00035  | -0.4725  | 2.40E-27 | -0.30294 | 2.28E-11 | -0.46996 | 4.94E-27 | -0.33471 | 1.09E-13 |
| 9.70E-06 | -0.45257 | 5.85E-25 | -0.51253 | 1.22E-32 | -0.53699 | 3.06E-36 | -0.43336 | 8.40E-23 |
| 1.05E-05 | -0.36132 | 7.56E-16 | -0.33884 | 5.21E-14 | -0.49372 | 4.58E-30 | -0.39993 | 2.31E-19 |
| 1.65E-07 | -0.2931  | 1.05E-10 | -0.17564 | 0.00014  | -0.25324 | 2.88E-08 | -0.30297 | 2.27E-11 |
| 6.40E-07 | -0.43522 | 5.26E-23 | -0.28345 | 4.45E-10 | -0.39503 | 6.84E-19 | -0.33004 | 2.49E-13 |
| 6.17E-09 | -0.43011 | 1.89E-22 | -0.38004 | 1.71E-17 | -0.50296 | 2.60E-31 | -0.33963 | 4.52E-14 |
| 0.00113  | -0.35422 | 2.99E-15 | -0.39701 | 4.42E-19 | -0.4639  | 2.68E-26 | -0.36623 | 2.86E-16 |
| 0.00681  | -0.30251 | 2.44E-11 | -0.11831 | 0.01051  | -0.26256 | 8.40E-09 | -0.19263 | 2.78E-05 |
| 2.81E-06 | -0.32775 | 3.72E-13 | -0.15253 | 0.00094  | -0.26834 | 3.82E-09 | -0.20346 | 9.36E-06 |
| 0.98467  | -0.36556 | 3.27E-16 | -0.15293 | 0.00091  | -0.38287 | 9.42E-18 | -0.20999 | 4.72E-06 |
| 0.00237  | -0.40361 | 1.01E-19 | -0.39747 | 3.99E-19 | -0.4974  | 1.48E-30 | -0.40083 | 1.88E-19 |
| 1.65E-07 | -0.38941 | 2.33E-18 | -0.27753 | 1.05E-09 | -0.43184 | 1.23E-22 | -0.3529  | 3.84E-15 |
| 6.11E-13 | -0.50399 | 1.88E-31 | -0.37404 | 5.91E-17 | -0.49685 | 1.75E-30 | -0.48575 | 5.06E-29 |
| 0.03947  | -0.30638 | 1.32E-11 | -0.25064 | 4.03E-08 | -0.3633  | 5.12E-16 | -0.05064 | 0.27481  |



|          |          |          |          |          |          |          |          |          |
|----------|----------|----------|----------|----------|----------|----------|----------|----------|
| 2.96E-05 | -0.36619 | 2.89E-16 | -0.42396 | 8.51E-22 | -0.48201 | 1.53E-28 | -0.44285 | 7.51E-24 |
| 1.56E-07 | -0.33001 | 2.51E-13 | -0.22359 | 1.06E-06 | -0.33296 | 1.49E-13 | -0.31133 | 5.91E-12 |
| 1.04E-05 | -0.3942  | 8.21E-19 | -0.39329 | 1.00E-18 | -0.49121 | 9.82E-30 | -0.32102 | 1.18E-12 |
| 2.62E-06 | -0.23349 | 3.34E-07 | -0.24604 | 7.21E-08 | -0.30619 | 1.36E-11 | -0.24948 | 4.67E-08 |
| 1.14E-06 | -0.21172 | 3.92E-06 | -0.1499  | 0.00116  | -0.15794 | 0.00061  | -0.19909 | 1.46E-05 |
| 8.13E-13 | -0.44018 | 1.49E-23 | -0.35791 | 1.47E-15 | -0.47056 | 4.16E-27 | -0.54918 | 3.81E-38 |
| 0.93225  | -0.29088 | 1.47E-10 | -0.13564 | 0.00332  | -0.24059 | 1.42E-07 | -0.13374 | 0.00379  |
| 0.7173   | -0.28935 | 1.86E-10 | -0.19294 | 2.70E-05 | -0.33381 | 1.28E-13 | -0.1462  | 0.00153  |
| 2.45E-07 | -0.38136 | 1.30E-17 | -0.16783 | 0.00027  | -0.23857 | 1.82E-07 | -0.29255 | 1.14E-10 |
| 0.0003   | -0.45312 | 5.05E-25 | -0.30787 | 1.04E-11 | -0.43656 | 3.75E-23 | -0.3675  | 2.22E-16 |
| 0.13146  | -0.49065 | 1.16E-29 | -0.21669 | 2.29E-06 | -0.41306 | 1.14E-20 | -0.34618 | 1.36E-14 |
| 0.00681  | -0.39831 | 3.31E-19 | -0.31306 | 4.46E-12 | -0.42423 | 7.96E-22 | -0.37812 | 2.55E-17 |
| 6.59E-05 | -0.3303  | 2.38E-13 | -0.15922 | 0.00055  | -0.25908 | 1.34E-08 | -0.28314 | 4.66E-10 |
| 3.13E-05 | -0.25739 | 1.67E-08 | -0.16036 | 0.0005   | -0.21728 | 2.14E-06 | -0.27392 | 1.75E-09 |
| 5.80E-14 | -0.49065 | 1.16E-29 | -0.31407 | 3.77E-12 | -0.39016 | 1.98E-18 | -0.4194  | 2.55E-21 |
| 5.91E-21 | -0.30336 | 2.14E-11 | -0.24243 | 1.13E-07 | -0.2986  | 4.51E-11 | -0.45733 | 1.62E-25 |
| 3.77E-08 | -0.28942 | 1.84E-10 | -0.15017 | 0.00113  | -0.24746 | 6.03E-08 | -0.31929 | 1.58E-12 |
| 3.49E-06 | -0.411   | 1.85E-20 | -0.29842 | 4.64E-11 | -0.44613 | 3.20E-24 | -0.4041  | 9.00E-20 |
| 0.00503  | -0.03414 | 0.46178  | -0.04088 | 0.37813  | -0.17082 | 0.00021  | -0.14393 | 0.00182  |
| 0.31388  | 0.103851 | 0.02481  | 0.006997 | 0.88013  | 0.056778 | 0.22069  | 0.050234 | 0.27866  |
| 0.0142   | 0.273845 | 1.77E-09 | 0.174367 | 0.00015  | 0.328615 | 3.20E-13 | 0.012682 | 0.7846   |
| 0.13247  | 0.125105 | 0.00679  | 0.044595 | 0.33625  | 0.182816 | 7.08E-05 | 0.1057   | 0.02234  |
| 0.32569  | 0.092469 | 0.0458   | 0.029906 | 0.51914  | 0.095277 | 0.03958  | 0.030209 | 0.51491  |
| 0.94159  | 0.121249 | 0.00872  | 0.131458 | 0.00443  | 0.144556 | 0.00174  | 0.030591 | 0.5096   |
| 0.16273  | 0.078184 | 0.09148  | 0.015451 | 0.73912  | 0.092709 | 0.04524  | -0.02404 | 0.60427  |
| 0.39772  | 0.161406 | 0.00046  | 0.006793 | 0.8836   | 0.078667 | 0.08949  | 0.021989 | 0.63551  |
| 0.87505  | 0.126869 | 0.00604  | 0.056586 | 0.22226  | 0.10583  | 0.02218  | 0.05668  | 0.22149  |
| 0.66058  | 0.1267   | 0.00611  | 0.039699 | 0.39204  | 0.136595 | 0.0031   | 0.077282 | 0.0953   |
| 0.91192  | 0.144822 | 0.0017   | 0.057699 | 0.21329  | 0.180611 | 8.68E-05 | 0.094855 | 0.04047  |
| 0.12759  | 0.004662 | 0.91996  | 0.017009 | 0.71391  | 0.071098 | 0.12496  | -0.08136 | 0.07901  |
| 0.02598  | 0.378581 | 2.31E-17 | 0.274715 | 1.57E-09 | 0.34271  | 2.57E-14 | 0.257404 | 1.67E-08 |
| 0.0112   | 0.027423 | 0.55443  | 0.011685 | 0.80116  | 0.069662 | 0.13279  | -0.0174  | 0.70758  |
| 0.4364   | 0.113352 | 0.01425  | 0.028017 | 0.54588  | 0.147008 | 0.00144  | 0.049425 | 0.28648  |
| 0.36926  | 0.135585 | 0.00333  | 0.03013  | 0.516    | 0.121526 | 0.00857  | 0.019337 | 0.67682  |
| 0.76415  | 0.123997 | 0.0073   | -0.01057 | 0.81976  | 0.077965 | 0.0924   | 0.050221 | 0.27878  |
| 0.00024  | 0.055536 | 0.23097  | 0.016664 | 0.71946  | 0.202282 | 1.06E-05 | -0.04121 | 0.37422  |
| 0.61511  | 0.111976 | 0.01548  | 0.029835 | 0.52012  | 0.107612 | 0.02002  | 0.030426 | 0.51189  |
| 0.38944  | 0.110346 | 0.01706  | 0.076803 | 0.09737  | 0.093252 | 0.04399  | 0.024734 | 0.59392  |
| 0.00285  | -0.02386 | 0.60698  | -0.04612 | 0.31993  | 0.042217 | 0.36267  | -0.07851 | 0.09012  |
| 0.3783   | 0.101655 | 0.02805  | 0.02304  | 0.61945  | 0.090306 | 0.05114  | 0.066711 | 0.15005  |
| 0.63938  | 0.129133 | 0.00519  | 0.03583  | 0.43983  | 0.117833 | 0.01082  | 0.059529 | 0.1991   |
| 0.0021   | 0.026713 | 0.56474  | -0.07568 | 0.10238  | 0.024461 | 0.59801  | -0.04787 | 0.3019   |
| 0.06855  | 0.077814 | 0.09303  | -0.01893 | 0.68326  | 0.069386 | 0.13433  | -0.02631 | 0.57064  |
| 0.65293  | 0.162445 | 0.00042  | 0.033732 | 0.4671   | 0.107774 | 0.01983  | 0.038838 | 0.40238  |
| 0.00129  | -0.00752 | 0.87128  | -0.06006 | 0.19512  | 0.066912 | 0.14881  | -0.04177 | 0.36776  |

|          |          |          |          |          |          |          |          |          |
|----------|----------|----------|----------|----------|----------|----------|----------|----------|
| 0.54716  | 0.247585 | 5.94E-08 | 0.182364 | 7.38E-05 | 0.236588 | 2.31E-07 | 0.108654 | 0.01884  |
| 0.9324   | 0.061667 | 0.18341  | 0.066339 | 0.15234  | 0.11171  | 0.01573  | 0.063761 | 0.16895  |
| 0.61669  | -0.00592 | 0.89841  | -0.01493 | 0.74761  | -0.02447 | 0.59788  | 0.047847 | 0.30216  |
| 0.16623  | 0.109315 | 0.01812  | -0.00247 | 0.95756  | 0.103484 | 0.02533  | 0.026861 | 0.56257  |
| 0.73835  | 0.18058  | 8.70E-05 | 0.094756 | 0.04068  | 0.151808 | 0.001    | 0.071194 | 0.12446  |
| 0.08159  | 0.046662 | 0.31431  | -0.02983 | 0.52019  | 0.068837 | 0.13745  | -0.0059  | 0.89885  |
| 0.11673  | 0.369196 | 1.58E-16 | 0.210685 | 4.38E-06 | 0.327851 | 3.65E-13 | 0.189905 | 3.62E-05 |
| 0.7377   | 0.115799 | 0.01227  | 0.096781 | 0.03655  | 0.132809 | 0.00404  | 0.077113 | 0.09602  |
| 0.00066  | -0.16585 | 0.00032  | -0.17095 | 0.00021  | -0.09172 | 0.0476   | -0.19928 | 1.43E-05 |
| 4.93E-05 | 0.059203 | 0.20157  | -0.05077 | 0.27354  | 0.104001 | 0.02461  | 0.00046  | 0.99208  |
| 0.33306  | 0.025956 | 0.57582  | 0.016195 | 0.72705  | 0.078726 | 0.08925  | -0.01809 | 0.6966   |
| 0.01992  | 0.065153 | 0.15982  | 0.006229 | 0.89321  | 0.073983 | 0.11033  | -0.02124 | 0.64705  |
| 0.01927  | 0.109189 | 0.01826  | 0.046951 | 0.31132  | 0.128647 | 0.00537  | 0.037447 | 0.41947  |
| 0.01756  | -0.00464 | 0.92033  | -0.09274 | 0.04518  | 0.034429 | 0.45794  | -0.02775 | 0.54969  |
| 0.42902  | 0.055847 | 0.22837  | -0.00196 | 0.96624  | 0.08449  | 0.06812  | -0.00463 | 0.92057  |
| 0.03914  | 0.078697 | 0.08937  | 0.012597 | 0.78601  | 0.119945 | 0.00947  | -0.00498 | 0.91451  |
| 0.20896  | 0.114062 | 0.01365  | 0.077433 | 0.09465  | 0.2143   | 2.97E-06 | 0.063849 | 0.16836  |
| 0.03796  | 0.274854 | 1.54E-09 | 0.256907 | 1.78E-08 | 0.384909 | 6.11E-18 | 0.08233  | 0.0755   |
| 0.97297  | 0.100038 | 0.03066  | -0.01105 | 0.81173  | 0.041118 | 0.37532  | 0.035434 | 0.44492  |
| 0.01113  | 0.159147 | 0.00056  | -0.02058 | 0.65734  | 0.174409 | 0.00015  | -0.03508 | 0.4495   |
| 0.59742  | 0.141342 | 0.0022   | 7.88E-05 | 0.99864  | 0.073484 | 0.11277  | 0.032281 | 0.48649  |
| 0.50043  | 0.077033 | 0.09637  | 0.003098 | 0.94676  | 0.098811 | 0.03277  | 0.042969 | 0.35419  |
| 0.13622  | 0.09601  | 0.03808  | 0.031202 | 0.50118  | 0.075025 | 0.10539  | 0.046391 | 0.31714  |
| 0.0647   | 0.142426 | 0.00203  | 0.0444   | 0.33837  | 0.118104 | 0.01064  | 0.062084 | 0.18046  |
| 0.53754  | 0.078953 | 0.08833  | 0.032253 | 0.48686  | 0.116153 | 0.01201  | 0.028308 | 0.54171  |
| 0.07389  | 0.157352 | 0.00064  | 0.131693 | 0.00436  | 0.251541 | 3.59E-08 | 0.077859 | 0.09284  |
| 0.32213  | 0.162795 | 0.00041  | 0.081084 | 0.08005  | 0.156712 | 0.00068  | 0.08882  | 0.0551   |
| 0.00186  | 0.053815 | 0.24577  | -0.02176 | 0.63906  | 0.098321 | 0.03366  | -0.02699 | 0.56069  |
| 0.00797  | 0.021866 | 0.63742  | -0.04153 | 0.37053  | 0.02555  | 0.5818   | -0.10128 | 0.02863  |
| 0.18586  | 0.005431 | 0.90682  | -0.06008 | 0.19493  | 0.052754 | 0.25522  | -0.06274 | 0.17587  |
| 0.00027  | 0.180421 | 8.83E-05 | -0.01376 | 0.76686  | 0.219363 | 1.70E-06 | -0.05404 | 0.24378  |
| 0.8681   | 0.061927 | 0.18156  | -0.01234 | 0.79031  | 0.103643 | 0.02511  | 0.016524 | 0.72173  |
| 0.0575   | 0.109608 | 0.01782  | 0.028496 | 0.53903  | 0.144276 | 0.00177  | 0.011141 | 0.81024  |
| 0.34246  | 0.209796 | 4.82E-06 | 0.114511 | 0.01328  | 0.203766 | 9.07E-06 | 0.11447  | 0.01332  |
| 0.31422  | 0.109667 | 0.01775  | 0.0294   | 0.52622  | 0.117803 | 0.01084  | -0.01513 | 0.7443   |
| 0.69072  | 0.195785 | 2.04E-05 | 0.122404 | 0.0081   | 0.222572 | 1.19E-06 | 0.04036  | 0.38419  |
| 0.18842  | 0.070784 | 0.12665  | 0.020897 | 0.6524   | 0.049043 | 0.29023  | 0.07561  | 0.1027   |
| 0.87696  | 0.19297  | 2.69E-05 | 0.067174 | 0.14723  | 0.175586 | 0.00014  | 0.096745 | 0.03662  |
| 0.05632  | 0.229105 | 5.60E-07 | 0.193656 | 2.51E-05 | 0.236416 | 2.36E-07 | 0.169395 | 0.00024  |
| 2.57E-05 | 0.243912 | 9.41E-08 | 0.103831 | 0.02484  | 0.226845 | 7.28E-07 | 0.022921 | 0.62126  |
| 0.81808  | 0.200093 | 1.32E-05 | 0.124094 | 0.00726  | 0.244931 | 8.29E-08 | 0.069776 | 0.13215  |
| 0.841    | 0.078516 | 0.09011  | -0.05056 | 0.27553  | 0.024097 | 0.60347  | 0.027312 | 0.55603  |
| 0.0499   | 0.067359 | 0.14611  | -0.05635 | 0.22423  | 0.024425 | 0.59855  | 0.012067 | 0.7948   |
| 0.02395  | 0.122395 | 0.0081   | 0.031914 | 0.49146  | 0.045999 | 0.32125  | 0.155554 | 0.00074  |
| 0.53059  | 0.050908 | 0.27225  | -0.04042 | 0.38345  | 0.031972 | 0.49067  | 0.070543 | 0.12794  |

|          |          |          |          |          |          |          |          |          |
|----------|----------|----------|----------|----------|----------|----------|----------|----------|
| 0.38692  | 0.058251 | 0.20893  | 0.068341 | 0.14031  | 0.143069 | 0.00194  | 0.069738 | 0.13236  |
| 0.21127  | 0.075781 | 0.10192  | 0.014065 | 0.76177  | 0.083841 | 0.07027  | -0.00536 | 0.90806  |
| 0.32106  | 0.077141 | 0.0959   | 0.004761 | 0.91827  | 0.085231 | 0.06573  | 0.019507 | 0.67414  |
| 0.34016  | 0.093096 | 0.04435  | -0.00697 | 0.88057  | 0.049664 | 0.28416  | 0.033859 | 0.46543  |
| 0.95549  | 0.147847 | 0.00136  | 0.053006 | 0.25295  | 0.151633 | 0.00101  | 0.056703 | 0.2213   |
| 1.08E-11 | -0.17065 | 0.00021  | -0.23868 | 1.79E-07 | -0.12415 | 0.00723  | -0.23094 | 4.52E-07 |
| 0.03835  | 0.093657 | 0.04308  | -0.00497 | 0.91471  | 0.088174 | 0.0569   | -0.04395 | 0.34325  |
| 0.01187  | 0.045647 | 0.32496  | -0.02139 | 0.64469  | 0.023801 | 0.60792  | -0.04699 | 0.31092  |
| 0.0983   | 0.045737 | 0.32401  | 0.002191 | 0.96233  | 0.108355 | 0.01917  | -0.02747 | 0.55372  |
| 0.06171  | 0.205142 | 7.86E-06 | 0.168159 | 0.00026  | 0.265208 | 5.87E-09 | 0.107578 | 0.02006  |
| 0.00323  | 0.03388  | 0.46515  | 0.017483 | 0.7063   | 0.126323 | 0.00627  | -0.01827 | 0.69374  |
| 0.0925   | 0.313005 | 4.50E-12 | 0.164527 | 0.00036  | 0.30474  | 1.71E-11 | 0.184388 | 6.11E-05 |
| 0.0136   | -0.00382 | 0.93433  | -0.00992 | 0.83076  | 0.186453 | 5.03E-05 | -0.02139 | 0.6448   |
| 0.19399  | 0.080534 | 0.08212  | 0.015762 | 0.73406  | 0.116143 | 0.01202  | 0.018404 | 0.69161  |
| 0.35443  | -0.04843 | 0.29626  | -0.07968 | 0.08543  | -0.01255 | 0.78671  | -0.0359  | 0.43898  |
| 0.769    | 0.051091 | 0.27053  | 0.004429 | 0.92395  | 0.062693 | 0.17621  | 0.072212 | 0.11915  |
| 0.02587  | -0.01158 | 0.80288  | 0.004705 | 0.91922  | 0.039833 | 0.39044  | -0.08249 | 0.07493  |
| 0.33488  | 0.074228 | 0.10916  | 0.029051 | 0.53116  | 0.127687 | 0.00572  | 0.029598 | 0.52344  |
| 6.96E-07 | -0.11114 | 0.01627  | -0.05855 | 0.20658  | -0.04116 | 0.37481  | -0.16129 | 0.00047  |
| 0.24347  | 0.045389 | 0.32771  | -0.03012 | 0.5162   | 0.047943 | 0.30119  | 0.014845 | 0.749    |
| 0.32107  | 0.136102 | 0.00321  | 0.048934 | 0.2913   | 0.133622 | 0.00382  | 0.047894 | 0.30169  |
| 0.84075  | -0.01999 | 0.66655  | -0.06109 | 0.18757  | -0.03637 | 0.43298  | 0.030157 | 0.51563  |
| 1.66E-05 | -0.04188 | 0.36652  | -0.11541 | 0.01257  | -0.05597 | 0.22735  | -0.13243 | 0.00415  |
| 0.00131  | 0.140886 | 0.00228  | 0.032179 | 0.48787  | 0.208742 | 5.39E-06 | -0.00569 | 0.90236  |
| 0.01209  | -0.07357 | 0.11235  | -0.06209 | 0.18043  | 0.057871 | 0.21192  | -0.06682 | 0.14939  |
| 0.0003   | 0.066692 | 0.15016  | 0.05059  | 0.27526  | 0.196115 | 1.97E-05 | -0.04944 | 0.28634  |
| 0.42505  | 0.007428 | 0.8728   | -0.0079  | 0.86486  | 0.039786 | 0.39099  | -0.02367 | 0.60993  |
| 0.10172  | 0.062516 | 0.17744  | -0.03461 | 0.45556  | 0.112556 | 0.01495  | 0.042992 | 0.35393  |
| 0.00693  | 0.084173 | 0.06916  | 0.065595 | 0.157    | 0.191549 | 3.09E-05 | 0.031749 | 0.4937   |
| 0.00016  | 0.093631 | 0.04313  | 0.008641 | 0.85226  | 0.1754   | 0.00014  | -0.04717 | 0.30905  |
| 0.39988  | 0.152311 | 0.00096  | 0.159067 | 0.00056  | 0.291413 | 1.36E-10 | 0.172463 | 0.00018  |
| 0.31236  | 0.168246 | 0.00026  | 0.130159 | 0.00484  | 0.29037  | 1.59E-10 | 0.138803 | 0.00265  |
| 0.08425  | 0.029759 | 0.52119  | -0.00977 | 0.8333   | 0.081801 | 0.0774   | 0.008595 | 0.85304  |
| 0.98439  | 0.104786 | 0.02354  | 0.000115 | 0.99802  | 0.144837 | 0.0017   | 0.063303 | 0.17204  |
| 0.4041   | 0.110758 | 0.01664  | 0.033397 | 0.47154  | 0.112506 | 0.015    | 0.00432  | 0.92582  |
| 0.1507   | 0.058032 | 0.21065  | 0.036766 | 0.42797  | 0.084218 | 0.06902  | -0.01272 | 0.78404  |
| 0.00033  | 0.064142 | 0.16641  | -0.03749 | 0.41888  | 0.070337 | 0.12906  | -0.05403 | 0.24392  |
| 0.00816  | 0.000542 | 0.99068  | -0.05249 | 0.25762  | 0.018571 | 0.68895  | -0.06283 | 0.17526  |
| 2.20E-05 | 0.035685 | 0.44169  | -0.02211 | 0.63365  | 0.095848 | 0.03841  | -0.05201 | 0.26195  |
| 0.14751  | 0.006838 | 0.88284  | 0.038817 | 0.40264  | 0.081729 | 0.07766  | -0.0313  | 0.49984  |
| 0.16787  | 0.065617 | 0.15686  | -0.02848 | 0.53926  | 0.057516 | 0.21474  | -0.13371 | 0.0038   |
| 0.50122  | 0.260432 | 1.12E-08 | 0.168726 | 0.00025  | 0.280431 | 6.91E-10 | 0.120891 | 0.00892  |
| 0.00035  | 0.123909 | 0.00734  | -0.00202 | 0.96522  | 0.058675 | 0.20563  | -0.0562  | 0.2254   |
| 0.65723  | 0.115057 | 0.01285  | 0.0671   | 0.14768  | 0.149275 | 0.00121  | 0.038182 | 0.41039  |
| 0.81604  | 0.095284 | 0.03956  | 0.036389 | 0.43273  | 0.150037 | 0.00115  | 0.063976 | 0.16751  |

|          |          |          |          |          |          |          |          |          |
|----------|----------|----------|----------|----------|----------|----------|----------|----------|
| 0.38068  | 0.030476 | 0.5112   | 0.002023 | 0.96523  | 0.13208  | 0.00425  | 0.062665 | 0.17641  |
| 4.47E-05 | 0.00199  | 0.96578  | 0.097122 | 0.03589  | 0.13565  | 0.00331  | -0.02368 | 0.60977  |
| 0.00136  | -0.05883 | 0.20442  | 0.067176 | 0.14721  | 0.093148 | 0.04423  | -0.00322 | 0.94459  |
| 1.63E-05 | 0.196811 | 1.84E-05 | 0.175404 | 0.00014  | 0.290741 | 1.50E-10 | -0.01805 | 0.69724  |
| 0.00085  | 0.015693 | 0.73518  | 0.000652 | 0.98879  | 0.092534 | 0.04565  | -0.05875 | 0.20504  |
| 7.20E-05 | 0.053429 | 0.24918  | 0.013249 | 0.77522  | 0.066862 | 0.14912  | -0.04695 | 0.31135  |
| 0.58747  | 0.044222 | 0.34031  | -0.02447 | 0.59789  | 0.028629 | 0.53714  | 0.001301 | 0.97763  |
| 0.04003  | 0.226616 | 7.47E-07 | 0.103965 | 0.02465  | 0.063    | 0.1741   | 0.316806 | 2.40E-12 |
| 0.8259   | 0.206405 | 6.89E-06 | 0.00173  | 0.97025  | -0.05972 | 0.19767  | 0.153278 | 0.00089  |
| 0.26392  | 0.232494 | 3.76E-07 | 0.083692 | 0.07077  | 0.255422 | 2.17E-08 | 0.040118 | 0.38705  |
| 0.90431  | 0.127697 | 0.00572  | 0.014146 | 0.76044  | 0.085908 | 0.06361  | 0.07158  | 0.12242  |
| 0.18109  | 0.093385 | 0.04369  | 0.000538 | 0.99076  | 0.069854 | 0.13172  | 0.045386 | 0.32774  |
| 0.63587  | 0.077238 | 0.09548  | -0.00511 | 0.9123   | 0.103996 | 0.02461  | 0.048007 | 0.30055  |
| 0.53372  | 0.107851 | 0.01974  | 0.031846 | 0.49238  | 0.137245 | 0.00296  | 0.027175 | 0.55802  |
| 0.0278   | 0.008562 | 0.85359  | -0.0609  | 0.18894  | 0.002562 | 0.95596  | -0.04636 | 0.31751  |
| 0.06991  | 0.190588 | 3.39E-05 | 0.117522 | 0.01103  | 0.166661 | 0.0003   | 0.12188  | 0.00837  |
| 0.17921  | 0.098794 | 0.0328   | 0.057631 | 0.21382  | 0.125813 | 0.00648  | -0.00677 | 0.88391  |
| 0.0004   | 0.374504 | 5.37E-17 | 0.16118  | 0.00047  | 0.361605 | 7.14E-16 | 0.137222 | 0.00296  |
| 0.09345  | 0.171548 | 0.0002   | 0.103767 | 0.02493  | 0.204869 | 8.09E-06 | 0.048273 | 0.29787  |
| 0.02197  | 0.074831 | 0.1063   | 0.024357 | 0.59957  | 0.099825 | 0.03102  | 0.032897 | 0.4782   |
| 0.27656  | 0.003896 | 0.93309  | 0.074895 | 0.106    | 0.063377 | 0.17154  | 0.067655 | 0.14435  |
| 0.01448  | -0.01965 | 0.67194  | -0.05053 | 0.2758   | 0.019897 | 0.66802  | -0.04471 | 0.33499  |
| 0.29391  | 0.029386 | 0.52642  | -0.0115  | 0.80419  | 0.002458 | 0.95776  | -0.0719  | 0.12074  |
| 0.03452  | 0.191746 | 3.03E-05 | 0.121564 | 0.00854  | 0.204422 | 8.47E-06 | 0.046233 | 0.31878  |
| 0.04781  | 0.301535 | 2.85E-11 | 0.179483 | 9.62E-05 | 0.286958 | 2.65E-10 | 0.17009  | 0.00022  |
| 0.00613  | 0.067027 | 0.14812  | 0.022701 | 0.62461  | 0.165221 | 0.00034  | -0.02894 | 0.5327   |
| 0.29049  | 0.058688 | 0.20553  | -0.0098  | 0.83264  | 0.074998 | 0.10552  | 0.044838 | 0.33363  |
| 0.01043  | 0.079591 | 0.08578  | -0.03671 | 0.42867  | 0.086881 | 0.06065  | -0.08898 | 0.05467  |
| 0.66161  | 0.062934 | 0.17456  | 0.011721 | 0.80056  | 0.098002 | 0.03424  | 0.124671 | 0.00699  |
| 0.01329  | 0.076051 | 0.1007   | 0.007414 | 0.87305  | 0.129118 | 0.0052   | -0.05847 | 0.20722  |
| 0.11623  | 0.294036 | 9.12E-11 | 0.172126 | 0.00019  | 0.303606 | 2.05E-11 | 0.204915 | 8.05E-06 |
| 0.01351  | 0.146459 | 0.00151  | 0.041559 | 0.37021  | 0.057961 | 0.21121  | 0.036122 | 0.43612  |
| 0.15068  | 0.174933 | 0.00014  | 0.07118  | 0.12453  | 0.13324  | 0.00392  | 0.105837 | 0.02217  |
| 0.29199  | 0.115781 | 0.01229  | 0.055311 | 0.23287  | 0.116821 | 0.01152  | 0.126442 | 0.00622  |
| 0.48479  | 0.176866 | 0.00012  | 0.079184 | 0.0874   | 0.17851  | 0.00011  | 0.067337 | 0.14625  |
| 0.15241  | 0.401074 | 1.78E-19 | 0.208576 | 5.48E-06 | 0.300586 | 3.31E-11 | 0.189773 | 3.67E-05 |
| 0.39669  | 0.011536 | 0.80364  | 0.004333 | 0.92559  | 0.019952 | 0.66716  | 0.061591 | 0.18395  |
| 0.18996  | -0.11338 | 0.01422  | -0.14504 | 0.00168  | -0.07664 | 0.0981   | -0.09259 | 0.04552  |
| 0.59954  | 0.105465 | 0.02264  | 0.024585 | 0.59615  | 0.106226 | 0.02168  | 0.037799 | 0.41511  |
| 0.03898  | 0.154612 | 0.0008   | 0.026536 | 0.56732  | 0.192103 | 2.92E-05 | 0.04575  | 0.32387  |
| 0.05584  | 0.020602 | 0.657    | -0.02905 | 0.53118  | 0.057189 | 0.21737  | -0.02997 | 0.51818  |
| 0.24211  | 0.111699 | 0.01574  | 0.075616 | 0.10267  | 0.168051 | 0.00026  | 0.112259 | 0.01522  |
| 0.13991  | 0.315204 | 3.13E-12 | 0.183445 | 6.68E-05 | 0.319532 | 1.52E-12 | 0.161926 | 0.00044  |
| 0.56873  | 0.056547 | 0.22258  | 0.025724 | 0.57924  | 0.092596 | 0.04551  | 0.046818 | 0.31269  |
| 0.79707  | 0.142792 | 0.00198  | 0.137669 | 0.00287  | 0.16035  | 0.0005   | 0.088797 | 0.05516  |

|          |          |          |          |          |          |          |          |         |
|----------|----------|----------|----------|----------|----------|----------|----------|---------|
| 0.11588  | 0.206334 | 6.94E-06 | 0.127768 | 0.00569  | 0.191599 | 3.07E-05 | 0.078468 | 0.09031 |
| 0.20581  | 0.188494 | 4.14E-05 | 0.121813 | 0.00841  | 0.201521 | 1.14E-05 | 0.044132 | 0.3413  |
| 0.68808  | 0.060804 | 0.18963  | 0.003239 | 0.94434  | 0.074464 | 0.10803  | 0.011654 | 0.80167 |
| 0.07813  | -0.03599 | 0.43774  | -0.13747 | 0.00291  | -0.07    | 0.13091  | -0.00732 | 0.87465 |
| 0.47973  | 0.036146 | 0.43581  | -0.06189 | 0.18184  | -0.00622 | 0.89333  | 0.004665 | 0.91991 |
| 0.01578  | 0.025255 | 0.58617  | -0.02698 | 0.56088  | 0.083823 | 0.07033  | -0.04677 | 0.31323 |
| 0.13767  | 0.0944   | 0.04144  | 0.031044 | 0.50335  | 0.087625 | 0.05847  | -0.03846 | 0.40704 |
| 0.00055  | 0.008918 | 0.84758  | -0.02984 | 0.52     | 0.067135 | 0.14746  | 0.010866 | 0.81483 |
| 0.62773  | 0.096804 | 0.0365   | 0.05153  | 0.26643  | 0.078043 | 0.09207  | 0.061211 | 0.18668 |
| 0.18483  | 0.07997  | 0.08429  | 0.008448 | 0.85552  | 0.049654 | 0.28425  | 0.035811 | 0.44009 |
| 0.00045  | 0.042629 | 0.35801  | 0.033996 | 0.46361  | 0.159663 | 0.00053  | -0.00111 | 0.98089 |
| 0.98862  | 0.175853 | 0.00013  | 0.075437 | 0.10349  | 0.114984 | 0.0129   | 0.073467 | 0.11285 |
| 0.96652  | 0.120146 | 0.00935  | 0.033745 | 0.46693  | 0.106704 | 0.02109  | 0.063537 | 0.17045 |
| 0.01259  | 0.013733 | 0.76723  | -0.05852 | 0.20685  | 0.038376 | 0.40801  | -0.05848 | 0.20715 |
| 0.10546  | 0.062274 | 0.17913  | -0.0297  | 0.52201  | 0.07631  | 0.09955  | 0.001771 | 0.96955 |
| 0.06449  | 0.089674 | 0.0528   | 0.024291 | 0.60056  | 0.141018 | 0.00225  | 0.011388 | 0.80612 |
| 0.4422   | 0.085392 | 0.06522  | -0.00297 | 0.94893  | 0.086371 | 0.06218  | 0.061713 | 0.18308 |
| 0.13417  | 0.023158 | 0.61765  | -0.04432 | 0.33925  | 0.021207 | 0.6476   | -0.03526 | 0.44714 |
| 0.00229  | 0.103402 | 0.02545  | 0.079883 | 0.08463  | 0.152406 | 0.00095  | -0.00235 | 0.95955 |
| 0.00163  | 0.000103 | 0.99822  | -0.03959 | 0.39328  | 0.05386  | 0.24538  | -0.02927 | 0.52806 |
| 0.05854  | 0.059297 | 0.20086  | -0.00142 | 0.97559  | 0.070985 | 0.12557  | -0.00639 | 0.89041 |
| 0.02439  | 0.023149 | 0.61779  | -0.01432 | 0.75766  | 0.054697 | 0.23811  | -0.04586 | 0.32273 |
| 0.95683  | 0.090599 | 0.05039  | 0.080126 | 0.08369  | 0.094355 | 0.04154  | 0.097589 | 0.03501 |
| 0.49336  | 0.080461 | 0.0824   | -0.03097 | 0.50435  | 0.058411 | 0.20769  | 0.008277 | 0.85842 |
| 0.02118  | 0.02022  | 0.66296  | -0.03843 | 0.40741  | 0.023729 | 0.609    | -0.02895 | 0.53259 |
| 0.59488  | 0.207657 | 6.04E-06 | 0.078104 | 0.09181  | 0.209377 | 5.04E-06 | 0.044291 | 0.33956 |
| 0.90768  | 0.132373 | 0.00416  | 0.058758 | 0.20499  | 0.11505  | 0.01285  | 0.083533 | 0.07131 |
| 0.36333  | 0.251861 | 3.44E-08 | 0.066682 | 0.15022  | 0.250422 | 4.14E-08 | 0.135535 | 0.00334 |
| 0.32395  | 0.173518 | 0.00016  | 0.114897 | 0.01297  | 0.257166 | 1.72E-08 | 0.151578 | 0.00102 |
| 0.46485  | 0.335184 | 1.00E-13 | 0.183192 | 6.84E-05 | 0.279678 | 7.71E-10 | 0.142256 | 0.00206 |
| 0.03038  | 0.089937 | 0.0521   | -0.01247 | 0.78809  | 0.027275 | 0.55657  | 0.035842 | 0.43968 |
| 8.15E-06 | -0.02061 | 0.65692  | 0.032601 | 0.48217  | 0.229516 | 5.34E-07 | -0.11604 | 0.01209 |
| 0.66087  | 0.127296 | 0.00587  | 0.002292 | 0.9606   | 0.129975 | 0.00491  | 0.064548 | 0.16374 |
| 0.01777  | 0.005142 | 0.91176  | 0.001205 | 0.97928  | 0.131408 | 0.00445  | 0.003207 | 0.94489 |
| 0.64701  | 0.070541 | 0.12796  | -0.01867 | 0.68737  | 0.036979 | 0.4253   | 0.08295  | 0.07332 |
| 0.89683  | 0.167828 | 0.00027  | 0.10193  | 0.02763  | 0.191585 | 3.08E-05 | 0.072324 | 0.11857 |
| 0.61664  | 0.165921 | 0.00032  | 0.103849 | 0.02482  | 0.185725 | 5.39E-05 | 0.040307 | 0.38481 |
| 9.74E-06 | -0.01268 | 0.78465  | -0.05649 | 0.22301  | 0.123526 | 0.00753  | -0.07472 | 0.1068  |
| 0.00041  | 0.005162 | 0.91142  | -0.03226 | 0.48682  | 0.13514  | 0.00343  | -0.05335 | 0.2499  |
| 0.00233  | -0.01605 | 0.72946  | -0.05507 | 0.23493  | 0.09047  | 0.05072  | -0.06009 | 0.19491 |
| 0.93055  | 0.22752  | 6.73E-07 | 0.157176 | 0.00065  | 0.291796 | 1.28E-10 | 0.129309 | 0.00513 |
| 0.85524  | 0.10344  | 0.02539  | -0.00646 | 0.88922  | 0.04933  | 0.28741  | 0.007332 | 0.87444 |
| 0.46767  | 0.098358 | 0.03359  | 0.011109 | 0.81078  | 0.084817 | 0.06705  | 0.017053 | 0.7132  |
| 0.03866  | 0.147463 | 0.0014   | 0.09177  | 0.04748  | 0.275742 | 1.35E-09 | 0.111976 | 0.01548 |
| 0.79957  | 0.03483  | 0.45272  | -0.04792 | 0.30139  | -0.0024  | 0.95878  | -0.06468 | 0.16288 |

|         |          |          |          |         |          |          |          |         |
|---------|----------|----------|----------|---------|----------|----------|----------|---------|
| 0.15849 | 0.063127 | 0.17323  | 0.005869 | 0.89934 | 0.06323  | 0.17253  | -0.03481 | 0.45303 |
| 0.25979 | 0.026151 | 0.57295  | 0.006464 | 0.88921 | 0.011899 | 0.7976   | 0.048035 | 0.30026 |
| 0.00332 | 0.080001 | 0.08417  | 0.009417 | 0.83917 | 0.077165 | 0.0958   | -0.04661 | 0.31485 |
| 0.04156 | 0.050378 | 0.27728  | -0.00541 | 0.90722 | 0.110657 | 0.01675  | 0.043562 | 0.34757 |
| 0.1915  | -0.00313 | 0.94629  | -0.01488 | 0.74846 | 0.068432 | 0.13978  | -0.00324 | 0.94429 |
| 0.95818 | 0.110619 | 0.01678  | 0.025088 | 0.58865 | 0.092992 | 0.04459  | 0.049811 | 0.28273 |
| 0.05049 | 0.010902 | 0.81423  | -0.01707 | 0.71293 | 0.059973 | 0.19576  | -0.04329 | 0.35056 |
| 0.56707 | 0.081248 | 0.07943  | 0.116215 | 0.01196 | 0.084071 | 0.0695   | 0.164451 | 0.00036 |
| 0.02164 | 0.086584 | 0.06154  | -0.01669 | 0.71898 | 0.170307 | 0.00022  | 0.042754 | 0.3566  |
| 0.00516 | 0.01893  | 0.68325  | -0.03455 | 0.4564  | 0.057342 | 0.21614  | -0.01301 | 0.77914 |
| 0.0625  | 0.233442 | 3.36E-07 | 0.151025 | 0.00106 | 0.323181 | 8.17E-13 | 0.085281 | 0.06557 |
| 0.00037 | 0.130339 | 0.00479  | 0.04661  | 0.31485 | 0.196813 | 1.84E-05 | -0.04268 | 0.35745 |
| 0.16841 | 0.031322 | 0.49954  | -0.02392 | 0.60614 | 0.043623 | 0.3469   | -0.00474 | 0.91865 |
| 0.72845 | 0.102384 | 0.02694  | 0.028958 | 0.53246 | 0.085359 | 0.06532  | 0.020288 | 0.66189 |
| 0.39746 | 0.095875 | 0.03835  | -0.01178 | 0.79964 | 0.053498 | 0.24857  | -0.03205 | 0.48956 |
| 0.18552 | 0.126938 | 0.00602  | 0.142878 | 0.00197 | 0.250189 | 4.26E-08 | 0.030294 | 0.51373 |
| 0.61009 | -0.05432 | 0.24136  | -0.01273 | 0.78376 | -0.02841 | 0.54027  | 0.013732 | 0.76725 |
| 0.30071 | -0.04231 | 0.36161  | -0.01664 | 0.71993 | -0.0184  | 0.69168  | -0.00897 | 0.84667 |
| 0.01337 | -0.04929 | 0.28778  | -0.08958 | 0.05304 | -0.02525 | 0.58629  | -0.06818 | 0.14124 |
| 0.00209 | 0.00429  | 0.92634  | -0.03389 | 0.465   | 0.051683 | 0.26501  | -0.06345 | 0.17103 |
| 0.00067 | -0.01995 | 0.66712  | -0.081   | 0.08037 | 0.044859 | 0.3334   | -0.07026 | 0.1295  |
| 0.02366 | 0.063805 | 0.16865  | -0.00034 | 0.99414 | 0.081581 | 0.07821  | -0.02104 | 0.65025 |
| 0.00663 | 0.002795 | 0.95197  | -0.04683 | 0.31261 | 0.053709 | 0.2467   | -0.04246 | 0.35997 |
| 0.10652 | 0.078956 | 0.08832  | -0.02174 | 0.63936 | 0.088998 | 0.05461  | -0.02218 | 0.63256 |
| 0.00269 | -0.03    | 0.51787  | -0.08511 | 0.06612 | 0.016691 | 0.71903  | -0.06044 | 0.19228 |
| 0.00165 | -0.01801 | 0.69785  | -0.07212 | 0.11963 | 0.014138 | 0.76058  | -0.05385 | 0.24546 |
| 0.02786 | 0.072409 | 0.11814  | 0.009719 | 0.83408 | 0.126351 | 0.00625  | 0.003878 | 0.93339 |
| 0.08102 | 0.047567 | 0.30501  | 0.014259 | 0.75859 | 0.156118 | 0.00071  | 0.00237  | 0.95926 |
| 0.12808 | 0.001265 | 0.97824  | -0.01301 | 0.77923 | 0.033853 | 0.4655   | -0.037   | 0.42507 |
| 0.8648  | 0.094242 | 0.04178  | 0.046691 | 0.31401 | 0.085902 | 0.06362  | 0.055201 | 0.2338  |
| 0.31659 | 0.112473 | 0.01503  | 0.032866 | 0.47862 | 0.087033 | 0.0602   | 0.071439 | 0.12316 |
| 0.34764 | 0.125463 | 0.00663  | 0.015651 | 0.73586 | 0.164996 | 0.00034  | 0.040132 | 0.38688 |
| 0.22468 | -0.00222 | 0.96181  | -0.0304  | 0.51222 | 0.025913 | 0.57644  | -0.00268 | 0.95392 |
| 0.14438 | 0.159085 | 0.00056  | 0.001976 | 0.96603 | 0.096765 | 0.03658  | 0.054027 | 0.24392 |
| 0.4542  | 0.061541 | 0.18431  | -0.00605 | 0.89621 | 0.055722 | 0.22941  | 0.036382 | 0.43282 |
| 0.31353 | 0.060348 | 0.19298  | -0.01532 | 0.7412  | 0.037911 | 0.41373  | -0.01348 | 0.77134 |
| 0.00076 | -0.03365 | 0.46815  | -0.10923 | 0.01821 | 0.000702 | 0.98792  | -0.08149 | 0.07856 |
| 0.87073 | 0.130092 | 0.00487  | 0.028344 | 0.54121 | 0.115188 | 0.01274  | 0.042565 | 0.35873 |
| 0.84676 | 0.024116 | 0.60318  | 0.000947 | 0.98371 | 0.042855 | 0.35546  | 0.104659 | 0.02371 |
| 0.20304 | -0.00816 | 0.86046  | -0.03242 | 0.4846  | -0.00405 | 0.93039  | -0.02629 | 0.57097 |
| 0.06444 | 0.046875 | 0.3121   | 0.032878 | 0.47846 | 0.085444 | 0.06505  | 0.099906 | 0.03088 |
| 0.28435 | 0.125808 | 0.00648  | 0.023944 | 0.60576 | 0.14227  | 0.00206  | 0.026452 | 0.56855 |
| 0.08274 | -0.0353  | 0.4467   | -0.06075 | 0.19006 | 0.050646 | 0.27473  | -0.01262 | 0.78569 |
| 0.13369 | 0.032557 | 0.48276  | -0.01927 | 0.67791 | 0.081328 | 0.07914  | 0.006852 | 0.8826  |
| 0.1033  | -0.0325  | 0.48348  | -0.06097 | 0.18842 | 0.01913  | 0.68009  | 0.016568 | 0.72102 |

|          |          |          |          |          |          |          |          |          |
|----------|----------|----------|----------|----------|----------|----------|----------|----------|
| 0.21594  | 0.068195 | 0.14117  | -0.05947 | 0.19953  | -0.0048  | 0.91768  | 0.193199 | 2.63E-05 |
| 0.75856  | 0.14038  | 0.00236  | 0.04087  | 0.37821  | 0.145082 | 0.00167  | 0.067653 | 0.14436  |
| 0.00053  | 0.3021   | 2.60E-11 | 0.098988 | 0.03246  | 0.156401 | 0.00069  | 0.197846 | 1.66E-05 |
| 0.16944  | 0.137132 | 0.00298  | 0.022459 | 0.62832  | 0.237408 | 2.09E-07 | 0.104553 | 0.02385  |
| 0.79069  | 0.092811 | 0.045    | 0.02514  | 0.58788  | 0.078325 | 0.0909   | 0.031506 | 0.49701  |
| 0.54302  | 0.097407 | 0.03535  | 0.008055 | 0.86217  | 0.073461 | 0.11288  | 0.015758 | 0.73412  |
| 0.01984  | 0.023199 | 0.61704  | 0.069892 | 0.13151  | 0.150546 | 0.0011   | 0.02114  | 0.64863  |
| 0.01809  | 0.034015 | 0.46337  | -0.01557 | 0.73711  | 0.024792 | 0.59306  | 0.005522 | 0.90527  |
| 0.02816  | 0.098642 | 0.03308  | 0.018553 | 0.68924  | 0.048359 | 0.29702  | 0.018258 | 0.69392  |
| 0.22696  | 0.070465 | 0.12837  | 0.036709 | 0.42869  | 0.088633 | 0.05562  | -0.01408 | 0.76155  |
| 0.59645  | 0.041986 | 0.36531  | -0.0496  | 0.28477  | -0.00729 | 0.87519  | 0.044008 | 0.34266  |
| 0.59206  | 0.180623 | 8.67E-05 | 0.070059 | 0.13059  | 0.167339 | 0.00028  | 0.092561 | 0.04559  |
| 0.56138  | 0.163872 | 0.00038  | 0.057096 | 0.21812  | 0.126051 | 0.00638  | 0.094686 | 0.04083  |
| 0.65779  | 0.104546 | 0.02386  | 0.004174 | 0.92832  | 0.081215 | 0.07956  | 0.034521 | 0.45674  |
| 0.79276  | 0.159948 | 0.00052  | 0.051567 | 0.26609  | 0.145848 | 0.00158  | 0.072391 | 0.11823  |
| 0.11659  | 0.047646 | 0.30421  | -0.07361 | 0.11216  | 0.021    | 0.6508   | -0.07573 | 0.10215  |
| 0.18362  | -0.05729 | 0.21658  | -0.1229  | 0.00784  | -0.01065 | 0.8184   | -0.06036 | 0.19291  |
| 0.04742  | 0.064888 | 0.16152  | 0.003777 | 0.93512  | 0.062718 | 0.17604  | 0.030855 | 0.50596  |
| 0.23981  | 0.08047  | 0.08237  | 0.015386 | 0.74018  | 0.134558 | 0.00358  | 0.039332 | 0.39642  |
| 0.05388  | 0.06278  | 0.17561  | 0.027825 | 0.54863  | 0.106689 | 0.02111  | 0.024769 | 0.59341  |
| 0.32432  | 0.034332 | 0.45921  | -0.03612 | 0.43612  | 0.057726 | 0.21307  | 0.009802 | 0.83268  |
| 0.74509  | 0.12046  | 0.00917  | 0.199775 | 1.36E-05 | 0.279495 | 7.91E-10 | 0.117735 | 0.01089  |
| 0.83435  | 0.266858 | 4.69E-09 | 0.138783 | 0.00265  | 0.194657 | 2.28E-05 | 0.180159 | 9.04E-05 |
| 0.00565  | 0.016316 | 0.72509  | -0.01247 | 0.78811  | 0.084165 | 0.06919  | -0.02718 | 0.55793  |
| 0.80286  | 0.095054 | 0.04005  | 0.008042 | 0.86239  | 0.06187  | 0.18197  | 0.036243 | 0.43459  |
| 0.76636  | 0.024707 | 0.59433  | 0.021461 | 0.64365  | 0.071146 | 0.12471  | 0.006142 | 0.89469  |
| 0.46596  | 0.070432 | 0.12855  | -0.00934 | 0.8404   | 0.071835 | 0.12109  | 0.003753 | 0.93554  |
| 0.0028   | 0.311265 | 5.98E-12 | 0.126889 | 0.00604  | 0.282829 | 4.87E-10 | 0.055046 | 0.23512  |
| 0.47218  | 0.099516 | 0.03154  | 0.037649 | 0.41696  | 0.114369 | 0.0134   | 0.022684 | 0.62488  |
| 0.05129  | 0.035707 | 0.4414   | -0.01128 | 0.80792  | 0.085474 | 0.06496  | 0.000628 | 0.9892   |
| 0.18885  | 0.027347 | 0.55552  | -0.03064 | 0.50886  | 0.175048 | 0.00014  | 0.002471 | 0.95753  |
| 6.06E-09 | -0.00343 | 0.94107  | -0.01788 | 0.69987  | 0.095158 | 0.03983  | -0.10962 | 0.0178   |
| 0.47096  | 0.209907 | 4.76E-06 | 0.155233 | 0.00076  | 0.274714 | 1.57E-09 | 0.197882 | 1.65E-05 |
| 0.0002   | 0.167836 | 0.00027  | 0.033743 | 0.46696  | 0.061252 | 0.18638  | 0.108245 | 0.01929  |
| 0.14778  | 0.119292 | 0.00987  | -0.00056 | 0.99031  | 0.102074 | 0.02741  | 0.004136 | 0.92897  |
| 0.61165  | 0.169635 | 0.00023  | 0.073989 | 0.11031  | 0.140189 | 0.00239  | 0.061545 | 0.18428  |
| 0.00179  | 0.033829 | 0.46581  | -0.00033 | 0.99435  | 0.063636 | 0.16979  | -0.04421 | 0.34048  |
| 0.11564  | -0.0066  | 0.88681  | -0.00775 | 0.86735  | 0.029566 | 0.52389  | -0.03563 | 0.44239  |
| 0.95314  | 0.12036  | 0.00923  | 0.005952 | 0.89793  | 0.12727  | 0.00588  | 0.066328 | 0.1524   |
| 0.34356  | 0.067249 | 0.14678  | 0.021447 | 0.64388  | 0.092604 | 0.04549  | -0.00537 | 0.90786  |
| 0.22717  | 0.072117 | 0.11963  | -0.00743 | 0.87277  | 0.057698 | 0.21329  | -0.02091 | 0.6522   |
| 0.18212  | 0.064138 | 0.16644  | 0.028732 | 0.53568  | 0.086806 | 0.06087  | 0.029364 | 0.52674  |
| 0.72111  | 0.117386 | 0.01113  | 0.039357 | 0.39613  | 0.104965 | 0.0233   | 0.020062 | 0.66544  |
| 0.81647  | 0.174478 | 0.00015  | 0.100537 | 0.02983  | 0.149966 | 0.00115  | 0.098594 | 0.03316  |
| 0.00028  | 0.029506 | 0.52473  | -0.01693 | 0.71519  | 0.089247 | 0.05394  | -0.07611 | 0.10045  |

|          |          |          |          |         |          |          |          |          |
|----------|----------|----------|----------|---------|----------|----------|----------|----------|
| 0.02579  | 0.06616  | 0.15345  | 0.000296 | 0.99491 | 0.143476 | 0.00188  | 0.011873 | 0.79803  |
| 1.31E-06 | 0.003849 | 0.93389  | -0.04776 | 0.30305 | 0.167534 | 0.00028  | -0.08982 | 0.05241  |
| 0.00782  | -0.03571 | 0.44136  | -0.11455 | 0.01325 | -0.01268 | 0.78462  | -0.0792  | 0.08735  |
| 9.73E-05 | 0.222326 | 1.22E-06 | 0.132631 | 0.00409 | 0.317502 | 2.13E-12 | 0.052614 | 0.25649  |
| 0.06847  | 0.15762  | 0.00063  | 0.111238 | 0.01618 | 0.240685 | 1.40E-07 | 0.24175  | 1.23E-07 |
| 0.21828  | 0.049273 | 0.28797  | -0.06662 | 0.1506  | 0.036603 | 0.43003  | -0.01645 | 0.72295  |
| 0.05585  | 0.150151 | 0.00114  | 0.020549 | 0.65782 | 0.140523 | 0.00234  | 0.019679 | 0.67145  |
| 0.226    | 0.189132 | 3.90E-05 | 0.008352 | 0.85714 | 0.056419 | 0.22363  | -0.03323 | 0.4738   |
| 0.04154  | 0.025522 | 0.58221  | 0.036973 | 0.42537 | 0.059185 | 0.20171  | -0.04329 | 0.35054  |
| 0.18354  | 0.064933 | 0.16123  | -0.02341 | 0.61381 | 0.056498 | 0.22298  | -0.05606 | 0.22658  |
| 0.2961   | 0.094498 | 0.04123  | 0.043727 | 0.34575 | 0.103262 | 0.02565  | 0.002542 | 0.95631  |
| 0.13144  | 0.147007 | 0.00144  | 0.015741 | 0.7344  | 0.166656 | 0.0003   | 0.037451 | 0.41942  |
| 0.00282  | 0.012844 | 0.78192  | -0.06123 | 0.18653 | 0.083333 | 0.07199  | -0.01935 | 0.6767   |
| 0.20529  | -0.03175 | 0.49363  | -0.01056 | 0.81998 | 0.064291 | 0.16542  | 0.036349 | 0.43324  |
| 0.00435  | 0.051713 | 0.26473  | -0.0115  | 0.80431 | 0.071211 | 0.12436  | 0.001189 | 0.97956  |
| 0.77683  | 0.241164 | 1.32E-07 | 0.107834 | 0.01976 | 0.2496   | 4.60E-08 | 0.141775 | 0.00213  |
| 0.2177   | 0.25398  | 2.62E-08 | 0.099677 | 0.03127 | 0.31415  | 3.72E-12 | 0.168102 | 0.00026  |
| 0.02821  | -0.02517 | 0.58739  | -0.09323 | 0.04405 | 0.043761 | 0.34538  | -0.07839 | 0.09063  |
| 0.04528  | 0.007193 | 0.87679  | -0.05148 | 0.2669  | 0.02142  | 0.64429  | -0.03242 | 0.48466  |
| 0.00112  | -0.03226 | 0.48671  | -0.06703 | 0.14808 | 0.002602 | 0.95527  | -0.04842 | 0.29645  |
| 0.02017  | -0.03563 | 0.44238  | -0.07657 | 0.09841 | 0.053814 | 0.24578  | -0.03766 | 0.41679  |
| 0.28118  | 0.12346  | 0.00756  | 0.066069 | 0.15402 | 0.189735 | 3.68E-05 | 0.046202 | 0.31911  |
| 0.06654  | 0.030946 | 0.50469  | -0.03407 | 0.4627  | 0.065854 | 0.15536  | 0.018938 | 0.68313  |
| 0.9821   | 0.067737 | 0.14386  | -0.01372 | 0.76751 | 0.055665 | 0.22989  | 0.045964 | 0.32161  |
| 0.42068  | 0.122544 | 0.00802  | 0.051227 | 0.26925 | 0.109643 | 0.01778  | 0.099532 | 0.03152  |
| 0.33299  | 0.060121 | 0.19466  | -0.03589 | 0.43903 | 0.054078 | 0.24347  | 0.033603 | 0.4688   |
| 0.01962  | 0.015445 | 0.73921  | -0.03679 | 0.42764 | 0.080163 | 0.08355  | -0.02248 | 0.62805  |
| 0.30126  | 0.118333 | 0.01049  | 0.064133 | 0.16647 | 0.177606 | 0.00011  | 0.088406 | 0.05625  |
| 0.07482  | 0.02766  | 0.55101  | -0.04364 | 0.34668 | 0.029385 | 0.52643  | -0.04992 | 0.28169  |
| 0.03852  | 0.081727 | 0.07767  | -0.00812 | 0.86107 | 0.104341 | 0.02414  | -0.01565 | 0.73581  |
| 0.18821  | 0.079445 | 0.08636  | -0.0035  | 0.93995 | 0.074152 | 0.10952  | -0.00275 | 0.95274  |
| 0.30446  | 0.065158 | 0.15979  | -0.00186 | 0.96804 | 0.068646 | 0.13855  | 0.001567 | 0.97306  |
| 0.28615  | 0.049535 | 0.28541  | -0.00223 | 0.96175 | 0.073068 | 0.11482  | 0.026027 | 0.57478  |
| 0.38274  | 0.191195 | 3.19E-05 | 0.038313 | 0.40878 | 0.203571 | 9.25E-06 | 0.107611 | 0.02002  |
| 0.80555  | 0.117784 | 0.01085  | 0.034517 | 0.45679 | 0.107756 | 0.01985  | 0.068078 | 0.14185  |
| 0.79383  | 0.117188 | 0.01126  | 0.043731 | 0.34571 | 0.145845 | 0.00158  | 0.025602 | 0.58103  |
| 0.26594  | 0.13679  | 0.00306  | 0.006521 | 0.88823 | 0.085923 | 0.06356  | 0.029856 | 0.51983  |
| 0.24347  | 0.08284  | 0.0737   | -0.01851 | 0.68984 | 0.14179  | 0.00213  | 0.063046 | 0.17379  |
| 0.96917  | 0.10977  | 0.01765  | 0.050744 | 0.2738  | 0.137123 | 0.00298  | 0.029765 | 0.5211   |
| 0.14714  | 0.030545 | 0.51024  | -0.0311  | 0.50261 | 0.061021 | 0.18805  | -0.01332 | 0.77408  |
| 0.21771  | 0.034438 | 0.45783  | -0.05415 | 0.24286 | 0.03502  | 0.45025  | 0.016895 | 0.71574  |
| 0.29698  | 0.075928 | 0.10126  | -0.01586 | 0.73255 | 0.063874 | 0.16819  | 0.019591 | 0.67283  |
| 0.07806  | 0.035388 | 0.4455   | 0.004942 | 0.91518 | 0.075818 | 0.10176  | 0.024052 | 0.60415  |
| 0.05601  | 0.017205 | 0.71077  | -0.02071 | 0.65524 | 0.051043 | 0.27098  | 0.005133 | 0.91191  |
| 0.02126  | 0.01825  | 0.69405  | -0.03315 | 0.47476 | 0.048474 | 0.29587  | -0.04078 | 0.37931  |



|          |          |          |          |         |          |          |          |         |
|----------|----------|----------|----------|---------|----------|----------|----------|---------|
| 0.21916  | -0.03656 | 0.43051  | -0.08786 | 0.05778 | -0.03107 | 0.50298  | -0.03991 | 0.38956 |
| 0.07506  | 0.083243 | 0.07231  | -0.00037 | 0.99358 | 0.103505 | 0.0253   | 0.025584 | 0.58131 |
| 0.02619  | -0.01627 | 0.72582  | -0.07167 | 0.12195 | 0.042853 | 0.35548  | -0.0039  | 0.93301 |
| 0.00706  | -0.02167 | 0.64046  | -0.0749  | 0.10598 | 0.005508 | 0.9055   | -0.07502 | 0.10541 |
| 0.26209  | 0.053298 | 0.25034  | -0.00495 | 0.91511 | 0.056651 | 0.22173  | 0.023454 | 0.61318 |
| 0.23637  | 0.017904 | 0.69957  | -0.05189 | 0.2631  | 0.049204 | 0.28864  | 0.028444 | 0.53977 |
| 0.01356  | 0.05134  | 0.2682   | -0.01397 | 0.76328 | 0.083681 | 0.07081  | -0.02132 | 0.64578 |
| 0.0007   | 0.235193 | 2.73E-07 | 0.103609 | 0.02515 | 0.257525 | 1.64E-08 | 0.051079 | 0.27064 |
| 1.64E-05 | -0.01874 | 0.68628  | -0.00874 | 0.85063 | 0.146242 | 0.00153  | -0.07906 | 0.0879  |
| 0.28927  | 0.165591 | 0.00033  | 0.085281 | 0.06557 | 0.195729 | 2.05E-05 | 0.101603 | 0.02813 |
| 0.96822  | 0.12986  | 0.00494  | 0.053296 | 0.25036 | 0.119844 | 0.00954  | 0.095081 | 0.03999 |
| 0.00779  | -0.01461 | 0.75282  | -0.02386 | 0.60704 | 0.093664 | 0.04306  | -0.00087 | 0.98498 |
| 0.16916  | 0.023253 | 0.61621  | -0.02771 | 0.55023 | 0.058766 | 0.20493  | -0.01275 | 0.78348 |
| 0.00939  | -0.02502 | 0.58966  | -0.08232 | 0.07552 | 0.001082 | 0.9814   | -0.02594 | 0.57603 |
| 0.02059  | -0.03436 | 0.4588   | -0.07209 | 0.11975 | -0.00034 | 0.99422  | -0.04174 | 0.36808 |
| 0.01025  | -0.04149 | 0.37103  | -0.06476 | 0.16238 | -0.00306 | 0.94737  | -0.0443  | 0.33941 |
| 0.00122  | -0.10692 | 0.02084  | -0.10895 | 0.01852 | -0.01471 | 0.75117  | -0.11801 | 0.0107  |
| 0.21639  | 0.004853 | 0.9167   | -0.03949 | 0.39458 | 0.052464 | 0.25785  | 0.017192 | 0.71097 |
| 0.09344  | 0.041745 | 0.36807  | -0.013   | 0.77928 | 0.059494 | 0.19936  | -0.01732 | 0.70893 |
| 0.01071  | 0.003639 | 0.93749  | -0.03037 | 0.51261 | 0.049771 | 0.28312  | -0.0509  | 0.27235 |
| 0.11476  | 0.066221 | 0.15307  | 0.040938 | 0.37741 | 0.136099 | 0.00321  | 0.017621 | 0.70409 |
| 0.3461   | -0.00926 | 0.84173  | -0.00028 | 0.99512 | 0.148694 | 0.00127  | 0.014789 | 0.74991 |
| 0.84432  | 0.112133 | 0.01534  | 0.043901 | 0.34383 | 0.110408 | 0.01699  | 0.016138 | 0.72796 |
| 0.45679  | 0.111396 | 0.01603  | 0.065622 | 0.15682 | 0.157434 | 0.00064  | 0.020982 | 0.65109 |
| 0.35088  | 0.032553 | 0.48282  | -0.01305 | 0.77847 | 0.053863 | 0.24536  | -0.00676 | 0.88419 |
| 0.55512  | 0.087936 | 0.05758  | -0.01356 | 0.77012 | 0.088629 | 0.05563  | 0.027942 | 0.54696 |
| 0.98335  | 0.162952 | 0.00041  | 0.108619 | 0.01888 | 0.253921 | 2.64E-08 | 0.087504 | 0.05882 |
| 0.02491  | 0.009366 | 0.84002  | -0.04201 | 0.36501 | 0.042483 | 0.35966  | -0.05293 | 0.25367 |
| 0.03107  | 0.056446 | 0.22341  | -0.00871 | 0.85102 | 0.08122  | 0.07954  | -0.02199 | 0.63555 |
| 0.61094  | 0.119929 | 0.00948  | 0.032067 | 0.48938 | 0.088459 | 0.0561   | 0.071303 | 0.12388 |
| 0.22183  | 0.014293 | 0.75803  | -0.04531 | 0.32859 | 0.055578 | 0.23063  | -0.02873 | 0.53564 |
| 0.57945  | 0.136489 | 0.00312  | 0.041384 | 0.37223 | 0.175876 | 0.00013  | 0.056336 | 0.22432 |
| 0.92507  | 0.076839 | 0.09722  | 0.040029 | 0.3881  | 0.083632 | 0.07098  | 0.033738 | 0.46702 |
| 0.42674  | 0.087826 | 0.05789  | 0.012233 | 0.79205 | 0.103277 | 0.02563  | 0.031889 | 0.4918  |
| 0.74859  | 0.11044  | 0.01696  | 0.079289 | 0.08698 | 0.111588 | 0.01584  | 0.040084 | 0.38745 |
| 0.925    | 0.144682 | 0.00172  | 0.042746 | 0.35669 | 0.114581 | 0.01323  | 0.06566  | 0.15659 |
| 0.70235  | 0.06928  | 0.13493  | -0.0171  | 0.71244 | 0.075306 | 0.10409  | 0.037759 | 0.41559 |
| 0.41578  | 0.032281 | 0.48648  | 0.002211 | 0.962   | 0.067467 | 0.14547  | 0.065013 | 0.16072 |
| 0.02616  | 0.007853 | 0.8656   | -0.03591 | 0.43882 | 0.055755 | 0.22914  | -0.04845 | 0.29614 |
| 0.05851  | 0.043272 | 0.35079  | -0.01776 | 0.70184 | 0.041222 | 0.3741   | -0.045   | 0.33184 |
| 0.37535  | 0.065085 | 0.16026  | 0.027067 | 0.55958 | 0.099749 | 0.03115  | 0.078602 | 0.08976 |
| 0.11272  | 0.037253 | 0.42188  | -0.00513 | 0.91204 | 0.087732 | 0.05816  | 0.010809 | 0.81579 |
| 0.43948  | 0.050886 | 0.27245  | -0.01693 | 0.71512 | 0.071572 | 0.12246  | 0.003643 | 0.93741 |
| 0.38135  | 0.071617 | 0.12223  | -0.00056 | 0.99033 | 0.07259  | 0.11722  | 0.005477 | 0.90603 |
| 0.66987  | 0.092759 | 0.04513  | 0.105985 | 0.02198 | 0.169117 | 0.00024  | 0.069978 | 0.13103 |

|         |          |          |          |         |          |          |          |         |
|---------|----------|----------|----------|---------|----------|----------|----------|---------|
| 0.44901 | 0.092873 | 0.04486  | 0.017865 | 0.70018 | 0.11671  | 0.0116   | 0.035113 | 0.44905 |
| 0.59516 | 0.071469 | 0.123    | -0.02833 | 0.54144 | 0.044889 | 0.33307  | 0.003274 | 0.94375 |
| 0.31014 | 0.218916 | 1.79E-06 | 0.13481  | 0.00351 | 0.293576 | 9.78E-11 | 0.152292 | 0.00096 |
| 0.70574 | 0.192656 | 2.77E-05 | 0.079199 | 0.08734 | 0.266943 | 4.63E-09 | 0.146489 | 0.0015  |
| 0.46836 | 0.098511 | 0.03331  | 0.013387 | 0.77293 | 0.084771 | 0.0672   | 0.028376 | 0.54074 |
| 0.78137 | 0.124587 | 0.00703  | 0.032637 | 0.48169 | 0.0686   | 0.13881  | 0.041868 | 0.36667 |
| 0.48077 | 0.109264 | 0.01818  | 0.03828  | 0.40919 | 0.103981 | 0.02463  | 0.059028 | 0.20291 |
| 0.02236 | -0.01337 | 0.7733   | -0.06401 | 0.16728 | 0.008996 | 0.84627  | -0.05814 | 0.20983 |
| 0.13058 | 0.060997 | 0.18823  | 0.015484 | 0.73858 | 0.124801 | 0.00693  | 0.02969  | 0.52215 |
| 0.16835 | 0.118948 | 0.01009  | 0.026489 | 0.568   | 0.194478 | 2.32E-05 | 0.175566 | 0.00014 |
| 0.81841 | 0.115066 | 0.01284  | 0.037999 | 0.41263 | 0.137169 | 0.00297  | 0.060225 | 0.19389 |
| 0.12131 | 0.105857 | 0.02214  | 0.057289 | 0.21656 | 0.121233 | 0.00873  | 0.03494  | 0.45129 |
| 0.40861 | 0.157213 | 0.00065  | 0.085836 | 0.06383 | 0.1648   | 0.00035  | 0.090184 | 0.05146 |
| 0.14239 | 0.069777 | 0.13215  | 0.004185 | 0.92814 | 0.120383 | 0.00921  | 0.023158 | 0.61765 |
| 0.21192 | -0.04575 | 0.32392  | -0.0234  | 0.61401 | 0.085813 | 0.0639   | -0.0206  | 0.65701 |
| 0.09948 | 0.058406 | 0.20772  | 0.008153 | 0.86051 | 0.11038  | 0.01702  | -0.00449 | 0.92289 |
| 0.30678 | 0.082798 | 0.07385  | 0.065307 | 0.15883 | 0.133478 | 0.00386  | 0.113569 | 0.01406 |
| 0.0107  | 0.030054 | 0.51706  | -0.05088 | 0.27254 | 0.031517 | 0.49686  | -0.02397 | 0.60531 |
| 0.13044 | 0.052025 | 0.26186  | -0.00957 | 0.83655 | 0.067474 | 0.14543  | 0.025966 | 0.57566 |
| 0.20711 | 0.127136 | 0.00594  | 0.076363 | 0.09931 | 0.185738 | 5.38E-05 | 0.002304 | 0.9604  |
| 0.12767 | 0.070209 | 0.12976  | 0.00059  | 0.98986 | 0.082277 | 0.07569  | 0.008522 | 0.85427 |
| 0.01213 | -0.06902 | 0.13641  | -0.0653  | 0.15888 | 0.086541 | 0.06167  | -0.07215 | 0.11947 |
| 0.57756 | 0.123657 | 0.00746  | 0.012452 | 0.78841 | 0.094801 | 0.04058  | 0.031667 | 0.49482 |
| 0.28413 | 0.020413 | 0.65994  | -0.00297 | 0.94902 | 0.049492 | 0.28583  | -0.00381 | 0.93456 |
| 0.66233 | 0.058837 | 0.20438  | -0.02333 | 0.61503 | 0.008723 | 0.85088  | 0.006409 | 0.89014 |
| 0.00423 | -0.00684 | 0.88288  | -0.07004 | 0.13068 | 0.024714 | 0.59423  | -0.06249 | 0.17765 |
| 0.60833 | 0.133254 | 0.00392  | 0.017458 | 0.7067  | 0.053318 | 0.25017  | -0.01316 | 0.77675 |
| 0.77761 | 0.076878 | 0.09704  | -0.01175 | 0.80012 | 0.058612 | 0.20612  | 0.006807 | 0.88337 |
| 0.87759 | 0.078991 | 0.08818  | -0.00411 | 0.92935 | 0.057578 | 0.21425  | 0.017089 | 0.71262 |
| 0.30363 | 0.140924 | 0.00227  | 0.065106 | 0.16012 | 0.150637 | 0.00109  | 0.06116  | 0.18705 |
| 0.97093 | 0.184645 | 5.97E-05 | 0.012176 | 0.793   | 0.209067 | 5.21E-06 | 0.114528 | 0.01327 |
| 0.05983 | 0.020587 | 0.65723  | -0.04457 | 0.33653 | 0.040721 | 0.37995  | -0.02395 | 0.60567 |
| 0.00846 | 0.019935 | 0.66742  | -0.03666 | 0.42932 | 0.032946 | 0.47755  | -0.06521 | 0.15947 |
| 0.05536 | 0.132127 | 0.00423  | 0.1369   | 0.00303 | 0.210727 | 4.36E-06 | 0.065414 | 0.15815 |
| 0.89992 | 0.187161 | 4.71E-05 | 0.072529 | 0.11753 | 0.182816 | 7.08E-05 | 0.063386 | 0.17147 |
| 0.06    | 0.020131 | 0.66435  | -0.04482 | 0.33385 | 0.066334 | 0.15237  | -0.00414 | 0.92894 |
| 0.36796 | 0.111548 | 0.01588  | 0.041201 | 0.37435 | 0.113832 | 0.01384  | 0.042599 | 0.35835 |
| 0.17204 | 0.104609 | 0.02377  | 0.007722 | 0.86781 | 0.111842 | 0.0156   | 0.042256 | 0.36223 |
| 0.22077 | 0.113785 | 0.01388  | -0.00604 | 0.8964  | 0.167377 | 0.00028  | -0.07668 | 0.0979  |
| 0.22104 | 0.212729 | 3.52E-06 | 0.162916 | 0.00041 | 0.235206 | 2.73E-07 | 0.153458 | 0.00088 |
| 0.00211 | 0.049525 | 0.28551  | 0.082588 | 0.07459 | 0.06325  | 0.17239  | 0.135584 | 0.00333 |
| 0.08476 | 0.129849 | 0.00495  | 0.09502  | 0.04012 | 0.1924   | 2.84E-05 | 0.030553 | 0.51013 |
| 0.00017 | -0.00273 | 0.95301  | -0.06714 | 0.14746 | 0.030114 | 0.51622  | -0.09155 | 0.04801 |
| 0.04173 | 0.094558 | 0.0411   | 0.013566 | 0.76998 | 0.123564 | 0.00751  | -0.01167 | 0.80136 |
| 0.14153 | 0.050927 | 0.27208  | -0.03136 | 0.49905 | 0.0994   | 0.03174  | 0.034626 | 0.45538 |

|         |          |          |          |         |          |          |          |          |
|---------|----------|----------|----------|---------|----------|----------|----------|----------|
| 0.04038 | -0.06797 | 0.14249  | -0.12038 | 0.00922 | -0.07208 | 0.11984  | -0.02258 | 0.62649  |
| 0.26816 | 0.144376 | 0.00176  | 0.048937 | 0.29127 | 0.15334  | 0.00089  | 0.056658 | 0.22168  |
| 0.98199 | 0.132817 | 0.00404  | 0.019636 | 0.67212 | 0.084691 | 0.06746  | 0.140689 | 0.00231  |
| 0.58984 | 0.176277 | 0.00013  | 0.066015 | 0.15435 | 0.135628 | 0.00332  | 0.085603 | 0.06455  |
| 0.59907 | 0.147924 | 0.00135  | 0.028663 | 0.53665 | 0.100791 | 0.02942  | 0.056557 | 0.2225   |
| 0.08613 | 0.198721 | 1.52E-05 | 0.090747 | 0.05001 | 0.197656 | 1.69E-05 | 0.124324 | 0.00715  |
| 0.69411 | 0.14499  | 0.00168  | 0.046985 | 0.31097 | 0.08799  | 0.05742  | 0.067288 | 0.14654  |
| 0.46153 | 0.096654 | 0.0368   | 0.035309 | 0.44652 | 0.087168 | 0.0598   | -0.00225 | 0.96132  |
| 0.16938 | 0.094336 | 0.04158  | 0.033759 | 0.46674 | 0.089075 | 0.05441  | 0.01249  | 0.78778  |
| 0.15142 | 0.114823 | 0.01303  | 0.039086 | 0.39939 | 0.114458 | 0.01332  | 0.014823 | 0.74935  |
| 0.06086 | 0.0726   | 0.11717  | 0.028522 | 0.53865 | 0.106143 | 0.02178  | 0.004074 | 0.93003  |
| 0.16121 | -0.01867 | 0.68742  | -0.02783 | 0.54858 | -0.00425 | 0.92694  | -0.04058 | 0.38155  |
| 0.0946  | 0.049854 | 0.28231  | -0.00301 | 0.94826 | 0.042553 | 0.35887  | 0.063266 | 0.17229  |
| 0.87559 | 0.146163 | 0.00154  | -0.00758 | 0.8702  | 0.130155 | 0.00485  | 0.056017 | 0.22695  |
| 0.11643 | 0.046909 | 0.31175  | 0.005831 | 0.89999 | 0.073255 | 0.11389  | -0.00256 | 0.95606  |
| 0.14998 | 0.019943 | 0.6673   | -0.06874 | 0.13802 | 0.117783 | 0.01085  | -0.02341 | 0.61379  |
| 0.11755 | 0.093132 | 0.04426  | 0.005218 | 0.91045 | 0.104752 | 0.02358  | -0.0135  | 0.7711   |
| 0.00686 | -0.02997 | 0.51827  | -0.05854 | 0.20671 | 0.033229 | 0.47377  | -0.05467 | 0.23831  |
| 0.94505 | 0.114552 | 0.01325  | 0.086882 | 0.06065 | 0.120255 | 0.00929  | 0.024509 | 0.59729  |
| 0.19338 | 0.146603 | 0.00149  | 0.070309 | 0.12922 | 0.149658 | 0.00118  | -0.00785 | 0.86564  |
| 0.93075 | 0.193122 | 2.65E-05 | 0.111061 | 0.01635 | 0.164035 | 0.00037  | 0.032972 | 0.4772   |
| 0.35807 | 0.080346 | 0.08284  | 0.043041 | 0.35338 | 0.10436  | 0.02411  | -0.00897 | 0.84672  |
| 0.9844  | 0.05912  | 0.20221  | -0.02692 | 0.56178 | 0.028755 | 0.53534  | 0.081393 | 0.0789   |
| 0.45384 | 0.142258 | 0.00206  | 0.048876 | 0.29188 | 0.125097 | 0.00679  | 0.029706 | 0.52193  |
| 0.21003 | 0.231637 | 4.16E-07 | 0.070806 | 0.12652 | 0.201619 | 1.13E-05 | 0.204179 | 8.69E-06 |
| 0.81746 | 0.187698 | 4.47E-05 | 0.106342 | 0.02154 | 0.208721 | 5.40E-06 | 0.096864 | 0.03639  |
| 0.00989 | 8.70E-05 | 0.9985   | -0.05679 | 0.22064 | 0.013513 | 0.77087  | -0.04631 | 0.31794  |
| 0.84246 | 0.142944 | 0.00196  | 0.047191 | 0.30885 | 0.147678 | 0.00137  | 0.044041 | 0.34229  |
| 0.88555 | 0.027728 | 0.55002  | 0.093727 | 0.04292 | 0.066903 | 0.14887  | -0.00525 | 0.90992  |
| 0.26711 | 0.031204 | 0.50115  | 0.046778 | 0.31311 | 0.063744 | 0.16906  | 0.058719 | 0.20529  |
| 0.00015 | 0.114686 | 0.01314  | 0.100481 | 0.02992 | 0.256214 | 1.95E-08 | 0.022046 | 0.63465  |
| 0.54342 | 0.192903 | 2.70E-05 | 0.088026 | 0.05732 | 0.161416 | 0.00046  | 0.060493 | 0.19191  |
| 0.31835 | 0.070431 | 0.12855  | 0.027814 | 0.5488  | 0.106806 | 0.02097  | 0.009167 | 0.84337  |
| 0.17123 | 0.042631 | 0.35798  | -0.05539 | 0.23221 | 0.034266 | 0.46007  | 0.017983 | 0.69831  |
| 0.36203 | 0.093548 | 0.04332  | 0.020529 | 0.65813 | 0.092045 | 0.04681  | -0.02772 | 0.55018  |
| 0.18856 | 0.101985 | 0.02754  | 0.056939 | 0.21938 | 0.138072 | 0.00279  | 0.022772 | 0.62353  |
| 0.38059 | 0.107273 | 0.02041  | 0.043536 | 0.34787 | 0.09855  | 0.03324  | 0.072388 | 0.11825  |
| 0.914   | 0.09914  | 0.0322   | 0.047353 | 0.30719 | 0.084052 | 0.06957  | 0.078206 | 0.09139  |
| 0.0024  | 0.140897 | 0.00227  | 0.078285 | 0.09107 | 0.143741 | 0.00184  | 0.024874 | 0.59184  |
| 0.8715  | 0.209824 | 4.80E-06 | 0.094351 | 0.04155 | 0.246734 | 6.61E-08 | 0.133508 | 0.00385  |
| 0.2829  | 0.157195 | 0.00065  | 0.065016 | 0.1607  | 0.131191 | 0.00451  | 0.029282 | 0.5279   |
| 0.04457 | 0.02192  | 0.63659  | -0.0358  | 0.44021 | 0.038155 | 0.41073  | -0.02998 | 0.5181   |
| 0.3706  | 0.015854 | 0.73257  | 0.026131 | 0.57325 | 0.039145 | 0.39868  | 0.032081 | 0.4892   |
| 0.00062 | -0.07837 | 0.09073  | -0.09585 | 0.03841 | -0.01322 | 0.77573  | -0.08344 | 0.07164  |
| 0.07112 | 0.128778 | 0.00532  | 0.12074  | 0.00901 | 0.093154 | 0.04421  | 0.174113 | 0.00016  |

|          |          |          |          |          |          |          |          |         |
|----------|----------|----------|----------|----------|----------|----------|----------|---------|
| 0.18332  | -0.04155 | 0.3703   | -0.07786 | 0.09285  | -0.02397 | 0.60534  | -0.03241 | 0.48479 |
| 0.00982  | 0.035804 | 0.44017  | 0.024512 | 0.59724  | 0.161133 | 0.00047  | 0.002464 | 0.95766 |
| 4.06E-06 | 0.047527 | 0.30541  | -0.06878 | 0.13775  | 0.032024 | 0.48996  | -0.12598 | 0.00641 |
| 0.00339  | -0.03845 | 0.40715  | 0.002047 | 0.96481  | 0.033843 | 0.46563  | -0.10278 | 0.02635 |
| 0.07178  | 0.076924 | 0.09684  | 0.026228 | 0.57182  | 0.110441 | 0.01696  | 0.027833 | 0.54852 |
| 0.338    | 0.076173 | 0.10016  | -0.01527 | 0.7421   | 0.114784 | 0.01306  | 0.068684 | 0.13833 |
| 0.13131  | 0.115375 | 0.0126   | 0.024214 | 0.60171  | 0.115687 | 0.01236  | -0.02949 | 0.52497 |
| 0.00215  | 0.079621 | 0.08566  | 0.044664 | 0.3355   | 0.155607 | 0.00074  | 0.013803 | 0.76608 |
| 0.92866  | 0.056509 | 0.22289  | 0.071422 | 0.12325  | 0.109189 | 0.01826  | 0.079381 | 0.08661 |
| 0.61649  | 0.109217 | 0.01823  | 0.043562 | 0.34757  | 0.107031 | 0.0207   | 0.027362 | 0.55531 |
| 0.80057  | 0.153317 | 0.00089  | 0.004745 | 0.91855  | 0.034108 | 0.46215  | 0.06662  | 0.1506  |
| 0.90886  | 0.277087 | 1.12E-09 | 0.217857 | 2.01E-06 | 0.306149 | 1.37E-11 | 0.163611 | 0.00039 |
| 0.1172   | 0.150863 | 0.00107  | 0.090261 | 0.05126  | 0.173828 | 0.00016  | 0.020365 | 0.66069 |
| 0.2838   | 0.222205 | 1.24E-06 | 0.168126 | 0.00026  | 0.241958 | 1.20E-07 | 0.084646 | 0.06761 |
| 0.84529  | 0.151124 | 0.00105  | 0.047155 | 0.30921  | 0.244762 | 8.47E-08 | 0.112414 | 0.01508 |
| 0.01364  | 0.246778 | 6.58E-08 | 0.123115 | 0.00773  | 0.214188 | 3.00E-06 | 0.137159 | 0.00298 |
| 0.28744  | 0.091999 | 0.04692  | 0.000176 | 0.99697  | 0.076605 | 0.09824  | -0.0389  | 0.40162 |
| 0.0029   | 0.052898 | 0.25392  | -0.03402 | 0.46327  | 0.19232  | 2.86E-05 | -0.01887 | 0.68427 |
| 0.57446  | 0.174219 | 0.00015  | 0.073578 | 0.1123   | 0.187413 | 4.59E-05 | 0.098644 | 0.03307 |
| 0.22873  | 0.0596   | 0.19856  | -0.00881 | 0.8494   | 0.061914 | 0.18166  | 0.006916 | 0.88151 |
| 0.31308  | 0.063639 | 0.16977  | -0.00729 | 0.87515  | 0.129088 | 0.00521  | 0.024937 | 0.5909  |
| 0.09605  | 0.055674 | 0.22981  | -0.01612 | 0.72829  | 0.0526   | 0.25661  | 0.028249 | 0.54256 |
| 0.03758  | 0.312949 | 4.54E-12 | 0.12237  | 0.00811  | 0.19626  | 1.94E-05 | 0.172556 | 0.00018 |
| 0.45314  | -0.01738 | 0.70788  | -0.10245 | 0.02684  | -0.03516 | 0.4484   | -0.03906 | 0.39976 |
| 0.2723   | 0.10867  | 0.01882  | 0.05327  | 0.25059  | 0.158535 | 0.00058  | 0.015822 | 0.73309 |
| 0.32867  | 0.083953 | 0.0699   | 0.031079 | 0.50287  | 0.100419 | 0.03003  | -0.01079 | 0.81613 |
| 0.0163   | 0.034757 | 0.45367  | -0.0668  | 0.14948  | 0.068065 | 0.14193  | -0.04556 | 0.32586 |
| 0.18646  | 0.100372 | 0.0301   | 0.006452 | 0.88941  | 0.085761 | 0.06406  | -0.00513 | 0.91197 |
| 0.03115  | 0.051329 | 0.2683   | -0.00395 | 0.93223  | 0.100033 | 0.03067  | -0.01459 | 0.75314 |
| 0.31046  | 0.180213 | 9.00E-05 | 0.071336 | 0.1237   | 0.186724 | 4.91E-05 | 0.064846 | 0.1618  |
| 0.04671  | 0.117296 | 0.01119  | 0.065367 | 0.15845  | 0.195273 | 2.14E-05 | -0.00905 | 0.84534 |
| 0.17216  | 0.261745 | 9.38E-09 | 0.101855 | 0.02774  | 0.205194 | 7.82E-06 | 0.070579 | 0.12775 |
| 0.93443  | 0.21252  | 3.60E-06 | 0.045678 | 0.32463  | 0.172733 | 0.00018  | 0.073693 | 0.11174 |
| 0.11518  | 0.078236 | 0.09127  | 0.070958 | 0.12571  | 0.17476  | 0.00015  | 0.0375   | 0.41881 |
| 0.9269   | 0.154792 | 0.00079  | 0.048548 | 0.29513  | 0.141314 | 0.00221  | 0.081155 | 0.07978 |
| 0.0001   | -0.0069  | 0.88179  | -0.00366 | 0.9371   | 0.153084 | 0.0009   | -0.12382 | 0.00739 |
| 1.87E-06 | -0.01924 | 0.67831  | -0.06445 | 0.1644   | 0.055902 | 0.22791  | -0.11936 | 0.00983 |
| 0.40582  | 0.040627 | 0.38105  | 0.033987 | 0.46374  | 0.052495 | 0.25757  | -0.05042 | 0.27692 |
| 0.56395  | 0.106608 | 0.02121  | 0.010739 | 0.81695  | 0.095814 | 0.03847  | 0.02469  | 0.59459 |
| 0.20009  | 0.09248  | 0.04578  | 0.055135 | 0.23437  | 0.08671  | 0.06116  | 0.05545  | 0.2317  |
| 0.1028   | 0.039578 | 0.39348  | 0.002817 | 0.95159  | 0.143578 | 0.00187  | -0.02567 | 0.57996 |
| 0.3823   | 0.117695 | 0.01091  | 0.073131 | 0.11451  | 0.155232 | 0.00076  | 0.112263 | 0.01522 |
| 0.57588  | 0.138045 | 0.00279  | 0.045473 | 0.32681  | 0.129908 | 0.00493  | 0.06415  | 0.16635 |
| 0.04732  | 0.019157 | 0.67966  | 0.002652 | 0.95441  | 0.071489 | 0.1229   | 0.007201 | 0.87666 |
| 0.00919  | 0.053622 | 0.24748  | -0.02334 | 0.61496  | 0.054435 | 0.24037  | -0.03287 | 0.47853 |

|         |          |          |          |          |          |          |          |          |
|---------|----------|----------|----------|----------|----------|----------|----------|----------|
| 0.0455  | 0.08772  | 0.0582   | 0.059448 | 0.19971  | 0.188355 | 4.20E-05 | -0.02672 | 0.56465  |
| 0.94152 | 0.200866 | 1.22E-05 | 0.107083 | 0.02064  | 0.214158 | 3.01E-06 | 0.118759 | 0.01021  |
| 0.06294 | 0.052582 | 0.25677  | -0.01688 | 0.71604  | 0.083337 | 0.07198  | 0.013242 | 0.77534  |
| 0.25345 | 0.060898 | 0.18894  | 0.000781 | 0.98658  | 0.083842 | 0.07027  | 0.02676  | 0.56404  |
| 0.0819  | 0.118372 | 0.01046  | 0.04766  | 0.30406  | 0.148993 | 0.00124  | -0.01022 | 0.82559  |
| 0.49603 | 0.126283 | 0.00628  | 0.036032 | 0.43727  | 0.110031 | 0.01738  | 0.027124 | 0.55875  |
| 0.04737 | 0.119496 | 0.00975  | 0.059497 | 0.19934  | 0.215757 | 2.53E-06 | 0.044911 | 0.33284  |
| 0.01489 | 0.033681 | 0.46777  | -0.04672 | 0.31373  | 0.029186 | 0.52925  | -0.0425  | 0.35946  |
| 0.9139  | 0.070579 | 0.12775  | 0.004505 | 0.92265  | 0.073276 | 0.11379  | 0.058425 | 0.20758  |
| 0.33427 | 0.056429 | 0.22355  | -0.0064  | 0.89037  | 0.075695 | 0.10231  | 0.00868  | 0.85159  |
| 0.0277  | 0.030305 | 0.51358  | 0.005666 | 0.90281  | 0.060113 | 0.19472  | -0.02452 | 0.59713  |
| 0.04799 | -0.03881 | 0.40278  | -0.03559 | 0.44293  | -0.0216  | 0.64151  | 0.023728 | 0.60903  |
| 0.93692 | 0.130516 | 0.00473  | 0.065369 | 0.15844  | 0.190925 | 3.28E-05 | 0.048099 | 0.29962  |
| 0.88899 | 0.182977 | 6.97E-05 | 0.102657 | 0.02653  | 0.247561 | 5.96E-08 | 0.121109 | 0.0088   |
| 0.6686  | 0.12554  | 0.0066   | 0.027432 | 0.5543   | 0.092057 | 0.04678  | 0.036541 | 0.43082  |
| 0.12982 | 0.193058 | 2.66E-05 | 0.11163  | 0.0158   | 0.312802 | 4.65E-12 | 0.103522 | 0.02528  |
| 0.32333 | 0.26555  | 5.60E-09 | 0.201303 | 1.17E-05 | 0.320928 | 1.20E-12 | 0.205433 | 7.63E-06 |
| 0.00949 | 0.113361 | 0.01424  | -0.02225 | 0.63147  | 0.075522 | 0.1031   | -0.03772 | 0.41602  |
| 0.91781 | 0.116273 | 0.01192  | 0.043397 | 0.34941  | 0.141985 | 0.0021   | 0.074214 | 0.10922  |
| 0.92758 | 0.118668 | 0.01027  | 0.092014 | 0.04689  | 0.132602 | 0.0041   | 0.072706 | 0.11664  |
| 0.00179 | 0.023898 | 0.60647  | -0.02324 | 0.61641  | 0.074813 | 0.10638  | -0.04871 | 0.29355  |
| 0.9936  | 0.145437 | 0.00163  | 0.020347 | 0.66098  | 0.117901 | 0.01077  | 0.027392 | 0.55488  |
| 0.07118 | 0.289043 | 1.94E-10 | 0.187145 | 4.71E-05 | 0.291917 | 1.26E-10 | 0.110714 | 0.01669  |
| 0.17713 | 0.092011 | 0.04689  | 0.04421  | 0.34044  | 0.167774 | 0.00027  | 0.003924 | 0.93261  |
| 0.93189 | 0.045526 | 0.32624  | -0.04079 | 0.37914  | 0.029091 | 0.53058  | 0.004694 | 0.91941  |
| 0.02455 | 0.054806 | 0.23717  | -0.01335 | 0.77354  | 0.072352 | 0.11843  | -0.00398 | 0.93168  |
| 0.50066 | 0.173333 | 0.00017  | 0.059683 | 0.19794  | 0.162576 | 0.00042  | 0.101951 | 0.02759  |
| 0.38183 | 0.12833  | 0.00548  | 0.060369 | 0.19282  | 0.166915 | 0.00029  | 0.125926 | 0.00643  |
| 0.14394 | 0.04642  | 0.31683  | -0.01413 | 0.76079  | 0.054258 | 0.2419   | 0.00747  | 0.8721   |
| 0.00076 | 0.001959 | 0.96633  | -0.04628 | 0.31826  | 0.039657 | 0.39253  | -0.07003 | 0.13073  |
| 0.04334 | 0.065639 | 0.15672  | -0.00414 | 0.92887  | 0.098788 | 0.03282  | 0.026943 | 0.56139  |
| 0.00082 | -0.04348 | 0.34854  | -0.0115  | 0.80417  | 0.021994 | 0.63544  | -0.12646 | 0.00621  |
| 0.20929 | 0.19862  | 1.53E-05 | 0.097699 | 0.0348   | 0.139584 | 0.0025   | 0.107888 | 0.0197   |
| 0.66431 | 0.269008 | 3.48E-09 | 0.136285 | 0.00317  | 0.207535 | 6.12E-06 | 0.171985 | 0.00019  |
| 0.1088  | -0.09056 | 0.0505   | -0.10712 | 0.0206   | -0.10485 | 0.02345  | 0.052865 | 0.25422  |
| 0.00074 | 0.074435 | 0.10817  | 0.082131 | 0.07621  | 0.216121 | 2.43E-06 | -0.02535 | 0.58484  |
| 0.0367  | 0.020988 | 0.65098  | -0.00555 | 0.90478  | 0.09636  | 0.03738  | -0.05461 | 0.23885  |
| 0.30677 | 0.060461 | 0.19214  | 0.044088 | 0.34177  | 0.157352 | 0.00064  | 0.034111 | 0.46211  |
| 0.00026 | 0.046127 | 0.3199   | 0.054282 | 0.24169  | 0.184195 | 6.22E-05 | -0.08383 | 0.07031  |
| 0.84453 | -0.04891 | 0.29156  | -0.09109 | 0.04916  | -0.0459  | 0.32228  | -0.03464 | 0.4552   |
| 0.33541 | -0.02832 | 0.54149  | -0.08889 | 0.05491  | -0.01058 | 0.81966  | -0.07129 | 0.12393  |
| 0.19943 | 0.009896 | 0.8311   | -0.07065 | 0.12739  | 0.037016 | 0.42484  | -0.00741 | 0.87307  |
| 0.5445  | 0.095022 | 0.04011  | 0.052511 | 0.25742  | 0.113431 | 0.01418  | 0.038654 | 0.40462  |
| 0.0182  | 0.029745 | 0.52139  | 0.052623 | 0.2564   | 0.160746 | 0.00049  | 0.027378 | 0.55508  |
| 0.00627 | 0.005244 | 0.91001  | 0.024322 | 0.60009  | 0.114377 | 0.01339  | -0.03989 | 0.38981  |

|          |          |          |          |          |          |          |          |          |
|----------|----------|----------|----------|----------|----------|----------|----------|----------|
| 0.117    | -0.0062  | 0.8937   | -0.08748 | 0.05889  | -0.0174  | 0.70769  | -0.06243 | 0.17801  |
| 0.01201  | -0.04574 | 0.32393  | -0.09226 | 0.0463   | -0.01571 | 0.73484  | -0.0265  | 0.56786  |
| 0.21804  | 0.006499 | 0.88861  | -0.03479 | 0.4532   | 0.037426 | 0.41973  | -0.03398 | 0.46379  |
| 0.3312   | 0.14495  | 0.00169  | 0.033473 | 0.47053  | 0.24179  | 1.22E-07 | 0.081433 | 0.07875  |
| 0.39593  | 0.132852 | 0.00403  | 0.048233 | 0.29828  | 0.073499 | 0.11269  | 0.010406 | 0.82254  |
| 0.54326  | 0.158582 | 0.00058  | 0.05588  | 0.2281   | 0.099502 | 0.03157  | 0.064557 | 0.16368  |
| 0.02682  | -0.0471  | 0.30983  | -0.08527 | 0.06561  | -0.03739 | 0.4202   | -0.02922 | 0.52882  |
| 0.0518   | 0.023927 | 0.60602  | 0.016573 | 0.72093  | 0.017121 | 0.71211  | 0.021422 | 0.64427  |
| 0.13497  | 0.060039 | 0.19527  | -0.03397 | 0.46393  | 0.076351 | 0.09936  | 0.010832 | 0.81541  |
| 0.44635  | 0.054702 | 0.23806  | -0.04097 | 0.37709  | 0.067288 | 0.14654  | 0.011215 | 0.80901  |
| 0.06414  | 0.031189 | 0.50136  | -0.0296  | 0.52344  | 0.075208 | 0.10455  | -0.01158 | 0.80289  |
| 0.86353  | 0.23051  | 4.75E-07 | 0.221058 | 1.41E-06 | 0.37178  | 9.37E-17 | 0.128527 | 0.00541  |
| 0.75294  | 0.092132 | 0.0466   | -0.02017 | 0.66375  | 0.081678 | 0.07785  | 0.026839 | 0.56289  |
| 0.3675   | 0.216549 | 2.32E-06 | 0.213877 | 3.11E-06 | 0.337089 | 7.14E-14 | 0.113665 | 0.01398  |
| 0.13736  | 0.187428 | 4.59E-05 | 0.073975 | 0.11038  | 0.267182 | 4.48E-09 | 0.116359 | 0.01186  |
| 0.24413  | 0.028743 | 0.53551  | -0.02962 | 0.5231   | 0.034299 | 0.45964  | -0.00482 | 0.91719  |
| 1.81E-07 | 0.077868 | 0.09281  | 0.011569 | 0.8031   | 0.142167 | 0.00207  | -0.04704 | 0.31041  |
| 0.86119  | 0.105279 | 0.02289  | 0.059581 | 0.19871  | 0.112319 | 0.01516  | 0.050132 | 0.27963  |
| 0.86499  | 0.130099 | 0.00486  | 0.063484 | 0.17081  | 0.146178 | 0.00154  | 0.010031 | 0.82883  |
| 4.85E-14 | 0.582404 | 9.29E-44 | 0.487769 | 2.77E-29 | 0.485708 | 5.12E-29 | 0.470428 | 4.32E-27 |
| 3.63E-35 | 0.427725 | 3.39E-22 | 0.370368 | 1.25E-16 | 0.342777 | 2.54E-14 | 0.584322 | 4.21E-44 |
| 2.25E-22 | 0.576353 | 1.09E-42 | 0.43152  | 1.33E-22 | 0.481703 | 1.67E-28 | 0.541286 | 6.66E-37 |
| 4.04E-15 | 0.376067 | 3.90E-17 | 0.31634  | 2.59E-12 | 0.320199 | 1.36E-12 | 0.450991 | 8.90E-25 |
| 8.00E-10 | 0.041631 | 0.36938  | 0.080467 | 0.08237  | -0.02191 | 0.63678  | 0.24841  | 5.35E-08 |
| 4.62E-56 | 0.468116 | 8.29E-27 | 0.398402 | 3.24E-19 | 0.30497  | 1.65E-11 | 0.625866 | 3.77E-52 |
| 0.62303  | 0.19123  | 3.18E-05 | 0.077027 | 0.0964   | 0.093113 | 0.04431  | 0.063953 | 0.16767  |
| 0.00025  | 0.43074  | 1.61E-22 | 0.341356 | 3.30E-14 | 0.376582 | 3.50E-17 | 0.329037 | 2.97E-13 |
| 4.31E-10 | 0.403127 | 1.12E-19 | 0.228563 | 5.97E-07 | 0.205833 | 7.32E-06 | 0.361322 | 7.55E-16 |
| 2.33E-39 | 0.448702 | 1.63E-24 | 0.511347 | 1.78E-32 | 0.459701 | 8.53E-26 | 0.597285 | 1.73E-46 |
| 4.26E-05 | 0.363014 | 5.42E-16 | 0.268711 | 3.63E-09 | 0.276586 | 1.20E-09 | 0.345279 | 1.60E-14 |
| 1.40E-05 | 0.24281  | 1.08E-07 | 0.273178 | 1.95E-09 | 0.314756 | 3.37E-12 | 0.294131 | 8.98E-11 |
| 1.16E-30 | 0.66872  | 7.78E-62 | 0.555747 | 3.32E-39 | 0.569612 | 1.60E-41 | 0.601948 | 2.26E-47 |
| 1.79E-12 | 0.537665 | 2.42E-36 | 0.384845 | 6.20E-18 | 0.385562 | 5.32E-18 | 0.512237 | 1.34E-32 |
| 6.21E-24 | 0.427706 | 3.41E-22 | 0.30192  | 2.68E-11 | 0.254676 | 2.39E-08 | 0.278041 | 9.75E-10 |
| 5.35E-05 | 0.062912 | 0.17471  | 0.223504 | 1.07E-06 | 0.139757 | 0.00247  | 0.128565 | 0.0054   |
| 7.69E-52 | 0.507042 | 7.12E-32 | 0.398569 | 3.13E-19 | 0.357812 | 1.50E-15 | 0.552708 | 1.03E-38 |
| 0.00197  | 0.303608 | 2.05E-11 | 0.240423 | 1.45E-07 | 0.21258  | 3.58E-06 | 0.144885 | 0.00169  |
| 0.96342  | 0.182877 | 7.04E-05 | 0.205903 | 7.26E-06 | 0.268134 | 3.93E-09 | 0.15518  | 0.00077  |
| 1.55E-07 | 0.284593 | 3.76E-10 | 0.217301 | 2.14E-06 | 0.259764 | 1.22E-08 | 0.362702 | 5.76E-16 |
| 1.05E-31 | 0.513071 | 1.02E-32 | 0.45953  | 8.94E-26 | 0.456903 | 1.83E-25 | 0.589946 | 4.00E-45 |
| 0.00676  | 0.454697 | 3.31E-25 | 0.290052 | 1.67E-10 | 0.307488 | 1.10E-11 | 0.30379  | 1.99E-11 |
| 1.37E-42 | 0.646304 | 1.42E-56 | 0.463727 | 2.82E-26 | 0.479962 | 2.79E-28 | 0.613461 | 1.27E-49 |
| 2.00E-26 | 0.438287 | 2.42E-23 | 0.386073 | 4.77E-18 | 0.398762 | 2.99E-19 | 0.570854 | 9.81E-42 |
| 1.40E-11 | 0.456448 | 2.06E-25 | 0.522448 | 4.58E-34 | 0.528577 | 5.72E-35 | 0.500248 | 6.09E-31 |
| 2.02E-13 | 0.36781  | 2.09E-16 | 0.122699 | 0.00794  | 0.186962 | 4.80E-05 | 0.299996 | 3.63E-11 |

|          |          |          |          |          |          |          |          |          |
|----------|----------|----------|----------|----------|----------|----------|----------|----------|
| 5.10E-44 | 0.440307 | 1.44E-23 | 0.25633  | 1.92E-08 | 0.235465 | 2.64E-07 | 0.537473 | 2.58E-36 |
| 0.0248   | 0.257466 | 1.66E-08 | 0.292762 | 1.11E-10 | 0.287083 | 2.60E-10 | 0.259049 | 1.34E-08 |
| 0.00107  | 0.056079 | 0.22644  | 0.100748 | 0.02949  | 0.038882 | 0.40185  | 0.135806 | 0.00328  |
| 4.59E-06 | 0.17779  | 0.00011  | 0.118001 | 0.01071  | 0.045627 | 0.32518  | 0.103053 | 0.02595  |
| 1.55E-37 | 0.357949 | 1.46E-15 | 0.42508  | 6.48E-22 | 0.335581 | 9.36E-14 | 0.521338 | 6.65E-34 |
| 1.21E-06 | 0.556555 | 2.45E-39 | 0.336913 | 7.37E-14 | 0.34001  | 4.21E-14 | 0.307698 | 1.07E-11 |
| 1.86E-33 | 0.339428 | 4.68E-14 | 0.262613 | 8.34E-09 | 0.214212 | 3.00E-06 | 0.498964 | 9.08E-31 |
| 7.31E-50 | 0.510759 | 2.16E-32 | 0.420607 | 1.91E-21 | 0.409998 | 2.33E-20 | 0.589566 | 4.70E-45 |
| 3.60E-31 | 0.47818  | 4.68E-28 | 0.428564 | 2.76E-22 | 0.413685 | 9.87E-21 | 0.638854 | 6.35E-55 |
| 0.02291  | 0.446163 | 3.17E-24 | 0.303128 | 2.21E-11 | 0.316398 | 2.56E-12 | 0.237296 | 2.12E-07 |
| 0.48283  | 0.345479 | 1.55E-14 | 0.255254 | 2.22E-08 | 0.293828 | 9.41E-11 | 0.1671   | 0.00029  |
| 8.90E-07 | 0.319052 | 1.64E-12 | 0.287778 | 2.35E-10 | 0.264151 | 6.78E-09 | 0.317751 | 2.05E-12 |
| 5.11E-19 | 0.31969  | 1.48E-12 | 0.192844 | 2.72E-05 | 0.271381 | 2.51E-09 | 0.420887 | 1.79E-21 |
| 1.06E-23 | 0.631341 | 2.65E-53 | 0.51709  | 2.73E-33 | 0.510032 | 2.73E-32 | 0.550105 | 2.71E-38 |
| 0.00071  | 0.079809 | 0.08492  | 0.101679 | 0.02801  | 0.020961 | 0.6514   | 0.22143  | 1.35E-06 |
| 4.69E-45 | 0.451061 | 8.74E-25 | 0.484143 | 8.15E-29 | 0.357991 | 1.44E-15 | 0.53884  | 1.59E-36 |
| 5.90E-39 | 0.408592 | 3.23E-20 | 0.406165 | 5.63E-20 | 0.316864 | 2.37E-12 | 0.497119 | 1.61E-30 |
| 3.73E-13 | 0.431453 | 1.35E-22 | 0.274074 | 1.72E-09 | 0.292809 | 1.10E-10 | 0.341185 | 3.40E-14 |
| 6.96E-16 | 0.432507 | 1.04E-22 | 0.381553 | 1.24E-17 | 0.357233 | 1.67E-15 | 0.552343 | 1.18E-38 |
| 1.22E-27 | 0.410902 | 1.89E-20 | 0.248641 | 5.19E-08 | 0.260738 | 1.07E-08 | 0.427206 | 3.86E-22 |
| 6.42E-17 | 0.442759 | 7.69E-24 | 0.440137 | 1.51E-23 | 0.426593 | 4.48E-22 | 0.507335 | 6.49E-32 |
| 2.07E-21 | 0.649196 | 3.14E-57 | 0.508016 | 5.22E-32 | 0.567641 | 3.47E-41 | 0.557719 | 1.58E-39 |
| 3.07E-16 | 0.408348 | 3.41E-20 | 0.305973 | 1.41E-11 | 0.316353 | 2.58E-12 | 0.260662 | 1.08E-08 |
| 4.73E-13 | 0.390412 | 1.88E-18 | 0.505959 | 1.01E-31 | 0.481023 | 2.04E-28 | 0.419463 | 2.51E-21 |
| 5.59E-22 | 0.516222 | 3.63E-33 | 0.397183 | 4.25E-19 | 0.424765 | 7.00E-22 | 0.536099 | 4.20E-36 |
| 2.76E-08 | 0.295451 | 7.34E-11 | 0.250599 | 4.05E-08 | 0.222813 | 1.15E-06 | 0.368942 | 1.66E-16 |
| 3.56E-27 | 0.53585  | 4.58E-36 | 0.43457  | 6.19E-23 | 0.423894 | 8.65E-22 | 0.603783 | 1.00E-47 |
| 5.70E-20 | 0.503825 | 1.98E-31 | 0.392008 | 1.33E-18 | 0.438554 | 2.26E-23 | 0.515797 | 4.18E-33 |
| 9.39E-29 | 0.556312 | 2.68E-39 | 0.547662 | 6.64E-38 | 0.490575 | 1.19E-29 | 0.638569 | 7.34E-55 |
| 9.04E-08 | 0.440955 | 1.22E-23 | 0.390503 | 1.84E-18 | 0.403345 | 1.07E-19 | 0.37435  | 5.54E-17 |
| 1.69E-29 | 0.506741 | 7.84E-32 | 0.380673 | 1.50E-17 | 0.360256 | 9.30E-16 | 0.51163  | 1.63E-32 |
| 0.03281  | 0.031598 | 0.49575  | -0.06694 | 0.14867  | -0.0216  | 0.6415   | -0.04493 | 0.33259  |
| 4.74E-14 | 0.42401  | 8.41E-22 | 0.368765 | 1.72E-16 | 0.411354 | 1.70E-20 | 0.45588  | 2.41E-25 |
| 8.30E-43 | 0.54718  | 7.92E-38 | 0.355823 | 2.20E-15 | 0.33371  | 1.31E-13 | 0.47653  | 7.55E-28 |
| 1.55E-11 | 0.155319 | 0.00076  | 0.2427   | 1.09E-07 | 0.147605 | 0.00138  | 0.257195 | 1.72E-08 |
| 2.71E-20 | 0.313162 | 4.38E-12 | 0.147254 | 0.00142  | 0.130435 | 0.00475  | 0.407516 | 4.13E-20 |
| 0.18256  | 0.097423 | 0.03532  | 0.199713 | 1.37E-05 | 0.155789 | 0.00073  | 0.15009  | 0.00114  |
| 5.31E-19 | 0.446949 | 2.58E-24 | 0.323083 | 8.31E-13 | 0.325681 | 5.32E-13 | 0.409286 | 2.75E-20 |
| 7.88E-34 | 0.592445 | 1.39E-45 | 0.446732 | 2.74E-24 | 0.489815 | 1.50E-29 | 0.608969 | 9.84E-49 |
| 8.12E-15 | 0.466902 | 1.17E-26 | 0.469497 | 5.62E-27 | 0.428281 | 2.96E-22 | 0.557801 | 1.53E-39 |
| 2.24E-14 | 0.50511  | 1.32E-31 | 0.553666 | 7.23E-39 | 0.531104 | 2.40E-35 | 0.480844 | 2.15E-28 |
| 7.16E-16 | 0.403143 | 1.12E-19 | 0.292603 | 1.13E-10 | 0.299895 | 3.68E-11 | 0.433851 | 7.42E-23 |
| 2.32E-18 | 0.531627 | 2.00E-35 | 0.45213  | 6.58E-25 | 0.500181 | 6.22E-31 | 0.468512 | 7.42E-27 |
| 7.27E-28 | 0.589459 | 4.92E-45 | 0.458795 | 1.09E-25 | 0.42474  | 7.04E-22 | 0.50672  | 7.89E-32 |
| 0.20561  | 0.272526 | 2.13E-09 | 0.400072 | 2.23E-19 | 0.360773 | 8.41E-16 | 0.149557 | 0.00119  |

|          |          |          |          |          |          |          |          |          |
|----------|----------|----------|----------|----------|----------|----------|----------|----------|
| 0.29626  | 0.328336 | 3.36E-13 | 0.391389 | 1.52E-18 | 0.397781 | 3.72E-19 | 0.293792 | 9.46E-11 |
| 0.90439  | 0.358696 | 1.26E-15 | 0.324863 | 6.13E-13 | 0.393258 | 1.01E-18 | 0.154383 | 0.00082  |
| 0.00037  | 0.38781  | 3.29E-18 | 0.486002 | 4.69E-29 | 0.465333 | 1.80E-26 | 0.476529 | 7.55E-28 |
| 0.61689  | 0.513451 | 9.00E-33 | 0.418393 | 3.25E-21 | 0.429786 | 2.04E-22 | 0.292015 | 1.24E-10 |
| 2.25E-08 | 0.429261 | 2.32E-22 | 0.228425 | 6.06E-07 | 0.257315 | 1.69E-08 | 0.285341 | 3.37E-10 |
| 0.94351  | -0.11591 | 0.01219  | -0.22362 | 1.05E-06 | -0.20727 | 6.29E-06 | -0.21736 | 2.12E-06 |
| 0.42785  | -0.07393 | 0.11059  | -0.15979 | 0.00053  | -0.17011 | 0.00022  | -0.23704 | 2.19E-07 |
| 1.71E-09 | 0.093029 | 0.0445   | 0.027246 | 0.55699  | 0.010714 | 0.81737  | 0.171841 | 0.00019  |
| 1.46E-15 | -0.00316 | 0.94568  | -0.03409 | 0.46239  | -0.08819 | 0.05685  | 0.157821 | 0.00062  |
| 0.13487  | -0.19563 | 2.07E-05 | -0.22783 | 6.49E-07 | -0.23143 | 4.27E-07 | -0.11406 | 0.01365  |
| 3.86E-09 | 0.161241 | 0.00047  | 0.206381 | 6.91E-06 | 0.061636 | 0.18363  | 0.235898 | 2.51E-07 |
| 2.98E-14 | 0.282003 | 5.50E-10 | 0.260681 | 1.08E-08 | 0.131309 | 0.00448  | 0.270053 | 3.01E-09 |
| 0.03126  | 0.042688 | 0.35734  | -0.00203 | 0.96505  | -0.07707 | 0.09622  | -0.0013  | 0.9777   |
| 1.61E-08 | 0.185051 | 5.74E-05 | 0.178912 | 0.0001   | 0.087095 | 0.06002  | 0.197467 | 1.72E-05 |
| 1.23E-07 | -0.09932 | 0.03188  | -0.23061 | 4.70E-07 | -0.13549 | 0.00335  | -0.15998 | 0.00052  |
| 0.719    | -0.08031 | 0.08297  | -0.06416 | 0.16627  | -0.13479 | 0.00352  | -0.11211 | 0.01535  |
| 0.00283  | -0.22504 | 8.95E-07 | -0.26137 | 9.86E-09 | -0.27513 | 1.48E-09 | -0.16396 | 0.00037  |
| 1.34E-27 | 0.190772 | 3.33E-05 | 0.085713 | 0.06421  | -0.02577 | 0.57851  | 0.260236 | 1.15E-08 |
| 2.50E-05 | -0.31881 | 1.71E-12 | -0.31327 | 4.30E-12 | -0.3632  | 5.22E-16 | -0.24438 | 8.88E-08 |
| 0.10685  | -0.26492 | 6.11E-09 | -0.24643 | 6.87E-08 | -0.3     | 3.62E-11 | -0.15576 | 0.00073  |
| 0.15328  | -0.33694 | 7.33E-14 | -0.2595  | 1.27E-08 | -0.34366 | 2.16E-14 | -0.15656 | 0.00069  |
| 0.15851  | -0.28074 | 6.61E-10 | -0.23962 | 1.60E-07 | -0.25898 | 1.36E-08 | -0.22386 | 1.02E-06 |
| 6.90E-06 | -0.19804 | 1.62E-05 | -0.26155 | 9.62E-09 | -0.21509 | 2.72E-06 | -0.25177 | 3.48E-08 |
| 0.01684  | -0.34759 | 1.04E-14 | -0.2446  | 8.64E-08 | -0.26474 | 6.26E-09 | -0.12984 | 0.00495  |
| 0.0481   | -0.02615 | 0.57297  | -0.1412  | 0.00222  | -0.19311 | 2.65E-05 | 0.047235 | 0.3084   |
| 2.19E-08 | -0.25603 | 2.00E-08 | -0.2724  | 2.17E-09 | -0.23184 | 4.06E-07 | -0.30974 | 7.67E-12 |
| 8.99E-06 | -0.21798 | 1.98E-06 | -0.23385 | 3.20E-07 | -0.22172 | 1.30E-06 | -0.16163 | 0.00045  |
| 9.48E-06 | -0.26971 | 3.16E-09 | -0.24038 | 1.46E-07 | -0.20912 | 5.18E-06 | -0.31595 | 2.77E-12 |
| 3.72E-17 | -0.30213 | 2.59E-11 | -0.29395 | 9.23E-11 | -0.22886 | 5.77E-07 | -0.36275 | 5.70E-16 |
| 0.00058  | -0.20057 | 1.26E-05 | -0.19281 | 2.73E-05 | -0.19141 | 3.13E-05 | -0.19879 | 1.51E-05 |
| 0.0309   | -0.27264 | 2.10E-09 | -0.28145 | 5.96E-10 | -0.3271  | 4.16E-13 | -0.25742 | 1.67E-08 |
| 0.00357  | -0.40044 | 2.06E-19 | -0.40166 | 1.57E-19 | -0.37837 | 2.42E-17 | -0.29919 | 4.11E-11 |
| 0.20256  | -0.00454 | 0.92206  | -0.14199 | 0.0021   | -0.1698  | 0.00023  | 0.004156 | 0.92863  |
| 0.00014  | -0.29728 | 5.54E-11 | -0.21919 | 1.73E-06 | -0.17817 | 0.00011  | -0.1899  | 3.62E-05 |
| 0.00085  | -0.25675 | 1.82E-08 | -0.3176  | 2.10E-12 | -0.36449 | 4.04E-16 | -0.22784 | 6.49E-07 |
| 0.0004   | -0.30224 | 2.55E-11 | -0.30903 | 8.60E-12 | -0.31558 | 2.94E-12 | -0.27534 | 1.44E-09 |
| 0.45728  | -0.16922 | 0.00024  | -0.16331 | 0.00039  | -0.20013 | 1.32E-05 | -0.11963 | 0.00966  |
| 0.558    | -0.23881 | 1.76E-07 | -0.17997 | 9.20E-05 | -0.25279 | 3.05E-08 | -0.03467 | 0.45482  |
| 0.01573  | -0.06618 | 0.15333  | -0.14138 | 0.0022   | -0.12096 | 0.00888  | -0.10213 | 0.02731  |
| 1.04E-05 | -0.36531 | 3.44E-16 | -0.34348 | 2.24E-14 | -0.35755 | 1.57E-15 | -0.22206 | 1.26E-06 |
| 0.01041  | -0.26863 | 3.67E-09 | -0.20071 | 1.24E-05 | -0.22135 | 1.36E-06 | -0.12808 | 0.00557  |
| 6.23E-16 | 0.251899 | 3.42E-08 | 0.193439 | 2.57E-05 | 0.109817 | 0.0176   | 0.251512 | 3.60E-08 |
| 0.0016   | -0.07293 | 0.11551  | -0.13553 | 0.00334  | -0.15348 | 0.00088  | -0.20146 | 1.15E-05 |
| 0.26876  | -0.27485 | 1.54E-09 | -0.23642 | 2.35E-07 | -0.25548 | 2.15E-08 | -0.12068 | 0.00904  |
| 6.59E-12 | -0.28882 | 2.01E-10 | -0.32563 | 5.37E-13 | -0.28435 | 3.90E-10 | -0.27393 | 1.75E-09 |



|          |          |          |          |          |          |          |          |          |
|----------|----------|----------|----------|----------|----------|----------|----------|----------|
| 0.17897  | -0.03452 | 0.45669  | -0.20558 | 7.51E-06 | -0.3137  | 4.01E-12 | -0.16686 | 0.00029  |
| 0.00759  | -0.23648 | 2.34E-07 | -0.29015 | 1.64E-10 | -0.34092 | 3.57E-14 | -0.30243 | 2.47E-11 |
| 1.58E-08 | -0.17897 | 0.0001   | -0.1761  | 0.00013  | -0.17139 | 0.0002   | -0.31025 | 7.06E-12 |
| 0.68898  | 0.15831  | 0.0006   | 0.214161 | 3.01E-06 | 0.311521 | 5.74E-12 | 0.150491 | 0.00111  |
| 1.65E-09 | -0.18365 | 6.55E-05 | -0.26409 | 6.84E-09 | -0.28468 | 3.71E-10 | -0.28196 | 5.54E-10 |
| 0.01557  | -0.03763 | 0.41725  | -0.03002 | 0.5176   | -0.15023 | 0.00113  | -0.08476 | 0.06726  |
| 1.00E-15 | -0.33408 | 1.22E-13 | -0.23816 | 1.91E-07 | -0.25072 | 3.98E-08 | -0.03362 | 0.46852  |
| 5.27E-10 | 0.081655 | 0.07793  | -0.0168  | 0.71722  | 0.043081 | 0.35292  | -0.2243  | 9.75E-07 |
| 0.00052  | -0.33686 | 7.45E-14 | -0.33996 | 4.25E-14 | -0.38584 | 5.02E-18 | -0.21669 | 2.29E-06 |
| 1.94E-16 | 0.078661 | 0.08952  | -0.17657 | 0.00013  | -0.12045 | 0.00918  | -0.27256 | 2.12E-09 |
| 5.68E-26 | -0.52222 | 4.94E-34 | -0.46176 | 4.85E-26 | -0.43944 | 1.80E-23 | -0.53472 | 6.80E-36 |
| 1.47E-14 | -0.24336 | 1.01E-07 | -0.29143 | 1.35E-10 | -0.22926 | 5.50E-07 | -0.35003 | 6.61E-15 |
| 2.06E-07 | -0.2482  | 5.49E-08 | -0.24586 | 7.38E-08 | -0.28179 | 5.67E-10 | -0.3688  | 1.71E-16 |
| 0.97248  | 0.023184 | 0.61726  | -0.1198  | 0.00956  | -0.09873 | 0.03292  | -0.14774 | 0.00137  |
| 3.89E-20 | -0.2342  | 3.07E-07 | -0.31017 | 7.15E-12 | -0.29637 | 6.37E-11 | -0.47173 | 2.98E-27 |
| 1.21E-06 | -0.17241 | 0.00018  | -0.29744 | 5.40E-11 | -0.32358 | 7.64E-13 | -0.28391 | 4.16E-10 |
| 0.00351  | -0.13734 | 0.00294  | -0.19999 | 1.33E-05 | -0.19985 | 1.35E-05 | -0.29525 | 7.57E-11 |
| 3.00E-07 | -0.08323 | 0.07235  | -0.10497 | 0.02329  | -0.07022 | 0.12968  | -0.28887 | 1.99E-10 |
| 0.00234  | -0.01599 | 0.73028  | -0.15694 | 0.00067  | -0.27766 | 1.03E-09 | -0.17854 | 0.0001   |
| 2.40E-18 | -0.38391 | 7.56E-18 | -0.42467 | 7.17E-22 | -0.42898 | 2.49E-22 | -0.49391 | 4.31E-30 |
| 4.37E-24 | -0.1917  | 3.04E-05 | -0.19464 | 2.28E-05 | -0.15482 | 0.00079  | -0.36624 | 2.86E-16 |
| 0.00201  | -0.18656 | 4.98E-05 | -0.14323 | 0.00192  | -0.20804 | 5.80E-06 | -0.29166 | 1.31E-10 |
| 0.00207  | -0.33538 | 9.71E-14 | -0.20645 | 6.86E-06 | -0.35277 | 3.93E-15 | -0.23789 | 1.97E-07 |
| 1.14E-07 | -0.24594 | 7.31E-08 | -0.09763 | 0.03492  | -0.16202 | 0.00044  | -0.31193 | 5.36E-12 |
| 1.47E-17 | 0.016102 | 0.72855  | -0.08393 | 0.06998  | -0.06337 | 0.17159  | -0.29408 | 9.05E-11 |
| 0.16176  | -0.08132 | 0.07918  | -0.18777 | 4.44E-05 | -0.23685 | 2.24E-07 | -0.15835 | 0.00059  |
| 1.55E-10 | -0.21852 | 1.87E-06 | -0.1456  | 0.00161  | -0.28454 | 3.79E-10 | -0.24928 | 4.79E-08 |
| 4.29E-05 | 0.030107 | 0.51632  | 0.068455 | 0.13965  | -0.05491 | 0.23626  | -0.14797 | 0.00134  |
| 8.75E-06 | 0.142222 | 0.00206  | -0.07869 | 0.0894   | -0.11266 | 0.01485  | -0.15177 | 0.001    |
| 1.42E-24 | -0.4004  | 2.08E-19 | -0.39118 | 1.59E-18 | -0.39187 | 1.37E-18 | -0.5367  | 3.40E-36 |
| 0.00104  | -0.10392 | 0.02471  | -0.10795 | 0.01962  | -0.24701 | 6.38E-08 | -0.19313 | 2.65E-05 |
| 2.40E-05 | -0.20941 | 5.02E-06 | -0.15938 | 0.00055  | -0.21043 | 4.50E-06 | -0.20537 | 7.68E-06 |
| 0.09747  | 0.015139 | 0.7442   | -0.16688 | 0.00029  | -0.23595 | 2.49E-07 | 0.009995 | 0.82944  |
| 2.30E-06 | -0.19152 | 3.10E-05 | -0.26144 | 9.77E-09 | -0.24928 | 4.79E-08 | -0.32334 | 7.96E-13 |
| 5.79E-22 | -0.3271  | 4.16E-13 | -0.38669 | 4.18E-18 | -0.39504 | 6.82E-19 | -0.50322 | 2.39E-31 |
| 0.00018  | -0.15433 | 0.00082  | -0.17843 | 0.00011  | -0.19834 | 1.58E-05 | -0.21578 | 2.53E-06 |
| 3.42E-17 | -0.2533  | 2.86E-08 | -0.25105 | 3.82E-08 | -0.19261 | 2.78E-05 | -0.39555 | 6.10E-19 |
| 0.00304  | -0.10906 | 0.01839  | -0.15661 | 0.00068  | -0.22905 | 5.64E-07 | -0.19275 | 2.75E-05 |
| 1.44E-11 | -0.37267 | 7.82E-17 | -0.30902 | 8.62E-12 | -0.29925 | 4.07E-11 | -0.28403 | 4.09E-10 |
| 4.83E-12 | -0.05603 | 0.22684  | -0.07114 | 0.12472  | -0.10295 | 0.0261   | 0.03926  | 0.3973   |
| 8.36E-08 | -0.19007 | 3.56E-05 | -0.12519 | 0.00675  | -0.17919 | 9.88E-05 | -0.31424 | 3.67E-12 |
| 3.04E-16 | -0.05887 | 0.20411  | -0.17866 | 0.0001   | -0.14058 | 0.00233  | -0.2559  | 2.04E-08 |
| 0.00043  | -0.12971 | 0.00499  | 0.070199 | 0.12982  | -0.09048 | 0.0507   | -0.08105 | 0.08019  |
| 4.51E-07 | -0.26741 | 4.34E-09 | -0.19503 | 2.20E-05 | -0.29841 | 4.64E-11 | -0.35542 | 2.37E-15 |
| 2.58E-05 | -0.0855  | 0.06489  | -0.23291 | 3.58E-07 | -0.29279 | 1.10E-10 | -0.31726 | 2.22E-12 |

|          |          |          |          |          |          |          |          |          |
|----------|----------|----------|----------|----------|----------|----------|----------|----------|
| 9.19E-10 | -0.29197 | 1.25E-10 | -0.23051 | 4.76E-07 | -0.26568 | 5.50E-09 | -0.37155 | 9.82E-17 |
| 0.14795  | -0.06009 | 0.19491  | -0.11469 | 0.01314  | -0.19753 | 1.71E-05 | -0.21629 | 2.39E-06 |
| 7.11E-06 | -0.08063 | 0.08176  | -0.12032 | 0.00925  | -0.19089 | 3.29E-05 | -0.12433 | 0.00715  |
| 3.33E-14 | -0.1787  | 0.0001   | -0.23331 | 3.42E-07 | -0.22393 | 1.02E-06 | -0.28533 | 3.37E-10 |
| 2.77E-12 | -0.24868 | 5.17E-08 | -0.25005 | 4.34E-08 | -0.27523 | 1.46E-09 | -0.26615 | 5.16E-09 |
| 2.97E-16 | -0.02665 | 0.56567  | -0.06607 | 0.15399  | -0.0606  | 0.19115  | -0.2479  | 5.71E-08 |
| 0.00124  | -0.31447 | 3.53E-12 | -0.30296 | 2.27E-11 | -0.38712 | 3.81E-18 | -0.17881 | 0.0001   |
| 0.01808  | 0.042669 | 0.35755  | -0.02836 | 0.54099  | -0.00345 | 0.94066  | -0.09188 | 0.04722  |
| 1.27E-11 | -0.21531 | 2.66E-06 | -0.2031  | 9.72E-06 | -0.16401 | 0.00037  | -0.27221 | 2.23E-09 |
| 1.97E-06 | 0.190298 | 3.48E-05 | 0.002576 | 0.95573  | -0.0451  | 0.33076  | -0.17976 | 9.38E-05 |
| 0.40064  | -0.0628  | 0.17547  | -0.18578 | 5.36E-05 | -0.20668 | 6.69E-06 | -0.12808 | 0.00557  |
| 2.46E-13 | -0.25678 | 1.81E-08 | -0.05418 | 0.24259  | -0.08109 | 0.08002  | -0.29761 | 5.26E-11 |
| 2.48E-07 | -0.38394 | 7.51E-18 | -0.31736 | 2.19E-12 | -0.46664 | 1.25E-26 | -0.46737 | 1.02E-26 |
| 1.76E-12 | -0.32091 | 1.20E-12 | -0.24743 | 6.06E-08 | -0.33355 | 1.34E-13 | -0.38145 | 1.27E-17 |
| 3.20E-05 | -0.41302 | 1.15E-20 | -0.3544  | 2.88E-15 | -0.32496 | 6.03E-13 | -0.30976 | 7.64E-12 |
| 0.17721  | -0.24512 | 8.10E-08 | -0.26657 | 4.88E-09 | -0.42781 | 3.33E-22 | -0.18866 | 4.08E-05 |
| 0.00035  | -0.30035 | 3.43E-11 | -0.30211 | 2.60E-11 | -0.38098 | 1.40E-17 | -0.20546 | 7.60E-06 |
| 4.54E-06 | -0.31815 | 1.91E-12 | -0.31075 | 6.51E-12 | -0.39135 | 1.53E-18 | -0.3397  | 4.46E-14 |
| 0.00824  | -0.29385 | 9.38E-11 | -0.19524 | 2.15E-05 | -0.27734 | 1.08E-09 | -0.24659 | 6.73E-08 |
| 0.34567  | -0.17141 | 0.0002   | -0.1486  | 0.00128  | -0.19148 | 3.11E-05 | -0.21501 | 2.75E-06 |
| 0.00727  | -0.16628 | 0.00031  | -0.21454 | 2.89E-06 | -0.25498 | 2.30E-08 | -0.25406 | 2.59E-08 |
| 0.91351  | -0.31708 | 2.29E-12 | -0.2144  | 2.93E-06 | -0.37078 | 1.15E-16 | -0.27598 | 1.31E-09 |
| 0.00103  | -0.04223 | 0.36255  | -0.09221 | 0.04641  | -0.08414 | 0.06929  | -0.2034  | 9.41E-06 |
| 4.83E-13 | -0.3426  | 2.63E-14 | -0.41103 | 1.84E-20 | -0.41312 | 1.13E-20 | -0.44317 | 6.91E-24 |
| 0.01124  | 0.038599 | 0.40529  | -0.06504 | 0.16056  | -0.01895 | 0.68291  | -0.0731  | 0.11468  |
| 0.34348  | -0.13264 | 0.00409  | -0.12256 | 0.00801  | -0.19544 | 2.11E-05 | -0.20549 | 7.58E-06 |
| 0.7924   | -0.175   | 0.00014  | -0.10778 | 0.01982  | -0.1105  | 0.0169   | -0.16565 | 0.00032  |
| 5.36E-08 | -0.47649 | 7.64E-28 | -0.31737 | 2.18E-12 | -0.36303 | 5.40E-16 | -0.33065 | 2.24E-13 |
| 2.21E-18 | -0.24926 | 4.80E-08 | -0.31826 | 1.88E-12 | -0.27214 | 2.25E-09 | -0.40897 | 2.95E-20 |
| 2.35E-08 | -0.33481 | 1.07E-13 | -0.35959 | 1.06E-15 | -0.40016 | 2.19E-19 | -0.38422 | 7.08E-18 |
| 1.01E-29 | -0.3405  | 3.86E-14 | -0.34438 | 1.89E-14 | -0.18064 | 8.65E-05 | -0.51612 | 3.76E-33 |
| 0.32236  | -0.05712 | 0.21796  | -0.11354 | 0.01409  | -0.17596 | 0.00013  | -0.08908 | 0.0544   |
| 1.83E-07 | -0.24284 | 1.08E-07 | -0.25518 | 2.24E-08 | -0.23401 | 3.14E-07 | -0.361   | 8.04E-16 |
| 0.01262  | -0.0112  | 0.80925  | -0.10424 | 0.02428  | -0.15735 | 0.00064  | -0.17731 | 0.00012  |
| 0.24726  | -0.06384 | 0.16845  | -0.17427 | 0.00015  | -0.29474 | 8.18E-11 | -0.09734 | 0.03547  |
| 0.23689  | -0.17346 | 0.00017  | -0.1613  | 0.00047  | -0.22597 | 8.05E-07 | -0.23329 | 3.43E-07 |
| 4.17E-27 | -0.11975 | 0.00959  | -0.23401 | 3.15E-07 | -0.16548 | 0.00033  | -0.429   | 2.48E-22 |
| 0.96149  | -0.08273 | 0.07409  | -0.12047 | 0.00916  | -0.17518 | 0.00014  | -0.08467 | 0.06753  |
| 2.22E-16 | 0.021624 | 0.64114  | 0.029978 | 0.51813  | 0.012465 | 0.78819  | -0.27151 | 2.46E-09 |
| 1.27E-06 | 0.109068 | 0.01839  | -0.09853 | 0.03328  | -0.15862 | 0.00058  | -0.18959 | 3.73E-05 |
| 2.10E-14 | -0.22158 | 1.33E-06 | -0.20585 | 7.30E-06 | -0.11018 | 0.01723  | -0.3084  | 9.53E-12 |
| 1.08E-12 | 0.118946 | 0.01009  | -0.01224 | 0.79192  | -0.06777 | 0.14369  | -0.24584 | 7.40E-08 |
| 4.15E-07 | -0.3887  | 2.72E-18 | -0.31646 | 2.54E-12 | -0.39195 | 1.34E-18 | -0.38903 | 2.53E-18 |
| 1.91E-08 | 0.116029 | 0.0121   | -0.00243 | 0.95829  | -0.03374 | 0.46706  | -0.15116 | 0.00105  |
| 0.08182  | -0.30049 | 3.36E-11 | -0.32631 | 4.77E-13 | -0.40941 | 2.67E-20 | -0.25845 | 1.46E-08 |

|          |          |          |          |          |          |          |          |          |
|----------|----------|----------|----------|----------|----------|----------|----------|----------|
| 5.23E-06 | -0.32647 | 4.65E-13 | -0.35255 | 4.10E-15 | -0.42787 | 3.28E-22 | -0.42234 | 1.26E-21 |
| 6.78E-17 | -0.3715  | 9.92E-17 | -0.40037 | 2.09E-19 | -0.4748  | 1.24E-27 | -0.55229 | 1.21E-38 |
| 8.25E-06 | -0.29123 | 1.40E-10 | -0.25014 | 4.29E-08 | -0.33575 | 9.09E-14 | -0.36565 | 3.21E-16 |
| 0.02285  | -0.14573 | 0.00159  | -0.15651 | 0.00069  | -0.22719 | 7.00E-07 | -0.1984  | 1.57E-05 |
| 6.08E-06 | -0.28352 | 4.40E-10 | -0.3424  | 2.73E-14 | -0.4148  | 7.60E-21 | -0.32467 | 6.34E-13 |
| 1.54E-05 | -0.20144 | 1.15E-05 | -0.15573 | 0.00073  | -0.20533 | 7.71E-06 | -0.26022 | 1.15E-08 |
| 0.01423  | -0.40539 | 6.72E-20 | -0.2611  | 1.02E-08 | -0.38166 | 1.22E-17 | -0.28101 | 6.35E-10 |
| 3.90E-15 | 0.056071 | 0.2265   | -0.11663 | 0.01166  | -0.08857 | 0.05578  | -0.22605 | 7.98E-07 |
| 1.30E-09 | 0.265906 | 5.34E-09 | 0.04631  | 0.31798  | 0.074086 | 0.10984  | -0.13056 | 0.00471  |
| 9.99E-13 | 0.451948 | 6.90E-25 | 0.539724 | 1.16E-36 | 0.551057 | 1.91E-38 | 0.530161 | 3.32E-35 |
| 5.45E-20 | -0.19401 | 2.43E-05 | -0.08867 | 0.05551  | -0.07121 | 0.12436  | -0.29357 | 9.78E-11 |
| 9.30E-13 | -0.24758 | 5.95E-08 | -0.20356 | 9.26E-06 | -0.2546  | 2.41E-08 | -0.3835  | 8.25E-18 |
| 0.72858  | -0.08581 | 0.06391  | -0.15924 | 0.00055  | -0.30705 | 1.18E-11 | -0.16567 | 0.00032  |
| 0.6613   | 0.060508 | 0.1918   | -0.0196  | 0.67268  | -0.05347 | 0.24881  | -0.05073 | 0.27395  |
| 1.09E-16 | -0.36427 | 4.23E-16 | -0.44416 | 5.34E-24 | -0.44755 | 2.21E-24 | -0.45039 | 1.04E-24 |
| 1.84E-09 | -0.32174 | 1.05E-12 | -0.40669 | 5.00E-20 | -0.42978 | 2.05E-22 | -0.37213 | 8.72E-17 |
| 3.38E-23 | -0.38495 | 6.05E-18 | -0.45139 | 8.02E-25 | -0.48274 | 1.23E-28 | -0.51223 | 1.34E-32 |
| 1.46E-08 | 0.059347 | 0.20048  | -0.0601  | 0.19483  | -0.12866 | 0.00536  | -0.21559 | 2.58E-06 |
| 6.32E-19 | -0.0885  | 0.05599  | -0.21109 | 4.20E-06 | -0.1419  | 0.00211  | -0.32353 | 7.69E-13 |
| 9.17E-13 | -0.13348 | 0.00386  | -0.1092  | 0.01825  | -0.09534 | 0.03946  | -0.18154 | 7.96E-05 |
| 2.01E-21 | -0.21324 | 3.33E-06 | -0.23864 | 1.80E-07 | -0.14842 | 0.0013   | -0.32326 | 8.06E-13 |
| 4.51E-28 | -0.24682 | 6.54E-08 | -0.35671 | 1.85E-15 | -0.31605 | 2.72E-12 | -0.5266  | 1.12E-34 |
| 3.90E-08 | -0.22127 | 1.37E-06 | -0.1612  | 0.00047  | -0.2576  | 1.63E-08 | -0.29178 | 1.29E-10 |
| 6.78E-12 | -0.06974 | 0.13237  | -0.04925 | 0.28824  | -0.02153 | 0.64262  | -0.21279 | 3.50E-06 |
| 0.00265  | -0.01712 | 0.71212  | -0.11748 | 0.01106  | -0.19047 | 3.43E-05 | -0.16455 | 0.00036  |
| 4.25E-11 | -0.20126 | 1.17E-05 | -0.07758 | 0.094    | -0.11881 | 0.01018  | -0.26895 | 3.51E-09 |
| 0.28755  | -0.25044 | 4.13E-08 | -0.30751 | 1.10E-11 | -0.39853 | 3.15E-19 | -0.32965 | 2.67E-13 |
| 0.00926  | 0.000711 | 0.98778  | -0.15985 | 0.00053  | -0.16763 | 0.00027  | -0.27969 | 7.70E-10 |
| 1.32E-10 | -0.3014  | 2.91E-11 | -0.17412 | 0.00016  | -0.25434 | 2.50E-08 | -0.37479 | 5.07E-17 |
| 0.16476  | -0.15185 | 0.001    | -0.24367 | 9.70E-08 | -0.37564 | 4.25E-17 | -0.11437 | 0.01339  |
| 2.82E-06 | 0.149877 | 0.00116  | -0.03131 | 0.49969  | -0.09402 | 0.04227  | 0.106878 | 0.02088  |
| 0.01375  | -0.18247 | 7.31E-05 | -0.19974 | 1.37E-05 | -0.2458  | 7.44E-08 | -0.28542 | 3.33E-10 |
| 0.00024  | 0.295498 | 7.28E-11 | 0.27499  | 1.51E-09 | 0.277437 | 1.06E-09 | 0.317049 | 2.30E-12 |
| 0.0006   | -0.13029 | 0.0048   | -0.26039 | 1.12E-08 | -0.21322 | 3.34E-06 | -0.32449 | 6.53E-13 |
| 1.66E-05 | -0.20741 | 6.20E-06 | -0.22795 | 6.41E-07 | -0.25814 | 1.52E-08 | -0.33979 | 4.39E-14 |
| 4.44E-25 | -0.45224 | 6.38E-25 | -0.31913 | 1.62E-12 | -0.33273 | 1.55E-13 | -0.42967 | 2.10E-22 |
| 0.25485  | -0.10302 | 0.02601  | -0.13329 | 0.00391  | -0.15569 | 0.00074  | -0.17028 | 0.00022  |
| 0.00086  | 0.167135 | 0.00029  | 0.231314 | 4.33E-07 | 0.247474 | 6.02E-08 | 0.164701 | 0.00035  |
| 0.97546  | -0.2007  | 1.24E-05 | -0.21517 | 2.70E-06 | -0.28618 | 2.97E-10 | -0.25854 | 1.44E-08 |
| 3.03E-13 | -0.08332 | 0.07205  | -0.23571 | 2.57E-07 | -0.1967  | 1.86E-05 | -0.2866  | 2.79E-10 |
| 9.97E-11 | -0.19978 | 1.36E-05 | -0.1623  | 0.00043  | -0.18979 | 3.66E-05 | -0.07311 | 0.11463  |
| 0.479    | -0.24024 | 1.48E-07 | -0.35413 | 3.03E-15 | -0.38407 | 7.30E-18 | -0.14327 | 0.00191  |
| 1.07E-06 | 0.221996 | 1.27E-06 | 0.057201 | 0.21727  | 0.010663 | 0.81824  | -0.14606 | 0.00155  |
| 0.00473  | 0.181987 | 7.64E-05 | 0.236459 | 2.34E-07 | 0.394185 | 8.24E-19 | 0.152138 | 0.00097  |
| 2.92E-15 | -0.32541 | 5.57E-13 | -0.25595 | 2.02E-08 | -0.23249 | 3.77E-07 | -0.23808 | 1.93E-07 |

|          |          |          |          |          |          |          |          |          |
|----------|----------|----------|----------|----------|----------|----------|----------|----------|
| 3.32E-09 | -0.31139 | 5.86E-12 | -0.34586 | 1.44E-14 | -0.41926 | 2.64E-21 | -0.17094 | 0.00021  |
| 6.02E-16 | -0.15351 | 0.00087  | -0.02222 | 0.63205  | -0.04776 | 0.30303  | -0.33873 | 5.32E-14 |
| 0.04481  | -0.1246  | 0.00702  | -0.13099 | 0.00458  | -0.2205  | 1.50E-06 | -0.18971 | 3.69E-05 |
| 1.40E-15 | 0.475241 | 1.09E-27 | 0.50163  | 3.95E-31 | 0.564876 | 1.02E-40 | 0.563684 | 1.62E-40 |
| 9.79E-16 | -0.25088 | 3.91E-08 | -0.23547 | 2.64E-07 | -0.26779 | 4.12E-09 | -0.309   | 8.65E-12 |
| 5.06E-15 | -0.22386 | 1.02E-06 | -0.15162 | 0.00101  | -0.14562 | 0.0016   | -0.29654 | 6.21E-11 |
| 0.13737  | -0.16904 | 0.00024  | -0.20763 | 6.06E-06 | -0.34968 | 7.06E-15 | -0.23105 | 4.46E-07 |
| 0.78846  | -0.06639 | 0.15204  | 0.023465 | 0.613    | -0.05905 | 0.20276  | -0.01791 | 0.69949  |
| 3.30E-13 | -0.35343 | 3.47E-15 | -0.20294 | 9.87E-06 | -0.24574 | 7.49E-08 | -0.29914 | 4.14E-11 |
| 1.29E-32 | 0.427591 | 3.51E-22 | 0.457298 | 1.64E-25 | 0.424292 | 7.85E-22 | 0.496003 | 2.27E-30 |
| 3.85E-14 | -0.05191 | 0.26289  | -0.2067  | 6.69E-06 | -0.13739 | 0.00293  | -0.18229 | 7.43E-05 |
| 0.73456  | -0.17507 | 0.00014  | -0.13517 | 0.00343  | -0.23992 | 1.54E-07 | -0.09015 | 0.05156  |
| 2.92E-20 | -0.12695 | 0.00601  | -0.21387 | 3.11E-06 | -0.19402 | 2.43E-05 | -0.346   | 1.40E-14 |
| 8.52E-12 | -0.33471 | 1.09E-13 | -0.23901 | 1.72E-07 | -0.28397 | 4.12E-10 | -0.34999 | 6.66E-15 |
| 0.62471  | -0.29197 | 1.25E-10 | -0.27521 | 1.46E-09 | -0.40022 | 2.16E-19 | -0.18941 | 3.80E-05 |
| 1.59E-10 | -0.25018 | 4.27E-08 | -0.23311 | 3.50E-07 | -0.27724 | 1.09E-09 | -0.31805 | 1.94E-12 |
| 7.17E-27 | -0.31045 | 6.83E-12 | -0.37632 | 3.70E-17 | -0.34311 | 2.39E-14 | -0.47367 | 1.72E-27 |
| 8.03E-12 | -0.32074 | 1.24E-12 | -0.32008 | 1.38E-12 | -0.35275 | 3.95E-15 | -0.31027 | 7.03E-12 |
| 0.2423   | 0.047479 | 0.3059   | 0.008762 | 0.85021  | -0.04486 | 0.33336  | -0.11293 | 0.01462  |
| 0.03702  | -0.16275 | 0.00041  | -0.22439 | 9.64E-07 | -0.25966 | 1.24E-08 | -0.26335 | 7.55E-09 |
| 9.96E-17 | -0.247   | 6.40E-08 | -0.24305 | 1.05E-07 | -0.18309 | 6.90E-05 | -0.42181 | 1.43E-21 |
| 0.35221  | 0.039629 | 0.39286  | -0.12602 | 0.00639  | -0.09659 | 0.03693  | -0.22488 | 9.12E-07 |
| 5.08E-11 | -0.37437 | 5.52E-17 | -0.43337 | 8.36E-23 | -0.48467 | 6.97E-29 | -0.47373 | 1.69E-27 |
| 5.95E-06 | -0.16537 | 0.00033  | -0.27523 | 1.46E-09 | -0.29646 | 6.28E-11 | -0.09476 | 0.04066  |
| 1.16E-18 | -0.34495 | 1.70E-14 | -0.36011 | 9.57E-16 | -0.35744 | 1.61E-15 | -0.50899 | 3.81E-32 |
| 0.91223  | 0.007188 | 0.87688  | -0.02262 | 0.6259   | -0.05663 | 0.22192  | -0.07899 | 0.08817  |
| 1.33E-09 | -0.24191 | 1.21E-07 | -0.14498 | 0.00168  | -0.11609 | 0.01206  | -0.24362 | 9.76E-08 |
| 1.25E-08 | -0.37147 | 9.98E-17 | -0.40814 | 3.58E-20 | -0.46944 | 5.71E-27 | -0.45967 | 8.60E-26 |
| 5.97E-11 | -0.15437 | 0.00082  | -0.27423 | 1.68E-09 | -0.26476 | 6.24E-09 | -0.36993 | 1.36E-16 |
| 1.27E-10 | 0.136923 | 0.00303  | -0.02576 | 0.57876  | 0.039179 | 0.39826  | -0.10956 | 0.01786  |
| 0.06965  | -0.15296 | 0.00091  | -0.229   | 5.67E-07 | -0.29271 | 1.12E-10 | -0.3284  | 3.32E-13 |
| 0.20209  | 0.036473 | 0.43167  | -0.18235 | 7.39E-05 | -0.16411 | 0.00037  | -0.20846 | 5.55E-06 |
| 1.04E-05 | 0.109938 | 0.01747  | -0.08287 | 0.07361  | -0.06412 | 0.16656  | -0.15536 | 0.00075  |
| 3.85E-11 | -0.01858 | 0.68877  | -0.10053 | 0.02985  | -0.04248 | 0.3597   | -0.25591 | 2.03E-08 |
| 0.00803  | 0.010889 | 0.81445  | 0.030769 | 0.50713  | 0.062087 | 0.18044  | 0.102211 | 0.0272   |
| 6.10E-17 | -0.02662 | 0.56614  | -0.08032 | 0.08293  | -0.00764 | 0.86925  | -0.14732 | 0.00141  |
| 0.00014  | -0.08284 | 0.07369  | -0.10878 | 0.0187   | -0.07358 | 0.11229  | -0.17774 | 0.00011  |
| 4.97E-15 | 0.04485  | 0.33349  | -0.12836 | 0.00547  | -0.07592 | 0.10129  | -0.23889 | 1.75E-07 |
| 0.00014  | -0.20821 | 5.70E-06 | -0.18072 | 8.59E-05 | -0.24669 | 6.65E-08 | -0.15583 | 0.00073  |
| 1.38E-06 | -0.21533 | 2.65E-06 | -0.18741 | 4.60E-05 | -0.21002 | 4.70E-06 | -0.28541 | 3.33E-10 |
| 1.75E-20 | -0.16686 | 0.00029  | -0.18098 | 8.39E-05 | -0.21383 | 3.12E-06 | -0.34301 | 2.44E-14 |
| 2.08E-42 | -0.42264 | 1.17E-21 | -0.51457 | 6.24E-33 | -0.47327 | 1.92E-27 | -0.59329 | 9.69E-46 |
| 4.92E-24 | -0.4399  | 1.60E-23 | -0.37691 | 3.27E-17 | -0.4401  | 1.52E-23 | -0.47243 | 2.45E-27 |
| 6.54E-12 | -0.25091 | 3.89E-08 | -0.17964 | 9.48E-05 | -0.20228 | 1.06E-05 | -0.21444 | 2.92E-06 |
| 0.00012  | -0.32108 | 1.17E-12 | -0.24748 | 6.02E-08 | -0.42097 | 1.75E-21 | -0.20658 | 6.77E-06 |

|          |          |          |          |          |          |          |          |          |
|----------|----------|----------|----------|----------|----------|----------|----------|----------|
| 3.42E-06 | 0.022955 | 0.62075  | -0.08964 | 0.05288  | -0.09122 | 0.04882  | -0.23195 | 4.01E-07 |
| 0.00289  | -0.04118 | 0.37458  | -0.18745 | 4.58E-05 | -0.16843 | 0.00026  | -0.29158 | 1.33E-10 |
| 0.24932  | -0.11166 | 0.01577  | -0.1214  | 0.00863  | -0.16327 | 0.0004   | -0.23195 | 4.02E-07 |
| 1.61E-32 | -0.40283 | 1.20E-19 | -0.43238 | 1.07E-22 | -0.41184 | 1.52E-20 | -0.57112 | 8.85E-42 |
| 3.86E-07 | -0.28429 | 3.93E-10 | -0.33935 | 4.75E-14 | -0.36406 | 4.40E-16 | -0.41445 | 8.26E-21 |
| 1.65E-22 | -0.34091 | 3.58E-14 | -0.31087 | 6.38E-12 | -0.35668 | 1.86E-15 | -0.47102 | 3.65E-27 |
| 0.85596  | -0.21959 | 1.66E-06 | -0.20298 | 9.84E-06 | -0.31475 | 3.37E-12 | -0.21171 | 3.93E-06 |
| 0.02027  | -0.18173 | 7.82E-05 | -0.19263 | 2.78E-05 | -0.28003 | 7.33E-10 | -0.30311 | 2.22E-11 |
| 3.51E-20 | -0.30179 | 2.73E-11 | -0.31426 | 3.66E-12 | -0.26923 | 3.38E-09 | -0.4164  | 5.20E-21 |
| 9.73E-18 | -0.3932  | 1.02E-18 | -0.3104  | 6.89E-12 | -0.32076 | 1.23E-12 | -0.38894 | 2.58E-18 |
| 0.00043  | -0.26147 | 9.73E-09 | -0.25247 | 3.18E-08 | -0.30431 | 1.84E-11 | -0.20183 | 1.11E-05 |
| 1.03E-05 | 0.110491 | 0.01691  | -0.02449 | 0.5976   | -0.0692  | 0.13541  | 0.088973 | 0.05468  |
| 3.04E-46 | -0.46314 | 3.31E-26 | -0.3976  | 3.88E-19 | -0.37367 | 6.38E-17 | -0.61364 | 1.17E-49 |
| 5.64E-17 | -0.15876 | 0.00057  | -0.13871 | 0.00266  | -0.12832 | 0.00548  | -0.27679 | 1.17E-09 |
| 1.37E-09 | 0.10886  | 0.01861  | -0.00551 | 0.9054   | -0.05034 | 0.27763  | -0.0083  | 0.8581   |
| 1.72E-12 | -0.3147  | 3.40E-12 | -0.33744 | 6.71E-14 | -0.41824 | 3.37E-21 | -0.47697 | 6.65E-28 |
| 3.24E-28 | -0.44721 | 2.42E-24 | -0.3488  | 8.32E-15 | -0.32175 | 1.04E-12 | -0.46104 | 5.91E-26 |
| 3.90E-35 | -0.47632 | 8.02E-28 | -0.48646 | 4.09E-29 | -0.46714 | 1.09E-26 | -0.6033  | 1.24E-47 |
| 4.52E-06 | -0.22804 | 6.34E-07 | -0.19624 | 1.95E-05 | -0.2386  | 1.81E-07 | -0.28659 | 2.80E-10 |
| 1.13E-23 | -0.21324 | 3.33E-06 | -0.1458  | 0.00158  | -0.13006 | 0.00488  | -0.3783  | 2.45E-17 |
| 6.29E-09 | -0.18528 | 5.62E-05 | -0.27562 | 1.38E-09 | -0.30011 | 3.56E-11 | -0.30879 | 8.94E-12 |
| 2.03E-05 | 0.174947 | 0.00014  | -0.09303 | 0.04449  | -0.09155 | 0.048    | -0.15687 | 0.00067  |
| 0.32316  | -0.31087 | 6.38E-12 | -0.30045 | 3.38E-11 | -0.37852 | 2.34E-17 | -0.22487 | 9.13E-07 |
| 5.06E-07 | -0.04958 | 0.28497  | -0.20104 | 1.20E-05 | -0.18168 | 7.86E-05 | -0.27645 | 1.22E-09 |
| 1.33E-15 | -0.21658 | 2.31E-06 | -0.16784 | 0.00027  | -0.23406 | 3.13E-07 | -0.32745 | 3.92E-13 |
| 5.32E-21 | -0.31794 | 1.98E-12 | -0.28577 | 3.16E-10 | -0.29688 | 5.89E-11 | -0.32989 | 2.56E-13 |
| 3.32E-07 | 0.163989 | 0.00037  | 0.209741 | 4.85E-06 | 0.2715   | 2.46E-09 | 0.169558 | 0.00023  |
| 0.00202  | -0.29339 | 1.01E-10 | -0.21869 | 1.83E-06 | -0.28306 | 4.71E-10 | -0.38088 | 1.43E-17 |
| 9.18E-20 | -0.27062 | 2.78E-09 | -0.24939 | 4.72E-08 | -0.22669 | 7.41E-07 | -0.39282 | 1.11E-18 |
| 1.14E-08 | 0.077038 | 0.09635  | 0.06974  | 0.13235  | 0.087124 | 0.05993  | 0.308378 | 9.56E-12 |
| 6.50E-07 | 0.110745 | 0.01666  | -0.14597 | 0.00156  | -0.10495 | 0.02331  | -0.21569 | 2.55E-06 |
| 0.04766  | 0.029583 | 0.52366  | -0.10387 | 0.02478  | -0.1497  | 0.00118  | -0.19443 | 2.33E-05 |
| 0.98233  | -0.14932 | 0.00121  | -0.17238 | 0.00018  | -0.28758 | 2.42E-10 | -0.24634 | 6.94E-08 |
| 1.81E-06 | -0.23469 | 2.90E-07 | -0.16378 | 0.00038  | -0.23184 | 4.07E-07 | -0.25195 | 3.40E-08 |
| 0.70771  | 0.059212 | 0.2015   | -0.07646 | 0.09889  | -0.04564 | 0.32499  | -0.09649 | 0.03712  |
| 4.29E-18 | -0.17047 | 0.00021  | -0.17858 | 0.0001   | -0.20721 | 6.33E-06 | -0.28358 | 4.37E-10 |
| 2.33E-10 | 0.050775 | 0.27351  | -0.17667 | 0.00012  | -0.11022 | 0.01719  | -0.26924 | 3.38E-09 |
| 1.30E-10 | -0.4252  | 6.30E-22 | -0.38438 | 6.84E-18 | -0.47838 | 4.42E-28 | -0.45455 | 3.45E-25 |
| 0.00019  | -0.14071 | 0.00231  | -0.18717 | 4.70E-05 | -0.27236 | 2.18E-09 | -0.1745  | 0.00015  |
| 0.00018  | -0.04231 | 0.36161  | -0.10639 | 0.02148  | -0.20138 | 1.16E-05 | -0.21242 | 3.64E-06 |
| 4.34E-17 | -0.23617 | 2.43E-07 | -0.15557 | 0.00074  | -0.1292  | 0.00517  | -0.34543 | 1.56E-14 |
| 0.00386  | 0.116533 | 0.01173  | -0.00474 | 0.91863  | 0.039906 | 0.38957  | -0.15385 | 0.00085  |
| 5.31E-09 | -0.03798 | 0.41291  | -0.1169  | 0.01147  | -0.11972 | 0.00961  | 0.026276 | 0.57112  |
| 1.30E-09 | -0.32967 | 2.66E-13 | -0.23363 | 3.29E-07 | -0.31351 | 4.14E-12 | -0.31612 | 2.69E-12 |
| 0.00022  | -0.36262 | 5.85E-16 | -0.25229 | 3.26E-08 | -0.37269 | 7.78E-17 | -0.05159 | 0.26591  |

|          |          |          |          |          |          |          |          |          |
|----------|----------|----------|----------|----------|----------|----------|----------|----------|
| 0.00283  | -0.15471 | 0.00008  | -0.12185 | 0.00839  | -0.13562 | 0.00332  | -0.17405 | 0.00016  |
| 2.97E-14 | 0.019486 | 0.67449  | -0.06147 | 0.18484  | -0.05583 | 0.22852  | -0.22781 | 6.51E-07 |
| 1.12E-21 | -0.24033 | 1.46E-07 | -0.36317 | 5.25E-16 | -0.36001 | 9.76E-16 | -0.4727  | 2.27E-27 |
| 3.46E-11 | -0.15553 | 0.00074  | -0.21236 | 3.66E-06 | -0.22339 | 1.08E-06 | -0.33483 | 1.07E-13 |
| 1.80E-15 | -0.26458 | 6.40E-09 | -0.27619 | 1.27E-09 | -0.32207 | 9.88E-13 | -0.321   | 1.18E-12 |
| 1.30E-15 | -0.03392 | 0.46463  | -0.13533 | 0.00339  | -0.06321 | 0.17264  | -0.28502 | 3.53E-10 |
| 0.1484   | -0.07618 | 0.10015  | -0.25006 | 4.33E-08 | -0.27053 | 2.82E-09 | -0.25821 | 1.50E-08 |
| 0.30906  | -0.15999 | 0.00052  | -0.06745 | 0.14557  | -0.21027 | 4.58E-06 | -0.0897  | 0.05273  |
| 2.93E-12 | -0.12793 | 0.00563  | -0.05784 | 0.21215  | -0.07844 | 0.09042  | -0.33438 | 1.16E-13 |
| 1.08E-08 | -0.12007 | 0.0094   | -0.25998 | 1.19E-08 | -0.27531 | 1.44E-09 | -0.26575 | 5.45E-09 |
| 4.31E-13 | -0.12341 | 0.00759  | -0.32009 | 1.38E-12 | -0.35794 | 1.46E-15 | -0.32594 | 5.09E-13 |
| 0.96212  | -0.26149 | 9.70E-09 | -0.21546 | 2.62E-06 | -0.34406 | 2.01E-14 | -0.26883 | 3.57E-09 |
| 8.17E-06 | -0.27392 | 1.75E-09 | -0.2178  | 2.02E-06 | -0.22399 | 1.01E-06 | -0.2929  | 1.08E-10 |
| 4.08E-05 | 0.250669 | 4.01E-08 | 0.010532 | 0.82043  | -0.00334 | 0.94266  | -0.09667 | 0.03677  |
| 5.58E-10 | -0.25745 | 1.66E-08 | -0.2602  | 1.15E-08 | -0.28336 | 4.51E-10 | -0.36233 | 6.19E-16 |
| 2.52E-25 | -0.43155 | 1.32E-22 | -0.48286 | 1.19E-28 | -0.42194 | 1.39E-21 | -0.50818 | 4.94E-32 |
| 8.56E-16 | -0.49163 | 8.65E-30 | -0.40529 | 6.87E-20 | -0.47737 | 5.92E-28 | -0.49394 | 4.28E-30 |
| 4.58E-14 | -0.38387 | 7.62E-18 | -0.32751 | 3.88E-13 | -0.36376 | 4.68E-16 | -0.45797 | 1.37E-25 |
| 7.17E-12 | -0.25607 | 1.99E-08 | -0.15804 | 0.00061  | 0.002266 | 0.96105  | -0.23353 | 3.33E-07 |
| 1.44E-11 | -0.30677 | 1.24E-11 | -0.31724 | 2.23E-12 | -0.30643 | 1.31E-11 | -0.40767 | 3.98E-20 |
| 0.00841  | -0.16695 | 0.00029  | -0.19295 | 2.69E-05 | -0.27003 | 3.02E-09 | -0.2542  | 2.54E-08 |
| 4.85E-09 | -0.24236 | 1.14E-07 | -0.32641 | 4.69E-13 | -0.40976 | 2.46E-20 | -0.40687 | 4.79E-20 |
| 0.19893  | -0.14285 | 0.00197  | -0.17807 | 0.00011  | -0.26904 | 3.47E-09 | -0.25177 | 3.48E-08 |
| 0.56029  | 0.133182 | 0.00394  | -0.01067 | 0.81804  | 0.012154 | 0.79336  | -0.08584 | 0.06383  |
| 3.96E-13 | -0.23006 | 5.01E-07 | -0.14544 | 0.00162  | -0.17157 | 0.0002   | -0.29147 | 1.35E-10 |
| 0.00316  | -0.1466  | 0.00149  | -0.20679 | 6.62E-06 | -0.18919 | 3.88E-05 | -0.13495 | 0.00348  |
| 0.00023  | -0.1078  | 0.0198   | -0.22257 | 1.19E-06 | -0.25366 | 2.73E-08 | -0.21234 | 3.67E-06 |
| 4.71E-06 | -0.32844 | 3.30E-13 | -0.25489 | 2.32E-08 | -0.3863  | 4.54E-18 | -0.27731 | 1.08E-09 |
| 8.73E-11 | 0.173053 | 0.00017  | 0.019448 | 0.67508  | 0.044976 | 0.33213  | -0.24237 | 1.14E-07 |
| 0.00123  | -0.17354 | 0.00016  | -0.25524 | 2.22E-08 | -0.30291 | 2.29E-11 | -0.27257 | 2.12E-09 |
| 0.00417  | 0.224533 | 9.49E-07 | 0.201489 | 1.15E-05 | 0.259688 | 1.23E-08 | 0.231538 | 4.21E-07 |
| 0.56836  | 0.068365 | 0.14017  | -0.10585 | 0.02215  | -0.16603 | 0.00031  | -0.16885 | 0.00025  |
| 9.86E-13 | -0.36523 | 3.50E-16 | -0.1682  | 0.00026  | -0.23959 | 1.60E-07 | -0.35262 | 4.04E-15 |
| 0.0014   | -0.03779 | 0.41524  | -0.16083 | 0.00048  | -0.18645 | 5.04E-05 | -0.07016 | 0.13003  |
| 1.23E-14 | -0.20449 | 8.42E-06 | -0.23007 | 5.01E-07 | -0.3376  | 6.52E-14 | -0.3569  | 1.78E-15 |
| 1.66E-28 | -0.47844 | 4.35E-28 | -0.45126 | 8.29E-25 | -0.46007 | 7.71E-26 | -0.54641 | 1.05E-37 |
| 0.002    | -0.27004 | 3.02E-09 | -0.19351 | 2.55E-05 | -0.25255 | 3.15E-08 | -0.24435 | 8.91E-08 |
| 3.83E-42 | -0.45841 | 1.21E-25 | -0.48014 | 2.64E-28 | -0.43044 | 1.74E-22 | -0.58246 | 9.07E-44 |
| 9.81E-06 | -0.05802 | 0.21073  | -0.14271 | 0.00199  | -0.1309  | 0.00461  | -0.19016 | 3.53E-05 |
| 1.58E-09 | 0.060765 | 0.18991  | 0.107525 | 0.02012  | 0.059913 | 0.19621  | -0.13561 | 0.00332  |
| 7.19E-05 | -0.3179  | 1.99E-12 | -0.23591 | 2.50E-07 | -0.29038 | 1.59E-10 | -0.29835 | 4.69E-11 |
| 2.83E-15 | -0.01219 | 0.79282  | -0.07908 | 0.08783  | -0.11158 | 0.01585  | -0.27499 | 1.51E-09 |
| 0.00032  | -0.15869 | 0.00058  | -0.20227 | 1.06E-05 | -0.20304 | 9.77E-06 | -0.13284 | 0.00403  |
| 8.36E-07 | -0.29138 | 1.36E-10 | -0.30013 | 3.55E-11 | -0.3952  | 6.60E-19 | -0.38408 | 7.29E-18 |
| 9.45E-08 | -0.3138  | 3.94E-12 | -0.15728 | 0.00065  | -0.25478 | 2.36E-08 | -0.3228  | 8.72E-13 |

|          |          |          |          |          |          |          |          |          |
|----------|----------|----------|----------|----------|----------|----------|----------|----------|
| 1.61E-11 | -0.20816 | 5.73E-06 | -0.23818 | 1.90E-07 | -0.25021 | 4.25E-08 | -0.26592 | 5.32E-09 |
| 1.35E-27 | -0.22013 | 1.56E-06 | -0.24595 | 7.30E-08 | -0.232   | 3.99E-07 | -0.34958 | 7.19E-15 |
| 5.26E-14 | 0.172564 | 0.00018  | 0.058852 | 0.20427  | -0.02116 | 0.64827  | 0.02155  | 0.64229  |
| 2.39E-09 | -0.25596 | 2.02E-08 | -0.08479 | 0.06716  | 0.004267 | 0.92672  | -0.27054 | 2.82E-09 |
| 1.53E-27 | -0.36276 | 5.69E-16 | -0.32227 | 9.55E-13 | -0.28817 | 2.21E-10 | -0.51616 | 3.71E-33 |
| 1.20E-06 | -0.05615 | 0.22582  | -0.1621  | 0.00044  | -0.28809 | 2.24E-10 | -0.15608 | 0.00071  |
| 6.16E-08 | -0.31621 | 2.65E-12 | -0.41612 | 5.57E-21 | -0.4494  | 1.36E-24 | -0.46333 | 3.15E-26 |
| 0.00058  | -0.04348 | 0.34851  | -0.20681 | 6.61E-06 | -0.25565 | 2.10E-08 | -0.25667 | 1.84E-08 |
| 6.45E-06 | 0.011571 | 0.80305  | -0.16369 | 0.00038  | -0.15959 | 0.00054  | -0.27069 | 2.76E-09 |
| 0.19283  | 0.153717 | 0.00086  | 0.11181  | 0.01563  | 0.26051  | 1.11E-08 | 0.144829 | 0.0017   |
| 0.00495  | -0.13316 | 0.00394  | -0.03236 | 0.48535  | -0.15996 | 0.00052  | -0.2354  | 2.66E-07 |
| 3.42E-05 | -0.10695 | 0.0208   | -0.14466 | 0.00172  | -0.16377 | 0.00038  | -0.19502 | 2.20E-05 |
| 0.0001   | 0.075645 | 0.10254  | -0.04239 | 0.36074  | 0.0167   | 0.71889  | -0.11427 | 0.01348  |
| 1.73E-13 | -0.30511 | 1.62E-11 | -0.22334 | 1.09E-06 | -0.18858 | 4.11E-05 | -0.36197 | 6.65E-16 |
| 1.29E-32 | -0.33241 | 1.64E-13 | -0.16958 | 0.00023  | -0.17116 | 0.0002   | -0.4686  | 7.23E-27 |
| 3.84E-12 | -0.09249 | 0.04576  | -0.2238  | 1.03E-06 | -0.21663 | 2.30E-06 | -0.31528 | 3.09E-12 |
| 9.73E-06 | -0.19202 | 2.95E-05 | -0.19416 | 2.39E-05 | -0.21522 | 2.69E-06 | -0.25224 | 3.28E-08 |
| 0.00927  | -0.19335 | 2.59E-05 | -0.28884 | 2.00E-10 | -0.3517  | 4.82E-15 | -0.29806 | 4.90E-11 |
| 0.08126  | 0.146985 | 0.00145  | -0.04993 | 0.28157  | -0.04323 | 0.35123  | -0.06218 | 0.17978  |
| 3.42E-14 | -0.43243 | 1.06E-22 | -0.44117 | 1.16E-23 | -0.52129 | 6.75E-34 | -0.52229 | 4.83E-34 |
| 0.78958  | -0.12138 | 0.00865  | -0.05377 | 0.2462   | -0.16201 | 0.00044  | 0.152858 | 0.00092  |
| 3.21E-32 | -0.43869 | 2.19E-23 | -0.33287 | 1.52E-13 | -0.32694 | 4.28E-13 | -0.53058 | 2.87E-35 |
| 0.24678  | -0.08464 | 0.06764  | -0.1752  | 0.00014  | -0.21794 | 1.99E-06 | -0.1797  | 9.43E-05 |
| 3.02E-17 | -0.20189 | 1.10E-05 | -0.23985 | 1.55E-07 | -0.2934  | 1.00E-10 | -0.3703  | 1.26E-16 |
| 0.00152  | -0.15539 | 0.00075  | -0.23468 | 2.90E-07 | -0.24307 | 1.05E-07 | -0.29111 | 1.42E-10 |
| 0.0319   | -0.30586 | 1.43E-11 | -0.22987 | 5.12E-07 | -0.31285 | 4.61E-12 | -0.31524 | 3.11E-12 |
| 1.41E-22 | -0.31066 | 6.60E-12 | -0.36714 | 2.39E-16 | -0.36246 | 6.03E-16 | -0.49402 | 4.17E-30 |
| 0.58047  | -0.15997 | 0.00052  | 0.003746 | 0.93565  | -0.12844 | 0.00544  | -0.06558 | 0.15711  |
| 1.83E-06 | -0.26655 | 4.89E-09 | -0.14421 | 0.00178  | -0.1397  | 0.00248  | -0.2345  | 2.96E-07 |
| 2.19E-10 | -0.26974 | 3.15E-09 | -0.37058 | 1.19E-16 | -0.34464 | 1.80E-14 | -0.40651 | 5.20E-20 |
| 2.63E-36 | -0.49177 | 8.28E-30 | -0.48412 | 8.20E-29 | -0.48435 | 7.67E-29 | -0.63893 | 6.12E-55 |
| 4.23E-12 | -0.38219 | 1.09E-17 | -0.23482 | 2.85E-07 | -0.34783 | 9.97E-15 | -0.37744 | 2.93E-17 |
| 5.92E-16 | -0.30093 | 3.13E-11 | -0.3173  | 2.21E-12 | -0.25149 | 3.61E-08 | -0.35408 | 3.07E-15 |
| 0.00691  | -0.26748 | 4.30E-09 | -0.11548 | 0.01251  | -0.12897 | 0.00525  | -0.21136 | 4.08E-06 |
| 4.18E-09 | -0.13014 | 0.00485  | -0.16145 | 0.00046  | -0.25821 | 1.50E-08 | -0.35753 | 1.58E-15 |
| 8.37E-21 | -0.14265 | 0.002    | -0.0819  | 0.07703  | 0.120128 | 0.00936  | -0.33018 | 2.43E-13 |
| 9.92E-07 | -0.27265 | 2.10E-09 | -0.24246 | 1.13E-07 | -0.30304 | 2.24E-11 | -0.37868 | 2.27E-17 |
| 0.01678  | -0.17151 | 0.0002   | -0.27118 | 2.58E-09 | -0.32718 | 4.11E-13 | -0.19234 | 2.86E-05 |
| 7.74E-10 | 0.046082 | 0.32037  | -0.12436 | 0.00713  | -0.04647 | 0.31633  | -0.27893 | 8.59E-10 |
| 0.00194  | -0.32382 | 7.32E-13 | -0.25398 | 2.62E-08 | -0.31777 | 2.04E-12 | -0.31846 | 1.82E-12 |
| 1.24E-08 | -0.18111 | 8.29E-05 | -0.20349 | 9.33E-06 | -0.21859 | 1.85E-06 | -0.18832 | 4.21E-05 |
| 0.68078  | 0.016512 | 0.72191  | -0.03596 | 0.43813  | -0.06153 | 0.18439  | -0.10031 | 0.03021  |
| 2.40E-12 | -0.13792 | 0.00282  | -0.25403 | 2.60E-08 | -0.26675 | 4.76E-09 | -0.32396 | 7.15E-13 |
| 0.08734  | -0.06631 | 0.15252  | -0.12394 | 0.00733  | -0.18147 | 8.02E-05 | -0.14077 | 0.0023   |
| 8.38E-11 | -0.03089 | 0.50542  | -0.09966 | 0.03129  | -0.0505  | 0.27614  | -0.18939 | 3.80E-05 |

|          |          |          |          |          |          |          |          |          |
|----------|----------|----------|----------|----------|----------|----------|----------|----------|
| 5.61E-17 | -0.50276 | 2.77E-31 | -0.3365  | 7.94E-14 | -0.38575 | 5.12E-18 | -0.45129 | 8.22E-25 |
| 0.01059  | -0.32327 | 8.04E-13 | -0.28616 | 2.98E-10 | -0.36803 | 2.00E-16 | -0.33681 | 7.51E-14 |
| 8.84E-08 | -0.24167 | 1.24E-07 | -0.19265 | 2.77E-05 | -0.16741 | 0.00028  | -0.30389 | 1.96E-11 |
| 1.10E-21 | -0.09205 | 0.04679  | -0.20892 | 5.29E-06 | -0.18247 | 7.31E-05 | -0.44296 | 7.30E-24 |
| 2.21E-07 | -0.04004 | 0.38799  | -0.14614 | 0.00154  | -0.27135 | 2.52E-09 | -0.10829 | 0.01925  |
| 0.69925  | -0.2229  | 1.14E-06 | -0.23755 | 2.05E-07 | -0.32516 | 5.82E-13 | -0.15852 | 0.00059  |
| 0.0184   | -0.08661 | 0.06146  | -0.13346 | 0.00386  | -0.13981 | 0.00246  | -0.17005 | 0.00022  |
| 3.03E-11 | -0.05365 | 0.24718  | -0.11546 | 0.01253  | -0.09331 | 0.04385  | -0.23491 | 2.82E-07 |
| 3.40E-07 | -0.10857 | 0.01893  | -0.16893 | 0.00025  | -0.12595 | 0.00642  | -0.31896 | 1.67E-12 |
| 3.08E-07 | -0.39218 | 1.28E-18 | -0.20096 | 1.21E-05 | -0.24469 | 8.55E-08 | -0.3069  | 1.21E-11 |
| 0.02371  | 0.084155 | 0.06922  | -0.14431 | 0.00177  | -0.16108 | 0.00048  | -0.07643 | 0.09903  |
| 3.89E-06 | -0.17956 | 9.55E-05 | -0.12157 | 0.00854  | -0.21454 | 2.89E-06 | -0.30104 | 3.08E-11 |
| 1.64E-19 | -0.05972 | 0.19763  | -0.19121 | 3.19E-05 | -0.1197  | 0.00962  | -0.31495 | 3.26E-12 |
| 5.00E-28 | -0.32907 | 2.96E-13 | -0.325   | 5.98E-13 | -0.32211 | 9.80E-13 | -0.49921 | 8.41E-31 |
| 0.00069  | -0.34263 | 2.61E-14 | -0.37308 | 7.19E-17 | -0.44722 | 2.41E-24 | -0.37072 | 1.16E-16 |
| 0.00598  | -0.38949 | 2.29E-18 | -0.26582 | 5.40E-09 | -0.37663 | 3.47E-17 | -0.3439  | 2.07E-14 |
| 0.00076  | -0.02454 | 0.59684  | -0.10619 | 0.02172  | -0.11177 | 0.01567  | -0.11005 | 0.01736  |
| 3.57E-10 | 0.022568 | 0.62664  | -0.04178 | 0.36771  | -0.08435 | 0.06858  | -0.14813 | 0.00133  |
| 0.67374  | -0.31636 | 2.58E-12 | -0.14078 | 0.00229  | -0.25451 | 2.44E-08 | -0.1488  | 0.00126  |
| 0.00384  | 0.0008   | 0.98624  | -0.16664 | 0.0003   | -0.18576 | 5.37E-05 | -0.21988 | 1.60E-06 |
| 0.00022  | -0.36239 | 6.13E-16 | -0.3295  | 2.74E-13 | -0.455   | 3.05E-25 | -0.36208 | 6.51E-16 |
| 2.62E-26 | -0.33724 | 6.95E-14 | -0.12774 | 0.0057   | -0.15769 | 0.00063  | -0.28911 | 1.92E-10 |
| 2.70E-28 | -0.1603  | 0.00051  | -0.13634 | 0.00315  | -0.10158 | 0.02817  | -0.3633  | 5.11E-16 |
| 0.98407  | 0.062323 | 0.17878  | -0.12172 | 0.00846  | -0.16138 | 0.00046  | -0.07052 | 0.12807  |
| 9.94E-06 | -0.20166 | 1.13E-05 | -0.13831 | 0.00274  | -0.19081 | 3.32E-05 | -0.30602 | 1.40E-11 |
| 6.36E-32 | 0.362265 | 6.28E-16 | 0.390717 | 1.76E-18 | 0.406108 | 5.70E-20 | 0.447618 | 2.17E-24 |
| 0.2449   | 0.174472 | 0.00015  | -0.01846 | 0.69075  | -0.02693 | 0.56156  | -0.05076 | 0.27365  |
| 0.89273  | -0.24648 | 6.82E-08 | -0.19642 | 1.91E-05 | -0.32312 | 8.26E-13 | -0.23654 | 2.32E-07 |
| 2.81E-08 | -0.06925 | 0.1351   | -0.16766 | 0.00027  | -0.20386 | 8.98E-06 | -0.24227 | 1.15E-07 |
| 6.32E-20 | -0.16942 | 0.00023  | -0.18169 | 7.85E-05 | -0.15238 | 0.00096  | -0.27259 | 2.12E-09 |
| 6.52E-06 | 0.023573 | 0.61136  | 0.05526  | 0.2333   | -0.05402 | 0.24399  | -0.06191 | 0.18166  |
| 8.39E-21 | -0.32184 | 1.03E-12 | -0.36697 | 2.47E-16 | -0.38909 | 2.50E-18 | -0.46642 | 1.33E-26 |
| 3.62E-08 | -0.16742 | 0.00028  | -0.33648 | 7.96E-14 | -0.33945 | 4.67E-14 | -0.38132 | 1.31E-17 |
| 0.01214  | 0.351429 | 5.07E-15 | 0.19532  | 2.13E-05 | 0.376019 | 3.93E-17 | 0.202531 | 1.03E-05 |
| 3.27E-06 | 0.350839 | 5.67E-15 | 0.279565 | 7.83E-10 | 0.33173  | 1.85E-13 | 0.261642 | 9.51E-09 |
| 2.70E-06 | 0.048022 | 0.30039  | -0.08137 | 0.079    | 0.03132  | 0.49956  | 0.22155  | 1.33E-06 |
| 5.21E-07 | 0.255635 | 2.11E-08 | 0.133729 | 0.00379  | 0.195347 | 2.13E-05 | 0.276941 | 1.14E-09 |
| 0.20447  | 0.185494 | 5.51E-05 | 0.116989 | 0.0114   | 0.256463 | 1.89E-08 | 0.134217 | 0.00366  |
| 0.00013  | 0.365389 | 3.38E-16 | 0.188861 | 4.00E-05 | 0.407032 | 4.62E-20 | 0.256766 | 1.82E-08 |
| 1.49E-08 | 0.40324  | 1.09E-19 | 0.24133  | 1.30E-07 | 0.349069 | 7.91E-15 | 0.294079 | 9.05E-11 |
| 0.54573  | 0.141587 | 0.00216  | 0.083153 | 0.07261  | 0.15924  | 0.00055  | 0.04292  | 0.35473  |
| 0.64684  | 0.213142 | 3.36E-06 | 0.127483 | 0.0058   | 0.201338 | 1.16E-05 | 0.108373 | 0.01915  |
| 0.00075  | 0.185745 | 5.38E-05 | 0.115511 | 0.01249  | 0.215453 | 2.62E-06 | 0.049553 | 0.28523  |
| 0.00011  | 0.357186 | 1.69E-15 | 0.228156 | 6.26E-07 | 0.336348 | 8.16E-14 | 0.250034 | 4.35E-08 |
| 1.83E-06 | 0.389661 | 2.21E-18 | 0.243079 | 1.04E-07 | 0.34421  | 1.95E-14 | 0.274557 | 1.60E-09 |



|          |          |          |          |          |          |          |          |          |
|----------|----------|----------|----------|----------|----------|----------|----------|----------|
| 3.55E-06 | 0.570099 | 1.32E-41 | 0.297265 | 5.55E-11 | 0.363784 | 4.65E-16 | 0.266021 | 5.26E-09 |
| 0.00325  | 0.242474 | 1.13E-07 | 0.175762 | 0.00013  | 0.271619 | 2.42E-09 | 0.234265 | 3.05E-07 |
| 0.00171  | 0.230379 | 4.83E-07 | 0.170444 | 0.00022  | 0.176862 | 0.00012  | 0.120384 | 0.00921  |
| 4.95E-06 | 0.42962  | 2.13E-22 | 0.260668 | 1.08E-08 | 0.407315 | 4.33E-20 | 0.295779 | 6.98E-11 |
| 0.06369  | 0.358088 | 1.42E-15 | 0.351784 | 4.74E-15 | 0.427705 | 3.41E-22 | 0.288196 | 2.20E-10 |
| 0.00213  | 0.343528 | 2.22E-14 | 0.18812  | 4.30E-05 | 0.34757  | 1.05E-14 | 0.2225   | 1.20E-06 |
| 1.51E-05 | 0.351043 | 5.46E-15 | 0.207406 | 6.20E-06 | 0.305444 | 1.53E-11 | 0.265689 | 5.50E-09 |
| 6.01E-05 | 0.391157 | 1.60E-18 | 0.25226  | 3.27E-08 | 0.385857 | 5.00E-18 | 0.299875 | 3.69E-11 |
| 6.07E-05 | 0.395129 | 6.70E-19 | 0.220007 | 1.58E-06 | 0.40075  | 1.92E-19 | 0.302236 | 2.55E-11 |
| 0.00168  | 0.342641 | 2.61E-14 | 0.206425 | 6.88E-06 | 0.327268 | 4.04E-13 | 0.252799 | 3.05E-08 |
| 0.02494  | 0.222627 | 1.18E-06 | 0.114611 | 0.0132   | 0.21816  | 1.94E-06 | 0.142441 | 0.00203  |
| 0.7555   | 0.229807 | 5.16E-07 | 0.118583 | 0.01032  | 0.294199 | 8.89E-11 | 0.105023 | 0.02322  |
| 6.05E-08 | 0.301698 | 2.78E-11 | 0.229671 | 5.24E-07 | 0.274066 | 1.72E-09 | 0.30345  | 2.10E-11 |
| 2.36E-06 | 0.350752 | 5.77E-15 | 0.188349 | 4.20E-05 | 0.303087 | 2.23E-11 | 0.27987  | 7.50E-10 |
| 1.67E-05 | 0.401676 | 1.56E-19 | 0.254326 | 2.50E-08 | 0.373308 | 6.86E-17 | 0.275397 | 1.42E-09 |
| 4.43E-05 | 0.357105 | 1.71E-15 | 0.205381 | 7.67E-06 | 0.360053 | 9.68E-16 | 0.237613 | 2.04E-07 |
| 0.40807  | 0.136486 | 0.00312  | 0.190809 | 3.32E-05 | 0.185961 | 5.27E-05 | 0.095604 | 0.0389   |
| 0.00028  | 0.414742 | 7.70E-21 | 0.282566 | 5.07E-10 | 0.409105 | 2.86E-20 | 0.245658 | 7.57E-08 |
| 1.06E-05 | 0.410995 | 1.85E-20 | 0.247167 | 6.26E-08 | 0.404551 | 8.13E-20 | 0.299653 | 3.83E-11 |
| 0.34678  | 0.213405 | 3.27E-06 | 0.214201 | 3.00E-06 | 0.320756 | 1.23E-12 | 0.192178 | 2.90E-05 |
| 0.00018  | 0.436335 | 3.97E-23 | 0.242983 | 1.06E-07 | 0.341291 | 3.34E-14 | 0.30682  | 1.23E-11 |
| 4.67E-12 | 0.417823 | 3.72E-21 | 0.25241  | 3.21E-08 | 0.345661 | 1.49E-14 | 0.327112 | 4.15E-13 |
| 0.08846  | 0.292282 | 1.19E-10 | 0.176998 | 0.00012  | 0.282844 | 4.86E-10 | 0.185314 | 5.60E-05 |
| 0.02936  | 0.363096 | 5.33E-16 | 0.201032 | 1.20E-05 | 0.360888 | 8.22E-16 | 0.235668 | 2.58E-07 |
| 0.00564  | 0.381443 | 1.27E-17 | 0.395676 | 5.94E-19 | 0.507875 | 5.46E-32 | 0.364741 | 3.85E-16 |
| 7.19E-07 | 0.436298 | 4.01E-23 | 0.284622 | 3.75E-10 | 0.418662 | 3.04E-21 | 0.327655 | 3.78E-13 |
| 6.04E-05 | 0.364841 | 3.77E-16 | 0.199695 | 1.38E-05 | 0.351228 | 5.27E-15 | 0.277384 | 1.07E-09 |
| 0.00179  | 0.221994 | 1.27E-06 | 0.094846 | 0.04048  | 0.173966 | 0.00016  | 0.205119 | 7.88E-06 |
| 1.39E-06 | 0.46321  | 3.25E-26 | 0.261905 | 9.18E-09 | 0.40374  | 9.78E-20 | 0.343876 | 2.08E-14 |
| 0.00245  | 0.357952 | 1.46E-15 | 0.218453 | 1.88E-06 | 0.354493 | 2.83E-15 | 0.217841 | 2.01E-06 |
| 2.39E-05 | 0.401477 | 1.63E-19 | 0.276157 | 1.28E-09 | 0.374842 | 5.01E-17 | 0.300626 | 3.28E-11 |
| 0.00045  | 0.375152 | 4.70E-17 | 0.267252 | 4.44E-09 | 0.413345 | 1.07E-20 | 0.270786 | 2.72E-09 |
| 0.00182  | 0.353815 | 3.22E-15 | 0.290879 | 1.47E-10 | 0.338637 | 5.40E-14 | 0.201641 | 1.13E-05 |
| 1.07E-06 | 0.488355 | 2.32E-29 | 0.351141 | 5.36E-15 | 0.458644 | 1.14E-25 | 0.453462 | 4.61E-25 |
| 7.81E-13 | 0.584861 | 3.37E-44 | 0.425285 | 6.17E-22 | 0.458066 | 1.33E-25 | 0.409001 | 2.93E-20 |
| 0.05831  | -0.02501 | 0.58978  | -0.06822 | 0.14103  | -0.02477 | 0.59339  | 0.084987 | 0.06651  |
| 0.0977   | 0.225905 | 8.11E-07 | 0.021847 | 0.6377   | 0.235712 | 2.56E-07 | 0.165244 | 0.00034  |
| 0.01942  | 0.232168 | 3.91E-07 | 0.170824 | 0.00021  | 0.291518 | 1.34E-10 | 0.087808 | 0.05794  |
| 0.00586  | 0.373298 | 6.88E-17 | 0.269731 | 3.15E-09 | 0.378459 | 2.37E-17 | 0.0591   | 0.20236  |
| 0.0129   | 0.397122 | 4.31E-19 | 0.20962  | 4.91E-06 | 0.398418 | 3.23E-19 | 0.261487 | 9.71E-09 |
| 2.12E-09 | 0.233901 | 3.18E-07 | 0.031597 | 0.49577  | 0.063129 | 0.17322  | 0.217694 | 2.05E-06 |
| 0.00088  | 0.429757 | 2.06E-22 | 0.266712 | 4.78E-09 | 0.415442 | 6.53E-21 | 0.235666 | 2.58E-07 |
| 0.0005   | 0.455147 | 2.93E-25 | 0.259375 | 1.29E-08 | 0.316481 | 2.53E-12 | 0.310898 | 6.35E-12 |
| 0.00068  | 0.385114 | 5.85E-18 | 0.169027 | 0.00024  | 0.294287 | 8.77E-11 | 0.306027 | 1.40E-11 |
| 1.40E-06 | 0.348046 | 9.59E-15 | 0.275827 | 1.34E-09 | 0.313913 | 3.87E-12 | 0.229359 | 5.44E-07 |

|          |          |          |          |          |          |          |          |          |
|----------|----------|----------|----------|----------|----------|----------|----------|----------|
| 5.20E-15 | 0.211251 | 4.12E-06 | 0.141568 | 0.00217  | 0.142033 | 0.00209  | 0.257761 | 1.59E-08 |
| 0.04566  | 0.209414 | 5.02E-06 | 0.182241 | 7.47E-05 | 0.22224  | 1.23E-06 | 0.231664 | 4.15E-07 |
| 7.55E-05 | 0.445516 | 3.76E-24 | 0.275598 | 1.38E-09 | 0.277582 | 1.04E-09 | 0.340709 | 3.71E-14 |
| 4.92E-15 | 0.574262 | 2.53E-42 | 0.383287 | 8.62E-18 | 0.447341 | 2.33E-24 | 0.366085 | 2.95E-16 |
| 0.03182  | 0.391997 | 1.33E-18 | 0.341219 | 3.38E-14 | 0.4607   | 6.49E-26 | 0.2703   | 2.91E-09 |
| 0.10737  | 0.471613 | 3.09E-27 | 0.255908 | 2.03E-08 | 0.44351  | 6.33E-24 | 0.237212 | 2.14E-07 |
| 0.0179   | 0.349391 | 7.45E-15 | 0.15532  | 0.00076  | 0.330675 | 2.23E-13 | 0.235889 | 2.51E-07 |
| 1.09E-06 | 0.404896 | 7.52E-20 | 0.293157 | 1.04E-10 | 0.383108 | 8.96E-18 | 0.294801 | 8.11E-11 |
| 3.83E-08 | 0.522376 | 4.69E-34 | 0.313913 | 3.87E-12 | 0.422509 | 1.21E-21 | 0.378249 | 2.48E-17 |
| 7.34E-06 | 0.4118   | 1.53E-20 | 0.285648 | 3.22E-10 | 0.337349 | 6.82E-14 | 0.254417 | 2.47E-08 |
| 8.01E-16 | 0.489048 | 1.89E-29 | 0.317682 | 2.07E-12 | 0.331389 | 1.97E-13 | 0.415131 | 7.03E-21 |
| 2.63E-05 | 0.334775 | 1.08E-13 | 0.197639 | 1.69E-05 | 0.308158 | 9.90E-12 | 0.251046 | 3.82E-08 |
| 0.00104  | 0.369765 | 1.41E-16 | 0.223043 | 1.12E-06 | 0.350872 | 5.64E-15 | 0.248693 | 5.16E-08 |
| 0.09023  | 0.21585  | 2.51E-06 | 0.109107 | 0.01835  | 0.237785 | 2.00E-07 | 0.134367 | 0.00362  |
| 0.02369  | 0.294482 | 8.51E-11 | 0.194099 | 2.41E-05 | 0.317184 | 2.25E-12 | 0.190058 | 3.57E-05 |
| 0.00015  | 0.401141 | 1.76E-19 | 0.285465 | 3.31E-10 | 0.421483 | 1.55E-21 | 0.271981 | 2.30E-09 |
| 1.52E-06 | 0.313993 | 3.82E-12 | 0.262754 | 8.19E-09 | 0.349321 | 7.55E-15 | 0.244541 | 8.70E-08 |
| 1.33E-05 | 0.395483 | 6.19E-19 | 0.227602 | 6.67E-07 | 0.354001 | 3.11E-15 | 0.331298 | 2.00E-13 |
| 0.70672  | 0.197847 | 1.66E-05 | 0.099696 | 0.03124  | 0.247457 | 6.04E-08 | 0.076959 | 0.09669  |
| 3.88E-07 | 0.442062 | 9.20E-24 | 0.264036 | 6.89E-09 | 0.412115 | 1.42E-20 | 0.307073 | 1.18E-11 |
| 0.9831   | 0.142773 | 0.00198  | 0.095858 | 0.03839  | 0.296704 | 6.05E-11 | 0.171038 | 0.0002   |
| 3.85E-11 | 0.65908  | 1.62E-59 | 0.461005 | 5.97E-26 | 0.568268 | 2.72E-41 | 0.393877 | 8.82E-19 |
| 8.46E-07 | 0.473486 | 1.81E-27 | 0.199348 | 1.42E-05 | 0.26066  | 1.08E-08 | 0.205374 | 7.67E-06 |
| 1.13E-15 | 0.376317 | 3.70E-17 | 0.136421 | 0.00314  | 0.091741 | 0.04754  | 0.11428  | 0.01347  |
| 3.51E-08 | 0.405118 | 7.15E-20 | 0.245488 | 7.73E-08 | 0.342032 | 2.91E-14 | 0.255964 | 2.02E-08 |
| 0.75151  | 0.365846 | 3.09E-16 | 0.247689 | 5.86E-08 | 0.335708 | 9.15E-14 | 0.1127   | 0.01482  |
| 8.00E-11 | 0.584304 | 4.24E-44 | 0.416034 | 5.68E-21 | 0.527505 | 8.25E-35 | 0.408937 | 2.98E-20 |
| 5.20E-10 | 0.519373 | 1.28E-33 | 0.396117 | 5.38E-19 | 0.479558 | 3.14E-28 | 0.395703 | 5.90E-19 |
| 2.63E-11 | 0.519837 | 1.10E-33 | 0.394156 | 8.29E-19 | 0.482701 | 1.25E-28 | 0.374204 | 5.71E-17 |
| 0.27976  | 0.188911 | 3.98E-05 | 0.033887 | 0.46505  | 0.213964 | 3.08E-06 | 0.137577 | 0.00289  |
| 1.01E-05 | 0.44442  | 5.00E-24 | 0.325537 | 5.45E-13 | 0.384856 | 6.18E-18 | 0.356167 | 2.05E-15 |
| 0.03272  | 0.361834 | 6.83E-16 | 0.27331  | 1.91E-09 | 0.34739  | 1.08E-14 | 0.274126 | 1.70E-09 |
| 4.80E-06 | 0.202211 | 1.06E-05 | 0.075439 | 0.10348  | 0.133142 | 0.00395  | 0.12414  | 0.00723  |
| 1.42E-05 | 0.689835 | 3.14E-67 | 0.367156 | 2.38E-16 | 0.512911 | 1.07E-32 | 0.297981 | 4.96E-11 |
| 2.06E-07 | 0.575888 | 1.32E-42 | 0.378619 | 2.30E-17 | 0.499492 | 7.71E-31 | 0.448023 | 1.95E-24 |
| 0.22105  | 0.28348  | 4.43E-10 | 0.233747 | 3.24E-07 | 0.339465 | 4.65E-14 | 0.168204 | 0.00026  |
| 3.07E-07 | 0.370477 | 1.22E-16 | 0.227761 | 6.55E-07 | 0.328073 | 3.52E-13 | 0.268744 | 3.61E-09 |
| 0.20323  | 0.168878 | 0.00025  | 0.159596 | 0.00054  | 0.238593 | 1.81E-07 | 0.102476 | 0.0268   |
| 0.0023   | 0.272832 | 2.04E-09 | 0.084074 | 0.06949  | 0.094364 | 0.04152  | 0.208846 | 5.33E-06 |
| 0.00071  | -0.44289 | 7.43E-24 | -0.24243 | 1.13E-07 | -0.34925 | 7.64E-15 | -0.26094 | 1.04E-08 |
| 3.58E-13 | 0.506545 | 8.35E-32 | 0.374833 | 5.02E-17 | 0.451413 | 7.96E-25 | 0.39599  | 5.54E-19 |
| 1.97E-12 | 0.570868 | 9.76E-42 | 0.353792 | 3.24E-15 | 0.387051 | 3.87E-18 | 0.368455 | 1.83E-16 |
| 0.18668  | 0.324811 | 6.18E-13 | 0.227058 | 7.10E-07 | 0.306536 | 1.29E-11 | 0.125592 | 0.00658  |
| 2.58E-06 | 0.549437 | 3.46E-38 | 0.282816 | 4.88E-10 | 0.363696 | 4.73E-16 | 0.206305 | 6.96E-06 |
| 0.92279  | 0.301517 | 2.86E-11 | 0.188264 | 4.24E-05 | 0.338504 | 5.54E-14 | 0.157186 | 0.00065  |

|          |          |          |          |          |          |          |          |          |
|----------|----------|----------|----------|----------|----------|----------|----------|----------|
| 0.01101  | 0.326437 | 4.67E-13 | 0.200867 | 1.22E-05 | 0.308228 | 9.79E-12 | 0.204658 | 8.27E-06 |
| 1.92E-07 | 0.26804  | 3.98E-09 | 0.04835  | 0.29711  | 0.236169 | 2.43E-07 | -0.05616 | 0.22576  |
| 0.02229  | 0.283123 | 4.67E-10 | 0.167611 | 0.00027  | 0.335297 | 9.85E-14 | 0.187316 | 4.64E-05 |
| 8.27E-05 | 0.381647 | 1.22E-17 | 0.36386  | 4.58E-16 | 0.382332 | 1.05E-17 | 0.393268 | 1.01E-18 |
| 2.13E-05 | 0.351079 | 5.42E-15 | 0.277691 | 1.03E-09 | 0.347967 | 9.73E-15 | 0.289329 | 1.86E-10 |
| 0.00195  | 0.435762 | 4.59E-23 | 0.290351 | 1.59E-10 | 0.453101 | 5.08E-25 | 0.32278  | 8.75E-13 |
| 0.00746  | 0.498144 | 1.17E-30 | 0.355739 | 2.23E-15 | 0.398204 | 3.39E-19 | 0.314949 | 3.26E-12 |
| 0.02773  | -0.26955 | 3.23E-09 | -0.22266 | 1.17E-06 | -0.29647 | 6.27E-11 | -0.17505 | 0.00014  |
| 0.00759  | 0.358337 | 1.35E-15 | 0.261873 | 9.22E-09 | 0.379661 | 1.85E-17 | 0.230353 | 4.84E-07 |
| 0.00493  | 0.343747 | 2.13E-14 | 0.227499 | 6.75E-07 | 0.289448 | 1.83E-10 | 0.147934 | 0.00135  |
| 0.00053  | 0.381855 | 1.17E-17 | 0.21757  | 2.07E-06 | 0.365689 | 3.19E-16 | 0.295052 | 7.80E-11 |
| 0.00018  | 0.424085 | 8.26E-22 | 0.256687 | 1.84E-08 | 0.430681 | 1.64E-22 | 0.299024 | 4.22E-11 |
| 2.59E-06 | 0.461735 | 4.88E-26 | 0.332165 | 1.72E-13 | 0.382963 | 9.23E-18 | 0.361448 | 7.37E-16 |
| 0.005    | 0.388626 | 2.76E-18 | 0.199391 | 1.42E-05 | 0.387756 | 3.33E-18 | 0.270499 | 2.83E-09 |
| 0.00073  | 0.311763 | 5.51E-12 | 0.221269 | 1.37E-06 | 0.309974 | 7.38E-12 | 0.286701 | 2.75E-10 |
| 0.00172  | 0.322084 | 9.85E-13 | 0.299163 | 4.13E-11 | 0.34204  | 2.91E-14 | 0.258939 | 1.36E-08 |
| 3.71E-13 | 0.472721 | 2.25E-27 | 0.263278 | 7.63E-09 | 0.365553 | 3.28E-16 | 0.29913  | 4.15E-11 |
| 3.14E-11 | -0.36776 | 2.11E-16 | -0.06683 | 0.14934  | -0.12903 | 0.00523  | -0.32029 | 1.33E-12 |
| 3.27E-05 | 0.374236 | 5.68E-17 | 0.201392 | 1.16E-05 | 0.356424 | 1.96E-15 | 0.272799 | 2.05E-09 |
| 6.31E-06 | 0.436884 | 3.45E-23 | 0.276306 | 1.25E-09 | 0.391909 | 1.36E-18 | 0.294895 | 7.99E-11 |
| 0.02564  | 0.263327 | 7.58E-09 | 0.055614 | 0.23032  | 0.200779 | 1.23E-05 | 0.142233 | 0.00206  |
| 0.00037  | 0.375735 | 4.17E-17 | 0.151039 | 0.00106  | 0.290498 | 1.56E-10 | 0.252049 | 3.36E-08 |
| 0.94984  | 0.318351 | 1.85E-12 | 0.301072 | 3.06E-11 | 0.355016 | 2.56E-15 | 0.169663 | 0.00023  |
| 0.00024  | 0.397144 | 4.29E-19 | 0.252373 | 3.22E-08 | 0.382415 | 1.04E-17 | 0.273846 | 1.77E-09 |
| 0.06113  | 0.271103 | 2.60E-09 | 0.095932 | 0.03824  | 0.293885 | 9.33E-11 | 0.216656 | 2.29E-06 |
| 0.98962  | 0.318445 | 1.82E-12 | 0.098085 | 0.03408  | 0.166012 | 0.00031  | 0.068381 | 0.14008  |
| 2.53E-07 | 0.464435 | 2.32E-26 | 0.195445 | 2.11E-05 | 0.245896 | 7.35E-08 | 0.38855  | 2.80E-18 |
| 0.07253  | 0.286888 | 2.68E-10 | 0.161435 | 0.00046  | 0.286387 | 2.89E-10 | 0.245469 | 7.75E-08 |
| 4.00E-07 | 0.399073 | 2.79E-19 | 0.232726 | 3.66E-07 | 0.370183 | 1.29E-16 | 0.431943 | 1.20E-22 |
| 0.00969  | 0.474075 | 1.53E-27 | 0.209642 | 4.90E-06 | 0.319387 | 1.55E-12 | 0.175757 | 0.00013  |
| 0.00037  | 0.397021 | 4.41E-19 | 0.205477 | 7.59E-06 | 0.401088 | 1.78E-19 | 0.281632 | 5.80E-10 |
| 4.64E-06 | 0.362732 | 5.73E-16 | 0.292268 | 1.19E-10 | 0.306233 | 1.35E-11 | 0.308763 | 8.98E-12 |
| 0.59273  | 0.288697 | 2.04E-10 | 0.135456 | 0.00336  | 0.252931 | 3.00E-08 | 0.153385 | 0.00088  |
| 0.02658  | 0.211776 | 3.90E-06 | 0.144426 | 0.00175  | 0.306267 | 1.34E-11 | 0.198819 | 1.50E-05 |
| 6.88E-07 | 0.431057 | 1.49E-22 | 0.387808 | 3.29E-18 | 0.471266 | 3.41E-27 | 0.336021 | 8.65E-14 |
| 0.00034  | 0.405673 | 6.30E-20 | 0.232849 | 3.61E-07 | 0.415412 | 6.58E-21 | 0.282346 | 5.23E-10 |
| 0.4156   | 0.248496 | 5.29E-08 | 0.042461 | 0.3599   | 0.240327 | 1.47E-07 | 0.085049 | 0.06631  |
| 0.02718  | 0.296153 | 6.59E-11 | 0.124    | 0.0073   | 0.327714 | 3.74E-13 | 0.233709 | 3.26E-07 |
| 4.39E-07 | 0.584991 | 3.19E-44 | 0.310147 | 7.18E-12 | 0.331502 | 1.93E-13 | 0.161746 | 0.00045  |
| 2.75E-08 | 0.53704  | 3.01E-36 | 0.361432 | 7.39E-16 | 0.375384 | 4.48E-17 | 0.336576 | 7.83E-14 |
| 5.98E-07 | 0.422357 | 1.25E-21 | 0.33215  | 1.72E-13 | 0.390796 | 1.73E-18 | 0.295173 | 7.66E-11 |
| 7.24E-05 | 0.409965 | 2.35E-20 | 0.280813 | 6.54E-10 | 0.391122 | 1.61E-18 | 0.273091 | 1.97E-09 |
| 0.00704  | 0.419919 | 2.25E-21 | 0.2111   | 4.19E-06 | 0.400183 | 2.18E-19 | 0.240401 | 1.45E-07 |
| 2.15E-07 | 0.371563 | 9.79E-17 | 0.282059 | 5.45E-10 | 0.427267 | 3.80E-22 | 0.290835 | 1.48E-10 |
| 7.29E-07 | 0.45072  | 9.57E-25 | 0.263941 | 6.97E-09 | 0.362035 | 6.57E-16 | 0.278871 | 8.66E-10 |

|          |          |          |          |          |          |          |          |          |
|----------|----------|----------|----------|----------|----------|----------|----------|----------|
| 0.00028  | 0.39173  | 1.41E-18 | 0.218895 | 1.79E-06 | 0.413165 | 1.11E-20 | 0.290617 | 1.53E-10 |
| 0.00312  | 0.339479 | 4.64E-14 | 0.128013 | 0.0056   | 0.338604 | 5.44E-14 | 0.297772 | 5.13E-11 |
| 0.00813  | 0.202036 | 1.08E-05 | 0.102226 | 0.02718  | 0.227304 | 6.90E-07 | 0.196768 | 1.85E-05 |
| 0.00614  | -0.14775 | 0.00137  | -0.07898 | 0.08821  | -0.17904 | 0.0001   | -0.17683 | 0.00012  |
| 0.18487  | 0.159909 | 0.00052  | 0.001821 | 0.9687   | 0.171915 | 0.00019  | 0.071142 | 0.12473  |
| 0.02043  | 0.37562  | 4.27E-17 | 0.248492 | 5.29E-08 | 0.417255 | 4.25E-21 | 0.248934 | 5.00E-08 |
| 2.42E-06 | 0.647954 | 6.02E-57 | 0.427825 | 3.31E-22 | 0.50624  | 9.20E-32 | 0.408657 | 3.18E-20 |
| 4.33E-07 | 0.45389  | 4.11E-25 | 0.296256 | 6.48E-11 | 0.427935 | 3.22E-22 | 0.315554 | 2.95E-12 |
| 2.00E-07 | 0.34461  | 1.81E-14 | 0.262979 | 7.94E-09 | 0.283961 | 4.13E-10 | 0.249202 | 4.84E-08 |
| 0.00017  | 0.465739 | 1.61E-26 | 0.343566 | 2.20E-14 | 0.440978 | 1.22E-23 | 0.252774 | 3.06E-08 |
| 6.58E-08 | 0.405125 | 7.14E-20 | 0.277739 | 1.02E-09 | 0.302721 | 2.36E-11 | 0.265672 | 5.51E-09 |
| 2.19E-07 | 0.384024 | 7.38E-18 | 0.221573 | 1.33E-06 | 0.364111 | 4.36E-16 | 0.325279 | 5.70E-13 |
| 0.00136  | 0.472048 | 2.73E-27 | 0.321407 | 1.11E-12 | 0.492756 | 6.14E-30 | 0.309603 | 7.84E-12 |
| 0.00589  | 0.36674  | 2.59E-16 | 0.28001  | 7.35E-10 | 0.384575 | 6.56E-18 | 0.294251 | 8.82E-11 |
| 4.06E-08 | 0.477301 | 6.04E-28 | 0.343798 | 2.11E-14 | 0.432423 | 1.06E-22 | 0.31203  | 5.28E-12 |
| 8.65E-21 | 0.642223 | 1.15E-55 | 0.358914 | 1.21E-15 | 0.368364 | 1.87E-16 | 0.406394 | 5.34E-20 |
| 0.01316  | 0.319819 | 1.45E-12 | 0.23465  | 2.91E-07 | 0.320823 | 1.22E-12 | 0.194437 | 2.33E-05 |
| 0.53613  | 0.354334 | 2.92E-15 | 0.109262 | 0.01818  | 0.270304 | 2.91E-09 | 0.162526 | 0.00042  |
| 0.01478  | -0.1735  | 0.00016  | 0.00244  | 0.95807  | -0.11618 | 0.01199  | -0.10295 | 0.02609  |
| 4.27E-06 | 0.230963 | 4.51E-07 | 0.1328   | 0.00404  | 0.234704 | 2.89E-07 | 0.204851 | 8.10E-06 |
| 1.42E-15 | 0.445528 | 3.75E-24 | 0.335166 | 1.01E-13 | 0.41138  | 1.69E-20 | 0.46217  | 4.33E-26 |
| 3.08E-09 | 0.4795   | 3.19E-28 | 0.346667 | 1.24E-14 | 0.445213 | 4.07E-24 | 0.380828 | 1.45E-17 |
| 0.0005   | 0.321171 | 1.15E-12 | 0.151891 | 0.00099  | 0.323536 | 7.69E-13 | 0.271676 | 2.40E-09 |
| 6.83E-14 | -0.2681  | 3.95E-09 | -0.17213 | 0.00019  | -0.18193 | 7.68E-05 | -0.39359 | 9.39E-19 |
| 0.13206  | 0.20639  | 6.90E-06 | 0.026262 | 0.57132  | 0.239087 | 1.71E-07 | 0.22535  | 8.64E-07 |
| 0.00566  | 0.532967 | 1.26E-35 | 0.277356 | 1.08E-09 | 0.387161 | 3.78E-18 | 0.172744 | 0.00018  |
| 0.00031  | 0.318849 | 1.70E-12 | 0.237047 | 2.18E-07 | 0.257894 | 1.57E-08 | 0.223642 | 1.05E-06 |
| 0.06373  | 0.232505 | 3.76E-07 | 0.184713 | 5.93E-05 | 0.326149 | 4.91E-13 | 0.225079 | 8.92E-07 |
| 0.25206  | 0.230006 | 5.04E-07 | 0.232046 | 3.97E-07 | 0.258085 | 1.53E-08 | 0.146147 | 0.00154  |
| 2.68E-08 | 0.55932  | 8.60E-40 | 0.292044 | 1.23E-10 | 0.337231 | 6.96E-14 | 0.217319 | 2.13E-06 |
| 0.04356  | 0.229777 | 5.18E-07 | 0.12017  | 0.00934  | 0.203499 | 9.32E-06 | 0.165267 | 0.00034  |
| 0.15571  | 0.281971 | 5.52E-10 | 0.158446 | 0.00059  | 0.335622 | 9.29E-14 | 0.144671 | 0.00172  |
| 0.19256  | 0.309844 | 7.54E-12 | 0.154035 | 0.00084  | 0.308988 | 8.66E-12 | 0.188433 | 4.17E-05 |
| 0.00323  | 0.359216 | 1.14E-15 | 0.221175 | 1.39E-06 | 0.239267 | 1.67E-07 | 0.168088 | 0.00026  |
| 0.0025   | 0.342636 | 2.61E-14 | 0.217689 | 2.05E-06 | 0.33174  | 1.85E-13 | 0.274151 | 1.70E-09 |
| 0.02088  | 0.247195 | 6.24E-08 | 0.139105 | 0.00259  | 0.245068 | 8.15E-08 | 0.202517 | 1.03E-05 |
| 0.03351  | 0.068144 | 0.14146  | 0.041508 | 0.3708   | 0.120885 | 0.00892  | -0.03144 | 0.49789  |
| 0.27789  | 0.098245 | 0.03379  | 0.053893 | 0.24509  | 0.10215  | 0.02729  | 0.126449 | 0.00621  |
| 0.26856  | 0.207977 | 5.84E-06 | 0.108435 | 0.01908  | 0.225716 | 8.29E-07 | 0.11181  | 0.01563  |
| 2.98E-06 | 0.40443  | 8.36E-20 | 0.324124 | 6.95E-13 | 0.389666 | 2.20E-18 | 0.310767 | 6.49E-12 |
| 0.00435  | -0.40464 | 7.97E-20 | -0.16409 | 0.00037  | -0.32059 | 1.27E-12 | -0.17122 | 0.0002   |
| 0.00856  | 0.34301  | 2.44E-14 | 0.128419 | 0.00545  | 0.307593 | 1.09E-11 | 0.295273 | 7.54E-11 |
| 0.28174  | 0.332867 | 1.52E-13 | 0.270037 | 3.02E-09 | 0.42443  | 7.59E-22 | 0.180672 | 8.63E-05 |
| 0.08845  | -0.25463 | 2.40E-08 | -0.05416 | 0.24276  | -0.1612  | 0.00047  | -0.03581 | 0.44012  |
| 0.08871  | 0.154175 | 0.00083  | 0.080767 | 0.08124  | 0.173724 | 0.00016  | 0.112225 | 0.01525  |

|          |          |          |          |          |          |          |          |          |
|----------|----------|----------|----------|----------|----------|----------|----------|----------|
| 0.31054  | -0.34414 | 1.98E-14 | -0.12645 | 0.00621  | -0.2492  | 4.84E-08 | -0.15406 | 0.00084  |
| 0.00611  | 0.36637  | 2.78E-16 | 0.129869 | 0.00494  | 0.36515  | 3.55E-16 | 0.24387  | 9.46E-08 |
| 0.07474  | 0.17238  | 0.00018  | 0.104718 | 0.02363  | 0.201761 | 1.11E-05 | 0.170465 | 0.00021  |
| 0.01413  | 0.318795 | 1.72E-12 | 0.295873 | 6.87E-11 | 0.365384 | 3.39E-16 | 0.208979 | 5.25E-06 |
| 0.06185  | 0.15623  | 0.0007   | 0.147105 | 0.00143  | 0.185066 | 5.74E-05 | 0.207304 | 6.27E-06 |
| 0.20206  | 0.314818 | 3.33E-12 | 0.168086 | 0.00026  | 0.384166 | 7.16E-18 | 0.193414 | 2.57E-05 |
| 2.21E-10 | 0.439645 | 1.71E-23 | 0.379866 | 1.77E-17 | 0.415232 | 6.86E-21 | 0.441049 | 1.19E-23 |
| 6.74E-05 | 0.386235 | 4.61E-18 | 0.22143  | 1.35E-06 | 0.356715 | 1.85E-15 | 0.2573   | 1.69E-08 |
| 9.50E-08 | 0.479684 | 3.02E-28 | 0.352736 | 3.96E-15 | 0.476897 | 6.79E-28 | 0.375061 | 4.79E-17 |
| 1.45E-05 | 0.398015 | 3.54E-19 | 0.227284 | 6.92E-07 | 0.405124 | 7.14E-20 | 0.291597 | 1.32E-10 |
| 0.68166  | 0.200449 | 1.27E-05 | 0.118737 | 0.01022  | 0.163113 | 0.0004   | 0.090768 | 0.04996  |
| 0.00016  | 0.371449 | 1.00E-16 | 0.192323 | 2.86E-05 | 0.363427 | 4.99E-16 | 0.274593 | 1.59E-09 |
| 0.00031  | -0.20121 | 1.18E-05 | -0.09521 | 0.03971  | -0.09111 | 0.04909  | -0.21113 | 4.18E-06 |
| 0.01288  | 0.206172 | 7.06E-06 | 0.02961  | 0.52327  | 0.121099 | 0.0088   | -0.00836 | 0.857    |
| 0.02917  | 0.282327 | 5.25E-10 | 0.104451 | 0.02399  | 0.326448 | 4.66E-13 | 0.224625 | 9.39E-07 |
| 0.82043  | 0.191979 | 2.96E-05 | 0.162068 | 0.00044  | 0.248057 | 5.59E-08 | 0.104741 | 0.0236   |
| 0.00019  | 0.303918 | 1.95E-11 | 0.13978  | 0.00247  | 0.207928 | 5.87E-06 | 0.190237 | 3.51E-05 |
| 0.00389  | 0.281675 | 5.77E-10 | 0.16976  | 0.00023  | 0.241702 | 1.24E-07 | 0.183467 | 6.66E-05 |
| 0.00079  | 0.338852 | 5.20E-14 | 0.2992   | 4.11E-11 | 0.383262 | 8.67E-18 | 0.244176 | 9.11E-08 |
| 0.12356  | 0.197788 | 1.67E-05 | 0.0342   | 0.46093  | 0.210477 | 4.48E-06 | 0.121455 | 0.00861  |
| 0.00013  | 0.464896 | 2.04E-26 | 0.299543 | 3.89E-11 | 0.296369 | 6.37E-11 | 0.303019 | 2.25E-11 |
| 0.49316  | 0.280943 | 6.42E-10 | 0.192757 | 2.74E-05 | 0.342195 | 2.83E-14 | 0.136098 | 0.00321  |
| 0.18798  | 0.371712 | 9.50E-17 | 0.222893 | 1.14E-06 | 0.24401  | 9.30E-08 | 0.229413 | 5.40E-07 |
| 3.26E-05 | 0.367855 | 2.07E-16 | 0.237061 | 2.18E-07 | 0.360926 | 8.16E-16 | 0.243082 | 1.04E-07 |
| 0.01441  | 0.363605 | 4.82E-16 | 0.205211 | 7.81E-06 | 0.347888 | 9.87E-15 | 0.218668 | 1.84E-06 |
| 0.07642  | 0.105787 | 0.02223  | 0.099558 | 0.03147  | 0.124277 | 0.00717  | 0.078144 | 0.09165  |
| 0.50707  | 0.180492 | 8.77E-05 | 0.04826  | 0.298    | 0.188309 | 4.22E-05 | 0.170477 | 0.00021  |
| 0.70459  | 0.15689  | 0.00067  | 0.085646 | 0.06442  | 0.199975 | 1.34E-05 | 0.088252 | 0.05668  |
| 1.83E-31 | 0.54613  | 1.16E-37 | 0.425199 | 6.30E-22 | 0.451052 | 8.76E-25 | 0.453583 | 4.46E-25 |
| 0.04691  | 0.212748 | 3.51E-06 | 0.08849  | 0.05602  | 0.258276 | 1.49E-08 | 0.172127 | 0.00019  |
| 0.13512  | 0.244438 | 8.82E-08 | 0.11763  | 0.01096  | 0.197129 | 1.78E-05 | 0.129832 | 0.00495  |
| 3.09E-16 | 0.529727 | 3.85E-35 | 0.28491  | 3.59E-10 | 0.408126 | 3.59E-20 | 0.433522 | 8.06E-23 |
| 2.03E-07 | 0.364838 | 3.78E-16 | 0.267587 | 4.24E-09 | 0.375481 | 4.40E-17 | 0.328083 | 3.51E-13 |
| 0.0029   | 0.340789 | 3.66E-14 | 0.177792 | 0.00011  | 0.291549 | 1.33E-10 | 0.229637 | 5.26E-07 |
| 2.47E-08 | 0.65906  | 1.63E-59 | 0.414762 | 7.67E-21 | 0.497544 | 1.41E-30 | 0.532873 | 1.30E-35 |
| 2.00E-07 | 0.574814 | 2.03E-42 | 0.381018 | 1.39E-17 | 0.502261 | 3.24E-31 | 0.313099 | 4.43E-12 |
| 0.29405  | 0.407213 | 4.43E-20 | 0.208742 | 5.39E-06 | 0.302581 | 2.41E-11 | 0.05431  | 0.24145  |
| 6.40E-05 | 0.331674 | 1.87E-13 | 0.195082 | 2.18E-05 | 0.399627 | 2.47E-19 | 0.370036 | 1.33E-16 |
| 0.43397  | 0.162679 | 0.00042  | -0.01945 | 0.67499  | 0.252582 | 3.14E-08 | 0.157644 | 0.00063  |
| 0.27813  | 0.215638 | 2.56E-06 | 0.09619  | 0.03772  | 0.219488 | 1.68E-06 | 0.16617  | 0.00031  |
| 1.20E-10 | 0.528815 | 5.27E-35 | 0.413445 | 1.04E-20 | 0.458074 | 1.33E-25 | 0.488515 | 2.21E-29 |
| 0.3203   | 0.243952 | 9.37E-08 | 0.139908 | 0.00244  | 0.169378 | 0.00024  | 0.184041 | 6.31E-05 |
| 6.80E-09 | 0.583871 | 5.07E-44 | 0.360845 | 8.29E-16 | 0.494921 | 3.16E-30 | 0.372712 | 7.75E-17 |
| 2.00E-07 | 0.236219 | 2.41E-07 | 0.026588 | 0.56656  | 0.170044 | 0.00022  | 0.238108 | 1.92E-07 |
| 1.64E-06 | -0.24499 | 8.23E-08 | -0.15053 | 0.0011   | -0.18381 | 6.45E-05 | -0.2749  | 1.53E-09 |

|          |          |          |          |          |          |          |          |          |
|----------|----------|----------|----------|----------|----------|----------|----------|----------|
| 9.58E-05 | 0.383675 | 7.94E-18 | 0.217889 | 2.00E-06 | 0.315415 | 3.02E-12 | 0.293398 | 1.00E-10 |
| 0.07314  | 0.200331 | 1.29E-05 | -0.00199 | 0.96575  | 0.25169  | 3.52E-08 | 0.209981 | 4.72E-06 |
| 0.00029  | 0.33876  | 5.29E-14 | 0.149038 | 0.00124  | 0.255452 | 2.16E-08 | 0.201901 | 1.10E-05 |
| 0.01242  | 0.221869 | 1.28E-06 | 0.080216 | 0.08334  | 0.289334 | 1.86E-10 | 0.22979  | 5.17E-07 |
| 2.24E-12 | 0.401411 | 1.65E-19 | 0.280303 | 7.04E-10 | 0.266661 | 4.81E-09 | 0.292893 | 1.09E-10 |
| 0.1261   | 0.385433 | 5.47E-18 | 0.195743 | 2.04E-05 | 0.304507 | 1.78E-11 | 0.115732 | 0.01232  |
| 0.00252  | 0.447302 | 2.36E-24 | 0.322141 | 9.75E-13 | 0.421134 | 1.68E-21 | 0.406304 | 5.45E-20 |
| 4.46E-20 | 0.600324 | 4.61E-47 | 0.436907 | 3.43E-23 | 0.419296 | 2.62E-21 | 0.441454 | 1.08E-23 |
| 0.06807  | 0.372235 | 8.54E-17 | 0.22116  | 1.39E-06 | 0.437251 | 3.15E-23 | 0.231435 | 4.26E-07 |
| 0.07518  | 0.177916 | 0.00011  | 0.057994 | 0.21095  | 0.176707 | 0.00012  | 0.204935 | 8.03E-06 |
| 0.03478  | 0.160718 | 0.00049  | 0.094613 | 0.04098  | 0.140026 | 0.00242  | 0.147558 | 0.00139  |
| 0.00762  | 0.239871 | 1.55E-07 | 0.104264 | 0.02424  | 0.211241 | 4.13E-06 | 0.094111 | 0.04207  |
| 0.19409  | 0.373241 | 6.96E-17 | 0.318478 | 1.81E-12 | 0.403961 | 9.30E-20 | 0.227369 | 6.85E-07 |
| 7.78E-08 | 0.443362 | 6.58E-24 | 0.304887 | 1.67E-11 | 0.406307 | 5.45E-20 | 0.350706 | 5.82E-15 |
| 0.00117  | 0.309869 | 7.51E-12 | 0.23635  | 2.38E-07 | 0.29899  | 4.24E-11 | 0.2611   | 1.02E-08 |
| 3.66E-06 | 0.410546 | 2.05E-20 | 0.296775 | 5.98E-11 | 0.357535 | 1.58E-15 | 0.309521 | 7.94E-12 |
| 8.09E-15 | -0.23983 | 1.56E-07 | -0.18482 | 5.87E-05 | -0.18198 | 7.65E-05 | -0.30316 | 2.20E-11 |
| 0.14618  | 0.448461 | 1.74E-24 | 0.323608 | 7.59E-13 | 0.445192 | 4.09E-24 | 0.221575 | 1.33E-06 |
| 0.41763  | 0.396166 | 5.33E-19 | 0.277332 | 1.08E-09 | 0.376098 | 3.87E-17 | 0.2494   | 4.72E-08 |
| 0.00022  | 0.350088 | 6.53E-15 | 0.198129 | 1.61E-05 | 0.380067 | 1.70E-17 | 0.284256 | 3.95E-10 |
| 2.03E-08 | 0.399295 | 2.66E-19 | 0.214052 | 3.05E-06 | 0.282629 | 5.02E-10 | 0.313645 | 4.05E-12 |
| 0.00014  | 0.28707  | 2.61E-10 | 0.157695 | 0.00063  | 0.257978 | 1.55E-08 | 0.240526 | 1.43E-07 |
| 0.05982  | 0.316025 | 2.73E-12 | 0.162655 | 0.00042  | 0.308721 | 9.04E-12 | 0.29263  | 1.13E-10 |
| 0.00301  | 0.369378 | 1.52E-16 | 0.153369 | 0.00088  | 0.231571 | 4.20E-07 | 0.200758 | 1.23E-05 |
| 0.90904  | 0.280844 | 6.51E-10 | 0.241837 | 1.22E-07 | 0.408795 | 3.08E-20 | 0.183615 | 6.57E-05 |
| 0.30616  | 0.273888 | 1.76E-09 | 0.166871 | 0.00029  | 0.33103  | 2.10E-13 | 0.168478 | 0.00025  |
| 0.99954  | 0.155997 | 0.00072  | 0.101159 | 0.02883  | 0.208025 | 5.81E-06 | 0.062684 | 0.17627  |
| 0.00058  | 0.337752 | 6.34E-14 | 0.167015 | 0.00029  | 0.293561 | 9.80E-11 | 0.239715 | 1.58E-07 |
| 0.26578  | 0.171728 | 0.00019  | 0.098627 | 0.0331   | 0.237205 | 2.14E-07 | 0.054425 | 0.24046  |
| 0.10843  | 0.236854 | 2.24E-07 | 0.232949 | 3.57E-07 | 0.290755 | 1.50E-10 | 0.176015 | 0.00013  |
| 0.00069  | 0.361465 | 7.34E-16 | 0.200501 | 1.27E-05 | 0.336154 | 8.45E-14 | 0.233482 | 3.35E-07 |
| 0.2394   | 0.261457 | 9.75E-09 | 0.13546  | 0.00336  | 0.205305 | 7.73E-06 | 0.153368 | 0.00088  |
| 0.01236  | 0.209742 | 4.85E-06 | 0.162409 | 0.00043  | 0.183821 | 6.45E-05 | 0.110742 | 0.01666  |
| 0.00135  | 0.345912 | 1.43E-14 | 0.209161 | 5.15E-06 | 0.322529 | 9.13E-13 | 0.216839 | 2.25E-06 |
| 1.83E-09 | 0.500304 | 5.98E-31 | 0.342456 | 2.70E-14 | 0.389181 | 2.45E-18 | 0.372856 | 7.53E-17 |
| 1.55E-05 | 0.390396 | 1.88E-18 | 0.230608 | 4.70E-07 | 0.377506 | 2.89E-17 | 0.291403 | 1.36E-10 |
| 7.85E-07 | 0.487449 | 3.05E-29 | 0.319935 | 1.42E-12 | 0.460224 | 7.39E-26 | 0.331924 | 1.79E-13 |
| 0.02853  | 0.249162 | 4.86E-08 | 0.144913 | 0.00169  | 0.284546 | 3.79E-10 | 0.176051 | 0.00013  |
| 0.24273  | 0.167504 | 0.00028  | 0.060487 | 0.19195  | 0.259995 | 1.19E-08 | 0.168004 | 0.00027  |
| 0.24072  | 0.376473 | 3.58E-17 | 0.259107 | 1.33E-08 | 0.408843 | 3.04E-20 | 0.239517 | 1.62E-07 |
| 0.63188  | 0.191532 | 3.09E-05 | -0.01533 | 0.74107  | 0.278824 | 8.72E-10 | 0.169846 | 0.00023  |
| 0.22288  | 0.317828 | 2.02E-12 | 0.207351 | 6.24E-06 | 0.390031 | 2.04E-18 | 0.205872 | 7.29E-06 |
| 8.79E-13 | 0.358472 | 1.32E-15 | 0.23035  | 4.84E-07 | 0.270254 | 2.93E-09 | 0.383149 | 8.88E-18 |
| 0.00547  | 0.390647 | 1.78E-18 | 0.280239 | 7.11E-10 | 0.442007 | 9.33E-24 | 0.254848 | 2.34E-08 |
| 1.20E-05 | 0.443244 | 6.78E-24 | 0.267139 | 4.51E-09 | 0.444931 | 4.38E-24 | 0.339121 | 4.95E-14 |

|          |          |          |          |          |          |          |          |          |
|----------|----------|----------|----------|----------|----------|----------|----------|----------|
| 1.69E-10 | 0.319978 | 1.41E-12 | 0.190735 | 3.34E-05 | 0.328297 | 3.38E-13 | 0.293968 | 9.21E-11 |
| 2.30E-12 | -0.19877 | 1.51E-05 | -0.18736 | 4.62E-05 | -0.14447 | 0.00175  | -0.2041  | 8.76E-06 |
| 0.68457  | 0.212869 | 3.47E-06 | 0.0467   | 0.31391  | 0.231738 | 4.11E-07 | 0.159055 | 0.00056  |
| 0.18361  | 0.210803 | 4.33E-06 | 0.09818  | 0.03391  | 0.145212 | 0.00165  | 0.074057 | 0.10998  |
| 0.17119  | 0.179312 | 9.77E-05 | 0.050482 | 0.27629  | 0.231972 | 4.00E-07 | 0.100812 | 0.02938  |
| 0.0336   | 0.313098 | 4.43E-12 | 0.142721 | 0.00199  | 0.317154 | 2.26E-12 | 0.201516 | 1.14E-05 |
| 8.47E-07 | 0.385253 | 5.68E-18 | 0.288167 | 2.21E-10 | 0.334036 | 1.23E-13 | 0.334116 | 1.22E-13 |
| 0.00089  | 0.343503 | 2.23E-14 | 0.204753 | 8.19E-06 | 0.308574 | 9.26E-12 | 0.201237 | 1.18E-05 |
| 8.36E-09 | 0.470124 | 4.71E-27 | 0.333457 | 1.37E-13 | 0.439412 | 1.82E-23 | 0.34449  | 1.86E-14 |
| 0.00011  | -0.55483 | 4.68E-39 | -0.30908 | 8.53E-12 | -0.46688 | 1.17E-26 | -0.27683 | 1.16E-09 |
| 1.95E-06 | 0.454587 | 3.41E-25 | 0.302424 | 2.47E-11 | 0.418129 | 3.46E-21 | 0.323893 | 7.23E-13 |
| 1.22E-05 | 0.275752 | 1.35E-09 | 0.1663   | 0.00031  | 0.227224 | 6.97E-07 | 0.213156 | 3.36E-06 |
| 0.44057  | 0.268475 | 3.75E-09 | 0.124489 | 0.00707  | 0.371418 | 1.01E-16 | 0.202307 | 1.05E-05 |
| 0.56042  | 0.245093 | 8.12E-08 | 0.172246 | 0.00018  | 0.222322 | 1.22E-06 | 0.107117 | 0.0206   |
| 3.15E-07 | 0.321456 | 1.10E-12 | 0.147403 | 0.0014   | 0.245598 | 7.63E-08 | 0.180514 | 8.75E-05 |
| 2.14E-05 | 0.355343 | 2.41E-15 | 0.261428 | 9.79E-09 | 0.343981 | 2.04E-14 | 0.224451 | 9.58E-07 |
| 3.18E-06 | 0.369199 | 1.58E-16 | 0.293646 | 9.67E-11 | 0.371226 | 1.05E-16 | 0.218922 | 1.79E-06 |
| 1.95E-05 | 0.39895  | 2.87E-19 | 0.232085 | 3.95E-07 | 0.411241 | 1.75E-20 | 0.314054 | 3.78E-12 |
| 0.00805  | 0.3432   | 2.35E-14 | 0.176236 | 0.00013  | 0.396688 | 4.75E-19 | 0.054401 | 0.24067  |
| 1.87E-06 | 0.358461 | 1.32E-15 | 0.209286 | 5.09E-06 | 0.346247 | 1.34E-14 | 0.247422 | 6.06E-08 |
| 2.17E-07 | 0.327442 | 3.92E-13 | 0.285018 | 3.53E-10 | 0.244779 | 8.45E-08 | 0.277165 | 1.11E-09 |
| 0.1191   | 0.287748 | 2.36E-10 | 0.195269 | 2.14E-05 | 0.280474 | 6.87E-10 | 0.162824 | 0.00041  |
| 0.56479  | 0.240707 | 1.40E-07 | 0.183998 | 6.34E-05 | 0.266357 | 5.02E-09 | 0.131329 | 0.00447  |
| 0.19583  | 0.19953  | 1.40E-05 | 0.175739 | 0.00013  | 0.362995 | 5.44E-16 | 0.213272 | 3.32E-06 |
| 3.69E-06 | 0.198723 | 1.52E-05 | 0.179973 | 9.20E-05 | 0.176208 | 0.00013  | 0.18525  | 5.64E-05 |
| 9.44E-08 | 0.479629 | 3.07E-28 | 0.290458 | 1.57E-10 | 0.329386 | 2.80E-13 | 0.360892 | 8.22E-16 |
| 6.05E-05 | -0.04645 | 0.31654  | 0.121961 | 0.00833  | 0.09839  | 0.03353  | -0.06109 | 0.18756  |
| 3.82E-06 | 0.294123 | 8.99E-11 | 0.185552 | 5.48E-05 | 0.382538 | 1.01E-17 | 0.225011 | 8.99E-07 |
| 0.78428  | 0.238362 | 1.86E-07 | 0.150899 | 0.00107  | 0.249278 | 4.79E-08 | 0.111674 | 0.01576  |
| 0.03296  | 0.329843 | 2.58E-13 | 0.214952 | 2.76E-06 | 0.297915 | 5.01E-11 | 0.202671 | 1.02E-05 |
| 0.0432   | 0.330625 | 2.25E-13 | 0.255419 | 2.17E-08 | 0.304622 | 1.75E-11 | 0.181903 | 7.70E-05 |
| 3.59E-12 | -0.16597 | 0.00032  | -0.07888 | 0.08862  | -0.07154 | 0.12263  | -0.18774 | 4.45E-05 |
| 0.64327  | 0.283734 | 4.27E-10 | 0.141915 | 0.00211  | 0.337812 | 6.27E-14 | 0.180775 | 8.55E-05 |
| 0.48945  | 0.228227 | 6.20E-07 | 0.141306 | 0.00221  | 0.275406 | 1.42E-09 | 0.203765 | 9.07E-06 |
| 4.32E-05 | 0.404284 | 8.64E-20 | 0.240558 | 1.42E-07 | 0.3532   | 3.63E-15 | 0.282344 | 5.23E-10 |
| 0.03217  | 0.179812 | 9.33E-05 | 0.164716 | 0.00035  | 0.192363 | 2.85E-05 | 0.115632 | 0.0124   |
| 0.00074  | 0.274486 | 1.62E-09 | 0.199824 | 1.36E-05 | 0.249983 | 4.38E-08 | 0.216787 | 2.26E-06 |
| 0.0208   | 0.207748 | 5.98E-06 | 0.187654 | 4.49E-05 | 0.209706 | 4.86E-06 | 0.261732 | 9.40E-09 |
| 5.37E-06 | 0.37946  | 1.93E-17 | 0.303428 | 2.11E-11 | 0.405027 | 7.30E-20 | 0.321525 | 1.08E-12 |
| 0.00049  | 0.359089 | 1.17E-15 | 0.206168 | 7.06E-06 | 0.362458 | 6.04E-16 | 0.263449 | 7.46E-09 |
| 0.00719  | 0.343736 | 2.13E-14 | 0.164676 | 0.00035  | 0.358645 | 1.27E-15 | 0.199256 | 1.44E-05 |
| 0.45089  | 0.278877 | 8.65E-10 | 0.270856 | 2.70E-09 | 0.381344 | 1.30E-17 | 0.162114 | 0.00044  |
| 0.04877  | 0.149371 | 0.00121  | 0.01797  | 0.69851  | 0.266786 | 4.73E-09 | 0.073086 | 0.11473  |
| 0.00249  | 0.294432 | 8.58E-11 | 0.219893 | 1.60E-06 | 0.271195 | 2.57E-09 | 0.18672  | 4.91E-05 |
| 0.14846  | 0.253989 | 2.61E-08 | 0.116497 | 0.01176  | 0.274707 | 1.57E-09 | 0.170457 | 0.00021  |

|          |          |          |          |          |          |          |          |          |
|----------|----------|----------|----------|----------|----------|----------|----------|----------|
| 0.00572  | 0.382444 | 1.03E-17 | 0.224074 | 1.00E-06 | 0.41755  | 3.97E-21 | 0.239995 | 1.53E-07 |
| 0.01066  | 0.286016 | 3.05E-10 | 0.190629 | 3.37E-05 | 0.242282 | 1.15E-07 | 0.181798 | 7.78E-05 |
| 2.59E-06 | 0.419476 | 2.51E-21 | 0.262411 | 8.58E-09 | 0.384409 | 6.80E-18 | 0.29014  | 1.65E-10 |
| 0.00471  | 0.338213 | 5.83E-14 | 0.210456 | 4.49E-06 | 0.330545 | 2.28E-13 | 0.222239 | 1.23E-06 |
| 0.00043  | 0.248199 | 5.49E-08 | 0.214677 | 2.85E-06 | 0.3824   | 1.04E-17 | 0.279565 | 7.83E-10 |
| 0.00196  | 0.135173 | 0.00343  | 0.00709  | 0.87855  | 0.133643 | 0.00381  | 0.160378 | 0.0005   |
| 2.54E-05 | 0.411074 | 1.82E-20 | 0.242931 | 1.06E-07 | 0.373857 | 6.13E-17 | 0.263846 | 7.07E-09 |
| 4.44E-09 | 0.431391 | 1.37E-22 | 0.249069 | 4.92E-08 | 0.429109 | 2.41E-22 | 0.391858 | 1.37E-18 |
| 0.11608  | 0.231765 | 4.10E-07 | 0.140824 | 0.00229  | 0.196797 | 1.84E-05 | 0.189536 | 3.75E-05 |
| 3.32E-16 | -0.23346 | 3.35E-07 | 0.038818 | 0.40263  | 0.014663 | 0.75197  | -0.18236 | 7.39E-05 |
| 0.89886  | 0.186437 | 5.04E-05 | 0.116525 | 0.01174  | 0.313588 | 4.08E-12 | 0.081562 | 0.07827  |
| 2.93E-09 | 0.448877 | 1.56E-24 | 0.321769 | 1.04E-12 | 0.425991 | 5.19E-22 | 0.311565 | 5.69E-12 |
| 1.06E-10 | 0.36384  | 4.60E-16 | 0.340357 | 3.96E-14 | 0.295946 | 6.80E-11 | 0.370534 | 1.21E-16 |
| 0.12304  | 0.233127 | 3.49E-07 | 0.228495 | 6.01E-07 | 0.303835 | 1.98E-11 | 0.13436  | 0.00363  |
| 0.07551  | 0.242258 | 1.16E-07 | 0.058329 | 0.20832  | 0.218962 | 1.78E-06 | 0.156835 | 0.00067  |
| 0.54991  | 0.27107  | 2.62E-09 | 0.216938 | 2.22E-06 | 0.338747 | 5.30E-14 | 0.143554 | 0.00187  |
| 0.08294  | 0.346779 | 1.21E-14 | 0.20906  | 5.21E-06 | 0.349437 | 7.39E-15 | 0.255434 | 2.16E-08 |
| 0.92902  | 0.380829 | 1.45E-17 | 0.237199 | 2.14E-07 | 0.364895 | 3.73E-16 | 0.188294 | 4.22E-05 |
| 0.00581  | 0.365507 | 3.31E-16 | 0.26773  | 4.16E-09 | 0.433929 | 7.28E-23 | 0.201325 | 1.17E-05 |
| 0.29734  | 0.35415  | 3.02E-15 | 0.289959 | 1.69E-10 | 0.39524  | 6.53E-19 | 0.219003 | 1.77E-06 |
| 3.26E-05 | 0.417963 | 3.59E-21 | 0.261581 | 9.59E-09 | 0.404434 | 8.35E-20 | 0.293838 | 9.39E-11 |
| 0.69808  | -0.22749 | 6.76E-07 | -0.01007 | 0.82824  | -0.14078 | 0.00229  | -0.12112 | 0.00879  |
| 0.00011  | 0.348375 | 9.01E-15 | 0.270922 | 2.67E-09 | 0.38339  | 8.44E-18 | 0.270105 | 2.99E-09 |
| 0.18321  | 0.344403 | 1.89E-14 | 0.222361 | 1.21E-06 | 0.420305 | 2.06E-21 | 0.228065 | 6.32E-07 |
| 2.52E-11 | 0.395721 | 5.88E-19 | 0.240777 | 1.39E-07 | 0.359537 | 1.07E-15 | 0.300307 | 3.45E-11 |
| 9.64E-08 | 0.299145 | 4.14E-11 | 0.136865 | 0.00304  | 0.156026 | 0.00072  | -0.08508 | 0.0662   |
| 0.76446  | 0.164968 | 0.00034  | 0.163364 | 0.00039  | 0.188581 | 4.11E-05 | 0.121848 | 0.00839  |
| 0.84137  | 0.275279 | 1.45E-09 | 0.092433 | 0.04589  | 0.188546 | 4.12E-05 | 0.075895 | 0.10141  |
| 0.05981  | 0.439314 | 1.86E-23 | 0.258768 | 1.40E-08 | 0.451509 | 7.76E-25 | 0.270774 | 2.73E-09 |
| 0.00631  | 0.361577 | 7.18E-16 | 0.194429 | 2.33E-05 | 0.363928 | 4.52E-16 | 0.267019 | 4.58E-09 |
| 0.00225  | 0.337655 | 6.45E-14 | 0.160385 | 0.0005   | 0.393165 | 1.03E-18 | 0.283468 | 4.44E-10 |
| 0.0261   | 0.321549 | 1.08E-12 | 0.254935 | 2.31E-08 | 0.350474 | 6.08E-15 | 0.360829 | 8.32E-16 |
| 0.03534  | 0.300814 | 3.19E-11 | 0.170728 | 0.00021  | 0.221428 | 1.35E-06 | 0.098253 | 0.03378  |
| 0.26587  | 0.298612 | 4.50E-11 | 0.239669 | 1.59E-07 | 0.388088 | 3.10E-18 | 0.158142 | 0.0006   |
| 3.07E-08 | 0.487998 | 2.58E-29 | 0.377474 | 2.91E-17 | 0.400327 | 2.11E-19 | 0.502817 | 2.72E-31 |
| 5.90E-05 | 0.47826  | 4.57E-28 | 0.370799 | 1.14E-16 | 0.500266 | 6.05E-31 | 0.317008 | 2.32E-12 |
| 0.00658  | 0.200196 | 1.31E-05 | 0.043249 | 0.35106  | 0.269395 | 3.30E-09 | 0.198116 | 1.61E-05 |
| 3.96E-05 | 0.440883 | 1.25E-23 | 0.248757 | 5.12E-08 | 0.267152 | 4.50E-09 | 0.25318  | 2.90E-08 |
| 0.02339  | 0.274346 | 1.65E-09 | 0.128916 | 0.00527  | 0.349463 | 7.35E-15 | 0.301202 | 3.00E-11 |
| 0.11544  | 0.231991 | 3.99E-07 | -0.01964 | 0.67202  | 0.210985 | 4.24E-06 | 0.120952 | 0.00889  |
| 0.00122  | 0.443638 | 6.12E-24 | 0.208462 | 5.55E-06 | 0.31733  | 2.20E-12 | 0.198585 | 1.54E-05 |
| 3.46E-13 | 0.553859 | 6.73E-39 | 0.396241 | 5.24E-19 | 0.363817 | 4.62E-16 | 0.381671 | 1.21E-17 |
| 0.06129  | 0.471936 | 2.82E-27 | 0.199908 | 1.35E-05 | 0.318168 | 1.91E-12 | 0.195433 | 2.11E-05 |
| 0.00664  | 0.417284 | 4.22E-21 | 0.344356 | 1.90E-14 | 0.41402  | 9.12E-21 | 0.271618 | 2.42E-09 |
| 4.48E-05 | 0.208658 | 5.44E-06 | 0.209339 | 5.06E-06 | 0.338263 | 5.78E-14 | 0.130649 | 0.00469  |



|          |          |          |          |          |          |          |          |          |
|----------|----------|----------|----------|----------|----------|----------|----------|----------|
| 0.00455  | 0.383703 | 7.90E-18 | 0.307081 | 1.18E-11 | 0.443539 | 6.28E-24 | 0.199197 | 1.45E-05 |
| 0.02384  | 0.47028  | 4.50E-27 | 0.269954 | 3.06E-09 | 0.33707  | 7.17E-14 | 0.159207 | 0.00055  |
| 0.02835  | 0.255125 | 2.25E-08 | 0.278617 | 8.98E-10 | 0.317623 | 2.09E-12 | 0.188543 | 4.13E-05 |
| 0.00012  | 0.393361 | 9.87E-19 | 0.24254  | 1.12E-07 | 0.41792  | 3.63E-21 | 0.300318 | 3.45E-11 |
| 0.86924  | 0.234364 | 3.01E-07 | 0.193186 | 2.63E-05 | 0.379571 | 1.88E-17 | 0.163453 | 0.00039  |
| 0.00085  | 0.523765 | 2.94E-34 | 0.143528 | 0.00187  | 0.25691  | 1.78E-08 | 0.152495 | 0.00095  |
| 0.57135  | 0.234993 | 2.80E-07 | 0.046113 | 0.32004  | 0.121943 | 0.00834  | 0.095222 | 0.03969  |
| 1.82E-09 | -0.10911 | 0.01834  | -0.11132 | 0.0161   | -0.14603 | 0.00155  | -0.17676 | 0.00012  |
| 0.83662  | 0.246608 | 6.72E-08 | 0.206099 | 7.12E-06 | 0.352205 | 4.38E-15 | 0.173658 | 0.00016  |
| 0.00035  | 0.382805 | 9.55E-18 | 0.248272 | 5.44E-08 | 0.387303 | 3.67E-18 | 0.278326 | 9.36E-10 |
| 2.68E-06 | 0.091291 | 0.04865  | 0.001703 | 0.97072  | 0.130509 | 0.00473  | 0.276815 | 1.16E-09 |
| 0.57835  | 0.314022 | 3.80E-12 | 0.25878  | 1.39E-08 | 0.404919 | 7.48E-20 | 0.172913 | 0.00017  |
| 0.00035  | 0.363765 | 4.67E-16 | 0.324547 | 6.47E-13 | 0.422415 | 1.24E-21 | 0.276643 | 1.19E-09 |
| 3.20E-23 | 0.730734 | 4.07E-79 | 0.506596 | 8.21E-32 | 0.576611 | 9.85E-43 | 0.553675 | 7.21E-39 |
| 0.7577   | 0.258347 | 1.48E-08 | 0.158533 | 0.00058  | 0.297448 | 5.39E-11 | 0.169392 | 0.00024  |
| 2.56E-05 | 0.512229 | 1.34E-32 | 0.255429 | 2.17E-08 | 0.41178  | 1.54E-20 | 0.31061  | 6.66E-12 |
| 0.00014  | 0.123062 | 0.00776  | 0.079783 | 0.08502  | 0.120291 | 0.00927  | 0.312031 | 5.28E-12 |
| 0.26062  | 0.242746 | 1.09E-07 | 0.112413 | 0.01508  | 0.290449 | 1.57E-10 | 0.189058 | 3.93E-05 |
| 2.05E-05 | 0.602645 | 1.66E-47 | 0.325639 | 5.36E-13 | 0.45348  | 4.59E-25 | 0.358047 | 1.43E-15 |
| 0.01303  | 0.262942 | 7.98E-09 | 0.15359  | 0.00087  | 0.252759 | 3.06E-08 | 0.202647 | 1.02E-05 |
| 0.01866  | 0.231176 | 4.40E-07 | 0.238335 | 1.87E-07 | 0.327125 | 4.15E-13 | 0.170343 | 0.00022  |
| 0.89975  | 0.166712 | 0.0003   | 0.023442 | 0.61335  | 0.268767 | 3.60E-09 | 0.174655 | 0.00015  |
| 1.05E-18 | 0.26593  | 5.32E-09 | 0.11902  | 0.01004  | 0.203898 | 8.95E-06 | 0.298443 | 4.62E-11 |
| 4.13E-05 | 0.374304 | 5.60E-17 | 0.287631 | 2.40E-10 | 0.327322 | 4.01E-13 | 0.295406 | 7.39E-11 |
| 1.24E-09 | -0.30045 | 3.38E-11 | -0.23079 | 4.60E-07 | -0.27886 | 8.67E-10 | -0.2022  | 1.07E-05 |
| 0.04463  | 0.228467 | 6.03E-07 | 0.167733 | 0.00027  | 0.380135 | 1.67E-17 | 0.122112 | 0.00825  |
| 0.00084  | 0.49033  | 1.28E-29 | 0.291685 | 1.30E-10 | 0.411958 | 1.48E-20 | 0.240201 | 1.49E-07 |
| 2.61E-10 | -0.22516 | 8.83E-07 | -0.08989 | 0.05222  | -0.15076 | 0.00108  | -0.13204 | 0.00426  |
| 0.96142  | -0.46631 | 1.38E-26 | -0.3088  | 8.93E-12 | -0.49603 | 2.25E-30 | -0.23646 | 2.34E-07 |
| 0.00223  | 0.362774 | 5.68E-16 | 0.20599  | 7.20E-06 | 0.416365 | 5.25E-21 | 0.251334 | 3.68E-08 |
| 0.81605  | 0.142025 | 0.00209  | 0.070355 | 0.12897  | 0.194433 | 2.33E-05 | 0.139429 | 0.00253  |
| 0.27029  | -0.21197 | 3.82E-06 | -0.03521 | 0.44782  | -0.02729 | 0.55631  | -0.15882 | 0.00057  |
| 0.02075  | 0.202923 | 9.89E-06 | 0.149307 | 0.00121  | 0.197446 | 1.73E-05 | 0.176026 | 0.00013  |
| 0.05062  | 0.345202 | 1.63E-14 | 0.275596 | 1.38E-09 | 0.355629 | 2.28E-15 | 0.179386 | 9.71E-05 |
| 3.88E-06 | 0.347572 | 1.05E-14 | 0.208658 | 5.44E-06 | 0.26329  | 7.62E-09 | 0.122826 | 0.00788  |
| 0.00238  | 0.275314 | 1.44E-09 | 0.156327 | 0.0007   | 0.262247 | 8.77E-09 | 0.193772 | 2.48E-05 |
| 0.08992  | 0.293438 | 9.99E-11 | 0.124651 | 0.007    | 0.258031 | 1.54E-08 | 0.049761 | 0.28322  |
| 1.18E-06 | 0.506055 | 9.76E-32 | 0.390248 | 1.94E-18 | 0.494757 | 3.33E-30 | 0.414096 | 8.96E-21 |
| 0.72323  | 0.070483 | 0.12827  | -0.0198  | 0.6696   | 0.195727 | 2.05E-05 | 0.12971  | 0.00499  |
| 0.38051  | 0.213888 | 3.10E-06 | 0.029161 | 0.52959  | 0.166522 | 0.0003   | 0.066761 | 0.14974  |
| 0.00126  | 0.336497 | 7.94E-14 | 0.266512 | 4.91E-09 | 0.307178 | 1.16E-11 | 0.238007 | 1.94E-07 |
| 0.00241  | 0.344102 | 1.99E-14 | 0.18965  | 3.71E-05 | 0.288365 | 2.15E-10 | 0.228941 | 5.71E-07 |
| 0.22574  | 0.223649 | 1.05E-06 | 0.077654 | 0.09371  | 0.285218 | 3.43E-10 | 0.153528 | 0.00087  |
| 0.53364  | 0.230816 | 4.59E-07 | 0.088246 | 0.0567   | 0.304718 | 1.72E-11 | 0.163212 | 0.0004   |
| 0.6049   | 0.096779 | 0.03655  | 0.064258 | 0.16564  | 0.188458 | 4.16E-05 | 0.04465  | 0.33566  |

|          |          |          |          |          |          |          |          |          |
|----------|----------|----------|----------|----------|----------|----------|----------|----------|
| 0.07029  | 0.27241  | 2.17E-09 | 0.097656 | 0.03488  | 0.339906 | 4.29E-14 | 0.209174 | 5.15E-06 |
| 0.19149  | 0.267299 | 4.41E-09 | 0.068307 | 0.14051  | 0.171328 | 0.0002   | 0.16813  | 0.00026  |
| 0.23691  | 0.109343 | 0.01809  | 0.021417 | 0.64435  | 0.159219 | 0.00055  | 0.092279 | 0.04625  |
| 0.00049  | 0.44838  | 1.77E-24 | 0.097421 | 0.03532  | 0.254563 | 2.43E-08 | 0.283695 | 4.29E-10 |
| 0.00022  | 0.307754 | 1.06E-11 | 0.208232 | 5.69E-06 | 0.282162 | 5.37E-10 | 0.219347 | 1.70E-06 |
| 2.65E-19 | 0.467207 | 1.07E-26 | 0.312436 | 4.94E-12 | 0.413322 | 1.07E-20 | 0.452023 | 6.77E-25 |
| 3.64E-06 | 0.322392 | 9.35E-13 | 0.314541 | 3.49E-12 | 0.427579 | 3.52E-22 | 0.340594 | 3.79E-14 |
| 0.00074  | 0.3757   | 4.20E-17 | 0.215964 | 2.47E-06 | 0.319918 | 1.42E-12 | 0.267366 | 4.37E-09 |
| 0.64937  | -0.12637 | 0.00625  | -0.05843 | 0.20755  | -0.16738 | 0.00028  | -0.07062 | 0.12755  |
| 7.12E-10 | 0.435769 | 4.58E-23 | 0.329497 | 2.74E-13 | 0.386684 | 4.19E-18 | 0.368965 | 1.66E-16 |
| 0.47503  | 0.373701 | 6.33E-17 | 0.277733 | 1.02E-09 | 0.425656 | 5.63E-22 | 0.124901 | 0.00688  |
| 0.63081  | 0.241155 | 1.32E-07 | 0.160055 | 0.00052  | 0.312944 | 4.54E-12 | 0.120543 | 0.00912  |
| 0.67377  | 0.214975 | 2.76E-06 | 0.068627 | 0.13866  | 0.285547 | 3.27E-10 | 0.170384 | 0.00022  |
| 0.00025  | 0.390754 | 1.74E-18 | 0.312972 | 4.52E-12 | 0.326594 | 4.54E-13 | 0.288745 | 2.03E-10 |
| 4.36E-07 | 0.588694 | 6.78E-45 | 0.306024 | 1.40E-11 | 0.387526 | 3.50E-18 | 0.314045 | 3.79E-12 |
| 0.00013  | 0.356966 | 1.76E-15 | 0.161537 | 0.00046  | 0.344699 | 1.79E-14 | 0.277755 | 1.02E-09 |
| 5.94E-07 | 0.336183 | 8.40E-14 | 0.250782 | 3.95E-08 | 0.287072 | 2.61E-10 | 0.332973 | 1.49E-13 |
| 2.39E-11 | -0.47819 | 4.67E-28 | -0.18907 | 3.92E-05 | -0.29268 | 1.12E-10 | -0.27732 | 1.08E-09 |
| 8.80E-21 | 0.503606 | 2.12E-31 | 0.245904 | 7.34E-08 | 0.309896 | 7.47E-12 | 0.351201 | 5.30E-15 |
| 0.14684  | 0.380872 | 1.43E-17 | 0.209279 | 5.09E-06 | 0.396232 | 5.25E-19 | 0.249478 | 4.67E-08 |
| 0.00899  | 0.292637 | 1.13E-10 | 0.147534 | 0.00139  | 0.286422 | 2.87E-10 | 0.274438 | 1.63E-09 |
| 0.00121  | 0.398436 | 3.22E-19 | 0.178377 | 0.00011  | 0.302483 | 2.45E-11 | 0.231443 | 4.26E-07 |
| 0.28374  | 0.223832 | 1.03E-06 | 0.195223 | 2.15E-05 | 0.251522 | 3.59E-08 | 0.114598 | 0.01321  |
| 0.01217  | 0.099042 | 0.03237  | 0.077496 | 0.09438  | 0.179643 | 9.48E-05 | -0.03527 | 0.447    |
| 1.65E-05 | 0.39104  | 1.64E-18 | 0.266101 | 5.20E-09 | 0.337798 | 6.29E-14 | 0.286595 | 2.80E-10 |
| 2.98E-07 | 0.191827 | 3.00E-05 | 0.093773 | 0.04282  | 0.102576 | 0.02665  | 0.256734 | 1.83E-08 |
| 8.90E-14 | 0.53065  | 2.80E-35 | 0.370753 | 1.15E-16 | 0.491602 | 8.71E-30 | 0.5559   | 3.13E-39 |
| 0.0016   | 0.3786   | 2.30E-17 | 0.225404 | 8.59E-07 | 0.399924 | 2.31E-19 | 0.271699 | 2.40E-09 |
| 0.73195  | 0.162123 | 0.00044  | 0.053944 | 0.24464  | 0.187472 | 4.57E-05 | 0.114781 | 0.01306  |
| 0.77984  | 0.166165 | 0.00031  | 0.042589 | 0.35846  | 0.175886 | 0.00013  | 0.032575 | 0.48252  |
| 0.03736  | 0.309884 | 7.49E-12 | 0.163718 | 0.00038  | 0.346334 | 1.32E-14 | 0.213207 | 3.34E-06 |
| 0.11158  | 0.251451 | 3.63E-08 | 0.153114 | 0.0009   | 0.271842 | 2.35E-09 | 0.234797 | 2.86E-07 |
| 3.01E-05 | 0.313012 | 4.49E-12 | 0.229863 | 5.13E-07 | 0.299676 | 3.81E-11 | 0.239022 | 1.72E-07 |
| 0.00026  | 0.342182 | 2.84E-14 | 0.260204 | 1.15E-08 | 0.29614  | 6.60E-11 | 0.228504 | 6.01E-07 |
| 0.00072  | 0.386315 | 4.53E-18 | 0.259066 | 1.34E-08 | 0.328883 | 3.05E-13 | 0.230467 | 4.78E-07 |
| 0.00103  | 0.363966 | 4.49E-16 | 0.178068 | 0.00011  | 0.378367 | 2.42E-17 | 0.280751 | 6.60E-10 |
| 0.00082  | 0.32075  | 1.24E-12 | 0.248714 | 5.15E-08 | 0.307623 | 1.08E-11 | 0.182117 | 7.55E-05 |
| 0.00051  | 0.327224 | 4.07E-13 | 0.195248 | 2.15E-05 | 0.294339 | 8.70E-11 | 0.203092 | 9.72E-06 |
| 1.36E-05 | 0.34564  | 1.50E-14 | 0.213377 | 3.28E-06 | 0.287253 | 2.54E-10 | 0.284009 | 4.10E-10 |
| 0.33997  | 0.168328 | 0.00026  | 0.105429 | 0.02269  | 0.140956 | 0.00226  | 0.047022 | 0.31058  |
| 0.00256  | 0.257462 | 1.66E-08 | 0.167972 | 0.00027  | 0.234901 | 2.83E-07 | 0.198686 | 1.52E-05 |
| 0.62302  | 0.195875 | 2.02E-05 | 0.126236 | 0.0063   | 0.269893 | 3.08E-09 | 0.108528 | 0.01898  |
| 0.00169  | 0.278826 | 8.71E-10 | 0.169582 | 0.00023  | 0.372448 | 8.18E-17 | 0.25913  | 1.33E-08 |
| 0.72083  | 0.24416  | 9.13E-08 | 0.173693 | 0.00016  | 0.248564 | 5.25E-08 | 0.142594 | 0.00201  |
| 0.00178  | 0.35711  | 1.71E-15 | 0.204569 | 8.35E-06 | 0.400765 | 1.91E-19 | 0.239059 | 1.71E-07 |

|          |          |          |          |          |          |          |          |          |
|----------|----------|----------|----------|----------|----------|----------|----------|----------|
| 0.00879  | 0.36013  | 9.53E-16 | 0.238916 | 1.74E-07 | 0.371501 | 9.91E-17 | 0.202705 | 1.01E-05 |
| 0.02852  | 0.178696 | 0.0001   | 0.157122 | 0.00066  | 0.238251 | 1.89E-07 | 0.088941 | 0.05477  |
| 0.0133   | 0.221312 | 1.37E-06 | 0.164719 | 0.00035  | 0.184068 | 6.30E-05 | 0.116372 | 0.01185  |
| 0.00035  | 0.257676 | 1.61E-08 | 0.193562 | 2.54E-05 | 0.20188  | 1.10E-05 | 0.181433 | 8.04E-05 |
| 0.01677  | 0.22673  | 7.38E-07 | 0.194387 | 2.34E-05 | 0.281674 | 5.77E-10 | 0.162942 | 0.00041  |
| 0.35959  | 0.108379 | 0.01914  | -0.01944 | 0.67516  | 0.187723 | 4.46E-05 | 0.073745 | 0.11149  |
| 0.24261  | 0.203145 | 9.67E-06 | 0.105549 | 0.02254  | 0.199238 | 1.44E-05 | 0.122511 | 0.00804  |
| 0.00137  | 0.341984 | 2.94E-14 | 0.243329 | 1.01E-07 | 0.323766 | 7.39E-13 | 0.230081 | 5.00E-07 |
| 0.97906  | 0.272866 | 2.03E-09 | 0.120645 | 0.00906  | 0.275263 | 1.45E-09 | 0.133341 | 0.00389  |
| 0.12007  | 0.283582 | 4.36E-10 | 0.168674 | 0.00025  | 0.302097 | 2.61E-11 | 0.196045 | 1.98E-05 |
| 0.03648  | 0.326035 | 5.01E-13 | 0.214444 | 2.92E-06 | 0.322203 | 9.65E-13 | 0.19522  | 2.15E-05 |
| 0.01294  | 0.321088 | 1.17E-12 | 0.22067  | 1.47E-06 | 0.34259  | 2.63E-14 | 0.199126 | 1.46E-05 |
| 0.90251  | 0.257801 | 1.59E-08 | 0.089388 | 0.05356  | 0.227727 | 6.57E-07 | 0.103084 | 0.02591  |
| 0.05887  | 0.300227 | 3.50E-11 | 0.167567 | 0.00028  | 0.299044 | 4.21E-11 | 0.196154 | 1.96E-05 |
| 0.00107  | 0.388554 | 2.80E-18 | 0.254583 | 2.42E-08 | 0.375077 | 4.78E-17 | 0.240914 | 1.36E-07 |
| 0.00936  | 0.317608 | 2.10E-12 | 0.216603 | 2.31E-06 | 0.343173 | 2.36E-14 | 0.219403 | 1.69E-06 |
| 0.00405  | 0.317844 | 2.01E-12 | 0.199693 | 1.38E-05 | 0.28029  | 7.05E-10 | 0.225527 | 8.47E-07 |
| 0.00669  | 0.312901 | 4.57E-12 | 0.193855 | 2.46E-05 | 0.268438 | 3.77E-09 | 0.227352 | 6.87E-07 |
| 0.06982  | 0.27948  | 7.93E-10 | 0.145037 | 0.00168  | 0.186427 | 5.05E-05 | 0.152486 | 0.00095  |
| 0.00062  | 0.363608 | 4.82E-16 | 0.243187 | 1.03E-07 | 0.325844 | 5.17E-13 | 0.241491 | 1.27E-07 |
| 4.42E-06 | 0.327061 | 4.19E-13 | 0.23317  | 3.47E-07 | 0.282685 | 4.98E-10 | 0.26513  | 5.93E-09 |
| 0.00193  | 0.336005 | 8.68E-14 | 0.22361  | 1.05E-06 | 0.30488  | 1.68E-11 | 0.239908 | 1.54E-07 |
| 0.05666  | 0.183524 | 6.63E-05 | 0.059457 | 0.19964  | 0.137613 | 0.00288  | 0.190814 | 3.31E-05 |
| 0.00208  | 0.307837 | 1.04E-11 | 0.207518 | 6.13E-06 | 0.274006 | 1.73E-09 | 0.215417 | 2.63E-06 |
| 0.94147  | 0.184146 | 6.25E-05 | 0.035034 | 0.45007  | 0.21851  | 1.87E-06 | 0.102967 | 0.02608  |
| 0.00049  | 0.324022 | 7.08E-13 | 0.202768 | 1.01E-05 | 0.262486 | 8.49E-09 | 0.247833 | 5.76E-08 |
| 0.09491  | 0.271005 | 2.64E-09 | 0.147327 | 0.00141  | 0.335913 | 8.82E-14 | 0.198382 | 1.57E-05 |
| 0.02267  | 0.188562 | 4.12E-05 | 0.122627 | 0.00798  | 0.135866 | 0.00326  | 0.191044 | 3.24E-05 |
| 0.53445  | 0.230544 | 4.73E-07 | 0.142536 | 0.00202  | 0.239105 | 1.70E-07 | 0.087742 | 0.05813  |
| 0.00121  | 0.382875 | 9.41E-18 | 0.232    | 3.99E-07 | 0.41954  | 2.47E-21 | 0.261819 | 9.29E-09 |
| 0.00074  | 0.352606 | 4.06E-15 | 0.202875 | 9.94E-06 | 0.27281  | 2.05E-09 | 0.248433 | 5.33E-08 |
| 0.00112  | 0.194557 | 2.30E-05 | 0.084589 | 0.0678   | 0.172116 | 0.00019  | 0.106473 | 0.02138  |
| 0.08576  | 0.28557  | 3.26E-10 | 0.206295 | 6.97E-06 | 0.324627 | 6.38E-13 | 0.215674 | 2.55E-06 |
| 0.92138  | 0.130905 | 0.0046   | 0.144731 | 0.00171  | 0.18144  | 8.04E-05 | 0.148828 | 0.00126  |
| 6.48E-05 | 0.281148 | 6.23E-10 | 0.213967 | 3.08E-06 | 0.203512 | 9.31E-06 | 0.326187 | 4.88E-13 |
| 0.01286  | 0.302044 | 2.63E-11 | 0.194231 | 2.37E-05 | 0.299297 | 4.04E-11 | 0.272624 | 2.11E-09 |
| 0.00013  | 0.372437 | 8.20E-17 | 0.282157 | 5.38E-10 | 0.388123 | 3.08E-18 | 0.241057 | 1.34E-07 |
| 0.01608  | 0.325187 | 5.79E-13 | 0.226859 | 7.27E-07 | 0.344096 | 2.00E-14 | 0.223168 | 1.11E-06 |
| 0.12538  | 0.33463  | 1.11E-13 | 0.243037 | 1.05E-07 | 0.372723 | 7.73E-17 | 0.219957 | 1.59E-06 |
| 0.1205   | 0.322735 | 8.82E-13 | 0.201502 | 1.14E-05 | 0.351308 | 5.19E-15 | 0.201361 | 1.16E-05 |
| 0.0159   | 0.352105 | 4.46E-15 | 0.233403 | 3.38E-07 | 0.371767 | 9.39E-17 | 0.230996 | 4.49E-07 |
| 1.08E-06 | 0.387645 | 3.41E-18 | 0.230063 | 5.01E-07 | 0.342749 | 2.56E-14 | 0.284294 | 3.93E-10 |
| 0.55798  | 0.234544 | 2.95E-07 | 0.204783 | 8.16E-06 | 0.347417 | 1.08E-14 | 0.216397 | 2.36E-06 |
| 0.00367  | 0.258629 | 1.42E-08 | 0.239211 | 1.68E-07 | 0.321082 | 1.17E-12 | 0.193666 | 2.51E-05 |
| 0.20607  | 0.216844 | 2.25E-06 | 0.195987 | 2.00E-05 | 0.220067 | 1.57E-06 | 0.173641 | 0.00016  |

|          |          |          |          |          |          |          |          |          |
|----------|----------|----------|----------|----------|----------|----------|----------|----------|
| 0.6842   | 0.178365 | 0.00011  | 0.229337 | 5.45E-07 | 0.316917 | 2.35E-12 | 0.198529 | 1.55E-05 |
| 0.00035  | 0.370062 | 1.33E-16 | 0.241002 | 1.35E-07 | 0.361462 | 7.35E-16 | 0.274663 | 1.58E-09 |
| 8.63E-08 | 0.381721 | 1.20E-17 | 0.379051 | 2.10E-17 | 0.415871 | 5.90E-21 | 0.269267 | 3.36E-09 |
| 0.00932  | 0.336427 | 8.04E-14 | 0.264304 | 6.64E-09 | 0.348346 | 9.06E-15 | 0.238993 | 1.72E-07 |
| 0.00891  | 0.314491 | 3.52E-12 | 0.3471   | 1.14E-14 | 0.394134 | 8.33E-19 | 0.272227 | 2.23E-09 |
| 9.68E-06 | 0.432944 | 9.31E-23 | 0.276581 | 1.20E-09 | 0.386819 | 4.07E-18 | 0.344894 | 1.72E-14 |
| 0.01539  | 0.593536 | 8.70E-46 | 0.256508 | 1.88E-08 | 0.383558 | 8.14E-18 | 0.247536 | 5.98E-08 |
| 2.49E-05 | 0.438372 | 2.37E-23 | 0.282307 | 5.26E-10 | 0.400683 | 1.95E-19 | 0.219351 | 1.70E-06 |
| 2.27E-05 | -0.31683 | 2.39E-12 | -0.13482 | 0.00351  | -0.21587 | 2.50E-06 | -0.35427 | 2.96E-15 |
| 0.07403  | 0.221988 | 1.27E-06 | 0.07761  | 0.0939   | 0.039755 | 0.39136  | 0.058622 | 0.20604  |
| 7.64E-06 | 0.346216 | 1.35E-14 | 0.234424 | 2.99E-07 | 0.291111 | 1.42E-10 | 0.243648 | 9.73E-08 |
| 0.13944  | 0.254112 | 2.57E-08 | 0.102315 | 0.02704  | 0.18941  | 3.80E-05 | 0.05623  | 0.22519  |
| 4.30E-07 | 0.472127 | 2.67E-27 | 0.28738  | 2.49E-10 | 0.429027 | 2.46E-22 | 0.324959 | 6.02E-13 |
| 0.03098  | 0.257285 | 1.70E-08 | 0.032497 | 0.48358  | 0.260166 | 1.16E-08 | 0.196413 | 1.91E-05 |
| 0.00115  | 0.381232 | 1.33E-17 | 0.221644 | 1.32E-06 | 0.398024 | 3.53E-19 | 0.270012 | 3.03E-09 |
| 0.01168  | 0.376317 | 3.70E-17 | 0.260544 | 1.10E-08 | 0.359218 | 1.14E-15 | 0.244227 | 9.05E-08 |
| 0.11906  | 0.315036 | 3.22E-12 | 0.178908 | 0.0001   | 0.38798  | 3.17E-18 | 0.211588 | 3.98E-06 |
| 0.01283  | 0.282138 | 5.39E-10 | 0.148836 | 0.00126  | 0.298538 | 4.55E-11 | 0.206087 | 7.12E-06 |
| 0.01306  | 0.189253 | 3.85E-05 | 0.083552 | 0.07125  | 0.184429 | 6.09E-05 | 0.104467 | 0.02396  |
| 0.00141  | 0.309008 | 8.63E-12 | 0.21372  | 3.16E-06 | 0.27191  | 2.33E-09 | 0.193799 | 2.48E-05 |
| 2.92E-06 | 0.419771 | 2.34E-21 | 0.270055 | 3.01E-09 | 0.360207 | 9.39E-16 | 0.280547 | 6.80E-10 |
| 0.25721  | 0.199873 | 1.35E-05 | 0.178926 | 0.0001   | 0.337685 | 6.42E-14 | 0.1394   | 0.00253  |
| 6.59E-10 | 0.507047 | 7.11E-32 | 0.304466 | 1.79E-11 | 0.425563 | 5.76E-22 | 0.354023 | 3.10E-15 |
| 0.00311  | 0.278525 | 9.10E-10 | 0.241045 | 1.34E-07 | 0.301439 | 2.89E-11 | 0.214803 | 2.81E-06 |
| 0.26173  | 0.101438 | 0.02839  | 0.105184 | 0.02301  | 0.162393 | 0.00043  | 0.142008 | 0.0021   |
| 0.97213  | 0.181089 | 8.30E-05 | 0.18248  | 7.30E-05 | 0.257098 | 1.74E-08 | 0.149651 | 0.00118  |
| 0.19977  | 0.144419 | 0.00175  | 0.099352 | 0.03183  | 0.160458 | 0.0005   | 0.102826 | 0.02628  |
| 0.01036  | 0.339681 | 4.47E-14 | 0.149227 | 0.00122  | 0.303651 | 2.04E-11 | 0.282022 | 5.48E-10 |
| 5.58E-07 | -0.27557 | 1.39E-09 | -0.18441 | 6.10E-05 | -0.23008 | 5.00E-07 | -0.21556 | 2.59E-06 |
| 0.12262  | 0.487363 | 3.13E-29 | 0.250292 | 4.21E-08 | 0.388686 | 2.72E-18 | 0.223531 | 1.06E-06 |
| 0.00012  | 0.425707 | 5.56E-22 | 0.217474 | 2.10E-06 | 0.338823 | 5.23E-14 | 0.223817 | 1.03E-06 |
| 1.82E-07 | 0.442005 | 9.33E-24 | 0.358778 | 1.24E-15 | 0.436145 | 4.16E-23 | 0.33609  | 8.54E-14 |
| 0.04636  | 0.206954 | 6.51E-06 | 0.062743 | 0.17587  | 0.172381 | 0.00018  | 0.051596 | 0.26581  |
| 0.43087  | 0.111782 | 0.01083  | 0.137798 | 0.00284  | 0.184779 | 5.89E-05 | 0.075466 | 0.10336  |
| 2.60E-07 | 0.584156 | 4.51E-44 | 0.326334 | 4.75E-13 | 0.459631 | 8.69E-26 | 0.384219 | 7.08E-18 |
| 0.63202  | 0.265807 | 5.41E-09 | 0.124572 | 0.00703  | 0.21477  | 2.82E-06 | 0.198578 | 1.54E-05 |
| 0.00016  | 0.357009 | 1.75E-15 | 0.20586  | 7.30E-06 | 0.392505 | 1.19E-18 | 0.26689  | 4.67E-09 |
| 0.07774  | 0.363501 | 4.92E-16 | 0.113975 | 0.01372  | 0.370332 | 1.26E-16 | 0.154131 | 0.00083  |
| 0.0078   | 0.247267 | 6.18E-08 | 0.097667 | 0.03486  | 0.271236 | 2.56E-09 | 0.157603 | 0.00063  |
| 0.0003   | 0.404141 | 8.93E-20 | 0.237915 | 1.97E-07 | 0.400925 | 1.85E-19 | 0.273879 | 1.76E-09 |
| 0.85656  | 0.225938 | 8.08E-07 | 0.175824 | 0.00013  | 0.270918 | 2.67E-09 | 0.113953 | 0.01374  |
| 0.21888  | 0.255467 | 2.16E-08 | 0.195052 | 2.19E-05 | 0.282996 | 4.76E-10 | 0.152714 | 0.00093  |
| 0.90134  | 0.248438 | 5.33E-08 | 0.151104 | 0.00105  | 0.242468 | 1.13E-07 | 0.114707 | 0.01312  |
| 0.0659   | 0.30057  | 3.31E-11 | 0.18389  | 6.40E-05 | 0.340966 | 3.54E-14 | 0.186614 | 4.96E-05 |
| 0.46151  | 0.256078 | 1.99E-08 | 0.183036 | 6.94E-05 | 0.297534 | 5.32E-11 | 0.146636 | 0.00149  |

|          |          |          |          |          |          |          |          |          |
|----------|----------|----------|----------|----------|----------|----------|----------|----------|
| 0.07687  | 0.286938 | 2.66E-10 | 0.214671 | 2.85E-06 | 0.287078 | 2.60E-10 | 0.161735 | 0.00045  |
| 6.33E-24 | -0.24301 | 1.05E-07 | -0.13067 | 0.00468  | -0.18209 | 7.57E-05 | -0.29224 | 1.20E-10 |
| 5.82E-06 | 0.240327 | 1.47E-07 | 0.128765 | 0.00532  | 0.141915 | 0.00211  | 0.015642 | 0.73601  |
| 6.26E-06 | 0.442149 | 8.99E-24 | 0.29244  | 1.16E-10 | 0.417268 | 4.24E-21 | 0.327936 | 3.60E-13 |
| 0.48107  | 0.225244 | 8.75E-07 | 0.19988  | 1.35E-05 | 0.274136 | 1.70E-09 | 0.163552 | 0.00039  |
| 0.64105  | -0.47147 | 3.22E-27 | -0.20255 | 1.03E-05 | -0.40041 | 2.07E-19 | -0.16017 | 0.00051  |
| 0.01343  | 0.239239 | 1.67E-07 | 0.169875 | 0.00023  | 0.298805 | 4.37E-11 | 0.243622 | 9.76E-08 |
| 0.24438  | 0.509975 | 2.78E-32 | 0.299347 | 4.01E-11 | 0.475196 | 1.11E-27 | 0.196001 | 1.99E-05 |
| 0.00242  | 0.43967  | 1.70E-23 | 0.262366 | 8.63E-09 | 0.419746 | 2.35E-21 | 0.286292 | 2.93E-10 |
| 0.01239  | 0.302638 | 2.39E-11 | 0.154136 | 0.00083  | 0.291464 | 1.35E-10 | 0.227942 | 6.41E-07 |
| 0.01301  | 0.310291 | 7.01E-12 | 0.303809 | 1.99E-11 | 0.35258  | 4.08E-15 | 0.280149 | 7.20E-10 |
| 7.21E-19 | 0.276167 | 1.28E-09 | 0.220657 | 1.47E-06 | 0.25155  | 3.58E-08 | 0.480196 | 2.60E-28 |
| 0.00012  | 0.423179 | 1.03E-21 | 0.336469 | 7.98E-14 | 0.357324 | 1.64E-15 | 0.376292 | 3.72E-17 |
| 6.03E-09 | 0.554113 | 6.12E-39 | 0.260738 | 1.07E-08 | 0.427791 | 3.34E-22 | 0.256235 | 1.95E-08 |
| 0.24861  | 0.247197 | 6.24E-08 | 0.07667  | 0.09795  | 0.324408 | 6.62E-13 | 0.18099  | 8.38E-05 |
| 8.92E-05 | 0.435099 | 5.42E-23 | 0.221074 | 1.40E-06 | 0.364065 | 4.40E-16 | 0.243378 | 1.01E-07 |
| 0.91872  | 0.208164 | 5.73E-06 | 0.212004 | 3.80E-06 | 0.289484 | 1.82E-10 | 0.143159 | 0.00193  |
| 0.05511  | 0.255149 | 2.25E-08 | 0.185343 | 5.59E-05 | 0.292155 | 1.21E-10 | 0.247059 | 6.35E-08 |
| 0.00847  | 0.317317 | 2.20E-12 | 0.172004 | 0.00019  | 0.231217 | 4.38E-07 | 0.114979 | 0.01291  |
| 0.04469  | 0.288412 | 2.13E-10 | 0.077327 | 0.0951   | 0.230857 | 4.56E-07 | 0.229048 | 5.64E-07 |
| 0.01085  | 0.268238 | 3.88E-09 | 0.103666 | 0.02507  | 0.246632 | 6.70E-08 | 0.19597  | 2.00E-05 |
| 0.58875  | 0.221813 | 1.29E-06 | 0.160448 | 0.0005   | 0.19042  | 3.44E-05 | 0.147359 | 0.00141  |
| 8.03E-05 | 0.522642 | 4.29E-34 | 0.432699 | 9.90E-23 | 0.541282 | 6.67E-37 | 0.372259 | 8.50E-17 |
| 2.67E-06 | 0.459819 | 8.26E-26 | 0.389109 | 2.49E-18 | 0.428893 | 2.55E-22 | 0.276794 | 1.17E-09 |
| 0.60818  | 0.364655 | 3.92E-16 | 0.202787 | 1.00E-05 | 0.274627 | 1.59E-09 | 0.120752 | 0.009    |
| 0.83285  | 0.169105 | 0.00024  | 0.06375  | 0.16902  | 0.12439  | 0.00712  | -0.04468 | 0.33537  |
| 0.00032  | 0.396238 | 5.24E-19 | 0.219682 | 1.64E-06 | 0.388929 | 2.59E-18 | 0.275879 | 1.33E-09 |
| 6.53E-10 | 0.383667 | 7.96E-18 | 0.198931 | 1.49E-05 | 0.351194 | 5.30E-15 | 0.293924 | 9.27E-11 |
| 0.00024  | 0.290307 | 1.61E-10 | 0.129576 | 0.00504  | 0.210469 | 4.48E-06 | 0.167487 | 0.00028  |
| 0.08322  | -0.16655 | 0.0003   | -0.0218  | 0.63846  | -0.10844 | 0.01907  | 0.003292 | 0.94344  |
| 0.00794  | 0.446198 | 3.15E-24 | 0.227185 | 7.00E-07 | 0.279144 | 8.32E-10 | 0.294447 | 8.56E-11 |
| 0.21925  | -0.5175  | 2.38E-33 | -0.19356 | 2.54E-05 | -0.32269 | 8.89E-13 | -0.23829 | 1.88E-07 |
| 1.47E-15 | 0.5835   | 5.91E-44 | 0.402109 | 1.41E-19 | 0.483303 | 1.04E-28 | 0.644262 | 4.06E-56 |
| 1.17E-06 | 0.506223 | 9.25E-32 | 0.340702 | 3.72E-14 | 0.436295 | 4.01E-23 | 0.311003 | 6.24E-12 |
| 3.90E-08 | 0.328703 | 3.15E-13 | 0.246565 | 6.75E-08 | 0.239883 | 1.55E-07 | 0.226704 | 7.40E-07 |
| 0.00847  | 0.313039 | 4.47E-12 | 0.132649 | 0.00408  | 0.239324 | 1.66E-07 | 0.152588 | 0.00094  |
| 3.62E-05 | 0.438527 | 2.28E-23 | 0.269746 | 3.15E-09 | 0.430151 | 1.87E-22 | 0.293223 | 1.03E-10 |
| 2.32E-05 | 0.270764 | 2.73E-09 | 0.210539 | 4.45E-06 | 0.29256  | 1.14E-10 | 0.213343 | 3.29E-06 |
| 2.45E-06 | 0.525523 | 1.62E-34 | 0.326935 | 4.28E-13 | 0.485091 | 6.15E-29 | 0.345909 | 1.43E-14 |
| 0.51381  | 0.378175 | 2.52E-17 | 0.250061 | 4.34E-08 | 0.399448 | 2.57E-19 | 0.250197 | 4.26E-08 |
| 0.0555   | 0.20044  | 1.28E-05 | 0.13185  | 0.00432  | 0.159449 | 0.00054  | 0.12849  | 0.00542  |
| 1.91E-09 | 0.695585 | 8.86E-69 | 0.443179 | 6.89E-24 | 0.536157 | 4.11E-36 | 0.427373 | 3.70E-22 |
| 1.50E-07 | 0.325464 | 5.52E-13 | 0.200994 | 1.21E-05 | 0.348771 | 8.37E-15 | 0.310625 | 6.64E-12 |
| 6.00E-10 | 0.370432 | 1.23E-16 | 0.227134 | 7.04E-07 | 0.29339  | 1.01E-10 | 0.348279 | 9.18E-15 |
| 7.53E-06 | 0.395977 | 5.55E-19 | 0.241474 | 1.27E-07 | 0.332521 | 1.61E-13 | 0.340989 | 3.53E-14 |

|          |          |          |          |          |          |          |          |          |
|----------|----------|----------|----------|----------|----------|----------|----------|----------|
| 7.03E-13 | 0.438802 | 2.12E-23 | 0.353635 | 3.34E-15 | 0.370476 | 1.22E-16 | 0.407844 | 3.83E-20 |
| 0.00248  | 0.225483 | 8.51E-07 | 0.133116 | 0.00395  | 0.158954 | 0.00057  | 0.142436 | 0.00203  |
| 0.002    | 0.518224 | 1.88E-33 | 0.30438  | 1.81E-11 | 0.40252  | 1.29E-19 | 0.300757 | 3.22E-11 |
| 1.17E-07 | 0.476517 | 7.58E-28 | 0.272199 | 2.23E-09 | 0.436229 | 4.08E-23 | 0.342457 | 2.70E-14 |
| 8.47E-05 | 0.334091 | 1.22E-13 | 0.201432 | 1.15E-05 | 0.312588 | 4.82E-12 | 0.273032 | 1.99E-09 |
| 2.88E-07 | 0.441064 | 1.19E-23 | 0.309823 | 7.56E-12 | 0.33335  | 1.39E-13 | 0.38298  | 9.20E-18 |
| 0.01997  | 0.136338 | 0.00316  | 0.09824  | 0.0338   | 0.090712 | 0.0501   | 0.086793 | 0.06091  |
| 0.00039  | 0.33911  | 4.96E-14 | 0.211977 | 3.82E-06 | 0.283069 | 4.71E-10 | 0.225216 | 8.78E-07 |
| 0.16863  | 0.256314 | 1.93E-08 | 0.176239 | 0.00013  | 0.312263 | 5.08E-12 | 0.216241 | 2.40E-06 |
| 6.14E-07 | 0.519314 | 1.31E-33 | 0.340639 | 3.76E-14 | 0.452423 | 6.08E-25 | 0.399625 | 2.47E-19 |
| 0.376    | 0.210063 | 4.68E-06 | 0.188902 | 3.99E-05 | 0.234637 | 2.92E-07 | 0.117467 | 0.01107  |
| 0.2168   | 0.188271 | 4.23E-05 | 0.046028 | 0.32094  | 0.209383 | 5.03E-06 | 0.155772 | 0.00073  |
| 0.01727  | 0.346929 | 1.18E-14 | 0.178101 | 0.00011  | 0.382546 | 1.01E-17 | 0.251587 | 3.56E-08 |
| 4.88E-15 | 0.4714   | 3.28E-27 | 0.340529 | 3.83E-14 | 0.36449  | 4.05E-16 | 0.373245 | 6.95E-17 |
| 6.41E-07 | 0.443738 | 5.97E-24 | 0.300734 | 3.23E-11 | 0.433496 | 8.11E-23 | 0.304871 | 1.68E-11 |
| 1.62E-11 | 0.520774 | 8.03E-34 | 0.339402 | 4.71E-14 | 0.429115 | 2.41E-22 | 0.4342   | 6.80E-23 |
| 0.00022  | 0.295522 | 7.26E-11 | 0.220185 | 1.55E-06 | 0.29523  | 7.59E-11 | 0.261464 | 9.74E-09 |
| 0.01497  | 0.535625 | 4.96E-36 | 0.373948 | 6.02E-17 | 0.5275   | 8.27E-35 | 0.321205 | 1.14E-12 |
| 0.76664  | 0.309526 | 7.94E-12 | 0.230953 | 4.51E-07 | 0.326297 | 4.78E-13 | 0.109021 | 0.01844  |
| 0.09945  | 0.340721 | 3.70E-14 | 0.196891 | 1.82E-05 | 0.297039 | 5.74E-11 | 0.219007 | 1.77E-06 |
| 0.10881  | 0.270593 | 2.80E-09 | 0.142003 | 0.0021   | 0.311624 | 5.64E-12 | 0.211239 | 4.13E-06 |
| 2.70E-07 | 0.448946 | 1.53E-24 | 0.273596 | 1.84E-09 | 0.423838 | 8.77E-22 | 0.330885 | 2.15E-13 |
| 9.03E-07 | 0.482232 | 1.43E-28 | 0.241025 | 1.35E-07 | 0.304355 | 1.82E-11 | 0.256368 | 1.92E-08 |
| 1.66E-05 | 0.391143 | 1.60E-18 | 0.234318 | 3.03E-07 | 0.351321 | 5.18E-15 | 0.270521 | 2.82E-09 |
| 3.52E-08 | 0.453201 | 4.94E-25 | 0.287389 | 2.49E-10 | 0.332718 | 1.56E-13 | 0.357838 | 1.49E-15 |
| 0.03734  | 0.41511  | 7.06E-21 | 0.254263 | 2.52E-08 | 0.407586 | 4.06E-20 | 0.258228 | 1.50E-08 |
| 0.8161   | 0.153687 | 0.00086  | 0.146802 | 0.00147  | 0.267135 | 4.51E-09 | 0.085195 | 0.06584  |
| 0.00195  | 0.283491 | 4.42E-10 | 0.19121  | 3.19E-05 | 0.288255 | 2.18E-10 | 0.251063 | 3.81E-08 |
| 5.83E-07 | 0.376891 | 3.29E-17 | 0.244356 | 8.91E-08 | 0.296723 | 6.03E-11 | 0.334667 | 1.10E-13 |
| 0.00031  | 0.187996 | 4.35E-05 | 0.059182 | 0.20173  | 0.092573 | 0.04556  | 0.126452 | 0.00621  |
| 0.03297  | 0.315656 | 2.90E-12 | 0.136061 | 0.00322  | 0.287255 | 2.54E-10 | 0.212122 | 3.76E-06 |
| 0.82393  | 0.425159 | 6.36E-22 | 0.125181 | 0.00676  | 0.234864 | 2.84E-07 | 0.061529 | 0.18439  |
| 4.84E-18 | -0.32723 | 4.07E-13 | -0.02275 | 0.6239   | -0.11465 | 0.01317  | -0.24721 | 6.22E-08 |
| 0.20677  | 0.292551 | 1.14E-10 | 0.212829 | 3.48E-06 | 0.468117 | 8.29E-27 | 0.133349 | 0.00389  |
| 0.71851  | 0.298378 | 4.67E-11 | 0.131184 | 0.00452  | 0.357697 | 1.53E-15 | 0.226246 | 7.80E-07 |
| 0.08286  | 0.190051 | 3.57E-05 | 0.094713 | 0.04077  | 0.138124 | 0.00278  | 0.063051 | 0.17375  |
| 0.07805  | 0.400023 | 2.26E-19 | 0.216261 | 2.40E-06 | 0.393762 | 9.04E-19 | 0.07681  | 0.09734  |
| 0.27276  | 0.274321 | 1.66E-09 | 0.137063 | 0.003    | 0.327892 | 3.63E-13 | 0.163382 | 0.00039  |
| 0.00666  | 0.218453 | 1.88E-06 | 0.130727 | 0.00466  | 0.228626 | 5.92E-07 | 0.303361 | 2.13E-11 |
| 0.4734   | -0.35525 | 2.45E-15 | -0.22102 | 1.41E-06 | -0.37052 | 1.21E-16 | -0.14535 | 0.00164  |
| 0.16032  | 0.2741   | 1.71E-09 | 0.167701 | 0.00027  | 0.300493 | 3.35E-11 | 0.165198 | 0.00034  |
| 0.00013  | 0.389642 | 2.22E-18 | 0.139863 | 0.00245  | 0.190049 | 3.57E-05 | 0.29611  | 6.63E-11 |
| 0.81586  | 0.257959 | 1.55E-08 | 0.132238 | 0.0042   | 0.282037 | 5.47E-10 | 0.175876 | 0.00013  |
| 0.43179  | 0.256762 | 1.82E-08 | 0.250082 | 4.32E-08 | 0.292729 | 1.11E-10 | 0.191553 | 3.09E-05 |
| 0.00273  | 0.432975 | 9.24E-23 | 0.243791 | 9.56E-08 | 0.385605 | 5.27E-18 | 0.247507 | 6.00E-08 |

|          |          |          |          |          |          |          |          |          |
|----------|----------|----------|----------|----------|----------|----------|----------|----------|
| 3.51E-06 | -0.30447 | 1.79E-11 | -0.21528 | 2.67E-06 | -0.20628 | 6.98E-06 | -0.18919 | 3.88E-05 |
| 1.13E-05 | 0.493846 | 4.40E-30 | 0.362516 | 5.97E-16 | 0.40431  | 8.59E-20 | 0.379423 | 1.94E-17 |
| 0.00689  | 0.357595 | 1.56E-15 | 0.230185 | 4.94E-07 | 0.352001 | 4.55E-15 | 0.210764 | 4.35E-06 |
| 0.45479  | 0.133917 | 0.00374  | -0.09663 | 0.03685  | 0.16528  | 0.00033  | 0.061331 | 0.18581  |
| 5.17E-11 | 0.232887 | 3.59E-07 | 0.179712 | 9.42E-05 | 0.140027 | 0.00242  | 0.272975 | 2.00E-09 |
| 6.56E-05 | 0.510271 | 2.53E-32 | 0.314457 | 3.54E-12 | 0.457313 | 1.63E-25 | 0.325859 | 5.16E-13 |
| 0.00315  | 0.431705 | 1.27E-22 | 0.267547 | 4.26E-09 | 0.466062 | 1.47E-26 | 0.279117 | 8.36E-10 |
| 2.38E-07 | 0.380981 | 1.40E-17 | 0.213801 | 3.13E-06 | 0.227593 | 6.68E-07 | 0.173397 | 0.00017  |
| 0.32029  | 0.282381 | 5.20E-10 | 0.136178 | 0.00319  | 0.160396 | 0.0005   | 0.173523 | 0.00016  |
| 3.93E-06 | 0.287756 | 2.35E-10 | 0.188587 | 4.11E-05 | 0.197172 | 1.77E-05 | 0.343587 | 2.19E-14 |
| 0.15385  | 0.085445 | 0.06505  | -0.07919 | 0.08737  | 0.150909 | 0.00107  | 0.062651 | 0.1765   |
| 0.65874  | -0.39053 | 1.83E-18 | -0.23283 | 3.62E-07 | -0.36713 | 2.39E-16 | -0.17845 | 0.00011  |
| 0.10587  | 0.33917  | 4.91E-14 | 0.269854 | 3.10E-09 | 0.472409 | 2.46E-27 | 0.218384 | 1.90E-06 |
| 0.81179  | 0.206411 | 6.89E-06 | 0.200193 | 1.31E-05 | 0.339181 | 4.90E-14 | 0.162663 | 0.00042  |
| 2.01E-08 | 0.541438 | 6.31E-37 | 0.28674  | 2.74E-10 | 0.335439 | 9.60E-14 | 0.19389  | 2.46E-05 |
| 0.91487  | 0.311794 | 5.48E-12 | 0.1767   | 0.00012  | 0.292346 | 1.18E-10 | 0.186422 | 5.05E-05 |
| 0.98429  | 0.183781 | 6.47E-05 | 0.1278   | 0.00568  | 0.266121 | 5.18E-09 | 0.085391 | 0.06522  |
| 0.0559   | 0.25212  | 3.33E-08 | 0.187926 | 4.38E-05 | 0.261338 | 9.91E-09 | 0.182464 | 7.31E-05 |
| 0.00042  | 0.304359 | 1.82E-11 | 0.09648  | 0.03714  | 0.228096 | 6.30E-07 | 0.16308  | 0.0004   |
| 0.1291   | 0.084989 | 0.0665   | 0.035742 | 0.44096  | 0.240067 | 1.51E-07 | -0.00231 | 0.96032  |
| 8.45E-05 | 0.416931 | 4.59E-21 | 0.212563 | 3.58E-06 | 0.367072 | 2.42E-16 | 0.286122 | 3.00E-10 |
| 0.69795  | 0.183132 | 6.87E-05 | 0.124301 | 0.00716  | 0.328504 | 3.26E-13 | 0.113346 | 0.01426  |
| 0.00255  | 0.193819 | 2.47E-05 | 0.11471  | 0.01312  | 0.16963  | 0.00023  | 0.126949 | 0.00601  |
| 0.4498   | 0.308081 | 1.00E-11 | 0.125545 | 0.0066   | 0.275427 | 1.42E-09 | 0.116837 | 0.01151  |
| 0.00365  | 0.434721 | 5.96E-23 | 0.286168 | 2.98E-10 | 0.448631 | 1.66E-24 | 0.331308 | 2.00E-13 |
| 0.0274   | 0.189385 | 3.80E-05 | 0.032066 | 0.48939  | 0.209806 | 4.81E-06 | 0.052543 | 0.25713  |
| 0.48429  | 0.367398 | 2.27E-16 | 0.240028 | 1.52E-07 | 0.389386 | 2.34E-18 | 0.118491 | 0.01038  |
| 1.75E-07 | 0.421889 | 1.40E-21 | 0.247708 | 5.85E-08 | 0.398373 | 3.26E-19 | 0.315465 | 3.00E-12 |
| 0.32006  | -0.26615 | 5.16E-09 | -0.1024  | 0.02692  | -0.27039 | 2.88E-09 | -0.21762 | 2.06E-06 |
| 2.06E-05 | 0.469138 | 6.22E-27 | 0.292083 | 1.23E-10 | 0.373571 | 6.50E-17 | 0.331987 | 1.77E-13 |
| 0.00725  | -0.34209 | 2.88E-14 | -0.07771 | 0.09348  | -0.15004 | 0.00115  | -0.19179 | 3.01E-05 |
| 0.00029  | 0.453399 | 4.69E-25 | 0.404023 | 9.17E-20 | 0.480083 | 2.69E-28 | 0.320226 | 1.35E-12 |
| 0.01116  | 0.291952 | 1.25E-10 | 0.199059 | 1.47E-05 | 0.25961  | 1.25E-08 | 0.189239 | 3.86E-05 |
| 0.00257  | 0.194468 | 2.32E-05 | 0.054108 | 0.24321  | 0.122187 | 0.00821  | 0.151617 | 0.00101  |
| 0.01102  | 0.215908 | 2.49E-06 | 0.135858 | 0.00326  | 0.205736 | 7.39E-06 | 0.247466 | 6.03E-08 |
| 4.10E-08 | 0.673039 | 6.67E-63 | 0.341316 | 3.32E-14 | 0.473095 | 2.02E-27 | 0.322021 | 9.96E-13 |
| 1.20E-05 | 0.46617  | 1.43E-26 | 0.318333 | 1.86E-12 | 0.411396 | 1.68E-20 | 0.336557 | 7.86E-14 |
| 2.26E-05 | 0.427785 | 3.34E-22 | 0.300511 | 3.34E-11 | 0.412728 | 1.23E-20 | 0.407872 | 3.81E-20 |
| 0.0707   | 0.254743 | 2.37E-08 | 0.17831  | 0.00011  | 0.234488 | 2.97E-07 | 0.260661 | 1.08E-08 |
| 0.00501  | 0.466553 | 1.28E-26 | 0.248868 | 5.05E-08 | 0.398099 | 3.47E-19 | 0.289846 | 1.72E-10 |
| 0.30973  | 0.221358 | 1.36E-06 | 0.09815  | 0.03397  | 0.154897 | 0.00078  | 0.133994 | 0.00372  |
| 0.07427  | 0.257964 | 1.55E-08 | 0.181167 | 8.24E-05 | 0.253069 | 2.94E-08 | 0.213502 | 3.24E-06 |
| 0.00701  | 0.376971 | 3.23E-17 | 0.249144 | 4.87E-08 | 0.418816 | 2.93E-21 | 0.26393  | 6.99E-09 |
| 3.51E-09 | 0.202794 | 1.00E-05 | 0.096145 | 0.0378   | 0.129427 | 0.00509  | 0.247745 | 5.82E-08 |
| 0.00082  | 0.344068 | 2.01E-14 | 0.226483 | 7.59E-07 | 0.319303 | 1.58E-12 | 0.2357   | 2.57E-07 |

|          |          |          |          |          |          |          |          |          |
|----------|----------|----------|----------|----------|----------|----------|----------|----------|
| 0.02853  | 0.320244 | 1.35E-12 | 0.19404  | 2.42E-05 | 0.330997 | 2.11E-13 | 0.200745 | 1.24E-05 |
| 0.02457  | 0.273873 | 1.77E-09 | 0.18873  | 4.05E-05 | 0.314864 | 3.31E-12 | 0.235649 | 2.58E-07 |
| 0.51517  | 0.298838 | 4.34E-11 | 0.084135 | 0.06929  | 0.223469 | 1.07E-06 | 0.11486  | 0.013    |
| 3.77E-10 | 0.503958 | 1.90E-31 | 0.267093 | 4.54E-09 | 0.451806 | 7.17E-25 | 0.362298 | 6.24E-16 |
| 0.00013  | -0.50054 | 5.56E-31 | -0.22441 | 9.63E-07 | -0.3599  | 9.96E-16 | -0.28351 | 4.41E-10 |
| 1.25E-05 | 0.386273 | 4.57E-18 | 0.257978 | 1.55E-08 | 0.342448 | 2.70E-14 | 0.284086 | 4.05E-10 |
| 2.83E-05 | 0.456447 | 2.06E-25 | 0.237211 | 2.14E-07 | 0.432731 | 9.82E-23 | 0.310398 | 6.89E-12 |
| 0.5436   | 0.317697 | 2.06E-12 | 0.183063 | 6.92E-05 | 0.391746 | 1.40E-18 | 0.193275 | 2.61E-05 |
| 0.05642  | 0.360247 | 9.32E-16 | 0.310852 | 6.40E-12 | 0.444689 | 4.66E-24 | 0.111062 | 0.01635  |
| 2.43E-06 | 0.46166  | 4.99E-26 | 0.293221 | 1.03E-10 | 0.405428 | 6.66E-20 | 0.274767 | 1.56E-09 |
| 0.00274  | 0.118084 | 0.01065  | 0.098781 | 0.03283  | 0.301222 | 2.99E-11 | 0.033632 | 0.46842  |
| 0.64926  | 0.247761 | 5.81E-08 | 0.256689 | 1.84E-08 | 0.287086 | 2.60E-10 | 0.172932 | 0.00017  |
| 0.0008   | 0.341522 | 3.20E-14 | 0.233194 | 3.46E-07 | 0.401603 | 1.58E-19 | 0.33964  | 4.51E-14 |
| 0.5434   | 0.152002 | 0.00098  | -0.02665 | 0.56568  | 0.144963 | 0.00168  | 0.088191 | 0.05685  |
| 0.68467  | 0.22268  | 1.17E-06 | 0.045131 | 0.33047  | 0.22904  | 5.64E-07 | 0.1512   | 0.00105  |
| 0.39059  | -0.18645 | 5.04E-05 | 0.010115 | 0.82743  | -0.15987 | 0.00052  | -0.12109 | 0.00881  |
| 0.00647  | 0.304513 | 1.78E-11 | 0.184034 | 6.32E-05 | 0.297496 | 5.35E-11 | 0.205394 | 7.66E-06 |
| 0.75097  | 0.184092 | 6.28E-05 | 0.059806 | 0.19701  | 0.167236 | 0.00028  | 0.072795 | 0.11619  |
| 0.00102  | 0.505853 | 1.04E-31 | 0.337561 | 6.56E-14 | 0.406485 | 5.23E-20 | 0.331804 | 1.83E-13 |
| 5.34E-06 | 0.425389 | 6.01E-22 | 0.270684 | 2.76E-09 | 0.408188 | 3.54E-20 | 0.316683 | 2.45E-12 |
| 8.27E-14 | 0.663101 | 1.79E-60 | 0.415547 | 6.37E-21 | 0.520641 | 8.39E-34 | 0.38086  | 1.44E-17 |
| 9.18E-05 | 0.542829 | 3.83E-37 | 0.36746  | 2.24E-16 | 0.525771 | 1.49E-34 | 0.309093 | 8.52E-12 |
| 5.18E-11 | 0.604218 | 8.27E-48 | 0.418207 | 3.39E-21 | 0.556974 | 2.09E-39 | 0.449768 | 1.23E-24 |
| 2.02E-05 | 0.396112 | 5.39E-19 | 0.257112 | 1.74E-08 | 0.412023 | 1.46E-20 | 0.297683 | 5.20E-11 |
| 3.24E-05 | 0.413067 | 1.14E-20 | 0.256303 | 1.93E-08 | 0.411181 | 1.77E-20 | 0.294153 | 8.95E-11 |
| 1.72E-05 | 0.50563  | 1.12E-31 | 0.371314 | 1.03E-16 | 0.521264 | 6.81E-34 | 0.340315 | 3.99E-14 |
| 5.89E-05 | 0.552169 | 1.26E-38 | 0.333365 | 1.39E-13 | 0.514009 | 7.51E-33 | 0.278864 | 8.67E-10 |
| 6.00E-05 | 0.355283 | 2.44E-15 | 0.173148 | 0.00017  | 0.291204 | 1.40E-10 | 0.255694 | 2.09E-08 |
| 0.00983  | 0.327648 | 3.79E-13 | 0.217604 | 2.07E-06 | 0.380444 | 1.57E-17 | 0.233506 | 3.34E-07 |
| 0.00013  | 0.36304  | 5.39E-16 | 0.220594 | 1.48E-06 | 0.314443 | 3.55E-12 | 0.258353 | 1.47E-08 |
| 0.00425  | 0.386384 | 4.46E-18 | 0.252335 | 3.24E-08 | 0.439793 | 1.65E-23 | 0.264562 | 6.41E-09 |
| 7.85E-06 | 0.419524 | 2.48E-21 | 0.266562 | 4.88E-09 | 0.421865 | 1.41E-21 | 0.303835 | 1.98E-11 |
| 6.28E-06 | 0.427797 | 3.33E-22 | 0.272872 | 2.03E-09 | 0.422089 | 1.34E-21 | 0.316436 | 2.55E-12 |
| 0.03509  | 0.228734 | 5.85E-07 | 0.083538 | 0.07129  | 0.235925 | 2.50E-07 | 0.164235 | 0.00037  |
| 0.00295  | 0.307246 | 1.15E-11 | 0.195002 | 2.20E-05 | 0.326631 | 4.52E-13 | 0.274797 | 1.55E-09 |
| 0.00017  | 0.328186 | 3.45E-13 | 0.220648 | 1.47E-06 | 0.353363 | 3.51E-15 | 0.257639 | 1.62E-08 |
| 0.0339   | 0.340751 | 3.68E-14 | 0.281301 | 6.09E-10 | 0.363483 | 4.94E-16 | 0.253694 | 2.72E-08 |
| 0.02197  | 0.180607 | 8.68E-05 | 0.107604 | 0.02003  | 0.133496 | 0.00385  | 0.109492 | 0.01794  |
| 0.01057  | 0.256827 | 1.80E-08 | 0.205083 | 7.91E-06 | 0.268481 | 3.75E-09 | 0.211815 | 3.88E-06 |
| 1.51E-05 | 0.468206 | 8.08E-27 | 0.346338 | 1.32E-14 | 0.40404  | 9.13E-20 | 0.306502 | 1.29E-11 |
| 0.02162  | 0.356953 | 1.77E-15 | 0.241626 | 1.25E-07 | 0.352123 | 4.45E-15 | 0.313881 | 3.89E-12 |
| 0.00112  | 0.463195 | 3.27E-26 | 0.236719 | 2.27E-07 | 0.378404 | 2.40E-17 | 0.216831 | 2.25E-06 |
| 1.02E-05 | 0.133584 | 0.00383  | -0.0126  | 0.78588  | 0.09637  | 0.03736  | -0.10663 | 0.02118  |
| 1.04E-11 | 0.352678 | 4.00E-15 | 0.313621 | 4.06E-12 | 0.278584 | 9.02E-10 | 0.328091 | 3.51E-13 |
| 0.55206  | 0.21931  | 1.71E-06 | 0.142637 | 0.002    | 0.185704 | 5.40E-05 | 0.055134 | 0.23438  |



|          |          |          |          |          |          |          |          |          |
|----------|----------|----------|----------|----------|----------|----------|----------|----------|
| 0.04921  | 0.193364 | 2.59E-05 | 0.147731 | 0.00137  | 0.314153 | 3.72E-12 | 0.144472 | 0.00175  |
| 2.65E-13 | -0.3823  | 1.06E-17 | -0.2032  | 9.61E-06 | -0.21597 | 2.47E-06 | -0.32577 | 5.24E-13 |
| 3.28E-05 | 0.400068 | 2.24E-19 | 0.24301  | 1.05E-07 | 0.410221 | 2.21E-20 | 0.291603 | 1.32E-10 |
| 0.03722  | -0.17938 | 9.71E-05 | -0.0634  | 0.17141  | -0.17601 | 0.00013  | -0.12027 | 0.00928  |
| 0.00118  | -0.27552 | 1.40E-09 | -0.15039 | 0.00111  | -0.31004 | 7.30E-12 | -0.06877 | 0.13785  |
| 0.02714  | 0.328511 | 3.26E-13 | 0.18826  | 4.24E-05 | 0.336257 | 8.29E-14 | 0.229565 | 5.31E-07 |
| 0.99277  | 0.2154   | 2.63E-06 | 0.151321 | 0.00104  | 0.366804 | 2.55E-16 | 0.131712 | 0.00436  |
| 0.02308  | 0.383482 | 8.27E-18 | 0.200382 | 1.28E-05 | 0.32047  | 1.30E-12 | 0.204351 | 8.54E-06 |
| 0.51026  | 0.113194 | 0.01439  | -0.11488 | 0.01299  | 0.146327 | 0.00152  | 0.124846 | 0.00691  |
| 0.00029  | 0.35251  | 4.13E-15 | 0.229183 | 5.55E-07 | 0.345838 | 1.45E-14 | 0.230325 | 4.86E-07 |
| 0.00257  | 0.168129 | 0.00026  | 0.117379 | 0.01113  | 0.161075 | 0.00048  | 0.126641 | 0.00614  |
| 0.08064  | 0.32831  | 3.37E-13 | 0.221286 | 1.37E-06 | 0.34457  | 1.83E-14 | 0.203117 | 9.70E-06 |
| 0.02497  | 0.363924 | 4.52E-16 | 0.207967 | 5.85E-06 | 0.312284 | 5.06E-12 | 0.226254 | 7.79E-07 |
| 0.90341  | 0.15745  | 0.00064  | 0.10725  | 0.02044  | 0.229668 | 5.25E-07 | 0.144255 | 0.00178  |
| 0.46274  | 0.20358  | 9.24E-06 | 0.048361 | 0.297    | 0.275624 | 1.38E-09 | 0.147466 | 0.00139  |
| 0.00156  | -0.53166 | 1.98E-35 | -0.23211 | 3.94E-07 | -0.30731 | 1.14E-11 | -0.2497  | 4.54E-08 |
| 1.88E-07 | 0.312476 | 4.90E-12 | 0.29383  | 9.41E-11 | 0.294708 | 8.22E-11 | 0.11717  | 0.01128  |
| 3.08E-08 | 0.449202 | 1.43E-24 | 0.386687 | 4.18E-18 | 0.423429 | 9.68E-22 | 0.451443 | 7.90E-25 |
| 0.02183  | 0.335945 | 8.77E-14 | 0.278809 | 8.74E-10 | 0.44219  | 8.90E-24 | 0.309078 | 8.54E-12 |
| 0.00035  | 0.283284 | 4.56E-10 | 0.116705 | 0.01161  | 0.295664 | 7.10E-11 | 0.240263 | 1.48E-07 |
| 0.00286  | 0.376755 | 3.38E-17 | 0.242989 | 1.06E-07 | 0.351659 | 4.86E-15 | 0.255712 | 2.09E-08 |
| 0.00159  | 0.397829 | 3.68E-19 | 0.253386 | 2.83E-08 | 0.252668 | 3.10E-08 | 0.211222 | 4.14E-06 |
| 0.3116   | 0.280449 | 6.89E-10 | 0.22308  | 1.12E-06 | 0.314524 | 3.50E-12 | 0.040799 | 0.37904  |
| 0.07562  | 0.191179 | 3.20E-05 | 0.183417 | 6.69E-05 | 0.445976 | 3.33E-24 | 0.102399 | 0.02692  |
| 0.04823  | 0.26464  | 6.34E-09 | 0.21928  | 1.72E-06 | 0.30634  | 1.33E-11 | 0.175073 | 0.00014  |
| 0.01501  | 0.22552  | 8.48E-07 | 0.082181 | 0.07603  | 0.244606 | 8.63E-08 | 0.198073 | 1.62E-05 |
| 0.00795  | 0.338383 | 5.66E-14 | 0.248005 | 5.63E-08 | 0.353316 | 3.55E-15 | 0.216984 | 2.21E-06 |
| 0.02728  | 0.389837 | 2.12E-18 | 0.240289 | 1.47E-07 | 0.365055 | 3.62E-16 | 0.294257 | 8.81E-11 |
| 0.01127  | -0.22491 | 9.09E-07 | 0.07476  | 0.10663  | -0.09165 | 0.04778  | -0.1073  | 0.02039  |
| 8.70E-05 | 0.271191 | 2.57E-09 | 0.199655 | 1.38E-05 | 0.229434 | 5.39E-07 | 0.281123 | 6.25E-10 |
| 0.89054  | 0.148341 | 0.0013   | -0.01544 | 0.73933  | 0.147705 | 0.00137  | 0.08661  | 0.06146  |
| 0.00225  | 0.388998 | 2.55E-18 | 0.235776 | 2.54E-07 | 0.397584 | 3.89E-19 | 0.26053  | 1.10E-08 |
| 3.25E-05 | 0.290916 | 1.46E-10 | 0.176289 | 0.00013  | 0.193398 | 2.58E-05 | 0.135056 | 0.00345  |
| 6.42E-08 | 0.498545 | 1.03E-30 | 0.445306 | 3.97E-24 | 0.472819 | 2.19E-27 | 0.433944 | 7.25E-23 |
| 3.72E-11 | 0.428516 | 2.79E-22 | 0.415039 | 7.18E-21 | 0.43502  | 5.53E-23 | 0.435144 | 5.36E-23 |
| 7.05E-07 | 0.531298 | 2.24E-35 | 0.3902   | 1.96E-18 | 0.450246 | 1.08E-24 | 0.336545 | 7.88E-14 |
| 0.04401  | 0.239426 | 1.64E-07 | 0.086476 | 0.06187  | 0.207807 | 5.95E-06 | 0.095905 | 0.03829  |
| 0.01079  | 0.276485 | 1.22E-09 | 0.148435 | 0.0013   | 0.323656 | 7.53E-13 | 0.267748 | 4.15E-09 |
| 0.00099  | 0.458417 | 1.21E-25 | 0.157635 | 0.00063  | 0.224912 | 9.09E-07 | 0.094161 | 0.04196  |
| 3.12E-06 | 0.354427 | 2.87E-15 | 0.248419 | 5.34E-08 | 0.279344 | 8.09E-10 | 0.249723 | 4.53E-08 |
| 0.00306  | 0.253889 | 2.65E-08 | 0.196236 | 1.95E-05 | 0.230773 | 4.61E-07 | 0.140102 | 0.00241  |
| 0.00316  | 0.519726 | 1.14E-33 | 0.31521  | 3.12E-12 | 0.460257 | 7.33E-26 | 0.310506 | 6.77E-12 |
| 3.79E-05 | 0.391287 | 1.55E-18 | 0.26004  | 1.18E-08 | 0.402055 | 1.43E-19 | 0.299497 | 3.92E-11 |
| 0.00467  | 0.482262 | 1.42E-28 | 0.346539 | 1.27E-14 | 0.381115 | 1.36E-17 | 0.072079 | 0.11983  |
| 0.00586  | 0.351464 | 5.04E-15 | 0.23747  | 2.08E-07 | 0.367401 | 2.27E-16 | 0.22637  | 7.69E-07 |

|          |          |          |          |          |          |          |          |          |
|----------|----------|----------|----------|----------|----------|----------|----------|----------|
| 0.04855  | 0.264304 | 6.64E-09 | 0.107813 | 0.01978  | 0.346955 | 1.18E-14 | 0.181696 | 7.85E-05 |
| 1.45E-08 | -0.4422  | 8.87E-24 | -0.16769 | 0.00027  | -0.25197 | 3.39E-08 | -0.26205 | 9.00E-09 |
| 1.50E-07 | 0.360128 | 9.54E-16 | 0.152037 | 0.00098  | 0.251159 | 3.77E-08 | 0.225454 | 8.54E-07 |
| 0.67239  | 0.154332 | 0.00082  | 0.135654 | 0.00331  | 0.212696 | 3.53E-06 | 0.112547 | 0.01496  |
| 0.02527  | 0.282189 | 5.35E-10 | 0.210757 | 4.35E-06 | 0.252268 | 3.27E-08 | 0.228406 | 6.08E-07 |
| 0.11156  | 0.266263 | 5.08E-09 | 0.277232 | 1.10E-09 | 0.302901 | 2.30E-11 | 0.187255 | 4.66E-05 |
| 0.0215   | 0.302042 | 2.63E-11 | 0.112858 | 0.01468  | 0.297533 | 5.32E-11 | 0.196112 | 1.97E-05 |
| 0.00064  | 0.377193 | 3.09E-17 | 0.336324 | 8.19E-14 | 0.448403 | 1.76E-24 | 0.228938 | 5.71E-07 |
| 0.8956   | 0.128428 | 0.00545  | 0.042829 | 0.35575  | 0.250991 | 3.85E-08 | 0.101276 | 0.02864  |
| 0.33129  | 0.481514 | 1.77E-28 | 0.503838 | 1.97E-31 | 0.549153 | 3.85E-38 | 0.289598 | 1.79E-10 |
| 0.00129  | 0.394026 | 8.53E-19 | 0.22896  | 5.70E-07 | 0.418292 | 3.32E-21 | 0.268177 | 3.91E-09 |
| 0.10259  | -0.27453 | 1.61E-09 | -0.16299 | 0.00041  | -0.13365 | 0.00381  | -0.11765 | 0.01094  |
| 0.08845  | 0.509625 | 3.11E-32 | 0.318461 | 1.82E-12 | 0.411262 | 1.74E-20 | 0.258173 | 1.51E-08 |
| 7.24E-22 | 0.588181 | 8.42E-45 | 0.454102 | 3.88E-25 | 0.534717 | 6.81E-36 | 0.479967 | 2.78E-28 |
| 0.00015  | 0.358056 | 1.43E-15 | 0.249617 | 4.59E-08 | 0.293308 | 1.02E-10 | 0.268423 | 3.78E-09 |
| 0.71342  | 0.220997 | 1.42E-06 | 0.167927 | 0.00027  | 0.320871 | 1.21E-12 | 0.118669 | 0.01027  |
| 3.97E-08 | 0.49157  | 8.80E-30 | 0.384131 | 7.21E-18 | 0.398682 | 3.05E-19 | 0.318466 | 1.82E-12 |
| 0.01733  | 0.332515 | 1.61E-13 | 0.178681 | 0.0001   | 0.328474 | 3.28E-13 | 0.226412 | 7.65E-07 |
| 0.52794  | 0.358682 | 1.26E-15 | 0.297167 | 5.63E-11 | 0.524706 | 2.14E-34 | 0.315623 | 2.92E-12 |
| 0.07278  | 0.255244 | 2.22E-08 | 0.169175 | 0.00024  | 0.373338 | 6.82E-17 | 0.170254 | 0.00022  |
| 2.96E-05 | -0.05516 | 0.23418  | 0.139995 | 0.00243  | 0.060816 | 0.18954  | -0.20312 | 9.69E-06 |
| 0.00184  | 0.18508  | 5.73E-05 | 0.126504 | 0.00619  | 0.138895 | 0.00263  | 0.156691 | 0.00068  |
| 0.05955  | -0.453   | 5.22E-25 | -0.11423 | 0.01352  | -0.24629 | 6.99E-08 | -0.12648 | 0.0062   |
| 0.00045  | 0.240043 | 1.52E-07 | 0.026895 | 0.56208  | 0.184004 | 6.34E-05 | -0.03187 | 0.49207  |
| 0.00193  | 0.30622  | 1.35E-11 | 0.211442 | 4.04E-06 | 0.365084 | 3.60E-16 | 0.264436 | 6.52E-09 |
| 0.02417  | 0.30718  | 1.16E-11 | 0.161301 | 0.00047  | 0.229712 | 5.22E-07 | 0.198764 | 1.51E-05 |
| 0.53307  | 0.23242  | 3.80E-07 | 0.169866 | 0.00023  | 0.338903 | 5.15E-14 | 0.165179 | 0.00034  |
| 1.03E-05 | 0.425986 | 5.20E-22 | 0.387081 | 3.85E-18 | 0.460426 | 6.99E-26 | 0.256398 | 1.91E-08 |
| 0.03239  | 0.311061 | 6.18E-12 | 0.280906 | 6.45E-10 | 0.300498 | 3.35E-11 | 0.188262 | 4.24E-05 |
| 0.02665  | 0.359434 | 1.09E-15 | 0.353987 | 3.12E-15 | 0.3659   | 3.06E-16 | 0.13083  | 0.00463  |
| 0.21999  | 0.454778 | 3.24E-25 | 0.323351 | 7.94E-13 | 0.511165 | 1.89E-32 | 0.266883 | 4.67E-09 |
| 1.55E-16 | 0.639848 | 3.85E-55 | 0.468897 | 6.66E-27 | 0.540475 | 8.90E-37 | 0.548665 | 4.60E-38 |
| 1.40E-05 | 0.426198 | 4.93E-22 | 0.396708 | 4.72E-19 | 0.496274 | 2.09E-30 | 0.25851  | 1.44E-08 |
| 0.25799  | 0.383254 | 8.68E-18 | 0.313094 | 4.43E-12 | 0.4191   | 2.74E-21 | 0.077541 | 0.09419  |
| 4.78E-07 | 0.639782 | 3.98E-55 | 0.491467 | 9.08E-30 | 0.574226 | 2.57E-42 | 0.332249 | 1.69E-13 |
| 6.53E-08 | 0.537692 | 2.39E-36 | 0.352338 | 4.27E-15 | 0.470483 | 4.25E-27 | 0.355744 | 2.23E-15 |
| 1.39E-07 | 0.434626 | 6.11E-23 | 0.480768 | 2.20E-28 | 0.686549 | 2.33E-66 | 0.413811 | 9.58E-21 |
| 0.27762  | 0.3303   | 2.38E-13 | 0.396403 | 5.05E-19 | 0.464633 | 2.19E-26 | 0.139571 | 0.0025   |
| 7.05E-16 | 0.371767 | 9.39E-17 | 0.471738 | 2.98E-27 | 0.327311 | 4.01E-13 | 0.410043 | 2.31E-20 |
| 0.10442  | 0.247155 | 6.27E-08 | 0.121962 | 0.00833  | 0.376341 | 3.68E-17 | 0.134442 | 0.00361  |
| 0.42868  | 0.377484 | 2.91E-17 | 0.252159 | 3.31E-08 | 0.373292 | 6.89E-17 | 0.162414 | 0.00043  |
| 6.21E-15 | 0.507789 | 5.61E-32 | 0.482314 | 1.40E-28 | 0.506316 | 8.98E-32 | 0.525928 | 1.41E-34 |
| 3.76E-19 | 0.52673  | 1.08E-34 | 0.508004 | 5.24E-32 | 0.509193 | 3.58E-32 | 0.518192 | 1.90E-33 |
| 5.69E-05 | 0.391226 | 1.57E-18 | 0.303507 | 2.08E-11 | 0.377829 | 2.70E-17 | 0.347917 | 9.82E-15 |
| 3.88E-13 | 0.64291  | 8.12E-56 | 0.58659  | 1.64E-44 | 0.634901 | 4.58E-54 | 0.493644 | 4.68E-30 |

|          |          |          |          |          |          |          |          |          |
|----------|----------|----------|----------|----------|----------|----------|----------|----------|
| 0.10173  | 0.291984 | 1.25E-10 | 0.177293 | 0.00012  | 0.466096 | 1.46E-26 | 0.170786 | 0.00021  |
| 0.59394  | 0.332353 | 1.66E-13 | 0.187431 | 4.59E-05 | 0.409997 | 2.33E-20 | 0.172795 | 0.00018  |
| 0.1887   | 0.277943 | 9.89E-10 | 0.266199 | 5.13E-09 | 0.362872 | 5.57E-16 | 0.153914 | 0.00085  |
| 6.26E-07 | 0.368334 | 1.88E-16 | 0.229469 | 5.37E-07 | 0.285394 | 3.34E-10 | 0.28097  | 6.39E-10 |
| 4.18E-05 | 0.44774  | 2.10E-24 | 0.414911 | 7.40E-21 | 0.532147 | 1.67E-35 | 0.384736 | 6.34E-18 |
| 0.06391  | 0.287588 | 2.41E-10 | 0.129786 | 0.00497  | 0.214593 | 2.87E-06 | 0.074129 | 0.10963  |
| 0.39412  | -0.23079 | 4.60E-07 | -0.28685 | 2.69E-10 | -0.29645 | 6.29E-11 | -0.31381 | 3.94E-12 |
| 0.08407  | -0.19503 | 2.19E-05 | -0.32188 | 1.02E-12 | -0.33261 | 1.59E-13 | -0.20533 | 7.71E-06 |
| 3.52E-05 | -0.40319 | 1.11E-19 | -0.22165 | 1.32E-06 | -0.40689 | 4.77E-20 | -0.3513  | 5.20E-15 |
| 1.10E-17 | 0.47623  | 8.23E-28 | 0.476837 | 6.91E-28 | 0.51721  | 2.62E-33 | 0.466081 | 1.47E-26 |
| 0.53457  | 0.345984 | 1.41E-14 | 0.239342 | 1.65E-07 | 0.319256 | 1.59E-12 | 0.182579 | 7.24E-05 |
| 0.27123  | 0.214695 | 2.84E-06 | 0.285168 | 3.46E-10 | 0.465683 | 1.64E-26 | 0.237481 | 2.07E-07 |
| 0.00623  | 0.360627 | 8.65E-16 | 0.350423 | 6.14E-15 | 0.365689 | 3.19E-16 | 0.267482 | 4.30E-09 |
| 0.80477  | 0.303627 | 2.05E-11 | 0.23636  | 2.37E-07 | 0.437017 | 3.34E-23 | 0.238235 | 1.89E-07 |
| 1.57E-10 | 0.44659  | 2.84E-24 | 0.406173 | 5.62E-20 | 0.452455 | 6.03E-25 | 0.47201  | 2.76E-27 |
| 2.90E-13 | 0.609969 | 6.26E-49 | 0.551161 | 1.83E-38 | 0.596471 | 2.46E-46 | 0.507287 | 6.59E-32 |
| 0.74482  | -0.31946 | 1.53E-12 | -0.31071 | 6.55E-12 | -0.42809 | 3.11E-22 | -0.2282  | 6.22E-07 |
| 0.0187   | 0.433534 | 8.03E-23 | 0.466466 | 1.32E-26 | 0.491047 | 1.03E-29 | 0.304654 | 1.74E-11 |
| 5.71E-15 | 0.500158 | 6.26E-31 | 0.394567 | 7.58E-19 | 0.478845 | 3.86E-28 | 0.515501 | 4.60E-33 |
| 5.80E-30 | 0.544446 | 2.14E-37 | 0.397565 | 3.91E-19 | 0.463977 | 2.63E-26 | 0.598833 | 8.84E-47 |
| 6.47E-05 | 0.41119  | 1.77E-20 | 0.397533 | 3.94E-19 | 0.42574  | 5.52E-22 | 0.399781 | 2.38E-19 |
| 0.0529   | -0.26729 | 4.42E-09 | -0.13963 | 0.00249  | -0.23193 | 4.02E-07 | -0.24774 | 5.82E-08 |
| 0.05929  | 0.278757 | 8.80E-10 | 0.302263 | 2.54E-11 | 0.297787 | 5.11E-11 | 0.216646 | 2.30E-06 |
| 0.22586  | 0.275716 | 1.36E-09 | 0.262888 | 8.04E-09 | 0.355375 | 2.39E-15 | 0.238488 | 1.83E-07 |
| 0.31958  | 0.326018 | 5.02E-13 | 0.428368 | 2.90E-22 | 0.402894 | 1.18E-19 | 0.272747 | 2.07E-09 |
| 1.70E-22 | 0.687101 | 1.67E-66 | 0.58858  | 7.12E-45 | 0.625254 | 5.05E-52 | 0.597288 | 1.73E-46 |
| 2.63E-06 | 0.389003 | 2.54E-18 | 0.326047 | 5.00E-13 | 0.366919 | 2.50E-16 | 0.309695 | 7.72E-12 |
| 2.01E-15 | 0.50289  | 2.66E-31 | 0.456049 | 2.30E-25 | 0.401908 | 1.48E-19 | 0.45682  | 1.87E-25 |
| 0.28093  | 0.407508 | 4.14E-20 | 0.320448 | 1.30E-12 | 0.369031 | 1.63E-16 | 0.274197 | 1.69E-09 |
| 6.58E-08 | 0.230895 | 4.54E-07 | 0.282139 | 5.39E-10 | 0.23646  | 2.34E-07 | 0.318004 | 1.96E-12 |
| 0.03642  | 0.288402 | 2.14E-10 | 0.210784 | 4.34E-06 | 0.341585 | 3.16E-14 | 0.240489 | 1.44E-07 |
| 8.22E-05 | 0.47866  | 4.07E-28 | 0.385565 | 5.32E-18 | 0.431847 | 1.22E-22 | 0.409812 | 2.43E-20 |
| 0.00203  | 0.328319 | 3.37E-13 | 0.203905 | 8.94E-06 | 0.38984  | 2.12E-18 | 0.209545 | 4.95E-06 |
| 0.69033  | 0.237804 | 1.99E-07 | 0.283972 | 4.12E-10 | 0.324218 | 6.84E-13 | 0.123692 | 0.00745  |
| 0.9472   | 0.310763 | 6.49E-12 | 0.385074 | 5.90E-18 | 0.375    | 4.85E-17 | 0.264367 | 6.58E-09 |
| 7.72E-22 | 0.534858 | 6.49E-36 | 0.553535 | 7.59E-39 | 0.567148 | 4.21E-41 | 0.505606 | 1.13E-31 |
| 2.24E-22 | 0.60171  | 2.51E-47 | 0.482897 | 1.18E-28 | 0.556038 | 2.97E-39 | 0.58425  | 4.34E-44 |
| 2.90E-06 | 0.56958  | 1.62E-41 | 0.38686  | 4.03E-18 | 0.372405 | 8.25E-17 | 0.315568 | 2.94E-12 |
| 0.31691  | 0.203248 | 9.57E-06 | 0.064701 | 0.16274  | 0.234545 | 2.95E-07 | 0.37112  | 1.07E-16 |
| 9.09E-11 | 0.507288 | 6.59E-32 | 0.365259 | 3.47E-16 | 0.393914 | 8.74E-19 | 0.342994 | 2.44E-14 |
| 6.99E-23 | 0.599253 | 7.36E-47 | 0.586058 | 2.05E-44 | 0.614475 | 7.99E-50 | 0.604172 | 8.44E-48 |
| 1.12E-07 | 0.521812 | 5.67E-34 | 0.499071 | 8.78E-31 | 0.508134 | 5.02E-32 | 0.424965 | 6.67E-22 |
| 6.76E-17 | 0.244973 | 8.25E-08 | 0.296844 | 5.92E-11 | 0.279428 | 7.99E-10 | 0.474295 | 1.44E-27 |
| 1.15E-24 | 0.582007 | 1.09E-43 | 0.450116 | 1.12E-24 | 0.490376 | 1.26E-29 | 0.61839  | 1.30E-50 |
| 0.24517  | 0.239667 | 1.59E-07 | 0.219011 | 1.77E-06 | 0.343011 | 2.44E-14 | 0.291886 | 1.26E-10 |

|          |          |          |          |          |          |          |          |          |
|----------|----------|----------|----------|----------|----------|----------|----------|----------|
| 0.00154  | 0.087779 | 0.05803  | 0.152965 | 0.00091  | 0.166331 | 0.00031  | 0.136635 | 0.00309  |
| 1.58E-06 | 0.360909 | 8.19E-16 | 0.299372 | 4.00E-11 | 0.387407 | 3.59E-18 | 0.428621 | 2.72E-22 |
| 0.00053  | 0.452522 | 5.92E-25 | 0.352757 | 3.94E-15 | 0.3713   | 1.03E-16 | 0.352923 | 3.82E-15 |
| 1.18E-10 | 0.538565 | 1.76E-36 | 0.417756 | 3.78E-21 | 0.405185 | 7.04E-20 | 0.387969 | 3.18E-18 |
| 3.18E-05 | 0.304948 | 1.66E-11 | 0.232487 | 3.77E-07 | 0.320205 | 1.35E-12 | 0.223433 | 1.08E-06 |
| 0.00017  | 0.286519 | 2.83E-10 | 0.16682  | 0.00029  | 0.294961 | 7.91E-11 | 0.23716  | 2.15E-07 |
| 0.00011  | 0.332041 | 1.75E-13 | 0.22961  | 5.28E-07 | 0.324724 | 6.27E-13 | 0.240783 | 1.39E-07 |
| 1.80E-44 | 0.694027 | 2.35E-68 | 0.555024 | 4.35E-39 | 0.545868 | 1.28E-37 | 0.60329  | 1.25E-47 |
| 0.6133   | 0.291898 | 1.26E-10 | 0.370197 | 1.29E-16 | 0.387251 | 3.71E-18 | 0.080312 | 0.08297  |
| 0.09676  | 0.187366 | 4.62E-05 | 0.134368 | 0.00362  | 0.256031 | 2.00E-08 | 0.201183 | 1.18E-05 |
| 0.26103  | 0.326295 | 4.79E-13 | 0.272944 | 2.01E-09 | 0.366564 | 2.68E-16 | 0.078432 | 0.09046  |
| 2.13E-27 | 0.545407 | 1.51E-37 | 0.466164 | 1.43E-26 | 0.480414 | 2.44E-28 | 0.58601  | 2.09E-44 |
| 4.76E-20 | 0.679827 | 1.29E-64 | 0.556879 | 2.17E-39 | 0.562166 | 2.90E-40 | 0.53032  | 3.14E-35 |
| 1.71E-06 | 0.331156 | 2.05E-13 | 0.217356 | 2.12E-06 | 0.326902 | 4.31E-13 | 0.354951 | 2.59E-15 |
| 4.62E-16 | 0.432579 | 1.02E-22 | 0.436075 | 4.24E-23 | 0.44021  | 1.48E-23 | 0.509745 | 2.99E-32 |
| 0.06559  | -0.08664 | 0.06137  | -0.14258 | 0.00201  | -0.29277 | 1.11E-10 | -0.08717 | 0.05979  |
| 0.02417  | -0.23482 | 2.85E-07 | -0.21562 | 2.57E-06 | -0.29165 | 1.31E-10 | -0.24364 | 9.74E-08 |
| 0.12215  | 0.316668 | 2.45E-12 | 0.21505  | 2.73E-06 | 0.383824 | 7.70E-18 | 0.321635 | 1.06E-12 |
| 2.06E-18 | 0.543882 | 2.62E-37 | 0.396461 | 4.99E-19 | 0.468722 | 6.99E-27 | 0.500813 | 5.10E-31 |
| 0.10113  | 0.296416 | 6.32E-11 | 0.322995 | 8.43E-13 | 0.409652 | 2.52E-20 | 0.162157 | 0.00043  |
| 2.17E-06 | 0.477261 | 6.11E-28 | 0.391519 | 1.48E-18 | 0.4738   | 1.65E-27 | 0.357474 | 1.60E-15 |
| 4.11E-12 | 0.448297 | 1.81E-24 | 0.460466 | 6.92E-26 | 0.495261 | 2.85E-30 | 0.479299 | 3.38E-28 |
| 9.53E-27 | 0.667484 | 1.56E-61 | 0.577137 | 7.96E-43 | 0.547128 | 8.07E-38 | 0.587185 | 1.28E-44 |
| 6.24E-19 | 0.332162 | 1.72E-13 | 0.387152 | 3.79E-18 | 0.393716 | 9.13E-19 | 0.520014 | 1.03E-33 |
| 0.24317  | -0.28147 | 5.94E-10 | -0.15398 | 0.00084  | -0.23496 | 2.81E-07 | -0.2035  | 9.32E-06 |
| 0.85397  | 0.471926 | 2.82E-27 | 0.379629 | 1.86E-17 | 0.588332 | 7.90E-45 | 0.219645 | 1.65E-06 |
| 2.87E-32 | 0.555917 | 3.11E-39 | 0.547973 | 5.93E-38 | 0.469745 | 5.24E-27 | 0.603457 | 1.16E-47 |
| 0.53566  | -0.28249 | 5.12E-10 | -0.15412 | 0.00083  | -0.30968 | 7.74E-12 | -0.20507 | 7.93E-06 |
| 0.00036  | 0.557317 | 1.84E-39 | 0.3951   | 6.74E-19 | 0.424438 | 7.58E-22 | 0.389508 | 2.28E-18 |
| 4.77E-33 | 0.464109 | 2.54E-26 | 0.489873 | 1.47E-29 | 0.479881 | 2.85E-28 | 0.661474 | 4.38E-60 |
| 1.39E-21 | 0.557383 | 1.79E-39 | 0.523452 | 3.27E-34 | 0.555442 | 3.72E-39 | 0.597078 | 1.89E-46 |
| 5.76E-19 | 0.493569 | 4.79E-30 | 0.469626 | 5.42E-27 | 0.502296 | 3.20E-31 | 0.549842 | 2.98E-38 |
| 5.95E-24 | 0.389665 | 2.21E-18 | 0.406274 | 5.49E-20 | 0.39405  | 8.49E-19 | 0.551668 | 1.52E-38 |
| 0.00033  | 0.402148 | 1.40E-19 | 0.324963 | 6.02E-13 | 0.348491 | 8.82E-15 | 0.269201 | 3.39E-09 |
| 1.92E-12 | 0.491928 | 7.89E-30 | 0.553413 | 7.95E-39 | 0.595079 | 4.49E-46 | 0.523853 | 2.85E-34 |
| 0.0452   | -0.3361  | 8.53E-14 | -0.28168 | 5.76E-10 | -0.331   | 2.11E-13 | -0.33697 | 7.30E-14 |
| 0.00092  | -0.15512 | 0.00077  | -0.2333  | 3.42E-07 | -0.27634 | 1.24E-09 | -0.29595 | 6.80E-11 |
| 2.55E-14 | 0.46281  | 3.63E-26 | 0.441282 | 1.12E-23 | 0.496598 | 1.89E-30 | 0.532014 | 1.75E-35 |
| 0.00043  | 0.091756 | 0.04751  | 0.18179  | 7.78E-05 | 0.226313 | 7.74E-07 | 0.143875 | 0.00183  |
| 5.68E-15 | 0.560007 | 6.62E-40 | 0.492059 | 7.58E-30 | 0.563304 | 1.87E-40 | 0.578953 | 3.81E-43 |
| 7.34E-30 | 0.603507 | 1.13E-47 | 0.502039 | 3.47E-31 | 0.550357 | 2.47E-38 | 0.593346 | 9.44E-46 |
| 6.10E-22 | 0.497415 | 1.47E-30 | 0.477505 | 5.69E-28 | 0.515416 | 4.73E-33 | 0.570702 | 1.04E-41 |
| 1.43E-15 | 0.471265 | 3.41E-27 | 0.499321 | 8.13E-31 | 0.500558 | 5.53E-31 | 0.513293 | 9.48E-33 |
| 0.011    | -0.23407 | 3.12E-07 | -0.19467 | 2.27E-05 | -0.33105 | 2.09E-13 | -0.12493 | 0.00687  |
| 1.77E-10 | -0.46088 | 6.18E-26 | -0.33346 | 1.37E-13 | -0.41806 | 3.51E-21 | -0.40909 | 2.88E-20 |

|          |          |          |          |          |          |          |          |          |
|----------|----------|----------|----------|----------|----------|----------|----------|----------|
| 0.22286  | 0.262553 | 8.41E-09 | 0.178709 | 0.0001   | 0.304778 | 1.70E-11 | 0.329183 | 2.90E-13 |
| 3.58E-06 | -0.41697 | 4.55E-21 | -0.29802 | 4.93E-11 | -0.39893 | 2.88E-19 | -0.33513 | 1.01E-13 |
| 0.84509  | 0.236475 | 2.34E-07 | 0.210423 | 4.51E-06 | 0.309656 | 7.77E-12 | 0.179623 | 9.50E-05 |
| 1.69E-36 | 0.550862 | 2.05E-38 | 0.528448 | 5.98E-35 | 0.543689 | 2.81E-37 | 0.632275 | 1.68E-53 |
| 5.33E-11 | 0.472749 | 2.23E-27 | 0.478373 | 4.43E-28 | 0.669997 | 3.78E-62 | 0.425426 | 5.96E-22 |
| 0.0492   | 0.154732 | 0.00079  | 0.238279 | 1.88E-07 | 0.273725 | 1.80E-09 | 0.214872 | 2.79E-06 |
| 0.00011  | 0.389849 | 2.12E-18 | 0.293595 | 9.75E-11 | 0.411076 | 1.81E-20 | 0.262026 | 9.03E-09 |
| 1.48E-11 | 0.457226 | 1.67E-25 | 0.389931 | 2.08E-18 | 0.38848  | 2.85E-18 | 0.435441 | 4.97E-23 |
| 0.40963  | -0.29506 | 7.79E-11 | -0.18221 | 7.49E-05 | -0.28996 | 1.69E-10 | -0.20372 | 9.11E-06 |
| 7.32E-06 | 0.1987   | 1.52E-05 | 0.086086 | 0.06306  | 0.142586 | 0.00201  | 0.221203 | 1.38E-06 |
| 0.00935  | 0.192392 | 2.84E-05 | 0.165961 | 0.00032  | 0.37709  | 3.15E-17 | 0.089223 | 0.05401  |
| 0.0406   | 0.232136 | 3.93E-07 | 0.195642 | 2.06E-05 | 0.335791 | 9.01E-14 | 0.262377 | 8.61E-09 |
| 9.34E-33 | 0.740633 | 2.50E-82 | 0.65129  | 1.05E-57 | 0.646028 | 1.63E-56 | 0.642557 | 9.73E-56 |
| 0.00299  | 0.252353 | 3.23E-08 | 0.29425  | 8.82E-11 | 0.25785  | 1.58E-08 | 0.344991 | 1.69E-14 |
| 1.95E-07 | 0.404686 | 7.89E-20 | 0.467684 | 9.36E-27 | 0.440822 | 1.27E-23 | 0.501189 | 4.54E-31 |
| 1.59E-18 | 0.598397 | 1.07E-46 | 0.429781 | 2.04E-22 | 0.469212 | 6.09E-27 | 0.537716 | 2.37E-36 |
| 8.78E-17 | 0.532277 | 1.60E-35 | 0.4575   | 1.55E-25 | 0.479134 | 3.55E-28 | 0.533698 | 9.73E-36 |
| 0.00141  | 0.277546 | 1.05E-09 | 0.187314 | 4.64E-05 | 0.295006 | 7.86E-11 | 0.344495 | 1.85E-14 |
| 7.68E-22 | 0.613539 | 1.23E-49 | 0.535921 | 4.47E-36 | 0.533775 | 9.47E-36 | 0.597897 | 1.33E-46 |
| 8.39E-06 | 0.36545  | 3.34E-16 | 0.331995 | 1.77E-13 | 0.336766 | 7.57E-14 | 0.526633 | 1.11E-34 |
| 0.00069  | 0.345752 | 1.47E-14 | 0.316535 | 2.51E-12 | 0.394779 | 7.23E-19 | 0.368848 | 1.69E-16 |
| 2.57E-15 | 0.682854 | 2.14E-65 | 0.611011 | 3.90E-49 | 0.656718 | 5.80E-59 | 0.498349 | 1.10E-30 |
| 1.34E-10 | 0.4347   | 5.99E-23 | 0.207594 | 6.08E-06 | 0.227462 | 6.78E-07 | 0.404379 | 8.46E-20 |
| 9.51E-23 | 0.615965 | 4.01E-50 | 0.454484 | 3.50E-25 | 0.461526 | 5.17E-26 | 0.546126 | 1.16E-37 |
| 0.45037  | 0.342782 | 2.54E-14 | 0.373565 | 6.51E-17 | 0.415    | 7.25E-21 | 0.234205 | 3.07E-07 |
| 6.97E-10 | 0.632048 | 1.87E-53 | 0.500118 | 6.34E-31 | 0.567248 | 4.05E-41 | 0.453371 | 4.72E-25 |
| 4.70E-23 | 0.646238 | 1.47E-56 | 0.512178 | 1.36E-32 | 0.539802 | 1.13E-36 | 0.58534  | 2.76E-44 |
| 0.02074  | 0.601119 | 3.25E-47 | 0.300231 | 3.49E-11 | 0.453476 | 4.59E-25 | 0.226334 | 7.72E-07 |
| 0.08124  | 0.34378  | 2.12E-14 | 0.337133 | 7.09E-14 | 0.392822 | 1.11E-18 | 0.187869 | 4.40E-05 |
| 0.22254  | 0.409174 | 2.82E-20 | 0.345792 | 1.46E-14 | 0.410063 | 2.30E-20 | 0.273023 | 1.99E-09 |
| 1.99E-16 | 0.578904 | 3.89E-43 | 0.391637 | 1.44E-18 | 0.424248 | 7.94E-22 | 0.398415 | 3.23E-19 |
| 3.18E-25 | 0.549257 | 3.70E-38 | 0.480484 | 2.39E-28 | 0.518266 | 1.85E-33 | 0.587067 | 1.34E-44 |
| 4.82E-34 | 0.641409 | 1.74E-55 | 0.495106 | 2.99E-30 | 0.495318 | 2.80E-30 | 0.624978 | 5.77E-52 |
| 2.00E-22 | 0.612949 | 1.61E-49 | 0.505742 | 1.08E-31 | 0.564401 | 1.22E-40 | 0.526226 | 1.28E-34 |
| 7.32E-13 | 0.434406 | 6.45E-23 | 0.338673 | 5.37E-14 | 0.455933 | 2.37E-25 | 0.429425 | 2.23E-22 |
| 0.74486  | 0.21688  | 2.24E-06 | 0.170999 | 0.0002   | 0.238988 | 1.73E-07 | 0.101052 | 0.029    |
| 8.17E-19 | 0.439865 | 1.62E-23 | 0.401714 | 1.55E-19 | 0.451106 | 8.64E-25 | 0.547982 | 5.91E-38 |
| 0.00089  | 0.322631 | 8.97E-13 | 0.313148 | 4.39E-12 | 0.401915 | 1.48E-19 | 0.282575 | 5.06E-10 |
| 0.01524  | 0.362984 | 5.45E-16 | 0.343776 | 2.12E-14 | 0.458904 | 1.06E-25 | 0.186092 | 5.21E-05 |
| 4.79E-05 | 0.41297  | 1.17E-20 | 0.236555 | 2.32E-07 | 0.466576 | 1.28E-26 | 0.29185  | 1.27E-10 |
| 0.20255  | 0.284963 | 3.56E-10 | 0.250603 | 4.04E-08 | 0.334923 | 1.05E-13 | 0.213507 | 3.23E-06 |
| 4.29E-08 | 0.304398 | 1.81E-11 | 0.341431 | 3.25E-14 | 0.348607 | 8.63E-15 | 0.345031 | 1.68E-14 |
| 0.67333  | -0.19662 | 1.87E-05 | -0.16993 | 0.00022  | -0.28258 | 5.05E-10 | -0.23586 | 2.52E-07 |
| 0.06721  | 0.386501 | 4.35E-18 | 0.485665 | 5.19E-29 | 0.499791 | 7.02E-31 | 0.294245 | 8.83E-11 |
| 6.28E-36 | 0.615884 | 4.17E-50 | 0.537004 | 3.05E-36 | 0.509385 | 3.36E-32 | 0.68869  | 6.33E-67 |

|          |          |          |          |          |          |          |          |          |
|----------|----------|----------|----------|----------|----------|----------|----------|----------|
| 1.02E-09 | 0.479683 | 3.02E-28 | 0.438139 | 2.51E-23 | 0.538255 | 1.96E-36 | 0.490584 | 1.19E-29 |
| 0.11866  | 0.363175 | 5.25E-16 | 0.242933 | 1.06E-07 | 0.437156 | 3.22E-23 | 0.138958 | 0.00262  |
| 0.00058  | -0.10192 | 0.02764  | -0.10356 | 0.02522  | -0.23832 | 1.87E-07 | -0.13985 | 0.00245  |
| 0.34872  | 0.244434 | 8.82E-08 | 0.293013 | 1.07E-10 | 0.334084 | 1.22E-13 | 0.244768 | 8.46E-08 |
| 0.02566  | 0.236214 | 2.41E-07 | 0.183082 | 6.91E-05 | 0.272307 | 2.20E-09 | 0.197805 | 1.66E-05 |
| 0.00475  | 0.418086 | 3.49E-21 | 0.303892 | 1.96E-11 | 0.423127 | 1.04E-21 | 0.373089 | 7.18E-17 |
| 1.58E-23 | 0.531939 | 1.79E-35 | 0.41355  | 1.02E-20 | 0.396915 | 4.51E-19 | 0.54328  | 3.26E-37 |
| 0.49246  | 0.341362 | 3.29E-14 | 0.280205 | 7.14E-10 | 0.299943 | 3.66E-11 | 0.197094 | 1.79E-05 |
| 3.01E-08 | 0.547118 | 8.10E-38 | 0.331836 | 1.82E-13 | 0.357134 | 1.71E-15 | 0.328154 | 3.47E-13 |
| 1.65E-07 | 0.535818 | 4.63E-36 | 0.328455 | 3.29E-13 | 0.42328  | 1.00E-21 | 0.32792  | 3.61E-13 |
| 1.96E-22 | 0.601427 | 2.84E-47 | 0.524115 | 2.61E-34 | 0.513953 | 7.64E-33 | 0.574792 | 2.05E-42 |
| 3.90E-08 | 0.348705 | 8.47E-15 | 0.31425  | 3.66E-12 | 0.368311 | 1.89E-16 | 0.343607 | 2.18E-14 |
| 2.01E-30 | 0.63911  | 5.59E-55 | 0.566375 | 5.69E-41 | 0.552724 | 1.03E-38 | 0.674119 | 3.59E-63 |
| 3.47E-27 | 0.528479 | 5.91E-35 | 0.455827 | 2.44E-25 | 0.5537   | 7.14E-39 | 0.607275 | 2.11E-48 |
| 0.09281  | 0.284652 | 3.73E-10 | 0.243636 | 9.74E-08 | 0.358777 | 1.24E-15 | 0.207276 | 6.29E-06 |
| 1.70E-19 | 0.57801  | 5.59E-43 | 0.489373 | 1.71E-29 | 0.577593 | 6.62E-43 | 0.624245 | 8.18E-52 |
| 0.47803  | -0.11012 | 0.01728  | -0.1743  | 0.00015  | -0.19861 | 1.53E-05 | -0.18482 | 5.87E-05 |
| 9.83E-41 | 0.580035 | 2.45E-43 | 0.564639 | 1.12E-40 | 0.552683 | 1.04E-38 | 0.642349 | 1.08E-55 |
| 0.00135  | -0.26074 | 1.07E-08 | -0.28061 | 6.73E-10 | -0.27565 | 1.37E-09 | -0.33362 | 1.33E-13 |
| 0.25597  | 0.171851 | 0.00019  | 0.101307 | 0.02859  | 0.195549 | 2.08E-05 | 0.288437 | 2.13E-10 |
| 0.00483  | 0.196944 | 1.81E-05 | 0.371232 | 1.05E-16 | 0.383389 | 8.44E-18 | 0.34242  | 2.71E-14 |
| 0.0029   | 0.297966 | 4.97E-11 | 0.279831 | 7.54E-10 | 0.346147 | 1.37E-14 | 0.237748 | 2.01E-07 |
| 0.11349  | 0.321505 | 1.09E-12 | 0.371574 | 9.77E-17 | 0.46634  | 1.36E-26 | 0.180213 | 9.00E-05 |
| 1.94E-06 | 0.548118 | 5.62E-38 | 0.453511 | 4.55E-25 | 0.47588  | 9.11E-28 | 0.335895 | 8.85E-14 |
| 0.00014  | 0.434304 | 6.62E-23 | 0.459271 | 9.59E-26 | 0.551662 | 1.52E-38 | 0.414234 | 8.68E-21 |
| 0.21886  | 0.477293 | 6.06E-28 | 0.388031 | 3.14E-18 | 0.559698 | 7.45E-40 | 0.34189  | 2.99E-14 |
| 3.90E-24 | 0.583886 | 5.04E-44 | 0.578233 | 5.11E-43 | 0.597527 | 1.56E-46 | 0.62196  | 2.42E-51 |
| 0.66033  | 0.404801 | 7.68E-20 | 0.315284 | 3.09E-12 | 0.422998 | 1.07E-21 | 0.15678  | 0.00067  |
| 0.6304   | 0.22638  | 7.68E-07 | 0.204909 | 8.06E-06 | 0.282459 | 5.14E-10 | 0.210353 | 4.54E-06 |
| 7.37E-05 | 0.261657 | 9.49E-09 | 0.173872 | 0.00016  | 0.241424 | 1.28E-07 | 0.348672 | 8.53E-15 |
| 0.10609  | 0.302489 | 2.45E-11 | 0.29577  | 6.99E-11 | 0.297711 | 5.17E-11 | 0.183298 | 6.77E-05 |
| 1.62E-11 | 0.45644  | 2.07E-25 | 0.438308 | 2.41E-23 | 0.509641 | 3.10E-32 | 0.524778 | 2.09E-34 |
| 0.00158  | 0.294048 | 9.10E-11 | 0.241777 | 1.23E-07 | 0.337012 | 7.24E-14 | 0.319646 | 1.49E-12 |
| 0.00583  | 0.188924 | 3.98E-05 | 0.192465 | 2.82E-05 | 0.227073 | 7.09E-07 | 0.248107 | 5.56E-08 |
| 1.74E-16 | 0.549889 | 2.93E-38 | 0.412773 | 1.22E-20 | 0.450819 | 9.32E-25 | 0.514921 | 5.57E-33 |
| 0.00341  | 0.447292 | 2.36E-24 | 0.435351 | 5.09E-23 | 0.537403 | 2.65E-36 | 0.380961 | 1.41E-17 |
| 2.51E-10 | 0.391958 | 1.34E-18 | 0.530708 | 2.75E-35 | 0.49821  | 1.15E-30 | 0.396169 | 5.32E-19 |
| 3.55E-28 | 0.55069  | 2.18E-38 | 0.513866 | 7.86E-33 | 0.526202 | 1.29E-34 | 0.603629 | 1.07E-47 |
| 0.10068  | 0.364743 | 3.85E-16 | 0.246    | 7.25E-08 | 0.447113 | 2.48E-24 | 0.196625 | 1.87E-05 |
| 2.11E-26 | 0.544889 | 1.82E-37 | 0.466966 | 1.14E-26 | 0.499408 | 7.91E-31 | 0.500004 | 6.57E-31 |
| 0.28593  | 0.346814 | 1.21E-14 | 0.279214 | 8.24E-10 | 0.291653 | 1.31E-10 | 0.192801 | 2.73E-05 |
| 0.01272  | -0.11111 | 0.0163   | -0.12913 | 0.00519  | -0.19763 | 1.69E-05 | -0.11056 | 0.01685  |
| 2.89E-19 | 0.590284 | 3.47E-45 | 0.425904 | 5.30E-22 | 0.512573 | 1.20E-32 | 0.467473 | 9.93E-27 |
| 0.02278  | 0.407428 | 4.21E-20 | 0.329128 | 2.93E-13 | 0.426464 | 4.62E-22 | 0.295825 | 6.93E-11 |
| 6.94E-06 | 0.386347 | 4.50E-18 | 0.364822 | 3.79E-16 | 0.358037 | 1.43E-15 | 0.360884 | 8.23E-16 |

|          |          |          |          |          |          |          |          |          |
|----------|----------|----------|----------|----------|----------|----------|----------|----------|
| 4.29E-15 | 0.323653 | 7.54E-13 | 0.455283 | 2.83E-25 | 0.377764 | 2.74E-17 | 0.467292 | 1.04E-26 |
| 9.48E-12 | 0.498563 | 1.03E-30 | 0.387025 | 3.89E-18 | 0.47157  | 3.13E-27 | 0.499905 | 6.77E-31 |
| 0.19986  | 0.316316 | 2.60E-12 | 0.297477 | 5.37E-11 | 0.394633 | 7.47E-19 | 0.197851 | 1.66E-05 |
| 0.04851  | 0.358786 | 1.24E-15 | 0.445725 | 3.56E-24 | 0.501398 | 4.25E-31 | 0.352098 | 4.47E-15 |
| 0.01158  | -0.14294 | 0.00196  | -0.01763 | 0.70396  | -0.15729 | 0.00065  | -0.0873  | 0.05942  |
| 0.04137  | 0.273942 | 1.75E-09 | 0.343842 | 2.09E-14 | 0.456511 | 2.03E-25 | 0.219091 | 1.75E-06 |
| 0.00074  | 0.355905 | 2.16E-15 | 0.267079 | 4.55E-09 | 0.363593 | 4.83E-16 | 0.294709 | 8.22E-11 |
| 3.51E-05 | 0.513799 | 8.04E-33 | 0.488364 | 2.32E-29 | 0.568099 | 2.90E-41 | 0.422579 | 1.19E-21 |
| 0.97011  | 0.33178  | 1.84E-13 | 0.38504  | 5.95E-18 | 0.413531 | 1.02E-20 | 0.28042  | 6.92E-10 |
| 0.58027  | -0.36454 | 4.01E-16 | -0.30453 | 1.77E-11 | -0.46241 | 4.06E-26 | -0.21743 | 2.11E-06 |
| 0.02446  | -0.26735 | 4.38E-09 | -0.21235 | 3.67E-06 | -0.37514 | 4.71E-17 | -0.14726 | 0.00142  |
| 0.08516  | 0.372791 | 7.63E-17 | 0.378457 | 2.37E-17 | 0.444858 | 4.46E-24 | 0.392946 | 1.08E-18 |
| 7.38E-05 | 0.306173 | 1.36E-11 | 0.239177 | 1.69E-07 | 0.302089 | 2.61E-11 | 0.201032 | 1.20E-05 |
| 0.00132  | 0.395098 | 6.74E-19 | 0.301032 | 3.08E-11 | 0.366201 | 2.88E-16 | 0.417844 | 3.70E-21 |
| 8.76E-10 | 0.449687 | 1.26E-24 | 0.434787 | 5.86E-23 | 0.604244 | 8.17E-48 | 0.435196 | 5.29E-23 |
| 0.14129  | 0.467088 | 1.11E-26 | 0.382516 | 1.01E-17 | 0.41601  | 5.71E-21 | 0.18496  | 5.79E-05 |
| 1.39E-10 | 0.540083 | 1.02E-36 | 0.34762  | 1.04E-14 | 0.478307 | 4.51E-28 | 0.465346 | 1.80E-26 |
| 6.03E-16 | 0.565657 | 7.53E-41 | 0.578236 | 5.10E-43 | 0.63801  | 9.71E-55 | 0.597564 | 1.53E-46 |
| 0.5626   | 0.270899 | 2.68E-09 | 0.300346 | 3.43E-11 | 0.49491  | 3.18E-30 | 0.219943 | 1.59E-06 |
| 0.84222  | 0.295938 | 6.81E-11 | 0.334555 | 1.12E-13 | 0.398463 | 3.20E-19 | 0.216272 | 2.39E-06 |
| 3.43E-12 | 0.563017 | 2.09E-40 | 0.499115 | 8.66E-31 | 0.506066 | 9.73E-32 | 0.488775 | 2.05E-29 |
| 0.38444  | 0.377476 | 2.91E-17 | 0.286914 | 2.67E-10 | 0.480128 | 2.65E-28 | 0.288683 | 2.05E-10 |
| 6.48E-17 | 0.704799 | 2.43E-71 | 0.546692 | 9.46E-38 | 0.556454 | 2.54E-39 | 0.546229 | 1.12E-37 |
| 0.01654  | 0.380514 | 1.55E-17 | 0.418476 | 3.18E-21 | 0.433954 | 7.23E-23 | 0.410672 | 1.99E-20 |
| 2.17E-05 | 0.448217 | 1.85E-24 | 0.381363 | 1.29E-17 | 0.440293 | 1.45E-23 | 0.419145 | 2.71E-21 |
| 0.20335  | 0.379885 | 1.76E-17 | 0.388228 | 3.01E-18 | 0.53478  | 6.67E-36 | 0.31276  | 4.68E-12 |
| 9.85E-35 | 0.517732 | 2.21E-33 | 0.577918 | 5.80E-43 | 0.502216 | 3.29E-31 | 0.618849 | 1.05E-50 |
| 4.49E-07 | 0.637847 | 1.05E-54 | 0.58261  | 8.54E-44 | 0.595724 | 3.40E-46 | 0.458723 | 1.11E-25 |
| 0.42969  | 0.298709 | 4.43E-11 | 0.368071 | 1.98E-16 | 0.420863 | 1.80E-21 | 0.167061 | 0.00029  |
| 2.38E-15 | 0.462376 | 4.09E-26 | 0.305296 | 1.57E-11 | 0.285563 | 3.26E-10 | 0.409275 | 2.75E-20 |
| 4.92E-15 | 0.507816 | 5.56E-32 | 0.35767  | 1.54E-15 | 0.405239 | 6.95E-20 | 0.496959 | 1.69E-30 |
| 0.00619  | 0.564836 | 1.03E-40 | 0.476231 | 8.23E-28 | 0.5382   | 2.00E-36 | 0.286226 | 2.96E-10 |
| 4.00E-06 | 0.483034 | 1.13E-28 | 0.623467 | 1.19E-51 | 0.55242  | 1.15E-38 | 0.428179 | 3.04E-22 |
| 0.28178  | 0.310321 | 6.98E-12 | 0.357512 | 1.59E-15 | 0.355143 | 2.50E-15 | 0.284226 | 3.97E-10 |
| 4.77E-23 | 0.599295 | 7.22E-47 | 0.604518 | 7.24E-48 | 0.709263 | 1.28E-72 | 0.595407 | 3.90E-46 |
| 0.33842  | 0.430898 | 1.55E-22 | 0.381718 | 1.20E-17 | 0.405592 | 6.42E-20 | 0.266159 | 5.16E-09 |
| 0.09962  | 0.379145 | 2.06E-17 | 0.424575 | 7.33E-22 | 0.500381 | 5.84E-31 | 0.265152 | 5.92E-09 |
| 2.10E-05 | 0.513868 | 7.86E-33 | 0.431449 | 1.35E-22 | 0.412245 | 1.38E-20 | 0.374075 | 5.87E-17 |
| 0.31105  | 0.330748 | 2.20E-13 | 0.328653 | 3.18E-13 | 0.437026 | 3.33E-23 | 0.073379 | 0.11328  |
| 2.96E-07 | 0.479385 | 3.30E-28 | 0.466802 | 1.20E-26 | 0.502728 | 2.80E-31 | 0.377545 | 2.87E-17 |
| 5.83E-06 | 0.400002 | 2.27E-19 | 0.385675 | 5.19E-18 | 0.409259 | 2.76E-20 | 0.397351 | 4.10E-19 |
| 1.92E-05 | -0.21184 | 3.87E-06 | -0.0895  | 0.05325  | -0.22648 | 7.59E-07 | 0.040349 | 0.38431  |
| 3.93E-10 | 0.154165 | 0.00083  | 0.088666 | 0.05553  | -0.01806 | 0.69709  | 0.174328 | 0.00015  |
| 0.00748  | 0.031646 | 0.4951   | 0.121705 | 0.00847  | 0.205615 | 7.48E-06 | 0.050648 | 0.27471  |
| 7.34E-14 | 0.080345 | 0.08284  | -0.02788 | 0.54783  | -0.1238  | 0.00739  | 0.035728 | 0.44114  |

|          |          |          |          |          |          |          |          |          |
|----------|----------|----------|----------|----------|----------|----------|----------|----------|
| 4.03E-23 | 0.162511 | 0.00042  | 0.083004 | 0.07313  | -0.07051 | 0.12813  | 0.285903 | 3.10E-10 |
| 2.75E-16 | 0.045526 | 0.32624  | 0.115285 | 0.01267  | -0.04366 | 0.3465   | 0.18704  | 4.76E-05 |
| 0.13327  | -0.11725 | 0.01122  | -0.06607 | 0.15399  | -0.20603 | 7.17E-06 | -0.09145 | 0.04825  |
| 0.00336  | -0.26331 | 7.59E-09 | -0.16537 | 0.00033  | -0.28674 | 2.74E-10 | 0.1875   | 4.56E-05 |
| 1.78E-09 | -0.12538 | 0.00667  | -0.04083 | 0.37871  | -0.23446 | 2.98E-07 | -0.00813 | 0.86095  |
| 6.87E-21 | 0.019283 | 0.67768  | 0.040427 | 0.3834   | -0.13276 | 0.00405  | 0.20808  | 5.78E-06 |
| 9.01E-12 | -0.01727 | 0.70978  | -0.01465 | 0.75226  | -0.2147  | 2.84E-06 | 0.075044 | 0.10531  |
| 3.31E-05 | -0.10324 | 0.02569  | -0.10035 | 0.03014  | -0.30265 | 2.39E-11 | -0.06166 | 0.18348  |
| 2.57E-17 | -0.01943 | 0.67529  | -0.06843 | 0.13978  | -0.19712 | 1.78E-05 | 0.191459 | 3.11E-05 |
| 6.31E-11 | -0.02342 | 0.61375  | -0.00484 | 0.91696  | -0.15242 | 0.00095  | 0.128698 | 0.00535  |
| 1.32E-16 | -0.15163 | 0.00101  | -0.0601  | 0.19484  | 0.128838 | 0.0053   | -0.2099  | 4.76E-06 |
| 3.09E-07 | -0.01614 | 0.728    | -0.03084 | 0.5062   | -0.13055 | 0.00472  | -0.00633 | 0.89145  |
| 8.51E-20 | 0.036383 | 0.43281  | 0.009324 | 0.84073  | -0.08979 | 0.05248  | 0.271779 | 2.37E-09 |
| 2.98E-08 | -0.03879 | 0.40301  | -0.07365 | 0.11195  | -0.19051 | 3.41E-05 | 0.059784 | 0.19718  |
| 6.19E-38 | 0.0184   | 0.69166  | 0.068598 | 0.13882  | -0.14806 | 0.00133  | 0.199002 | 1.48E-05 |
| 5.17E-19 | 0.167129 | 0.00029  | 0.080018 | 0.08411  | -0.01762 | 0.70406  | 0.337855 | 6.22E-14 |
| 8.78E-10 | 0.009073 | 0.84497  | 0.073906 | 0.11071  | -0.00237 | 0.95925  | 0.102044 | 0.02745  |
| 2.87E-07 | 0.109753 | 0.01766  | 0.055855 | 0.2283   | -0.04307 | 0.353    | 0.171873 | 0.00019  |
| 2.11E-21 | -0.05026 | 0.2784   | -0.05689 | 0.21978  | -0.22895 | 5.71E-07 | 0.159197 | 0.00055  |
| 3.25E-07 | 0.066317 | 0.15247  | 0.029384 | 0.52645  | -0.08805 | 0.05725  | 0.123506 | 0.00754  |
| 1.36E-10 | 0.001859 | 0.96805  | 0.005921 | 0.89845  | -0.15663 | 0.00068  | 0.160293 | 0.00051  |
| 1.03E-06 | -0.11843 | 0.01042  | -0.12006 | 0.00941  | -0.26057 | 1.10E-08 | 0.062266 | 0.17918  |
| 2.92E-11 | 0.087499 | 0.05883  | 0.026124 | 0.57335  | 0.22636  | 7.70E-07 | -0.00118 | 0.97966  |
| 1.19E-06 | 0.042888 | 0.3551   | 0.071582 | 0.12241  | 0.251491 | 3.61E-08 | -0.03375 | 0.46688  |
| 6.16E-12 | -0.02397 | 0.60539  | -0.06105 | 0.18782  | -0.14505 | 0.00167  | 0.114604 | 0.01321  |
| 1.37E-10 | 0.058527 | 0.20678  | 0.044435 | 0.33799  | -0.11852 | 0.01036  | 0.287789 | 2.34E-10 |
| 1.64E-18 | -0.14208 | 0.00209  | -0.0593  | 0.20086  | -0.20718 | 6.35E-06 | 0.016609 | 0.72035  |
| 0.00053  | -0.23513 | 2.75E-07 | -0.15084 | 0.00108  | -0.36739 | 2.27E-16 | -0.00732 | 0.87472  |
| 2.41E-16 | -0.08365 | 0.07093  | -0.07466 | 0.1071   | -0.26383 | 7.08E-09 | 0.055495 | 0.23132  |
| 1.02E-07 | -0.1702  | 0.00022  | -0.08969 | 0.05275  | -0.24546 | 7.76E-08 | 0.179908 | 9.25E-05 |
| 2.30E-09 | 0.106549 | 0.02128  | 0.009288 | 0.84135  | -0.06359 | 0.17009  | 0.139998 | 0.00243  |
| 2.08E-17 | 0.09191  | 0.04714  | 0.132575 | 0.0041   | -0.04316 | 0.35207  | 0.283408 | 4.48E-10 |
| 0.0037   | 0.061419 | 0.18518  | 0.005442 | 0.90664  | -0.06148 | 0.18471  | -0.00917 | 0.8434   |
| 2.80E-19 | 0.075519 | 0.10312  | 0.093099 | 0.04434  | -0.05661 | 0.22203  | 0.136927 | 0.00303  |
| 7.91E-19 | 0.117689 | 0.01092  | 0.060049 | 0.1952   | -0.07673 | 0.09769  | 0.174778 | 0.00015  |
| 5.51E-18 | 0.209537 | 4.95E-06 | 0.082198 | 0.07597  | 0.001176 | 0.97977  | 0.150978 | 0.00107  |
| 3.34E-20 | 0.075168 | 0.10473  | 0.099334 | 0.03186  | -0.10579 | 0.02223  | 0.290181 | 1.64E-10 |
| 1.20E-16 | -0.06645 | 0.15168  | -0.02494 | 0.59088  | 0.146492 | 0.0015   | -0.11364 | 0.014    |
| 1.54E-07 | -0.19835 | 1.58E-05 | -0.15238 | 0.00095  | -0.32501 | 5.97E-13 | 0.148545 | 0.00128  |
| 1.23E-18 | -0.15986 | 0.00053  | -0.02763 | 0.55142  | -0.15458 | 0.0008   | 0.182255 | 7.46E-05 |
| 2.84E-13 | 0.063706 | 0.16931  | 0.049968 | 0.28121  | -0.12364 | 0.00747  | 0.140549 | 0.00233  |
| 5.25E-29 | 0.210863 | 4.30E-06 | 0.246254 | 7.02E-08 | 0.044257 | 0.33993  | 0.2269   | 7.23E-07 |
| 1.11E-06 | -0.05265 | 0.25614  | -0.02736 | 0.55528  | -0.18619 | 5.16E-05 | -0.04363 | 0.3468   |
| 1.01E-11 | 0.089691 | 0.05275  | 0.123492 | 0.00755  | -0.03046 | 0.51141  | 0.108523 | 0.01898  |
| 1.22E-23 | 0.005356 | 0.9081   | 0.080978 | 0.08044  | -0.05932 | 0.20066  | 0.24687  | 6.50E-08 |



|          |          |          |          |          |          |          |          |          |
|----------|----------|----------|----------|----------|----------|----------|----------|----------|
| 0.42377  | -0.13921 | 0.00257  | -0.07728 | 0.09529  | -0.19815 | 1.61E-05 | -0.17638 | 0.00013  |
| 2.73E-16 | -0.12809 | 0.00557  | -0.15472 | 0.00079  | -0.00899 | 0.84636  | -0.15006 | 0.00114  |
| 3.32E-18 | 0.178613 | 0.0001   | 0.145545 | 0.00161  | -0.01469 | 0.75152  | 0.227952 | 6.41E-07 |
| 1.16E-12 | 0.007764 | 0.8671   | 0.003319 | 0.94297  | -0.17427 | 0.00015  | 0.056595 | 0.22219  |
| 2.37E-19 | -0.10066 | 0.02962  | 0.028769 | 0.53515  | -0.16671 | 0.0003   | 0.141172 | 0.00223  |
| 8.55E-17 | 0.066794 | 0.14953  | 0.093605 | 0.04319  | -0.04745 | 0.30617  | 0.170407 | 0.00022  |
| 3.71E-24 | 0.169864 | 0.00023  | 0.153362 | 0.00088  | -0.00487 | 0.91637  | 0.265617 | 5.55E-09 |
| 6.42E-24 | 0.137371 | 0.00293  | 0.052992 | 0.25308  | -0.04943 | 0.28643  | 0.272092 | 2.27E-09 |
| 3.08E-20 | -0.07893 | 0.08841  | -0.08615 | 0.06287  | -0.15552 | 0.00075  | 0.118026 | 0.01069  |
| 0.11949  | -0.02613 | 0.57322  | -0.00658 | 0.88727  | -0.11164 | 0.0158   | 0.013119 | 0.77736  |
| 5.79E-07 | 0.048107 | 0.29954  | 0.064496 | 0.16408  | 0.215902 | 2.49E-06 | -0.09554 | 0.03904  |
| 5.19E-19 | 0.031003 | 0.50391  | 0.040082 | 0.38748  | -0.15715 | 0.00065  | 0.203236 | 9.58E-06 |
| 2.58E-11 | 0.081038 | 0.08022  | 0.091055 | 0.04924  | -0.04422 | 0.34037  | 0.073935 | 0.11057  |
| 3.48E-14 | 0.141641 | 0.00215  | 0.225544 | 8.45E-07 | 0.07241  | 0.11814  | 0.196209 | 1.95E-05 |
| 3.10E-05 | -0.04366 | 0.34653  | -0.04763 | 0.30436  | -0.18068 | 8.62E-05 | 0.076307 | 0.09956  |
| 7.57E-19 | -0.02181 | 0.63834  | 0.119497 | 0.00975  | -0.10972 | 0.01769  | 0.097767 | 0.03467  |
| 4.03E-20 | 0.010516 | 0.8207   | -0.12885 | 0.00529  | -0.24243 | 1.13E-07 | 0.073416 | 0.1131   |
| 0.00688  | -0.12347 | 0.00755  | -0.10452 | 0.0239   | -0.26082 | 1.06E-08 | -0.0241  | 0.60341  |
| 4.56E-11 | 0.197282 | 1.75E-05 | 0.248767 | 5.11E-08 | 0.465491 | 1.73E-26 | 0.002749 | 0.95276  |
| 0.0068   | 0.212223 | 3.72E-06 | 0.167647 | 0.00027  | 0.33896  | 5.10E-14 | 0.132865 | 0.00402  |
| 3.39E-06 | 0.100965 | 0.02914  | 0.055776 | 0.22897  | 0.175598 | 0.00014  | -0.05446 | 0.24011  |
| 0.01997  | 0.115007 | 0.01289  | 0.072217 | 0.11912  | 0.009291 | 0.84129  | 0.055633 | 0.23016  |
| 4.51E-06 | 0.126071 | 0.00637  | 0.044042 | 0.34228  | 0.240549 | 1.43E-07 | -0.04174 | 0.36814  |
| 1.48E-11 | 0.04586  | 0.32271  | 0.017958 | 0.6987   | -0.10696 | 0.02078  | -0.00241 | 0.9585   |
| 4.72E-22 | -0.01944 | 0.67517  | 0.008341 | 0.85733  | -0.15718 | 0.00065  | 0.086583 | 0.06154  |
| 0.00013  | 0.023605 | 0.61088  | 0.008399 | 0.85635  | 0.212074 | 3.78E-06 | 0.044785 | 0.33419  |
| 3.34E-10 | -0.02297 | 0.62057  | 0.036328 | 0.43351  | 0.169892 | 0.00023  | -0.05707 | 0.2183   |
| 6.34E-12 | -0.02192 | 0.63652  | 0.086197 | 0.06271  | -0.14268 | 0.002    | 0.111048 | 0.01636  |
| 4.13E-21 | -0.00388 | 0.93329  | 0.050839 | 0.2729   | -0.16493 | 0.00034  | 0.086792 | 0.06092  |
| 4.67E-13 | 0.062617 | 0.17674  | -0.01403 | 0.76234  | 0.225132 | 8.86E-07 | -0.00694 | 0.88112  |
| 0.08185  | 0.18065  | 8.65E-05 | 0.035199 | 0.44794  | -0.01301 | 0.77921  | 0.02562  | 0.58076  |
| 6.16E-05 | -0.11263 | 0.01489  | -0.09549 | 0.03914  | -0.23443 | 2.99E-07 | 0.02829  | 0.54197  |
| 1.02E-18 | -0.07118 | 0.12451  | 0.061575 | 0.18407  | 0.209194 | 5.14E-06 | -0.1143  | 0.01346  |
| 3.55E-08 | -0.09619 | 0.03771  | -0.11952 | 0.00973  | 0.013424 | 0.77233  | -0.07723 | 0.09554  |
| 3.65E-49 | 0.032292 | 0.48634  | 0.086538 | 0.06168  | -0.1304  | 0.00477  | 0.3437   | 2.15E-14 |
| 1.22E-19 | 0.143229 | 0.00192  | 0.104043 | 0.02455  | -0.0465  | 0.31595  | 0.26312  | 7.79E-09 |
| 1.54E-11 | 0.146179 | 0.00154  | 0.226096 | 7.94E-07 | 0.007852 | 0.86561  | 0.225309 | 8.68E-07 |
| 1.07E-09 | -0.08092 | 0.08068  | -0.05315 | 0.2517   | -0.25012 | 4.30E-08 | 0.032871 | 0.47855  |
| 1.71E-06 | 0.148228 | 0.00132  | 0.115679 | 0.01237  | 0.032484 | 0.48375  | 0.13654  | 0.00311  |
| 0.60065  | -0.25809 | 1.53E-08 | -0.14112 | 0.00224  | -0.16967 | 0.00023  | -0.09864 | 0.03308  |
| 9.03E-06 | -0.22795 | 6.40E-07 | -0.12883 | 0.0053   | -0.22399 | 1.01E-06 | -0.00043 | 0.99256  |
| 1.31E-13 | 0.026699 | 0.56493  | 0.044397 | 0.3384   | -0.06347 | 0.17088  | 0.182068 | 7.59E-05 |
| 2.96E-12 | -0.12329 | 0.00764  | -0.17843 | 0.00011  | -0.26212 | 8.92E-09 | 0.006901 | 0.88176  |
| 3.87E-31 | 0.198266 | 1.59E-05 | 0.251061 | 3.81E-08 | 0.065426 | 0.15807  | 0.219237 | 1.72E-06 |
| 1.24E-16 | -0.05972 | 0.19764  | -0.15049 | 0.00111  | -0.27864 | 8.96E-10 | 0.17048  | 0.00021  |

|          |          |          |          |          |          |          |          |          |
|----------|----------|----------|----------|----------|----------|----------|----------|----------|
| 1.38E-19 | 0.046581 | 0.31515  | 0.15151  | 0.00102  | -0.09536 | 0.03942  | 0.23663  | 2.30E-07 |
| 0.0177   | -0.06474 | 0.16247  | -0.07748 | 0.09446  | -0.18991 | 3.62E-05 | -0.08253 | 0.07481  |
| 5.35E-13 | 0.097987 | 0.03427  | 0.151525 | 0.00102  | 0.00544  | 0.90667  | 0.151947 | 0.00099  |
| 0.08478  | -0.07587 | 0.10152  | -0.0615  | 0.18459  | -0.17541 | 0.00014  | 0.049034 | 0.29032  |
| 9.25E-10 | -0.17375 | 0.00016  | -0.11364 | 0.014    | -0.33991 | 4.29E-14 | 0.009884 | 0.8313   |
| 8.53E-18 | 0.062248 | 0.17931  | 0.093242 | 0.04401  | -0.0721  | 0.11971  | 0.135802 | 0.00328  |
| 1.07E-07 | 0.036129 | 0.43603  | -0.07808 | 0.09191  | -0.22662 | 7.47E-07 | 0.083203 | 0.07244  |
| 4.07E-19 | 0.093573 | 0.04326  | 0.023854 | 0.60713  | 0.247381 | 6.09E-08 | -0.0114  | 0.80588  |
| 3.10E-08 | -0.10886 | 0.01862  | -0.09397 | 0.04238  | -0.19544 | 2.11E-05 | 0.015884 | 0.73207  |
| 0.00125  | -0.043   | 0.35379  | -0.03605 | 0.43704  | -0.17018 | 0.00022  | 0.163079 | 0.0004   |
| 0.00151  | -0.1743  | 0.00015  | -0.17852 | 0.00011  | -0.36852 | 1.81E-16 | -0.07577 | 0.10199  |
| 2.12E-23 | 0.042966 | 0.35422  | -0.0154  | 0.73992  | -0.17176 | 0.00019  | 0.196488 | 1.90E-05 |
| 0.00011  | 0.009193 | 0.84295  | -0.10035 | 0.03014  | -0.20185 | 1.10E-05 | -0.06819 | 0.14117  |
| 0.00029  | -0.06227 | 0.17914  | 0.025077 | 0.58882  | -0.12465 | 0.007    | -0.0312  | 0.50115  |
| 1.11E-23 | 0.162585 | 0.00042  | 0.056928 | 0.21947  | -0.00608 | 0.89582  | 0.206318 | 6.95E-06 |
| 6.01E-11 | 0.033163 | 0.47465  | 0.008418 | 0.85603  | -0.13891 | 0.00263  | 0.092645 | 0.04539  |
| 1.33E-16 | -0.08013 | 0.08367  | -0.0564  | 0.2238   | -0.19657 | 1.88E-05 | 0.162119 | 0.00044  |
| 3.96E-09 | -0.01584 | 0.73284  | -0.08659 | 0.06153  | 0.081858 | 0.0772   | -0.08389 | 0.07012  |
| 1.89E-08 | 0.006425 | 0.88987  | 0.008762 | 0.85022  | 0.205434 | 7.63E-06 | -0.01079 | 0.81608  |
| 4.28E-16 | -0.08514 | 0.06603  | -0.06332 | 0.17189  | -0.26315 | 7.76E-09 | 0.042921 | 0.35472  |
| 0.04182  | -0.0893  | 0.05379  | -0.15314 | 0.0009   | -0.19829 | 1.58E-05 | -0.03819 | 0.41029  |
| 2.67E-14 | -0.12808 | 0.00557  | -0.10619 | 0.02173  | -0.27306 | 1.98E-09 | 0.122978 | 0.0078   |
| 9.34E-18 | -0.01349 | 0.77131  | 0.015896 | 0.73189  | -0.12926 | 0.00515  | 0.065507 | 0.15756  |
| 1.66E-21 | -0.01838 | 0.69194  | 0.000537 | 0.99076  | -0.15945 | 0.00054  | 0.156173 | 0.00071  |
| 3.30E-19 | 0.260232 | 1.15E-08 | 0.159863 | 0.00052  | 0.021671 | 0.64042  | 0.177864 | 0.00011  |
| 1.85E-14 | 0.156493 | 0.00069  | 0.196368 | 1.92E-05 | -0.02133 | 0.64563  | 0.289326 | 1.86E-10 |
| 2.32E-31 | 0.179866 | 9.29E-05 | 0.072718 | 0.11657  | -0.05715 | 0.2177   | 0.323534 | 7.69E-13 |
| 2.38E-10 | -0.17945 | 9.65E-05 | -0.0877  | 0.05826  | -0.26392 | 7.00E-09 | -0.02674 | 0.56431  |
| 2.21E-23 | -0.04027 | 0.38526  | -0.11336 | 0.01424  | -0.2177  | 2.04E-06 | 0.166058 | 0.00031  |
| 0.00019  | -0.07439 | 0.10839  | -0.0637  | 0.16936  | -0.18701 | 4.77E-05 | 0.031017 | 0.50372  |
| 4.39E-05 | -0.1321  | 0.00424  | -0.13532 | 0.00339  | -0.23889 | 1.75E-07 | 0.006168 | 0.89425  |
| 8.53E-28 | 0.042969 | 0.35418  | -0.05993 | 0.19606  | -0.20881 | 5.35E-06 | 0.179826 | 9.32E-05 |
| 1.37E-06 | 0.04291  | 0.35484  | -0.08197 | 0.07679  | -0.15156 | 0.00102  | 0.186504 | 5.01E-05 |
| 0.0017   | -0.06025 | 0.19372  | -0.08299 | 0.07318  | -0.24403 | 9.27E-08 | 0.026597 | 0.56643  |
| 1.52E-14 | -0.07987 | 0.08469  | -0.11476 | 0.01308  | 0.021503 | 0.64301  | -0.12891 | 0.00527  |
| 5.33E-05 | -0.06328 | 0.17222  | 0.044583 | 0.33638  | -0.08172 | 0.07772  | 0.070443 | 0.12849  |
| 1.03E-08 | -0.0853  | 0.06551  | -0.07631 | 0.09954  | -0.28709 | 2.60E-10 | -0.02726 | 0.55673  |
| 2.86E-09 | -0.20661 | 6.74E-06 | -0.12199 | 0.00831  | -0.25481 | 2.35E-08 | -0.02758 | 0.55211  |
| 2.68E-12 | 0.027727 | 0.55004  | 0.010011 | 0.82917  | -0.05412 | 0.24313  | 0.127715 | 0.00571  |
| 0.78739  | -0.0072  | 0.87669  | -0.02905 | 0.53112  | -0.08777 | 0.05807  | -0.07341 | 0.1131   |
| 1.01E-10 | 0.117118 | 0.01131  | 0.104086 | 0.02449  | 0.278958 | 8.55E-10 | 0.056885 | 0.21982  |
| 0.00083  | -0.02914 | 0.52996  | -0.00588 | 0.89921  | -0.10631 | 0.02158  | -0.10857 | 0.01893  |
| 2.84E-15 | 0.007168 | 0.87723  | 0.039688 | 0.39216  | -0.14974 | 0.00117  | 0.113725 | 0.01393  |
| 1.20E-07 | -0.12879 | 0.00532  | -0.10499 | 0.02326  | -0.1982  | 1.60E-05 | 0.028731 | 0.53569  |
| 8.33E-11 | 0.162338 | 0.00043  | 0.253351 | 2.84E-08 | 0.096442 | 0.03721  | 0.185269 | 5.63E-05 |

|          |          |          |          |          |          |          |          |          |
|----------|----------|----------|----------|----------|----------|----------|----------|----------|
| 4.85E-10 | 0.02839  | 0.54055  | -0.01834 | 0.69263  | -0.00961 | 0.83592  | -0.22293 | 1.14E-06 |
| 0.00032  | 0.296158 | 6.58E-11 | 0.330248 | 2.41E-13 | 0.459822 | 8.25E-26 | 0.367334 | 2.30E-16 |
| 6.78E-14 | 0.396591 | 4.85E-19 | 0.38981  | 2.14E-18 | 0.364312 | 4.19E-16 | 0.390991 | 1.65E-18 |
| 1.13E-09 | 0.274027 | 1.73E-09 | 0.456463 | 2.06E-25 | 0.349327 | 7.54E-15 | 0.32432  | 6.72E-13 |
| 0.00028  | 0.249268 | 4.80E-08 | 0.224264 | 9.79E-07 | 0.2313   | 4.33E-07 | 0.264724 | 6.27E-09 |
| 5.06E-08 | 0.582016 | 1.09E-43 | 0.460488 | 6.88E-26 | 0.512386 | 1.27E-32 | 0.491814 | 8.17E-30 |
| 0.00049  | 0.327447 | 3.92E-13 | 0.285396 | 3.34E-10 | 0.318991 | 1.66E-12 | 0.269047 | 3.47E-09 |
| 0.16892  | 0.158642 | 0.00058  | 0.336252 | 8.30E-14 | 0.356981 | 1.76E-15 | 0.254551 | 2.43E-08 |
| 0.01091  | 0.302645 | 2.39E-11 | 0.313474 | 4.16E-12 | 0.391138 | 1.60E-18 | 0.351453 | 5.05E-15 |
| 1.24E-14 | 0.64027  | 3.11E-55 | 0.589975 | 3.95E-45 | 0.675122 | 2.01E-63 | 0.541615 | 5.92E-37 |
| 0.03559  | -0.16968 | 0.00023  | -0.18544 | 5.54E-05 | -0.22261 | 1.18E-06 | -0.28117 | 6.21E-10 |
| 1.30E-19 | 0.205082 | 7.91E-06 | 0.279711 | 7.67E-10 | 0.259265 | 1.31E-08 | 0.322936 | 8.52E-13 |
| 4.25E-21 | -0.25956 | 1.26E-08 | -0.14788 | 0.00135  | -0.23437 | 3.01E-07 | -0.3314  | 1.97E-13 |
| 0.00354  | 0.351709 | 4.81E-15 | 0.400544 | 2.01E-19 | 0.403792 | 9.66E-20 | 0.2783   | 9.40E-10 |
| 1.89E-11 | -0.38993 | 2.08E-18 | -0.32268 | 8.89E-13 | -0.44667 | 2.78E-24 | -0.37219 | 8.62E-17 |
| 1.96E-31 | 0.411366 | 1.70E-20 | 0.345477 | 1.55E-14 | 0.382466 | 1.03E-17 | 0.582653 | 8.39E-44 |
| 4.10E-33 | 0.370285 | 1.27E-16 | 0.383498 | 8.25E-18 | 0.280566 | 6.78E-10 | 0.439473 | 1.79E-23 |
| 4.84E-07 | -0.29202 | 1.24E-10 | -0.30714 | 1.17E-11 | -0.33714 | 7.08E-14 | -0.31263 | 4.78E-12 |
| 2.12E-05 | 0.370184 | 1.29E-16 | 0.304832 | 1.69E-11 | 0.470173 | 4.64E-27 | 0.185507 | 5.50E-05 |
| 4.33E-37 | 0.426582 | 4.49E-22 | 0.439689 | 1.69E-23 | 0.42669  | 4.37E-22 | 0.597028 | 1.94E-46 |
| 0.00402  | -0.19548 | 2.10E-05 | -0.23965 | 1.59E-07 | -0.29443 | 8.58E-11 | -0.29825 | 4.76E-11 |
| 3.40E-09 | -0.30873 | 9.03E-12 | -0.39084 | 1.71E-18 | -0.40929 | 2.75E-20 | -0.33856 | 5.48E-14 |
| 2.05E-07 | 0.091094 | 0.04914  | 0.242761 | 1.09E-07 | 0.13871  | 0.00266  | 0.219544 | 1.67E-06 |
| 0.00028  | -0.14694 | 0.00145  | -0.10634 | 0.02154  | -0.07365 | 0.11193  | -0.17289 | 0.00017  |
| 1.98E-17 | 0.247715 | 5.84E-08 | 0.360863 | 8.26E-16 | 0.26821  | 3.89E-09 | 0.68606  | 3.13E-66 |
| 4.77E-24 | -0.15714 | 0.00065  | -0.14309 | 0.00194  | -0.16291 | 0.00041  | -0.31966 | 1.48E-12 |
| 7.36E-09 | -0.07232 | 0.1186   | -0.15817 | 0.0006   | -0.13775 | 0.00285  | -0.34902 | 7.99E-15 |
| 4.84E-28 | 0.448222 | 1.85E-24 | 0.459882 | 8.12E-26 | 0.474949 | 1.19E-27 | 0.575184 | 1.75E-42 |
| 5.34E-20 | 0.265767 | 5.44E-09 | 0.313358 | 4.24E-12 | 0.273802 | 1.78E-09 | 0.434671 | 6.04E-23 |
| 7.77E-28 | 0.470743 | 3.95E-27 | 0.563586 | 1.68E-40 | 0.512405 | 1.27E-32 | 0.583999 | 4.81E-44 |
| 4.94E-18 | 0.310864 | 6.39E-12 | 0.27817  | 9.58E-10 | 0.329032 | 2.98E-13 | 0.450215 | 1.09E-24 |
| 8.29E-19 | -0.24667 | 6.66E-08 | -0.26128 | 9.98E-09 | -0.21579 | 2.52E-06 | -0.51678 | 3.02E-33 |
| 0.0486   | 0.116238 | 0.01195  | 0.023346 | 0.6148   | -0.04994 | 0.28152  | 0.036126 | 0.43607  |
| 1.57E-22 | -0.19898 | 1.48E-05 | -0.31196 | 5.34E-12 | -0.25786 | 1.57E-08 | -0.4589  | 1.06E-25 |
| 1.02E-14 | 0.295874 | 6.87E-11 | 0.258411 | 1.46E-08 | 0.230993 | 4.49E-07 | 0.367948 | 2.03E-16 |
| 0.14965  | 0.368988 | 1.65E-16 | 0.346972 | 1.17E-14 | 0.465958 | 1.52E-26 | 0.244643 | 8.59E-08 |
| 1.26E-19 | 0.637784 | 1.09E-54 | 0.557581 | 1.66E-39 | 0.615222 | 5.66E-50 | 0.560871 | 4.76E-40 |
| 5.23E-05 | -0.08601 | 0.06328  | -0.23061 | 4.70E-07 | -0.30437 | 1.82E-11 | -0.31375 | 3.98E-12 |
| 8.56E-11 | 0.369515 | 1.48E-16 | 0.426908 | 4.15E-22 | 0.463159 | 3.30E-26 | 0.483471 | 9.94E-29 |
| 0.02107  | -0.2244  | 9.64E-07 | -0.16438 | 0.00036  | -0.25767 | 1.61E-08 | -0.1481  | 0.00133  |
| 4.59E-09 | -0.02607 | 0.57411  | -0.0245  | 0.59747  | -0.03961 | 0.39315  | 0.252106 | 3.33E-08 |
| 0.00632  | -0.3843  | 6.96E-18 | -0.39949 | 2.54E-19 | -0.45346 | 4.61E-25 | -0.3427  | 2.58E-14 |
| 0.00029  | 0.165758 | 0.00032  | -0.03247 | 0.48397  | -0.08331 | 0.07207  | -0.1709  | 0.00021  |
| 0.20668  | 0.216935 | 2.22E-06 | 0.257689 | 1.61E-08 | 0.385319 | 5.60E-18 | 0.199926 | 1.34E-05 |
| 0.16489  | 0.253868 | 2.65E-08 | 0.17657  | 0.00013  | 0.359401 | 1.10E-15 | 0.271892 | 2.33E-09 |

|          |          |          |          |          |          |          |          |          |
|----------|----------|----------|----------|----------|----------|----------|----------|----------|
| 5.11E-05 | 0.347909 | 9.83E-15 | 0.39043  | 1.87E-18 | 0.491283 | 9.60E-30 | 0.406907 | 4.75E-20 |
| 0.00575  | -0.13215 | 0.00423  | -0.1498  | 0.00117  | -0.22565 | 8.35E-07 | -0.31724 | 2.23E-12 |
| 4.75E-06 | 0.252432 | 3.20E-08 | 0.332548 | 1.60E-13 | 0.330719 | 2.21E-13 | 0.262303 | 8.70E-09 |
| 6.72E-08 | 0.399917 | 2.31E-19 | 0.427559 | 3.54E-22 | 0.465971 | 1.51E-26 | 0.460021 | 7.82E-26 |
| 4.94E-19 | -0.26466 | 6.33E-09 | -0.25104 | 3.82E-08 | -0.23317 | 3.47E-07 | -0.39117 | 1.59E-18 |
| 3.07E-10 | 0.221167 | 1.39E-06 | 0.02898  | 0.53215  | 0.187188 | 4.69E-05 | 0.324664 | 6.34E-13 |
| 4.42E-18 | -0.33837 | 5.67E-14 | -0.32467 | 6.33E-13 | -0.3153  | 3.08E-12 | -0.44195 | 9.46E-24 |
| 2.09E-21 | 0.352859 | 3.87E-15 | 0.408046 | 3.66E-20 | 0.433808 | 7.50E-23 | 0.438655 | 2.20E-23 |
| 2.44E-05 | 0.288039 | 2.26E-10 | 0.376364 | 3.66E-17 | 0.267782 | 4.13E-09 | 0.303936 | 1.95E-11 |
| 9.14E-09 | 0.312182 | 5.15E-12 | 0.427207 | 3.85E-22 | 0.311304 | 5.94E-12 | 0.37651  | 3.55E-17 |
| 1.05E-07 | -0.01223 | 0.79211  | -0.09799 | 0.03426  | -0.09264 | 0.04539  | -0.24315 | 1.03E-07 |
| 1.39E-11 | -0.32893 | 3.03E-13 | -0.23729 | 2.12E-07 | -0.31446 | 3.54E-12 | -0.44482 | 4.51E-24 |
| 2.30E-14 | -0.32362 | 7.58E-13 | -0.30225 | 2.55E-11 | -0.34755 | 1.05E-14 | -0.47083 | 3.85E-27 |
| 0.00254  | -0.14391 | 0.00182  | -0.20663 | 6.73E-06 | -0.28203 | 5.48E-10 | -0.37339 | 6.75E-17 |
| 1.57E-11 | 0.385268 | 5.66E-18 | 0.376343 | 3.68E-17 | 0.48617  | 4.46E-29 | 0.356356 | 1.98E-15 |
| 7.92E-27 | -0.27229 | 2.21E-09 | -0.323   | 8.43E-13 | -0.30399 | 1.93E-11 | -0.48059 | 2.32E-28 |
| 2.25E-06 | 0.287051 | 2.61E-10 | 0.263515 | 7.39E-09 | 0.394852 | 7.12E-19 | 0.293899 | 9.31E-11 |
| 1.65E-24 | -0.34383 | 2.10E-14 | -0.41754 | 3.98E-21 | -0.33419 | 1.20E-13 | -0.50826 | 4.82E-32 |
| 2.93E-10 | -0.28644 | 2.86E-10 | -0.24307 | 1.05E-07 | -0.14887 | 0.00125  | -0.36329 | 5.13E-16 |
| 2.53E-19 | 0.315555 | 2.95E-12 | 0.303056 | 2.24E-11 | 0.34772  | 1.02E-14 | 0.446036 | 3.28E-24 |
| 2.78E-24 | 0.46726  | 1.05E-26 | 0.545792 | 1.31E-37 | 0.484276 | 7.84E-29 | 0.548664 | 4.60E-38 |
| 0.16316  | 0.252588 | 3.13E-08 | 0.280451 | 6.89E-10 | 0.454078 | 3.91E-25 | 0.191075 | 3.23E-05 |
| 3.23E-06 | -0.12715 | 0.00593  | 0.020842 | 0.65326  | 0.035333 | 0.44622  | -0.19272 | 2.75E-05 |
| 0.48115  | -0.29711 | 5.68E-11 | -0.26868 | 3.64E-09 | -0.36605 | 2.97E-16 | -0.18529 | 5.62E-05 |
| 3.62E-15 | 0.153602 | 0.00087  | 0.277174 | 1.10E-09 | 0.214936 | 2.77E-06 | 0.342544 | 2.65E-14 |
| 2.53E-18 | 0.400785 | 1.90E-19 | 0.46371  | 2.83E-26 | 0.438036 | 2.58E-23 | 0.450475 | 1.02E-24 |
| 2.12E-09 | 0.240409 | 1.45E-07 | 0.14331  | 0.0019   | 0.223987 | 1.01E-06 | 0.292818 | 1.10E-10 |
| 3.76E-16 | -0.17611 | 0.00013  | -0.19226 | 2.88E-05 | -0.21862 | 1.85E-06 | -0.30891 | 8.77E-12 |
| 8.66E-34 | -0.36928 | 1.55E-16 | -0.35517 | 2.49E-15 | -0.37113 | 1.07E-16 | -0.64422 | 4.14E-56 |
| 4.22E-23 | 0.304782 | 1.70E-11 | 0.20847  | 5.55E-06 | 0.230415 | 4.81E-07 | 0.463485 | 3.01E-26 |
| 1.11E-16 | 0.210398 | 4.52E-06 | 0.266717 | 4.78E-09 | 0.208476 | 5.54E-06 | 0.340281 | 4.01E-14 |
| 6.58E-14 | 0.397534 | 3.93E-19 | 0.436321 | 3.98E-23 | 0.423324 | 9.93E-22 | 0.44477  | 4.56E-24 |
| 6.99E-16 | 0.377976 | 2.62E-17 | 0.417355 | 4.15E-21 | 0.427111 | 3.95E-22 | 0.51457  | 6.25E-33 |
| 8.79E-27 | 0.266238 | 5.10E-09 | 0.288963 | 1.96E-10 | 0.27275  | 2.07E-09 | 0.352088 | 4.48E-15 |
| 0.00104  | -0.18101 | 8.36E-05 | -0.26823 | 3.88E-09 | -0.31591 | 2.78E-12 | -0.29631 | 6.43E-11 |
| 0.00272  | -0.06787 | 0.14309  | 0.13659  | 0.0031   | 0.058024 | 0.21071  | 0.223906 | 1.02E-06 |
| 3.25E-16 | 0.56794  | 3.09E-41 | 0.596225 | 2.74E-46 | 0.602443 | 1.81E-47 | 0.527865 | 7.30E-35 |
| 0.01138  | 0.131017 | 0.00457  | 0.304245 | 1.85E-11 | 0.399849 | 2.35E-19 | 0.177211 | 0.00012  |
| 8.09E-05 | 0.373341 | 6.82E-17 | 0.334322 | 1.17E-13 | 0.427641 | 3.46E-22 | 0.359627 | 1.05E-15 |
| 1.12E-06 | -0.05713 | 0.21787  | -0.23117 | 4.40E-07 | -0.351   | 5.50E-15 | -0.124   | 0.0073   |
| 0.0078   | 0.174779 | 0.00015  | 0.188408 | 4.18E-05 | 0.265357 | 5.75E-09 | 0.267098 | 4.53E-09 |
| 1.35E-10 | 0.439491 | 1.78E-23 | 0.366945 | 2.48E-16 | 0.41128  | 1.73E-20 | 0.499101 | 8.70E-31 |
| 1.16E-14 | 0.29104  | 1.44E-10 | 0.417914 | 3.64E-21 | 0.41394  | 9.30E-21 | 0.347942 | 9.77E-15 |
| 0.29904  | -0.04927 | 0.28803  | -0.11522 | 0.01272  | -0.10893 | 0.01854  | -0.22003 | 1.58E-06 |
| 1.07E-06 | 0.233439 | 3.36E-07 | 0.190771 | 3.33E-05 | 0.237099 | 2.17E-07 | 0.372728 | 7.73E-17 |

|          |          |          |          |          |          |          |          |          |
|----------|----------|----------|----------|----------|----------|----------|----------|----------|
| 1.27E-18 | 0.325342 | 5.64E-13 | 0.384446 | 6.75E-18 | 0.368227 | 1.92E-16 | 0.512634 | 1.18E-32 |
| 3.43E-11 | 0.413213 | 1.10E-20 | 0.323954 | 7.16E-13 | 0.417552 | 3.96E-21 | 0.323823 | 7.32E-13 |
| 0.00096  | 0.164701 | 0.00035  | 0.215467 | 2.61E-06 | 0.18085  | 8.49E-05 | 0.291447 | 1.35E-10 |
| 0.00054  | -0.12707 | 0.00596  | -0.19325 | 2.62E-05 | -0.27278 | 2.06E-09 | -0.29081 | 1.49E-10 |
| 3.34E-11 | -0.13822 | 0.00276  | -0.17289 | 0.00017  | -0.10151 | 0.02827  | -0.32559 | 5.40E-13 |
| 0.00943  | 0.150866 | 0.00107  | 0.184073 | 6.30E-05 | 0.241341 | 1.29E-07 | 0.281466 | 5.95E-10 |
| 0.63921  | 0.227948 | 6.41E-07 | 0.170001 | 0.00022  | 0.282437 | 5.16E-10 | 0.198488 | 1.55E-05 |
| 0.10735  | 0.419583 | 2.44E-21 | 0.376203 | 3.79E-17 | 0.435724 | 4.63E-23 | 0.413694 | 9.85E-21 |
| 7.67E-20 | 0.204763 | 8.18E-06 | 0.213853 | 3.12E-06 | 0.170469 | 0.00021  | 0.370829 | 1.14E-16 |
| 4.97E-06 | -0.23646 | 2.34E-07 | -0.15709 | 0.00066  | -0.15705 | 0.00066  | -0.24881 | 5.08E-08 |
| 0.00098  | 0.225537 | 8.46E-07 | 0.289529 | 1.80E-10 | 0.330582 | 2.27E-13 | 0.21451  | 2.90E-06 |
| 0.09397  | 0.306119 | 1.37E-11 | 0.293122 | 1.05E-10 | 0.440798 | 1.27E-23 | 0.308351 | 9.60E-12 |
| 0.00081  | 0.251704 | 3.51E-08 | 0.365821 | 3.11E-16 | 0.347468 | 1.07E-14 | 0.378066 | 2.58E-17 |
| 1.15E-10 | 0.357374 | 1.63E-15 | 0.511598 | 1.65E-32 | 0.49454  | 3.56E-30 | 0.527146 | 9.33E-35 |
| 0.00049  | 0.272989 | 2.00E-09 | 0.40445  | 8.32E-20 | 0.522573 | 4.39E-34 | 0.352828 | 3.89E-15 |
| 1.17E-50 | 0.449855 | 1.20E-24 | 0.531578 | 2.03E-35 | 0.480077 | 2.69E-28 | 0.664189 | 9.80E-61 |
| 1.93E-10 | 0.091413 | 0.04835  | 0.234004 | 3.15E-07 | 0.214517 | 2.90E-06 | 0.288286 | 2.17E-10 |
| 1.38E-11 | 0.152234 | 0.00097  | 0.363532 | 4.89E-16 | 0.302088 | 2.61E-11 | 0.422566 | 1.19E-21 |
| 1.57E-15 | 0.473616 | 1.74E-27 | 0.490848 | 1.10E-29 | 0.519328 | 1.30E-33 | 0.463193 | 3.27E-26 |
| 3.67E-06 | 0.162076 | 0.00044  | 0.365114 | 3.58E-16 | 0.292785 | 1.10E-10 | 0.353548 | 3.39E-15 |
| 3.05E-31 | -0.45754 | 1.53E-25 | -0.40661 | 5.08E-20 | -0.4147  | 7.78E-21 | -0.53091 | 2.56E-35 |
| 1.47E-15 | 0.327045 | 4.20E-13 | 0.155725 | 0.00073  | 0.139588 | 0.0025   | 0.347952 | 9.76E-15 |
| 3.46E-10 | -0.09898 | 0.03247  | -0.05389 | 0.24513  | -0.1363  | 0.00316  | -0.32805 | 3.53E-13 |
| 9.62E-12 | 0.151495 | 0.00102  | 0.08618  | 0.06277  | 0.186257 | 5.13E-05 | 0.305981 | 1.41E-11 |
| 3.44E-07 | 0.427383 | 3.69E-22 | 0.287576 | 2.42E-10 | 0.295243 | 7.58E-11 | 0.335631 | 9.28E-14 |
| 0.55408  | 0.447436 | 2.27E-24 | 0.384981 | 6.02E-18 | 0.436053 | 4.26E-23 | 0.296637 | 6.11E-11 |
| 0.00047  | 0.268866 | 3.55E-09 | 0.166261 | 0.00031  | 0.256614 | 1.85E-08 | 0.284844 | 3.63E-10 |
| 4.67E-16 | 0.274754 | 1.56E-09 | 0.416715 | 4.83E-21 | 0.383682 | 7.93E-18 | 0.395669 | 5.94E-19 |
| 0.00017  | 0.149072 | 0.00123  | 0.175102 | 0.00014  | 0.119987 | 0.00945  | 0.310327 | 6.97E-12 |
| 1.93E-08 | 0.283277 | 4.56E-10 | 0.377476 | 2.91E-17 | 0.381608 | 1.23E-17 | 0.379934 | 1.74E-17 |
| 6.04E-10 | 0.043757 | 0.34541  | 0.134036 | 0.00371  | 0.045897 | 0.32232  | 0.253956 | 2.62E-08 |
| 1.02E-07 | 0.173925 | 0.00016  | 0.302705 | 2.37E-11 | 0.376091 | 3.88E-17 | 0.365159 | 3.54E-16 |
| 0.00907  | -0.06035 | 0.19298  | -0.20112 | 1.19E-05 | -0.15313 | 0.0009   | -0.12556 | 0.00659  |
| 9.15E-23 | 0.391018 | 1.65E-18 | 0.519189 | 1.36E-33 | 0.466885 | 1.17E-26 | 0.505089 | 1.33E-31 |
| 0.24485  | -0.05899 | 0.20318  | -0.16983 | 0.00023  | -0.16533 | 0.00033  | -0.35091 | 5.60E-15 |
| 4.49E-15 | -0.07075 | 0.12684  | -0.09772 | 0.03477  | -0.07485 | 0.1062   | -0.297   | 5.77E-11 |
| 1.76E-19 | 0.394082 | 8.43E-19 | 0.496172 | 2.15E-30 | 0.465236 | 1.85E-26 | 0.461124 | 5.78E-26 |
| 1.71E-15 | -0.40991 | 2.38E-20 | -0.24914 | 4.87E-08 | -0.29033 | 1.60E-10 | -0.40607 | 5.75E-20 |
| 1.60E-06 | 0.261377 | 9.85E-09 | 0.263218 | 7.69E-09 | 0.308368 | 9.57E-12 | 0.228516 | 6.00E-07 |
| 2.94E-23 | -0.25504 | 2.28E-08 | -0.29298 | 1.07E-10 | -0.23495 | 2.81E-07 | -0.40912 | 2.86E-20 |
| 1.58E-21 | -0.32582 | 5.20E-13 | -0.33034 | 2.37E-13 | -0.35386 | 3.19E-15 | -0.46203 | 4.50E-26 |
| 0.00012  | 0.432311 | 1.09E-22 | 0.436816 | 3.51E-23 | 0.429208 | 2.36E-22 | 0.334674 | 1.10E-13 |
| 8.00E-19 | -0.32973 | 2.63E-13 | -0.25549 | 2.15E-08 | -0.28195 | 5.54E-10 | -0.37955 | 1.89E-17 |
| 9.77E-36 | 0.41466  | 7.85E-21 | 0.444796 | 4.53E-24 | 0.416887 | 4.64E-21 | 0.553678 | 7.20E-39 |
| 9.93E-19 | -0.2023  | 1.05E-05 | -0.11503 | 0.01286  | -0.14873 | 0.00127  | -0.28829 | 2.17E-10 |

|          |          |          |          |          |          |          |          |          |
|----------|----------|----------|----------|----------|----------|----------|----------|----------|
| 0.0003   | 0.13275  | 0.00406  | 0.224495 | 9.53E-07 | 0.228314 | 6.14E-07 | 0.298032 | 4.92E-11 |
| 7.98E-06 | 0.317916 | 1.99E-12 | 0.31494  | 3.27E-12 | 0.250873 | 3.91E-08 | 0.248957 | 4.99E-08 |
| 0.21757  | 0.083684 | 0.0708   | 0.044557 | 0.33666  | 0.134756 | 0.00353  | 0.403076 | 1.14E-19 |
| 0.316    | 0.00351  | 0.93969  | -0.15246 | 0.00095  | -0.25115 | 3.77E-08 | -0.1474  | 0.0014   |
| 0.00057  | -0.2071  | 6.41E-06 | -0.16073 | 0.00049  | -0.2079  | 5.89E-06 | -0.19659 | 1.88E-05 |
| 3.33E-12 | -0.17893 | 0.0001   | -0.22593 | 8.08E-07 | -0.23732 | 2.11E-07 | -0.4412  | 1.15E-23 |
| 0.0039   | 0.225055 | 8.94E-07 | 0.24769  | 5.86E-08 | 0.292428 | 1.16E-10 | 0.289438 | 1.83E-10 |
| 0.00054  | 0.149085 | 0.00123  | 0.194254 | 2.37E-05 | 0.268577 | 3.70E-09 | 0.231507 | 4.23E-07 |
| 0.09795  | 0.20378  | 9.06E-06 | 0.315234 | 3.11E-12 | 0.408866 | 3.03E-20 | 0.235647 | 2.58E-07 |
| 0.03104  | 0.151468 | 0.00103  | 0.305338 | 1.56E-11 | 0.298505 | 4.57E-11 | 0.194987 | 2.20E-05 |
| 0.12534  | 0.159115 | 0.00056  | 0.233134 | 3.49E-07 | 0.265567 | 5.59E-09 | 0.213636 | 3.19E-06 |
| 1.17E-08 | 0.319675 | 1.48E-12 | 0.324525 | 6.49E-13 | 0.370996 | 1.10E-16 | 0.396666 | 4.77E-19 |
| 9.94E-20 | 0.419858 | 2.29E-21 | 0.516079 | 3.81E-33 | 0.487144 | 3.34E-29 | 0.479985 | 2.77E-28 |
| 0.09059  | -0.08329 | 0.07214  | 0.099545 | 0.03149  | 0.052979 | 0.2532   | 0.152724 | 0.00093  |
| 2.36E-18 | 0.127426 | 0.00582  | -0.00893 | 0.84729  | -0.10142 | 0.02842  | 0.142225 | 0.00206  |
| 0.15971  | 0.198966 | 1.48E-05 | 0.205508 | 7.57E-06 | 0.248964 | 4.99E-08 | 0.304579 | 1.76E-11 |
| 1.46E-15 | 0.344847 | 1.74E-14 | 0.39174  | 1.41E-18 | 0.42286  | 1.11E-21 | 0.454    | 3.99E-25 |
| 0.8216   | -0.08008 | 0.08387  | -0.08444 | 0.06827  | -0.20289 | 9.92E-06 | -0.19634 | 1.93E-05 |
| 3.66E-17 | 0.257446 | 1.66E-08 | 0.304277 | 1.84E-11 | 0.273049 | 1.98E-09 | 0.328829 | 3.08E-13 |
| 3.69E-12 | -0.1929  | 2.71E-05 | -0.32626 | 4.81E-13 | -0.33553 | 9.44E-14 | -0.12773 | 0.0057   |
| 2.36E-14 | -0.24073 | 1.39E-07 | -0.30402 | 1.92E-11 | -0.28965 | 1.77E-10 | -0.45863 | 1.14E-25 |
| 1.06E-14 | 0.488823 | 2.02E-29 | 0.470562 | 4.16E-27 | 0.556479 | 2.52E-39 | 0.546935 | 8.66E-38 |
| 7.68E-10 | 0.410802 | 1.93E-20 | 0.419643 | 2.41E-21 | 0.485445 | 5.54E-29 | 0.414133 | 8.89E-21 |
| 7.39E-07 | 0.324118 | 6.96E-13 | 0.341395 | 3.27E-14 | 0.442684 | 7.84E-24 | 0.451498 | 7.78E-25 |
| 4.24E-11 | -0.04351 | 0.3481   | -0.05936 | 0.2004   | -0.06265 | 0.17652  | -0.11933 | 0.00985  |
| 0.00019  | 0.049388 | 0.28685  | 0.246944 | 6.44E-08 | 0.188209 | 4.26E-05 | 0.355881 | 2.17E-15 |
| 2.67E-14 | 0.182473 | 7.31E-05 | 0.32944  | 2.77E-13 | 0.262295 | 8.71E-09 | 0.405578 | 6.44E-20 |
| 0.00262  | -0.15955 | 0.00054  | -0.22926 | 5.50E-07 | -0.36487 | 3.75E-16 | -0.17063 | 0.00021  |
| 1.53E-12 | -0.38542 | 5.48E-18 | -0.34242 | 2.71E-14 | -0.37475 | 5.11E-17 | -0.4724  | 2.47E-27 |
| 3.90E-06 | 0.35869  | 1.26E-15 | 0.343327 | 2.30E-14 | 0.435221 | 5.26E-23 | 0.349456 | 7.36E-15 |
| 0.02466  | -0.28749 | 2.45E-10 | -0.33683 | 7.48E-14 | -0.29459 | 8.37E-11 | -0.22465 | 9.37E-07 |
| 2.70E-19 | 0.384789 | 6.27E-18 | 0.38006  | 1.70E-17 | 0.355769 | 2.22E-15 | 0.714302 | 4.34E-74 |
| 3.60E-09 | -0.21353 | 3.23E-06 | -0.26451 | 6.46E-09 | -0.25919 | 1.32E-08 | -0.02991 | 0.51902  |
| 2.54E-18 | -0.27192 | 2.32E-09 | -0.27935 | 8.08E-10 | -0.27804 | 9.76E-10 | -0.10847 | 0.01904  |
| 3.49E-05 | 0.353234 | 3.60E-15 | 0.364286 | 4.21E-16 | 0.456263 | 2.17E-25 | 0.508335 | 4.71E-32 |
| 5.48E-08 | -0.19234 | 2.86E-05 | -0.24043 | 1.45E-07 | -0.22429 | 9.76E-07 | -0.23767 | 2.03E-07 |
| 0.31123  | -0.02387 | 0.60695  | -0.14061 | 0.00232  | -0.16097 | 0.00048  | 0.045019 | 0.33167  |
| 6.97E-08 | 0.067873 | 0.14305  | -0.06577 | 0.15591  | -0.06851 | 0.13932  | -0.23547 | 2.64E-07 |
| 0.00382  | 0.299094 | 4.17E-11 | 0.353896 | 3.17E-15 | 0.351936 | 4.61E-15 | 0.407296 | 4.34E-20 |
| 1.21E-25 | 0.138241 | 0.00276  | 0.204908 | 8.06E-06 | 0.093978 | 0.04236  | 0.466044 | 1.48E-26 |
| 3.71E-06 | 0.506769 | 7.77E-32 | 0.432019 | 1.17E-22 | 0.482045 | 1.51E-28 | 0.429116 | 2.41E-22 |
| 4.05E-22 | 0.363291 | 5.13E-16 | 0.324133 | 6.94E-13 | 0.358672 | 1.27E-15 | 0.53287  | 1.30E-35 |
| 7.41E-13 | -0.00711 | 0.87821  | 0.174985 | 0.00014  | 0.115928 | 0.01218  | 0.314433 | 3.55E-12 |
| 0.4117   | -0.41124 | 1.75E-20 | -0.28964 | 1.77E-10 | -0.39074 | 1.75E-18 | -0.2436  | 9.79E-08 |
| 2.27E-12 | 0.126662 | 0.00613  | 0.100022 | 0.03069  | 0.079984 | 0.08424  | -0.15932 | 0.00055  |

|          |          |          |          |          |          |          |          |          |
|----------|----------|----------|----------|----------|----------|----------|----------|----------|
| 1.20E-07 | 0.260947 | 1.04E-08 | 0.366117 | 2.93E-16 | 0.312406 | 4.96E-12 | 0.268662 | 3.66E-09 |
| 1.15E-29 | 0.397062 | 4.37E-19 | 0.507433 | 6.29E-32 | 0.475429 | 1.04E-27 | 0.609051 | 9.49E-49 |
| 2.56E-29 | -0.2333  | 3.42E-07 | -0.23519 | 2.73E-07 | -0.21299 | 3.42E-06 | -0.42714 | 3.92E-22 |
| 2.01E-07 | 0.179549 | 9.56E-05 | 0.158092 | 0.00061  | 0.158125 | 0.0006   | 0.291224 | 1.40E-10 |
| 1.27E-07 | 0.263978 | 6.94E-09 | 0.265093 | 5.96E-09 | 0.221388 | 1.36E-06 | 0.307717 | 1.06E-11 |
| 0.00264  | 0.2125   | 3.61E-06 | 0.328199 | 3.44E-13 | 0.299063 | 4.19E-11 | 0.332749 | 1.55E-13 |
| 4.38E-12 | -0.29959 | 3.86E-11 | -0.19895 | 1.48E-05 | -0.28768 | 2.38E-10 | -0.33373 | 1.30E-13 |
| 4.13E-23 | -0.40998 | 2.34E-20 | -0.26843 | 3.77E-09 | -0.1283  | 0.00549  | -0.50858 | 4.35E-32 |
| 0.01623  | 0.309843 | 7.54E-12 | 0.323499 | 7.74E-13 | 0.334555 | 1.12E-13 | 0.359613 | 1.05E-15 |
| 1.82E-16 | 0.410997 | 1.85E-20 | 0.350234 | 6.36E-15 | 0.378993 | 2.12E-17 | 0.519595 | 1.19E-33 |
| 0.53504  | -0.10424 | 0.02427  | -0.07634 | 0.09939  | -0.20016 | 1.31E-05 | -0.17025 | 0.00022  |
| 8.19E-12 | 0.043384 | 0.34955  | -0.06984 | 0.13182  | -0.00676 | 0.88415  | 0.009274 | 0.84158  |
| 9.38E-06 | -0.17907 | 9.99E-05 | -0.20124 | 1.18E-05 | -0.25992 | 1.20E-08 | -0.38862 | 2.76E-18 |
| 0.89964  | -0.18288 | 7.04E-05 | -0.06645 | 0.15166  | -0.13921 | 0.00257  | -0.17551 | 0.00014  |
| 2.39E-07 | -0.32452 | 6.50E-13 | -0.40664 | 5.05E-20 | -0.44144 | 1.08E-23 | -0.34741 | 1.08E-14 |
| 2.86E-20 | 0.506174 | 9.39E-32 | 0.49632  | 2.06E-30 | 0.533936 | 8.95E-36 | 0.576986 | 8.46E-43 |
| 0.00564  | 0.287619 | 2.40E-10 | 0.263751 | 7.16E-09 | 0.356527 | 1.92E-15 | 0.367252 | 2.33E-16 |
| 9.13E-21 | 0.280063 | 7.29E-10 | 0.410543 | 2.05E-20 | 0.351642 | 4.87E-15 | 0.422066 | 1.35E-21 |
| 2.60E-08 | 0.200455 | 1.27E-05 | 0.32673  | 4.44E-13 | 0.269654 | 3.19E-09 | 0.259411 | 1.28E-08 |
| 2.47E-06 | 0.257998 | 1.55E-08 | 0.34037  | 3.95E-14 | 0.264618 | 6.36E-09 | 0.261927 | 9.15E-09 |
| 0.0296   | 0.244643 | 8.59E-08 | 0.350887 | 5.62E-15 | 0.356447 | 1.95E-15 | 0.14346  | 0.00188  |
| 4.31E-16 | 0.396229 | 5.25E-19 | 0.342684 | 2.59E-14 | 0.385711 | 5.15E-18 | 0.372418 | 8.23E-17 |
| 0.0074   | -0.20581 | 7.33E-06 | -0.20974 | 4.84E-06 | -0.23647 | 2.34E-07 | -0.29283 | 1.09E-10 |
| 0.00743  | 0.181714 | 7.84E-05 | 0.220024 | 1.58E-06 | 0.28262  | 5.03E-10 | 0.201053 | 1.20E-05 |
| 0.06585  | 0.170231 | 0.00022  | 0.151659 | 0.00101  | 0.239528 | 1.62E-07 | 0.186258 | 5.13E-05 |
| 2.45E-10 | 0.386716 | 4.16E-18 | 0.358652 | 1.27E-15 | 0.396432 | 5.02E-19 | 0.542043 | 5.08E-37 |
| 1.86E-12 | -0.08595 | 0.06349  | -0.10585 | 0.02215  | -0.09424 | 0.04179  | -0.2854  | 3.34E-10 |
| 0.9269   | -0.10595 | 0.02202  | -0.04575 | 0.32391  | -0.14007 | 0.00242  | -0.22922 | 5.53E-07 |
| 7.30E-08 | -0.00854 | 0.85398  | -0.13574 | 0.00329  | -0.08676 | 0.061    | -0.26752 | 4.28E-09 |
| 2.16E-05 | 0.429622 | 2.13E-22 | 0.435002 | 5.56E-23 | 0.55545  | 3.71E-39 | 0.379847 | 1.78E-17 |
| 1.85E-19 | 0.305196 | 1.59E-11 | 0.277347 | 1.08E-09 | 0.278635 | 8.96E-10 | 0.353043 | 3.74E-15 |
| 0.54774  | 0.387555 | 3.47E-18 | 0.369168 | 1.59E-16 | 0.433353 | 8.40E-23 | 0.209725 | 4.85E-06 |
| 3.95E-19 | 0.256372 | 1.91E-08 | 0.313357 | 4.24E-12 | 0.208603 | 5.47E-06 | 0.429181 | 2.37E-22 |
| 0.18006  | 0.338362 | 5.68E-14 | 0.300237 | 3.49E-11 | 0.332953 | 1.49E-13 | 0.09195  | 0.04704  |
| 7.30E-05 | -0.16365 | 0.00038  | -0.1378  | 0.00284  | -0.2     | 1.33E-05 | -0.24699 | 6.40E-08 |
| 1.98E-27 | 0.431248 | 1.42E-22 | 0.448395 | 1.77E-24 | 0.386715 | 4.16E-18 | 0.548624 | 4.67E-38 |
| 0.42126  | 0.286922 | 2.66E-10 | 0.300374 | 3.42E-11 | 0.462024 | 4.51E-26 | 0.273993 | 1.74E-09 |
| 6.77E-18 | 0.188205 | 4.26E-05 | 0.212578 | 3.58E-06 | 0.235963 | 2.49E-07 | 0.435696 | 4.66E-23 |
| 0.00083  | 0.133745 | 0.00379  | 0.26217  | 8.86E-09 | 0.316863 | 2.37E-12 | 0.293997 | 9.17E-11 |
| 1.09E-17 | 0.274762 | 1.56E-09 | 0.302489 | 2.45E-11 | 0.326453 | 4.66E-13 | 0.435335 | 5.11E-23 |
| 1.53E-26 | 0.211976 | 3.82E-06 | 0.14847  | 0.00129  | 0.047502 | 0.30567  | 0.366832 | 2.54E-16 |
| 0.0007   | 0.413409 | 1.05E-20 | 0.434236 | 6.73E-23 | 0.514423 | 6.56E-33 | 0.344052 | 2.01E-14 |
| 2.93E-08 | -0.07906 | 0.0879   | -0.097   | 0.03613  | -0.15694 | 0.00067  | -0.29991 | 3.67E-11 |
| 1.92E-16 | -0.23049 | 4.76E-07 | -0.1989  | 1.49E-05 | -0.24574 | 7.49E-08 | -0.39146 | 1.49E-18 |
| 0.00019  | -0.32917 | 2.91E-13 | -0.35903 | 1.18E-15 | -0.39175 | 1.40E-18 | -0.36799 | 2.02E-16 |

|          |          |          |          |          |          |          |          |          |
|----------|----------|----------|----------|----------|----------|----------|----------|----------|
| 0.02787  | -0.04233 | 0.36137  | -0.16926 | 0.00024  | -0.17664 | 0.00012  | -0.25707 | 1.75E-08 |
| 1.46E-06 | 0.174782 | 0.00015  | 0.19568  | 2.06E-05 | 0.242754 | 1.09E-07 | 0.370228 | 1.28E-16 |
| 9.68E-22 | 0.39157  | 1.46E-18 | 0.471413 | 3.27E-27 | 0.468096 | 8.34E-27 | 0.522116 | 5.12E-34 |
| 3.86E-14 | -0.40638 | 5.36E-20 | -0.38046 | 1.56E-17 | -0.42355 | 9.40E-22 | -0.45912 | 1.00E-25 |
| 3.67E-09 | -0.30905 | 8.57E-12 | -0.14999 | 0.00115  | -0.24372 | 9.64E-08 | -0.32529 | 5.69E-13 |
| 0.00042  | 0.372939 | 7.40E-17 | 0.375653 | 4.24E-17 | 0.468572 | 7.29E-27 | 0.385469 | 5.43E-18 |
| 1.06E-10 | -0.07598 | 0.10102  | -0.16312 | 0.0004   | -0.12336 | 0.00761  | -0.33881 | 5.24E-14 |
| 2.10E-10 | 0.277002 | 1.13E-09 | 0.3892   | 2.44E-18 | 0.328908 | 3.04E-13 | 0.221412 | 1.35E-06 |
| 4.40E-29 | 0.386559 | 4.30E-18 | 0.418168 | 3.42E-21 | 0.332557 | 1.60E-13 | 0.571616 | 7.26E-42 |
| 4.57E-22 | -0.35776 | 1.51E-15 | -0.27237 | 2.18E-09 | -0.28639 | 2.88E-10 | -0.5711  | 8.90E-42 |
| 9.23E-26 | -0.087   | 0.0603   | -0.17666 | 0.00012  | -0.08192 | 0.07699  | -0.39793 | 3.60E-19 |
| 7.70E-11 | 0.510304 | 2.50E-32 | 0.459439 | 9.16E-26 | 0.495861 | 2.37E-30 | 0.432166 | 1.13E-22 |
| 0.00025  | 0.271149 | 2.59E-09 | 0.28688  | 2.68E-10 | 0.397812 | 3.70E-19 | 0.332321 | 1.67E-13 |
| 4.33E-28 | 0.416919 | 4.61E-21 | 0.498331 | 1.11E-30 | 0.477605 | 5.53E-28 | 0.62695  | 2.24E-52 |
| 9.77E-25 | 0.413271 | 1.09E-20 | 0.451496 | 7.79E-25 | 0.426295 | 4.82E-22 | 0.593636 | 8.34E-46 |
| 4.98E-19 | 0.46927  | 5.99E-27 | 0.528312 | 6.26E-35 | 0.538329 | 1.91E-36 | 0.544844 | 1.85E-37 |
| 6.28E-38 | 0.316923 | 2.35E-12 | 0.471931 | 2.82E-27 | 0.408933 | 2.98E-20 | 0.504034 | 1.85E-31 |
| 1.79E-22 | 0.360337 | 9.16E-16 | 0.419418 | 2.54E-21 | 0.392769 | 1.12E-18 | 0.656985 | 5.03E-59 |
| 6.08E-12 | 0.218979 | 1.77E-06 | 0.34072  | 3.70E-14 | 0.302235 | 2.55E-11 | 0.420069 | 2.17E-21 |
| 9.06E-14 | 0.579578 | 2.96E-43 | 0.591638 | 1.95E-45 | 0.600929 | 3.53E-47 | 0.536394 | 3.78E-36 |
| 6.65E-27 | 0.287565 | 2.42E-10 | 0.34718  | 1.13E-14 | 0.185319 | 5.60E-05 | 0.445202 | 4.08E-24 |
| 0.00029  | 0.243462 | 9.96E-08 | 0.37935  | 1.97E-17 | 0.268497 | 3.74E-09 | 0.309701 | 7.72E-12 |
| 0.69011  | 0.077502 | 0.09436  | 0.099903 | 0.03089  | 0.180909 | 8.44E-05 | 0.171259 | 0.0002   |
| 0.00867  | -0.12028 | 0.00927  | -0.15695 | 0.00066  | -0.2207  | 1.46E-06 | -0.23756 | 2.05E-07 |
| 2.95E-14 | 0.33149  | 1.93E-13 | 0.599467 | 6.70E-47 | 0.480187 | 2.61E-28 | 0.40215  | 1.40E-19 |
| 9.96E-19 | 0.515524 | 4.57E-33 | 0.494543 | 3.55E-30 | 0.43801  | 2.60E-23 | 0.48421  | 7.99E-29 |
| 7.15E-29 | 0.404252 | 8.70E-20 | 0.66182  | 3.62E-60 | 0.510555 | 2.31E-32 | 0.442828 | 7.55E-24 |
| 0.00018  | 0.330417 | 2.34E-13 | 0.367884 | 2.06E-16 | 0.370639 | 1.18E-16 | 0.308265 | 9.74E-12 |
| 4.93E-13 | 0.290142 | 1.65E-10 | 0.459714 | 8.50E-26 | 0.432957 | 9.28E-23 | 0.4472   | 2.42E-24 |
| 1.64E-06 | 0.534053 | 8.60E-36 | 0.677449 | 5.20E-64 | 0.54329  | 3.24E-37 | 0.372491 | 8.11E-17 |
| 3.12E-07 | 0.293294 | 1.02E-10 | 0.387497 | 3.52E-18 | 0.407134 | 4.51E-20 | 0.383944 | 7.50E-18 |
| 2.89E-06 | 0.285361 | 3.36E-10 | 0.365696 | 3.18E-16 | 0.354514 | 2.82E-15 | 0.392741 | 1.13E-18 |
| 1.49E-11 | 0.327824 | 3.67E-13 | 0.391438 | 1.50E-18 | 0.391109 | 1.61E-18 | 0.465697 | 1.63E-26 |
| 6.78E-16 | 0.380091 | 1.69E-17 | 0.72528  | 2.08E-77 | 0.550212 | 2.60E-38 | 0.510575 | 2.29E-32 |
| 1.84E-13 | 0.457796 | 1.43E-25 | 0.749713 | 2.08E-85 | 0.569866 | 1.45E-41 | 0.513883 | 7.82E-33 |
| 6.90E-14 | 0.35572  | 2.24E-15 | 0.49698  | 1.68E-30 | 0.394697 | 7.36E-19 | 0.390127 | 2.00E-18 |
| 6.22E-14 | 0.44328  | 6.72E-24 | 0.549806 | 3.02E-38 | 0.42496  | 6.67E-22 | 0.467452 | 9.99E-27 |
| 1.64E-15 | 0.522349 | 4.74E-34 | 0.566691 | 5.03E-41 | 0.544276 | 2.27E-37 | 0.508997 | 3.81E-32 |
| 1.90E-09 | 0.375258 | 4.60E-17 | 0.471143 | 3.53E-27 | 0.439193 | 1.92E-23 | 0.436075 | 4.24E-23 |
| 1.61E-16 | 0.3543   | 2.94E-15 | 0.513114 | 1.01E-32 | 0.475982 | 8.84E-28 | 0.456745 | 1.91E-25 |
| 0.00156  | 0.218935 | 1.78E-06 | 0.374609 | 5.26E-17 | 0.399647 | 2.46E-19 | 0.217422 | 2.11E-06 |
| 1.61E-08 | 0.35319  | 3.63E-15 | 0.425826 | 5.40E-22 | 0.444627 | 4.74E-24 | 0.4462   | 3.14E-24 |
| 0.75249  | 0.339662 | 4.49E-14 | 0.355667 | 2.26E-15 | 0.531307 | 2.23E-35 | 0.200796 | 1.23E-05 |
| 4.76E-07 | 0.200127 | 1.32E-05 | 0.492919 | 5.84E-30 | 0.300818 | 3.19E-11 | 0.304193 | 1.87E-11 |
| 3.11E-14 | 0.478869 | 3.83E-28 | 0.674669 | 2.61E-63 | 0.540566 | 8.62E-37 | 0.527534 | 8.17E-35 |



|          |          |          |          |          |          |          |          |          |
|----------|----------|----------|----------|----------|----------|----------|----------|----------|
| 0.20745  | 0.171781 | 0.00019  | 0.30859  | 9.24E-12 | 0.240698 | 1.40E-07 | 0.227556 | 6.71E-07 |
| 0.00155  | 0.363346 | 5.07E-16 | 0.618252 | 1.39E-50 | 0.4962   | 2.14E-30 | 0.396316 | 5.15E-19 |
| 1.60E-13 | 0.337826 | 6.26E-14 | 0.54659  | 9.82E-38 | 0.484254 | 7.89E-29 | 0.510797 | 2.13E-32 |
| 3.64E-14 | 0.508681 | 4.21E-32 | 0.61765  | 1.83E-50 | 0.552168 | 1.26E-38 | 0.473403 | 1.85E-27 |
| 0.00085  | 0.270196 | 2.96E-09 | 0.567108 | 4.28E-41 | 0.420355 | 2.03E-21 | 0.325522 | 5.47E-13 |
| 5.73E-20 | 0.484576 | 7.17E-29 | 0.429056 | 2.45E-22 | 0.410199 | 2.22E-20 | 0.533406 | 1.08E-35 |
| 1.10E-23 | 0.452451 | 6.04E-25 | 0.716928 | 7.21E-75 | 0.542123 | 4.94E-37 | 0.582765 | 8.01E-44 |
| 2.55E-23 | -0.21867 | 1.84E-06 | -0.11957 | 0.0097   | -0.17344 | 0.00017  | -0.41135 | 1.70E-20 |
| 0.00132  | 0.056585 | 0.22227  | 0.104696 | 0.02366  | 0.110957 | 0.01645  | 0.267443 | 4.32E-09 |
| 7.04E-09 | 0.508023 | 5.21E-32 | 0.498612 | 1.01E-30 | 0.500262 | 6.06E-31 | 0.465739 | 1.61E-26 |
| 0.07126  | 0.188428 | 4.17E-05 | 0.144264 | 0.00177  | 0.255086 | 2.27E-08 | 0.083542 | 0.07128  |
| 0.15506  | -0.01158 | 0.80283  | -0.04549 | 0.32666  | -0.00471 | 0.91916  | 0.023208 | 0.6169   |
| 0.98611  | 0.034375 | 0.45864  | 0.074877 | 0.10609  | 0.176337 | 0.00013  | 0.035572 | 0.44314  |
| 0.55117  | 0.039957 | 0.38896  | 0.028098 | 0.54471  | 0.060597 | 0.19114  | 0.020083 | 0.66511  |
| 5.01E-07 | -0.01803 | 0.69749  | -0.0443  | 0.33946  | 0.022918 | 0.6213   | -0.10343 | 0.0254   |
| 0.10836  | 0.069702 | 0.13257  | 0.013965 | 0.76342  | 0.133061 | 0.00397  | -0.00559 | 0.9041   |
| 0.63698  | -0.01951 | 0.67405  | -0.08803 | 0.05732  | -0.03732 | 0.42102  | 0.000104 | 0.99821  |
| 0.1471   | 0.068977 | 0.13665  | 0.043157 | 0.35208  | 0.106467 | 0.02138  | 0.057134 | 0.21781  |
| 0.06569  | 0.100895 | 0.02925  | -0.00153 | 0.97373  | 0.097522 | 0.03513  | -0.04591 | 0.32217  |
| 0.03217  | 0.191701 | 3.04E-05 | 0.17233  | 0.00018  | 0.300749 | 3.22E-11 | 0.080811 | 0.08107  |
| 0.79832  | 0.408249 | 3.49E-20 | 0.262603 | 8.36E-09 | 0.310617 | 6.65E-12 | 0.153761 | 0.00086  |
| 0.9687   | -0.03005 | 0.51712  | -0.02961 | 0.52333  | -0.03288 | 0.4784   | 0.102271 | 0.02711  |
| 1.59E-05 | -0.00231 | 0.96034  | -0.02071 | 0.65532  | 0.114902 | 0.01297  | -0.02878 | 0.53505  |
| 0.44356  | -0.00924 | 0.84211  | 0.044615 | 0.33603  | 0.046443 | 0.31658  | -0.01974 | 0.67044  |
| 0.5191   | 0.069762 | 0.13223  | 0.078388 | 0.09064  | 0.103075 | 0.02592  | 0.013417 | 0.77244  |
| 0.03513  | 0.040857 | 0.37836  | 0.040537 | 0.3821   | 0.076061 | 0.10066  | 0.013316 | 0.77411  |
| 0.04546  | 0.217693 | 2.05E-06 | 0.103085 | 0.0259   | 0.222129 | 1.25E-06 | 0.17255  | 0.00018  |
| 0.12074  | 0.005758 | 0.90124  | 0.022872 | 0.62201  | 0.052772 | 0.25506  | -0.0036  | 0.9382   |
| 7.64E-05 | 0.023989 | 0.60509  | 0.137216 | 0.00296  | 0.205688 | 7.43E-06 | 0.02108  | 0.64957  |
| 0.7253   | 0.079323 | 0.08684  | 0.101277 | 0.02864  | 0.096932 | 0.03626  | 0.066653 | 0.1504   |
| 0.88233  | 0.09071  | 0.05011  | 0.066441 | 0.15171  | 0.090504 | 0.05063  | 0.077026 | 0.0964   |
| 0.71428  | 0.12482  | 0.00692  | 0.045275 | 0.32893  | 0.123479 | 0.00755  | 0.099314 | 0.03189  |
| 0.16456  | 0.100625 | 0.02969  | 0.080469 | 0.08237  | 0.121486 | 0.00859  | 0.059321 | 0.20067  |
| 0.62723  | 0.03513  | 0.44884  | 0.129336 | 0.00512  | 0.117677 | 0.01093  | 0.200009 | 1.33E-05 |
| 0.54231  | 0.001986 | 0.96586  | 0.00818  | 0.86005  | 0.050172 | 0.27925  | 0.00866  | 0.85194  |
| 0.31137  | 0.149009 | 0.00124  | 0.137439 | 0.00292  | 0.260377 | 1.13E-08 | 0.098686 | 0.033    |
| 0.16021  | 0.177462 | 0.00012  | 0.148153 | 0.00132  | 0.184033 | 6.32E-05 | 0.106771 | 0.02101  |
| 0.6272   | 0.02465  | 0.59518  | -0.04206 | 0.36443  | -0.01525 | 0.74242  | -0.03505 | 0.44985  |
| 0.00835  | 0.209772 | 4.83E-06 | 0.184649 | 5.97E-05 | 0.230615 | 4.70E-07 | 0.214498 | 2.90E-06 |
| 8.13E-07 | 0.212131 | 3.75E-06 | 0.299958 | 3.65E-11 | 0.277583 | 1.04E-09 | 0.276855 | 1.16E-09 |
| 0.42666  | 0.077236 | 0.0955   | 0.063197 | 0.17275  | 0.069273 | 0.13497  | 0.066477 | 0.15148  |
| 0.63355  | 0.061123 | 0.18731  | 0.060867 | 0.18917  | 0.111561 | 0.01587  | 0.084888 | 0.06683  |
| 0.72508  | 0.090448 | 0.05078  | -0.00774 | 0.86758  | 0.017927 | 0.69921  | 0.086574 | 0.06157  |
| 0.0177   | 0.027071 | 0.55952  | 0.038074 | 0.41172  | 0.064854 | 0.16174  | -0.04839 | 0.29674  |
| 0.15839  | -0.02982 | 0.52036  | -0.01669 | 0.71911  | 0.041695 | 0.36865  | 0.004965 | 0.91479  |

|          |          |          |          |          |          |          |          |          |
|----------|----------|----------|----------|----------|----------|----------|----------|----------|
| 0.07408  | 0.183613 | 6.57E-05 | 0.167235 | 0.00028  | 0.306672 | 1.26E-11 | 0.073992 | 0.11029  |
| 0.0001   | -0.01731 | 0.70906  | -0.03499 | 0.45065  | 0.030525 | 0.51052  | -0.0635  | 0.17071  |
| 0.48552  | 0.038629 | 0.40493  | 0.095858 | 0.03838  | 0.130672 | 0.00468  | 0.010018 | 0.82906  |
| 0.36114  | 0.099006 | 0.03243  | 0.109137 | 0.01831  | 0.14208  | 0.00209  | 0.110444 | 0.01696  |
| 0.83516  | 0.067667 | 0.14428  | 0.096392 | 0.03731  | 0.113243 | 0.01434  | 0.098872 | 0.03267  |
| 0.41978  | 0.048916 | 0.29148  | 0.007323 | 0.87459  | 0.08045  | 0.08244  | 0.111657 | 0.01578  |
| 0.02045  | 0.020679 | 0.65579  | 0.037378 | 0.42032  | 0.0995   | 0.03157  | -0.02111 | 0.64902  |
| 8.12E-07 | 0.068158 | 0.14138  | 0.084085 | 0.06946  | 0.215434 | 2.62E-06 | -0.05813 | 0.2099   |
| 0.00949  | -0.0079  | 0.86485  | -0.00568 | 0.90256  | 0.045569 | 0.3258   | -0.02398 | 0.60516  |
| 0.01271  | 0.03031  | 0.51349  | 0.021534 | 0.64254  | 0.077339 | 0.09505  | -0.01287 | 0.78151  |
| 0.00482  | -0.12219 | 0.00821  | -0.03712 | 0.42356  | -0.01809 | 0.69655  | -0.06492 | 0.16133  |
| 0.0177   | 0.215844 | 2.51E-06 | 0.133997 | 0.00372  | 0.182594 | 7.23E-05 | 0.151431 | 0.00103  |
| 0.20639  | 0.049826 | 0.28258  | 0.026876 | 0.56236  | 0.051633 | 0.26548  | 0.004472 | 0.92322  |
| 0.97835  | 0.069324 | 0.13468  | -0.00596 | 0.89778  | -0.00314 | 0.946    | 0.041637 | 0.36932  |
| 0.01869  | 0.010723 | 0.81723  | 0.031614 | 0.49554  | 0.075351 | 0.10389  | 0.008873 | 0.84835  |
| 0.02428  | -0.00444 | 0.92368  | -0.02541 | 0.58382  | 0.062558 | 0.17715  | 0.002654 | 0.95438  |
| 0.87967  | 0.130914 | 0.0046   | 0.17049  | 0.00021  | 0.158253 | 0.0006   | 0.161018 | 0.00048  |
| 0.00997  | 0.09322  | 0.04406  | 0.130927 | 0.0046   | 0.234383 | 3.01E-07 | 0.003823 | 0.93433  |
| 0.59984  | -0.09507 | 0.04002  | -0.099   | 0.03244  | -0.06132 | 0.18592  | -0.01657 | 0.72101  |
| 0.00134  | 0.134276 | 0.00365  | 0.141395 | 0.00219  | 0.198986 | 1.48E-05 | 0.199978 | 1.34E-05 |
| 0.17782  | 0.241895 | 1.21E-07 | 0.208404 | 5.58E-06 | 0.266116 | 5.19E-09 | 0.141119 | 0.00224  |
| 0.00017  | 0.151542 | 0.00102  | 0.133269 | 0.00391  | 0.152111 | 0.00098  | 0.059006 | 0.20308  |
| 0.72302  | 0.005321 | 0.9087   | -0.01556 | 0.73732  | 0.028368 | 0.54086  | -0.00633 | 0.8914   |
| 0.3912   | 0.013268 | 0.77491  | -0.02216 | 0.63292  | 0.011546 | 0.80348  | -0.02926 | 0.52821  |
| 0.01083  | 0.135949 | 0.00324  | 0.002644 | 0.95456  | 0.111401 | 0.01602  | 0.021324 | 0.64578  |
| 0.99352  | 0.038444 | 0.40719  | 0.063382 | 0.1715   | 0.077318 | 0.09514  | 0.07157  | 0.12248  |
| 0.00714  | 0.006996 | 0.88015  | 0.062116 | 0.18024  | 0.111343 | 0.01608  | -0.02958 | 0.52376  |
| 0.03301  | 0.268798 | 3.59E-09 | 0.180998 | 8.37E-05 | 0.19991  | 1.35E-05 | 0.29511  | 7.73E-11 |
| 0.00114  | -0.08397 | 0.06984  | -0.04389 | 0.34399  | 0.046242 | 0.31869  | -0.06684 | 0.14928  |
| 1.62E-06 | 0.098213 | 0.03385  | 0.141505 | 0.00218  | 0.138284 | 0.00275  | 0.190229 | 3.51E-05 |
| 0.85321  | 0.093368 | 0.04373  | 0.093888 | 0.04256  | 0.120294 | 0.00927  | 0.049653 | 0.28426  |
| 0.37979  | 0.036266 | 0.43429  | 0.023066 | 0.61905  | 0.060728 | 0.19018  | 0.046449 | 0.31652  |
| 0.00192  | -0.01675 | 0.71807  | -0.00338 | 0.94199  | 0.076839 | 0.09721  | -0.0008  | 0.98627  |
| 0.0016   | 0.05287  | 0.25417  | 0.041256 | 0.37371  | 0.100704 | 0.02956  | 0.015765 | 0.73402  |
| 0.24826  | 0.003898 | 0.93304  | 0.077322 | 0.09512  | 0.069907 | 0.13142  | 0.013576 | 0.76982  |
| 0.36262  | 0.029023 | 0.53155  | 0.085534 | 0.06477  | 0.081237 | 0.07948  | 0.053091 | 0.25219  |
| 0.95193  | 0.083912 | 0.07003  | 0.049735 | 0.28347  | 0.067405 | 0.14584  | 0.082052 | 0.0765   |
| 0.86244  | 0.174496 | 0.00015  | 0.100148 | 0.03047  | 0.181794 | 7.78E-05 | 0.096051 | 0.03799  |
| 0.67369  | 0.030278 | 0.51395  | 0.04493  | 0.33263  | 0.06711  | 0.14761  | 0.03027  | 0.51406  |
| 0.31202  | 0.114792 | 0.01306  | 0.115009 | 0.01288  | 0.147618 | 0.00138  | 0.028396 | 0.54046  |
| 0.27926  | 0.127066 | 0.00596  | 0.090293 | 0.05118  | 0.167532 | 0.00028  | 0.118885 | 0.01013  |
| 0.72074  | 0.075564 | 0.10291  | 0.059033 | 0.20287  | 0.103416 | 0.02543  | 0.090745 | 0.05002  |
| 0.07712  | 0.089078 | 0.0544   | 0.040712 | 0.38005  | 0.087913 | 0.05764  | -0.01001 | 0.82927  |
| 0.02226  | 0.025481 | 0.58282  | -0.00688 | 0.88211  | 0.028986 | 0.53208  | 0.004248 | 0.92706  |
| 0.37427  | 0.086465 | 0.0619   | 0.115316 | 0.01264  | 0.179564 | 9.55E-05 | 0.095634 | 0.03884  |

|          |          |          |          |          |          |          |          |          |
|----------|----------|----------|----------|----------|----------|----------|----------|----------|
| 0.02982  | 0.008696 | 0.85133  | -0.03986 | 0.39005  | 0.038181 | 0.41041  | -0.00543 | 0.90689  |
| 0.03116  | 0.13881  | 0.00265  | 0.096189 | 0.03772  | 0.183734 | 6.50E-05 | 0.034224 | 0.46063  |
| 0.37081  | 0.058334 | 0.20828  | 0.081636 | 0.078    | 0.128933 | 0.00526  | 0.088645 | 0.05559  |
| 0.10515  | -0.01251 | 0.7874   | -0.03752 | 0.41852  | 0.06482  | 0.16197  | 0.042364 | 0.36101  |
| 0.56466  | -0.04748 | 0.30588  | -0.04307 | 0.35306  | -0.00029 | 0.99493  | -0.02221 | 0.63212  |
| 0.92342  | -0.02677 | 0.56386  | 0.010246 | 0.82523  | 0.01131  | 0.80741  | -0.00485 | 0.91672  |
| 0.00023  | 0.047213 | 0.30862  | 0.125982 | 0.00641  | 0.1755   | 0.00014  | 0.090491 | 0.05067  |
| 0.10356  | -0.0319  | 0.49159  | -0.00161 | 0.97229  | 0.05687  | 0.21995  | 0.015545 | 0.73759  |
| 0.82334  | 0.14359  | 0.00187  | 0.069304 | 0.1348   | 0.218667 | 1.84E-06 | 0.148417 | 0.0013   |
| 0.52494  | 0.042281 | 0.36195  | 0.036578 | 0.43034  | 0.021125 | 0.64886  | 0.078299 | 0.09101  |
| 0.93811  | 0.068624 | 0.13868  | -0.02901 | 0.53174  | 0.07892  | 0.08846  | 0.083569 | 0.07119  |
| 0.64044  | 0.067895 | 0.14292  | 0.024868 | 0.59192  | -0.03316 | 0.47467  | 0.148389 | 0.0013   |
| 3.29E-05 | -0.07377 | 0.11136  | -0.02434 | 0.59986  | -0.00646 | 0.88934  | -0.08055 | 0.08204  |
| 0.79213  | 0.016894 | 0.71576  | 0.017551 | 0.70522  | 0.066645 | 0.15045  | 0.020209 | 0.66314  |
| 7.48E-07 | 0.048117 | 0.29944  | 0.066981 | 0.1484   | 0.127799 | 0.00568  | -0.01047 | 0.82151  |
| 0.69085  | -0.0007  | 0.9879   | 0.051453 | 0.26715  | 0.039042 | 0.39992  | 0.120359 | 0.00923  |
| 0.31796  | 0.039552 | 0.39379  | 0.054591 | 0.23902  | 0.045736 | 0.32402  | 0.000146 | 0.99749  |
| 0.00274  | 0.10093  | 0.0292   | 0.090669 | 0.05021  | 0.225488 | 8.51E-07 | 0.052542 | 0.25714  |
| 0.00143  | 0.126175 | 0.00633  | 0.180776 | 8.55E-05 | 0.279652 | 7.74E-10 | 0.048481 | 0.29579  |
| 0.88513  | 0.093182 | 0.04415  | 0.069472 | 0.13385  | 0.143358 | 0.0019   | 0.057329 | 0.21624  |
| 0.52833  | 0.04818  | 0.29881  | 0.044856 | 0.33343  | 0.144063 | 0.0018   | 0.052472 | 0.25778  |
| 1.36E-11 | -0.13015 | 0.00485  | -0.09121 | 0.04885  | -0.06719 | 0.14714  | -0.31566 | 2.90E-12 |
| 0.6335   | -0.14812 | 0.00133  | -0.07369 | 0.11175  | -0.07691 | 0.09689  | -0.02758 | 0.55214  |
| 1.09E-13 | 0.234007 | 3.14E-07 | 0.260766 | 1.07E-08 | 0.151145 | 0.00105  | 0.172344 | 0.00018  |
| 2.47E-11 | 0.075344 | 0.10392  | 0.039679 | 0.39227  | 0.064197 | 0.16604  | -0.18052 | 8.75E-05 |
| 0.00191  | 0.135565 | 0.00333  | 0.091064 | 0.04922  | 0.090515 | 0.0506   | -0.00595 | 0.898    |
| 7.09E-08 | 0.171408 | 0.0002   | 0.063414 | 0.17129  | 0.092307 | 0.04619  | 0.221455 | 1.34E-06 |
| 0.04959  | 0.104561 | 0.02384  | 0.078019 | 0.09217  | 0.101612 | 0.02812  | -0.11426 | 0.01349  |
| 0.104    | 0.317904 | 1.99E-12 | 0.230393 | 4.82E-07 | 0.191577 | 3.08E-05 | 0.078588 | 0.08981  |
| 0.82321  | 0.08324  | 0.07231  | 0.043923 | 0.34359  | 0.05603  | 0.22685  | 0.094883 | 0.04041  |
| 0.24753  | -0.02112 | 0.64891  | 0.072778 | 0.11627  | 0.052878 | 0.2541   | -0.13771 | 0.00286  |
| 0.04371  | -0.12837 | 0.00547  | -0.08891 | 0.05486  | -0.16638 | 0.0003   | -0.19029 | 3.49E-05 |
| 0.32709  | -0.0008  | 0.98617  | 0.060699 | 0.1904   | 0.012735 | 0.78372  | -0.02024 | 0.66262  |
| 0.00762  | -0.21674 | 2.27E-06 | -0.03553 | 0.44367  | -0.03415 | 0.46162  | 0.01138  | 0.80625  |
| 0.92645  | 0.080169 | 0.08352  | 0.014517 | 0.75436  | 0.002544 | 0.95627  | -0.06471 | 0.16267  |
| 0.40982  | -0.13504 | 0.00346  | -0.03721 | 0.42246  | -0.10871 | 0.01878  | -0.08198 | 0.07676  |
| 5.90E-07 | -0.04091 | 0.37771  | -0.01053 | 0.8204   | -0.03294 | 0.47765  | -0.12399 | 0.00731  |
| 0.41433  | -0.19641 | 1.91E-05 | -0.10897 | 0.0185   | -0.12535 | 0.00668  | -0.16209 | 0.00044  |
| 0.02356  | -0.30879 | 8.94E-12 | -0.13137 | 0.00446  | -0.24431 | 8.96E-08 | -0.21659 | 2.31E-06 |
| 0.14803  | -0.27802 | 9.78E-10 | -0.04342 | 0.34915  | -0.13123 | 0.0045   | -0.27155 | 2.45E-09 |
| 0.06132  | -0.12803 | 0.00559  | -0.03134 | 0.49922  | -0.11872 | 0.01023  | -0.2891  | 1.92E-10 |
| 1.43E-11 | -0.33495 | 1.05E-13 | -0.23676 | 2.26E-07 | -0.27108 | 2.61E-09 | -0.46198 | 4.57E-26 |
| 1.12E-05 | 0.193452 | 2.56E-05 | 0.206223 | 7.02E-06 | 0.119396 | 0.00981  | 0.121343 | 0.00867  |
| 0.75898  | 0.05144  | 0.26726  | -0.07972 | 0.08529  | -0.10268 | 0.0265   | -0.15925 | 0.00055  |
| 4.92E-06 | 0.070402 | 0.12871  | 0.188161 | 4.28E-05 | 0.106885 | 0.02087  | -0.0483  | 0.29765  |

|          |          |          |          |          |          |          |          |          |
|----------|----------|----------|----------|----------|----------|----------|----------|----------|
| 6.71E-11 | -0.21524 | 2.68E-06 | -0.15732 | 0.00065  | -0.16746 | 0.00028  | -0.25824 | 1.50E-08 |
| 9.38E-14 | 0.002834 | 0.9513   | 0.066544 | 0.15107  | 0.1135   | 0.01412  | -0.21534 | 2.65E-06 |
| 0.01586  | -0.26146 | 9.75E-09 | -0.07436 | 0.10851  | -0.13973 | 0.00248  | 0.015754 | 0.73419  |
| 1.07E-09 | 0.015908 | 0.73169  | -0.09238 | 0.04601  | -0.03555 | 0.44343  | -0.25644 | 1.90E-08 |
| 1.95E-11 | 0.238907 | 1.74E-07 | 0.019807 | 0.66943  | -0.06572 | 0.15618  | 0.016481 | 0.72241  |
| 0.00493  | 0.152043 | 0.00098  | 0.052898 | 0.25392  | -0.0004  | 0.99306  | -0.03116 | 0.50175  |
| 0.0377   | 0.049274 | 0.28796  | -0.03025 | 0.51428  | -0.09011 | 0.05165  | -0.08421 | 0.06904  |
| 0.45032  | -0.05191 | 0.26289  | -0.11369 | 0.01396  | -0.10188 | 0.02771  | 0.128087 | 0.00557  |
| 3.99E-06 | 0.093729 | 0.04292  | 0.068554 | 0.13908  | 0.113031 | 0.01453  | 0.273976 | 1.74E-09 |
| 0.01396  | -0.0893  | 0.05381  | 0.002977 | 0.94884  | -0.12969 | 0.005    | -0.1681  | 0.00026  |
| 4.42E-15 | -0.17342 | 0.00017  | -0.21148 | 4.02E-06 | -0.18103 | 8.35E-05 | -0.46571 | 1.62E-26 |
| 1.19E-06 | -0.21718 | 2.17E-06 | -0.09208 | 0.04672  | -0.16387 | 0.00038  | -0.22995 | 5.07E-07 |
| 0.19823  | -0.1769  | 0.00012  | -0.0367  | 0.42877  | -0.07881 | 0.08893  | 0.116672 | 0.01163  |
| 1.38E-12 | -0.12082 | 0.00896  | 0.001684 | 0.97104  | 0.038589 | 0.40542  | -0.05701 | 0.21882  |
| 3.53E-05 | 0.003009 | 0.94829  | -0.09356 | 0.04329  | -0.07984 | 0.08482  | -0.23878 | 1.77E-07 |
| 8.08E-12 | 0.198693 | 1.52E-05 | 0.117719 | 0.0109   | -0.00833 | 0.85754  | 0.115614 | 0.01241  |
| 0.06899  | 0.008309 | 0.85787  | 0.185491 | 5.51E-05 | 0.137763 | 0.00285  | -0.04483 | 0.33374  |
| 0.85974  | -0.06502 | 0.16066  | 0.053356 | 0.24983  | -0.07262 | 0.11706  | 0.091483 | 0.04818  |
| 7.79E-46 | -0.27343 | 1.88E-09 | -0.32356 | 7.66E-13 | -0.23957 | 1.61E-07 | -0.49842 | 1.08E-30 |
| 2.35E-28 | -0.15407 | 0.00084  | -0.20615 | 7.08E-06 | -0.1015  | 0.0283   | -0.32153 | 1.08E-12 |
| 3.26E-11 | 0.315847 | 2.81E-12 | 0.255017 | 2.29E-08 | 0.322689 | 8.89E-13 | 0.003398 | 0.94162  |
| 0.0112   | 0.071795 | 0.1213   | -0.02459 | 0.59608  | -0.04302 | 0.35356  | -0.0151  | 0.74481  |
| 0.00064  | -0.18972 | 3.69E-05 | -0.16452 | 0.00036  | -0.22811 | 6.29E-07 | -0.26962 | 3.20E-09 |
| 0.01995  | -0.20917 | 5.15E-06 | -0.17042 | 0.00022  | -0.22471 | 9.30E-07 | -0.33215 | 1.72E-13 |
| 0.68354  | -0.19642 | 1.91E-05 | 0.029644 | 0.52279  | -0.0969  | 0.03633  | -0.08268 | 0.07428  |
| 0.31133  | -0.00943 | 0.83892  | -0.03456 | 0.45622  | -0.05706 | 0.21842  | -0.2253  | 8.69E-07 |
| 0.00044  | -0.07021 | 0.12977  | -0.19917 | 1.45E-05 | -0.2142  | 3.00E-06 | -0.29968 | 3.81E-11 |
| 9.59E-10 | -0.30248 | 2.45E-11 | -0.30386 | 1.97E-11 | -0.37408 | 5.86E-17 | -0.46963 | 5.41E-27 |
| 7.33E-08 | -0.25736 | 1.68E-08 | -0.08518 | 0.06588  | -0.18791 | 4.38E-05 | -0.37586 | 4.06E-17 |
| 0.01759  | 0.058304 | 0.20852  | -0.1009  | 0.02925  | -0.09622 | 0.03766  | -0.24431 | 8.96E-08 |
| 0.00644  | 0.10396  | 0.02466  | 0.070562 | 0.12784  | 0.031419 | 0.49821  | -0.06814 | 0.14148  |
| 0.05459  | 0.12648  | 0.0062   | 0.137148 | 0.00298  | 0.093862 | 0.04262  | 0.007841 | 0.8658   |
| 2.60E-17 | -0.29811 | 4.86E-11 | -0.2582  | 1.50E-08 | -0.32383 | 7.32E-13 | -0.53298 | 1.25E-35 |
| 9.62E-25 | -0.29869 | 4.44E-11 | -0.25986 | 1.21E-08 | -0.2309  | 4.54E-07 | -0.45471 | 3.30E-25 |
| 2.36E-06 | -0.15948 | 0.00054  | -0.26708 | 4.55E-09 | -0.23328 | 3.43E-07 | -0.36244 | 6.06E-16 |
| 0.39995  | 0.057865 | 0.21197  | 0.100483 | 0.02992  | 0.097822 | 0.03457  | -0.03062 | 0.50918  |
| 0.00015  | 0.296168 | 6.57E-11 | 0.199724 | 1.37E-05 | 0.153881 | 0.00085  | 0.064724 | 0.16259  |
| 0.00734  | 0.09943  | 0.03169  | -0.03188 | 0.49193  | -0.04755 | 0.30513  | -0.01346 | 0.77172  |
| 0.05736  | -0.02293 | 0.62117  | -0.10587 | 0.02213  | -0.0578  | 0.21247  | -0.21598 | 2.47E-06 |
| 5.47E-05 | -0.26378 | 7.12E-09 | -0.23347 | 3.35E-07 | -0.25913 | 1.33E-08 | -0.31408 | 3.77E-12 |
| 0.2056   | 0.147543 | 0.00139  | -0.01623 | 0.72646  | 0.009635 | 0.8355   | -0.13993 | 0.00244  |
| 0.19434  | -0.04025 | 0.38553  | -0.02518 | 0.58724  | -0.09392 | 0.0425   | -0.07725 | 0.09545  |
| 0.00244  | -0.26343 | 7.47E-09 | -0.15924 | 0.00055  | -0.22785 | 6.48E-07 | -0.3204  | 1.31E-12 |
| 1.02E-06 | -0.11556 | 0.01246  | -0.22118 | 1.39E-06 | -0.21223 | 3.71E-06 | -0.38301 | 9.14E-18 |
| 5.27E-41 | -0.46336 | 3.12E-26 | -0.38991 | 2.09E-18 | -0.40912 | 2.86E-20 | -0.60491 | 6.09E-48 |

|          |          |          |          |          |          |          |          |          |
|----------|----------|----------|----------|----------|----------|----------|----------|----------|
| 2.13E-06 | -0.20895 | 5.27E-06 | -0.24904 | 4.93E-08 | -0.30096 | 3.12E-11 | -0.39399 | 8.60E-19 |
| 0.01675  | -0.25108 | 3.80E-08 | -0.17966 | 9.47E-05 | -0.31415 | 3.72E-12 | -0.32412 | 6.96E-13 |
| 0.00012  | -0.02602 | 0.57494  | -0.02648 | 0.56806  | -0.0416  | 0.36976  | -0.15797 | 0.00061  |
| 0.00124  | 0.004058 | 0.9303   | -0.08913 | 0.05425  | -0.05949 | 0.19941  | -0.24182 | 1.22E-07 |
| 2.11E-08 | -0.07996 | 0.08435  | -0.16177 | 0.00045  | -0.16045 | 0.0005   | -0.35103 | 5.47E-15 |
| 0.13504  | -0.03317 | 0.47461  | -0.11504 | 0.01286  | -0.13683 | 0.00305  | -0.26874 | 3.62E-09 |
| 3.74E-13 | -0.18828 | 4.23E-05 | -0.27904 | 8.45E-10 | -0.28652 | 2.83E-10 | -0.45528 | 2.83E-25 |
| 0.00018  | 0.067851 | 0.14319  | 0.020851 | 0.65312  | 0.073672 | 0.11184  | -0.13305 | 0.00397  |
| 3.35E-13 | -0.38618 | 4.66E-18 | -0.32411 | 6.98E-13 | -0.41262 | 1.27E-20 | -0.47969 | 3.02E-28 |
| 4.82E-07 | 0.07229  | 0.11875  | -0.14321 | 0.00192  | -0.06901 | 0.13644  | -0.27352 | 1.86E-09 |
| 3.08E-06 | -0.10143 | 0.02841  | -0.13148 | 0.00443  | -0.11616 | 0.01201  | -0.22536 | 8.64E-07 |
| 0.07843  | -0.26581 | 5.41E-09 | -0.22561 | 8.39E-07 | -0.32197 | 1.00E-12 | -0.40557 | 6.45E-20 |
| 2.29E-19 | -0.16914 | 0.00024  | -0.22741 | 6.82E-07 | -0.14887 | 0.00125  | -0.36952 | 1.48E-16 |
| 1.74E-09 | -0.1947  | 2.27E-05 | -0.17783 | 0.00011  | -0.15906 | 0.00056  | -0.281   | 6.36E-10 |
| 1.07E-14 | -0.17237 | 0.00018  | -0.2201  | 1.57E-06 | -0.14175 | 0.00214  | -0.39706 | 4.37E-19 |
| 0.22988  | 0.177937 | 0.00011  | -0.01188 | 0.79799  | 0.011681 | 0.80123  | -0.07845 | 0.09037  |
| 0.38944  | 0.038512 | 0.40635  | -0.05621 | 0.22539  | -0.07847 | 0.0903   | -0.19862 | 1.53E-05 |
| 0.01267  | -0.10534 | 0.0228   | -0.06626 | 0.15284  | -0.12596 | 0.00642  | -0.11444 | 0.01334  |
| 0.46532  | 0.118939 | 0.0101   | 0.078759 | 0.08912  | 0.040914 | 0.37769  | -0.15066 | 0.00109  |
| 0.01753  | 0.221532 | 1.33E-06 | 0.074123 | 0.10966  | 0.055028 | 0.23527  | -0.01767 | 0.70335  |
| 0.3425   | 0.083811 | 0.07037  | 0.096162 | 0.03777  | 0.053465 | 0.24886  | 0.032444 | 0.48428  |
| 0.0109   | -0.27098 | 2.65E-09 | -0.21274 | 3.52E-06 | -0.32799 | 3.57E-13 | -0.3505  | 6.05E-15 |
| 0.00804  | 0.231075 | 4.45E-07 | 0.099362 | 0.03181  | 0.078822 | 0.08886  | -0.06491 | 0.16139  |
| 4.46E-06 | -0.42859 | 2.75E-22 | -0.31009 | 7.24E-12 | -0.37053 | 1.21E-16 | -0.3624  | 6.11E-16 |
| 1.35E-20 | -0.46379 | 2.77E-26 | -0.45139 | 8.00E-25 | -0.44216 | 8.96E-24 | -0.57238 | 5.36E-42 |
| 1.13E-28 | -0.43339 | 8.32E-23 | -0.41785 | 3.69E-21 | -0.4081  | 3.61E-20 | -0.59754 | 1.55E-46 |
| 3.11E-13 | -0.10519 | 0.02301  | -0.14979 | 0.00117  | -0.14204 | 0.00209  | -0.31717 | 2.26E-12 |
| 3.88E-18 | -0.30628 | 1.34E-11 | -0.13671 | 0.00307  | -0.22985 | 5.14E-07 | -0.48662 | 3.90E-29 |
| 3.05E-05 | -0.26518 | 5.90E-09 | -0.1347  | 0.00354  | -0.13733 | 0.00294  | -0.19353 | 2.54E-05 |
| 0.75902  | -0.11094 | 0.01647  | -0.08078 | 0.08118  | -0.09921 | 0.03207  | -0.22858 | 5.96E-07 |
| 2.72E-11 | -0.35831 | 1.36E-15 | -0.27681 | 1.16E-09 | -0.31698 | 2.33E-12 | -0.46991 | 5.00E-27 |
| 0.01494  | -0.04661 | 0.31483  | -0.07171 | 0.12175  | -0.06575 | 0.15599  | -0.1767  | 0.00012  |
| 0.02014  | -0.03336 | 0.47207  | -0.10422 | 0.02431  | -0.10587 | 0.02213  | -0.24286 | 1.07E-07 |
| 1.65E-16 | -0.17592 | 0.00013  | -0.16691 | 0.00029  | -0.18277 | 7.11E-05 | -0.35855 | 1.30E-15 |
| 2.52E-19 | -0.20576 | 7.37E-06 | -0.19826 | 1.59E-05 | -0.16339 | 0.00039  | -0.41391 | 9.37E-21 |
| 1.68E-16 | -0.41504 | 7.19E-21 | -0.39306 | 1.06E-18 | -0.45346 | 4.61E-25 | -0.49256 | 6.51E-30 |
| 0.00026  | 0.128552 | 0.0054   | -0.08753 | 0.05873  | -0.01653 | 0.72165  | -0.18576 | 5.37E-05 |
| 0.36603  | 0.061752 | 0.18281  | 0.009596 | 0.83614  | -0.0033  | 0.94331  | -0.11806 | 0.01067  |
| 0.01073  | 0.064307 | 0.16532  | -0.09294 | 0.04471  | -0.07484 | 0.10625  | -0.1945  | 2.31E-05 |
| 1.50E-06 | 0.278339 | 9.35E-10 | 0.158821 | 0.00057  | 0.142543 | 0.00202  | 0.056432 | 0.22353  |
| 9.18E-09 | -0.22289 | 1.14E-06 | -0.28292 | 4.81E-10 | -0.2376  | 2.04E-07 | -0.32147 | 1.09E-12 |
| 0.05802  | 0.028533 | 0.53851  | 0.052374 | 0.25866  | 0.053587 | 0.24778  | 0.122362 | 0.00812  |
| 0.00022  | -0.11961 | 0.00968  | -0.0439  | 0.34389  | -0.01483 | 0.74926  | -0.20103 | 1.20E-05 |
| 1.65E-16 | -0.50961 | 3.13E-32 | -0.36615 | 2.91E-16 | -0.45894 | 1.05E-25 | -0.53008 | 3.41E-35 |
| 8.16E-07 | -0.26212 | 8.92E-09 | -0.1256  | 0.00657  | -0.14676 | 0.00147  | -0.26506 | 5.99E-09 |

|          |          |          |          |          |          |          |          |          |
|----------|----------|----------|----------|----------|----------|----------|----------|----------|
| 3.44E-16 | -0.31931 | 1.57E-12 | -0.27065 | 2.77E-09 | -0.29963 | 3.84E-11 | -0.44192 | 9.54E-24 |
| 8.10E-05 | 0.152728 | 0.00093  | 0.148652 | 0.00127  | 0.090988 | 0.0494   | 0.041864 | 0.3667   |
| 0.39103  | -0.14524 | 0.00165  | -0.10586 | 0.02214  | -0.18711 | 4.73E-05 | -0.26386 | 7.05E-09 |
| 3.31E-20 | -0.46167 | 4.97E-26 | -0.12458 | 0.00703  | -0.27744 | 1.06E-09 | -0.45464 | 3.36E-25 |
| 0.43766  | -0.03324 | 0.4736   | -0.0563  | 0.22461  | -0.11939 | 0.00981  | -0.19483 | 2.24E-05 |
| 0.15484  | 0.230087 | 5.00E-07 | 0.022857 | 0.62223  | 0.045404 | 0.32755  | -0.01105 | 0.8117   |
| 0.00026  | -0.09087 | 0.0497   | -0.12252 | 0.00804  | -0.14885 | 0.00125  | -0.3342  | 1.20E-13 |
| 1.01E-11 | -0.33489 | 1.06E-13 | -0.24398 | 9.33E-08 | -0.32566 | 5.34E-13 | -0.47046 | 4.28E-27 |
| 1.58E-14 | -0.28043 | 6.91E-10 | -0.28554 | 3.27E-10 | -0.30726 | 1.14E-11 | -0.44967 | 1.26E-24 |
| 0.07855  | 0.188983 | 3.95E-05 | 0.139956 | 0.00243  | 0.046736 | 0.31354  | 0.018789 | 0.68549  |
| 0.20881  | -0.17139 | 0.0002   | -0.1044  | 0.02406  | -0.12119 | 0.00875  | -0.02868 | 0.53646  |
| 0.03384  | -0.35763 | 1.55E-15 | -0.21636 | 2.37E-06 | -0.3206  | 1.27E-12 | -0.11713 | 0.0113   |
| 0.04316  | 0.021974 | 0.63575  | 0.088945 | 0.05476  | 0.032982 | 0.47707  | -0.14146 | 0.00218  |
| 0.63619  | 0.088372 | 0.05635  | 0.152283 | 0.00096  | 0.031951 | 0.49095  | -0.08998 | 0.052    |
| 0.00246  | -0.0389  | 0.40159  | 0.047161 | 0.30915  | -0.03757 | 0.41798  | -0.08357 | 0.07117  |
| 0.36267  | -0.27743 | 1.07E-09 | -0.1613  | 0.00047  | -0.2385  | 1.83E-07 | 0.06578  | 0.15582  |
| 0.13021  | -0.22821 | 6.22E-07 | -0.06622 | 0.15308  | -0.13267 | 0.00408  | -0.19789 | 1.65E-05 |
| 1.32E-10 | 0.16812  | 0.00026  | 0.000817 | 0.98596  | -0.06557 | 0.15714  | -0.0425  | 0.35951  |
| 9.96E-41 | -0.49097 | 1.06E-29 | -0.34216 | 2.85E-14 | -0.34183 | 3.03E-14 | -0.56407 | 1.39E-40 |
| 0.00959  | -0.09869 | 0.03299  | -0.14182 | 0.00213  | -0.15983 | 0.00053  | -0.27475 | 1.56E-09 |
| 7.58E-11 | -0.00212 | 0.96348  | -0.08915 | 0.0542   | -0.03503 | 0.4501   | -0.22291 | 1.14E-06 |
| 0.02473  | -0.09002 | 0.05188  | -0.14832 | 0.00131  | -0.17055 | 0.00021  | -0.27311 | 1.96E-09 |
| 0.48429  | 0.119218 | 0.00992  | 0.140241 | 0.00239  | 0.077885 | 0.09273  | -0.01869 | 0.68707  |
| 8.60E-23 | -0.39049 | 1.84E-18 | -0.13399 | 0.00372  | -0.23878 | 1.77E-07 | -0.39065 | 1.78E-18 |
| 4.14E-05 | 0.22784  | 6.49E-07 | 0.210906 | 4.28E-06 | 0.225757 | 8.25E-07 | -0.02902 | 0.53153  |
| 1.03E-09 | -0.06154 | 0.18432  | -0.03692 | 0.42604  | -0.02534 | 0.58495  | -0.07559 | 0.10279  |
| 6.31E-23 | -0.10896 | 0.01851  | -0.21411 | 3.03E-06 | -0.25775 | 1.60E-08 | -0.32901 | 2.99E-13 |
| 4.24E-27 | -0.32997 | 2.52E-13 | -0.3092  | 8.37E-12 | -0.21227 | 3.70E-06 | -0.34904 | 7.96E-15 |
| 4.31E-28 | -0.3696  | 1.46E-16 | -0.2125  | 3.61E-06 | -0.20973 | 4.85E-06 | -0.32828 | 3.39E-13 |
| 0.06288  | 0.028604 | 0.53749  | 0.055939 | 0.2276   | 0.021697 | 0.64002  | 0.033265 | 0.47329  |
| 4.86E-15 | -0.42393 | 8.58E-22 | -0.3635  | 4.92E-16 | -0.45344 | 4.63E-25 | -0.40403 | 9.16E-20 |
| 3.55E-41 | -0.40307 | 1.14E-19 | -0.33707 | 7.17E-14 | -0.35581 | 2.20E-15 | -0.38952 | 2.27E-18 |
| 4.79E-20 | -0.20476 | 8.18E-06 | -0.14034 | 0.00237  | -0.16428 | 0.00036  | -0.26153 | 9.65E-09 |
| 2.50E-28 | 0.283629 | 4.33E-10 | 0.331477 | 1.94E-13 | 0.23825  | 1.89E-07 | 0.264781 | 6.22E-09 |
| 3.37E-09 | -0.436   | 4.31E-23 | -0.2983  | 4.72E-11 | -0.36621 | 2.88E-16 | -0.23715 | 2.16E-07 |
| 7.94E-12 | -0.26496 | 6.07E-09 | -0.20414 | 8.73E-06 | -0.2911  | 1.43E-10 | -0.23862 | 1.80E-07 |
| 8.69E-22 | -0.16006 | 0.00052  | -0.09887 | 0.03267  | -0.18544 | 5.54E-05 | -0.24561 | 7.62E-08 |
| 7.15E-14 | -0.4395  | 1.78E-23 | -0.27813 | 9.64E-10 | -0.33728 | 6.90E-14 | -0.29456 | 8.41E-11 |
| 2.82E-44 | -0.29289 | 1.09E-10 | -0.21473 | 2.83E-06 | -0.23107 | 4.45E-07 | -0.37526 | 4.60E-17 |
| 1.31E-21 | -0.29877 | 4.39E-11 | -0.30388 | 1.96E-11 | -0.3064  | 1.31E-11 | -0.33988 | 4.32E-14 |
| 1.16E-11 | -0.42311 | 1.05E-21 | -0.25926 | 1.31E-08 | -0.30043 | 3.38E-11 | -0.27543 | 1.42E-09 |
| 3.71E-18 | -0.29766 | 5.21E-11 | -0.25563 | 2.11E-08 | -0.22031 | 1.53E-06 | -0.22143 | 1.35E-06 |
| 1.40E-05 | -0.03114 | 0.50203  | -0.03429 | 0.45973  | -0.10398 | 0.02463  | -0.09192 | 0.04712  |
| 4.58E-17 | -0.31639 | 2.57E-12 | -0.19834 | 1.58E-05 | -0.253   | 2.97E-08 | -0.3345  | 1.14E-13 |
| 0.68429  | -0.40289 | 1.19E-19 | -0.23123 | 4.37E-07 | -0.33703 | 7.22E-14 | -0.15335 | 0.00088  |

|          |          |          |          |          |          |          |          |          |
|----------|----------|----------|----------|----------|----------|----------|----------|----------|
| 2.27E-38 | -0.53154 | 2.06E-35 | -0.44885 | 1.57E-24 | -0.4927  | 6.25E-30 | -0.49744 | 1.46E-30 |
| 0.00463  | 0.261351 | 9.89E-09 | 0.101545 | 0.02822  | 0.104481 | 0.02395  | 0.007039 | 0.87942  |
| 3.80E-09 | 0.056054 | 0.22664  | 0.042722 | 0.35695  | 0.034576 | 0.45602  | -0.01544 | 0.73925  |
| 1.19E-18 | -0.20572 | 7.40E-06 | -0.31714 | 2.27E-12 | -0.35803 | 1.44E-15 | -0.33313 | 1.45E-13 |
| 8.87E-20 | 0.019911 | 0.66781  | -0.08411 | 0.06937  | -0.0406  | 0.3814   | -0.19066 | 3.37E-05 |
| 4.82E-25 | -0.48128 | 1.90E-28 | -0.28635 | 2.90E-10 | -0.32333 | 7.97E-13 | -0.27684 | 1.16E-09 |
| 2.35E-14 | -0.38957 | 2.25E-18 | -0.23195 | 4.01E-07 | -0.23252 | 3.75E-07 | -0.31184 | 5.45E-12 |
| 2.82E-05 | -0.07449 | 0.10792  | -0.11491 | 0.01296  | -0.08845 | 0.05612  | -0.10819 | 0.01935  |
| 1.69E-06 | -0.41739 | 4.12E-21 | -0.23525 | 2.71E-07 | -0.32706 | 4.19E-13 | -0.14648 | 0.0015   |
| 3.37E-09 | -0.34537 | 1.58E-14 | -0.02441 | 0.59877  | -0.14299 | 0.00195  | -0.20123 | 1.18E-05 |
| 9.68E-13 | -0.27413 | 1.70E-09 | -0.27359 | 1.84E-09 | -0.3445  | 1.85E-14 | -0.30666 | 1.26E-11 |
| 6.89E-14 | -0.27485 | 1.54E-09 | -0.16944 | 0.00023  | -0.18543 | 5.54E-05 | -0.2695  | 3.25E-09 |
| 1.32E-26 | -0.31375 | 3.98E-12 | -0.13287 | 0.00402  | -0.07298 | 0.11525  | -0.29272 | 1.11E-10 |
| 6.73E-25 | -0.45391 | 4.08E-25 | -0.32127 | 1.13E-12 | -0.3555  | 2.34E-15 | -0.39096 | 1.67E-18 |
| 2.75E-16 | -0.39685 | 4.57E-19 | -0.14851 | 0.00129  | -0.24164 | 1.25E-07 | -0.25471 | 2.38E-08 |
| 4.05E-05 | -0.28192 | 5.56E-10 | -0.06583 | 0.15549  | -0.15094 | 0.00107  | -0.07685 | 0.09716  |
| 0.06913  | 0.207856 | 5.92E-06 | 0.060253 | 0.19368  | -0.00072 | 0.9876   | 0.091126 | 0.04906  |
| 2.82E-18 | -0.27904 | 8.45E-10 | -0.19604 | 1.99E-05 | -0.22803 | 6.34E-07 | -0.30732 | 1.13E-11 |
| 2.79E-10 | -0.02851 | 0.53884  | 0.030262 | 0.51417  | -0.04699 | 0.31093  | -0.03975 | 0.39141  |
| 7.73E-27 | -0.38791 | 3.22E-18 | -0.23053 | 4.74E-07 | -0.23965 | 1.59E-07 | -0.37141 | 1.01E-16 |
| 2.05E-17 | -0.39347 | 9.63E-19 | -0.3041  | 1.90E-11 | -0.32062 | 1.26E-12 | -0.34229 | 2.78E-14 |
| 7.90E-08 | -0.10135 | 0.02852  | 0.015816 | 0.73318  | -0.06429 | 0.16542  | -0.08715 | 0.05986  |
| 6.97E-15 | -0.39783 | 3.68E-19 | -0.33355 | 1.34E-13 | -0.41013 | 2.26E-20 | -0.33777 | 6.32E-14 |
| 9.50E-05 | -0.11601 | 0.01211  | -0.13244 | 0.00414  | -0.21901 | 1.77E-06 | -0.09885 | 0.0327   |
| 0.01013  | -0.10629 | 0.0216   | -0.02373 | 0.60905  | -0.09471 | 0.04077  | -0.0135  | 0.77111  |
| 1.03E-12 | -0.27258 | 2.12E-09 | -0.25577 | 2.07E-08 | -0.26185 | 9.25E-09 | -0.35227 | 4.32E-15 |
| 2.05E-20 | -0.14384 | 0.00183  | -0.0394  | 0.39567  | 0.014808 | 0.7496   | -0.16164 | 0.00045  |
| 1.44E-40 | -0.49375 | 4.53E-30 | -0.34448 | 1.86E-14 | -0.3385  | 5.54E-14 | -0.53178 | 1.90E-35 |
| 0.00312  | -0.17718 | 0.00012  | -0.14392 | 0.00182  | -0.20572 | 7.41E-06 | -0.02112 | 0.64898  |
| 3.64E-16 | -0.39166 | 1.43E-18 | -0.25648 | 1.89E-08 | -0.26882 | 3.58E-09 | -0.35588 | 2.17E-15 |
| 2.60E-14 | -0.36347 | 4.95E-16 | -0.19247 | 2.82E-05 | -0.30206 | 2.62E-11 | -0.32656 | 4.57E-13 |
| 1.06E-22 | -0.16502 | 0.00034  | -0.25934 | 1.29E-08 | -0.20786 | 5.91E-06 | -0.30348 | 2.09E-11 |
| 1.25E-19 | -0.26823 | 3.88E-09 | -0.24795 | 5.67E-08 | -0.28104 | 6.33E-10 | -0.3527  | 3.99E-15 |
| 5.62E-20 | -0.3285  | 3.26E-13 | -0.11599 | 0.01213  | -0.18803 | 4.33E-05 | -0.345   | 1.69E-14 |
| 3.06E-29 | -0.41727 | 4.24E-21 | -0.22449 | 9.54E-07 | -0.2464  | 6.89E-08 | -0.33911 | 4.96E-14 |
| 6.15E-20 | -0.35443 | 2.87E-15 | -0.32527 | 5.71E-13 | -0.34693 | 1.18E-14 | -0.35289 | 3.84E-15 |
| 2.94E-19 | -0.46342 | 3.07E-26 | -0.35092 | 5.58E-15 | -0.40186 | 1.49E-19 | -0.35373 | 3.28E-15 |
| 2.23E-14 | -0.14283 | 0.00197  | -0.05959 | 0.19862  | 0.002851 | 0.951    | -0.17555 | 0.00014  |
| 6.61E-07 | -0.10635 | 0.02153  | -0.23882 | 1.76E-07 | -0.29107 | 1.43E-10 | -0.15083 | 0.00108  |
| 4.40E-11 | -0.1519  | 0.00099  | 0.015959 | 0.73086  | -0.0513  | 0.2686   | -0.15341 | 0.00088  |
| 2.59E-11 | -0.1281  | 0.00557  | -0.03206 | 0.48943  | -0.08363 | 0.071    | -0.067   | 0.14831  |
| 7.91E-22 | -0.44344 | 6.45E-24 | -0.29818 | 4.81E-11 | -0.34448 | 1.86E-14 | -0.38949 | 2.29E-18 |
| 1.57E-34 | -0.4054  | 6.71E-20 | -0.38105 | 1.38E-17 | -0.38651 | 4.34E-18 | -0.47448 | 1.36E-27 |
| 1.21E-16 | -0.12955 | 0.00505  | 0.01794  | 0.69899  | 0.004301 | 0.92615  | -0.12287 | 0.00785  |
| 2.23E-08 | -0.18983 | 3.64E-05 | -0.10467 | 0.0237   | -0.16134 | 0.00046  | -0.13674 | 0.00307  |

|          |          |          |          |          |          |          |          |          |
|----------|----------|----------|----------|----------|----------|----------|----------|----------|
| 1.08E-21 | -0.27678 | 1.17E-09 | -0.31849 | 1.81E-12 | -0.29804 | 4.92E-11 | -0.34283 | 2.52E-14 |
| 0.00336  | -0.04009 | 0.38737  | -0.08332 | 0.07203  | -0.00888 | 0.84816  | -0.08468 | 0.0675   |
| 7.22E-17 | -0.46912 | 6.25E-27 | -0.40732 | 4.32E-20 | -0.46791 | 8.78E-27 | -0.30373 | 2.01E-11 |
| 1.04E-09 | 0.028599 | 0.53756  | 0.078142 | 0.09166  | 0.086244 | 0.06257  | -0.1052  | 0.023    |
| 1.32E-26 | -0.24671 | 6.63E-08 | -0.28493 | 3.58E-10 | -0.26923 | 3.38E-09 | -0.33371 | 1.31E-13 |
| 0.33373  | -0.33787 | 6.21E-14 | -0.19962 | 1.39E-05 | -0.34265 | 2.60E-14 | -0.0802  | 0.08341  |
| 1.53E-30 | -0.29583 | 6.92E-11 | -0.17792 | 0.00011  | -0.17795 | 0.00011  | -0.26018 | 1.16E-08 |
| 2.00E-10 | 0.150365 | 0.00112  | 0.012849 | 0.78182  | 0.031968 | 0.49073  | -0.09106 | 0.04924  |
| 0.00039  | -0.23361 | 3.30E-07 | 0.011385 | 0.80615  | -0.01498 | 0.74685  | -0.02767 | 0.5509   |
| 2.33E-12 | 0.067441 | 0.14562  | 0.000528 | 0.99091  | 0.032255 | 0.48683  | -0.06404 | 0.16707  |
| 9.19E-18 | -0.43261 | 1.01E-22 | -0.38639 | 4.46E-18 | -0.4792  | 3.48E-28 | -0.31895 | 1.67E-12 |
| 0.23481  | -0.32039 | 1.31E-12 | -0.14538 | 0.00163  | -0.28292 | 4.81E-10 | -0.13815 | 0.00277  |
| 8.62E-13 | -0.37699 | 3.22E-17 | -0.23883 | 1.76E-07 | -0.31241 | 4.96E-12 | -0.19329 | 2.60E-05 |
| 6.35E-31 | -0.44053 | 1.36E-23 | -0.3749  | 4.96E-17 | -0.43966 | 1.70E-23 | -0.51197 | 1.46E-32 |
| 6.18E-06 | -0.22526 | 8.74E-07 | -0.20782 | 5.94E-06 | -0.23637 | 2.37E-07 | -0.21316 | 3.36E-06 |
| 8.41E-12 | -0.10488 | 0.02341  | -0.114   | 0.0137   | -0.07952 | 0.08606  | -0.10999 | 0.01742  |
| 3.56E-27 | -0.16013 | 0.00051  | -0.00646 | 0.88927  | 0.016467 | 0.72264  | -0.21836 | 1.90E-06 |
| 2.64E-15 | 0.04984  | 0.28245  | 0.147565 | 0.00138  | 0.14149  | 0.00218  | -0.04249 | 0.35958  |
| 4.73E-05 | 0.136616 | 0.00309  | 0.267375 | 4.37E-09 | 0.222677 | 1.17E-06 | 0.132529 | 0.00412  |
| 7.22E-09 | 0.093766 | 0.04283  | 0.154321 | 0.00082  | 0.169325 | 0.00024  | 0.074437 | 0.10816  |
| 2.52E-09 | -0.2331  | 3.50E-07 | -0.05659 | 0.22221  | -0.16371 | 0.00038  | -0.26341 | 7.49E-09 |
| 8.27E-14 | -0.34708 | 1.15E-14 | -0.17251 | 0.00018  | -0.26019 | 1.16E-08 | -0.31725 | 2.23E-12 |
| 2.03E-25 | -0.58854 | 7.23E-45 | -0.41318 | 1.11E-20 | -0.46541 | 1.77E-26 | -0.50267 | 2.85E-31 |
| 0.07382  | -0.25927 | 1.31E-08 | -0.13953 | 0.00251  | -0.24939 | 4.72E-08 | -0.25118 | 3.76E-08 |
| 4.20E-15 | -0.52065 | 8.38E-34 | -0.30418 | 1.87E-11 | -0.39487 | 7.09E-19 | -0.4337  | 7.71E-23 |
| 2.56E-17 | -0.31922 | 1.60E-12 | -0.21261 | 3.56E-06 | -0.2315  | 4.23E-07 | -0.30655 | 1.28E-11 |
| 1.21E-06 | -0.21496 | 2.76E-06 | -0.25065 | 4.02E-08 | -0.29024 | 1.62E-10 | -0.30562 | 1.49E-11 |
| 1.32E-12 | -0.09246 | 0.04582  | -0.18833 | 4.21E-05 | -0.19848 | 1.56E-05 | -0.24009 | 1.51E-07 |
| 1.65E-13 | -0.14954 | 0.00119  | -0.29924 | 4.08E-11 | -0.33012 | 2.46E-13 | -0.37771 | 2.77E-17 |
| 3.75E-18 | -0.3751  | 4.75E-17 | -0.41067 | 2.00E-20 | -0.44033 | 1.44E-23 | -0.44274 | 7.73E-24 |
| 1.46E-18 | -0.33311 | 1.45E-13 | -0.20122 | 1.18E-05 | -0.26327 | 7.64E-09 | -0.35093 | 5.57E-15 |
| 9.69E-07 | -0.44527 | 4.00E-24 | -0.25526 | 2.21E-08 | -0.2427  | 1.09E-07 | -0.27293 | 2.02E-09 |
| 1.49E-21 | -0.28488 | 3.61E-10 | -0.30436 | 1.82E-11 | -0.31948 | 1.53E-12 | -0.43825 | 2.44E-23 |
| 4.21E-11 | -0.33871 | 5.34E-14 | -0.32745 | 3.92E-13 | -0.3625  | 6.00E-16 | -0.27426 | 1.67E-09 |
| 6.03E-14 | -0.17509 | 0.00014  | -0.13688 | 0.00304  | -0.15396 | 0.00084  | -0.27021 | 2.95E-09 |
| 1.36E-22 | -0.28707 | 2.61E-10 | -0.12446 | 0.00708  | -0.21573 | 2.54E-06 | -0.38579 | 5.07E-18 |
| 6.40E-28 | -0.31573 | 2.87E-12 | -0.29179 | 1.28E-10 | -0.31749 | 2.14E-12 | -0.42928 | 2.31E-22 |
| 0.00033  | -0.25867 | 1.41E-08 | -0.17209 | 0.00019  | -0.24505 | 8.17E-08 | -0.30966 | 7.77E-12 |
| 3.66E-08 | -0.16619 | 0.00031  | -0.07775 | 0.0933   | -0.18617 | 5.17E-05 | -0.24865 | 5.19E-08 |
| 0.00034  | -0.26477 | 6.23E-09 | -0.28687 | 2.69E-10 | -0.35305 | 3.73E-15 | -0.28879 | 2.02E-10 |
| 2.52E-26 | -0.16895 | 0.00024  | -0.16122 | 0.00047  | -0.17877 | 0.0001   | -0.30952 | 7.94E-12 |
| 5.64E-08 | -0.44633 | 3.04E-24 | -0.28444 | 3.85E-10 | -0.3716  | 9.73E-17 | -0.28484 | 3.63E-10 |
| 3.46E-14 | -0.27899 | 8.51E-10 | -0.38473 | 6.35E-18 | -0.31952 | 1.52E-12 | -0.41241 | 1.33E-20 |
| 8.19E-31 | -0.08151 | 0.07848  | -0.19993 | 1.34E-05 | -0.14369 | 0.00185  | -0.3313  | 2.00E-13 |
| 2.28E-18 | -0.37841 | 2.40E-17 | -0.41156 | 1.62E-20 | -0.41454 | 8.07E-21 | -0.48287 | 1.19E-28 |



|          |          |          |          |          |          |          |          |          |
|----------|----------|----------|----------|----------|----------|----------|----------|----------|
| 3.64E-16 | -0.49858 | 1.02E-30 | -0.38557 | 5.31E-18 | -0.42935 | 2.28E-22 | -0.41626 | 5.39E-21 |
| 1.23E-30 | -0.24239 | 1.14E-07 | -0.0775  | 0.09436  | -0.08424 | 0.06895  | -0.36653 | 2.70E-16 |
| 3.79E-21 | -0.39232 | 1.24E-18 | -0.33229 | 1.68E-13 | -0.36126 | 7.65E-16 | -0.41614 | 5.54E-21 |
| 6.21E-21 | -0.15288 | 0.00092  | -0.2452  | 8.02E-08 | -0.21233 | 3.67E-06 | -0.30869 | 9.08E-12 |
| 7.18E-18 | 0.016508 | 0.72199  | 0.073329 | 0.11353  | 0.039381 | 0.39584  | -0.14489 | 0.00169  |
| 1.74E-14 | -0.36006 | 9.66E-16 | -0.31212 | 5.20E-12 | -0.38491 | 6.11E-18 | -0.41073 | 1.97E-20 |
| 1.06E-07 | -0.20411 | 8.75E-06 | -0.33002 | 2.50E-13 | -0.38439 | 6.82E-18 | -0.29899 | 4.24E-11 |
| 1.44E-15 | -0.34853 | 8.75E-15 | -0.34693 | 1.18E-14 | -0.38033 | 1.61E-17 | -0.38446 | 6.73E-18 |
| 5.59E-24 | -0.38457 | 6.57E-18 | -0.38271 | 9.74E-18 | -0.4206  | 1.92E-21 | -0.49541 | 2.72E-30 |
| 2.02E-15 | -0.23064 | 4.68E-07 | -0.0805  | 0.08225  | -0.06939 | 0.13433  | -0.26841 | 3.79E-09 |
| 3.80E-24 | -0.24977 | 4.50E-08 | -0.19461 | 2.29E-05 | -0.1718  | 0.00019  | -0.33927 | 4.82E-14 |
| 1.35E-14 | -0.37999 | 1.72E-17 | -0.22339 | 1.08E-06 | -0.3019  | 2.69E-11 | -0.376   | 3.95E-17 |
| 2.85E-06 | -0.23125 | 4.36E-07 | -0.25882 | 1.39E-08 | -0.28929 | 1.87E-10 | -0.31653 | 2.51E-12 |
| 4.46E-06 | -0.04987 | 0.28216  | -0.05444 | 0.24028  | -0.09243 | 0.0459   | -0.24747 | 6.02E-08 |
| 1.34E-23 | -0.47102 | 3.66E-27 | -0.3457  | 1.48E-14 | -0.34172 | 3.09E-14 | -0.40289 | 1.19E-19 |
| 1.18E-11 | -0.43258 | 1.02E-22 | -0.39319 | 1.02E-18 | -0.5093  | 3.46E-32 | -0.43449 | 6.32E-23 |
| 2.41E-32 | -0.35761 | 1.56E-15 | -0.26606 | 5.22E-09 | -0.24184 | 1.22E-07 | -0.41456 | 8.04E-21 |
| 1.69E-05 | -0.41868 | 3.03E-21 | -0.41717 | 4.34E-21 | -0.47583 | 9.23E-28 | -0.35098 | 5.52E-15 |
| 2.04E-07 | -0.26887 | 3.55E-09 | -0.30205 | 2.62E-11 | -0.3576  | 1.56E-15 | -0.28334 | 4.53E-10 |
| 0.03896  | -0.45691 | 1.82E-25 | -0.42731 | 3.76E-22 | -0.52421 | 2.53E-34 | -0.36635 | 2.79E-16 |
| 3.94E-26 | -0.44106 | 1.19E-23 | -0.40382 | 9.61E-20 | -0.47391 | 1.60E-27 | -0.55268 | 1.04E-38 |
| 1.70E-20 | -0.36113 | 7.84E-16 | -0.22299 | 1.13E-06 | -0.26861 | 3.68E-09 | -0.49139 | 9.29E-30 |
| 1.44E-27 | -0.14226 | 0.00206  | -0.16264 | 0.00042  | -0.16792 | 0.00027  | -0.35875 | 1.25E-15 |
| 5.25E-20 | -0.46992 | 4.98E-27 | -0.28574 | 3.18E-10 | -0.34468 | 1.79E-14 | -0.42863 | 2.71E-22 |
| 7.57E-06 | -0.0457  | 0.32442  | -0.13364 | 0.00381  | -0.1222  | 0.0082   | -0.18806 | 4.32E-05 |
| 1.27E-13 | -0.06386 | 0.16827  | -0.0449  | 0.33296  | -0.07264 | 0.11696  | -0.20329 | 9.52E-06 |
| 0.00013  | -0.53048 | 2.97E-35 | -0.26264 | 8.31E-09 | -0.4048  | 7.69E-20 | -0.35689 | 1.79E-15 |
| 2.25E-05 | -0.21951 | 1.67E-06 | -0.2006  | 1.25E-05 | -0.32138 | 1.11E-12 | -0.26273 | 8.21E-09 |
| 8.39E-16 | -0.48961 | 1.59E-29 | -0.34793 | 9.80E-15 | -0.40825 | 3.49E-20 | -0.44974 | 1.24E-24 |
| 1.99E-15 | -0.50665 | 8.07E-32 | -0.34607 | 1.39E-14 | -0.42964 | 2.12E-22 | -0.4211  | 1.70E-21 |
| 1.13E-06 | -0.33977 | 4.41E-14 | -0.36863 | 1.77E-16 | -0.42497 | 6.65E-22 | -0.3987  | 3.04E-19 |
| 7.30E-29 | -0.48197 | 1.55E-28 | -0.43579 | 4.56E-23 | -0.44453 | 4.86E-24 | -0.58422 | 4.39E-44 |
| 0.23761  | -0.24747 | 6.03E-08 | -0.14389 | 0.00182  | -0.25108 | 3.80E-08 | -0.19114 | 3.21E-05 |
| 1.98E-25 | -0.44132 | 1.11E-23 | -0.25914 | 1.33E-08 | -0.16901 | 0.00024  | -0.38594 | 4.91E-18 |
| 5.22E-20 | -0.26537 | 5.74E-09 | -0.28423 | 3.97E-10 | -0.30548 | 1.52E-11 | -0.39252 | 1.19E-18 |
| 1.29E-14 | -0.56893 | 2.09E-41 | -0.43282 | 9.60E-23 | -0.55773 | 1.57E-39 | -0.50647 | 8.54E-32 |
| 5.19E-11 | 0.02421  | 0.60177  | -0.12396 | 0.00732  | -0.10456 | 0.02384  | -0.24657 | 6.75E-08 |
| 7.24E-08 | -0.14687 | 0.00146  | -0.13942 | 0.00253  | -0.21472 | 2.84E-06 | -0.27354 | 1.85E-09 |
| 5.87E-07 | -0.16006 | 0.00052  | -0.23664 | 2.30E-07 | -0.30058 | 3.31E-11 | -0.30518 | 1.60E-11 |
| 6.97E-17 | -0.13885 | 0.00264  | -0.1093  | 0.01814  | -0.1346  | 0.00357  | -0.35458 | 2.79E-15 |
| 2.44E-18 | -0.31049 | 6.79E-12 | -0.18956 | 3.74E-05 | -0.2537  | 2.71E-08 | -0.38362 | 8.04E-18 |
| 1.38E-23 | -0.53552 | 5.15E-36 | -0.45753 | 1.54E-25 | -0.49119 | 9.87E-30 | -0.57565 | 1.45E-42 |
| 9.56E-14 | -0.33435 | 1.17E-13 | -0.29085 | 1.48E-10 | -0.29026 | 1.62E-10 | -0.42348 | 9.55E-22 |
| 3.89E-11 | -0.29556 | 7.22E-11 | -0.31437 | 3.59E-12 | -0.38243 | 1.03E-17 | -0.41017 | 2.24E-20 |
| 6.22E-26 | -0.42852 | 2.79E-22 | -0.34069 | 3.73E-14 | -0.37714 | 3.12E-17 | -0.43706 | 3.31E-23 |

|          |          |          |          |          |          |          |          |          |
|----------|----------|----------|----------|----------|----------|----------|----------|----------|
| 1.97E-64 | -0.55343 | 7.89E-39 | -0.33853 | 5.51E-14 | -0.37895 | 2.14E-17 | -0.63873 | 6.75E-55 |
| 2.28E-29 | -0.47527 | 1.09E-27 | -0.40828 | 3.46E-20 | -0.43288 | 9.46E-23 | -0.50308 | 2.51E-31 |
| 2.11E-11 | -0.41907 | 2.76E-21 | -0.30875 | 8.99E-12 | -0.40594 | 5.93E-20 | -0.44337 | 6.56E-24 |
| 9.29E-10 | -0.41886 | 2.90E-21 | -0.2043  | 8.58E-06 | -0.28557 | 3.26E-10 | -0.27339 | 1.89E-09 |
| 1.62E-25 | -0.25379 | 2.68E-08 | -0.33826 | 5.78E-14 | -0.30796 | 1.02E-11 | -0.428   | 3.18E-22 |
| 9.78E-20 | -0.34744 | 1.07E-14 | -0.26438 | 6.57E-09 | -0.30899 | 8.66E-12 | -0.33121 | 2.03E-13 |
| 2.08E-17 | 0.448835 | 1.57E-24 | 0.467138 | 1.09E-26 | 0.504053 | 1.84E-31 | 0.449534 | 1.31E-24 |
| 4.65E-06 | -0.12184 | 0.0084   | -0.23886 | 1.75E-07 | -0.30176 | 2.75E-11 | -0.20974 | 4.85E-06 |
| 2.76E-13 | -0.24887 | 5.04E-08 | -0.2319  | 4.04E-07 | -0.25283 | 3.04E-08 | -0.38308 | 9.01E-18 |
| 1.04E-16 | -0.39073 | 1.75E-18 | -0.43338 | 8.35E-23 | -0.44444 | 4.97E-24 | -0.38129 | 1.31E-17 |
| 8.63E-11 | -0.29602 | 6.73E-11 | -0.10759 | 0.02004  | -0.23463 | 2.92E-07 | -0.32873 | 3.14E-13 |
| 4.88E-13 | -0.15259 | 0.00094  | -0.15608 | 0.00071  | -0.2214  | 1.35E-06 | -0.29224 | 1.20E-10 |
| 4.47E-07 | -0.37894 | 2.15E-17 | -0.1653  | 0.00033  | -0.28377 | 4.25E-10 | -0.37043 | 1.23E-16 |
| 1.73E-40 | -0.4886  | 2.16E-29 | -0.35241 | 4.21E-15 | -0.25616 | 1.97E-08 | -0.60355 | 1.11E-47 |
| 1.07E-27 | -0.63297 | 1.19E-53 | -0.44159 | 1.04E-23 | -0.49288 | 5.92E-30 | -0.53641 | 3.75E-36 |
| 0.00853  | -0.4093  | 2.74E-20 | -0.26988 | 3.09E-09 | -0.39812 | 3.45E-19 | -0.21784 | 2.01E-06 |
| 9.12E-09 | -0.40927 | 2.76E-20 | -0.3567  | 1.86E-15 | -0.40793 | 3.76E-20 | -0.3124  | 4.97E-12 |
| 8.50E-18 | -0.48953 | 1.63E-29 | -0.41792 | 3.63E-21 | -0.39122 | 1.58E-18 | -0.41718 | 4.33E-21 |
| 1.17E-16 | -0.3992  | 2.71E-19 | -0.40258 | 1.27E-19 | -0.4401  | 1.52E-23 | -0.38845 | 2.87E-18 |
| 5.19E-29 | -0.34289 | 2.49E-14 | -0.15298 | 0.00091  | -0.25986 | 1.21E-08 | -0.5145  | 6.39E-33 |
| 2.76E-26 | -0.48302 | 1.14E-28 | -0.36349 | 4.93E-16 | -0.40116 | 1.75E-19 | -0.55004 | 2.77E-38 |
| 7.36E-08 | -0.40505 | 7.25E-20 | -0.13568 | 0.00331  | -0.00767 | 0.86868  | -0.2134  | 3.27E-06 |
| 2.60E-20 | -0.50082 | 5.09E-31 | -0.40745 | 4.19E-20 | -0.49304 | 5.63E-30 | -0.49993 | 6.71E-31 |
| 1.40E-28 | -0.26112 | 1.02E-08 | -0.14534 | 0.00164  | -0.22824 | 6.19E-07 | -0.51573 | 4.28E-33 |
| 0.02455  | -0.22576 | 8.24E-07 | -0.17588 | 0.00013  | -0.31916 | 1.62E-12 | -0.17099 | 0.00021  |
| 3.65E-21 | -0.19064 | 3.37E-05 | -0.17966 | 9.47E-05 | -0.19433 | 2.35E-05 | -0.39724 | 4.20E-19 |
| 0.00039  | -0.36202 | 6.58E-16 | -0.24568 | 7.55E-08 | -0.39429 | 8.05E-19 | -0.32218 | 9.69E-13 |
| 7.22E-08 | -0.32489 | 6.10E-13 | -0.23055 | 4.73E-07 | -0.29539 | 7.41E-11 | -0.2915  | 1.34E-10 |
| 7.61E-29 | -0.42865 | 2.70E-22 | -0.39791 | 3.62E-19 | -0.41319 | 1.11E-20 | -0.46389 | 2.70E-26 |
| 1.23E-16 | -0.42261 | 1.18E-21 | -0.2579  | 1.57E-08 | -0.32691 | 4.30E-13 | -0.50878 | 4.08E-32 |
| 5.11E-43 | -0.48434 | 7.70E-29 | -0.39704 | 4.39E-19 | -0.41121 | 1.76E-20 | -0.51242 | 1.26E-32 |
| 4.36E-09 | -0.04293 | 0.35466  | -0.11386 | 0.01382  | -0.11257 | 0.01494  | -0.11482 | 0.01303  |
| 2.10E-26 | -0.41733 | 4.18E-21 | -0.39285 | 1.10E-18 | -0.41571 | 6.13E-21 | -0.50797 | 5.29E-32 |
| 0.00719  | -0.37646 | 3.59E-17 | -0.23939 | 1.64E-07 | -0.32455 | 6.46E-13 | -0.21911 | 1.75E-06 |
| 3.44E-19 | -0.62193 | 2.46E-51 | -0.38217 | 1.09E-17 | -0.49718 | 1.58E-30 | -0.52039 | 9.11E-34 |
| 1.54E-05 | -0.01725 | 0.70998  | -0.16156 | 0.00046  | -0.14243 | 0.00203  | -0.20277 | 1.01E-05 |
| 6.24E-36 | -0.44551 | 3.76E-24 | -0.27455 | 1.60E-09 | -0.33971 | 4.45E-14 | -0.4994  | 7.93E-31 |
| 2.55E-08 | -0.26108 | 1.03E-08 | -0.35493 | 2.60E-15 | -0.3993  | 2.66E-19 | -0.34227 | 2.79E-14 |
| 1.04E-12 | -0.38089 | 1.43E-17 | -0.34358 | 2.20E-14 | -0.37722 | 3.07E-17 | -0.38752 | 3.50E-18 |
| 1.25E-06 | -0.48832 | 2.35E-29 | -0.29877 | 4.39E-11 | -0.42991 | 1.98E-22 | -0.25658 | 1.86E-08 |
| 0.43801  | -0.03642 | 0.43233  | -0.11794 | 0.01075  | -0.12678 | 0.00608  | -0.07951 | 0.0861   |
| 1.69E-08 | -0.36422 | 4.27E-16 | -0.30308 | 2.23E-11 | -0.40941 | 2.67E-20 | -0.34981 | 6.89E-15 |
| 2.69E-13 | 0.009128 | 0.84404  | -0.00581 | 0.90039  | -0.10249 | 0.02678  | -0.28942 | 1.83E-10 |
| 1.23E-17 | -0.18407 | 6.30E-05 | -0.21516 | 2.70E-06 | -0.23614 | 2.44E-07 | -0.43102 | 1.50E-22 |
| 5.19E-30 | -0.39348 | 9.61E-19 | -0.36084 | 8.30E-16 | -0.38387 | 7.61E-18 | -0.47344 | 1.83E-27 |

|          |          |          |          |          |          |          |          |          |
|----------|----------|----------|----------|----------|----------|----------|----------|----------|
| 3.53E-10 | -0.37296 | 7.36E-17 | -0.28576 | 3.16E-10 | -0.40067 | 1.95E-19 | -0.3911  | 1.62E-18 |
| 1.32E-20 | 0.049377 | 0.28695  | 0.047755 | 0.3031   | 0.05321  | 0.25113  | -0.1652  | 0.00034  |
| 8.62E-40 | -0.55582 | 3.22E-39 | -0.42456 | 7.36E-22 | -0.44811 | 1.91E-24 | -0.57006 | 1.34E-41 |
| 2.47E-10 | -0.19555 | 2.08E-05 | -0.23314 | 3.49E-07 | -0.36323 | 5.19E-16 | -0.3054  | 1.54E-11 |
| 4.02E-21 | -0.1883  | 4.22E-05 | -0.32343 | 7.84E-13 | -0.32911 | 2.94E-13 | -0.41304 | 1.15E-20 |
| 3.94E-14 | -0.38439 | 6.83E-18 | -0.2806  | 6.75E-10 | -0.32623 | 4.84E-13 | -0.38562 | 5.25E-18 |
| 3.67E-07 | -0.39274 | 1.13E-18 | -0.37486 | 5.00E-17 | -0.4396  | 1.73E-23 | -0.39246 | 1.20E-18 |
| 4.06E-33 | -0.49163 | 8.64E-30 | -0.30425 | 1.85E-11 | -0.1646  | 0.00035  | -0.4531  | 5.07E-25 |
| 1.61E-33 | -0.44831 | 1.81E-24 | -0.31607 | 2.71E-12 | -0.33751 | 6.63E-14 | -0.48249 | 1.33E-28 |
| 7.88E-09 | -0.00347 | 0.94039  | -0.12952 | 0.00506  | -0.1644  | 0.00036  | -0.22982 | 5.15E-07 |
| 1.36E-11 | -0.48231 | 1.40E-28 | -0.31349 | 4.15E-12 | -0.36123 | 7.69E-16 | -0.41939 | 2.56E-21 |
| 7.06E-22 | -0.4221  | 1.34E-21 | -0.22655 | 7.53E-07 | -0.36015 | 9.50E-16 | -0.43076 | 1.60E-22 |
| 3.20E-09 | -0.38544 | 5.46E-18 | -0.38692 | 3.98E-18 | -0.40547 | 6.60E-20 | -0.41739 | 4.12E-21 |
| 0.00473  | -0.28172 | 5.73E-10 | -0.19201 | 2.95E-05 | -0.26828 | 3.86E-09 | -0.16208 | 0.00044  |
| 3.71E-14 | -0.16593 | 0.00032  | -0.24956 | 4.62E-08 | -0.24546 | 7.76E-08 | -0.29576 | 6.99E-11 |
| 6.49E-22 | -0.65063 | 1.48E-57 | -0.44733 | 2.34E-24 | -0.49553 | 2.62E-30 | -0.54374 | 2.76E-37 |
| 6.62E-15 | -0.43444 | 6.40E-23 | -0.24592 | 7.33E-08 | -0.16133 | 0.00047  | -0.3371  | 7.13E-14 |
| 4.37E-14 | -0.21689 | 2.24E-06 | -0.11006 | 0.01734  | -0.21221 | 3.72E-06 | -0.3867  | 4.17E-18 |
| 9.15E-11 | -0.04683 | 0.31256  | 0.010302 | 0.82429  | -0.12338 | 0.0076   | -0.2711  | 2.60E-09 |
| 3.66E-09 | -0.32258 | 9.05E-13 | -0.18118 | 8.24E-05 | -0.2535  | 2.78E-08 | -0.19959 | 1.39E-05 |
| 1.59E-21 | -0.19673 | 1.85E-05 | 0.05817  | 0.20956  | -0.05254 | 0.25713  | -0.27494 | 1.52E-09 |
| 2.71E-14 | -0.1573  | 0.00065  | -0.06968 | 0.13271  | -0.14388 | 0.00183  | -0.30899 | 8.66E-12 |
| 2.34E-14 | -0.318   | 1.96E-12 | -0.3151  | 3.18E-12 | -0.33221 | 1.70E-13 | -0.43545 | 4.97E-23 |
| 0.34306  | 0.421805 | 1.43E-21 | 0.205245 | 7.78E-06 | 0.189117 | 3.90E-05 | 0.079472 | 0.08625  |
| 1.76E-07 | 0.239197 | 1.68E-07 | 0.102504 | 0.02676  | 0.04864  | 0.29421  | 0.101936 | 0.02762  |
| 0.0019   | 0.183975 | 6.35E-05 | 0.094658 | 0.04088  | 0.052673 | 0.25595  | 0.139381 | 0.00254  |
| 0.21947  | -0.27879 | 8.76E-10 | -0.05045 | 0.27657  | -0.1808  | 8.52E-05 | -0.02872 | 0.53584  |
| 0.00156  | 0.140618 | 0.00232  | 0.136042 | 0.00322  | 0.075667 | 0.10244  | 0.109476 | 0.01795  |
| 0.0002   | 0.3061   | 1.38E-11 | 0.0563   | 0.22461  | 0.067556 | 0.14494  | 0.008549 | 0.85381  |
| 0.36226  | 0.075786 | 0.1019   | -0.06521 | 0.15942  | -0.04532 | 0.32848  | -0.14348 | 0.00188  |
| 6.09E-11 | 0.218471 | 1.88E-06 | -0.0236  | 0.61101  | -0.04999 | 0.28099  | 0.082528 | 0.0748   |
| 0.03758  | 0.125235 | 0.00673  | 0.071946 | 0.12052  | 0.080868 | 0.08086  | 0.039837 | 0.39038  |
| 0.01182  | -0.40388 | 9.48E-20 | -0.28612 | 3.00E-10 | -0.35452 | 2.82E-15 | -0.24336 | 1.01E-07 |
| 8.24E-10 | 0.39193  | 1.35E-18 | 0.181459 | 8.03E-05 | 0.206347 | 6.93E-06 | 0.261316 | 9.93E-09 |
| 1.30E-14 | 0.289335 | 1.86E-10 | 0.116982 | 0.01141  | 0.122446 | 0.00807  | 0.285451 | 3.31E-10 |
| 0.03354  | 0.109405 | 0.01803  | 0.035722 | 0.44122  | 0.105423 | 0.0227   | 0.003373 | 0.94205  |
| 1.61E-08 | 0.465168 | 1.89E-26 | 0.274313 | 1.66E-09 | 0.339221 | 4.86E-14 | 0.326015 | 5.02E-13 |
| 0.0585   | -0.14006 | 0.00242  | 0.029749 | 0.52133  | -0.06213 | 0.18012  | -0.007   | 0.88004  |
| 4.19E-27 | 0.613763 | 1.11E-49 | 0.473326 | 1.90E-27 | 0.46281  | 3.63E-26 | 0.458811 | 1.09E-25 |
| 0.00072  | 0.182477 | 7.30E-05 | 0.039613 | 0.39306  | 0.012115 | 0.794    | 0.031098 | 0.5026   |
| 0.21618  | 0.299709 | 3.79E-11 | 0.255386 | 2.18E-08 | 0.268373 | 3.80E-09 | 0.105144 | 0.02306  |
| 0.01257  | 0.053537 | 0.24822  | -0.09211 | 0.04664  | -0.1098  | 0.01762  | -0.15536 | 0.00075  |
| 0.0001   | 0.198546 | 1.54E-05 | 0.098373 | 0.03356  | -0.00565 | 0.90306  | 0.050288 | 0.27814  |
| 0.01806  | 0.365203 | 3.51E-16 | 0.202782 | 1.00E-05 | 0.230124 | 4.97E-07 | 0.09318  | 0.04416  |
| 1.73E-09 | 0.280335 | 7.01E-10 | 0.249678 | 4.55E-08 | 0.137095 | 0.00299  | 0.166199 | 0.00031  |

|          |          |          |          |          |          |          |          |          |
|----------|----------|----------|----------|----------|----------|----------|----------|----------|
| 0.01172  | 0.301364 | 2.92E-11 | 0.069198 | 0.1354   | 0.079563 | 0.08589  | 0.066637 | 0.1505   |
| 1.22E-08 | 0.307526 | 1.10E-11 | 0.134293 | 0.00364  | 0.113137 | 0.01444  | 0.203855 | 8.99E-06 |
| 0.07475  | 0.349945 | 6.71E-15 | 0.157405 | 0.00064  | 0.183822 | 6.45E-05 | 0.121606 | 0.00852  |
| 0.26892  | 0.264965 | 6.07E-09 | 0.079221 | 0.08725  | 0.210898 | 4.28E-06 | 0.050229 | 0.2787   |
| 0.01723  | 0.332379 | 1.65E-13 | 0.263102 | 7.81E-09 | 0.277909 | 9.94E-10 | 0.20976  | 4.84E-06 |
| 6.03E-10 | 0.50146  | 4.17E-31 | 0.308085 | 1.00E-11 | 0.302254 | 2.54E-11 | 0.405947 | 5.92E-20 |
| 0.25752  | 0.262536 | 8.43E-09 | 0.203595 | 9.23E-06 | 0.245788 | 7.45E-08 | 0.027697 | 0.55048  |
| 1.09E-30 | 0.430536 | 1.70E-22 | 0.358722 | 1.25E-15 | 0.302282 | 2.53E-11 | 0.407271 | 4.37E-20 |
| 0.08084  | 0.38477  | 6.30E-18 | 0.119803 | 0.00956  | 0.167758 | 0.00027  | 0.149677 | 0.00118  |
| 1.53E-07 | 0.45551  | 2.66E-25 | 0.290813 | 1.49E-10 | 0.332854 | 1.52E-13 | 0.293872 | 9.35E-11 |
| 2.02E-12 | 0.225254 | 8.74E-07 | 0.201362 | 1.16E-05 | 0.142996 | 0.00195  | 0.24125  | 1.31E-07 |
| 1.15E-05 | 0.066051 | 0.15413  | 0.108536 | 0.01897  | -0.0044  | 0.92453  | 0.09262  | 0.04545  |
| 2.90E-15 | 0.582546 | 8.77E-44 | 0.473955 | 1.58E-27 | 0.492397 | 6.84E-30 | 0.454882 | 3.15E-25 |
| 5.81E-05 | 0.145851 | 0.00158  | 0.121578 | 0.00854  | 0.07677  | 0.09752  | -0.01263 | 0.78547  |
| 0.01233  | 0.055652 | 0.23     | 0.035425 | 0.44503  | -0.00064 | 0.98892  | 0.076073 | 0.1006   |
| 0.0026   | 0.180162 | 9.04E-05 | 0.078337 | 0.09085  | 0.19061  | 3.38E-05 | -0.00462 | 0.9206   |
| 2.36E-05 | 0.009963 | 0.82998  | -0.02612 | 0.57337  | -0.05915 | 0.202    | 0.069714 | 0.1325   |
| 6.65E-13 | 0.114311 | 0.01344  | -0.00987 | 0.83154  | -0.04258 | 0.35861  | 0.102129 | 0.02732  |
| 0.8374   | -0.00593 | 0.89835  | -0.11653 | 0.01173  | -0.14261 | 0.00201  | -0.08852 | 0.05594  |
| 6.39E-15 | 0.366154 | 2.91E-16 | 0.164817 | 0.00035  | 0.155346 | 0.00076  | 0.299069 | 4.19E-11 |
| 0.54888  | 0.274006 | 1.73E-09 | 0.245592 | 7.63E-08 | 0.308013 | 1.01E-11 | 0.175189 | 0.00014  |
| 1.28E-05 | 0.602564 | 1.72E-47 | 0.393307 | 9.99E-19 | 0.450893 | 9.14E-25 | 0.273272 | 1.92E-09 |
| 2.36E-07 | 0.24486  | 8.36E-08 | 0.041643 | 0.36924  | 0.005979 | 0.89746  | 0.297735 | 5.16E-11 |
| 0.0002   | 0.34896  | 8.08E-15 | 0.203186 | 9.63E-06 | 0.148961 | 0.00124  | 0.23072  | 4.64E-07 |
| 5.49E-11 | 0.1809   | 8.45E-05 | 0.17138  | 0.0002   | 0.016123 | 0.72821  | 0.145794 | 0.00158  |
| 0.45907  | 0.115539 | 0.01247  | -0.12416 | 0.00723  | -0.0512  | 0.26954  | -0.02978 | 0.52089  |
| 4.06E-06 | -0.00848 | 0.85491  | -0.14567 | 0.0016   | -0.11832 | 0.01049  | -0.24928 | 4.79E-08 |
| 1.18E-12 | 0.224188 | 9.87E-07 | 0.218621 | 1.85E-06 | 0.22583  | 8.18E-07 | 0.229445 | 5.38E-07 |
| 0.00027  | -0.12106 | 0.00883  | -0.07064 | 0.12742  | -0.11124 | 0.01617  | -0.15103 | 0.00106  |
| 3.59E-09 | 0.46997  | 4.92E-27 | 0.312524 | 4.87E-12 | 0.383222 | 8.74E-18 | 0.33899  | 5.07E-14 |
| 1.61E-05 | 0.422008 | 1.36E-21 | 0.182124 | 7.55E-05 | 0.26995  | 3.06E-09 | 0.175712 | 0.00014  |
| 3.86E-18 | 0.557713 | 1.58E-39 | 0.338171 | 5.88E-14 | 0.32633  | 4.76E-13 | 0.365012 | 3.65E-16 |
| 1.55E-15 | -0.04628 | 0.31833  | 0.017888 | 0.69983  | 0.121117 | 0.00879  | -0.20046 | 1.27E-05 |
| 0.00111  | 0.236579 | 2.31E-07 | 0.076385 | 0.09921  | 0.151935 | 0.00099  | 0.047661 | 0.30405  |
| 0.00163  | 0.404828 | 7.64E-20 | 0.192542 | 2.80E-05 | 0.213859 | 3.11E-06 | 0.039418 | 0.39539  |
| 1.10E-07 | 0.33664  | 7.74E-14 | 0.153045 | 0.00091  | 0.18004  | 9.14E-05 | 0.20722  | 6.33E-06 |
| 7.39E-06 | -0.06727 | 0.14666  | 0.030105 | 0.51635  | -0.07208 | 0.11983  | -0.00187 | 0.96792  |
| 0.00773  | -0.12853 | 0.00541  | -0.13562 | 0.00332  | -0.17382 | 0.00016  | -0.13376 | 0.00378  |
| 1.43E-12 | 0.237438 | 2.08E-07 | 0.089124 | 0.05427  | -0.01983 | 0.66905  | 0.162735 | 0.00041  |
| 5.72E-14 | 0.398563 | 3.13E-19 | 0.338582 | 5.46E-14 | 0.334806 | 1.07E-13 | 0.403018 | 1.15E-19 |
| 0.384    | 0.095635 | 0.03884  | -0.06201 | 0.18095  | -0.02987 | 0.51969  | -0.14466 | 0.00172  |
| 1.70E-14 | 0.601247 | 3.07E-47 | 0.343742 | 2.13E-14 | 0.343599 | 2.19E-14 | 0.415614 | 6.27E-21 |
| 2.34E-16 | 0.211042 | 4.22E-06 | 0.175443 | 0.00014  | 0.081303 | 0.07923  | 0.206142 | 7.08E-06 |
| 0.01437  | 0.157087 | 0.00066  | 0.191206 | 3.19E-05 | 0.085184 | 0.06588  | -0.02121 | 0.64756  |
| 1.21E-14 | 0.390855 | 1.70E-18 | 0.318257 | 1.88E-12 | 0.304764 | 1.71E-11 | 0.322771 | 8.76E-13 |

|          |          |          |          |          |          |          |          |          |
|----------|----------|----------|----------|----------|----------|----------|----------|----------|
| 3.78E-05 | 0.296661 | 6.09E-11 | 0.065583 | 0.15707  | 0.130201 | 0.00483  | 0.115752 | 0.01231  |
| 0.22053  | -0.05948 | 0.19945  | 0.00732  | 0.87464  | -0.02736 | 0.55539  | -0.07182 | 0.12119  |
| 6.61E-07 | 0.195655 | 2.06E-05 | 0.067277 | 0.14661  | -0.0107  | 0.81759  | 0.049316 | 0.28755  |
| 0.01124  | 0.345842 | 1.44E-14 | 0.067465 | 0.14548  | 0.145334 | 0.00164  | 0.133026 | 0.00398  |
| 0.00605  | -0.31679 | 2.40E-12 | -0.08109 | 0.08003  | -0.27758 | 1.04E-09 | -0.09657 | 0.03696  |
| 0.00027  | 0.295748 | 7.01E-11 | 0.338496 | 5.54E-14 | 0.47121  | 3.46E-27 | 0.164384 | 0.00036  |
| 0.0002   | 0.238635 | 1.80E-07 | 0.241279 | 1.30E-07 | 0.234219 | 3.07E-07 | 0.060769 | 0.18989  |
| 0.00674  | 0.307579 | 1.09E-11 | 0.138514 | 0.0027   | 0.189152 | 3.89E-05 | 0.137981 | 0.00281  |
| 0.55366  | -0.18417 | 6.24E-05 | -0.11775 | 0.01088  | -0.16467 | 0.00035  | -0.14804 | 0.00134  |
| 4.39E-06 | 0.51136  | 1.78E-32 | 0.19503  | 2.19E-05 | 0.192821 | 2.73E-05 | 0.122847 | 0.00787  |
| 2.96E-05 | 0.371527 | 9.86E-17 | 0.200341 | 1.29E-05 | 0.186095 | 5.21E-05 | 0.158581 | 0.00058  |
| 3.14E-23 | 0.305324 | 1.56E-11 | 0.222414 | 1.21E-06 | 0.153707 | 0.00086  | 0.294585 | 8.38E-11 |
| 0.01997  | 0.082884 | 0.07355  | 0.013803 | 0.76609  | 0.071635 | 0.12213  | 0.010748 | 0.81681  |
| 1.52E-07 | 0.312456 | 4.92E-12 | 0.201488 | 1.15E-05 | 0.113517 | 0.01411  | 0.196446 | 1.91E-05 |
| 0.00365  | 0.138311 | 0.00274  | 0.120546 | 0.00912  | 0.047292 | 0.30781  | 0.048567 | 0.29494  |
| 0.00504  | 0.154188 | 0.00083  | 0.236486 | 2.34E-07 | 0.144269 | 0.00177  | 0.117489 | 0.01105  |
| 8.44E-09 | 0.153499 | 0.00087  | -0.00722 | 0.87631  | 0.007337 | 0.87436  | 0.149447 | 0.0012   |
| 9.50E-10 | 0.302309 | 2.52E-11 | 0.1541   | 0.00083  | 0.194906 | 2.22E-05 | 0.182312 | 7.42E-05 |
| 0.92116  | 0.077194 | 0.09567  | 0.121081 | 0.00881  | 0.158236 | 0.0006   | 0.026781 | 0.56374  |
| 4.25E-05 | 0.146049 | 0.00155  | 0.095047 | 0.04006  | -0.0037  | 0.93652  | 0.081697 | 0.07778  |
| 0.12775  | 0.081926 | 0.07695  | 0.021753 | 0.63915  | -0.03408 | 0.46251  | -0.05057 | 0.27542  |
| 0.30976  | 0.178425 | 0.00011  | 0.080372 | 0.08274  | 0.056683 | 0.22147  | 0.048847 | 0.29217  |
| 0.01253  | 0.229886 | 5.11E-07 | 0.036708 | 0.4287   | 0.135406 | 0.00337  | -0.11792 | 0.01076  |
| 4.80E-08 | 0.152458 | 0.00095  | 0.026072 | 0.57412  | -0.09513 | 0.03988  | 0.104104 | 0.02446  |
| 5.94E-09 | 0.392826 | 1.11E-18 | 0.350114 | 6.50E-15 | 0.393365 | 9.86E-19 | 0.34677  | 1.22E-14 |
| 1.15E-06 | 0.172697 | 0.00018  | 0.083057 | 0.07295  | 0.096399 | 0.0373   | 0.205089 | 7.91E-06 |
| 0.67494  | 0.05098  | 0.27157  | 0.082035 | 0.07656  | 0.082055 | 0.07648  | -0.01427 | 0.75841  |
| 4.65E-05 | 0.174892 | 0.00015  | 0.03795  | 0.41324  | 0.078324 | 0.0909   | 0.056839 | 0.2202   |
| 0.06276  | 0.421862 | 1.41E-21 | 0.174664 | 0.00015  | 0.198013 | 1.63E-05 | 0.129694 | 0.005    |
| 7.59E-12 | 0.385897 | 4.95E-18 | 0.282605 | 5.04E-10 | 0.202682 | 1.01E-05 | 0.321718 | 1.05E-12 |
| 3.01E-09 | -0.07815 | 0.09161  | 0.054749 | 0.23766  | 0.043093 | 0.35279  | -0.12053 | 0.00913  |
| 0.002    | -0.08748 | 0.05888  | -0.05827 | 0.20876  | -0.17338 | 0.00017  | -0.06724 | 0.14683  |
| 3.87E-27 | 0.285977 | 3.07E-10 | 0.1257   | 0.00653  | 0.075036 | 0.10534  | 0.225965 | 8.06E-07 |
| 1.95E-15 | 0.360932 | 8.15E-16 | 0.201207 | 1.18E-05 | 0.174216 | 0.00015  | 0.228667 | 5.90E-07 |
| 0.38671  | 0.416253 | 5.39E-21 | 0.19072  | 3.35E-05 | 0.205253 | 7.77E-06 | 0.09964  | 0.03133  |
| 1.15E-05 | 0.180609 | 8.68E-05 | 0.056072 | 0.22649  | 0.046079 | 0.3204   | 0.048623 | 0.29438  |
| 8.79E-07 | 0.143677 | 0.00185  | -0.00692 | 0.88139  | -0.09755 | 0.03507  | 0.134122 | 0.00369  |
| 1.22E-20 | 0.490932 | 1.07E-29 | 0.307627 | 1.08E-11 | 0.298016 | 4.94E-11 | 0.52871  | 5.46E-35 |
| 2.56E-05 | 0.155096 | 0.00077  | 0.216491 | 2.34E-06 | 0.243041 | 1.05E-07 | 0.070294 | 0.1293   |
| 1.39E-09 | 0.292649 | 1.13E-10 | 0.256919 | 1.78E-08 | 0.165158 | 0.00034  | 0.231738 | 4.11E-07 |
| 6.17E-09 | 0.318944 | 1.68E-12 | 0.242171 | 1.17E-07 | 0.187597 | 4.51E-05 | 0.243266 | 1.02E-07 |
| 0.00445  | 0.270631 | 2.78E-09 | 0.11532  | 0.01264  | 0.057395 | 0.21571  | 0.027853 | 0.54824  |
| 2.85E-06 | 0.528105 | 6.72E-35 | 0.282293 | 5.27E-10 | 0.34305  | 2.42E-14 | 0.256923 | 1.78E-08 |
| 2.50E-17 | 0.517468 | 2.41E-33 | 0.361138 | 7.83E-16 | 0.334753 | 1.08E-13 | 0.323913 | 7.21E-13 |
| 2.06E-06 | 0.381808 | 1.18E-17 | 0.253647 | 2.73E-08 | 0.224242 | 9.81E-07 | 0.256718 | 1.83E-08 |

|          |          |          |          |          |          |          |          |          |
|----------|----------|----------|----------|----------|----------|----------|----------|----------|
| 1.18E-06 | 0.449021 | 1.50E-24 | 0.281117 | 6.26E-10 | 0.290457 | 1.57E-10 | 0.226457 | 7.61E-07 |
| 1.17E-24 | 0.517026 | 2.79E-33 | 0.365838 | 3.10E-16 | 0.31709  | 2.29E-12 | 0.444306 | 5.15E-24 |
| 4.73E-18 | 0.391856 | 1.37E-18 | 0.330061 | 2.49E-13 | 0.259514 | 1.26E-08 | 0.390011 | 2.05E-18 |
| 2.17E-09 | 0.367558 | 2.20E-16 | 0.309991 | 7.36E-12 | 0.233327 | 3.41E-07 | 0.246116 | 7.15E-08 |
| 3.62E-09 | 0.351751 | 4.77E-15 | 0.30488  | 1.68E-11 | 0.30754  | 1.09E-11 | 0.341839 | 3.02E-14 |
| 0.09542  | 0.255425 | 2.17E-08 | 0.182886 | 7.03E-05 | 0.191162 | 3.21E-05 | -0.06581 | 0.15566  |
| 1.55E-09 | 0.359325 | 1.12E-15 | 0.129558 | 0.00505  | 0.149647 | 0.00118  | 0.168643 | 0.00025  |
| 2.44E-08 | 0.146688 | 0.00148  | 0.06952  | 0.13358  | 0.051256 | 0.26898  | 0.225196 | 8.80E-07 |
| 1.20E-11 | 0.160068 | 0.00052  | 0.08023  | 0.08329  | 0.065379 | 0.15837  | 0.201575 | 1.14E-05 |
| 5.08E-08 | 0.395664 | 5.95E-19 | 0.194153 | 2.39E-05 | 0.236267 | 2.40E-07 | 0.187953 | 4.36E-05 |
| 0.89581  | 0.098052 | 0.03415  | -0.08866 | 0.05555  | -0.09099 | 0.0494   | -0.05791 | 0.21159  |
| 0.05801  | 0.136457 | 0.00313  | 0.067834 | 0.14329  | 0.026617 | 0.56613  | 0.080257 | 0.08318  |
| 7.78E-08 | 0.467944 | 8.70E-27 | 0.241851 | 1.22E-07 | 0.252875 | 3.02E-08 | 0.214575 | 2.88E-06 |
| 0.18042  | 0.133446 | 0.00386  | 0.034073 | 0.4626   | 0.100142 | 0.03048  | -0.04233 | 0.36135  |
| 1.65E-06 | 0.15111  | 0.00105  | 0.170276 | 0.00022  | 0.137117 | 0.00299  | 0.111712 | 0.01573  |
| 0.0066   | 0.095875 | 0.03835  | 0.093429 | 0.04359  | 0.187324 | 4.63E-05 | -0.03806 | 0.41186  |
| 3.31E-17 | 0.585529 | 2.55E-44 | 0.350663 | 5.86E-15 | 0.374858 | 5.00E-17 | 0.281209 | 6.17E-10 |
| 0.9276   | 0.125856 | 0.00646  | -0.00061 | 0.98959  | 0.032816 | 0.47929  | -0.02426 | 0.60096  |
| 0.00018  | 0.178937 | 0.0001   | 0.23214  | 3.92E-07 | 0.203693 | 9.14E-06 | 0.167523 | 0.00028  |
| 2.54E-27 | 0.389509 | 2.28E-18 | 0.28232  | 5.25E-10 | 0.200433 | 1.28E-05 | 0.414685 | 7.81E-21 |
| 0.00097  | 0.132991 | 0.00399  | 0.112356 | 0.01513  | 0.084572 | 0.06785  | 0.122535 | 0.00803  |
| 0.11442  | 0.30119  | 3.01E-11 | 0.196891 | 1.82E-05 | 0.210867 | 4.30E-06 | 0.10983  | 0.01758  |
| 4.98E-08 | 0.339721 | 4.44E-14 | 0.252759 | 3.06E-08 | 0.277895 | 9.96E-10 | 0.227715 | 6.58E-07 |
| 4.06E-12 | 0.495888 | 2.35E-30 | 0.315767 | 2.85E-12 | 0.30754  | 1.09E-11 | 0.353491 | 3.43E-15 |
| 0.13435  | 0.223907 | 1.02E-06 | 0.14695  | 0.00145  | 0.141427 | 0.00219  | 0.114341 | 0.01342  |
| 8.49E-05 | 0.400959 | 1.83E-19 | 0.178512 | 0.00011  | 0.224012 | 1.01E-06 | 0.269821 | 3.11E-09 |
| 0.00036  | 0.032549 | 0.48288  | -0.0556  | 0.23042  | -0.08924 | 0.05397  | 0.039539 | 0.39395  |
| 0.15103  | -0.19697 | 1.81E-05 | -0.1711  | 0.0002   | -0.19797 | 1.64E-05 | -0.14859 | 0.00128  |
| 5.02E-27 | 0.573815 | 3.02E-42 | 0.406229 | 5.55E-20 | 0.385024 | 5.97E-18 | 0.346374 | 1.31E-14 |
| 6.46E-07 | 0.440548 | 1.36E-23 | 0.392308 | 1.24E-18 | 0.416097 | 5.59E-21 | 0.281539 | 5.88E-10 |
| 0.01196  | 0.225093 | 8.90E-07 | 0.111131 | 0.01628  | 0.12707  | 0.00596  | 0.07991  | 0.08453  |
| 0.00049  | 0.164748 | 0.00035  | 0.082458 | 0.07504  | 0.085654 | 0.06439  | 0.187347 | 4.62E-05 |
| 0.25164  | -0.30215 | 2.58E-11 | -0.13645 | 0.00313  | -0.21496 | 2.76E-06 | -0.11459 | 0.01322  |
| 0.00217  | 0.228821 | 5.79E-07 | 0.259139 | 1.33E-08 | 0.220711 | 1.46E-06 | 0.149743 | 0.00117  |
| 0.00157  | -0.2684  | 3.79E-09 | -0.13566 | 0.00331  | -0.16965 | 0.00023  | -0.14089 | 0.00227  |
| 8.04E-29 | 0.45259  | 5.82E-25 | 0.29907  | 4.19E-11 | 0.217284 | 2.14E-06 | 0.354243 | 2.97E-15 |
| 1.48E-19 | 0.606787 | 2.63E-48 | 0.387503 | 3.51E-18 | 0.36238  | 6.14E-16 | 0.432939 | 9.32E-23 |
| 4.81E-12 | 0.443362 | 6.58E-24 | 0.313554 | 4.11E-12 | 0.291282 | 1.39E-10 | 0.333077 | 1.46E-13 |
| 1.55E-10 | 0.308467 | 9.42E-12 | 0.180239 | 8.98E-05 | 0.125548 | 0.0066   | 0.138417 | 0.00272  |
| 1.54E-08 | 0.205112 | 7.89E-06 | 0.029619 | 0.52315  | 0.005965 | 0.8977   | 0.028153 | 0.54393  |
| 7.34E-18 | 0.447538 | 2.21E-24 | 0.224279 | 9.77E-07 | 0.171265 | 0.0002   | 0.247912 | 5.70E-08 |
| 0.00709  | 0.153515 | 0.00087  | 0.089194 | 0.05408  | 0.109381 | 0.01805  | 0.095733 | 0.03864  |
| 1.12E-22 | 0.376477 | 3.58E-17 | 0.310483 | 6.79E-12 | 0.247076 | 6.33E-08 | 0.361319 | 7.56E-16 |
| 4.10E-15 | 0.295038 | 7.82E-11 | 0.1804   | 8.85E-05 | 0.134719 | 0.00354  | 0.233619 | 3.29E-07 |
| 0.38738  | 0.046175 | 0.31939  | 0.040343 | 0.38438  | 0.045581 | 0.32566  | -0.04676 | 0.31331  |

|          |          |          |          |          |          |          |          |          |
|----------|----------|----------|----------|----------|----------|----------|----------|----------|
| 0.00338  | -0.09691 | 0.0363   | -0.10208 | 0.02739  | -0.09098 | 0.04943  | -0.1174  | 0.01112  |
| 6.39E-17 | 0.320985 | 1.19E-12 | 0.308102 | 9.99E-12 | 0.251145 | 3.77E-08 | 0.401473 | 1.63E-19 |
| 0.07146  | 0.122158 | 0.00822  | 0.08084  | 0.08096  | 0.085674 | 0.06433  | -0.02019 | 0.66341  |
| 0.00054  | 0.167219 | 0.00028  | 0.130643 | 0.00469  | 0.095991 | 0.03812  | 0.067516 | 0.14518  |
| 8.81E-06 | 0.389803 | 2.14E-18 | 0.285528 | 3.28E-10 | 0.330915 | 2.14E-13 | 0.256484 | 1.89E-08 |
| 6.73E-10 | 0.580916 | 1.71E-43 | 0.318426 | 1.83E-12 | 0.323105 | 8.28E-13 | 0.170275 | 0.00022  |
| 0.00286  | 0.068529 | 0.13922  | -0.01891 | 0.68363  | -0.03179 | 0.49315  | -0.04611 | 0.32003  |
| 0.37228  | 0.246664 | 6.67E-08 | 0.15984  | 0.00053  | 0.236554 | 2.32E-07 | 0.110803 | 0.0166   |
| 0.44089  | 0.185665 | 5.42E-05 | 0.096194 | 0.03771  | 0.079363 | 0.08668  | 0.018889 | 0.68391  |
| 5.62E-30 | 0.495777 | 2.43E-30 | 0.344164 | 1.97E-14 | 0.315575 | 2.94E-12 | 0.41662  | 4.94E-21 |
| 4.12E-19 | 0.380754 | 1.47E-17 | 0.195471 | 2.10E-05 | 0.242577 | 1.11E-07 | 0.259635 | 1.24E-08 |
| 0.00599  | -0.26067 | 1.08E-08 | 0.030546 | 0.51022  | -0.03816 | 0.41065  | -0.08469 | 0.06745  |
| 0.0003   | 0.052191 | 0.26033  | 0.077309 | 0.09518  | -0.01134 | 0.80696  | 0.07019  | 0.12987  |
| 0.93335  | -0.19679 | 1.84E-05 | -0.09161 | 0.04786  | -0.12465 | 0.007    | -0.1055  | 0.0226   |
| 0.17698  | 0.188353 | 4.20E-05 | 0.129786 | 0.00497  | 0.144054 | 0.0018   | 0.118522 | 0.01036  |
| 4.40E-06 | 0.05419  | 0.2425   | 0.001553 | 0.97329  | -0.00435 | 0.92531  | 0.132605 | 0.0041   |
| 0.00327  | 0.064105 | 0.16666  | 0.10163  | 0.02809  | 0.041355 | 0.37256  | 0.021578 | 0.64185  |
| 0.31804  | 0.09795  | 0.03433  | 0.023175 | 0.6174   | -0.01455 | 0.7539   | -0.02831 | 0.54165  |
| 4.41E-15 | 0.032014 | 0.4901   | 0.004935 | 0.9153   | -0.03349 | 0.47028  | 0.045216 | 0.32956  |
| 0.05011  | 0.167996 | 0.00027  | 0.155859 | 0.00073  | 0.205205 | 7.81E-06 | 0.013753 | 0.7669   |
| 1.36E-11 | 0.45809  | 1.32E-25 | 0.290192 | 1.63E-10 | 0.319083 | 1.64E-12 | 0.349052 | 7.94E-15 |
| 0.44495  | 0.348328 | 9.09E-15 | 0.124195 | 0.00721  | 0.201324 | 1.17E-05 | 0.126938 | 0.00602  |
| 0.00196  | 0.308588 | 9.24E-12 | 0.194943 | 2.21E-05 | 0.234111 | 3.11E-07 | 0.267054 | 4.56E-09 |
| 0.06634  | 0.253346 | 2.84E-08 | 0.140417 | 0.00235  | 0.161827 | 0.00045  | 0.066123 | 0.15368  |
| 4.02E-05 | 0.422974 | 1.08E-21 | 0.221362 | 1.36E-06 | 0.248483 | 5.30E-08 | 0.307493 | 1.10E-11 |
| 0.02318  | 0.226864 | 7.26E-07 | 0.0006   | 0.98968  | 0.042713 | 0.35706  | 0.042809 | 0.35598  |
| 2.12E-09 | 0.403235 | 1.10E-19 | 0.297838 | 5.07E-11 | 0.262266 | 8.74E-09 | 0.23217  | 3.91E-07 |
| 1.46E-07 | 0.30814  | 9.93E-12 | 0.322867 | 8.62E-13 | 0.297042 | 5.74E-11 | 0.150249 | 0.00113  |
| 0.00024  | 0.103835 | 0.02484  | -0.00633 | 0.89153  | -0.06932 | 0.13473  | -0.01873 | 0.68643  |
| 0.04337  | 0.297417 | 5.42E-11 | 0.201421 | 1.15E-05 | 0.25128  | 3.71E-08 | 0.175335 | 0.00014  |
| 5.07E-13 | 0.432812 | 9.62E-23 | 0.315125 | 3.17E-12 | 0.305194 | 1.59E-11 | 0.315007 | 3.23E-12 |
| 0.00162  | 0.034424 | 0.458    | -0.02112 | 0.64891  | -0.07492 | 0.10589  | 0.082501 | 0.07489  |
| 3.97E-09 | 0.097999 | 0.03424  | 0.042785 | 0.35625  | -0.01442 | 0.75589  | 0.147705 | 0.00137  |
| 0.14201  | 0.163638 | 0.00038  | -0.00142 | 0.97553  | -0.02471 | 0.59429  | -0.02236 | 0.62985  |
| 0.14774  | 0.274436 | 1.63E-09 | 0.064884 | 0.16155  | 0.228808 | 5.80E-07 | 0.071876 | 0.12088  |
| 0.90617  | 0.017724 | 0.70245  | -0.01258 | 0.78626  | -0.13369 | 0.0038   | -0.04555 | 0.32604  |
| 0.57757  | -0.26451 | 6.46E-09 | -0.04425 | 0.34003  | -0.18481 | 5.88E-05 | -0.13016 | 0.00485  |
| 0.14713  | 0.152117 | 0.00097  | 0.237622 | 2.04E-07 | 0.168492 | 0.00025  | 0.074463 | 0.10804  |
| 3.64E-10 | -0.25575 | 2.08E-08 | -0.15661 | 0.00068  | -0.09767 | 0.03486  | -0.20518 | 7.83E-06 |
| 6.75E-17 | 0.186942 | 4.80E-05 | 0.193726 | 2.50E-05 | 0.106637 | 0.02118  | 0.267763 | 4.14E-09 |
| 0.39346  | -0.29313 | 1.05E-10 | -0.11796 | 0.01073  | -0.24914 | 4.87E-08 | -0.12402 | 0.00729  |
| 0.27612  | 0.335352 | 9.75E-14 | 0.20802  | 5.82E-06 | 0.214066 | 3.04E-06 | 0.222337 | 1.22E-06 |
| 2.14E-05 | 0.050494 | 0.27618  | -0.06704 | 0.14806  | -0.09614 | 0.03782  | -0.00699 | 0.88023  |
| 9.69E-26 | 0.17652  | 0.00013  | 0.069548 | 0.13342  | -0.06886 | 0.13731  | 0.252345 | 3.23E-08 |
| 8.08E-30 | 0.319144 | 1.62E-12 | 0.233351 | 3.40E-07 | 0.169767 | 0.00023  | 0.297005 | 5.77E-11 |

|          |          |          |          |          |          |          |          |          |
|----------|----------|----------|----------|----------|----------|----------|----------|----------|
| 0.02096  | 0.187096 | 4.74E-05 | 0.129806 | 0.00496  | 0.279158 | 8.31E-10 | 0.02816  | 0.54383  |
| 1.09E-07 | -0.07944 | 0.08637  | -0.05944 | 0.19974  | -0.17226 | 0.00018  | 0.052389 | 0.25853  |
| 0.41163  | 0.084447 | 0.06826  | 0.040818 | 0.37881  | 0.093837 | 0.04267  | 0.212962 | 3.43E-06 |
| 1.05E-06 | 0.225554 | 8.44E-07 | 0.075391 | 0.1037   | 0.056774 | 0.22073  | 0.126472 | 0.0062   |
| 0.02197  | 0.256148 | 1.97E-08 | 0.070792 | 0.1266   | 0.084385 | 0.06847  | 0.055568 | 0.2307   |
| 7.61E-08 | 0.192053 | 2.94E-05 | -0.00893 | 0.84736  | -0.07681 | 0.09734  | 0.072082 | 0.11981  |
| 0.00022  | 0.082241 | 0.07582  | -0.04668 | 0.31408  | -0.08851 | 0.05597  | -0.00351 | 0.93972  |
| 2.70E-29 | 0.51607  | 3.82E-33 | 0.350368 | 6.20E-15 | 0.293115 | 1.05E-10 | 0.371565 | 9.79E-17 |
| 1.15E-14 | 0.299445 | 3.95E-11 | 0.215335 | 2.65E-06 | 0.163923 | 0.00038  | 0.276376 | 1.24E-09 |
| 0.00013  | 0.227152 | 7.03E-07 | 0.145484 | 0.00162  | 0.102409 | 0.0269   | 0.161276 | 0.00047  |
| 1.74E-12 | 0.4201   | 2.16E-21 | 0.182343 | 7.40E-05 | 0.186692 | 4.92E-05 | 0.17756  | 0.00011  |
| 7.77E-18 | 0.311825 | 5.46E-12 | 0.093609 | 0.04318  | 0.061414 | 0.18522  | 0.212139 | 3.75E-06 |
| 0.00167  | 0.341848 | 3.01E-14 | 0.125885 | 0.00645  | 0.153442 | 0.00088  | 0.049482 | 0.28592  |
| 1.29E-09 | 0.189113 | 3.91E-05 | 0.169299 | 0.00024  | 0.136068 | 0.00322  | 0.186586 | 4.97E-05 |
| 0.57444  | 0.352611 | 4.06E-15 | 0.157168 | 0.00065  | 0.203319 | 9.50E-06 | 0.125173 | 0.00676  |
| 0.27764  | 0.076645 | 0.09806  | 0.132571 | 0.00411  | 0.045679 | 0.32462  | 0.293344 | 1.01E-10 |
| 0.17557  | 0.255961 | 2.02E-08 | 0.134913 | 0.00349  | 0.124917 | 0.00688  | 0.064014 | 0.16726  |
| 3.11E-16 | 0.357995 | 1.44E-15 | 0.284918 | 3.59E-10 | 0.276452 | 1.22E-09 | 0.261538 | 9.64E-09 |
| 0.00081  | 0.305667 | 1.48E-11 | 0.240014 | 1.52E-07 | 0.187256 | 4.66E-05 | 0.166658 | 0.0003   |
| 2.88E-08 | 0.457928 | 1.38E-25 | 0.295556 | 7.22E-11 | 0.309364 | 8.15E-12 | 0.194851 | 2.23E-05 |
| 0.22304  | 0.033687 | 0.4677   | 0.121003 | 0.00886  | 0.139034 | 0.0026   | 0.043882 | 0.34404  |
| 0.27775  | 0.161498 | 0.00046  | 0.000433 | 0.99256  | 0.014739 | 0.75073  | -0.02755 | 0.55263  |
| 0.00154  | 0.197921 | 1.64E-05 | 0.311109 | 6.13E-12 | 0.234247 | 3.06E-07 | 0.154106 | 0.00083  |
| 1.40E-11 | 0.315068 | 3.20E-12 | 0.327135 | 4.14E-13 | 0.308736 | 9.02E-12 | 0.238592 | 1.81E-07 |
| 0.00663  | 0.362548 | 5.94E-16 | 0.1775   | 0.00012  | 0.197641 | 1.69E-05 | 0.178881 | 0.0001   |
| 0.00736  | 0.38473  | 6.35E-18 | 0.143665 | 0.00186  | 0.195633 | 2.07E-05 | 0.107699 | 0.01992  |
| 0.09645  | 0.297021 | 5.76E-11 | 0.137706 | 0.00286  | 0.158906 | 0.00057  | 0.08974  | 0.05262  |
| 0.02553  | 0.064797 | 0.16212  | 0.151186 | 0.00105  | 0.246923 | 6.46E-08 | 0.028271 | 0.54225  |
| 0.00892  | 0.148361 | 0.0013   | 0.117567 | 0.011    | 0.073568 | 0.11235  | -0.00589 | 0.89904  |
| 0.00094  | 0.204245 | 8.63E-06 | 0.169734 | 0.00023  | 0.135432 | 0.00336  | 0.161392 | 0.00046  |
| 0.01847  | -0.04815 | 0.29911  | -0.11967 | 0.00964  | -0.17587 | 0.00013  | -0.04962 | 0.2846   |
| 0.25934  | 0.157284 | 0.00065  | 0.081356 | 0.07903  | 0.118014 | 0.0107   | 0.103478 | 0.02534  |
| 4.18E-08 | 0.607116 | 2.27E-48 | 0.459999 | 7.86E-26 | 0.422144 | 1.32E-21 | 0.421649 | 1.49E-21 |
| 1.38E-18 | 0.218991 | 1.77E-06 | 0.088567 | 0.0558   | 0.0725   | 0.11768  | 0.260556 | 1.10E-08 |
| 1.12E-09 | 0.371201 | 1.05E-16 | 0.268525 | 3.73E-09 | 0.326277 | 4.80E-13 | 0.29532  | 7.49E-11 |
| 0.21581  | 0.15798  | 0.00061  | 0.089171 | 0.05414  | 0.102809 | 0.02631  | 0.0119   | 0.79758  |
| 8.28E-13 | 0.457571 | 1.52E-25 | 0.168672 | 0.00025  | 0.219453 | 1.68E-06 | 0.229944 | 5.08E-07 |
| 0.00083  | 0.076197 | 0.10005  | 0.012276 | 0.79133  | -0.0398  | 0.39087  | 0.060816 | 0.18954  |
| 3.49E-27 | 0.517876 | 2.10E-33 | 0.376858 | 3.31E-17 | 0.420099 | 2.16E-21 | 0.482376 | 1.37E-28 |
| 0.24672  | 0.325081 | 5.90E-13 | 0.217519 | 2.09E-06 | 0.302987 | 2.26E-11 | 0.172745 | 0.00018  |
| 0.74351  | 0.110909 | 0.0165   | 0.061931 | 0.18154  | 0.0316   | 0.49573  | 0.2113   | 4.10E-06 |
| 0.52133  | 0.110383 | 0.01702  | -0.057   | 0.21889  | -0.05537 | 0.2324   | -0.00747 | 0.87204  |
| 7.42E-08 | 0.075515 | 0.10313  | 0.065997 | 0.15447  | 0.016019 | 0.72989  | 0.119486 | 0.00975  |
| 1.68E-21 | 0.050119 | 0.27976  | 0.130571 | 0.00471  | 0.006715 | 0.88492  | 0.227678 | 6.61E-07 |
| 7.76E-16 | 0.38945  | 2.31E-18 | 0.101651 | 0.02806  | 0.078028 | 0.09214  | 0.182226 | 7.48E-05 |



|          |          |          |          |          |          |          |          |          |
|----------|----------|----------|----------|----------|----------|----------|----------|----------|
| 2.59E-22 | 0.60199  | 2.22E-47 | 0.413237 | 1.10E-20 | 0.387384 | 3.60E-18 | 0.457917 | 1.39E-25 |
| 7.67E-12 | 0.575046 | 1.85E-42 | 0.365139 | 3.56E-16 | 0.371773 | 9.38E-17 | 0.371893 | 9.16E-17 |
| 1.38E-10 | 0.470216 | 4.59E-27 | 0.385886 | 4.97E-18 | 0.360163 | 9.47E-16 | 0.363279 | 5.14E-16 |
| 0.00014  | 0.46612  | 1.45E-26 | 0.327298 | 4.02E-13 | 0.269177 | 3.40E-09 | 0.277794 | 1.01E-09 |
| 4.76E-17 | 0.440156 | 1.50E-23 | 0.303206 | 2.19E-11 | 0.310515 | 6.76E-12 | 0.367195 | 2.36E-16 |
| 0.01047  | 0.114748 | 0.01309  | -0.05696 | 0.21925  | -0.10701 | 0.02072  | 0.006481 | 0.88891  |
| 6.68E-20 | 0.428485 | 2.82E-22 | 0.300073 | 3.58E-11 | 0.31096  | 6.29E-12 | 0.359061 | 1.17E-15 |
| 0.22     | -0.05039 | 0.2772   | -0.00185 | 0.96811  | -0.00718 | 0.87697  | -0.05492 | 0.23618  |
| 3.95E-10 | 0.389345 | 2.36E-18 | 0.24403  | 9.28E-08 | 0.292339 | 1.18E-10 | 0.307509 | 1.10E-11 |
| 2.41E-05 | 0.373383 | 6.76E-17 | 0.265156 | 5.91E-09 | 0.321397 | 1.11E-12 | 0.260243 | 1.15E-08 |
| 0.16687  | 0.178552 | 0.0001   | 0.085104 | 0.06613  | 0.121422 | 0.00862  | 0.094261 | 0.04174  |
| 0.00145  | 0.332694 | 1.56E-13 | 0.250673 | 4.01E-08 | 0.235697 | 2.57E-07 | 0.195745 | 2.04E-05 |
| 2.57E-14 | 0.271823 | 2.36E-09 | 0.159663 | 0.00053  | 0.108555 | 0.01895  | 0.190746 | 3.34E-05 |
| 1.89E-20 | 0.451638 | 7.50E-25 | 0.38953  | 2.27E-18 | 0.340727 | 3.70E-14 | 0.396681 | 4.75E-19 |
| 0.00291  | -0.18224 | 7.47E-05 | 0.055391 | 0.2322   | -0.02106 | 0.64982  | -0.05772 | 0.21311  |
| 0.00011  | 0.369333 | 1.54E-16 | 0.179824 | 9.32E-05 | 0.277587 | 1.04E-09 | 0.179517 | 9.59E-05 |
| 3.64E-18 | 0.397126 | 4.31E-19 | 0.164574 | 0.00036  | 0.113351 | 0.01425  | 0.228684 | 5.88E-07 |
| 4.78E-07 | 0.297413 | 5.42E-11 | 0.185933 | 5.29E-05 | 0.166555 | 0.0003   | 0.109324 | 0.01811  |
| 1.46E-07 | 0.236206 | 2.42E-07 | 0.184015 | 6.33E-05 | 0.20219  | 1.07E-05 | 0.195747 | 2.04E-05 |
| 0.62293  | 0.201352 | 1.16E-05 | -0.01141 | 0.80571  | -0.03339 | 0.47169  | -0.05332 | 0.25018  |
| 1.22E-06 | 0.202497 | 1.03E-05 | 0.153897 | 0.00085  | 0.088151 | 0.05697  | 0.041898 | 0.36632  |
| 0.0007   | 0.285187 | 3.45E-10 | 0.273813 | 1.78E-09 | 0.29078  | 1.49E-10 | 0.264653 | 6.33E-09 |
| 0.64162  | 0.091914 | 0.04713  | 0.154568 | 0.0008   | 0.175641 | 0.00014  | 0.045699 | 0.32441  |
| 0.01746  | 0.203109 | 9.70E-06 | 0.089204 | 0.05405  | 0.124701 | 0.00697  | 0.10306  | 0.02594  |
| 5.87E-11 | 0.338613 | 5.43E-14 | 0.234397 | 3.00E-07 | 0.203737 | 9.10E-06 | 0.12967  | 0.00501  |
| 0.00011  | 0.310781 | 6.47E-12 | 0.150785 | 0.00108  | 0.123077 | 0.00775  | 0.088898 | 0.05489  |
| 0.72745  | -0.08131 | 0.07919  | -0.04321 | 0.35144  | -0.04724 | 0.30834  | -0.0426  | 0.35836  |
| 0.69412  | 0.157384 | 0.00064  | 0.041333 | 0.37282  | 0.156477 | 0.00069  | 0.141737 | 0.00214  |
| 1.45E-05 | 0.454718 | 3.29E-25 | 0.259562 | 1.26E-08 | 0.291022 | 1.44E-10 | 0.143434 | 0.00189  |
| 3.12E-06 | 0.129929 | 0.00492  | 0.131325 | 0.00447  | 0.070583 | 0.12773  | 0.114347 | 0.01342  |
| 2.84E-06 | 0.594056 | 6.97E-46 | 0.399707 | 2.42E-19 | 0.452442 | 6.05E-25 | 0.301399 | 2.91E-11 |
| 1.04E-08 | 0.421381 | 1.59E-21 | 0.320255 | 1.34E-12 | 0.361123 | 7.85E-16 | 0.311897 | 5.39E-12 |
| 0.00316  | -0.09524 | 0.03967  | -0.0099  | 0.83105  | -0.09987 | 0.03095  | -0.05165 | 0.26534  |
| 0.29468  | 0.010927 | 0.81382  | -0.096   | 0.0381   | -0.09484 | 0.04049  | -0.05195 | 0.26251  |
| 0.2632   | 0.001661 | 0.97145  | 0.034065 | 0.46271  | -0.01389 | 0.76466  | -0.03911 | 0.3991   |
| 0.10135  | 0.205205 | 7.81E-06 | 0.253226 | 2.88E-08 | 0.269164 | 3.41E-09 | 0.079541 | 0.08598  |
| 1.04E-10 | 0.272458 | 2.15E-09 | 0.1449   | 0.00169  | 0.132681 | 0.00408  | 0.158271 | 0.0006   |
| 1.67E-22 | 0.438215 | 2.46E-23 | 0.291977 | 1.25E-10 | 0.307883 | 1.04E-11 | 0.446384 | 3.00E-24 |
| 3.66E-07 | 0.587344 | 1.20E-44 | 0.421445 | 1.56E-21 | 0.42271  | 1.15E-21 | 0.345669 | 1.49E-14 |
| 0.22026  | 0.183077 | 6.91E-05 | 0.063549 | 0.17037  | 0.053788 | 0.24601  | -0.07149 | 0.12289  |
| 1.94E-11 | 0.417086 | 4.43E-21 | 0.265811 | 5.41E-09 | 0.263272 | 7.64E-09 | 0.263338 | 7.57E-09 |
| 0.00073  | 0.291405 | 1.36E-10 | 0.188527 | 4.13E-05 | 0.163454 | 0.00039  | 0.215372 | 2.64E-06 |
| 3.81E-27 | 0.389075 | 2.50E-18 | 0.354767 | 2.69E-15 | 0.306789 | 1.23E-11 | 0.447255 | 2.39E-24 |
| 2.86E-15 | 0.452643 | 5.74E-25 | 0.251396 | 3.65E-08 | 0.24563  | 7.60E-08 | 0.268916 | 3.53E-09 |
| 0.01023  | 0.212037 | 3.79E-06 | 0.159532 | 0.00054  | 0.200669 | 1.25E-05 | 0.150413 | 0.00111  |

|          |          |          |          |          |          |          |          |          |
|----------|----------|----------|----------|----------|----------|----------|----------|----------|
| 2.73E-08 | 0.59054  | 3.11E-45 | 0.395154 | 6.66E-19 | 0.348866 | 8.22E-15 | 0.295146 | 7.69E-11 |
| 0.00022  | -0.27069 | 2.76E-09 | -0.10992 | 0.01749  | -0.22957 | 5.31E-07 | -0.15669 | 0.00068  |
| 4.58E-11 | 0.417174 | 4.34E-21 | 0.411745 | 1.55E-20 | 0.384978 | 6.02E-18 | 0.361386 | 7.46E-16 |
| 8.55E-06 | 0.361105 | 7.88E-16 | 0.294752 | 8.17E-11 | 0.274566 | 1.60E-09 | 0.18274  | 7.13E-05 |
| 0.00203  | 0.213558 | 3.22E-06 | 0.231241 | 4.36E-07 | 0.275357 | 1.43E-09 | 0.126591 | 0.00616  |
| 0.03019  | 0.139701 | 0.00248  | 0.242435 | 1.13E-07 | 0.272312 | 2.20E-09 | 0.036168 | 0.43553  |
| 0.00126  | 0.160698 | 0.00049  | 0.227799 | 6.52E-07 | 0.225254 | 8.74E-07 | 0.095738 | 0.03863  |
| 0.01298  | 0.077723 | 0.09341  | 0.051527 | 0.26646  | -0.02007 | 0.66533  | 0.216647 | 2.30E-06 |
| 0.00042  | 0.160728 | 0.00049  | 0.224805 | 9.20E-07 | 0.273553 | 1.85E-09 | 0.131519 | 0.00441  |
| 0.00034  | 0.165147 | 0.00034  | 0.212794 | 3.49E-06 | 0.24504  | 8.18E-08 | 0.048165 | 0.29896  |
| 8.12E-05 | -0.11895 | 0.01009  | -0.30731 | 1.14E-11 | -0.28531 | 3.38E-10 | -0.22941 | 5.40E-07 |
| 1.64E-21 | -0.03998 | 0.38869  | -0.02404 | 0.60433  | -0.16172 | 0.00045  | 0.192974 | 2.69E-05 |
| 0.00167  | 0.238963 | 1.73E-07 | 0.290801 | 1.49E-10 | 0.358068 | 1.42E-15 | 0.081059 | 0.08014  |
| 0.2765   | -0.0795  | 0.08614  | 0.014763 | 0.75034  | 0.097132 | 0.03587  | -0.06346 | 0.171    |
| 1.18E-17 | 0.143376 | 0.0019   | 0.001389 | 0.97612  | -0.09524 | 0.03965  | 0.290138 | 1.65E-10 |
| 2.59E-07 | 0.090103 | 0.05167  | 0.203385 | 9.43E-06 | 0.304087 | 1.90E-11 | 0.030246 | 0.51438  |
| 0.00035  | 0.135668 | 0.00331  | 0.104604 | 0.02378  | 0.180775 | 8.55E-05 | 0.108531 | 0.01898  |
| 0.71354  | -0.02592 | 0.57641  | 0.016426 | 0.72331  | 0.011425 | 0.80549  | -0.08371 | 0.07071  |
| 0.00804  | 0.223939 | 1.02E-06 | 0.218715 | 1.83E-06 | 0.285569 | 3.26E-10 | 0.28213  | 5.40E-10 |
| 0.54999  | -0.10185 | 0.02775  | 0.004993 | 0.9143   | -0.02034 | 0.66116  | -0.11509 | 0.01282  |
| 0.00259  | 0.004669 | 0.91984  | 0.032647 | 0.48155  | 0.113148 | 0.01443  | -0.02862 | 0.5373   |
| 0.21439  | -0.09635 | 0.03739  | 0.000631 | 0.98915  | -0.00152 | 0.9738   | -0.1138  | 0.01387  |
| 0.04565  | -0.08584 | 0.06381  | 0.126776 | 0.00608  | 0.077287 | 0.09528  | 0.096486 | 0.03713  |
| 0.9414   | 0.106088 | 0.02185  | 0.066054 | 0.15411  | -0.0305  | 0.51086  | 0.086726 | 0.06111  |
| 0.00027  | -0.03912 | 0.39901  | -0.21813 | 1.95E-06 | -0.20326 | 9.56E-06 | -0.1116  | 0.01583  |
| 8.66E-13 | 0.067161 | 0.14731  | 0.136971 | 0.00302  | 0.233238 | 3.45E-07 | -0.1182  | 0.01057  |
| 0.003    | 0.223648 | 1.05E-06 | 0.343555 | 2.20E-14 | 0.361388 | 7.46E-16 | 0.245557 | 7.67E-08 |
| 1.26E-08 | 0.134724 | 0.00354  | 0.06772  | 0.14396  | 0.222239 | 1.23E-06 | -0.1082  | 0.01934  |
| 0.02299  | 0.201503 | 1.14E-05 | 0.185443 | 5.54E-05 | 0.28047  | 6.87E-10 | 0.191143 | 3.21E-05 |
| 0.00087  | 0.086135 | 0.06291  | 0.183496 | 6.64E-05 | 0.202315 | 1.05E-05 | -0.05356 | 0.24801  |
| 0.07424  | 0.23103  | 4.47E-07 | 0.284423 | 3.86E-10 | 0.301297 | 2.96E-11 | 0.185064 | 5.74E-05 |
| 0.13909  | -0.00189 | 0.96749  | 0.113477 | 0.01414  | 0.073055 | 0.11489  | -0.0622  | 0.17963  |
| 0.00741  | 0.080447 | 0.08245  | 0.276723 | 1.18E-09 | 0.248484 | 5.30E-08 | 0.125189 | 0.00675  |
| 0.04973  | 0.156659 | 0.00068  | 0.139096 | 0.00259  | 0.334332 | 1.17E-13 | 0.056953 | 0.21928  |
| 0.02397  | -0.0256  | 0.58104  | -0.01741 | 0.70752  | 0.07683  | 0.09726  | -0.17043 | 0.00022  |
| 0.00066  | 0.174602 | 0.00015  | 0.247984 | 5.65E-08 | 0.369467 | 1.50E-16 | 0.047067 | 0.31012  |
| 0.19707  | 0.017206 | 0.71075  | 0.146859 | 0.00146  | 0.287841 | 2.32E-10 | -0.01068 | 0.81799  |
| 0.00352  | -0.07971 | 0.08529  | 0.107777 | 0.01983  | 0.144556 | 0.00174  | 0.042407 | 0.36052  |
| 0.0004   | 0.004906 | 0.91579  | 0.078007 | 0.09222  | 0.201153 | 1.19E-05 | 0.0009   | 0.98452  |
| 0.00121  | 0.014155 | 0.7603   | 0.041228 | 0.37404  | 0.145354 | 0.00164  | -0.06186 | 0.18205  |
| 0.90588  | 0.111018 | 0.01639  | 0.17033  | 0.00022  | 0.228497 | 6.01E-07 | 0.069039 | 0.1363   |
| 0.37149  | 0.045451 | 0.32705  | 0.156302 | 0.0007   | 0.176878 | 0.00012  | -0.02545 | 0.58332  |
| 0.18702  | 0.315048 | 3.21E-12 | 0.166674 | 0.0003   | 0.25778  | 1.59E-08 | -0.02308 | 0.61878  |
| 0.36925  | -0.20105 | 1.20E-05 | -0.26327 | 7.64E-09 | -0.27418 | 1.69E-09 | -0.02363 | 0.61045  |
| 0.01018  | 0.115862 | 0.01223  | 0.145217 | 0.00165  | 0.256924 | 1.78E-08 | -0.01073 | 0.81719  |

|          |          |          |          |          |          |          |          |          |
|----------|----------|----------|----------|----------|----------|----------|----------|----------|
| 1.69E-05 | -0.05132 | 0.26835  | 0.063507 | 0.17066  | -0.01751 | 0.70586  | -0.02081 | 0.65382  |
| 5.62E-10 | -0.14957 | 0.00119  | -0.05479 | 0.23733  | 0.007902 | 0.86476  | -0.24278 | 1.08E-07 |
| 0.05944  | 0.052685 | 0.25584  | 0.137393 | 0.00293  | 0.218101 | 1.96E-06 | 0.032476 | 0.48386  |
| 0.81688  | 0.049431 | 0.28642  | 0.154371 | 0.00082  | 0.212052 | 3.78E-06 | 0.046592 | 0.31503  |
| 3.73E-05 | 0.08502  | 0.0664   | 0.204972 | 8.00E-06 | 0.12399  | 0.0073   | 0.100426 | 0.03001  |
| 1.83E-05 | -0.00796 | 0.86379  | -0.05191 | 0.26294  | -0.12501 | 0.00683  | 0.139817 | 0.00246  |
| 0.00078  | -0.20265 | 1.02E-05 | -0.10958 | 0.01785  | -0.14553 | 0.00161  | -0.08641 | 0.06206  |
| 5.60E-08 | -0.27438 | 1.64E-09 | -0.18177 | 7.80E-05 | -0.22125 | 1.38E-06 | -0.23374 | 3.25E-07 |
| 5.61E-08 | 0.149021 | 0.00124  | 0.334214 | 1.19E-13 | 0.354659 | 2.74E-15 | 0.200129 | 1.32E-05 |
| 5.60E-05 | 0.009523 | 0.83738  | -0.04682 | 0.31262  | -0.10279 | 0.02634  | -0.02103 | 0.65028  |
| 0.00143  | 0.233878 | 3.19E-07 | 0.213051 | 3.40E-06 | 0.35413  | 3.04E-15 | 0.249361 | 4.74E-08 |
| 0.64599  | 0.254636 | 2.40E-08 | 0.174289 | 0.00015  | 0.29016  | 1.64E-10 | 0.100135 | 0.0305   |
| 0.00054  | 0.199714 | 1.37E-05 | 0.226309 | 7.74E-07 | 0.280851 | 6.50E-10 | 0.153136 | 0.0009   |
| 6.00E-26 | 0.051921 | 0.26281  | 0.019645 | 0.67197  | -0.1242  | 0.0072   | 0.300413 | 3.40E-11 |
| 9.73E-06 | 0.171202 | 0.0002   | 0.192286 | 2.87E-05 | 0.209585 | 4.93E-06 | 0.12474  | 0.00696  |
| 0.11072  | 0.187877 | 4.40E-05 | 0.237025 | 2.19E-07 | 0.333334 | 1.40E-13 | -0.00296 | 0.94911  |
| 8.10E-07 | 0.062522 | 0.1774   | 0.101167 | 0.02882  | 0.114026 | 0.01368  | 0.085928 | 0.06354  |
| 0.61784  | -0.07927 | 0.08705  | 0.148496 | 0.00129  | 0.094127 | 0.04204  | 0.054778 | 0.23742  |
| 1.27E-06 | -0.51189 | 1.49E-32 | -0.39642 | 5.03E-19 | -0.40193 | 1.47E-19 | -0.34306 | 2.41E-14 |
| 0.99954  | 0.06308  | 0.17356  | 0.290373 | 1.59E-10 | 0.264219 | 6.72E-09 | 0.153125 | 0.0009   |
| 0.00143  | 0.135454 | 0.00336  | 0.176775 | 0.00012  | 0.18597  | 5.27E-05 | 0.067479 | 0.1454   |
| 0.00145  | -0.08689 | 0.06062  | -0.05315 | 0.25162  | -0.12163 | 0.00851  | -0.08857 | 0.05579  |
| 0.00216  | 0.214034 | 3.05E-06 | 0.276744 | 1.17E-09 | 0.311278 | 5.97E-12 | 0.274126 | 1.70E-09 |
| 0.01128  | 0.127107 | 0.00595  | 0.195831 | 2.03E-05 | 0.246702 | 6.64E-08 | 0.250678 | 4.01E-08 |
| 3.41E-06 | 0.234567 | 2.94E-07 | 0.253386 | 2.83E-08 | 0.300365 | 3.42E-11 | 0.158987 | 0.00056  |
| 0.00809  | 0.318489 | 1.81E-12 | 0.294083 | 9.05E-11 | 0.390604 | 1.80E-18 | 0.026926 | 0.56163  |
| 0.13033  | 0.13757  | 0.00289  | 0.197356 | 1.74E-05 | 0.266175 | 5.15E-09 | 0.008873 | 0.84834  |
| 0.00011  | 0.08232  | 0.07553  | 0.210537 | 4.45E-06 | 0.379545 | 1.89E-17 | -0.01439 | 0.75645  |
| 0.01028  | 0.205558 | 7.53E-06 | 0.159705 | 0.00053  | 0.162045 | 0.00044  | 0.228114 | 6.29E-07 |
| 0.54543  | 0.193584 | 2.53E-05 | 0.049794 | 0.2829   | -0.03022 | 0.51474  | 0.065893 | 0.15511  |
| 0.00469  | 0.198349 | 1.58E-05 | 0.221999 | 1.27E-06 | 0.23846  | 1.84E-07 | 0.025984 | 0.57541  |
| 0.22042  | 0.34249  | 2.68E-14 | 0.302396 | 2.49E-11 | 0.469789 | 5.18E-27 | 0.185648 | 5.43E-05 |
| 0.00404  | 0.038187 | 0.41032  | -0.15358 | 0.00087  | -0.18994 | 3.61E-05 | -0.06792 | 0.14279  |
| 3.55E-11 | 0.149396 | 0.0012   | 0.239923 | 1.54E-07 | 0.178226 | 0.00011  | 0.204518 | 8.39E-06 |
| 0.15781  | -0.08401 | 0.06972  | 0.056567 | 0.22241  | 0.072179 | 0.11931  | -0.11258 | 0.01493  |
| 0.51416  | 0.024066 | 0.60393  | 0.12289  | 0.00785  | 0.126538 | 0.00618  | -0.03254 | 0.48301  |
| 0.21887  | 0.119658 | 0.00965  | 0.224281 | 9.77E-07 | 0.279073 | 8.41E-10 | 0.084581 | 0.06782  |
| 0.94264  | -0.33419 | 1.20E-13 | -0.23771 | 2.02E-07 | -0.36555 | 3.28E-16 | -0.04198 | 0.36538  |
| 0.02823  | 0.340197 | 4.07E-14 | 0.329294 | 2.84E-13 | 0.365013 | 3.65E-16 | 0.104278 | 0.02422  |
| 0.02643  | 0.134757 | 0.00353  | 0.235168 | 2.74E-07 | 0.234829 | 2.85E-07 | 0.168877 | 0.00025  |
| 1.04E-09 | 0.013332 | 0.77384  | 0.175474 | 0.00014  | 0.265492 | 5.65E-09 | -0.11524 | 0.01271  |
| 4.20E-07 | -0.47871 | 4.01E-28 | -0.26056 | 1.10E-08 | -0.37248 | 8.13E-17 | -0.27475 | 1.56E-09 |
| 0.70377  | -0.2223  | 1.22E-06 | -0.05268 | 0.25586  | -0.2029  | 9.92E-06 | 0.039673 | 0.39234  |
| 0.46036  | 0.002088 | 0.9641   | 0.002442 | 0.95802  | 0.027095 | 0.55917  | -0.15834 | 0.00059  |
| 0.03392  | 0.182512 | 7.28E-05 | 0.175699 | 0.00014  | 0.241837 | 1.22E-07 | 0.177755 | 0.00011  |

|          |          |          |          |          |          |          |          |          |
|----------|----------|----------|----------|----------|----------|----------|----------|----------|
| 0.0029   | 0.072657 | 0.11688  | 0.070729 | 0.12694  | 0.143854 | 0.00183  | -0.10641 | 0.02146  |
| 3.87E-10 | 0.253707 | 2.71E-08 | 0.34683  | 1.20E-14 | 0.2773   | 1.08E-09 | 0.188917 | 3.98E-05 |
| 0.00615  | 0.180641 | 8.65E-05 | 0.146201 | 0.00153  | 0.175231 | 0.00014  | 0.025052 | 0.58918  |
| 0.00787  | 0.205394 | 7.66E-06 | 0.240326 | 1.47E-07 | 0.301929 | 2.68E-11 | 0.06562  | 0.15684  |
| 1.46E-07 | 0.045944 | 0.32182  | 0.072359 | 0.1184   | 0.249031 | 4.94E-08 | -0.09114 | 0.04903  |
| 0.00467  | 0.1982   | 1.60E-05 | 0.150452 | 0.00111  | 0.277738 | 1.02E-09 | 0.258928 | 1.37E-08 |
| 0.66509  | 0.152626 | 0.00094  | 0.205965 | 7.22E-06 | 0.315944 | 2.77E-12 | 0.070424 | 0.12859  |
| 0.06153  | 0.257044 | 1.75E-08 | 0.329073 | 2.95E-13 | 0.281483 | 5.93E-10 | 0.261844 | 9.26E-09 |
| 0.03364  | 0.12384  | 0.00738  | 0.245324 | 7.89E-08 | 0.278079 | 9.70E-10 | 0.067326 | 0.14632  |
| 0.49302  | -0.01072 | 0.81727  | -0.01073 | 0.81715  | -0.15803 | 0.00061  | 0.057411 | 0.21558  |
| 6.11E-05 | 0.153016 | 0.00091  | 0.186957 | 4.80E-05 | 0.253021 | 2.96E-08 | -0.06221 | 0.17957  |
| 0.00124  | 0.274817 | 1.54E-09 | 0.406401 | 5.33E-20 | 0.423607 | 9.27E-22 | 0.268029 | 3.99E-09 |
| 0.38154  | 0.116344 | 0.01187  | 0.160432 | 0.0005   | 0.200385 | 1.28E-05 | 0.18033  | 8.90E-05 |
| 0.01443  | -0.10501 | 0.02324  | -0.11817 | 0.01059  | -0.19525 | 2.15E-05 | 0.145663 | 0.0016   |
| 0.04528  | 0.310698 | 6.56E-12 | 0.366306 | 2.82E-16 | 0.514328 | 6.76E-33 | 0.178566 | 0.0001   |
| 0.0008   | 0.181843 | 7.75E-05 | 0.266629 | 4.84E-09 | 0.242846 | 1.07E-07 | 0.16444  | 0.00036  |
| 0.74703  | 0.310775 | 6.48E-12 | 0.359719 | 1.03E-15 | 0.471076 | 3.60E-27 | 0.228998 | 5.67E-07 |
| 0.34612  | 0.339643 | 4.50E-14 | 0.389764 | 2.16E-18 | 0.491211 | 9.81E-30 | 0.147142 | 0.00143  |
| 0.0007   | -0.19561 | 2.07E-05 | -0.0985  | 0.03334  | -0.00626 | 0.89259  | -0.16442 | 0.00036  |
| 2.29E-13 | -0.20227 | 1.06E-05 | -0.14004 | 0.00242  | 0.039652 | 0.3926   | -0.17828 | 0.00011  |
| 0.00486  | 0.224264 | 9.79E-07 | 0.240712 | 1.40E-07 | 0.30218  | 2.57E-11 | 0.159428 | 0.00054  |
| 0.81788  | -0.08856 | 0.05583  | -0.16182 | 0.00045  | -0.25486 | 2.33E-08 | 0.025734 | 0.57909  |
| 0.00438  | -0.07564 | 0.10255  | -0.07214 | 0.1195   | -0.20162 | 1.13E-05 | -0.12675 | 0.00609  |
| 1.25E-06 | 0.019154 | 0.67972  | 0.221922 | 1.28E-06 | 0.294869 | 8.02E-11 | 0.02228  | 0.63105  |
| 0.09595  | -0.14637 | 0.00152  | -0.01188 | 0.79795  | -0.02292 | 0.62133  | -0.21279 | 3.49E-06 |
| 0.42719  | 0.160298 | 0.00051  | 0.14705  | 0.00144  | 0.21019  | 4.62E-06 | 0.072401 | 0.11818  |
| 0.46287  | 0.119745 | 0.00959  | 0.202456 | 1.04E-05 | 0.247483 | 6.02E-08 | 0.001607 | 0.97238  |
| 6.42E-06 | 0.138343 | 0.00274  | 0.145302 | 0.00164  | 0.149135 | 0.00123  | 0.094881 | 0.04041  |
| 0.00155  | -0.23284 | 3.61E-07 | -0.2102  | 4.62E-06 | -0.21391 | 3.10E-06 | -0.11432 | 0.01344  |
| 4.54E-12 | 0.136302 | 0.00316  | 0.305707 | 1.47E-11 | 0.235755 | 2.55E-07 | 0.306678 | 1.26E-11 |
| 0.00221  | 0.011454 | 0.80502  | 0.150109 | 0.00114  | 0.224521 | 9.50E-07 | -0.05961 | 0.19852  |
| 1.17E-09 | -0.22384 | 1.03E-06 | -0.19863 | 1.53E-05 | -0.28862 | 2.07E-10 | -0.2464  | 6.90E-08 |
| 0.00658  | -0.37231 | 8.41E-17 | -0.15181 | 0.001    | -0.33455 | 1.12E-13 | -0.1133  | 0.01429  |
| 0.10569  | 0.110785 | 0.01662  | 0.155111 | 0.00077  | 0.28503  | 3.53E-10 | -0.00358 | 0.93845  |
| 0.09806  | -0.38733 | 3.65E-18 | -0.28416 | 4.01E-10 | -0.35209 | 4.48E-15 | -0.0746  | 0.10739  |
| 2.20E-10 | -0.43433 | 6.58E-23 | -0.40799 | 3.70E-20 | -0.48777 | 2.77E-29 | -0.33426 | 1.18E-13 |
| 0.07204  | 0.266788 | 4.73E-09 | 0.299552 | 3.89E-11 | 0.429469 | 2.21E-22 | 0.056173 | 0.22566  |
| 0.39545  | 0.192393 | 2.84E-05 | 0.311683 | 5.59E-12 | 0.393316 | 9.97E-19 | 0.224394 | 9.64E-07 |
| 2.92E-07 | 0.246397 | 6.90E-08 | 0.235344 | 2.68E-07 | 0.287246 | 2.54E-10 | 0.176129 | 0.00013  |
| 0.18334  | 0.234676 | 2.90E-07 | 0.246717 | 6.63E-08 | 0.266438 | 4.96E-09 | 0.140482 | 0.00234  |
| 0.01234  | 0.195176 | 2.16E-05 | 0.193417 | 2.57E-05 | 0.296    | 6.74E-11 | 0.133515 | 0.00385  |
| 1.02E-08 | -0.0501  | 0.27995  | -0.02637 | 0.56971  | 0.13025  | 0.00481  | -0.12605 | 0.00638  |
| 0.07819  | -0.26667 | 4.81E-09 | -0.16465 | 0.00035  | -0.2626  | 8.36E-09 | -0.12628 | 0.00628  |
| 0.0298   | -0.04033 | 0.38453  | 0.12374  | 0.00742  | 0.200652 | 1.25E-05 | -0.0877  | 0.05825  |
| 2.61E-14 | 0.336774 | 7.56E-14 | 0.382684 | 9.79E-18 | 0.355871 | 2.18E-15 | 0.287977 | 2.28E-10 |

|          |          |          |          |          |          |          |          |          |
|----------|----------|----------|----------|----------|----------|----------|----------|----------|
| 0.08379  | -0.11306 | 0.0145   | -0.15858 | 0.00058  | -0.15538 | 0.00075  | -0.03919 | 0.39817  |
| 9.01E-06 | -0.09476 | 0.04068  | 0.133017 | 0.00398  | 0.160842 | 0.00048  | -0.11698 | 0.01141  |
| 0.24372  | 0.248027 | 5.62E-08 | 0.344382 | 1.89E-14 | 0.453032 | 5.17E-25 | 0.184454 | 6.08E-05 |
| 2.90E-10 | 0.263407 | 7.50E-09 | 0.259205 | 1.32E-08 | 0.239262 | 1.67E-07 | 0.299456 | 3.94E-11 |
| 0.97146  | 0.164961 | 0.00034  | 0.251112 | 3.79E-08 | 0.304781 | 1.70E-11 | 0.100541 | 0.02983  |
| 0.05711  | -0.10807 | 0.01949  | -0.20947 | 4.99E-06 | -0.26774 | 4.15E-09 | 0.034879 | 0.45208  |
| 0.02551  | -0.06177 | 0.18266  | -0.02192 | 0.63663  | 0.015077 | 0.74521  | -0.0997  | 0.03123  |
| 0.40723  | 0.135125 | 0.00344  | 0.213998 | 3.07E-06 | 0.28433  | 3.91E-10 | 0.0774   | 0.09479  |
| 1.35E-09 | 0.257681 | 1.61E-08 | 0.331223 | 2.03E-13 | 0.270548 | 2.81E-09 | 0.302919 | 2.29E-11 |
| 0.82139  | -0.02871 | 0.53597  | -0.00099 | 0.98294  | -0.10358 | 0.02519  | 0.020624 | 0.65666  |
| 8.88E-06 | -0.01603 | 0.72969  | 0.11258  | 0.01493  | 0.191621 | 3.07E-05 | -0.06246 | 0.17786  |
| 0.33793  | 0.274784 | 1.55E-09 | 0.315625 | 2.92E-12 | 0.403708 | 9.85E-20 | 0.163116 | 0.0004   |
| 0.02429  | 0.057271 | 0.2167   | 0.059363 | 0.20036  | 0.199634 | 1.38E-05 | -0.06479 | 0.16217  |
| 0.01349  | 0.106787 | 0.02099  | 0.148891 | 0.00125  | 0.196801 | 1.84E-05 | 0.087166 | 0.05981  |
| 0.39185  | 0.224156 | 9.91E-07 | 0.076916 | 0.09688  | 0.248448 | 5.32E-08 | 0.081068 | 0.08011  |
| 0.82042  | -0.08859 | 0.05573  | -0.21544 | 2.62E-06 | -0.25303 | 2.96E-08 | -0.15263 | 0.00094  |
| 0.58766  | 0.058936 | 0.20362  | 0.121103 | 0.0088   | 0.190966 | 3.27E-05 | 0.100378 | 0.03009  |
| 0.80801  | 0.140697 | 0.00231  | 0.244428 | 8.83E-08 | 0.330082 | 2.48E-13 | 0.04864  | 0.29421  |
| 0.77688  | 0.139622 | 0.00249  | 0.292805 | 1.10E-10 | 0.349397 | 7.44E-15 | 0.179034 | 0.0001   |
| 0.00845  | 0.030088 | 0.51659  | 0.109527 | 0.0179   | 0.13294  | 0.004    | -0.1002  | 0.03039  |
| 0.08532  | 0.092767 | 0.04511  | 0.094789 | 0.04061  | 0.160541 | 0.0005   | 0.056985 | 0.21902  |
| 0.61807  | 0.24929  | 4.78E-08 | 0.184608 | 5.99E-05 | 0.337693 | 6.41E-14 | 0.047256 | 0.30818  |
| 5.12E-32 | 0.293016 | 1.06E-10 | 0.268193 | 3.90E-09 | 0.264514 | 6.45E-09 | 0.369749 | 1.41E-16 |
| 0.08507  | 0.132623 | 0.00409  | 0.218829 | 1.80E-06 | 0.254118 | 2.57E-08 | 0.261897 | 9.19E-09 |
| 0.94104  | 0.384772 | 6.29E-18 | 0.388657 | 2.74E-18 | 0.46652  | 1.30E-26 | 0.190563 | 3.40E-05 |
| 0.06609  | -0.10466 | 0.02371  | -0.09289 | 0.04483  | -0.01524 | 0.74258  | -0.16747 | 0.00028  |
| 1.53E-15 | 0.385147 | 5.81E-18 | 0.365456 | 3.34E-16 | 0.317535 | 2.12E-12 | 0.194803 | 2.24E-05 |
| 0.66492  | 0.08452  | 0.06802  | 0.051897 | 0.26303  | 0.100715 | 0.02954  | 0.004887 | 0.91611  |
| 0.11785  | 0.018971 | 0.68261  | 0.086883 | 0.06064  | 0.17336  | 0.00017  | -0.06408 | 0.16685  |
| 0.0003   | -0.08102 | 0.08027  | -0.03712 | 0.42359  | -0.02816 | 0.54382  | -0.19216 | 2.91E-05 |
| 0.01355  | 0.163557 | 0.00039  | 0.226477 | 7.59E-07 | 0.315459 | 3.00E-12 | 0.026996 | 0.56061  |
| 0.14435  | 0.049646 | 0.28433  | 0.153081 | 0.0009   | 0.104247 | 0.02426  | 0.08889  | 0.05491  |
| 0.00105  | -0.14843 | 0.0013   | -0.10935 | 0.01809  | -0.11328 | 0.01431  | -0.23283 | 3.62E-07 |
| 1.12E-05 | 0.103032 | 0.02598  | -0.09343 | 0.0436   | -0.1416  | 0.00216  | -0.17151 | 0.0002   |
| 1.27E-05 | 0.218267 | 1.92E-06 | 0.247528 | 5.98E-08 | 0.25953  | 1.26E-08 | 0.14227  | 0.00206  |
| 0.19996  | 0.015725 | 0.73466  | -0.05782 | 0.21231  | -0.04768 | 0.30386  | 0.137847 | 0.00283  |
| 0.00012  | -0.12759 | 0.00576  | -0.06391 | 0.16795  | -0.00215 | 0.963    | -0.17162 | 0.00019  |
| 0.00237  | -0.02367 | 0.6099   | 0.060073 | 0.19502  | 0.134092 | 0.00369  | -0.11273 | 0.01479  |
| 1.30E-09 | -0.09686 | 0.03641  | 0.01745  | 0.70683  | 0.09993  | 0.03084  | -0.23407 | 3.12E-07 |
| 0.00012  | 0.227445 | 6.79E-07 | 0.279613 | 7.78E-10 | 0.294478 | 8.52E-11 | 0.084863 | 0.06691  |
| 4.68E-08 | -0.19542 | 2.11E-05 | -0.08337 | 0.07187  | -0.05582 | 0.22863  | -0.21054 | 4.45E-06 |
| 0.98521  | 0.022663 | 0.62519  | 0.032425 | 0.48454  | 0.087503 | 0.05882  | -0.0648  | 0.16212  |
| 0.00236  | 0.032764 | 0.47999  | 0.039301 | 0.3968   | 0.111283 | 0.01613  | -0.07554 | 0.10301  |
| 1.07E-05 | 0.37028  | 1.27E-16 | 0.190139 | 3.54E-05 | 0.21168  | 3.94E-06 | 0.243478 | 9.94E-08 |
| 0.38248  | 0.092458 | 0.04583  | 0.17892  | 0.0001   | 0.189368 | 3.81E-05 | 0.085313 | 0.06547  |

|          |          |          |          |          |          |          |          |          |
|----------|----------|----------|----------|----------|----------|----------|----------|----------|
| 0.69214  | 0.1528   | 0.00092  | 0.168643 | 0.00025  | 0.263194 | 7.72E-09 | -0.00735 | 0.87417  |
| 0.00643  | 0.141052 | 0.00225  | 0.241663 | 1.24E-07 | 0.258502 | 1.45E-08 | 0.085454 | 0.06502  |
| 0.76151  | 0.076409 | 0.09911  | 0.184856 | 5.85E-05 | 0.222711 | 1.17E-06 | 0.050696 | 0.27426  |
| 3.81E-15 | 0.143726 | 0.00185  | 0.108321 | 0.01921  | 0.08181  | 0.07737  | 0.18613  | 5.19E-05 |
| 0.80586  | 0.026969 | 0.561    | 0.144321 | 0.00177  | 0.184667 | 5.96E-05 | -0.01438 | 0.75662  |
| 0.45897  | 0.341858 | 3.01E-14 | 0.310131 | 7.19E-12 | 0.411519 | 1.64E-20 | 0.146828 | 0.00146  |
| 0.50034  | 0.318767 | 1.73E-12 | 0.18556  | 5.48E-05 | 0.266143 | 5.17E-09 | 0.020042 | 0.66574  |
| 0.54734  | 0.147615 | 0.00138  | 0.205635 | 7.47E-06 | 0.365593 | 3.25E-16 | 0.080467 | 0.08238  |
| 0.78278  | 0.242404 | 1.14E-07 | 0.146932 | 0.00145  | 0.277855 | 1.00E-09 | -0.00875 | 0.85043  |
| 0.00023  | 0.005325 | 0.90863  | 0.090555 | 0.0505   | 0.105125 | 0.02309  | -0.1079  | 0.01969  |
| 0.78739  | 0.252892 | 3.01E-08 | 0.24113  | 1.33E-07 | 0.352256 | 4.34E-15 | 0.14242  | 0.00203  |
| 2.57E-08 | 0.144828 | 0.0017   | 0.26639  | 5.00E-09 | 0.20841  | 5.58E-06 | 0.168544 | 0.00025  |
| 0.0006   | 0.074503 | 0.10785  | 0.111559 | 0.01587  | 0.170288 | 0.00022  | -0.10802 | 0.01955  |
| 0.18157  | 0.09583  | 0.03844  | 0.165307 | 0.00033  | 0.190869 | 3.30E-05 | 0.101345 | 0.02853  |
| 0.14191  | 0.128129 | 0.00556  | 0.125503 | 0.00662  | 0.203922 | 8.92E-06 | -0.0361  | 0.4364   |
| 0.46257  | -0.04731 | 0.30758  | 0.071284 | 0.12398  | 0.109613 | 0.01781  | -0.06511 | 0.16009  |
| 0.11102  | 0.23343  | 3.37E-07 | 0.254858 | 2.33E-08 | 0.362609 | 5.87E-16 | 0.125213 | 0.00674  |
| 0.46214  | 0.299061 | 4.20E-11 | 0.277287 | 1.09E-09 | 0.361041 | 7.98E-16 | 0.098545 | 0.03325  |
| 0.02075  | 0.026343 | 0.57014  | 0.080895 | 0.08075  | 0.13729  | 0.00295  | -0.01523 | 0.74279  |
| 1.30E-05 | 0.22746  | 6.78E-07 | 0.374577 | 5.29E-17 | 0.334793 | 1.08E-13 | 0.254083 | 2.58E-08 |
| 1.90E-09 | 0.241895 | 1.21E-07 | 0.267545 | 4.26E-09 | 0.260925 | 1.05E-08 | 0.236928 | 2.22E-07 |
| 0.00121  | -0.13907 | 0.0026   | 0.015036 | 0.74588  | 0.035874 | 0.43928  | -0.0697  | 0.13259  |
| 2.34E-07 | -0.31747 | 2.15E-12 | -0.2845  | 3.81E-10 | -0.31218 | 5.15E-12 | -0.21217 | 3.74E-06 |
| 0.74259  | 0.047471 | 0.30598  | 0.138664 | 0.00267  | 0.196175 | 1.96E-05 | -0.02349 | 0.61269  |
| 0.05322  | 0.200886 | 1.22E-05 | 0.224812 | 9.19E-07 | 0.213965 | 3.08E-06 | 0.23126  | 4.35E-07 |
| 8.54E-10 | 0.397291 | 4.15E-19 | 0.191447 | 3.12E-05 | 0.196741 | 1.85E-05 | 0.201574 | 1.14E-05 |
| 0.00342  | 0.141401 | 0.00219  | 0.244466 | 8.79E-08 | 0.289274 | 1.88E-10 | 0.1217   | 0.00847  |
| 1.25E-05 | -0.13793 | 0.00282  | -0.20314 | 9.68E-06 | -0.24132 | 1.30E-07 | -0.13132 | 0.00447  |
| 0.00023  | -0.07323 | 0.11399  | 0.147335 | 0.00141  | 0.168556 | 0.00025  | 0.013774 | 0.76656  |
| 7.20E-15 | 0.146373 | 0.00152  | 0.068927 | 0.13693  | -0.08106 | 0.08013  | 0.242826 | 1.08E-07 |
| 0.34642  | 0.065157 | 0.15979  | 0.175737 | 0.00013  | 0.160919 | 0.00048  | 0.054294 | 0.24159  |
| 0.0029   | 0.094506 | 0.04121  | 0.165335 | 0.00033  | 0.233043 | 3.53E-07 | 0.055173 | 0.23404  |
| 0.00115  | 0.103407 | 0.02544  | 0.096426 | 0.03725  | 0.190953 | 3.27E-05 | 0.047933 | 0.3013   |
| 0.7407   | 0.061871 | 0.18196  | 0.112894 | 0.01465  | 0.139286 | 0.00256  | -0.04178 | 0.36762  |
| 0.10041  | 0.196225 | 1.95E-05 | 0.181541 | 7.96E-05 | 0.228252 | 6.19E-07 | 0.016685 | 0.71912  |
| 2.70E-06 | 0.01068  | 0.81794  | 0.07214  | 0.11952  | 0.16919  | 0.00024  | -0.05552 | 0.23112  |
| 0.45596  | 0.067868 | 0.14309  | 0.151578 | 0.00102  | 0.168026 | 0.00027  | 0.023644 | 0.61029  |
| 0.88141  | 0.099793 | 0.03107  | -0.0022  | 0.96216  | -0.06266 | 0.17644  | 0.011063 | 0.81154  |
| 0.57492  | 0.144497 | 0.00174  | 0.173589 | 0.00016  | 0.206581 | 6.77E-06 | -0.00145 | 0.97506  |
| 0.43952  | -0.22094 | 1.43E-06 | -0.15989 | 0.00052  | -0.24893 | 5.00E-08 | -0.08701 | 0.06027  |
| 0.009    | 0.143218 | 0.00192  | 0.178344 | 0.00011  | 0.26386  | 7.05E-09 | -0.01863 | 0.68809  |
| 0.0232   | 0.196577 | 1.88E-05 | 0.189219 | 3.87E-05 | 0.245379 | 7.84E-08 | 0.134766 | 0.00352  |
| 4.51E-19 | 0.251857 | 3.44E-08 | 0.273551 | 1.85E-09 | 0.128056 | 0.00558  | 0.27829  | 9.41E-10 |
| 0.17716  | 0.295191 | 7.64E-11 | 0.289158 | 1.91E-10 | 0.379028 | 2.11E-17 | 0.15496  | 0.00078  |
| 0.91118  | 0.304463 | 1.79E-11 | 0.254412 | 2.47E-08 | 0.382232 | 1.08E-17 | 0.132998 | 0.00399  |

|          |          |          |          |          |          |          |          |          |
|----------|----------|----------|----------|----------|----------|----------|----------|----------|
| 0.2196   | 0.058654 | 0.20579  | 0.085365 | 0.0653   | 0.155027 | 0.00078  | -0.08928 | 0.05384  |
| 2.91E-05 | -0.02787 | 0.54804  | 0.112017 | 0.01544  | 0.213243 | 3.33E-06 | -0.07164 | 0.12213  |
| 0.92403  | 0.299541 | 3.89E-11 | 0.187876 | 4.40E-05 | 0.399175 | 2.73E-19 | 0.11941  | 0.0098   |
| 0.79566  | -0.03933 | 0.39649  | -0.24874 | 5.13E-08 | -0.2223  | 1.22E-06 | -0.04561 | 0.3254   |
| 0.96008  | 0.025384 | 0.58427  | 0.15671  | 0.00068  | 0.18626  | 5.13E-05 | -0.02297 | 0.62048  |
| 0.05141  | 0.060009 | 0.19549  | 0.223983 | 1.01E-06 | 0.175691 | 0.00014  | 0.152877 | 0.00092  |
| 3.35E-07 | 0.022868 | 0.62207  | 0.103274 | 0.02563  | 0.265697 | 5.49E-09 | -0.00185 | 0.96823  |
| 0.67597  | 0.072828 | 0.11602  | 0.135165 | 0.00343  | 0.160117 | 0.00051  | -0.01778 | 0.70157  |
| 0.70513  | 0.128334 | 0.00548  | 0.127424 | 0.00582  | 0.18198  | 7.65E-05 | 0.019792 | 0.66967  |
| 0.91042  | -0.05036 | 0.27746  | -0.00388 | 0.93331  | -0.00693 | 0.88123  | -0.18287 | 7.04E-05 |
| 0.25122  | -0.07878 | 0.08903  | 0.040746 | 0.37966  | 0.067745 | 0.14381  | -0.10916 | 0.01829  |
| 0.00279  | 0.144394 | 0.00176  | 0.223834 | 1.03E-06 | 0.255652 | 2.10E-08 | 0.052847 | 0.25439  |
| 9.40E-08 | 0.274339 | 1.65E-09 | 0.252306 | 3.25E-08 | 0.232074 | 3.95E-07 | 0.060834 | 0.18941  |
| 0.62826  | 0.03847  | 0.40686  | 0.132918 | 0.00401  | 0.165271 | 0.00033  | -0.00308 | 0.94704  |
| 7.79E-12 | 0.353964 | 3.13E-15 | 0.371284 | 1.04E-16 | 0.445864 | 3.43E-24 | 0.292443 | 1.16E-10 |
| 0.00132  | -0.00308 | 0.9471   | 0.109663 | 0.01776  | 0.138792 | 0.00265  | -0.06896 | 0.13673  |
| 1.36E-06 | 0.250379 | 4.16E-08 | 0.277115 | 1.11E-09 | 0.306788 | 1.23E-11 | 0.2517   | 3.51E-08 |
| 5.78E-06 | -0.15124 | 0.00104  | -0.11103 | 0.01638  | -0.05364 | 0.24731  | -0.30167 | 2.79E-11 |
| 0.03194  | 0.023032 | 0.61958  | 0.099709 | 0.03121  | 0.102483 | 0.02679  | 0.099296 | 0.03192  |
| 2.29E-08 | -0.0405  | 0.38252  | 0.087373 | 0.0592   | 0.220248 | 1.54E-06 | -0.10116 | 0.02883  |
| 2.76E-07 | -0.02931 | 0.5275   | 0.091294 | 0.04864  | 0.191423 | 3.12E-05 | -0.08964 | 0.05289  |
| 0.41642  | 0.18405  | 6.31E-05 | 0.255521 | 2.14E-08 | 0.317057 | 2.30E-12 | 0.062056 | 0.18065  |
| 0.32636  | 0.211206 | 4.14E-06 | 0.335876 | 8.88E-14 | 0.437551 | 2.92E-23 | 0.183427 | 6.69E-05 |
| 7.26E-12 | 0.125817 | 0.00648  | 0.181015 | 8.36E-05 | 0.132602 | 0.0041   | 0.184827 | 5.87E-05 |
| 3.06E-10 | 0.411118 | 1.80E-20 | 0.36183  | 6.84E-16 | 0.454661 | 3.34E-25 | 0.291032 | 1.44E-10 |
| 0.27718  | -0.02611 | 0.5735   | 0.052716 | 0.25557  | 0.057939 | 0.21139  | -0.05705 | 0.21848  |
| 6.60E-05 | 0.289925 | 1.70E-10 | 0.312072 | 5.24E-12 | 0.358532 | 1.30E-15 | 0.14173  | 0.00214  |
| 1.19E-14 | 0.096508 | 0.03708  | 0.209247 | 5.11E-06 | 0.150528 | 0.0011   | 0.197781 | 1.67E-05 |
| 0.91748  | 0.300004 | 3.62E-11 | 0.082827 | 0.07375  | 0.089969 | 0.05202  | 0.046391 | 0.31713  |
| 0.22315  | -0.29249 | 1.15E-10 | -0.22725 | 6.95E-07 | -0.35996 | 9.86E-16 | -0.0222  | 0.63223  |
| 0.0001   | 0.168769 | 0.00025  | 0.206447 | 6.86E-06 | 0.289358 | 1.85E-10 | 0.07314  | 0.11446  |
| 0.01013  | 0.007425 | 0.87286  | -0.0529  | 0.25393  | 0.033081 | 0.47574  | -0.06269 | 0.17625  |
| 0.91676  | 0.105234 | 0.02295  | 0.201695 | 1.12E-05 | 0.25718  | 1.72E-08 | 0.048825 | 0.29238  |
| 0.37993  | -0.03335 | 0.47219  | 0.046661 | 0.31432  | 0.085765 | 0.06405  | -0.05662 | 0.22196  |
| 0.00989  | 0.204394 | 8.50E-06 | 0.160996 | 0.00048  | 0.257767 | 1.59E-08 | 0.186161 | 5.17E-05 |
| 0.05523  | 0.129992 | 0.0049   | 0.155787 | 0.00073  | 0.155711 | 0.00073  | 0.140994 | 0.00226  |
| 0.09262  | -0.00739 | 0.87349  | 0.075113 | 0.10498  | 0.167281 | 0.00028  | -0.11166 | 0.01578  |
| 0.00257  | 0.08104  | 0.08021  | 0.133117 | 0.00395  | 0.216504 | 2.33E-06 | 0.054099 | 0.24329  |
| 0.05047  | -0.09173 | 0.04758  | -0.01003 | 0.82884  | 0.046477 | 0.31623  | -0.08868 | 0.05549  |
| 0.43217  | 0.047448 | 0.30622  | 0.120905 | 0.00891  | 0.166187 | 0.00031  | -0.043   | 0.35388  |
| 9.23E-14 | -0.18786 | 4.41E-05 | -0.0518  | 0.26396  | 0.064515 | 0.16395  | -0.08687 | 0.06068  |
| 0.00018  | 0.090656 | 0.05024  | 0.152663 | 0.00093  | 0.335054 | 1.03E-13 | -0.07624 | 0.09985  |
| 0.03537  | 0.135895 | 0.00326  | 0.174986 | 0.00014  | 0.236467 | 2.34E-07 | 0.058719 | 0.20529  |
| 0.93236  | 0.122354 | 0.00812  | 0.239691 | 1.58E-07 | 0.319074 | 1.64E-12 | 0.152869 | 0.00092  |
| 0.37923  | 0.069068 | 0.13613  | 0.100259 | 0.03029  | 0.108389 | 0.01913  | 0.086221 | 0.06264  |

|          |          |          |          |          |          |          |          |          |
|----------|----------|----------|----------|----------|----------|----------|----------|----------|
| 0.92168  | 0.035408 | 0.44525  | 0.112731 | 0.01479  | 0.201674 | 1.12E-05 | 0.020239 | 0.66266  |
| 0.06951  | 0.020639 | 0.65642  | 0.04927  | 0.288    | 0.094648 | 0.04091  | -0.2029  | 9.91E-06 |
| 3.42E-05 | 0.025981 | 0.57545  | 0.111323 | 0.0161   | 0.212723 | 3.52E-06 | -0.11067 | 0.01673  |
| 0.01484  | 0.28888  | 1.99E-10 | 0.274166 | 1.69E-09 | 0.355311 | 2.42E-15 | 0.239497 | 1.62E-07 |
| 0.1681   | -0.03295 | 0.47743  | 0.045276 | 0.32892  | 0.083465 | 0.07154  | -0.10201 | 0.0275   |
| 0.15265  | 0.140895 | 0.00227  | 0.104873 | 0.02342  | 0.313344 | 4.25E-12 | 0.011818 | 0.79895  |
| 0.69118  | 0.12638  | 0.00624  | 0.150531 | 0.0011   | 0.13438  | 0.00362  | 0.04478  | 0.33425  |
| 0.37256  | 0.090431 | 0.05082  | 0.13531  | 0.00339  | 0.176229 | 0.00013  | -0.05231 | 0.25928  |
| 2.16E-09 | 0.198661 | 1.53E-05 | 0.244703 | 8.53E-08 | 0.181854 | 7.74E-05 | 0.248845 | 5.06E-08 |
| 0.00175  | 0.195225 | 2.15E-05 | 0.232188 | 3.90E-07 | 0.252752 | 3.07E-08 | 0.093003 | 0.04456  |
| 0.8578   | 0.110929 | 0.01648  | 0.191785 | 3.02E-05 | 0.211767 | 3.90E-06 | 0.044043 | 0.34227  |
| 6.50E-12 | 0.194796 | 2.25E-05 | 0.279137 | 8.33E-10 | 0.186668 | 4.93E-05 | 0.282234 | 5.32E-10 |
| 0.01     | 0.1319   | 0.0043   | 0.222011 | 1.26E-06 | 0.201289 | 1.17E-05 | 0.073065 | 0.11484  |
| 0.01861  | 0.127796 | 0.00568  | 0.101816 | 0.0278   | 0.151023 | 0.00106  | -0.03801 | 0.41253  |
| 0.54079  | 0.091039 | 0.04928  | 0.216202 | 2.41E-06 | 0.304522 | 1.77E-11 | 0.029612 | 0.52324  |
| 0.5534   | 0.092428 | 0.0459   | 0.155898 | 0.00072  | 0.212499 | 3.61E-06 | 0.089785 | 0.0525   |
| 0.00035  | -0.14717 | 0.00143  | -0.06969 | 0.13264  | -0.1763  | 0.00013  | 0.06944  | 0.13403  |
| 2.33E-07 | -0.01452 | 0.75425  | -0.06161 | 0.18384  | -0.14253 | 0.00202  | 0.025852 | 0.57735  |
| 4.26E-06 | -0.04903 | 0.29034  | -0.02465 | 0.59515  | 0.084977 | 0.06654  | -0.19228 | 2.87E-05 |
| 0.04179  | -0.12046 | 0.00917  | -0.13925 | 0.00256  | -0.25645 | 1.89E-08 | -0.10323 | 0.02569  |
| 0.5854   | 0.090136 | 0.05158  | 0.166334 | 0.00031  | 0.254806 | 2.35E-08 | 0.026159 | 0.57284  |
| 1.73E-15 | -0.00967 | 0.83494  | -0.02066 | 0.6561   | 0.159152 | 0.00056  | -0.17119 | 0.0002   |
| 0.35689  | -0.20925 | 5.11E-06 | -0.27244 | 2.16E-09 | -0.3237  | 7.48E-13 | -0.18034 | 8.89E-05 |
| 5.50E-09 | -0.11017 | 0.01723  | -0.12014 | 0.00936  | -0.03875 | 0.40347  | -0.33419 | 1.20E-13 |
| 0.00239  | 0.055245 | 0.23343  | 0.083333 | 0.072    | 0.150132 | 0.00114  | 0.115789 | 0.01228  |
| 0.23161  | 0.164902 | 0.00035  | 0.272219 | 2.23E-09 | 0.323806 | 7.34E-13 | 0.222369 | 1.21E-06 |
| 0.0676   | 0.166896 | 0.00029  | 0.191632 | 3.06E-05 | 0.361713 | 6.99E-16 | -0.00626 | 0.89276  |
| 6.83E-07 | 0.176163 | 0.00013  | 0.282094 | 5.43E-10 | 0.279442 | 7.97E-10 | 0.113801 | 0.01387  |
| 9.10E-06 | 0.176054 | 0.00013  | 0.223579 | 1.06E-06 | 0.258606 | 1.43E-08 | 0.241652 | 1.25E-07 |
| 5.87E-08 | -0.04968 | 0.28404  | -0.03151 | 0.4969   | 0.073443 | 0.11296  | -0.22216 | 1.24E-06 |
| 0.27146  | -0.04924 | 0.28826  | 0.071299 | 0.1239   | 0.066766 | 0.14971  | -0.09547 | 0.03917  |
| 6.88E-14 | 0.506184 | 9.37E-32 | 0.422805 | 1.13E-21 | 0.511594 | 1.65E-32 | 0.393693 | 9.18E-19 |
| 0.81957  | 0.160198 | 0.00051  | 0.18137  | 8.09E-05 | 0.261579 | 9.59E-09 | 0.061315 | 0.18593  |
| 1.10E-07 | 0.205121 | 7.88E-06 | 0.256359 | 1.92E-08 | 0.345599 | 1.51E-14 | 0.243842 | 9.50E-08 |
| 0.04248  | 0.097926 | 0.03438  | 0.136772 | 0.00306  | 0.188481 | 4.15E-05 | 0.115941 | 0.01217  |
| 1.27E-06 | 0.120234 | 0.0093   | 0.183982 | 6.35E-05 | 0.277192 | 1.10E-09 | -0.03942 | 0.39535  |
| 0.00037  | 0.067332 | 0.14628  | 0.107677 | 0.01994  | 0.138519 | 0.0027   | 0.122199 | 0.0082   |
| 0.00723  | 0.015668 | 0.73559  | 0.093858 | 0.04263  | 0.165029 | 0.00034  | -0.10253 | 0.02672  |
| 1.89E-06 | 0.11843  | 0.01042  | 0.067929 | 0.14272  | 0.092104 | 0.04667  | 0.179077 | 9.98E-05 |
| 1.11E-05 | 0.076954 | 0.09671  | 0.060353 | 0.19294  | 0.066997 | 0.1483   | 0.11389  | 0.01379  |
| 0.09121  | -0.0518  | 0.26395  | 0.068716 | 0.13814  | 0.032779 | 0.47978  | 0.060244 | 0.19374  |
| 0.03305  | -0.36367 | 4.76E-16 | -0.38547 | 5.42E-18 | -0.4424  | 8.42E-24 | -0.22732 | 6.89E-07 |
| 0.0177   | 0.149523 | 0.00119  | 0.215089 | 2.72E-06 | 0.243114 | 1.04E-07 | 0.129127 | 0.00519  |
| 0.91772  | -0.02196 | 0.63594  | 0.059248 | 0.20123  | 0.071282 | 0.12399  | -0.0277  | 0.55048  |
| 0.78     | -0.09393 | 0.04246  | 0.057886 | 0.2118   | 0.027867 | 0.54803  | -0.03076 | 0.5072   |



|          |          |          |          |          |          |          |          |          |
|----------|----------|----------|----------|----------|----------|----------|----------|----------|
| 7.14E-05 | 0.065031 | 0.1606   | 0.174749 | 0.00015  | 0.172853 | 0.00017  | 0.106533 | 0.0213   |
| 0.04233  | -0.05052 | 0.27594  | 0.121088 | 0.00881  | 0.067956 | 0.14257  | -0.00211 | 0.96369  |
| 0.54802  | 0.150105 | 0.00114  | 0.216859 | 2.24E-06 | 0.292984 | 1.07E-10 | 0.081436 | 0.07874  |
| 2.35E-09 | 0.002109 | 0.96375  | 0.169347 | 0.00024  | 0.248362 | 5.38E-08 | 0.004785 | 0.91786  |
| 0.01759  | -0.05988 | 0.19645  | 0.040393 | 0.3838   | 0.106595 | 0.02123  | -0.07461 | 0.10734  |
| 0.00319  | 0.096457 | 0.03718  | 0.125547 | 0.0066   | 0.113276 | 0.01432  | 0.059633 | 0.19831  |
| 3.52E-29 | 0.239121 | 1.70E-07 | 0.266418 | 4.98E-09 | 0.199549 | 1.40E-05 | 0.297179 | 5.62E-11 |
| 0.04472  | 0.094847 | 0.04048  | 0.186285 | 5.11E-05 | 0.155846 | 0.00073  | 0.05439  | 0.24076  |
| 0.42536  | 0.08616  | 0.06283  | 0.186891 | 4.83E-05 | 0.23537  | 2.67E-07 | 0.003704 | 0.93637  |
| 0.53275  | 0.144595 | 0.00173  | 0.173518 | 0.00016  | 0.2988   | 4.37E-11 | 0.07684  | 0.09721  |
| 0.00015  | 0.269825 | 3.11E-09 | 0.311776 | 5.50E-12 | 0.381524 | 1.25E-17 | 0.223756 | 1.04E-06 |
| 0.01998  | 0.147567 | 0.00138  | 0.145426 | 0.00163  | 0.257681 | 1.61E-08 | 0.085524 | 0.0648   |
| 7.84E-11 | 0.272113 | 2.26E-09 | 0.422971 | 1.08E-21 | 0.371002 | 1.10E-16 | 0.249918 | 4.41E-08 |
| 0.02085  | 0.095199 | 0.03974  | 0.116289 | 0.01191  | 0.177682 | 0.00011  | 0.058404 | 0.20774  |
| 0.01603  | 0.019048 | 0.68139  | -0.09106 | 0.04921  | 0.112681 | 0.01484  | -0.0358  | 0.44022  |
| 4.90E-05 | 0.084653 | 0.06759  | 0.124543 | 0.00705  | 0.226687 | 7.41E-07 | -0.0424  | 0.3606   |
| 0.02429  | 0.160263 | 0.00051  | 0.303668 | 2.03E-11 | 0.224579 | 9.44E-07 | 0.299425 | 3.96E-11 |
| 2.34E-13 | 0.226957 | 7.19E-07 | 0.204538 | 8.37E-06 | 0.239759 | 1.57E-07 | 0.216393 | 2.36E-06 |
| 0.00035  | 0.15718  | 0.00065  | 0.208281 | 5.66E-06 | 0.192373 | 2.85E-05 | 0.118732 | 0.01023  |
| 0.25836  | 0.059093 | 0.20242  | 0.166872 | 0.00029  | 0.19627  | 1.94E-05 | -0.03692 | 0.4261   |
| 0.00021  | -0.13214 | 0.00423  | -0.08178 | 0.07748  | -0.17157 | 0.0002   | -0.12442 | 0.0071   |
| 0.0235   | -0.16264 | 0.00042  | -0.19868 | 1.52E-05 | -0.22877 | 5.83E-07 | 0.070528 | 0.12803  |
| 0.66089  | -0.12122 | 0.00874  | -0.10176 | 0.02788  | -0.22664 | 7.45E-07 | -0.01051 | 0.82073  |
| 0.09331  | 0.114994 | 0.0129   | 0.13894  | 0.00262  | 0.202596 | 1.02E-05 | 0.151731 | 0.001    |
| 0.53039  | 0.113765 | 0.0139   | 0.204932 | 8.04E-06 | 0.287487 | 2.45E-10 | 0.040653 | 0.38075  |
| 0.15208  | 0.050257 | 0.27844  | 0.242988 | 1.06E-07 | 0.274369 | 1.65E-09 | 0.085908 | 0.0636   |
| 0.27228  | 0.120191 | 0.00933  | 0.224359 | 9.68E-07 | 0.231679 | 4.14E-07 | 0.197948 | 1.64E-05 |
| 0.75812  | 0.280333 | 7.01E-10 | 0.300593 | 3.30E-11 | 0.386931 | 3.97E-18 | 0.240823 | 1.38E-07 |
| 0.00066  | 0.103748 | 0.02496  | 0.173475 | 0.00016  | 0.176223 | 0.00013  | 0.008702 | 0.85123  |
| 0.0129   | 0.215094 | 2.72E-06 | 0.334745 | 1.09E-13 | 0.294663 | 8.28E-11 | 0.197511 | 1.71E-05 |
| 0.01024  | 0.171804 | 0.00019  | 0.276828 | 1.16E-09 | 0.349703 | 7.03E-15 | 0.148114 | 0.00133  |
| 1.55E-06 | -0.47066 | 4.05E-27 | -0.26444 | 6.52E-09 | -0.36564 | 3.22E-16 | -0.28681 | 2.71E-10 |
| 0.10284  | 0.201559 | 1.14E-05 | 0.094565 | 0.04108  | 0.182994 | 6.96E-05 | -0.11384 | 0.01383  |
| 0.04373  | 0.033204 | 0.4741   | 0.119007 | 0.01005  | 0.186237 | 5.14E-05 | -0.04887 | 0.29191  |
| 5.42E-05 | 0.095832 | 0.03844  | -0.02168 | 0.64028  | -0.04935 | 0.28723  | 0.085874 | 0.06371  |
| 0.00203  | -0.08507 | 0.06623  | -0.0053  | 0.90912  | 0.054391 | 0.24075  | -0.14685 | 0.00146  |
| 1.08E-11 | 0.276573 | 1.20E-09 | 0.37665  | 3.45E-17 | 0.350203 | 6.39E-15 | 0.247641 | 5.90E-08 |
| 0.64177  | 0.135486 | 0.00335  | 0.176639 | 0.00012  | 0.246188 | 7.08E-08 | 0.075932 | 0.10124  |
| 0.3139   | 0.117774 | 0.01086  | 0.162556 | 0.00042  | 0.215344 | 2.65E-06 | 0.054096 | 0.24331  |
| 0.0771   | -0.13123 | 0.0045   | -0.02151 | 0.64285  | 0.022577 | 0.62651  | -0.14469 | 0.00172  |
| 0.16932  | 0.20896  | 5.27E-06 | 0.295199 | 7.63E-11 | 0.292416 | 1.17E-10 | 0.188485 | 4.15E-05 |
| 0.00785  | -0.02719 | 0.55773  | 0.094043 | 0.04222  | 0.127488 | 0.0058   | -0.08101 | 0.08031  |
| 6.75E-11 | 0.291003 | 1.45E-10 | 0.390895 | 1.69E-18 | 0.397245 | 4.19E-19 | 0.256777 | 1.81E-08 |
| 5.73E-14 | 0.208611 | 5.46E-06 | 0.220349 | 1.52E-06 | 0.212129 | 3.75E-06 | 0.227027 | 7.13E-07 |
| 0.45294  | 0.134286 | 0.00365  | 0.150369 | 0.00112  | 0.165669 | 0.00032  | 0.104852 | 0.02345  |

|          |          |          |          |          |          |          |          |          |
|----------|----------|----------|----------|----------|----------|----------|----------|----------|
| 0.32495  | 0.075408 | 0.10362  | 0.213099 | 3.38E-06 | 0.144021 | 0.00181  | 0.15021  | 0.00113  |
| 5.71E-09 | 0.268714 | 3.63E-09 | 0.308473 | 9.41E-12 | 0.341058 | 3.48E-14 | 0.304806 | 1.70E-11 |
| 3.14E-07 | 0.11862  | 0.0103   | 0.144609 | 0.00173  | 0.204054 | 8.80E-06 | -0.08157 | 0.07826  |
| 0.02367  | 0.022078 | 0.63415  | 0.04322  | 0.35137  | 0.133001 | 0.00399  | -0.02039 | 0.66035  |
| 0.76599  | 0.264969 | 6.07E-09 | 0.330446 | 2.32E-13 | 0.411399 | 1.68E-20 | 0.165141 | 0.00034  |
| 0.71659  | 0.022887 | 0.62178  | 0.12944  | 0.00509  | 0.122358 | 0.00812  | -0.10364 | 0.02512  |
| 0.00029  | 0.27415  | 1.70E-09 | 0.242258 | 1.16E-07 | 0.363577 | 4.85E-16 | 0.267876 | 4.07E-09 |
| 0.72497  | -0.25979 | 1.22E-08 | -0.17057 | 0.00021  | -0.27373 | 1.80E-09 | 0.022491 | 0.62783  |
| 0.63377  | 0.010455 | 0.82172  | 0.111539 | 0.01589  | 0.118429 | 0.01042  | -0.06361 | 0.16995  |
| 0.64336  | -0.01116 | 0.80997  | 0.113908 | 0.01378  | 0.145174 | 0.00166  | -0.0703  | 0.12926  |
| 1.55E-07 | 0.125542 | 0.0066   | 0.138319 | 0.00274  | 0.213497 | 3.24E-06 | 0.148287 | 0.00131  |
| 0.38148  | 0.033922 | 0.46459  | 0.212331 | 3.67E-06 | 0.247587 | 5.94E-08 | 0.143757 | 0.00184  |
| 0.62623  | -0.03029 | 0.5138   | 0.092633 | 0.04542  | 0.084728 | 0.06734  | 0.066445 | 0.15168  |
| 0.00068  | 0.016245 | 0.72624  | 0.088744 | 0.05531  | 0.124896 | 0.00688  | -0.06497 | 0.16098  |
| 0.61317  | 0.261432 | 9.78E-09 | 0.235322 | 2.69E-07 | 0.324275 | 6.78E-13 | 0.18402  | 6.33E-05 |
| 4.08E-05 | 0.009747 | 0.8336   | 0.029838 | 0.52009  | 0.264134 | 6.79E-09 | -0.07813 | 0.09173  |
| 0.5022   | 0.214474 | 2.91E-06 | 0.236219 | 2.41E-07 | 0.357783 | 1.50E-15 | 0.104014 | 0.02459  |
| 2.02E-12 | 0.098004 | 0.03423  | 0.154037 | 0.00084  | 0.072761 | 0.11636  | 0.376865 | 3.30E-17 |
| 9.93E-16 | 0.165216 | 0.00034  | 0.220916 | 1.43E-06 | 0.195746 | 2.04E-05 | 0.185767 | 5.37E-05 |
| 0.01149  | 0.161708 | 0.00045  | 0.211487 | 4.02E-06 | 0.435316 | 5.13E-23 | 0.127269 | 0.00588  |
| 0.08709  | -0.21041 | 4.51E-06 | -0.17583 | 0.00013  | -0.2989  | 4.30E-11 | -0.14757 | 0.00138  |
| 9.63E-05 | 0.038769 | 0.40323  | 0.030561 | 0.51002  | 0.121034 | 0.00884  | 0.057725 | 0.21308  |
| 4.49E-09 | 0.011275 | 0.80799  | 0.062993 | 0.17415  | 0.108559 | 0.01894  | 0.143899 | 0.00182  |
| 0.53668  | 0.362913 | 5.52E-16 | 0.376702 | 3.42E-17 | 0.488838 | 2.01E-29 | 0.079912 | 0.08452  |
| 0.00694  | 0.179309 | 9.77E-05 | 0.201476 | 1.15E-05 | 0.232995 | 3.55E-07 | 0.04145  | 0.37147  |
| 0.77704  | 0.083328 | 0.07201  | 0.14309  | 0.00194  | 0.172945 | 0.00017  | 0.078654 | 0.08955  |
| 0.19187  | 0.162088 | 0.00044  | 0.180137 | 9.06E-05 | 0.304801 | 1.70E-11 | 0.042058 | 0.36449  |
| 2.56E-10 | 0.123046 | 0.00777  | 0.135396 | 0.00337  | 0.285437 | 3.32E-10 | -0.0612  | 0.18677  |
| 5.09E-06 | 0.234477 | 2.97E-07 | 0.267029 | 4.58E-09 | 0.293824 | 9.41E-11 | 0.127821 | 0.00567  |
| 3.03E-09 | 0.201951 | 1.09E-05 | 0.340849 | 3.62E-14 | 0.255411 | 2.17E-08 | 0.22446  | 9.57E-07 |
| 0.04328  | -0.22187 | 1.28E-06 | -0.23275 | 3.65E-07 | -0.26705 | 4.57E-09 | -0.08964 | 0.05288  |
| 2.65E-06 | 0.231316 | 4.32E-07 | 0.223162 | 1.11E-06 | 0.272705 | 2.08E-09 | 0.157384 | 0.00064  |
| 4.66E-05 | 0.204365 | 8.52E-06 | 0.217708 | 2.04E-06 | 0.238701 | 1.79E-07 | 0.120722 | 0.00902  |
| 0.00212  | 0.174587 | 0.00015  | 0.166153 | 0.00031  | 0.233256 | 3.44E-07 | 0.144033 | 0.00181  |
| 0.68818  | 0.014243 | 0.75885  | 0.031452 | 0.49775  | 0.047694 | 0.30372  | -0.08971 | 0.05271  |
| 0.45703  | 0.087825 | 0.05789  | 0.096974 | 0.03618  | 0.218946 | 1.78E-06 | 0.028119 | 0.54441  |
| 2.12E-16 | -0.08211 | 0.0763   | 0.070979 | 0.1256   | 0.126417 | 0.00623  | -0.25735 | 1.68E-08 |
| 0.15108  | 0.013274 | 0.77481  | 0.08188  | 0.07712  | 0.104198 | 0.02433  | 0.051066 | 0.27076  |
| 0.00243  | 0.080393 | 0.08266  | -0.00798 | 0.86347  | -0.01371 | 0.76758  | 0.109987 | 0.01742  |
| 0.71966  | 0.087147 | 0.05986  | 0.047902 | 0.3016   | -0.07553 | 0.10304  | 0.273348 | 1.90E-09 |
| 3.88E-05 | 0.140136 | 0.0024   | 0.208013 | 5.82E-06 | 0.28864  | 2.06E-10 | 0.067176 | 0.14721  |
| 0.00012  | 0.072361 | 0.11839  | 0.111309 | 0.01611  | 0.129091 | 0.00521  | 0.147316 | 0.00141  |
| 0.15208  | 0.100849 | 0.02932  | 0.120294 | 0.00927  | 0.17717  | 0.00012  | 0.086004 | 0.06331  |
| 0.00048  | -0.16664 | 0.0003   | -0.03739 | 0.42012  | -0.06449 | 0.16409  | -0.07676 | 0.09754  |
| 0.0038   | -0.16693 | 0.00029  | -0.01669 | 0.71906  | 0.028588 | 0.53771  | -0.19658 | 1.88E-05 |

|          |          |          |          |          |          |          |          |          |
|----------|----------|----------|----------|----------|----------|----------|----------|----------|
| 0.09061  | 0.354865 | 2.64E-15 | 0.253694 | 2.71E-08 | 0.441825 | 9.78E-24 | 0.16022  | 0.00051  |
| 5.12E-15 | 0.248595 | 5.23E-08 | 0.266235 | 5.10E-09 | 0.275516 | 1.40E-09 | 0.341225 | 3.38E-14 |
| 0.00104  | -0.01723 | 0.71037  | 0.125668 | 0.00654  | 0.158064 | 0.00061  | -0.00108 | 0.98139  |
| 0.05451  | -0.09774 | 0.03473  | 0.03766  | 0.41682  | 0.052595 | 0.25666  | -0.1451  | 0.00167  |
| 0.08625  | 0.036028 | 0.43732  | 0.195136 | 2.17E-05 | 0.242953 | 1.06E-07 | -0.03197 | 0.49064  |
| 0.19949  | 0.189294 | 3.84E-05 | 0.269801 | 3.12E-09 | 0.339518 | 4.61E-14 | 0.094684 | 0.04083  |
| 1.08E-16 | -0.30603 | 1.40E-11 | -0.23876 | 1.78E-07 | -0.14998 | 0.00115  | -0.44483 | 4.49E-24 |
| 0.08608  | -0.30145 | 2.88E-11 | -0.22956 | 5.31E-07 | -0.32376 | 7.40E-13 | -0.17611 | 0.00013  |
| 0.25933  | 0.132347 | 0.00417  | 0.259472 | 1.27E-08 | 0.311971 | 5.33E-12 | 0.053532 | 0.24827  |
| 6.59E-05 | 0.245341 | 7.88E-08 | 0.193853 | 2.46E-05 | 0.269284 | 3.35E-09 | 0.179217 | 9.86E-05 |
| 0.00072  | 0.172597 | 0.00018  | 0.219269 | 1.72E-06 | 0.262658 | 8.29E-09 | 0.194686 | 2.27E-05 |
| 0.00345  | -0.22548 | 8.52E-07 | -0.24286 | 1.07E-07 | -0.29114 | 1.42E-10 | -0.0747  | 0.10692  |
| 0.00191  | 0.170558 | 0.00021  | 0.213201 | 3.34E-06 | 0.292774 | 1.10E-10 | 0.119898 | 0.0095   |
| 4.52E-08 | 0.21154  | 4.00E-06 | 0.283139 | 4.66E-10 | 0.259063 | 1.34E-08 | 0.182575 | 7.24E-05 |
| 2.24E-05 | 0.057694 | 0.21332  | 0.157972 | 0.00061  | 0.101058 | 0.02899  | 0.172748 | 0.00018  |
| 0.88042  | 0.191259 | 3.18E-05 | 0.129478 | 0.00507  | 0.179932 | 9.23E-05 | 0.03538  | 0.44561  |
| 3.27E-10 | -0.00021 | 0.99647  | 0.154084 | 0.00084  | 0.212083 | 3.77E-06 | -0.09796 | 0.03432  |
| 0.00207  | 0.307648 | 1.08E-11 | 0.409432 | 2.66E-20 | 0.469125 | 6.24E-27 | 0.305241 | 1.58E-11 |
| 0.1783   | 0.097954 | 0.03433  | 0.056121 | 0.22609  | 0.06329  | 0.17212  | 0.032244 | 0.48698  |
| 0.02403  | -0.2104  | 4.52E-06 | -0.18998 | 3.59E-05 | -0.2679  | 4.06E-09 | -0.22681 | 7.31E-07 |
| 0.71173  | -0.19048 | 3.42E-05 | -0.25422 | 2.54E-08 | -0.29836 | 4.68E-11 | -0.1116  | 0.01583  |
| 0.05199  | 0.237868 | 1.98E-07 | 0.249558 | 4.62E-08 | 0.345287 | 1.60E-14 | 0.142596 | 0.00201  |
| 8.41E-05 | 0.078475 | 0.09028  | 0.147785 | 0.00136  | 0.238753 | 1.78E-07 | -0.05298 | 0.2532   |
| 0.00588  | 0.314622 | 3.44E-12 | 0.322874 | 8.61E-13 | 0.312624 | 4.79E-12 | 0.158108 | 0.00061  |
| 0.01062  | -0.12362 | 0.00748  | -0.09521 | 0.03971  | -0.11092 | 0.01648  | -0.00195 | 0.96653  |
| 3.85E-05 | 0.015877 | 0.7322   | 0.075899 | 0.10139  | 0.199517 | 1.40E-05 | -0.20304 | 9.77E-06 |
| 0.00332  | -0.28903 | 1.94E-10 | -0.25636 | 1.92E-08 | -0.26343 | 7.47E-09 | -0.05142 | 0.26741  |
| 1.13E-05 | 0.14556  | 0.00161  | 0.159264 | 0.00055  | 0.13587  | 0.00326  | 0.084864 | 0.0669   |
| 2.06E-07 | 0.238461 | 1.84E-07 | 0.322749 | 8.80E-13 | 0.354596 | 2.78E-15 | 0.338724 | 5.32E-14 |
| 0.00023  | 0.142273 | 0.00206  | 0.051341 | 0.26819  | 0.003341 | 0.94259  | 0.12382  | 0.00739  |
| 0.1332   | 0.005343 | 0.90833  | 0.082746 | 0.07403  | 0.092952 | 0.04468  | 0.070138 | 0.13015  |
| 0.04317  | -0.21895 | 1.78E-06 | -0.23923 | 1.68E-07 | -0.35222 | 4.36E-15 | -0.03049 | 0.51105  |
| 3.35E-07 | 0.177979 | 0.00011  | 0.213768 | 3.14E-06 | 0.421516 | 1.54E-21 | 0.119988 | 0.00945  |
| 1.65E-09 | 0.035771 | 0.44059  | 0.132872 | 0.00402  | 0.082582 | 0.07461  | 0.200722 | 1.24E-05 |
| 0.08655  | 0.201706 | 1.12E-05 | 0.314569 | 3.47E-12 | 0.325176 | 5.80E-13 | 0.204867 | 8.09E-06 |
| 2.24E-08 | 0.048938 | 0.29126  | 0.092234 | 0.04636  | 0.074607 | 0.10735  | 0.250241 | 4.24E-08 |
| 0.92045  | 0.042363 | 0.36101  | 0.09841  | 0.03349  | 0.14249  | 0.00202  | -0.01142 | 0.80565  |
| 4.42E-14 | 0.195154 | 2.17E-05 | 0.281711 | 5.74E-10 | 0.199086 | 1.46E-05 | 0.14766  | 0.00137  |
| 0.87908  | 0.223382 | 1.08E-06 | 0.162957 | 0.00041  | 0.253033 | 2.96E-08 | -0.00077 | 0.98677  |
| 0.43185  | 0.042236 | 0.36246  | 0.15977  | 0.00053  | 0.169418 | 0.00024  | 0.046968 | 0.31115  |
| 0.0557   | 0.029148 | 0.52979  | 0.064459 | 0.16432  | 0.143919 | 0.00182  | -0.04924 | 0.28828  |
| 0.20135  | 0.144283 | 0.00177  | 0.148179 | 0.00132  | 0.194692 | 2.27E-05 | 0.116238 | 0.01195  |
| 2.66E-25 | 0.222542 | 1.19E-06 | 0.258796 | 1.39E-08 | 0.216846 | 2.25E-06 | 0.263228 | 7.68E-09 |
| 0.01522  | 0.04395  | 0.3433   | 0.045093 | 0.33087  | 0.125567 | 0.00659  | -0.11788 | 0.01079  |
| 0.17821  | -0.02195 | 0.63607  | 0.170163 | 0.00022  | 0.14165  | 0.00215  | 0.05881  | 0.20459  |

|          |          |          |          |          |          |          |          |          |
|----------|----------|----------|----------|----------|----------|----------|----------|----------|
| 0.01794  | 0.076661 | 0.09799  | 0.148151 | 0.00132  | 0.204261 | 8.62E-06 | 0.132266 | 0.00419  |
| 0.3253   | 0.466163 | 1.43E-26 | 0.260328 | 1.13E-08 | 0.348348 | 9.06E-15 | 0.126185 | 0.00632  |
| 0.06382  | 0.078436 | 0.09044  | 0.158761 | 0.00057  | 0.188923 | 3.98E-05 | 0.103174 | 0.02577  |
| 6.98E-06 | -0.14326 | 0.00191  | 0.08624  | 0.06259  | 0.110596 | 0.01681  | -0.05876 | 0.20497  |
| 0.01642  | 0.154525 | 0.00081  | 0.196793 | 1.84E-05 | 0.25604  | 2.00E-08 | 0.19375  | 2.49E-05 |
| 0.574    | -0.07284 | 0.11598  | 0.049378 | 0.28694  | 0.017139 | 0.71183  | -0.03733 | 0.42086  |
| 0.00027  | 0.162054 | 0.00044  | 0.188299 | 4.22E-05 | 0.24796  | 5.66E-08 | 0.08257  | 0.07465  |
| 0.13005  | 0.247477 | 6.02E-08 | 0.185613 | 5.45E-05 | 0.349538 | 7.25E-15 | 0.033389 | 0.47164  |
| 0.01802  | 0.221308 | 1.37E-06 | 0.256347 | 1.92E-08 | 0.354044 | 3.09E-15 | 0.153368 | 0.00088  |
| 1.39E-12 | -0.07415 | 0.10953  | -0.05798 | 0.21108  | 0.006723 | 0.8848   | -0.28734 | 2.50E-10 |
| 0.22107  | 0.061596 | 0.18392  | 0.126278 | 0.00629  | 0.097471 | 0.03523  | 0.151563 | 0.00102  |
| 0.30872  | -0.10107 | 0.02897  | -0.16201 | 0.00044  | -0.17092 | 0.00021  | 0.10345  | 0.02538  |
| 0.01872  | 0.094033 | 0.04224  | 0.056903 | 0.21968  | 0.18337  | 6.72E-05 | 0.033209 | 0.47404  |
| 1.82E-05 | 0.227308 | 6.90E-07 | 0.352179 | 4.40E-15 | 0.332575 | 1.60E-13 | 0.237528 | 2.06E-07 |
| 0.84232  | 0.178668 | 0.0001   | 0.310387 | 6.90E-12 | 0.348413 | 8.95E-15 | 0.034201 | 0.46092  |
| 0.02943  | 0.007042 | 0.87936  | 0.083208 | 0.07242  | 0.140165 | 0.0024   | -0.07371 | 0.11165  |
| 0.7597   | 0.062891 | 0.17485  | 0.159624 | 0.00054  | 0.160472 | 0.0005   | -0.03097 | 0.50432  |
| 0.08868  | 0.107126 | 0.02059  | 0.168812 | 0.00025  | 0.191422 | 3.13E-05 | 0.015979 | 0.73054  |
| 3.49E-12 | 0.105976 | 0.02199  | 0.099361 | 0.03181  | 0.382777 | 9.60E-18 | -0.10984 | 0.01758  |
| 0.0092   | 0.052296 | 0.25938  | 0.161316 | 0.00047  | 0.169586 | 0.00023  | 0.144482 | 0.00175  |
| 8.67E-05 | 0.263598 | 7.31E-09 | 0.288642 | 2.06E-10 | 0.339317 | 4.78E-14 | 0.26088  | 1.05E-08 |
| 1.20E-08 | -0.06522 | 0.15937  | -0.01143 | 0.80544  | 0.056694 | 0.22138  | -0.17886 | 0.0001   |
| 0.09176  | -0.02246 | 0.62831  | 0.081435 | 0.07874  | 0.093167 | 0.04418  | -0.11808 | 0.01065  |
| 0.00175  | 0.179907 | 9.25E-05 | 0.170417 | 0.00022  | 0.154454 | 0.00081  | 0.028249 | 0.54255  |
| 0.26375  | 0.180279 | 8.94E-05 | 0.193471 | 2.56E-05 | 0.246924 | 6.46E-08 | 0.058191 | 0.2094   |
| 0.00014  | 0.224944 | 9.05E-07 | 0.273146 | 1.96E-09 | 0.276652 | 1.19E-09 | 0.236022 | 2.47E-07 |
| 0.00122  | 0.204303 | 8.58E-06 | 0.242152 | 1.17E-07 | 0.323091 | 8.30E-13 | 0.10294  | 0.02611  |
| 0.00865  | 0.115068 | 0.01284  | 0.150069 | 0.00114  | 0.189901 | 3.62E-05 | 0.062217 | 0.17952  |
| 0.79966  | 0.10241  | 0.0269   | 0.159095 | 0.00056  | 0.284836 | 3.63E-10 | 0.002851 | 0.95101  |
| 2.89E-12 | -0.14194 | 0.00211  | -0.05639 | 0.22385  | -0.01541 | 0.73971  | -0.28167 | 5.77E-10 |
| 0.01654  | 0.089281 | 0.05385  | 0.168465 | 0.00026  | 0.187621 | 4.50E-05 | 0.082034 | 0.07656  |
| 0.54473  | -0.02735 | 0.55548  | 0.060188 | 0.19416  | 0.092159 | 0.04654  | 0.078031 | 0.09212  |
| 0.20814  | 0.121194 | 0.00875  | 0.146727 | 0.00148  | 0.157198 | 0.00065  | 0.041863 | 0.36672  |
| 0.00077  | 0.206449 | 6.86E-06 | 0.303669 | 2.03E-11 | 0.303977 | 1.94E-11 | 0.091992 | 0.04694  |
| 0.00044  | 0.202542 | 1.03E-05 | 0.21508  | 2.73E-06 | 0.254325 | 2.50E-08 | 0.15234  | 0.00096  |
| 9.27E-06 | 0.343819 | 2.10E-14 | 0.361849 | 6.81E-16 | 0.39172  | 1.41E-18 | 0.266273 | 5.08E-09 |
| 8.70E-05 | -0.13016 | 0.00484  | -0.19304 | 2.67E-05 | -0.24189 | 1.21E-07 | 0.141288 | 0.00221  |
| 0.00088  | -0.1669  | 0.00029  | 0.096589 | 0.03692  | 0.107732 | 0.01988  | -0.04167 | 0.36893  |
| 0.0051   | -0.03584 | 0.43968  | 0.093372 | 0.04372  | 0.216509 | 2.33E-06 | -0.07326 | 0.11387  |
| 0.23209  | 0.179514 | 9.59E-05 | 0.259011 | 1.35E-08 | 0.290724 | 1.51E-10 | 0.054724 | 0.23788  |
| 4.14E-05 | 0.144339 | 0.00176  | 0.22559  | 8.41E-07 | 0.30375  | 2.01E-11 | 0.101288 | 0.02863  |
| 0.16729  | 0.108301 | 0.01923  | 0.12811  | 0.00556  | 0.221085 | 1.40E-06 | 0.038423 | 0.40744  |
| 0.00047  | 0.033684 | 0.46774  | 0.156794 | 0.00067  | 0.132734 | 0.00406  | 0.177204 | 0.00012  |
| 0.2875   | 0.190295 | 3.49E-05 | 0.210715 | 4.37E-06 | 0.27499  | 1.51E-09 | 0.047658 | 0.30408  |
| 0.00061  | 0.152464 | 0.00095  | 0.290402 | 1.58E-10 | 0.369078 | 1.62E-16 | -0.01466 | 0.75203  |

|          |          |          |          |          |          |          |          |          |
|----------|----------|----------|----------|----------|----------|----------|----------|----------|
| 2.05E-06 | 0.09339  | 0.04368  | 0.032176 | 0.48791  | 0.064167 | 0.16625  | 0.122995 | 0.00779  |
| 0.06256  | 0.12873  | 0.00534  | 0.075004 | 0.10549  | 0.16556  | 0.00033  | 0.053233 | 0.25092  |
| 0.09941  | 0.068773 | 0.13782  | 0.046447 | 0.31655  | 0.161668 | 0.00045  | 0.034751 | 0.45374  |
| 6.87E-05 | -0.11321 | 0.01437  | -0.03864 | 0.4048   | 0.056786 | 0.22063  | -0.10277 | 0.02637  |
| 0.05903  | 0.058722 | 0.20527  | 0.259635 | 1.24E-08 | 0.157622 | 0.00063  | 0.140423 | 0.00235  |
| 0.77132  | 0.075336 | 0.10396  | 0.128836 | 0.0053   | 0.139732 | 0.00247  | -0.13499 | 0.00347  |
| 0.00103  | 0.176765 | 0.00012  | 0.259859 | 1.21E-08 | 0.264669 | 6.32E-09 | 0.060256 | 0.19366  |
| 1.08E-12 | 0.282057 | 5.46E-10 | 0.441556 | 1.05E-23 | 0.387493 | 3.52E-18 | 0.355495 | 2.34E-15 |
| 1.99E-13 | 0.165182 | 0.00034  | 0.270863 | 2.69E-09 | 0.240489 | 1.44E-07 | 0.26148  | 9.72E-09 |
| 0.06552  | 0.162839 | 0.00041  | 0.309265 | 8.28E-12 | 0.333624 | 1.33E-13 | 0.207157 | 6.37E-06 |
| 9.31E-11 | 0.243155 | 1.03E-07 | 0.20773  | 6.00E-06 | 0.204161 | 8.71E-06 | 0.105665 | 0.02239  |
| 0.05954  | 0.094714 | 0.04077  | 0.234749 | 2.88E-07 | 0.236473 | 2.34E-07 | 0.047985 | 0.30077  |
| 0.01055  | -0.00044 | 0.99246  | 0.007146 | 0.8776   | -0.07392 | 0.11066  | 0.09457  | 0.04107  |
| 0.00693  | 0.282179 | 5.36E-10 | 0.281521 | 5.90E-10 | 0.370753 | 1.15E-16 | 0.103835 | 0.02484  |
| 8.08E-07 | 0.172994 | 0.00017  | 0.19501  | 2.20E-05 | 0.261529 | 9.65E-09 | 0.235928 | 2.50E-07 |
| 7.45E-07 | 0.20293  | 9.89E-06 | 0.301929 | 2.68E-11 | 0.276628 | 1.19E-09 | 0.266265 | 5.08E-09 |
| 0.32328  | 0.038638 | 0.40482  | 0.14158  | 0.00216  | 0.15599  | 0.00072  | 0.062434 | 0.17801  |
| 1.84E-07 | 0.241412 | 1.28E-07 | 0.25987  | 1.21E-08 | 0.315459 | 3.00E-12 | 0.218789 | 1.81E-06 |
| 2.36E-05 | 0.205747 | 7.38E-06 | 0.305742 | 1.46E-11 | 0.340365 | 3.95E-14 | 0.180288 | 8.94E-05 |
| 3.24E-21 | -0.20688 | 6.56E-06 | -0.16872 | 0.00025  | -0.00364 | 0.93748  | -0.27427 | 1.67E-09 |
| 2.66E-06 | 0.010441 | 0.82196  | 0.093932 | 0.04246  | 0.261093 | 1.02E-08 | -0.1648  | 0.00035  |
| 6.79E-18 | -0.02065 | 0.65617  | 0.120251 | 0.00929  | 0.241534 | 1.26E-07 | -0.15911 | 0.00056  |
| 2.21E-16 | 0.141759 | 0.00214  | 0.291001 | 1.45E-10 | 0.195947 | 2.00E-05 | 0.257785 | 1.59E-08 |
| 0.50622  | 0.142079 | 0.00209  | 0.18175  | 7.81E-05 | 0.266223 | 5.11E-09 | 0.129007 | 0.00524  |
| 0.07553  | 0.187368 | 4.61E-05 | 0.266182 | 5.14E-09 | 0.3642   | 4.28E-16 | 0.169895 | 0.00023  |
| 0.01188  | 0.032327 | 0.48587  | 0.147955 | 0.00134  | 0.214449 | 2.92E-06 | 0.173475 | 0.00016  |
| 0.56621  | 0.077592 | 0.09397  | 0.238225 | 1.89E-07 | 0.244369 | 8.89E-08 | 0.166083 | 0.00031  |
| 0.00078  | 0.066398 | 0.15197  | 0.016452 | 0.72289  | 0.119304 | 0.00987  | 0.195105 | 2.18E-05 |
| 7.61E-05 | 0.342471 | 2.69E-14 | 0.255159 | 2.24E-08 | 0.418186 | 3.41E-21 | 0.131692 | 0.00436  |
| 0.21941  | 0.176791 | 0.00012  | 0.185071 | 5.73E-05 | 0.260388 | 1.12E-08 | 0.143032 | 0.00194  |
| 0.94835  | -0.16567 | 0.00032  | -0.35877 | 1.24E-15 | -0.38056 | 1.53E-17 | -0.20209 | 1.08E-05 |
| 0.74529  | -0.012   | 0.79594  | 0.050282 | 0.2782   | 0.107281 | 0.0204   | 0.042956 | 0.35433  |
| 0.00396  | -0.13121 | 0.00451  | -0.00147 | 0.97472  | 0.055308 | 0.2329   | 0.002015 | 0.96536  |
| 0.23655  | -0.13847 | 0.00271  | -0.22228 | 1.23E-06 | -0.23388 | 3.19E-07 | -0.03421 | 0.46086  |
| 6.55E-07 | -0.47947 | 3.22E-28 | -0.38037 | 1.59E-17 | -0.45604 | 2.31E-25 | -0.27933 | 8.11E-10 |
| 0.41466  | 0.331138 | 2.06E-13 | 0.351161 | 5.34E-15 | 0.396397 | 5.06E-19 | 0.166419 | 0.0003   |
| 0.73507  | 0.122817 | 0.00788  | 0.246476 | 6.83E-08 | 0.300559 | 3.32E-11 | 0.07362  | 0.1121   |
| 0.00016  | -0.02315 | 0.6177   | 0.109716 | 0.0177   | 0.144478 | 0.00175  | -0.14162 | 0.00216  |
| 0.10076  | 0.140608 | 0.00232  | 0.238121 | 1.92E-07 | 0.243425 | 1.00E-07 | 0.071259 | 0.12411  |
| 0.37341  | 0.066176 | 0.15335  | 0.133195 | 0.00393  | 0.228226 | 6.20E-07 | 0.013177 | 0.77641  |
| 0.00033  | 0.164991 | 0.00034  | 0.24554  | 7.68E-08 | 0.292552 | 1.14E-10 | 0.191295 | 3.16E-05 |
| 0.00833  | 0.211082 | 4.20E-06 | 0.186023 | 5.24E-05 | 0.306973 | 1.20E-11 | 0.175276 | 0.00014  |
| 0.00114  | 0.104118 | 0.02444  | 0.11362  | 0.01402  | 0.292904 | 1.08E-10 | -0.01195 | 0.79676  |
| 0.7868   | 0.010556 | 0.82002  | 0.100705 | 0.02956  | 0.118307 | 0.0105   | 0.038928 | 0.4013   |
| 0.00982  | -0.2354  | 2.66E-07 | -0.31998 | 1.41E-12 | -0.37505 | 4.81E-17 | -0.06955 | 0.13341  |

|          |          |          |          |          |          |          |          |          |
|----------|----------|----------|----------|----------|----------|----------|----------|----------|
| 0.04354  | 0.159536 | 0.00054  | 0.183419 | 6.69E-05 | 0.206883 | 6.55E-06 | 0.025731 | 0.57914  |
| 3.74E-06 | 0.13018  | 0.00484  | 0.100614 | 0.02971  | 0.174367 | 0.00015  | 0.136903 | 0.00303  |
| 0.00506  | -0.00136 | 0.97664  | 0.008924 | 0.84748  | 0.155253 | 0.00076  | 0.047516 | 0.30553  |
| 0.07489  | 0.114297 | 0.01346  | 0.168463 | 0.00026  | 0.218996 | 1.77E-06 | 0.096989 | 0.03615  |
| 6.04E-05 | -0.27882 | 8.72E-10 | -0.22593 | 8.08E-07 | -0.22568 | 8.33E-07 | -0.3204  | 1.31E-12 |
| 0.08287  | 0.212568 | 3.58E-06 | 0.343846 | 2.09E-14 | 0.398701 | 3.03E-19 | 0.18234  | 7.40E-05 |
| 6.48E-12 | -0.3557  | 2.25E-15 | -0.36926 | 1.56E-16 | -0.34355 | 2.21E-14 | -0.28303 | 4.73E-10 |
| 0.85608  | 0.121144 | 0.00878  | 0.202531 | 1.03E-05 | 0.272325 | 2.20E-09 | 0.075628 | 0.10262  |
| 1.90E-13 | -0.17339 | 0.00017  | -0.05341 | 0.24934  | -0.02041 | 0.65994  | -0.18056 | 8.72E-05 |
| 0.4611   | 0.065371 | 0.15842  | 0.129782 | 0.00497  | 0.123909 | 0.00734  | -0.08926 | 0.0539   |
| 9.90E-05 | 0.034669 | 0.45481  | 0.191149 | 3.21E-05 | 0.263872 | 7.04E-09 | -0.0667  | 0.15014  |
| 0.02312  | 0.161168 | 0.00047  | 0.2588   | 1.39E-08 | 0.360955 | 8.11E-16 | 0.058252 | 0.20892  |
| 7.02E-08 | 0.288465 | 2.12E-10 | 0.222983 | 1.13E-06 | 0.265065 | 5.99E-09 | 0.192559 | 2.80E-05 |
| 0.00016  | 0.206727 | 6.66E-06 | 0.268826 | 3.57E-09 | 0.278585 | 9.02E-10 | 0.095377 | 0.03937  |
| 1.93E-05 | -0.02372 | 0.60919  | 0.031146 | 0.50195  | 0.062755 | 0.17579  | -0.16222 | 0.00043  |
| 1.57E-05 | 0.033002 | 0.4768   | 0.051267 | 0.26888  | 0.173716 | 0.00016  | -0.13433 | 0.00363  |
| 0.83441  | 0.092196 | 0.04645  | 0.153978 | 0.00084  | 0.199196 | 1.45E-05 | 0.060988 | 0.18829  |
| 0.66917  | -0.00082 | 0.98584  | 0.085177 | 0.0659   | 0.122884 | 0.00785  | -0.00454 | 0.9221   |
| 0.15083  | 0.088978 | 0.05467  | 0.076566 | 0.09841  | 0.168789 | 0.00025  | 0.006089 | 0.89558  |
| 0.03894  | 0.223607 | 1.05E-06 | 0.258291 | 1.49E-08 | 0.342862 | 2.50E-14 | 0.125856 | 0.00646  |
| 4.65E-05 | -0.19907 | 1.46E-05 | -0.10804 | 0.01953  | -0.28556 | 3.26E-10 | -0.16076 | 0.00049  |
| 0.51814  | -0.16518 | 0.00034  | -0.11697 | 0.01142  | -0.26553 | 5.62E-09 | 0.010409 | 0.82249  |
| 7.80E-10 | 0.077947 | 0.09247  | 0.173904 | 0.00016  | 0.124199 | 0.00721  | 0.140429 | 0.00235  |
| 0.01054  | 0.064908 | 0.1614   | 0.111809 | 0.01564  | 0.225899 | 8.12E-07 | -0.01204 | 0.79528  |
| 0.80601  | 0.075114 | 0.10498  | 0.15811  | 0.00061  | 0.230886 | 4.55E-07 | 0.043668 | 0.3464   |
| 3.93E-07 | 0.01793  | 0.69915  | 0.189879 | 3.63E-05 | 0.273572 | 1.84E-09 | 0.052534 | 0.25721  |
| 3.80E-07 | 0.197072 | 1.79E-05 | 0.169834 | 0.00023  | 0.169388 | 0.00024  | 0.130456 | 0.00475  |
| 0.00027  | 0.194046 | 2.42E-05 | 0.144998 | 0.00168  | 0.185931 | 5.29E-05 | 0.119629 | 0.00967  |
| 0.10364  | 0.049505 | 0.2857   | 0.121187 | 0.00875  | 0.15541  | 0.00075  | -0.04085 | 0.37839  |
| 0.00131  | -0.03842 | 0.40742  | -0.11442 | 0.01336  | -0.22637 | 7.69E-07 | 0.154624 | 0.0008   |
| 0.13358  | -0.1823  | 7.42E-05 | -0.19051 | 3.41E-05 | -0.19491 | 2.22E-05 | -0.03289 | 0.4783   |
| 0.00051  | -0.31241 | 4.96E-12 | -0.18062 | 8.67E-05 | -0.13051 | 0.00473  | -0.18762 | 4.50E-05 |
| 0.05061  | -0.03072 | 0.50782  | 0.067795 | 0.14351  | 0.139001 | 0.00261  | -0.0926  | 0.0455   |
| 0.82749  | 0.089905 | 0.05219  | 0.13468  | 0.00355  | 0.207276 | 6.29E-06 | -0.00152 | 0.97381  |
| 0.18117  | 0.244629 | 8.61E-08 | 0.19234  | 2.86E-05 | 0.359399 | 1.10E-15 | 0.154709 | 0.00079  |
| 0.11959  | 0.003208 | 0.94488  | 0.160588 | 0.00049  | 0.150568 | 0.0011   | 0.043771 | 0.34526  |
| 0.82554  | 0.113543 | 0.01409  | 0.215555 | 2.59E-06 | 0.260073 | 1.17E-08 | -0.02811 | 0.54455  |
| 0.00181  | 0.129003 | 0.00524  | 0.171865 | 0.00019  | 0.281161 | 6.22E-10 | 0.231528 | 4.22E-07 |
| 0.85476  | -0.09143 | 0.0483   | 0.108231 | 0.01931  | 0.068837 | 0.13745  | 0.060557 | 0.19144  |
| 1.87E-11 | -0.09968 | 0.03127  | -0.03192 | 0.49134  | 0.061743 | 0.18287  | -0.08343 | 0.07166  |
| 0.26755  | 0.123882 | 0.00736  | 0.321957 | 1.01E-12 | 0.316982 | 2.33E-12 | 0.247937 | 5.68E-08 |
| 0.19431  | 0.220957 | 1.42E-06 | 0.177495 | 0.00012  | 0.295087 | 7.76E-11 | 0.084192 | 0.0691   |
| 5.78E-09 | 0.291863 | 1.27E-10 | 0.232113 | 3.94E-07 | 0.401088 | 1.78E-19 | 0.044207 | 0.34047  |
| 0.20464  | 0.029864 | 0.51972  | 0.095169 | 0.0398   | 0.207629 | 6.06E-06 | 0.049012 | 0.29053  |
| 0.58534  | 0.10739  | 0.02027  | 0.146434 | 0.00151  | 0.224772 | 9.23E-07 | 0.042395 | 0.36066  |

|          |          |          |          |          |          |          |          |          |
|----------|----------|----------|----------|----------|----------|----------|----------|----------|
| 8.99E-05 | -0.00433 | 0.92565  | 0.109508 | 0.01792  | 0.186243 | 5.13E-05 | -0.02602 | 0.57484  |
| 0.39414  | 0.183821 | 6.45E-05 | 0.119005 | 0.01005  | 0.229703 | 5.22E-07 | -0.0306  | 0.50941  |
| 0.00178  | 0.335568 | 9.38E-14 | 0.360642 | 8.63E-16 | 0.409746 | 2.47E-20 | 0.15109  | 0.00106  |
| 6.62E-05 | 0.310539 | 6.73E-12 | 0.462419 | 4.05E-26 | 0.476098 | 8.55E-28 | 0.296769 | 5.99E-11 |
| 0.09955  | -0.13077 | 0.00465  | -0.104   | 0.02461  | -0.24666 | 6.67E-08 | -0.07754 | 0.0942   |
| 1.44E-13 | 0.035866 | 0.43938  | 0.016364 | 0.72431  | 0.134651 | 0.00355  | -0.17272 | 0.00018  |
| 0.01017  | 0.094357 | 0.04153  | 0.063604 | 0.17     | 0.160377 | 0.0005   | 0.138215 | 0.00276  |
| 0.32365  | 0.279794 | 7.58E-10 | 0.237346 | 2.11E-07 | 0.359603 | 1.06E-15 | 0.160037 | 0.00052  |
| 0.08648  | 8.09E-05 | 0.99861  | 0.064632 | 0.16319  | 0.172547 | 0.00018  | -0.07001 | 0.13086  |
| 0.63596  | -0.01162 | 0.80228  | 0.098377 | 0.03355  | 0.135362 | 0.00338  | 0.050665 | 0.27455  |
| 0.68345  | 0.19225  | 2.88E-05 | 0.171926 | 0.00019  | 0.238278 | 1.88E-07 | 0.046812 | 0.31275  |
| 0.04812  | 0.1143   | 0.01345  | 0.151158 | 0.00105  | 0.156562 | 0.00069  | 0.002057 | 0.96465  |
| 0.87064  | -0.33224 | 1.70E-13 | -0.06757 | 0.14484  | -0.12598 | 0.00641  | -0.22704 | 7.11E-07 |
| 0.2089   | 0.195472 | 2.10E-05 | 0.22984  | 5.14E-07 | 0.339305 | 4.79E-14 | 0.086308 | 0.06237  |
| 0.04695  | -0.26896 | 3.51E-09 | -0.35618 | 2.05E-15 | -0.41368 | 9.89E-21 | -0.22943 | 5.39E-07 |
| 0.00483  | 0.3857   | 5.17E-18 | 0.265213 | 5.87E-09 | 0.376114 | 3.86E-17 | 0.016198 | 0.72699  |
| 0.81717  | 0.095514 | 0.03909  | 0.181339 | 8.11E-05 | 0.209542 | 4.95E-06 | -0.06582 | 0.15556  |
| 7.75E-07 | 0.465344 | 1.80E-26 | 0.343049 | 2.42E-14 | 0.299369 | 4.00E-11 | 0.207252 | 6.31E-06 |
| 8.92E-07 | 0.275983 | 1.31E-09 | 0.262958 | 7.97E-09 | 0.331821 | 1.82E-13 | 0.156396 | 0.00069  |
| 1.38E-09 | 0.151584 | 0.00102  | 0.119086 | 0.01     | 0.206873 | 6.56E-06 | 0.219916 | 1.60E-06 |
| 0.10837  | -0.20899 | 5.25E-06 | 0.000858 | 0.98525  | -0.16126 | 0.00047  | -0.09197 | 0.04698  |
| 0.00116  | 0.032062 | 0.48945  | 0.184972 | 5.79E-05 | 0.108052 | 0.01951  | 0.200967 | 1.21E-05 |
| 2.43E-06 | 0.004469 | 0.92326  | 0.029664 | 0.52252  | 0.136417 | 0.00314  | -0.21852 | 1.87E-06 |
| 0.00857  | 0.148652 | 0.00127  | 0.150693 | 0.00109  | 0.151066 | 0.00106  | 0.141475 | 0.00218  |
| 0.25211  | 0.1331   | 0.00396  | 0.166359 | 0.00031  | 0.184477 | 6.06E-05 | -0.04721 | 0.30866  |
| 0.00022  | 0.0047   | 0.91931  | 0.035159 | 0.44845  | 0.107783 | 0.01982  | -0.11768 | 0.01092  |
| 0.0512   | -0.00963 | 0.83559  | 0.012755 | 0.78338  | 0.117971 | 0.01073  | -0.01471 | 0.75122  |
| 0.00111  | -0.04545 | 0.32707  | -0.00824 | 0.85898  | 0.023402 | 0.61396  | 0.040821 | 0.37877  |
| 2.92E-09 | -0.11891 | 0.01011  | 0.094031 | 0.04225  | 0.119262 | 0.00989  | -0.12047 | 0.00916  |
| 0.2891   | 0.022149 | 0.63307  | 0.102854 | 0.02624  | 0.090606 | 0.05037  | 0.0709   | 0.12602  |
| 0.0765   | -0.09325 | 0.04399  | -0.09928 | 0.03195  | -0.25583 | 2.06E-08 | -0.08564 | 0.06443  |
| 0.00021  | 0.260411 | 1.12E-08 | 0.256025 | 2.00E-08 | 0.303166 | 2.20E-11 | 0.198555 | 1.54E-05 |
| 6.35E-12 | -0.06911 | 0.13591  | 0.010848 | 0.81513  | 0.098445 | 0.03343  | -0.05365 | 0.24722  |
| 0.03442  | -0.06179 | 0.18257  | 0.011233 | 0.80869  | 0.030419 | 0.51198  | -0.19242 | 2.83E-05 |
| 2.69E-07 | -0.03126 | 0.50041  | -0.00287 | 0.95064  | -0.10426 | 0.02425  | 0.207217 | 6.33E-06 |
| 0.58406  | -0.03489 | 0.45191  | -0.13772 | 0.00286  | -0.2322  | 3.90E-07 | -0.02424 | 0.60131  |
| 5.28E-11 | -0.00371 | 0.93619  | 0.006842 | 0.88276  | -0.07071 | 0.12706  | 0.212811 | 3.49E-06 |
| 0.06649  | 0.134224 | 0.00366  | 0.184555 | 6.02E-05 | 0.288298 | 2.17E-10 | 0.120117 | 0.00937  |
| 0.01007  | -0.0027  | 0.95354  | 0.093866 | 0.04261  | 0.126438 | 0.00622  | -0.06401 | 0.16727  |
| 2.00E-24 | 0.084407 | 0.06839  | 0.071131 | 0.12479  | -0.0869  | 0.06059  | 0.2344   | 3.00E-07 |
| 7.02E-18 | 0.255914 | 2.03E-08 | 0.158213 | 0.0006   | 0.162426 | 0.00042  | 0.149135 | 0.00123  |
| 0.00177  | 0.107015 | 0.02072  | 0.002993 | 0.94856  | -0.06955 | 0.13343  | 0.008859 | 0.84858  |
| 0.42086  | 0.048144 | 0.29917  | 0.059762 | 0.19735  | 0.056583 | 0.22228  | -0.01073 | 0.81715  |
| 3.32E-06 | 0.152632 | 0.00094  | 0.141764 | 0.00213  | 0.086486 | 0.06184  | 0.179308 | 9.78E-05 |
| 0.00129  | 0.037876 | 0.41415  | 0.087697 | 0.05826  | -0.00343 | 0.94114  | 0.044454 | 0.33778  |

|          |          |          |          |          |          |          |          |          |
|----------|----------|----------|----------|----------|----------|----------|----------|----------|
| 0.73779  | 0.014841 | 0.74906  | 0.05424  | 0.24206  | 0.140835 | 0.00228  | 0.003856 | 0.93377  |
| 0.00026  | 0.138502 | 0.0027   | 0.110078 | 0.01733  | 0.145804 | 0.00158  | 0.054705 | 0.23804  |
| 0.24684  | 0.207324 | 6.26E-06 | 0.23409  | 3.11E-07 | 0.312168 | 5.16E-12 | 0.052001 | 0.26208  |
| 0.00399  | 0.024027 | 0.60453  | 0.099317 | 0.03189  | 0.121953 | 0.00833  | -0.1282  | 0.00553  |
| 3.55E-09 | -0.21376 | 3.15E-06 | -0.09723 | 0.03568  | -0.05554 | 0.23098  | -0.25267 | 3.10E-08 |
| 0.00798  | -0.10011 | 0.03054  | -0.10037 | 0.0301   | -0.0753  | 0.10411  | 0.020735 | 0.65493  |
| 0.00019  | 0.225911 | 8.11E-07 | 0.250543 | 4.08E-08 | 0.225335 | 8.66E-07 | 0.29305  | 1.06E-10 |
| 1.52E-06 | 0.271921 | 2.32E-09 | 0.190844 | 3.31E-05 | 0.286736 | 2.74E-10 | 0.256643 | 1.85E-08 |
| 0.35055  | 0.096446 | 0.03721  | 0.146736 | 0.00147  | 0.172857 | 0.00017  | 0.059313 | 0.20074  |
| 0.86691  | 0.075402 | 0.10365  | 0.169469 | 0.00023  | 0.206918 | 6.53E-06 | 0.06581  | 0.15564  |
| 1.48E-06 | -0.07011 | 0.13032  | 0.050968 | 0.27168  | 0.1353   | 0.0034   | -0.15938 | 0.00055  |
| 2.44E-09 | -0.0487  | 0.29365  | 0.020988 | 0.65099  | 0.120241 | 0.0093   | -0.18884 | 4.01E-05 |
| 0.52976  | 0.071786 | 0.12135  | 0.093018 | 0.04453  | 0.120846 | 0.00895  | -0.03337 | 0.47192  |
| 0.17838  | 0.003326 | 0.94285  | 0.035314 | 0.44646  | 0.079019 | 0.08806  | -0.05185 | 0.26346  |
| 1.90E-06 | 0.060995 | 0.18824  | 0.068386 | 0.14005  | 0.194841 | 2.24E-05 | -0.14265 | 0.002    |
| 0.56837  | 0.021948 | 0.63615  | 0.13381  | 0.00377  | 0.16245  | 0.00042  | -0.03235 | 0.48553  |
| 0.00021  | 0.041295 | 0.37326  | 0.007963 | 0.86373  | 0.084354 | 0.06857  | -0.04881 | 0.29252  |
| 0.44265  | -0.0454  | 0.32761  | 0.118342 | 0.01048  | 0.10244  | 0.02685  | 0.049241 | 0.28829  |
| 0.95519  | 0.021348 | 0.64542  | 0.104066 | 0.02451  | 0.146598 | 0.00149  | 0.061168 | 0.18699  |
| 0.00029  | 0.179565 | 9.55E-05 | 0.173257 | 0.00017  | 0.194184 | 2.39E-05 | 0.151656 | 0.00101  |
| 0.08813  | -0.08768 | 0.05832  | -0.02674 | 0.56439  | -0.07286 | 0.11586  | -0.03412 | 0.46204  |
| 2.42E-06 | -0.25143 | 3.64E-08 | -0.12537 | 0.00667  | -0.12702 | 0.00598  | -0.30217 | 2.58E-11 |
| 0.18951  | -0.29792 | 5.01E-11 | -0.27403 | 1.73E-09 | -0.36186 | 6.79E-16 | -0.14774 | 0.00137  |
| 0.13845  | 0.176648 | 0.00012  | 0.208797 | 5.36E-06 | 0.38126  | 1.32E-17 | 0.069263 | 0.13503  |
| 1.87E-09 | -0.00107 | 0.9816   | 0.076745 | 0.09762  | 0.283411 | 4.48E-10 | -0.13094 | 0.00459  |
| 0.25345  | 0.023808 | 0.60783  | 0.203968 | 8.88E-06 | 0.173421 | 0.00017  | 0.149852 | 0.00116  |
| 5.16E-18 | -0.121   | 0.00886  | -0.07502 | 0.10541  | 0.063147 | 0.1731   | -0.3029  | 2.30E-11 |
| 0.1327   | 0.158303 | 0.0006   | 0.101148 | 0.02885  | 0.180575 | 8.70E-05 | 0.003997 | 0.93135  |
| 3.85E-18 | 0.382776 | 9.61E-18 | 0.312078 | 5.24E-12 | 0.298024 | 4.93E-11 | 0.282438 | 5.16E-10 |
| 0.00143  | -0.24034 | 1.46E-07 | -0.14014 | 0.0024   | -0.26376 | 7.15E-09 | 0.09237  | 0.04604  |
| 0.04004  | 0.066928 | 0.14872  | 0.150333 | 0.00112  | 0.065905 | 0.15504  | 0.268575 | 3.70E-09 |
| 0.04546  | 0.075212 | 0.10453  | 0.163707 | 0.00038  | 0.271203 | 2.57E-09 | 0.007087 | 0.87859  |
| 0.10649  | -0.18913 | 3.90E-05 | -0.23783 | 1.99E-07 | -0.27843 | 9.23E-10 | 0.04417  | 0.34088  |
| 3.80E-10 | 0.162455 | 0.00042  | 0.215541 | 2.59E-06 | 0.3568   | 1.82E-15 | 0.001459 | 0.97492  |
| 0.09694  | 0.185058 | 5.74E-05 | 0.263655 | 7.25E-09 | 0.278371 | 9.30E-10 | -0.01312 | 0.77741  |
| 0.03677  | -0.12473 | 0.00696  | -0.00633 | 0.89146  | -0.01576 | 0.73417  | -0.14679 | 0.00147  |
| 0.15007  | 0.085671 | 0.06434  | 0.149825 | 0.00116  | 0.143352 | 0.0019   | 0.112406 | 0.01509  |
| 0.11003  | 0.130016 | 0.00489  | 0.22682  | 7.30E-07 | 0.305329 | 1.56E-11 | 0.240869 | 1.37E-07 |
| 0.38215  | 0.011068 | 0.81145  | 0.16153  | 0.00046  | 0.160253 | 0.00051  | 0.057957 | 0.21124  |
| 6.67E-07 | 0.086996 | 0.06031  | 0.145371 | 0.00163  | 0.35855  | 1.30E-15 | -0.0552  | 0.23384  |
| 0.00451  | 0.11427  | 0.01348  | 0.260194 | 1.15E-08 | 0.234732 | 2.88E-07 | 0.138077 | 0.00279  |
| 0.00063  | 0.167914 | 0.00027  | 0.159512 | 0.00054  | 0.308583 | 9.25E-12 | 0.068233 | 0.14094  |
| 0.47016  | 0.089237 | 0.05397  | 0.181921 | 7.69E-05 | 0.23693  | 2.22E-07 | 0.051653 | 0.26529  |
| 8.19E-07 | 0.176425 | 0.00013  | 0.224601 | 9.42E-07 | 0.248373 | 5.37E-08 | 0.099641 | 0.03133  |
| 0.93681  | -0.12349 | 0.00755  | 0.012452 | 0.78841  | -0.02236 | 0.62976  | -0.02186 | 0.63748  |



|          |          |          |          |          |          |          |          |          |
|----------|----------|----------|----------|----------|----------|----------|----------|----------|
| 1.16E-08 | 0.073563 | 0.11237  | 0.084824 | 0.06703  | 0.193377 | 2.58E-05 | -0.07356 | 0.11241  |
| 0.0003   | 0.145819 | 0.00158  | 0.193444 | 2.57E-05 | 0.224019 | 1.01E-06 | 0.104301 | 0.02419  |
| 0.00876  | 0.041642 | 0.36925  | 0.186814 | 4.86E-05 | 0.094279 | 0.0417   | 0.115426 | 0.01256  |
| 0.03383  | 0.107191 | 0.02051  | 0.099269 | 0.03197  | 0.155636 | 0.00074  | -0.044   | 0.34272  |
| 0.24391  | -0.04141 | 0.37189  | 0.031003 | 0.50391  | -0.00074 | 0.98733  | 0.079472 | 0.08625  |
| 0.00571  | 0.114682 | 0.01314  | 0.183    | 6.96E-05 | 0.246558 | 6.76E-08 | 0.053264 | 0.25065  |
| 1.05E-05 | 0.04071  | 0.38007  | 0.250899 | 3.89E-08 | 0.097976 | 0.03428  | 0.376674 | 3.44E-17 |
| 9.39E-11 | 0.181369 | 8.09E-05 | 0.249781 | 4.49E-08 | 0.238054 | 1.93E-07 | 0.299575 | 3.87E-11 |
| 0.00764  | 0.034417 | 0.45809  | -0.00308 | 0.947    | 0.018526 | 0.68966  | 0.059572 | 0.19877  |
| 0.66391  | -0.05673 | 0.22106  | -0.02757 | 0.55233  | 0.052122 | 0.26096  | 0.00948  | 0.8381   |
| 0.0027   | 0.168711 | 0.00025  | 0.249265 | 4.80E-08 | 0.240686 | 1.40E-07 | 0.113766 | 0.0139   |
| 0.51722  | 0.116798 | 0.01154  | 0.188361 | 4.20E-05 | 0.265209 | 5.87E-09 | 0.014348 | 0.75714  |
| 4.69E-18 | 0.282711 | 4.96E-10 | 0.298358 | 4.68E-11 | 0.296564 | 6.18E-11 | 0.216701 | 2.28E-06 |
| 0.03015  | -0.02271 | 0.62442  | 0.071467 | 0.12301  | 0.134563 | 0.00358  | -0.07996 | 0.08434  |
| 0.59753  | 0.092976 | 0.04462  | 0.188828 | 4.01E-05 | 0.250893 | 3.90E-08 | -0.01585 | 0.73265  |
| 0.81649  | 0.058572 | 0.20643  | 0.243331 | 1.01E-07 | 0.230474 | 4.77E-07 | 0.040272 | 0.38522  |
| 4.01E-07 | 0.330318 | 2.38E-13 | 0.366125 | 2.92E-16 | 0.423422 | 9.70E-22 | 0.30125  | 2.98E-11 |
| 0.14621  | 0.012524 | 0.78721  | 0.078245 | 0.09123  | 0.110362 | 0.01704  | -0.07428 | 0.10891  |
| 0.9682   | 0.169831 | 0.00023  | 0.159668 | 0.00053  | 0.407429 | 4.21E-20 | 0.095315 | 0.0395   |
| 0.64613  | 0.050616 | 0.27501  | 0.137831 | 0.00284  | 0.180248 | 8.97E-05 | 0.027522 | 0.553    |
| 0.00392  | 0.036715 | 0.42861  | 0.01044  | 0.82197  | 0.265514 | 5.63E-09 | 0.002104 | 0.96384  |
| 8.29E-10 | 0.336197 | 8.38E-14 | 0.266982 | 4.61E-09 | 0.35599  | 2.13E-15 | 0.21582  | 2.51E-06 |
| 0.22879  | 0.308598 | 9.23E-12 | 0.196336 | 1.93E-05 | 0.210956 | 4.26E-06 | -0.01095 | 0.8135   |
| 0.09022  | 0.068048 | 0.14203  | 0.163196 | 0.0004   | 0.219508 | 1.67E-06 | 0.018106 | 0.69635  |
| 0.00112  | 0.155627 | 0.00074  | 0.200782 | 1.23E-05 | 0.235201 | 2.73E-07 | 0.138279 | 0.00275  |
| 0.00206  | 0.04655  | 0.31548  | 0.137432 | 0.00292  | 0.142095 | 0.00208  | 0.0804   | 0.08263  |
| 0.00087  | 0.060482 | 0.19199  | 0.099098 | 0.03227  | 0.105838 | 0.02217  | 0.042627 | 0.35803  |
| 1.99E-06 | 0.005033 | 0.91361  | 0.076419 | 0.09906  | 0.161268 | 0.00047  | -0.04614 | 0.3198   |
| 0.79857  | 0.001413 | 0.9757   | 0.086592 | 0.06152  | 0.170436 | 0.00022  | 0.02768  | 0.55072  |
| 0.01569  | -0.06048 | 0.19199  | -0.04576 | 0.32376  | 0.114615 | 0.0132   | -0.06888 | 0.13722  |
| 0.142    | 0.027069 | 0.55955  | 0.16738  | 0.00028  | 0.152437 | 0.00095  | 0.000776 | 0.98665  |
| 0.39519  | -0.04677 | 0.31317  | 0.055448 | 0.23171  | 0.071058 | 0.12518  | -0.08169 | 0.07782  |
| 0.00585  | 0.055599 | 0.23044  | 0.118912 | 0.01011  | 0.059745 | 0.19747  | 0.104969 | 0.02329  |
| 0.00161  | 0.107752 | 0.01985  | 0.245863 | 7.38E-08 | 0.256693 | 1.84E-08 | 0.297786 | 5.12E-11 |
| 0.00074  | 0.271421 | 2.49E-09 | 0.338709 | 5.33E-14 | 0.403855 | 9.52E-20 | 0.195767 | 2.04E-05 |
| 0.00484  | 0.126728 | 0.0061   | 0.227745 | 6.56E-07 | 0.309832 | 7.55E-12 | -0.00294 | 0.94941  |
| 8.60E-18 | -0.14537 | 0.00163  | -0.05939 | 0.20013  | 0.032214 | 0.48739  | -0.18584 | 5.33E-05 |
| 8.47E-05 | 0.290894 | 1.47E-10 | 0.413109 | 1.13E-20 | 0.436025 | 4.29E-23 | 0.313923 | 3.87E-12 |
| 0.97389  | 0.18905  | 3.93E-05 | 0.146881 | 0.00146  | 0.273333 | 1.91E-09 | 0.04313  | 0.35238  |
| 0.16135  | 0.211996 | 3.81E-06 | 0.242113 | 1.18E-07 | 0.30226  | 2.54E-11 | 0.031881 | 0.4919   |
| 0.01103  | 0.09673  | 0.03665  | 0.22047  | 1.50E-06 | 0.228784 | 5.82E-07 | 0.104483 | 0.02394  |
| 0.10438  | 0.20053  | 1.26E-05 | 0.230243 | 4.90E-07 | 0.205812 | 7.33E-06 | 0.293627 | 9.70E-11 |
| 0.26918  | 0.051143 | 0.27004  | 0.126207 | 0.00631  | 0.153182 | 0.0009   | 0.010476 | 0.82136  |
| 0.46144  | 0.0348   | 0.45311  | 0.054423 | 0.24047  | 0.076786 | 0.09745  | -0.12863 | 0.00537  |
| 0.01215  | -0.01761 | 0.70423  | 0.123272 | 0.00765  | 0.169043 | 0.00024  | -0.03348 | 0.47044  |

|          |          |          |          |          |          |          |          |          |
|----------|----------|----------|----------|----------|----------|----------|----------|----------|
| 0.00413  | 0.153093 | 0.0009   | 0.197246 | 1.76E-05 | 0.229913 | 5.10E-07 | 0.316868 | 2.37E-12 |
| 0.99119  | 0.052937 | 0.25357  | 0.112131 | 0.01534  | 0.168808 | 0.00025  | 0.008926 | 0.84745  |
| 0.4303   | -0.12258 | 0.008    | -0.00401 | 0.93118  | -0.00133 | 0.97716  | -0.15283 | 0.00092  |
| 2.19E-14 | 0.018383 | 0.69193  | 0.131371 | 0.00446  | 0.08876  | 0.05527  | 0.20217  | 1.07E-05 |
| 9.54E-07 | 0.296633 | 6.11E-11 | 0.297933 | 5.00E-11 | 0.388175 | 3.04E-18 | 0.338084 | 5.97E-14 |
| 1.70E-18 | 0.270726 | 2.75E-09 | 0.305245 | 1.58E-11 | 0.33055  | 2.28E-13 | 0.269861 | 3.10E-09 |
| 2.39E-12 | 0.507038 | 7.13E-32 | 0.456116 | 2.26E-25 | 0.455074 | 2.99E-25 | 0.272418 | 2.17E-09 |
| 9.48E-09 | 0.198865 | 1.50E-05 | 0.206863 | 6.57E-06 | 0.255945 | 2.02E-08 | 0.112001 | 0.01546  |
| 0.02884  | 0.035324 | 0.44633  | 0.080736 | 0.08135  | 0.059986 | 0.19567  | 0.136731 | 0.00307  |
| 0.80422  | 0.042349 | 0.36117  | 0.13596  | 0.00324  | 0.189566 | 3.74E-05 | -0.00904 | 0.84547  |
| 0.55081  | 0.027213 | 0.55746  | 0.129411 | 0.0051   | 0.160128 | 0.00051  | 0.021517 | 0.64279  |
| 0.66571  | 0.049384 | 0.28688  | 0.179831 | 9.32E-05 | 0.213682 | 3.17E-06 | 0.020199 | 0.66329  |
| 0.01444  | 0.074876 | 0.10609  | 0.10456  | 0.02384  | 0.102818 | 0.02629  | 0.056881 | 0.21986  |
| 3.10E-07 | -0.14365 | 0.00186  | -0.17555 | 0.00014  | -0.13219 | 0.00422  | -0.19389 | 2.46E-05 |
| 0.52476  | 0.303759 | 2.00E-11 | 0.168846 | 0.00025  | 0.321714 | 1.05E-12 | 0.143472 | 0.00188  |
| 0.60244  | 0.067686 | 0.14416  | 0.14149  | 0.00218  | 0.185041 | 5.75E-05 | 0.098417 | 0.03348  |
| 0.14647  | 0.118402 | 0.01044  | 0.210429 | 4.50E-06 | 0.276092 | 1.29E-09 | 0.094218 | 0.04184  |
| 0.00478  | 0.073916 | 0.11066  | 0.075736 | 0.10213  | 0.114563 | 0.01324  | 0.102871 | 0.02622  |
| 0.18025  | -0.07979 | 0.085    | -0.20958 | 4.93E-06 | -0.15384 | 0.00085  | -0.17397 | 0.00016  |
| 6.65E-05 | 0.253041 | 2.95E-08 | 0.254337 | 2.50E-08 | 0.382969 | 9.22E-18 | 0.243724 | 9.64E-08 |
| 0.0169   | 0.060541 | 0.19155  | 0.166217 | 0.00031  | 0.258489 | 1.45E-08 | -0.06121 | 0.18669  |
| 0.35965  | -0.04609 | 0.32033  | 0.111887 | 0.01556  | 0.114763 | 0.01308  | -0.06676 | 0.14973  |
| 0.94699  | 0.104774 | 0.02355  | 0.147764 | 0.00136  | 0.175523 | 0.00014  | 0.054614 | 0.23882  |
| 0.85423  | 0.028164 | 0.54377  | 0.126311 | 0.00627  | 0.12925  | 0.00515  | 0.023706 | 0.60936  |
| 2.59E-06 | 0.230608 | 4.70E-07 | 0.242033 | 1.19E-07 | 0.250124 | 4.30E-08 | 0.126394 | 0.00624  |
| 0.76774  | 0.08622  | 0.06265  | 0.10592  | 0.02206  | 0.097887 | 0.03445  | -0.02118 | 0.64804  |
| 0.10435  | 0.067927 | 0.14274  | 0.121692 | 0.00848  | 0.143145 | 0.00193  | -0.02726 | 0.55678  |
| 1.16E-15 | 0.246037 | 7.22E-08 | 0.312504 | 4.88E-12 | 0.298544 | 4.55E-11 | 0.305981 | 1.41E-11 |
| 0.45281  | -0.0205  | 0.65865  | 0.047277 | 0.30797  | 0.127461 | 0.00581  | 0.003569 | 0.93868  |
| 3.09E-06 | 0.26452  | 6.45E-09 | 0.30787  | 1.04E-11 | 0.344496 | 1.85E-14 | 0.159023 | 0.00056  |
| 0.0212   | 0.069743 | 0.13233  | 0.12474  | 0.00696  | 0.23566  | 2.58E-07 | 0.00423  | 0.92736  |
| 0.04338  | -0.01541 | 0.73982  | 0.024809 | 0.5928   | 0.121951 | 0.00834  | -0.08034 | 0.08285  |
| 0.08328  | -0.0269  | 0.56201  | 0.054747 | 0.23768  | 0.185885 | 5.31E-05 | -0.10669 | 0.02111  |
| 0.02041  | 0.136168 | 0.00319  | 0.205347 | 7.70E-06 | 0.21451  | 2.90E-06 | 0.110223 | 0.01718  |
| 1.12E-08 | 0.361711 | 7.00E-16 | 0.408432 | 3.35E-20 | 0.475288 | 1.08E-27 | 0.372814 | 7.59E-17 |
| 8.47E-10 | -0.14974 | 0.00117  | -0.02007 | 0.66524  | 0.016881 | 0.71597  | -0.23644 | 2.35E-07 |
| 8.79E-05 | 0.174141 | 0.00016  | 0.211687 | 3.94E-06 | 0.225451 | 8.54E-07 | 0.240395 | 1.45E-07 |
| 0.07965  | 0.060286 | 0.19343  | 0.191752 | 3.03E-05 | 0.264646 | 6.34E-09 | 0.068277 | 0.14069  |
| 5.64E-10 | 0.200563 | 1.26E-05 | 0.273414 | 1.88E-09 | 0.262774 | 8.17E-09 | 0.281845 | 5.63E-10 |
| 0.81091  | 0.079346 | 0.08675  | 0.138677 | 0.00267  | 0.23506  | 2.77E-07 | -0.04488 | 0.33322  |
| 0.78719  | -0.00406 | 0.93028  | 0.101004 | 0.02908  | 0.104316 | 0.02417  | -0.05252 | 0.25734  |
| 0.51264  | 0.216406 | 2.36E-06 | 0.249035 | 4.94E-08 | 0.344783 | 1.76E-14 | 0.081608 | 0.07811  |
| 2.00E-07 | 0.31033  | 6.97E-12 | 0.389552 | 2.26E-18 | 0.371398 | 1.01E-16 | 0.226345 | 7.71E-07 |
| 0.09258  | -0.02352 | 0.61216  | 0.103452 | 0.02538  | 0.151415 | 0.00103  | -0.06198 | 0.18121  |
| 4.21E-19 | 0.151645 | 0.00101  | 0.267859 | 4.08E-09 | 0.128158 | 0.00554  | 0.250561 | 4.07E-08 |

|          |          |          |          |          |          |          |          |          |
|----------|----------|----------|----------|----------|----------|----------|----------|----------|
| 1.57E-11 | -0.23871 | 1.78E-07 | -0.15125 | 0.00104  | -0.23629 | 2.39E-07 | -0.22169 | 1.31E-06 |
| 0.91412  | 0.234681 | 2.90E-07 | 0.254331 | 2.50E-08 | 0.421353 | 1.60E-21 | 0.150683 | 0.00109  |
| 8.75E-18 | 0.416032 | 5.68E-21 | 0.286749 | 2.73E-10 | 0.263917 | 7.00E-09 | 0.270541 | 2.82E-09 |
| 1.75E-20 | 0.343496 | 2.23E-14 | 0.404224 | 8.76E-20 | 0.407093 | 4.55E-20 | 0.414402 | 8.34E-21 |
| 0.78997  | 0.324181 | 6.89E-13 | 0.236108 | 2.45E-07 | 0.474788 | 1.25E-27 | 0.176117 | 0.00013  |
| 0.59468  | 0.238927 | 1.74E-07 | 0.232459 | 3.78E-07 | 0.394368 | 7.92E-19 | 0.109431 | 0.018    |
| 0.07229  | -0.06149 | 0.18466  | 0.1899   | 3.62E-05 | 0.175294 | 0.00014  | 0.075807 | 0.10181  |
| 6.13E-05 | 0.104975 | 0.02328  | 0.105844 | 0.02216  | 0.096212 | 0.03767  | 0.129111 | 0.0052   |
| 0.01425  | -0.07172 | 0.1217   | 0.009195 | 0.84291  | 0.075438 | 0.10349  | -0.0499  | 0.28186  |
| 2.38E-06 | -0.0867  | 0.06119  | -0.00782 | 0.86611  | 0.108266 | 0.01927  | -0.21067 | 4.39E-06 |
| 3.56E-10 | 0.417529 | 3.98E-21 | 0.338844 | 5.21E-14 | 0.398677 | 3.05E-19 | 0.255423 | 2.17E-08 |
| 2.87E-07 | 0.253068 | 2.94E-08 | 0.282934 | 4.80E-10 | 0.337743 | 6.35E-14 | 0.24109  | 1.33E-07 |
| 4.38E-05 | 0.24906  | 4.93E-08 | 0.167774 | 0.00027  | 0.344396 | 1.89E-14 | 0.185382 | 5.57E-05 |
| 0.38159  | 0.081273 | 0.07934  | 0.124577 | 0.00703  | 0.132474 | 0.00413  | -0.09357 | 0.04328  |
| 0.2751   | 0.142269 | 0.00206  | 0.148608 | 0.00128  | 0.252929 | 3.00E-08 | 0.037005 | 0.42498  |
| 0.58005  | 0.135876 | 0.00326  | 0.13184  | 0.00432  | 0.203639 | 9.19E-06 | -0.02444 | 0.59835  |
| 0.02939  | -0.08832 | 0.05648  | 0.098332 | 0.03363  | 0.110703 | 0.0167   | 0.033704 | 0.46746  |
| 0.00232  | -0.01497 | 0.74697  | 0.164428 | 0.00036  | 0.204561 | 8.35E-06 | -0.14368 | 0.00185  |
| 0.54684  | 0.04954  | 0.28536  | 0.098647 | 0.03307  | 0.124277 | 0.00717  | -0.06882 | 0.13754  |
| 0.02262  | 0.106051 | 0.0219   | 0.114135 | 0.01359  | 0.207336 | 6.25E-06 | 0.001936 | 0.96672  |
| 0.00026  | -0.33719 | 7.02E-14 | -0.29309 | 1.05E-10 | -0.33346 | 1.36E-13 | -0.2593  | 1.30E-08 |
| 0.05199  | 0.21751  | 2.09E-06 | 0.121056 | 0.00883  | 0.122008 | 0.0083   | 0.062849 | 0.17513  |
| 0.04011  | 0.186361 | 5.08E-05 | 0.236114 | 2.44E-07 | 0.261838 | 9.26E-09 | 0.006259 | 0.8927   |
| 0.04009  | 0.090217 | 0.05137  | 0.131035 | 0.00456  | 0.190525 | 3.41E-05 | 0.071122 | 0.12484  |
| 0.00016  | 0.151903 | 0.00099  | 0.239942 | 1.54E-07 | 0.233062 | 3.52E-07 | 0.136674 | 0.00308  |
| 0.3296   | 0.179403 | 9.69E-05 | 0.347091 | 1.15E-14 | 0.404362 | 8.49E-20 | 0.163305 | 0.00039  |
| 0.8698   | 0.213828 | 3.12E-06 | 0.312119 | 5.20E-12 | 0.409385 | 2.69E-20 | 0.131479 | 0.00443  |
| 0.00774  | 0.169188 | 0.00024  | 0.246912 | 6.46E-08 | 0.411715 | 1.56E-20 | 0.021069 | 0.64973  |
| 0.00218  | 0.150942 | 0.00107  | 0.22309  | 1.12E-06 | 0.415873 | 5.90E-21 | -0.01644 | 0.72312  |
| 0.13831  | 0.37795  | 2.64E-17 | 0.338222 | 5.82E-14 | 0.520796 | 7.97E-34 | 0.172992 | 0.00017  |
| 0.09212  | 0.164575 | 0.00036  | 0.223824 | 1.03E-06 | 0.285652 | 3.22E-10 | 0.065673 | 0.15651  |
| 0.61825  | 0.202091 | 1.08E-05 | 0.275973 | 1.31E-09 | 0.361969 | 6.65E-16 | 0.170554 | 0.00021  |
| 1.28E-19 | 0.284599 | 3.76E-10 | 0.213609 | 3.20E-06 | 0.215072 | 2.73E-06 | 0.272938 | 2.01E-09 |
| 6.43E-05 | 0.093383 | 0.04369  | 0.137026 | 0.003    | 0.142006 | 0.0021   | 0.129741 | 0.00498  |
| 0.47117  | -0.14131 | 0.00221  | -0.16845 | 0.00026  | -0.24557 | 7.66E-08 | -0.08994 | 0.05209  |
| 1.64E-05 | 0.070603 | 0.12762  | 0.150543 | 0.0011   | 0.148848 | 0.00126  | 0.04267  | 0.35755  |
| 0.88987  | 0.165639 | 0.00032  | 0.206441 | 6.87E-06 | 0.279589 | 7.81E-10 | 0.122206 | 0.0082   |
| 4.17E-08 | 0.136217 | 0.00318  | 0.17586  | 0.00013  | 0.169579 | 0.00023  | 0.210711 | 4.37E-06 |
| 0.00019  | -0.29214 | 1.22E-10 | -0.25266 | 3.10E-08 | -0.36422 | 4.27E-16 | -0.07013 | 0.13018  |
| 0.01519  | 0.343231 | 2.34E-14 | 0.209008 | 5.24E-06 | 0.350905 | 5.60E-15 | 0.16241  | 0.00043  |
| 0.01455  | 0.18728  | 4.65E-05 | 0.308446 | 9.45E-12 | 0.352629 | 4.04E-15 | 0.225248 | 8.75E-07 |
| 0.21046  | 0.243491 | 9.92E-08 | 0.146573 | 0.00149  | 0.214715 | 2.84E-06 | 0.052574 | 0.25685  |
| 0.65436  | 0.306063 | 1.39E-11 | 0.326069 | 4.98E-13 | 0.457335 | 1.62E-25 | 0.180641 | 8.65E-05 |
| 0.02473  | 0.316112 | 2.69E-12 | 0.308446 | 9.45E-12 | 0.379584 | 1.88E-17 | 0.200668 | 1.25E-05 |
| 5.31E-10 | -0.32866 | 3.18E-13 | -0.10709 | 0.02062  | -0.05324 | 0.25085  | -0.301   | 3.10E-11 |

|          |          |          |          |          |          |          |          |          |
|----------|----------|----------|----------|----------|----------|----------|----------|----------|
| 6.26E-07 | -0.31071 | 6.55E-12 | -0.22209 | 1.25E-06 | -0.25143 | 3.64E-08 | -0.21854 | 1.86E-06 |
| 2.54E-06 | 0.227    | 7.15E-07 | 0.303602 | 2.05E-11 | 0.216057 | 2.45E-06 | 0.180237 | 8.98E-05 |
| 1.95E-06 | 0.098386 | 0.03354  | 0.210513 | 4.46E-06 | 0.226289 | 7.76E-07 | 0.292276 | 1.19E-10 |
| 0.99588  | -0.05257 | 0.25688  | 0.062228 | 0.17945  | -0.08932 | 0.05373  | 0.097598 | 0.03499  |
| 0.00701  | -0.08826 | 0.05667  | 0.050772 | 0.27354  | 0.053858 | 0.2454   | -0.14292 | 0.00196  |
| 0.50494  | 0.110621 | 0.01678  | 0.156624 | 0.00068  | 0.237214 | 2.14E-07 | 0.048771 | 0.29292  |
| 0.20072  | 0.075537 | 0.10303  | 0.141815 | 0.00213  | 0.223292 | 1.09E-06 | 0.069777 | 0.13215  |
| 0.18692  | 0.041756 | 0.36794  | 0.138984 | 0.00261  | 0.181774 | 7.80E-05 | 0.004893 | 0.91601  |
| 1.22E-25 | 0.224105 | 9.96E-07 | 0.284137 | 4.02E-10 | 0.158211 | 0.0006   | 0.221908 | 1.28E-06 |
| 0.19647  | 0.078519 | 0.0901   | 0.196184 | 1.96E-05 | 0.178264 | 0.00011  | -0.0124  | 0.78928  |
| 0.00045  | -0.26459 | 6.39E-09 | -0.06476 | 0.16236  | -0.22252 | 1.19E-06 | -0.05943 | 0.19988  |
| 0.38855  | -0.04328 | 0.35069  | 0.052388 | 0.25854  | 0.096627 | 0.03685  | 0.019961 | 0.66701  |
| 8.40E-09 | 0.211904 | 3.85E-06 | 0.220595 | 1.48E-06 | 0.236529 | 2.32E-07 | 0.166217 | 0.00031  |
| 1.54E-07 | 0.000576 | 0.9901   | 0.109962 | 0.01745  | 0.209677 | 4.88E-06 | -0.08342 | 0.07168  |
| 0.01553  | 0.291049 | 1.44E-10 | 0.353059 | 3.72E-15 | 0.421615 | 1.50E-21 | 0.231302 | 4.33E-07 |
| 0.36422  | 0.061594 | 0.18393  | 0.080851 | 0.08092  | 0.158603 | 0.00058  | 0.066587 | 0.15081  |
| 7.34E-06 | 0.210703 | 4.37E-06 | 0.234566 | 2.94E-07 | 0.268072 | 3.97E-09 | 0.134971 | 0.00347  |
| 0.10206  | -0.06258 | 0.17698  | 0.091977 | 0.04697  | 0.092194 | 0.04645  | 0.309712 | 7.70E-12 |
| 9.44E-08 | 0.172923 | 0.00017  | 0.220288 | 1.53E-06 | 0.155487 | 0.00075  | 0.051241 | 0.26913  |
| 0.01162  | -0.03583 | 0.43981  | 0.022999 | 0.62007  | 0.079236 | 0.08719  | -0.15279 | 0.00093  |
| 2.32E-06 | 0.012373 | 0.78972  | 0.161211 | 0.00047  | 0.245985 | 7.27E-08 | -0.0572  | 0.21726  |
| 0.20362  | 0.026054 | 0.57438  | 0.114796 | 0.01305  | 0.118593 | 0.01032  | 0.007256 | 0.87573  |
| 1.24E-11 | 0.126787 | 0.00608  | 0.212103 | 3.76E-06 | 0.122808 | 0.00789  | 0.122871 | 0.00786  |
| 0.00415  | 0.201248 | 1.17E-05 | 0.31473  | 3.38E-12 | 0.244312 | 8.96E-08 | 0.255236 | 2.22E-08 |
| 0.00313  | 0.017525 | 0.70562  | 0.129768 | 0.00497  | 0.215728 | 2.54E-06 | -0.08356 | 0.07123  |
| 0.52483  | 0.13063  | 0.00469  | 0.066799 | 0.14951  | 0.102612 | 0.0266   | -0.05259 | 0.25673  |
| 0.00759  | 0.158264 | 0.0006   | 0.216016 | 2.46E-06 | 0.196833 | 1.83E-05 | -0.01444 | 0.75569  |
| 0.41987  | -0.18353 | 6.62E-05 | -0.18051 | 8.75E-05 | -0.16263 | 0.00042  | -0.05131 | 0.26846  |
| 0.6336   | -0.06107 | 0.18773  | -0.0051  | 0.91239  | 0.025468 | 0.58302  | -0.03551 | 0.44398  |
| 0.03527  | -0.12529 | 0.00671  | 0.060963 | 0.18847  | 0.033974 | 0.46391  | 0.060164 | 0.19434  |
| 2.56E-09 | 0.491298 | 9.56E-30 | 0.38911  | 2.49E-18 | 0.460009 | 7.84E-26 | 0.284449 | 3.84E-10 |
| 1.18E-13 | 0.21992  | 1.60E-06 | 0.169134 | 0.00024  | 0.238901 | 1.74E-07 | 0.238149 | 1.91E-07 |
| 0.01573  | 0.225897 | 8.12E-07 | 0.245272 | 7.94E-08 | 0.264854 | 6.16E-09 | 0.139427 | 0.00253  |
| 0.04341  | -0.29482 | 8.08E-11 | -0.29871 | 4.43E-11 | -0.31237 | 4.99E-12 | -0.19179 | 3.02E-05 |
| 0.02014  | 0.306875 | 1.22E-11 | 0.281467 | 5.95E-10 | 0.352457 | 4.18E-15 | 0.211831 | 3.88E-06 |
| 0.52113  | 0.078669 | 0.08948  | -0.00533 | 0.90853  | 0.121787 | 0.00842  | -0.03241 | 0.48475  |
| 0.43244  | 0.07786  | 0.09284  | 0.101489 | 0.02831  | 0.212257 | 3.70E-06 | 0.055852 | 0.22833  |
| 0.359    | -0.05345 | 0.249    | 0.054119 | 0.24312  | 0.089444 | 0.05341  | -0.12236 | 0.00812  |
| 0.96765  | 0.081314 | 0.07919  | 0.220588 | 1.48E-06 | 0.278809 | 8.74E-10 | 0.116167 | 0.012    |
| 0.01015  | 0.010602 | 0.81925  | 0.058996 | 0.20316  | 0.08375  | 0.07058  | -0.0287  | 0.53615  |
| 0.00372  | -0.1794  | 9.69E-05 | -0.18659 | 4.97E-05 | -0.25265 | 3.11E-08 | -0.06278 | 0.17562  |
| 1.62E-08 | -0.0418  | 0.36749  | -0.12811 | 0.00556  | -0.09394 | 0.04244  | -0.18501 | 5.77E-05 |
| 0.06078  | 0.214835 | 2.80E-06 | 0.274614 | 1.59E-09 | 0.268193 | 3.90E-09 | 0.148588 | 0.00128  |
| 0.00356  | 0.06052  | 0.19171  | 0.157729 | 0.00062  | 0.224801 | 9.20E-07 | 0.127119 | 0.00594  |
| 1.99E-05 | -0.11087 | 0.01654  | 0.039182 | 0.39823  | 0.073454 | 0.11291  | -0.12536 | 0.00668  |

|          |          |          |          |          |          |          |          |          |
|----------|----------|----------|----------|----------|----------|----------|----------|----------|
| 1.22E-18 | 0.136751 | 0.00306  | -0.02402 | 0.60463  | -0.034   | 0.46363  | 0.268486 | 3.75E-09 |
| 0.87865  | 0.057583 | 0.21421  | 0.127937 | 0.00563  | 0.153308 | 0.00089  | 0.069505 | 0.13367  |
| 0.05547  | -0.05718 | 0.21745  | 0.070349 | 0.129    | 0.096274 | 0.03755  | -0.1603  | 0.00051  |
| 0.03857  | 0.084041 | 0.0696   | 0.15068  | 0.00109  | 0.144789 | 0.00171  | -0.01048 | 0.82124  |
| 0.01435  | 0.150509 | 0.0011   | 0.150007 | 0.00115  | 0.241625 | 1.25E-07 | 0.119164 | 0.00995  |
| 0.06325  | -0.096   | 0.0381   | -0.13048 | 0.00474  | -0.05725 | 0.21688  | -0.17262 | 0.00018  |
| 0.03232  | 0.087383 | 0.05917  | 0.199967 | 1.34E-05 | 0.219601 | 1.66E-06 | 0.096084 | 0.03793  |
| 0.00052  | 0.035827 | 0.43987  | -0.06786 | 0.14312  | -0.14959 | 0.00119  | 0.128498 | 0.00542  |
| 3.11E-05 | -0.19971 | 1.37E-05 | -0.31224 | 5.10E-12 | -0.2982  | 4.80E-11 | -0.30746 | 1.11E-11 |
| 9.02E-06 | -0.33445 | 1.15E-13 | -0.39071 | 1.76E-18 | -0.45964 | 8.68E-26 | -0.37202 | 8.92E-17 |
| 0.27993  | 0.203918 | 8.93E-06 | 0.092876 | 0.04485  | 0.141888 | 0.00212  | 0.143462 | 0.00188  |
| 0.0071   | 0.289631 | 1.78E-10 | 0.16672  | 0.0003   | 0.253048 | 2.95E-08 | 0.335713 | 9.14E-14 |
| 0.56349  | 0.09494  | 0.04029  | 0.187423 | 4.59E-05 | 0.201577 | 1.14E-05 | 0.032688 | 0.48101  |
| 0.01924  | 0.026568 | 0.56685  | -0.01084 | 0.8153   | -0.04336 | 0.34984  | 0.285409 | 3.33E-10 |
| 0.8495   | 0.025321 | 0.5852   | 0.117494 | 0.01105  | 0.017601 | 0.70442  | -0.07816 | 0.0916   |
| 0.06949  | 0.195585 | 2.08E-05 | 0.204425 | 8.47E-06 | 0.325974 | 5.06E-13 | 0.130506 | 0.00473  |
| 0.6934   | 0.207222 | 6.33E-06 | 0.125277 | 0.00671  | 0.100549 | 0.02981  | 0.022399 | 0.62923  |
| 0.42575  | 0.124949 | 0.00686  | 0.280954 | 6.41E-10 | 0.250837 | 3.93E-08 | 0.141149 | 0.00223  |
| 0.0166   | 0.095324 | 0.03948  | 0.263348 | 7.56E-09 | 0.279286 | 8.16E-10 | 0.083795 | 0.07043  |
| 0.00031  | -0.04151 | 0.37076  | 0.162189 | 0.00043  | 0.129114 | 0.0052   | 0.058871 | 0.20412  |
| 0.53822  | -0.00543 | 0.90679  | 0.093883 | 0.04257  | 0.090498 | 0.05065  | -0.0446  | 0.33618  |
| 3.62E-06 | -0.06652 | 0.15121  | -0.14828 | 0.00131  | -0.01362 | 0.76909  | -0.19396 | 2.44E-05 |
| 2.43E-09 | -0.10846 | 0.01906  | -0.05198 | 0.26226  | 0.021896 | 0.63696  | -0.21362 | 3.19E-06 |
| 0.00543  | 0.133056 | 0.00397  | 0.213687 | 3.17E-06 | 0.252046 | 3.36E-08 | 0.093421 | 0.04361  |
| 5.82E-07 | 0.095744 | 0.03862  | 0.076415 | 0.09908  | 0.00079  | 0.98641  | 0.30941  | 8.09E-12 |
| 0.40941  | 0.066236 | 0.15297  | 0.151704 | 0.00101  | 0.182849 | 7.06E-05 | 0.003393 | 0.9417   |
| 0.16754  | 0.061691 | 0.18324  | 0.044311 | 0.33934  | 0.16711  | 0.00029  | -0.04675 | 0.31337  |
| 0.47684  | -0.04441 | 0.33827  | 0.060528 | 0.19165  | 0.039803 | 0.3908   | -0.14789 | 0.00135  |
| 0.41547  | 0.075397 | 0.10368  | 0.135006 | 0.00347  | 0.174907 | 0.00015  | 0.021686 | 0.64019  |
| 5.34E-05 | 0.124677 | 0.00698  | 0.199481 | 1.41E-05 | 0.332654 | 1.57E-13 | 0.035268 | 0.44706  |
| 0.00077  | 0.086109 | 0.06298  | 0.160944 | 0.00048  | 0.205518 | 7.56E-06 | 0.041768 | 0.3678   |
| 0.00946  | 0.414274 | 8.60E-21 | 0.331372 | 1.97E-13 | 0.373186 | 7.04E-17 | 0.083102 | 0.07279  |
| 0.18845  | 0.429543 | 2.17E-22 | 0.352636 | 4.04E-15 | 0.561958 | 3.14E-40 | 0.17693  | 0.00012  |
| 4.55E-09 | -0.00399 | 0.93146  | 0.096654 | 0.0368   | 0.143126 | 0.00193  | -0.18945 | 3.78E-05 |
| 9.77E-13 | -0.00632 | 0.89162  | 0.098537 | 0.03326  | 0.210693 | 4.38E-06 | -0.12037 | 0.00922  |
| 9.87E-09 | -0.18802 | 4.33E-05 | -0.18882 | 4.02E-05 | -0.19939 | 1.42E-05 | -0.09753 | 0.03512  |
| 0.31189  | -0.16806 | 0.00026  | 0.003683 | 0.93673  | -0.03511 | 0.4491   | -0.0792  | 0.08735  |
| 0.03305  | 0.247053 | 6.35E-08 | 0.364729 | 3.86E-16 | 0.405578 | 6.44E-20 | 0.243391 | 1.00E-07 |
| 0.30603  | 0.270139 | 2.98E-09 | 0.349154 | 7.79E-15 | 0.462193 | 4.31E-26 | 0.150114 | 0.00114  |
| 1.28E-12 | 0.361149 | 7.81E-16 | 0.381589 | 1.23E-17 | 0.404239 | 8.73E-20 | 0.274575 | 1.60E-09 |
| 0.28608  | 0.131404 | 0.00445  | 0.180107 | 9.09E-05 | 0.217879 | 2.00E-06 | 0.097236 | 0.03567  |
| 0.06733  | 0.240401 | 1.45E-07 | 0.288809 | 2.01E-10 | 0.358536 | 1.30E-15 | 0.164135 | 0.00037  |
| 0.00048  | 0.270286 | 2.92E-09 | 0.36956  | 1.47E-16 | 0.454176 | 3.81E-25 | 0.30597  | 1.41E-11 |
| 0.74214  | 0.086326 | 0.06232  | -0.0126  | 0.78603  | -0.12881 | 0.00531  | 0.057578 | 0.21425  |
| 4.62E-11 | -0.24009 | 1.51E-07 | -0.20102 | 1.20E-05 | -0.11561 | 0.01242  | -0.44708 | 2.49E-24 |

|          |          |          |          |          |          |          |          |          |
|----------|----------|----------|----------|----------|----------|----------|----------|----------|
| 0.08317  | 0.050423 | 0.27685  | 0.188434 | 4.17E-05 | 0.264565 | 6.41E-09 | 0.089803 | 0.05245  |
| 0.00033  | -0.07896 | 0.08831  | 0.041212 | 0.37422  | 0.12103  | 0.00884  | -0.07596 | 0.1011   |
| 0.56005  | 0.01593  | 0.73133  | 0.085342 | 0.06538  | 0.100522 | 0.02986  | -0.12327 | 0.00766  |
| 2.52E-05 | 0.22442  | 9.61E-07 | 0.290168 | 1.64E-10 | 0.3091   | 8.50E-12 | 0.16106  | 0.00048  |
| 6.47E-05 | 0.044733 | 0.33475  | 0.187199 | 4.69E-05 | 0.086937 | 0.06048  | 0.030473 | 0.51124  |
| 0.00516  | 0.111462 | 0.01596  | 0.146207 | 0.00153  | 0.227053 | 7.11E-07 | 0.047675 | 0.3039   |
| 0.29899  | 0.17381  | 0.00016  | 0.177706 | 0.00011  | 0.335843 | 8.93E-14 | 0.038993 | 0.40051  |
| 3.15E-10 | -0.0624  | 0.17825  | -0.17092 | 0.00021  | -0.12941 | 0.0051   | -0.1657  | 0.00032  |
| 7.57E-15 | 0.333521 | 1.35E-13 | 0.344183 | 1.96E-14 | 0.372812 | 7.59E-17 | 0.348708 | 8.47E-15 |
| 0.39757  | 0.126006 | 0.0064   | 0.141241 | 0.00222  | 0.163197 | 0.0004   | 0.011954 | 0.79669  |
| 0.92421  | 0.033785 | 0.4664   | 0.097885 | 0.03445  | 0.132573 | 0.00411  | 0.015708 | 0.73494  |
| 1.08E-10 | -0.1108  | 0.0166   | 0.042737 | 0.35679  | -0.15642 | 0.00069  | 0.123146 | 0.00772  |
| 0.00023  | -0.04094 | 0.37741  | 0.050492 | 0.2762   | 0.094153 | 0.04198  | -0.06877 | 0.13784  |
| 0.76037  | -0.28578 | 3.16E-10 | -0.20713 | 6.39E-06 | -0.23063 | 4.69E-07 | -0.02277 | 0.62349  |
| 9.35E-08 | -0.03489 | 0.45195  | -0.01185 | 0.79833  | 0.170236 | 0.00022  | -0.08111 | 0.07993  |
| 0.10442  | 0.051025 | 0.27115  | 0.21467  | 2.85E-06 | 0.189339 | 3.82E-05 | 0.120588 | 0.00909  |
| 0.24082  | 0.16103  | 0.00048  | 0.188612 | 4.10E-05 | 0.252249 | 3.27E-08 | 0.065998 | 0.15446  |
| 0.04195  | 0.05529  | 0.23305  | 0.126432 | 0.00622  | 0.146475 | 0.0015   | 0.061351 | 0.18567  |
| 1.23E-05 | 0.29362  | 9.71E-11 | 0.245441 | 7.78E-08 | 0.329058 | 2.96E-13 | 0.274045 | 1.72E-09 |
| 1.98E-06 | 0.110117 | 0.01729  | 0.072406 | 0.11816  | 0.087457 | 0.05896  | -0.11122 | 0.01619  |
| 0.00033  | 0.023519 | 0.61218  | 0.083647 | 0.07093  | 0.195881 | 2.02E-05 | -0.04735 | 0.30725  |
| 0.00011  | -0.07457 | 0.10755  | 0.045272 | 0.32896  | 0.094486 | 0.04126  | -0.07819 | 0.09145  |
| 1.01E-15 | 0.314726 | 3.39E-12 | 0.246512 | 6.80E-08 | 0.230973 | 4.50E-07 | 0.280168 | 7.18E-10 |
| 0.66579  | 0.079603 | 0.08573  | 0.145189 | 0.00166  | 0.171692 | 0.00019  | -0.02234 | 0.63006  |
| 0.06077  | 0.224922 | 9.08E-07 | 0.215735 | 2.54E-06 | 0.429032 | 2.46E-22 | 0.107749 | 0.01986  |
| 1.43E-08 | 0.080092 | 0.08382  | 0.083059 | 0.07294  | 0.178609 | 0.0001   | 0.010649 | 0.81847  |
| 0.01731  | 0.096946 | 0.03623  | 0.182146 | 7.53E-05 | 0.28715  | 2.58E-10 | 0.01051  | 0.8208   |
| 0.00667  | 0.154582 | 0.0008   | 0.162994 | 0.00041  | 0.255335 | 2.19E-08 | -0.03066 | 0.50862  |
| 0.89102  | 0.336846 | 7.46E-14 | 0.358039 | 1.43E-15 | 0.431142 | 1.46E-22 | 0.197706 | 1.68E-05 |
| 0.17169  | 0.064408 | 0.16465  | 0.09554  | 0.03903  | 0.112404 | 0.01509  | -0.08956 | 0.05309  |
| 0.9896   | 0.234773 | 2.87E-07 | 0.193139 | 2.64E-05 | 0.300045 | 3.60E-11 | 0.081742 | 0.07762  |
| 5.44E-09 | 0.266777 | 4.74E-09 | 0.193993 | 2.43E-05 | 0.223038 | 1.12E-06 | 0.133185 | 0.00394  |
| 0.00101  | 0.24477  | 8.46E-08 | 0.221937 | 1.27E-06 | 0.396476 | 4.97E-19 | 0.069491 | 0.13375  |
| 0.20355  | 0.057892 | 0.21176  | 0.083298 | 0.07211  | 0.144902 | 0.00169  | -0.0279  | 0.54753  |
| 5.73E-10 | 0.015751 | 0.73424  | 0.090031 | 0.05186  | 0.264626 | 6.36E-09 | -0.11515 | 0.01278  |
| 0.86025  | 0.30664  | 1.26E-11 | 0.299827 | 3.72E-11 | 0.387485 | 3.53E-18 | 0.053298 | 0.25035  |
| 4.55E-05 | 0.144941 | 0.00169  | 0.224897 | 9.10E-07 | 0.279828 | 7.54E-10 | 0.215871 | 2.50E-06 |
| 0.64037  | 0.163771 | 0.00038  | 0.194297 | 2.36E-05 | 0.319906 | 1.42E-12 | 0.077836 | 0.09294  |
| 0.90856  | 0.107777 | 0.01983  | 0.122287 | 0.00816  | 0.276781 | 1.17E-09 | 0.058074 | 0.21032  |
| 0.45939  | 0.110548 | 0.01685  | 0.213758 | 3.15E-06 | 0.241975 | 1.20E-07 | -0.06459 | 0.16346  |
| 3.11E-07 | 0.136613 | 0.00309  | 0.218777 | 1.81E-06 | 0.198488 | 1.55E-05 | 0.080654 | 0.08166  |
| 6.94E-17 | -0.15245 | 0.00095  | -0.1929  | 2.71E-05 | -0.11887 | 0.01014  | -0.19371 | 2.50E-05 |
| 0.0968   | 0.25524  | 2.22E-08 | 0.287659 | 2.39E-10 | 0.426246 | 4.88E-22 | 0.120911 | 0.00891  |
| 2.16E-10 | 0.253544 | 2.77E-08 | 0.327722 | 3.74E-13 | 0.389998 | 2.05E-18 | 0.317166 | 2.26E-12 |
| 1.52E-05 | 0.074239 | 0.1091   | 0.054684 | 0.23822  | 0.080568 | 0.08199  | 0.17653  | 0.00013  |

|          |          |          |          |          |          |          |           |          |
|----------|----------|----------|----------|----------|----------|----------|-----------|----------|
| 1.61E-20 | 0.189992 | 3.59E-05 | 0.181347 | 8.11E-05 | 0.136942 | 0.00302  | 0.293293  | 1.02E-10 |
| 0.00035  | 0.133379 | 0.00388  | 0.088114 | 0.05707  | 0.196468 | 1.90E-05 | 0.204053  | 8.80E-06 |
| 0.19892  | 0.18389  | 6.40E-05 | 0.206257 | 7.00E-06 | 0.207247 | 6.31E-06 | 0.031937  | 0.49114  |
| 0.00527  | 0.042052 | 0.36456  | 0.155058 | 0.00077  | 0.098853 | 0.0327   | 0.17127   | 0.0002   |
| 4.43E-05 | -0.0151  | 0.74489  | 0.102749 | 0.02639  | 0.179141 | 9.93E-05 | -0.13873  | 0.00266  |
| 2.91E-05 | 0.17806  | 0.00011  | 0.127714 | 0.00571  | 0.194719 | 2.26E-05 | 0.298795  | 4.37E-11 |
| 2.04E-26 | 0.103866 | 0.02479  | 0.199239 | 1.44E-05 | 0.034297 | 0.45967  | 0.253363  | 2.83E-08 |
| 0.02108  | 0.010561 | 0.81994  | 0.19277  | 2.74E-05 | 0.129337 | 0.00512  | 0.115793  | 0.01228  |
| 0.32258  | 0.138578 | 0.00269  | 0.178933 | 0.0001   | 0.27378  | 1.79E-09 | 0.054375  | 0.24089  |
| 0.33363  | 0.077931 | 0.09254  | 0.210433 | 4.50E-06 | 0.250959 | 3.86E-08 | 0.168756  | 0.00025  |
| 0.22483  | 0.030023 | 0.5175   | -0.02454 | 0.59689  | 0.073167 | 0.11433  | 0.180467  | 8.79E-05 |
| 0.51016  | 0.230244 | 4.90E-07 | 0.239484 | 1.62E-07 | 0.389207 | 2.43E-18 | 0.000545  | 0.99062  |
| 0.03423  | 0.251663 | 3.53E-08 | 0.28145  | 5.96E-10 | 0.462021 | 4.51E-26 | 0.081412  | 0.07883  |
| 1.19E-15 | 0.203887 | 8.96E-06 | 0.214659 | 2.85E-06 | 0.140611 | 0.00232  | 0.146396  | 0.00151  |
| 1.47E-07 | 0.105733 | 0.0223   | 0.196208 | 1.95E-05 | 0.256294 | 1.93E-08 | 0.000797  | 0.9863   |
| 0.35828  | 0.235577 | 2.61E-07 | 0.329176 | 2.90E-13 | 0.440549 | 1.36E-23 | 0.172184  | 0.00018  |
| 0.51914  | -0.04429 | 0.33957  | 0.113346 | 0.01426  | 0.117476 | 0.01106  | -0.05101  | 0.27132  |
| 1.90E-06 | 0.192896 | 2.71E-05 | 0.236405 | 2.36E-07 | 0.355506 | 2.33E-15 | 0.045583  | 0.32565  |
| 0.00041  | -0.01698 | 0.71431  | -0.03256 | 0.48274  | 0.04072  | 0.37996  | -0.16529  | 0.00033  |
| 1.15E-05 | -0.04746 | 0.30609  | -0.10238 | 0.02694  | -0.26194 | 9.14E-09 | -0.06104  | 0.18791  |
| 0.00461  | 0.180658 | 8.64E-05 | 0.232151 | 3.92E-07 | 0.263741 | 7.17E-09 | 0.025059  | 0.58908  |
| 0.17916  | -0.03066 | 0.50863  | 0.074411 | 0.10829  | 0.110778 | 0.01662  | -0.09101  | 0.04934  |
| 0.40923  | 0.139568 | 0.0025   | 0.196211 | 1.95E-05 | 0.286445 | 2.86E-10 | -7.35E-05 | 0.99874  |
| 0.47311  | -0.00825 | 0.85895  | 0.146581 | 0.00149  | 0.167541 | 0.00028  | 0.023565  | 0.61149  |
| 0.17641  | -0.07605 | 0.10073  | 0.040792 | 0.37912  | 0.01204  | 0.79526  | -0.07715  | 0.09584  |
| 0.00048  | 0.228312 | 6.14E-07 | 0.262055 | 9.00E-09 | 0.301175 | 3.01E-11 | 0.101696  | 0.02799  |
| 0.1454   | 0.090111 | 0.05165  | 0.124351 | 0.00713  | 0.134779 | 0.00352  | 0.060515  | 0.19174  |
| 0.00017  | 0.246463 | 6.84E-08 | 0.168528 | 0.00025  | 0.241787 | 1.22E-07 | 0.229422  | 5.40E-07 |
| 0.00192  | 0.259655 | 1.24E-08 | 0.20307  | 9.74E-06 | 0.265273 | 5.82E-09 | 0.141569  | 0.00217  |
| 0.00037  | -0.36588 | 3.07E-16 | -0.36913 | 1.60E-16 | -0.38022 | 1.64E-17 | -0.28128  | 6.11E-10 |
| 2.46E-10 | 0.358936 | 1.20E-15 | 0.47053  | 4.20E-27 | 0.475811 | 9.29E-28 | 0.348773  | 8.37E-15 |
| 0.60767  | -0.05853 | 0.20673  | 0.053871 | 0.24529  | -0.00591 | 0.89862  | -0.03397  | 0.46399  |
| 0.86424  | 0.016749 | 0.71809  | 0.142423 | 0.00203  | 0.156016 | 0.00072  | 0.017882  | 0.69992  |
| 0.23645  | 0.096452 | 0.03719  | 0.192465 | 2.82E-05 | 0.250425 | 4.14E-08 | -0.13436  | 0.00363  |
| 0.11583  | 0.030105 | 0.51635  | 0.086331 | 0.06231  | 0.164391 | 0.00036  | -0.03539  | 0.44542  |
| 0.06574  | -0.02803 | 0.54566  | 0.035558 | 0.44332  | 0.088613 | 0.05567  | -0.04895  | 0.29113  |
| 0.00947  | 0.130665 | 0.00468  | 0.270968 | 2.65E-09 | 0.331372 | 1.97E-13 | 0.066333  | 0.15237  |
| 0.28714  | -0.04701 | 0.31071  | -0.04276 | 0.35656  | -0.04628 | 0.31827  | 0.143066  | 0.00194  |
| 6.61E-08 | 0.108707 | 0.01878  | 0.056132 | 0.226    | 0.220398 | 1.51E-06 | -0.17993  | 9.23E-05 |
| 2.16E-11 | 0.28578  | 3.16E-10 | 0.106069 | 0.02188  | -0.00452 | 0.92235  | 0.173638  | 0.00016  |
| 1.01E-12 | 0.313062 | 4.46E-12 | 0.352267 | 4.33E-15 | 0.301366 | 2.92E-11 | 0.239996  | 1.53E-07 |
| 1.69E-07 | 0.219401 | 1.69E-06 | 0.158281 | 0.0006   | 0.148571 | 0.00128  | 0.081825  | 0.07732  |
| 0.22519  | 0.116526 | 0.01174  | 0.096096 | 0.0379   | 0.258888 | 1.37E-08 | 0.083492  | 0.07145  |
| 3.76E-12 | -0.0899  | 0.05219  | -0.01106 | 0.81156  | 0.059448 | 0.19971  | -0.16133  | 0.00047  |
| 0.01559  | 0.237176 | 2.15E-07 | 0.282074 | 5.44E-10 | 0.337631 | 6.48E-14 | 0.100277  | 0.03026  |

|          |          |          |          |          |          |          |          |          |
|----------|----------|----------|----------|----------|----------|----------|----------|----------|
| 0.00411  | 0.037608 | 0.41746  | 0.005993 | 0.89722  | -0.07334 | 0.1135   | 0.293414 | 1.00E-10 |
| 0.07543  | 0.1084   | 0.01912  | 0.107673 | 0.01995  | 0.182622 | 7.21E-05 | -0.07792 | 0.09259  |
| 0.98904  | 0.209131 | 5.17E-06 | 0.285026 | 3.53E-10 | 0.356529 | 1.92E-15 | 0.110312 | 0.01709  |
| 7.76E-23 | 0.148005 | 0.00134  | 0.260291 | 1.14E-08 | 0.116421 | 0.01181  | 0.282261 | 5.30E-10 |
| 1.35E-11 | 0.013148 | 0.77689  | 0.066713 | 0.15003  | 0.220629 | 1.48E-06 | -0.15794 | 0.00061  |
| 0.00442  | 0.12617  | 0.00633  | 0.234977 | 2.80E-07 | 0.246047 | 7.21E-08 | 0.215795 | 2.52E-06 |
| 5.07E-05 | 0.139086 | 0.00259  | 0.067616 | 0.14458  | 0.271931 | 2.32E-09 | -0.07747 | 0.09451  |
| 0.05796  | 0.170696 | 0.00021  | 0.162755 | 0.00041  | 0.299606 | 3.85E-11 | 0.127389 | 0.00584  |
| 4.91E-06 | -0.14224 | 0.00206  | -0.0952  | 0.03974  | -0.25456 | 2.42E-08 | 0.060294 | 0.19337  |
| 3.71E-05 | 0.167371 | 0.00028  | 0.216053 | 2.45E-06 | 0.197412 | 1.73E-05 | 0.205059 | 7.93E-06 |
| 1.38E-06 | 0.065311 | 0.1588   | 0.107798 | 0.0198   | 0.108885 | 0.01859  | 0.187607 | 4.51E-05 |
| 1.21E-12 | 0.101478 | 0.02833  | 0.208958 | 5.27E-06 | 0.172925 | 0.00017  | 0.136027 | 0.00323  |
| 0.30568  | 0.104765 | 0.02357  | -0.0563  | 0.22462  | -0.02689 | 0.56216  | 0.008074 | 0.86186  |
| 0.41482  | 0.154728 | 0.00079  | 0.192272 | 2.88E-05 | 0.268403 | 3.79E-09 | 0.08176  | 0.07755  |
| 0.01619  | -0.09491 | 0.04035  | -0.18925 | 3.86E-05 | -0.22242 | 1.21E-06 | -0.15975 | 0.00053  |
| 4.85E-06 | 0.001973 | 0.96608  | 0.026797 | 0.56351  | 0.149118 | 0.00123  | -0.14335 | 0.0019   |
| 1.11E-06 | 0.192627 | 2.78E-05 | 0.292836 | 1.09E-10 | 0.244632 | 8.61E-08 | 0.154713 | 0.00079  |
| 0.0414   | 0.102598 | 0.02662  | 0.087808 | 0.05794  | 0.145765 | 0.00159  | 0.094488 | 0.04125  |
| 0.00718  | 0.225091 | 8.90E-07 | 0.302808 | 2.33E-11 | 0.350535 | 6.01E-15 | 0.153554 | 0.00087  |
| 0.02647  | 0.089907 | 0.05218  | 0.167363 | 0.00028  | 0.104018 | 0.02458  | 0.206322 | 6.95E-06 |
| 0.00649  | 0.292172 | 1.21E-10 | 0.396013 | 5.51E-19 | 0.3716   | 9.72E-17 | 0.21671  | 2.28E-06 |
| 3.05E-06 | 0.26704  | 4.57E-09 | 0.359982 | 9.81E-16 | 0.314697 | 3.40E-12 | 0.24436  | 8.90E-08 |
| 0.71702  | 0.205254 | 7.77E-06 | 0.228748 | 5.84E-07 | 0.331137 | 2.06E-13 | 0.011988 | 0.79611  |
| 0.01029  | 0.291705 | 1.30E-10 | 0.317426 | 2.16E-12 | 0.385825 | 5.03E-18 | 0.167789 | 0.00027  |
| 0.84448  | 0.124226 | 0.00719  | 0.174823 | 0.00015  | 0.189004 | 3.95E-05 | 0.064872 | 0.16163  |
| 0.0611   | 0.035934 | 0.43852  | 0.228326 | 6.13E-07 | 0.22197  | 1.27E-06 | -0.02144 | 0.64395  |
| 0.35354  | 0.100568 | 0.02978  | 0.230598 | 4.71E-07 | 0.271743 | 2.38E-09 | 0.025489 | 0.58271  |
| 0.11985  | 0.063479 | 0.17085  | 0.222148 | 1.24E-06 | 0.233899 | 3.19E-07 | 0.101234 | 0.02871  |
| 0.40335  | 0.157111 | 0.00066  | 0.306973 | 1.20E-11 | 0.361114 | 7.87E-16 | 0.096023 | 0.03805  |
| 0.75756  | 0.150132 | 0.00114  | 0.310313 | 6.98E-12 | 0.340235 | 4.05E-14 | 0.109679 | 0.01774  |
| 0.03847  | 0.204468 | 8.43E-06 | 0.333369 | 1.39E-13 | 0.360468 | 8.92E-16 | 0.104644 | 0.02373  |
| 0.0181   | 0.260783 | 1.07E-08 | 0.331076 | 2.08E-13 | 0.370891 | 1.12E-16 | 0.147595 | 0.00138  |
| 0.17782  | 0.173566 | 0.00016  | 0.212663 | 3.54E-06 | 0.288705 | 2.04E-10 | 0.111369 | 0.01605  |
| 0.00761  | 0.088477 | 0.05605  | 0.183885 | 6.41E-05 | 0.192455 | 2.83E-05 | 0.181719 | 7.84E-05 |
| 0.01645  | 0.138439 | 0.00272  | 0.228931 | 5.72E-07 | 0.224135 | 9.93E-07 | 0.119383 | 0.00982  |
| 0.19949  | 0.005842 | 0.8998   | 0.199542 | 1.40E-05 | 0.153586 | 0.00087  | 0.09378  | 0.0428   |
| 0.51421  | -0.02891 | 0.53311  | -0.04026 | 0.3854   | -0.00408 | 0.92995  | 0.003304 | 0.94323  |
| 9.16E-05 | 0.216512 | 2.33E-06 | 0.207399 | 6.21E-06 | 0.331105 | 2.07E-13 | 0.220875 | 1.44E-06 |
| 0.00034  | 0.25575  | 2.08E-08 | 0.255296 | 2.20E-08 | 0.282596 | 5.04E-10 | 0.087868 | 0.05777  |
| 0.01273  | 0.031118 | 0.50234  | 0.079989 | 0.08422  | 0.174265 | 0.00015  | -0.03013 | 0.51607  |
| 0.90623  | 0.039344 | 0.39628  | 0.132603 | 0.0041   | 0.162474 | 0.00042  | 0.045842 | 0.3229   |
| 0.6274   | 0.006889 | 0.88196  | 0.119654 | 0.00965  | 0.155756 | 0.00073  | -0.03982 | 0.39058  |
| 7.25E-12 | 0.368337 | 1.88E-16 | 0.364494 | 4.04E-16 | 0.376199 | 3.79E-17 | 0.263866 | 7.05E-09 |
| 0.02524  | 0.215318 | 2.66E-06 | 0.230696 | 4.65E-07 | 0.30537  | 1.55E-11 | 0.13793  | 0.00282  |
| 8.89E-07 | 0.238386 | 1.86E-07 | 0.319559 | 1.51E-12 | 0.323275 | 8.04E-13 | 0.187305 | 4.64E-05 |



|          |          |          |          |          |          |          |          |          |
|----------|----------|----------|----------|----------|----------|----------|----------|----------|
| 1.02E-17 | 0.343867 | 2.08E-14 | 0.370641 | 1.18E-16 | 0.370127 | 1.31E-16 | 0.294916 | 7.97E-11 |
| 5.60E-05 | 0.178705 | 0.0001   | 0.260601 | 1.09E-08 | 0.251687 | 3.52E-08 | 0.105552 | 0.02253  |
| 0.10036  | 0.10035  | 0.03014  | 0.222628 | 1.18E-06 | 0.203959 | 8.89E-06 | 0.1947   | 2.27E-05 |
| 1.14E-07 | -0.09313 | 0.04427  | -0.08618 | 0.06276  | -0.2176  | 2.07E-06 | 0.165092 | 0.00034  |
| 1.04E-19 | 0.226176 | 7.86E-07 | 0.267677 | 4.19E-09 | 0.3203   | 1.33E-12 | 0.358086 | 1.42E-15 |
| 5.98E-08 | -0.21218 | 3.73E-06 | -0.08832 | 0.05648  | -0.10288 | 0.02621  | -0.17928 | 9.80E-05 |
| 0.79052  | 0.00793  | 0.86429  | 0.104897 | 0.02339  | 0.138495 | 0.00271  | -0.00309 | 0.94691  |
| 1.55E-33 | -0.19812 | 1.61E-05 | -0.11607 | 0.01207  | -0.0335  | 0.4702   | -0.40055 | 2.01E-19 |
| 0.00148  | 0.0913   | 0.04863  | 0.151428 | 0.00103  | 0.273052 | 1.98E-09 | -0.05378 | 0.24606  |
| 2.85E-05 | -0.01611 | 0.7285   | 0.100745 | 0.02949  | 0.210308 | 4.56E-06 | -0.13575 | 0.00329  |
| 0.00024  | 0.140315 | 0.00237  | 0.218464 | 1.88E-06 | 0.136277 | 0.00317  | 0.143662 | 0.00186  |
| 0.57927  | 0.046117 | 0.32     | 0.1559   | 0.00072  | 0.209942 | 4.74E-06 | 0.001683 | 0.97107  |
| 0.14948  | 0.062923 | 0.17463  | 0.14137  | 0.0022   | 0.153409 | 0.00088  | 0.06211  | 0.18027  |
| 0.80299  | 0.089655 | 0.05285  | 0.165317 | 0.00033  | 0.241698 | 1.24E-07 | 0.150223 | 0.00113  |
| 0.37703  | 0.144282 | 0.00177  | 0.246554 | 6.76E-08 | 0.297106 | 5.68E-11 | 0.036462 | 0.4318   |
| 2.36E-14 | -0.26337 | 7.53E-09 | -0.04779 | 0.30278  | -0.05278 | 0.25494  | -0.16774 | 0.00027  |
| 0.5213   | 0.113108 | 0.01446  | 0.12936  | 0.00511  | 0.158959 | 0.00057  | 0.026712 | 0.56474  |
| 0.71797  | -0.00133 | 0.97707  | 0.094783 | 0.04062  | 0.132822 | 0.00404  | 0.009748 | 0.8336   |
| 0.0297   | 0.274832 | 1.54E-09 | 0.349333 | 7.53E-15 | 0.356918 | 1.78E-15 | 0.162819 | 0.00041  |
| 0.98971  | -0.03147 | 0.49746  | -0.00514 | 0.91182  | -0.06478 | 0.16222  | 0.081024 | 0.08027  |
| 0.14143  | -0.08124 | 0.07946  | -0.02322 | 0.61669  | -0.1895  | 3.76E-05 | -0.01541 | 0.73974  |
| 0.43445  | -0.26257 | 8.39E-09 | -0.18368 | 6.53E-05 | -0.31157 | 5.69E-12 | -0.05986 | 0.19659  |
| 0.56647  | 0.046846 | 0.3124   | 0.221834 | 1.29E-06 | 0.232997 | 3.55E-07 | 0.035669 | 0.4419   |
| 0.01008  | 0.125335 | 0.00669  | 0.100621 | 0.0297   | 0.132083 | 0.00425  | -0.0097  | 0.83441  |
| 0.05601  | 0.199264 | 1.44E-05 | 0.157143 | 0.00065  | 0.203255 | 9.56E-06 | -0.05588 | 0.22807  |
| 0.85788  | -0.35641 | 1.96E-15 | -0.36023 | 9.35E-16 | -0.40501 | 7.33E-20 | -0.13065 | 0.00469  |
| 0.00025  | 0.149242 | 0.00122  | 0.145823 | 0.00158  | 0.241617 | 1.25E-07 | 0.281898 | 5.58E-10 |
| 0.01844  | -0.00964 | 0.83541  | 0.068076 | 0.14186  | 0.12589  | 0.00645  | -0.14915 | 0.00123  |
| 0.0114   | 0.219335 | 1.71E-06 | 0.250507 | 4.09E-08 | 0.325787 | 5.22E-13 | 0.145846 | 0.00158  |
| 0.23031  | -0.03026 | 0.51419  | 0.082323 | 0.07553  | 0.13466  | 0.00355  | -0.04008 | 0.38754  |
| 0.00037  | 0.027859 | 0.54814  | 0.123249 | 0.00767  | 0.186307 | 5.10E-05 | -0.05911 | 0.20229  |
| 0.83304  | 0.065412 | 0.15816  | 0.182467 | 7.31E-05 | 0.233386 | 3.39E-07 | 0.045861 | 0.3227   |
| 0.02442  | 0.16002  | 0.00052  | 0.179439 | 9.66E-05 | 0.264599 | 6.38E-09 | 0.193868 | 2.46E-05 |
| 0.00114  | -0.00433 | 0.92562  | 0.083745 | 0.07059  | 0.020427 | 0.65973  | 0.079461 | 0.08629  |
| 0.00694  | 0.091561 | 0.04799  | 0.108772 | 0.01871  | 0.199072 | 1.46E-05 | -0.16405 | 0.00037  |
| 0.04014  | -0.22654 | 7.54E-07 | -0.16496 | 0.00034  | -0.21119 | 4.15E-06 | -0.21925 | 1.72E-06 |
| 0.0807   | 0.20238  | 1.05E-05 | 0.15034  | 0.00112  | 0.19279  | 2.73E-05 | 0.090215 | 0.05138  |
| 4.76E-18 | 0.323572 | 7.64E-13 | 0.398336 | 3.29E-19 | 0.344514 | 1.85E-14 | 0.389652 | 2.21E-18 |
| 3.59E-09 | 0.031699 | 0.49438  | 0.070311 | 0.1292   | 0.086332 | 0.0623   | -0.159   | 0.00056  |
| 5.50E-20 | 0.465774 | 1.60E-26 | 0.431515 | 1.33E-22 | 0.422413 | 1.24E-21 | 0.400029 | 2.26E-19 |
| 0.07048  | 0.063537 | 0.17045  | 0.051402 | 0.26762  | 0.069386 | 0.13433  | -0.04819 | 0.29867  |
| 0.15536  | -0.39146 | 1.49E-18 | -0.24492 | 8.31E-08 | -0.32945 | 2.76E-13 | -0.17681 | 0.00012  |
| 0.11948  | 0.113581 | 0.01405  | 0.201059 | 1.20E-05 | 0.294234 | 8.84E-11 | 0.059121 | 0.2022   |
| 1.78E-17 | 0.324257 | 6.80E-13 | 0.341241 | 3.37E-14 | 0.317239 | 2.23E-12 | 0.287004 | 2.63E-10 |
| 0.00603  | 0.079182 | 0.08741  | 0.075872 | 0.10151  | 0.188907 | 3.98E-05 | -0.08299 | 0.07319  |

|          |          |          |          |          |          |          |          |          |
|----------|----------|----------|----------|----------|----------|----------|----------|----------|
| 0.80173  | 0.007416 | 0.87301  | 0.014634 | 0.75245  | 0.072105 | 0.1197   | -0.04822 | 0.2984   |
| 0.14373  | 0.167743 | 0.00027  | 0.218966 | 1.78E-06 | 0.309327 | 8.20E-12 | 0.093175 | 0.04416  |
| 0.00247  | -0.09711 | 0.0359   | -0.09808 | 0.0341   | -0.05118 | 0.26969  | 0.018845 | 0.68461  |
| 0.00013  | 0.358232 | 1.38E-15 | 0.276447 | 1.23E-09 | 0.376404 | 3.63E-17 | 0.213539 | 3.22E-06 |
| 0.22913  | 0.070133 | 0.13018  | 0.113537 | 0.01409  | 0.12366  | 0.00746  | 0.044928 | 0.33265  |
| 0.05962  | 0.069049 | 0.13624  | 0.062777 | 0.17563  | 0.125178 | 0.00676  | -0.13754 | 0.0029   |
| 0.01377  | 0.118365 | 0.01047  | 0.179244 | 9.83E-05 | 0.194243 | 2.37E-05 | 0.06583  | 0.15552  |
| 0.00068  | -0.28443 | 3.85E-10 | -0.21564 | 2.56E-06 | -0.34234 | 2.75E-14 | -0.18138 | 8.09E-05 |
| 0.61598  | 0.040945 | 0.37733  | 0.150538 | 0.0011   | 0.205704 | 7.42E-06 | 0.033243 | 0.47359  |
| 2.76E-06 | 0.275708 | 1.36E-09 | 0.321836 | 1.03E-12 | 0.412049 | 1.45E-20 | 0.218488 | 1.87E-06 |
| 0.96176  | 0.119052 | 0.01002  | 0.157077 | 0.00066  | 0.169288 | 0.00024  | 0.050709 | 0.27413  |
| 3.52E-08 | 0.203606 | 9.22E-06 | 0.245154 | 8.06E-08 | 0.284059 | 4.07E-10 | 0.142738 | 0.00199  |
| 0.27912  | -0.00542 | 0.90695  | 0.133206 | 0.00393  | 0.129303 | 0.00513  | 0.038258 | 0.40946  |
| 6.01E-06 | -0.24404 | 9.26E-08 | -0.32014 | 1.37E-12 | -0.25237 | 3.22E-08 | -0.24563 | 7.60E-08 |
| 7.51E-13 | 0.014178 | 0.75991  | 0.135677 | 0.00331  | 0.235177 | 2.73E-07 | -0.12776 | 0.00569  |
| 0.00115  | -0.03211 | 0.48885  | 0.066007 | 0.1544   | 0.139244 | 0.00256  | -0.06984 | 0.13181  |
| 0.01248  | -0.02406 | 0.60406  | 0.016259 | 0.72601  | -0.07008 | 0.1305   | 0.131687 | 0.00436  |
| 0.01047  | -0.27218 | 2.24E-09 | -0.20798 | 5.84E-06 | -0.19326 | 2.61E-05 | -0.14691 | 0.00145  |
| 1.00E-04 | -0.17038 | 0.00022  | 0.094722 | 0.04075  | 0.088464 | 0.05609  | -0.11366 | 0.01399  |
| 0.20048  | 0.128762 | 0.00532  | 0.121412 | 0.00863  | 0.151866 | 0.00099  | -0.07458 | 0.10746  |
| 3.89E-05 | -0.46094 | 6.08E-26 | -0.34903 | 7.97E-15 | -0.39609 | 5.42E-19 | -0.20147 | 1.15E-05 |
| 0.00095  | 0.114581 | 0.01323  | 0.192119 | 2.92E-05 | 0.196212 | 1.95E-05 | 0.214817 | 2.81E-06 |
| 0.0195   | 0.161858 | 0.00045  | 0.186325 | 5.09E-05 | 0.218934 | 1.78E-06 | -0.0591  | 0.20233  |
| 0.00017  | -0.00735 | 0.87419  | 0.047426 | 0.30644  | 0.155825 | 0.00073  | -0.11629 | 0.01191  |
| 0.20343  | 0.283333 | 4.53E-10 | 0.14294  | 0.00196  | 0.099848 | 0.03098  | 0.307848 | 1.04E-11 |
| 8.60E-05 | 0.019676 | 0.67149  | 0.09835  | 0.0336   | 0.124105 | 0.00725  | -0.0495  | 0.28579  |
| 0.00049  | 0.163247 | 0.0004   | 0.272275 | 2.21E-09 | 0.272011 | 2.29E-09 | 0.104809 | 0.02351  |
| 0.00011  | 0.178347 | 0.00011  | 0.264818 | 6.19E-09 | 0.27141  | 2.50E-09 | 0.17704  | 0.00012  |
| 1.65E-07 | 0.103347 | 0.02553  | 0.178324 | 0.00011  | 0.161925 | 0.00044  | -0.14639 | 0.00151  |
| 2.10E-10 | -0.11571 | 0.01234  | -0.12482 | 0.00692  | 0.015454 | 0.73907  | -0.26657 | 4.87E-09 |
| 0.03123  | -0.06624 | 0.15294  | 0.011081 | 0.81124  | 0.020946 | 0.65164  | -0.0429  | 0.35498  |
| 0.02144  | 0.146474 | 0.0015   | 0.250616 | 4.04E-08 | 0.337221 | 6.97E-14 | 0.130217 | 0.00483  |
| 0.35844  | 0.087888 | 0.05772  | -0.0035  | 0.93985  | -0.06178 | 0.18257  | 0.143797 | 0.00184  |
| 0.01169  | 0.234189 | 3.08E-07 | 0.324537 | 6.48E-13 | 0.461293 | 5.51E-26 | 0.070834 | 0.12638  |
| 0.00086  | 0.400978 | 1.82E-19 | 0.416961 | 4.56E-21 | 0.510265 | 2.53E-32 | 0.249475 | 4.67E-08 |
| 0.81474  | 0.058705 | 0.2054   | 0.151789 | 0.001    | 0.177909 | 0.00011  | -0.01469 | 0.75153  |
| 0.19099  | -0.03273 | 0.48047  | 0.079561 | 0.0859   | 0.126284 | 0.00628  | -0.03426 | 0.46021  |
| 0.29418  | 0.219064 | 1.76E-06 | 0.286651 | 2.77E-10 | 0.319776 | 1.46E-12 | 0.148762 | 0.00126  |
| 0.00452  | 0.288959 | 1.97E-10 | 0.238952 | 1.73E-07 | 0.285009 | 3.54E-10 | 0.167198 | 0.00028  |
| 4.35E-05 | 0.01874  | 0.68627  | 0.113895 | 0.01379  | 0.22024  | 1.54E-06 | 0.027074 | 0.55948  |
| 0.09241  | 0.217638 | 2.06E-06 | 0.318752 | 1.73E-12 | 0.369006 | 1.64E-16 | 0.232473 | 3.77E-07 |
| 1.96E-05 | 0.129008 | 0.00524  | 0.1574   | 0.00064  | 0.210373 | 4.53E-06 | 0.16269  | 0.00042  |
| 0.04375  | -0.0584  | 0.20781  | -0.02234 | 0.63013  | -0.11792 | 0.01076  | -0.00644 | 0.88969  |
| 2.40E-14 | -0.13881 | 0.00264  | -0.1685  | 0.00025  | -0.04911 | 0.28959  | -0.28184 | 5.63E-10 |
| 0.0097   | -0.11221 | 0.01526  | 0.004771 | 0.9181   | -0.15985 | 0.00053  | 0.021727 | 0.63956  |

|          |          |          |          |          |          |          |          |          |
|----------|----------|----------|----------|----------|----------|----------|----------|----------|
| 0.10786  | 0.290788 | 1.49E-10 | 0.348446 | 8.90E-15 | 0.363154 | 5.27E-16 | 0.254825 | 2.34E-08 |
| 0.00621  | 0.150136 | 0.00114  | 0.199179 | 1.45E-05 | 0.249195 | 4.84E-08 | 0.147066 | 0.00144  |
| 0.75837  | -0.03088 | 0.50561  | 0.069432 | 0.13408  | 0.081895 | 0.07706  | -0.05897 | 0.20334  |
| 4.94E-15 | 0.272123 | 2.26E-09 | 0.270746 | 2.74E-09 | 0.226322 | 7.73E-07 | 0.266796 | 4.73E-09 |
| 0.43848  | 0.030779 | 0.507    | 0.174709 | 0.00015  | 0.187078 | 4.74E-05 | 0.01247  | 0.7881   |
| 0.45098  | 0.162312 | 0.00043  | 0.220218 | 1.55E-06 | 0.336123 | 8.49E-14 | 0.054061 | 0.24362  |
| 0.73613  | 0.14172  | 0.00214  | 0.164029 | 0.00037  | 0.213009 | 3.41E-06 | 0.065946 | 0.15478  |
| 0.27383  | -0.00589 | 0.89901  | -0.04786 | 0.30203  | 0.045013 | 0.33174  | -0.11986 | 0.00953  |
| 0.00013  | 0.237681 | 2.02E-07 | 0.257058 | 1.75E-08 | 0.364264 | 4.23E-16 | 0.158142 | 0.0006   |
| 0.00114  | 0.003021 | 0.94808  | -0.05637 | 0.22407  | -0.13091 | 0.0046   | 0.073611 | 0.11214  |
| 0.30575  | 0.105107 | 0.02311  | 0.184833 | 5.86E-05 | 0.268268 | 3.86E-09 | 0.036744 | 0.42826  |
| 0.00013  | 0.05691  | 0.21962  | 0.08151  | 0.07847  | 0.042422 | 0.36035  | 0.08026  | 0.08317  |
| 0.11391  | -0.0787  | 0.08934  | -0.05386 | 0.24534  | -0.20189 | 1.10E-05 | 0.002478 | 0.95742  |
| 4.17E-09 | -0.18207 | 7.59E-05 | -0.21115 | 4.17E-06 | -0.22214 | 1.24E-06 | -0.17025 | 0.00022  |
| 0.09506  | 0.215817 | 2.51E-06 | 0.298182 | 4.81E-11 | 0.453699 | 4.32E-25 | 0.086703 | 0.06118  |
| 0.07809  | 0.20019  | 1.31E-05 | 0.171123 | 0.0002   | 0.159715 | 0.00053  | -0.10568 | 0.02236  |
| 0.21688  | 0.225919 | 8.10E-07 | 0.16641  | 0.0003   | 0.238811 | 1.76E-07 | 0.013221 | 0.77568  |
| 1.00E-10 | 0.186373 | 5.07E-05 | 0.232415 | 3.80E-07 | 0.160433 | 0.0005   | 0.352726 | 3.97E-15 |
| 0.00089  | 0.048248 | 0.29813  | 0.115032 | 0.01287  | 0.147492 | 0.00139  | 0.181928 | 7.69E-05 |
| 0.29291  | 0.126017 | 0.00639  | 0.103814 | 0.02487  | 0.246155 | 7.11E-08 | 0.091424 | 0.04832  |
| 1.85E-05 | 0.189343 | 3.82E-05 | 0.252461 | 3.18E-08 | 0.321396 | 1.11E-12 | 0.138391 | 0.00273  |
| 6.89E-06 | -0.0317  | 0.49431  | 0.1855   | 5.51E-05 | 0.308591 | 9.24E-12 | -0.09786 | 0.0345   |
| 2.61E-05 | 0.044304 | 0.33942  | 0.080529 | 0.08214  | 0.169196 | 0.00024  | -0.15703 | 0.00066  |
| 5.27E-07 | 0.154394 | 0.00082  | 0.274148 | 1.70E-09 | 0.181536 | 7.97E-05 | 0.171643 | 0.00019  |
| 0.84674  | 0.137825 | 0.00284  | 0.127175 | 0.00592  | 0.108255 | 0.01928  | -0.00515 | 0.91162  |
| 0.25987  | 0.082203 | 0.07595  | 0.156639 | 0.00068  | 0.169732 | 0.00023  | 0.130722 | 0.00466  |
| 0.02285  | 0.239014 | 1.72E-07 | 0.169158 | 0.00024  | 0.20713  | 6.39E-06 | 0.038677 | 0.40435  |
| 0.0103   | 0.00714  | 0.87771  | 0.030091 | 0.51654  | 0.098654 | 0.03305  | -0.07183 | 0.12111  |
| 0.00423  | -0.08082 | 0.08102  | -0.07246 | 0.11788  | 0.012037 | 0.7953   | -0.27325 | 1.93E-09 |
| 6.57E-08 | 0.018409 | 0.69152  | 0.088462 | 0.0561   | 0.105542 | 0.02255  | 0.098108 | 0.03404  |
| 0.45115  | 0.064007 | 0.16731  | 0.138649 | 0.00268  | 0.168975 | 0.00024  | 0.051635 | 0.26545  |
| 0.21485  | 0.204872 | 8.09E-06 | 0.164573 | 0.00036  | 0.213612 | 3.20E-06 | -0.0106  | 0.81924  |
| 0.059    | 0.080095 | 0.08381  | 0.179531 | 9.58E-05 | 0.217341 | 2.13E-06 | 0.047171 | 0.30905  |
| 0.0782   | 0.0084   | 0.85633  | 0.150058 | 0.00114  | 0.208675 | 5.43E-06 | -0.03868 | 0.40429  |
| 2.35E-07 | 0.00359  | 0.93833  | -0.12078 | 0.00899  | 0.045276 | 0.32892  | -0.24009 | 1.51E-07 |
| 0.03033  | 0.151793 | 0.001    | 0.170466 | 0.00021  | 0.146344 | 0.00152  | 0.171272 | 0.0002   |
| 1.71E-05 | 0.329611 | 2.69E-13 | 0.440114 | 1.52E-23 | 0.410472 | 2.09E-20 | 0.284145 | 4.02E-10 |
| 0.001    | -0.22059 | 1.48E-06 | -0.31198 | 5.32E-12 | -0.37139 | 1.01E-16 | -0.22671 | 7.39E-07 |
| 0.01755  | 0.218077 | 1.96E-06 | 0.280175 | 7.17E-10 | 0.33233  | 1.67E-13 | 0.232596 | 3.72E-07 |
| 0.03795  | 0.056852 | 0.22009  | 0.166249 | 0.00031  | 0.162497 | 0.00042  | 0.006498 | 0.88863  |
| 0.30333  | 0.115426 | 0.01256  | 0.151673 | 0.00101  | 0.199125 | 1.46E-05 | 0.11335  | 0.01425  |
| 5.21E-08 | 0.090683 | 0.05018  | 0.128604 | 0.00538  | 0.131464 | 0.00443  | 0.124717 | 0.00697  |
| 0.00138  | -0.09546 | 0.0392   | 0.053926 | 0.2448   | 0.099056 | 0.03234  | -0.16589 | 0.00032  |
| 0.1876   | 0.23322  | 3.45E-07 | 0.279752 | 7.62E-10 | 0.398092 | 3.48E-19 | 0.056265 | 0.2249   |
| 0.59119  | -0.2364  | 2.36E-07 | -0.119   | 0.01006  | -0.26389 | 7.02E-09 | 0.005956 | 0.89786  |

|          |          |          |          |          |          |          |          |          |
|----------|----------|----------|----------|----------|----------|----------|----------|----------|
| 0.00516  | 0.044548 | 0.33676  | 0.081761 | 0.07755  | 0.136941 | 0.00302  | -0.04328 | 0.35071  |
| 0.40136  | 0.003246 | 0.94422  | 0.04738  | 0.30691  | 0.062327 | 0.17876  | 0.130926 | 0.0046   |
| 0.74701  | 0.014385 | 0.75653  | 0.078989 | 0.08819  | 0.171594 | 0.00019  | 0.150224 | 0.00113  |
| 0.82332  | -0.08598 | 0.06338  | -0.15378 | 0.00086  | -0.23438 | 3.01E-07 | -0.09203 | 0.04686  |
| 6.75E-05 | -0.1941  | 2.40E-05 | -0.1584  | 0.00059  | -0.26727 | 4.43E-09 | -0.08228 | 0.07568  |
| 2.47E-19 | 0.321698 | 1.05E-12 | 0.44859  | 1.68E-24 | 0.399142 | 2.75E-19 | 0.440212 | 1.48E-23 |
| 0.00037  | 0.098722 | 0.03293  | 0.102596 | 0.02662  | 0.178125 | 0.00011  | 0.094812 | 0.04056  |
| 0.49832  | 0.080839 | 0.08097  | 0.088977 | 0.05467  | 0.137903 | 0.00282  | 0.029369 | 0.52667  |
| 3.00E-09 | -0.08153 | 0.0784   | -0.04966 | 0.28422  | 0.025198 | 0.58702  | -0.26422 | 6.71E-09 |
| 0.08125  | 0.387614 | 3.43E-18 | 0.296632 | 6.12E-11 | 0.375123 | 4.73E-17 | 0.160731 | 0.00049  |
| 0.01915  | 0.275291 | 1.44E-09 | 0.181801 | 7.78E-05 | 0.227735 | 6.57E-07 | 0.065987 | 0.15453  |
| 0.1111   | 0.294563 | 8.41E-11 | 0.368224 | 1.92E-16 | 0.427592 | 3.51E-22 | 0.273494 | 1.86E-09 |
| 8.94E-05 | 0.025819 | 0.57784  | 0.168037 | 0.00026  | 0.21089  | 4.29E-06 | -0.02904 | 0.53137  |
| 0.00376  | -0.15372 | 0.00086  | -0.03085 | 0.50606  | -0.02285 | 0.62233  | -0.24653 | 6.79E-08 |
| 3.36E-09 | 0.340569 | 3.81E-14 | 0.354174 | 3.01E-15 | 0.376498 | 3.56E-17 | 0.273832 | 1.78E-09 |
| 2.85E-13 | -0.19037 | 3.46E-05 | -0.16531 | 0.00033  | -0.07817 | 0.09154  | -0.38212 | 1.10E-17 |
| 0.78561  | 0.069656 | 0.13282  | 0.110758 | 0.01664  | 0.179875 | 9.28E-05 | 0.010984 | 0.81286  |
| 0.89894  | 0.164619 | 0.00035  | 0.194179 | 2.39E-05 | 0.286991 | 2.64E-10 | 0.075099 | 0.10505  |
| 0.54969  | 0.096988 | 0.03615  | 0.095722 | 0.03866  | 0.107916 | 0.01967  | 0.031201 | 0.50119  |
| 0.38512  | -0.11919 | 0.00994  | 0.03077  | 0.50713  | 0.046891 | 0.31194  | -0.00585 | 0.89967  |
| 1.27E-05 | 0.198886 | 1.49E-05 | 0.199413 | 1.42E-05 | 0.242942 | 1.06E-07 | 0.212039 | 3.79E-06 |
| 0.40702  | -0.04202 | 0.36496  | 0.004165 | 0.92847  | 0.062922 | 0.17463  | 0.029843 | 0.52001  |
| 0.1075   | -0.02516 | 0.58754  | 0.020776 | 0.65429  | 0.119791 | 0.00957  | -0.11813 | 0.01062  |
| 3.71E-05 | 0.164756 | 0.00035  | 0.211661 | 3.95E-06 | 0.197288 | 1.75E-05 | 0.107017 | 0.02072  |
| 7.25E-06 | 0.302049 | 2.63E-11 | 0.333071 | 1.46E-13 | 0.44571  | 3.57E-24 | 0.273503 | 1.86E-09 |
| 9.06E-09 | 0.255632 | 2.11E-08 | 0.413623 | 1.00E-20 | 0.388993 | 2.55E-18 | 0.325899 | 5.12E-13 |
| 0.04989  | 0.034423 | 0.45802  | 0.083489 | 0.07146  | 0.165246 | 0.00034  | -0.02133 | 0.64575  |
| 2.96E-05 | 0.192239 | 2.89E-05 | 0.165384 | 0.00033  | 0.189361 | 3.81E-05 | 0.079304 | 0.08692  |
| 2.68E-13 | 0.232918 | 3.58E-07 | 0.281335 | 6.06E-10 | 0.233905 | 3.18E-07 | 0.17648  | 0.00013  |
| 8.34E-22 | 0.073097 | 0.11467  | -0.00871 | 0.85111  | -0.08153 | 0.07839  | 0.193069 | 2.66E-05 |
| 0.00052  | 0.308593 | 9.23E-12 | 0.357442 | 1.61E-15 | 0.401973 | 1.46E-19 | 0.199502 | 1.40E-05 |
| 0.00318  | 0.063389 | 0.17145  | 0.024938 | 0.59088  | 0.137322 | 0.00294  | -0.08443 | 0.0683   |
| 0.44336  | -0.05997 | 0.1958   | 0.02441  | 0.59877  | 0.045155 | 0.33021  | -0.03949 | 0.39454  |
| 0.02933  | 0.130685 | 0.00467  | 0.210139 | 4.65E-06 | 0.273663 | 1.82E-09 | 0.161    | 0.00048  |
| 0.05789  | 0.359943 | 9.89E-16 | 0.372997 | 7.31E-17 | 0.421422 | 1.57E-21 | 0.219332 | 1.71E-06 |
| 0.9484   | 0.2241   | 9.97E-07 | 0.336538 | 7.89E-14 | 0.410143 | 2.25E-20 | 0.137251 | 0.00296  |
| 9.53E-05 | 0.154779 | 0.00079  | 0.230385 | 4.82E-07 | 0.251803 | 3.47E-08 | 0.16847  | 0.00026  |
| 0.0004   | -0.01887 | 0.68416  | 0.031217 | 0.50097  | 0.12756  | 0.00577  | -0.18629 | 5.11E-05 |
| 0.70396  | -0.12166 | 0.00849  | -0.13322 | 0.00393  | -0.19919 | 1.45E-05 | -0.13634 | 0.00315  |
| 0.17385  | 0.136703 | 0.00307  | 0.194795 | 2.25E-05 | 0.284831 | 3.63E-10 | 0.057752 | 0.21287  |
| 0.32036  | 0.143177 | 0.00192  | 0.214751 | 2.83E-06 | 0.222021 | 1.26E-06 | 0.017885 | 0.69987  |
| 0.00288  | 0.320408 | 1.31E-12 | 0.290426 | 1.58E-10 | 0.367797 | 2.09E-16 | 0.144478 | 0.00175  |
| 0.82583  | 0.173747 | 0.00016  | 0.292789 | 1.10E-10 | 0.350158 | 6.45E-15 | 0.154591 | 0.0008   |
| 3.99E-21 | 0.288629 | 2.07E-10 | 0.314934 | 3.27E-12 | 0.218934 | 1.78E-06 | 0.457848 | 1.41E-25 |
| 0.00031  | -0.01468 | 0.75172  | 0.133129 | 0.00395  | 0.167791 | 0.00027  | -0.03734 | 0.42083  |

|          |          |          |          |          |          |          |          |          |
|----------|----------|----------|----------|----------|----------|----------|----------|----------|
| 0.57668  | 0.28152  | 5.90E-10 | 0.27406  | 1.72E-09 | 0.383906 | 7.56E-18 | 0.110708 | 0.01669  |
| 0.61015  | 0.058342 | 0.20822  | 0.0751   | 0.10505  | 0.157914 | 0.00061  | 0.047267 | 0.30807  |
| 0.01222  | 0.203067 | 9.75E-06 | 0.171763 | 0.00019  | 0.280322 | 7.02E-10 | 0.166741 | 0.0003   |
| 1.47E-08 | 0.024841 | 0.59234  | 0.010624 | 0.81889  | 0.198053 | 1.62E-05 | -0.0661  | 0.15384  |
| 0.00026  | -0.03181 | 0.49289  | -0.02952 | 0.52451  | 0.02439  | 0.59906  | 0.105362 | 0.02278  |
| 0.03799  | -0.10899 | 0.01847  | 0.040873 | 0.37817  | -0.03691 | 0.4262   | 0.030157 | 0.51563  |
| 0.20405  | -0.24469 | 8.54E-08 | -0.27973 | 7.64E-10 | -0.30843 | 9.47E-12 | -0.09499 | 0.04017  |
| 1.35E-11 | 0.133824 | 0.00376  | 0.036896 | 0.42635  | 0.133088 | 0.00396  | 0.229327 | 5.46E-07 |
| 0.36076  | 0.235131 | 2.75E-07 | 0.229135 | 5.58E-07 | 0.37957  | 1.88E-17 | 0.06562  | 0.15684  |
| 8.39E-07 | -0.00729 | 0.87513  | 0.082766 | 0.07396  | 0.084705 | 0.06742  | -0.06602 | 0.15434  |
| 2.15E-05 | 0.051909 | 0.26292  | 0.160753 | 0.00049  | 0.273037 | 1.99E-09 | 0.040348 | 0.38433  |
| 0.25027  | -0.2418  | 1.22E-07 | -0.11749 | 0.01106  | -0.19081 | 3.32E-05 | -0.07873 | 0.08924  |
| 0.00754  | 0.04571  | 0.3243   | 0.048269 | 0.29791  | 0.028963 | 0.5324   | -0.03135 | 0.49912  |
| 1.64E-07 | 0.149079 | 0.00123  | 0.112576 | 0.01493  | 0.245295 | 7.92E-08 | -0.07643 | 0.09902  |
| 0.18991  | 0.223898 | 1.02E-06 | 0.324311 | 6.73E-13 | 0.343194 | 2.36E-14 | 0.295409 | 7.38E-11 |
| 0.00292  | 0.275992 | 1.31E-09 | 0.234965 | 2.80E-07 | 0.27061  | 2.79E-09 | 0.102009 | 0.0275   |
| 0.00944  | 0.322268 | 9.55E-13 | 0.241788 | 1.22E-07 | 0.310854 | 6.40E-12 | 0.200115 | 1.32E-05 |
| 0.46541  | 0.101329 | 0.02856  | 0.137485 | 0.00291  | 0.243972 | 9.34E-08 | 0.087944 | 0.05755  |
| 0.85788  | 0.00712  | 0.87803  | 0.100794 | 0.02941  | 0.083706 | 0.07073  | 0.01172  | 0.80058  |
| 0.00807  | 0.393507 | 9.56E-19 | 0.200543 | 1.26E-05 | 0.257873 | 1.57E-08 | 0.126827 | 0.00606  |
| 0.01039  | 0.07798  | 0.09233  | 0.131819 | 0.00432  | 0.093603 | 0.0432   | 0.046535 | 0.31563  |
| 0.40128  | 0.104402 | 0.02405  | 0.163281 | 0.0004   | 0.182614 | 7.21E-05 | 0.054159 | 0.24276  |
| 0.05622  | -0.27058 | 2.80E-09 | -0.20959 | 4.93E-06 | -0.20821 | 5.70E-06 | -0.1653  | 0.00033  |
| 0.17839  | 0.048683 | 0.29379  | 0.158417 | 0.00059  | 0.225701 | 8.30E-07 | 0.070248 | 0.12955  |
| 2.55E-07 | -0.16849 | 0.00025  | -0.20842 | 5.58E-06 | -0.37826 | 2.47E-17 | -0.02477 | 0.59339  |
| 2.79E-05 | 0.075537 | 0.10303  | 0.184155 | 6.25E-05 | 0.081999 | 0.07669  | 0.156191 | 0.00071  |
| 0.20821  | 0.263812 | 7.10E-09 | 0.227871 | 6.47E-07 | 0.407086 | 4.56E-20 | 0.136891 | 0.00303  |
| 0.18279  | -0.00028 | 0.99519  | 0.10212  | 0.02734  | 0.137685 | 0.00287  | -0.11711 | 0.01132  |
| 0.0264   | 0.114275 | 0.01347  | 0.170552 | 0.00021  | 0.234455 | 2.98E-07 | 0.020137 | 0.66426  |
| 5.15E-05 | -0.12416 | 0.00722  | -0.21317 | 3.36E-06 | -0.17696 | 0.00012  | -0.10867 | 0.01882  |
| 0.02352  | -0.05808 | 0.21023  | -0.18656 | 4.98E-05 | -0.23089 | 4.54E-07 | -0.02891 | 0.53317  |
| 3.19E-07 | 0.202373 | 1.05E-05 | 0.276799 | 1.17E-09 | 0.230146 | 4.96E-07 | 0.129129 | 0.00519  |
| 0.07667  | 0.223426 | 1.08E-06 | 0.241686 | 1.24E-07 | 0.285426 | 3.33E-10 | 0.041977 | 0.36542  |
| 0.31675  | 0.151073 | 0.00106  | 0.220916 | 1.43E-06 | 0.283013 | 4.74E-10 | 0.070447 | 0.12846  |
| 0.03254  | 0.207375 | 6.22E-06 | 0.212239 | 3.71E-06 | 0.282182 | 5.36E-10 | 0.219194 | 1.73E-06 |
| 0.01544  | 0.25408  | 2.58E-08 | 0.24921  | 4.83E-08 | 0.299621 | 3.84E-11 | 0.112552 | 0.01495  |
| 0.54743  | -0.20774 | 5.99E-06 | -0.32804 | 3.54E-13 | -0.37718 | 3.10E-17 | -0.04982 | 0.28266  |
| 0.02364  | 0.05844  | 0.20745  | 0.175576 | 0.00014  | 0.207843 | 5.92E-06 | 0.106884 | 0.02088  |
| 8.38E-09 | -0.17061 | 0.00021  | -0.24218 | 1.17E-07 | -0.2527  | 3.09E-08 | -0.15761 | 0.00063  |
| 0.8438   | 0.160516 | 0.0005   | 0.164394 | 0.00036  | 0.332376 | 1.65E-13 | 0.106406 | 0.02146  |
| 0.62239  | 0.207597 | 6.08E-06 | 0.198254 | 1.59E-05 | 0.37452  | 5.35E-17 | 0.159246 | 0.00055  |
| 4.12E-08 | 0.250764 | 3.96E-08 | 0.420252 | 2.08E-21 | 0.393447 | 9.69E-19 | 0.245137 | 8.08E-08 |
| 9.70E-10 | 0.281387 | 6.02E-10 | 0.275363 | 1.43E-09 | 0.28051  | 6.83E-10 | 0.192414 | 2.84E-05 |
| 0.37803  | 0.013166 | 0.77658  | 0.109602 | 0.01782  | 0.012285 | 0.79119  | 0.095947 | 0.0382   |
| 0.56512  | -0.11699 | 0.01141  | 0.025917 | 0.57639  | -0.00429 | 0.92625  | 0.053901 | 0.24502  |

|          |          |          |          |          |          |          |          |          |
|----------|----------|----------|----------|----------|----------|----------|----------|----------|
| 0.73303  | 0.033895 | 0.46494  | 0.10338  | 0.02548  | 0.12139  | 0.00864  | -0.00123 | 0.97886  |
| 3.14E-12 | -0.06529 | 0.15897  | 0.095589 | 0.03893  | 0.123534 | 0.00752  | -0.1478  | 0.00136  |
| 0.00048  | -0.13497 | 0.00347  | -0.065   | 0.16081  | 0.079838 | 0.08481  | -0.08737 | 0.0592   |
| 0.00622  | 0.080174 | 0.0835   | 0.186038 | 5.23E-05 | 0.280926 | 6.43E-10 | -0.01045 | 0.82189  |
| 0.05141  | 0.046709 | 0.31382  | 0.134309 | 0.00364  | 0.256392 | 1.91E-08 | 0.017807 | 0.70112  |
| 0.02074  | 0.074346 | 0.10859  | 0.155991 | 0.00072  | 0.179252 | 9.82E-05 | 0.099026 | 0.0324   |
| 0.109    | 0.076894 | 0.09698  | 0.138127 | 0.00278  | 0.168123 | 0.00026  | 0.04056  | 0.38184  |
| 0.03998  | 0.198996 | 1.48E-05 | 0.203561 | 9.26E-06 | 0.269195 | 3.40E-09 | 0.153827 | 0.00085  |
| 0.10348  | -0.23942 | 1.64E-07 | -0.2376  | 2.04E-07 | -0.29225 | 1.20E-10 | -0.05527 | 0.23322  |
| 0.14902  | 0.151288 | 0.00104  | 0.212743 | 3.51E-06 | 0.293192 | 1.04E-10 | 0.06347  | 0.17091  |
| 0.99291  | -0.33322 | 1.42E-13 | -0.15618 | 0.00071  | -0.33809 | 5.96E-14 | -0.05216 | 0.26061  |
| 0.73477  | 0.035959 | 0.43819  | 0.101069 | 0.02897  | 0.146646 | 0.00148  | -0.0024  | 0.95872  |
| 0.00185  | 0.08885  | 0.05502  | 0.044691 | 0.3352   | 0.087485 | 0.05888  | 0.136271 | 0.00317  |
| 0.00357  | -0.16676 | 0.0003   | -0.11899 | 0.01006  | -0.07706 | 0.09623  | -0.08247 | 0.07499  |
| 0.41325  | 0.006673 | 0.88564  | -0.05061 | 0.27503  | -0.08899 | 0.05463  | 0.139995 | 0.00243  |
| 0.00538  | 0.14191  | 0.00211  | 0.222935 | 1.14E-06 | 0.215623 | 2.57E-06 | 0.19365  | 2.51E-05 |
| 4.29E-05 | -0.11665 | 0.01164  | -0.11968 | 0.00963  | -0.14975 | 0.00117  | 0.075241 | 0.10439  |
| 0.06676  | -0.00097 | 0.98324  | -0.02201 | 0.63515  | -0.02035 | 0.66089  | -0.01669 | 0.71912  |
| 0.0233   | 0.184981 | 5.78E-05 | 0.14009  | 0.00241  | 0.2856   | 3.24E-10 | -0.07196 | 0.12046  |
| 0.88118  | -0.00345 | 0.94072  | 0.049006 | 0.29059  | 0.075262 | 0.1043   | -0.12153 | 0.00856  |
| 0.00891  | -0.05447 | 0.24009  | -0.06717 | 0.14725  | 0.023766 | 0.60845  | -0.09691 | 0.03629  |
| 2.28E-12 | 0.216564 | 2.32E-06 | 0.24118  | 1.32E-07 | 0.178599 | 0.0001   | 0.396729 | 4.70E-19 |
| 1.70E-06 | 0.036468 | 0.43174  | 0.163814 | 0.00038  | 0.133601 | 0.00382  | 0.098136 | 0.03399  |
| 0.00021  | 0.30459  | 1.76E-11 | 0.380445 | 1.57E-17 | 0.502723 | 2.80E-31 | 0.28425  | 3.96E-10 |
| 5.33E-19 | 0.150448 | 0.00111  | 0.220135 | 1.56E-06 | 0.18153  | 7.97E-05 | 0.303312 | 2.15E-11 |
| 0.31821  | -0.36948 | 1.49E-16 | -0.42078 | 1.83E-21 | -0.50961 | 3.13E-32 | -0.17815 | 0.00011  |
| 0.20538  | 0.1612   | 0.00047  | 0.221102 | 1.40E-06 | 0.308581 | 9.25E-12 | 0.080325 | 0.08292  |
| 0.00798  | 0.056864 | 0.21999  | 0.102284 | 0.02709  | 0.077476 | 0.09447  | -0.08752 | 0.05877  |
| 0.19484  | -0.06221 | 0.17956  | 0.043901 | 0.34383  | 0.06587  | 0.15526  | -0.08652 | 0.06174  |
| 0.1571   | 0.161881 | 0.00044  | 0.254379 | 2.48E-08 | 0.334701 | 1.09E-13 | 0.188018 | 4.34E-05 |
| 0.04497  | 0.338105 | 5.95E-14 | 0.16136  | 0.00046  | 0.266369 | 5.01E-09 | 0.155815 | 0.00073  |
| 4.49E-38 | 0.422113 | 1.33E-21 | 0.398844 | 2.94E-19 | 0.372049 | 8.87E-17 | 0.42998  | 1.95E-22 |
| 0.00726  | 0.015389 | 0.74012  | 0.255531 | 2.14E-08 | 0.192418 | 2.84E-05 | 0.168691 | 0.00025  |
| 0.06414  | 0.207325 | 6.26E-06 | 0.2547   | 2.38E-08 | 0.267037 | 4.57E-09 | 0.156563 | 0.00069  |
| 0.00117  | -0.07962 | 0.08566  | -0.02693 | 0.56152  | 0.017913 | 0.69943  | -0.12779 | 0.00568  |
| 0.01525  | 0.127757 | 0.0057   | 0.146339 | 0.00152  | 0.161418 | 0.00046  | -0.0564  | 0.22379  |
| 0.00096  | 0.050296 | 0.27806  | 0.013168 | 0.77656  | -0.05763 | 0.2138   | 0.121634 | 0.00851  |
| 0.00154  | -0.1181  | 0.01064  | 0.029423 | 0.5259   | 0.034322 | 0.45933  | -0.09417 | 0.04194  |
| 0.88763  | 0.071502 | 0.12283  | 0.080906 | 0.08071  | 0.22408  | 9.99E-07 | 0.052315 | 0.25921  |
| 0.00064  | 0.112404 | 0.01509  | 0.139725 | 0.00248  | 0.17535  | 0.00014  | 0.176818 | 0.00012  |
| 0.13553  | -0.14952 | 0.00119  | 0.058045 | 0.21055  | 0.028669 | 0.53657  | -0.09204 | 0.04682  |
| 2.20E-07 | 0.095587 | 0.03894  | -0.00698 | 0.88046  | -0.01731 | 0.70904  | 0.260765 | 1.07E-08 |
| 0.64796  | 0.135259 | 0.0034   | 0.262603 | 8.36E-09 | 0.282374 | 5.21E-10 | 0.200303 | 1.29E-05 |
| 0.01278  | -0.36626 | 2.84E-16 | -0.35505 | 2.54E-15 | -0.3348  | 1.08E-13 | -0.25932 | 1.30E-08 |
| 0.00027  | 0.233521 | 3.33E-07 | 0.217401 | 2.11E-06 | 0.296784 | 5.97E-11 | 0.160083 | 0.00052  |

|          |          |          |          |          |          |          |          |          |
|----------|----------|----------|----------|----------|----------|----------|----------|----------|
| 0.56003  | 0.097287 | 0.03558  | 0.154443 | 0.00081  | 0.231366 | 4.30E-07 | 0.025747 | 0.5789   |
| 1.98E-14 | 0.046136 | 0.3198   | 0.113016 | 0.01454  | 0.21034  | 4.55E-06 | -0.02513 | 0.58802  |
| 0.81757  | 0.044887 | 0.33309  | 0.145018 | 0.00168  | 0.197359 | 1.74E-05 | -0.04059 | 0.38144  |
| 0.80296  | 0.288968 | 1.96E-10 | 0.323631 | 7.57E-13 | 0.386462 | 4.39E-18 | 0.154494 | 0.00081  |
| 0.77035  | 0.032623 | 0.48188  | 0.184441 | 6.08E-05 | 0.210546 | 4.45E-06 | 0.052816 | 0.25466  |
| 0.05674  | -0.25406 | 2.59E-08 | -0.23001 | 5.04E-07 | -0.32209 | 9.84E-13 | -0.13414 | 0.00368  |
| 0.00022  | 0.044714 | 0.33496  | 0.118185 | 0.01058  | 0.164637 | 0.00035  | -0.00415 | 0.92868  |
| 0.00821  | 0.2443   | 8.97E-08 | 0.231061 | 4.46E-07 | 0.256033 | 2.00E-08 | 0.049375 | 0.28696  |
| 9.88E-05 | -0.04469 | 0.33524  | -0.16539 | 0.00033  | -0.20923 | 5.12E-06 | -0.08294 | 0.07335  |
| 0.00515  | 0.075196 | 0.1046   | 0.192073 | 2.93E-05 | 0.286625 | 2.79E-10 | -0.04097 | 0.37702  |
| 1.50E-07 | -0.28948 | 1.82E-10 | -0.36827 | 1.90E-16 | -0.37295 | 7.39E-17 | -0.13767 | 0.00287  |
| 0.67422  | 0.160091 | 0.00052  | 0.216328 | 2.38E-06 | 0.326609 | 4.53E-13 | 0.123199 | 0.00769  |
| 0.08711  | 0.205669 | 7.44E-06 | 0.173894 | 0.00016  | 0.307286 | 1.14E-11 | 0.174308 | 0.00015  |
| 0.28812  | -0.11974 | 0.0096   | -0.07521 | 0.10455  | -0.21387 | 3.11E-06 | -0.01331 | 0.77428  |
| 8.57E-17 | 0.002863 | 0.95079  | -0.02635 | 0.57005  | -0.07367 | 0.11185  | 0.244764 | 8.47E-08 |
| 7.84E-07 | -0.04916 | 0.28912  | 0.073394 | 0.11321  | 0.134408 | 0.00361  | -0.09341 | 0.04363  |
| 0.25839  | -0.10189 | 0.02769  | -0.26024 | 1.15E-08 | -0.27227 | 2.21E-09 | 0.117583 | 0.01099  |
| 0.00693  | 0.051004 | 0.27134  | -0.02982 | 0.52039  | 0.058185 | 0.20945  | -0.05441 | 0.24061  |
| 0.02281  | 0.161652 | 0.00045  | 0.108507 | 0.019    | 0.185186 | 5.67E-05 | 0.219513 | 1.67E-06 |
| 0.28044  | 0.032205 | 0.48751  | 0.167981 | 0.00027  | 0.218993 | 1.77E-06 | -0.00489 | 0.91613  |
| 0.04743  | -0.25478 | 2.36E-08 | -0.29427 | 8.80E-11 | -0.39796 | 3.58E-19 | -0.0427  | 0.35717  |
| 0.49986  | 0.225665 | 8.34E-07 | 0.193133 | 2.64E-05 | 0.373551 | 6.53E-17 | 0.111719 | 0.01572  |
| 0.05038  | -0.05903 | 0.20293  | 0.050845 | 0.27284  | 0.109555 | 0.01787  | -0.0521  | 0.26112  |
| 8.01E-09 | 0.27046  | 2.85E-09 | 0.290923 | 1.46E-10 | 0.294532 | 8.45E-11 | 0.252621 | 3.12E-08 |
| 0.7783   | 0.010188 | 0.82619  | 0.185967 | 5.27E-05 | 0.232456 | 3.78E-07 | 0.057187 | 0.21738  |
| 0.76149  | 0.015719 | 0.73476  | 0.126784 | 0.00608  | 0.154547 | 0.00081  | -0.02623 | 0.57179  |
| 4.70E-27 | 0.285379 | 3.35E-10 | 0.330587 | 2.27E-13 | 0.225945 | 8.07E-07 | 0.299984 | 3.63E-11 |
| 0.0536   | -0.10793 | 0.01965  | -0.01993 | 0.66743  | -0.08289 | 0.07353  | -0.01096 | 0.81322  |
| 0.10827  | 0.189984 | 3.59E-05 | 0.233136 | 3.49E-07 | 0.339183 | 4.90E-14 | 0.003352 | 0.94241  |
| 0.06403  | 0.063343 | 0.17177  | 0.135677 | 0.00331  | 0.123    | 0.00779  | 0.046214 | 0.31899  |
| 2.25E-15 | 0.283469 | 4.44E-10 | 0.209291 | 5.08E-06 | 0.240235 | 1.48E-07 | 0.275405 | 1.42E-09 |
| 0.00012  | -0.07526 | 0.1043   | 0.060606 | 0.19108  | 0.062649 | 0.17652  | -0.10772 | 0.01989  |
| 7.28E-05 | 0.199189 | 1.45E-05 | 0.286114 | 3.00E-10 | 0.282953 | 4.79E-10 | 0.196393 | 1.92E-05 |
| 0.00212  | 0.154041 | 0.00084  | 0.201397 | 1.16E-05 | 0.351852 | 4.68E-15 | 0.022718 | 0.62435  |
| 0.78988  | 0.123363 | 0.00761  | 0.158128 | 0.0006   | 0.278471 | 9.17E-10 | 0.085135 | 0.06603  |
| 0.00029  | 0.15483  | 0.00079  | 0.190763 | 3.33E-05 | 0.235436 | 2.65E-07 | 0.097412 | 0.03534  |
| 0.48278  | 0.14822  | 0.00132  | 0.21404  | 3.05E-06 | 0.251612 | 3.55E-08 | 0.073689 | 0.11176  |
| 0.20713  | 0.041924 | 0.36602  | 0.029691 | 0.52214  | 0.132861 | 0.00402  | 0.088292 | 0.05657  |
| 0.08652  | 0.029177 | 0.52937  | 0.078953 | 0.08833  | 0.14835  | 0.0013   | -0.02825 | 0.54249  |
| 0.00026  | -0.0304  | 0.51225  | 0.010902 | 0.81424  | 0.049715 | 0.28366  | -0.07249 | 0.11775  |
| 0.00423  | -0.17917 | 9.90E-05 | -0.00948 | 0.83808  | -0.03586 | 0.43948  | -0.00257 | 0.95578  |
| 0.002    | 0.059959 | 0.19587  | 0.137761 | 0.00285  | 0.180504 | 8.76E-05 | 0.035886 | 0.43912  |
| 0.00156  | 0.208699 | 5.41E-06 | 0.231709 | 4.13E-07 | 0.258226 | 1.50E-08 | 0.069498 | 0.13371  |
| 0.00155  | 0.115573 | 0.01245  | 0.190624 | 3.38E-05 | 0.21449  | 2.91E-06 | 0.145108 | 0.00167  |
| 0.00013  | -0.05072 | 0.27405  | 0.016611 | 0.72032  | -0.00153 | 0.9737   | -0.25162 | 3.55E-08 |

|          |          |          |          |          |          |          |          |          |
|----------|----------|----------|----------|----------|----------|----------|----------|----------|
| 0.08564  | 0.102011 | 0.0275   | 0.161263 | 0.00047  | 0.242554 | 1.11E-07 | 0.045219 | 0.32952  |
| 0.1419   | 0.075495 | 0.10323  | 0.112999 | 0.01456  | 0.146455 | 0.00151  | -0.02645 | 0.56852  |
| 0.00014  | 0.157596 | 0.00063  | 0.200519 | 1.27E-05 | 0.196141 | 1.97E-05 | 0.161843 | 0.00045  |
| 0.30666  | -0.10947 | 0.01796  | -0.2839  | 4.17E-10 | -0.29017 | 1.64E-10 | -0.17456 | 0.00015  |
| 4.44E-06 | 0.150136 | 0.00114  | 0.239365 | 1.65E-07 | 0.238099 | 1.92E-07 | 0.126445 | 0.00622  |
| 5.41E-09 | 0.099167 | 0.03215  | 0.084072 | 0.0695   | 0.223896 | 1.02E-06 | -0.03673 | 0.42841  |
| 0.00217  | -0.06592 | 0.15496  | -0.13273 | 0.00406  | -0.12257 | 0.00801  | 0.137782 | 0.00285  |
| 0.60632  | -0.07787 | 0.09281  | -0.12045 | 0.00917  | -0.07279 | 0.11622  | -0.02835 | 0.54109  |
| 0.00539  | -0.14654 | 0.0015   | -0.0159  | 0.73181  | -0.08196 | 0.07684  | -0.01152 | 0.80398  |
| 1.55E-08 | 0.022128 | 0.63339  | 0.146269 | 0.00153  | 0.343491 | 2.23E-14 | -0.0939  | 0.04255  |
| 0.00032  | -0.22408 | 9.99E-07 | -0.22055 | 1.49E-06 | -0.39207 | 1.31E-18 | -0.02945 | 0.52554  |
| 4.63E-10 | -0.20496 | 8.01E-06 | -0.00088 | 0.9849   | 0.014692 | 0.7515   | -0.11814 | 0.01061  |
| 0.26447  | 0.043751 | 0.34548  | 0.143917 | 0.00182  | 0.190735 | 3.34E-05 | 0.025815 | 0.5779   |
| 5.94E-06 | -0.08188 | 0.07712  | -0.08195 | 0.07687  | -0.21333 | 3.30E-06 | 0.026751 | 0.56417  |
| 0.00024  | 0.047357 | 0.30714  | 0.151142 | 0.00105  | 0.286622 | 2.79E-10 | -0.04641 | 0.31689  |
| 1.86E-08 | 0.301222 | 2.99E-11 | 0.381484 | 1.26E-17 | 0.400349 | 2.10E-19 | 0.183257 | 6.79E-05 |
| 0.00441  | -0.10236 | 0.02698  | 0.019352 | 0.67659  | 0.027307 | 0.5561   | -0.05422 | 0.24222  |
| 0.0152   | 0.161446 | 0.00046  | 0.2566   | 1.86E-08 | 0.312202 | 5.13E-12 | 0.11694  | 0.01144  |
| 0.36592  | 0.090592 | 0.05041  | 0.114331 | 0.01343  | 0.174678 | 0.00015  | 0.107518 | 0.02013  |
| 0.00244  | -0.00952 | 0.83743  | 0.120167 | 0.00934  | 0.178661 | 0.0001   | -0.03845 | 0.40715  |
| 0.0002   | 0.053549 | 0.24812  | 0.147637 | 0.00138  | 0.192484 | 2.82E-05 | 0.069001 | 0.13651  |
| 1.30E-16 | -0.04497 | 0.3322   | 0.00603  | 0.89659  | 0.067359 | 0.14612  | -0.17742 | 0.00012  |
| 0.32665  | 0.160901 | 0.00048  | 0.230843 | 4.57E-07 | 0.232604 | 3.71E-07 | 0.13064  | 0.00469  |
| 4.17E-10 | 0.100574 | 0.02977  | 0.204569 | 8.35E-06 | 0.177839 | 0.00011  | 0.298602 | 4.51E-11 |
| 0.10655  | 0.207104 | 6.40E-06 | 0.261697 | 9.44E-09 | 0.272703 | 2.08E-09 | 0.187623 | 4.50E-05 |
| 0.86388  | 0.162031 | 0.00044  | 0.200863 | 1.22E-05 | 0.304397 | 1.81E-11 | 0.085889 | 0.06366  |
| 0.00121  | -0.10638 | 0.02149  | 0.036923 | 0.426    | 0.032535 | 0.48306  | -0.17738 | 0.00012  |
| 0.0714   | 0.264302 | 6.64E-09 | 0.227162 | 7.02E-07 | 0.308098 | 1.00E-11 | 0.132644 | 0.00409  |
| 0.74241  | 0.075001 | 0.10551  | 0.080807 | 0.08109  | 0.166279 | 0.00031  | 0.029132 | 0.53001  |
| 2.46E-15 | 0.26201  | 9.05E-09 | 0.267941 | 4.04E-09 | 0.230018 | 5.04E-07 | 0.25712  | 1.73E-08 |
| 4.47E-05 | 0.038385 | 0.4079   | 0.134042 | 0.00371  | 0.084971 | 0.06656  | 0.120825 | 0.00896  |
| 0.13203  | 0.313486 | 4.15E-12 | 0.340648 | 3.75E-14 | 0.388392 | 2.90E-18 | 0.134348 | 0.00363  |
| 4.26E-06 | 0.206426 | 6.88E-06 | 0.307958 | 1.02E-11 | 0.261364 | 9.87E-09 | 0.188862 | 4.00E-05 |
| 0.02423  | -0.07934 | 0.08678  | -0.06961 | 0.13307  | -0.15882 | 0.00057  | 0.024254 | 0.60111  |
| 1.93E-05 | 0.097984 | 0.03427  | 0.11356  | 0.01407  | 0.154736 | 0.00079  | 0.206213 | 7.03E-06 |
| 6.51E-08 | -0.03955 | 0.39383  | -0.02451 | 0.5972   | 0.052978 | 0.25321  | -0.17259 | 0.00018  |
| 0.19067  | 0.208823 | 5.34E-06 | 0.309647 | 7.78E-12 | 0.392495 | 1.19E-18 | 0.181431 | 8.05E-05 |
| 0.10077  | 0.058262 | 0.20884  | 0.120465 | 0.00917  | 0.16345  | 0.00039  | -0.01454 | 0.75398  |
| 3.74E-09 | -0.02064 | 0.65633  | -0.04931 | 0.28761  | 0.126972 | 0.006    | -0.13334 | 0.00389  |
| 3.91E-06 | 0.277845 | 1.00E-09 | 0.219657 | 1.64E-06 | 0.321645 | 1.06E-12 | 0.144216 | 0.00178  |
| 0.0791   | 0.074213 | 0.10923  | 0.155444 | 0.00075  | 0.209965 | 4.73E-06 | 0.136679 | 0.00308  |
| 0.78264  | -0.03715 | 0.42317  | -0.00155 | 0.97333  | 0.011849 | 0.79843  | -0.03687 | 0.42661  |
| 0.66109  | 0.194343 | 2.35E-05 | 0.173565 | 0.00016  | 0.281153 | 6.22E-10 | 0.1762   | 0.00013  |
| 0.00039  | 0.085945 | 0.06349  | 0.155434 | 0.00075  | 0.132111 | 0.00424  | 0.057888 | 0.21179  |
| 2.68E-05 | 0.16362  | 0.00038  | 0.300786 | 3.20E-11 | 0.289994 | 1.68E-10 | 0.192066 | 2.94E-05 |



|          |          |          |          |          |          |          |          |          |
|----------|----------|----------|----------|----------|----------|----------|----------|----------|
| 1.47E-07 | 0.026353 | 0.57     | 0.073145 | 0.11444  | -0.07261 | 0.11712  | 0.15551  | 0.00075  |
| 0.33615  | 0.012444 | 0.78854  | 0.185089 | 5.72E-05 | 0.213336 | 3.29E-06 | 0.051637 | 0.26543  |
| 3.34E-05 | 0.287186 | 2.56E-10 | 0.276979 | 1.14E-09 | 0.407626 | 4.03E-20 | 0.189928 | 3.61E-05 |
| 0.42376  | 0.046755 | 0.31334  | 0.136926 | 0.00303  | 0.17381  | 0.00016  | 0.082037 | 0.07655  |
| 0.83586  | -0.01634 | 0.72476  | 0.121912 | 0.00836  | 0.163642 | 0.00038  | 0.071189 | 0.12448  |
| 0.00023  | -0.15582 | 0.00073  | -0.00607 | 0.89588  | 0.073657 | 0.11191  | -0.10791 | 0.01967  |
| 0.00095  | 0.111474 | 0.01595  | 0.188802 | 4.02E-05 | 0.195133 | 2.17E-05 | 0.067801 | 0.14348  |
| 0.99365  | 0.032023 | 0.48998  | 0.079957 | 0.08435  | 0.155436 | 0.00075  | -0.00829 | 0.85818  |
| 0.8241   | 0.068118 | 0.14161  | 0.06729  | 0.14653  | 0.158933 | 0.00057  | 0.076737 | 0.09766  |
| 0.72054  | 0.075753 | 0.10205  | 0.138226 | 0.00276  | 0.201595 | 1.13E-05 | -0.00098 | 0.98314  |
| 0.1328   | 0.139762 | 0.00247  | 0.195867 | 2.02E-05 | 0.32608  | 4.97E-13 | 0.032672 | 0.48122  |
| 1.55E-07 | 0.20043  | 1.28E-05 | 0.269851 | 3.10E-09 | 0.243384 | 1.01E-07 | 0.154446 | 0.00081  |
| 5.27E-05 | 0.171414 | 0.0002   | 0.138116 | 0.00278  | 0.155674 | 0.00074  | 0.151309 | 0.00104  |
| 3.87E-11 | 0.194556 | 2.30E-05 | 0.269933 | 3.07E-09 | 0.25816  | 1.51E-08 | 0.221211 | 1.38E-06 |
| 0.46489  | -0.04084 | 0.37851  | 0.103797 | 0.02489  | 0.169245 | 0.00024  | -0.00424 | 0.92718  |
| 0.07376  | -0.07492 | 0.10589  | 0.005294 | 0.90916  | 0.009914 | 0.83081  | -0.1237  | 0.00744  |
| 0.49214  | 0.107554 | 0.02008  | 0.167996 | 0.00027  | 0.213637 | 3.19E-06 | 0.028688 | 0.5363   |
| 0.91672  | -0.38165 | 1.22E-17 | -0.35118 | 5.32E-15 | -0.48446 | 7.41E-29 | -0.24424 | 9.04E-08 |
| 7.98E-28 | -0.20635 | 6.93E-06 | -0.23573 | 2.56E-07 | -0.18563 | 5.44E-05 | -0.37467 | 5.19E-17 |
| 4.06E-07 | 0.111656 | 0.01578  | 0.186728 | 4.90E-05 | 0.116915 | 0.01146  | 0.014877 | 0.74847  |
| 0.00012  | 0.109608 | 0.01781  | 0.274038 | 1.72E-09 | 0.269218 | 3.38E-09 | 0.197799 | 1.67E-05 |
| 0.01206  | -0.1074  | 0.02026  | -0.12931 | 0.00513  | -0.17964 | 9.48E-05 | -0.01495 | 0.74726  |
| 0.00646  | 0.142976 | 0.00195  | 0.264838 | 6.17E-09 | 0.275542 | 1.39E-09 | 0.117089 | 0.01133  |
| 0.00032  | -0.0092  | 0.84277  | 0.091368 | 0.04846  | 0.193837 | 2.47E-05 | -0.1311  | 0.00454  |
| 0.00418  | 0.18284  | 7.06E-05 | 0.247003 | 6.39E-08 | 0.263321 | 7.58E-09 | 0.103388 | 0.02547  |
| 4.83E-08 | 0.135954 | 0.00324  | 0.183896 | 6.40E-05 | 0.113741 | 0.01392  | 0.206695 | 6.68E-06 |
| 2.28E-20 | 0.367674 | 2.15E-16 | 0.395538 | 6.12E-19 | 0.366152 | 2.91E-16 | 0.360064 | 9.66E-16 |
| 0.07863  | 0.108474 | 0.01904  | 0.221895 | 1.28E-06 | 0.263963 | 6.95E-09 | 0.041503 | 0.37086  |
| 0.05924  | 0.116731 | 0.01159  | 0.210804 | 4.33E-06 | 0.169328 | 0.00024  | 0.063047 | 0.17378  |
| 0.01156  | 0.241845 | 1.22E-07 | 0.25183  | 3.46E-08 | 0.210078 | 4.68E-06 | 0.052198 | 0.26027  |
| 1.84E-06 | 0.184149 | 6.25E-05 | 0.208877 | 5.31E-06 | 0.390562 | 1.82E-18 | -0.00947 | 0.83825  |
| 0.74245  | 0.059995 | 0.1956   | 0.18841  | 4.18E-05 | 0.200102 | 1.32E-05 | 0.006197 | 0.89374  |
| 0.00631  | 0.220167 | 1.55E-06 | 0.234977 | 2.80E-07 | 0.260939 | 1.04E-08 | 0.057797 | 0.21251  |
| 0.96951  | 0.020377 | 0.6605   | 0.105061 | 0.02317  | 0.109619 | 0.0178   | -0.02582 | 0.57776  |
| 0.36546  | 0.014211 | 0.75938  | 0.143507 | 0.00188  | 0.174503 | 0.00015  | -0.05863 | 0.20601  |
| 6.17E-07 | 0.301233 | 2.99E-11 | 0.363845 | 4.60E-16 | 0.35618  | 2.05E-15 | 0.160781 | 0.00049  |
| 0.02214  | 0.189364 | 3.81E-05 | 0.204098 | 8.76E-06 | 0.271729 | 2.39E-09 | 0.004701 | 0.91929  |
| 0.04204  | 0.145121 | 0.00166  | 0.12488  | 0.00689  | 0.231043 | 4.47E-07 | 0.074765 | 0.10661  |
| 0.19531  | 0.147481 | 0.00139  | 0.188383 | 4.19E-05 | 0.211292 | 4.11E-06 | 0.131778 | 0.00434  |
| 0.40297  | 0.030592 | 0.50959  | 0.226764 | 7.35E-07 | 0.177059 | 0.00012  | 0.019342 | 0.67674  |
| 0.55182  | 0.188652 | 4.08E-05 | 0.21661  | 2.31E-06 | 0.346477 | 1.28E-14 | 0.146886 | 0.00146  |
| 0.00771  | -0.00421 | 0.92765  | -0.04656 | 0.31541  | -0.10125 | 0.02869  | 0.247858 | 5.74E-08 |
| 0.00247  | 0.081778 | 0.07749  | -0.01233 | 0.79043  | 0.13728  | 0.00295  | 0.123532 | 0.00753  |
| 0.00303  | -0.08645 | 0.06193  | 0.037988 | 0.41277  | 0.074754 | 0.10666  | -0.15856 | 0.00058  |
| 0.25878  | -0.02319 | 0.61717  | 0.177064 | 0.00012  | 0.121693 | 0.00847  | -0.00299 | 0.94867  |

|          |          |          |          |          |          |          |          |          |
|----------|----------|----------|----------|----------|----------|----------|----------|----------|
| 0.07221  | 0.19403  | 2.42E-05 | 0.248948 | 5.00E-08 | 0.317772 | 2.04E-12 | 0.108119 | 0.01944  |
| 0.7163   | -0.12277 | 0.00791  | -0.11511 | 0.0128   | -0.06    | 0.19553  | -0.13587 | 0.00326  |
| 0.06588  | -0.03185 | 0.49233  | 0.126124 | 0.00635  | 0.099506 | 0.03156  | 0.056046 | 0.22671  |
| 6.06E-05 | 0.002649 | 0.95448  | -0.07934 | 0.08679  | 0.048074 | 0.29987  | -0.05367 | 0.24702  |
| 0.64355  | 0.010713 | 0.8174   | 0.17387  | 0.00016  | 0.16521  | 0.00034  | -0.04268 | 0.35745  |
| 0.71225  | 0.221076 | 1.40E-06 | 0.211148 | 4.17E-06 | 0.334141 | 1.21E-13 | 0.081463 | 0.07864  |
| 0.14642  | 0.229804 | 5.16E-07 | 0.295974 | 6.77E-11 | 0.354928 | 2.61E-15 | 0.170196 | 0.00022  |
| 0.00636  | -0.00588 | 0.8991   | 0.113735 | 0.01392  | 0.189834 | 3.64E-05 | -0.02628 | 0.5711   |
| 0.11447  | -0.05388 | 0.2452   | 0.153829 | 0.00085  | 0.18734  | 4.63E-05 | 0.032849 | 0.47885  |
| 3.74E-11 | 0.095088 | 0.03997  | 0.108817 | 0.01866  | 0.034294 | 0.45971  | 0.109134 | 0.01832  |
| 0.29014  | -0.2951  | 7.74E-11 | -0.30635 | 1.33E-11 | -0.38156 | 1.24E-17 | -0.26466 | 6.33E-09 |
| 0.00024  | -0.19311 | 2.65E-05 | -0.32036 | 1.32E-12 | -0.2517  | 3.51E-08 | -0.22094 | 1.43E-06 |
| 0.24637  | 0.195289 | 2.14E-05 | 0.27056  | 2.81E-09 | 0.350063 | 6.57E-15 | 0.124372 | 0.00712  |
| 0.16257  | 0.16057  | 0.0005   | 0.211344 | 4.08E-06 | 0.24679  | 6.57E-08 | 0.170988 | 0.00021  |
| 0.04744  | -0.03773 | 0.41599  | 0.198511 | 1.55E-05 | 0.167654 | 0.00027  | 0.145642 | 0.0016   |
| 8.43E-13 | -0.17441 | 0.00015  | -0.16134 | 0.00046  | -0.17462 | 0.00015  | -0.21505 | 2.74E-06 |
| 5.91E-13 | -0.26747 | 4.31E-09 | -0.28698 | 2.64E-10 | -0.23232 | 3.84E-07 | -0.19233 | 2.86E-05 |
| 0.73624  | 0.028888 | 0.53345  | 0.090102 | 0.05167  | 0.143022 | 0.00195  | -0.10647 | 0.02138  |
| 0.26262  | -0.24227 | 1.15E-07 | -0.22406 | 1.00E-06 | -0.34888 | 8.20E-15 | -0.10204 | 0.02746  |
| 0.94484  | 0.097388 | 0.03538  | 0.140738 | 0.0023   | 0.201578 | 1.14E-05 | -0.06414 | 0.1664   |
| 0.05617  | -0.09573 | 0.03865  | -0.08013 | 0.08367  | -0.07027 | 0.12946  | -0.09131 | 0.04861  |
| 0.77175  | -0.11191 | 0.01554  | -0.05244 | 0.2581   | -0.08425 | 0.0689   | 0.004629 | 0.92052  |
| 0.94952  | 0.213331 | 3.30E-06 | 0.151992 | 0.00098  | 0.21842  | 1.89E-06 | 0.02512  | 0.58817  |
| 2.71E-08 | 0.252591 | 3.13E-08 | 0.278067 | 9.72E-10 | 0.3092   | 8.37E-12 | 0.170907 | 0.00021  |
| 0.22305  | 0.057952 | 0.21129  | 0.132496 | 0.00413  | 0.163662 | 0.00038  | -0.0143  | 0.75785  |
| 0.05294  | 0.17967  | 9.46E-05 | 0.165882 | 0.00032  | 0.178492 | 0.00011  | 0.123177 | 0.0077   |
| 3.32E-10 | 0.158357 | 0.00059  | 0.159848 | 0.00053  | 0.108519 | 0.01899  | 0.158367 | 0.00059  |
| 9.42E-05 | -0.43036 | 1.77E-22 | -0.23739 | 2.10E-07 | -0.35248 | 4.16E-15 | -0.20024 | 1.30E-05 |
| 3.65E-07 | -0.00488 | 0.91632  | 0.043097 | 0.35274  | 0.082146 | 0.07616  | -0.15286 | 0.00092  |
| 0.34486  | 0.150529 | 0.0011   | 0.270704 | 2.75E-09 | 0.330307 | 2.38E-13 | 0.01356  | 0.77008  |
| 0.18061  | 0.064964 | 0.16104  | 0.151529 | 0.00102  | 0.180741 | 8.57E-05 | 0.072951 | 0.1154   |
| 0.00078  | 0.181009 | 8.37E-05 | 0.297901 | 5.02E-11 | 0.232062 | 3.96E-07 | 0.203389 | 9.43E-06 |
| 4.57E-05 | 0.210919 | 4.27E-06 | 0.304454 | 1.79E-11 | 0.309621 | 7.82E-12 | 0.243736 | 9.62E-08 |
| 2.64E-16 | 0.316324 | 2.60E-12 | 0.347801 | 1.00E-14 | 0.359805 | 1.02E-15 | 0.273203 | 1.94E-09 |
| 0.00156  | 0.254219 | 2.54E-08 | 0.241043 | 1.34E-07 | 0.32565  | 5.35E-13 | 0.227237 | 6.96E-07 |
| 0.07215  | -0.41214 | 1.42E-20 | -0.21725 | 2.15E-06 | -0.36152 | 7.26E-16 | -0.0268  | 0.56343  |
| 0.00188  | 0.088559 | 0.05582  | 0.033656 | 0.4681   | 0.07982  | 0.08488  | -0.16005 | 0.00052  |
| 0.02192  | -0.43871 | 2.17E-23 | -0.33625 | 8.30E-14 | -0.45358 | 4.47E-25 | -0.20996 | 4.73E-06 |
| 8.89E-05 | -0.0715  | 0.12284  | 0.169951 | 0.00022  | 0.115647 | 0.01239  | -0.0716  | 0.1223   |
| 0.00574  | -0.01482 | 0.74945  | 0.05739  | 0.21575  | 0.051374 | 0.26788  | 0.077272 | 0.09534  |
| 0.00142  | 0.262943 | 7.98E-09 | 0.346409 | 1.30E-14 | 0.406922 | 4.73E-20 | 0.256538 | 1.87E-08 |
| 0.05558  | -0.10965 | 0.01778  | -0.18733 | 4.63E-05 | -0.22224 | 1.23E-06 | -0.0009  | 0.98447  |
| 0.00311  | 0.069869 | 0.13164  | 0.145472 | 0.00162  | 0.164697 | 0.00035  | 0.06491  | 0.16138  |
| 0.01044  | 0.184229 | 6.20E-05 | 0.320404 | 1.31E-12 | 0.346071 | 1.38E-14 | 0.087173 | 0.05979  |
| 0.33765  | 0.076749 | 0.09761  | 0.228711 | 5.87E-07 | 0.272499 | 2.14E-09 | 0.114015 | 0.01369  |

|          |          |          |          |          |          |          |          |          |
|----------|----------|----------|----------|----------|----------|----------|----------|----------|
| 0.55445  | 0.040153 | 0.38664  | 0.115247 | 0.0127   | 0.109199 | 0.01825  | -0.0135  | 0.77111  |
| 0.30337  | 0.026014 | 0.57497  | 0.157489 | 0.00064  | 0.184294 | 6.17E-05 | -0.01536 | 0.74055  |
| 0.0008   | -0.44672 | 2.74E-24 | -0.28878 | 2.02E-10 | -0.41645 | 5.15E-21 | -0.24811 | 5.56E-08 |
| 0.01089  | 0.061781 | 0.1826   | 0.156457 | 0.00069  | 0.202672 | 1.02E-05 | 0.064248 | 0.16571  |
| 6.35E-11 | -0.10306 | 0.02594  | -0.09265 | 0.04539  | -0.04885 | 0.29217  | -0.31162 | 5.64E-12 |
| 0.38976  | 0.201093 | 1.19E-05 | 0.202808 | 1.00E-05 | 0.247242 | 6.20E-08 | 0.081177 | 0.0797   |
| 4.73E-08 | -0.31575 | 2.86E-12 | -0.27991 | 7.46E-10 | -0.28351 | 4.41E-10 | -0.18279 | 7.10E-05 |
| 0.0167   | -0.19363 | 2.52E-05 | -0.16603 | 0.00031  | -0.11165 | 0.01579  | -0.17006 | 0.00022  |
| 0.02234  | -0.12111 | 0.0088   | -0.11681 | 0.01153  | -0.04147 | 0.37119  | -0.1348  | 0.00352  |
| 0.26471  | -0.1029  | 0.02618  | -0.05821 | 0.20926  | 0.007137 | 0.87776  | -0.04479 | 0.33412  |
| 0.81898  | 0.075526 | 0.10308  | 0.132366 | 0.00416  | 0.18733  | 4.63E-05 | 0.010885 | 0.81452  |
| 0.0163   | -0.16686 | 0.00029  | -0.24498 | 8.23E-08 | -0.26742 | 4.34E-09 | -0.07279 | 0.11619  |
| 4.66E-05 | 0.186116 | 5.20E-05 | 0.210793 | 4.33E-06 | 0.203706 | 9.13E-06 | 0.16461  | 0.00035  |
| 0.92032  | 0.056357 | 0.22414  | 0.096626 | 0.03685  | 0.130258 | 0.00481  | 0.003779 | 0.93509  |
| 0.23598  | 0.300385 | 3.41E-11 | 0.330262 | 2.40E-13 | 0.421218 | 1.65E-21 | 0.208153 | 5.73E-06 |
| 0.94528  | 0.120541 | 0.00912  | 0.128797 | 0.00531  | 0.13636  | 0.00315  | -0.11711 | 0.01132  |
| 7.09E-09 | 0.229251 | 5.51E-07 | 0.280798 | 6.55E-10 | 0.317159 | 2.26E-12 | 0.195006 | 2.20E-05 |
| 1.62E-06 | 0.21031  | 4.56E-06 | 0.240728 | 1.40E-07 | 0.200903 | 1.22E-05 | 0.251437 | 3.63E-08 |
| 0.21455  | 0.072431 | 0.11803  | 0.122925 | 0.00783  | 0.174836 | 0.00015  | 0.0067   | 0.88518  |
| 0.92424  | 0.13048  | 0.00474  | 0.200645 | 1.25E-05 | 0.270146 | 2.98E-09 | 0.110299 | 0.0171   |
| 5.21E-06 | 0.060023 | 0.19539  | -0.06471 | 0.16267  | -0.00607 | 0.89592  | -0.17914 | 9.92E-05 |
| 1.56E-11 | 0.184988 | 5.78E-05 | 0.24127  | 1.31E-07 | 0.407362 | 4.28E-20 | -0.02556 | 0.5817   |
| 0.36744  | 0.410227 | 2.21E-20 | 0.353578 | 3.37E-15 | 0.477647 | 5.46E-28 | 0.177087 | 0.00012  |
| 0.06331  | 0.118049 | 0.01068  | 0.167314 | 0.00028  | 0.186904 | 4.82E-05 | 0.057137 | 0.21778  |
| 0.02832  | -0.27573 | 1.36E-09 | -0.34799 | 9.68E-15 | -0.38769 | 3.37E-18 | -0.24267 | 1.10E-07 |
| 0.63741  | 0.177    | 0.00012  | 0.150426 | 0.00111  | 0.237196 | 2.14E-07 | 0.108892 | 0.01858  |
| 0.62228  | -0.13753 | 0.0029   | -0.02631 | 0.57055  | -0.18663 | 4.95E-05 | -0.07723 | 0.09554  |
| 0.6213   | 0.229296 | 5.48E-07 | -0.01417 | 0.75998  | 0.114845 | 0.01301  | 0.220019 | 1.58E-06 |
| 0.00709  | -0.05732 | 0.21629  | 0.023256 | 0.61617  | 0.161993 | 0.00044  | -0.05094 | 0.27191  |
| 0.04291  | 0.152064 | 0.00098  | 0.181157 | 8.25E-05 | 0.244426 | 8.83E-08 | 0.08259  | 0.07458  |
| 0.00844  | 0.225839 | 8.17E-07 | 0.292476 | 1.16E-10 | 0.306114 | 1.38E-11 | 0.191842 | 3.00E-05 |
| 0.0432   | 0.137272 | 0.00295  | 0.219788 | 1.62E-06 | 0.287061 | 2.61E-10 | 0.014293 | 0.75804  |
| 0.00049  | 0.2404   | 1.45E-07 | 0.203232 | 9.58E-06 | 0.220771 | 1.45E-06 | 0.17599  | 0.00013  |
| 0.00116  | -0.2191  | 1.75E-06 | -0.14605 | 0.00155  | -0.18752 | 4.55E-05 | -0.14158 | 0.00216  |
| 0.00835  | 0.051365 | 0.26796  | 0.1404   | 0.00236  | 0.289248 | 1.88E-10 | 0.028277 | 0.54216  |
| 0.62061  | 0.2039   | 8.94E-06 | 0.268524 | 3.73E-09 | 0.349466 | 7.35E-15 | 0.121139 | 0.00878  |
| 6.86E-07 | -0.22455 | 9.47E-07 | -0.22885 | 5.77E-07 | -0.18349 | 6.65E-05 | -0.13825 | 0.00275  |
| 1.11E-24 | -0.29685 | 5.91E-11 | -0.10793 | 0.01965  | 0.004798 | 0.91764  | -0.36131 | 7.57E-16 |
| 2.64E-07 | 0.045234 | 0.32936  | 0.127029 | 0.00598  | 0.060663 | 0.19066  | 0.154963 | 0.00078  |
| 0.30777  | 0.094003 | 0.04231  | 0.162053 | 0.00044  | 0.260233 | 1.15E-08 | 0.001652 | 0.97159  |
| 0.38838  | -0.18767 | 4.48E-05 | -0.02764 | 0.55132  | -0.04812 | 0.29941  | -0.03691 | 0.42621  |
| 0.00272  | 0.17208  | 0.00019  | 0.184479 | 6.06E-05 | 0.209878 | 4.78E-06 | -0.08445 | 0.06826  |
| 0.07164  | 0.138239 | 0.00276  | 0.143712 | 0.00185  | 0.343187 | 2.36E-14 | 0.042409 | 0.3605   |
| 0.09777  | -0.27892 | 8.60E-10 | -0.19088 | 3.29E-05 | -0.23754 | 2.06E-07 | -0.10866 | 0.01884  |
| 0.03967  | 0.098021 | 0.0342   | 0.242643 | 1.10E-07 | 0.33142  | 1.96E-13 | 0.100816 | 0.02938  |

|          |          |          |          |          |          |          |          |          |
|----------|----------|----------|----------|----------|----------|----------|----------|----------|
| 0.53323  | 0.235326 | 2.69E-07 | 0.331171 | 2.05E-13 | 0.434684 | 6.02E-23 | 0.051006 | 0.27133  |
| 7.01E-14 | -0.15911 | 0.00056  | -0.06488 | 0.16154  | 0.102964 | 0.02608  | -0.24008 | 1.51E-07 |
| 4.45E-06 | 0.077895 | 0.09269  | 0.101902 | 0.02767  | 0.0997   | 0.03123  | -0.10885 | 0.01863  |
| 0.22671  | 0.073892 | 0.11078  | 0.165578 | 0.00033  | 0.260141 | 1.16E-08 | 0.131675 | 0.00437  |
| 0.82852  | 0.203312 | 9.50E-06 | 0.193969 | 2.44E-05 | 0.270255 | 2.93E-09 | 0.023792 | 0.60806  |
| 0.49738  | 0.117364 | 0.01114  | 0.136681 | 0.00308  | 0.158004 | 0.00061  | 0.007112 | 0.87818  |
| 0.01018  | 0.02751  | 0.55317  | 0.059153 | 0.20196  | 0.154601 | 0.0008   | -0.17609 | 0.00013  |
| 1.63E-05 | 0.225567 | 8.43E-07 | 0.232743 | 3.65E-07 | 0.30718  | 1.16E-11 | 0.151047 | 0.00106  |
| 4.94E-17 | 0.282444 | 5.16E-10 | 0.307371 | 1.12E-11 | 0.296871 | 5.89E-11 | 0.271269 | 2.54E-09 |
| 9.76E-17 | 0.18745  | 4.58E-05 | 0.232121 | 3.93E-07 | 0.165405 | 0.00033  | 0.328311 | 3.37E-13 |
| 0.00146  | -0.1906  | 3.38E-05 | -0.1281  | 0.00557  | -0.22265 | 1.18E-06 | -0.22297 | 1.13E-06 |
| 5.97E-06 | -0.16882 | 0.00025  | -0.18165 | 7.89E-05 | -0.22802 | 6.35E-07 | -0.14571 | 0.00159  |
| 0.08419  | -0.04366 | 0.34653  | 0.049839 | 0.28245  | 0.061785 | 0.18257  | -0.01742 | 0.70735  |
| 0.94371  | -0.182   | 7.64E-05 | -0.25105 | 3.82E-08 | -0.32141 | 1.10E-12 | -0.20183 | 1.11E-05 |
| 6.98E-08 | -0.3429  | 2.49E-14 | -0.25828 | 1.49E-08 | -0.30788 | 1.04E-11 | -0.28183 | 5.64E-10 |
| 5.17E-11 | -0.16622 | 0.00031  | -0.14153 | 0.00217  | -0.24191 | 1.21E-07 | -0.0235  | 0.6125   |
| 0.76198  | 0.260175 | 1.16E-08 | 0.350335 | 6.24E-15 | 0.442249 | 8.77E-24 | 0.167326 | 0.00028  |
| 0.40965  | 0.353054 | 3.73E-15 | 0.434644 | 6.08E-23 | 0.559421 | 8.27E-40 | 0.218436 | 1.88E-06 |
| 0.2458   | 0.182934 | 7.00E-05 | 0.235914 | 2.50E-07 | 0.378302 | 2.45E-17 | 0.163532 | 0.00039  |
| 0.41568  | -0.0136  | 0.76938  | 0.132097 | 0.00424  | 0.031546 | 0.49646  | 0.012105 | 0.79417  |
| 1.40E-05 | 0.019942 | 0.66731  | 0.094808 | 0.04057  | 0.118182 | 0.01059  | -0.07079 | 0.12659  |
| 0.25285  | -0.02556 | 0.58164  | 0.017748 | 0.70206  | 0.059557 | 0.19889  | 0.028479 | 0.53927  |
| 8.31E-18 | 0.194521 | 2.31E-05 | 0.097877 | 0.03447  | 0.061553 | 0.18422  | 0.282844 | 4.86E-10 |
| 0.00749  | 0.17688  | 0.00012  | 0.175343 | 0.00014  | 0.264841 | 6.17E-09 | 0.138139 | 0.00278  |
| 0.35514  | 0.217976 | 1.98E-06 | 0.1729   | 0.00017  | 0.210296 | 4.57E-06 | 0.02145  | 0.64383  |
| 0.55643  | -0.04327 | 0.35079  | 0.041506 | 0.37082  | 0.07835  | 0.0908   | -0.11675 | 0.01158  |
| 0.39037  | -0.17087 | 0.00021  | -0.18566 | 5.42E-05 | -0.27477 | 1.55E-09 | -0.12757 | 0.00577  |
| 0.343    | 0.07343  | 0.11303  | 0.15129  | 0.00104  | 0.167149 | 0.00029  | 0.021041 | 0.65016  |
| 0.78979  | 0.124871 | 0.0069   | 0.161943 | 0.00044  | 0.214531 | 2.89E-06 | -0.01333 | 0.77387  |
| 0.00051  | 0.081596 | 0.07815  | 0.242058 | 1.18E-07 | 0.301774 | 2.74E-11 | 0.015096 | 0.74489  |
| 0.04915  | 0.368627 | 1.77E-16 | 0.384251 | 7.03E-18 | 0.484449 | 7.44E-29 | 0.248932 | 5.01E-08 |
| 1.72E-26 | 0.126346 | 0.00626  | 0.07514  | 0.10486  | -0.05076 | 0.27365  | 0.335888 | 8.86E-14 |
| 0.11548  | 0.14573  | 0.00159  | 0.207533 | 6.12E-06 | 0.267935 | 4.04E-09 | 0.015153 | 0.74397  |
| 0.50536  | -0.04007 | 0.38761  | -0.0055  | 0.90568  | 0.066352 | 0.15225  | -0.05801 | 0.21084  |
| 0.56725  | 0.226545 | 7.54E-07 | 0.270704 | 2.75E-09 | 0.471836 | 2.90E-27 | 0.163374 | 0.00039  |
| 0.00055  | 0.025511 | 0.58238  | 0.098346 | 0.03361  | 0.178176 | 0.00011  | -0.15798 | 0.00061  |
| 0.86825  | 0.142243 | 0.00206  | 0.208413 | 5.58E-06 | 0.305739 | 1.46E-11 | 0.109365 | 0.01807  |
| 0.0165   | -0.00465 | 0.92015  | 0.159425 | 0.00054  | 0.188535 | 4.13E-05 | -0.02456 | 0.5965   |
| 0.00284  | 0.078056 | 0.09202  | 0.19295  | 2.69E-05 | 0.29181  | 1.28E-10 | -0.05901 | 0.20308  |
| 0.27524  | 0.096884 | 0.03635  | 0.11306  | 0.0145   | 0.16182  | 0.00045  | 0.147937 | 0.00135  |
| 9.57E-05 | 0.249623 | 4.58E-08 | 0.164332 | 0.00036  | 0.277435 | 1.06E-09 | 0.185051 | 5.74E-05 |
| 0.57295  | 0.121295 | 0.00869  | 0.211522 | 4.01E-06 | 0.188949 | 3.97E-05 | 0.13693  | 0.00303  |
| 0.01633  | -0.06023 | 0.19384  | 0.004526 | 0.9223   | 0.145284 | 0.00164  | -0.07139 | 0.12341  |
| 0.95061  | 0.098906 | 0.03261  | 0.172389 | 0.00018  | 0.241634 | 1.25E-07 | 0.051535 | 0.26638  |
| 5.91E-13 | -0.05942 | 0.1999   | -0.03392 | 0.46457  | -0.13766 | 0.00287  | 0.08351  | 0.07139  |

|          |          |          |          |          |          |          |          |          |
|----------|----------|----------|----------|----------|----------|----------|----------|----------|
| 0.01279  | 0.242647 | 1.10E-07 | 0.217523 | 2.08E-06 | 0.38352  | 8.21E-18 | 0.067968 | 0.14249  |
| 0.00163  | 0.020642 | 0.65637  | -0.02222 | 0.63193  | -0.11818 | 0.01059  | 0.036914 | 0.42612  |
| 0.58664  | 0.050825 | 0.27303  | 0.149179 | 0.00122  | 0.216869 | 2.24E-06 | 0.007281 | 0.87531  |
| 4.19E-12 | 0.15278  | 0.00093  | 0.247138 | 6.28E-08 | 0.163168 | 0.0004   | 0.254132 | 2.57E-08 |
| 6.49E-15 | 0.051213 | 0.26938  | 0.059134 | 0.2021   | 0.268939 | 3.52E-09 | -0.1453  | 0.00164  |
| 0.86754  | -0.02608 | 0.57404  | 0.176215 | 0.00013  | 0.157187 | 0.00065  | 0.067551 | 0.14497  |
| 0.26867  | 0.428187 | 3.03E-22 | 0.436308 | 4.00E-23 | 0.573629 | 3.26E-42 | 0.229917 | 5.10E-07 |
| 0.00662  | 0.07564  | 0.10256  | 0.160946 | 0.00048  | 0.150091 | 0.00114  | 0.075907 | 0.10135  |
| 0.86295  | 0.368338 | 1.88E-16 | 0.385194 | 5.75E-18 | 0.381012 | 1.39E-17 | 0.134602 | 0.00357  |
| 0.72412  | 0.054852 | 0.23678  | 0.216874 | 2.24E-06 | 0.260889 | 1.05E-08 | -0.006   | 0.89706  |
| 0.95876  | 0.008537 | 0.85401  | 0.079924 | 0.08447  | 0.116462 | 0.01178  | 0.021819 | 0.63813  |
| 0.59599  | 0.340813 | 3.64E-14 | 0.215588 | 2.58E-06 | 0.453997 | 3.99E-25 | 0.204182 | 8.69E-06 |
| 0.00014  | 0.005327 | 0.9086   | -0.01116 | 0.80986  | 0.086833 | 0.06079  | -0.01102 | 0.81232  |
| 0.88027  | 0.299287 | 4.05E-11 | 0.381332 | 1.30E-17 | 0.45307  | 5.12E-25 | 0.191897 | 2.98E-05 |
| 0.39062  | -0.15166 | 0.00101  | -0.22687 | 7.26E-07 | -0.22767 | 6.61E-07 | -0.10209 | 0.02738  |
| 4.15E-05 | 0.252521 | 3.16E-08 | 0.247286 | 6.17E-08 | 0.303038 | 2.25E-11 | 0.144882 | 0.00169  |
| 3.71E-06 | 0.268272 | 3.86E-09 | 0.246012 | 7.24E-08 | 0.320484 | 1.29E-12 | 0.174636 | 0.00015  |
| 0.17043  | 0.238102 | 1.92E-07 | 0.266775 | 4.74E-09 | 0.385339 | 5.58E-18 | 0.132757 | 0.00405  |
| 0.07986  | -0.04454 | 0.33684  | 0.062778 | 0.17563  | -0.03045 | 0.5115   | -0.1123  | 0.01518  |
| 0.1257   | 0.29894  | 4.28E-11 | 0.055561 | 0.23076  | 0.18941  | 3.80E-05 | 0.147421 | 0.0014   |
| 0.92035  | 0.188553 | 4.12E-05 | 0.190784 | 3.32E-05 | 0.250252 | 4.23E-08 | 0.072801 | 0.11616  |
| 0.06521  | 0.251715 | 3.51E-08 | 0.367594 | 2.18E-16 | 0.478711 | 4.01E-28 | 0.107913 | 0.01967  |
| 6.29E-22 | 0.561652 | 3.53E-40 | 0.51445  | 6.50E-33 | 0.502385 | 3.12E-31 | 0.462903 | 3.54E-26 |
| 0.00015  | 0.280969 | 6.39E-10 | 0.337871 | 6.21E-14 | 0.382091 | 1.11E-17 | 0.028961 | 0.53243  |
| 0.31384  | 0.170034 | 0.00022  | 0.140094 | 0.00241  | 0.269172 | 3.41E-09 | 0.113525 | 0.0141   |
| 0.10437  | 0.195823 | 2.03E-05 | 0.16782  | 0.00027  | 0.133264 | 0.00391  | 0.110566 | 0.01684  |
| 0.14962  | 0.368813 | 1.71E-16 | 0.305784 | 1.45E-11 | 0.4607   | 6.49E-26 | 0.207811 | 5.95E-06 |
| 0.09066  | 0.305836 | 1.44E-11 | 0.391719 | 1.41E-18 | 0.436789 | 3.54E-23 | 0.163781 | 0.00038  |
| 0.52819  | 0.315795 | 2.84E-12 | 0.297362 | 5.46E-11 | 0.356523 | 1.92E-15 | 0.081182 | 0.07968  |
| 0.04736  | 0.154152 | 0.00083  | 0.287374 | 2.49E-10 | 0.295781 | 6.97E-11 | 0.151256 | 0.00104  |
| 0.00105  | 0.362861 | 5.58E-16 | 0.366537 | 2.69E-16 | 0.493126 | 5.48E-30 | 0.14965  | 0.00118  |
| 0.00492  | 0.561575 | 3.64E-40 | 0.527286 | 8.90E-35 | 0.550904 | 2.02E-38 | 0.194801 | 2.24E-05 |
| 0.00377  | -0.03198 | 0.49052  | 0.136933 | 0.00302  | 0.15805  | 0.00061  | -0.11268 | 0.01484  |
| 0.77673  | 0.325807 | 5.21E-13 | 0.468321 | 7.83E-27 | 0.473697 | 1.70E-27 | 0.099186 | 0.03212  |
| 0.04623  | 0.339743 | 4.42E-14 | 0.318318 | 1.86E-12 | 0.459495 | 9.02E-26 | 0.068544 | 0.13913  |
| 0.14167  | -0.33941 | 4.70E-14 | -0.15074 | 0.00108  | -0.31571 | 2.88E-12 | 0.157617 | 0.00063  |
| 0.52408  | 0.220159 | 1.56E-06 | 0.205712 | 7.41E-06 | 0.28209  | 5.43E-10 | 0.063071 | 0.17362  |
| 0.46573  | 0.36194  | 6.69E-16 | 0.502788 | 2.74E-31 | 0.537761 | 2.33E-36 | 0.130768 | 0.00465  |
| 0.39161  | 0.388816 | 2.65E-18 | 0.415636 | 6.24E-21 | 0.592203 | 1.54E-45 | 0.164905 | 0.00035  |
| 4.70E-05 | 0.021032 | 0.6503   | 0.231839 | 4.07E-07 | 0.271115 | 2.60E-09 | -0.06717 | 0.14724  |
| 0.04532  | 0.156732 | 0.00068  | 0.224492 | 9.53E-07 | 0.306597 | 1.27E-11 | 0.029102 | 0.53044  |
| 2.01E-06 | -0.3177  | 2.06E-12 | -0.16354 | 0.00039  | -0.1655  | 0.00033  | -0.26295 | 7.97E-09 |
| 0.84226  | 0.270352 | 2.89E-09 | 0.178723 | 0.0001   | 0.241544 | 1.26E-07 | 0.114247 | 0.0135   |
| 0.04872  | 0.22636  | 7.70E-07 | 0.144438 | 0.00175  | 0.204059 | 8.80E-06 | 0.116034 | 0.0121   |
| 0.0394   | 0.263224 | 7.68E-09 | 0.082632 | 0.07443  | 0.284011 | 4.10E-10 | 0.175059 | 0.00014  |

|          |          |          |          |          |          |          |          |          |
|----------|----------|----------|----------|----------|----------|----------|----------|----------|
| 0.19365  | 0.213118 | 3.37E-06 | 0.124042 | 0.00728  | 0.220712 | 1.46E-06 | 0.124971 | 0.00685  |
| 0.05722  | 0.224568 | 9.45E-07 | 0.072524 | 0.11756  | 0.083898 | 0.07008  | 0.17721  | 0.00012  |
| 0.16033  | 0.153535 | 0.00087  | 0.079533 | 0.08601  | 0.184389 | 6.11E-05 | 0.075832 | 0.10169  |
| 0.81874  | 0.170274 | 0.00022  | 0.078108 | 0.0918   | 0.160619 | 0.00049  | 0.080471 | 0.08236  |
| 0.2282   | 0.232219 | 3.89E-07 | 0.07924  | 0.08717  | 0.119592 | 0.00969  | 0.132618 | 0.00409  |
| 0.02492  | 0.23159  | 4.19E-07 | 0.15604  | 0.00071  | 0.168829 | 0.00025  | 0.152718 | 0.00093  |
| 0.2017   | 0.094805 | 0.04057  | 0.055053 | 0.23506  | 0.133925 | 0.00374  | 0.064481 | 0.16417  |
| 0.81065  | 0.096573 | 0.03696  | 0.111481 | 0.01594  | 0.135414 | 0.00337  | 0.075931 | 0.10124  |
| 0.08798  | 0.210891 | 4.29E-06 | 0.130588 | 0.0047   | 0.198445 | 1.56E-05 | 0.110151 | 0.01725  |
| 0.81765  | 0.144123 | 0.00179  | 0.044179 | 0.34078  | 0.125481 | 0.00662  | 0.042714 | 0.35705  |
| 0.0052   | 0.053204 | 0.25119  | 0.027425 | 0.5544   | 0.214305 | 2.97E-06 | -0.05302 | 0.25281  |
| 0.00632  | 0.315028 | 3.22E-12 | 0.15427  | 0.00082  | 0.293399 | 1.00E-10 | 0.204828 | 8.12E-06 |
| 0.01644  | 0.27044  | 2.86E-09 | 0.143756 | 0.00184  | 0.253627 | 2.74E-08 | 0.12129  | 0.0087   |
| 0.01316  | 0.272997 | 2.00E-09 | 0.161868 | 0.00045  | 0.238624 | 1.80E-07 | 0.175726 | 0.00014  |
| 0.13028  | 0.124961 | 0.00686  | 0.121802 | 0.00842  | 0.220114 | 1.56E-06 | 0.208438 | 5.56E-06 |
| 0.1692   | -0.03307 | 0.47585  | -0.03107 | 0.50299  | 0.18738  | 4.61E-05 | -0.00759 | 0.87006  |
| 0.153    | 0.173596 | 0.00016  | 0.09055  | 0.05052  | 0.156857 | 0.00067  | 0.115827 | 0.01225  |
| 0.00376  | 0.23648  | 2.34E-07 | 0.185383 | 5.57E-05 | 0.206698 | 6.68E-06 | 0.187548 | 4.54E-05 |
| 0.11563  | 0.2017   | 1.12E-05 | 0.11328  | 0.01431  | 0.194886 | 2.23E-05 | 0.121744 | 0.00845  |
| 0.06175  | 0.060582 | 0.19126  | -0.01369 | 0.768    | 0.130877 | 0.00461  | -0.04603 | 0.32093  |
| 0.06266  | 0.115868 | 0.01222  | 0.062107 | 0.1803   | 0.080038 | 0.08403  | 0.116906 | 0.01146  |
| 0.21728  | 0.146444 | 0.00151  | 0.064954 | 0.1611   | 0.211973 | 3.82E-06 | 0.090798 | 0.04988  |
| 0.21192  | 0.186832 | 4.86E-05 | 0.076567 | 0.09841  | 0.166962 | 0.00029  | 0.074737 | 0.10674  |
| 0.66529  | 0.173693 | 0.00016  | 0.132198 | 0.00421  | 0.22385  | 1.03E-06 | 0.128372 | 0.00547  |
| 0.94586  | 0.205376 | 7.67E-06 | 0.100065 | 0.03061  | 0.248969 | 4.98E-08 | 0.096576 | 0.03695  |
| 0.07707  | 0.208666 | 5.43E-06 | 0.142292 | 0.00205  | 0.157858 | 0.00062  | 0.142169 | 0.00207  |
| 0.00365  | 0.267339 | 4.39E-09 | 0.149436 | 0.0012   | 0.233099 | 3.50E-07 | 0.152048 | 0.00098  |
| 0.24234  | 0.160528 | 0.0005   | 0.066857 | 0.14915  | 0.14996  | 0.00115  | 0.097335 | 0.03548  |
| 0.11125  | 0.190769 | 3.33E-05 | 0.14236  | 0.00204  | 0.14389  | 0.00182  | 0.120046 | 0.00941  |
| 0.27277  | 0.188954 | 3.97E-05 | 0.086107 | 0.06299  | 0.117502 | 0.01105  | 0.114626 | 0.01319  |
| 0.78141  | 0.104534 | 0.02387  | 0.100647 | 0.02965  | 0.146891 | 0.00146  | 0.064254 | 0.16567  |
| 4.73E-13 | 0.155969 | 0.00072  | 0.12048  | 0.00916  | 0.058149 | 0.20973  | 0.246628 | 6.70E-08 |
| 0.60011  | 0.17696  | 0.00012  | 0.097295 | 0.03556  | 0.140686 | 0.00231  | 0.049543 | 0.28533  |
| 0.00027  | 0.234074 | 3.12E-07 | 0.191953 | 2.97E-05 | 0.236428 | 2.35E-07 | 0.144469 | 0.00175  |
| 0.06005  | 0.1712   | 0.0002   | 0.066606 | 0.15069  | 0.106994 | 0.02074  | 0.121558 | 0.00855  |
| 0.05209  | 0.194809 | 2.24E-05 | 0.155107 | 0.00077  | 0.149713 | 0.00117  | 0.145791 | 0.00158  |
| 0.42824  | 0.161208 | 0.00047  | 0.01989  | 0.66813  | 0.083834 | 0.07029  | 0.154068 | 0.00084  |
| 0.01302  | 0.309179 | 8.40E-12 | 0.201019 | 1.20E-05 | 0.279648 | 7.74E-10 | 0.144451 | 0.00175  |
| 0.93423  | 0.061496 | 0.18463  | -0.01498 | 0.7468   | 0.127857 | 0.00566  | 0.040209 | 0.38597  |
| 0.37853  | 0.231311 | 4.33E-07 | 0.066899 | 0.1489   | 0.165479 | 0.00033  | 0.114419 | 0.01336  |
| 0.03978  | 0.224177 | 9.88E-07 | 0.145054 | 0.00167  | 0.184703 | 5.94E-05 | 0.144583 | 0.00173  |
| 0.76802  | 0.057206 | 0.21723  | -0.02823 | 0.54282  | 0.053907 | 0.24497  | -0.04381 | 0.34488  |
| 0.00054  | 0.216255 | 2.40E-06 | 0.032836 | 0.47902  | 0.089163 | 0.05417  | 0.106387 | 0.02148  |
| 0.02881  | 0.244029 | 9.28E-08 | 0.099443 | 0.03167  | 0.156554 | 0.00069  | 0.133802 | 0.00377  |
| 0.11167  | 0.201217 | 1.18E-05 | 0.042024 | 0.36487  | 0.147559 | 0.00139  | 0.056467 | 0.22324  |

|          |          |          |          |          |          |          |          |          |
|----------|----------|----------|----------|----------|----------|----------|----------|----------|
| 0.0048   | 0.25994  | 1.19E-08 | 0.168933 | 0.00025  | 0.213023 | 3.41E-06 | 0.179536 | 9.57E-05 |
| 0.02602  | 0.142475 | 0.00203  | 0.072665 | 0.11684  | 0.16634  | 0.00031  | 0.113751 | 0.01391  |
| 0.02935  | 0.218708 | 1.83E-06 | 0.122031 | 0.00829  | 0.186784 | 4.88E-05 | 0.13573  | 0.00329  |
| 0.00059  | 0.261965 | 9.11E-09 | 0.156017 | 0.00072  | 0.231249 | 4.36E-07 | 0.158798 | 0.00057  |
| 0.0123   | 0.210273 | 4.58E-06 | 0.130541 | 0.00472  | 0.196016 | 1.99E-05 | 0.202165 | 1.07E-05 |
| 0.0973   | 0.206755 | 6.64E-06 | 0.131283 | 0.00449  | 0.206314 | 6.96E-06 | 0.136003 | 0.00323  |
| 0.07636  | 0.307207 | 1.15E-11 | 0.292489 | 1.15E-10 | 0.45388  | 4.12E-25 | 0.20894  | 5.28E-06 |
| 0.14117  | 0.249315 | 4.77E-08 | 0.087845 | 0.05784  | 0.08947  | 0.05334  | 0.034403 | 0.45828  |
| 0.72992  | 0.182936 | 7.00E-05 | 0.054933 | 0.23608  | 0.131825 | 0.00432  | 0.06402  | 0.16722  |
| 0.27375  | 0.220305 | 1.53E-06 | 0.173679 | 0.00016  | 0.244362 | 8.90E-08 | 0.163737 | 0.00038  |
| 0.37871  | 0.149063 | 0.00123  | 0.060272 | 0.19354  | 0.114591 | 0.01322  | 0.085884 | 0.06368  |
| 0.45596  | 0.169979 | 0.00022  | 0.119813 | 0.00955  | 0.192601 | 2.79E-05 | 0.067425 | 0.14572  |
| 0.13383  | 0.228722 | 5.86E-07 | 0.095757 | 0.03859  | 0.266011 | 5.26E-09 | 0.071346 | 0.12365  |
| 0.28667  | 0.217787 | 2.02E-06 | 0.112207 | 0.01527  | 0.156899 | 0.00067  | 0.127026 | 0.00598  |
| 0.62074  | 0.209459 | 4.99E-06 | 0.054706 | 0.23803  | 0.157158 | 0.00065  | 0.12194  | 0.00834  |
| 1.82E-05 | 0.248323 | 5.41E-08 | 0.203878 | 8.96E-06 | 0.187195 | 4.69E-05 | 0.20999  | 4.72E-06 |
| 0.90699  | 0.14022  | 0.00239  | 0.031939 | 0.49112  | 0.074553 | 0.10761  | 0.095322 | 0.03949  |
| 0.01075  | 0.285509 | 3.29E-10 | 0.143995 | 0.00181  | 0.2957   | 7.06E-11 | 0.189655 | 3.71E-05 |
| 0.46212  | 0.170393 | 0.00022  | 0.093229 | 0.04404  | 0.138432 | 0.00272  | 0.107491 | 0.02016  |
| 0.00561  | 0.241976 | 1.20E-07 | 0.127316 | 0.00587  | 0.156919 | 0.00067  | 0.164305 | 0.00036  |
| 0.7476   | 0.140191 | 0.00239  | 0.112193 | 0.01528  | 0.195216 | 2.15E-05 | 0.07024  | 0.12959  |
| 0.37606  | 0.252445 | 3.19E-08 | 0.095897 | 0.03831  | 0.266892 | 4.66E-09 | 0.154912 | 0.00078  |
| 0.28741  | 0.176908 | 0.00012  | 0.090744 | 0.05002  | 0.198949 | 1.48E-05 | 0.06967  | 0.13274  |
| 0.42528  | 0.117222 | 0.01124  | 0.053432 | 0.24916  | 0.172173 | 0.00018  | 0.04886  | 0.29203  |
| 0.14121  | 0.171905 | 0.00019  | 0.096577 | 0.03695  | 0.138735 | 0.00266  | 0.097695 | 0.03481  |
| 0.10567  | 0.191437 | 3.12E-05 | 0.114135 | 0.01359  | 0.139383 | 0.00254  | 0.104589 | 0.0238   |
| 0.96344  | 0.103007 | 0.02602  | 0.008739 | 0.8506   | 0.092854 | 0.04491  | 0.08175  | 0.07759  |
| 0.71085  | 0.123782 | 0.0074   | 0.022539 | 0.62709  | 0.137446 | 0.00292  | 0.056945 | 0.21934  |
| 0.45655  | 0.167793 | 0.00027  | 0.059158 | 0.20192  | 0.111078 | 0.01633  | 0.09204  | 0.04682  |
| 0.04503  | 0.191601 | 3.07E-05 | 0.091079 | 0.04918  | 0.124007 | 0.0073   | 0.122651 | 0.00797  |
| 0.01613  | 0.195902 | 2.01E-05 | 0.103881 | 0.02477  | 0.143153 | 0.00193  | 0.159354 | 0.00055  |
| 0.00095  | 0.218329 | 1.91E-06 | 0.124857 | 0.0069   | 0.143576 | 0.00187  | 0.179751 | 9.39E-05 |
| 0.01531  | 0.192295 | 2.87E-05 | 0.10818  | 0.01937  | 0.139268 | 0.00256  | 0.155064 | 0.00077  |
| 0.0062   | 0.281089 | 6.28E-10 | 0.140048 | 0.00242  | 0.215935 | 2.48E-06 | 0.174784 | 0.00015  |
| 0.48385  | 0.211857 | 3.86E-06 | 0.13974  | 0.00247  | 0.255421 | 2.17E-08 | 0.152128 | 0.00097  |
| 0.7127   | 0.123004 | 0.00779  | 0.075947 | 0.10117  | 0.098225 | 0.03383  | 0.095089 | 0.03997  |
| 0.00263  | 0.257173 | 1.72E-08 | 0.142867 | 0.00197  | 0.185587 | 5.46E-05 | 0.206386 | 6.91E-06 |
| 0.27517  | 0.142495 | 0.00202  | 0.040932 | 0.37748  | 0.070357 | 0.12895  | 0.079483 | 0.08621  |
| 0.52416  | 0.136422 | 0.00314  | 0.070761 | 0.12677  | 0.12254  | 0.00803  | 0.086329 | 0.06231  |
| 0.21449  | 0.163545 | 0.00039  | 0.106642 | 0.02117  | 0.097935 | 0.03436  | 0.133312 | 0.0039   |
| 0.01421  | 0.186209 | 5.15E-05 | 0.105938 | 0.02204  | 0.10515  | 0.02305  | 0.166725 | 0.0003   |
| 0.21486  | 0.035542 | 0.44353  | 0.00824  | 0.85905  | 0.045812 | 0.32322  | 0.045045 | 0.33139  |
| 0.0634   | 0.164308 | 0.00036  | 0.085571 | 0.06466  | 0.083599 | 0.07109  | 0.139926 | 0.00244  |
| 0.50761  | 0.259131 | 1.33E-08 | 0.094593 | 0.04103  | 0.232847 | 3.61E-07 | 0.152644 | 0.00094  |
| 0.24159  | 0.248485 | 5.30E-08 | 0.182976 | 6.97E-05 | 0.351983 | 4.57E-15 | 0.122534 | 0.00803  |

|         |          |          |          |          |          |          |          |          |
|---------|----------|----------|----------|----------|----------|----------|----------|----------|
| 0.15163 | 0.033275 | 0.47316  | 0.046652 | 0.31442  | 0.217577 | 2.07E-06 | 0.010297 | 0.82436  |
| 0.26895 | 0.172203 | 0.00018  | 0.089539 | 0.05316  | 0.161828 | 0.00045  | 0.120749 | 0.009    |
| 0.00369 | 0.253441 | 2.81E-08 | 0.171004 | 0.0002   | 0.219582 | 1.66E-06 | 0.140567 | 0.00233  |
| 0.43604 | 0.192255 | 2.88E-05 | 0.125446 | 0.00664  | 0.2176   | 2.07E-06 | 0.114758 | 0.01308  |
| 0.04351 | 0.228382 | 6.09E-07 | 0.147255 | 0.00142  | 0.182052 | 7.60E-05 | 0.133954 | 0.00373  |
| 0.09942 | 0.137306 | 0.00295  | 0.056077 | 0.22646  | 0.074498 | 0.10787  | 0.06194  | 0.18147  |
| 0.31504 | 0.07878  | 0.08903  | 0.108851 | 0.01862  | 0.251422 | 3.64E-08 | 0.065983 | 0.15455  |
| 0.2576  | 0.19714  | 1.78E-05 | 0.082393 | 0.07528  | 0.200295 | 1.29E-05 | 0.077722 | 0.09342  |
| 0.22538 | 0.161586 | 0.00046  | 0.117654 | 0.01094  | 0.159838 | 0.00053  | 0.096957 | 0.03621  |
| 0.58482 | 0.213485 | 3.24E-06 | 0.107731 | 0.01988  | 0.303554 | 2.07E-11 | 0.141751 | 0.00214  |
| 0.19218 | 0.103356 | 0.02551  | 0.086805 | 0.06088  | 0.130766 | 0.00465  | 0.138419 | 0.00272  |
| 0.06372 | 0.230772 | 4.61E-07 | 0.087129 | 0.05992  | 0.209779 | 4.83E-06 | 0.140279 | 0.00238  |
| 0.00658 | 0.263019 | 7.90E-09 | 0.151056 | 0.00106  | 0.162358 | 0.00043  | 0.169544 | 0.00023  |
| 0.05123 | 0.207938 | 5.87E-06 | 0.113058 | 0.01451  | 0.158796 | 0.00057  | 0.161138 | 0.00047  |
| 0.05184 | 0.197018 | 1.80E-05 | 0.123168 | 0.00771  | 0.193571 | 2.53E-05 | 0.131918 | 0.0043   |
| 0.70917 | 0.251097 | 3.80E-08 | 0.153216 | 0.00089  | 0.275454 | 1.41E-09 | 0.162152 | 0.00043  |
| 0.27707 | 0.153714 | 0.00086  | 0.05707  | 0.21833  | 0.187423 | 4.59E-05 | 0.079069 | 0.08786  |
| 0.00141 | 0.440904 | 1.24E-23 | 0.255511 | 2.14E-08 | 0.344961 | 1.70E-14 | 0.254795 | 2.35E-08 |
| 0.01043 | 0.271725 | 2.39E-09 | 0.14009  | 0.00241  | 0.226061 | 7.97E-07 | 0.187378 | 4.61E-05 |
| 0.81879 | 0.213817 | 3.13E-06 | 0.039353 | 0.39617  | 0.133869 | 0.00375  | 0.09866  | 0.03304  |
| 0.03764 | 0.244441 | 8.81E-08 | 0.112614 | 0.0149   | 0.193594 | 2.53E-05 | 0.162993 | 0.00041  |
| 0.04059 | 0.261076 | 1.03E-08 | 0.113062 | 0.0145   | 0.242128 | 1.17E-07 | 0.175426 | 0.00014  |
| 0.02665 | 0.260027 | 1.18E-08 | 0.13245  | 0.00414  | 0.201998 | 1.09E-05 | 0.168196 | 0.00026  |
| 0.00266 | 0.267914 | 4.05E-09 | 0.161949 | 0.00044  | 0.334225 | 1.19E-13 | 0.120503 | 0.00914  |
| 0.40588 | 0.251597 | 3.56E-08 | 0.073583 | 0.11228  | 0.224888 | 9.11E-07 | 0.115214 | 0.01272  |
| 0.30413 | 0.189424 | 3.79E-05 | 0.175689 | 0.00014  | 0.205339 | 7.70E-06 | 0.119579 | 0.0097   |
| 0.25608 | 0.293783 | 9.47E-11 | 0.14202  | 0.00209  | 0.273595 | 1.84E-09 | 0.143463 | 0.00188  |
| 0.03694 | 0.232091 | 3.95E-07 | 0.103972 | 0.02464  | 0.150726 | 0.00109  | 0.157196 | 0.00065  |
| 0.15265 | 0.081432 | 0.07875  | 0.095599 | 0.03891  | 0.238936 | 1.74E-07 | 0.101388 | 0.02847  |
| 0.12584 | 0.205405 | 7.65E-06 | 0.100032 | 0.03067  | 0.158183 | 0.0006   | 0.113837 | 0.01384  |
| 0.02495 | 0.252055 | 3.36E-08 | 0.15945  | 0.00054  | 0.21177  | 3.90E-06 | 0.192236 | 2.89E-05 |
| 0.29049 | 0.199433 | 1.41E-05 | 0.076712 | 0.09777  | 0.202787 | 1.00E-05 | 0.109671 | 0.01775  |
| 0.76552 | 0.178345 | 0.00011  | 0.074156 | 0.1095   | 0.172054 | 0.00019  | 0.104657 | 0.02371  |
| 0.07508 | 0.097997 | 0.03425  | 0.04891  | 0.29153  | 0.127492 | 0.0058   | 0.128104 | 0.00557  |
| 0.04778 | 0.138246 | 0.00275  | 0.113398 | 0.01421  | 0.096221 | 0.03765  | 0.195403 | 2.11E-05 |
| 0.77369 | 0.031519 | 0.49684  | -0.00218 | 0.96259  | 0.132427 | 0.00415  | 0.005122 | 0.9121   |
| 0.05668 | 0.22376  | 1.04E-06 | 0.090682 | 0.05018  | 0.126954 | 0.00601  | 0.140147 | 0.0024   |
| 0.32766 | 0.375521 | 4.36E-17 | 0.292674 | 1.12E-10 | 0.432418 | 1.06E-22 | 0.240659 | 1.41E-07 |
| 0.32845 | 0.204843 | 8.11E-06 | 0.172428 | 0.00018  | 0.282632 | 5.02E-10 | 0.137928 | 0.00282  |
| 0.9302  | 0.070758 | 0.12678  | 0.039079 | 0.39948  | 0.058143 | 0.20978  | 0.017372 | 0.70809  |
| 0.92454 | 0.182724 | 7.14E-05 | 0.133795 | 0.00377  | 0.157392 | 0.00064  | 0.034395 | 0.45838  |
| 0.18266 | 0.203787 | 9.05E-06 | 0.075168 | 0.10473  | 0.16649  | 0.0003   | 0.135807 | 0.00328  |
| 0.39331 | 0.146107 | 0.00155  | 0.055031 | 0.23525  | 0.102775 | 0.02636  | 0.103944 | 0.02468  |
| 0.51075 | 0.183687 | 6.53E-05 | 0.06194  | 0.18147  | 0.163779 | 0.00038  | 0.142341 | 0.00205  |
| 0.46277 | 0.170477 | 0.00021  | 0.066394 | 0.15199  | 0.157057 | 0.00066  | 0.062497 | 0.17757  |



|          |          |          |          |          |          |          |          |          |
|----------|----------|----------|----------|----------|----------|----------|----------|----------|
| 0.63354  | 0.126356 | 0.00625  | 0.030895 | 0.50539  | 0.144217 | 0.00178  | 0.047444 | 0.30626  |
| 0.94923  | 0.104362 | 0.02411  | 0.006631 | 0.88635  | 0.16417  | 0.00037  | 0.079141 | 0.08757  |
| 0.9969   | 0.166124 | 0.00031  | 0.047613 | 0.30454  | 0.147925 | 0.00135  | 0.033147 | 0.47486  |
| 0.91308  | 0.086291 | 0.06243  | 0.027626 | 0.5515   | 0.120396 | 0.00921  | 0.032679 | 0.48112  |
| 0.55663  | 0.028593 | 0.53766  | 0.018284 | 0.69351  | 0.06817  | 0.14131  | -0.03221 | 0.48742  |
| 0.05919  | 0.025403 | 0.58398  | -0.05222 | 0.26011  | -0.01833 | 0.69284  | -0.06235 | 0.17861  |
| 0.16345  | 0.133508 | 0.00385  | -0.00329 | 0.9435   | 0.080151 | 0.08359  | 0.009737 | 0.83378  |
| 0.49812  | 0.044518 | 0.33709  | 0.010324 | 0.82391  | 0.070764 | 0.12675  | 0.057823 | 0.21231  |
| 0.29271  | 0.202601 | 1.02E-05 | 0.085988 | 0.06336  | 0.186799 | 4.87E-05 | 0.137585 | 0.00289  |
| 0.33592  | 0.168598 | 0.00025  | 0.076125 | 0.10037  | 0.161577 | 0.00046  | 0.085945 | 0.06349  |
| 0.40092  | 0.212372 | 3.66E-06 | 0.119598 | 0.00968  | 0.166321 | 0.00031  | 0.081695 | 0.07779  |
| 0.95584  | 0.142954 | 0.00196  | 0.041695 | 0.36865  | 0.149097 | 0.00123  | 0.049834 | 0.28251  |
| 0.00026  | 0.406789 | 4.88E-20 | 0.208655 | 5.44E-06 | 0.320667 | 1.25E-12 | 0.241199 | 1.32E-07 |
| 0.26976  | 0.174614 | 0.00015  | 0.049626 | 0.28453  | 0.213452 | 3.25E-06 | 0.034764 | 0.45358  |
| 0.87391  | 0.255233 | 2.22E-08 | 0.133292 | 0.00391  | 0.327422 | 3.94E-13 | 0.11416  | 0.01357  |
| 0.31149  | 0.214249 | 2.98E-06 | 0.0745   | 0.10786  | 0.15469  | 0.0008   | 0.069082 | 0.13605  |
| 0.34693  | 0.164692 | 0.00035  | 0.094675 | 0.04085  | 0.135691 | 0.0033   | 0.089544 | 0.05314  |
| 0.00995  | 0.156782 | 0.00067  | 0.1137   | 0.01395  | 0.157966 | 0.00061  | -0.00895 | 0.84703  |
| 0.11011  | 0.172329 | 0.00018  | 0.062245 | 0.17933  | 0.12982  | 0.00496  | 0.118594 | 0.01032  |
| 2.16E-05 | 0.141266 | 0.00221  | 0.088049 | 0.05726  | 0.250668 | 4.01E-08 | -0.01677 | 0.7178   |
| 0.87386  | 0.221199 | 1.38E-06 | 0.103154 | 0.0258   | 0.175469 | 0.00014  | 0.130843 | 0.00462  |
| 0.00044  | 0.152946 | 0.00091  | 0.09052  | 0.05059  | 0.104352 | 0.02412  | 0.148965 | 0.00124  |
| 0.14458  | 0.072352 | 0.11843  | 0.071277 | 0.12402  | 0.011824 | 0.79884  | 0.07529  | 0.10417  |
| 0.40451  | 0.165532 | 0.00033  | 0.058801 | 0.20466  | 0.103786 | 0.0249   | 0.098814 | 0.03277  |
| 0.81885  | 0.210155 | 4.64E-06 | 0.079592 | 0.08577  | 0.146628 | 0.00149  | 0.122048 | 0.00828  |
| 0.04368  | 0.163993 | 0.00037  | 0.061498 | 0.18461  | 0.141304 | 0.00221  | 0.108813 | 0.01866  |
| 0.69316  | 0.134991 | 0.00347  | 0.058949 | 0.20352  | 0.130766 | 0.00465  | 0.03088  | 0.50561  |
| 0.50047  | 0.14688  | 0.00146  | 0.110726 | 0.01668  | 0.139218 | 0.00257  | 0.078277 | 0.0911   |
| 0.05156  | 0.01071  | 0.81745  | -0.03496 | 0.45106  | 0.046655 | 0.31438  | -0.03013 | 0.51601  |
| 0.08152  | 0.358833 | 1.23E-15 | 0.106236 | 0.02167  | 0.190982 | 3.26E-05 | 0.040443 | 0.38321  |
| 0.09711  | 0.121553 | 0.00855  | -0.03142 | 0.49816  | 0.08313  | 0.0727   | -0.0249  | 0.5914   |
| 0.22124  | 0.207793 | 5.96E-06 | 0.101931 | 0.02762  | 0.107989 | 0.01958  | 0.11511  | 0.0128   |
| 0.0615   | 0.274789 | 1.55E-09 | 0.083568 | 0.07119  | 0.202421 | 1.04E-05 | 0.160009 | 0.00052  |
| 0.60293  | 0.174725 | 0.00015  | 0.073205 | 0.11414  | 0.156929 | 0.00067  | 0.071421 | 0.12326  |
| 0.65732  | 0.220891 | 1.43E-06 | 0.054521 | 0.23963  | 0.226694 | 7.41E-07 | 0.093699 | 0.04298  |
| 0.96285  | 0.135676 | 0.00331  | 0.077324 | 0.09512  | 0.17253  | 0.00018  | 0.040895 | 0.37791  |
| 0.17236  | 0.148761 | 0.00126  | 0.140801 | 0.00229  | 0.245384 | 7.83E-08 | 0.062891 | 0.17485  |
| 0.61392  | 0.133904 | 0.00374  | 0.019254 | 0.67813  | 0.123062 | 0.00776  | 0.063885 | 0.16812  |
| 0.21248  | 0.151044 | 0.00106  | 0.068879 | 0.13721  | 0.104412 | 0.02404  | 0.059671 | 0.19803  |
| 0.98026  | 0.131652 | 0.00437  | 0.038154 | 0.41074  | 0.082106 | 0.0763   | 0.055153 | 0.23421  |
| 0.76299  | 0.075148 | 0.10483  | -0.01091 | 0.81416  | 0.162525 | 0.00042  | 0.029133 | 0.53     |
| 0.29888  | 0.180325 | 8.91E-05 | 0.107665 | 0.01995  | 0.178202 | 0.00011  | 0.090195 | 0.05143  |
| 0.52098  | 0.097251 | 0.03564  | 0.047264 | 0.3081   | 0.116285 | 0.01191  | 4.72E-05 | 0.99919  |
| 0.73548  | 0.181503 | 7.99E-05 | 0.116296 | 0.0119   | 0.174128 | 0.00016  | 0.030065 | 0.51692  |
| 0.0674   | 0.072806 | 0.11613  | 0.041745 | 0.36807  | 0.108057 | 0.01951  | -0.03312 | 0.47529  |

|          |          |          |          |          |          |          |          |          |
|----------|----------|----------|----------|----------|----------|----------|----------|----------|
| 0.01061  | 0.028036 | 0.54561  | 0.045087 | 0.33094  | 0.120609 | 0.00908  | -0.0268  | 0.56349  |
| 0.96209  | 0.21927  | 1.72E-06 | 0.064554 | 0.1637   | 0.19008  | 3.56E-05 | 0.077532 | 0.09423  |
| 0.00451  | 0.006248 | 0.89288  | -0.01228 | 0.7913   | 0.049405 | 0.28668  | -0.09919 | 0.03211  |
| 2.88E-05 | -0.00527 | 0.90964  | -0.01647 | 0.7226   | 0.062576 | 0.17702  | -0.0871  | 0.06     |
| 0.55981  | 0.08489  | 0.06682  | 0.022576 | 0.62652  | 0.047556 | 0.30512  | 0.014329 | 0.75745  |
| 0.16772  | 0.152729 | 0.00093  | 0.10849  | 0.01902  | 0.172076 | 0.00019  | 0.136328 | 0.00316  |
| 0.13469  | 0.190508 | 3.41E-05 | 0.125268 | 0.00672  | 0.252944 | 2.99E-08 | 0.055406 | 0.23207  |
| 0.73485  | 0.109246 | 0.0182   | 0.024812 | 0.59277  | 0.068893 | 0.13713  | 0.01355  | 0.77025  |
| 0.0399   | 0.105879 | 0.02212  | 0.031474 | 0.49745  | 0.133006 | 0.00398  | -0.02704 | 0.56004  |
| 0.02932  | 0.11918  | 0.00994  | 0.068834 | 0.13747  | 0.065258 | 0.15915  | 0.140134 | 0.0024   |
| 0.02433  | 0.270822 | 2.71E-09 | 0.215851 | 2.51E-06 | 0.260493 | 1.11E-08 | 0.084679 | 0.0675   |
| 0.32869  | 0.080491 | 0.08228  | -0.01325 | 0.77513  | 0.065312 | 0.1588   | 0.024957 | 0.5906   |
| 0.95148  | 0.245193 | 8.02E-08 | 0.186062 | 5.22E-05 | 0.215832 | 2.51E-06 | 0.058111 | 0.21003  |
| 0.65743  | 0.178732 | 0.0001   | 0.104909 | 0.02337  | 0.093035 | 0.04449  | 0.028158 | 0.54386  |
| 0.1283   | 0.128502 | 0.00542  | 0.099162 | 0.03216  | 0.17628  | 0.00013  | 0.044094 | 0.34171  |
| 0.3558   | 0.027821 | 0.54869  | 0.031927 | 0.49127  | 0.061991 | 0.18111  | 0.030419 | 0.51199  |
| 0.59779  | 0.104924 | 0.02335  | 0.053539 | 0.24821  | 0.114818 | 0.01304  | 0.04395  | 0.34329  |
| 0.00226  | 0.117697 | 0.01091  | 0.049415 | 0.28658  | 0.073629 | 0.11205  | 0.18377  | 6.48E-05 |
| 0.08269  | 0.291221 | 1.40E-10 | 0.200719 | 1.24E-05 | 0.242379 | 1.14E-07 | 0.204721 | 8.21E-06 |
| 0.02916  | 0.185892 | 5.31E-05 | 0.083353 | 0.07193  | 0.130684 | 0.00467  | 0.134311 | 0.00364  |
| 0.98591  | 0.138633 | 0.00268  | 0.010433 | 0.82208  | 0.08209  | 0.07636  | -0.01613 | 0.72812  |
| 0.93597  | 0.093181 | 0.04415  | 0.110376 | 0.01703  | 0.136382 | 0.00315  | 0.092903 | 0.04479  |
| 0.08488  | 0.230527 | 4.74E-07 | 0.117814 | 0.01083  | 0.14556  | 0.00161  | 0.152126 | 0.00097  |
| 0.11259  | 0.200184 | 1.31E-05 | 0.111001 | 0.01641  | 0.215764 | 2.53E-06 | 0.04461  | 0.33609  |
| 0.27621  | 0.134433 | 0.00361  | -0.01554 | 0.73759  | 0.042555 | 0.35885  | -0.05083 | 0.273    |
| 0.99487  | 0.125386 | 0.00667  | 0.037351 | 0.42065  | 0.096987 | 0.03615  | 0.050342 | 0.27762  |
| 0.41745  | 0.043162 | 0.35202  | 0.062406 | 0.17821  | 0.148307 | 0.00131  | -0.01484 | 0.74912  |
| 0.7897   | 0.114943 | 0.01294  | 0.082476 | 0.07498  | 0.194932 | 2.22E-05 | 0.056674 | 0.22154  |
| 0.54872  | 0.082322 | 0.07553  | 0.001802 | 0.96902  | 0.074989 | 0.10556  | 0.012341 | 0.79025  |
| 0.79754  | 0.179135 | 9.93E-05 | 0.0784   | 0.09059  | 0.203798 | 9.04E-06 | 0.09293  | 0.04473  |
| 0.31849  | 0.093636 | 0.04312  | 0.044549 | 0.33675  | 0.083528 | 0.07133  | 0.058981 | 0.20327  |
| 0.72667  | 0.146457 | 0.00151  | 0.057112 | 0.21799  | 0.156424 | 0.00069  | 0.081593 | 0.07816  |
| 0.27295  | 0.113632 | 0.01401  | 0.079006 | 0.08811  | 0.093284 | 0.04392  | 0.106034 | 0.02192  |
| 0.03524  | 0.221666 | 1.31E-06 | 0.139597 | 0.0025   | 0.214421 | 2.93E-06 | 0.091923 | 0.04711  |
| 0.38463  | 0.138861 | 0.00264  | 0.067905 | 0.14287  | 0.171716 | 0.00019  | 0.082168 | 0.07608  |
| 0.69976  | 0.087005 | 0.06028  | 0.029824 | 0.52027  | 0.091238 | 0.04878  | 0.070184 | 0.1299   |
| 0.48315  | 0.130068 | 0.00487  | 0.047469 | 0.306    | 0.146142 | 0.00154  | 0.084704 | 0.06742  |
| 0.64919  | 0.11199  | 0.01547  | 0.02781  | 0.54885  | 0.066361 | 0.1522   | 0.018946 | 0.683    |
| 0.76124  | 0.09754  | 0.0351   | 0.023373 | 0.61439  | 0.088979 | 0.05467  | 0.003492 | 0.94     |
| 0.47737  | 0.141522 | 0.00217  | 0.066862 | 0.14912  | 0.126645 | 0.00613  | 0.062146 | 0.18002  |
| 0.33861  | 0.089287 | 0.05383  | 0.064476 | 0.16421  | 0.133079 | 0.00396  | -0.01463 | 0.75252  |
| 0.79338  | 0.176602 | 0.00012  | 0.11065  | 0.01675  | 0.18692  | 4.81E-05 | 0.032575 | 0.48252  |
| 0.13276  | 0.16187  | 0.00044  | 0.075205 | 0.10456  | 0.12041  | 0.0092   | 0.109703 | 0.01772  |
| 0.65778  | 0.208857 | 5.32E-06 | 0.07033  | 0.1291   | 0.173783 | 0.00016  | 0.082751 | 0.07401  |
| 0.988    | 0.181188 | 8.23E-05 | 0.083171 | 0.07255  | 0.161199 | 0.00047  | 0.058242 | 0.209    |

|          |          |          |          |          |          |          |          |         |
|----------|----------|----------|----------|----------|----------|----------|----------|---------|
| 0.32302  | 0.061777 | 0.18263  | -0.0422  | 0.36288  | 0.031701 | 0.49436  | -0.03868 | 0.40426 |
| 0.75436  | 0.113126 | 0.01445  | 0.066106 | 0.15378  | 0.135182 | 0.00342  | 0.021454 | 0.64377 |
| 0.26194  | 0.15998  | 0.00052  | 0.086202 | 0.0627   | 0.125157 | 0.00677  | 0.095815 | 0.03847 |
| 0.53142  | 0.227424 | 6.81E-07 | 0.088164 | 0.05693  | 0.234498 | 2.97E-07 | 0.105007 | 0.02324 |
| 0.36185  | 0.141182 | 0.00223  | 0.051688 | 0.26496  | 0.106496 | 0.02135  | 0.057041 | 0.21856 |
| 0.38281  | 0.105193 | 0.023    | 0.033604 | 0.4688   | 0.087505 | 0.05882  | 0.053993 | 0.24421 |
| 0.62899  | 0.013751 | 0.76695  | -0.00617 | 0.89425  | 0.003916 | 0.93274  | 0.003999 | 0.93132 |
| 0.91542  | 0.033555 | 0.46944  | 0.05886  | 0.2042   | 0.060803 | 0.18964  | -0.00074 | 0.98732 |
| 0.68968  | 0.1205   | 0.00915  | 0.076676 | 0.09793  | 0.112571 | 0.01494  | 0.053998 | 0.24417 |
| 0.33588  | 0.140946 | 0.00227  | 0.071508 | 0.1228   | 0.085944 | 0.06349  | 0.079236 | 0.08719 |
| 0.00316  | 0.101234 | 0.02871  | 0.021105 | 0.64917  | 0.043209 | 0.35149  | 0.056005 | 0.22705 |
| 5.16E-06 | 0.107692 | 0.01992  | -0.04158 | 0.37002  | 0.057935 | 0.21142  | -0.03814 | 0.41087 |
| 0.47118  | 0.228491 | 6.02E-07 | 0.265264 | 5.83E-09 | 0.327787 | 3.70E-13 | 0.048218 | 0.29842 |
| 0.37888  | 0.143026 | 0.00195  | 0.061675 | 0.18336  | 0.118229 | 0.01056  | 0.061694 | 0.18322 |
| 0.08889  | 0.208975 | 5.26E-06 | 0.076925 | 0.09684  | 0.158164 | 0.0006   | -0.01733 | 0.70869 |
| 0.75429  | 0.089625 | 0.05293  | 0.024955 | 0.59064  | 0.127983 | 0.00561  | 0.041888 | 0.36643 |
| 0.49514  | 0.072074 | 0.11986  | 0.050681 | 0.2744   | 0.071151 | 0.12468  | 0.002178 | 0.96256 |
| 0.57847  | 0.12404  | 0.00728  | 0.05326  | 0.25069  | 0.089877 | 0.05226  | 0.073769 | 0.11137 |
| 0.00061  | 0.104749 | 0.02359  | 0.008073 | 0.86186  | 0.036681 | 0.42905  | 0.05485  | 0.2368  |
| 0.13026  | 0.070148 | 0.1301   | 0.01905  | 0.68136  | 0.028071 | 0.54511  | 0.038098 | 0.41142 |
| 0.14388  | 0.048478 | 0.29583  | 0.026807 | 0.56337  | 0.09201  | 0.0469   | 0.044316 | 0.33928 |
| 0.70078  | 0.059364 | 0.20035  | 0.051202 | 0.26949  | 0.031896 | 0.49171  | 0.077821 | 0.093   |
| 0.25623  | 0.097424 | 0.03532  | -0.0044  | 0.92445  | 0.049649 | 0.2843   | 0.009236 | 0.84221 |
| 0.3008   | 0.09734  | 0.03547  | 0.052284 | 0.25949  | 0.10406  | 0.02452  | 0.046399 | 0.31704 |
| 0.32823  | 0.193318 | 2.60E-05 | 0.105251 | 0.02292  | 0.147785 | 0.00136  | 0.104014 | 0.02459 |
| 0.08446  | 0.191325 | 3.15E-05 | -0.01058 | 0.81971  | 0.08886  | 0.05499  | -0.0421  | 0.36402 |
| 0.03291  | 0.139315 | 0.00255  | 0.0765   | 0.09871  | 0.095125 | 0.0399   | 0.088877 | 0.05495 |
| 0.30912  | 0.158126 | 0.0006   | 0.061306 | 0.18599  | 0.145787 | 0.00158  | 0.090272 | 0.05123 |
| 0.38343  | 0.015137 | 0.74422  | -0.00703 | 0.87956  | 0.164202 | 0.00037  | -0.0188  | 0.68525 |
| 0.49552  | 0.188472 | 4.15E-05 | 0.096175 | 0.03775  | 0.195996 | 1.99E-05 | 0.063969 | 0.16756 |
| 0.88133  | 0.119892 | 0.00951  | 0.117063 | 0.01135  | 0.195271 | 2.14E-05 | 0.082008 | 0.07666 |
| 0.34825  | 0.16307  | 0.0004   | 0.112853 | 0.01469  | 0.163846 | 0.00038  | 0.091619 | 0.04784 |
| 0.19782  | 0.1499   | 0.00116  | -0.00971 | 0.83417  | 0.146851 | 0.00146  | 0.060399 | 0.1926  |
| 0.71793  | 0.217608 | 2.07E-06 | 0.103813 | 0.02487  | 0.199257 | 1.44E-05 | 0.107945 | 0.01963 |
| 0.00401  | 0.168425 | 0.00026  | 0.099571 | 0.03145  | 0.143666 | 0.00186  | 0.051967 | 0.26238 |
| 0.51729  | -0.03063 | 0.50912  | -0.00098 | 0.98315  | 0.074078 | 0.10988  | -0.02264 | 0.62557 |
| 0.06754  | -0.00954 | 0.83711  | -0.09555 | 0.03902  | -0.03623 | 0.43471  | -0.08643 | 0.06201 |
| 0.73974  | 0.122742 | 0.00792  | 0.035062 | 0.44971  | 0.056504 | 0.22294  | 0.048055 | 0.30007 |
| 0.03625  | 0.1361   | 0.00321  | 0.024746 | 0.59375  | 0.078389 | 0.09063  | -0.05795 | 0.21127 |
| 0.93952  | 0.135557 | 0.00333  | 0.040474 | 0.38285  | 0.108887 | 0.01858  | 0.048452 | 0.29609 |
| 0.03604  | 0.216234 | 2.40E-06 | 0.12126  | 0.00871  | 0.236311 | 2.39E-07 | 0.08086  | 0.08089 |
| 0.36077  | 0.181161 | 8.25E-05 | 0.101283 | 0.02863  | 0.189744 | 3.68E-05 | 0.128931 | 0.00526 |
| 0.23357  | 0.157496 | 0.00064  | 0.056902 | 0.21968  | 0.146754 | 0.00147  | -0.00024 | 0.99581 |
| 0.70157  | 0.126524 | 0.00618  | 0.06572  | 0.15621  | 0.150644 | 0.00109  | 0.02869  | 0.53626 |
| 2.21E-05 | 0.037455 | 0.41937  | -0.04215 | 0.36347  | 0.038935 | 0.40122  | -0.06797 | 0.14249 |

|          |          |          |          |          |          |          |          |          |
|----------|----------|----------|----------|----------|----------|----------|----------|----------|
| 0.87586  | 0.137719 | 0.00286  | 0.071389 | 0.12342  | 0.12743  | 0.00582  | 0.049637 | 0.28442  |
| 0.15212  | 0.29318  | 1.04E-10 | 0.355817 | 2.20E-15 | 0.376873 | 3.30E-17 | 0.139371 | 0.00254  |
| 0.9951   | 0.112564 | 0.01494  | 0.061983 | 0.18117  | 0.114087 | 0.01363  | 0.043455 | 0.34876  |
| 1.41E-51 | 0.445783 | 3.50E-24 | 0.375624 | 4.27E-17 | 0.296354 | 6.38E-11 | 0.787231 | 1.10E-99 |
| 1.30E-34 | 0.634142 | 6.68E-54 | 0.48397  | 8.58E-29 | 0.494149 | 4.01E-30 | 0.817588 | #####    |
| 2.27E-24 | 0.479787 | 2.93E-28 | 0.337534 | 6.59E-14 | 0.296459 | 6.28E-11 | 0.668344 | 9.62E-62 |
| 2.83E-15 | 0.285814 | 3.14E-10 | 0.216272 | 2.39E-06 | 0.172258 | 0.00018  | 0.549765 | 3.07E-38 |
| 1.18E-18 | 0.386334 | 4.51E-18 | 0.258121 | 1.52E-08 | 0.205912 | 7.26E-06 | 0.557652 | 1.62E-39 |
| 0.2335   | -0.0731  | 0.11466  | -0.03977 | 0.3912   | -0.14035 | 0.00237  | 0.438387 | 2.36E-23 |
| 1.53E-23 | 0.000378 | 0.9935   | 0.096187 | 0.03772  | -0.02214 | 0.63319  | 0.564063 | 1.40E-40 |
| 1.11E-32 | 0.507961 | 5.31E-32 | 0.402249 | 1.37E-19 | 0.307191 | 1.16E-11 | 0.685793 | 3.68E-66 |
| 1.95E-21 | 0.093037 | 0.04448  | 0.117918 | 0.01076  | -0.01744 | 0.70695  | 0.59538  | 3.94E-46 |
| 1.70E-08 | 0.271461 | 2.48E-09 | 0.33834  | 5.70E-14 | 0.259438 | 1.28E-08 | 0.645616 | 2.02E-56 |
| 2.45E-15 | 0.277671 | 1.03E-09 | 0.193166 | 2.64E-05 | 0.094854 | 0.04047  | 0.487011 | 3.47E-29 |
| 5.19E-17 | 0.402455 | 1.31E-19 | 0.372718 | 7.74E-17 | 0.351938 | 4.61E-15 | 0.700732 | 3.38E-70 |
| 8.67E-12 | 0.410129 | 2.26E-20 | 0.335476 | 9.54E-14 | 0.220253 | 1.54E-06 | 0.609195 | 8.89E-49 |
| 0.36606  | 0.367873 | 2.06E-16 | 0.281496 | 5.92E-10 | 0.263171 | 7.74E-09 | 0.405673 | 6.30E-20 |
| 0.04621  | 0.015217 | 0.74293  | 0.013063 | 0.77829  | 0.03647  | 0.4317   | 0.363685 | 4.74E-16 |
| 3.98E-26 | 0.373007 | 7.30E-17 | 0.356231 | 2.03E-15 | 0.255491 | 2.15E-08 | 0.736318 | 6.53E-81 |
| 6.60E-07 | 0.388418 | 2.89E-18 | 0.247751 | 5.82E-08 | 0.234751 | 2.88E-07 | 0.425964 | 5.22E-22 |
| 6.43E-13 | 0.247726 | 5.83E-08 | 0.199791 | 1.36E-05 | 0.246739 | 6.61E-08 | 0.559835 | 7.07E-40 |
| 2.00E-06 | 0.150833 | 0.00108  | 0.092738 | 0.04517  | 0.004676 | 0.91972  | 0.495929 | 2.32E-30 |
| 2.71E-05 | 0.300368 | 3.42E-11 | 0.193186 | 2.63E-05 | 0.119624 | 0.00967  | 0.563098 | 2.03E-40 |
| 0.74242  | 0.190268 | 3.49E-05 | 0.207781 | 5.96E-06 | 0.182738 | 7.13E-05 | 0.429551 | 2.16E-22 |
| 0.00019  | 0.241064 | 1.34E-07 | 0.117815 | 0.01083  | 0.108054 | 0.01951  | 0.410248 | 2.20E-20 |
| 5.87E-34 | 0.255118 | 2.26E-08 | 0.346008 | 1.40E-14 | 0.2233   | 1.09E-06 | 0.725722 | 1.52E-77 |
| 3.09E-06 | -0.10882 | 0.01866  | -0.0635  | 0.17073  | -0.02424 | 0.60133  | 0.229817 | 5.16E-07 |
| 4.13E-05 | -0.08914 | 0.05423  | -0.05094 | 0.27193  | -0.16463 | 0.00035  | 0.312747 | 4.69E-12 |
| 2.65E-06 | 0.40249  | 1.30E-19 | 0.249692 | 4.54E-08 | 0.221518 | 1.34E-06 | 0.603787 | 1.00E-47 |
| 0.00081  | -0.09701 | 0.0361   | 0.084259 | 0.06888  | 0.022025 | 0.63497  | 0.449431 | 1.35E-24 |
| 0.1211   | -0.20698 | 6.49E-06 | -0.08174 | 0.07761  | -0.14711 | 0.00143  | 0.304713 | 1.72E-11 |
| 1.47E-45 | 0.479024 | 3.66E-28 | 0.328269 | 3.40E-13 | 0.241785 | 1.23E-07 | 0.724151 | 4.65E-77 |
| 0.11045  | -0.07327 | 0.11381  | 0.026099 | 0.57372  | 0.039825 | 0.39053  | 0.360492 | 8.88E-16 |
| 2.11E-10 | 0.124795 | 0.00693  | -0.00742 | 0.87295  | -0.04623 | 0.31887  | 0.319806 | 1.45E-12 |
| 4.06E-40 | 0.436464 | 3.84E-23 | 0.395545 | 6.11E-19 | 0.257559 | 1.64E-08 | 0.685772 | 3.72E-66 |
| 0.33156  | 0.045324 | 0.32841  | -0.00435 | 0.92529  | -0.03791 | 0.41378  | 0.27442  | 1.63E-09 |
| 5.46E-07 | 0.216865 | 2.24E-06 | 0.096074 | 0.03795  | -0.0157  | 0.73505  | 0.41788  | 3.67E-21 |
| 1.49E-48 | 0.22544  | 8.56E-07 | 0.328483 | 3.27E-13 | 0.223108 | 1.12E-06 | 0.706604 | 7.44E-72 |
| 2.60E-17 | 0.30319  | 2.19E-11 | 0.279812 | 7.56E-10 | 0.180148 | 9.05E-05 | 0.692023 | 8.16E-68 |
| 0.00341  | 0.124638 | 0.007    | 0.233995 | 3.15E-07 | 0.166799 | 0.00029  | 0.557174 | 1.94E-39 |
| 0.50957  | -0.08216 | 0.07612  | -0.09029 | 0.05118  | -0.15877 | 0.00057  | 0.22135  | 1.36E-06 |
| 0.00502  | 0.105134 | 0.02308  | 0.072159 | 0.11942  | 0.04618  | 0.31933  | 0.266028 | 5.25E-09 |
| 4.56E-15 | 0.564495 | 1.18E-40 | 0.41346  | 1.04E-20 | 0.452646 | 5.73E-25 | 0.654221 | 2.21E-58 |
| 0.00155  | 0.177321 | 0.00012  | 0.133524 | 0.00384  | 0.063836 | 0.16844  | 0.384129 | 7.21E-18 |
| 0.01424  | -0.16171 | 0.00045  | 0.09084  | 0.04978  | -0.06371 | 0.16928  | 0.409337 | 2.72E-20 |

|          |          |          |          |          |          |          |          |          |
|----------|----------|----------|----------|----------|----------|----------|----------|----------|
| 2.93E-15 | 0.487078 | 3.40E-29 | 0.419726 | 2.36E-21 | 0.340874 | 3.60E-14 | 0.561526 | 3.71E-40 |
| 2.91E-22 | 0.244979 | 8.24E-08 | 0.039388 | 0.39575  | 0.057203 | 0.21725  | 0.460107 | 7.63E-26 |
| 0.05765  | 0.164442 | 0.00036  | 0.168766 | 0.00025  | 0.129654 | 0.00501  | 0.401731 | 1.54E-19 |
| 2.08E-17 | 0.188535 | 4.13E-05 | 0.259282 | 1.30E-08 | 0.180445 | 8.81E-05 | 0.555415 | 3.76E-39 |
| 0.16492  | -0.21411 | 3.03E-06 | -0.06559 | 0.15705  | -0.21052 | 4.46E-06 | 0.244187 | 9.10E-08 |
| 4.08E-30 | 0.557559 | 1.68E-39 | 0.49606  | 2.23E-30 | 0.43339  | 8.33E-23 | 0.729529 | 9.78E-79 |
| 5.05E-14 | 0.183346 | 6.74E-05 | 0.145619 | 0.0016   | 0.019922 | 0.66763  | 0.452663 | 5.71E-25 |
| 3.30E-26 | 0.37191  | 9.12E-17 | 0.488999 | 1.91E-29 | 0.384105 | 7.25E-18 | 0.78262  | 8.88E-98 |
| 1.46E-13 | 0.403346 | 1.07E-19 | 0.369057 | 1.62E-16 | 0.277319 | 1.08E-09 | 0.660651 | 6.87E-60 |
| 3.50E-13 | 0.292096 | 1.22E-10 | 0.286142 | 2.99E-10 | 0.165134 | 0.00034  | 0.43203  | 1.17E-22 |
| 5.24E-06 | 0.023015 | 0.61984  | 0.211284 | 4.11E-06 | 0.090927 | 0.04956  | 0.529448 | 4.24E-35 |
| 4.09E-26 | 0.196083 | 1.98E-05 | 0.272254 | 2.22E-09 | 0.086131 | 0.06292  | 0.522347 | 4.74E-34 |
| 1.42E-14 | 0.289624 | 1.78E-10 | 0.421815 | 1.43E-21 | 0.3479   | 9.85E-15 | 0.655876 | 9.12E-59 |
| 0.00056  | 0.296194 | 6.54E-11 | 0.227473 | 6.77E-07 | 0.246636 | 6.69E-08 | 0.522679 | 4.24E-34 |
| 1.58E-15 | 0.387382 | 3.61E-18 | 0.36589  | 3.06E-16 | 0.272856 | 2.04E-09 | 0.660429 | 7.76E-60 |
| 0.99155  | 0.145936 | 0.00157  | 0.233755 | 3.24E-07 | 0.18779  | 4.43E-05 | 0.428639 | 2.71E-22 |
| 0.40383  | 0.080047 | 0.084    | 0.077378 | 0.09489  | 0.071605 | 0.12229  | 0.401161 | 1.75E-19 |
| 0.01179  | 0.52356  | 3.15E-34 | 0.3688   | 1.71E-16 | 0.34329  | 2.31E-14 | 0.474674 | 1.29E-27 |
| 0.44384  | 0.133977 | 0.00372  | 0.149643 | 0.00118  | 0.081096 | 0.08     | 0.447658 | 2.15E-24 |
| 1.29E-40 | 0.303937 | 1.95E-11 | 0.341857 | 3.01E-14 | 0.219466 | 1.68E-06 | 0.660136 | 9.10E-60 |
| 0.0002   | -0.07399 | 0.11032  | -0.07324 | 0.11394  | -0.1744  | 0.00015  | 0.430271 | 1.81E-22 |
| 0.00581  | 0.352998 | 3.77E-15 | 0.140836 | 0.00228  | 0.16385  | 0.00038  | 0.416796 | 4.74E-21 |
| 2.94E-07 | 0.318998 | 1.66E-12 | 0.243663 | 9.71E-08 | 0.242954 | 1.06E-07 | 0.646245 | 1.46E-56 |
| 1.17E-10 | 0.007763 | 0.86712  | 0.015425 | 0.73955  | -0.13011 | 0.00486  | 0.328695 | 3.16E-13 |
| 1.16E-26 | 0.457581 | 1.52E-25 | 0.44117  | 1.16E-23 | 0.412413 | 1.33E-20 | 0.716275 | 1.13E-74 |
| 0.00141  | -0.35176 | 4.77E-15 | -0.15545 | 0.00075  | -0.24228 | 1.15E-07 | 0.151264 | 0.00104  |
| 8.13E-10 | 0.144618 | 0.00173  | 0.19372  | 2.50E-05 | 0.106067 | 0.02188  | 0.448311 | 1.81E-24 |
| 1.16E-28 | 0.292045 | 1.23E-10 | 0.343134 | 2.38E-14 | 0.301382 | 2.92E-11 | 0.723282 | 8.60E-77 |
| 0.43379  | -0.09515 | 0.03985  | 0.085317 | 0.06546  | -0.06702 | 0.14815  | 0.396821 | 4.61E-19 |
| 0.02485  | 0.027568 | 0.55234  | 0.141429 | 0.00219  | 0.112654 | 0.01486  | 0.540328 | 9.38E-37 |
| 2.63E-29 | 0.240839 | 1.38E-07 | 0.178704 | 0.0001   | 0.040549 | 0.38196  | 0.461548 | 5.14E-26 |
| 0.08293  | -0.07639 | 0.09919  | 0.200793 | 1.23E-05 | 0.138415 | 0.00272  | 0.371478 | 9.96E-17 |
| 5.46E-10 | 0.223249 | 1.10E-06 | 0.197558 | 1.71E-05 | 0.117641 | 0.01095  | 0.502477 | 3.03E-31 |
| 1.32E-53 | 0.408346 | 3.41E-20 | 0.373782 | 6.23E-17 | 0.269621 | 3.20E-09 | 0.697765 | 2.24E-69 |
| 5.08E-28 | 0.269351 | 3.32E-09 | 0.231949 | 4.01E-07 | 0.034832 | 0.45269  | 0.61923  | 8.77E-51 |
| 0.9737   | 0.156966 | 0.00066  | 0.118711 | 0.01024  | 0.095162 | 0.03982  | 0.364035 | 4.43E-16 |
| 5.16E-32 | 0.39535  | 6.38E-19 | 0.300822 | 3.18E-11 | 0.220371 | 1.52E-06 | 0.647904 | 6.17E-57 |
| 1.58E-20 | 0.458967 | 1.04E-25 | 0.330885 | 2.15E-13 | 0.279956 | 7.40E-10 | 0.721213 | 3.69E-76 |
| 4.50E-25 | 0.291459 | 1.35E-10 | 0.332654 | 1.57E-13 | 0.237549 | 2.06E-07 | 0.67674  | 7.86E-64 |
| 1.42E-14 | 0.180347 | 8.89E-05 | 0.155261 | 0.00076  | 0.071508 | 0.1228   | 0.498891 | 9.29E-31 |
| 2.25E-45 | 0.530536 | 2.91E-35 | 0.436022 | 4.30E-23 | 0.377141 | 3.12E-17 | 0.774739 | 1.26E-94 |
| 9.72E-19 | 0.189316 | 3.83E-05 | 0.238119 | 1.92E-07 | 0.074179 | 0.10939  | 0.579601 | 2.93E-43 |
| 6.23E-23 | 0.338132 | 5.92E-14 | 0.353472 | 3.44E-15 | 0.279805 | 7.57E-10 | 0.64394  | 4.79E-56 |
| 1.09E-12 | 0.030476 | 0.5112   | 0.077215 | 0.09559  | -0.11355 | 0.01408  | 0.41906  | 2.77E-21 |
| 3.60E-15 | 0.150867 | 0.00107  | 0.134475 | 0.0036   | 0.069215 | 0.1353   | 0.523003 | 3.80E-34 |

|          |          |          |          |          |          |          |          |          |
|----------|----------|----------|----------|----------|----------|----------|----------|----------|
| 3.12E-19 | 0.366298 | 2.82E-16 | 0.332367 | 1.66E-13 | 0.250906 | 3.89E-08 | 0.669744 | 4.36E-62 |
| 4.94E-27 | 0.416696 | 4.86E-21 | 0.366909 | 2.50E-16 | 0.346378 | 1.31E-14 | 0.715316 | 2.17E-74 |
| 1.45E-07 | 0.557206 | 1.92E-39 | 0.334861 | 1.06E-13 | 0.325236 | 5.74E-13 | 0.611172 | 3.63E-49 |
| 6.46E-10 | 0.244903 | 8.32E-08 | 0.199724 | 1.37E-05 | 0.139094 | 0.00259  | 0.649751 | 2.35E-57 |
| 0.88264  | 0.019363 | 0.67642  | 0.1814   | 8.07E-05 | 0.122755 | 0.00791  | 0.459372 | 9.33E-26 |
| 2.04E-41 | 0.48659  | 3.94E-29 | 0.373439 | 6.68E-17 | 0.31801  | 1.96E-12 | 0.773559 | 3.65E-94 |
| 0.12267  | 0.342891 | 2.49E-14 | 0.313475 | 4.16E-12 | 0.271741 | 2.38E-09 | 0.479796 | 2.93E-28 |
| 7.51E-15 | 0.463197 | 3.26E-26 | 0.385818 | 5.04E-18 | 0.269715 | 3.16E-09 | 0.62954  | 6.38E-53 |
| 0.24852  | 0.098245 | 0.03379  | 0.119856 | 0.00953  | 0.083577 | 0.07116  | 0.325154 | 5.83E-13 |

| MMyellowp | MMyell   | MMtan    | p.MMt看   | MMlightyp | MMligh   | MMorange | p.MMorar | MMplum1   |
|-----------|----------|----------|----------|-----------|----------|----------|----------|-----------|
| 0.121715  | 0.00846  | 0.053112 | 0.25201  | 0.235223  | 2.72E-07 | 0.139075 | 0.0026   | 0.23673   |
| -0.16841  | 0.00026  | -0.11604 | 0.0121   | -0.0234   | 0.61402  | 0.077605 | 0.09392  | -0.03488  |
| -0.08985  | 0.05234  | -0.08158 | 0.0782   | -0.0655   | 0.15759  | -0.00701 | 0.87987  | -0.04957  |
| -0.08251  | 0.07488  | -0.05322 | 0.25106  | 0.055547  | 0.23088  | 0.129004 | 0.00524  | 0.025393  |
| -0.21642  | 2.35E-06 | -0.06844 | 0.13974  | -0.0677   | 0.14409  | 0.037515 | 0.41862  | -0.01714  |
| -0.06451  | 0.164    | -0.07317 | 0.11432  | 0.037087  | 0.42395  | 0.05139  | 0.26773  | 0.043119  |
| 0.016092  | 0.72871  | 0.029546 | 0.52417  | 0.098151  | 0.03396  | 0.075094 | 0.10508  | 0.134698  |
| -0.07233  | 0.11853  | -0.07373 | 0.11154  | 0.053942  | 0.24466  | 0.060881 | 0.18907  | -0.00396  |
| -0.07065  | 0.12736  | -0.03572 | 0.44128  | 0.020488  | 0.65878  | 0.06454  | 0.16379  | -0.01314  |
| -0.07609  | 0.10053  | -0.04964 | 0.28441  | -0.04101  | 0.37655  | 0.007504 | 0.87152  | 0.000609  |
| -0.02847  | 0.53936  | -0.06831 | 0.14046  | 0.031121  | 0.50229  | 0.022402 | 0.62919  | 0.02708   |
| 0.029659  | 0.52259  | -0.00051 | 0.99118  | 0.053002  | 0.25299  | 0.053997 | 0.24418  | 0.078881  |
| -0.10814  | 0.01941  | -0.06257 | 0.17708  | -0.07722  | 0.09556  | 0.013319 | 0.77406  | -0.01738  |
| -0.00216  | 0.96287  | -0.12314 | 0.00772  | 0.151333  | 0.00104  | 0.071161 | 0.12463  | 0.111761  |
| -0.08882  | 0.05511  | -0.07102 | 0.12539  | 0.0263    | 0.57076  | 0.05245  | 0.25797  | -0.00751  |
| -0.05252  | 0.25738  | -0.05522 | 0.23368  | 0.006364  | 0.89091  | 0.069849 | 0.13175  | -0.01149  |
| -0.03063  | 0.50903  | -0.1274  | 0.00583  | -0.03582  | 0.43994  | -0.02641 | 0.56909  | 0.000247  |
| -0.06539  | 0.15833  | -0.05039 | 0.27713  | 0.072486  | 0.11775  | 0.06839  | 0.14003  | 0.063138  |
| 0.022942  | 0.62094  | 0.042084 | 0.36419  | 0.013939  | 0.76385  | 0.028946 | 0.53264  | 0.017031  |
| -0.01145  | 0.80515  | -0.04573 | 0.32407  | 0.033291  | 0.47295  | 0.060482 | 0.19199  | -0.00366  |
| -0.00383  | 0.93414  | 0.02985  | 0.51991  | 0.047048  | 0.31032  | 0.03204  | 0.48974  | 0.098303  |
| -0.09895  | 0.03253  | -0.15761 | 0.00063  | -0.18699  | 4.78E-05 | -0.14724 | 0.00142  | -0.09022  |
| 0.058584  | 0.20634  | 0.028135 | 0.54418  | 0.160582  | 0.00049  | 0.13185  | 0.00432  | 0.132443  |
| 0.065941  | 0.15482  | 0.034777 | 0.4534   | 0.07482   | 0.10635  | 0.099178 | 0.03213  | 0.048626  |
| -0.04077  | 0.37935  | 0.066136 | 0.1536   | 0.001322  | 0.97726  | 0.046828 | 0.31259  | -0.00852  |
| -0.11004  | 0.01736  | -0.07299 | 0.11522  | 0.078205  | 0.0914   | 0.116942 | 0.01144  | 0.076482  |
| -0.06639  | 0.15203  | -0.15729 | 0.00065  | -0.00394  | 0.93233  | -0.01802 | 0.69773  | 0.004677  |
| -0.06952  | 0.13359  | -0.02522 | 0.58664  | 0.050338  | 0.27767  | 0.06107  | 0.18769  | 0.056017  |
| -0.03388  | 0.46517  | -0.00078 | 0.98663  | -0.01963  | 0.67228  | 0.022809 | 0.62297  | -0.02085  |
| -0.14321  | 0.00192  | -0.06482 | 0.16194  | -0.13406  | 0.0037   | -0.0098  | 0.83267  | -0.1309   |
| -0.16059  | 0.00049  | -0.09532 | 0.03949  | -0.03981  | 0.39073  | 0.064947 | 0.16114  | -0.05035  |
| -0.07206  | 0.11994  | -0.02891 | 0.53314  | 0.083565  | 0.07121  | 0.142852 | 0.00197  | 0.086124  |
| -0.1494   | 0.0012   | -0.06828 | 0.14069  | 0.032255  | 0.48683  | 0.147929 | 0.00135  | -8.65E-05 |
| -0.10997  | 0.01744  | -0.04323 | 0.35124  | -0.03361  | 0.46877  | 0.038301 | 0.40893  | -0.04969  |
| -0.01     | 0.82928  | -0.09642 | 0.03725  | 0.140781  | 0.00229  | 0.054323 | 0.24134  | 0.074143  |
| -0.10024  | 0.03032  | -0.14779 | 0.00136  | -0.06668  | 0.15025  | 0.007181 | 0.877    | -0.06394  |
| -0.07464  | 0.10722  | -0.03355 | 0.46949  | 0.063401  | 0.17137  | 0.106447 | 0.02141  | 0.067744  |
| -0.05339  | 0.24954  | 0.053777 | 0.24611  | -0.02163  | 0.64099  | 0.063897 | 0.16804  | -0.03514  |
| -0.09364  | 0.04312  | -0.08071 | 0.08143  | -0.01499  | 0.74657  | 0.055953 | 0.22749  | -0.01836  |
| -0.02442  | 0.59868  | -0.03972 | 0.39175  | 0.168065  | 0.00026  | 0.158107 | 0.00061  | 0.143375  |
| -0.10397  | 0.02464  | -0.12744 | 0.00582  | -0.02877  | 0.53518  | 0.019567 | 0.67321  | -0.02994  |
| -0.11444  | 0.01334  | -0.04437 | 0.33865  | 0.027679  | 0.55074  | 0.107252 | 0.02044  | -0.00519  |
| 0.104773  | 0.02355  | 0.044839 | 0.33361  | 0.392648  | 1.15E-18 | 0.148532 | 0.00129  | 0.443112  |
| 0.379453  | 1.93E-17 | 0.249155 | 4.87E-08 | 0.491773  | 8.27E-30 | 0.289029 | 1.95E-10 | 0.457994  |

|          |          |          |          |          |          |          |          |          |
|----------|----------|----------|----------|----------|----------|----------|----------|----------|
| 0.06244  | 0.17797  | -0.18086 | 8.48E-05 | 0.330333 | 2.37E-13 | 0.119801 | 0.00956  | 0.125354 |
| 0.004529 | 0.92224  | -0.23732 | 2.11E-07 | 0.245027 | 8.19E-08 | 0.188978 | 3.96E-05 | 0.042245 |
| 0.010137 | 0.82706  | -0.1669  | 0.00029  | 0.176566 | 0.00013  | -0.05649 | 0.22309  | 0.14011  |
| 0.117415 | 0.01111  | 0.083447 | 0.0716   | 0.361026 | 8.00E-16 | 0.229295 | 5.48E-07 | 0.262545 |
| 0.119516 | 0.00973  | -0.09269 | 0.04529  | 0.314357 | 3.60E-12 | 0.149544 | 0.00119  | 0.209398 |
| 0.262345 | 8.65E-09 | 0.004549 | 0.9219   | 0.310512 | 6.76E-12 | 0.199867 | 1.35E-05 | 0.174907 |
| 0.350382 | 6.18E-15 | 0.11848  | 0.01039  | 0.436099 | 4.21E-23 | 0.136905 | 0.00303  | 0.362778 |
| 0.146348 | 0.00152  | -0.20134 | 1.16E-05 | 0.391237 | 1.57E-18 | 0.063403 | 0.17136  | 0.269309 |
| 0.254218 | 2.54E-08 | 0.012691 | 0.78445  | 0.38065  | 1.50E-17 | 0.213339 | 3.29E-06 | 0.208029 |
| 0.280145 | 7.20E-10 | 0.008923 | 0.8475   | 0.402702 | 1.24E-19 | 0.196777 | 1.84E-05 | 0.244513 |
| 0.321629 | 1.06E-12 | 0.195676 | 2.06E-05 | 0.474406 | 1.39E-27 | 0.229687 | 5.23E-07 | 0.368206 |
| 0.128256 | 0.00551  | -0.14796 | 0.00134  | 0.450234 | 1.09E-24 | 0.236511 | 2.33E-07 | 0.259602 |
| 0.280383 | 6.96E-10 | 0.02445  | 0.59817  | 0.599419 | 6.84E-47 | 0.16783  | 0.00027  | 0.531233 |
| 0.276393 | 1.23E-09 | 0.070271 | 0.12943  | 0.574334 | 2.46E-42 | 0.297826 | 5.08E-11 | 0.413829 |
| 0.63273  | 1.34E-53 | 0.124086 | 0.00726  | 0.470714 | 3.98E-27 | 0.140825 | 0.00229  | 0.389773 |
| 0.322615 | 9.00E-13 | 0.054945 | 0.23599  | 0.449391 | 1.36E-24 | 0.219576 | 1.66E-06 | 0.229343 |
| 0.070576 | 0.12777  | -0.26576 | 5.44E-09 | 0.13086  | 0.00462  | -0.03787 | 0.41421  | 0.024329 |
| 0.418746 | 2.98E-21 | 0.166805 | 0.00029  | 0.626866 | 2.33E-52 | 0.339181 | 4.90E-14 | 0.578433 |
| -0.03254 | 0.48297  | -0.26283 | 8.11E-09 | 0.262308 | 8.69E-09 | 0.067473 | 0.14544  | 0.160951 |
| -0.05874 | 0.20511  | 0.170798 | 0.00021  | -0.2392  | 1.68E-07 | 0.018906 | 0.68364  | -0.10613 |
| 0.261898 | 9.19E-09 | 0.160478 | 0.0005   | 0.653826 | 2.73E-58 | 0.309036 | 8.59E-12 | 0.583157 |
| 0.139201 | 0.00257  | -0.07097 | 0.12565  | 0.411358 | 1.70E-20 | 0.219588 | 1.66E-06 | 0.219837 |
| 0.249202 | 4.84E-08 | -0.02668 | 0.56522  | 0.513508 | 8.84E-33 | 0.283437 | 4.46E-10 | 0.371043 |
| 0.009918 | 0.83074  | 0.008537 | 0.85402  | -0.26368 | 7.22E-09 | -0.19352 | 2.55E-05 | -0.11604 |
| 0.122834 | 0.00787  | 0.140878 | 0.00228  | 0.389036 | 2.53E-18 | 0.20819  | 5.71E-06 | 0.348117 |
| 0.002605 | 0.95522  | 0.021979 | 0.63568  | 0.328924 | 3.03E-13 | 0.222428 | 1.21E-06 | 0.237988 |
| 0.201013 | 1.20E-05 | 0.077192 | 0.09568  | 0.363984 | 4.47E-16 | 0.274751 | 1.56E-09 | 0.14707  |
| 0.12069  | 0.00904  | -0.08914 | 0.05422  | 0.327248 | 4.06E-13 | 0.07506  | 0.10523  | 0.233501 |
| 0.192189 | 2.90E-05 | -0.01343 | 0.77229  | 0.477683 | 5.41E-28 | 0.181964 | 7.66E-05 | 0.403067 |
| -0.00922 | 0.84241  | -0.21669 | 2.28E-06 | 0.289414 | 1.84E-10 | 0.074136 | 0.1096   | 0.150151 |
| 0.080087 | 0.08384  | -0.13589 | 0.00326  | 0.199021 | 1.47E-05 | -0.0031  | 0.9467   | 0.189187 |
| 0.26288  | 8.05E-09 | -0.10486 | 0.02344  | 0.558896 | 1.01E-39 | 0.205587 | 7.51E-06 | 0.453304 |
| 0.257378 | 1.68E-08 | -0.06406 | 0.16693  | 0.428439 | 2.85E-22 | 0.091674 | 0.04771  | 0.37771  |
| -0.28051 | 6.83E-10 | -0.09026 | 0.05126  | -0.46217 | 4.33E-26 | -0.20846 | 5.55E-06 | -0.35022 |
| 0.121559 | 0.00855  | -0.0325  | 0.48356  | 0.530225 | 3.24E-35 | 0.37316  | 7.07E-17 | 0.353186 |
| 0.36706  | 2.43E-16 | 0.034093 | 0.46234  | 0.675282 | 1.83E-63 | 0.331743 | 1.85E-13 | 0.467002 |
| 0.183185 | 6.84E-05 | 0.034075 | 0.46258  | 0.376847 | 3.32E-17 | 0.198744 | 1.51E-05 | 0.28608  |
| 0.07558  | 0.10283  | 0.444129 | 5.39E-24 | -0.10171 | 0.02796  | 0.186218 | 5.15E-05 | -0.02351 |
| 0.320647 | 1.26E-12 | 0.116308 | 0.0119   | 0.502642 | 2.87E-31 | 0.146871 | 0.00146  | 0.457255 |
| -0.0018  | 0.96909  | -0.11749 | 0.01106  | 0.237286 | 2.12E-07 | 0.133038 | 0.00398  | 0.161144 |
| 0.207219 | 6.33E-06 | -0.18253 | 7.27E-05 | 0.481944 | 1.56E-28 | 0.129966 | 0.00491  | 0.351191 |
| 0.196662 | 1.87E-05 | 0.125968 | 0.00642  | 0.265384 | 5.73E-09 | 0.140015 | 0.00242  | 0.260881 |
| 0.256513 | 1.88E-08 | 0.001888 | 0.96755  | 0.591411 | 2.15E-45 | 0.374361 | 5.53E-17 | 0.409832 |
| 0.396553 | 4.89E-19 | -0.0219  | 0.63685  | 0.456035 | 2.31E-25 | 0.302424 | 2.47E-11 | 0.376577 |
| 0.135292 | 0.0034   | -0.06828 | 0.14066  | 0.237341 | 2.11E-07 | 0.078261 | 0.09116  | 0.151799 |



|          |          |           |          |          |          |          |          |          |
|----------|----------|-----------|----------|----------|----------|----------|----------|----------|
| 0.125052 | 0.00681  | -0.00745  | 0.87244  | 0.278202 | 9.53E-10 | 0.099932 | 0.03084  | 0.226378 |
| 0.154793 | 0.00079  | 0.000949  | 0.98369  | 0.384299 | 6.96E-18 | 0.20497  | 8.00E-06 | 0.186137 |
| 0.225764 | 8.24E-07 | 0.099061  | 0.03233  | 0.579388 | 3.19E-43 | 0.255619 | 2.11E-08 | 0.651003 |
| 0.097747 | 0.03471  | -0.2282   | 6.22E-07 | 0.392822 | 1.11E-18 | -0.03025 | 0.51431  | 0.305473 |
| 0.319531 | 1.52E-12 | 0.102339  | 0.027    | 0.660679 | 6.77E-60 | 0.312181 | 5.15E-12 | 0.478565 |
| 0.438677 | 2.19E-23 | -0.09273  | 0.04519  | 0.587838 | 9.72E-45 | 0.284683 | 3.71E-10 | 0.477912 |
| 0.224447 | 9.58E-07 | 0.006719  | 0.88485  | 0.373597 | 6.47E-17 | 0.131098 | 0.00454  | 0.289153 |
| 0.111282 | 0.01613  | -0.08275  | 0.07403  | 0.429589 | 2.14E-22 | 0.266496 | 4.92E-09 | 0.253937 |
| 0.327855 | 3.65E-13 | 0.000211  | 0.99638  | 0.500983 | 4.84E-31 | 0.121599 | 0.00853  | 0.467185 |
| 0.295495 | 7.29E-11 | 0.105033  | 0.02321  | 0.462023 | 4.51E-26 | 0.326949 | 4.27E-13 | 0.407183 |
| -0.00764 | 0.86929  | -0.27943  | 7.99E-10 | 0.075508 | 0.10317  | 0.013797 | 0.76619  | -0.09453 |
| 0.30512  | 1.61E-11 | 0.156178  | 0.00071  | 0.514088 | 7.32E-33 | 0.184157 | 6.25E-05 | 0.456308 |
| 0.049181 | 0.28887  | -0.08787  | 0.05777  | 0.29959  | 3.86E-11 | 0.115286 | 0.01267  | 0.344851 |
| 0.25327  | 2.87E-08 | 0.105062  | 0.02317  | 0.54103  | 7.30E-37 | 0.323872 | 7.26E-13 | 0.422016 |
| 0.19337  | 2.58E-05 | 0.054481  | 0.23997  | 0.028333 | 0.54135  | -0.1289  | 0.00527  | 0.049753 |
| 0.162663 | 0.00042  | -1.41E-05 | 0.99976  | 0.306231 | 1.35E-11 | 0.198561 | 1.54E-05 | 0.172389 |
| 0.337249 | 6.94E-14 | 0.089544  | 0.05314  | 0.440826 | 1.26E-23 | 0.142176 | 0.00207  | 0.359697 |
| 0.153123 | 0.0009   | 0.041612  | 0.3696   | 0.476495 | 7.63E-28 | 0.360323 | 9.18E-16 | 0.369122 |
| 0.504535 | 1.58E-31 | 0.007577  | 0.87027  | 0.434181 | 6.83E-23 | 0.237396 | 2.09E-07 | 0.325087 |
| 0.139541 | 0.00251  | -0.04283  | 0.35578  | 0.210731 | 4.36E-06 | -0.01263 | 0.78548  | 0.234427 |
| 0.119489 | 0.00975  | 0.066081  | 0.15394  | -0.31832 | 1.86E-12 | -0.08635 | 0.06226  | -0.19731 |
| 0.004314 | 0.92592  | -0.16054  | 0.0005   | 0.347293 | 1.10E-14 | 0.134221 | 0.00366  | 0.243068 |
| -0.20167 | 1.12E-05 | 0.070872  | 0.12617  | -0.60809 | 1.46E-48 | -0.25017 | 4.28E-08 | -0.48012 |
| 0.288763 | 2.02E-10 | 0.022932  | 0.62109  | 0.623228 | 1.33E-51 | 0.298523 | 4.56E-11 | 0.48222  |
| 0.07882  | 0.08887  | -0.20635  | 6.93E-06 | 0.302566 | 2.42E-11 | 0.150108 | 0.00114  | 0.164899 |
| 0.004169 | 0.9284   | -0.24993  | 4.41E-08 | 0.039335 | 0.39639  | -0.24267 | 1.10E-07 | 0.044588 |
| 0.13353  | 0.00384  | -0.08243  | 0.07513  | 0.217245 | 2.15E-06 | 0.196838 | 1.83E-05 | 0.081679 |
| 0.088879 | 0.05494  | -0.10508  | 0.02314  | 0.407831 | 3.84E-20 | 0.257543 | 1.64E-08 | 0.235101 |
| 0.288804 | 2.01E-10 | 0.093442  | 0.04356  | 0.483412 | 1.01E-28 | 0.128764 | 0.00532  | 0.371492 |
| -0.0762  | 0.10004  | 0.150988  | 0.00106  | -0.41924 | 2.65E-21 | -0.16056 | 0.0005   | -0.34214 |
| 0.042491 | 0.35957  | -0.28666  | 2.77E-10 | 0.071893 | 0.12079  | -0.10613 | 0.0218   | 0.024406 |
| -0.13243 | 0.00415  | 0.326483  | 4.63E-13 | -0.09135 | 0.04851  | 0.324262 | 6.79E-13 | -0.08291 |
| 0.098458 | 0.03341  | 0.054539  | 0.23947  | -0.24    | 1.53E-07 | -0.18898 | 3.96E-05 | -0.08285 |
| -0.03671 | 0.4287   | 0.172898  | 0.00017  | -0.3481  | 9.49E-15 | -0.13959 | 0.0025   | -0.27018 |
| 0.16973  | 0.00023  | -0.0933   | 0.04389  | 0.409026 | 2.92E-20 | 0.133601 | 0.00382  | 0.266666 |
| 0.058436 | 0.20749  | 0.237681  | 2.02E-07 | -0.09097 | 0.04945  | 0.176921 | 0.00012  | -0.05365 |
| 0.231239 | 4.36E-07 | -0.02446  | 0.59803  | 0.294839 | 8.06E-11 | 0.19282  | 2.73E-05 | 0.229711 |
| -0.1143  | 0.01345  | 0.082388  | 0.07529  | -0.26369 | 7.22E-09 | -0.13634 | 0.00315  | -0.10136 |
| -0.04757 | 0.305    | 0.084824  | 0.06703  | -0.27857 | 9.05E-10 | -0.15946 | 0.00054  | -0.1358  |
| -0.11805 | 0.01068  | -0.06683  | 0.14933  | -0.42919 | 2.37E-22 | -0.24726 | 6.19E-08 | -0.40902 |
| 0.080721 | 0.08141  | -0.05279  | 0.25493  | 0.349619 | 7.14E-15 | 0.219295 | 1.71E-06 | 0.283594 |
| 0.164563 | 0.00036  | 0.01469   | 0.75152  | 0.287536 | 2.43E-10 | 0.211379 | 4.07E-06 | 0.169334 |
| 0.326022 | 5.02E-13 | 0.164393  | 0.00036  | 0.576561 | 1.00E-42 | 0.308506 | 9.36E-12 | 0.515426 |
| 0.357447 | 1.61E-15 | 0.070878  | 0.12614  | 0.460634 | 6.61E-26 | 0.176729 | 0.00012  | 0.363383 |
| 0.29281  | 1.10E-10 | 0.123602  | 0.00749  | 0.635766 | 2.98E-54 | 0.378783 | 2.22E-17 | 0.515566 |

|          |          |          |          |          |          |          |          |          |
|----------|----------|----------|----------|----------|----------|----------|----------|----------|
| -0.28209 | 5.43E-10 | -0.05    | 0.28093  | -0.49664 | 1.86E-30 | -0.14316 | 0.00193  | -0.44565 |
| 0.301273 | 2.97E-11 | 0.012398 | 0.7893   | 0.613569 | 1.21E-49 | 0.231631 | 4.17E-07 | 0.507751 |
| -0.18351 | 6.64E-05 | 0.178006 | 0.00011  | -0.50686 | 7.56E-32 | -0.18279 | 7.09E-05 | -0.36381 |
| -0.04069 | 0.38035  | 0.013949 | 0.76369  | -0.29587 | 6.88E-11 | -0.07678 | 0.09745  | -0.23592 |
| -0.03257 | 0.48264  | 0.021078 | 0.64959  | -0.27992 | 7.45E-10 | 0.018102 | 0.69641  | -0.24304 |
| 0.059283 | 0.20097  | 0.289209 | 1.89E-10 | -0.1649  | 0.00035  | -0.0501  | 0.27995  | -0.01543 |
| -0.2413  | 1.30E-07 | -0.0959  | 0.03829  | -0.40164 | 1.57E-19 | -0.20284 | 9.98E-06 | -0.3222  |
| 0.13909  | 0.00259  | 0.057972 | 0.21112  | 0.495833 | 2.39E-30 | 0.244819 | 8.41E-08 | 0.438839 |
| -0.07044 | 0.12849  | 0.031938 | 0.49113  | -0.3682  | 1.93E-16 | -0.18097 | 8.39E-05 | -0.20521 |
| 0.195303 | 2.14E-05 | 0.05288  | 0.25409  | 0.573661 | 3.22E-42 | 0.432352 | 1.08E-22 | 0.384871 |
| 0.406792 | 4.88E-20 | 0.156767 | 0.00067  | 0.741583 | 1.21E-82 | 0.377967 | 2.63E-17 | 0.619832 |
| -0.1054  | 0.02273  | 0.126213 | 0.00631  | -0.44746 | 2.26E-24 | -0.19609 | 1.98E-05 | -0.3213  |
| -0.06297 | 0.1743   | -0.01652 | 0.72176  | -0.3638  | 4.63E-16 | -0.14312 | 0.00193  | -0.32072 |
| 0.361108 | 7.87E-16 | 0.215854 | 2.50E-06 | 0.685777 | 3.71E-66 | 0.395235 | 6.54E-19 | 0.50787  |
| 0.219489 | 1.68E-06 | 0.03783  | 0.41472  | 0.302424 | 2.47E-11 | 0.140541 | 0.00233  | 0.203775 |
| 0.089888 | 0.05223  | 0.004574 | 0.92147  | 0.208854 | 5.32E-06 | 0.173032 | 0.00017  | 0.09105  |
| 0.554379 | 5.54E-39 | 0.126287 | 0.00628  | 0.533561 | 1.02E-35 | 0.306467 | 1.30E-11 | 0.410245 |
| -0.01828 | 0.69362  | -0.13318 | 0.00394  | -0.35393 | 3.15E-15 | -0.17425 | 0.00015  | -0.33804 |
| 0.258543 | 1.44E-08 | 0.099901 | 0.03089  | 0.473163 | 1.99E-27 | 0.255094 | 2.26E-08 | 0.412449 |
| -0.0065  | 0.88853  | 0.395349 | 6.38E-19 | -0.14536 | 0.00163  | 0.147386 | 0.0014   | -0.05515 |
| 0.329569 | 2.71E-13 | 0.135193 | 0.00342  | 0.635245 | 3.86E-54 | 0.402972 | 1.16E-19 | 0.477782 |
| 0.20113  | 1.19E-05 | 0.131297 | 0.00448  | 0.370963 | 1.11E-16 | 0.138112 | 0.00278  | 0.27218  |
| 0.056161 | 0.22576  | -0.10703 | 0.0207   | 0.264651 | 6.33E-09 | 0.143593 | 0.00187  | 0.136595 |
| -0.05327 | 0.25059  | 0.050326 | 0.27777  | -0.37213 | 8.72E-17 | -0.20847 | 5.55E-06 | -0.22136 |
| 0.232572 | 3.73E-07 | 0.060001 | 0.19555  | 0.451847 | 7.09E-25 | 0.222914 | 1.14E-06 | 0.367948 |
| 0.110071 | 0.01734  | 0.00266  | 0.95428  | 0.43185  | 1.22E-22 | 0.314846 | 3.32E-12 | 0.230372 |
| 0.19241  | 2.84E-05 | -0.05084 | 0.27286  | 0.350806 | 5.71E-15 | 0.006272 | 0.89248  | 0.328402 |
| 0.248799 | 5.09E-08 | -0.08723 | 0.05963  | 0.54992  | 2.90E-38 | 0.140515 | 0.00234  | 0.387149 |
| 0.221005 | 1.41E-06 | 0.539101 | 1.45E-36 | -0.08732 | 0.05934  | 0.174777 | 0.00015  | -0.01096 |
| 0.003906 | 0.93291  | 0.010997 | 0.81265  | 0.400554 | 2.01E-19 | 0.235678 | 2.58E-07 | 0.241172 |
| -0.23233 | 3.84E-07 | -0.0962  | 0.0377   | -0.48055 | 2.35E-28 | -0.29655 | 6.20E-11 | -0.46928 |
| 0.206638 | 6.73E-06 | 0.132514 | 0.00412  | 0.431522 | 1.33E-22 | 0.266615 | 4.84E-09 | 0.378703 |
| 0.132367 | 0.00416  | 0.096136 | 0.03782  | 0.374444 | 5.44E-17 | 0.374118 | 5.81E-17 | 0.103764 |
| -0.02174 | 0.63942  | -0.22601 | 8.02E-07 | 0.360147 | 9.50E-16 | 0.239198 | 1.68E-07 | 0.162014 |
| 0.146758 | 0.00147  | 0.05314  | 0.25175  | 0.344167 | 1.97E-14 | 0.228514 | 6.00E-07 | 0.276246 |
| 0.009121 | 0.84416  | -0.28068 | 6.67E-10 | 0.233289 | 3.43E-07 | 0.105708 | 0.02233  | 0.101139 |
| -0.23302 | 3.53E-07 | -0.07342 | 0.1131   | -0.33526 | 9.91E-14 | -0.21575 | 2.53E-06 | -0.21693 |
| 0.290713 | 1.51E-10 | 0.216147 | 2.43E-06 | 0.665385 | 5.04E-61 | 0.446889 | 2.63E-24 | 0.532681 |
| 0.297369 | 5.46E-11 | -0.03185 | 0.49237  | 0.634419 | 5.82E-54 | 0.289771 | 1.74E-10 | 0.424167 |
| 0.327455 | 3.92E-13 | 0.15517  | 0.00077  | 0.61392  | 1.03E-49 | 0.344812 | 1.75E-14 | 0.444362 |
| 0.216041 | 2.45E-06 | 0.056738 | 0.22102  | 0.381251 | 1.32E-17 | 0.095865 | 0.03837  | 0.312685 |
| 0.069463 | 0.1339   | 0.203029 | 9.79E-06 | -0.16858 | 0.00025  | -0.03311 | 0.47541  | -0.02451 |
| 0.299126 | 4.15E-11 | 0.052464 | 0.25784  | 0.408135 | 3.58E-20 | 0.239682 | 1.59E-07 | 0.311118 |
| 0.245465 | 7.75E-08 | -0.03019 | 0.51513  | 0.502765 | 2.77E-31 | 0.193089 | 2.66E-05 | 0.343149 |
| 0.255743 | 2.08E-08 | -0.00336 | 0.94227  | 0.607264 | 2.12E-48 | 0.31693  | 2.35E-12 | 0.448994 |

|          |          |          |          |          |          |          |          |          |
|----------|----------|----------|----------|----------|----------|----------|----------|----------|
| -0.02337 | 0.61441  | -0.08957 | 0.05306  | 0.294123 | 8.99E-11 | 0.130882 | 0.00461  | 0.296502 |
| -0.05621 | 0.22537  | -0.18768 | 4.48E-05 | 0.101962 | 0.02758  | -0.16037 | 0.0005   | 0.140484 |
| 0.298254 | 4.76E-11 | 0.087898 | 0.05768  | 0.48953  | 1.63E-29 | 0.355399 | 2.38E-15 | 0.276883 |
| 0.233695 | 3.26E-07 | 0.080331 | 0.0829   | 0.511712 | 1.59E-32 | 0.297883 | 5.04E-11 | 0.388157 |
| -0.076   | 0.10095  | -0.20984 | 4.80E-06 | 0.020524 | 0.65822  | -0.19658 | 1.88E-05 | 0.007169 |
| 0.31705  | 2.30E-12 | 0.207363 | 6.23E-06 | 0.559111 | 9.31E-40 | 0.470366 | 4.40E-27 | 0.376915 |
| 0.030595 | 0.50955  | -0.21428 | 2.97E-06 | 0.370591 | 1.19E-16 | 0.170905 | 0.00021  | 0.241183 |
| 0.133455 | 0.00386  | -0.16079 | 0.00049  | 0.199392 | 1.42E-05 | 0.020439 | 0.65954  | 0.175986 |
| 0.037362 | 0.42052  | -0.1864  | 5.06E-05 | 0.106173 | 0.02175  | -0.08067 | 0.0816   | 0.111661 |
| 0.214127 | 3.02E-06 | 0.100343 | 0.03015  | 0.399332 | 2.64E-19 | 0.186158 | 5.18E-05 | 0.373609 |
| 0.248206 | 5.49E-08 | 0.007105 | 0.8783   | 0.396879 | 4.55E-19 | 0.06929  | 0.13488  | 0.267771 |
| 0.196159 | 1.96E-05 | -0.05351 | 0.24845  | 0.446311 | 3.05E-24 | 0.199264 | 1.44E-05 | 0.412983 |
| 0.285719 | 3.19E-10 | 0.031083 | 0.50281  | 0.631703 | 2.22E-53 | 0.239508 | 1.62E-07 | 0.509156 |
| -0.11473 | 0.01311  | 0.149727 | 0.00117  | -0.36611 | 2.93E-16 | -0.15462 | 0.0008   | -0.21818 |
| 0.02919  | 0.52919  | -0.21544 | 2.62E-06 | 0.3508   | 5.71E-15 | 0.194129 | 2.40E-05 | 0.180657 |
| 0.345531 | 1.53E-14 | 0.161512 | 0.00046  | 0.752353 | 2.51E-86 | 0.430971 | 1.52E-22 | 0.583348 |
| 0.050721 | 0.27402  | -0.29725 | 5.56E-11 | 0.367649 | 2.16E-16 | 0.077409 | 0.09475  | 0.284165 |
| 0.236615 | 2.30E-07 | -0.11157 | 0.01586  | 0.327015 | 4.23E-13 | 0.000771 | 0.98674  | 0.242889 |
| 0.182639 | 7.20E-05 | -0.0341  | 0.46225  | 0.182689 | 7.16E-05 | 0.024789 | 0.59311  | 0.026779 |
| 0.300298 | 3.46E-11 | 0.098963 | 0.03251  | 0.516075 | 3.81E-33 | 0.313946 | 3.85E-12 | 0.362861 |
| -0.03665 | 0.42942  | -0.08492 | 0.06674  | 0.211776 | 3.90E-06 | 0.042431 | 0.36024  | 0.192119 |
| 0.193753 | 2.49E-05 | 0.011235 | 0.80866  | 0.219516 | 1.67E-06 | 0.088345 | 0.05642  | 0.118221 |
| 0.216388 | 2.36E-06 | 0.180252 | 8.97E-05 | 0.528309 | 6.27E-35 | 0.431314 | 1.40E-22 | 0.378279 |
| 0.262851 | 8.08E-09 | 0.082092 | 0.07635  | 0.588894 | 6.24E-45 | 0.344404 | 1.89E-14 | 0.416598 |
| 0.22898  | 5.68E-07 | -0.0214  | 0.64467  | 0.665943 | 3.70E-61 | 0.39249  | 1.19E-18 | 0.481533 |
| 0.26463  | 6.35E-09 | 0.054893 | 0.23643  | 0.601938 | 2.27E-47 | 0.346566 | 1.26E-14 | 0.411633 |
| 0.125405 | 0.00666  | -0.06964 | 0.13291  | 0.387727 | 3.35E-18 | 0.205437 | 7.62E-06 | 0.255247 |
| 0.032417 | 0.48464  | -0.14898 | 0.00124  | 0.346531 | 1.27E-14 | 0.195043 | 2.19E-05 | 0.225644 |
| 0.229183 | 5.55E-07 | -0.12526 | 0.00672  | 0.3277   | 3.75E-13 | 0.05131  | 0.26847  | 0.225165 |
| 0.086394 | 0.06211  | -0.28862 | 2.07E-10 | 0.198921 | 1.49E-05 | -0.05377 | 0.24617  | 0.008703 |
| 0.064033 | 0.16714  | -0.16988 | 0.00023  | 0.198484 | 1.55E-05 | 0.007458 | 0.87229  | 0.068488 |
| 0.255963 | 2.02E-08 | -0.00505 | 0.91335  | 0.645365 | 2.30E-56 | 0.425268 | 6.19E-22 | 0.432182 |
| 0.260337 | 1.13E-08 | 0.1008   | 0.0294   | 0.379197 | 2.04E-17 | 0.174699 | 0.00015  | 0.311359 |
| 0.125375 | 0.00667  | -0.01369 | 0.76789  | 0.35103  | 5.47E-15 | 0.179791 | 9.35E-05 | 0.32827  |
| 0.054509 | 0.23973  | 0.41851  | 3.16E-21 | -0.195   | 2.20E-05 | 0.003754 | 0.93551  | -0.05111 |
| 0.009814 | 0.83248  | 0.021465 | 0.6436   | 0.306164 | 1.37E-11 | 0.178414 | 0.00011  | 0.245462 |
| 0.066119 | 0.1537   | -0.04644 | 0.31663  | 0.290783 | 1.49E-10 | 0.136349 | 0.00315  | 0.23007  |
| 0.26306  | 7.86E-09 | 0.069545 | 0.13344  | 0.531143 | 2.36E-35 | 0.33757  | 6.55E-14 | 0.442499 |
| 0.317535 | 2.12E-12 | 0.070948 | 0.12577  | 0.541049 | 7.25E-37 | 0.203771 | 9.06E-06 | 0.377253 |
| 0.073967 | 0.11041  | -0.07348 | 0.11277  | 0.205017 | 7.97E-06 | 0.081397 | 0.07888  | 0.227778 |
| -0.08875 | 0.0553   | -0.22615 | 7.89E-07 | 0.088578 | 0.05577  | 0.011892 | 0.79772  | 0.043475 |
| 0.236531 | 2.32E-07 | 0.079585 | 0.0858   | 0.487494 | 3.01E-29 | 0.359592 | 1.06E-15 | 0.288772 |
| 0.164398 | 0.00036  | -0.14352 | 0.00188  | 0.436057 | 4.26E-23 | 0.087821 | 0.05791  | 0.350387 |
| 0.379056 | 2.10E-17 | 0.199558 | 1.39E-05 | 0.497072 | 1.63E-30 | 0.252044 | 3.36E-08 | 0.43354  |
| 0.122338 | 0.00813  | 0.476273 | 8.13E-28 | 0.076306 | 0.09957  | 0.46215  | 4.36E-26 | 0.028519 |

|          |          |          |          |          |          |          |          |          |
|----------|----------|----------|----------|----------|----------|----------|----------|----------|
| 0.262786 | 8.15E-09 | 0.186736 | 4.90E-05 | 0.376337 | 3.68E-17 | 0.241438 | 1.28E-07 | 0.324555 |
| 0.204183 | 8.69E-06 | 0.065886 | 0.15516  | 0.424482 | 7.50E-22 | 0.159483 | 0.00054  | 0.322735 |
| 0.199958 | 1.34E-05 | 0.066929 | 0.14871  | 0.597807 | 1.38E-46 | 0.383201 | 8.78E-18 | 0.480469 |
| -0.05133 | 0.26831  | 0.157749 | 0.00062  | -0.36549 | 3.32E-16 | -0.09597 | 0.03817  | -0.28601 |
| 0.547681 | 6.60E-38 | 0.02099  | 0.65096  | 0.604304 | 7.96E-48 | 0.337784 | 6.30E-14 | 0.501832 |
| 0.066999 | 0.14829  | -0.18597 | 5.27E-05 | 0.262486 | 8.49E-09 | 0.098339 | 0.03362  | 0.211272 |
| 0.351216 | 5.28E-15 | 0.101471 | 0.02834  | 0.491256 | 9.68E-30 | 0.196315 | 1.93E-05 | 0.433767 |
| 0.180684 | 8.62E-05 | 0.02015  | 0.66406  | 0.290768 | 1.50E-10 | 0.13825  | 0.00275  | 0.170935 |
| 0.195407 | 2.11E-05 | 0.002504 | 0.95697  | 0.564696 | 1.09E-40 | 0.342884 | 2.49E-14 | 0.466688 |
| 0.187015 | 4.77E-05 | 0.394717 | 7.33E-19 | -0.03774 | 0.41579  | 0.210434 | 4.50E-06 | -0.07192 |
| 0.244129 | 9.16E-08 | 0.166042 | 0.00031  | 0.573642 | 3.24E-42 | 0.274636 | 1.59E-09 | 0.503404 |
| 0.179458 | 9.64E-05 | -0.02456 | 0.5965   | 0.427498 | 3.59E-22 | 0.209263 | 5.10E-06 | 0.370441 |
| 0.012587 | 0.78617  | -0.34358 | 2.19E-14 | 0.003007 | 0.94833  | -0.12144 | 0.00861  | -0.05308 |
| -0.11156 | 0.01587  | 0.004998 | 0.91422  | -0.31792 | 1.99E-12 | -0.05802 | 0.21072  | -0.24963 |
| 0.211349 | 4.08E-06 | -0.1608  | 0.00049  | 0.177644 | 0.00011  | -0.02656 | 0.56703  | 0.061107 |
| 0.281126 | 6.25E-10 | 0.078273 | 0.09111  | 0.585923 | 2.16E-44 | 0.383241 | 8.71E-18 | 0.454465 |
| 0.245867 | 7.37E-08 | -0.06503 | 0.16061  | 0.439237 | 1.90E-23 | 0.129263 | 0.00515  | 0.370598 |
| 0.266978 | 4.61E-09 | -0.06536 | 0.15846  | 0.531658 | 1.98E-35 | 0.133727 | 0.00379  | 0.402842 |
| 0.071123 | 0.12483  | -0.2156  | 2.58E-06 | 0.220118 | 1.56E-06 | 0.014059 | 0.76187  | 0.100391 |
| -0.10426 | 0.02424  | 0.127711 | 0.00571  | -0.28824 | 2.19E-10 | -0.06622 | 0.15308  | -0.24063 |
| 0.082791 | 0.07387  | -0.19398 | 2.43E-05 | 0.27715  | 1.11E-09 | 0.117214 | 0.01125  | 0.134342 |
| 0.272566 | 2.12E-09 | 0.045635 | 0.32509  | 0.715097 | 2.52E-74 | 0.384029 | 7.37E-18 | 0.573046 |
| 0.129789 | 0.00497  | -0.07845 | 0.09038  | 0.326566 | 4.57E-13 | 0.228951 | 5.70E-07 | 0.242347 |
| 0.157219 | 0.00065  | 0.194983 | 2.20E-05 | 0.452876 | 5.39E-25 | 0.377793 | 2.73E-17 | 0.259544 |
| 0.215856 | 2.50E-06 | 0.068494 | 0.13942  | 0.6733   | 5.75E-63 | 0.448893 | 1.55E-24 | 0.505014 |
| 0.241144 | 1.33E-07 | 0.005928 | 0.89834  | 0.393247 | 1.01E-18 | 0.292279 | 1.19E-10 | 0.132008 |
| -0.08612 | 0.06296  | 0.353235 | 3.60E-15 | -0.33563 | 9.27E-14 | 0.031115 | 0.50237  | -0.2438  |
| 0.244648 | 8.59E-08 | 0.044155 | 0.34104  | 0.371867 | 9.20E-17 | 0.110676 | 0.01673  | 0.357668 |
| 0.132579 | 0.0041   | -0.05131 | 0.26845  | 0.325505 | 5.48E-13 | 0.17608  | 0.00013  | 0.221863 |
| -0.12856 | 0.0054   | -0.3553  | 2.43E-15 | 0.01221  | 0.79243  | -0.18273 | 7.13E-05 | 0.000465 |
| 0.258978 | 1.36E-08 | 0.108877 | 0.0186   | 0.470197 | 4.61E-27 | 0.311448 | 5.80E-12 | 0.303153 |
| 0.260234 | 1.15E-08 | -0.01341 | 0.77263  | 0.598952 | 8.39E-47 | 0.30995  | 7.41E-12 | 0.470822 |
| 0.162978 | 0.00041  | -0.04904 | 0.29021  | 0.319511 | 1.52E-12 | 0.055136 | 0.23436  | 0.24431  |
| 0.16149  | 0.00046  | 0.186798 | 4.87E-05 | 0.390811 | 1.72E-18 | 0.290956 | 1.46E-10 | 0.317232 |
| 0.286535 | 2.82E-10 | -0.12397 | 0.00731  | 0.468238 | 8.01E-27 | 0.082326 | 0.07551  | 0.311602 |
| 0.036636 | 0.42961  | -0.28783 | 2.33E-10 | 0.161685 | 0.00045  | 0.015608 | 0.73656  | 0.011525 |
| 0.170095 | 0.00022  | -0.00558 | 0.90431  | 0.312594 | 4.81E-12 | -0.01048 | 0.82126  | 0.286048 |
| 0.168186 | 0.00026  | 0.020859 | 0.65299  | 0.483436 | 1.00E-28 | 0.342569 | 2.64E-14 | 0.275795 |
| 0.166826 | 0.00029  | -0.17852 | 0.00011  | 0.210393 | 4.52E-06 | 0.010036 | 0.82874  | 0.085181 |
| 0.537031 | 3.02E-36 | -0.04218 | 0.36315  | 0.456432 | 2.07E-25 | 0.200253 | 1.30E-05 | 0.387874 |
| 0.188359 | 4.20E-05 | 0.09833  | 0.03364  | 0.339153 | 4.92E-14 | 0.057627 | 0.21386  | 0.357889 |
| 0.113037 | 0.01452  | 0.001563 | 0.97312  | 0.436874 | 3.46E-23 | 0.337571 | 6.55E-14 | 0.266003 |
| 0.300066 | 3.59E-11 | 0.089355 | 0.05365  | 0.631659 | 2.27E-53 | 0.375307 | 4.56E-17 | 0.511801 |
| 0.288255 | 2.18E-10 | 0.111477 | 0.01595  | 0.494084 | 4.09E-30 | 0.318412 | 1.83E-12 | 0.321958 |
| 0.163827 | 0.00038  | -0.12665 | 0.00613  | 0.491416 | 9.22E-30 | 0.34229  | 2.78E-14 | 0.356785 |

|          |          |          |          |          |          |          |          |          |
|----------|----------|----------|----------|----------|----------|----------|----------|----------|
| 0.283813 | 4.22E-10 | 0.075956 | 0.10113  | 0.353617 | 3.35E-15 | 0.182147 | 7.53E-05 | 0.257846 |
| 0.21236  | 3.66E-06 | 0.013235 | 0.77545  | 0.346888 | 1.19E-14 | 0.12551  | 0.00661  | 0.201175 |
| 0.110876 | 0.01653  | -0.09633 | 0.03743  | 0.27726  | 1.09E-09 | -0.01873 | 0.68647  | 0.142947 |
| 0.033641 | 0.4683   | -0.13497 | 0.00347  | 0.299396 | 3.98E-11 | 0.155894 | 0.00072  | 0.143034 |
| 0.213046 | 3.40E-06 | 0.017306 | 0.70915  | 0.446809 | 2.68E-24 | 0.271221 | 2.56E-09 | 0.301309 |
| 0.151272 | 0.00104  | -0.06252 | 0.1774   | 0.277046 | 1.13E-09 | 0.227989 | 6.38E-07 | 0.133261 |
| 0.186242 | 5.13E-05 | -0.16036 | 0.0005   | 0.500414 | 5.78E-31 | 0.213164 | 3.36E-06 | 0.343395 |
| 0.191162 | 3.21E-05 | 0.049069 | 0.28997  | 0.412797 | 1.22E-20 | 0.241257 | 1.31E-07 | 0.281518 |
| 0.143584 | 0.00187  | -0.00177 | 0.96962  | 0.303451 | 2.10E-11 | 0.142422 | 0.00203  | 0.252488 |
| 0.036292 | 0.43396  | 0.469393 | 5.79E-27 | -0.02972 | 0.52177  | 0.300532 | 3.33E-11 | -0.08674 |
| 0.364015 | 4.44E-16 | 0.026336 | 0.57024  | 0.657568 | 3.67E-59 | 0.268569 | 3.70E-09 | 0.497188 |
| 0.002894 | 0.95026  | -0.26938 | 3.31E-09 | 0.090538 | 0.05055  | -0.09208 | 0.04672  | -0.02045 |
| -0.06637 | 0.15213  | 0.001499 | 0.97422  | -0.32099 | 1.19E-12 | -0.22401 | 1.01E-06 | -0.18311 |
| 0.194258 | 2.37E-05 | -0.10259 | 0.02663  | 0.563147 | 1.99E-40 | 0.301746 | 2.75E-11 | 0.42311  |
| -0.2795  | 7.91E-10 | -0.05535 | 0.23255  | -0.50739 | 6.38E-32 | -0.19369 | 2.50E-05 | -0.38752 |
| -0.18979 | 3.66E-05 | -0.11779 | 0.01085  | -0.46876 | 6.92E-27 | -0.2343  | 3.04E-07 | -0.4268  |
| 0.063411 | 0.1713   | -0.09763 | 0.03492  | 0.236517 | 2.33E-07 | 0.116021 | 0.01211  | 0.188723 |
| 0.417179 | 4.33E-21 | 0.198963 | 1.48E-05 | 0.683864 | 1.17E-65 | 0.534051 | 8.60E-36 | 0.523952 |
| 0.614936 | 6.46E-50 | 0.205588 | 7.51E-06 | 0.708652 | 1.92E-72 | 0.36524  | 3.49E-16 | 0.603971 |
| 0.255808 | 2.06E-08 | 0.063136 | 0.17317  | 0.677612 | 4.73E-64 | 0.378821 | 2.20E-17 | 0.586286 |
| 0.059725 | 0.19762  | -0.06956 | 0.13333  | 0.324712 | 6.29E-13 | 0.126563 | 0.00617  | 0.199007 |
| 0.294381 | 8.65E-11 | -0.05354 | 0.24823  | 0.354616 | 2.77E-15 | 0.165695 | 0.00032  | 0.218758 |
| 0.166458 | 0.0003   | -0.14395 | 0.00182  | 0.511573 | 1.66E-32 | 0.263473 | 7.43E-09 | 0.352877 |
| -0.0089  | 0.84782  | 0.101401 | 0.02845  | -0.19413 | 2.40E-05 | -0.05312 | 0.25198  | -0.09637 |
| 0.299903 | 3.68E-11 | 0.036326 | 0.43354  | 0.679046 | 2.04E-64 | 0.392144 | 1.29E-18 | 0.488298 |
| -0.03179 | 0.4931   | -0.07587 | 0.1015   | -0.34646 | 1.29E-14 | -0.14048 | 0.00234  | -0.24041 |
| 0.028903 | 0.53325  | 0.142006 | 0.0021   | -0.20964 | 4.90E-06 | -0.08126 | 0.07939  | -0.11125 |
| -0.11886 | 0.01015  | -0.50552 | 1.16E-31 | 0.103389 | 0.02547  | -0.21919 | 1.73E-06 | 0.050138 |
| 0.359944 | 9.89E-16 | 0.065567 | 0.15717  | 0.464938 | 2.01E-26 | 0.1107   | 0.0167   | 0.303511 |
| 0.216001 | 2.46E-06 | 0.096715 | 0.03668  | 0.406754 | 4.92E-20 | 0.167662 | 0.00027  | 0.254852 |
| 0.283819 | 4.22E-10 | -0.01661 | 0.72039  | 0.268756 | 3.61E-09 | -0.02215 | 0.63302  | 0.273046 |
| -0.28379 | 4.24E-10 | -0.10458 | 0.02381  | -0.58797 | 9.19E-45 | -0.28237 | 5.21E-10 | -0.45584 |
| -0.12194 | 0.00834  | 0.181563 | 7.95E-05 | -0.39722 | 4.22E-19 | -0.10115 | 0.02884  | -0.27378 |
| 0.142623 | 0.002    | 0.049828 | 0.28256  | 0.40701  | 4.64E-20 | 0.255218 | 2.23E-08 | 0.277722 |
| 0.636567 | 2.00E-54 | 0.13713  | 0.00298  | 0.474281 | 1.44E-27 | 0.161303 | 0.00047  | 0.391072 |
| 0.338876 | 5.18E-14 | 0.056883 | 0.21984  | 0.566717 | 4.98E-41 | 0.324138 | 6.94E-13 | 0.395059 |
| 0.16544  | 0.00033  | -0.0077  | 0.86817  | 0.605545 | 4.58E-48 | 0.38916  | 2.46E-18 | 0.390957 |
| 0.177871 | 0.00011  | 0.599055 | 8.02E-47 | 0.034059 | 0.46279  | 0.311793 | 5.49E-12 | 0.121423 |
| 0.20223  | 1.06E-05 | -0.08926 | 0.05391  | 0.369098 | 1.61E-16 | 0.174587 | 0.00015  | 0.2658   |
| 0.118404 | 0.01044  | -0.06358 | 0.17014  | 0.403014 | 1.15E-19 | 0.256083 | 1.99E-08 | 0.186793 |
| 0.279643 | 7.75E-10 | 0.024755 | 0.59362  | 0.662472 | 2.53E-60 | 0.365086 | 3.59E-16 | 0.491901 |
| 0.105618 | 0.02245  | -0.28525 | 3.41E-10 | 0.154713 | 0.00079  | -0.22384 | 1.03E-06 | 0.114986 |
| 0.044754 | 0.33453  | -0.21572 | 2.54E-06 | 0.425893 | 5.32E-22 | 0.080465 | 0.08238  | 0.304345 |
| -0.12781 | 0.00568  | -0.30457 | 1.76E-11 | 0.121301 | 0.00869  | -0.0263  | 0.57081  | 0.056888 |
| 0.078061 | 0.092    | -0.06194 | 0.18148  | 0.373246 | 6.95E-17 | 0.203168 | 9.65E-06 | 0.309317 |

|          |          |          |          |          |          |          |          |          |
|----------|----------|----------|----------|----------|----------|----------|----------|----------|
| 0.384459 | 6.73E-18 | 0.110277 | 0.01713  | 0.388064 | 3.11E-18 | 0.108326 | 0.0192   | 0.38638  |
| 0.292111 | 1.22E-10 | 0.139764 | 0.00247  | 0.503966 | 1.89E-31 | 0.283761 | 4.25E-10 | 0.343337 |
| -0.19788 | 1.65E-05 | 0.039567 | 0.39361  | -0.30935 | 8.17E-12 | -0.04946 | 0.28618  | -0.24736 |
| 0.016122 | 0.72822  | -0.19288 | 2.71E-05 | 0.228451 | 6.05E-07 | 0.118169 | 0.0106   | 0.116702 |
| 0.174113 | 0.00016  | -0.22375 | 1.04E-06 | 0.412021 | 1.46E-20 | 0.163069 | 0.0004   | 0.282123 |
| 0.135936 | 0.00325  | -0.08042 | 0.08255  | 0.422443 | 1.23E-21 | 0.211813 | 3.88E-06 | 0.380327 |
| 0.294212 | 8.87E-11 | 0.041002 | 0.37666  | 0.581439 | 1.38E-43 | 0.37913  | 2.06E-17 | 0.456412 |
| 0.352378 | 4.24E-15 | 0.131582 | 0.0044   | 0.629077 | 7.99E-53 | 0.482571 | 1.30E-28 | 0.430481 |
| 0.374275 | 5.63E-17 | 0.120882 | 0.00893  | 0.655916 | 8.93E-59 | 0.401279 | 1.70E-19 | 0.490108 |
| 0.179325 | 9.76E-05 | -0.0128  | 0.78261  | 0.421393 | 1.58E-21 | 0.074438 | 0.10816  | 0.405565 |
| 0.18299  | 6.96E-05 | -0.03397 | 0.46396  | 0.255557 | 2.13E-08 | 0.020659 | 0.6561   | 0.142985 |
| 0.315086 | 3.19E-12 | 0.128117 | 0.00556  | 0.506466 | 8.56E-32 | 0.201103 | 1.19E-05 | 0.418838 |
| 0.294006 | 9.16E-11 | 0.025514 | 0.58234  | 0.649294 | 2.99E-57 | 0.335346 | 9.76E-14 | 0.508256 |
| 0.022324 | 0.63038  | -0.35773 | 1.52E-15 | 0.094717 | 0.04076  | -0.0926  | 0.04551  | -0.0193  |
| 0.145077 | 0.00167  | -0.07236 | 0.11839  | 0.312504 | 4.88E-12 | -0.0002  | 0.99654  | 0.174564 |
| 0.046576 | 0.31521  | 0.092842 | 0.04493  | 0.359478 | 1.08E-15 | 0.207157 | 6.37E-06 | 0.280817 |
| 0.368338 | 1.88E-16 | 0.075753 | 0.10205  | 0.529063 | 4.84E-35 | 0.283733 | 4.27E-10 | 0.434134 |
| 0.198383 | 1.57E-05 | -0.02857 | 0.53791  | 0.440043 | 1.55E-23 | 0.146625 | 0.00149  | 0.325475 |
| 0.232905 | 3.58E-07 | 0.015668 | 0.73559  | 0.358644 | 1.27E-15 | 0.143219 | 0.00192  | 0.310381 |
| 0.314344 | 3.61E-12 | 0.098709 | 0.03296  | 0.390976 | 1.66E-18 | 0.202487 | 1.03E-05 | 0.329129 |
| 0.217669 | 2.05E-06 | -0.07567 | 0.10241  | 0.393491 | 9.59E-19 | 0.065935 | 0.15486  | 0.280487 |
| 0.084575 | 0.06784  | -0.10737 | 0.0203   | 0.466076 | 1.47E-26 | 0.21395  | 3.08E-06 | 0.32177  |
| 0.27153  | 2.45E-09 | 0.04797  | 0.30092  | 0.563652 | 1.64E-40 | 0.310913 | 6.33E-12 | 0.390342 |
| 0.266499 | 4.92E-09 | 0.069327 | 0.13466  | 0.653819 | 2.74E-58 | 0.406944 | 4.71E-20 | 0.547181 |
| 0.117849 | 0.01081  | -0.07693 | 0.09682  | 0.460846 | 6.23E-26 | 0.246663 | 6.67E-08 | 0.393777 |
| 0.059556 | 0.19889  | -0.22794 | 6.42E-07 | 0.162662 | 0.00042  | 0.029373 | 0.5266   | 0.014011 |
| 0.174494 | 0.00015  | 0.07529  | 0.10417  | 0.57982  | 2.68E-43 | 0.291371 | 1.37E-10 | 0.540871 |
| 0.124453 | 0.00709  | 0.056152 | 0.22583  | 0.269231 | 3.38E-09 | 0.037034 | 0.42461  | 0.281375 |
| 0.039925 | 0.38933  | -0.07823 | 0.0913   | 0.46187  | 4.71E-26 | 0.27973  | 7.65E-10 | 0.401142 |
| 0.221491 | 1.34E-06 | -0.03372 | 0.46732  | 0.459661 | 8.62E-26 | 0.225803 | 8.21E-07 | 0.367868 |
| 0.190825 | 3.31E-05 | -0.05323 | 0.25098  | 0.353071 | 3.72E-15 | 0.015462 | 0.73894  | 0.275142 |
| 0.463894 | 2.69E-26 | 0.036888 | 0.42645  | 0.574442 | 2.35E-42 | 0.395389 | 6.32E-19 | 0.386479 |
| 0.124649 | 0.007    | -0.20133 | 1.16E-05 | 0.422979 | 1.08E-21 | 0.19738  | 1.74E-05 | 0.333329 |
| 0.29578  | 6.97E-11 | 0.297604 | 5.26E-11 | -0.29248 | 1.16E-10 | -0.00749 | 0.87177  | -0.16824 |
| 0.272626 | 2.10E-09 | 0.069066 | 0.13614  | 0.330744 | 2.21E-13 | 0.080189 | 0.08344  | 0.309104 |
| 0.367148 | 2.38E-16 | 0.227023 | 7.13E-07 | 0.74195  | 9.10E-83 | 0.559262 | 8.79E-40 | 0.551323 |
| -0.01994 | 0.6673   | -0.27763 | 1.03E-09 | 0.19275  | 2.75E-05 | 0.051969 | 0.26237  | 0.079016 |
| 0.091747 | 0.04753  | 0.023673 | 0.60986  | 0.257512 | 1.65E-08 | 0.087384 | 0.05917  | 0.124602 |
| 0.031109 | 0.50245  | -0.20499 | 7.98E-06 | 0.178006 | 0.00011  | -0.04731 | 0.30768  | 0.078122 |
| -0.09393 | 0.04246  | -0.35643 | 1.95E-15 | -0.01344 | 0.772    | -0.1228  | 0.00789  | 0.008916 |
| 0.292516 | 1.15E-10 | -0.01754 | 0.70534  | 0.449075 | 1.48E-24 | 0.195336 | 2.13E-05 | 0.312489 |
| -0.06604 | 0.15422  | -0.00415 | 0.92875  | -0.38385 | 7.66E-18 | -0.18113 | 8.27E-05 | -0.29581 |
| 0.11661  | 0.01167  | 0.055532 | 0.23101  | 0.314009 | 3.81E-12 | 0.134792 | 0.00352  | 0.264571 |
| 0.248841 | 5.06E-08 | -0.07796 | 0.0924   | 0.483888 | 8.79E-29 | 0.094652 | 0.0409   | 0.402667 |
| 0.38358  | 8.11E-18 | 0.161515 | 0.00046  | 0.672752 | 7.86E-63 | 0.36627  | 2.84E-16 | 0.49898  |

|          |          |          |          |          |          |          |          |          |
|----------|----------|----------|----------|----------|----------|----------|----------|----------|
| 0.183164 | 6.85E-05 | 0.041512 | 0.37075  | 0.424469 | 7.52E-22 | 0.1739   | 0.00016  | 0.380057 |
| 0.263501 | 7.40E-09 | -0.05173 | 0.26457  | 0.482991 | 1.15E-28 | 0.21353  | 3.23E-06 | 0.338269 |
| 0.096927 | 0.03627  | -0.16682 | 0.00029  | 0.348588 | 8.66E-15 | 0.125575 | 0.00658  | 0.207293 |
| -0.00482 | 0.91724  | -0.39409 | 8.41E-19 | -0.01982 | 0.66927  | -0.20674 | 6.66E-06 | -0.1414  |
| 0.260322 | 1.13E-08 | 0.069219 | 0.13528  | 0.435413 | 5.01E-23 | 0.139736 | 0.00247  | 0.360835 |
| -0.15068 | 0.00109  | -0.43087 | 1.56E-22 | 0.011289 | 0.80777  | -0.15701 | 0.00066  | -0.14372 |
| 0.193202 | 2.63E-05 | -0.23931 | 1.66E-07 | 0.206186 | 7.05E-06 | -0.13937 | 0.00254  | 0.148049 |
| 0.035561 | 0.44329  | -0.13988 | 0.00245  | 0.209092 | 5.19E-06 | 0.077591 | 0.09398  | 0.15106  |
| -0.01911 | 0.68049  | 0.189131 | 3.90E-05 | -0.10457 | 0.02383  | 0.143919 | 0.00182  | -0.0625  |
| 0.107751 | 0.01986  | -0.04793 | 0.30133  | 0.51681  | 2.99E-33 | 0.24779  | 5.79E-08 | 0.371855 |
| 0.667308 | 1.72E-61 | 0.358933 | 1.20E-15 | 0.408923 | 2.99E-20 | 0.387284 | 3.68E-18 | 0.385724 |
| -0.08517 | 0.06593  | -0.27235 | 2.19E-09 | 0.131857 | 0.00431  | -0.03637 | 0.43294  | 0.094691 |
| -0.0258  | 0.57817  | 0.033986 | 0.46374  | -0.32852 | 3.25E-13 | -0.16247 | 0.00042  | -0.21774 |
| 0.050323 | 0.2778   | -0.10017 | 0.03043  | 0.464932 | 2.02E-26 | 0.214406 | 2.93E-06 | 0.367455 |
| 0.006771 | 0.88397  | -0.2637  | 7.21E-09 | 0.201844 | 1.11E-05 | 0.129164 | 0.00518  | 0.047197 |
| -0.10057 | 0.02978  | -0.04661 | 0.31487  | -0.34643 | 1.30E-14 | -0.11063 | 0.01677  | -0.28846 |
| 0.16872  | 0.00025  | 0.086376 | 0.06217  | 0.33204  | 1.76E-13 | 0.166891 | 0.00029  | 0.260145 |
| 0.202431 | 1.04E-05 | 0.152036 | 0.00098  | 0.329443 | 2.77E-13 | 0.299982 | 3.63E-11 | 0.188074 |
| -0.03401 | 0.46344  | -0.10138 | 0.02848  | 0.252424 | 3.20E-08 | 0.101575 | 0.02817  | 0.16388  |
| 0.225299 | 8.69E-07 | 0.087936 | 0.05758  | 0.425734 | 5.53E-22 | 0.165574 | 0.00033  | 0.30118  |
| 0.225929 | 8.09E-07 | -0.00979 | 0.83289  | 0.659807 | 1.09E-59 | 0.33884  | 5.21E-14 | 0.482129 |
| 0.157    | 0.00066  | -0.00921 | 0.84259  | 0.377666 | 2.80E-17 | 0.283038 | 4.73E-10 | 0.250361 |
| 0.217806 | 2.02E-06 | -0.13264 | 0.00409  | 0.153279 | 0.00089  | -0.16963 | 0.00023  | 0.154493 |
| 0.0258   | 0.57812  | -0.24422 | 9.06E-08 | 0.181107 | 8.29E-05 | -0.00697 | 0.88064  | 0.177402 |
| -0.02177 | 0.63884  | 0.081601 | 0.07813  | -0.372   | 8.96E-17 | -0.13991 | 0.00244  | -0.29123 |
| 0.133269 | 0.00391  | -0.24946 | 4.68E-08 | 0.282104 | 5.42E-10 | 0.021691 | 0.64011  | 0.181028 |
| 0.041662 | 0.36902  | -0.1167  | 0.01161  | 0.295151 | 7.68E-11 | 0.155629 | 0.00074  | 0.185526 |
| 0.33766  | 6.45E-14 | 0.184349 | 6.14E-05 | 0.647928 | 6.10E-57 | 0.37662  | 3.47E-17 | 0.462383 |
| 0.332022 | 1.76E-13 | 0.091248 | 0.04876  | 0.624872 | 6.07E-52 | 0.275917 | 1.32E-09 | 0.495002 |
| 0.08755  | 0.05869  | -0.01349 | 0.77131  | 0.264161 | 6.77E-09 | 0.093559 | 0.0433   | 0.226392 |
| 0.302727 | 2.36E-11 | 0.180617 | 8.67E-05 | 0.399488 | 2.55E-19 | 0.252558 | 3.15E-08 | 0.379919 |
| 0.286173 | 2.98E-10 | -0.0271  | 0.55913  | 0.676194 | 1.08E-63 | 0.299001 | 4.23E-11 | 0.494769 |
| 0.103603 | 0.02516  | -0.0753  | 0.10411  | 0.337836 | 6.24E-14 | 0.035675 | 0.44183  | 0.235229 |
| 0.020382 | 0.66042  | 0.31682  | 2.39E-12 | -0.10779 | 0.01982  | -0.06075 | 0.19004  | -0.00496 |
| 0.325043 | 5.94E-13 | 0.078308 | 0.09097  | 0.453288 | 4.83E-25 | 0.08297  | 0.07325  | 0.327672 |
| -0.20046 | 1.27E-05 | 0.102995 | 0.02603  | -0.31637 | 2.58E-12 | -0.06101 | 0.18809  | -0.30502 |
| -0.03788 | 0.41413  | 0.211769 | 3.90E-06 | -0.38555 | 5.34E-18 | -0.19176 | 3.02E-05 | -0.28898 |
| 0.08322  | 0.07239  | 0.530689 | 2.76E-35 | 0.043012 | 0.3537   | 0.342281 | 2.79E-14 | 0.075542 |
| 0.054624 | 0.23873  | -0.08437 | 0.06852  | 0.173613 | 0.00016  | -0.00263 | 0.95476  | 0.088365 |
| 0.163818 | 0.00038  | -0.00692 | 0.88138  | 0.325293 | 5.69E-13 | 0.210769 | 4.34E-06 | 0.232757 |
| 0.190664 | 3.36E-05 | 0.281133 | 6.24E-10 | -0.14859 | 0.00128  | 0.104687 | 0.02367  | -0.06735 |
| -0.05216 | 0.26061  | -0.03412 | 0.46197  | -0.38003 | 1.71E-17 | -0.16376 | 0.00038  | -0.34496 |
| 0.151045 | 0.00106  | 0.147431 | 0.0014   | 0.286449 | 2.86E-10 | 0.301367 | 2.92E-11 | 0.176718 |
| 0.159916 | 0.00052  | -0.06426 | 0.16565  | 0.472311 | 2.53E-27 | 0.178155 | 0.00011  | 0.361681 |
| 0.148658 | 0.00127  | 0.193172 | 2.63E-05 | 0.013839 | 0.76549  | 0.013478 | 0.77144  | 0.023739 |

|          |          |          |          |          |          |          |          |          |
|----------|----------|----------|----------|----------|----------|----------|----------|----------|
| 0.294265 | 8.80E-11 | 0.004855 | 0.91666  | 0.487475 | 3.02E-29 | 0.17337  | 0.00017  | 0.427069 |
| 0.213157 | 3.36E-06 | 0.064622 | 0.16325  | 0.546788 | 9.13E-38 | 0.27975  | 7.63E-10 | 0.478368 |
| 0.212505 | 3.60E-06 | -0.13299 | 0.00399  | 0.323974 | 7.13E-13 | -0.04504 | 0.33148  | 0.249818 |
| 0.06237  | 0.17846  | 0.111216 | 0.0162   | 0.331419 | 1.96E-13 | 0.200304 | 1.29E-05 | 0.338665 |
| 0.106345 | 0.02153  | -0.01972 | 0.67075  | 0.39387  | 8.83E-19 | 0.180023 | 9.16E-05 | 0.301393 |
| -0.12206 | 0.00828  | -0.37932 | 1.98E-17 | 0.14059  | 0.00233  | -0.08364 | 0.07095  | 0.019055 |
| 0.02415  | 0.60267  | 0.19641  | 1.91E-05 | -0.23191 | 4.03E-07 | 0.004351 | 0.92529  | -0.149   |
| -0.00811 | 0.86127  | -0.19211 | 2.92E-05 | 0.320183 | 1.36E-12 | 0.150504 | 0.00111  | 0.150709 |
| -0.0671  | 0.14765  | -0.20924 | 5.11E-06 | 0.328803 | 3.10E-13 | 0.146776 | 0.00147  | 0.148153 |
| -0.06141 | 0.18528  | -0.31907 | 1.64E-12 | 0.059464 | 0.19959  | -0.02118 | 0.648    | -0.03896 |
| 0.144052 | 0.0018   | -0.1151  | 0.01282  | 0.228779 | 5.82E-07 | -0.02116 | 0.64832  | 0.178298 |
| 0.138711 | 0.00266  | -0.0755  | 0.10322  | 0.320758 | 1.23E-12 | 0.128385 | 0.00546  | 0.146201 |
| 0.264188 | 6.74E-09 | -0.01759 | 0.70454  | 0.456441 | 2.07E-25 | 0.202711 | 1.01E-05 | 0.340354 |
| 0.140386 | 0.00236  | -0.15854 | 0.00058  | 0.391166 | 1.59E-18 | 0.184307 | 6.16E-05 | 0.304781 |
| 0.331555 | 1.91E-13 | 0.114237 | 0.01351  | 0.648538 | 4.44E-57 | 0.465178 | 1.88E-26 | 0.450754 |
| 0.285951 | 3.08E-10 | -0.04377 | 0.34532  | 0.468982 | 6.50E-27 | 0.109884 | 0.01753  | 0.421749 |
| 0.143316 | 0.0019   | -0.11737 | 0.01113  | 0.441088 | 1.18E-23 | 0.218153 | 1.94E-06 | 0.260665 |
| 0.13243  | 0.00415  | -0.21593 | 2.48E-06 | 0.309531 | 7.93E-12 | 0.1305   | 0.00473  | 0.172737 |
| 0.081402 | 0.07886  | 0.436995 | 3.36E-23 | -0.16886 | 0.00025  | 0.160759 | 0.00049  | -0.08415 |
| 0.08444  | 0.06828  | 0.401784 | 1.52E-19 | -0.23929 | 1.66E-07 | 0.097406 | 0.03535  | -0.14884 |
| -0.04655 | 0.31543  | 0.349928 | 6.73E-15 | -0.32107 | 1.17E-12 | 0.048074 | 0.29988  | -0.26238 |
| 0.183517 | 6.63E-05 | 0.653379 | 3.46E-58 | 0.077771 | 0.09321  | 0.360761 | 8.43E-16 | 0.161031 |
| 0.063481 | 0.17083  | -0.0531  | 0.2521   | 0.269898 | 3.08E-09 | 0.087619 | 0.05849  | 0.203843 |
| 0.199769 | 1.37E-05 | 0.102194 | 0.02722  | -0.32972 | 2.64E-13 | -0.05154 | 0.26631  | -0.2865  |
| 0.149363 | 0.00121  | -0.06273 | 0.17595  | 0.22054  | 1.49E-06 | 0.089487 | 0.05329  | 0.181369 |
| 0.107035 | 0.0207   | -0.26367 | 7.24E-09 | 0.364728 | 3.86E-16 | 0.013216 | 0.77576  | 0.199393 |
| 0.102906 | 0.02616  | -0.15577 | 0.00073  | 0.4224   | 1.24E-21 | 0.177911 | 0.00011  | 0.258896 |
| -0.02987 | 0.5197   | -0.24652 | 6.79E-08 | 0.131613 | 0.00439  | -0.10166 | 0.02804  | 0.084003 |
| 0.26333  | 7.58E-09 | -0.00157 | 0.97298  | 0.369792 | 1.40E-16 | 0.22586  | 8.15E-07 | 0.253102 |
| 0.206928 | 6.52E-06 | 0.114367 | 0.0134   | 0.457226 | 1.67E-25 | 0.250219 | 4.25E-08 | 0.381866 |
| 0.109437 | 0.01799  | -0.16586 | 0.00032  | 0.237513 | 2.06E-07 | 0.042068 | 0.36437  | 0.187573 |
| -0.21601 | 2.46E-06 | -0.13018 | 0.00484  | -0.48415 | 8.14E-29 | -0.20483 | 8.12E-06 | -0.45019 |
| 0.178412 | 0.00011  | -0.10282 | 0.02629  | 0.158222 | 0.0006   | -0.12877 | 0.00532  | 0.095363 |
| 0.213842 | 3.12E-06 | 0.03648  | 0.43158  | 0.414533 | 8.09E-21 | 0.135174 | 0.00343  | 0.368982 |
| 0.026517 | 0.56758  | -0.24706 | 6.35E-08 | 0.399194 | 2.72E-19 | 0.046831 | 0.31256  | 0.307142 |
| -0.03835 | 0.40827  | -0.32503 | 5.95E-13 | 0.024329 | 0.59999  | -0.26887 | 3.55E-09 | 0.022016 |
| -0.05892 | 0.20372  | 0.079374 | 0.08664  | -0.35356 | 3.38E-15 | -0.09275 | 0.04514  | -0.24979 |
| 0.114464 | 0.01332  | -0.0162  | 0.72695  | 0.501831 | 3.71E-31 | 0.382286 | 1.07E-17 | 0.311377 |
| 0.288512 | 2.10E-10 | 0.032675 | 0.48118  | 0.561849 | 3.27E-40 | 0.258186 | 1.51E-08 | 0.416871 |
| 0.248659 | 5.18E-08 | -0.10217 | 0.02726  | 0.592551 | 1.33E-45 | 0.222084 | 1.25E-06 | 0.446648 |
| 0.019666 | 0.67165  | -0.27168 | 2.40E-09 | 0.296783 | 5.98E-11 | 0.124274 | 0.00717  | 0.170963 |
| 0.373927 | 6.05E-17 | 0.220457 | 1.50E-06 | 0.747953 | 8.43E-85 | 0.390979 | 1.66E-18 | 0.663205 |
| 0.323963 | 7.15E-13 | 0.167222 | 0.00028  | 0.709921 | 8.27E-73 | 0.391287 | 1.55E-18 | 0.5586   |
| 0.105162 | 0.02304  | -0.22116 | 1.39E-06 | 0.092328 | 0.04614  | -0.15585 | 0.00073  | -0.06755 |
| 0.103516 | 0.02529  | -0.22882 | 5.79E-07 | 0.116341 | 0.01187  | -0.07765 | 0.09374  | 0.036089 |



|          |          |          |          |          |          |          |          |          |
|----------|----------|----------|----------|----------|----------|----------|----------|----------|
| 0.273439 | 1.88E-09 | 0.023168 | 0.61751  | 0.600356 | 4.54E-47 | 0.260749 | 1.07E-08 | 0.424444 |
| -0.1737  | 0.00016  | 0.034744 | 0.45383  | -0.28809 | 2.24E-10 | -0.03271 | 0.48075  | -0.23127 |
| -0.05094 | 0.27196  | 0.192213 | 2.89E-05 | -0.22956 | 5.31E-07 | 0.043548 | 0.34773  | -0.15278 |
| 0.377544 | 2.87E-17 | 0.044415 | 0.3382   | 0.512572 | 1.20E-32 | 0.19121  | 3.19E-05 | 0.353572 |
| -0.06291 | 0.17474  | 0.146838 | 0.00146  | -0.32716 | 4.12E-13 | -0.16619 | 0.00031  | -0.18694 |
| -0.12361 | 0.00749  | -0.05103 | 0.27114  | -0.34514 | 1.65E-14 | -0.08128 | 0.07933  | -0.26975 |
| 0.153007 | 0.00091  | 0.141925 | 0.00211  | 0.38981  | 2.14E-18 | 0.172309 | 0.00018  | 0.368998 |
| -0.06586 | 0.15532  | -0.00415 | 0.92868  | -0.34559 | 1.52E-14 | -0.12233 | 0.00814  | -0.3224  |
| 0.223035 | 1.13E-06 | 0.583034 | 7.17E-44 | 0.07178  | 0.12137  | 0.363772 | 4.66E-16 | 0.156233 |
| 0.214648 | 2.86E-06 | 0.169367 | 0.00024  | 0.482269 | 1.42E-28 | 0.263852 | 7.06E-09 | 0.414647 |
| 0.333386 | 1.38E-13 | 0.066378 | 0.15209  | 0.576979 | 8.48E-43 | 0.334339 | 1.17E-13 | 0.368285 |
| 0.20534  | 7.70E-06 | -0.016   | 0.73028  | 0.465034 | 1.96E-26 | 0.123199 | 0.00769  | 0.363168 |
| 0.154382 | 0.00082  | -0.1053  | 0.02286  | 0.243737 | 9.62E-08 | 0.114402 | 0.01337  | 0.138409 |
| 0.00085  | 0.98539  | -0.13941 | 0.00253  | 0.197183 | 1.77E-05 | -0.03406 | 0.46278  | 0.097009 |
| -0.02366 | 0.6101   | -0.13116 | 0.00452  | 0.192989 | 2.68E-05 | 0.056989 | 0.21898  | 0.108896 |
| -0.06589 | 0.15512  | -0.34623 | 1.34E-14 | 0.245279 | 7.94E-08 | 0.033906 | 0.46481  | 0.08586  |
| 0.039087 | 0.39937  | -0.12837 | 0.00547  | 0.098196 | 0.03388  | 0.031789 | 0.49315  | 0.073917 |
| -0.04845 | 0.29614  | -0.04712 | 0.30959  | -0.34483 | 1.74E-14 | -0.1051  | 0.02313  | -0.25031 |
| -0.08458 | 0.06784  | -0.29328 | 1.02E-10 | 0.03141  | 0.49833  | -0.11563 | 0.0124   | -0.04833 |
| 0.297394 | 5.44E-11 | 0.08706  | 0.06012  | 0.473481 | 1.81E-27 | 0.313778 | 3.96E-12 | 0.343384 |
| -0.12399 | 0.0073   | 0.05147  | 0.26698  | -0.27956 | 7.84E-10 | -0.16799 | 0.00027  | -0.09378 |
| 0.088935 | 0.05479  | 0.488044 | 2.55E-29 | -0.21322 | 3.34E-06 | 0.153731 | 0.00086  | -0.14183 |
| 0.139451 | 0.00253  | -0.05402 | 0.244    | 0.323618 | 7.58E-13 | 0.05966  | 0.19811  | 0.201624 |
| 0.193835 | 2.47E-05 | 0.082695 | 0.07421  | 0.308727 | 9.03E-12 | 0.130126 | 0.00485  | 0.251857 |
| 0.177082 | 0.00012  | -0.06582 | 0.15556  | 0.251723 | 3.50E-08 | 0.039245 | 0.39748  | 0.134891 |
| 0.057552 | 0.21446  | 0.06985  | 0.13174  | 0.285088 | 3.50E-10 | 0.206344 | 6.94E-06 | 0.266193 |
| 0.098696 | 0.03298  | -0.03908 | 0.39948  | 0.154409 | 0.00081  | -0.06427 | 0.16558  | 0.227461 |
| 0.224363 | 9.68E-07 | 0.038791 | 0.40295  | 0.451709 | 7.36E-25 | 0.206413 | 6.89E-06 | 0.345959 |
| 0.149813 | 0.00117  | -0.11789 | 0.01078  | 0.301697 | 2.78E-11 | 0.151648 | 0.00101  | 0.229245 |
| 0.14787  | 0.00135  | -0.13329 | 0.00391  | 0.260076 | 1.17E-08 | 0.091515 | 0.0481   | 0.179897 |
| 0.078432 | 0.09046  | -0.23861 | 1.81E-07 | 0.301586 | 2.82E-11 | 0.198128 | 1.61E-05 | 0.135119 |
| 0.303059 | 2.24E-11 | -0.07437 | 0.10846  | 0.329504 | 2.74E-13 | 0.03988  | 0.38988  | 0.279089 |
| 0.310505 | 6.77E-12 | 0.134911 | 0.00349  | 0.428578 | 2.75E-22 | 0.226996 | 7.15E-07 | 0.37283  |
| -0.03905 | 0.39982  | 0.14671  | 0.00148  | -0.34424 | 1.94E-14 | -0.19257 | 2.80E-05 | -0.19788 |
| 0.030181 | 0.51529  | -0.18851 | 4.14E-05 | 0.253353 | 2.84E-08 | 0.065453 | 0.1579   | 0.161011 |
| 0.118981 | 0.01007  | -0.03046 | 0.51148  | 0.215351 | 2.65E-06 | 0.041019 | 0.37647  | 0.10465  |
| 0.522647 | 4.28E-34 | -0.02153 | 0.64266  | 0.124054 | 0.00727  | -0.02204 | 0.6348   | 0.098898 |
| 0.409121 | 2.85E-20 | -0.07063 | 0.12748  | 0.349912 | 6.76E-15 | 0.184138 | 6.26E-05 | 0.258847 |
| 0.170943 | 0.00021  | -0.13215 | 0.00423  | 0.244519 | 8.73E-08 | 0.049713 | 0.28368  | 0.120745 |
| 0.268376 | 3.80E-09 | -0.0776  | 0.09393  | 0.280645 | 6.70E-10 | -0.03246 | 0.48407  | 0.163817 |
| 0.088673 | 0.05551  | -0.22529 | 8.70E-07 | 0.141105 | 0.00224  | -0.06495 | 0.1611   | 0.070465 |
| -0.12997 | 0.00491  | 0.182322 | 7.41E-05 | -0.35086 | 5.65E-15 | -0.10012 | 0.03053  | -0.25414 |
| 0.385047 | 5.94E-18 | 0.189015 | 3.94E-05 | 0.702762 | 9.13E-71 | 0.385897 | 4.95E-18 | 0.626602 |
| 0.344772 | 1.76E-14 | 0.033123 | 0.47518  | 0.449925 | 1.18E-24 | 0.108658 | 0.01883  | 0.337099 |
| 0.077733 | 0.09337  | -0.08055 | 0.08207  | 0.260647 | 1.09E-08 | 0.188309 | 4.22E-05 | 0.119812 |

|          |          |          |          |          |          |          |          |          |
|----------|----------|----------|----------|----------|----------|----------|----------|----------|
| 0.186026 | 5.24E-05 | -0.1596  | 0.00054  | 0.200763 | 1.23E-05 | 0.08384  | 0.07027  | 0.031797 |
| -0.04557 | 0.32574  | -0.21366 | 3.18E-06 | 0.146093 | 0.00155  | 0.022131 | 0.63334  | 0.044784 |
| 0.234108 | 3.11E-07 | 0.057877 | 0.21187  | 0.401344 | 1.68E-19 | 0.219954 | 1.59E-06 | 0.247815 |
| 0.232321 | 3.84E-07 | 0.047254 | 0.3082   | 0.325276 | 5.70E-13 | 0.000968 | 0.98336  | 0.338196 |
| 0.010722 | 0.81725  | -0.16153 | 0.00046  | 0.138557 | 0.00269  | -0.01451 | 0.75453  | 0.078921 |
| 0.069531 | 0.13352  | -0.19795 | 1.64E-05 | 0.329436 | 2.77E-13 | -0.01693 | 0.71516  | 0.243638 |
| 0.287366 | 2.49E-10 | 0.11256  | 0.01495  | 0.517203 | 2.63E-33 | 0.180116 | 9.08E-05 | 0.406187 |
| 0.030413 | 0.51207  | 0.002878 | 0.95054  | 0.281664 | 5.78E-10 | 0.229903 | 5.10E-07 | 0.150466 |
| 0.024858 | 0.59208  | 0.036974 | 0.42537  | 0.305833 | 1.44E-11 | 0.20229  | 1.06E-05 | 0.307934 |
| 0.268525 | 3.73E-09 | 0.241948 | 1.20E-07 | 0.400988 | 1.82E-19 | 0.228566 | 5.96E-07 | 0.392818 |
| -0.11246 | 0.01503  | 0.08303  | 0.07304  | -0.22384 | 1.03E-06 | -0.05621 | 0.22536  | -0.17172 |
| 0.327415 | 3.94E-13 | 0.07016  | 0.13003  | 0.531211 | 2.31E-35 | 0.188477 | 4.15E-05 | 0.415718 |
| 0.062483 | 0.17767  | -0.11675 | 0.01157  | 0.314456 | 3.54E-12 | 0.143942 | 0.00182  | 0.255857 |
| 0.227875 | 6.46E-07 | -0.00214 | 0.96327  | 0.523871 | 2.84E-34 | 0.196061 | 1.98E-05 | 0.488354 |
| 0.096662 | 0.03678  | -0.12756 | 0.00577  | 0.164782 | 0.00035  | -0.12596 | 0.00642  | 0.127373 |
| 0.322528 | 9.13E-13 | 0.02982  | 0.52034  | 0.649196 | 3.14E-57 | 0.346076 | 1.38E-14 | 0.507575 |
| 0.296699 | 6.05E-11 | 0.067177 | 0.14721  | 0.364942 | 3.70E-16 | 0.113559 | 0.01407  | 0.244922 |
| 0.310298 | 7.00E-12 | 0.020375 | 0.66053  | 0.444792 | 4.54E-24 | 0.089031 | 0.05453  | 0.354344 |
| 0.100331 | 0.03017  | -0.20157 | 1.14E-05 | 0.234333 | 3.02E-07 | -0.08135 | 0.07907  | 0.199127 |
| 0.222692 | 1.17E-06 | -0.10155 | 0.02822  | 0.221047 | 1.41E-06 | 0.086902 | 0.06059  | 0.2173   |
| 0.366048 | 2.97E-16 | -0.01534 | 0.74089  | 0.566678 | 5.06E-41 | 0.192751 | 2.75E-05 | 0.471488 |
| -0.05748 | 0.21505  | 0.047494 | 0.30575  | -0.32282 | 8.69E-13 | -0.11178 | 0.01566  | -0.25816 |
| -0.15583 | 0.00073  | -0.02053 | 0.65813  | -0.37044 | 1.23E-16 | -0.14747 | 0.00139  | -0.33719 |
| 0.193899 | 2.45E-05 | -0.09274 | 0.04517  | 0.168064 | 0.00026  | -0.06357 | 0.17022  | 0.167026 |
| 0.664162 | 9.95E-61 | 0.18271  | 7.15E-05 | 0.421933 | 1.39E-21 | 0.258058 | 1.53E-08 | 0.415957 |
| 0.326261 | 4.81E-13 | 0.188138 | 4.29E-05 | 0.577543 | 6.76E-43 | 0.303382 | 2.13E-11 | 0.406449 |
| 0.137177 | 0.00297  | -0.10024 | 0.03031  | 0.398178 | 3.41E-19 | 0.073209 | 0.11412  | 0.352239 |
| 0.170253 | 0.00022  | 0.021062 | 0.64984  | 0.346855 | 1.20E-14 | 0.166996 | 0.00029  | 0.313286 |
| 0.194579 | 2.29E-05 | 0.070138 | 0.13015  | 0.343792 | 2.11E-14 | 0.10641  | 0.02145  | 0.239592 |
| 0.208878 | 5.31E-06 | -0.00669 | 0.88539  | 0.468078 | 8.38E-27 | 0.157276 | 0.00065  | 0.35743  |
| 0.152159 | 0.00097  | -0.16687 | 0.00029  | 0.41901  | 2.80E-21 | 0.138844 | 0.00264  | 0.343656 |
| 0.161884 | 0.00044  | -0.14773 | 0.00137  | 0.370636 | 1.18E-16 | 0.018175 | 0.69525  | 0.312212 |
| -0.18247 | 7.31E-05 | -0.07169 | 0.12184  | -0.4961  | 2.20E-30 | -0.24675 | 6.60E-08 | -0.39746 |
| 0.29122  | 1.40E-10 | 0.071557 | 0.12254  | 0.471678 | 3.03E-27 | 0.249542 | 4.63E-08 | 0.443625 |
| 0.046433 | 0.31669  | 0.165335 | 0.00033  | -0.20456 | 8.36E-06 | 0.116589 | 0.01169  | -0.24419 |
| 0.160444 | 0.0005   | 0.057541 | 0.21454  | 0.354247 | 2.97E-15 | 0.138137 | 0.00278  | 0.297993 |
| 0.307303 | 1.14E-11 | 0.035658 | 0.44204  | 0.702693 | 9.54E-71 | 0.465377 | 1.78E-26 | 0.483771 |
| 0.214962 | 2.76E-06 | -0.06495 | 0.16113  | 0.595806 | 3.28E-46 | 0.392275 | 1.25E-18 | 0.41616  |
| 0.117475 | 0.01106  | -0.03971 | 0.39184  | 0.397509 | 3.96E-19 | 0.206261 | 7.00E-06 | 0.332794 |
| 0.247678 | 5.87E-08 | 0.168664 | 0.00025  | 0.7083   | 2.43E-72 | 0.413524 | 1.03E-20 | 0.540634 |
| -0.22543 | 8.57E-07 | -0.0032  | 0.94497  | -0.33628 | 8.25E-14 | -0.17049 | 0.00021  | -0.20509 |
| 0.361308 | 7.57E-16 | 0.155013 | 0.00078  | 0.631066 | 3.03E-53 | 0.29766  | 5.22E-11 | 0.575292 |
| 0.358138 | 1.40E-15 | 0.158437 | 0.00059  | 0.609289 | 8.52E-49 | 0.325581 | 5.41E-13 | 0.490353 |
| 0.03038  | 0.51253  | -0.22041 | 1.51E-06 | 0.210656 | 4.40E-06 | 0.039846 | 0.39028  | 0.169845 |
| 0.088611 | 0.05568  | -0.02218 | 0.63262  | 0.398461 | 3.20E-19 | 0.289475 | 1.82E-10 | 0.231402 |

|          |          |          |          |          |          |          |          |          |
|----------|----------|----------|----------|----------|----------|----------|----------|----------|
| 0.016879 | 0.71601  | 0.073741 | 0.111151 | -0.26902 | 3.48E-09 | -0.11396 | 0.01374  | -0.20873 |
| 0.098143 | 0.03398  | -0.08088 | 0.08082  | 0.372896 | 7.47E-17 | 0.150374 | 0.00112  | 0.306832 |
| 0.240384 | 1.46E-07 | 0.007434 | 0.87271  | 0.277737 | 1.02E-09 | 0.131593 | 0.00439  | 0.212481 |
| -0.06598 | 0.15454  | 0.203604 | 9.22E-06 | -0.38471 | 6.38E-18 | -0.14055 | 0.00233  | -0.28778 |
| -0.10411 | 0.02445  | 0.133627 | 0.00382  | -0.25027 | 4.22E-08 | -0.06682 | 0.14939  | -0.14635 |
| 0.13595  | 0.00324  | -0.21656 | 2.32E-06 | 0.52128  | 6.78E-34 | 0.184704 | 5.93E-05 | 0.327206 |
| 0.252278 | 3.26E-08 | 0.098248 | 0.03379  | 0.500682 | 5.31E-31 | 0.280995 | 6.37E-10 | 0.394293 |
| 0.147626 | 0.00138  | -0.06946 | 0.13391  | 0.561935 | 3.17E-40 | 0.344337 | 1.91E-14 | 0.428384 |
| 0.333118 | 1.45E-13 | 0.144232 | 0.00178  | 0.655345 | 1.21E-58 | 0.347773 | 1.01E-14 | 0.561739 |
| 0.116766 | 0.01156  | -0.08072 | 0.08141  | 0.291993 | 1.24E-10 | 0.125569 | 0.00659  | 0.128116 |
| -0.12834 | 0.00548  | 0.114278 | 0.01347  | -0.29483 | 8.07E-11 | -0.14208 | 0.00209  | -0.2262  |
| 0.441945 | 9.48E-24 | -0.03144 | 0.49798  | 0.267541 | 4.27E-09 | 0.035988 | 0.43782  | 0.236774 |
| 0.12561  | 0.00657  | 0.02862  | 0.53727  | 0.275369 | 1.43E-09 | 0.157769 | 0.00062  | 0.224877 |
| 0.561501 | 3.74E-40 | 0.000543 | 0.99066  | 0.460509 | 6.84E-26 | 0.253198 | 2.90E-08 | 0.378223 |
| 0.101176 | 0.0288   | -0.26601 | 5.26E-09 | 0.280523 | 6.82E-10 | 0.015379 | 0.74028  | 0.149439 |
| 0.14542  | 0.00163  | 0.154396 | 0.00081  | -0.08157 | 0.07824  | -0.04456 | 0.33666  | 0.030252 |
| 0.151475 | 0.00102  | 0.346821 | 1.20E-14 | -0.17487 | 0.00015  | 0.065202 | 0.1595   | -0.09469 |
| 0.166557 | 0.0003   | -0.12873 | 0.00534  | 0.232741 | 3.65E-07 | 0.113656 | 0.01399  | 0.108209 |
| 0.122377 | 0.00811  | 0.029195 | 0.52912  | 0.297795 | 5.11E-11 | 0.147391 | 0.0014   | 0.256254 |
| -0.06608 | 0.15396  | 0.088816 | 0.05511  | -0.25179 | 3.47E-08 | -0.07676 | 0.09756  | -0.10113 |
| 0.020605 | 0.65694  | -0.27165 | 2.41E-09 | 0.142973 | 0.00195  | 0.023465 | 0.613    | 0.069868 |
| 0.046275 | 0.31834  | 0.335813 | 8.98E-14 | -0.22195 | 1.27E-06 | -0.02273 | 0.62419  | -0.09844 |
| 0.348404 | 8.96E-15 | 0.184478 | 6.06E-05 | 0.686844 | 1.95E-66 | 0.397513 | 3.95E-19 | 0.555251 |
| 0.239968 | 1.53E-07 | 0.06129  | 0.18611  | 0.408514 | 3.28E-20 | 0.161093 | 0.00047  | 0.368468 |
| 0.279752 | 7.62E-10 | 0.039166 | 0.39842  | 0.338273 | 5.77E-14 | 0.200349 | 1.29E-05 | 0.199959 |
| -0.12558 | 0.00658  | -0.11385 | 0.01382  | -0.402   | 1.45E-19 | -0.26253 | 8.44E-09 | -0.25947 |
| 0.186642 | 4.94E-05 | -0.20859 | 5.48E-06 | 0.19062  | 3.38E-05 | 0.01683  | 0.7168   | -0.04474 |
| 0.428165 | 3.05E-22 | 0.078221 | 0.09133  | 0.477451 | 5.78E-28 | 0.142177 | 0.00207  | 0.280805 |
| 0.241359 | 1.29E-07 | -0.00042 | 0.99275  | 0.675404 | 1.71E-63 | 0.418067 | 3.51E-21 | 0.506814 |
| 0.215595 | 2.58E-06 | -0.1472  | 0.00142  | 0.482749 | 1.23E-28 | 0.212418 | 3.64E-06 | 0.254844 |
| 0.026451 | 0.56855  | 0.357553 | 1.57E-15 | -0.02848 | 0.53921  | 0.268278 | 3.85E-09 | 0.005939 |
| 0.019497 | 0.67431  | 0.049271 | 0.28798  | -0.20477 | 8.17E-06 | 0.043693 | 0.34612  | -0.2613  |
| 0.310592 | 6.67E-12 | 0.085026 | 0.06638  | 0.667305 | 1.73E-61 | 0.405119 | 7.15E-20 | 0.55444  |
| 0.279131 | 8.34E-10 | -0.00554 | 0.90504  | 0.513047 | 1.03E-32 | 0.227183 | 7.00E-07 | 0.480701 |
| 0.622414 | 1.96E-51 | 0.142938 | 0.00196  | 0.400567 | 2.00E-19 | 0.187998 | 4.35E-05 | 0.384479 |
| 0.140482 | 0.00234  | 0.002    | 0.96561  | 0.288557 | 2.09E-10 | 0.076765 | 0.09754  | 0.153455 |
| 0.285487 | 3.30E-10 | 0.099269 | 0.03197  | 0.414133 | 8.89E-21 | 0.152216 | 0.00097  | 0.283586 |
| 0.219542 | 1.67E-06 | 0.549789 | 3.04E-38 | 0.108713 | 0.01877  | 0.32187  | 1.02E-12 | 0.124546 |
| 0.231165 | 4.40E-07 | -0.00844 | 0.85566  | 0.362033 | 6.57E-16 | 0.08197  | 0.07679  | 0.280297 |
| 0.050916 | 0.27217  | -0.25295 | 2.99E-08 | 0.143445 | 0.00189  | -0.03055 | 0.51017  | 0.050821 |
| 0.041836 | 0.36702  | -0.29779 | 5.11E-11 | 0.156872 | 0.00067  | 0.001426 | 0.97548  | 0.055123 |
| 0.239844 | 1.55E-07 | -0.06922 | 0.13528  | 0.432485 | 1.04E-22 | 0.126676 | 0.00612  | 0.31361  |
| 0.186377 | 5.07E-05 | -0.03753 | 0.41842  | 0.34023  | 4.05E-14 | 0.087286 | 0.05946  | 0.264561 |
| 0.161191 | 0.00047  | -0.09059 | 0.05042  | 0.507763 | 5.66E-32 | 0.264802 | 6.21E-09 | 0.347109 |
| -0.10724 | 0.02046  | -0.2606  | 1.09E-08 | -0.00406 | 0.9303   | -0.09616 | 0.03777  | 0.057621 |

|          |          |          |          |          |          |          |          |          |
|----------|----------|----------|----------|----------|----------|----------|----------|----------|
| 0.146408 | 0.00151  | -0.24138 | 1.29E-07 | 0.19483  | 2.24E-05 | -0.15557 | 0.00074  | 0.141131 |
| -0.04176 | 0.36788  | -0.26525 | 5.84E-09 | 0.240509 | 1.43E-07 | 0.039637 | 0.39277  | 0.188028 |
| 0.207956 | 5.85E-06 | -0.03697 | 0.42537  | 0.43851  | 2.29E-23 | 0.225056 | 8.94E-07 | 0.241388 |
| 0.134576 | 0.00357  | -0.21104 | 4.22E-06 | 0.423314 | 9.95E-22 | 0.217042 | 2.20E-06 | 0.206364 |
| 0.025021 | 0.58965  | -0.20071 | 1.24E-05 | 0.351323 | 5.18E-15 | 0.182799 | 7.09E-05 | 0.144233 |
| 0.278045 | 9.75E-10 | 0.008805 | 0.84949  | 0.439402 | 1.82E-23 | 0.088747 | 0.0553   | 0.32526  |
| -0.19413 | 2.40E-05 | 0.008959 | 0.84689  | -0.3878  | 3.30E-18 | -0.11135 | 0.01607  | -0.37521 |
| 0.45904  | 1.02E-25 | 0.133237 | 0.00392  | 0.487605 | 2.91E-29 | 0.252048 | 3.36E-08 | 0.317275 |
| 0.127138 | 0.00594  | 0.034911 | 0.45167  | 0.305301 | 1.57E-11 | 0.160881 | 0.00048  | 0.274454 |
| -0.01453 | 0.75422  | 0.072648 | 0.11693  | -0.24567 | 7.56E-08 | -0.14882 | 0.00126  | -0.1115  |
| 0.306361 | 1.32E-11 | 0.038683 | 0.40427  | 0.42411  | 8.21E-22 | 0.099556 | 0.03148  | 0.398533 |
| 0.086533 | 0.06169  | -0.14846 | 0.00129  | 0.304278 | 1.84E-11 | 0.14713  | 0.00143  | 0.213534 |
| 0.201773 | 1.11E-05 | -0.02157 | 0.64205  | 0.328242 | 3.41E-13 | 0.012397 | 0.78933  | 0.260075 |
| 0.523696 | 3.01E-34 | 0.145221 | 0.00165  | 0.267619 | 4.22E-09 | 0.094295 | 0.04167  | 0.188634 |
| 0.223724 | 1.04E-06 | 0.099766 | 0.03112  | 0.430484 | 1.72E-22 | 0.208936 | 5.28E-06 | 0.36543  |
| 0.289094 | 1.93E-10 | 0.017455 | 0.70676  | 0.495678 | 2.51E-30 | 0.331398 | 1.97E-13 | 0.314965 |
| 0.470139 | 4.69E-27 | 0.001867 | 0.96791  | 0.39283  | 1.11E-18 | 0.170503 | 0.00021  | 0.296115 |
| 0.129758 | 0.00498  | -0.0637  | 0.16936  | 0.301203 | 3.00E-11 | 0.058474 | 0.20719  | 0.171436 |
| 0.245592 | 7.63E-08 | 0.198246 | 1.59E-05 | 0.530489 | 2.96E-35 | 0.305633 | 1.49E-11 | 0.389427 |
| 0.215139 | 2.71E-06 | -0.0706  | 0.12764  | 0.565614 | 7.65E-41 | 0.291806 | 1.28E-10 | 0.39217  |
| 0.028341 | 0.54125  | -0.08075 | 0.08131  | 0.256266 | 1.94E-08 | 0.144362 | 0.00176  | 0.211489 |
| 0.476774 | 7.04E-28 | 0.204344 | 8.54E-06 | 0.611983 | 2.51E-49 | 0.271822 | 2.36E-09 | 0.518125 |
| 0.218239 | 1.93E-06 | -0.15855 | 0.00058  | 0.450341 | 1.06E-24 | 0.097896 | 0.03443  | 0.27671  |
| -0.10671 | 0.02108  | -0.00515 | 0.91156  | -0.26632 | 5.04E-09 | 0.059922 | 0.19614  | -0.32333 |
| 0.003261 | 0.94396  | -0.06439 | 0.16479  | -0.31327 | 4.30E-12 | -0.14654 | 0.0015   | -0.29417 |
| 0.149696 | 0.00118  | 0.040308 | 0.3848   | 0.466073 | 1.47E-26 | 0.222068 | 1.26E-06 | 0.424677 |
| 0.208559 | 5.49E-06 | 0.162505 | 0.00042  | 0.364518 | 4.02E-16 | 0.18364  | 6.56E-05 | 0.299629 |
| 0.028603 | 0.53751  | 0.346556 | 1.27E-14 | -0.28059 | 6.75E-10 | 0.109461 | 0.01797  | -0.24946 |
| 0.146008 | 0.00156  | 0.025713 | 0.5794   | 0.440053 | 1.54E-23 | 0.413434 | 1.05E-20 | 0.278644 |
| 0.159609 | 0.00054  | -0.02026 | 0.66232  | 0.489427 | 1.68E-29 | 0.363358 | 5.06E-16 | 0.304932 |
| 0.201009 | 1.20E-05 | -0.07627 | 0.09974  | 0.515222 | 5.04E-33 | 0.270883 | 2.69E-09 | 0.296977 |
| -0.00579 | 0.90061  | 0.099405 | 0.03174  | -0.24329 | 1.02E-07 | -0.12416 | 0.00722  | -0.18045 |
| 0.478943 | 3.75E-28 | -0.05941 | 0.2      | 0.459755 | 8.40E-26 | 0.179858 | 9.30E-05 | 0.374369 |
| 0.023556 | 0.61163  | -0.17923 | 9.85E-05 | 0.311838 | 5.45E-12 | 0.117574 | 0.011    | 0.229343 |
| 0.155339 | 0.00076  | -0.0871  | 0.06001  | 0.438842 | 2.10E-23 | 0.25831  | 1.48E-08 | 0.278963 |
| 0.304242 | 1.86E-11 | 0.075051 | 0.10527  | 0.627728 | 1.54E-52 | 0.345646 | 1.50E-14 | 0.493731 |
| 0.183372 | 6.72E-05 | -0.04898 | 0.29089  | 0.323268 | 8.05E-13 | 0.093384 | 0.04369  | 0.214447 |
| 0.283696 | 4.29E-10 | -0.00086 | 0.98513  | 0.347775 | 1.01E-14 | 0.051787 | 0.26405  | 0.350789 |
| 0.20984  | 4.80E-06 | -0.15395 | 0.00084  | 0.449428 | 1.35E-24 | 0.264911 | 6.11E-09 | 0.239991 |
| -0.14894 | 0.00125  | -0.17195 | 0.00019  | -0.26659 | 4.86E-09 | -0.16027 | 0.00051  | -0.30939 |
| 0.288205 | 2.20E-10 | 0.071883 | 0.12084  | 0.477229 | 6.17E-28 | 0.242307 | 1.15E-07 | 0.569509 |
| 0.177123 | 0.00012  | 0.010546 | 0.82019  | 0.514137 | 7.20E-33 | 0.309175 | 8.40E-12 | 0.438007 |
| -0.08798 | 0.05746  | 0.115078 | 0.01283  | -0.35079 | 5.72E-15 | -0.16485 | 0.00035  | -0.24898 |
| -0.00571 | 0.90209  | -0.04929 | 0.28782  | 0.295694 | 7.07E-11 | 0.265342 | 5.77E-09 | 0.130444 |
| 0.000372 | 0.9936   | -0.07443 | 0.10821  | 0.245974 | 7.27E-08 | 0.187986 | 4.35E-05 | 0.085931 |

|          |          |          |          |          |          |          |          |          |
|----------|----------|----------|----------|----------|----------|----------|----------|----------|
| -0.00209 | 0.9641   | 0.099167 | 0.03215  | -0.25266 | 3.10E-08 | -0.13415 | 0.00368  | -0.19949 |
| -0.02409 | 0.60352  | -0.33098 | 2.12E-13 | 0.294095 | 9.03E-11 | 0.05943  | 0.19985  | 0.131701 |
| -0.00504 | 0.91348  | -0.38634 | 4.51E-18 | 0.004271 | 0.92666  | -0.28371 | 4.28E-10 | 0.024113 |
| 0.120434 | 0.00918  | -0.24377 | 9.59E-08 | 0.113128 | 0.01444  | -0.0973  | 0.03555  | 0.006039 |
| 0.053109 | 0.25203  | -0.22278 | 1.16E-06 | 0.093162 | 0.0442   | -0.06223 | 0.17945  | -0.03809 |
| 0.026573 | 0.56677  | -0.2101  | 4.67E-06 | 0.388903 | 2.60E-18 | 0.144264 | 0.00177  | 0.281733 |
| 0.172985 | 0.00017  | 0.377731 | 2.76E-17 | 0.00856  | 0.85363  | 0.18263  | 7.20E-05 | 0.094597 |
| 0.283826 | 4.21E-10 | 0.063595 | 0.17006  | 0.691299 | 1.28E-67 | 0.381585 | 1.23E-17 | 0.553232 |
| 0.188786 | 4.03E-05 | -0.18098 | 8.39E-05 | 0.290418 | 1.58E-10 | 0.059334 | 0.20058  | 0.106418 |
| -0.03885 | 0.40226  | -0.33609 | 8.55E-14 | 0.117365 | 0.01114  | 0.004473 | 0.9232   | -0.05074 |
| 0.227676 | 6.61E-07 | -0.07006 | 0.13057  | 0.31455  | 3.49E-12 | -0.0475  | 0.30564  | 0.318288 |
| 0.01387  | 0.76498  | -0.14878 | 0.00126  | 0.142226 | 0.00206  | -0.0914  | 0.04837  | 0.035249 |
| 0.199248 | 1.44E-05 | 0.002916 | 0.94989  | 0.338755 | 5.29E-14 | 0.190399 | 3.45E-05 | 0.236716 |
| 0.252898 | 3.01E-08 | 0.078658 | 0.08953  | 0.423573 | 9.35E-22 | 0.241728 | 1.23E-07 | 0.209655 |
| 0.120524 | 0.00913  | -0.1973  | 1.75E-05 | 0.159338 | 0.00055  | 0.052444 | 0.25802  | 0.087559 |
| 0.312082 | 5.23E-12 | 0.138241 | 0.00276  | 0.358065 | 1.42E-15 | 0.277081 | 1.12E-09 | 0.203855 |
| -0.04737 | 0.30698  | -0.2961  | 6.64E-11 | -0.00366 | 0.93716  | -0.21578 | 2.53E-06 | -0.11576 |
| 0.213082 | 3.39E-06 | 0.001898 | 0.96737  | 0.393791 | 8.98E-19 | 0.117721 | 0.0109   | 0.237102 |
| 0.364137 | 4.34E-16 | 0.096869 | 0.03638  | 0.521575 | 6.14E-34 | 0.31215  | 5.17E-12 | 0.325572 |
| 0.10012  | 0.03052  | 0.047349 | 0.30723  | 0.321476 | 1.09E-12 | 0.199533 | 1.40E-05 | 0.280903 |
| 0.094255 | 0.04176  | -0.06682 | 0.14935  | 0.294715 | 8.21E-11 | 0.153023 | 0.00091  | 0.160351 |
| 0.272012 | 2.29E-09 | -0.01263 | 0.78538  | 0.616332 | 3.39E-50 | 0.332818 | 1.53E-13 | 0.527864 |
| 0.317788 | 2.03E-12 | 0.166992 | 0.00029  | 0.391811 | 1.38E-18 | 0.183454 | 6.67E-05 | 0.317443 |
| 0.111613 | 0.01582  | 0.041477 | 0.37116  | 0.357019 | 1.74E-15 | 0.251294 | 3.70E-08 | 0.173541 |
| 0.040238 | 0.38563  | 0.369825 | 1.39E-16 | 0.004142 | 0.92887  | 0.266277 | 5.07E-09 | -0.00757 |
| -0.09182 | 0.04736  | 0.105372 | 0.02277  | -0.33258 | 1.60E-13 | -0.08686 | 0.06072  | -0.23918 |
| 0.209119 | 5.18E-06 | -0.14376 | 0.00184  | 0.502311 | 3.19E-31 | 0.114595 | 0.01321  | 0.394309 |
| 0.235442 | 2.65E-07 | -0.00873 | 0.85078  | 0.577748 | 6.22E-43 | 0.374117 | 5.82E-17 | 0.395586 |
| 0.052815 | 0.25467  | 0.178645 | 0.0001   | -0.19236 | 2.85E-05 | -0.09989 | 0.03091  | 0.017791 |
| 0.246213 | 7.06E-08 | -0.04441 | 0.33829  | 0.449603 | 1.29E-24 | 0.111361 | 0.01606  | 0.37328  |
| 0.372973 | 7.35E-17 | 0.151333 | 0.00104  | 0.405858 | 6.04E-20 | 0.311715 | 5.56E-12 | 0.236952 |
| 0.368343 | 1.88E-16 | 0.073137 | 0.11448  | 0.569704 | 1.55E-41 | 0.169714 | 0.00023  | 0.50632  |
| 0.188801 | 4.02E-05 | 0.063876 | 0.16818  | 0.513835 | 7.94E-33 | 0.312745 | 4.69E-12 | 0.400818 |
| 0.142104 | 0.00208  | 0.004422 | 0.92407  | 0.271058 | 2.62E-09 | 0.054549 | 0.23938  | 0.231344 |
| 0.028599 | 0.53756  | -0.10729 | 0.0204   | 0.254361 | 2.49E-08 | 0.080258 | 0.08318  | 0.183591 |
| 0.166882 | 0.00029  | -0.0443  | 0.33941  | 0.264025 | 6.90E-09 | 0.194816 | 2.24E-05 | 0.196937 |
| 0.250493 | 4.10E-08 | -0.11753 | 0.01103  | 0.435969 | 4.35E-23 | 0.05274  | 0.25535  | 0.294595 |
| 0.347036 | 1.16E-14 | 0.057057 | 0.21843  | 0.604799 | 6.39E-48 | 0.363372 | 5.05E-16 | 0.413607 |
| 0.320701 | 1.25E-12 | 0.150991 | 0.00106  | 0.627137 | 2.04E-52 | 0.355181 | 2.48E-15 | 0.521854 |
| -0.34184 | 3.02E-14 | -0.19656 | 1.88E-05 | -0.48182 | 1.62E-28 | -0.27522 | 1.46E-09 | -0.42657 |
| 0.125327 | 0.00669  | -0.21279 | 3.49E-06 | 0.29064  | 1.53E-10 | 0.134091 | 0.0037   | 0.086437 |
| 0.052205 | 0.26021  | -0.10894 | 0.01852  | 0.475166 | 1.12E-27 | 0.332628 | 1.58E-13 | 0.293272 |
| 0.341074 | 3.47E-14 | 0.120869 | 0.00893  | 0.48488  | 6.55E-29 | 0.311407 | 5.84E-12 | 0.323319 |
| 0.18244  | 7.33E-05 | -0.00963 | 0.83566  | 0.274049 | 1.72E-09 | 0.00492  | 0.91555  | 0.275211 |
| 0.065481 | 0.15772  | -0.09687 | 0.03637  | 0.429146 | 2.39E-22 | 0.208935 | 5.28E-06 | 0.250927 |

|          |          |          |          |          |          |          |          |          |
|----------|----------|----------|----------|----------|----------|----------|----------|----------|
| 0.283931 | 4.15E-10 | 0.126583 | 0.00616  | 0.350024 | 6.61E-15 | 0.151957 | 0.00099  | 0.356223 |
| 0.240254 | 1.48E-07 | 0.139596 | 0.0025   | 0.33015  | 2.45E-13 | 0.13304  | 0.00398  | 0.300044 |
| 0.267527 | 4.27E-09 | -0.06695 | 0.14858  | 0.508095 | 5.09E-32 | 0.238529 | 1.83E-07 | 0.352354 |
| 0.03812  | 0.41115  | -0.01031 | 0.82411  | 0.289803 | 1.73E-10 | 0.139922 | 0.00244  | 0.271631 |
| 0.22955  | 5.32E-07 | -0.00028 | 0.99513  | 0.400832 | 1.88E-19 | 0.059078 | 0.20253  | 0.337904 |
| -0.14113 | 0.00224  | 0.053779 | 0.24609  | -0.4158  | 6.00E-21 | -0.09356 | 0.0433   | -0.39656 |
| 0.275971 | 1.31E-09 | 0.014782 | 0.75003  | 0.272188 | 2.24E-09 | 0.005227 | 0.9103   | 0.298934 |
| 0.097627 | 0.03493  | -0.07405 | 0.11001  | 0.395886 | 5.67E-19 | 0.224097 | 9.97E-07 | 0.269779 |
| -0.23745 | 2.08E-07 | 0.061662 | 0.18345  | -0.45796 | 1.37E-25 | -0.18878 | 4.03E-05 | -0.28095 |
| -0.18498 | 5.78E-05 | -0.11958 | 0.0097   | -0.4176  | 3.92E-21 | -0.14445 | 0.00175  | -0.36004 |
| 0.062727 | 0.17598  | 0.352943 | 3.81E-15 | -0.2567  | 1.83E-08 | -0.03325 | 0.47342  | -0.20345 |
| 0.120864 | 0.00894  | -0.06963 | 0.13295  | 0.234964 | 2.81E-07 | 0.015993 | 0.73031  | 0.097242 |
| 0.152464 | 0.00095  | -0.04092 | 0.37763  | 0.262164 | 8.87E-09 | 0.034162 | 0.46144  | 0.199759 |
| 0.006629 | 0.88639  | 0.318098 | 1.93E-12 | -0.14084 | 0.00228  | -0.02744 | 0.55411  | 0.044489 |
| 0.163954 | 0.00037  | -0.16486 | 0.00035  | 0.328728 | 3.14E-13 | 0.161731 | 0.00045  | 0.192228 |
| 0.270018 | 3.03E-09 | -0.09621 | 0.03767  | 0.572286 | 5.56E-42 | 0.248392 | 5.36E-08 | 0.371176 |
| -0.05287 | 0.25415  | -0.25258 | 3.14E-08 | 0.170084 | 0.00022  | 0.008855 | 0.84865  | -0.0173  |
| 0.59819  | 1.17E-46 | 0.090488 | 0.05067  | 0.610214 | 5.60E-49 | 0.325503 | 5.49E-13 | 0.494014 |
| 0.182977 | 6.97E-05 | -0.05161 | 0.26566  | 0.273418 | 1.88E-09 | 0.043768 | 0.3453   | 0.263637 |
| 0.117371 | 0.01114  | -0.23958 | 1.61E-07 | 0.399939 | 2.30E-19 | -0.06145 | 0.18493  | 0.342687 |
| 0.132479 | 0.00413  | 0.488332 | 2.34E-29 | 0.025751 | 0.57884  | 0.321083 | 1.17E-12 | 0.045647 |
| 0.06279  | 0.17554  | -0.24853 | 5.27E-08 | 0.250445 | 4.13E-08 | 0.036451 | 0.43194  | 0.141707 |
| 0.166327 | 0.00031  | -0.13996 | 0.00243  | 0.258689 | 1.41E-08 | 0.169924 | 0.00023  | 0.023377 |
| 0.40275  | 1.22E-19 | 0.204972 | 8.00E-06 | 0.726769 | 7.18E-78 | 0.422941 | 1.09E-21 | 0.552061 |
| 0.151319 | 0.00104  | -0.18251 | 7.28E-05 | 0.434265 | 6.69E-23 | 0.013438 | 0.7721   | 0.339244 |
| 0.055013 | 0.2354   | -0.087   | 0.06029  | 0.31021  | 7.10E-12 | 0.236796 | 2.25E-07 | 0.175383 |
| 0.208224 | 5.69E-06 | -0.05973 | 0.1976   | 0.26683  | 4.70E-09 | 0.207747 | 5.99E-06 | 0.129107 |
| 0.270182 | 2.96E-09 | 0.135821 | 0.00327  | 0.608977 | 9.81E-49 | 0.416741 | 4.80E-21 | 0.435404 |
| 0.128412 | 0.00545  | -0.24221 | 1.16E-07 | 0.471806 | 2.92E-27 | 0.155085 | 0.00077  | 0.290711 |
| 0.321653 | 1.06E-12 | 0.125187 | 0.00675  | 0.541879 | 5.39E-37 | 0.363474 | 4.95E-16 | 0.438921 |
| -0.01071 | 0.81739  | -0.12826 | 0.00551  | 0.16235  | 0.00043  | -0.00375 | 0.93552  | 0.225687 |
| 0.337194 | 7.01E-14 | 0.117907 | 0.01077  | 0.478086 | 4.81E-28 | 0.33046  | 2.32E-13 | 0.290984 |
| 0.032119 | 0.48868  | -0.28608 | 3.02E-10 | 0.125998 | 0.0064   | -0.03671 | 0.42867  | 0.056189 |
| 0.096148 | 0.0378   | -0.04019 | 0.38625  | 0.210756 | 4.35E-06 | 0.00661  | 0.88671  | 0.069794 |
| 0.003356 | 0.94234  | 0.166466 | 0.0003   | -0.25642 | 1.90E-08 | -0.06222 | 0.17949  | -0.14353 |
| 0.14663  | 0.00149  | -0.20026 | 1.30E-05 | 0.220289 | 1.53E-06 | -0.14071 | 0.0023   | 0.202511 |
| 0.307133 | 1.17E-11 | 0.18612  | 5.19E-05 | 0.626128 | 3.32E-52 | 0.406297 | 5.46E-20 | 0.554872 |
| 0.322496 | 9.18E-13 | 0.118511 | 0.01037  | 0.659809 | 1.09E-59 | 0.434161 | 6.86E-23 | 0.50059  |
| 0.059312 | 0.20074  | -0.26494 | 6.09E-09 | 0.398133 | 3.44E-19 | -0.01346 | 0.77167  | 0.329257 |
| -0.11076 | 0.01664  | -0.04753 | 0.30541  | -0.33947 | 4.65E-14 | -0.09443 | 0.04139  | -0.32566 |
| 0.363475 | 4.94E-16 | 0.039524 | 0.39412  | 0.465339 | 1.80E-26 | 0.093785 | 0.04279  | 0.290559 |
| 0.344714 | 1.78E-14 | 0.164879 | 0.00035  | 0.607295 | 2.09E-48 | 0.214694 | 2.84E-06 | 0.528558 |
| 0.159461 | 0.00054  | -0.13125 | 0.0045   | 0.307802 | 1.05E-11 | -0.0609  | 0.18892  | 0.165633 |
| 0.225161 | 8.83E-07 | -0.10081 | 0.02938  | 0.301033 | 3.08E-11 | 0.099264 | 0.03198  | 0.110435 |
| 0.077714 | 0.09346  | -0.20187 | 1.10E-05 | 0.156403 | 0.00069  | -0.04268 | 0.35743  | 0.078742 |

|          |          |          |          |          |          |          |          |          |
|----------|----------|----------|----------|----------|----------|----------|----------|----------|
| -0.03154 | 0.49661  | -0.30405 | 1.91E-11 | 0.095769 | 0.03856  | -0.11876 | 0.01021  | 0.06656  |
| 0.110899 | 0.01651  | -0.12485 | 0.00691  | 0.167667 | 0.00027  | -0.0563  | 0.22463  | 0.11521  |
| 0.597484 | 1.59E-46 | 0.075491 | 0.10324  | 0.498586 | 1.02E-30 | 0.090841 | 0.04978  | 0.419099 |
| 0.261964 | 9.11E-09 | 0.621387 | 3.18E-51 | 0.09181  | 0.04738  | 0.332443 | 1.63E-13 | 0.135342 |
| 0.294365 | 8.67E-11 | 0.1665   | 0.0003   | 0.599268 | 7.31E-47 | 0.360219 | 9.37E-16 | 0.439009 |
| 0.23909  | 1.70E-07 | 0.053568 | 0.24795  | 0.448864 | 1.56E-24 | 0.344012 | 2.03E-14 | 0.345569 |
| 0.112528 | 0.01498  | -0.03905 | 0.39984  | 0.229116 | 5.59E-07 | 0.013871 | 0.76497  | 0.233105 |
| 0.114246 | 0.0135   | -0.23968 | 1.59E-07 | 0.221842 | 1.29E-06 | -0.01854 | 0.68944  | 0.092514 |
| 0.260443 | 1.12E-08 | 0.008406 | 0.85624  | 0.485211 | 5.94E-29 | 0.266829 | 4.70E-09 | 0.367428 |
| 0.207135 | 6.38E-06 | 0.095119 | 0.03991  | 0.609338 | 8.33E-49 | 0.297948 | 4.99E-11 | 0.507928 |
| 0.365663 | 3.21E-16 | 0.152455 | 0.00095  | 0.742632 | 5.38E-83 | 0.505158 | 1.30E-31 | 0.522297 |
| 0.244602 | 8.64E-08 | 0.03413  | 0.46186  | 0.43411  | 6.95E-23 | 0.165901 | 0.00032  | 0.301322 |
| 0.015917 | 0.73155  | -0.07491 | 0.10595  | 0.446695 | 2.76E-24 | 0.229552 | 5.32E-07 | 0.32518  |
| 0.236512 | 2.33E-07 | -0.03018 | 0.51526  | 0.523455 | 3.26E-34 | 0.333507 | 1.35E-13 | 0.33305  |
| 0.221133 | 1.39E-06 | -0.16223 | 0.00043  | 0.501005 | 4.80E-31 | 0.162162 | 0.00043  | 0.373417 |
| 0.348266 | 9.20E-15 | 0.069205 | 0.13535  | 0.577742 | 6.23E-43 | 0.253158 | 2.91E-08 | 0.466856 |
| -0.15552 | 0.00075  | -0.34081 | 3.64E-14 | -0.01432 | 0.75755  | -0.06935 | 0.13454  | -0.12786 |
| 0.111212 | 0.0162   | -0.21497 | 2.76E-06 | 0.240059 | 1.51E-07 | 0.019936 | 0.66741  | 0.23905  |
| 0.231217 | 4.38E-07 | 0.102782 | 0.02635  | 0.398333 | 3.29E-19 | 0.219877 | 1.61E-06 | 0.291004 |
| 0.30901  | 8.63E-12 | 0.04051  | 0.38242  | 0.457231 | 1.67E-25 | 0.338323 | 5.72E-14 | 0.317964 |
| -0.1058  | 0.02221  | 0.077244 | 0.09546  | -0.45837 | 1.23E-25 | -0.22218 | 1.24E-06 | -0.34534 |
| 0.235871 | 2.52E-07 | -0.01105 | 0.81176  | 0.361882 | 6.77E-16 | 0.212796 | 3.49E-06 | 0.170788 |
| 0.12577  | 0.0065   | 0.023281 | 0.61579  | 0.28899  | 1.96E-10 | 0.193047 | 2.67E-05 | 0.197517 |
| 0.144622 | 0.00173  | -0.12473 | 0.00696  | 0.493846 | 4.40E-30 | 0.181372 | 8.09E-05 | 0.412647 |
| 0.304445 | 1.80E-11 | 0.019225 | 0.67859  | 0.598755 | 9.14E-47 | 0.290321 | 1.60E-10 | 0.444944 |
| 0.083427 | 0.07168  | -0.1183  | 0.01051  | 0.255087 | 2.26E-08 | 0.139867 | 0.00245  | 0.076834 |
| 0.228122 | 6.28E-07 | -0.12871 | 0.00534  | 0.340966 | 3.54E-14 | 0.035047 | 0.44991  | 0.195812 |
| 0.120908 | 0.00891  | -0.16006 | 0.00052  | 0.314731 | 3.38E-12 | 0.167654 | 0.00027  | 0.174809 |
| -0.1492  | 0.00122  | -0.06084 | 0.18935  | -0.48553 | 5.41E-29 | -0.27222 | 2.23E-09 | -0.33739 |
| 0.211033 | 4.22E-06 | 0.121838 | 0.0084   | 0.348265 | 9.20E-15 | 0.280536 | 6.81E-10 | 0.267074 |
| -0.03529 | 0.44672  | 0.184733 | 5.92E-05 | -0.20768 | 6.03E-06 | -0.03808 | 0.41162  | -0.16511 |
| 0.284018 | 4.09E-10 | 0.001772 | 0.96954  | 0.513835 | 7.95E-33 | 0.252873 | 3.02E-08 | 0.415304 |
| 0.308887 | 8.80E-12 | 0.043233 | 0.35123  | 0.538033 | 2.12E-36 | 0.233288 | 3.43E-07 | 0.483124 |
| 0.128366 | 0.00547  | 0.024951 | 0.59069  | 0.277984 | 9.84E-10 | 0.048483 | 0.29578  | 0.25183  |
| 0.231605 | 4.18E-07 | 0.025881 | 0.57692  | 0.372885 | 7.48E-17 | 0.083396 | 0.07178  | 0.259517 |
| 0.012592 | 0.78608  | -0.08384 | 0.07027  | 0.247716 | 5.84E-08 | 0.127791 | 0.00568  | 0.143516 |
| 0.131358 | 0.00446  | -0.10262 | 0.02659  | 0.177497 | 0.00012  | -0.12439 | 0.00712  | 0.337228 |
| 0.021526 | 0.64265  | -0.17907 | 9.99E-05 | 0.312009 | 5.30E-12 | 0.189942 | 3.61E-05 | 0.158533 |
| 0.35284  | 3.88E-15 | 0.121971 | 0.00832  | 0.733155 | 6.87E-80 | 0.427578 | 3.52E-22 | 0.637507 |
| 0.039352 | 0.39618  | -0.29565 | 7.11E-11 | 0.120939 | 0.00889  | -0.0542  | 0.24241  | -0.02839 |
| 0.230569 | 4.72E-07 | 0.037293 | 0.42138  | 0.557845 | 1.50E-39 | 0.306448 | 1.30E-11 | 0.455638 |
| -0.04149 | 0.37096  | 0.155881 | 0.00072  | -0.27824 | 9.48E-10 | -0.01955 | 0.67343  | -0.20779 |
| 0.081741 | 0.07762  | 0.309417 | 8.08E-12 | -0.15673 | 0.00068  | -0.06906 | 0.13619  | 0.14142  |
| 0.097895 | 0.03444  | -0.07602 | 0.10082  | 0.269344 | 3.33E-09 | 0.135588 | 0.00333  | 0.22818  |
| 0.003133 | 0.94617  | -0.27274 | 2.07E-09 | 0.259556 | 1.26E-08 | 0.070622 | 0.12751  | 0.199677 |

|          |          |          |          |          |          |          |          |          |
|----------|----------|----------|----------|----------|----------|----------|----------|----------|
| 0.215046 | 2.74E-06 | 0.004613 | 0.92081  | 0.255445 | 2.16E-08 | 0.029432 | 0.52578  | 0.252231 |
| -0.09702 | 0.03608  | -0.4844  | 7.55E-29 | -0.12846 | 0.00543  | -0.42785 | 3.29E-22 | -0.09451 |
| 0.226525 | 7.55E-07 | -0.06804 | 0.1421   | 0.516542 | 3.27E-33 | 0.24492  | 8.30E-08 | 0.37583  |
| 0.413841 | 9.52E-21 | 0.082801 | 0.07384  | 0.613624 | 1.18E-49 | 0.245816 | 7.42E-08 | 0.487477 |
| 0.188892 | 3.99E-05 | 0.094993 | 0.04017  | 0.338469 | 5.57E-14 | 0.204161 | 8.71E-06 | 0.299508 |
| 0.329575 | 2.71E-13 | 0.07601  | 0.10089  | 0.574075 | 2.73E-42 | 0.277119 | 1.11E-09 | 0.508995 |
| 0.330756 | 2.20E-13 | 0.009328 | 0.84066  | 0.404531 | 8.17E-20 | 0.168571 | 0.00025  | 0.279398 |
| 0.13645  | 0.00313  | -0.13416 | 0.00368  | 0.177058 | 0.00012  | 0.086064 | 0.06312  | 0.149818 |
| 0.359059 | 1.17E-15 | 0.096529 | 0.03704  | 0.557611 | 1.64E-39 | 0.247851 | 5.74E-08 | 0.440412 |
| 0.064493 | 0.1641   | 0.366226 | 2.87E-16 | -0.20927 | 5.09E-06 | 0.109082 | 0.01837  | -0.24093 |
| 0.131182 | 0.00452  | -0.02321 | 0.61689  | 0.198902 | 1.49E-05 | -0.03489 | 0.45198  | 0.265902 |
| 0.04087  | 0.37821  | -0.13188 | 0.00431  | 0.383683 | 7.93E-18 | 0.208535 | 5.51E-06 | 0.293838 |
| 0.165729 | 0.00032  | 0.047633 | 0.30433  | 0.351039 | 5.46E-15 | 0.151501 | 0.00102  | 0.339471 |
| 0.127066 | 0.00596  | -0.22851 | 6.00E-07 | 0.42195  | 1.38E-21 | 0.15178  | 0.001    | 0.248727 |
| 0.127473 | 0.00581  | -0.18162 | 7.90E-05 | 0.164137 | 0.00037  | -0.05789 | 0.21177  | 0.123515 |
| 0.344696 | 1.79E-14 | 0.047951 | 0.30111  | 0.504171 | 1.77E-31 | 0.243152 | 1.03E-07 | 0.453469 |
| 0.507164 | 6.85E-32 | -0.09377 | 0.04282  | 0.257362 | 1.68E-08 | -0.04577 | 0.32365  | 0.227661 |
| -0.19456 | 2.30E-05 | -0.0462  | 0.31915  | -0.39943 | 2.58E-19 | -0.07108 | 0.12507  | -0.37672 |
| 0.154126 | 0.00083  | -0.0107  | 0.81768  | 0.296115 | 6.62E-11 | 0.148218 | 0.00132  | 0.182338 |
| 0.256089 | 1.99E-08 | 0.153601 | 0.00087  | -0.25631 | 1.93E-08 | -0.03689 | 0.42642  | -0.15305 |
| 0.265001 | 6.04E-09 | -0.14428 | 0.00177  | 0.371322 | 1.03E-16 | 0.083837 | 0.07029  | 0.210716 |
| 0.325946 | 5.08E-13 | 0.054703 | 0.23806  | 0.719352 | 1.35E-75 | 0.367158 | 2.38E-16 | 0.563118 |
| -0.15357 | 0.00087  | -0.06693 | 0.14868  | -0.36915 | 1.59E-16 | -0.08717 | 0.05981  | -0.39366 |
| 0.234776 | 2.87E-07 | -0.0676  | 0.14468  | 0.240107 | 1.51E-07 | 0.021761 | 0.63903  | 0.185096 |
| 0.071659 | 0.12201  | -0.02716 | 0.55819  | 0.22922  | 5.53E-07 | 0.180423 | 8.83E-05 | 0.065511 |
| 0.229961 | 5.07E-07 | -0.11052 | 0.01689  | 0.363748 | 4.69E-16 | 0.129844 | 0.00495  | 0.254221 |
| 0.325994 | 5.04E-13 | 0.131958 | 0.00428  | 0.402436 | 1.31E-19 | 0.29906  | 4.20E-11 | 0.283525 |
| 0.197598 | 1.70E-05 | 0.053279 | 0.25051  | 0.370595 | 1.19E-16 | 0.142428 | 0.00203  | 0.330074 |
| 0.209633 | 4.90E-06 | -0.02551 | 0.58239  | 0.607126 | 2.26E-48 | 0.285698 | 3.20E-10 | 0.492326 |
| 0.1087   | 0.01879  | 0.338556 | 5.48E-14 | 0.002111 | 0.96371  | 0.332171 | 1.72E-13 | -0.05501 |
| 0.22175  | 1.30E-06 | -0.06281 | 0.1754   | 0.211255 | 4.12E-06 | -0.01607 | 0.72911  | 0.187344 |
| 0.127913 | 0.00564  | -0.03893 | 0.40124  | 0.381475 | 1.26E-17 | 0.193293 | 2.60E-05 | 0.302713 |
| 0.247126 | 6.29E-08 | -0.06051 | 0.19175  | 0.264838 | 6.17E-09 | 0.031416 | 0.49824  | 0.343854 |
| 0.171053 | 0.0002   | 0.16674  | 0.0003   | 0.411315 | 1.72E-20 | 0.440437 | 1.40E-23 | 0.249686 |
| 0.358462 | 1.32E-15 | 0.232477 | 3.77E-07 | 0.60995  | 6.32E-49 | 0.470384 | 4.37E-27 | 0.528774 |
| 0.214087 | 3.04E-06 | 0.125592 | 0.00658  | 0.282258 | 5.30E-10 | 0.321025 | 1.18E-12 | 0.262329 |
| 0.230565 | 4.72E-07 | 0.182576 | 7.24E-05 | 0.622325 | 2.04E-51 | 0.461392 | 5.37E-26 | 0.494867 |
| 0.116746 | 0.01158  | 0.083263 | 0.07224  | 0.334068 | 1.23E-13 | 0.275487 | 1.40E-09 | 0.305281 |
| 0.198678 | 1.52E-05 | 0.19189  | 2.99E-05 | 0.501366 | 4.29E-31 | 0.342711 | 2.57E-14 | 0.583447 |
| 0.251327 | 3.69E-08 | 0.2032   | 9.61E-06 | 0.547499 | 7.05E-38 | 0.487054 | 3.43E-29 | 0.452166 |
| 0.356587 | 1.89E-15 | 0.263653 | 7.25E-09 | 0.723453 | 7.62E-77 | 0.500319 | 5.95E-31 | 0.695396 |
| 0.143917 | 0.00182  | 0.064148 | 0.16637  | 0.329398 | 2.79E-13 | 0.231393 | 4.29E-07 | 0.246783 |
| -0.10668 | 0.02113  | 0.004049 | 0.93047  | -0.41178 | 1.54E-20 | -0.3827  | 9.76E-18 | -0.2412  |
| -0.0444  | 0.33837  | -0.1481  | 0.00133  | -0.23381 | 3.22E-07 | -0.34896 | 8.08E-15 | -0.27025 |
| 0.166346 | 0.00031  | 0.03043  | 0.51183  | 0.33519  | 1.00E-13 | 0.206971 | 6.49E-06 | 0.307464 |



|          |          |          |          |          |          |          |          |          |
|----------|----------|----------|----------|----------|----------|----------|----------|----------|
| 0.250936 | 3.88E-08 | 0.061798 | 0.18248  | 0.346108 | 1.38E-14 | 0.287486 | 2.45E-10 | 0.259226 |
| 0.035441 | 0.44482  | -0.03217 | 0.48802  | -0.35504 | 2.55E-15 | -0.27618 | 1.27E-09 | -0.27129 |
| 0.297454 | 5.39E-11 | 0.242691 | 1.10E-07 | 0.588711 | 6.74E-45 | 0.467495 | 9.87E-27 | 0.49466  |
| 0.203389 | 9.43E-06 | 0.127836 | 0.00567  | 0.440503 | 1.37E-23 | 0.265992 | 5.28E-09 | 0.466445 |
| 0.074823 | 0.10634  | 0.002077 | 0.9643   | 0.225306 | 8.69E-07 | 0.153263 | 0.00089  | 0.230432 |
| -0.11122 | 0.0162   | -0.20713 | 6.38E-06 | -0.31243 | 4.94E-12 | -0.3418  | 3.04E-14 | -0.27726 |
| 0.26733  | 4.39E-09 | 0.175594 | 0.00014  | 0.557146 | 1.96E-39 | 0.445044 | 4.25E-24 | 0.442822 |
| 0.032106 | 0.48885  | -0.08242 | 0.07516  | 0.265202 | 5.88E-09 | 0.187489 | 4.56E-05 | 0.159358 |
| -0.02791 | 0.54745  | 0.152055 | 0.00098  | -0.35305 | 3.73E-15 | -0.32613 | 4.92E-13 | -0.22507 |
| 0.200067 | 1.32E-05 | -0.02704 | 0.55997  | 0.535499 | 5.18E-36 | 0.366908 | 2.50E-16 | 0.39338  |
| 0.343934 | 2.06E-14 | 0.093886 | 0.04257  | 0.765801 | 3.35E-91 | 0.512062 | 1.42E-32 | 0.585009 |
| -0.31209 | 5.23E-12 | -0.18939 | 3.80E-05 | -0.39434 | 7.96E-19 | -0.32944 | 2.77E-13 | -0.27755 |
| 0.380871 | 1.43E-17 | 0.279834 | 7.53E-10 | 0.530108 | 3.38E-35 | 0.442767 | 7.67E-24 | 0.510818 |
| 0.189726 | 3.68E-05 | 0.020213 | 0.66307  | 0.464998 | 1.98E-26 | 0.306148 | 1.37E-11 | 0.410784 |
| -0.09215 | 0.04657  | -0.05609 | 0.22638  | -0.37385 | 6.14E-17 | -0.24568 | 7.55E-08 | -0.27912 |
| 0.350215 | 6.38E-15 | 0.242205 | 1.16E-07 | 0.650222 | 1.84E-57 | 0.435061 | 5.47E-23 | 0.573016 |
| -0.17273 | 0.00018  | -0.086   | 0.06331  | -0.38215 | 1.10E-17 | -0.32157 | 1.08E-12 | -0.30012 |
| 0.076055 | 0.10068  | -0.00072 | 0.9876   | 0.420314 | 2.05E-21 | 0.266617 | 4.84E-09 | 0.313925 |
| -0.33575 | 9.09E-14 | -0.18718 | 4.70E-05 | -0.57979 | 2.71E-43 | -0.38368 | 7.93E-18 | -0.47969 |
| 0.225382 | 8.61E-07 | 0.103497 | 0.02531  | 0.614205 | 9.05E-50 | 0.469872 | 5.06E-27 | 0.434052 |
| 0.209135 | 5.17E-06 | 0.049502 | 0.28573  | 0.663269 | 1.63E-60 | 0.500936 | 4.91E-31 | 0.501818 |
| 0.120666 | 0.00905  | 0.166905 | 0.00029  | 0.419119 | 2.73E-21 | 0.301072 | 3.06E-11 | 0.367445 |
| 0.277753 | 1.02E-09 | 0.096046 | 0.038    | 0.651789 | 8.04E-58 | 0.434949 | 5.63E-23 | 0.524396 |
| 0.22637  | 7.69E-07 | 0.100214 | 0.03037  | 0.287757 | 2.35E-10 | 0.260758 | 1.07E-08 | 0.269454 |
| 0.291615 | 1.32E-10 | 0.373527 | 6.56E-17 | 0.663628 | 1.34E-60 | 0.579831 | 2.67E-43 | 0.536442 |
| 0.289717 | 1.75E-10 | 0.10712  | 0.02059  | 0.625771 | 3.94E-52 | 0.326056 | 4.99E-13 | 0.534881 |
| 0.2593   | 1.30E-08 | 0.281886 | 5.59E-10 | 0.56102  | 4.50E-40 | 0.518828 | 1.53E-33 | 0.387176 |
| 0.273046 | 1.98E-09 | 0.29412  | 9.00E-11 | 0.651807 | 7.97E-58 | 0.625973 | 3.58E-52 | 0.438096 |
| 0.319041 | 1.65E-12 | 0.166953 | 0.00029  | 0.646377 | 1.36E-56 | 0.416581 | 4.99E-21 | 0.526681 |
| 0.365487 | 3.32E-16 | 0.17274  | 0.00018  | 0.674828 | 2.38E-63 | 0.363447 | 4.97E-16 | 0.557545 |
| -0.22074 | 1.46E-06 | -0.22308 | 1.12E-06 | -0.38572 | 5.14E-18 | -0.43381 | 7.49E-23 | -0.36593 |
| 0.243941 | 9.38E-08 | 0.142542 | 0.00202  | 0.364255 | 4.24E-16 | 0.294482 | 8.51E-11 | 0.279063 |
| 0.237799 | 1.99E-07 | -0.02245 | 0.62841  | 0.431042 | 1.50E-22 | 0.296335 | 6.40E-11 | 0.290085 |
| 0.316526 | 2.51E-12 | 0.110872 | 0.01653  | 0.687452 | 1.35E-66 | 0.419973 | 2.22E-21 | 0.549557 |
| 0.251302 | 3.70E-08 | 0.243441 | 9.98E-08 | 0.562371 | 2.68E-40 | 0.5216   | 6.09E-34 | 0.365154 |
| 0.214733 | 2.83E-06 | 0.184663 | 5.96E-05 | 0.565257 | 8.79E-41 | 0.488907 | 1.97E-29 | 0.505506 |
| 0.099912 | 0.03087  | 0.127574 | 0.00577  | 0.322842 | 8.66E-13 | 0.223595 | 1.06E-06 | 0.318635 |
| 0.390251 | 1.94E-18 | 0.368966 | 1.66E-16 | 0.795395 | #####    | 0.668856 | 7.21E-62 | 0.672931 |
| 0.348539 | 8.74E-15 | 0.182097 | 7.57E-05 | 0.684922 | 6.21E-66 | 0.416392 | 5.22E-21 | 0.644298 |
| 0.261669 | 9.48E-09 | 0.187878 | 4.40E-05 | 0.613167 | 1.46E-49 | 0.486515 | 4.03E-29 | 0.469079 |
| 0.224753 | 9.26E-07 | 0.047298 | 0.30775  | 0.609904 | 6.45E-49 | 0.379219 | 2.03E-17 | 0.443309 |
| -0.00011 | 0.99815  | -0.01877 | 0.68579  | 0.198616 | 1.53E-05 | 0.195937 | 2.01E-05 | 0.226824 |
| 0.263968 | 6.95E-09 | 0.134024 | 0.00371  | 0.644778 | 3.11E-56 | 0.457954 | 1.37E-25 | 0.435058 |
| -0.06467 | 0.16295  | -0.12661 | 0.00615  | -0.31252 | 4.87E-12 | -0.33476 | 1.08E-13 | -0.27291 |
| 0.152459 | 0.00095  | -0.0255  | 0.58258  | 0.317996 | 1.96E-12 | 0.220969 | 1.42E-06 | 0.261833 |

|          |          |          |          |          |          |          |          |          |
|----------|----------|----------|----------|----------|----------|----------|----------|----------|
| 0.308789 | 8.94E-12 | 0.112326 | 0.01516  | 0.744071 | 1.77E-83 | 0.496751 | 1.80E-30 | 0.564486 |
| 0.043905 | 0.34379  | -0.01262 | 0.78554  | 0.263437 | 7.47E-09 | 0.306576 | 1.28E-11 | 0.133864 |
| 0.383758 | 7.80E-18 | 0.191323 | 3.16E-05 | 0.722704 | 1.29E-76 | 0.465327 | 1.81E-26 | 0.626226 |
| 0.366845 | 2.53E-16 | 0.232933 | 3.57E-07 | 0.745903 | 4.23E-84 | 0.603086 | 1.37E-47 | 0.560032 |
| 0.407401 | 4.24E-20 | 0.357278 | 1.66E-15 | 0.801245 | #####    | 0.638153 | 9.04E-55 | 0.672207 |
| 0.364781 | 3.82E-16 | 0.1347   | 0.00354  | 0.568911 | 2.11E-41 | 0.417517 | 4.00E-21 | 0.380334 |
| 0.316875 | 2.37E-12 | 0.156206 | 0.00071  | 0.660752 | 6.50E-60 | 0.481984 | 1.54E-28 | 0.475141 |
| 0.153829 | 0.00085  | 0.100924 | 0.0292   | 0.41057  | 2.04E-20 | 0.300958 | 3.12E-11 | 0.363144 |
| -0.20292 | 9.90E-06 | -0.10498 | 0.02328  | -0.54585 | 1.29E-37 | -0.46082 | 6.29E-26 | -0.37647 |
| -0.27084 | 2.70E-09 | -0.05018 | 0.27914  | -0.4274  | 3.68E-22 | -0.30983 | 7.56E-12 | -0.29711 |
| 0.345614 | 1.51E-14 | 0.219569 | 1.66E-06 | 0.635376 | 3.62E-54 | 0.536014 | 4.32E-36 | 0.538394 |
| 0.162927 | 0.00041  | 0.077549 | 0.09415  | 0.572587 | 4.93E-42 | 0.382526 | 1.01E-17 | 0.507568 |
| 0.114184 | 0.01355  | 0.158822 | 0.00057  | 0.317053 | 2.30E-12 | 0.273656 | 1.82E-09 | 0.345199 |
| 0.051626 | 0.26553  | 0.016358 | 0.7244   | 0.507655 | 5.86E-32 | 0.303395 | 2.12E-11 | 0.39285  |
| 0.37589  | 4.04E-17 | 0.24455  | 8.69E-08 | 0.748895 | 4.00E-85 | 0.585921 | 2.17E-44 | 0.670195 |
| 0.226233 | 7.81E-07 | -0.02705 | 0.55979  | 0.655708 | 9.98E-59 | 0.396956 | 4.47E-19 | 0.49518  |
| 0.052886 | 0.25403  | -0.11541 | 0.01257  | 0.307603 | 1.08E-11 | 0.203598 | 9.23E-06 | 0.277634 |
| 0.067685 | 0.14417  | -0.09048 | 0.0507   | 0.178661 | 0.0001   | 0.183836 | 6.44E-05 | 0.075978 |
| 0.324252 | 6.80E-13 | 0.091058 | 0.04923  | 0.592012 | 1.67E-45 | 0.31167  | 5.60E-12 | 0.535268 |
| 0.267769 | 4.13E-09 | 0.183523 | 6.63E-05 | 0.615961 | 4.02E-50 | 0.562448 | 2.60E-40 | 0.507296 |
| 0.05286  | 0.25426  | 0.017331 | 0.70873  | 0.433972 | 7.20E-23 | 0.323508 | 7.73E-13 | 0.442618 |
| 0.236915 | 2.22E-07 | 0.077939 | 0.09251  | 0.683846 | 1.19E-65 | 0.471788 | 2.94E-27 | 0.524598 |
| 0.237258 | 2.13E-07 | 0.228332 | 6.13E-07 | 0.632133 | 1.80E-53 | 0.562269 | 2.79E-40 | 0.475511 |
| -0.25961 | 1.25E-08 | 0.063699 | 0.16937  | -0.42143 | 1.57E-21 | -0.20079 | 1.23E-05 | -0.34965 |
| 0.252887 | 3.01E-08 | 0.327839 | 3.66E-13 | 0.612968 | 1.60E-49 | 0.561071 | 4.41E-40 | 0.578738 |
| -0.19554 | 2.09E-05 | -0.03503 | 0.45016  | -0.39369 | 9.19E-19 | -0.22224 | 1.23E-06 | -0.38576 |
| 0.249991 | 4.37E-08 | 0.128824 | 0.0053   | 0.498441 | 1.07E-30 | 0.442493 | 8.23E-24 | 0.334686 |
| 0.125776 | 0.0065   | -0.08929 | 0.05383  | 0.391606 | 1.45E-18 | 0.242762 | 1.09E-07 | 0.240067 |
| 0.087477 | 0.0589   | 0.018746 | 0.68618  | -0.18069 | 8.61E-05 | -0.24254 | 1.12E-07 | -0.15643 |
| 0.02736  | 0.55534  | -0.07632 | 0.09948  | 0.301023 | 3.09E-11 | 0.261049 | 1.03E-08 | 0.125241 |
| 0.335768 | 9.05E-14 | 0.33561  | 9.31E-14 | 0.766918 | 1.28E-91 | 0.675314 | 1.80E-63 | 0.557085 |
| -0.13922 | 0.00257  | -0.19322 | 2.62E-05 | -0.39321 | 1.02E-18 | -0.36081 | 8.35E-16 | -0.37517 |
| 0.235168 | 2.74E-07 | 0.104902 | 0.02338  | 0.593145 | 1.03E-45 | 0.488436 | 2.27E-29 | 0.381474 |
| 0.254699 | 2.38E-08 | 0.176333 | 0.00013  | 0.608243 | 1.37E-48 | 0.438993 | 2.02E-23 | 0.494648 |
| 0.345015 | 1.68E-14 | 0.288008 | 2.27E-10 | 0.533212 | 1.15E-35 | 0.539677 | 1.18E-36 | 0.385143 |
| 0.404336 | 8.54E-20 | 0.278767 | 8.79E-10 | 0.710287 | 6.48E-73 | 0.481805 | 1.62E-28 | 0.623469 |
| 0.277373 | 1.07E-09 | 0.175164 | 0.00014  | 0.683291 | 1.65E-65 | 0.525266 | 1.77E-34 | 0.47969  |
| 0.296908 | 5.86E-11 | 0.142431 | 0.00203  | 0.69027  | 2.41E-67 | 0.537175 | 2.87E-36 | 0.534368 |
| 0.150807 | 0.00108  | -0.16391 | 0.00038  | 0.374174 | 5.75E-17 | 0.290908 | 1.47E-10 | 0.154753 |
| 0.262065 | 8.98E-09 | 0.031558 | 0.49631  | 0.503353 | 2.30E-31 | 0.304379 | 1.82E-11 | 0.441596 |
| 0.126028 | 0.00639  | -0.02826 | 0.54236  | 0.500639 | 5.39E-31 | 0.356249 | 2.02E-15 | 0.462195 |
| -0.14154 | 0.00217  | -0.10338 | 0.02548  | -0.37487 | 4.98E-17 | -0.36971 | 1.42E-16 | -0.24733 |
| 0.331296 | 2.00E-13 | 0.254563 | 2.43E-08 | 0.60964  | 7.27E-49 | 0.5061   | 9.62E-32 | 0.493918 |
| 0.15934  | 0.00055  | 0.05581  | 0.22868  | 0.574834 | 2.01E-42 | 0.447917 | 2.00E-24 | 0.468361 |
| 0.171163 | 0.0002   | 0.100225 | 0.03035  | 0.443075 | 7.08E-24 | 0.275221 | 1.46E-09 | 0.375668 |

|          |          |          |          |          |          |          |          |          |
|----------|----------|----------|----------|----------|----------|----------|----------|----------|
| 0.28189  | 5.59E-10 | 0.276019 | 1.30E-09 | 0.69544  | 9.70E-69 | 0.50048  | 5.66E-31 | 0.584287 |
| 0.354397 | 2.89E-15 | 0.28788  | 2.31E-10 | 0.642623 | 9.40E-56 | 0.511254 | 1.84E-32 | 0.502166 |
| 0.20798  | 5.84E-06 | -0.11111 | 0.0163   | 0.276076 | 1.29E-09 | 0.199088 | 1.46E-05 | 0.231873 |
| 0.346222 | 1.35E-14 | 0.128682 | 0.00535  | 0.672553 | 8.82E-63 | 0.471809 | 2.92E-27 | 0.52847  |
| 0.112325 | 0.01516  | 0.04292  | 0.35474  | 0.286115 | 3.00E-10 | 0.297973 | 4.97E-11 | 0.262854 |
| 0.312636 | 4.78E-12 | 0.122722 | 0.00793  | 0.539911 | 1.09E-36 | 0.297311 | 5.51E-11 | 0.503707 |
| 0.299146 | 4.14E-11 | 0.152027 | 0.00098  | 0.678362 | 3.05E-64 | 0.508016 | 5.22E-32 | 0.552973 |
| 0.018433 | 0.69114  | -0.17505 | 0.00014  | 0.385481 | 5.41E-18 | 0.247719 | 5.84E-08 | 0.247249 |
| 0.305433 | 1.53E-11 | 0.036748 | 0.4282   | 0.574859 | 1.99E-42 | 0.35917  | 1.15E-15 | 0.486449 |
| 0.370714 | 1.16E-16 | 0.222209 | 1.24E-06 | 0.568139 | 2.86E-41 | 0.378346 | 2.43E-17 | 0.478877 |
| 0.168851 | 0.00025  | 0.24687  | 6.50E-08 | 0.413108 | 1.13E-20 | 0.385892 | 4.96E-18 | 0.392653 |
| -0.2625  | 8.48E-09 | -0.20956 | 4.94E-06 | -0.55715 | 1.96E-39 | -0.45482 | 3.20E-25 | -0.50168 |
| 0.19137  | 3.14E-05 | 0.143502 | 0.00188  | 0.640932 | 2.22E-55 | 0.422074 | 1.34E-21 | 0.577773 |
| 0.186379 | 5.07E-05 | 0.015622 | 0.73634  | 0.517131 | 2.69E-33 | 0.389154 | 2.46E-18 | 0.414756 |
| 0.110507 | 0.01689  | 0.242334 | 1.14E-07 | 0.416056 | 5.65E-21 | 0.559131 | 9.24E-40 | 0.312375 |
| 0.303976 | 1.94E-11 | 0.303065 | 2.24E-11 | 0.643971 | 4.72E-56 | 0.594066 | 6.94E-46 | 0.553309 |
| 0.220566 | 1.49E-06 | 0.085982 | 0.06338  | 0.488521 | 2.21E-29 | 0.421645 | 1.49E-21 | 0.342932 |
| 0.321965 | 1.01E-12 | 0.092575 | 0.04555  | 0.707374 | 4.48E-72 | 0.470852 | 3.83E-27 | 0.536273 |
| 0.170743 | 0.00021  | 0.342128 | 2.86E-14 | 0.44697  | 2.57E-24 | 0.610856 | 4.19E-49 | 0.311991 |
| -0.07764 | 0.09376  | 0.116855 | 0.0115   | -0.33092 | 2.14E-13 | -0.24822 | 5.48E-08 | -0.21194 |
| 0.274936 | 1.52E-09 | 0.170984 | 0.00021  | 0.728468 | 2.11E-78 | 0.545678 | 1.37E-37 | 0.580727 |
| 0.038883 | 0.40184  | 0.076995 | 0.09654  | 0.2084   | 5.59E-06 | 0.175488 | 0.00014  | 0.271992 |
| 0.271915 | 2.32E-09 | 0.179807 | 9.34E-05 | 0.522949 | 3.87E-34 | 0.421489 | 1.55E-21 | 0.425937 |
| 0.156033 | 0.00072  | 0.11503  | 0.01287  | 0.376574 | 3.51E-17 | 0.280461 | 6.88E-10 | 0.343616 |
| 0.170759 | 0.00021  | 0.361378 | 7.47E-16 | 0.389269 | 2.40E-18 | 0.542224 | 4.76E-37 | 0.326892 |
| 0.37955  | 1.89E-17 | 0.382371 | 1.05E-17 | 0.792952 | #####    | 0.746853 | 2.01E-84 | 0.559746 |
| -0.18986 | 3.63E-05 | -0.15223 | 0.00097  | -0.38395 | 7.49E-18 | -0.3464  | 1.30E-14 | -0.33791 |
| 0.247462 | 6.03E-08 | 0.176907 | 0.00012  | 0.565704 | 7.39E-41 | 0.518955 | 1.47E-33 | 0.40946  |
| 0.170186 | 0.00022  | 0.03777  | 0.41546  | 0.648015 | 5.83E-57 | 0.439834 | 1.63E-23 | 0.484658 |
| 0.210588 | 4.43E-06 | 0.220608 | 1.48E-06 | 0.612815 | 1.71E-49 | 0.621946 | 2.44E-51 | 0.466872 |
| -0.23549 | 2.63E-07 | -0.08338 | 0.07183  | -0.53715 | 2.90E-36 | -0.44884 | 1.57E-24 | -0.40887 |
| 0.323778 | 7.38E-13 | 0.16145  | 0.00046  | 0.659326 | 1.41E-59 | 0.449216 | 1.42E-24 | 0.606106 |
| 0.008873 | 0.84834  | 0.184154 | 6.25E-05 | -0.15286 | 0.00092  | -0.09454 | 0.04115  | -0.13552 |
| 0.390012 | 2.05E-18 | 0.186541 | 4.99E-05 | 0.66662  | 2.53E-61 | 0.380283 | 1.62E-17 | 0.582001 |
| 0.139301 | 0.00255  | -0.02185 | 0.63771  | 0.539582 | 1.22E-36 | 0.319042 | 1.65E-12 | 0.463997 |
| 0.147294 | 0.00141  | 0.013717 | 0.76751  | 0.453709 | 4.31E-25 | 0.242313 | 1.15E-07 | 0.373617 |
| 0.185664 | 5.42E-05 | -0.03851 | 0.40643  | 0.535567 | 5.06E-36 | 0.314989 | 3.24E-12 | 0.478116 |
| 0.262774 | 8.17E-09 | 0.131256 | 0.00449  | 0.351609 | 4.90E-15 | 0.310056 | 7.28E-12 | 0.33628  |
| 0.227787 | 6.53E-07 | -0.04264 | 0.35791  | 0.249647 | 4.57E-08 | 0.287751 | 2.36E-10 | 0.09731  |
| -0.16264 | 0.00042  | -0.27452 | 1.61E-09 | -0.34263 | 2.61E-14 | -0.39895 | 2.87E-19 | -0.35749 |
| 0.20597  | 7.21E-06 | 0.009244 | 0.84208  | 0.516916 | 2.89E-33 | 0.260391 | 1.12E-08 | 0.439583 |
| 0.331932 | 1.79E-13 | 0.338751 | 5.29E-14 | 0.602416 | 1.84E-47 | 0.608382 | 1.28E-48 | 0.471474 |
| -0.17291 | 0.00017  | -0.07069 | 0.12715  | -0.50251 | 2.99E-31 | -0.21641 | 2.36E-06 | -0.53568 |
| 0.188503 | 4.14E-05 | 0.134181 | 0.00367  | 0.381641 | 1.22E-17 | 0.223293 | 1.09E-06 | 0.400854 |
| 0.126907 | 0.00603  | 0.194495 | 2.31E-05 | 0.412268 | 1.37E-20 | 0.436727 | 3.59E-23 | 0.346346 |

|          |          |          |          |          |          |          |          |          |
|----------|----------|----------|----------|----------|----------|----------|----------|----------|
| 0.03047  | 0.51128  | 0.037815 | 0.41491  | 0.008616 | 0.85268  | 0.11372  | 0.01394  | 0.045597 |
| 0.18269  | 7.16E-05 | 0.214166 | 3.01E-06 | 0.461279 | 5.54E-26 | 0.36153  | 7.25E-16 | 0.328998 |
| 0.255577 | 2.12E-08 | 0.066179 | 0.15333  | 0.445726 | 3.56E-24 | 0.383635 | 8.01E-18 | 0.294239 |
| 0.297902 | 5.02E-11 | 0.209964 | 4.73E-06 | 0.681052 | 6.26E-65 | 0.435768 | 4.58E-23 | 0.601099 |
| -0.03087 | 0.5057   | -0.13066 | 0.00468  | 0.283994 | 4.11E-10 | 0.214368 | 2.95E-06 | 0.220435 |
| 0.331755 | 1.85E-13 | 0.360438 | 8.98E-16 | 0.666746 | 2.36E-61 | 0.561812 | 3.32E-40 | 0.591891 |
| 0.216451 | 2.35E-06 | 0.233158 | 3.48E-07 | 0.340279 | 4.01E-14 | 0.412088 | 1.43E-20 | 0.2982   |
| 0.276574 | 1.20E-09 | 0.258091 | 1.53E-08 | 0.506321 | 8.97E-32 | 0.45918  | 9.83E-26 | 0.405119 |
| 0.271058 | 2.62E-09 | 0.224672 | 9.34E-07 | 0.531789 | 1.89E-35 | 0.467665 | 9.41E-27 | 0.408184 |
| -0.18132 | 8.13E-05 | -0.20589 | 7.28E-06 | -0.53623 | 4.01E-36 | -0.46641 | 1.34E-26 | -0.4319  |
| 0.374736 | 5.12E-17 | 0.346126 | 1.37E-14 | 0.818879 | #####    | 0.722623 | 1.37E-76 | 0.61895  |
| -0.08056 | 0.08202  | -0.11732 | 0.01118  | -0.50852 | 4.44E-32 | -0.31611 | 2.69E-12 | -0.38593 |
| 0.299784 | 3.75E-11 | 0.202398 | 1.04E-05 | 0.551881 | 1.40E-38 | 0.312389 | 4.97E-12 | 0.508896 |
| 0.294307 | 8.74E-11 | 0.336745 | 7.60E-14 | 0.70453  | 2.89E-71 | 0.6564   | 6.88E-59 | 0.551437 |
| 0.23368  | 3.27E-07 | 0.125587 | 0.00658  | 0.496366 | 2.03E-30 | 0.447436 | 2.27E-24 | 0.494344 |
| 0.25015  | 4.29E-08 | 0.198532 | 1.55E-05 | 0.522441 | 4.59E-34 | 0.525301 | 1.75E-34 | 0.425704 |
| -0.2702  | 2.96E-09 | -0.20412 | 8.74E-06 | -0.34476 | 1.77E-14 | -0.21751 | 2.09E-06 | -0.34686 |
| 0.285635 | 3.23E-10 | 0.085622 | 0.06449  | 0.315722 | 2.87E-12 | 0.20703  | 6.45E-06 | 0.430916 |
| 0.036355 | 0.43316  | -0.10304 | 0.02596  | -0.32879 | 3.10E-13 | -0.30432 | 1.83E-11 | -0.30227 |
| 0.147858 | 0.00135  | 0.147003 | 0.00144  | 0.415065 | 7.14E-21 | 0.470892 | 3.79E-27 | 0.264426 |
| 0.139633 | 0.00249  | 0.053062 | 0.25245  | 0.45903  | 1.02E-25 | 0.392867 | 1.10E-18 | 0.305907 |
| 0.137384 | 0.00293  | 0.052372 | 0.25868  | 0.422623 | 1.18E-21 | 0.379283 | 2.00E-17 | 0.339304 |
| 0.165574 | 0.00033  | -0.11191 | 0.01554  | 0.223212 | 1.10E-06 | 0.165307 | 0.00033  | 0.119669 |
| 0.412695 | 1.24E-20 | 0.337075 | 7.16E-14 | 0.780679 | 5.46E-97 | 0.627844 | 1.45E-52 | 0.671397 |
| -0.28828 | 2.18E-10 | -0.23329 | 3.42E-07 | -0.48283 | 1.20E-28 | -0.3888  | 2.66E-18 | -0.47076 |
| 0.192303 | 2.87E-05 | 0.158617 | 0.00058  | 0.560728 | 5.03E-40 | 0.52916  | 4.68E-35 | 0.440786 |
| 0.271528 | 2.45E-09 | 0.216075 | 2.44E-06 | 0.645349 | 2.32E-56 | 0.63913  | 5.53E-55 | 0.467103 |
| 0.412554 | 1.29E-20 | 0.231819 | 4.08E-07 | 0.731901 | 1.73E-79 | 0.463815 | 2.75E-26 | 0.652725 |
| 0.19254  | 2.80E-05 | 0.036319 | 0.43362  | 0.446549 | 2.87E-24 | 0.307752 | 1.06E-11 | 0.36293  |
| 0.362816 | 5.63E-16 | 0.298615 | 4.50E-11 | 0.630841 | 3.38E-53 | 0.624385 | 7.66E-52 | 0.497471 |
| 0.186905 | 4.82E-05 | 0.228117 | 6.28E-07 | 0.518106 | 1.95E-33 | 0.537343 | 2.71E-36 | 0.350142 |
| -0.12986 | 0.00494  | 0.078564 | 0.08991  | -0.41894 | 2.84E-21 | -0.2891  | 1.92E-10 | -0.2941  |
| 0.417317 | 4.19E-21 | 0.27821  | 9.52E-10 | 0.713838 | 5.94E-74 | 0.567759 | 3.32E-41 | 0.574381 |
| 0.25812  | 1.52E-08 | 0.183877 | 6.41E-05 | 0.41734  | 4.17E-21 | 0.309965 | 7.39E-12 | 0.315629 |
| 0.128354 | 0.00547  | 0.071769 | 0.12144  | 0.381239 | 1.33E-17 | 0.358899 | 1.21E-15 | 0.294791 |
| 0.329035 | 2.97E-13 | 0.13871  | 0.00266  | 0.694225 | 2.08E-68 | 0.493894 | 4.34E-30 | 0.530262 |
| 0.228253 | 6.19E-07 | 0.287397 | 2.48E-10 | 0.53618  | 4.08E-36 | 0.577567 | 6.69E-43 | 0.486033 |
| -0.01746 | 0.70666  | 0.047135 | 0.30942  | 0.299465 | 3.94E-11 | 0.268474 | 3.75E-09 | 0.158735 |
| 0.215069 | 2.73E-06 | 0.194673 | 2.27E-05 | 0.409749 | 2.47E-20 | 0.363053 | 5.37E-16 | 0.3326   |
| 0.257663 | 1.61E-08 | 0.309377 | 8.13E-12 | 0.64704  | 9.67E-57 | 0.637512 | 1.25E-54 | 0.478514 |
| -0.204   | 8.85E-06 | 0.01334  | 0.77372  | -0.44627 | 3.08E-24 | -0.23896 | 1.73E-07 | -0.29463 |
| 0.015918 | 0.73152  | 0.130999 | 0.00457  | 0.353483 | 3.43E-15 | 0.24697  | 6.42E-08 | 0.320601 |
| 0.348065 | 9.55E-15 | 0.354297 | 2.94E-15 | 0.62658  | 2.67E-52 | 0.608321 | 1.32E-48 | 0.49494  |
| -0.14368 | 0.00185  | -0.00627 | 0.89253  | -0.36731 | 2.31E-16 | -0.36833 | 1.88E-16 | -0.26706 |
| 0.368009 | 2.01E-16 | 0.324364 | 6.67E-13 | 0.71732  | 5.50E-75 | 0.611089 | 3.76E-49 | 0.618512 |

|          |          |          |          |          |          |          |          |          |
|----------|----------|----------|----------|----------|----------|----------|----------|----------|
| 0.422207 | 1.30E-21 | 0.285163 | 3.46E-10 | 0.779109 | 2.34E-96 | 0.548284 | 5.29E-38 | 0.643685 |
| 0.331568 | 1.91E-13 | 0.205606 | 7.49E-06 | 0.642779 | 8.68E-56 | 0.521673 | 5.94E-34 | 0.475711 |
| 0.213821 | 3.13E-06 | 0.073848 | 0.11099  | 0.541187 | 6.90E-37 | 0.467308 | 1.04E-26 | 0.318273 |
| 0.018198 | 0.69488  | -0.01869 | 0.68699  | 0.266422 | 4.97E-09 | 0.216798 | 2.26E-06 | 0.218619 |
| -0.35116 | 5.34E-15 | -0.33586 | 8.90E-14 | -0.49628 | 2.08E-30 | -0.44338 | 6.55E-24 | -0.44709 |
| 0.182942 | 7.00E-05 | 0.09424  | 0.04179  | 0.491794 | 8.22E-30 | 0.447751 | 2.09E-24 | 0.376073 |
| 0.197602 | 1.70E-05 | 0.062834 | 0.17524  | 0.49579  | 2.42E-30 | 0.353545 | 3.39E-15 | 0.322657 |
| 0.258628 | 1.42E-08 | 0.063392 | 0.17143  | 0.594028 | 7.05E-46 | 0.358157 | 1.40E-15 | 0.539432 |
| 0.119489 | 0.00975  | 0.053608 | 0.2476   | 0.3572   | 1.68E-15 | 0.323536 | 7.69E-13 | 0.250852 |
| 0.161413 | 0.00046  | 0.151496 | 0.00102  | 0.597396 | 1.65E-46 | 0.547366 | 7.40E-38 | 0.48852  |
| 0.37411  | 5.82E-17 | 0.20795  | 5.86E-06 | 0.591778 | 1.84E-45 | 0.375921 | 4.01E-17 | 0.550536 |
| -0.13754 | 0.0029   | -0.0451  | 0.3308   | -0.40069 | 1.95E-19 | -0.28957 | 1.79E-10 | -0.35039 |
| 0.057102 | 0.21807  | -0.04463 | 0.33583  | 0.331937 | 1.79E-13 | 0.195044 | 2.19E-05 | 0.288379 |
| -0.1842  | 6.22E-05 | -0.16754 | 0.00028  | -0.42513 | 6.40E-22 | -0.34831 | 9.12E-15 | -0.36301 |
| 0.301544 | 2.84E-11 | 0.252177 | 3.30E-08 | 0.683093 | 1.86E-65 | 0.625625 | 4.23E-52 | 0.54817  |
| 0.164317 | 0.00036  | 0.210456 | 4.49E-06 | 0.59214  | 1.58E-45 | 0.629835 | 5.53E-53 | 0.379932 |
| 0.299711 | 3.79E-11 | 0.298505 | 4.57E-11 | 0.611848 | 2.66E-49 | 0.388635 | 2.75E-18 | 0.546192 |
| 0.249446 | 4.69E-08 | 0.239774 | 1.57E-07 | 0.61202  | 2.46E-49 | 0.529593 | 4.03E-35 | 0.539193 |
| 0.28619  | 2.97E-10 | 0.246086 | 7.17E-08 | 0.332625 | 1.58E-13 | 0.307476 | 1.11E-11 | 0.276228 |
| 0.290849 | 1.48E-10 | 0.145132 | 0.00166  | 0.622059 | 2.31E-51 | 0.340772 | 3.67E-14 | 0.545229 |
| 0.376185 | 3.80E-17 | 0.299672 | 3.81E-11 | 0.673662 | 4.66E-63 | 0.432421 | 1.06E-22 | 0.622605 |
| 0.087105 | 0.05999  | 0.15782  | 0.00062  | 0.290469 | 1.57E-10 | 0.315688 | 2.89E-12 | 0.274673 |
| 0.195864 | 2.02E-05 | 0.030514 | 0.51067  | 0.448145 | 1.89E-24 | 0.363937 | 4.51E-16 | 0.373418 |
| 0.09022  | 0.05136  | 0.05424  | 0.24206  | 0.379157 | 2.05E-17 | 0.355746 | 2.23E-15 | 0.366908 |
| 0.342209 | 2.82E-14 | 0.175532 | 0.00014  | 0.645606 | 2.03E-56 | 0.465685 | 1.64E-26 | 0.543041 |
| 0.370505 | 1.21E-16 | 0.200106 | 1.32E-05 | 0.7548   | 3.43E-87 | 0.543896 | 2.61E-37 | 0.619242 |
| 0.330368 | 2.36E-13 | 0.263223 | 7.69E-09 | 0.750216 | 1.40E-85 | 0.658533 | 2.18E-59 | 0.53085  |
| 0.111504 | 0.01592  | -0.08712 | 0.05994  | 0.238296 | 1.88E-07 | 0.118707 | 0.01024  | 0.238854 |
| 0.407643 | 4.01E-20 | 0.385147 | 5.81E-18 | 0.748526 | 5.36E-85 | 0.723931 | 5.43E-77 | 0.578577 |
| 0.30166  | 2.79E-11 | 0.287467 | 2.46E-10 | 0.652013 | 7.15E-58 | 0.601851 | 2.36E-47 | 0.511929 |
| 0.098834 | 0.03273  | -0.07768 | 0.09359  | 0.45494  | 3.10E-25 | 0.320421 | 1.31E-12 | 0.370022 |
| 0.195333 | 2.13E-05 | -0.07086 | 0.12622  | 0.457446 | 1.58E-25 | 0.26121  | 1.01E-08 | 0.394114 |
| 0.138937 | 0.00262  | 0.043544 | 0.34778  | 0.578    | 5.61E-43 | 0.480918 | 2.11E-28 | 0.419324 |
| 0.197139 | 1.78E-05 | 0.158072 | 0.00061  | 0.509216 | 3.55E-32 | 0.482549 | 1.31E-28 | 0.425823 |
| -0.0384  | 0.40772  | -0.04986 | 0.28226  | -0.24591 | 7.34E-08 | -0.20727 | 6.29E-06 | -0.25726 |
| 0.268141 | 3.93E-09 | 0.143163 | 0.00193  | 0.67974  | 1.36E-64 | 0.462387 | 4.08E-26 | 0.576202 |
| 0.064685 | 0.16284  | 0.338367 | 5.67E-14 | -0.09825 | 0.03378  | -0.01222 | 0.79232  | -0.03889 |
| 0.285613 | 3.24E-10 | 0.408162 | 3.56E-20 | 0.639246 | 5.22E-55 | 0.54802  | 5.83E-38 | 0.596146 |
| -0.13776 | 0.00285  | -0.30394 | 1.95E-11 | -0.3285  | 3.27E-13 | -0.34864 | 8.58E-15 | -0.37218 |
| 0.215298 | 2.66E-06 | 0.165393 | 0.00033  | 0.598727 | 9.26E-47 | 0.432745 | 9.78E-23 | 0.476677 |
| 0.256006 | 2.01E-08 | 0.205212 | 7.81E-06 | 0.558752 | 1.07E-39 | 0.536904 | 3.16E-36 | 0.404224 |
| -0.11231 | 0.01517  | -0.07002 | 0.13081  | -0.29978 | 3.75E-11 | -0.17211 | 0.00019  | -0.37437 |
| 0.323234 | 8.10E-13 | 0.160635 | 0.00049  | 0.643795 | 5.16E-56 | 0.513076 | 1.02E-32 | 0.546639 |
| 0.180646 | 8.65E-05 | 0.102674 | 0.02651  | 0.369062 | 1.62E-16 | 0.202199 | 1.07E-05 | 0.398389 |
| -0.08186 | 0.07719  | -0.09414 | 0.04202  | 0.216875 | 2.24E-06 | 0.135956 | 0.00324  | 0.217411 |

|          |          |          |          |          |          |          |          |          |
|----------|----------|----------|----------|----------|----------|----------|----------|----------|
| 0.29284  | 1.09E-10 | 0.140178 | 0.0024   | 0.583637 | 5.59E-44 | 0.404306 | 8.60E-20 | 0.381087 |
| 0.337667 | 6.44E-14 | 0.346478 | 1.28E-14 | 0.637973 | 9.90E-55 | 0.637289 | 1.39E-54 | 0.550329 |
| 0.185154 | 5.69E-05 | 0.263641 | 7.26E-09 | 0.628843 | 8.96E-53 | 0.551281 | 1.75E-38 | 0.534513 |
| 0.153833 | 0.00085  | -0.01649 | 0.72225  | 0.546225 | 1.12E-37 | 0.374975 | 4.88E-17 | 0.406447 |
| -0.03553 | 0.44365  | 0.08013  | 0.08367  | 0.325043 | 5.94E-13 | 0.266421 | 4.98E-09 | 0.340822 |
| 0.238029 | 1.94E-07 | 0.06433  | 0.16517  | 0.633911 | 7.48E-54 | 0.434903 | 5.70E-23 | 0.521683 |
| -0.28989 | 1.71E-10 | -0.14534 | 0.00164  | -0.57489 | 1.97E-42 | -0.33594 | 8.77E-14 | -0.5283  |
| 0.240015 | 1.52E-07 | 0.187514 | 4.55E-05 | 0.612785 | 1.74E-49 | 0.501137 | 4.61E-31 | 0.42346  |
| -0.00962 | 0.83579  | -0.092   | 0.04692  | -0.34809 | 9.51E-15 | -0.31268 | 4.75E-12 | -0.21027 |
| 0.128655 | 0.00536  | 0.030007 | 0.51771  | 0.332634 | 1.58E-13 | 0.17596  | 0.00013  | 0.346561 |
| 0.352615 | 4.05E-15 | 0.309957 | 7.40E-12 | 0.56001  | 6.61E-40 | 0.47592  | 9.00E-28 | 0.465993 |
| 0.286469 | 2.85E-10 | 0.202621 | 1.02E-05 | 0.606303 | 3.26E-48 | 0.513455 | 8.99E-33 | 0.481757 |
| 0.281272 | 6.12E-10 | 0.170005 | 0.00022  | 0.646657 | 1.18E-56 | 0.553675 | 7.21E-39 | 0.540286 |
| 0.203841 | 9.00E-06 | 0.230012 | 5.04E-07 | 0.474622 | 1.31E-27 | 0.488224 | 2.42E-29 | 0.295734 |
| 0.264972 | 6.06E-09 | 0.189448 | 3.78E-05 | 0.547942 | 5.99E-38 | 0.492989 | 5.71E-30 | 0.351461 |
| 0.30047  | 3.37E-11 | 0.104891 | 0.0234   | 0.699992 | 5.42E-70 | 0.445735 | 3.55E-24 | 0.541357 |
| 0.238041 | 1.94E-07 | 0.149529 | 0.00119  | 0.57585  | 1.34E-42 | 0.456053 | 2.30E-25 | 0.329943 |
| 0.140642 | 0.00232  | -0.04591 | 0.32215  | 0.278775 | 8.78E-10 | 0.244684 | 8.55E-08 | 0.147039 |
| -0.19123 | 3.18E-05 | -0.33661 | 7.78E-14 | -0.37536 | 4.50E-17 | -0.35804 | 1.43E-15 | -0.40683 |
| -0.14448 | 0.00175  | -0.0952  | 0.03974  | -0.4728  | 2.20E-27 | -0.37726 | 3.05E-17 | -0.44679 |
| -0.13049 | 0.00474  | -0.37622 | 3.78E-17 | -0.4338  | 7.51E-23 | -0.48097 | 2.08E-28 | -0.44174 |
| 0.139555 | 0.00251  | 0.031547 | 0.49646  | 0.399349 | 2.63E-19 | 0.382141 | 1.10E-17 | 0.352786 |
| 0.085306 | 0.06549  | -0.02812 | 0.54444  | 0.304795 | 1.70E-11 | 0.238915 | 1.74E-07 | 0.240699 |
| 0.142343 | 0.00205  | -0.0886  | 0.0557   | 0.462767 | 3.68E-26 | 0.343917 | 2.06E-14 | 0.312515 |
| -0.01941 | 0.67574  | 0.122217 | 0.00819  | 0.242578 | 1.11E-07 | 0.214251 | 2.98E-06 | 0.297363 |
| -0.29346 | 9.95E-11 | -0.21518 | 2.70E-06 | -0.52392 | 2.79E-34 | -0.406   | 5.84E-20 | -0.4178  |
| -0.17719 | 0.00012  | -0.08972 | 0.05267  | -0.42259 | 1.19E-21 | -0.30935 | 8.17E-12 | -0.30667 |
| 0.096614 | 0.03688  | 0.001158 | 0.98009  | 0.300664 | 3.26E-11 | 0.221411 | 1.35E-06 | 0.25869  |
| 0.263028 | 7.89E-09 | 0.355745 | 2.23E-15 | 0.556478 | 2.52E-39 | 0.641964 | 1.32E-55 | 0.530579 |
| 0.401415 | 1.65E-19 | 0.298394 | 4.65E-11 | 0.814253 | #####    | 0.587468 | 1.14E-44 | 0.707667 |
| 0.056501 | 0.22296  | -0.06782 | 0.14334  | 0.287809 | 2.33E-10 | 0.158515 | 0.00059  | 0.214049 |
| 0.179891 | 9.27E-05 | 0.155264 | 0.00076  | 0.529593 | 4.03E-35 | 0.53692  | 3.14E-36 | 0.313532 |
| 0.315689 | 2.89E-12 | 0.208724 | 5.40E-06 | 0.656164 | 7.82E-59 | 0.47784  | 5.17E-28 | 0.551743 |
| -0.16271 | 0.00042  | -0.24832 | 5.41E-08 | -0.37599 | 3.96E-17 | -0.33251 | 1.61E-13 | -0.36659 |
| 0.143143 | 0.00193  | 0.030051 | 0.51711  | 0.330768 | 2.20E-13 | 0.217884 | 2.00E-06 | 0.190887 |
| 0.322814 | 8.70E-13 | 0.295224 | 7.60E-11 | 0.59867  | 9.49E-47 | 0.492199 | 7.27E-30 | 0.463483 |
| 0.25083  | 3.93E-08 | 0.11868  | 0.01026  | 0.420714 | 1.86E-21 | 0.418508 | 3.16E-21 | 0.272349 |
| 0.335817 | 8.97E-14 | 0.19101  | 3.25E-05 | 0.621083 | 3.67E-51 | 0.497895 | 1.27E-30 | 0.505542 |
| 0.344744 | 1.77E-14 | 0.349495 | 7.31E-15 | 0.762435 | 5.97E-90 | 0.713211 | 9.08E-74 | 0.577135 |
| 0.343134 | 2.38E-14 | 0.15023  | 0.00113  | 0.50489  | 1.41E-31 | 0.326121 | 4.93E-13 | 0.454199 |
| 0.184825 | 5.87E-05 | -0.01177 | 0.79967  | 0.37769  | 2.78E-17 | 0.270037 | 3.02E-09 | 0.281448 |
| 0.142201 | 0.00207  | 0.275086 | 1.49E-09 | 0.528589 | 5.70E-35 | 0.537814 | 2.29E-36 | 0.403349 |
| 0.110582 | 0.01682  | 0.123517 | 0.00753  | 0.301556 | 2.84E-11 | 0.227422 | 6.81E-07 | 0.30541  |
| 0.409347 | 2.71E-20 | 0.400921 | 1.85E-19 | 0.819971 | #####    | 0.707657 | 3.72E-72 | 0.661273 |
| 0.224979 | 9.02E-07 | 0.05944  | 0.19977  | 0.601159 | 3.19E-47 | 0.351282 | 5.22E-15 | 0.482303 |

|          |          |          |          |          |          |          |          |          |
|----------|----------|----------|----------|----------|----------|----------|----------|----------|
| 0.360276 | 9.27E-16 | 0.382646 | 9.87E-18 | 0.660044 | 9.57E-60 | 0.601964 | 2.24E-47 | 0.575913 |
| 0.132489 | 0.00413  | 0.22722  | 6.97E-07 | -0.2448  | 8.43E-08 | -0.11217 | 0.0153   | -0.17696 |
| 0.26761  | 4.23E-09 | 0.386939 | 3.96E-18 | 0.585692 | 2.38E-44 | 0.584522 | 3.87E-44 | 0.482643 |
| -0.10955 | 0.01788  | -0.18599 | 5.26E-05 | -0.41753 | 3.98E-21 | -0.35431 | 2.93E-15 | -0.39546 |
| 0.032423 | 0.48456  | -0.06986 | 0.13171  | -0.25166 | 3.53E-08 | -0.28463 | 3.74E-10 | -0.3155  |
| -0.14725 | 0.00142  | -0.09207 | 0.04675  | -0.39908 | 2.79E-19 | -0.31669 | 2.44E-12 | -0.38254 |
| 0.082407 | 0.07523  | -0.02634 | 0.57023  | 0.279631 | 7.76E-10 | 0.256091 | 1.99E-08 | 0.150974 |
| 0.245972 | 7.28E-08 | 0.05214  | 0.2608   | 0.282377 | 5.21E-10 | 0.322224 | 9.62E-13 | 0.148351 |
| 0.25688  | 1.79E-08 | 0.23445  | 2.98E-07 | 0.529898 | 3.63E-35 | 0.497319 | 1.51E-30 | 0.456314 |
| 0.14712  | 0.00143  | 0.024786 | 0.59315  | 0.29074  | 1.50E-10 | 0.206707 | 6.68E-06 | 0.217359 |
| 0.430028 | 1.92E-22 | 0.285579 | 3.25E-10 | 0.681077 | 6.16E-65 | 0.506889 | 7.48E-32 | 0.584135 |
| 0.265373 | 5.74E-09 | 0.238626 | 1.80E-07 | 0.621019 | 3.78E-51 | 0.520232 | 9.62E-34 | 0.494593 |
| 0.412834 | 1.20E-20 | 0.270096 | 3.00E-09 | 0.791088 | #####    | 0.586384 | 1.79E-44 | 0.624544 |
| 0.216038 | 2.45E-06 | 0.012179 | 0.79294  | 0.429894 | 1.99E-22 | 0.298563 | 4.53E-11 | 0.348247 |
| 0.189758 | 3.67E-05 | 0.156429 | 0.00069  | 0.347416 | 1.08E-14 | 0.282452 | 5.15E-10 | 0.330677 |
| 0.334686 | 1.10E-13 | 0.400821 | 1.89E-19 | 0.737457 | 2.78E-81 | 0.596525 | 2.41E-46 | 0.644143 |
| 0.380244 | 1.64E-17 | 0.267179 | 4.48E-09 | 0.665928 | 3.73E-61 | 0.635576 | 3.28E-54 | 0.444631 |
| 0.027073 | 0.5595   | -0.13931 | 0.00255  | 0.247174 | 6.25E-08 | 0.17984  | 9.31E-05 | 0.129333 |
| 0.303122 | 2.22E-11 | 0.253254 | 2.87E-08 | 0.610908 | 4.09E-49 | 0.572716 | 4.69E-42 | 0.503632 |
| -0.16816 | 0.00026  | 0.053029 | 0.25275  | -0.27845 | 9.20E-10 | -0.13271 | 0.00407  | -0.2208  |
| 0.176974 | 0.00012  | 0.162199 | 0.00043  | 0.519568 | 1.20E-33 | 0.400732 | 1.93E-19 | 0.501424 |
| 0.388949 | 2.57E-18 | 0.272259 | 2.22E-09 | 0.6604   | 7.88E-60 | 0.465849 | 1.56E-26 | 0.579059 |
| 0.156511 | 0.00069  | 0.184624 | 5.98E-05 | -0.11664 | 0.01165  | -0.09128 | 0.04867  | -0.12895 |
| -0.11825 | 0.01054  | -0.07918 | 0.08741  | -0.3747  | 5.16E-17 | -0.36956 | 1.47E-16 | -0.3399  |
| -0.01108 | 0.81127  | 0.114423 | 0.01335  | -0.29044 | 1.57E-10 | -0.25095 | 3.87E-08 | -0.19773 |
| 0.352888 | 3.85E-15 | 0.259269 | 1.31E-08 | 0.615478 | 5.03E-50 | 0.535868 | 4.55E-36 | 0.412098 |
| 0.449687 | 1.26E-24 | 0.273116 | 1.96E-09 | 0.778177 | 5.52E-96 | 0.637474 | 1.27E-54 | 0.608442 |
| -0.14213 | 0.00208  | -0.24952 | 4.64E-08 | -0.33978 | 4.39E-14 | -0.30379 | 1.99E-11 | -0.34586 |
| -0.0658  | 0.15571  | -0.13737 | 0.00293  | -0.43822 | 2.46E-23 | -0.29582 | 6.94E-11 | -0.38201 |
| 0.156422 | 0.00069  | -0.01893 | 0.68333  | 0.276299 | 1.25E-09 | 0.16178  | 0.00045  | 0.307283 |
| 0.071564 | 0.1225   | -0.00439 | 0.92461  | 0.462119 | 4.39E-26 | 0.430575 | 1.68E-22 | 0.302527 |
| 0.213784 | 3.14E-06 | -0.00933 | 0.84062  | 0.618989 | 9.82E-51 | 0.371395 | 1.01E-16 | 0.442082 |
| 0.079696 | 0.08537  | 0.16372  | 0.00038  | 0.416956 | 4.57E-21 | 0.320707 | 1.24E-12 | 0.396734 |
| 0.248762 | 5.12E-08 | 0.21933  | 1.71E-06 | 0.616636 | 2.94E-50 | 0.533262 | 1.13E-35 | 0.499651 |
| 0.103223 | 0.0257   | 0.030219 | 0.51476  | 0.292131 | 1.22E-10 | 0.315699 | 2.88E-12 | 0.172453 |
| -0.13825 | 0.00275  | -0.18831 | 4.22E-05 | -0.3287  | 3.15E-13 | -0.44093 | 1.23E-23 | -0.24049 |
| 0.156869 | 0.00067  | 0.102134 | 0.02731  | 0.42805  | 3.13E-22 | 0.503117 | 2.48E-31 | 0.262944 |
| -0.01946 | 0.67488  | 0.080429 | 0.08252  | -0.24159 | 1.25E-07 | -0.10371 | 0.025    | -0.21657 |
| -0.23745 | 2.08E-07 | -0.24507 | 8.15E-08 | -0.38893 | 2.59E-18 | -0.35908 | 1.17E-15 | -0.28345 |
| -0.12356 | 0.00751  | 0.030203 | 0.51499  | -0.16942 | 0.00024  | -0.07963 | 0.08563  | -0.17497 |
| 0.233651 | 3.28E-07 | 0.115353 | 0.01262  | 0.401639 | 1.57E-19 | 0.367637 | 2.16E-16 | 0.267644 |
| 0.170142 | 0.00022  | 0.186917 | 4.82E-05 | 0.425565 | 5.76E-22 | 0.435346 | 5.09E-23 | 0.335996 |
| 0.322069 | 9.88E-13 | 0.182518 | 7.28E-05 | 0.680627 | 8.04E-65 | 0.481955 | 1.55E-28 | 0.570309 |
| 0.262523 | 8.45E-09 | 0.169828 | 0.00023  | 0.480699 | 2.25E-28 | 0.448895 | 1.55E-24 | 0.304909 |
| 0.200028 | 1.33E-05 | 0.022551 | 0.6269   | 0.609231 | 8.75E-49 | 0.437962 | 2.63E-23 | 0.503149 |

|          |          |          |          |          |          |          |          |          |
|----------|----------|----------|----------|----------|----------|----------|----------|----------|
| 0.261065 | 1.03E-08 | 0.273399 | 1.89E-09 | 0.728192 | 2.58E-78 | 0.657698 | 3.42E-59 | 0.585956 |
| -0.15466 | 0.0008   | 0.018812 | 0.68513  | -0.34249 | 2.68E-14 | -0.18385 | 6.43E-05 | -0.24729 |
| 0.10802  | 0.01955  | 0.155528 | 0.00074  | 0.467241 | 1.06E-26 | 0.508042 | 5.17E-32 | 0.37296  |
| 0.179703 | 9.43E-05 | 0.196917 | 1.82E-05 | 0.483075 | 1.12E-28 | 0.362793 | 5.66E-16 | 0.479142 |
| 0.246575 | 6.75E-08 | 0.10124  | 0.0287   | 0.628795 | 9.17E-53 | 0.370884 | 1.12E-16 | 0.582621 |
| 0.343573 | 2.20E-14 | 0.16931  | 0.00024  | 0.632022 | 1.90E-53 | 0.426948 | 4.11E-22 | 0.478315 |
| 0.276514 | 1.21E-09 | 0.16484  | 0.00035  | 0.670871 | 2.30E-62 | 0.467517 | 9.81E-27 | 0.498809 |
| 0.141417 | 0.00219  | 0.068791 | 0.13772  | 0.539095 | 1.46E-36 | 0.462122 | 4.39E-26 | 0.419214 |
| -0.1629  | 0.00041  | -0.16315 | 0.0004   | -0.48431 | 7.76E-29 | -0.23405 | 3.13E-07 | -0.45763 |
| -0.14925 | 0.00122  | -0.09681 | 0.0365   | -0.34321 | 2.35E-14 | -0.28861 | 2.07E-10 | -0.23614 |
| 0.102951 | 0.0261   | 0.002697 | 0.95365  | 0.312703 | 4.73E-12 | 0.205791 | 7.35E-06 | 0.233485 |
| 0.239974 | 1.53E-07 | 0.001515 | 0.97396  | 0.547612 | 6.76E-38 | 0.371504 | 9.91E-17 | 0.430705 |
| 0.061583 | 0.18401  | 0.260187 | 1.16E-08 | 0.451677 | 7.42E-25 | 0.469985 | 4.90E-27 | 0.385987 |
| 0.019434 | 0.67531  | -0.16048 | 0.0005   | -0.58429 | 4.26E-44 | -0.35431 | 2.93E-15 | -0.51353 |
| -0.04824 | 0.29822  | -0.09244 | 0.04586  | -0.41896 | 2.83E-21 | -0.20755 | 6.11E-06 | -0.37161 |
| 0.248357 | 5.39E-08 | 0.166184 | 0.00031  | 0.681507 | 4.78E-65 | 0.593024 | 1.08E-45 | 0.489786 |
| -0.04491 | 0.33287  | -0.09418 | 0.04191  | 0.2763   | 1.25E-09 | 0.188613 | 4.10E-05 | 0.228491 |
| 0.369631 | 1.45E-16 | 0.088029 | 0.05731  | 0.449787 | 1.22E-24 | 0.355806 | 2.20E-15 | 0.430016 |
| 0.143232 | 0.00192  | 0.28038  | 6.96E-10 | 0.441727 | 1.00E-23 | 0.666125 | 3.34E-61 | 0.254152 |
| 0.364782 | 3.82E-16 | 0.172713 | 0.00018  | 0.656416 | 6.83E-59 | 0.481924 | 1.57E-28 | 0.458037 |
| -0.18093 | 8.42E-05 | -0.27761 | 1.04E-09 | -0.41515 | 6.99E-21 | -0.41455 | 8.06E-21 | -0.44227 |
| -0.18703 | 4.76E-05 | -0.14589 | 0.00157  | -0.35008 | 6.55E-15 | -0.34247 | 2.69E-14 | -0.17237 |
| 0.197649 | 1.69E-05 | -0.02513 | 0.58809  | 0.556344 | 2.65E-39 | 0.339626 | 4.52E-14 | 0.441612 |
| -0.08854 | 0.05589  | 0.124629 | 0.00701  | -0.20865 | 5.44E-06 | -0.03819 | 0.41031  | -0.21458 |
| 0.417289 | 4.22E-21 | 0.217196 | 2.16E-06 | 0.463715 | 2.83E-26 | 0.36733  | 2.30E-16 | 0.364953 |
| 0.186046 | 5.23E-05 | 0.135134 | 0.00343  | 0.615236 | 5.62E-50 | 0.513295 | 9.48E-33 | 0.461209 |
| -0.07082 | 0.12645  | -0.0464  | 0.31703  | -0.33668 | 7.69E-14 | -0.29773 | 5.16E-11 | -0.21807 |
| 0.25238  | 3.22E-08 | 0.069354 | 0.13451  | 0.630584 | 3.84E-53 | 0.458547 | 1.17E-25 | 0.448271 |
| 0.314662 | 3.42E-12 | 0.317149 | 2.26E-12 | 0.642618 | 9.43E-56 | 0.606716 | 2.71E-48 | 0.497152 |
| 0.186892 | 4.83E-05 | 0.143693 | 0.00185  | 0.549935 | 2.88E-38 | 0.383841 | 7.67E-18 | 0.625789 |
| 0.107653 | 0.01997  | 0.126758 | 0.00609  | 0.555473 | 3.68E-39 | 0.5142   | 7.05E-33 | 0.430894 |
| 0.204694 | 8.24E-06 | 0.30939  | 8.11E-12 | 0.513105 | 1.01E-32 | 0.680505 | 8.64E-65 | 0.306479 |
| 0.272671 | 2.09E-09 | 0.057    | 0.21889  | 0.543762 | 2.74E-37 | 0.325403 | 5.58E-13 | 0.351273 |
| 0.013386 | 0.77295  | 0.108009 | 0.01956  | -0.3246  | 6.41E-13 | -0.23033 | 4.86E-07 | -0.29159 |
| -0.1035  | 0.02531  | 0.014727 | 0.75093  | -0.31666 | 2.46E-12 | -0.182   | 7.63E-05 | -0.29804 |
| -0.06822 | 0.14102  | 0.203489 | 9.33E-06 | -0.28227 | 5.29E-10 | -0.13766 | 0.00287  | -0.21979 |
| 0.268867 | 3.55E-09 | 0.185523 | 5.50E-05 | 0.470285 | 4.50E-27 | 0.296518 | 6.22E-11 | 0.416013 |
| 0.20707  | 6.43E-06 | 0.258006 | 1.54E-08 | 0.533957 | 8.89E-36 | 0.53649  | 3.66E-36 | 0.498442 |
| -0.0358  | 0.44025  | 0.077845 | 0.0929   | 0.348399 | 8.97E-15 | 0.345278 | 1.60E-14 | 0.327994 |
| 0.271314 | 2.53E-09 | 0.208581 | 5.48E-06 | 0.618575 | 1.19E-50 | 0.474448 | 1.37E-27 | 0.522585 |
| -0.04875 | 0.29309  | 0.202632 | 1.02E-05 | -0.34825 | 9.23E-15 | -0.2576  | 1.63E-08 | -0.23864 |
| 0.220502 | 1.50E-06 | 0.071134 | 0.12477  | 0.581015 | 1.64E-43 | 0.481473 | 1.79E-28 | 0.463434 |
| 0.409449 | 2.65E-20 | 0.134331 | 0.00363  | 0.563831 | 1.53E-40 | 0.414397 | 8.35E-21 | 0.52257  |
| -0.17416 | 0.00016  | 0.037588 | 0.41771  | -0.43728 | 3.12E-23 | -0.24291 | 1.07E-07 | -0.32072 |
| 0.141522 | 0.00217  | 0.139724 | 0.00248  | 0.374017 | 5.94E-17 | 0.411498 | 1.65E-20 | 0.283876 |



|          |          |          |          |          |          |          |          |          |
|----------|----------|----------|----------|----------|----------|----------|----------|----------|
| 0.097696 | 0.0348   | 0.043137 | 0.3523   | -0.18282 | 7.07E-05 | -0.11241 | 0.01508  | -0.19479 |
| 0.267691 | 4.18E-09 | 0.196594 | 1.88E-05 | 0.506504 | 8.46E-32 | 0.248225 | 5.48E-08 | 0.45698  |
| 0.341227 | 3.38E-14 | 0.09828  | 0.03373  | 0.45103  | 8.81E-25 | 0.250387 | 4.16E-08 | 0.390668 |
| 0.098022 | 0.0342   | 0.006274 | 0.89244  | 0.354221 | 2.98E-15 | 0.325617 | 5.38E-13 | 0.220936 |
| 0.053216 | 0.25107  | -0.00959 | 0.83626  | 0.296265 | 6.47E-11 | 0.196536 | 1.89E-05 | 0.211955 |
| 0.300214 | 3.50E-11 | 0.187181 | 4.70E-05 | 0.541629 | 5.89E-37 | 0.321502 | 1.09E-12 | 0.516586 |
| 0.230875 | 4.55E-07 | 0.060808 | 0.1896   | 0.485134 | 6.07E-29 | 0.418376 | 3.26E-21 | 0.410758 |
| -0.1649  | 0.00035  | 0.012146 | 0.79348  | 0.163063 | 0.0004   | 0.143623 | 0.00186  | 0.240283 |
| -0.1818  | 7.78E-05 | -0.23869 | 1.79E-07 | -0.46743 | 1.00E-26 | -0.49304 | 5.63E-30 | -0.36502 |
| 0.292164 | 1.21E-10 | 0.277483 | 1.06E-09 | 0.731226 | 2.84E-79 | 0.622008 | 2.37E-51 | 0.610392 |
| 0.08597  | 0.06341  | -0.16166 | 0.00045  | 0.369057 | 1.63E-16 | 0.250655 | 4.02E-08 | 0.174007 |
| -0.04096 | 0.3771   | -0.03758 | 0.41779  | -0.27195 | 2.31E-09 | -0.34041 | 3.92E-14 | -0.16721 |
| 0.261741 | 9.38E-09 | 0.160367 | 0.0005   | 0.644256 | 4.07E-56 | 0.478555 | 4.20E-28 | 0.471241 |
| 0.309067 | 8.55E-12 | 0.071511 | 0.12278  | 0.516059 | 3.83E-33 | 0.301854 | 2.71E-11 | 0.445961 |
| 0.154497 | 0.00081  | 0.025545 | 0.58187  | 0.587454 | 1.14E-44 | 0.427411 | 3.67E-22 | 0.389918 |
| -0.09798 | 0.03428  | -0.1671  | 0.00029  | -0.42824 | 2.99E-22 | -0.42352 | 9.47E-22 | -0.31857 |
| 0.193202 | 2.63E-05 | -0.01939 | 0.67592  | 0.344696 | 1.79E-14 | 0.294909 | 7.97E-11 | 0.234905 |
| 0.024556 | 0.59658  | -0.18112 | 8.28E-05 | 0.285615 | 3.23E-10 | 0.216854 | 2.24E-06 | 0.126839 |
| 0.019748 | 0.67036  | 0.00876  | 0.85024  | 0.350419 | 6.14E-15 | 0.28253  | 5.09E-10 | 0.300025 |
| 0.301949 | 2.67E-11 | -0.0135  | 0.7711   | 0.396777 | 4.65E-19 | 0.172123 | 0.00019  | 0.329381 |
| 0.248049 | 5.60E-08 | 0.378825 | 2.20E-17 | 0.570376 | 1.19E-41 | 0.623679 | 1.07E-51 | 0.411548 |
| -0.12551 | 0.00661  | 0.147872 | 0.00135  | -0.4517  | 7.37E-25 | -0.21413 | 3.02E-06 | -0.3701  |
| 0.179389 | 9.70E-05 | 0.049759 | 0.28324  | 0.630247 | 4.52E-53 | 0.461937 | 4.62E-26 | 0.446822 |
| 0.332977 | 1.49E-13 | 0.359397 | 1.10E-15 | 0.646155 | 1.53E-56 | 0.634232 | 6.38E-54 | 0.536319 |
| 0.20364  | 9.19E-06 | 0.040384 | 0.3839   | 0.368332 | 1.88E-16 | 0.22779  | 6.53E-07 | 0.248173 |
| 0.286392 | 2.88E-10 | 0.353619 | 3.35E-15 | 0.598671 | 9.48E-47 | 0.629238 | 7.39E-53 | 0.397122 |
| 0.360338 | 9.15E-16 | 0.167515 | 0.00028  | 0.604887 | 6.14E-48 | 0.422603 | 1.18E-21 | 0.501708 |
| 0.262332 | 8.67E-09 | 0.003029 | 0.94796  | 0.507063 | 7.08E-32 | 0.340011 | 4.21E-14 | 0.349779 |
| 0.299707 | 3.79E-11 | 0.133497 | 0.00385  | 0.338309 | 5.73E-14 | 0.238674 | 1.79E-07 | 0.349078 |
| 0.12062  | 0.00908  | 0.032959 | 0.47737  | 0.466436 | 1.33E-26 | 0.498049 | 1.21E-30 | 0.267838 |
| 0.2781   | 9.67E-10 | 0.288603 | 2.07E-10 | 0.546193 | 1.13E-37 | 0.427547 | 3.55E-22 | 0.503633 |
| 0.132624 | 0.00409  | 0.157035 | 0.00066  | 0.272735 | 2.07E-09 | 0.314871 | 3.30E-12 | 0.217609 |
| 0.174763 | 0.00015  | 0.149054 | 0.00124  | 0.522451 | 4.58E-34 | 0.430095 | 1.89E-22 | 0.446065 |
| 0.125536 | 0.0066   | 0.134363 | 0.00363  | 0.544513 | 2.09E-37 | 0.362038 | 6.56E-16 | 0.48785  |
| 0.184597 | 5.99E-05 | 0.080701 | 0.08149  | 0.41487  | 7.47E-21 | 0.383931 | 7.52E-18 | 0.28865  |
| 0.180203 | 9.01E-05 | 0.044555 | 0.33668  | 0.538298 | 1.93E-36 | 0.468082 | 8.37E-27 | 0.409917 |
| 0.109208 | 0.01824  | 0.05518  | 0.23398  | 0.437128 | 3.25E-23 | 0.435958 | 4.37E-23 | 0.338996 |
| 0.291713 | 1.30E-10 | 0.347726 | 1.02E-14 | 0.574361 | 2.43E-42 | 0.528938 | 5.05E-35 | 0.469678 |
| 0.270855 | 2.70E-09 | 0.059295 | 0.20088  | 0.355631 | 2.28E-15 | 0.241716 | 1.24E-07 | 0.333727 |
| 0.299151 | 4.14E-11 | 0.260687 | 1.08E-08 | 0.607476 | 1.93E-48 | 0.667477 | 1.57E-61 | 0.399639 |
| 0.105271 | 0.0229   | 0.147289 | 0.00141  | 0.488171 | 2.45E-29 | 0.52763  | 7.91E-35 | 0.354071 |
| 0.228035 | 6.34E-07 | 0.132447 | 0.00414  | 0.496342 | 2.04E-30 | 0.437636 | 2.85E-23 | 0.38357  |
| 0.15671  | 0.00068  | 0.17056  | 0.00021  | 0.284962 | 3.56E-10 | 0.263115 | 7.80E-09 | 0.256503 |
| 0.267143 | 4.51E-09 | 0.34553  | 1.53E-14 | 0.647204 | 8.89E-57 | 0.682632 | 2.45E-65 | 0.522831 |
| 0.07785  | 0.09288  | 0.04272  | 0.35698  | 0.275684 | 1.37E-09 | 0.25655  | 1.87E-08 | 0.220673 |

|          |          |          |          |          |          |          |          |          |
|----------|----------|----------|----------|----------|----------|----------|----------|----------|
| 0.018809 | 0.68517  | 0.269392 | 3.30E-09 | -0.24661 | 6.71E-08 | -0.17685 | 0.00012  | -0.18029 |
| 0.376344 | 3.68E-17 | 0.246988 | 6.40E-08 | 0.713901 | 5.69E-74 | 0.543121 | 3.45E-37 | 0.640176 |
| 0.357138 | 1.70E-15 | 0.128165 | 0.00554  | 0.696412 | 5.26E-69 | 0.371379 | 1.02E-16 | 0.609256 |
| 0.142642 | 0.002    | -0.04224 | 0.36242  | 0.374796 | 5.06E-17 | 0.372152 | 8.69E-17 | 0.228925 |
| 0.251987 | 3.39E-08 | 0.297311 | 5.51E-11 | 0.522368 | 4.71E-34 | 0.456426 | 2.08E-25 | 0.427815 |
| 0.109318 | 0.01812  | 0.225466 | 8.53E-07 | 0.429049 | 2.45E-22 | 0.559551 | 7.88E-40 | 0.239153 |
| -0.22069 | 1.47E-06 | -0.09485 | 0.04048  | -0.47106 | 3.61E-27 | -0.33208 | 1.74E-13 | -0.30959 |
| -0.10689 | 0.02086  | 0.11178  | 0.01566  | -0.37295 | 7.39E-17 | -0.30214 | 2.59E-11 | -0.25965 |
| 0.050904 | 0.27229  | 0.10264  | 0.02656  | 0.535964 | 4.40E-36 | 0.472398 | 2.47E-27 | 0.436932 |
| 0.164698 | 0.00035  | 0.192078 | 2.93E-05 | 0.58297  | 7.36E-44 | 0.458842 | 1.08E-25 | 0.531209 |
| 0.300297 | 3.46E-11 | 0.361194 | 7.74E-16 | 0.57201  | 6.21E-42 | 0.616871 | 2.64E-50 | 0.451835 |
| 0.273007 | 1.99E-09 | 0.188684 | 4.07E-05 | 0.594406 | 5.99E-46 | 0.597498 | 1.58E-46 | 0.453649 |
| 0.133101 | 0.00396  | 0.118334 | 0.01049  | 0.43517  | 5.33E-23 | 0.390898 | 1.69E-18 | 0.257603 |
| -0.08287 | 0.07358  | 0.143618 | 0.00186  | -0.26395 | 6.97E-09 | -0.207   | 6.48E-06 | -0.16627 |
| -0.24705 | 6.35E-08 | -0.22647 | 7.60E-07 | -0.58548 | 2.61E-44 | -0.45601 | 2.32E-25 | -0.57986 |
| 0.351172 | 5.33E-15 | 0.193905 | 2.45E-05 | 0.600307 | 4.64E-47 | 0.562115 | 2.96E-40 | 0.405322 |
| 0.160943 | 0.00048  | 0.148432 | 0.0013   | 0.621297 | 3.32E-51 | 0.554188 | 5.95E-39 | 0.474018 |
| 0.296023 | 6.72E-11 | 0.217507 | 2.09E-06 | 0.714478 | 3.85E-74 | 0.533715 | 9.67E-36 | 0.547007 |
| 0.236049 | 2.46E-07 | 0.132513 | 0.00412  | 0.555684 | 3.40E-39 | 0.555574 | 3.54E-39 | 0.351217 |
| 0.26628  | 5.07E-09 | 0.256771 | 1.82E-08 | 0.674894 | 2.29E-63 | 0.632774 | 1.31E-53 | 0.515095 |
| 0.237538 | 2.06E-07 | 0.156937 | 0.00067  | 0.669958 | 3.86E-62 | 0.518509 | 1.71E-33 | 0.541609 |
| 0.285046 | 3.52E-10 | 0.094049 | 0.04221  | 0.686668 | 2.17E-66 | 0.526216 | 1.28E-34 | 0.447939 |
| 0.146263 | 0.00153  | 0.035847 | 0.43962  | 0.298275 | 4.74E-11 | 0.166599 | 0.0003   | 0.280448 |
| -0.13196 | 0.00428  | -0.01672 | 0.71862  | -0.32399 | 7.11E-13 | -0.19501 | 2.20E-05 | -0.18227 |
| 0.236384 | 2.37E-07 | 0.335169 | 1.01E-13 | 0.423536 | 9.43E-22 | 0.415483 | 6.47E-21 | 0.369478 |
| 0.102577 | 0.02665  | 0.123608 | 0.00749  | 0.366745 | 2.58E-16 | 0.405229 | 6.97E-20 | 0.250587 |
| 0.38547  | 5.42E-18 | 0.165921 | 0.00032  | 0.473747 | 1.68E-27 | 0.375876 | 4.05E-17 | 0.352099 |
| -0.22013 | 1.56E-06 | -0.4211  | 1.70E-21 | -0.45213 | 6.58E-25 | -0.50672 | 7.89E-32 | -0.48884 |
| 0.229595 | 5.29E-07 | 0.15321  | 0.00089  | 0.626211 | 3.19E-52 | 0.599359 | 7.03E-47 | 0.413128 |
| 0.175008 | 0.00014  | 0.197403 | 1.73E-05 | 0.527967 | 7.05E-35 | 0.41702  | 4.50E-21 | 0.437442 |
| 0.178748 | 0.0001   | 0.142613 | 0.00201  | 0.648047 | 5.73E-57 | 0.54121  | 6.85E-37 | 0.502677 |
| 0.307776 | 1.05E-11 | 0.230719 | 4.64E-07 | 0.684615 | 7.47E-66 | 0.565125 | 9.25E-41 | 0.516736 |
| 0.207547 | 6.11E-06 | 0.07098  | 0.12559  | 0.57703  | 8.31E-43 | 0.423687 | 9.09E-22 | 0.451485 |
| 0.148874 | 0.00125  | 0.2996   | 3.86E-11 | 0.567351 | 3.89E-41 | 0.551109 | 1.87E-38 | 0.464926 |
| 0.261534 | 9.65E-09 | 0.167031 | 0.00029  | 0.545467 | 1.48E-37 | 0.353279 | 3.57E-15 | 0.508911 |
| 0.148368 | 0.0013   | -0.01543 | 0.73943  | 0.460161 | 7.52E-26 | 0.265039 | 6.01E-09 | 0.352898 |
| -0.14326 | 0.00191  | -0.02747 | 0.55371  | -0.38229 | 1.06E-17 | -0.26556 | 5.59E-09 | -0.33296 |
| -0.09807 | 0.03411  | -0.14696 | 0.00145  | -0.36119 | 7.76E-16 | -0.2977  | 5.18E-11 | -0.27956 |
| 0.17718  | 0.00012  | 0.129123 | 0.0052   | 0.463167 | 3.29E-26 | 0.371784 | 9.36E-17 | 0.29543  |
| -0.26208 | 8.97E-09 | -0.20548 | 7.59E-06 | -0.54723 | 7.78E-38 | -0.39714 | 4.30E-19 | -0.47061 |
| 0.485522 | 5.41E-29 | 0.298934 | 4.28E-11 | 0.746849 | 2.02E-84 | 0.613505 | 1.25E-49 | 0.525588 |
| -0.07697 | 0.09667  | 0.001354 | 0.97672  | -0.37247 | 8.14E-17 | -0.24138 | 1.29E-07 | -0.29374 |
| -0.04314 | 0.35226  | -0.185   | 5.77E-05 | -0.28526 | 3.41E-10 | -0.33103 | 2.10E-13 | -0.26341 |
| 0.176376 | 0.00013  | 0.130689 | 0.00467  | 0.467509 | 9.83E-27 | 0.320055 | 1.39E-12 | 0.475666 |
| 0.14336  | 0.0019   | -0.0328  | 0.47946  | 0.516261 | 3.59E-33 | 0.388592 | 2.78E-18 | 0.292145 |

|          |          |          |          |          |          |          |          |          |
|----------|----------|----------|----------|----------|----------|----------|----------|----------|
| 0.227936 | 6.42E-07 | 0.008272 | 0.8585   | 0.456634 | 1.96E-25 | 0.21194  | 3.83E-06 | 0.387561 |
| 0.259971 | 1.19E-08 | 0.155749 | 0.00073  | 0.711256 | 3.39E-73 | 0.536785 | 3.30E-36 | 0.591718 |
| 0.163474 | 0.00039  | 0.005675 | 0.90265  | 0.475116 | 1.13E-27 | 0.335357 | 9.74E-14 | 0.332587 |
| 0.365038 | 3.63E-16 | 0.302175 | 2.57E-11 | 0.732971 | 7.87E-80 | 0.531425 | 2.14E-35 | 0.655838 |
| 0.29816  | 4.83E-11 | 0.069989 | 0.13097  | 0.575018 | 1.87E-42 | 0.401508 | 1.62E-19 | 0.491555 |
| -0.08554 | 0.06475  | -0.11919 | 0.00994  | -0.36188 | 6.77E-16 | -0.2776  | 1.04E-09 | -0.42398 |
| 0.198362 | 1.57E-05 | 0.022359 | 0.62984  | 0.418119 | 3.46E-21 | 0.30788  | 1.04E-11 | 0.373077 |
| 0.315681 | 2.89E-12 | 0.093747 | 0.04288  | 0.675245 | 1.87E-63 | 0.47505  | 1.16E-27 | 0.536225 |
| 0.197518 | 1.71E-05 | 0.082027 | 0.07658  | 0.538444 | 1.83E-36 | 0.394675 | 7.40E-19 | 0.428899 |
| 0.175941 | 0.00013  | 0.008215 | 0.85946  | 0.32743  | 3.93E-13 | 0.214963 | 2.76E-06 | 0.14671  |
| 0.362454 | 6.05E-16 | 0.106079 | 0.02186  | 0.529201 | 4.62E-35 | 0.317792 | 2.03E-12 | 0.570571 |
| -0.11502 | 0.01288  | -0.21863 | 1.84E-06 | -0.38409 | 7.27E-18 | -0.28994 | 1.70E-10 | -0.4267  |
| 0.040831 | 0.37866  | -0.04943 | 0.28639  | 0.455863 | 2.42E-25 | 0.369257 | 1.56E-16 | 0.353419 |
| 0.287842 | 2.32E-10 | -0.09203 | 0.04685  | 0.235867 | 2.52E-07 | 0.216369 | 2.37E-06 | 0.172063 |
| 0.196618 | 1.87E-05 | 0.042133 | 0.36363  | 0.358202 | 1.39E-15 | 0.239453 | 1.63E-07 | 0.328389 |
| 0.074584 | 0.10746  | -0.10123 | 0.02871  | 0.32337  | 7.91E-13 | 0.224474 | 9.55E-07 | 0.131124 |
| 0.256411 | 1.90E-08 | 0.054756 | 0.2376   | 0.620382 | 5.11E-51 | 0.378325 | 2.44E-17 | 0.435092 |
| 0.102892 | 0.02618  | 0.045066 | 0.33117  | 0.326321 | 4.76E-13 | 0.152639 | 0.00094  | 0.329346 |
| 0.315469 | 2.99E-12 | 0.289357 | 1.85E-10 | 0.534911 | 6.37E-36 | 0.61181  | 2.71E-49 | 0.356798 |
| 0.311799 | 5.48E-12 | 0.127474 | 0.0058   | 0.653049 | 4.13E-58 | 0.486874 | 3.62E-29 | 0.514225 |
| 0.145281 | 0.00164  | 0.155844 | 0.00073  | 0.393171 | 1.03E-18 | 0.326413 | 4.69E-13 | 0.310379 |
| 0.192116 | 2.92E-05 | 0.178943 | 0.0001   | 0.345212 | 1.62E-14 | 0.285136 | 3.47E-10 | 0.349192 |
| 0.346992 | 1.17E-14 | 0.208413 | 5.58E-06 | 0.680583 | 8.26E-65 | 0.383544 | 8.17E-18 | 0.621539 |
| 0.325633 | 5.37E-13 | 0.110285 | 0.01712  | 0.404334 | 8.54E-20 | 0.269632 | 3.20E-09 | 0.38968  |
| 0.298052 | 4.91E-11 | 0.162878 | 0.00041  | 0.382932 | 9.29E-18 | 0.307318 | 1.13E-11 | 0.378944 |
| 0.166645 | 0.0003   | 0.233748 | 3.24E-07 | 0.483842 | 8.91E-29 | 0.359658 | 1.05E-15 | 0.498766 |
| 0.328789 | 3.10E-13 | 0.251753 | 3.49E-08 | 0.715716 | 1.65E-74 | 0.495786 | 2.43E-30 | 0.588034 |
| 0.168369 | 0.00026  | 0.133396 | 0.00388  | 0.390669 | 1.77E-18 | 0.341915 | 2.98E-14 | 0.278784 |
| 0.227079 | 7.09E-07 | 0.106826 | 0.02095  | 0.461545 | 5.15E-26 | 0.480475 | 2.40E-28 | 0.299778 |
| -0.1696  | 0.00023  | -0.11669 | 0.01162  | -0.30732 | 1.13E-11 | -0.35157 | 4.94E-15 | -0.19403 |
| 0.182171 | 7.51E-05 | 0.064533 | 0.16383  | 0.527943 | 7.11E-35 | 0.492524 | 6.59E-30 | 0.336426 |
| 0.349448 | 7.37E-15 | 0.227961 | 6.40E-07 | 0.569214 | 1.87E-41 | 0.583454 | 6.03E-44 | 0.437112 |
| 0.121568 | 0.00854  | -0.01169 | 0.80106  | 0.389183 | 2.45E-18 | 0.192768 | 2.74E-05 | 0.256161 |
| 0.162497 | 0.00042  | -0.0146  | 0.75304  | 0.3575   | 1.59E-15 | 0.335628 | 9.28E-14 | 0.111998 |
| 0.020136 | 0.66427  | 0.152561 | 0.00094  | 0.231294 | 4.34E-07 | 0.374787 | 5.07E-17 | 0.178274 |
| 0.081099 | 0.07999  | -0.03146 | 0.49764  | 0.196434 | 1.91E-05 | 0.217884 | 2.00E-06 | 0.113742 |
| 0.334635 | 1.11E-13 | 0.072536 | 0.11749  | 0.5203   | 9.40E-34 | 0.374913 | 4.94E-17 | 0.389669 |
| 0.268825 | 3.57E-09 | 0.124788 | 0.00693  | 0.418841 | 2.92E-21 | 0.315487 | 2.98E-12 | 0.297565 |
| 0.377188 | 3.09E-17 | 0.277951 | 9.88E-10 | 0.676721 | 7.95E-64 | 0.552609 | 1.07E-38 | 0.472305 |
| 0.424225 | 7.98E-22 | 0.320202 | 1.36E-12 | 0.626697 | 2.53E-52 | 0.566952 | 4.55E-41 | 0.430284 |
| 0.160803 | 0.00049  | 0.025743 | 0.57896  | 0.310237 | 7.07E-12 | 0.230324 | 4.86E-07 | 0.197045 |
| 0.1951   | 2.18E-05 | 0.062243 | 0.17934  | 0.371614 | 9.69E-17 | 0.333234 | 1.42E-13 | 0.227733 |
| 0.234179 | 3.08E-07 | 0.114994 | 0.0129   | 0.361885 | 6.76E-16 | 0.248343 | 5.39E-08 | 0.313075 |
| 0.24505  | 8.17E-08 | 0.18824  | 4.25E-05 | 0.490877 | 1.09E-29 | 0.407393 | 4.25E-20 | 0.437461 |
| 0.186511 | 5.01E-05 | 0.117922 | 0.01076  | 0.331894 | 1.80E-13 | 0.170742 | 0.00021  | 0.380813 |

|          |          |          |          |          |          |          |          |          |
|----------|----------|----------|----------|----------|----------|----------|----------|----------|
| -0.15909 | 0.00056  | 0.025644 | 0.58042  | -0.36031 | 9.21E-16 | -0.26908 | 3.45E-09 | -0.32666 |
| 0.091069 | 0.0492   | 0.139643 | 0.00249  | 0.345984 | 1.41E-14 | 0.363777 | 4.66E-16 | 0.185646 |
| 0.293458 | 9.95E-11 | 0.058757 | 0.20499  | 0.444417 | 5.00E-24 | 0.247963 | 5.66E-08 | 0.362327 |
| 0.037449 | 0.41943  | -0.1988  | 1.51E-05 | -0.21319 | 3.35E-06 | -0.38193 | 1.15E-17 | -0.22096 |
| -0.0955  | 0.03911  | -0.01383 | 0.76567  | -0.38524 | 5.70E-18 | -0.27115 | 2.59E-09 | -0.20619 |
| -0.22215 | 1.24E-06 | -0.06751 | 0.1452   | -0.38379 | 7.75E-18 | -0.38556 | 5.32E-18 | -0.30144 |
| 0.374512 | 5.36E-17 | 0.308937 | 8.73E-12 | 0.641842 | 1.40E-55 | 0.434274 | 6.67E-23 | 0.636675 |
| 0.070018 | 0.13081  | -0.00516 | 0.91148  | -0.2229  | 1.14E-06 | -0.17873 | 0.0001   | -0.2345  |
| -0.19795 | 1.64E-05 | -0.21321 | 3.34E-06 | -0.37799 | 2.61E-17 | -0.35126 | 5.24E-15 | -0.38678 |
| 0.020699 | 0.65548  | -0.1645  | 0.00036  | -0.56601 | 6.56E-41 | -0.47124 | 3.43E-27 | -0.47173 |
| 0.029998 | 0.51785  | 0.025605 | 0.581    | 0.383369 | 8.47E-18 | 0.383045 | 9.08E-18 | 0.221631 |
| 0.221026 | 1.41E-06 | 0.098377 | 0.03355  | 0.329977 | 2.52E-13 | 0.202164 | 1.07E-05 | 0.302272 |
| 0.044161 | 0.34098  | 0.03861  | 0.40516  | 0.289698 | 1.76E-10 | 0.161396 | 0.00046  | 0.29477  |
| 0.250833 | 3.93E-08 | 0.133978 | 0.00372  | 0.496328 | 2.05E-30 | 0.29571  | 7.05E-11 | 0.434011 |
| 0.304699 | 1.73E-11 | 0.135942 | 0.00324  | 0.576542 | 1.01E-42 | 0.396886 | 4.54E-19 | 0.537233 |
| 0.1193   | 0.00987  | 0.015159 | 0.74388  | 0.49077  | 1.12E-29 | 0.442582 | 8.04E-24 | 0.346159 |
| 0.183281 | 6.78E-05 | 0.121528 | 0.00856  | 0.464757 | 2.12E-26 | 0.342269 | 2.79E-14 | 0.300129 |
| 0.15136  | 0.00103  | 0.107271 | 0.02042  | 0.315143 | 3.16E-12 | 0.236104 | 2.45E-07 | 0.31875  |
| 0.288597 | 2.08E-10 | 0.118189 | 0.01058  | 0.600086 | 5.11E-47 | 0.391471 | 1.49E-18 | 0.510131 |
| 0.318849 | 1.70E-12 | -0.02557 | 0.58145  | 0.591055 | 2.50E-45 | 0.338742 | 5.30E-14 | 0.41985  |
| 0.260576 | 1.10E-08 | 0.184515 | 6.04E-05 | 0.462883 | 3.56E-26 | 0.34899  | 8.03E-15 | 0.425736 |
| 0.190234 | 3.51E-05 | 0.05326  | 0.25069  | 0.522541 | 4.44E-34 | 0.371317 | 1.03E-16 | 0.454287 |
| 0.102999 | 0.02603  | 0.078953 | 0.08833  | 0.445253 | 4.02E-24 | 0.428474 | 2.82E-22 | 0.379376 |
| 0.256606 | 1.86E-08 | 0.043904 | 0.3438   | 0.663517 | 1.42E-60 | 0.392376 | 1.22E-18 | 0.543637 |
| 0.181094 | 8.30E-05 | 0.029174 | 0.52942  | 0.528987 | 4.97E-35 | 0.363634 | 4.79E-16 | 0.381199 |
| 0.387791 | 3.30E-18 | 0.401906 | 1.48E-19 | 0.717104 | 6.38E-75 | 0.631526 | 2.42E-53 | 0.633783 |
| 0.217154 | 2.17E-06 | 0.174988 | 0.00014  | 0.581576 | 1.31E-43 | 0.510896 | 2.06E-32 | 0.480815 |
| 0.073464 | 0.11286  | 0.127131 | 0.00594  | 0.258773 | 1.39E-08 | 0.243064 | 1.05E-07 | 0.27256  |
| 0.186342 | 5.09E-05 | 0.104109 | 0.02445  | 0.412185 | 1.40E-20 | 0.269784 | 3.13E-09 | 0.286478 |
| 0.038433 | 0.40732  | -0.01737 | 0.70818  | 0.486    | 4.70E-29 | 0.39206  | 1.31E-18 | 0.391491 |
| -0.09403 | 0.04226  | 0.011817 | 0.79896  | -0.3322  | 1.71E-13 | -0.34428 | 1.93E-14 | -0.23596 |
| 0.090322 | 0.0511   | -0.0342  | 0.46091  | 0.367308 | 2.31E-16 | 0.240093 | 1.51E-07 | 0.44828  |
| 0.338192 | 5.86E-14 | 0.354241 | 2.97E-15 | 0.717446 | 5.04E-75 | 0.632489 | 1.51E-53 | 0.636995 |
| 0.260477 | 1.11E-08 | 0.226526 | 7.55E-07 | 0.645504 | 2.14E-56 | 0.50941  | 3.33E-32 | 0.472141 |
| 0.163765 | 0.00038  | 0.064361 | 0.16497  | 0.317391 | 2.17E-12 | 0.233789 | 3.23E-07 | 0.264138 |
| -0.08171 | 0.07772  | 0.002926 | 0.94972  | -0.24495 | 8.27E-08 | -0.1882  | 4.26E-05 | -0.16503 |
| -0.34202 | 2.92E-14 | -0.2014  | 1.16E-05 | -0.50885 | 3.99E-32 | -0.3357  | 9.17E-14 | -0.42517 |
| -0.20229 | 1.06E-05 | -0.23675 | 2.26E-07 | -0.33519 | 1.00E-13 | -0.28781 | 2.33E-10 | -0.32056 |
| 0.318561 | 1.79E-12 | 0.327479 | 3.90E-13 | 0.688189 | 8.60E-67 | 0.603777 | 1.01E-47 | 0.507438 |
| 0.369363 | 1.53E-16 | 0.355216 | 2.47E-15 | 0.724712 | 3.12E-77 | 0.696382 | 5.37E-69 | 0.519982 |
| 0.394189 | 8.23E-19 | 0.126953 | 0.00601  | 0.633427 | 9.50E-54 | 0.463231 | 3.23E-26 | 0.452889 |
| 0.123461 | 0.00756  | 0.01304  | 0.77867  | 0.422965 | 1.08E-21 | 0.366209 | 2.88E-16 | 0.39     |
| 0.210481 | 4.48E-06 | 0.238459 | 1.84E-07 | 0.503175 | 2.43E-31 | 0.42786  | 3.28E-22 | 0.414164 |
| 0.113809 | 0.01386  | 0.161936 | 0.00044  | 0.507926 | 5.37E-32 | 0.500848 | 5.05E-31 | 0.361351 |
| 0.227967 | 6.39E-07 | 0.068341 | 0.14031  | 0.489258 | 1.77E-29 | 0.282249 | 5.31E-10 | 0.429052 |

|          |          |          |          |          |          |          |          |          |
|----------|----------|----------|----------|----------|----------|----------|----------|----------|
| 0.081016 | 0.0803   | -0.07515 | 0.10481  | 0.240657 | 1.41E-07 | 0.183651 | 6.55E-05 | 0.217784 |
| 0.281326 | 6.07E-10 | 0.261791 | 9.32E-09 | 0.663179 | 1.71E-60 | 0.660171 | 8.93E-60 | 0.538902 |
| 0.048986 | 0.29079  | -0.15211 | 0.00098  | 0.217377 | 2.12E-06 | 0.178969 | 0.0001   | 0.071257 |
| 0.219507 | 1.67E-06 | 0.151474 | 0.00102  | 0.51118  | 1.88E-32 | 0.284895 | 3.60E-10 | 0.479544 |
| 0.157337 | 0.00064  | -0.05968 | 0.19793  | 0.452599 | 5.80E-25 | 0.440076 | 1.53E-23 | 0.265321 |
| 0.099764 | 0.03112  | -0.03384 | 0.46565  | -0.19257 | 2.79E-05 | -0.27463 | 1.59E-09 | -0.12013 |
| 0.325408 | 5.58E-13 | 0.059598 | 0.19858  | 0.469945 | 4.95E-27 | 0.213273 | 3.32E-06 | 0.378209 |
| 0.358302 | 1.36E-15 | 0.331874 | 1.81E-13 | 0.684857 | 6.46E-66 | 0.642862 | 8.32E-56 | 0.53087  |
| 0.214589 | 2.88E-06 | 0.074425 | 0.10822  | 0.61481  | 6.85E-50 | 0.438438 | 2.33E-23 | 0.511819 |
| -0.04943 | 0.28641  | -0.10418 | 0.02435  | 0.2836   | 4.35E-10 | 0.184529 | 6.03E-05 | 0.148302 |
| 0.120813 | 0.00897  | 0.056425 | 0.22358  | 0.499221 | 8.38E-31 | 0.406964 | 4.69E-20 | 0.341213 |
| 0.353055 | 3.73E-15 | 0.284141 | 4.02E-10 | 0.67061  | 2.67E-62 | 0.511056 | 1.96E-32 | 0.59616  |
| 0.202444 | 1.04E-05 | 0.085683 | 0.0643   | 0.493398 | 5.04E-30 | 0.345905 | 1.43E-14 | 0.33843  |
| 0.264016 | 6.90E-09 | 0.141987 | 0.0021   | 0.445967 | 3.34E-24 | 0.366013 | 2.99E-16 | 0.343457 |
| 0.188978 | 3.96E-05 | 0.074656 | 0.10712  | 0.334771 | 1.08E-13 | 0.340132 | 4.12E-14 | 0.182434 |
| 0.396261 | 5.22E-19 | 0.382571 | 1.00E-17 | 0.814129 | #####    | 0.585555 | 2.52E-44 | 0.72753  |
| -0.21748 | 2.10E-06 | -0.16218 | 0.00043  | -0.54129 | 6.66E-37 | -0.40693 | 4.72E-20 | -0.45936 |
| 0.269566 | 3.23E-09 | 0.167744 | 0.00027  | 0.663618 | 1.34E-60 | 0.447261 | 2.38E-24 | 0.557285 |
| 0.154299 | 0.00082  | 0.073037 | 0.11497  | 0.433795 | 7.52E-23 | 0.188585 | 4.11E-05 | 0.45742  |
| 0.181299 | 8.14E-05 | 0.007086 | 0.87862  | 0.38961  | 2.23E-18 | 0.261299 | 9.96E-09 | 0.216744 |
| 0.141254 | 0.00222  | 0.0671   | 0.14767  | 0.506145 | 9.48E-32 | 0.315614 | 2.92E-12 | 0.462784 |
| 0.234477 | 2.97E-07 | 0.077885 | 0.09273  | 0.480837 | 2.16E-28 | 0.333393 | 1.38E-13 | 0.355268 |
| 0.137383 | 0.00293  | 0.099558 | 0.03147  | 0.492121 | 7.44E-30 | 0.48022  | 2.58E-28 | 0.29902  |
| 0.216945 | 2.22E-06 | 0.070288 | 0.12933  | 0.677294 | 5.69E-64 | 0.486554 | 3.98E-29 | 0.54236  |
| 0.184209 | 6.22E-05 | -0.11015 | 0.01725  | 0.21465  | 2.86E-06 | 0.115465 | 0.01253  | 0.160563 |
| -0.22242 | 1.21E-06 | -0.20233 | 1.05E-05 | -0.44096 | 1.22E-23 | -0.36443 | 4.09E-16 | -0.42263 |
| 0.15858  | 0.00058  | 0.12985  | 0.00495  | 0.561785 | 3.35E-40 | 0.469784 | 5.18E-27 | 0.495977 |
| -0.16677 | 0.0003   | -0.11075 | 0.01665  | -0.45727 | 1.65E-25 | -0.27361 | 1.83E-09 | -0.39235 |
| 0.372538 | 8.03E-17 | 0.269938 | 3.06E-09 | 0.710743 | 4.78E-73 | 0.617485 | 1.98E-50 | 0.558265 |
| 0.182315 | 7.42E-05 | 0.086791 | 0.06092  | 0.559075 | 9.44E-40 | 0.403147 | 1.12E-19 | 0.496848 |
| 0.010111 | 0.82749  | -0.01875 | 0.68614  | 0.249503 | 4.65E-08 | 0.139615 | 0.0025   | 0.277018 |
| 0.175622 | 0.00014  | 0.19423  | 2.37E-05 | 0.478917 | 3.78E-28 | 0.47877  | 3.94E-28 | 0.415764 |
| 0.263179 | 7.73E-09 | 0.201619 | 1.13E-05 | 0.576981 | 8.48E-43 | 0.439754 | 1.66E-23 | 0.53126  |
| 0.249133 | 4.88E-08 | 0.27801  | 9.80E-10 | 0.431264 | 1.42E-22 | 0.553659 | 7.25E-39 | 0.302171 |
| 0.071768 | 0.12144  | 0.135524 | 0.00334  | 0.252525 | 3.16E-08 | 0.310483 | 6.79E-12 | 0.250561 |
| 0.285571 | 3.26E-10 | 0.163592 | 0.00039  | 0.509673 | 3.06E-32 | 0.476511 | 7.59E-28 | 0.359722 |
| 0.060031 | 0.19533  | 0.097367 | 0.03542  | 0.34201  | 2.93E-14 | 0.310385 | 6.90E-12 | 0.331198 |
| 0.050188 | 0.2791   | 0.042851 | 0.3555   | 0.225669 | 8.33E-07 | 0.162696 | 0.00042  | 0.196681 |
| 0.228357 | 6.11E-07 | 0.326881 | 4.32E-13 | 0.427715 | 3.40E-22 | 0.458564 | 1.16E-25 | 0.392812 |
| 0.1685   | 0.00025  | 0.218886 | 1.79E-06 | 0.571157 | 8.71E-42 | 0.544161 | 2.37E-37 | 0.346716 |
| 0.311033 | 6.21E-12 | 0.194013 | 2.43E-05 | 0.631446 | 2.52E-53 | 0.383292 | 8.61E-18 | 0.561865 |
| 0.251377 | 3.66E-08 | 0.119149 | 0.00996  | 0.449163 | 1.44E-24 | 0.414215 | 8.72E-21 | 0.325856 |
| 0.314706 | 3.40E-12 | -0.01339 | 0.77286  | 0.444199 | 5.29E-24 | 0.293217 | 1.03E-10 | 0.319622 |
| 0.232725 | 3.66E-07 | 0.111567 | 0.01586  | 0.58194  | 1.12E-43 | 0.483066 | 1.12E-28 | 0.42376  |
| 0.321131 | 1.16E-12 | 0.250075 | 4.33E-08 | 0.561632 | 3.56E-40 | 0.43134  | 1.39E-22 | 0.400851 |

|          |          |          |          |          |          |          |          |          |
|----------|----------|----------|----------|----------|----------|----------|----------|----------|
| 0.111199 | 0.01621  | -0.06121 | 0.18669  | 0.426503 | 4.58E-22 | 0.353791 | 3.24E-15 | 0.291024 |
| 0.326712 | 4.45E-13 | 0.113317 | 0.01428  | 0.609402 | 8.10E-49 | 0.407647 | 4.01E-20 | 0.439686 |
| 0.34135  | 3.30E-14 | 0.2289   | 5.74E-07 | 0.564591 | 1.14E-40 | 0.478844 | 3.86E-28 | 0.401047 |
| 0.285794 | 3.15E-10 | 0.186464 | 5.03E-05 | 0.544516 | 2.08E-37 | 0.380023 | 1.71E-17 | 0.444868 |
| 0.166461 | 0.0003   | 0.043304 | 0.35044  | 0.246261 | 7.02E-08 | 0.089661 | 0.05283  | 0.220157 |
| 0.296795 | 5.96E-11 | 0.272314 | 2.20E-09 | 0.691299 | 1.28E-67 | 0.602907 | 1.48E-47 | 0.548698 |
| 0.141492 | 0.00218  | -0.09299 | 0.04459  | 0.563781 | 1.56E-40 | 0.348204 | 9.31E-15 | 0.448753 |
| 0.101107 | 0.02891  | 0.096452 | 0.0372   | 0.274107 | 1.71E-09 | 0.178392 | 0.00011  | 0.317459 |
| 0.130971 | 0.00458  | 0.124897 | 0.00688  | 0.42178  | 1.44E-21 | 0.402021 | 1.44E-19 | 0.344853 |
| 0.321999 | 9.99E-13 | 0.117021 | 0.01138  | 0.563656 | 1.63E-40 | 0.385705 | 5.16E-18 | 0.472383 |
| 0.176057 | 0.00013  | 0.254207 | 2.54E-08 | 0.488149 | 2.47E-29 | 0.421099 | 1.70E-21 | 0.436492 |
| -0.01018 | 0.82641  | -0.04474 | 0.33469  | -0.2488  | 5.09E-08 | -0.3205  | 1.29E-12 | -0.23213 |
| 0.187445 | 4.58E-05 | -0.04365 | 0.34662  | 0.518474 | 1.73E-33 | 0.353175 | 3.64E-15 | 0.391786 |
| 0.211108 | 4.19E-06 | -0.1471  | 0.00143  | 0.423069 | 1.06E-21 | 0.216276 | 2.39E-06 | 0.281456 |
| 0.278685 | 8.89E-10 | 0.148879 | 0.00125  | 0.535685 | 4.85E-36 | 0.343105 | 2.39E-14 | 0.399008 |
| 0.370618 | 1.19E-16 | 0.172263 | 0.00018  | 0.611122 | 3.71E-49 | 0.516879 | 2.93E-33 | 0.466934 |
| 0.130998 | 0.00457  | 0.056176 | 0.22564  | 0.363102 | 5.32E-16 | 0.271562 | 2.44E-09 | 0.286905 |
| 0.165981 | 0.00032  | 0.046503 | 0.31597  | 0.385398 | 5.51E-18 | 0.262875 | 8.06E-09 | 0.357324 |
| 0.092019 | 0.04687  | -0.02686 | 0.56264  | 0.556608 | 2.40E-39 | 0.402131 | 1.41E-19 | 0.39506  |
| 0.042245 | 0.36236  | 0.093522 | 0.04338  | 0.407575 | 4.08E-20 | 0.357317 | 1.65E-15 | 0.309425 |
| 0.097605 | 0.03498  | 0.051226 | 0.26926  | 0.24344  | 9.98E-08 | 0.1501   | 0.00114  | 0.28064  |
| 0.220976 | 1.42E-06 | 0.083547 | 0.07127  | 0.494531 | 3.57E-30 | 0.358117 | 1.41E-15 | 0.334712 |
| 0.023889 | 0.60659  | 0.067559 | 0.14492  | -0.34711 | 1.14E-14 | -0.35625 | 2.02E-15 | -0.17496 |
| 0.343587 | 2.19E-14 | 0.243176 | 1.03E-07 | 0.635403 | 3.57E-54 | 0.479057 | 3.63E-28 | 0.585874 |
| 0.281214 | 6.17E-10 | 0.142947 | 0.00196  | 0.744017 | 1.84E-83 | 0.561646 | 3.54E-40 | 0.54999  |
| 0.18967  | 3.70E-05 | 0.116202 | 0.01197  | 0.475552 | 1.00E-27 | 0.373683 | 6.36E-17 | 0.365323 |
| 0.097808 | 0.0346   | 0.052074 | 0.2614   | 0.459908 | 8.06E-26 | 0.258541 | 1.44E-08 | 0.378298 |
| 0.348855 | 8.24E-15 | 0.174676 | 0.00015  | 0.692833 | 4.94E-68 | 0.581145 | 1.56E-43 | 0.493327 |
| 0.140289 | 0.00238  | -0.12666 | 0.00613  | 0.526163 | 1.30E-34 | 0.243463 | 9.95E-08 | 0.400505 |
| 0.194362 | 2.34E-05 | 0.287791 | 2.34E-10 | 0.511338 | 1.79E-32 | 0.601764 | 2.45E-47 | 0.410767 |
| 0.136574 | 0.0031   | 0.309356 | 8.16E-12 | 0.351492 | 5.01E-15 | 0.391683 | 1.42E-18 | 0.373312 |
| 0.360977 | 8.08E-16 | 0.251176 | 3.76E-08 | 0.726078 | 1.18E-77 | 0.572129 | 5.92E-42 | 0.607665 |
| 0.182507 | 7.28E-05 | 0.138989 | 0.00261  | 0.415287 | 6.77E-21 | 0.433338 | 8.44E-23 | 0.276363 |
| 0.248131 | 5.54E-08 | 0.035653 | 0.44211  | 0.243162 | 1.03E-07 | 0.228789 | 5.81E-07 | 0.169481 |
| 0.371156 | 1.06E-16 | 0.351325 | 5.17E-15 | 0.515422 | 4.72E-33 | 0.445743 | 3.54E-24 | 0.448543 |
| 0.079657 | 0.08552  | 0.123174 | 0.0077   | 0.426316 | 4.79E-22 | 0.436862 | 3.47E-23 | 0.270642 |
| 0.468996 | 6.47E-27 | 0.458409 | 1.21E-25 | 0.798617 | #####    | 0.58981  | 4.24E-45 | 0.685232 |
| 0.333591 | 1.33E-13 | 0.099042 | 0.03237  | 0.742001 | 8.75E-83 | 0.507925 | 5.37E-32 | 0.570334 |
| -0.12925 | 0.00515  | 0.134483 | 0.0036   | -0.1891  | 3.91E-05 | -0.08107 | 0.08008  | -0.16991 |
| 0.281261 | 6.13E-10 | 0.198318 | 1.58E-05 | 0.645461 | 2.19E-56 | 0.420559 | 1.93E-21 | 0.580691 |
| 0.258658 | 1.42E-08 | 0.128606 | 0.00538  | 0.373126 | 7.12E-17 | 0.24387  | 9.46E-08 | 0.353952 |
| 0.400641 | 1.97E-19 | 0.285989 | 3.06E-10 | 0.76092  | 2.15E-89 | 0.620517 | 4.79E-51 | 0.628662 |
| 0.056192 | 0.22551  | 0.037861 | 0.41434  | 0.489142 | 1.83E-29 | 0.475395 | 1.05E-27 | 0.363974 |
| 0.002048 | 0.9648   | 0.048075 | 0.29986  | 0.458764 | 1.10E-25 | 0.337032 | 7.22E-14 | 0.3106   |
| 0.288981 | 1.96E-10 | 0.204477 | 8.42E-06 | 0.585703 | 2.37E-44 | 0.529787 | 3.77E-35 | 0.44627  |

|          |          |          |          |          |          |          |          |          |
|----------|----------|----------|----------|----------|----------|----------|----------|----------|
| 0.210968 | 4.25E-06 | 0.144122 | 0.00179  | 0.606415 | 3.11E-48 | 0.482637 | 1.27E-28 | 0.361707 |
| 0.285888 | 3.11E-10 | 0.076632 | 0.09812  | 0.423254 | 1.01E-21 | 0.254461 | 2.46E-08 | 0.435105 |
| 0.199175 | 1.45E-05 | 0.100085 | 0.03058  | 0.476543 | 7.52E-28 | 0.396905 | 4.52E-19 | 0.379558 |
| 0.168458 | 0.00026  | 0.192974 | 2.69E-05 | 0.419098 | 2.74E-21 | 0.374619 | 5.25E-17 | 0.321266 |
| -0.00085 | 0.98534  | -0.06255 | 0.17723  | -0.35523 | 2.46E-15 | -0.3432  | 2.35E-14 | -0.37863 |
| 0.399352 | 2.62E-19 | 0.254156 | 2.56E-08 | 0.708086 | 2.80E-72 | 0.496705 | 1.83E-30 | 0.579292 |
| 0.221732 | 1.30E-06 | 0.090929 | 0.04955  | 0.589538 | 4.75E-45 | 0.439075 | 1.98E-23 | 0.455209 |
| 0.164425 | 0.00036  | -0.06506 | 0.16044  | 0.476815 | 6.95E-28 | 0.297035 | 5.75E-11 | 0.304728 |
| 0.086502 | 0.06179  | 0.067139 | 0.14744  | 0.358577 | 1.29E-15 | 0.263848 | 7.06E-09 | 0.237863 |
| -0.00724 | 0.87608  | -0.11985 | 0.00953  | 0.435993 | 4.33E-23 | 0.336091 | 8.54E-14 | 0.298502 |
| 0.093368 | 0.04373  | 0.041758 | 0.36792  | 0.340487 | 3.86E-14 | 0.204693 | 8.24E-06 | 0.402567 |
| 0.076876 | 0.09705  | -0.04631 | 0.31796  | 0.378577 | 2.32E-17 | 0.24144  | 1.28E-07 | 0.36413  |
| 0.225454 | 8.54E-07 | 0.09507  | 0.04001  | 0.544776 | 1.90E-37 | 0.373487 | 6.62E-17 | 0.562539 |
| 0.306522 | 1.29E-11 | 0.122847 | 0.00787  | 0.644673 | 3.29E-56 | 0.395638 | 5.98E-19 | 0.530665 |
| 0.201823 | 1.11E-05 | 0.18725  | 4.67E-05 | 0.361472 | 7.33E-16 | 0.342611 | 2.62E-14 | 0.336435 |
| 0.068048 | 0.14202  | 0.019934 | 0.66744  | 0.428931 | 2.52E-22 | 0.335109 | 1.02E-13 | 0.308147 |
| 0.167526 | 0.00028  | 0.295749 | 7.01E-11 | 0.467196 | 1.07E-26 | 0.473964 | 1.58E-27 | 0.424168 |
| 0.142837 | 0.00197  | 0.195698 | 2.05E-05 | 0.508252 | 4.84E-32 | 0.494593 | 3.50E-30 | 0.345529 |
| 0.323558 | 7.66E-13 | 0.204807 | 8.14E-06 | 0.718151 | 3.10E-75 | 0.539261 | 1.37E-36 | 0.646229 |
| 0.323473 | 7.77E-13 | 0.307471 | 1.11E-11 | 0.554465 | 5.37E-39 | 0.60794  | 1.57E-48 | 0.396222 |
| 0.28864  | 2.06E-10 | 0.258752 | 1.40E-08 | 0.73876  | 1.04E-81 | 0.68692  | 1.86E-66 | 0.515394 |
| 0.265742 | 5.46E-09 | -0.0599  | 0.19628  | 0.401026 | 1.80E-19 | 0.271604 | 2.43E-09 | 0.315476 |
| -0.17176 | 0.00019  | -0.12303 | 0.00777  | -0.37234 | 8.36E-17 | -0.226   | 8.02E-07 | -0.32462 |
| -0.16682 | 0.00029  | -0.05972 | 0.19762  | -0.38563 | 5.24E-18 | -0.3181  | 1.93E-12 | -0.31022 |
| 0.276357 | 1.24E-09 | 0.08559  | 0.0646   | 0.629886 | 5.39E-53 | 0.373467 | 6.64E-17 | 0.486837 |
| 0.170181 | 0.00022  | 0.096153 | 0.03779  | 0.393061 | 1.05E-18 | 0.227293 | 6.91E-07 | 0.330967 |
| 0.45274  | 5.59E-25 | 0.230316 | 4.86E-07 | 0.737784 | 2.17E-81 | 0.553113 | 8.89E-39 | 0.584474 |
| 0.09819  | 0.03389  | 0.096037 | 0.03802  | -0.22508 | 8.91E-07 | -0.1333  | 0.0039   | -0.24732 |
| 0.261698 | 9.44E-09 | 0.076199 | 0.10004  | 0.537392 | 2.66E-36 | 0.396773 | 4.66E-19 | 0.348222 |
| 0.446486 | 2.92E-24 | 0.290375 | 1.59E-10 | 0.799076 | #####    | 0.615936 | 4.07E-50 | 0.610607 |
| -0.03407 | 0.46266  | -0.2374  | 2.09E-07 | -0.29499 | 7.88E-11 | -0.37829 | 2.46E-17 | -0.23435 |
| 0.258084 | 1.53E-08 | 0.133433 | 0.00387  | 0.588747 | 6.64E-45 | 0.451323 | 8.15E-25 | 0.42022  |
| 0.184184 | 6.23E-05 | 0.090485 | 0.05068  | 0.498391 | 1.08E-30 | 0.377685 | 2.79E-17 | 0.395029 |
| 0.298809 | 4.36E-11 | 0.186815 | 4.86E-05 | 0.739299 | 6.89E-82 | 0.528235 | 6.43E-35 | 0.610634 |
| 0.091219 | 0.04883  | -0.05654 | 0.22268  | 0.285072 | 3.50E-10 | 0.146663 | 0.00148  | 0.234139 |
| -0.08995 | 0.05207  | -0.12729 | 0.00588  | 0.2002   | 1.31E-05 | 0.130839 | 0.00462  | 0.125363 |
| 0.297467 | 5.37E-11 | 0.273941 | 1.75E-09 | 0.612098 | 2.38E-49 | 0.430112 | 1.88E-22 | 0.516243 |
| 0.348496 | 8.81E-15 | 0.26543  | 5.70E-09 | 0.706338 | 8.87E-72 | 0.568755 | 2.24E-41 | 0.622252 |
| 0.270728 | 2.74E-09 | 0.289507 | 1.81E-10 | 0.705238 | 1.82E-71 | 0.650915 | 1.28E-57 | 0.586401 |
| 0.302261 | 2.54E-11 | 0.27064  | 2.78E-09 | 0.601857 | 2.35E-47 | 0.537543 | 2.52E-36 | 0.468398 |
| 0.244727 | 8.50E-08 | 0.136906 | 0.00303  | 0.582719 | 8.16E-44 | 0.321132 | 1.16E-12 | 0.540881 |
| 0.394796 | 7.20E-19 | 0.254849 | 2.34E-08 | 0.64131  | 1.83E-55 | 0.518713 | 1.59E-33 | 0.518415 |
| 0.159712 | 0.00053  | 0.094461 | 0.04131  | 0.5381   | 2.07E-36 | 0.520488 | 8.83E-34 | 0.353914 |
| 0.112225 | 0.01525  | 0.116919 | 0.01145  | 0.524738 | 2.12E-34 | 0.505685 | 1.10E-31 | 0.399953 |
| -0.0573  | 0.21651  | -0.04014 | 0.38679  | 0.370953 | 1.11E-16 | 0.356962 | 1.76E-15 | 0.300409 |

|          |          |          |          |          |          |          |          |          |
|----------|----------|----------|----------|----------|----------|----------|----------|----------|
| 0.280704 | 6.64E-10 | 0.163975 | 0.00037  | 0.547919 | 6.04E-38 | 0.386637 | 4.23E-18 | 0.410973 |
| 0.396305 | 5.17E-19 | 0.22142  | 1.35E-06 | 0.682872 | 2.12E-65 | 0.44379  | 5.89E-24 | 0.553746 |
| 0.034802 | 0.45308  | -0.12232 | 0.00814  | 0.222967 | 1.13E-06 | 0.219117 | 1.75E-06 | 0.162142 |
| 0.411954 | 1.48E-20 | 0.151187 | 0.00105  | 0.616846 | 2.67E-50 | 0.34053  | 3.83E-14 | 0.542267 |
| 0.110021 | 0.01739  | 0.052179 | 0.26044  | -0.18534 | 5.59E-05 | -0.16202 | 0.00044  | -0.14211 |
| 0.167163 | 0.00029  | -0.00811 | 0.86129  | 0.529688 | 3.90E-35 | 0.230552 | 4.73E-07 | 0.505045 |
| 0.264432 | 6.52E-09 | 0.12518  | 0.00676  | 0.33213  | 1.73E-13 | 0.190051 | 3.57E-05 | 0.338613 |
| 0.318897 | 1.69E-12 | 0.145222 | 0.00165  | 0.712469 | 1.50E-73 | 0.435014 | 5.54E-23 | 0.553391 |
| 0.024278 | 0.60076  | -0.14594 | 0.00156  | 0.470663 | 4.04E-27 | 0.277697 | 1.02E-09 | 0.388082 |
| 0.373339 | 6.82E-17 | 0.102083 | 0.02739  | 0.636071 | 2.56E-54 | 0.409746 | 2.47E-20 | 0.51497  |
| 0.304857 | 1.68E-11 | 0.289183 | 1.90E-10 | 0.561526 | 3.70E-40 | 0.473448 | 1.83E-27 | 0.473179 |
| 0.260682 | 1.08E-08 | 0.055896 | 0.22796  | 0.40509  | 7.19E-20 | 0.207089 | 6.41E-06 | 0.351518 |
| 0.225    | 9.00E-07 | 0.307952 | 1.02E-11 | 0.557452 | 1.75E-39 | 0.562047 | 3.03E-40 | 0.39057  |
| 0.170028 | 0.00022  | 0.024046 | 0.60424  | 0.432579 | 1.02E-22 | 0.38953  | 2.27E-18 | 0.241926 |
| 0.287611 | 2.40E-10 | 0.347079 | 1.15E-14 | 0.532591 | 1.43E-35 | 0.5693   | 1.81E-41 | 0.412685 |
| 0.339982 | 4.24E-14 | 0.158078 | 0.00061  | 0.705417 | 1.62E-71 | 0.462973 | 3.47E-26 | 0.589792 |
| -0.08677 | 0.06099  | -0.16492 | 0.00035  | -0.38285 | 9.45E-18 | -0.31962 | 1.49E-12 | -0.32577 |
| 0.084335 | 0.06863  | 0.070568 | 0.12781  | -0.2814  | 6.00E-10 | -0.22706 | 7.10E-07 | -0.27747 |
| 0.312948 | 4.54E-12 | 0.426631 | 4.44E-22 | 0.669751 | 4.35E-62 | 0.658195 | 2.61E-59 | 0.585343 |
| 0.329983 | 2.52E-13 | 0.167446 | 0.00028  | 0.721732 | 2.56E-76 | 0.466354 | 1.36E-26 | 0.609239 |
| 0.364968 | 3.68E-16 | 0.373168 | 7.06E-17 | 0.547216 | 7.82E-38 | 0.579673 | 2.84E-43 | 0.483681 |
| 0.302489 | 2.45E-11 | 0.194363 | 2.34E-05 | 0.760662 | 2.67E-89 | 0.509565 | 3.17E-32 | 0.651666 |
| 0.10857  | 0.01893  | -0.06116 | 0.18705  | 0.328632 | 3.19E-13 | 0.189485 | 3.77E-05 | 0.221426 |
| 0.35196  | 4.59E-15 | 0.32534  | 5.64E-13 | 0.7365   | 5.70E-81 | 0.651103 | 1.16E-57 | 0.607132 |
| 0.351296 | 5.20E-15 | 0.296312 | 6.43E-11 | 0.753929 | 6.99E-87 | 0.642392 | 1.06E-55 | 0.557952 |
| 0.014388 | 0.75648  | 0.130029 | 0.00489  | -0.28327 | 4.57E-10 | -0.19532 | 2.13E-05 | -0.23818 |
| 0.287371 | 2.49E-10 | 0.144507 | 0.00174  | 0.649631 | 2.50E-57 | 0.372723 | 7.73E-17 | 0.57464  |
| 0.301539 | 2.85E-11 | 0.143431 | 0.00189  | 0.501664 | 3.91E-31 | 0.388125 | 3.07E-18 | 0.423365 |
| 0.212336 | 3.67E-06 | 0.041638 | 0.3693   | 0.547205 | 7.85E-38 | 0.309822 | 7.57E-12 | 0.504252 |
| 0.244034 | 9.27E-08 | -0.08396 | 0.06989  | 0.397407 | 4.05E-19 | 0.200709 | 1.24E-05 | 0.296638 |
| 0.323175 | 8.18E-13 | 0.379639 | 1.86E-17 | 0.688799 | 5.93E-67 | 0.625311 | 4.92E-52 | 0.648076 |
| -0.30556 | 1.50E-11 | -0.13436 | 0.00363  | -0.4581  | 1.32E-25 | -0.22723 | 6.96E-07 | -0.43483 |
| 0.010318 | 0.82402  | 0.06899  | 0.13658  | 0.3689   | 1.68E-16 | 0.323242 | 8.09E-13 | 0.313711 |
| -0.01198 | 0.79624  | -0.07943 | 0.08641  | -0.29681 | 5.95E-11 | -0.27221 | 2.23E-09 | -0.30945 |
| 0.210548 | 4.45E-06 | 0.083785 | 0.07046  | 0.550668 | 2.20E-38 | 0.455297 | 2.82E-25 | 0.480794 |
| 0.182153 | 7.53E-05 | 0.131853 | 0.00431  | 0.657868 | 3.12E-59 | 0.549497 | 3.39E-38 | 0.559848 |
| 0.15634  | 0.0007   | 0.308388 | 9.54E-12 | 0.432094 | 1.15E-22 | 0.530066 | 3.43E-35 | 0.36566  |
| 0.375932 | 4.00E-17 | 0.211028 | 4.22E-06 | 0.670926 | 2.23E-62 | 0.549117 | 3.90E-38 | 0.457452 |
| 0.091821 | 0.04735  | -0.10712 | 0.0206   | 0.40299  | 1.16E-19 | 0.323645 | 7.55E-13 | 0.260268 |
| 0.14802  | 0.00134  | 0.11439  | 0.01338  | 0.381856 | 1.17E-17 | 0.458523 | 1.18E-25 | 0.240111 |
| 0.161231 | 0.00047  | 0.042021 | 0.36492  | 0.355437 | 2.36E-15 | 0.287074 | 2.61E-10 | 0.190008 |
| -0.3062  | 1.36E-11 | -0.1758  | 0.00013  | -0.51428 | 6.88E-33 | -0.29589 | 6.85E-11 | -0.52613 |
| -0.05156 | 0.26612  | 0.20608  | 7.13E-06 | -0.36771 | 2.13E-16 | -0.2786  | 9.00E-10 | -0.19645 |
| -0.12372 | 0.00743  | -0.0591  | 0.20234  | -0.31197 | 5.33E-12 | -0.15722 | 0.00065  | -0.36476 |
| 0.008481 | 0.85496  | -0.20762 | 6.06E-06 | -0.66463 | 7.67E-61 | -0.5346  | 7.09E-36 | -0.54393 |



|          |          |          |          |          |          |          |          |          |
|----------|----------|----------|----------|----------|----------|----------|----------|----------|
| -0.12119 | 0.00875  | -0.07196 | 0.12044  | -0.33873 | 5.32E-14 | -0.28474 | 3.68E-10 | -0.34256 |
| 0.127009 | 0.00599  | 0.060332 | 0.19309  | 0.34196  | 2.95E-14 | 0.266931 | 4.64E-09 | 0.21255  |
| 0.165056 | 0.00034  | 0.155618 | 0.00074  | 0.465345 | 1.80E-26 | 0.403137 | 1.12E-19 | 0.394371 |
| 0.389837 | 2.12E-18 | 0.164074 | 0.00037  | 0.60549  | 4.69E-48 | 0.43977  | 1.66E-23 | 0.422061 |
| 0.385812 | 5.04E-18 | 0.328756 | 3.12E-13 | 0.682591 | 2.51E-65 | 0.558705 | 1.09E-39 | 0.605191 |
| -0.20947 | 4.99E-06 | -0.07213 | 0.11956  | -0.34637 | 1.31E-14 | -0.25827 | 1.49E-08 | -0.29348 |
| -0.006   | 0.89715  | 0.312723 | 4.71E-12 | -0.05488 | 0.23655  | 0.036624 | 0.42976  | -0.03004 |
| -0.17338 | 0.00017  | 0.090142 | 0.05157  | -0.24316 | 1.03E-07 | -0.15783 | 0.00062  | -0.20516 |
| 0.218796 | 1.81E-06 | 0.342881 | 2.50E-14 | 0.390921 | 1.68E-18 | 0.372592 | 7.94E-17 | 0.330324 |
| 0.170806 | 0.00021  | 0.018831 | 0.68483  | 0.545829 | 1.29E-37 | 0.343383 | 2.28E-14 | 0.468965 |
| 0.065283 | 0.15898  | 0.138111 | 0.00278  | 0.319698 | 1.48E-12 | 0.374871 | 4.98E-17 | 0.196625 |
| -0.04808 | 0.29985  | -0.14683 | 0.00146  | 0.230387 | 4.82E-07 | 0.183459 | 6.67E-05 | 0.172231 |
| 0.305208 | 1.59E-11 | 0.210581 | 4.43E-06 | 0.712621 | 1.35E-73 | 0.625944 | 3.63E-52 | 0.451267 |
| 0.422794 | 1.13E-21 | 0.012282 | 0.79123  | 0.495309 | 2.81E-30 | 0.387008 | 3.91E-18 | 0.328558 |
| 0.231362 | 4.30E-07 | 0.205103 | 7.89E-06 | 0.573119 | 3.99E-42 | 0.449884 | 1.19E-24 | 0.502749 |
| 0.07384  | 0.11103  | 0.015409 | 0.73979  | 0.224817 | 9.19E-07 | 0.264632 | 6.35E-09 | 0.177147 |
| 0.178189 | 0.00011  | -0.08287 | 0.07361  | 0.380978 | 1.40E-17 | 0.301284 | 2.96E-11 | 0.201089 |
| 0.3968   | 4.63E-19 | 0.314858 | 3.31E-12 | 0.694075 | 2.28E-68 | 0.61445  | 8.08E-50 | 0.543921 |
| 0.254862 | 2.33E-08 | 0.07488  | 0.10607  | 0.405686 | 6.28E-20 | 0.192088 | 2.93E-05 | 0.383017 |
| 0.145353 | 0.00164  | 0.169778 | 0.00023  | 0.468259 | 7.96E-27 | 0.492128 | 7.43E-30 | 0.392837 |
| 0.393362 | 9.87E-19 | 0.29877  | 4.39E-11 | 0.529259 | 4.52E-35 | 0.446036 | 3.28E-24 | 0.446537 |
| 0.085224 | 0.06575  | -0.15169 | 0.00101  | 0.296068 | 6.67E-11 | 0.201492 | 1.15E-05 | 0.22867  |
| 0.370044 | 1.33E-16 | 0.09456  | 0.0411   | 0.442525 | 8.16E-24 | 0.21031  | 4.56E-06 | 0.413622 |
| 0.043029 | 0.35351  | -0.02678 | 0.56376  | 0.473008 | 2.08E-27 | 0.34013  | 4.12E-14 | 0.401875 |
| 0.146608 | 0.00149  | -0.05711 | 0.21797  | 0.232781 | 3.64E-07 | 0.219717 | 1.63E-06 | 0.138302 |
| 0.323223 | 8.11E-13 | 0.276039 | 1.30E-09 | 0.763836 | 1.81E-90 | 0.537363 | 2.69E-36 | 0.637435 |
| 0.144988 | 0.00168  | 0.09188  | 0.04721  | 0.296409 | 6.33E-11 | 0.347958 | 9.74E-15 | 0.196425 |
| -0.24088 | 1.37E-07 | -0.16485 | 0.00035  | -0.48644 | 4.12E-29 | -0.2998  | 3.74E-11 | -0.47459 |
| 0.169351 | 0.00024  | 0.110325 | 0.01708  | 0.416454 | 5.14E-21 | 0.328087 | 3.51E-13 | 0.322118 |
| 0.215222 | 2.68E-06 | 0.259772 | 1.22E-08 | 0.547187 | 7.90E-38 | 0.438655 | 2.20E-23 | 0.542988 |
| -0.12191 | 0.00836  | -0.1204  | 0.00921  | -0.32337 | 7.91E-13 | -0.21591 | 2.49E-06 | -0.43864 |
| -0.15588 | 0.00072  | -0.12112 | 0.00879  | -0.39357 | 9.43E-19 | -0.32164 | 1.06E-12 | -0.36513 |
| 0.265562 | 5.59E-09 | 0.125429 | 0.00665  | 0.558392 | 1.22E-39 | 0.448303 | 1.81E-24 | 0.381859 |
| 0.364114 | 4.36E-16 | 0.356288 | 2.01E-15 | 0.673497 | 5.13E-63 | 0.575596 | 1.48E-42 | 0.540397 |
| 0.158594 | 0.00058  | 0.131662 | 0.00437  | 0.52445  | 2.33E-34 | 0.35473  | 2.71E-15 | 0.420484 |
| 0.253047 | 2.95E-08 | -0.07674 | 0.09765  | 0.354866 | 2.64E-15 | 0.203451 | 9.37E-06 | 0.247238 |
| 0.411627 | 1.60E-20 | 0.097306 | 0.03554  | 0.259563 | 1.26E-08 | 0.288875 | 1.99E-10 | 0.270496 |
| 0.415822 | 5.97E-21 | 0.073117 | 0.11458  | 0.435265 | 5.20E-23 | 0.318185 | 1.90E-12 | 0.394086 |
| 0.243507 | 9.90E-08 | 0.07398  | 0.11035  | 0.223201 | 1.10E-06 | 0.149014 | 0.00124  | 0.186309 |
| 0.248865 | 5.05E-08 | -0.16503 | 0.00034  | 0.201164 | 1.18E-05 | 0.085492 | 0.0649   | 0.06014  |
| 0.302787 | 2.34E-11 | 0.071097 | 0.12497  | 0.406021 | 5.82E-20 | 0.350636 | 5.89E-15 | 0.330695 |
| 0.358398 | 1.34E-15 | 0.219329 | 1.71E-06 | 0.389586 | 2.24E-18 | 0.330055 | 2.49E-13 | 0.288793 |
| 0.23713  | 2.16E-07 | 0.109044 | 0.01841  | 0.568682 | 2.31E-41 | 0.549855 | 2.97E-38 | 0.289263 |
| 0.366655 | 2.63E-16 | 0.189611 | 3.72E-05 | 0.767846 | 5.70E-92 | 0.469926 | 4.98E-27 | 0.661837 |
| 0.195877 | 2.02E-05 | 0.087261 | 0.05953  | 0.362119 | 6.46E-16 | 0.188681 | 4.07E-05 | 0.32408  |

|          |          |          |          |          |          |          |          |          |
|----------|----------|----------|----------|----------|----------|----------|----------|----------|
| 0.297607 | 5.26E-11 | 0.190201 | 3.52E-05 | 0.5883   | 8.01E-45 | 0.342735 | 2.56E-14 | 0.505882 |
| 0.115947 | 0.01216  | -0.01997 | 0.66687  | 0.23634  | 2.38E-07 | 0.084936 | 0.06667  | 0.258118 |
| -0.2783  | 9.40E-10 | -0.129   | 0.00524  | -0.51105 | 1.96E-32 | -0.30374 | 2.01E-11 | -0.4055  |
| 0.242906 | 1.07E-07 | 0.117209 | 0.01125  | 0.595395 | 3.92E-46 | 0.537984 | 2.16E-36 | 0.400459 |
| 0.433677 | 7.75E-23 | 0.167312 | 0.00028  | 0.622609 | 1.78E-51 | 0.531845 | 1.85E-35 | 0.524681 |
| -0.05144 | 0.26727  | 0.037293 | 0.42138  | 0.345491 | 1.54E-14 | 0.361984 | 6.63E-16 | 0.204671 |
| 0.357572 | 1.57E-15 | 0.196539 | 1.89E-05 | 0.672299 | 1.02E-62 | 0.450011 | 1.15E-24 | 0.581728 |
| 0.213507 | 3.23E-06 | 0.099858 | 0.03096  | 0.28906  | 1.94E-10 | 0.119134 | 0.00997  | 0.311249 |
| 0.243304 | 1.02E-07 | -0.0035  | 0.93984  | 0.575567 | 1.50E-42 | 0.326238 | 4.83E-13 | 0.43815  |
| 0.314651 | 3.43E-12 | 0.183904 | 6.40E-05 | 0.696204 | 6.00E-69 | 0.528124 | 6.68E-35 | 0.530885 |
| 0.167073 | 0.00029  | 0.0104   | 0.82265  | 0.239151 | 1.69E-07 | 0.252525 | 3.16E-08 | 0.114084 |
| -0.20109 | 1.19E-05 | -0.13172 | 0.00436  | -0.38346 | 8.31E-18 | -0.30743 | 1.11E-11 | -0.27977 |
| -0.06251 | 0.17745  | 0.086618 | 0.06144  | -0.31839 | 1.84E-12 | -0.25342 | 2.81E-08 | -0.2669  |
| 0.325666 | 5.33E-13 | 0.09124  | 0.04878  | 0.55019  | 2.63E-38 | 0.318022 | 1.96E-12 | 0.451964 |
| 0.276922 | 1.15E-09 | 0.135944 | 0.00324  | 0.641469 | 1.69E-55 | 0.538693 | 1.68E-36 | 0.491925 |
| 0.332393 | 1.65E-13 | 0.260969 | 1.04E-08 | 0.614003 | 9.93E-50 | 0.536913 | 3.15E-36 | 0.427836 |
| 0.018094 | 0.69654  | -0.02605 | 0.57439  | 0.257437 | 1.66E-08 | 0.225806 | 8.20E-07 | 0.185421 |
| 0.273179 | 1.95E-09 | 0.154893 | 0.00078  | 0.586021 | 2.08E-44 | 0.397238 | 4.20E-19 | 0.459845 |
| 0.393391 | 9.81E-19 | 0.150979 | 0.00107  | 0.47254  | 2.37E-27 | 0.256856 | 1.80E-08 | 0.452625 |
| 0.31509  | 3.19E-12 | 0.212424 | 3.64E-06 | 0.715896 | 1.46E-74 | 0.46779  | 9.09E-27 | 0.637526 |
| -0.07509 | 0.10508  | -0.13796 | 0.00281  | -0.35542 | 2.37E-15 | -0.23263 | 3.70E-07 | -0.35015 |
| 0.338468 | 5.57E-14 | 0.192186 | 2.90E-05 | 0.769858 | 9.79E-93 | 0.504655 | 1.52E-31 | 0.630706 |
| 0.022712 | 0.62445  | 0.241615 | 1.25E-07 | -0.16304 | 0.0004   | -0.09245 | 0.04585  | -0.1278  |
| -0.1928  | 2.73E-05 | -0.34788 | 9.89E-15 | -0.35667 | 1.87E-15 | -0.40666 | 5.02E-20 | -0.39804 |
| 0.204355 | 8.53E-06 | 0.205228 | 7.79E-06 | 0.56205  | 3.03E-40 | 0.565292 | 8.67E-41 | 0.476265 |
| 0.23921  | 1.68E-07 | -0.0865  | 0.06178  | 0.510209 | 2.58E-32 | 0.261857 | 9.24E-09 | 0.46011  |
| 0.183589 | 6.59E-05 | 0.086251 | 0.06255  | 0.348086 | 9.51E-15 | 0.247487 | 6.01E-08 | 0.335789 |
| 0.247739 | 5.82E-08 | -0.00826 | 0.8587   | 0.546583 | 9.84E-38 | 0.349354 | 7.50E-15 | 0.413052 |
| 0.017296 | 0.7093   | 0.12932  | 0.00513  | -0.12091 | 0.00891  | -0.19018 | 3.52E-05 | -0.08471 |
| 0.210651 | 4.40E-06 | 0.098333 | 0.03363  | 0.472698 | 2.27E-27 | 0.310509 | 6.77E-12 | 0.572245 |
| -0.18465 | 5.96E-05 | 0.038778 | 0.40311  | -0.44757 | 2.20E-24 | -0.20331 | 9.50E-06 | -0.40754 |
| 0.368652 | 1.76E-16 | 0.247305 | 6.15E-08 | 0.719303 | 1.40E-75 | 0.556585 | 2.42E-39 | 0.573489 |
| 0.202968 | 9.85E-06 | 0.26497  | 6.07E-09 | 0.515749 | 4.24E-33 | 0.452237 | 6.39E-25 | 0.479645 |
| -0.08835 | 0.05641  | 0.086238 | 0.06259  | -0.40044 | 2.06E-19 | -0.24416 | 9.12E-08 | -0.28741 |
| 0.037898 | 0.41388  | -0.00253 | 0.95658  | -0.24746 | 6.04E-08 | -0.26421 | 6.73E-09 | -0.27599 |
| -0.2299  | 5.11E-07 | -0.17397 | 0.00016  | -0.4829  | 1.18E-28 | -0.42421 | 8.01E-22 | -0.40654 |
| 0.436585 | 3.73E-23 | 0.323472 | 7.77E-13 | 0.713352 | 8.25E-74 | 0.519604 | 1.19E-33 | 0.594231 |
| 0.265151 | 5.92E-09 | 0.130343 | 0.00478  | 0.424462 | 7.53E-22 | 0.31238  | 4.98E-12 | 0.421441 |
| 0.380297 | 1.62E-17 | 0.161339 | 0.00046  | 0.638636 | 7.09E-55 | 0.447714 | 2.11E-24 | 0.477636 |
| -0.14088 | 0.00228  | -0.13172 | 0.00435  | -0.35054 | 6.01E-15 | -0.28867 | 2.05E-10 | -0.37495 |
| 0.225947 | 8.07E-07 | 0.210443 | 4.50E-06 | 0.475816 | 9.28E-28 | 0.425788 | 5.46E-22 | 0.440891 |
| 0.176101 | 0.00013  | -0.02217 | 0.63281  | 0.467732 | 9.23E-27 | 0.270663 | 2.77E-09 | 0.388406 |
| 0.205698 | 7.42E-06 | 0.052778 | 0.255    | 0.283982 | 4.12E-10 | 0.192937 | 2.70E-05 | 0.306812 |
| 0.283808 | 4.22E-10 | 0.188893 | 3.99E-05 | 0.749045 | 3.55E-85 | 0.562824 | 2.25E-40 | 0.582072 |
| 0.28349  | 4.42E-10 | 0.26782  | 4.11E-09 | 0.68108  | 6.15E-65 | 0.56883  | 2.18E-41 | 0.581436 |

|          |          |          |          |          |          |          |          |          |
|----------|----------|----------|----------|----------|----------|----------|----------|----------|
| 0.023219 | 0.61673  | 0.149135 | 0.00123  | -0.2819  | 5.58E-10 | -0.18849 | 4.14E-05 | -0.26063 |
| 0.200583 | 1.26E-05 | 0.220581 | 1.48E-06 | 0.51206  | 1.42E-32 | 0.504407 | 1.65E-31 | 0.36278  |
| 0.096789 | 0.03653  | 0.099059 | 0.03234  | 0.311698 | 5.57E-12 | 0.301033 | 3.08E-11 | 0.318352 |
| 0.265294 | 5.80E-09 | 0.145473 | 0.00162  | 0.53662  | 3.49E-36 | 0.3381   | 5.95E-14 | 0.487339 |
| 0.214149 | 3.02E-06 | 0.125866 | 0.00646  | 0.658049 | 2.83E-59 | 0.471749 | 2.97E-27 | 0.577738 |
| 0.28387  | 4.18E-10 | 0.131122 | 0.00454  | 0.57533  | 1.65E-42 | 0.472809 | 2.20E-27 | 0.56065  |
| 0.179356 | 9.73E-05 | 0.122493 | 0.00805  | -0.08148 | 0.07856  | -0.11112 | 0.01629  | -0.16079 |
| 0.032348 | 0.48558  | 0.130419 | 0.00476  | 0.375183 | 4.67E-17 | 0.325837 | 5.18E-13 | 0.265993 |
| 0.263173 | 7.74E-09 | 0.185954 | 5.28E-05 | 0.357333 | 1.64E-15 | 0.275361 | 1.43E-09 | 0.403611 |
| 0.307531 | 1.10E-11 | 0.284168 | 4.00E-10 | 0.69636  | 5.44E-69 | 0.670542 | 2.78E-62 | 0.496945 |
| 0.339454 | 4.66E-14 | 0.302042 | 2.63E-11 | 0.751742 | 4.10E-86 | 0.5811   | 1.59E-43 | 0.65384  |
| 0.366125 | 2.92E-16 | 0.260024 | 1.18E-08 | 0.736319 | 6.53E-81 | 0.562941 | 2.15E-40 | 0.594506 |
| 0.114962 | 0.01292  | 0.072615 | 0.1171   | 0.34711  | 1.14E-14 | 0.272123 | 2.26E-09 | 0.265488 |
| -0.00915 | 0.84364  | -0.14606 | 0.00155  | -0.35328 | 3.57E-15 | -0.31541 | 3.02E-12 | -0.17574 |
| 0.02256  | 0.62677  | 0.132332 | 0.00417  | 0.39722  | 4.22E-19 | 0.389676 | 2.20E-18 | 0.272529 |
| 0.165015 | 0.00034  | 0.031339 | 0.4993   | 0.351354 | 5.15E-15 | 0.268568 | 3.70E-09 | 0.197522 |
| 0.235082 | 2.77E-07 | 0.255897 | 2.04E-08 | 0.62667  | 2.56E-52 | 0.598396 | 1.07E-46 | 0.532048 |
| 0.259357 | 1.29E-08 | 0.026153 | 0.57293  | 0.418309 | 3.31E-21 | 0.363284 | 5.13E-16 | 0.294814 |
| 0.170478 | 0.00021  | 0.252476 | 3.18E-08 | 0.403006 | 1.15E-19 | 0.398259 | 3.35E-19 | 0.301493 |
| -0.03404 | 0.463    | 0.063228 | 0.17254  | -0.21142 | 4.05E-06 | -0.17777 | 0.00011  | -0.11298 |
| 0.174478 | 0.00015  | 0.167557 | 0.00028  | 0.52604  | 1.36E-34 | 0.45146  | 7.86E-25 | 0.370408 |
| 0.269286 | 3.35E-09 | 0.174013 | 0.00016  | 0.678644 | 2.58E-64 | 0.576655 | 9.67E-43 | 0.52577  |
| 0.311715 | 5.56E-12 | 0.163747 | 0.00038  | 0.628461 | 1.08E-52 | 0.413185 | 1.11E-20 | 0.512426 |
| 0.136388 | 0.00314  | 0.141519 | 0.00217  | 0.364986 | 3.67E-16 | 0.469039 | 6.40E-27 | 0.241726 |
| 0.315293 | 3.08E-12 | 0.22104  | 1.41E-06 | 0.70318  | 6.96E-71 | 0.57265  | 4.81E-42 | 0.53657  |
| 0.043962 | 0.34316  | 0.016402 | 0.7237   | 0.284619 | 3.75E-10 | 0.240386 | 1.46E-07 | 0.180295 |
| 0.042085 | 0.36418  | -0.02133 | 0.6457   | 0.286032 | 3.04E-10 | 0.249207 | 4.83E-08 | 0.12088  |
| -0.00167 | 0.97132  | -0.05623 | 0.22519  | 0.237651 | 2.03E-07 | 0.178268 | 0.00011  | 0.200589 |
| 0.083023 | 0.07307  | 0.06156  | 0.18417  | 0.478405 | 4.39E-28 | 0.372368 | 8.31E-17 | 0.339784 |
| -0.06553 | 0.15738  | -0.19603 | 1.99E-05 | 0.257614 | 1.63E-08 | 0.21563  | 2.57E-06 | 0.107672 |
| 0.240061 | 1.51E-07 | 0.047624 | 0.30442  | 0.433209 | 8.71E-23 | 0.274372 | 1.65E-09 | 0.445105 |
| 0.195305 | 2.14E-05 | 0.012934 | 0.78042  | 0.570791 | 1.01E-41 | 0.389058 | 2.51E-18 | 0.415375 |
| -0.03172 | 0.49405  | -0.13252 | 0.00412  | 0.140134 | 0.0024   | 0.11256  | 0.01495  | 0.062226 |
| 0.209916 | 4.76E-06 | 0.187441 | 4.58E-05 | 0.663241 | 1.66E-60 | 0.544651 | 1.99E-37 | 0.525945 |
| -0.16986 | 0.00023  | -0.14645 | 0.00151  | -0.27233 | 2.19E-09 | -0.38231 | 1.06E-17 | -0.21389 |
| 0.259616 | 1.25E-08 | 0.115925 | 0.01218  | 0.545641 | 1.39E-37 | 0.383557 | 8.14E-18 | 0.439058 |
| 0.10298  | 0.02606  | 0.125612 | 0.00657  | 0.375358 | 4.51E-17 | 0.28867  | 2.05E-10 | 0.398736 |
| 0.46242  | 4.05E-26 | 0.262128 | 8.91E-09 | 0.700814 | 3.20E-70 | 0.528514 | 5.84E-35 | 0.504279 |
| 0.139532 | 0.00251  | 0.146156 | 0.00154  | 0.470706 | 3.99E-27 | 0.507469 | 6.22E-32 | 0.258465 |
| -0.19603 | 1.99E-05 | -0.19834 | 1.58E-05 | -0.35627 | 2.01E-15 | -0.33958 | 4.56E-14 | -0.32715 |
| -0.16796 | 0.00027  | -0.0742  | 0.10928  | -0.52075 | 8.09E-34 | -0.35395 | 3.14E-15 | -0.49692 |
| -0.05158 | 0.26593  | -0.28407 | 4.06E-10 | -0.29592 | 6.83E-11 | -0.45882 | 1.09E-25 | -0.26049 |
| -0.06156 | 0.1842   | 0.004394 | 0.92455  | -0.35747 | 1.60E-15 | -0.30356 | 2.07E-11 | -0.38752 |
| 0.222364 | 1.21E-06 | 0.117607 | 0.01097  | 0.449659 | 1.27E-24 | 0.340342 | 3.97E-14 | 0.463451 |
| 0.081617 | 0.07808  | 0.043638 | 0.34673  | 0.228399 | 6.08E-07 | 0.281238 | 6.15E-10 | 0.114064 |

|          |          |          |          |          |          |          |          |          |
|----------|----------|----------|----------|----------|----------|----------|----------|----------|
| 0.17767  | 0.00011  | 0.063615 | 0.16993  | 0.405085 | 7.20E-20 | 0.225411 | 8.58E-07 | 0.335136 |
| 0.075833 | 0.10169  | 0.056952 | 0.21928  | 0.533428 | 1.07E-35 | 0.35945  | 1.09E-15 | 0.473378 |
| 0.334665 | 1.10E-13 | 0.284092 | 4.05E-10 | 0.638984 | 5.95E-55 | 0.424639 | 7.22E-22 | 0.750932 |
| 0.073033 | 0.11499  | -0.11166 | 0.01577  | 0.242149 | 1.17E-07 | 0.202639 | 1.02E-05 | 0.184732 |
| 0.351571 | 4.94E-15 | 0.278462 | 9.18E-10 | 0.777531 | 9.98E-96 | 0.617356 | 2.10E-50 | 0.646082 |
| 0.385878 | 4.97E-18 | 0.312483 | 4.90E-12 | 0.646519 | 1.27E-56 | 0.521087 | 7.23E-34 | 0.608482 |
| 0.210717 | 4.37E-06 | 0.014616 | 0.75275  | 0.440874 | 1.25E-23 | 0.357146 | 1.70E-15 | 0.222352 |
| 0.07831  | 0.09096  | -0.07283 | 0.116    | 0.4681   | 8.33E-27 | 0.32535  | 5.63E-13 | 0.330764 |
| 0.216267 | 2.39E-06 | 0.187563 | 4.53E-05 | 0.684028 | 1.06E-65 | 0.527509 | 8.24E-35 | 0.542247 |
| -0.18915 | 3.89E-05 | -0.28448 | 3.83E-10 | -0.45865 | 1.14E-25 | -0.44104 | 1.20E-23 | -0.44936 |
| 0.318232 | 1.89E-12 | 0.148266 | 0.00131  | 0.738034 | 1.80E-81 | 0.539815 | 1.13E-36 | 0.582795 |
| 0.288287 | 2.17E-10 | 0.245343 | 7.87E-08 | 0.653717 | 2.89E-58 | 0.529904 | 3.62E-35 | 0.561319 |
| 0.317695 | 2.07E-12 | 0.114902 | 0.01297  | 0.678328 | 3.11E-64 | 0.435474 | 4.93E-23 | 0.579726 |
| 0.067522 | 0.14514  | 0.241    | 1.35E-07 | -0.09819 | 0.03389  | 0.025747 | 0.5789   | -0.11677 |
| 0.222761 | 1.16E-06 | 0.060836 | 0.1894   | 0.663988 | 1.10E-60 | 0.567036 | 4.40E-41 | 0.43922  |
| 0.35497  | 2.59E-15 | 0.346142 | 1.37E-14 | 0.805004 | #####    | 0.662222 | 2.90E-60 | 0.688508 |
| 0.106545 | 0.02129  | 0.092657 | 0.04536  | 0.188702 | 4.06E-05 | 0.20141  | 1.16E-05 | 0.178411 |
| -0.04377 | 0.34528  | -0.02853 | 0.53858  | 0.266602 | 4.85E-09 | 0.130445 | 0.00475  | 0.346662 |
| 0.112935 | 0.01461  | 0.058872 | 0.20411  | 0.380577 | 1.53E-17 | 0.300241 | 3.49E-11 | 0.330878 |
| 0.182189 | 7.50E-05 | 0.010413 | 0.82243  | 0.279429 | 7.99E-10 | 0.220381 | 1.52E-06 | 0.208409 |
| -0.05307 | 0.2524   | -0.12515 | 0.00677  | 0.209624 | 4.91E-06 | 0.171195 | 0.0002   | 0.098431 |
| 0.177821 | 0.00011  | -0.02879 | 0.53489  | 0.209379 | 5.04E-06 | 0.200448 | 1.27E-05 | 0.178446 |
| -0.06496 | 0.16107  | -0.06019 | 0.19415  | 0.183854 | 6.43E-05 | 0.09425  | 0.04177  | 0.164793 |
| 0.25515  | 2.25E-08 | 0.144941 | 0.00169  | 0.583672 | 5.51E-44 | 0.409152 | 2.83E-20 | 0.451519 |
| 0.315433 | 3.01E-12 | 0.224916 | 9.08E-07 | 0.714468 | 3.87E-74 | 0.558643 | 1.11E-39 | 0.596886 |
| 0.22422  | 9.83E-07 | -0.01464 | 0.75238  | 0.372985 | 7.33E-17 | 0.309629 | 7.81E-12 | 0.241973 |
| -0.29702 | 5.76E-11 | -0.1305  | 0.00473  | -0.39102 | 1.64E-18 | -0.30483 | 1.69E-11 | -0.26608 |
| 0.206246 | 7.01E-06 | 0.031805 | 0.49293  | 0.441979 | 9.40E-24 | 0.216052 | 2.45E-06 | 0.34996  |
| -0.03171 | 0.49418  | -0.22849 | 6.01E-07 | -0.23643 | 2.35E-07 | -0.36185 | 6.80E-16 | -0.22005 |
| 0.256903 | 1.79E-08 | 0.339804 | 4.37E-14 | 0.603556 | 1.11E-47 | 0.50583  | 1.05E-31 | 0.498636 |
| 0.201564 | 1.14E-05 | 0.210541 | 4.45E-06 | 0.476717 | 7.15E-28 | 0.523938 | 2.77E-34 | 0.401783 |
| 0.323781 | 7.37E-13 | 0.312087 | 5.23E-12 | 0.496229 | 2.12E-30 | 0.489265 | 1.77E-29 | 0.461799 |
| 0.337934 | 6.13E-14 | 0.201607 | 1.13E-05 | 0.688938 | 5.45E-67 | 0.62397  | 9.33E-52 | 0.4578   |
| 0.171127 | 0.0002   | 0.327379 | 3.97E-13 | 0.568292 | 2.69E-41 | 0.706864 | 6.27E-72 | 0.382594 |
| 0.469461 | 5.68E-27 | 0.200136 | 1.32E-05 | 0.525629 | 1.56E-34 | 0.29496  | 7.91E-11 | 0.54344  |
| -0.13205 | 0.00426  | -0.13461 | 0.00356  | -0.49809 | 1.19E-30 | -0.37275 | 7.69E-17 | -0.38184 |
| 0.071199 | 0.12443  | 0.043252 | 0.35102  | 0.389172 | 2.45E-18 | 0.216358 | 2.37E-06 | 0.368714 |
| 0.385874 | 4.98E-18 | 0.300018 | 3.61E-11 | 0.775677 | 5.41E-95 | 0.642192 | 1.17E-55 | 0.599264 |
| 0.359426 | 1.09E-15 | 0.220525 | 1.49E-06 | 0.742006 | 8.71E-83 | 0.602509 | 1.76E-47 | 0.612821 |
| 0.249455 | 4.68E-08 | 0.209233 | 5.11E-06 | 0.624742 | 6.46E-52 | 0.515954 | 3.97E-33 | 0.454478 |
| 0.059461 | 0.19961  | -0.00225 | 0.96126  | 0.330046 | 2.49E-13 | 0.290302 | 1.61E-10 | 0.212538 |
| 0.175983 | 0.00013  | 0.128019 | 0.0056   | 0.638963 | 6.01E-55 | 0.527559 | 8.10E-35 | 0.489714 |
| 0.328582 | 3.22E-13 | 0.296127 | 6.61E-11 | 0.598717 | 9.30E-47 | 0.543404 | 3.11E-37 | 0.519204 |
| 0.065587 | 0.15705  | -0.07607 | 0.10061  | 0.214405 | 2.93E-06 | 0.190768 | 3.33E-05 | 0.134617 |
| 0.21129  | 4.11E-06 | -0.03148 | 0.49741  | 0.417661 | 3.86E-21 | 0.27741  | 1.07E-09 | 0.305577 |

|          |          |          |          |          |          |          |          |          |
|----------|----------|----------|----------|----------|----------|----------|----------|----------|
| 0.26497  | 6.06E-09 | 0.043794 | 0.345    | 0.444292 | 5.17E-24 | 0.294679 | 8.26E-11 | 0.321072 |
| -0.1044  | 0.02406  | -0.19187 | 2.99E-05 | -0.35742 | 1.61E-15 | -0.39598 | 5.56E-19 | -0.3264  |
| 0.22932  | 5.46E-07 | 0.153819 | 0.00085  | 0.476453 | 7.72E-28 | 0.318803 | 1.72E-12 | 0.502684 |
| -0.12971 | 0.00499  | 0.043744 | 0.34557  | -0.31592 | 2.78E-12 | -0.21485 | 2.80E-06 | -0.24656 |
| 0.273879 | 1.76E-09 | 0.158583 | 0.00058  | 0.528078 | 6.79E-35 | 0.44261  | 7.99E-24 | 0.433847 |
| 0.260454 | 1.11E-08 | 0.278371 | 9.30E-10 | 0.613656 | 1.16E-49 | 0.608124 | 1.44E-48 | 0.447179 |
| 0.144267 | 0.00177  | 0.152886 | 0.00092  | 0.516437 | 3.38E-33 | 0.29424  | 8.83E-11 | 0.419023 |
| 0.171391 | 0.0002   | 0.089223 | 0.05401  | 0.474214 | 1.47E-27 | 0.284472 | 3.83E-10 | 0.434774 |
| -0.00972 | 0.83404  | 0.002488 | 0.95724  | 0.268306 | 3.84E-09 | 0.229267 | 5.50E-07 | 0.209361 |
| 0.23649  | 2.34E-07 | 0.051342 | 0.26818  | 0.5729   | 4.36E-42 | 0.365096 | 3.59E-16 | 0.495362 |
| 0.406188 | 5.60E-20 | 0.29962  | 3.84E-11 | 0.758799 | 1.27E-88 | 0.60114  | 3.22E-47 | 0.586973 |
| -0.0289  | 0.53328  | -0.07052 | 0.12807  | 0.240978 | 1.35E-07 | 0.123308 | 0.00764  | 0.27249  |
| 0.310671 | 6.59E-12 | 0.251603 | 3.56E-08 | 0.692865 | 4.84E-68 | 0.598387 | 1.07E-46 | 0.572514 |
| 0.099407 | 0.03173  | 0.118196 | 0.01058  | 0.468353 | 7.76E-27 | 0.317384 | 2.18E-12 | 0.40154  |
| 0.495647 | 2.53E-30 | 0.217532 | 2.08E-06 | 0.541721 | 5.70E-37 | 0.44675  | 2.72E-24 | 0.464038 |
| 0.160729 | 0.00049  | 0.165439 | 0.00033  | 0.557637 | 1.63E-39 | 0.507083 | 7.03E-32 | 0.378894 |
| 0.250881 | 3.90E-08 | 0.1892   | 3.87E-05 | 0.660053 | 9.52E-60 | 0.575756 | 1.39E-42 | 0.442778 |
| 0.00226  | 0.96115  | 0.039755 | 0.39137  | -0.23374 | 3.24E-07 | -0.21382 | 3.13E-06 | -0.15388 |
| -0.10365 | 0.0251   | -0.29799 | 4.96E-11 | -0.34815 | 9.41E-15 | -0.46441 | 2.33E-26 | -0.28524 |
| 0.264745 | 6.25E-09 | 0.152529 | 0.00094  | 0.61628  | 3.47E-50 | 0.407674 | 3.98E-20 | 0.461963 |
| 0.402283 | 1.36E-19 | 0.536325 | 3.88E-36 | 0.649868 | 2.21E-57 | 0.602738 | 1.59E-47 | 0.57283  |
| -0.16046 | 0.0005   | -0.15661 | 0.00068  | -0.30692 | 1.21E-11 | -0.40379 | 9.68E-20 | -0.26974 |
| 0.296881 | 5.88E-11 | 0.276266 | 1.26E-09 | 0.612675 | 1.83E-49 | 0.534889 | 6.42E-36 | 0.474965 |
| 0.454485 | 3.50E-25 | 0.344677 | 1.79E-14 | 0.754094 | 6.11E-87 | 0.564201 | 1.32E-40 | 0.671412 |
| -0.09633 | 0.03743  | -0.0139  | 0.76446  | -0.30778 | 1.05E-11 | -0.27263 | 2.10E-09 | -0.19936 |
| 0.191137 | 3.21E-05 | 0.147758 | 0.00136  | 0.393375 | 9.84E-19 | 0.284634 | 3.74E-10 | 0.432082 |
| 0.093193 | 0.04412  | 0.015849 | 0.73265  | 0.342718 | 2.57E-14 | 0.277566 | 1.04E-09 | 0.273525 |
| 0.100154 | 0.03047  | 0.021233 | 0.64719  | 0.40653  | 5.18E-20 | 0.271995 | 2.30E-09 | 0.308671 |
| 0.29775  | 5.14E-11 | 0.110134 | 0.01727  | 0.646626 | 1.20E-56 | 0.533548 | 1.02E-35 | 0.48413  |
| -0.04516 | 0.33011  | 0.026843 | 0.56284  | -0.4042  | 8.80E-20 | -0.33389 | 1.26E-13 | -0.27456 |
| -0.41717 | 4.34E-21 | -0.26268 | 8.27E-09 | -0.50478 | 1.46E-31 | -0.45575 | 2.49E-25 | -0.40593 |
| 0.132972 | 0.00399  | 0.164646 | 0.00035  | 0.456089 | 2.27E-25 | 0.473385 | 1.86E-27 | 0.306577 |
| 0.335248 | 9.93E-14 | 0.202023 | 1.09E-05 | 0.495479 | 2.67E-30 | 0.384476 | 6.70E-18 | 0.410096 |
| 0.336939 | 7.34E-14 | 0.265513 | 5.63E-09 | 0.680147 | 1.07E-64 | 0.546645 | 9.62E-38 | 0.529881 |
| 0.01118  | 0.80959  | -0.01232 | 0.79059  | 0.357797 | 1.50E-15 | 0.217928 | 1.99E-06 | 0.324371 |
| 0.357428 | 1.61E-15 | 0.148251 | 0.00131  | 0.636401 | 2.17E-54 | 0.456674 | 1.94E-25 | 0.4798   |
| 0.259345 | 1.29E-08 | 0.063971 | 0.16755  | 0.541982 | 5.19E-37 | 0.329368 | 2.81E-13 | 0.474462 |
| 0.318016 | 1.96E-12 | 0.194837 | 2.24E-05 | 0.692922 | 4.67E-68 | 0.528508 | 5.86E-35 | 0.600373 |
| 0.130839 | 0.00463  | 0.075323 | 0.10402  | 0.505433 | 1.19E-31 | 0.489722 | 1.54E-29 | 0.370784 |
| -0.04753 | 0.30535  | 0.001459 | 0.97492  | -0.40873 | 3.12E-20 | -0.38068 | 1.49E-17 | -0.29058 |
| 0.458981 | 1.04E-25 | 0.286391 | 2.88E-10 | 0.711065 | 3.85E-73 | 0.527184 | 9.21E-35 | 0.561172 |
| -0.11621 | 0.01197  | 0.034025 | 0.46323  | -0.39438 | 7.89E-19 | -0.33831 | 5.73E-14 | -0.24944 |
| -0.05229 | 0.25947  | -0.157   | 0.00066  | -0.25342 | 2.81E-08 | -0.35838 | 1.34E-15 | -0.18582 |
| 0.435449 | 4.96E-23 | 0.405825 | 6.08E-20 | 0.755619 | 1.76E-87 | 0.721368 | 3.31E-76 | 0.600495 |
| -0.03466 | 0.45494  | -0.10758 | 0.02005  | -0.25137 | 3.67E-08 | -0.25204 | 3.36E-08 | -0.23179 |

|          |          |          |          |          |          |          |          |          |
|----------|----------|----------|----------|----------|----------|----------|----------|----------|
| 0.116772 | 0.01156  | 0.022881 | 0.62187  | 0.429021 | 2.47E-22 | 0.319223 | 1.60E-12 | 0.351057 |
| 0.140517 | 0.00234  | 0.088857 | 0.055    | 0.393894 | 8.78E-19 | 0.34928  | 7.61E-15 | 0.320451 |
| -0.04504 | 0.33143  | -0.04651 | 0.31591  | -0.32246 | 9.23E-13 | -0.27726 | 1.09E-09 | -0.31581 |
| 0.136701 | 0.00308  | 0.104405 | 0.02405  | 0.572773 | 4.58E-42 | 0.42994  | 1.97E-22 | 0.49248  |
| 0.363601 | 4.82E-16 | 0.222769 | 1.16E-06 | 0.71812  | 3.17E-75 | 0.452821 | 5.47E-25 | 0.541638 |
| -0.19482 | 2.24E-05 | -0.06022 | 0.19391  | -0.5214  | 6.50E-34 | -0.32709 | 4.17E-13 | -0.40311 |
| 0.249654 | 4.57E-08 | 0.144563 | 0.00174  | 0.394554 | 7.60E-19 | 0.408651 | 3.18E-20 | 0.354568 |
| 0.335849 | 8.92E-14 | 0.134974 | 0.00347  | 0.549117 | 3.90E-38 | 0.456539 | 2.01E-25 | 0.415668 |
| 0.231368 | 4.30E-07 | 0.075876 | 0.10149  | 0.479348 | 3.33E-28 | 0.405391 | 6.72E-20 | 0.401531 |
| 0.147756 | 0.00136  | 0.052498 | 0.25754  | 0.451289 | 8.23E-25 | 0.391643 | 1.44E-18 | 0.327441 |
| 0.142897 | 0.00196  | 0.114421 | 0.01335  | 0.55635  | 2.65E-39 | 0.549012 | 4.05E-38 | 0.400401 |
| 0.246071 | 7.19E-08 | 0.17379  | 0.00016  | 0.670046 | 3.68E-62 | 0.498775 | 9.63E-31 | 0.531868 |
| 0.079457 | 0.08631  | 0.12457  | 0.00703  | 0.483467 | 9.96E-29 | 0.485929 | 4.80E-29 | 0.33318  |
| -0.34235 | 2.75E-14 | -0.21603 | 2.46E-06 | -0.58694 | 1.42E-44 | -0.41341 | 1.05E-20 | -0.42499 |
| 0.184887 | 5.83E-05 | 0.15581  | 0.00073  | 0.515778 | 4.20E-33 | 0.471031 | 3.64E-27 | 0.327137 |
| 0.19107  | 3.23E-05 | 0.007324 | 0.87457  | 0.475771 | 9.40E-28 | 0.386646 | 4.22E-18 | 0.341134 |
| -0.09083 | 0.04979  | -0.18463 | 5.98E-05 | -0.49139 | 9.28E-30 | -0.39242 | 1.21E-18 | -0.42582 |
| 0.320891 | 1.21E-12 | 0.237568 | 2.05E-07 | 0.66119  | 5.11E-60 | 0.543183 | 3.37E-37 | 0.469169 |
| 0.193899 | 2.45E-05 | 0.134748 | 0.00353  | 0.432068 | 1.16E-22 | 0.403285 | 1.08E-19 | 0.327971 |
| 0.085052 | 0.0663   | 0.137219 | 0.00296  | 0.274772 | 1.55E-09 | 0.232671 | 3.69E-07 | 0.27903  |
| 0.123078 | 0.00775  | 0.038816 | 0.40265  | 0.365672 | 3.20E-16 | 0.205382 | 7.67E-06 | 0.279651 |
| 0.004588 | 0.92124  | 0.080868 | 0.08086  | 0.388446 | 2.87E-18 | 0.266665 | 4.81E-09 | 0.311445 |
| 0.257691 | 1.61E-08 | 0.119424 | 0.00979  | 0.559423 | 8.27E-40 | 0.435968 | 4.35E-23 | 0.507803 |
| 0.172286 | 0.00018  | 0.126618 | 0.00614  | 0.292918 | 1.08E-10 | 0.258233 | 1.50E-08 | 0.216028 |
| -0.11615 | 0.01201  | 0.068481 | 0.1395   | -0.42273 | 1.15E-21 | -0.33932 | 4.78E-14 | -0.28183 |
| 0.461938 | 4.62E-26 | 0.28682  | 2.71E-10 | 0.705095 | 2.00E-71 | 0.562906 | 2.18E-40 | 0.58731  |
| 0.367876 | 2.06E-16 | 0.249932 | 4.41E-08 | 0.696804 | 4.11E-69 | 0.588171 | 8.45E-45 | 0.495649 |
| 0.215958 | 2.48E-06 | 0.272871 | 2.03E-09 | 0.598733 | 9.23E-47 | 0.507671 | 5.83E-32 | 0.492365 |
| 0.219254 | 1.72E-06 | 0.289787 | 1.74E-10 | 0.611323 | 3.38E-49 | 0.566219 | 6.05E-41 | 0.5072   |
| 0.124069 | 0.00727  | -0.14083 | 0.00229  | 0.508217 | 4.89E-32 | 0.310621 | 6.64E-12 | 0.382441 |
| 0.169067 | 0.00024  | -0.0081  | 0.86137  | 0.417196 | 4.31E-21 | 0.223559 | 1.06E-06 | 0.380732 |
| 0.25422  | 2.54E-08 | 0.424389 | 7.67E-22 | 0.609403 | 8.09E-49 | 0.64328  | 6.72E-56 | 0.523926 |
| -0.04546 | 0.32695  | 0.012395 | 0.78936  | 0.309994 | 7.36E-12 | 0.248065 | 5.59E-08 | 0.261699 |
| 0.120026 | 0.00943  | 0.181595 | 7.93E-05 | 0.440094 | 1.53E-23 | 0.39475  | 7.28E-19 | 0.293729 |
| 0.06566  | 0.15659  | 0.113224 | 0.01436  | 0.359603 | 1.06E-15 | 0.292027 | 1.24E-10 | 0.317226 |
| 0.334713 | 1.09E-13 | 0.212593 | 3.57E-06 | 0.478876 | 3.82E-28 | 0.413723 | 9.78E-21 | 0.346039 |
| 0.431635 | 1.29E-22 | 0.377911 | 2.66E-17 | 0.778914 | 2.80E-96 | 0.609343 | 8.31E-49 | 0.635773 |
| -0.15214 | 0.00097  | -0.16596 | 0.00032  | -0.47061 | 4.11E-27 | -0.38438 | 6.85E-18 | -0.37428 |
| 0.038758 | 0.40336  | 0.030814 | 0.50651  | -0.32019 | 1.36E-12 | -0.2636  | 7.30E-09 | -0.26264 |
| 0.397282 | 4.16E-19 | 0.326082 | 4.97E-13 | 0.684104 | 1.02E-65 | 0.503256 | 2.37E-31 | 0.747122 |
| 0.23153  | 4.22E-07 | 0.251657 | 3.53E-08 | 0.516493 | 3.32E-33 | 0.530149 | 3.33E-35 | 0.419131 |
| 0.384827 | 6.22E-18 | 0.296803 | 5.96E-11 | 0.675718 | 1.42E-63 | 0.505079 | 1.33E-31 | 0.602751 |
| -0.1     | 0.03072  | 0.178966 | 0.0001   | -0.38308 | 9.02E-18 | -0.20146 | 1.15E-05 | -0.27293 |
| 0.239676 | 1.59E-07 | 0.140643 | 0.00232  | 0.481622 | 1.71E-28 | 0.518971 | 1.46E-33 | 0.326866 |
| 0.454031 | 3.96E-25 | 0.372828 | 7.57E-17 | 0.590958 | 2.61E-45 | 0.587787 | 9.93E-45 | 0.484061 |

|          |          |          |          |          |          |          |          |          |
|----------|----------|----------|----------|----------|----------|----------|----------|----------|
| -0.02229 | 0.63092  | 0.106459 | 0.02139  | 0.388309 | 2.95E-18 | 0.333411 | 1.38E-13 | 0.358411 |
| 0.336452 | 8.01E-14 | 0.323835 | 7.31E-13 | 0.668165 | 1.06E-61 | 0.547505 | 7.03E-38 | 0.555992 |
| 0.101033 | 0.02903  | 0.242864 | 1.07E-07 | 0.385783 | 5.08E-18 | 0.483378 | 1.02E-28 | 0.28925  |
| 0.307347 | 1.13E-11 | 0.063966 | 0.16758  | 0.570677 | 1.05E-41 | 0.395959 | 5.58E-19 | 0.387588 |
| 0.368787 | 1.72E-16 | 0.246818 | 6.54E-08 | 0.709358 | 1.20E-72 | 0.555655 | 3.43E-39 | 0.570506 |
| 0.270441 | 2.86E-09 | 0.093896 | 0.04255  | 0.621021 | 3.78E-51 | 0.462445 | 4.02E-26 | 0.492306 |
| 0.259857 | 1.21E-08 | 0.051657 | 0.26525  | 0.617873 | 1.65E-50 | 0.404397 | 8.42E-20 | 0.495034 |
| 0.258662 | 1.42E-08 | 0.077583 | 0.09401  | 0.650529 | 1.56E-57 | 0.413738 | 9.75E-21 | 0.423886 |
| 0.010536 | 0.82037  | 0.198907 | 1.49E-05 | -0.35235 | 4.26E-15 | -0.21837 | 1.90E-06 | -0.25009 |
| -0.17385 | 0.00016  | -0.25826 | 1.49E-08 | -0.38543 | 5.47E-18 | -0.42021 | 2.10E-21 | -0.36193 |
| 0.043361 | 0.34981  | -0.00893 | 0.84744  | 0.349021 | 7.99E-15 | 0.276961 | 1.14E-09 | 0.233567 |
| 0.1434   | 0.00189  | 0.057678 | 0.21345  | 0.319336 | 1.57E-12 | 0.237375 | 2.10E-07 | 0.224201 |
| -0.34363 | 2.18E-14 | -0.38157 | 1.24E-17 | -0.55343 | 7.90E-39 | -0.49471 | 3.38E-30 | -0.58923 |
| 0.146887 | 0.00146  | 0.32006  | 1.39E-12 | 0.527732 | 7.64E-35 | 0.5031   | 2.49E-31 | 0.449357 |
| 0.280636 | 6.71E-10 | 0.091346 | 0.04851  | 0.341292 | 3.34E-14 | 0.309459 | 8.02E-12 | 0.226045 |
| 0.181851 | 7.74E-05 | 0.028252 | 0.54252  | 0.628209 | 1.22E-52 | 0.367372 | 2.28E-16 | 0.495764 |
| 0.279634 | 7.76E-10 | 0.145261 | 0.00165  | 0.524265 | 2.48E-34 | 0.44223  | 8.81E-24 | 0.35696  |
| 0.170966 | 0.00021  | 0.170721 | 0.00021  | 0.561316 | 4.02E-40 | 0.468331 | 7.81E-27 | 0.550565 |
| 0.361599 | 7.15E-16 | 0.326772 | 4.41E-13 | 0.775895 | 4.44E-95 | 0.530945 | 2.53E-35 | 0.728646 |
| 0.400595 | 1.99E-19 | 0.348223 | 9.27E-15 | 0.553742 | 7.03E-39 | 0.477655 | 5.45E-28 | 0.489986 |
| 0.323288 | 8.02E-13 | 0.2554   | 2.17E-08 | 0.743571 | 2.60E-83 | 0.475378 | 1.05E-27 | 0.676796 |
| 0.415676 | 6.18E-21 | 0.260926 | 1.05E-08 | 0.77516  | 8.63E-95 | 0.542744 | 3.95E-37 | 0.68452  |
| 0.183706 | 6.52E-05 | 0.183686 | 6.53E-05 | 0.438607 | 2.23E-23 | 0.465433 | 1.76E-26 | 0.338531 |
| 0.366441 | 2.74E-16 | 0.225025 | 8.97E-07 | 0.699492 | 7.46E-70 | 0.462248 | 4.24E-26 | 0.608554 |
| 0.2244   | 9.63E-07 | -0.0672  | 0.1471   | 0.298815 | 4.36E-11 | 0.307243 | 1.15E-11 | 0.118309 |
| 0.02544  | 0.58343  | 0.16979  | 0.00023  | 0.415728 | 6.10E-21 | 0.342351 | 2.75E-14 | 0.393906 |
| 0.217477 | 2.10E-06 | 0.128086 | 0.00557  | 0.439313 | 1.86E-23 | 0.505809 | 1.06E-31 | 0.306912 |
| 0.323376 | 7.90E-13 | 0.276101 | 1.29E-09 | 0.72565  | 1.60E-77 | 0.643999 | 4.65E-56 | 0.583541 |
| 0.031743 | 0.49378  | 0.031492 | 0.49721  | 0.325835 | 5.18E-13 | 0.326101 | 4.95E-13 | 0.25857  |
| 0.331409 | 1.96E-13 | 0.255422 | 2.17E-08 | 0.683366 | 1.58E-65 | 0.589227 | 5.42E-45 | 0.56539  |
| 0.347178 | 1.13E-14 | 0.196029 | 1.99E-05 | 0.611131 | 3.69E-49 | 0.463938 | 2.66E-26 | 0.437928 |
| 0.293583 | 9.77E-11 | 0.148677 | 0.00127  | 0.511619 | 1.63E-32 | 0.500633 | 5.40E-31 | 0.441041 |
| -0.06916 | 0.13563  | -0.05853 | 0.20677  | 0.209853 | 4.79E-06 | 0.172808 | 0.00017  | 0.162931 |
| 0.286106 | 3.01E-10 | 0.243961 | 9.36E-08 | 0.483284 | 1.05E-28 | 0.420806 | 1.82E-21 | 0.538534 |
| 0.131945 | 0.00429  | 0.044851 | 0.33348  | 0.285122 | 3.48E-10 | 0.339415 | 4.69E-14 | 0.15461  |
| 0.416025 | 5.69E-21 | 0.051208 | 0.26943  | -0.1451  | 0.00167  | -0.17963 | 9.49E-05 | -0.13125 |
| 0.069922 | 0.13135  | -0.05044 | 0.27671  | 0.455509 | 2.66E-25 | 0.2642   | 6.73E-09 | 0.573298 |
| -0.13649 | 0.00312  | -0.25413 | 2.57E-08 | -0.43954 | 1.76E-23 | -0.3844  | 6.81E-18 | -0.40733 |
| 0.043895 | 0.3439   | 0.134578 | 0.00357  | 0.388542 | 2.81E-18 | 0.345779 | 1.46E-14 | 0.375879 |
| -0.2609  | 1.05E-08 | -0.39861 | 3.09E-19 | -0.53553 | 5.12E-36 | -0.53665 | 3.45E-36 | -0.52259 |
| 0.273496 | 1.86E-09 | 0.138137 | 0.00278  | 0.723723 | 6.29E-77 | 0.481521 | 1.77E-28 | 0.603319 |
| 0.19913  | 1.46E-05 | 0.106695 | 0.0211   | 0.626428 | 2.88E-52 | 0.464927 | 2.02E-26 | 0.502114 |
| 0.050333 | 0.27771  | -0.06528 | 0.15901  | 0.266409 | 4.98E-09 | 0.186221 | 5.14E-05 | 0.154774 |
| -0.04602 | 0.32097  | -0.0502  | 0.27902  | 0.292472 | 1.16E-10 | 0.281117 | 6.26E-10 | 0.246672 |
| 0.182845 | 7.06E-05 | 0.069885 | 0.13155  | 0.287321 | 2.51E-10 | 0.204725 | 8.21E-06 | 0.220137 |

|          |          |          |          |          |          |          |          |          |
|----------|----------|----------|----------|----------|----------|----------|----------|----------|
| 0.284286 | 3.94E-10 | 0.202672 | 1.02E-05 | 0.697445 | 2.74E-69 | 0.499387 | 7.96E-31 | 0.549852 |
| 0.497243 | 1.55E-30 | 0.383204 | 8.78E-18 | 0.731983 | 1.63E-79 | 0.545955 | 1.24E-37 | 0.623065 |
| -0.16586 | 0.00032  | 0.045829 | 0.32303  | -0.45325 | 4.88E-25 | -0.27172 | 2.39E-09 | -0.205   |
| 0.244721 | 8.51E-08 | 0.304782 | 1.70E-11 | 0.555497 | 3.65E-39 | 0.467596 | 9.59E-27 | 0.495974 |
| 0.342573 | 2.64E-14 | 0.25902  | 1.35E-08 | 0.640434 | 2.86E-55 | 0.431112 | 1.47E-22 | 0.587655 |
| -0.14125 | 0.00222  | 0.060025 | 0.19538  | -0.43056 | 1.69E-22 | -0.27538 | 1.43E-09 | -0.32524 |
| 0.179144 | 9.92E-05 | 0.035965 | 0.43811  | 0.562341 | 2.71E-40 | 0.375824 | 4.10E-17 | 0.437816 |
| -0.16434 | 0.00036  | -0.17965 | 9.47E-05 | -0.27502 | 1.50E-09 | -0.39352 | 9.53E-19 | -0.24506 |
| 0.159701 | 0.00053  | -0.01243 | 0.78884  | 0.303431 | 2.11E-11 | 0.27022  | 2.95E-09 | 0.285002 |
| 0.193925 | 2.45E-05 | 0.171887 | 0.00019  | 0.433022 | 9.13E-23 | 0.398086 | 3.48E-19 | 0.378628 |
| -0.00483 | 0.91712  | 0.199696 | 1.38E-05 | -0.25415 | 2.56E-08 | -0.19811 | 1.61E-05 | -0.14983 |
| 0.339915 | 4.29E-14 | 0.281888 | 5.59E-10 | 0.759708 | 5.94E-89 | 0.661691 | 3.89E-60 | 0.6274   |
| 0.318513 | 1.80E-12 | 0.153261 | 0.00089  | 0.608601 | 1.16E-48 | 0.461983 | 4.56E-26 | 0.485075 |
| 0.317091 | 2.28E-12 | 0.256612 | 1.85E-08 | 0.697012 | 3.61E-69 | 0.526046 | 1.36E-34 | 0.594119 |
| 0.321828 | 1.03E-12 | 0.177142 | 0.00012  | 0.658403 | 2.33E-59 | 0.508563 | 4.38E-32 | 0.473107 |
| 0.143561 | 0.00187  | 0.164256 | 0.00036  | 0.495172 | 2.93E-30 | 0.446404 | 2.98E-24 | 0.327184 |
| 0.298862 | 4.33E-11 | 0.183376 | 6.72E-05 | 0.562435 | 2.61E-40 | 0.358637 | 1.27E-15 | 0.460133 |
| 0.28758  | 2.42E-10 | 0.229209 | 5.53E-07 | 0.611695 | 2.86E-49 | 0.580778 | 1.81E-43 | 0.494411 |
| 0.12174  | 0.00845  | 0.167374 | 0.00028  | 0.408575 | 3.24E-20 | 0.35943  | 1.09E-15 | 0.423181 |
| 0.382354 | 1.05E-17 | 0.333263 | 1.41E-13 | 0.731606 | 2.15E-79 | 0.639183 | 5.38E-55 | 0.604934 |
| 0.377366 | 2.98E-17 | 0.330622 | 2.25E-13 | 0.716873 | 7.48E-75 | 0.579761 | 2.74E-43 | 0.660579 |
| 0.292485 | 1.15E-10 | 0.25091  | 3.89E-08 | 0.606571 | 2.89E-48 | 0.49334  | 5.13E-30 | 0.495038 |
| 0.396211 | 5.27E-19 | 0.333252 | 1.42E-13 | 0.764895 | 7.31E-91 | 0.659211 | 1.51E-59 | 0.638448 |
| 0.169818 | 0.00023  | 0.10321  | 0.02572  | 0.500565 | 5.51E-31 | 0.325307 | 5.67E-13 | 0.43998  |
| 0.239906 | 1.54E-07 | 0.212918 | 3.45E-06 | 0.645039 | 2.72E-56 | 0.527765 | 7.55E-35 | 0.541715 |
| -0.18618 | 5.16E-05 | 0.125118 | 0.00678  | -0.39385 | 8.86E-19 | -0.2068  | 6.61E-06 | -0.31994 |
| 0.136565 | 0.0031   | -0.02214 | 0.63318  | 0.452718 | 5.62E-25 | 0.247109 | 6.31E-08 | 0.413547 |
| 0.150883 | 0.00107  | -0.09066 | 0.05024  | 0.563829 | 1.53E-40 | 0.365977 | 3.01E-16 | 0.407656 |
| 0.43571  | 4.65E-23 | 0.288728 | 2.04E-10 | 0.793374 | #####    | 0.580075 | 2.41E-43 | 0.665323 |
| 0.372175 | 8.65E-17 | 0.211998 | 3.81E-06 | 0.737794 | 2.15E-81 | 0.505382 | 1.21E-31 | 0.63581  |
| 0.304547 | 1.77E-11 | 0.240324 | 1.47E-07 | 0.596871 | 2.07E-46 | 0.514075 | 7.34E-33 | 0.520307 |
| 0.381193 | 1.34E-17 | 0.371774 | 9.38E-17 | 0.747165 | 1.57E-84 | 0.754422 | 4.68E-87 | 0.544521 |
| 0.214215 | 3.00E-06 | 0.043107 | 0.35264  | 0.516698 | 3.10E-33 | 0.359575 | 1.06E-15 | 0.377589 |
| -0.17286 | 0.00017  | -0.11416 | 0.01357  | -0.52724 | 9.03E-35 | -0.4159  | 5.86E-21 | -0.48845 |
| 0.353094 | 3.70E-15 | 0.255376 | 2.18E-08 | 0.659802 | 1.09E-59 | 0.590104 | 3.74E-45 | 0.497027 |
| 0.176302 | 0.00013  | 0.112581 | 0.01493  | 0.307261 | 1.14E-11 | 0.2701   | 3.00E-09 | 0.358233 |
| 0.001187 | 0.97958  | 0.118791 | 0.01019  | -0.25178 | 3.48E-08 | -0.14514 | 0.00166  | -0.27869 |
| 0.190664 | 3.36E-05 | 0.123282 | 0.00765  | 0.595234 | 4.20E-46 | 0.432951 | 9.29E-23 | 0.44338  |
| 0.377067 | 3.17E-17 | 0.154244 | 0.00082  | 0.698313 | 1.58E-69 | 0.423727 | 9.01E-22 | 0.513487 |
| 0.092089 | 0.04671  | -0.14247 | 0.00203  | 0.334123 | 1.21E-13 | 0.221328 | 1.36E-06 | 0.254081 |
| 0.355201 | 2.47E-15 | 0.191833 | 3.00E-05 | 0.533639 | 9.93E-36 | 0.483751 | 9.15E-29 | 0.37736  |
| 0.210838 | 4.31E-06 | 0.024361 | 0.59951  | 0.559882 | 6.94E-40 | 0.504957 | 1.38E-31 | 0.402264 |
| 0.335059 | 1.03E-13 | 0.156243 | 0.0007   | 0.724177 | 4.56E-77 | 0.485765 | 5.04E-29 | 0.563511 |
| 0.124629 | 0.00701  | 0.024364 | 0.59946  | 0.373365 | 6.78E-17 | 0.302574 | 2.42E-11 | 0.260614 |
| 0.223668 | 1.05E-06 | 0.20292  | 9.90E-06 | 0.503054 | 2.52E-31 | 0.472509 | 2.39E-27 | 0.331876 |



|          |          |          |          |          |          |          |          |          |
|----------|----------|----------|----------|----------|----------|----------|----------|----------|
| 0.219995 | 1.58E-06 | 0.140117 | 0.00241  | 0.41118  | 1.77E-20 | 0.387605 | 3.44E-18 | 0.319805 |
| 0.186034 | 5.24E-05 | 0.196686 | 1.86E-05 | 0.647631 | 7.12E-57 | 0.545728 | 1.34E-37 | 0.453439 |
| 0.194939 | 2.21E-05 | 0.123236 | 0.00767  | 0.582951 | 7.42E-44 | 0.352313 | 4.29E-15 | 0.50015  |
| 0.32021  | 1.35E-12 | 0.220069 | 1.57E-06 | 0.729625 | 9.12E-79 | 0.578321 | 4.93E-43 | 0.519184 |
| 0.304657 | 1.74E-11 | 0.20031  | 1.29E-05 | 0.598005 | 1.27E-46 | 0.359938 | 9.90E-16 | 0.493407 |
| 0.164474 | 0.00036  | 0.07683  | 0.09725  | 0.606222 | 3.39E-48 | 0.491463 | 9.09E-30 | 0.451834 |
| 0.167216 | 0.00028  | 0.038311 | 0.40881  | 0.479933 | 2.81E-28 | 0.377704 | 2.78E-17 | 0.371266 |
| -0.10825 | 0.01929  | 0.047016 | 0.31065  | -0.23001 | 5.04E-07 | -0.10901 | 0.01845  | -0.17177 |
| 0.290453 | 1.57E-10 | 0.15142  | 0.00103  | 0.52082  | 7.90E-34 | 0.297839 | 5.07E-11 | 0.486268 |
| 0.170262 | 0.00022  | 0.10617  | 0.02175  | 0.401756 | 1.53E-19 | 0.500221 | 6.14E-31 | 0.188012 |
| 0.280572 | 6.77E-10 | 0.093719 | 0.04294  | 0.501556 | 4.04E-31 | 0.431536 | 1.32E-22 | 0.321566 |
| 0.233798 | 3.22E-07 | 0.059709 | 0.19774  | 0.525959 | 1.40E-34 | 0.287281 | 2.53E-10 | 0.452934 |
| 0.14631  | 0.00152  | 0.272028 | 2.29E-09 | 0.470772 | 3.92E-27 | 0.578205 | 5.17E-43 | 0.339623 |
| 0.239815 | 1.56E-07 | 0.293131 | 1.05E-10 | 0.337802 | 6.28E-14 | 0.476542 | 7.52E-28 | 0.247334 |
| 0.243689 | 9.68E-08 | -0.0013  | 0.9776   | 0.601088 | 3.29E-47 | 0.371984 | 8.99E-17 | 0.420239 |
| 0.345282 | 1.60E-14 | 0.161226 | 0.00047  | 0.648352 | 4.89E-57 | 0.45146  | 7.86E-25 | 0.559852 |
| 0.488385 | 2.30E-29 | 0.071296 | 0.12391  | 0.567885 | 3.16E-41 | 0.303222 | 2.18E-11 | 0.496382 |
| 0.230106 | 4.98E-07 | 0.013208 | 0.77589  | 0.222405 | 1.21E-06 | 0.058443 | 0.20743  | 0.212718 |
| 0.237778 | 2.00E-07 | 0.157037 | 0.00066  | 0.560942 | 4.63E-40 | 0.407868 | 3.81E-20 | 0.463446 |
| 0.098914 | 0.03259  | 0.015476 | 0.73871  | 0.482155 | 1.47E-28 | 0.376761 | 3.38E-17 | 0.318039 |
| 0.159152 | 0.00056  | 0.167864 | 0.00027  | 0.384391 | 6.82E-18 | 0.399371 | 2.61E-19 | 0.295528 |
| 0.127618 | 0.00575  | 0.199631 | 1.38E-05 | 0.550908 | 2.01E-38 | 0.471593 | 3.11E-27 | 0.43044  |
| -0.08049 | 0.0823   | -0.07759 | 0.09396  | -0.27344 | 1.88E-09 | -0.32256 | 9.08E-13 | -0.14383 |
| 0.149737 | 0.00117  | 0.062661 | 0.17643  | 0.363502 | 4.92E-16 | 0.315746 | 2.86E-12 | 0.280539 |
| 0.040658 | 0.38069  | 0.032584 | 0.4824   | 0.501974 | 3.55E-31 | 0.471883 | 2.86E-27 | 0.329129 |
| -0.08924 | 0.05395  | -0.03944 | 0.39515  | -0.26499 | 6.05E-09 | -0.19556 | 2.08E-05 | -0.27316 |
| -0.12169 | 0.00847  | -0.28732 | 2.51E-10 | -0.27164 | 2.41E-09 | -0.39151 | 1.48E-18 | -0.23853 |
| -0.02502 | 0.58973  | -0.0721  | 0.11974  | -0.24734 | 6.13E-08 | -0.35891 | 1.21E-15 | -0.18289 |
| 0.297428 | 5.41E-11 | 0.268272 | 3.86E-09 | 0.658747 | 1.94E-59 | 0.637046 | 1.57E-54 | 0.496234 |
| -0.15686 | 0.00067  | -0.09453 | 0.04115  | -0.4289  | 2.54E-22 | -0.2585  | 1.45E-08 | -0.36381 |
| 0.089478 | 0.05332  | 0.088396 | 0.05628  | 0.227638 | 6.64E-07 | 0.213318 | 3.30E-06 | 0.255938 |
| -0.12102 | 0.00885  | -0.14991 | 0.00116  | -0.5268  | 1.05E-34 | -0.40964 | 2.53E-20 | -0.38981 |
| 0.379983 | 1.73E-17 | 0.293685 | 9.62E-11 | 0.769177 | 1.78E-92 | 0.6649   | 6.61E-61 | 0.6212   |
| 0.28918  | 1.90E-10 | 0.289121 | 1.92E-10 | 0.50501  | 1.36E-31 | 0.388867 | 2.62E-18 | 0.512065 |
| 0.204283 | 8.60E-06 | 0.077531 | 0.09423  | 0.619113 | 9.26E-51 | 0.511439 | 1.73E-32 | 0.413854 |
| 0.296692 | 6.06E-11 | 0.153782 | 0.00086  | 0.613517 | 1.24E-49 | 0.510961 | 2.02E-32 | 0.441505 |
| 0.155143 | 0.00077  | 0.016325 | 0.72493  | 0.445285 | 3.99E-24 | 0.346019 | 1.40E-14 | 0.24132  |
| 0.040069 | 0.38762  | -0.04868 | 0.29385  | 0.231435 | 4.26E-07 | 0.132511 | 0.00412  | 0.234024 |
| 0.504635 | 1.53E-31 | 0.236696 | 2.28E-07 | 0.622024 | 2.35E-51 | 0.432689 | 9.92E-23 | 0.556409 |
| -0.12054 | 0.00912  | -0.1951  | 2.18E-05 | -0.38515 | 5.81E-18 | -0.39787 | 3.65E-19 | -0.32116 |
| -0.0099  | 0.83112  | 0.074275 | 0.10893  | -0.246   | 7.25E-08 | -0.1824  | 7.36E-05 | -0.28028 |
| 0.211459 | 4.03E-06 | 0.18458  | 6.00E-05 | 0.335449 | 9.58E-14 | 0.325756 | 5.25E-13 | 0.298095 |
| 0.126855 | 0.00605  | 0.097318 | 0.03552  | 0.306047 | 1.39E-11 | 0.239014 | 1.72E-07 | 0.290281 |
| 0.309083 | 8.53E-12 | 0.215928 | 2.48E-06 | 0.682279 | 3.02E-65 | 0.553626 | 7.34E-39 | 0.497994 |
| 0.233407 | 3.38E-07 | 0.182465 | 7.31E-05 | 0.606255 | 3.34E-48 | 0.518799 | 1.55E-33 | 0.414003 |

|          |          |          |          |          |          |          |          |          |
|----------|----------|----------|----------|----------|----------|----------|----------|----------|
| -0.17371 | 0.00016  | -0.2176  | 2.07E-06 | -0.28935 | 1.85E-10 | -0.27515 | 1.47E-09 | -0.34275 |
| -0.16193 | 0.00044  | -0.04309 | 0.3528   | -0.39097 | 1.66E-18 | -0.25504 | 2.28E-08 | -0.28519 |
| 0.032286 | 0.48641  | 0.044742 | 0.33465  | 0.374057 | 5.89E-17 | 0.301653 | 2.79E-11 | 0.312698 |
| -0.03961 | 0.39307  | -0.03385 | 0.46559  | -0.36846 | 1.83E-16 | -0.28821 | 2.20E-10 | -0.22508 |
| 0.032965 | 0.47729  | -0.048   | 0.30065  | 0.394327 | 7.99E-19 | 0.308107 | 9.99E-12 | 0.278456 |
| 0.413113 | 1.13E-20 | 0.275947 | 1.32E-09 | 0.694765 | 1.48E-68 | 0.504721 | 1.49E-31 | 0.550223 |
| 0.135535 | 0.00334  | 0.047045 | 0.31035  | 0.363849 | 4.59E-16 | 0.223162 | 1.11E-06 | 0.295417 |
| 0.340729 | 3.70E-14 | 0.118744 | 0.01022  | 0.673259 | 5.88E-63 | 0.408695 | 3.15E-20 | 0.515158 |
| 0.268706 | 3.63E-09 | 0.276715 | 1.18E-09 | 0.54166  | 5.83E-37 | 0.354332 | 2.92E-15 | 0.555565 |
| 0.190242 | 3.50E-05 | 0.220414 | 1.51E-06 | 0.419813 | 2.31E-21 | 0.316497 | 2.52E-12 | 0.382768 |
| 0.19273  | 2.75E-05 | -0.04707 | 0.31005  | 0.421266 | 1.63E-21 | 0.288504 | 2.10E-10 | 0.296827 |
| 0.140835 | 0.00228  | 0.316028 | 2.73E-12 | 0.561726 | 3.43E-40 | 0.486773 | 3.73E-29 | 0.52613  |
| 0.273207 | 1.94E-09 | 0.32969  | 2.65E-13 | 0.532687 | 1.38E-35 | 0.413116 | 1.13E-20 | 0.512833 |
| 0.348335 | 9.08E-15 | 0.158862 | 0.00057  | 0.562529 | 2.52E-40 | 0.338937 | 5.12E-14 | 0.50343  |
| 0.305913 | 1.42E-11 | 0.22278  | 1.16E-06 | 0.643699 | 5.42E-56 | 0.425941 | 5.25E-22 | 0.589    |
| 0.20622  | 7.03E-06 | 0.20775  | 5.98E-06 | 0.59391  | 7.42E-46 | 0.374239 | 5.67E-17 | 0.560415 |
| 0.372423 | 8.22E-17 | 0.209557 | 4.94E-06 | 0.599557 | 6.44E-47 | 0.429835 | 2.02E-22 | 0.480198 |
| 0.07583  | 0.1017   | 0.058907 | 0.20384  | 0.243729 | 9.63E-08 | 0.293256 | 1.03E-10 | 0.171784 |
| 0.232427 | 3.79E-07 | 0.189095 | 3.91E-05 | 0.490468 | 1.23E-29 | 0.345217 | 1.62E-14 | 0.388788 |
| 0.197459 | 1.72E-05 | 0.17808  | 0.00011  | 0.645936 | 1.71E-56 | 0.538412 | 1.85E-36 | 0.464687 |
| 0.110694 | 0.01671  | 0.030119 | 0.51616  | 0.563897 | 1.49E-40 | 0.453715 | 4.31E-25 | 0.423085 |
| 0.393081 | 1.05E-18 | 0.298611 | 4.50E-11 | 0.628715 | 9.53E-53 | 0.548387 | 5.09E-38 | 0.477575 |
| 0.340018 | 4.21E-14 | 0.222041 | 1.26E-06 | 0.720346 | 6.75E-76 | 0.536252 | 3.98E-36 | 0.559601 |
| 0.219785 | 1.62E-06 | 0.072697 | 0.11668  | 0.564114 | 1.37E-40 | 0.471126 | 3.55E-27 | 0.39097  |
| 0.331031 | 2.10E-13 | 0.207522 | 6.13E-06 | 0.725394 | 1.92E-77 | 0.655436 | 1.16E-58 | 0.50802  |
| 0.106799 | 0.02098  | -0.06646 | 0.15158  | 0.356415 | 1.96E-15 | 0.322888 | 8.59E-13 | 0.194798 |
| 0.404547 | 8.14E-20 | 0.265144 | 5.92E-09 | 0.774904 | 1.09E-94 | 0.618763 | 1.09E-50 | 0.6051   |
| 0.384248 | 7.03E-18 | 0.333792 | 1.29E-13 | 0.743689 | 2.38E-83 | 0.645829 | 1.81E-56 | 0.612608 |
| 0.317668 | 2.07E-12 | 0.266603 | 4.85E-09 | 0.722037 | 2.07E-76 | 0.518253 | 1.86E-33 | 0.66307  |
| 0.236401 | 2.36E-07 | 0.108492 | 0.01902  | 0.668105 | 1.10E-61 | 0.379456 | 1.93E-17 | 0.594444 |
| 0.177107 | 0.00012  | 0.107838 | 0.01976  | 0.37566  | 4.24E-17 | 0.250529 | 4.08E-08 | 0.311855 |
| 0.304741 | 1.71E-11 | 0.196682 | 1.86E-05 | 0.663037 | 1.85E-60 | 0.527281 | 8.91E-35 | 0.512177 |
| 0.01037  | 0.82315  | -0.03119 | 0.50133  | 0.412368 | 1.34E-20 | 0.372208 | 8.59E-17 | 0.353828 |
| 0.045788 | 0.32347  | 0.036585 | 0.43026  | 0.465895 | 1.54E-26 | 0.325635 | 5.36E-13 | 0.404337 |
| 0.298103 | 4.87E-11 | 0.254224 | 2.53E-08 | 0.726468 | 8.91E-78 | 0.592451 | 1.38E-45 | 0.611922 |
| 0.253161 | 2.91E-08 | 0.316256 | 2.63E-12 | 0.600311 | 4.63E-47 | 0.584637 | 3.69E-44 | 0.679967 |
| -0.1429  | 0.00196  | -0.09762 | 0.03495  | -0.26695 | 4.63E-09 | -0.35815 | 1.40E-15 | -0.2149  |
| 0.065842 | 0.15544  | -0.00402 | 0.93102  | 0.42726  | 3.80E-22 | 0.300752 | 3.22E-11 | 0.368001 |
| 0.273543 | 1.85E-09 | 0.158176 | 0.0006   | 0.675564 | 1.56E-63 | 0.510758 | 2.16E-32 | 0.554411 |
| 0.259637 | 1.24E-08 | 0.113985 | 0.01371  | 0.617243 | 2.22E-50 | 0.470466 | 4.27E-27 | 0.456202 |
| 0.264687 | 6.30E-09 | 0.123505 | 0.00754  | 0.648548 | 4.41E-57 | 0.409639 | 2.53E-20 | 0.590381 |
| 0.296793 | 5.97E-11 | 0.155491 | 0.00075  | 0.702586 | 1.02E-70 | 0.530315 | 3.15E-35 | 0.57066  |
| 0.115087 | 0.01282  | 0.146461 | 0.00151  | 0.4394   | 1.82E-23 | 0.293218 | 1.03E-10 | 0.3867   |
| 0.006484 | 0.88886  | -0.01203 | 0.79538  | 0.292447 | 1.16E-10 | 0.250826 | 3.93E-08 | 0.247724 |
| 0.213734 | 3.16E-06 | -0.07663 | 0.09813  | 0.520276 | 9.48E-34 | 0.318797 | 1.72E-12 | 0.362165 |

|          |          |          |          |          |          |          |          |          |
|----------|----------|----------|----------|----------|----------|----------|----------|----------|
| 0.411601 | 1.61E-20 | 0.293315 | 1.02E-10 | 0.817166 | #####    | 0.583792 | 5.24E-44 | 0.702563 |
| 0.346126 | 1.37E-14 | 0.222057 | 1.26E-06 | 0.692057 | 7.99E-68 | 0.513733 | 8.21E-33 | 0.566494 |
| 0.122718 | 0.00793  | 0.042043 | 0.36466  | 0.612397 | 2.07E-49 | 0.409551 | 2.58E-20 | 0.449339 |
| 0.030871 | 0.50573  | -0.1438  | 0.00184  | 0.287966 | 2.28E-10 | 0.202607 | 1.02E-05 | 0.14854  |
| 0.255355 | 2.19E-08 | 0.243803 | 9.54E-08 | 0.689223 | 4.57E-67 | 0.433921 | 7.29E-23 | 0.564887 |
| 0.138755 | 0.00266  | 0.11917  | 0.00995  | 0.452381 | 6.15E-25 | 0.463086 | 3.37E-26 | 0.291928 |
| 0.334249 | 1.19E-13 | 0.266862 | 4.68E-09 | 0.642115 | 1.22E-55 | 0.422416 | 1.24E-21 | 0.59448  |
| 0.234277 | 3.05E-07 | 0.059955 | 0.1959   | 0.583143 | 6.85E-44 | 0.493938 | 4.28E-30 | 0.399767 |
| 0.28307  | 4.70E-10 | 0.136452 | 0.00313  | 0.473457 | 1.83E-27 | 0.339984 | 4.23E-14 | 0.447732 |
| 0.261367 | 9.87E-09 | 0.251159 | 3.77E-08 | 0.735943 | 8.65E-81 | 0.497465 | 1.45E-30 | 0.620447 |
| 0.179969 | 9.20E-05 | 0.126178 | 0.00633  | 0.592104 | 1.60E-45 | 0.546316 | 1.09E-37 | 0.402894 |
| 0.19461  | 2.29E-05 | 0.13664  | 0.00309  | 0.350589 | 5.95E-15 | 0.261641 | 9.51E-09 | 0.29309  |
| 0.246027 | 7.23E-08 | 0.331291 | 2.00E-13 | 0.57592  | 1.30E-42 | 0.506907 | 7.44E-32 | 0.553537 |
| 0.070745 | 0.12686  | 0.012579 | 0.78631  | 0.255717 | 2.09E-08 | 0.30872  | 9.04E-12 | 0.129227 |
| 0.298044 | 4.91E-11 | 0.180115 | 9.08E-05 | 0.475955 | 8.91E-28 | 0.316828 | 2.39E-12 | 0.435256 |
| 0.230021 | 5.03E-07 | 0.123472 | 0.00755  | 0.308944 | 8.72E-12 | 0.10654  | 0.02129  | 0.406234 |
| 0.161671 | 0.00045  | 0.033864 | 0.46536  | 0.460575 | 6.72E-26 | 0.2756   | 1.38E-09 | 0.391809 |
| 0.250508 | 4.09E-08 | 0.113836 | 0.01384  | 0.428101 | 3.09E-22 | 0.170844 | 0.00021  | 0.351388 |
| 0.34137  | 3.29E-14 | 0.243736 | 9.62E-08 | 0.748392 | 5.96E-85 | 0.580143 | 2.35E-43 | 0.599574 |
| -0.05287 | 0.25419  | -0.13673 | 0.00307  | -0.30448 | 1.79E-11 | -0.23709 | 2.17E-07 | -0.31648 |
| -0.2247  | 9.31E-07 | -0.15757 | 0.00063  | -0.421   | 1.74E-21 | -0.34326 | 2.33E-14 | -0.40026 |
| 0.215657 | 2.56E-06 | 0.051809 | 0.26384  | 0.37444  | 5.44E-17 | 0.313683 | 4.02E-12 | 0.169739 |
| 0.221161 | 1.39E-06 | 0.238433 | 1.85E-07 | 0.481086 | 2.01E-28 | 0.419937 | 2.24E-21 | 0.401631 |
| 0.289181 | 1.90E-10 | 0.238249 | 1.89E-07 | 0.603273 | 1.26E-47 | 0.396415 | 5.04E-19 | 0.542658 |
| 0.146123 | 0.00154  | -0.00402 | 0.93099  | 0.324809 | 6.18E-13 | 0.192741 | 2.75E-05 | 0.320245 |
| 0.354578 | 2.79E-15 | 0.203265 | 9.55E-06 | 0.753588 | 9.22E-87 | 0.467915 | 8.77E-27 | 0.640242 |
| 0.269748 | 3.15E-09 | 0.25134  | 3.68E-08 | 0.746668 | 2.32E-84 | 0.544646 | 1.99E-37 | 0.633819 |
| 0.39492  | 7.01E-19 | 0.146598 | 0.00149  | 0.671352 | 1.75E-62 | 0.46     | 7.86E-26 | 0.487965 |
| -0.2185  | 1.87E-06 | -0.00761 | 0.86968  | -0.39739 | 4.06E-19 | -0.2642  | 6.74E-09 | -0.28755 |
| -0.09255 | 0.04561  | -0.11396 | 0.01374  | -0.22224 | 1.23E-06 | -0.2415  | 1.27E-07 | -0.26572 |
| 0.203552 | 9.27E-06 | 0.250456 | 4.12E-08 | 0.591808 | 1.82E-45 | 0.55773  | 1.57E-39 | 0.454476 |
| 0.223493 | 1.07E-06 | 0.139778 | 0.00247  | 0.557835 | 1.51E-39 | 0.447202 | 2.42E-24 | 0.403928 |
| 0.383207 | 8.77E-18 | 0.145297 | 0.00164  | 0.511163 | 1.89E-32 | 0.346491 | 1.28E-14 | 0.428998 |
| 0.013535 | 0.77049  | 0.094608 | 0.04099  | -0.33771 | 6.39E-14 | -0.21994 | 1.59E-06 | -0.1964  |
| 0.170112 | 0.00022  | -0.05276 | 0.2552   | 0.287985 | 2.27E-10 | 0.213471 | 3.25E-06 | 0.234299 |
| 0.127866 | 0.00565  | 0.005925 | 0.89839  | 0.472345 | 2.51E-27 | 0.333346 | 1.39E-13 | 0.393137 |
| 0.287436 | 2.47E-10 | 0.226986 | 7.16E-07 | 0.513938 | 7.68E-33 | 0.468475 | 7.50E-27 | 0.48029  |
| 0.233255 | 3.44E-07 | 0.008395 | 0.85642  | 0.525229 | 1.79E-34 | 0.400687 | 1.95E-19 | 0.273225 |
| -0.01294 | 0.7803   | 0.133294 | 0.00391  | -0.2457  | 7.53E-08 | -0.10162 | 0.02811  | -0.21655 |
| -0.12632 | 0.00627  | -0.11526 | 0.01269  | -0.37944 | 1.93E-17 | -0.37608 | 3.88E-17 | -0.28249 |
| 0.16379  | 0.00038  | -0.04988 | 0.28202  | 0.461042 | 5.91E-26 | 0.286194 | 2.97E-10 | 0.3839   |
| 0.31582  | 2.82E-12 | 0.236345 | 2.38E-07 | 0.677339 | 5.55E-64 | 0.581417 | 1.39E-43 | 0.455623 |
| 0.091276 | 0.04869  | -0.04609 | 0.32025  | 0.255309 | 2.20E-08 | 0.131007 | 0.00457  | 0.226582 |
| 0.342217 | 2.82E-14 | 0.202641 | 1.02E-05 | 0.721658 | 2.70E-76 | 0.468301 | 7.87E-27 | 0.589623 |
| 0.17991  | 9.25E-05 | 0.018009 | 0.69789  | 0.57795  | 5.73E-43 | 0.418605 | 3.09E-21 | 0.455343 |

|          |          |          |          |          |          |          |          |          |
|----------|----------|----------|----------|----------|----------|----------|----------|----------|
| 0.23829  | 1.88E-07 | 0.06499  | 0.16086  | 0.40811  | 3.60E-20 | 0.114537 | 0.01326  | 0.470652 |
| 0.29764  | 5.23E-11 | 0.237186 | 2.15E-07 | 0.52182  | 5.65E-34 | 0.501412 | 4.23E-31 | 0.476827 |
| 0.307803 | 1.05E-11 | 0.109865 | 0.01755  | 0.720227 | 7.34E-76 | 0.469902 | 5.01E-27 | 0.562831 |
| 0.045834 | 0.32298  | -0.07343 | 0.11303  | 0.27758  | 1.04E-09 | 0.145562 | 0.00161  | 0.192286 |
| 0.212939 | 3.44E-06 | 0.122767 | 0.00791  | 0.338585 | 5.46E-14 | 0.446087 | 3.24E-24 | 0.196425 |
| 0.192511 | 2.81E-05 | 0.228429 | 6.06E-07 | 0.370711 | 1.16E-16 | 0.428016 | 3.16E-22 | 0.298567 |
| -0.04715 | 0.30923  | -0.10145 | 0.02837  | 0.16387  | 0.00038  | 0.081915 | 0.07699  | 0.214884 |
| 0.244286 | 8.99E-08 | 0.129681 | 0.005    | 0.567154 | 4.20E-41 | 0.386873 | 4.02E-18 | 0.473906 |
| 0.236621 | 2.30E-07 | 0.092525 | 0.04567  | 0.598944 | 8.42E-47 | 0.44906  | 1.48E-24 | 0.48774  |
| 0.324761 | 6.23E-13 | 0.353462 | 3.45E-15 | 0.681377 | 5.16E-65 | 0.612145 | 2.33E-49 | 0.565784 |
| 0.284122 | 4.03E-10 | 0.246061 | 7.20E-08 | 0.629636 | 6.09E-53 | 0.57004  | 1.35E-41 | 0.508939 |
| 0.433877 | 7.37E-23 | 0.364466 | 4.07E-16 | 0.73442  | 2.69E-80 | 0.609174 | 8.98E-49 | 0.671478 |
| 0.085544 | 0.06474  | 0.02928  | 0.52793  | 0.340914 | 3.57E-14 | 0.348273 | 9.19E-15 | 0.274867 |
| 0.23037  | 4.83E-07 | 0.020284 | 0.66195  | 0.346478 | 1.28E-14 | 0.290334 | 1.60E-10 | 0.237641 |
| -0.10335 | 0.02552  | 0.084379 | 0.06848  | -0.3536  | 3.36E-15 | -0.25038 | 4.16E-08 | -0.19952 |
| 0.298364 | 4.68E-11 | 0.261753 | 9.37E-09 | 0.715704 | 1.67E-74 | 0.587278 | 1.23E-44 | 0.573079 |
| 0.239717 | 1.58E-07 | 0.094281 | 0.0417   | 0.505428 | 1.19E-31 | 0.418899 | 2.88E-21 | 0.411987 |
| 0.286885 | 2.68E-10 | 0.150563 | 0.0011   | 0.53545  | 5.27E-36 | 0.503186 | 2.42E-31 | 0.351981 |
| 0.293729 | 9.55E-11 | 0.27237  | 2.18E-09 | 0.389358 | 2.36E-18 | 0.437038 | 3.32E-23 | 0.297308 |
| 0.198604 | 1.54E-05 | 0.160993 | 0.00048  | 0.473127 | 2.01E-27 | 0.3685   | 1.82E-16 | 0.302695 |
| 0.215199 | 2.69E-06 | -0.0166  | 0.72048  | 0.571264 | 8.34E-42 | 0.380688 | 1.49E-17 | 0.3446   |
| 0.208418 | 5.58E-06 | 0.355776 | 2.22E-15 | 0.400223 | 2.16E-19 | 0.604883 | 6.15E-48 | 0.255159 |
| 0.255783 | 2.07E-08 | 0.14505  | 0.00167  | 0.437191 | 3.20E-23 | 0.355135 | 2.51E-15 | 0.246397 |
| 0.125282 | 0.00671  | 0.064225 | 0.16586  | 0.647656 | 7.02E-57 | 0.435213 | 5.27E-23 | 0.4971   |
| -0.02505 | 0.58926  | 0.01558  | 0.73701  | -0.33807 | 5.99E-14 | -0.23125 | 4.36E-07 | -0.28951 |
| 0.242101 | 1.18E-07 | -0.01335 | 0.77347  | 0.556137 | 2.87E-39 | 0.36306  | 5.37E-16 | 0.421536 |
| 0.244869 | 8.35E-08 | 0.146509 | 0.0015   | 0.643248 | 6.83E-56 | 0.504633 | 1.53E-31 | 0.474145 |
| 0.412098 | 1.43E-20 | 0.3905   | 1.84E-18 | 0.552149 | 1.27E-38 | 0.602937 | 1.46E-47 | 0.477128 |
| 0.007118 | 0.87807  | 0.061424 | 0.18515  | -0.18488 | 5.84E-05 | -0.15366 | 0.00086  | -0.21996 |
| 0.326638 | 4.51E-13 | 0.313903 | 3.88E-12 | 0.662999 | 1.89E-60 | 0.660252 | 8.54E-60 | 0.504374 |
| 0.016487 | 0.72232  | 0.135542 | 0.00334  | -0.1086  | 0.0189   | -0.04522 | 0.32948  | -0.0668  |
| 0.090241 | 0.05131  | -0.01717 | 0.71139  | 0.300968 | 3.11E-11 | 0.214005 | 3.06E-06 | 0.232267 |
| 0.329007 | 2.99E-13 | 0.318627 | 1.77E-12 | 0.64206  | 1.25E-55 | 0.669306 | 5.59E-62 | 0.462823 |
| 0.098294 | 0.0337   | 0.268818 | 3.58E-09 | 0.28412  | 4.03E-10 | 0.338846 | 5.20E-14 | 0.295244 |
| 0.123047 | 0.00777  | 0.071104 | 0.12493  | 0.471901 | 2.85E-27 | 0.461145 | 5.74E-26 | 0.342305 |
| 0.355408 | 2.38E-15 | 0.093916 | 0.0425   | 0.551454 | 1.65E-38 | 0.310338 | 6.96E-12 | 0.507668 |
| 0.092411 | 0.04594  | 0.013805 | 0.76605  | 0.294009 | 9.15E-11 | 0.171286 | 0.0002   | 0.285215 |
| 0.370214 | 1.29E-16 | 0.187078 | 4.74E-05 | 0.686857 | 1.93E-66 | 0.513207 | 9.75E-33 | 0.522939 |
| 0.132942 | 0.004    | 0.219887 | 1.60E-06 | -0.1329  | 0.00401  | -0.06699 | 0.14836  | -0.1284  |
| 0.341696 | 3.10E-14 | 0.314447 | 3.55E-12 | 0.71292  | 1.11E-73 | 0.633793 | 7.93E-54 | 0.566536 |
| -0.23668 | 2.28E-07 | -0.15655 | 0.00069  | -0.40433 | 8.55E-20 | -0.25312 | 2.92E-08 | -0.37715 |
| 0.033507 | 0.47008  | 0.046632 | 0.31462  | 0.468467 | 7.51E-27 | 0.405781 | 6.15E-20 | 0.296645 |
| -0.02894 | 0.5327   | -0.01172 | 0.80059  | -0.26108 | 1.03E-08 | -0.22678 | 7.33E-07 | -0.19536 |
| 0.383018 | 9.13E-18 | 0.325784 | 5.23E-13 | 0.722748 | 1.25E-76 | 0.603239 | 1.28E-47 | 0.587472 |
| 0.380149 | 1.67E-17 | 0.252959 | 2.99E-08 | 0.608291 | 1.34E-48 | 0.573194 | 3.87E-42 | 0.508779 |

|          |          |          |          |          |          |          |          |          |
|----------|----------|----------|----------|----------|----------|----------|----------|----------|
| 0.217041 | 2.20E-06 | 0.185234 | 5.65E-05 | 0.488208 | 2.43E-29 | 0.353346 | 3.53E-15 | 0.474819 |
| 0.247299 | 6.16E-08 | 0.088432 | 0.05618  | 0.471839 | 2.90E-27 | 0.316171 | 2.66E-12 | 0.367371 |
| -0.05412 | 0.2431   | -0.20967 | 4.88E-06 | -0.27779 | 1.01E-09 | -0.30628 | 1.34E-11 | -0.30019 |
| 0.230838 | 4.57E-07 | 0.14393  | 0.00182  | 0.485845 | 4.92E-29 | 0.421735 | 1.46E-21 | 0.360538 |
| -0.06265 | 0.17653  | 0.071822 | 0.12116  | -0.3003  | 3.46E-11 | -0.14841 | 0.0013   | -0.25701 |
| -0.33404 | 1.23E-13 | -0.27009 | 3.00E-09 | -0.49962 | 7.41E-31 | -0.37195 | 9.04E-17 | -0.46762 |
| 0.100038 | 0.03066  | 0.057921 | 0.21153  | 0.521277 | 6.78E-34 | 0.43871  | 2.17E-23 | 0.411925 |
| 0.282973 | 4.77E-10 | 0.212039 | 3.79E-06 | 0.646827 | 1.08E-56 | 0.511976 | 1.46E-32 | 0.479981 |
| 0.356179 | 2.05E-15 | 0.10111  | 0.02891  | 0.545947 | 1.24E-37 | 0.333723 | 1.30E-13 | 0.484248 |
| 0.130832 | 0.00463  | 0.138695 | 0.00267  | 0.296296 | 6.44E-11 | 0.25667  | 1.84E-08 | 0.2256   |
| -0.11531 | 0.01265  | -0.21669 | 2.28E-06 | -0.29399 | 9.18E-11 | -0.31217 | 5.16E-12 | -0.33445 |
| -0.17908 | 9.98E-05 | -0.11576 | 0.01231  | -0.31252 | 4.87E-12 | -0.29237 | 1.17E-10 | -0.21854 |
| 0.276445 | 1.23E-09 | 0.195944 | 2.00E-05 | 0.469465 | 5.67E-27 | 0.438746 | 2.15E-23 | 0.327233 |
| 0.270768 | 2.73E-09 | 0.296654 | 6.10E-11 | 0.562774 | 2.29E-40 | 0.492057 | 7.59E-30 | 0.478399 |
| 0.193024 | 2.67E-05 | 0.123713 | 0.00744  | 0.446414 | 2.97E-24 | 0.346635 | 1.25E-14 | 0.469779 |
| 0.310375 | 6.91E-12 | -0.02475 | 0.59362  | -0.23481 | 2.86E-07 | -0.19315 | 2.64E-05 | -0.22322 |
| 0.38855  | 2.80E-18 | 0.245219 | 8.00E-08 | 0.740472 | 2.82E-82 | 0.615653 | 4.64E-50 | 0.575228 |
| 0.009199 | 0.84284  | 0.037835 | 0.41466  | 0.252016 | 3.37E-08 | 0.166347 | 0.00031  | 0.244264 |
| 0.266172 | 5.15E-09 | 0.027523 | 0.55298  | 0.455626 | 2.58E-25 | 0.292024 | 1.24E-10 | 0.324402 |
| 0.337982 | 6.08E-14 | 0.324708 | 6.29E-13 | 0.662446 | 2.57E-60 | 0.657287 | 4.27E-59 | 0.490646 |
| -0.06416 | 0.16628  | -0.10793 | 0.01965  | -0.29783 | 5.08E-11 | -0.2153  | 2.66E-06 | -0.29737 |
| 0.27353  | 1.85E-09 | 0.067532 | 0.14508  | 0.680966 | 6.58E-65 | 0.470913 | 3.77E-27 | 0.513402 |
| -0.03156 | 0.4963   | -0.1412  | 0.00222  | 0.24395  | 9.37E-08 | 0.185699 | 5.40E-05 | 0.220046 |
| 0.067408 | 0.14582  | 0.236351 | 2.38E-07 | -0.106   | 0.02196  | -0.03523 | 0.44753  | 0.163053 |
| 0.430785 | 1.59E-22 | 0.369742 | 1.42E-16 | 0.779133 | 2.29E-96 | 0.658793 | 1.89E-59 | 0.607413 |
| 0.018976 | 0.68254  | -0.11527 | 0.01268  | -0.28584 | 3.13E-10 | -0.25314 | 2.92E-08 | -0.2905  |
| 0.313953 | 3.85E-12 | 0.205526 | 7.55E-06 | 0.503494 | 2.20E-31 | 0.442552 | 8.11E-24 | 0.526634 |
| 0.330457 | 2.32E-13 | 0.294482 | 8.51E-11 | 0.734186 | 3.20E-80 | 0.589257 | 5.35E-45 | 0.566279 |
| -0.13282 | 0.00404  | -0.05611 | 0.22615  | -0.46304 | 3.40E-26 | -0.35072 | 5.80E-15 | -0.26198 |
| 0.006388 | 0.8905   | 0.148292 | 0.00131  | 0.337368 | 6.79E-14 | 0.255163 | 2.24E-08 | 0.341062 |
| -0.09081 | 0.04985  | -0.23651 | 2.33E-07 | -0.41295 | 1.17E-20 | -0.41893 | 2.86E-21 | -0.41403 |
| -0.03733 | 0.42097  | 0.085099 | 0.06615  | -0.3409  | 3.59E-14 | -0.26472 | 6.28E-09 | -0.25065 |
| 0.132063 | 0.00425  | -0.07891 | 0.08852  | 0.533206 | 1.15E-35 | 0.298825 | 4.35E-11 | 0.392586 |
| 0.052433 | 0.25812  | -0.01525 | 0.74247  | 0.410568 | 2.04E-20 | 0.238059 | 1.93E-07 | 0.286684 |
| 0.424715 | 7.08E-22 | 0.276904 | 1.15E-09 | 0.818677 | #####    | 0.626476 | 2.81E-52 | 0.61777  |
| 0.293911 | 9.29E-11 | 0.177455 | 0.00012  | 0.746512 | 2.62E-84 | 0.542648 | 4.09E-37 | 0.622965 |
| 0.160477 | 0.0005   | 0.146453 | 0.00151  | 0.410128 | 2.26E-20 | 0.31606  | 2.71E-12 | 0.427605 |
| 0.27294  | 2.01E-09 | 0.272905 | 2.02E-09 | 0.507088 | 7.02E-32 | 0.593281 | 9.70E-46 | 0.355457 |
| 0.211744 | 3.91E-06 | 0.182659 | 7.18E-05 | 0.640553 | 2.69E-55 | 0.613657 | 1.16E-49 | 0.465753 |
| -0.08764 | 0.05844  | -0.09145 | 0.04827  | -0.25861 | 1.43E-08 | -0.33687 | 7.43E-14 | -0.19259 |
| 0.384123 | 7.22E-18 | 0.271654 | 2.41E-09 | 0.668787 | 7.49E-62 | 0.48786  | 2.69E-29 | 0.626136 |
| 0.24332  | 1.01E-07 | 0.2007   | 1.24E-05 | 0.580011 | 2.48E-43 | 0.355467 | 2.35E-15 | 0.461094 |
| 0.175418 | 0.00014  | 0.086258 | 0.06253  | 0.444875 | 4.44E-24 | 0.362971 | 5.46E-16 | 0.216076 |
| 0.198192 | 1.60E-05 | 0.077896 | 0.09269  | 0.362351 | 6.17E-16 | 0.320352 | 1.32E-12 | 0.182293 |
| 0.041405 | 0.37199  | -0.09441 | 0.04142  | 0.243503 | 9.91E-08 | 0.148644 | 0.00128  | 0.139428 |

|          |          |          |          |          |          |          |          |          |
|----------|----------|----------|----------|----------|----------|----------|----------|----------|
| 0.37328  | 6.90E-17 | 0.178114 | 0.00011  | 0.722946 | 1.09E-76 | 0.503681 | 2.07E-31 | 0.591178 |
| 0.232258 | 3.87E-07 | 0.235245 | 2.71E-07 | 0.484891 | 6.53E-29 | 0.566916 | 4.61E-41 | 0.498538 |
| -0.09891 | 0.0326   | 0.065513 | 0.15752  | -0.35101 | 5.49E-15 | -0.22604 | 7.99E-07 | -0.19978 |
| 0.293885 | 9.33E-11 | 0.330792 | 2.19E-13 | 0.621141 | 3.57E-51 | 0.516328 | 3.51E-33 | 0.565409 |
| -0.26173 | 9.40E-09 | -0.07589 | 0.10143  | -0.44421 | 5.27E-24 | -0.35979 | 1.02E-15 | -0.28822 |
| 0.30325  | 2.17E-11 | 0.202671 | 1.02E-05 | 0.72915  | 1.29E-78 | 0.579925 | 2.57E-43 | 0.552788 |
| 0.382025 | 1.13E-17 | 0.08569  | 0.06428  | 0.465868 | 1.56E-26 | 0.275312 | 1.44E-09 | 0.48401  |
| -0.08356 | 0.07121  | -0.04319 | 0.3517   | -0.44315 | 6.95E-24 | -0.30686 | 1.22E-11 | -0.41053 |
| 0.058422 | 0.20759  | -0.09487 | 0.04043  | 0.22106  | 1.41E-06 | 0.22128  | 1.37E-06 | 0.16357  |
| 0.115483 | 0.01251  | 0.021624 | 0.64114  | 0.458713 | 1.12E-25 | 0.228354 | 6.11E-07 | 0.499924 |
| -0.13266 | 0.00408  | -0.11922 | 0.00992  | -0.39781 | 3.70E-19 | -0.27388 | 1.76E-09 | -0.41384 |
| 0.201737 | 1.12E-05 | 0.036294 | 0.43394  | 0.495004 | 3.09E-30 | 0.355487 | 2.34E-15 | 0.387728 |
| -0.17931 | 9.78E-05 | -0.01421 | 0.75944  | -0.47909 | 3.59E-28 | -0.30607 | 1.39E-11 | -0.45123 |
| -0.22419 | 9.86E-07 | -0.10772 | 0.0199   | -0.3857  | 5.16E-18 | -0.20287 | 9.94E-06 | -0.39407 |
| 0.047951 | 0.30111  | -0.0014  | 0.97597  | 0.429052 | 2.45E-22 | 0.447809 | 2.06E-24 | 0.286918 |
| 0.17915  | 9.92E-05 | 0.06751  | 0.14521  | 0.38435  | 6.88E-18 | 0.308991 | 8.66E-12 | 0.368575 |
| 0.313287 | 4.29E-12 | 0.202818 | 1.00E-05 | 0.581028 | 1.63E-43 | 0.444579 | 4.80E-24 | 0.488438 |
| 0.266798 | 4.72E-09 | 0.105208 | 0.02298  | 0.520878 | 7.75E-34 | 0.404391 | 8.43E-20 | 0.398297 |
| 0.350187 | 6.41E-15 | 0.366992 | 2.46E-16 | 0.750366 | 1.24E-85 | 0.720965 | 4.38E-76 | 0.574299 |
| 0.330514 | 2.30E-13 | 0.087315 | 0.05937  | 0.634188 | 6.53E-54 | 0.471031 | 3.64E-27 | 0.47782  |
| 0.053489 | 0.24865  | 0.0278   | 0.549    | 0.252461 | 3.18E-08 | 0.225716 | 8.29E-07 | 0.24559  |
| 0.199549 | 1.40E-05 | 0.123045 | 0.00777  | 0.557101 | 1.99E-39 | 0.378314 | 2.45E-17 | 0.442927 |
| 0.016069 | 0.72909  | 0.117404 | 0.01111  | -0.2456  | 7.63E-08 | -0.15047 | 0.00111  | -0.21811 |
| 0.146444 | 0.00151  | 0.20455  | 8.36E-06 | 0.539633 | 1.20E-36 | 0.468315 | 7.84E-27 | 0.406357 |
| -0.00658 | 0.88715  | -0.02149 | 0.64317  | -0.39179 | 1.39E-18 | -0.28295 | 4.79E-10 | -0.27576 |
| 0.084017 | 0.06968  | 0.156896 | 0.00067  | 0.31708  | 2.29E-12 | 0.341774 | 3.06E-14 | 0.239332 |
| 0.35703  | 1.74E-15 | 0.336135 | 8.48E-14 | 0.70527  | 1.79E-71 | 0.517254 | 2.58E-33 | 0.630541 |
| -0.25769 | 1.61E-08 | -0.29485 | 8.05E-11 | -0.5133  | 9.47E-33 | -0.41427 | 8.61E-21 | -0.4611  |
| -0.04336 | 0.34981  | 0.00127  | 0.97817  | -0.39606 | 5.46E-19 | -0.35953 | 1.07E-15 | -0.2828  |
| 0.224397 | 9.64E-07 | 0.184874 | 5.84E-05 | 0.319766 | 1.46E-12 | 0.235056 | 2.77E-07 | 0.280564 |
| 0.394111 | 8.37E-19 | 0.422005 | 1.37E-21 | 0.788149 | #####    | 0.719964 | 8.82E-76 | 0.622337 |
| 0.2236   | 1.06E-06 | 0.032966 | 0.47728  | 0.556567 | 2.44E-39 | 0.252489 | 3.17E-08 | 0.438456 |
| 0.130482 | 0.00474  | 0.074834 | 0.10629  | 0.541968 | 5.22E-37 | 0.565459 | 8.13E-41 | 0.37076  |
| 0.24755  | 5.96E-08 | 0.03103  | 0.50354  | 0.64145  | 1.71E-55 | 0.478133 | 4.75E-28 | 0.424278 |
| 0.313973 | 3.83E-12 | 0.173328 | 0.00017  | 0.62784  | 1.46E-52 | 0.420182 | 2.12E-21 | 0.601864 |
| 0.355844 | 2.19E-15 | 0.15707  | 0.00066  | 0.729734 | 8.43E-79 | 0.473352 | 1.88E-27 | 0.628169 |
| -0.19079 | 3.32E-05 | -0.15682 | 0.00067  | -0.30942 | 8.07E-12 | -0.33429 | 1.18E-13 | -0.24927 |
| 0.36169  | 7.03E-16 | 0.203294 | 9.52E-06 | 0.682982 | 1.99E-65 | 0.562357 | 2.69E-40 | 0.464426 |
| 0.009776 | 0.83313  | 0.080473 | 0.08235  | -0.2967  | 6.06E-11 | -0.22505 | 8.95E-07 | -0.17951 |
| 0.346741 | 1.22E-14 | 0.384784 | 6.28E-18 | 0.618729 | 1.11E-50 | 0.572287 | 5.56E-42 | 0.541044 |
| 0.393127 | 1.04E-18 | 0.230484 | 4.77E-07 | 0.728651 | 1.85E-78 | 0.505689 | 1.10E-31 | 0.567634 |
| 0.290102 | 1.66E-10 | 0.203743 | 9.09E-06 | 0.645722 | 1.91E-56 | 0.490066 | 1.39E-29 | 0.527425 |
| 0.154704 | 0.0008   | -0.0358  | 0.44018  | 0.300989 | 3.10E-11 | 0.278225 | 9.50E-10 | 0.197823 |
| -0.13541 | 0.00337  | -0.05937 | 0.20033  | -0.41594 | 5.80E-21 | -0.4085  | 3.29E-20 | -0.36033 |
| -0.24589 | 7.35E-08 | -0.03553 | 0.44372  | -0.38812 | 3.08E-18 | -0.25941 | 1.28E-08 | -0.34156 |

|          |          |          |          |          |          |          |          |          |
|----------|----------|----------|----------|----------|----------|----------|----------|----------|
| -0.03063 | 0.50909  | 0.058708 | 0.20538  | -0.33793 | 6.14E-14 | -0.2234  | 1.08E-06 | -0.18949 |
| 0.270726 | 2.75E-09 | 0.326545 | 4.58E-13 | 0.707155 | 5.18E-72 | 0.598807 | 8.94E-47 | 0.599859 |
| 0.114709 | 0.01312  | 0.160008 | 0.00052  | 0.371941 | 9.07E-17 | 0.226152 | 7.88E-07 | 0.383963 |
| 0.341192 | 3.40E-14 | 0.353488 | 3.43E-15 | 0.679138 | 1.93E-64 | 0.554189 | 5.95E-39 | 0.572151 |
| 0.21808  | 1.96E-06 | 0.195085 | 2.18E-05 | 0.631292 | 2.71E-53 | 0.522386 | 4.68E-34 | 0.564611 |
| 0.17024  | 0.00022  | 0.016938 | 0.71505  | 0.363207 | 5.21E-16 | 0.278459 | 9.19E-10 | 0.200579 |
| 0.371959 | 9.03E-17 | 0.403897 | 9.43E-20 | 0.769912 | 9.33E-93 | 0.646989 | 9.94E-57 | 0.703645 |
| 0.031616 | 0.49552  | -0.08207 | 0.07645  | 0.16505  | 0.00034  | 0.049995 | 0.28095  | 0.165735 |
| 0.351824 | 4.71E-15 | 0.192279 | 2.88E-05 | 0.696571 | 4.76E-69 | 0.427802 | 3.33E-22 | 0.583338 |
| 0.30412  | 1.89E-11 | 0.318541 | 1.79E-12 | 0.694685 | 1.56E-68 | 0.642759 | 8.77E-56 | 0.491317 |
| 0.348047 | 9.58E-15 | 0.193321 | 2.60E-05 | 0.490894 | 1.08E-29 | 0.284262 | 3.95E-10 | 0.484507 |
| 0.126202 | 0.00632  | 0.010562 | 0.81993  | 0.375007 | 4.84E-17 | 0.352746 | 3.95E-15 | 0.339046 |
| 0.358865 | 1.22E-15 | 0.302544 | 2.43E-11 | 0.75911  | 9.78E-89 | 0.654013 | 2.47E-58 | 0.547988 |
| 0.223994 | 1.01E-06 | 0.139246 | 0.00256  | 0.49571  | 2.48E-30 | 0.299817 | 3.73E-11 | 0.364267 |
| 0.009327 | 0.84068  | -0.14692 | 0.00145  | 0.411555 | 1.62E-20 | 0.246714 | 6.63E-08 | 0.31982  |
| 0.093989 | 0.04234  | 0.111125 | 0.01629  | 0.394005 | 8.57E-19 | 0.249528 | 4.64E-08 | 0.403292 |
| 0.108878 | 0.01859  | -0.11162 | 0.01582  | 0.151554 | 0.00102  | 0.059393 | 0.20013  | 0.103861 |
| 0.132557 | 0.00411  | 0.255363 | 2.18E-08 | 0.482069 | 1.50E-28 | 0.468519 | 7.40E-27 | 0.350228 |
| -0.04098 | 0.37688  | 0.058839 | 0.20436  | -0.25057 | 4.06E-08 | -0.2509  | 3.89E-08 | -0.13797 |
| 0.291542 | 1.33E-10 | 0.177556 | 0.00011  | 0.668586 | 8.40E-62 | 0.43238  | 1.07E-22 | 0.764501 |
| -0.16856 | 0.00025  | -0.0581  | 0.21009  | -0.29227 | 1.19E-10 | -0.22127 | 1.37E-06 | -0.2436  |
| 0.165219 | 0.00034  | 0.324153 | 6.92E-13 | 0.347229 | 1.12E-14 | 0.36242  | 6.09E-16 | 0.304415 |
| 0.170025 | 0.00022  | 0.077316 | 0.09515  | 0.54524  | 1.60E-37 | 0.39569  | 5.92E-19 | 0.399956 |
| 0.149323 | 0.00121  | -0.07165 | 0.12207  | 0.50611  | 9.59E-32 | 0.338198 | 5.85E-14 | 0.350027 |
| 0.063054 | 0.17373  | -0.12678 | 0.00608  | 0.425733 | 5.53E-22 | 0.194442 | 2.33E-05 | 0.343788 |
| 0.057426 | 0.21546  | 0.012523 | 0.78723  | -0.29886 | 4.33E-11 | -0.24619 | 7.08E-08 | -0.25073 |
| 0.272218 | 2.23E-09 | 0.217861 | 2.01E-06 | 0.656491 | 6.56E-59 | 0.602624 | 1.68E-47 | 0.447715 |
| 0.273422 | 1.88E-09 | 0.103638 | 0.02511  | 0.572305 | 5.52E-42 | 0.344353 | 1.90E-14 | 0.494211 |
| 0.468479 | 7.49E-27 | 0.412395 | 1.33E-20 | 0.766791 | 1.43E-91 | 0.660017 | 9.71E-60 | 0.63423  |
| 0.245427 | 7.79E-08 | 0.169695 | 0.00023  | 0.430325 | 1.79E-22 | 0.295949 | 6.80E-11 | 0.479939 |
| 0.132444 | 0.00414  | -0.05441 | 0.24054  | 0.401304 | 1.69E-19 | 0.340874 | 3.60E-14 | 0.225261 |
| 0.309789 | 7.61E-12 | 0.149358 | 0.00121  | 0.294713 | 8.22E-11 | 0.191463 | 3.11E-05 | 0.255206 |
| 0.160445 | 0.0005   | 0.028114 | 0.54449  | 0.289179 | 1.90E-10 | 0.299282 | 4.05E-11 | 0.224595 |
| 0.195243 | 2.15E-05 | 0.05683  | 0.22027  | 0.623522 | 1.16E-51 | 0.450839 | 9.27E-25 | 0.467541 |
| 0.169397 | 0.00024  | 0.098381 | 0.03355  | 0.632214 | 1.73E-53 | 0.404743 | 7.78E-20 | 0.490375 |
| -0.00343 | 0.94105  | -0.12055 | 0.00912  | 0.186303 | 5.10E-05 | 0.122443 | 0.00808  | 0.093641 |
| 0.200689 | 1.24E-05 | -0.07748 | 0.09444  | 0.536464 | 3.69E-36 | 0.287694 | 2.38E-10 | 0.480137 |
| 0.324514 | 6.50E-13 | 0.106589 | 0.02123  | 0.671065 | 2.06E-62 | 0.463012 | 3.43E-26 | 0.48389  |
| 0.251617 | 3.55E-08 | 0.119027 | 0.01004  | 0.548815 | 4.35E-38 | 0.362716 | 5.74E-16 | 0.477856 |
| 0.11904  | 0.01003  | 0.057086 | 0.21819  | 0.428812 | 2.60E-22 | 0.356891 | 1.79E-15 | 0.326143 |
| 0.415281 | 6.78E-21 | 0.401772 | 1.53E-19 | 0.839931 | #####    | 0.724632 | 3.30E-77 | 0.658917 |
| 0.302788 | 2.34E-11 | 0.162782 | 0.00041  | 0.698199 | 1.70E-69 | 0.520233 | 9.61E-34 | 0.540452 |
| 0.192623 | 2.78E-05 | 0.051465 | 0.26704  | 0.610046 | 6.05E-49 | 0.400779 | 1.91E-19 | 0.478897 |
| 0.260743 | 1.07E-08 | 0.205045 | 7.94E-06 | 0.503809 | 1.99E-31 | 0.459943 | 7.98E-26 | 0.447059 |
| 0.253861 | 2.66E-08 | 0.212266 | 3.70E-06 | 0.542284 | 4.66E-37 | 0.388645 | 2.75E-18 | 0.424543 |

|          |          |          |          |          |          |          |          |          |
|----------|----------|----------|----------|----------|----------|----------|----------|----------|
| -0.01123 | 0.8087   | 0.142686 | 0.00199  | -0.33912 | 4.95E-14 | -0.15321 | 0.00089  | -0.25252 |
| 0.020701 | 0.65546  | -0.00099 | 0.98306  | 0.277741 | 1.02E-09 | 0.222986 | 1.13E-06 | 0.13472  |
| 0.304533 | 1.77E-11 | 0.172174 | 0.00018  | 0.649693 | 2.42E-57 | 0.434077 | 7.01E-23 | 0.582979 |
| 0.027937 | 0.54703  | 0.066272 | 0.15275  | 0.456261 | 2.17E-25 | 0.296435 | 6.30E-11 | 0.431016 |
| 0.386717 | 4.16E-18 | 0.234863 | 2.84E-07 | 0.666867 | 2.21E-61 | 0.517787 | 2.17E-33 | 0.727599 |
| 0.306744 | 1.24E-11 | 0.080509 | 0.08222  | 0.59462  | 5.47E-46 | 0.422768 | 1.14E-21 | 0.453626 |
| 0.309199 | 8.37E-12 | 0.204202 | 8.67E-06 | 0.724431 | 3.81E-77 | 0.45758  | 1.52E-25 | 0.597367 |
| 0.280734 | 6.61E-10 | 0.179795 | 9.35E-05 | 0.650227 | 1.83E-57 | 0.466821 | 1.19E-26 | 0.608545 |
| 0.19048  | 3.42E-05 | 0.073669 | 0.11186  | 0.634436 | 5.77E-54 | 0.450756 | 9.47E-25 | 0.505252 |
| 0.096121 | 0.03785  | 0.024842 | 0.59232  | 0.402676 | 1.24E-19 | 0.356063 | 2.10E-15 | 0.266897 |
| 0.182497 | 7.29E-05 | 0.177642 | 0.00011  | 0.41108  | 1.81E-20 | 0.45538  | 2.75E-25 | 0.323728 |
| 0.310143 | 7.18E-12 | 0.233052 | 3.52E-07 | 0.676763 | 7.76E-64 | 0.594864 | 4.93E-46 | 0.567278 |
| 0.37067  | 1.17E-16 | 0.274063 | 1.72E-09 | 0.626186 | 3.23E-52 | 0.551803 | 1.45E-38 | 0.474604 |
| 0.331845 | 1.82E-13 | 0.226856 | 7.27E-07 | 0.694406 | 1.85E-68 | 0.474687 | 1.28E-27 | 0.791185 |
| 0.156749 | 0.00068  | 0.029007 | 0.53178  | 0.380593 | 1.52E-17 | 0.200789 | 1.23E-05 | 0.2803   |
| 0.340508 | 3.85E-14 | 0.179316 | 9.77E-05 | 0.708708 | 1.85E-72 | 0.531031 | 2.46E-35 | 0.579523 |
| 0.377525 | 2.88E-17 | 0.309421 | 8.07E-12 | 0.766998 | 1.19E-91 | 0.60394  | 9.35E-48 | 0.686235 |
| 0.349035 | 7.97E-15 | 0.269587 | 3.22E-09 | 0.653743 | 2.85E-58 | 0.570671 | 1.06E-41 | 0.50217  |
| -0.12607 | 0.00637  | -0.19477 | 2.25E-05 | -0.34684 | 1.20E-14 | -0.35104 | 5.46E-15 | -0.33017 |
| 0.267419 | 4.34E-09 | 0.163316 | 0.00039  | 0.668697 | 7.89E-62 | 0.505592 | 1.13E-31 | 0.563238 |
| 0.290377 | 1.59E-10 | 0.25218  | 3.30E-08 | 0.653316 | 3.58E-58 | 0.624971 | 5.79E-52 | 0.447462 |
| 0.203606 | 9.22E-06 | 0.088739 | 0.05532  | 0.557137 | 1.97E-39 | 0.374732 | 5.13E-17 | 0.507379 |
| 0.245707 | 7.52E-08 | -0.00273 | 0.953    | 0.560246 | 6.04E-40 | 0.361764 | 6.93E-16 | 0.449941 |
| 0.343088 | 2.40E-14 | 0.242322 | 1.15E-07 | 0.667525 | 1.52E-61 | 0.511875 | 1.50E-32 | 0.613467 |
| -0.02218 | 0.63261  | -0.30824 | 9.78E-12 | -0.23136 | 4.30E-07 | -0.31511 | 3.18E-12 | -0.27264 |
| 0.055083 | 0.23481  | 0.106542 | 0.02129  | 0.372737 | 7.71E-17 | 0.432413 | 1.06E-22 | 0.220955 |
| 0.212274 | 3.70E-06 | 0.194138 | 2.40E-05 | 0.532967 | 1.26E-35 | 0.559368 | 8.44E-40 | 0.545812 |
| 0.136668 | 0.00308  | 0.018915 | 0.68349  | 0.404366 | 8.48E-20 | 0.308037 | 1.01E-11 | 0.395929 |
| 0.193011 | 2.68E-05 | 0.079762 | 0.08511  | 0.565448 | 8.16E-41 | 0.441972 | 9.41E-24 | 0.41513  |
| 0.114116 | 0.0136   | -0.03041 | 0.51216  | 0.374196 | 5.72E-17 | 0.360726 | 8.49E-16 | 0.304158 |
| 0.362609 | 5.86E-16 | 0.18542  | 5.55E-05 | 0.703232 | 6.73E-71 | 0.552875 | 9.71E-39 | 0.540198 |
| 0.340514 | 3.84E-14 | 0.063028 | 0.17391  | 0.516024 | 3.88E-33 | 0.287324 | 2.51E-10 | 0.360419 |
| 0.23396  | 3.16E-07 | 0.22011  | 1.56E-06 | 0.587387 | 1.17E-44 | 0.579843 | 2.65E-43 | 0.398098 |
| 0.302325 | 2.51E-11 | 0.112916 | 0.01463  | 0.523766 | 2.94E-34 | 0.422234 | 1.29E-21 | 0.356034 |
| 0.270157 | 2.97E-09 | 0.168978 | 0.00024  | 0.380484 | 1.56E-17 | 0.476445 | 7.74E-28 | 0.303438 |
| -0.02801 | 0.54593  | -0.08022 | 0.08334  | -0.39542 | 6.27E-19 | -0.33891 | 5.14E-14 | -0.40607 |
| 0.247127 | 6.29E-08 | 0.057334 | 0.2162   | 0.324982 | 6.00E-13 | 0.30043  | 3.39E-11 | 0.18098  |
| 0.390732 | 1.75E-18 | 0.34416  | 1.97E-14 | 0.711621 | 2.65E-73 | 0.602323 | 1.91E-47 | 0.592944 |
| -0.20711 | 6.40E-06 | -0.33688 | 7.42E-14 | -0.47782 | 5.19E-28 | -0.47425 | 1.45E-27 | -0.4946  |
| -0.06324 | 0.17249  | 0.108849 | 0.01863  | -0.40856 | 3.25E-20 | -0.22286 | 1.15E-06 | -0.33945 |
| 0.251392 | 3.66E-08 | 0.246019 | 7.23E-08 | 0.552513 | 1.11E-38 | 0.439169 | 1.93E-23 | 0.437358 |
| 0.235427 | 2.65E-07 | 0.218698 | 1.83E-06 | 0.54879  | 4.39E-38 | 0.582974 | 7.35E-44 | 0.435263 |
| 0.287415 | 2.48E-10 | 0.386936 | 3.97E-18 | 0.645855 | 1.79E-56 | 0.652763 | 4.80E-58 | 0.489107 |
| 0.120786 | 0.00898  | 0.0632   | 0.17274  | 0.212866 | 3.47E-06 | 0.40591  | 5.97E-20 | 0.138113 |
| 0.109084 | 0.01837  | -0.00265 | 0.95448  | 0.167537 | 0.00028  | 0.14921  | 0.00122  | 0.206496 |



|          |          |          |          |          |          |          |          |          |
|----------|----------|----------|----------|----------|----------|----------|----------|----------|
| 0.065856 | 0.15535  | -0.00574 | 0.90148  | 0.259404 | 1.28E-08 | 0.276622 | 1.20E-09 | 0.151893 |
| 0.273669 | 1.82E-09 | 0.177202 | 0.00012  | 0.458387 | 1.22E-25 | 0.518716 | 1.59E-33 | 0.277101 |
| 0.077205 | 0.09563  | 0.023336 | 0.61495  | 0.317185 | 2.25E-12 | 0.332642 | 1.58E-13 | 0.191342 |
| 0.21978  | 1.62E-06 | 0.044819 | 0.33383  | 0.607298 | 2.09E-48 | 0.423631 | 9.22E-22 | 0.503413 |
| 0.275443 | 1.41E-09 | 0.242949 | 1.06E-07 | 0.675501 | 1.61E-63 | 0.636992 | 1.62E-54 | 0.506575 |
| 0.327997 | 3.56E-13 | 0.246432 | 6.87E-08 | 0.619549 | 7.55E-51 | 0.497166 | 1.59E-30 | 0.660856 |
| 0.275536 | 1.40E-09 | 0.10396  | 0.02466  | 0.429709 | 2.08E-22 | 0.390667 | 1.78E-18 | 0.338717 |
| 0.355775 | 2.22E-15 | 0.172834 | 0.00017  | 0.457644 | 1.49E-25 | 0.328441 | 3.30E-13 | 0.370363 |
| -0.02644 | 0.56876  | 0.166953 | 0.00029  | 0.297577 | 5.28E-11 | 0.311879 | 5.41E-12 | 0.283608 |
| 0.2935   | 9.89E-11 | 0.136202 | 0.00319  | 0.603527 | 1.12E-47 | 0.452582 | 5.83E-25 | 0.518383 |
| 0.160133 | 0.00051  | -0.00952 | 0.83746  | 0.437542 | 2.92E-23 | 0.324418 | 6.61E-13 | 0.250636 |
| 0.339183 | 4.90E-14 | 0.275204 | 1.46E-09 | 0.674529 | 2.83E-63 | 0.507589 | 5.98E-32 | 0.600613 |
| 0.357279 | 1.66E-15 | 0.245396 | 7.82E-08 | 0.629577 | 6.27E-53 | 0.511448 | 1.73E-32 | 0.553863 |
| 0.42585  | 5.37E-22 | 0.315967 | 2.76E-12 | 0.719682 | 1.07E-75 | 0.538395 | 1.87E-36 | 0.596615 |
| 0.215681 | 2.55E-06 | 0.024384 | 0.59916  | 0.634871 | 4.65E-54 | 0.425158 | 6.36E-22 | 0.428646 |
| 0.387826 | 3.28E-18 | 0.299    | 4.24E-11 | 0.590334 | 3.40E-45 | 0.446582 | 2.85E-24 | 0.550513 |
| 0.299187 | 4.11E-11 | 0.168256 | 0.00026  | 0.26157  | 9.60E-09 | 0.273296 | 1.92E-09 | 0.270462 |
| 0.313104 | 4.42E-12 | 0.225752 | 8.26E-07 | 0.720815 | 4.87E-76 | 0.543678 | 2.82E-37 | 0.601204 |
| 0.285197 | 3.44E-10 | 0.209947 | 4.74E-06 | 0.377413 | 2.95E-17 | 0.287374 | 2.49E-10 | 0.377894 |
| 0.441037 | 1.20E-23 | 0.380526 | 1.54E-17 | 0.675688 | 1.45E-63 | 0.521277 | 6.78E-34 | 0.614171 |
| 0.293497 | 9.90E-11 | 0.272004 | 2.30E-09 | 0.633328 | 9.98E-54 | 0.540782 | 7.98E-37 | 0.532335 |
| 0.374134 | 5.80E-17 | 0.240483 | 1.44E-07 | 0.752816 | 1.72E-86 | 0.53447  | 7.43E-36 | 0.675437 |
| 0.14303  | 0.00194  | 0.039942 | 0.38914  | 0.382388 | 1.04E-17 | 0.313144 | 4.40E-12 | 0.339969 |
| 0.179179 | 9.89E-05 | -0.09742 | 0.03533  | 0.225272 | 8.72E-07 | 0.109467 | 0.01796  | 0.2162   |
| -0.01059 | 0.81953  | 0.030885 | 0.50553  | 0.334171 | 1.20E-13 | 0.349978 | 6.67E-15 | 0.226701 |
| 0.313263 | 4.31E-12 | 0.354982 | 2.58E-15 | 0.515665 | 4.36E-33 | 0.526935 | 1.00E-34 | 0.468195 |
| 0.292762 | 1.11E-10 | 0.211175 | 4.16E-06 | 0.553479 | 7.75E-39 | 0.611498 | 3.12E-49 | 0.359702 |
| 0.379627 | 1.86E-17 | 0.401028 | 1.80E-19 | 0.630744 | 3.55E-53 | 0.61258  | 1.91E-49 | 0.569012 |
| 0.327297 | 4.02E-13 | 0.201857 | 1.10E-05 | 0.425406 | 5.99E-22 | 0.305327 | 1.56E-11 | 0.347836 |
| 0.368252 | 1.91E-16 | 0.267097 | 4.53E-09 | 0.539611 | 1.21E-36 | 0.385498 | 5.39E-18 | 0.43738  |
| -0.21587 | 2.50E-06 | -0.20633 | 6.95E-06 | -0.56575 | 7.27E-41 | -0.39512 | 6.70E-19 | -0.50803 |
| 0.050614 | 0.27504  | 0.069432 | 0.13407  | 0.258271 | 1.49E-08 | 0.334003 | 1.24E-13 | 0.205849 |
| 0.295006 | 7.86E-11 | 0.166589 | 0.0003   | 0.529335 | 4.41E-35 | 0.312521 | 4.87E-12 | 0.536458 |
| 0.124671 | 0.00699  | -0.03174 | 0.4938   | 0.41539  | 6.61E-21 | 0.250729 | 3.98E-08 | 0.335962 |
| 0.384338 | 6.90E-18 | 0.352793 | 3.92E-15 | 0.715153 | 2.43E-74 | 0.653348 | 3.52E-58 | 0.577371 |
| 0.082827 | 0.07375  | 0.170116 | 0.00022  | 0.295752 | 7.00E-11 | 0.317177 | 2.25E-12 | 0.335367 |
| 0.246845 | 6.52E-08 | 0.299783 | 3.75E-11 | 0.637426 | 1.30E-54 | 0.504554 | 1.57E-31 | 0.562687 |
| 0.139019 | 0.00261  | 0.085323 | 0.06544  | 0.291791 | 1.28E-10 | 0.191658 | 3.05E-05 | 0.347896 |
| 0.39908  | 2.79E-19 | 0.294451 | 8.55E-11 | 0.71349  | 7.52E-74 | 0.477779 | 5.26E-28 | 0.618054 |
| 0.214533 | 2.89E-06 | 0.142645 | 0.002    | 0.508978 | 3.83E-32 | 0.574793 | 2.04E-42 | 0.337099 |
| 0.307035 | 1.19E-11 | 0.359702 | 1.04E-15 | 0.572636 | 4.84E-42 | 0.490659 | 1.16E-29 | 0.490773 |
| 0.242521 | 1.12E-07 | 0.25997  | 1.19E-08 | 0.385215 | 5.73E-18 | 0.378715 | 2.25E-17 | 0.381564 |
| 0.30285  | 2.31E-11 | 0.240748 | 1.39E-07 | 0.503234 | 2.39E-31 | 0.494918 | 3.17E-30 | 0.311645 |
| 0.29558  | 7.19E-11 | 0.16816  | 0.00026  | 0.65587  | 9.15E-59 | 0.460989 | 5.99E-26 | 0.603883 |
| 0.130244 | 0.00482  | 0.079975 | 0.08428  | 0.269124 | 3.43E-09 | 0.166173 | 0.00031  | 0.251169 |

|          |          |          |          |          |          |          |          |          |
|----------|----------|----------|----------|----------|----------|----------|----------|----------|
| 0.033242 | 0.47359  | -0.03541 | 0.44521  | 0.250864 | 3.91E-08 | 0.252729 | 3.08E-08 | 0.222013 |
| 0.161746 | 0.00045  | -0.08065 | 0.08168  | 0.248163 | 5.52E-08 | 0.14736  | 0.00141  | 0.282521 |
| 0.424202 | 8.02E-22 | 0.294275 | 8.79E-11 | 0.652073 | 6.92E-58 | 0.558963 | 9.85E-40 | 0.571825 |
| 0.230184 | 4.94E-07 | 0.183841 | 6.43E-05 | 0.513674 | 8.37E-33 | 0.529135 | 4.72E-35 | 0.358931 |
| 0.255802 | 2.06E-08 | 0.213749 | 3.15E-06 | 0.455791 | 2.46E-25 | 0.397037 | 4.39E-19 | 0.427365 |
| 0.288115 | 2.23E-10 | 0.149764 | 0.00117  | 0.600892 | 3.59E-47 | 0.44255  | 8.11E-24 | 0.527145 |
| 0.29095  | 1.46E-10 | 0.203205 | 9.61E-06 | 0.51361  | 8.55E-33 | 0.492987 | 5.72E-30 | 0.418565 |
| -0.15226 | 0.00096  | -0.10129 | 0.02863  | -0.41769 | 3.84E-21 | -0.38234 | 1.05E-17 | -0.37616 |
| 0.359558 | 1.07E-15 | 0.086583 | 0.06154  | 0.592866 | 1.16E-45 | 0.339634 | 4.51E-14 | 0.530174 |
| 0.288443 | 2.12E-10 | 0.190049 | 3.57E-05 | 0.548914 | 4.20E-38 | 0.429285 | 2.31E-22 | 0.410547 |
| 0.189612 | 3.72E-05 | 0.024764 | 0.59348  | 0.444688 | 4.66E-24 | 0.327534 | 3.86E-13 | 0.381038 |
| 0.18735  | 4.62E-05 | 0.173894 | 0.00016  | 0.454627 | 3.37E-25 | 0.479026 | 3.66E-28 | 0.393271 |
| 0.121055 | 0.00883  | 0.091598 | 0.0479   | 0.325152 | 5.83E-13 | 0.349844 | 6.84E-15 | 0.262952 |
| 0.206498 | 6.83E-06 | 0.04978  | 0.28303  | 0.506835 | 7.61E-32 | 0.289993 | 1.68E-10 | 0.443536 |
| 0.299679 | 3.81E-11 | 0.266312 | 5.05E-09 | 0.645501 | 2.15E-56 | 0.497969 | 1.24E-30 | 0.61585  |
| 0.226944 | 7.20E-07 | 0.038185 | 0.41035  | 0.515172 | 5.13E-33 | 0.370638 | 1.18E-16 | 0.408447 |
| 0.239837 | 1.56E-07 | 0.050684 | 0.27437  | 0.337156 | 7.06E-14 | 0.299926 | 3.66E-11 | 0.226759 |
| 0.299826 | 3.72E-11 | 0.122626 | 0.00798  | 0.645801 | 1.84E-56 | 0.559311 | 8.63E-40 | 0.412488 |
| 0.23851  | 1.83E-07 | 0.138147 | 0.00277  | 0.525875 | 1.44E-34 | 0.444333 | 5.11E-24 | 0.424894 |
| 0.315436 | 3.01E-12 | 0.219762 | 1.63E-06 | 0.563695 | 1.61E-40 | 0.401487 | 1.63E-19 | 0.503262 |
| 0.177279 | 0.00012  | 0.223324 | 1.09E-06 | 0.488316 | 2.35E-29 | 0.36942  | 1.51E-16 | 0.462356 |
| 0.43479  | 5.86E-23 | 0.284589 | 3.76E-10 | 0.519289 | 1.32E-33 | 0.317826 | 2.02E-12 | 0.503891 |
| 0.165267 | 0.00034  | 0.031398 | 0.49849  | 0.466893 | 1.17E-26 | 0.376999 | 3.21E-17 | 0.326561 |
| 0.185937 | 5.28E-05 | 0.226665 | 7.43E-07 | 0.433889 | 7.35E-23 | 0.420234 | 2.09E-21 | 0.404056 |
| 0.2294   | 5.41E-07 | 0.126312 | 0.00627  | 0.524512 | 2.28E-34 | 0.457978 | 1.36E-25 | 0.344588 |
| 0.310235 | 7.07E-12 | 0.140647 | 0.00232  | 0.424528 | 7.41E-22 | 0.250195 | 4.26E-08 | 0.37146  |
| -0.15573 | 0.00073  | -0.01133 | 0.80715  | -0.48112 | 1.98E-28 | -0.31379 | 3.95E-12 | -0.33985 |
| -0.22057 | 1.48E-06 | -0.17857 | 0.0001   | -0.53378 | 9.46E-36 | -0.32023 | 1.35E-12 | -0.50369 |
| 0.33902  | 5.04E-14 | 0.226132 | 7.90E-07 | 0.539432 | 1.29E-36 | 0.486273 | 4.33E-29 | 0.382818 |
| 0.210749 | 4.35E-06 | 0.212502 | 3.61E-06 | 0.391131 | 1.61E-18 | 0.374767 | 5.09E-17 | 0.358845 |
| 0.15357  | 0.00087  | 0.066597 | 0.15074  | 0.362923 | 5.51E-16 | 0.30826  | 9.74E-12 | 0.196197 |
| 0.259704 | 1.23E-08 | 0.006884 | 0.88205  | 0.471151 | 3.52E-27 | 0.324572 | 6.44E-13 | 0.378498 |
| 0.138946 | 0.00262  | 0.151332 | 0.00104  | 0.473737 | 1.68E-27 | 0.523144 | 3.62E-34 | 0.329038 |
| 0.365466 | 3.33E-16 | 0.231834 | 4.07E-07 | 0.619727 | 6.95E-51 | 0.482897 | 1.18E-28 | 0.536218 |
| -0.14073 | 0.0023   | -0.32777 | 3.71E-13 | -0.4291  | 2.42E-22 | -0.53405 | 8.60E-36 | -0.36212 |
| 0.183203 | 6.83E-05 | 0.037616 | 0.41737  | 0.272016 | 2.29E-09 | 0.242958 | 1.06E-07 | 0.284699 |
| 0.296466 | 6.27E-11 | 0.034594 | 0.45579  | 0.487756 | 2.78E-29 | 0.413275 | 1.09E-20 | 0.324872 |
| 0.370978 | 1.10E-16 | 0.357125 | 1.71E-15 | 0.802118 | #####    | 0.624606 | 6.89E-52 | 0.71423  |
| 0.243528 | 9.88E-08 | -0.00834 | 0.8574   | 0.414216 | 8.72E-21 | 0.31712  | 2.27E-12 | 0.232869 |
| -0.12623 | 0.0063   | -0.15492 | 0.00078  | -0.37628 | 3.73E-17 | -0.28742 | 2.47E-10 | -0.34648 |
| 0.406252 | 5.52E-20 | 0.300642 | 3.28E-11 | 0.756885 | 6.20E-88 | 0.621913 | 2.48E-51 | 0.619283 |
| 0.177802 | 0.00011  | 0.101938 | 0.02761  | 0.463444 | 3.05E-26 | 0.386599 | 4.26E-18 | 0.336994 |
| 0.234067 | 3.12E-07 | 0.190582 | 3.39E-05 | 0.399351 | 2.63E-19 | 0.486984 | 3.50E-29 | 0.268664 |
| -0.00696 | 0.88083  | 0.143638 | 0.00186  | 0.288657 | 2.06E-10 | 0.276348 | 1.24E-09 | 0.306605 |
| 0.22006  | 1.57E-06 | 0.221383 | 1.36E-06 | 0.496081 | 2.22E-30 | 0.345707 | 1.48E-14 | 0.481996 |

|          |          |          |          |          |          |          |          |          |
|----------|----------|----------|----------|----------|----------|----------|----------|----------|
| 0.195926 | 2.01E-05 | 0.101608 | 0.02812  | 0.506959 | 7.32E-32 | 0.286793 | 2.72E-10 | 0.443708 |
| 0.301112 | 3.04E-11 | 0.110319 | 0.01708  | 0.462291 | 4.19E-26 | 0.228279 | 6.17E-07 | 0.406288 |
| 0.135718 | 0.0033   | -0.04152 | 0.37065  | 0.295447 | 7.34E-11 | 0.265733 | 5.47E-09 | 0.292343 |
| 0.263736 | 7.17E-09 | 0.181067 | 8.32E-05 | 0.399498 | 2.54E-19 | 0.35355  | 3.39E-15 | 0.329665 |
| 0.254211 | 2.54E-08 | 0.089996 | 0.05195  | 0.410109 | 2.27E-20 | 0.288224 | 2.19E-10 | 0.344216 |
| 0.050569 | 0.27546  | 0.110746 | 0.01666  | 0.268894 | 3.54E-09 | 0.232861 | 3.60E-07 | 0.305588 |
| 0.140547 | 0.00233  | 0.098352 | 0.0336   | 0.401523 | 1.61E-19 | 0.243924 | 9.40E-08 | 0.40787  |
| 0.350737 | 5.78E-15 | 0.302626 | 2.40E-11 | 0.679088 | 1.99E-64 | 0.5543   | 5.71E-39 | 0.583376 |
| 0.168328 | 0.00026  | 0.126914 | 0.00603  | 0.308317 | 9.65E-12 | 0.132855 | 0.00403  | 0.343552 |
| 0.191172 | 3.20E-05 | 0.055311 | 0.23287  | 0.441377 | 1.10E-23 | 0.284136 | 4.02E-10 | 0.365744 |
| 0.246005 | 7.25E-08 | 0.146458 | 0.00151  | 0.419353 | 2.58E-21 | 0.367981 | 2.02E-16 | 0.402104 |
| 0.30273  | 2.36E-11 | 0.073603 | 0.11218  | 0.391176 | 1.59E-18 | 0.213391 | 3.28E-06 | 0.377904 |
| 0.14081  | 0.00229  | 0.131129 | 0.00453  | 0.338984 | 5.08E-14 | 0.229918 | 5.09E-07 | 0.353302 |
| 0.187273 | 4.66E-05 | 0.075322 | 0.10402  | 0.315813 | 2.83E-12 | 0.226252 | 7.79E-07 | 0.247957 |
| 0.241295 | 1.30E-07 | 0.186945 | 4.80E-05 | 0.432118 | 1.14E-22 | 0.405339 | 6.80E-20 | 0.40306  |
| 0.292144 | 1.22E-10 | 0.146677 | 0.00148  | 0.658594 | 2.11E-59 | 0.515478 | 4.64E-33 | 0.544899 |
| 0.230058 | 5.01E-07 | 0.134065 | 0.0037   | 0.370907 | 1.12E-16 | 0.305579 | 1.50E-11 | 0.222332 |
| 0.416732 | 4.81E-21 | 0.279273 | 8.17E-10 | 0.468366 | 7.73E-27 | 0.410852 | 1.91E-20 | 0.396424 |
| 0.012299 | 0.79095  | -0.22286 | 1.15E-06 | 0.10894  | 0.01853  | 0.00528  | 0.9094   | 0.111708 |
| 0.225134 | 8.86E-07 | 0.062976 | 0.17426  | 0.415238 | 6.85E-21 | 0.341091 | 3.46E-14 | 0.326074 |
| 0.04178  | 0.36767  | 0.103239 | 0.02568  | 0.217593 | 2.07E-06 | 0.286609 | 2.79E-10 | 0.261791 |
| -0.2061  | 7.12E-06 | -0.27584 | 1.34E-09 | -0.4937  | 4.60E-30 | -0.42339 | 9.77E-22 | -0.40971 |
| 0.203409 | 9.41E-06 | 0.079323 | 0.08685  | 0.488461 | 2.25E-29 | 0.34701  | 1.16E-14 | 0.421746 |
| 0.081386 | 0.07892  | 0.076066 | 0.10064  | -0.20713 | 6.38E-06 | -0.19883 | 1.50E-05 | -0.09687 |
| 0.228307 | 6.15E-07 | 0.236931 | 2.21E-07 | 0.466331 | 1.37E-26 | 0.413639 | 9.98E-21 | 0.443361 |
| 0.342884 | 2.49E-14 | 0.357063 | 1.73E-15 | 0.434101 | 6.97E-23 | 0.50194  | 3.58E-31 | 0.314885 |
| 0.240344 | 1.46E-07 | 0.27336  | 1.90E-09 | 0.395847 | 5.72E-19 | 0.484691 | 6.93E-29 | 0.35359  |
| 0.360707 | 8.52E-16 | 0.142653 | 0.002    | 0.562015 | 3.07E-40 | 0.421719 | 1.46E-21 | 0.421322 |
| 0.333679 | 1.31E-13 | 0.255409 | 2.17E-08 | 0.615308 | 5.44E-50 | 0.473516 | 1.79E-27 | 0.490359 |
| 0.121163 | 0.00877  | -0.13534 | 0.00339  | 0.366742 | 2.59E-16 | 0.191593 | 3.07E-05 | 0.282409 |
| 0.164873 | 0.00035  | 0.007392 | 0.87341  | 0.481113 | 1.99E-28 | 0.329655 | 2.67E-13 | 0.396987 |
| 0.312847 | 4.62E-12 | 0.165999 | 0.00031  | 0.67021  | 3.35E-62 | 0.509969 | 2.79E-32 | 0.542465 |
| 0.269997 | 3.04E-09 | 0.233842 | 3.21E-07 | 0.72147  | 3.08E-76 | 0.550392 | 2.44E-38 | 0.609315 |
| 0.348858 | 8.23E-15 | 0.26986  | 3.10E-09 | 0.730076 | 6.57E-79 | 0.534555 | 7.21E-36 | 0.66594  |
| 0.147852 | 0.00135  | -0.05131 | 0.26851  | 0.176263 | 0.00013  | 0.156281 | 0.0007   | 0.033669 |
| -0.03766 | 0.41684  | -0.08817 | 0.05692  | 0.08838  | 0.05632  | 0.052471 | 0.25778  | 0.069655 |
| 0.002907 | 0.95004  | -0.12606 | 0.00637  | 0.006782 | 0.88379  | 0.006018 | 0.8968   | -0.01617 |
| -0.10672 | 0.02107  | -0.12887 | 0.00529  | -0.15188 | 0.00099  | -0.18095 | 8.41E-05 | -0.07425 |
| -0.17496 | 0.00014  | -0.1997  | 1.37E-05 | -0.30376 | 2.00E-11 | -0.36222 | 6.33E-16 | -0.17257 |
| 0.035942 | 0.4384   | -0.08643 | 0.062    | 0.102834 | 0.02627  | 0.175448 | 0.00014  | -0.00497 |
| -0.06617 | 0.1534   | -0.10412 | 0.02444  | -0.10861 | 0.01889  | -0.10945 | 0.01798  | -0.05966 |
| 0.109701 | 0.01772  | 0.278821 | 8.72E-10 | 0.145211 | 0.00165  | 0.237527 | 2.06E-07 | 0.134764 |
| -0.18347 | 6.66E-05 | -0.13205 | 0.00426  | -0.18134 | 8.12E-05 | -0.05026 | 0.27838  | -0.18172 |
| -0.0686  | 0.13881  | -0.02333 | 0.6151   | 0.044693 | 0.33519  | 0.13347  | 0.00386  | 0.031814 |
| -0.00545 | 0.90642  | 0.022016 | 0.6351   | 0.144633 | 0.00173  | 0.166771 | 0.00029  | 0.080993 |

|          |          |          |          |          |          |          |          |          |
|----------|----------|----------|----------|----------|----------|----------|----------|----------|
| -0.05663 | 0.22192  | -0.07396 | 0.11042  | 0.074688 | 0.10697  | 0.033329 | 0.47244  | 0.07788  |
| -0.03166 | 0.49492  | 0.028985 | 0.53209  | -0.02463 | 0.59549  | 0.054461 | 0.24014  | -0.12248 |
| -0.14295 | 0.00196  | -0.1552  | 0.00076  | -0.10447 | 0.02396  | -0.01063 | 0.81872  | -0.14524 |
| -0.04366 | 0.3465   | -0.09972 | 0.0312   | 0.001386 | 0.97617  | 0.030037 | 0.5173   | 0.037999 |
| 0.145448 | 0.00162  | 0.071844 | 0.12104  | -0.21333 | 3.30E-06 | -0.04628 | 0.31826  | -0.20708 |
| 0.02013  | 0.66437  | -0.01667 | 0.71935  | -0.04691 | 0.31179  | 0.01368  | 0.76812  | -0.02611 |
| 0.102423 | 0.02688  | -0.02448 | 0.59773  | 0.08953  | 0.05318  | 0.096265 | 0.03757  | 0.153909 |
| -0.20117 | 1.18E-05 | -0.12501 | 0.00683  | -0.24296 | 1.06E-07 | -0.05808 | 0.21024  | -0.17775 |
| 0.026486 | 0.56804  | 0.153655 | 0.00086  | -0.04833 | 0.29734  | -0.17071 | 0.00021  | 0.016845 |
| -0.063   | 0.1741   | -0.10594 | 0.02203  | -0.05669 | 0.22141  | -0.04836 | 0.29698  | -0.05329 |
| -0.08239 | 0.07528  | -0.11656 | 0.01171  | -0.00878 | 0.84988  | 0.059671 | 0.19803  | -0.06935 |
| 0.068002 | 0.14229  | -0.09034 | 0.05106  | -0.11907 | 0.01001  | -0.12335 | 0.00762  | -0.13525 |
| 0.061461 | 0.18488  | 0.235117 | 2.75E-07 | 0.065477 | 0.15775  | 0.301684 | 2.78E-11 | 0.048189 |
| -0.16262 | 0.00042  | -0.10885 | 0.01862  | -0.04047 | 0.38293  | 0.026633 | 0.56589  | -0.05041 |
| -0.14486 | 0.0017   | -0.2668  | 4.72E-09 | -0.12678 | 0.00608  | -0.10398 | 0.02464  | -0.12129 |
| -0.09542 | 0.03929  | -0.18685 | 4.85E-05 | -0.0157  | 0.73514  | 0.007095 | 0.87846  | -0.05621 |
| -0.07541 | 0.10363  | -0.06905 | 0.13623  | 0.046873 | 0.31212  | 0.114495 | 0.01329  | 0.001615 |
| -0.16247 | 0.00042  | -0.12014 | 0.00936  | -0.07055 | 0.12789  | 0.000756 | 0.98701  | -0.12463 |
| -0.00437 | 0.92503  | -0.09365 | 0.0431   | 0.016964 | 0.71464  | 0.090129 | 0.0516   | -0.06145 |
| -0.04143 | 0.37171  | -0.01388 | 0.76483  | 0.010899 | 0.81428  | 0.002289 | 0.96065  | -0.00486 |
| 0.096109 | 0.03788  | 0.018172 | 0.69529  | 0.030921 | 0.50504  | 0.067169 | 0.14726  | -0.0093  |
| -0.12012 | 0.00937  | -0.11886 | 0.01014  | -0.03939 | 0.39573  | 0.061721 | 0.18302  | -0.09365 |
| -0.11474 | 0.01309  | -0.05063 | 0.27486  | 0.110539 | 0.01686  | 0.089536 | 0.05316  | 0.106616 |
| 0.022371 | 0.62966  | 0.060452 | 0.19221  | -0.04903 | 0.29032  | -0.1053  | 0.02286  | 0.17485  |
| 0.025877 | 0.57698  | -0.0091  | 0.84451  | 0.030232 | 0.51458  | 0.062874 | 0.17497  | -0.1566  |
| 0.004826 | 0.91716  | 0.062487 | 0.17764  | 0.052027 | 0.26184  | 0.160621 | 0.00049  | -0.02474 |
| -0.01986 | 0.66865  | -0.02153 | 0.64265  | 0.129242 | 0.00515  | 0.147049 | 0.00144  | 0.058172 |
| -0.1341  | 0.00369  | -0.15653 | 0.00069  | -0.11284 | 0.0147   | -0.00043 | 0.9926   | -0.1805  |
| 0.15929  | 0.00055  | 0.115965 | 0.01215  | 0.365434 | 3.35E-16 | 0.363338 | 5.08E-16 | 0.217683 |
| -0.07096 | 0.12567  | -0.04138 | 0.37227  | -0.01036 | 0.82327  | 0.095383 | 0.03936  | -0.0639  |
| -0.21058 | 4.43E-06 | -0.33003 | 2.50E-13 | -0.05167 | 0.2651   | 0.030802 | 0.50669  | -0.19382 |
| -0.0393  | 0.39675  | -0.0259  | 0.57668  | 0.023992 | 0.60504  | 0.018514 | 0.68985  | 0.027367 |
| -0.07973 | 0.08521  | -0.06154 | 0.18433  | 0.008936 | 0.84728  | -0.02331 | 0.61529  | -0.02048 |
| -0.13416 | 0.00368  | -0.09415 | 0.04199  | -0.14054 | 0.00233  | -0.10361 | 0.02515  | -0.22242 |
| -0.26352 | 7.39E-09 | -0.18964 | 3.71E-05 | -0.20333 | 9.49E-06 | -0.18304 | 6.93E-05 | -0.19403 |
| 0.060029 | 0.19534  | 0.022384 | 0.62946  | -0.00038 | 0.99346  | -0.03549 | 0.44423  | -0.03385 |
| 0.195317 | 2.13E-05 | 0.237207 | 2.14E-07 | 0.193005 | 2.68E-05 | 0.295803 | 6.95E-11 | 0.088331 |
| 0.032925 | 0.47783  | -0.02682 | 0.56318  | -0.1943  | 2.36E-05 | -0.14632 | 0.00152  | -0.12061 |
| 0.0571   | 0.21809  | -0.12758 | 0.00577  | -0.03825 | 0.4096   | -0.09278 | 0.04509  | -0.01122 |
| 0.04095  | 0.37727  | -0.09647 | 0.03716  | 0.127376 | 0.00584  | 0.132018 | 0.00427  | 0.064497 |
| -0.00218 | 0.96258  | -0.0766  | 0.09826  | -0.0822  | 0.07596  | -0.08826 | 0.05667  | -0.152   |
| 0.014195 | 0.75964  | 0.030059 | 0.517    | 0.148245 | 0.00131  | 0.186844 | 4.85E-05 | 0.115623 |
| 0.0214   | 0.6446   | -0.11891 | 0.01011  | 0.174521 | 0.00015  | 0.118528 | 0.01036  | 0.066291 |
| -0.05148 | 0.26689  | -0.19484 | 2.24E-05 | -0.15566 | 0.00074  | -0.04735 | 0.30723  | -0.15256 |
| 0.00073  | 0.98745  | 0.008139 | 0.86076  | 0.033531 | 0.46976  | 0.212681 | 3.54E-06 | -0.05686 |

|          |          |          |          |          |          |          |          |          |
|----------|----------|----------|----------|----------|----------|----------|----------|----------|
| -0.09646 | 0.03717  | -0.08061 | 0.08184  | 0.046447 | 0.31655  | 0.123667 | 0.00746  | -0.00701 |
| 0.005334 | 0.90847  | -0.19783 | 1.66E-05 | -0.07138 | 0.12349  | 0.01792  | 0.69931  | -0.16815 |
| -0.24274 | 1.09E-07 | -0.26272 | 8.22E-09 | -0.26931 | 3.34E-09 | -0.14889 | 0.00125  | -0.28453 |
| -0.11101 | 0.0164   | -0.26207 | 8.97E-09 | -0.1696  | 0.00023  | -0.14337 | 0.0019   | -0.19379 |
| 0.139815 | 0.00246  | 0.108616 | 0.01888  | 0.360161 | 9.48E-16 | 0.309869 | 7.51E-12 | 0.256867 |
| -0.0412  | 0.37437  | -0.20982 | 4.81E-06 | -0.14475 | 0.00171  | -0.06316 | 0.17298  | -0.11117 |
| 0.113717 | 0.01394  | 0.091179 | 0.04893  | 0.166664 | 0.0003   | 0.206919 | 6.53E-06 | 0.055811 |
| 0.099118 | 0.03223  | 0.024711 | 0.59428  | 0.365342 | 3.42E-16 | 0.327959 | 3.59E-13 | 0.201755 |
| 0.297127 | 5.67E-11 | 0.108983 | 0.01848  | 0.265968 | 5.29E-09 | 0.241127 | 1.33E-07 | 0.203397 |
| -0.17949 | 9.61E-05 | -0.12142 | 0.00862  | -0.10887 | 0.01861  | -0.03494 | 0.45129  | -0.09659 |
| -0.12256 | 0.00801  | -0.09002 | 0.05188  | -0.28679 | 2.72E-10 | -0.13373 | 0.00379  | -0.2883  |
| -0.09775 | 0.0347   | -0.06589 | 0.15515  | -0.14898 | 0.00124  | -0.05    | 0.2809   | -0.07894 |
| -0.06721 | 0.14704  | -0.09606 | 0.03797  | -0.00498 | 0.91459  | 0.073009 | 0.11512  | -0.06563 |
| -0.10069 | 0.02958  | -0.08062 | 0.08178  | -0.03163 | 0.49537  | -0.07536 | 0.10386  | -0.06026 |
| -0.08132 | 0.07916  | -0.11679 | 0.01154  | 0.035201 | 0.44791  | 0.061838 | 0.18219  | 0.018139 |
| -0.2091  | 5.19E-06 | -0.09051 | 0.05061  | -0.0358  | 0.44022  | 0.054905 | 0.23633  | -0.02291 |
| -0.14942 | 0.0012   | -0.17269 | 0.00018  | -0.11569 | 0.01236  | -0.11444 | 0.01334  | -0.14883 |
| -0.1585  | 0.00059  | -0.15257 | 0.00094  | -0.08036 | 0.08278  | -0.07014 | 0.13016  | -0.10784 |
| 0.365357 | 3.41E-16 | 0.202328 | 1.05E-05 | 0.226843 | 7.28E-07 | 0.173185 | 0.00017  | 0.157167 |
| -0.00431 | 0.92595  | -0.10057 | 0.02978  | 0.020871 | 0.65281  | 0.094502 | 0.04122  | -0.05883 |
| 0.330532 | 2.29E-13 | 0.468171 | 8.16E-27 | 0.218001 | 1.98E-06 | 0.33206  | 1.75E-13 | 0.161952 |
| -0.04016 | 0.38651  | -0.107   | 0.02074  | 0.001176 | 0.97978  | 0.04292  | 0.35474  | -0.03484 |
| 0.02888  | 0.53357  | -0.15977 | 0.00053  | -0.04543 | 0.32722  | -0.04788 | 0.3018   | -0.11874 |
| -0.22343 | 1.08E-06 | -0.20412 | 8.74E-06 | -0.11591 | 0.01219  | -0.00896 | 0.84681  | -0.16241 |
| 0.154389 | 0.00082  | 0.153071 | 0.0009   | 0.41208  | 1.44E-20 | 0.450735 | 9.53E-25 | 0.245553 |
| 0.014931 | 0.7476   | -0.1967  | 1.86E-05 | 0.077364 | 0.09494  | 0.054901 | 0.23636  | -0.05521 |
| 0.075244 | 0.10438  | -0.08698 | 0.06037  | 0.103609 | 0.02515  | 0.102354 | 0.02698  | 0.140805 |
| -0.0106  | 0.81929  | 0.072268 | 0.11886  | 0.082378 | 0.07533  | 0.186355 | 5.08E-05 | 0.102801 |
| 0.044247 | 0.34004  | -0.08841 | 0.05624  | 0.11078  | 0.01662  | 0.086687 | 0.06123  | 0.009098 |
| 0.164855 | 0.00035  | 0.286258 | 2.94E-10 | 0.224963 | 9.04E-07 | 0.326653 | 4.50E-13 | 0.091443 |
| 0.318906 | 1.69E-12 | 0.288648 | 2.06E-10 | 0.523669 | 3.04E-34 | 0.513655 | 8.42E-33 | 0.429468 |
| 0.08345  | 0.0716   | 0.039311 | 0.39668  | 0.195634 | 2.07E-05 | 0.204965 | 8.01E-06 | 0.103804 |
| -0.0052  | 0.91078  | -0.06101 | 0.18811  | 0.072402 | 0.11818  | 0.087534 | 0.05873  | -0.00355 |
| 0.006444 | 0.88953  | -0.0598  | 0.19707  | 0.114437 | 0.01334  | 0.163934 | 0.00037  | -0.01867 |
| 0.15679  | 0.00067  | 0.03797  | 0.41299  | 0.081008 | 0.08033  | 0.145709 | 0.00159  | 0.00966  |
| -0.05946 | 0.19966  | -0.26792 | 4.05E-09 | -0.23756 | 2.05E-07 | -0.16911 | 0.00024  | -0.25379 |
| 0.017371 | 0.7081   | -0.02832 | 0.5416   | -0.01308 | 0.77809  | 0.014306 | 0.75783  | -0.08958 |
| 0.024848 | 0.59223  | -0.10613 | 0.0218   | -0.00337 | 0.94203  | 0.019701 | 0.67109  | -0.08884 |
| 0.048888 | 0.29176  | 0.042061 | 0.36445  | -0.00441 | 0.92436  | 0.035953 | 0.43827  | 0.076449 |
| -0.09271 | 0.04523  | 0.027245 | 0.557    | -0.13965 | 0.00249  | -0.06062 | 0.191    | -0.03609 |
| 0.001886 | 0.96758  | 0.032391 | 0.485    | 0.007422 | 0.87291  | 0.012662 | 0.78492  | 0.085483 |
| 0.04464  | 0.33576  | -0.07704 | 0.09634  | 0.058299 | 0.20856  | 0.091831 | 0.04733  | -0.00306 |
| 0.15365  | 0.00086  | 0.134699 | 0.00354  | 0.327415 | 3.94E-13 | 0.452667 | 5.70E-25 | 0.230887 |
| 0.005624 | 0.90352  | 0.096622 | 0.03686  | 0.041708 | 0.36849  | 0.218553 | 1.86E-06 | 0.055354 |
| 0.014601 | 0.75299  | -0.18341 | 6.70E-05 | 0.171129 | 0.0002   | 0.055611 | 0.23035  | 0.07586  |

|          |          |          |          |          |          |          |          |          |
|----------|----------|----------|----------|----------|----------|----------|----------|----------|
| -0.13987 | 0.00245  | -0.01568 | 0.73532  | -0.08362 | 0.07103  | -0.0534  | 0.24948  | -0.12331 |
| 0.106849 | 0.02092  | 0.077365 | 0.09494  | 0.067535 | 0.14506  | 0.100314 | 0.0302   | 0.052431 |
| -0.1724  | 0.00018  | -0.14798 | 0.00134  | -0.16799 | 0.00027  | -0.07492 | 0.1059   | -0.18436 |
| -0.1093  | 0.01814  | -0.1565  | 0.00069  | -0.02776 | 0.54953  | -0.04942 | 0.28649  | -0.09487 |
| -0.09105 | 0.04925  | -0.06285 | 0.17514  | -0.17403 | 0.00016  | -0.0833  | 0.07212  | -0.11354 |
| -0.20694 | 6.52E-06 | -0.06612 | 0.15368  | -0.20238 | 1.05E-05 | -0.06425 | 0.16568  | -0.30981 |
| -0.16507 | 0.00034  | -0.18639 | 5.06E-05 | -0.36285 | 5.60E-16 | -0.25098 | 3.85E-08 | -0.38001 |
| -0.10484 | 0.02347  | -0.228   | 6.37E-07 | -0.17269 | 0.00018  | -0.12472 | 0.00696  | -0.15634 |
| 0.036029 | 0.4373   | 0.117437 | 0.01109  | -0.05293 | 0.2536   | -0.07227 | 0.11884  | 0.044591 |
| 0.206109 | 7.11E-06 | 0.037393 | 0.42013  | 0.174843 | 0.00015  | 0.103156 | 0.0258   | 0.120949 |
| 0.07543  | 0.10352  | 0.055386 | 0.23224  | 0.414713 | 7.75E-21 | 0.433968 | 7.20E-23 | 0.195726 |
| 0.183906 | 6.40E-05 | 0.111879 | 0.01557  | 0.410811 | 1.93E-20 | 0.433778 | 7.56E-23 | 0.22668  |
| 0.044529 | 0.33696  | -0.00878 | 0.84997  | 0.102017 | 0.02749  | 0.167349 | 0.00028  | 0.028676 |
| -0.1519  | 0.00099  | -0.1292  | 0.00517  | -0.03917 | 0.39833  | -0.04042 | 0.38347  | -0.06721 |
| -0.02551 | 0.58245  | -0.22056 | 1.49E-06 | 0.118021 | 0.01069  | -0.00129 | 0.97786  | 0.030256 |
| -0.16164 | 0.00045  | -0.02495 | 0.59071  | 0.096255 | 0.03759  | 0.195744 | 2.04E-05 | 0.083602 |
| -0.11962 | 0.00967  | -0.09828 | 0.03373  | -0.14545 | 0.00162  | -0.03851 | 0.40642  | -0.13867 |
| -0.15231 | 0.00096  | 0.005806 | 0.90042  | -0.12271 | 0.00794  | -0.06266 | 0.17645  | -0.00742 |
| 0.043    | 0.35383  | -0.05357 | 0.24794  | 0.13651  | 0.00312  | 0.090468 | 0.05073  | 0.105655 |
| 0.097887 | 0.03445  | 0.04191  | 0.36618  | 0.20701  | 6.47E-06 | 0.149518 | 0.00119  | 0.098217 |
| 0.095527 | 0.03906  | 0.003583 | 0.93844  | 0.162889 | 0.00041  | 0.179893 | 9.27E-05 | 0.083888 |
| 0.062562 | 0.17712  | -0.24318 | 1.03E-07 | 0.191851 | 3.00E-05 | -0.00397 | 0.93177  | 0.113207 |
| 0.022018 | 0.63508  | -0.00845 | 0.85546  | 0.074593 | 0.10742  | 0.141264 | 0.00221  | 0.02577  |
| -0.02959 | 0.52362  | 0.009484 | 0.83804  | 0.064837 | 0.16186  | 0.234529 | 2.95E-07 | -0.02909 |
| -0.04207 | 0.36438  | -0.04973 | 0.28352  | -0.02239 | 0.62944  | 0.034087 | 0.46243  | -0.01873 |
| -0.00056 | 0.99037  | -0.02804 | 0.54551  | 0.019369 | 0.67633  | 0.049978 | 0.28112  | 0.042665 |
| -0.08823 | 0.05674  | -0.08925 | 0.05394  | -0.04467 | 0.3354   | 0.039977 | 0.38872  | -0.10716 |
| 0.057168 | 0.21754  | 0.048664 | 0.29397  | 0.028268 | 0.54229  | 0.050015 | 0.28076  | -0.10475 |
| -0.00257 | 0.9558   | 0.002624 | 0.95491  | 0.085108 | 0.06612  | 0.095597 | 0.03892  | 0.054954 |
| 0.106445 | 0.02141  | 0.004873 | 0.91635  | 0.212336 | 3.67E-06 | 0.26479  | 6.21E-09 | 0.033266 |
| 0.022167 | 0.63279  | 0.082365 | 0.07538  | 0.123845 | 0.00737  | 0.258664 | 1.41E-08 | 0.05952  |
| 0.120176 | 0.00934  | 0.341645 | 3.13E-14 | 0.163024 | 0.0004   | 0.408714 | 3.14E-20 | 0.091645 |
| -0.09352 | 0.04337  | -0.01547 | 0.73874  | -0.01053 | 0.82052  | 0.122982 | 0.0078   | -0.02251 |
| -0.05832 | 0.20836  | -0.05615 | 0.22584  | -0.00884 | 0.84894  | -0.01716 | 0.71153  | 0.001084 |
| 0.194804 | 2.24E-05 | 0.406189 | 5.60E-20 | 0.298726 | 4.42E-11 | 0.386645 | 4.22E-18 | 0.233951 |
| 0.100942 | 0.02918  | -0.11828 | 0.01052  | 0.20953  | 4.96E-06 | 0.098943 | 0.03254  | 0.11214  |
| 0.157578 | 0.00063  | 0.235118 | 2.75E-07 | 0.354461 | 2.85E-15 | 0.369791 | 1.40E-16 | 0.269369 |
| -0.14809 | 0.00133  | -0.02916 | 0.52961  | 0.009129 | 0.84401  | 0.048878 | 0.29186  | 0.022956 |
| 0.22256  | 1.19E-06 | 0.354873 | 2.63E-15 | 0.320015 | 1.40E-12 | 0.396504 | 4.94E-19 | 0.254167 |
| -0.23105 | 4.46E-07 | -0.22171 | 1.31E-06 | -0.07951 | 0.08611  | -0.02816 | 0.54379  | -0.16099 |
| 0.084399 | 0.06842  | 0.194545 | 2.30E-05 | -0.063   | 0.17411  | 0.108433 | 0.01908  | -0.0267  |
| -0.00999 | 0.82945  | -0.0802  | 0.08338  | -0.18413 | 6.26E-05 | 0.012278 | 0.7913   | -0.19325 |
| -0.07449 | 0.10789  | -0.10424 | 0.02428  | 0.007593 | 0.87     | 0.073787 | 0.11129  | -0.05812 |
| 0.102464 | 0.02682  | 0.134297 | 0.00364  | 0.104529 | 0.02388  | 0.314991 | 3.24E-12 | -0.05257 |
| 0.205582 | 7.51E-06 | 0.098832 | 0.03274  | 0.356996 | 1.75E-15 | 0.311755 | 5.52E-12 | 0.189073 |

|          |          |          |          |          |          |          |          |          |
|----------|----------|----------|----------|----------|----------|----------|----------|----------|
| -0.10843 | 0.01909  | -0.14199 | 0.0021   | -0.0822  | 0.07595  | 0.020141 | 0.66419  | -0.15912 |
| -0.05706 | 0.21837  | -0.03138 | 0.49876  | -0.11503 | 0.01287  | -0.03274 | 0.48031  | -0.12804 |
| -0.08203 | 0.07656  | -0.05718 | 0.21741  | -0.11914 | 0.00997  | -0.00115 | 0.98026  | -0.13393 |
| 0.03504  | 0.45     | 0.039901 | 0.38963  | 0.00124  | 0.97868  | 0.160944 | 0.00048  | -0.09781 |
| 0.102801 | 0.02632  | -0.0072  | 0.8767   | 0.206216 | 7.03E-06 | 0.239016 | 1.72E-07 | 0.033521 |
| -0.14005 | 0.00242  | 0.038824 | 0.40256  | -0.19804 | 1.63E-05 | 0.066912 | 0.14882  | -0.21538 |
| 0.076314 | 0.09953  | -0.04827 | 0.29794  | 0.018343 | 0.69258  | -0.10471 | 0.02363  | 0.023787 |
| -0.01121 | 0.80914  | -0.03378 | 0.46652  | -0.15098 | 0.00107  | -0.04758 | 0.30492  | -0.09686 |
| 0.226181 | 7.86E-07 | 0.015957 | 0.73091  | 0.165767 | 0.00032  | 0.22704  | 7.12E-07 | 0.160422 |
| 0.033409 | 0.47138  | -0.04249 | 0.35962  | 0.029534 | 0.52435  | 0.025008 | 0.58985  | 0.010368 |
| -0.01125 | 0.80834  | 0.004796 | 0.91767  | -0.00915 | 0.84372  | 0.03635  | 0.43322  | 0.002332 |
| -0.12591 | 0.00644  | -0.12377 | 0.00741  | -0.10754 | 0.0201   | 0.001099 | 0.9811   | -0.13817 |
| 0.02666  | 0.5655   | -0.02319 | 0.61711  | 0.177781 | 0.00011  | 0.217054 | 2.20E-06 | 0.050287 |
| -0.01914 | 0.67987  | -0.02447 | 0.59786  | -0.11003 | 0.01738  | -0.05586 | 0.22828  | -0.03706 |
| 0.023161 | 0.6176   | -0.07033 | 0.12912  | -0.01921 | 0.67879  | 0.086385 | 0.06214  | -0.07361 |
| -0.11425 | 0.01349  | -0.08661 | 0.06146  | -0.11749 | 0.01106  | 0.037135 | 0.42335  | -0.15132 |
| -0.20495 | 8.02E-06 | -0.19333 | 2.59E-05 | -0.31567 | 2.90E-12 | -0.16825 | 0.00026  | -0.28707 |
| -0.07802 | 0.09218  | -0.08309 | 0.07284  | 0.020896 | 0.65241  | 0.087304 | 0.0594   | -0.03514 |
| 0.0206   | 0.65702  | -0.00363 | 0.93765  | -0.06585 | 0.15541  | -0.10583 | 0.02218  | -0.01867 |
| -0.04625 | 0.31857  | -0.09146 | 0.04824  | -0.12892 | 0.00527  | -0.04578 | 0.32354  | -0.1464  |
| 0.021136 | 0.64869  | -0.11684 | 0.01151  | -0.06406 | 0.16694  | -0.1206  | 0.00909  | -0.00405 |
| -0.18353 | 6.62E-05 | -0.14205 | 0.00209  | -0.13332 | 0.0039   | -0.00891 | 0.8478   | -0.17321 |
| 0.092714 | 0.04523  | 0.198208 | 1.60E-05 | 0.080186 | 0.08345  | 0.194427 | 2.33E-05 | 0.068505 |
| 0.030566 | 0.50995  | -0.00257 | 0.95578  | -0.0717  | 0.12177  | -0.02276 | 0.62368  | -0.05228 |
| 0.184209 | 6.22E-05 | 0.458799 | 1.09E-25 | 0.070394 | 0.12875  | 0.35007  | 6.56E-15 | 0.080774 |
| -0.13336 | 0.00389  | -0.15117 | 0.00105  | -0.1178  | 0.01084  | -0.00546 | 0.90629  | -0.17978 |
| -0.06742 | 0.14574  | -0.11944 | 0.00978  | 0.175533 | 0.00014  | 0.173696 | 0.00016  | 0.064366 |
| 0.024171 | 0.60236  | 0.024988 | 0.59014  | 0.017623 | 0.70407  | 0.05727  | 0.21671  | -0.00341 |
| 0.094357 | 0.04153  | -0.13827 | 0.00275  | -0.01412 | 0.76085  | -0.11166 | 0.01578  | -0.08421 |
| -0.08232 | 0.07553  | -0.07018 | 0.12993  | -0.0429  | 0.35501  | 0.000214 | 0.99632  | -0.06949 |
| -0.10865 | 0.01884  | -0.09795 | 0.03434  | -0.17133 | 0.0002   | -0.13443 | 0.00361  | -0.15161 |
| -0.04263 | 0.35796  | -0.01595 | 0.73103  | 0.022472 | 0.62811  | 0.150376 | 0.00112  | -0.02529 |
| -0.11591 | 0.01219  | -0.17671 | 0.00012  | -0.25852 | 1.44E-08 | -0.09691 | 0.03629  | -0.29166 |
| -0.07853 | 0.09005  | 0.001367 | 0.9765   | 0.134614 | 0.00356  | 0.140484 | 0.00234  | 0.014176 |
| 0.00736  | 0.87396  | 0.044388 | 0.3385   | 0.093747 | 0.04287  | 0.19738  | 1.74E-05 | 0.03527  |
| 0.298825 | 4.35E-11 | 0.329103 | 2.94E-13 | 0.414934 | 7.36E-21 | 0.475238 | 1.10E-27 | 0.253573 |
| 0.05739  | 0.21575  | 0.117985 | 0.01072  | 0.098962 | 0.03251  | 0.229658 | 5.25E-07 | 0.043678 |
| -0.14061 | 0.00232  | -0.09613 | 0.03783  | -0.10534 | 0.0228   | 0.009619 | 0.83576  | -0.13305 |
| -0.07407 | 0.10992  | -0.07226 | 0.1189   | -0.04575 | 0.32388  | 0.012624 | 0.78556  | -0.05379 |
| -0.04585 | 0.32284  | -0.13605 | 0.00322  | -0.00361 | 0.93798  | 0.07112  | 0.12485  | -0.07116 |
| -0.02272 | 0.6243   | -0.06022 | 0.19394  | 0.036302 | 0.43383  | 0.102454 | 0.02683  | -0.04298 |
| 0.05904  | 0.20282  | 0.078924 | 0.08845  | 0.181504 | 7.99E-05 | 0.212858 | 3.47E-06 | 0.152027 |
| 0.031367 | 0.49891  | -0.13928 | 0.00256  | 0.095803 | 0.0385   | 0.066109 | 0.15377  | 0.068467 |
| 0.141146 | 0.00223  | 0.028537 | 0.53844  | 0.028767 | 0.53518  | -0.11553 | 0.01248  | 0.008872 |
| 0.006768 | 0.88403  | -0.0114  | 0.80592  | 0.061577 | 0.18405  | 0.09684  | 0.03644  | 0.040746 |

|          |          |          |          |          |          |          |          |          |
|----------|----------|----------|----------|----------|----------|----------|----------|----------|
| 0.251469 | 3.62E-08 | 0.175084 | 0.00014  | 0.044046 | 0.34224  | 0.118164 | 0.0106   | 0.013048 |
| 0.167154 | 0.00029  | 0.426111 | 5.04E-22 | 0.194299 | 2.36E-05 | 0.385432 | 5.47E-18 | 0.183822 |
| 0.011955 | 0.79667  | -0.05137 | 0.26788  | 0.079516 | 0.08608  | 0.118471 | 0.0104   | 0.030844 |
| -0.08401 | 0.0697   | -0.11078 | 0.01663  | -0.03809 | 0.41157  | 0.004889 | 0.91608  | -0.08811 |
| 0.073095 | 0.11469  | 0.037518 | 0.41858  | 0.270173 | 2.96E-09 | 0.20728  | 6.29E-06 | 0.256897 |
| 0.100521 | 0.02986  | 0.085963 | 0.06343  | 0.141176 | 0.00223  | 0.224713 | 9.30E-07 | 0.135434 |
| -0.01644 | 0.72316  | -0.00175 | 0.96991  | -0.09618 | 0.03774  | 0.038585 | 0.40546  | -0.1921  |
| -0.10435 | 0.02412  | -0.15503 | 0.00077  | -0.10343 | 0.0254   | -0.01112 | 0.81051  | -0.16057 |
| -0.05824 | 0.20902  | 0.03719  | 0.42266  | 0.0395   | 0.39441  | 0.136621 | 0.00309  | 0.014432 |
| -0.10944 | 0.01799  | -0.11099 | 0.01642  | -0.08324 | 0.07232  | 0.012464 | 0.7882   | -0.14515 |
| -0.13153 | 0.00441  | -0.18966 | 3.71E-05 | -0.16001 | 0.00052  | -0.05936 | 0.20036  | -0.21474 |
| 0.114612 | 0.0132   | 0.319891 | 1.43E-12 | 0.199915 | 1.35E-05 | 0.296595 | 6.15E-11 | 0.139466 |
| -0.05251 | 0.25746  | 3.66E-05 | 0.99937  | -0.1319  | 0.0043   | -0.00484 | 0.91692  | -0.12701 |
| -0.1073  | 0.02038  | -0.19683 | 1.83E-05 | -0.15253 | 0.00094  | 0.013496 | 0.77113  | -0.25818 |
| 0.227395 | 6.83E-07 | 0.136142 | 0.0032   | 0.131454 | 0.00443  | 0.039311 | 0.39668  | 0.150625 |
| 0.050685 | 0.27436  | -0.00527 | 0.90955  | -0.00417 | 0.92844  | -0.0926  | 0.0455   | 0.092685 |
| 0.022516 | 0.62744  | 0.081981 | 0.07675  | 0.068165 | 0.14134  | 0.110937 | 0.01647  | 0.172568 |
| 0.128699 | 0.00535  | 0.131066 | 0.00455  | 0.261095 | 1.02E-08 | 0.210712 | 4.37E-06 | 0.214128 |
| 0.180185 | 9.02E-05 | 0.091067 | 0.04921  | 0.175149 | 0.00014  | 0.18697  | 4.79E-05 | 0.010818 |
| 0.034445 | 0.45773  | -0.05725 | 0.21689  | -0.00622 | 0.89338  | -0.00391 | 0.93279  | -0.00929 |
| 0.112184 | 0.01529  | 0.02732  | 0.55591  | -0.03711 | 0.42371  | -0.00821 | 0.85954  | -0.00843 |
| -0.07436 | 0.10852  | -0.17267 | 0.00018  | -0.25549 | 2.15E-08 | -0.14515 | 0.00166  | -0.24728 |
| 0.079358 | 0.0867   | 0.038832 | 0.40247  | 0.271621 | 2.42E-09 | 0.341452 | 3.24E-14 | 0.140126 |
| -0.03452 | 0.4568   | -0.0232  | 0.61699  | -0.00252 | 0.95667  | 0.101201 | 0.02876  | -0.05503 |
| -0.17345 | 0.00017  | -0.21642 | 2.35E-06 | -0.1256  | 0.00657  | -0.04941 | 0.28661  | -0.14619 |
| 0.043522 | 0.34802  | 0.033627 | 0.46849  | 0.135374 | 0.00338  | 0.20214  | 1.07E-05 | 0.060314 |
| 0.007188 | 0.87689  | -0.04766 | 0.30403  | -0.04321 | 0.35149  | -0.01853 | 0.68965  | 0.03624  |
| -0.16878 | 0.00025  | -0.12623 | 0.0063   | -0.14692 | 0.00145  | -0.02338 | 0.61432  | -0.18217 |
| -0.1346  | 0.00357  | -0.17009 | 0.00022  | -0.13147 | 0.00443  | -0.01935 | 0.67668  | -0.15773 |
| 0.043044 | 0.35334  | 0.290544 | 1.55E-10 | -0.01697 | 0.71452  | 0.302584 | 2.41E-11 | -0.07818 |
| 0.036755 | 0.42812  | -0.02978 | 0.52085  | 0.249001 | 4.96E-08 | 0.302382 | 2.49E-11 | 0.142481 |
| 0.046125 | 0.31992  | 0.108615 | 0.01888  | 0.150673 | 0.00109  | 0.134445 | 0.0036   | 0.066995 |
| -0.16597 | 0.00032  | -0.19807 | 1.62E-05 | -0.11319 | 0.01439  | -0.01401 | 0.76265  | -0.17294 |
| 0.070049 | 0.13064  | -0.06178 | 0.18263  | 0.160438 | 0.0005   | 0.137385 | 0.00293  | 0.034696 |
| -0.11543 | 0.01256  | -0.14067 | 0.00231  | -0.15078 | 0.00108  | -0.07044 | 0.12848  | -0.14748 |
| 0.307818 | 1.05E-11 | 0.173137 | 0.00017  | 0.290611 | 1.53E-10 | 0.32286  | 8.63E-13 | 0.111338 |
| -0.0665  | 0.15133  | -0.07595 | 0.10117  | -0.02477 | 0.59337  | 0.065316 | 0.15877  | -0.08817 |
| 0.411877 | 1.51E-20 | 0.37463  | 5.23E-17 | 0.570982 | 9.33E-42 | 0.453556 | 4.49E-25 | 0.450603 |
| 0.067918 | 0.14279  | 0.080004 | 0.08416  | 0.204745 | 8.19E-06 | 0.242325 | 1.15E-07 | 0.087349 |
| 0.140104 | 0.00241  | 0.079309 | 0.0869   | 0.334734 | 1.09E-13 | 0.31821  | 1.89E-12 | 0.212666 |
| -0.08232 | 0.07555  | -0.07986 | 0.08473  | -0.17586 | 0.00013  | -0.06234 | 0.17868  | -0.13526 |
| -0.1183  | 0.01051  | 0.011644 | 0.80185  | -0.18423 | 6.21E-05 | -0.00512 | 0.91213  | -0.14622 |
| -0.06001 | 0.19545  | -0.03402 | 0.46332  | -0.16515 | 0.00034  | -0.10482 | 0.0235   | -0.13253 |
| 0.192859 | 2.72E-05 | 0.145149 | 0.00166  | 0.133266 | 0.00391  | 0.224757 | 9.25E-07 | 0.067403 |
| -0.14705 | 0.00144  | -0.15606 | 0.00071  | -0.11736 | 0.01115  | 0.010587 | 0.8195   | -0.15229 |



|          |          |          |          |          |          |          |          |          |
|----------|----------|----------|----------|----------|----------|----------|----------|----------|
| -0.03801 | 0.41252  | -0.0996  | 0.0314   | 0.03532  | 0.44638  | 0.148166 | 0.00132  | -0.07007 |
| 0.043291 | 0.35059  | 0.070395 | 0.12875  | 0.151664 | 0.00101  | 0.213079 | 3.39E-06 | 0.084569 |
| 0.066213 | 0.15312  | 0.068835 | 0.13746  | 0.260974 | 1.04E-08 | 0.342201 | 2.83E-14 | 0.158364 |
| -0.0446  | 0.3362   | -0.05435 | 0.2411   | 0.03774  | 0.41584  | 0.123377 | 0.0076   | 0.041977 |
| -0.09222 | 0.04639  | 0.024878 | 0.59178  | -0.30926 | 8.28E-12 | -0.10345 | 0.02538  | -0.23378 |
| 0.210141 | 4.64E-06 | 0.292488 | 1.15E-10 | 0.26904  | 3.47E-09 | 0.440194 | 1.49E-23 | 0.141244 |
| 0.042623 | 0.35807  | 0.064141 | 0.16642  | 0.231584 | 4.19E-07 | 0.259889 | 1.20E-08 | 0.176998 |
| -0.08369 | 0.07077  | -0.07299 | 0.11521  | -0.0564  | 0.2238   | 0.058497 | 0.20701  | -0.11465 |
| -0.06504 | 0.16053  | -0.06824 | 0.14088  | -0.09135 | 0.04851  | 0.014682 | 0.75166  | -0.09892 |
| 0.038576 | 0.40557  | 0.023041 | 0.61943  | 0.221847 | 1.29E-06 | 0.264144 | 6.78E-09 | 0.175318 |
| -0.08261 | 0.07452  | -0.16496 | 0.00034  | -0.0794  | 0.08654  | -0.02715 | 0.55842  | -0.15499 |
| -0.16088 | 0.00048  | -0.1468  | 0.00147  | -0.16763 | 0.00027  | -0.05099 | 0.27151  | -0.21139 |
| -0.0753  | 0.10414  | -0.08112 | 0.07989  | -0.25736 | 1.68E-08 | -0.08743 | 0.05902  | -0.25713 |
| -0.22697 | 7.17E-07 | -0.18906 | 3.92E-05 | -0.11081 | 0.01659  | -0.0274  | 0.55478  | -0.153   |
| -0.01396 | 0.76344  | -0.02349 | 0.61261  | 0.091622 | 0.04784  | 0.144422 | 0.00175  | 0.032372 |
| 0.075067 | 0.1052   | 0.128833 | 0.0053   | 0.137866 | 0.00283  | 0.166894 | 0.00029  | 0.182615 |
| 0.007841 | 0.86581  | 0.017033 | 0.71353  | -0.09354 | 0.04334  | 0.056029 | 0.22685  | -0.09152 |
| -0.06651 | 0.15127  | -0.01335 | 0.77351  | -0.01709 | 0.71261  | 0.110151 | 0.01725  | -0.05028 |
| -0.11078 | 0.01663  | -0.08239 | 0.0753   | -0.16716 | 0.00029  | -0.03434 | 0.45905  | -0.16751 |
| -0.14396 | 0.00182  | -0.0442  | 0.34054  | 0.056334 | 0.22433  | 0.159827 | 0.00053  | 0.036321 |
| 0.147409 | 0.0014   | 0.024231 | 0.60146  | 0.147934 | 0.00135  | 0.074385 | 0.10841  | 0.082901 |
| 0.15537  | 0.00075  | -0.12432 | 0.00715  | 0.184848 | 5.86E-05 | -0.01986 | 0.66858  | 0.120486 |
| -0.16487 | 0.00035  | -0.0875  | 0.05883  | 0.063409 | 0.17132  | 0.122714 | 0.00794  | 0.022944 |
| -0.0897  | 0.05273  | -0.01974 | 0.67049  | -0.08614 | 0.06289  | 0.076996 | 0.09653  | -0.15217 |
| -0.11151 | 0.01592  | -0.07087 | 0.12618  | -0.0394  | 0.39561  | 0.050611 | 0.27506  | -0.07268 |
| -0.1286  | 0.00538  | -0.0804  | 0.08261  | -0.06046 | 0.19217  | 0.041591 | 0.36985  | -0.07561 |
| -0.02366 | 0.61001  | -0.06314 | 0.17313  | 0.023317 | 0.61524  | 0.00542  | 0.90701  | -0.06975 |
| 0.070896 | 0.12604  | 0.034473 | 0.45737  | 0.106429 | 0.02143  | 0.065744 | 0.15606  | 0.059483 |
| -0.00447 | 0.92332  | -0.12267 | 0.00796  | -0.17654 | 0.00013  | -0.14023 | 0.00239  | -0.22146 |
| 0.278467 | 9.18E-10 | 0.203746 | 9.09E-06 | 0.226616 | 7.47E-07 | 0.327511 | 3.88E-13 | 0.098521 |
| -0.09399 | 0.04234  | -0.05962 | 0.19841  | -0.15755 | 0.00063  | -0.04275 | 0.35661  | -0.12508 |
| -0.02513 | 0.58797  | -0.06938 | 0.13436  | 0.035968 | 0.43808  | 0.043528 | 0.34795  | -0.01113 |
| 0.064237 | 0.16578  | 0.233776 | 3.23E-07 | 0.052232 | 0.25996  | -0.07243 | 0.11801  | 0.143879 |
| -0.22003 | 1.58E-06 | -0.28482 | 3.64E-10 | -0.18843 | 4.17E-05 | -0.22599 | 8.04E-07 | -0.21202 |
| -0.10839 | 0.01913  | -0.12574 | 0.00651  | -0.03299 | 0.47696  | 0.055685 | 0.22973  | -0.0856  |
| -0.13453 | 0.00358  | -0.20909 | 5.19E-06 | -0.12951 | 0.00506  | -0.04101 | 0.37658  | -0.17894 |
| -0.0043  | 0.92621  | -0.25037 | 4.17E-08 | 0.009807 | 0.8326   | -0.00932 | 0.84088  | -0.12634 |
| -0.07518 | 0.10467  | -0.20266 | 1.02E-05 | 0.129274 | 0.00514  | 0.148987 | 0.00124  | 0.034212 |
| -0.06431 | 0.1653   | -0.19026 | 3.50E-05 | -0.00548 | 0.90602  | 0.00473  | 0.9188   | -0.17487 |
| 0.066315 | 0.15248  | 0.125108 | 0.00679  | 0.226791 | 7.33E-07 | 0.353743 | 3.27E-15 | 0.169449 |
| -0.08001 | 0.08412  | 0.013996 | 0.76291  | 0.03915  | 0.39862  | 0.052711 | 0.25561  | -0.01305 |
| 0.218097 | 1.96E-06 | 0.095678 | 0.03875  | 0.313465 | 4.17E-12 | 0.225973 | 8.05E-07 | 0.22981  |
| -0.19715 | 1.78E-05 | -0.14548 | 0.00162  | -0.13314 | 0.00395  | -0.01288 | 0.78132  | -0.1889  |
| 0.161578 | 0.00046  | -0.05175 | 0.26435  | -0.05589 | 0.22805  | 0.009185 | 0.84308  | -0.06089 |
| 0.003883 | 0.9333   | -0.03914 | 0.39873  | -0.08963 | 0.0529   | -0.02009 | 0.66492  | -0.07119 |

|          |          |          |          |          |          |          |          |          |
|----------|----------|----------|----------|----------|----------|----------|----------|----------|
| 0.047148 | 0.30929  | 0.015297 | 0.74162  | 0.072061 | 0.11992  | 0.058316 | 0.20842  | 0.167976 |
| 0.280063 | 7.29E-10 | 0.271322 | 2.53E-09 | 0.41004  | 2.31E-20 | 0.378312 | 2.45E-17 | 0.374599 |
| 0.200383 | 1.28E-05 | 0.201218 | 1.18E-05 | 0.367278 | 2.32E-16 | 0.334295 | 1.18E-13 | 0.25556  |
| 0.236577 | 2.31E-07 | 0.316368 | 2.58E-12 | 0.447155 | 2.45E-24 | 0.50842  | 4.58E-32 | 0.363408 |
| -0.02421 | 0.60173  | -0.00366 | 0.93719  | -0.14931 | 0.00121  | -0.16142 | 0.00046  | -0.06817 |
| 0.169297 | 0.00024  | 0.101138 | 0.02886  | 0.278918 | 8.60E-10 | 0.296731 | 6.02E-11 | 0.109393 |
| -0.01436 | 0.75693  | -0.10973 | 0.01768  | -0.05184 | 0.26359  | 0.008288 | 0.85823  | -0.00879 |
| 0.086497 | 0.0618   | 0.313942 | 3.85E-12 | 0.180955 | 8.41E-05 | 0.395687 | 5.92E-19 | 0.115997 |
| -0.02286 | 0.62218  | -0.09232 | 0.04616  | 0.042905 | 0.3549   | 0.078688 | 0.08941  | -0.02612 |
| 0.282403 | 5.19E-10 | 0.557422 | 1.77E-39 | 0.414761 | 7.67E-21 | 0.639663 | 4.23E-55 | 0.2714   |
| -0.03731 | 0.42122  | -0.04933 | 0.28743  | 0.076792 | 0.09742  | 0.152664 | 0.00093  | 0.007349 |
| 0.012953 | 0.78011  | -0.02408 | 0.60367  | -0.08232 | 0.07552  | 0.031019 | 0.50369  | -0.12314 |
| -0.14228 | 0.00205  | -0.17464 | 0.00015  | -0.06096 | 0.18848  | -0.01854 | 0.68948  | -0.13183 |
| -0.10702 | 0.02072  | -0.11437 | 0.01339  | -0.04822 | 0.29836  | 0.035485 | 0.44425  | -0.07682 |
| -0.02208 | 0.63413  | 0.017304 | 0.70918  | 0.03756  | 0.41806  | 0.164977 | 0.00034  | -0.03812 |
| 0.009931 | 0.83052  | -0.01041 | 0.82247  | 0.196925 | 1.82E-05 | 0.178576 | 0.0001   | 0.158816 |
| -0.09773 | 0.03474  | -0.10243 | 0.02686  | -0.04996 | 0.28127  | 0.051899 | 0.26302  | -0.10679 |
| -0.04581 | 0.32321  | -0.08821 | 0.0568   | 0.053621 | 0.24748  | 0.17804  | 0.00011  | -0.02043 |
| -0.07954 | 0.08597  | -0.15417 | 0.00083  | 0.009668 | 0.83494  | 0.024753 | 0.59364  | -0.057   |
| -0.06262 | 0.17668  | -0.02154 | 0.64251  | 0.154815 | 0.00079  | 0.239833 | 1.56E-07 | 0.083549 |
| -0.05416 | 0.24271  | -0.02106 | 0.6499   | 0.089091 | 0.05436  | 0.176901 | 0.00012  | 0.065516 |
| -0.14178 | 0.00213  | -0.16138 | 0.00046  | -0.11942 | 0.00979  | -0.03555 | 0.44345  | -0.14139 |
| -0.13311 | 0.00396  | -0.16015 | 0.00051  | -0.1335  | 0.00385  | -0.03755 | 0.41816  | -0.17779 |
| -0.00554 | 0.90492  | -0.06075 | 0.19     | 0.098651 | 0.03306  | 0.115903 | 0.0122   | 0.039473 |
| -0.23788 | 1.97E-07 | -0.16304 | 0.0004   | -0.26231 | 8.70E-09 | -0.17095 | 0.00021  | -0.23618 |
| -0.05338 | 0.24961  | -0.13446 | 0.0036   | -0.05777 | 0.21272  | -0.03676 | 0.42801  | -0.10416 |
| -0.10036 | 0.03012  | 0.006158 | 0.89442  | -0.08193 | 0.07695  | -0.02965 | 0.52275  | -0.10287 |
| -0.03998 | 0.38868  | -0.08483 | 0.06701  | -0.07397 | 0.11038  | -0.02869 | 0.53625  | -0.09002 |
| -0.06853 | 0.1392   | -0.04886 | 0.29203  | 0.156779 | 0.00067  | 0.182167 | 7.52E-05 | 0.077973 |
| -0.1474  | 0.0014   | -0.29313 | 1.05E-10 | -0.05728 | 0.21664  | -0.23134 | 4.31E-07 | -0.13524 |
| -0.00609 | 0.89558  | -0.1179  | 0.01078  | 0.065651 | 0.15664  | -0.03105 | 0.50331  | -0.01709 |
| -0.07325 | 0.11391  | -0.02493 | 0.59102  | -0.02173 | 0.63951  | 0.054456 | 0.24018  | -0.01926 |
| -0.09874 | 0.03291  | -0.23655 | 2.32E-07 | -0.07722 | 0.09556  | -0.16275 | 0.00041  | -0.18418 |
| 0.066684 | 0.15021  | -0.04381 | 0.34483  | 0.081523 | 0.07842  | 0.057653 | 0.21365  | 0.076955 |
| -0.03657 | 0.4304   | -0.04766 | 0.30401  | 0.115569 | 0.01245  | 0.093296 | 0.04389  | 0.099073 |
| 0.222696 | 1.17E-06 | 0.178799 | 0.0001   | 0.196613 | 1.87E-05 | 0.224371 | 9.67E-07 | 0.152409 |
| 0.194872 | 2.23E-05 | 0.098194 | 0.03389  | 0.28013  | 7.22E-10 | 0.318017 | 1.96E-12 | 0.23118  |
| -0.0997  | 0.03123  | -0.16079 | 0.00049  | -0.09002 | 0.05187  | -0.06857 | 0.13901  | -0.11942 |
| 0.275225 | 1.46E-09 | -0.01295 | 0.78009  | 0.356695 | 1.86E-15 | 0.164428 | 0.00036  | 0.262604 |
| 0.061735 | 0.18292  | 0.252672 | 3.10E-08 | 0.303436 | 2.11E-11 | 0.485543 | 5.38E-29 | 0.19892  |
| -0.09896 | 0.03251  | -0.21404 | 3.05E-06 | -0.07908 | 0.08781  | -0.01206 | 0.79494  | -0.14776 |
| 0.125941 | 0.00643  | 0.068932 | 0.1369   | 0.009482 | 0.83807  | -0.01531 | 0.74147  | 0.049377 |
| 0.014541 | 0.75398  | -0.01434 | 0.75729  | 0.011037 | 0.81197  | 0.085738 | 0.06413  | -0.01519 |
| 0.09527  | 0.03959  | 0.014264 | 0.75851  | 0.310187 | 7.13E-12 | 0.204815 | 8.13E-06 | 0.249438 |
| 0.198568 | 1.54E-05 | -0.00109 | 0.98118  | 0.192428 | 2.83E-05 | 0.178824 | 0.0001   | 0.215594 |

|          |          |          |          |          |          |          |          |          |
|----------|----------|----------|----------|----------|----------|----------|----------|----------|
| 0.187674 | 4.48E-05 | 0.009096 | 0.84457  | 0.162639 | 0.00042  | 0.06629  | 0.15264  | 0.192405 |
| 0.082838 | 0.07371  | 6.84E-05 | 0.99882  | 0.116705 | 0.01161  | 0.096843 | 0.03643  | 0.148177 |
| -0.03171 | 0.49427  | -0.03312 | 0.47523  | -0.05112 | 0.27022  | 0.015966 | 0.73075  | -0.01456 |
| 0.028507 | 0.53887  | -0.14506 | 0.00167  | 0.102575 | 0.02665  | 0.006742 | 0.88447  | -0.02762 |
| -0.03778 | 0.41528  | -0.29739 | 5.44E-11 | -0.08588 | 0.0637   | -0.1182  | 0.01057  | -0.21394 |
| 0.009777 | 0.8331   | -0.06287 | 0.17499  | 0.136324 | 0.00316  | 0.127652 | 0.00574  | 0.131249 |
| 0.054992 | 0.23559  | -0.12543 | 0.00665  | -0.01282 | 0.78225  | 0.084157 | 0.06922  | -0.01751 |
| -0.16473 | 0.00035  | -0.16287 | 0.00041  | -0.07553 | 0.10306  | 0.05597  | 0.22734  | -0.17073 |
| -0.12464 | 0.007    | -0.10391 | 0.02473  | -0.12731 | 0.00587  | 0.022853 | 0.6223   | -0.06035 |
| 0.115901 | 0.0122   | 0.200352 | 1.29E-05 | 0.079425 | 0.08644  | 0.257114 | 1.74E-08 | -0.00551 |
| -0.22123 | 1.38E-06 | -0.17365 | 0.00016  | -0.42876 | 2.63E-22 | -0.2253  | 8.69E-07 | -0.49482 |
| 0.061835 | 0.18221  | 0.175172 | 0.00014  | -0.06323 | 0.1725   | 0.099682 | 0.03126  | -0.02566 |
| -0.08707 | 0.0601   | -0.08763 | 0.05845  | -0.02776 | 0.54959  | 0.022281 | 0.63103  | -0.05559 |
| -0.02354 | 0.61182  | -0.22297 | 1.13E-06 | -0.0899  | 0.05219  | -0.1543  | 0.00082  | -0.07673 |
| 0.064614 | 0.16331  | -0.02652 | 0.5675   | 0.083468 | 0.07153  | 0.091333 | 0.04855  | 0.027848 |
| 0.0978   | 0.03461  | 0.04297  | 0.35417  | 0.0282   | 0.54325  | 0.024165 | 0.60245  | 0.00487  |
| -0.05552 | 0.23113  | -0.06033 | 0.19307  | -0.01302 | 0.77901  | 0.043341 | 0.35002  | -0.00772 |
| -0.01817 | 0.69538  | -0.0828  | 0.07386  | 0.059529 | 0.1991   | 0.09192  | 0.04711  | -0.00666 |
| -0.0677  | 0.14409  | -0.07133 | 0.12375  | -0.06821 | 0.1411   | -0.07822 | 0.09134  | -0.08785 |
| -0.11918 | 0.00995  | -0.08274 | 0.07404  | -0.17529 | 0.00014  | 0.027169 | 0.5581   | -0.18562 |
| 0.166989 | 0.00029  | 0.124967 | 0.00685  | 0.42282  | 1.12E-21 | 0.295885 | 6.86E-11 | 0.517834 |
| -0.06496 | 0.16103  | -0.00816 | 0.86041  | -0.019   | 0.68217  | 0.04307  | 0.35305  | -0.00829 |
| 0.005509 | 0.90549  | -0.05693 | 0.21943  | -0.03046 | 0.51138  | 0.030402 | 0.51222  | -0.04874 |
| -0.07044 | 0.12849  | -0.06122 | 0.18662  | -0.02757 | 0.55232  | 0.020689 | 0.65565  | -0.02709 |
| -0.10937 | 0.01806  | -0.11538 | 0.01259  | -0.23587 | 2.52E-07 | -0.18384 | 6.44E-05 | -0.22308 |
| -0.15393 | 0.00085  | -0.26809 | 3.96E-09 | -0.08815 | 0.05698  | -0.0126  | 0.78594  | -0.10663 |
| 0.113658 | 0.01399  | -0.04457 | 0.33655  | 0.018042 | 0.69737  | -0.01046 | 0.82167  | -0.10094 |
| 0.017386 | 0.70786  | 0.023896 | 0.60649  | 0.109548 | 0.01788  | 0.16001  | 0.00052  | 0.016477 |
| -0.0318  | 0.49294  | -0.04192 | 0.36611  | 0.014025 | 0.76244  | -0.06762 | 0.14455  | 0.019894 |
| 0.04366  | 0.34648  | -0.07781 | 0.09304  | -0.14413 | 0.00179  | -0.11232 | 0.01517  | -0.09279 |
| -0.06504 | 0.16053  | -0.12966 | 0.00501  | -0.0183  | 0.69323  | 0.023996 | 0.60499  | -0.0665  |
| -0.06788 | 0.143    | -0.12704 | 0.00597  | 0.006344 | 0.89124  | -0.02805 | 0.54537  | -0.08894 |
| -0.0132  | 0.77606  | -0.09011 | 0.05164  | 0.103355 | 0.02551  | 0.009783 | 0.83301  | 0.039855 |
| -0.065   | 0.16078  | -0.18807 | 4.32E-05 | -0.00361 | 0.93803  | -0.08358 | 0.07115  | -0.0429  |
| -0.01131 | 0.80744  | -0.01419 | 0.75967  | 0.170855 | 0.00021  | 0.135455 | 0.00336  | 0.140673 |
| 0.090989 | 0.0494   | 0.029749 | 0.52132  | 0.211191 | 4.15E-06 | 0.182658 | 7.18E-05 | 0.165929 |
| 0.238127 | 1.92E-07 | 0.035224 | 0.44762  | 0.194815 | 2.24E-05 | 0.239384 | 1.64E-07 | 0.154128 |
| -0.00644 | 0.88956  | -0.00162 | 0.97212  | -0.04094 | 0.37743  | 0.056355 | 0.22416  | -0.03698 |
| -0.06037 | 0.19284  | -0.08541 | 0.06515  | -0.02378 | 0.60828  | -0.00767 | 0.86862  | 0.011669 |
| -0.05128 | 0.26873  | -0.00781 | 0.8664   | -0.11054 | 0.01686  | 0.007367 | 0.87385  | -0.17323 |
| 0.172546 | 0.00018  | 0.030678 | 0.5084   | 0.223824 | 1.03E-06 | 0.134459 | 0.0036   | 0.198495 |
| -0.09501 | 0.04015  | -0.0567  | 0.22134  | 0.004166 | 0.92846  | 0.063077 | 0.17358  | -0.01576 |
| -0.04072 | 0.37996  | -0.22144 | 1.35E-06 | 0.001365 | 0.97653  | -0.00219 | 0.96241  | -0.14786 |
| -0.00222 | 0.96178  | -0.03201 | 0.49013  | 0.214209 | 3.00E-06 | 0.183046 | 6.93E-05 | 0.141881 |
| 0.04987  | 0.28216  | 0.141897 | 0.00211  | 0.203459 | 9.36E-06 | 0.138696 | 0.00267  | 0.189022 |

|           |          |          |          |          |          |          |          |          |
|-----------|----------|----------|----------|----------|----------|----------|----------|----------|
| -0.04694  | 0.31144  | -0.13498 | 0.00347  | 0.068933 | 0.1369   | 0.076609 | 0.09822  | 0.019949 |
| -0.05404  | 0.24376  | -0.00431 | 0.92602  | 0.090009 | 0.05192  | 0.164597 | 0.00035  | -0.02942 |
| -0.24379  | 9.56E-08 | -0.21939 | 1.70E-06 | -0.37779 | 2.73E-17 | -0.17937 | 9.72E-05 | -0.36623 |
| -0.05043  | 0.27678  | -0.32055 | 1.28E-12 | -0.09984 | 0.03099  | -0.0579  | 0.21166  | -0.17031 |
| -0.19398  | 2.43E-05 | -0.14032 | 0.00237  | -0.21348 | 3.25E-06 | -0.11502 | 0.01287  | -0.20491 |
| -0.0918   | 0.0474   | -0.12088 | 0.00893  | -0.26669 | 4.80E-09 | -0.11032 | 0.01709  | -0.29386 |
| 0.01888   | 0.68405  | 0.002256 | 0.96122  | 0.081233 | 0.07949  | 0.06538  | 0.15836  | 0.101664 |
| -0.18336  | 6.73E-05 | -0.23928 | 1.67E-07 | -0.2669  | 4.66E-09 | -0.21453 | 2.89E-06 | -0.27779 |
| -0.14332  | 0.0019   | -0.16394 | 0.00037  | -0.11773 | 0.01089  | -0.00573 | 0.90174  | -0.12879 |
| -0.09689  | 0.03634  | -0.2664  | 4.99E-09 | -0.12485 | 0.0069   | -0.13999 | 0.00243  | -0.19005 |
| -0.11721  | 0.01125  | -0.14413 | 0.00179  | -0.09338 | 0.04369  | 0.021943 | 0.63622  | -0.13919 |
| -0.0327   | 0.48089  | 0.0148   | 0.74974  | -0.08491 | 0.06674  | 0.018732 | 0.6864   | -0.10441 |
| -0.03591  | 0.43882  | -0.11251 | 0.01499  | 0.055128 | 0.23442  | 0.084444 | 0.06827  | -0.01846 |
| 0.06565   | 0.15665  | -0.05739 | 0.21576  | 0.19582  | 2.03E-05 | 0.145166 | 0.00166  | 0.101627 |
| -0.04587  | 0.32259  | -0.03613 | 0.43603  | 0.046727 | 0.31364  | 0.139616 | 0.0025   | -0.00522 |
| -0.00293  | 0.94973  | -0.1063  | 0.0216   | -0.02692 | 0.56167  | -0.03102 | 0.50367  | 0.020226 |
| -0.07209  | 0.11977  | -0.17341 | 0.00017  | 0.014796 | 0.7498   | 0.011723 | 0.80053  | -0.03825 |
| -3.66E-05 | 0.99937  | -0.09185 | 0.04729  | 0.145349 | 0.00164  | 0.115991 | 0.01213  | 0.083332 |
| -0.01166  | 0.80157  | -0.05077 | 0.27357  | 0.100701 | 0.02957  | 0.144767 | 0.00171  | 0.041677 |
| -0.01112  | 0.81057  | -0.06599 | 0.1545   | 0.211207 | 4.14E-06 | 0.158589 | 0.00058  | 0.151786 |
| -0.07625  | 0.09979  | -0.16149 | 0.00046  | 0.014378 | 0.75663  | 0.059547 | 0.19896  | -0.06416 |
| -0.15821  | 0.0006   | -0.1546  | 0.0008   | -0.10268 | 0.02649  | -0.00981 | 0.83248  | -0.14577 |
| -0.16325  | 0.0004   | -0.15404 | 0.00084  | -0.09391 | 0.04251  | 0.002561 | 0.95598  | -0.13506 |
| 0.120259  | 0.00929  | -0.07399 | 0.11029  | 0.13488  | 0.0035   | 0.080285 | 0.08307  | 0.095269 |
| -0.08864  | 0.05559  | -0.05517 | 0.23409  | -0.03821 | 0.41009  | 0.049999 | 0.28091  | -0.111   |
| 0.12474   | 0.00696  | 0.079176 | 0.08743  | 0.32103  | 1.18E-12 | 0.310082 | 7.25E-12 | 0.187147 |
| 0.173557  | 0.00016  | 0.110697 | 0.01671  | 0.458358 | 1.23E-25 | 0.403242 | 1.09E-19 | 0.32138  |
| 0.097517  | 0.03514  | 0.011652 | 0.80171  | -0.00655 | 0.88766  | 0.052715 | 0.25557  | -0.04125 |
| -0.08089  | 0.08077  | -0.02637 | 0.56969  | -0.13166 | 0.00437  | -0.02662 | 0.5661   | -0.12873 |
| -0.11565  | 0.01239  | -0.00117 | 0.97985  | -0.0942  | 0.04187  | -0.00571 | 0.90208  | -0.01071 |
| -0.0152   | 0.7432   | 0.136384 | 0.00315  | -0.13889 | 0.00263  | -0.01471 | 0.7512   | -0.19616 |
| 0.158092  | 0.00061  | 0.110377 | 0.01702  | 0.144224 | 0.00178  | 0.140995 | 0.00226  | 0.169488 |
| -0.09156  | 0.04798  | -0.06098 | 0.18833  | -0.04545 | 0.32707  | 0.04833  | 0.29731  | -0.09694 |
| -0.12185  | 0.00839  | -0.16128 | 0.00047  | -0.11956 | 0.00971  | -0.04796 | 0.30101  | -0.16074 |
| -0.29702  | 5.76E-11 | -0.20933 | 5.06E-06 | -0.28005 | 7.30E-10 | -0.17819 | 0.00011  | -0.22192 |
| -0.03296  | 0.47737  | -0.07684 | 0.0972   | 0.078879 | 0.08863  | 0.136621 | 0.00309  | 0.005224 |
| 0.044385  | 0.33853  | -0.29017 | 1.64E-10 | -0.1424  | 0.00204  | -0.15396 | 0.00084  | -0.13839 |
| 0.079293  | 0.08696  | -0.24143 | 1.28E-07 | -0.11628 | 0.01191  | -0.16602 | 0.00031  | -0.09904 |
| 0.124694  | 0.00698  | -0.20312 | 9.69E-06 | -0.08766 | 0.05836  | -0.10155 | 0.02821  | -0.08152 |
| -0.06407  | 0.16688  | -0.23373 | 3.25E-07 | -0.13509 | 0.00344  | -0.21169 | 3.93E-06 | -0.12994 |
| 0.139603  | 0.0025   | 0.0045   | 0.92274  | 0.150374 | 0.00112  | 0.064324 | 0.16521  | -0.00977 |
| -0.11589  | 0.0122   | -0.26348 | 7.42E-09 | -0.04935 | 0.28719  | -0.11366 | 0.01399  | -0.07692 |
| 0.045367  | 0.32794  | 0.010612 | 0.81909  | 0.353244 | 3.60E-15 | 0.381744 | 1.19E-17 | 0.199528 |
| -0.13172  | 0.00435  | -0.03042 | 0.512    | 0.088801 | 0.05516  | 0.030073 | 0.5168   | 0.080936 |
| -0.02922  | 0.52881  | 0.024142 | 0.60279  | 0.025735 | 0.57907  | 0.115198 | 0.01274  | -0.01367 |

|          |          |          |          |          |          |          |          |          |
|----------|----------|----------|----------|----------|----------|----------|----------|----------|
| 0.041467 | 0.37128  | 0.055053 | 0.23506  | 0.007564 | 0.8705   | 0.125048 | 0.00682  | -0.00433 |
| -0.02414 | 0.60282  | -0.07943 | 0.08641  | 0.326072 | 4.97E-13 | 0.275109 | 1.48E-09 | 0.220699 |
| 0.308371 | 9.57E-12 | 0.452043 | 6.73E-25 | 0.588517 | 7.31E-45 | 0.69773  | 2.29E-69 | 0.439765 |
| 0.169986 | 0.00022  | 0.402755 | 1.22E-19 | 0.11717  | 0.01128  | 0.228217 | 6.21E-07 | 0.067171 |
| -0.05454 | 0.23943  | -0.05531 | 0.23291  | -0.03733 | 0.42094  | 0.118158 | 0.0106   | -0.09258 |
| 0.085772 | 0.06403  | 0.110359 | 0.01704  | -0.06215 | 0.17997  | 0.000748 | 0.98713  | -0.12162 |
| 0.432694 | 9.91E-23 | 0.030478 | 0.51116  | 0.279964 | 7.39E-10 | 0.237166 | 2.15E-07 | 0.265216 |
| 0.111587 | 0.01584  | 0.241025 | 1.35E-07 | 0.154889 | 0.00078  | 0.32668  | 4.48E-13 | 0.057141 |
| 0.141476 | 0.00218  | -0.03259 | 0.48229  | 0.213636 | 3.19E-06 | 0.163589 | 0.00039  | 0.203015 |
| -0.12653 | 0.00618  | -0.13999 | 0.00243  | 0.003895 | 0.93311  | 0.094494 | 0.04124  | -0.04769 |
| 0.177961 | 0.00011  | 0.122364 | 0.00812  | 0.385653 | 5.22E-18 | 0.411924 | 1.49E-20 | 0.227055 |
| -0.09759 | 0.03501  | -0.19204 | 2.94E-05 | -0.13413 | 0.00368  | -0.17615 | 0.00013  | -0.18155 |
| 0.018307 | 0.69315  | 0.032255 | 0.48684  | -0.11715 | 0.01129  | 0.076604 | 0.09825  | -0.04383 |
| 0.091992 | 0.04694  | 0.135043 | 0.00346  | 0.02306  | 0.61915  | 0.14802  | 0.00134  | -0.03174 |
| 0.006263 | 0.89263  | -0.06435 | 0.16502  | 0.105009 | 0.02324  | 0.137356 | 0.00294  | 0.072849 |
| 0.008775 | 0.84999  | -0.15645 | 0.00069  | -0.0518  | 0.26389  | -0.1228  | 0.00789  | -0.01667 |
| -0.11607 | 0.01207  | -0.11423 | 0.01351  | -0.02912 | 0.53025  | 0.082666 | 0.07431  | -0.05521 |
| 0.040686 | 0.38036  | 0.056243 | 0.22508  | 0.129921 | 0.00492  | 0.209645 | 4.90E-06 | 0.069999 |
| 0.260721 | 1.08E-08 | 0.274263 | 1.67E-09 | 0.309893 | 7.48E-12 | 0.365098 | 3.59E-16 | 0.188173 |
| -0.13834 | 0.00274  | -0.17862 | 0.0001   | -0.13398 | 0.00372  | -0.0625  | 0.17758  | -0.1469  |
| 0.216643 | 2.30E-06 | 0.041251 | 0.37378  | 0.107831 | 0.01976  | 0.194806 | 2.24E-05 | 0.058775 |
| -0.08877 | 0.05523  | -0.09787 | 0.03449  | 0.120063 | 0.0094   | 0.164442 | 0.00036  | 0.017384 |
| 0.003823 | 0.93434  | 0.008337 | 0.85741  | 0.116259 | 0.01193  | 0.176149 | 0.00013  | 0.0587   |
| -0.04459 | 0.33628  | -0.0026  | 0.95529  | 0.09061  | 0.05036  | 0.182646 | 7.19E-05 | 0.042814 |
| 0.046463 | 0.31638  | 0.04866  | 0.29401  | 0.257796 | 1.59E-08 | 0.248024 | 5.62E-08 | 0.199879 |
| 0.045399 | 0.3276   | 0.041584 | 0.36992  | 0.101992 | 0.02753  | 0.064755 | 0.16239  | 0.08054  |
| 0.014347 | 0.75715  | 0.108826 | 0.01865  | -0.16416 | 0.00037  | 0.084145 | 0.06926  | -0.08943 |
| 0.306542 | 1.28E-11 | 0.183183 | 6.84E-05 | 0.199832 | 1.36E-05 | 0.177116 | 0.00012  | 0.104916 |
| -0.0119  | 0.79761  | -0.04523 | 0.32944  | 0.064207 | 0.16598  | 0.127432 | 0.00582  | 0.021879 |
| 0.190482 | 3.42E-05 | -0.00265 | 0.95438  | 0.058909 | 0.20383  | 0.097161 | 0.03582  | 0.008929 |
| -0.19205 | 2.94E-05 | -0.04525 | 0.32916  | -0.35315 | 3.66E-15 | -0.03416 | 0.46143  | -0.37524 |
| -0.02927 | 0.52802  | -0.02772 | 0.55008  | 0.042194 | 0.36294  | 0.135501 | 0.00335  | -0.02078 |
| -0.06486 | 0.16171  | -0.16044 | 0.0005   | 0.048459 | 0.29602  | 0.036443 | 0.43205  | -0.03519 |
| 0.350446 | 6.11E-15 | 0.109891 | 0.01752  | 0.330436 | 2.33E-13 | 0.216938 | 2.22E-06 | 0.244211 |
| -0.02765 | 0.55114  | -0.15861 | 0.00058  | -0.02216 | 0.63291  | 0.007792 | 0.86663  | -0.04022 |
| -0.02995 | 0.51851  | -0.05546 | 0.23159  | 0.16029  | 0.00051  | 0.171455 | 0.0002   | 0.096908 |
| 0.046128 | 0.31989  | 0.143287 | 0.00191  | 0.000358 | 0.99385  | 0.168738 | 0.00025  | -0.04229 |
| -0.02779 | 0.54916  | -0.17788 | 0.00011  | 0.019979 | 0.66673  | 0.086003 | 0.06331  | -0.08675 |
| 0.018615 | 0.68826  | 0.139143 | 0.00258  | 0.057158 | 0.21761  | 0.079491 | 0.08618  | 0.132954 |
| -0.11729 | 0.01119  | -0.10236 | 0.02697  | -0.22365 | 1.05E-06 | -0.06802 | 0.14221  | -0.21184 |
| -0.01173 | 0.80036  | 0.000974 | 0.98326  | 0.028421 | 0.54011  | 0.003349 | 0.94247  | 0.052205 |
| 0.181179 | 8.24E-05 | 0.158553 | 0.00058  | 0.06487  | 0.16164  | 0.031629 | 0.49534  | 0.057276 |
| 0.153632 | 0.00087  | 0.077687 | 0.09357  | 0.177727 | 0.00011  | 0.107617 | 0.02001  | 0.119276 |
| 0.082468 | 0.07501  | -0.04294 | 0.35449  | -0.01911 | 0.68036  | 0.004729 | 0.91882  | -0.07169 |
| -0.21218 | 3.73E-06 | -0.33097 | 2.12E-13 | -0.25324 | 2.88E-08 | -0.27587 | 1.33E-09 | -0.20392 |

|          |          |          |          |          |          |          |          |          |
|----------|----------|----------|----------|----------|----------|----------|----------|----------|
| -0.04097 | 0.37702  | 0.100604 | 0.02972  | -0.14064 | 0.00232  | -0.033   | 0.47687  | -0.10723 |
| 0.291788 | 1.28E-10 | 0.41379  | 9.63E-21 | 0.46238  | 4.09E-26 | 0.512216 | 1.35E-32 | 0.386017 |
| -0.10222 | 0.02718  | -0.07539 | 0.1037   | -0.07454 | 0.10765  | -0.0251  | 0.58848  | -0.03796 |
| -0.20902 | 5.23E-06 | -0.33007 | 2.48E-13 | -0.01996 | 0.66699  | -0.0719  | 0.12073  | -0.14097 |
| 0.201312 | 1.17E-05 | 0.470194 | 4.62E-27 | 0.198417 | 1.56E-05 | 0.473878 | 1.62E-27 | 0.155489 |
| 0.068455 | 0.13965  | 0.044606 | 0.33613  | 0.126281 | 0.00628  | 0.129174 | 0.00518  | 0.068908 |
| -0.07808 | 0.09191  | -0.16387 | 0.00038  | -0.09657 | 0.03697  | -0.00325 | 0.94409  | -0.22079 |
| 0.027253 | 0.55689  | -0.02624 | 0.57168  | 0.099677 | 0.03127  | 0.185236 | 5.65E-05 | -0.00267 |
| 0.149446 | 0.0012   | 0.072319 | 0.1186   | 0.222072 | 1.25E-06 | 0.203537 | 9.29E-06 | 0.210658 |
| 0.067226 | 0.14691  | -0.07292 | 0.11556  | 0.081941 | 0.0769   | 0.061553 | 0.18422  | 0.036761 |
| 0.007615 | 0.86964  | -0.06058 | 0.19129  | 0.088765 | 0.05525  | 0.153081 | 0.0009   | 0.005471 |
| 0.049614 | 0.28464  | -0.11966 | 0.00965  | 0.115186 | 0.01275  | 0.13468  | 0.00355  | -0.02268 |
| 0.145242 | 0.00165  | -0.00616 | 0.8943   | 0.327588 | 3.83E-13 | 0.335313 | 9.82E-14 | 0.212583 |
| 0.068266 | 0.14075  | -0.0552  | 0.23384  | 0.065691 | 0.15639  | 0.017346 | 0.70849  | 0.001978 |
| -0.09227 | 0.04628  | -0.12006 | 0.00941  | -0.09738 | 0.0354   | 0.031603 | 0.49569  | -0.15116 |
| -0.12822 | 0.00552  | -0.12333 | 0.00762  | -0.20123 | 1.18E-05 | -0.10467 | 0.02369  | -0.20489 |
| 0.109275 | 0.01817  | 0.038255 | 0.4095   | 0.224332 | 9.71E-07 | 0.285347 | 3.37E-10 | 0.046572 |
| -0.13451 | 0.00359  | -0.14596 | 0.00156  | -0.08921 | 0.05405  | 0.014161 | 0.76019  | -0.147   |
| 0.074587 | 0.10745  | 0.030589 | 0.50962  | 0.416806 | 4.73E-21 | 0.335072 | 1.02E-13 | 0.394581 |
| 0.004442 | 0.92374  | -0.01887 | 0.68429  | -0.12005 | 0.00941  | -0.08847 | 0.05608  | -0.09779 |
| -0.03366 | 0.46801  | -0.05895 | 0.20349  | -0.08838 | 0.05633  | 0.032577 | 0.48249  | -0.09102 |
| 0.068613 | 0.13873  | -0.03483 | 0.45265  | 0.117395 | 0.01112  | 0.086224 | 0.06263  | 0.100701 |
| -0.1401  | 0.00241  | -0.09152 | 0.04809  | -0.14564 | 0.0016   | -0.00923 | 0.84228  | -0.16065 |
| -0.08357 | 0.0712   | -0.01993 | 0.6675   | -0.19017 | 3.53E-05 | -0.0424  | 0.36057  | -0.1402  |
| 0.327433 | 3.93E-13 | 0.307839 | 1.04E-11 | 0.526852 | 1.03E-34 | 0.560292 | 5.94E-40 | 0.324364 |
| -0.06538 | 0.15834  | -0.11446 | 0.01332  | 0.020402 | 0.66011  | 0.098997 | 0.03245  | -0.06667 |
| 0.204734 | 8.20E-06 | 0.100387 | 0.03008  | 0.297735 | 5.16E-11 | 0.211708 | 3.93E-06 | 0.280678 |
| 0.104969 | 0.02329  | 0.011774 | 0.79967  | 0.035052 | 0.44984  | -0.09277 | 0.0451   | 0.051466 |
| 0.095552 | 0.03901  | -0.0002  | 0.99648  | 0.197433 | 1.73E-05 | 0.150307 | 0.00112  | 0.153863 |
| -0.00701 | 0.87991  | 0.074034 | 0.11009  | -0.0204  | 0.66012  | 0.184656 | 5.96E-05 | -0.08142 |
| 0.063262 | 0.17231  | 0.289371 | 1.85E-10 | 0.064389 | 0.16478  | 0.1503   | 0.00112  | 0.05899  |
| 0.027042 | 0.55994  | 0.017246 | 0.71009  | 0.110895 | 0.01651  | 0.222401 | 1.21E-06 | 0.030484 |
| 0.013693 | 0.7679   | -0.06947 | 0.13385  | 0.005453 | 0.90644  | 0.102613 | 0.0266   | -0.12217 |
| -0.01185 | 0.79839  | 0.009978 | 0.82973  | 0.039538 | 0.39396  | 0.161032 | 0.00048  | -0.02419 |
| -0.05115 | 0.26996  | -0.07028 | 0.12936  | -0.06814 | 0.14151  | -0.07864 | 0.0896   | -0.02616 |
| 0.037069 | 0.42417  | 0.012542 | 0.78691  | -0.00344 | 0.94095  | 0.082491 | 0.07493  | 0.029568 |
| 0.024105 | 0.60335  | -0.1427  | 0.00199  | 0.033125 | 0.47516  | -0.01947 | 0.67466  | 0.064421 |
| -0.10967 | 0.01775  | -0.12636 | 0.00625  | -0.0828  | 0.07382  | 0.020705 | 0.65538  | -0.14342 |
| 0.320117 | 1.37E-12 | 0.27602  | 1.30E-09 | 0.377226 | 3.07E-17 | 0.464276 | 2.42E-26 | 0.213012 |
| -0.03578 | 0.4405   | -0.04103 | 0.37635  | -0.02147 | 0.64357  | 0.084717 | 0.06738  | -0.09827 |
| 0.058774 | 0.20486  | 0.012992 | 0.77946  | 0.36156  | 7.21E-16 | 0.258353 | 1.47E-08 | 0.281887 |
| -0.0311  | 0.50256  | 0.068865 | 0.13729  | 0.292645 | 1.13E-10 | 0.244772 | 8.46E-08 | 0.275768 |
| 0.026682 | 0.56518  | -0.00197 | 0.96618  | 0.068822 | 0.13754  | 0.145196 | 0.00166  | -0.00373 |
| 0.303932 | 1.95E-11 | 0.263659 | 7.25E-09 | 0.182962 | 6.98E-05 | 0.231273 | 4.35E-07 | 0.129914 |
| 0.024018 | 0.60465  | -0.02661 | 0.5663   | 0.280247 | 7.10E-10 | 0.248309 | 5.42E-08 | 0.123026 |

|          |          |          |          |          |          |          |          |          |
|----------|----------|----------|----------|----------|----------|----------|----------|----------|
| -0.07088 | 0.1261   | 0.003887 | 0.93323  | -0.04356 | 0.34761  | 0.013406 | 0.77262  | -0.00194 |
| 0.040387 | 0.38387  | -0.0194  | 0.6758   | -0.07786 | 0.09283  | -0.14884 | 0.00126  | -0.12199 |
| -0.18103 | 8.35E-05 | -0.31052 | 6.75E-12 | -0.23457 | 2.94E-07 | -0.21263 | 3.56E-06 | -0.32337 |
| -0.03077 | 0.50709  | -0.20584 | 7.31E-06 | 0.054551 | 0.23936  | -0.06532 | 0.15873  | 0.023383 |
| -0.034   | 0.46355  | -0.09654 | 0.03702  | -0.11015 | 0.01725  | -0.08091 | 0.08069  | -0.10537 |
| -0.00132 | 0.97729  | -0.10588 | 0.02211  | 0.014468 | 0.75517  | 0.044261 | 0.33989  | -0.03248 |
| 0.160915 | 0.00048  | 0.374269 | 5.64E-17 | 0.344049 | 2.01E-14 | 0.427538 | 3.55E-22 | 0.335017 |
| 0.112263 | 0.01522  | 0.078113 | 0.09178  | 0.15355  | 0.00087  | 0.167881 | 0.00027  | 0.046736 |
| -0.01043 | 0.82206  | -0.03186 | 0.49225  | 0.066002 | 0.15443  | 0.108535 | 0.01897  | 0.009863 |
| 0.13344  | 0.00387  | 0.133962 | 0.00373  | -0.03177 | 0.49347  | 0.117032 | 0.01137  | 0.067383 |
| -0.14431 | 0.00177  | -0.21979 | 1.62E-06 | 0.077442 | 0.09461  | -0.0031  | 0.9468   | 0.00539  |
| -0.00958 | 0.8364   | -0.06543 | 0.15807  | -0.03723 | 0.42215  | 0.001482 | 0.97453  | -0.04041 |
| 0.084038 | 0.06961  | -0.1021  | 0.02737  | 0.336432 | 8.04E-14 | 0.131303 | 0.00448  | 0.190006 |
| -0.05188 | 0.26317  | -0.11764 | 0.01095  | 0.105457 | 0.02266  | 0.10412  | 0.02444  | 0.102114 |
| 0.163815 | 0.00038  | 0.005741 | 0.90154  | 0.209243 | 5.11E-06 | 0.227268 | 6.93E-07 | 0.176714 |
| -0.0453  | 0.32867  | -0.0898  | 0.05246  | -0.04307 | 0.35303  | -0.06829 | 0.14059  | 0.019276 |
| -0.09255 | 0.04562  | 0.009946 | 0.83026  | -0.03522 | 0.44764  | -0.08224 | 0.07583  | 0.011452 |
| 0.126982 | 0.006    | 0.019777 | 0.6699   | 0.099611 | 0.03138  | 0.030142 | 0.51584  | 0.089779 |
| -0.11549 | 0.01251  | -0.06282 | 0.17531  | -0.11541 | 0.01257  | -0.06881 | 0.13759  | -0.09866 |
| -0.14704 | 0.00144  | -0.26932 | 3.34E-09 | -0.16991 | 0.00023  | -0.21138 | 4.07E-06 | -0.15378 |
| 0.113211 | 0.01437  | 0.038449 | 0.40712  | 0.100021 | 0.03069  | 0.112225 | 0.01525  | 0.070104 |
| -0.02719 | 0.55776  | -0.05774 | 0.21294  | -0.11863 | 0.01029  | -0.05621 | 0.22534  | -0.15088 |
| -0.03468 | 0.45472  | -0.03005 | 0.51714  | -0.06643 | 0.15179  | -0.01874 | 0.68622  | -0.03656 |
| 0.198201 | 1.60E-05 | 0.1053   | 0.02286  | 0.004389 | 0.92464  | 0.09822  | 0.03384  | -0.00694 |
| 0.00343  | 0.94107  | -0.1264  | 0.00624  | 0.090646 | 0.05027  | 0.067591 | 0.14473  | 0.000586 |
| 0.179903 | 9.26E-05 | 0.103925 | 0.02471  | 0.392199 | 1.27E-18 | 0.375217 | 4.64E-17 | 0.248969 |
| 0.126318 | 0.00627  | 0.204526 | 8.38E-06 | 0.339665 | 4.49E-14 | 0.384931 | 6.08E-18 | 0.257113 |
| 0.051553 | 0.26621  | 0.090927 | 0.04956  | 0.014938 | 0.74748  | 0.063704 | 0.16933  | -0.00047 |
| 0.123878 | 0.00736  | 0.018325 | 0.69286  | 0.110484 | 0.01692  | 0.168171 | 0.00026  | -0.06569 |
| -0.15116 | 0.00105  | -0.00314 | 0.94603  | -0.14221 | 0.00207  | -0.07011 | 0.13032  | -0.04481 |
| -0.20308 | 9.73E-06 | -0.22095 | 1.42E-06 | -0.07026 | 0.1295   | -0.04321 | 0.35152  | -0.1011  |
| 0.177265 | 0.00012  | 0.03519  | 0.44805  | 0.344902 | 1.72E-14 | 0.298028 | 4.93E-11 | 0.27466  |
| -0.01301 | 0.7792   | -0.10994 | 0.01747  | 0.034683 | 0.45463  | -0.10521 | 0.02298  | -0.00551 |
| -0.1031  | 0.02588  | -0.13071 | 0.00466  | -0.24985 | 4.45E-08 | -0.22534 | 8.66E-07 | -0.23708 |
| -0.11428 | 0.01347  | -0.1791  | 9.96E-05 | -0.09683 | 0.03646  | -0.01473 | 0.75095  | -0.16696 |
| 0.005452 | 0.90645  | -0.07482 | 0.10638  | -0.0688  | 0.13765  | 0.024368 | 0.5994   | -0.13071 |
| -0.15839 | 0.00059  | -0.14056 | 0.00233  | -0.0457  | 0.32441  | 0.003074 | 0.94717  | -0.09253 |
| 0.088932 | 0.05479  | 0.028749 | 0.53544  | -0.00821 | 0.85959  | 0.161589 | 0.00046  | -0.07418 |
| 0.013547 | 0.7703   | -0.18755 | 4.54E-05 | 0.024156 | 0.60258  | -0.07001 | 0.13085  | -0.04491 |
| -0.13403 | 0.00371  | -0.11558 | 0.01244  | -0.12249 | 0.00805  | -0.02377 | 0.60841  | -0.13878 |
| -0.04655 | 0.31545  | 0.02583  | 0.57768  | 0.063689 | 0.16943  | 0.067677 | 0.14422  | 0.149924 |
| 0.159476 | 0.00054  | 0.148483 | 0.00129  | 0.356634 | 1.88E-15 | 0.264863 | 6.15E-09 | 0.299686 |
| -0.04357 | 0.34754  | -0.08411 | 0.06939  | -0.05558 | 0.23057  | 0.038519 | 0.40626  | -0.06532 |
| 0.052511 | 0.25742  | -0.11256 | 0.01494  | -0.11062 | 0.01678  | -0.07618 | 0.10012  | -0.13523 |
| 0.050066 | 0.28027  | 0.018402 | 0.69164  | 0.125087 | 0.0068   | 0.083027 | 0.07305  | 0.083724 |

|          |          |          |          |          |          |          |          |          |
|----------|----------|----------|----------|----------|----------|----------|----------|----------|
| 0.110915 | 0.01649  | 0.087592 | 0.05856  | 0.322331 | 9.45E-13 | 0.310283 | 7.02E-12 | 0.155583 |
| 0.23205  | 3.97E-07 | 0.264553 | 6.42E-09 | 0.318057 | 1.94E-12 | 0.424607 | 7.27E-22 | 0.204395 |
| 0.071154 | 0.12467  | -0.04119 | 0.37446  | 0.049428 | 0.28645  | 0.087283 | 0.05946  | -0.09534 |
| -0.08332 | 0.07206  | -0.12255 | 0.00802  | -0.19582 | 2.03E-05 | -0.15111 | 0.00105  | -0.23508 |
| 0.082826 | 0.07375  | 0.099336 | 0.03185  | 0.178839 | 0.0001   | 0.186804 | 4.87E-05 | 0.133979 |
| 0.078378 | 0.09068  | -0.04709 | 0.30993  | -0.14475 | 0.00171  | -0.02176 | 0.63902  | -0.22352 |
| 0.023199 | 0.61704  | 0.28772  | 2.37E-10 | -0.03751 | 0.41867  | 0.045004 | 0.33183  | 0.008834 |
| -0.19183 | 3.01E-05 | -0.16223 | 0.00043  | -0.28153 | 5.89E-10 | -0.20938 | 5.04E-06 | -0.20813 |
| 0.037131 | 0.4234   | 0.002559 | 0.95602  | 0.159982 | 0.00052  | 0.180487 | 8.78E-05 | 0.062394 |
| 0.052869 | 0.25419  | 0.010244 | 0.82526  | 0.126128 | 0.00635  | 0.090689 | 0.05016  | 0.074589 |
| 0.066335 | 0.15236  | 0.00445  | 0.92359  | 0.151443 | 0.00103  | 0.136995 | 0.00301  | 0.105823 |
| -0.00511 | 0.91227  | -0.09217 | 0.04652  | 0.074965 | 0.10567  | 0.041536 | 0.37048  | 0.044506 |
| 0.073176 | 0.11428  | 0.110528 | 0.01687  | 0.151217 | 0.00105  | 0.189381 | 3.81E-05 | 0.1066   |
| 0.179883 | 9.27E-05 | 0.040952 | 0.37725  | 0.163588 | 0.00039  | 0.173324 | 0.00017  | 0.028902 |
| 0.10232  | 0.02703  | -0.15901 | 0.00056  | 0.109142 | 0.01831  | 0.005461 | 0.90631  | 0.05675  |
| -0.05947 | 0.19958  | -0.15402 | 0.00084  | -0.07639 | 0.0992   | -0.0597  | 0.19779  | -0.12833 |
| -0.06043 | 0.19241  | -0.07109 | 0.12503  | -0.05443 | 0.24041  | -0.02982 | 0.52032  | 0.02441  |
| -0.10538 | 0.02276  | -0.13241 | 0.00415  | -0.11906 | 0.01002  | -0.2274  | 6.83E-07 | -0.06635 |
| -0.11571 | 0.01234  | -0.07519 | 0.10464  | -0.05128 | 0.26872  | -0.00423 | 0.92738  | -0.05116 |
| -0.13914 | 0.00258  | -0.11311 | 0.01446  | 0.105785 | 0.02223  | 0.185031 | 5.76E-05 | 0.0404   |
| -0.03982 | 0.3906   | -0.06034 | 0.19307  | -0.1048  | 0.02351  | 0.009957 | 0.83008  | -0.06269 |
| 0.069588 | 0.1332   | 0.046205 | 0.31908  | 0.012096 | 0.79432  | -0.08103 | 0.08025  | 0.051286 |
| -0.20811 | 5.76E-06 | -0.22634 | 7.71E-07 | -0.16756 | 0.00028  | -0.11164 | 0.0158   | -0.17002 |
| 0.083142 | 0.07265  | 0.112812 | 0.01472  | 0.240298 | 1.47E-07 | 0.300548 | 3.32E-11 | 0.173453 |
| -0.02875 | 0.53542  | -0.01835 | 0.69241  | 0.018352 | 0.69243  | 0.00836  | 0.85701  | -0.01491 |
| -0.08672 | 0.06114  | -0.02545 | 0.58331  | 0.066942 | 0.14863  | 0.104787 | 0.02354  | 0.109216 |
| -0.01293 | 0.78041  | -0.1265  | 0.0062   | -0.08164 | 0.07799  | -0.13913 | 0.00258  | -0.04757 |
| -0.15644 | 0.00069  | -0.20331 | 9.50E-06 | -0.12011 | 0.00938  | -0.08681 | 0.06085  | -0.12111 |
| -0.061   | 0.18822  | -0.0518  | 0.26393  | 0.043541 | 0.34781  | -0.02266 | 0.62518  | 0.033681 |
| 0.036916 | 0.4261   | -0.05496 | 0.23584  | 0.111041 | 0.01637  | 0.226343 | 7.71E-07 | 0.011546 |
| 0.03879  | 0.40297  | 0.118392 | 0.01045  | 0.103402 | 0.02545  | 0.118776 | 0.0102   | 0.058626 |
| -0.09916 | 0.03217  | -0.06796 | 0.14255  | -0.01856 | 0.68906  | 0.097245 | 0.03566  | -0.06599 |
| 0.020737 | 0.65488  | 0.089426 | 0.05346  | 0.035493 | 0.44415  | 0.306841 | 1.22E-11 | -0.02291 |
| 0.001824 | 0.96864  | -0.06301 | 0.17401  | 0.162419 | 0.00043  | 0.124107 | 0.00725  | 0.1179   |
| -0.05024 | 0.2786   | -0.02933 | 0.52715  | -0.07326 | 0.11389  | -0.0227  | 0.62456  | -0.01739 |
| -0.15225 | 0.00096  | -0.13843 | 0.00272  | -0.0682  | 0.14111  | -0.06001 | 0.19551  | -0.11231 |
| 0.006743 | 0.88445  | -0.0857  | 0.06424  | 0.009589 | 0.83627  | -0.05106 | 0.2708   | 0.005103 |
| -0.09237 | 0.04604  | -0.04139 | 0.37217  | 0.000182 | 0.99687  | 0.010749 | 0.81679  | 0.030682 |
| -0.09486 | 0.04046  | -0.11636 | 0.01186  | -0.12304 | 0.00777  | -0.02346 | 0.61313  | -0.20555 |
| -0.14309 | 0.00194  | -0.19491 | 2.22E-05 | -0.10518 | 0.02302  | -0.0586  | 0.20621  | -0.07685 |
| 0.282584 | 5.05E-10 | -0.08747 | 0.05892  | 0.27376  | 1.79E-09 | 0.211921 | 3.84E-06 | 0.147968 |
| -0.10449 | 0.02393  | -0.09631 | 0.03747  | -0.07269 | 0.1167   | 0.034763 | 0.45358  | -0.09153 |
| -0.11318 | 0.0144   | -0.1063  | 0.02159  | -0.05462 | 0.23875  | -0.01861 | 0.68833  | -0.06896 |
| 0.071084 | 0.12504  | -0.12059 | 0.0091   | 0.099418 | 0.03171  | -0.02419 | 0.60209  | 0.093835 |
| 0.016814 | 0.71705  | -0.18781 | 4.42E-05 | -0.052   | 0.26211  | -0.0603  | 0.19329  | -0.09155 |



|          |          |          |          |          |          |          |          |          |
|----------|----------|----------|----------|----------|----------|----------|----------|----------|
| -0.11528 | 0.01267  | -0.26816 | 3.92E-09 | -0.10592 | 0.02206  | -0.17589 | 0.00013  | -0.21523 |
| 0.121976 | 0.00832  | -0.07209 | 0.11978  | 0.059204 | 0.20157  | -0.00363 | 0.93764  | 0.036991 |
| -0.13868 | 0.00267  | -0.14174 | 0.00214  | -0.12203 | 0.0083   | -0.0821  | 0.07632  | -0.10615 |
| 0.105054 | 0.02318  | 0.060016 | 0.19544  | 0.066923 | 0.14875  | 0.034872 | 0.45217  | 0.139509 |
| 0.026169 | 0.57269  | -0.06132 | 0.18589  | -0.0083  | 0.8581   | 0.012335 | 0.79035  | 0.085025 |
| -0.04733 | 0.30743  | -0.04378 | 0.34514  | -0.02064 | 0.6564   | -0.0043  | 0.92611  | 0.060517 |
| 0.006177 | 0.89409  | -0.06318 | 0.17285  | -0.12492 | 0.00687  | -0.09033 | 0.05107  | -0.04029 |
| -0.01188 | 0.7979   | -0.05689 | 0.21981  | -0.09182 | 0.04736  | -0.07898 | 0.08823  | -0.02309 |
| -0.11911 | 0.00999  | -0.03121 | 0.50112  | -0.09193 | 0.04709  | -0.03958 | 0.39348  | -0.10223 |
| -0.13275 | 0.00406  | -0.04359 | 0.34723  | -0.12074 | 0.00901  | -0.09379 | 0.04278  | -0.0486  |
| 0.135099 | 0.00344  | 0.286681 | 2.76E-10 | 0.142765 | 0.00198  | 0.292454 | 1.16E-10 | 0.030221 |
| -0.2035  | 9.32E-06 | -0.07251 | 0.11765  | -0.23913 | 1.70E-07 | -0.06699 | 0.14834  | -0.17535 |
| -0.0545  | 0.23977  | -0.10992 | 0.01749  | 0.0681   | 0.14172  | 0.175139 | 0.00014  | 0.017948 |
| -0.13209 | 0.00425  | -0.11808 | 0.01065  | 0.057025 | 0.21869  | 0.061661 | 0.18345  | 0.010504 |
| -0.03706 | 0.42427  | 0.021449 | 0.64384  | 0.173559 | 0.00016  | 0.274278 | 1.67E-09 | 0.127296 |
| 0.143157 | 0.00193  | 0.112444 | 0.01505  | 0.077535 | 0.09421  | 0.284877 | 3.61E-10 | -0.05526 |
| -0.18692 | 4.82E-05 | -0.37836 | 2.42E-17 | -0.26221 | 8.81E-09 | -0.34593 | 1.42E-14 | -0.22037 |
| -0.14936 | 0.00121  | -0.33134 | 1.98E-13 | -0.10401 | 0.02459  | -0.08325 | 0.07228  | -0.21516 |
| 0.016624 | 0.72011  | -0.16611 | 0.00031  | -0.09789 | 0.03445  | -0.07004 | 0.1307   | -0.09207 |
| 0.040097 | 0.38729  | 0.129484 | 0.00507  | 0.066084 | 0.15392  | 0.128554 | 0.0054   | -0.03575 |
| 0.001762 | 0.96971  | 0.11406  | 0.01365  | -0.12206 | 0.00828  | 0.11619  | 0.01198  | -0.12699 |
| -0.1271  | 0.00595  | 0.135353 | 0.00338  | -0.25138 | 3.66E-08 | 0.031691 | 0.49449  | -0.23748 |
| -0.05439 | 0.24075  | -0.00318 | 0.94542  | 0.050654 | 0.27465  | 0.156563 | 0.00069  | -0.03409 |
| 0.215115 | 2.72E-06 | 0.303553 | 2.07E-11 | 0.430142 | 1.87E-22 | 0.405256 | 6.93E-20 | 0.35919  |
| 0.2625   | 8.47E-09 | 0.389504 | 2.28E-18 | 0.459306 | 9.50E-26 | 0.587916 | 9.41E-45 | 0.338032 |
| 0.153837 | 0.00085  | 0.213933 | 3.09E-06 | 0.416855 | 4.68E-21 | 0.538922 | 1.55E-36 | 0.278323 |
| 0.037346 | 0.42072  | -0.07909 | 0.08777  | 0.040506 | 0.38247  | 0.090577 | 0.05045  | -0.03057 |
| 0.243395 | 1.00E-07 | 0.425341 | 6.08E-22 | 0.283222 | 4.60E-10 | 0.486262 | 4.34E-29 | 0.142622 |
| 0.129108 | 0.0052   | 0.110004 | 0.0174   | 0.139441 | 0.00253  | 0.126529 | 0.00618  | 0.143669 |
| 0.056485 | 0.22309  | -0.05429 | 0.24162  | 0.163327 | 0.00039  | 0.10755  | 0.02009  | 0.038981 |
| -0.06818 | 0.14125  | -0.05922 | 0.20146  | -0.07447 | 0.10803  | -0.0737  | 0.11172  | -0.17834 |
| -0.03045 | 0.51155  | -0.01013 | 0.8272   | -0.0073  | 0.87491  | 0.054044 | 0.24377  | 0.000218 |
| -0.0806  | 0.08189  | -0.0227  | 0.62461  | -0.09336 | 0.04375  | 0.052292 | 0.25941  | -0.08149 |
| -0.0677  | 0.14411  | -0.1092  | 0.01824  | 0.018949 | 0.68295  | 0.083579 | 0.07116  | -0.04361 |
| 0.034675 | 0.45474  | -0.04366 | 0.34646  | 0.225586 | 8.41E-07 | 0.211275 | 4.11E-06 | 0.1422   |
| 0.015323 | 0.74119  | -0.13073 | 0.00466  | -0.03756 | 0.41805  | 0.018491 | 0.69022  | -0.0863  |
| -0.06839 | 0.14004  | 0.061444 | 0.185    | -0.10947 | 0.01796  | 0.047643 | 0.30423  | -0.06255 |
| 0.174284 | 0.00015  | 0.069448 | 0.13399  | 0.438586 | 2.24E-23 | 0.384589 | 6.54E-18 | 0.327431 |
| -0.07281 | 0.11613  | -0.05397 | 0.24446  | 0.099322 | 0.03188  | 0.135174 | 0.00343  | 0.057583 |
| 0.268069 | 3.97E-09 | 0.413184 | 1.11E-20 | 0.223069 | 1.12E-06 | 0.245869 | 7.37E-08 | 0.246761 |
| -0.00131 | 0.97741  | 0.075298 | 0.10413  | -0.03866 | 0.40457  | 0.024215 | 0.60169  | -0.05951 |
| -0.08582 | 0.06386  | -0.19101 | 3.25E-05 | -0.01157 | 0.80307  | -0.0714  | 0.12336  | -0.0941  |
| 0.155894 | 0.00072  | 0.163029 | 0.0004   | 0.218383 | 1.90E-06 | 0.265796 | 5.42E-09 | 0.133705 |
| 0.135088 | 0.00345  | 0.037344 | 0.42075  | 0.245134 | 8.08E-08 | 0.221511 | 1.34E-06 | 0.122747 |
| 0.097336 | 0.03548  | 0.03098  | 0.50424  | 0.321956 | 1.01E-12 | 0.296496 | 6.25E-11 | 0.179513 |

|          |          |          |          |          |          |          |          |          |
|----------|----------|----------|----------|----------|----------|----------|----------|----------|
| 0.201212 | 1.18E-05 | 0.020636 | 0.65647  | 0.346516 | 1.27E-14 | 0.234418 | 2.99E-07 | 0.20332  |
| 0.009307 | 0.84101  | 0.009936 | 0.83044  | 0.176763 | 0.00012  | 0.208172 | 5.72E-06 | 0.097999 |
| -0.07424 | 0.10912  | -0.1271  | 0.00595  | -0.12319 | 0.0077   | -0.11232 | 0.01517  | -0.04419 |
| -0.06368 | 0.16947  | -0.00676 | 0.88413  | 0.003577 | 0.93856  | 0.030904 | 0.50528  | 0.022045 |
| -0.01897 | 0.6826   | -0.01537 | 0.74041  | -0.13897 | 0.00262  | -0.00214 | 0.96321  | -0.08612 |
| 0.233486 | 3.35E-07 | 0.146323 | 0.00152  | 0.151974 | 0.00099  | 0.151331 | 0.00104  | 0.228009 |
| -0.01781 | 0.701    | -0.16266 | 0.00042  | -0.06851 | 0.13932  | -0.13168 | 0.00437  | -0.16204 |
| -0.19347 | 2.56E-05 | -0.21063 | 4.41E-06 | -0.15948 | 0.00054  | -0.14717 | 0.00143  | -0.13624 |
| -0.06958 | 0.13326  | -0.15385 | 0.00085  | 0.022835 | 0.62256  | 0.002137 | 0.96326  | -0.02743 |
| 0.054054 | 0.24368  | -0.03678 | 0.4278   | -0.0256  | 0.58112  | -0.05599 | 0.22719  | -0.03742 |
| 0.046056 | 0.32065  | -0.05372 | 0.24665  | -0.04868 | 0.2938   | -0.01449 | 0.75481  | -0.03721 |
| -0.0213  | 0.6462   | 0.003406 | 0.94149  | 0.152352 | 0.00096  | 0.225466 | 8.53E-07 | 0.111127 |
| -0.04379 | 0.34506  | -0.20789 | 5.90E-06 | 0.03085  | 0.50603  | 0.063469 | 0.17091  | 0.017094 |
| -0.04525 | 0.32916  | -0.10513 | 0.02307  | -0.00268 | 0.95388  | 0.082602 | 0.07454  | -0.08509 |
| 0.070651 | 0.12736  | 0.153735 | 0.00086  | 0.022681 | 0.62493  | 0.000859 | 0.98523  | 0.028024 |
| -0.10429 | 0.02421  | -0.12814 | 0.00555  | 0.062242 | 0.17935  | 0.10028  | 0.03026  | -0.06002 |
| 0.021172 | 0.64814  | 0.022568 | 0.62665  | 0.0705   | 0.12818  | 0.04474  | 0.33468  | 0.032841 |
| -0.09768 | 0.03484  | -0.31421 | 3.68E-12 | 0.080839 | 0.08096  | -0.04827 | 0.29794  | -0.02104 |
| 0.083337 | 0.07198  | -0.02269 | 0.6248   | 0.424321 | 7.80E-22 | 0.308366 | 9.58E-12 | 0.312511 |
| 0.02692  | 0.56172  | -0.02189 | 0.63703  | 0.038727 | 0.40374  | 0.059646 | 0.19821  | -0.00638 |
| 0.11646  | 0.01178  | 0.106139 | 0.02179  | 0.050494 | 0.27618  | 0.085213 | 0.06579  | 0.034163 |
| -0.06304 | 0.17386  | -0.06653 | 0.15117  | 0.158799 | 0.00057  | 0.264035 | 6.89E-09 | 0.068297 |
| 0.05034  | 0.27764  | 0.001853 | 0.96814  | 0.161536 | 0.00046  | 0.271273 | 2.54E-09 | 0.091194 |
| 0.04906  | 0.29006  | -0.05594 | 0.22756  | 0.092358 | 0.04607  | 0.156827 | 0.00067  | 0.099861 |
| 0.255344 | 2.19E-08 | 0.219825 | 1.61E-06 | 0.363331 | 5.09E-16 | 0.258316 | 1.48E-08 | 0.289981 |
| -0.04035 | 0.38429  | -0.0733  | 0.11366  | -0.1969  | 1.82E-05 | -0.14556 | 0.00161  | -0.07789 |
| -0.07057 | 0.12782  | -0.09301 | 0.04455  | 0.018806 | 0.68522  | 0.079605 | 0.08573  | -0.01497 |
| -0.17967 | 9.46E-05 | -0.16394 | 0.00037  | -0.09863 | 0.0331   | -0.03288 | 0.47841  | -0.13167 |
| -0.13977 | 0.00247  | -0.12132 | 0.00868  | -0.09636 | 0.03738  | 0.000938 | 0.98387  | -0.1288  |
| 0.163136 | 0.0004   | 0.05955  | 0.19894  | 0.25973  | 1.23E-08 | 0.089342 | 0.05368  | 0.198037 |
| 0.259616 | 1.25E-08 | 0.107238 | 0.02045  | 0.506949 | 7.34E-32 | 0.381578 | 1.24E-17 | 0.370477 |
| 0.055151 | 0.23423  | -0.04037 | 0.38408  | 0.110702 | 0.0167   | 0.130875 | 0.00461  | 0.041763 |
| 0.085578 | 0.06463  | 0.155006 | 0.00078  | 0.08468  | 0.0675   | 0.149456 | 0.0012   | 0.005773 |
| 0.083842 | 0.07027  | 0.03308  | 0.47576  | 0.176908 | 0.00012  | 0.116214 | 0.01196  | 0.182102 |
| 0.196399 | 1.92E-05 | 0.00382  | 0.93438  | -0.16897 | 0.00024  | -0.01157 | 0.80312  | -0.17618 |
| -0.03471 | 0.45432  | -0.25926 | 1.31E-08 | -0.0215  | 0.64313  | 0.001055 | 0.98185  | -0.053   |
| 0.103186 | 0.02576  | 0.018541 | 0.68942  | 0.151097 | 0.00106  | 0.172237 | 0.00018  | 0.122369 |
| 0.048162 | 0.29898  | 0.101534 | 0.02824  | 0.170859 | 0.00021  | 0.224729 | 9.28E-07 | 0.111384 |
| -0.04691 | 0.31174  | -0.1235  | 0.00754  | 0.05558  | 0.2306   | 0.039279 | 0.39706  | -0.00069 |
| -0.09162 | 0.04785  | -0.18006 | 9.13E-05 | -0.1465  | 0.0015   | -0.1086  | 0.0189   | -0.14991 |
| 0.177165 | 0.00012  | -0.00619 | 0.8939   | 0.329705 | 2.65E-13 | 0.229766 | 5.19E-07 | 0.16866  |
| -0.10713 | 0.02059  | -0.07202 | 0.12015  | -0.05527 | 0.2332   | 0.039047 | 0.39986  | -0.0532  |
| -0.1723  | 0.00018  | -0.17964 | 9.48E-05 | -0.07671 | 0.09777  | 0.064275 | 0.16553  | -0.11645 |
| -0.05291 | 0.25379  | -0.14079 | 0.00229  | -0.03639 | 0.43275  | -0.06532 | 0.15877  | -0.04474 |
| -0.00078 | 0.98659  | -0.0812  | 0.0796   | 0.027209 | 0.55753  | -0.03285 | 0.47883  | 0.052748 |

|          |          |          |          |          |          |          |          |          |
|----------|----------|----------|----------|----------|----------|----------|----------|----------|
| 0.172897 | 0.00017  | 0.302844 | 2.32E-11 | 0.150366 | 0.00112  | 0.297475 | 5.37E-11 | 0.095509 |
| 0.104991 | 0.02326  | 0.035864 | 0.4394   | 0.374871 | 4.98E-17 | 0.390526 | 1.83E-18 | 0.26412  |
| 0.166946 | 0.00029  | 0.13791  | 0.00282  | 0.278702 | 8.87E-10 | 0.345883 | 1.43E-14 | 0.201788 |
| -0.10946 | 0.01797  | -0.13978 | 0.00247  | -0.04721 | 0.30862  | 0.018503 | 0.69002  | -0.13272 |
| 0.118897 | 0.01012  | 0.141031 | 0.00225  | 0.268198 | 3.90E-09 | 0.277805 | 1.01E-09 | 0.242829 |
| -0.01199 | 0.79614  | -0.01621 | 0.72685  | -0.04148 | 0.37118  | -0.11373 | 0.01393  | 0.036863 |
| -0.11089 | 0.01652  | -0.0333  | 0.4728   | -0.19269 | 2.76E-05 | -0.08252 | 0.07484  | -0.13645 |
| 0.119022 | 0.01004  | -0.06834 | 0.1403   | 0.209814 | 4.81E-06 | 0.07792  | 0.09259  | 0.174096 |
| -0.00919 | 0.84306  | -0.11129 | 0.01613  | 0.10227  | 0.02711  | 0.097597 | 0.03499  | 0.027225 |
| 0.033163 | 0.47465  | 0.007531 | 0.87107  | 0.018249 | 0.69407  | 0.038345 | 0.4084   | -0.06444 |
| -0.10941 | 0.01802  | -0.10597 | 0.022    | -0.06664 | 0.15048  | -0.05189 | 0.26307  | -0.04178 |
| 0.011607 | 0.80245  | 0.04744  | 0.3063   | 0.109227 | 0.01822  | 0.055749 | 0.22919  | 0.170785 |
| -0.19544 | 2.11E-05 | -0.26334 | 7.56E-09 | -0.16225 | 0.00043  | -0.14004 | 0.00242  | -0.20617 |
| 0.003744 | 0.93569  | -0.03752 | 0.41861  | 0.064287 | 0.16545  | 0.11854  | 0.01035  | 0.019895 |
| 0.053978 | 0.24434  | -0.08193 | 0.07694  | 0.108542 | 0.01896  | 0.046172 | 0.31942  | 0.094974 |
| 0.135574 | 0.00333  | 0.073149 | 0.11442  | 0.285868 | 3.12E-10 | 0.211962 | 3.82E-06 | 0.226937 |
| -0.05859 | 0.20631  | -0.08397 | 0.06985  | 0.069797 | 0.13204  | 0.143649 | 0.00186  | 0.045748 |
| -0.16102 | 0.00048  | -0.13888 | 0.00263  | -0.13902 | 0.00261  | -0.02541 | 0.58382  | -0.14938 |
| -0.04412 | 0.34147  | -0.04021 | 0.38592  | 0.126883 | 0.00604  | 0.127547 | 0.00578  | 0.050966 |
| -0.09748 | 0.03521  | -0.10983 | 0.01758  | -0.0356  | 0.44273  | 0.048799 | 0.29264  | -0.09597 |
| -0.14246 | 0.00203  | -0.04021 | 0.38598  | -0.14579 | 0.00158  | 0.040092 | 0.38736  | -0.19759 |
| 0.011666 | 0.80148  | 0.087146 | 0.05987  | -0.02498 | 0.59019  | 0.162113 | 0.00044  | -0.10687 |
| -0.00042 | 0.99286  | 0.078978 | 0.08823  | 0.226317 | 7.74E-07 | 0.210359 | 4.54E-06 | 0.199648 |
| -0.00095 | 0.98368  | -0.10489 | 0.02339  | -0.07741 | 0.09474  | 0.036582 | 0.43029  | -0.11141 |
| 0.067634 | 0.14447  | 0.015377 | 0.74031  | 0.090347 | 0.05104  | 0.098795 | 0.0328   | 0.041503 |
| -0.03479 | 0.45327  | -0.09413 | 0.04203  | -0.033   | 0.47686  | 0.011448 | 0.80511  | -0.09054 |
| -0.13977 | 0.00247  | -0.12764 | 0.00574  | -0.14168 | 0.00215  | 0.002419 | 0.95843  | -0.20609 |
| -0.16693 | 0.00029  | -0.2396  | 1.60E-07 | -0.12468 | 0.00698  | -0.01105 | 0.81183  | -0.19888 |
| 0.086061 | 0.06313  | 0.090008 | 0.05192  | 0.368736 | 1.73E-16 | 0.437529 | 2.93E-23 | 0.183809 |
| 0.072808 | 0.11612  | -0.10566 | 0.0224   | -0.13055 | 0.00472  | -0.07527 | 0.10428  | -0.12691 |
| 0.022912 | 0.62139  | 0.035111 | 0.44908  | 0.137899 | 0.00282  | 0.187181 | 4.70E-05 | 0.149794 |
| 0.022437 | 0.62866  | -0.01362 | 0.76905  | 0.13811  | 0.00278  | 0.173289 | 0.00017  | 0.05672  |
| -0.07808 | 0.0919   | -0.14774 | 0.00137  | -0.13574 | 0.00329  | -0.02404 | 0.60433  | -0.16323 |
| -0.0537  | 0.24675  | -0.0358  | 0.44028  | -0.17109 | 0.0002   | -0.11802 | 0.01069  | -0.16387 |
| -0.12187 | 0.00838  | -0.11359 | 0.01405  | -0.09269 | 0.04529  | 0.028581 | 0.53782  | -0.13009 |
| 0.061306 | 0.18599  | 0.048794 | 0.29268  | 0.251875 | 3.44E-08 | 0.231696 | 4.14E-07 | 0.191518 |
| 0.15265  | 0.00094  | 0.182205 | 7.49E-05 | 0.337003 | 7.25E-14 | 0.348592 | 8.65E-15 | 0.20879  |
| -0.00662 | 0.88657  | -0.0725  | 0.11768  | 0.024667 | 0.59493  | 0.094616 | 0.04097  | -0.04588 |
| 0.06015  | 0.19444  | -0.03766 | 0.41687  | -0.09959 | 0.03141  | -0.14717 | 0.00143  | -0.12648 |
| 0.068403 | 0.13995  | -0.14984 | 0.00116  | -0.08422 | 0.06899  | -0.0901  | 0.05168  | -0.15203 |
| -0.07402 | 0.11017  | -0.03351 | 0.47005  | -0.17766 | 0.00011  | 0.027515 | 0.5531   | -0.27617 |
| 0.072798 | 0.11617  | 0.100553 | 0.02981  | 0.185955 | 5.28E-05 | 0.19421  | 2.38E-05 | 0.116773 |
| 0.299013 | 4.23E-11 | 0.344921 | 1.71E-14 | 0.610707 | 4.48E-49 | 0.647562 | 7.38E-57 | 0.471413 |
| -0.05025 | 0.27847  | -0.01029 | 0.8245   | 0.082363 | 0.07538  | 0.154979 | 0.00078  | 0.098036 |
| 0.171314 | 0.0002   | -0.11602 | 0.01211  | 0.195011 | 2.20E-05 | 0.161412 | 0.00046  | 0.10872  |

|          |          |          |          |          |          |          |          |          |
|----------|----------|----------|----------|----------|----------|----------|----------|----------|
| 0.062355 | 0.17856  | -0.01903 | 0.68169  | 0.220643 | 1.47E-06 | 0.166213 | 0.00031  | 0.160401 |
| -0.17866 | 0.0001   | -0.21975 | 1.63E-06 | -0.00569 | 0.90242  | 0.023699 | 0.60946  | -0.08119 |
| -0.05116 | 0.26985  | -0.11182 | 0.01563  | 0.04368  | 0.34627  | 0.086911 | 0.06056  | -0.02363 |
| -0.13086 | 0.00462  | -0.13354 | 0.00384  | -0.02918 | 0.52929  | 0.133986 | 0.00372  | -0.06716 |
| -0.10497 | 0.02329  | 0.043611 | 0.34703  | -0.03735 | 0.42066  | -0.01826 | 0.69393  | 7.92E-05 |
| -0.1021  | 0.02737  | -0.02463 | 0.5955   | -0.16386 | 0.00038  | -0.11227 | 0.01521  | 0.005356 |
| 0.069028 | 0.13636  | 0.031947 | 0.491    | -0.00531 | 0.90883  | -0.05216 | 0.26059  | -0.00973 |
| -0.05975 | 0.19741  | -0.23772 | 2.01E-07 | -0.13633 | 0.00316  | -0.01204 | 0.79521  | -0.16173 |
| -0.13907 | 0.0026   | -0.08587 | 0.06373  | -0.11545 | 0.01254  | 0.010866 | 0.81484  | -0.1379  |
| -0.04526 | 0.32904  | 0.001798 | 0.96909  | -0.04496 | 0.33227  | -0.00829 | 0.85813  | -0.0409  |
| -0.00779 | 0.86673  | 0.045476 | 0.32678  | 0.004343 | 0.92542  | -0.07336 | 0.11339  | 0.116978 |
| -0.12025 | 0.00929  | -0.15889 | 0.00057  | -0.09734 | 0.03548  | -0.15708 | 0.00066  | -0.04221 |
| 0.013376 | 0.77312  | -0.09859 | 0.03317  | -0.06665 | 0.15041  | -0.02262 | 0.62583  | -0.08993 |
| -0.12805 | 0.00558  | -0.03098 | 0.50427  | -0.09643 | 0.03724  | 0.050076 | 0.28018  | -0.10072 |
| 0.012448 | 0.78848  | 0.012465 | 0.7882   | 0.157246 | 0.00065  | 0.110685 | 0.01672  | 0.171589 |
| 0.023479 | 0.61278  | -0.02334 | 0.61496  | 0.047222 | 0.30853  | 0.025399 | 0.58403  | -0.0099  |
| 0.095444 | 0.03923  | 0.068618 | 0.13871  | 0.157925 | 0.00061  | 0.220465 | 1.50E-06 | 0.082336 |
| 0.31156  | 5.70E-12 | 0.324017 | 7.08E-13 | 0.571436 | 7.79E-42 | 0.617849 | 1.67E-50 | 0.40024  |
| 0.241274 | 1.30E-07 | 0.125627 | 0.00656  | 0.415717 | 6.12E-21 | 0.371943 | 9.06E-17 | 0.214951 |
| -0.07296 | 0.11534  | -0.15913 | 0.00056  | -0.26451 | 6.45E-09 | -0.2619  | 9.19E-09 | -0.19489 |
| 0.115984 | 0.01214  | 0.187261 | 4.66E-05 | 0.089717 | 0.05268  | 0.192712 | 2.76E-05 | 0.078422 |
| -0.14642 | 0.00151  | 0.004801 | 0.91759  | 0.088992 | 0.05463  | 0.125482 | 0.00662  | 0.120371 |
| 0.201492 | 1.15E-05 | 0.071328 | 0.12375  | 0.270396 | 2.87E-09 | 0.369056 | 1.63E-16 | 0.154357 |
| 0.066204 | 0.15317  | 0.017324 | 0.70885  | 0.136304 | 0.00316  | 0.121916 | 0.00835  | 0.110409 |
| -0.10141 | 0.02844  | -0.13763 | 0.00288  | -0.05033 | 0.27771  | -0.00982 | 0.83238  | -0.10134 |
| 0.165746 | 0.00032  | 0.375885 | 4.04E-17 | 0.119767 | 0.00958  | 0.391606 | 1.45E-18 | 0.021739 |
| 0.104557 | 0.02384  | -0.18122 | 8.21E-05 | 0.022261 | 0.63134  | -0.10301 | 0.02601  | -0.07091 |
| 0.155643 | 0.00074  | 0.102335 | 0.02701  | 0.30375  | 2.01E-11 | 0.19556  | 2.08E-05 | 0.132305 |
| 0.06142  | 0.18518  | 0.176195 | 0.00013  | 0.111815 | 0.01563  | 0.217104 | 2.18E-06 | 0.002302 |
| 0.142938 | 0.00196  | 0.090111 | 0.05165  | 0.230775 | 4.61E-07 | 0.214359 | 2.95E-06 | 0.093975 |
| 0.095719 | 0.03867  | 0.088356 | 0.05639  | 0.112651 | 0.01487  | -0.01767 | 0.70329  | 0.116719 |
| 0.205694 | 7.42E-06 | 0.330698 | 2.22E-13 | 0.386485 | 4.37E-18 | 0.435554 | 4.83E-23 | 0.277352 |
| -0.07472 | 0.10681  | -0.02943 | 0.52582  | 0.026648 | 0.56568  | 0.04654  | 0.31558  | 0.033406 |
| -0.06937 | 0.13443  | -0.04918 | 0.28886  | -0.0602  | 0.19407  | 0.012693 | 0.78441  | -0.05673 |
| -0.2201  | 1.57E-06 | -0.16699 | 0.00029  | -0.17715 | 0.00012  | -0.08667 | 0.06128  | -0.15182 |
| 0.149543 | 0.00119  | 0.288589 | 2.08E-10 | 0.12801  | 0.0056   | 0.289634 | 1.78E-10 | 0.063962 |
| -0.0948  | 0.04058  | -0.03154 | 0.4966   | -0.13095 | 0.00459  | -0.0164  | 0.7237   | -0.12096 |
| 0.130579 | 0.00471  | 0.139625 | 0.00249  | 0.185757 | 5.38E-05 | 0.27332  | 1.91E-09 | 0.060069 |
| -0.1739  | 0.00016  | -0.12092 | 0.00891  | -0.12986 | 0.00494  | 0.033058 | 0.47604  | -0.17072 |
| 0.06565  | 0.15665  | -0.03338 | 0.47173  | 0.14934  | 0.00121  | 0.144399 | 0.00176  | 0.073414 |
| -0.02169 | 0.64007  | -0.04205 | 0.36462  | 0.015657 | 0.73576  | 0.111743 | 0.0157   | -0.10997 |
| 0.138589 | 0.00269  | -0.06336 | 0.17168  | 0.115867 | 0.01222  | 0.120693 | 0.00903  | 0.054887 |
| -0.12623 | 0.0063   | -0.17115 | 0.0002   | -0.05378 | 0.24606  | 0.029562 | 0.52395  | -0.11202 |
| -0.0335  | 0.47023  | 0.291463 | 1.35E-10 | -0.04783 | 0.30235  | 0.17129  | 0.0002   | 0.0028   |
| -0.07951 | 0.0861   | -0.11583 | 0.01225  | -0.13138 | 0.00446  | -0.11114 | 0.01628  | -0.11759 |

|          |          |          |          |          |          |          |          |          |
|----------|----------|----------|----------|----------|----------|----------|----------|----------|
| 0.040505 | 0.38248  | -0.08189 | 0.0771   | -0.07068 | 0.12722  | 0.054494 | 0.23986  | -0.20092 |
| 0.041861 | 0.36674  | 0.043174 | 0.35189  | -0.00541 | 0.90713  | 0.167926 | 0.00027  | -0.02379 |
| 0.072152 | 0.11945  | -0.07621 | 0.10001  | 0.181145 | 8.26E-05 | 0.099627 | 0.03135  | 0.111511 |
| -0.06195 | 0.18137  | -0.16343 | 0.00039  | -0.04825 | 0.29808  | -0.00811 | 0.8613   | -0.16375 |
| -0.23846 | 1.84E-07 | -0.30408 | 1.90E-11 | -0.16147 | 0.00046  | -0.26736 | 4.37E-09 | -0.13584 |
| 0.20794  | 5.86E-06 | 0.115767 | 0.0123   | 0.183345 | 6.74E-05 | 0.159693 | 0.00053  | 0.120229 |
| 0.344965 | 1.70E-14 | 0.34017  | 4.09E-14 | 0.434026 | 7.10E-23 | 0.359585 | 1.06E-15 | 0.301111 |
| 0.02828  | 0.54211  | -0.09261 | 0.04548  | -0.01635 | 0.72458  | 0.080786 | 0.08117  | -0.07852 |
| 0.083621 | 0.07102  | -0.09881 | 0.03277  | 0.073575 | 0.11232  | 0.041895 | 0.36635  | 0.056652 |
| 0.039979 | 0.3887   | 0.142076 | 0.00209  | -0.07615 | 0.10027  | -0.09301 | 0.04455  | 0.026188 |
| 0.024867 | 0.59194  | 0.200646 | 1.25E-05 | -0.02062 | 0.65671  | 0.262147 | 8.89E-09 | -0.03321 |
| -0.05824 | 0.20901  | -0.07348 | 0.11277  | 0.008073 | 0.86188  | 0.046695 | 0.31397  | -0.01478 |
| -0.02503 | 0.58948  | -0.12588 | 0.00645  | -0.05705 | 0.21851  | -0.06331 | 0.17197  | -0.08654 |
| 0.005055 | 0.91324  | -0.00595 | 0.89796  | 0.129934 | 0.00492  | -0.04075 | 0.37964  | 0.232746 |
| 0.04127  | 0.37355  | -0.13948 | 0.00252  | -0.19347 | 2.56E-05 | 0.013912 | 0.76429  | -0.23207 |
| -0.00816 | 0.86042  | -0.04914 | 0.28923  | 0.138283 | 0.00275  | 0.151286 | 0.00104  | 0.08156  |
| 0.091843 | 0.0473   | 0.036122 | 0.43611  | 0.192682 | 2.76E-05 | 0.213777 | 3.14E-06 | 0.143506 |
| -0.01309 | 0.77791  | -0.05127 | 0.26884  | 0.062667 | 0.17639  | 0.155098 | 0.00077  | -0.02757 |
| -0.03818 | 0.41043  | 0.034942 | 0.45127  | -0.03508 | 0.44948  | 0.007421 | 0.87293  | 0.044033 |
| -0.04102 | 0.37646  | -0.08129 | 0.0793   | -0.05026 | 0.27837  | 0.094632 | 0.04094  | -0.09957 |
| -0.03299 | 0.47703  | -0.16693 | 0.00029  | -0.0861  | 0.06302  | -0.07578 | 0.10191  | -0.08364 |
| 0.077029 | 0.09639  | -0.01723 | 0.7104   | 0.212481 | 3.61E-06 | 0.184545 | 6.02E-05 | 0.175967 |
| 0.030579 | 0.50976  | 0.060621 | 0.19096  | 0.140213 | 0.00239  | 0.300764 | 3.21E-11 | 0.013208 |
| 0.521741 | 5.81E-34 | 0.324277 | 6.77E-13 | 0.53282  | 1.32E-35 | 0.514125 | 7.23E-33 | 0.362873 |
| -0.07012 | 0.13026  | -0.08671 | 0.06117  | -0.01668 | 0.71922  | 0.07227  | 0.11885  | -0.04597 |
| -0.06182 | 0.18231  | -0.27231 | 2.20E-09 | -0.19178 | 3.02E-05 | -0.16352 | 0.00039  | -0.18145 |
| 0.041506 | 0.37082  | 0.048884 | 0.2918   | 0.25747  | 1.66E-08 | 0.233296 | 3.42E-07 | 0.219303 |
| -0.02496 | 0.5906   | -0.07826 | 0.09118  | -0.02794 | 0.54705  | 0.022545 | 0.627    | -0.02272 |
| 0.102675 | 0.0265   | 0.044366 | 0.33874  | 0.130909 | 0.0046   | 0.210128 | 4.65E-06 | 0.089655 |
| 0.041627 | 0.36943  | -0.2686  | 3.69E-09 | 0.13272  | 0.00406  | -0.1182  | 0.01058  | 0.064004 |
| 0.203108 | 9.71E-06 | 0.087217 | 0.05966  | 0.074211 | 0.10924  | 0.078898 | 0.08855  | -0.04283 |
| -0.10728 | 0.0204   | -0.04369 | 0.34612  | -0.03829 | 0.40906  | -0.01395 | 0.76364  | -0.02003 |
| -0.02606 | 0.57435  | -0.0285  | 0.53893  | -0.00668 | 0.88556  | 0.020766 | 0.65444  | -0.00214 |
| 0.158516 | 0.00059  | 0.18173  | 7.83E-05 | 0.18713  | 4.72E-05 | 0.164581 | 0.00035  | 0.175857 |
| -0.11077 | 0.01663  | 0.087774 | 0.05804  | -0.1796  | 9.52E-05 | -0.11513 | 0.01279  | -0.12124 |
| -0.07061 | 0.1276   | -0.13037 | 0.00478  | -0.19233 | 2.86E-05 | -0.20577 | 7.36E-06 | -0.13526 |
| 0.159999 | 0.00052  | 0.056343 | 0.22426  | 0.226601 | 7.49E-07 | 0.178775 | 0.0001   | 0.213398 |
| -0.09355 | 0.04332  | -0.28739 | 2.49E-10 | -0.0114  | 0.80592  | -0.08544 | 0.06505  | -0.06426 |
| 0.172473 | 0.00018  | 0.230822 | 4.58E-07 | 0.154772 | 0.00079  | 0.374076 | 5.87E-17 | 0.036146 |
| 0.102988 | 0.02604  | 0.05329  | 0.25042  | 0.266726 | 4.77E-09 | 0.229314 | 5.47E-07 | 0.138928 |
| -0.02696 | 0.56115  | -0.17787 | 0.00011  | 0.006497 | 0.88864  | 0.004526 | 0.92229  | -0.06823 |
| -0.16463 | 0.00035  | -0.17282 | 0.00017  | -0.12793 | 0.00563  | -0.03606 | 0.43693  | -0.17978 |
| -0.17586 | 0.00013  | -0.14359 | 0.00187  | -0.08239 | 0.07528  | 0.032747 | 0.48022  | -0.15314 |
| 0.313796 | 3.95E-12 | 0.141422 | 0.00219  | 0.273428 | 1.88E-09 | 0.22574  | 8.27E-07 | 0.136554 |
| 0.195579 | 2.08E-05 | 0.244442 | 8.81E-08 | 0.375691 | 4.21E-17 | 0.420449 | 1.99E-21 | 0.336957 |

|          |          |          |          |          |          |          |          |          |
|----------|----------|----------|----------|----------|----------|----------|----------|----------|
| -0.1683  | 0.00026  | -0.17034 | 0.00022  | -0.34272 | 2.57E-14 | -0.1689  | 0.00025  | -0.35114 |
| -0.27069 | 2.76E-09 | -0.25377 | 2.69E-08 | -0.17844 | 0.00011  | -0.12396 | 0.00732  | -0.18319 |
| -0.03542 | 0.44508  | -0.10381 | 0.02487  | -0.05248 | 0.25773  | -0.05167 | 0.26511  | -0.06946 |
| -0.05653 | 0.22275  | -0.1075  | 0.02014  | 0.033062 | 0.47599  | 0.083584 | 0.07114  | -0.03189 |
| -0.06155 | 0.18424  | -0.26952 | 3.25E-09 | -0.04646 | 0.31644  | -0.09426 | 0.04174  | -0.05833 |
| 0.071319 | 0.12379  | -0.04791 | 0.30151  | 0.075807 | 0.1018   | 0.022528 | 0.62725  | 0.045275 |
| -0.00796 | 0.86377  | 0.020193 | 0.66338  | 0.057317 | 0.21634  | 0.172467 | 0.00018  | -0.06944 |
| 0.068517 | 0.13929  | -0.08961 | 0.05296  | 0.152925 | 0.00092  | -0.0022  | 0.96226  | 0.130067 |
| -0.18494 | 5.81E-05 | -0.10473 | 0.02361  | -0.10999 | 0.01742  | 0.038934 | 0.40122  | -0.16213 |
| -0.02144 | 0.64404  | 0.016694 | 0.71898  | 0.083408 | 0.07174  | 0.118046 | 0.01068  | 0.094413 |
| -0.04906 | 0.29009  | -0.07439 | 0.10836  | -0.111   | 0.01641  | -0.06817 | 0.14131  | 0.028093 |
| -0.08841 | 0.05624  | -0.27007 | 3.01E-09 | -0.28456 | 3.78E-10 | -0.21919 | 1.73E-06 | -0.28892 |
| -0.09087 | 0.04971  | -0.09326 | 0.04398  | -0.00873 | 0.85068  | 0.113102 | 0.01447  | -0.09116 |
| 0.122271 | 0.00817  | 0.067632 | 0.14448  | 0.126584 | 0.00616  | 0.128881 | 0.00528  | 0.093905 |
| -0.09262 | 0.04546  | -0.00331 | 0.94305  | 0.168363 | 0.00026  | 0.309269 | 8.28E-12 | 0.027633 |
| 0.075213 | 0.10452  | -0.1202  | 0.00932  | 0.231089 | 4.44E-07 | 0.251588 | 3.56E-08 | 0.055167 |
| 0.061291 | 0.1861   | -0.13214 | 0.00423  | 0.186943 | 4.80E-05 | 0.139216 | 0.00257  | 0.059723 |
| 0.151548 | 0.00102  | 0.003276 | 0.94371  | 0.271828 | 2.35E-09 | 0.278492 | 9.14E-10 | 0.115743 |
| 0.075372 | 0.10379  | 0.049671 | 0.28409  | 0.107078 | 0.02064  | 0.098967 | 0.0325   | 0.133061 |
| -0.30011 | 3.56E-11 | -0.25951 | 1.26E-08 | -0.40005 | 2.24E-19 | -0.29141 | 1.36E-10 | -0.31937 |
| 0.165896 | 0.00032  | 0.068302 | 0.14054  | 0.09215  | 0.04656  | 0.166698 | 0.0003   | 0.014442 |
| 0.005486 | 0.90588  | -0.06426 | 0.16562  | 0.117935 | 0.01075  | 0.099611 | 0.03138  | 0.043201 |
| -0.09814 | 0.03399  | -0.06794 | 0.14269  | -0.05364 | 0.24728  | 0.003809 | 0.93458  | -0.1419  |
| 0.299268 | 4.06E-11 | 0.134404 | 0.00362  | 0.249248 | 4.81E-08 | 0.276315 | 1.25E-09 | 0.195633 |
| -0.05328 | 0.2505   | -0.09697 | 0.03619  | -0.23956 | 1.61E-07 | -0.18021 | 9.00E-05 | -0.15119 |
| -0.04669 | 0.31404  | -0.09688 | 0.03635  | -0.03896 | 0.40094  | -0.1089  | 0.01856  | -0.04076 |
| 0.133373 | 0.00388  | 0.290278 | 1.61E-10 | 0.104672 | 0.02369  | 0.233798 | 3.22E-07 | 0.142698 |
| -0.09235 | 0.04608  | 0.021131 | 0.64877  | 0.004325 | 0.92574  | -0.01274 | 0.78363  | -0.00475 |
| -0.00533 | 0.90861  | -0.01352 | 0.77076  | 0.071824 | 0.12115  | 0.140877 | 0.00228  | 0.006852 |
| 0.303766 | 2.00E-11 | 0.28001  | 7.34E-10 | 0.491605 | 8.71E-30 | 0.353361 | 3.52E-15 | 0.394881 |
| -0.02228 | 0.6311   | -0.03324 | 0.47366  | 0.076001 | 0.10093  | 0.065816 | 0.1556   | -0.0003  |
| -0.04157 | 0.37009  | -0.03667 | 0.42919  | 0.01347  | 0.77158  | 0.121774 | 0.00843  | -0.06348 |
| 0.098289 | 0.03371  | 0.14076  | 0.0023   | 0.180223 | 8.99E-05 | 0.286862 | 2.69E-10 | 0.085101 |
| -0.04567 | 0.32467  | -0.01027 | 0.8248   | 0.032458 | 0.4841   | 0.151243 | 0.00104  | -0.02884 |
| 0.057445 | 0.21531  | -0.10862 | 0.01888  | 0.209582 | 4.93E-06 | 0.195275 | 2.14E-05 | 0.092299 |
| 0.149752 | 0.00117  | 0.076355 | 0.09935  | 0.34023  | 4.05E-14 | 0.271761 | 2.38E-09 | 0.253787 |
| -0.12631 | 0.00627  | -0.27919 | 8.27E-10 | -0.06714 | 0.14743  | -0.3209  | 1.21E-12 | -0.09762 |
| -0.07651 | 0.09865  | -0.10066 | 0.02963  | 0.019748 | 0.67037  | -0.02044 | 0.6595   | 0.095252 |
| 0.161777 | 0.00045  | 0.023786 | 0.60815  | 0.275421 | 1.42E-09 | 0.151164 | 0.00105  | 0.154786 |
| -0.16916 | 0.00024  | -0.21487 | 2.79E-06 | -0.24807 | 5.59E-08 | -0.16753 | 0.00028  | -0.29605 |
| -0.093   | 0.04456  | -0.02796 | 0.54664  | -0.01369 | 0.76791  | 0.023952 | 0.60565  | -0.06994 |
| 0.005755 | 0.90129  | -0.04913 | 0.28938  | -0.10528 | 0.02288  | -0.21448 | 2.91E-06 | -0.06807 |
| 0.204942 | 8.03E-06 | -0.01689 | 0.71578  | 0.220595 | 1.48E-06 | 0.128176 | 0.00554  | 0.142628 |
| 0.244889 | 8.33E-08 | -0.01462 | 0.75264  | -0.02495 | 0.59072  | -0.06062 | 0.19095  | -0.0473  |
| -0.04364 | 0.34671  | -0.09596 | 0.03818  | -0.02549 | 0.58271  | 0.08676  | 0.06101  | -0.09124 |

|          |          |          |          |          |          |          |          |          |
|----------|----------|----------|----------|----------|----------|----------|----------|----------|
| 0.142868 | 0.00197  | -0.09938 | 0.03178  | 0.163913 | 0.00038  | 0.041079 | 0.37577  | 0.145505 |
| 0.006311 | 0.8918   | -0.26542 | 5.71E-09 | -0.1252  | 0.00675  | -0.11759 | 0.01098  | -0.2126  |
| -0.10241 | 0.0269   | -0.10261 | 0.02661  | -0.00764 | 0.86928  | 0.015989 | 0.73038  | -0.06703 |
| 0.197155 | 1.78E-05 | 0.107719 | 0.01989  | 0.168567 | 0.00025  | 0.041132 | 0.37516  | 0.149012 |
| -0.12044 | 0.00918  | -0.26533 | 5.77E-09 | -0.29176 | 1.29E-10 | -0.30692 | 1.21E-11 | -0.21685 |
| 0.060612 | 0.19103  | 0.043236 | 0.3512   | 0.034347 | 0.45901  | 0.037757 | 0.41562  | 0.073612 |
| 0.017955 | 0.69876  | -0.22511 | 8.88E-07 | 0.107738 | 0.01987  | 0.017897 | 0.69968  | -0.00873 |
| -0.06168 | 0.18335  | -0.17552 | 0.00014  | -0.00819 | 0.85988  | -0.04381 | 0.34481  | -0.00349 |
| 0.099027 | 0.03239  | 0.058262 | 0.20885  | 0.139059 | 0.0026   | 0.163277 | 0.0004   | 0.078361 |
| 0.02128  | 0.64645  | -0.03268 | 0.48112  | 0.115357 | 0.01261  | 0.151886 | 0.00099  | 0.032003 |
| 0.070161 | 0.13003  | 0.015928 | 0.73136  | 0.204093 | 8.77E-06 | 0.193975 | 2.43E-05 | 0.167247 |
| 0.226206 | 7.84E-07 | -0.0209  | 0.65235  | -0.23421 | 3.07E-07 | -0.06406 | 0.16695  | -0.21773 |
| -0.00344 | 0.94097  | -0.25917 | 1.32E-08 | -0.0306  | 0.50953  | -0.17067 | 0.00021  | 0.013537 |
| 0.010616 | 0.81903  | 0.10513  | 0.02308  | 0.130831 | 0.00463  | 0.042947 | 0.35443  | 0.202897 |
| -0.16387 | 0.00038  | -0.16234 | 0.00043  | -0.16005 | 0.00052  | -0.01761 | 0.70431  | -0.1991  |
| -0.04218 | 0.36312  | -0.04734 | 0.30729  | 0.003307 | 0.94318  | 0.112753 | 0.01477  | -0.05548 |
| 0.012913 | 0.78077  | 0.094245 | 0.04178  | 0.113632 | 0.01401  | 0.227921 | 6.43E-07 | 0.099004 |
| -0.04643 | 0.31673  | -0.116   | 0.01212  | -0.0733  | 0.11366  | -0.02957 | 0.52382  | -0.04882 |
| -0.09838 | 0.03355  | -0.0704  | 0.12871  | -0.04428 | 0.33967  | 0.017025 | 0.71366  | -0.08527 |
| -0.2506  | 4.05E-08 | -0.1188  | 0.01019  | -0.19589 | 2.01E-05 | -0.18549 | 5.51E-05 | -0.20415 |
| 0.018704 | 0.68684  | -0.00122 | 0.97908  | 0.02519  | 0.58714  | 0.069948 | 0.1312   | 0.015563 |
| -0.1285  | 0.00542  | -0.10326 | 0.02564  | -0.08743 | 0.05902  | 0.017725 | 0.70244  | -0.12493 |
| 0.117873 | 0.01079  | 0.012913 | 0.78078  | 0.03955  | 0.39382  | 0.037122 | 0.42352  | 0.033803 |
| -0.11204 | 0.01542  | -0.02216 | 0.63291  | -0.23993 | 1.54E-07 | -0.18932 | 3.83E-05 | -0.13142 |
| -0.04492 | 0.33272  | -0.06432 | 0.16524  | 0.047368 | 0.30704  | 0.024428 | 0.5985   | 0.040657 |
| 0.083026 | 0.07305  | 0.411683 | 1.58E-20 | -0.04988 | 0.28203  | 0.228529 | 5.99E-07 | 0.001801 |
| 0.186711 | 4.91E-05 | 0.359597 | 1.06E-15 | 0.274918 | 1.52E-09 | 0.423542 | 9.42E-22 | 0.270012 |
| 0.095563 | 0.03899  | 0.044957 | 0.33233  | 0.312104 | 5.21E-12 | 0.32372  | 7.45E-13 | 0.214058 |
| 0.075838 | 0.10167  | -0.03384 | 0.46569  | 0.117303 | 0.01118  | 0.11083  | 0.01657  | 0.093244 |
| 0.019169 | 0.67947  | -0.01366 | 0.76844  | 0.047552 | 0.30516  | 0.032105 | 0.48887  | 0.092244 |
| -0.00271 | 0.95339  | -0.10383 | 0.02485  | -0.22361 | 1.05E-06 | -0.12157 | 0.00854  | -0.16971 |
| -0.00896 | 0.84685  | -0.15416 | 0.00083  | -0.00534 | 0.90843  | 0.003845 | 0.93395  | -0.04271 |
| -0.06795 | 0.14263  | -0.21901 | 1.77E-06 | -0.19911 | 1.46E-05 | -0.22367 | 1.05E-06 | -0.18802 |
| -0.08354 | 0.07128  | -0.21719 | 2.16E-06 | -0.0617  | 0.18317  | -0.06788 | 0.14304  | -0.12115 |
| -0.1058  | 0.02221  | -0.16308 | 0.0004   | -0.03886 | 0.40207  | 0.047859 | 0.30204  | -0.08532 |
| 0.093153 | 0.04422  | 0.056866 | 0.21998  | 0.12536  | 0.00668  | 0.171674 | 0.00019  | 0.114219 |
| 0.068503 | 0.13937  | -0.00226 | 0.9612   | 0.176579 | 0.00013  | 0.234327 | 3.03E-07 | 0.011198 |
| -0.05593 | 0.22765  | -0.11909 | 0.01     | 0.010327 | 0.82387  | 0.031461 | 0.49763  | -0.0108  |
| 0.201679 | 1.12E-05 | -0.08088 | 0.08082  | 0.274799 | 1.55E-09 | 0.120949 | 0.00889  | 0.181238 |
| 0.114246 | 0.0135   | 0.110912 | 0.01649  | 0.055818 | 0.22861  | -0.01478 | 0.75014  | 0.163359 |
| -0.00175 | 0.96987  | 0.056894 | 0.21975  | 0.03856  | 0.40577  | 0.122591 | 0.008    | 0.018663 |
| 0.245995 | 7.26E-08 | 0.144566 | 0.00174  | 0.391261 | 1.56E-18 | 0.282544 | 5.08E-10 | 0.277853 |
| -0.03    | 0.51779  | 0.022838 | 0.62252  | -0.0432  | 0.35161  | -0.01741 | 0.70754  | -0.02605 |
| 0.138717 | 0.00266  | 0.089557 | 0.05311  | -0.0348  | 0.45313  | 0.007549 | 0.87075  | 0.014725 |
| -0.23233 | 3.84E-07 | -0.22974 | 5.20E-07 | -0.08234 | 0.07546  | 0.004763 | 0.91823  | -0.11731 |

|          |          |          |          |          |          |          |          |          |
|----------|----------|----------|----------|----------|----------|----------|----------|----------|
| 0.214869 | 2.79E-06 | 0.037004 | 0.42499  | 0.454109 | 3.87E-25 | 0.341437 | 3.25E-14 | 0.31061  |
| -0.02961 | 0.52322  | -0.10667 | 0.02114  | -0.01038 | 0.82298  | 0.01631  | 0.72518  | -0.08907 |
| -0.01794 | 0.69892  | -0.0285  | 0.53893  | 0.105333 | 0.02282  | 0.193242 | 2.62E-05 | 0.107936 |
| -0.09868 | 0.03302  | -0.11407 | 0.01364  | 0.009659 | 0.83509  | 0.015689 | 0.73525  | 0.049307 |
| -0.01656 | 0.72112  | -0.14653 | 0.0015   | 0.162207 | 0.00043  | 0.121039 | 0.00884  | 0.075685 |
| 0.153771 | 0.00086  | 0.208063 | 5.79E-06 | 0.016099 | 0.7286   | 0.073487 | 0.11275  | 0.034553 |
| -0.09191 | 0.04714  | -0.07845 | 0.09038  | -0.09036 | 0.05101  | 0.021074 | 0.64966  | -0.15905 |
| 0.001965 | 0.96622  | 0.098334 | 0.03363  | 0.017968 | 0.69854  | 0.075858 | 0.10157  | -0.00449 |
| -0.01138 | 0.80618  | -0.03003 | 0.51746  | -0.08375 | 0.07056  | 0.077954 | 0.09244  | -0.12403 |
| -0.07687 | 0.0971   | -0.04162 | 0.36955  | -0.0529  | 0.25391  | 0.145318 | 0.00164  | -0.21044 |
| -0.06393 | 0.1678   | -0.14543 | 0.00163  | -0.06874 | 0.138    | -0.03297 | 0.47721  | -0.07806 |
| 0.058273 | 0.20876  | -0.00057 | 0.99022  | -0.04427 | 0.33983  | 0.074101 | 0.10977  | -0.17279 |
| 0.160623 | 0.00049  | 0.173477 | 0.00016  | 0.247284 | 6.17E-08 | 0.215014 | 2.75E-06 | 0.294603 |
| 0.002479 | 0.95739  | -0.04043 | 0.38331  | 0.154115 | 0.00083  | 0.089651 | 0.05286  | 0.103846 |
| 0.121335 | 0.00867  | -0.05678 | 0.22067  | 0.018471 | 0.69054  | -0.04235 | 0.36119  | 0.062657 |
| -0.08929 | 0.05382  | -0.08856 | 0.05582  | -0.05783 | 0.21222  | 0.030703 | 0.50805  | -0.10944 |
| 0.030005 | 0.51775  | -0.07809 | 0.09189  | 0.147629 | 0.00138  | 0.097153 | 0.03583  | 0.121613 |
| 0.104413 | 0.02404  | -0.10021 | 0.03037  | 0.002763 | 0.95252  | -0.03561 | 0.44272  | -0.04214 |
| 0.022536 | 0.62714  | -0.07091 | 0.12596  | 0.150168 | 0.00113  | 0.07269  | 0.11672  | 0.098776 |
| 0.027888 | 0.54772  | 0.001261 | 0.97832  | 0.128991 | 0.00524  | 0.12248  | 0.00806  | 0.162286 |
| -0.11519 | 0.01274  | -0.05996 | 0.19585  | -0.00679 | 0.88358  | 0.066171 | 0.15338  | -0.03481 |
| 0.204377 | 8.51E-06 | -0.11379 | 0.01388  | 0.068739 | 0.13801  | 0.097626 | 0.03494  | -0.02299 |
| 0.066284 | 0.15268  | 0.266138 | 5.17E-09 | 0.187457 | 4.58E-05 | 0.270794 | 2.72E-09 | 0.158876 |
| -0.03048 | 0.51119  | -0.11262 | 0.0149   | 0.011324 | 0.80718  | 0.036581 | 0.43031  | -0.0006  |
| 0.13872  | 0.00266  | 0.066551 | 0.15103  | 0.167206 | 0.00028  | 0.134847 | 0.0035   | 0.127343 |
| -0.04471 | 0.33503  | 0.061567 | 0.18412  | 0.050215 | 0.27884  | 0.074937 | 0.10581  | 0.052784 |
| -0.02392 | 0.60617  | -0.04222 | 0.3626   | 0.147027 | 0.00144  | 0.135283 | 0.0034   | 0.099662 |
| -0.04743 | 0.30644  | -0.08035 | 0.08281  | -0.11969 | 0.00963  | -0.00038 | 0.99344  | -0.07313 |
| 0.102597 | 0.02662  | 0.151355 | 0.00103  | 0.368259 | 1.91E-16 | 0.400056 | 2.24E-19 | 0.287898 |
| 0.205395 | 7.66E-06 | 0.108987 | 0.01848  | 0.46004  | 7.78E-26 | 0.370581 | 1.19E-16 | 0.327339 |
| -0.32381 | 7.34E-13 | -0.25992 | 1.20E-08 | -0.24878 | 5.11E-08 | -0.11659 | 0.01169  | -0.27116 |
| -0.07383 | 0.11108  | -0.09952 | 0.03155  | -0.07384 | 0.11104  | 0.025046 | 0.58927  | -0.15224 |
| -0.1206  | 0.00909  | -0.05179 | 0.26404  | -0.01469 | 0.75152  | 0.07244  | 0.11798  | -0.05788 |
| -0.02504 | 0.58935  | -0.02462 | 0.59559  | 0.07317  | 0.11431  | 0.122335 | 0.00813  | 0.019432 |
| -0.1777  | 0.00011  | -0.15049 | 0.00111  | -0.14782 | 0.00136  | -0.03768 | 0.4166   | -0.20729 |
| 0.092334 | 0.04612  | -0.05119 | 0.26961  | 0.315268 | 3.09E-12 | 0.217526 | 2.08E-06 | 0.195167 |
| -0.0093  | 0.84106  | -0.04065 | 0.38075  | 0.099553 | 0.03148  | 0.147407 | 0.0014   | 0.009907 |
| -0.07182 | 0.12119  | -0.06633 | 0.1524   | -0.04794 | 0.30124  | 0.043989 | 0.34286  | -0.04701 |
| 0.026714 | 0.56472  | -0.05864 | 0.20592  | 0.112282 | 0.0152   | 0.08267  | 0.0743   | 0.084601 |
| 0.176927 | 0.00012  | 0.081287 | 0.07929  | 0.077056 | 0.09627  | 0.184742 | 5.91E-05 | -0.02303 |
| 0.133731 | 0.00379  | -0.11598 | 0.01214  | 0.234063 | 3.12E-07 | 0.145885 | 0.00157  | 0.004952 |
| 0.132177 | 0.00422  | 0.056258 | 0.22496  | 0.302574 | 2.42E-11 | 0.213683 | 3.17E-06 | 0.182449 |
| 0.004595 | 0.92112  | 0.037959 | 0.41313  | -0.04128 | 0.37342  | 0.04335  | 0.34993  | -0.07877 |
| -0.08344 | 0.07162  | -0.3229  | 8.57E-13 | -0.16796 | 0.00027  | -0.19029 | 3.49E-05 | -0.27312 |
| -0.04659 | 0.31505  | -0.08514 | 0.066    | -0.13257 | 0.00411  | -0.11244 | 0.01505  | -0.10948 |



|          |          |          |          |          |          |          |          |          |
|----------|----------|----------|----------|----------|----------|----------|----------|----------|
| -0.14309 | 0.00194  | -0.11183 | 0.01561  | -0.16634 | 0.00031  | -0.04804 | 0.30024  | -0.20369 |
| -0.14558 | 0.00161  | -0.12713 | 0.00594  | -0.13275 | 0.00406  | -0.0179  | 0.69963  | -0.14159 |
| -0.04788 | 0.30184  | -0.10363 | 0.02512  | -0.13075 | 0.00465  | -0.00488 | 0.91631  | -0.19762 |
| -0.07001 | 0.13086  | -0.18156 | 7.95E-05 | -0.23708 | 2.18E-07 | -0.05711 | 0.21803  | -0.30697 |
| 0.033948 | 0.46425  | -0.04287 | 0.35534  | 0.091703 | 0.04764  | 0.085241 | 0.0657   | 0.081411 |
| -0.08228 | 0.07569  | -0.24154 | 1.26E-07 | -0.16986 | 0.00023  | -0.20973 | 4.85E-06 | -0.15211 |
| -0.03817 | 0.41056  | -0.17318 | 0.00017  | -0.07314 | 0.11444  | -0.08353 | 0.07133  | -0.08311 |
| -0.05761 | 0.21399  | 0.033081 | 0.47575  | -0.00544 | 0.90669  | -0.0022  | 0.96224  | 0.027434 |
| -0.11569 | 0.01236  | -0.20872 | 5.40E-06 | -0.20972 | 4.86E-06 | -0.09084 | 0.04979  | -0.21485 |
| 0.00874  | 0.85058  | -0.05746 | 0.21517  | 0.026877 | 0.56234  | 0.028975 | 0.53222  | 0.012864 |
| -0.06988 | 0.13156  | -0.10576 | 0.02227  | -0.04517 | 0.33009  | -0.06512 | 0.16003  | -0.08965 |
| -0.01898 | 0.68248  | 0.009712 | 0.8342   | 0.206915 | 6.53E-06 | 0.184731 | 5.92E-05 | 0.132784 |
| 0.008841 | 0.84887  | 0.027064 | 0.55963  | 0.107562 | 0.02007  | 0.117414 | 0.01111  | 0.099333 |
| -0.06119 | 0.18681  | -0.15114 | 0.00105  | -0.06333 | 0.17188  | -0.03693 | 0.42589  | -0.06776 |
| -0.22476 | 9.24E-07 | -0.22586 | 8.15E-07 | -0.24183 | 1.22E-07 | -0.15118 | 0.00105  | -0.32569 |
| -0.16683 | 0.00029  | -0.21178 | 3.90E-06 | -0.14407 | 0.0018   | -0.05376 | 0.2463   | -0.21381 |
| -0.12702 | 0.00598  | 0.016174 | 0.72739  | 0.092982 | 0.04461  | 0.121061 | 0.00882  | 0.050823 |
| -0.06798 | 0.14241  | -0.01456 | 0.7537   | -0.08878 | 0.05521  | -0.16076 | 0.00049  | -0.06145 |
| -0.03176 | 0.49359  | 0.101022 | 0.02905  | 0.069725 | 0.13244  | 0.178996 | 0.0001   | 0.054711 |
| 0.037391 | 0.42015  | -0.09773 | 0.03475  | -0.14467 | 0.00172  | -0.09661 | 0.03688  | -0.15108 |
| 0.19073  | 3.34E-05 | 0.239826 | 1.56E-07 | 0.329421 | 2.78E-13 | 0.427321 | 3.75E-22 | 0.398762 |
| 0.026579 | 0.56669  | 0.146425 | 0.00151  | 0.144594 | 0.00173  | 0.045011 | 0.33175  | 0.169945 |
| 0.114937 | 0.01294  | 0.181284 | 8.16E-05 | 0.135611 | 0.00332  | 0.26826  | 3.86E-09 | 0.11024  |
| 0.011846 | 0.79848  | 0.069452 | 0.13396  | -0.05548 | 0.23143  | -0.173   | 0.00017  | 0.02502  |
| 0.009488 | 0.83797  | 0.029448 | 0.52556  | 0.042178 | 0.36312  | 0.060854 | 0.18927  | 0.027251 |
| -0.06901 | 0.13647  | -0.07891 | 0.0885   | 0.005957 | 0.89785  | -0.02174 | 0.63937  | -0.07864 |
| -0.25255 | 3.15E-08 | -0.25828 | 1.49E-08 | -0.11773 | 0.01089  | -0.05951 | 0.19926  | -0.14793 |
| 0.311781 | 5.50E-12 | 0.218348 | 1.90E-06 | 0.388241 | 3.00E-18 | 0.419367 | 2.57E-21 | 0.272117 |
| 0.076702 | 0.09782  | -0.23495 | 2.81E-07 | 0.092692 | 0.04528  | -0.05245 | 0.25799  | 0.081404 |
| -0.12235 | 0.00812  | -0.07445 | 0.10808  | -0.20923 | 5.12E-06 | -0.12355 | 0.00752  | -0.15694 |
| 0.024864 | 0.59199  | -0.12682 | 0.00606  | 0.063808 | 0.16863  | 0.0241   | 0.60342  | 0.011397 |
| -0.09219 | 0.04645  | -0.24516 | 8.05E-08 | -0.09567 | 0.03878  | -0.13714 | 0.00298  | -0.12331 |
| 0.103357 | 0.02551  | -0.12171 | 0.00847  | 0.204429 | 8.47E-06 | 0.001529 | 0.97372  | 0.118173 |
| 0.108955 | 0.01851  | 0.035562 | 0.44327  | 0.264504 | 6.46E-09 | 0.231107 | 4.43E-07 | 0.19228  |
| 0.188531 | 4.13E-05 | -0.1024  | 0.02691  | 0.088976 | 0.05468  | 0.073829 | 0.11108  | -0.05052 |
| 0.121757 | 0.00844  | -0.06266 | 0.17646  | 0.039888 | 0.38978  | 0.044073 | 0.34194  | 0.006304 |
| 0.101166 | 0.02882  | -0.2919  | 1.26E-10 | -0.0161  | 0.72857  | -0.15874 | 0.00058  | -0.04215 |
| -0.00753 | 0.87103  | -0.15349 | 0.00088  | 0.050755 | 0.27369  | 0.084855 | 0.06693  | -0.03355 |
| 0.017988 | 0.69822  | -0.1619  | 0.00044  | 0.06434  | 0.1651   | 0.043782 | 0.34514  | -0.00292 |
| -0.13228 | 0.00419  | -0.21008 | 4.67E-06 | -0.05912 | 0.20222  | -0.04688 | 0.31202  | -0.12141 |
| 0.250553 | 4.07E-08 | 0.391901 | 1.36E-18 | 0.303245 | 2.17E-11 | 0.421753 | 1.45E-21 | 0.251199 |
| 0.200382 | 1.28E-05 | 0.103204 | 0.02573  | 0.189167 | 3.89E-05 | 0.159689 | 0.00053  | 0.011333 |
| 0.02222  | 0.63197  | 0.011369 | 0.80643  | 0.199132 | 1.46E-05 | 0.225547 | 8.45E-07 | 0.155647 |
| 0.001408 | 0.97578  | -0.09834 | 0.03362  | 0.062631 | 0.17664  | -0.00271 | 0.95345  | 0.037779 |
| 0.089411 | 0.0535   | 0.003721 | 0.93608  | 0.053282 | 0.25049  | 0.029178 | 0.52936  | 0.020779 |

|          |          |          |          |          |          |          |          |          |
|----------|----------|----------|----------|----------|----------|----------|----------|----------|
| 0.074406 | 0.10831  | -0.00289 | 0.95027  | 0.024542 | 0.5968   | 0.024276 | 0.60078  | 0.000314 |
| 0.148741 | 0.00127  | -0.03583 | 0.43982  | -0.04267 | 0.3575   | -0.10663 | 0.02118  | 0.038464 |
| 0.052073 | 0.26142  | 0.215082 | 2.73E-06 | 0.061726 | 0.18299  | -0.00208 | 0.96426  | 0.100959 |
| 0.007088 | 0.87858  | -0.19096 | 3.27E-05 | 0.107017 | 0.02072  | 0.098293 | 0.03371  | 0.015959 |
| -0.0613  | 0.18603  | -0.237   | 2.20E-07 | -0.14446 | 0.00175  | -0.13194 | 0.00429  | -0.1685  |
| 0.078198 | 0.09142  | -0.03764 | 0.41712  | 0.064928 | 0.16126  | 0.116805 | 0.01153  | 0.026434 |
| -0.07652 | 0.0986   | -0.22971 | 5.22E-07 | -0.07349 | 0.11276  | -0.06307 | 0.17363  | -0.13818 |
| -0.00538 | 0.90768  | -0.03859 | 0.4054   | 0.025706 | 0.5795   | 0.073871 | 0.11088  | -0.04639 |
| 0.042107 | 0.36393  | -0.00086 | 0.98523  | -0.01268 | 0.78467  | -0.04027 | 0.38522  | 0.013238 |
| 0.093736 | 0.0429   | -0.05447 | 0.24006  | 0.156889 | 0.00067  | 0.084555 | 0.06791  | 0.080507 |
| 0.098947 | 0.03253  | -0.09737 | 0.03543  | 0.092177 | 0.0465   | 0.037268 | 0.42169  | 0.031962 |
| -0.05422 | 0.24222  | -0.0928  | 0.04504  | -0.07193 | 0.12058  | -0.12172 | 0.00846  | 0.088418 |
| -0.11455 | 0.01325  | -0.13385 | 0.00376  | -0.1771  | 0.00012  | -0.12779 | 0.00568  | -0.15375 |
| -0.11132 | 0.0161   | -0.16777 | 0.00027  | -0.05193 | 0.26274  | -0.02717 | 0.55809  | -0.03644 |
| 0.022066 | 0.63433  | -0.08391 | 0.07004  | -0.07055 | 0.12793  | -0.16189 | 0.00044  | -0.1023  |
| 0.077346 | 0.09502  | 0.019214 | 0.67877  | 0.121863 | 0.00838  | 0.147447 | 0.0014   | 0.117425 |
| -0.10381 | 0.02487  | -0.01484 | 0.74909  | -0.03665 | 0.42944  | -0.10553 | 0.02256  | 0.043654 |
| 0.04434  | 0.33903  | -0.00667 | 0.88577  | 0.112992 | 0.01456  | 0.109588 | 0.01784  | 0.082049 |
| -0.13165 | 0.00438  | -0.20186 | 1.10E-05 | -0.18865 | 4.08E-05 | -0.17337 | 0.00017  | -0.12193 |
| -0.17936 | 9.73E-05 | -0.09825 | 0.03378  | -0.12964 | 0.00502  | 0.016156 | 0.72768  | -0.21066 |
| 0.255892 | 2.04E-08 | 0.306753 | 1.24E-11 | 0.074146 | 0.10955  | 0.150734 | 0.00109  | 0.148165 |
| -0.11075 | 0.01666  | -0.09206 | 0.04678  | -0.01288 | 0.78127  | 0.04539  | 0.32769  | -0.05092 |
| -0.14027 | 0.00238  | -0.1703  | 0.00022  | -0.16036 | 0.0005   | -0.21838 | 1.90E-06 | -0.14805 |
| -0.07853 | 0.09005  | 0.000266 | 0.99542  | -0.28297 | 4.78E-10 | -0.19859 | 1.54E-05 | -0.25918 |
| -0.06351 | 0.17063  | -0.2271  | 7.07E-07 | -0.0515  | 0.26673  | -0.05614 | 0.22592  | -0.16423 |
| 0.048902 | 0.29162  | -0.01205 | 0.79516  | -0.13119 | 0.00452  | -0.10611 | 0.02183  | -0.15807 |
| -0.03172 | 0.49403  | -0.05176 | 0.2643   | 0.027022 | 0.56023  | 0.141446 | 0.00218  | -0.03747 |
| 0.011144 | 0.81019  | 0.055517 | 0.23113  | 0.152233 | 0.00097  | 0.128339 | 0.00548  | 0.216126 |
| 0.141739 | 0.00214  | -0.11176 | 0.01568  | 0.236924 | 2.22E-07 | 0.231367 | 4.30E-07 | 0.00235  |
| 0.051958 | 0.26247  | 0.020351 | 0.66092  | 0.057448 | 0.21529  | -0.0148  | 0.74979  | 0.071621 |
| 0.14737  | 0.00141  | 0.089483 | 0.05331  | 0.014111 | 0.76103  | 0.085964 | 0.06343  | 0.010252 |
| -0.04109 | 0.37568  | -0.0137  | 0.76771  | -0.01869 | 0.6871   | 0.065116 | 0.16005  | -0.02802 |
| 0.007491 | 0.87173  | -0.02382 | 0.60769  | 0.078776 | 0.08905  | 0.01175  | 0.80007  | 0.081309 |
| 0.139632 | 0.00249  | 0.191327 | 3.15E-05 | 0.168819 | 0.00025  | 0.306976 | 1.20E-11 | 0.013968 |
| 0.136921 | 0.00303  | 0.118701 | 0.01025  | 0.343955 | 2.05E-14 | 0.267867 | 4.08E-09 | 0.390826 |
| 0.041887 | 0.36644  | 0.149556 | 0.00119  | 0.268382 | 3.80E-09 | 0.328237 | 3.42E-13 | 0.228398 |
| 0.003254 | 0.94408  | -0.03254 | 0.48302  | 0.118431 | 0.01042  | 0.112374 | 0.01511  | 0.102246 |
| 0.013074 | 0.77811  | -0.02192 | 0.63656  | 0.039124 | 0.39893  | 0.063917 | 0.1679   | 0.040687 |
| -0.10181 | 0.02781  | -0.08627 | 0.06249  | -0.05999 | 0.19562  | 0.064257 | 0.16565  | -0.10945 |
| 0.238007 | 1.94E-07 | 0.138547 | 0.0027   | 0.175628 | 0.00014  | 0.257885 | 1.57E-08 | 0.095579 |
| -0.00506 | 0.91317  | -0.16085 | 0.00048  | 0.059555 | 0.19891  | 0.127098 | 0.00595  | -0.0846  |
| 0.168377 | 0.00026  | 0.385119 | 5.85E-18 | 0.104171 | 0.02437  | 0.328032 | 3.54E-13 | 0.063962 |
| -0.02175 | 0.63924  | 0.064311 | 0.1653   | -0.10186 | 0.02774  | -0.00448 | 0.92305  | -0.13615 |
| -0.00464 | 0.92029  | -0.01936 | 0.67643  | 0.081906 | 0.07702  | 0.173229 | 0.00017  | 0.02093  |
| 0.159251 | 0.00055  | 0.05381  | 0.24582  | 0.374431 | 5.45E-17 | 0.400435 | 2.06E-19 | 0.210371 |

|          |          |          |          |          |          |          |          |          |
|----------|----------|----------|----------|----------|----------|----------|----------|----------|
| -0.01874 | 0.68619  | 0.002075 | 0.96433  | 0.10769  | 0.01993  | 0.155132 | 0.00077  | 0.030554 |
| 0.115437 | 0.01255  | 0.220033 | 1.58E-06 | 0.320105 | 1.38E-12 | 0.475923 | 9.00E-28 | 0.231505 |
| -0.03043 | 0.51179  | -0.09865 | 0.03306  | -0.01786 | 0.70031  | 0.042315 | 0.36156  | -0.06157 |
| -0.07896 | 0.08829  | -0.13998 | 0.00243  | -0.02107 | 0.6497   | -0.01448 | 0.75503  | -0.06934 |
| -0.10342 | 0.02542  | -0.08735 | 0.05927  | -0.14789 | 0.00135  | -0.05029 | 0.27809  | -0.15525 |
| 0.037191 | 0.42266  | 0.05964  | 0.19826  | 0.172437 | 0.00018  | 0.304141 | 1.89E-11 | 0.10378  |
| 0.038869 | 0.40202  | 0.004185 | 0.92813  | -0.16246 | 0.00042  | -0.09914 | 0.0322   | -0.0735  |
| -0.26688 | 4.67E-09 | -0.16169 | 0.00045  | -0.29568 | 7.08E-11 | -0.18045 | 8.80E-05 | -0.30107 |
| -0.16339 | 0.00039  | -0.24827 | 5.45E-08 | -0.43922 | 1.91E-23 | -0.29429 | 8.76E-11 | -0.40976 |
| 0.195932 | 2.01E-05 | -0.05745 | 0.21529  | 0.256587 | 1.86E-08 | 0.149776 | 0.00117  | 0.211773 |
| 0.193112 | 2.65E-05 | -0.05768 | 0.21345  | -0.05794 | 0.21135  | -0.06296 | 0.17438  | 0.046977 |
| -0.02108 | 0.64956  | -0.10305 | 0.02596  | 0.037691 | 0.41644  | 0.101241 | 0.0287   | -0.03497 |
| 0.123536 | 0.00752  | -0.11487 | 0.013    | 0.084434 | 0.0683   | 0.020821 | 0.65359  | 0.060169 |
| -0.03586 | 0.43952  | -0.0447  | 0.33517  | 0.030675 | 0.50843  | 0.051256 | 0.26898  | 0.022133 |
| -0.03549 | 0.44418  | 0.091273 | 0.04869  | 0.11857  | 0.01033  | 0.16212  | 0.00044  | 0.150961 |
| 0.054015 | 0.24402  | -0.09347 | 0.0435   | -0.03975 | 0.39138  | -0.00808 | 0.86182  | -0.09521 |
| 0.058639 | 0.20591  | 0.013484 | 0.77133  | 0.154082 | 0.00084  | 0.116817 | 0.01153  | 0.169688 |
| 0.068635 | 0.13861  | 0.087801 | 0.05796  | 0.227543 | 6.72E-07 | 0.321265 | 1.13E-12 | 0.112877 |
| 0.08225  | 0.07579  | -0.09925 | 0.032    | 0.066908 | 0.14884  | 0.013198 | 0.77606  | 0.077779 |
| 0.008656 | 0.852    | -0.00622 | 0.89334  | 0.051756 | 0.26434  | 0.153681 | 0.00086  | -0.00823 |
| -0.13574 | 0.00329  | -0.1406  | 0.00232  | -0.06045 | 0.19221  | 0.031242 | 0.50063  | -0.1307  |
| 0.243134 | 1.04E-07 | 0.169468 | 0.00023  | 0.308531 | 9.33E-12 | 0.258077 | 1.53E-08 | 0.297987 |
| 0.077442 | 0.09461  | -0.03292 | 0.47792  | 0.109972 | 0.01744  | 0.148165 | 0.00132  | -0.00193 |
| 0.042635 | 0.35794  | -0.06075 | 0.19004  | 0.011469 | 0.80476  | 0.114303 | 0.01345  | -0.1483  |
| 0.105191 | 0.023    | 0.182355 | 7.39E-05 | 0.102088 | 0.02738  | 0.065801 | 0.15569  | 0.192984 |
| 0.041469 | 0.37125  | 0.107428 | 0.02023  | -0.09061 | 0.05035  | 0.040312 | 0.38476  | -0.10763 |
| 0.048951 | 0.29113  | -0.13821 | 0.00276  | -0.11519 | 0.01274  | -0.08282 | 0.07376  | -0.12819 |
| 0.032857 | 0.47874  | 0.001187 | 0.97959  | 0.079616 | 0.08568  | 0.036571 | 0.43043  | 0.131922 |
| -0.0369  | 0.42634  | -0.00239 | 0.959    | 0.114673 | 0.01315  | 0.054785 | 0.23735  | 0.211719 |
| 0.043859 | 0.34429  | 0.176518 | 0.00013  | 0.168264 | 0.00026  | 0.17985  | 9.30E-05 | 0.158146 |
| -0.10211 | 0.02735  | 0.015229 | 0.74273  | -0.13005 | 0.00488  | -0.07177 | 0.12142  | -0.05786 |
| -0.04466 | 0.33551  | -0.09187 | 0.04722  | -0.09215 | 0.04655  | -0.07377 | 0.11139  | -0.11425 |
| 0.103696 | 0.02503  | -0.05787 | 0.2119   | 0.057938 | 0.21139  | -0.01366 | 0.76843  | -0.00727 |
| -0.05947 | 0.19956  | -0.06824 | 0.14089  | 0.058853 | 0.20426  | 0.075585 | 0.10282  | -0.00374 |
| -0.13075 | 0.00465  | -0.21542 | 2.63E-06 | 0.010012 | 0.82916  | 0.009208 | 0.84269  | 0.005742 |
| 0.017663 | 0.70342  | 0.005968 | 0.89766  | 0.080924 | 0.08065  | 0.127053 | 0.00597  | 0.070156 |
| 0.024856 | 0.5921   | -0.21406 | 3.05E-06 | 0.157378 | 0.00064  | 0.047009 | 0.31072  | 0.078889 |
| -0.0214  | 0.64457  | -0.0945  | 0.04122  | 0.024322 | 0.60008  | 0.023312 | 0.61531  | -0.06903 |
| 0.011981 | 0.79623  | 0.190914 | 3.28E-05 | -0.05347 | 0.24877  | 0.106124 | 0.02181  | 0.071194 |
| -0.12616 | 0.00633  | -0.24379 | 9.56E-08 | -0.10657 | 0.02126  | -0.05975 | 0.19744  | -0.15515 |
| -0.08959 | 0.05303  | -0.00432 | 0.9259   | 0.085016 | 0.06641  | 0.148589 | 0.00128  | 0.078133 |
| 0.164772 | 0.00035  | 0.365846 | 3.09E-16 | 0.105137 | 0.02307  | 0.250706 | 3.99E-08 | 0.127952 |
| -0.19124 | 3.18E-05 | -0.18759 | 4.52E-05 | -0.16923 | 0.00024  | -0.06345 | 0.17103  | -0.2148  |
| 0.023595 | 0.61103  | -0.04019 | 0.38615  | 0.103221 | 0.02571  | 0.206295 | 6.97E-06 | -0.00276 |
| 0.159432 | 0.00054  | -0.10356 | 0.02522  | 0.134015 | 0.00371  | 0.069038 | 0.1363   | -0.00012 |

|          |          |          |          |          |          |          |          |          |
|----------|----------|----------|----------|----------|----------|----------|----------|----------|
| 0.020818 | 0.65363  | 0.024699 | 0.59445  | 0.109253 | 0.01819  | 0.162025 | 0.00044  | 0.183222 |
| -0.14574 | 0.00159  | -0.12693 | 0.00602  | -0.07039 | 0.12876  | 0.02798  | 0.54641  | -0.11648 |
| -0.11768 | 0.01092  | -0.13214 | 0.00423  | -0.18432 | 6.15E-05 | -0.1053  | 0.02285  | -0.20014 |
| -0.18074 | 8.57E-05 | -0.17524 | 0.00014  | -0.1563  | 0.0007   | -0.00798 | 0.86348  | -0.18702 |
| -0.18091 | 8.44E-05 | -0.20505 | 7.94E-06 | -0.19389 | 2.45E-05 | -0.09586 | 0.03838  | -0.21858 |
| 0.048273 | 0.29788  | 0.033651 | 0.46817  | 0.052999 | 0.25302  | 0.074575 | 0.10751  | 0.05716  |
| 0.210915 | 4.28E-06 | 0.170429 | 0.00022  | 0.430305 | 1.80E-22 | 0.431196 | 1.44E-22 | 0.281558 |
| -0.1413  | 0.00221  | -0.14855 | 0.00128  | -0.19951 | 1.40E-05 | -0.137   | 0.00301  | -0.26234 |
| 0.018156 | 0.69555  | -0.13821 | 0.00276  | -0.09249 | 0.04575  | -0.08586 | 0.06376  | -0.203   |
| -0.11081 | 0.01659  | -0.09083 | 0.04979  | 0.071753 | 0.12152  | 0.024374 | 0.59932  | 0.078572 |
| 0.191407 | 3.13E-05 | 0.079293 | 0.08696  | 0.322794 | 8.73E-13 | 0.343653 | 2.16E-14 | 0.222028 |
| 0.128283 | 0.0055   | 0.024348 | 0.59971  | 0.112127 | 0.01534  | 0.079859 | 0.08473  | 0.137673 |
| 0.010321 | 0.82397  | -0.06652 | 0.15123  | 0.039856 | 0.39016  | 0.052532 | 0.25723  | 0.025668 |
| -0.05839 | 0.20781  | 0.008327 | 0.85757  | 0.030711 | 0.50794  | 0.066194 | 0.15324  | 0.042132 |
| 0.042819 | 0.35587  | -0.00916 | 0.84342  | 0.053198 | 0.25124  | 0.176402 | 0.00013  | -0.09324 |
| -0.14172 | 0.00214  | -0.21605 | 2.45E-06 | -0.22524 | 8.75E-07 | -0.0739  | 0.11072  | -0.24755 |
| 0.083513 | 0.07138  | 0.052719 | 0.25554  | 0.162877 | 0.00041  | 0.170892 | 0.00021  | 0.05056  |
| 0.000905 | 0.98444  | 0.098576 | 0.03319  | -0.09624 | 0.03762  | -0.03173 | 0.49401  | -0.06177 |
| 0.018443 | 0.69098  | -0.04478 | 0.33424  | -0.02887 | 0.53375  | 0.064835 | 0.16187  | 0.013641 |
| -0.19068 | 3.36E-05 | -0.17245 | 0.00018  | -0.23519 | 2.73E-07 | -0.14002 | 0.00242  | -0.22977 |
| 0.036469 | 0.43172  | 0.166495 | 0.0003   | 0.033734 | 0.46707  | 0.071971 | 0.12038  | -0.02656 |
| 0.148401 | 0.0013   | -0.09344 | 0.04357  | 0.176638 | 0.00012  | 0.092481 | 0.04578  | 0.104509 |
| 0.172031 | 0.00019  | 0.241833 | 1.22E-07 | 0.443727 | 5.98E-24 | 0.471254 | 3.42E-27 | 0.278296 |
| 0.03829  | 0.40907  | 0.086592 | 0.06152  | 0.002402 | 0.95871  | -0.06615 | 0.15351  | 0.03324  |
| -0.00831 | 0.85778  | 0.015061 | 0.74547  | -0.02321 | 0.61681  | 0.02644  | 0.56871  | 0.041217 |
| -0.10467 | 0.02369  | -0.0725  | 0.11769  | -0.15212 | 0.00097  | -0.00982 | 0.83239  | -0.14463 |
| 0.080014 | 0.08412  | -0.00832 | 0.85767  | 0.079372 | 0.08665  | 0.049209 | 0.2886   | 0.126486 |
| -0.04714 | 0.30937  | -0.04446 | 0.33767  | 0.042375 | 0.36088  | 0.1273   | 0.00587  | -0.00503 |
| -0.0356  | 0.44278  | -0.07653 | 0.09857  | 0.066182 | 0.15331  | 0.129073 | 0.00521  | -0.02984 |
| -0.01174 | 0.80017  | 0.022125 | 0.63343  | 0.154675 | 0.0008   | 0.244266 | 9.01E-08 | 0.070793 |
| -0.14099 | 0.00226  | 0.068729 | 0.13807  | -0.22961 | 5.28E-07 | -0.11642 | 0.01181  | -0.13769 |
| 0.425037 | 6.55E-22 | 0.278642 | 8.95E-10 | 0.36015  | 9.50E-16 | 0.379392 | 1.95E-17 | 0.270986 |
| 0.092925 | 0.04474  | 0.059485 | 0.19943  | 0.089549 | 0.05313  | 0.020625 | 0.65664  | 0.103995 |
| -0.075   | 0.10552  | 0.002156 | 0.96293  | -0.09381 | 0.04274  | 0.003388 | 0.94179  | 0.032345 |
| -0.17701 | 0.00012  | -0.10759 | 0.02004  | -0.06888 | 0.1372   | -0.08085 | 0.08094  | -0.06897 |
| -0.01565 | 0.73582  | -0.04803 | 0.30034  | 0.063134 | 0.17319  | -0.00174 | 0.97009  | -0.02196 |
| 0.226527 | 7.55E-07 | 0.149251 | 0.00122  | 0.460583 | 6.70E-26 | 0.391833 | 1.38E-18 | 0.510082 |
| 0.139986 | 0.00243  | -0.09281 | 0.04501  | 0.050513 | 0.276    | -0.02884 | 0.53413  | -0.03847 |
| -0.00236 | 0.95947  | -0.10935 | 0.01809  | -0.06518 | 0.15962  | -0.12376 | 0.00741  | -0.08588 |
| -0.01292 | 0.78064  | -0.01477 | 0.75021  | 0.075582 | 0.10283  | 0.060262 | 0.19361  | 0.039687 |
| -0.07139 | 0.12344  | -0.00843 | 0.85584  | -0.03787 | 0.4142   | 0.022666 | 0.62516  | -0.04086 |
| -0.10302 | 0.026    | -0.05028 | 0.27825  | -0.26157 | 9.60E-09 | -0.11541 | 0.01257  | -0.17399 |
| -0.16525 | 0.00034  | -0.02432 | 0.60012  | -0.25776 | 1.60E-08 | -0.15746 | 0.00064  | -0.20153 |
| 0.033455 | 0.47077  | 0.046334 | 0.31773  | 0.019099 | 0.68058  | 0.116664 | 0.01164  | -0.04875 |
| 0.033203 | 0.47411  | -0.16211 | 0.00044  | -0.02208 | 0.63412  | -0.04165 | 0.36915  | -0.13591 |

|          |          |          |          |          |          |          |          |          |
|----------|----------|----------|----------|----------|----------|----------|----------|----------|
| -0.1301  | 0.00486  | -0.17309 | 0.00017  | -0.08954 | 0.05314  | -0.20168 | 1.12E-05 | 0.004541 |
| -0.13019 | 0.00483  | -0.2016  | 1.13E-05 | -0.0201  | 0.66483  | -0.00918 | 0.84308  | -0.00589 |
| -0.20648 | 6.83E-06 | -0.18455 | 6.02E-05 | -0.18131 | 8.14E-05 | -0.03017 | 0.51544  | -0.22842 |
| 0.097759 | 0.03469  | 0.041153 | 0.37491  | 0.089504 | 0.05325  | -0.01404 | 0.76226  | 0.104315 |
| 0.200008 | 1.33E-05 | 0.135278 | 0.0034   | 0.499957 | 6.67E-31 | 0.422262 | 1.28E-21 | 0.324491 |
| -0.11637 | 0.01185  | -0.14722 | 0.00142  | -0.12176 | 0.00844  | -0.0772  | 0.09567  | -0.167   |
| 0.091066 | 0.04921  | 0.136502 | 0.00312  | -0.00574 | 0.90161  | -0.12801 | 0.0056   | 0.09287  |
| -0.07026 | 0.1295   | -0.05082 | 0.27307  | 0.018425 | 0.69127  | -0.0298  | 0.52059  | -0.03864 |
| -0.11499 | 0.0129   | -0.03367 | 0.46785  | -0.07845 | 0.0904   | -0.07404 | 0.11004  | -0.13299 |
| -0.15551 | 0.00075  | -0.09999 | 0.03075  | -0.0934  | 0.04365  | -0.04923 | 0.28839  | -0.15896 |
| 0.103624 | 0.02513  | 0.002395 | 0.95884  | -0.01386 | 0.7652   | 0.041722 | 0.36834  | -0.07487 |
| -0.11134 | 0.01608  | -0.09796 | 0.03431  | 0.006918 | 0.88147  | 0.062025 | 0.18087  | -0.02977 |
| -0.06802 | 0.1422   | -0.03474 | 0.45387  | -0.07435 | 0.10856  | 0.041714 | 0.36843  | -0.10309 |
| -0.02932 | 0.52734  | 0.192954 | 2.69E-05 | -0.02352 | 0.61216  | 0.189155 | 3.89E-05 | -0.02719 |
| 0.147289 | 0.00141  | 0.138385 | 0.00273  | 0.311447 | 5.80E-12 | 0.306499 | 1.29E-11 | 0.247612 |
| -0.08754 | 0.0587   | -0.05449 | 0.23986  | -0.12885 | 0.00529  | 0.032744 | 0.48025  | -0.1688  |
| -0.07653 | 0.09858  | -0.11597 | 0.01215  | -0.13999 | 0.00243  | -0.1215  | 0.00858  | -0.21866 |
| -0.01676 | 0.71786  | 0.014498 | 0.75467  | 0.112388 | 0.0151   | 0.123417 | 0.00758  | 0.090601 |
| 0.079755 | 0.08514  | 0.124917 | 0.00688  | 0.313179 | 4.37E-12 | 0.334174 | 1.20E-13 | 0.152505 |
| 0.068034 | 0.14211  | 0.015394 | 0.74004  | 0.160971 | 0.00048  | 0.164322 | 0.00036  | 0.053502 |
| -0.06603 | 0.15428  | -0.14451 | 0.00174  | -0.09609 | 0.03791  | 0.000599 | 0.98971  | -0.1281  |
| -0.11522 | 0.01272  | -0.13158 | 0.00439  | -0.16565 | 0.00032  | -0.04082 | 0.37876  | -0.1427  |
| 0.068873 | 0.13724  | 0.024494 | 0.59751  | 0.14446  | 0.00175  | 0.189673 | 3.70E-05 | 0.082937 |
| -0.06964 | 0.1329   | -0.01738 | 0.70796  | -0.02113 | 0.64875  | 0.147108 | 0.00143  | -0.10016 |
| 0.260927 | 1.05E-08 | 0.196001 | 1.99E-05 | 0.480054 | 2.71E-28 | 0.422166 | 1.31E-21 | 0.352673 |
| -0.0469  | 0.31189  | -0.05727 | 0.21674  | 0.032609 | 0.48206  | 0.124845 | 0.00691  | -0.03819 |
| 0.237925 | 1.96E-07 | 0.141807 | 0.00213  | 0.363217 | 5.20E-16 | 0.256204 | 1.96E-08 | 0.341202 |
| 0.152578 | 0.00094  | 0.100994 | 0.02909  | 0.296961 | 5.81E-11 | 0.256083 | 1.99E-08 | 0.221955 |
| -0.04026 | 0.38534  | -0.05834 | 0.20823  | 0.002935 | 0.94957  | 0.065527 | 0.15742  | 0.017357 |
| 0.186952 | 4.80E-05 | 0.214061 | 3.05E-06 | 0.321654 | 1.06E-12 | 0.244682 | 8.55E-08 | 0.300029 |
| 0.095014 | 0.04013  | 0.039871 | 0.38998  | 0.053323 | 0.25012  | 0.062767 | 0.1757   | 0.118775 |
| 0.148727 | 0.00127  | -0.04312 | 0.35247  | 0.285844 | 3.13E-10 | 0.306935 | 1.21E-11 | 0.147081 |
| -0.05373 | 0.24654  | -0.21616 | 2.42E-06 | -0.14748 | 0.00139  | -0.12385 | 0.00737  | -0.23874 |
| -0.15395 | 0.00084  | -0.20584 | 7.31E-06 | -0.13382 | 0.00376  | -0.06814 | 0.14148  | -0.14416 |
| 0.121914 | 0.00836  | -0.04067 | 0.38059  | 0.362212 | 6.34E-16 | 0.152713 | 0.00093  | 0.278658 |
| -0.08992 | 0.05215  | -0.07899 | 0.08816  | -0.04043 | 0.38337  | 0.036344 | 0.4333   | -0.06261 |
| 0.038593 | 0.40537  | -0.00196 | 0.96631  | 0.274607 | 1.59E-09 | 0.269744 | 3.15E-09 | 0.198348 |
| -0.06596 | 0.15467  | -0.09795 | 0.03433  | -0.00632 | 0.89173  | 0.033984 | 0.46377  | -0.02202 |
| -0.14006 | 0.00242  | -0.09975 | 0.03114  | -0.17719 | 0.00012  | -0.23762 | 2.04E-07 | -0.16199 |
| 0.206777 | 6.63E-06 | 0.270024 | 3.03E-09 | 0.371417 | 1.01E-16 | 0.358513 | 1.31E-15 | 0.324188 |
| 0.000945 | 0.98375  | -0.10046 | 0.02996  | 0.084506 | 0.06807  | 0.142032 | 0.00209  | -0.04736 |
| -0.13842 | 0.00272  | -0.02181 | 0.63834  | -0.29446 | 8.54E-11 | -0.13128 | 0.00449  | -0.26979 |
| -0.06261 | 0.17679  | -0.03648 | 0.43159  | -0.0485  | 0.29565  | -0.01728 | 0.7096   | -0.08678 |
| 0.483269 | 1.06E-28 | 0.221093 | 1.40E-06 | 0.039112 | 0.39908  | 0.237621 | 2.04E-07 | -0.08569 |
| -0.16636 | 0.00031  | 0.07709  | 0.09612  | 0.025415 | 0.5838   | 0.095567 | 0.03898  | -0.02641 |

|          |          |          |          |          |          |          |          |          |
|----------|----------|----------|----------|----------|----------|----------|----------|----------|
| 0.190971 | 3.26E-05 | -0.01669 | 0.71902  | 0.036164 | 0.43559  | -0.09799 | 0.03425  | -0.0366  |
| 0.011017 | 0.81231  | 0.022011 | 0.63518  | 0.213607 | 3.20E-06 | 0.176387 | 0.00013  | 0.185105 |
| 0.046977 | 0.31105  | -0.02469 | 0.59451  | -0.01004 | 0.82874  | -0.00249 | 0.95714  | 0.006956 |
| 0.067957 | 0.14256  | -0.04003 | 0.38811  | 0.128718 | 0.00534  | 0.023663 | 0.61001  | 0.176436 |
| -0.07228 | 0.11879  | -0.11541 | 0.01257  | -0.03882 | 0.40263  | -0.077   | 0.09653  | -0.04005 |
| 0.071315 | 0.12381  | 0.010881 | 0.81459  | -0.03164 | 0.49516  | -0.00403 | 0.93077  | 0.011432 |
| -0.04917 | 0.28896  | -0.05737 | 0.21593  | -0.08313 | 0.07269  | -0.08304 | 0.073    | -0.10143 |
| -0.11393 | 0.01376  | -0.14656 | 0.00149  | -0.07243 | 0.11804  | -0.14694 | 0.00145  | -0.05496 |
| -0.03647 | 0.43166  | -0.04455 | 0.33678  | 0.061769 | 0.18268  | 0.0884   | 0.05627  | 0.035911 |
| -0.04168 | 0.36883  | -0.11694 | 0.01144  | 0.021993 | 0.63546  | 0.017611 | 0.70426  | -0.00646 |
| 0.129595 | 0.00503  | 0.104071 | 0.02451  | 0.191254 | 3.18E-05 | 0.145758 | 0.00159  | 0.136519 |
| 0.1155   | 0.0125   | 0.154213 | 0.00083  | 0.043047 | 0.35331  | 0.041134 | 0.37513  | 0.024354 |
| -0.03847 | 0.40689  | -0.08588 | 0.0637   | -0.04693 | 0.31157  | -0.04443 | 0.33804  | -0.0553  |
| 0.179223 | 9.85E-05 | 0.121752 | 0.00844  | 0.114849 | 0.01301  | 0.030549 | 0.51018  | 0.05388  |
| 0.025178 | 0.58732  | 0.067158 | 0.14732  | 0.057764 | 0.21277  | 0.022608 | 0.62604  | 0.084259 |
| -0.19472 | 2.26E-05 | -0.20185 | 1.10E-05 | -0.17546 | 0.00014  | -0.0292  | 0.52905  | -0.21486 |
| -0.09844 | 0.03344  | -0.14402 | 0.00181  | -0.02423 | 0.60142  | 0.052434 | 0.25812  | -0.09414 |
| -0.01337 | 0.77328  | -0.11848 | 0.01039  | 0.010565 | 0.81988  | -0.081   | 0.08038  | 0.081724 |
| -0.00576 | 0.90127  | -0.18486 | 5.85E-05 | -0.20014 | 1.31E-05 | -0.15578 | 0.00073  | -0.14072 |
| -0.15892 | 0.00057  | -0.2812  | 6.18E-10 | 0.009541 | 0.83708  | -0.05973 | 0.19756  | -0.035   |
| -0.20759 | 6.09E-06 | -0.08435 | 0.06857  | -0.2423  | 1.15E-07 | -0.10335 | 0.02552  | -0.2336  |
| 0.023747 | 0.60874  | 0.004921 | 0.91554  | -0.1941  | 2.41E-05 | -0.15615 | 0.00071  | -0.12062 |
| 0.06942  | 0.13414  | -0.02069 | 0.65565  | 0.341935 | 2.97E-14 | 0.327607 | 3.81E-13 | 0.223504 |
| 0.1104   | 0.017    | -0.18285 | 7.05E-05 | 0.201319 | 1.17E-05 | 0.127857 | 0.00566  | 0.000159 |
| -0.18184 | 7.75E-05 | -0.19541 | 2.11E-05 | -0.15316 | 0.0009   | -0.05137 | 0.2679   | -0.19698 |
| -0.00821 | 0.85953  | 0.017071 | 0.71291  | 0.131591 | 0.00439  | 0.184031 | 6.32E-05 | 0.063365 |
| -0.14716 | 0.00143  | -0.05184 | 0.26355  | -0.21466 | 2.85E-06 | -0.14526 | 0.00165  | -0.21543 |
| 0.273886 | 1.76E-09 | 0.197326 | 1.75E-05 | 0.396356 | 5.11E-19 | 0.416151 | 5.52E-21 | 0.349373 |
| -0.00057 | 0.99024  | -0.10634 | 0.02154  | 0.251479 | 3.61E-08 | 0.209997 | 4.72E-06 | 0.164449 |
| -0.01851 | 0.68996  | -0.00721 | 0.87652  | 0.100703 | 0.02956  | 0.166768 | 0.0003   | 0.026997 |
| -0.06207 | 0.18056  | -0.07035 | 0.12897  | 0.018355 | 0.69238  | 0.081389 | 0.07891  | -0.05512 |
| -0.00558 | 0.90425  | 0.002378 | 0.95912  | -0.04125 | 0.3738   | -0.03837 | 0.40811  | -0.07463 |
| 0.012485 | 0.78786  | 0.027778 | 0.54931  | 0.181243 | 8.19E-05 | 0.25306  | 2.95E-08 | 0.110684 |
| -0.08031 | 0.08297  | -0.31218 | 5.15E-12 | -0.21696 | 2.22E-06 | -0.29166 | 1.31E-10 | -0.22231 |
| 0.170173 | 0.00022  | 0.495312 | 2.81E-30 | 0.249176 | 4.85E-08 | 0.445861 | 3.43E-24 | 0.27474  |
| -0.03722 | 0.42229  | -0.02747 | 0.55374  | -0.02591 | 0.57646  | 0.071813 | 0.1212   | -0.04638 |
| -0.04061 | 0.38126  | 0.048428 | 0.29633  | -0.15867 | 0.00058  | -0.05706 | 0.2184   | -0.11157 |
| -0.0573  | 0.2165   | -0.11531 | 0.01265  | -0.0634  | 0.17141  | 0.040674 | 0.3805   | -0.08633 |
| -0.12919 | 0.00517  | -0.38286 | 9.44E-18 | -0.10054 | 0.02982  | -0.19926 | 1.44E-05 | -0.07071 |
| 0.191982 | 2.96E-05 | 0.201303 | 1.17E-05 | 0.365296 | 3.45E-16 | 0.457289 | 1.64E-25 | 0.233472 |
| -0.01704 | 0.71338  | -0.17724 | 0.00012  | -0.08297 | 0.07325  | -0.05774 | 0.21297  | -0.1805  |
| 0.165914 | 0.00032  | 0.01259  | 0.78611  | 0.355543 | 2.32E-15 | 0.206763 | 6.64E-06 | 0.237584 |
| -0.01555 | 0.73756  | 0.025872 | 0.57706  | 0.084652 | 0.06759  | 0.169302 | 0.00024  | 0.041605 |
| 0.210851 | 4.30E-06 | -0.14507 | 0.00167  | 0.083495 | 0.07144  | 0.098631 | 0.0331   | 0.029209 |
| 0.074149 | 0.10953  | 0.142344 | 0.00205  | 0.085728 | 0.06416  | 0.196834 | 1.83E-05 | 0.039707 |

|          |          |          |          |          |          |          |          |          |
|----------|----------|----------|----------|----------|----------|----------|----------|----------|
| -0.00647 | 0.88902  | 0.173267 | 0.00017  | 0.066074 | 0.15398  | 0.27547  | 1.41E-09 | 0.073653 |
| -0.1324  | 0.00415  | -0.33076 | 2.20E-13 | -0.20164 | 1.13E-05 | -0.06289 | 0.17486  | -0.33647 |
| 0.029408 | 0.52611  | 0.005675 | 0.90266  | -0.07545 | 0.10344  | -0.06855 | 0.13908  | 0.013985 |
| -0.03951 | 0.39426  | -0.01813 | 0.69594  | -0.02523 | 0.58649  | 0.026173 | 0.57262  | 0.084081 |
| 0.071322 | 0.12378  | -0.0035  | 0.93993  | 0.041174 | 0.37466  | -0.08919 | 0.05409  | 0.089104 |
| 0.06757  | 0.14486  | -0.2331  | 3.50E-07 | -0.10827 | 0.01927  | -0.15184 | 0.001    | -0.08784 |
| 0.172668 | 0.00018  | 0.100706 | 0.02956  | 0.122847 | 0.00787  | 0.130802 | 0.00464  | 0.04242  |
| -0.26819 | 3.90E-09 | -0.30652 | 1.29E-11 | -0.19375 | 2.49E-05 | -0.11109 | 0.01632  | -0.17683 |
| -0.11137 | 0.01605  | -0.12506 | 0.00681  | -0.15914 | 0.00056  | -0.07966 | 0.08549  | -0.181   |
| 0.062996 | 0.17413  | -0.0079  | 0.86484  | 0.050126 | 0.27969  | 0.172253 | 0.00018  | -0.02963 |
| -0.05046 | 0.27652  | -0.06206 | 0.18064  | 0.239135 | 1.70E-07 | 0.225869 | 8.14E-07 | 0.212056 |
| 0.083013 | 0.0731   | 0.127486 | 0.0058   | 0.230385 | 4.82E-07 | 0.403808 | 9.63E-20 | 0.092658 |
| 0.09111  | 0.0491   | 0.278288 | 9.41E-10 | 0.214093 | 3.04E-06 | 0.306115 | 1.38E-11 | 0.204288 |
| 0.239886 | 1.55E-07 | 0.278908 | 8.61E-10 | 0.256605 | 1.86E-08 | 0.354407 | 2.88E-15 | 0.165099 |
| 0.364596 | 3.96E-16 | 0.172291 | 0.00018  | 0.419656 | 2.40E-21 | 0.411218 | 1.76E-20 | 0.29108  |
| 0.242496 | 1.12E-07 | 0.120958 | 0.00888  | 0.309027 | 8.61E-12 | 0.346667 | 1.24E-14 | 0.203858 |
| 0.187097 | 4.73E-05 | 0.062545 | 0.17724  | 0.342715 | 2.57E-14 | 0.257291 | 1.70E-08 | 0.263547 |
| 0.00795  | 0.86395  | -0.01408 | 0.76151  | -0.26955 | 3.23E-09 | -0.01366 | 0.76847  | -0.28446 |
| 0.173226 | 0.00017  | 0.200574 | 1.26E-05 | 0.262711 | 8.24E-09 | 0.165975 | 0.00032  | 0.285654 |
| -0.02634 | 0.57015  | -0.08697 | 0.0604   | 0.06863  | 0.13864  | 0.111858 | 0.01559  | -0.03754 |
| -0.01065 | 0.81846  | 0.113948 | 0.01375  | 0.157596 | 0.00063  | 0.276659 | 1.19E-09 | 0.104585 |
| -0.07423 | 0.10913  | -0.31566 | 2.90E-12 | -0.2449  | 8.32E-08 | -0.25197 | 3.39E-08 | -0.24001 |
| -0.03178 | 0.49322  | -0.15319 | 0.0009   | 0.0307   | 0.5081   | -0.06001 | 0.19547  | 0.005959 |
| 0.126894 | 0.00603  | 0.16827  | 0.00026  | 0.248412 | 5.35E-08 | 0.287384 | 2.49E-10 | 0.218399 |
| -0.12829 | 0.0055   | -0.1092  | 0.01825  | -0.02903 | 0.5314   | 0.053371 | 0.2497   | -0.12844 |
| -0.03918 | 0.3982   | 0.005958 | 0.89782  | 0.131976 | 0.00428  | 0.136772 | 0.00306  | 0.047057 |
| 0.044709 | 0.33501  | -0.07901 | 0.08811  | 0.064786 | 0.16219  | 0.067318 | 0.14636  | 0.015871 |
| -0.04072 | 0.37993  | -0.05219 | 0.26034  | 0.007541 | 0.87089  | 0.046012 | 0.3211   | -0.00589 |
| 0.021297 | 0.64619  | 0.18065  | 8.65E-05 | 0.148522 | 0.00129  | 0.164075 | 0.00037  | 0.139433 |
| 0.434036 | 7.08E-23 | 0.339908 | 4.29E-14 | 0.70884  | 1.70E-72 | 0.517591 | 2.31E-33 | 0.583337 |
| 0.34909  | 7.88E-15 | 0.062077 | 0.18051  | 0.42805  | 3.13E-22 | 0.26273  | 8.21E-09 | 0.313783 |
| 0.378302 | 2.45E-17 | 0.274389 | 1.64E-09 | 0.452516 | 5.93E-25 | 0.372254 | 8.51E-17 | 0.411596 |
| 0.272932 | 2.02E-09 | 0.193256 | 2.61E-05 | 0.376644 | 3.46E-17 | 0.249043 | 4.94E-08 | 0.320813 |
| 0.364052 | 4.41E-16 | 0.26374  | 7.17E-09 | 0.645806 | 1.83E-56 | 0.448658 | 1.65E-24 | 0.608675 |
| 0.102102 | 0.02736  | 0.056774 | 0.22073  | 0.211734 | 3.92E-06 | 0.179392 | 9.70E-05 | 0.149678 |
| 0.251016 | 3.84E-08 | 0.220371 | 1.52E-06 | 0.520951 | 7.57E-34 | 0.508437 | 4.56E-32 | 0.348943 |
| 0.267782 | 4.13E-09 | 0.248516 | 5.28E-08 | 0.184065 | 6.30E-05 | 0.208435 | 5.57E-06 | 0.087105 |
| 0.342255 | 2.80E-14 | 0.374252 | 5.66E-17 | 0.510167 | 2.61E-32 | 0.525063 | 1.90E-34 | 0.360639 |
| 0.227254 | 6.94E-07 | 0.279121 | 8.35E-10 | 0.251701 | 3.51E-08 | 0.273091 | 1.97E-09 | 0.123814 |
| 0.077735 | 0.09336  | -0.14578 | 0.00158  | 0.190671 | 3.36E-05 | 0.024015 | 0.6047   | 0.123109 |
| 0.487642 | 2.88E-29 | 0.46068  | 6.52E-26 | 0.752304 | 2.61E-86 | 0.644178 | 4.24E-56 | 0.627082 |
| 0.352803 | 3.91E-15 | 0.421945 | 1.39E-21 | 0.540854 | 7.78E-37 | 0.614241 | 8.90E-50 | 0.407297 |
| 0.313492 | 4.15E-12 | 0.195857 | 2.02E-05 | 0.601176 | 3.17E-47 | 0.466903 | 1.16E-26 | 0.555172 |
| 0.329875 | 2.57E-13 | 0.131008 | 0.00457  | 0.484549 | 7.23E-29 | 0.363756 | 4.68E-16 | 0.374301 |
| 0.157973 | 0.00061  | 0.11206  | 0.0154   | 0.354697 | 2.72E-15 | 0.240819 | 1.38E-07 | 0.309018 |

|          |          |          |          |          |          |          |          |          |
|----------|----------|----------|----------|----------|----------|----------|----------|----------|
| 0.239113 | 1.70E-07 | 0.059291 | 0.2009   | 0.450053 | 1.14E-24 | 0.33773  | 6.37E-14 | 0.332553 |
| 0.266397 | 4.99E-09 | 0.156251 | 0.0007   | 0.268864 | 3.55E-09 | 0.273254 | 1.93E-09 | 0.207035 |
| 0.308413 | 9.50E-12 | 0.12819  | 0.00553  | 0.221553 | 1.33E-06 | 0.135987 | 0.00323  | 0.094802 |
| 0.288321 | 2.16E-10 | 0.123702 | 0.00744  | 0.52209  | 5.17E-34 | 0.313067 | 4.45E-12 | 0.413887 |
| 0.29536  | 7.44E-11 | 0.506772 | 7.77E-32 | 0.318792 | 1.72E-12 | 0.387976 | 3.17E-18 | 0.270259 |
| 0.178534 | 0.0001   | 0.026841 | 0.56287  | 0.302905 | 2.29E-11 | 0.282185 | 5.35E-10 | 0.282736 |
| 0.204761 | 8.18E-06 | 0.20845  | 5.56E-06 | 0.218134 | 1.95E-06 | 0.292213 | 1.20E-10 | 0.166162 |
| 0.23573  | 2.56E-07 | 0.08058  | 0.08194  | 0.163333 | 0.00039  | 0.130967 | 0.00458  | 0.072254 |
| 0.294098 | 9.03E-11 | 0.327653 | 3.78E-13 | 0.66561  | 4.45E-61 | 0.581309 | 1.46E-43 | 0.533221 |
| 0.24711  | 6.31E-08 | 0.366783 | 2.56E-16 | 0.447723 | 2.11E-24 | 0.531939 | 1.79E-35 | 0.317454 |
| 0.28854  | 2.09E-10 | 0.184718 | 5.93E-05 | 0.535587 | 5.02E-36 | 0.458018 | 1.35E-25 | 0.500799 |
| 0.441252 | 1.13E-23 | 0.510236 | 2.56E-32 | 0.523691 | 3.01E-34 | 0.469426 | 5.73E-27 | 0.504707 |
| 0.439058 | 1.99E-23 | 0.480519 | 2.37E-28 | 0.661975 | 3.33E-60 | 0.566634 | 5.15E-41 | 0.610513 |
| 0.277132 | 1.11E-09 | 0.199495 | 1.40E-05 | 0.497858 | 1.28E-30 | 0.437836 | 2.71E-23 | 0.35333  |
| 0.160974 | 0.00048  | 0.162217 | 0.00043  | 0.536325 | 3.88E-36 | 0.436099 | 4.21E-23 | 0.487112 |
| 0.128747 | 0.00533  | 0.046433 | 0.3167   | 0.103504 | 0.0253   | 0.09656  | 0.03698  | 0.015386 |
| 0.29309  | 1.05E-10 | 0.209013 | 5.24E-06 | 0.588576 | 7.13E-45 | 0.517905 | 2.08E-33 | 0.450268 |
| 0.162758 | 0.00041  | 0.02928  | 0.52792  | 0.40503  | 7.29E-20 | 0.266208 | 5.12E-09 | 0.267835 |
| 0.264364 | 6.59E-09 | 0.077633 | 0.0938   | 0.285245 | 3.42E-10 | 0.07108  | 0.12506  | 0.209578 |
| 0.191635 | 3.06E-05 | 0.110842 | 0.01656  | 0.508519 | 4.44E-32 | 0.439462 | 1.79E-23 | 0.365381 |
| 0.393736 | 9.09E-19 | 0.252301 | 3.25E-08 | 0.624857 | 6.11E-52 | 0.458571 | 1.16E-25 | 0.498345 |
| 0.10013  | 0.03051  | 0.163724 | 0.00038  | 0.303026 | 2.25E-11 | 0.331079 | 2.08E-13 | 0.213012 |
| 0.219396 | 1.69E-06 | 0.301697 | 2.78E-11 | 0.510439 | 2.39E-32 | 0.463883 | 2.70E-26 | 0.438543 |
| 0.152979 | 0.00091  | 0.112009 | 0.01545  | 0.385027 | 5.96E-18 | 0.434656 | 6.06E-23 | 0.222819 |
| 0.321311 | 1.12E-12 | 0.349136 | 7.82E-15 | 0.404845 | 7.61E-20 | 0.357152 | 1.70E-15 | 0.341817 |
| 0.123198 | 0.00769  | -0.0676  | 0.14465  | 0.181253 | 8.18E-05 | 0.067713 | 0.144    | 0.068876 |
| 0.270534 | 2.82E-09 | 0.020807 | 0.6538   | 0.505697 | 1.09E-31 | 0.336642 | 7.74E-14 | 0.402591 |
| 0.410963 | 1.86E-20 | 0.25566  | 2.10E-08 | 0.475838 | 9.22E-28 | 0.356378 | 1.97E-15 | 0.318867 |
| 0.349266 | 7.63E-15 | 0.377438 | 2.93E-17 | 0.435007 | 5.55E-23 | 0.486776 | 3.72E-29 | 0.350891 |
| 0.39878  | 2.98E-19 | 0.281378 | 6.02E-10 | 0.674515 | 2.85E-63 | 0.581084 | 1.60E-43 | 0.539169 |
| 0.327924 | 3.61E-13 | 0.157353 | 0.00064  | 0.567424 | 3.78E-41 | 0.405312 | 6.84E-20 | 0.558589 |
| 0.246979 | 6.41E-08 | 0.01393  | 0.76399  | 0.425645 | 5.65E-22 | 0.209098 | 5.19E-06 | 0.356879 |
| 0.173721 | 0.00016  | 0.045395 | 0.32765  | 0.243291 | 1.02E-07 | 0.19443  | 2.33E-05 | 0.153437 |
| 0.020431 | 0.65966  | -0.00118 | 0.97963  | 0.157897 | 0.00062  | 0.05529  | 0.23305  | 0.190865 |
| 0.035966 | 0.43811  | 0.043665 | 0.34644  | 0.114867 | 0.013    | 0.045875 | 0.32255  | 0.120773 |
| 0.068554 | 0.13908  | 0.063345 | 0.17175  | 0.149735 | 0.00117  | 0.083189 | 0.07249  | 0.185887 |
| 0.111798 | 0.01565  | 0.13929  | 0.00256  | 0.099827 | 0.03101  | 0.075179 | 0.10468  | 0.12985  |
| 0.006032 | 0.89657  | 0.000202 | 0.99653  | 0.070423 | 0.1286   | -0.00189 | 0.96755  | 0.138836 |
| 0.078047 | 0.09205  | 0.050229 | 0.2787   | 0.114812 | 0.01304  | 0.055146 | 0.23427  | 0.160749 |
| -0.07351 | 0.11265  | -0.06433 | 0.16516  | 0.101884 | 0.0277   | 0.093827 | 0.0427   | 0.084141 |
| 0.045432 | 0.32725  | 0.021005 | 0.65073  | 0.1587   | 0.00058  | 0.058511 | 0.20691  | 0.15869  |
| 0.041099 | 0.37553  | 0.010168 | 0.82653  | 0.134501 | 0.00359  | 0.052673 | 0.25595  | 0.178253 |
| 0.028734 | 0.53564  | 0.007582 | 0.87019  | 0.127811 | 0.00568  | 0.051283 | 0.26873  | 0.132252 |
| -0.04551 | 0.32647  | -0.06478 | 0.16225  | -0.00844 | 0.85572  | 0.021271 | 0.64661  | -0.04764 |
| 0.083254 | 0.07227  | 0.071566 | 0.12249  | 0.153161 | 0.0009   | 0.088412 | 0.05623  | 0.139185 |



|          |          |          |          |          |          |          |          |          |
|----------|----------|----------|----------|----------|----------|----------|----------|----------|
| 0.001873 | 0.9678   | -0.02198 | 0.63566  | 0.094512 | 0.0412   | 0.03393  | 0.46448  | 0.127682 |
| -0.01073 | 0.81708  | -0.00531 | 0.90888  | 0.046785 | 0.31304  | -0.00545 | 0.90653  | 0.053185 |
| 0.027394 | 0.55485  | 0.009747 | 0.83361  | 0.139256 | 0.00256  | 0.051559 | 0.26616  | 0.134029 |
| 0.070903 | 0.12601  | 0.110249 | 0.01715  | 0.180904 | 8.45E-05 | 0.095363 | 0.0394   | 0.240856 |
| 0.194377 | 2.34E-05 | 0.13247  | 0.00413  | 0.335597 | 9.33E-14 | 0.252523 | 3.16E-08 | 0.280341 |
| 0.029753 | 0.52128  | 0.036238 | 0.43465  | 0.150396 | 0.00111  | 0.061345 | 0.18571  | 0.186508 |
| 0.058291 | 0.20862  | 0.046136 | 0.3198   | 0.095411 | 0.0393   | 0.053261 | 0.25068  | 0.10545  |
| 0.004645 | 0.92025  | 0.000859 | 0.98523  | 0.048726 | 0.29336  | 0.005636 | 0.90332  | 0.067634 |
| -0.04452 | 0.33706  | -0.07426 | 0.10902  | 0.010095 | 0.82776  | -0.04611 | 0.32007  | 0.032432 |
| -0.02056 | 0.65773  | -0.08236 | 0.07541  | 0.041424 | 0.37177  | -0.07346 | 0.11288  | 0.112225 |
| -0.01175 | 0.80014  | 0.040739 | 0.37974  | 0.057642 | 0.21374  | 0.016349 | 0.72455  | 0.131717 |
| 0.019907 | 0.66787  | 0.016588 | 0.72069  | 0.10458  | 0.02381  | 0.068339 | 0.14033  | 0.136404 |
| -0.07063 | 0.1275   | -0.11572 | 0.01234  | 0.027987 | 0.54631  | -0.06985 | 0.13173  | 0.078262 |
| 0.049012 | 0.29054  | 0.037588 | 0.41771  | 0.182386 | 7.37E-05 | 0.079243 | 0.08716  | 0.223197 |
| 0.010606 | 0.81918  | 0.006736 | 0.88456  | 0.126399 | 0.00623  | 0.043621 | 0.34692  | 0.148843 |
| 0.179053 | 0.0001   | 0.227103 | 7.07E-07 | 0.312319 | 5.03E-12 | 0.327777 | 3.70E-13 | 0.287145 |
| 0.05704  | 0.21857  | 0.031814 | 0.49281  | 0.140354 | 0.00237  | 0.057744 | 0.21292  | 0.17085  |
| -0.02853 | 0.53857  | -0.02995 | 0.51858  | -0.03633 | 0.43343  | -0.08064 | 0.08171  | 0.042904 |
| 0.002977 | 0.94885  | 0.00535  | 0.90821  | 0.071478 | 0.12295  | 0.0178   | 0.70123  | 0.065916 |
| -0.03741 | 0.41994  | 0.02434  | 0.59982  | 0.110648 | 0.01675  | 0.098868 | 0.03267  | 0.102693 |
| -0.02459 | 0.59612  | -0.02774 | 0.54989  | 0.004551 | 0.92186  | -0.07935 | 0.08672  | 0.025884 |
| 0.024036 | 0.60439  | 0.036606 | 0.43     | 0.147528 | 0.00139  | 0.074311 | 0.10876  | 0.176921 |
| -0.08141 | 0.07884  | -0.00665 | 0.88603  | 0.145235 | 0.00165  | 0.126091 | 0.00636  | 0.211201 |
| 0.056906 | 0.21965  | 0.017722 | 0.70247  | 0.097582 | 0.03502  | 0.037613 | 0.41741  | 0.123869 |
| 0.139402 | 0.00253  | 0.060393 | 0.19265  | 0.197602 | 1.70E-05 | 0.125928 | 0.00643  | 0.225037 |
| 0.076535 | 0.09855  | 0.092024 | 0.04686  | 0.130782 | 0.00464  | 0.091928 | 0.04709  | 0.176034 |
| 0.007538 | 0.87094  | -0.01599 | 0.73038  | 0.142792 | 0.00198  | 0.055551 | 0.23085  | 0.161772 |
| 0.222967 | 1.13E-06 | 0.193569 | 2.53E-05 | 0.210102 | 4.66E-06 | 0.160926 | 0.00048  | 0.247085 |
| 0.041003 | 0.37665  | 0.017141 | 0.71179  | 0.174278 | 0.00015  | 0.06618  | 0.15332  | 0.189693 |
| 0.040575 | 0.38166  | 0.018712 | 0.68672  | 0.147309 | 0.00141  | 0.060892 | 0.18899  | 0.156405 |
| -0.00388 | 0.93342  | -0.03321 | 0.47407  | 0.05495  | 0.23595  | -0.00963 | 0.83558  | 0.021635 |
| 0.043059 | 0.35317  | 0.023095 | 0.61861  | 0.145011 | 0.00168  | 0.061743 | 0.18287  | 0.155313 |
| 0.004651 | 0.92016  | -0.02852 | 0.53875  | 0.072631 | 0.11701  | -0.00679 | 0.88373  | 0.155116 |
| 0.032227 | 0.48722  | -0.01853 | 0.68961  | 0.034264 | 0.4601   | -0.02092 | 0.65202  | 0.096718 |
| -0.01001 | 0.82914  | -0.02496 | 0.59058  | 0.083596 | 0.0711   | 0.031027 | 0.50359  | 0.09128  |
| 0.008169 | 0.86025  | -0.03914 | 0.39873  | 0.055411 | 0.23203  | 0.002176 | 0.96259  | 0.114564 |
| 0.095165 | 0.03981  | 0.086275 | 0.06248  | 0.122703 | 0.00794  | 0.071782 | 0.12137  | 0.13157  |
| 0.047448 | 0.30622  | 0.061234 | 0.18651  | 0.056701 | 0.22133  | 0.037227 | 0.4222   | 0.057643 |
| 0.095983 | 0.03813  | 0.062499 | 0.17756  | 0.119783 | 0.00957  | 0.040602 | 0.38134  | 0.160686 |
| 0.115237 | 0.01271  | 0.086856 | 0.06072  | 0.143449 | 0.00189  | 0.102264 | 0.02712  | 0.172297 |
| 0.022274 | 0.63115  | 0.029561 | 0.52396  | 0.058733 | 0.20518  | 0.071544 | 0.12261  | 0.094782 |
| 0.179995 | 9.18E-05 | 0.06808  | 0.14184  | 0.277831 | 1.01E-09 | 0.145897 | 0.00157  | 0.26382  |
| -0.0136  | 0.76944  | -0.05642 | 0.22358  | 0.002886 | 0.9504   | -0.00386 | 0.93369  | -0.00906 |
| 0.015602 | 0.73666  | -0.01888 | 0.684    | 0.054498 | 0.23982  | 0.010724 | 0.81721  | 0.097079 |
| -0.03662 | 0.42986  | -0.08993 | 0.05212  | -0.00775 | 0.86742  | -0.06279 | 0.17553  | 0.045668 |

|          |         |          |         |          |          |          |         |          |
|----------|---------|----------|---------|----------|----------|----------|---------|----------|
| 0.037179 | 0.4228  | -0.00095 | 0.98375 | 0.202795 | 1.00E-05 | 0.088998 | 0.05462 | 0.213887 |
| 0.006727 | 0.88473 | -0.03616 | 0.43558 | 0.099063 | 0.03233  | 0.037382 | 0.42027 | 0.129616 |
| 0.030623 | 0.50916 | 0.080866 | 0.08086 | 0.091154 | 0.04899  | 0.080207 | 0.08337 | 0.137412 |
| -0.01409 | 0.76135 | 0.006138 | 0.89476 | 0.030818 | 0.50646  | 0.039207 | 0.39792 | -0.00019 |
| -0.01348 | 0.77141 | -0.15058 | 0.0011  | -0.02622 | 0.57201  | -0.11496 | 0.01292 | -0.09981 |
| -0.01464 | 0.75232 | -0.00855 | 0.85383 | 0.078366 | 0.09073  | 0.016924 | 0.71528 | 0.119004 |
| 0.010628 | 0.81882 | -0.03157 | 0.49609 | 0.143725 | 0.00185  | 0.035777 | 0.44052 | 0.179954 |
| 0.008945 | 0.84713 | 0.045084 | 0.33097 | 0.125406 | 0.00666  | 0.077882 | 0.09274 | 0.192074 |
| -0.00175 | 0.96986 | -0.04227 | 0.36211 | -0.07454 | 0.10769  | -0.1485  | 0.00129 | -0.00077 |
| -0.01195 | 0.79668 | -0.00751 | 0.87138 | 0.062726 | 0.17599  | 0.009675 | 0.83482 | 0.03663  |
| 0.038788 | 0.40299 | 0.050555 | 0.2756  | 0.162577 | 0.00042  | 0.074113 | 0.10971 | 0.192228 |
| -0.00055 | 0.99054 | -0.0699  | 0.13149 | -0.0094  | 0.83951  | -0.07449 | 0.10789 | 0.016153 |
| 0.05174  | 0.26448 | 0.01042  | 0.82231 | 0.127704 | 0.00572  | 0.059606 | 0.19852 | 0.135569 |
| 0.089585 | 0.05303 | 0.019333 | 0.67688 | 0.048749 | 0.29313  | 0.018519 | 0.68977 | 0.051593 |
| 0.022301 | 0.63073 | 0.009802 | 0.83268 | 0.146176 | 0.00154  | 0.04184  | 0.36698 | 0.199412 |
| -0.03151 | 0.49696 | -0.07164 | 0.12209 | -0.01313 | 0.7772   | -0.06762 | 0.14458 | 0.009461 |
| -0.01154 | 0.80364 | -0.02869 | 0.53624 | 0.044416 | 0.3382   | -0.02425 | 0.60121 | 0.058322 |
| 0.063757 | 0.16897 | 0.033643 | 0.46827 | 0.137604 | 0.00288  | 0.059482 | 0.19945 | 0.17716  |
| 0.024579 | 0.59625 | -0.01358 | 0.76975 | 0.167272 | 0.00028  | 0.052202 | 0.26023 | 0.189663 |
| 0.037207 | 0.42245 | 0.018548 | 0.68931 | 0.172342 | 0.00018  | 0.077565 | 0.09409 | 0.189525 |
| -0.03773 | 0.416   | -0.04273 | 0.35684 | 0.040999 | 0.3767   | -0.01867 | 0.68731 | 0.045693 |
| -0.00134 | 0.97695 | -0.01173 | 0.80048 | 0.08131  | 0.0792   | 0.018553 | 0.68923 | 0.086161 |
| 0.060403 | 0.19257 | 0.057764 | 0.21277 | 0.133409 | 0.00387  | 0.085634 | 0.06446 | 0.183928 |
| -0.00232 | 0.9602  | -0.02855 | 0.53822 | 0.06917  | 0.13555  | 0.006351 | 0.89112 | 0.068229 |
| 0.108588 | 0.01891 | 0.01213  | 0.79375 | 0.135817 | 0.00327  | 0.064675 | 0.16291 | 0.153998 |
| 0.011601 | 0.80257 | -0.00825 | 0.85895 | 0.090852 | 0.04975  | 0.018478 | 0.69042 | 0.134085 |
| -0.00168 | 0.97111 | -0.03351 | 0.47    | 0.062549 | 0.17721  | -0.01275 | 0.78353 | 0.083875 |
| 0.081067 | 0.08011 | 0.049047 | 0.29018 | 0.172666 | 0.00018  | 0.072301 | 0.11869 | 0.145404 |
| -0.01399 | 0.76293 | 0.090121 | 0.05162 | 0.122053 | 0.00828  | 0.140177 | 0.0024  | 0.191072 |
| 0.121467 | 0.0086  | 0.110669 | 0.01673 | 0.161795 | 0.00045  | 0.083106 | 0.07278 | 0.191587 |
| -0.01951 | 0.67407 | -0.04547 | 0.32686 | 0.012154 | 0.79336  | -0.05075 | 0.27372 | 0.06354  |
| -0.00763 | 0.86934 | -0.01972 | 0.67079 | 0.016807 | 0.71716  | -0.0055  | 0.9056  | -0.01112 |
| -0.12842 | 0.00545 | -0.12582 | 0.00648 | -0.05429 | 0.24159  | -0.08254 | 0.07475 | -0.03916 |
| -0.00922 | 0.84242 | -0.0283  | 0.54179 | 0.094571 | 0.04107  | 0.019881 | 0.66827 | 0.114194 |
| 0.003813 | 0.93451 | -0.00404 | 0.93061 | 0.136523 | 0.00311  | 0.052842 | 0.25443 | 0.157759 |
| 0.010599 | 0.81931 | -0.00918 | 0.84312 | 0.115917 | 0.01219  | 0.043448 | 0.34884 | 0.121021 |
| -0.03693 | 0.42587 | -0.05023 | 0.27869 | -0.00788 | 0.86511  | -0.03811 | 0.41129 | -0.03215 |
| -0.0621  | 0.18033 | -0.09656 | 0.03699 | -0.01894 | 0.68308  | -0.07691 | 0.09692 | -0.03989 |
| -0.01237 | 0.78969 | 0.002441 | 0.95804 | 0.089003 | 0.0546   | 0.031414 | 0.49828 | 0.102726 |
| 0.008248 | 0.8589  | -0.06056 | 0.19138 | 0.020784 | 0.65416  | -0.03298 | 0.47709 | 0.079718 |
| -0.00938 | 0.83973 | -0.02391 | 0.6063  | 0.101564 | 0.02819  | 0.033729 | 0.46714 | 0.07355  |
| -0.0216  | 0.64145 | -0.02269 | 0.62473 | 0.00831  | 0.85785  | -0.02997 | 0.51827 | 0.02208  |
| 0.033868 | 0.46531 | -0.05806 | 0.21046 | 0.060525 | 0.19167  | -0.01257 | 0.78643 | 0.043193 |
| -0.0051  | 0.91244 | 0.013866 | 0.76505 | -0.02595 | 0.57587  | -0.04151 | 0.37077 | -0.0034  |
| 0.082431 | 0.07514 | 0.002033 | 0.96505 | 0.125131 | 0.00678  | 0.037642 | 0.41704 | 0.132931 |

|          |          |          |         |          |          |          |         |          |
|----------|----------|----------|---------|----------|----------|----------|---------|----------|
| 0.047649 | 0.30417  | -0.04506 | 0.33121 | 0.051602 | 0.26576  | -0.01567 | 0.73559 | 0.107359 |
| -0.00552 | 0.90538  | -0.04523 | 0.32944 | 0.018651 | 0.68768  | -0.0319  | 0.49159 | 0.080714 |
| -0.00148 | 0.9745   | 0.026656 | 0.56556 | 0.137573 | 0.00289  | 0.087233 | 0.05961 | 0.169089 |
| 0.063855 | 0.16832  | 0.071596 | 0.12234 | 0.153387 | 0.00088  | 0.085067 | 0.06625 | 0.123317 |
| 0.04029  | 0.38502  | -0.03192 | 0.49135 | 0.044853 | 0.33346  | -0.00162 | 0.9721  | 0.051451 |
| -0.0216  | 0.64155  | 0.014594 | 0.7531  | 0.053627 | 0.24743  | 0.032669 | 0.48126 | 0.131215 |
| 0.024473 | 0.59782  | 0.031216 | 0.50099 | 0.135288 | 0.0034   | 0.065948 | 0.15477 | 0.113167 |
| 0.126996 | 0.00599  | 0.003774 | 0.93517 | 0.144235 | 0.00178  | 0.038677 | 0.40435 | 0.16085  |
| -0.08541 | 0.06516  | -0.07283 | 0.11603 | -0.11437 | 0.0134   | -0.06273 | 0.17594 | -0.07849 |
| 0.055421 | 0.23194  | -0.00279 | 0.95199 | 0.145121 | 0.00166  | 0.049472 | 0.28602 | 0.1768   |
| 0.081767 | 0.07752  | 0.016447 | 0.72297 | 0.125825 | 0.00648  | 0.054485 | 0.23994 | 0.138305 |
| 0.22657  | 7.51E-07 | 0.056424 | 0.22359 | 0.174117 | 0.00016  | 0.085244 | 0.06569 | 0.138102 |
| -0.03697 | 0.42546  | 0.00385  | 0.93387 | 0.054761 | 0.23756  | 0.020795 | 0.654   | 0.080866 |
| -0.00042 | 0.99277  | -0.02707 | 0.5595  | 0.068118 | 0.14162  | 0.01469  | 0.75153 | 0.093641 |
| 0.040134 | 0.38686  | 0.017067 | 0.71298 | 0.148903 | 0.00125  | 0.0565   | 0.22297 | 0.177556 |
| -0.07369 | 0.11177  | -0.09998 | 0.03075 | -0.11596 | 0.01215  | -0.12422 | 0.0072  | -0.09923 |
| 0.028961 | 0.53242  | 0.005811 | 0.90033 | 0.121804 | 0.00841  | 0.042904 | 0.35492 | 0.133364 |
| 0.016449 | 0.72293  | -0.04719 | 0.30889 | 0.037643 | 0.41704  | -0.0187  | 0.68684 | 0.084146 |
| 0.035758 | 0.44076  | -0.01358 | 0.76969 | 0.078345 | 0.09082  | 0.034272 | 0.45999 | 0.075972 |
| -0.01845 | 0.6909   | -0.0242  | 0.60192 | 0.011272 | 0.80805  | -0.01392 | 0.76417 | 0.049968 |
| 0.043211 | 0.35147  | -0.01996 | 0.66704 | 0.031955 | 0.4909   | 0.023713 | 0.60925 | 0.053049 |
| 0.043668 | 0.3464   | 0.040389 | 0.38385 | 0.121231 | 0.00873  | 0.067953 | 0.14258 | 0.154086 |
| 0.023954 | 0.60562  | 0.002948 | 0.94933 | 0.183384 | 6.71E-05 | 0.053451 | 0.24899 | 0.217335 |
| 0.161936 | 0.00044  | 0.069447 | 0.13399 | 0.192689 | 2.76E-05 | 0.122441 | 0.00808 | 0.157755 |
| 0.022353 | 0.62993  | 0.003673 | 0.9369  | 0.150146 | 0.00114  | 0.070221 | 0.1297  | 0.165048 |
| -0.00248 | 0.9574   | -0.03186 | 0.49213 | 0.097439 | 0.03529  | 0.029339 | 0.52709 | 0.104022 |
| 0.07277  | 0.11631  | -0.01055 | 0.82008 | -0.04434 | 0.33905  | -0.01866 | 0.68755 | 0.019393 |
| -0.00314 | 0.94605  | -0.03698 | 0.42525 | 0.121718 | 0.00846  | 0.005404 | 0.90728 | 0.151895 |
| 0.001748 | 0.96995  | -0.10056 | 0.0298  | 0.04619  | 0.31923  | -0.05581 | 0.2287  | 0.116204 |
| 0.042222 | 0.36262  | -0.13371 | 0.00379 | 0.044024 | 0.34247  | -0.09545 | 0.03923 | 0.108583 |
| -0.01905 | 0.68142  | -0.04123 | 0.37406 | -0.02449 | 0.59757  | -0.03907 | 0.39963 | -0.00134 |
| 0.003259 | 0.94401  | -0.05337 | 0.24975 | 0.055334 | 0.23268  | -0.01475 | 0.75047 | 0.059088 |
| 0.037532 | 0.41841  | -0.03153 | 0.49671 | 0.016741 | 0.71822  | -0.01649 | 0.72226 | 0.046485 |
| -0.02239 | 0.62942  | -0.06771 | 0.14403 | 0.138228 | 0.00276  | 0.026247 | 0.57154 | 0.147213 |
| -0.04727 | 0.308    | -0.15379 | 0.00085 | 0.011062 | 0.81156  | -0.05605 | 0.22671 | 0.056418 |
| 0.000621 | 0.98932  | -0.05504 | 0.23514 | 0.034886 | 0.45199  | 0.007896 | 0.86486 | 0.068001 |
| 0.037978 | 0.41289  | -0.00256 | 0.95595 | 0.128237 | 0.00552  | 0.043674 | 0.34634 | 0.160337 |
| 0.011983 | 0.7962   | -0.06768 | 0.14419 | 0.037374 | 0.42037  | -0.02666 | 0.56555 | 0.106905 |
| -0.03657 | 0.43039  | -0.04881 | 0.29253 | 0.012412 | 0.78907  | -0.00792 | 0.86439 | 0.017074 |
| 0.023645 | 0.61028  | -0.01478 | 0.7501  | 0.032017 | 0.49006  | -0.01363 | 0.76886 | 0.068401 |
| -0.04231 | 0.3616   | -0.0612  | 0.18672 | 0.030095 | 0.51649  | -0.04566 | 0.32484 | 0.085214 |
| -0.01839 | 0.69183  | -0.09275 | 0.04514 | 0.002725 | 0.95316  | -0.01375 | 0.76702 | 0.038546 |
| -0.04429 | 0.33958  | -0.10945 | 0.01798 | -0.02909 | 0.53063  | -0.06229 | 0.17898 | 0.020702 |
| 0.006166 | 0.89428  | -0.01138 | 0.80624 | 0.179397 | 9.70E-05 | 0.071631 | 0.12216 | 0.177533 |
| 0.048198 | 0.29863  | 0.019457 | 0.67494 | 0.100532 | 0.02984  | 0.054911 | 0.23627 | 0.080554 |

|          |         |          |         |          |          |          |         |          |
|----------|---------|----------|---------|----------|----------|----------|---------|----------|
| 0.004257 | 0.9269  | -0.01427 | 0.75848 | 0.05533  | 0.23271  | -0.00294 | 0.94939 | 0.085499 |
| -0.02658 | 0.56673 | -0.13333 | 0.00389 | -0.08806 | 0.05724  | -0.1254  | 0.00666 | -0.03032 |
| -0.00388 | 0.93342 | -0.0206  | 0.657   | 0.066261 | 0.15282  | -0.00041 | 0.99298 | 0.073467 |
| 0.028574 | 0.53792 | -0.00069 | 0.9881  | 0.111389 | 0.01603  | 0.04737  | 0.30701 | 0.097387 |
| 0.026036 | 0.57464 | 0.034721 | 0.45414 | 0.10563  | 0.02243  | 0.042445 | 0.36009 | 0.116478 |
| 0.023647 | 0.61025 | 0.000786 | 0.98649 | 0.098951 | 0.03253  | 0.030184 | 0.51525 | 0.104683 |
| 0.022168 | 0.63277 | 0.009841 | 0.83203 | 0.155669 | 0.00074  | 0.064163 | 0.16627 | 0.192116 |
| -0.0196  | 0.67269 | -0.1072  | 0.0205  | -0.02903 | 0.53146  | -0.09103 | 0.04931 | 0.030182 |
| 0.024211 | 0.60175 | -0.01641 | 0.72358 | 0.110588 | 0.01681  | 0.037889 | 0.414   | 0.133301 |
| 0.001592 | 0.97264 | -0.06601 | 0.15438 | 0.046309 | 0.31799  | -0.01884 | 0.68467 | 0.086062 |
| 0.011403 | 0.80586 | -0.01875 | 0.68613 | 0.088142 | 0.05699  | 0.014071 | 0.76168 | 0.162033 |
| 0.033914 | 0.4647  | 0.014395 | 0.75636 | 0.147316 | 0.00141  | 0.063146 | 0.1731  | 0.158974 |
| 0.002191 | 0.96234 | -0.00477 | 0.91818 | 0.0787   | 0.08936  | 0.034006 | 0.46349 | 0.10266  |
| 0.0441   | 0.34165 | 0.028383 | 0.54064 | 0.140741 | 0.0023   | 0.068729 | 0.13807 | 0.141398 |
| -0.02119 | 0.64791 | -0.02769 | 0.55059 | -0.01108 | 0.81124  | -0.01976 | 0.67015 | -0.0422  |
| 0.012259 | 0.79161 | -0.00067 | 0.98852 | 0.170415 | 0.00022  | 0.079417 | 0.08647 | 0.172403 |
| -0.0253  | 0.58552 | -0.05704 | 0.2186  | -0.03921 | 0.39791  | -0.07393 | 0.11061 | 0.02103  |
| 0.012247 | 0.79182 | -0.02155 | 0.64235 | 0.119889 | 0.00951  | 0.010254 | 0.82509 | 0.163341 |
| 0.037389 | 0.42018 | 0.012909 | 0.78083 | 0.139595 | 0.0025   | 0.062422 | 0.1781  | 0.14411  |
| 0.030487 | 0.51104 | 0.012453 | 0.78838 | 0.144169 | 0.00179  | 0.060037 | 0.19529 | 0.16267  |
| -0.02092 | 0.65199 | -0.01188 | 0.79798 | 0.05341  | 0.24935  | -0.00101 | 0.98269 | 0.090345 |
| 0.036934 | 0.42587 | 0.017605 | 0.70435 | 0.193331 | 2.59E-05 | 0.078432 | 0.09046 | 0.214192 |
| 0.04673  | 0.3136  | -0.01554 | 0.73764 | 0.069217 | 0.13529  | 0.043452 | 0.34879 | 0.074846 |
| 0.034944 | 0.45124 | -0.04931 | 0.2876  | 0.122217 | 0.00819  | 0.020706 | 0.65538 | 0.148146 |
| -0.0192  | 0.67904 | 0.000156 | 0.99732 | 0.074522 | 0.10776  | 0.030039 | 0.51727 | 0.091327 |
| 0.052068 | 0.26146 | -0.00275 | 0.95277 | 0.066516 | 0.15124  | 0.033074 | 0.47584 | 0.076738 |
| 0.0242   | 0.60192 | -0.01661 | 0.72038 | 0.129157 | 0.00518  | 0.056417 | 0.22365 | 0.163483 |
| -0.0113  | 0.8076  | -0.09989 | 0.03092 | 0.032151 | 0.48824  | -0.07239 | 0.11823 | 0.099163 |
| -0.02366 | 0.61009 | -0.08374 | 0.0706  | 0.087251 | 0.05956  | 0.089276 | 0.05386 | 0.081128 |
| 0.037579 | 0.41783 | 0.009233 | 0.84226 | 0.125079 | 0.0068   | 0.033101 | 0.47548 | 0.177488 |
| 0.027293 | 0.5563  | 0.016993 | 0.71417 | 0.11497  | 0.01291  | 0.038889 | 0.40177 | 0.137733 |
| 0.027358 | 0.55537 | -0.03242 | 0.48459 | 0.019875 | 0.66837  | 0.010601 | 0.81926 | 0.03871  |
| 0.019688 | 0.67129 | -0.0462  | 0.31916 | 0.020073 | 0.66526  | -0.01748 | 0.70638 | 0.069281 |
| 0.04415  | 0.3411  | 0.017935 | 0.69907 | 0.136863 | 0.00304  | 0.059899 | 0.19631 | 0.142779 |
| 0.002801 | 0.95187 | -0.03402 | 0.4633  | 0.073571 | 0.11234  | -0.00766 | 0.8688  | 0.115755 |
| 0.02601  | 0.57502 | 0.006902 | 0.88175 | 0.144137 | 0.00179  | 0.043749 | 0.3455  | 0.164559 |
| -0.01142 | 0.80564 | -0.03235 | 0.48556 | 0.072252 | 0.11894  | 0.007295 | 0.87506 | 0.092399 |
| 0.05272  | 0.25552 | -0.00521 | 0.9106  | 0.139187 | 0.00257  | 0.04876  | 0.29302 | 0.163509 |
| 0.008463 | 0.85527 | -0.01748 | 0.70639 | 0.067736 | 0.14387  | 0.00052  | 0.99105 | 0.100151 |
| 0.01989  | 0.66814 | 0.010461 | 0.82162 | 0.190842 | 3.31E-05 | 0.090412 | 0.05087 | 0.196371 |
| 0.024073 | 0.60383 | 0.043307 | 0.35041 | 0.10705  | 0.02068  | 0.054977 | 0.23571 | 0.12963  |
| 0.007644 | 0.86914 | -0.01928 | 0.67773 | 0.082781 | 0.07391  | 0.011891 | 0.79773 | 0.105468 |
| 0.070666 | 0.12728 | -0.0082  | 0.85971 | 0.035653 | 0.4421   | 0.01273  | 0.78379 | 0.081269 |
| -0.04882 | 0.29243 | -0.09359 | 0.04323 | -0.03657 | 0.43039  | -0.0899  | 0.05219 | -0.0349  |
| -0.01165 | 0.80166 | 0.008599 | 0.85297 | 0.040781 | 0.37925  | -0.017   | 0.71412 | 0.061892 |

|           |         |          |         |          |          |          |         |          |
|-----------|---------|----------|---------|----------|----------|----------|---------|----------|
| 0.025926  | 0.57625 | -0.00576 | 0.90119 | 0.107897 | 0.01969  | 0.029932 | 0.51876 | 0.132046 |
| 0.008988  | 0.8464  | -0.03043 | 0.51184 | 0.132629 | 0.00409  | 0.025198 | 0.58702 | 0.160719 |
| -0.0074   | 0.87323 | -0.02496 | 0.59061 | 0.070915 | 0.12594  | 0.022038 | 0.63477 | 0.073437 |
| 0.019624  | 0.67231 | 0.00092  | 0.98417 | 0.056369 | 0.22405  | -0.00909 | 0.84463 | 0.116412 |
| 0.062874  | 0.17496 | -0.01608 | 0.72895 | 0.107108 | 0.02061  | 0.02791  | 0.54741 | 0.10902  |
| 0.07938   | 0.08662 | -0.00681 | 0.88331 | 0.021388 | 0.64479  | 0.02244  | 0.62861 | 0.037476 |
| -0.02997  | 0.51824 | -0.04352 | 0.34803 | 0.043249 | 0.35106  | 0.001713 | 0.97055 | 0.071649 |
| 0.016891  | 0.71582 | 0.011901 | 0.79757 | 0.122688 | 0.00795  | 0.050369 | 0.27736 | 0.134658 |
| 0.164594  | 0.00035 | 0.005814 | 0.90028 | 0.166605 | 0.0003   | 0.084068 | 0.06951 | 0.162431 |
| 0.086459  | 0.06192 | 0.017122 | 0.71209 | 0.116029 | 0.0121   | 0.062573 | 0.17705 | 0.106985 |
| 0.050539  | 0.27574 | 0.021033 | 0.6503  | 0.144656 | 0.00172  | 0.05856  | 0.20652 | 0.182162 |
| 0.022043  | 0.63468 | 0.006229 | 0.89321 | 0.018559 | 0.68914  | -0.0389  | 0.40166 | 0.076855 |
| 0.007079  | 0.87873 | 0.003172 | 0.9455  | 0.12011  | 0.00938  | 0.037283 | 0.4215  | 0.162364 |
| 0.038704  | 0.40401 | 0.015247 | 0.74243 | 0.15158  | 0.00102  | 0.050058 | 0.28035 | 0.184204 |
| 0.042126  | 0.36371 | 0.020884 | 0.6526  | 0.149758 | 0.00117  | 0.060742 | 0.19008 | 0.170576 |
| 0.087736  | 0.05815 | 0.069952 | 0.13118 | 0.110124 | 0.01728  | 0.032258 | 0.48679 | 0.142534 |
| 0.002279  | 0.96082 | -0.00252 | 0.95662 | 0.113601 | 0.01404  | 0.046891 | 0.31193 | 0.125253 |
| -0.04765  | 0.30416 | -0.00115 | 0.98025 | 0.005757 | 0.90126  | 0.01316  | 0.77668 | 0.037239 |
| -5.91E-06 | 0.9999  | -0.0003  | 0.99488 | 0.137697 | 0.00286  | 0.050023 | 0.28069 | 0.176174 |
| 0.05536   | 0.23246 | 0.005106 | 0.91237 | 0.124339 | 0.00714  | 0.038784 | 0.40304 | 0.158766 |
| 0.001242  | 0.97864 | -0.00442 | 0.92413 | 0.091372 | 0.04845  | 0.026384 | 0.56954 | 0.078891 |
| -0.03655  | 0.43065 | -0.06303 | 0.17391 | -0.00311 | 0.94656  | -0.04197 | 0.36552 | 0.01541  |
| -0.04569  | 0.32447 | 0.005477 | 0.90604 | 0.005368 | 0.9079   | 0.00284  | 0.95119 | 0.01415  |
| 0.018791  | 0.68546 | -0.06645 | 0.15167 | 0.020497 | 0.65864  | -0.03978 | 0.39111 | 0.068084 |
| 0.049553  | 0.28523 | 0.040478 | 0.3828  | 0.123848 | 0.00737  | 0.049938 | 0.2815  | 0.130286 |
| 0.045546  | 0.32603 | 0.009387 | 0.83967 | 0.06256  | 0.17714  | 0.016342 | 0.72467 | 0.075271 |
| 0.010925  | 0.81385 | 0.020304 | 0.66165 | 0.142505 | 0.00202  | 0.089199 | 0.05407 | 0.15955  |
| -0.06972  | 0.13247 | -0.03812 | 0.4112  | 0.00085  | 0.98539  | 0.034689 | 0.45455 | 0.031305 |
| 0.017756  | 0.70193 | 0.021191 | 0.64784 | 0.100432 | 0.03001  | 0.029486 | 0.52501 | 0.132429 |
| 0.091521  | 0.04808 | 0.000966 | 0.98339 | 0.098778 | 0.03283  | 0.034266 | 0.46007 | 0.142374 |
| 0.08023   | 0.08329 | 0.121431 | 0.00862 | 0.118459 | 0.0104   | 0.068033 | 0.14211 | 0.105853 |
| 0.010241  | 0.8253  | -0.0227  | 0.62463 | 0.091164 | 0.04896  | 0.032023 | 0.48998 | 0.117797 |
| -0.00468  | 0.91972 | -0.04576 | 0.32374 | 0.076518 | 0.09863  | 0.02203  | 0.63489 | 0.087972 |
| 0.059378  | 0.20025 | 0.010972 | 0.81306 | 0.175278 | 0.00014  | 0.04501  | 0.33176 | 0.223464 |
| 0.04431   | 0.33935 | 0.051353 | 0.26807 | 0.119614 | 0.00967  | 0.079026 | 0.08803 | 0.103389 |
| 0.025261  | 0.58608 | 0.003402 | 0.94154 | 0.116096 | 0.01205  | 0.041913 | 0.36615 | 0.141522 |
| -0.0976   | 0.03499 | -0.15546 | 0.00075 | -0.04578 | 0.32354  | -0.11696 | 0.01143 | 0.015089 |
| 0.015805  | 0.73337 | 0.00666  | 0.88586 | 0.102123 | 0.02733  | 0.060779 | 0.18981 | 0.12252  |
| 0.007377  | 0.87368 | 0.071852 | 0.12101 | 0.046764 | 0.31325  | 0.034464 | 0.45749 | 0.108082 |
| 0.048202  | 0.29859 | 0.07664  | 0.09809 | 0.157235 | 0.00065  | 0.119428 | 0.00979 | 0.162076 |
| 0.004172  | 0.92835 | -0.04626 | 0.31848 | -0.00983 | 0.83216  | -0.01585 | 0.73266 | 0.023494 |
| 0.092614  | 0.04546 | -0.02725 | 0.55689 | 0.194778 | 2.25E-05 | 0.047065 | 0.31015 | 0.149915 |
| 0.033643  | 0.46828 | -0.00741 | 0.87304 | 0.147761 | 0.00136  | 0.051493 | 0.26677 | 0.165728 |
| -0.02849  | 0.53909 | -0.03696 | 0.42548 | -0.00438 | 0.92487  | -0.03776 | 0.41554 | -0.02384 |
| 0.060751  | 0.19002 | 0.04371  | 0.34593 | 0.088471 | 0.05607  | 0.03846  | 0.40698 | 0.096944 |

|          |          |          |          |          |          |          |          |          |
|----------|----------|----------|----------|----------|----------|----------|----------|----------|
| 0.03294  | 0.47762  | -0.02994 | 0.51859  | 0.055647 | 0.23004  | -0.00302 | 0.94818  | 0.111615 |
| 0.088711 | 0.0554   | 0.017987 | 0.69824  | 0.144756 | 0.00171  | 0.076515 | 0.09864  | 0.166711 |
| 0.052504 | 0.25748  | -0.05282 | 0.25461  | 0.062448 | 0.17791  | -0.02277 | 0.62357  | 0.077555 |
| 0.049992 | 0.28098  | -0.02009 | 0.66504  | 0.102141 | 0.0273   | 0.031567 | 0.49619  | 0.130984 |
| 0.011601 | 0.80255  | -0.05407 | 0.24355  | 0.010785 | 0.81618  | -0.04512 | 0.3306   | 0.071193 |
| 0.104974 | 0.02329  | 0.063271 | 0.17225  | 0.146499 | 0.0015   | 0.059332 | 0.20059  | 0.202952 |
| 0.129477 | 0.00507  | 0.037459 | 0.41932  | 0.19141  | 3.13E-05 | 0.090609 | 0.05036  | 0.227701 |
| 0.020179 | 0.6636   | -0.03418 | 0.46121  | 0.094428 | 0.04138  | 0.035009 | 0.45039  | 0.105721 |
| 0.001417 | 0.97563  | -0.0237  | 0.6094   | 0.052197 | 0.26028  | -0.0034  | 0.94166  | 0.076973 |
| 0.039209 | 0.3979   | 0.030697 | 0.50814  | 0.129098 | 0.00521  | 0.053666 | 0.24709  | 0.097412 |
| 0.002496 | 0.95709  | -0.04616 | 0.31958  | 0.07841  | 0.09055  | 0.015731 | 0.73456  | 0.082993 |
| -0.04058 | 0.38156  | -0.05246 | 0.25791  | -0.05121 | 0.2694   | -0.0779  | 0.09266  | -0.04024 |
| 0.096108 | 0.03788  | -0.09252 | 0.04568  | 0.021271 | 0.6466   | -0.04346 | 0.34866  | 0.059946 |
| 0.027594 | 0.55196  | 0.026964 | 0.56108  | 0.069973 | 0.13106  | 0.008268 | 0.85858  | 0.128102 |
| -0.01665 | 0.71974  | 0.010244 | 0.82526  | -0.00845 | 0.85554  | -0.02363 | 0.61054  | -0.00485 |
| -0.02119 | 0.64791  | -0.02769 | 0.55059  | -0.01108 | 0.81124  | -0.01976 | 0.67015  | -0.0422  |
| 0.04104  | 0.37623  | 0.033924 | 0.46457  | 0.131055 | 0.00456  | 0.063645 | 0.16972  | 0.153335 |
| 0.057659 | 0.21361  | 0.025905 | 0.57657  | 0.078307 | 0.09097  | -0.00131 | 0.97752  | 0.183308 |
| 0.078798 | 0.08896  | 0.043053 | 0.35324  | 0.171832 | 0.00019  | 0.113845 | 0.01383  | 0.161401 |
| -0.02703 | 0.56005  | -0.03264 | 0.48164  | 0.155833 | 0.00073  | 0.096479 | 0.03714  | 0.182009 |
| -0.03296 | 0.47736  | 0.047138 | 0.3094   | 0.004428 | 0.92396  | 0.011436 | 0.80531  | 0.078793 |
| 0.032009 | 0.49017  | 0.044331 | 0.33912  | 0.136869 | 0.00304  | 0.07025  | 0.12954  | 0.178182 |
| 0.055851 | 0.22834  | 0.061423 | 0.18515  | 0.175173 | 0.00014  | 0.093891 | 0.04256  | 0.204679 |
| 0.002668 | 0.95414  | 0.040178 | 0.38634  | 0.0679   | 0.1429   | 0.028504 | 0.53891  | 0.074364 |
| 0.054632 | 0.23867  | 0.010159 | 0.82668  | 0.118963 | 0.01008  | 0.086333 | 0.0623   | 0.117416 |
| 0.096516 | 0.03707  | 0.097205 | 0.03573  | 0.163683 | 0.00038  | 0.111296 | 0.01612  | 0.203789 |
| 0.027175 | 0.55801  | 0.017389 | 0.70781  | 0.122018 | 0.0083   | 0.04807  | 0.29991  | 0.148931 |
| -0.24648 | 6.83E-08 | -0.24384 | 9.50E-08 | -0.06583 | 0.1555   | -0.02055 | 0.65784  | -0.10783 |
| -0.22868 | 5.88E-07 | -0.21725 | 2.15E-06 | 0.018976 | 0.68252  | 0.089102 | 0.05433  | -0.00956 |
| -0.21815 | 1.94E-06 | -0.15584 | 0.00073  | 0.047426 | 0.30645  | 0.184193 | 6.23E-05 | -0.02043 |
| -0.01594 | 0.73115  | -0.01134 | 0.80698  | 0.120063 | 0.0094   | 0.117087 | 0.01133  | 0.144027 |
| -0.39601 | 5.51E-19 | -0.3402  | 4.07E-14 | -0.32182 | 1.03E-12 | -0.1534  | 0.00088  | -0.31926 |
| -0.35309 | 3.70E-15 | -0.34557 | 1.52E-14 | -0.32184 | 1.03E-12 | -0.21653 | 2.33E-06 | -0.31843 |
| -0.05648 | 0.22309  | -0.15103 | 0.00106  | 0.036287 | 0.43403  | -0.03356 | 0.46937  | 0.003554 |
| -0.30745 | 1.11E-11 | -0.34643 | 1.29E-14 | -0.26298 | 7.94E-09 | -0.12519 | 0.00675  | -0.26184 |
| -0.07424 | 0.10908  | -0.05517 | 0.23406  | 0.077647 | 0.09374  | 0.057885 | 0.21181  | 0.070248 |
| -0.194   | 2.43E-05 | -0.24199 | 1.19E-07 | -0.07523 | 0.10447  | -0.06205 | 0.18073  | -0.07928 |
| -0.13037 | 0.00477  | -0.28921 | 1.89E-10 | -0.15155 | 0.00102  | -0.18111 | 8.29E-05 | -0.18227 |
| -0.29217 | 1.21E-10 | -0.27939 | 8.03E-10 | -0.16955 | 0.00023  | -0.02731 | 0.55602  | -0.19795 |
| -0.15777 | 0.00062  | -0.25199 | 3.38E-08 | 0.110843 | 0.01656  | 0.09325  | 0.04399  | 0.070554 |
| -0.27638 | 1.24E-09 | -0.29793 | 5.00E-11 | -0.17256 | 0.00018  | -0.03286 | 0.47868  | -0.2031  |
| -0.0641  | 0.16667  | -0.14551 | 0.00162  | 0.191307 | 3.16E-05 | 0.203347 | 9.47E-06 | 0.072055 |
| -0.22232 | 1.22E-06 | -0.04128 | 0.37347  | -0.23178 | 4.10E-07 | -0.08701 | 0.06026  | -0.14339 |
| 0.124896 | 0.00688  | 0.021655 | 0.64067  | 0.363965 | 4.49E-16 | 0.432715 | 9.86E-23 | 0.150244 |
| -0.13676 | 0.00306  | -0.0891  | 0.05432  | 0.02538  | 0.58432  | 0.140762 | 0.0023   | -0.03021 |

|          |          |          |          |          |          |          |          |          |
|----------|----------|----------|----------|----------|----------|----------|----------|----------|
| -0.22876 | 5.83E-07 | -0.25265 | 3.11E-08 | -0.02095 | 0.65165  | -0.10241 | 0.0269   | -0.02496 |
| -0.26868 | 3.64E-09 | -0.55249 | 1.12E-38 | -0.21158 | 3.98E-06 | -0.38794 | 3.20E-18 | -0.22586 |
| -0.22109 | 1.40E-06 | -0.16051 | 0.0005   | -0.1024  | 0.02691  | -0.02703 | 0.56005  | -0.09608 |
| -0.09989 | 0.03091  | -0.11134 | 0.01608  | -0.02805 | 0.54534  | 0.033115 | 0.47528  | -0.11014 |
| -0.41396 | 9.25E-21 | -0.34899 | 8.03E-15 | -0.25334 | 2.84E-08 | -0.20685 | 6.58E-06 | -0.29857 |
| -0.08815 | 0.05696  | -0.06979 | 0.13207  | 0.222279 | 1.23E-06 | 0.229321 | 5.46E-07 | 0.182667 |
| -0.1607  | 0.00049  | -0.158   | 0.00061  | -0.09939 | 0.03176  | -0.02095 | 0.65158  | -0.10943 |
| -0.27421 | 1.68E-09 | -0.19426 | 2.37E-05 | -0.17196 | 0.00019  | -0.06465 | 0.16305  | -0.16461 |
| -0.33862 | 5.42E-14 | -0.20981 | 4.81E-06 | -0.14825 | 0.00131  | 0.034872 | 0.45218  | -0.20539 |
| -0.27198 | 2.30E-09 | -0.14649 | 0.0015   | -0.22987 | 5.12E-07 | -0.07898 | 0.08822  | -0.14724 |
| -0.15195 | 0.00099  | -0.14702 | 0.00144  | -0.00159 | 0.97264  | 0.093862 | 0.04262  | -0.06891 |
| -0.14786 | 0.00135  | -0.26093 | 1.05E-08 | 0.121642 | 0.0085   | 0.063267 | 0.17228  | 0.036304 |
| -0.33017 | 2.44E-13 | -0.2311  | 4.44E-07 | -0.12662 | 0.00614  | -0.13541 | 0.00337  | -0.13725 |
| -0.21633 | 2.38E-06 | -0.38884 | 2.64E-18 | -0.0357  | 0.44152  | -0.07799 | 0.0923   | -0.08656 |
| -0.13837 | 0.00273  | -0.11462 | 0.01319  | -0.11548 | 0.01252  | -0.00229 | 0.96065  | -0.15631 |
| -0.33647 | 7.99E-14 | -0.2647  | 6.29E-09 | -0.39151 | 1.48E-18 | -0.18901 | 3.95E-05 | -0.37462 |
| -0.18084 | 8.50E-05 | -0.14072 | 0.0023   | -0.06011 | 0.19475  | 0.073826 | 0.1111   | -0.12072 |
| -0.21465 | 2.86E-06 | -0.14322 | 0.00192  | 0.012477 | 0.788    | 0.154678 | 0.0008   | -0.02711 |
| -0.21347 | 3.25E-06 | 0.055684 | 0.22974  | -0.0334  | 0.47151  | 0.203196 | 9.62E-06 | -0.07923 |
| -0.25351 | 2.78E-08 | -0.14419 | 0.00178  | -0.18374 | 6.50E-05 | 0.068789 | 0.13773  | -0.1993  |
| -0.24691 | 6.46E-08 | -0.11457 | 0.01324  | -0.03461 | 0.45556  | 0.095687 | 0.03873  | -0.05739 |
| -0.13362 | 0.00382  | 0.002935 | 0.94956  | 0.132888 | 0.00402  | 0.320594 | 1.27E-12 | 0.07324  |
| -0.04486 | 0.33336  | -0.04587 | 0.32257  | 0.093831 | 0.04269  | 0.061754 | 0.18279  | 0.07327  |
| -0.1961  | 1.97E-05 | -0.31714 | 2.27E-12 | -0.1573  | 0.00065  | -0.16662 | 0.0003   | -0.183   |
| -0.30071 | 3.24E-11 | -0.24741 | 6.08E-08 | -0.10912 | 0.01833  | 0.042278 | 0.36198  | -0.14216 |
| -0.25409 | 2.58E-08 | -0.17335 | 0.00017  | -0.19152 | 3.10E-05 | -0.02191 | 0.63672  | -0.30893 |
| -0.1228  | 0.00789  | -0.0929  | 0.0448   | 0.060652 | 0.19074  | 0.163843 | 0.00038  | 0.016975 |
| -0.31059 | 6.67E-12 | -0.34986 | 6.82E-15 | -0.26732 | 4.40E-09 | -0.18733 | 4.63E-05 | -0.28975 |
| -0.24674 | 6.61E-08 | -0.35479 | 2.68E-15 | -0.13767 | 0.00287  | -0.13193 | 0.00429  | -0.17046 |
| -0.11422 | 0.01352  | -0.23992 | 1.54E-07 | -0.05192 | 0.2628   | -0.15797 | 0.00061  | -0.04194 |
| -0.2316  | 4.18E-07 | 0.015072 | 0.7453   | -0.18206 | 7.60E-05 | 0.089208 | 0.05404  | -0.20289 |
| -0.07937 | 0.08664  | 0.024946 | 0.59077  | 0.208258 | 5.67E-06 | 0.227066 | 7.10E-07 | 0.161891 |
| -0.18283 | 7.07E-05 | -0.12929 | 0.00514  | -0.333   | 1.48E-13 | -0.15119 | 0.00105  | -0.22119 |
| -0.29908 | 4.18E-11 | -0.29516 | 7.67E-11 | -0.24032 | 1.47E-07 | -0.19443 | 2.33E-05 | -0.23127 |
| -0.08425 | 0.06892  | -0.155   | 0.00078  | 0.046359 | 0.31746  | 0.020657 | 0.65614  | 0.018801 |
| -0.08742 | 0.05907  | -0.01423 | 0.75909  | 0.181269 | 8.17E-05 | 0.281107 | 6.27E-10 | 0.111097 |
| -0.22109 | 1.40E-06 | -0.11464 | 0.01318  | 0.013122 | 0.77731  | 0.194253 | 2.37E-05 | -0.03423 |
| -0.35108 | 5.42E-15 | -0.37222 | 8.57E-17 | -0.35656 | 1.91E-15 | -0.21693 | 2.23E-06 | -0.37088 |
| -0.18123 | 8.19E-05 | -0.16207 | 0.00044  | 0.064911 | 0.16138  | 0.108995 | 0.01847  | 0.050323 |
| 0.033119 | 0.47523  | 0.004836 | 0.91699  | 0.241174 | 1.32E-07 | 0.261958 | 9.11E-09 | 0.107745 |
| -0.07224 | 0.11899  | -0.30846 | 9.43E-12 | 0.136446 | 0.00313  | 0.03561  | 0.44266  | 0.051431 |
| -0.10439 | 0.02407  | -0.22333 | 1.09E-06 | 0.008247 | 0.85893  | 0.100515 | 0.02987  | -0.01719 |
| -0.16241 | 0.00043  | -0.23496 | 2.81E-07 | -0.09182 | 0.04735  | -0.01114 | 0.81024  | -0.16691 |
| -0.0114  | 0.80587  | -0.05518 | 0.23401  | 0.36204  | 6.56E-16 | 0.2625   | 8.47E-09 | 0.272269 |
| -0.13147 | 0.00443  | -0.2146  | 2.87E-06 | -0.28619 | 2.97E-10 | -0.18511 | 5.71E-05 | -0.30598 |

|          |          |          |          |          |          |          |          |          |
|----------|----------|----------|----------|----------|----------|----------|----------|----------|
| -0.18802 | 4.34E-05 | -0.19592 | 2.01E-05 | -0.19159 | 3.08E-05 | -0.06068 | 0.19056  | -0.18651 |
| -0.29796 | 4.98E-11 | -0.16701 | 0.00029  | -0.17542 | 0.00014  | 0.027607 | 0.55178  | -0.20147 |
| -0.00271 | 0.95341  | -0.04728 | 0.30791  | 0.109603 | 0.01782  | 0.147881 | 0.00135  | 0.077758 |
| -0.27784 | 1.00E-09 | -0.10789 | 0.0197   | -0.43861 | 2.23E-23 | -0.17864 | 0.0001   | -0.39155 |
| -0.35256 | 4.10E-15 | -0.20981 | 4.81E-06 | -0.40303 | 1.15E-19 | -0.20086 | 1.22E-05 | -0.35318 |
| -0.20949 | 4.98E-06 | -0.25857 | 1.43E-08 | -0.06052 | 0.19168  | -0.02397 | 0.60544  | -0.06516 |
| -0.23098 | 4.50E-07 | -0.19266 | 2.77E-05 | 0.017847 | 0.70048  | 0.08843  | 0.05618  | -0.04445 |
| 0.121027 | 0.00884  | 0.021398 | 0.64464  | 0.388781 | 2.67E-18 | 0.28765  | 2.39E-10 | 0.293366 |
| -0.28761 | 2.40E-10 | -0.3353  | 9.84E-14 | -0.19541 | 2.11E-05 | -0.06701 | 0.14822  | -0.2194  |
| -0.168   | 0.00027  | -0.14588 | 0.00157  | -0.04839 | 0.29671  | 0.115002 | 0.01289  | -0.1273  |
| -0.30868 | 9.11E-12 | -0.27093 | 2.67E-09 | -0.44202 | 9.30E-24 | -0.24357 | 9.82E-08 | -0.452   |
| -0.29786 | 5.05E-11 | -0.1396  | 0.0025   | -0.15351 | 0.00087  | 0.05092  | 0.27214  | -0.19056 |
| -0.09141 | 0.04835  | -0.14947 | 0.0012   | 0.055423 | 0.23193  | 0.143351 | 0.0019   | -0.03354 |
| -0.15405 | 0.00084  | 0.016888 | 0.71586  | 0.046101 | 0.32017  | 0.20092  | 1.21E-05 | -0.03752 |
| -0.15956 | 0.00054  | -0.09201 | 0.04691  | 0.13616  | 0.0032   | 0.161932 | 0.00044  | 0.09268  |
| -0.22381 | 1.03E-06 | -0.18641 | 5.05E-05 | 0.044991 | 0.33197  | 0.122841 | 0.00787  | -0.04193 |
| -0.20036 | 1.29E-05 | -0.06225 | 0.17926  | 0.006752 | 0.8843   | 0.171668 | 0.00019  | -0.05743 |
| -0.25287 | 3.02E-08 | -0.15975 | 0.00053  | -0.01285 | 0.78179  | 0.11716  | 0.01128  | -0.0736  |
| -0.20659 | 6.76E-06 | -0.16655 | 0.0003   | -0.15221 | 0.00097  | -0.02033 | 0.66121  | -0.1303  |
| -0.25791 | 1.56E-08 | -0.20609 | 7.12E-06 | -0.23193 | 4.02E-07 | -0.12232 | 0.00814  | -0.23998 |
| -0.15948 | 0.00054  | -0.13618 | 0.00319  | -0.0497  | 0.28381  | 0.024425 | 0.59855  | -0.0451  |
| -0.26144 | 9.77E-09 | -0.36115 | 7.81E-16 | -0.27923 | 8.22E-10 | -0.2644  | 6.55E-09 | -0.36143 |
| -0.08612 | 0.06295  | -0.16015 | 0.00051  | 0.219231 | 1.73E-06 | 0.170405 | 0.00022  | 0.155259 |
| -0.15843 | 0.00059  | -0.27837 | 9.30E-10 | -0.15861 | 0.00058  | -0.1808  | 8.52E-05 | -0.17051 |
| -0.15038 | 0.00112  | -0.13383 | 0.00376  | -0.03347 | 0.47059  | 0.019154 | 0.67972  | -0.00355 |
| 0.063005 | 0.17407  | 0.183887 | 6.41E-05 | 0.188436 | 4.17E-05 | 0.328531 | 3.25E-13 | 0.112386 |
| -0.02194 | 0.63629  | -0.20778 | 5.97E-06 | 0.194135 | 2.40E-05 | 0.123708 | 0.00744  | 0.09822  |
| -0.45288 | 5.38E-25 | -0.32434 | 6.70E-13 | -0.3358  | 9.00E-14 | -0.14056 | 0.00233  | -0.34916 |
| -0.1403  | 0.00237  | -0.27107 | 2.62E-09 | 0.16938  | 0.00024  | 0.080895 | 0.08075  | 0.111233 |
| -0.17093 | 0.00021  | -0.22481 | 9.19E-07 | -0.04177 | 0.36773  | -0.00559 | 0.90418  | -0.12038 |
| -0.06413 | 0.16647  | 0.120637 | 0.00907  | 0.119142 | 0.00997  | 0.18698  | 4.79E-05 | 0.14209  |
| -0.2145  | 2.90E-06 | -0.1019  | 0.02767  | -0.19112 | 3.22E-05 | 0.050213 | 0.27886  | -0.19084 |
| 0.126123 | 0.00635  | 0.081299 | 0.07925  | 0.096268 | 0.03756  | 0.027293 | 0.55631  | 0.166638 |
| -0.07494 | 0.10579  | -0.05581 | 0.22864  | 0.058496 | 0.20702  | 0.123104 | 0.00774  | 0.047598 |
| -0.05174 | 0.26447  | -0.0086  | 0.85299  | 0.015753 | 0.73421  | 0.090456 | 0.05076  | 0.01323  |
| -0.08383 | 0.0703   | 0.019082 | 0.68085  | 0.092348 | 0.04609  | 0.155862 | 0.00073  | 0.11032  |
| -0.01621 | 0.7268   | 0.058888 | 0.20399  | 0.057483 | 0.215    | 0.12723  | 0.0059   | 0.108234 |
| -0.02861 | 0.53735  | 0.097515 | 0.03514  | 0.127678 | 0.00573  | 0.235113 | 2.76E-07 | 0.125399 |
| -0.13711 | 0.00299  | -0.05842 | 0.20764  | -0.15055 | 0.0011   | 0.01198  | 0.79625  | -0.11288 |
| -0.2673  | 4.41E-09 | -0.34276 | 2.55E-14 | -0.3094  | 8.10E-12 | -0.28274 | 4.94E-10 | -0.27898 |
| -0.30639 | 1.32E-11 | -0.11219 | 0.01528  | -0.09782 | 0.03458  | 0.069665 | 0.13277  | -0.12934 |
| -0.27196 | 2.31E-09 | -0.22431 | 9.73E-07 | -0.22832 | 6.14E-07 | -0.14535 | 0.00164  | -0.19336 |
| -0.08839 | 0.05629  | 0.050197 | 0.27901  | 0.020372 | 0.66058  | 0.083032 | 0.07303  | -0.03848 |
| -0.42616 | 4.99E-22 | -0.30138 | 2.92E-11 | -0.27394 | 1.75E-09 | -0.09666 | 0.03678  | -0.29428 |
| -0.2778  | 1.01E-09 | -0.18459 | 6.00E-05 | -0.08441 | 0.06837  | 0.074844 | 0.10624  | -0.14422 |



|          |          |          |          |          |          |          |          |          |
|----------|----------|----------|----------|----------|----------|----------|----------|----------|
| -0.0314  | 0.49848  | -0.11264 | 0.01487  | 0.163461 | 0.00039  | 0.257565 | 1.64E-08 | 0.056972 |
| -0.25964 | 1.24E-08 | -0.23248 | 3.77E-07 | -0.30486 | 1.68E-11 | -0.20521 | 7.81E-06 | -0.24163 |
| -0.25891 | 1.37E-08 | -0.12163 | 0.00851  | -0.33493 | 1.05E-13 | -0.04455 | 0.33671  | -0.31437 |
| -0.26879 | 3.59E-09 | -0.36939 | 1.52E-16 | -0.06214 | 0.18004  | -0.07483 | 0.10633  | -0.01358 |
| -0.15272 | 0.00093  | -0.1326  | 0.0041   | 0.10987  | 0.01754  | 0.075127 | 0.10492  | 0.053267 |
| -0.03011 | 0.51625  | -0.08692 | 0.06055  | 0.200271 | 1.30E-05 | 0.168858 | 0.00025  | 0.114633 |
| -0.09051 | 0.05061  | -0.1479  | 0.00135  | 0.038908 | 0.40154  | -0.02197 | 0.63578  | 0.015385 |
| -0.4048  | 7.69E-20 | -0.34988 | 6.80E-15 | -0.29847 | 4.60E-11 | -0.14647 | 0.0015   | -0.30274 |
| -0.06599 | 0.15451  | -0.17548 | 0.00014  | 0.198446 | 1.56E-05 | 0.182803 | 7.09E-05 | 0.098751 |
| -0.13468 | 0.00355  | -0.13454 | 0.00358  | 0.114328 | 0.01343  | 0.1477   | 0.00137  | 0.066806 |
| -0.10443 | 0.02402  | -0.14815 | 0.00132  | -0.01396 | 0.76345  | -0.0129  | 0.78094  | 0.023224 |
| -0.36225 | 6.29E-16 | -0.19331 | 2.60E-05 | -0.40702 | 4.62E-20 | -0.1925  | 2.81E-05 | -0.40556 |
| -0.24196 | 1.20E-07 | -0.09714 | 0.03586  | -0.24077 | 1.39E-07 | -0.07006 | 0.13056  | -0.24195 |
| -0.0187  | 0.68693  | -0.081   | 0.08036  | 0.137192 | 0.00297  | 0.074043 | 0.11004  | 0.136582 |
| -0.26635 | 5.03E-09 | -0.14512 | 0.00166  | -0.19315 | 2.64E-05 | -0.03641 | 0.43242  | -0.2526  |
| -0.20381 | 9.02E-06 | -0.14993 | 0.00116  | 0.081337 | 0.0791   | 0.173517 | 0.00016  | 0.020373 |
| -0.24444 | 8.81E-08 | -0.28152 | 5.90E-10 | -0.07102 | 0.12539  | -0.00523 | 0.91023  | -0.10762 |
| -0.15198 | 0.00099  | -0.07418 | 0.10939  | 0.111122 | 0.01629  | 0.264142 | 6.79E-09 | 0.046144 |
| -0.11965 | 0.00965  | -0.16569 | 0.00032  | -0.03012 | 0.51616  | -0.0595  | 0.19933  | -0.00968 |
| -0.25645 | 1.90E-08 | -0.37149 | 9.94E-17 | -0.14339 | 0.00189  | -0.11363 | 0.01401  | -0.17201 |
| -0.30643 | 1.31E-11 | -0.26378 | 7.13E-09 | -0.17777 | 0.00011  | -0.09221 | 0.04642  | -0.08387 |
| -0.14161 | 0.00216  | -0.07996 | 0.08434  | 0.217565 | 2.07E-06 | 0.223752 | 1.04E-06 | 0.108759 |
| -0.05423 | 0.24217  | -0.1506  | 0.0011   | -0.06389 | 0.16811  | -0.03148 | 0.49735  | -0.14202 |
| -0.07371 | 0.11167  | -0.19636 | 1.92E-05 | -0.01697 | 0.7145   | 0.017024 | 0.71368  | -0.09555 |
| -0.20723 | 6.32E-06 | -0.17905 | 0.0001   | 0.02327  | 0.61595  | 0.063772 | 0.16888  | -0.01738 |
| -0.12751 | 0.00579  | -0.19707 | 1.79E-05 | -0.06686 | 0.14912  | -0.03257 | 0.48263  | -0.08627 |
| -0.09993 | 0.03084  | -0.23462 | 2.92E-07 | 0.136334 | 0.00316  | 0.029548 | 0.52415  | 0.073428 |
| -0.14562 | 0.0016   | -0.17308 | 0.00017  | -0.02218 | 0.63256  | 0.003377 | 0.94198  | -0.08308 |
| -0.21047 | 4.48E-06 | -0.12769 | 0.00572  | -0.08264 | 0.07442  | 0.025978 | 0.57549  | -0.04747 |
| -0.31122 | 6.02E-12 | -0.50805 | 5.16E-32 | -0.42496 | 6.67E-22 | -0.46037 | 7.10E-26 | -0.39238 |
| -0.2621  | 8.94E-09 | -0.31078 | 6.47E-12 | -0.14857 | 0.00128  | -0.24961 | 4.59E-08 | -0.10735 |
| -0.12529 | 0.00671  | -0.15852 | 0.00059  | 0.09378  | 0.0428   | 0.165804 | 0.00032  | 0.007791 |
| -0.08013 | 0.08366  | -0.15093 | 0.00107  | -0.19906 | 1.47E-05 | -0.02729 | 0.55638  | -0.2168  |
| -0.24461 | 8.63E-08 | -0.2858  | 3.15E-10 | -0.05408 | 0.24342  | -0.04162 | 0.36947  | -0.09722 |
| -0.05516 | 0.23414  | -0.15235 | 0.00096  | 0.237301 | 2.12E-07 | 0.190363 | 3.46E-05 | 0.102432 |
| -0.20092 | 1.21E-05 | -0.13407 | 0.0037   | -0.21304 | 3.40E-06 | -0.16896 | 0.00024  | -0.1816  |
| -0.1861  | 5.20E-05 | -0.24532 | 7.90E-08 | 0.088257 | 0.05667  | 0.119237 | 0.00991  | 0.021859 |
| -0.2623  | 8.70E-09 | -0.2433  | 1.02E-07 | -0.36483 | 3.78E-16 | -0.13841 | 0.00272  | -0.31565 |
| -0.22397 | 1.01E-06 | -0.15808 | 0.00061  | -0.31491 | 3.28E-12 | -0.13224 | 0.0042   | -0.30123 |
| -0.36711 | 2.40E-16 | -0.24455 | 8.69E-08 | -0.2702  | 2.95E-09 | -0.09503 | 0.04009  | -0.24835 |
| -0.11561 | 0.01242  | -0.1264  | 0.00623  | -0.249   | 4.96E-08 | -0.1562  | 0.00071  | -0.18833 |
| -0.17754 | 0.00011  | -0.16655 | 0.0003   | -0.19333 | 2.59E-05 | -0.08525 | 0.06566  | -0.19904 |
| -0.24809 | 5.57E-08 | -0.1958  | 2.03E-05 | -0.03083 | 0.50635  | 0.054737 | 0.23777  | -0.09685 |
| 0.089422 | 0.05347  | 0.199223 | 1.44E-05 | 0.175761 | 0.00013  | 0.315889 | 2.79E-12 | 0.134119 |
| -0.00323 | 0.9445   | -0.01708 | 0.71278  | 0.249643 | 4.57E-08 | 0.326302 | 4.78E-13 | 0.16584  |

|          |          |          |          |          |          |          |          |          |
|----------|----------|----------|----------|----------|----------|----------|----------|----------|
| -0.3023  | 2.53E-11 | -0.26542 | 5.70E-09 | -0.07189 | 0.12083  | 0.043468 | 0.34862  | -0.08753 |
| -0.27681 | 1.16E-09 | -0.28351 | 4.41E-10 | -0.13944 | 0.00253  | -0.00789 | 0.86491  | -0.18042 |
| -0.09929 | 0.03194  | -0.20865 | 5.44E-06 | 0.130846 | 0.00462  | 0.150577 | 0.0011   | 0.015874 |
| -0.14517 | 0.00166  | -0.26424 | 6.70E-09 | -0.03715 | 0.42318  | 0.010081 | 0.82799  | -0.08381 |
| -0.28348 | 4.43E-10 | -0.26461 | 6.37E-09 | -0.08074 | 0.08135  | 0.004053 | 0.9304   | -0.12254 |
| -0.03095 | 0.50462  | -0.10569 | 0.02236  | -0.05543 | 0.23188  | 0.016575 | 0.7209   | -0.02994 |
| -0.25782 | 1.58E-08 | -0.23615 | 2.43E-07 | -0.2389  | 1.74E-07 | -0.20471 | 8.22E-06 | -0.21832 |
| -0.06996 | 0.13112  | -0.13152 | 0.00441  | 0.075878 | 0.10148  | -0.01229 | 0.79116  | 0.02679  |
| -0.2031  | 9.71E-06 | -0.14019 | 0.00239  | 0.126881 | 0.00604  | 0.169573 | 0.00023  | 0.069641 |
| -0.06343 | 0.17121  | -0.22323 | 1.10E-06 | 0.243772 | 9.58E-08 | 0.077125 | 0.09597  | 0.105691 |
| -0.41023 | 2.21E-20 | -0.44686 | 2.65E-24 | -0.35819 | 1.39E-15 | -0.23176 | 4.10E-07 | -0.36901 |
| -0.16247 | 0.00042  | -0.18171 | 7.84E-05 | 0.059891 | 0.19637  | 0.12842  | 0.00545  | 0.003395 |
| 0.053784 | 0.24605  | 0.003825 | 0.93431  | 0.225174 | 8.82E-07 | 0.123951 | 0.00732  | 0.210256 |
| 0.087186 | 0.05975  | 0.01427  | 0.7584   | 0.207924 | 5.87E-06 | -0.07112 | 0.12483  | 0.190764 |
| -0.15844 | 0.00059  | -0.13889 | 0.00263  | 0.062157 | 0.17995  | 0.126037 | 0.00639  | 0.018196 |
| -0.31612 | 2.69E-12 | -0.19579 | 2.03E-05 | -0.34376 | 2.12E-14 | -0.15024 | 0.00113  | -0.22927 |
| -0.21822 | 1.93E-06 | -0.29567 | 7.09E-11 | 0.004688 | 0.91952  | -0.01655 | 0.72131  | -0.03808 |
| -0.09466 | 0.04088  | -0.04409 | 0.34174  | 0.169345 | 0.00024  | 0.253507 | 2.78E-08 | 0.082407 |
| -0.09712 | 0.0359   | -0.09288 | 0.04485  | 0.10006  | 0.03062  | 0.109675 | 0.01774  | 0.085235 |
| -0.20132 | 1.17E-05 | -0.15937 | 0.00055  | 0.075084 | 0.10512  | 0.113546 | 0.01408  | 0.001812 |
| -0.31905 | 1.64E-12 | -0.30055 | 3.32E-11 | -0.2663  | 5.06E-09 | -0.16064 | 0.00049  | -0.26247 |
| -0.15393 | 0.00085  | -0.27792 | 9.93E-10 | 0.082703 | 0.07418  | 0.102299 | 0.02707  | -0.00978 |
| -0.24688 | 6.49E-08 | -0.27738 | 1.07E-09 | -0.16898 | 0.00024  | -0.18321 | 6.82E-05 | -0.21817 |
| -0.068   | 0.14229  | -0.16113 | 0.00047  | 0.350258 | 6.33E-15 | 0.204898 | 8.06E-06 | 0.22181  |
| -0.18537 | 5.58E-05 | -0.24876 | 5.12E-08 | 0.034583 | 0.45593  | 0.042502 | 0.35944  | -0.05268 |
| -0.19957 | 1.39E-05 | -0.2557  | 2.09E-08 | -0.08567 | 0.06433  | 0.046607 | 0.31488  | -0.16687 |
| -0.32805 | 3.53E-13 | -0.35072 | 5.80E-15 | -0.19148 | 3.11E-05 | -0.1278  | 0.00568  | -0.19737 |
| 0.072171 | 0.11936  | -0.06789 | 0.14296  | 0.248817 | 5.08E-08 | 0.218012 | 1.97E-06 | 0.090349 |
| -0.06705 | 0.14801  | -0.03473 | 0.45405  | 0.167791 | 0.00027  | 0.255992 | 2.01E-08 | 0.076075 |
| -0.35327 | 3.57E-15 | -0.44556 | 3.72E-24 | -0.26005 | 1.18E-08 | -0.18386 | 6.42E-05 | -0.31132 |
| -0.3955  | 6.17E-19 | -0.29296 | 1.07E-10 | -0.35838 | 1.34E-15 | -0.16006 | 0.00052  | -0.32442 |
| -0.02479 | 0.59314  | -0.22733 | 6.88E-07 | 0.107186 | 0.02052  | 0.00389  | 0.93318  | 0.013425 |
| -0.24366 | 9.72E-08 | -0.1268  | 0.00607  | -0.22425 | 9.81E-07 | -0.04074 | 0.37971  | -0.17996 |
| -0.0674  | 0.14587  | -0.00249 | 0.95717  | 0.084987 | 0.06651  | 0.224659 | 9.35E-07 | 0.033756 |
| -0.23159 | 4.19E-07 | -0.46957 | 5.50E-27 | -0.17328 | 0.00017  | -0.29707 | 5.71E-11 | -0.22428 |
| -0.21825 | 1.92E-06 | -0.13775 | 0.00285  | -0.1994  | 1.42E-05 | -0.01071 | 0.8174   | -0.25054 |
| -0.24674 | 6.61E-08 | -0.39468 | 7.39E-19 | 0.003964 | 0.93192  | -0.06517 | 0.15969  | -0.05756 |
| 0.348724 | 8.44E-15 | 0.301805 | 2.73E-11 | 0.625229 | 5.11E-52 | 0.419777 | 2.33E-21 | 0.477108 |
| 0.382963 | 9.23E-18 | 0.219122 | 1.75E-06 | 0.716883 | 7.43E-75 | 0.542833 | 3.82E-37 | 0.486312 |
| 0.394366 | 7.92E-19 | 0.133533 | 0.00384  | 0.654133 | 2.32E-58 | 0.32625  | 4.82E-13 | 0.455929 |
| 0.38222  | 1.08E-17 | 0.316139 | 2.68E-12 | 0.6576   | 3.61E-59 | 0.333943 | 1.25E-13 | 0.641949 |
| 0.358561 | 1.29E-15 | 0.257357 | 1.68E-08 | 0.665278 | 5.35E-61 | 0.411718 | 1.56E-20 | 0.483089 |
| 0.210578 | 4.43E-06 | 0.108074 | 0.01949  | 0.310761 | 6.49E-12 | 0.1396   | 0.0025   | 0.25749  |
| 0.411926 | 1.49E-20 | -0.00081 | 0.98603  | 0.596892 | 2.05E-46 | 0.284395 | 3.87E-10 | 0.442304 |
| 0.385756 | 5.10E-18 | 0.263467 | 7.44E-09 | 0.375728 | 4.18E-17 | 0.207053 | 6.44E-06 | 0.323027 |

|          |          |          |          |          |          |          |          |          |
|----------|----------|----------|----------|----------|----------|----------|----------|----------|
| 0.230118 | 4.98E-07 | 0.207839 | 5.93E-06 | 0.347168 | 1.13E-14 | 0.295169 | 7.66E-11 | 0.313916 |
| 0.367781 | 2.10E-16 | 0.280949 | 6.41E-10 | 0.662066 | 3.16E-60 | 0.434061 | 7.04E-23 | 0.555772 |
| 0.181936 | 7.68E-05 | -0.035   | 0.45047  | 0.51382  | 7.98E-33 | 0.238629 | 1.80E-07 | 0.345087 |
| 0.520793 | 7.98E-34 | 0.330255 | 2.40E-13 | 0.825875 | #####    | 0.507324 | 6.51E-32 | 0.673509 |
| 0.493872 | 4.37E-30 | 0.299972 | 3.64E-11 | 0.793482 | #####    | 0.504875 | 1.42E-31 | 0.575331 |
| 0.235172 | 2.74E-07 | -0.00295 | 0.94927  | 0.153148 | 0.0009   | 0.011047 | 0.8118   | 0.050763 |
| 0.481336 | 1.86E-28 | 0.462263 | 4.22E-26 | 0.759977 | 4.74E-89 | 0.596715 | 2.22E-46 | 0.624069 |
| 0.451097 | 8.65E-25 | 0.318097 | 1.93E-12 | 0.800568 | #####    | 0.512396 | 1.27E-32 | 0.659404 |
| 0.317143 | 2.27E-12 | 0.195695 | 2.05E-05 | 0.390034 | 2.04E-18 | 0.296174 | 6.56E-11 | 0.243993 |
| 0.454736 | 3.27E-25 | 0.266528 | 4.90E-09 | 0.756353 | 9.61E-88 | 0.529273 | 4.50E-35 | 0.553155 |
| 0.27526  | 1.45E-09 | 0.158363 | 0.00059  | 0.312849 | 4.61E-12 | 0.068162 | 0.14136  | 0.314659 |
| 0.266638 | 4.83E-09 | 0.109112 | 0.01834  | 0.341786 | 3.05E-14 | 0.091671 | 0.04772  | 0.322017 |
| 0.39723  | 4.21E-19 | 0.138927 | 0.00262  | 0.68396  | 1.11E-65 | 0.365575 | 3.26E-16 | 0.471809 |
| 0.530519 | 2.93E-35 | 0.342423 | 2.71E-14 | 0.773367 | 4.34E-94 | 0.484922 | 6.47E-29 | 0.666865 |
| 0.401174 | 1.74E-19 | 0.12841  | 0.00545  | 0.445714 | 3.57E-24 | 0.14773  | 0.00137  | 0.340857 |
| 0.378612 | 2.30E-17 | 0.184608 | 5.99E-05 | 0.651876 | 7.68E-58 | 0.480739 | 2.22E-28 | 0.439577 |
| 0.409786 | 2.45E-20 | 0.29963  | 3.84E-11 | 0.7924   | #####    | 0.516366 | 3.46E-33 | 0.628815 |
| 0.482609 | 1.28E-28 | 0.269703 | 3.16E-09 | 0.637656 | 1.16E-54 | 0.380396 | 1.58E-17 | 0.526274 |
| 0.349671 | 7.07E-15 | 0.099657 | 0.0313   | 0.564959 | 9.87E-41 | 0.272439 | 2.16E-09 | 0.401183 |
| 0.416618 | 4.95E-21 | 0.35892  | 1.21E-15 | 0.441114 | 1.17E-23 | 0.353941 | 3.15E-15 | 0.336067 |
| 0.423705 | 9.05E-22 | 0.246854 | 6.51E-08 | 0.73538  | 1.32E-80 | 0.422088 | 1.34E-21 | 0.594745 |
| 0.309925 | 7.44E-12 | 0.165771 | 0.00032  | 0.416207 | 5.45E-21 | 0.194875 | 2.23E-05 | 0.322006 |
| 0.579727 | 2.78E-43 | 0.245428 | 7.79E-08 | 0.715516 | 1.89E-74 | 0.378869 | 2.18E-17 | 0.570177 |
| 0.416074 | 5.63E-21 | 0.395948 | 5.59E-19 | 0.683535 | 1.43E-65 | 0.459973 | 7.92E-26 | 0.546914 |
| 0.392591 | 1.17E-18 | 0.187683 | 4.48E-05 | 0.575386 | 1.61E-42 | 0.239763 | 1.57E-07 | 0.488587 |
| 0.387733 | 3.34E-18 | 0.112634 | 0.01488  | 0.625966 | 3.59E-52 | 0.319831 | 1.44E-12 | 0.482102 |
| 0.272085 | 2.27E-09 | 0.228847 | 5.77E-07 | 0.623944 | 9.45E-52 | 0.381843 | 1.17E-17 | 0.463503 |
| 0.327902 | 3.62E-13 | 0.111164 | 0.01625  | 0.6953   | 1.06E-68 | 0.406123 | 5.68E-20 | 0.488637 |
| 0.29454  | 8.44E-11 | 0.106293 | 0.0216   | 0.580661 | 1.90E-43 | 0.286276 | 2.93E-10 | 0.496598 |
| 0.209906 | 4.76E-06 | 0.164099 | 0.00037  | 0.341488 | 3.22E-14 | 0.193655 | 2.51E-05 | 0.323948 |
| 0.370361 | 1.25E-16 | 0.148658 | 0.00127  | 0.546948 | 8.62E-38 | 0.316144 | 2.68E-12 | 0.323818 |
| 0.399864 | 2.34E-19 | 0.288444 | 2.12E-10 | 0.647585 | 7.29E-57 | 0.441067 | 1.19E-23 | 0.573797 |
| 0.252465 | 3.18E-08 | 0.072073 | 0.11986  | 0.641722 | 1.49E-55 | 0.425247 | 6.22E-22 | 0.425815 |
| 0.348985 | 8.04E-15 | 0.297632 | 5.24E-11 | 0.690976 | 1.56E-67 | 0.467326 | 1.03E-26 | 0.558763 |
| 0.507664 | 5.84E-32 | 0.419467 | 2.51E-21 | 0.751317 | 5.77E-86 | 0.557196 | 1.92E-39 | 0.620849 |
| 0.538088 | 2.08E-36 | 0.315683 | 2.89E-12 | 0.753198 | 1.26E-86 | 0.449265 | 1.41E-24 | 0.636265 |
| 0.326415 | 4.69E-13 | 0.160633 | 0.00049  | 0.711625 | 2.65E-73 | 0.4917   | 8.46E-30 | 0.516295 |
| 0.231787 | 4.09E-07 | 0.064205 | 0.16599  | 0.214901 | 2.78E-06 | 0.020434 | 0.65961  | 0.10101  |
| 0.422815 | 1.12E-21 | 0.360741 | 8.46E-16 | 0.690853 | 1.68E-67 | 0.496414 | 2.00E-30 | 0.551027 |
| 0.436034 | 4.28E-23 | 0.312284 | 5.06E-12 | 0.404416 | 8.39E-20 | 0.391192 | 1.58E-18 | 0.187838 |
| 0.380876 | 1.43E-17 | 0.4084   | 3.37E-20 | 0.521339 | 6.64E-34 | 0.471909 | 2.84E-27 | 0.326873 |
| 0.390856 | 1.70E-18 | 0.387389 | 3.60E-18 | 0.745058 | 8.19E-84 | 0.476757 | 7.07E-28 | 0.660252 |
| 0.20262  | 1.02E-05 | -0.01069 | 0.81786  | 0.482038 | 1.52E-28 | 0.237588 | 2.05E-07 | 0.342665 |
| 0.287919 | 2.30E-10 | 0.295315 | 7.49E-11 | 0.456321 | 2.14E-25 | 0.305058 | 1.63E-11 | 0.326556 |
| 0.448887 | 1.55E-24 | 0.298253 | 4.76E-11 | 0.762922 | 3.95E-90 | 0.490154 | 1.35E-29 | 0.586588 |

|          |          |          |          |          |          |          |          |          |
|----------|----------|----------|----------|----------|----------|----------|----------|----------|
| 0.460213 | 7.41E-26 | 0.259776 | 1.22E-08 | 0.618279 | 1.37E-50 | 0.422769 | 1.14E-21 | 0.36235  |
| 0.397806 | 3.70E-19 | 0.232524 | 3.75E-07 | 0.714489 | 3.82E-74 | 0.43576  | 4.59E-23 | 0.540136 |
| 0.353171 | 3.65E-15 | 0.285182 | 3.45E-10 | 0.709488 | 1.10E-72 | 0.530865 | 2.60E-35 | 0.526537 |
| 0.43541  | 5.01E-23 | 0.23948  | 1.63E-07 | 0.73523  | 1.47E-80 | 0.498635 | 1.01E-30 | 0.592434 |
| 0.36829  | 1.90E-16 | 0.274725 | 1.57E-09 | 0.455385 | 2.75E-25 | 0.388539 | 2.81E-18 | 0.28401  |
| 0.389624 | 2.22E-18 | 0.180662 | 8.64E-05 | 0.501143 | 4.60E-31 | 0.313222 | 4.34E-12 | 0.313406 |
| 0.595861 | 3.21E-46 | 0.570771 | 1.01E-41 | 0.841443 | #####    | 0.76341  | 2.61E-90 | 0.653702 |
| 0.250539 | 4.08E-08 | 0.072611 | 0.11711  | 0.291204 | 1.40E-10 | 0.108515 | 0.01899  | 0.273768 |
| 0.418252 | 3.36E-21 | 0.19051  | 3.41E-05 | 0.681778 | 4.07E-65 | 0.381445 | 1.27E-17 | 0.486237 |
| 0.250941 | 3.87E-08 | 0.016804 | 0.71721  | 0.563026 | 2.08E-40 | 0.263273 | 7.63E-09 | 0.363946 |
| 0.349756 | 6.96E-15 | 0.125142 | 0.00677  | 0.545041 | 1.72E-37 | 0.37985  | 1.78E-17 | 0.347582 |
| 0.457156 | 1.70E-25 | 0.247774 | 5.80E-08 | 0.699208 | 8.95E-70 | 0.538687 | 1.68E-36 | 0.430777 |
| 0.367251 | 2.33E-16 | 0.218277 | 1.92E-06 | 0.736167 | 7.32E-81 | 0.485953 | 4.76E-29 | 0.530225 |
| 0.422521 | 1.21E-21 | 0.223795 | 1.03E-06 | 0.660481 | 7.54E-60 | 0.359197 | 1.14E-15 | 0.561699 |
| 0.361208 | 7.72E-16 | 0.068306 | 0.14052  | 0.676691 | 8.09E-64 | 0.431473 | 1.34E-22 | 0.46718  |
| 0.23095  | 4.51E-07 | 0.150186 | 0.00113  | 0.313353 | 4.25E-12 | 0.178253 | 0.00011  | 0.245861 |
| 0.323092 | 8.29E-13 | 0.220222 | 1.54E-06 | 0.44399  | 5.59E-24 | 0.297115 | 5.68E-11 | 0.282616 |
| 0.3974   | 4.05E-19 | 0.22051  | 1.50E-06 | 0.707252 | 4.86E-72 | 0.368052 | 1.99E-16 | 0.75184  |
| 0.267957 | 4.03E-09 | 0.153824 | 0.00085  | 0.496488 | 1.95E-30 | 0.453762 | 4.25E-25 | 0.276123 |
| 0.397487 | 3.98E-19 | 0.196641 | 1.87E-05 | 0.707221 | 4.96E-72 | 0.391708 | 1.42E-18 | 0.481904 |
| 0.36093  | 8.15E-16 | 0.21597  | 2.47E-06 | 0.692658 | 5.51E-68 | 0.390344 | 1.90E-18 | 0.526305 |
| 0.271543 | 2.45E-09 | 0.029291 | 0.52777  | 0.474198 | 1.48E-27 | 0.176741 | 0.00012  | 0.346128 |
| 0.373437 | 6.68E-17 | 0.20925  | 5.11E-06 | 0.412305 | 1.36E-20 | 0.208987 | 5.25E-06 | 0.362569 |
| 0.373138 | 7.10E-17 | 0.07308  | 0.11476  | 0.616549 | 3.06E-50 | 0.371479 | 9.96E-17 | 0.447674 |
| 0.263609 | 7.29E-09 | 0.254359 | 2.49E-08 | 0.405306 | 6.85E-20 | 0.296567 | 6.18E-11 | 0.28032  |
| 0.399733 | 2.41E-19 | 0.14156  | 0.00217  | 0.585321 | 2.78E-44 | 0.214303 | 2.97E-06 | 0.487923 |
| 0.333654 | 1.32E-13 | 0.079184 | 0.0874   | 0.578569 | 4.46E-43 | 0.253441 | 2.81E-08 | 0.476187 |
| 0.350637 | 5.89E-15 | 0.281327 | 6.07E-10 | 0.69661  | 4.65E-69 | 0.448023 | 1.95E-24 | 0.549168 |
| 0.266352 | 5.02E-09 | 0.06143  | 0.1851   | 0.444721 | 4.62E-24 | 0.128764 | 0.00532  | 0.342239 |
| 0.308204 | 9.83E-12 | 0.137051 | 0.003    | 0.479873 | 2.86E-28 | 0.22339  | 1.08E-06 | 0.346234 |
| 0.4805   | 2.38E-28 | 0.358632 | 1.28E-15 | 0.737911 | 1.97E-81 | 0.544534 | 2.07E-37 | 0.525881 |
| 0.449616 | 1.28E-24 | 0.304836 | 1.69E-11 | 0.713027 | 1.03E-73 | 0.477799 | 5.23E-28 | 0.49624  |
| 0.257236 | 1.71E-08 | 0.118633 | 0.01029  | 0.443757 | 5.94E-24 | 0.209594 | 4.92E-06 | 0.286757 |
| 0.351108 | 5.39E-15 | 0.137533 | 0.0029   | 0.641097 | 2.04E-55 | 0.339502 | 4.62E-14 | 0.480462 |
| 0.404948 | 7.43E-20 | 0.185021 | 5.76E-05 | 0.744866 | 9.52E-84 | 0.459373 | 9.33E-26 | 0.555264 |
| 0.4402   | 1.48E-23 | 0.185886 | 5.31E-05 | 0.569757 | 1.51E-41 | 0.243891 | 9.44E-08 | 0.566044 |
| 0.460415 | 7.02E-26 | 0.216762 | 2.27E-06 | 0.726082 | 1.17E-77 | 0.369105 | 1.61E-16 | 0.547141 |
| 0.244072 | 9.23E-08 | 0.125054 | 0.00681  | 0.524701 | 2.14E-34 | 0.244049 | 9.25E-08 | 0.429757 |
| 0.395096 | 6.74E-19 | 0.279479 | 7.93E-10 | 0.497149 | 1.59E-30 | 0.30711  | 1.17E-11 | 0.351182 |
| 0.444062 | 5.49E-24 | 0.29324  | 1.03E-10 | 0.715296 | 2.20E-74 | 0.368911 | 1.67E-16 | 0.615412 |
| 0.463394 | 3.09E-26 | 0.345642 | 1.50E-14 | 0.67613  | 1.12E-63 | 0.448591 | 1.68E-24 | 0.53196  |
| 0.454289 | 3.69E-25 | 0.351936 | 4.61E-15 | 0.745292 | 6.82E-84 | 0.475589 | 9.90E-28 | 0.581964 |
| 0.341172 | 3.41E-14 | 0.080904 | 0.08072  | 0.513805 | 8.02E-33 | 0.189687 | 3.70E-05 | 0.431283 |
| 0.45318  | 4.97E-25 | 0.377901 | 2.67E-17 | 0.697368 | 2.88E-69 | 0.664177 | 9.87E-61 | 0.442272 |
| 0.36141  | 7.42E-16 | 0.229816 | 5.16E-07 | 0.649607 | 2.54E-57 | 0.345236 | 1.62E-14 | 0.553199 |

|          |          |          |          |          |          |          |          |          |
|----------|----------|----------|----------|----------|----------|----------|----------|----------|
| 0.410638 | 2.01E-20 | 0.201886 | 1.10E-05 | 0.588395 | 7.69E-45 | 0.254233 | 2.53E-08 | 0.53493  |
| 0.41202  | 1.46E-20 | 0.231697 | 4.13E-07 | 0.747801 | 9.51E-85 | 0.431925 | 1.20E-22 | 0.600095 |
| 0.338265 | 5.78E-14 | 0.192667 | 2.77E-05 | 0.483197 | 1.08E-28 | 0.241658 | 1.24E-07 | 0.349403 |
| 0.448472 | 1.73E-24 | 0.471197 | 3.47E-27 | 0.714458 | 3.90E-74 | 0.628303 | 1.16E-52 | 0.554539 |
| 0.413509 | 1.03E-20 | 0.393988 | 8.60E-19 | 0.698536 | 1.37E-69 | 0.714106 | 4.95E-74 | 0.421053 |
| 0.35038  | 6.19E-15 | 0.159145 | 0.00056  | 0.591827 | 1.80E-45 | 0.183332 | 6.75E-05 | 0.661055 |
| 0.447531 | 2.22E-24 | 0.39943  | 2.58E-19 | 0.676062 | 1.17E-63 | 0.4375   | 2.95E-23 | 0.602904 |
| 0.364443 | 4.08E-16 | 0.267339 | 4.39E-09 | 0.612474 | 2.00E-49 | 0.541337 | 6.54E-37 | 0.388398 |
| 0.400281 | 2.13E-19 | 0.293462 | 9.95E-11 | 0.72347  | 7.53E-77 | 0.62666  | 2.57E-52 | 0.477251 |
| 0.495607 | 2.56E-30 | 0.384999 | 6.00E-18 | 0.770196 | 7.27E-93 | 0.61099  | 3.94E-49 | 0.548849 |
| 0.303975 | 1.94E-11 | 0.15499  | 0.00078  | 0.553824 | 6.82E-39 | 0.285023 | 3.53E-10 | 0.441693 |
| 0.487026 | 3.46E-29 | 0.425689 | 5.59E-22 | 0.779036 | 2.50E-96 | 0.60104  | 3.37E-47 | 0.621429 |
| 0.4957   | 2.49E-30 | 0.368445 | 1.84E-16 | 0.846444 | #####    | 0.566233 | 6.02E-41 | 0.678127 |
| 0.374091 | 5.85E-17 | 0.280107 | 7.24E-10 | 0.708242 | 2.53E-72 | 0.658313 | 2.45E-59 | 0.435961 |
| 0.411521 | 1.64E-20 | 0.405601 | 6.40E-20 | 0.785045 | 8.95E-99 | 0.612275 | 2.19E-49 | 0.626542 |
| 0.379676 | 1.84E-17 | 0.224921 | 9.08E-07 | 0.603569 | 1.10E-47 | 0.527437 | 8.45E-35 | 0.328693 |
| 0.307954 | 1.02E-11 | 0.054026 | 0.24392  | 0.539684 | 1.18E-36 | 0.241554 | 1.26E-07 | 0.366633 |
| 0.341308 | 3.33E-14 | 0.071884 | 0.12084  | 0.46616  | 1.43E-26 | 0.202191 | 1.07E-05 | 0.39439  |
| 0.372546 | 8.02E-17 | 0.180498 | 8.77E-05 | 0.515823 | 4.14E-33 | 0.30374  | 2.01E-11 | 0.317349 |
| 0.338182 | 5.87E-14 | 0.174824 | 0.00015  | 0.583606 | 5.66E-44 | 0.326843 | 4.35E-13 | 0.425666 |
| 0.472644 | 2.30E-27 | 0.368546 | 1.80E-16 | 0.820971 | #####    | 0.59577  | 3.33E-46 | 0.657345 |
| 0.366157 | 2.90E-16 | 0.300765 | 3.21E-11 | 0.374144 | 5.78E-17 | 0.336049 | 8.61E-14 | 0.355828 |
| 0.391434 | 1.50E-18 | 0.18041  | 8.84E-05 | 0.514553 | 6.28E-33 | 0.240639 | 1.41E-07 | 0.320389 |
| 0.327885 | 3.63E-13 | 0.158399 | 0.00059  | 0.60436  | 7.76E-48 | 0.271734 | 2.38E-09 | 0.466195 |
| 0.467885 | 8.85E-27 | 0.412388 | 1.34E-20 | 0.810667 | #####    | 0.640939 | 2.22E-55 | 0.665233 |
| 0.45535  | 2.78E-25 | 0.268097 | 3.95E-09 | 0.721011 | 4.24E-76 | 0.465865 | 1.56E-26 | 0.52773  |
| 0.353775 | 3.25E-15 | 0.155519 | 0.00075  | 0.733338 | 6.00E-80 | 0.49834  | 1.10E-30 | 0.518047 |
| 0.455761 | 2.48E-25 | 0.408928 | 2.98E-20 | 0.706721 | 6.89E-72 | 0.523863 | 2.84E-34 | 0.55897  |
| 0.350206 | 6.39E-15 | 0.135273 | 0.0034   | 0.697064 | 3.49E-69 | 0.387462 | 3.54E-18 | 0.517667 |
| 0.409792 | 2.44E-20 | 0.231733 | 4.12E-07 | 0.59733  | 1.70E-46 | 0.325128 | 5.85E-13 | 0.446167 |
| 0.455018 | 3.04E-25 | 0.359805 | 1.02E-15 | 0.693044 | 4.33E-68 | 0.417854 | 3.69E-21 | 0.803278 |
| 0.483923 | 8.70E-29 | 0.4272   | 3.86E-22 | 0.80216  | #####    | 0.628741 | 9.41E-53 | 0.579312 |
| 0.316739 | 2.42E-12 | 0.134217 | 0.00366  | 0.339368 | 4.73E-14 | 0.101564 | 0.02819  | 0.304258 |
| 0.489697 | 1.55E-29 | 0.311742 | 5.53E-12 | 0.707086 | 5.42E-72 | 0.500573 | 5.50E-31 | 0.57503  |
| 0.353391 | 3.50E-15 | 0.165132 | 0.00034  | 0.528766 | 5.36E-35 | 0.225758 | 8.25E-07 | 0.42873  |
| 0.338823 | 5.23E-14 | 0.25762  | 1.62E-08 | 0.395084 | 6.76E-19 | 0.331916 | 1.79E-13 | 0.157779 |
| 0.262565 | 8.40E-09 | 0.093486 | 0.04346  | 0.356923 | 1.78E-15 | 0.235722 | 2.56E-07 | 0.158244 |
| 0.196824 | 1.84E-05 | -0.13346 | 0.00386  | 0.436783 | 3.54E-23 | 0.277947 | 9.89E-10 | 0.178439 |
| 0.494669 | 3.42E-30 | 0.294049 | 9.10E-11 | 0.728926 | 1.52E-78 | 0.486358 | 4.22E-29 | 0.524238 |
| 0.494183 | 3.97E-30 | 0.383061 | 9.04E-18 | 0.736771 | 4.65E-81 | 0.518375 | 1.78E-33 | 0.58275  |
| 0.431405 | 1.37E-22 | 0.267346 | 4.38E-09 | 0.585242 | 2.87E-44 | 0.347643 | 1.03E-14 | 0.4309   |
| 0.287227 | 2.55E-10 | 0.006139 | 0.89474  | 0.618865 | 1.04E-50 | 0.253706 | 2.71E-08 | 0.456738 |
| 0.393461 | 9.66E-19 | 0.284939 | 3.57E-10 | 0.633619 | 8.65E-54 | 0.396233 | 5.25E-19 | 0.500897 |
| 0.433735 | 7.64E-23 | 0.315469 | 2.99E-12 | 0.783854 | 2.77E-98 | 0.57787  | 5.92E-43 | 0.589702 |
| 0.510393 | 2.43E-32 | 0.358279 | 1.37E-15 | 0.77924  | 2.07E-96 | 0.496354 | 2.04E-30 | 0.804315 |

|          |          |          |          |          |          |          |          |          |
|----------|----------|----------|----------|----------|----------|----------|----------|----------|
| 0.319711 | 1.47E-12 | 0.187577 | 4.52E-05 | 0.5681   | 2.90E-41 | 0.266306 | 5.05E-09 | 0.5055   |
| 0.317498 | 2.13E-12 | 0.154943 | 0.00078  | 0.636323 | 2.26E-54 | 0.341796 | 3.04E-14 | 0.524231 |
| 0.368839 | 1.70E-16 | 0.318172 | 1.91E-12 | 0.628677 | 9.71E-53 | 0.401062 | 1.79E-19 | 0.488969 |
| 0.220054 | 1.57E-06 | 0.083981 | 0.0698   | 0.260469 | 1.11E-08 | 0.125593 | 0.00658  | 0.221358 |
| 0.435072 | 5.46E-23 | 0.276081 | 1.29E-09 | 0.754491 | 4.42E-87 | 0.452285 | 6.31E-25 | 0.611419 |
| 0.355008 | 2.57E-15 | 0.268099 | 3.95E-09 | 0.675331 | 1.78E-63 | 0.38499  | 6.01E-18 | 0.525952 |
| 0.386928 | 3.97E-18 | 0.370239 | 1.28E-16 | 0.723592 | 6.91E-77 | 0.478418 | 4.37E-28 | 0.565522 |
| 0.444937 | 4.37E-24 | 0.174847 | 0.00015  | 0.577632 | 6.52E-43 | 0.305169 | 1.60E-11 | 0.459099 |
| 0.422762 | 1.14E-21 | 0.369035 | 1.63E-16 | 0.765994 | 2.84E-91 | 0.689444 | 4.00E-67 | 0.548314 |
| 0.291909 | 1.26E-10 | 0.191561 | 3.08E-05 | 0.370181 | 1.30E-16 | 0.27812  | 9.64E-10 | 0.231933 |
| 0.339256 | 4.83E-14 | 0.063055 | 0.17372  | 0.528315 | 6.26E-35 | 0.222556 | 1.19E-06 | 0.391316 |
| 0.045644 | 0.32499  | -0.1565  | 0.00069  | 0.012427 | 0.78882  | -0.1088  | 0.01868  | -0.00904 |
| -0.02709 | 0.55929  | -0.07024 | 0.12959  | -0.01885 | 0.68449  | -0.03718 | 0.42276  | -0.0937  |
| 0.21494  | 2.77E-06 | 0.072137 | 0.11953  | 0.08299  | 0.07318  | 0.168478 | 0.00025  | 0.047722 |
| -0.01101 | 0.81244  | -0.05886 | 0.20419  | -0.05489 | 0.23646  | -0.05316 | 0.25153  | -0.07674 |
| 0.016902 | 0.71563  | -0.05963 | 0.19836  | -0.03811 | 0.41132  | -0.08475 | 0.06729  | -0.09474 |
| 0.006848 | 0.88267  | -0.03948 | 0.39465  | -0.09    | 0.05193  | -0.12558 | 0.00658  | -0.05066 |
| 0.050561 | 0.27554  | -0.1561  | 0.00071  | -0.03637 | 0.43298  | -0.0872  | 0.05971  | -0.11724 |
| 0.022125 | 0.63343  | -0.01663 | 0.72002  | 0.034786 | 0.45329  | -0.02325 | 0.61625  | 0.072973 |
| 0.046689 | 0.31403  | 5.69E-05 | 0.99902  | 0.059862 | 0.19659  | 0.007372 | 0.87377  | 0.001829 |
| -0.08298 | 0.07322  | -0.06769 | 0.14416  | -0.04533 | 0.32839  | -0.0581  | 0.21008  | -0.09303 |
| -0.18934 | 3.82E-05 | -0.20568 | 7.43E-06 | -0.1425  | 0.00202  | -0.17879 | 0.0001   | -0.14068 |
| 0.0432   | 0.3516   | 0.028335 | 0.54132  | 0.066542 | 0.15108  | 0.036837 | 0.42709  | 0.019081 |
| -0.04962 | 0.28456  | -0.07922 | 0.08726  | 0.009348 | 0.84033  | -0.0558  | 0.22877  | -0.03295 |
| 0.087532 | 0.05874  | 0.006393 | 0.89041  | 0.101907 | 0.02766  | 0.048421 | 0.29639  | 0.02349  |
| 0.025374 | 0.58441  | -0.04268 | 0.35748  | 0.005845 | 0.89975  | 0.021188 | 0.64789  | -0.02914 |
| -0.06714 | 0.14741  | -0.07929 | 0.08697  | 0.008084 | 0.86169  | 0.030808 | 0.50661  | -0.04272 |
| 0.134928 | 0.00348  | 0.072294 | 0.11873  | 0.189837 | 3.64E-05 | 0.116172 | 0.012    | 0.145761 |
| -0.04152 | 0.37067  | 0.050872 | 0.27259  | -0.03653 | 0.4309   | -0.00854 | 0.85395  | -0.07297 |
| 0.036116 | 0.43619  | -0.00777 | 0.86703  | 0.070684 | 0.12718  | 0.030418 | 0.512    | -0.07496 |
| 0.018949 | 0.68296  | -0.11472 | 0.01311  | 0.100289 | 0.03024  | -0.01903 | 0.6816   | -0.01527 |
| 0.069273 | 0.13497  | 0.003597 | 0.93821  | 0.132575 | 0.0041   | 0.046386 | 0.31719  | 0.12234  |
| -0.0262  | 0.5723   | -0.11252 | 0.01498  | 0.024135 | 0.6029   | -0.08948 | 0.0533   | 0.039226 |
| 0.083487 | 0.07147  | -0.03743 | 0.41964  | 0.140129 | 0.0024   | -0.07308 | 0.11476  | 0.128539 |
| -0.03734 | 0.42084  | -0.01684 | 0.71664  | -0.00778 | 0.86676  | -0.15904 | 0.00056  | -0.00405 |
| -0.05902 | 0.20294  | -0.06662 | 0.1506   | -0.00693 | 0.88119  | -0.09151 | 0.04811  | -0.03002 |
| -0.00397 | 0.93178  | -0.10758 | 0.02005  | -0.03042 | 0.51198  | -0.08384 | 0.07028  | -0.08356 |
| 0.002916 | 0.94988  | 0.004389 | 0.92464  | 0.063918 | 0.1679   | 0.028237 | 0.54273  | 0.012144 |
| -0.07796 | 0.09243  | -0.13169 | 0.00436  | -0.07051 | 0.12811  | -0.04685 | 0.31232  | -0.09388 |
| -0.20273 | 1.01E-05 | -0.12957 | 0.00504  | -0.06794 | 0.14267  | -0.08774 | 0.05815  | -0.10966 |
| -0.0945  | 0.04123  | -0.13158 | 0.0044   | -0.14092 | 0.00227  | -0.17343 | 0.00017  | -0.14832 |
| -0.06881 | 0.13759  | -0.12539 | 0.00667  | -0.10782 | 0.01977  | -0.17331 | 0.00017  | -0.13727 |
| -0.1787  | 0.0001   | -0.08271 | 0.07415  | -0.15394 | 0.00084  | -0.2133  | 3.31E-06 | -0.17821 |
| 0.019926 | 0.66757  | 0.000576 | 0.99009  | 0.031983 | 0.49052  | -0.00501 | 0.91397  | 0.032156 |
| 0.033919 | 0.46463  | -0.02544 | 0.58336  | 0.039527 | 0.39409  | 0.004478 | 0.92311  | -0.00916 |

|          |          |          |          |          |          |          |          |          |
|----------|----------|----------|----------|----------|----------|----------|----------|----------|
| 0.064115 | 0.16659  | 0.025331 | 0.58505  | 0.094117 | 0.04206  | 0.045623 | 0.32522  | 0.036866 |
| -0.03534 | 0.44616  | -0.1316  | 0.00439  | -0.07349 | 0.11273  | -0.17243 | 0.00018  | -0.10542 |
| -0.07602 | 0.10083  | -0.2076  | 6.08E-06 | -0.08298 | 0.07321  | -0.19637 | 1.92E-05 | -0.12576 |
| -0.05913 | 0.20215  | -0.19082 | 3.31E-05 | -0.13269 | 0.00407  | -0.20732 | 6.26E-06 | -0.1496  |
| -0.05484 | 0.23689  | -0.14911 | 0.00123  | -0.09839 | 0.03353  | -0.14026 | 0.00238  | -0.13582 |
| 0.111985 | 0.01547  | 0.042895 | 0.35501  | 0.040687 | 0.38035  | 0.024937 | 0.5909   | 0.011035 |
| -0.08807 | 0.05718  | -0.12652 | 0.00618  | -0.0461  | 0.32014  | -0.10434 | 0.02413  | -0.03212 |
| -0.0972  | 0.03575  | -0.09332 | 0.04383  | -0.08697 | 0.0604   | -0.14352 | 0.00188  | -0.10604 |
| 0.090794 | 0.0499   | 0.026885 | 0.56222  | 0.04171  | 0.36847  | 0.023549 | 0.61173  | 0.026318 |
| -0.02271 | 0.62451  | -0.08074 | 0.08135  | -0.04613 | 0.31988  | -0.11327 | 0.01432  | -0.07945 |
| 0.003086 | 0.94697  | 0.002023 | 0.96522  | 0.040278 | 0.38516  | 0.014842 | 0.74905  | -0.00693 |
| 0.034947 | 0.4512   | 0.033755 | 0.46679  | 0.079258 | 0.0871   | 0.047338 | 0.30735  | 0.04333  |
| -0.01439 | 0.7564   | -0.03233 | 0.48584  | -0.0019  | 0.96731  | -0.02418 | 0.60215  | -0.04414 |
| -0.00586 | 0.89943  | 0.008448 | 0.85552  | 0.02831  | 0.54169  | 0.013893 | 0.76461  | -0.02252 |
| -0.00764 | 0.86918  | -0.052   | 0.26206  | 0.058293 | 0.2086   | -0.01252 | 0.78724  | -0.00054 |
| -0.17172 | 0.00019  | -0.12241 | 0.00809  | -0.13502 | 0.00346  | -0.17593 | 0.00013  | -0.09172 |
| -0.00235 | 0.95957  | -0.11353 | 0.0141   | -0.0632  | 0.17271  | -0.18276 | 7.11E-05 | -0.04639 |
| 0.05192  | 0.26282  | 0.082475 | 0.07498  | 0.092764 | 0.04511  | 0.086016 | 0.06327  | 0.085936 |
| 0.099173 | 0.03214  | 0.016729 | 0.71842  | 0.00718  | 0.87703  | 0.03542  | 0.44509  | -0.06701 |
| -0.03138 | 0.4988   | -0.05899 | 0.2032   | -0.07153 | 0.12266  | -0.1796  | 9.52E-05 | 0.025478 |
| -0.03517 | 0.44836  | -0.15518 | 0.00077  | -0.04521 | 0.32967  | -0.13853 | 0.0027   | -0.059   |
| 0.043112 | 0.35258  | -0.10272 | 0.02644  | -0.06813 | 0.14156  | -0.14914 | 0.00123  | -0.04148 |
| -0.07031 | 0.12923  | -0.10483 | 0.02348  | -0.20728 | 6.29E-06 | -0.26036 | 1.13E-08 | -0.19041 |
| 0.049183 | 0.28885  | -0.04971 | 0.28367  | 0.041489 | 0.37102  | -0.09526 | 0.03962  | 0.033161 |
| -0.12783 | 0.00567  | -0.16573 | 0.00032  | -0.10063 | 0.02968  | -0.11659 | 0.01169  | -0.10603 |
| -0.18556 | 5.48E-05 | -0.23485 | 2.84E-07 | -0.25022 | 4.25E-08 | -0.28069 | 6.66E-10 | -0.19771 |
| 0.05786  | 0.21201  | -0.01274 | 0.78357  | 0.022134 | 0.63329  | -0.00853 | 0.85417  | -0.03419 |
| 0.036049 | 0.43704  | -0.06712 | 0.14754  | 0.076223 | 0.09993  | -0.07747 | 0.09451  | -0.03403 |
| -0.02718 | 0.55797  | -0.01935 | 0.67657  | -0.04942 | 0.28648  | -0.13469 | 0.00354  | -0.03795 |
| -0.03421 | 0.46085  | -0.1403  | 0.00238  | -0.02643 | 0.56886  | -0.07207 | 0.11986  | -0.08771 |
| -0.01094 | 0.81353  | -0.08815 | 0.05698  | -0.00027 | 0.99541  | -0.04761 | 0.30453  | -0.05221 |
| -0.0875  | 0.05884  | -0.09262 | 0.04545  | -0.09622 | 0.03765  | -0.12332 | 0.00763  | -0.065   |
| -0.04118 | 0.37456  | 0.026715 | 0.5647   | -0.1291  | 0.0052   | -0.17125 | 0.0002   | -0.15728 |
| -0.05304 | 0.25264  | -0.04365 | 0.34665  | -0.11487 | 0.013    | -0.09227 | 0.04627  | -0.16072 |
| 0.033385 | 0.4717   | -0.12023 | 0.0093   | -0.13856 | 0.00269  | -0.16847 | 0.00026  | -0.142   |
| -0.04785 | 0.30214  | -0.13846 | 0.00271  | -0.07215 | 0.11947  | -0.14719 | 0.00142  | -0.04634 |
| 0.044629 | 0.33588  | -0.01339 | 0.77297  | -0.11396 | 0.01374  | -0.12517 | 0.00676  | -0.11398 |
| 0.05416  | 0.24275  | -0.08523 | 0.06574  | -0.12136 | 0.00866  | -0.23807 | 1.93E-07 | -0.10489 |
| -0.06887 | 0.13728  | -0.0901  | 0.05169  | -0.12359 | 0.0075   | -0.17592 | 0.00013  | -0.14463 |
| -0.01932 | 0.67717  | -0.10161 | 0.02812  | -0.10173 | 0.02793  | -0.147   | 0.00145  | -0.06952 |
| -0.03703 | 0.42461  | -0.02568 | 0.57991  | 0.045385 | 0.32775  | 0.023502 | 0.61244  | -0.01298 |
| 0.112727 | 0.0148   | -0.03058 | 0.50975  | 0.091156 | 0.04899  | 0.038872 | 0.40197  | 0.081199 |
| 0.011598 | 0.8026   | -0.05725 | 0.21689  | 0.037525 | 0.41849  | -0.00128 | 0.97797  | 0.000329 |
| 0.013607 | 0.76931  | -0.10884 | 0.01864  | 0.065853 | 0.15537  | -0.03414 | 0.46171  | 0.020035 |
| 0.125486 | 0.00662  | 0.060476 | 0.19203  | 0.198831 | 1.50E-05 | 0.081265 | 0.07937  | 0.10757  |

|          |          |          |          |          |          |          |          |          |
|----------|----------|----------|----------|----------|----------|----------|----------|----------|
| 0.052474 | 0.25775  | -0.10558 | 0.0225   | 0.080176 | 0.08349  | -0.00131 | 0.97746  | -0.04948 |
| -0.10433 | 0.02416  | -0.12408 | 0.00726  | -0.18748 | 4.57E-05 | -0.19645 | 1.91E-05 | -0.0863  |
| -0.01395 | 0.76367  | -0.01067 | 0.81807  | 0.043527 | 0.34796  | 0.060086 | 0.19492  | -0.03324 |
| -0.07379 | 0.11129  | -0.05193 | 0.26277  | 0.00594  | 0.89813  | -0.00453 | 0.92229  | -0.03527 |
| 0.039241 | 0.39752  | -0.03604 | 0.43713  | 0.039781 | 0.39105  | 0.006925 | 0.88136  | -0.00771 |
| -0.06099 | 0.18825  | -0.07116 | 0.12462  | 0.007441 | 0.87259  | -0.01917 | 0.6794   | -0.03656 |
| 0.025992 | 0.57528  | -0.01568 | 0.73542  | 0.056633 | 0.22188  | 0.03421  | 0.46081  | 0.005971 |
| 0.003706 | 0.93633  | -0.10295 | 0.02611  | -0.07839 | 0.09062  | -0.11993 | 0.00948  | -0.09945 |
| 0.000347 | 0.99403  | -0.10679 | 0.02098  | -0.07223 | 0.11905  | -0.11975 | 0.00959  | -0.11922 |
| 0.050342 | 0.27762  | -0.0758  | 0.10183  | -0.03114 | 0.50209  | -0.07905 | 0.08794  | -0.07701 |
| 0.041103 | 0.37549  | -0.01042 | 0.82234  | 0.012567 | 0.7865   | 0.009793 | 0.83283  | -0.02726 |
| 0.019894 | 0.66806  | -0.07282 | 0.11608  | -0.02527 | 0.58591  | -0.05582 | 0.2286   | -0.09477 |
| -0.03944 | 0.39511  | -0.10674 | 0.02105  | -0.05702 | 0.21873  | -0.089   | 0.05462  | -0.09253 |
| -0.01234 | 0.79034  | -0.08772 | 0.0582   | -0.01863 | 0.68803  | -0.03237 | 0.48526  | -0.06777 |
| -0.01083 | 0.81536  | -0.09355 | 0.04333  | -0.04255 | 0.35891  | -0.08717 | 0.0598   | -0.07088 |
| -0.04496 | 0.33228  | -0.10692 | 0.02084  | -0.03821 | 0.41001  | -0.08837 | 0.05636  | -0.08501 |
| -0.04846 | 0.29597  | -0.04715 | 0.30931  | 0.027695 | 0.5505   | 0.031231 | 0.50078  | -0.06453 |
| 0.09482  | 0.04054  | -0.03192 | 0.49134  | 0.053209 | 0.25114  | -0.02364 | 0.61029  | 0.037809 |
| 0.068301 | 0.14054  | -0.02567 | 0.58003  | 0.083491 | 0.07146  | 0.007951 | 0.86394  | 0.018053 |
| -0.03374 | 0.46697  | -0.14122 | 0.00222  | -0.08081 | 0.08107  | -0.11001 | 0.01739  | -0.09106 |
| 0.015675 | 0.73547  | -0.09195 | 0.04704  | 0.040051 | 0.38785  | -0.05494 | 0.23601  | 0.003449 |
| -0.09166 | 0.04774  | -0.2425  | 1.12E-07 | -0.15684 | 0.00067  | -0.21298 | 3.42E-06 | -0.23271 |
| -0.08205 | 0.07651  | -0.162   | 0.00044  | -0.08838 | 0.05631  | -0.22335 | 1.09E-06 | -0.0303  |
| 0.062957 | 0.1744   | -0.05511 | 0.2346   | -0.02509 | 0.58859  | -0.03521 | 0.44785  | -0.06755 |
| 0.006437 | 0.88966  | -0.10511 | 0.02311  | 0.008337 | 0.8574   | -0.03145 | 0.49776  | -0.05357 |
| 0.131793 | 0.00433  | -0.1081  | 0.01945  | 0.121076 | 0.00882  | -0.05045 | 0.27655  | 0.094332 |
| 0.615539 | 4.89E-50 | 0.283747 | 4.26E-10 | 0.665301 | 5.28E-61 | 0.512265 | 1.32E-32 | 0.51923  |
| 0.45339  | 4.70E-25 | -0.04999 | 0.28102  | 0.373923 | 6.05E-17 | 0.136768 | 0.00306  | 0.367104 |
| 0.651657 | 8.62E-58 | 0.245295 | 7.92E-08 | 0.701281 | 2.37E-70 | 0.485856 | 4.90E-29 | 0.550645 |
| 0.604909 | 6.08E-48 | 0.132259 | 0.0042   | 0.361274 | 7.62E-16 | 0.237246 | 2.13E-07 | 0.236681 |
| 0.65015  | 1.91E-57 | 0.223858 | 1.02E-06 | 0.496399 | 2.01E-30 | 0.46845  | 7.55E-27 | 0.310944 |
| 0.650303 | 1.76E-57 | 0.298677 | 4.45E-11 | 0.583659 | 5.54E-44 | 0.56984  | 1.46E-41 | 0.499214 |
| 0.463257 | 3.21E-26 | -0.23234 | 3.83E-07 | 0.288214 | 2.20E-10 | 0.00809  | 0.86158  | 0.22371  |
| 0.501351 | 4.31E-31 | 0.043358 | 0.34984  | 0.21386  | 3.11E-06 | 0.074779 | 0.10654  | 0.151236 |
| 0.580314 | 2.19E-43 | 0.186408 | 5.05E-05 | 0.563963 | 1.45E-40 | 0.482582 | 1.29E-28 | 0.472367 |
| 0.674215 | 3.39E-63 | 0.201006 | 1.20E-05 | 0.626331 | 3.01E-52 | 0.386385 | 4.46E-18 | 0.459166 |
| 0.421067 | 1.71E-21 | 0.14628  | 0.00153  | 0.337998 | 6.07E-14 | 0.272587 | 2.12E-09 | 0.276046 |
| 0.700585 | 3.71E-70 | 0.450759 | 9.47E-25 | 0.71802  | 3.40E-75 | 0.650822 | 1.34E-57 | 0.611186 |
| 0.74219  | 7.56E-83 | 0.343234 | 2.34E-14 | 0.674285 | 3.26E-63 | 0.569379 | 1.76E-41 | 0.534001 |
| 0.438483 | 2.30E-23 | -0.05847 | 0.20719  | 0.250499 | 4.10E-08 | 0.090654 | 0.05025  | 0.204731 |
| 0.710894 | 4.32E-73 | 0.44471  | 4.63E-24 | 0.626506 | 2.77E-52 | 0.630907 | 3.28E-53 | 0.511394 |
| 0.54526  | 1.59E-37 | 0.284629 | 3.74E-10 | 0.622877 | 1.57E-51 | 0.558536 | 1.16E-39 | 0.547503 |
| 0.529694 | 3.90E-35 | 0.133808 | 0.00377  | 0.594459 | 5.86E-46 | 0.445164 | 4.12E-24 | 0.431622 |
| 0.394436 | 7.80E-19 | -0.03278 | 0.47978  | 0.382862 | 9.43E-18 | 0.286801 | 2.71E-10 | 0.243649 |
| 0.701324 | 2.31E-70 | 0.273824 | 1.78E-09 | 0.579044 | 3.67E-43 | 0.313867 | 3.90E-12 | 0.541882 |



|          |          |          |          |          |          |          |          |          |
|----------|----------|----------|----------|----------|----------|----------|----------|----------|
| 0.72818  | 2.60E-78 | 0.376457 | 3.59E-17 | 0.814877 | #####    | 0.604413 | 7.58E-48 | 0.651419 |
| 0.525944 | 1.41E-34 | 0.252026 | 3.37E-08 | 0.653756 | 2.83E-58 | 0.494655 | 3.43E-30 | 0.52504  |
| 0.565135 | 9.22E-41 | 0.14397  | 0.00181  | 0.652202 | 6.46E-58 | 0.422991 | 1.08E-21 | 0.565849 |
| 0.560459 | 5.57E-40 | 0.079457 | 0.08631  | 0.554601 | 5.10E-39 | 0.374222 | 5.69E-17 | 0.48551  |
| 0.551676 | 1.52E-38 | -0.06534 | 0.15863  | 0.397008 | 4.42E-19 | 0.153387 | 0.00088  | 0.28607  |
| 0.612222 | 2.25E-49 | 0.307853 | 1.04E-11 | 0.575622 | 1.47E-42 | 0.476744 | 7.10E-28 | 0.46894  |
| 0.484382 | 7.59E-29 | 0.217976 | 1.98E-06 | 0.17663  | 0.00012  | 0.308955 | 8.71E-12 | 0.188826 |
| 0.684169 | 9.76E-66 | 0.322842 | 8.66E-13 | 0.642498 | 1.00E-55 | 0.598388 | 1.07E-46 | 0.497659 |
| 0.605334 | 5.03E-48 | 0.191096 | 3.23E-05 | 0.481453 | 1.80E-28 | 0.362923 | 5.51E-16 | 0.382396 |
| 0.742767 | 4.85E-83 | 0.346228 | 1.34E-14 | 0.737129 | 3.55E-81 | 0.519204 | 1.35E-33 | 0.575542 |
| 0.697575 | 2.52E-69 | 0.229086 | 5.61E-07 | 0.61361  | 1.19E-49 | 0.377545 | 2.87E-17 | 0.529726 |
| 0.348242 | 9.24E-15 | -0.08835 | 0.05641  | 0.248689 | 5.16E-08 | 0.090815 | 0.04984  | 0.201551 |
| 0.278042 | 9.75E-10 | -0.14335 | 0.0019   | 0.134998 | 0.00347  | 0.070297 | 0.12928  | 0.050667 |
| 0.666756 | 2.35E-61 | 0.246976 | 6.41E-08 | 0.700029 | 5.29E-70 | 0.521643 | 6.00E-34 | 0.551217 |
| 0.60772  | 1.73E-48 | 0.218312 | 1.91E-06 | 0.646466 | 1.30E-56 | 0.458698 | 1.12E-25 | 0.503495 |
| 0.574059 | 2.74E-42 | 0.183872 | 6.42E-05 | 0.602772 | 1.57E-47 | 0.401252 | 1.71E-19 | 0.460864 |
| 0.338397 | 5.64E-14 | 0.057542 | 0.21454  | 0.331211 | 2.03E-13 | 0.148197 | 0.00132  | 0.325607 |
| 0.32546  | 5.53E-13 | -0.00104 | 0.98203  | 0.228883 | 5.75E-07 | 0.104224 | 0.0243   | 0.109974 |
| 0.606445 | 3.06E-48 | 0.217272 | 2.14E-06 | 0.688209 | 8.49E-67 | 0.49134  | 9.44E-30 | 0.561155 |
| 0.649215 | 3.11E-57 | 0.217246 | 2.15E-06 | 0.565745 | 7.27E-41 | 0.426915 | 4.14E-22 | 0.468099 |
| 0.707657 | 3.72E-72 | 0.34814  | 9.42E-15 | 0.704644 | 2.69E-71 | 0.564026 | 1.42E-40 | 0.583589 |
| 0.363152 | 5.27E-16 | -0.05113 | 0.27016  | 0.155345 | 0.00076  | 0.168842 | 0.00025  | 0.055597 |
| 0.414457 | 8.24E-21 | -0.06538 | 0.15836  | 0.284595 | 3.76E-10 | 0.212172 | 3.74E-06 | 0.156317 |
| 0.657544 | 3.72E-59 | 0.31124  | 6.01E-12 | 0.513114 | 1.01E-32 | 0.497293 | 1.52E-30 | 0.371721 |
| 0.592006 | 1.67E-45 | 0.096374 | 0.03735  | 0.490581 | 1.19E-29 | 0.212076 | 3.77E-06 | 0.469915 |
| 0.647657 | 7.02E-57 | 0.265479 | 5.66E-09 | 0.563489 | 1.74E-40 | 0.501211 | 4.50E-31 | 0.434338 |
| 0.639664 | 4.22E-55 | 0.27819  | 9.55E-10 | 0.596708 | 2.22E-46 | 0.458232 | 1.27E-25 | 0.523658 |
| 0.340373 | 3.94E-14 | -0.18813 | 4.29E-05 | 0.227003 | 7.15E-07 | 0.037263 | 0.42175  | 0.210899 |
| 0.479582 | 3.11E-28 | 0.122957 | 0.00781  | 0.442661 | 7.88E-24 | 0.411426 | 1.67E-20 | 0.309461 |
| 0.503558 | 2.15E-31 | 0.122247 | 0.00818  | 0.352641 | 4.03E-15 | 0.203503 | 9.32E-06 | 0.271568 |
| 0.57701  | 8.38E-43 | 0.148251 | 0.00131  | 0.564837 | 1.03E-40 | 0.45557  | 2.62E-25 | 0.438914 |
| 0.626801 | 2.40E-52 | 0.128895 | 0.00528  | 0.564652 | 1.11E-40 | 0.297215 | 5.59E-11 | 0.430977 |
| 0.631269 | 2.75E-53 | 0.16013  | 0.00051  | 0.455096 | 2.97E-25 | 0.384818 | 6.23E-18 | 0.31055  |
| 0.690551 | 2.02E-67 | 0.149842 | 0.00116  | 0.466819 | 1.19E-26 | 0.276537 | 1.21E-09 | 0.321992 |
| 0.433274 | 8.57E-23 | 0.095538 | 0.03904  | 0.350273 | 6.31E-15 | 0.347365 | 1.09E-14 | 0.20093  |
| 0.647613 | 7.18E-57 | 0.254526 | 2.44E-08 | 0.561405 | 3.88E-40 | 0.398609 | 3.10E-19 | 0.456958 |
| 0.270783 | 2.72E-09 | 0.002878 | 0.95054  | 0.253534 | 2.77E-08 | 0.238629 | 1.80E-07 | 0.175937 |
| 0.432661 | 9.99E-23 | -0.00743 | 0.87283  | 0.318397 | 1.84E-12 | 0.220222 | 1.54E-06 | 0.314831 |
| 0.615454 | 5.08E-50 | 0.212675 | 3.54E-06 | 0.608204 | 1.39E-48 | 0.486208 | 4.41E-29 | 0.45334  |
| 0.626179 | 3.24E-52 | 0.049163 | 0.28905  | 0.380735 | 1.48E-17 | 0.218377 | 1.90E-06 | 0.208645 |
| 0.291272 | 1.39E-10 | -0.11733 | 0.01116  | 0.254792 | 2.35E-08 | 0.196222 | 1.95E-05 | 0.06313  |
| 0.331409 | 1.96E-13 | -0.05442 | 0.24052  | 0.261753 | 9.37E-09 | 0.065689 | 0.1564   | 0.169874 |
| 0.457899 | 1.39E-25 | -0.02614 | 0.57307  | 0.340477 | 3.87E-14 | 0.142214 | 0.00207  | 0.231197 |
| 0.541094 | 7.14E-37 | -0.03209 | 0.48907  | 0.245163 | 8.05E-08 | 0.088186 | 0.05687  | 0.162987 |
| 0.646274 | 1.44E-56 | 0.452939 | 5.30E-25 | 0.562075 | 3.00E-40 | 0.517181 | 2.65E-33 | 0.512429 |

|          |          |          |          |          |          |          |          |          |
|----------|----------|----------|----------|----------|----------|----------|----------|----------|
| 0.439925 | 1.59E-23 | -0.02593 | 0.57619  | 0.309863 | 7.51E-12 | 0.225316 | 8.68E-07 | 0.254765 |
| 0.316728 | 2.43E-12 | -0.14964 | 0.00118  | 0.056985 | 0.21902  | -0.04852 | 0.29543  | 0.071835 |
| 0.534101 | 8.45E-36 | 0.146174 | 0.00154  | 0.245049 | 8.17E-08 | 0.23665  | 2.29E-07 | 0.191076 |
| 0.454289 | 3.69E-25 | -0.06377 | 0.16889  | 0.232585 | 3.72E-07 | 0.087914 | 0.05764  | 0.110884 |
| 0.308384 | 9.55E-12 | -0.1488  | 0.00126  | 0.14533  | 0.00164  | 0.051877 | 0.26321  | 0.121773 |
| 0.625313 | 4.91E-52 | 0.218688 | 1.83E-06 | 0.591711 | 1.89E-45 | 0.379152 | 2.05E-17 | 0.52585  |
| 0.759621 | 6.38E-89 | 0.290338 | 1.60E-10 | 0.624287 | 8.02E-52 | 0.408763 | 3.10E-20 | 0.536843 |
| 0.409382 | 2.69E-20 | -0.07674 | 0.09765  | 0.25899  | 1.35E-08 | 0.140648 | 0.00232  | 0.260462 |
| 0.627618 | 1.62E-52 | 0.308042 | 1.01E-11 | 0.782234 | 1.28E-97 | 0.555361 | 3.84E-39 | 0.665818 |
| 0.625093 | 5.46E-52 | 0.363292 | 5.13E-16 | 0.514446 | 6.51E-33 | 0.50067  | 5.34E-31 | 0.458    |
| 0.542388 | 4.49E-37 | 0.223968 | 1.01E-06 | 0.404034 | 9.15E-20 | 0.2205   | 1.50E-06 | 0.403944 |
| 0.640301 | 3.06E-55 | 0.183417 | 6.69E-05 | 0.641939 | 1.33E-55 | 0.458947 | 1.05E-25 | 0.538513 |
| 0.421276 | 1.63E-21 | 0.10724  | 0.02045  | 0.428295 | 2.95E-22 | 0.39418  | 8.25E-19 | 0.238433 |
| 0.429573 | 2.15E-22 | -0.01046 | 0.82159  | 0.547675 | 6.61E-38 | 0.315271 | 3.09E-12 | 0.397045 |
| 0.756013 | 1.27E-87 | 0.326828 | 4.36E-13 | 0.592855 | 1.16E-45 | 0.415184 | 6.94E-21 | 0.51648  |
| 0.444367 | 5.07E-24 | 0.180317 | 8.91E-05 | 0.672082 | 1.15E-62 | 0.525804 | 1.47E-34 | 0.575811 |
| 0.543931 | 2.58E-37 | 0.092181 | 0.04649  | 0.442503 | 8.21E-24 | 0.388963 | 2.57E-18 | 0.39327  |
| 0.618721 | 1.11E-50 | 0.246126 | 7.14E-08 | 0.475097 | 1.14E-27 | 0.333618 | 1.33E-13 | 0.430008 |
| 0.511986 | 1.45E-32 | 0.253986 | 2.61E-08 | 0.439973 | 1.57E-23 | 0.428743 | 2.64E-22 | 0.40542  |
| 0.687002 | 1.77E-66 | 0.36902  | 1.64E-16 | 0.728325 | 2.34E-78 | 0.549781 | 3.05E-38 | 0.615103 |
| 0.662155 | 3.01E-60 | 0.267077 | 4.55E-09 | 0.642399 | 1.05E-55 | 0.482304 | 1.40E-28 | 0.515268 |
| 0.605796 | 4.09E-48 | 0.074366 | 0.1085   | 0.423188 | 1.03E-21 | 0.351204 | 5.29E-15 | 0.298193 |
| 0.630981 | 3.16E-53 | 0.263028 | 7.89E-09 | 0.456219 | 2.20E-25 | 0.426666 | 4.40E-22 | 0.326473 |
| 0.631837 | 2.08E-53 | 0.223522 | 1.06E-06 | 0.748208 | 6.89E-85 | 0.535503 | 5.17E-36 | 0.599609 |
| 0.350401 | 6.16E-15 | -0.02692 | 0.56167  | 0.252491 | 3.17E-08 | 0.125955 | 0.00642  | 0.212501 |
| 0.346536 | 1.27E-14 | -0.12099 | 0.00886  | 0.21877  | 1.82E-06 | 0.048585 | 0.29476  | 0.11297  |
| 0.440904 | 1.24E-23 | 0.019335 | 0.67686  | 0.519076 | 1.41E-33 | 0.343188 | 2.36E-14 | 0.360231 |
| 0.750535 | 1.08E-85 | 0.263166 | 7.75E-09 | 0.500915 | 4.94E-31 | 0.29104  | 1.44E-10 | 0.432233 |
| 0.74032  | 3.17E-82 | 0.283208 | 4.61E-10 | 0.657765 | 3.30E-59 | 0.444721 | 4.62E-24 | 0.534562 |
| 0.455652 | 2.56E-25 | 0.054828 | 0.23699  | 0.28805  | 2.25E-10 | 0.107094 | 0.02062  | 0.276818 |
| 0.699071 | 9.76E-70 | 0.334036 | 1.23E-13 | 0.600275 | 4.71E-47 | 0.506386 | 8.78E-32 | 0.482955 |
| 0.593728 | 8.01E-46 | 0.246345 | 6.94E-08 | 0.605268 | 5.18E-48 | 0.522703 | 4.20E-34 | 0.49293  |
| 0.738956 | 8.94E-82 | 0.367264 | 2.33E-16 | 0.716982 | 6.94E-75 | 0.60511  | 5.56E-48 | 0.576728 |
| 0.671475 | 1.63E-62 | 0.040694 | 0.38026  | 0.475525 | 1.01E-27 | 0.171971 | 0.00019  | 0.383393 |
| 0.538185 | 2.01E-36 | 0.196958 | 1.81E-05 | 0.645865 | 1.78E-56 | 0.615005 | 6.26E-50 | 0.450113 |
| 0.581172 | 1.54E-43 | 0.138547 | 0.0027   | 0.367755 | 2.11E-16 | 0.189155 | 3.89E-05 | 0.315229 |
| 0.617741 | 1.76E-50 | 0.183663 | 6.54E-05 | 0.626081 | 3.40E-52 | 0.323274 | 8.04E-13 | 0.557589 |
| 0.168463 | 0.00026  | -0.08369 | 0.07078  | 0.053707 | 0.24673  | 0.136415 | 0.00314  | 0.050509 |
| 0.5567   | 2.32E-39 | 0.130574 | 0.00471  | 0.703545 | 5.49E-71 | 0.46889  | 6.67E-27 | 0.564332 |
| 0.635639 | 3.18E-54 | 0.223752 | 1.04E-06 | 0.394231 | 8.16E-19 | 0.170591 | 0.00021  | 0.371475 |
| 0.659458 | 1.32E-59 | 0.226559 | 7.52E-07 | 0.409436 | 2.65E-20 | 0.335186 | 1.00E-13 | 0.324703 |
| 0.496877 | 1.73E-30 | -0.12108 | 0.00881  | 0.208332 | 5.63E-06 | -0.07325 | 0.11393  | 0.195894 |
| 0.676568 | 8.69E-64 | 0.324947 | 6.04E-13 | 0.643182 | 7.07E-56 | 0.499461 | 7.78E-31 | 0.512976 |
| 0.582985 | 7.31E-44 | 0.292698 | 1.12E-10 | 0.568118 | 2.88E-41 | 0.603412 | 1.18E-47 | 0.434215 |
| 0.650532 | 1.56E-57 | 0.158374 | 0.00059  | 0.670106 | 3.55E-62 | 0.431597 | 1.30E-22 | 0.567492 |

|          |          |          |          |          |          |          |          |          |
|----------|----------|----------|----------|----------|----------|----------|----------|----------|
| 0.589224 | 5.43E-45 | 0.227963 | 6.40E-07 | 0.481044 | 2.03E-28 | 0.317559 | 2.11E-12 | 0.444169 |
| 0.598989 | 8.26E-47 | 0.26585  | 5.38E-09 | 0.597496 | 1.58E-46 | 0.460844 | 6.24E-26 | 0.517512 |
| 0.729787 | 8.11E-79 | 0.263741 | 7.17E-09 | 0.404197 | 8.81E-20 | 0.30972  | 7.69E-12 | 0.316227 |
| 0.459274 | 9.58E-26 | 0.076974 | 0.09663  | 0.486465 | 4.09E-29 | 0.346199 | 1.35E-14 | 0.450177 |
| 0.664225 | 9.61E-61 | 0.268428 | 3.78E-09 | 0.743822 | 2.14E-83 | 0.562938 | 2.15E-40 | 0.585707 |
| 0.638924 | 6.14E-55 | 0.19507  | 2.19E-05 | 0.658258 | 2.53E-59 | 0.528103 | 6.73E-35 | 0.514985 |
| 0.488916 | 1.96E-29 | 0.131039 | 0.00456  | 0.483902 | 8.75E-29 | 0.267008 | 4.59E-09 | 0.461312 |
| 0.624985 | 5.75E-52 | 0.293177 | 1.04E-10 | 0.725017 | 2.51E-77 | 0.476899 | 6.79E-28 | 0.64208  |
| 0.62502  | 5.65E-52 | 0.164715 | 0.00035  | 0.525651 | 1.55E-34 | 0.279153 | 8.31E-10 | 0.404769 |
| 0.533557 | 1.02E-35 | 0.286356 | 2.90E-10 | 0.582142 | 1.03E-43 | 0.461089 | 5.83E-26 | 0.506749 |
| 0.029477 | 0.52515  | -0.17797 | 0.00011  | -0.11785 | 0.01081  | -0.22306 | 1.12E-06 | -0.11782 |
| 0.200244 | 1.30E-05 | 0.094156 | 0.04197  | -0.07122 | 0.1243   | -0.12316 | 0.00771  | -0.04755 |
| 0.010191 | 0.82616  | -0.23345 | 3.36E-07 | -0.12174 | 0.00845  | -0.23065 | 4.68E-07 | -0.1293  |
| 0.161074 | 0.00048  | 0.03912  | 0.39898  | -0.08649 | 0.06183  | -0.16002 | 0.00052  | -0.09293 |
| -0.00761 | 0.86972  | -0.25998 | 1.19E-08 | -0.11859 | 0.01032  | -0.34596 | 1.41E-14 | -0.18985 |
| 0.209142 | 5.16E-06 | 0.001869 | 0.96788  | 0.010887 | 0.81449  | -0.09138 | 0.04843  | -0.07001 |
| 0.120575 | 0.0091   | -0.02367 | 0.60989  | 0.073947 | 0.11051  | -0.13681 | 0.00305  | 0.123542 |
| 0.322761 | 8.78E-13 | 0.121842 | 0.00839  | 0.105422 | 0.0227   | -0.04996 | 0.2813   | 0.109229 |
| 0.106642 | 0.02117  | 0.036071 | 0.43677  | 0.054865 | 0.23667  | -0.15735 | 0.00064  | 0.124196 |
| 0.11923  | 0.00991  | -0.07798 | 0.09235  | -0.1843  | 6.17E-05 | -0.26099 | 1.04E-08 | -0.14735 |
| 0.02745  | 0.55403  | -0.23098 | 4.50E-07 | -0.00864 | 0.85229  | -0.23499 | 2.80E-07 | -0.07499 |
| 0.022291 | 0.63088  | 0.036843 | 0.42701  | -0.20649 | 6.83E-06 | -0.20678 | 6.62E-06 | -0.12082 |
| 0.065634 | 0.15675  | -0.09997 | 0.03077  | -0.22101 | 1.41E-06 | -0.18979 | 3.66E-05 | -0.15584 |
| 0.334276 | 1.18E-13 | 0.259223 | 1.31E-08 | 0.293494 | 9.90E-11 | 0.178612 | 0.0001   | 0.2358   |
| -0.01165 | 0.80175  | -0.18097 | 8.40E-05 | -0.13002 | 0.00489  | -0.24328 | 1.02E-07 | -0.13002 |
| 0.218528 | 1.87E-06 | 0.089296 | 0.05381  | 0.243247 | 1.02E-07 | 0.073021 | 0.11505  | 0.188949 |
| 0.122572 | 0.00801  | -0.10379 | 0.02489  | 0.004071 | 0.93008  | -0.19881 | 1.50E-05 | -0.00492 |
| 0.208933 | 5.28E-06 | -0.07933 | 0.08682  | 0.13748  | 0.00291  | -0.1281  | 0.00557  | 0.074669 |
| 0.293445 | 9.98E-11 | 0.115761 | 0.0123   | 0.256419 | 1.90E-08 | 0.071684 | 0.12188  | 0.143563 |
| 0.008359 | 0.85702  | -0.1709  | 0.00021  | 0.119318 | 0.00986  | -0.10037 | 0.0301   | 0.045477 |
| 0.135023 | 0.00346  | -0.20749 | 6.15E-06 | 0.105814 | 0.0222   | -0.18577 | 5.37E-05 | 0.064541 |
| 0.302343 | 2.51E-11 | 0.093163 | 0.04419  | 0.193999 | 2.43E-05 | -0.01817 | 0.69526  | 0.232332 |
| 0.4238   | 8.85E-22 | 0.362776 | 5.68E-16 | 0.383734 | 7.84E-18 | 0.264021 | 6.90E-09 | 0.458937 |
| -0.04569 | 0.32448  | -0.13243 | 0.00415  | -0.29672 | 6.03E-11 | -0.33883 | 5.22E-14 | -0.20397 |
| 0.122991 | 0.00779  | -0.04385 | 0.34436  | -0.0384  | 0.40778  | -0.22145 | 1.35E-06 | 0.007598 |
| 0.267513 | 4.28E-09 | 0.113608 | 0.01403  | 0.020259 | 0.66235  | -0.11523 | 0.01271  | 0.029653 |
| 0.037302 | 0.42127  | -0.11103 | 0.01638  | 0.046206 | 0.31907  | -0.05908 | 0.20254  | -0.05884 |
| 0.102971 | 0.02607  | -0.01924 | 0.67843  | -0.21559 | 2.58E-06 | -0.1795  | 9.61E-05 | -0.14947 |
| 0.181059 | 8.33E-05 | -0.0876  | 0.05854  | 0.143128 | 0.00193  | -0.03598 | 0.43798  | 0.053256 |
| 0.123902 | 0.00735  | 0.038752 | 0.40344  | -0.13087 | 0.00461  | -0.18276 | 7.11E-05 | -0.14613 |
| 0.17618  | 0.00013  | -0.13807 | 0.00279  | 0.092495 | 0.04574  | -0.11652 | 0.01174  | 0.054922 |
| 0.168286 | 0.00026  | -0.12607 | 0.00637  | -0.16891 | 0.00025  | -0.17562 | 0.00014  | -0.09559 |
| 0.223259 | 1.10E-06 | 0.031438 | 0.49794  | -0.03848 | 0.40678  | -0.10929 | 0.01816  | -0.01308 |
| 0.019644 | 0.672    | -0.11792 | 0.01076  | -0.28089 | 6.47E-10 | -0.23732 | 2.11E-07 | -0.22126 |
| 0.310114 | 7.21E-12 | 0.308981 | 8.67E-12 | 0.175718 | 0.00014  | 0.117173 | 0.01127  | 0.16419  |

|          |          |          |          |          |          |          |          |          |
|----------|----------|----------|----------|----------|----------|----------|----------|----------|
| 0.045158 | 0.33018  | -0.16664 | 0.0003   | -0.10298 | 0.02606  | -0.25462 | 2.41E-08 | -0.07504 |
| 0.155322 | 0.00076  | -0.06685 | 0.1492   | -0.0436  | 0.34715  | -0.12482 | 0.00692  | -0.072   |
| -0.08891 | 0.05487  | -0.0252  | 0.587    | -0.28037 | 6.97E-10 | -0.22973 | 5.21E-07 | -0.17855 |
| -0.01877 | 0.68575  | -0.11963 | 0.00966  | -0.22063 | 1.48E-06 | -0.27788 | 9.99E-10 | -0.16385 |
| 0.186168 | 5.17E-05 | 0.06356  | 0.1703   | -0.02201 | 0.63513  | -0.10196 | 0.02758  | 0.031752 |
| 0.358782 | 1.24E-15 | 0.253996 | 2.61E-08 | 0.246018 | 7.23E-08 | 0.084001 | 0.06974  | 0.395024 |
| 0.119055 | 0.01002  | -0.02283 | 0.6226   | 0.013002 | 0.7793   | -0.1841  | 6.28E-05 | 0.032029 |
| 0.053198 | 0.25123  | -0.12205 | 0.00828  | -0.17232 | 0.00018  | -0.2571  | 1.74E-08 | -0.14643 |
| 0.479178 | 3.50E-28 | 0.182039 | 7.61E-05 | 0.135578 | 0.00333  | 0.086875 | 0.06067  | 0.118462 |
| 0.2048   | 8.15E-06 | 0.074525 | 0.10774  | 0.283563 | 4.38E-10 | 0.103678 | 0.02506  | 0.181651 |
| 0.034729 | 0.45403  | -0.18599 | 5.26E-05 | 0.025256 | 0.58616  | -0.15891 | 0.00057  | -0.04705 |
| -0.11733 | 0.01116  | -0.23378 | 3.23E-07 | -0.19298 | 2.69E-05 | -0.18678 | 4.88E-05 | -0.24134 |
| 0.117815 | 0.01083  | 0.010573 | 0.81975  | -0.1325  | 0.00413  | -0.28483 | 3.63E-10 | 0.068766 |
| 0.031338 | 0.49931  | -0.22598 | 8.04E-07 | -0.11313 | 0.01444  | -0.22862 | 5.93E-07 | -0.14265 |
| -0.01327 | 0.77484  | -0.08884 | 0.05506  | -0.19246 | 2.83E-05 | -0.16829 | 0.00026  | -0.17321 |
| 0.065408 | 0.15818  | -0.0393  | 0.39679  | -0.10388 | 0.02477  | -0.13009 | 0.00487  | -0.02698 |
| -0.10908 | 0.01838  | -0.14522 | 0.00165  | -0.1568  | 0.00067  | -0.21106 | 4.21E-06 | -0.21416 |
| 0.037076 | 0.42409  | -0.19943 | 1.41E-05 | -0.02416 | 0.60246  | -0.2451  | 8.12E-08 | -0.0292  |
| 0.339972 | 4.24E-14 | 0.014395 | 0.75637  | 0.216456 | 2.34E-06 | 0.017784 | 0.70149  | 0.270615 |
| 0.249283 | 4.79E-08 | -0.09627 | 0.03755  | -0.09032 | 0.0511   | -0.18023 | 8.98E-05 | -0.10903 |
| 0.320247 | 1.34E-12 | 0.116933 | 0.01144  | 0.114151 | 0.01358  | 0.16475  | 0.00035  | -0.00551 |
| 0.163273 | 0.0004   | -0.1401  | 0.00241  | 0.066621 | 0.15059  | -0.07181 | 0.12121  | -0.00696 |
| 0.389302 | 2.39E-18 | -0.0072  | 0.87664  | 0.185132 | 5.70E-05 | 0.053223 | 0.25101  | 0.146431 |
| -0.22615 | 7.88E-07 | -0.19628 | 1.94E-05 | -0.11102 | 0.01639  | -0.17041 | 0.00022  | -0.12301 |
| 0.039806 | 0.39076  | -0.11354 | 0.01409  | -0.08804 | 0.05729  | -0.23213 | 3.93E-07 | -0.11465 |
| 0.231864 | 4.05E-07 | 0.021337 | 0.64558  | -0.02762 | 0.5516   | -0.14788 | 0.00135  | -0.02043 |
| 0.100499 | 0.02989  | -0.00959 | 0.83632  | 0.077988 | 0.0923   | -0.12318 | 0.0077   | 0.085036 |
| 0.144845 | 0.0017   | 0.125985 | 0.00641  | 0.289251 | 1.88E-10 | 0.170389 | 0.00022  | 0.242527 |
| -0.04045 | 0.38318  | 0.092309 | 0.04618  | -0.29332 | 1.02E-10 | -0.22918 | 5.56E-07 | -0.24476 |
| -0.10382 | 0.02486  | 0.019262 | 0.67801  | -0.15415 | 0.00083  | -0.16539 | 0.00033  | -0.18013 |
| 0.017419 | 0.70734  | 0.107542 | 0.0201   | -0.18939 | 3.80E-05 | -0.2108  | 4.33E-06 | -0.16064 |
| -0.04424 | 0.34007  | -0.13381 | 0.00377  | 0.022171 | 0.63272  | -0.15979 | 0.00053  | 0.020608 |
| 0.102056 | 0.02743  | 0.01124  | 0.80858  | -0.27129 | 2.54E-09 | -0.24545 | 7.77E-08 | -0.18176 |
| 0.208177 | 5.72E-06 | -0.03091 | 0.50525  | -0.12687 | 0.00604  | -0.15941 | 0.00054  | -0.16308 |
| -0.06635 | 0.15226  | -0.16854 | 0.00025  | -0.07712 | 0.09599  | -0.21074 | 4.36E-06 | -0.12209 |
| 0.136209 | 0.00318  | -0.10191 | 0.02765  | 0.08802  | 0.05734  | -0.02533 | 0.5851   | -0.01929 |
| -0.11163 | 0.0158   | -0.19416 | 2.39E-05 | -0.25093 | 3.88E-08 | -0.22467 | 9.35E-07 | -0.26512 |
| 0.026418 | 0.56904  | -0.11578 | 0.01229  | -0.1946  | 2.29E-05 | -0.2875  | 2.45E-10 | -0.18309 |
| -0.01899 | 0.68224  | -0.10044 | 0.02999  | -0.16159 | 0.00046  | -0.11882 | 0.01017  | -0.17432 |
| 0.073723 | 0.11159  | -0.04564 | 0.32507  | -0.17467 | 0.00015  | -0.31022 | 7.09E-12 | -0.10187 |
| 0.184793 | 5.89E-05 | -0.11643 | 0.01181  | -0.00788 | 0.8651   | -0.11431 | 0.01344  | 0.031433 |
| 0.339715 | 4.45E-14 | 0.375561 | 4.32E-17 | 0.340399 | 3.93E-14 | 0.195705 | 2.05E-05 | 0.490098 |
| 0.43851  | 2.29E-23 | 0.283518 | 4.41E-10 | 0.467094 | 1.10E-26 | 0.221293 | 1.37E-06 | 0.400949 |
| 0.213647 | 3.19E-06 | 0.022965 | 0.6206   | 0.119107 | 0.00999  | -0.07045 | 0.12846  | 0.06172  |
| 0.351981 | 4.57E-15 | 0.123223 | 0.00768  | 0.346872 | 1.19E-14 | 0.205072 | 7.92E-06 | 0.180289 |

|          |          |          |          |          |          |          |          |          |
|----------|----------|----------|----------|----------|----------|----------|----------|----------|
| 0.343467 | 2.24E-14 | 0.226084 | 7.95E-07 | 0.22583  | 8.18E-07 | 0.149743 | 0.00117  | 0.13985  |
| -0.02155 | 0.64225  | 0.053441 | 0.24908  | -0.09177 | 0.04748  | -0.13231 | 0.00418  | -0.10114 |
| 0.290177 | 1.64E-10 | 0.138667 | 0.00267  | 0.342281 | 2.79E-14 | 0.232209 | 3.89E-07 | 0.251147 |
| 0.130118 | 0.00486  | -0.12803 | 0.00559  | -0.22928 | 5.49E-07 | -0.25823 | 1.50E-08 | -0.18952 |
| 0.016782 | 0.71757  | -0.05314 | 0.25175  | -0.12368 | 0.00745  | -0.15984 | 0.00053  | -0.04243 |
| -0.03303 | 0.47641  | -0.06826 | 0.14076  | -0.0251  | 0.58845  | -0.2296  | 5.29E-07 | 0.036189 |
| 0.169663 | 0.00023  | -0.08562 | 0.06449  | 0.284736 | 3.68E-10 | -0.0187  | 0.68687  | 0.191858 |
| 0.104384 | 0.02408  | 0.00883  | 0.84906  | -0.09604 | 0.03802  | -0.1156  | 0.01242  | -0.10293 |
| -0.08622 | 0.06265  | -0.16661 | 0.0003   | -0.27105 | 2.63E-09 | -0.24113 | 1.33E-07 | -0.26397 |
| 0.224297 | 9.75E-07 | 0.148427 | 0.0013   | 0.318578 | 1.78E-12 | 0.216766 | 2.27E-06 | 0.227203 |
| 0.108527 | 0.01898  | 0.031671 | 0.49477  | -0.1164  | 0.01183  | -0.20775 | 5.98E-06 | -0.06121 |
| -0.03778 | 0.41537  | -0.18201 | 7.63E-05 | 0.108526 | 0.01898  | -0.11483 | 0.01302  | 0.033695 |
| -0.08213 | 0.07621  | -0.30448 | 1.79E-11 | -0.23635 | 2.37E-07 | -0.35994 | 9.89E-16 | -0.17489 |
| 0.178267 | 0.00011  | -0.13791 | 0.00282  | -0.02557 | 0.58157  | -0.17141 | 0.0002   | 0.013973 |
| 0.246377 | 6.92E-08 | 0.106572 | 0.02125  | 0.123848 | 0.00737  | 0.111523 | 0.0159   | 0.060222 |
| 0.234058 | 3.13E-07 | 0.053349 | 0.24989  | 0.038229 | 0.40981  | 0.003529 | 0.93937  | -0.07135 |
| 0.076528 | 0.09858  | 0.007347 | 0.87419  | -0.19756 | 1.71E-05 | -0.20001 | 1.33E-05 | -0.15804 |
| -0.07133 | 0.12376  | -0.17283 | 0.00017  | -0.12194 | 0.00834  | -0.22381 | 1.03E-06 | -0.09761 |
| 0.16915  | 0.00024  | 0.04003  | 0.38809  | -0.10695 | 0.02079  | -0.17797 | 0.00011  | -0.06065 |
| 0.192467 | 2.82E-05 | -0.12223 | 0.00819  | -0.09594 | 0.03822  | -0.25862 | 1.42E-08 | -0.0638  |
| 0.091257 | 0.04873  | -0.12621 | 0.00631  | 0.144024 | 0.00181  | 0.039887 | 0.38979  | 0.007284 |
| 0.156796 | 0.00067  | -0.20922 | 5.12E-06 | 0.155344 | 0.00076  | -0.21318 | 3.35E-06 | 0.139114 |
| 0.275087 | 1.49E-09 | -0.08409 | 0.06945  | -0.03663 | 0.42971  | -0.18902 | 3.94E-05 | 0.021274 |
| 0.243167 | 1.03E-07 | -0.03872 | 0.4038   | -0.11915 | 0.00996  | -0.16348 | 0.00039  | -0.11241 |
| 0.148475 | 0.00129  | -0.13613 | 0.0032   | 0.163325 | 0.00039  | -0.1072  | 0.0205   | 0.125174 |
| 0.081093 | 0.08001  | -0.08781 | 0.05794  | -0.0708  | 0.12658  | -0.09144 | 0.04827  | -0.11421 |
| 0.0783   | 0.091    | 0.005099 | 0.9125   | -0.27974 | 7.64E-10 | -0.20196 | 1.09E-05 | -0.14383 |
| 0.078864 | 0.08869  | -0.11894 | 0.01009  | 0.102947 | 0.0261   | -0.12167 | 0.00849  | 0.080616 |
| 0.103788 | 0.0249   | -0.07163 | 0.12214  | -0.03794 | 0.41338  | -0.14791 | 0.00135  | -0.06912 |
| 0.277852 | 1.00E-09 | -0.0388  | 0.4029   | 0.242517 | 1.12E-07 | 0.000129 | 0.99778  | 0.086092 |
| 0.031397 | 0.4985   | -0.22327 | 1.10E-06 | -0.01701 | 0.71394  | -0.19666 | 1.87E-05 | -0.09853 |
| 0.143506 | 0.00188  | -0.19281 | 2.73E-05 | 0.188989 | 3.95E-05 | -0.1296  | 0.00503  | 0.120794 |
| 0.045466 | 0.32688  | 0.122583 | 0.008    | -0.0722  | 0.11919  | -0.04574 | 0.32393  | -0.04336 |
| 0.043689 | 0.34617  | -0.1498  | 0.00117  | -0.01314 | 0.77706  | -0.11988 | 0.00951  | -0.07958 |
| 0.149386 | 0.0012   | -0.16176 | 0.00045  | 0.056532 | 0.22271  | -0.10025 | 0.03031  | -0.07276 |
| 0.109503 | 0.01793  | -0.20444 | 8.46E-06 | -0.08164 | 0.07798  | -0.18856 | 4.12E-05 | -0.06209 |
| -0.01572 | 0.73478  | -0.06194 | 0.18148  | -0.23016 | 4.95E-07 | -0.18677 | 4.88E-05 | -0.22045 |
| 0.141084 | 0.00224  | -0.02151 | 0.64292  | -0.07489 | 0.10602  | -0.20643 | 6.87E-06 | -0.08837 |
| -0.12106 | 0.00882  | -0.27477 | 1.56E-09 | -0.29323 | 1.03E-10 | -0.2389  | 1.74E-07 | -0.29546 |
| 0.157916 | 0.00061  | 0.000599 | 0.9897   | -0.03985 | 0.39024  | -0.17242 | 0.00018  | -0.08372 |
| 0.230812 | 4.59E-07 | 0.220963 | 1.42E-06 | 0.00735  | 0.87414  | -0.05781 | 0.21238  | 0.050237 |
| 0.126419 | 0.00623  | -0.02484 | 0.59235  | -0.09226 | 0.04631  | -0.26365 | 7.25E-09 | -0.08351 |
| 0.004684 | 0.91959  | -0.07275 | 0.11644  | -0.3783  | 2.45E-17 | -0.35624 | 2.03E-15 | -0.34537 |
| 0.163488 | 0.00039  | 0.184586 | 6.00E-05 | -0.18394 | 6.38E-05 | -0.10031 | 0.0302   | -0.06393 |
| -0.09384 | 0.04268  | -0.19008 | 3.56E-05 | -0.30625 | 1.35E-11 | -0.33063 | 2.25E-13 | -0.32641 |

|          |          |          |          |          |          |          |          |          |
|----------|----------|----------|----------|----------|----------|----------|----------|----------|
| -0.06083 | 0.18947  | -0.09676 | 0.0366   | -0.28462 | 3.75E-10 | -0.18783 | 4.41E-05 | -0.30378 |
| 0.109093 | 0.01836  | -0.04757 | 0.30501  | -0.00402 | 0.93091  | -0.09618 | 0.03773  | 0.009101 |
| 0.303081 | 2.23E-11 | 0.095854 | 0.03839  | -0.04127 | 0.37355  | -0.07115 | 0.12468  | -0.05273 |
| 0.0441   | 0.34164  | -0.16158 | 0.00046  | -0.18336 | 6.73E-05 | -0.21924 | 1.72E-06 | -0.22982 |
| 0.11865  | 0.01028  | -0.05957 | 0.19882  | -0.1429  | 0.00196  | -0.09855 | 0.03324  | -0.14778 |
| 0.212707 | 3.53E-06 | 0.007847 | 0.8657   | 0.044139 | 0.34122  | -0.10973 | 0.01769  | -0.04826 |
| 0.049298 | 0.28772  | -0.10145 | 0.02836  | -0.20211 | 1.08E-05 | -0.27977 | 7.61E-10 | -0.15218 |
| 0.087932 | 0.05759  | 0.144274 | 0.00177  | 0.0013   | 0.97765  | 0.039941 | 0.38915  | 0.026614 |
| -0.00716 | 0.87741  | -0.15852 | 0.00059  | -0.1656  | 0.00033  | -0.21046 | 4.49E-06 | -0.12628 |
| 0.120379 | 0.00922  | -0.07509 | 0.10508  | 0.157349 | 0.00064  | 0.047993 | 0.30069  | 0.12551  |
| 0.212016 | 3.80E-06 | -0.07199 | 0.1203   | 0.013172 | 0.77649  | -0.08463 | 0.06765  | -0.03821 |
| 0.04688  | 0.31205  | -0.17269 | 0.00018  | -0.12496 | 0.00686  | -0.22827 | 6.17E-07 | -0.12294 |
| 0.350399 | 6.16E-15 | 0.219206 | 1.73E-06 | -0.10634 | 0.02153  | 0.035203 | 0.44788  | -0.07998 |
| 0.084218 | 0.06901  | -0.12098 | 0.00887  | 0.048595 | 0.29466  | -0.00661 | 0.88676  | -0.01859 |
| 0.11841  | 0.01044  | 0.19628  | 1.94E-05 | -0.19752 | 1.71E-05 | -0.13711 | 0.00299  | -0.13303 |
| 0.15552  | 0.00075  | 0.049884 | 0.28203  | 0.119306 | 0.00986  | -0.01132 | 0.80724  | 0.196061 |
| 0.012077 | 0.79463  | -0.14119 | 0.00223  | -0.24845 | 5.32E-08 | -0.22052 | 1.49E-06 | -0.24191 |
| 0.167004 | 0.00029  | 0.056239 | 0.22512  | 0.124306 | 0.00716  | -0.01817 | 0.69525  | 0.058648 |
| -0.03606 | 0.4369   | -0.24674 | 6.61E-08 | -0.23724 | 2.13E-07 | -0.33728 | 6.90E-14 | -0.17088 |
| 0.158682 | 0.00058  | -0.09278 | 0.04508  | -0.0967  | 0.03671  | -0.22896 | 5.70E-07 | -0.04212 |
| 0.47638  | 7.88E-28 | -0.09626 | 0.03758  | 0.025522 | 0.58221  | -0.12633 | 0.00626  | 0.018059 |
| 0.07605  | 0.10071  | 0.13859  | 0.00269  | 0.402945 | 1.17E-19 | 0.418307 | 3.31E-21 | 0.329094 |
| 0.288062 | 2.25E-10 | 0.17455  | 0.00015  | 0.530432 | 3.02E-35 | 0.453513 | 4.55E-25 | 0.405073 |
| 0.24588  | 7.36E-08 | 0.148069 | 0.00133  | 0.49121  | 9.81E-30 | 0.356576 | 1.90E-15 | 0.416789 |
| 0.267066 | 4.55E-09 | 0.002673 | 0.95407  | 0.473999 | 1.56E-27 | 0.27216  | 2.25E-09 | 0.38038  |
| 0.247909 | 5.70E-08 | 0.245141 | 8.08E-08 | 0.574944 | 1.92E-42 | 0.480276 | 2.54E-28 | 0.501253 |
| 0.383583 | 8.10E-18 | 0.432119 | 1.14E-22 | 0.624906 | 5.97E-52 | 0.588751 | 6.63E-45 | 0.568753 |
| 0.0431   | 0.35271  | -0.07122 | 0.12434  | 0.120639 | 0.00907  | 0.144733 | 0.00171  | 0.135314 |
| 0.430009 | 1.93E-22 | 0.487064 | 3.42E-29 | 0.529301 | 4.46E-35 | 0.572697 | 4.72E-42 | 0.45724  |
| 0.158279 | 0.0006   | 0.063298 | 0.17207  | 0.296339 | 6.40E-11 | 0.215723 | 2.54E-06 | 0.282194 |
| 0.267769 | 4.13E-09 | 0.195241 | 2.15E-05 | 0.476991 | 6.61E-28 | 0.45071  | 9.59E-25 | 0.396376 |
| 0.223864 | 1.02E-06 | 0.315547 | 2.95E-12 | 0.377362 | 2.98E-17 | 0.485293 | 5.80E-29 | 0.311295 |
| 0.400143 | 2.20E-19 | 0.397423 | 4.03E-19 | 0.626239 | 3.15E-52 | 0.558903 | 1.01E-39 | 0.516849 |
| 0.265648 | 5.53E-09 | 0.240755 | 1.39E-07 | 0.450352 | 1.05E-24 | 0.474947 | 1.19E-27 | 0.345347 |
| 0.307658 | 1.07E-11 | 0.108007 | 0.01956  | 0.568627 | 2.36E-41 | 0.360282 | 9.26E-16 | 0.47337  |
| 0.202696 | 1.01E-05 | 0.175662 | 0.00014  | 0.503661 | 2.08E-31 | 0.379987 | 1.73E-17 | 0.4947   |
| 0.19375  | 2.49E-05 | 0.26324  | 7.67E-09 | 0.327493 | 3.89E-13 | 0.295844 | 6.91E-11 | 0.298444 |
| 0.31345  | 4.18E-12 | 0.248424 | 5.34E-08 | 0.55921  | 8.97E-40 | 0.397704 | 3.79E-19 | 0.477846 |
| 0.240552 | 1.43E-07 | 0.182478 | 7.30E-05 | 0.189232 | 3.86E-05 | 0.238037 | 1.94E-07 | 0.208547 |
| 0.2061   | 7.11E-06 | 0.029075 | 0.53082  | 0.431199 | 1.44E-22 | 0.263455 | 7.45E-09 | 0.393593 |
| 0.243421 | 1.00E-07 | 0.165324 | 0.00033  | 0.423963 | 8.51E-22 | 0.341513 | 3.20E-14 | 0.301486 |
| 0.290229 | 1.62E-10 | 0.072556 | 0.11739  | 0.568858 | 2.16E-41 | 0.373288 | 6.89E-17 | 0.463876 |
| 0.294749 | 8.17E-11 | 0.280756 | 6.59E-10 | 0.377101 | 3.15E-17 | 0.411901 | 1.50E-20 | 0.354729 |
| 0.232023 | 3.98E-07 | 0.051446 | 0.26721  | 0.253427 | 2.81E-08 | 0.296751 | 6.00E-11 | 0.166971 |
| 0.296451 | 6.29E-11 | 0.251916 | 3.42E-08 | 0.412469 | 1.31E-20 | 0.33801  | 6.05E-14 | 0.329622 |

|          |          |          |          |          |          |          |          |          |
|----------|----------|----------|----------|----------|----------|----------|----------|----------|
| 0.241609 | 1.25E-07 | 0.287939 | 2.29E-10 | 0.240251 | 1.48E-07 | 0.308144 | 9.93E-12 | 0.271253 |
| 0.372116 | 8.75E-17 | 0.176848 | 0.00012  | 0.585991 | 2.10E-44 | 0.406335 | 5.41E-20 | 0.454353 |
| 0.227776 | 6.54E-07 | 0.133313 | 0.0039   | 0.450615 | 9.84E-25 | 0.36893  | 1.67E-16 | 0.316892 |
| 0.045549 | 0.326    | -0.00914 | 0.84377  | 0.211127 | 4.18E-06 | 0.299673 | 3.81E-11 | 0.18839  |
| 0.135924 | 0.00325  | -0.08931 | 0.05377  | 0.136219 | 0.00318  | 0.105436 | 0.02268  | 0.097021 |
| 0.081578 | 0.07822  | 0.010894 | 0.81436  | -0.0256  | 0.58103  | 0.109459 | 0.01797  | -0.01289 |
| 0.222429 | 1.21E-06 | 0.162518 | 0.00042  | 0.508702 | 4.19E-32 | 0.468122 | 8.28E-27 | 0.432645 |
| 0.195751 | 2.04E-05 | 0.082847 | 0.07368  | 0.309343 | 8.18E-12 | 0.242213 | 1.16E-07 | 0.21358  |
| 0.297618 | 5.25E-11 | 0.126185 | 0.00632  | 0.549732 | 3.11E-38 | 0.370399 | 1.24E-16 | 0.488555 |
| 0.236746 | 2.26E-07 | 0.222455 | 1.20E-06 | 0.467254 | 1.06E-26 | 0.485363 | 5.68E-29 | 0.303789 |
| 0.219802 | 1.62E-06 | 0.283655 | 4.32E-10 | 0.356164 | 2.06E-15 | 0.384494 | 6.68E-18 | 0.337103 |
| 0.330694 | 2.22E-13 | 0.239188 | 1.68E-07 | 0.384703 | 6.39E-18 | 0.38158  | 1.24E-17 | 0.325503 |
| 0.294777 | 8.14E-11 | 0.168277 | 0.00026  | 0.354908 | 2.62E-15 | 0.249187 | 4.85E-08 | 0.311453 |
| 0.338965 | 5.09E-14 | 0.205956 | 7.22E-06 | 0.628468 | 1.07E-52 | 0.496493 | 1.95E-30 | 0.523103 |
| 0.208549 | 5.50E-06 | 0.077302 | 0.09521  | 0.457445 | 1.58E-25 | 0.409563 | 2.58E-20 | 0.360965 |
| 0.271126 | 2.60E-09 | 0.188714 | 4.06E-05 | 0.557208 | 1.91E-39 | 0.410838 | 1.92E-20 | 0.413634 |
| 0.213425 | 3.26E-06 | 0.144225 | 0.00178  | 0.469471 | 5.66E-27 | 0.313635 | 4.05E-12 | 0.367719 |
| 0.109399 | 0.01803  | 0.058826 | 0.20447  | 0.319981 | 1.41E-12 | 0.277805 | 1.01E-09 | 0.272007 |
| 0.410369 | 2.14E-20 | 0.349916 | 6.75E-15 | 0.51497  | 5.48E-33 | 0.44079  | 1.28E-23 | 0.408019 |
| 0.253205 | 2.89E-08 | 0.282771 | 4.92E-10 | 0.32846  | 3.29E-13 | 0.312889 | 4.58E-12 | 0.319161 |
| 0.370137 | 1.31E-16 | 0.14467  | 0.00172  | 0.622608 | 1.78E-51 | 0.428224 | 3.00E-22 | 0.507243 |
| 0.003697 | 0.9365   | 0.051808 | 0.26385  | -0.08767 | 0.05834  | 0.040781 | 0.37924  | -0.01954 |
| 0.271107 | 2.60E-09 | 0.168614 | 0.00025  | 0.301042 | 3.08E-11 | 0.286114 | 3.00E-10 | 0.2465   |
| 0.205367 | 7.68E-06 | 0.074674 | 0.10704  | 0.278923 | 8.59E-10 | 0.235323 | 2.69E-07 | 0.184019 |
| -0.03321 | 0.474    | 0.158439 | 0.00059  | 0.09267  | 0.04533  | 0.282168 | 5.37E-10 | 0.088856 |
| 0.219466 | 1.68E-06 | 0.159932 | 0.00052  | 0.301167 | 3.02E-11 | 0.315017 | 3.23E-12 | 0.176732 |
| 0.2866   | 2.80E-10 | 0.087327 | 0.05934  | 0.301233 | 2.99E-11 | 0.317542 | 2.12E-12 | 0.056906 |
| 0.218899 | 1.79E-06 | 0.062782 | 0.1756   | 0.375573 | 4.31E-17 | 0.346308 | 1.33E-14 | 0.215898 |
| 0.157638 | 0.00063  | 0.094227 | 0.04182  | 0.371897 | 9.15E-17 | 0.453965 | 4.03E-25 | 0.107719 |
| 0.213016 | 3.41E-06 | 0.099987 | 0.03075  | 0.481334 | 1.87E-28 | 0.547485 | 7.08E-38 | 0.26501  |
| 0.162983 | 0.00041  | 0.092779 | 0.04508  | 0.334205 | 1.20E-13 | 0.416175 | 5.49E-21 | 0.151248 |
| 0.354915 | 2.61E-15 | 0.178781 | 0.0001   | 0.64457  | 3.47E-56 | 0.463856 | 2.72E-26 | 0.448994 |
| 0.210999 | 4.24E-06 | 0.061457 | 0.18491  | 0.336711 | 7.65E-14 | 0.318649 | 1.76E-12 | 0.145324 |
| 0.410348 | 2.15E-20 | 0.351066 | 5.43E-15 | 0.687603 | 1.23E-66 | 0.725475 | 1.81E-77 | 0.463037 |
| 0.005677 | 0.90262  | -0.0524  | 0.2584   | 0.22506  | 8.94E-07 | 0.254654 | 2.40E-08 | 0.05408  |
| 0.351207 | 5.29E-15 | 0.31823  | 1.89E-12 | 0.585656 | 2.42E-44 | 0.623138 | 1.39E-51 | 0.393079 |
| 0.237765 | 2.00E-07 | 0.159009 | 0.00056  | 0.401867 | 1.49E-19 | 0.465749 | 1.61E-26 | 0.16722  |
| 0.052867 | 0.2542   | 0.009166 | 0.84339  | 0.240358 | 1.46E-07 | 0.319652 | 1.49E-12 | 0.055846 |
| 0.37895  | 2.14E-17 | 0.325899 | 5.12E-13 | 0.43381  | 7.49E-23 | 0.387985 | 3.17E-18 | 0.260773 |
| 0.114828 | 0.01303  | -0.0976  | 0.03499  | 0.366854 | 2.53E-16 | 0.193494 | 2.55E-05 | 0.227613 |
| 0.23288  | 3.60E-07 | 0.077731 | 0.09338  | 0.314883 | 3.30E-12 | 0.229499 | 5.35E-07 | 0.212443 |
| 0.066305 | 0.15255  | -0.08077 | 0.08121  | 0.262158 | 8.87E-09 | 0.14336  | 0.0019   | 0.174292 |
| 0.195601 | 2.07E-05 | 0.271579 | 2.44E-09 | 0.377987 | 2.62E-17 | 0.59869  | 9.40E-47 | 0.212623 |
| 0.258722 | 1.40E-08 | 0.196496 | 1.90E-05 | 0.526463 | 1.18E-34 | 0.500059 | 6.46E-31 | 0.285432 |
| -0.12573 | 0.00652  | 0.043989 | 0.34286  | -0.22416 | 9.90E-07 | -0.19502 | 2.20E-05 | -0.09412 |

|          |          |          |          |          |          |          |          |          |
|----------|----------|----------|----------|----------|----------|----------|----------|----------|
| 0.225958 | 8.06E-07 | 0.145614 | 0.0016   | 0.268053 | 3.98E-09 | 0.364663 | 3.91E-16 | 0.043137 |
| -0.00384 | 0.93409  | -0.15863 | 0.00058  | 0.151768 | 0.001    | 0.152434 | 0.00095  | 0.023854 |
| 0.272226 | 2.23E-09 | 0.191006 | 3.25E-05 | 0.694954 | 1.32E-68 | 0.648433 | 4.69E-57 | 0.465604 |
| 0.201729 | 1.12E-05 | 0.083036 | 0.07302  | 0.380489 | 1.55E-17 | 0.245718 | 7.51E-08 | 0.266024 |
| 0.309977 | 7.38E-12 | 0.068083 | 0.14182  | 0.469246 | 6.03E-27 | 0.384133 | 7.21E-18 | 0.232143 |
| 0.196168 | 1.96E-05 | 0.087415 | 0.05908  | 0.393038 | 1.06E-18 | 0.412227 | 1.39E-20 | 0.141983 |
| 0.220042 | 1.58E-06 | 0.203875 | 8.97E-06 | 0.454888 | 3.14E-25 | 0.545578 | 1.42E-37 | 0.245814 |
| 0.327901 | 3.62E-13 | 0.158307 | 0.0006   | 0.560193 | 6.17E-40 | 0.504782 | 1.46E-31 | 0.335517 |
| 0.38984  | 2.12E-18 | 0.498567 | 1.03E-30 | 0.46277  | 3.67E-26 | 0.582135 | 1.04E-43 | 0.321056 |
| 0.186744 | 4.90E-05 | -0.10199 | 0.02753  | 0.245887 | 7.35E-08 | 0.097967 | 0.0343   | 0.146872 |
| 0.208654 | 5.44E-06 | -0.00129 | 0.97778  | 0.317619 | 2.09E-12 | 0.192994 | 2.68E-05 | 0.081954 |
| 0.328899 | 3.05E-13 | 0.083287 | 0.07215  | 0.623491 | 1.17E-51 | 0.458282 | 1.26E-25 | 0.376134 |
| 0.405712 | 6.24E-20 | 0.452761 | 5.56E-25 | 0.685848 | 3.56E-66 | 0.672196 | 1.08E-62 | 0.490342 |
| 0.258876 | 1.38E-08 | 0.220918 | 1.43E-06 | 0.522156 | 5.05E-34 | 0.460245 | 7.35E-26 | 0.392259 |
| 0.180708 | 8.60E-05 | -0.02301 | 0.61984  | 0.474039 | 1.55E-27 | 0.381055 | 1.38E-17 | 0.299877 |
| 0.368249 | 1.91E-16 | 0.202648 | 1.02E-05 | 0.745128 | 7.76E-84 | 0.599545 | 6.48E-47 | 0.539316 |
| 0.303201 | 2.19E-11 | 0.238168 | 1.91E-07 | 0.493504 | 4.88E-30 | 0.448561 | 1.69E-24 | 0.288594 |
| 0.322884 | 8.59E-13 | 0.077761 | 0.09326  | 0.492651 | 6.34E-30 | 0.312903 | 4.57E-12 | 0.311575 |
| -0.14027 | 0.00238  | -0.04752 | 0.30544  | -0.28257 | 5.06E-10 | -0.30263 | 2.40E-11 | -0.12769 |
| 0.155268 | 0.00076  | 0.209759 | 4.84E-06 | 0.408562 | 3.25E-20 | 0.484861 | 6.59E-29 | 0.26992  |
| 0.21727  | 2.14E-06 | 0.250712 | 3.99E-08 | 0.260024 | 1.18E-08 | 0.357367 | 1.63E-15 | 0.247677 |
| 0.060324 | 0.19316  | -0.03335 | 0.47221  | 0.169282 | 0.00024  | 0.259039 | 1.35E-08 | -0.01776 |
| 0.171191 | 0.0002   | 0.058316 | 0.20843  | 0.306984 | 1.20E-11 | 0.244726 | 8.51E-08 | 0.139914 |
| 0.38541  | 5.49E-18 | 0.386972 | 3.94E-18 | 0.608984 | 9.78E-49 | 0.683905 | 1.14E-65 | 0.398064 |
| 0.241783 | 1.23E-07 | 0.159494 | 0.00054  | 0.560372 | 5.76E-40 | 0.533845 | 9.24E-36 | 0.329922 |
| 0.248316 | 5.41E-08 | 0.091773 | 0.04747  | 0.592997 | 1.10E-45 | 0.460164 | 7.51E-26 | 0.333599 |
| 0.263009 | 7.91E-09 | 0.388947 | 2.57E-18 | 0.433853 | 7.41E-23 | 0.560389 | 5.72E-40 | 0.330471 |
| 0.290314 | 1.60E-10 | 0.294861 | 8.03E-11 | 0.577806 | 6.07E-43 | 0.617404 | 2.06E-50 | 0.398428 |
| 0.046937 | 0.31146  | -0.10082 | 0.02938  | -0.23983 | 1.56E-07 | -0.36865 | 1.77E-16 | -0.1463  |
| 0.10633  | 0.02155  | -0.01033 | 0.82388  | 0.253995 | 2.61E-08 | 0.20431  | 8.57E-06 | 0.096301 |
| 0.248725 | 5.14E-08 | 0.12346  | 0.00756  | 0.520212 | 9.68E-34 | 0.360867 | 8.26E-16 | 0.330295 |
| 0.424634 | 7.23E-22 | 0.192428 | 2.83E-05 | 0.521836 | 5.63E-34 | 0.387497 | 3.52E-18 | 0.351835 |
| 0.374679 | 5.18E-17 | 0.191908 | 2.98E-05 | 0.721094 | 4.01E-76 | 0.599661 | 6.16E-47 | 0.498287 |
| 0.426387 | 4.71E-22 | 0.326881 | 4.32E-13 | 0.650819 | 1.34E-57 | 0.613817 | 1.08E-49 | 0.4146   |
| 0.215126 | 2.71E-06 | 0.21103  | 4.22E-06 | 0.360438 | 8.98E-16 | 0.273329 | 1.91E-09 | 0.246115 |
| 0.288241 | 2.19E-10 | 0.187465 | 4.57E-05 | 0.405722 | 6.23E-20 | 0.403127 | 1.12E-19 | 0.253804 |
| 0.173586 | 0.00016  | 0.114186 | 0.01355  | 0.440001 | 1.56E-23 | 0.385518 | 5.37E-18 | 0.311898 |
| 0.349518 | 7.27E-15 | 0.386416 | 4.43E-18 | 0.676605 | 8.51E-64 | 0.755759 | 1.57E-87 | 0.446072 |
| 0.198942 | 1.48E-05 | -0.00929 | 0.84127  | 0.40217  | 1.39E-19 | 0.282132 | 5.40E-10 | 0.141169 |
| 0.412718 | 1.24E-20 | 0.367399 | 2.27E-16 | 0.481587 | 1.73E-28 | 0.544781 | 1.89E-37 | 0.28279  |
| 0.525783 | 1.48E-34 | 0.438228 | 2.46E-23 | 0.699006 | 1.02E-69 | 0.679877 | 1.25E-64 | 0.499438 |
| 0.184133 | 6.26E-05 | 0.316728 | 2.43E-12 | 0.398893 | 2.91E-19 | 0.545603 | 1.41E-37 | 0.240385 |
| 0.380204 | 1.65E-17 | 0.175207 | 0.00014  | 0.4572   | 1.68E-25 | 0.282504 | 5.11E-10 | 0.316357 |
| 0.344792 | 1.76E-14 | 0.216728 | 2.28E-06 | 0.548083 | 5.69E-38 | 0.456979 | 1.79E-25 | 0.294498 |
| 0.353589 | 3.37E-15 | 0.147206 | 0.00142  | 0.536393 | 3.78E-36 | 0.35     | 6.64E-15 | 0.387094 |



|          |          |          |          |          |          |          |          |          |
|----------|----------|----------|----------|----------|----------|----------|----------|----------|
| 0.172496 | 0.00018  | 0.093845 | 0.04266  | 0.360483 | 8.90E-16 | 0.435325 | 5.12E-23 | 0.182681 |
| 0.045021 | 0.33165  | 0.029561 | 0.52396  | 0.225611 | 8.39E-07 | 0.259917 | 1.20E-08 | 0.137888 |
| 0.132417 | 0.00415  | -0.13598 | 0.00324  | 0.187259 | 4.66E-05 | 0.122383 | 0.00811  | -0.04046 |
| 0.31358  | 4.09E-12 | 0.209934 | 4.75E-06 | 0.554085 | 6.18E-39 | 0.482803 | 1.21E-28 | 0.379819 |
| 0.337099 | 7.13E-14 | 0.101749 | 0.0279   | 0.608123 | 1.44E-48 | 0.392384 | 1.22E-18 | 0.447112 |
| 0.161634 | 0.00045  | 0.040166 | 0.38649  | 0.29145  | 1.35E-10 | 0.197119 | 1.78E-05 | 0.189274 |
| 0.412972 | 1.17E-20 | 0.23625  | 2.40E-07 | 0.637751 | 1.11E-54 | 0.55696  | 2.10E-39 | 0.367475 |
| 0.182883 | 7.03E-05 | 0.137656 | 0.00287  | 0.327817 | 3.68E-13 | 0.429104 | 2.42E-22 | 0.124962 |
| 0.431425 | 1.36E-22 | 0.202889 | 9.93E-06 | 0.390505 | 1.84E-18 | 0.228558 | 5.97E-07 | 0.240984 |
| -0.10654 | 0.02129  | 0.006378 | 0.89066  | -0.18614 | 5.18E-05 | -0.20787 | 5.91E-06 | -0.09568 |
| 0.169947 | 0.00022  | 0.104506 | 0.02391  | 0.431391 | 1.37E-22 | 0.435488 | 4.91E-23 | 0.261421 |
| 0.233366 | 3.39E-07 | 0.20753  | 6.12E-06 | 0.416081 | 5.62E-21 | 0.47409  | 1.52E-27 | 0.215871 |
| -0.16914 | 0.00024  | -0.02067 | 0.65598  | -0.21508 | 2.73E-06 | -0.20124 | 1.18E-05 | -0.09019 |
| 0.027562 | 0.55243  | 0.153494 | 0.00088  | 0.307206 | 1.15E-11 | 0.461585 | 5.09E-26 | 0.214228 |
| 0.243142 | 1.04E-07 | 0.238426 | 1.85E-07 | 0.351866 | 4.67E-15 | 0.261569 | 9.60E-09 | 0.253483 |
| 0.114213 | 0.01352  | -0.02045 | 0.65944  | 0.261971 | 9.10E-09 | 0.311254 | 5.99E-12 | 0.038519 |
| 0.172051 | 0.00019  | -0.18557 | 5.47E-05 | 0.216829 | 2.25E-06 | 0.017597 | 0.70447  | 0.067981 |
| 0.210767 | 4.34E-06 | 0.017177 | 0.71122  | 0.440708 | 1.30E-23 | 0.327784 | 3.70E-13 | 0.280211 |
| 0.261055 | 1.03E-08 | 0.171931 | 0.00019  | 0.515857 | 4.10E-33 | 0.464974 | 1.99E-26 | 0.318571 |
| 0.323944 | 7.17E-13 | 0.398032 | 3.52E-19 | 0.66088  | 6.06E-60 | 0.710619 | 5.19E-73 | 0.542339 |
| 0.375275 | 4.59E-17 | 0.391337 | 1.53E-18 | 0.71624  | 1.16E-74 | 0.656925 | 5.19E-59 | 0.532997 |
| 0.22553  | 8.47E-07 | 0.173902 | 0.00016  | 0.511208 | 1.87E-32 | 0.456125 | 2.25E-25 | 0.294603 |
| 0.413345 | 1.07E-20 | 0.249786 | 4.49E-08 | 0.705019 | 2.10E-71 | 0.57108  | 8.97E-42 | 0.498855 |
| 0.309811 | 7.58E-12 | 0.291972 | 1.25E-10 | 0.654702 | 1.71E-58 | 0.647116 | 9.30E-57 | 0.561564 |
| 0.119137 | 0.00997  | -0.13281 | 0.00404  | 0.242183 | 1.17E-07 | 0.131825 | 0.00432  | 0.120597 |
| 0.156127 | 0.00071  | 0.004126 | 0.92914  | 0.352035 | 4.52E-15 | 0.412502 | 1.30E-20 | 0.120656 |
| 0.159181 | 0.00055  | 0.234344 | 3.02E-07 | 0.444405 | 5.02E-24 | 0.519854 | 1.09E-33 | 0.254243 |
| 0.364492 | 4.04E-16 | 0.222011 | 1.26E-06 | 0.683776 | 1.24E-65 | 0.508038 | 5.18E-32 | 0.482877 |
| 0.3015   | 2.86E-11 | 0.103777 | 0.02492  | 0.352959 | 3.80E-15 | 0.235948 | 2.49E-07 | 0.215496 |
| 0.366331 | 2.81E-16 | 0.378189 | 2.51E-17 | 0.42275  | 1.14E-21 | 0.556692 | 2.33E-39 | 0.320795 |
| 0.236125 | 2.44E-07 | 0.000764 | 0.98686  | 0.485791 | 5.00E-29 | 0.384245 | 7.04E-18 | 0.245822 |
| 0.346044 | 1.39E-14 | 0.197519 | 1.71E-05 | 0.524857 | 2.03E-34 | 0.436749 | 3.57E-23 | 0.41768  |
| 0.305285 | 1.57E-11 | -0.0378  | 0.41514  | 0.355082 | 2.53E-15 | 0.176307 | 0.00013  | 0.169735 |
| 0.299264 | 4.06E-11 | 0.101088 | 0.02894  | 0.312022 | 5.28E-12 | 0.24587  | 7.37E-08 | 0.193592 |
| 0.236125 | 2.44E-07 | 0.193777 | 2.48E-05 | 0.344481 | 1.86E-14 | 0.368937 | 1.66E-16 | 0.271657 |
| 0.195638 | 2.07E-05 | 0.31977  | 1.46E-12 | 0.344388 | 1.89E-14 | 0.535646 | 4.92E-36 | 0.221615 |
| 0.226763 | 7.35E-07 | 0.077017 | 0.09644  | 0.35092  | 5.59E-15 | 0.300187 | 3.52E-11 | 0.167059 |
| 0.191996 | 2.96E-05 | 0.19355  | 2.54E-05 | 0.278328 | 9.36E-10 | 0.347977 | 9.71E-15 | 0.129372 |
| -0.15509 | 0.00077  | -0.05315 | 0.25168  | -0.31538 | 3.04E-12 | -0.26645 | 4.96E-09 | -0.13459 |
| 0.118438 | 0.01042  | -0.09564 | 0.03882  | 0.348379 | 9.01E-15 | 0.21561  | 2.57E-06 | 0.135199 |
| -0.12481 | 0.00692  | 0.08574  | 0.06413  | -0.21884 | 1.80E-06 | -0.1108  | 0.0166   | -0.11751 |
| 0.331916 | 1.79E-13 | 0.290742 | 1.50E-10 | 0.537106 | 2.94E-36 | 0.54793  | 6.02E-38 | 0.308339 |
| 0.175416 | 0.00014  | 0.230071 | 5.00E-07 | 0.374488 | 5.39E-17 | 0.48074  | 2.22E-28 | 0.231561 |
| 0.233332 | 3.41E-07 | 0.380518 | 1.54E-17 | 0.411994 | 1.47E-20 | 0.547425 | 7.24E-38 | 0.277064 |
| 0.335382 | 9.70E-14 | 0.461124 | 5.78E-26 | 0.563042 | 2.07E-40 | 0.651744 | 8.24E-58 | 0.425313 |

|          |          |          |          |          |          |          |          |          |
|----------|----------|----------|----------|----------|----------|----------|----------|----------|
| -0.16123 | 0.00047  | -0.2918  | 1.28E-10 | -0.31372 | 4.00E-12 | -0.4388  | 2.12E-23 | -0.23138 |
| 0.161872 | 0.00044  | 0.093314 | 0.04385  | 0.342637 | 2.61E-14 | 0.282616 | 5.03E-10 | 0.198392 |
| -0.09449 | 0.04124  | -0.04404 | 0.34235  | -0.31899 | 1.66E-12 | -0.18588 | 5.31E-05 | -0.16761 |
| 0.369252 | 1.56E-16 | 0.291026 | 1.44E-10 | 0.426143 | 5.00E-22 | 0.397317 | 4.13E-19 | 0.249519 |
| 0.382388 | 1.04E-17 | 0.424925 | 6.73E-22 | 0.74049  | 2.78E-82 | 0.768888 | 2.29E-92 | 0.534739 |
| 0.339964 | 4.25E-14 | 0.377218 | 3.07E-17 | 0.692318 | 6.80E-68 | 0.721781 | 2.47E-76 | 0.501471 |
| 0.425545 | 5.79E-22 | 0.256729 | 1.83E-08 | 0.591698 | 1.91E-45 | 0.559349 | 8.50E-40 | 0.396913 |
| 0.072125 | 0.11959  | 0.043025 | 0.35355  | 0.309635 | 7.80E-12 | 0.347999 | 9.67E-15 | 0.121904 |
| -0.02265 | 0.62542  | 0.132673 | 0.00408  | -0.15803 | 0.00061  | -0.11118 | 0.01624  | -0.07337 |
| 0.344246 | 1.94E-14 | 0.22742  | 6.81E-07 | 0.712696 | 1.29E-73 | 0.584212 | 4.40E-44 | 0.542406 |
| 0.292682 | 1.12E-10 | 0.21963  | 1.65E-06 | 0.491355 | 9.39E-30 | 0.456927 | 1.81E-25 | 0.306586 |
| 0.234528 | 2.96E-07 | 0.09688  | 0.03636  | 0.219857 | 1.61E-06 | 0.25401  | 2.61E-08 | 0.092191 |
| 0.265295 | 5.80E-09 | 0.007579 | 0.87024  | 0.286387 | 2.89E-10 | 0.197665 | 1.69E-05 | 0.13588  |
| 0.266265 | 5.08E-09 | 0.141536 | 0.00217  | 0.365528 | 3.29E-16 | 0.337333 | 6.84E-14 | 0.326303 |
| 0.452255 | 6.36E-25 | 0.213682 | 3.17E-06 | 0.766992 | 1.20E-91 | 0.592702 | 1.24E-45 | 0.530935 |
| 0.187206 | 4.69E-05 | 0.047272 | 0.30801  | 0.293082 | 1.05E-10 | 0.171877 | 0.00019  | 0.185642 |
| 0.447295 | 2.36E-24 | 0.427074 | 3.98E-22 | 0.522432 | 4.61E-34 | 0.575817 | 1.36E-42 | 0.383701 |
| 0.279161 | 8.30E-10 | 0.372236 | 8.54E-17 | 0.565436 | 8.20E-41 | 0.608656 | 1.13E-48 | 0.329153 |
| 0.368968 | 1.65E-16 | 0.110479 | 0.01692  | 0.490201 | 1.33E-29 | 0.293598 | 9.75E-11 | 0.338816 |
| 0.243465 | 9.95E-08 | 0.063369 | 0.17159  | 0.260647 | 1.09E-08 | 0.194723 | 2.26E-05 | 0.091485 |
| 0.371441 | 1.00E-16 | 0.249719 | 4.53E-08 | 0.707988 | 2.99E-72 | 0.600883 | 3.61E-47 | 0.472357 |
| 0.117706 | 0.01091  | 0.290202 | 1.63E-10 | 0.231098 | 4.44E-07 | 0.470751 | 3.94E-27 | 0.130624 |
| 0.224717 | 9.29E-07 | -0.03177 | 0.49338  | 0.257383 | 1.68E-08 | 0.145385 | 0.00163  | 0.213583 |
| 0.259884 | 1.20E-08 | 0.252213 | 3.29E-08 | 0.382308 | 1.06E-17 | 0.364066 | 4.40E-16 | 0.191359 |
| 0.311959 | 5.34E-12 | 0.148802 | 0.00126  | 0.635936 | 2.74E-54 | 0.479247 | 3.43E-28 | 0.464699 |
| 0.208526 | 5.51E-06 | 0.096621 | 0.03686  | 0.408296 | 3.45E-20 | 0.386719 | 4.16E-18 | 0.238003 |
| 0.448107 | 1.91E-24 | 0.423379 | 9.80E-22 | 0.695786 | 7.81E-69 | 0.722381 | 1.62E-76 | 0.477392 |
| 0.242717 | 1.09E-07 | -0.02478 | 0.59319  | 0.402728 | 1.23E-19 | 0.213415 | 3.27E-06 | 0.245333 |
| 0.274053 | 1.72E-09 | 0.128631 | 0.00537  | 0.458735 | 1.11E-25 | 0.489401 | 1.70E-29 | 0.26006  |
| 0.255549 | 2.13E-08 | 0.170499 | 0.00021  | 0.643395 | 6.34E-56 | 0.56707  | 4.34E-41 | 0.410349 |
| 0.168067 | 0.00026  | 0.024303 | 0.60037  | 0.283656 | 4.32E-10 | 0.238979 | 1.73E-07 | 0.124903 |
| 0.268046 | 3.98E-09 | -0.12077 | 0.00899  | 0.279597 | 7.80E-10 | 0.080526 | 0.08215  | 0.203773 |
| 0.393539 | 9.49E-19 | 0.264467 | 6.49E-09 | 0.413276 | 1.09E-20 | 0.379379 | 1.96E-17 | 0.287369 |
| 0.239892 | 1.55E-07 | 0.008685 | 0.85152  | 0.271545 | 2.45E-09 | 0.215698 | 2.55E-06 | 0.200487 |
| 0.374797 | 5.06E-17 | 0.292898 | 1.08E-10 | 0.722423 | 1.58E-76 | 0.634103 | 6.81E-54 | 0.487949 |
| 0.341297 | 3.33E-14 | 0.243569 | 9.82E-08 | 0.661632 | 4.01E-60 | 0.510761 | 2.16E-32 | 0.545101 |
| 0.234989 | 2.80E-07 | 0.125004 | 0.00684  | 0.361292 | 7.60E-16 | 0.266317 | 5.05E-09 | 0.262145 |
| 0.355628 | 2.28E-15 | 0.176898 | 0.00012  | 0.505793 | 1.06E-31 | 0.479654 | 3.05E-28 | 0.289327 |
| 0.27836  | 9.32E-10 | 0.035784 | 0.44043  | 0.45426  | 3.72E-25 | 0.351878 | 4.66E-15 | 0.255045 |
| 0.182677 | 7.17E-05 | -0.00488 | 0.91627  | 0.365616 | 3.24E-16 | 0.386749 | 4.13E-18 | 0.193967 |
| 0.466925 | 1.16E-26 | 0.599287 | 7.25E-47 | 0.719614 | 1.12E-75 | 0.818141 | #####    | 0.507334 |
| 0.279496 | 7.91E-10 | 0.183391 | 6.71E-05 | 0.593769 | 7.88E-46 | 0.572591 | 4.93E-42 | 0.376681 |
| 0.42064  | 1.90E-21 | 0.102117 | 0.02734  | 0.414685 | 7.80E-21 | 0.311637 | 5.63E-12 | 0.219606 |
| 0.248656 | 5.19E-08 | 0.299521 | 3.90E-11 | 0.600696 | 3.91E-47 | 0.61221  | 2.26E-49 | 0.367276 |
| 0.338308 | 5.73E-14 | 0.20008  | 1.32E-05 | 0.621456 | 3.08E-51 | 0.529572 | 4.06E-35 | 0.418315 |

|          |          |          |          |          |          |          |          |          |
|----------|----------|----------|----------|----------|----------|----------|----------|----------|
| 0.226396 | 7.67E-07 | 0.42953  | 2.18E-22 | 0.455615 | 2.58E-25 | 0.566526 | 5.37E-41 | 0.33495  |
| 0.254973 | 2.30E-08 | 0.086169 | 0.0628   | 0.638628 | 7.12E-55 | 0.52323  | 3.52E-34 | 0.436112 |
| 0.069578 | 0.13326  | -0.06111 | 0.18742  | 0.245597 | 7.63E-08 | 0.23583  | 2.53E-07 | 0.069125 |
| 0.154768 | 0.00079  | -0.08699 | 0.06034  | 0.254052 | 2.59E-08 | 0.157345 | 0.00064  | 0.075259 |
| 0.293935 | 9.26E-11 | 0.242658 | 1.10E-07 | 0.597392 | 1.65E-46 | 0.633165 | 1.08E-53 | 0.401571 |
| 0.358233 | 1.38E-15 | 0.405343 | 6.79E-20 | 0.558543 | 1.16E-39 | 0.60383  | 9.82E-48 | 0.387713 |
| 0.434969 | 5.60E-23 | 0.420097 | 2.16E-21 | 0.494447 | 3.66E-30 | 0.568958 | 2.07E-41 | 0.333096 |
| 0.380339 | 1.60E-17 | 0.377853 | 2.69E-17 | 0.430578 | 1.68E-22 | 0.405004 | 7.34E-20 | 0.304566 |
| 0.105286 | 0.02288  | -0.03519 | 0.44811  | 0.259767 | 1.22E-08 | 0.235498 | 2.63E-07 | 0.113397 |
| 0.312079 | 5.24E-12 | 0.267628 | 4.22E-09 | 0.650823 | 1.34E-57 | 0.593068 | 1.06E-45 | 0.478805 |
| 0.261974 | 9.09E-09 | 0.112137 | 0.01533  | 0.465391 | 1.78E-26 | 0.366131 | 2.92E-16 | 0.340056 |
| -0.17485 | 0.00015  | -0.05445 | 0.24025  | -0.37734 | 3.00E-17 | -0.2159  | 2.49E-06 | -0.16507 |
| 0.220493 | 1.50E-06 | 0.326382 | 4.71E-13 | 0.389652 | 2.21E-18 | 0.595904 | 3.15E-46 | 0.227501 |
| 0.09953  | 0.03152  | -0.03198 | 0.49057  | 0.248683 | 5.17E-08 | 0.273883 | 1.76E-09 | 0.015705 |
| 0.310556 | 6.71E-12 | 0.162344 | 0.00043  | 0.360234 | 9.34E-16 | 0.254458 | 2.46E-08 | 0.265371 |
| 0.282944 | 4.79E-10 | 0.083264 | 0.07223  | 0.49483  | 3.25E-30 | 0.359305 | 1.12E-15 | 0.303189 |
| 0.350904 | 5.60E-15 | 0.386593 | 4.27E-18 | 0.76916  | 1.81E-92 | 0.756727 | 7.06E-88 | 0.555803 |
| 0.302216 | 2.56E-11 | 0.090663 | 0.05023  | 0.368502 | 1.82E-16 | 0.335417 | 9.64E-14 | 0.223978 |
| 0.311727 | 5.55E-12 | 0.055346 | 0.23258  | 0.383078 | 9.01E-18 | 0.29912  | 4.16E-11 | 0.159139 |
| 0.40125  | 1.72E-19 | 0.319343 | 1.57E-12 | 0.462119 | 4.39E-26 | 0.413939 | 9.30E-21 | 0.387254 |
| 0.310516 | 6.76E-12 | 0.422928 | 1.09E-21 | 0.636176 | 2.43E-54 | 0.72879  | 1.67E-78 | 0.501061 |
| 0.292569 | 1.14E-10 | 0.220105 | 1.56E-06 | 0.629916 | 5.32E-53 | 0.538525 | 1.78E-36 | 0.450548 |
| 0.109074 | 0.01838  | -0.0629  | 0.17478  | 0.249547 | 4.63E-08 | 0.132538 | 0.00412  | 0.101127 |
| -0.10581 | 0.02221  | -0.14863 | 0.00128  | -0.2647  | 6.29E-09 | -0.27296 | 2.01E-09 | -0.19407 |
| 0.320513 | 1.29E-12 | 0.390712 | 1.76E-18 | 0.491876 | 8.02E-30 | 0.471967 | 2.79E-27 | 0.387506 |
| 0.27808  | 9.70E-10 | 0.412736 | 1.23E-20 | 0.396892 | 4.54E-19 | 0.526821 | 1.04E-34 | 0.32182  |
| 0.259742 | 1.23E-08 | 0.22617  | 7.87E-07 | 0.415567 | 6.34E-21 | 0.469313 | 5.92E-27 | 0.258415 |
| 0.381914 | 1.15E-17 | 0.279463 | 7.95E-10 | 0.577324 | 7.38E-43 | 0.56312  | 2.01E-40 | 0.404961 |
| 0.410478 | 2.09E-20 | 0.217272 | 2.14E-06 | 0.621449 | 3.09E-51 | 0.489845 | 1.48E-29 | 0.447467 |
| 0.333145 | 1.44E-13 | 0.295942 | 6.80E-11 | 0.447708 | 2.12E-24 | 0.478197 | 4.66E-28 | 0.274848 |
| 0.322148 | 9.74E-13 | 0.221089 | 1.40E-06 | 0.723355 | 8.17E-77 | 0.602445 | 1.81E-47 | 0.488881 |
| 0.224743 | 9.27E-07 | -0.01484 | 0.74903  | 0.290913 | 1.47E-10 | 0.331019 | 2.10E-13 | 0.088259 |
| 0.204356 | 8.53E-06 | 0.032513 | 0.48336  | 0.375239 | 4.62E-17 | 0.234667 | 2.91E-07 | 0.291933 |
| 0.273921 | 1.75E-09 | 0.023023 | 0.6197   | 0.464321 | 2.39E-26 | 0.325787 | 5.22E-13 | 0.24682  |
| 0.318373 | 1.84E-12 | 0.224625 | 9.39E-07 | 0.341026 | 3.50E-14 | 0.298497 | 4.58E-11 | 0.207507 |
| 0.350566 | 5.97E-15 | 0.319583 | 1.50E-12 | 0.643229 | 6.90E-56 | 0.615227 | 5.65E-50 | 0.43428  |
| 0.505015 | 1.36E-31 | 0.44833  | 1.80E-24 | 0.75224  | 2.75E-86 | 0.687866 | 1.05E-66 | 0.545833 |
| 0.30171  | 2.77E-11 | 0.262554 | 8.41E-09 | 0.61708  | 2.39E-50 | 0.558078 | 1.38E-39 | 0.419907 |
| 0.45278  | 5.53E-25 | 0.373712 | 6.32E-17 | 0.813911 | #####    | 0.679293 | 1.77E-64 | 0.632025 |
| -0.08384 | 0.07028  | -0.16144 | 0.00046  | -0.30873 | 9.03E-12 | -0.42165 | 1.49E-21 | -0.16799 |
| 0.397725 | 3.77E-19 | 0.350346 | 6.22E-15 | 0.772017 | 1.45E-93 | 0.701754 | 1.75E-70 | 0.587248 |
| 0.053797 | 0.24594  | 0.072913 | 0.11559  | 0.299016 | 4.22E-11 | 0.347714 | 1.02E-14 | 0.184062 |
| 0.298657 | 4.47E-11 | 0.171115 | 0.0002   | 0.484287 | 7.81E-29 | 0.329623 | 2.68E-13 | 0.34284  |
| 0.393808 | 8.95E-19 | 0.322124 | 9.78E-13 | 0.795153 | #####    | 0.665764 | 4.08E-61 | 0.609455 |
| -0.13484 | 0.00351  | -0.27661 | 1.20E-09 | -0.32704 | 4.20E-13 | -0.43605 | 4.27E-23 | -0.231   |

|          |          |          |          |          |          |          |          |          |
|----------|----------|----------|----------|----------|----------|----------|----------|----------|
| 0.252329 | 3.24E-08 | 0.194517 | 2.31E-05 | 0.47853  | 4.23E-28 | 0.411043 | 1.83E-20 | 0.416404 |
| 0.054974 | 0.23574  | 0.261253 | 1.00E-08 | 0.135385 | 0.00337  | 0.332781 | 1.54E-13 | 0.08597  |
| 0.057483 | 0.21501  | -0.02396 | 0.60557  | 0.061942 | 0.18146  | 0.076419 | 0.09906  | 0.096245 |
| 0.186922 | 4.81E-05 | 0.122238 | 0.00818  | 0.51546  | 4.67E-33 | 0.469794 | 5.17E-27 | 0.353897 |
| 0.317052 | 2.30E-12 | 0.24843  | 5.34E-08 | 0.65531  | 1.24E-58 | 0.485635 | 5.23E-29 | 0.524525 |
| 0.007087 | 0.8786   | 0.224676 | 9.34E-07 | 0.221261 | 1.37E-06 | 0.235318 | 2.69E-07 | 0.239797 |
| 0.19118  | 3.20E-05 | 0.282982 | 4.77E-10 | 0.523943 | 2.77E-34 | 0.531344 | 2.20E-35 | 0.454427 |
| 0.362349 | 6.17E-16 | 0.333404 | 1.38E-13 | 0.648815 | 3.84E-57 | 0.49658  | 1.90E-30 | 0.565394 |
| 0.323714 | 7.46E-13 | 0.250535 | 4.08E-08 | 0.332245 | 1.69E-13 | 0.340883 | 3.60E-14 | 0.233598 |
| 0.084255 | 0.06889  | 0.247929 | 5.69E-08 | 0.321087 | 1.17E-12 | 0.371771 | 9.39E-17 | 0.377349 |
| 0.012783 | 0.78293  | 0.067502 | 0.14526  | 0.091308 | 0.04861  | 0.08373  | 0.07065  | 0.172912 |
| -0.04052 | 0.38236  | 0.075545 | 0.103    | 0.132131 | 0.00423  | 0.139527 | 0.00251  | 0.162362 |
| 0.08593  | 0.06354  | 0.073779 | 0.11132  | 0.300975 | 3.11E-11 | 0.285236 | 3.42E-10 | 0.313292 |
| 0.126788 | 0.00608  | 0.145259 | 0.00165  | 0.320057 | 1.39E-12 | 0.267662 | 4.20E-09 | 0.298209 |
| 0.117191 | 0.01126  | 0.142452 | 0.00203  | 0.395091 | 6.75E-19 | 0.428336 | 2.92E-22 | 0.302985 |
| 0.059507 | 0.19927  | 0.141359 | 0.0022   | 0.050109 | 0.27986  | 0.201396 | 1.16E-05 | 0.117746 |
| 0.295924 | 6.82E-11 | 0.385155 | 5.80E-18 | 0.567099 | 4.29E-41 | 0.550779 | 2.11E-38 | 0.485535 |
| 0.344912 | 1.72E-14 | 0.235164 | 2.74E-07 | 0.487795 | 2.75E-29 | 0.426933 | 4.12E-22 | 0.460062 |
| 0.227484 | 6.76E-07 | 0.194425 | 2.33E-05 | 0.505472 | 1.17E-31 | 0.368349 | 1.87E-16 | 0.494541 |
| 0.199893 | 1.35E-05 | 0.225992 | 8.03E-07 | 0.404199 | 8.81E-20 | 0.378504 | 2.35E-17 | 0.359983 |
| 0.148923 | 0.00125  | 0.14506  | 0.00167  | 0.33013  | 2.46E-13 | 0.335703 | 9.16E-14 | 0.335567 |
| 0.123258 | 0.00766  | 0.027258 | 0.55681  | 0.175287 | 0.00014  | 0.225106 | 8.89E-07 | 0.20806  |
| 0.199551 | 1.40E-05 | 0.085293 | 0.06553  | 0.197384 | 1.74E-05 | 0.146638 | 0.00149  | 0.231908 |
| 0.223532 | 1.06E-06 | 0.267977 | 4.02E-09 | 0.527733 | 7.64E-35 | 0.48356  | 9.68E-29 | 0.48145  |
| 0.365537 | 3.29E-16 | 0.290972 | 1.45E-10 | 0.617217 | 2.24E-50 | 0.451156 | 8.52E-25 | 0.589194 |
| 0.054648 | 0.23853  | 0.108037 | 0.01953  | 0.277047 | 1.12E-09 | 0.253839 | 2.66E-08 | 0.312471 |
| 0.368551 | 1.80E-16 | 0.408038 | 3.66E-20 | 0.569586 | 1.62E-41 | 0.540404 | 9.13E-37 | 0.453102 |
| 0.283731 | 4.27E-10 | 0.187479 | 4.57E-05 | 0.528026 | 6.91E-35 | 0.425879 | 5.33E-22 | 0.375016 |
| 0.196347 | 1.93E-05 | 0.193479 | 2.56E-05 | 0.437401 | 3.03E-23 | 0.43078  | 1.60E-22 | 0.41389  |
| 0.236203 | 2.42E-07 | 0.140484 | 0.00234  | 0.500286 | 6.02E-31 | 0.348393 | 8.98E-15 | 0.449799 |
| 0.044865 | 0.33333  | -0.07259 | 0.11723  | 0.281496 | 5.92E-10 | 0.165688 | 0.00032  | 0.229195 |
| 0.040047 | 0.38789  | -0.01174 | 0.80021  | 0.12465  | 0.007    | -0.00435 | 0.92525  | 0.186776 |
| 0.09241  | 0.04594  | 0.102573 | 0.02665  | 0.097719 | 0.03476  | 0.14486  | 0.0017   | 0.185982 |
| 0.15056  | 0.0011   | 0.164893 | 0.00035  | 0.434053 | 7.05E-23 | 0.367747 | 2.11E-16 | 0.371698 |
| 0.076638 | 0.0981   | 0.040152 | 0.38664  | 0.406736 | 4.94E-20 | 0.291146 | 1.41E-10 | 0.356547 |
| 0.276514 | 1.21E-09 | 0.219608 | 1.65E-06 | 0.480932 | 2.10E-28 | 0.383579 | 8.11E-18 | 0.437647 |
| 0.147146 | 0.00143  | 0.138168 | 0.00277  | 0.382795 | 9.57E-18 | 0.27927  | 8.17E-10 | 0.364145 |
| 0.090889 | 0.04965  | 0.166756 | 0.0003   | 0.292345 | 1.18E-10 | 0.203589 | 9.24E-06 | 0.378842 |
| 0.162665 | 0.00042  | 0.159781 | 0.00053  | 0.323331 | 7.96E-13 | 0.121163 | 0.00877  | 0.385694 |
| 0.214612 | 2.87E-06 | 0.278202 | 9.53E-10 | 0.289838 | 1.72E-10 | 0.329619 | 2.69E-13 | 0.318354 |
| -0.01049 | 0.82115  | -0.09853 | 0.03327  | 0.039996 | 0.38849  | 0.011313 | 0.80736  | 0.009859 |
| 0.005485 | 0.90589  | -0.05512 | 0.2345   | -0.00622 | 0.89334  | 0.021024 | 0.65044  | -0.07451 |
| 0.083146 | 0.07264  | -0.04751 | 0.30555  | 0.074686 | 0.10698  | 0.020261 | 0.66232  | 0.056293 |
| 0.162822 | 0.00041  | 0.034573 | 0.45607  | 0.177991 | 0.00011  | 0.131032 | 0.00456  | 0.084605 |
| 0.011486 | 0.80448  | -0.0606  | 0.19114  | 0.081618 | 0.07807  | 0.121636 | 0.00851  | 0.008488 |

|          |          |          |          |          |          |          |          |          |
|----------|----------|----------|----------|----------|----------|----------|----------|----------|
| -0.08599 | 0.06336  | -0.21253 | 3.59E-06 | -0.21171 | 3.93E-06 | -0.17149 | 0.0002   | -0.22012 |
| 0.04679  | 0.31298  | -0.01015 | 0.82679  | 0.021553 | 0.64223  | -0.00432 | 0.9259   | -0.04239 |
| 0.147662 | 0.00137  | -0.21314 | 3.37E-06 | 0.15295  | 0.00091  | 0.011191 | 0.80939  | -0.00786 |
| -0.03086 | 0.50588  | -0.07218 | 0.11931  | -0.05083 | 0.27298  | -0.00686 | 0.88241  | -0.06822 |
| -0.17678 | 0.00012  | -0.21323 | 3.33E-06 | -0.08673 | 0.06111  | -0.04873 | 0.29331  | -0.1742  |
| 0.077208 | 0.09561  | -0.04976 | 0.28325  | -0.07879 | 0.08898  | -0.06355 | 0.17035  | -0.12788 |
| -0.00506 | 0.91313  | -0.11282 | 0.01471  | 0.129459 | 0.00508  | 0.154369 | 0.00082  | -0.03223 |
| 0.04881  | 0.29252  | -0.10698 | 0.02076  | 0.045571 | 0.32577  | 0.030179 | 0.51532  | -0.05089 |
| 0.058062 | 0.21041  | -0.03706 | 0.42425  | -0.01443 | 0.75584  | -0.01068 | 0.81791  | -0.06421 |
| -0.14288 | 0.00197  | -0.20369 | 9.14E-06 | -0.08594 | 0.06351  | -0.0421  | 0.36404  | -0.16435 |
| 0.011377 | 0.8063   | -0.05584 | 0.22845  | -0.01139 | 0.80605  | -0.03697 | 0.42542  | -0.04968 |
| 0.086351 | 0.06225  | 0.063012 | 0.17402  | 0.120026 | 0.00943  | 0.060019 | 0.19542  | 0.050998 |
| -0.03371 | 0.46737  | -0.21216 | 3.74E-06 | -0.1378  | 0.00284  | -0.09914 | 0.0322   | -0.16999 |
| 0.073603 | 0.11218  | -0.06804 | 0.14209  | -0.0595  | 0.19932  | -0.02278 | 0.62341  | -0.10022 |
| 0.049624 | 0.28455  | -0.10216 | 0.02727  | -0.04894 | 0.29126  | -0.05605 | 0.22668  | -0.07099 |
| -0.07955 | 0.08594  | -0.17699 | 0.00012  | -0.19657 | 1.88E-05 | -0.15894 | 0.00057  | -0.21816 |
| -0.07551 | 0.10316  | -0.13392 | 0.00374  | -0.15923 | 0.00055  | -0.12484 | 0.00691  | -0.20474 |
| 0.069963 | 0.13112  | 0.026308 | 0.57064  | 0.123601 | 0.00749  | 0.150379 | 0.00112  | 0.06038  |
| 0.019836 | 0.66898  | -0.01707 | 0.71297  | -0.04503 | 0.33154  | -0.01608 | 0.72887  | -0.12771 |
| -0.00185 | 0.96826  | -0.14319 | 0.00192  | 0.11728  | 0.0112   | 0.023486 | 0.61268  | -0.03288 |
| -0.09133 | 0.04855  | -0.0999  | 0.03089  | -0.06491 | 0.16137  | -0.04162 | 0.3695   | -0.11565 |
| 0.001211 | 0.97917  | -0.05652 | 0.22277  | 0.042097 | 0.36404  | 0.026482 | 0.5681   | -0.00538 |
| -0.03991 | 0.38952  | -0.06685 | 0.14917  | -0.16787 | 0.00027  | -0.14815 | 0.00132  | -0.14566 |
| -0.04698 | 0.31104  | -0.08223 | 0.07586  | -0.12004 | 0.00942  | -0.06839 | 0.14002  | -0.175   |
| 0.012435 | 0.78869  | -0.05512 | 0.23446  | -0.08075 | 0.08132  | -0.04601 | 0.32113  | -0.17915 |
| -0.01911 | 0.68035  | -0.11944 | 0.00978  | -0.15335 | 0.00089  | -0.08515 | 0.06598  | -0.15194 |
| -0.08326 | 0.07225  | -0.19001 | 3.58E-05 | -0.19547 | 2.10E-05 | -0.16375 | 0.00038  | -0.19274 |
| 0.039281 | 0.39704  | -0.04577 | 0.32364  | -0.11446 | 0.01333  | -0.05171 | 0.26479  | -0.03684 |
| -0.1119  | 0.01555  | -0.10854 | 0.01897  | -0.17025 | 0.00022  | -0.16308 | 0.0004   | -0.14695 |
| -0.23207 | 3.96E-07 | -0.39226 | 1.26E-18 | -0.31532 | 3.07E-12 | -0.35164 | 4.88E-15 | -0.30419 |
| -0.05177 | 0.26418  | -0.11446 | 0.01332  | -0.12308 | 0.00775  | -0.05049 | 0.2762   | -0.16471 |
| -0.05774 | 0.21292  | -0.12412 | 0.00724  | -0.14355 | 0.00187  | -0.08575 | 0.0641   | -0.19502 |
| -0.01083 | 0.81539  | -0.14926 | 0.00122  | 0.029332 | 0.52719  | 0.052037 | 0.26175  | -0.01298 |
| -0.06854 | 0.13918  | -0.13071 | 0.00467  | -0.14786 | 0.00135  | -0.10844 | 0.01907  | -0.1749  |
| -0.03051 | 0.5107   | -0.10063 | 0.02968  | -0.08763 | 0.05845  | -0.07706 | 0.09623  | -0.11773 |
| 0.008824 | 0.84918  | 0.025791 | 0.57825  | 0.064799 | 0.16211  | 0.020222 | 0.66292  | 0.084008 |
| 0.138741 | 0.00266  | 0.222763 | 1.16E-06 | 0.198624 | 1.53E-05 | 0.205449 | 7.62E-06 | 0.129197 |
| 0.076113 | 0.10043  | -0.03551 | 0.44399  | 0.04684  | 0.31246  | 0.022348 | 0.63002  | -0.0655  |
| -0.00093 | 0.98398  | -0.13488 | 0.0035   | -0.10369 | 0.02504  | -0.08176 | 0.07754  | -0.17362 |
| 0.188056 | 4.32E-05 | 0.149156 | 0.00123  | 0.069598 | 0.13315  | 0.004505 | 0.92266  | 0.115715 |
| -0.10632 | 0.02156  | -0.22573 | 8.27E-07 | -0.24691 | 6.47E-08 | -0.19023 | 3.51E-05 | -0.27987 |
| 0.103575 | 0.0252   | -0.00087 | 0.98497  | 0.084107 | 0.06938  | -0.00253 | 0.95658  | 0.078622 |
| 0.247608 | 5.92E-08 | 0.067923 | 0.14276  | 0.218697 | 1.83E-06 | 0.228134 | 6.27E-07 | 0.091741 |
| -0.02874 | 0.53562  | -0.12292 | 0.00783  | 0.062041 | 0.18076  | -0.03047 | 0.51124  | -0.01108 |
| -0.06445 | 0.16439  | -0.11307 | 0.0145   | -0.06051 | 0.19177  | 0.021927 | 0.63648  | -0.09298 |

|          |          |          |          |          |          |          |         |          |
|----------|----------|----------|----------|----------|----------|----------|---------|----------|
| 0.2177   | 2.04E-06 | 0.031533 | 0.49664  | 0.199416 | 1.41E-05 | 0.147418 | 0.0014  | 0.089902 |
| 0.134686 | 0.00354  | 0.01291  | 0.78082  | 0.069417 | 0.13416  | -0.00143 | 0.97545 | 0.044674 |
| -0.03685 | 0.42691  | -0.02423 | 0.60142  | -0.02138 | 0.64498  | -0.03172 | 0.49412 | -0.05829 |
| -0.043   | 0.35383  | -0.055   | 0.23552  | -0.08118 | 0.0797   | -0.03875 | 0.40344 | -0.07071 |
| -0.02325 | 0.61619  | -0.04315 | 0.35218  | -0.06202 | 0.18087  | -0.0506  | 0.27516 | -0.09889 |
| -0.05238 | 0.25861  | -0.04007 | 0.38767  | -0.11025 | 0.01715  | -0.08018 | 0.08349 | -0.10172 |
| 0.143016 | 0.00195  | -0.01466 | 0.75196  | 0.12531  | 0.0067   | 0.069584 | 0.13322 | 0.038136 |
| 0.045871 | 0.32259  | -0.06498 | 0.16094  | -0.04287 | 0.35526  | -0.03421 | 0.4608  | -0.14352 |
| 0.031871 | 0.49204  | -0.04705 | 0.3103   | -0.04254 | 0.35897  | 0.008513 | 0.85443 | -0.12831 |
| -0.08145 | 0.07868  | -0.12069 | 0.00904  | -0.12673 | 0.0061   | -0.11513 | 0.01279 | -0.16012 |
| 0.005282 | 0.90936  | -0.05784 | 0.21217  | -0.07679 | 0.09741  | -0.04857 | 0.29495 | -0.12349 |
| -0.06896 | 0.13672  | -0.03667 | 0.42923  | -0.10898 | 0.01849  | -0.07888 | 0.08861 | -0.11633 |
| -0.06779 | 0.14357  | -0.03288 | 0.47843  | -0.06653 | 0.15117  | -0.00231 | 0.96034 | -0.0898  |
| 0.020701 | 0.65545  | -0.02764 | 0.55133  | -0.02888 | 0.53356  | -0.03245 | 0.4842  | -0.04285 |
| -0.0225  | 0.62766  | -0.02079 | 0.65403  | -0.06995 | 0.13117  | -0.10309 | 0.0259  | -0.0539  |
| 0.037957 | 0.41315  | -0.15031 | 0.00112  | -0.00607 | 0.89584  | -0.02113 | 0.64871 | -0.09628 |
| 0.071636 | 0.12213  | -0.0933  | 0.04388  | -0.04936 | 0.2871   | -0.04009 | 0.38733 | -0.11989 |
| -0.04464 | 0.33576  | -0.12974 | 0.00498  | -0.10574 | 0.0223   | -0.03951 | 0.39425 | -0.16103 |
| 0.088654 | 0.05556  | 0.028549 | 0.53828  | 0.037581 | 0.41781  | 0.10146  | 0.02835 | 0.021842 |
| 0.013044 | 0.7786   | -0.0197  | 0.67105  | 0.019759 | 0.67019  | -0.02556 | 0.58168 | -0.02863 |
| -0.00526 | 0.90966  | -0.06693 | 0.14868  | -0.05856 | 0.2065   | -0.06587 | 0.15525 | -0.06882 |
| 0.055279 | 0.23315  | -0.084   | 0.06975  | 0.060959 | 0.1885   | 0.101795 | 0.02783 | 0.042334 |
| 0.029265 | 0.52813  | -0.00453 | 0.92227  | 0.105178 | 0.02302  | 0.069921 | 0.13135 | 0.041385 |
| -0.03145 | 0.49774  | -0.05219 | 0.26036  | -0.0032  | 0.94508  | -0.00903 | 0.84565 | -0.06059 |
| -0.08065 | 0.08166  | -0.13677 | 0.00306  | -0.12213 | 0.00824  | -0.09775 | 0.03471 | -0.20517 |
| -0.01864 | 0.68786  | -0.12731 | 0.00587  | 0.00519  | 0.91093  | 0.093497 | 0.04344 | -0.02911 |
| -0.015   | 0.7464   | -0.05813 | 0.20988  | 0.032925 | 0.47782  | 0.012147 | 0.79347 | 0.0196   |
| 0.048886 | 0.29177  | -0.07174 | 0.12158  | 0.013329 | 0.77389  | -0.03975 | 0.39142 | -0.02125 |
| 0.043497 | 0.3483   | -0.04974 | 0.28344  | -0.05346 | 0.24892  | -0.04908 | 0.28983 | -0.09108 |
| 0.005259 | 0.90976  | -0.04634 | 0.31769  | 0.014622 | 0.75264  | 0.012287 | 0.79114 | -0.02441 |
| 0.139846 | 0.00245  | -0.08115 | 0.07978  | 0.179973 | 9.20E-05 | 0.123618 | 0.00748 | 0.0664   |
| -0.05579 | 0.22886  | -0.12611 | 0.00635  | -0.02442 | 0.59867  | 0.032152 | 0.48822 | -0.02263 |
| 0.098654 | 0.03305  | -0.03574 | 0.44098  | 0.162844 | 0.00041  | 0.020345 | 0.66101 | 0.172443 |
| 0.145826 | 0.00158  | -0.04862 | 0.29441  | 0.045128 | 0.3305   | -0.06204 | 0.18075 | 0.015222 |
| -0.02797 | 0.54659  | -0.03026 | 0.51424  | -0.01497 | 0.74704  | -0.0238  | 0.60795 | -0.02487 |
| 0.038303 | 0.4089   | 0.005094 | 0.91257  | 0.086648 | 0.06135  | 0.000314 | 0.99459 | 0.099006 |
| -0.00022 | 0.99628  | -0.01656 | 0.72117  | 0.223645 | 1.05E-06 | 0.177972 | 0.00011 | 0.127713 |
| 0.10225  | 0.02714  | 0.119751 | 0.00959  | 0.099576 | 0.03144  | 0.050273 | 0.27828 | 0.086769 |
| -0.05464 | 0.23859  | -0.0377  | 0.41628  | 0.030509 | 0.51073  | -0.00706 | 0.87913 | 0.026338 |
| -0.03823 | 0.40974  | -0.0596  | 0.19857  | -0.02372 | 0.60919  | -0.04871 | 0.29354 | -0.05764 |
| 0.049516 | 0.2856   | -0.08268 | 0.07427  | -0.02787 | 0.54803  | -0.07221 | 0.11914 | -0.03803 |
| 0.244707 | 8.53E-08 | -0.14356 | 0.00187  | 0.1675   | 0.00028  | -0.00026 | 0.99556 | 0.032152 |
| 0.096752 | 0.03661  | 0.064458 | 0.16433  | 0.013311 | 0.77419  | 0.171596 | 0.00019 | -0.07268 |
| -0.08825 | 0.0567   | -0.1815  | 8.00E-05 | -0.15677 | 0.00067  | -0.03949 | 0.39453 | -0.20452 |
| 0.00918  | 0.84316  | -0.05828 | 0.2087   | -0.02289 | 0.62171  | -0.03717 | 0.42296 | -0.06601 |

|          |          |          |          |          |          |          |          |          |
|----------|----------|----------|----------|----------|----------|----------|----------|----------|
| 0.077052 | 0.09629  | -0.03512 | 0.44896  | -0.04392 | 0.34364  | -0.03251 | 0.48345  | -0.05671 |
| -0.10253 | 0.02672  | -0.1753  | 0.00014  | -0.13154 | 0.00441  | -0.04758 | 0.30486  | -0.18285 |
| 0.12191  | 0.00836  | -0.01967 | 0.67156  | 0.09643  | 0.03724  | 0.114896 | 0.01297  | 0.027829 |
| 0.186828 | 4.86E-05 | -0.04805 | 0.30013  | 0.13344  | 0.00387  | -0.00212 | 0.96363  | -0.00591 |
| -0.02978 | 0.52084  | -0.10822 | 0.01933  | 0.018949 | 0.68296  | -0.02031 | 0.66158  | -0.03931 |
| -0.04154 | 0.37041  | -0.1297  | 0.005    | -0.12591 | 0.00644  | -0.11999 | 0.00945  | -0.14781 |
| 0.058861 | 0.2042   | 0.069616 | 0.13304  | 0.043295 | 0.35054  | 0.051776 | 0.26414  | -0.01387 |
| -0.00185 | 0.9682   | -0.03382 | 0.46595  | 0.04693  | 0.31153  | 0.080366 | 0.08276  | -0.04159 |
| -0.0133  | 0.77439  | -0.16014 | 0.00051  | -0.17428 | 0.00015  | -0.14385 | 0.00183  | -0.18949 |
| -0.06284 | 0.1752   | -0.1618  | 0.00045  | -0.19296 | 2.69E-05 | -0.12643 | 0.00622  | -0.1856  |
| 0.119601 | 0.00968  | 0.030019 | 0.51756  | 0.017502 | 0.706    | 0.019871 | 0.66843  | -0.01115 |
| -0.04357 | 0.3475   | -0.14106 | 0.00225  | -0.02959 | 0.52353  | -0.02109 | 0.6494   | -0.1125  |
| -0.13872 | 0.00266  | -0.15741 | 0.00064  | -0.24818 | 5.51E-08 | -0.30003 | 3.60E-11 | -0.15088 |
| -0.02577 | 0.57849  | -0.05416 | 0.24274  | 0.016965 | 0.71462  | -0.03722 | 0.42225  | -0.01279 |
| -0.05473 | 0.23783  | -0.08382 | 0.07036  | -0.10887 | 0.0186   | -0.09043 | 0.05083  | -0.14321 |
| 0.018629 | 0.68802  | 0.015819 | 0.73313  | 0.031928 | 0.49126  | 0.013793 | 0.76625  | 0.020205 |
| 0.030922 | 0.50503  | -0.0231  | 0.6186   | 0.088445 | 0.05614  | 0.034707 | 0.45431  | 0.049254 |
| -0.11889 | 0.01013  | -0.07617 | 0.10018  | -0.14996 | 0.00115  | -0.10462 | 0.02376  | -0.10251 |
| 0.10042  | 0.03002  | -0.00603 | 0.89661  | 0.029412 | 0.52605  | 0.023361 | 0.61458  | 0.017574 |
| -0.03304 | 0.47624  | -0.121   | 0.00886  | 0.060174 | 0.19427  | 0.020438 | 0.65956  | -0.06917 |
| 0.038295 | 0.409    | -0.03373 | 0.46715  | 0.042024 | 0.36488  | -0.01486 | 0.74881  | -0.04199 |
| 0.053817 | 0.24575  | 0.062441 | 0.17796  | 0.009769 | 0.83324  | 0.089538 | 0.05316  | 0.001722 |
| 0.122512 | 0.00804  | -0.07568 | 0.10239  | 0.119737 | 0.0096   | 0.125249 | 0.00673  | 0.005718 |
| 0.051055 | 0.27087  | -0.06147 | 0.18478  | -0.03251 | 0.48337  | -0.02862 | 0.53732  | -0.11532 |
| -0.03986 | 0.39007  | -0.15894 | 0.00057  | 0.089935 | 0.05211  | -0.00561 | 0.90369  | 0.073619 |
| -0.07014 | 0.13012  | -0.17868 | 0.0001   | -0.12112 | 0.00879  | -0.03831 | 0.40876  | -0.19029 |
| 0.011059 | 0.8116   | -0.06068 | 0.19055  | 0.020848 | 0.65317  | 0.053    | 0.25301  | -0.01057 |
| 0.216289 | 2.39E-06 | 0.036326 | 0.43353  | 0.180042 | 9.14E-05 | 0.068907 | 0.13705  | 0.078451 |
| -0.13296 | 0.004    | -0.15638 | 0.0007   | -0.17421 | 0.00015  | -0.18117 | 8.24E-05 | -0.17078 |
| -0.01353 | 0.77063  | -0.06741 | 0.14582  | 0.104042 | 0.02455  | 0.036419 | 0.43235  | 0.049168 |
| 0.073776 | 0.11134  | 0.042885 | 0.35513  | 0.137735 | 0.00286  | 0.2164   | 2.36E-06 | 0.118352 |
| -0.01631 | 0.72521  | -0.05816 | 0.20968  | -0.03565 | 0.44211  | -0.04863 | 0.29433  | -0.112   |
| -0.05103 | 0.27109  | -0.16604 | 0.00031  | -0.03523 | 0.44749  | 0.027    | 0.56056  | -0.12374 |
| 0.054886 | 0.23649  | -0.09867 | 0.03302  | -0.04633 | 0.31779  | -0.02015 | 0.66412  | -0.10132 |
| 0.006458 | 0.88931  | -0.01174 | 0.80026  | 0.02208  | 0.63412  | -0.01876 | 0.68591  | -0.01421 |
| 0.0708   | 0.12656  | -0.10713 | 0.02059  | 0.005261 | 0.90972  | 0.064636 | 0.16316  | -0.05699 |
| 0.036948 | 0.42569  | -0.00629 | 0.89212  | 0.029574 | 0.52378  | 0.017562 | 0.70504  | 0.015913 |
| -0.17649 | 0.00013  | -0.36719 | 2.36E-16 | -0.12751 | 0.00579  | -0.11148 | 0.01595  | -0.16063 |
| 0.171756 | 0.00019  | 0.052871 | 0.25416  | 0.150902 | 0.00107  | 0.094832 | 0.04052  | 0.133527 |
| 0.079165 | 0.08748  | 0.046186 | 0.31928  | 0.065541 | 0.15734  | 0.087679 | 0.05831  | 0.021675 |
| 0.077268 | 0.09536  | -0.02792 | 0.54723  | -0.00584 | 0.89989  | -0.00131 | 0.97748  | -0.0459  |
| 0.038946 | 0.40108  | -0.1199  | 0.0095   | -0.0932  | 0.04411  | -0.04735 | 0.30727  | -0.17556 |
| 0.078491 | 0.09021  | 0.076502 | 0.09869  | 0.056942 | 0.21936  | 0.018672 | 0.68735  | 0.05357  |
| 0.066902 | 0.14888  | 0.004161 | 0.92854  | 0.050056 | 0.28036  | 0.038764 | 0.40329  | 0.014302 |
| 0.058108 | 0.21005  | -0.11603 | 0.0121   | -0.03228 | 0.48653  | -0.08814 | 0.057    | -0.01809 |

|          |          |          |          |          |          |          |          |          |
|----------|----------|----------|----------|----------|----------|----------|----------|----------|
| 0.101645 | 0.02806  | 0.036465 | 0.43178  | 0.118443 | 0.01042  | 0.027242 | 0.55705  | 0.019635 |
| -0.10775 | 0.01986  | -0.08545 | 0.06502  | -0.04989 | 0.28194  | -0.04028 | 0.38508  | -0.09605 |
| 0.073585 | 0.11227  | -0.05729 | 0.21657  | 0.050309 | 0.27794  | 0.064969 | 0.161    | -0.08764 |
| -0.14665 | 0.00148  | -0.12539 | 0.00666  | -0.0944  | 0.04145  | -0.13928 | 0.00256  | -0.04514 |
| -0.12946 | 0.00508  | -0.15896 | 0.00056  | -0.29304 | 1.06E-10 | -0.18974 | 3.68E-05 | -0.24715 |
| 0.068677 | 0.13837  | -0.04951 | 0.28564  | 0.177883 | 0.00011  | 0.134982 | 0.00347  | 0.089586 |
| 0.059895 | 0.19635  | -0.0627  | 0.17618  | -0.04591 | 0.3222   | 0.003365 | 0.94219  | -0.08178 |
| -0.04926 | 0.28806  | -0.28617 | 2.98E-10 | -0.09774 | 0.03473  | -0.12103 | 0.00884  | -0.19042 |
| 0.198756 | 1.51E-05 | -0.08838 | 0.05632  | 0.134662 | 0.00355  | 0.153279 | 0.00089  | 0.004084 |
| -0.14088 | 0.00228  | -0.28107 | 6.30E-10 | -0.06376 | 0.16894  | -0.09326 | 0.04397  | -0.18559 |
| 0.097419 | 0.03533  | -0.09329 | 0.04389  | 0.135556 | 0.00333  | 0.04319  | 0.35171  | -0.04144 |
| 0.000768 | 0.9868   | 0.02959  | 0.52356  | 0.049726 | 0.28355  | 0.039654 | 0.39257  | -0.02955 |
| 0.0503   | 0.27803  | -0.25975 | 1.22E-08 | 0.07943  | 0.08642  | -0.12189 | 0.00837  | -0.04752 |
| 0.025872 | 0.57705  | -0.10275 | 0.0264   | 0.022237 | 0.63171  | 0.027478 | 0.55364  | -0.05318 |
| -0.00594 | 0.8982   | -0.0919  | 0.04716  | -0.01781 | 0.70103  | -0.06366 | 0.16961  | -0.00789 |
| -0.12179 | 0.00842  | -0.1465  | 0.0015   | -0.20493 | 8.04E-06 | -0.16245 | 0.00042  | -0.16784 |
| 0.005613 | 0.90372  | 0.014942 | 0.74741  | -0.06625 | 0.15288  | -0.028   | 0.54607  | -0.10248 |
| 0.019354 | 0.67656  | 0.076875 | 0.09706  | 0.128798 | 0.00531  | 0.015486 | 0.73855  | 0.212021 |
| 0.1763   | 0.00013  | 0.365684 | 3.19E-16 | 0.03544  | 0.44484  | 0.125588 | 0.00658  | 0.137519 |
| 0.051165 | 0.26984  | 0.077632 | 0.0938   | 0.208032 | 5.81E-06 | 0.054301 | 0.24153  | 0.273144 |
| 0.075095 | 0.10507  | 0.106096 | 0.02184  | 0.155827 | 0.00073  | 0.055935 | 0.22764  | 0.201214 |
| 0.094168 | 0.04195  | 0.028331 | 0.54139  | 0.15491  | 0.00078  | 0.01765  | 0.70364  | 0.209756 |
| 0.009737 | 0.83378  | 0.037488 | 0.41896  | 0.121361 | 0.00866  | -0.01679 | 0.7175   | 0.205032 |
| 0.288949 | 1.97E-10 | 0.18728  | 4.65E-05 | 0.22168  | 1.31E-06 | 0.157793 | 0.00062  | 0.21999  |
| 0.136807 | 0.00305  | 0.0899   | 0.0522   | 0.202771 | 1.00E-05 | 0.036987 | 0.42521  | 0.249398 |
| 0.001602 | 0.97246  | 0.0257   | 0.5796   | -0.10478 | 0.02354  | -0.1003  | 0.03021  | -0.00213 |
| 0.13199  | 0.00427  | 0.119368 | 0.00983  | 0.29547  | 7.32E-11 | 0.100596 | 0.02974  | 0.299354 |
| 0.015508 | 0.73818  | 0.008172 | 0.8602   | 0.090738 | 0.05004  | -0.05438 | 0.24083  | 0.153852 |
| 0.169723 | 0.00023  | 0.108069 | 0.01949  | 0.245932 | 7.31E-08 | 0.033939 | 0.46437  | 0.33069  |
| 0.026202 | 0.5722   | 0.127863 | 0.00566  | 0.128643 | 0.00537  | 0.027774 | 0.54937  | 0.19326  |
| 0.016815 | 0.71704  | -0.0345  | 0.457    | 0.064329 | 0.16517  | -0.07948 | 0.0862   | 0.131151 |
| 0.136157 | 0.0032   | 0.211031 | 4.22E-06 | 0.135377 | 0.00338  | 0.063359 | 0.17165  | 0.212761 |
| 0.134505 | 0.00359  | 0.062451 | 0.17789  | 0.118305 | 0.01051  | -0.00517 | 0.91131  | 0.14581  |
| 0.072226 | 0.11907  | 0.024203 | 0.60188  | -0.06715 | 0.14738  | -0.09378 | 0.0428   | -0.00385 |
| 0.037781 | 0.41533  | -0.02186 | 0.63753  | 0.034649 | 0.45507  | 0.001543 | 0.97347  | 0.079097 |
| 0.081966 | 0.07681  | -0.08379 | 0.07044  | 0.13331  | 0.0039   | -0.08018 | 0.08348  | 0.213083 |
| 0.137709 | 0.00286  | -0.01802 | 0.69776  | 0.100633 | 0.02968  | -0.06363 | 0.16982  | 0.206338 |
| 0.013247 | 0.77525  | -0.03495 | 0.45121  | -0.0552  | 0.23382  | -0.19271 | 2.76E-05 | 0.055714 |
| 0.000299 | 0.99486  | -0.0406  | 0.38138  | 0.142443 | 0.00203  | -0.03671 | 0.42871  | 0.234847 |
| 0.118579 | 0.01033  | 0.161796 | 0.00045  | 0.143188 | 0.00192  | -0.00671 | 0.88508  | 0.220266 |
| 0.161115 | 0.00047  | 0.092293 | 0.04622  | 0.14543  | 0.00163  | 0.020291 | 0.66185  | 0.157272 |
| 0.054665 | 0.23839  | 0.046405 | 0.31698  | 0.134712 | 0.00354  | -0.05349 | 0.24864  | 0.208351 |
| 0.034563 | 0.45619  | -0.01902 | 0.68176  | 0.111663 | 0.01577  | -0.02303 | 0.61954  | 0.182894 |
| 0.170056 | 0.00022  | 0.180543 | 8.73E-05 | 0.294937 | 7.94E-11 | 0.169903 | 0.00023  | 0.315821 |
| 0.170243 | 0.00022  | 0.118262 | 0.01053  | 0.199212 | 1.44E-05 | -0.01321 | 0.77578  | 0.274111 |



|          |          |          |          |          |          |          |          |          |
|----------|----------|----------|----------|----------|----------|----------|----------|----------|
| -0.00602 | 0.89678  | 0.033725 | 0.4672   | 0.13195  | 0.00429  | 0.010418 | 0.82234  | 0.18802  |
| 0.046376 | 0.31729  | 0.089587 | 0.05303  | 0.150935 | 0.00107  | -0.00996 | 0.83007  | 0.259015 |
| -0.01913 | 0.68014  | 0.033965 | 0.46403  | 0.05166  | 0.26522  | -0.04278 | 0.35627  | 0.148931 |
| -0.02587 | 0.57714  | -0.05222 | 0.26005  | -0.10535 | 0.0228   | -0.19857 | 1.54E-05 | -0.01706 |
| -0.03022 | 0.51472  | 0.00321  | 0.94484  | 0.011706 | 0.80081  | -0.11636 | 0.01185  | 0.128208 |
| 0.096822 | 0.03647  | 0.149058 | 0.00124  | 0.115214 | 0.01272  | 0.006476 | 0.889    | 0.243462 |
| 0.207995 | 5.83E-06 | 0.20143  | 1.15E-05 | 0.136885 | 0.00304  | 0.038588 | 0.40542  | 0.195298 |
| -0.05485 | 0.2368   | -0.05083 | 0.27297  | 0.009518 | 0.83746  | -0.09513 | 0.03988  | 0.078904 |
| 0.177199 | 0.00012  | 0.096492 | 0.03712  | 0.180229 | 8.99E-05 | 0.028611 | 0.53739  | 0.238204 |
| -0.10334 | 0.02554  | -0.11721 | 0.01125  | 0.035843 | 0.43967  | -0.11872 | 0.01024  | 0.113606 |
| -0.0804  | 0.08264  | -0.08762 | 0.05849  | 0.040694 | 0.38026  | -0.09845 | 0.03343  | 0.106897 |
| 0.029112 | 0.53029  | 0.073479 | 0.11279  | 0.177266 | 0.00012  | 0.034061 | 0.46277  | 0.249518 |
| 0.03917  | 0.39837  | 0.056796 | 0.22055  | 0.140617 | 0.00232  | 0.022573 | 0.62657  | 0.207993 |
| 0.07693  | 0.09682  | -0.0291  | 0.53053  | 0.078927 | 0.08843  | -0.07932 | 0.08684  | 0.149126 |
| -0.04453 | 0.33698  | -0.11413 | 0.0136   | 0.087814 | 0.05793  | -0.06617 | 0.15339  | 0.149923 |
| 0.168814 | 0.00025  | -0.02028 | 0.66209  | 0.119536 | 0.00972  | -0.1156  | 0.01243  | 0.200229 |
| 0.202997 | 9.82E-06 | 0.251608 | 3.55E-08 | 0.159352 | 0.00055  | 0.155319 | 0.00076  | 0.184622 |
| 0.170789 | 0.00021  | 0.259034 | 1.35E-08 | 0.190584 | 3.39E-05 | 0.159032 | 0.00056  | 0.233364 |
| -0.00956 | 0.83677  | -0.03972 | 0.39174  | 0.109436 | 0.018    | -0.03362 | 0.46858  | 0.172466 |
| 0.03855  | 0.40589  | 0.003396 | 0.94165  | 0.138025 | 0.0028   | -0.01203 | 0.79544  | 0.196793 |
| 0.109036 | 0.01842  | 0.124867 | 0.0069   | -0.13241 | 0.00415  | -0.13553 | 0.00334  | -0.00091 |
| 0.275262 | 1.45E-09 | 0.042015 | 0.36498  | 0.142781 | 0.00198  | 0.097672 | 0.03485  | 0.16654  |
| 0.225667 | 8.34E-07 | 0.02512  | 0.58818  | 0.204705 | 8.23E-06 | 0.078917 | 0.08847  | 0.259413 |
| 0.134483 | 0.0036   | 0.047001 | 0.3108   | 0.149882 | 0.00116  | 0.022213 | 0.63208  | 0.192496 |
| 0.260503 | 1.11E-08 | 0.066453 | 0.15163  | 0.130202 | 0.00483  | 0.025605 | 0.58099  | 0.233271 |
| 0.202273 | 1.06E-05 | 0.279408 | 8.01E-10 | 0.043372 | 0.34969  | 0.027483 | 0.55357  | 0.159837 |
| 0.420424 | 2.00E-21 | 0.400714 | 1.93E-19 | 0.525502 | 1.63E-34 | 0.347191 | 1.12E-14 | 0.327105 |
| 0.211161 | 4.16E-06 | 0.096643 | 0.03682  | 0.134633 | 0.00356  | -0.05779 | 0.21255  | 0.230431 |
| 0.266406 | 4.99E-09 | 0.290564 | 1.54E-10 | 0.408858 | 3.03E-20 | 0.247224 | 6.22E-08 | 0.419056 |
| -0.23486 | 2.84E-07 | -0.23749 | 2.07E-07 | -0.37168 | 9.55E-17 | -0.21835 | 1.90E-06 | -0.25185 |
| 0.271114 | 2.60E-09 | 0.334556 | 1.12E-13 | 0.201342 | 1.16E-05 | 0.205483 | 7.59E-06 | 0.176897 |
| -0.02785 | 0.54821  | 0.025912 | 0.57647  | -0.07509 | 0.10508  | -0.21164 | 3.96E-06 | 0.04378  |
| 0.377007 | 3.21E-17 | 0.424858 | 6.84E-22 | 0.338829 | 5.22E-14 | 0.207303 | 6.27E-06 | 0.278675 |
| 0.189549 | 3.75E-05 | 0.188417 | 4.18E-05 | 0.143025 | 0.00195  | 0.029755 | 0.52125  | 0.226464 |
| 0.423679 | 9.11E-22 | 0.587433 | 1.15E-44 | 0.559213 | 8.96E-40 | 0.470746 | 3.95E-27 | 0.462364 |
| 0.506557 | 8.32E-32 | 0.519751 | 1.13E-33 | 0.629031 | 8.17E-53 | 0.453242 | 4.89E-25 | 0.613792 |
| 0.089855 | 0.05232  | 0.189193 | 3.88E-05 | -0.04158 | 0.36998  | -0.09128 | 0.04868  | 0.078832 |
| 0.131217 | 0.00451  | 0.126962 | 0.00601  | 0.123484 | 0.00755  | -0.02989 | 0.51936  | 0.208285 |
| -0.20525 | 7.78E-06 | -0.15563 | 0.00074  | -0.13269 | 0.00407  | -0.0242  | 0.60188  | -0.1791  |
| 0.261246 | 1.00E-08 | 0.516005 | 3.90E-33 | 0.286469 | 2.85E-10 | 0.247892 | 5.71E-08 | 0.338379 |
| 0.41111  | 1.80E-20 | 0.50539  | 1.21E-31 | 0.411979 | 1.47E-20 | 0.419936 | 2.25E-21 | 0.381021 |
| 0.307654 | 1.07E-11 | 0.486574 | 3.96E-29 | 0.181355 | 8.10E-05 | 0.102371 | 0.02696  | 0.148144 |
| 0.238188 | 1.90E-07 | 0.189905 | 3.62E-05 | 0.223692 | 1.04E-06 | 0.15211  | 0.00098  | 0.138764 |
| 0.129816 | 0.00496  | 0.169218 | 0.00024  | 0.119881 | 0.00951  | -0.02442 | 0.59866  | 0.246764 |
| -0.20659 | 6.76E-06 | -0.14465 | 0.00172  | -0.25716 | 1.73E-08 | -0.0458  | 0.32337  | -0.26046 |

|          |          |          |          |          |          |          |          |          |
|----------|----------|----------|----------|----------|----------|----------|----------|----------|
| 0.152184 | 0.00097  | -0.02001 | 0.66631  | -0.09865 | 0.03307  | -0.20674 | 6.65E-06 | -0.04284 |
| 0.435474 | 4.93E-23 | 0.428925 | 2.53E-22 | 0.572173 | 5.82E-42 | 0.275306 | 1.44E-09 | 0.556692 |
| 0.058396 | 0.2078   | -0.08734 | 0.05929  | 0.086892 | 0.06062  | -0.21564 | 2.56E-06 | 0.10043  |
| 0.652173 | 6.57E-58 | 0.274489 | 1.62E-09 | 0.341787 | 3.05E-14 | 0.152469 | 0.00095  | 0.314277 |
| 0.104814 | 0.0235   | 0.21643  | 2.35E-06 | 0.058526 | 0.20679  | -0.00149 | 0.9743   | 0.172417 |
| 0.191771 | 3.02E-05 | 0.245951 | 7.30E-08 | 0.161732 | 0.00045  | 0.024041 | 0.60431  | 0.188537 |
| 0.471174 | 3.50E-27 | 0.540967 | 7.47E-37 | 0.591112 | 2.44E-45 | 0.372275 | 8.47E-17 | 0.537867 |
| 0.300676 | 3.26E-11 | 0.282254 | 5.30E-10 | 0.346366 | 1.31E-14 | 0.130713 | 0.00466  | 0.390806 |
| 0.074463 | 0.10804  | 0.077048 | 0.09631  | -0.04085 | 0.3784   | -0.01823 | 0.69439  | 0.081257 |
| -0.12987 | 0.00494  | -0.17508 | 0.00014  | 0.073855 | 0.11095  | 0.091713 | 0.04761  | 0.046876 |
| 0.221907 | 1.28E-06 | 0.327281 | 4.03E-13 | 0.075222 | 0.10448  | 0.032959 | 0.47737  | 0.128981 |
| 0.125195 | 0.00675  | -0.02697 | 0.56094  | 0.196524 | 1.89E-05 | -0.03412 | 0.46197  | 0.129274 |
| 0.08475  | 0.06727  | 0.134447 | 0.0036   | 0.189315 | 3.83E-05 | 0.030869 | 0.50576  | 0.212895 |
| 0.47308  | 2.03E-27 | 0.599444 | 6.77E-47 | 0.649834 | 2.25E-57 | 0.557274 | 1.87E-39 | 0.622327 |
| -0.02472 | 0.59409  | 0.127189 | 0.00592  | 0.276238 | 1.26E-09 | 0.038503 | 0.40646  | 0.252434 |
| 0.29075  | 1.50E-10 | 0.31006  | 7.28E-12 | 0.131462 | 0.00443  | -0.03715 | 0.4232   | 0.150146 |
| 0.101808 | 0.02781  | 0.099006 | 0.03243  | -0.07835 | 0.09081  | -0.14064 | 0.00232  | -0.08854 |
| 0.298641 | 4.48E-11 | 0.426907 | 4.15E-22 | 0.224335 | 9.71E-07 | 0.18081  | 8.52E-05 | 0.25782  |
| 0.598385 | 1.07E-46 | 0.44496  | 4.34E-24 | 0.583405 | 6.15E-44 | 0.297483 | 5.36E-11 | 0.585116 |
| 0.423502 | 9.51E-22 | 0.422646 | 1.17E-21 | 0.542263 | 4.69E-37 | 0.265229 | 5.85E-09 | 0.715033 |
| 0.436558 | 3.75E-23 | 0.417416 | 4.09E-21 | 0.607885 | 1.61E-48 | 0.372405 | 8.25E-17 | 0.565256 |
| 0.278293 | 9.41E-10 | 0.116534 | 0.01173  | 0.080491 | 0.08228  | 0.020244 | 0.66259  | 0.114351 |
| 0.075455 | 0.10341  | 0.206798 | 6.61E-06 | -0.07871 | 0.08933  | -0.09436 | 0.04152  | -0.03819 |
| 0.061871 | 0.18196  | -0.04371 | 0.34594  | -0.08151 | 0.07845  | -0.21575 | 2.53E-06 | -0.07572 |
| 0.18348  | 6.65E-05 | 0.262541 | 8.43E-09 | 0.302517 | 2.44E-11 | 0.178065 | 0.00011  | 0.292086 |
| 0.345943 | 1.42E-14 | 0.652335 | 6.03E-58 | 0.256614 | 1.85E-08 | 0.38647  | 4.38E-18 | 0.267578 |
| 0.41183  | 1.52E-20 | 0.476067 | 8.63E-28 | 0.360237 | 9.34E-16 | 0.381355 | 1.30E-17 | 0.34795  |
| 0.356782 | 1.83E-15 | 0.523037 | 3.76E-34 | 0.367037 | 2.44E-16 | 0.201895 | 1.10E-05 | 0.395859 |
| 0.39823  | 3.37E-19 | 0.523524 | 3.19E-34 | 0.347865 | 9.92E-15 | 0.15342  | 0.00088  | 0.427467 |
| 0.210716 | 4.37E-06 | 0.29397  | 9.21E-11 | -0.02864 | 0.53705  | -0.13837 | 0.00273  | 0.039834 |
| 0.213144 | 3.36E-06 | 0.321614 | 1.07E-12 | 0.130798 | 0.00464  | -0.03206 | 0.4895   | 0.190295 |
| 0.476272 | 8.13E-28 | 0.323876 | 7.25E-13 | 0.658422 | 2.31E-59 | 0.392846 | 1.10E-18 | 0.563173 |
| 0.184105 | 6.28E-05 | 0.41414  | 8.87E-21 | -0.06409 | 0.16676  | -0.0594  | 0.20011  | 0.029942 |
| -0.06715 | 0.14739  | -0.25291 | 3.01E-08 | -0.00643 | 0.88971  | -0.05249 | 0.25758  | 0.094901 |
| 0.292241 | 1.20E-10 | 0.060978 | 0.18836  | 0.312625 | 4.79E-12 | -0.03656 | 0.43057  | 0.311746 |
| 0.33948  | 4.64E-14 | 0.487211 | 3.27E-29 | 0.188876 | 4.00E-05 | 0.041949 | 0.36573  | 0.24053  |
| 0.394278 | 8.07E-19 | 0.526639 | 1.11E-34 | 0.465241 | 1.85E-26 | 0.293418 | 1.00E-10 | 0.45519  |
| 0.376016 | 3.94E-17 | 0.471973 | 2.79E-27 | 0.437018 | 3.34E-23 | 0.398121 | 3.45E-19 | 0.319586 |
| 0.346778 | 1.21E-14 | 0.627595 | 1.64E-52 | 0.200976 | 1.21E-05 | 0.281434 | 5.97E-10 | 0.249125 |
| 0.419409 | 2.55E-21 | 0.390877 | 1.70E-18 | 0.597436 | 1.62E-46 | 0.338922 | 5.13E-14 | 0.511026 |
| 0.401426 | 1.65E-19 | 0.37498  | 4.87E-17 | 0.565124 | 9.26E-41 | 0.329856 | 2.58E-13 | 0.421084 |
| 0.325839 | 5.18E-13 | 0.31415  | 3.72E-12 | 0.56601  | 6.56E-41 | 0.28039  | 6.95E-10 | 0.505494 |
| 0.419186 | 2.69E-21 | 0.29581  | 6.94E-11 | 0.422181 | 1.31E-21 | 0.187591 | 4.52E-05 | 0.318487 |
| 0.454352 | 3.63E-25 | 0.445085 | 4.20E-24 | 0.590513 | 3.15E-45 | 0.371707 | 9.51E-17 | 0.490266 |
| 0.454271 | 3.71E-25 | 0.463388 | 3.10E-26 | 0.505666 | 1.10E-31 | 0.205075 | 7.92E-06 | 0.512787 |

|          |          |          |          |          |          |          |          |          |
|----------|----------|----------|----------|----------|----------|----------|----------|----------|
| 0.447912 | 2.01E-24 | 0.491731 | 8.38E-30 | 0.548598 | 4.71E-38 | 0.305045 | 1.63E-11 | 0.504924 |
| 0.369442 | 1.50E-16 | 0.359998 | 9.78E-16 | 0.493331 | 5.15E-30 | 0.347725 | 1.02E-14 | 0.347395 |
| 0.270452 | 2.85E-09 | 0.355854 | 2.18E-15 | 0.116702 | 0.01161  | -0.01689 | 0.7158   | 0.14496  |
| 0.462011 | 4.53E-26 | 0.581762 | 1.21E-43 | 0.55906  | 9.49E-40 | 0.420169 | 2.12E-21 | 0.517837 |
| 0.339759 | 4.41E-14 | 0.303822 | 1.98E-11 | 0.048525 | 0.29536  | -0.03113 | 0.50215  | 0.103407 |
| 0.197031 | 1.80E-05 | 0.192729 | 2.75E-05 | 0.076762 | 0.09755  | -0.06224 | 0.17937  | 0.113476 |
| 0.334643 | 1.11E-13 | 0.576089 | 1.21E-42 | 0.190863 | 3.30E-05 | 0.313331 | 4.26E-12 | 0.216058 |
| 0.268962 | 3.51E-09 | 0.367153 | 2.38E-16 | -0.00314 | 0.94607  | -0.0666  | 0.15073  | 0.03595  |
| -0.16855 | 0.00025  | -0.12562 | 0.00656  | -0.16368 | 0.00038  | -0.04784 | 0.30227  | -0.13166 |
| 0.258807 | 1.39E-08 | 0.377931 | 2.65E-17 | 0.155693 | 0.00074  | 0.021777 | 0.63879  | 0.199337 |
| 0.10301  | 0.02601  | 0.388698 | 2.72E-18 | 0.062087 | 0.18044  | 0.06128  | 0.18618  | 0.16144  |
| 0.261953 | 9.12E-09 | 0.402682 | 1.24E-19 | 0.584931 | 3.27E-44 | 0.424012 | 8.40E-22 | 0.521578 |
| 0.282225 | 5.32E-10 | 0.467791 | 9.08E-27 | 0.251183 | 3.75E-08 | 0.207182 | 6.35E-06 | 0.259896 |
| 0.167673 | 0.00027  | 0.256075 | 1.99E-08 | 0.005172 | 0.91124  | 0.027815 | 0.54878  | 0.029743 |
| 0.263833 | 7.08E-09 | 0.272179 | 2.24E-09 | 0.096991 | 0.03614  | 0.049061 | 0.29005  | 0.195487 |
| 0.642076 | 1.24E-55 | 0.356049 | 2.10E-15 | 0.578305 | 4.96E-43 | 0.255152 | 2.25E-08 | 0.536051 |
| 0.174367 | 0.00015  | -0.13852 | 0.0027   | 0.018799 | 0.68533  | 0.10111  | 0.02891  | -0.0487  |
| 0.318504 | 1.80E-12 | 0.537201 | 2.85E-36 | 0.260957 | 1.04E-08 | 0.190359 | 3.46E-05 | 0.306999 |
| 0.21406  | 3.05E-06 | 0.355113 | 2.52E-15 | 0.139218 | 0.00257  | 0.129076 | 0.00521  | 0.254803 |
| 0.389164 | 2.46E-18 | 0.493913 | 4.31E-30 | 0.674372 | 3.10E-63 | 0.539823 | 1.12E-36 | 0.55442  |
| 0.384521 | 6.64E-18 | 0.507913 | 5.39E-32 | 0.478088 | 4.81E-28 | 0.336615 | 7.78E-14 | 0.506755 |
| 0.426599 | 4.47E-22 | 0.518678 | 1.61E-33 | 0.443935 | 5.67E-24 | 0.446738 | 2.73E-24 | 0.363823 |
| 0.326495 | 4.62E-13 | 0.140794 | 0.00229  | 0.174783 | 0.00015  | -0.05721 | 0.21719  | 0.292807 |
| 0.171696 | 0.00019  | 0.101156 | 0.02883  | 0.044783 | 0.33422  | -0.05245 | 0.25801  | 0.091441 |
| 0.064382 | 0.16482  | -0.09891 | 0.03261  | 0.058926 | 0.20369  | 0.121044 | 0.00883  | -0.02891 |
| 0.280545 | 6.80E-10 | 0.444726 | 4.62E-24 | 0.351741 | 4.78E-15 | 0.291198 | 1.40E-10 | 0.291521 |
| 0.437278 | 3.13E-23 | 0.383873 | 7.62E-18 | 0.593376 | 9.32E-46 | 0.306873 | 1.22E-11 | 0.517112 |
| 0.111891 | 0.01556  | 0.166511 | 0.0003   | 0.162315 | 0.00043  | -0.00252 | 0.95666  | 0.257944 |
| 0.248186 | 5.50E-08 | 0.198195 | 1.60E-05 | 0.148256 | 0.00131  | -0.00448 | 0.92302  | 0.157381 |
| 0.366829 | 2.54E-16 | 0.223174 | 1.11E-06 | 0.565497 | 8.01E-41 | 0.335205 | 1.00E-13 | 0.468427 |
| 0.194412 | 2.33E-05 | -0.03234 | 0.48565  | 0.137041 | 0.003    | -0.07119 | 0.12449  | 0.188529 |
| 0.267461 | 4.31E-09 | 0.134897 | 0.00349  | 0.227859 | 6.48E-07 | 0.042814 | 0.35593  | 0.32798  |
| 0.265598 | 5.57E-09 | 0.412953 | 1.17E-20 | 0.281533 | 5.89E-10 | 0.182008 | 7.63E-05 | 0.37437  |
| 0.381533 | 1.25E-17 | 0.527732 | 7.64E-35 | 0.564325 | 1.26E-40 | 0.44631  | 3.05E-24 | 0.586068 |
| 0.23096  | 4.51E-07 | 0.462978 | 3.47E-26 | 0.25749  | 1.65E-08 | 0.339326 | 4.77E-14 | 0.113402 |
| 0.448762 | 1.61E-24 | 0.629892 | 5.38E-53 | 0.414573 | 8.01E-21 | 0.387681 | 3.38E-18 | 0.421304 |
| 0.459044 | 1.02E-25 | 0.531984 | 1.77E-35 | 0.484294 | 7.79E-29 | 0.276147 | 1.28E-09 | 0.460262 |
| 0.387803 | 3.29E-18 | 0.481533 | 1.76E-28 | 0.313669 | 4.03E-12 | 0.149938 | 0.00115  | 0.299462 |
| 0.343066 | 2.41E-14 | 0.424416 | 7.62E-22 | 0.2638   | 7.11E-09 | 0.067565 | 0.14488  | 0.267369 |
| 0.193995 | 2.43E-05 | 0.350832 | 5.68E-15 | 0.105879 | 0.02212  | -0.0275  | 0.55338  | 0.222031 |
| 0.34556  | 1.52E-14 | 0.287218 | 2.55E-10 | 0.415498 | 6.45E-21 | 0.23538  | 2.67E-07 | 0.521484 |
| 0.248784 | 5.10E-08 | 0.246616 | 6.71E-08 | 0.139568 | 0.0025   | -0.10234 | 0.027    | 0.184395 |
| 0.646265 | 1.45E-56 | 0.512457 | 1.24E-32 | 0.252149 | 3.32E-08 | 0.201881 | 1.10E-05 | 0.272896 |
| 0.480547 | 2.35E-28 | 0.586816 | 1.49E-44 | 0.651629 | 8.75E-58 | 0.475624 | 9.80E-28 | 0.611582 |
| 0.19669  | 1.86E-05 | 0.287579 | 2.42E-10 | 0.065869 | 0.15527  | 0.011453 | 0.80503  | 0.209714 |

|          |          |          |          |          |          |          |          |          |
|----------|----------|----------|----------|----------|----------|----------|----------|----------|
| -0.0317  | 0.49432  | -0.07841 | 0.09054  | 0.082868 | 0.0736   | 0.134752 | 0.00353  | -0.03923 |
| -0.2726  | 2.11E-09 | -0.29771 | 5.18E-11 | -0.3542  | 2.99E-15 | -0.24548 | 7.74E-08 | -0.33602 |
| 0.467564 | 9.68E-27 | 0.597971 | 1.29E-46 | 0.436277 | 4.03E-23 | 0.353263 | 3.58E-15 | 0.424703 |
| 0.208276 | 5.66E-06 | 0.298313 | 4.71E-11 | -0.00184 | 0.96836  | -0.1634  | 0.00039  | 0.090533 |
| 0.343091 | 2.40E-14 | 0.45911  | 1.00E-25 | 0.306749 | 1.24E-11 | 0.108783 | 0.0187   | 0.36275  |
| 0.370147 | 1.30E-16 | 0.539275 | 1.37E-36 | 0.233506 | 3.34E-07 | 0.169087 | 0.00024  | 0.287116 |
| 0.267615 | 4.22E-09 | 0.338945 | 5.11E-14 | 0.15528  | 0.00076  | -0.03859 | 0.40541  | 0.177864 |
| 0.395185 | 6.61E-19 | 0.474306 | 1.43E-27 | 0.363619 | 4.81E-16 | 0.192769 | 2.74E-05 | 0.287397 |
| 0.431415 | 1.36E-22 | 0.593231 | 9.91E-46 | 0.541966 | 5.22E-37 | 0.380519 | 1.54E-17 | 0.507932 |
| 0.426107 | 5.05E-22 | 0.487609 | 2.90E-29 | 0.442773 | 7.66E-24 | 0.231839 | 4.07E-07 | 0.442402 |
| 0.266952 | 4.63E-09 | 0.404517 | 8.20E-20 | 0.064927 | 0.16128  | -0.02223 | 0.6318   | 0.157922 |
| 0.239644 | 1.59E-07 | 0.284511 | 3.81E-10 | 0.159616 | 0.00054  | -0.00457 | 0.9216   | 0.212109 |
| 0.349882 | 6.79E-15 | 0.483258 | 1.06E-28 | 0.234626 | 2.92E-07 | 0.054578 | 0.23913  | 0.276174 |
| 0.34615  | 1.36E-14 | 0.271719 | 2.39E-09 | 0.362566 | 5.92E-16 | 0.269171 | 3.41E-09 | 0.238665 |
| 0.346072 | 1.38E-14 | 0.334435 | 1.15E-13 | 0.2695   | 3.26E-09 | 0.002306 | 0.96037  | 0.296223 |
| 0.109384 | 0.01805  | -0.02511 | 0.5883   | -0.04721 | 0.30864  | -0.14194 | 0.00211  | 0.02516  |
| 0.517256 | 2.58E-33 | 0.678428 | 2.93E-64 | 0.528248 | 6.40E-35 | 0.435519 | 4.88E-23 | 0.517357 |
| 0.022287 | 0.63095  | -0.03979 | 0.39091  | -0.11    | 0.0174   | -0.34303 | 2.43E-14 | -0.01191 |
| 0.494143 | 4.02E-30 | 0.504767 | 1.47E-31 | 0.630163 | 4.71E-53 | 0.452849 | 5.43E-25 | 0.577337 |
| 0.17696  | 0.00012  | 0.403584 | 1.01E-19 | 0.008509 | 0.85449  | 0.021639 | 0.64091  | 0.115582 |
| 0.060723 | 0.19022  | 0.167286 | 0.00028  | -0.09068 | 0.05018  | -0.15362 | 0.00087  | 0.063124 |
| 0.379591 | 1.87E-17 | 0.546898 | 8.78E-38 | 0.317304 | 2.20E-12 | 0.197531 | 1.71E-05 | 0.370902 |
| -0.00056 | 0.99029  | 0.063044 | 0.1738   | 0.070192 | 0.12986  | -0.09524 | 0.03966  | 0.146187 |
| 0.152574 | 0.00094  | 0.172361 | 0.00018  | -0.07081 | 0.1265   | -0.2009  | 1.22E-05 | -0.03272 |
| 0.105329 | 0.02282  | 0.12498  | 0.00685  | 0.095159 | 0.03982  | -0.02377 | 0.60837  | 0.09186  |
| 0.372882 | 7.49E-17 | 0.559885 | 6.93E-40 | 0.311975 | 5.33E-12 | 0.167892 | 0.00027  | 0.389322 |
| 0.447937 | 1.99E-24 | 0.512438 | 1.25E-32 | 0.593938 | 7.33E-46 | 0.365833 | 3.10E-16 | 0.597028 |
| 0.607793 | 1.67E-48 | 0.464439 | 2.31E-26 | 0.528097 | 6.74E-35 | 0.275349 | 1.43E-09 | 0.52952  |
| 0.403063 | 1.14E-19 | 0.578959 | 3.80E-43 | 0.331425 | 1.96E-13 | 0.352177 | 4.40E-15 | 0.270008 |
| 0.393108 | 1.04E-18 | 0.372393 | 8.27E-17 | 0.526099 | 1.33E-34 | 0.20871  | 5.41E-06 | 0.522336 |
| 0.416111 | 5.58E-21 | 0.533299 | 1.12E-35 | 0.612782 | 1.74E-49 | 0.50709  | 7.02E-32 | 0.495225 |
| 0.712654 | 1.32E-73 | 0.476052 | 8.67E-28 | 0.530952 | 2.52E-35 | 0.312291 | 5.06E-12 | 0.539404 |
| 0.432607 | 1.01E-22 | 0.510402 | 2.42E-32 | 0.412161 | 1.41E-20 | 0.22939  | 5.42E-07 | 0.378083 |
| 0.283465 | 4.44E-10 | 0.326216 | 4.85E-13 | 0.266594 | 4.86E-09 | 0.00851  | 0.85447  | 0.286583 |
| 0.250451 | 4.12E-08 | 0.276254 | 1.26E-09 | 0.434182 | 6.83E-23 | 0.260936 | 1.05E-08 | 0.350029 |
| 0.432267 | 1.10E-22 | 0.567326 | 3.93E-41 | 0.449568 | 1.30E-24 | 0.359885 | 1.00E-15 | 0.397255 |
| 0.198517 | 1.55E-05 | 0.516297 | 3.54E-33 | 0.126584 | 0.00616  | 0.16879  | 0.00025  | 0.204181 |
| 0.404962 | 7.41E-20 | 0.518856 | 1.52E-33 | 0.433033 | 9.11E-23 | 0.262037 | 9.02E-09 | 0.426722 |
| 0.213176 | 3.35E-06 | 0.259736 | 1.23E-08 | 0.306158 | 1.37E-11 | 0.083773 | 0.0705   | 0.349234 |
| 0.509614 | 3.12E-32 | 0.320772 | 1.23E-12 | 0.584209 | 4.41E-44 | 0.276968 | 1.14E-09 | 0.501158 |
| 0.18595  | 5.28E-05 | 0.275627 | 1.38E-09 | 0.196573 | 1.88E-05 | 0.177876 | 0.00011  | 0.140573 |
| 0.039218 | 0.3978   | 0.305919 | 1.42E-11 | 0.036432 | 0.43219  | 0.06485  | 0.16177  | 0.14196  |
| -0.22463 | 9.39E-07 | -0.24361 | 9.77E-08 | -0.12535 | 0.00668  | -0.09396 | 0.0424   | -0.15914 |
| 0.472297 | 2.54E-27 | 0.636832 | 1.75E-54 | 0.630117 | 4.82E-53 | 0.479553 | 3.14E-28 | 0.581372 |
| 0.280212 | 7.13E-10 | 0.255133 | 2.25E-08 | 0.183609 | 6.58E-05 | -0.00826 | 0.85876  | 0.118888 |

|          |          |          |          |          |          |          |          |          |
|----------|----------|----------|----------|----------|----------|----------|----------|----------|
| 0.344802 | 1.75E-14 | 0.428193 | 3.03E-22 | 0.27539  | 1.42E-09 | 0.172511 | 0.00018  | 0.243288 |
| 0.444385 | 5.04E-24 | 0.588751 | 6.63E-45 | 0.542342 | 4.56E-37 | 0.367141 | 2.39E-16 | 0.510065 |
| 0.440363 | 1.42E-23 | 0.62194  | 2.45E-51 | 0.374655 | 5.21E-17 | 0.328267 | 3.40E-13 | 0.399789 |
| 0.208583 | 5.48E-06 | 0.380524 | 1.54E-17 | 0.244483 | 8.77E-08 | 0.244781 | 8.45E-08 | 0.497185 |
| 0.334616 | 1.11E-13 | 0.354336 | 2.92E-15 | 0.297402 | 5.43E-11 | 0.207976 | 5.84E-06 | 0.266549 |
| 0.284858 | 3.62E-10 | 0.273805 | 1.78E-09 | 0.421857 | 1.42E-21 | 0.178207 | 0.00011  | 0.431796 |
| 0.109422 | 0.01801  | 0.164698 | 0.00035  | 0.057104 | 0.21805  | -0.07631 | 0.09955  | 0.191315 |
| -0.05057 | 0.27543  | 0.016325 | 0.72494  | -0.09589 | 0.03831  | 0.232229 | 3.88E-07 | -0.19262 |
| 0.235104 | 2.76E-07 | 0.12479  | 0.00693  | 0.197925 | 1.64E-05 | -0.08063 | 0.08175  | 0.224421 |
| 0.562689 | 2.37E-40 | 0.548672 | 4.59E-38 | 0.683313 | 1.63E-65 | 0.46128  | 5.54E-26 | 0.603538 |
| 0.446878 | 2.63E-24 | 0.457332 | 1.63E-25 | 0.531986 | 1.76E-35 | 0.265642 | 5.53E-09 | 0.520975 |
| 0.401586 | 1.59E-19 | 0.282457 | 5.15E-10 | 0.618344 | 1.33E-50 | 0.29441  | 8.61E-11 | 0.508706 |
| 0.500167 | 6.24E-31 | 0.554604 | 5.09E-39 | 0.288855 | 2.00E-10 | 0.168906 | 0.00025  | 0.322171 |
| 0.346244 | 1.34E-14 | 0.545302 | 1.57E-37 | 0.229566 | 5.31E-07 | 0.180919 | 8.43E-05 | 0.24415  |
| 0.126591 | 0.00616  | 0.142437 | 0.00203  | 0.008062 | 0.86205  | -0.14029 | 0.00238  | 0.205678 |
| 0.112179 | 0.01529  | 0.403394 | 1.06E-19 | 0.077707 | 0.09348  | 0.101668 | 0.02803  | 0.031981 |
| 0.003066 | 0.94731  | -0.15469 | 0.0008   | -0.04567 | 0.32474  | -0.33974 | 4.43E-14 | -0.0221  |
| 0.194132 | 2.40E-05 | 0.074794 | 0.10647  | 0.025061 | 0.58905  | -0.20007 | 1.32E-05 | 0.05651  |
| 0.344171 | 1.97E-14 | 0.215601 | 2.57E-06 | 0.467763 | 9.15E-27 | 0.102541 | 0.0267   | 0.408939 |
| 0.033904 | 0.46483  | -0.14106 | 0.00225  | -0.1168  | 0.01154  | -0.03133 | 0.49938  | -0.15251 |
| 0.371385 | 1.02E-16 | 0.602282 | 1.95E-47 | 0.35614  | 2.07E-15 | 0.376269 | 3.74E-17 | 0.296137 |
| 0.414205 | 8.74E-21 | 0.516417 | 3.41E-33 | 0.456296 | 2.15E-25 | 0.432369 | 1.07E-22 | 0.426268 |
| 0.104338 | 0.02414  | 0.050902 | 0.27231  | 0.006698 | 0.88521  | -0.19737 | 1.74E-05 | 0.093915 |
| 0.419456 | 2.52E-21 | 0.544047 | 2.47E-37 | 0.483442 | 1.00E-28 | 0.457431 | 1.58E-25 | 0.317397 |
| 0.20211  | 1.08E-05 | 0.125515 | 0.00661  | 0.071173 | 0.12457  | -0.02906 | 0.5311   | 0.010163 |
| 0.270221 | 2.95E-09 | 0.499027 | 8.91E-31 | 0.442179 | 8.93E-24 | 0.434174 | 6.84E-23 | 0.344995 |
| 0.371598 | 9.72E-17 | 0.691575 | 1.08E-67 | 0.291887 | 1.26E-10 | 0.420724 | 1.86E-21 | 0.266534 |
| 0.377052 | 3.18E-17 | 0.562197 | 2.86E-40 | 0.339486 | 4.63E-14 | 0.256216 | 1.95E-08 | 0.293596 |
| 0.232906 | 3.58E-07 | 0.282396 | 5.19E-10 | 0.064868 | 0.16166  | -0.01588 | 0.73216  | 0.04679  |
| -0.15967 | 0.00053  | -0.33981 | 4.37E-14 | 0.03363  | 0.46845  | 0.011636 | 0.80198  | -0.04694 |
| 0.472462 | 2.42E-27 | 0.623325 | 1.27E-51 | 0.554116 | 6.11E-39 | 0.392751 | 1.13E-18 | 0.582692 |
| 0.176943 | 0.00012  | 0.196856 | 1.83E-05 | 0.232628 | 3.70E-07 | 0.086097 | 0.06302  | 0.212506 |
| 0.377451 | 2.93E-17 | 0.291426 | 1.36E-10 | 0.187993 | 4.35E-05 | 0.031971 | 0.49069  | 0.259528 |
| 0.432033 | 1.17E-22 | 0.4383   | 2.41E-23 | 0.496362 | 2.03E-30 | 0.288451 | 2.12E-10 | 0.408907 |
| 0.314599 | 3.46E-12 | 0.352173 | 4.41E-15 | 0.422324 | 1.26E-21 | 0.229306 | 5.47E-07 | 0.428769 |
| 0.270103 | 2.99E-09 | 0.329328 | 2.83E-13 | 0.556178 | 2.82E-39 | 0.408331 | 3.42E-20 | 0.514424 |
| 0.25507  | 2.27E-08 | 0.42116  | 1.67E-21 | 0.311159 | 6.09E-12 | 0.273844 | 1.77E-09 | 0.296729 |
| -0.10352 | 0.02528  | -0.24421 | 9.07E-08 | 0.037856 | 0.4144   | 0.039905 | 0.38957  | -0.04412 |
| -0.079   | 0.08815  | -0.14061 | 0.00232  | -0.08608 | 0.06308  | 0.09663  | 0.03684  | -0.25414 |
| -0.08999 | 0.05197  | -0.23554 | 2.62E-07 | -0.17666 | 0.00012  | -0.10052 | 0.02986  | -0.22353 |
| 0.741462 | 1.32E-82 | 0.472622 | 2.32E-27 | 0.625815 | 3.86E-52 | 0.391234 | 1.57E-18 | 0.538472 |
| 0.242923 | 1.06E-07 | 0.348322 | 9.10E-15 | 0.08713  | 0.05991  | 0.076005 | 0.10091  | 0.055639 |
| 0.290009 | 1.68E-10 | 0.393047 | 1.06E-18 | 0.076327 | 0.09947  | 0.099945 | 0.03082  | 0.07321  |
| 0.501341 | 4.32E-31 | 0.690149 | 2.59E-67 | 0.633516 | 9.09E-54 | 0.536635 | 3.47E-36 | 0.594014 |
| 0.201135 | 1.19E-05 | 0.231281 | 4.34E-07 | 0.235973 | 2.49E-07 | 0.123686 | 0.00745  | 0.203553 |

|          |          |          |          |          |          |          |          |          |
|----------|----------|----------|----------|----------|----------|----------|----------|----------|
| 0.071238 | 0.12422  | 0.107032 | 0.0207   | 0.046721 | 0.3137   | -0.03195 | 0.49102  | 0.01042  |
| -0.06338 | 0.17151  | -0.116   | 0.01212  | -0.22636 | 7.70E-07 | -0.30712 | 1.17E-11 | -0.13226 |
| 0.428637 | 2.71E-22 | 0.287085 | 2.60E-10 | 0.59733  | 1.70E-46 | 0.277681 | 1.03E-09 | 0.479296 |
| 0.459253 | 9.64E-26 | 0.645306 | 2.37E-56 | 0.511866 | 1.51E-32 | 0.399574 | 2.50E-19 | 0.478231 |
| 0.43744  | 3.00E-23 | 0.464586 | 2.22E-26 | 0.587367 | 1.18E-44 | 0.341355 | 3.30E-14 | 0.546995 |
| 0.209178 | 5.15E-06 | 0.234132 | 3.10E-07 | 0.009019 | 0.84587  | -0.04723 | 0.3084   | 0.05617  |
| 0.275115 | 1.48E-09 | 0.459321 | 9.46E-26 | 0.247149 | 6.27E-08 | 0.169961 | 0.00022  | 0.345625 |
| 0.477588 | 5.56E-28 | 0.5276   | 7.99E-35 | 0.584042 | 4.73E-44 | 0.322423 | 9.30E-13 | 0.575055 |
| 0.402931 | 1.17E-19 | 0.51379  | 8.06E-33 | 0.512782 | 1.12E-32 | 0.299858 | 3.70E-11 | 0.5009   |
| 0.114817 | 0.01304  | 0.222989 | 1.13E-06 | 0.320664 | 1.25E-12 | 0.165756 | 0.00032  | 0.277075 |
| 0.251726 | 3.50E-08 | 0.163492 | 0.00039  | 0.039961 | 0.38891  | -0.0889  | 0.05487  | 0.204253 |
| 0.231319 | 4.32E-07 | 0.103788 | 0.0249   | 0.142104 | 0.00208  | -0.10861 | 0.01889  | 0.155241 |
| 0.198389 | 1.57E-05 | -0.01057 | 0.81973  | -0.03356 | 0.46939  | -0.25468 | 2.39E-08 | 0.019483 |
| 0.466621 | 1.26E-26 | 0.468307 | 7.86E-27 | 0.593669 | 8.22E-46 | 0.431882 | 1.21E-22 | 0.46255  |
| -0.14792 | 0.00135  | -0.01014 | 0.82705  | -0.17506 | 0.00014  | 0.119686 | 0.00963  | -0.17662 |
| 0.138003 | 0.0028   | 0.008561 | 0.85361  | 0.039484 | 0.39461  | -0.20044 | 1.28E-05 | -0.01735 |
| 0.380006 | 1.72E-17 | 0.422457 | 1.22E-21 | 0.578588 | 4.42E-43 | 0.299087 | 4.18E-11 | 0.511826 |
| 0.454753 | 3.26E-25 | 0.573304 | 3.71E-42 | 0.516272 | 3.57E-33 | 0.292849 | 1.09E-10 | 0.517057 |
| 0.515271 | 4.96E-33 | 0.470074 | 4.77E-27 | 0.612627 | 1.87E-49 | 0.35585  | 2.18E-15 | 0.584724 |
| 0.425084 | 6.48E-22 | 0.662771 | 2.15E-60 | 0.307867 | 1.04E-11 | 0.337461 | 6.68E-14 | 0.3877   |
| 0.394461 | 7.75E-19 | 0.672656 | 8.31E-63 | 0.358273 | 1.37E-15 | 0.498018 | 1.22E-30 | 0.435761 |
| 0.407946 | 3.74E-20 | 0.345494 | 1.54E-14 | 0.548893 | 4.23E-38 | 0.302546 | 2.43E-11 | 0.439481 |
| 0.280047 | 7.31E-10 | 0.24998  | 4.38E-08 | 0.014471 | 0.75512  | 0.001909 | 0.96718  | 0.007347 |
| 0.256762 | 1.82E-08 | 0.054557 | 0.23932  | 0.303262 | 2.17E-11 | -0.02214 | 0.63325  | 0.276994 |
| 0.267686 | 4.18E-09 | 0.209004 | 5.24E-06 | 0.306016 | 1.40E-11 | 0.07433  | 0.10867  | 0.300874 |
| 0.312648 | 4.77E-12 | 0.304035 | 1.92E-11 | 0.306463 | 1.30E-11 | 0.10738  | 0.02029  | 0.397966 |
| 0.434119 | 6.94E-23 | 0.469717 | 5.28E-27 | 0.395621 | 6.01E-19 | 0.307696 | 1.07E-11 | 0.387506 |
| 0.136915 | 0.00303  | 0.21447  | 2.91E-06 | 0.088279 | 0.05661  | 0.016182 | 0.72726  | 0.123139 |
| 0.291709 | 1.30E-10 | 0.22901  | 5.66E-07 | 0.269248 | 3.37E-09 | 0.000895 | 0.9846   | 0.278302 |
| 0.236529 | 2.32E-07 | 0.478145 | 4.73E-28 | 0.144717 | 0.00172  | 0.214298 | 2.97E-06 | 0.144058 |
| 0.347184 | 1.13E-14 | 0.308379 | 9.56E-12 | 0.482121 | 1.48E-28 | 0.266879 | 4.67E-09 | 0.49702  |
| 0.459078 | 1.01E-25 | 0.613455 | 1.28E-49 | 0.503831 | 1.98E-31 | 0.355936 | 2.15E-15 | 0.670687 |
| 0.474261 | 1.45E-27 | 0.669602 | 4.73E-62 | 0.38371  | 7.88E-18 | 0.340083 | 4.16E-14 | 0.442188 |
| 0.309177 | 8.40E-12 | 0.445639 | 3.64E-24 | 0.231412 | 4.28E-07 | 0.228127 | 6.28E-07 | 0.192561 |
| 0.659196 | 1.52E-59 | 0.500585 | 5.48E-31 | 0.52151  | 6.27E-34 | 0.311063 | 6.18E-12 | 0.456508 |
| 0.312962 | 4.53E-12 | 0.527494 | 8.29E-35 | 0.117114 | 0.01132  | 0.137771 | 0.00285  | 0.105632 |
| 0.220669 | 1.47E-06 | 0.225626 | 8.38E-07 | 0.076434 | 0.099    | -0.01953 | 0.67386  | 0.214136 |
| 0.250917 | 3.88E-08 | 0.360267 | 9.28E-16 | 0.041465 | 0.37129  | -0.10185 | 0.02775  | 0.159812 |
| 0.310124 | 7.20E-12 | 0.332029 | 1.76E-13 | 0.228761 | 5.83E-07 | 0.022177 | 0.63263  | 0.267173 |
| 0.435353 | 5.08E-23 | 0.361573 | 7.19E-16 | 0.511778 | 1.55E-32 | 0.256374 | 1.91E-08 | 0.536045 |
| 0.294702 | 8.23E-11 | 0.203817 | 9.02E-06 | 0.43903  | 2.00E-23 | 0.230134 | 4.97E-07 | 0.335088 |
| 0.37424  | 5.67E-17 | 0.28017  | 7.18E-10 | 0.485122 | 6.10E-29 | 0.166476 | 0.0003   | 0.406967 |
| 0.226308 | 7.74E-07 | 0.312383 | 4.98E-12 | -0.10195 | 0.0276   | -0.0653  | 0.1589   | -0.04645 |
| 0.517712 | 2.22E-33 | 0.500912 | 4.95E-31 | 0.618687 | 1.13E-50 | 0.345454 | 1.55E-14 | 0.589739 |
| 0.149355 | 0.00121  | 0.261156 | 1.02E-08 | 0.148706 | 0.00127  | 0.036793 | 0.42764  | 0.230343 |

|          |          |          |          |          |          |          |          |          |
|----------|----------|----------|----------|----------|----------|----------|----------|----------|
| 0.367112 | 2.40E-16 | 0.338735 | 5.31E-14 | 0.291185 | 1.41E-10 | 0.203749 | 9.08E-06 | 0.236979 |
| 0.386443 | 4.41E-18 | 0.703089 | 7.39E-71 | 0.4117   | 1.57E-20 | 0.371501 | 9.91E-17 | 0.4197   |
| 0.436083 | 4.23E-23 | 0.314803 | 3.34E-12 | 0.522329 | 4.77E-34 | 0.341147 | 3.43E-14 | 0.368365 |
| 0.393638 | 9.29E-19 | 0.352845 | 3.88E-15 | 0.430727 | 1.62E-22 | 0.275452 | 1.41E-09 | 0.363746 |
| 0.324868 | 6.12E-13 | 0.219632 | 1.65E-06 | 0.431329 | 1.39E-22 | 0.117888 | 0.01078  | 0.379167 |
| 0.358168 | 1.40E-15 | 0.497951 | 1.24E-30 | 0.294617 | 8.34E-11 | 0.197604 | 1.70E-05 | 0.33253  |
| 0.046277 | 0.31832  | -0.15621 | 0.00071  | -0.18875 | 4.04E-05 | -0.10845 | 0.01906  | -0.24895 |
| 0.051276 | 0.26879  | -0.05409 | 0.24334  | 0.03915  | 0.39862  | 0.150503 | 0.00111  | 0.008267 |
| 0.451816 | 7.15E-25 | 0.38631  | 4.53E-18 | 0.623033 | 1.46E-51 | 0.299516 | 3.91E-11 | 0.584775 |
| 0.26663  | 4.83E-09 | 0.319539 | 1.52E-12 | 0.053442 | 0.24906  | 0.044622 | 0.33595  | 0.005958 |
| 0.44669  | 2.77E-24 | 0.523081 | 3.70E-34 | 0.560816 | 4.86E-40 | 0.322167 | 9.71E-13 | 0.540445 |
| 0.3782   | 2.50E-17 | 0.581877 | 1.15E-43 | 0.328979 | 3.00E-13 | 0.432294 | 1.10E-22 | 0.323018 |
| 0.481504 | 1.77E-28 | 0.419771 | 2.34E-21 | 0.604272 | 8.07E-48 | 0.339422 | 4.69E-14 | 0.51372  |
| 0.360456 | 8.95E-16 | 0.306404 | 1.31E-11 | 0.306281 | 1.34E-11 | 0.218462 | 1.88E-06 | 0.303708 |
| 0.358934 | 1.20E-15 | 0.251585 | 3.57E-08 | 0.22727  | 6.93E-07 | -0.04805 | 0.30012  | 0.287752 |
| -0.24098 | 1.35E-07 | -0.16812 | 0.00026  | -0.16951 | 0.00023  | 0.027145 | 0.55845  | -0.17805 |
| 0.271942 | 2.32E-09 | 0.405725 | 6.22E-20 | 0.329864 | 2.57E-13 | 0.290083 | 1.66E-10 | 0.252035 |
| 0.655827 | 9.36E-59 | 0.530323 | 3.14E-35 | 0.478024 | 4.90E-28 | 0.261135 | 1.02E-08 | 0.456245 |
| 0.39052  | 1.83E-18 | 0.493033 | 5.64E-30 | 0.469172 | 6.16E-27 | 0.399435 | 2.58E-19 | 0.40408  |
| 0.258269 | 1.49E-08 | 0.350375 | 6.19E-15 | 0.23765  | 2.03E-07 | 0.23002  | 5.03E-07 | 0.193309 |
| 0.492244 | 7.17E-30 | 0.666377 | 2.90E-61 | 0.561751 | 3.40E-40 | 0.503321 | 2.32E-31 | 0.478379 |
| 0.39838  | 3.26E-19 | 0.452991 | 5.23E-25 | 0.316987 | 2.32E-12 | 0.139308 | 0.00255  | 0.358577 |
| 0.238871 | 1.75E-07 | 0.294949 | 7.93E-11 | 0.208393 | 5.59E-06 | 0.179703 | 9.43E-05 | 0.245606 |
| 0.240868 | 1.37E-07 | 0.210842 | 4.31E-06 | 0.361462 | 7.35E-16 | 0.201878 | 1.10E-05 | 0.277254 |
| 0.207141 | 6.38E-06 | 0.001934 | 0.96676  | 0.121101 | 0.0088   | -0.0285  | 0.53903  | 0.040087 |
| 0.296198 | 6.54E-11 | 0.484211 | 7.99E-29 | 0.38132  | 1.31E-17 | 0.359718 | 1.03E-15 | 0.334295 |
| 0.401921 | 1.47E-19 | 0.22908  | 5.62E-07 | 0.343911 | 2.06E-14 | 0.109163 | 0.01829  | 0.293411 |
| 0.051571 | 0.26605  | 0.077635 | 0.09379  | 0.06869  | 0.1383   | -0.05171 | 0.26474  | 0.079622 |
| 0.36781  | 2.09E-16 | 0.578687 | 4.25E-43 | 0.305515 | 1.51E-11 | 0.243168 | 1.03E-07 | 0.289634 |
| 0.267509 | 4.29E-09 | 0.549727 | 3.11E-38 | 0.230414 | 4.81E-07 | 0.304278 | 1.84E-11 | 0.229153 |
| 0.194179 | 2.39E-05 | -0.2991  | 4.17E-11 | 0.020751 | 0.65468  | -0.06695 | 0.14859  | -0.04781 |
| 0.409869 | 2.40E-20 | 0.471151 | 3.52E-27 | 0.307912 | 1.03E-11 | 0.142928 | 0.00196  | 0.298902 |
| 0.523256 | 3.49E-34 | 0.511079 | 1.95E-32 | 0.484466 | 7.41E-29 | 0.333249 | 1.42E-13 | 0.479051 |
| 0.402407 | 1.32E-19 | 0.502873 | 2.67E-31 | 0.516614 | 3.19E-33 | 0.324585 | 6.42E-13 | 0.502215 |
| 0.288119 | 2.23E-10 | 0.488866 | 1.99E-29 | 0.213471 | 3.25E-06 | 0.238222 | 1.89E-07 | 0.273527 |
| 0.363658 | 4.77E-16 | 0.532077 | 1.71E-35 | 0.221883 | 1.28E-06 | 0.237414 | 2.09E-07 | 0.297833 |
| 0.396905 | 4.52E-19 | 0.318382 | 1.84E-12 | 0.392382 | 1.22E-18 | 0.055359 | 0.23247  | 0.410382 |
| 0.225034 | 8.96E-07 | 0.182137 | 7.54E-05 | 0.222566 | 1.19E-06 | -0.03181 | 0.49286  | 0.228984 |
| 0.399043 | 2.81E-19 | 0.446847 | 2.65E-24 | 0.568002 | 3.02E-41 | 0.329858 | 2.58E-13 | 0.557653 |
| 0.316488 | 2.53E-12 | 0.226038 | 7.99E-07 | 0.41057  | 2.04E-20 | 0.226682 | 7.42E-07 | 0.265109 |
| 0.4457   | 3.58E-24 | 0.418041 | 3.53E-21 | 0.483353 | 1.03E-28 | 0.228174 | 6.24E-07 | 0.485756 |
| 0.273009 | 1.99E-09 | 0.238386 | 1.86E-07 | 0.253071 | 2.94E-08 | 0.076617 | 0.09819  | 0.243672 |
| 0.336923 | 7.36E-14 | 0.411889 | 1.50E-20 | 0.219635 | 1.65E-06 | 0.16443  | 0.00036  | 0.168505 |
| 0.449914 | 1.18E-24 | 0.485483 | 5.48E-29 | 0.481861 | 1.60E-28 | 0.269297 | 3.35E-09 | 0.424096 |
| 0.167577 | 0.00028  | 0.193259 | 2.61E-05 | -0.05379 | 0.24598  | -0.12272 | 0.00793  | -0.02011 |

|          |          |          |          |          |          |          |          |          |
|----------|----------|----------|----------|----------|----------|----------|----------|----------|
| 0.351541 | 4.97E-15 | 0.575048 | 1.85E-42 | 0.313052 | 4.46E-12 | 0.372522 | 8.06E-17 | 0.303248 |
| 0.220847 | 1.44E-06 | -0.13844 | 0.00272  | 0.071031 | 0.12532  | -0.29421 | 8.88E-11 | 0.083525 |
| 0.426756 | 4.30E-22 | 0.569727 | 1.53E-41 | 0.502472 | 3.03E-31 | 0.451387 | 8.01E-25 | 0.475949 |
| 0.04922  | 0.28848  | 0.038614 | 0.40511  | 0.229291 | 5.48E-07 | 0.031081 | 0.50284  | 0.194561 |
| 0.180652 | 8.64E-05 | 0.110665 | 0.01674  | 0.069747 | 0.13231  | -0.07481 | 0.10639  | 0.11361  |
| -0.19204 | 2.94E-05 | -0.279   | 8.50E-10 | -0.10716 | 0.02055  | -0.0181  | 0.69637  | -0.19647 |
| 0.135619 | 0.00332  | 0.034794 | 0.45318  | 0.104733 | 0.02361  | -0.07268 | 0.11678  | 0.161184 |
| 0.280266 | 7.08E-10 | 0.350767 | 5.75E-15 | 0.205085 | 7.91E-06 | 0.210413 | 4.51E-06 | 0.346033 |
| 0.521817 | 5.66E-34 | 0.557061 | 2.02E-39 | 0.642813 | 8.53E-56 | 0.421369 | 1.59E-21 | 0.624285 |
| 0.499451 | 7.80E-31 | 0.594699 | 5.29E-46 | 0.721596 | 2.82E-76 | 0.523135 | 3.64E-34 | 0.654161 |
| 0.34938  | 7.47E-15 | 0.41262  | 1.27E-20 | 0.199762 | 1.37E-05 | 0.037301 | 0.42128  | 0.159517 |
| 0.456373 | 2.11E-25 | 0.466196 | 1.42E-26 | 0.700881 | 3.07E-70 | 0.502781 | 2.75E-31 | 0.664629 |
| 0.281968 | 5.53E-10 | 0.379786 | 1.80E-17 | 0.101523 | 0.02826  | 0.040041 | 0.38796  | 0.220562 |
| 0.161469 | 0.00046  | 0.013483 | 0.77136  | 0.088349 | 0.05641  | -0.14694 | 0.00145  | 0.115978 |
| 0.388476 | 2.85E-18 | 0.26221  | 8.81E-09 | 0.350497 | 6.05E-15 | 0.021452 | 0.6438   | 0.330024 |
| 0.188456 | 4.16E-05 | -0.009   | 0.84624  | 0.151035 | 0.00106  | -0.03767 | 0.41669  | 0.141053 |
| 0.263336 | 7.57E-09 | 0.210064 | 4.68E-06 | 0.184451 | 6.08E-05 | 0.065148 | 0.15985  | 0.139985 |
| 0.232181 | 3.91E-07 | 0.1976   | 1.70E-05 | 0.166994 | 0.00029  | 0.073144 | 0.11444  | 0.184868 |
| -0.21032 | 4.56E-06 | -0.16653 | 0.0003   | -0.20962 | 4.91E-06 | -0.04891 | 0.29153  | -0.18226 |
| -0.22307 | 1.12E-06 | -0.23036 | 4.84E-07 | -0.35745 | 1.60E-15 | -0.1153  | 0.01266  | -0.4321  |
| 0.310273 | 7.03E-12 | 0.495211 | 2.90E-30 | 0.348266 | 9.20E-15 | 0.211396 | 4.06E-06 | 0.345924 |
| 0.442453 | 8.32E-24 | 0.460257 | 7.33E-26 | 0.505717 | 1.09E-31 | 0.309781 | 7.62E-12 | 0.507429 |
| 0.174594 | 0.00015  | 0.049162 | 0.28905  | 0.289204 | 1.89E-10 | -0.00935 | 0.84034  | 0.258975 |
| 0.1098   | 0.01762  | 0.32266  | 8.93E-13 | 0.166158 | 0.00031  | 0.228545 | 5.98E-07 | 0.154409 |
| 0.431682 | 1.28E-22 | 0.653351 | 3.51E-58 | 0.446477 | 2.92E-24 | 0.436319 | 3.98E-23 | 0.428287 |
| 0.110397 | 0.017    | 0.261396 | 9.83E-09 | -0.02713 | 0.55868  | -0.04161 | 0.36963  | 0.014925 |
| 0.5206   | 8.51E-34 | 0.67758  | 4.82E-64 | 0.574817 | 2.03E-42 | 0.502585 | 2.93E-31 | 0.558863 |
| 0.368326 | 1.88E-16 | 0.426908 | 4.15E-22 | 0.423328 | 9.92E-22 | 0.294315 | 8.73E-11 | 0.462095 |
| 0.42816  | 3.05E-22 | 0.489442 | 1.67E-29 | 0.37078  | 1.15E-16 | 0.258732 | 1.40E-08 | 0.44357  |
| 0.285258 | 3.41E-10 | 0.284251 | 3.96E-10 | 0.328046 | 3.53E-13 | 0.118809 | 0.01018  | 0.407988 |
| 0.441134 | 1.17E-23 | 0.469563 | 5.52E-27 | 0.454474 | 3.51E-25 | 0.210656 | 4.40E-06 | 0.459397 |
| 0.313537 | 4.12E-12 | 0.518594 | 1.66E-33 | 0.221703 | 1.31E-06 | 0.195221 | 2.15E-05 | 0.189054 |
| 0.421928 | 1.39E-21 | 0.44395  | 5.65E-24 | 0.460964 | 6.04E-26 | 0.37705  | 3.18E-17 | 0.361078 |
| 0.292573 | 1.14E-10 | 0.238354 | 1.86E-07 | 0.427802 | 3.33E-22 | 0.098742 | 0.0329   | 0.486637 |
| 0.183294 | 6.77E-05 | 0.444398 | 5.03E-24 | 0.192659 | 2.77E-05 | 0.243364 | 1.01E-07 | 0.165682 |
| 0.215251 | 2.68E-06 | 0.196874 | 1.83E-05 | 0.164217 | 0.00037  | -0.00024 | 0.99587  | 0.275384 |
| 0.194044 | 2.42E-05 | 0.020104 | 0.66478  | -0.05506 | 0.23502  | -0.18942 | 3.79E-05 | 0.09599  |
| 0.442009 | 9.33E-24 | 0.686148 | 2.97E-66 | 0.465086 | 1.93E-26 | 0.390933 | 1.68E-18 | 0.440364 |
| 0.505382 | 1.21E-31 | 0.452398 | 6.12E-25 | 0.706464 | 8.16E-72 | 0.446108 | 3.22E-24 | 0.661493 |
| 0.322043 | 9.92E-13 | 0.352079 | 4.49E-15 | 0.361847 | 6.81E-16 | 0.326522 | 4.60E-13 | 0.219244 |
| 0.308139 | 9.94E-12 | 0.291693 | 1.30E-10 | 0.236915 | 2.22E-07 | 0.168391 | 0.00026  | 0.256583 |
| -0.30047 | 3.37E-11 | -0.37306 | 7.21E-17 | -0.2593  | 1.30E-08 | -0.19206 | 2.94E-05 | -0.27411 |
| 0.126025 | 0.00639  | 0.173437 | 0.00017  | 0.078163 | 0.09157  | -0.03637 | 0.43297  | 0.175072 |
| 0.329009 | 2.99E-13 | 0.251562 | 3.58E-08 | 0.244887 | 8.34E-08 | 0.105288 | 0.02288  | 0.195211 |
| 0.445856 | 3.44E-24 | 0.382803 | 9.55E-18 | 0.594595 | 5.53E-46 | 0.344987 | 1.69E-14 | 0.531925 |



|          |          |          |          |          |          |          |          |          |
|----------|----------|----------|----------|----------|----------|----------|----------|----------|
| 0.031865 | 0.49212  | 0.036045 | 0.43709  | -0.15455 | 0.00081  | -0.23034 | 4.85E-07 | -0.11855 |
| 0.36062  | 8.66E-16 | 0.265102 | 5.96E-09 | 0.438907 | 2.07E-23 | 0.117209 | 0.01125  | 0.33647  |
| 0.176424 | 0.00013  | 0.106486 | 0.02136  | 0.176549 | 0.00013  | 0.009584 | 0.83635  | 0.181512 |
| 0.325869 | 5.15E-13 | 0.149394 | 0.0012   | 0.359396 | 1.10E-15 | 0.097109 | 0.03592  | 0.339393 |
| 0.083884 | 0.07013  | -0.12413 | 0.00724  | 0.036582 | 0.43029  | -0.22611 | 7.92E-07 | 0.044071 |
| 0.200653 | 1.25E-05 | 0.298938 | 4.28E-11 | 0.095532 | 0.03905  | 0.049747 | 0.28335  | 0.191771 |
| 0.503046 | 2.53E-31 | 0.545063 | 1.71E-37 | 0.59871  | 9.33E-47 | 0.376786 | 3.36E-17 | 0.575171 |
| 0.364884 | 3.74E-16 | 0.357784 | 1.50E-15 | 0.287154 | 2.57E-10 | 0.08852  | 0.05593  | 0.276074 |
| 0.323892 | 7.24E-13 | 0.439836 | 1.63E-23 | 0.436844 | 3.49E-23 | 0.358988 | 1.19E-15 | 0.396252 |
| 0.159591 | 0.00054  | 0.314177 | 3.71E-12 | -0.04943 | 0.28642  | -0.05395 | 0.24462  | -0.01735 |
| 0.459216 | 9.74E-26 | 0.413299 | 1.08E-20 | 0.451488 | 7.80E-25 | 0.30261  | 2.40E-11 | 0.37033  |
| 0.390404 | 1.88E-18 | 0.525671 | 1.54E-34 | 0.356335 | 1.99E-15 | 0.265219 | 5.86E-09 | 0.300141 |
| 0.244328 | 8.94E-08 | 0.207083 | 6.42E-06 | 0.248365 | 5.38E-08 | 0.151511 | 0.00102  | 0.240391 |
| 0.180606 | 8.68E-05 | 0.275909 | 1.32E-09 | 0.107032 | 0.0207   | 0.088778 | 0.05522  | 0.178455 |
| 0.248776 | 5.11E-08 | 0.514017 | 7.49E-33 | 0.119548 | 0.00971  | 0.121391 | 0.00864  | 0.196017 |
| 0.204217 | 8.66E-06 | 0.360701 | 8.53E-16 | 0.262513 | 8.46E-09 | 0.226407 | 7.66E-07 | 0.219052 |
| 0.311066 | 6.18E-12 | 0.427344 | 3.73E-22 | 0.237236 | 2.13E-07 | 0.308742 | 9.01E-12 | 0.212783 |
| 0.656033 | 8.38E-59 | 0.575006 | 1.88E-42 | 0.379656 | 1.85E-17 | 0.269409 | 3.30E-09 | 0.40096  |
| 0.386146 | 4.70E-18 | 0.409549 | 2.59E-20 | 0.569558 | 1.64E-41 | 0.381962 | 1.14E-17 | 0.520959 |
| 0.139855 | 0.00245  | 0.276154 | 1.28E-09 | 0.097593 | 0.035    | 0.049335 | 0.28736  | 0.266566 |
| 0.209089 | 5.19E-06 | 0.165481 | 0.00033  | 0.237113 | 2.17E-07 | 0.144537 | 0.00174  | 0.182668 |
| 0.376867 | 3.30E-17 | 0.450361 | 1.05E-24 | 0.259782 | 1.22E-08 | 0.108886 | 0.01859  | 0.321961 |
| 0.350558 | 5.98E-15 | 0.463597 | 2.92E-26 | 0.143922 | 0.00182  | 0.187169 | 4.70E-05 | 0.204511 |
| 0.171049 | 0.0002   | 0.231884 | 4.04E-07 | 0.092442 | 0.04587  | -0.12037 | 0.00922  | 0.162614 |
| 0.377444 | 2.93E-17 | 0.600808 | 3.73E-47 | 0.39575  | 5.84E-19 | 0.411588 | 1.61E-20 | 0.386511 |
| 0.369061 | 1.62E-16 | 0.508206 | 4.91E-32 | 0.242516 | 1.12E-07 | 0.150213 | 0.00113  | 0.295701 |
| 0.471489 | 3.20E-27 | 0.547735 | 6.47E-38 | 0.57431  | 2.48E-42 | 0.393472 | 9.63E-19 | 0.500491 |
| 0.249304 | 4.77E-08 | 0.406079 | 5.74E-20 | -0.00189 | 0.96755  | -0.03569 | 0.44164  | 0.032001 |
| 0.31182  | 5.46E-12 | 0.437201 | 3.19E-23 | 0.250727 | 3.98E-08 | 0.228587 | 5.95E-07 | 0.198705 |
| 0.172494 | 0.00018  | 0.19327  | 2.61E-05 | -0.00937 | 0.83988  | -0.0818  | 0.0774   | 0.159226 |
| 0.432951 | 9.29E-23 | 0.59542  | 3.88E-46 | 0.480599 | 2.31E-28 | 0.47733  | 5.99E-28 | 0.466541 |
| 0.286752 | 2.73E-10 | 0.299981 | 3.63E-11 | 0.322134 | 9.77E-13 | 0.187854 | 4.41E-05 | 0.374924 |
| 0.589357 | 5.13E-45 | 0.492623 | 6.39E-30 | 0.716625 | 8.87E-75 | 0.45028  | 1.08E-24 | 0.663693 |
| 0.464754 | 2.12E-26 | 0.507523 | 6.11E-32 | 0.607505 | 1.90E-48 | 0.467306 | 1.04E-26 | 0.505164 |
| 0.433174 | 8.79E-23 | 0.637772 | 1.09E-54 | 0.577231 | 7.66E-43 | 0.44862  | 1.67E-24 | 0.573099 |
| -0.01049 | 0.82113  | -0.23742 | 2.09E-07 | 0.097958 | 0.03432  | -0.23535 | 2.68E-07 | 0.075886 |
| 0.119371 | 0.00982  | 0.047063 | 0.31017  | 0.022717 | 0.62438  | -0.15002 | 0.00115  | 0.032033 |
| -0.37976 | 1.81E-17 | -0.3199  | 1.43E-12 | -0.32293 | 8.53E-13 | -0.12105 | 0.00883  | -0.39813 |
| 0.756317 | 9.90E-88 | 0.492408 | 6.82E-30 | 0.455079 | 2.99E-25 | 0.261654 | 9.49E-09 | 0.411603 |
| 0.21926  | 1.72E-06 | 0.204838 | 8.12E-06 | 0.233895 | 3.19E-07 | 0.108434 | 0.01908  | 0.228407 |
| 0.012028 | 0.79545  | 0.320837 | 1.22E-12 | -0.07715 | 0.09585  | -0.01095 | 0.81346  | -0.01266 |
| 0.178824 | 0.0001   | 0.155509 | 0.00075  | 0.177545 | 0.00011  | -0.03463 | 0.45532  | 0.213618 |
| 0.178343 | 0.00011  | 0.181087 | 8.31E-05 | 0.167316 | 0.00028  | 0.029809 | 0.52048  | 0.184306 |
| 0.220116 | 1.56E-06 | 0.049332 | 0.28739  | 0.339668 | 4.48E-14 | -0.05442 | 0.24047  | 0.322889 |
| 0.400967 | 1.83E-19 | 0.432419 | 1.06E-22 | 0.500474 | 5.67E-31 | 0.424145 | 8.14E-22 | 0.710368 |

|          |          |          |          |          |          |          |          |          |
|----------|----------|----------|----------|----------|----------|----------|----------|----------|
| 0.355504 | 2.33E-15 | 0.140154 | 0.0024   | 0.157881 | 0.00062  | -0.09394 | 0.04245  | 0.231391 |
| 0.214568 | 2.88E-06 | 0.173734 | 0.00016  | 0.19489  | 2.22E-05 | -0.07851 | 0.09015  | 0.2114   |
| -0.23227 | 3.87E-07 | -0.32911 | 2.94E-13 | -0.17369 | 0.00016  | -0.16469 | 0.00035  | -0.11188 |
| -0.29667 | 6.08E-11 | -0.32039 | 1.31E-12 | -0.29931 | 4.03E-11 | -0.12938 | 0.00511  | -0.35768 |
| 0.219566 | 1.66E-06 | 0.277047 | 1.12E-09 | 0.263165 | 7.75E-09 | 0.17986  | 9.29E-05 | 0.331728 |
| 0.366004 | 3.00E-16 | 0.364724 | 3.86E-16 | 0.428654 | 2.70E-22 | 0.250786 | 3.95E-08 | 0.370809 |
| 0.368063 | 1.98E-16 | 0.525134 | 1.85E-34 | 0.278884 | 8.64E-10 | 0.268209 | 3.89E-09 | 0.259534 |
| 0.465787 | 1.59E-26 | 0.524327 | 2.43E-34 | 0.645453 | 2.20E-56 | 0.372232 | 8.55E-17 | 0.611954 |
| -0.21522 | 2.68E-06 | -0.24214 | 1.17E-07 | -0.20552 | 7.56E-06 | -0.11405 | 0.01366  | -0.17662 |
| 0.496646 | 1.86E-30 | 0.558781 | 1.06E-39 | 0.542626 | 4.12E-37 | 0.335773 | 9.04E-14 | 0.500475 |
| 0.606666 | 2.78E-48 | 0.400221 | 2.16E-19 | 0.592025 | 1.66E-45 | 0.297673 | 5.21E-11 | 0.562762 |
| 0.483485 | 9.90E-29 | 0.520839 | 7.86E-34 | 0.570684 | 1.05E-41 | 0.341225 | 3.38E-14 | 0.539404 |
| 0.42747  | 3.61E-22 | 0.513177 | 9.85E-33 | 0.58592  | 2.17E-44 | 0.342422 | 2.71E-14 | 0.539428 |
| 0.284119 | 4.03E-10 | 0.264953 | 6.08E-09 | 0.198929 | 1.49E-05 | -0.04344 | 0.34893  | 0.219045 |
| 0.253694 | 2.72E-08 | 0.156481 | 0.00069  | 0.102558 | 0.02668  | -0.07513 | 0.10493  | 0.221809 |
| 0.335557 | 9.40E-14 | 0.313242 | 4.32E-12 | 0.281291 | 6.10E-10 | 0.072145 | 0.11949  | 0.304557 |
| 0.478209 | 4.64E-28 | 0.504527 | 1.58E-31 | 0.708606 | 1.98E-72 | 0.493904 | 4.32E-30 | 0.631314 |
| 0.230276 | 4.89E-07 | 0.488599 | 2.16E-29 | 0.072769 | 0.11632  | 0.061943 | 0.18146  | 0.141858 |
| 0.354562 | 2.80E-15 | 0.407992 | 3.70E-20 | 0.455893 | 2.40E-25 | 0.189254 | 3.85E-05 | 0.465964 |
| 0.333712 | 1.31E-13 | 0.486244 | 4.37E-29 | 0.22484  | 9.16E-07 | 0.05425  | 0.24197  | 0.306088 |
| 0.414895 | 7.43E-21 | 0.47175  | 2.97E-27 | 0.396892 | 4.54E-19 | 0.154858 | 0.00079  | 0.405729 |
| 0.145367 | 0.00163  | 0.087681 | 0.05831  | 0.212921 | 3.45E-06 | 0.055287 | 0.23307  | 0.160069 |
| 0.300842 | 3.17E-11 | 0.314326 | 3.62E-12 | 0.120844 | 0.00895  | -0.08643 | 0.06201  | 0.185444 |
| 0.199561 | 1.39E-05 | 0.19329  | 2.60E-05 | 0.035182 | 0.44816  | -0.08432 | 0.06867  | 0.179837 |
| 0.232114 | 3.94E-07 | 0.243875 | 9.46E-08 | 0.334307 | 1.17E-13 | 0.201481 | 1.15E-05 | 0.30555  |
| 0.124799 | 0.00693  | 0.166447 | 0.0003   | 0.092777 | 0.04508  | -0.07417 | 0.10944  | 0.303182 |
| 0.429135 | 2.40E-22 | 0.487847 | 2.70E-29 | 0.358883 | 1.22E-15 | 0.251144 | 3.77E-08 | 0.338245 |
| 0.409941 | 2.36E-20 | 0.557994 | 1.42E-39 | 0.416045 | 5.66E-21 | 0.295435 | 7.35E-11 | 0.43365  |
| 0.364026 | 4.43E-16 | 0.35113  | 5.37E-15 | 0.413355 | 1.07E-20 | 0.238183 | 1.90E-07 | 0.449563 |
| 0.418286 | 3.33E-21 | 0.459146 | 9.92E-26 | 0.412293 | 1.37E-20 | 0.165927 | 0.00032  | 0.368711 |
| 0.157753 | 0.00062  | 0.331581 | 1.90E-13 | -0.00662 | 0.88656  | 0.056062 | 0.22658  | 0.074045 |
| 0.138908 | 0.00263  | 0.38682  | 4.07E-18 | 0.054912 | 0.23627  | 0.169205 | 0.00024  | 0.015967 |
| 0.479701 | 3.01E-28 | 0.366396 | 2.77E-16 | 0.653777 | 2.80E-58 | 0.359964 | 9.85E-16 | 0.593941 |
| 0.224427 | 9.61E-07 | 0.104272 | 0.02423  | 0.245898 | 7.34E-08 | 0.038348 | 0.40836  | 0.342492 |
| 0.227737 | 6.57E-07 | 0.282388 | 5.20E-10 | 0.318899 | 1.69E-12 | 0.173201 | 0.00017  | 0.195279 |
| 0.19311  | 2.65E-05 | 0.342998 | 2.44E-14 | 0.051033 | 0.27107  | 0.03677  | 0.42792  | 0.18967  |
| 0.088001 | 0.05739  | -0.0174  | 0.70759  | 0.030906 | 0.50525  | -0.18315 | 6.86E-05 | 0.030891 |
| 0.255149 | 2.25E-08 | 0.27449  | 1.62E-09 | 0.12572  | 0.00652  | -0.00329 | 0.94348  | 0.178408 |
| -0.00535 | 0.90817  | -0.15289 | 0.00092  | -0.02672 | 0.56465  | -0.27317 | 1.95E-09 | -0.01904 |
| 0.163468 | 0.00039  | 0.082154 | 0.07613  | 0.246555 | 6.76E-08 | 0.020224 | 0.6629   | 0.283485 |
| 0.443756 | 5.94E-24 | 0.420452 | 1.98E-21 | 0.468434 | 7.58E-27 | 0.245722 | 7.51E-08 | 0.403577 |
| 0.240113 | 1.50E-07 | 0.202989 | 9.83E-06 | 0.206312 | 6.96E-06 | -0.02781 | 0.54885  | 0.144266 |
| 0.325417 | 5.57E-13 | 0.245877 | 7.36E-08 | 0.173516 | 0.00016  | 0.045951 | 0.32174  | 0.172202 |
| 0.246603 | 6.72E-08 | 0.157014 | 0.00066  | 0.29888  | 4.32E-11 | 0.035325 | 0.44631  | 0.325899 |
| 0.530815 | 2.65E-35 | 0.745932 | 4.14E-84 | 0.570029 | 1.36E-41 | 0.539282 | 1.36E-36 | 0.490985 |

|          |          |          |          |          |          |          |          |          |
|----------|----------|----------|----------|----------|----------|----------|----------|----------|
| 0.385595 | 5.28E-18 | 0.258831 | 1.38E-08 | 0.394724 | 7.32E-19 | 0.199134 | 1.46E-05 | 0.419255 |
| 0.182553 | 7.25E-05 | 0.112361 | 0.01513  | 0.174652 | 0.00015  | 0.017745 | 0.70211  | 0.198193 |
| 0.177091 | 0.00012  | 0.121608 | 0.00852  | 0.121367 | 0.00865  | 0.032361 | 0.4854   | -0.02985 |
| -0.38274 | 9.67E-18 | -0.32635 | 4.74E-13 | -0.4618  | 4.79E-26 | -0.24582 | 7.42E-08 | -0.40324 |
| 0.311012 | 6.23E-12 | 0.365129 | 3.56E-16 | 0.479486 | 3.20E-28 | 0.283339 | 4.52E-10 | 0.444565 |
| 0.329378 | 2.80E-13 | 0.297102 | 5.69E-11 | 0.385453 | 5.44E-18 | 0.135196 | 0.00342  | 0.450751 |
| 0.202844 | 9.97E-06 | 0.42713  | 3.93E-22 | -0.012   | 0.7959   | 0.034386 | 0.4585   | -0.00784 |
| 0.241288 | 1.30E-07 | 0.518118 | 1.94E-33 | 0.026268 | 0.57124  | 0.087817 | 0.05792  | 0.083218 |
| 0.325785 | 5.23E-13 | 0.612883 | 1.66E-49 | 0.287617 | 2.40E-10 | 0.361118 | 7.86E-16 | 0.294851 |
| 0.025456 | 0.5832   | -0.13128 | 0.00449  | -0.0109  | 0.8143   | -0.20818 | 5.72E-06 | 0.001068 |
| -0.26007 | 1.17E-08 | -0.28901 | 1.95E-10 | -0.25215 | 3.31E-08 | -0.21593 | 2.48E-06 | -0.18397 |
| -0.08727 | 0.05949  | -0.01063 | 0.8188   | -0.13517 | 0.00343  | 0.177728 | 0.00011  | -0.2081  |
| 0.504685 | 1.51E-31 | 0.636981 | 1.63E-54 | 0.63163  | 2.30E-53 | 0.448004 | 1.96E-24 | 0.558101 |
| 0.107647 | 0.01998  | 0.175224 | 0.00014  | -0.11399 | 0.01371  | -0.15333 | 0.00089  | -0.03302 |
| 0.330641 | 2.25E-13 | 0.458822 | 1.08E-25 | 0.297441 | 5.40E-11 | 0.325201 | 5.78E-13 | 0.323659 |
| 0.278028 | 9.77E-10 | 0.683569 | 1.40E-65 | 0.240858 | 1.37E-07 | 0.409311 | 2.73E-20 | 0.258641 |
| 0.189802 | 3.66E-05 | 0.016292 | 0.72548  | -0.02853 | 0.53848  | -0.1711  | 0.0002   | 0.039754 |
| 0.07361  | 0.11215  | 0.302029 | 2.63E-11 | -0.01351 | 0.77092  | -0.0455  | 0.32656  | 0.152775 |
| 0.184737 | 5.92E-05 | 0.217023 | 2.20E-06 | 0.183486 | 6.65E-05 | 0.077391 | 0.09483  | 0.289353 |
| 0.303212 | 2.18E-11 | 0.226804 | 7.31E-07 | 0.216181 | 2.42E-06 | -0.06296 | 0.17439  | 0.220746 |
| 0.114605 | 0.01321  | 0.133776 | 0.00378  | 0.008059 | 0.86212  | -0.11183 | 0.01561  | 0.115431 |
| 0.475995 | 8.81E-28 | 0.512217 | 1.35E-32 | 0.635104 | 4.14E-54 | 0.406256 | 5.51E-20 | 0.610204 |
| 0.453672 | 4.36E-25 | 0.480144 | 2.64E-28 | 0.502723 | 2.80E-31 | 0.224791 | 9.21E-07 | 0.498483 |
| 0.302172 | 2.58E-11 | 0.203481 | 9.34E-06 | 0.229831 | 5.15E-07 | -0.07641 | 0.0991   | 0.267864 |
| 0.304601 | 1.75E-11 | 0.354965 | 2.59E-15 | 0.312916 | 4.56E-12 | 0.130686 | 0.00467  | 0.307311 |
| 0.387278 | 3.69E-18 | 0.34649  | 1.28E-14 | 0.409199 | 2.80E-20 | 0.104252 | 0.02426  | 0.508685 |
| 0.01768  | 0.70314  | -0.03892 | 0.40137  | -0.098   | 0.03423  | -0.27233 | 2.19E-09 | -0.08156 |
| 0.415545 | 6.37E-21 | 0.465794 | 1.59E-26 | 0.479586 | 3.11E-28 | 0.258269 | 1.49E-08 | 0.43875  |
| 0.17209  | 0.00019  | 0.244087 | 9.21E-08 | 0.039495 | 0.39447  | -0.10826 | 0.01928  | 0.079508 |
| 0.402897 | 1.18E-19 | 0.38124  | 1.33E-17 | 0.543459 | 3.05E-37 | 0.22978  | 5.18E-07 | 0.566085 |
| 0.414542 | 8.07E-21 | 0.437211 | 3.18E-23 | 0.462511 | 3.94E-26 | 0.307167 | 1.16E-11 | 0.497888 |
| 0.291984 | 1.25E-10 | 0.239297 | 1.66E-07 | 0.42876  | 2.63E-22 | 0.199632 | 1.38E-05 | 0.40321  |
| 0.213648 | 3.19E-06 | 0.197514 | 1.71E-05 | 0.241553 | 1.26E-07 | 0.120632 | 0.00907  | 0.32054  |
| 0.259494 | 1.27E-08 | 0.339943 | 4.27E-14 | 0.120046 | 0.00941  | 0.037582 | 0.41779  | 0.128748 |
| 0.43624  | 4.07E-23 | 0.500572 | 5.50E-31 | 0.464236 | 2.45E-26 | 0.241745 | 1.23E-07 | 0.444227 |
| 0.312166 | 5.16E-12 | 0.322842 | 8.66E-13 | 0.236863 | 2.23E-07 | 0.150882 | 0.00107  | 0.259266 |
| 0.234321 | 3.03E-07 | 0.397659 | 3.83E-19 | 0.129077 | 0.00521  | 0.18353  | 6.62E-05 | 0.201063 |
| 0.257436 | 1.66E-08 | 0.434154 | 6.88E-23 | 0.277119 | 1.11E-09 | 0.342693 | 2.58E-14 | 0.236618 |
| 0.457563 | 1.53E-25 | 0.210716 | 4.37E-06 | 0.248287 | 5.43E-08 | 0.070144 | 0.13012  | 0.266224 |
| 0.15688  | 0.00067  | -0.03855 | 0.40591  | 0.266449 | 4.96E-09 | 0.058666 | 0.2057   | 0.093797 |
| -0.14886 | 0.00125  | -0.27782 | 1.01E-09 | -0.08117 | 0.07973  | -0.07647 | 0.09884  | -0.06676 |
| 0.464151 | 2.51E-26 | 0.550627 | 2.23E-38 | 0.470227 | 4.57E-27 | 0.362341 | 6.18E-16 | 0.496668 |
| 0.281328 | 6.07E-10 | 0.109195 | 0.01825  | 0.187814 | 4.42E-05 | 0.020858 | 0.653    | 0.207848 |
| 0.452534 | 5.90E-25 | 0.647275 | 8.56E-57 | 0.483491 | 9.89E-29 | 0.393171 | 1.03E-18 | 0.473234 |
| 0.341723 | 3.08E-14 | 0.281016 | 6.35E-10 | 0.304333 | 1.83E-11 | 0.019982 | 0.66668  | 0.308598 |

|          |          |          |          |          |          |          |          |          |
|----------|----------|----------|----------|----------|----------|----------|----------|----------|
| 0.317129 | 2.27E-12 | 0.19702  | 1.80E-05 | 0.250236 | 4.24E-08 | 0.106728 | 0.02106  | 0.199818 |
| 0.292831 | 1.10E-10 | 0.281793 | 5.67E-10 | 0.558559 | 1.15E-39 | 0.292819 | 1.10E-10 | 0.526784 |
| 0.460811 | 6.30E-26 | 0.67395  | 3.95E-63 | 0.377158 | 3.11E-17 | 0.384336 | 6.90E-18 | 0.34561  |
| 0.335619 | 9.30E-14 | 0.16797  | 0.00027  | 0.313109 | 4.42E-12 | 0.113486 | 0.01414  | 0.293694 |
| 0.198023 | 1.63E-05 | 0.426533 | 4.55E-22 | 0.092763 | 0.04512  | 0.056862 | 0.22001  | 0.250475 |
| 0.225207 | 8.79E-07 | 0.536153 | 4.12E-36 | 0.069118 | 0.13585  | 0.146405 | 0.00151  | 0.085422 |
| 0.459336 | 9.42E-26 | 0.63621  | 2.39E-54 | 0.376229 | 3.77E-17 | 0.32102  | 1.18E-12 | 0.585254 |
| 0.534494 | 7.37E-36 | 0.584633 | 3.70E-44 | 0.682886 | 2.10E-65 | 0.515335 | 4.86E-33 | 0.6883   |
| 0.28492  | 3.58E-10 | 0.424875 | 6.81E-22 | 0.186149 | 5.18E-05 | 0.08394  | 0.06994  | 0.135154 |
| 0.372732 | 7.72E-17 | 0.750533 | 1.08E-85 | 0.242749 | 1.09E-07 | 0.371267 | 1.04E-16 | 0.330866 |
| 0.299194 | 4.11E-11 | 0.63581  | 2.92E-54 | 0.190374 | 3.46E-05 | 0.366476 | 2.73E-16 | 0.20448  |
| 0.360707 | 8.52E-16 | 0.491078 | 1.02E-29 | 0.338899 | 5.15E-14 | 0.251352 | 3.67E-08 | 0.279595 |
| 0.219214 | 1.73E-06 | 0.424663 | 7.18E-22 | 0.106374 | 0.0215   | 0.078221 | 0.09133  | 0.091396 |
| 0.123771 | 0.00741  | 0.513025 | 1.03E-32 | 0.037614 | 0.4174   | 0.126535 | 0.00618  | 0.122762 |
| 0.575868 | 1.33E-42 | 0.517372 | 2.49E-33 | 0.735236 | 1.47E-80 | 0.47224  | 2.58E-27 | 0.66218  |
| 0.061347 | 0.1857   | 0.098886 | 0.03264  | 0.069045 | 0.13626  | -0.01867 | 0.6874   | 0.137562 |
| 0.194914 | 2.22E-05 | 0.220533 | 1.49E-06 | 0.140541 | 0.00233  | -0.01469 | 0.75146  | 0.070593 |
| 0.411972 | 1.47E-20 | 0.43782  | 2.72E-23 | 0.560394 | 5.71E-40 | 0.356418 | 1.96E-15 | 0.770985 |
| 0.377535 | 2.88E-17 | 0.423204 | 1.02E-21 | 0.409112 | 2.86E-20 | 0.237521 | 2.06E-07 | 0.289798 |
| 0.399284 | 2.66E-19 | 0.575047 | 1.85E-42 | 0.36554  | 3.28E-16 | 0.236067 | 2.46E-07 | 0.392861 |
| 0.362159 | 6.41E-16 | 0.370526 | 1.21E-16 | 0.460087 | 7.68E-26 | 0.273787 | 1.79E-09 | 0.370377 |
| 0.12409  | 0.00726  | 0.288233 | 2.19E-10 | 0.279366 | 8.06E-10 | 0.034403 | 0.45828  | 0.279642 |
| 0.402124 | 1.41E-19 | 0.430514 | 1.71E-22 | 0.486227 | 4.39E-29 | 0.26054  | 1.10E-08 | 0.478867 |
| 0.454877 | 3.15E-25 | 0.679488 | 1.57E-64 | 0.522023 | 5.28E-34 | 0.472993 | 2.08E-27 | 0.503708 |
| 0.27154  | 2.45E-09 | 0.346502 | 1.28E-14 | 0.43311  | 8.93E-23 | 0.271713 | 2.39E-09 | 0.54693  |
| 0.261237 | 1.00E-08 | 0.291704 | 1.30E-10 | 0.038443 | 0.40719  | -0.15607 | 0.00071  | 0.130953 |
| 0.236549 | 2.32E-07 | 0.250963 | 3.86E-08 | 0.197188 | 1.77E-05 | 0.090113 | 0.05164  | 0.259539 |
| 0.224753 | 9.26E-07 | 0.056919 | 0.21955  | 0.153968 | 0.00084  | -0.05701 | 0.2188   | 0.112953 |
| -0.06469 | 0.16282  | -0.16382 | 0.00038  | -0.06323 | 0.17252  | -0.2892  | 1.90E-10 | -0.02383 |
| 0.243599 | 9.79E-08 | 0.145971 | 0.00156  | 0.257937 | 1.56E-08 | 0.087751 | 0.05811  | 0.245525 |
| 0.421939 | 1.39E-21 | 0.32723  | 4.07E-13 | 0.613727 | 1.13E-49 | 0.365605 | 3.24E-16 | 0.527142 |
| 0.233938 | 3.17E-07 | 0.404497 | 8.23E-20 | 0.272423 | 2.17E-09 | 0.334717 | 1.09E-13 | 0.185241 |
| 0.274884 | 1.53E-09 | 0.599359 | 7.03E-47 | 0.25375  | 2.70E-08 | 0.314439 | 3.55E-12 | 0.280508 |
| 0.258594 | 1.43E-08 | 0.271755 | 2.38E-09 | 0.282088 | 5.43E-10 | 0.130581 | 0.00471  | 0.225541 |
| 0.433962 | 7.21E-23 | 0.352519 | 4.13E-15 | 0.45162  | 7.53E-25 | 0.169977 | 0.00022  | 0.418312 |
| 0.405638 | 6.35E-20 | 0.183927 | 6.38E-05 | 0.522137 | 5.09E-34 | 0.173064 | 0.00017  | 0.427123 |
| 0.448662 | 1.65E-24 | 0.554223 | 5.87E-39 | 0.443694 | 6.03E-24 | 0.269684 | 3.17E-09 | 0.453062 |
| 0.420086 | 2.17E-21 | 0.374747 | 5.11E-17 | 0.610756 | 4.38E-49 | 0.285579 | 3.25E-10 | 0.54814  |
| 0.392715 | 1.14E-18 | 0.414209 | 8.73E-21 | 0.392202 | 1.27E-18 | 0.127938 | 0.00563  | 0.397208 |
| 0.416554 | 5.02E-21 | 0.630675 | 3.67E-53 | 0.500097 | 6.38E-31 | 0.484077 | 8.31E-29 | 0.571876 |
| 0.492145 | 7.39E-30 | 0.566084 | 6.38E-41 | 0.7059   | 1.18E-71 | 0.457219 | 1.68E-25 | 0.636157 |
| 0.407371 | 4.27E-20 | 0.630259 | 4.50E-53 | 0.407608 | 4.04E-20 | 0.317866 | 2.01E-12 | 0.473626 |
| 0.015346 | 0.74082  | -0.19341 | 2.57E-05 | -0.07714 | 0.09589  | -0.2651  | 5.96E-09 | -0.10136 |
| -0.11164 | 0.01579  | -0.29501 | 7.86E-11 | -0.12055 | 0.00912  | -0.04592 | 0.32209  | -0.11652 |
| 0.299498 | 3.92E-11 | 0.545112 | 1.68E-37 | 0.318291 | 1.87E-12 | 0.372473 | 8.14E-17 | 0.297923 |

|          |          |          |          |          |          |          |          |          |
|----------|----------|----------|----------|----------|----------|----------|----------|----------|
| 0.477483 | 5.73E-28 | 0.78883  | #####    | 0.539315 | 1.35E-36 | 0.653095 | 4.03E-58 | 0.519578 |
| 0.387562 | 3.47E-18 | 0.467837 | 8.97E-27 | 0.483123 | 1.10E-28 | 0.272771 | 2.06E-09 | 0.482822 |
| 0.624411 | 7.56E-52 | 0.489778 | 1.51E-29 | 0.481606 | 1.72E-28 | 0.273027 | 1.99E-09 | 0.460371 |
| 0.21893  | 1.78E-06 | 0.214307 | 2.97E-06 | 0.146688 | 0.00148  | -0.02273 | 0.62424  | 0.24869  |
| 0.337376 | 6.78E-14 | 0.305899 | 1.42E-11 | 0.339315 | 4.78E-14 | 0.194706 | 2.27E-05 | 0.31098  |
| -0.20144 | 1.15E-05 | -0.43861 | 2.23E-23 | -0.22383 | 1.03E-06 | -0.16618 | 0.00031  | -0.31074 |
| 0.233259 | 3.44E-07 | 0.004319 | 0.92583  | 0.231553 | 4.21E-07 | -0.01045 | 0.82183  | 0.142276 |
| 0.426763 | 4.30E-22 | 0.447106 | 2.48E-24 | 0.565077 | 9.43E-41 | 0.352163 | 4.42E-15 | 0.513038 |
| 0.308794 | 8.94E-12 | 0.335032 | 1.03E-13 | 0.325815 | 5.20E-13 | 0.133086 | 0.00396  | 0.305012 |
| 0.07339  | 0.11323  | 0.094907 | 0.04036  | 0.02886  | 0.53386  | -0.01466 | 0.75198  | -0.06305 |
| 0.29789  | 5.03E-11 | 0.398005 | 3.54E-19 | 0.119571 | 0.0097   | 0.067991 | 0.14236  | 0.234319 |
| 0.235567 | 2.61E-07 | 0.200505 | 1.27E-05 | 0.098419 | 0.03348  | -0.06937 | 0.13443  | 0.106632 |
| 0.276849 | 1.16E-09 | 0.323203 | 8.14E-13 | -0.01225 | 0.79183  | -0.0439  | 0.34379  | 0.04093  |
| 0.314653 | 3.43E-12 | 0.5173   | 2.55E-33 | 0.212974 | 3.43E-06 | 0.16384  | 0.00038  | 0.293227 |
| -0.19769 | 1.68E-05 | -0.29086 | 1.48E-10 | -0.3601  | 9.59E-16 | -0.11994 | 0.00948  | -0.44144 |
| 0.056573 | 0.22237  | -0.12535 | 0.00668  | -0.05838 | 0.20789  | -0.31307 | 4.45E-12 | 0.030736 |
| -0.2857  | 3.19E-10 | -0.37948 | 1.92E-17 | -0.20026 | 1.30E-05 | -0.11281 | 0.01472  | -0.33362 |
| 0.201163 | 1.18E-05 | 0.462773 | 3.67E-26 | -0.01481 | 0.74965  | 0.160187 | 0.00051  | 0.08659  |
| -0.01547 | 0.73875  | 0.066508 | 0.15129  | 0.124531 | 0.00705  | -0.03323 | 0.47371  | 0.263818 |
| 0.358865 | 1.22E-15 | 0.437601 | 2.88E-23 | 0.468821 | 6.80E-27 | 0.320728 | 1.24E-12 | 0.47649  |
| 0.438321 | 2.40E-23 | 0.419054 | 2.77E-21 | 0.620231 | 5.48E-51 | 0.372064 | 8.84E-17 | 0.559215 |
| 0.331395 | 1.97E-13 | 0.185289 | 5.62E-05 | 0.350032 | 6.60E-15 | 0.105335 | 0.02281  | 0.281514 |
| -0.0538  | 0.24587  | 0.014134 | 0.76064  | -0.16529 | 0.00033  | -0.28263 | 5.02E-10 | -0.03423 |
| 0.332249 | 1.69E-13 | 0.547244 | 7.74E-38 | 0.549427 | 3.48E-38 | 0.516932 | 2.88E-33 | 0.459259 |
| 0.250029 | 4.35E-08 | 0.322824 | 8.68E-13 | 0.378488 | 2.36E-17 | 0.269534 | 3.24E-09 | 0.337789 |
| 0.308721 | 9.04E-12 | 0.469728 | 5.27E-27 | 0.283867 | 4.19E-10 | 0.270491 | 2.84E-09 | 0.385464 |
| 0.416517 | 5.07E-21 | 0.544902 | 1.81E-37 | 0.26939  | 3.31E-09 | 0.241253 | 1.31E-07 | 0.27458  |
| 0.631328 | 2.67E-53 | 0.650429 | 1.65E-57 | 0.47002  | 4.85E-27 | 0.369796 | 1.40E-16 | 0.51223  |
| 0.455384 | 2.75E-25 | 0.523591 | 3.12E-34 | 0.651267 | 1.06E-57 | 0.482517 | 1.32E-28 | 0.609605 |
| 0.413516 | 1.03E-20 | 0.290582 | 1.54E-10 | 0.620707 | 4.38E-51 | 0.263908 | 7.01E-09 | 0.598815 |
| 0.347562 | 1.05E-14 | 0.06802  | 0.14219  | 0.140103 | 0.00241  | -0.16028 | 0.00051  | 0.178623 |
| 0.470682 | 4.02E-27 | 0.453049 | 5.15E-25 | 0.520306 | 9.39E-34 | 0.370294 | 1.27E-16 | 0.474013 |
| 0.207573 | 6.10E-06 | 0.004446 | 0.92366  | 0.121623 | 0.00851  | -0.1138  | 0.01387  | 0.124699 |
| 0.238146 | 1.91E-07 | 0.380637 | 1.51E-17 | 0.206847 | 6.58E-06 | 0.106821 | 0.02095  | 0.215765 |
| 0.422848 | 1.11E-21 | 0.315549 | 2.95E-12 | 0.396358 | 5.10E-19 | 0.233823 | 3.21E-07 | 0.269234 |
| 0.261709 | 9.42E-09 | 0.244669 | 8.57E-08 | 0.302011 | 2.64E-11 | 0.088198 | 0.05683  | 0.265579 |
| 0.493836 | 4.41E-30 | 0.530501 | 2.95E-35 | 0.455765 | 2.48E-25 | 0.29545  | 7.34E-11 | 0.432422 |
| 0.06938  | 0.13436  | 0.113564 | 0.01407  | 0.033187 | 0.47433  | -0.08392 | 0.07002  | 0.125014 |
| 0.169269 | 0.00024  | 0.393645 | 9.28E-19 | -0.03837 | 0.40812  | 0.071888 | 0.12081  | 0.003269 |
| 0.306338 | 1.33E-11 | 0.398707 | 3.03E-19 | 0.458982 | 1.04E-25 | 0.269087 | 3.45E-09 | 0.402734 |
| 0.401587 | 1.59E-19 | 0.511693 | 1.60E-32 | 0.437011 | 3.34E-23 | 0.258897 | 1.37E-08 | 0.369493 |
| 0.325361 | 5.62E-13 | 0.34121  | 3.39E-14 | 0.315722 | 2.87E-12 | 0.041597 | 0.36977  | 0.276656 |
| 0.363044 | 5.38E-16 | 0.492405 | 6.83E-30 | 0.375935 | 4.00E-17 | 0.236404 | 2.36E-07 | 0.413377 |
| 0.178791 | 0.0001   | 0.082032 | 0.07657  | 0.0671   | 0.14767  | -0.11371 | 0.01394  | 0.08132  |
| 0.278207 | 9.53E-10 | 0.3668   | 2.55E-16 | 0.384378 | 6.84E-18 | 0.229544 | 5.32E-07 | 0.400914 |

|          |          |          |          |          |          |          |          |          |
|----------|----------|----------|----------|----------|----------|----------|----------|----------|
| 0.179071 | 9.99E-05 | 0.566705 | 5.00E-41 | 0.020623 | 0.65666  | 0.180765 | 8.55E-05 | 0.098557 |
| 0.398655 | 3.07E-19 | 0.494511 | 3.59E-30 | 0.556503 | 2.50E-39 | 0.432637 | 1.01E-22 | 0.463639 |
| 0.233056 | 3.52E-07 | 0.568352 | 2.63E-41 | 0.082163 | 0.0761   | 0.208432 | 5.57E-06 | 0.227816 |
| 0.388332 | 2.94E-18 | 0.509751 | 2.99E-32 | 0.446228 | 3.12E-24 | 0.398103 | 3.47E-19 | 0.438283 |
| 0.502219 | 3.28E-31 | 0.636209 | 2.39E-54 | 0.647794 | 6.54E-57 | 0.476031 | 8.72E-28 | 0.582096 |
| 0.198937 | 1.48E-05 | 0.044235 | 0.34017  | 0.164155 | 0.00037  | -0.00663 | 0.88643  | 0.132082 |
| 0.477903 | 5.07E-28 | 0.566412 | 5.61E-41 | 0.453009 | 5.20E-25 | 0.313292 | 4.29E-12 | 0.439992 |
| 0.264481 | 6.48E-09 | -0.04645 | 0.31652  | -0.05523 | 0.23353  | 0.075577 | 0.10285  | -0.08111 |
| 0.306221 | 1.35E-11 | 0.239006 | 1.72E-07 | 0.204171 | 8.70E-06 | -0.00242 | 0.95845  | 0.13205  |
| 0.174916 | 0.00015  | 0.144253 | 0.00178  | 0.003554 | 0.93895  | -0.11685 | 0.0115   | 0.029678 |
| 0.418363 | 3.27E-21 | 0.459644 | 8.66E-26 | 0.391456 | 1.50E-18 | 0.215265 | 2.67E-06 | 0.347945 |
| 0.227637 | 6.64E-07 | 0.059207 | 0.20154  | 0.290171 | 1.64E-10 | 0.013949 | 0.76369  | 0.321107 |
| 0.027547 | 0.55264  | -0.18575 | 5.38E-05 | -0.09329 | 0.0439   | -0.40595 | 5.91E-20 | -0.09519 |
| 0.318641 | 1.76E-12 | 0.516016 | 3.89E-33 | 0.132251 | 0.0042   | 0.170342 | 0.00022  | 0.129792 |
| 0.268126 | 3.94E-09 | 0.645294 | 2.39E-56 | 0.133757 | 0.00378  | 0.276378 | 1.24E-09 | 0.248468 |
| 0.407741 | 3.92E-20 | 0.238351 | 1.86E-07 | 0.411786 | 1.54E-20 | 0.210841 | 4.31E-06 | 0.546012 |
| 0.09728  | 0.03559  | 0.244658 | 8.58E-08 | 0.013034 | 0.77878  | -0.00693 | 0.88124  | 0.115052 |
| 0.242577 | 1.11E-07 | 0.214133 | 3.02E-06 | 0.277632 | 1.03E-09 | 0.119448 | 0.00978  | 0.219252 |
| -0.37183 | 9.28E-17 | -0.40496 | 7.41E-20 | -0.3804  | 1.58E-17 | -0.28397 | 4.12E-10 | -0.33639 |
| 0.172002 | 0.00019  | 0.484351 | 7.66E-29 | 0.038021 | 0.41237  | 0.070199 | 0.12982  | 0.153765 |
| 0.445451 | 3.82E-24 | 0.518598 | 1.66E-33 | 0.457723 | 1.46E-25 | 0.3067   | 1.25E-11 | 0.487781 |
| 0.294461 | 8.54E-11 | 0.181467 | 8.02E-05 | 0.233853 | 3.20E-07 | -0.014   | 0.76284  | 0.170165 |
| 0.317737 | 2.05E-12 | 0.420308 | 2.05E-21 | 0.417417 | 4.09E-21 | 0.362677 | 5.79E-16 | 0.303549 |
| 0.143446 | 0.00189  | 0.161169 | 0.00047  | 0.042319 | 0.36152  | -0.0699  | 0.13147  | 0.111262 |
| 0.19056  | 3.40E-05 | 0.336376 | 8.12E-14 | 0.024198 | 0.60195  | -0.0276  | 0.5519   | 0.13431  |
| 0.436928 | 3.42E-23 | 0.582451 | 9.11E-44 | 0.455319 | 2.80E-25 | 0.471954 | 2.80E-27 | 0.507664 |
| 0.202025 | 1.08E-05 | 0.196568 | 1.88E-05 | 0.027406 | 0.55468  | -0.1642  | 0.00037  | 0.065963 |
| 0.052746 | 0.25529  | 0.088979 | 0.05467  | -0.07482 | 0.10633  | -0.03285 | 0.47883  | -0.11596 |
| 0.26973  | 3.15E-09 | 0.066219 | 0.15308  | 0.117398 | 0.01112  | 0.006123 | 0.89501  | -0.02848 |
| -0.18215 | 7.53E-05 | -0.31791 | 1.99E-12 | -0.19313 | 2.65E-05 | -0.18169 | 7.86E-05 | -0.18131 |
| 0.11489  | 0.01298  | 0.153039 | 0.00091  | 0.052134 | 0.26086  | -0.05752 | 0.21473  | 0.136565 |
| 0.249672 | 4.56E-08 | 0.177247 | 0.00012  | 0.109194 | 0.01825  | -0.17355 | 0.00016  | 0.145387 |
| 0.407916 | 3.77E-20 | 0.462072 | 4.45E-26 | 0.562489 | 2.56E-40 | 0.380151 | 1.67E-17 | 0.499287 |
| 0.378303 | 2.45E-17 | 0.281897 | 5.58E-10 | 0.238859 | 1.75E-07 | 0.048466 | 0.29595  | 0.248863 |
| -0.19921 | 1.45E-05 | -0.35124 | 5.25E-15 | -0.34444 | 1.87E-14 | -0.14686 | 0.00146  | -0.3573  |
| 0.244156 | 9.13E-08 | 0.348774 | 8.37E-15 | 0.06943  | 0.13408  | -0.08103 | 0.08025  | 0.126886 |
| 0.432712 | 9.87E-23 | 0.320339 | 1.32E-12 | 0.683885 | 1.16E-65 | 0.439565 | 1.75E-23 | 0.553514 |
| 0.145098 | 0.00167  | 0.242588 | 1.11E-07 | 0.013778 | 0.76649  | -0.10862 | 0.01888  | 0.021732 |
| 0.080159 | 0.08356  | 0.021206 | 0.64761  | -0.12924 | 0.00516  | -0.32257 | 9.07E-13 | -0.05039 |
| 0.380187 | 1.66E-17 | 0.405429 | 6.66E-20 | 0.636143 | 2.47E-54 | 0.493122 | 5.49E-30 | 0.509724 |
| 0.190769 | 3.33E-05 | 0.118421 | 0.01043  | 0.060955 | 0.18853  | -0.12276 | 0.00791  | 0.11323  |
| 0.371348 | 1.02E-16 | 0.527455 | 8.40E-35 | 0.424808 | 6.93E-22 | 0.331131 | 2.06E-13 | 0.435559 |
| 0.336756 | 7.58E-14 | 0.393584 | 9.40E-19 | 0.46338  | 3.10E-26 | 0.199306 | 1.43E-05 | 0.520876 |
| 0.505042 | 1.35E-31 | 0.520499 | 8.80E-34 | 0.568919 | 2.10E-41 | 0.381663 | 1.21E-17 | 0.481027 |
| 0.100328 | 0.03018  | 0.033767 | 0.46664  | 0.088139 | 0.057    | -0.05017 | 0.27929  | 0.025973 |

|          |          |          |          |          |          |          |          |          |
|----------|----------|----------|----------|----------|----------|----------|----------|----------|
| 0.343499 | 2.23E-14 | 0.374684 | 5.18E-17 | 0.404432 | 8.36E-20 | 0.189421 | 3.79E-05 | 0.526078 |
| 0.163878 | 0.00038  | 0.38404  | 7.35E-18 | 0.069769 | 0.13219  | 0.096778 | 0.03656  | 0.15004  |
| 0.284048 | 4.08E-10 | 0.476224 | 8.25E-28 | 0.142877 | 0.00197  | 0.176591 | 0.00012  | 0.161299 |
| 0.149383 | 0.0012   | 0.140356 | 0.00237  | 0.023481 | 0.61276  | -0.17762 | 0.00011  | 0.057712 |
| 0.316586 | 2.49E-12 | 0.6622   | 2.94E-60 | 0.13561  | 0.00332  | 0.276184 | 1.27E-09 | 0.152756 |
| 0.117263 | 0.01121  | 0.222345 | 1.22E-06 | -0.06588 | 0.15521  | -0.15218 | 0.00097  | -0.10034 |
| 0.432253 | 1.11E-22 | 0.36908  | 1.62E-16 | 0.421266 | 1.63E-21 | 0.149739 | 0.00117  | 0.390598 |
| 0.173677 | 0.00016  | 0.24453  | 8.72E-08 | 0.048514 | 0.29547  | 0.022719 | 0.62434  | 0.010626 |
| 0.159578 | 0.00054  | 0.361483 | 7.32E-16 | -0.01358 | 0.7698   | -0.00598 | 0.89747  | -0.01332 |
| 0.070924 | 0.12589  | -0.18534 | 5.59E-05 | 0.002694 | 0.9537   | -0.27032 | 2.90E-09 | 0.025824 |
| 0.433148 | 8.85E-23 | 0.506887 | 7.49E-32 | 0.546655 | 9.59E-38 | 0.393691 | 9.18E-19 | 0.464438 |
| 0.421131 | 1.69E-21 | 0.506812 | 7.67E-32 | 0.595377 | 3.95E-46 | 0.410576 | 2.04E-20 | 0.608115 |
| 0.350832 | 5.68E-15 | 0.287485 | 2.45E-10 | 0.394063 | 8.46E-19 | 0.250994 | 3.85E-08 | 0.284114 |
| 0.444987 | 4.31E-24 | 0.397607 | 3.87E-19 | 0.436723 | 3.60E-23 | 0.316512 | 2.52E-12 | 0.35267  |
| 0.335553 | 9.41E-14 | 0.424362 | 7.72E-22 | 0.35608  | 2.09E-15 | 0.124537 | 0.00705  | 0.368197 |
| 0.283395 | 4.49E-10 | 0.211426 | 4.05E-06 | -0.01808 | 0.69681  | -0.06871 | 0.13819  | 0.035049 |
| 0.265924 | 5.32E-09 | 0.378075 | 2.57E-17 | 0.326732 | 4.44E-13 | 0.196802 | 1.84E-05 | 0.309267 |
| 0.29017  | 1.64E-10 | 0.545327 | 1.55E-37 | 0.278496 | 9.14E-10 | 0.252499 | 3.17E-08 | 0.210366 |
| 0.161034 | 0.00048  | 0.289339 | 1.86E-10 | 0.053059 | 0.25248  | -0.09437 | 0.04151  | 0.089572 |
| 0.195662 | 2.06E-05 | 0.388459 | 2.86E-18 | 0.145315 | 0.00164  | 0.05369  | 0.24687  | 0.135954 |
| 0.459101 | 1.00E-25 | 0.591302 | 2.25E-45 | 0.508182 | 4.95E-32 | 0.448678 | 1.64E-24 | 0.440921 |
| 0.342775 | 2.54E-14 | 0.383064 | 9.04E-18 | 0.439407 | 1.82E-23 | 0.310481 | 6.80E-12 | 0.324917 |
| 0.475116 | 1.13E-27 | 0.542536 | 4.26E-37 | 0.531853 | 1.85E-35 | 0.38637  | 4.48E-18 | 0.428094 |
| 0.460381 | 7.08E-26 | 0.544069 | 2.45E-37 | 0.55567  | 3.42E-39 | 0.346728 | 1.23E-14 | 0.497402 |
| 0.220667 | 1.47E-06 | 0.15743  | 0.00064  | 0.148895 | 0.00125  | -0.15061 | 0.0011   | 0.207548 |
| 0.380864 | 1.44E-17 | 0.461357 | 5.42E-26 | 0.221187 | 1.39E-06 | 0.103382 | 0.02548  | 0.265553 |
| 0.23927  | 1.67E-07 | 0.091412 | 0.04835  | 0.186842 | 4.85E-05 | 0.02328  | 0.61581  | 0.089441 |
| 0.2061   | 7.11E-06 | 0.150122 | 0.00114  | 0.291984 | 1.25E-10 | 0.040478 | 0.3828   | 0.507129 |
| 0.229664 | 5.25E-07 | 0.42388  | 8.68E-22 | 0.199316 | 1.43E-05 | 0.262661 | 8.29E-09 | 0.160472 |
| 0.326983 | 4.25E-13 | 0.554766 | 4.79E-39 | 0.102123 | 0.02733  | 0.11139  | 0.01603  | 0.160589 |
| 0.448032 | 1.95E-24 | 0.436317 | 3.99E-23 | 0.631009 | 3.12E-53 | 0.447043 | 2.52E-24 | 0.584615 |
| 0.145674 | 0.0016   | 0.162837 | 0.00041  | 0.154046 | 0.00084  | -0.00147 | 0.97477  | 0.187922 |
| 0.101731 | 0.02793  | -0.05171 | 0.26478  | 0.059339 | 0.20054  | -0.14054 | 0.00233  | 0.01289  |
| 0.424223 | 7.99E-22 | 0.562582 | 2.47E-40 | 0.30989  | 7.48E-12 | 0.312215 | 5.12E-12 | 0.253205 |
| 0.359929 | 9.91E-16 | 0.162391 | 0.00043  | 0.480719 | 2.23E-28 | 0.12594  | 0.00643  | 0.38374  |
| 0.305476 | 1.52E-11 | 0.037742 | 0.41581  | 0.141682 | 0.00215  | -0.06181 | 0.18237  | 0.18877  |
| 0.211434 | 4.04E-06 | 0.254551 | 2.43E-08 | 0.309057 | 8.57E-12 | 0.155103 | 0.00077  | 0.252162 |
| 0.24764  | 5.90E-08 | 0.271089 | 2.61E-09 | -0.03229 | 0.48638  | -0.12506 | 0.00681  | 0.071536 |
| 0.480256 | 2.56E-28 | 0.416211 | 5.45E-21 | 0.482762 | 1.23E-28 | 0.174643 | 0.00015  | 0.474963 |
| 0.48034  | 2.50E-28 | 0.509688 | 3.05E-32 | 0.616266 | 3.49E-50 | 0.422151 | 1.32E-21 | 0.635846 |
| 0.278148 | 9.61E-10 | 0.334963 | 1.05E-13 | 0.285682 | 3.20E-10 | 0.248215 | 5.48E-08 | 0.238386 |
| 0.331376 | 1.97E-13 | 0.486951 | 3.54E-29 | 0.289182 | 1.90E-10 | 0.145683 | 0.0016   | 0.281186 |
| 0.545843 | 1.29E-37 | 0.589415 | 5.01E-45 | 0.623675 | 1.07E-51 | 0.393373 | 9.84E-19 | 0.615429 |
| 0.243292 | 1.02E-07 | 0.396348 | 5.12E-19 | 0.344035 | 2.02E-14 | 0.288486 | 2.11E-10 | 0.511205 |
| 0.35667  | 1.86E-15 | 0.388929 | 2.59E-18 | 0.351218 | 5.28E-15 | 0.084777 | 0.06719  | 0.368925 |

|          |          |          |          |          |          |          |          |          |
|----------|----------|----------|----------|----------|----------|----------|----------|----------|
| 0.421484 | 1.55E-21 | 0.582692 | 8.25E-44 | 0.427073 | 3.98E-22 | 0.326882 | 4.32E-13 | 0.49578  |
| 0.322154 | 9.73E-13 | 0.629519 | 6.45E-53 | 0.28309  | 4.69E-10 | 0.266875 | 4.68E-09 | 0.261365 |
| -0.1268  | 0.00607  | -0.38148 | 1.26E-17 | -0.20725 | 6.30E-06 | -0.14504 | 0.00167  | -0.33911 |
| -0.05781 | 0.21241  | -0.27992 | 7.44E-10 | -0.16418 | 0.00037  | -0.12089 | 0.00892  | -0.20973 |
| 0.346491 | 1.28E-14 | 0.452966 | 5.26E-25 | 0.524795 | 2.08E-34 | 0.377636 | 2.82E-17 | 0.522978 |
| 0.416539 | 5.04E-21 | 0.391037 | 1.64E-18 | 0.533266 | 1.13E-35 | 0.347121 | 1.14E-14 | 0.523379 |
| 0.364885 | 3.74E-16 | 0.406853 | 4.81E-20 | 0.547584 | 6.83E-38 | 0.346235 | 1.34E-14 | 0.517082 |
| -0.32714 | 4.14E-13 | -0.34658 | 1.26E-14 | -0.18893 | 3.98E-05 | -0.0633  | 0.17206  | -0.22344 |
| 0.186935 | 4.81E-05 | 0.338569 | 5.47E-14 | 0.253441 | 2.81E-08 | 0.102867 | 0.02622  | 0.243648 |
| 0.369056 | 1.63E-16 | 0.284965 | 3.56E-10 | 0.289567 | 1.79E-10 | 0.075765 | 0.10199  | 0.303602 |
| 0.225545 | 8.45E-07 | 0.278659 | 8.93E-10 | 0.086115 | 0.06297  | 0.134195 | 0.00367  | 0.027784 |
| 0.187611 | 4.51E-05 | 0.221957 | 1.27E-06 | 0.072653 | 0.1169   | -0.04938 | 0.2869   | 0.121736 |
| 0.292351 | 1.18E-10 | 0.244474 | 8.78E-08 | 0.182756 | 7.12E-05 | 0.069023 | 0.13639  | 0.177453 |
| 0.231847 | 4.06E-07 | 0.428604 | 2.73E-22 | 0.109634 | 0.01779  | 0.102961 | 0.02608  | 0.129751 |
| 0.125734 | 0.00652  | 0.198232 | 1.59E-05 | -0.15948 | 0.00054  | -0.2634  | 7.50E-09 | 0.078    |
| 0.11391  | 0.01378  | 0.19003  | 3.58E-05 | -0.1056  | 0.02248  | -0.18476 | 5.90E-05 | -0.021   |
| 0.107025 | 0.02071  | 0.08767  | 0.05834  | 0.082432 | 0.07514  | -0.1688  | 0.00025  | 0.150939 |
| 0.327896 | 3.63E-13 | 0.421469 | 1.55E-21 | 0.135812 | 0.00327  | 0.057903 | 0.21167  | 0.127478 |
| 0.489302 | 1.75E-29 | 0.510868 | 2.08E-32 | 0.719808 | 9.83E-76 | 0.503172 | 2.43E-31 | 0.601468 |
| 0.439203 | 1.92E-23 | 0.660388 | 7.93E-60 | 0.363465 | 4.95E-16 | 0.313171 | 4.38E-12 | 0.444518 |
| 0.429557 | 2.16E-22 | 0.573479 | 3.46E-42 | 0.550519 | 2.32E-38 | 0.440504 | 1.37E-23 | 0.487162 |
| 0.26073  | 1.07E-08 | 0.409746 | 2.47E-20 | 0.251665 | 3.53E-08 | 0.200206 | 1.31E-05 | 0.253362 |
| 0.458281 | 1.26E-25 | 0.259892 | 1.20E-08 | 0.562642 | 2.41E-40 | 0.272016 | 2.29E-09 | 0.427402 |
| 0.451965 | 6.87E-25 | 0.534788 | 6.65E-36 | 0.421413 | 1.57E-21 | 0.400603 | 1.98E-19 | 0.373929 |
| 0.337959 | 6.11E-14 | 0.515968 | 3.95E-33 | 0.242724 | 1.09E-07 | 0.180422 | 8.83E-05 | 0.312632 |
| 0.344046 | 2.01E-14 | 0.396282 | 5.19E-19 | 0.410091 | 2.28E-20 | 0.165433 | 0.00033  | 0.375706 |
| 0.167785 | 0.00027  | 0.309    | 8.64E-12 | -0.05045 | 0.27662  | -0.10128 | 0.02863  | 0.025727 |
| 0.263214 | 7.70E-09 | 0.058994 | 0.20317  | 0.300094 | 3.57E-11 | 0.110013 | 0.01739  | 0.176667 |
| 0.367397 | 2.27E-16 | 0.380461 | 1.56E-17 | 0.34858  | 8.67E-15 | 0.287672 | 2.38E-10 | 0.320678 |
| 0.188649 | 4.08E-05 | 0.086315 | 0.06235  | 0.00163  | 0.97198  | -0.1333  | 0.0039   | 0.000867 |
| 0.198243 | 1.59E-05 | 0.402553 | 1.28E-19 | 0.163926 | 0.00038  | 0.182119 | 7.55E-05 | 0.14241  |
| 0.229871 | 5.12E-07 | 0.368767 | 1.72E-16 | 0.178752 | 0.0001   | 0.188357 | 4.20E-05 | 0.14142  |
| 0.371337 | 1.03E-16 | 0.691106 | 1.44E-67 | 0.374489 | 5.39E-17 | 0.447464 | 2.26E-24 | 0.28109  |
| 0.337639 | 6.47E-14 | 0.339739 | 4.43E-14 | 0.329992 | 2.52E-13 | 0.314701 | 3.40E-12 | 0.189805 |
| 0.375708 | 4.19E-17 | 0.374199 | 5.72E-17 | 0.322433 | 9.28E-13 | 0.24984  | 4.46E-08 | 0.317136 |
| 0.248803 | 5.09E-08 | 0.365305 | 3.44E-16 | 0.10495  | 0.02332  | 0.06255  | 0.1772   | 0.180705 |
| 0.336984 | 7.28E-14 | 0.55812  | 1.36E-39 | 0.218666 | 1.84E-06 | 0.356148 | 2.06E-15 | 0.1929   |
| 0.437725 | 2.79E-23 | 0.599129 | 7.77E-47 | 0.303931 | 1.95E-11 | 0.30893  | 8.74E-12 | 0.336979 |
| 0.416047 | 5.66E-21 | 0.305012 | 1.64E-11 | 0.49175  | 8.33E-30 | 0.297197 | 5.60E-11 | 0.395091 |
| 0.481934 | 1.56E-28 | 0.449343 | 1.38E-24 | 0.631983 | 1.93E-53 | 0.425434 | 5.95E-22 | 0.454689 |
| 0.344571 | 1.83E-14 | 0.414313 | 8.52E-21 | 0.330745 | 2.20E-13 | 0.116033 | 0.0121   | 0.300836 |
| 0.454505 | 3.48E-25 | 0.599724 | 5.99E-47 | 0.285013 | 3.54E-10 | 0.210309 | 4.56E-06 | 0.282772 |
| 0.268372 | 3.80E-09 | 0.419033 | 2.79E-21 | 0.236524 | 2.33E-07 | 0.205604 | 7.49E-06 | 0.434364 |
| 0.41303  | 1.15E-20 | 0.479722 | 2.99E-28 | 0.550598 | 2.26E-38 | 0.354168 | 3.01E-15 | 0.536776 |
| 0.275089 | 1.49E-09 | 0.295968 | 6.78E-11 | 0.16838  | 0.00026  | 0.045619 | 0.32526  | 0.203011 |



|          |          |          |          |          |          |          |          |          |
|----------|----------|----------|----------|----------|----------|----------|----------|----------|
| 0.252835 | 3.03E-08 | 0.251361 | 3.67E-08 | 0.057655 | 0.21363  | -0.03347 | 0.47058  | 0.045207 |
| 0.513653 | 8.43E-33 | 0.605952 | 3.82E-48 | 0.722796 | 1.21E-76 | 0.56984  | 1.46E-41 | 0.685449 |
| 0.272109 | 2.26E-09 | 0.203896 | 8.95E-06 | 0.278538 | 9.08E-10 | 0.082654 | 0.07435  | 0.205318 |
| 0.265755 | 5.45E-09 | 0.312732 | 4.70E-12 | 0.118856 | 0.01015  | 0.145388 | 0.00163  | 0.054815 |
| 0.318795 | 1.72E-12 | 0.32654  | 4.59E-13 | 0.390223 | 1.95E-18 | 0.250172 | 4.27E-08 | 0.430692 |
| 0.109896 | 0.01752  | -0.04208 | 0.3642   | 0.147605 | 0.00138  | -0.05761 | 0.21397  | 0.120751 |
| 0.491457 | 9.11E-30 | 0.371535 | 9.85E-17 | 0.735508 | 1.20E-80 | 0.511873 | 1.50E-32 | 0.62084  |
| 0.353048 | 3.73E-15 | 0.390348 | 1.90E-18 | 0.33955  | 4.58E-14 | 0.247217 | 6.22E-08 | 0.355213 |
| 0.295637 | 7.13E-11 | 0.140729 | 0.0023   | 0.15811  | 0.00061  | -0.0219  | 0.63692  | 0.303294 |
| -0.1147  | 0.01313  | -0.01391 | 0.76433  | -0.17865 | 0.0001   | 0.029611 | 0.52327  | -0.25721 |
| 0.295356 | 7.44E-11 | 0.418721 | 3.00E-21 | 0.34634  | 1.32E-14 | 0.30686  | 1.22E-11 | 0.321641 |
| 0.259814 | 1.21E-08 | 0.335619 | 9.30E-14 | 0.383138 | 8.90E-18 | 0.182418 | 7.34E-05 | 0.440374 |
| 0.373096 | 7.17E-17 | 0.426509 | 4.57E-22 | 0.534235 | 8.06E-36 | 0.390872 | 1.70E-18 | 0.396041 |
| -0.24496 | 8.26E-08 | -0.32869 | 3.16E-13 | -0.09071 | 0.05009  | -0.07821 | 0.09138  | -0.136   |
| 0.078371 | 0.09071  | 0.121583 | 0.00853  | 0.004287 | 0.92639  | -0.13616 | 0.00319  | 0.08433  |
| 0.476836 | 6.91E-28 | 0.580094 | 2.39E-43 | 0.496906 | 1.72E-30 | 0.329069 | 2.96E-13 | 0.512596 |
| 0.533433 | 1.07E-35 | 0.61015  | 5.77E-49 | 0.700729 | 3.38E-70 | 0.483506 | 9.84E-29 | 0.644428 |
| 0.393597 | 9.37E-19 | 0.367453 | 2.24E-16 | 0.36629  | 2.83E-16 | 0.168492 | 0.00025  | 0.35123  |
| 0.231972 | 4.00E-07 | 0.278399 | 9.27E-10 | 0.135524 | 0.00334  | -0.01888 | 0.68401  | 0.129515 |
| 0.05465  | 0.23851  | -0.03212 | 0.48873  | -0.08699 | 0.06032  | -0.1341  | 0.00369  | -0.11204 |
| 0.344264 | 1.93E-14 | 0.464094 | 2.55E-26 | 0.289867 | 1.72E-10 | 0.144099 | 0.0018   | 0.285012 |
| 0.392164 | 1.28E-18 | 0.519766 | 1.12E-33 | 0.347735 | 1.02E-14 | 0.223706 | 1.04E-06 | 0.361263 |
| 0.522362 | 4.71E-34 | 0.519143 | 1.38E-33 | 0.656001 | 8.53E-59 | 0.46175  | 4.86E-26 | 0.545064 |
| 0.479382 | 3.30E-28 | 0.621392 | 3.17E-51 | 0.609995 | 6.19E-49 | 0.561207 | 4.19E-40 | 0.538529 |
| 0.146159 | 0.00154  | 0.240104 | 1.51E-07 | 0.28304  | 4.73E-10 | 0.125135 | 0.00678  | 0.347716 |
| -0.11607 | 0.01207  | -0.06875 | 0.13796  | -0.10411 | 0.02445  | 0.048423 | 0.29637  | -0.04708 |
| 0.291964 | 1.25E-10 | 0.206221 | 7.03E-06 | 0.313069 | 4.45E-12 | 0.141683 | 0.00215  | 0.307829 |
| 0.286357 | 2.90E-10 | 0.359681 | 1.04E-15 | 0.276792 | 1.17E-09 | 0.166529 | 0.0003   | 0.321003 |
| 0.351135 | 5.36E-15 | 0.567481 | 3.70E-41 | 0.367945 | 2.03E-16 | 0.353522 | 3.41E-15 | 0.356559 |
| -0.21354 | 3.22E-06 | -0.34594 | 1.42E-14 | -0.33381 | 1.28E-13 | -0.23857 | 1.82E-07 | -0.29169 |
| 0.102863 | 0.02623  | 0.089767 | 0.05255  | -0.07605 | 0.10069  | -0.24315 | 1.03E-07 | 0.05011  |
| 0.22838  | 6.10E-07 | 0.053423 | 0.24923  | 0.254436 | 2.47E-08 | -0.03594 | 0.43842  | 0.253124 |
| 0.059921 | 0.19615  | 0.062349 | 0.1786   | 0.028198 | 0.54329  | -0.09031 | 0.05113  | 0.051087 |
| 0.1828   | 7.09E-05 | 0.052425 | 0.2582   | 0.046654 | 0.3144   | -0.18164 | 7.89E-05 | 0.042649 |
| 0.088073 | 0.05719  | 0.252833 | 3.04E-08 | 0.135877 | 0.00326  | 0.082276 | 0.07569  | 0.265772 |
| 0.076938 | 0.09678  | -0.18313 | 6.87E-05 | 0.052447 | 0.258    | -0.15853 | 0.00059  | -0.02734 |
| 0.389599 | 2.24E-18 | 0.294639 | 8.31E-11 | 0.411523 | 1.64E-20 | 0.254471 | 2.45E-08 | 0.328051 |
| 0.144248 | 0.00178  | 0.203993 | 8.86E-06 | 0.082327 | 0.07551  | 0.014809 | 0.74959  | 0.265032 |
| 0.499296 | 8.19E-31 | 0.419426 | 2.54E-21 | 0.70858  | 2.02E-72 | 0.476602 | 7.40E-28 | 0.552745 |
| 0.498271 | 1.13E-30 | 0.391934 | 1.35E-18 | 0.667651 | 1.42E-61 | 0.364637 | 3.93E-16 | 0.649416 |
| 0.391935 | 1.35E-18 | 0.094889 | 0.04039  | 0.07982  | 0.08488  | -0.17496 | 0.00014  | 0.177382 |
| 0.25452  | 2.44E-08 | 0.133865 | 0.00375  | 0.303342 | 2.14E-11 | 0.025872 | 0.57705  | 0.312457 |
| 0.407358 | 4.28E-20 | 0.653146 | 3.92E-58 | 0.310495 | 6.78E-12 | 0.335664 | 9.22E-14 | 0.307218 |
| 0.238068 | 1.93E-07 | 0.474126 | 1.51E-27 | -0.04438 | 0.33862  | 0.054327 | 0.2413   | 0.032211 |
| 0.29591  | 6.84E-11 | 0.565436 | 8.20E-41 | 0.028565 | 0.53805  | 0.095874 | 0.03835  | 0.08948  |

|          |          |          |          |          |          |          |          |          |
|----------|----------|----------|----------|----------|----------|----------|----------|----------|
| 0.394784 | 7.22E-19 | 0.752423 | 2.37E-86 | 0.300968 | 3.11E-11 | 0.3707   | 1.17E-16 | 0.327985 |
| 0.233811 | 3.22E-07 | 0.547222 | 7.80E-38 | 0.059783 | 0.19719  | 0.165037 | 0.00034  | 0.094248 |
| -0.19067 | 3.36E-05 | -0.22601 | 8.01E-07 | -0.21478 | 2.82E-06 | -0.06874 | 0.13801  | -0.23088 |
| 0.125441 | 0.00664  | 0.134007 | 0.00372  | -0.04787 | 0.30195  | -0.11143 | 0.01599  | 0.057718 |
| 0.430829 | 1.58E-22 | 0.512996 | 1.04E-32 | 0.326555 | 4.58E-13 | 0.179195 | 9.88E-05 | 0.323585 |
| 0.18446  | 6.07E-05 | 0.339851 | 4.34E-14 | -0.03129 | 0.49997  | -0.07755 | 0.09414  | 0.048705 |
| 0.43883  | 2.11E-23 | 0.58275  | 8.06E-44 | 0.390946 | 1.67E-18 | 0.238275 | 1.88E-07 | 0.397939 |
| 0.456651 | 1.95E-25 | 0.646918 | 1.03E-56 | 0.614363 | 8.41E-50 | 0.496945 | 1.70E-30 | 0.612959 |
| -0.11138 | 0.01604  | -0.37966 | 1.85E-17 | -0.15222 | 0.00097  | -0.13901 | 0.00261  | -0.24977 |
| 0.228587 | 5.95E-07 | 0.283647 | 4.32E-10 | 0.397699 | 3.79E-19 | 0.200915 | 1.22E-05 | 0.383572 |
| 0.236556 | 2.32E-07 | 0.300402 | 3.40E-11 | -0.01241 | 0.78908  | -0.03101 | 0.50386  | 0.003853 |
| 0.41232  | 1.36E-20 | 0.292748 | 1.11E-10 | 0.483564 | 9.67E-29 | 0.167227 | 0.00028  | 0.44457  |
| 0.271592 | 2.43E-09 | 0.377843 | 2.70E-17 | 0.270663 | 2.77E-09 | 0.112961 | 0.01459  | 0.29161  |
| 0.494749 | 3.34E-30 | 0.728311 | 2.36E-78 | 0.494936 | 3.15E-30 | 0.5187   | 1.60E-33 | 0.474837 |
| 0.209855 | 4.79E-06 | 0.174578 | 0.00015  | 0.171471 | 0.0002   | 0.00106  | 0.98177  | 0.220553 |
| 0.152331 | 0.00096  | 0.210034 | 4.70E-06 | -0.04355 | 0.34774  | -0.14675 | 0.00147  | 0.048521 |
| 0.545043 | 1.72E-37 | 0.578276 | 5.02E-43 | 0.682833 | 2.17E-65 | 0.44325  | 6.77E-24 | 0.621315 |
| 0.144932 | 0.00169  | 0.327794 | 3.69E-13 | 0.015183 | 0.74349  | 0.076373 | 0.09927  | 0.122585 |
| 0.043312 | 0.35035  | 0.092061 | 0.04677  | -0.07805 | 0.09206  | -0.15957 | 0.00054  | 0.014685 |
| 0.137946 | 0.00281  | 0.211845 | 3.87E-06 | 0.160779 | 0.00049  | 0.02984  | 0.52005  | 0.291206 |
| 0.261423 | 9.79E-09 | 0.427934 | 3.22E-22 | 0.078125 | 0.09173  | -0.00295 | 0.94922  | 0.141258 |
| 0.501791 | 3.75E-31 | 0.712542 | 1.43E-73 | 0.480631 | 2.29E-28 | 0.483727 | 9.22E-29 | 0.481005 |
| 0.437375 | 3.05E-23 | 0.55209  | 1.30E-38 | 0.586983 | 1.39E-44 | 0.497573 | 1.40E-30 | 0.558528 |
| 0.481576 | 1.74E-28 | 0.547896 | 6.10E-38 | 0.642693 | 9.07E-56 | 0.439209 | 1.91E-23 | 0.573123 |
| 0.209704 | 4.87E-06 | 0.341986 | 2.94E-14 | 0.025398 | 0.58406  | 0.101311 | 0.02859  | 0.106898 |
| 0.40313  | 1.12E-19 | 0.50863  | 4.29E-32 | 0.526712 | 1.08E-34 | 0.34901  | 8.00E-15 | 0.7079   |
| 0.332327 | 1.67E-13 | 0.302754 | 2.35E-11 | 0.275866 | 1.33E-09 | 0.107202 | 0.0205   | 0.250423 |
| 0.186221 | 5.14E-05 | 0.013238 | 0.7754   | 0.108357 | 0.01917  | -0.04029 | 0.38498  | -0.00489 |
| 0.232099 | 3.94E-07 | 0.460233 | 7.37E-26 | 0.091577 | 0.04795  | 0.118774 | 0.0102   | 0.111989 |
| 0.518877 | 1.51E-33 | 0.428819 | 2.59E-22 | 0.543112 | 3.46E-37 | 0.35012  | 6.50E-15 | 0.467351 |
| 0.619847 | 6.57E-51 | 0.285725 | 3.18E-10 | 0.350252 | 6.34E-15 | 0.154332 | 0.00082  | 0.347694 |
| 0.317351 | 2.19E-12 | 0.229679 | 5.24E-07 | 0.238568 | 1.82E-07 | 0.1287   | 0.00535  | 0.274721 |
| -0.01931 | 0.67718  | 0.059565 | 0.19883  | -0.1353  | 0.0034   | -0.24891 | 5.02E-08 | -0.08422 |
| 0.100579 | 0.02976  | 0.093725 | 0.04292  | -0.04578 | 0.32359  | -0.08002 | 0.08409  | -0.02699 |
| 0.184254 | 6.19E-05 | 0.290515 | 1.56E-10 | 0.149726 | 0.00117  | 0.176718 | 0.00012  | 0.206553 |
| 0.322697 | 8.87E-13 | 0.252615 | 3.12E-08 | 0.429476 | 2.20E-22 | 0.229323 | 5.46E-07 | 0.378301 |
| 0.366481 | 2.72E-16 | 0.3287   | 3.15E-13 | 0.533862 | 9.19E-36 | 0.231021 | 4.48E-07 | 0.509085 |
| 0.32168  | 1.06E-12 | 0.496805 | 1.77E-30 | 0.239054 | 1.71E-07 | 0.233206 | 3.46E-07 | 0.268772 |
| 0.06909  | 0.13601  | 0.033601 | 0.46883  | 0.098506 | 0.03332  | -0.09212 | 0.04663  | 0.102782 |
| 0.272568 | 2.12E-09 | 0.31702  | 2.31E-12 | 0.286147 | 2.99E-10 | 0.040687 | 0.38034  | 0.334457 |
| 0.16598  | 0.00032  | 0.201773 | 1.11E-05 | -0.01338 | 0.7731   | -0.04388 | 0.34406  | -0.00462 |
| 0.497343 | 1.50E-30 | 0.433517 | 8.07E-23 | 0.449052 | 1.49E-24 | 0.188952 | 3.97E-05 | 0.430328 |
| 0.328429 | 3.31E-13 | 0.532298 | 1.58E-35 | 0.200959 | 1.21E-05 | 0.276191 | 1.27E-09 | 0.182215 |
| 0.386169 | 4.67E-18 | 0.67402  | 3.80E-63 | 0.390352 | 1.90E-18 | 0.332919 | 1.50E-13 | 0.442892 |
| 0.425175 | 6.33E-22 | 0.563976 | 1.44E-40 | 0.379379 | 1.96E-17 | 0.422284 | 1.28E-21 | 0.2725   |

|          |          |          |          |          |          |          |          |          |
|----------|----------|----------|----------|----------|----------|----------|----------|----------|
| 0.159193 | 0.00055  | 0.226778 | 7.34E-07 | -0.09152 | 0.04809  | -0.20996 | 4.74E-06 | -0.01579 |
| 0.054751 | 0.23765  | -0.16578 | 0.00032  | -0.04147 | 0.37119  | -0.34028 | 4.01E-14 | -0.07859 |
| 0.34132  | 3.32E-14 | 0.253378 | 2.83E-08 | 0.188113 | 4.30E-05 | 0.087036 | 0.06019  | 0.149899 |
| -0.15843 | 0.00059  | -0.23072 | 4.64E-07 | -0.14201 | 0.0021   | -0.03154 | 0.49662  | -0.22183 |
| 0.136185 | 0.00319  | -0.00277 | 0.95241  | -0.09497 | 0.04021  | -0.16169 | 0.00045  | -0.14981 |
| 0.03102  | 0.50367  | 0.249337 | 4.75E-08 | -0.0662  | 0.15322  | -0.04907 | 0.28997  | 0.016884 |
| 0.415979 | 5.75E-21 | 0.376498 | 3.56E-17 | 0.688578 | 6.78E-67 | 0.438256 | 2.44E-23 | 0.63832  |
| 0.03873  | 0.4037   | -0.05938 | 0.20025  | -0.05931 | 0.20078  | -0.22416 | 9.90E-07 | 0.005163 |
| 0.655922 | 8.90E-59 | 0.383157 | 8.86E-18 | 0.445393 | 3.88E-24 | 0.254946 | 2.31E-08 | 0.358838 |
| 0.180288 | 8.94E-05 | 0.181974 | 7.65E-05 | 0.054141 | 0.24292  | -0.07476 | 0.10662  | 0.201749 |
| 0.198351 | 1.58E-05 | 0.31745  | 2.15E-12 | 0.167065 | 0.00029  | 0.046909 | 0.31175  | 0.338523 |
| 0.403889 | 9.45E-20 | 0.384206 | 7.10E-18 | 0.399104 | 2.77E-19 | 0.269459 | 3.27E-09 | 0.292102 |
| 0.537828 | 2.28E-36 | 0.522428 | 4.61E-34 | 0.69504  | 1.25E-68 | 0.513411 | 9.12E-33 | 0.644586 |
| 0.275519 | 1.40E-09 | 0.31239  | 4.97E-12 | 0.247948 | 5.67E-08 | 0.21432  | 2.96E-06 | 0.279962 |
| -0.1331  | 0.00396  | -0.19506 | 2.19E-05 | -0.29527 | 7.54E-11 | 0.003892 | 0.93315  | -0.38247 |
| 0.051848 | 0.26348  | -0.0975  | 0.03517  | 0.105862 | 0.02214  | -0.07503 | 0.10536  | 0.118383 |
| -0.28453 | 3.80E-10 | -0.45371 | 4.31E-25 | -0.17732 | 0.00012  | -0.14488 | 0.00169  | -0.23274 |
| 0.269619 | 3.20E-09 | 0.345542 | 1.53E-14 | 0.249204 | 4.84E-08 | 0.137159 | 0.00298  | 0.261494 |
| 0.037352 | 0.42065  | 0.27012  | 2.99E-09 | -0.179   | 0.0001   | -0.20561 | 7.49E-06 | -0.03541 |
| 0.402933 | 1.17E-19 | 0.662568 | 2.40E-60 | 0.33143  | 1.95E-13 | 0.368678 | 1.75E-16 | 0.309979 |
| 0.260269 | 1.14E-08 | 0.230313 | 4.86E-07 | 0.057878 | 0.21187  | -0.14485 | 0.0017   | 0.270359 |
| 0.505496 | 1.17E-31 | 0.474734 | 1.27E-27 | 0.497792 | 1.31E-30 | 0.263081 | 7.83E-09 | 0.44663  |
| 0.262447 | 8.53E-09 | 0.10194  | 0.02761  | 0.241081 | 1.34E-07 | 0.055433 | 0.23184  | 0.121942 |
| 0.482392 | 1.37E-28 | 0.411616 | 1.60E-20 | 0.684022 | 1.07E-65 | 0.382712 | 9.74E-18 | 0.670595 |
| -0.31588 | 2.80E-12 | -0.38914 | 2.47E-18 | -0.2481  | 5.57E-08 | -0.25171 | 3.51E-08 | -0.15026 |
| 0.341122 | 3.44E-14 | 0.285227 | 3.43E-10 | 0.445831 | 3.46E-24 | 0.303821 | 1.98E-11 | 0.331208 |
| 0.454545 | 3.45E-25 | 0.43676  | 3.56E-23 | 0.447724 | 2.11E-24 | 0.353033 | 3.74E-15 | 0.407553 |
| -0.06171 | 0.18313  | -0.14271 | 0.00199  | 0.047538 | 0.3053   | 0.034501 | 0.457    | -0.05055 |
| 0.398426 | 3.23E-19 | 0.478174 | 4.69E-28 | 0.299759 | 3.76E-11 | 0.091373 | 0.04845  | 0.352156 |
| 0.52214  | 5.08E-34 | 0.583523 | 5.86E-44 | 0.763328 | 2.79E-90 | 0.582708 | 8.20E-44 | 0.715341 |
| 0.211877 | 3.86E-06 | 0.359608 | 1.06E-15 | 0.017918 | 0.69934  | -0.07029 | 0.1293   | 0.127672 |
| 0.421313 | 1.61E-21 | 0.373    | 7.31E-17 | 0.463526 | 2.98E-26 | 0.374947 | 4.91E-17 | 0.41715  |
| 0.346629 | 1.25E-14 | 0.46567  | 1.64E-26 | 0.399988 | 2.28E-19 | 0.199445 | 1.41E-05 | 0.421846 |
| 0.287381 | 2.49E-10 | 0.392633 | 1.16E-18 | 0.062545 | 0.17723  | -0.02193 | 0.6364   | 0.160286 |
| 0.235443 | 2.65E-07 | 0.037431 | 0.41967  | 0.11081  | 0.01659  | -0.13349 | 0.00385  | 0.089299 |
| 0.297892 | 5.03E-11 | 0.191191 | 3.20E-05 | 0.264806 | 6.20E-09 | 0.225902 | 8.11E-07 | 0.257552 |
| 0.325379 | 5.60E-13 | 0.202878 | 9.94E-06 | 0.551264 | 1.77E-38 | 0.204815 | 8.13E-06 | 0.483528 |
| 0.275136 | 1.48E-09 | 0.102904 | 0.02617  | 0.319972 | 1.41E-12 | 0.048169 | 0.29891  | 0.334141 |
| 0.464417 | 2.33E-26 | 0.551803 | 1.45E-38 | 0.511943 | 1.47E-32 | 0.292816 | 1.10E-10 | 0.557717 |
| 0.178914 | 0.0001   | 0.141749 | 0.00214  | 0.330017 | 2.50E-13 | 0.077692 | 0.09355  | 0.302742 |
| 0.232476 | 3.77E-07 | 0.074727 | 0.10679  | 0.276984 | 1.13E-09 | -0.01398 | 0.76314  | 0.280845 |
| 0.077591 | 0.09398  | -0.15265 | 0.00093  | 0.094188 | 0.0419   | -0.22455 | 9.47E-07 | 0.081131 |
| 0.362185 | 6.38E-16 | 0.298004 | 4.95E-11 | 0.294179 | 8.92E-11 | 0.001402 | 0.97589  | 0.294557 |
| 0.14886  | 0.00125  | 0.273387 | 1.89E-09 | 0.069753 | 0.13228  | -0.04037 | 0.3841   | 0.089032 |
| 0.13645  | 0.00313  | 0.108731 | 0.01875  | 0.195946 | 2.00E-05 | 0.011853 | 0.79837  | 0.212661 |

|          |          |          |          |          |          |          |          |          |
|----------|----------|----------|----------|----------|----------|----------|----------|----------|
| 0.376776 | 3.36E-17 | 0.511874 | 1.50E-32 | 0.393231 | 1.02E-18 | 0.219997 | 1.58E-06 | 0.358297 |
| 0.249091 | 4.91E-08 | 0.15509  | 0.00077  | 0.171731 | 0.00019  | 0.048382 | 0.29679  | 0.144576 |
| 0.012675 | 0.78471  | -0.1873  | 4.64E-05 | -0.07309 | 0.11473  | -0.33442 | 1.15E-13 | -0.05782 |
| 0.318421 | 1.83E-12 | 0.471287 | 3.39E-27 | 0.113362 | 0.01424  | 0.032615 | 0.48198  | 0.226543 |
| 0.139539 | 0.00251  | -0.05395 | 0.24461  | 0.089658 | 0.05284  | -0.13851 | 0.0027   | 0.032852 |
| 0.255995 | 2.01E-08 | 0.505493 | 1.17E-31 | 0.003114 | 0.9465   | 0.024453 | 0.59812  | 0.094021 |
| 0.608882 | 1.02E-48 | 0.532127 | 1.68E-35 | 0.333655 | 1.32E-13 | 0.210511 | 4.46E-06 | 0.329806 |
| 0.150648 | 0.00109  | 0.152976 | 0.00091  | -0.04437 | 0.33869  | -0.13396 | 0.00373  | 0.020479 |
| 0.138255 | 0.00275  | 0.263427 | 7.48E-09 | 0.156625 | 0.00068  | 0.033719 | 0.46727  | 0.294921 |
| 0.496258 | 2.10E-30 | 0.214421 | 2.93E-06 | 0.155422 | 0.00075  | 0.041707 | 0.36851  | 0.151177 |
| 0.106054 | 0.0219   | 0.348372 | 9.02E-15 | 0.035648 | 0.44217  | 0.068809 | 0.13761  | 0.01819  |
| 0.236774 | 2.26E-07 | 0.098623 | 0.03311  | 0.223767 | 1.04E-06 | -0.0533  | 0.25031  | 0.135524 |
| 0.335775 | 9.04E-14 | 0.228488 | 6.02E-07 | 0.269471 | 3.27E-09 | 0.127486 | 0.0058   | 0.268837 |
| 0.516767 | 3.03E-33 | 0.534046 | 8.62E-36 | 0.523581 | 3.13E-34 | 0.339451 | 4.66E-14 | 0.510469 |
| 0.219935 | 1.59E-06 | 0.201738 | 1.12E-05 | 0.096056 | 0.03798  | 0.016502 | 0.72208  | 0.09644  |
| 0.502699 | 2.82E-31 | 0.55336  | 8.10E-39 | 0.499202 | 8.43E-31 | 0.398682 | 3.05E-19 | 0.463418 |
| 0.460415 | 7.02E-26 | 0.426321 | 4.79E-22 | 0.46865  | 7.14E-27 | 0.266265 | 5.08E-09 | 0.474008 |
| 0.412288 | 1.37E-20 | 0.512389 | 1.27E-32 | 0.487794 | 2.75E-29 | 0.39747  | 3.99E-19 | 0.349794 |
| 0.275687 | 1.37E-09 | 0.417097 | 4.42E-21 | 0.280062 | 7.29E-10 | 0.282825 | 4.88E-10 | 0.385214 |
| 0.495496 | 2.65E-30 | 0.733953 | 3.81E-80 | 0.626711 | 2.51E-52 | 0.547533 | 6.96E-38 | 0.635166 |
| -0.10793 | 0.01965  | -0.0679  | 0.1429   | -0.09237 | 0.04604  | 0.040923 | 0.37759  | -0.07309 |
| 0.008822 | 0.8492   | -0.23083 | 4.58E-07 | 0.089173 | 0.05414  | 0.046834 | 0.31253  | -0.01948 |
| 0.496756 | 1.80E-30 | 0.529055 | 4.85E-35 | 0.6636   | 1.36E-60 | 0.410814 | 1.93E-20 | 0.594674 |
| 0.354206 | 2.99E-15 | 0.610995 | 3.93E-49 | 0.317056 | 2.30E-12 | 0.325906 | 5.12E-13 | 0.433903 |
| 0.136361 | 0.00315  | 0.108717 | 0.01877  | -0.00748 | 0.87199  | -0.21799 | 1.98E-06 | 0.04498  |
| 0.352593 | 4.07E-15 | 0.531532 | 2.07E-35 | 0.393315 | 9.97E-19 | 0.365239 | 3.49E-16 | 0.413986 |
| 0.451013 | 8.85E-25 | 0.417587 | 3.93E-21 | 0.484657 | 7.00E-29 | 0.312299 | 5.05E-12 | 0.385499 |
| -0.21542 | 2.63E-06 | -0.44253 | 8.15E-24 | -0.26314 | 7.77E-09 | -0.23201 | 3.99E-07 | -0.33327 |
| 0.292476 | 1.16E-10 | 0.13548  | 0.00335  | 0.389413 | 2.33E-18 | 0.094173 | 0.04194  | 0.340605 |
| 0.228272 | 6.17E-07 | 0.166798 | 0.00029  | 0.066699 | 0.15012  | -0.0086  | 0.85294  | -0.0061  |
| 0.283345 | 4.52E-10 | 0.216499 | 2.33E-06 | 0.283672 | 4.31E-10 | 0.13708  | 0.00299  | 0.328245 |
| 0.36098  | 8.07E-16 | 0.336329 | 8.19E-14 | 0.42314  | 1.04E-21 | 0.088496 | 0.056    | 0.451703 |
| 0.419526 | 2.48E-21 | 0.419768 | 2.34E-21 | 0.521442 | 6.42E-34 | 0.272633 | 2.10E-09 | 0.506823 |
| 0.120498 | 0.00915  | 0.220244 | 1.54E-06 | -0.00793 | 0.86433  | -0.07126 | 0.12411  | 0.079767 |
| 0.303041 | 2.24E-11 | 0.330152 | 2.45E-13 | 0.280401 | 6.94E-10 | 0.148182 | 0.00132  | 0.255407 |
| 0.233939 | 3.17E-07 | 0.14468  | 0.00172  | 0.237029 | 2.19E-07 | 0.0271   | 0.5591   | 0.293576 |
| 0.302425 | 2.47E-11 | 0.456603 | 1.98E-25 | 0.342759 | 2.55E-14 | 0.209324 | 5.07E-06 | 0.287261 |
| 0.566071 | 6.41E-41 | 0.555013 | 4.37E-39 | 0.510904 | 2.06E-32 | 0.448332 | 1.80E-24 | 0.381629 |
| 0.234987 | 2.80E-07 | 0.409857 | 2.41E-20 | 0.338537 | 5.50E-14 | 0.215366 | 2.64E-06 | 0.304261 |
| 0.108711 | 0.01878  | 0.188197 | 4.26E-05 | 0.033074 | 0.47584  | -0.0351  | 0.44923  | 0.16984  |
| 0.262303 | 8.70E-09 | 0.369703 | 1.43E-16 | 0.226471 | 7.60E-07 | 0.066539 | 0.1511   | 0.227879 |
| 0.419307 | 2.61E-21 | 0.460173 | 7.50E-26 | 0.558054 | 1.39E-39 | 0.384625 | 6.49E-18 | 0.501701 |
| 0.270539 | 2.82E-09 | 0.238359 | 1.86E-07 | 0.241561 | 1.26E-07 | 0.075595 | 0.10277  | 0.27537  |
| 0.396582 | 4.86E-19 | 0.377856 | 2.69E-17 | 0.539982 | 1.06E-36 | 0.325552 | 5.44E-13 | 0.536085 |
| -0.27279 | 2.06E-09 | -0.41174 | 1.56E-20 | -0.23926 | 1.67E-07 | -0.1712  | 0.0002   | -0.35044 |

|          |          |          |          |          |          |          |          |          |
|----------|----------|----------|----------|----------|----------|----------|----------|----------|
| 0.303834 | 1.98E-11 | 0.488629 | 2.14E-29 | 0.182803 | 7.09E-05 | 0.272421 | 2.17E-09 | 0.173182 |
| 0.184658 | 5.96E-05 | 0.421699 | 1.47E-21 | 0.180668 | 8.63E-05 | 0.20953  | 4.96E-06 | 0.177718 |
| -0.15868 | 0.00058  | -0.29979 | 3.74E-11 | -0.23693 | 2.22E-07 | -0.11439 | 0.01338  | -0.34433 |
| 0.348782 | 8.35E-15 | 0.324155 | 6.92E-13 | 0.563276 | 1.89E-40 | 0.332959 | 1.49E-13 | 0.48492  |
| 0.261092 | 1.02E-08 | 0.340968 | 3.54E-14 | 0.483237 | 1.07E-28 | 0.333689 | 1.31E-13 | 0.510641 |
| 0.457984 | 1.36E-25 | 0.484558 | 7.21E-29 | 0.62432  | 7.90E-52 | 0.43654  | 3.77E-23 | 0.502766 |
| 0.13443  | 0.00361  | 0.169562 | 0.00023  | 0.053223 | 0.25101  | -0.02626 | 0.57137  | 0.056824 |
| 0.156202 | 0.00071  | 0.262581 | 8.38E-09 | 0.254615 | 2.41E-08 | 0.151935 | 0.00099  | 0.34052  |
| 0.297061 | 5.72E-11 | 0.315617 | 2.92E-12 | 0.256045 | 2.00E-08 | 0.143631 | 0.00186  | 0.299205 |
| 0.295811 | 6.94E-11 | 0.220709 | 1.46E-06 | 0.396873 | 4.56E-19 | 0.171327 | 0.0002   | 0.432708 |
| 0.115405 | 0.01257  | 0.19157  | 3.08E-05 | 0.159145 | 0.00056  | 0.116451 | 0.01179  | 0.125796 |
| 0.550678 | 2.19E-38 | 0.469435 | 5.72E-27 | 0.488382 | 2.30E-29 | 0.261302 | 9.95E-09 | 0.537057 |
| 0.080701 | 0.08149  | 0.243585 | 9.80E-08 | 0.212981 | 3.42E-06 | 0.14896  | 0.00124  | 0.258059 |
| -0.02435 | 0.5997   | -0.26291 | 8.01E-09 | -0.13977 | 0.00247  | -0.03387 | 0.46527  | -0.08645 |
| 0.28515  | 3.47E-10 | 0.441865 | 9.68E-24 | 0.394795 | 7.21E-19 | 0.24862  | 5.21E-08 | 0.343798 |
| 0.472492 | 2.40E-27 | 0.537007 | 3.05E-36 | 0.294588 | 8.38E-11 | 0.361417 | 7.41E-16 | 0.265499 |
| 0.473146 | 2.00E-27 | 0.58288  | 7.64E-44 | 0.638519 | 7.52E-55 | 0.514439 | 6.52E-33 | 0.531183 |
| 0.464345 | 2.38E-26 | 0.495583 | 2.58E-30 | 0.334384 | 1.16E-13 | 0.185507 | 5.50E-05 | 0.313308 |
| 0.247954 | 5.67E-08 | 0.206227 | 7.02E-06 | 0.116362 | 0.01186  | -0.01121 | 0.80913  | 0.278901 |
| 0.196181 | 1.96E-05 | 0.128845 | 0.00529  | 0.139973 | 0.00243  | 0.072545 | 0.11745  | 0.281143 |
| 0.241495 | 1.27E-07 | 0.189127 | 3.90E-05 | 0.181461 | 8.02E-05 | 0.190692 | 3.35E-05 | 0.208506 |
| -0.28425 | 3.96E-10 | -0.3674  | 2.27E-16 | -0.28243 | 5.16E-10 | -0.36863 | 1.77E-16 | -0.34092 |
| 0.187914 | 4.38E-05 | 0.278115 | 9.65E-10 | 0.244777 | 8.45E-08 | 0.247572 | 5.95E-08 | 0.293282 |
| -0.0376  | 0.4176   | -0.17233 | 0.00018  | -0.18102 | 8.36E-05 | -0.11835 | 0.01047  | -0.13182 |
| 0.140112 | 0.00241  | 0.128509 | 0.00542  | 0.131851 | 0.00432  | 0.154531 | 0.00081  | 0.160846 |
| 0.039255 | 0.39735  | 0.031466 | 0.49756  | -0.09165 | 0.04777  | 0.025398 | 0.58405  | 0.000392 |
| 0.219958 | 1.59E-06 | 0.130612 | 0.0047   | 0.426532 | 4.55E-22 | 0.408406 | 3.37E-20 | 0.332274 |
| 0.073486 | 0.11276  | 0.143264 | 0.00191  | 0.109957 | 0.01745  | 0.221582 | 1.33E-06 | 0.174272 |
| 0.071731 | 0.12163  | 0.134622 | 0.00356  | 0.315669 | 2.90E-12 | 0.390762 | 1.74E-18 | 0.245066 |
| 0.024631 | 0.59546  | 0.010799 | 0.81596  | 0.105618 | 0.02245  | 0.197047 | 1.80E-05 | 0.131802 |
| 0.276347 | 1.24E-09 | 0.233709 | 3.26E-07 | 0.545953 | 1.24E-37 | 0.436004 | 4.32E-23 | 0.523559 |
| 0.161316 | 0.00047  | 0.23371  | 3.26E-07 | 0.367406 | 2.26E-16 | 0.427111 | 3.95E-22 | 0.308354 |
| 0.194858 | 2.23E-05 | 0.324748 | 6.25E-13 | 0.376964 | 3.24E-17 | 0.50677  | 7.77E-32 | 0.344721 |
| 0.019644 | 0.67199  | -0.03092 | 0.50503  | -0.17604 | 0.00013  | -0.32477 | 6.23E-13 | -0.15639 |
| 0.181618 | 7.91E-05 | 0.221568 | 1.33E-06 | 0.466949 | 1.15E-26 | 0.488968 | 1.93E-29 | 0.456697 |
| -0.26424 | 6.69E-09 | -0.1687  | 0.00025  | -0.27008 | 3.00E-09 | -0.11691 | 0.01146  | -0.1844  |
| -0.09853 | 0.03327  | -0.30113 | 3.03E-11 | -0.19085 | 3.30E-05 | -0.42296 | 1.09E-21 | -0.22083 |
| -0.13445 | 0.0036   | -0.29533 | 7.47E-11 | -0.15993 | 0.00052  | -0.31956 | 1.51E-12 | -0.25504 |
| 0.133493 | 0.00385  | 0.188016 | 4.34E-05 | 0.411972 | 1.47E-20 | 0.423657 | 9.16E-22 | 0.434609 |
| 0.305695 | 1.47E-11 | 0.275115 | 1.48E-09 | 0.642247 | 1.14E-55 | 0.546392 | 1.06E-37 | 0.584014 |
| 0.46943  | 5.73E-27 | 0.557558 | 1.68E-39 | 0.69916  | 9.22E-70 | 0.708767 | 1.78E-72 | 0.594958 |
| 0.170867 | 0.00021  | 0.222266 | 1.23E-06 | 0.565515 | 7.95E-41 | 0.598292 | 1.12E-46 | 0.490132 |
| 0.258353 | 1.47E-08 | 0.552632 | 1.06E-38 | 0.523614 | 3.09E-34 | 0.6062   | 3.42E-48 | 0.542698 |
| 0.351616 | 4.90E-15 | 0.306341 | 1.33E-11 | 0.585694 | 2.38E-44 | 0.585998 | 2.10E-44 | 0.497954 |
| 0.354507 | 2.83E-15 | 0.410299 | 2.17E-20 | 0.578786 | 4.08E-43 | 0.545284 | 1.58E-37 | 0.516858 |

|          |          |          |          |          |          |          |          |          |
|----------|----------|----------|----------|----------|----------|----------|----------|----------|
| 0.161403 | 0.00046  | 0.060856 | 0.18925  | 0.199034 | 1.47E-05 | 0.267399 | 4.35E-09 | 0.172082 |
| 0.285214 | 3.43E-10 | 0.253521 | 2.78E-08 | 0.195492 | 2.10E-05 | 0.330238 | 2.41E-13 | 0.143808 |
| 0.360405 | 9.04E-16 | 0.491922 | 7.91E-30 | 0.568588 | 2.40E-41 | 0.644489 | 3.61E-56 | 0.521989 |
| 0.199885 | 1.35E-05 | 0.374625 | 5.24E-17 | 0.202574 | 1.03E-05 | 0.305214 | 1.59E-11 | 0.452812 |
| -0.00649 | 0.88876  | -0.01347 | 0.77159  | 0.112356 | 0.01513  | 0.198788 | 1.51E-05 | 0.050931 |
| 0.153549 | 0.00087  | 0.155144 | 0.00077  | 0.265227 | 5.86E-09 | 0.277109 | 1.11E-09 | 0.297619 |
| 0.117043 | 0.01137  | 0.123782 | 0.0074   | 0.339274 | 4.82E-14 | 0.395608 | 6.02E-19 | 0.326615 |
| -0.04997 | 0.28115  | 0.00374  | 0.93575  | -0.07553 | 0.10307  | 0.053224 | 0.25101  | -0.00479 |
| 0.285065 | 3.51E-10 | 0.361575 | 7.19E-16 | 0.224128 | 9.94E-07 | 0.302609 | 2.40E-11 | 0.298984 |
| 0.480792 | 2.19E-28 | 0.522405 | 4.65E-34 | 0.664968 | 6.36E-61 | 0.591521 | 2.05E-45 | 0.595269 |
| 0.259156 | 1.33E-08 | 0.229215 | 5.53E-07 | 0.358467 | 1.32E-15 | 0.34157  | 3.17E-14 | 0.357857 |
| 0.292243 | 1.20E-10 | 0.329235 | 2.87E-13 | 0.505375 | 1.21E-31 | 0.552359 | 1.18E-38 | 0.459731 |
| 0.051927 | 0.26275  | 0.207265 | 6.30E-06 | 0.061625 | 0.18371  | 0.201226 | 1.18E-05 | 0.123615 |
| 0.144874 | 0.0017   | 0.182096 | 7.57E-05 | 0.368793 | 1.71E-16 | 0.317811 | 2.03E-12 | 0.434504 |
| 0.020545 | 0.65788  | 0.090123 | 0.05162  | -0.00059 | 0.98993  | 0.109557 | 0.01787  | 0.038795 |
| 0.187019 | 4.77E-05 | 0.104527 | 0.02388  | 0.493174 | 5.40E-30 | 0.393203 | 1.02E-18 | 0.45294  |
| 0.089587 | 0.05303  | 0.178286 | 0.00011  | 0.154568 | 0.0008   | 0.319506 | 1.52E-12 | 0.122164 |
| 0.189901 | 3.62E-05 | 0.42513  | 6.40E-22 | 0.285818 | 3.14E-10 | 0.452116 | 6.60E-25 | 0.279402 |
| 0.30836  | 9.59E-12 | 0.231525 | 4.22E-07 | 0.334364 | 1.16E-13 | 0.277842 | 1.00E-09 | 0.31959  |
| 0.300023 | 3.61E-11 | 0.312967 | 4.53E-12 | 0.526516 | 1.16E-34 | 0.560691 | 5.10E-40 | 0.417908 |
| 0.240437 | 1.45E-07 | 0.297042 | 5.74E-11 | 0.563394 | 1.81E-40 | 0.619377 | 8.18E-51 | 0.439694 |
| 0.426818 | 4.24E-22 | 0.557428 | 1.76E-39 | 0.642883 | 8.23E-56 | 0.562487 | 2.56E-40 | 0.58585  |
| 0.277739 | 1.02E-09 | 0.41093  | 1.88E-20 | 0.451709 | 7.36E-25 | 0.546228 | 1.12E-37 | 0.419609 |
| 0.099074 | 0.03231  | 0.025923 | 0.57631  | 0.143623 | 0.00186  | 0.223574 | 1.06E-06 | 0.156692 |
| -0.03269 | 0.48097  | 0.09547  | 0.03918  | 0.236936 | 2.21E-07 | 0.384082 | 7.29E-18 | 0.255434 |
| 0.008315 | 0.85778  | 0.106119 | 0.02181  | 0.256776 | 1.82E-08 | 0.410913 | 1.88E-20 | 0.232953 |
| 0.056352 | 0.22418  | -0.0497  | 0.28376  | -0.09042 | 0.05084  | 0.002419 | 0.95843  | -0.01951 |
| 0.252152 | 3.31E-08 | 0.153249 | 0.00089  | 0.458969 | 1.04E-25 | 0.458814 | 1.09E-25 | 0.421781 |
| -0.13486 | 0.0035   | -0.17124 | 0.0002   | -0.22202 | 1.26E-06 | -0.33579 | 9.02E-14 | -0.24106 |
| 0.28378  | 4.24E-10 | 0.049565 | 0.28512  | 0.510222 | 2.57E-32 | 0.427119 | 3.94E-22 | 0.391609 |
| 0.491115 | 1.01E-29 | 0.54752  | 6.99E-38 | 0.728707 | 1.77E-78 | 0.657677 | 3.46E-59 | 0.62382  |
| 0.21659  | 2.31E-06 | 0.155856 | 0.00073  | 0.353133 | 3.67E-15 | 0.364147 | 4.33E-16 | 0.333418 |
| 0.300592 | 3.30E-11 | 0.121704 | 0.00847  | 0.336259 | 8.29E-14 | 0.222594 | 1.18E-06 | 0.365977 |
| 0.172594 | 0.00018  | 0.197637 | 1.69E-05 | 0.406341 | 5.41E-20 | 0.308618 | 9.20E-12 | 0.4128   |
| -0.10573 | 0.0223   | 0.085492 | 0.0649   | -0.04558 | 0.32564  | 0.206153 | 7.08E-06 | -0.05312 |
| 0.193058 | 2.66E-05 | 0.068414 | 0.13989  | 0.418595 | 3.09E-21 | 0.356413 | 1.96E-15 | 0.387451 |
| 0.179965 | 9.21E-05 | 0.037301 | 0.42129  | 0.446396 | 2.99E-24 | 0.251568 | 3.57E-08 | 0.416473 |
| -0.00674 | 0.88454  | 0.026836 | 0.56294  | 0.114097 | 0.01362  | 0.210261 | 4.59E-06 | 0.100889 |
| 0.031215 | 0.501    | 0.175883 | 0.00013  | 0.073545 | 0.11247  | 0.232566 | 3.73E-07 | 0.141456 |
| -0.26493 | 6.10E-09 | -0.34482 | 1.75E-14 | -0.2993  | 4.04E-11 | -0.44103 | 1.20E-23 | -0.25554 |
| 0.018782 | 0.6856   | -0.00755 | 0.87067  | 0.099482 | 0.0316   | 0.102151 | 0.02729  | 0.063849 |
| 0.092633 | 0.04542  | -0.02603 | 0.57471  | -0.01118 | 0.80959  | -0.01119 | 0.80934  | 0.009559 |
| 0.43175  | 1.25E-22 | 0.522246 | 4.90E-34 | 0.736178 | 7.26E-81 | 0.640738 | 2.45E-55 | 0.658463 |
| -0.10049 | 0.0299   | -0.17508 | 0.00014  | -0.21332 | 3.30E-06 | -0.32057 | 1.27E-12 | -0.23441 |
| 0.405449 | 6.63E-20 | 0.34485  | 1.74E-14 | 0.715647 | 1.73E-74 | 0.618412 | 1.29E-50 | 0.588267 |

|          |          |          |          |          |          |          |          |          |
|----------|----------|----------|----------|----------|----------|----------|----------|----------|
| 0.245238 | 7.98E-08 | 0.283551 | 4.38E-10 | 0.360022 | 9.74E-16 | 0.376686 | 3.43E-17 | 0.299532 |
| 0.229192 | 5.55E-07 | 0.133726 | 0.00379  | 0.220651 | 1.47E-06 | 0.222805 | 1.15E-06 | 0.124306 |
| 0.240078 | 1.51E-07 | 0.195167 | 2.16E-05 | 0.587683 | 1.04E-44 | 0.40601  | 5.83E-20 | 0.540712 |
| 0.417677 | 3.85E-21 | 0.531557 | 2.05E-35 | 0.701504 | 2.05E-70 | 0.686201 | 2.87E-66 | 0.616969 |
| 0.358468 | 1.32E-15 | 0.368474 | 1.83E-16 | 0.701543 | 2.00E-70 | 0.64558  | 2.06E-56 | 0.586602 |
| 0.277594 | 1.04E-09 | 0.479437 | 3.25E-28 | 0.490065 | 1.39E-29 | 0.570179 | 1.28E-41 | 0.561473 |
| 0.432634 | 1.01E-22 | 0.550918 | 2.01E-38 | 0.590935 | 2.63E-45 | 0.657234 | 4.39E-59 | 0.508578 |
| 0.462243 | 4.25E-26 | 0.531293 | 2.24E-35 | 0.653583 | 3.11E-58 | 0.610574 | 4.76E-49 | 0.593851 |
| 0.113303 | 0.01429  | 0.132387 | 0.00416  | 0.402561 | 1.28E-19 | 0.387693 | 3.37E-18 | 0.366971 |
| 0.181317 | 8.13E-05 | 0.086342 | 0.06227  | 0.363636 | 4.79E-16 | 0.306612 | 1.27E-11 | 0.362922 |
| 0.434131 | 6.91E-23 | 0.594582 | 5.56E-46 | 0.665414 | 4.96E-61 | 0.700618 | 3.63E-70 | 0.624016 |
| 0.28515  | 3.46E-10 | 0.422532 | 1.20E-21 | 0.624319 | 7.90E-52 | 0.755078 | 2.74E-87 | 0.451116 |
| 0.459523 | 8.95E-26 | 0.703187 | 6.93E-71 | 0.594202 | 6.54E-46 | 0.645055 | 2.70E-56 | 0.554879 |
| 0.06922  | 0.13527  | 0.211147 | 4.17E-06 | 0.127772 | 0.00569  | 0.28892  | 1.98E-10 | 0.209965 |
| 0.128946 | 0.00526  | 0.181945 | 7.67E-05 | 0.212559 | 3.58E-06 | 0.308283 | 9.71E-12 | 0.219096 |
| 0.057385 | 0.21579  | 0.146851 | 0.00146  | 0.070502 | 0.12817  | 0.221457 | 1.34E-06 | 0.137053 |
| 0.029629 | 0.52301  | 0.131948 | 0.00429  | -0.01381 | 0.76598  | 0.199144 | 1.45E-05 | 0.038549 |
| 0.294515 | 8.47E-11 | 0.300614 | 3.29E-11 | 0.695435 | 9.73E-69 | 0.6473   | 8.45E-57 | 0.598877 |
| 0.191616 | 3.07E-05 | 0.453086 | 5.10E-25 | 0.353138 | 3.67E-15 | 0.506018 | 9.88E-32 | 0.339569 |
| 0.308876 | 8.82E-12 | 0.373434 | 6.69E-17 | 0.527128 | 9.39E-35 | 0.507204 | 6.76E-32 | 0.478479 |
| 0.468546 | 7.35E-27 | 0.553796 | 6.89E-39 | 0.728468 | 2.11E-78 | 0.668372 | 9.47E-62 | 0.636719 |
| 0.070268 | 0.12944  | 0.40529  | 6.87E-20 | 0.258206 | 1.50E-08 | 0.475264 | 1.09E-27 | 0.247861 |
| 0.368698 | 1.75E-16 | 0.247429 | 6.06E-08 | 0.5795   | 3.05E-43 | 0.432171 | 1.13E-22 | 0.462382 |
| 0.244637 | 8.60E-08 | 0.358316 | 1.36E-15 | 0.25231  | 3.25E-08 | 0.313882 | 3.89E-12 | 0.348306 |
| 0.264814 | 6.19E-09 | 0.345195 | 1.63E-14 | 0.462572 | 3.88E-26 | 0.554548 | 5.20E-39 | 0.448069 |
| 0.485655 | 5.20E-29 | 0.472193 | 2.62E-27 | 0.646933 | 1.02E-56 | 0.594255 | 6.40E-46 | 0.585467 |
| 0.354706 | 2.72E-15 | 0.503809 | 1.99E-31 | 0.609196 | 8.89E-49 | 0.70126  | 2.40E-70 | 0.496362 |
| 0.53502  | 6.13E-36 | 0.300444 | 3.38E-11 | 0.388076 | 3.11E-18 | 0.333704 | 1.31E-13 | 0.429267 |
| 0.161977 | 0.00044  | 0.083254 | 0.07227  | 0.382095 | 1.11E-17 | 0.399101 | 2.78E-19 | 0.347672 |
| 0.429046 | 2.45E-22 | 0.656381 | 6.95E-59 | 0.650349 | 1.72E-57 | 0.722754 | 1.25E-76 | 0.619491 |
| 0.086479 | 0.06186  | 0.051035 | 0.27106  | 0.167386 | 0.00028  | 0.214925 | 2.77E-06 | 0.174054 |
| -0.0431  | 0.35271  | -0.00647 | 0.88918  | 0.146907 | 0.00146  | 0.209289 | 5.08E-06 | 0.156657 |
| 0.053259 | 0.25069  | 0.04527  | 0.32898  | 0.099199 | 0.03209  | 0.08064  | 0.08172  | 0.210891 |
| 0.34684  | 1.20E-14 | 0.342542 | 2.65E-14 | 0.681078 | 6.16E-65 | 0.578145 | 5.29E-43 | 0.589903 |
| 0.298013 | 4.94E-11 | 0.457139 | 1.71E-25 | 0.422026 | 1.36E-21 | 0.576276 | 1.13E-42 | 0.36358  |
| 0.15971  | 0.00053  | 0.284434 | 3.85E-10 | 0.203431 | 9.39E-06 | 0.29286  | 1.09E-10 | 0.258245 |
| 0.326318 | 4.77E-13 | 0.542342 | 4.56E-37 | 0.455136 | 2.94E-25 | 0.65189  | 7.62E-58 | 0.418579 |
| 0.305871 | 1.43E-11 | 0.131428 | 0.00444  | 0.527281 | 8.91E-35 | 0.348453 | 8.88E-15 | 0.527321 |
| 0.129727 | 0.00499  | 0.110803 | 0.0166   | 0.243753 | 9.60E-08 | 0.119399 | 0.00981  | 0.288709 |
| 0.058222 | 0.20916  | 0.14588  | 0.00157  | 0.081195 | 0.07963  | 0.253812 | 2.67E-08 | 0.066769 |
| 0.265889 | 5.35E-09 | 0.223629 | 1.05E-06 | 0.497985 | 1.23E-30 | 0.447825 | 2.05E-24 | 0.445467 |
| 0.376712 | 3.41E-17 | 0.640434 | 2.86E-55 | 0.478571 | 4.18E-28 | 0.642545 | 9.78E-56 | 0.442959 |
| 0.176557 | 0.00013  | 0.232815 | 3.62E-07 | 0.347376 | 1.09E-14 | 0.450555 | 9.99E-25 | 0.344012 |
| 0.230245 | 4.90E-07 | 0.107451 | 0.0202   | 0.22819  | 6.23E-07 | 0.106826 | 0.02095  | 0.248789 |
| 0.040465 | 0.38295  | 0.060461 | 0.19215  | 0.04672  | 0.3137   | 0.144945 | 0.00169  | 0.109449 |

|          |          |          |          |          |          |          |          |          |
|----------|----------|----------|----------|----------|----------|----------|----------|----------|
| 0.338509 | 5.53E-14 | 0.450915 | 9.08E-25 | 0.550722 | 2.16E-38 | 0.544291 | 2.26E-37 | 0.514353 |
| 0.375694 | 4.21E-17 | 0.440756 | 1.29E-23 | 0.303387 | 2.12E-11 | 0.526476 | 1.17E-34 | 0.237045 |
| 0.365137 | 3.56E-16 | 0.502141 | 3.36E-31 | 0.659463 | 1.31E-59 | 0.577765 | 6.17E-43 | 0.642453 |
| 0.161324 | 0.00047  | 0.130575 | 0.00471  | 0.286142 | 2.99E-10 | 0.329093 | 2.94E-13 | 0.208032 |
| 0.264667 | 6.32E-09 | 0.137144 | 0.00298  | 0.612546 | 1.94E-49 | 0.443806 | 5.86E-24 | 0.556029 |
| 0.149257 | 0.00122  | 0.154546 | 0.00081  | 0.436051 | 4.26E-23 | 0.526619 | 1.12E-34 | 0.354367 |
| 0.223891 | 1.02E-06 | 0.253335 | 2.84E-08 | 0.580853 | 1.76E-43 | 0.567188 | 4.14E-41 | 0.507283 |
| 0.135141 | 0.00343  | 0.157678 | 0.00063  | 0.393257 | 1.01E-18 | 0.352745 | 3.95E-15 | 0.424147 |
| 0.124859 | 0.0069   | 0.262407 | 8.58E-09 | 0.274729 | 1.56E-09 | 0.35691  | 1.78E-15 | 0.201875 |
| 0.231196 | 4.39E-07 | 0.160567 | 0.0005   | 0.278389 | 9.28E-10 | 0.179587 | 9.53E-05 | 0.301397 |
| 0.081262 | 0.07938  | 0.203162 | 9.65E-06 | 0.279423 | 8.00E-10 | 0.494189 | 3.96E-30 | 0.191163 |
| 0.176981 | 0.00012  | 0.072851 | 0.1159   | 0.382759 | 9.64E-18 | 0.34102  | 3.51E-14 | 0.400094 |
| -0.00736 | 0.87404  | 0.166387 | 0.0003   | 0.21445  | 2.92E-06 | 0.392897 | 1.09E-18 | 0.253018 |
| 0.122764 | 0.00791  | 0.333345 | 1.39E-13 | 0.405804 | 6.11E-20 | 0.477817 | 5.20E-28 | 0.341694 |
| 0.3916   | 1.45E-18 | 0.486367 | 4.21E-29 | 0.477029 | 6.54E-28 | 0.561343 | 3.97E-40 | 0.434769 |
| 0.471491 | 3.20E-27 | 0.505733 | 1.08E-31 | 0.551937 | 1.38E-38 | 0.574134 | 2.66E-42 | 0.500149 |
| 0.276356 | 1.24E-09 | 0.385704 | 5.16E-18 | 0.252669 | 3.10E-08 | 0.389865 | 2.11E-18 | 0.302987 |
| 0.09453  | 0.04116  | 0.049925 | 0.28163  | 0.319081 | 1.64E-12 | 0.227125 | 7.05E-07 | 0.386467 |
| -0.10869 | 0.0188   | -0.20794 | 5.87E-06 | -0.33238 | 1.65E-13 | -0.43127 | 1.41E-22 | -0.33783 |
| 0.402388 | 1.33E-19 | 0.544657 | 1.98E-37 | 0.65357  | 3.13E-58 | 0.612915 | 1.64E-49 | 0.613788 |
| 0.364496 | 4.04E-16 | 0.523184 | 3.58E-34 | 0.519093 | 1.41E-33 | 0.610774 | 4.35E-49 | 0.47827  |
| 0.360701 | 8.53E-16 | 0.480093 | 2.68E-28 | 0.536557 | 3.57E-36 | 0.562437 | 2.61E-40 | 0.475112 |
| 0.198001 | 1.63E-05 | 0.153759 | 0.00086  | 0.509965 | 2.79E-32 | 0.512174 | 1.36E-32 | 0.452648 |
| 0.317675 | 2.07E-12 | 0.332701 | 1.56E-13 | 0.513683 | 8.35E-33 | 0.49794  | 1.25E-30 | 0.50451  |
| 0.285678 | 3.20E-10 | 0.229406 | 5.41E-07 | 0.606178 | 3.45E-48 | 0.549122 | 3.89E-38 | 0.535446 |
| 0.218235 | 1.93E-06 | 0.222494 | 1.20E-06 | 0.508798 | 4.06E-32 | 0.57972  | 2.79E-43 | 0.550185 |
| 0.290059 | 1.67E-10 | 0.239999 | 1.53E-07 | 0.559576 | 7.80E-40 | 0.533285 | 1.12E-35 | 0.527323 |
| -0.21571 | 2.55E-06 | -0.20508 | 7.91E-06 | -0.11185 | 0.0156   | -0.02815 | 0.54396  | -0.08398 |
| 0.328589 | 3.21E-13 | 0.258849 | 1.38E-08 | 0.509008 | 3.79E-32 | 0.396843 | 4.59E-19 | 0.490685 |
| -0.08451 | 0.06805  | 0.078602 | 0.08976  | 0.171644 | 0.00019  | 0.237027 | 2.19E-07 | 0.176046 |
| 0.449653 | 1.27E-24 | 0.547334 | 7.49E-38 | 0.716589 | 9.09E-75 | 0.679396 | 1.66E-64 | 0.631745 |
| 0.279315 | 8.12E-10 | 0.284364 | 3.89E-10 | 0.463895 | 2.69E-26 | 0.506935 | 7.37E-32 | 0.446591 |
| 0.290014 | 1.68E-10 | 0.396016 | 5.51E-19 | 0.479468 | 3.22E-28 | 0.596741 | 2.19E-46 | 0.366934 |
| 0.394887 | 7.06E-19 | 0.508337 | 4.71E-32 | 0.444374 | 5.06E-24 | 0.499641 | 7.36E-31 | 0.421036 |
| 0.148556 | 0.00128  | 0.186647 | 4.94E-05 | 0.428893 | 2.55E-22 | 0.538278 | 1.94E-36 | 0.320425 |
| 0.321439 | 1.10E-12 | 0.33366  | 1.32E-13 | 0.590361 | 3.36E-45 | 0.634466 | 5.69E-54 | 0.424988 |
| 0.359102 | 1.16E-15 | 0.435803 | 4.54E-23 | 0.630762 | 3.52E-53 | 0.610656 | 4.58E-49 | 0.574445 |
| 0.307069 | 1.18E-11 | 0.432666 | 9.98E-23 | 0.495118 | 2.98E-30 | 0.60588  | 3.94E-48 | 0.488438 |
| 0.168505 | 0.00025  | 0.313494 | 4.15E-12 | 0.404023 | 9.17E-20 | 0.446831 | 2.67E-24 | 0.439595 |
| 0.351155 | 5.34E-15 | 0.307446 | 1.11E-11 | 0.602981 | 1.43E-47 | 0.513336 | 9.35E-33 | 0.56896  |
| 0.048369 | 0.29691  | 0.063179 | 0.17288  | 0.12551  | 0.00661  | 0.153284 | 0.00089  | 0.182947 |
| -0.00102 | 0.98246  | -0.09248 | 0.04578  | 0.037418 | 0.41983  | 0.041414 | 0.37188  | 0.031208 |
| 0.214009 | 3.06E-06 | 0.236594 | 2.31E-07 | 0.56009  | 6.41E-40 | 0.504396 | 1.65E-31 | 0.56207  |
| 0.422927 | 1.09E-21 | 0.431157 | 1.45E-22 | 0.69855  | 1.36E-69 | 0.647826 | 6.43E-57 | 0.627331 |
| 0.371837 | 9.26E-17 | 0.404618 | 8.01E-20 | 0.555105 | 4.22E-39 | 0.562071 | 3.01E-40 | 0.525867 |



|          |          |          |          |          |          |          |          |          |
|----------|----------|----------|----------|----------|----------|----------|----------|----------|
| 0.337117 | 7.11E-14 | 0.413493 | 1.03E-20 | 0.524069 | 2.65E-34 | 0.540577 | 8.59E-37 | 0.542034 |
| 0.079451 | 0.08633  | -0.05719 | 0.21736  | 0.082385 | 0.0753   | 0.173577 | 0.00016  | 0.083011 |
| 0.098417 | 0.03348  | 0.337778 | 6.31E-14 | 0.105194 | 0.023    | 0.311983 | 5.32E-12 | 0.171136 |
| -0.01178 | 0.79955  | 0.029859 | 0.51979  | 0.118736 | 0.01023  | 0.162992 | 0.00041  | 0.129623 |
| 0.289829 | 1.73E-10 | 0.309722 | 7.69E-12 | 0.531189 | 2.33E-35 | 0.464712 | 2.15E-26 | 0.520135 |
| 0.036327 | 0.43351  | 0.128335 | 0.00548  | 0.067679 | 0.14421  | 0.079997 | 0.08419  | 0.128093 |
| 0.50723  | 6.71E-32 | 0.567212 | 4.11E-41 | 0.7649   | 7.29E-91 | 0.767391 | 8.47E-92 | 0.65766  |
| 0.121713 | 0.00846  | 0.103609 | 0.02515  | 0.1698   | 0.00023  | 0.254715 | 2.38E-08 | 0.181951 |
| 0.409236 | 2.78E-20 | 0.527109 | 9.45E-35 | 0.671188 | 1.92E-62 | 0.610301 | 5.39E-49 | 0.594859 |
| 0.362664 | 5.80E-16 | 0.378163 | 2.52E-17 | 0.750887 | 8.16E-86 | 0.668062 | 1.13E-61 | 0.682855 |
| 0.183871 | 6.42E-05 | 0.195995 | 1.99E-05 | 0.566603 | 5.21E-41 | 0.560498 | 5.49E-40 | 0.517622 |
| 0.283692 | 4.29E-10 | 0.232821 | 3.62E-07 | 0.506922 | 7.40E-32 | 0.551742 | 1.48E-38 | 0.348058 |
| 0.192696 | 2.76E-05 | 0.301738 | 2.76E-11 | 0.23545  | 2.65E-07 | 0.306949 | 1.20E-11 | 0.239876 |
| -0.00981 | 0.83258  | 0.042826 | 0.35578  | 0.034623 | 0.45541  | 0.215162 | 2.70E-06 | 0.082737 |
| 0.335971 | 8.73E-14 | 0.264276 | 6.66E-09 | 0.523255 | 3.49E-34 | 0.521293 | 6.75E-34 | 0.46916  |
| 0.159703 | 0.00053  | 0.438638 | 2.21E-23 | 0.378336 | 2.43E-17 | 0.583822 | 5.18E-44 | 0.347994 |
| 0.338946 | 5.11E-14 | 0.201417 | 1.15E-05 | 0.448404 | 1.76E-24 | 0.339627 | 4.52E-14 | 0.400353 |
| 0.233893 | 3.19E-07 | 0.473374 | 1.87E-27 | 0.454677 | 3.33E-25 | 0.596156 | 2.82E-46 | 0.388934 |
| 0.125917 | 0.00644  | 0.112615 | 0.0149   | 0.231566 | 4.20E-07 | 0.182166 | 7.52E-05 | 0.298641 |
| 0.273941 | 1.75E-09 | 0.279829 | 7.54E-10 | 0.560093 | 6.41E-40 | 0.616557 | 3.05E-50 | 0.418591 |
| 0.191094 | 3.23E-05 | 0.094652 | 0.0409   | 0.107565 | 0.02007  | 0.050466 | 0.27644  | 0.249581 |
| 0.472478 | 2.41E-27 | 0.44873  | 1.62E-24 | 0.81603  | #####    | 0.681191 | 5.76E-65 | 0.696919 |
| 0.371175 | 1.06E-16 | 0.383682 | 7.93E-18 | 0.571098 | 8.91E-42 | 0.567821 | 3.24E-41 | 0.530099 |
| 0.182086 | 7.57E-05 | 0.371079 | 1.08E-16 | 0.401151 | 1.75E-19 | 0.570554 | 1.10E-41 | 0.344984 |
| 0.330294 | 2.39E-13 | 0.323314 | 7.99E-13 | 0.366813 | 2.55E-16 | 0.362089 | 6.50E-16 | 0.406729 |
| 0.095455 | 0.03921  | 0.205337 | 7.70E-06 | 0.191395 | 3.13E-05 | 0.289206 | 1.89E-10 | 0.306314 |
| 0.17944  | 9.66E-05 | 0.06266  | 0.17644  | 0.432338 | 1.08E-22 | 0.326237 | 4.83E-13 | 0.344941 |
| 0.168643 | 0.00025  | 0.189027 | 3.94E-05 | 0.260393 | 1.12E-08 | 0.182441 | 7.33E-05 | 0.280546 |
| 0.417669 | 3.85E-21 | 0.106092 | 0.02185  | 0.198058 | 1.62E-05 | 0.160059 | 0.00052  | 0.218844 |
| 0.200822 | 1.23E-05 | 0.16631  | 0.00031  | 0.470899 | 3.78E-27 | 0.343717 | 2.14E-14 | 0.461086 |
| 0.083206 | 0.07243  | 0.231029 | 4.47E-07 | 0.340927 | 3.57E-14 | 0.392062 | 1.31E-18 | 0.278253 |
| 0.326107 | 4.94E-13 | 0.298359 | 4.68E-11 | 0.52319  | 3.57E-34 | 0.45386  | 4.14E-25 | 0.483709 |
| 0.293661 | 9.65E-11 | 0.456018 | 2.32E-25 | 0.388709 | 2.71E-18 | 0.443449 | 6.43E-24 | 0.425786 |
| 0.350079 | 6.55E-15 | 0.389111 | 2.49E-18 | 0.622664 | 1.74E-51 | 0.604898 | 6.11E-48 | 0.575387 |
| 0.332581 | 1.60E-13 | 0.52859  | 5.69E-35 | 0.363779 | 4.66E-16 | 0.464449 | 2.31E-26 | 0.417187 |
| 0.436886 | 3.45E-23 | 0.394483 | 7.72E-19 | 0.736283 | 6.71E-81 | 0.599115 | 7.82E-47 | 0.63652  |
| 0.449228 | 1.42E-24 | 0.536084 | 4.22E-36 | 0.445435 | 3.84E-24 | 0.547458 | 7.15E-38 | 0.434668 |
| 0.291762 | 1.29E-10 | 0.31573  | 2.87E-12 | 0.464789 | 2.10E-26 | 0.497199 | 1.57E-30 | 0.44557  |
| 0.217266 | 2.14E-06 | 0.243203 | 1.03E-07 | 0.476521 | 7.57E-28 | 0.392219 | 1.27E-18 | 0.462585 |
| 0.269184 | 3.40E-09 | 0.349477 | 7.33E-15 | 0.159939 | 0.00052  | 0.264144 | 6.79E-09 | 0.186019 |
| 0.307293 | 1.14E-11 | 0.314961 | 3.26E-12 | 0.426227 | 4.90E-22 | 0.473549 | 1.78E-27 | 0.381464 |
| 0.25661  | 1.86E-08 | 0.34431  | 1.92E-14 | 0.386552 | 4.31E-18 | 0.523191 | 3.57E-34 | 0.284894 |
| 0.276608 | 1.20E-09 | 0.137489 | 0.00291  | 0.155122 | 0.00077  | 0.190285 | 3.49E-05 | 0.171317 |
| 0.11836  | 0.01047  | 0.043402 | 0.34934  | 0.205327 | 7.71E-06 | 0.295654 | 7.11E-11 | 0.168106 |
| 0.177413 | 0.00012  | 0.087204 | 0.0597   | 0.239287 | 1.66E-07 | 0.344648 | 1.80E-14 | 0.166705 |

|          |          |          |          |          |          |          |          |          |
|----------|----------|----------|----------|----------|----------|----------|----------|----------|
| 0.354274 | 2.95E-15 | 0.417697 | 3.83E-21 | 0.59797  | 1.29E-46 | 0.636915 | 1.68E-54 | 0.533114 |
| 0.20409  | 8.77E-06 | 0.21923  | 1.73E-06 | 0.308286 | 9.70E-12 | 0.305765 | 1.46E-11 | 0.351924 |
| 0.186945 | 4.80E-05 | 0.283014 | 4.74E-10 | 0.426472 | 4.62E-22 | 0.455686 | 2.54E-25 | 0.418524 |
| -0.11123 | 0.01618  | -0.18916 | 3.89E-05 | -0.13278 | 0.00405  | -0.01181 | 0.799    | -0.07733 |
| 0.232235 | 3.88E-07 | 0.248975 | 4.98E-08 | 0.553344 | 8.15E-39 | 0.54964  | 3.21E-38 | 0.457385 |
| 0.026624 | 0.56603  | 0.024293 | 0.60052  | 0.115224 | 0.01272  | 0.149485 | 0.0012   | 0.12308  |
| 0.377304 | 3.02E-17 | 0.383135 | 8.90E-18 | 0.673144 | 6.28E-63 | 0.483219 | 1.07E-28 | 0.638634 |
| 0.516112 | 3.77E-33 | 0.592639 | 1.28E-45 | 0.722131 | 1.93E-76 | 0.681503 | 4.79E-65 | 0.711029 |
| 0.206527 | 6.80E-06 | 0.052207 | 0.26019  | 0.47655  | 7.51E-28 | 0.342846 | 2.51E-14 | 0.433601 |
| 0.265182 | 5.89E-09 | 0.407443 | 4.20E-20 | 0.311087 | 6.16E-12 | 0.453099 | 5.08E-25 | 0.270155 |
| 0.277132 | 1.11E-09 | 0.311724 | 5.55E-12 | 0.599644 | 6.20E-47 | 0.482359 | 1.38E-28 | 0.579864 |
| 0.191306 | 3.16E-05 | 0.23509  | 2.76E-07 | 0.504816 | 1.45E-31 | 0.557961 | 1.44E-39 | 0.421221 |
| 0.319849 | 1.44E-12 | 0.529958 | 3.56E-35 | 0.484227 | 7.95E-29 | 0.595721 | 3.41E-46 | 0.460961 |
| -0.16389 | 0.00038  | -0.2396  | 1.60E-07 | -0.18088 | 8.46E-05 | -0.29022 | 1.63E-10 | -0.32589 |
| -0.09755 | 0.03509  | -0.10181 | 0.02781  | -0.03128 | 0.50005  | -0.01579 | 0.73366  | 0.06069  |
| 0.420632 | 1.90E-21 | 0.563557 | 1.70E-40 | 0.511753 | 1.56E-32 | 0.54304  | 3.55E-37 | 0.5104   |
| 0.090457 | 0.05075  | 0.129402 | 0.0051   | 0.379712 | 1.83E-17 | 0.34508  | 1.66E-14 | 0.338186 |
| 0.251915 | 3.42E-08 | 0.3593   | 1.12E-15 | 0.612139 | 2.33E-49 | 0.602191 | 2.03E-47 | 0.4931   |
| 0.253991 | 2.61E-08 | 0.339109 | 4.96E-14 | 0.486223 | 4.39E-29 | 0.587328 | 1.20E-44 | 0.383694 |
| 0.292113 | 1.22E-10 | 0.34772  | 1.02E-14 | 0.447169 | 2.44E-24 | 0.607548 | 1.87E-48 | 0.316374 |
| 0.19654  | 1.89E-05 | 0.135933 | 0.00325  | 0.461435 | 5.30E-26 | 0.418371 | 3.26E-21 | 0.365945 |
| 0.304434 | 1.80E-11 | 0.333914 | 1.26E-13 | 0.491774 | 8.27E-30 | 0.527096 | 9.49E-35 | 0.435504 |
| 0.148326 | 0.00131  | 0.122143 | 0.00823  | 0.528385 | 6.11E-35 | 0.517505 | 2.38E-33 | 0.443934 |
| 0.357957 | 1.45E-15 | 0.281366 | 6.03E-10 | 0.661151 | 5.22E-60 | 0.534749 | 6.74E-36 | 0.588437 |
| 0.484589 | 7.14E-29 | 0.419632 | 2.41E-21 | 0.642897 | 8.18E-56 | 0.592334 | 1.45E-45 | 0.519578 |
| 0.088408 | 0.05625  | 0.051308 | 0.2685   | 0.183683 | 6.53E-05 | 0.324189 | 6.88E-13 | 0.177368 |
| 0.287398 | 2.48E-10 | 0.239254 | 1.67E-07 | 0.603038 | 1.40E-47 | 0.561164 | 4.26E-40 | 0.533944 |
| 0.214418 | 2.93E-06 | 0.442581 | 8.05E-24 | 0.542244 | 4.73E-37 | 0.647273 | 8.57E-57 | 0.468574 |
| 0.087014 | 0.06026  | 0.105397 | 0.02273  | 0.225278 | 8.72E-07 | 0.358955 | 1.20E-15 | 0.192293 |
| 0.348044 | 9.59E-15 | 0.373191 | 7.03E-17 | 0.60332  | 1.23E-47 | 0.494631 | 3.46E-30 | 0.552611 |
| 0.51673  | 3.07E-33 | 0.549307 | 3.63E-38 | 0.615194 | 5.73E-50 | 0.57545  | 1.57E-42 | 0.554711 |
| 0.304157 | 1.88E-11 | 0.18232  | 7.41E-05 | 0.605927 | 3.86E-48 | 0.51502  | 5.39E-33 | 0.442983 |
| 0.14351  | 0.00188  | 0.145095 | 0.00167  | 0.338354 | 5.69E-14 | 0.314689 | 3.41E-12 | 0.352046 |
| 0.291248 | 1.39E-10 | 0.454403 | 3.58E-25 | 0.289923 | 1.70E-10 | 0.526319 | 1.24E-34 | 0.18312  |
| 0.363283 | 5.14E-16 | 0.4508   | 9.36E-25 | 0.510374 | 2.44E-32 | 0.491255 | 9.68E-30 | 0.451355 |
| 0.093848 | 0.04265  | 0.172656 | 0.00018  | 0.29801  | 4.94E-11 | 0.299619 | 3.85E-11 | 0.2605   |
| 0.118052 | 0.01067  | 0.238287 | 1.88E-07 | 0.202159 | 1.07E-05 | 0.407486 | 4.16E-20 | 0.175006 |
| 0.191224 | 3.19E-05 | 0.197526 | 1.71E-05 | 0.232005 | 3.99E-07 | 0.254435 | 2.47E-08 | 0.460217 |
| 0.381294 | 1.31E-17 | 0.293031 | 1.06E-10 | 0.675257 | 1.86E-63 | 0.554729 | 4.86E-39 | 0.56964  |
| 0.23923  | 1.68E-07 | 0.195935 | 2.01E-05 | 0.317284 | 2.21E-12 | 0.295937 | 6.81E-11 | 0.354866 |
| 0.09673  | 0.03665  | 0.15798  | 0.00061  | 0.136337 | 0.00316  | 0.24131  | 1.30E-07 | 0.140065 |
| 0.288507 | 2.10E-10 | 0.247556 | 5.96E-08 | 0.492186 | 7.30E-30 | 0.49689  | 1.73E-30 | 0.328451 |
| 0.30922  | 8.34E-12 | 0.369112 | 1.61E-16 | 0.515665 | 4.36E-33 | 0.452874 | 5.39E-25 | 0.493008 |
| 0.411949 | 1.48E-20 | 0.483582 | 9.62E-29 | 0.784354 | 1.73E-98 | 0.69776  | 2.25E-69 | 0.662639 |
| 0.064731 | 0.16255  | 0.067748 | 0.1438   | 0.202312 | 1.05E-05 | 0.187252 | 4.67E-05 | 0.240443 |

|          |          |          |          |          |          |          |          |          |
|----------|----------|----------|----------|----------|----------|----------|----------|----------|
| 0.413121 | 1.13E-20 | 0.57399  | 2.82E-42 | 0.469662 | 5.36E-27 | 0.581795 | 1.19E-43 | 0.465865 |
| 0.234115 | 3.10E-07 | 0.279707 | 7.67E-10 | 0.44489  | 4.42E-24 | 0.468521 | 7.40E-27 | 0.428379 |
| 0.204989 | 7.99E-06 | 0.091868 | 0.04724  | 0.331437 | 1.95E-13 | 0.302792 | 2.33E-11 | 0.249354 |
| 0.240384 | 1.46E-07 | 0.205262 | 7.76E-06 | 0.395638 | 5.98E-19 | 0.324515 | 6.50E-13 | 0.350926 |
| 0.263712 | 7.19E-09 | 0.283238 | 4.59E-10 | 0.658177 | 2.64E-59 | 0.510766 | 2.15E-32 | 0.561167 |
| 0.276954 | 1.14E-09 | 0.24212  | 1.18E-07 | 0.529341 | 4.40E-35 | 0.429465 | 2.21E-22 | 0.449296 |
| 0.176924 | 0.00012  | -0.00121 | 0.97927  | 0.209183 | 5.14E-06 | 0.231448 | 4.26E-07 | 0.140677 |
| 0.313886 | 3.89E-12 | 0.309443 | 8.05E-12 | 0.363952 | 4.50E-16 | 0.360215 | 9.38E-16 | 0.362726 |
| 0.274556 | 1.60E-09 | 0.246643 | 6.69E-08 | 0.331186 | 2.04E-13 | 0.304061 | 1.91E-11 | 0.348706 |
| 0.131759 | 0.00434  | 0.181882 | 7.72E-05 | 0.285822 | 3.14E-10 | 0.33453  | 1.13E-13 | 0.309084 |
| 0.311467 | 5.79E-12 | 0.245052 | 8.17E-08 | 0.415852 | 5.93E-21 | 0.415788 | 6.02E-21 | 0.39488  |
| 0.156511 | 0.00069  | 0.227748 | 6.56E-07 | 0.50291  | 2.64E-31 | 0.513318 | 9.40E-33 | 0.454997 |
| 0.204276 | 8.60E-06 | 0.183209 | 6.82E-05 | 0.412876 | 1.19E-20 | 0.407123 | 4.52E-20 | 0.37818  |
| 0.123238 | 0.00767  | 0.155888 | 0.00072  | 0.26728  | 4.42E-09 | 0.302408 | 2.48E-11 | 0.27919  |
| 0.00761  | 0.86972  | 0.091791 | 0.04742  | 0.109942 | 0.01747  | 0.245449 | 7.77E-08 | 0.137839 |
| 0.250953 | 3.87E-08 | 0.158027 | 0.00061  | 0.276793 | 1.17E-09 | 0.37416  | 5.77E-17 | 0.258113 |
| 0.199089 | 1.46E-05 | 0.178086 | 0.00011  | 0.157286 | 0.00065  | 0.137482 | 0.00291  | 0.210035 |
| 0.290066 | 1.66E-10 | 0.182783 | 7.10E-05 | 0.385961 | 4.89E-18 | 0.364084 | 4.38E-16 | 0.316243 |
| 0.474155 | 1.49E-27 | 0.541717 | 5.71E-37 | 0.726394 | 9.39E-78 | 0.72712  | 5.58E-78 | 0.670378 |
| 0.142915 | 0.00196  | 0.093645 | 0.0431   | 0.378542 | 2.33E-17 | 0.209928 | 4.75E-06 | 0.383251 |
| 0.438673 | 2.19E-23 | 0.366389 | 2.77E-16 | 0.663526 | 1.41E-60 | 0.461027 | 5.93E-26 | 0.616691 |
| 0.480012 | 2.75E-28 | 0.452256 | 6.36E-25 | 0.751663 | 4.37E-86 | 0.624434 | 7.48E-52 | 0.642787 |
| 0.292909 | 1.08E-10 | 0.302964 | 2.27E-11 | 0.503465 | 2.22E-31 | 0.398852 | 2.93E-19 | 0.464036 |
| 0.332087 | 1.74E-13 | 0.384505 | 6.66E-18 | 0.341244 | 3.37E-14 | 0.364185 | 4.30E-16 | 0.34842  |
| 0.228439 | 6.05E-07 | 0.332642 | 1.58E-13 | 0.408949 | 2.97E-20 | 0.418039 | 3.53E-21 | 0.38514  |
| 0.328414 | 3.31E-13 | 0.268164 | 3.92E-09 | 0.431567 | 1.31E-22 | 0.381423 | 1.28E-17 | 0.422594 |
| 0.284244 | 3.96E-10 | 0.171815 | 0.00019  | 0.577634 | 6.51E-43 | 0.42374  | 8.98E-22 | 0.501877 |
| 0.107887 | 0.0197   | 0.21821  | 1.93E-06 | 0.13972  | 0.00248  | 0.251123 | 3.78E-08 | 0.169304 |
| 0.392022 | 1.32E-18 | 0.359753 | 1.03E-15 | 0.606929 | 2.47E-48 | 0.575287 | 1.68E-42 | 0.52007  |
| 0.290513 | 1.56E-10 | 0.216559 | 2.32E-06 | 0.542948 | 3.67E-37 | 0.347522 | 1.06E-14 | 0.49199  |
| 0.251184 | 3.75E-08 | 0.352996 | 3.77E-15 | 0.424153 | 8.12E-22 | 0.360803 | 8.36E-16 | 0.385334 |
| 0.124742 | 0.00695  | 0.264116 | 6.81E-09 | 0.248865 | 5.05E-08 | 0.301603 | 2.82E-11 | 0.308014 |
| 0.148332 | 0.00131  | 0.260645 | 1.09E-08 | 0.120991 | 0.00886  | 0.306129 | 1.37E-11 | 0.14696  |
| 0.220462 | 1.50E-06 | 0.153163 | 0.0009   | 0.496498 | 1.95E-30 | 0.446563 | 2.86E-24 | 0.422437 |
| 0.250323 | 4.19E-08 | 0.23493  | 2.82E-07 | 0.261712 | 9.42E-09 | 0.272189 | 2.24E-09 | 0.266908 |
| 0.166708 | 0.0003   | 0.129465 | 0.00508  | 0.298429 | 4.63E-11 | 0.376192 | 3.80E-17 | 0.252707 |
| 0.264374 | 6.58E-09 | 0.277529 | 1.05E-09 | 0.455593 | 2.60E-25 | 0.418598 | 3.09E-21 | 0.439765 |
| -0.00755 | 0.87072  | 0.011688 | 0.80111  | 0.083956 | 0.06989  | 0.20405  | 8.81E-06 | 0.113779 |
| 0.284123 | 4.03E-10 | 0.287204 | 2.56E-10 | 0.461061 | 5.88E-26 | 0.509265 | 3.49E-32 | 0.355885 |
| 0.218278 | 1.92E-06 | 0.367122 | 2.40E-16 | 0.389613 | 2.23E-18 | 0.398648 | 3.07E-19 | 0.348957 |
| 0.522849 | 4.00E-34 | 0.517889 | 2.10E-33 | 0.770858 | 4.05E-93 | 0.636096 | 2.53E-54 | 0.671057 |
| 0.292874 | 1.09E-10 | 0.273212 | 1.94E-09 | 0.325479 | 5.51E-13 | 0.244213 | 9.07E-08 | 0.317854 |
| 0.413895 | 9.40E-21 | 0.554992 | 4.40E-39 | 0.704243 | 3.49E-71 | 0.761413 | 1.42E-89 | 0.631562 |
| 0.308447 | 9.45E-12 | 0.133658 | 0.00381  | 0.468485 | 7.47E-27 | 0.413649 | 9.96E-21 | 0.44169  |
| 0.323105 | 8.28E-13 | 0.300497 | 3.35E-11 | 0.270472 | 2.84E-09 | 0.324978 | 6.01E-13 | 0.259335 |

|          |          |          |          |          |          |          |          |          |
|----------|----------|----------|----------|----------|----------|----------|----------|----------|
| -0.07209 | 0.1198   | -0.07735 | 0.09501  | -0.1081  | 0.01946  | -0.09819 | 0.0339   | -0.02797 |
| -0.25026 | 4.23E-08 | -0.2724  | 2.17E-09 | -0.25699 | 1.77E-08 | -0.20601 | 7.19E-06 | -0.25569 |
| 0.041267 | 0.37358  | 0.05949  | 0.19939  | 0.067319 | 0.14636  | 0.040475 | 0.38284  | 0.138245 |
| 0.134343 | 0.00363  | 0.003639 | 0.93748  | 0.034597 | 0.45575  | 0.064787 | 0.16218  | 0.024297 |
| 0.202889 | 9.93E-06 | 0.153269 | 0.00089  | 0.260806 | 1.06E-08 | 0.283619 | 4.34E-10 | 0.199454 |
| -0.10616 | 0.02177  | 0.002697 | 0.95365  | -0.1867  | 4.92E-05 | -0.1642  | 0.00037  | -0.10895 |
| 0.184299 | 6.16E-05 | 0.163723 | 0.00038  | 0.14332  | 0.0019   | 0.050328 | 0.27776  | 0.300181 |
| 0.128419 | 0.00545  | 0.297693 | 5.19E-11 | 0.056725 | 0.22113  | 0.085216 | 0.06578  | 0.000854 |
| 0.131054 | 0.00456  | 0.071392 | 0.12341  | 0.058669 | 0.20568  | 0.001437 | 0.97529  | 0.098134 |
| -0.11162 | 0.01581  | -0.40864 | 3.19E-20 | -0.24051 | 1.43E-07 | -0.34816 | 9.38E-15 | -0.17312 |
| -0.06304 | 0.17386  | -0.02898 | 0.53223  | -0.11006 | 0.01735  | -0.11214 | 0.01533  | 0.000501 |
| 0.030207 | 0.51493  | -0.02768 | 0.55079  | 0.037273 | 0.42163  | -0.08563 | 0.06448  | 0.091817 |
| 0.043936 | 0.34345  | 0.067446 | 0.14559  | 0.099847 | 0.03098  | 0.073695 | 0.11173  | 0.115108 |
| 0.05282  | 0.25463  | 0.131728 | 0.00435  | -0.00375 | 0.93558  | -0.04508 | 0.33096  | 0.009346 |
| 0.050501 | 0.27611  | -0.08055 | 0.08205  | -0.16957 | 0.00023  | -0.22837 | 6.10E-07 | -0.02741 |
| -0.05129 | 0.26865  | -0.10755 | 0.02009  | -0.10817 | 0.01937  | -0.08352 | 0.07134  | -0.08503 |
| 0.032021 | 0.49001  | 0.018194 | 0.69494  | 0.089984 | 0.05198  | 0.070866 | 0.1262   | 0.036981 |
| -0.16833 | 0.00026  | -0.2055  | 7.57E-06 | -0.13764 | 0.00288  | -0.17225 | 0.00018  | -0.20096 |
| -0.0674  | 0.14586  | -0.0587  | 0.20544  | -0.03741 | 0.41998  | 0.039533 | 0.39401  | -0.05701 |
| 0.023806 | 0.60785  | 0.066519 | 0.15122  | 0.029776 | 0.52095  | 0.079968 | 0.0843   | 0.015243 |
| 0.042196 | 0.36291  | -0.19555 | 2.08E-05 | -0.07357 | 0.11233  | -0.18206 | 7.59E-05 | -0.05763 |
| -0.03771 | 0.41622  | -0.03314 | 0.47497  | 0.016617 | 0.72022  | -0.06487 | 0.16162  | 0.072656 |
| 0.061984 | 0.18117  | 0.054    | 0.24415  | -0.07204 | 0.12001  | -0.06009 | 0.19492  | 0.083533 |
| 0.261266 | 1.00E-08 | 0.448593 | 1.68E-24 | 0.268798 | 3.59E-09 | 0.488054 | 2.54E-29 | 0.158646 |
| 0.148057 | 0.00133  | 0.137207 | 0.00297  | 0.128241 | 0.00551  | 0.077835 | 0.09294  | 0.187419 |
| 0.126333 | 0.00626  | 0.090947 | 0.04951  | 0.172163 | 0.00019  | 0.130511 | 0.00473  | 0.015541 |
| 0.091702 | 0.04764  | -0.18914 | 3.90E-05 | -0.00235 | 0.95955  | -0.06637 | 0.15216  | 0.033819 |
| -0.03568 | 0.44173  | -0.07712 | 0.09598  | -0.21684 | 2.25E-06 | -0.23046 | 4.78E-07 | -0.20688 |
| -0.10282 | 0.02628  | -0.11122 | 0.0162   | 0.204721 | 8.21E-06 | 0.091929 | 0.04709  | 0.208328 |
| 0.019874 | 0.66838  | -0.13311 | 0.00396  | -0.07172 | 0.12169  | -0.04046 | 0.38306  | 0.047683 |
| -0.00441 | 0.92436  | -0.27876 | 8.80E-10 | 0.038766 | 0.40326  | -0.02934 | 0.52712  | -0.09277 |
| -0.03474 | 0.45393  | -0.03936 | 0.39609  | 0.030831 | 0.50628  | -0.03587 | 0.43936  | 0.043183 |
| 0.049537 | 0.28539  | 0.146046 | 0.00155  | -0.01845 | 0.69087  | 0.000281 | 0.99516  | 0.021703 |
| 0.100673 | 0.02961  | 0.02825  | 0.54255  | 0.162198 | 0.00043  | 0.078936 | 0.0884   | 0.087395 |
| 0.094262 | 0.04174  | 0.015848 | 0.73266  | 0.225934 | 8.08E-07 | 0.074729 | 0.10678  | 0.230584 |
| 0.200837 | 1.22E-05 | 0.01841  | 0.6915   | 0.236853 | 2.24E-07 | 0.136464 | 0.00313  | 0.184841 |
| 0.081199 | 0.07962  | 0.060127 | 0.19462  | 0.180043 | 9.14E-05 | 0.118239 | 0.01055  | 0.243834 |
| 0.054296 | 0.24157  | 0.163674 | 0.00038  | 0.06533  | 0.15869  | 0.095894 | 0.03831  | 0.184692 |
| -0.15864 | 0.00058  | -0.05465 | 0.23853  | -0.314   | 3.82E-12 | -0.18493 | 5.81E-05 | -0.1658  |
| 0.012323 | 0.79054  | 0.024082 | 0.60369  | -0.01338 | 0.77307  | -0.0437  | 0.34609  | 0.069466 |
| 0.0656   | 0.15696  | -0.01462 | 0.75272  | 0.030765 | 0.50719  | -0.03087 | 0.50576  | 0.074595 |
| 0.014025 | 0.76243  | 0.199852 | 1.35E-05 | -0.03701 | 0.42498  | 0.077001 | 0.09651  | -0.02043 |
| 0.066372 | 0.15213  | 0.096486 | 0.03713  | 0.082813 | 0.0738   | 0.066746 | 0.14983  | 0.032014 |
| 0.065002 | 0.16079  | -0.01137 | 0.80635  | 0.039624 | 0.39293  | 0.036818 | 0.42732  | 0.018755 |
| 0.125489 | 0.00662  | 0.11441  | 0.01336  | 0.040691 | 0.3803   | 0.030707 | 0.50799  | 0.117053 |

|          |          |          |          |          |          |          |          |          |
|----------|----------|----------|----------|----------|----------|----------|----------|----------|
| 0.111582 | 0.01585  | 0.145559 | 0.00161  | 0.144194 | 0.00178  | 0.117311 | 0.01118  | 0.066833 |
| 0.014301 | 0.75791  | 0.014858 | 0.74878  | 0.031303 | 0.49979  | -0.02235 | 0.62999  | 0.079707 |
| 0.066186 | 0.15328  | -0.05776 | 0.21284  | 0.134159 | 0.00368  | 0.040762 | 0.37947  | 0.149357 |
| 0.009443 | 0.83873  | 0.236424 | 2.35E-07 | -0.02853 | 0.53853  | 0.084875 | 0.06687  | 0.048263 |
| 0.003301 | 0.94329  | -0.02108 | 0.64958  | 0.004407 | 0.92433  | -0.03838 | 0.40799  | 0.045499 |
| 0.031773 | 0.49337  | 0.165768 | 0.00032  | 0.040429 | 0.38338  | 0.09349  | 0.04345  | 0.092396 |
| 0.090681 | 0.05018  | 0.13746  | 0.00291  | 0.030031 | 0.51739  | 0.092716 | 0.04522  | 0.079854 |
| 0.038654 | 0.40462  | 0.007483 | 0.87188  | 0.024273 | 0.60083  | 0.026969 | 0.56101  | 0.004148 |
| -0.04107 | 0.37582  | 0.008438 | 0.85569  | -0.00805 | 0.86232  | 0.023718 | 0.60918  | -0.02091 |
| -0.01795 | 0.69883  | -0.06072 | 0.19025  | -0.0645  | 0.16403  | -0.08357 | 0.07118  | -0.03267 |
| -0.04137 | 0.37237  | -0.03726 | 0.42183  | -0.07183 | 0.12114  | -0.05066 | 0.27456  | -0.02369 |
| 0.087369 | 0.05921  | 0.114127 | 0.0136   | 0.081622 | 0.07806  | 0.070563 | 0.12783  | 0.142566 |
| -0.13641 | 0.00314  | -0.19974 | 1.37E-05 | -0.12278 | 0.0079   | -0.19585 | 2.02E-05 | -0.11602 |
| -0.1082  | 0.01934  | -0.1675  | 0.00028  | -0.08762 | 0.05847  | -0.11211 | 0.01535  | -0.036   |
| -0.00105 | 0.98199  | 0.076072 | 0.10061  | -0.00478 | 0.91787  | 0.0092   | 0.84283  | -0.00802 |
| 0.036895 | 0.42636  | 0.118604 | 0.01031  | -0.05531 | 0.23285  | -0.00075 | 0.98718  | 0.024476 |
| 0.02989  | 0.51936  | 0.121186 | 0.00875  | 0.033251 | 0.47348  | 0.036756 | 0.4281   | 0.090353 |
| -0.03652 | 0.43108  | -0.03438 | 0.45862  | -0.13009 | 0.00487  | -0.08202 | 0.07662  | -0.08955 |
| -0.09328 | 0.04393  | -0.09937 | 0.0318   | -0.02219 | 0.6325   | -0.0572  | 0.21731  | 0.010518 |
| -0.06542 | 0.15813  | 0.045646 | 0.32497  | -0.02884 | 0.53415  | 0.018877 | 0.68409  | 0.026198 |
| 0.066439 | 0.15172  | -0.07221 | 0.11916  | 0.067358 | 0.14612  | -0.01293 | 0.78043  | 0.0561   |
| 0.086438 | 0.06198  | 0.026865 | 0.56252  | 0.013406 | 0.77263  | -0.02953 | 0.52447  | 0.087081 |
| 0.102869 | 0.02622  | 0.100291 | 0.03024  | 0.104602 | 0.02378  | 0.101206 | 0.02875  | 0.054031 |
| 0.057426 | 0.21546  | 0.018992 | 0.68228  | 0.119666 | 0.00964  | 0.141262 | 0.00221  | 0.080412 |
| 0.021841 | 0.6378   | 0.171747 | 0.00019  | 0.027225 | 0.55729  | 0.057516 | 0.21474  | 0.140227 |
| 0.165914 | 0.00032  | -0.00074 | 0.98721  | 0.193361 | 2.59E-05 | 0.104831 | 0.02348  | 0.062749 |
| -0.0528  | 0.25481  | -0.00591 | 0.89858  | -0.02171 | 0.63976  | -0.00108 | 0.98141  | 0.000666 |
| 0.264091 | 6.83E-09 | 0.159026 | 0.00056  | 0.326674 | 4.48E-13 | 0.227903 | 6.44E-07 | 0.230831 |
| -0.07333 | 0.11351  | -0.11527 | 0.01268  | -0.10501 | 0.02324  | -0.10956 | 0.01787  | -0.07319 |
| 0.133241 | 0.00392  | 0.087999 | 0.0574   | 0.082066 | 0.07644  | 0.102496 | 0.02677  | 0.112871 |
| 0.00023  | 0.99604  | 0.038426 | 0.40741  | 0.048397 | 0.29663  | 0.032692 | 0.48095  | 0.090702 |
| -0.06815 | 0.1414   | -0.08037 | 0.08275  | -0.09526 | 0.03961  | -0.11109 | 0.01632  | -0.10038 |
| -0.07421 | 0.10925  | -0.18905 | 3.93E-05 | -0.16614 | 0.00031  | -0.16811 | 0.00026  | -0.16059 |
| 0.0933   | 0.04388  | 0.132099 | 0.00424  | 0.0575   | 0.21487  | 0.140873 | 0.00228  | 0.079712 |
| 0.008217 | 0.85944  | 0.005174 | 0.91121  | 0.028012 | 0.54595  | 0.016487 | 0.72232  | 0.044418 |
| -0.07138 | 0.12347  | -0.0246  | 0.59593  | -0.07464 | 0.10721  | -0.05707 | 0.21834  | -0.05455 |
| -0.08921 | 0.05403  | -0.01316 | 0.77673  | -0.04269 | 0.35737  | -0.02827 | 0.54228  | -0.01706 |
| 0.030174 | 0.51539  | 0.023643 | 0.61032  | 0.028003 | 0.54608  | 0.012203 | 0.79253  | 0.009313 |
| 0.079692 | 0.08538  | 0.026945 | 0.56135  | -0.00399 | 0.93146  | 0.035587 | 0.44295  | 0.044509 |
| 0.056424 | 0.22359  | 0.073838 | 0.11104  | 0.035724 | 0.44119  | 0.054369 | 0.24094  | 0.022122 |
| 0.056053 | 0.22665  | 0.085976 | 0.0634   | 0.035981 | 0.43791  | 0.039782 | 0.39104  | 0.0324   |
| 0.136249 | 0.00318  | 0.132475 | 0.00413  | 0.07466  | 0.1071   | 0.040599 | 0.38138  | 0.068254 |
| -0.0498  | 0.2828   | 0.121398 | 0.00864  | 0.083092 | 0.07283  | 0.209297 | 5.08E-06 | 0.095979 |
| 0.100117 | 0.03053  | 0.168906 | 0.00025  | 0.04028  | 0.38513  | 0.049907 | 0.2818   | 0.086253 |
| 0.033801 | 0.46619  | 0.13664  | 0.00309  | -0.01975 | 0.6703   | 0.035301 | 0.44662  | 0.073567 |

|          |          |          |          |          |          |          |          |          |
|----------|----------|----------|----------|----------|----------|----------|----------|----------|
| 0.002592 | 0.95545  | 0.250662 | 4.01E-08 | 0.003119 | 0.94641  | 0.108726 | 0.01876  | 0.119842 |
| 0.179866 | 9.29E-05 | 0.222288 | 1.22E-06 | 0.263006 | 7.91E-09 | 0.257876 | 1.57E-08 | 0.237459 |
| -0.0983  | 0.0337   | -0.16464 | 0.00035  | -0.0857  | 0.06425  | -0.09603 | 0.03803  | -0.06966 |
| 0.123345 | 0.00762  | -0.30412 | 1.89E-11 | -0.05364 | 0.24732  | -0.27348 | 1.87E-09 | -0.08659 |
| 0.070594 | 0.12767  | -0.06193 | 0.18158  | -0.0055  | 0.90562  | -0.07997 | 0.08427  | 0.026853 |
| 0.002462 | 0.95768  | 0.013127 | 0.77723  | -0.05725 | 0.21686  | -0.03922 | 0.39781  | -0.10214 |
| 0.090587 | 0.05042  | 0.021982 | 0.63563  | -0.16419 | 0.00037  | -0.08004 | 0.08401  | -0.18158 |
| 0.015569 | 0.7372   | 0.109015 | 0.01845  | 0.079858 | 0.08473  | 0.040124 | 0.38698  | 0.113105 |
| -0.10768 | 0.01994  | -0.09004 | 0.05185  | -0.10922 | 0.01823  | -0.05995 | 0.19595  | -0.02514 |
| -0.17307 | 0.00017  | -0.27476 | 1.56E-09 | -0.1473  | 0.00141  | -0.3119  | 5.39E-12 | -0.13208 |
| -0.0094  | 0.8395   | -0.02333 | 0.61508  | -0.11204 | 0.01542  | -0.12965 | 0.00501  | -0.08032 |
| 0.023428 | 0.61357  | -0.07082 | 0.12644  | -0.0259  | 0.57671  | -0.0618  | 0.18246  | -0.0729  |
| -0.2017  | 1.12E-05 | -0.25456 | 2.42E-08 | -0.33419 | 1.20E-13 | -0.29311 | 1.05E-10 | -0.27118 |
| -0.16522 | 0.00034  | 0.075268 | 0.10427  | -0.21349 | 3.24E-06 | 0.077734 | 0.09337  | -0.23191 |
| -0.08073 | 0.08139  | -0.29467 | 8.27E-11 | -0.2137  | 3.17E-06 | -0.20839 | 5.59E-06 | -0.15615 |
| -0.00385 | 0.9339   | -0.00491 | 0.91579  | 0.096109 | 0.03788  | 0.036438 | 0.43211  | 0.007205 |
| -0.14629 | 0.00152  | -0.09857 | 0.03321  | -0.12597 | 0.00642  | -0.0767  | 0.09781  | -0.06723 |
| -0.09372 | 0.04294  | -0.20936 | 5.04E-06 | -0.02638 | 0.56962  | -0.15702 | 0.00066  | 0.015157 |
| 0.093461 | 0.04352  | 0.062384 | 0.17836  | 0.080023 | 0.08409  | 0.078352 | 0.09079  | 0.000149 |
| 0.056345 | 0.22424  | -0.16318 | 0.0004   | 0.032037 | 0.48978  | -0.20001 | 1.33E-05 | 0.057888 |
| 0.169625 | 0.00023  | 0.160438 | 0.0005   | 0.14389  | 0.00182  | 0.169906 | 0.00023  | 0.046783 |
| 0.208973 | 5.26E-06 | 0.18815  | 4.28E-05 | 0.047855 | 0.30208  | 0.064315 | 0.16527  | 0.020663 |
| 0.086843 | 0.06076  | 0.261024 | 1.03E-08 | 0.211814 | 3.88E-06 | 0.240986 | 1.35E-07 | 0.116687 |
| 0.073229 | 0.11402  | -0.09432 | 0.04161  | -0.00496 | 0.91495  | -0.0863  | 0.0624   | 0.030641 |
| 0.363513 | 4.91E-16 | 0.095309 | 0.03951  | 0.103538 | 0.02525  | 0.109479 | 0.01795  | 0.074408 |
| 0.104441 | 0.024    | 0.027726 | 0.55007  | 0.179816 | 9.33E-05 | 0.015811 | 0.73327  | 0.171017 |
| -0.1548  | 0.00079  | -0.15342 | 0.00088  | -0.06976 | 0.13223  | -0.08061 | 0.08185  | 0.012933 |
| 0.128498 | 0.00542  | 0.056768 | 0.22077  | -0.04248 | 0.35974  | -0.05268 | 0.25591  | 0.021598 |
| -0.10422 | 0.0243   | 0.00359  | 0.93832  | -0.03661 | 0.42998  | 0.018534 | 0.68954  | 0.10317  |
| -0.07982 | 0.08489  | 0.119483 | 0.00975  | -0.0881  | 0.05711  | -0.11086 | 0.01655  | -0.0245  |
| 0.000102 | 0.99824  | -0.00738 | 0.87365  | 0.170118 | 0.00022  | 0.184968 | 5.79E-05 | 0.071409 |
| 0.078062 | 0.09199  | 0.059816 | 0.19694  | 0.087997 | 0.0574   | 0.019166 | 0.67952  | 0.162893 |
| -0.00017 | 0.99708  | -0.11235 | 0.01514  | -0.13781 | 0.00284  | -0.14942 | 0.0012   | -0.07422 |
| -0.05666 | 0.22164  | -0.25094 | 3.88E-08 | -0.25876 | 1.40E-08 | -0.29216 | 1.21E-10 | -0.19694 |
| -0.02731 | 0.5561   | -0.11373 | 0.01393  | 0.002218 | 0.96187  | -0.0764  | 0.09914  | -0.05477 |
| 0.018428 | 0.69122  | -0.12061 | 0.00908  | 0.006585 | 0.88715  | -0.12793 | 0.00563  | -0.0854  |
| 0.105516 | 0.02258  | 0.17195  | 0.00019  | 0.014337 | 0.75732  | -0.05374 | 0.24647  | 0.146577 |
| 0.030642 | 0.5089   | 0.060227 | 0.19388  | -0.03321 | 0.47401  | 0.018143 | 0.69576  | 0.034448 |
| -0.21883 | 1.80E-06 | -0.35913 | 1.16E-15 | -0.0419  | 0.36629  | -0.24964 | 4.57E-08 | -0.0722  |
| -0.06456 | 0.16368  | -0.00303 | 0.94791  | -0.10055 | 0.02982  | -0.07225 | 0.11895  | -0.2176  |
| 0.148683 | 0.00127  | 0.308911 | 8.77E-12 | -0.05688 | 0.21985  | 0.049311 | 0.2876   | 0.015798 |
| -0.02368 | 0.60982  | -0.02058 | 0.65732  | -0.05802 | 0.21076  | -0.05113 | 0.27017  | -0.07191 |
| 0.257018 | 1.76E-08 | 0.202999 | 9.81E-06 | 0.214798 | 2.81E-06 | 0.112218 | 0.01526  | 0.237141 |
| 0.213633 | 3.19E-06 | 0.407795 | 3.87E-20 | 0.247623 | 5.91E-08 | 0.36534  | 3.42E-16 | 0.244448 |
| 0.02576  | 0.57871  | 0.124732 | 0.00696  | 0.079791 | 0.08499  | 0.150391 | 0.00111  | 0.040188 |

|          |          |          |          |          |          |          |          |          |
|----------|----------|----------|----------|----------|----------|----------|----------|----------|
| -0.06319 | 0.17283  | 0.018924 | 0.68335  | -0.05873 | 0.20519  | -0.01801 | 0.69792  | -0.09253 |
| 0.16624  | 0.00031  | 0.271411 | 2.49E-09 | 0.317389 | 2.17E-12 | 0.303122 | 2.22E-11 | 0.259377 |
| 0.1921   | 2.93E-05 | -0.1811  | 8.29E-05 | -0.22404 | 1.00E-06 | -0.26595 | 5.30E-09 | -0.15457 |
| 0.154686 | 0.0008   | 0.144264 | 0.00177  | 0.218809 | 1.81E-06 | 0.087329 | 0.05933  | 0.193914 |
| -0.02512 | 0.58814  | -0.14885 | 0.00126  | -0.23008 | 5.00E-07 | -0.10188 | 0.0277   | -0.18238 |
| -0.1415  | 0.00218  | -0.10266 | 0.02652  | -0.13606 | 0.00322  | -0.17348 | 0.00016  | -0.077   |
| 0.126145 | 0.00634  | 0.05076  | 0.27365  | 0.015856 | 0.73253  | -0.1046  | 0.02379  | 0.188274 |
| -0.00653 | 0.88813  | -0.00021 | 0.99638  | 0.058379 | 0.20793  | 0.00367  | 0.93696  | 0.056123 |
| -0.00125 | 0.97859  | -0.10163 | 0.02809  | -0.03123 | 0.50079  | -0.07859 | 0.08981  | 0.05915  |
| 0.006272 | 0.89248  | 0.029558 | 0.52401  | 0.079913 | 0.08452  | 0.023318 | 0.61523  | 0.136382 |
| -0.00928 | 0.8415   | -0.14519 | 0.00166  | -0.00502 | 0.91385  | -0.11417 | 0.01356  | -0.07721 |
| -0.11843 | 0.01042  | -0.06794 | 0.14264  | 0.13846  | 0.00271  | 0.030808 | 0.5066   | 0.134744 |
| -0.12706 | 0.00597  | -0.09659 | 0.03693  | -0.0801  | 0.08381  | -0.01182 | 0.79895  | -0.0308  |
| 0.1455   | 0.00162  | -0.02511 | 0.58828  | -0.01791 | 0.69953  | -0.10238 | 0.02695  | -0.02772 |
| 0.274254 | 1.67E-09 | 0.065468 | 0.1578   | -0.01461 | 0.75285  | 0.102066 | 0.02742  | 0.020979 |
| 0.046357 | 0.31748  | 0.063115 | 0.17331  | -0.1183  | 0.01051  | -0.09001 | 0.05191  | -0.09947 |
| 0.03366  | 0.46804  | -0.03206 | 0.48948  | -0.01061 | 0.81915  | -0.01818 | 0.69521  | 0.019782 |
| -0.1113  | 0.01612  | -0.06849 | 0.13946  | -0.01326 | 0.77512  | 0.037673 | 0.41666  | 0.004591 |
| 0.395389 | 6.32E-19 | 0.423809 | 8.83E-22 | 0.267906 | 4.06E-09 | 0.269099 | 3.44E-09 | 0.232261 |
| 0.057285 | 0.21659  | 0.108649 | 0.01884  | 0.080216 | 0.08334  | 0.061727 | 0.18298  | 0.131774 |
| -0.07184 | 0.12108  | -0.05538 | 0.23231  | -0.07227 | 0.11884  | -0.0461  | 0.32018  | -0.04634 |
| -0.02593 | 0.57619  | 0.023439 | 0.6134   | 0.023807 | 0.60783  | 0.037653 | 0.41691  | -0.00322 |
| 0.131316 | 0.00448  | 0.071921 | 0.12065  | 0.098007 | 0.03423  | 0.048373 | 0.29687  | 0.060893 |
| -0.18393 | 6.38E-05 | -0.06457 | 0.16357  | -0.31346 | 4.17E-12 | -0.15861 | 0.00058  | -0.1632  |
| 0.094904 | 0.04036  | 0.021198 | 0.64772  | -0.04858 | 0.29478  | -0.12746 | 0.00581  | -0.04216 |
| 0.02521  | 0.58685  | -0.13051 | 0.00473  | 0.110749 | 0.01665  | 0.025251 | 0.58624  | 0.028527 |
| -0.03165 | 0.49503  | -0.00259 | 0.95542  | 0.069817 | 0.13193  | 0.005889 | 0.899    | 0.138522 |
| 0.024436 | 0.59838  | 0.123883 | 0.00736  | -0.04442 | 0.33811  | -0.03189 | 0.49177  | 0.074642 |
| -0.02778 | 0.54934  | -0.10853 | 0.01897  | 0.020242 | 0.66262  | -0.05777 | 0.2127   | 0.102305 |
| -0.02399 | 0.60507  | -0.03788 | 0.41412  | -0.0525  | 0.25751  | -0.06863 | 0.13862  | 0.009485 |
| 0.04602  | 0.32102  | -0.05257 | 0.25685  | 0.079849 | 0.08477  | -0.01088 | 0.81454  | -0.11607 |
| 0.017464 | 0.7066   | 0.203312 | 9.50E-06 | 0.068579 | 0.13893  | 0.192326 | 2.86E-05 | 0.072072 |
| 0.052203 | 0.26022  | 0.051695 | 0.2649   | 0.038869 | 0.40202  | 0.01622  | 0.72663  | -0.01182 |
| 0.099695 | 0.03124  | 0.058536 | 0.20671  | 0.255593 | 2.12E-08 | 0.149496 | 0.00119  | 0.180362 |
| -0.03333 | 0.47238  | 0.033446 | 0.47089  | 0.0749   | 0.10598  | 0.106037 | 0.02192  | 0.070454 |
| 0.286172 | 2.98E-10 | 0.231068 | 4.45E-07 | 0.167608 | 0.00027  | 0.22265  | 1.18E-06 | 0.141191 |
| 0.378092 | 2.56E-17 | 0.149336 | 0.00121  | 0.26418  | 6.75E-09 | 0.269836 | 3.11E-09 | 0.120653 |
| 0.051027 | 0.27113  | 0.062883 | 0.17491  | 0.054831 | 0.23696  | -0.00079 | 0.98647  | 0.068244 |
| 0.149436 | 0.0012   | -0.18394 | 6.37E-05 | 0.101812 | 0.02781  | -0.13713 | 0.00298  | 0.065741 |
| -0.11225 | 0.01523  | 0.05141  | 0.26754  | 0.194094 | 2.41E-05 | 0.193454 | 2.56E-05 | 0.144792 |
| 0.025381 | 0.58431  | -0.11225 | 0.01523  | -0.04954 | 0.28532  | -0.04715 | 0.30923  | -0.06667 |
| -0.03469 | 0.4545   | 0.027943 | 0.54693  | 0.142058 | 0.00209  | 0.132349 | 0.00417  | 0.079051 |
| -0.10245 | 0.02684  | -0.29324 | 1.03E-10 | -0.0364  | 0.43264  | -0.12139 | 0.00864  | -0.0263  |
| -0.15414 | 0.00083  | -0.10525 | 0.02292  | 0.146441 | 0.00151  | 0.037003 | 0.42501  | 0.174805 |
| -0.07258 | 0.11726  | -0.13594 | 0.00325  | -0.00944 | 0.83871  | -0.08315 | 0.07263  | 0.031882 |

|          |          |          |          |          |          |          |          |          |
|----------|----------|----------|----------|----------|----------|----------|----------|----------|
| 0.193058 | 2.66E-05 | 0.220417 | 1.51E-06 | 0.06943  | 0.13408  | 0.027982 | 0.54638  | 0.226509 |
| 0.031863 | 0.49215  | 0.022399 | 0.62923  | -0.108   | 0.01957  | -0.11649 | 0.01176  | -0.12082 |
| 0.184046 | 6.31E-05 | 0.293995 | 9.17E-11 | 0.178128 | 0.00011  | 0.238064 | 1.93E-07 | 0.211046 |
| 0.089936 | 0.05211  | -0.0544  | 0.24064  | 0.177648 | 0.00011  | 0.050998 | 0.2714   | 0.105242 |
| -0.00559 | 0.90418  | -0.00255 | 0.9561   | -0.02983 | 0.52025  | -0.1657  | 0.00032  | 0.02678  |
| -0.11314 | 0.01443  | -0.02786 | 0.54814  | -0.06545 | 0.15795  | -0.02733 | 0.5557   | 0.020071 |
| 0.00015  | 0.99743  | 0.014822 | 0.74938  | 0.057455 | 0.21523  | 0.031787 | 0.49319  | 0.014011 |
| -0.05896 | 0.20344  | 0.01004  | 0.82868  | -0.00368 | 0.9368   | 0.00743  | 0.87278  | -0.01885 |
| 0.057845 | 0.21213  | 0.069288 | 0.13489  | 0.059182 | 0.20174  | 0.047319 | 0.30754  | 0.169084 |
| 0.024555 | 0.59661  | -0.03038 | 0.51258  | 0.006751 | 0.88432  | 0.089014 | 0.05457  | -0.0832  |
| 0.009936 | 0.83044  | -0.00787 | 0.86529  | 0.121377 | 0.00865  | 0.056733 | 0.22106  | 0.076438 |
| 0.033813 | 0.46603  | -0.02615 | 0.57303  | 0.205748 | 7.38E-06 | 0.15266  | 0.00093  | 0.184779 |
| 0.230571 | 4.72E-07 | 0.227115 | 7.06E-07 | 0.247973 | 5.65E-08 | 0.187004 | 4.78E-05 | 0.279614 |
| 0.086543 | 0.06166  | 0.304894 | 1.67E-11 | -0.08399 | 0.06977  | 0.025383 | 0.58428  | 0.063784 |
| 0.170307 | 0.00022  | 0.237105 | 2.17E-07 | 0.256923 | 1.78E-08 | 0.345933 | 1.42E-14 | 0.028297 |
| -0.01093 | 0.8137   | 0.212688 | 3.53E-06 | 0.07909  | 0.08778  | 0.013023 | 0.77895  | 0.184377 |
| 0.052506 | 0.25747  | 0.052248 | 0.25981  | 0.066858 | 0.14915  | 0.018905 | 0.68366  | 0.047821 |
| 0.086442 | 0.06197  | 0.065451 | 0.15791  | 0.069375 | 0.13439  | -0.01371 | 0.76755  | 0.142274 |
| 0.013271 | 0.77485  | 0.062554 | 0.17718  | 0.080228 | 0.08329  | 0.036368 | 0.433    | 0.096023 |
| -0.00892 | 0.84757  | 0.040062 | 0.38772  | 0.070138 | 0.13015  | 0.027811 | 0.54883  | 0.06725  |
| -0.0461  | 0.3202   | 0.035121 | 0.44894  | 0.108094 | 0.01946  | -0.01431 | 0.75779  | 0.151476 |
| 0.03004  | 0.51726  | 0.085187 | 0.06587  | 0.017307 | 0.70912  | 0.016409 | 0.72359  | -0.07228 |
| -0.04776 | 0.30309  | -0.02252 | 0.62734  | -0.20522 | 7.80E-06 | -0.13183 | 0.00432  | -0.15283 |
| -0.03332 | 0.47252  | -0.19354 | 2.54E-05 | -0.04423 | 0.34021  | -0.23655 | 2.32E-07 | 0.043321 |
| 0.057314 | 0.21636  | 0.077103 | 0.09607  | 0.011549 | 0.80343  | 0.021866 | 0.63741  | 0.016558 |
| -0.07477 | 0.10657  | -0.129   | 0.00524  | -0.05327 | 0.25064  | -0.16236 | 0.00043  | -0.05945 |
| 0.11155  | 0.01588  | 0.226564 | 7.52E-07 | 0.086638 | 0.06138  | 0.156526 | 0.00069  | 0.132788 |
| 0.10743  | 0.02023  | -0.02814 | 0.54414  | 0.087549 | 0.05869  | 0.058202 | 0.20932  | 0.095196 |
| -0.03009 | 0.51651  | -0.00844 | 0.8557   | -0.04337 | 0.34968  | 0.003841 | 0.93403  | -0.07133 |
| -0.01574 | 0.7344   | 0.143011 | 0.00195  | -0.0343  | 0.45968  | 0.159829 | 0.00053  | -0.00092 |
| 0.166788 | 0.00029  | 0.185578 | 5.47E-05 | 0.038056 | 0.41194  | 0.006859 | 0.88247  | 0.121746 |
| -0.03044 | 0.51175  | -0.04779 | 0.3027   | -0.14685 | 0.00146  | -0.10819 | 0.01936  | -0.06656 |
| -0.05574 | 0.22927  | -0.10418 | 0.02436  | -0.0666  | 0.15075  | -0.05914 | 0.20209  | -0.00875 |
| 0.024128 | 0.603    | 0.015871 | 0.7323   | 0.025781 | 0.57839  | 0.005905 | 0.89873  | 0.045828 |
| 0.069233 | 0.1352   | -0.27195 | 2.31E-09 | 0.049865 | 0.2822   | 0.013044 | 0.77861  | -0.11573 |
| 0.001334 | 0.97707  | -0.01728 | 0.70956  | 0.019045 | 0.68144  | -0.0254  | 0.58403  | 0.053354 |
| 0.291071 | 1.43E-10 | 0.113393 | 0.01421  | 0.292899 | 1.08E-10 | 0.30143  | 2.89E-11 | 0.158694 |
| 0.043226 | 0.35131  | -0.16142 | 0.00046  | -0.08122 | 0.07955  | -0.0795  | 0.08612  | -0.08096 |
| 0.119926 | 0.00949  | 0.043151 | 0.35214  | 0.22619  | 7.85E-07 | 0.022451 | 0.62844  | 0.245377 |
| -0.12733 | 0.00586  | -0.01467 | 0.75185  | -0.12562 | 0.00656  | 0.067294 | 0.14651  | -0.2291  |
| 0.033632 | 0.46842  | 0.050566 | 0.27548  | -0.07674 | 0.09763  | -0.07772 | 0.09342  | -0.09493 |
| 0.304052 | 1.91E-11 | 0.327039 | 4.21E-13 | 0.260933 | 1.05E-08 | 0.303518 | 2.08E-11 | 0.198059 |
| -0.1303  | 0.0048   | -0.06326 | 0.17232  | -0.15537 | 0.00075  | -0.08238 | 0.07532  | -0.08026 |
| 0.02927  | 0.52805  | 0.208462 | 5.55E-06 | 0.03093  | 0.50491  | 0.16913  | 0.00024  | 0.090526 |
| 0.045775 | 0.3236   | 0.000955 | 0.98358  | 0.057724 | 0.21309  | -0.08014 | 0.08364  | 0.115558 |



|          |          |          |          |           |          |          |          |          |
|----------|----------|----------|----------|-----------|----------|----------|----------|----------|
| -0.12867 | 0.00536  | 0.187398 | 4.60E-05 | 0.021891  | 0.63703  | 0.114717 | 0.01312  | 0.09901  |
| 0.173427 | 0.00017  | 0.398069 | 3.49E-19 | 0.019206  | 0.6789   | 0.155538 | 0.00074  | 0.124113 |
| -0.03162 | 0.49541  | 0.021319 | 0.64585  | -0.00728  | 0.87526  | 0.038982 | 0.40064  | -0.03769 |
| -0.01616 | 0.72757  | -0.09818 | 0.03391  | 0.040989  | 0.37681  | -0.01578 | 0.73385  | 0.05601  |
| 0.026429 | 0.56888  | -0.0024  | 0.9588   | -0.02728  | 0.55652  | -0.08562 | 0.06451  | 0.04757  |
| -0.04001 | 0.38833  | -0.07417 | 0.10943  | -0.06262  | 0.17675  | -0.08821 | 0.05679  | -0.10124 |
| -0.00368 | 0.93679  | 0.010797 | 0.81599  | 0.045034  | 0.33151  | -0.05323 | 0.25099  | 0.11021  |
| -0.10489 | 0.0234   | -0.1379  | 0.00282  | -0.03677  | 0.42787  | -0.11561 | 0.01242  | -0.07724 |
| 0.013815 | 0.76589  | -0.00858 | 0.85321  | -0.05287  | 0.25422  | -0.08412 | 0.06935  | 0.006015 |
| 0.03796  | 0.41311  | -0.08702 | 0.06022  | -0.10024  | 0.03032  | -0.10785 | 0.01974  | -0.15515 |
| -0.1377  | 0.00286  | -0.16281 | 0.00041  | -0.20984  | 4.79E-06 | -0.1998  | 1.36E-05 | -0.09618 |
| 0.162677 | 0.00042  | 0.152205 | 0.00097  | 0.162472  | 0.00042  | 0.080054 | 0.08397  | 0.212682 |
| 0.027063 | 0.55965  | 0.096031 | 0.03803  | 0.092236  | 0.04635  | 0.093786 | 0.04279  | 0.114342 |
| 0.039189 | 0.39814  | 0.084124 | 0.06933  | 0.08046   | 0.0824   | -0.00273 | 0.95301  | 0.13129  |
| -0.05753 | 0.21462  | -0.04202 | 0.36489  | -0.04447  | 0.33764  | -0.03926 | 0.39727  | 0.007703 |
| 0.304488 | 1.78E-11 | 0.105397 | 0.02273  | 0.319469  | 1.53E-12 | 0.22066  | 1.47E-06 | 0.194463 |
| 0.043695 | 0.34611  | 0.009122 | 0.84414  | -0.04815  | 0.29911  | -0.00924 | 0.84213  | -0.14116 |
| 0.131542 | 0.00441  | 0.098416 | 0.03348  | 0.093087  | 0.04437  | 0.077149 | 0.09587  | 0.035793 |
| 0.02917  | 0.52948  | 0.055971 | 0.22734  | 0.103414  | 0.02543  | 0.041888 | 0.36643  | 0.138678 |
| 0.016603 | 0.72045  | 0.061076 | 0.18765  | 0.050928  | 0.27206  | 0.050335 | 0.27769  | 0.051432 |
| 0.024152 | 0.60264  | 0.027222 | 0.55733  | 0.058777  | 0.20484  | 0.072152 | 0.11945  | 0.056837 |
| 0.008108 | 0.86128  | -0.01089 | 0.81451  | -0.06723  | 0.14689  | -0.02552 | 0.58226  | -0.06546 |
| 0.072318 | 0.1186   | -0.08385 | 0.07024  | -0.0845   | 0.06808  | -0.10007 | 0.0306   | -0.12127 |
| -0.07269 | 0.11671  | 0.056242 | 0.22509  | -0.19193  | 2.97E-05 | -0.0913  | 0.04863  | -0.11668 |
| -0.14137 | 0.0022   | -0.06594 | 0.1548   | -0.1967   | 1.86E-05 | -0.24195 | 1.20E-07 | -0.08403 |
| -0.098   | 0.03424  | -0.17823 | 0.00011  | -0.17191  | 0.00019  | -0.29867 | 4.46E-11 | -0.01679 |
| 0.003889 | 0.93321  | -0.07933 | 0.08681  | -0.01148  | 0.80452  | -0.10917 | 0.01828  | 0.098135 |
| 0.02353  | 0.61202  | 0.02232  | 0.63044  | 0.120947  | 0.00889  | 0.053664 | 0.2471   | 0.126993 |
| 0.04269  | 0.35732  | 0.013264 | 0.77497  | 0.138614  | 0.00268  | 0.053208 | 0.25115  | 0.128807 |
| 0.042564 | 0.35874  | 0.153665 | 0.00086  | 0.060172  | 0.19428  | 0.129758 | 0.00498  | 0.094205 |
| -0.06525 | 0.15919  | 0.013049 | 0.77853  | -0.10401  | 0.02459  | 0.096132 | 0.03783  | -0.03821 |
| 0.185321 | 5.60E-05 | 0.236536 | 2.32E-07 | -0.05373  | 0.24649  | 0.031861 | 0.49218  | 0.011303 |
| 0.129034 | 0.00523  | 0.117635 | 0.01095  | 0.267953  | 4.03E-09 | 0.220456 | 1.50E-06 | 0.25095  |
| -0.04365 | 0.34656  | -0.03052 | 0.51061  | -4.09E-05 | 0.9993   | 0.018154 | 0.69558  | 0.028108 |
| 0.09961  | 0.03138  | -0.00094 | 0.98384  | -0.02863  | 0.53718  | -0.03879 | 0.40297  | -0.05207 |
| 0.063174 | 0.17291  | 0.061688 | 0.18326  | 0.020737  | 0.65489  | 0.03767  | 0.4167   | -0.00199 |
| 0.047342 | 0.3073   | -0.03442 | 0.45802  | -0.01442  | 0.75601  | -0.08278 | 0.07392  | 0.004805 |
| -0.02085 | 0.65321  | -0.2044  | 8.49E-06 | 0.115864  | 0.01222  | -0.01382 | 0.76575  | 0.143015 |
| -0.01474 | 0.75078  | 0.062778 | 0.17563  | 0.151456  | 0.00103  | 0.077543 | 0.09418  | 0.102528 |
| -0.03591 | 0.43876  | 0.017626 | 0.704    | 0.020625  | 0.65664  | 0.036244 | 0.43457  | -0.02579 |
| 0.113913 | 0.01377  | 0.109164 | 0.01829  | -0.07835  | 0.09079  | -0.02997 | 0.51819  | -0.07304 |
| 0.171434 | 0.0002   | 0.135616 | 0.00332  | 0.1299    | 0.00493  | 0.141755 | 0.00214  | 0.131467 |
| -0.02495 | 0.5907   | 0.10735  | 0.02032  | -0.0293   | 0.52766  | -0.0652  | 0.15954  | 0.064729 |
| -0.02085 | 0.65316  | -0.02958 | 0.52366  | 0.064736  | 0.16251  | 0.025782 | 0.57838  | 0.021812 |
| -0.00736 | 0.87401  | 0.039725 | 0.39172  | 0.072036  | 0.12005  | 0.067089 | 0.14774  | 0.060703 |

|          |          |          |          |          |          |          |          |          |
|----------|----------|----------|----------|----------|----------|----------|----------|----------|
| 0.040553 | 0.38192  | 0.092908 | 0.04478  | 0.159102 | 0.00056  | 0.134116 | 0.00369  | 0.109654 |
| -0.00757 | 0.87048  | 0.037502 | 0.41878  | -0.0029  | 0.95023  | -0.04694 | 0.31139  | 0.095919 |
| 0.082622 | 0.07446  | 0.064904 | 0.16142  | 0.123173 | 0.0077   | 0.014979 | 0.7468   | 0.16404  |
| -0.03508 | 0.44942  | -0.02074 | 0.65491  | -0.00041 | 0.99293  | 0.019886 | 0.66819  | -0.00688 |
| 0.064568 | 0.16361  | 0.16528  | 0.00033  | 0.1442   | 0.00178  | 0.098498 | 0.03334  | 0.230581 |
| 0.128125 | 0.00556  | -0.01052 | 0.82063  | 0.036773 | 0.42789  | -0.01826 | 0.6939   | -0.05607 |
| 0.049455 | 0.28619  | -0.11978 | 0.00958  | -0.01309 | 0.77777  | -0.05206 | 0.26158  | -0.04816 |
| 0.011823 | 0.79886  | -0.04651 | 0.31586  | 0.032314 | 0.48604  | 0.012959 | 0.78001  | 0.084117 |
| 0.069258 | 0.13505  | 0.014655 | 0.7521   | 0.192701 | 2.76E-05 | 0.103008 | 0.02602  | 0.172703 |
| -0.0477  | 0.30367  | -0.06009 | 0.19492  | -0.0705  | 0.12819  | -0.15086 | 0.00107  | 0.020072 |
| 0.176647 | 0.00012  | -0.15556 | 0.00074  | 0.025258 | 0.58613  | -0.11951 | 0.00974  | 0.021793 |
| -0.04843 | 0.29633  | -0.14599 | 0.00156  | 0.000275 | 0.99527  | -0.14719 | 0.00142  | -0.01012 |
| -0.08235 | 0.07542  | -0.11634 | 0.01187  | -0.15922 | 0.00055  | -0.23594 | 2.50E-07 | -0.13263 |
| 0.047866 | 0.30197  | 0.012865 | 0.78156  | -0.03446 | 0.45756  | -0.05838 | 0.20793  | 0.044788 |
| -0.0564  | 0.22375  | 0.033101 | 0.47548  | 0.227046 | 7.11E-07 | 0.195384 | 2.12E-05 | 0.046503 |
| -0.15627 | 0.0007   | -0.02034 | 0.66102  | -0.0869  | 0.06059  | -0.06418 | 0.16616  | -0.12329 |
| -0.07778 | 0.09316  | -0.0034  | 0.94155  | -0.02837 | 0.54084  | -0.02309 | 0.61876  | -0.18862 |
| 0.196329 | 1.93E-05 | -0.03091 | 0.50522  | -0.17259 | 0.00018  | -0.04833 | 0.29729  | -0.1322  |
| 0.135116 | 0.00344  | 0.181214 | 8.21E-05 | 0.293608 | 9.73E-11 | 0.250773 | 3.96E-08 | 0.218063 |
| -0.04129 | 0.3733   | 0.013581 | 0.76975  | 0.108519 | 0.01899  | 0.093403 | 0.04365  | 0.033264 |
| 0.104353 | 0.02412  | -0.14007 | 0.00241  | 0.01592  | 0.7315   | -0.01241 | 0.78918  | -0.06646 |
| -0.06695 | 0.14858  | -0.04648 | 0.31625  | -0.13728 | 0.00295  | -0.20613 | 7.09E-06 | 0.005943 |
| -0.02987 | 0.51962  | 0.01485  | 0.74892  | 0.109324 | 0.01811  | 0.09486  | 0.04045  | 0.041478 |
| 0.121843 | 0.00839  | 0.361345 | 7.52E-16 | 0.139474 | 0.00252  | 0.23918  | 1.69E-07 | 0.199089 |
| 0.045161 | 0.33015  | 0.092023 | 0.04687  | 0.197193 | 1.77E-05 | 0.189584 | 3.73E-05 | 0.156355 |
| 0.146929 | 0.00145  | 0.114958 | 0.01292  | 0.08031  | 0.08298  | 0.027455 | 0.55397  | 0.100294 |
| 0.038092 | 0.4115   | 0.065997 | 0.15447  | 0.034031 | 0.46316  | 0.042705 | 0.35715  | 0.076686 |
| 0.06092  | 0.18878  | 0.164043 | 0.00037  | -0.03183 | 0.49264  | 0.006355 | 0.89106  | 0.032512 |
| -0.06172 | 0.18306  | -0.18793 | 4.37E-05 | -0.13268 | 0.00408  | -0.19408 | 2.41E-05 | -0.1234  |
| 0.061713 | 0.18308  | 0.129518 | 0.00506  | 0.065152 | 0.15982  | 0.048798 | 0.29265  | 0.027453 |
| 0.010847 | 0.81516  | 0.003723 | 0.93605  | -0.14667 | 0.00148  | -0.04152 | 0.3707   | -0.12094 |
| 0.009674 | 0.83484  | -0.23224 | 3.88E-07 | -0.09845 | 0.03342  | -0.31806 | 1.94E-12 | -0.16122 |
| 0.087479 | 0.05889  | -0.13663 | 0.00309  | -0.12523 | 0.00674  | -0.14922 | 0.00122  | -0.12847 |
| -0.14143 | 0.00219  | -0.16961 | 0.00023  | -0.22943 | 5.39E-07 | -0.25746 | 1.66E-08 | -0.1948  |
| -0.14445 | 0.00175  | -0.3468  | 1.21E-14 | -0.22163 | 1.32E-06 | -0.31819 | 1.90E-12 | -0.28129 |
| 0.049193 | 0.28875  | 0.097141 | 0.03585  | 0.007513 | 0.87137  | -0.01625 | 0.72609  | 0.095043 |
| -0.01972 | 0.67083  | -0.07452 | 0.10778  | 0.098779 | 0.03283  | 0.123473 | 0.00755  | -0.04    |
| 0.039975 | 0.38874  | 0.077128 | 0.09596  | -0.12375 | 0.00742  | 0.015331 | 0.74107  | -0.1431  |
| -0.00174 | 0.97001  | -0.1545  | 0.00081  | -0.08776 | 0.05807  | -0.27248 | 2.15E-09 | -0.05625 |
| 0.130176 | 0.00484  | -0.00803 | 0.86262  | -0.0584  | 0.2078   | -0.1017  | 0.02799  | -0.049   |
| -0.09994 | 0.03083  | -0.23517 | 2.74E-07 | -0.26441 | 6.54E-09 | -0.13868 | 0.00267  | -0.22882 |
| -0.04965 | 0.28424  | -0.20838 | 5.60E-06 | -0.00211 | 0.96373  | -0.09799 | 0.03426  | 0.001963 |
| 0.071533 | 0.12267  | -0.01783 | 0.70077  | 0.091623 | 0.04783  | -0.03309 | 0.47565  | 0.138955 |
| -0.02046 | 0.65922  | 0.024225 | 0.60155  | -0.03875 | 0.40341  | 0.006549 | 0.88776  | -0.04482 |
| 0.023206 | 0.61693  | 0.08271  | 0.07416  | 0.064345 | 0.16507  | 0.052606 | 0.25656  | 0.051749 |

|          |          |          |          |          |          |          |          |          |
|----------|----------|----------|----------|----------|----------|----------|----------|----------|
| -0.04704 | 0.31041  | 0.099657 | 0.0313   | -0.12353 | 0.00753  | -0.0294  | 0.5262   | -0.00057 |
| 0.019197 | 0.67903  | 0.05835  | 0.20816  | 0.017027 | 0.71362  | 0.02871  | 0.53599  | 0.017459 |
| -0.11641 | 0.01182  | -0.04419 | 0.34066  | -0.13689 | 0.00303  | -0.06379 | 0.16875  | -0.16364 |
| 0.174255 | 0.00015  | 0.015743 | 0.73437  | 0.121079 | 0.00881  | 0.076756 | 0.09758  | 0.072796 |
| -0.05863 | 0.20599  | 0.172261 | 0.00018  | -0.13027 | 0.00481  | 0.052326 | 0.2591   | -0.15449 |
| 0.35109  | 5.41E-15 | 0.452825 | 5.46E-25 | 0.207766 | 5.97E-06 | 0.345174 | 1.64E-14 | 0.10261  |
| 0.166467 | 0.0003   | 0.074823 | 0.10634  | 0.241986 | 1.20E-07 | 0.063875 | 0.16818  | 0.275764 |
| -0.02681 | 0.56337  | -0.09148 | 0.04818  | -0.08796 | 0.05751  | -0.08409 | 0.06943  | -0.06503 |
| 0.003105 | 0.94665  | -0.06973 | 0.13243  | -0.07289 | 0.11573  | -0.0746  | 0.10737  | -0.06596 |
| -0.01106 | 0.8116   | -0.04403 | 0.34238  | -0.01502 | 0.74606  | -0.03475 | 0.4538   | -0.04434 |
| 0.055901 | 0.22792  | -0.0243  | 0.60042  | 0.030893 | 0.50543  | 0.005121 | 0.91211  | 0.022685 |
| -0.0498  | 0.2828   | -0.02898 | 0.5321   | -0.07541 | 0.10362  | -0.07364 | 0.11198  | -0.03993 |
| -0.03215 | 0.48827  | -0.17417 | 0.00016  | -0.1092  | 0.01825  | -0.272   | 2.30E-09 | -0.10927 |
| -0.1769  | 0.00012  | -0.20988 | 4.77E-06 | -0.06206 | 0.1806   | -0.13014 | 0.00485  | -0.09906 |
| -0.08347 | 0.07153  | -0.12198 | 0.00832  | -0.04175 | 0.36797  | 0.00644  | 0.88962  | 0.025856 |
| -0.09759 | 0.035    | -0.02945 | 0.52551  | -0.00026 | 0.99549  | 0.036788 | 0.4277   | 0.098612 |
| 0.042265 | 0.36214  | 0.028694 | 0.53622  | 0.146815 | 0.00147  | 0.047938 | 0.30125  | 0.150934 |
| 0.248387 | 5.36E-08 | 0.001679 | 0.97114  | 0.206446 | 6.86E-06 | 0.033116 | 0.47528  | 0.196248 |
| -0.0007  | 0.98796  | 0.100276 | 0.03026  | -0.17926 | 9.81E-05 | -0.0867  | 0.06119  | -0.14876 |
| 0.224406 | 9.63E-07 | 0.063682 | 0.16947  | 0.236011 | 2.47E-07 | 0.09634  | 0.03742  | 0.135299 |
| -0.13743 | 0.00292  | -0.4399  | 1.60E-23 | -0.04575 | 0.32385  | -0.15703 | 0.00066  | -0.2108  |
| 0.016851 | 0.71646  | 0.11104  | 0.01637  | -0.08077 | 0.08123  | -0.06599 | 0.15448  | -0.00747 |
| 0.02044  | 0.65952  | 0.046078 | 0.32041  | 0.037516 | 0.41861  | 0.013662 | 0.7684   | 0.09351  |
| 0.007643 | 0.86917  | 0.018003 | 0.69799  | -0.13134 | 0.00447  | -0.14478 | 0.00171  | 0.000136 |
| 0.007919 | 0.86448  | 0.133148 | 0.00395  | -0.07313 | 0.11453  | -0.03772 | 0.41604  | 0.03799  |
| -0.20899 | 5.25E-06 | -0.38755 | 3.47E-18 | -0.21492 | 2.77E-06 | -0.2931  | 1.05E-10 | -0.21488 |
| 0.034437 | 0.45783  | -0.11034 | 0.01706  | 0.140262 | 0.00238  | 0.110947 | 0.01646  | 0.060992 |
| 0.366341 | 2.80E-16 | 0.402249 | 1.37E-19 | 0.368023 | 2.00E-16 | 0.335369 | 9.72E-14 | 0.299442 |
| -0.05809 | 0.2102   | -0.11438 | 0.01339  | -0.05633 | 0.22434  | -0.09287 | 0.04487  | 0.031848 |
| 0.104198 | 0.02433  | 0.090436 | 0.05081  | 0.112675 | 0.01484  | -0.00798 | 0.86349  | 0.16599  |
| 0.083628 | 0.07099  | 0.144203 | 0.00178  | 0.09157  | 0.04796  | 0.067568 | 0.14487  | 0.106589 |
| -0.00145 | 0.9751   | 0.15419  | 0.00083  | -0.12588 | 0.00645  | 0.181407 | 8.06E-05 | -0.112   |
| -0.05607 | 0.22648  | 0.100306 | 0.03021  | 0.076659 | 0.098    | 0.070187 | 0.12988  | 0.06793  |
| 0.037466 | 0.41923  | 0.154398 | 0.00081  | 0.175277 | 0.00014  | 0.159959 | 0.00052  | 0.176512 |
| -0.08909 | 0.05436  | -0.0593  | 0.20085  | 0.016173 | 0.7274   | 0.005249 | 0.90992  | -0.02356 |
| 0.15238  | 0.00096  | 0.35692  | 1.78E-15 | 0.344907 | 1.72E-14 | 0.45968  | 8.58E-26 | 0.146108 |
| -0.06624 | 0.15293  | -0.07502 | 0.10541  | -0.12209 | 0.00826  | 0.009574 | 0.83651  | -0.26853 |
| 0.491646 | 8.60E-30 | 0.08137  | 0.07898  | 0.112978 | 0.01458  | 0.059478 | 0.19949  | 0.080506 |
| 0.260683 | 1.08E-08 | 0.22727  | 6.93E-07 | 0.078909 | 0.08851  | 0.120364 | 0.00923  | 0.072938 |
| -0.00371 | 0.93635  | 0.042186 | 0.36302  | -0.08108 | 0.08004  | -0.00904 | 0.84554  | -0.04223 |
| 0.053772 | 0.24615  | 0.092    | 0.04692  | -0.09609 | 0.03791  | -0.15743 | 0.00064  | -0.11656 |
| 0.170757 | 0.00021  | 0.204153 | 8.71E-06 | 0.28336  | 4.51E-10 | 0.280751 | 6.60E-10 | 0.278835 |
| -0.13321 | 0.00393  | -0.0777  | 0.09349  | -0.08804 | 0.05728  | -0.02327 | 0.61603  | -0.11197 |
| 0.180567 | 8.71E-05 | 0.150337 | 0.00112  | 0.070245 | 0.12957  | -0.04158 | 0.36992  | 0.071091 |
| -0.28825 | 2.19E-10 | -0.18968 | 3.70E-05 | -0.1548  | 0.00079  | -0.10624 | 0.02166  | -0.24249 |

|          |          |           |          |          |          |          |          |          |
|----------|----------|-----------|----------|----------|----------|----------|----------|----------|
| 0.038779 | 0.4031   | -0.08651  | 0.06178  | 0.002288 | 0.96067  | -0.05921 | 0.2015   | -0.02661 |
| -0.05498 | 0.23567  | -0.07364  | 0.11201  | 0.124877 | 0.00689  | 0.125181 | 0.00676  | 0.072537 |
| 0.203178 | 9.64E-06 | -0.01482  | 0.74947  | 0.160499 | 0.0005   | 0.002929 | 0.94967  | 0.055859 |
| -0.03302 | 0.47659  | -0.10958  | 0.01784  | 0.224956 | 9.04E-07 | 0.128401 | 0.00546  | 0.128092 |
| -0.03651 | 0.43115  | 0.127719  | 0.00571  | 0.022007 | 0.63524  | 0.093609 | 0.04318  | 0.105408 |
| 0.149512 | 0.00119  | 0.043037  | 0.35342  | 0.124006 | 0.0073   | 0.089401 | 0.05352  | 0.123634 |
| 0.069352 | 0.13452  | -0.15598  | 0.00072  | 0.04463  | 0.33587  | -0.10669 | 0.02111  | 0.03135  |
| -0.01149 | 0.80433  | -0.10759  | 0.02005  | 0.076687 | 0.09788  | 5.19E-06 | 0.99991  | 0.176852 |
| 0.09602  | 0.03806  | 0.051549  | 0.26625  | -0.01087 | 0.81474  | -0.04384 | 0.34446  | 0.070421 |
| 0.03967  | 0.39237  | -0.09326  | 0.04397  | -0.06836 | 0.14021  | -0.04605 | 0.32066  | -0.06675 |
| -0.03609 | 0.43649  | -0.32467  | 6.34E-13 | -0.00758 | 0.87031  | -0.12237 | 0.00811  | -0.04913 |
| 0.034542 | 0.45646  | 0.038558  | 0.40579  | 0.082197 | 0.07598  | 0.065127 | 0.15999  | -0.00916 |
| -0.05688 | 0.21985  | -0.00627  | 0.89255  | -0.20161 | 1.13E-05 | -0.17085 | 0.00021  | -0.14328 |
| 0.16208  | 0.00044  | 0.182279  | 7.44E-05 | 0.229891 | 5.11E-07 | 0.156228 | 0.0007   | 0.134399 |
| 0.084502 | 0.06808  | 0.051002  | 0.27137  | -0.02613 | 0.57332  | 0.044428 | 0.33806  | -0.02182 |
| 0.135839 | 0.00327  | 0.094986  | 0.04019  | -0.13889 | 0.00263  | -0.03065 | 0.50877  | -0.158   |
| -0.03573 | 0.44107  | -0.09999  | 0.03073  | 0.016282 | 0.72563  | -0.02191 | 0.63666  | 0.017123 |
| -0.08999 | 0.05196  | -0.06651  | 0.15129  | -0.08951 | 0.05324  | -0.05965 | 0.19822  | -0.11352 |
| -0.096   | 0.03809  | 0.053634  | 0.24736  | -0.20573 | 7.39E-06 | -0.09712 | 0.0359   | -0.13485 |
| -0.00666 | 0.88584  | -0.05923  | 0.20134  | -0.01908 | 0.68086  | -0.04659 | 0.31501  | -0.02196 |
| -0.01744 | 0.70696  | -0.06209  | 0.18039  | 0.042336 | 0.36133  | 0.055403 | 0.2321   | -0.02423 |
| -0.16256 | 0.00042  | -0.13376  | 0.00378  | -0.31491 | 3.28E-12 | -0.17279 | 0.00018  | -0.21628 |
| 0.095569 | 0.03897  | 0.058556  | 0.20656  | -0.09218 | 0.04649  | -0.16128 | 0.00047  | -0.09817 |
| -0.19302 | 2.67E-05 | -0.08166  | 0.07793  | -0.13792 | 0.00282  | -0.03972 | 0.39184  | -0.17058 |
| -0.25445 | 2.46E-08 | -0.16524  | 0.00034  | -0.18914 | 3.90E-05 | -0.14014 | 0.0024   | -0.11956 |
| -0.04741 | 0.3066   | 0.152675  | 0.00093  | -0.08248 | 0.07498  | -0.02031 | 0.66151  | -0.02253 |
| 0.055285 | 0.23309  | -0.04543  | 0.32724  | 0.018497 | 0.69012  | -0.08649 | 0.06183  | -0.04001 |
| -0.04497 | 0.33217  | 0.036525  | 0.43102  | -0.01203 | 0.79548  | 0.121063 | 0.00882  | -0.00985 |
| -0.03388 | 0.46517  | 0.023535  | 0.61194  | -0.12614 | 0.00634  | -0.11237 | 0.01512  | 0.012859 |
| 0.062229 | 0.17944  | 0.114762  | 0.01308  | 0.125017 | 0.00683  | 0.044118 | 0.34145  | 0.178567 |
| 0.00356  | 0.93884  | -0.10876  | 0.01872  | 0.026928 | 0.5616   | 0.06339  | 0.17144  | -0.00352 |
| 0.036477 | 0.43162  | 0.033088  | 0.47566  | 0.162843 | 0.00041  | 0.161931 | 0.00044  | 0.122795 |
| -0.01156 | 0.80317  | -0.03965  | 0.39257  | -0.22508 | 8.91E-07 | -0.14411 | 0.0018   | -0.09092 |
| -0.05778 | 0.2126   | -0.02187  | 0.63735  | -0.0583  | 0.20854  | -0.04068 | 0.38046  | -0.06334 |
| 0.008135 | 0.86082  | 0.041518  | 0.37069  | 0.201211 | 1.18E-05 | 0.225752 | 8.25E-07 | 0.196207 |
| 0.123465 | 0.00756  | 0.42831   | 2.94E-22 | 0.080307 | 0.08299  | 0.294415 | 8.60E-11 | 0.067852 |
| 0.276255 | 1.26E-09 | 0.345831  | 1.45E-14 | 0.299546 | 3.89E-11 | 0.387028 | 3.89E-18 | 0.160589 |
| -0.05517 | 0.2341   | -0.02921  | 0.52893  | -0.01443 | 0.75584  | -0.12353 | 0.00752  | -0.03418 |
| 0.081644 | 0.07798  | 0.082144  | 0.07617  | 0.167769 | 0.00027  | 0.07481  | 0.1064   | 0.101618 |
| 0.010091 | 0.82783  | -0.05099  | 0.27145  | -0.22465 | 9.36E-07 | -0.15454 | 0.00081  | -0.09655 |
| 0.157278 | 0.00065  | 0.076448  | 0.09894  | 0.089822 | 0.0524   | 0.046352 | 0.31754  | 0.066609 |
| 0.140217 | 0.00239  | 0.212289  | 3.69E-06 | 0.066939 | 0.14865  | 0.103025 | 0.02599  | 0.146401 |
| -0.13547 | 0.00335  | -0.11588  | 0.01221  | -0.11001 | 0.01739  | -0.14943 | 0.0012   | -0.0441  |
| 0.105244 | 0.02293  | -0.06167  | 0.18339  | 0.115041 | 0.01286  | -0.04911 | 0.2896   | 0.079926 |
| 0.106589 | 0.02123  | -6.41E-05 | 0.9989   | 0.009456 | 0.83851  | -0.05936 | 0.20038  | 0.025549 |

|          |          |          |          |          |          |          |          |          |
|----------|----------|----------|----------|----------|----------|----------|----------|----------|
| 0.019281 | 0.67772  | -0.12051 | 0.00914  | 0.063883 | 0.16813  | -0.01617 | 0.72746  | 0.033293 |
| 0.019762 | 0.67015  | 0.005247 | 0.90996  | 0.056163 | 0.22574  | -0.0009  | 0.98445  | 0.132345 |
| 0.235595 | 2.60E-07 | -0.01463 | 0.75254  | 0.197913 | 1.65E-05 | -0.03662 | 0.42978  | 0.151179 |
| -0.00839 | 0.85642  | -0.06673 | 0.14995  | 0.073095 | 0.11469  | 0.092566 | 0.04557  | 0.017123 |
| -0.0332  | 0.47411  | 0.008312 | 0.85782  | -0.12605 | 0.00638  | -0.1269  | 0.00603  | -0.04981 |
| 0.096943 | 0.03624  | -0.0647  | 0.16272  | 0.006478 | 0.88897  | -0.0789  | 0.08853  | -0.01492 |
| -0.02112 | 0.64901  | -0.05737 | 0.2159   | 0.02061  | 0.65688  | -0.0539  | 0.24499  | 0.060949 |
| -0.0084  | 0.8564   | 0.028672 | 0.53652  | -0.02297 | 0.62048  | -0.09129 | 0.04866  | 0.049058 |
| -0.07408 | 0.10988  | -0.14292 | 0.00196  | -0.24291 | 1.07E-07 | -0.22257 | 1.19E-06 | -0.24333 |
| -0.07393 | 0.11059  | -0.02999 | 0.51802  | -0.18686 | 4.84E-05 | -0.14581 | 0.00158  | -0.05892 |
| -0.14267 | 0.002    | -0.27438 | 1.64E-09 | -0.23949 | 1.62E-07 | -0.31758 | 2.11E-12 | -0.24671 |
| -0.1319  | 0.0043   | -0.32685 | 4.35E-13 | -0.14993 | 0.00116  | -0.21843 | 1.89E-06 | -0.22104 |
| 0.127487 | 0.0058   | -0.13139 | 0.00445  | -0.01832 | 0.69297  | -0.07423 | 0.10915  | -0.04656 |
| 0.023396 | 0.61405  | 0.153375 | 0.00088  | -0.03168 | 0.49464  | 0.09379  | 0.04278  | -0.15032 |
| 0.252241 | 3.28E-08 | 0.091788 | 0.04743  | -0.0651  | 0.16019  | -0.06964 | 0.13289  | -0.02655 |
| -0.0182  | 0.69477  | -0.02269 | 0.62481  | -0.18201 | 7.63E-05 | -0.20821 | 5.70E-06 | -0.02352 |
| -0.03054 | 0.51024  | -0.01771 | 0.70266  | -0.03443 | 0.45792  | -0.02202 | 0.63499  | -0.02453 |
| 0.092461 | 0.04582  | 0.236825 | 2.24E-07 | 0.192289 | 2.87E-05 | 0.260267 | 1.14E-08 | 0.08025  |
| 0.309107 | 8.50E-12 | 0.248659 | 5.18E-08 | 0.323808 | 7.34E-13 | 0.222359 | 1.21E-06 | 0.290037 |
| -0.00306 | 0.94738  | 0.00505  | 0.91333  | 0.084452 | 0.06824  | 0.097865 | 0.03449  | 0.094425 |
| 0.166548 | 0.0003   | 0.14087  | 0.00228  | 0.130199 | 0.00483  | 0.120873 | 0.00893  | 0.113238 |
| 0.068961 | 0.13674  | -0.12989 | 0.00493  | 0.155325 | 0.00076  | -0.08214 | 0.07617  | 0.137745 |
| -0.22745 | 6.79E-07 | -0.17509 | 0.00014  | -0.18501 | 5.76E-05 | -0.10769 | 0.01993  | -0.22705 |
| 0.077044 | 0.09632  | 0.125628 | 0.00656  | -0.07849 | 0.09022  | -0.00418 | 0.92813  | 0.014153 |
| 0.050066 | 0.28027  | -0.07695 | 0.09675  | 0.178955 | 0.0001   | 0.008401 | 0.85632  | 0.212308 |
| 0.174186 | 0.00015  | 0.447582 | 2.19E-24 | 0.231897 | 4.04E-07 | 0.420141 | 2.14E-21 | 0.100438 |
| 0.037381 | 0.42028  | 0.054128 | 0.24303  | 0.013184 | 0.7763   | -0.00487 | 0.91648  | 0.055183 |
| 0.229453 | 5.38E-07 | -0.19872 | 1.52E-05 | -0.06162 | 0.18377  | -0.15432 | 0.00082  | -0.06155 |
| 0.033639 | 0.46832  | -0.0252  | 0.58703  | 0.016389 | 0.7239   | -0.04287 | 0.35525  | 0.079806 |
| -0.02973 | 0.5216   | -0.06442 | 0.1646   | -0.14058 | 0.00233  | -0.06692 | 0.14875  | -0.1035  |
| -0.20906 | 5.21E-06 | -0.14383 | 0.00183  | -0.08104 | 0.08022  | -0.01759 | 0.70458  | -0.01284 |
| 0.0642   | 0.16603  | 0.109739 | 0.01768  | 0.194828 | 2.24E-05 | 0.113718 | 0.01394  | 0.219907 |
| -0.03678 | 0.42776  | -0.06147 | 0.18484  | -0.18717 | 4.70E-05 | -0.11945 | 0.00978  | -0.11722 |
| 0.055041 | 0.23517  | -0.09377 | 0.04283  | -0.06681 | 0.14946  | -0.06561 | 0.15693  | -0.04705 |
| -0.03847 | 0.40684  | -0.01598 | 0.73057  | -0.03746 | 0.41931  | -0.14963 | 0.00118  | 0.016294 |
| -0.06652 | 0.15121  | -0.13205 | 0.00426  | -0.07965 | 0.08555  | -0.16156 | 0.00046  | -0.04231 |
| -0.03664 | 0.42953  | -0.07946 | 0.08631  | 0.027822 | 0.54867  | -0.11341 | 0.0142   | 0.037211 |
| 0.13811  | 0.00278  | -0.02006 | 0.6655   | -0.08359 | 0.07113  | -0.06859 | 0.1389   | -0.04012 |
| 0.101376 | 0.02849  | 0.070923 | 0.1259   | 0.078922 | 0.08845  | 0.027954 | 0.54679  | 0.058539 |
| 0.042028 | 0.36483  | 0.118022 | 0.01069  | 0.006553 | 0.88769  | 0.004009 | 0.93114  | 0.0684   |
| 0.130601 | 0.0047   | 0.07562  | 0.10266  | 0.310095 | 7.24E-12 | 0.197224 | 1.76E-05 | 0.188512 |
| -0.01146 | 0.80496  | -0.03107 | 0.50305  | 0.081434 | 0.07875  | 0.04417  | 0.34088  | 0.186296 |
| 0.028504 | 0.53891  | 0.056673 | 0.22155  | 0.056332 | 0.22435  | 0.063176 | 0.1729   | 0.038135 |
| 0.145543 | 0.00161  | 0.3211   | 1.16E-12 | 0.079215 | 0.08728  | 0.207404 | 6.21E-06 | -0.02762 |
| 0.079568 | 0.08587  | -0.05727 | 0.21669  | 0.227529 | 6.73E-07 | 0.156845 | 0.00067  | 0.121025 |

|          |          |          |          |          |          |          |          |          |
|----------|----------|----------|----------|----------|----------|----------|----------|----------|
| 0.140679 | 0.00231  | -0.15314 | 0.0009   | 0.01631  | 0.72518  | 0.022538 | 0.62711  | -0.02061 |
| -0.12574 | 0.00651  | -0.07784 | 0.0929   | -0.09299 | 0.04458  | -0.05323 | 0.25097  | 0.011594 |
| -0.11141 | 0.01601  | -0.11367 | 0.01398  | -0.12342 | 0.00758  | -0.18593 | 5.29E-05 | -0.03272 |
| -0.24696 | 6.42E-08 | -0.11768 | 0.01092  | -0.14731 | 0.00141  | -0.17946 | 9.64E-05 | -0.05466 |
| -0.08715 | 0.05986  | -0.03158 | 0.49596  | -0.16068 | 0.00049  | -0.07935 | 0.08674  | -0.15741 |
| 0.021688 | 0.64015  | -0.00792 | 0.8644   | 0.011261 | 0.80824  | -0.01539 | 0.74015  | -0.02038 |
| 0.03325  | 0.47349  | 0.038686 | 0.40423  | 0.00022  | 0.99622  | -0.033   | 0.47685  | 0.075151 |
| 0.049569 | 0.28507  | 0.068814 | 0.13758  | 0.055416 | 0.23198  | 0.030718 | 0.50785  | 0.113843 |
| 0.242212 | 1.16E-07 | 0.206908 | 6.54E-06 | 0.2664   | 4.99E-09 | 0.285012 | 3.54E-10 | 0.244388 |
| -0.04395 | 0.34332  | 0.107239 | 0.02045  | -0.10405 | 0.02454  | -0.01491 | 0.74785  | -0.02433 |
| 0.099014 | 0.03242  | 0.1471   | 0.00143  | 0.03053  | 0.51045  | 0.128161 | 0.00554  | -0.07755 |
| -0.04049 | 0.38261  | -0.07771 | 0.09345  | -0.184   | 6.34E-05 | -0.18971 | 3.69E-05 | -0.01619 |
| 0.119122 | 0.00998  | -0.02413 | 0.60291  | 0.239306 | 1.66E-07 | 0.060391 | 0.19266  | 0.225838 |
| 0.156558 | 0.00069  | 0.153556 | 0.00087  | 0.25828  | 1.49E-08 | 0.220569 | 1.49E-06 | 0.243585 |
| 0.05697  | 0.21914  | 0.138996 | 0.00261  | 0.136795 | 0.00305  | 0.084151 | 0.06924  | 0.204759 |
| -0.05443 | 0.24044  | 0.064091 | 0.16675  | -0.07451 | 0.10784  | -0.10162 | 0.0281   | -0.10761 |
| 0.077239 | 0.09548  | 0.108698 | 0.01879  | -0.0084  | 0.85639  | 0.151087 | 0.00106  | -0.05509 |
| -0.05935 | 0.20042  | -0.1095  | 0.01793  | -0.03875 | 0.40341  | -0.01635 | 0.72453  | -0.16958 |
| -0.05417 | 0.24265  | -0.02551 | 0.58236  | 0.005584 | 0.9042   | -0.02523 | 0.58651  | -0.04551 |
| -0.15713 | 0.00066  | -0.04211 | 0.36395  | -0.04972 | 0.28363  | -0.02809 | 0.54488  | 0.002612 |
| 0.05364  | 0.24731  | 0.014357 | 0.75699  | 0.104048 | 0.02454  | 0.05549  | 0.23136  | 0.073557 |
| -0.2416  | 1.25E-07 | -0.28043 | 6.91E-10 | -0.11737 | 0.01114  | -0.21157 | 3.99E-06 | -0.07036 |
| 0.114148 | 0.01358  | 0.083198 | 0.07246  | 0.119882 | 0.00951  | 0.078676 | 0.08946  | 0.13455  |
| 0.038439 | 0.40725  | 0.189376 | 3.81E-05 | 0.084202 | 0.06907  | 0.211241 | 4.13E-06 | 0.071378 |
| -0.10992 | 0.01749  | -0.27451 | 1.61E-09 | -0.09721 | 0.03572  | -0.08776 | 0.05809  | -0.25155 |
| -0.00236 | 0.95939  | 0.119729 | 0.0096   | 0.091983 | 0.04696  | 0.130504 | 0.00473  | 0.062272 |
| 0.084771 | 0.0672   | 0.157456 | 0.00064  | 0.069823 | 0.13189  | 0.079226 | 0.08723  | 0.190419 |
| 0.059247 | 0.20124  | 0.194551 | 2.30E-05 | 0.135501 | 0.00335  | 0.246538 | 6.78E-08 | 0.194047 |
| 0.287553 | 2.43E-10 | 0.173556 | 0.00016  | 0.142979 | 0.00195  | 0.211102 | 4.19E-06 | 0.075595 |
| 0.081247 | 0.07944  | 0.187823 | 4.42E-05 | 0.108587 | 0.01891  | 0.221887 | 1.28E-06 | 0.012231 |
| 0.177972 | 0.00011  | -0.12023 | 0.0093   | 0.126028 | 0.00639  | -0.07493 | 0.10586  | -0.00305 |
| -0.06782 | 0.14339  | -0.0395  | 0.39441  | -0.10798 | 0.0196   | -0.05188 | 0.26322  | -0.04409 |
| 0.000724 | 0.98755  | 0.049216 | 0.28853  | 0.053529 | 0.24829  | 0.082871 | 0.07359  | 0.018385 |
| 0.102572 | 0.02666  | 0.058105 | 0.21008  | 0.039594 | 0.39329  | 0.027288 | 0.55637  | 0.057016 |
| -0.04433 | 0.33915  | 0.036991 | 0.42515  | 0.037598 | 0.41759  | 0.028825 | 0.53436  | 0.089949 |
| -0.13116 | 0.00452  | -0.06966 | 0.13278  | 0.138699 | 0.00267  | 0.07135  | 0.12363  | 0.160673 |
| 0.01174  | 0.80024  | 0.023938 | 0.60585  | 0.011705 | 0.80082  | -0.11767 | 0.01093  | -0.04015 |
| -0.21559 | 2.58E-06 | -0.09838 | 0.03355  | -0.26424 | 6.70E-09 | -0.14455 | 0.00174  | -0.22982 |
| -0.10281 | 0.0263   | -0.02592 | 0.57635  | -0.21862 | 1.85E-06 | -0.20302 | 9.80E-06 | -0.10779 |
| 0.130728 | 0.00466  | 0.051606 | 0.26573  | 0.160833 | 0.00048  | 0.121638 | 0.0085   | 0.141762 |
| 0.052516 | 0.25737  | -0.07718 | 0.09571  | -0.0954  | 0.03932  | -0.05419 | 0.2425   | -0.06052 |
| 0.177914 | 0.00011  | 0.29419  | 8.90E-11 | 0.280919 | 6.44E-10 | 0.272051 | 2.28E-09 | 0.216147 |
| 0.118642 | 0.01029  | 0.072767 | 0.11633  | 0.10019  | 0.0304   | 0.115333 | 0.01263  | 0.011246 |
| 0.088027 | 0.05732  | 0.060692 | 0.19044  | -0.09565 | 0.0388   | -0.14259 | 0.00201  | 0.004622 |
| 0.074621 | 0.10729  | 0.039414 | 0.39544  | -0.06114 | 0.18715  | -0.07891 | 0.0885   | -0.07264 |

|          |          |          |          |          |          |          |          |           |
|----------|----------|----------|----------|----------|----------|----------|----------|-----------|
| -0.06717 | 0.14725  | 0.155084 | 0.00077  | -0.02825 | 0.54259  | 0.143264 | 0.00191  | 0.065215  |
| 0.225834 | 8.18E-07 | 0.311932 | 5.36E-12 | 0.072891 | 0.1157   | 0.217941 | 1.99E-06 | 0.035226  |
| 0.0817   | 0.07777  | -0.02696 | 0.56109  | 0.110712 | 0.01669  | 0.053723 | 0.24658  | 0.110468  |
| -0.08997 | 0.05201  | -0.10411 | 0.02445  | -0.14407 | 0.0018   | -0.12747 | 0.0058   | -0.09139  |
| 0.114316 | 0.01344  | 0.092329 | 0.04613  | 0.162717 | 0.00041  | 0.118135 | 0.01062  | 0.182846  |
| 0.137527 | 0.0029   | 0.078212 | 0.09137  | 0.12111  | 0.0088   | 0.069361 | 0.13447  | 0.139633  |
| 0.016234 | 0.72641  | 0.119752 | 0.00959  | -0.01345 | 0.77187  | -0.07512 | 0.10497  | 0.095846  |
| 0.117425 | 0.0111   | -0.04125 | 0.3738   | 0.069614 | 0.13305  | -0.12575 | 0.00651  | 0.195698  |
| 0.093132 | 0.04426  | 0.002589 | 0.9555   | 0.12879  | 0.00531  | 0.139306 | 0.00255  | 0.095279  |
| -0.00045 | 0.9922   | 0.068113 | 0.14164  | 0.08233  | 0.0755   | 0.044476 | 0.33754  | 0.123265  |
| 0.314843 | 3.32E-12 | 0.100971 | 0.02913  | 0.059349 | 0.20046  | 0.021203 | 0.64765  | 0.141782  |
| 0.314665 | 3.42E-12 | 0.106273 | 0.02162  | -0.1575  | 0.00064  | 0.027067 | 0.55958  | -0.13727  |
| -0.09937 | 0.0318   | -0.18365 | 6.55E-05 | -0.11438 | 0.01339  | -0.16611 | 0.00031  | -0.06995  |
| -0.05723 | 0.21703  | -0.08593 | 0.06354  | -0.08708 | 0.06006  | -0.15167 | 0.00101  | -0.0264   |
| -0.08846 | 0.05609  | -0.25798 | 1.55E-08 | -0.176   | 0.00013  | -0.26042 | 1.12E-08 | -0.18292  |
| 0.095772 | 0.03856  | -0.18924 | 3.86E-05 | -0.10646 | 0.02139  | -0.09065 | 0.05027  | -0.1781   |
| -0.02661 | 0.56621  | -0.03748 | 0.41905  | -0.00764 | 0.86921  | -0.05058 | 0.27531  | 0.02149   |
| 0.027535 | 0.55281  | -0.07815 | 0.09162  | -0.05112 | 0.27023  | -0.08689 | 0.06062  | -0.05371  |
| 0.140275 | 0.00238  | -0.07726 | 0.09539  | -0.04066 | 0.38071  | -0.0578  | 0.21251  | -0.08197  |
| 0.036244 | 0.43457  | -0.02845 | 0.53973  | -0.03981 | 0.39073  | -0.15615 | 0.00071  | 0.042147  |
| 0.016876 | 0.71605  | -0.01949 | 0.67436  | 0.022635 | 0.62562  | -0.0474  | 0.30672  | 0.067937  |
| -0.0154  | 0.73998  | 0.04649  | 0.3161   | 0.02861  | 0.53741  | 0.040262 | 0.38535  | 0.092357  |
| 0.174085 | 0.00016  | -0.03823 | 0.40978  | 0.044372 | 0.33867  | 0.033829 | 0.46581  | -6.01E-05 |
| 0.034273 | 0.45999  | -0.01901 | 0.68207  | 0.055142 | 0.23431  | 0.056437 | 0.22348  | 0.0371    |
| 0.142144 | 0.00208  | 0.090019 | 0.05189  | 0.045037 | 0.33148  | 0.027928 | 0.54716  | 0.0895    |
| 0.003934 | 0.93243  | 0.032993 | 0.47692  | 0.001664 | 0.9714   | -0.01734 | 0.70854  | 0.037547  |
| 0.11296  | 0.01459  | -0.01147 | 0.80476  | 0.064987 | 0.16089  | -0.0448  | 0.33402  | 0.038034  |
| 0.051886 | 0.26314  | -0.01855 | 0.68925  | 0.109882 | 0.01753  | -0.04557 | 0.32574  | 0.160182  |
| 0.027119 | 0.55883  | -0.00023 | 0.99605  | 0.057383 | 0.2158   | 0.019451 | 0.67503  | 0.09745   |
| -0.00529 | 0.9093   | -0.05229 | 0.25944  | 0.000187 | 0.99678  | -0.07043 | 0.12856  | -0.0044   |
| -0.06484 | 0.16184  | 0.014364 | 0.75687  | -0.00545 | 0.90643  | 0.014739 | 0.75073  | -0.03316  |
| 0.100148 | 0.03047  | 0.066036 | 0.15422  | -0.03059 | 0.50964  | -0.05632 | 0.22448  | -0.01775  |
| -0.03161 | 0.49562  | -0.04696 | 0.31127  | -0.04911 | 0.2896   | -0.05633 | 0.2244   | -0.07803  |
| 0.108237 | 0.0193   | 0.042199 | 0.36288  | 0.000965 | 0.98341  | 0.047425 | 0.30646  | 0.052091  |
| -0.03084 | 0.50611  | -0.02729 | 0.55642  | 0.018771 | 0.68578  | 0.130715 | 0.00466  | 0.065445  |
| 0.108176 | 0.01937  | 0.048109 | 0.29952  | -0.12856 | 0.0054   | 0.029007 | 0.53178  | -0.12309  |
| -0.06395 | 0.1677   | -0.04721 | 0.30866  | -0.06637 | 0.15212  | 8.22E-05 | 0.99859  | -0.0556   |
| -0.11087 | 0.01654  | -0.10342 | 0.02541  | 0.076888 | 0.097    | -0.04237 | 0.36098  | 0.059377  |
| 0.122071 | 0.00827  | -0.01179 | 0.79937  | 0.053437 | 0.24911  | -0.05373 | 0.24656  | 0.049522  |
| 0.017505 | 0.70595  | 0.113956 | 0.01374  | 0.044119 | 0.34144  | 0.033381 | 0.47174  | 0.078761  |
| 0.096325 | 0.03745  | -0.01147 | 0.80478  | -0.01047 | 0.82152  | -0.03312 | 0.4752   | 0.027785  |
| -0.04469 | 0.33525  | -0.0552  | 0.23383  | -0.13584 | 0.00327  | -0.12079 | 0.00898  | -0.11679  |
| 0.111112 | 0.0163   | 0.054188 | 0.24251  | 0.098192 | 0.03389  | 0.000725 | 0.98754  | 0.206843  |
| 0.163851 | 0.00038  | 0.33245  | 1.63E-13 | 0.267709 | 4.17E-09 | 0.44022  | 1.48E-23 | 0.186548  |
| 0.13298  | 0.00399  | 0.2303   | 4.87E-07 | 0.134507 | 0.00359  | 0.083916 | 0.07002  | 0.242725  |

|          |          |          |          |          |          |          |          |          |
|----------|----------|----------|----------|----------|----------|----------|----------|----------|
| 0.085777 | 0.06401  | 0.170669 | 0.00021  | 0.036661 | 0.4293   | 0.041937 | 0.36587  | 0.166039 |
| 0.047345 | 0.30727  | 0.084362 | 0.06854  | -0.03329 | 0.47292  | -0.04676 | 0.3133   | 0.011387 |
| 0.104172 | 0.02437  | 0.145089 | 0.00167  | -0.00127 | 0.97813  | 0.019843 | 0.66886  | -0.01307 |
| 0.124544 | 0.00705  | 0.354794 | 2.67E-15 | 0.026279 | 0.57108  | 0.205849 | 7.30E-06 | -0.04498 |
| -0.11775 | 0.01088  | -0.11324 | 0.01434  | -0.16797 | 0.00027  | -0.03283 | 0.47912  | -0.11528 |
| 0.071306 | 0.12386  | 0.218835 | 1.80E-06 | 0.150855 | 0.00108  | 0.103568 | 0.02521  | 0.237238 |
| 0.048034 | 0.30028  | 0.261348 | 9.89E-09 | 0.07898  | 0.08822  | 0.2688   | 3.59E-09 | 0.015879 |
| 0.161826 | 0.00045  | 0.154456 | 0.00081  | 0.18781  | 4.42E-05 | 0.173826 | 0.00016  | 0.115021 |
| 0.219695 | 1.64E-06 | 0.419148 | 2.71E-21 | 0.171315 | 0.0002   | 0.228471 | 6.03E-07 | 0.168748 |
| 0.137699 | 0.00286  | 0.17108  | 0.0002   | 0.077739 | 0.09335  | 0.058277 | 0.20873  | 0.135218 |
| -0.05599 | 0.22716  | -0.00155 | 0.9734   | -0.12677 | 0.00608  | -0.02402 | 0.60462  | -0.04446 |
| -0.02659 | 0.5665   | -0.00611 | 0.89532  | 0.038103 | 0.41136  | 0.121201 | 0.00875  | 0.015008 |
| 0.13617  | 0.00319  | 0.134929 | 0.00348  | 0.058486 | 0.20709  | 0.021775 | 0.63882  | 0.106741 |
| 0.238112 | 1.92E-07 | 0.174242 | 0.00015  | 0.343236 | 2.34E-14 | 0.27801  | 9.80E-10 | 0.173503 |
| 0.220266 | 1.54E-06 | 0.334215 | 1.19E-13 | 0.287802 | 2.34E-10 | 0.448329 | 1.80E-24 | 0.14799  |
| -0.07832 | 0.09091  | -0.11867 | 0.01027  | -0.04461 | 0.33613  | 0.040228 | 0.38575  | -0.06559 |
| 0.079927 | 0.08446  | 0.049084 | 0.28983  | -0.08377 | 0.07052  | -0.06081 | 0.18958  | -0.13072 |
| 0.123532 | 0.00753  | 0.07222  | 0.1191   | 0.294264 | 8.80E-11 | 0.276468 | 1.22E-09 | 0.143452 |
| -0.09067 | 0.0502   | 0.114376 | 0.01339  | -0.10436 | 0.02411  | -0.06849 | 0.13944  | -0.00302 |
| -0.01884 | 0.68472  | 0.010644 | 0.81856  | -0.07285 | 0.11592  | -0.05766 | 0.21359  | -0.01597 |
| -0.01157 | 0.803    | -0.01752 | 0.70574  | -0.02659 | 0.56659  | 0.032047 | 0.48965  | -0.01031 |
| 0.082735 | 0.07407  | 0.273789 | 1.79E-09 | -0.03502 | 0.4502   | 0.20572  | 7.40E-06 | -0.0306  |
| 0.028061 | 0.54525  | 0.257692 | 1.61E-08 | 0.21679  | 2.26E-06 | 0.355121 | 2.51E-15 | 0.178793 |
| 0.017171 | 0.7113   | -0.02539 | 0.58414  | -0.0741  | 0.10977  | -0.09139 | 0.04841  | -0.00772 |
| 0.037585 | 0.41775  | 0.03652  | 0.43108  | 0.011177 | 0.80964  | 0.003272 | 0.94379  | 0.002409 |
| 0.0985   | 0.03333  | 0.237774 | 2.00E-07 | 0.135893 | 0.00326  | 0.152632 | 0.00094  | 0.208113 |
| -0.07939 | 0.08657  | 0.193051 | 2.67E-05 | -0.15349 | 0.00088  | -0.02823 | 0.54287  | -0.05601 |
| 0.076809 | 0.09735  | 0.072441 | 0.11797  | -0.12237 | 0.00811  | -0.00362 | 0.93782  | -0.08191 |
| -0.05157 | 0.26607  | -0.03797 | 0.41295  | -0.19953 | 1.40E-05 | -0.25796 | 1.55E-08 | -0.11055 |
| -0.04569 | 0.32447  | 0.165977 | 0.00032  | -0.03941 | 0.39553  | 0.07598  | 0.10102  | -0.01977 |
| -0.13869 | 0.00267  | 0.070519 | 0.12807  | -0.23774 | 2.01E-07 | -0.0784  | 0.09057  | -0.14136 |
| -0.00981 | 0.83253  | 0.127753 | 0.0057   | -0.10799 | 0.01958  | -0.03402 | 0.46329  | -0.06541 |
| -0.00985 | 0.83191  | 0.127151 | 0.00593  | -0.03595 | 0.43827  | -0.03788 | 0.41409  | 0.005299 |
| 0.068873 | 0.13724  | -0.14129 | 0.00221  | 0.018052 | 0.69721  | -0.10349 | 0.02532  | -0.02412 |
| 0.072524 | 0.11755  | 0.014757 | 0.75044  | -0.07817 | 0.09153  | -0.05253 | 0.25722  | -0.0821  |
| 0.259888 | 1.20E-08 | 0.094937 | 0.04029  | 0.013999 | 0.76287  | 0.019491 | 0.6744   | 0.193052 |
| 0.114785 | 0.01306  | 0.053823 | 0.2457   | 0.10837  | 0.01915  | 0.012108 | 0.79412  | 0.071825 |
| 0.3835   | 8.24E-18 | -0.07331 | 0.11361  | 0.094785 | 0.04061  | -0.08684 | 0.06078  | 0.077238 |
| 0.069681 | 0.13268  | 0.085003 | 0.06646  | -0.00612 | 0.89506  | 0.051653 | 0.26528  | 0.055697 |
| 0.362254 | 6.29E-16 | 0.084911 | 0.06675  | -0.02584 | 0.57755  | 0.077933 | 0.09253  | 0.003945 |
| -0.01075 | 0.81679  | 0.003483 | 0.94017  | -0.06643 | 0.15177  | -0.09125 | 0.04875  | -0.00212 |
| 0.009585 | 0.83634  | 0.011792 | 0.79939  | -0.00905 | 0.84535  | -0.00156 | 0.9731   | 0.005751 |
| 0.056873 | 0.21992  | -0.05356 | 0.248    | 0.019895 | 0.66806  | -0.01977 | 0.67004  | 0.059356 |
| 0.066441 | 0.1517   | 0.029331 | 0.52719  | -0.02423 | 0.60152  | -0.05599 | 0.22715  | 0.026461 |
| 0.047389 | 0.30682  | 0.145219 | 0.00165  | -0.01624 | 0.72629  | -0.00098 | 0.98319  | 0.076063 |



|          |          |          |          |          |          |          |          |          |
|----------|----------|----------|----------|----------|----------|----------|----------|----------|
| 0.029263 | 0.52815  | 0.073382 | 0.11326  | 0.123217 | 0.00768  | 0.180144 | 9.06E-05 | 0.202635 |
| -0.18056 | 8.71E-05 | -0.16078 | 0.00049  | -0.19521 | 2.15E-05 | -0.14405 | 0.0018   | -0.23088 |
| -0.02821 | 0.54309  | 0.028992 | 0.53199  | -0.04547 | 0.32684  | 0.038827 | 0.40253  | -0.03947 |
| -0.03161 | 0.49565  | 0.069509 | 0.13364  | -0.03163 | 0.49526  | -0.01108 | 0.81126  | 0.038726 |
| 0.03755  | 0.41819  | -0.19577 | 2.04E-05 | 0.009269 | 0.84165  | -0.0279  | 0.5475   | -0.03582 |
| -0.17012 | 0.00022  | -0.0778  | 0.09308  | -0.1432  | 0.00192  | -0.09335 | 0.04376  | -0.0702  |
| 0.196494 | 1.90E-05 | 0.297828 | 5.08E-11 | 0.114797 | 0.01305  | 0.239652 | 1.59E-07 | 0.053037 |
| 0.052541 | 0.25714  | 0.089187 | 0.0541   | 0.087925 | 0.05761  | 0.105458 | 0.02265  | 0.109495 |
| 0.092755 | 0.04513  | 0.068194 | 0.14117  | 0.037188 | 0.42269  | 0.043307 | 0.35041  | 0.022155 |
| 0.033139 | 0.47498  | 0.063364 | 0.17162  | -0.13741 | 0.00292  | -0.08545 | 0.06503  | -0.07253 |
| 0.029196 | 0.5291   | -0.16758 | 0.00028  | 0.074827 | 0.10632  | -0.12735 | 0.00585  | 0.038662 |
| -0.2059  | 7.26E-06 | -0.14654 | 0.0015   | -0.06899 | 0.13656  | 0.006865 | 0.88237  | -0.17235 |
| 0.050184 | 0.27914  | 0.01844  | 0.69103  | 0.056803 | 0.22049  | 0.188652 | 4.08E-05 | -0.0209  |
| 0.048656 | 0.29405  | -0.10733 | 0.02034  | 0.077793 | 0.09312  | 0.031172 | 0.50159  | 0.091151 |
| 0.073645 | 0.11198  | 0.006924 | 0.88137  | 0.0153   | 0.74158  | -0.03089 | 0.50547  | -0.00423 |
| -0.12908 | 0.00521  | -0.17945 | 9.65E-05 | -0.24642 | 6.88E-08 | -0.16783 | 0.00027  | -0.17255 |
| 0.289653 | 1.77E-10 | -0.04074 | 0.37969  | -0.16999 | 0.00022  | -0.15451 | 0.00081  | -0.10826 |
| -0.02665 | 0.56571  | 0.110392 | 0.01701  | 0.167173 | 0.00029  | 0.128445 | 0.00544  | 0.235111 |
| -0.04041 | 0.38364  | -0.06584 | 0.15542  | -0.10091 | 0.02923  | -0.17719 | 0.00012  | -0.06954 |
| 0.111959 | 0.0155   | 0.050504 | 0.27607  | 0.085234 | 0.06572  | 0.08293  | 0.07339  | 0.179071 |
| 0.043174 | 0.35189  | 0.060265 | 0.19359  | -0.00132 | 0.97725  | -0.09103 | 0.04931  | 0.063843 |
| 0.131111 | 0.00454  | 0.084772 | 0.0672   | 0.030748 | 0.50743  | 0.02146  | 0.64368  | 0.047516 |
| -0.00677 | 0.88398  | 0.043029 | 0.35351  | -0.25414 | 2.56E-08 | -0.1811  | 8.30E-05 | -0.1677  |
| 0.054061 | 0.24362  | -0.04032 | 0.38463  | -0.00908 | 0.84485  | -0.00743 | 0.87273  | -0.0555  |
| 0.103311 | 0.02558  | 0.239903 | 1.54E-07 | 0.195733 | 2.05E-05 | 0.248814 | 5.08E-08 | 0.226082 |
| 0.214578 | 2.88E-06 | 0.101654 | 0.02805  | 0.295906 | 6.84E-11 | 0.101982 | 0.02755  | 0.212051 |
| -0.03847 | 0.40683  | 0.004237 | 0.92724  | -0.01726 | 0.70993  | -0.00467 | 0.91976  | 0.057228 |
| 0.199176 | 1.45E-05 | 0.214794 | 2.81E-06 | 0.238348 | 1.87E-07 | 0.127022 | 0.00598  | 0.305476 |
| -0.09071 | 0.05011  | -0.24492 | 8.30E-08 | -0.02784 | 0.54849  | -0.08464 | 0.06765  | -0.07265 |
| -0.07379 | 0.11125  | -0.25134 | 3.68E-08 | -0.06032 | 0.19316  | -0.11081 | 0.01659  | -0.10038 |
| -0.03712 | 0.42349  | -0.21256 | 3.58E-06 | -0.15677 | 0.00067  | -0.12777 | 0.00569  | -0.1898  |
| 0.104395 | 0.02406  | -0.06767 | 0.14427  | 0.124616 | 0.00701  | 0.063355 | 0.17168  | 0.025512 |
| 0.011586 | 0.80281  | 0.040702 | 0.38017  | 0.212281 | 3.69E-06 | 0.204715 | 8.22E-06 | 0.133982 |
| 0.059671 | 0.19803  | -0.00029 | 0.99502  | 0.211293 | 4.11E-06 | 0.229297 | 5.48E-07 | 0.093738 |
| -0.04896 | 0.29102  | 0.037698 | 0.41635  | -0.07643 | 0.09901  | -0.02363 | 0.61057  | 0.001237 |
| -0.0406  | 0.38137  | -0.01963 | 0.67225  | -0.10302 | 0.026    | -0.12536 | 0.00668  | -0.11953 |
| 0.022651 | 0.62537  | 0.012156 | 0.79332  | -0.02478 | 0.59327  | 0.087779 | 0.05803  | -0.00908 |
| 0.173489 | 0.00016  | 0.126982 | 0.006    | 0.13218  | 0.00422  | 0.109943 | 0.01747  | 0.166054 |
| 0.01217  | 0.7931   | -0.03714 | 0.42332  | -0.031   | 0.50399  | -0.07472 | 0.1068   | -0.07238 |
| -0.04644 | 0.31665  | -0.06058 | 0.19125  | 0.072063 | 0.11991  | 0.015867 | 0.73236  | 0.116395 |
| 0.063587 | 0.17011  | 0.126122 | 0.00635  | 0.164978 | 0.00034  | 0.232051 | 3.97E-07 | 0.085942 |
| 0.166161 | 0.00031  | -0.00727 | 0.87544  | -0.11998 | 0.00946  | -0.12803 | 0.00559  | -0.17489 |
| 0.01019  | 0.82616  | 0.000411 | 0.99293  | 0.034678 | 0.45469  | -0.00933 | 0.84068  | 0.099329 |
| 0.126706 | 0.00611  | 0.09356  | 0.04329  | 0.1942   | 2.38E-05 | 0.247442 | 6.05E-08 | 0.170214 |
| 0.055785 | 0.22889  | 0.158197 | 0.0006   | -0.03825 | 0.40962  | 0.156822 | 0.00067  | -0.0226  |

|          |          |          |          |          |          |          |          |          |
|----------|----------|----------|----------|----------|----------|----------|----------|----------|
| -0.01372 | 0.76742  | -0.03322 | 0.47386  | -0.02444 | 0.59827  | -0.04738 | 0.30688  | 0.083887 |
| -0.05257 | 0.25688  | 0.085041 | 0.06633  | 0.009329 | 0.84064  | 0.179926 | 9.24E-05 | 0.08784  |
| -0.01495 | 0.74721  | -0.01692 | 0.71542  | -0.04166 | 0.36901  | -0.04924 | 0.28832  | -0.00761 |
| -0.02471 | 0.59434  | -0.14375 | 0.00184  | -0.00419 | 0.92802  | -0.04744 | 0.30627  | -0.00933 |
| 0.102266 | 0.02711  | -0.11547 | 0.01253  | -0.18047 | 8.79E-05 | -0.12967 | 0.00501  | -0.22458 |
| 0.106748 | 0.02104  | 0.061057 | 0.18779  | -0.07605 | 0.10072  | -0.03331 | 0.47274  | 0.01294  |
| 0.181439 | 8.04E-05 | 0.182748 | 7.12E-05 | 0.135892 | 0.00326  | 0.098371 | 0.03356  | 0.199945 |
| 0.265039 | 6.01E-09 | 0.437563 | 2.91E-23 | 0.254172 | 2.55E-08 | 0.446012 | 3.30E-24 | 0.092942 |
| 0.248099 | 5.56E-08 | 0.011247 | 0.80847  | 0.243935 | 9.39E-08 | 0.260084 | 1.17E-08 | 0.031902 |
| -0.03909 | 0.39936  | 0.004783 | 0.91789  | 0.002216 | 0.96191  | 0.037806 | 0.41502  | 0.031395 |
| 0.112632 | 0.01488  | -0.00531 | 0.90881  | -0.01079 | 0.81612  | 0.000277 | 0.99524  | 0.021954 |
| -0.06613 | 0.15361  | -0.17885 | 0.0001   | 0.007398 | 0.87333  | 0.024624 | 0.59557  | -0.1246  |
| 0.3046   | 1.75E-11 | 0.16093  | 0.00048  | 0.189904 | 3.62E-05 | 0.158257 | 0.0006   | 0.098177 |
| 0.203574 | 9.25E-06 | 0.102042 | 0.02745  | 0.204688 | 8.24E-06 | 0.048626 | 0.29435  | 0.232689 |
| -0.02139 | 0.6447   | 0.012268 | 0.79146  | -0.00566 | 0.90292  | 0.04791  | 0.30153  | -0.00723 |
| 0.074063 | 0.10995  | 0.009957 | 0.83007  | -0.07147 | 0.123    | -0.10054 | 0.02982  | -0.14342 |
| -0.06946 | 0.13391  | -0.38975 | 2.17E-18 | -0.03389 | 0.46506  | -0.21931 | 1.71E-06 | -0.16946 |
| 0.056369 | 0.22404  | 0.046915 | 0.31169  | 0.071463 | 0.12303  | 0.03921  | 0.39789  | 0.139308 |
| 0.068316 | 0.14046  | -0.03076 | 0.5072   | -0.07942 | 0.08646  | 0.010785 | 0.8162   | -0.09951 |
| 0.060303 | 0.19331  | 0.085808 | 0.06391  | -0.00942 | 0.83919  | -0.01839 | 0.69187  | -0.0037  |
| 0.033139 | 0.47498  | 0.148247 | 0.00131  | -0.09439 | 0.04147  | -0.00765 | 0.86907  | 0.03113  |
| 0.13035  | 0.00478  | 0.080243 | 0.08324  | 0.032739 | 0.48032  | -0.00984 | 0.83199  | 0.074836 |
| 0.012346 | 0.79016  | -0.24128 | 1.30E-07 | 0.018725 | 0.68651  | -0.04005 | 0.3878   | -0.0115  |
| -0.09701 | 0.03611  | -0.04845 | 0.29609  | -0.18169 | 7.86E-05 | -0.12569 | 0.00653  | -0.11238 |
| -0.10687 | 0.02089  | -0.12629 | 0.00628  | -0.18281 | 7.08E-05 | -0.14878 | 0.00126  | -0.11946 |
| -0.00451 | 0.92251  | 0.03488  | 0.45207  | 0.014807 | 0.74962  | -0.03015 | 0.5157   | 0.130679 |
| -0.10612 | 0.02181  | -0.1715  | 0.0002   | -0.17913 | 9.93E-05 | -0.14316 | 0.00193  | -0.1501  |
| 0.069048 | 0.13625  | -0.15794 | 0.00061  | -0.04527 | 0.32902  | 0.006663 | 0.88581  | -0.02878 |
| -0.09913 | 0.03221  | -0.0452  | 0.32975  | -0.06568 | 0.15645  | -0.09644 | 0.03722  | 0.001844 |
| -0.01281 | 0.78254  | -0.0141  | 0.76113  | -0.04099 | 0.3768   | -0.04188 | 0.36651  | 0.028772 |
| -0.00126 | 0.97831  | 0.085313 | 0.06547  | 0.027431 | 0.55431  | -0.02745 | 0.55404  | 0.150407 |
| 0.068436 | 0.13976  | 0.001519 | 0.97388  | 0.030921 | 0.50505  | -0.02861 | 0.53747  | 0.023352 |
| -0.00153 | 0.97374  | 0.032692 | 0.48095  | -0.04062 | 0.38115  | -0.04268 | 0.35748  | 0.001505 |
| -0.07433 | 0.10866  | -0.0668  | 0.14948  | -0.07496 | 0.10572  | -0.09859 | 0.03318  | 0.070832 |
| 0.081806 | 0.07738  | -0.13174 | 0.00435  | 0.12377  | 0.00741  | -0.00436 | 0.92509  | 0.07137  |
| -0.02229 | 0.63096  | 0.037586 | 0.41773  | 0.028479 | 0.53927  | 0.06885  | 0.13738  | 0.050251 |
| -0.07441 | 0.10829  | -0.08851 | 0.05595  | 0.04004  | 0.38797  | -0.01602 | 0.72989  | 0.038905 |
| 0.162844 | 0.00041  | 0.111842 | 0.0156   | 0.14687  | 0.00146  | 0.045199 | 0.32974  | 0.197107 |
| 0.048151 | 0.2991   | 0.112275 | 0.0152   | 0.125278 | 0.00671  | 0.046952 | 0.3113   | 0.231485 |
| 0.035962 | 0.43815  | 0.092148 | 0.04656  | -0.00399 | 0.93155  | -0.00841 | 0.85609  | 0.011464 |
| 0.169267 | 0.00024  | 0.114263 | 0.01348  | 0.06492  | 0.16132  | 0.009552 | 0.83688  | 0.0743   |
| 0.147591 | 0.00138  | 0.108426 | 0.01909  | 0.119147 | 0.00996  | 0.037345 | 0.42073  | 0.158226 |
| 0.044459 | 0.33773  | 0.062243 | 0.17934  | -0.00534 | 0.90835  | -0.04626 | 0.31853  | 0.090187 |
| 0.030538 | 0.51033  | 0.059479 | 0.19948  | -0.18941 | 3.79E-05 | -0.04753 | 0.30539  | -0.11272 |
| -0.0342  | 0.46093  | -0.01817 | 0.69531  | -0.12581 | 0.00648  | -0.09199 | 0.04695  | -0.06641 |

|          |          |          |          |          |          |          |          |          |
|----------|----------|----------|----------|----------|----------|----------|----------|----------|
| 0.134102 | 0.00369  | -0.00893 | 0.84739  | 0.134647 | 0.00355  | 0.029272 | 0.52804  | 0.158926 |
| 0.04229  | 0.36184  | -0.1218  | 0.00842  | -0.04037 | 0.38406  | -0.02313 | 0.61802  | 0.003587 |
| 0.102701 | 0.02647  | 0.101135 | 0.02887  | -0.06965 | 0.13287  | -0.04032 | 0.3847   | 0.082641 |
| 0.110816 | 0.01659  | 0.097548 | 0.03508  | -0.06998 | 0.13104  | -0.10205 | 0.02745  | 0.015611 |
| 0.106096 | 0.02184  | 0.064409 | 0.16465  | 0.193275 | 2.61E-05 | 0.166532 | 0.0003   | 0.133103 |
| 0.011776 | 0.79964  | -0.05176 | 0.26429  | -0.01537 | 0.74036  | 0.008978 | 0.84656  | -0.00989 |
| 0.084991 | 0.06649  | 0.045324 | 0.3284   | 0.011875 | 0.798    | -0.05256 | 0.25693  | 0.097486 |
| 0.079304 | 0.08692  | -0.02508 | 0.58884  | -0.12076 | 0.00899  | -0.14248 | 0.00202  | -0.10916 |
| 0.328915 | 3.04E-13 | -0.05818 | 0.20951  | 0.202285 | 1.06E-05 | -0.01886 | 0.68432  | 0.049259 |
| 0.002371 | 0.95925  | 0.045644 | 0.325    | -0.20218 | 1.07E-05 | -0.12766 | 0.00573  | -0.14501 |
| -0.17655 | 0.00013  | -0.12764 | 0.00574  | -0.19844 | 1.56E-05 | -0.17114 | 0.0002   | -0.07912 |
| 0.129809 | 0.00496  | -0.04315 | 0.3522   | -0.00657 | 0.88747  | -0.09149 | 0.04816  | -0.02734 |
| -0.01923 | 0.67847  | -0.05739 | 0.21572  | 0.019592 | 0.67281  | -0.04944 | 0.28635  | 0.048999 |
| -0.18822 | 4.26E-05 | -0.26459 | 6.39E-09 | -0.16049 | 0.0005   | -0.27369 | 1.81E-09 | -0.05429 |
| -0.0134  | 0.77277  | -0.12743 | 0.00582  | -0.11955 | 0.00971  | -0.09056 | 0.05048  | -0.1742  |
| -0.0883  | 0.05654  | -0.074   | 0.11025  | -0.03935 | 0.39615  | -0.01964 | 0.67202  | -0.05012 |
| -0.00859 | 0.85307  | -0.01975 | 0.67033  | -0.10506 | 0.02317  | -0.02113 | 0.64872  | -0.0421  |
| -0.19239 | 2.84E-05 | -0.29763 | 5.24E-11 | -0.11168 | 0.01576  | -0.15133 | 0.00104  | -0.2426  |
| 0.127216 | 0.00591  | -0.08903 | 0.05453  | -0.0792  | 0.08732  | -0.17138 | 0.0002   | 0.06985  |
| 0.098876 | 0.03266  | -0.09242 | 0.04593  | 0.13741  | 0.00292  | 0.164166 | 0.00037  | 0.008452 |
| -0.11443 | 0.01334  | -0.11621 | 0.01197  | -0.15863 | 0.00058  | -0.18408 | 6.29E-05 | -0.01754 |
| 0.055416 | 0.23198  | 0.063535 | 0.17046  | -0.03105 | 0.50325  | -0.03152 | 0.49681  | 0.08669  |
| 0.011217 | 0.80896  | 0.109038 | 0.01842  | 0.075279 | 0.10422  | 0.057132 | 0.21783  | 0.101931 |
| 0.100902 | 0.02924  | -0.07151 | 0.12277  | 0.069478 | 0.13382  | -0.10258 | 0.02664  | 0.153947 |
| 0.117183 | 0.01127  | -0.07913 | 0.08762  | 0.016158 | 0.72764  | -0.06895 | 0.13681  | 0.079071 |
| 0.010336 | 0.82371  | -0.03002 | 0.51759  | 0.067016 | 0.14819  | 0.068027 | 0.14215  | 0.015465 |
| 0.146611 | 0.00149  | 0.032318 | 0.48599  | 0.092933 | 0.04472  | 0.049068 | 0.28998  | 0.070379 |
| 0.042242 | 0.36239  | 0.032598 | 0.48221  | 0.052864 | 0.25423  | -0.00626 | 0.89263  | 0.146539 |
| 0.101465 | 0.02835  | -0.2929  | 1.08E-10 | 0.071708 | 0.12175  | -0.09901 | 0.03242  | 0.007356 |
| -0.08606 | 0.06312  | 0.127176 | 0.00592  | -0.16149 | 0.00046  | 0.038511 | 0.40637  | -0.16444 |
| -0.01716 | 0.71146  | -0.0847  | 0.06744  | -0.05867 | 0.20565  | -0.00856 | 0.85355  | -0.07093 |
| 0.013742 | 0.76708  | -0.00168 | 0.97112  | 0.008537 | 0.85401  | -0.05421 | 0.24234  | 0.138068 |
| 0.083187 | 0.0725   | 0.08202  | 0.07661  | 0.080236 | 0.08326  | 0.082396 | 0.07527  | 0.114265 |
| -0.18405 | 6.31E-05 | -0.03193 | 0.49122  | -0.04769 | 0.30373  | 0.002569 | 0.95584  | 0.043344 |
| -0.08957 | 0.05308  | 0.223909 | 1.02E-06 | 0.098248 | 0.03379  | 0.064735 | 0.16252  | 0.132793 |
| -0.08888 | 0.05493  | 0.027096 | 0.55916  | -0.1819  | 7.70E-05 | -0.02251 | 0.62746  | -0.15277 |
| 0.171923 | 0.00019  | -0.01016 | 0.82674  | 0.085874 | 0.06371  | -0.02283 | 0.62272  | 0.034074 |
| -0.10975 | 0.01767  | -0.26598 | 5.29E-09 | -0.15572 | 0.00073  | -0.244   | 9.31E-08 | -0.1054  |
| 0.072554 | 0.1174   | 0.074291 | 0.10886  | -0.08327 | 0.07223  | -0.09819 | 0.0339   | -0.06546 |
| -0.00792 | 0.86442  | -0.17946 | 9.64E-05 | -0.1795  | 9.61E-05 | -0.07454 | 0.10768  | -0.2329  |
| -0.11828 | 0.01052  | -0.04997 | 0.28117  | -0.09781 | 0.03459  | 0.025647 | 0.58037  | -0.0741  |
| 0.121284 | 0.0087   | 0.260563 | 1.10E-08 | 0.257199 | 1.72E-08 | 0.243538 | 9.86E-08 | 0.224597 |
| 0.1003   | 0.03022  | 0.142895 | 0.00196  | 0.271681 | 2.40E-09 | 0.264623 | 6.36E-09 | 0.246583 |
| -0.20344 | 9.38E-06 | -0.1292  | 0.00517  | -0.23708 | 2.17E-07 | -0.12975 | 0.00498  | -0.21655 |
| 0.155018 | 0.00078  | 0.287544 | 2.43E-10 | 0.249364 | 4.74E-08 | 0.324197 | 6.87E-13 | 0.273843 |

|          |          |          |          |          |          |          |          |          |
|----------|----------|----------|----------|----------|----------|----------|----------|----------|
| 0.036022 | 0.43739  | 0.087529 | 0.05875  | 0.066457 | 0.1516   | 0.046737 | 0.31353  | 0.115914 |
| -0.08563 | 0.06448  | 0.039692 | 0.39211  | -0.24838 | 5.37E-08 | -0.06991 | 0.13141  | -0.15071 |
| 0.056101 | 0.22626  | 0.075348 | 0.1039   | -0.05869 | 0.20555  | -0.05349 | 0.24862  | 0.014325 |
| -0.00228 | 0.96076  | 0.038279 | 0.40919  | 0.064923 | 0.1613   | 0.036344 | 0.4333   | -0.00481 |
| 0.073499 | 0.11269  | 0.026938 | 0.56145  | -0.02603 | 0.57477  | -0.07368 | 0.11181  | 0.094333 |
| 0.173813 | 0.00016  | 0.149008 | 0.00124  | 0.283234 | 4.59E-10 | 0.217259 | 2.15E-06 | 0.217867 |
| 0.180998 | 8.37E-05 | 0.261947 | 9.13E-09 | 0.148131 | 0.00133  | 0.362872 | 5.57E-16 | 0.165909 |
| -0.03094 | 0.50475  | -0.00228 | 0.96088  | 0.059607 | 0.19851  | 0.111103 | 0.01631  | 0.025172 |
| 0.12074  | 0.00901  | 0.226319 | 7.73E-07 | -0.09816 | 0.03395  | 0.104045 | 0.02454  | -0.11256 |
| 0.142843 | 0.00197  | 0.075766 | 0.10199  | 0.07023  | 0.12965  | -0.03892 | 0.40141  | 0.102647 |
| -0.10419 | 0.02434  | 0.011192 | 0.80939  | -0.15255 | 0.00094  | -0.09648 | 0.03713  | -0.12501 |
| 0.071658 | 0.12201  | 0.351476 | 5.03E-15 | 0.189805 | 3.65E-05 | 0.482344 | 1.39E-28 | 0.000235 |
| -0.12928 | 0.00514  | 0.119006 | 0.01005  | 0.051891 | 0.26308  | 0.080904 | 0.08072  | 0.085111 |
| -0.14641 | 0.00151  | -0.37567 | 4.22E-17 | -0.25021 | 4.25E-08 | -0.20736 | 6.23E-06 | -0.31662 |
| 0.043225 | 0.35132  | 0.117134 | 0.0113   | 0.004643 | 0.92028  | 0.010524 | 0.82057  | 0.028975 |
| -0.00037 | 0.99358  | -0.04082 | 0.37879  | -0.0428  | 0.35613  | -0.10453 | 0.02388  | 0.034777 |
| -0.06521 | 0.15947  | 0.052309 | 0.25926  | 0.023131 | 0.61807  | 0.035358 | 0.44589  | 0.038311 |
| -0.05823 | 0.20907  | -0.20088 | 1.22E-05 | -0.1564  | 0.00069  | -0.17714 | 0.00012  | -0.20631 |
| -0.06628 | 0.15272  | 0.005824 | 0.90011  | -0.00729 | 0.8752   | 0.077144 | 0.09589  | -0.05797 |
| -0.01705 | 0.71321  | 0.031347 | 0.49918  | 0.058998 | 0.20314  | 0.062429 | 0.17804  | 0.043244 |
| 0.231328 | 4.32E-07 | 0.082246 | 0.0758   | 0.207581 | 6.09E-06 | 0.093354 | 0.04376  | 0.217059 |
| 0.218119 | 1.95E-06 | 0.104233 | 0.02428  | 0.254195 | 2.54E-08 | 0.097676 | 0.03484  | 0.240266 |
| -0.02559 | 0.58117  | -0.10606 | 0.02188  | 0.087322 | 0.05935  | -0.01459 | 0.75323  | -0.02004 |
| -0.12669 | 0.00612  | -0.03903 | 0.40012  | -0.16817 | 0.00026  | -0.13541 | 0.00337  | -0.1134  |
| 0.037225 | 0.42223  | 0.048129 | 0.29932  | -0.00102 | 0.98249  | -0.07114 | 0.12472  | 0.097524 |
| 0.210288 | 4.57E-06 | 0.069133 | 0.13576  | 0.100072 | 0.0306   | -0.02262 | 0.62591  | 0.065334 |
| -0.16867 | 0.00025  | -0.03926 | 0.39724  | -0.12707 | 0.00596  | -0.03747 | 0.41924  | -0.14572 |
| 0.015312 | 0.74138  | -0.09968 | 0.03126  | 0.069725 | 0.13243  | 0.017152 | 0.71161  | 0.015704 |
| -0.08941 | 0.05351  | -0.06265 | 0.17649  | -0.10514 | 0.02306  | -0.12424 | 0.00718  | -0.06752 |
| -0.06565 | 0.15667  | -0.17697 | 0.00012  | -0.10188 | 0.0277   | -0.14743 | 0.0014   | -0.1347  |
| -0.06379 | 0.16878  | -0.1863  | 5.11E-05 | -0.09155 | 0.048    | -0.13911 | 0.00259  | -0.10801 |
| -0.23088 | 4.55E-07 | -0.11454 | 0.01326  | -0.11483 | 0.01302  | -0.04388 | 0.34409  | -0.05073 |
| 0.054159 | 0.24277  | -0.16583 | 0.00032  | -0.00662 | 0.88657  | -0.22753 | 6.73E-07 | -0.10001 |
| 0.064563 | 0.16364  | 0.361323 | 7.55E-16 | -0.01409 | 0.76135  | 0.179399 | 9.69E-05 | -0.0447  |
| -0.07477 | 0.10661  | -0.14128 | 0.00221  | 0.106743 | 0.02105  | 0.080503 | 0.08224  | -0.0602  |
| 0.210912 | 4.28E-06 | 0.064736 | 0.16251  | 0.265026 | 6.02E-09 | 0.210953 | 4.26E-06 | 0.226349 |
| 0.214049 | 3.05E-06 | 0.203598 | 9.23E-06 | 0.248741 | 5.13E-08 | 0.274684 | 1.57E-09 | 0.222382 |
| 0.014664 | 0.75196  | -0.03281 | 0.47934  | -0.0385  | 0.40649  | -0.05077 | 0.27353  | -0.04134 |
| 0.247298 | 6.16E-08 | 0.183524 | 6.63E-05 | 0.169191 | 0.00024  | 0.167346 | 0.00028  | 0.165577 |
| -0.1504  | 0.00111  | -0.05259 | 0.25671  | -0.09831 | 0.03367  | 0.08835  | 0.05641  | -0.2076  |
| -0.30143 | 2.89E-11 | -0.17819 | 0.00011  | -0.29541 | 7.38E-11 | -0.19428 | 2.36E-05 | -0.23109 |
| 0.085766 | 0.06404  | 0.180402 | 8.84E-05 | 0.135439 | 0.00336  | 0.196947 | 1.81E-05 | 0.086196 |
| -0.04992 | 0.28169  | -0.18846 | 4.16E-05 | -0.09898 | 0.03247  | -0.11235 | 0.01513  | -0.16319 |
| 0.023105 | 0.61846  | -0.10141 | 0.02843  | 0.092759 | 0.04512  | 0.000405 | 0.99303  | 0.014847 |
| 0.068923 | 0.13696  | 0.096955 | 0.03621  | 0.173046 | 0.00017  | 0.123265 | 0.00766  | 0.095095 |

|          |          |          |          |          |          |          |          |          |
|----------|----------|----------|----------|----------|----------|----------|----------|----------|
| -0.00787 | 0.86533  | -0.04053 | 0.38218  | 0.067773 | 0.14365  | 0.033416 | 0.47128  | 0.090143 |
| -0.05727 | 0.21672  | 0.00211  | 0.96373  | -0.16395 | 0.00037  | -0.12655 | 0.00617  | -0.07212 |
| -0.11643 | 0.0118   | -0.04214 | 0.36355  | -0.07456 | 0.10757  | -0.08823 | 0.05674  | -0.09817 |
| -0.00761 | 0.86965  | 0.030575 | 0.50983  | 0.071452 | 0.12309  | 0.033029 | 0.47644  | 0.05272  |
| 0.144909 | 0.00169  | 0.15324  | 0.00089  | 0.103617 | 0.02514  | 0.015595 | 0.73677  | 0.190406 |
| -0.02714 | 0.55854  | 0.030277 | 0.51396  | 0.112767 | 0.01476  | 0.096993 | 0.03614  | 0.112218 |
| 0.147094 | 0.00143  | 0.051407 | 0.26757  | 0.212544 | 3.59E-06 | 0.141218 | 0.00222  | 0.161166 |
| 0.064227 | 0.16585  | -0.00763 | 0.8694   | 0.016269 | 0.72584  | -0.01337 | 0.77324  | 0.034668 |
| -0.12508 | 0.0068   | -0.11345 | 0.01417  | -0.14777 | 0.00136  | -0.08359 | 0.07111  | -0.1439  |
| -0.03911 | 0.39914  | -0.11192 | 0.01553  | 0.014694 | 0.75147  | -0.04781 | 0.30255  | 0.033912 |
| 0.066443 | 0.15169  | -0.05814 | 0.20978  | 0.049725 | 0.28356  | -0.10904 | 0.01842  | 0.046164 |
| -0.09918 | 0.03213  | -0.09036 | 0.05101  | -0.04987 | 0.28212  | -0.01645 | 0.72299  | -0.04814 |
| 0.043618 | 0.34695  | 0.075336 | 0.10396  | 0.123279 | 0.00765  | 0.006492 | 0.88873  | 0.197666 |
| -0.01177 | 0.79967  | -0.0643  | 0.16538  | -0.09528 | 0.03958  | -0.02371 | 0.60927  | -0.09902 |
| 0.026975 | 0.56092  | -0.048   | 0.30061  | 0.009587 | 0.8363   | -0.04955 | 0.28531  | -0.03036 |
| -0.17172 | 0.00019  | -0.16019 | 0.00051  | -0.19229 | 2.87E-05 | -0.14025 | 0.00238  | -0.10164 |
| 0.069529 | 0.13353  | 0.144306 | 0.00177  | -0.0423  | 0.3617   | 0.059971 | 0.19577  | -0.01679 |
| 0.131736 | 0.00435  | 0.181039 | 8.34E-05 | 0.115122 | 0.0128   | 0.123599 | 0.00749  | 0.048658 |
| 0.173964 | 0.00016  | -0.2025  | 1.03E-05 | -0.14038 | 0.00236  | -0.24274 | 1.09E-07 | -0.06582 |
| 0.247538 | 5.97E-08 | 0.226157 | 7.88E-07 | 0.150886 | 0.00107  | 0.20412  | 8.74E-06 | 0.185034 |
| 0.034435 | 0.45787  | 0.083992 | 0.06977  | 0.004816 | 0.91734  | -0.02818 | 0.54355  | 0.001037 |
| -0.09152 | 0.04808  | -0.0268  | 0.56353  | -0.0996  | 0.0314   | 0.01592  | 0.7315   | -0.06633 |
| 0.04521  | 0.32962  | 0.016805 | 0.71719  | 0.130441 | 0.00475  | -0.019   | 0.68218  | 0.168027 |
| 0.077734 | 0.09337  | 0.214394 | 2.94E-06 | 0.041955 | 0.36566  | 0.130044 | 0.00488  | 0.082709 |
| 0.027908 | 0.54744  | -0.00811 | 0.8613   | -0.02934 | 0.52701  | -0.0335  | 0.47013  | -0.022   |
| -0.19539 | 2.12E-05 | -0.02294 | 0.62103  | -0.08786 | 0.05779  | -0.03936 | 0.3961   | -0.04164 |
| 0.099697 | 0.03124  | 0.002548 | 0.9562   | 0.038873 | 0.40196  | 0.021999 | 0.63537  | 0.017015 |
| 0.001229 | 0.97886  | 0.073282 | 0.11376  | 0.054002 | 0.24413  | 0.082302 | 0.0756   | 0.081216 |
| -0.18106 | 8.32E-05 | -0.08864 | 0.05561  | -0.24758 | 5.94E-08 | -0.13462 | 0.00356  | -0.09413 |
| -0.02029 | 0.66185  | -0.12652 | 0.00618  | -0.10566 | 0.02239  | -0.13552 | 0.00334  | -0.09779 |
| -0.11532 | 0.01264  | -0.17551 | 0.00014  | -0.04156 | 0.37019  | -0.14425 | 0.00178  | -0.08935 |
| -0.10272 | 0.02644  | -0.16857 | 0.00025  | -0.01919 | 0.6792   | -0.15332 | 0.00089  | -0.05164 |
| -0.12713 | 0.00594  | -0.1443  | 0.00177  | -0.04569 | 0.32446  | -0.11348 | 0.01414  | -0.03405 |
| 0.022156 | 0.63295  | 0.117678 | 0.01093  | 0.012231 | 0.79207  | -0.0004  | 0.99311  | 0.164747 |
| -0.0328  | 0.47955  | 0.042839 | 0.35564  | -0.12662 | 0.00615  | -0.09106 | 0.04923  | -0.0334  |
| -0.14411 | 0.00179  | -0.08897 | 0.05468  | -0.14199 | 0.0021   | -0.03748 | 0.419    | -0.04941 |
| 0.028946 | 0.53263  | 0.019623 | 0.67232  | 0.015993 | 0.73032  | 0.033226 | 0.47382  | -0.00812 |
| 0.02742  | 0.55447  | -0.04101 | 0.37653  | -0.07364 | 0.11202  | -0.03362 | 0.46852  | -0.11326 |
| 0.003475 | 0.94029  | -0.06552 | 0.1575   | -0.10968 | 0.01774  | -0.04656 | 0.31534  | -0.13493 |
| 0.063535 | 0.17046  | 0.106272 | 0.02162  | 0.037547 | 0.41822  | 0.002854 | 0.95095  | 0.115889 |
| -0.05311 | 0.25203  | 0.044846 | 0.33354  | -0.05706 | 0.2184   | 0.017012 | 0.71386  | 0.060564 |
| -0.09752 | 0.03513  | 0.029745 | 0.52138  | -0.10218 | 0.02725  | -0.05969 | 0.19789  | -0.10636 |
| -0.019   | 0.68211  | 0.24643  | 6.87E-08 | 0.094931 | 0.0403   | 0.144084 | 0.0018   | 0.107105 |
| 0.14175  | 0.00214  | -0.00827 | 0.85853  | 0.024551 | 0.59666  | -0.07694 | 0.09679  | 0.052026 |
| 0.030339 | 0.51309  | 0.033854 | 0.46549  | 0.10041  | 0.03004  | 0.050535 | 0.27578  | 0.137125 |

|          |          |          |          |          |          |          |          |          |
|----------|----------|----------|----------|----------|----------|----------|----------|----------|
| 0.180092 | 9.10E-05 | 0.076385 | 0.09921  | -0.05698 | 0.21906  | -0.05877 | 0.20491  | 0.090834 |
| 0.07929  | 0.08697  | 0.21843  | 1.89E-06 | 0.014339 | 0.75728  | 0.133321 | 0.0039   | 0.107161 |
| -0.17398 | 0.00016  | -0.13897 | 0.00261  | -0.27986 | 7.51E-10 | -0.19896 | 1.48E-05 | -0.2319  |
| -0.08401 | 0.06971  | 0.02158  | 0.64183  | -0.01166 | 0.80163  | 0.080994 | 0.08038  | -0.0423  |
| -0.04957 | 0.2851   | 0.026759 | 0.56406  | 0.037735 | 0.4159   | 0.085294 | 0.06553  | 0.012765 |
| 0.050453 | 0.27656  | -0.15431 | 0.00082  | 0.041657 | 0.36908  | 0.027259 | 0.5568   | -0.04412 |
| 0.097943 | 0.03435  | 0.056737 | 0.22103  | 0.013089 | 0.77786  | 0.097989 | 0.03426  | -0.02225 |
| 0.133024 | 0.00398  | 0.022734 | 0.62411  | 0.046599 | 0.31496  | 0.103847 | 0.02482  | -0.0192  |
| 0.183212 | 6.82E-05 | 0.108843 | 0.01863  | 0.207518 | 6.13E-06 | 0.187592 | 4.52E-05 | 0.189003 |
| 0.125837 | 0.00647  | 0.009196 | 0.84289  | 0.071521 | 0.12273  | 0.078056 | 0.09202  | 0.029944 |
| -0.03252 | 0.4832   | -0.02588 | 0.57699  | -0.01107 | 0.81146  | 0.012206 | 0.79249  | -0.00469 |
| 0.186932 | 4.81E-05 | 0.036881 | 0.42654  | 0.015694 | 0.73517  | 0.018292 | 0.69338  | -0.00596 |
| -0.06056 | 0.19144  | -0.03638 | 0.43279  | -0.08963 | 0.05291  | -0.06842 | 0.13986  | -0.05022 |
| -0.0563  | 0.22458  | 0.019151 | 0.67976  | -0.06811 | 0.14164  | -0.03984 | 0.39033  | -0.03509 |
| 0.020881 | 0.65266  | 0.106652 | 0.02116  | -0.08507 | 0.06624  | -0.07402 | 0.11016  | -0.0275  |
| -0.13071 | 0.00466  | -0.08828 | 0.0566   | -0.08329 | 0.07214  | -0.08415 | 0.06923  | -0.0862  |
| -0.10983 | 0.01758  | -0.06115 | 0.1871   | -0.07512 | 0.10495  | -0.05742 | 0.21549  | -0.06156 |
| 0.155624 | 0.00074  | 0.138866 | 0.00263  | 0.023789 | 0.60811  | 0.069089 | 0.13601  | 0.127986 |
| 0.03897  | 0.40079  | 0.063887 | 0.16811  | 0.163266 | 0.0004   | 0.111889 | 0.01556  | 0.08313  |
| 0.025394 | 0.58411  | 0.015985 | 0.73044  | 0.066449 | 0.15166  | 0.107158 | 0.02055  | 0.062995 |
| -0.08486 | 0.06693  | -0.01859 | 0.6887   | -0.06971 | 0.13251  | -0.0358  | 0.44021  | -0.04529 |
| -0.00142 | 0.97567  | -0.00363 | 0.93766  | 0.110789 | 0.01661  | 0.154783 | 0.00079  | 0.074616 |
| 0.024897 | 0.59149  | 0.099256 | 0.03199  | 0.047945 | 0.30118  | 0.071332 | 0.12372  | 0.057875 |
| -0.14391 | 0.00182  | -0.21655 | 2.32E-06 | -0.20798 | 5.84E-06 | -0.29599 | 6.76E-11 | -0.22687 |
| 0.17799  | 0.00011  | 0.160457 | 0.0005   | 0.149305 | 0.00121  | 0.09682  | 0.03647  | 0.124598 |
| 0.121783 | 0.00843  | 0.140774 | 0.00229  | 0.212872 | 3.46E-06 | 0.094823 | 0.04053  | 0.163122 |
| 0.101303 | 0.0286   | 0.435718 | 4.64E-23 | 0.174278 | 0.00015  | 0.421827 | 1.43E-21 | 0.170075 |
| -0.0009  | 0.98449  | 0.027603 | 0.55183  | -0.08885 | 0.05501  | -0.14307 | 0.00194  | -0.06989 |
| 0.092283 | 0.04624  | -0.02542 | 0.58376  | 0.115252 | 0.01269  | -0.00222 | 0.96176  | 0.158541 |
| 0.110993 | 0.01641  | -0.00826 | 0.85873  | 0.06138  | 0.18546  | 0.002083 | 0.9642   | 0.086648 |
| -0.0714  | 0.12339  | -0.12988 | 0.00494  | -0.30245 | 2.47E-11 | -0.25158 | 3.57E-08 | -0.2026  |
| -0.00416 | 0.92849  | -0.19492 | 2.22E-05 | 0.058345 | 0.2082   | 0.01515  | 0.74402  | -0.01491 |
| -0.09945 | 0.03165  | -0.01648 | 0.72245  | -0.07258 | 0.11725  | -0.05733 | 0.21626  | 0.003905 |
| 0.029991 | 0.51794  | -0.21453 | 2.90E-06 | -0.04873 | 0.29327  | -0.20732 | 6.26E-06 | -0.10386 |
| -0.01751 | 0.70583  | 0.028743 | 0.53552  | 0.055342 | 0.23261  | 0.093331 | 0.04381  | -0.01897 |
| 0.041422 | 0.37179  | -0.09595 | 0.0382   | -0.08561 | 0.06454  | -0.13138 | 0.00446  | -0.07065 |
| 0.011826 | 0.79881  | -0.09641 | 0.03728  | -0.12473 | 0.00696  | -0.08709 | 0.06002  | -0.13195 |
| 0.203288 | 9.53E-06 | 0.080044 | 0.084    | 0.11802  | 0.01069  | 0.157866 | 0.00062  | 0.070418 |
| -0.01955 | 0.67343  | 0.043482 | 0.34846  | 0.151375 | 0.00103  | 0.110144 | 0.01726  | 0.241545 |
| -0.02388 | 0.60672  | 0.170951 | 0.00021  | -0.08638 | 0.06216  | 0.030817 | 0.50648  | -0.11903 |
| 0.145609 | 0.0016   | 0.200259 | 1.30E-05 | 0.102401 | 0.02691  | 0.059404 | 0.20004  | 0.225277 |
| -0.01705 | 0.7133   | -0.06299 | 0.17416  | -0.0938  | 0.04276  | -0.13057 | 0.00471  | 0.011337 |
| 0.10778  | 0.01982  | 0.011037 | 0.81198  | 0.128651 | 0.00536  | 0.043943 | 0.34337  | 0.107784 |
| 0.010406 | 0.82254  | -0.05797 | 0.21116  | -0.06744 | 0.14562  | -0.04878 | 0.29279  | 0.012345 |
| 0.042407 | 0.36051  | -0.0362  | 0.43512  | 0.059004 | 0.2031   | 0.080811 | 0.08107  | 0.06627  |

|          |          |          |          |          |          |          |          |          |
|----------|----------|----------|----------|----------|----------|----------|----------|----------|
| 0.227334 | 6.88E-07 | 0.011861 | 0.79822  | 0.173059 | 0.00017  | 0.107697 | 0.01992  | 0.10326  |
| 0.061527 | 0.18441  | -0.04192 | 0.36604  | 0.015196 | 0.74327  | -0.07326 | 0.11389  | -0.03423 |
| -0.13795 | 0.00281  | -0.19219 | 2.90E-05 | -0.32161 | 1.07E-12 | -0.19121 | 3.19E-05 | -0.23432 |
| -0.00699 | 0.88033  | -0.05353 | 0.24832  | -0.03927 | 0.39721  | -0.05605 | 0.22668  | -0.05515 |
| -0.07939 | 0.08656  | -0.05936 | 0.20041  | -0.01792 | 0.69927  | -0.00134 | 0.97695  | 0.031522 |
| -0.04645 | 0.3165   | -0.14257 | 0.00201  | 0.017718 | 0.70254  | -0.05246 | 0.25792  | 0.087161 |
| 0.043859 | 0.34429  | -0.02464 | 0.59528  | 0.095637 | 0.03883  | -0.00934 | 0.84038  | 0.094772 |
| 0.179903 | 9.26E-05 | 0.064871 | 0.16164  | 0.150214 | 0.00113  | 0.063064 | 0.17367  | 0.109124 |
| 0.04702  | 0.31061  | 0.060424 | 0.19241  | 0.06231  | 0.17888  | -0.00078 | 0.98655  | 0.118207 |
| 0.109322 | 0.01812  | 0.054592 | 0.23901  | 0.143101 | 0.00193  | 0.062832 | 0.17526  | 0.09442  |
| 0.010659 | 0.81831  | -0.02638 | 0.56962  | 0.01132  | 0.80724  | -0.05314 | 0.25172  | 0.019676 |
| -0.09652 | 0.03707  | -0.07294 | 0.11544  | -0.05679 | 0.22063  | -0.05631 | 0.22453  | -0.0552  |
| -0.09297 | 0.04464  | -0.05654 | 0.22268  | -0.07481 | 0.1064   | -0.02541 | 0.58393  | -0.05858 |
| -0.01483 | 0.7492   | -0.2257  | 8.30E-07 | -0.12017 | 0.00934  | -0.13204 | 0.00426  | -0.12187 |
| 0.143591 | 0.00187  | 0.048091 | 0.2997   | -0.03354 | 0.46962  | 0.037926 | 0.41354  | -0.03225 |
| -0.01954 | 0.6737   | 0.042942 | 0.35448  | -0.13949 | 0.00252  | -0.16414 | 0.00037  | -0.01826 |
| 0.092417 | 0.04593  | 0.021315 | 0.64591  | 0.062218 | 0.17952  | 0.14747  | 0.00139  | -0.05574 |
| -0.0541  | 0.24324  | -0.11126 | 0.01616  | 0.165831 | 0.00032  | 0.010193 | 0.82611  | 0.141577 |
| 0.236033 | 2.47E-07 | -0.04197 | 0.36546  | 0.080418 | 0.08256  | 0.018161 | 0.69546  | -0.01723 |
| -0.07317 | 0.11431  | -0.30896 | 8.70E-12 | 0.019106 | 0.68047  | -0.04783 | 0.30238  | -0.07821 |
| -0.07166 | 0.12199  | -0.01355 | 0.77025  | 0.044785 | 0.3342   | 0.074125 | 0.10965  | -0.06277 |
| -0.03557 | 0.44316  | 0.02259  | 0.62631  | -0.07457 | 0.10751  | -0.01271 | 0.78405  | -0.00931 |
| 0.091505 | 0.04812  | 0.156955 | 0.00066  | 0.306939 | 1.21E-11 | 0.25684  | 1.80E-08 | 0.270728 |
| 0.420109 | 2.15E-21 | 0.166807 | 0.00029  | 0.124861 | 0.0069   | 0.108829 | 0.01865  | 0.139996 |
| 0.136332 | 0.00316  | 0.133351 | 0.00389  | 0.074081 | 0.10986  | 0.008597 | 0.85301  | 0.066855 |
| -0.09128 | 0.04869  | -0.07264 | 0.11696  | -0.1176  | 0.01098  | -0.0789  | 0.08854  | -0.06577 |
| 0.08083  | 0.081    | 0.063659 | 0.16963  | -0.02396 | 0.60547  | -0.00471 | 0.91908  | -0.03833 |
| 0.281528 | 5.89E-10 | 0.208332 | 5.63E-06 | 0.21394  | 3.09E-06 | 0.163704 | 0.00038  | 0.036662 |
| -0.22744 | 6.80E-07 | -0.13851 | 0.0027   | -0.20055 | 1.26E-05 | -0.17193 | 0.00019  | -0.20633 |
| -0.07537 | 0.10379  | 0.004182 | 0.92817  | -0.1577  | 0.00063  | -0.13537 | 0.00338  | -0.11015 |
| 0.047242 | 0.30832  | 0.173847 | 0.00016  | -0.10905 | 0.0184   | -0.0632  | 0.17275  | -0.05069 |
| 0.116007 | 0.01212  | 0.203555 | 9.27E-06 | -0.09926 | 0.03199  | -0.05896 | 0.20341  | -0.0037  |
| -0.12539 | 0.00666  | -0.03159 | 0.4959   | 0.025699 | 0.57961  | 0.074651 | 0.10715  | 0.027467 |
| -0.04293 | 0.35465  | 0.01003  | 0.82886  | -0.01922 | 0.67863  | -0.04789 | 0.3017   | 0.039985 |
| 0.016871 | 0.71613  | -0.04819 | 0.2987   | 0.09479  | 0.0406   | 0.051591 | 0.26586  | 0.044294 |
| -0.12744 | 0.00582  | -0.12074 | 0.00901  | -0.0123  | 0.79101  | -0.07614 | 0.10031  | 0.054837 |
| 0.213629 | 3.19E-06 | 0.112094 | 0.01537  | 0.219863 | 1.61E-06 | 0.051855 | 0.26342  | 0.260168 |
| 0.044975 | 0.33214  | 0.015209 | 0.74306  | -0.08151 | 0.07846  | -0.05037 | 0.27732  | 0.035193 |
| 0.028782 | 0.53497  | 0.093406 | 0.04364  | -0.00502 | 0.91382  | -0.05042 | 0.2769   | 0.103696 |
| -0.07913 | 0.08763  | -0.01969 | 0.67134  | 0.17217  | 0.00019  | 0.06781  | 0.14343  | 0.182437 |
| -0.23874 | 1.78E-07 | -0.09333 | 0.04381  | -0.05011 | 0.27985  | -0.0287  | 0.53619  | -0.03238 |
| -0.08414 | 0.06927  | -0.0992  | 0.03209  | -0.13344 | 0.00387  | -0.17533 | 0.00014  | -0.10874 |
| 0.033817 | 0.46598  | 0.108914 | 0.01856  | 0.107899 | 0.01969  | 0.020957 | 0.65147  | 0.204064 |
| -0.01386 | 0.76519  | 0.009904 | 0.83097  | 0.075698 | 0.1023   | 0.035623 | 0.44249  | 0.063602 |
| -0.02505 | 0.58915  | 0.052708 | 0.25563  | -0.00387 | 0.93345  | -0.07405 | 0.11001  | 0.100424 |

|          |          |          |          |          |          |          |          |          |
|----------|----------|----------|----------|----------|----------|----------|----------|----------|
| -0.12165 | 0.0085   | -0.11737 | 0.01113  | -0.10374 | 0.02496  | -0.08836 | 0.05637  | -0.12739 |
| 0.246695 | 6.64E-08 | -0.01711 | 0.71225  | 0.06524  | 0.15926  | -0.01035 | 0.82344  | 0.105436 |
| 0.024043 | 0.60427  | 0.084092 | 0.06943  | 0.08991  | 0.05217  | 0.060629 | 0.19091  | 0.193641 |
| 0.201004 | 1.20E-05 | 0.035312 | 0.44649  | 0.141872 | 0.00212  | 0.132945 | 0.004    | 0.118227 |
| -0.01912 | 0.68027  | 0.03132  | 0.49956  | -0.08286 | 0.07365  | -0.17151 | 0.0002   | 0.057099 |
| -0.0452  | 0.32977  | 0.025517 | 0.5823   | -0.10548 | 0.02263  | -0.04271 | 0.35707  | -0.06856 |
| 0.068964 | 0.13672  | 0.104781 | 0.02354  | -0.01365 | 0.76853  | -0.00064 | 0.98903  | 0.004104 |
| -0.04922 | 0.28851  | -0.02153 | 0.64261  | -0.11572 | 0.01234  | -0.09939 | 0.03176  | -0.11404 |
| 0.026009 | 0.57504  | -0.0078  | 0.86642  | 0.046044 | 0.32077  | 0.025888 | 0.57682  | 0.011632 |
| 0.040432 | 0.38334  | 0.095443 | 0.03924  | 0.08173  | 0.07766  | 0.018265 | 0.69381  | 0.149725 |
| 0.001673 | 0.97123  | -0.02325 | 0.61631  | 0.031535 | 0.49662  | 0.011706 | 0.80081  | -0.00432 |
| -0.12001 | 0.00943  | -0.11837 | 0.01046  | -0.1575  | 0.00064  | -0.13795 | 0.00281  | -0.08546 |
| -0.16737 | 0.00028  | -0.19273 | 2.75E-05 | -0.30893 | 8.74E-12 | -0.30483 | 1.69E-11 | -0.27799 |
| 0.020028 | 0.66597  | -0.1064  | 0.02147  | 0.082253 | 0.07578  | 0.005623 | 0.90354  | 0.062774 |
| 0.390308 | 1.92E-18 | 0.01427  | 0.75842  | -0.00373 | 0.93588  | -0.00653 | 0.88814  | 0.051491 |
| -0.14799 | 0.00134  | -0.16428 | 0.00036  | -0.14007 | 0.00241  | -0.08998 | 0.05198  | -0.14188 |
| 0.027629 | 0.55145  | 0.013287 | 0.77458  | 0.017012 | 0.71387  | 0.042786 | 0.35624  | 0.120852 |
| 0.215582 | 2.58E-06 | -0.03377 | 0.46662  | -0.05283 | 0.25457  | -0.08826 | 0.05666  | -0.02896 |
| 0.272159 | 2.25E-09 | 0.07659  | 0.09831  | -0.06059 | 0.19121  | -0.06617 | 0.15337  | -0.03884 |
| 0.336806 | 7.52E-14 | 0.113448 | 0.01417  | -0.04704 | 0.31038  | -0.03402 | 0.46332  | -0.01788 |
| -0.08771 | 0.05822  | -0.28199 | 5.51E-10 | -0.20616 | 7.07E-06 | -0.37692 | 3.27E-17 | -0.14394 |
| -0.03847 | 0.40689  | -0.06701 | 0.1482   | -0.07647 | 0.09885  | -0.07664 | 0.09807  | -0.11743 |
| -0.08527 | 0.06562  | -0.28936 | 1.85E-10 | 0.009239 | 0.84216  | -0.1358  | 0.00328  | 0.017633 |
| 0.239467 | 1.63E-07 | -0.07631 | 0.09954  | 0.058529 | 0.20676  | -0.11281 | 0.01472  | 0.077419 |
| -0.04847 | 0.29592  | -0.06206 | 0.18061  | 0.019896 | 0.66804  | -0.08899 | 0.05463  | 0.048239 |
| 0.269015 | 3.48E-09 | 0.09068  | 0.05018  | 0.160012 | 0.00052  | 0.148288 | 0.00131  | 0.13734  |
| 0.083423 | 0.07169  | 0.221954 | 1.27E-06 | 0.057058 | 0.21842  | 0.234273 | 3.05E-07 | 0.034694 |
| 0.161919 | 0.00044  | 0.165873 | 0.00032  | 0.226357 | 7.70E-07 | 0.246293 | 6.99E-08 | 0.105611 |
| -0.09031 | 0.05114  | -0.14296 | 0.00195  | -0.12033 | 0.00924  | -0.15443 | 0.00081  | -0.11825 |
| -0.15232 | 0.00096  | -0.0548  | 0.23724  | -0.17113 | 0.0002   | -0.08466 | 0.06755  | -0.1105  |
| 0.009557 | 0.83681  | 0.149082 | 0.00123  | -0.05694 | 0.21939  | 0.028838 | 0.53417  | -0.0338  |
| 0.255372 | 2.18E-08 | 0.090738 | 0.05004  | 0.250326 | 4.19E-08 | 0.154779 | 0.00079  | 0.186246 |
| 0.257316 | 1.69E-08 | -0.01836 | 0.69225  | 0.060246 | 0.19373  | 0.089284 | 0.05384  | 0.059272 |
| -0.00724 | 0.87593  | -0.02321 | 0.61682  | 0.033617 | 0.46862  | -0.03459 | 0.45582  | 0.070867 |
| 0.06782  | 0.14337  | 0.060369 | 0.19282  | 0.022244 | 0.63161  | -0.02986 | 0.51982  | 0.098982 |
| 0.029727 | 0.52163  | 0.052729 | 0.25544  | 0.173719 | 0.00016  | 0.135331 | 0.00339  | 0.191623 |
| -0.09281 | 0.045    | -0.11364 | 0.014    | 0.066978 | 0.14842  | 0.012683 | 0.78458  | -0.02708 |
| -0.0393  | 0.39684  | -0.27083 | 2.70E-09 | 0.097469 | 0.03523  | -0.03311 | 0.47532  | -0.0554  |
| 0.047788 | 0.30276  | 0.037774 | 0.41542  | 0.054739 | 0.23775  | 0.018589 | 0.68866  | 0.046014 |
| 0.052249 | 0.2598   | 0.031109 | 0.50245  | 0.118657 | 0.01028  | 0.091826 | 0.04734  | 0.144268 |
| 0.003509 | 0.93972  | -0.02595 | 0.57589  | -0.12759 | 0.00576  | -0.15564 | 0.00074  | -0.0686  |
| -0.07527 | 0.10424  | 0.023125 | 0.61816  | 0.022044 | 0.63468  | 0.044163 | 0.34096  | 0.13118  |
| 0.019299 | 0.67742  | 0.018532 | 0.68957  | 0.102927 | 0.02613  | 0.071981 | 0.12034  | 0.128105 |
| 0.107653 | 0.01997  | 0.137612 | 0.00288  | 0.139461 | 0.00252  | 0.117818 | 0.01083  | 0.169827 |
| 0.050287 | 0.27815  | 0.067621 | 0.14455  | 0.105994 | 0.02197  | 0.059971 | 0.19578  | 0.126835 |



|          |          |          |          |          |          |          |          |          |
|----------|----------|----------|----------|----------|----------|----------|----------|----------|
| 0.036656 | 0.42936  | 0.11999  | 0.00945  | -0.03911 | 0.39913  | 0.081045 | 0.08019  | -0.07592 |
| 0.132828 | 0.00403  | 0.240082 | 1.51E-07 | 0.164707 | 0.00035  | 0.143666 | 0.00186  | 0.13902  |
| 0.102015 | 0.0275   | -0.04731 | 0.30767  | 0.187913 | 4.38E-05 | 0.156704 | 0.00068  | 0.001622 |
| 0.062783 | 0.17559  | 0.067925 | 0.14275  | 0.14182  | 0.00213  | 0.058951 | 0.2035   | 0.08835  |
| 0.14308  | 0.00194  | 0.159398 | 0.00055  | 0.084438 | 0.06829  | 0.04203  | 0.3648   | 0.162573 |
| 0.054133 | 0.24299  | 0.054998 | 0.23553  | 0.030686 | 0.50828  | 0.05369  | 0.24688  | 0.028028 |
| -0.01244 | 0.78855  | -0.15958 | 0.00054  | 0.001929 | 0.96684  | -0.05987 | 0.19652  | -0.09171 |
| -0.03177 | 0.49336  | -0.08828 | 0.05661  | -0.07651 | 0.09865  | -0.13212 | 0.00424  | -0.03417 |
| -0.01207 | 0.79479  | -0.00404 | 0.9306   | 0.099884 | 0.03092  | 0.026164 | 0.57276  | 0.132587 |
| -0.00736 | 0.87404  | 0.0472   | 0.30875  | 0.033807 | 0.46611  | -0.01649 | 0.72234  | 0.128834 |
| 0.092778 | 0.04508  | 0.140141 | 0.0024   | 0.003559 | 0.93885  | 0.002607 | 0.9552   | 0.119638 |
| 0.148558 | 0.00128  | 0.093881 | 0.04258  | 0.145632 | 0.0016   | 0.034759 | 0.45363  | 0.244869 |
| -0.0072  | 0.87661  | 0.13964  | 0.00249  | -0.01286 | 0.78167  | -0.06123 | 0.18657  | 0.054437 |
| -0.07452 | 0.10777  | -0.13021 | 0.00483  | -0.11174 | 0.0157   | 0.027033 | 0.56008  | -0.09848 |
| 0.027315 | 0.55599  | 0.018752 | 0.68608  | 0.010526 | 0.82053  | -0.00076 | 0.98689  | 0.01708  |
| -0.04514 | 0.33037  | -0.01902 | 0.68183  | 0.055684 | 0.22973  | -0.03738 | 0.42027  | 0.184651 |
| -0.04026 | 0.38537  | -0.02534 | 0.58485  | 0.076414 | 0.09909  | -0.01231 | 0.79074  | 0.182383 |
| -0.21673 | 2.28E-06 | -0.09296 | 0.04467  | -0.08941 | 0.0535   | -0.11952 | 0.00973  | -0.00673 |
| -0.07956 | 0.08589  | -0.01733 | 0.70874  | 0.020888 | 0.65254  | -0.0005  | 0.99135  | 0.064749 |
| 0.022175 | 0.63266  | 0.152248 | 0.00096  | 0.121226 | 0.00873  | 0.090181 | 0.05147  | 0.140573 |
| 0.07638  | 0.09924  | 0.041652 | 0.36914  | -0.09477 | 0.04064  | -0.09948 | 0.03161  | -0.02571 |
| 0.087683 | 0.0583   | 0.141548 | 0.00217  | 0.062842 | 0.17519  | 0.048274 | 0.29786  | 0.129736 |
| 0.026871 | 0.56243  | -0.00065 | 0.98877  | 0.022111 | 0.63364  | -0.02106 | 0.64985  | 0.058998 |
| -0.09011 | 0.05165  | -0.08433 | 0.06866  | -0.13809 | 0.00278  | -0.02296 | 0.62061  | -0.16782 |
| 0.14129  | 0.00221  | -0.04883 | 0.29231  | 0.011912 | 0.79739  | 0.015821 | 0.7331   | -0.00747 |
| 0.158845 | 0.00057  | 0.078983 | 0.08821  | 0.13317  | 0.00394  | 0.077166 | 0.0958   | 0.170656 |
| -0.08785 | 0.05784  | -0.03042 | 0.51194  | -0.11776 | 0.01087  | -0.15591 | 0.00072  | -0.06603 |
| 0.336527 | 7.90E-14 | 0.452156 | 6.53E-25 | 0.2799   | 7.46E-10 | 0.421126 | 1.69E-21 | 0.136597 |
| 0.140976 | 0.00226  | 0.200188 | 1.31E-05 | 0.006304 | 0.89193  | 0.05447  | 0.24007  | 0.048568 |
| -0.10593 | 0.02205  | 0.04416  | 0.34099  | -0.10285 | 0.02625  | -0.06857 | 0.139    | -0.00681 |
| -0.14727 | 0.00142  | 0.051981 | 0.26226  | -0.15558 | 0.00074  | 0.010567 | 0.81985  | -0.13167 |
| -0.09492 | 0.04033  | 0.052373 | 0.25868  | -0.15641 | 0.00069  | -0.05551 | 0.23118  | -0.07117 |
| -0.03753 | 0.4184   | 0.0119   | 0.79757  | -0.12008 | 0.0094   | -0.09045 | 0.05077  | -0.00649 |
| -0.1817  | 7.85E-05 | -0.08402 | 0.06966  | -0.1287  | 0.00535  | -0.15357 | 0.00087  | -0.03961 |
| 0.107742 | 0.01987  | 0.13592  | 0.00325  | 0.074129 | 0.10963  | 0.03174  | 0.49382  | 0.109507 |
| 0.064264 | 0.1656   | 0.039648 | 0.39264  | 0.010877 | 0.81465  | -0.0235  | 0.61254  | 0.077323 |
| 0.194886 | 2.23E-05 | 0.027417 | 0.55451  | 0.156248 | 0.0007   | 0.011121 | 0.81057  | 0.212192 |
| -0.04333 | 0.3502   | -0.01721 | 0.71074  | -0.00765 | 0.86899  | 0.007655 | 0.86895  | -0.0127  |
| 0.097303 | 0.03555  | 0.080667 | 0.08161  | 0.008768 | 0.85011  | 0.015844 | 0.73273  | 0.01363  |
| -0.04973 | 0.28355  | -0.09471 | 0.04077  | -0.03938 | 0.3959   | -0.16852 | 0.00025  | 0.013964 |
| -0.15479 | 0.00079  | -0.07412 | 0.10966  | -0.15727 | 0.00065  | -0.12816 | 0.00554  | -0.15137 |
| 0.043713 | 0.3459   | 0.092864 | 0.04488  | 0.136748 | 0.00306  | 0.081858 | 0.0772   | 0.154828 |
| -0.09945 | 0.03165  | -0.13206 | 0.00425  | -0.11568 | 0.01237  | -0.1612  | 0.00047  | -0.04296 |
| 0.076061 | 0.10066  | 0.091211 | 0.04885  | 0.13473  | 0.00353  | 0.150576 | 0.0011   | 0.102312 |
| -0.1718  | 0.00019  | -0.21253 | 3.59E-06 | -0.26971 | 3.16E-09 | -0.13089 | 0.00461  | -0.23942 |

|          |          |          |          |          |          |          |          |          |
|----------|----------|----------|----------|----------|----------|----------|----------|----------|
| -0.01686 | 0.71634  | 0.019981 | 0.66671  | 0.011096 | 0.81099  | -0.05499 | 0.23562  | -0.03407 |
| -0.03596 | 0.43819  | -0.04813 | 0.2993   | -0.13488 | 0.0035   | -0.07876 | 0.0891   | -0.10607 |
| 0.116907 | 0.01146  | -0.03079 | 0.50689  | 0.047147 | 0.3093   | -0.01486 | 0.74882  | 0.002459 |
| 0.217166 | 2.17E-06 | 0.078311 | 0.09096  | 0.149639 | 0.00118  | 0.091293 | 0.04864  | 0.178728 |
| 0.075917 | 0.10131  | -0.00508 | 0.91285  | -0.22269 | 1.17E-06 | -0.08547 | 0.06499  | -0.14981 |
| -0.03223 | 0.48723  | -0.02736 | 0.5553   | -0.01573 | 0.7345   | 0.058766 | 0.20493  | -0.00331 |
| 0.119685 | 0.00963  | -0.01868 | 0.68716  | 0.106917 | 0.02084  | 0.03178  | 0.49327  | 0.078882 |
| 0.002877 | 0.95055  | 0.063752 | 0.16901  | 0.144844 | 0.0017   | 0.104054 | 0.02453  | 0.085132 |
| 0.037218 | 0.42232  | 0.028499 | 0.53899  | 0.063599 | 0.17003  | 0.038476 | 0.40679  | 0.064154 |
| 0.023662 | 0.61002  | -0.16125 | 0.00047  | 0.139775 | 0.00247  | -0.03492 | 0.45152  | 0.140882 |
| 0.012576 | 0.78636  | 0.026326 | 0.57038  | -0.20414 | 8.72E-06 | -0.06897 | 0.13666  | -0.18398 |
| 0.078214 | 0.09136  | 0.103705 | 0.02502  | -0.0295  | 0.5248   | -0.0034  | 0.94164  | 0.013908 |
| -0.13213 | 0.00423  | -0.01947 | 0.67476  | 0.044562 | 0.3366   | 0.026748 | 0.56423  | 0.137729 |
| 0.229667 | 5.25E-07 | 0.099931 | 0.03084  | 0.166205 | 0.00031  | 0.044187 | 0.3407   | 0.166279 |
| 0.189194 | 3.88E-05 | 0.135599 | 0.00332  | 0.006829 | 0.88299  | -0.0869  | 0.0606   | 0.16425  |
| 0.073531 | 0.11253  | 0.090955 | 0.04949  | -0.06435 | 0.16506  | -0.0592  | 0.20157  | 0.05951  |
| -0.06539 | 0.15831  | -0.13743 | 0.00292  | -0.00703 | 0.87949  | -0.06057 | 0.19132  | -0.03312 |
| -0.07952 | 0.08606  | -0.31538 | 3.04E-12 | -0.15923 | 0.00055  | -0.17256 | 0.00018  | -0.29458 |
| -0.09881 | 0.03278  | -0.10496 | 0.0233   | -0.06464 | 0.16312  | -0.08581 | 0.06392  | -0.03481 |
| 0.022822 | 0.62276  | 0.050423 | 0.27685  | 0.163214 | 0.0004   | 0.068933 | 0.1369   | 0.105088 |
| -0.02262 | 0.62587  | -0.03154 | 0.49654  | -0.17466 | 0.00015  | -0.0742  | 0.10927  | -0.1245  |
| 0.017691 | 0.70297  | 0.003534 | 0.9393   | 0.019744 | 0.67042  | -0.00259 | 0.95543  | 0.021306 |
| -0.14073 | 0.0023   | -0.1589  | 0.00057  | -0.06301 | 0.17401  | -0.07897 | 0.08825  | 0.007763 |
| 0.06855  | 0.1391   | 0.11541  | 0.01257  | -0.08287 | 0.07359  | -0.06197 | 0.18124  | 0.101311 |
| -0.02523 | 0.58649  | -0.07242 | 0.11809  | -0.02778 | 0.54932  | -0.05149 | 0.26679  | 0.056938 |
| -0.05431 | 0.24145  | -0.07976 | 0.08512  | -0.04941 | 0.28667  | -0.10598 | 0.02199  | -0.03736 |
| -0.00733 | 0.87452  | -0.03972 | 0.39177  | -0.09224 | 0.04635  | -0.04532 | 0.32841  | -0.09459 |
| -0.07974 | 0.08518  | -0.04054 | 0.38207  | -0.03334 | 0.47234  | -0.05009 | 0.28005  | 0.078538 |
| -0.07079 | 0.12661  | -0.24154 | 1.26E-07 | -0.21647 | 2.34E-06 | -0.2319  | 4.04E-07 | -0.17559 |
| 0.345401 | 1.57E-14 | -0.12461 | 0.00701  | -0.20249 | 1.03E-05 | -0.24134 | 1.29E-07 | -0.11722 |
| -0.14471 | 0.00172  | 0.007495 | 0.87168  | 0.009248 | 0.84201  | 0.032389 | 0.48502  | 0.042538 |
| 0.06952  | 0.13358  | 0.045025 | 0.33161  | -0.03797 | 0.41299  | -0.00049 | 0.9916   | -0.03003 |
| -0.19145 | 3.12E-05 | -0.13087 | 0.00461  | -0.24916 | 4.86E-08 | -0.20198 | 1.09E-05 | -0.21268 |
| -0.02987 | 0.51966  | 0.03602  | 0.43742  | -0.01973 | 0.67063  | -0.02374 | 0.60882  | 0.027964 |
| -0.03669 | 0.42892  | 0.056569 | 0.2224   | -0.03088 | 0.50558  | -0.0421  | 0.364    | -0.01042 |
| -0.13242 | 0.00415  | -0.02454 | 0.5968   | -0.10133 | 0.02857  | -0.03555 | 0.44348  | -0.03483 |
| -0.06794 | 0.14268  | 0.069059 | 0.13618  | -0.18573 | 5.39E-05 | 0.044914 | 0.3328   | -0.11219 |
| -0.04765 | 0.30414  | -0.02996 | 0.51835  | -0.04357 | 0.34744  | -0.07435 | 0.10857  | -0.0145  |
| 0.036163 | 0.4356   | 0.120464 | 0.00917  | 0.058266 | 0.20882  | 0.033226 | 0.47381  | 0.109631 |
| -0.06916 | 0.13563  | -0.0135  | 0.77103  | -0.00678 | 0.88382  | -0.02681 | 0.56339  | 0.003068 |
| -0.11449 | 0.0133   | -0.18996 | 3.60E-05 | -0.13394 | 0.00373  | -0.08362 | 0.07103  | -0.21371 |
| -0.06874 | 0.13801  | -0.01216 | 0.79318  | -0.07424 | 0.1091   | -0.0936  | 0.0432   | -0.00055 |
| -0.07076 | 0.12677  | -0.03139 | 0.49858  | -0.11158 | 0.01585  | -0.12383 | 0.00738  | 0.012654 |
| -0.07128 | 0.12402  | -0.06709 | 0.14774  | -0.09907 | 0.03232  | -0.09729 | 0.03557  | -0.07294 |
| 0.100231 | 0.03034  | 0.000464 | 0.99201  | 0.009148 | 0.84369  | 0.024805 | 0.59287  | -0.06179 |

|          |          |          |          |          |          |          |          |          |
|----------|----------|----------|----------|----------|----------|----------|----------|----------|
| 0.009954 | 0.83012  | -0.03176 | 0.49359  | 0.011643 | 0.80186  | -0.06361 | 0.16996  | 0.007656 |
| 0.242515 | 1.12E-07 | 0.163585 | 0.00039  | 0.202501 | 1.03E-05 | 0.143457 | 0.00188  | 0.192555 |
| 0.281882 | 5.60E-10 | 0.289415 | 1.84E-10 | 0.331685 | 1.87E-13 | 0.334843 | 1.07E-13 | 0.244756 |
| 0.142455 | 0.00203  | 0.133551 | 0.00384  | 0.135908 | 0.00325  | 0.069758 | 0.13225  | 0.119523 |
| -0.25073 | 3.98E-08 | -0.19638 | 1.92E-05 | -0.26814 | 3.93E-09 | -0.31148 | 5.78E-12 | -0.21833 |
| 0.087131 | 0.05991  | 0.022991 | 0.62019  | 0.004234 | 0.92729  | -0.03795 | 0.41321  | 0.065005 |
| 0.026242 | 0.57162  | -0.00308 | 0.94711  | 0.001955 | 0.96639  | -0.01174 | 0.80021  | 0.015639 |
| 0.10964  | 0.01778  | 0.131628 | 0.00438  | 0.034331 | 0.45922  | 0.007805 | 0.86641  | 0.064328 |
| 0.107026 | 0.02071  | 0.133174 | 0.00394  | 0.060636 | 0.19086  | 0.035955 | 0.43825  | 0.077826 |
| 0.107579 | 0.02005  | 0.152983 | 0.00091  | 0.085847 | 0.06379  | 0.062127 | 0.18016  | 0.094786 |
| 0.041999 | 0.36516  | 0.028989 | 0.53204  | 0.035964 | 0.43813  | -0.03492 | 0.45152  | 0.067968 |
| 0.006825 | 0.88305  | 0.087494 | 0.05885  | -0.02343 | 0.61359  | 0.027335 | 0.5557   | -0.03503 |
| 0.002204 | 0.96212  | 0.000572 | 0.99017  | 0.017419 | 0.70733  | -0.00473 | 0.91877  | 0.059293 |
| 0.055808 | 0.2287   | 0.056842 | 0.22018  | 0.050989 | 0.27148  | -0.00186 | 0.96799  | 0.079077 |
| 0.028491 | 0.53911  | 0.039413 | 0.39545  | 0.042869 | 0.35531  | -0.0163  | 0.72542  | 0.022695 |
| 0.067839 | 0.14326  | 0.084089 | 0.06944  | 0.064636 | 0.16316  | 0.041006 | 0.37661  | 0.089216 |
| 0.099333 | 0.03186  | 0.102952 | 0.0261   | 0.039522 | 0.39415  | 0.042642 | 0.35786  | 0.061859 |
| 0.035705 | 0.44144  | 0.10396  | 0.02466  | 0.05523  | 0.23356  | 0.065206 | 0.15948  | 0.053645 |
| 0.220945 | 1.42E-06 | 0.131306 | 0.00448  | 0.110225 | 0.01718  | 0.13699  | 0.00301  | 0.101992 |
| 0.027389 | 0.55492  | -0.08777 | 0.05805  | -0.1424  | 0.00204  | -0.10107 | 0.02898  | -0.11524 |
| 0.159562 | 0.00054  | 0.314003 | 3.81E-12 | 0.121519 | 0.00857  | 0.194406 | 2.33E-05 | 0.136787 |
| 0.198107 | 1.61E-05 | -0.08771 | 0.05822  | 0.111183 | 0.01623  | 0.021004 | 0.65074  | 0.118477 |
| 0.11236  | 0.01513  | 0.079433 | 0.0864   | 0.142936 | 0.00196  | 0.125723 | 0.00652  | 0.110983 |
| 0.10639  | 0.02148  | 0.104703 | 0.02365  | 0.037683 | 0.41654  | 0.049398 | 0.28675  | 0.043122 |
| 0.002827 | 0.95142  | 0.0795   | 0.08614  | -0.00147 | 0.97476  | 0.030983 | 0.50418  | -0.02267 |
| 0.150883 | 0.00107  | 0.368179 | 1.94E-16 | -0.02612 | 0.57346  | 0.039336 | 0.39638  | 0.103567 |
| 0.077317 | 0.09515  | -0.00953 | 0.83732  | -0.00113 | 0.98057  | -0.04103 | 0.37632  | 0.013308 |
| -0.01731 | 0.70901  | -0.0029  | 0.95022  | 0.003882 | 0.93332  | 0.014767 | 0.75027  | -0.01063 |
| -0.07149 | 0.12289  | -0.05096 | 0.27171  | -0.05593 | 0.22771  | -0.09724 | 0.03567  | 0.028188 |
| 0.116883 | 0.01148  | 0.151677 | 0.00101  | 0.1214   | 0.00864  | 0.125135 | 0.00678  | 0.111537 |
| 0.116067 | 0.01207  | 0.036464 | 0.43178  | 0.104991 | 0.02326  | 0.023302 | 0.61548  | 0.085686 |
| -0.02719 | 0.55783  | -0.01713 | 0.71196  | 0.059744 | 0.19747  | 0.063425 | 0.17121  | 0.058042 |
| 0.01431  | 0.75776  | -0.03351 | 0.47008  | 0.000265 | 0.99545  | -0.02373 | 0.60892  | -0.05555 |
| 0.089086 | 0.05438  | 0.027902 | 0.54753  | 0.032646 | 0.48157  | 0.029132 | 0.53     | 0.06254  |
| -0.00192 | 0.96707  | -0.23717 | 2.15E-07 | -0.03277 | 0.47989  | -0.00359 | 0.9384   | -0.13912 |
| 0.120971 | 0.00888  | 0.181424 | 8.05E-05 | 0.126564 | 0.00617  | 0.034673 | 0.45476  | 0.147648 |
| 0.065    | 0.1608   | 0.195908 | 2.01E-05 | 0.016796 | 0.71734  | 0.036899 | 0.42631  | 0.024625 |
| 0.071324 | 0.12377  | 0.007372 | 0.87376  | 0.193835 | 2.47E-05 | 0.168347 | 0.00026  | 0.182808 |
| -0.0869  | 0.06061  | 0.002228 | 0.9617   | -0.10348 | 0.02533  | -0.07318 | 0.11428  | -0.03053 |
| -0.06041 | 0.19253  | -0.13453 | 0.00358  | -0.05738 | 0.21587  | -0.08256 | 0.07468  | -0.08918 |
| 0.089721 | 0.05267  | 0.114628 | 0.01319  | 0.236198 | 2.42E-07 | 0.182358 | 7.39E-05 | 0.179674 |
| -0.13458 | 0.00357  | -0.1506  | 0.0011   | -0.13408 | 0.0037   | -0.13135 | 0.00446  | -0.12667 |
| -0.15648 | 0.00069  | -0.38704 | 3.88E-18 | -0.19782 | 1.66E-05 | -0.31754 | 2.12E-12 | -0.24664 |
| -0.05926 | 0.20112  | -0.1467  | 0.00148  | -0.07386 | 0.11094  | -0.15708 | 0.00066  | -0.06587 |
| 0.049409 | 0.28664  | 0.022538 | 0.6271   | 0.010774 | 0.81637  | -0.01259 | 0.78605  | 0.00268  |

|          |          |          |          |          |          |          |          |          |
|----------|----------|----------|----------|----------|----------|----------|----------|----------|
| 0.087612 | 0.05851  | 0.109317 | 0.01812  | 0.13499  | 0.00347  | 0.119507 | 0.00974  | 0.114446 |
| 0.062988 | 0.17418  | 0.077436 | 0.09464  | 0.073937 | 0.11056  | 0.074139 | 0.10959  | 0.079683 |
| -0.08511 | 0.0661   | -0.08958 | 0.05305  | -0.03534 | 0.4461   | -0.01739 | 0.70786  | -0.04055 |
| 0.191931 | 2.97E-05 | 0.241628 | 1.25E-07 | 0.102354 | 0.02698  | 0.212008 | 3.80E-06 | 0.082103 |
| -0.01855 | 0.68935  | 0.074868 | 0.10613  | -0.17425 | 0.00015  | -0.09589 | 0.03831  | -0.08635 |
| 0.175999 | 0.00013  | 0.228621 | 5.93E-07 | 0.234552 | 2.95E-07 | 0.206508 | 6.82E-06 | 0.181676 |
| -0.03192 | 0.49133  | -0.07291 | 0.11559  | -0.03177 | 0.49344  | -0.05514 | 0.23431  | -0.04619 |
| -0.0346  | 0.45569  | -0.14151 | 0.00217  | -0.06788 | 0.14304  | -0.13233 | 0.00418  | -0.1004  |
| -0.01317 | 0.77646  | -0.01164 | 0.80195  | 0.017154 | 0.71158  | -0.01562 | 0.73645  | -0.0083  |
| 0.095306 | 0.03952  | 0.072231 | 0.11905  | 0.174006 | 0.00016  | 0.101902 | 0.02767  | 0.110597 |
| 0.101906 | 0.02766  | 0.195212 | 2.15E-05 | 0.042419 | 0.36038  | 0.121462 | 0.0086   | 0.032647 |
| -0.00876 | 0.85032  | 0.13163  | 0.00438  | -0.03073 | 0.50763  | 0.04299  | 0.35394  | 0.023833 |
| -0.04526 | 0.32904  | 0.163627 | 0.00038  | -0.1097  | 0.01772  | 0.055664 | 0.2299   | -0.11711 |
| 0.124909 | 0.00688  | 0.163012 | 0.0004   | 0.190719 | 3.35E-05 | 0.167453 | 0.00028  | 0.162098 |
| 0.025851 | 0.57736  | -0.05635 | 0.22416  | 0.008675 | 0.85168  | -0.05052 | 0.27589  | 0.008725 |
| -0.01567 | 0.73549  | -0.03397 | 0.46401  | -0.05955 | 0.19896  | -0.04033 | 0.38455  | -0.06681 |
| 0.024785 | 0.59317  | -0.04049 | 0.38267  | -0.02086 | 0.65292  | -0.01979 | 0.66965  | 0.002401 |
| -0.0114  | 0.8059   | -0.15083 | 0.00108  | -0.06422 | 0.16593  | -0.18165 | 7.89E-05 | -0.13863 |
| 0.081627 | 0.07804  | -0.08274 | 0.07407  | 0.085576 | 0.06464  | 0.057471 | 0.2151   | 0.012966 |
| 0.284384 | 3.88E-10 | 0.200233 | 1.30E-05 | 0.33561  | 9.31E-14 | 0.272984 | 2.00E-09 | 0.25335  |
| 0.204467 | 8.43E-06 | 0.173683 | 0.00016  | 0.217169 | 2.17E-06 | 0.069071 | 0.13612  | 0.32427  |
| 0.095867 | 0.03837  | -0.06547 | 0.15779  | 0.098847 | 0.03271  | -0.03954 | 0.39388  | 0.080576 |
| -0.02341 | 0.61388  | -0.11897 | 0.01008  | 0.03424  | 0.46041  | -0.1022  | 0.02721  | -0.01127 |
| 0.052989 | 0.25311  | 0.073562 | 0.11238  | 0.022794 | 0.6232   | 0.029216 | 0.52883  | 0.056441 |
| 0.022081 | 0.63411  | 0.006225 | 0.89327  | -0.02773 | 0.54997  | -0.03023 | 0.51461  | 0.041788 |
| 0.007983 | 0.8634   | 0.011267 | 0.80813  | -0.16204 | 0.00044  | -0.23713 | 2.16E-07 | -0.07586 |
| -0.07433 | 0.10869  | -0.153   | 0.00091  | -0.06582 | 0.15555  | -0.11182 | 0.01562  | -0.13949 |
| 0.036251 | 0.43449  | -0.11552 | 0.01249  | -0.16351 | 0.00039  | -0.04688 | 0.31208  | -0.2049  |
| 0.149404 | 0.0012   | 0.108177 | 0.01937  | 0.056863 | 0.22     | 1.40E-05 | 0.99976  | 0.013526 |
| -0.1512  | 0.00105  | -0.25758 | 1.63E-08 | -0.12975 | 0.00498  | -0.22559 | 8.41E-07 | -0.10205 |
| -0.03907 | 0.39955  | -0.02816 | 0.54378  | 0.169679 | 0.00023  | 0.106876 | 0.02089  | 0.125144 |
| 0.189708 | 3.69E-05 | 0.019215 | 0.67875  | 0.096563 | 0.03698  | 0.070816 | 0.12647  | 0.062153 |
| 0.034392 | 0.45842  | -0.20994 | 4.75E-06 | -0.15825 | 0.0006   | -0.2512  | 3.75E-08 | -0.16013 |
| 0.032676 | 0.48116  | -0.03189 | 0.49173  | -0.02132 | 0.64584  | -0.00807 | 0.86198  | -0.04721 |
| 0.006046 | 0.89633  | 0.08998  | 0.05199  | 0.003482 | 0.94017  | 0.006573 | 0.88734  | 0.079337 |
| 0.106991 | 0.02075  | 0.261836 | 9.27E-09 | 0.239921 | 1.54E-07 | 0.330033 | 2.50E-13 | 0.185271 |
| 0.018534 | 0.68953  | -0.16562 | 0.00033  | -0.02137 | 0.64503  | -0.08003 | 0.08406  | -0.04757 |
| 0.01879  | 0.68548  | 0.03325  | 0.47349  | 0.133379 | 0.00388  | 0.055101 | 0.23465  | 0.117549 |
| 0.080448 | 0.08245  | 0.054898 | 0.23639  | 0.232178 | 3.91E-07 | 0.114778 | 0.01307  | 0.181467 |
| -0.14558 | 0.00161  | -0.20342 | 9.40E-06 | -0.09354 | 0.04335  | -0.1479  | 0.00135  | -0.12021 |
| 0.064462 | 0.1643   | 0.030046 | 0.51718  | 0.061119 | 0.18734  | -0.0023  | 0.96055  | 0.01568  |
| 0.188728 | 4.05E-05 | 0.230254 | 4.90E-07 | 0.268935 | 3.52E-09 | 0.21345  | 3.25E-06 | 0.230393 |
| 0.054773 | 0.23746  | 0.07346  | 0.11288  | -0.00851 | 0.85455  | -0.02061 | 0.65686  | -0.04432 |
| -0.0548  | 0.23722  | 0.049722 | 0.2836   | -0.05419 | 0.24245  | -0.04434 | 0.33905  | -0.04762 |
| 0.010892 | 0.81441  | 0.051171 | 0.26978  | -0.02901 | 0.53168  | -0.05873 | 0.20524  | 0.034524 |

|          |          |           |          |          |          |          |          |           |
|----------|----------|-----------|----------|----------|----------|----------|----------|-----------|
| 0.055655 | 0.22998  | 0.067408  | 0.14582  | -0.03767 | 0.41669  | -0.04151 | 0.37075  | -0.01639  |
| -0.05596 | 0.22745  | -0.1819   | 7.71E-05 | 0.010002 | 0.82932  | -0.09491 | 0.04034  | -0.00091  |
| 0.387773 | 3.32E-18 | 0.159348  | 0.00055  | 0.33793  | 6.14E-14 | 0.263735 | 7.17E-09 | 0.217353  |
| 0.155462 | 0.00075  | 0.28817   | 2.21E-10 | 0.346507 | 1.28E-14 | 0.378255 | 2.48E-17 | 0.190214  |
| -0.1459  | 0.00157  | 0.01643   | 0.72324  | -0.04258 | 0.35858  | -0.00487 | 0.91645  | -0.05265  |
| -0.2371  | 2.17E-07 | -0.38015  | 1.67E-17 | -0.11586 | 0.01223  | -0.19541 | 2.11E-05 | -0.13963  |
| 0.063326 | 0.17188  | -0.03962  | 0.39301  | 0.094158 | 0.04197  | -0.0785  | 0.09016  | 0.15442   |
| -0.03088 | 0.50563  | -0.0871   | 0.06001  | -0.04787 | 0.30192  | -0.02975 | 0.52137  | -0.06858  |
| 0.067535 | 0.14506  | 0.095437  | 0.03925  | 0.069469 | 0.13386  | 0.044957 | 0.33234  | 0.131384  |
| 0.062795 | 0.17551  | 0.023942  | 0.6058   | 0.003964 | 0.93191  | -0.02937 | 0.52666  | 0.099358  |
| 0.097636 | 0.03492  | -0.03968  | 0.39221  | -0.12345 | 0.00757  | -0.06062 | 0.19101  | -0.05262  |
| -0.0581  | 0.21015  | -0.12959  | 0.00503  | 0.097229 | 0.03569  | 0.02415  | 0.60267  | 0.025053  |
| 0.110266 | 0.01714  | 0.04195   | 0.36573  | 0.037842 | 0.41458  | -0.02364 | 0.61032  | 0.119022  |
| -0.0529  | 0.25387  | -0.093    | 0.04456  | 0.064905 | 0.16142  | 0.000719 | 0.98764  | 0.038439  |
| 0.017611 | 0.70425  | -0.04859  | 0.29475  | -0.01428 | 0.75829  | -0.11272 | 0.01481  | -0.02366  |
| 0.185511 | 5.50E-05 | 0.021202  | 0.64766  | 0.063139 | 0.17315  | -0.01532 | 0.74124  | 0.03658   |
| -0.09312 | 0.04428  | 0.001196  | 0.97944  | 0.068675 | 0.13838  | 0.063333 | 0.17183  | 0.079738  |
| -0.07878 | 0.08904  | -0.10217  | 0.02727  | -0.05803 | 0.2107   | -0.07967 | 0.08548  | 0.05466   |
| 0.042392 | 0.36069  | -0.03523  | 0.4475   | -0.04708 | 0.31003  | -0.09297 | 0.04463  | -0.02674  |
| -0.02144 | 0.64392  | 0.020067  | 0.66535  | -0.01335 | 0.77363  | -0.04045 | 0.38313  | -0.02714  |
| -0.05477 | 0.23747  | -0.01397  | 0.76331  | -0.08359 | 0.07113  | -0.07086 | 0.12626  | -0.04082  |
| -0.12384 | 0.00738  | -0.23671  | 2.27E-07 | -0.29321 | 1.03E-10 | -0.30313 | 2.21E-11 | -0.22523  |
| -0.01768 | 0.70307  | -0.08533  | 0.06541  | -0.12287 | 0.00785  | -0.04728 | 0.30796  | -0.0568   |
| 0.329415 | 2.78E-13 | 0.282938  | 4.80E-10 | 0.178005 | 0.00011  | 0.264668 | 6.32E-09 | 0.186428  |
| -0.14857 | 0.00128  | -0.05031  | 0.27796  | -0.17536 | 0.00014  | -0.19311 | 2.65E-05 | -9.88E-05 |
| -0.04041 | 0.38362  | 0.013183  | 0.7763   | -0.03583 | 0.43988  | -0.05373 | 0.24648  | -0.02452  |
| -0.19298 | 2.68E-05 | -0.14451  | 0.00174  | -0.07204 | 0.12004  | 0.001029 | 0.9823   | -0.1318   |
| 0.040109 | 0.38715  | -0.01728  | 0.70953  | 0.135684 | 0.0033   | 0.050992 | 0.27145  | 0.078983  |
| -0.03539 | 0.44553  | -0.02976  | 0.5212   | 0.020015 | 0.66617  | -0.01116 | 0.80988  | 0.056699  |
| 0.029832 | 0.52017  | 0.049024  | 0.29042  | 0.032606 | 0.48211  | -0.02488 | 0.59181  | 0.01799   |
| -0.19954 | 1.40E-05 | -0.10252  | 0.02673  | -0.044   | 0.34269  | -0.0242  | 0.60187  | -0.04906  |
| -0.06532 | 0.15876  | -0.02248  | 0.62805  | 0.032348 | 0.48558  | -0.05295 | 0.25346  | 0.003281  |
| 0.072746 | 0.11643  | 0.018966  | 0.68268  | -0.01288 | 0.78127  | -0.03568 | 0.4417   | 0.04919   |
| 0.128953 | 0.00526  | -1.31E-05 | 0.99977  | 0.075573 | 0.10287  | 0.035402 | 0.44533  | 0.114931  |
| -0.12923 | 0.00516  | -0.09189  | 0.04719  | 0.059233 | 0.20135  | 0.094448 | 0.04134  | -0.00204  |
| -0.07229 | 0.11873  | -0.05741  | 0.2156   | -0.26    | 1.18E-08 | -0.17803 | 0.00011  | -0.25611  |
| 0.166143 | 0.00031  | 0.115218  | 0.01272  | -0.11573 | 0.01233  | 0.017266 | 0.70978  | -0.05667  |
| 0.029784 | 0.52084  | 0.024048  | 0.60421  | 0.118401 | 0.01044  | 0.106157 | 0.02177  | 0.126583  |
| 0.109791 | 0.01762  | 0.093072  | 0.0444   | 0.168998 | 0.00024  | 0.112381 | 0.01511  | 0.210945  |
| -0.16703 | 0.00029  | -0.30723  | 1.15E-11 | 0.005847 | 0.89972  | -0.03232 | 0.48601  | -0.10277  |
| 0.038607 | 0.4052   | 0.056575  | 0.22235  | 0.102633 | 0.02657  | 0.140764 | 0.0023   | 0.075845  |
| 0.128259 | 0.00551  | -0.10378  | 0.02492  | 0.211262 | 4.12E-06 | 0.051956 | 0.26249  | 0.009017  |
| -0.03832 | 0.40865  | -0.27351  | 1.86E-09 | 0.068553 | 0.13908  | -0.05816 | 0.20968  | 0.000739  |
| 0.080872 | 0.08084  | -0.04896  | 0.29109  | -0.03897 | 0.40078  | -0.046   | 0.32119  | -0.04362  |
| 0.106498 | 0.02135  | 0.115182  | 0.01275  | -0.00844 | 0.85562  | 0.039949 | 0.38905  | -0.01661  |

|          |          |          |          |          |          |          |          |          |
|----------|----------|----------|----------|----------|----------|----------|----------|----------|
| -0.00904 | 0.84544  | 0.042606 | 0.35827  | -0.00959 | 0.83633  | 0.02907  | 0.53089  | 0.015053 |
| -0.04106 | 0.37601  | 0.024259 | 0.60104  | -0.03262 | 0.48196  | 0.005454 | 0.90642  | -0.01518 |
| -0.02948 | 0.52511  | 0.167647 | 0.00027  | -0.14655 | 0.00149  | 0.017833 | 0.7007   | -0.03587 |
| -0.00548 | 0.90596  | -0.00337 | 0.94216  | 0.031647 | 0.49509  | -0.02108 | 0.64963  | 0.038984 |
| 0.090032 | 0.05185  | 0.006299 | 0.89202  | 0.081216 | 0.07955  | 0.070792 | 0.1266   | 0.111158 |
| 0.018822 | 0.68496  | 0.080839 | 0.08096  | 0.111635 | 0.0158   | 0.077245 | 0.09546  | 0.141879 |
| 0.260104 | 1.17E-08 | 0.245543 | 7.68E-08 | 0.293107 | 1.05E-10 | 0.1763   | 0.00013  | 0.353951 |
| -0.00849 | 0.85478  | 0.049418 | 0.28655  | -0.0448  | 0.33401  | -0.06827 | 0.14074  | 0.022117 |
| 0.020238 | 0.66268  | 0.054889 | 0.23647  | 0.058655 | 0.20579  | 0.025427 | 0.58362  | 0.072601 |
| -0.04134 | 0.37276  | -0.00888 | 0.84822  | 0.025163 | 0.58754  | 0.003089 | 0.94692  | 0.012825 |
| 0.188726 | 4.05E-05 | 0.023211 | 0.61685  | 0.257117 | 1.74E-08 | 0.134423 | 0.00361  | 0.101126 |
| 0.037964 | 0.41307  | 0.018391 | 0.69181  | 0.080469 | 0.08237  | 0.035454 | 0.44465  | 0.088028 |
| 0.021456 | 0.64374  | -0.0099  | 0.83112  | -0.03253 | 0.48316  | -0.02145 | 0.64388  | 0.012677 |
| 0.150221 | 0.00113  | 0.087137 | 0.05989  | 0.128617 | 0.00538  | 0.081598 | 0.07814  | 0.226489 |
| 0.004589 | 0.92122  | -0.03189 | 0.49173  | -0.16716 | 0.00029  | -0.16317 | 0.0004   | -0.20632 |
| -0.09807 | 0.03412  | -0.0275  | 0.55338  | 0.016214 | 0.72674  | 0.125768 | 0.0065   | -0.01042 |
| 0.173363 | 0.00017  | -0.02083 | 0.65345  | 0.223729 | 1.04E-06 | 0.213372 | 3.28E-06 | 0.016987 |
| -0.06486 | 0.16168  | 0.031322 | 0.49953  | -0.04952 | 0.28555  | 0.017301 | 0.70922  | 0.090624 |
| 0.020285 | 0.66195  | -0.04453 | 0.33698  | 0.093815 | 0.04272  | 0.097561 | 0.03506  | 0.044823 |
| 0.027069 | 0.55956  | 0.06198  | 0.18119  | -0.11799 | 0.01071  | -0.15595 | 0.00072  | -0.04025 |
| -0.13051 | 0.00473  | -0.07039 | 0.12879  | -0.07857 | 0.08987  | 0.002557 | 0.95605  | -0.27867 |
| 0.107747 | 0.01986  | 0.067032 | 0.14809  | 0.070049 | 0.13064  | 0.006847 | 0.88268  | 0.056217 |
| 0.107556 | 0.02008  | 0.439371 | 1.83E-23 | 0.048856 | 0.29207  | 0.225411 | 8.58E-07 | 0.098668 |
| 0.032114 | 0.48874  | -0.03509 | 0.44939  | 0.107423 | 0.02024  | -0.00464 | 0.92032  | -0.02876 |
| 0.080454 | 0.08243  | -0.06287 | 0.17498  | 0.167336 | 0.00028  | 0.071562 | 0.12252  | 0.10643  |
| 0.189242 | 3.86E-05 | 0.236914 | 2.22E-07 | 0.170094 | 0.00022  | 0.111511 | 0.01592  | 0.152243 |
| 0.032733 | 0.4804   | 0.151261 | 0.00104  | -0.11717 | 0.01127  | -0.00213 | 0.96338  | -0.04069 |
| -0.00296 | 0.94911  | 0.264216 | 6.72E-09 | 0.011065 | 0.81151  | 0.232891 | 3.59E-07 | -0.09275 |
| 0.074551 | 0.10762  | 0.139644 | 0.00249  | 0.145057 | 0.00167  | 0.13054  | 0.00472  | 0.161041 |
| 0.011954 | 0.79669  | 0.11775  | 0.01088  | 0.083318 | 0.07205  | 0.098089 | 0.03408  | 0.169785 |
| -0.06863 | 0.13864  | 0.02149  | 0.64321  | 0.011283 | 0.80786  | 0.100578 | 0.02977  | -0.00607 |
| -0.05428 | 0.24168  | -0.04282 | 0.35582  | -0.2285  | 6.01E-07 | -0.17398 | 0.00016  | -0.14407 |
| -0.02504 | 0.58941  | -0.012   | 0.79584  | -0.10414 | 0.02442  | -0.04203 | 0.36485  | -0.06275 |
| -0.09694 | 0.03625  | -0.09183 | 0.04733  | -0.14307 | 0.00194  | -0.11694 | 0.01144  | -0.12198 |
| -0.08536 | 0.06533  | -0.15945 | 0.00054  | -0.16406 | 0.00037  | -0.18083 | 8.51E-05 | -0.13336 |
| 0.022369 | 0.62969  | -0.1181  | 0.01064  | -0.18357 | 6.60E-05 | -0.14006 | 0.00242  | -0.22571 |
| 0.036221 | 0.43487  | 0.050532 | 0.27581  | 0.038995 | 0.40049  | 0.021171 | 0.64815  | 0.021578 |
| 0.013827 | 0.76569  | 0.072341 | 0.11849  | 0.062078 | 0.1805   | 0.090784 | 0.04992  | 0.029155 |
| 0.014049 | 0.76205  | 0.111664 | 0.01577  | 0.086138 | 0.0629   | 0.124666 | 0.00699  | 0.044845 |
| 0.05919  | 0.20168  | -0.00476 | 0.91837  | 0.041083 | 0.37572  | 0.07028  | 0.12937  | -0.00844 |
| 0.095033 | 0.04009  | 0.033295 | 0.4729   | 0.052734 | 0.2554   | 0.046572 | 0.31524  | 0.027609 |
| 0.013292 | 0.7745   | 0.017307 | 0.70913  | 0.014437 | 0.75568  | -0.00195 | 0.96639  | 0.030735 |
| 0.02059  | 0.65719  | 0.028442 | 0.5398   | 0.078748 | 0.08916  | 0.054809 | 0.23714  | 0.036223 |
| 0.080247 | 0.08322  | 0.092711 | 0.04524  | -0.00532 | 0.90869  | 0.024166 | 0.60244  | 0.058887 |
| -0.06302 | 0.17395  | 0.107567 | 0.02007  | -0.13625 | 0.00317  | -0.07917 | 0.08746  | 0.021396 |

|          |          |          |          |          |          |          |          |          |
|----------|----------|----------|----------|----------|----------|----------|----------|----------|
| 0.117798 | 0.01084  | 0.005677 | 0.90263  | 0.068212 | 0.14106  | 0.030007 | 0.51771  | 0.062407 |
| -0.03245 | 0.48415  | -0.03747 | 0.41918  | 0.005346 | 0.90827  | -0.05359 | 0.24771  | 0.060713 |
| 0.060553 | 0.19147  | -0.05944 | 0.19978  | -0.05524 | 0.23349  | -0.02747 | 0.5537   | -0.13837 |
| 0.092114 | 0.04665  | -0.02863 | 0.53719  | -0.03854 | 0.40605  | -0.02023 | 0.66287  | -0.06613 |
| -0.03157 | 0.49614  | -0.24556 | 7.67E-08 | -0.30543 | 1.54E-11 | -0.30145 | 2.88E-11 | -0.28964 |
| 0.051221 | 0.26931  | -0.08385 | 0.07024  | 0.107642 | 0.01998  | -0.002   | 0.96564  | -0.00228 |
| 0.317886 | 2.00E-12 | -0.16661 | 0.0003   | -0.00218 | 0.96245  | -0.18336 | 6.73E-05 | 0.012633 |
| 0.088309 | 0.05652  | 0.053386 | 0.24956  | 0.107002 | 0.02073  | 0.097669 | 0.03486  | 0.061193 |
| 0.160462 | 0.0005   | 0.185617 | 5.45E-05 | 0.040185 | 0.38626  | 0.000356 | 0.99388  | 0.099534 |
| -0.05569 | 0.22972  | -0.17154 | 0.0002   | -0.03249 | 0.48365  | -0.16008 | 0.00052  | -0.0299  |
| -0.02281 | 0.623    | -0.22671 | 7.40E-07 | -0.16828 | 0.00026  | -0.12779 | 0.00568  | -0.17306 |
| -0.01896 | 0.68284  | 0.018114 | 0.69622  | 0.072655 | 0.11689  | 0.047343 | 0.30729  | 0.068059 |
| 0.06525  | 0.1592   | -0.0357  | 0.44148  | 0.04558  | 0.32567  | -0.0727  | 0.11669  | 0.084127 |
| 0.009576 | 0.83648  | -0.29271 | 1.12E-10 | -0.18676 | 4.89E-05 | -0.29047 | 1.57E-10 | -0.21072 |
| 0.120572 | 0.0091   | 0.025906 | 0.57656  | 0.222276 | 1.23E-06 | 0.012942 | 0.78028  | 0.166517 |
| 0.17728  | 0.00012  | 0.184074 | 6.30E-05 | -0.07213 | 0.11957  | -0.08009 | 0.08382  | 0.027514 |
| 0.142022 | 0.00209  | 0.212549 | 3.59E-06 | 0.070957 | 0.12572  | 0.194511 | 2.31E-05 | -0.01903 |
| 0.043193 | 0.35168  | -0.03779 | 0.41523  | -0.11531 | 0.01265  | -0.1428  | 0.00198  | -0.14072 |
| -0.08212 | 0.07624  | 0.041842 | 0.36696  | -0.05931 | 0.20079  | -0.08484 | 0.06699  | -0.02175 |
| 0.135076 | 0.00345  | 0.046706 | 0.31386  | 0.169827 | 0.00023  | 0.197165 | 1.77E-05 | 0.059841 |
| -0.08349 | 0.07145  | -0.07761 | 0.09391  | 0.007909 | 0.86464  | -0.04027 | 0.3852   | -0.01237 |
| 0.101613 | 0.02812  | -0.07301 | 0.11512  | -0.00719 | 0.8769   | -0.01594 | 0.73121  | -0.10753 |
| 0.096083 | 0.03793  | -0.02025 | 0.66241  | 0.232017 | 3.98E-07 | 0.070781 | 0.12666  | 0.212105 |
| 0.107529 | 0.02011  | 0.046662 | 0.31431  | 0.171874 | 0.00019  | 0.149258 | 0.00122  | 0.060535 |
| 0.024051 | 0.60416  | 0.073633 | 0.11204  | 0.183959 | 6.36E-05 | 0.137246 | 0.00296  | 0.195288 |
| 0.053958 | 0.24452  | 0.036886 | 0.42647  | 0.035452 | 0.44468  | -0.02882 | 0.53442  | 0.000129 |
| 0.130735 | 0.00466  | 0.047173 | 0.30903  | 0.186207 | 5.15E-05 | 0.122032 | 0.00829  | 0.198269 |
| -0.05858 | 0.20634  | -0.02504 | 0.58937  | 0.060774 | 0.18985  | 0.066118 | 0.15371  | 0.078257 |
| 0.063995 | 0.16739  | 0.118355 | 0.01047  | -0.06276 | 0.17573  | 0.025917 | 0.57639  | 0.005817 |
| 0.090068 | 0.05176  | 0.085031 | 0.06637  | 0.071496 | 0.12286  | 0.042853 | 0.35549  | -0.03527 |
| 0.123545 | 0.00752  | 0.080265 | 0.08315  | 0.195091 | 2.18E-05 | 0.147247 | 0.00142  | 0.126165 |
| 0.04638  | 0.31724  | -0.00413 | 0.9291   | 0.030195 | 0.51509  | 0.046194 | 0.31919  | 0.029656 |
| 0.10826  | 0.01928  | 0.120477 | 0.00916  | -0.00092 | 0.98426  | -0.07344 | 0.11296  | 0.091091 |
| 0.101778 | 0.02786  | 0.024172 | 0.60234  | 0.050806 | 0.27322  | 0.026996 | 0.56061  | 0.054909 |
| -0.00738 | 0.87365  | 0.03581  | 0.4401   | 0.007976 | 0.86351  | 0.024277 | 0.60076  | -0.00412 |
| 0.007529 | 0.87109  | 0.047287 | 0.30787  | -0.0497  | 0.28377  | -0.11125 | 0.01617  | 0.025291 |
| 0.125263 | 0.00672  | 0.192989 | 2.68E-05 | -0.04119 | 0.37447  | -0.02667 | 0.56537  | 0.0229   |
| 0.084757 | 0.06725  | 0.075156 | 0.10479  | 0.08187  | 0.07715  | 0.020873 | 0.65278  | 0.048427 |
| 0.064654 | 0.16305  | 0.070229 | 0.12965  | 0.085727 | 0.06417  | 0.017113 | 0.71223  | 0.032971 |
| 0.160926 | 0.00048  | 0.173986 | 0.00016  | 0.089816 | 0.05242  | 0.026508 | 0.56773  | 0.108939 |
| 0.180092 | 9.10E-05 | 0.016283 | 0.72562  | 0.094738 | 0.04071  | 0.099307 | 0.03191  | 0.0043   |
| 0.259166 | 1.32E-08 | 0.072816 | 0.11608  | 0.188399 | 4.18E-05 | 0.150949 | 0.00107  | 0.108276 |
| 0.102883 | 0.0262   | 0.050338 | 0.27766  | 0.026708 | 0.56481  | -0.08446 | 0.06823  | 0.045281 |
| 0.105179 | 0.02302  | 0.188594 | 4.11E-05 | 0.141922 | 0.00211  | 0.136352 | 0.00315  | 0.188157 |
| -0.07635 | 0.09938  | 0.084662 | 0.06756  | 0.199487 | 1.40E-05 | 0.224318 | 9.73E-07 | 0.234532 |

|          |          |          |          |          |          |          |          |           |
|----------|----------|----------|----------|----------|----------|----------|----------|-----------|
| -0.07407 | 0.10994  | 0.104473 | 0.02396  | -0.14497 | 0.00168  | -0.05686 | 0.22005  | -0.08391  |
| 0.188501 | 4.14E-05 | 0.15069  | 0.00109  | 0.144222 | 0.00178  | 0.008992 | 0.84634  | 0.23034   |
| 0.145448 | 0.00162  | 0.071124 | 0.12483  | 0.040969 | 0.37705  | -0.04246 | 0.35995  | 0.112035  |
| 0.15947  | 0.00054  | 0.102012 | 0.0275   | 0.072812 | 0.1161   | -0.03914 | 0.39868  | 0.16353   |
| 0.305514 | 1.51E-11 | 0.098474 | 0.03338  | 0.16567  | 0.00032  | 0.143839 | 0.00183  | 0.151183  |
| 0.140531 | 0.00234  | 0.178948 | 0.0001   | 0.028362 | 0.54094  | 0.037178 | 0.42282  | -0.03424  |
| 0.062721 | 0.17602  | 0.034374 | 0.45866  | 0.020393 | 0.66025  | 0.012381 | 0.78959  | 0.045528  |
| -0.05354 | 0.24816  | -0.07503 | 0.10536  | -0.08458 | 0.06782  | -0.07734 | 0.09503  | -0.06802  |
| 0.013754 | 0.76689  | 0.052594 | 0.25666  | 0.088738 | 0.05533  | 0.152981 | 0.00091  | 0.046918  |
| 0.053916 | 0.24489  | -0.12864 | 0.00537  | -0.04759 | 0.30473  | -0.04933 | 0.28736  | -0.01713  |
| -0.12407 | 0.00727  | -0.16718 | 0.00028  | -0.13641 | 0.00314  | -0.23514 | 2.75E-07 | -0.04174  |
| -0.15573 | 0.00073  | -0.37985 | 1.78E-17 | -0.20569 | 7.42E-06 | -0.20215 | 1.07E-05 | -0.14248  |
| 0.332767 | 1.54E-13 | -0.00013 | 0.99769  | 0.231323 | 4.32E-07 | 0.066541 | 0.15109  | 0.168857  |
| 0.187599 | 4.51E-05 | 0.17697  | 0.00012  | 0.195252 | 2.15E-05 | 0.138257 | 0.00275  | 0.171432  |
| 0.04546  | 0.32695  | 0.051046 | 0.27095  | -0.06563 | 0.15678  | -0.01591 | 0.73171  | -0.0545   |
| 0.289129 | 1.92E-10 | 0.421707 | 1.47E-21 | 0.282552 | 5.08E-10 | 0.409292 | 2.74E-20 | 0.177054  |
| 0.039902 | 0.38961  | 0.091469 | 0.04821  | 0.121475 | 0.00859  | 0.25412  | 2.57E-08 | 0.051675  |
| 0.109525 | 0.0179   | 0.196804 | 1.84E-05 | 0.105768 | 0.02226  | 0.228728 | 5.85E-07 | 0.021076  |
| 0.166178 | 0.00031  | 0.155265 | 0.00076  | 0.121989 | 0.00832  | 0.112728 | 0.0148   | 0.10969   |
| 0.071322 | 0.12378  | 0.356902 | 1.78E-15 | 0.035027 | 0.45016  | 0.260776 | 1.07E-08 | -0.01765  |
| -0.07469 | 0.10697  | -0.16021 | 0.00051  | -0.21608 | 2.44E-06 | -0.18261 | 7.21E-05 | -0.12646  |
| 0.024161 | 0.60251  | 0.023886 | 0.60664  | 0.059735 | 0.19754  | 0.027549 | 0.5526   | 0.096886  |
| -0.07718 | 0.09572  | 0.083683 | 0.07081  | -0.12386 | 0.00737  | -0.03854 | 0.40603  | -3.67E-05 |
| -0.2575  | 1.65E-08 | -0.22155 | 1.33E-06 | -0.18637 | 5.07E-05 | -0.21847 | 1.88E-06 | -0.05836  |
| 0.029816 | 0.5204   | -0.12201 | 0.0083   | 0.163029 | 0.0004   | 0.1832   | 6.83E-05 | -0.03852  |
| -0.01712 | 0.71211  | -0.12983 | 0.00495  | -0.00245 | 0.95791  | -0.06262 | 0.17673  | -0.01792  |
| 0.03134  | 0.49929  | 0.079296 | 0.08695  | 0.065259 | 0.15914  | -0.02205 | 0.63461  | 0.207902  |
| -0.29154 | 1.33E-10 | -0.44257 | 8.08E-24 | -0.18946 | 3.78E-05 | -0.3148  | 3.34E-12 | -0.15674  |
| -0.05164 | 0.26536  | -0.07758 | 0.09403  | -0.03395 | 0.46421  | -0.08801 | 0.05735  | 0.006393  |
| -0.05917 | 0.20182  | 0.067951 | 0.1426   | 0.040737 | 0.37976  | 0.056512 | 0.22286  | 0.133462  |
| -0.12945 | 0.00508  | -0.07164 | 0.12208  | -0.15957 | 0.00054  | -0.09837 | 0.03357  | -0.16623  |
| 0.007694 | 0.86829  | 0.044147 | 0.34113  | 0.079181 | 0.08741  | 0.048271 | 0.2979   | 0.067909  |
| 0.04856  | 0.29501  | 0.058834 | 0.20441  | 0.037144 | 0.42324  | 0.011154 | 0.81002  | 0.073497  |
| -0.05057 | 0.27542  | 0.000824 | 0.98583  | 0.136485 | 0.00312  | 0.083023 | 0.07307  | 0.120069  |
| 0.012051 | 0.79507  | 0.106604 | 0.02122  | 0.005279 | 0.90942  | -0.00219 | 0.96229  | 0.027543  |
| -0.01394 | 0.76391  | 0.051935 | 0.26268  | -0.04467 | 0.33542  | -0.00285 | 0.95101  | -0.05137  |
| 0.059709 | 0.19774  | -0.00657 | 0.88735  | -0.00457 | 0.92153  | -0.01104 | 0.81198  | 0.012716  |
| -0.00877 | 0.85001  | 0.053433 | 0.24915  | -0.05282 | 0.25459  | 0.005666 | 0.9028   | 0.033985  |
| -0.04727 | 0.308    | -0.01513 | 0.74428  | -0.04024 | 0.38565  | -0.00454 | 0.92204  | 0.002679  |
| -0.05143 | 0.2674   | -0.01512 | 0.74458  | -0.02159 | 0.64165  | -0.02198 | 0.63563  | 0.080979  |
| 0.069874 | 0.13161  | 0.094365 | 0.04152  | 0.028919 | 0.53303  | -0.00743 | 0.87284  | 0.10305   |
| 0.108859 | 0.01861  | 0.077185 | 0.09571  | -0.00949 | 0.83801  | -0.02164 | 0.64091  | 0.03896   |
| -0.02392 | 0.60613  | 0.031853 | 0.49229  | 0.080427 | 0.08253  | 0.074707 | 0.10689  | 0.056865  |
| -0.21775 | 2.03E-06 | -0.2329  | 3.59E-07 | -0.20418 | 8.68E-06 | -0.17633 | 0.00013  | -0.18367  |
| -0.00457 | 0.92153  | 0.016907 | 0.71556  | 0.005686 | 0.90246  | -0.023   | 0.61999  | 0.016488  |



|          |          |          |          |           |          |          |          |          |
|----------|----------|----------|----------|-----------|----------|----------|----------|----------|
| -0.04159 | 0.36985  | 0.005507 | 0.90551  | -0.02279  | 0.62321  | 0.023819 | 0.60765  | -0.03525 |
| 0.066955 | 0.14855  | 0.04661  | 0.31485  | 0.106374  | 0.0215   | 0.055073 | 0.23489  | 0.048076 |
| 0.025803 | 0.57808  | 0.056312 | 0.22451  | 0.086708  | 0.06117  | 0.023547 | 0.61175  | 0.094364 |
| 0.024771 | 0.59338  | 0.08633  | 0.06231  | 0.129094  | 0.00521  | 0.00499  | 0.91436  | 0.223609 |
| 0.047087 | 0.30991  | 0.149342 | 0.00121  | 0.080233  | 0.08328  | -0.00261 | 0.95514  | 0.184198 |
| 0.232236 | 3.88E-07 | 0.352126 | 4.45E-15 | 0.074525  | 0.10774  | 0.098083 | 0.03409  | 0.065952 |
| -0.28425 | 3.96E-10 | -0.21419 | 3.00E-06 | -0.22476  | 9.24E-07 | -0.17766 | 0.00011  | -0.24789 |
| -0.05684 | 0.22022  | -0.1375  | 0.00291  | -0.15875  | 0.00057  | 0.004315 | 0.92591  | -0.17319 |
| -0.07445 | 0.1081   | -0.21327 | 3.32E-06 | -0.0249   | 0.59149  | -0.14989 | 0.00116  | 0.034151 |
| -0.05388 | 0.24519  | 0.017354 | 0.70837  | -0.08848  | 0.05605  | -0.01766 | 0.7035   | -0.04735 |
| 0.236179 | 2.42E-07 | -0.05505 | 0.23507  | 0.169542  | 0.00023  | 0.033333 | 0.47238  | 0.135377 |
| -0.04381 | 0.34483  | 0.052579 | 0.2568   | -0.01958  | 0.673    | -0.0444  | 0.33832  | 0.062969 |
| -0.06576 | 0.15595  | 0.024731 | 0.59396  | -0.16509  | 0.00034  | -0.13926 | 0.00256  | -0.06002 |
| 0.059622 | 0.1984   | 0.146279 | 0.00153  | 0.05525   | 0.23339  | 0.104502 | 0.02392  | 0.083347 |
| 0.023308 | 0.61538  | -0.03535 | 0.44599  | -0.00192  | 0.96701  | 0.074764 | 0.10661  | -0.00952 |
| 0.032931 | 0.47774  | 0.002255 | 0.96123  | -0.00047  | 0.99195  | -0.0235  | 0.61248  | -0.00547 |
| 0.214646 | 2.86E-06 | 0.249017 | 4.95E-08 | 0.069965  | 0.1311   | 0.173765 | 0.00016  | 0.080515 |
| 0.080755 | 0.08128  | -0.14943 | 0.0012   | 0.060844  | 0.18934  | -0.00567 | 0.90268  | -0.04395 |
| 0.138399 | 0.00272  | 0.104112 | 0.02445  | 0.246424  | 6.87E-08 | 0.268255 | 3.87E-09 | 0.104906 |
| -0.02524 | 0.58634  | -0.24042 | 1.45E-07 | -0.03467  | 0.45479  | -0.08511 | 0.0661   | -0.13033 |
| 0.051508 | 0.26663  | 0.023074 | 0.61894  | 0.174989  | 0.00014  | 0.084484 | 0.06814  | 0.142098 |
| 0.207886 | 5.90E-06 | 0.203077 | 9.74E-06 | 0.245762  | 7.47E-08 | 0.190067 | 3.56E-05 | 0.163959 |
| -0.08716 | 0.05982  | -0.12455 | 0.00704  | -0.26341  | 7.49E-09 | -0.21131 | 4.10E-06 | -0.16596 |
| 0.094371 | 0.0415   | 0.071962 | 0.12044  | 0.118899  | 0.01012  | 0.052423 | 0.25822  | 0.027164 |
| -0.1267  | 0.00611  | -0.23768 | 2.02E-07 | -0.03411  | 0.46207  | -0.15689 | 0.00067  | -0.04847 |
| 0.057315 | 0.21635  | -0.01482 | 0.74946  | -0.01183  | 0.79881  | -0.06239 | 0.17831  | 0.059273 |
| 0.075245 | 0.10438  | 0.054637 | 0.23863  | 0.147929  | 0.00135  | 0.062205 | 0.17961  | 0.270168 |
| 0.134258 | 0.00365  | 0.110978 | 0.01643  | 0.035918  | 0.43871  | -0.03831 | 0.40884  | 0.097846 |
| 0.183255 | 6.80E-05 | 0.149915 | 0.00116  | 0.157576  | 0.00063  | 0.115724 | 0.01233  | 0.09959  |
| 0.051646 | 0.26535  | 0.031587 | 0.49591  | 0.057891  | 0.21176  | 0.026721 | 0.56461  | 0.109726 |
| -0.04592 | 0.32207  | -0.01748 | 0.70631  | -0.01445  | 0.75542  | -0.08491 | 0.06675  | 0.002664 |
| -0.04608 | 0.32035  | 0.053946 | 0.24463  | -0.10087  | 0.02929  | -0.10713 | 0.02059  | 0.036475 |
| -0.03993 | 0.38925  | 0.000482 | 0.99171  | 0.07119   | 0.12448  | 0.069012 | 0.13645  | 0.039579 |
| -0.0238  | 0.60789  | 0.029156 | 0.52967  | -0.01797  | 0.69847  | -0.05335 | 0.24986  | 0.110076 |
| 0.147721 | 0.00137  | 0.067889 | 0.14296  | 0.104907  | 0.02338  | 0.018907 | 0.68362  | 0.150651 |
| -0.13629 | 0.00317  | -0.02354 | 0.61183  | -0.04263  | 0.35799  | -0.08474 | 0.06731  | 0.060842 |
| -0.05215 | 0.26073  | 0.019807 | 0.66944  | 0.207759  | 5.98E-06 | 0.1168   | 0.01154  | 0.28937  |
| 0.027898 | 0.54758  | 0.070342 | 0.12903  | 0.134263  | 0.00365  | 0.102639 | 0.02656  | 0.192211 |
| 0.148603 | 0.00128  | -0.05683 | 0.22024  | 0.155616  | 0.00074  | -0.03483 | 0.45276  | 0.112222 |
| 0.085887 | 0.06367  | -0.00523 | 0.91022  | 0.128112  | 0.00556  | -0.00746 | 0.87226  | 0.186653 |
| 0.177209 | 0.00012  | 0.224306 | 9.74E-07 | 0.259828  | 1.21E-08 | 0.116968 | 0.01142  | 0.306569 |
| 0.010308 | 0.82418  | 0.018116 | 0.69618  | 0.15203   | 0.00098  | 0.068388 | 0.14004  | 0.145645 |
| -0.02825 | 0.54249  | -0.12404 | 0.00728  | 0.117315  | 0.01118  | 0.09997  | 0.03077  | 0.074491 |
| 0.084217 | 0.06902  | 0.093119 | 0.04429  | 0.065991  | 0.1545   | 0.064129 | 0.1665   | 0.076733 |
| -0.1432  | 0.00192  | -0.27724 | 1.09E-09 | -8.65E-05 | 0.99851  | -0.13096 | 0.00459  | -0.0044  |

|          |          |          |          |          |          |          |          |          |
|----------|----------|----------|----------|----------|----------|----------|----------|----------|
| -0.07671 | 0.09776  | -0.17132 | 0.0002   | 0.117035 | 0.01137  | 0.015041 | 0.7458   | -0.03824 |
| -0.05363 | 0.24739  | -0.03464 | 0.45514  | -0.02783 | 0.54858  | -0.03277 | 0.47996  | -0.05724 |
| 0.302563 | 2.42E-11 | 0.058156 | 0.20967  | 0.132525 | 0.00412  | 0.275708 | 1.36E-09 | 0.032293 |
| 0.116519 | 0.01174  | 0.197098 | 1.79E-05 | 0.048391 | 0.29669  | 0.102488 | 0.02678  | 0.035375 |
| 0.088226 | 0.05675  | 0.056081 | 0.22642  | 0.16674  | 0.0003   | 0.190585 | 3.39E-05 | 0.147031 |
| 0.025501 | 0.58252  | 0.168829 | 0.00025  | -0.01949 | 0.67439  | 0.094708 | 0.04078  | -0.04487 |
| 0.083175 | 0.07254  | -0.04597 | 0.32155  | -0.01384 | 0.7655   | -0.11203 | 0.01543  | -0.11727 |
| -0.24524 | 7.97E-08 | -0.2446  | 8.64E-08 | -0.26743 | 4.33E-09 | -0.21408 | 3.04E-06 | -0.21224 |
| 0.242797 | 1.08E-07 | 0.0267   | 0.56492  | 0.124985 | 0.00684  | 0.148957 | 0.00124  | 0.100271 |
| -0.00461 | 0.92083  | -0.00789 | 0.86503  | -0.04988 | 0.28205  | -0.04221 | 0.36272  | -0.0069  |
| 0.116367 | 0.01185  | 0.070359 | 0.12894  | 0.058232 | 0.20908  | 0.06109  | 0.18755  | 0.031448 |
| 0.010902 | 0.81423  | -0.14621 | 0.00153  | 0.12119  | 0.00875  | -0.06249 | 0.17759  | 0.151456 |
| 0.131255 | 0.0045   | -0.00596 | 0.89783  | 0.084694 | 0.06745  | -0.00841 | 0.85625  | 0.102766 |
| -0.04903 | 0.29039  | 0.01352  | 0.77074  | -0.01602 | 0.72985  | -0.09196 | 0.04702  | 0.107964 |
| 0.096354 | 0.03739  | 0.138781 | 0.00265  | 0.044349 | 0.33892  | 0.173024 | 0.00017  | 0.059562 |
| 0.12891  | 0.00527  | 0.15557  | 0.00074  | 0.176483 | 0.00013  | 0.075525 | 0.10309  | 0.210416 |
| 0.131863 | 0.00431  | 0.172028 | 0.00019  | 0.015923 | 0.73144  | -0.06684 | 0.14924  | 0.101773 |
| 0.091035 | 0.04929  | 0.176496 | 0.00013  | 0.169172 | 0.00024  | 0.156964 | 0.00066  | 0.216859 |
| 0.017396 | 0.70769  | -0.00014 | 0.99768  | 0.011987 | 0.79613  | -0.0197  | 0.67113  | 0.067007 |
| 0.200462 | 1.27E-05 | 0.421305 | 1.62E-21 | 0.279715 | 7.67E-10 | 0.431413 | 1.36E-22 | 0.196899 |
| 0.183396 | 6.71E-05 | 0.443741 | 5.96E-24 | 0.223172 | 1.11E-06 | 0.458188 | 1.29E-25 | 0.093371 |
| -0.01714 | 0.71179  | -0.05466 | 0.23841  | -0.21549 | 2.61E-06 | -0.12245 | 0.00807  | -0.17092 |
| 0.032314 | 0.48604  | 0.069049 | 0.13624  | -0.05494 | 0.23604  | -0.03508 | 0.44946  | 0.020853 |
| -0.11747 | 0.01107  | 0.023105 | 0.61846  | -0.00984 | 0.83208  | 0.058301 | 0.20854  | -0.03334 |
| -0.04954 | 0.28536  | -0.1669  | 0.00029  | -0.19224 | 2.89E-05 | -0.21977 | 1.63E-06 | -0.14715 |
| -0.21379 | 3.14E-06 | -0.27294 | 2.01E-09 | -0.36579 | 3.13E-16 | -0.25513 | 2.25E-08 | -0.33925 |
| 0.004743 | 0.91859  | -0.16831 | 0.00026  | -0.05353 | 0.24828  | -0.09928 | 0.03196  | -0.0794  |
| -0.03817 | 0.41058  | -0.01475 | 0.75063  | -0.05736 | 0.21602  | -0.0901  | 0.05168  | -0.03952 |
| 0.094583 | 0.04105  | -0.05288 | 0.25406  | 0.039968 | 0.38883  | 0.102743 | 0.0264   | 0.007088 |
| 0.056152 | 0.22583  | 0.083214 | 0.0724   | -0.01344 | 0.77211  | -0.05044 | 0.27671  | 0.095759 |
| 0.069936 | 0.13126  | -0.06307 | 0.17364  | 0.012849 | 0.78183  | 0.018088 | 0.69663  | -0.0653  |
| 0.299841 | 3.71E-11 | 0.093907 | 0.04252  | 0.300185 | 3.52E-11 | 0.143866 | 0.00183  | 0.20159  |
| -0.19461 | 2.29E-05 | -0.04207 | 0.36433  | -0.23485 | 2.84E-07 | -0.07534 | 0.10395  | -0.16291 |
| 0.086666 | 0.06129  | 0.010074 | 0.82811  | -0.05322 | 0.25106  | 0.039137 | 0.39877  | -0.02694 |
| 0.018772 | 0.68577  | 0.231014 | 4.48E-07 | 0.010194 | 0.82611  | 0.039403 | 0.39557  | 0.12186  |
| 0.012279 | 0.79128  | 0.030769 | 0.50714  | 0.012853 | 0.78176  | -0.053   | 0.25305  | -0.02055 |
| 0.038817 | 0.40265  | -0.16371 | 0.00038  | -0.02906 | 0.53101  | -0.02079 | 0.65411  | -0.06772 |
| -0.06701 | 0.1482   | -0.12877 | 0.00532  | -0.05597 | 0.22736  | -0.122   | 0.00831  | -0.08416 |
| 0.073957 | 0.11046  | 0.077152 | 0.09586  | 0.046039 | 0.32082  | 0.027145 | 0.55845  | 0.045771 |
| -0.03548 | 0.4443   | -0.17243 | 0.00018  | -0.21214 | 3.75E-06 | -0.1906  | 3.38E-05 | -0.28622 |
| 0.028935 | 0.53279  | 0.005578 | 0.90431  | 0.144582 | 0.00173  | 0.054924 | 0.23616  | 0.184647 |
| 0.040601 | 0.38136  | -0.01192 | 0.79726  | -0.05828 | 0.20867  | -0.08572 | 0.06419  | -0.00986 |
| -0.10607 | 0.02188  | -0.16779 | 0.00027  | 0.091786 | 0.04744  | -0.09512 | 0.03991  | 0.031744 |
| 0.166173 | 0.00031  | 0.136118 | 0.0032   | 0.068349 | 0.14027  | 0.063057 | 0.17371  | 0.114273 |
| 0.146532 | 0.0015   | 0.093616 | 0.04317  | 0.163873 | 0.00038  | 0.078305 | 0.09098  | 0.197873 |

|          |          |          |          |          |          |          |          |          |
|----------|----------|----------|----------|----------|----------|----------|----------|----------|
| 0.1883   | 4.22E-05 | -0.10833 | 0.0192   | -0.1041  | 0.02447  | -0.09475 | 0.04068  | -0.12974 |
| 0.061119 | 0.18734  | -0.07234 | 0.1185   | 0.123486 | 0.00755  | -0.00333 | 0.94273  | 0.01554  |
| -0.02799 | 0.54629  | -0.05986 | 0.19661  | -0.05044 | 0.27671  | -0.13011 | 0.00486  | -0.0216  |
| 0.297482 | 5.36E-11 | 0.233904 | 3.18E-07 | 0.25253  | 3.16E-08 | 0.139734 | 0.00247  | 0.29045  |
| -0.01614 | 0.72791  | -0.00894 | 0.84713  | -0.12752 | 0.00579  | -0.04077 | 0.37941  | -0.00939 |
| -0.0619  | 0.18179  | -0.17166 | 0.00019  | -0.03054 | 0.5103   | -0.26022 | 1.15E-08 | 0.192266 |
| -0.12525 | 0.00673  | -0.13596 | 0.00324  | -0.13033 | 0.00479  | -0.1136  | 0.01404  | -0.18575 |
| 0.071285 | 0.12397  | 0.096727 | 0.03666  | 0.12047  | 0.00916  | 0.06684  | 0.14925  | 0.11729  |
| -0.09094 | 0.04952  | 0.033009 | 0.47671  | 0.001881 | 0.96767  | 0.080037 | 0.08403  | -0.0428  |
| -0.01403 | 0.76232  | 0.046437 | 0.31665  | -0.06662 | 0.15061  | -0.03042 | 0.51202  | 0.016563 |
| 0.04427  | 0.33979  | 0.006845 | 0.88272  | 0.027293 | 0.55631  | -0.10121 | 0.02875  | -0.00406 |
| -0.00885 | 0.84865  | 0.068513 | 0.13931  | 0.17946  | 9.64E-05 | 0.055782 | 0.22891  | 0.247127 |
| -0.01491 | 0.74794  | -0.0684  | 0.13996  | 0.00184  | 0.96836  | 0.014996 | 0.74653  | 0.001093 |
| -0.05018 | 0.27916  | -0.15327 | 0.00089  | -0.15257 | 0.00094  | -0.14874 | 0.00127  | -0.21519 |
| 0.09993  | 0.03084  | 0.104861 | 0.02344  | 0.245587 | 7.64E-08 | 0.223465 | 1.07E-06 | 0.224476 |
| 0.058769 | 0.2049   | 0.048719 | 0.29343  | 0.067042 | 0.14803  | -0.0275  | 0.55335  | 0.128057 |
| 0.013022 | 0.77897  | 0.089286 | 0.05384  | -0.00641 | 0.8902   | 0.026871 | 0.56243  | 0.006942 |
| 0.074128 | 0.10964  | 0.027198 | 0.55768  | 0.050091 | 0.28003  | -0.01598 | 0.73051  | 0.087542 |
| 0.027888 | 0.54773  | 0.075694 | 0.10232  | 0.046519 | 0.31579  | 0.037555 | 0.41812  | 0.059531 |
| 0.178445 | 0.00011  | 0.086908 | 0.06057  | 0.061132 | 0.18725  | 0.042152 | 0.36341  | 0.166194 |
| 0.086245 | 0.06257  | 0.025472 | 0.58296  | 0.038415 | 0.40754  | 0.032178 | 0.48788  | 0.076342 |
| 0.072807 | 0.11613  | -0.08659 | 0.06151  | 0.163284 | 0.0004   | 0.18667  | 4.93E-05 | 0.070628 |
| 0.086755 | 0.06103  | 0.135436 | 0.00336  | 0.227108 | 7.06E-07 | 0.202246 | 1.06E-05 | 0.136984 |
| -0.0839  | 0.07009  | -0.23791 | 1.97E-07 | -0.17072 | 0.00021  | -0.22542 | 8.58E-07 | -0.18791 |
| -0.01541 | 0.73986  | -0.03322 | 0.47386  | -0.02346 | 0.61309  | 0.055853 | 0.22832  | -0.00491 |
| 0.09319  | 0.04413  | 0.118067 | 0.01066  | 0.011732 | 0.80037  | 0.005231 | 0.91023  | 0.025328 |
| -0.17897 | 0.0001   | -0.30969 | 7.73E-12 | -0.2689  | 3.54E-09 | -0.37513 | 4.72E-17 | -0.23845 |
| -0.10512 | 0.02309  | 0.017744 | 0.70212  | -0.13434 | 0.00363  | -0.12227 | 0.00817  | -0.08809 |
| 0.192477 | 2.82E-05 | 0.348264 | 9.20E-15 | 0.318252 | 1.88E-12 | 0.419962 | 2.23E-21 | 0.201948 |
| -0.05593 | 0.22767  | -0.17582 | 0.00013  | 0.013225 | 0.77562  | -0.05832 | 0.2084   | -0.07887 |
| 0.150211 | 0.00113  | 0.015041 | 0.7458   | 0.113088 | 0.01448  | 0.04587  | 0.3226   | 0.111776 |
| -0.02011 | 0.6646   | 0.040525 | 0.38225  | 0.048315 | 0.29746  | 0.005727 | 0.90176  | 0.067593 |
| -0.0222  | 0.63221  | -0.05811 | 0.21005  | 0.115757 | 0.01231  | 0.071051 | 0.12522  | 0.067095 |
| -0.09806 | 0.03412  | -0.04781 | 0.30252  | -0.20781 | 5.95E-06 | -0.15341 | 0.00088  | -0.18547 |
| -0.08463 | 0.06767  | -0.04155 | 0.37029  | 0.168162 | 0.00026  | 0.15972  | 0.00053  | 0.097852 |
| 0.187158 | 4.71E-05 | -0.0262  | 0.5723   | 0.098733 | 0.03291  | 0.063708 | 0.16931  | -0.01771 |
| 0.004106 | 0.92948  | 0.025636 | 0.58053  | -0.13548 | 0.00335  | -0.03298 | 0.47714  | -0.12069 |
| -0.01834 | 0.69264  | -0.0713  | 0.12387  | -0.03588 | 0.43916  | -0.0641  | 0.16669  | -0.04677 |
| -0.03982 | 0.39058  | 0.036684 | 0.42901  | 0.016059 | 0.72925  | 0.06978  | 0.13213  | 0.02096  |
| 0.087343 | 0.05929  | -0.06024 | 0.19377  | -0.06068 | 0.19055  | -0.12162 | 0.00851  | -0.12888 |
| 0.019062 | 0.68117  | 0.072502 | 0.11767  | 0.005071 | 0.91297  | 0.000483 | 0.99169  | 0.029328 |
| 0.063136 | 0.17317  | 0.001704 | 0.97071  | 0.110591 | 0.01681  | 0.061917 | 0.18164  | 0.110597 |
| -0.12011 | 0.00938  | 0.018944 | 0.68304  | -0.0545  | 0.23979  | -0.02269 | 0.62486  | -0.00192 |
| 0.130366 | 0.00478  | 0.066668 | 0.15031  | 0.010081 | 0.828    | 0.003059 | 0.94743  | 0.011993 |
| -0.13713 | 0.00298  | -0.02472 | 0.59416  | -0.24178 | 1.23E-07 | -0.25281 | 3.05E-08 | -0.09078 |

|          |          |          |          |          |          |          |          |          |
|----------|----------|----------|----------|----------|----------|----------|----------|----------|
| 0.07418  | 0.10939  | 0.031642 | 0.49516  | 0.008956 | 0.84693  | -0.0608  | 0.18966  | 0.094267 |
| -0.08402 | 0.06966  | -0.0094  | 0.83941  | -0.18488 | 5.84E-05 | -0.1434  | 0.00189  | -0.16589 |
| 0.149298 | 0.00121  | 0.240475 | 1.44E-07 | 0.162106 | 0.00044  | 0.133384 | 0.00388  | 0.055097 |
| 0.001857 | 0.96807  | 0.243308 | 1.01E-07 | 0.019255 | 0.67812  | 0.079163 | 0.08748  | 0.003591 |
| 0.056733 | 0.22106  | 0.153018 | 0.00091  | -0.03945 | 0.39503  | 0.05541  | 0.23203  | -0.04572 |
| -0.0393  | 0.39686  | -0.18831 | 4.22E-05 | -0.15369 | 0.00086  | -0.0807  | 0.08147  | -0.21152 |
| 0.003797 | 0.93478  | -0.00396 | 0.93199  | 0.086278 | 0.06247  | 0.044188 | 0.34068  | 0.187834 |
| -0.00105 | 0.9819   | -0.04179 | 0.3676   | -0.26314 | 7.77E-09 | -0.15166 | 0.00101  | -0.23833 |
| 0.007956 | 0.86384  | -0.0346  | 0.45575  | -0.08418 | 0.06916  | 0.00576  | 0.90121  | -0.06547 |
| -0.07697 | 0.09663  | 0.051465 | 0.26703  | 0.012422 | 0.78891  | 0.135413 | 0.00337  | 0.043881 |
| 0.091197 | 0.04888  | -0.0125  | 0.78759  | 0.006153 | 0.89449  | 0.031795 | 0.49307  | 0.016627 |
| 0.020237 | 0.66269  | -0.05294 | 0.25355  | -0.0401  | 0.38732  | -0.02553 | 0.5821   | 0.02368  |
| 0.099092 | 0.03228  | 0.146043 | 0.00155  | -0.0261  | 0.57373  | -0.06041 | 0.19252  | 0.108852 |
| 0.015805 | 0.73336  | 0.140757 | 0.0023   | -0.14508 | 0.00167  | -0.10536 | 0.02279  | -0.01102 |
| 0.058387 | 0.20787  | 0.104739 | 0.0236   | 0.097979 | 0.03428  | 0.021089 | 0.64943  | 0.175779 |
| 0.105479 | 0.02263  | -0.07944 | 0.08636  | 0.04513  | 0.33047  | -0.08647 | 0.06188  | 0.027324 |
| 0.181842 | 7.75E-05 | 0.129943 | 0.00492  | 0.267732 | 4.16E-09 | 0.249736 | 4.52E-08 | 0.267796 |
| 0.105279 | 0.02289  | 0.123757 | 0.00742  | 0.004053 | 0.9304   | 0.121319 | 0.00868  | -0.13865 |
| -0.03059 | 0.50962  | -0.07391 | 0.11069  | -0.00974 | 0.83376  | -0.0639  | 0.16799  | 0.034558 |
| -0.0562  | 0.22547  | -0.03767 | 0.41673  | -0.04735 | 0.3072   | -0.00472 | 0.91901  | -0.03788 |
| -0.04572 | 0.32418  | -0.03564 | 0.44221  | -0.00318 | 0.94535  | 0.045693 | 0.32447  | 0.006667 |
| 0.057795 | 0.21252  | -0.03805 | 0.41195  | 0.032198 | 0.4876   | 0.112622 | 0.01489  | 0.040291 |
| 0.236085 | 2.45E-07 | 0.106761 | 0.02102  | 0.078156 | 0.0916   | 0.033377 | 0.47181  | 0.082254 |
| 0.003004 | 0.94837  | 0.020887 | 0.65256  | -0.01563 | 0.73626  | -0.01739 | 0.70783  | -0.02489 |
| -0.04804 | 0.30025  | -0.26988 | 3.09E-09 | -0.26997 | 3.05E-09 | -0.21022 | 4.60E-06 | -0.24374 |
| 0.066569 | 0.15091  | -0.09337 | 0.04373  | -0.17914 | 9.92E-05 | -0.11702 | 0.01138  | -0.15576 |
| 0.050551 | 0.27564  | -0.08456 | 0.06788  | 0.033818 | 0.46596  | -0.11076 | 0.01665  | 0.031913 |
| 0.069004 | 0.13649  | 0.060965 | 0.18846  | 0.007645 | 0.86912  | 0.078663 | 0.08951  | -0.0261  |
| 0.088155 | 0.05696  | -0.05589 | 0.22798  | 0.115257 | 0.01269  | 0.015391 | 0.7401   | 0.195399 |
| 0.090681 | 0.05018  | -0.07189 | 0.12081  | -0.02058 | 0.65734  | -0.13303 | 0.00398  | 0.004772 |
| 0.00163  | 0.97198  | 0.135788 | 0.00328  | -0.11235 | 0.01514  | 0.008232 | 0.85917  | -0.08076 |
| 0.060798 | 0.18967  | 0.021048 | 0.65006  | -0.06282 | 0.17535  | -0.0124  | 0.78927  | -0.00749 |
| 0.0061   | 0.8954   | -0.09694 | 0.03623  | -0.08559 | 0.0646   | -0.03093 | 0.50489  | -0.18966 |
| 0.229463 | 5.37E-07 | 0.367697 | 2.14E-16 | 0.243065 | 1.05E-07 | 0.387232 | 3.72E-18 | 0.149511 |
| 0.016438 | 0.72312  | 0.052196 | 0.26029  | 0.075623 | 0.10264  | 0.108036 | 0.01953  | 0.072616 |
| -0.03568 | 0.44171  | 0.013261 | 0.77501  | -0.08335 | 0.07194  | -0.05708 | 0.21827  | -0.0232  |
| 0.080777 | 0.0812   | 0.08434  | 0.06861  | 0.036806 | 0.42747  | 0.005591 | 0.90409  | 0.089655 |
| -0.04975 | 0.28335  | 0.027001 | 0.56054  | -0.13024 | 0.00482  | -0.05627 | 0.22483  | -0.06697 |
| -0.07854 | 0.09002  | 0.140725 | 0.0023   | -0.1592  | 0.00055  | -0.01622 | 0.72668  | -0.13332 |
| -0.07627 | 0.09972  | -0.08656 | 0.06161  | -0.07299 | 0.11522  | -0.10395 | 0.02467  | -0.04452 |
| -0.1066  | 0.02122  | -0.11343 | 0.01419  | -0.19276 | 2.74E-05 | -0.21132 | 4.10E-06 | -0.11177 |
| 0.122787 | 0.0079   | 0.104867 | 0.02343  | 0.196994 | 1.80E-05 | 0.30028  | 3.47E-11 | 0.092617 |
| 0.314909 | 3.28E-12 | 0.380037 | 1.71E-17 | 0.302136 | 2.59E-11 | 0.326145 | 4.91E-13 | 0.309821 |
| -0.08056 | 0.08202  | 0.054247 | 0.242    | -0.09017 | 0.05149  | -0.08932 | 0.05373  | -0.03048 |
| -0.12774 | 0.0057   | -0.16292 | 0.00041  | -0.18072 | 8.59E-05 | -0.19011 | 3.55E-05 | -0.18535 |

|          |          |          |          |          |          |          |          |          |
|----------|----------|----------|----------|----------|----------|----------|----------|----------|
| 0.014414 | 0.75605  | 0.006187 | 0.89391  | -0.02517 | 0.58737  | -0.02709 | 0.55922  | 0.065363 |
| -0.03189 | 0.49182  | 0.123907 | 0.00734  | 0.12766  | 0.00573  | 0.144848 | 0.0017   | 0.215278 |
| -0.06499 | 0.16085  | -0.03121 | 0.5011   | 0.046934 | 0.31149  | 0.133163 | 0.00394  | 0.03245  |
| -0.06583 | 0.15551  | 0.013938 | 0.76387  | -0.04691 | 0.31174  | 0.00049  | 0.99157  | -0.03282 |
| 0.072079 | 0.11983  | 0.05646  | 0.22329  | 0.031628 | 0.49536  | 0.064834 | 0.16187  | 0.025873 |
| 0.156134 | 0.00071  | -0.0032  | 0.94502  | 0.003613 | 0.93793  | 0.02728  | 0.5565   | 0.008671 |
| 0.028688 | 0.5363   | 0.208311 | 5.64E-06 | 0.028488 | 0.53914  | 0.028684 | 0.53636  | 0.110689 |
| -0.09321 | 0.04408  | 0.006567 | 0.88745  | -0.03703 | 0.42462  | 0.002049 | 0.96478  | -0.02304 |
| 0.020062 | 0.66543  | 0.019229 | 0.67853  | -0.06741 | 0.14584  | -0.06975 | 0.1323   | 0.011947 |
| 0.015573 | 0.73712  | -0.17231 | 0.00018  | -0.15705 | 0.00066  | -0.16468 | 0.00035  | -0.1462  |
| -0.14888 | 0.00125  | -0.04282 | 0.35588  | -0.14998 | 0.00115  | -0.04782 | 0.30239  | -0.06376 |
| -0.01645 | 0.72286  | -0.07657 | 0.0984   | 0.121732 | 0.00845  | 0.101398 | 0.02845  | 0.131136 |
| -0.11329 | 0.0143   | -0.14213 | 0.00208  | -0.07029 | 0.12934  | -0.17467 | 0.00015  | -0.03578 |
| -0.01114 | 0.81026  | -0.01    | 0.82942  | 0.045972 | 0.32153  | 0.109788 | 0.01763  | 0.020541 |
| -0.00635 | 0.89108  | -0.0532  | 0.25125  | -0.02919 | 0.52919  | -0.02302 | 0.61968  | 0.008385 |
| 0.176146 | 0.00013  | 0.043517 | 0.34807  | -0.0478  | 0.30261  | -0.03525 | 0.44727  | 0.060831 |
| -0.13292 | 0.00401  | -0.11359 | 0.01405  | -0.03891 | 0.40157  | -0.02907 | 0.53087  | -0.06442 |
| 0.029192 | 0.52916  | -0.13609 | 0.00321  | 0.006836 | 0.88288  | -0.13539 | 0.00337  | -0.15356 |
| -0.02359 | 0.61107  | -0.07422 | 0.10918  | -0.08598 | 0.06338  | -0.12971 | 0.00499  | -0.02885 |
| -0.04752 | 0.30547  | -0.09577 | 0.03856  | -0.22792 | 6.43E-07 | -0.14321 | 0.00192  | -0.10428 |
| -0.17237 | 0.00018  | -0.29477 | 8.15E-11 | -0.22216 | 1.24E-06 | -0.2809  | 6.46E-10 | -0.16462 |
| -0.0997  | 0.03123  | -0.1076  | 0.02003  | -0.05913 | 0.20214  | -0.11171 | 0.01573  | 0.033374 |
| 0.03403  | 0.46317  | -0.04418 | 0.34077  | -0.10162 | 0.0281   | -0.07197 | 0.1204   | -0.03009 |
| -0.0718  | 0.12127  | -0.11449 | 0.0133   | -0.08637 | 0.0622   | -0.07242 | 0.11809  | -0.01383 |
| 0.006903 | 0.88172  | -0.07647 | 0.09883  | -0.07027 | 0.12942  | -0.18414 | 6.26E-05 | -0.01797 |
| 0.021036 | 0.65025  | -0.01128 | 0.80798  | -0.00379 | 0.93498  | -0.12126 | 0.00871  | 0.031072 |
| 0.05826  | 0.20886  | 0.116145 | 0.01202  | -0.02798 | 0.54636  | -0.06406 | 0.16695  | -0.0566  |
| 0.157456 | 0.00064  | 0.162242 | 0.00043  | -0.00717 | 0.87716  | -0.04282 | 0.35587  | 0.086261 |
| 0.148243 | 0.00131  | 0.168132 | 0.00026  | 0.147089 | 0.00144  | 0.153696 | 0.00086  | 0.128096 |
| 0.076959 | 0.09669  | 0.150174 | 0.00113  | -0.12696 | 0.00601  | 0.03064  | 0.50892  | -0.10986 |
| 0.015635 | 0.73613  | 0.088228 | 0.05675  | 0.004018 | 0.93098  | 0.016299 | 0.72535  | 0.016125 |
| 0.026463 | 0.56838  | -0.10321 | 0.02572  | 0.11165  | 0.01578  | -0.0972  | 0.03574  | 0.077917 |
| -0.02304 | 0.61944  | 0.053498 | 0.24857  | -0.11724 | 0.01123  | -0.05688 | 0.21989  | -0.08374 |
| 0.179754 | 9.38E-05 | 0.197923 | 1.64E-05 | 0.241263 | 1.31E-07 | 0.208837 | 5.33E-06 | 0.243749 |
| -0.09255 | 0.04562  | -0.22172 | 1.31E-06 | -0.00549 | 0.90582  | -0.04377 | 0.34527  | -0.06511 |
| -0.13051 | 0.00473  | -0.01582 | 0.73312  | -0.13656 | 0.00311  | -0.05098 | 0.27157  | -0.07694 |
| -0.1652  | 0.00034  | -0.23245 | 3.78E-07 | -0.12324 | 0.00767  | -0.24424 | 9.04E-08 | -0.009   |
| -0.00885 | 0.84874  | -0.1373  | 0.00295  | -0.02759 | 0.55198  | 0.00883  | 0.84906  | -0.0814  |
| 0.057731 | 0.21303  | 0.056084 | 0.2264   | 0.046591 | 0.31505  | -0.04549 | 0.32664  | 0.142085 |
| -0.04647 | 0.31633  | -0.06814 | 0.14148  | -0.0092  | 0.84285  | -0.05017 | 0.27927  | 0.053076 |
| 0.0459   | 0.32229  | -0.01662 | 0.72015  | -0.00545 | 0.90651  | 0.023652 | 0.61018  | 0.050388 |
| 0.029193 | 0.52914  | -0.0313  | 0.49989  | -0.06192 | 0.1816   | -0.08322 | 0.07237  | 0.037585 |
| 0.032485 | 0.48373  | -0.02406 | 0.60406  | -0.09924 | 0.03201  | -0.09895 | 0.03254  | -0.11077 |
| -0.07209 | 0.11979  | 0.103846 | 0.02482  | -0.16559 | 0.00033  | -0.14883 | 0.00126  | -0.0277  |
| -0.02165 | 0.64071  | 0.018221 | 0.69452  | -0.14589 | 0.00157  | 0.005276 | 0.90946  | -0.06079 |

|          |          |          |          |          |          |          |          |          |
|----------|----------|----------|----------|----------|----------|----------|----------|----------|
| 0.050717 | 0.27405  | 0.122242 | 0.00818  | 0.025001 | 0.58994  | -0.04762 | 0.30445  | 0.1687   |
| 0.161064 | 0.00048  | -0.02142 | 0.64429  | -0.09783 | 0.03456  | -0.17128 | 0.0002   | 0.021898 |
| -0.05099 | 0.27151  | -0.08142 | 0.07879  | 0.069426 | 0.13411  | -0.0287  | 0.53611  | 0.06157  |
| -0.24417 | 9.12E-08 | -0.13069 | 0.00467  | -0.2496  | 4.60E-08 | -0.12222 | 0.00819  | -0.24699 |
| -0.02284 | 0.62244  | 0.029975 | 0.51817  | -0.07178 | 0.12137  | 0.02584  | 0.57752  | -0.03189 |
| -0.02205 | 0.63451  | -0.0869  | 0.0606   | -0.093   | 0.04456  | -0.09601 | 0.03807  | -0.02783 |
| -0.14144 | 0.00219  | -0.09989 | 0.03091  | -0.30748 | 1.10E-11 | -0.20638 | 6.91E-06 | -0.22917 |
| 0.088947 | 0.05475  | -0.05533 | 0.23274  | -0.01431 | 0.75782  | 0.003003 | 0.9484   | -0.0697  |
| 0.027964 | 0.54664  | -0.01223 | 0.79202  | 0.006662 | 0.88583  | 0.039075 | 0.39953  | 0.005434 |
| -0.03582 | 0.43996  | -0.03438 | 0.45863  | 0.017707 | 0.70271  | 0.000636 | 0.98907  | 8.69E-05 |
| 0.157883 | 0.00062  | 0.249975 | 4.38E-08 | 0.167039 | 0.00029  | 0.265386 | 5.73E-09 | 0.087372 |
| -0.1648  | 0.00035  | -0.29756 | 5.30E-11 | -0.13486 | 0.0035   | -0.23207 | 3.96E-07 | -0.15271 |
| 0.000381 | 0.99344  | 0.018902 | 0.68371  | 0.055973 | 0.22732  | 0.007143 | 0.87765  | 0.088562 |
| -0.06827 | 0.14074  | -0.03234 | 0.48572  | -0.13253 | 0.00412  | -0.11934 | 0.00984  | -0.11921 |
| 0.045977 | 0.32147  | -0.01475 | 0.75056  | 0.193557 | 2.54E-05 | 0.098414 | 0.03349  | 0.097592 |
| 0.002669 | 0.95412  | -0.04746 | 0.30613  | 0.009545 | 0.83701  | -0.0243  | 0.60044  | 0.011258 |
| -0.02537 | 0.58453  | 0.021885 | 0.63712  | -0.03792 | 0.41361  | 0.042575 | 0.35861  | -0.01727 |
| -0.004   | 0.93134  | -0.02553 | 0.58204  | -0.03967 | 0.39241  | -0.03508 | 0.44953  | -0.0756  |
| 0.032316 | 0.48601  | -0.00937 | 0.84001  | 0.064109 | 0.16663  | 0.022499 | 0.6277   | 0.099553 |
| -0.1241  | 0.00725  | -0.03694 | 0.42573  | -0.05399 | 0.24424  | -0.00769 | 0.86843  | 0.031779 |
| 0.00676  | 0.88415  | -0.03047 | 0.51127  | 0.120985 | 0.00887  | -0.02527 | 0.58598  | 0.158243 |
| 0.161189 | 0.00047  | 0.162952 | 0.00041  | 0.20535  | 7.69E-06 | 0.092945 | 0.04469  | 0.19349  |
| 0.169519 | 0.00023  | 0.171796 | 0.00019  | 0.18661  | 4.96E-05 | 0.103797 | 0.02489  | 0.265874 |
| -0.02345 | 0.61329  | -0.01786 | 0.70024  | -0.00674 | 0.88457  | 0.03169  | 0.4945   | -0.00805 |
| -0.02058 | 0.65734  | 0.013729 | 0.76731  | -0.11002 | 0.01739  | -0.04915 | 0.28916  | -0.05974 |
| 0.194181 | 2.39E-05 | 0.169337 | 0.00024  | 0.076837 | 0.09723  | 0.061364 | 0.18557  | 0.12093  |
| 0.131436 | 0.00444  | 0.159982 | 0.00052  | 0.034602 | 0.45568  | 0.018902 | 0.68369  | 0.06628  |
| 0.128924 | 0.00527  | 0.017073 | 0.71288  | 0.060526 | 0.19167  | 0.083226 | 0.07236  | 0.002377 |
| -0.01212 | 0.79393  | -0.01651 | 0.72199  | 0.021708 | 0.63985  | -0.01836 | 0.69226  | -0.01903 |
| 0.014184 | 0.75982  | -0.01603 | 0.72975  | 0.099253 | 0.032    | 0.039206 | 0.39794  | 0.125492 |
| 0.140845 | 0.00228  | 0.119823 | 0.00955  | 0.20593  | 7.24E-06 | 0.192829 | 2.72E-05 | 0.163203 |
| 0.079107 | 0.08771  | 0.046814 | 0.31274  | 0.002254 | 0.96126  | 0.042196 | 0.36292  | -0.07062 |
| 0.107228 | 0.02047  | 0.325157 | 5.82E-13 | 0.131022 | 0.00457  | 0.24327  | 1.02E-07 | 0.115522 |
| 0.07138  | 0.12347  | -0.16674 | 0.0003   | 0.104356 | 0.02412  | -0.03089 | 0.50547  | 0.161162 |
| 0.003537 | 0.93924  | -0.04413 | 0.34135  | 0.16868  | 0.00025  | 0.129862 | 0.00494  | 0.116331 |
| -0.11547 | 0.01253  | -0.07197 | 0.12038  | -0.12971 | 0.00499  | -0.16603 | 0.00031  | -0.04259 |
| -0.01147 | 0.80479  | 0.023754 | 0.60863  | -0.13632 | 0.00316  | -0.17501 | 0.00014  | -0.04463 |
| -0.1133  | 0.01429  | -0.40646 | 5.26E-20 | -0.19693 | 1.82E-05 | -0.40635 | 5.39E-20 | -0.17695 |
| 0.080724 | 0.0814   | 0.026934 | 0.56151  | 0.082108 | 0.07629  | 0.140851 | 0.00228  | -0.03039 |
| 0.257508 | 1.65E-08 | 0.008388 | 0.85653  | 0.201395 | 1.16E-05 | 0.038593 | 0.40536  | 0.228312 |
| -0.20918 | 5.15E-06 | -0.26744 | 4.33E-09 | -0.0521  | 0.26115  | -0.06672 | 0.14997  | -0.16581 |
| -0.06385 | 0.16832  | -0.17132 | 0.0002   | -0.29561 | 7.16E-11 | -0.21617 | 2.42E-06 | -0.2829  |
| 0.051213 | 0.26939  | -0.02545 | 0.58324  | -0.02642 | 0.56901  | -0.06022 | 0.19395  | -0.02157 |
| 0.051961 | 0.26244  | -0.28591 | 3.10E-10 | 0.066365 | 0.15218  | -0.01335 | 0.77355  | -0.14703 |
| -0.02187 | 0.63734  | -0.02845 | 0.53964  | -0.12923 | 0.00516  | -0.1124  | 0.01509  | -0.08538 |

|          |          |          |          |          |          |          |          |          |
|----------|----------|----------|----------|----------|----------|----------|----------|----------|
| -0.09727 | 0.03562  | 0.097646 | 0.0349   | 0.061745 | 0.18286  | 0.062345 | 0.17863  | 0.090898 |
| -0.02564 | 0.58054  | 0.050083 | 0.2801   | -0.00659 | 0.88698  | -0.00668 | 0.88554  | 0.031441 |
| 0.043893 | 0.34391  | 0.046279 | 0.3183   | -0.14677 | 0.00147  | 0.006062 | 0.89605  | -0.18535 |
| -0.1998  | 1.36E-05 | 0.094217 | 0.04184  | -0.09446 | 0.04131  | -0.06841 | 0.13991  | -0.04152 |
| 0.192263 | 2.88E-05 | 0.172901 | 0.00017  | 0.209013 | 5.24E-06 | 0.153507 | 0.00087  | 0.165856 |
| 0.06197  | 0.18126  | 0.048508 | 0.29553  | 0.217432 | 2.11E-06 | 0.143636 | 0.00186  | 0.16338  |
| 0.062567 | 0.17709  | -0.03536 | 0.44581  | 0.158925 | 0.00057  | 0.060736 | 0.19013  | 0.157275 |
| 0.116672 | 0.01163  | 0.165744 | 0.00032  | 0.017153 | 0.7116   | 0.029324 | 0.5273   | 0.132148 |
| 0.067787 | 0.14356  | 0.157698 | 0.00063  | 0.108901 | 0.01857  | 0.083591 | 0.07112  | 0.184104 |
| 0.024798 | 0.59296  | 0.22829  | 6.16E-07 | -0.0426  | 0.35829  | 0.049879 | 0.28208  | 0.111526 |
| -0.00183 | 0.96846  | 0.045504 | 0.32648  | 0.013292 | 0.7745   | 0.042018 | 0.36495  | 0.079301 |
| 0.066858 | 0.14915  | 0.084608 | 0.06773  | 0.088797 | 0.05517  | 0.08378  | 0.07048  | 0.078035 |
| 0.000401 | 0.9931   | 0.053099 | 0.25212  | 0.008079 | 0.86177  | -0.01901 | 0.68203  | 0.050404 |
| 0.19237  | 2.85E-05 | 0.297309 | 5.51E-11 | 0.094826 | 0.04053  | 0.159467 | 0.00054  | 0.099418 |
| 0.133621 | 0.00382  | 0.214995 | 2.75E-06 | 0.148864 | 0.00125  | 0.1407   | 0.00231  | 0.262728 |
| -0.01575 | 0.7342   | -0.08429 | 0.06878  | 0.050072 | 0.28021  | -0.03427 | 0.46001  | 0.057364 |
| 0.027788 | 0.54916  | -0.125   | 0.00684  | 0.041109 | 0.37542  | -0.01109 | 0.81108  | 0.033129 |
| 0.035263 | 0.44712  | 0.052664 | 0.25604  | 0.208899 | 5.30E-06 | 0.09014  | 0.05157  | 0.203807 |
| -0.25037 | 4.17E-08 | -0.35128 | 5.22E-15 | -0.28144 | 5.97E-10 | -0.22225 | 1.23E-06 | -0.29175 |
| 0.109934 | 0.01748  | 0.038148 | 0.4108   | 0.102879 | 0.0262   | 0.149211 | 0.00122  | 0.140401 |
| 0.033478 | 0.47046  | 0.022426 | 0.62882  | -0.00088 | 0.98483  | -0.00453 | 0.92217  | 0.061043 |
| 0.028631 | 0.53711  | 0.01703  | 0.71357  | -0.01008 | 0.82793  | -0.01046 | 0.82169  | 0.070083 |
| 0.029344 | 0.52702  | -0.12687 | 0.00604  | -0.16335 | 0.00039  | -0.12861 | 0.00538  | -0.22125 |
| -0.07154 | 0.12265  | -0.03588 | 0.43921  | -0.03181 | 0.49286  | -0.0373  | 0.42133  | -0.00788 |
| 0.079619 | 0.08567  | 0.073265 | 0.11385  | 0.237984 | 1.95E-07 | 0.135965 | 0.00324  | 0.162779 |
| 0.087521 | 0.05877  | 0.075657 | 0.10249  | -0.07839 | 0.09062  | 0.005869 | 0.89934  | -0.05121 |
| 0.002801 | 0.95186  | 0.009564 | 0.83668  | 0.013179 | 0.77637  | -0.01322 | 0.77569  | -0.03377 |
| 0.009361 | 0.8401   | -0.04606 | 0.32057  | -0.01023 | 0.82556  | -0.05395 | 0.24461  | 0.018836 |
| -0.06711 | 0.14762  | -0.07798 | 0.09231  | -0.19264 | 2.78E-05 | -0.18142 | 8.05E-05 | -0.12848 |
| -0.02554 | 0.58199  | 0.114733 | 0.0131   | -0.12113 | 0.00878  | -0.11135 | 0.01607  | -0.01462 |
| 0.030418 | 0.512    | -0.01966 | 0.67174  | -0.0968  | 0.03651  | -0.13003 | 0.00489  | -0.1056  |
| 0.000465 | 0.99201  | -0.00397 | 0.93174  | 0.118666 | 0.01027  | 0.036285 | 0.43405  | 0.156761 |
| -0.10988 | 0.01754  | -0.03774 | 0.41581  | 0.031187 | 0.50138  | 0.024476 | 0.59778  | -0.01578 |
| -0.03875 | 0.40351  | -0.03673 | 0.42839  | -0.02654 | 0.56719  | -0.09385 | 0.04265  | -0.01841 |
| -0.00049 | 0.99164  | 0.046271 | 0.31838  | 0.013149 | 0.77687  | 0.029845 | 0.51998  | 0.003112 |
| 0.090227 | 0.05135  | 0.122012 | 0.0083   | -0.00722 | 0.87635  | -0.0559  | 0.22795  | 0.059719 |
| 0.199773 | 1.36E-05 | 0.170214 | 0.00022  | 0.035791 | 0.44034  | 0.107211 | 0.02049  | -0.01768 |
| 0.129707 | 0.005    | 0.006232 | 0.89315  | -0.08109 | 0.08002  | -0.04655 | 0.31544  | -0.01164 |
| 0.128596 | 0.00538  | 0.060443 | 0.19228  | 0.076777 | 0.09749  | 0.051495 | 0.26675  | 0.056963 |
| 0.136975 | 0.00302  | 0.109222 | 0.01822  | 0.00365  | 0.9373   | 0.057727 | 0.21306  | 0.000222 |
| 0.012691 | 0.78444  | 0.011702 | 0.80088  | 0.033932 | 0.46446  | -0.04228 | 0.36197  | 0.067388 |
| -0.00055 | 0.99062  | 0.00142  | 0.97559  | -0.03573 | 0.44108  | -0.06778 | 0.14363  | -0.00794 |
| 0.077547 | 0.09416  | 0.038596 | 0.40533  | -0.00095 | 0.98366  | -0.08518 | 0.06588  | 0.094766 |
| 0.100023 | 0.03068  | 0.124462 | 0.00708  | 0.044251 | 0.34     | -0.00999 | 0.82948  | 0.224077 |
| 0.047269 | 0.30804  | -0.05543 | 0.23186  | -0.03009 | 0.51662  | -0.08005 | 0.08397  | -0.0334  |

|          |          |          |          |          |          |          |          |          |
|----------|----------|----------|----------|----------|----------|----------|----------|----------|
| 0.066264 | 0.1528   | 0.050416 | 0.27691  | 0.00985  | 0.83188  | -0.07502 | 0.10543  | 0.066311 |
| -0.01783 | 0.70081  | 0.015655 | 0.7358   | -0.02024 | 0.66264  | -0.03455 | 0.45633  | 0.020307 |
| -0.03215 | 0.48825  | -0.07785 | 0.09287  | -0.06946 | 0.1339   | -0.16913 | 0.00024  | 0.102094 |
| 0.029547 | 0.52417  | -0.10097 | 0.02913  | 0.05078  | 0.27346  | -0.0462  | 0.31911  | 0.030843 |
| 0.113702 | 0.01395  | 0.08213  | 0.07622  | 0.039978 | 0.3887   | 0.016108 | 0.72846  | 0.057835 |
| 0.061847 | 0.18213  | 0.062484 | 0.17766  | 0.084613 | 0.06772  | 0.024515 | 0.5972   | 0.13584  |
| 0.038834 | 0.40244  | -0.00141 | 0.97577  | 0.084895 | 0.06681  | 0.020462 | 0.65918  | 0.091967 |
| 0.108636 | 0.01886  | 0.003102 | 0.9467   | 0.084921 | 0.06672  | 0.024711 | 0.59427  | 0.087628 |
| 0.001983 | 0.96591  | -0.0299  | 0.51918  | -0.04301 | 0.35367  | -0.0671  | 0.1477   | -0.00674 |
| 0.030235 | 0.51454  | -0.19654 | 1.89E-05 | 0.045433 | 0.32724  | -0.08613 | 0.06291  | 0.104249 |
| 0.064587 | 0.16348  | 0.066243 | 0.15293  | 0.154746 | 0.00079  | 0.028072 | 0.54509  | 0.104924 |
| 0.0841   | 0.06941  | 0.014364 | 0.75687  | 0.047069 | 0.3101   | -0.00786 | 0.86542  | 0.143913 |
| -0.06706 | 0.14789  | 0.01241  | 0.7891   | 0.189811 | 3.65E-05 | 0.227717 | 6.58E-07 | 0.08691  |
| 0.033113 | 0.47531  | 0.026784 | 0.56369  | -0.14854 | 0.00129  | -0.04707 | 0.31006  | -0.04687 |
| -0.00839 | 0.85655  | -0.02101 | 0.65063  | 0.0574   | 0.21567  | 0.083854 | 0.07023  | 0.049901 |
| -0.11741 | 0.01111  | -0.07822 | 0.09132  | -0.07699 | 0.09655  | -0.1598  | 0.00053  | -0.03958 |
| -0.04962 | 0.28456  | -0.18259 | 7.23E-05 | -0.18361 | 6.57E-05 | -0.20571 | 7.41E-06 | -0.15288 |
| -0.09894 | 0.03255  | -0.09326 | 0.04397  | 0.012837 | 0.78202  | -0.03243 | 0.48447  | 0.041887 |
| 0.032567 | 0.48262  | 0.17894  | 0.0001   | -0.08438 | 0.06847  | -0.07739 | 0.09484  | 0.04345  |
| 0.094318 | 0.04162  | 0.112118 | 0.01535  | 0.151501 | 0.00102  | 0.095713 | 0.03868  | 0.200065 |
| -0.11289 | 0.01465  | -0.05532 | 0.23284  | -0.22714 | 7.03E-07 | -0.17572 | 0.00014  | -0.09004 |
| 0.337736 | 6.36E-14 | 0.301957 | 2.66E-11 | 0.269231 | 3.38E-09 | 0.259711 | 1.23E-08 | 0.284419 |
| -0.00206 | 0.96452  | 0.045363 | 0.32799  | -0.03581 | 0.44015  | -0.05886 | 0.20424  | 0.015593 |
| 0.042144 | 0.36351  | 0.001906 | 0.96723  | 0.010983 | 0.81288  | -0.02283 | 0.6226   | 0.007519 |
| -0.01972 | 0.67076  | -0.30435 | 1.82E-11 | -0.13183 | 0.00432  | -0.25648 | 1.89E-08 | -0.17097 |
| 0.107386 | 0.02028  | 0.135154 | 0.00343  | 0.095346 | 0.03944  | -0.03576 | 0.44068  | 0.220765 |
| 0.00358  | 0.93851  | -0.19211 | 2.92E-05 | -0.14193 | 0.00211  | -0.17719 | 0.00012  | -0.18452 |
| 0.046514 | 0.31585  | 0.077105 | 0.09606  | 0.277011 | 1.13E-09 | 0.158784 | 0.00057  | 0.175403 |
| -0.16609 | 0.00031  | -0.21692 | 2.23E-06 | -0.30039 | 3.41E-11 | -0.36911 | 1.61E-16 | -0.18171 |
| -0.04933 | 0.28738  | -0.23587 | 2.52E-07 | -0.17037 | 0.00022  | -0.17591 | 0.00013  | -0.25682 |
| -0.08248 | 0.07497  | 0.028784 | 0.53493  | -0.06114 | 0.18719  | -0.07507 | 0.10519  | 0.012934 |
| 0.026946 | 0.56135  | 0.114703 | 0.01313  | -0.13921 | 0.00257  | -0.07493 | 0.10586  | 0.01991  |
| -0.09345 | 0.04355  | 0.063647 | 0.16971  | -0.11428 | 0.01347  | -0.0439  | 0.3439   | -0.01853 |
| -0.00173 | 0.97028  | -0.12386 | 0.00737  | -0.21672 | 2.28E-06 | -0.22397 | 1.01E-06 | -0.24025 |
| 0.089443 | 0.05341  | -0.1683  | 0.00026  | 0.02992  | 0.51893  | -0.09974 | 0.03116  | 0.017154 |
| 0.064812 | 0.16202  | 0.056955 | 0.21926  | -0.07741 | 0.09473  | -0.16131 | 0.00047  | 0.073429 |
| -0.11156 | 0.01587  | -0.22272 | 1.17E-06 | -0.20668 | 6.69E-06 | -0.1323  | 0.00418  | -0.26475 |
| -0.12352 | 0.00753  | -0.08737 | 0.05922  | -0.17883 | 0.0001   | -0.29247 | 1.16E-10 | -0.13854 |
| -0.00438 | 0.9248   | -0.10169 | 0.028    | -0.15965 | 0.00053  | -0.17395 | 0.00016  | -0.07324 |
| 0.048802 | 0.29261  | -0.0446  | 0.33623  | -0.03551 | 0.44392  | -0.10841 | 0.01911  | 0.027631 |
| 0.030533 | 0.51041  | 0.0535   | 0.24855  | 0.085267 | 0.06561  | 0.096265 | 0.03757  | 0.107933 |
| 0.046608 | 0.31487  | 0.110526 | 0.01688  | 0.128217 | 0.00552  | 0.04871  | 0.29352  | 0.160178 |
| 0.095694 | 0.03872  | 0.047972 | 0.3009   | 0.031439 | 0.49793  | -0.00242 | 0.95838  | 0.068667 |
| -0.12493 | 0.00687  | -0.17846 | 0.00011  | -0.30511 | 1.62E-11 | -0.28283 | 4.87E-10 | -0.2562  |
| -0.08071 | 0.08144  | -0.0417  | 0.36854  | -0.00506 | 0.91323  | -0.00625 | 0.89288  | 0.119796 |



|          |          |          |          |          |          |          |          |          |
|----------|----------|----------|----------|----------|----------|----------|----------|----------|
| 0.041187 | 0.37451  | 0.049377 | 0.28695  | 0.082981 | 0.07321  | 0.104592 | 0.0238   | 0.133313 |
| 0.062423 | 0.17808  | 0.052886 | 0.25403  | 0.051792 | 0.264    | 0.001155 | 0.98015  | 0.115794 |
| 0.113831 | 0.01384  | 0.108381 | 0.01914  | 0.116502 | 0.01175  | 0.058599 | 0.20622  | 0.144572 |
| 0.003713 | 0.93621  | 0.024899 | 0.59146  | 0.11189  | 0.01556  | 0.046286 | 0.31822  | 0.158433 |
| 0.000911 | 0.98434  | -0.03811 | 0.41122  | 0.00245  | 0.95789  | -0.11919 | 0.00994  | 0.050902 |
| 0.129509 | 0.00506  | 0.07389  | 0.11078  | 0.055351 | 0.23254  | 0.050684 | 0.27437  | 0.068975 |
| 0.031802 | 0.49298  | 0.014581 | 0.75332  | 0.184869 | 5.84E-05 | 0.194954 | 2.21E-05 | 0.044229 |
| -0.0016  | 0.97247  | 0.010993 | 0.81271  | 0.02033  | 0.66125  | 0.002894 | 0.95027  | 0.080328 |
| 0.067593 | 0.14471  | 0.08541  | 0.06516  | 0.140702 | 0.00231  | 0.071412 | 0.1233   | 0.095371 |
| 0.039808 | 0.39073  | 0.056568 | 0.22241  | 0.060264 | 0.1936   | 0.010183 | 0.82629  | 0.04624  |
| 0.010721 | 0.81726  | 0.039088 | 0.39936  | 0.023078 | 0.61888  | -0.00925 | 0.84198  | 0.035453 |
| 0.105461 | 0.02265  | 0.149117 | 0.00123  | 0.119171 | 0.00995  | 0.049518 | 0.28557  | 0.113399 |
| -0.0774  | 0.09481  | -0.24829 | 5.43E-08 | -0.15439 | 0.00082  | -0.235   | 2.79E-07 | -0.1969  |
| 0.078666 | 0.0895   | 0.223775 | 1.03E-06 | -0.01263 | 0.78548  | -0.03841 | 0.40761  | 0.157089 |
| -0.15252 | 0.00094  | -0.19127 | 3.17E-05 | -0.25777 | 1.59E-08 | -0.23607 | 2.46E-07 | -0.22016 |
| -0.02268 | 0.62494  | -0.22884 | 5.78E-07 | -0.07565 | 0.1025   | -0.20751 | 6.14E-06 | -0.04354 |
| -0.01015 | 0.82675  | 0.045244 | 0.32926  | 0.031581 | 0.496    | 0.006049 | 0.89627  | 0.102066 |
| 0.131223 | 0.00451  | 0.080409 | 0.0826   | 0.14564  | 0.0016   | 0.158126 | 0.0006   | 0.172279 |
| 0.056629 | 0.22191  | 0.056277 | 0.2248   | -0.03922 | 0.39779  | -0.14826 | 0.00131  | 0.017741 |
| 0.099589 | 0.03142  | -0.17404 | 0.00016  | -0.05339 | 0.24953  | -0.07226 | 0.11892  | -0.09352 |
| 0.055165 | 0.23411  | -0.11802 | 0.01069  | 0.096728 | 0.03665  | 0.006489 | 0.88877  | 0.007006 |
| -0.01449 | 0.75474  | 0.042781 | 0.3563   | 0.025114 | 0.58827  | -0.01096 | 0.81329  | 0.002785 |
| -0.08948 | 0.05332  | -0.13943 | 0.00253  | -0.14842 | 0.0013   | -0.1386  | 0.00269  | -0.15551 |
| 0.065804 | 0.15567  | 0.147762 | 0.00136  | 0.057605 | 0.21403  | 0.05594  | 0.22759  | 0.167662 |
| 0.009512 | 0.83757  | -0.02115 | 0.64846  | 0.029426 | 0.52586  | 0.008311 | 0.85784  | 0.088902 |
| -0.04912 | 0.28948  | -0.15568 | 0.00074  | -0.21567 | 2.56E-06 | -0.23779 | 2.00E-07 | -0.17694 |
| 0.0042   | 0.92787  | 0.075177 | 0.10469  | -0.22915 | 5.57E-07 | -0.10054 | 0.02983  | -0.15256 |
| -0.16278 | 0.00041  | -0.07657 | 0.09838  | -0.26807 | 3.97E-09 | -0.11442 | 0.01335  | -0.19088 |
| 0.06782  | 0.14337  | 0.069145 | 0.13569  | 0.02491  | 0.5913   | 0.021019 | 0.6505   | 0.001775 |
| 0.21077  | 4.34E-06 | 0.111284 | 0.01613  | 0.089462 | 0.05336  | -0.01349 | 0.77121  | 0.099017 |
| 0.140852 | 0.00228  | 0.109642 | 0.01778  | 0.240871 | 1.37E-07 | 0.283704 | 4.29E-10 | 0.13608  |
| -0.0037  | 0.93638  | -0.1148  | 0.01305  | -0.16072 | 0.00049  | -0.19048 | 3.42E-05 | -0.18293 |
| -0.03811 | 0.41124  | 0.001607 | 0.97237  | -0.13676 | 0.00306  | -0.06773 | 0.1439   | -0.10921 |
| 0.033504 | 0.47012  | -0.13161 | 0.00439  | -0.00369 | 0.93669  | 0.014999 | 0.74648  | 0.023577 |
| 0.00774  | 0.86751  | -0.10333 | 0.02555  | -0.10325 | 0.02567  | -0.14849 | 0.00129  | -0.04042 |
| -0.18839 | 4.19E-05 | -0.10666 | 0.02115  | -0.17538 | 0.00014  | -0.0682  | 0.14113  | -0.11801 |
| 0.116237 | 0.01195  | -0.05083 | 0.27297  | 0.197045 | 1.80E-05 | 0.176035 | 0.00013  | 0.074966 |
| -0.08274 | 0.07404  | 0.018982 | 0.68243  | -0.21791 | 2.00E-06 | -0.07771 | 0.09347  | -0.09488 |
| -0.07697 | 0.09665  | -0.09618 | 0.03773  | -0.15232 | 0.00096  | -0.06591 | 0.15502  | -0.0513  |
| -0.00221 | 0.96202  | -0.01402 | 0.76258  | 0.116275 | 0.01192  | 0.066999 | 0.14829  | 0.108767 |
| 0.111263 | 0.01615  | 0.105171 | 0.02303  | 0.042949 | 0.35441  | -0.01289 | 0.78113  | 0.1287   |
| 0.001326 | 0.97719  | 0.071984 | 0.12032  | 0.058613 | 0.20611  | 0.05511  | 0.23458  | 0.019652 |
| 0.049412 | 0.28661  | 0.087323 | 0.05935  | -0.0108  | 0.81588  | -0.04224 | 0.36237  | 0.061995 |
| 0.042531 | 0.35912  | 0.079418 | 0.08646  | 0.043499 | 0.34828  | 0.052623 | 0.2564   | 0.080938 |
| -0.09622 | 0.03766  | -0.07054 | 0.12794  | -0.13184 | 0.00432  | -0.15768 | 0.00063  | -0.03665 |

|           |          |          |          |          |          |          |          |          |
|-----------|----------|----------|----------|----------|----------|----------|----------|----------|
| -0.02152  | 0.64272  | 0.012346 | 0.79016  | 0.197036 | 1.80E-05 | 0.197965 | 1.64E-05 | 0.178718 |
| 0.178899  | 0.0001   | 0.061457 | 0.18491  | 0.168351 | 0.00026  | 0.096864 | 0.03639  | 0.064012 |
| 0.165294  | 0.00033  | 0.07631  | 0.09955  | 0.097547 | 0.03508  | 0.028864 | 0.5338   | 0.125122 |
| 0.055665  | 0.22989  | -0.0656  | 0.15694  | -0.13331 | 0.0039   | -0.03024 | 0.51454  | -0.11135 |
| 0.011573  | 0.80303  | -0.02845 | 0.53974  | -0.09539 | 0.03934  | -0.03996 | 0.38894  | -0.01758 |
| 0.040533  | 0.38215  | 0.030188 | 0.5152   | 0.113664 | 0.01398  | 0.087128 | 0.05992  | 0.127165 |
| 0.213594  | 3.20E-06 | 0.21315  | 3.36E-06 | 0.228394 | 6.09E-07 | 0.265922 | 5.33E-09 | 0.22324  |
| 0.025494  | 0.58263  | 0.090365 | 0.05099  | -0.05608 | 0.22642  | -0.05709 | 0.21819  | 0.042056 |
| -0.20634  | 6.94E-06 | -0.02696 | 0.56109  | -0.19149 | 3.11E-05 | -0.07162 | 0.1222   | -0.1306  |
| -0.16293  | 0.00041  | -0.13481 | 0.00351  | -0.20261 | 1.02E-05 | -0.23839 | 1.86E-07 | -0.08949 |
| -0.04096  | 0.37712  | -0.22678 | 7.33E-07 | -0.19943 | 1.41E-05 | -0.20659 | 6.76E-06 | -0.2354  |
| -0.01051  | 0.82083  | -0.01259 | 0.78612  | -0.06822 | 0.14103  | -0.07098 | 0.12557  | -0.08123 |
| -0.08584  | 0.06383  | -0.0917  | 0.04764  | -0.05956 | 0.19884  | -0.18088 | 8.46E-05 | 0.112175 |
| -0.12142  | 0.00863  | -0.0118  | 0.79927  | -0.02315 | 0.61772  | 0.046616 | 0.31479  | 0.016253 |
| -0.0126   | 0.7859   | -0.06771 | 0.14403  | -0.13063 | 0.00469  | -0.14497 | 0.00168  | -0.07402 |
| 0.04847   | 0.29591  | 0.020146 | 0.66411  | -0.01413 | 0.76068  | -0.03098 | 0.50417  | -0.04944 |
| 0.046871  | 0.31215  | 0.112833 | 0.0147   | 0.02367  | 0.60991  | -0.00742 | 0.87301  | 0.017268 |
| 0.150525  | 0.0011   | -0.03992 | 0.38939  | 0.186932 | 4.81E-05 | 0.024973 | 0.59036  | 0.126756 |
| 0.051611  | 0.26567  | -0.14449 | 0.00174  | 0.048535 | 0.29525  | -0.16541 | 0.00033  | 0.100645 |
| 0.292588  | 1.14E-10 | 0.268632 | 3.67E-09 | 0.313692 | 4.02E-12 | 0.307401 | 1.12E-11 | 0.1402   |
| -0.01266  | 0.78499  | -0.14322 | 0.00192  | -0.16835 | 0.00026  | -0.22167 | 1.31E-06 | -0.03463 |
| 0.088563  | 0.05581  | -0.14668 | 0.00148  | -0.21246 | 3.62E-06 | -0.20817 | 5.72E-06 | -0.19464 |
| -9.16E-05 | 0.99842  | -0.04881 | 0.29249  | -0.1291  | 0.0052   | -0.11579 | 0.01228  | -0.06999 |
| 0.270618  | 2.79E-09 | 0.048892 | 0.29172  | 0.080585 | 0.08192  | -0.0166  | 0.72053  | 0.174006 |
| 0.065891  | 0.15513  | 0.006429 | 0.8898   | -0.10069 | 0.02959  | -0.03154 | 0.4966   | -0.06209 |
| -0.11554  | 0.01247  | -0.02579 | 0.57833  | -0.10899 | 0.01847  | -0.03332 | 0.47256  | -0.08192 |
| -0.04286  | 0.35536  | 0.027388 | 0.55493  | -0.04897 | 0.29097  | -0.06015 | 0.19441  | 0.008409 |
| 0.105252  | 0.02292  | 0.059662 | 0.19809  | 0.007738 | 0.86755  | 0.004664 | 0.91993  | 0.025469 |
| 0.019449  | 0.67506  | -0.03903 | 0.40012  | 0.024315 | 0.60019  | -0.03684 | 0.4271   | 0.008569 |
| -0.02118  | 0.64799  | -0.04035 | 0.38429  | -0.15408 | 0.00084  | -0.0043  | 0.92617  | -0.05768 |
| 0.035823  | 0.43992  | -0.02165 | 0.64073  | -0.00853 | 0.85413  | -0.02174 | 0.63942  | 0.004485 |
| 0.094724  | 0.04075  | 0.030684 | 0.50832  | 0.192878 | 2.71E-05 | 0.244416 | 8.84E-08 | 0.090129 |
| -0.05179  | 0.26405  | -0.04527 | 0.32898  | -0.14402 | 0.00181  | -0.19266 | 2.77E-05 | -0.14288 |
| -0.08611  | 0.06298  | -0.00351 | 0.93967  | 0.012849 | 0.78182  | 0.018732 | 0.6864   | 0.019423 |
| -0.11231  | 0.01518  | -0.2206  | 1.48E-06 | -0.19383 | 2.47E-05 | -0.18958 | 3.74E-05 | -0.24134 |
| -0.21594  | 2.48E-06 | -0.07449 | 0.1079   | -0.1393  | 0.00255  | -0.22537 | 8.63E-07 | -0.04919 |
| -0.2383   | 1.88E-07 | -0.18868 | 4.07E-05 | -0.14181 | 0.00213  | -0.2233  | 1.09E-06 | -0.13237 |
| -0.01134  | 0.80692  | -0.05855 | 0.20663  | -0.05526 | 0.23329  | -0.08867 | 0.05551  | -0.07369 |
| 0.019698  | 0.67115  | -0.0135  | 0.77103  | 0.020957 | 0.65147  | 0.044215 | 0.34039  | -0.0166  |
| 0.320378  | 1.32E-12 | 0.044422 | 0.33813  | 0.278363 | 9.31E-10 | 0.052603 | 0.25658  | 0.170565 |
| 0.159256  | 0.00055  | 0.130973 | 0.00458  | 0.141522 | 0.00217  | 0.080848 | 0.08093  | 0.275323 |
| 0.050852  | 0.27278  | 0.120035 | 0.00942  | -0.08509 | 0.06617  | -0.03494 | 0.4513   | 0.03106  |
| 0.160909  | 0.00048  | 0.099294 | 0.03193  | 0.105165 | 0.02303  | 0.038222 | 0.4099   | 0.169902 |
| 0.085798  | 0.06395  | 0.071714 | 0.12172  | 0.018005 | 0.69795  | 0.008318 | 0.85772  | 0.020356 |
| 0.177337  | 0.00012  | -0.01971 | 0.67094  | 0.215842 | 2.51E-06 | 0.06503  | 0.16061  | 0.205537 |

|           |          |          |          |          |          |          |          |          |
|-----------|----------|----------|----------|----------|----------|----------|----------|----------|
| 0.163744  | 0.00038  | 0.151227 | 0.00104  | 0.141944 | 0.00211  | 0.14941  | 0.0012   | 0.034421 |
| -0.00051  | 0.99127  | -0.04257 | 0.35864  | 0.009253 | 0.84193  | 0.031882 | 0.49189  | -0.03225 |
| 0.116941  | 0.01144  | -0.05093 | 0.27204  | 0.049653 | 0.28426  | 0.001454 | 0.975    | -0.00075 |
| -0.06132  | 0.18587  | -0.06748 | 0.14541  | -0.00992 | 0.83062  | -0.05508 | 0.23482  | 0.024106 |
| -0.02753  | 0.55284  | -0.09856 | 0.03323  | -0.16249 | 0.00042  | -0.14954 | 0.00119  | -0.07512 |
| -0.01262  | 0.78563  | 0.063926 | 0.16785  | 0.01778  | 0.70154  | 0.045235 | 0.32936  | 0.020322 |
| -0.03106  | 0.50312  | -0.00695 | 0.88086  | -0.01561 | 0.73655  | 0.006081 | 0.89573  | -0.0102  |
| 0.20478   | 8.16E-06 | 0.153224 | 0.00089  | 0.131305 | 0.00448  | 0.049037 | 0.29028  | 0.180028 |
| 0.057147  | 0.2177   | -0.00351 | 0.9397   | 0.092099 | 0.04668  | 0.072732 | 0.1165   | 0.068965 |
| -0.22254  | 1.19E-06 | -0.02489 | 0.59153  | -0.30433 | 1.83E-11 | -0.12578 | 0.0065   | -0.20993 |
| 0.103542  | 0.02525  | 0.145753 | 0.00159  | 0.164953 | 0.00034  | 0.040663 | 0.38062  | 0.230889 |
| 0.113531  | 0.0141   | -0.01677 | 0.71772  | -0.07947 | 0.08625  | -0.04829 | 0.29773  | -0.07655 |
| -0.03299  | 0.477    | -0.0667  | 0.15012  | -0.08225 | 0.07577  | -0.07152 | 0.12271  | -0.03252 |
| 0.05194   | 0.26263  | -0.00484 | 0.91699  | -0.05805 | 0.21054  | -0.06297 | 0.1743   | -0.00197 |
| -0.0264   | 0.56934  | -0.09567 | 0.03876  | 0.056348 | 0.22422  | 0.033444 | 0.47092  | 0.055453 |
| -0.00031  | 0.99471  | 0.026422 | 0.56898  | -0.03317 | 0.47457  | -0.0503  | 0.27805  | -0.01609 |
| -0.1863   | 5.11E-05 | -0.20716 | 6.36E-06 | -0.16063 | 0.00049  | -0.15001 | 0.00115  | -0.12632 |
| 0.141077  | 0.00224  | 0.025465 | 0.58306  | 0.099203 | 0.03209  | 0.128442 | 0.00544  | 0.139687 |
| 0.003055  | 0.9475   | 0.020424 | 0.65977  | 0.118335 | 0.01049  | 0.097402 | 0.03536  | 0.078525 |
| 0.096598  | 0.03691  | 0.061474 | 0.18478  | 0.126692 | 0.00612  | 0.079598 | 0.08575  | -0.06615 |
| -0.08606  | 0.06312  | -0.10112 | 0.02889  | 0.060832 | 0.18943  | 0.060249 | 0.19371  | 0.015506 |
| -0.1451   | 0.00167  | -0.04146 | 0.3714   | -0.14879 | 0.00126  | -0.05155 | 0.26627  | -0.13095 |
| -0.01432  | 0.75766  | -0.14874 | 0.00127  | -0.07285 | 0.11592  | -0.12655 | 0.00617  | -0.12212 |
| 0.041939  | 0.36585  | 0.020856 | 0.65304  | -0.02301 | 0.61985  | -0.00627 | 0.89247  | 0.032938 |
| -0.13506  | 0.00345  | -0.05225 | 0.25981  | -0.23989 | 1.55E-07 | -0.17801 | 0.00011  | -0.13847 |
| 0.085442  | 0.06506  | 0.040275 | 0.38519  | 0.058845 | 0.20432  | 0.020405 | 0.66007  | 0.107765 |
| 0.185363  | 5.58E-05 | -0.05549 | 0.23135  | 0.104354 | 0.02412  | 0.013479 | 0.77142  | 0.050833 |
| 0.070643  | 0.12741  | -0.02506 | 0.58912  | -0.06027 | 0.19356  | -0.08099 | 0.08041  | -0.00409 |
| 0.053674  | 0.24702  | 0.048642 | 0.29419  | -0.11206 | 0.0154   | -0.09166 | 0.04774  | 0.064645 |
| -7.89E-05 | 0.99864  | -0.10628 | 0.02162  | -0.07958 | 0.08581  | -0.08973 | 0.05266  | -0.0264  |
| -0.07622  | 0.09995  | -0.12435 | 0.00714  | -0.10198 | 0.02754  | -0.18548 | 5.52E-05 | -0.11717 |
| 0.019439  | 0.67523  | -0.04955 | 0.28531  | 0.064387 | 0.1648   | -0.05265 | 0.25613  | 0.059719 |
| -0.04378  | 0.34518  | 0.000614 | 0.98944  | 0.058468 | 0.20724  | -0.03065 | 0.50881  | 0.120651 |
| -0.05804  | 0.21059  | 0.009943 | 0.83031  | 0.042239 | 0.36243  | -0.03616 | 0.43558  | 0.085615 |
| -0.255    | 2.29E-08 | -0.39852 | 3.16E-19 | -0.27149 | 2.47E-09 | -0.39144 | 1.50E-18 | -0.26816 |
| -0.08078  | 0.08119  | -0.07087 | 0.12617  | 0.016033 | 0.72966  | 0.025937 | 0.5761   | 0.012212 |
| -0.01212  | 0.794    | -0.00587 | 0.89938  | -0.00986 | 0.8317   | -0.04244 | 0.36012  | 0.049986 |
| 0.025418  | 0.58375  | -0.01041 | 0.82243  | -0.05579 | 0.2288   | -0.10422 | 0.0243   | 0.019839 |
| -0.06034  | 0.19303  | -0.16162 | 0.00045  | 0.04857  | 0.29491  | -0.06995 | 0.13118  | 0.026059 |
| -0.14381  | 0.00184  | -0.197   | 1.80E-05 | -0.10204 | 0.02746  | -0.18588 | 5.31E-05 | -0.03956 |
| 0.134325  | 0.00364  | 0.106074 | 0.02187  | 0.159728 | 0.00053  | 0.032233 | 0.48714  | 0.23184  |
| 0.214817  | 2.81E-06 | 0.045309 | 0.32857  | 0.21832  | 1.91E-06 | 0.0762   | 0.10004  | 0.177228 |
| 0.132868  | 0.00402  | 0.18378  | 6.47E-05 | 0.17511  | 0.00014  | 0.070204 | 0.12979  | 0.280464 |
| 0.31701   | 2.32E-12 | 0.215624 | 2.57E-06 | 0.274564 | 1.60E-09 | 0.174103 | 0.00016  | 0.287127 |
| 0.046598  | 0.31497  | 0.210412 | 4.51E-06 | 0.315746 | 2.86E-12 | 0.282234 | 5.32E-10 | 0.35167  |

|          |          |          |          |          |          |          |          |          |
|----------|----------|----------|----------|----------|----------|----------|----------|----------|
| -0.01944 | 0.6752   | -0.05637 | 0.224    | 0.018233 | 0.69433  | -0.04279 | 0.35621  | 0.015684 |
| -0.1651  | 0.00034  | -0.2015  | 1.14E-05 | -0.27373 | 1.80E-09 | -0.25096 | 3.86E-08 | -0.2586  |
| 0.163283 | 0.0004   | -0.06455 | 0.16376  | 0.204019 | 8.83E-06 | 0.067221 | 0.14695  | 0.130065 |
| 0.040408 | 0.38362  | -0.02046 | 0.65926  | -0.08154 | 0.07834  | -0.0915  | 0.04812  | 0.004138 |
| 0.066985 | 0.14837  | -0.03925 | 0.39738  | 0.05824  | 0.20902  | -0.03879 | 0.40302  | 0.020537 |
| -0.02447 | 0.59783  | -0.06899 | 0.13658  | -0.01523 | 0.74269  | -0.09919 | 0.03211  | -0.01529 |
| -0.09996 | 0.0308   | -0.17194 | 0.00019  | -0.10406 | 0.02452  | -0.17237 | 0.00018  | -0.07569 |
| 0.073354 | 0.1134   | 0.065638 | 0.15673  | 0.009048 | 0.84538  | 0.019452 | 0.67501  | -0.01534 |
| -0.02463 | 0.59554  | 0.062911 | 0.17471  | -0.00248 | 0.95729  | 0.019423 | 0.67548  | 0.026455 |
| 0.162827 | 0.00041  | 0.151815 | 0.001    | 0.205029 | 7.96E-06 | 0.156554 | 0.00069  | 0.23173  |
| 0.087367 | 0.05922  | -0.04646 | 0.31646  | 0.114779 | 0.01307  | 0.039775 | 0.39112  | 0.084054 |
| 0.42802  | 3.16E-22 | 0.279214 | 8.24E-10 | 0.032762 | 0.48001  | 0.096748 | 0.03661  | 0.112648 |
| 0.37954  | 1.89E-17 | 0.230006 | 5.04E-07 | 0.049548 | 0.28528  | 0.125227 | 0.00674  | 0.151428 |
| 0.158325 | 0.00059  | 0.048968 | 0.29097  | 0.189792 | 3.66E-05 | 0.093342 | 0.04379  | 0.145441 |
| 0.035015 | 0.45032  | -0.11497 | 0.01291  | 0.055829 | 0.22852  | -0.0852  | 0.06583  | 0.050034 |
| 0.001141 | 0.98038  | 0.074012 | 0.11019  | 0.118971 | 0.01008  | 0.033424 | 0.47118  | 0.222776 |
| -0.06386 | 0.16828  | -0.11238 | 0.01511  | -0.17364 | 0.00016  | -0.20058 | 1.26E-05 | -0.17146 |
| 0.113981 | 0.01372  | 0.125753 | 0.00651  | -0.01436 | 0.75688  | -0.10589 | 0.0221   | 0.132219 |
| -0.06635 | 0.1523   | -0.02608 | 0.57406  | -0.18889 | 3.99E-05 | -0.04614 | 0.31981  | -0.14674 |
| -0.01313 | 0.77724  | -0.03768 | 0.41661  | -0.0735  | 0.11267  | -0.02063 | 0.65651  | 0.015255 |
| -0.11267 | 0.01485  | -0.16265 | 0.00042  | -0.20908 | 5.20E-06 | -0.19443 | 2.33E-05 | -0.08408 |
| 0.096512 | 0.03708  | 0.145126 | 0.00166  | 0.137514 | 0.0029   | 0.087502 | 0.05883  | 0.137992 |
| 0.042629 | 0.358    | -0.15476 | 0.00079  | -0.10123 | 0.02872  | -0.1543  | 0.00082  | -0.11192 |
| -0.02556 | 0.5816   | -0.04397 | 0.34309  | 0.051393 | 0.26771  | -0.00736 | 0.87395  | 0.04758  |
| 0.240454 | 1.44E-07 | -0.00278 | 0.95224  | 0.187661 | 4.49E-05 | 0.093234 | 0.04403  | 0.091771 |
| 0.005901 | 0.89881  | 0.102851 | 0.02624  | 0.125534 | 0.0066   | 0.248173 | 5.51E-08 | 0.089466 |
| 0.103443 | 0.02539  | 0.146871 | 0.00146  | 0.049321 | 0.2875   | 0.057008 | 0.21882  | 0.139046 |
| 0.138794 | 0.00265  | 0.076463 | 0.09887  | 0.003745 | 0.93566  | -0.12432 | 0.00715  | 0.039122 |
| 0.212489 | 3.61E-06 | 0.046529 | 0.3157   | 0.288576 | 2.08E-10 | 0.032201 | 0.48757  | 0.291607 |
| -0.11342 | 0.01419  | -0.04749 | 0.30577  | -0.00444 | 0.92376  | 0.049993 | 0.28097  | -0.03162 |
| 0.096411 | 0.03728  | 0.144226 | 0.00178  | 0.175793 | 0.00013  | 0.14085  | 0.00228  | 0.178246 |
| 0.054453 | 0.24021  | 0.012447 | 0.78849  | 0.028015 | 0.5459   | -0.0876  | 0.05854  | 0.1453   |
| 0.086104 | 0.063    | 0.126629 | 0.00614  | 0.088349 | 0.05641  | 0.087946 | 0.05755  | 0.117542 |
| -0.05794 | 0.21139  | -0.21628 | 2.39E-06 | -0.10739 | 0.02028  | -0.20215 | 1.07E-05 | -0.03692 |
| -0.00946 | 0.83847  | 0.074033 | 0.1101   | 0.05107  | 0.27072  | 0.02461  | 0.59578  | 0.189851 |
| -0.07367 | 0.11184  | -0.07949 | 0.08617  | 0.053702 | 0.24677  | 0.065379 | 0.15837  | 0.035646 |
| 0.097034 | 0.03606  | 0.020062 | 0.66544  | -0.00844 | 0.8557   | -0.0533  | 0.25034  | -0.00664 |
| -0.00059 | 0.98983  | -0.08632 | 0.06235  | -0.2097  | 4.86E-06 | -0.22321 | 1.10E-06 | -0.13403 |
| 0.142074 | 0.00209  | 0.09161  | 0.04786  | 0.198147 | 1.61E-05 | 0.156362 | 0.0007   | 0.149828 |
| 0.262679 | 8.27E-09 | 0.227375 | 6.85E-07 | 0.272733 | 2.07E-09 | 0.168655 | 0.00025  | 0.273834 |
| 0.063204 | 0.17271  | -0.00273 | 0.95313  | -0.00022 | 0.99624  | -0.0547  | 0.23805  | 0.070033 |
| 0.110805 | 0.0166   | 0.146779 | 0.00147  | 0.158812 | 0.00057  | 0.217955 | 1.99E-06 | 0.187135 |
| 0.136551 | 0.00311  | 0.011458 | 0.80495  | 0.125037 | 0.00682  | 0.03846  | 0.40698  | 0.181166 |
| -0.09928 | 0.03195  | -0.249   | 4.96E-08 | -0.19274 | 2.75E-05 | -0.24638 | 6.91E-08 | -0.14494 |
| 0.04377  | 0.34528  | -0.03151 | 0.49698  | 0.009968 | 0.8299   | -0.09417 | 0.04195  | 0.099534 |

|          |          |          |          |          |          |          |          |          |
|----------|----------|----------|----------|----------|----------|----------|----------|----------|
| -0.08022 | 0.08333  | -0.04859 | 0.29473  | -0.09952 | 0.03154  | -0.06254 | 0.17728  | 0.007893 |
| 0.007822 | 0.86613  | 0.08927  | 0.05388  | 0.004344 | 0.92542  | 0.000176 | 0.99697  | 0.007938 |
| 0.099041 | 0.03237  | -0.09502 | 0.04013  | 0.222185 | 1.24E-06 | -0.01015 | 0.82682  | 0.098917 |
| 0.32728  | 4.04E-13 | 0.257054 | 1.75E-08 | 0.267852 | 4.09E-09 | 0.230126 | 4.97E-07 | 0.277501 |
| 0.138488 | 0.00271  | -0.02322 | 0.61664  | -0.20143 | 1.15E-05 | -0.12766 | 0.00573  | -0.16654 |
| 0.02355  | 0.61172  | 0.116919 | 0.01145  | -0.07185 | 0.12101  | 0.002013 | 0.9654   | -0.03357 |
| 0.043156 | 0.35209  | -0.03215 | 0.48825  | 0.049413 | 0.2866   | -0.09514 | 0.03987  | 0.129328 |
| -0.02767 | 0.55089  | 0.031278 | 0.50014  | -0.01801 | 0.69785  | -0.03578 | 0.44049  | -0.04356 |
| 0.247778 | 5.80E-08 | 0.033201 | 0.47415  | 0.209033 | 5.22E-06 | 0.077752 | 0.09329  | 0.092579 |
| 0.114486 | 0.0133   | 0.108136 | 0.01942  | 0.103437 | 0.0254   | 0.108173 | 0.01938  | 0.080881 |
| -0.01101 | 0.81249  | 0.000854 | 0.98531  | -0.02341 | 0.61378  | 0.053367 | 0.24974  | -0.01538 |
| -0.05043 | 0.27675  | 0.086792 | 0.06092  | -0.04897 | 0.29097  | 0.006697 | 0.88523  | 0.009355 |
| -0.10258 | 0.02665  | -0.0153  | 0.74161  | -0.17843 | 0.00011  | -0.11892 | 0.0101   | -0.08562 |
| 0.172319 | 0.00018  | 0.084497 | 0.0681   | 0.015207 | 0.74309  | 0.05202  | 0.2619   | 0.035436 |
| 0.060337 | 0.19306  | 0.144553 | 0.00174  | 0.016689 | 0.71907  | 0.065823 | 0.15556  | 0.004472 |
| 0.016072 | 0.72903  | 0.001146 | 0.9803   | 0.034099 | 0.46227  | -0.00293 | 0.9497   | -0.01811 |
| -0.00998 | 0.82964  | -0.01304 | 0.77867  | -0.03744 | 0.41958  | -0.04616 | 0.3195   | 0.008907 |
| -0.03499 | 0.45062  | 0.067249 | 0.14678  | 0.025831 | 0.57766  | 0.08611  | 0.06298  | 0.063814 |
| 0.272919 | 2.02E-09 | 0.330959 | 2.12E-13 | 0.342142 | 2.86E-14 | 0.393042 | 1.06E-18 | 0.170377 |
| 0.029108 | 0.53035  | 0.113443 | 0.01417  | 0.052538 | 0.25718  | 0.031297 | 0.49988  | 0.110349 |
| 0.060985 | 0.18831  | 0.140635 | 0.00232  | -0.05755 | 0.21448  | -0.02396 | 0.60552  | 0.015755 |
| -0.25693 | 1.78E-08 | -0.16285 | 0.00041  | -0.08302 | 0.07307  | -0.04439 | 0.33846  | -0.07324 |
| -0.02068 | 0.65583  | 0.009503 | 0.83771  | -0.01681 | 0.71715  | -0.04486 | 0.3334   | 0.013782 |
| 0.05394  | 0.24468  | 0.078187 | 0.09147  | -0.00408 | 0.92994  | 0.002614 | 0.95507  | 0.035903 |
| -0.00463 | 0.92043  | 0.019158 | 0.67965  | -0.0758  | 0.10182  | -0.05601 | 0.22699  | -0.0379  |
| -0.03036 | 0.51276  | -0.19289 | 2.71E-05 | -0.02006 | 0.66545  | -0.22925 | 5.51E-07 | -0.05485 |
| -0.04869 | 0.29369  | 0.074332 | 0.10866  | -0.17788 | 0.00011  | -0.1315  | 0.00442  | 0.002559 |
| 0.068272 | 0.14072  | 0.006598 | 0.88692  | -0.16964 | 0.00023  | -0.18031 | 8.92E-05 | -0.16406 |
| 0.025211 | 0.58682  | 0.013817 | 0.76585  | 0.095983 | 0.03813  | 0.041536 | 0.37048  | 0.006171 |
| 0.019374 | 0.67624  | -0.02836 | 0.54092  | 0.069629 | 0.13297  | 0.082519 | 0.07483  | 0.068829 |
| 0.321766 | 1.04E-12 | 0.269814 | 3.12E-09 | 0.321475 | 1.09E-12 | 0.323636 | 7.56E-13 | 0.248015 |
| 0.022203 | 0.63223  | -0.00237 | 0.95928  | -0.059   | 0.20312  | -0.0033  | 0.94333  | -0.01754 |
| -0.08918 | 0.05412  | -0.112   | 0.01545  | -0.13589 | 0.00326  | -0.14096 | 0.00226  | -0.13836 |
| 0.089697 | 0.05274  | 0.073121 | 0.11456  | -0.00347 | 0.94047  | 0.034064 | 0.46272  | -0.01824 |
| -0.2371  | 2.17E-07 | -0.01994 | 0.66734  | -0.29119 | 1.40E-10 | -0.12632 | 0.00627  | -0.20144 |
| 0.179538 | 9.57E-05 | 0.148599 | 0.00128  | 0.082767 | 0.07396  | 0.134302 | 0.00364  | 0.026817 |
| 0.007594 | 0.87     | 0.105926 | 0.02206  | 0.023676 | 0.6098   | -0.01535 | 0.74079  | 0.088421 |
| 0.10284  | 0.02626  | 0.13633  | 0.00316  | 0.08797  | 0.05748  | 0.10676  | 0.02103  | 0.066607 |
| 0.006662 | 0.88582  | 0.1213   | 0.00869  | -0.02327 | 0.61599  | -0.02855 | 0.53831  | 0.060825 |
| -0.08858 | 0.05577  | -0.17206 | 0.00019  | 0.01043  | 0.82214  | -0.08379 | 0.07045  | -0.03509 |
| 0.175114 | 0.00014  | 0.201449 | 1.15E-05 | 0.223037 | 1.13E-06 | 0.221553 | 1.33E-06 | 0.052752 |
| 0.083475 | 0.07151  | 0.041154 | 0.3749   | 0.055479 | 0.23146  | 0.01759  | 0.7046   | 0.050346 |
| 0.024271 | 0.60086  | -0.00542 | 0.90693  | -0.02035 | 0.66094  | -0.06111 | 0.18738  | 0.075698 |
| 0.151209 | 0.00105  | 0.036214 | 0.43495  | 0.042208 | 0.36277  | 0.072358 | 0.1184   | 0.022848 |
| -0.02124 | 0.64706  | 0.007571 | 0.87039  | -0.01131 | 0.80742  | 0.029851 | 0.51991  | 0.029979 |

|          |          |          |          |          |          |          |          |          |
|----------|----------|----------|----------|----------|----------|----------|----------|----------|
| 0.106201 | 0.02171  | 0.012554 | 0.78672  | -0.09594 | 0.03822  | -0.18361 | 6.58E-05 | -0.10645 |
| -0.0041  | 0.92967  | 0.031357 | 0.49905  | 0.082279 | 0.07568  | 0.051148 | 0.26999  | 0.07703  |
| 0.158256 | 0.0006   | 0.272671 | 2.09E-09 | 0.122731 | 0.00793  | 0.25859  | 1.43E-08 | -0.02619 |
| 0.021162 | 0.64829  | -0.04639 | 0.31713  | 0.147521 | 0.00139  | 0.094159 | 0.04197  | 0.104063 |
| 0.061135 | 0.18723  | 0.010784 | 0.81621  | 0.179147 | 9.92E-05 | 0.065228 | 0.15934  | 0.037143 |
| -0.02936 | 0.5268   | -0.09382 | 0.04271  | -0.00899 | 0.84644  | -0.13787 | 0.00283  | 0.001866 |
| -0.25448 | 2.45E-08 | -0.37886 | 2.18E-17 | -0.2993  | 4.04E-11 | -0.29779 | 5.12E-11 | -0.25041 |
| -0.21557 | 2.58E-06 | -0.13231 | 0.00418  | -0.29902 | 4.22E-11 | -0.1347  | 0.00354  | -0.24732 |
| -0.10335 | 0.02553  | -0.10733 | 0.02034  | -0.05303 | 0.2527   | -0.02595 | 0.57586  | -0.04725 |
| -0.06337 | 0.17158  | -0.0256  | 0.58106  | -0.02971 | 0.52191  | 0.029519 | 0.52456  | -0.02272 |
| 0.00322  | 0.94467  | 0.027117 | 0.55886  | -0.04562 | 0.32521  | -0.00222 | 0.96184  | -0.0414  |
| -0.06389 | 0.16811  | 0.033781 | 0.46646  | -0.0711  | 0.12493  | -0.04002 | 0.3882   | 0.043699 |
| -0.00604 | 0.89649  | 0.203412 | 9.41E-06 | -0.0391  | 0.39922  | -0.02318 | 0.61735  | 0.014563 |
| -0.04748 | 0.30587  | -0.02348 | 0.61272  | -0.02758 | 0.55216  | -0.03474 | 0.45392  | 0.005497 |
| 0.086204 | 0.06269  | -0.01532 | 0.7413   | 0.094419 | 0.0414   | 0.016966 | 0.7146   | 0.185463 |
| -0.07838 | 0.09068  | -0.14396 | 0.00181  | -0.01473 | 0.75086  | -0.13994 | 0.00244  | 0.031076 |
| -0.07893 | 0.08843  | -0.24082 | 1.38E-07 | -0.02133 | 0.64569  | -0.18108 | 8.31E-05 | -0.0058  |
| -0.01476 | 0.75034  | 0.073523 | 0.11257  | 0.0126   | 0.78596  | 0.118875 | 0.01014  | 0.045271 |
| -0.00636 | 0.89096  | -0.07818 | 0.0915   | 0.026233 | 0.57175  | 0.06278  | 0.17561  | -0.03758 |
| -0.04704 | 0.31035  | -0.0795  | 0.08613  | -0.09479 | 0.04061  | -0.1653  | 0.00033  | -0.0649  |
| 0.195168 | 2.16E-05 | -0.12522 | 0.00674  | -0.12523 | 0.00673  | -0.13757 | 0.00289  | -0.12293 |
| 0.085628 | 0.06448  | 0.050143 | 0.27953  | 0.089132 | 0.05425  | 0.055704 | 0.22956  | 0.212149 |
| -0.02025 | 0.66251  | 0.05297  | 0.25328  | -0.13804 | 0.0028   | -0.09348 | 0.04347  | -0.02157 |
| 0.034696 | 0.45445  | -0.05569 | 0.22964  | 0.041731 | 0.36823  | -0.089   | 0.0546   | 0.100249 |
| -0.03246 | 0.4841   | 0.067564 | 0.14489  | -0.02366 | 0.61006  | 0.018297 | 0.69331  | 0.051771 |
| 0.158924 | 0.00057  | 0.015139 | 0.7442   | 0.1158   | 0.01227  | 0.103812 | 0.02487  | 0.068963 |
| 0.206631 | 6.73E-06 | 0.403055 | 1.14E-19 | 0.066909 | 0.14883  | 0.209147 | 5.16E-06 | 0.018766 |
| 0.000383 | 0.99342  | -0.04347 | 0.34855  | -0.02206 | 0.63447  | -0.05837 | 0.208    | -0.04284 |
| 0.107234 | 0.02046  | 0.139076 | 0.00259  | 0.180406 | 8.84E-05 | 0.126814 | 0.00607  | 0.129317 |
| 0.090985 | 0.04941  | -0.25676 | 1.82E-08 | 0.067248 | 0.14678  | -0.15122 | 0.00105  | -0.09847 |
| 0.00774  | 0.86752  | 0.183095 | 6.90E-05 | 0.150384 | 0.00112  | 0.157521 | 0.00063  | 0.170113 |
| -0.18276 | 7.12E-05 | -0.38365 | 7.99E-18 | -0.23267 | 3.69E-07 | -0.38224 | 1.08E-17 | -0.27104 |
| 0.020942 | 0.6517   | -0.12035 | 0.00923  | 0.062657 | 0.17646  | -0.05938 | 0.20019  | 0.054972 |
| 0.021888 | 0.63707  | 0.046115 | 0.32002  | -0.02353 | 0.61197  | -0.02987 | 0.51957  | 0.072785 |
| -0.00988 | 0.83135  | 0.078256 | 0.09119  | -0.09089 | 0.04964  | 0.114277 | 0.01347  | -0.0783  |
| 0.026585 | 0.56659  | -0.05356 | 0.248    | -0.02373 | 0.60901  | -0.00605 | 0.89626  | -0.05503 |
| 0.01985  | 0.66876  | -0.07561 | 0.10268  | -0.02267 | 0.62514  | -0.09006 | 0.05178  | -0.02038 |
| -0.01008 | 0.82795  | 0.091952 | 0.04703  | -0.03945 | 0.39495  | 0.015713 | 0.73486  | -0.02516 |
| -0.06967 | 0.13276  | 0.051685 | 0.26499  | -0.15902 | 0.00056  | 0.010719 | 0.81729  | -0.22138 |
| 0.242972 | 1.06E-07 | 0.309944 | 7.42E-12 | 0.281048 | 6.32E-10 | 0.314966 | 3.25E-12 | 0.151842 |
| 0.217427 | 2.11E-06 | 0.324589 | 6.42E-13 | 0.14485  | 0.0017   | 0.305476 | 1.52E-11 | 0.004176 |
| 0.022646 | 0.62545  | -0.03861 | 0.40516  | 0.00623  | 0.89319  | -0.02205 | 0.63457  | 0.059366 |
| -0.0048  | 0.91769  | -0.06468 | 0.16291  | -0.18176 | 7.81E-05 | -0.13619 | 0.00319  | -0.13495 |
| 0.000741 | 0.98726  | -0.03321 | 0.47402  | 0.070803 | 0.12654  | 0.088797 | 0.05517  | 0.000542 |
| 0.065614 | 0.15688  | 0.337522 | 6.61E-14 | 0.029165 | 0.52955  | 0.2191   | 1.75E-06 | 0.018066 |

|          |          |          |          |          |          |          |          |          |
|----------|----------|----------|----------|----------|----------|----------|----------|----------|
| 0.044554 | 0.3367   | -0.03362 | 0.46853  | 0.173347 | 0.00017  | 0.025513 | 0.58235  | 0.154829 |
| 0.043082 | 0.35291  | -0.00592 | 0.8985   | -0.16782 | 0.00027  | -0.08193 | 0.07693  | -0.14653 |
| 0.090556 | 0.0505   | 0.133718 | 0.00379  | 0.104534 | 0.02387  | 0.091954 | 0.04703  | 0.120634 |
| -0.04297 | 0.35418  | 0.06214  | 0.18006  | -0.10893 | 0.01854  | -0.05345 | 0.24899  | -0.06052 |
| 0.081715 | 0.07771  | 0.004344 | 0.9254   | -0.02366 | 0.61001  | 0.017051 | 0.71324  | 0.003177 |
| 0.24003  | 1.52E-07 | 0.198332 | 1.58E-05 | 0.099477 | 0.03161  | 0.088678 | 0.05549  | 0.174215 |
| 0.077104 | 0.09606  | 0.067256 | 0.14674  | 0.045688 | 0.32453  | 0.049231 | 0.28838  | 0.106837 |
| 0.193866 | 2.46E-05 | 0.080289 | 0.08306  | -0.05462 | 0.23875  | -0.01507 | 0.74532  | 0.019633 |
| -0.03819 | 0.4103   | -0.24399 | 9.32E-08 | -0.02843 | 0.53999  | -0.26078 | 1.07E-08 | -0.05107 |
| -0.01438 | 0.75653  | -0.08312 | 0.07274  | 0.009355 | 0.84021  | -0.05386 | 0.24534  | -0.0946  |
| 0.341616 | 3.15E-14 | 0.138499 | 0.0027   | 0.351417 | 5.09E-15 | 0.161077 | 0.00048  | 0.274066 |
| 0.056971 | 0.21913  | 0.032838 | 0.479    | 0.156957 | 0.00066  | 0.143384 | 0.00189  | 0.215363 |
| 0.041062 | 0.37596  | -0.00712 | 0.87809  | -0.02735 | 0.55547  | -0.04194 | 0.36587  | 0.021733 |
| 0.314756 | 3.37E-12 | 0.354787 | 2.68E-15 | 0.337233 | 6.96E-14 | 0.462362 | 4.11E-26 | 0.21891  |
| -0.05034 | 0.27765  | 0.045482 | 0.32671  | -0.08195 | 0.07687  | -0.01835 | 0.69244  | -0.01183 |
| 0.047502 | 0.30566  | 0.018738 | 0.6863   | 0.001425 | 0.9755   | -0.00837 | 0.85685  | -0.01965 |
| 0.124724 | 0.00696  | 0.15361  | 0.00087  | -0.00388 | 0.93337  | 0.029628 | 0.52303  | -0.02423 |
| 0.00456  | 0.92171  | 0.062559 | 0.17714  | 0.006912 | 0.88158  | -0.00939 | 0.8397   | 0.0568   |
| 0.004072 | 0.93007  | 0.005483 | 0.90594  | -0.03867 | 0.40439  | -0.08647 | 0.06189  | -0.07789 |
| 0.050369 | 0.27737  | 0.012778 | 0.783    | 0.041178 | 0.37462  | -0.03361 | 0.46872  | 0.010646 |
| -0.05898 | 0.20327  | -0.10777 | 0.01983  | -0.0734  | 0.11319  | -0.05582 | 0.22862  | -0.11096 |
| -0.06943 | 0.13407  | -0.07275 | 0.11642  | -0.0378  | 0.41505  | -0.09161 | 0.04786  | -0.06734 |
| 0.090108 | 0.05166  | 0.180061 | 9.13E-05 | 0.141904 | 0.00211  | 0.131433 | 0.00444  | 0.084322 |
| 0.127138 | 0.00594  | 0.145013 | 0.00168  | 0.107858 | 0.01973  | 0.151543 | 0.00102  | 0.091834 |
| -0.06577 | 0.15589  | 0.06795  | 0.1426   | 0.051368 | 0.26793  | 0.039652 | 0.39259  | 0.065886 |
| 0.074321 | 0.10872  | 0.113267 | 0.01432  | -0.13711 | 0.00299  | -0.10688 | 0.02088  | -0.07533 |
| 0.182909 | 7.02E-05 | 0.02822  | 0.54297  | 0.088566 | 0.05581  | 0.003241 | 0.94431  | 0.085307 |
| 0.172654 | 0.00018  | 0.175728 | 0.00014  | 0.211251 | 4.12E-06 | 0.105013 | 0.02323  | 0.297501 |
| 0.118577 | 0.01033  | 0.162434 | 0.00042  | 0.151501 | 0.00102  | 0.092114 | 0.04665  | 0.110383 |
| 0.281897 | 5.58E-10 | 0.171529 | 0.0002   | 0.247988 | 5.64E-08 | 0.221521 | 1.33E-06 | 0.134716 |
| 0.063565 | 0.17026  | 0.19367  | 2.51E-05 | 0.091687 | 0.04768  | 0.129501 | 0.00507  | 0.115139 |
| -0.02884 | 0.53419  | 0.105153 | 0.02305  | 0.05987  | 0.19653  | 0.086066 | 0.06312  | 0.044095 |
| 0.018967 | 0.68268  | 0.134396 | 0.00362  | 0.092679 | 0.04531  | 0.135362 | 0.00338  | 0.063473 |
| 0.079246 | 0.08715  | -0.03816 | 0.41066  | 0.165381 | 0.00033  | 0.060271 | 0.19354  | 0.105468 |
| 0.158874 | 0.00057  | 0.084213 | 0.06903  | 0.13884  | 0.00264  | 0.083963 | 0.06986  | 0.076691 |
| 0.171796 | 0.00019  | 0.141733 | 0.00214  | 0.145475 | 0.00162  | 0.142452 | 0.00203  | 0.091153 |
| 0.300062 | 3.59E-11 | 0.091723 | 0.04759  | 0.04635  | 0.31756  | 0.032894 | 0.47825  | -0.01618 |
| 0.114901 | 0.01297  | 0.166773 | 0.00029  | -0.06261 | 0.17679  | 0.03924  | 0.39753  | 0.02365  |
| 0.125213 | 0.00674  | 0.058761 | 0.20497  | 0.007935 | 0.8642   | -0.01055 | 0.82009  | 0.061563 |
| 0.205586 | 7.51E-06 | 0.092871 | 0.04486  | 0.041379 | 0.37228  | -0.07828 | 0.09108  | 0.104796 |
| 0.153857 | 0.00085  | 0.050311 | 0.27792  | 0.02637  | 0.56974  | 0.005094 | 0.91258  | -0.00865 |
| 0.176127 | 0.00013  | 0.075778 | 0.10194  | 0.00569  | 0.9024   | 0.017704 | 0.70276  | -0.01244 |
| 0.081171 | 0.07972  | 0.091052 | 0.04925  | 0.086052 | 0.06316  | 0.06052  | 0.19171  | 0.07154  |
| 0.103851 | 0.02481  | 0.131136 | 0.00453  | 0.059795 | 0.19709  | 0.046478 | 0.31622  | 0.058061 |
| 0.064863 | 0.16169  | 0.137697 | 0.00286  | 0.037735 | 0.4159   | 0.112788 | 0.01474  | 0.032755 |

|          |          |           |          |          |          |          |          |          |
|----------|----------|-----------|----------|----------|----------|----------|----------|----------|
| 0.103312 | 0.02558  | 0.041531  | 0.37053  | 0.026356 | 0.56995  | 0.070446 | 0.12847  | -0.00764 |
| 0.091404 | 0.04837  | 0.068679  | 0.13836  | 0.0142   | 0.75956  | 0.081172 | 0.07972  | 0.003808 |
| 0.141451 | 0.00218  | 0.098694  | 0.03298  | 0.000176 | 0.99697  | 0.037827 | 0.41476  | -0.00988 |
| 0.10244  | 0.02685  | 0.066444  | 0.15168  | 0.084255 | 0.06889  | 0.041272 | 0.37352  | 0.046384 |
| 0.123915 | 0.00734  | 0.142447  | 0.00203  | 0.107853 | 0.01974  | 0.053403 | 0.24941  | 0.112384 |
| 0.030064 | 0.51693  | -0.15893  | 0.00057  | -0.16618 | 0.00031  | -0.11821 | 0.01057  | -0.23451 |
| -0.02526 | 0.58609  | 0.047749  | 0.30315  | -0.05251 | 0.25745  | 0.002718 | 0.95328  | -0.04041 |
| -0.03285 | 0.47883  | 0.03713   | 0.42341  | 0.059114 | 0.20225  | 0.136074 | 0.00321  | 0.081421 |
| 0.173339 | 0.00017  | -0.01506  | 0.74553  | -0.08558 | 0.06462  | -0.06304 | 0.17385  | -0.0155  |
| 0.017381 | 0.70793  | -0.05818  | 0.20948  | -0.0145  | 0.75467  | 0.006266 | 0.89257  | -0.03336 |
| -0.2368  | 2.25E-07 | -0.2754   | 1.42E-09 | -0.21966 | 1.64E-06 | -0.17693 | 0.00012  | -0.33052 |
| -0.01276 | 0.78322  | -0.06603  | 0.15424  | -0.10002 | 0.03069  | -0.11298 | 0.01457  | -0.16208 |
| 0.059315 | 0.20072  | 0.114421  | 0.01336  | 0.175449 | 0.00014  | 0.109388 | 0.01805  | 0.218656 |
| -0.04484 | 0.33355  | -0.10595  | 0.02202  | -0.04936 | 0.28716  | -0.11504 | 0.01286  | -0.00714 |
| 0.325286 | 5.70E-13 | 0.242306  | 1.15E-07 | 0.146378 | 0.00151  | 0.072761 | 0.11636  | 0.251046 |
| -0.04701 | 0.3107   | 0.019752  | 0.67029  | 0.098614 | 0.03313  | 0.154169 | 0.00083  | 0.038304 |
| -0.18046 | 8.80E-05 | -0.10195  | 0.0276   | 0.098771 | 0.03285  | 0.076167 | 0.10018  | 0.034506 |
| 0.082342 | 0.07546  | 0.065889  | 0.15514  | 0.042508 | 0.35937  | 0.035926 | 0.43862  | 0.048314 |
| -0.01644 | 0.7231   | 0.016664  | 0.71947  | 0.021906 | 0.6368   | -0.01977 | 0.67001  | 0.129676 |
| -0.01951 | 0.67406  | 0.014218  | 0.75927  | -0.04851 | 0.29556  | 0.035232 | 0.44751  | -0.08192 |
| -0.02039 | 0.66029  | -0.18454  | 6.03E-05 | 0.002477 | 0.95743  | -0.04528 | 0.32885  | -0.03947 |
| -0.009   | 0.84619  | -0.0444   | 0.33837  | 0.016923 | 0.71529  | -0.01811 | 0.69627  | 0.010972 |
| 0.063952 | 0.16767  | -0.03759  | 0.41772  | 0.156234 | 0.0007   | 0.078177 | 0.09151  | 0.114565 |
| -0.02542 | 0.58365  | -0.01815  | 0.69569  | 0.018648 | 0.68772  | -0.01839 | 0.69186  | 0.027552 |
| 0.080968 | 0.08048  | 0.128052  | 0.00558  | 0.092412 | 0.04594  | 0.079007 | 0.08811  | 0.141276 |
| 0.10389  | 0.02476  | 0.317639  | 2.08E-12 | 0.025631 | 0.58061  | 0.225518 | 8.48E-07 | 0.057605 |
| 0.145034 | 0.00168  | -0.06293  | 0.17457  | -0.09792 | 0.03438  | -0.05893 | 0.20369  | -0.1332  |
| 0.036051 | 0.43702  | 0.106937  | 0.02081  | -0.13807 | 0.00279  | -0.03066 | 0.5086   | -0.1533  |
| -0.17348 | 0.00016  | 0.060606  | 0.19108  | -0.15784 | 0.00062  | -0.00035 | 0.99394  | 0.002927 |
| -0.01626 | 0.72604  | -0.06565  | 0.15664  | -0.11705 | 0.01136  | -0.09104 | 0.04928  | -0.14642 |
| -0.06175 | 0.18282  | -0.08732  | 0.05934  | -0.05863 | 0.20597  | -0.00029 | 0.9951   | -0.04733 |
| 0.180677 | 8.62E-05 | 0.201049  | 1.20E-05 | 0.298605 | 4.50E-11 | 0.319445 | 1.54E-12 | 0.139194 |
| 0.071967 | 0.12041  | 0.053609  | 0.24759  | -0.19627 | 1.94E-05 | 0.024948 | 0.59073  | -0.1151  |
| -0.00481 | 0.9174   | -0.13594  | 0.00325  | 0.062612 | 0.17677  | -0.02553 | 0.58216  | 0.073156 |
| -0.06749 | 0.14531  | -0.07366  | 0.1119   | -0.011   | 0.81255  | 0.021172 | 0.64813  | -0.05195 |
| 0.098893 | 0.03263  | 0.075891  | 0.10143  | 0.076535 | 0.09855  | 0.086931 | 0.0605   | 0.026186 |
| -0.01837 | 0.69219  | -0.01062  | 0.81893  | 0.009544 | 0.83703  | 0.005018 | 0.91387  | -0.00179 |
| -0.08838 | 0.05632  | -0.00172  | 0.97048  | -0.06887 | 0.13724  | 0.002978 | 0.94882  | 0.012776 |
| 0.119098 | 0.00999  | 0.223533  | 1.06E-06 | 0.143026 | 0.00195  | 0.130543 | 0.00472  | 0.189727 |
| -0.06366 | 0.16964  | -0.16305  | 0.0004   | 0.003387 | 0.94181  | -0.00815 | 0.86055  | -0.02732 |
| 0.139733 | 0.00247  | 0.140946  | 0.00227  | 0.061222 | 0.1866   | 0.044709 | 0.33502  | 0.073397 |
| -0.03763 | 0.41719  | -2.69E-05 | 0.99954  | -0.23776 | 2.00E-07 | -0.18529 | 5.62E-05 | -0.1035  |
| 0.221879 | 1.28E-06 | 0.347812  | 1.00E-14 | 0.26942  | 3.29E-09 | 0.213967 | 3.08E-06 | 0.223325 |
| -0.01605 | 0.7294   | -0.03773  | 0.41591  | 0.005274 | 0.9095   | -0.03608 | 0.43663  | 0.022045 |
| -0.07275 | 0.11643  | -0.06749  | 0.14532  | -0.01364 | 0.7687   | -0.03869 | 0.40414  | -0.01732 |



|          |          |          |          |          |          |          |          |          |
|----------|----------|----------|----------|----------|----------|----------|----------|----------|
| -0.00848 | 0.85499  | -0.05097 | 0.27171  | 0.015805 | 0.73337  | -0.0327  | 0.48089  | -0.01669 |
| 0.027362 | 0.5553   | 0.089808 | 0.05244  | 0.12811  | 0.00556  | 0.040447 | 0.38316  | 0.160102 |
| 0.173396 | 0.00017  | 0.069428 | 0.1341   | 0.002022 | 0.96524  | -0.06808 | 0.14186  | 0.053298 |
| 0.064654 | 0.16304  | 0.009741 | 0.83371  | -0.01479 | 0.74991  | -0.04359 | 0.34731  | 0.086399 |
| -0.0187  | 0.68684  | -0.04306 | 0.35322  | -0.02623 | 0.57176  | -0.06319 | 0.1728   | -0.03007 |
| -0.00285 | 0.95107  | -0.02745 | 0.55409  | 0.032049 | 0.48963  | -0.08634 | 0.06228  | 0.027684 |
| 0.091368 | 0.04846  | -0.05276 | 0.25513  | 0.137049 | 0.003    | 0.068789 | 0.13772  | 0.078379 |
| -0.06766 | 0.14432  | -0.07278 | 0.11626  | -0.15778 | 0.00062  | -0.16371 | 0.00038  | -0.01945 |
| 0.17941  | 9.68E-05 | 0.1099   | 0.01751  | -0.06459 | 0.16343  | -0.13156 | 0.0044   | -0.00439 |
| -0.00201 | 0.9654   | -0.01663 | 0.71999  | 0.063477 | 0.17086  | 0.028714 | 0.53593  | 0.033041 |
| 0.114542 | 0.01326  | 0.152091 | 0.00098  | -0.02913 | 0.5301   | 0.146046 | 0.00155  | -0.04618 |
| 0.192934 | 2.70E-05 | 0.233639 | 3.29E-07 | 0.222236 | 1.23E-06 | 0.305953 | 1.41E-11 | 0.128786 |
| 0.119101 | 0.00999  | 0.176255 | 0.00013  | 0.077629 | 0.09381  | 0.210287 | 4.57E-06 | 0.059047 |
| -0.05529 | 0.23306  | 0.039545 | 0.39387  | -0.10367 | 0.02507  | -0.03385 | 0.46555  | -0.05725 |
| 0.211791 | 3.89E-06 | 0.146608 | 0.00149  | 0.109577 | 0.01785  | 0.167813 | 0.00027  | -0.00795 |
| 0.325145 | 5.83E-13 | 0.059493 | 0.19937  | 0.206301 | 6.97E-06 | 0.031699 | 0.49438  | 0.195964 |
| 0.087287 | 0.05945  | 0.061638 | 0.18362  | 0.080724 | 0.0814   | 0.032063 | 0.48943  | 0.108364 |
| 0.104368 | 0.0241   | 0.062729 | 0.17596  | 0.041459 | 0.37137  | -0.01907 | 0.68098  | 0.079943 |
| 0.118033 | 0.01069  | 0.199515 | 1.40E-05 | 0.098549 | 0.03324  | 0.029352 | 0.5269   | 0.244287 |
| -0.27943 | 7.98E-10 | -0.1895  | 3.76E-05 | -0.22189 | 1.28E-06 | -0.10337 | 0.02549  | -0.28786 |
| 0.059666 | 0.19807  | 0.092459 | 0.04583  | 0.272433 | 2.16E-09 | 0.342179 | 2.84E-14 | 0.120189 |
| -0.12858 | 0.00539  | -0.13685 | 0.00304  | -0.02594 | 0.57603  | 0.066522 | 0.1512   | -0.18051 |
| 0.063214 | 0.17264  | 0.193139 | 2.64E-05 | 0.226133 | 7.90E-07 | 0.391639 | 1.44E-18 | 0.112568 |
| 0.024735 | 0.59391  | 0.012285 | 0.79117  | -0.02767 | 0.55083  | -0.00941 | 0.83928  | 0.041993 |
| -0.02472 | 0.59413  | 0.193393 | 2.58E-05 | -0.07507 | 0.10519  | 0.102709 | 0.02645  | -0.05022 |
| 0.064914 | 0.16135  | -0.0023  | 0.96055  | 0.023177 | 0.61737  | 0.016246 | 0.72622  | -0.04392 |
| 0.200974 | 1.21E-05 | 0.045626 | 0.32518  | 0.134555 | 0.00358  | 0.150932 | 0.00107  | 0.088183 |
| -0.1172  | 0.01126  | -0.05069 | 0.27427  | -0.24747 | 6.03E-08 | -0.15937 | 0.00055  | -0.27176 |
| -0.03537 | 0.44579  | -0.11157 | 0.01586  | 0.087376 | 0.05919  | 0.046906 | 0.31178  | 0.040287 |
| -0.01774 | 0.70212  | -0.05109 | 0.27053  | -0.21571 | 2.54E-06 | -0.21059 | 4.42E-06 | -0.17527 |
| 0.122814 | 0.00788  | -0.02948 | 0.52511  | 0.010912 | 0.81407  | -0.02195 | 0.63613  | 0.027764 |
| 0.017083 | 0.71272  | 0.001397 | 0.97598  | 0.044888 | 0.33308  | 0.019368 | 0.67633  | 0.064464 |
| -0.05651 | 0.22286  | 0.040826 | 0.37871  | -0.00146 | 0.97493  | 0.021472 | 0.64349  | 0.112871 |
| 0.269372 | 3.31E-09 | 0.271875 | 2.34E-09 | 0.247582 | 5.94E-08 | 0.290788 | 1.49E-10 | 0.11498  |
| 0.162628 | 0.00042  | 0.015593 | 0.7368   | 0.25161  | 3.55E-08 | 0.081622 | 0.07806  | 0.179194 |
| -0.00067 | 0.98853  | 0.056358 | 0.22413  | 0.069329 | 0.13465  | 0.048381 | 0.29679  | 0.152295 |
| -0.07887 | 0.08867  | -0.01864 | 0.68778  | -0.12345 | 0.00756  | 0.018869 | 0.68422  | -0.08838 |
| 0.020618 | 0.65675  | 0.130358 | 0.00478  | 0.07051  | 0.12812  | -0.02524 | 0.58637  | 0.177378 |
| -0.06447 | 0.16424  | -0.05579 | 0.22882  | -0.19115 | 3.21E-05 | -0.16626 | 0.00031  | -0.13989 |
| -0.16929 | 0.00024  | -0.06659 | 0.15079  | -0.10057 | 0.02978  | -0.05457 | 0.23921  | -0.07658 |
| 0.057645 | 0.21371  | 0.173506 | 0.00016  | 0.068192 | 0.14118  | 0.015727 | 0.73463  | 0.097085 |
| -0.05313 | 0.25182  | -0.0369  | 0.42632  | 0.015526 | 0.73789  | 0.059277 | 0.20101  | -0.047   |
| -0.15489 | 0.00078  | -0.08388 | 0.07014  | -0.06318 | 0.1729   | -0.10777 | 0.01983  | -0.02761 |
| -0.00952 | 0.83745  | -0.0163  | 0.72531  | -0.0303  | 0.5137   | -0.0813  | 0.07924  | -0.05381 |
| -0.08902 | 0.05455  | -0.03967 | 0.39242  | -0.07744 | 0.09462  | -0.07716 | 0.09584  | -0.08278 |

|           |          |          |          |          |          |          |          |          |
|-----------|----------|----------|----------|----------|----------|----------|----------|----------|
| -0.00554  | 0.90502  | -0.05261 | 0.25654  | -0.02636 | 0.56995  | -0.08965 | 0.05287  | -0.00427 |
| -0.03056  | 0.51008  | 0.03381  | 0.46607  | -0.03385 | 0.46556  | -0.06439 | 0.16478  | 0.052358 |
| 0.127789  | 0.00568  | 0.042648 | 0.35779  | 0.13745  | 0.00292  | 0.052881 | 0.25408  | 0.195634 |
| -0.03093  | 0.50498  | -0.09832 | 0.03365  | 0.148742 | 0.00127  | 0.076039 | 0.10076  | 0.177146 |
| 0.132405  | 0.00415  | -0.02237 | 0.6297   | 0.102624 | 0.02658  | 0.059114 | 0.20226  | 0.077216 |
| -0.132    | 0.00427  | -0.16253 | 0.00042  | -0.23696 | 2.21E-07 | -0.1666  | 0.0003   | -0.19    |
| 0.057076  | 0.21827  | 0.127865 | 0.00566  | -0.02636 | 0.56987  | -0.05111 | 0.27035  | 0.075421 |
| 0.024361  | 0.5995   | -0.04784 | 0.30222  | 0.099767 | 0.03112  | 0.027577 | 0.55221  | 0.312808 |
| 0.03777   | 0.41546  | 0.180283 | 8.94E-05 | 0.025356 | 0.58467  | 0.144668 | 0.00172  | -0.00191 |
| 0.020276  | 0.66209  | 0.037208 | 0.42244  | 0.05965  | 0.19818  | -0.01172 | 0.80051  | 0.147968 |
| 0.031443  | 0.49787  | 0.086862 | 0.06071  | 0.109149 | 0.0183   | -0.023   | 0.6201   | 0.168221 |
| 0.039389  | 0.39574  | 0.156611 | 0.00068  | 0.072929 | 0.11551  | 0.097988 | 0.03426  | 0.080066 |
| -0.00406  | 0.93026  | 0.05085  | 0.2728   | 0.026756 | 0.56411  | 0.064599 | 0.1634   | 0.012377 |
| -0.23162  | 4.17E-07 | -0.17573 | 0.00014  | -0.21401 | 3.06E-06 | -0.14743 | 0.0014   | -0.19732 |
| -0.03563  | 0.44246  | -0.12366 | 0.00746  | -0.09318 | 0.04416  | -0.10993 | 0.01748  | -0.14444 |
| -0.0277   | 0.55039  | -0.32436 | 6.68E-13 | -0.02383 | 0.60742  | -0.16476 | 0.00035  | -0.10647 |
| 0.267397  | 4.35E-09 | 0.077838 | 0.09293  | 0.144598 | 0.00173  | 0.116695 | 0.01161  | 0.154809 |
| -0.05984  | 0.19675  | -0.22984 | 5.14E-07 | -0.28155 | 5.87E-10 | -0.21969 | 1.64E-06 | -0.25347 |
| 0.075331  | 0.10398  | 0.048803 | 0.2926   | -0.09734 | 0.03548  | -0.13747 | 0.00291  | -0.0188  |
| -3.22E-05 | 0.99945  | -0.1328  | 0.00404  | 0.034176 | 0.46125  | -0.08404 | 0.06959  | 0.004668 |
| 0.123647  | 0.00747  | -0.10827 | 0.01927  | -0.06488 | 0.16157  | -0.05949 | 0.19937  | -0.13608 |
| 0.056448  | 0.2234   | -0.01481 | 0.74951  | 0.112857 | 0.01468  | 0.04522  | 0.32951  | 0.037372 |
| -0.02294  | 0.62095  | -0.01761 | 0.7043   | -0.05337 | 0.24974  | -0.09681 | 0.0365   | 0.002115 |
| 0.031836  | 0.49251  | -0.08829 | 0.05658  | 0.00321  | 0.94484  | 0.022361 | 0.62981  | -0.02374 |
| -0.06877  | 0.13781  | -0.0984  | 0.03352  | -0.2192  | 1.73E-06 | -0.24868 | 5.17E-08 | -0.10412 |
| 0.027217  | 0.55741  | 0.035555 | 0.44336  | 0.044773 | 0.33433  | -0.07166 | 0.122    | 0.033554 |
| 0.013445  | 0.77198  | 0.007629 | 0.8694   | 0.065678 | 0.15647  | 0.019261 | 0.67803  | 0.055554 |
| 0.096363  | 0.03737  | 0.119074 | 0.01001  | -0.03821 | 0.4101   | -0.00537 | 0.90781  | -0.04218 |
| 0.053616  | 0.24753  | -0.04074 | 0.37978  | 0.044027 | 0.34244  | -0.02345 | 0.61321  | -0.01367 |
| 0.039813  | 0.39067  | 0.072256 | 0.11892  | 0.06017  | 0.1943   | 0.038606 | 0.40521  | 0.010324 |
| -0.07364  | 0.11201  | -0.03849 | 0.40661  | 0.02987  | 0.51964  | -0.00628 | 0.89231  | 0.060426 |
| 0.123609  | 0.00749  | -0.0414  | 0.37204  | 0.212295 | 3.69E-06 | 0.152474 | 0.00095  | 0.172361 |
| 0.187651  | 4.49E-05 | 0.013463 | 0.77168  | 0.110619 | 0.01678  | 0.070115 | 0.13028  | 0.074827 |
| -0.04995  | 0.28143  | 0.003149 | 0.9459   | 0.091376 | 0.04844  | 0.080271 | 0.08313  | 0.111776 |
| 0.070013  | 0.13084  | 0.078717 | 0.08929  | 0.230321 | 4.86E-07 | 0.236507 | 2.33E-07 | 0.19088  |
| -0.09138  | 0.04844  | -0.12096 | 0.00888  | -0.25628 | 1.94E-08 | -0.30595 | 1.41E-11 | -0.10025 |
| 0.082382  | 0.07532  | 0.008906 | 0.84778  | 0.166467 | 0.0003   | 0.136775 | 0.00306  | 0.08855  |
| 0.196802  | 1.84E-05 | 0.224363 | 9.68E-07 | 0.079489 | 0.08618  | 0.149674 | 0.00118  | 0.134614 |
| 0.053533  | 0.24826  | 0.076412 | 0.09909  | 0.010855 | 0.81501  | 0.035069 | 0.44962  | 0.065618 |
| -0.12791  | 0.00564  | -0.12419 | 0.00721  | -0.02295 | 0.62077  | -0.07668 | 0.0979   | -0.02737 |
| 0.099799  | 0.03106  | 0.138956 | 0.00262  | 0.115192 | 0.01274  | 0.041752 | 0.368    | 0.064551 |
| 0.183326  | 6.75E-05 | 0.196345 | 1.93E-05 | 0.122333 | 0.00813  | 0.119159 | 0.00996  | 0.06418  |
| 0.000533  | 0.99084  | 0.03662  | 0.42981  | -0.17257 | 0.00018  | -0.00186 | 0.96803  | -0.16536 |
| -0.06452  | 0.16395  | 0.12115  | 0.00877  | 0.159169 | 0.00056  | 0.243525 | 9.88E-08 | 0.081475 |
| 0.070363  | 0.12892  | -0.15271 | 0.00093  | -0.13188 | 0.00431  | -0.21146 | 4.03E-06 | -0.10145 |

|          |          |          |          |          |          |          |          |          |
|----------|----------|----------|----------|----------|----------|----------|----------|----------|
| -0.17004 | 0.00022  | -0.24785 | 5.74E-08 | -0.29603 | 6.71E-11 | -0.19711 | 1.78E-05 | -0.36305 |
| 0.04264  | 0.35788  | -0.0786  | 0.08976  | 0.004783 | 0.91789  | -0.14145 | 0.00218  | 0.051607 |
| -0.00843 | 0.85583  | 0.02227  | 0.63121  | -0.01876 | 0.68596  | 0.001707 | 0.97065  | -0.00407 |
| -0.01077 | 0.81643  | -0.01516 | 0.74382  | -0.00105 | 0.98199  | -0.02426 | 0.60106  | 0.013653 |
| 0.11916  | 0.00996  | -0.02626 | 0.57134  | 0.01551  | 0.73816  | -0.02618 | 0.57252  | -0.03213 |
| 0.074035 | 0.11008  | -0.00382 | 0.93439  | 0.06237  | 0.17845  | 0.02409  | 0.60357  | 0.016794 |
| 0.056655 | 0.22169  | 0.028182 | 0.54351  | 0.019923 | 0.6676   | 0.007647 | 0.86908  | 0.033466 |
| 0.066192 | 0.15325  | 0.093921 | 0.04249  | 0.046825 | 0.31262  | 0.059184 | 0.20172  | 0.042007 |
| -0.02285 | 0.62228  | -0.11002 | 0.01739  | -0.08566 | 0.06436  | -0.11571 | 0.01234  | 0.008846 |
| 0.051867 | 0.2633   | -0.16348 | 0.00039  | -0.09777 | 0.03466  | -0.24691 | 6.46E-08 | -0.1445  |
| -0.00081 | 0.9861   | 0.037568 | 0.41796  | -0.09731 | 0.03553  | -0.00669 | 0.88533  | -0.08376 |
| -0.12328 | 0.00765  | -0.12889 | 0.00528  | -0.04995 | 0.28134  | -0.07073 | 0.12693  | -0.03801 |
| -0.03744 | 0.41954  | 0.038095 | 0.41146  | 0.05308  | 0.25229  | 0.059214 | 0.20149  | 0.118592 |
| -0.10175 | 0.02791  | -0.03054 | 0.51037  | -0.05907 | 0.20257  | -0.05396 | 0.24447  | -0.01434 |
| 0.032365 | 0.48536  | -0.20028 | 1.30E-05 | -0.09245 | 0.04585  | -0.11203 | 0.01543  | -0.09824 |
| 0.003956 | 0.93205  | -0.01488 | 0.74842  | 0.157281 | 0.00065  | 0.002143 | 0.96316  | 0.231816 |
| 0.046872 | 0.31213  | -0.10045 | 0.02997  | 0.120399 | 0.0092   | -0.13004 | 0.00488  | 0.111288 |
| -0.03905 | 0.39985  | 0.050332 | 0.27772  | 0.010488 | 0.82116  | 0.010051 | 0.8285   | 0.057296 |
| 0.027081 | 0.55938  | 0.098021 | 0.0342   | -0.05535 | 0.23251  | -0.03557 | 0.44315  | 0.051213 |
| 0.138673 | 0.00267  | 0.03401  | 0.46344  | 0.069079 | 0.13607  | 0.018813 | 0.68511  | 0.10537  |
| -0.10863 | 0.01887  | -0.06592 | 0.15495  | -0.20285 | 9.97E-06 | -0.19646 | 1.90E-05 | -0.15371 |
| 0.052273 | 0.25958  | 0.000928 | 0.98405  | 0.026196 | 0.57229  | 0.001322 | 0.97726  | -0.01971 |
| -0.00881 | 0.84935  | 0.006735 | 0.88459  | -0.0587  | 0.2054   | -0.10381 | 0.02487  | 0.062712 |
| -0.01895 | 0.68292  | -0.14    | 0.00243  | 0.03563  | 0.4424   | -0.02489 | 0.5916   | -0.02093 |
| -0.09616 | 0.03777  | -0.10007 | 0.03061  | 0.085185 | 0.06588  | -0.00568 | 0.90257  | 0.059583 |
| 0.006673 | 0.88564  | 0.001585 | 0.97276  | 0.0544   | 0.24067  | 0.018079 | 0.69678  | 0.030544 |
| 0.033571 | 0.46923  | 0.072911 | 0.11561  | 0.128445 | 0.00544  | 0.111039 | 0.01637  | 0.112184 |
| 0.03401  | 0.46344  | -0.11868 | 0.01026  | -0.04883 | 0.29228  | -0.04132 | 0.373    | -0.03214 |
| -0.02862 | 0.5373   | -0.21544 | 2.62E-06 | -0.07355 | 0.11243  | 0.006893 | 0.88189  | -0.10815 |
| 0.052547 | 0.2571   | 0.020025 | 0.66602  | -0.16111 | 0.00047  | -0.09914 | 0.0322   | -0.08112 |
| -0.12011 | 0.00938  | -0.05322 | 0.25107  | -0.04287 | 0.35531  | -0.00373 | 0.93586  | -0.04238 |
| -0.13694 | 0.00302  | -0.15821 | 0.0006   | 0.121849 | 0.00839  | -0.01142 | 0.80562  | 0.086883 |
| -0.19518 | 2.16E-05 | -0.38256 | 1.00E-17 | -0.18404 | 6.32E-05 | -0.28286 | 4.85E-10 | -0.27106 |
| 0.07435  | 0.10857  | -0.17038 | 0.00022  | -0.01495 | 0.74722  | -0.10608 | 0.02186  | 0.02509  |
| 0.123391 | 0.00759  | -0.0278  | 0.54894  | 0.21279  | 3.50E-06 | 0.019897 | 0.66802  | 0.200901 |
| -0.15714 | 0.00065  | -0.19346 | 2.56E-05 | 0.027458 | 0.55392  | 0.019237 | 0.6784   | -0.00439 |
| -0.07084 | 0.12636  | -0.00374 | 0.93581  | -0.08349 | 0.07146  | -0.00947 | 0.83823  | -0.049   |
| 0.071541 | 0.12262  | -0.10424 | 0.02427  | -0.16223 | 0.00043  | -0.12517 | 0.00676  | -0.14424 |
| -0.09355 | 0.04332  | 0.0393   | 0.3968   | -0.16011 | 0.00051  | -0.14644 | 0.00151  | -0.12772 |
| -0.10825 | 0.01929  | -0.02214 | 0.63323  | -0.1444  | 0.00176  | -0.14036 | 0.00236  | -0.01636 |
| -0.00227 | 0.96101  | 0.114065 | 0.01365  | 0.083903 | 0.07006  | -0.02608 | 0.57401  | 0.082529 |
| 0.022411 | 0.62905  | 0.038967 | 0.40082  | 0.030346 | 0.51299  | 0.089866 | 0.05229  | -0.07973 |
| 0.027009 | 0.56042  | -0.04094 | 0.37743  | 0.08837  | 0.05635  | 0.01495  | 0.74728  | 0.009817 |
| -0.01459 | 0.75314  | 0.055433 | 0.23184  | -0.00644 | 0.88958  | -0.00797 | 0.86364  | 0.033487 |
| 0.000881 | 0.98485  | 0.062909 | 0.17473  | 0.187565 | 4.53E-05 | 0.203643 | 9.18E-06 | 0.192138 |

|          |          |          |          |          |          |          |          |          |
|----------|----------|----------|----------|----------|----------|----------|----------|----------|
| -0.12829 | 0.0055   | -0.2748  | 1.55E-09 | -0.24736 | 6.11E-08 | -0.36196 | 6.67E-16 | -0.13754 |
| -0.02006 | 0.66541  | 0.074667 | 0.10707  | 0.094447 | 0.04134  | 0.116962 | 0.01142  | 0.102339 |
| -0.00187 | 0.96777  | -0.01785 | 0.70042  | 0.081658 | 0.07793  | 0.049115 | 0.28952  | 0.081155 |
| 0.066005 | 0.15442  | 0.178031 | 0.00011  | 0.324111 | 6.97E-13 | 0.224084 | 9.99E-07 | 0.246313 |
| 0.183385 | 6.71E-05 | 0.27973  | 7.65E-10 | 0.090548 | 0.05052  | 0.09888  | 0.03265  | 0.040422 |
| 0.192244 | 2.88E-05 | 0.093931 | 0.04247  | 0.276311 | 1.25E-09 | 0.09743  | 0.0353   | 0.378331 |
| -0.07367 | 0.11186  | 0.014817 | 0.74945  | -0.03324 | 0.47361  | -0.06615 | 0.15351  | 0.111062 |
| -0.06937 | 0.13441  | -0.14142 | 0.00219  | 0.092172 | 0.04651  | 0.091183 | 0.04892  | 0.069761 |
| -0.13128 | 0.00449  | -0.15189 | 0.00099  | -0.08119 | 0.07966  | -0.00842 | 0.85592  | -0.12062 |
| -0.04499 | 0.33201  | 0.171525 | 0.0002   | -0.02484 | 0.59236  | -0.01396 | 0.7635   | 0.024685 |
| 0.19365  | 2.51E-05 | 0.049464 | 0.2861   | 0.149914 | 0.00116  | 0.016178 | 0.72731  | 0.152059 |
| 0.244733 | 8.50E-08 | 0.057788 | 0.21258  | 0.20258  | 1.02E-05 | 0.007347 | 0.87419  | 0.200253 |
| 0.197998 | 1.63E-05 | 0.438561 | 2.26E-23 | 0.221742 | 1.30E-06 | 0.299263 | 4.07E-11 | 0.102455 |
| -0.16446 | 0.00036  | 0.020103 | 0.66479  | -0.12718 | 0.00592  | 0.041659 | 0.36906  | -0.08835 |
| -0.03016 | 0.51564  | 0.040153 | 0.38664  | -0.16808 | 0.00026  | -0.08197 | 0.0768   | -0.17475 |
| 0.018597 | 0.68854  | -0.0134  | 0.77276  | 0.14793  | 0.00135  | -0.01794 | 0.69906  | 0.147945 |
| -0.00178 | 0.96946  | 0.032459 | 0.48408  | 0.166262 | 0.00031  | 0.179417 | 9.68E-05 | 0.11738  |
| -0.03605 | 0.43707  | -0.06352 | 0.17054  | -0.11631 | 0.0119   | -0.09475 | 0.04069  | -0.04601 |
| 0.067399 | 0.14587  | 0.09688  | 0.03636  | 0.095812 | 0.03848  | 0.083231 | 0.07235  | 0.066907 |
| -0.03269 | 0.48102  | 0.037338 | 0.42082  | 0.041922 | 0.36605  | 0.082033 | 0.07656  | 0.044799 |
| -0.00062 | 0.98929  | -0.0268  | 0.56343  | 0.032052 | 0.48958  | -0.00578 | 0.90094  | 0.023021 |
| 0.107791 | 0.01981  | 0.337122 | 7.10E-14 | 0.012868 | 0.78151  | 0.109784 | 0.01763  | 0.135437 |
| 0.029852 | 0.51989  | 0.097326 | 0.0355   | 0.096825 | 0.03646  | 0.080365 | 0.08277  | 0.130619 |
| 0.117971 | 0.01073  | -0.01932 | 0.67717  | -0.05736 | 0.21601  | -0.05522 | 0.23362  | -0.00769 |
| -0.07107 | 0.12512  | -0.07536 | 0.10383  | -0.11888 | 0.01013  | -0.1105  | 0.0169   | -0.0406  |
| -0.03339 | 0.47157  | -0.08983 | 0.05238  | -0.10691 | 0.02084  | -0.12219 | 0.00821  | -0.00489 |
| -0.12032 | 0.00925  | -0.13651 | 0.00312  | -0.07965 | 0.08553  | -0.16068 | 0.00049  | 0.000409 |
| -0.01602 | 0.72983  | -0.00187 | 0.96789  | 0.032322 | 0.48593  | 0.034017 | 0.46334  | 0.020128 |
| 0.012599 | 0.78597  | 0.052776 | 0.25502  | 0.004652 | 0.92014  | 0.0924   | 0.04597  | 0.081575 |
| 0.006605 | 0.8868   | 0.021888 | 0.63707  | -0.07673 | 0.0977   | -0.05998 | 0.19574  | 0.049248 |
| 0.099319 | 0.03188  | 0.072522 | 0.11757  | 0.064238 | 0.16577  | 0.029629 | 0.52301  | 0.081088 |
| 0.18395  | 6.37E-05 | -0.02035 | 0.6609   | -0.09912 | 0.03223  | -0.1869  | 4.82E-05 | -0.1194  |
| 0.069897 | 0.13148  | 0.047286 | 0.30788  | 0.015873 | 0.73225  | -0.03315 | 0.47481  | 0.05665  |
| -0.11737 | 0.01114  | -0.09288 | 0.04483  | -0.27078 | 2.72E-09 | -0.23663 | 2.30E-07 | -0.13498 |
| 0.062962 | 0.17436  | -0.17538 | 0.00014  | -0.05396 | 0.24452  | -0.12372 | 0.00743  | -0.02692 |
| 0.024809 | 0.59281  | 0.053092 | 0.25219  | 0.112155 | 0.01532  | 0.036211 | 0.43499  | 0.120205 |
| -0.09572 | 0.03866  | -0.11948 | 0.00976  | -0.11584 | 0.01224  | -0.15652 | 0.00069  | -0.08842 |
| -0.01814 | 0.69578  | -0.07589 | 0.10143  | 0.168948 | 0.00024  | 0.122281 | 0.00816  | 0.108067 |
| 0.058783 | 0.2048   | 0.060306 | 0.19329  | 0.076645 | 0.09807  | 0.052159 | 0.26063  | 0.07788  |
| 0.003319 | 0.94297  | 0.052949 | 0.25347  | 0.021994 | 0.63544  | 0.010845 | 0.81519  | 0.06903  |
| 0.042763 | 0.35649  | -0.04403 | 0.34239  | -0.03306 | 0.47598  | -0.03483 | 0.45271  | -0.0442  |
| 0.295454 | 7.33E-11 | -0.07062 | 0.12753  | 0.198576 | 1.54E-05 | 0.059019 | 0.20298  | 0.096434 |
| -0.05744 | 0.21536  | -0.11503 | 0.01287  | -0.08495 | 0.06661  | -0.18023 | 8.99E-05 | -0.02096 |
| 0.026305 | 0.57069  | -0.11713 | 0.0113   | -0.11419 | 0.01355  | -0.14926 | 0.00122  | -0.04169 |
| 0.16129  | 0.00047  | 0.042952 | 0.35437  | 0.065373 | 0.15841  | 0.023712 | 0.60927  | 0.021091 |

|          |          |          |          |          |          |          |          |          |
|----------|----------|----------|----------|----------|----------|----------|----------|----------|
| 0.026906 | 0.56192  | -0.02305 | 0.61933  | -0.06669 | 0.15016  | -0.03523 | 0.44753  | -0.06121 |
| 0.0356   | 0.44278  | 0.041843 | 0.36695  | 0.126718 | 0.0061   | 0.07169  | 0.12184  | 0.18819  |
| 0.126459 | 0.00621  | 0.089711 | 0.0527   | 0.097682 | 0.03483  | 0.027258 | 0.55681  | 0.181923 |
| 0.188862 | 4.00E-05 | -0.01624 | 0.72627  | -0.00233 | 0.96001  | -0.12429 | 0.00716  | 0.048959 |
| -0.17088 | 0.00021  | -0.0426  | 0.35831  | -0.30515 | 1.61E-11 | -0.24654 | 6.77E-08 | -0.14291 |
| 0.083903 | 0.07006  | 0.117614 | 0.01097  | 0.017371 | 0.7081   | -0.04384 | 0.34448  | 0.131947 |
| 0.035113 | 0.44904  | 0.059948 | 0.19595  | 0.101288 | 0.02863  | 0.107008 | 0.02073  | 0.073206 |
| -0.00547 | 0.9061   | 0.023934 | 0.60592  | 0.008826 | 0.84914  | -0.01883 | 0.68477  | 0.045272 |
| -0.04157 | 0.37003  | -0.16538 | 0.00033  | -0.22467 | 9.35E-07 | -0.14001 | 0.00243  | -0.30168 |
| -0.07992 | 0.08447  | -0.25    | 4.37E-08 | -0.18662 | 4.95E-05 | -0.15308 | 0.0009   | -0.18993 |
| -0.01081 | 0.81572  | 0.072656 | 0.11689  | -0.06031 | 0.19328  | -0.07078 | 0.12665  | 0.03478  |
| 0.078379 | 0.09067  | -0.00312 | 0.94643  | 0.195213 | 2.15E-05 | 0.006714 | 0.88495  | 0.294571 |
| -0.09827 | 0.03374  | -0.12555 | 0.00659  | -0.06224 | 0.17933  | -0.09746 | 0.03524  | 0.056822 |
| 0.120049 | 0.00941  | 0.101362 | 0.02851  | 0.07225  | 0.11895  | -0.06098 | 0.18835  | 0.137376 |
| 0.085858 | 0.06376  | -0.01701 | 0.71394  | 0.040165 | 0.38649  | 0.051852 | 0.26344  | 0.084764 |
| 0.045625 | 0.3252   | 0.099029 | 0.03239  | -0.04113 | 0.37512  | -0.03283 | 0.47905  | 0.085045 |
| 0.019837 | 0.66896  | 0.02478  | 0.59323  | 0.0191   | 0.68057  | 0.008238 | 0.85908  | 0.074053 |
| 0.03071  | 0.50795  | 0.061982 | 0.18118  | 0.103014 | 0.02601  | 0.009657 | 0.83513  | 0.194823 |
| -0.10695 | 0.0208   | -0.09816 | 0.03394  | -0.15183 | 0.001    | -0.22153 | 1.33E-06 | -0.08507 |
| 0.043341 | 0.35002  | -0.01505 | 0.74565  | 0.094426 | 0.04138  | 0.122713 | 0.00794  | 0.011715 |
| -0.02247 | 0.62816  | -0.18414 | 6.26E-05 | -0.16752 | 0.00028  | -0.17307 | 0.00017  | -0.14012 |
| 0.141102 | 0.00224  | 0.13703  | 0.003    | 0.198766 | 1.51E-05 | 0.144196 | 0.00178  | 0.025068 |
| -0.05578 | 0.22893  | -0.03492 | 0.45157  | 0.114061 | 0.01365  | 0.108107 | 0.01945  | 0.071729 |
| -0.00682 | 0.88306  | 0.069315 | 0.13473  | 0.054782 | 0.23738  | 0.054223 | 0.24221  | 0.020958 |
| 0.188812 | 4.02E-05 | 0.077235 | 0.0955   | 0.223154 | 1.11E-06 | 0.196323 | 1.93E-05 | 0.193361 |
| 0.170772 | 0.00021  | 0.027806 | 0.54891  | 0.089632 | 0.05291  | 0.08725  | 0.05956  | 0.069995 |
| -0.11976 | 0.00959  | -0.06125 | 0.18638  | -0.10798 | 0.01959  | -0.08448 | 0.06814  | -0.08795 |
| -0.16994 | 0.00022  | -0.02357 | 0.61137  | -0.13001 | 0.00489  | 0.016884 | 0.71592  | -0.14559 |
| -0.00249 | 0.95716  | -0.04172 | 0.36842  | -0.13524 | 0.00341  | -0.19511 | 2.18E-05 | -0.14884 |
| -0.11584 | 0.01225  | -0.04341 | 0.34929  | -0.12765 | 0.00574  | -0.12974 | 0.00499  | -0.01403 |
| -0.02321 | 0.61681  | -0.06457 | 0.1636   | 0.039116 | 0.39902  | 0.030063 | 0.51694  | 0.03396  |
| 0.016948 | 0.71489  | 0.111963 | 0.01549  | -0.04147 | 0.37118  | -0.01996 | 0.66707  | 0.048862 |
| 0.070001 | 0.13091  | 0.09214  | 0.04658  | 0.190645 | 3.37E-05 | 0.172345 | 0.00018  | 0.213797 |
| 0.116278 | 0.01192  | 0.159616 | 0.00054  | 0.2136   | 3.20E-06 | 0.13668  | 0.00308  | 0.379361 |
| 0.22852  | 6.00E-07 | -0.03731 | 0.42111  | 0.147996 | 0.00134  | 0.1511   | 0.00106  | 0.075186 |
| 0.22371  | 1.04E-06 | -0.09472 | 0.04074  | 0.132652 | 0.00408  | -0.04496 | 0.33229  | 0.058849 |
| -0.00369 | 0.93659  | -0.11657 | 0.0117   | -0.16209 | 0.00044  | -0.09499 | 0.04018  | -0.16435 |
| -0.30987 | 7.51E-12 | -0.20109 | 1.19E-05 | -0.25264 | 3.11E-08 | -0.24229 | 1.15E-07 | -0.21606 |
| 0.083918 | 0.07001  | 0.020171 | 0.66372  | 0.052809 | 0.25473  | 0.034695 | 0.45447  | 0.036319 |
| 0.06084  | 0.18936  | -0.04859 | 0.29475  | 0.15421  | 0.00083  | -0.04909 | 0.28976  | 0.146402 |
| 0.179523 | 9.59E-05 | 0.072233 | 0.11904  | 0.163509 | 0.00039  | -0.01061 | 0.81908  | 0.153273 |
| 0.23136  | 4.30E-07 | 0.023758 | 0.60857  | 0.270213 | 2.95E-09 | 0.155572 | 0.00074  | 0.25303  |
| -0.09621 | 0.03767  | -0.12862 | 0.00538  | -0.21994 | 1.59E-06 | -0.09094 | 0.04953  | -0.24313 |
| 0.00351  | 0.93971  | -0.10033 | 0.03017  | 0.157563 | 0.00063  | -0.00321 | 0.94481  | 0.007535 |
| -0.01099 | 0.81282  | 0.018582 | 0.68877  | -0.13255 | 0.00411  | -0.07698 | 0.09662  | -0.04063 |

|          |          |          |          |          |          |          |          |          |
|----------|----------|----------|----------|----------|----------|----------|----------|----------|
| 0.042633 | 0.35796  | 0.06642  | 0.15183  | 0.118039 | 0.01068  | 0.087496 | 0.05884  | 0.147025 |
| 0.200958 | 1.21E-05 | 0.139028 | 0.0026   | 0.23362  | 3.29E-07 | 0.12107  | 0.00882  | 0.247589 |
| -0.03355 | 0.46952  | 0.049248 | 0.28821  | 0.026645 | 0.56573  | 0.016615 | 0.72026  | 0.095072 |
| -0.26318 | 7.73E-09 | -0.23668 | 2.28E-07 | -0.15619 | 0.00071  | -0.2218  | 1.29E-06 | -0.1202  |
| -0.10328 | 0.02563  | -0.03136 | 0.49898  | -0.03177 | 0.49348  | 0.006998 | 0.88012  | -0.01865 |
| -0.12138 | 0.00865  | -0.0534  | 0.24945  | -0.06394 | 0.16774  | -0.01717 | 0.71139  | -0.04648 |
| -0.0991  | 0.03227  | -0.0214  | 0.64462  | -0.03169 | 0.49453  | -0.00785 | 0.86562  | -0.01533 |
| -0.04172 | 0.36834  | -0.00813 | 0.86088  | -0.00877 | 0.85002  | 0.003476 | 0.94028  | -0.0194  |
| -0.00927 | 0.84164  | 0.116274 | 0.01192  | -0.01046 | 0.82155  | -0.03016 | 0.51553  | 0.055673 |
| 0.076789 | 0.09743  | -0.0241  | 0.60349  | 0.059858 | 0.19662  | -0.0203  | 0.66175  | 0.099903 |
| 0.165414 | 0.00033  | 0.057607 | 0.21402  | -0.16521 | 0.00034  | -0.0783  | 0.091    | -0.10168 |
| 0.035154 | 0.44852  | -0.04587 | 0.32256  | -0.02973 | 0.52162  | -0.117   | 0.0114   | -0.07306 |
| 0.022607 | 0.62605  | -0.19847 | 1.56E-05 | -0.03363 | 0.46848  | -0.17952 | 9.59E-05 | -0.09296 |
| 0.069612 | 0.13307  | 0.01844  | 0.69103  | -0.08536 | 0.06531  | -0.06095 | 0.18859  | -0.0423  |
| 0.148092 | 0.00133  | 0.155143 | 0.00077  | -0.0895  | 0.05325  | -0.10303 | 0.02599  | 0.00483  |
| 0.0307   | 0.50809  | 0.066719 | 0.15     | 0.073414 | 0.11311  | 0.057535 | 0.21459  | 0.010809 |
| 0.039448 | 0.39504  | -0.07831 | 0.09096  | 0.010956 | 0.81333  | 0.091053 | 0.04924  | 0.008074 |
| 0.011452 | 0.80504  | -0.10921 | 0.01824  | -0.00839 | 0.85654  | -0.06812 | 0.14162  | -0.10313 |
| 0.152028 | 0.00098  | -0.06154 | 0.1843   | -0.01477 | 0.75022  | 0.016405 | 0.72365  | -0.02456 |
| -0.10954 | 0.01788  | 0.015635 | 0.73612  | -0.09304 | 0.04448  | -0.04839 | 0.29668  | 0.040127 |
| 0.052729 | 0.25544  | 0.091718 | 0.0476   | 0.089028 | 0.05453  | 0.034262 | 0.46013  | 0.129394 |
| -0.07514 | 0.10488  | -0.13728 | 0.00295  | -0.29544 | 7.35E-11 | -0.28464 | 3.74E-10 | -0.21004 |
| -0.14019 | 0.00239  | -0.37378 | 6.23E-17 | -0.2761  | 1.29E-09 | -0.33958 | 4.56E-14 | -0.31609 |
| 0.007748 | 0.86737  | -0.11311 | 0.01446  | -0.06581 | 0.15562  | -0.16866 | 0.00025  | -0.09797 |
| -0.15119 | 0.00105  | -0.16921 | 0.00024  | 0.054259 | 0.24189  | -0.08607 | 0.06309  | 0.121665 |
| -0.04184 | 0.36696  | -0.02753 | 0.55283  | 0.0433   | 0.35048  | -0.05865 | 0.20582  | 0.107034 |
| -0.11476 | 0.01308  | -0.22725 | 6.95E-07 | -0.14184 | 0.00212  | -0.20456 | 8.35E-06 | -0.11484 |
| 0.126351 | 0.00625  | 0.027624 | 0.55152  | -0.14187 | 0.00212  | -0.21187 | 3.86E-06 | -0.03275 |
| 0.011257 | 0.8083   | 0.043277 | 0.35073  | 0.031035 | 0.50347  | 0.036943 | 0.42575  | 0.032889 |
| -0.15605 | 0.00071  | -0.09111 | 0.0491   | -0.13863 | 0.00268  | -0.03767 | 0.41668  | -0.12705 |
| -0.09367 | 0.04305  | -0.06635 | 0.15224  | -0.10336 | 0.02551  | -0.07275 | 0.1164   | -0.08527 |
| -0.04702 | 0.31064  | -0.12652 | 0.00619  | -0.10947 | 0.01796  | -0.09275 | 0.04515  | -0.10323 |
| -0.04304 | 0.35336  | -0.01154 | 0.80359  | -0.03494 | 0.4513   | -0.06289 | 0.17484  | -0.02161 |
| -0.01628 | 0.72562  | -0.16211 | 0.00044  | -0.15324 | 0.00089  | -0.11377 | 0.0139   | -0.14244 |
| 0.043162 | 0.35202  | 0.018769 | 0.68581  | -0.04532 | 0.32846  | -0.00201 | 0.96544  | -0.05027 |
| 0.032965 | 0.47729  | -0.07685 | 0.09717  | -0.07257 | 0.1173   | 0.016558 | 0.72118  | -0.0988  |
| -0.03208 | 0.48919  | -0.05864 | 0.20589  | -0.10078 | 0.02944  | -0.03747 | 0.41921  | -0.07569 |
| -0.011   | 0.81266  | 0.059672 | 0.19802  | -0.01199 | 0.79615  | -0.06866 | 0.13845  | 0.032473 |
| -0.14553 | 0.00161  | -0.03172 | 0.49405  | -0.10095 | 0.02917  | -0.13149 | 0.00442  | -0.00807 |
| -0.02602 | 0.57488  | 0.055369 | 0.23238  | -0.01504 | 0.74586  | -0.05299 | 0.2531   | 0.076049 |
| -0.0078  | 0.8665   | 0.107282 | 0.0204   | -0.07188 | 0.12087  | -0.06171 | 0.18313  | 0.06475  |
| -0.03463 | 0.4553   | -0.03782 | 0.41489  | -0.06129 | 0.18611  | -0.0761  | 0.10049  | -0.04898 |
| -0.03372 | 0.46726  | -0.06668 | 0.15021  | -0.20636 | 6.93E-06 | -0.00465 | 0.9202   | -0.22094 |
| -0.02898 | 0.53211  | 0.11679  | 0.01155  | 0.155521 | 0.00075  | 0.221457 | 1.34E-06 | 0.085241 |
| 0.172195 | 0.00018  | -0.02204 | 0.63473  | 0.063978 | 0.1675   | 0.083035 | 0.07302  | 0.03824  |

|           |          |          |          |          |          |          |          |          |
|-----------|----------|----------|----------|----------|----------|----------|----------|----------|
| 0.151569  | 0.00102  | 0.100899 | 0.02924  | 0.048573 | 0.29488  | 0.012972 | 0.77979  | 0.129033 |
| 0.00509   | 0.91264  | 0.128032 | 0.00559  | -0.08933 | 0.05371  | -0.12451 | 0.00706  | 0.020336 |
| 0.142087  | 0.00208  | 0.369632 | 1.45E-16 | 0.084675 | 0.06752  | 0.326774 | 4.40E-13 | 0.016722 |
| -0.01125  | 0.80842  | 0.006252 | 0.89281  | 0.017344 | 0.70853  | -0.06694 | 0.14864  | 0.019666 |
| 0.040297  | 0.38493  | 0.074603 | 0.10737  | 0.070718 | 0.127    | 0.033293 | 0.47292  | 0.057938 |
| -0.03441  | 0.45813  | -0.09565 | 0.03881  | 0.010414 | 0.8224   | -0.04717 | 0.30903  | -0.0314  |
| -0.04862  | 0.2944   | -0.01835 | 0.69248  | 0.000529 | 0.99091  | 0.0193   | 0.67741  | -0.04022 |
| 0.090721  | 0.05008  | 0.024741 | 0.59382  | 0.036767 | 0.42796  | 0.012399 | 0.78928  | 0.041757 |
| 0.017031  | 0.71356  | 0.064406 | 0.16467  | -0.02706 | 0.55962  | -0.02904 | 0.53134  | -0.00529 |
| -0.08527  | 0.06562  | -0.05938 | 0.20021  | -0.02568 | 0.57995  | -0.10019 | 0.0304   | -0.04099 |
| 0.014014  | 0.76261  | -0.08848 | 0.05604  | 0.004447 | 0.92365  | -0.04524 | 0.32925  | -0.07129 |
| 0.025848  | 0.57741  | -0.03058 | 0.50981  | -0.04043 | 0.38342  | -0.06919 | 0.13542  | 0.011353 |
| 0.083041  | 0.073    | 0.006859 | 0.88247  | 0.020996 | 0.65086  | -0.0087  | 0.85132  | 0.03985  |
| 0.029701  | 0.522    | -0.07874 | 0.08921  | 0.015351 | 0.74075  | -0.08574 | 0.06413  | 0.038161 |
| 0.01079   | 0.81611  | -0.02443 | 0.59842  | -0.00517 | 0.91124  | -0.02875 | 0.53547  | 0.066435 |
| 0.02461   | 0.59578  | 0.088524 | 0.05592  | -0.01755 | 0.70516  | 0.003135 | 0.94613  | -0.03519 |
| -0.02973  | 0.52162  | -0.0171  | 0.71239  | -0.14545 | 0.00162  | -0.1592  | 0.00055  | -0.11434 |
| -0.04979  | 0.28293  | -0.02763 | 0.55145  | -0.16736 | 0.00028  | -0.1666  | 0.0003   | -0.10063 |
| -0.14517  | 0.00166  | -0.17749 | 0.00012  | -0.13837 | 0.00273  | -0.17651 | 0.00013  | -0.09689 |
| -0.06326  | 0.17236  | 0.068798 | 0.13767  | -0.00453 | 0.92215  | -0.09914 | 0.03219  | 0.07182  |
| -3.38E-06 | 0.99994  | -0.00309 | 0.94684  | 0.03522  | 0.44766  | 0.003319 | 0.94297  | 0.052578 |
| -0.0524   | 0.25845  | -0.04669 | 0.31404  | -0.05656 | 0.22245  | -0.041   | 0.3767   | -0.05452 |
| 0.045706  | 0.32433  | 0.044416 | 0.3382   | 0.083957 | 0.06988  | 0.064771 | 0.16229  | 0.078844 |
| -0.00211  | 0.96373  | 0.024575 | 0.5963   | -0.02204 | 0.63471  | -0.05287 | 0.2542   | 0.009353 |
| 0.015611  | 0.73652  | -0.20049 | 1.27E-05 | -0.1492  | 0.00122  | -0.16706 | 0.00029  | -0.14106 |
| 0.00869   | 0.85143  | -0.12359 | 0.0075   | -0.33204 | 1.76E-13 | -0.24762 | 5.92E-08 | -0.18678 |
| -0.06115  | 0.18714  | -0.0809  | 0.08074  | -0.13088 | 0.00461  | -0.14034 | 0.00237  | -0.07756 |
| 0.055937  | 0.22762  | -0.06453 | 0.16388  | -0.23938 | 1.65E-07 | -0.12924 | 0.00516  | -0.13203 |
| -0.26319  | 7.73E-09 | -0.13408 | 0.0037   | -0.30785 | 1.04E-11 | -0.21601 | 2.46E-06 | -0.20919 |
| 0.114577  | 0.01323  | -0.05019 | 0.27905  | 0.124132 | 0.00724  | -0.06384 | 0.16841  | 0.182764 |
| 0.009717  | 0.83411  | 0.024936 | 0.59092  | 0.073266 | 0.11384  | 0.064977 | 0.16095  | 0.088408 |
| 0.061583  | 0.18401  | 0.086904 | 0.06058  | 0.102078 | 0.0274   | 0.085696 | 0.06426  | 0.099288 |
| 0.06232   | 0.1788   | -0.06021 | 0.19398  | -0.01053 | 0.82046  | -0.02964 | 0.52292  | -0.16167 |
| 0.001025  | 0.98238  | 0.074794 | 0.10647  | 0.068917 | 0.13699  | 0.203276 | 9.54E-06 | 0.050447 |
| 0.156633  | 0.00068  | 0.025243 | 0.58635  | 0.11539  | 0.01259  | -0.03755 | 0.41821  | 0.164372 |
| -0.19699  | 1.81E-05 | -0.17568 | 0.00014  | 0.111574 | 0.01586  | 0.006035 | 0.89651  | 0.026633 |
| -0.00144  | 0.97525  | -0.23682 | 2.24E-07 | -0.05202 | 0.26188  | -0.28748 | 2.45E-10 | 0.004753 |
| -0.13574  | 0.00329  | -0.3332  | 1.43E-13 | -0.18606 | 5.22E-05 | -0.26845 | 3.76E-09 | -0.17156 |
| -0.21119  | 4.15E-06 | -0.17758 | 0.00011  | -0.19074 | 3.34E-05 | -0.18968 | 3.70E-05 | -0.11338 |
| 0.042272  | 0.36205  | -0.07258 | 0.11725  | 0.070927 | 0.12588  | -0.11034 | 0.01706  | 0.089073 |
| 0.158234  | 0.0006   | 0.123198 | 0.00769  | 0.235755 | 2.55E-07 | 0.178198 | 0.00011  | 0.290522 |
| -0.13612  | 0.0032   | -0.01989 | 0.66818  | 0.065041 | 0.16054  | 0.126621 | 0.00614  | 0.026869 |
| -0.02021  | 0.66319  | -0.06886 | 0.13733  | -0.13091 | 0.0046   | -0.17045 | 0.00021  | -0.06154 |
| 0.127543  | 0.00578  | 0.077632 | 0.0938   | -0.00584 | 0.8998   | -0.01594 | 0.73121  | 0.06364  |
| 0.092415  | 0.04593  | 0.036555 | 0.43063  | -0.0843  | 0.06875  | -0.08632 | 0.06235  | -0.10503 |

|          |          |          |         |          |          |          |          |          |
|----------|----------|----------|---------|----------|----------|----------|----------|----------|
| 0.005487 | 0.90586  | -0.00863 | 0.85249 | 0.037711 | 0.41619  | -0.03239 | 0.48506  | 0.020768 |
| -0.06385 | 0.16836  | -0.02109 | 0.64936 | -0.02504 | 0.58933  | -0.00516 | 0.91141  | -0.03571 |
| 0.118667 | 0.01027  | -0.0417  | 0.36862 | 0.035987 | 0.43783  | -0.01998 | 0.66678  | -0.00506 |
| 0.009158 | 0.84353  | -0.00429 | 0.92638 | 0.025144 | 0.58783  | -0.01045 | 0.82185  | -0.02411 |
| -0.00933 | 0.84056  | 0.002599 | 0.95534 | 0.04037  | 0.38407  | 0.009527 | 0.83731  | 0.015609 |
| 0.013346 | 0.77362  | -0.01553 | 0.73789 | 0.02274  | 0.62401  | -0.00549 | 0.9058   | 0.016987 |
| 0.023487 | 0.61266  | -0.03188 | 0.49186 | -0.04982 | 0.28263  | -0.04175 | 0.36806  | -0.03839 |
| 0.079297 | 0.08695  | 0.110067 | 0.01734 | 0.045468 | 0.32687  | 0.02014  | 0.66421  | 0.143672 |
| 0.162959 | 0.00041  | 0.123891 | 0.00735 | 0.267676 | 4.19E-09 | 0.202717 | 1.01E-05 | 0.214435 |
| -0.10024 | 0.03033  | 0.018107 | 0.69633 | -0.06646 | 0.15157  | 0.002253 | 0.96126  | -0.03289 |
| -0.20754 | 6.12E-06 | -0.15454 | 0.00081 | -0.28127 | 6.12E-10 | -0.18392 | 6.38E-05 | -0.2499  |
| 0.070167 | 0.12999  | 0.03832  | 0.40869 | -0.04807 | 0.29995  | 0.011888 | 0.79777  | -0.07565 |
| 0.046806 | 0.31282  | -0.01513 | 0.74427 | -0.08723 | 0.05962  | -0.02565 | 0.58027  | -0.07934 |
| 0.089336 | 0.0537   | 0.006874 | 0.88222 | 0.002989 | 0.94864  | 0.036194 | 0.4352   | 0.016504 |
| -0.09385 | 0.04264  | -0.07645 | 0.09891 | -0.0576  | 0.21405  | -0.08616 | 0.06284  | 0.012088 |
| 0.125079 | 0.0068   | 0.173802 | 0.00016 | 0.061599 | 0.18389  | 0.078977 | 0.08823  | 0.132463 |
| -0.07017 | 0.12997  | -0.11632 | 0.01189 | -0.1741  | 0.00016  | -0.1006  | 0.02973  | -0.19569 |
| 0.072378 | 0.1183   | -0.06415 | 0.16635 | -0.10329 | 0.02561  | -0.15774 | 0.00062  | -0.11528 |
| 0.045814 | 0.3232   | -0.06178 | 0.18257 | -0.05677 | 0.22079  | -0.04186 | 0.36674  | 0.006985 |
| 0.083086 | 0.07285  | 0.064159 | 0.1663  | 0.014728 | 0.75091  | 0.119262 | 0.00989  | 0.047356 |
| 0.089181 | 0.05412  | 0.073968 | 0.11041 | 0.052338 | 0.259    | 0.048016 | 0.30045  | 0.055688 |
| 0.006058 | 0.89611  | -0.0016  | 0.97252 | -0.03322 | 0.47393  | -0.03159 | 0.49592  | -0.0793  |
| 0.189259 | 3.85E-05 | 0.087469 | 0.05892 | 0.102779 | 0.02635  | 0.004343 | 0.92543  | 0.087235 |
| 0.047972 | 0.30091  | 0.00044  | 0.99243 | 0.075731 | 0.10215  | 0.064978 | 0.16094  | 0.178899 |
| -0.0593  | 0.20081  | 0.041417 | 0.37185 | 0.144429 | 0.00175  | 0.286983 | 2.64E-10 | 0.093391 |
| -0.00394 | 0.93229  | -0.08061 | 0.08182 | -0.14295 | 0.00196  | -0.09566 | 0.03879  | -0.17808 |
| 0.019464 | 0.67482  | -0.05759 | 0.21416 | -0.02695 | 0.56128  | -0.03147 | 0.49757  | -0.0953  |
| -0.05046 | 0.27647  | -0.02597 | 0.5756  | -0.07185 | 0.12101  | -0.08086 | 0.08089  | -0.02045 |
| -0.14439 | 0.00176  | 0.058014 | 0.21079 | 0.018854 | 0.68446  | 0.147229 | 0.00142  | -0.05345 |
| -0.03309 | 0.4756   | -0.00554 | 0.90501 | -0.04769 | 0.30375  | -0.03104 | 0.50339  | -0.04023 |
| -0.03153 | 0.49662  | 0.049852 | 0.28233 | -0.02365 | 0.61021  | -0.05588 | 0.22811  | -0.0007  |
| 0.02789  | 0.5477   | 0.16421  | 0.00037 | -0.07133 | 0.12371  | -0.08968 | 0.05277  | 0.017985 |
| 0.001147 | 0.98028  | -0.0981  | 0.03405 | -0.11267 | 0.01485  | -0.1259  | 0.00645  | -0.14269 |
| -0.03368 | 0.46775  | 0.016986 | 0.71429 | -0.10016 | 0.03045  | -0.05025 | 0.27848  | -0.13289 |
| 0.01123  | 0.80874  | 0.037654 | 0.41689 | 0.029882 | 0.51947  | 0.048128 | 0.29933  | 0.045241 |
| 0.227799 | 6.52E-07 | 0.09125  | 0.04875 | 0.235033 | 2.78E-07 | 0.146705 | 0.00148  | 0.178232 |
| 0.015407 | 0.73983  | 0.023459 | 0.6131  | 0.007013 | 0.87986  | -0.01763 | 0.70392  | 0.006843 |
| -0.09782 | 0.03458  | -0.11829 | 0.01051 | -0.06168 | 0.18331  | -0.12186 | 0.00839  | -0.09691 |
| -0.00125 | 0.97847  | 0.0873   | 0.05942 | 0.095962 | 0.03817  | 0.060319 | 0.19319  | 0.135736 |
| 0.050223 | 0.27877  | 0.057047 | 0.21851 | 0.029338 | 0.5271   | 0.03631  | 0.43373  | 0.100632 |
| 0.005888 | 0.89901  | -0.00726 | 0.87564 | -0.02043 | 0.65961  | -0.10178 | 0.02785  | 0.038003 |
| 0.098419 | 0.03348  | 0.126233 | 0.0063  | 0.039324 | 0.39652  | 0.011908 | 0.79744  | 0.097042 |
| 0.040653 | 0.38074  | 0.047944 | 0.30118 | 0.039127 | 0.39889  | 0.019953 | 0.66714  | 0.069075 |
| 0.023252 | 0.61623  | 0.101782 | 0.02785 | -0.04551 | 0.32642  | -0.03315 | 0.47489  | 0.012621 |
| 0.066908 | 0.14884  | 0.054037 | 0.24382 | 0.079323 | 0.08684  | 0.046894 | 0.3119   | 0.140819 |



|          |          |          |          |          |          |          |          |          |
|----------|----------|----------|----------|----------|----------|----------|----------|----------|
| 0.21315  | 3.36E-06 | 0.04058  | 0.3816   | 0.052563 | 0.25695  | 0.026938 | 0.56146  | 0.069079 |
| -0.10726 | 0.02043  | -0.1171  | 0.01133  | 0.044888 | 0.33308  | -0.0806  | 0.08189  | 0.041635 |
| -0.03935 | 0.39617  | -0.0168  | 0.71732  | -0.02905 | 0.53118  | -0.04722 | 0.30859  | 0.038083 |
| 0.064576 | 0.16355  | 0.138606 | 0.00268  | -0.14971 | 0.00117  | -0.05028 | 0.27824  | -0.03329 |
| 0.004263 | 0.92679  | -0.09091 | 0.04961  | 0.087303 | 0.0594   | -0.05007 | 0.28022  | 0.128503 |
| -0.03631 | 0.4337   | 0.077914 | 0.09261  | -0.07846 | 0.09035  | 0.06602  | 0.15432  | -0.07199 |
| -0.09131 | 0.0486   | 0.005164 | 0.91138  | -0.13524 | 0.00341  | -0.0326  | 0.48216  | -0.10149 |
| 0.074443 | 0.10813  | 0.065229 | 0.15933  | 0.048215 | 0.29846  | 0.005883 | 0.8991   | 0.037417 |
| 0.080528 | 0.08214  | 0.394368 | 7.92E-19 | -0.02216 | 0.63295  | 0.181808 | 7.77E-05 | 0.084118 |
| 0.031451 | 0.49776  | -0.09733 | 0.0355   | -0.261   | 1.04E-08 | -0.10377 | 0.02493  | -0.21774 |
| -0.02357 | 0.6114   | -0.12412 | 0.00724  | -0.11886 | 0.01014  | -0.16694 | 0.00029  | -0.07389 |
| -0.07878 | 0.08904  | -0.12857 | 0.00539  | -0.20499 | 7.99E-06 | -0.25522 | 2.23E-08 | -0.04033 |
| 0.118716 | 0.01024  | -0.18284 | 7.07E-05 | -0.10386 | 0.0248   | -0.06903 | 0.13632  | -0.15527 |
| -0.1005  | 0.0299   | -0.03432 | 0.45933  | -0.03914 | 0.3987   | -0.06778 | 0.14363  | -0.02805 |
| -0.11467 | 0.01315  | -0.19608 | 1.98E-05 | -0.11054 | 0.01687  | -0.16192 | 0.00044  | -0.0547  |
| 0.040165 | 0.38649  | 0.059811 | 0.19697  | 0.082318 | 0.07554  | 0.0583   | 0.20855  | 0.121716 |
| -0.04361 | 0.34702  | -0.00745 | 0.87238  | 0.009013 | 0.84598  | -0.09724 | 0.03566  | 0.065956 |
| -0.01387 | 0.76497  | -0.00301 | 0.94828  | 0.023402 | 0.61396  | 0.002676 | 0.954    | -0.11406 |
| 0.039353 | 0.39617  | 0.04738  | 0.30692  | 0.061446 | 0.18499  | 0.008444 | 0.85559  | 0.077597 |
| 0.024076 | 0.60378  | -0.04851 | 0.29549  | -0.01843 | 0.69123  | -0.05086 | 0.27271  | -0.01716 |
| 0.180315 | 8.92E-05 | -0.00653 | 0.88811  | 0.052931 | 0.25363  | 0.041651 | 0.36915  | 0.031066 |
| 0.142072 | 0.00209  | 0.263182 | 7.73E-09 | 0.261021 | 1.03E-08 | 0.210069 | 4.68E-06 | 0.257925 |
| -0.14645 | 0.00151  | -0.28229 | 5.27E-10 | -0.2596  | 1.25E-08 | -0.20982 | 4.80E-06 | -0.23496 |
| -0.10977 | 0.01765  | -0.13658 | 0.0031   | -0.2653  | 5.80E-09 | -0.19225 | 2.88E-05 | -0.29597 |
| 0.106405 | 0.02146  | 0.066368 | 0.15215  | -0.11576 | 0.0123   | 0.024563 | 0.59649  | -0.11873 |
| 0.129312 | 0.00513  | 0.136218 | 0.00318  | 0.032305 | 0.48616  | -0.03326 | 0.47334  | 0.09939  |
| -0.01665 | 0.71962  | 0.035043 | 0.44996  | 0.021263 | 0.64672  | 0.155208 | 0.00076  | 0.032349 |
| 0.069398 | 0.13427  | 0.079399 | 0.08654  | 0.091758 | 0.0475   | 0.05974  | 0.19751  | 0.21077  |
| 0.048549 | 0.29512  | 0.155497 | 0.00075  | 0.118286 | 0.01052  | 0.079857 | 0.08473  | 0.14763  |
| -0.02204 | 0.63473  | 0.021252 | 0.6469   | 0.0139   | 0.76449  | 0.036131 | 0.436    | 0.020131 |
| -0.0477  | 0.30363  | 0.029796 | 0.52066  | -0.1839  | 6.40E-05 | -0.11994 | 0.00948  | -0.03844 |
| 0.003631 | 0.93762  | -0.00988 | 0.83134  | -0.04034 | 0.38447  | -0.0709  | 0.12604  | 0.015154 |
| 0.196455 | 1.90E-05 | 0.216964 | 2.22E-06 | 0.293149 | 1.04E-10 | 0.131307 | 0.00448  | 0.232198 |
| 0.048393 | 0.29667  | 0.009365 | 0.84005  | 0.271372 | 2.51E-09 | 0.156421 | 0.00069  | 0.144351 |
| -0.19662 | 1.87E-05 | -0.19737 | 1.74E-05 | -0.22123 | 1.38E-06 | -0.2695  | 3.26E-09 | -0.15587 |
| 0.058503 | 0.20696  | 0.068994 | 0.13655  | 0.116642 | 0.01165  | 0.009974 | 0.82978  | 0.191077 |
| -0.18025 | 8.97E-05 | -0.03076 | 0.50726  | -0.08904 | 0.0545   | -0.01379 | 0.76632  | -0.1306  |
| -0.07631 | 0.09956  | -0.06237 | 0.17846  | -0.17439 | 0.00015  | -0.16943 | 0.00023  | -0.04653 |
| 0.095709 | 0.03869  | 0.037082 | 0.42401  | 0.26327  | 7.64E-09 | 0.175616 | 0.00014  | 0.224747 |
| 0.15147  | 0.00103  | 0.004666 | 0.9199   | 0.111968 | 0.01549  | 0.007226 | 0.87623  | 0.178846 |
| -0.00438 | 0.92486  | -0.03663 | 0.42967  | 0.048665 | 0.29397  | 0.117739 | 0.01088  | 0.044017 |
| 0.142011 | 0.0021   | 0.025726 | 0.57921  | 0.021929 | 0.63644  | 0.002846 | 0.95109  | -0.00159 |
| -0.05209 | 0.26129  | -0.21994 | 1.59E-06 | -0.22778 | 6.53E-07 | -0.17008 | 0.00022  | -0.21101 |
| -0.00194 | 0.96659  | -0.03189 | 0.49181  | 0.218135 | 1.95E-06 | 0.140261 | 0.00238  | 0.111948 |
| -0.0541  | 0.24328  | 0.016984 | 0.71431  | 0.029062 | 0.53099  | 0.035875 | 0.43927  | 0.006917 |

|          |          |          |          |          |          |          |          |          |
|----------|----------|----------|----------|----------|----------|----------|----------|----------|
| 0.297678 | 5.20E-11 | 0.087664 | 0.05836  | 0.174141 | 0.00016  | 0.135536 | 0.00334  | 0.157211 |
| -0.16652 | 0.0003   | -0.14381 | 0.00184  | -0.2651  | 5.96E-09 | -0.14475 | 0.00171  | -0.20639 |
| 0.018671 | 0.68736  | 0.144808 | 0.0017   | -0.07445 | 0.10808  | -0.08136 | 0.07902  | 0.127159 |
| -0.06769 | 0.14415  | -0.09547 | 0.03918  | -0.10643 | 0.02143  | -0.0944  | 0.04143  | -0.05196 |
| 0.009448 | 0.83863  | 0.021463 | 0.64363  | -0.01406 | 0.7618   | 0.057213 | 0.21718  | -0.02023 |
| 0.100681 | 0.0296   | -0.03729 | 0.42136  | 0.058686 | 0.20555  | -0.11495 | 0.01293  | 0.142578 |
| 0.090858 | 0.04973  | 0.034689 | 0.45455  | -0.01739 | 0.70772  | -0.05769 | 0.21338  | -0.0422  |
| 0.173661 | 0.00016  | 0.090405 | 0.05089  | 0.032764 | 0.47998  | -0.03217 | 0.488    | 0.079214 |
| 0.049597 | 0.28481  | 0.02704  | 0.55998  | 0.034935 | 0.45135  | 0.024554 | 0.59662  | 0.077292 |
| 0.049676 | 0.28404  | 0.12053  | 0.00913  | 0.208219 | 5.69E-06 | 0.212409 | 3.64E-06 | 0.056194 |
| 0.152893 | 0.00092  | -0.00153 | 0.97372  | 0.111902 | 0.01555  | 0.038554 | 0.40585  | 0.065276 |
| 0.067034 | 0.14808  | 0.149328 | 0.00121  | 0.106453 | 0.0214   | 0.18314  | 6.87E-05 | 0.147545 |
| -0.00557 | 0.9044   | 0.101314 | 0.02858  | -0.01839 | 0.69178  | 0.026942 | 0.5614   | 0.068378 |
| -0.1385  | 0.0027   | -0.19292 | 2.70E-05 | 0.099589 | 0.03142  | -0.02245 | 0.62847  | 0.009877 |
| 0.026072 | 0.57411  | -0.01812 | 0.69608  | 0.203107 | 9.71E-06 | 0.09479  | 0.0406   | 0.156788 |
| -0.07562 | 0.10266  | -0.09843 | 0.03347  | -0.03255 | 0.48281  | -0.03758 | 0.41786  | -0.01388 |
| 0.164327 | 0.00036  | 0.054889 | 0.23646  | 0.025968 | 0.57564  | -0.04666 | 0.31431  | 0.113476 |
| 0.163315 | 0.00039  | 0.013104 | 0.77761  | 0.079903 | 0.08456  | 0.046728 | 0.31362  | 0.076226 |
| -0.08443 | 0.06831  | -0.13812 | 0.00278  | -0.05274 | 0.25536  | -0.0588  | 0.20464  | -0.09419 |
| -0.008   | 0.86312  | -0.08514 | 0.06603  | -0.08846 | 0.0561   | -0.13231 | 0.00418  | -0.16192 |
| 0.099307 | 0.0319   | -0.03684 | 0.42707  | -0.06049 | 0.19196  | 0.083615 | 0.07103  | -0.0587  |
| 0.158804 | 0.00057  | 0.099802 | 0.03106  | 0.113449 | 0.01417  | 0.043466 | 0.34864  | 0.090458 |
| -0.15598 | 0.00072  | -0.24952 | 4.65E-08 | -0.02418 | 0.60229  | -0.06245 | 0.17787  | -0.05616 |
| 0.129755 | 0.00498  | 0.056866 | 0.21998  | 0.201223 | 1.18E-05 | 0.096568 | 0.03697  | 0.222486 |
| 0.165886 | 0.00032  | 0.038308 | 0.40884  | 0.006174 | 0.89415  | -0.09301 | 0.04455  | 0.106244 |
| -0.02566 | 0.58011  | -0.064   | 0.16736  | -0.05534 | 0.23263  | -0.16795 | 0.00027  | 0.00406  |
| 0.053012 | 0.2529   | 0.030913 | 0.50515  | 0.04422  | 0.34033  | -0.00881 | 0.84943  | 0.055844 |
| 0.007097 | 0.87844  | -0.06276 | 0.17572  | -0.01252 | 0.7873   | -0.05088 | 0.27249  | 0.014284 |
| 0.255503 | 2.15E-08 | 0.006912 | 0.88158  | 0.058947 | 0.20353  | 0.00715  | 0.87753  | -0.00693 |
| -0.0022  | 0.96215  | -0.14396 | 0.00181  | -0.24648 | 6.83E-08 | -0.16314 | 0.0004   | -0.17663 |
| -0.16838 | 0.00026  | -0.36695 | 2.48E-16 | -0.14622 | 0.00153  | -0.27553 | 1.40E-09 | -0.08126 |
| 0.04576  | 0.32376  | 0.00058  | 0.99002  | -0.10913 | 0.01832  | -0.08005 | 0.08399  | -0.04605 |
| -0.00787 | 0.86536  | 0.038453 | 0.40707  | -0.06268 | 0.17629  | -0.06906 | 0.13619  | -0.05312 |
| 0.056323 | 0.22442  | 0.002244 | 0.96142  | 0.09863  | 0.0331   | 0.025342 | 0.58489  | 0.099214 |
| -0.04969 | 0.28394  | -0.17413 | 0.00016  | 0.018057 | 0.69712  | -0.01506 | 0.74544  | -0.09067 |
| 0.124523 | 0.00705  | 0.055942 | 0.22758  | 0.141365 | 0.0022   | 0.117427 | 0.0111   | 0.15118  |
| 0.136935 | 0.00302  | 0.068315 | 0.14046  | 0.202923 | 9.89E-06 | 0.310578 | 6.69E-12 | 0.123265 |
| -0.11948 | 0.00975  | -0.03889 | 0.40178  | -0.14885 | 0.00126  | -0.05059 | 0.27523  | -0.09852 |
| 0.102614 | 0.02659  | 0.135521 | 0.00334  | -0.05054 | 0.27573  | -0.10106 | 0.02899  | 0.169764 |
| -0.00713 | 0.87782  | 0.05862  | 0.20606  | 0.104249 | 0.02426  | 0.075378 | 0.10376  | 0.04582  |
| -0.01756 | 0.7051   | 0.138981 | 0.00261  | -0.13135 | 0.00447  | -0.01364 | 0.76872  | -0.08427 |
| 0.040638 | 0.38092  | 0.092241 | 0.04634  | -0.04081 | 0.37896  | -0.00944 | 0.83883  | -0.02343 |
| -0.186   | 5.25E-05 | -0.14334 | 0.0019   | -0.19509 | 2.18E-05 | -0.23775 | 2.01E-07 | -0.09668 |
| -0.10926 | 0.01818  | -0.12133 | 0.00867  | -0.1397  | 0.00248  | -0.15779 | 0.00062  | -0.12664 |
| -0.01063 | 0.81879  | 0.131528 | 0.00441  | 0.029879 | 0.51951  | -0.01628 | 0.7256   | 0.082775 |

|          |          |          |          |          |          |          |          |          |
|----------|----------|----------|----------|----------|----------|----------|----------|----------|
| 0.1152   | 0.01273  | 0.160809 | 0.00049  | 0.055836 | 0.22846  | 0.013524 | 0.77068  | 0.111394 |
| 0.15278  | 0.00093  | 0.261417 | 9.80E-09 | 0.252301 | 3.25E-08 | 0.48952  | 1.64E-29 | 0.117821 |
| 0.066342 | 0.15232  | 0.057451 | 0.21526  | -0.00824 | 0.85899  | -0.04666 | 0.31437  | 0.042707 |
| -0.1061  | 0.02184  | -0.29946 | 3.94E-11 | -0.26713 | 4.52E-09 | -0.27112 | 2.60E-09 | -0.22521 |
| 0.065725 | 0.15618  | -0.04092 | 0.37757  | 0.047224 | 0.30851  | -0.05339 | 0.24957  | 0.081046 |
| 0.032813 | 0.47932  | -0.03509 | 0.44941  | -0.04316 | 0.352    | -0.09365 | 0.04309  | -0.01961 |
| 0.04463  | 0.33587  | 0.126975 | 0.006    | 0.182818 | 7.08E-05 | 0.095497 | 0.03912  | 0.251685 |
| -0.15652 | 0.00069  | -0.06274 | 0.17588  | -0.20775 | 5.98E-06 | -0.08668 | 0.06124  | -0.121   |
| -0.01987 | 0.66845  | -0.2916  | 1.32E-10 | 0.013081 | 0.778    | -0.12245 | 0.00807  | -0.17297 |
| 0.082368 | 0.07536  | 0.014668 | 0.75189  | -0.02302 | 0.61975  | -0.00962 | 0.83582  | 0.009464 |
| 0.095343 | 0.03944  | 0.082992 | 0.07317  | -0.03983 | 0.39048  | -0.0843  | 0.06875  | 0.046166 |
| -0.0432  | 0.35159  | -0.0426  | 0.35834  | 0.101758 | 0.02789  | 0.136832 | 0.00305  | 0.044375 |
| -0.15785 | 0.00062  | -0.07636 | 0.09933  | -0.08176 | 0.07754  | -0.0293  | 0.52763  | -0.01505 |
| 0.095349 | 0.03943  | 0.136766 | 0.00306  | 0.120245 | 0.0093   | 0.053739 | 0.24644  | 0.189352 |
| 0.069564 | 0.13333  | 0.136389 | 0.00314  | 0.133934 | 0.00374  | 0.067361 | 0.1461   | 0.171763 |
| 0.080767 | 0.08124  | 0.171931 | 0.00019  | 0.114946 | 0.01293  | 0.039459 | 0.3949   | 0.187886 |
| 0.004995 | 0.91427  | 0.072001 | 0.12023  | 0.071947 | 0.12051  | 0.029978 | 0.51813  | 0.104188 |
| 0.035013 | 0.45034  | 0.110735 | 0.01667  | 0.129946 | 0.00491  | 0.054753 | 0.23763  | 0.159168 |
| 0.08066  | 0.08164  | 0.1318   | 0.00433  | 0.100735 | 0.02951  | 0.035993 | 0.43776  | 0.147557 |
| 0.040503 | 0.38251  | 0.118463 | 0.0104   | 0.145632 | 0.0016   | 0.066092 | 0.15387  | 0.154084 |
| 0.109779 | 0.01764  | 0.108561 | 0.01894  | 0.076517 | 0.09863  | 0.073879 | 0.11084  | 0.088713 |
| 0.084786 | 0.06716  | 0.145717 | 0.00159  | 0.112549 | 0.01496  | 0.059794 | 0.19711  | 0.12631  |
| 0.038928 | 0.40129  | 0.030853 | 0.50598  | 0.027574 | 0.55224  | -0.02624 | 0.57163  | 0.07428  |
| 0.079322 | 0.08685  | 0.103149 | 0.02581  | 0.124742 | 0.00695  | 0.065292 | 0.15892  | 0.164774 |
| 0.013804 | 0.76607  | -0.01588 | 0.7322   | 0.055275 | 0.23318  | 0.020962 | 0.65139  | 0.067416 |
| 0.252834 | 3.04E-08 | 0.158246 | 0.0006   | 0.210544 | 4.45E-06 | 0.127748 | 0.0057   | 0.193938 |
| 0.051933 | 0.2627   | 0.094954 | 0.04026  | 0.038764 | 0.40329  | 0.032692 | 0.48095  | 0.069976 |
| 0.049794 | 0.28289  | 0.051905 | 0.26296  | 0.038697 | 0.4041   | -0.01812 | 0.69607  | 0.081897 |
| 0.049501 | 0.28574  | 0.029644 | 0.5228   | 0.007397 | 0.87334  | -0.02581 | 0.57796  | 0.029367 |
| 0.095961 | 0.03818  | 0.123546 | 0.00752  | 0.109824 | 0.01759  | 0.061756 | 0.18277  | 0.129639 |
| 0.115776 | 0.01229  | 0.090625 | 0.05032  | 0.081072 | 0.08009  | 0.032713 | 0.48067  | 0.119096 |
| 0.033493 | 0.47026  | 0.025769 | 0.57857  | 0.039151 | 0.3986   | -0.04388 | 0.34411  | 0.093742 |
| 0.077012 | 0.09646  | 0.035597 | 0.44282  | 0.07606  | 0.10066  | 0.040548 | 0.38197  | 0.071279 |
| 0.263882 | 7.03E-09 | 0.212559 | 3.58E-06 | 0.228355 | 6.11E-07 | 0.137284 | 0.00295  | 0.201715 |
| 0.143345 | 0.0019   | 0.221504 | 1.34E-06 | 0.175774 | 0.00013  | 0.223811 | 1.03E-06 | 0.15237  |
| 0.029834 | 0.52013  | -0.0156  | 0.73662  | 0.02161  | 0.64137  | -0.04456 | 0.33665  | 0.059514 |
| 0.130799 | 0.00464  | 0.142542 | 0.00202  | 0.058969 | 0.20337  | 0.087186 | 0.05975  | 0.096616 |
| 0.196523 | 1.89E-05 | 0.223943 | 1.01E-06 | 0.030093 | 0.51652  | 0.039562 | 0.39367  | 0.001559 |
| -0.03126 | 0.50041  | -0.12219 | 0.00821  | -0.16092 | 0.00048  | -0.11901 | 0.01005  | -0.19874 |
| -0.06632 | 0.15243  | 0.144407 | 0.00176  | -0.05362 | 0.24753  | 0.050225 | 0.27874  | 0.063571 |
| 0.246778 | 6.58E-08 | -0.0699  | 0.13147  | 0.071379 | 0.12347  | -0.15323 | 0.00089  | 0.016305 |
| 0.027528 | 0.55291  | -0.35756 | 1.57E-15 | -0.0034  | 0.94166  | -0.16804 | 0.00026  | -0.10926 |
| -0.12426 | 0.00718  | -0.19685 | 1.83E-05 | 0.056628 | 0.22192  | 0.016767 | 0.71781  | 0.005205 |
| -0.12768 | 0.00572  | 0.034898 | 0.45184  | -0.17444 | 0.00015  | -0.01818 | 0.6951   | -0.14259 |
| 0.114086 | 0.01363  | 0.081903 | 0.07703  | 0.060235 | 0.19381  | 0.022559 | 0.62679  | 0.030564 |

|          |          |          |          |          |          |          |          |          |
|----------|----------|----------|----------|----------|----------|----------|----------|----------|
| 0.006459 | 0.88929  | -0.06254 | 0.1773   | 0.130699 | 0.00467  | 0.17042  | 0.00022  | 0.088989 |
| 0.196784 | 1.84E-05 | 0.438653 | 2.20E-23 | 0.24926  | 4.80E-08 | 0.39633  | 5.14E-19 | 0.230585 |
| 0.214906 | 2.78E-06 | 0.103035 | 0.02598  | 0.133622 | 0.00382  | 0.061064 | 0.18774  | 0.16453  |
| 0.072592 | 0.11721  | 0.100414 | 0.03003  | -0.04951 | 0.28566  | 0.121465 | 0.0086   | -0.0369  |
| 0.042223 | 0.36261  | -0.08694 | 0.06047  | -0.14144 | 0.00219  | -0.14099 | 0.00226  | -0.06362 |
| -0.1603  | 0.00051  | -0.23962 | 1.60E-07 | -0.04274 | 0.35676  | -0.08747 | 0.05891  | -0.12141 |
| 0.008414 | 0.8561   | 0.061036 | 0.18794  | 0.062185 | 0.17975  | -0.01223 | 0.79217  | 0.133409 |
| -0.18796 | 4.36E-05 | -0.20446 | 8.44E-06 | -0.26914 | 3.42E-09 | -0.26661 | 4.85E-09 | -0.20734 |
| -0.05857 | 0.20642  | -0.03447 | 0.45741  | 0.177474 | 0.00012  | 0.129651 | 0.00501  | 0.129889 |
| 0.148835 | 0.00126  | -0.00471 | 0.91906  | 0.131689 | 0.00436  | 0.051319 | 0.2684   | 0.15268  |
| -0.04486 | 0.33334  | -0.0263  | 0.5707   | -0.05844 | 0.20748  | -0.05119 | 0.2696   | -0.00079 |
| -0.19717 | 1.77E-05 | -0.34435 | 1.90E-14 | -0.35497 | 2.58E-15 | -0.30044 | 3.38E-11 | -0.27554 |
| 0.36797  | 2.02E-16 | -0.13914 | 0.00258  | -0.05556 | 0.23076  | -0.21014 | 4.64E-06 | -0.03992 |
| -0.0016  | 0.97242  | -0.04147 | 0.37122  | 0.019315 | 0.67718  | 0.018632 | 0.68798  | 0.033121 |
| 0.300368 | 3.42E-11 | 0.009287 | 0.84135  | 0.156041 | 0.00071  | 0.214847 | 2.80E-06 | 0.03617  |
| 0.016338 | 0.72473  | 0.073815 | 0.11115  | -0.01289 | 0.78108  | -0.02771 | 0.55025  | 0.083175 |
| 0.078719 | 0.08928  | -0.1255  | 0.00661  | 0.082666 | 0.07431  | -0.01722 | 0.71056  | 0.054582 |
| -0.05145 | 0.26713  | -0.23179 | 4.09E-07 | 0.021556 | 0.6422   | -0.12042 | 0.00919  | -0.0012  |
| 0.154279 | 0.00082  | 0.070346 | 0.12901  | 0.044425 | 0.3381   | -0.01172 | 0.80051  | -0.00094 |
| -0.04565 | 0.32498  | -0.18797 | 4.36E-05 | -0.22582 | 8.19E-07 | -0.13573 | 0.00329  | -0.23427 |
| -0.0207  | 0.65551  | 0.048332 | 0.29728  | 0.099411 | 0.03172  | 0.038954 | 0.40098  | 0.076758 |
| -0.00323 | 0.94453  | -0.00554 | 0.90499  | -0.13625 | 0.00317  | -0.17466 | 0.00015  | -0.12609 |
| -0.02269 | 0.62478  | -0.20651 | 6.82E-06 | 0.033629 | 0.46847  | -0.1345  | 0.00359  | 0.060128 |
| 0.18407  | 6.30E-05 | -0.13422 | 0.00366  | -0.02731 | 0.55603  | -0.02894 | 0.53268  | -0.05514 |
| -0.02455 | 0.59665  | -0.0124  | 0.78932  | -0.00667 | 0.88568  | 0.005782 | 0.90082  | 0.080473 |
| 0.087957 | 0.05752  | -0.01648 | 0.72236  | 0.069376 | 0.13439  | -0.01681 | 0.71704  | 0.067933 |
| 0.04794  | 0.30122  | 0.002303 | 0.96041  | -0.08723 | 0.05963  | -0.10806 | 0.0195   | 0.027785 |
| -0.07279 | 0.11623  | 0.015287 | 0.74179  | 0.117581 | 0.01099  | 0.076101 | 0.10048  | 0.178209 |
| 0.110457 | 0.01694  | -0.05613 | 0.22599  | 0.147356 | 0.00141  | 0.129492 | 0.00507  | 0.038977 |
| -0.05831 | 0.20846  | -0.07991 | 0.08451  | -0.15888 | 0.00057  | -0.1813  | 8.14E-05 | -0.11157 |
| 0.164862 | 0.00035  | 0.358662 | 1.27E-15 | 0.152577 | 0.00094  | 0.263808 | 7.10E-09 | 0.141956 |
| 0.118961 | 0.01008  | 0.207518 | 6.13E-06 | 0.302057 | 2.62E-11 | 0.22366  | 1.05E-06 | 0.30469  |
| -0.17083 | 0.00021  | -0.1681  | 0.00026  | -0.19806 | 1.62E-05 | -0.09446 | 0.04131  | -0.18689 |
| 0.041639 | 0.36929  | 0.161667 | 0.00045  | -0.06339 | 0.17141  | 0.032172 | 0.48796  | 0.01627  |
| 0.092596 | 0.04551  | 0.288015 | 2.26E-10 | 0.168203 | 0.00026  | 0.192323 | 2.86E-05 | 0.149083 |
| 0.185518 | 5.50E-05 | 0.01615  | 0.72778  | 0.113151 | 0.01442  | -0.04297 | 0.35414  | 0.218771 |
| 0.085021 | 0.0664   | 0.170037 | 0.00022  | -0.0131  | 0.77768  | 0.117628 | 0.01096  | -0.14758 |
| -0.06678 | 0.14962  | 0.017978 | 0.69839  | -0.11127 | 0.01614  | -0.05841 | 0.20766  | -0.04783 |
| 0.222892 | 1.14E-06 | 0.266708 | 4.78E-09 | 0.197366 | 1.74E-05 | 0.306629 | 1.27E-11 | 0.104348 |
| -0.09345 | 0.04355  | 0.084205 | 0.06906  | -0.18192 | 7.69E-05 | -0.01346 | 0.77178  | -0.1383  |
| 0.10364  | 0.02511  | 0.381717 | 1.20E-17 | 0.268123 | 3.94E-09 | 0.370742 | 1.16E-16 | 0.24882  |
| 0.06263  | 0.17665  | -0.03967 | 0.39233  | 0.127904 | 0.00564  | 0.086949 | 0.06045  | 0.13674  |
| 0.066013 | 0.15436  | -0.09298 | 0.04461  | 0.022488 | 0.62786  | -0.03575 | 0.4409   | 0.001065 |
| 0.07091  | 0.12597  | -0.05109 | 0.27056  | -0.03588 | 0.43917  | -0.1039  | 0.02474  | 0.064122 |
| -0.08759 | 0.05857  | -0.20164 | 1.13E-05 | -0.02089 | 0.65253  | -0.20915 | 5.16E-06 | -0.00374 |

|          |          |          |          |          |          |          |          |          |
|----------|----------|----------|----------|----------|----------|----------|----------|----------|
| 0.095105 | 0.03994  | 0.11597  | 0.01215  | 0.183393 | 6.71E-05 | 0.091739 | 0.04755  | 0.160551 |
| 0.131216 | 0.00451  | 0.118108 | 0.01064  | -0.0725  | 0.1177   | -0.03998 | 0.38864  | -0.03632 |
| -0.06876 | 0.13791  | -0.17681 | 0.00012  | -0.03549 | 0.44422  | -0.0927  | 0.04526  | -0.12518 |
| 0.209098 | 5.19E-06 | 0.116997 | 0.0114   | -0.07292 | 0.11558  | -0.06481 | 0.16206  | 0.000195 |
| 2.02E-05 | 0.99965  | 0.04     | 0.38845  | 0.200238 | 1.30E-05 | 0.079216 | 0.08727  | 0.205054 |
| -0.1049  | 0.02339  | -0.14324 | 0.00191  | -0.33478 | 1.08E-13 | -0.23446 | 2.98E-07 | -0.23069 |
| -0.22023 | 1.54E-06 | -0.14343 | 0.00189  | -0.21632 | 2.38E-06 | -0.26593 | 5.32E-09 | -0.12041 |
| -0.02696 | 0.56114  | 0.010369 | 0.82316  | 0.125697 | 0.00653  | 0.168768 | 0.00025  | 0.00606  |
| -0.18952 | 3.76E-05 | -0.00795 | 0.86397  | -0.14972 | 0.00117  | -0.10181 | 0.0278   | -0.09617 |
| 0.020051 | 0.66561  | 0.139027 | 0.0026   | -0.07279 | 0.11621  | -0.06226 | 0.17924  | -0.00705 |
| 0.016079 | 0.72892  | 0.082642 | 0.0744   | 0.066784 | 0.1496   | -0.01597 | 0.73063  | 0.130426 |
| -0.15037 | 0.00112  | -0.19374 | 2.49E-05 | -0.03546 | 0.44454  | -0.09878 | 0.03283  | -0.06043 |
| 0.000584 | 0.98995  | -0.0212  | 0.64768  | -0.17529 | 0.00014  | -0.22806 | 6.32E-07 | -0.02525 |
| 0.026659 | 0.56552  | 0.015568 | 0.73721  | -0.0766  | 0.09824  | 0.010877 | 0.81466  | -0.07745 |
| -0.02223 | 0.63184  | -0.10407 | 0.02451  | -0.09124 | 0.04877  | -0.12105 | 0.00883  | -0.11832 |
| 0.060005 | 0.19553  | -0.19772 | 1.68E-05 | -0.0109  | 0.81427  | -0.0598  | 0.19708  | -0.04239 |
| 0.141821 | 0.00213  | 0.123453 | 0.00756  | -0.00646 | 0.88925  | -0.05753 | 0.21464  | 0.05666  |
| -0.16521 | 0.00034  | -0.11175 | 0.01569  | -0.27049 | 2.84E-09 | -0.23472 | 2.89E-07 | -0.2026  |
| -0.10702 | 0.02071  | -0.06894 | 0.13686  | -0.15184 | 0.001    | -0.17832 | 0.00011  | -0.15558 |
| -0.16067 | 0.00049  | -0.14465 | 0.00172  | -0.00147 | 0.9748   | -0.12234 | 0.00813  | 0.064807 |
| 0.101119 | 0.02889  | 0.064905 | 0.16142  | 0.099825 | 0.03102  | 0.026911 | 0.56185  | 0.104615 |
| 0.31953  | 1.52E-12 | 0.25939  | 1.28E-08 | 0.276938 | 1.14E-09 | 0.199476 | 1.41E-05 | 0.20007  |
| 0.52026  | 9.53E-34 | 0.263118 | 7.80E-09 | 0.122989 | 0.0078   | 0.192303 | 2.87E-05 | 0.089257 |
| -0.0178  | 0.70121  | -0.06393 | 0.1678   | -0.17939 | 9.70E-05 | -0.13105 | 0.00456  | -0.17597 |
| 0.009393 | 0.83956  | 0.024016 | 0.60469  | -0.02823 | 0.54283  | -0.03012 | 0.51614  | -0.05349 |
| -0.02124 | 0.64711  | -0.02369 | 0.6096   | -0.10312 | 0.02586  | -0.02227 | 0.63123  | -0.14092 |
| -0.10493 | 0.02334  | -0.20798 | 5.84E-06 | 0.046902 | 0.31182  | -0.14568 | 0.0016   | -0.0429  |
| 0.037095 | 0.42385  | -0.03737 | 0.42039  | 0.020209 | 0.66312  | -0.01522 | 0.74281  | -0.03659 |
| -0.04486 | 0.3334   | -0.11287 | 0.01467  | -0.04621 | 0.31907  | -0.04964 | 0.28441  | -0.10945 |
| 0.074704 | 0.1069   | -0.03903 | 0.40001  | 0.017537 | 0.70544  | -0.0543  | 0.24151  | -0.08738 |
| -0.00017 | 0.99709  | 0.056625 | 0.22194  | 0.074791 | 0.10649  | 0.081572 | 0.07824  | 0.08905  |
| -0.10479 | 0.02353  | -0.08374 | 0.07063  | -0.19054 | 3.40E-05 | -0.19487 | 2.23E-05 | -0.12063 |
| 0.072439 | 0.11799  | 0.100653 | 0.02964  | 0.01211  | 0.79409  | -0.01924 | 0.67843  | -0.01718 |
| -0.04013 | 0.38691  | -0.10959 | 0.01784  | -0.00959 | 0.83627  | -0.14214 | 0.00208  | 0.04822  |
| 0.037326 | 0.42097  | -0.1329  | 0.00401  | 0.020188 | 0.66346  | -0.06505 | 0.16047  | -0.11947 |
| -0.04108 | 0.37579  | -0.14501 | 0.00168  | -0.11128 | 0.01614  | -0.12549 | 0.00662  | -0.17223 |
| 0.126561 | 0.00617  | 0.136034 | 0.00322  | 0.168769 | 0.00025  | 0.018746 | 0.68617  | 0.303946 |
| -0.06356 | 0.17032  | -0.03614 | 0.43588  | -0.09261 | 0.04547  | -0.03172 | 0.49416  | -0.05704 |
| 0.188257 | 4.24E-05 | 0.060139 | 0.19452  | 0.141044 | 0.00225  | 0.068018 | 0.1422   | 0.028663 |
| 0.210105 | 4.66E-06 | 0.273455 | 1.87E-09 | 0.16401  | 0.00037  | 0.163611 | 0.00039  | 0.306864 |
| -0.05171 | 0.26474  | 0.096338 | 0.03742  | 0.178769 | 0.0001   | 0.127118 | 0.00594  | 0.244213 |
| 0.051717 | 0.26469  | -0.03542 | 0.44509  | 0.123039 | 0.00777  | 0.122877 | 0.00785  | 0.002711 |
| 0.186613 | 4.96E-05 | 0.144348 | 0.00176  | 0.308679 | 9.11E-12 | 0.326842 | 4.35E-13 | 0.247564 |
| 0.013037 | 0.77872  | -0.19826 | 1.59E-05 | -0.01383 | 0.76568  | -0.03266 | 0.48144  | -0.05906 |
| 0.0089   | 0.84788  | -0.22807 | 6.32E-07 | -0.05951 | 0.19922  | -0.2286  | 5.94E-07 | 0.015465 |

|          |          |          |          |          |          |          |          |          |
|----------|----------|----------|----------|----------|----------|----------|----------|----------|
| -0.09996 | 0.03078  | -0.21274 | 3.51E-06 | 0.042672 | 0.35753  | -0.03815 | 0.41079  | 0.005611 |
| -0.05433 | 0.24124  | 0.002895 | 0.95025  | -0.23741 | 2.09E-07 | -0.16956 | 0.00023  | -0.12444 |
| -0.07534 | 0.10394  | -0.11712 | 0.01131  | -0.19262 | 2.78E-05 | -0.15595 | 0.00072  | -0.123   |
| 0.028269 | 0.54227  | 0.00948  | 0.83811  | 0.109897 | 0.01751  | 0.024078 | 0.60376  | 0.089501 |
| -0.02759 | 0.55207  | -0.06863 | 0.13865  | 0.081283 | 0.07931  | -0.03592 | 0.43874  | 0.065806 |
| -0.18571 | 5.40E-05 | -0.1824  | 7.36E-05 | -0.22964 | 5.26E-07 | -0.18998 | 3.59E-05 | -0.25032 |
| -0.00322 | 0.94461  | 0.02069  | 0.65563  | 0.081869 | 0.07716  | 0.011357 | 0.80662  | 0.150505 |
| -0.07399 | 0.11029  | -0.08854 | 0.05589  | -0.14421 | 0.00178  | -0.09835 | 0.0336   | -0.09697 |
| -0.02834 | 0.54127  | -0.02229 | 0.63092  | 0.00641  | 0.89012  | -0.0222  | 0.63222  | 0.048913 |
| 0.016567 | 0.72103  | -0.0146  | 0.75308  | 0.085554 | 0.06471  | 0.001089 | 0.98128  | 0.07943  |
| -0.08024 | 0.08324  | -0.04021 | 0.38599  | 0.025184 | 0.58723  | -0.00543 | 0.90677  | 0.006616 |
| -0.0055  | 0.90573  | -0.00674 | 0.88452  | 0.056413 | 0.22368  | -0.00896 | 0.84688  | 0.088142 |
| 0.081743 | 0.07761  | 0.019846 | 0.66882  | -0.0787  | 0.08937  | -0.02155 | 0.64235  | -0.17047 |
| 0.097756 | 0.03469  | -0.07296 | 0.11534  | 0.087849 | 0.05783  | -0.03137 | 0.4989   | 0.034984 |
| 0.055404 | 0.23209  | -0.02595 | 0.57588  | 0.052208 | 0.26017  | 0.017945 | 0.69891  | 0.065567 |
| 0.035323 | 0.44634  | 0.002647 | 0.95451  | 0.103046 | 0.02596  | 0.049634 | 0.28444  | 0.112794 |
| -0.03193 | 0.49129  | -0.16802 | 0.00027  | -0.11002 | 0.01738  | -0.16192 | 0.00044  | -0.08489 |
| 0.062182 | 0.17977  | -0.22431 | 9.73E-07 | 0.070962 | 0.12569  | -0.0558  | 0.22872  | -0.10849 |
| 0.250743 | 3.97E-08 | 0.106412 | 0.02145  | 0.328737 | 3.13E-13 | 0.261127 | 1.02E-08 | 0.216921 |
| 0.027146 | 0.55844  | 0.115347 | 0.01262  | 0.017229 | 0.71038  | 0.016131 | 0.72808  | 0.103065 |
| -0.19909 | 1.46E-05 | -0.16138 | 0.00046  | -0.18337 | 6.73E-05 | -0.08917 | 0.05415  | -0.15069 |
| 0.124807 | 0.00692  | 0.304943 | 1.66E-11 | 0.234464 | 2.98E-07 | 0.346294 | 1.33E-14 | 0.165528 |
| -0.02844 | 0.53982  | 0.061926 | 0.18157  | 0.033463 | 0.47065  | 0.060462 | 0.19213  | -0.08008 |
| 0.029746 | 0.52137  | -0.0368  | 0.42752  | -0.014   | 0.76292  | -0.0807  | 0.08149  | -0.02331 |
| 0.081609 | 0.0781   | -0.0138  | 0.7661   | 0.085573 | 0.06465  | -0.01521 | 0.74311  | 0.10723  |
| -0.00045 | 0.99222  | 0.082062 | 0.07646  | 0.066265 | 0.15279  | 0.072117 | 0.11963  | 0.174273 |
| -0.11529 | 0.01267  | -0.04603 | 0.32087  | -0.00949 | 0.83791  | 0.071729 | 0.12164  | -0.02724 |
| -0.14789 | 0.00135  | -0.22504 | 8.96E-07 | -0.18471 | 5.93E-05 | -0.16593 | 0.00032  | -0.16891 |
| -0.10828 | 0.01926  | -0.04728 | 0.30797  | -0.06641 | 0.15189  | -0.02836 | 0.54092  | 0.047876 |
| 0.01323  | 0.77552  | 0.063476 | 0.17086  | 0.002881 | 0.95049  | 0.079238 | 0.08718  | 0.004547 |
| 0.114789 | 0.01306  | 0.235829 | 2.53E-07 | 0.252104 | 3.34E-08 | 0.393718 | 9.13E-19 | 0.176008 |
| -0.01908 | 0.68087  | -0.03047 | 0.51129  | -0.00491 | 0.91569  | -0.03615 | 0.43576  | -0.03499 |
| 0.257339 | 1.69E-08 | 0.088078 | 0.05717  | 0.246106 | 7.16E-08 | 0.11117  | 0.01624  | 0.231024 |
| 0.105804 | 0.02221  | 0.237248 | 2.13E-07 | -0.01883 | 0.68485  | 0.073575 | 0.11232  | -0.10106 |
| 0.07967  | 0.08547  | 0.05461  | 0.23885  | 0.170767 | 0.00021  | 0.09756  | 0.03506  | 0.15343  |
| 0.200332 | 1.29E-05 | 0.063763 | 0.16894  | 0.048132 | 0.29929  | 0.006016 | 0.89684  | 0.016729 |
| -0.11061 | 0.0168   | -0.02717 | 0.55816  | -0.23758 | 2.05E-07 | -0.29633 | 6.40E-11 | 0.004548 |
| 0.069175 | 0.13553  | 0.070411 | 0.12866  | 0.075827 | 0.10171  | 0.146574 | 0.00149  | 0.100676 |
| -0.14976 | 0.00117  | 0.032039 | 0.48976  | 0.064101 | 0.16668  | 0.180637 | 8.66E-05 | 0.003592 |
| 0.195897 | 2.01E-05 | 0.330984 | 2.11E-13 | -0.00065 | 0.98887  | 0.06786  | 0.14313  | 0.031124 |
| 0.070223 | 0.12969  | 0.10069  | 0.02958  | -0.02923 | 0.5286   | -0.07481 | 0.10641  | 0.074257 |
| 0.030205 | 0.51496  | 0.034383 | 0.45854  | 0.094376 | 0.04149  | 0.02767  | 0.55087  | 0.099916 |
| 0.028434 | 0.53992  | -0.01    | 0.8294   | -0.00272 | 0.95322  | 0.015855 | 0.73255  | -0.01682 |
| 0.017725 | 0.70243  | 0.065056 | 0.16044  | 0.124689 | 0.00698  | 0.118983 | 0.01007  | 0.149597 |
| -0.16926 | 0.00024  | -0.10152 | 0.02825  | -0.16634 | 0.00031  | -0.16006 | 0.00052  | -0.14205 |

|          |          |          |          |          |          |          |          |          |
|----------|----------|----------|----------|----------|----------|----------|----------|----------|
| -0.03303 | 0.47636  | -0.00079 | 0.9864   | -0.12314 | 0.00772  | -0.12684 | 0.00605  | -0.00927 |
| 0.074654 | 0.10714  | 0.007688 | 0.86839  | -0.03611 | 0.43629  | 0.123853 | 0.00737  | -0.15216 |
| -0.08188 | 0.0771   | 0.051482 | 0.26688  | -0.25166 | 3.53E-08 | -0.09946 | 0.03164  | -0.13592 |
| -0.03379 | 0.46639  | -0.14243 | 0.00203  | -0.13103 | 0.00457  | -0.17467 | 0.00015  | -0.18888 |
| -0.02876 | 0.53526  | -0.02947 | 0.52525  | 0.07832  | 0.09092  | 0.133786 | 0.00377  | -0.0035  |
| 0.063273 | 0.17224  | 0.17858  | 0.0001   | -0.02218 | 0.63255  | 0.003264 | 0.94392  | 0.055497 |
| 0.012652 | 0.78509  | 0.071311 | 0.12384  | -0.04765 | 0.30416  | -0.01337 | 0.77315  | -0.01426 |
| -0.26763 | 4.21E-09 | 0.005101 | 0.91245  | -0.20339 | 9.42E-06 | -0.14974 | 0.00117  | -0.1456  |
| -0.03596 | 0.43814  | 0.126575 | 0.00616  | -0.09303 | 0.0445   | -0.13658 | 0.0031   | -0.02919 |
| -0.03457 | 0.45607  | 0.163195 | 0.0004   | -0.0429  | 0.35492  | -0.07821 | 0.09136  | 0.024107 |
| -0.0202  | 0.66329  | -0.15385 | 0.00085  | -0.09425 | 0.04177  | -0.17143 | 0.0002   | -0.0667  |
| -0.15148 | 0.00102  | 0.0497   | 0.28381  | -0.08972 | 0.05269  | -0.10299 | 0.02605  | -0.02428 |
| -0.01152 | 0.80397  | 0.011713 | 0.80069  | -0.16056 | 0.0005   | -0.11982 | 0.00955  | -0.15524 |
| 0.047887 | 0.30176  | -0.12831 | 0.00549  | -0.08636 | 0.06222  | -0.15014 | 0.00114  | -0.05481 |
| -0.04205 | 0.36456  | -0.08788 | 0.05772  | 0.012186 | 0.79282  | -0.01083 | 0.81537  | 0.037861 |
| -0.06632 | 0.15244  | 0.121636 | 0.00851  | 0.004283 | 0.92645  | 0.285716 | 3.19E-10 | -0.03404 |
| -0.10023 | 0.03034  | -0.14826 | 0.00131  | -0.06914 | 0.13574  | -0.10593 | 0.02205  | -0.07073 |
| 0.02495  | 0.5907   | 0.073056 | 0.11488  | -0.03209 | 0.48907  | 0.033949 | 0.46423  | -0.02099 |
| -0.1154  | 0.01258  | 0.021684 | 0.64021  | -0.19492 | 2.22E-05 | -0.04036 | 0.38415  | -0.1269  |
| -0.1176  | 0.01098  | -0.10088 | 0.02928  | -0.17057 | 0.00021  | -0.09732 | 0.03551  | -0.14297 |
| -0.15656 | 0.00069  | 0.028837 | 0.53418  | -0.12448 | 0.00707  | 0.016831 | 0.71677  | -0.02654 |
| -0.10444 | 0.02401  | -0.09154 | 0.04804  | -0.17429 | 0.00015  | -0.0735  | 0.11271  | -0.13916 |
| -0.12084 | 0.00895  | -0.08049 | 0.0823   | -0.18583 | 5.34E-05 | -0.0827  | 0.0742   | -0.11721 |
| -0.0333  | 0.47289  | -0.07692 | 0.09688  | -0.09781 | 0.03458  | -0.03288 | 0.47837  | -0.05699 |
| -0.14109 | 0.00224  | 0.044713 | 0.33497  | -0.12741 | 0.00583  | 0.010896 | 0.81433  | -0.04461 |
| 0.153636 | 0.00087  | -0.02273 | 0.62413  | 0.200556 | 1.26E-05 | 0.083698 | 0.07075  | 0.338417 |
| -0.16111 | 0.00047  | -0.25501 | 2.29E-08 | -0.00984 | 0.83202  | -0.02467 | 0.59491  | -0.05274 |
| -0.13742 | 0.00292  | -0.03713 | 0.4234   | -0.16131 | 0.00047  | -0.06543 | 0.15804  | -0.12559 |
| 0.127229 | 0.0059   | 0.084906 | 0.06677  | 0.202255 | 1.06E-05 | 0.106584 | 0.02124  | 0.153603 |
| -0.12211 | 0.00825  | -0.18093 | 8.42E-05 | -0.01682 | 0.71702  | -0.1623  | 0.00043  | -0.02013 |
| -0.05583 | 0.2285   | -0.12557 | 0.00658  | -0.08747 | 0.05891  | -0.152   | 0.00098  | -0.04276 |
| -0.03678 | 0.42782  | -0.07316 | 0.11435  | -0.09408 | 0.04214  | -0.13958 | 0.0025   | -0.02996 |
| 0.013801 | 0.76612  | -0.20663 | 6.73E-06 | -0.16009 | 0.00052  | -0.09003 | 0.05185  | -0.2328  |
| -0.02381 | 0.60785  | -0.10196 | 0.02758  | 0.010463 | 0.82159  | -0.01716 | 0.71147  | -0.01621 |
| 0.150324 | 0.00112  | 0.223667 | 1.05E-06 | 0.121047 | 0.00883  | 0.156872 | 0.00067  | 0.086827 |
| -0.20332 | 9.50E-06 | -0.33489 | 1.06E-13 | -0.31262 | 4.79E-12 | -0.2323  | 3.85E-07 | -0.36959 |
| -0.00441 | 0.92421  | -0.17094 | 0.00021  | 0.135264 | 0.0034   | -0.07478 | 0.10652  | 0.131318 |
| 0.082163 | 0.0761   | 0.016468 | 0.72263  | -0.02073 | 0.65507  | -0.0471  | 0.3098   | -0.03026 |
| -0.02547 | 0.58295  | 0.036695 | 0.42887  | 0.014856 | 0.74881  | 0.029061 | 0.53101  | 0.002122 |
| 0.011459 | 0.80492  | -0.09094 | 0.04952  | -0.05551 | 0.23116  | -0.09222 | 0.0464   | -0.08301 |
| -0.03409 | 0.4624   | -0.01543 | 0.7395   | -0.10226 | 0.02713  | -0.07316 | 0.11439  | -0.08389 |
| -0.02184 | 0.63775  | -0.0137  | 0.76774  | -0.08558 | 0.06463  | -0.07988 | 0.08465  | -0.03598 |
| 0.095335 | 0.03946  | 0.081472 | 0.07861  | 0.052174 | 0.26049  | 0.014811 | 0.74956  | 0.142328 |
| 0.205754 | 7.38E-06 | -0.04443 | 0.3381   | 0.023795 | 0.60801  | -0.03258 | 0.48251  | -0.04999 |
| -0.05581 | 0.22864  | -0.02182 | 0.63807  | -0.00292 | 0.94981  | -0.0717  | 0.12178  | -0.06546 |

|          |          |          |          |          |          |          |          |          |
|----------|----------|----------|----------|----------|----------|----------|----------|----------|
| 0.028551 | 0.53825  | 0.025853 | 0.57733  | 0.007474 | 0.87203  | -0.00702 | 0.8797   | -0.01448 |
| 0.240207 | 1.49E-07 | 0.131188 | 0.00452  | 0.100925 | 0.0292   | 0.07837  | 0.09071  | 0.15169  |
| -0.22875 | 5.84E-07 | -0.03585 | 0.43961  | -0.19901 | 1.47E-05 | -0.00109 | 0.98128  | -0.17    |
| 0.050442 | 0.27667  | 0.095858 | 0.03838  | 0.001253 | 0.97845  | 0.008785 | 0.84983  | 0.070439 |
| 0.102459 | 0.02683  | 0.087155 | 0.05984  | -0.00378 | 0.93506  | -0.00261 | 0.95512  | 0.054395 |
| 0.044517 | 0.33709  | 0.077088 | 0.09613  | 0.116617 | 0.01167  | 0.0667   | 0.15011  | 0.144875 |
| 0.035588 | 0.44293  | 0.072788 | 0.11622  | 0.055126 | 0.23444  | 0.04628  | 0.31829  | 0.066823 |
| -0.08147 | 0.07863  | -0.055   | 0.23552  | -0.06154 | 0.1843   | -0.03637 | 0.43303  | -0.10344 |
| 0.216252 | 2.40E-06 | 0.320576 | 1.27E-12 | 0.348695 | 8.49E-15 | 0.324577 | 6.43E-13 | 0.226107 |
| 0.090303 | 0.05115  | 0.390778 | 1.73E-18 | 0.109928 | 0.01748  | 0.208637 | 5.45E-06 | 0.11003  |
| -0.00407 | 0.93013  | -0.01934 | 0.67678  | -0.10486 | 0.02344  | -0.05258 | 0.2568   | -0.1129  |
| -0.03752 | 0.41853  | 0.11701  | 0.01139  | -0.12506 | 0.00681  | -0.02775 | 0.54968  | -0.08213 |
| -0.04023 | 0.38575  | 0.090793 | 0.0499   | -0.15905 | 0.00056  | -0.08036 | 0.08278  | -0.0842  |
| 0.064797 | 0.16211  | -0.00628 | 0.89235  | 0.110655 | 0.01675  | 0.053326 | 0.2501   | 0.171496 |
| 0.012613 | 0.78574  | -0.07052 | 0.12805  | -0.0815  | 0.07849  | -0.0538  | 0.24591  | -0.00869 |
| -0.11067 | 0.01673  | -0.03658 | 0.43028  | -0.09093 | 0.04955  | -0.08432 | 0.06867  | -0.05172 |
| -0.01919 | 0.6791   | -0.01441 | 0.75607  | -0.00339 | 0.94184  | -0.04631 | 0.31793  | -0.00668 |
| -0.12149 | 0.00858  | -0.37656 | 3.51E-17 | -0.14493 | 0.00169  | -0.18969 | 3.69E-05 | -0.2553  |
| 0.074102 | 0.10976  | 0.026484 | 0.56808  | 0.021993 | 0.63545  | 0.001187 | 0.97959  | 0.087924 |
| 0.251808 | 3.46E-08 | -0.00175 | 0.96986  | 0.206662 | 6.71E-06 | 0.078183 | 0.09149  | 0.142754 |
| -0.02903 | 0.53143  | -0.06067 | 0.1906   | -0.06471 | 0.16268  | -0.13104 | 0.00456  | 0.002311 |
| -0.22807 | 6.32E-07 | -0.15952 | 0.00054  | -0.04705 | 0.31027  | -0.00261 | 0.9552   | -0.04379 |
| 0.095775 | 0.03855  | 0.167302 | 0.00028  | 0.078915 | 0.08848  | 0.022382 | 0.62949  | 0.138233 |
| 0.058932 | 0.20365  | 0.067669 | 0.14426  | 0.045222 | 0.32949  | 0.032886 | 0.47835  | 0.057187 |
| -0.09221 | 0.04642  | -0.0486  | 0.2946   | -0.00597 | 0.89764  | -0.09648 | 0.03714  | 0.021168 |
| -0.0042  | 0.92788  | 0.013665 | 0.76836  | 0.091089 | 0.04915  | 0.143699 | 0.00185  | 0.08588  |
| 0.107379 | 0.02029  | 0.158337 | 0.00059  | 0.02688  | 0.5623   | 0.071957 | 0.12046  | 0.032553 |
| 0.061803 | 0.18244  | -0.00427 | 0.9267   | -0.18809 | 4.31E-05 | -0.17166 | 0.00019  | -0.12173 |
| -0.14129 | 0.00221  | -0.1021  | 0.02737  | -0.07975 | 0.08516  | -0.10143 | 0.02841  | -0.08725 |
| 0.004327 | 0.92569  | 0.01842  | 0.69135  | -0.0395  | 0.39447  | 0.020003 | 0.66636  | -0.02982 |
| 0.052602 | 0.25659  | 0.065739 | 0.15608  | 0.002741 | 0.95289  | -0.0688  | 0.13768  | 0.085013 |
| 0.007527 | 0.87112  | -0.00068 | 0.98834  | -0.00805 | 0.86233  | -0.00326 | 0.94395  | -0.0193  |
| -0.02993 | 0.51878  | 0.061628 | 0.18369  | 0.03093  | 0.50491  | 0.08126  | 0.07939  | 0.07655  |
| -0.05789 | 0.21175  | -0.24593 | 7.32E-08 | -0.13262 | 0.00409  | -0.15638 | 0.0007   | -0.19168 |
| -0.01722 | 0.71059  | -0.19508 | 2.18E-05 | 0.012813 | 0.78242  | -0.12878 | 0.00532  | -0.0725  |
| 0.003133 | 0.94617  | -0.08082 | 0.08102  | -0.02612 | 0.5734   | -0.01983 | 0.66906  | -0.06836 |
| 0.091316 | 0.04859  | -0.10868 | 0.01881  | -0.0794  | 0.08654  | -0.12775 | 0.0057   | -0.1623  |
| 0.072757 | 0.11638  | -0.09171 | 0.04762  | 0.002034 | 0.96503  | 0.056817 | 0.22038  | -0.00675 |
| 0.279369 | 8.06E-10 | 0.142564 | 0.00201  | 0.226987 | 7.16E-07 | 0.15604  | 0.00071  | 0.228821 |
| -0.01544 | 0.73931  | 0.095834 | 0.03843  | -0.21017 | 4.63E-06 | -0.07919 | 0.08736  | -0.1889  |
| 0.023841 | 0.60732  | 0.076088 | 0.10054  | 0.05944  | 0.19977  | 0.066373 | 0.15212  | 0.094271 |
| -0.01911 | 0.68037  | -0.01877 | 0.68577  | -0.07876 | 0.08912  | -0.0901  | 0.05167  | -0.01695 |
| 0.242883 | 1.07E-07 | 0.096163 | 0.03777  | 0.238949 | 1.73E-07 | 0.239718 | 1.58E-07 | 0.114636 |
| -0.10587 | 0.02213  | -0.05541 | 0.23201  | -0.20266 | 1.02E-05 | -0.04701 | 0.31071  | -0.14014 |
| 0.088536 | 0.05589  | 0.083642 | 0.07094  | 0.019269 | 0.6779   | -0.03241 | 0.48475  | 0.151797 |



|          |          |          |          |          |          |          |          |          |
|----------|----------|----------|----------|----------|----------|----------|----------|----------|
| 0.129755 | 0.00498  | 0.138735 | 0.00266  | 0.073366 | 0.11335  | 0.005514 | 0.90541  | 0.179842 |
| 0.216958 | 2.22E-06 | 0.083504 | 0.07141  | 0.21993  | 1.60E-06 | 0.139985 | 0.00243  | 0.330858 |
| 0.055529 | 0.23103  | 0.092965 | 0.04465  | 0.209617 | 4.91E-06 | 0.207972 | 5.85E-06 | 0.172254 |
| 0.031727 | 0.494    | 0.074769 | 0.10659  | -0.00901 | 0.84607  | -0.01506 | 0.7455   | 0.06878  |
| 0.048308 | 0.29752  | -0.17124 | 0.0002   | -0.0268  | 0.56344  | -0.1749  | 0.00015  | 0.035046 |
| 0.182107 | 7.56E-05 | 0.099145 | 0.03219  | 0.300195 | 3.51E-11 | 0.130289 | 0.0048   | 0.249586 |
| -0.063   | 0.17407  | -0.20108 | 1.19E-05 | -0.23002 | 5.03E-07 | -0.31805 | 1.95E-12 | -0.23154 |
| 0.048406 | 0.29654  | 0.013375 | 0.77314  | 0.050836 | 0.27293  | 0.028734 | 0.53565  | 0.045091 |
| 0.259379 | 1.29E-08 | 0.289705 | 1.76E-10 | 0.345086 | 1.66E-14 | 0.307165 | 1.16E-11 | 0.314352 |
| 0.050218 | 0.27881  | -0.02088 | 0.65263  | 0.101593 | 0.02815  | 0.072282 | 0.11879  | 0.063013 |
| 0.146392 | 0.00151  | 0.17933  | 9.76E-05 | 0.061166 | 0.187    | -0.01688 | 0.71603  | 0.061505 |
| -0.03337 | 0.47185  | -0.01028 | 0.82471  | -0.14771 | 0.00137  | -0.13437 | 0.00362  | -0.12291 |
| 0.220344 | 1.52E-06 | 0.025835 | 0.5776   | 0.178498 | 0.00011  | 0.063916 | 0.16791  | 0.203213 |
| -0.04996 | 0.28127  | 0.083603 | 0.07108  | -0.01452 | 0.75433  | -0.00682 | 0.88322  | 0.052944 |
| 0.197321 | 1.75E-05 | 0.073666 | 0.11187  | 0.323872 | 7.26E-13 | 0.126542 | 0.00618  | 0.245794 |
| 0.206965 | 6.50E-06 | 0.254685 | 2.39E-08 | 0.127831 | 0.00567  | 0.197061 | 1.79E-05 | 0.053305 |
| 0.076149 | 0.10026  | 0.129123 | 0.0052   | 0.075984 | 0.10101  | 0.031595 | 0.4958   | 0.123597 |
| -0.07354 | 0.11248  | -0.02329 | 0.61565  | -0.05248 | 0.25772  | -0.09308 | 0.04437  | 0.001314 |
| -0.0899  | 0.05221  | -0.08275 | 0.07403  | -0.29879 | 4.37E-11 | -0.19352 | 2.55E-05 | -0.28853 |
| -0.0181  | 0.69639  | 0.002806 | 0.95177  | 0.009787 | 0.83293  | -0.01718 | 0.7111   | 0.038487 |
| 0.130174 | 0.00484  | 0.060473 | 0.19205  | 0.186448 | 5.04E-05 | 0.136255 | 0.00317  | 0.122104 |
| 0.011451 | 0.80507  | -0.00079 | 0.98639  | 0.052564 | 0.25694  | -0.01033 | 0.82384  | 0.03703  |
| -0.08599 | 0.06336  | -0.11153 | 0.01589  | -0.17118 | 0.0002   | -0.16413 | 0.00037  | -0.07227 |
| 0.063146 | 0.1731   | 0.044371 | 0.33869  | 0.04392  | 0.34362  | 0.031025 | 0.50361  | 0.094575 |
| 0.089195 | 0.05408  | 0.058634 | 0.20595  | 0.051548 | 0.26626  | 0.037225 | 0.42223  | 0.04736  |
| 0.063254 | 0.17237  | 0.014719 | 0.75106  | -0.01242 | 0.78895  | -0.04097 | 0.377    | 0.062184 |
| 0.031292 | 0.49995  | -0.03785 | 0.41447  | 0.022601 | 0.62615  | -0.01137 | 0.80643  | 0.006825 |
| 0.077995 | 0.09227  | 0.081134 | 0.07986  | 0.036641 | 0.42955  | 0.073807 | 0.11118  | 0.065896 |
| -0.0024  | 0.95868  | -0.05131 | 0.26846  | 0.070953 | 0.12574  | -0.06957 | 0.13332  | 0.039988 |
| -0.15045 | 0.00111  | -0.17848 | 0.00011  | -0.08704 | 0.06019  | -0.08123 | 0.0795   | -0.09053 |
| 0.076032 | 0.10079  | 0.003841 | 0.93402  | -0.14233 | 0.00205  | -0.14922 | 0.00122  | -0.13249 |
| 0.305847 | 1.44E-11 | 0.209014 | 5.24E-06 | 0.315246 | 3.11E-12 | 0.178355 | 0.00011  | 0.268631 |
| 0.197262 | 1.76E-05 | 0.049073 | 0.28993  | 0.236331 | 2.38E-07 | 0.172139 | 0.00019  | 0.158096 |
| 0.062172 | 0.17984  | -0.18476 | 5.91E-05 | 0.064282 | 0.16548  | 0.056804 | 0.22049  | -0.01259 |
| -0.00885 | 0.84871  | -0.02874 | 0.53562  | 0.044558 | 0.33665  | 0.034635 | 0.45526  | 0.074194 |
| -0.06089 | 0.18901  | 0.032889 | 0.47831  | -0.15095 | 0.00107  | -0.10518 | 0.02301  | -0.00883 |
| 0.018286 | 0.69348  | -0.10317 | 0.02578  | 0.129074 | 0.00521  | 0.084182 | 0.06914  | 0.118824 |
| 0.305749 | 1.46E-11 | 0.278222 | 9.50E-10 | 0.1263   | 0.00628  | 0.116907 | 0.01146  | 0.175709 |
| 0.124221 | 0.0072   | 0.034242 | 0.46039  | -0.00496 | 0.91495  | 0.012736 | 0.7837   | -0.00976 |
| 0.193698 | 2.50E-05 | 0.281054 | 6.31E-10 | 0.162854 | 0.00041  | 0.182518 | 7.28E-05 | 0.184837 |
| 0.031048 | 0.50329  | 0.002013 | 0.96539  | -0.06388 | 0.16815  | -0.05176 | 0.26429  | 0.033988 |
| -0.05801 | 0.21085  | -0.06284 | 0.17519  | -0.03149 | 0.49729  | -0.07798 | 0.09235  | -0.0514  |
| 0.154221 | 0.00083  | 0.046345 | 0.31761  | 0.053992 | 0.24422  | -0.0892  | 0.05407  | 0.134971 |
| 0.078241 | 0.09125  | 0.001827 | 0.9686   | 0.016094 | 0.72868  | 0.049762 | 0.28321  | 0.001577 |
| -0.11246 | 0.01504  | -0.19709 | 1.79E-05 | -0.15469 | 0.0008   | -0.2358  | 2.54E-07 | -0.16059 |

|          |          |          |          |          |          |          |          |          |
|----------|----------|----------|----------|----------|----------|----------|----------|----------|
| 0.148109 | 0.00133  | -0.05228 | 0.25952  | 0.236365 | 2.37E-07 | 0.098428 | 0.03346  | 0.034749 |
| -0.14913 | 0.00123  | -0.13836 | 0.00273  | -0.0374  | 0.41999  | -0.12648 | 0.0062   | 0.002164 |
| 0.320997 | 1.18E-12 | -0.07008 | 0.13048  | -0.19797 | 1.64E-05 | -0.13668 | 0.00308  | -0.21072 |
| 0.113646 | 0.014    | 0.175603 | 0.00014  | 0.109532 | 0.0179   | 0.022194 | 0.63237  | 0.135196 |
| 0.060433 | 0.19235  | 0.090532 | 0.05056  | 0.102379 | 0.02694  | 0.078481 | 0.09025  | 0.117913 |
| 0.035812 | 0.44007  | -0.00982 | 0.83243  | 0.014201 | 0.75955  | -0.04922 | 0.28853  | 0.092692 |
| 0.014178 | 0.75992  | 0.0497   | 0.2838   | -0.08214 | 0.07618  | -0.09962 | 0.03137  | -0.0138  |
| 0.057097 | 0.2181   | -0.0728  | 0.11616  | -0.10032 | 0.03019  | -0.19743 | 1.73E-05 | 0.024836 |
| -0.06393 | 0.16779  | -0.01087 | 0.81472  | -0.09195 | 0.04705  | -0.06456 | 0.16366  | -0.00971 |
| 0.116263 | 0.01193  | 0.106088 | 0.02185  | 0.163423 | 0.00039  | 0.061544 | 0.18429  | 0.224759 |
| 0.252516 | 3.16E-08 | 0.112741 | 0.01479  | 0.100434 | 0.03     | 0.076174 | 0.10015  | 0.065631 |
| 0.200014 | 1.33E-05 | 0.053213 | 0.25111  | 0.031157 | 0.50179  | 0.052192 | 0.26033  | -0.02764 |
| 0.101882 | 0.0277   | 0.097474 | 0.03522  | 0.005967 | 0.89767  | 0.026362 | 0.56986  | 0.074879 |
| 0.013873 | 0.76494  | 0.040659 | 0.38068  | 0.00264  | 0.95462  | -0.01766 | 0.70339  | -0.01852 |
| -0.00373 | 0.936    | 0.080961 | 0.0805   | -0.04653 | 0.3157   | -0.08603 | 0.06322  | -0.0051  |
| 0.106282 | 0.02161  | 0.156921 | 0.00067  | 0.037283 | 0.42151  | 0.013509 | 0.77093  | 0.063522 |
| 0.117164 | 0.01128  | 0.029982 | 0.51806  | 0.126899 | 0.00603  | 0.14946  | 0.0012   | 0.111261 |
| 0.005757 | 0.90126  | -0.0509  | 0.27232  | -0.00128 | 0.97806  | -0.04619 | 0.31928  | 0.114267 |
| 0.141374 | 0.0022   | 0.147295 | 0.00141  | 0.050851 | 0.27279  | 0.038699 | 0.40408  | 0.042995 |
| -0.01882 | 0.68502  | -0.00661 | 0.88669  | 0.015547 | 0.73756  | -0.00314 | 0.94601  | 0.04533  |
| -0.01856 | 0.68905  | 0.048479 | 0.29581  | -0.00551 | 0.90539  | -0.01281 | 0.78246  | 0.055148 |
| 0.04731  | 0.30763  | 0.113834 | 0.01384  | 0.016748 | 0.71811  | 0.002539 | 0.95637  | -0.09399 |
| 0.063553 | 0.17035  | 0.032895 | 0.47823  | 0.2455   | 7.72E-08 | 0.183996 | 6.34E-05 | 0.194381 |
| -0.02865 | 0.53688  | -0.05019 | 0.27911  | 0.020383 | 0.6604   | -0.02832 | 0.54152  | 0.029246 |
| 0.03217  | 0.48799  | 0.01509  | 0.74501  | -0.0268  | 0.56341  | -0.0136  | 0.76947  | -0.02724 |
| 0.107002 | 0.02074  | 0.117997 | 0.01071  | 0.046332 | 0.31775  | -0.02101 | 0.65058  | 0.080416 |
| 0.051252 | 0.26902  | 0.093012 | 0.04454  | 0.027971 | 0.54653  | 0.029368 | 0.52668  | 0.054833 |
| 0.087304 | 0.0594   | 0.083337 | 0.07198  | 0.023035 | 0.61952  | -0.0566  | 0.22211  | 0.154665 |
| -0.11478 | 0.01306  | -0.35428 | 2.95E-15 | -0.11784 | 0.01082  | -0.20934 | 5.06E-06 | -0.263   |
| 0.218563 | 1.86E-06 | 0.250001 | 4.37E-08 | -0.04059 | 0.38145  | -0.01553 | 0.73781  | -0.02871 |
| 0.042991 | 0.35393  | 0.328379 | 3.33E-13 | 0.069258 | 0.13506  | 0.122784 | 0.0079   | 0.078461 |
| 0.152299 | 0.00096  | 0.147321 | 0.00141  | 0.212236 | 3.71E-06 | 0.076293 | 0.09962  | 0.288213 |
| 0.159989 | 0.00052  | -0.06762 | 0.14453  | 0.094021 | 0.04227  | 0.025027 | 0.58956  | 0.050187 |
| -0.01516 | 0.74388  | -0.03341 | 0.47141  | 0.02283  | 0.62264  | 0.045798 | 0.32336  | 0.090845 |
| 0.142176 | 0.00207  | 0.131578 | 0.0044   | 0.080159 | 0.08356  | 0.311564 | 5.69E-12 | -0.02325 |
| -0.0594  | 0.20007  | -0.13809 | 0.00278  | -0.05912 | 0.20217  | -0.06552 | 0.1575   | -0.08484 |
| -0.2007  | 1.24E-05 | -0.12375 | 0.00742  | -0.23852 | 1.83E-07 | -0.1383  | 0.00274  | -0.22854 |
| 0.117019 | 0.01138  | 0.027757 | 0.54961  | 0.053653 | 0.2472   | 0.080852 | 0.08092  | -0.00538 |
| 0.175646 | 0.00014  | 0.112027 | 0.01543  | -0.07521 | 0.10453  | 0.05899  | 0.2032   | -0.07654 |
| 0.176382 | 0.00013  | 0.128477 | 0.00543  | 0.1763   | 0.00013  | 0.106258 | 0.02164  | 0.210146 |
| -0.04748 | 0.30589  | -0.11193 | 0.01552  | 0.077476 | 0.09447  | -0.08307 | 0.07291  | 0.131295 |
| -0.0728  | 0.11615  | -0.01579 | 0.73357  | -0.03633 | 0.4335   | -0.05053 | 0.27579  | 0.087035 |
| -0.07605 | 0.1007   | -0.09509 | 0.03997  | -0.03165 | 0.49505  | -0.06007 | 0.19505  | -0.08793 |
| 0.016152 | 0.72773  | 0.001355 | 0.97671  | 0.113805 | 0.01386  | 0.106574 | 0.02125  | 0.153412 |
| 0.013724 | 0.76739  | 0.084478 | 0.06816  | 0.159062 | 0.00056  | 0.139719 | 0.00248  | 0.132562 |

|          |          |          |         |          |          |          |          |          |
|----------|----------|----------|---------|----------|----------|----------|----------|----------|
| -0.00627 | 0.89253  | -0.10362 | 0.02514 | -0.00437 | 0.92495  | -0.10854 | 0.01896  | 0.000947 |
| -0.05837 | 0.20798  | 0.061244 | 0.18644 | -0.10662 | 0.02119  | -0.08623 | 0.06262  | -0.05143 |
| 0.10479  | 0.02353  | 0.135674 | 0.00331 | -0.00618 | 0.89404  | 0.108642 | 0.01885  | 0.004604 |
| 0.024749 | 0.5937   | 0.046026 | 0.32095 | 0.017866 | 0.70018  | -0.01617 | 0.72741  | 0.11689  |
| -0.13364 | 0.00381  | -0.09828 | 0.03372 | -0.09375 | 0.04286  | -0.11767 | 0.01093  | -0.08139 |
| 0.007441 | 0.87259  | -0.01273 | 0.78381 | -0.00499 | 0.91434  | -0.05145 | 0.26718  | 0.06446  |
| -0.06357 | 0.17024  | 0.100119 | 0.03052 | -0.13799 | 0.00281  | 0.068564 | 0.13902  | -0.03481 |
| -0.03556 | 0.44326  | 0.000314 | 0.9946  | -0.01987 | 0.66845  | 0.001502 | 0.97418  | -0.01634 |
| -0.17954 | 9.57E-05 | -0.14942 | 0.0012  | -0.27386 | 1.77E-09 | -0.1523  | 0.00096  | -0.17949 |
| -0.16154 | 0.00046  | -0.12048 | 0.00916 | -0.17725 | 0.00012  | -0.06313 | 0.17319  | -0.15706 |
| -0.00814 | 0.86068  | 0.030246 | 0.51439 | -0.03022 | 0.5148   | 0.031824 | 0.49268  | -0.02917 |
| -0.0319  | 0.49166  | -0.09584 | 0.03841 | -0.08532 | 0.06543  | -0.09922 | 0.03206  | -0.01928 |
| -0.16299 | 0.00041  | -0.16878 | 0.00025 | -0.26688 | 4.67E-09 | -0.1819  | 7.71E-05 | -0.18901 |
| -0.02646 | 0.56836  | 0.044585 | 0.33636 | -0.16552 | 0.00033  | 0.010889 | 0.81445  | -0.0921  |
| -0.02775 | 0.54976  | 0.045566 | 0.32582 | -0.16315 | 0.0004   | -0.03478 | 0.45342  | -0.09562 |
| -0.02457 | 0.59639  | -0.07147 | 0.12298 | -0.05268 | 0.25591  | -0.01807 | 0.69688  | -0.0353  |
| 0.086619 | 0.06144  | 0.176168 | 0.00013 | 0.101121 | 0.02889  | 0.127426 | 0.00582  | 0.128378 |
| -0.01832 | 0.69288  | 0.001624 | 0.97209 | -0.12014 | 0.00936  | 0.00653  | 0.88808  | -0.07094 |
| 0.037083 | 0.424    | -0.06332 | 0.17189 | 0.13482  | 0.00351  | 0.108663 | 0.01883  | 0.084887 |
| -0.0681  | 0.14173  | 0.009152 | 0.84364 | -0.01121 | 0.80903  | 0.036101 | 0.43639  | 0.034186 |
| -0.02184 | 0.63783  | 0.007927 | 0.86434 | -0.01339 | 0.77285  | -0.04391 | 0.34377  | 0.001899 |
| 0.125437 | 0.00664  | 0.082582 | 0.07461 | 0.049238 | 0.28831  | 0.013794 | 0.76623  | 0.029982 |
| 0.101938 | 0.02761  | 0.038415 | 0.40754 | 0.097847 | 0.03452  | 0.069883 | 0.13156  | 0.059558 |
| -0.03874 | 0.4036   | -0.04853 | 0.29532 | -0.04265 | 0.35779  | -0.0765  | 0.09871  | -0.02861 |
| -0.07903 | 0.08801  | -0.07088 | 0.1261  | -0.0106  | 0.81931  | -0.00348 | 0.94019  | -0.07596 |
| 0.10092  | 0.02921  | 0.038161 | 0.41065 | 0.002594 | 0.95542  | -0.05734 | 0.21618  | 0.12726  |
| -0.08306 | 0.07292  | -0.13777 | 0.00285 | -0.09251 | 0.04572  | -0.10366 | 0.02508  | 0.009589 |
| 0.036229 | 0.43476  | 0.002924 | 0.94976 | 0.017645 | 0.70371  | -0.01963 | 0.67227  | 0.037062 |
| -0.03738 | 0.42027  | 0.090808 | 0.04986 | -0.14378 | 0.00184  | -0.13173 | 0.00435  | -0.05355 |
| 0.001439 | 0.97526  | 0.021684 | 0.64022 | -0.00585 | 0.89963  | -0.02423 | 0.60144  | 0.049724 |
| -0.08789 | 0.0577   | 0.068148 | 0.14144 | -0.19993 | 1.34E-05 | -0.06711 | 0.14764  | -0.17309 |
| -0.02891 | 0.53319  | -0.04456 | 0.33661 | -0.03704 | 0.42455  | -0.09481 | 0.04057  | 0.018052 |
| 0.088491 | 0.05601  | 0.115837 | 0.01225 | 0.01168  | 0.80124  | 0.015553 | 0.73745  | -0.03863 |
| -0.10257 | 0.02665  | -0.05043 | 0.27682 | -0.06502 | 0.16065  | -0.06754 | 0.14504  | -0.04247 |
| 0.103698 | 0.02503  | 0.06525  | 0.15919 | 0.040506 | 0.38246  | 0.003414 | 0.94134  | 0.052094 |
| -0.00901 | 0.84606  | -0.12807 | 0.00558 | 0.053766 | 0.24621  | 0.056109 | 0.22619  | 0.057383 |
| -0.03034 | 0.51308  | -0.02448 | 0.59772 | -0.01469 | 0.75156  | -0.01715 | 0.7116   | -0.01299 |
| -0.01157 | 0.80305  | -0.12067 | 0.00905 | 0.05995  | 0.19594  | -0.10935 | 0.01809  | 0.057369 |
| 0.067451 | 0.14556  | 0.049155 | 0.28913 | 0.073853 | 0.11096  | -0.05644 | 0.22348  | 0.026415 |
| -0.027   | 0.56051  | -0.0359  | 0.43893 | 0.074613 | 0.10733  | 0.004761 | 0.91827  | 0.32799  |
| 0.272209 | 2.23E-09 | 0.177911 | 0.00011 | 0.324601 | 6.41E-13 | 0.162815 | 0.00041  | 0.351902 |
| -0.04565 | 0.32494  | -0.036   | 0.43763 | 0.109491 | 0.01794  | 0.063537 | 0.17045  | 0.152204 |
| -0.07906 | 0.08789  | -0.07593 | 0.10124 | -0.05999 | 0.19563  | 0.049116 | 0.28951  | -0.04738 |
| -0.00715 | 0.87749  | 0.005593 | 0.90405 | 0.042362 | 0.36103  | 0.033114 | 0.4753   | 0.059591 |
| -0.20358 | 9.24E-06 | -0.15049 | 0.00111 | -0.28297 | 4.78E-10 | -0.13587 | 0.00326  | -0.31816 |

|          |          |          |          |          |          |          |          |          |
|----------|----------|----------|----------|----------|----------|----------|----------|----------|
| 0.078535 | 0.09003  | 0.138413 | 0.00272  | 0.234787 | 2.87E-07 | 0.111536 | 0.01589  | 0.29527  |
| 0.083756 | 0.07056  | 0.182567 | 7.24E-05 | -0.04712 | 0.30955  | 0.021501 | 0.64304  | -0.0162  |
| 0.190784 | 3.32E-05 | 0.035458 | 0.4446   | 0.071544 | 0.12261  | 0.111157 | 0.01586  | 0.02224  |
| 0.006189 | 0.89388  | -0.05815 | 0.20974  | -0.19388 | 2.46E-05 | -0.14693 | 0.00145  | -0.0824  |
| 0.020063 | 0.66541  | 0.065963 | 0.15468  | 0.077811 | 0.09304  | 0.131003 | 0.00457  | 0.046723 |
| -0.01299 | 0.77951  | 0.048857 | 0.29206  | 0.119317 | 0.00986  | 0.100087 | 0.03058  | 0.122974 |
| 0.187577 | 4.52E-05 | 0.262908 | 8.02E-09 | 0.008356 | 0.85708  | 0.026147 | 0.57301  | 0.093315 |
| -0.11811 | 0.01063  | -0.09711 | 0.03592  | -0.10695 | 0.0208   | -0.13543 | 0.00336  | -0.04931 |
| -0.04413 | 0.34127  | -0.10989 | 0.01752  | -0.04979 | 0.28296  | -0.11722 | 0.01124  | -0.06225 |
| 0.178897 | 0.0001   | 0.272058 | 2.28E-09 | -0.02535 | 0.58478  | 0.099528 | 0.03152  | -0.08135 |
| 0.126291 | 0.00628  | 0.143138 | 0.00193  | -0.08028 | 0.08308  | 0.027278 | 0.55653  | 0.027701 |
| -0.02992 | 0.51894  | 0.032063 | 0.48943  | -0.00404 | 0.93053  | 0.033859 | 0.46543  | 0.094595 |
| 0.002158 | 0.96291  | 0.090275 | 0.05122  | 0.025854 | 0.57731  | 0.006117 | 0.89511  | 0.148643 |
| -0.03184 | 0.49251  | -0.11413 | 0.01359  | 0.060943 | 0.18862  | -0.11817 | 0.0106   | 0.144462 |
| -0.28904 | 1.94E-10 | -0.11342 | 0.01419  | -0.22562 | 8.38E-07 | -0.06052 | 0.1917   | -0.15846 |
| 0.077677 | 0.09361  | 0.053472 | 0.2488   | 0.161899 | 0.00044  | 0.062204 | 0.17961  | 0.189385 |
| -0.09092 | 0.04959  | -0.09967 | 0.03128  | -0.1229  | 0.00784  | -0.10999 | 0.01742  | -0.01394 |
| 0.052076 | 0.26139  | -0.08528 | 0.06557  | 0.118546 | 0.01035  | 0.054383 | 0.24082  | 0.062595 |
| 0.023034 | 0.61954  | 0.135664 | 0.00331  | 0.08363  | 0.07099  | 0.095102 | 0.03995  | 0.048916 |
| 0.094055 | 0.04219  | 0.06615  | 0.15351  | 0.02705  | 0.55983  | -0.02997 | 0.51824  | 0.075117 |
| 0.170881 | 0.00021  | 0.110903 | 0.0165   | 0.172556 | 0.00018  | 0.225005 | 8.99E-07 | -0.01893 |
| -0.0212  | 0.64766  | -0.18738 | 4.61E-05 | -0.02004 | 0.66576  | -0.08913 | 0.05427  | -0.05377 |
| 0.040362 | 0.38416  | 0.049857 | 0.28228  | 0.0701   | 0.13036  | 0.029714 | 0.52181  | 0.082433 |
| 0.470751 | 3.94E-27 | 0.190043 | 3.57E-05 | 0.241199 | 1.32E-07 | 0.203405 | 9.41E-06 | 0.25565  |
| 0.205721 | 7.40E-06 | 0.11401  | 0.01369  | 0.275896 | 1.33E-09 | 0.263087 | 7.83E-09 | 0.153319 |
| 0.034311 | 0.45948  | 0.100713 | 0.02955  | -0.01075 | 0.81674  | -0.07095 | 0.12573  | 0.119866 |
| 0.153678 | 0.00086  | 0.206254 | 7.00E-06 | 0.105772 | 0.02225  | 0.127723 | 0.00571  | 0.11094  |
| 0.197494 | 1.72E-05 | 0.055669 | 0.22986  | 0.240465 | 1.44E-07 | 0.15123  | 0.00104  | 0.215763 |
| 0.115431 | 0.01255  | 0.095452 | 0.03922  | 0.0484   | 0.2966   | 0.071545 | 0.12261  | 0.067794 |
| -0.05183 | 0.2636   | -0.04624 | 0.31873  | 0.010271 | 0.8248   | 0.028419 | 0.54013  | -0.00849 |
| 0.048662 | 0.29399  | -0.0429  | 0.35498  | 0.055675 | 0.22981  | 0.009607 | 0.83597  | 0.072317 |
| 0.104818 | 0.02349  | -0.07211 | 0.11968  | 0.122273 | 0.00816  | 0.092359 | 0.04606  | 0.055634 |
| 0.189143 | 3.89E-05 | 0.124343 | 0.00714  | 0.155258 | 0.00076  | 0.12732  | 0.00586  | 0.144155 |
| -0.09727 | 0.03561  | -0.03602 | 0.43741  | 0.053953 | 0.24456  | 0.054808 | 0.23716  | 0.003891 |
| 0.146919 | 0.00145  | -0.08264 | 0.07441  | 0.090157 | 0.05153  | 0.056571 | 0.22239  | -0.01248 |
| 0.0236   | 0.61097  | -0.02128 | 0.64648  | 0.012923 | 0.7806   | -0.01233 | 0.79043  | 0.105556 |
| -0.05281 | 0.25472  | -0.08688 | 0.06064  | 0.100514 | 0.02987  | -0.00937 | 0.83997  | 0.071713 |
| -0.18538 | 5.57E-05 | -0.11607 | 0.01207  | 0.099121 | 0.03223  | 0.014966 | 0.74703  | 0.068666 |
| -0.0145  | 0.75465  | 0.00073  | 0.98745  | -0.04628 | 0.31827  | -0.09483 | 0.04052  | 0.02395  |
| 0.172878 | 0.00017  | 0.231844 | 4.06E-07 | 0.299215 | 4.10E-11 | 0.401322 | 1.69E-19 | 0.213685 |
| 0.294497 | 8.49E-11 | -0.00933 | 0.8407   | -0.163   | 0.00041  | -0.08445 | 0.06823  | -0.1853  |
| -0.04016 | 0.38655  | 0.152026 | 0.00098  | 0.120997 | 0.00886  | 0.252088 | 3.34E-08 | -0.06008 |
| 0.075337 | 0.10395  | -0.05909 | 0.20245  | -0.11128 | 0.01614  | -0.0168  | 0.71734  | -0.12891 |
| 0.15025  | 0.00113  | -0.04863 | 0.29428  | -0.06299 | 0.17415  | 0.010196 | 0.82606  | -0.0958  |
| 0.103762 | 0.02494  | -0.12137 | 0.00865  | -0.12565 | 0.00655  | -0.18944 | 3.79E-05 | 0.034846 |

|          |          |          |          |          |          |          |          |          |
|----------|----------|----------|----------|----------|----------|----------|----------|----------|
| -0.11258 | 0.01493  | -0.24789 | 5.71E-08 | -0.22186 | 1.29E-06 | -0.23655 | 2.32E-07 | -0.15902 |
| -0.01476 | 0.75037  | -0.02162 | 0.64121  | 0.074987 | 0.10557  | 0.015325 | 0.74118  | 0.024156 |
| 0.081464 | 0.07864  | 0.015396 | 0.74002  | 0.074779 | 0.10655  | -0.041   | 0.37669  | 0.13996  |
| -0.07126 | 0.12412  | -0.09444 | 0.04136  | -0.07249 | 0.11774  | -0.06453 | 0.16386  | -0.07227 |
| 0.078282 | 0.09107  | 0.017639 | 0.70381  | -0.10445 | 0.02399  | -0.03758 | 0.41778  | -0.06525 |
| -0.08189 | 0.0771   | -0.01607 | 0.72908  | -0.09549 | 0.03914  | -0.10313 | 0.02583  | -0.08627 |
| -0.01718 | 0.71118  | 0.057216 | 0.21714  | 0.114908 | 0.01296  | 0.077031 | 0.09638  | 0.161361 |
| 0.050133 | 0.27963  | 0.053945 | 0.24463  | 0.112143 | 0.01533  | 0.072748 | 0.11642  | 0.056575 |
| 0.021024 | 0.65043  | 0.034002 | 0.46354  | -0.05304 | 0.25269  | -0.04479 | 0.33416  | -0.01935 |
| -0.00247 | 0.95747  | 0.001616 | 0.97221  | -0.06014 | 0.19449  | -0.08845 | 0.05613  | -0.03437 |
| -0.02034 | 0.66115  | -0.09175 | 0.04753  | 0.011415 | 0.80566  | -0.14098 | 0.00226  | 0.107326 |
| 0.144178 | 0.00179  | 0.006751 | 0.88432  | 0.059734 | 0.19756  | 0.022804 | 0.62304  | -0.01075 |
| 0.057997 | 0.21093  | 0.059562 | 0.19885  | 0.120886 | 0.00892  | -0.00354 | 0.93926  | 0.131537 |
| 0.00055  | 0.99054  | -0.0216  | 0.64152  | -0.05517 | 0.23404  | -0.01444 | 0.7556   | -0.13128 |
| 0.000578 | 0.99005  | 0.116143 | 0.01202  | -0.00054 | 0.99068  | 0.043766 | 0.34532  | 0.082377 |
| 0.020865 | 0.6529   | -0.01688 | 0.71606  | -0.04232 | 0.36155  | -0.14894 | 0.00125  | -0.01794 |
| -0.07282 | 0.11606  | -0.0699  | 0.13146  | -0.04744 | 0.30629  | -0.05845 | 0.20741  | -0.05349 |
| -0.01491 | 0.74799  | 0.036454 | 0.43191  | 0.03037  | 0.51266  | -0.04728 | 0.30797  | 0.108209 |
| 0.191558 | 3.08E-05 | 0.105593 | 0.02248  | 0.210565 | 4.44E-06 | 0.059018 | 0.20299  | 0.299461 |
| 0.103722 | 0.02499  | -0.06265 | 0.17649  | -0.05681 | 0.22043  | -0.12762 | 0.00575  | 0.044975 |
| 0.031864 | 0.49214  | -0.08879 | 0.05519  | -0.02334 | 0.61492  | -0.06088 | 0.18906  | 0.006078 |
| 0.015572 | 0.73716  | 0.063321 | 0.17191  | 0.095668 | 0.03877  | 0.074319 | 0.10872  | 0.084113 |
| -0.08138 | 0.07896  | -0.1082  | 0.01935  | -0.04859 | 0.29474  | -0.07714 | 0.09591  | -0.0416  |
| 0.026565 | 0.56689  | 0.070117 | 0.13027  | 0.043192 | 0.35169  | 0.056394 | 0.22384  | 0.049319 |
| -0.03087 | 0.50572  | -0.08247 | 0.075    | -0.06092 | 0.18878  | -0.13823 | 0.00276  | 0.034616 |
| -0.06069 | 0.19044  | -0.13624 | 0.00318  | -0.08024 | 0.08326  | -0.09157 | 0.04796  | -0.09434 |
| 0.011146 | 0.81016  | -0.01103 | 0.81209  | 0.064536 | 0.16382  | 0.002709 | 0.95345  | 0.056282 |
| 0.123392 | 0.00759  | 0.055366 | 0.23241  | 0.042753 | 0.35661  | -0.01248 | 0.78792  | 0.115857 |
| 0.00411  | 0.92942  | 0.01652  | 0.72178  | 0.128968 | 0.00525  | 0.109706 | 0.01771  | 0.104538 |
| -0.02982 | 0.52038  | -0.07781 | 0.09306  | -0.0283  | 0.54187  | -0.05157 | 0.26602  | 0.042377 |
| 0.1634   | 0.00039  | -0.04122 | 0.37416  | 0.030386 | 0.51244  | -0.01917 | 0.67948  | 0.05057  |
| -0.00857 | 0.8535   | 0.019068 | 0.68107  | 0.069701 | 0.13257  | 0.025792 | 0.57823  | 0.125729 |
| -0.03424 | 0.46041  | -0.21497 | 2.76E-06 | -0.04985 | 0.28238  | -0.16895 | 0.00024  | -0.08261 |
| -0.07112 | 0.12483  | -0.09712 | 0.0359   | -0.09397 | 0.04237  | -0.10549 | 0.02261  | -0.06746 |
| -0.09516 | 0.03983  | -0.16295 | 0.00041  | -0.10914 | 0.01831  | -0.14187 | 0.00212  | -0.05234 |
| 0.039286 | 0.39698  | -0.11117 | 0.01624  | 0.072711 | 0.11661  | -0.00554 | 0.90491  | 0.029922 |
| -0.10455 | 0.02386  | -0.07008 | 0.13045  | -0.00508 | 0.91284  | 0.050388 | 0.27719  | 0.001695 |
| -0.051   | 0.27137  | -0.03378 | 0.46647  | -0.0054  | 0.90736  | -0.01703 | 0.71361  | -0.01883 |
| -0.05533 | 0.23275  | -0.07912 | 0.08767  | -0.11271 | 0.01481  | -0.09878 | 0.03283  | -0.12676 |
| 0.06646  | 0.15159  | -0.10752 | 0.02013  | -0.01667 | 0.71933  | -0.05327 | 0.25059  | 0.008313 |
| 0.195532 | 2.09E-05 | 0.047608 | 0.30459  | 0.012562 | 0.78659  | 0.058875 | 0.20409  | 0.043749 |
| -0.00703 | 0.87954  | 0.00127  | 0.97816  | 0.018985 | 0.68239  | 0.028515 | 0.53876  | 0.061323 |
| 0.120317 | 0.00925  | -0.04818 | 0.29876  | -0.0141  | 0.76124  | -0.01472 | 0.75106  | 0.003834 |
| -0.03484 | 0.45255  | -0.04004 | 0.38803  | -0.00564 | 0.90324  | -0.03594 | 0.4385   | 0.037235 |
| -0.02114 | 0.64858  | -0.08443 | 0.06833  | -0.04023 | 0.38578  | -0.06135 | 0.18565  | -0.00587 |

|          |          |          |          |           |          |          |          |          |
|----------|----------|----------|----------|-----------|----------|----------|----------|----------|
| -0.05229 | 0.25946  | -0.02341 | 0.6139   | -0.04302  | 0.35365  | -0.00012 | 0.99802  | -0.03241 |
| 0.031186 | 0.5014   | 0.016134 | 0.72803  | 0.063298  | 0.17207  | 0.02144  | 0.64398  | 0.031357 |
| -0.02709 | 0.55923  | 0.050781 | 0.27345  | -0.05423  | 0.24211  | -0.02431 | 0.60028  | -0.06884 |
| 0.056152 | 0.22583  | 0.036665 | 0.42925  | 0.060294  | 0.19338  | 0.018656 | 0.6876   | -0.00902 |
| 0.005503 | 0.90559  | -0.0067  | 0.8852   | 0.056951  | 0.21929  | -0.02133 | 0.64568  | 0.081005 |
| -0.04569 | 0.32451  | -0.01881 | 0.68517  | -0.00029  | 0.99498  | -0.02948 | 0.52504  | 0.03193  |
| 0.041033 | 0.37631  | -0.03088 | 0.50554  | 0.005604  | 0.90386  | -0.01131 | 0.80741  | -0.02514 |
| -0.06702 | 0.14818  | -0.03782 | 0.41487  | -0.00914  | 0.84386  | -0.00016 | 0.99724  | -0.00206 |
| 0.033208 | 0.47405  | 0.025648 | 0.58036  | 0.074045  | 0.11004  | -0.01716 | 0.71154  | 0.1445   |
| -0.03966 | 0.39255  | -0.06146 | 0.18491  | 0.025102  | 0.58845  | -0.02285 | 0.62239  | 0.030534 |
| 0.031456 | 0.4977   | -0.03401 | 0.46337  | -0.08513  | 0.06604  | -0.06606 | 0.15408  | -0.01094 |
| -0.06909 | 0.13599  | -0.08652 | 0.06173  | -0.05589  | 0.22799  | -0.08924 | 0.05395  | -0.0123  |
| -0.04417 | 0.34085  | -0.01774 | 0.70219  | -0.05419  | 0.24253  | -0.06598 | 0.15457  | 0.0125   |
| 0.073784 | 0.1113   | 0.072356 | 0.11841  | 0.093601  | 0.0432   | 0.076841 | 0.09721  | 0.12646  |
| 0.079868 | 0.08469  | -0.02008 | 0.66513  | 0.029209  | 0.52892  | -0.01664 | 0.71986  | 0.022865 |
| 0.054427 | 0.24044  | -0.06482 | 0.16195  | -0.07183  | 0.12113  | -0.06425 | 0.16572  | -0.03762 |
| -0.00454 | 0.92205  | -0.0229  | 0.62163  | -0.04231  | 0.36164  | -0.02358 | 0.61124  | -0.04937 |
| 0.121311 | 0.00868  | 0.053716 | 0.24664  | 0.05538   | 0.23229  | 0.057159 | 0.21761  | 0.084948 |
| 0.005052 | 0.9133   | -0.05865 | 0.20579  | -0.02893  | 0.53292  | -0.03011 | 0.51633  | -0.01646 |
| 0.022515 | 0.62746  | -0.06169 | 0.18327  | -0.02024  | 0.66263  | -0.09368 | 0.04304  | -0.00859 |
| 0.050777 | 0.27349  | 0.123741 | 0.00742  | -2.13E-05 | 0.99963  | 0.034744 | 0.45383  | 0.102659 |
| 0.115432 | 0.01255  | -0.10518 | 0.02301  | -0.13716  | 0.00298  | -0.05949 | 0.19936  | -0.15349 |
| 0.149396 | 0.0012   | -0.06237 | 0.17849  | -0.11371  | 0.01394  | -0.00833 | 0.85755  | -0.14883 |
| 0.187093 | 4.74E-05 | 0.098819 | 0.03276  | 0.064598  | 0.16341  | 0.042438 | 0.36017  | -0.01441 |
| 0.25074  | 3.97E-08 | 0.012898 | 0.78102  | 0.228143  | 6.27E-07 | 0.01664  | 0.71985  | 0.223587 |
| 0.090752 | 0.05     | -0.00213 | 0.96343  | 0.142079  | 0.00209  | -0.06711 | 0.14759  | 0.23973  |
| -0.19563 | 2.07E-05 | -0.27456 | 1.60E-09 | -0.27639  | 1.24E-09 | -0.16686 | 0.00029  | -0.36196 |
| 0.033466 | 0.47062  | 0.159184 | 0.00055  | -0.10758  | 0.02006  | 0.029149 | 0.52977  | -0.06182 |
| -0.11775 | 0.01088  | -0.03779 | 0.41516  | -0.13557  | 0.00333  | -0.11936 | 0.00983  | -0.17238 |
| 0.215138 | 2.71E-06 | 0.201175 | 1.18E-05 | 0.235076  | 2.77E-07 | 0.269256 | 3.37E-09 | 0.122577 |
| -0.03023 | 0.51465  | 0.073391 | 0.11322  | 0.041913  | 0.36615  | 0.107307 | 0.02037  | 0.101085 |
| -0.01489 | 0.74831  | -0.10054 | 0.02983  | -0.09796  | 0.03431  | -0.14104 | 0.00225  | -0.06116 |
| 0.014    | 0.76285  | 0.045546 | 0.32604  | 0.000778  | 0.98661  | -0.06272 | 0.17606  | 0.027086 |
| 0.02819  | 0.5434   | -0.03653 | 0.43101  | -0.01912  | 0.68031  | -0.08354 | 0.07129  | 0.006572 |
| -0.00336 | 0.94225  | 0.0122   | 0.7926   | 0.078312  | 0.09095  | -0.03259 | 0.48237  | 0.029323 |
| 0.142821 | 0.00197  | 0.092502 | 0.04573  | 0.0779    | 0.09267  | 0.069008 | 0.13647  | 0.073116 |
| 0.253836 | 2.67E-08 | 0.050207 | 0.27891  | 0.003678  | 0.93682  | -0.01083 | 0.81551  | -0.00553 |
| 0.041418 | 0.37184  | 0.049362 | 0.28709  | 0.028488  | 0.53915  | -0.00788 | 0.8652   | 0.003795 |
| -0.03474 | 0.45387  | -0.03728 | 0.4216   | -0.11858  | 0.01033  | -0.17322 | 0.00017  | -0.10689 |
| 0.081865 | 0.07717  | 0.082155 | 0.07612  | 0.013433  | 0.77219  | -0.02569 | 0.57974  | 0.06802  |
| 0.022062 | 0.6344   | -0.00789 | 0.86491  | 0.026563  | 0.56692  | 0.015102 | 0.74479  | 0.044134 |
| -0.12147 | 0.00859  | -0.0826  | 0.07454  | -0.20856  | 5.49E-06 | -0.26249 | 8.48E-09 | -0.07074 |
| -0.0471  | 0.30973  | 0.160446 | 0.0005   | -0.03137  | 0.49894  | 0.096475 | 0.03715  | -0.07218 |
| -0.10833 | 0.0192   | 0.107922 | 0.01966  | -0.14232  | 0.00205  | -0.05266 | 0.25609  | -0.01336 |
| 0.2645   | 6.46E-09 | 0.02893  | 0.53287  | 0.141814  | 0.00213  | -0.01894 | 0.68306  | 0.236096 |

|          |          |          |          |          |          |          |          |          |
|----------|----------|----------|----------|----------|----------|----------|----------|----------|
| -0.16008 | 0.00052  | -0.08889 | 0.0549   | -0.18697 | 4.79E-05 | -0.11205 | 0.01541  | -0.13839 |
| 0.186789 | 4.88E-05 | 0.170163 | 0.00022  | 0.269036 | 3.47E-09 | 0.194222 | 2.38E-05 | 0.261333 |
| -0.02039 | 0.66025  | -0.1938  | 2.48E-05 | -0.10168 | 0.02801  | -0.31611 | 2.69E-12 | -0.02268 |
| -0.02949 | 0.52492  | 0.009432 | 0.83892  | -0.17351 | 0.00016  | -0.14234 | 0.00205  | -0.17786 |
| 0.06493  | 0.16125  | 0.141575 | 0.00216  | -0.11173 | 0.01571  | -0.06116 | 0.18704  | -0.10951 |
| 0.027325 | 0.55585  | -0.09396 | 0.04241  | 0.111283 | 0.01613  | 0.014157 | 0.76027  | -0.0187  |
| 0.168727 | 0.00025  | 0.205283 | 7.75E-06 | 0.141276 | 0.00221  | 0.186971 | 4.79E-05 | 0.089016 |
| 0.129315 | 0.00513  | 0.101437 | 0.02839  | -0.05761 | 0.21396  | -0.06746 | 0.14551  | 0.081924 |
| 0.037314 | 0.42112  | 0.100217 | 0.03036  | 0.103721 | 0.025    | 0.074288 | 0.10887  | 0.143646 |
| 0.023808 | 0.60782  | 0.060546 | 0.19152  | 0.027121 | 0.5588   | 0.030686 | 0.50828  | 0.049388 |
| 0.072669 | 0.11682  | -0.17865 | 0.0001   | 0.093511 | 0.0434   | -0.07892 | 0.08845  | 0.143139 |
| 0.132135 | 0.00423  | 0.219517 | 1.67E-06 | 0.312236 | 5.10E-12 | 0.217912 | 2.00E-06 | 0.337375 |
| -0.01196 | 0.79659  | 0.054143 | 0.2429   | -0.01794 | 0.69898  | 0.021669 | 0.64045  | 0.036089 |
| -0.1769  | 0.00012  | -0.4608  | 6.32E-26 | -0.26517 | 5.90E-09 | -0.38502 | 5.97E-18 | -0.26172 |
| -0.01217 | 0.79303  | -0.11232 | 0.01516  | 0.186665 | 4.93E-05 | 0.036551 | 0.43069  | 0.041376 |
| 0.010474 | 0.8214   | 0.12955  | 0.00505  | -0.1435  | 0.00188  | -0.08021 | 0.08337  | -0.11682 |
| -0.16462 | 0.00035  | -0.09477 | 0.04065  | -0.08357 | 0.07118  | -0.13134 | 0.00447  | -0.05456 |
| 0.117786 | 0.01085  | -0.05808 | 0.21028  | 0.027406 | 0.55467  | -0.10628 | 0.02162  | -0.00275 |
| 0.054915 | 0.23624  | 0.091842 | 0.0473   | 0.059482 | 0.19945  | 0.009672 | 0.83488  | 0.066774 |
| -0.13063 | 0.00469  | -0.08284 | 0.07369  | -0.11255 | 0.01496  | -0.02948 | 0.52505  | -0.07415 |
| -0.04705 | 0.31031  | 0.072946 | 0.11543  | -0.25989 | 1.20E-08 | -0.18818 | 4.27E-05 | -0.21563 |
| 0.124632 | 0.007    | 0.125846 | 0.00647  | 0.012189 | 0.79277  | -0.00272 | 0.95321  | 0.109334 |
| 0.063677 | 0.16951  | 0.137905 | 0.00282  | 0.024014 | 0.60471  | -0.03032 | 0.51341  | 0.101525 |
| 0.001612 | 0.97229  | 0.045582 | 0.32565  | -0.00888 | 0.84822  | -0.08119 | 0.07964  | 0.069969 |
| 0.077092 | 0.09612  | 0.108443 | 0.01907  | 0.115898 | 0.0122   | 0.075034 | 0.10536  | 0.103344 |
| 0.001993 | 0.96574  | 0.028062 | 0.54524  | -0.08842 | 0.0562   | -0.09502 | 0.04012  | -0.05631 |
| 0.315027 | 3.22E-12 | 0.504868 | 1.42E-31 | 0.281368 | 6.03E-10 | 0.43639  | 3.91E-23 | 0.228814 |
| 0.314427 | 3.56E-12 | 0.158999 | 0.00056  | 0.353606 | 3.36E-15 | 0.229901 | 5.11E-07 | 0.221715 |
| 0.019911 | 0.6678   | -0.12616 | 0.00634  | -0.09845 | 0.03342  | -0.21019 | 4.62E-06 | -0.07445 |
| -0.10448 | 0.02395  | -0.13355 | 0.00384  | -0.04744 | 0.30626  | -0.08998 | 0.05199  | -0.04425 |
| 0.086181 | 0.06276  | 0.099743 | 0.03116  | -0.12668 | 0.00612  | -0.07611 | 0.10044  | -0.02124 |
| 0.047414 | 0.30657  | -0.01305 | 0.77854  | 0.134352 | 0.00363  | 0.096633 | 0.03684  | 0.154547 |
| 0.034955 | 0.45109  | -0.01975 | 0.67028  | 0.103994 | 0.02461  | -0.02271 | 0.62445  | 0.08013  |
| -0.04584 | 0.32293  | -0.10589 | 0.02211  | -0.13871 | 0.00266  | -0.18249 | 7.30E-05 | 0.008858 |
| -0.17192 | 0.00019  | -0.13046 | 0.00475  | -0.22773 | 6.57E-07 | -0.19429 | 2.36E-05 | -0.25449 |
| 0.110291 | 0.01711  | 0.035385 | 0.44554  | 0.025285 | 0.58573  | -0.05466 | 0.23842  | 0.11678  |
| 0.09683  | 0.03646  | 0.018789 | 0.68549  | 0.077651 | 0.09372  | 0.069069 | 0.13613  | 0.013456 |
| -0.0235  | 0.61247  | -0.01781 | 0.70111  | 0.265361 | 5.75E-09 | 0.148407 | 0.0013   | 0.182334 |
| 0.079285 | 0.08699  | 0.127659 | 0.00573  | 0.269836 | 3.11E-09 | 0.092902 | 0.04479  | 0.365373 |
| 0.227843 | 6.49E-07 | 0.000108 | 0.99814  | -0.19997 | 1.34E-05 | -0.12385 | 0.00737  | -0.15226 |
| -0.13538 | 0.00338  | 0.003584 | 0.93842  | -0.08983 | 0.05238  | 0.021681 | 0.64026  | -0.07846 |
| -0.00756 | 0.87051  | -0.0131  | 0.77773  | 0.139026 | 0.0026   | 0.132313 | 0.00418  | 0.104257 |
| 0.128296 | 0.00549  | 0.059614 | 0.19846  | 0.154326 | 0.00082  | 0.057539 | 0.21456  | 0.067785 |
| -0.12542 | 0.00665  | -0.1847  | 5.94E-05 | -0.08058 | 0.08195  | -0.08904 | 0.05451  | -0.16416 |
| -0.02052 | 0.65828  | -0.0587  | 0.20541  | -0.11501 | 0.01288  | -0.1166  | 0.01168  | -0.06489 |

|          |          |          |          |          |          |          |          |          |
|----------|----------|----------|----------|----------|----------|----------|----------|----------|
| -0.08709 | 0.06003  | -0.01523 | 0.74264  | -0.15303 | 0.00091  | -0.06373 | 0.16914  | -0.11799 |
| 0.046772 | 0.31316  | 0.071559 | 0.12253  | 0.07811  | 0.09179  | 0.027568 | 0.55234  | 0.101775 |
| 0.292161 | 1.21E-10 | 0.055862 | 0.22825  | 0.1529   | 0.00092  | 0.115133 | 0.01279  | 0.066464 |
| 0.167765 | 0.00027  | -0.0478  | 0.30259  | -0.00527 | 0.90951  | -0.00051 | 0.99126  | 0.022345 |
| 0.041248 | 0.3738   | 0.086049 | 0.06317  | 0.072057 | 0.11994  | 0.046195 | 0.31918  | 0.128349 |
| 0.109049 | 0.01841  | 0.045464 | 0.32691  | 0.072912 | 0.1156   | 0.079775 | 0.08506  | 0.091113 |
| -0.00262 | 0.95505  | -0.02177 | 0.63888  | -0.03517 | 0.44831  | -0.06494 | 0.16118  | -0.03581 |
| 0.237875 | 1.98E-07 | 0.1001   | 0.03055  | 0.122708 | 0.00794  | 0.088065 | 0.05721  | 0.119899 |
| 0.031791 | 0.49313  | 0.013686 | 0.76801  | 0.013202 | 0.776    | 0.00403  | 0.93079  | 0.064218 |
| -0.0129  | 0.78099  | -0.13747 | 0.00291  | -0.05038 | 0.27723  | -0.09622 | 0.03767  | -0.09236 |
| -0.08083 | 0.081    | 0.02996  | 0.51838  | -0.26063 | 1.09E-08 | -0.20153 | 1.14E-05 | -0.0896  |
| 0.124156 | 0.00723  | -0.06184 | 0.18216  | -0.05176 | 0.2643   | -0.23609 | 2.45E-07 | 0.00485  |
| 0.176927 | 0.00012  | 0.05717  | 0.21752  | 0.286418 | 2.87E-10 | 0.234096 | 3.11E-07 | 0.107543 |
| -0.06662 | 0.15058  | -0.30727 | 1.14E-11 | -0.06607 | 0.15401  | -0.26699 | 4.60E-09 | -0.05424 |
| 0.023415 | 0.61375  | 0.05948  | 0.19947  | 0.119562 | 0.00971  | 0.097398 | 0.03537  | 0.117821 |
| 0.138146 | 0.00277  | 0.017933 | 0.69911  | 0.196526 | 1.89E-05 | 0.080944 | 0.08057  | 0.240136 |
| 0.086451 | 0.06194  | -0.0091  | 0.84455  | 0.118627 | 0.0103   | 0.022711 | 0.62446  | 0.146912 |
| 0.048447 | 0.29614  | 0.050444 | 0.27665  | 0.055011 | 0.23542  | 0.020237 | 0.66269  | 0.120238 |
| 0.041978 | 0.3654   | -0.01984 | 0.66899  | 0.20327  | 9.54E-06 | 0.07241  | 0.11813  | 0.167525 |
| -0.00655 | 0.8877   | -0.02699 | 0.56073  | 0.020697 | 0.65552  | -0.03218 | 0.4879   | 0.079677 |
| 0.106489 | 0.02136  | -0.15091 | 0.00107  | -0.06107 | 0.1877   | -0.12323 | 0.00767  | -0.04551 |
| -0.00968 | 0.83471  | -0.07132 | 0.12376  | 0.104719 | 0.02363  | -0.04578 | 0.3235   | 0.159767 |
| -0.04093 | 0.37746  | -0.10022 | 0.03035  | 0.03363  | 0.46844  | -0.09043 | 0.05083  | 0.07044  |
| -0.08906 | 0.05444  | -0.17845 | 0.00011  | 0.011724 | 0.80051  | -0.10074 | 0.0295   | 0.038657 |
| -0.08099 | 0.0804   | -0.23409 | 3.11E-07 | -0.03871 | 0.4039   | -0.15129 | 0.00104  | -0.03951 |
| -0.04757 | 0.30495  | -0.15709 | 0.00066  | 0.035536 | 0.44361  | 0.002946 | 0.94938  | -0.04061 |
| 0.081292 | 0.07927  | -0.20939 | 5.03E-06 | 0.093129 | 0.04427  | -0.09699 | 0.03614  | 0.02779  |
| 0.022397 | 0.62926  | -0.14931 | 0.00121  | 0.093053 | 0.04445  | -0.05785 | 0.21211  | 0.064667 |
| -0.14273 | 0.00199  | -0.23281 | 3.62E-07 | -0.08453 | 0.06799  | -0.15913 | 0.00056  | -0.10545 |
| -0.00964 | 0.83538  | -0.15358 | 0.00087  | 0.152929 | 0.00091  | 0.044769 | 0.33437  | 0.066199 |
| -0.08262 | 0.07446  | 0.012258 | 0.79163  | 0.140817 | 0.00229  | 0.175838 | 0.00013  | 0.073768 |
| 0.184527 | 6.03E-05 | 0.039433 | 0.39522  | 0.161619 | 0.00045  | 0.08244  | 0.07511  | 0.123261 |
| 0.125813 | 0.00648  | 0.025982 | 0.57544  | 0.217315 | 2.13E-06 | 0.10789  | 0.0197   | 0.19174  |
| 0.02003  | 0.66594  | 0.040438 | 0.38328  | 0.089447 | 0.0534   | 0.089525 | 0.05319  | 0.102493 |
| -0.01009 | 0.82778  | -0.10865 | 0.01884  | 0.075337 | 0.10395  | -0.0851  | 0.06614  | 0.067763 |
| 0.006565 | 0.88749  | -0.00997 | 0.82991  | 0.123982 | 0.00731  | 0.002895 | 0.95025  | 0.150198 |
| 0.140256 | 0.00238  | -0.04852 | 0.29539  | 0.241015 | 1.35E-07 | 0.114163 | 0.01357  | 0.122639 |
| 0.04698  | 0.31102  | -0.12249 | 0.00805  | 0.15867  | 0.00058  | -0.02802 | 0.54587  | 0.136882 |
| -0.01655 | 0.72131  | -0.12529 | 0.00671  | 0.119313 | 0.00986  | 0.030962 | 0.50447  | 0.06802  |
| -0.04079 | 0.37917  | -0.19725 | 1.76E-05 | 0.099409 | 0.03173  | -0.0095  | 0.83775  | 0.076324 |
| -0.11945 | 0.00977  | -0.24075 | 1.39E-07 | -0.30788 | 1.04E-11 | -0.26999 | 3.04E-09 | -0.28219 |
| 0.03531  | 0.44651  | 0.029151 | 0.52973  | 0.039973 | 0.38877  | -0.01728 | 0.70955  | 0.085592 |
| 0.030496 | 0.51092  | 0.060332 | 0.19309  | 0.088555 | 0.05583  | 0.093654 | 0.04308  | 0.134665 |
| 0.071984 | 0.12032  | 0.043322 | 0.35024  | 0.053012 | 0.2529   | 0.12454  | 0.00705  | 0.045656 |
| 0.053697 | 0.24681  | -0.05004 | 0.2805   | 0.080306 | 0.08299  | 0.016579 | 0.72084  | 0.072129 |



|          |          |          |          |          |          |          |          |          |
|----------|----------|----------|----------|----------|----------|----------|----------|----------|
| 0.132269 | 0.00419  | 0.110058 | 0.01735  | 0.106588 | 0.02123  | 0.067396 | 0.14589  | 0.0804   |
| -0.09006 | 0.05177  | -0.01093 | 0.8137   | -0.24273 | 1.09E-07 | -0.19783 | 1.66E-05 | -0.083   |
| -0.03833 | 0.40863  | -0.0643  | 0.16539  | 0.123968 | 0.00732  | 0.099351 | 0.03183  | 0.081298 |
| -0.0067  | 0.8852   | -0.16628 | 0.00031  | 0.051428 | 0.26738  | -0.09958 | 0.03143  | 0.090553 |
| -0.02691 | 0.56186  | -0.09435 | 0.04156  | -0.03579 | 0.44029  | -0.10649 | 0.02136  | -0.21358 |
| 0.279777 | 7.60E-10 | 0.158016 | 0.00061  | 0.2965   | 6.24E-11 | 0.222619 | 1.18E-06 | 0.216412 |
| 0.058376 | 0.20796  | 0.232732 | 3.66E-07 | 0.039017 | 0.40022  | 0.0241   | 0.60342  | 0.124679 |
| 0.113842 | 0.01383  | 0.042862 | 0.35539  | 0.010295 | 0.8244   | 0.05424  | 0.24206  | 0.022279 |
| 0.161987 | 0.00044  | 0.177866 | 0.00011  | 0.312485 | 4.90E-12 | 0.189382 | 3.81E-05 | 0.314742 |
| -0.08698 | 0.06037  | -0.22581 | 8.20E-07 | -0.16756 | 0.00028  | -0.12724 | 0.00589  | -0.13836 |
| -0.14617 | 0.00154  | -0.00556 | 0.90457  | -0.06118 | 0.18689  | -0.00593 | 0.89833  | -0.05581 |
| 0.047871 | 0.30193  | -0.03248 | 0.48374  | -0.0483  | 0.29761  | -0.06056 | 0.19144  | 0.058892 |
| -0.01909 | 0.68077  | 0.084319 | 0.06868  | -0.04032 | 0.3847   | -0.03979 | 0.39099  | 0.103077 |
| 0.288242 | 2.19E-10 | 0.309516 | 7.95E-12 | 0.303349 | 2.14E-11 | 0.301142 | 3.03E-11 | 0.226387 |
| 0.019584 | 0.67294  | 0.152754 | 0.00093  | -0.00931 | 0.84094  | -0.00824 | 0.85907  | 0.066906 |
| -0.03085 | 0.50604  | 0.007757 | 0.86723  | -0.11413 | 0.01359  | -0.07103 | 0.12533  | -0.04804 |
| -0.15077 | 0.00108  | -0.15386 | 0.00085  | -0.06686 | 0.14913  | -0.05599 | 0.22718  | -0.07972 |
| -0.01797 | 0.69847  | 0.034394 | 0.4584   | -0.0695  | 0.1337   | -0.04848 | 0.29583  | -0.08422 |
| 0.304799 | 1.70E-11 | 0.092332 | 0.04613  | 0.148545 | 0.00128  | 0.097708 | 0.03478  | 0.096766 |
| -0.004   | 0.93127  | -0.0137  | 0.7677   | 0.010014 | 0.82913  | -0.02304 | 0.61944  | 0.060022 |
| 0.027924 | 0.54722  | 0.012331 | 0.79041  | -0.07797 | 0.09236  | -0.05402 | 0.24399  | -0.0826  |
| -0.00213 | 0.96333  | 0.004026 | 0.93085  | -0.01801 | 0.69793  | -0.04603 | 0.32087  | 0.053116 |
| 0.027405 | 0.55469  | 0.008815 | 0.84932  | -0.04458 | 0.33646  | -0.04214 | 0.36352  | 0.037356 |
| 0.237393 | 2.09E-07 | 0.121416 | 0.00863  | 0.133096 | 0.00396  | 0.154071 | 0.00084  | 0.101793 |
| 0.361271 | 7.63E-16 | 0.030876 | 0.50567  | 0.065585 | 0.15706  | 0.064584 | 0.16351  | 0.13915  |
| 0.078973 | 0.08825  | -0.02976 | 0.52123  | -0.0643  | 0.16535  | 0.051709 | 0.26476  | -0.05689 |
| 0.210752 | 4.35E-06 | 0.206525 | 6.81E-06 | 0.266402 | 4.99E-09 | 0.206047 | 7.15E-06 | 0.218724 |
| -0.06742 | 0.14574  | -0.13638 | 0.00315  | -0.02084 | 0.65323  | -0.20872 | 5.40E-06 | -0.00025 |
| -0.10599 | 0.02198  | -0.05035 | 0.2775   | -0.12716 | 0.00593  | -0.12237 | 0.00811  | -0.1098  |
| 0.039743 | 0.3915   | -0.16522 | 0.00034  | 0.181181 | 8.23E-05 | 0.012576 | 0.78635  | 0.122218 |
| -0.00935 | 0.84021  | -0.14363 | 0.00186  | 0.031863 | 0.49215  | -0.11983 | 0.00954  | -0.06765 |
| 0.062855 | 0.1751   | 0.069969 | 0.13108  | 0.00352  | 0.93952  | -0.03185 | 0.49237  | 0.038361 |
| -0.02623 | 0.5718   | -0.02497 | 0.5904   | 0.012949 | 0.78018  | 0.016587 | 0.72071  | -0.00597 |
| -0.06364 | 0.16977  | -0.02905 | 0.53118  | -0.06718 | 0.14722  | -0.04488 | 0.33318  | -0.03525 |
| -0.02747 | 0.55374  | -0.1046  | 0.02379  | -0.19902 | 1.47E-05 | -0.17378 | 0.00016  | -0.20168 |
| -0.03629 | 0.43392  | -0.01215 | 0.7935   | 0.002922 | 0.94978  | -0.02242 | 0.62892  | 0.043391 |
| -0.10673 | 0.02106  | 0.015725 | 0.73466  | -0.16551 | 0.00033  | -0.05859 | 0.20629  | -0.06299 |
| 0.045884 | 0.32246  | -0.05516 | 0.23419  | -0.07504 | 0.10532  | -0.04547 | 0.3268   | -0.04109 |
| -0.04412 | 0.34143  | -0.09231 | 0.04618  | -0.01764 | 0.70376  | -0.00597 | 0.89754  | -0.10322 |
| -0.06183 | 0.18228  | -0.07028 | 0.12938  | -0.07567 | 0.10241  | -0.10528 | 0.02289  | 0.042232 |
| 0.18859  | 4.11E-05 | -0.04402 | 0.34253  | 0.145091 | 0.00167  | -0.00471 | 0.91915  | 0.140443 |
| -0.05598 | 0.22729  | -0.00456 | 0.92164  | 0.02457  | 0.59637  | 0.017181 | 0.71114  | 0.083528 |
| -0.00207 | 0.96438  | 0.082757 | 0.07399  | 0.038105 | 0.41134  | 0.06579  | 0.15576  | -0.04792 |
| 0.146539 | 0.0015   | 0.031647 | 0.49509  | 0.179373 | 9.72E-05 | 0.163651 | 0.00038  | 0.122056 |
| 0.139103 | 0.00259  | 0.209552 | 4.94E-06 | 0.162811 | 0.00041  | 0.369012 | 1.64E-16 | 0.057659 |

|          |          |          |          |          |          |          |          |          |
|----------|----------|----------|----------|----------|----------|----------|----------|----------|
| 0.020389 | 0.66032  | 0.046967 | 0.31116  | 0.029735 | 0.52152  | 0.010502 | 0.82093  | 0.031548 |
| 0.017595 | 0.7045   | -0.06531 | 0.15883  | -0.01118 | 0.80957  | -0.0669  | 0.14887  | 0.061962 |
| -0.03933 | 0.3965   | -0.17691 | 0.00012  | -0.26217 | 8.86E-09 | -0.15056 | 0.0011   | -0.30186 |
| 0.004323 | 0.92577  | -0.05841 | 0.20768  | -0.2103  | 4.57E-06 | -0.08554 | 0.06474  | -0.14091 |
| 0.069508 | 0.13365  | -0.24717 | 6.26E-08 | 0.102724 | 0.02643  | -0.04778 | 0.30285  | 0.054995 |
| -0.0153  | 0.7415   | 0.052183 | 0.26041  | -0.05692 | 0.21957  | -0.09188 | 0.04721  | 0.042769 |
| 0.073932 | 0.11058  | 0.101805 | 0.02782  | 0.008205 | 0.85963  | -0.00796 | 0.86373  | 0.083454 |
| 0.014104 | 0.76114  | 0.000807 | 0.98613  | 0.001789 | 0.96925  | -0.04082 | 0.37876  | 0.124566 |
| 0.382834 | 9.49E-18 | 0.368089 | 1.97E-16 | 0.317719 | 2.06E-12 | 0.291581 | 1.32E-10 | 0.338057 |
| -0.14069 | 0.00231  | -0.11609 | 0.01206  | -0.21054 | 4.45E-06 | -0.0109  | 0.8142   | -0.29237 |
| -0.02896 | 0.53247  | 0.076099 | 0.10049  | 0.039719 | 0.39179  | 0.018764 | 0.68588  | -0.02693 |
| -0.29579 | 6.96E-11 | -0.34398 | 2.04E-14 | -0.22176 | 1.30E-06 | -0.34109 | 3.46E-14 | -0.13232 |
| 0.104289 | 0.02421  | 0.370955 | 1.11E-16 | 0.062692 | 0.17622  | 0.390065 | 2.02E-18 | -0.02648 |
| 0.28068  | 6.67E-10 | 0.244937 | 8.28E-08 | 0.347071 | 1.15E-14 | 0.393517 | 9.54E-19 | 0.193318 |
| 0.04414  | 0.34121  | -0.069   | 0.13652  | -0.19752 | 1.71E-05 | -0.15541 | 0.00075  | -0.07943 |
| 0.135539 | 0.00334  | 0.010189 | 0.82619  | 0.095785 | 0.03853  | 0.098364 | 0.03358  | 0.080473 |
| 0.10937  | 0.01807  | 0.036124 | 0.43609  | 0.069923 | 0.13134  | 0.043584 | 0.34734  | 0.136639 |
| -0.09375 | 0.04287  | 0.087581 | 0.0586   | 0.065211 | 0.15945  | 0.089486 | 0.0533   | 0.166875 |
| -0.11046 | 0.01694  | -0.20972 | 4.86E-06 | -0.20727 | 6.29E-06 | -0.14454 | 0.00174  | -0.22488 |
| -0.02203 | 0.63484  | -0.15935 | 0.00055  | -0.08869 | 0.05547  | -0.04255 | 0.35886  | -0.12541 |
| 0.071828 | 0.12113  | 0.012754 | 0.78339  | 0.150601 | 0.0011   | 0.204137 | 8.73E-06 | 0.037773 |
| 0.127595 | 0.00576  | 0.189311 | 3.83E-05 | 0.018946 | 0.68301  | 0.029936 | 0.51871  | 0.124619 |
| -0.09365 | 0.04308  | -0.01251 | 0.78738  | 0.001261 | 0.97832  | 0.037731 | 0.41594  | 0.004743 |
| 0.269272 | 3.36E-09 | 0.326873 | 4.33E-13 | 0.235416 | 2.66E-07 | 0.293358 | 1.01E-10 | 0.183604 |
| 0.024528 | 0.597    | 0.016384 | 0.72399  | 0.076435 | 0.09899  | -0.04514 | 0.33042  | 0.140645 |
| 0.120727 | 0.00901  | 0.162366 | 0.00043  | 0.22646  | 7.61E-07 | 0.260342 | 1.13E-08 | 0.095259 |
| -0.27596 | 1.31E-09 | -0.40609 | 5.72E-20 | -0.18519 | 5.67E-05 | -0.25487 | 2.33E-08 | -0.12835 |
| 0.167534 | 0.00028  | 0.133401 | 0.00388  | 0.15212  | 0.00097  | 0.072913 | 0.1156   | 0.153269 |
| 0.030107 | 0.51632  | 0.080701 | 0.08148  | 0.035631 | 0.44238  | -0.02068 | 0.65574  | 0.137816 |
| 0.052768 | 0.25509  | 0.132386 | 0.00416  | -0.00792 | 0.86441  | -0.03652 | 0.43107  | 0.012882 |
| 0.129257 | 0.00515  | -0.01184 | 0.79864  | -0.00831 | 0.85789  | -0.03288 | 0.47848  | -0.02655 |
| -0.11561 | 0.01242  | -0.07281 | 0.11609  | 0.022993 | 0.62017  | -0.00333 | 0.94284  | 0.097442 |
| 0.192627 | 2.78E-05 | -0.02887 | 0.53378  | 0.045665 | 0.32477  | 0.008615 | 0.85271  | 0.055651 |
| 0.00148  | 0.97456  | -0.19804 | 1.63E-05 | -0.10871 | 0.01878  | -0.03123 | 0.50073  | -0.26014 |
| 0.149431 | 0.0012   | -0.11306 | 0.01451  | 0.132195 | 0.00421  | 0.05854  | 0.20668  | 0.086913 |
| 0.17523  | 0.00014  | 0.156106 | 0.00071  | 0.221381 | 1.36E-06 | 0.190875 | 3.30E-05 | 0.258325 |
| 0.083509 | 0.0714   | 0.184031 | 6.32E-05 | 0.139525 | 0.00251  | 0.194286 | 2.36E-05 | 0.128673 |
| 0.060451 | 0.19222  | -0.028   | 0.54614  | 0.134178 | 0.00367  | 0.046375 | 0.31729  | 0.19764  |
| -0.19327 | 2.61E-05 | -0.14983 | 0.00116  | -0.12016 | 0.00935  | -0.02039 | 0.66037  | -0.14961 |
| 0.075474 | 0.10332  | 0.08696  | 0.06042  | -0.07467 | 0.10707  | -0.14792 | 0.00135  | -0.04708 |
| -0.22163 | 1.32E-06 | -0.04837 | 0.29691  | -0.23206 | 3.96E-07 | -0.12562 | 0.00656  | -0.17894 |
| -0.10976 | 0.01766  | -0.06275 | 0.17583  | -0.07181 | 0.12123  | -0.00524 | 0.91016  | -0.05673 |
| 0.05629  | 0.2247   | -0.16113 | 0.00047  | -0.16352 | 0.00039  | -0.05158 | 0.26599  | -0.177   |
| 0.275688 | 1.37E-09 | 0.009869 | 0.83156  | 0.276071 | 1.29E-09 | 0.245989 | 7.26E-08 | 0.067399 |
| 0.196223 | 1.95E-05 | 0.002542 | 0.9563   | -0.00419 | 0.92812  | -0.06512 | 0.16003  | 0.04515  |

|          |          |          |          |          |          |          |          |          |
|----------|----------|----------|----------|----------|----------|----------|----------|----------|
| -0.1059  | 0.02208  | -0.18424 | 6.20E-05 | -0.28479 | 3.65E-10 | -0.10668 | 0.02113  | -0.22517 |
| 0.087408 | 0.0591   | 0.197205 | 1.77E-05 | 0.059848 | 0.1967   | 0.0248   | 0.59293  | 0.126439 |
| -0.06622 | 0.15305  | 0.169767 | 0.00023  | -0.12323 | 0.00768  | 0.068286 | 0.14063  | -0.08292 |
| -0.11825 | 0.01054  | -0.07299 | 0.11522  | 0.023348 | 0.61477  | -0.06167 | 0.18342  | -0.03978 |
| -0.04167 | 0.36898  | -0.17456 | 0.00015  | -0.09751 | 0.03516  | -0.19408 | 2.41E-05 | -0.16148 |
| 0.013614 | 0.7692   | -0.16945 | 0.00023  | -0.10169 | 0.028    | -0.11351 | 0.01411  | -0.10643 |
| -0.09713 | 0.03588  | 0.101814 | 0.0278   | 0.106617 | 0.0212   | 0.035545 | 0.44349  | 0.075154 |
| -0.29286 | 1.09E-10 | -0.09045 | 0.05077  | -0.14878 | 0.00126  | -0.13493 | 0.00348  | -0.08382 |
| 0.075229 | 0.10445  | 0.090299 | 0.05116  | 0.210866 | 4.30E-06 | 0.129382 | 0.00511  | 0.224642 |
| 0.027666 | 0.55092  | -0.09458 | 0.04106  | 0.109301 | 0.01814  | -0.00198 | 0.9659   | 0.080435 |
| -0.05493 | 0.23609  | -0.05861 | 0.20616  | -0.0871  | 0.06     | -0.09561 | 0.03889  | -0.00078 |
| -0.00509 | 0.9127   | -0.02591 | 0.57648  | 0.04415  | 0.34109  | -0.08038 | 0.0827   | 0.039956 |
| -0.04179 | 0.3676   | -0.09226 | 0.0463   | -0.18276 | 7.11E-05 | -0.24412 | 9.17E-08 | -0.08252 |
| 0.161518 | 0.00046  | -0.02885 | 0.53393  | 0.100232 | 0.03033  | 0.12892  | 0.00527  | 0.040947 |
| 0.315268 | 3.09E-12 | 0.190737 | 3.34E-05 | 0.230071 | 5.00E-07 | 0.257528 | 1.64E-08 | 0.164236 |
| 0.150655 | 0.00109  | 0.113724 | 0.01393  | -0.02919 | 0.52917  | -0.0301  | 0.51636  | -0.01757 |
| -0.09953 | 0.03152  | 0.054489 | 0.2399   | -0.07203 | 0.12007  | -0.02389 | 0.60665  | -0.04774 |
| 0.102473 | 0.0268   | -0.19623 | 1.95E-05 | -0.00023 | 0.99598  | -0.07251 | 0.11764  | -0.08528 |
| 0.23267  | 3.69E-07 | -0.02125 | 0.64694  | 0.027043 | 0.55994  | -0.07289 | 0.11573  | -0.00471 |
| -0.11264 | 0.01488  | -0.07122 | 0.12434  | 0.004924 | 0.91548  | -0.11242 | 0.01507  | 0.054971 |
| -0.02678 | 0.56373  | -0.1473  | 0.00141  | 0.130369 | 0.00478  | 0.007205 | 0.8766   | 0.098228 |
| 0.20837  | 5.60E-06 | 0.093956 | 0.04241  | 0.062422 | 0.1781   | 0.000726 | 0.98751  | 0.117573 |
| 0.078964 | 0.08829  | 0.083877 | 0.07015  | 0.020008 | 0.66627  | -0.00793 | 0.86437  | 0.017116 |
| -0.03076 | 0.50723  | -0.21001 | 4.71E-06 | -0.032   | 0.49027  | -0.16325 | 0.0004   | -0.02117 |
| 0.14965  | 0.00118  | -0.01598 | 0.73047  | 0.028748 | 0.53544  | 0.040336 | 0.38447  | -0.08657 |
| -0.06049 | 0.19194  | -0.37095 | 1.11E-16 | -0.07572 | 0.10219  | -0.19184 | 3.00E-05 | -0.21609 |
| -0.03659 | 0.43025  | -0.08877 | 0.05523  | -0.14306 | 0.00194  | -0.22926 | 5.50E-07 | 0.016603 |
| 0.072953 | 0.11539  | 0.122893 | 0.00784  | 0.061342 | 0.18574  | 0.173678 | 0.00016  | 0.142303 |
| 0.206098 | 7.12E-06 | 0.242354 | 1.14E-07 | 0.2871   | 2.60E-10 | 0.265478 | 5.66E-09 | 0.265223 |
| -0.05194 | 0.2626   | -0.1063  | 0.02159  | -0.08269 | 0.07422  | -0.02552 | 0.58222  | -0.0724  |
| 0.09505  | 0.04005  | -0.18025 | 8.97E-05 | 0.023004 | 0.62     | -0.1026  | 0.02661  | -0.1363  |
| 0.047203 | 0.30873  | -0.02019 | 0.6634   | -0.17097 | 0.00021  | -0.02081 | 0.65382  | -0.10238 |
| -0.27831 | 9.39E-10 | -0.2139  | 3.10E-06 | -0.08106 | 0.08015  | -0.09737 | 0.03542  | -0.10698 |
| 0.057322 | 0.2163   | 0.182027 | 7.62E-05 | -0.03507 | 0.44955  | 0.014483 | 0.75491  | -0.03626 |
| -0.21819 | 1.94E-06 | -0.0749  | 0.10596  | -0.17057 | 0.00021  | -0.14777 | 0.00136  | -0.03045 |
| 0.082869 | 0.0736   | -0.28918 | 1.90E-10 | -0.00295 | 0.94932  | -0.10194 | 0.02761  | -0.03835 |
| 0.101986 | 0.02754  | -0.05258 | 0.2568   | 0.047911 | 0.30151  | -0.07518 | 0.10468  | 0.086536 |
| -0.02036 | 0.66079  | -0.28841 | 2.13E-10 | -0.07941 | 0.0865   | -0.17867 | 0.0001   | -0.00485 |
| 0.165332 | 0.00033  | 0.182978 | 6.97E-05 | 0.303021 | 2.25E-11 | 0.255387 | 2.18E-08 | 0.253479 |
| -0.09944 | 0.03168  | -0.07921 | 0.08729  | -0.07108 | 0.12504  | -0.04555 | 0.32601  | -0.07541 |
| -0.03179 | 0.49316  | 0.008505 | 0.85456  | 0.012086 | 0.79449  | 0.011258 | 0.80829  | 0.045357 |
| 0.032727 | 0.48049  | 0.057789 | 0.21257  | -0.10508 | 0.02315  | -0.07328 | 0.11377  | 0.024183 |
| -0.01217 | 0.79317  | 0.064131 | 0.16648  | 0.122931 | 0.00782  | 0.103649 | 0.0251   | 0.107615 |
| 0.081043 | 0.0802   | 0.171499 | 0.0002   | -0.00731 | 0.87487  | -0.02783 | 0.54855  | 0.145262 |
| 0.0288   | 0.53471  | 0.134844 | 0.00351  | -0.14801 | 0.00134  | -0.04143 | 0.37175  | -0.02284 |

|          |          |          |          |          |          |          |          |          |
|----------|----------|----------|----------|----------|----------|----------|----------|----------|
| 0.013968 | 0.76337  | 0.104935 | 0.02334  | 0.220836 | 1.44E-06 | 0.169593 | 0.00023  | 0.249457 |
| -0.02479 | 0.5931   | -0.01642 | 0.72341  | -0.1292  | 0.00517  | -0.09662 | 0.03687  | -0.12241 |
| 0.127442 | 0.00582  | 0.143368 | 0.0019   | 0.059024 | 0.20294  | 0.027065 | 0.55962  | 0.139918 |
| 0.22106  | 1.41E-06 | -0.04422 | 0.34029  | 0.129546 | 0.00505  | -0.0918  | 0.04739  | 0.169644 |
| -0.04451 | 0.33716  | 0.038349 | 0.40834  | 0.088853 | 0.05501  | 0.158232 | 0.0006   | -0.01469 |
| 0.072226 | 0.11907  | 0.134206 | 0.00367  | 0.011009 | 0.81244  | -0.05109 | 0.27051  | 0.092613 |
| -0.21186 | 3.86E-06 | -0.2012  | 1.18E-05 | -0.32055 | 1.28E-12 | -0.31399 | 3.82E-12 | -0.25558 |
| 0.096741 | 0.03663  | 0.04416  | 0.34099  | 0.183094 | 6.90E-05 | 0.096607 | 0.03689  | 0.094207 |
| 0.013382 | 0.77303  | -0.06967 | 0.13275  | -0.14115 | 0.00223  | -0.09962 | 0.03136  | -0.06908 |
| -0.07463 | 0.10726  | -0.12344 | 0.00757  | -0.08081 | 0.08109  | -0.05287 | 0.25417  | -0.09642 |
| -0.07377 | 0.11137  | -0.0101  | 0.82763  | -0.02569 | 0.57977  | 0.053918 | 0.24487  | -0.01378 |
| 0.091913 | 0.04713  | 0.138221 | 0.00276  | 0.120335 | 0.00924  | 0.137937 | 0.00282  | 0.076108 |
| 0.01443  | 0.75578  | 0.016645 | 0.71978  | -0.05907 | 0.20258  | -0.06653 | 0.15117  | -0.00871 |
| -0.08769 | 0.05828  | -0.03022 | 0.51481  | -0.0629  | 0.17475  | -0.03008 | 0.51665  | -0.08074 |
| -0.0176  | 0.70448  | -0.07535 | 0.1039   | -0.0175  | 0.70607  | -0.09198 | 0.04696  | -0.02389 |
| 0.082661 | 0.07433  | 0.042712 | 0.35707  | 0.109311 | 0.01813  | 0.08124  | 0.07946  | 0.127783 |
| -0.02661 | 0.56627  | -0.03186 | 0.49219  | -0.13201 | 0.00427  | -0.09298 | 0.04462  | -0.13782 |
| 0.190508 | 3.41E-05 | 0.128905 | 0.00527  | -0.04486 | 0.3334   | -0.04144 | 0.37162  | -0.05292 |
| -0.03136 | 0.49908  | -0.1256  | 0.00657  | -0.22743 | 6.81E-07 | -0.20688 | 6.56E-06 | -0.24173 |
| -0.00893 | 0.84734  | 0.142933 | 0.00196  | -0.04906 | 0.29007  | 0.051539 | 0.26634  | -0.07734 |
| 0.045984 | 0.3214   | -0.03487 | 0.45221  | -0.00385 | 0.93382  | -0.00281 | 0.95165  | -0.01389 |
| 0.204179 | 8.69E-06 | 0.130345 | 0.00478  | 0.143682 | 0.00185  | 0.132408 | 0.00415  | 0.093398 |
| 0.020604 | 0.65696  | 0.049223 | 0.28846  | 0.049525 | 0.2855   | 0.013326 | 0.77394  | 0.060459 |
| 0.069464 | 0.1339   | 0.062362 | 0.17851  | 0.096861 | 0.03639  | 0.031253 | 0.50048  | 0.07078  |
| 0.126741 | 0.0061   | 0.097591 | 0.035    | 0.063956 | 0.16765  | 0.008292 | 0.85816  | 0.097008 |
| -0.00792 | 0.86451  | -0.02157 | 0.64196  | 0.009898 | 0.83107  | 0.020438 | 0.65955  | 0.03366  |
| 0.023802 | 0.60791  | 0.059366 | 0.20033  | 0.021837 | 0.63786  | 0.018856 | 0.68442  | 0.050891 |
| 0.009426 | 0.83901  | -0.10606 | 0.02189  | 0.002374 | 0.95919  | -0.09645 | 0.0372   | -0.02108 |
| 0.00643  | 0.88977  | 0.12738  | 0.00584  | -0.01752 | 0.70574  | 0.094149 | 0.04199  | 0.030987 |
| 0.055386 | 0.23224  | -0.0302  | 0.51503  | -0.0256  | 0.58104  | 0.062714 | 0.17607  | 0.030283 |
| 0.230234 | 4.91E-07 | 0.136533 | 0.00311  | 0.13557  | 0.00333  | 0.16391  | 0.00038  | 0.050089 |
| 0.039025 | 0.40012  | 0.137725 | 0.00286  | -0.00182 | 0.96879  | -0.05977 | 0.19729  | 0.106785 |
| 0.234108 | 3.11E-07 | 0.031483 | 0.49734  | 0.065773 | 0.15587  | 0.055962 | 0.22741  | 0.167224 |
| -0.02526 | 0.58616  | 0.050696 | 0.27425  | 0.11846  | 0.0104   | 0.067485 | 0.14536  | 0.173715 |
| -0.04246 | 0.35994  | -0.0915  | 0.04813  | 0.130539 | 0.00472  | 0.040249 | 0.38549  | 0.155079 |
| -0.09139 | 0.04841  | -0.08148 | 0.07857  | -0.05114 | 0.27004  | -0.09889 | 0.03264  | -0.03886 |
| -0.00075 | 0.98718  | 0.006606 | 0.88677  | 0.092541 | 0.04563  | 0.063369 | 0.17159  | 0.18972  |
| -0.04097 | 0.37704  | -0.16972 | 0.00023  | -0.01187 | 0.79805  | -0.1166  | 0.01168  | -0.06442 |
| 0.063855 | 0.16832  | 0.139583 | 0.0025   | 0.079214 | 0.08728  | 0.059612 | 0.19847  | 0.033641 |
| 0.093156 | 0.04421  | 0.035681 | 0.44175  | -0.13493 | 0.00348  | 0.012337 | 0.79031  | -0.07308 |
| 0.062619 | 0.17672  | 0.20342  | 9.40E-06 | 0.093915 | 0.0425   | 0.129875 | 0.00494  | 0.120468 |
| 0.005307 | 0.90894  | 0.139883 | 0.00245  | 0.0004   | 0.99313  | 0.067856 | 0.14316  | 0.004106 |
| -0.04778 | 0.30287  | -0.09631 | 0.03747  | -0.04687 | 0.31216  | -0.0707  | 0.12707  | -0.17899 |
| 0.140663 | 0.00231  | 0.227886 | 6.45E-07 | 0.293224 | 1.03E-10 | 0.410821 | 1.93E-20 | 0.192361 |
| 0.180919 | 8.43E-05 | 0.06826  | 0.14079  | -0.06979 | 0.13206  | 0.01519  | 0.74337  | -0.02794 |

|          |          |          |          |          |          |          |          |          |
|----------|----------|----------|----------|----------|----------|----------|----------|----------|
| -0.01697 | 0.71452  | 0.113676 | 0.01397  | -0.09023 | 0.05133  | -0.05259 | 0.25672  | -0.02864 |
| 0.044657 | 0.33557  | -0.13962 | 0.00249  | 0.081454 | 0.07867  | -0.06993 | 0.13129  | -0.0341  |
| 0.102006 | 0.02751  | -0.07264 | 0.11696  | -0.00796 | 0.86386  | 0.025637 | 0.58053  | -0.06086 |
| 0.28369  | 4.30E-10 | 0.252873 | 3.02E-08 | 0.28174  | 5.71E-10 | 0.353962 | 3.14E-15 | 0.210284 |
| 0.07774  | 0.09335  | 0.177695 | 0.00011  | -0.03766 | 0.41686  | 0.058459 | 0.2073   | -0.04845 |
| -0.13888 | 0.00263  | -0.01244 | 0.78856  | 0.052971 | 0.25327  | 0.157581 | 0.00063  | 0.020986 |
| -0.00833 | 0.85756  | -0.02377 | 0.60836  | 0.060902 | 0.18892  | 0.057982 | 0.21104  | 0.101719 |
| 0.066381 | 0.15208  | 0.082665 | 0.07432  | -0.03371 | 0.46739  | -0.01585 | 0.73269  | 0.025425 |
| 0.154725 | 0.00079  | -0.06031 | 0.19323  | -0.09815 | 0.03397  | -0.02187 | 0.63738  | -0.17464 |
| 0.013616 | 0.76916  | 0.097282 | 0.03558  | 0.077693 | 0.09354  | 0.032406 | 0.48479  | 0.13129  |
| 0.167104 | 0.00029  | -0.13662 | 0.00309  | 0.073383 | 0.11326  | -0.01114 | 0.81028  | -0.0485  |
| 0.02634  | 0.57018  | -0.05157 | 0.26603  | -0.19216 | 2.91E-05 | -0.25544 | 2.16E-08 | -0.11087 |
| 0.013827 | 0.76569  | 0.092837 | 0.04494  | 0.035743 | 0.44095  | 0.190051 | 3.57E-05 | 0.081304 |
| 0.045104 | 0.33076  | 0.057827 | 0.21227  | -0.0122  | 0.79264  | 0.074986 | 0.10558  | 0.026861 |
| 0.05997  | 0.19578  | 0.020728 | 0.65503  | 0.041644 | 0.36923  | 0.00947  | 0.83828  | 0.10686  |
| -0.00959 | 0.83622  | -0.14207 | 0.00209  | -0.00763 | 0.86934  | -0.02199 | 0.63553  | -0.09987 |
| -0.00224 | 0.96143  | 0.102279 | 0.0271   | 0.102309 | 0.02705  | 0.134923 | 0.00349  | 0.17035  |
| -0.13919 | 0.00257  | -0.16716 | 0.00029  | -0.03823 | 0.40976  | 0.020722 | 0.65512  | -0.06919 |
| -0.04995 | 0.28141  | 0.020574 | 0.65742  | -0.05419 | 0.24252  | -0.0754  | 0.10367  | 0.001429 |
| -0.03891 | 0.40146  | -0.13825 | 0.00275  | -0.00847 | 0.85513  | -0.0415  | 0.37091  | -0.0748  |
| -0.08512 | 0.06607  | -0.01983 | 0.66911  | 0.132534 | 0.00412  | 0.142304 | 0.00205  | 0.152011 |
| -0.08756 | 0.05866  | -0.20003 | 1.33E-05 | -0.23316 | 3.48E-07 | -0.20355 | 9.27E-06 | -0.27297 |
| 0.158344 | 0.00059  | 0.151739 | 0.001    | 0.214675 | 2.85E-06 | 0.134326 | 0.00363  | 0.233479 |
| -0.05702 | 0.21876  | -0.00545 | 0.90654  | -0.14349 | 0.00188  | -0.1251  | 0.00679  | -0.03698 |
| 0.193302 | 2.60E-05 | 0.215499 | 2.60E-06 | 0.139358 | 0.00254  | 0.060901 | 0.18892  | 0.266741 |
| 0.099684 | 0.03126  | 0.078753 | 0.08914  | 0.050327 | 0.27777  | 0.038128 | 0.41105  | 0.012078 |
| 0.283808 | 4.22E-10 | 0.079472 | 0.08625  | -0.02264 | 0.62557  | 0.006101 | 0.89538  | -0.04587 |
| 0.016865 | 0.71622  | 0.006443 | 0.88955  | -0.05743 | 0.21542  | -0.02799 | 0.54621  | -0.00754 |
| 0.108175 | 0.01937  | 0.136468 | 0.00313  | -0.06328 | 0.17221  | -0.09086 | 0.04973  | 0.099285 |
| -0.02043 | 0.65973  | 0.010178 | 0.82636  | 0.026747 | 0.56423  | 0.108934 | 0.01853  | -0.05243 |
| 0.073126 | 0.11453  | 0.149937 | 0.00115  | 0.002793 | 0.95199  | 0.049819 | 0.28265  | 0.080921 |
| 0.090212 | 0.05138  | -0.00221 | 0.96201  | -0.04299 | 0.35399  | -0.02052 | 0.65825  | -0.0353  |
| 0.052083 | 0.26132  | -0.11507 | 0.01283  | -0.03881 | 0.40269  | -0.20379 | 9.04E-06 | 0.079831 |
| 0.094005 | 0.0423   | -0.08935 | 0.05366  | 0.000206 | 0.99645  | 0.014795 | 0.74981  | -0.0248  |
| -0.11697 | 0.01141  | -0.01388 | 0.76477  | 0.043408 | 0.34929  | 0.088901 | 0.05488  | 0.080758 |
| -0.02815 | 0.54396  | 0.017128 | 0.71201  | -0.03405 | 0.46291  | -0.0241  | 0.60341  | 0.038641 |
| -0.04019 | 0.38617  | -0.0171  | 0.71244  | -0.015   | 0.74644  | 0.072448 | 0.11794  | 0.01671  |
| 0.271099 | 2.61E-09 | 0.347466 | 1.07E-14 | 0.26839  | 3.80E-09 | 0.356722 | 1.85E-15 | 0.235045 |
| 0.059522 | 0.19915  | 0.11429  | 0.01346  | 0.082486 | 0.07495  | 0.182073 | 7.58E-05 | 0.120074 |
| -0.01562 | 0.73643  | -0.14972 | 0.00117  | -0.02236 | 0.6298   | -0.01614 | 0.72788  | -0.14022 |
| 0.075107 | 0.10501  | 0.032428 | 0.4845   | 0.086819 | 0.06083  | 0.098123 | 0.03401  | 0.068634 |
| -0.18031 | 8.92E-05 | -0.06523 | 0.15929  | -0.20765 | 6.05E-06 | -0.13649 | 0.00312  | -0.22591 |
| -0.0613  | 0.18603  | 0.020644 | 0.65634  | -0.08193 | 0.07694  | -0.06168 | 0.18333  | -0.05413 |
| -0.00162 | 0.97218  | 0.043499 | 0.34827  | 0.068214 | 0.14105  | 0.040314 | 0.38473  | 0.064071 |
| 0.162842 | 0.00041  | 0.115621 | 0.01241  | 0.305453 | 1.53E-11 | 0.233329 | 3.41E-07 | 0.240138 |

|          |          |          |          |          |          |          |          |          |
|----------|----------|----------|----------|----------|----------|----------|----------|----------|
| 0.182571 | 7.24E-05 | 0.131027 | 0.00457  | 0.29907  | 4.19E-11 | 0.140483 | 0.00234  | 0.277596 |
| -0.04624 | 0.31867  | 0.055355 | 0.2325   | 0.02168  | 0.64028  | 0.066556 | 0.15099  | 0.027501 |
| 0.030091 | 0.51655  | -0.04379 | 0.345    | -0.26298 | 7.94E-09 | -0.15907 | 0.00056  | -0.21123 |
| -0.08687 | 0.06068  | -0.07126 | 0.12408  | -0.07577 | 0.10198  | -0.04443 | 0.33806  | -0.0433  |
| -0.20864 | 5.45E-06 | -0.36131 | 7.57E-16 | -0.20679 | 6.62E-06 | -0.30322 | 2.18E-11 | -0.1999  |
| 0.035414 | 0.44517  | 0.172281 | 0.00018  | -0.0345  | 0.45705  | 0.050368 | 0.27737  | 0.016353 |
| 0.029272 | 0.52803  | -0.00159 | 0.97267  | -0.01323 | 0.77551  | -0.06921 | 0.13534  | -0.03836 |
| 0.040886 | 0.37802  | 0.080808 | 0.08108  | 0.092169 | 0.04652  | 0.04668  | 0.31412  | 0.157017 |
| 0.16518  | 0.00034  | 0.014075 | 0.76161  | 0.06351  | 0.17064  | 0.012223 | 0.79221  | 0.10619  |
| 0.03287  | 0.47856  | -0.03296 | 0.4773   | -0.02657 | 0.56683  | -0.12054 | 0.00912  | 0.078087 |
| 0.137467 | 0.00291  | 0.003064 | 0.94735  | 0.026679 | 0.56522  | 0.002816 | 0.9516   | 0.089996 |
| 0.104279 | 0.02422  | -0.01335 | 0.77362  | 0.169762 | 0.00023  | 0.076121 | 0.10039  | 0.08767  |
| -0.05559 | 0.23054  | -0.03134 | 0.49931  | -0.05053 | 0.2758   | -0.04932 | 0.28751  | -0.03978 |
| -0.08488 | 0.06684  | -0.0505  | 0.27608  | -0.07707 | 0.09622  | -0.04693 | 0.31152  | -0.05074 |
| 0.106351 | 0.02153  | 0.12947  | 0.00508  | 0.071258 | 0.12412  | 0.0731   | 0.11466  | 0.092759 |
| 0.046022 | 0.321    | -0.02495 | 0.59076  | -0.0091  | 0.84455  | -0.02691 | 0.56181  | -0.02399 |
| 0.1046   | 0.02379  | 0.145506 | 0.00162  | -0.05619 | 0.22549  | 0.09445  | 0.04133  | -0.05455 |
| -0.05679 | 0.2206   | -0.0152  | 0.74316  | -0.05004 | 0.28055  | -0.02646 | 0.56836  | -0.04117 |
| 0.049084 | 0.28983  | 0.00547  | 0.90615  | -0.01974 | 0.67046  | 0.013234 | 0.77546  | 0.02259  |
| -0.04785 | 0.30212  | -0.09116 | 0.04897  | -0.02944 | 0.5256   | -0.08699 | 0.06033  | -0.01607 |
| 0.015675 | 0.73547  | 0.015275 | 0.74197  | -0.0242  | 0.60192  | -0.02883 | 0.53427  | -0.00377 |
| -0.11418 | 0.01355  | -0.16195 | 0.00044  | -0.01349 | 0.77129  | -0.08962 | 0.05293  | -0.05148 |
| 0.12017  | 0.00934  | 0.072279 | 0.1188   | 0.006398 | 0.89032  | -0.04001 | 0.38834  | 0.043421 |
| 0.140733 | 0.0023   | 0.073502 | 0.11268  | 0.037101 | 0.42378  | 0.041349 | 0.37263  | 0.086593 |
| 0.033555 | 0.46944  | 0.125379 | 0.00667  | -0.0177  | 0.7028   | -0.055   | 0.2355   | 0.04453  |
| 0.173641 | 0.00016  | 0.089158 | 0.05418  | 0.164968 | 0.00034  | 0.14426  | 0.00178  | 0.034713 |
| 0.061129 | 0.18727  | 0.079962 | 0.08432  | -0.04008 | 0.38746  | -0.07012 | 0.13023  | 0.054053 |
| -0.06926 | 0.13503  | -0.05895 | 0.2035   | -0.12646 | 0.00621  | -0.15086 | 0.00107  | -0.12542 |
| -0.06231 | 0.17884  | -0.12989 | 0.00493  | -0.13042 | 0.00476  | -0.08584 | 0.06382  | -0.11578 |
| -0.00104 | 0.98213  | 0.047652 | 0.30415  | -0.24247 | 1.13E-07 | -0.16715 | 0.00029  | -0.15121 |
| 0.150232 | 0.00113  | 0.042739 | 0.35676  | -0.07093 | 0.12588  | -0.07165 | 0.12204  | 0.072927 |
| 0.080549 | 0.08206  | 0.073646 | 0.11197  | -0.12095 | 0.00888  | -0.14327 | 0.00191  | 0.044303 |
| 0.125133 | 0.00678  | 0.045627 | 0.32517  | 0.146506 | 0.0015   | 0.097276 | 0.0356   | 0.193844 |
| -0.03444 | 0.45777  | -0.07736 | 0.09496  | -0.05688 | 0.21985  | -0.04207 | 0.36435  | -0.16069 |
| -0.12667 | 0.00612  | -0.00571 | 0.90203  | -0.09354 | 0.04334  | 0.023617 | 0.6107   | -0.06215 |
| -0.12212 | 0.00824  | -0.08073 | 0.08137  | -0.1435  | 0.00188  | -0.13706 | 0.003    | -0.10545 |
| 0.023102 | 0.61851  | -0.03534 | 0.44606  | -0.01943 | 0.67529  | -0.02552 | 0.58224  | -0.00979 |
| 0.089739 | 0.05262  | -0.13168 | 0.00437  | 0.036396 | 0.43264  | -0.12477 | 0.00694  | -0.01424 |
| -0.0592  | 0.20163  | -0.02541 | 0.58395  | -0.06071 | 0.19034  | -0.09309 | 0.04436  | 0.008027 |
| -0.00501 | 0.914    | -0.14132 | 0.0022   | -0.1428  | 0.00198  | -0.19686 | 1.83E-05 | -0.07796 |
| 0.049837 | 0.28248  | -0.03083 | 0.50625  | 0.027386 | 0.55496  | 0.008661 | 0.85191  | -0.02135 |
| 0.213961 | 3.08E-06 | -0.18646 | 5.03E-05 | -0.14651 | 0.0015   | -0.16608 | 0.00031  | -0.20126 |
| -0.05344 | 0.24912  | -0.01203 | 0.79545  | -0.04317 | 0.35199  | -0.06882 | 0.13756  | 0.049562 |
| 0.041218 | 0.37416  | 0.115035 | 0.01286  | 0.029904 | 0.51916  | 0.021012 | 0.65061  | 0.033057 |
| -0.06203 | 0.18082  | 0.076062 | 0.10065  | -0.07476 | 0.10665  | 0.061301 | 0.18603  | -0.05356 |

|          |          |          |          |          |          |          |          |          |
|----------|----------|----------|----------|----------|----------|----------|----------|----------|
| -0.12283 | 0.00788  | 0.004524 | 0.92232  | -0.0416  | 0.36976  | 0.095624 | 0.03886  | -0.16326 |
| 0.22157  | 1.33E-06 | 0.395659 | 5.96E-19 | 0.238647 | 1.80E-07 | 0.259883 | 1.20E-08 | 0.324041 |
| 0.209613 | 4.91E-06 | 0.16638  | 0.0003   | 0.284008 | 4.10E-10 | 0.216126 | 2.43E-06 | 0.277667 |
| -0.06849 | 0.13947  | -0.16733 | 0.00028  | -0.12786 | 0.00566  | -0.15733 | 0.00064  | -0.18646 |
| 0.098953 | 0.03252  | -0.06223 | 0.17946  | 0.068057 | 0.14197  | 0.113591 | 0.01405  | -0.02045 |
| 0.099861 | 0.03096  | -0.04711 | 0.30967  | 0.008272 | 0.8585   | 0.029857 | 0.51981  | -0.03387 |
| 0.026213 | 0.57204  | 0.005947 | 0.89802  | -0.14489 | 0.00169  | -0.11671 | 0.0116   | -0.11115 |
| -0.21733 | 2.13E-06 | -0.1666  | 0.0003   | -0.17909 | 9.97E-05 | -0.19758 | 1.70E-05 | -0.09396 |
| -0.00275 | 0.95265  | 0.153791 | 0.00085  | 0.139225 | 0.00257  | 0.210099 | 4.66E-06 | 0.088242 |
| 0.215234 | 2.68E-06 | 0.29688  | 5.89E-11 | 0.361742 | 6.95E-16 | 0.363732 | 4.70E-16 | 0.158628 |
| 0.07263  | 0.11702  | 0.088452 | 0.05612  | 0.020878 | 0.6527   | -0.03167 | 0.49471  | 0.147887 |
| 0.170879 | 0.00021  | -0.02912 | 0.53024  | 0.178871 | 0.0001   | 0.138957 | 0.00262  | 0.025627 |
| 0.073608 | 0.11215  | 0.129219 | 0.00516  | 0.13527  | 0.0034   | 0.061926 | 0.18157  | 0.137031 |
| 0.013971 | 0.76333  | 0.108953 | 0.01851  | -0.08888 | 0.05493  | -0.04657 | 0.3153   | -0.05514 |
| 0.036598 | 0.43009  | 0.038107 | 0.4113   | 0.075562 | 0.10292  | -0.0131  | 0.77765  | 0.165254 |
| -0.00776 | 0.86715  | 0.030715 | 0.50788  | 0.125362 | 0.00668  | 0.120742 | 0.00901  | 0.070903 |
| 0.06389  | 0.16809  | -0.06603 | 0.15423  | -0.11593 | 0.01218  | -0.15484 | 0.00079  | -0.0612  |
| 0.042712 | 0.35707  | -0.16503 | 0.00034  | 0.106435 | 0.02142  | -0.06734 | 0.14624  | 0.041775 |
| 0.008339 | 0.85737  | -0.04035 | 0.38425  | -0.19323 | 2.62E-05 | -0.16333 | 0.00039  | 0.024863 |
| -0.14169 | 0.00215  | 0.041288 | 0.37334  | 0.014207 | 0.75944  | 0.087061 | 0.06012  | -0.00451 |
| 0.004365 | 0.92505  | -0.09832 | 0.03365  | -0.24462 | 8.62E-08 | -0.10968 | 0.01774  | -0.2889  |
| 0.049452 | 0.28622  | 0.058427 | 0.20756  | 0.135405 | 0.00337  | 0.09993  | 0.03084  | 0.190877 |
| -0.0605  | 0.19189  | -0.01483 | 0.7493   | -0.0185  | 0.69005  | -0.01148 | 0.80451  | 0.019926 |
| -0.17117 | 0.0002   | -0.08427 | 0.06883  | -0.05716 | 0.21761  | -0.08407 | 0.0695   | -0.09477 |
| -0.17452 | 0.00015  | -0.1691  | 0.00024  | 0.031595 | 0.4958   | 0.019199 | 0.67901  | 0.042809 |
| 0.021509 | 0.64291  | -0.05535 | 0.23252  | 0.006362 | 0.89094  | -0.10144 | 0.02838  | 0.008471 |
| -0.09222 | 0.0464   | -0.29173 | 1.29E-10 | -0.14013 | 0.0024   | -0.25782 | 1.58E-08 | -0.13402 |
| -0.1712  | 0.0002   | -0.33509 | 1.02E-13 | -0.14167 | 0.00215  | -0.25779 | 1.59E-08 | -0.05231 |
| 0.06529  | 0.15894  | 0.020529 | 0.65813  | 0.040624 | 0.38109  | -0.01454 | 0.75404  | -0.03426 |
| 0.006938 | 0.88113  | -0.09214 | 0.04659  | -0.03787 | 0.41417  | -0.07182 | 0.12119  | -0.04717 |
| 0.096536 | 0.03703  | 0.205721 | 7.40E-06 | 0.255484 | 2.15E-08 | 0.307092 | 1.18E-11 | 0.187111 |
| 0.11653  | 0.01173  | 0.201643 | 1.13E-05 | 0.174135 | 0.00016  | 0.112957 | 0.01459  | 0.272006 |
| 0.000881 | 0.98484  | 0.08303  | 0.07304  | -0.0554  | 0.23214  | -0.03058 | 0.50977  | 0.039392 |
| 0.238968 | 1.73E-07 | 0.238277 | 1.88E-07 | 0.161577 | 0.00046  | 0.099485 | 0.0316   | 0.193152 |
| -0.12765 | 0.00574  | -0.01128 | 0.80787  | -0.04924 | 0.28832  | -0.0641  | 0.16666  | 0.109384 |
| 0.111264 | 0.01615  | -0.01844 | 0.69107  | 0.179868 | 9.29E-05 | 0.007063 | 0.87901  | 0.234827 |
| -0.12692 | 0.00602  | 0.052391 | 0.25851  | 0.011977 | 0.79629  | 0.038545 | 0.40595  | 0.004134 |
| -0.0841  | 0.06941  | 0.030327 | 0.51327  | 0.096268 | 0.03756  | 0.11592  | 0.01218  | 0.083351 |
| 0.4052   | 7.01E-20 | 0.173347 | 0.00017  | -0.09416 | 0.04196  | 0.058149 | 0.20973  | -0.05308 |
| -0.01924 | 0.67835  | -0.00056 | 0.99035  | -0.09995 | 0.03081  | -0.09301 | 0.04454  | -0.01231 |
| 0.051451 | 0.26716  | -0.18699 | 4.78E-05 | -0.15312 | 0.0009   | -0.28204 | 5.47E-10 | -0.17595 |
| 0.245437 | 7.78E-08 | 0.232111 | 3.94E-07 | 0.278369 | 9.31E-10 | 0.210076 | 4.68E-06 | 0.20835  |
| -0.19893 | 1.49E-05 | -0.16826 | 0.00026  | -0.17976 | 9.38E-05 | -0.04688 | 0.312    | -0.17187 |
| 0.197453 | 1.72E-05 | 0.183944 | 6.37E-05 | 0.089595 | 0.05301  | 0.151963 | 0.00099  | 0.045298 |
| -0.04321 | 0.35144  | -0.0174  | 0.70758  | 0.101489 | 0.02831  | 0.091351 | 0.0485   | 0.044652 |

|          |          |          |          |          |          |          |          |          |
|----------|----------|----------|----------|----------|----------|----------|----------|----------|
| -0.14955 | 0.00119  | 0.007673 | 0.86864  | -0.11624 | 0.01195  | -0.06177 | 0.18271  | -0.11926 |
| -0.00245 | 0.95791  | 0.089915 | 0.05216  | 0.078839 | 0.08879  | 0.040339 | 0.38443  | 0.201405 |
| 0.229761 | 5.19E-07 | -0.03933 | 0.39642  | 0.045134 | 0.33044  | -0.11492 | 0.01295  | 0.025268 |
| 0.333914 | 1.26E-13 | 0.181023 | 8.35E-05 | 0.282128 | 5.40E-10 | 0.188548 | 4.12E-05 | 0.200958 |
| -0.03724 | 0.42204  | -0.25483 | 2.34E-08 | -0.12299 | 0.00779  | -0.17256 | 0.00018  | -0.08706 |
| -0.1014  | 0.02845  | 0.076029 | 0.1008   | -0.11423 | 0.01351  | -0.03508 | 0.44949  | -0.22    |
| 0.123833 | 0.00738  | 0.097028 | 0.03607  | 0.271461 | 2.48E-09 | 0.128716 | 0.00534  | 0.142242 |
| 0.063643 | 0.16974  | -0.1342  | 0.00367  | -0.07292 | 0.11556  | -0.13224 | 0.0042   | -0.05457 |
| 0.184415 | 6.10E-05 | 0.056846 | 0.22015  | 0.183521 | 6.63E-05 | 0.049692 | 0.28388  | 0.110598 |
| 0.063952 | 0.16767  | 0.076014 | 0.10087  | 0.132989 | 0.00399  | 0.155967 | 0.00072  | 0.095027 |
| 0.032294 | 0.48631  | -0.02216 | 0.63295  | -0.0533  | 0.25032  | -0.00326 | 0.94393  | -0.03265 |
| 0.035185 | 0.44812  | -0.06777 | 0.14369  | 0.010268 | 0.82486  | -0.06107 | 0.1877   | 0.100506 |
| -0.04513 | 0.3305   | -0.03834 | 0.40848  | -0.02434 | 0.59975  | -0.0105  | 0.82088  | -0.00613 |
| 0.199123 | 1.46E-05 | 0.27327  | 1.92E-09 | 0.13975  | 0.00247  | 0.18659  | 4.97E-05 | 0.213505 |
| 0.065547 | 0.1573   | 0.321246 | 1.14E-12 | 0.186014 | 5.25E-05 | 0.306452 | 1.30E-11 | 0.063165 |
| 0.057942 | 0.21136  | 0.029149 | 0.52977  | 0.027566 | 0.55236  | 0.093965 | 0.04239  | -0.00616 |
| 0.079143 | 0.08757  | -0.03439 | 0.45841  | 0.078585 | 0.08983  | 0.050546 | 0.27568  | -0.07154 |
| 0.049614 | 0.28465  | -0.04082 | 0.37875  | 6.12E-05 | 0.99895  | -0.0477  | 0.30369  | 0.047684 |
| -0.09857 | 0.03321  | -0.27613 | 1.28E-09 | -0.24325 | 1.02E-07 | -0.29608 | 6.66E-11 | -0.1845  |
| 0.047705 | 0.30361  | 0.047878 | 0.30185  | 0.067596 | 0.1447   | 0.032253 | 0.48687  | 0.114438 |
| -0.09937 | 0.03179  | -0.13918 | 0.00258  | 0.041595 | 0.36979  | 0.095315 | 0.0395   | 0.02482  |
| 0.035524 | 0.44375  | -0.30159 | 2.82E-11 | -0.02039 | 0.66023  | -0.08331 | 0.07206  | -0.08867 |
| 0.045903 | 0.32225  | 0.089334 | 0.05371  | 0.09327  | 0.04395  | 0.063065 | 0.17365  | 0.204773 |
| 0.034683 | 0.45462  | -0.04283 | 0.35579  | 0.109603 | 0.01782  | 0.047066 | 0.31014  | 0.063019 |
| -0.11209 | 0.01538  | -0.09726 | 0.03562  | -0.15876 | 0.00057  | -0.09078 | 0.04993  | -0.13066 |
| -0.05893 | 0.20368  | -0.11851 | 0.01037  | -0.13404 | 0.00371  | -0.14053 | 0.00234  | -0.19124 |
| -0.06144 | 0.18501  | 0.067674 | 0.14423  | -0.10066 | 0.02963  | -0.05247 | 0.25775  | -0.01947 |
| -0.01333 | 0.77381  | -0.04086 | 0.37827  | 0.033577 | 0.46915  | -0.05063 | 0.27485  | 0.063675 |
| 0.034485 | 0.4572   | -0.03068 | 0.50832  | 0.058558 | 0.20654  | 0.020597 | 0.65707  | 0.095921 |
| -0.00221 | 0.96202  | 0.013829 | 0.76566  | -0.0815  | 0.07849  | -0.17219 | 0.00018  | -0.0125  |
| 0.216833 | 2.25E-06 | 0.116154 | 0.01201  | 0.232729 | 3.66E-07 | 0.216159 | 2.42E-06 | 0.246331 |
| 0.071761 | 0.12148  | 0.048328 | 0.29733  | -0.0771  | 0.09609  | -0.05528 | 0.2331   | 0.009616 |
| -0.0005  | 0.99132  | 0.092383 | 0.04601  | -0.17262 | 0.00018  | -0.05372 | 0.24659  | -0.07696 |
| 0.05231  | 0.25924  | 0.147438 | 0.0014   | 0.085942 | 0.0635   | 0.020094 | 0.66494  | 0.118588 |
| -0.00818 | 0.8601   | 0.081192 | 0.07964  | -0.11761 | 0.01097  | -0.02168 | 0.64027  | -0.05041 |
| -0.08182 | 0.07733  | 0.018659 | 0.68755  | 0.028781 | 0.53498  | -0.02857 | 0.53803  | 0.057478 |
| 0.079162 | 0.08749  | 0.019245 | 0.67827  | 0.009345 | 0.84038  | -0.05066 | 0.27463  | 0.074056 |
| -0.0707  | 0.12712  | 0.028754 | 0.53537  | -0.06337 | 0.17157  | 0.039888 | 0.38978  | -0.0815  |
| 0.06329  | 0.17212  | 0.162222 | 0.00043  | 0.169862 | 0.00023  | 0.228606 | 5.94E-07 | 0.141337 |
| -0.00091 | 0.98431  | 0.21361  | 3.20E-06 | -0.00561 | 0.90383  | 0.050594 | 0.27522  | -0.04715 |
| 0.142276 | 0.00206  | 0.155688 | 0.00074  | 0.211572 | 3.99E-06 | 0.235967 | 2.49E-07 | 0.23817  |
| 0.064204 | 0.166    | 0.142945 | 0.00196  | 0.123072 | 0.00775  | 0.086799 | 0.06089  | 0.062836 |
| 0.265586 | 5.58E-09 | 0.282852 | 4.86E-10 | 0.291014 | 1.44E-10 | 0.339749 | 4.42E-14 | 0.19789  |
| 0.218847 | 1.80E-06 | 0.116511 | 0.01175  | 0.241334 | 1.30E-07 | 0.314352 | 3.60E-12 | 0.146345 |
| -0.23415 | 3.09E-07 | -0.11103 | 0.01638  | -0.25563 | 2.11E-08 | -0.15701 | 0.00066  | -0.21066 |



|          |          |          |          |          |          |           |          |          |
|----------|----------|----------|----------|----------|----------|-----------|----------|----------|
| 0.06609  | 0.15388  | 0.133014 | 0.00398  | 0.139987 | 0.00243  | 0.07501   | 0.10546  | 0.154401 |
| 0.051755 | 0.26434  | 0.023072 | 0.61896  | -0.07209 | 0.11977  | -0.08098  | 0.08044  | -0.00779 |
| 0.063343 | 0.17176  | -0.13734 | 0.00294  | 0.127471 | 0.00581  | 0.02865   | 0.53684  | 0.029414 |
| -0.20418 | 8.69E-06 | -0.10738 | 0.02028  | -0.13439 | 0.00362  | -0.01718  | 0.71111  | -0.06197 |
| 0.148891 | 0.00125  | 0.087816 | 0.05792  | 0.106347 | 0.02153  | -0.00137  | 0.97653  | 0.095849 |
| 0.201177 | 1.18E-05 | 0.025617 | 0.58081  | 0.207087 | 6.42E-06 | 0.050398  | 0.27709  | 0.246168 |
| 0.222112 | 1.25E-06 | 0.28175  | 5.71E-10 | 0.354555 | 2.80E-15 | 0.341838  | 3.02E-14 | 0.235267 |
| -0.05683 | 0.2203   | 0.016738 | 0.71827  | -0.11214 | 0.01532  | -0.16634  | 0.00031  | 0.009248 |
| -0.12031 | 0.00926  | -0.0289  | 0.53329  | -0.13909 | 0.00259  | -0.07446  | 0.10804  | -0.04636 |
| -0.07309 | 0.11471  | -0.08003 | 0.08405  | -0.008   | 0.86311  | 0.013913  | 0.76428  | -0.00397 |
| 0.04516  | 0.33015  | 0.093873 | 0.0426   | -0.014   | 0.76278  | -1.09E-05 | 0.99981  | -0.08401 |
| -0.01315 | 0.77683  | 0.099352 | 0.03183  | -0.2105  | 4.47E-06 | -0.13455  | 0.00358  | -0.07416 |
| 0.00026  | 0.99553  | 0.170063 | 0.00022  | -0.03074 | 0.50752  | 5.50E-05  | 0.99905  | 0.072083 |
| -0.09675 | 0.03661  | -0.10684 | 0.02093  | -0.12119 | 0.00875  | -0.09758  | 0.03501  | -0.14729 |
| 0.009248 | 0.84202  | -0.04274 | 0.35671  | 0.003333 | 0.94273  | -0.04909  | 0.28978  | -0.01371 |
| -0.04599 | 0.32134  | -0.06231 | 0.17886  | -0.07419 | 0.10935  | -0.03623  | 0.43475  | -0.06897 |
| -0.02615 | 0.57289  | -0.00742 | 0.87297  | -0.04048 | 0.38283  | -0.01517  | 0.74365  | -0.0196  |
| 0.020146 | 0.66412  | 0.050357 | 0.27748  | 0.023498 | 0.6125   | 0.01634   | 0.72469  | -0.00308 |
| 0.236132 | 2.44E-07 | -0.02593 | 0.57622  | 0.09744  | 0.03529  | 0.012781  | 0.78295  | 0.070284 |
| 0.125478 | 0.00663  | 0.073886 | 0.1108   | 0.123505 | 0.00754  | -0.00053  | 0.99094  | 0.054035 |
| -0.02674 | 0.56427  | -0.13687 | 0.00304  | 0.001925 | 0.96691  | -0.06443  | 0.16451  | 0.023926 |
| -0.12171 | 0.00846  | -0.07763 | 0.09382  | -0.17791 | 0.00011  | -0.10568  | 0.02237  | -0.15751 |
| -0.0938  | 0.04276  | 0.262842 | 8.09E-09 | 0.060923 | 0.18876  | 0.156497  | 0.00069  | 0.150192 |
| 0.182553 | 7.25E-05 | -0.13339 | 0.00388  | 0.037179 | 0.4228   | -0.14187  | 0.00212  | -0.06861 |
| 0.238305 | 1.88E-07 | -0.04538 | 0.32784  | -0.00248 | 0.95732  | -0.03901  | 0.40031  | -0.02619 |
| -0.15582 | 0.00073  | -0.44143 | 1.08E-23 | -0.19631 | 1.93E-05 | -0.33252  | 1.61E-13 | -0.24277 |
| 0.166776 | 0.00029  | 0.135663 | 0.00331  | 0.069868 | 0.13164  | 0.07551   | 0.10316  | 0.099302 |
| 0.024446 | 0.59823  | -0.02331 | 0.61532  | -0.04019 | 0.38615  | -0.03178  | 0.4933   | 0.025941 |
| 0.048634 | 0.29427  | 0.133515 | 0.00385  | -0.04616 | 0.31955  | 0.061185  | 0.18687  | 0.01474  |
| 0.075693 | 0.10232  | 0.056694 | 0.22138  | 0.033131 | 0.47508  | -0.01162  | 0.80226  | 0.047929 |
| -0.04279 | 0.35622  | 0.056267 | 0.22489  | 0.069659 | 0.1328   | 0.077724  | 0.09341  | 0.123364 |
| 0.204353 | 8.53E-06 | 0.018338 | 0.69266  | -0.04302 | 0.35365  | -0.04914  | 0.28926  | 0.002557 |
| 0.180909 | 8.44E-05 | 0.099264 | 0.03198  | -0.04766 | 0.30407  | -0.00279  | 0.95197  | 0.064283 |
| 0.077239 | 0.09548  | 0.002912 | 0.94995  | 0.040094 | 0.38733  | 0.041642  | 0.36926  | 0.092613 |
| 0.089001 | 0.05461  | -0.00751 | 0.87149  | 0.045942 | 0.32184  | 0.016912  | 0.71547  | 0.012498 |
| 0.067865 | 0.1431   | 0.019551 | 0.67345  | 0.077673 | 0.09363  | 0.047771  | 0.30293  | 0.036078 |
| 0.177835 | 0.00011  | 0.022575 | 0.62653  | -0.0125  | 0.78754  | -0.0142   | 0.75962  | -0.01438 |
| 0.201632 | 1.13E-05 | 0.348133 | 9.43E-15 | 0.033021 | 0.47655  | 0.23024   | 4.91E-07 | 0.068255 |
| -0.04843 | 0.2963   | -0.02724 | 0.55704  | -0.15459 | 0.0008   | -0.06306  | 0.17368  | -0.01426 |
| 0.044627 | 0.3359   | -0.00673 | 0.88459  | -0.19845 | 1.56E-05 | -0.13422  | 0.00366  | -0.15415 |
| 0.217887 | 2.00E-06 | 0.095059 | 0.04003  | 0.178241 | 0.00011  | 0.133672  | 0.0038   | 0.192005 |
| -0.02676 | 0.56412  | 0.087942 | 0.05756  | 0.076052 | 0.1007   | 0.031262  | 0.50035  | 0.208026 |
| 0.032136 | 0.48845  | -0.12142 | 0.00863  | -0.01662 | 0.72025  | -0.01328  | 0.77475  | -0.17505 |
| 0.227131 | 7.04E-07 | 0.074083 | 0.10985  | 0.085149 | 0.06599  | 0.119481  | 0.00976  | 0.083534 |
| -0.06464 | 0.16314  | -0.00739 | 0.87347  | -0.12883 | 0.0053   | -0.11194  | 0.01552  | -0.09083 |

|          |          |          |          |          |          |          |          |          |
|----------|----------|----------|----------|----------|----------|----------|----------|----------|
| 0.048509 | 0.29551  | 0.080605 | 0.08185  | 0.016658 | 0.71956  | -0.0523  | 0.25937  | 0.129743 |
| -0.20771 | 6.01E-06 | -0.45684 | 1.86E-25 | -0.25407 | 2.59E-08 | -0.32035 | 1.32E-12 | -0.27636 |
| -0.05747 | 0.21512  | -0.18505 | 5.75E-05 | -0.12809 | 0.00557  | -0.3254  | 5.59E-13 | -0.04706 |
| 0.222359 | 1.21E-06 | 0.037277 | 0.42158  | 0.155447 | 0.00075  | 0.040583 | 0.38156  | 0.094516 |
| -0.00825 | 0.85883  | -0.03564 | 0.44226  | 0.029729 | 0.52161  | 0.031301 | 0.49982  | 0.037552 |
| 0.038175 | 0.41047  | -0.00756 | 0.87057  | -0.04726 | 0.30816  | -0.06304 | 0.1738   | 0.051977 |
| 0.154637 | 0.0008   | -0.0018  | 0.96908  | -0.01355 | 0.77028  | -0.11241 | 0.01508  | 0.091564 |
| -0.07078 | 0.12664  | -0.06579 | 0.15575  | -0.07697 | 0.09663  | -0.11459 | 0.01322  | -0.01584 |
| -0.09581 | 0.03849  | -0.0165  | 0.72203  | -0.22846 | 6.04E-07 | -0.21024 | 4.59E-06 | -0.17799 |
| -0.13682 | 0.00305  | -0.07197 | 0.1204   | -0.04284 | 0.35566  | -0.15348 | 0.00088  | -0.04784 |
| -0.04707 | 0.31013  | 0.02195  | 0.63613  | -0.05891 | 0.20379  | -0.0322  | 0.48757  | 0.039727 |
| 0.002901 | 0.95014  | 0.02997  | 0.51824  | -0.01272 | 0.78396  | -0.03195 | 0.49098  | 0.060426 |
| -0.00272 | 0.95323  | -0.01451 | 0.75441  | 0.029142 | 0.52987  | -0.03998 | 0.38874  | 0.059758 |
| 0.082255 | 0.07577  | -0.05483 | 0.23699  | 0.131822 | 0.00432  | 0.018196 | 0.69491  | -0.00694 |
| -0.10253 | 0.02671  | -0.2241  | 9.97E-07 | -0.08292 | 0.07343  | -0.05884 | 0.20434  | -0.16454 |
| 0.044533 | 0.33693  | -0.12343 | 0.00757  | 0.038635 | 0.40486  | -0.06528 | 0.15901  | -0.00337 |
| 0.073187 | 0.11423  | 0.028216 | 0.54303  | 0.101819 | 0.0278   | 0.102674 | 0.02651  | 0.033509 |
| 0.035939 | 0.43844  | 0.072045 | 0.12001  | -0.04699 | 0.31095  | 0.043465 | 0.34865  | -0.06446 |
| 0.255472 | 2.15E-08 | 0.078137 | 0.09168  | 0.153943 | 0.00084  | 0.036994 | 0.42512  | 0.025397 |
| -0.0313  | 0.49981  | -0.01316 | 0.77668  | 0.055019 | 0.23535  | 0.025215 | 0.58676  | 0.094779 |
| 0.067767 | 0.14368  | 0.016546 | 0.72137  | 0.121442 | 0.00861  | 0.08707  | 0.06009  | 0.136685 |
| 0.094122 | 0.04205  | 0.050818 | 0.2731   | 0.130159 | 0.00484  | 0.059391 | 0.20014  | 0.150833 |
| 0.172308 | 0.00018  | 0.251235 | 3.73E-08 | 0.061711 | 0.1831   | 0.140755 | 0.0023   | 0.144173 |
| 0.136056 | 0.00322  | 0.149634 | 0.00118  | 0.21815  | 1.94E-06 | 0.159601 | 0.00054  | 0.287292 |
| 0.029148 | 0.52978  | -0.06757 | 0.14488  | -0.13742 | 0.00292  | -0.10204 | 0.02747  | -0.13923 |
| 0.000357 | 0.99386  | -0.00236 | 0.95944  | -0.04433 | 0.33911  | -0.01077 | 0.81639  | -0.042   |
| 0.037213 | 0.42237  | 0.150949 | 0.00107  | 0.053372 | 0.24969  | 0.131956 | 0.00428  | 0.029691 |
| 0.136655 | 0.00309  | 0.189954 | 3.60E-05 | 0.048431 | 0.29629  | 0.096085 | 0.03793  | 0.074321 |
| 0.035025 | 0.45019  | 0.012277 | 0.79131  | 0.010833 | 0.81538  | -0.02978 | 0.5209   | 0.031838 |
| 0.095286 | 0.03956  | 0.195255 | 2.15E-05 | 0.129283 | 0.00514  | 0.150447 | 0.00111  | 0.109634 |
| 0.178329 | 0.00011  | 0.22616  | 7.88E-07 | 0.185452 | 5.53E-05 | 0.205745 | 7.38E-06 | 0.133456 |
| -0.01943 | 0.67544  | -0.12578 | 0.0065   | -0.1465  | 0.0015   | -0.18357 | 6.60E-05 | -0.1734  |
| -0.19371 | 2.50E-05 | -0.07102 | 0.1254   | -0.21454 | 2.89E-06 | -0.08809 | 0.05713  | -0.19257 |
| 0.07562  | 0.10266  | 0.118704 | 0.01025  | 0.015981 | 0.7305   | -0.00573 | 0.90164  | 0.1291   |
| -0.09628 | 0.03754  | -0.0663  | 0.15255  | -0.0758  | 0.10182  | -0.03612 | 0.43612  | -0.02464 |
| 0.153874 | 0.00085  | 0.213553 | 3.22E-06 | 0.037347 | 0.42071  | 0.162124 | 0.00044  | -0.05687 |
| -0.05437 | 0.24097  | -0.01677 | 0.71768  | -0.17654 | 0.00013  | -0.00074 | 0.98734  | -0.27813 |
| 0.069249 | 0.1351   | 0.054152 | 0.24282  | 0.017166 | 0.71138  | 0.059509 | 0.19925  | 0.001734 |
| 0.034453 | 0.45763  | 0.167121 | 0.00029  | 0.064693 | 0.16279  | 0.032158 | 0.48815  | 0.131379 |
| 0.177333 | 0.00012  | 0.105424 | 0.0227   | 0.132798 | 0.00404  | 0.136722 | 0.00307  | 0.035018 |
| 0.117787 | 0.01085  | 0.243938 | 9.38E-08 | 0.182369 | 7.38E-05 | 0.198788 | 1.51E-05 | 0.118962 |
| 0.20358  | 9.24E-06 | 0.051694 | 0.2649   | 0.100493 | 0.0299   | 0.071994 | 0.12027  | 0.04061  |
| 0.154571 | 0.0008   | 0.102958 | 0.02609  | 0.12231  | 0.00814  | 0.243953 | 9.37E-08 | 0.058224 |
| 0.230999 | 4.49E-07 | 0.099786 | 0.03108  | 0.309592 | 7.85E-12 | 0.179289 | 9.79E-05 | 0.236773 |
| -0.02241 | 0.62903  | 0.012151 | 0.79341  | -0.11512 | 0.01279  | -0.08138 | 0.07893  | -0.05723 |

|          |          |          |          |          |          |          |          |          |
|----------|----------|----------|----------|----------|----------|----------|----------|----------|
| 0.113694 | 0.01396  | 0.046594 | 0.31502  | 0.094266 | 0.04173  | -0.00686 | 0.88241  | 0.151871 |
| 0.042396 | 0.36064  | 0.046025 | 0.32097  | 0.112945 | 0.0146   | 0.018743 | 0.68622  | 0.150717 |
| 0.057261 | 0.21679  | 0.004221 | 0.92751  | 0.088255 | 0.05667  | 0.060505 | 0.19182  | 0.124429 |
| 0.143089 | 0.00194  | 0.179409 | 9.68E-05 | 0.09168  | 0.04769  | 0.117144 | 0.01129  | 0.130131 |
| 0.117511 | 0.01104  | 0.096458 | 0.03718  | 0.081929 | 0.07694  | 0.017591 | 0.70457  | 0.170702 |
| -0.16031 | 0.00051  | -0.14276 | 0.00198  | -0.14851 | 0.00129  | -0.15168 | 0.00101  | -0.14283 |
| -0.10859 | 0.01891  | -0.12444 | 0.0071   | -0.12192 | 0.00835  | -0.1056  | 0.02247  | -0.02024 |
| 0.007017 | 0.8798   | 0.116392 | 0.01183  | 0.008634 | 0.85237  | 0.010237 | 0.82538  | 0.078699 |
| -0.00631 | 0.89182  | 0.055229 | 0.23357  | -0.13373 | 0.00379  | -0.04899 | 0.29074  | -0.04788 |
| -0.11913 | 0.00997  | -0.09417 | 0.04195  | -0.14275 | 0.00199  | -0.14841 | 0.0013   | -0.13775 |
| -0.08512 | 0.06607  | -0.08574 | 0.06413  | -0.1739  | 0.00016  | -0.14845 | 0.00129  | -0.13857 |
| 0.127767 | 0.00569  | -0.12658 | 0.00616  | -0.01495 | 0.74726  | -0.15589 | 0.00072  | 0.070667 |
| 0.213357 | 3.29E-06 | -0.03834 | 0.4085   | 0.238871 | 1.75E-07 | 0.071391 | 0.12341  | 0.207091 |
| -0.0184  | 0.6917   | -0.13065 | 0.00468  | 0.034215 | 0.46074  | 0.047291 | 0.30783  | -0.03767 |
| -0.01413 | 0.76069  | 0.028663 | 0.53666  | 0.169084 | 0.00024  | 0.123124 | 0.00773  | 0.207502 |
| -0.09543 | 0.03926  | 0.060625 | 0.19093  | -0.10431 | 0.02418  | 0.023181 | 0.61731  | -0.05266 |
| -0.05189 | 0.26307  | 0.131507 | 0.00442  | -0.1846  | 5.99E-05 | 0.061868 | 0.18198  | -0.10064 |
| 0.147005 | 0.00144  | 0.048832 | 0.29231  | 0.045649 | 0.32495  | 0.024835 | 0.59242  | 0.044309 |
| -0.11027 | 0.01713  | -0.23224 | 3.88E-07 | 0.04095  | 0.37727  | 0.064568 | 0.1636   | -0.10639 |
| 0.225378 | 8.62E-07 | -0.07547 | 0.10333  | -0.02354 | 0.6118   | 0.011117 | 0.81063  | -0.07171 |
| 0.176299 | 0.00013  | 0.002026 | 0.96517  | 0.091993 | 0.04694  | 0.011813 | 0.79903  | 0.045965 |
| -0.03337 | 0.47189  | 0.084695 | 0.06745  | 0.004868 | 0.91644  | 0.101635 | 0.02808  | 0.060375 |
| 0.031687 | 0.49454  | 0.05126  | 0.26895  | 0.136568 | 0.0031   | 0.051278 | 0.26878  | 0.144428 |
| 0.000337 | 0.99421  | 0.044127 | 0.34135  | 0.040631 | 0.381    | 0.039856 | 0.39016  | -0.01292 |
| -0.05649 | 0.22309  | -0.20294 | 9.88E-06 | -0.0406  | 0.38141  | -0.15817 | 0.0006   | -0.08502 |
| 0.010921 | 0.81391  | -0.07777 | 0.0932   | -0.00582 | 0.90024  | -0.07563 | 0.10262  | -0.01726 |
| 0.040409 | 0.38361  | -0.08533 | 0.06541  | 0.001974 | 0.96607  | -0.00947 | 0.83834  | -0.01883 |
| -0.00935 | 0.84036  | 0.004839 | 0.91693  | 0.04908  | 0.28986  | 0.03979  | 0.39094  | 0.051355 |
| -0.20471 | 8.22E-06 | -0.40615 | 5.65E-20 | -0.23331 | 3.41E-07 | -0.24085 | 1.37E-07 | -0.21062 |
| 0.120423 | 0.00919  | -0.03258 | 0.48246  | -0.08475 | 0.06727  | -0.13013 | 0.00485  | -0.01179 |
| 0.076724 | 0.09772  | -0.02506 | 0.58903  | 0.034272 | 0.45999  | -0.02041 | 0.65995  | 0.039516 |
| 0.059218 | 0.20146  | -0.02411 | 0.6032   | 0.012573 | 0.7864   | -0.01002 | 0.82894  | 0.002856 |
| 0.004595 | 0.9211   | -0.01368 | 0.76811  | -0.04916 | 0.28911  | 0.019142 | 0.6799   | -0.01716 |
| -0.00756 | 0.87059  | -0.13213 | 0.00423  | 0.023238 | 0.61645  | -0.09271 | 0.04523  | 0.011817 |
| 0.054074 | 0.2435   | 0.051034 | 0.27106  | 0.055862 | 0.22824  | 0.04232  | 0.36151  | 0.005345 |
| 0.062775 | 0.17565  | 0.024156 | 0.60258  | 0.066346 | 0.15229  | 0.073888 | 0.1108   | 0.01625  |
| 0.036393 | 0.43268  | 0.015872 | 0.73227  | 0.050753 | 0.27371  | 0.019822 | 0.66919  | 0.029038 |
| -0.00697 | 0.88061  | 0.037682 | 0.41654  | 0.019746 | 0.6704   | 0.013268 | 0.77491  | 0.039395 |
| 0.089618 | 0.05294  | 0.056241 | 0.2251   | 0.100774 | 0.02945  | 0.029689 | 0.52217  | 0.061843 |
| 0.020852 | 0.65311  | 0.005913 | 0.8986   | 0.023779 | 0.60826  | -0.0101  | 0.82766  | 0.037687 |
| -0.10386 | 0.0248   | 0.009462 | 0.83841  | -0.15904 | 0.00056  | 0.001185 | 0.97962  | -0.13958 |
| 0.064103 | 0.16667  | -0.01045 | 0.82179  | 0.102649 | 0.02654  | 0.081452 | 0.07868  | 0.070905 |
| -0.07521 | 0.10452  | 0.057194 | 0.21733  | -0.0716  | 0.1223   | 0.068085 | 0.14181  | 0.000416 |
| -0.07141 | 0.12334  | 0.135067 | 0.00345  | 0.005125 | 0.91204  | 0.105675 | 0.02238  | 0.061196 |
| 0.102064 | 0.02742  | 0.094603 | 0.041    | 0.03049  | 0.511    | 0.063759 | 0.16896  | 0.040037 |

|          |          |          |          |          |          |          |          |          |
|----------|----------|----------|----------|----------|----------|----------|----------|----------|
| 0.126655 | 0.00613  | 0.170909 | 0.00021  | 0.116789 | 0.01155  | 0.128128 | 0.00556  | 0.066485 |
| 0.141032 | 0.00225  | 0.167529 | 0.00028  | -0.06317 | 0.17295  | 0.049399 | 0.28673  | -0.01919 |
| -0.07399 | 0.11029  | -0.01032 | 0.82406  | 0.039465 | 0.39482  | 0.100903 | 0.02924  | -0.00881 |
| 0.029305 | 0.52756  | 0.274074 | 1.72E-09 | -0.06514 | 0.15989  | 0.131197 | 0.00451  | -0.0963  |
| 0.089454 | 0.05338  | 0.021381 | 0.6449   | 0.160006 | 0.00052  | 0.067276 | 0.14661  | 0.164794 |
| 0.162296 | 0.00043  | 0.019004 | 0.68208  | -0.04849 | 0.29574  | -0.05994 | 0.19602  | -0.00689 |
| -0.01507 | 0.74537  | 0.05288  | 0.25408  | -0.05216 | 0.26066  | -0.0152  | 0.7432   | -0.08619 |
| 0.058478 | 0.20716  | 0.082965 | 0.07326  | 0.055489 | 0.23137  | 0.007499 | 0.87161  | 0.078769 |
| 0.11074  | 0.01666  | 0.153047 | 0.00091  | 0.17838  | 0.00011  | 0.116969 | 0.01142  | 0.199463 |
| 0.129943 | 0.00492  | 0.387919 | 3.21E-18 | 0.08511  | 0.06611  | 0.199315 | 1.43E-05 | 0.125937 |
| -0.07122 | 0.12432  | -0.04242 | 0.36032  | -0.0362  | 0.43516  | -0.02122 | 0.64742  | -0.04136 |
| 0.130628 | 0.00469  | 0.155189 | 0.00077  | 0.05106  | 0.27082  | 0.190738 | 3.34E-05 | 0.009598 |
| -0.09474 | 0.04072  | -0.15661 | 0.00068  | -0.12775 | 0.0057   | -0.11275 | 0.01478  | -0.11804 |
| 0.138558 | 0.00269  | 0.248713 | 5.15E-08 | 0.054254 | 0.24194  | 0.101762 | 0.02788  | 0.112699 |
| 0.001604 | 0.97242  | 0.018273 | 0.69368  | 0.054885 | 0.2365   | 0.014089 | 0.76139  | 0.058829 |
| 0.00838  | 0.85667  | 0.088183 | 0.05688  | 0.016694 | 0.71898  | 0.009842 | 0.83201  | -0.00029 |
| 0.019832 | 0.66905  | 0.054194 | 0.24246  | -0.07156 | 0.12254  | -0.02747 | 0.55381  | -0.06288 |
| 0.327086 | 4.17E-13 | 0.291844 | 1.27E-10 | 0.287577 | 2.42E-10 | 0.225971 | 8.05E-07 | 0.287665 |
| 0.019534 | 0.67373  | 0.070389 | 0.12878  | 0.072742 | 0.11645  | 0.113186 | 0.01439  | 0.015845 |
| 0.138062 | 0.00279  | 0.099136 | 0.0322   | 0.093024 | 0.04451  | 0.020073 | 0.66526  | 0.078299 |
| 0.090156 | 0.05153  | 0.040573 | 0.38168  | 0.054283 | 0.24168  | 0.058726 | 0.20523  | 0.021489 |
| 0.048754 | 0.29308  | 0.157981 | 0.00061  | 0.04948  | 0.28594  | 0.09698  | 0.03616  | 0.110359 |
| 0.095331 | 0.03947  | 0.072576 | 0.11729  | 0.096311 | 0.03747  | 0.074278 | 0.10892  | 0.072579 |
| 0.063431 | 0.17117  | 0.24671  | 6.63E-08 | 0.132772 | 0.00405  | 0.136199 | 0.00319  | 0.071374 |
| -0.01294 | 0.78033  | 0.043055 | 0.35322  | 0.009044 | 0.84545  | 0.036257 | 0.43441  | 0.00485  |
| 0.132883 | 0.00402  | 0.394537 | 7.63E-19 | 0.084771 | 0.06721  | 0.215911 | 2.49E-06 | 0.037654 |
| 0.031359 | 0.49903  | -0.06802 | 0.14221  | 0.072744 | 0.11644  | -0.01273 | 0.78382  | 0.109256 |
| 0.04236  | 0.36105  | 0.046815 | 0.31272  | 0.151289 | 0.00104  | 0.074092 | 0.10981  | 0.078146 |
| 0.137497 | 0.00291  | 0.066322 | 0.15244  | 0.125956 | 0.00642  | 0.129558 | 0.00505  | 0.077927 |
| -0.04715 | 0.30928  | -0.01785 | 0.70043  | 0.008019 | 0.86279  | -0.01037 | 0.82314  | 0.048786 |
| -0.20196 | 1.09E-05 | -0.09958 | 0.03143  | -0.13759 | 0.00289  | -0.1032  | 0.02574  | -0.11018 |
| -0.01489 | 0.74826  | 0.036521 | 0.43106  | 0.021139 | 0.64865  | 0.046155 | 0.3196   | -0.0037  |
| 0.127126 | 0.00594  | -0.00718 | 0.87704  | 0.095934 | 0.03823  | 0.08323  | 0.07235  | 0.042702 |
| 0.119673 | 0.00964  | 0.362572 | 5.91E-16 | 0.210567 | 4.44E-06 | 0.273957 | 1.74E-09 | 0.190701 |
| -0.09834 | 0.03362  | -0.11257 | 0.01494  | -0.28477 | 3.66E-10 | -0.09615 | 0.0378   | -0.22483 |
| 0.042287 | 0.36188  | -0.03749 | 0.41891  | 0.130573 | 0.00471  | 0.030895 | 0.5054   | 0.146325 |
| 0.005301 | 0.90903  | 0.027975 | 0.54648  | 0.043779 | 0.34518  | 0.022793 | 0.62321  | 0.114622 |
| 0.126058 | 0.00638  | 0.027904 | 0.5475   | 0.233963 | 3.16E-07 | 0.164716 | 0.00035  | 0.143849 |
| 0.090409 | 0.05088  | 0.206382 | 6.91E-06 | 0.16324  | 0.0004   | 0.183395 | 6.71E-05 | 0.130887 |
| 0.268369 | 3.81E-09 | 0.143298 | 0.00191  | 0.117935 | 0.01075  | 0.118727 | 0.01023  | 0.108239 |
| 0.004198 | 0.92791  | 0.220223 | 1.54E-06 | 0.072054 | 0.11996  | 0.168427 | 0.00026  | 0.089289 |
| 0.0045   | 0.92274  | 0.006544 | 0.88784  | 0.066195 | 0.15323  | 0.043387 | 0.34952  | 0.010009 |
| 0.105188 | 0.023    | 0.145355 | 0.00164  | 0.168168 | 0.00026  | 0.1712   | 0.0002   | 0.127282 |
| 0.024489 | 0.59759  | -0.00305 | 0.94766  | 0.128264 | 0.00551  | 0.122565 | 0.00801  | 0.054848 |
| 0.020531 | 0.65811  | -0.04859 | 0.29476  | -0.01272 | 0.78394  | -0.03932 | 0.39652  | 0.007553 |

|          |          |          |          |          |          |          |          |          |
|----------|----------|----------|----------|----------|----------|----------|----------|----------|
| -0.00172 | 0.9704   | 0.106126 | 0.02181  | 0.071155 | 0.12466  | 0.096469 | 0.03716  | 0.012088 |
| 0.093602 | 0.0432   | 0.096424 | 0.03725  | 0.152236 | 0.00097  | 0.123556 | 0.00751  | 0.15796  |
| 0.050238 | 0.27862  | 0.044355 | 0.33886  | 0.089865 | 0.05229  | 0.051387 | 0.26775  | -0.00247 |
| 0.02648  | 0.56813  | -0.21987 | 1.61E-06 | 0.051935 | 0.26268  | -0.14876 | 0.00126  | -0.01466 |
| 0.002954 | 0.94923  | 0.043843 | 0.34447  | 0.03821  | 0.41004  | 0.051923 | 0.2628   | 0.02996  |
| 0.132421 | 0.00415  | 0.152931 | 0.00091  | 0.114464 | 0.01332  | 0.090096 | 0.05169  | 0.122776 |
| 0.039562 | 0.39366  | 0.059473 | 0.19952  | 0.114382 | 0.01339  | 0.079647 | 0.08556  | 0.139946 |
| -0.17791 | 0.00011  | -0.27394 | 1.75E-09 | -0.1557  | 0.00073  | -0.23205 | 3.97E-07 | -0.10285 |
| 0.098101 | 0.03406  | -0.00596 | 0.8978   | 0.013141 | 0.77699  | 0.009277 | 0.84152  | 0.001798 |
| 0.07723  | 0.09552  | 0.016123 | 0.72821  | 0.039423 | 0.39534  | 0.043849 | 0.3444   | 0.030237 |
| 0.259942 | 1.19E-08 | 0.116674 | 0.01163  | 0.180298 | 8.93E-05 | 0.105239 | 0.02294  | 0.123839 |
| 0.167071 | 0.00029  | 0.185438 | 5.54E-05 | 0.057484 | 0.215    | 0.132377 | 0.00416  | 0.012688 |
| 0.007934 | 0.86422  | 0.05917  | 0.20182  | 0.065956 | 0.15472  | 0.072985 | 0.11523  | 0.046027 |
| 0.125399 | 0.00666  | 0.288824 | 2.01E-10 | 0.093564 | 0.04328  | 0.320243 | 1.35E-12 | -0.00153 |
| 0.122991 | 0.00779  | 0.154563 | 0.0008   | 0.028055 | 0.54534  | 0.121237 | 0.00873  | -0.03769 |
| 0.318738 | 1.73E-12 | 0.240028 | 1.52E-07 | 0.251221 | 3.74E-08 | 0.199176 | 1.45E-05 | 0.239524 |
| 0.279615 | 7.78E-10 | 0.125821 | 0.00648  | 0.210834 | 4.31E-06 | 0.249167 | 4.86E-08 | 0.15706  |
| 0.071871 | 0.1209   | -0.00168 | 0.97119  | 0.071817 | 0.12118  | 0.02314  | 0.61793  | 0.04716  |
| 0.072015 | 0.12016  | 0.092902 | 0.04479  | 0.072618 | 0.11708  | 0.100585 | 0.02975  | 0.055574 |
| 0.110747 | 0.01666  | 0.110058 | 0.01735  | 0.098439 | 0.03344  | 0.105709 | 0.02233  | 0.071078 |
| 0.158052 | 0.00061  | 0.125551 | 0.00659  | 0.315096 | 3.18E-12 | 0.154872 | 0.00078  | 0.251199 |
| 0.088714 | 0.0554   | 0.076266 | 0.09974  | 0.102076 | 0.0274   | 0.074626 | 0.10727  | 0.07055  |
| 0.180511 | 8.76E-05 | 0.284567 | 3.78E-10 | 0.16304  | 0.0004   | 0.196449 | 1.91E-05 | 0.237672 |
| -0.03433 | 0.45922  | 0.043942 | 0.34338  | -0.04111 | 0.37545  | 0.066474 | 0.1515   | -0.01038 |
| 0.221867 | 1.28E-06 | 0.148162 | 0.00132  | 0.035391 | 0.44547  | 0.052807 | 0.25475  | 0.062819 |
| 0.042352 | 0.36114  | 0.087744 | 0.05813  | 0.060869 | 0.18915  | 0.074693 | 0.10695  | 0.040561 |
| 0.034794 | 0.45319  | 0.104517 | 0.0239   | 0.176737 | 0.00012  | 0.161508 | 0.00046  | 0.115493 |
| 0.210874 | 4.29E-06 | 0.151918 | 0.00099  | 0.080245 | 0.08323  | 0.140702 | 0.00231  | 0.044296 |
| 0.205554 | 7.53E-06 | 0.26763  | 4.21E-09 | 0.127353 | 0.00585  | 0.106504 | 0.02134  | 0.120094 |
| 0.089236 | 0.05397  | 0.227298 | 6.91E-07 | 0.121717 | 0.00846  | 0.154051 | 0.00084  | 0.063343 |
| -0.08427 | 0.06884  | -0.04217 | 0.36321  | -0.26261 | 8.35E-09 | -0.01786 | 0.70032  | -0.27084 |
| 0.016117 | 0.72831  | -0.01371 | 0.76759  | -0.09737 | 0.03541  | 0.037211 | 0.4224   | -0.03945 |
| 0.07559  | 0.10279  | 0.115694 | 0.01235  | 0.08707  | 0.06009  | 0.101559 | 0.0282   | 0.096377 |
| 0.125957 | 0.00642  | 0.135485 | 0.00335  | 0.044912 | 0.33282  | 0.068743 | 0.13799  | 0.092824 |
| 0.046243 | 0.31868  | 0.135094 | 0.00344  | -0.10595 | 0.02203  | 0.040793 | 0.3791   | -0.07819 |
| 0.03179  | 0.49314  | 0.033756 | 0.46678  | 0.109313 | 0.01813  | 0.057177 | 0.21746  | 0.126379 |
| -0.00734 | 0.87429  | 0.167867 | 0.00027  | -0.09995 | 0.0308   | 0.035332 | 0.44623  | 0.00756  |
| 0.122204 | 0.0082   | 0.073386 | 0.11325  | 0.142145 | 0.00208  | 0.078723 | 0.08926  | 0.103963 |
| 0.020666 | 0.65599  | 0.016011 | 0.73002  | -0.01666 | 0.71953  | -0.00836 | 0.85704  | -0.01505 |
| -0.0273  | 0.55617  | -0.00593 | 0.89826  | 0.018314 | 0.69303  | 0.056706 | 0.22128  | 0.006962 |
| 0.066946 | 0.14861  | -0.00203 | 0.96502  | 0.076741 | 0.09764  | 0.007487 | 0.87181  | 0.012676 |
| 0.213672 | 3.18E-06 | 0.038617 | 0.40507  | 0.218564 | 1.86E-06 | 0.045731 | 0.32407  | 0.143155 |
| -0.01846 | 0.69065  | -0.01685 | 0.71653  | 0.007607 | 0.86978  | 0.011618 | 0.80228  | -0.0278  |
| 0.081595 | 0.07815  | 0.221616 | 1.32E-06 | -0.07838 | 0.09068  | -0.03114 | 0.50206  | -0.0268  |
| -0.03864 | 0.40478  | 0.091351 | 0.0485   | 0.008191 | 0.85987  | 0.104933 | 0.02334  | 0.019342 |

|          |          |          |          |          |          |          |          |          |
|----------|----------|----------|----------|----------|----------|----------|----------|----------|
| -0.04253 | 0.35908  | -0.03531 | 0.44653  | -0.00777 | 0.86706  | -0.01613 | 0.72802  | 0.033767 |
| 0.019421 | 0.67551  | 0.054725 | 0.23787  | 0.045987 | 0.32137  | 0.051021 | 0.27118  | 0.046338 |
| -0.05437 | 0.24091  | -0.12378 | 0.0074   | -0.01442 | 0.75602  | -0.09408 | 0.04214  | 0.000464 |
| -0.0816  | 0.07812  | -0.06367 | 0.16953  | -0.09936 | 0.03182  | -0.06195 | 0.18137  | -0.06386 |
| 0.251535 | 3.59E-08 | 0.342122 | 2.87E-14 | 0.149195 | 0.00122  | 0.178628 | 0.0001   | 0.228216 |
| 0.154369 | 0.00082  | 0.244509 | 8.74E-08 | 0.263185 | 7.73E-09 | 0.22915  | 5.57E-07 | 0.214614 |
| 0.20013  | 1.32E-05 | 0.347237 | 1.11E-14 | 0.218542 | 1.86E-06 | 0.295582 | 7.19E-11 | 0.181588 |
| 0.100335 | 0.03016  | 0.13752  | 0.0029   | 0.004358 | 0.92518  | 0.156278 | 0.0007   | -0.03383 |
| 0.112301 | 0.01518  | 0.155296 | 0.00076  | 0.068671 | 0.1384   | 0.028439 | 0.53984  | 0.100627 |
| 0.227444 | 6.79E-07 | 0.02901  | 0.53174  | 0.227395 | 6.83E-07 | 0.148264 | 0.00131  | 0.158516 |
| 0.008213 | 0.8595   | -0.00227 | 0.96106  | -0.05501 | 0.23542  | -0.03917 | 0.3984   | -0.01731 |
| 0.197103 | 1.79E-05 | 0.151866 | 0.00099  | 0.16489  | 0.00035  | 0.148994 | 0.00124  | 0.171527 |
| -0.05722 | 0.21708  | -0.11991 | 0.0095   | -0.06945 | 0.13398  | -0.01747 | 0.70658  | -0.20686 |
| 0.040177 | 0.38635  | -0.06112 | 0.18734  | -0.13034 | 0.00479  | -0.04723 | 0.30845  | -0.09947 |
| 0.033867 | 0.46532  | 0.13792  | 0.00282  | 0.121833 | 0.0084   | 0.175182 | 0.00014  | 0.083274 |
| -0.01869 | 0.68705  | -0.083   | 0.07315  | -0.0931  | 0.04435  | -0.1104  | 0.017    | -0.02907 |
| 0.055416 | 0.23199  | 0.289351 | 1.85E-10 | 0.032723 | 0.48053  | 0.073208 | 0.11413  | 0.095471 |
| -0.02046 | 0.65915  | -0.05054 | 0.27574  | -0.14105 | 0.00225  | -0.09147 | 0.04822  | -0.14931 |
| 0.00315  | 0.94587  | -0.02577 | 0.5785   | -0.00781 | 0.86629  | -0.01264 | 0.78525  | -0.04473 |
| 0.048414 | 0.29647  | 0.069145 | 0.13569  | -0.05616 | 0.22575  | -0.08485 | 0.06696  | -0.0285  |
| 0.029803 | 0.52057  | 0.009428 | 0.83898  | 0.150363 | 0.00112  | 0.16596  | 0.00032  | 0.066866 |
| 0.220924 | 1.43E-06 | 0.139796 | 0.00246  | 0.235215 | 2.72E-07 | 0.11618  | 0.01199  | 0.236992 |
| 0.084059 | 0.06954  | -0.08098 | 0.08044  | -0.06315 | 0.17309  | -0.12076 | 0.009    | -0.1167  |
| 0.341407 | 3.27E-14 | 0.044652 | 0.33564  | -0.16438 | 0.00036  | 0.015815 | 0.7332   | -0.13073 |
| 0.191696 | 3.04E-05 | 0.406045 | 5.79E-20 | 0.254222 | 2.54E-08 | 0.409676 | 2.51E-20 | 0.107037 |
| 0.072078 | 0.11983  | 0.080581 | 0.08194  | 0.057311 | 0.21639  | 0.065634 | 0.15675  | 0.023707 |
| -0.12633 | 0.00626  | -0.30559 | 1.50E-11 | -0.04688 | 0.31202  | -0.20392 | 8.93E-06 | -0.08586 |
| 0.120743 | 0.00901  | 0.040133 | 0.38688  | 0.087685 | 0.0583   | 0.04997  | 0.28119  | 0.07673  |
| 0.017572 | 0.70487  | 0.085465 | 0.06499  | -0.0334  | 0.47156  | -0.08143 | 0.07876  | 0.045539 |
| 0.004028 | 0.93082  | -0.16637 | 0.00031  | -0.04143 | 0.37171  | -0.17251 | 0.00018  | 0.028168 |
| 0.030684 | 0.50832  | -0.01583 | 0.73295  | 0.052505 | 0.25747  | -0.02017 | 0.66367  | 0.032043 |
| -0.0828  | 0.07385  | 0.003505 | 0.93978  | -0.12591 | 0.00644  | -0.09436 | 0.04154  | -0.03215 |
| -0.01021 | 0.82583  | -0.18796 | 4.36E-05 | -0.12521 | 0.00674  | -0.25033 | 4.19E-08 | -0.08298 |
| -0.04165 | 0.36922  | -0.12744 | 0.00582  | -0.0701  | 0.13038  | -0.05806 | 0.21041  | -0.06033 |
| 0.145288 | 0.00164  | -0.08445 | 0.06825  | -0.02389 | 0.60653  | -0.07137 | 0.1235   | -0.02452 |
| 0.08973  | 0.05265  | 0.025362 | 0.58459  | 0.045627 | 0.32518  | 0.010555 | 0.82005  | 0.094147 |
| 0.07578  | 0.10193  | 0.082576 | 0.07463  | 0.051047 | 0.27094  | 0.018698 | 0.68693  | 0.064422 |
| 0.004398 | 0.92449  | 0.088461 | 0.0561   | -0.02488 | 0.59174  | -0.01946 | 0.67497  | 0.018015 |
| 0.103956 | 0.02467  | -0.22171 | 1.31E-06 | 0.055464 | 0.23158  | -0.13865 | 0.00268  | 0.029814 |
| -0.09567 | 0.03876  | -0.11528 | 0.01268  | -0.10247 | 0.02681  | -0.20029 | 1.29E-05 | -0.08844 |
| 0.484345 | 7.68E-29 | 0.029237 | 0.52853  | -0.00442 | 0.92408  | -0.08373 | 0.07065  | -0.05585 |
| 0.170345 | 0.00022  | 0.36231  | 6.22E-16 | 0.253522 | 2.78E-08 | 0.393705 | 9.16E-19 | 0.167617 |
| 0.011993 | 0.79603  | -0.02228 | 0.63098  | 0.06227  | 0.17915  | 0.098183 | 0.03391  | 0.056284 |
| 0.040413 | 0.38357  | -0.03448 | 0.45722  | 0.05117  | 0.26979  | -0.02469 | 0.59452  | 0.01414  |
| 0.213583 | 3.21E-06 | 0.03629  | 0.43399  | -0.03218 | 0.48788  | -0.03807 | 0.41175  | -0.05373 |

|          |          |          |          |          |          |          |          |          |
|----------|----------|----------|----------|----------|----------|----------|----------|----------|
| -0.1797  | 9.43E-05 | -0.22373 | 1.04E-06 | -0.07011 | 0.13031  | -0.05237 | 0.25871  | -0.11179 |
| 0.102794 | 0.02633  | 0.053947 | 0.24462  | 0.01643  | 0.72324  | 0.011577 | 0.80296  | 0.063515 |
| 0.089288 | 0.05383  | 0.024453 | 0.59813  | 0.066693 | 0.15015  | 0.087367 | 0.05922  | 0.048923 |
| 0.122116 | 0.00825  | 0.168688 | 0.00025  | 0.011102 | 0.81088  | -0.05396 | 0.2445   | 0.141553 |
| 0.096502 | 0.0371   | 0.22645  | 7.62E-07 | 0.108346 | 0.01918  | 0.188298 | 4.22E-05 | 0.01323  |
| 0.078482 | 0.09025  | 0.183062 | 6.92E-05 | -0.01794 | 0.69907  | -0.01673 | 0.71845  | 0.03701  |
| -0.09278 | 0.04507  | -0.0387  | 0.40412  | -0.17948 | 9.62E-05 | -0.10961 | 0.01781  | -0.17953 |
| -0.08847 | 0.05609  | 0.151006 | 0.00106  | -0.12849 | 0.00542  | -0.01039 | 0.82289  | -0.13206 |
| -0.02477 | 0.59339  | 0.147993 | 0.00134  | -0.10177 | 0.02787  | -0.067   | 0.1483   | 0.015055 |
| -0.15871 | 0.00058  | 0.062832 | 0.17525  | -0.22204 | 1.26E-06 | -0.09365 | 0.04308  | -0.22256 |
| -0.13522 | 0.00341  | -0.14571 | 0.00159  | -0.15299 | 0.00091  | -0.2348  | 2.86E-07 | -0.06395 |
| -0.04513 | 0.33043  | 0.078717 | 0.08929  | -0.06973 | 0.1324   | -0.0621  | 0.18036  | -0.03137 |
| -0.04461 | 0.33611  | -0.09898 | 0.03248  | -0.25088 | 3.91E-08 | -0.19806 | 1.62E-05 | -0.25685 |
| -0.04414 | 0.34121  | -0.11097 | 0.01644  | -0.16795 | 0.00027  | -0.1427  | 0.00199  | -0.21542 |
| 0.002828 | 0.9514   | -0.03805 | 0.41203  | -0.1449  | 0.00169  | -0.08321 | 0.07241  | -0.17553 |
| -0.07653 | 0.09858  | -0.04712 | 0.30962  | -0.18179 | 7.79E-05 | -0.0926  | 0.04549  | -0.19065 |
| 0.206698 | 6.68E-06 | 0.333677 | 1.31E-13 | 0.085647 | 0.06442  | 0.19605  | 1.98E-05 | 0.033897 |
| 0.013157 | 0.77674  | 0.118743 | 0.01022  | -0.11484 | 0.01302  | 0.09823  | 0.03382  | -0.15645 |
| 0.070462 | 0.12838  | 0.080669 | 0.08161  | 0.08861  | 0.05568  | 0.063531 | 0.17049  | 0.091805 |
| 0.135931 | 0.00325  | 0.033164 | 0.47464  | 0.016859 | 0.71632  | 0.014963 | 0.74707  | 0.004675 |
| 0.061274 | 0.18622  | 0.007075 | 0.8788   | 0.02736  | 0.55533  | -0.09425 | 0.04177  | 0.132241 |
| 0.028845 | 0.53407  | 0.093467 | 0.0435   | 0.004164 | 0.92849  | 0.090471 | 0.05072  | 0.001159 |
| 0.119819 | 0.00955  | 0.300902 | 3.15E-11 | 0.324193 | 6.87E-13 | 0.432391 | 1.07E-22 | 0.198185 |
| -0.00674 | 0.88455  | -0.05768 | 0.21342  | -0.0281  | 0.54466  | 0.001721 | 0.97042  | -0.05499 |
| 0.042727 | 0.3569   | -0.13586 | 0.00326  | 0.087595 | 0.05856  | -0.14349 | 0.00188  | 0.160073 |
| 0.261936 | 9.14E-09 | 0.150794 | 0.00108  | 0.094606 | 0.041    | 0.121792 | 0.00842  | -0.01872 |
| 0.032037 | 0.48978  | 0.293803 | 9.44E-11 | -0.09782 | 0.03457  | 0.017674 | 0.70324  | -0.03278 |
| 0.02549  | 0.58269  | 0.169207 | 0.00024  | -0.14455 | 0.00174  | 0.014576 | 0.75339  | -0.07476 |
| -0.07039 | 0.12879  | -0.12488 | 0.00689  | -0.18644 | 5.04E-05 | -0.08581 | 0.06391  | -0.17298 |
| 0.327468 | 3.91E-13 | 0.074458 | 0.10806  | 0.194887 | 2.23E-05 | 0.146807 | 0.00147  | 0.178293 |
| 0.282981 | 4.77E-10 | 0.344105 | 1.99E-14 | 0.095918 | 0.03826  | 0.246302 | 6.98E-08 | 0.205621 |
| -0.05604 | 0.22678  | -0.01218 | 0.79293  | -0.03311 | 0.47539  | -0.02722 | 0.55731  | -0.0116  |
| -0.09229 | 0.04622  | -0.42513 | 6.40E-22 | -0.20094 | 1.21E-05 | -0.37466 | 5.21E-17 | -0.221   |
| 0.087439 | 0.05901  | 0.005228 | 0.9103   | 0.084942 | 0.06665  | 0.072479 | 0.11778  | 0.118748 |
| 0.014212 | 0.75937  | -0.14619 | 0.00154  | -0.03109 | 0.50265  | -0.09127 | 0.04871  | -0.12975 |
| 0.072679 | 0.11677  | 0.120559 | 0.00911  | 0.002592 | 0.95545  | -0.02353 | 0.61201  | 0.068897 |
| -0.01828 | 0.69364  | -0.17315 | 0.00017  | -0.14768 | 0.00137  | -0.24141 | 1.28E-07 | -0.12253 |
| 0.08947  | 0.05334  | 0.005497 | 0.90569  | 0.242674 | 1.10E-07 | 0.236991 | 2.20E-07 | 0.084968 |
| 0.030152 | 0.5157   | 0.080441 | 0.08247  | 0.190957 | 3.27E-05 | 0.05821  | 0.20926  | 0.199116 |
| 0.054428 | 0.24043  | 0.074559 | 0.10758  | 0.088659 | 0.05555  | 0.101139 | 0.02886  | 0.059056 |
| 0.092433 | 0.04589  | 0.108797 | 0.01868  | 0.113808 | 0.01386  | 0.085913 | 0.06359  | 0.092201 |
| 0.010632 | 0.81876  | 0.160044 | 0.00052  | 0.08242  | 0.07518  | 0.148378 | 0.0013   | 0.124988 |
| 0.015465 | 0.73889  | 0.022407 | 0.62912  | -0.06871 | 0.13817  | -0.0485  | 0.29559  | -0.03842 |
| 0.020588 | 0.65721  | 0.042756 | 0.35657  | -0.07472 | 0.10681  | -0.04061 | 0.3812   | -0.05811 |
| 0.070307 | 0.12923  | 0.064435 | 0.16448  | 0.028071 | 0.54511  | 0.059265 | 0.2011   | 0.027428 |

|          |          |          |          |          |          |          |          |          |
|----------|----------|----------|----------|----------|----------|----------|----------|----------|
| 0.070275 | 0.1294   | 0.050031 | 0.2806   | 0.033102 | 0.47546  | -0.03238 | 0.48511  | 0.042536 |
| 0.1095   | 0.01793  | 0.063257 | 0.17235  | 0.043271 | 0.35081  | 0.065502 | 0.15759  | 0.019025 |
| -0.00227 | 0.96104  | 0.027248 | 0.55696  | 0.104136 | 0.02442  | 0.05803  | 0.21067  | 0.101007 |
| -0.00024 | 0.99595  | -0.15221 | 0.00097  | 0.065841 | 0.15544  | 0.088544 | 0.05587  | 0.066489 |
| 0.071722 | 0.12168  | 0.070787 | 0.12663  | 0.04395  | 0.3433   | -0.01032 | 0.824    | 0.080529 |
| -0.17005 | 0.00022  | -0.10673 | 0.02106  | -0.10111 | 0.0289   | -0.0944  | 0.04145  | -0.01704 |
| 0.04507  | 0.33112  | 0.058054 | 0.21048  | 0.073643 | 0.11198  | -0.02546 | 0.5832   | 0.189187 |
| 0.105566 | 0.02252  | 0.076795 | 0.09741  | 0.213656 | 3.18E-06 | 0.117722 | 0.0109   | 0.19646  |
| -0.11958 | 0.00969  | -0.09906 | 0.03234  | -0.34113 | 3.44E-14 | -0.20826 | 5.67E-06 | -0.17124 |
| 0.245003 | 8.22E-08 | 0.18448  | 6.06E-05 | 0.341723 | 3.08E-14 | 0.26486  | 6.16E-09 | 0.240119 |
| 0.027104 | 0.55904  | 0.089405 | 0.05352  | -0.00466 | 0.92003  | -0.01162 | 0.80217  | 0.094136 |
| 0.095053 | 0.04005  | 0.007242 | 0.87596  | 0.026807 | 0.56336  | -0.00082 | 0.98594  | 0.051146 |
| 0.103896 | 0.02475  | -0.04284 | 0.35565  | -0.01729 | 0.70946  | -0.06789 | 0.14293  | -0.02469 |
| -0.00661 | 0.88669  | -0.10308 | 0.0259   | 0.029409 | 0.5261   | 0.018033 | 0.69751  | 0.033472 |
| 0.248222 | 5.48E-08 | -0.04577 | 0.32368  | 0.10673  | 0.02106  | -0.07844 | 0.09043  | 0.192559 |
| 0.094732 | 0.04073  | 0.085591 | 0.06459  | -0.20832 | 5.63E-06 | -0.16917 | 0.00024  | -0.00664 |
| 0.045161 | 0.33014  | 0.073733 | 0.11155  | -0.00475 | 0.91845  | -0.05776 | 0.21276  | 0.086449 |
| -0.14938 | 0.00121  | -0.14927 | 0.00122  | -0.10428 | 0.02422  | -0.12538 | 0.00667  | -0.15769 |
| 0.119001 | 0.01006  | 0.066323 | 0.15244  | -0.04313 | 0.3524   | -0.06135 | 0.18568  | -0.09482 |
| 0.05958  | 0.19871  | -0.13063 | 0.00469  | 0.023127 | 0.61813  | -0.08218 | 0.07604  | 0.050683 |
| -0.09106 | 0.04924  | -0.12308 | 0.00775  | -0.03036 | 0.51283  | -0.06711 | 0.1476   | -0.03475 |
| 0.076739 | 0.09765  | 0.086788 | 0.06093  | 0.057198 | 0.21729  | -0.02136 | 0.64522  | 0.106382 |
| 0.114795 | 0.01305  | 0.033449 | 0.47084  | 0.189729 | 3.68E-05 | 0.09875  | 0.03288  | 0.21531  |
| 0.342363 | 2.74E-14 | 0.411088 | 1.81E-20 | 0.279603 | 7.79E-10 | 0.40392  | 9.39E-20 | 0.144273 |
| -0.03091 | 0.50515  | -0.01781 | 0.7011   | -0.0612  | 0.18674  | -0.03799 | 0.41274  | -0.04419 |
| 0.095238 | 0.03966  | 0.000548 | 0.99057  | 0.037542 | 0.41829  | -0.08798 | 0.05746  | 0.138989 |
| -0.06896 | 0.13677  | -0.11875 | 0.01022  | -0.01398 | 0.76325  | -0.00738 | 0.8736   | 0.038995 |
| -0.13625 | 0.00318  | -0.10084 | 0.02934  | -0.09532 | 0.03948  | 0.04829  | 0.2977   | -0.16445 |
| 0.122193 | 0.00821  | 0.128035 | 0.00559  | 0.01498  | 0.74679  | 0.02033  | 0.66124  | 0.061368 |
| 0.067145 | 0.1474   | 0.11098  | 0.01643  | 0.216225 | 2.40E-06 | 0.153077 | 0.0009   | 0.118313 |
| -0.38046 | 1.56E-17 | -0.26919 | 3.40E-09 | -0.32504 | 5.94E-13 | -0.26119 | 1.01E-08 | -0.26847 |
| -0.06021 | 0.19403  | -0.25245 | 3.19E-08 | -0.20399 | 8.86E-06 | -0.33592 | 8.81E-14 | -0.16052 |
| 0.307483 | 1.10E-11 | 0.154085 | 0.00084  | 0.202284 | 1.06E-05 | 0.047593 | 0.30474  | 0.228341 |
| 0.016212 | 0.72677  | -0.10563 | 0.02244  | 0.048334 | 0.29727  | -0.11311 | 0.01446  | 0.025667 |
| 0.152663 | 0.00093  | -0.06918 | 0.13551  | -0.00368 | 0.93673  | -0.06967 | 0.13277  | 0.009521 |
| 0.057383 | 0.21581  | -0.04408 | 0.34182  | 0.142126 | 0.00208  | 0.072    | 0.12023  | 0.144255 |
| 0.128418 | 0.00545  | 0.046395 | 0.31709  | -0.00313 | 0.94613  | 0.004371 | 0.92495  | 0.106791 |
| -0.0203  | 0.66167  | 0.011754 | 0.8      | 0.101551 | 0.02821  | 0.097939 | 0.03435  | 0.146769 |
| -0.08393 | 0.06996  | -0.11525 | 0.0127   | -0.02015 | 0.664    | -0.15743 | 0.00064  | 0.002223 |
| -0.00993 | 0.83062  | 0.012423 | 0.78889  | 0.017535 | 0.70546  | -0.01991 | 0.66776  | 0.003621 |
| 5.44E-05 | 0.99907  | 0.004581 | 0.92135  | 0.020576 | 0.6574   | -0.02316 | 0.61759  | 0.030989 |
| 0.251237 | 3.73E-08 | 0.215355 | 2.65E-06 | 0.298149 | 4.84E-11 | 0.203589 | 9.24E-06 | 0.219391 |
| 0.099315 | 0.03189  | -0.29935 | 4.01E-11 | -0.02337 | 0.61445  | -0.11827 | 0.01053  | -0.13195 |
| 0.024739 | 0.59386  | 0.083792 | 0.07044  | 0.084252 | 0.0689   | 0.028451 | 0.53968  | 0.155947 |
| -0.05159 | 0.26583  | -0.16076 | 0.00049  | -0.03585 | 0.43962  | -0.08242 | 0.0752   | -0.00382 |



|          |          |          |          |          |          |          |          |          |
|----------|----------|----------|----------|----------|----------|----------|----------|----------|
| 0.01784  | 0.70059  | 0.029123 | 0.53013  | 0.086455 | 0.06193  | 0.037875 | 0.41417  | -0.01259 |
| 0.133943 | 0.00373  | 0.1887   | 4.06E-05 | 0.168648 | 0.00025  | 0.185402 | 5.56E-05 | 0.067912 |
| 0.151473 | 0.00103  | 0.11494  | 0.01294  | 0.080022 | 0.08409  | 0.098413 | 0.03349  | 0.157797 |
| 0.174522 | 0.00015  | 0.148139 | 0.00133  | 0.098356 | 0.03359  | 0.128445 | 0.00544  | 0.042634 |
| -0.12371 | 0.00744  | -0.25517 | 2.24E-08 | -0.21595 | 2.48E-06 | -0.19713 | 1.78E-05 | -0.27794 |
| -0.11504 | 0.01286  | -0.14571 | 0.00159  | -0.08857 | 0.05579  | -0.07516 | 0.10479  | -0.09441 |
| 0.05598  | 0.22726  | -0.17902 | 0.0001   | -0.11913 | 0.00998  | -0.06668 | 0.15025  | -0.20342 |
| 0.033631 | 0.46843  | -0.18449 | 6.06E-05 | -0.02262 | 0.62592  | -0.00569 | 0.90238  | -0.13866 |
| -0.17437 | 0.00015  | -0.2069  | 6.54E-06 | -0.13599 | 0.00323  | -0.14817 | 0.00132  | -0.14513 |
| 0.024287 | 0.60061  | 0.022061 | 0.63441  | 0.065892 | 0.15512  | 0.115213 | 0.01272  | -0.07901 |
| 0.085832 | 0.06384  | 0.010148 | 0.82687  | 0.085478 | 0.06495  | 0.034384 | 0.45853  | 0.062771 |
| 0.089831 | 0.05238  | -0.12532 | 0.00669  | -0.00765 | 0.86902  | -0.06977 | 0.1322   | -0.0767  |
| 0.040525 | 0.38225  | -0.04162 | 0.36947  | -0.01231 | 0.79077  | -0.04745 | 0.30624  | -0.04    |
| 0.035054 | 0.44982  | -0.10694 | 0.02081  | 0.000393 | 0.99323  | -0.07429 | 0.10884  | 0.004792 |
| 0.088106 | 0.05709  | 0.010821 | 0.81559  | 0.226585 | 7.50E-07 | 0.134226 | 0.00366  | 0.107951 |
| -0.24932 | 4.77E-08 | -0.16448 | 0.00036  | -0.25517 | 2.24E-08 | -0.18614 | 5.18E-05 | -0.26069 |
| 0.183224 | 6.81E-05 | 0.214539 | 2.89E-06 | 0.26011  | 1.17E-08 | 0.323208 | 8.13E-13 | 0.189553 |
| -0.04404 | 0.34233  | 0.218415 | 1.89E-06 | -0.09837 | 0.03357  | 0.103681 | 0.02505  | -0.02671 |
| 0.095747 | 0.03861  | 0.068651 | 0.13852  | 0.122788 | 0.0079   | 0.025653 | 0.58028  | 0.042469 |
| 0.244568 | 8.68E-08 | 0.221916 | 1.28E-06 | 0.243074 | 1.04E-07 | 0.192534 | 2.80E-05 | 0.241485 |
| 0.016033 | 0.72967  | -0.02033 | 0.66119  | 0.019092 | 0.68069  | -0.03681 | 0.42748  | 0.016284 |
| -0.13017 | 0.00484  | -0.10529 | 0.02287  | -0.15319 | 0.0009   | -0.15707 | 0.00066  | -0.08119 |
| 0.411112 | 1.80E-20 | 0.043314 | 0.35033  | -0.00998 | 0.82972  | -0.03612 | 0.43615  | -0.014   |
| -0.01155 | 0.80337  | -0.05253 | 0.25727  | 0.023247 | 0.6163   | -0.06088 | 0.18907  | 0.009367 |
| -0.13067 | 0.00468  | -0.06066 | 0.19066  | -0.03302 | 0.47653  | -0.00363 | 0.93763  | -0.08297 |
| 0.014406 | 0.75619  | 0.051757 | 0.26432  | -0.06637 | 0.15216  | 0.04325  | 0.35104  | -0.01217 |
| -0.19601 | 1.99E-05 | -0.1122  | 0.01527  | -0.24634 | 6.95E-08 | -0.17149 | 0.0002   | -0.22299 |
| 0.209879 | 4.78E-06 | 0.052874 | 0.25414  | 0.052108 | 0.26109  | 0.035807 | 0.44014  | 0.051932 |
| 0.018318 | 0.69297  | 0.02051  | 0.65842  | 0.066026 | 0.15429  | 0.01126  | 0.80825  | 0.034537 |
| 0.07704  | 0.09634  | -0.08657 | 0.06157  | -0.01995 | 0.66713  | -0.03765 | 0.41689  | -0.04057 |
| 0.157989 | 0.00061  | -0.00982 | 0.83243  | 0.033603 | 0.46881  | -0.01812 | 0.69609  | 0.033754 |
| 0.028028 | 0.54573  | -0.00349 | 0.94008  | 0.067342 | 0.14622  | 0.025844 | 0.57747  | 0.044073 |
| 0.188779 | 4.03E-05 | 0.060185 | 0.19418  | -0.05201 | 0.26195  | -0.02977 | 0.52097  | -0.00806 |
| 0.197889 | 1.65E-05 | 0.106713 | 0.02108  | 0.211464 | 4.03E-06 | 0.158967 | 0.00056  | 0.189193 |
| 0.090633 | 0.0503   | -0.0287  | 0.53617  | 0.215712 | 2.54E-06 | 0.228612 | 5.93E-07 | 0.164682 |
| -0.04029 | 0.38496  | 0.074262 | 0.109    | 0.035723 | 0.4412   | 0.030587 | 0.50966  | 0.110956 |
| -0.02622 | 0.57193  | -0.04694 | 0.31147  | 0.183103 | 6.89E-05 | 0.143513 | 0.00188  | 0.148027 |
| -0.00627 | 0.89253  | 0.005446 | 0.90657  | -0.0425  | 0.35943  | -0.05535 | 0.23251  | -0.01689 |
| -0.08377 | 0.0705   | -0.2304  | 4.81E-07 | 0.04057  | 0.38172  | -0.11163 | 0.0158   | -0.06219 |
| -0.11839 | 0.01045  | -0.33172 | 1.86E-13 | -0.2956  | 7.18E-11 | -0.31272 | 4.72E-12 | -0.28227 |
| 0.02344  | 0.61338  | -0.00711 | 0.87816  | 0.077975 | 0.09235  | 0.092454 | 0.04584  | 0.138271 |
| -0.20174 | 1.12E-05 | -0.37834 | 2.43E-17 | -0.31921 | 1.60E-12 | -0.29762 | 5.25E-11 | -0.28468 |
| -0.08474 | 0.0673   | -0.06443 | 0.16449  | -0.17056 | 0.00021  | 0.018143 | 0.69576  | -0.12434 |
| -0.08504 | 0.06632  | -0.10993 | 0.01748  | -0.11033 | 0.01707  | -0.20153 | 1.14E-05 | -0.04591 |
| 0.04868  | 0.29382  | 0.139618 | 0.0025   | 0.045978 | 0.32146  | -0.02976 | 0.52115  | 0.106054 |

|          |          |          |          |           |          |          |          |          |
|----------|----------|----------|----------|-----------|----------|----------|----------|----------|
| 0.030131 | 0.51599  | 0.095473 | 0.03917  | 0.086359  | 0.06222  | 0.158193 | 0.0006   | 0.070509 |
| 0.138776 | 0.00265  | 0.180543 | 8.73E-05 | 0.206209  | 7.03E-06 | 0.112626 | 0.01489  | 0.227833 |
| -0.18084 | 8.49E-05 | -0.29608 | 6.66E-11 | -0.31648  | 2.53E-12 | -0.32777 | 3.71E-13 | -0.28666 |
| -0.1681  | 0.00026  | -0.19338 | 2.58E-05 | -0.02144  | 0.64396  | -0.10137 | 0.02849  | -0.01237 |
| -0.13522 | 0.00341  | -0.16323 | 0.0004   | -0.04937  | 0.28704  | -0.07973 | 0.08525  | -0.07421 |
| -0.15629 | 0.0007   | -0.02534 | 0.58494  | -0.17057  | 0.00021  | -0.06304 | 0.17382  | -0.15944 |
| 0.007098 | 0.87842  | -0.00928 | 0.84143  | 0.081547  | 0.07833  | 0.088473 | 0.05606  | 0.0888   |
| 0.071935 | 0.12057  | 0.025592 | 0.58119  | 0.141017  | 0.00225  | 0.106221 | 0.02169  | 0.115326 |
| 0.031328 | 0.49945  | 0.136529 | 0.00311  | -0.02466  | 0.59501  | 0.022369 | 0.62969  | 0.042544 |
| -0.10542 | 0.0227   | -0.06516 | 0.1598   | -0.03583  | 0.43982  | -0.00741 | 0.87313  | -0.11085 |
| 0.073209 | 0.11412  | -0.03351 | 0.47008  | 0.060482  | 0.19199  | 0.029931 | 0.51878  | 0.057781 |
| -0.00131 | 0.97746  | 0.028105 | 0.54461  | 0.085301  | 0.06551  | 0.052611 | 0.25651  | 0.129687 |
| 0.247551 | 5.96E-08 | 0.002835 | 0.95128  | -0.01246  | 0.78828  | -0.04845 | 0.2961   | -0.00892 |
| 0.112174 | 0.0153   | 0.080035 | 0.08404  | 0.140091  | 0.00241  | -0.02909 | 0.53064  | 0.206075 |
| 0.157682 | 0.00063  | 0.111204 | 0.01621  | 0.132122  | 0.00424  | 0.055298 | 0.23298  | 0.198797 |
| 0.015303 | 0.74153  | 0.257287 | 1.70E-08 | -0.01878  | 0.68562  | 0.128553 | 0.0054   | -0.05168 |
| -0.08056 | 0.082    | -0.18786 | 4.40E-05 | -0.28042  | 6.92E-10 | -0.15297 | 0.00091  | -0.18376 |
| 0.058823 | 0.20449  | -0.21193 | 3.84E-06 | 0.154903  | 0.00078  | -0.06601 | 0.15437  | 0.117219 |
| 0.068347 | 0.14028  | -0.0386  | 0.40522  | 0.10223   | 0.02717  | 0.007966 | 0.86368  | 0.117993 |
| 0.046539 | 0.31559  | -0.03449 | 0.45718  | 0.078965  | 0.08828  | 0.003578 | 0.93854  | 0.035711 |
| 0.051674 | 0.26509  | 0.043573 | 0.34745  | 0.118015  | 0.0107   | 0.115636 | 0.0124   | 0.142274 |
| 0.054572 | 0.23918  | -0.04239 | 0.3607   | -0.01966  | 0.67173  | -0.06289 | 0.17487  | -0.01753 |
| -0.01875 | 0.68606  | 0.031172 | 0.50159  | 0.039809  | 0.39072  | -0.09178 | 0.04744  | 0.153224 |
| 0.048401 | 0.2966   | 0.096908 | 0.0363   | -0.01293  | 0.78042  | 0.104299 | 0.02419  | 0.009902 |
| -0.02382 | 0.60763  | 8.81E-05 | 0.99848  | -0.06054  | 0.19154  | 0.095622 | 0.03886  | -0.188   |
| 0.136539 | 0.00311  | 0.228731 | 5.85E-07 | 0.015923  | 0.73144  | 0.203276 | 9.54E-06 | 0.020902 |
| 0.268242 | 3.87E-09 | 0.129415 | 0.00509  | 0.17051   | 0.00021  | 0.020707 | 0.65535  | 0.211344 |
| 0.059584 | 0.19868  | 0.012344 | 0.7902   | -0.02316  | 0.61756  | -0.12041 | 0.0092   | 0.023081 |
| 0.009977 | 0.82974  | 0.039622 | 0.39295  | -7.33E-05 | 0.99874  | -0.09233 | 0.04613  | 0.098508 |
| -0.10131 | 0.02859  | -0.04897 | 0.29092  | -0.17222  | 0.00018  | -0.01876 | 0.68594  | -0.1691  |
| 0.025322 | 0.58518  | 0.050511 | 0.27602  | 0.085713  | 0.06421  | 0.069155 | 0.13564  | 0.11271  |
| -0.02042 | 0.65985  | -0.16019 | 0.00051  | -0.13158  | 0.0044   | -0.05734 | 0.21617  | -0.1271  |
| 0.129051 | 0.00522  | 0.118614 | 0.0103   | -0.00129  | 0.9779   | -0.04998 | 0.28108  | -0.00838 |
| -0.01948 | 0.67451  | -0.0039  | 0.93293  | 0.00196   | 0.96631  | -0.0239  | 0.60641  | 0.030988 |
| 0.084728 | 0.06734  | 0.036972 | 0.42539  | 0.017796  | 0.70129  | -0.03087 | 0.5057   | 0.021845 |
| 0.151712 | 0.00101  | 0.060029 | 0.19534  | 0.141745  | 0.00214  | 0.073858 | 0.11094  | 0.198916 |
| 0.102523 | 0.02673  | 0.063949 | 0.16769  | 0.040028  | 0.38811  | 0.015388 | 0.74015  | 0.077685 |
| -0.11125 | 0.01616  | 0.108561 | 0.01894  | -0.2043   | 8.58E-06 | -0.17802 | 0.00011  | -0.05746 |
| 0.022342 | 0.63011  | -0.09016 | 0.05152  | -0.25552  | 2.14E-08 | -0.26779 | 4.12E-09 | -0.22825 |
| 0.082715 | 0.07414  | -0.17087 | 0.00021  | -0.14575  | 0.00159  | -0.20909 | 5.19E-06 | -0.10124 |
| -0.01612 | 0.72831  | -0.09102 | 0.04933  | -0.02049  | 0.65875  | -0.06437 | 0.1649   | 0.003024 |
| -0.16669 | 0.0003   | -0.1099  | 0.01751  | -0.0946   | 0.04102  | -0.0535  | 0.24859  | -0.08373 |
| 0.000691 | 0.98811  | -0.0051  | 0.91242  | 0.069601  | 0.13313  | 0.038068 | 0.41179  | 0.11721  |
| 0.072239 | 0.11901  | -0.02638 | 0.56953  | 0.024805  | 0.59287  | -0.06751 | 0.14522  | 0.09763  |
| -0.0453  | 0.32866  | -0.04292 | 0.35479  | -0.08895  | 0.05474  | -0.11592 | 0.01218  | 0.036268 |

|          |          |          |          |          |          |          |          |          |
|----------|----------|----------|----------|----------|----------|----------|----------|----------|
| 0.147603 | 0.00138  | 0.013823 | 0.76575  | 0.252096 | 3.34E-08 | 0.191617 | 3.07E-05 | 0.102356 |
| 0.163353 | 0.00039  | -0.09543 | 0.03927  | 0.101907 | 0.02766  | -0.0597  | 0.19779  | 0.0125   |
| -0.24789 | 5.72E-08 | -0.19565 | 2.06E-05 | -0.14779 | 0.00136  | -0.22436 | 9.68E-07 | -0.07154 |
| -0.00391 | 0.93277  | 0.039937 | 0.38919  | 0.151504 | 0.00102  | 0.097243 | 0.03566  | 0.126511 |
| 0.195068 | 2.19E-05 | -0.05313 | 0.25184  | 0.033018 | 0.47659  | -0.01536 | 0.74054  | 0.015052 |
| 0.008798 | 0.8496   | 0.060853 | 0.18927  | 0.219987 | 1.59E-06 | 0.258936 | 1.36E-08 | 0.086927 |
| -0.05782 | 0.21229  | 0.055474 | 0.2315   | -0.00658 | 0.8873   | 0.049311 | 0.2876   | 0.068853 |
| -0.00445 | 0.92364  | 0.003814 | 0.93448  | 0.036808 | 0.42745  | -0.0048  | 0.91762  | 0.025826 |
| -0.00678 | 0.88387  | 0.089252 | 0.05393  | -0.01198 | 0.79628  | -0.01178 | 0.79951  | 0.080919 |
| -0.09398 | 0.04236  | 0.047075 | 0.31004  | -0.12103 | 0.00884  | -0.11319 | 0.01439  | -0.02843 |
| 0.011828 | 0.79877  | -0.0539  | 0.24503  | -0.04608 | 0.3204   | -0.07888 | 0.08863  | -0.05831 |
| -0.04343 | 0.34905  | -0.12562 | 0.00656  | 0.071721 | 0.12168  | -0.03244 | 0.48435  | 0.109771 |
| 0.040381 | 0.38394  | -0.01174 | 0.80026  | 0.033353 | 0.47211  | -0.02605 | 0.57447  | 0.055026 |
| -0.0849  | 0.0668   | 0.000874 | 0.98497  | -0.04445 | 0.33783  | -0.07468 | 0.10701  | 0.069396 |
| 0.036839 | 0.42706  | -0.12051 | 0.00914  | 0.186159 | 5.18E-05 | 0.163223 | 0.0004   | 0.025622 |
| 0.085386 | 0.06524  | 0.106567 | 0.02126  | 0.216068 | 2.45E-06 | 0.11472  | 0.01311  | 0.174052 |
| -0.04872 | 0.29346  | -0.1102  | 0.0172   | 0.04587  | 0.32261  | -0.00797 | 0.8636   | -0.05524 |
| -0.20617 | 7.06E-06 | -0.12996 | 0.00491  | -0.26626 | 5.08E-09 | -0.29586 | 6.89E-11 | -0.24556 |
| 0.015793 | 0.73356  | -0.01267 | 0.78477  | -0.04832 | 0.29736  | -0.08351 | 0.07139  | 0.065612 |
| -0.01681 | 0.71717  | -0.24255 | 1.11E-07 | 0.039142 | 0.39871  | -0.19618 | 1.96E-05 | 0.188773 |
| -0.18728 | 4.65E-05 | -0.00911 | 0.84442  | -0.11976 | 0.00959  | -0.11668 | 0.01162  | -0.06883 |
| -0.08184 | 0.07727  | -0.03504 | 0.45004  | -0.1071  | 0.02062  | -0.10485 | 0.02345  | -0.05405 |
| 0.141441 | 0.00219  | 0.190235 | 3.51E-05 | 0.118666 | 0.01027  | 0.032363 | 0.48538  | 0.266588 |
| -0.09688 | 0.03636  | -0.23949 | 1.62E-07 | -0.27619 | 1.27E-09 | -0.23974 | 1.57E-07 | -0.33953 |
| 0.002402 | 0.95871  | 0.039789 | 0.39095  | -0.13358 | 0.00383  | -0.13965 | 0.00249  | 0.025643 |
| 0.005662 | 0.90288  | -0.01165 | 0.80178  | 0.009152 | 0.84363  | -0.00604 | 0.89642  | -0.00096 |
| -0.0928  | 0.04503  | 0.044984 | 0.33204  | -0.10388 | 0.02478  | -0.02815 | 0.54401  | -0.01483 |
| -0.09357 | 0.04327  | -0.04619 | 0.31926  | -0.00301 | 0.94835  | 0.013749 | 0.76697  | 0.048012 |
| -0.07089 | 0.12605  | 0.065608 | 0.15691  | -0.06374 | 0.16912  | 0.010433 | 0.82209  | -0.06214 |
| 0.121642 | 0.0085   | 0.003942 | 0.9323   | 0.108691 | 0.0188   | 0.123084 | 0.00775  | -0.04242 |
| 0.175912 | 0.00013  | 0.211803 | 3.89E-06 | 0.270776 | 2.73E-09 | 0.272846 | 2.04E-09 | 0.227072 |
| 0.040813 | 0.37887  | -0.05756 | 0.21442  | 0.100407 | 0.03005  | 0.029074 | 0.53083  | 0.042601 |
| 0.228285 | 6.16E-07 | 0.360666 | 8.59E-16 | 0.25099  | 3.85E-08 | 0.303571 | 2.06E-11 | 0.182959 |
| 0.00908  | 0.84485  | -0.11774 | 0.01088  | -0.22065 | 1.47E-06 | -0.16812 | 0.00026  | -0.16442 |
| -0.1033  | 0.0256   | -0.0659  | 0.15504  | -0.18415 | 6.25E-05 | -0.01365 | 0.76856  | -0.1153  |
| 0.028999 | 0.53188  | -0.12818 | 0.00554  | -0.05317 | 0.25153  | -0.01105 | 0.81183  | 0.033601 |
| 0.196413 | 1.91E-05 | 0.299894 | 3.68E-11 | 0.08992  | 0.05215  | 0.201104 | 1.19E-05 | 0.097009 |
| -0.12416 | 0.00722  | 0.025904 | 0.57658  | -0.22997 | 5.06E-07 | -0.15281 | 0.00092  | -0.12133 |
| 0.006884 | 0.88205  | -0.08958 | 0.05305  | -0.15094 | 0.00107  | -0.10131 | 0.02859  | -0.24213 |
| 0.037748 | 0.41573  | 0.034374 | 0.45866  | -0.12628 | 0.00628  | -0.09077 | 0.04996  | -0.06853 |
| 0.016117 | 0.7283   | -0.03866 | 0.40453  | -0.03471 | 0.45433  | -0.04775 | 0.30319  | -0.01686 |
| -0.01529 | 0.74169  | -0.32829 | 3.38E-13 | -0.13823 | 0.00276  | -0.29009 | 1.66E-10 | -0.12021 |
| 0.234994 | 2.80E-07 | 0.076181 | 0.10012  | 0.164684 | 0.00035  | 0.075145 | 0.10484  | 0.201175 |
| 0.06491  | 0.16139  | -0.00132 | 0.97727  | 0.050872 | 0.27259  | 0.035766 | 0.44066  | 0.091244 |
| -0.1487  | 0.00127  | -0.13312 | 0.00395  | 0.021798 | 0.63846  | 0.049432 | 0.28642  | -0.03712 |

|          |          |          |          |          |          |          |          |          |
|----------|----------|----------|----------|----------|----------|----------|----------|----------|
| 0.167957 | 0.00027  | 0.145757 | 0.00159  | 0.228854 | 5.77E-07 | 0.19811  | 1.61E-05 | 0.25281  |
| -0.01103 | 0.81208  | -0.1384  | 0.00272  | -0.04641 | 0.31693  | -0.13541 | 0.00337  | -0.03757 |
| 0.136998 | 0.00301  | 0.069296 | 0.13484  | -0.20505 | 7.93E-06 | -0.1302  | 0.00483  | -0.1155  |
| 0.004336 | 0.92555  | -0.03393 | 0.4645   | 0.039274 | 0.39712  | 0.00744  | 0.8726   | 0.01037  |
| -0.10103 | 0.02903  | -0.07447 | 0.10798  | -0.05244 | 0.25808  | -0.12893 | 0.00526  | -0.04554 |
| -0.10545 | 0.02266  | -0.12007 | 0.0094   | -0.1754  | 0.00014  | -0.24002 | 1.52E-07 | -0.1004  |
| -0.0038  | 0.93478  | -0.19445 | 2.32E-05 | 0.145505 | 0.00162  | -0.0089  | 0.84789  | 0.103407 |
| -0.07516 | 0.10477  | -0.00706 | 0.87903  | -0.09787 | 0.03448  | -0.01913 | 0.68003  | -0.02295 |
| 0.042205 | 0.36281  | -0.02605 | 0.57447  | 0.031986 | 0.49048  | -0.04027 | 0.38523  | 0.120672 |
| 0.109591 | 0.01783  | -0.04885 | 0.29213  | 0.17598  | 0.00013  | 0.084469 | 0.06819  | 0.092695 |
| -0.00379 | 0.93492  | 0.030162 | 0.51556  | -0.09059 | 0.05041  | -0.15233 | 0.00096  | 0.027529 |
| 0.05897  | 0.20336  | -0.0143  | 0.75785  | -0.00624 | 0.89297  | -0.06815 | 0.14141  | -0.00786 |
| -0.03741 | 0.41991  | -0.00574 | 0.90162  | 0.078013 | 0.0922   | 0.056696 | 0.22136  | 0.100393 |
| -0.05855 | 0.20656  | -0.06622 | 0.15306  | -0.12927 | 0.00514  | -0.14289 | 0.00196  | -0.05118 |
| -0.0218  | 0.6385   | -0.2482  | 5.49E-08 | -0.04749 | 0.30582  | -0.23753 | 2.06E-07 | -0.19872 |
| 0.247297 | 6.16E-08 | 0.2323   | 3.85E-07 | 0.262653 | 8.30E-09 | 0.30476  | 1.71E-11 | 0.160468 |
| 0.154908 | 0.00078  | 0.033133 | 0.47505  | 0.102102 | 0.02736  | 0.082801 | 0.07384  | 0.079978 |
| -0.08566 | 0.06437  | -0.09326 | 0.04397  | -0.07613 | 0.10036  | -0.20248 | 1.04E-05 | -0.00603 |
| 0.039681 | 0.39225  | 0.161978 | 0.00044  | 0.333824 | 1.28E-13 | 0.242642 | 1.10E-07 | 0.254178 |
| -0.17916 | 9.91E-05 | -0.27865 | 8.94E-10 | -0.11147 | 0.01596  | -0.32486 | 6.13E-13 | -0.19839 |
| 0.040905 | 0.3778   | -0.10286 | 0.02623  | -0.22974 | 5.20E-07 | -0.18303 | 6.94E-05 | -0.09839 |
| 0.00882  | 0.84923  | -0.00417 | 0.9284   | 0.024616 | 0.59568  | -0.05904 | 0.20285  | 0.097513 |
| 0.118645 | 0.01028  | -0.18186 | 7.73E-05 | -0.24252 | 1.12E-07 | -0.18617 | 5.17E-05 | -0.33188 |
| 0.045884 | 0.32246  | -0.05563 | 0.23018  | 0.050272 | 0.27829  | 0.029825 | 0.52027  | 0.021656 |
| -0.10588 | 0.02212  | -0.08792 | 0.05761  | -0.1208  | 0.00897  | -0.07425 | 0.10907  | -0.11996 |
| 0.083715 | 0.0707   | 0.017454 | 0.70676  | -0.01145 | 0.80508  | -0.10781 | 0.01978  | 0.048951 |
| -0.23935 | 1.65E-07 | -0.21264 | 3.55E-06 | -0.33328 | 1.41E-13 | -0.21961 | 1.65E-06 | -0.26867 |
| -0.09687 | 0.03638  | -0.0775  | 0.09435  | -0.05403 | 0.24391  | -0.10284 | 0.02626  | 0.009054 |
| -0.04287 | 0.35531  | 0.052476 | 0.25774  | -0.05745 | 0.21526  | -0.08026 | 0.08317  | 0.006398 |
| 0.194552 | 2.30E-05 | 0.10939  | 0.01804  | 0.260094 | 1.17E-08 | 0.18374  | 6.50E-05 | 0.194306 |
| 0.023454 | 0.61316  | -0.00851 | 0.85447  | 0.049409 | 0.28664  | -0.03509 | 0.44928  | 0.052031 |
| -0.05725 | 0.21691  | -0.21396 | 3.08E-06 | -0.04126 | 0.37367  | -0.03143 | 0.49802  | -0.03691 |
| -0.07412 | 0.1097   | -0.2841  | 4.04E-10 | -0.19886 | 1.50E-05 | -0.29548 | 7.30E-11 | -0.28008 |
| -0.00554 | 0.90497  | 0.140352 | 0.00237  | -0.00845 | 0.8555   | -0.01132 | 0.80724  | 0.099288 |
| 0.117098 | 0.01133  | 0.149691 | 0.00118  | 0.185535 | 5.49E-05 | 0.154648 | 0.0008   | 0.191918 |
| -0.03159 | 0.49591  | -0.07227 | 0.11887  | -0.04906 | 0.29003  | -0.04951 | 0.28568  | -0.03604 |
| 0.168151 | 0.00026  | -0.11631 | 0.01189  | 0.023032 | 0.61957  | -0.06764 | 0.14445  | -0.03171 |
| -0.01613 | 0.72815  | -0.18309 | 6.90E-05 | -0.20678 | 6.63E-06 | -0.3336  | 1.33E-13 | -0.20189 |
| -0.03445 | 0.4576   | -0.08811 | 0.05707  | -0.13005 | 0.00488  | -0.13613 | 0.0032   | 0.014763 |
| -0.0476  | 0.30464  | -0.1128  | 0.01473  | -0.18675 | 4.89E-05 | -0.22233 | 1.22E-06 | -0.11908 |
| -0.04537 | 0.32796  | -0.11659 | 0.01169  | -0.10789 | 0.01969  | -0.13289 | 0.00402  | -0.08389 |
| 0.068206 | 0.1411   | -0.00772 | 0.86784  | 0.034298 | 0.45966  | 0.031518 | 0.49686  | 0.098943 |
| -0.00146 | 0.97496  | 0.033821 | 0.46593  | -0.05224 | 0.25986  | -0.02719 | 0.55786  | 0.02526  |
| 0.099943 | 0.03082  | 0.119928 | 0.00948  | 0.047534 | 0.30535  | -0.01775 | 0.70203  | 0.158989 |
| -0.0746  | 0.10739  | 0.044052 | 0.34218  | -0.05028 | 0.27824  | -0.05115 | 0.26999  | 0.080526 |

|          |          |          |          |          |          |          |          |          |
|----------|----------|----------|----------|----------|----------|----------|----------|----------|
| 0.138645 | 0.00268  | 0.183069 | 6.91E-05 | 0.184412 | 6.10E-05 | 0.108972 | 0.01849  | 0.231922 |
| 0.133667 | 0.00381  | 0.026339 | 0.57019  | 0.068005 | 0.14228  | 0.05001  | 0.28081  | 0.051068 |
| -0.00953 | 0.83725  | -0.17059 | 0.00021  | -0.01021 | 0.82589  | -0.12394 | 0.00733  | -0.08305 |
| -0.07238 | 0.11829  | -0.03351 | 0.46998  | -0.08508 | 0.0662   | -0.03384 | 0.46565  | -0.0261  |
| 0.035471 | 0.44444  | -0.06771 | 0.14402  | 0.056849 | 0.22011  | 0.011393 | 0.80603  | 0.105555 |
| 0.009496 | 0.83783  | -0.06516 | 0.15979  | -0.10432 | 0.02417  | -0.2606  | 1.09E-08 | -0.00668 |
| -0.11808 | 0.01066  | -0.1354  | 0.00337  | -0.03544 | 0.44487  | -0.20198 | 1.09E-05 | 0.043837 |
| 0.017133 | 0.71192  | 0.084996 | 0.06648  | 0.005593 | 0.90405  | -0.04468 | 0.33534  | 0.1011   |
| 0.154646 | 0.0008   | 0.134653 | 0.00355  | 0.343278 | 2.32E-14 | 0.210649 | 4.40E-06 | 0.20159  |
| 0.003506 | 0.93977  | -0.01191 | 0.79744  | -0.00403 | 0.93077  | -0.01014 | 0.82708  | 0.030877 |
| 0.043518 | 0.34806  | -0.02776 | 0.54953  | 0.11632  | 0.01189  | 0.131921 | 0.00429  | 0.070063 |
| 0.133059 | 0.00397  | -0.09628 | 0.03753  | -0.02862 | 0.53722  | -0.10718 | 0.02052  | 0.0813   |
| 0.194382 | 2.34E-05 | 0.040236 | 0.38566  | 0.247335 | 6.13E-08 | 0.061826 | 0.18228  | 0.225134 |
| -0.06149 | 0.18466  | -0.151   | 0.00106  | -0.02176 | 0.63909  | -0.04946 | 0.28617  | -0.00763 |
| -0.11072 | 0.01668  | -0.01126 | 0.80818  | -0.05628 | 0.22479  | -0.03491 | 0.45164  | 0.012154 |
| -0.10532 | 0.02283  | -0.15606 | 0.00071  | -0.23053 | 4.74E-07 | -0.25258 | 3.14E-08 | -0.16989 |
| 0.236611 | 2.30E-07 | 0.104622 | 0.02376  | 0.233492 | 3.34E-07 | 0.090162 | 0.05152  | 0.13774  |
| 0.149525 | 0.00119  | -0.00706 | 0.87908  | 0.099382 | 0.03177  | 0.02385  | 0.60718  | 0.094076 |
| 0.205976 | 7.21E-06 | 0.008504 | 0.85458  | 0.15686  | 0.00067  | 0.016258 | 0.72603  | 0.056739 |
| -0.02211 | 0.63369  | -0.06323 | 0.17255  | -0.13464 | 0.00356  | -0.09057 | 0.05047  | -0.09367 |
| -0.03046 | 0.51139  | -0.28769 | 2.38E-10 | 0.003966 | 0.93188  | -0.14189 | 0.00212  | 0.057278 |
| 0.002209 | 0.96203  | 0.003498 | 0.9399   | -0.0026  | 0.95539  | 0.022027 | 0.63493  | -0.02946 |
| 0.10296  | 0.02609  | 0.060206 | 0.19403  | 0.102848 | 0.02625  | 0.080944 | 0.08057  | 0.075374 |
| 0.134117 | 0.00369  | 0.112505 | 0.015    | 0.172177 | 0.00018  | 0.055663 | 0.22991  | 0.203003 |
| 0.130062 | 0.00488  | 0.113599 | 0.01404  | 0.294782 | 8.13E-11 | 0.25546  | 2.16E-08 | 0.173812 |
| 0.059102 | 0.20234  | 0.076894 | 0.09698  | 0.063176 | 0.1729   | 0.043244 | 0.35111  | 0.137131 |
| 0.06563  | 0.15677  | -0.01436 | 0.75701  | -0.04528 | 0.32884  | -0.09369 | 0.04301  | 0.010352 |
| 0.099354 | 0.03182  | 0.055516 | 0.23115  | 0.125048 | 0.00682  | 0.058522 | 0.20682  | 0.179911 |
| 0.026373 | 0.5697   | -0.00812 | 0.86107  | 0.031021 | 0.50367  | 0.028594 | 0.53764  | 0.054991 |
| 0.116537 | 0.01173  | 0.0607   | 0.19039  | 0.157839 | 0.00062  | 0.189222 | 3.87E-05 | 0.054566 |
| 0.026682 | 0.56519  | 0.070206 | 0.12978  | -0.03874 | 0.40361  | -0.05045 | 0.27655  | -0.00038 |
| -0.08937 | 0.05362  | 0.039131 | 0.39885  | -0.14601 | 0.00156  | -0.08515 | 0.066    | -0.05461 |
| 0.227731 | 6.57E-07 | 0.279371 | 8.06E-10 | 0.256778 | 1.81E-08 | 0.198455 | 1.56E-05 | 0.325105 |
| -0.13583 | 0.00327  | -0.16535 | 0.00033  | 0.036951 | 0.42565  | -0.09369 | 0.043    | 0.045312 |
| 0.10473  | 0.02361  | 0.106397 | 0.02147  | 0.118259 | 0.01054  | -0.01062 | 0.81896  | 0.122467 |
| 0.062848 | 0.17515  | 0.091152 | 0.04899  | -0.07002 | 0.13082  | 0.05584  | 0.22843  | 0.029559 |
| -0.13682 | 0.00305  | 0.036108 | 0.4363   | -0.04985 | 0.28231  | -0.06675 | 0.1498   | -0.00157 |
| 0.005295 | 0.90915  | 0.166977 | 0.00029  | -0.0478  | 0.30261  | 0.075152 | 0.10481  | -0.01995 |
| 0.259984 | 1.19E-08 | 0.40886  | 3.03E-20 | 0.215794 | 2.52E-06 | 0.40883  | 3.05E-20 | 0.322654 |
| 0.055937 | 0.22762  | -0.01573 | 0.73454  | 0.017189 | 0.71101  | -0.06125 | 0.18643  | 0.087202 |
| 0.044107 | 0.34157  | -0.02161 | 0.64135  | -0.13553 | 0.00334  | -0.05052 | 0.27595  | -0.12746 |
| -0.03212 | 0.48866  | 0.050317 | 0.27786  | -0.12062 | 0.00907  | -0.13666 | 0.00308  | -0.09491 |
| -0.03386 | 0.46541  | 0.009273 | 0.84159  | 0.158481 | 0.00059  | 0.159136 | 0.00056  | 0.050311 |
| 0.18557  | 5.47E-05 | 0.401357 | 1.67E-19 | 0.25183  | 3.46E-08 | 0.406556 | 5.15E-20 | 0.234215 |
| -0.02144 | 0.64406  | -0.05233 | 0.25903  | 0.054843 | 0.23685  | -0.01905 | 0.68141  | 0.05193  |

|          |          |          |          |          |          |          |          |          |
|----------|----------|----------|----------|----------|----------|----------|----------|----------|
| -0.00277 | 0.95235  | -0.14559 | 0.00161  | -0.13976 | 0.00247  | -0.10848 | 0.01904  | -0.27906 |
| -0.03323 | 0.47376  | -0.07812 | 0.09176  | -0.03622 | 0.43488  | -0.01522 | 0.74281  | -0.06387 |
| 0.012771 | 0.78312  | 0.050799 | 0.27328  | 0.04534  | 0.32823  | 0.041848 | 0.36689  | 0.040007 |
| -0.04672 | 0.31373  | 0.08479  | 0.06714  | -0.00201 | 0.96545  | 0.057421 | 0.2155   | 0.024333 |
| 0.082429 | 0.07515  | 0.003689 | 0.93662  | 0.024747 | 0.59374  | 0.006071 | 0.8959   | 0.032809 |
| 0.434582 | 6.17E-23 | 0.312305 | 5.04E-12 | 0.094167 | 0.04195  | 0.139243 | 0.00256  | 0.129528 |
| -0.16132 | 0.00047  | -0.10266 | 0.02653  | -0.02032 | 0.66134  | -0.05701 | 0.21883  | 0.008808 |
| 0.266394 | 4.99E-09 | 0.269224 | 3.38E-09 | 0.351746 | 4.78E-15 | 0.372206 | 8.59E-17 | 0.252041 |
| 0.019081 | 0.68086  | -0.02067 | 0.65588  | 0.010361 | 0.82329  | 0.079275 | 0.08704  | -0.00676 |
| 0.099418 | 0.03171  | 0.441372 | 1.10E-23 | 0.145895 | 0.00157  | 0.357115 | 1.71E-15 | 0.107984 |
| -0.01612 | 0.72818  | 0.069195 | 0.13541  | -0.06563 | 0.15675  | -0.03732 | 0.42107  | -0.00232 |
| -0.20702 | 6.46E-06 | -0.0421  | 0.36405  | -0.25012 | 4.30E-08 | -0.11211 | 0.01535  | -0.12443 |
| -0.01003 | 0.82888  | -0.2338  | 3.22E-07 | -0.00585 | 0.89968  | -0.12955 | 0.00505  | -0.14552 |
| -0.02868 | 0.5364   | 0.159764 | 0.00053  | 0.009571 | 0.83657  | 0.164598 | 0.00035  | -0.02823 |
| -0.134   | 0.00372  | 0.101692 | 0.02799  | -0.15196 | 0.00099  | -0.12946 | 0.00508  | -0.0175  |
| 0.176578 | 0.00013  | -0.05243 | 0.25812  | 0.202948 | 9.87E-06 | 0.024239 | 0.60133  | 0.321775 |
| -0.0353  | 0.44663  | -0.07565 | 0.1025   | -0.03354 | 0.46959  | -0.06976 | 0.13226  | 0.006256 |
| 0.106854 | 0.02091  | 0.206395 | 6.90E-06 | 0.024854 | 0.59213  | 0.061146 | 0.18714  | -0.07867 |
| 0.012997 | 0.77937  | 0.092384 | 0.04601  | 0.037132 | 0.42338  | 0.05502  | 0.23535  | 0.174937 |
| -0.07537 | 0.10381  | -0.04434 | 0.33899  | 0.05493  | 0.23611  | 0.003212 | 0.94481  | 0.072067 |
| 0.087687 | 0.05829  | 0.13589  | 0.00326  | 0.066318 | 0.15246  | 0.050454 | 0.27655  | 0.078646 |
| 0.113575 | 0.01406  | 0.089905 | 0.05219  | 0.068525 | 0.13924  | 0.078741 | 0.08919  | 0.063327 |
| -0.15323 | 0.00089  | -0.14873 | 0.00127  | -0.0146  | 0.75292  | -0.06794 | 0.14265  | 0.072008 |
| -0.04696 | 0.31121  | -0.08437 | 0.06851  | 0.084783 | 0.06717  | 0.010273 | 0.82478  | 0.129138 |
| 0.297244 | 5.56E-11 | 0.032403 | 0.48484  | 0.166982 | 0.00029  | 0.056877 | 0.21989  | 0.077588 |
| 0.055789 | 0.22885  | 0.108272 | 0.01926  | 0.087165 | 0.05981  | 0.058231 | 0.20909  | 0.071495 |
| 0.096837 | 0.03644  | 0.147866 | 0.00135  | 0.223326 | 1.09E-06 | 0.129384 | 0.00511  | 0.203158 |
| -0.00216 | 0.9629   | 0.083117 | 0.07274  | -0.00727 | 0.87546  | 0.003881 | 0.93334  | 0.113116 |
| 0.085829 | 0.06385  | 0.132446 | 0.00414  | 0.04472  | 0.33489  | 0.004647 | 0.92022  | 0.050746 |
| 0.234133 | 3.10E-07 | -0.20694 | 6.51E-06 | 0.060197 | 0.1941   | -0.05507 | 0.23492  | 0.075573 |
| 0.065203 | 0.1595   | 0.077524 | 0.09426  | 0.09253  | 0.04566  | 0.018732 | 0.68639  | 0.083137 |
| 0.114602 | 0.01321  | 0.14389  | 0.00182  | 0.067581 | 0.14479  | 0.036039 | 0.43717  | 0.161613 |
| -0.07556 | 0.10294  | -0.00019 | 0.99671  | -0.06813 | 0.14156  | 0.005431 | 0.90683  | -0.03969 |
| 0.146648 | 0.00148  | -0.13913 | 0.00258  | 0.046122 | 0.31995  | -0.03964 | 0.39277  | -0.02185 |
| 0.217749 | 2.03E-06 | 0.144187 | 0.00178  | 0.165309 | 0.00033  | 0.073842 | 0.11102  | 0.186311 |
| 0.113021 | 0.01454  | 0.090222 | 0.05136  | 0.118023 | 0.01069  | 0.076599 | 0.09827  | 0.137812 |
| -0.02078 | 0.6543   | -0.10119 | 0.02877  | -0.05267 | 0.25594  | -0.03187 | 0.49203  | -0.04868 |
| -0.01267 | 0.78483  | -0.04049 | 0.38269  | -0.01282 | 0.78224  | -0.0255  | 0.58253  | -0.00354 |
| -0.0154  | 0.73995  | -0.04112 | 0.37529  | 0.004355 | 0.92522  | -0.02276 | 0.62372  | 0.00988  |
| -0.00147 | 0.97465  | 0.040771 | 0.37936  | 0.038417 | 0.40751  | 0.031227 | 0.50083  | 0.032559 |
| 0.028531 | 0.53854  | 0.031834 | 0.49255  | 0.010438 | 0.82201  | -0.01775 | 0.70205  | 0.060745 |
| 0.021817 | 0.63817  | 0.009941 | 0.83034  | 0.018948 | 0.68297  | -0.0301  | 0.51648  | 0.001036 |
| 0.020927 | 0.65193  | -0.01454 | 0.75396  | 0.066583 | 0.15083  | 0.011259 | 0.80826  | 0.086293 |
| 0.034323 | 0.45932  | 0.001442 | 0.9752   | 0.031375 | 0.49881  | -0.00942 | 0.83917  | 0.058754 |
| 0.059158 | 0.20192  | 0.043121 | 0.35249  | 0.067245 | 0.1468   | 0.015761 | 0.73408  | 0.074448 |

|          |          |          |          |          |          |          |          |          |
|----------|----------|----------|----------|----------|----------|----------|----------|----------|
| -0.04288 | 0.35514  | 0.011492 | 0.80438  | -0.00462 | 0.92076  | 0.001092 | 0.98123  | 0.013131 |
| -0.18138 | 8.09E-05 | -0.17542 | 0.00014  | -0.25529 | 2.20E-08 | -0.12694 | 0.00602  | -0.28182 |
| 0.006686 | 0.88543  | 0.022367 | 0.62972  | 0.049652 | 0.28428  | 0.028598 | 0.53758  | 0.120885 |
| 0.052769 | 0.25509  | 0.001225 | 0.97894  | 0.139151 | 0.00258  | 0.067701 | 0.14407  | 0.197584 |
| 0.095246 | 0.03964  | 0.078592 | 0.0898   | 0.090519 | 0.05059  | 0.060426 | 0.1924   | 0.064721 |
| 0.032627 | 0.48182  | 0.031469 | 0.49752  | 0.038077 | 0.41168  | 0.042192 | 0.36296  | 0.028186 |
| 0.02456  | 0.59653  | 0.026866 | 0.5625   | -0.02902 | 0.53153  | -0.03004 | 0.51727  | 0.024283 |
| 0.076392 | 0.09918  | 0.042288 | 0.36187  | 0.050495 | 0.27617  | 0.062462 | 0.17781  | 0.04851  |
| 0.187157 | 4.71E-05 | 0.030115 | 0.51621  | -0.02491 | 0.59131  | 0.04246  | 0.35992  | -0.04341 |
| -0.07752 | 0.09427  | -0.06109 | 0.18757  | -0.09382 | 0.04271  | -0.04848 | 0.29579  | -0.08909 |
| -0.06037 | 0.19283  | -0.07119 | 0.12447  | -0.26905 | 3.46E-09 | -0.23525 | 2.71E-07 | -0.18253 |
| 0.061603 | 0.18387  | 0.059953 | 0.19591  | 0.227211 | 6.98E-07 | 0.178809 | 0.0001   | 0.19277  |
| 0.112501 | 0.015    | 0.111219 | 0.0162   | -0.05935 | 0.20042  | -0.03231 | 0.48605  | -0.03239 |
| 0.306557 | 1.28E-11 | 0.341038 | 3.50E-14 | 0.281565 | 5.86E-10 | 0.210252 | 4.59E-06 | 0.329172 |
| 0.021522 | 0.64272  | -0.01975 | 0.67029  | 0.051584 | 0.26593  | 0.005761 | 0.90119  | 0.063109 |
| 0.014071 | 0.76168  | -0.04727 | 0.30803  | 0.148294 | 0.00131  | 0.106886 | 0.02087  | 0.003026 |
| 0.029664 | 0.52251  | 0.047925 | 0.30138  | 0.003841 | 0.93402  | -0.02535 | 0.58481  | 0.065888 |
| -0.09463 | 0.04094  | -0.00983 | 0.83217  | -0.07671 | 0.09777  | -0.09402 | 0.04227  | -0.00579 |
| 0.081746 | 0.0776   | 0.062613 | 0.17677  | 0.076092 | 0.10052  | 0.133682 | 0.0038   | 0.058859 |
| 0.116748 | 0.01158  | -0.11823 | 0.01055  | 0.057319 | 0.21632  | -0.19458 | 2.29E-05 | 0.022726 |
| -0.02607 | 0.57408  | -0.13542 | 0.00337  | -0.0236  | 0.61095  | -0.07079 | 0.12661  | -0.044   |
| -0.04454 | 0.33684  | -0.03211 | 0.48884  | -0.07945 | 0.08634  | -0.07385 | 0.111    | -0.10433 |
| 0.13998  | 0.00243  | 0.159678 | 0.00053  | 0.009721 | 0.83405  | 0.053111 | 0.25201  | 0.047822 |
| 0.123563 | 0.00751  | 0.093601 | 0.0432   | 0.072346 | 0.11846  | 0.071905 | 0.12073  | 0.133748 |
| -0.23307 | 3.52E-07 | -0.17696 | 0.00012  | -0.05758 | 0.21426  | -0.12009 | 0.00939  | -0.08321 |
| 0.017156 | 0.71154  | -0.03617 | 0.43551  | -0.07002 | 0.1308   | -0.08537 | 0.0653   | -0.06764 |
| 0.085029 | 0.06637  | 0.093304 | 0.04387  | 0.204586 | 8.33E-06 | 0.175445 | 0.00014  | 0.154197 |
| -0.00656 | 0.8875   | 0.029427 | 0.52585  | 0.158718 | 0.00058  | 0.072233 | 0.11904  | 0.173601 |
| 0.066947 | 0.1486   | 0.062432 | 0.17802  | 0.049637 | 0.28441  | 0.048987 | 0.29078  | 0.061315 |
| 0.037508 | 0.4187   | 0.089956 | 0.05205  | -0.15706 | 0.00066  | -0.04283 | 0.35576  | -0.13882 |
| 0.253552 | 2.77E-08 | 0.036788 | 0.42771  | 0.233283 | 3.43E-07 | 0.046966 | 0.31116  | 0.262712 |
| 0.049436 | 0.28637  | -0.0827  | 0.07417  | 0.190867 | 3.30E-05 | 0.049682 | 0.28398  | 0.115495 |
| 0.171446 | 0.0002   | 0.241522 | 1.27E-07 | 0.17578  | 0.00013  | 0.147405 | 0.0014   | 0.23024  |
| 0.060868 | 0.18916  | 0.085798 | 0.06395  | 0.078241 | 0.09124  | -0.03031 | 0.51343  | 0.128116 |
| 0.057518 | 0.21472  | -0.01672 | 0.71853  | -0.08791 | 0.05765  | -0.07352 | 0.11256  | -0.10742 |
| 0.272056 | 2.28E-09 | 0.069705 | 0.13255  | 0.149091 | 0.00123  | 0.174607 | 0.00015  | 0.113166 |
| 0.172991 | 0.00017  | 0.096707 | 0.03669  | 0.216275 | 2.39E-06 | 0.171238 | 0.0002   | 0.153104 |
| -0.00816 | 0.86039  | -0.11711 | 0.01132  | 0.029926 | 0.51885  | -0.06678 | 0.1496   | 0.038295 |
| 0.237672 | 2.03E-07 | -0.08297 | 0.07324  | 0.028868 | 0.53374  | -0.10138 | 0.02848  | 0.00223  |
| 0.139379 | 0.00254  | -0.08571 | 0.06423  | -0.16427 | 0.00036  | -0.06731 | 0.14639  | -0.16781 |
| 0.069136 | 0.13575  | 0.17379  | 0.00016  | 0.291882 | 1.27E-10 | 0.355534 | 2.32E-15 | 0.139815 |
| -0.15571 | 0.00073  | -0.11538 | 0.01259  | -0.1406  | 0.00232  | -0.06168 | 0.1833   | -0.12519 |
| -0.07855 | 0.08998  | 0.053721 | 0.2466   | 0.030274 | 0.514    | 0.11182  | 0.01562  | 0.030578 |
| 0.159279 | 0.00055  | 0.044231 | 0.34021  | 0.219538 | 1.67E-06 | 0.03105  | 0.50326  | 0.180666 |
| -0.04133 | 0.37287  | -0.02945 | 0.52552  | -0.04845 | 0.29611  | -0.05475 | 0.23761  | -0.07577 |

|          |          |          |          |          |          |           |          |          |
|----------|----------|----------|----------|----------|----------|-----------|----------|----------|
| 0.010944 | 0.81354  | 0.073293 | 0.11371  | 0.036563 | 0.43053  | 0.064949  | 0.16113  | 0.084103 |
| 0.056777 | 0.22071  | 0.102015 | 0.0275   | -0.00039 | 0.99327  | -0.07571  | 0.10223  | 0.074571 |
| -0.11115 | 0.01627  | -0.39894 | 2.88E-19 | -0.26044 | 1.12E-08 | -0.32434  | 6.70E-13 | -0.23509 |
| 0.057976 | 0.21109  | -0.1106  | 0.0168   | -0.1172  | 0.01126  | -0.10991  | 0.0175   | -0.014   |
| -0.00984 | 0.83213  | 0.110667 | 0.01674  | -0.06288 | 0.1749   | -0.0785   | 0.09017  | 0.022097 |
| -0.05671 | 0.22123  | -0.04504 | 0.33142  | 0.010102 | 0.82764  | -0.00314  | 0.94599  | -0.01504 |
| 0.014169 | 0.76006  | -0.03347 | 0.47055  | -0.02543 | 0.58359  | -0.04978  | 0.28305  | -0.04731 |
| 0.072382 | 0.11828  | 0.056454 | 0.22334  | 0.064498 | 0.16406  | 0.035228  | 0.44756  | 0.041977 |
| 0.012632 | 0.78542  | -0.00686 | 0.88242  | 0.039779 | 0.39108  | -8.53E-05 | 0.99853  | 0.03973  |
| 0.110208 | 0.0172   | 0.059712 | 0.19772  | 0.071325 | 0.12376  | 0.024964  | 0.59049  | 0.050282 |
| 0.070039 | 0.1307   | 0.058864 | 0.20417  | 0.051452 | 0.26716  | 0.036129  | 0.43604  | 0.032001 |
| 0.218362 | 1.90E-06 | 0.359653 | 1.05E-15 | 0.195821 | 2.03E-05 | 0.255511  | 2.14E-08 | 0.146047 |
| -0.01569 | 0.73525  | -0.11766 | 0.01094  | 0.045402 | 0.32757  | -0.05027  | 0.27828  | 0.121378 |
| -0.03313 | 0.47508  | 0.052319 | 0.25917  | 0.014405 | 0.7562   | 0.012753  | 0.78342  | 0.054744 |
| 0.161004 | 0.00048  | -0.10438 | 0.02409  | 0.176225 | 0.00013  | 0.015695  | 0.73515  | 0.118484 |
| -0.10727 | 0.02042  | -0.18176 | 7.81E-05 | -0.22326 | 1.10E-06 | -0.22837  | 6.10E-07 | -0.26456 |
| 0.010281 | 0.82463  | 0.08242  | 0.07518  | 0.121408 | 0.00863  | 0.0891    | 0.05434  | 0.156321 |
| 0.180787 | 8.54E-05 | 0.22362  | 1.05E-06 | 0.22766  | 6.63E-07 | 0.259834  | 1.21E-08 | 0.199502 |
| 0.048672 | 0.29389  | 0.002253 | 0.96127  | 0.028846 | 0.53406  | -0.05964  | 0.19825  | 0.02606  |
| 0.041847 | 0.3669   | 0.041891 | 0.36639  | 0.004612 | 0.92082  | -0.05509  | 0.23477  | 0.041988 |
| 0.000678 | 0.98835  | -0.04245 | 0.35999  | 0.156453 | 0.00069  | 0.044026  | 0.34246  | 0.138463 |
| -0.01653 | 0.72156  | 0.023104 | 0.61848  | 0.047486 | 0.30583  | 0.024828  | 0.59252  | 0.152236 |
| 0.096842 | 0.03643  | -0.0372  | 0.42257  | 0.021572 | 0.64194  | -0.02159  | 0.64163  | -0.01752 |
| 0.043938 | 0.34343  | 0.157693 | 0.00063  | -0.11959 | 0.00969  | 0.066336  | 0.15235  | -0.02394 |
| -0.06647 | 0.1515   | -0.09123 | 0.0488   | -0.19826 | 1.59E-05 | -0.21014  | 4.65E-06 | -0.26107 |
| 0.192928 | 2.70E-05 | 0.148056 | 0.00133  | 0.157376 | 0.00064  | 0.103777  | 0.02492  | 0.123048 |
| -0.09222 | 0.0464   | -0.34203 | 2.91E-14 | -0.09182 | 0.04735  | -0.10701  | 0.02073  | -0.15507 |
| -0.02144 | 0.64393  | -0.04301 | 0.35377  | 0.005443 | 0.90662  | -0.03566  | 0.44199  | 0.044021 |
| 0.186656 | 4.94E-05 | 0.030644 | 0.50887  | 0.238512 | 1.83E-07 | 0.121849  | 0.00839  | 0.153959 |
| 0.219713 | 1.63E-06 | 0.193862 | 2.46E-05 | 0.156365 | 0.0007   | 0.038226  | 0.40985  | 0.207704 |
| 0.062645 | 0.17654  | -0.23422 | 3.07E-07 | -0.08705 | 0.06016  | -0.2091   | 5.19E-06 | -0.11755 |
| 0.152777 | 0.00093  | -0.01068 | 0.81793  | -0.00103 | 0.98221  | -0.09406  | 0.04219  | -0.04936 |
| 0.072361 | 0.11839  | -0.02796 | 0.54664  | -0.04113 | 0.3752   | -0.06132  | 0.18589  | -0.16979 |
| -0.04873 | 0.29335  | -0.06046 | 0.19219  | -0.14793 | 0.00135  | -0.22678  | 7.34E-07 | -0.13787 |
| 0.041965 | 0.36556  | 0.013165 | 0.7766   | 0.147557 | 0.00139  | 0.138153  | 0.00277  | 0.050169 |
| 0.097638 | 0.03491  | -0.03027 | 0.51407  | 0.074268 | 0.10897  | 0.05401   | 0.24406  | 0.037269 |
| 0.037962 | 0.41309  | 0.16257  | 0.00042  | -0.15703 | 0.00066  | -0.10957  | 0.01786  | -0.00818 |
| 0.229334 | 5.45E-07 | 0.189452 | 3.78E-05 | 0.34111  | 3.45E-14 | 0.234832  | 2.85E-07 | 0.255479 |
| 0.154406 | 0.00081  | 0.134365 | 0.00363  | 0.020968 | 0.65129  | 0.157797  | 0.00062  | 0.033623 |
| -0.05891 | 0.20378  | -0.0175  | 0.706    | 0.014447 | 0.75551  | 0.023765  | 0.60847  | 0.011086 |
| -0.0179  | 0.69966  | 0.035411 | 0.44521  | 0.008486 | 0.85488  | 0.016223  | 0.72659  | 0.029151 |
| -0.16236 | 0.00043  | -0.08769 | 0.05829  | -0.24643 | 6.87E-08 | -0.10789  | 0.0197   | -0.31076 |
| 0.12657  | 0.00616  | 0.166169 | 0.00031  | 0.267011 | 4.59E-09 | 0.145621  | 0.0016   | 0.302709 |
| -0.18894 | 3.97E-05 | -0.16463 | 0.00035  | -0.1005  | 0.02989  | -0.15681  | 0.00067  | -0.14743 |
| -0.00737 | 0.87372  | 0.056867 | 0.21997  | -0.03216 | 0.48818  | -0.04083  | 0.37863  | 0.040196 |



|           |          |          |          |          |          |          |          |          |
|-----------|----------|----------|----------|----------|----------|----------|----------|----------|
| 0.074052  | 0.11     | 0.018348 | 0.69249  | -0.12104 | 0.00884  | -0.0539  | 0.24506  | -0.03157 |
| 0.041376  | 0.37232  | -0.07081 | 0.12649  | 0.105324 | 0.02283  | -0.02702 | 0.56027  | 0.134562 |
| -0.12072  | 0.00902  | -0.07081 | 0.12648  | -0.18835 | 4.20E-05 | -0.26754 | 4.27E-09 | -0.07896 |
| 0.222311  | 1.22E-06 | 0.101461 | 0.02835  | 0.21436  | 2.95E-06 | 0.12814  | 0.00555  | 0.143921 |
| -0.00681  | 0.88329  | 0.021581 | 0.6418   | -0.11803 | 0.01069  | -0.07674 | 0.09765  | -0.07767 |
| 0.040309  | 0.38479  | 0.097922 | 0.03439  | -0.01193 | 0.79705  | 0.060102 | 0.1948   | 0.104076 |
| -6.15E-06 | 0.99989  | 0.117591 | 0.01098  | -0.01847 | 0.69054  | 0.042065 | 0.36441  | -0.02926 |
| 0.024682  | 0.5947   | 0.058994 | 0.20317  | 0.084716 | 0.06738  | 0.050976 | 0.27161  | 0.119902 |
| 0.025327  | 0.5851   | 0.044229 | 0.34023  | 0.069255 | 0.13507  | 0.036921 | 0.42603  | 0.046305 |
| -0.16751  | 0.00028  | -0.17776 | 0.00011  | -0.25194 | 3.41E-08 | -0.23611 | 2.44E-07 | -0.2151  |
| 0.039496  | 0.39445  | 0.082009 | 0.07665  | -0.02746 | 0.55384  | 0.01323  | 0.77553  | 0.041143 |
| 0.230869  | 4.56E-07 | 0.119831 | 0.00954  | 0.185792 | 5.36E-05 | 0.178063 | 0.00011  | 0.235615 |
| 0.000252  | 0.99567  | 0.187673 | 4.48E-05 | 0.117421 | 0.0111   | 0.187624 | 4.50E-05 | 0.122545 |
| -0.08102  | 0.08028  | -0.12143 | 0.00862  | -0.25681 | 1.81E-08 | -0.32553 | 5.46E-13 | -0.17602 |
| -0.01418  | 0.75995  | -0.2584  | 1.47E-08 | -0.27564 | 1.37E-09 | -0.27901 | 8.48E-10 | -0.17469 |
| -0.18477  | 5.90E-05 | -0.07382 | 0.11111  | -0.12172 | 0.00846  | -0.06365 | 0.16967  | -0.0128  |
| 0.196981  | 1.81E-05 | 0.004407 | 0.92432  | -0.01384 | 0.76545  | -0.10881 | 0.01866  | 0.094335 |
| -0.00737  | 0.87386  | -0.00655 | 0.8878   | 0.066713 | 0.15003  | 0.021632 | 0.64101  | 0.094499 |
| 0.000589  | 0.98987  | 0.017344 | 0.70853  | 0.040371 | 0.38406  | 0.061619 | 0.18375  | 0.104428 |
| 0.010818  | 0.81564  | 0.023056 | 0.6192   | 0.107466 | 0.02019  | 0.072576 | 0.11729  | 0.121592 |
| 0.071121  | 0.12484  | 0.05755  | 0.21447  | -0.04946 | 0.28619  | -0.02307 | 0.61899  | -0.00319 |
| 0.08212   | 0.07625  | 0.058892 | 0.20396  | 0.040537 | 0.38211  | 0.070955 | 0.12573  | 0.045703 |
| 0.004025  | 0.93087  | 0.013847 | 0.76536  | -0.16213 | 0.00044  | -0.11862 | 0.0103   | -0.15688 |
| -0.06383  | 0.1685   | 0.046156 | 0.31959  | -0.02756 | 0.5524   | -0.00633 | 0.89154  | -0.01632 |
| 0.188414  | 4.18E-05 | 0.037465 | 0.41924  | 0.056568 | 0.22241  | 0.091154 | 0.04899  | 0.0448   |
| -0.02049  | 0.65868  | 0.115967 | 0.01215  | 0.033876 | 0.4652   | 0.110546 | 0.01686  | 0.038957 |
| -0.08117  | 0.07971  | -0.00178 | 0.96938  | -0.03    | 0.5178   | -0.00332 | 0.94293  | 0.030694 |
| -0.19106  | 3.24E-05 | -0.21965 | 1.65E-06 | -0.13164 | 0.00438  | -0.12994 | 0.00492  | -0.03072 |
| 0.052358  | 0.25881  | 0.114047 | 0.01366  | -0.03961 | 0.39307  | -0.02568 | 0.57986  | 0.002616 |
| 0.120854  | 0.00894  | 0.322302 | 9.49E-13 | 0.185571 | 5.47E-05 | 0.320856 | 1.21E-12 | 0.12352  |
| 0.084346  | 0.06859  | 0.166314 | 0.00031  | 0.031703 | 0.49433  | 0.072229 | 0.11906  | 0.030507 |
| 0.168727  | 0.00025  | 0.28282  | 4.88E-10 | 0.343775 | 2.12E-14 | 0.334059 | 1.23E-13 | 0.319195 |
| -0.05785  | 0.21206  | -0.03075 | 0.50734  | -0.09257 | 0.04557  | -0.15862 | 0.00058  | 0.004222 |
| 0.053845  | 0.24551  | 0.050069 | 0.28024  | 0.10551  | 0.02259  | 0.038063 | 0.41186  | 0.251632 |
| -0.03745  | 0.41941  | -0.02372 | 0.60916  | -0.00561 | 0.90377  | -0.1137  | 0.01395  | 0.020385 |
| 0.214841  | 2.80E-06 | -0.02982 | 0.5203   | 0.099818 | 0.03103  | -0.01061 | 0.81904  | 0.087132 |
| -0.05702  | 0.21876  | 0.002107 | 0.96379  | -0.08339 | 0.07181  | -0.06919 | 0.13545  | -0.00324 |
| 0.064638  | 0.16315  | 0.071746 | 0.12156  | 0.054859 | 0.23672  | 0.06766  | 0.14432  | 0.018874 |
| -0.0118   | 0.79928  | -0.12078 | 0.00898  | -0.00964 | 0.83535  | -0.15979 | 0.00053  | 0.114497 |
| -0.11221  | 0.01526  | -0.33519 | 1.00E-13 | -0.19041 | 3.45E-05 | -0.25897 | 1.36E-08 | -0.21867 |
| 0.130272  | 0.00481  | 0.052118 | 0.261    | 0.001142 | 0.98036  | 0.00707  | 0.87889  | -0.00596 |
| -0.00977  | 0.83318  | 0.029297 | 0.52768  | 0.005336 | 0.90844  | -0.01463 | 0.75252  | 0.010984 |
| 0.059686  | 0.19791  | 0.02905  | 0.53116  | 0.132657 | 0.00408  | 0.068681 | 0.13834  | 0.134919 |
| -0.00361  | 0.93791  | -0.00819 | 0.8599   | -0.08833 | 0.05647  | -0.04059 | 0.38146  | -0.08012 |
| 0.256647  | 1.85E-08 | 0.315378 | 3.04E-12 | 0.257839 | 1.58E-08 | 0.311358 | 5.89E-12 | 0.141779 |

|          |          |          |          |          |          |          |          |          |
|----------|----------|----------|----------|----------|----------|----------|----------|----------|
| 0.222723 | 1.17E-06 | 0.245132 | 8.08E-08 | 0.217277 | 2.14E-06 | 0.258354 | 1.47E-08 | 0.06064  |
| -0.03167 | 0.49479  | -0.07498 | 0.10563  | -0.1496  | 0.00118  | -0.0295  | 0.52489  | -0.14414 |
| 0.075738 | 0.10212  | 0.009326 | 0.8407   | -0.15268 | 0.00093  | -0.14348 | 0.00188  | -0.1484  |
| 0.110909 | 0.0165   | 0.122746 | 0.00792  | 0.091929 | 0.04709  | 0.059901 | 0.1963   | 0.138657 |
| 0.087749 | 0.05811  | 0.064991 | 0.16086  | 0.044017 | 0.34256  | 0.003748 | 0.93562  | -0.00102 |
| 0.061593 | 0.18394  | 0.11307  | 0.01449  | 0.113229 | 0.01436  | 0.127748 | 0.0057   | 0.091392 |
| 0.276101 | 1.29E-09 | 0.36626  | 2.85E-16 | 0.317706 | 2.06E-12 | 0.353863 | 3.20E-15 | 0.269185 |
| 0.054049 | 0.24373  | -0.01651 | 0.72189  | -0.1193  | 0.00987  | -0.09578 | 0.03854  | -0.05331 |
| -0.0399  | 0.38965  | -0.09251 | 0.04571  | -0.11868 | 0.01026  | -0.19736 | 1.74E-05 | -0.04748 |
| -0.00161 | 0.97225  | 0.023434 | 0.61347  | 0.020533 | 0.65807  | 0.003251 | 0.94413  | 0.050265 |
| 0.032828 | 0.47912  | -0.00187 | 0.9678   | 0.119111 | 0.00999  | 0.038765 | 0.40327  | 0.117923 |
| -0.06234 | 0.17864  | -0.12701 | 0.00599  | -0.23243 | 3.79E-07 | -0.25857 | 1.43E-08 | -0.22775 |
| -0.00841 | 0.85615  | -0.07542 | 0.10355  | -0.08297 | 0.07324  | -0.02245 | 0.62843  | -0.20796 |
| -0.00183 | 0.9686   | -0.25383 | 2.67E-08 | -0.01227 | 0.79135  | -0.21731 | 2.13E-06 | -0.04453 |
| -0.1031  | 0.02588  | -0.38159 | 1.23E-17 | -0.17771 | 0.00011  | -0.29895 | 4.27E-11 | -0.27217 |
| 0.07154  | 0.12263  | -0.17843 | 0.00011  | 0.14283  | 0.00197  | 0.013274 | 0.7748   | 0.082153 |
| -0.17242 | 0.00018  | -0.22523 | 8.76E-07 | -0.19515 | 2.17E-05 | -0.17471 | 0.00015  | -0.29137 |
| 0.183419 | 6.69E-05 | 0.056431 | 0.22353  | 0.097153 | 0.03583  | -0.04856 | 0.29497  | 0.140381 |
| -0.09451 | 0.04121  | -0.26534 | 5.77E-09 | -0.09813 | 0.03401  | -0.24784 | 5.75E-08 | -0.0124  |
| 0.070762 | 0.12676  | 0.012385 | 0.78952  | 0.060125 | 0.19463  | -0.05554 | 0.23093  | 0.112309 |
| -0.02307 | 0.61907  | 0.026526 | 0.56747  | 0.016005 | 0.73011  | 0.009856 | 0.83178  | 0.077249 |
| 0.046046 | 0.32075  | 0.108701 | 0.01879  | 0.015788 | 0.73364  | 0.051799 | 0.26394  | 0.078416 |
| 0.00038  | 0.99346  | 0.007661 | 0.86885  | -0.02594 | 0.576    | -0.02628 | 0.57107  | 0.001982 |
| -0.08513 | 0.06606  | 0.046147 | 0.31969  | -0.1388  | 0.00265  | -0.05412 | 0.24307  | -0.11289 |
| 0.01455  | 0.75382  | 0.172549 | 0.00018  | -0.0283  | 0.54182  | 0.055152 | 0.23422  | 0.006809 |
| 0.050548 | 0.27566  | 0.109102 | 0.01835  | 0.025102 | 0.58844  | 0.060505 | 0.19182  | 0.09084  |
| 0.046779 | 0.31309  | 0.093642 | 0.04311  | 0.064498 | 0.16407  | 0.076647 | 0.09806  | 0.041401 |
| 0.000216 | 0.99628  | 0.093009 | 0.04455  | 0.022826 | 0.62271  | 0.056378 | 0.22397  | 0.01877  |
| 0.05208  | 0.26135  | 0.010432 | 0.8221   | -0.00471 | 0.9191   | -0.02336 | 0.61464  | 0.02749  |
| -0.07993 | 0.08444  | -0.05872 | 0.20527  | -0.09382 | 0.04272  | -0.11189 | 0.01556  | -0.05391 |
| 0.058194 | 0.20938  | 0.089318 | 0.05375  | 0.096027 | 0.03804  | 0.076837 | 0.09722  | 0.134013 |
| -0.01148 | 0.80452  | 0.26043  | 1.12E-08 | -0.01306 | 0.77837  | 0.149559 | 0.00119  | 0.022047 |
| 0.297064 | 5.72E-11 | 0.352338 | 4.27E-15 | 0.147892 | 0.00135  | 0.221948 | 1.27E-06 | 0.191771 |
| -0.05556 | 0.2308   | 0.030885 | 0.50553  | -0.13775 | 0.00285  | -0.01394 | 0.76385  | -0.03772 |
| 0.034201 | 0.46093  | 0.060441 | 0.19229  | 0.05316  | 0.25158  | 0.014874 | 0.74853  | 0.150373 |
| -0.10742 | 0.02023  | -0.10436 | 0.02411  | -0.08602 | 0.06325  | -0.0904  | 0.05091  | -0.0059  |
| -0.05302 | 0.25284  | 0.022503 | 0.62764  | -0.01573 | 0.73455  | -0.0166  | 0.72051  | -0.05096 |
| 0.119076 | 0.01001  | 0.029912 | 0.51905  | 0.065278 | 0.15902  | -0.00906 | 0.84515  | 0.04307  |
| 0.252871 | 3.02E-08 | 0.045955 | 0.32171  | 0.214311 | 2.96E-06 | 0.144055 | 0.0018   | 0.169155 |
| 0.132104 | 0.00424  | -0.08651 | 0.06177  | -0.0267  | 0.56497  | -0.02824 | 0.54274  | 0.084274 |
| 0.214426 | 2.93E-06 | -0.06749 | 0.14534  | 0.222468 | 1.20E-06 | 0.003838 | 0.93407  | 0.164948 |
| 0.130046 | 0.00488  | 0.108081 | 0.01948  | 0.12933  | 0.00512  | 0.091607 | 0.04787  | 0.110575 |
| 0.110306 | 0.0171   | 0.099363 | 0.03181  | 0.114214 | 0.01352  | 0.057021 | 0.21872  | 0.114976 |
| -0.07593 | 0.10126  | -0.12252 | 0.00804  | -0.11077 | 0.01663  | -0.18104 | 8.34E-05 | -0.09388 |
| -0.1213  | 0.00869  | -0.10674 | 0.02105  | -0.19195 | 2.97E-05 | -0.14021 | 0.00239  | -0.15276 |

|          |          |           |          |          |          |          |          |          |
|----------|----------|-----------|----------|----------|----------|----------|----------|----------|
| 0.002381 | 0.95908  | 0.070792  | 0.1266   | -0.13211 | 0.00424  | -0.03921 | 0.39787  | -0.12594 |
| 0.067642 | 0.14443  | -0.0346   | 0.45572  | -0.1053  | 0.02286  | -0.02497 | 0.59038  | -0.08516 |
| 0.106902 | 0.02085  | -0.01261  | 0.78585  | 0.003493 | 0.94     | -0.007   | 0.88011  | -0.00623 |
| 0.042945 | 0.35446  | 0.022386  | 0.62943  | 0.058669 | 0.20567  | 0.064803 | 0.16208  | 0.031163 |
| 0.212293 | 3.69E-06 | 0.182771  | 7.11E-05 | 0.187943 | 4.37E-05 | 0.124944 | 0.00686  | 0.244964 |
| 0.080903 | 0.08072  | -0.04035  | 0.38433  | 0.092125 | 0.04662  | -0.03556 | 0.44326  | 0.12402  |
| 0.119358 | 0.00983  | 0.102232  | 0.02717  | 0.062245 | 0.17933  | 0.046766 | 0.31323  | 0.02836  |
| 0.039399 | 0.39563  | -0.15423  | 0.00083  | -0.04679 | 0.31301  | -0.02862 | 0.53728  | -0.16322 |
| 0.052745 | 0.2553   | -0.0147   | 0.75137  | -0.00239 | 0.95899  | -0.06668 | 0.15023  | 0.01817  |
| 0.121759 | 0.00844  | 0.023278  | 0.61584  | 0.105181 | 0.02301  | 0.043863 | 0.34425  | 0.100161 |
| -0.08474 | 0.06732  | -0.08597  | 0.0634   | -0.05013 | 0.27967  | -0.09533 | 0.03948  | -0.00739 |
| 0.153272 | 0.00089  | 0.078759  | 0.08912  | 0.14931  | 0.00121  | 0.105659 | 0.0224   | 0.161011 |
| 0.005971 | 0.89759  | -0.16633  | 0.00031  | -0.04718 | 0.30899  | -0.06747 | 0.14542  | -0.10947 |
| 0.016244 | 0.72626  | 0.104084  | 0.02449  | 0.120366 | 0.00922  | 0.083191 | 0.07248  | 0.130815 |
| 0.069786 | 0.1321   | 0.05443   | 0.24041  | 0.112082 | 0.01538  | 0.038702 | 0.40404  | 0.090731 |
| 0.393339 | 9.92E-19 | 0.232556  | 3.74E-07 | 0.245799 | 7.44E-08 | 0.136904 | 0.00303  | 0.271743 |
| 0.063779 | 0.16883  | 0.026536  | 0.56732  | 0.035272 | 0.44699  | 0.015804 | 0.73338  | 0.068336 |
| 0.08038  | 0.08271  | 0.089395  | 0.05354  | 0.18533  | 5.60E-05 | 0.139592 | 0.0025   | 0.196606 |
| -0.0884  | 0.05627  | -0.24165  | 1.25E-07 | -0.27545 | 1.41E-09 | -0.25444 | 2.46E-08 | -0.34641 |
| -0.01125 | 0.80844  | -0.01228  | 0.79123  | 0.143905 | 0.00182  | 0.065997 | 0.15446  | 0.12543  |
| 0.015525 | 0.73792  | -0.05348  | 0.24873  | -0.02469 | 0.59465  | -0.01359 | 0.76963  | -0.03436 |
| 0.00782  | 0.86615  | -0.09198  | 0.04697  | -0.26855 | 3.71E-09 | -0.23262 | 3.71E-07 | -0.21978 |
| 0.277667 | 1.03E-09 | 0.232664  | 3.69E-07 | 0.231426 | 4.27E-07 | 0.165998 | 0.00031  | 0.259671 |
| 0.243733 | 9.63E-08 | 0.227095  | 7.07E-07 | 0.150725 | 0.00109  | 0.179329 | 9.76E-05 | 0.208412 |
| 0.164438 | 0.00036  | 0.086517  | 0.06174  | 0.177191 | 0.00012  | 0.103603 | 0.02516  | 0.242612 |
| 0.056056 | 0.22663  | -0.00643  | 0.8897   | 0.05535  | 0.23254  | -0.0125  | 0.78754  | 0.062056 |
| 0.051787 | 0.26404  | -0.01393  | 0.76399  | 0.098261 | 0.03376  | 0.035482 | 0.4443   | 0.081442 |
| -0.03261 | 0.48209  | -0.12672  | 0.0061   | 0.046454 | 0.31648  | -0.06205 | 0.18066  | 0.084574 |
| -0.20882 | 5.35E-06 | -0.03691  | 0.42612  | -0.1337  | 0.0038   | -0.04409 | 0.34177  | 0.011402 |
| -0.07556 | 0.10292  | -0.19076  | 3.33E-05 | -0.24722 | 6.22E-08 | -0.12197 | 0.00832  | -0.31766 |
| 0.046825 | 0.31262  | -0.21173  | 3.92E-06 | -0.02961 | 0.52331  | -0.10452 | 0.02389  | -0.1204  |
| 0.157203 | 0.00065  | 0.023744  | 0.60878  | 0.211313 | 4.10E-06 | 0.085596 | 0.06458  | 0.203677 |
| 0.080698 | 0.0815   | -4.18E-05 | 0.99928  | 0.08469  | 0.06747  | 0.01259  | 0.78612  | 0.06717  |
| 0.042059 | 0.36448  | 0.079082  | 0.08781  | -0.02804 | 0.54555  | -0.05858 | 0.20634  | 0.006737 |
| 0.159874 | 0.00052  | 0.005912  | 0.89862  | -0.15828 | 0.0006   | -0.10187 | 0.02772  | -0.0267  |
| -0.11832 | 0.01049  | 0.030818  | 0.50646  | -0.22638 | 7.68E-07 | -0.08993 | 0.05213  | -0.13547 |
| 0.039613 | 0.39306  | 0.023242  | 0.61638  | 0.046352 | 0.31754  | 0.011807 | 0.79912  | 0.051868 |
| 0.206092 | 7.12E-06 | 0.014146  | 0.76045  | 0.15161  | 0.00101  | 0.073167 | 0.11433  | 0.140705 |
| -0.00364 | 0.93746  | 0.080506  | 0.08223  | 0.078548 | 0.08998  | 0.100316 | 0.0302   | 0.078595 |
| 0.084672 | 0.06753  | 0.077074  | 0.0962   | 0.114819 | 0.01303  | 0.075039 | 0.10533  | 0.228397 |
| 0.039478 | 0.39467  | 0.166064  | 0.00031  | -0.05464 | 0.23859  | -0.00346 | 0.94048  | 0.152833 |
| 0.196212 | 1.95E-05 | 0.412749  | 1.23E-20 | 0.287641 | 2.39E-10 | 0.367548 | 2.20E-16 | 0.181443 |
| 0.196613 | 1.87E-05 | -0.038    | 0.41267  | 0.126725 | 0.0061   | -0.08373 | 0.07064  | 0.160039 |
| 0.035124 | 0.44891  | -0.02268  | 0.62498  | -0.03005 | 0.51708  | -0.07711 | 0.09605  | -0.05851 |
| 0.116778 | 0.01155  | 0.075145  | 0.10484  | 0.118275 | 0.01053  | 0.145354 | 0.00164  | 0.089974 |

|          |          |          |          |          |          |          |          |          |
|----------|----------|----------|----------|----------|----------|----------|----------|----------|
| 0.094763 | 0.04066  | 0.011865 | 0.79817  | 0.071209 | 0.12437  | 0.038194 | 0.41024  | 0.049922 |
| 0.085238 | 0.06571  | -0.01534 | 0.74093  | 0.249048 | 4.93E-08 | 0.070923 | 0.1259   | 0.118037 |
| -0.07798 | 0.09233  | 0.042002 | 0.36513  | -0.16784 | 0.00027  | -0.02953 | 0.52435  | -0.11926 |
| 0.218356 | 1.90E-06 | 0.197987 | 1.63E-05 | 0.285318 | 3.38E-10 | 0.308828 | 8.89E-12 | 0.229635 |
| 0.127982 | 0.00561  | 0.275055 | 1.49E-09 | 0.247663 | 5.88E-08 | 0.163807 | 0.00038  | 0.2897   |
| 0.10966  | 0.01776  | 0.256541 | 1.87E-08 | 0.260482 | 1.11E-08 | 0.212076 | 3.77E-06 | 0.218741 |
| 0.042514 | 0.3593   | 0.053369 | 0.24971  | 0.026492 | 0.56796  | 0.043254 | 0.35099  | 0.017987 |
| -0.11804 | 0.01068  | -0.06771 | 0.144    | -0.13311 | 0.00396  | -0.11623 | 0.01195  | -0.056   |
| 0.08932  | 0.05374  | -0.0279  | 0.54759  | 0.016157 | 0.72766  | -0.07155 | 0.12256  | 0.049188 |
| 0.060285 | 0.19344  | 0.082778 | 0.07392  | -0.04092 | 0.37764  | -0.02727 | 0.55665  | 0.009748 |
| -0.00731 | 0.87476  | -0.00658 | 0.88729  | -0.11776 | 0.01087  | -0.09947 | 0.03163  | -0.02464 |
| 0.060416 | 0.19248  | 0.052345 | 0.25893  | 0.078596 | 0.08978  | 0.047112 | 0.30966  | 0.127547 |
| 0.016991 | 0.7142   | -0.11296 | 0.0146   | -0.16323 | 0.0004   | -0.17272 | 0.00018  | -0.05299 |
| -0.11579 | 0.01228  | -0.14707 | 0.00144  | -0.03417 | 0.4613   | -0.03692 | 0.42602  | 0.001665 |
| 0.382539 | 1.01E-17 | 0.219022 | 1.77E-06 | 0.116938 | 0.01144  | 0.216543 | 2.32E-06 | 0.183991 |
| 0.171522 | 0.0002   | 0.028196 | 0.54331  | -0.01207 | 0.79476  | -0.01224 | 0.79195  | 0.013545 |
| -0.16459 | 0.00035  | -0.12116 | 0.00877  | -0.14767 | 0.00137  | -0.07564 | 0.10257  | -0.06829 |
| 0.119511 | 0.00974  | 0.057082 | 0.21823  | 0.004821 | 0.91724  | -0.01461 | 0.75285  | 0.033448 |
| 0.026317 | 0.57052  | -0.02247 | 0.62811  | 0.161384 | 0.00046  | 0.058566 | 0.20648  | 0.190706 |
| 0.011572 | 0.80304  | -0.3096  | 7.85E-12 | -0.10746 | 0.0202   | -0.22716 | 7.02E-07 | -0.14424 |
| 0.152142 | 0.00097  | -0.02204 | 0.63478  | 0.082591 | 0.07457  | 0.142094 | 0.00208  | -0.00248 |
| -0.10005 | 0.03065  | -0.15177 | 0.001    | -0.07861 | 0.08972  | -0.03255 | 0.4828   | -0.07722 |
| -0.03085 | 0.50595  | 0.022728 | 0.6242   | 0.004919 | 0.91557  | -0.03185 | 0.49233  | 0.035236 |
| -0.13273 | 0.00406  | -0.30369 | 2.02E-11 | -0.18674 | 4.90E-05 | -0.19313 | 2.65E-05 | -0.19392 |
| 0.108843 | 0.01863  | -0.00773 | 0.86765  | 0.011419 | 0.8056   | -0.02484 | 0.59233  | 0.082573 |
| 0.042319 | 0.36152  | 0.099506 | 0.03156  | 0.010702 | 0.81757  | -0.03052 | 0.51053  | 0.063237 |
| -0.06564 | 0.1567   | -0.10165 | 0.02805  | 0.063661 | 0.16962  | -0.01853 | 0.68965  | 0.02196  |
| 0.152752 | 0.00093  | 0.033226 | 0.47381  | 0.274969 | 1.51E-09 | 0.178784 | 0.0001   | 0.209472 |
| 0.104651 | 0.02372  | 0.200992 | 1.21E-05 | 0.169921 | 0.00023  | 0.119513 | 0.00974  | 0.227339 |
| 0.184803 | 5.88E-05 | -0.12567 | 0.00654  | 0.085559 | 0.06469  | -0.00639 | 0.89041  | 0.064161 |
| 0.028142 | 0.54408  | -0.18275 | 7.12E-05 | -0.06855 | 0.1391   | -0.21647 | 2.34E-06 | -0.07239 |
| 0.101475 | 0.02833  | 0.033762 | 0.4667   | -0.10472 | 0.02363  | -0.03005 | 0.51714  | -0.15951 |
| 0.06082  | 0.18951  | 0.130514 | 0.00473  | 0.070536 | 0.12798  | 0.038212 | 0.41002  | 0.111134 |
| -0.03516 | 0.44846  | -0.18832 | 4.21E-05 | 0.10557  | 0.02251  | -0.08672 | 0.06112  | 0.093065 |
| 0.236433 | 2.35E-07 | -0.15313 | 0.0009   | 0.067684 | 0.14417  | 0.059882 | 0.19645  | 0.019814 |
| -0.02985 | 0.51997  | -0.00282 | 0.95161  | -0.0513  | 0.2686   | -0.02332 | 0.6152   | -0.0442  |
| 0.028587 | 0.53774  | 0.036128 | 0.43604  | -0.01865 | 0.68773  | 0.007207 | 0.87656  | 0.018462 |
| 0.080977 | 0.08045  | 0.129807 | 0.00496  | -0.01711 | 0.71234  | -0.0319  | 0.49169  | 0.078657 |
| 0.081121 | 0.07991  | 0.079706 | 0.08533  | -0.00033 | 0.9944   | -0.04631 | 0.31795  | 0.101531 |
| -0.1955  | 2.09E-05 | -0.08825 | 0.0567   | -0.0443  | 0.33942  | 0.020517 | 0.65833  | -0.08804 |
| -0.01846 | 0.69077  | 0.072073 | 0.11986  | -0.04017 | 0.38647  | -0.0739  | 0.11073  | 0.034862 |
| -0.00905 | 0.84531  | -0.02275 | 0.62392  | 0.00052  | 0.99106  | -0.02833 | 0.5414   | -0.03327 |
| -0.04113 | 0.37516  | 0.00799  | 0.86327  | 0.022365 | 0.62975  | 0.005319 | 0.90873  | -0.04972 |
| -0.09975 | 0.03114  | 0.093469 | 0.0435   | -0.12201 | 0.0083   | -0.05578 | 0.22896  | -0.01742 |
| -0.17629 | 0.00013  | -0.10635 | 0.02153  | 0.056458 | 0.22331  | -0.05813 | 0.20986  | 0.055677 |

|          |          |          |          |          |          |          |          |          |
|----------|----------|----------|----------|----------|----------|----------|----------|----------|
| 0.032175 | 0.48791  | 0.105277 | 0.02289  | 0.222538 | 1.19E-06 | 0.09766  | 0.03487  | 0.218109 |
| -0.0784  | 0.0906   | -0.17498 | 0.00014  | -0.10144 | 0.02838  | -0.13057 | 0.00471  | -0.04489 |
| 0.196251 | 1.94E-05 | 0.260725 | 1.08E-08 | 0.29544  | 7.35E-11 | 0.321184 | 1.15E-12 | 0.291471 |
| -0.06478 | 0.16226  | -0.29077 | 1.50E-10 | -0.19368 | 2.51E-05 | -0.21358 | 3.21E-06 | -0.17874 |
| 0.089558 | 0.0531   | 0.092576 | 0.04555  | -0.04929 | 0.28778  | 0.053583 | 0.24782  | -0.01733 |
| 0.016447 | 0.72297  | 0.067514 | 0.14519  | 0.177743 | 0.00011  | 0.199571 | 1.39E-05 | 0.163427 |
| 0.128226 | 0.00552  | 0.095936 | 0.03823  | 0.000578 | 0.99007  | 0.020003 | 0.66636  | 0.00018  |
| 0.143622 | 0.00186  | 0.112373 | 0.01512  | 0.149562 | 0.00119  | 0.068092 | 0.14177  | 0.202932 |
| -0.23565 | 2.59E-07 | -0.23124 | 4.36E-07 | -0.26509 | 5.96E-09 | -0.19255 | 2.80E-05 | -0.30341 |
| 0.269379 | 3.31E-09 | 0.166472 | 0.0003   | 0.22689  | 7.24E-07 | 0.218102 | 1.96E-06 | 0.189047 |
| -0.08814 | 0.05699  | -0.19219 | 2.90E-05 | -0.25493 | 2.31E-08 | -0.2819  | 5.58E-10 | -0.13176 |
| -0.07101 | 0.12545  | -0.05884 | 0.20439  | -0.15787 | 0.00062  | -0.08571 | 0.06422  | -0.18786 |
| -0.10742 | 0.02025  | -0.04634 | 0.31762  | -0.07804 | 0.09206  | -0.05016 | 0.27938  | -0.03847 |
| -0.00701 | 0.87991  | 0.039393 | 0.39569  | 0.07653  | 0.09857  | 0.062822 | 0.17532  | 0.08617  |
| -0.02962 | 0.52311  | 0.008801 | 0.84955  | -0.00581 | 0.90033  | 0.037276 | 0.42159  | 0.007332 |
| -0.01139 | 0.80602  | -0.19312 | 2.65E-05 | -0.13779 | 0.00285  | -0.1543  | 0.00082  | -0.18029 |
| -0.07311 | 0.11462  | -0.12902 | 0.00523  | -0.15464 | 0.0008   | -0.10167 | 0.02803  | -0.1648  |
| 0.125551 | 0.00659  | 0.112571 | 0.01494  | -0.0291  | 0.53046  | -0.02701 | 0.56036  | -0.0245  |
| -0.07996 | 0.08432  | -0.24453 | 8.72E-08 | -0.31631 | 2.60E-12 | -0.31283 | 4.63E-12 | -0.17038 |
| 0.073887 | 0.1108   | -0.08437 | 0.06851  | 0.105682 | 0.02237  | 0.178845 | 0.0001   | -0.00114 |
| 0.017853 | 0.70039  | 0.049417 | 0.28656  | -0.08248 | 0.07496  | -0.05719 | 0.21737  | -0.05137 |
| 0.091351 | 0.0485   | 0.050323 | 0.2778   | 0.086193 | 0.06273  | 0.030307 | 0.51354  | 0.046766 |
| 0.097609 | 0.03497  | 0.186189 | 5.16E-05 | 0.082227 | 0.07587  | 0.083833 | 0.0703   | 0.134366 |
| 0.059922 | 0.19614  | -0.02907 | 0.53089  | 0.129121 | 0.0052   | 0.181027 | 8.35E-05 | -0.01223 |
| 0.113651 | 0.01399  | 0.066037 | 0.15421  | 0.152397 | 0.00095  | 0.02209  | 0.63397  | 0.161948 |
| -0.0993  | 0.03192  | -0.03011 | 0.51627  | -0.15615 | 0.00071  | -0.12545 | 0.00664  | -0.08198 |
| -0.04713 | 0.30949  | -0.00896 | 0.84695  | 0.082084 | 0.07638  | 0.016306 | 0.72524  | 0.107771 |
| 0.073083 | 0.11475  | 0.092202 | 0.04644  | 0.131801 | 0.00433  | 0.085326 | 0.06543  | 0.074592 |
| -0.03302 | 0.47655  | -0.00032 | 0.99447  | -0.15948 | 0.00054  | -0.14718 | 0.00143  | -0.12544 |
| 0.006961 | 0.88073  | 0.114323 | 0.01344  | 0.02267  | 0.62508  | 0.038161 | 0.41064  | 0.013006 |
| 0.226981 | 7.17E-07 | 0.471353 | 3.32E-27 | 0.161426 | 0.00046  | 0.341992 | 2.94E-14 | 0.085502 |
| 0.00078  | 0.98659  | 0.015035 | 0.74589  | 0.0041   | 0.92959  | -0.01611 | 0.72841  | 0.019384 |
| 0.097254 | 0.03564  | -0.13763 | 0.00288  | -0.03531 | 0.44656  | -0.06297 | 0.17427  | -0.0926  |
| 0.005324 | 0.90864  | 0.033375 | 0.47183  | -0.07082 | 0.12646  | -0.00509 | 0.91259  | -0.04283 |
| 0.120322 | 0.00925  | 0.022672 | 0.62506  | 0.091376 | 0.04844  | 0.004787 | 0.91783  | 0.091559 |
| -0.00617 | 0.89418  | 0.115697 | 0.01235  | 0.024992 | 0.59008  | 0.100274 | 0.03027  | 0.079048 |
| -0.01128 | 0.80791  | -0.02572 | 0.5793   | 0.046012 | 0.3211   | 0.064522 | 0.16391  | 0.035496 |
| 0.00894  | 0.8472   | -0.26917 | 3.41E-09 | -0.17272 | 0.00018  | -0.19683 | 1.83E-05 | -0.24    |
| -0.05769 | 0.21335  | -0.06973 | 0.13239  | 0.020145 | 0.66413  | 0.021368 | 0.6451   | -0.04136 |
| -0.02779 | 0.5491   | -0.0404  | 0.38367  | 0.146248 | 0.00153  | 0.074875 | 0.10609  | 0.080314 |
| 0.041961 | 0.3656   | -0.04845 | 0.29612  | 0.063655 | 0.16966  | 0.006006 | 0.89701  | 0.080727 |
| -0.03335 | 0.47217  | -0.02546 | 0.58307  | 0.141401 | 0.00219  | 0.137559 | 0.00289  | 0.060213 |
| 0.118342 | 0.01048  | -0.01881 | 0.6851   | 0.087003 | 0.06029  | 0.106088 | 0.02185  | 0.07942  |
| -0.01144 | 0.80531  | -0.0176  | 0.7045   | 0.110322 | 0.01708  | 0.145258 | 0.00165  | 0.086706 |
| 0.087276 | 0.05948  | 0.078596 | 0.08978  | 0.001938 | 0.96668  | 0.005428 | 0.90686  | -0.08173 |

|          |          |          |          |          |          |          |          |          |
|----------|----------|----------|----------|----------|----------|----------|----------|----------|
| 0.088265 | 0.05665  | 0.007852 | 0.86561  | -0.04739 | 0.30684  | -0.04394 | 0.34338  | 0.048944 |
| 0.170676 | 0.00021  | 0.203622 | 9.20E-06 | 0.193095 | 2.65E-05 | 0.313706 | 4.01E-12 | 0.112164 |
| 0.08298  | 0.07321  | 0.02011  | 0.66468  | -0.05567 | 0.22988  | -0.00713 | 0.87791  | -0.09208 |
| 0.006846 | 0.88271  | 0.208142 | 5.74E-06 | -0.08486 | 0.06691  | 0.171213 | 0.0002   | -0.04373 |
| -0.03169 | 0.49455  | 0.112882 | 0.01466  | -0.07452 | 0.10778  | -0.01249 | 0.78785  | -0.04379 |
| -0.03087 | 0.50572  | 0.040633 | 0.38098  | -0.05042 | 0.27688  | -0.04752 | 0.30545  | -0.03368 |
| 0.03783  | 0.41473  | 0.034585 | 0.4559   | -0.01455 | 0.75383  | 0.018951 | 0.68293  | 0.002098 |
| 0.11627  | 0.01192  | 0.006099 | 0.89542  | -0.02892 | 0.533    | -0.0547  | 0.23806  | 0.028541 |
| -0.00937 | 0.83996  | 0.022504 | 0.62762  | -0.02221 | 0.6321   | -0.14264 | 0.002    | 0.145261 |
| 0.127625 | 0.00575  | -0.01436 | 0.75702  | 0.017305 | 0.70915  | -0.05119 | 0.26959  | 0.004205 |
| 0.120481 | 0.00916  | 0.090891 | 0.04965  | 0.108216 | 0.01933  | 0.075559 | 0.10293  | 0.137799 |
| 0.059251 | 0.20121  | 0.078285 | 0.09106  | -0.09099 | 0.0494   | -0.0824  | 0.07525  | 0.017751 |
| 0.347738 | 1.02E-14 | -0.0077  | 0.86817  | -0.01199 | 0.79605  | -0.17232 | 0.00018  | 0.10423  |
| 0.107723 | 0.01989  | 0.068341 | 0.14031  | 0.14423  | 0.00178  | 0.279056 | 8.43E-10 | 0.035195 |
| 0.477412 | 5.85E-28 | 0.287109 | 2.59E-10 | 0.07576  | 0.10202  | 0.118661 | 0.01027  | 0.135903 |
| -0.038   | 0.41258  | 0.033511 | 0.47002  | -0.04786 | 0.30199  | -0.06146 | 0.18488  | -0.01524 |
| 0.057696 | 0.21331  | 0.036297 | 0.4339   | 0.029236 | 0.52853  | -0.03553 | 0.44365  | 0.141913 |
| -0.00959 | 0.83625  | -0.00309 | 0.94692  | -0.08378 | 0.07047  | -0.05572 | 0.22942  | -0.07651 |
| 0.003575 | 0.93859  | 0.036591 | 0.43019  | -0.06283 | 0.17529  | -0.02425 | 0.60115  | -0.07445 |
| 0.123152 | 0.00771  | -0.01107 | 0.81147  | 0.147773 | 0.00136  | 0.20718  | 6.35E-06 | 0.019344 |
| 0.21358  | 3.21E-06 | 0.256988 | 1.77E-08 | 0.212818 | 3.48E-06 | 0.261192 | 1.01E-08 | 0.102919 |
| -0.02043 | 0.6597   | 0.098937 | 0.03255  | -0.10352 | 0.02527  | -0.08318 | 0.07252  | 0.043258 |
| -0.02138 | 0.64494  | -0.00593 | 0.8983   | -0.00926 | 0.84185  | -0.02698 | 0.56088  | 0.06676  |
| -0.00307 | 0.94722  | 0.055011 | 0.23542  | 0.004111 | 0.9294   | 0.047283 | 0.3079   | -0.02498 |
| -0.061   | 0.18824  | -0.0466  | 0.31492  | 0.026178 | 0.57255  | 0.020834 | 0.65338  | 0.005317 |
| -0.09097 | 0.04945  | 0.014956 | 0.74718  | -0.07486 | 0.10618  | -0.03848 | 0.40676  | -0.0723  |
| 0.068789 | 0.13773  | 0.055555 | 0.23082  | -0.04687 | 0.31214  | -0.04569 | 0.32455  | 0.033419 |
| 0.060521 | 0.1917   | 0.233725 | 3.25E-07 | 0.030814 | 0.50652  | 0.141705 | 0.00214  | -0.01274 |
| 0.101476 | 0.02833  | 0.152905 | 0.00092  | 0.043618 | 0.34695  | 0.100166 | 0.03044  | 0.015777 |
| -0.06511 | 0.1601   | -0.16084 | 0.00048  | -0.07116 | 0.12463  | -0.00347 | 0.94044  | -0.20534 |
| 0.014789 | 0.74991  | 0.041651 | 0.36916  | 0.160424 | 0.0005   | 0.167582 | 0.00028  | 0.120794 |
| 0.036403 | 0.43255  | 0.049933 | 0.28155  | 0.018051 | 0.69723  | -0.07244 | 0.11799  | 0.103037 |
| 0.018279 | 0.6936   | -0.05978 | 0.19724  | -0.02449 | 0.59756  | -0.12142 | 0.00862  | 0.024096 |
| -0.01576 | 0.73412  | -0.12363 | 0.00748  | 0.228006 | 6.37E-07 | 0.087063 | 0.06011  | 0.204653 |
| 0.160319 | 0.00051  | 0.147874 | 0.00135  | 0.25499  | 2.29E-08 | 0.086785 | 0.06094  | 0.29804  |
| 0.025706 | 0.5795   | -0.10836 | 0.01916  | -0.04532 | 0.32841  | -0.04898 | 0.29085  | -0.10233 |
| 0.074846 | 0.10623  | 0.009981 | 0.82967  | 0.250057 | 4.34E-08 | 0.164391 | 0.00036  | 0.213051 |
| 0.060845 | 0.18933  | -0.10311 | 0.02586  | 0.062358 | 0.17854  | 5.05E-05 | 0.99913  | 0.030961 |
| 0.05936  | 0.20038  | -0.04039 | 0.38383  | 0.14909  | 0.00123  | 0.052602 | 0.2566   | 0.117876 |
| 0.02871  | 0.53599  | 0.210059 | 4.68E-06 | 0.047866 | 0.30197  | 0.003215 | 0.94475  | 0.073536 |
| 0.034583 | 0.45593  | 0.051865 | 0.26333  | -0.02105 | 0.6501   | -0.11619 | 0.01198  | 0.05472  |
| 0.027027 | 0.56017  | -0.01117 | 0.80968  | -0.23993 | 1.54E-07 | -0.20582 | 7.33E-06 | -0.14674 |
| -0.19105 | 3.24E-05 | -0.27939 | 8.03E-10 | -0.22438 | 9.65E-07 | -0.19118 | 3.20E-05 | -0.27452 |
| -0.02155 | 0.64235  | -0.14206 | 0.00209  | 0.132875 | 0.00402  | -0.06413 | 0.16652  | 0.098788 |
| -0.0817  | 0.07777  | -0.03208 | 0.48921  | -0.249   | 4.96E-08 | -0.1713  | 0.0002   | -0.10041 |

|          |          |          |          |          |          |          |          |          |
|----------|----------|----------|----------|----------|----------|----------|----------|----------|
| 0.015291 | 0.74172  | 0.018444 | 0.69097  | 0.057909 | 0.21162  | 0.060535 | 0.1916   | 0.011505 |
| 0.090005 | 0.05192  | 0.161326 | 0.00047  | 0.118044 | 0.01068  | 0.146064 | 0.00155  | 0.082224 |
| 0.082167 | 0.07608  | -0.09248 | 0.04579  | 0.147126 | 0.00143  | 0.058763 | 0.20495  | 0.051261 |
| 0.176723 | 0.00012  | 0.086833 | 0.06079  | 0.214489 | 2.91E-06 | 0.121533 | 0.00856  | 0.209125 |
| 0.161843 | 0.00045  | 0.115351 | 0.01262  | 0.170739 | 0.00021  | 0.160422 | 0.0005   | 0.15629  |
| 0.004502 | 0.92271  | 0.101467 | 0.02834  | -0.02813 | 0.54428  | -0.00165 | 0.9716   | -0.05609 |
| 0.095869 | 0.03836  | 0.006333 | 0.89143  | 0.184557 | 6.02E-05 | 0.07817  | 0.09154  | 0.185991 |
| -0.19985 | 1.35E-05 | -0.16194 | 0.00044  | -0.21114 | 4.17E-06 | -0.14979 | 0.00117  | -0.35337 |
| -0.11802 | 0.01069  | -0.03811 | 0.4113   | -0.26689 | 4.66E-09 | -0.18481 | 5.88E-05 | -0.07447 |
| 0.109791 | 0.01762  | -0.15873 | 0.00058  | 0.115387 | 0.01259  | -0.01637 | 0.72415  | 0.019634 |
| -0.01456 | 0.75371  | 0.036681 | 0.42904  | 0.047918 | 0.30145  | 0.032652 | 0.48149  | 0.09707  |
| 0.009627 | 0.83562  | -0.06865 | 0.13853  | -0.00014 | 0.99756  | -0.05888 | 0.20406  | -0.00391 |
| -0.07246 | 0.1179   | 0.048931 | 0.29133  | -0.1624  | 0.00043  | -0.16267 | 0.00042  | -0.07424 |
| 0.241383 | 1.29E-07 | 0.042582 | 0.35853  | 0.05402  | 0.24397  | 0.011429 | 0.80543  | 0.003523 |
| 0.068826 | 0.13751  | 0.002224 | 0.96177  | 0.038725 | 0.40376  | 0.156125 | 0.00071  | 0.060337 |
| 0.166893 | 0.00029  | 0.013882 | 0.76478  | -0.15562 | 0.00074  | -0.06805 | 0.14199  | -0.10525 |
| -0.14761 | 0.00138  | -0.0375  | 0.41875  | -0.03491 | 0.4517   | 0.02778  | 0.54928  | -0.00799 |
| 0.446828 | 2.67E-24 | 0.213987 | 3.07E-06 | 0.151665 | 0.00101  | 0.08076  | 0.08126  | 0.19574  |
| 0.004744 | 0.91856  | -0.05766 | 0.21359  | -0.0003  | 0.99486  | 0.005235 | 0.91017  | -0.11275 |
| 0.094654 | 0.04089  | 0.021642 | 0.64087  | 0.159996 | 0.00052  | 0.075446 | 0.10345  | 0.187474 |
| -0.05463 | 0.23868  | 0.013181 | 0.77634  | -0.0622  | 0.17966  | -0.04721 | 0.30866  | -0.0005  |
| 0.047342 | 0.3073   | -0.17399 | 0.00016  | 0.072376 | 0.11831  | -0.04448 | 0.33745  | 0.001018 |
| 0.152645 | 0.00094  | -0.06816 | 0.14137  | 0.083777 | 0.07049  | 0.015    | 0.74647  | -0.02763 |
| 0.145451 | 0.00162  | 0.15918  | 0.00055  | -0.05487 | 0.23662  | 0.004539 | 0.92207  | -0.20891 |
| 0.030924 | 0.505    | 0.069953 | 0.13117  | 0.129222 | 0.00516  | 0.098399 | 0.03351  | 0.147315 |
| 0.006984 | 0.88035  | 0.013642 | 0.76874  | 0.028348 | 0.54115  | 0.010953 | 0.81338  | 0.017441 |
| 0.016141 | 0.72792  | 0.115429 | 0.01256  | 0.137749 | 0.00285  | 0.121862 | 0.00838  | 0.162443 |
| 0.035167 | 0.44835  | -0.03699 | 0.42517  | 0.131951 | 0.00429  | 0.043453 | 0.34878  | 0.085179 |
| 0.164764 | 0.00035  | -0.11063 | 0.01677  | 0.240606 | 1.42E-07 | 0.102043 | 0.02745  | 0.107244 |
| -0.12071 | 0.00903  | -0.02341 | 0.6138   | -0.07518 | 0.10467  | -0.10626 | 0.02164  | -0.03405 |
| 0.172005 | 0.00019  | 0.229991 | 5.05E-07 | 0.23015  | 4.96E-07 | 0.170366 | 0.00022  | 0.28315  |
| 0.030006 | 0.51773  | 0.187253 | 4.67E-05 | -0.02145 | 0.6439   | -0.06682 | 0.14938  | 0.119384 |
| 0.096316 | 0.03746  | 0.192779 | 2.74E-05 | 0.20994  | 4.74E-06 | 0.159289 | 0.00055  | 0.190154 |
| 0.000651 | 0.98881  | -0.0669  | 0.14889  | 0.037272 | 0.42164  | -0.02423 | 0.60152  | 0.053701 |
| 0.175432 | 0.00014  | 0.102821 | 0.02629  | 0.129219 | 0.00516  | 0.176828 | 0.00012  | 0.145716 |
| 0.103882 | 0.02477  | 0.099704 | 0.03122  | 0.118428 | 0.01042  | 0.053345 | 0.24993  | 0.200059 |
| -0.03089 | 0.50545  | 0.105831 | 0.02218  | 0.014692 | 0.7515   | 0.073719 | 0.11162  | 0.061848 |
| 0.060833 | 0.18941  | -0.04656 | 0.31539  | -0.07366 | 0.11192  | -0.02936 | 0.52682  | -0.07593 |
| -0.10722 | 0.02047  | -0.05481 | 0.23712  | -0.0264  | 0.56933  | -0.04982 | 0.28266  | 0.025304 |
| 0.099743 | 0.03116  | 0.071551 | 0.12257  | 0.126717 | 0.0061   | 0.127348 | 0.00585  | 0.073176 |
| -0.12758 | 0.00576  | -0.04879 | 0.29276  | -0.1801  | 9.09E-05 | -0.06223 | 0.17943  | -0.17468 |
| 0.064297 | 0.16539  | 0.031101 | 0.50256  | 0.010791 | 0.81609  | -0.05971 | 0.19772  | 0.004978 |
| 0.119474 | 0.00976  | 0.123983 | 0.00731  | 0.125132 | 0.00678  | 0.056254 | 0.22499  | 0.133161 |
| 0.224773 | 9.23E-07 | 0.241658 | 1.24E-07 | 0.211731 | 3.92E-06 | 0.19107  | 3.23E-05 | 0.222182 |
| 0.08999  | 0.05196  | 0.106059 | 0.02189  | -0.15603 | 0.00072  | -0.06783 | 0.14331  | -0.02931 |

|          |          |          |          |          |          |          |          |          |
|----------|----------|----------|----------|----------|----------|----------|----------|----------|
| 0.071836 | 0.12109  | 0.122098 | 0.00826  | 0.170628 | 0.00021  | 0.115836 | 0.01225  | 0.251355 |
| 0.001194 | 0.97947  | 0.013234 | 0.77546  | 0.16648  | 0.0003   | 0.052525 | 0.25729  | 0.293608 |
| -0.01218 | 0.79296  | 0.026253 | 0.57145  | 0.143435 | 0.00189  | 0.148167 | 0.00132  | 0.118898 |
| 0.035683 | 0.44172  | -0.04271 | 0.35712  | 0.086996 | 0.06031  | -0.00223 | 0.96171  | 0.110567 |
| 0.562458 | 2.59E-40 | 0.216779 | 2.26E-06 | -0.0145  | 0.75465  | 0.01745  | 0.70683  | 0.004872 |
| 0.050491 | 0.27621  | 0.097642 | 0.03491  | 0.163011 | 0.0004   | 0.100202 | 0.03039  | 0.03096  |
| 0.10623  | 0.02168  | 0.162092 | 0.00044  | 0.184276 | 6.18E-05 | 0.153402 | 0.00088  | 0.10564  |
| 0.202702 | 1.01E-05 | 0.004891 | 0.91605  | -0.03404 | 0.46308  | -0.08138 | 0.07896  | 0.028294 |
| 0.192208 | 2.90E-05 | 0.037455 | 0.41937  | 0.234486 | 2.97E-07 | 0.123045 | 0.00777  | 0.122523 |
| 0.169504 | 0.00023  | -0.05148 | 0.26691  | 0.10991  | 0.0175   | -0.00674 | 0.88444  | 0.002105 |
| 0.154435 | 0.00081  | 0.015975 | 0.73061  | 0.126413 | 0.00623  | -0.03275 | 0.4801   | 0.048739 |
| 0.167037 | 0.00029  | 0.140505 | 0.00234  | 0.258851 | 1.38E-08 | 0.178225 | 0.00011  | 0.147233 |
| 0.159983 | 0.00052  | 0.320043 | 1.39E-12 | 0.220255 | 1.54E-06 | 0.336415 | 8.06E-14 | 0.274463 |
| 0.184513 | 6.04E-05 | 0.332483 | 1.62E-13 | 0.132285 | 0.00419  | 0.223104 | 1.12E-06 | 0.063261 |
| 0.282544 | 5.08E-10 | 0.037072 | 0.42414  | 0.003582 | 0.93847  | -0.06099 | 0.18827  | 0.095653 |
| -0.13086 | 0.00462  | -0.00943 | 0.83902  | -0.11547 | 0.01253  | -0.06835 | 0.14024  | -0.0991  |
| 0.009091 | 0.84467  | -0.0128  | 0.78265  | 0.001078 | 0.98147  | -0.03027 | 0.51405  | -0.00858 |
| 0.068613 | 0.13874  | 0.077132 | 0.09594  | -0.02564 | 0.58054  | -0.00482 | 0.91733  | 0.014763 |
| -0.06012 | 0.1947   | -0.00583 | 0.90002  | -0.15828 | 0.0006   | -0.14094 | 0.00227  | -0.12752 |
| 0.226625 | 7.47E-07 | 0.014116 | 0.76094  | 0.143733 | 0.00185  | 0.067346 | 0.14619  | 0.131661 |
| -0.02666 | 0.56547  | -0.02497 | 0.59046  | 0.097465 | 0.03524  | 0.038254 | 0.4095   | 0.077292 |
| 0.077682 | 0.09359  | -0.12462 | 0.00701  | 0.139886 | 0.00245  | -0.12161 | 0.00852  | 0.175305 |
| 0.013128 | 0.77721  | 0.028236 | 0.54274  | 0.017142 | 0.71177  | 0.032296 | 0.48628  | -0.0095  |
| 0.217405 | 2.11E-06 | 0.269734 | 3.15E-09 | 0.137078 | 0.00299  | 0.167057 | 0.00029  | 0.055695 |
| -0.07326 | 0.11386  | -0.0138  | 0.76607  | -0.03712 | 0.42355  | -0.02074 | 0.65483  | -0.06891 |
| -0.06838 | 0.14008  | -0.17599 | 0.00013  | -0.01479 | 0.74986  | -0.0068  | 0.88345  | -0.05877 |
| -0.21977 | 1.62E-06 | -0.04556 | 0.32585  | -0.21046 | 4.49E-06 | -0.03136 | 0.49908  | -0.24338 |
| -0.05907 | 0.20262  | -0.06811 | 0.14164  | -0.13449 | 0.00359  | -0.09754 | 0.03511  | -0.18658 |
| -0.01183 | 0.79868  | 0.00878  | 0.84991  | 0.067691 | 0.14413  | 0.099233 | 0.03203  | 0.066614 |
| -0.18756 | 4.53E-05 | 0.046175 | 0.31939  | -0.08094 | 0.08058  | -0.03961 | 0.3931   | 0.03933  |
| -0.06748 | 0.14539  | -0.05068 | 0.27439  | 0.034847 | 0.45249  | 0.034898 | 0.45184  | 0.029951 |
| 0.046383 | 0.31721  | 0.018357 | 0.69235  | 0.207637 | 6.06E-06 | 0.216924 | 2.23E-06 | 0.128875 |
| 0.054379 | 0.24085  | 0.039866 | 0.39004  | 0.035532 | 0.44366  | -0.00163 | 0.972    | 0.067261 |
| 0.003573 | 0.93863  | 0.046127 | 0.3199   | 0.019785 | 0.66978  | 0.026365 | 0.56982  | 0.041713 |
| 0.115859 | 0.01223  | -0.03353 | 0.46982  | 0.133747 | 0.00378  | 0.056334 | 0.22433  | 0.097892 |
| 0.147831 | 0.00136  | -0.01998 | 0.66674  | 0.026208 | 0.57212  | -0.00586 | 0.89952  | 0.007256 |
| 0.013962 | 0.76348  | -0.00772 | 0.86792  | 0.032605 | 0.48212  | -0.06334 | 0.17176  | 0.154406 |
| -0.12568 | 0.00654  | -0.33369 | 1.31E-13 | -0.20586 | 7.30E-06 | -0.34611 | 1.37E-14 | -0.24033 |
| 0.187358 | 4.62E-05 | -0.03118 | 0.50148  | -0.03894 | 0.4011   | -0.10059 | 0.02975  | 0.031706 |
| 0.043927 | 0.34354  | -0.05277 | 0.25507  | -0.16721 | 0.00028  | -0.08512 | 0.0661   | -0.16582 |
| 0.021601 | 0.64149  | -0.00423 | 0.92731  | 0.090851 | 0.04975  | 0.006305 | 0.89191  | 0.128357 |
| -0.14093 | 0.00227  | -0.0018  | 0.96914  | -0.19494 | 2.21E-05 | -0.06808 | 0.14182  | -0.12056 |
| -0.02644 | 0.5687   | 0.11276  | 0.01477  | -0.05355 | 0.24811  | 0.027959 | 0.54671  | 0.003464 |
| 0.163074 | 0.0004   | 0.085294 | 0.06553  | 0.262757 | 8.18E-09 | 0.186625 | 4.95E-05 | 0.223    |
| 0.056759 | 0.22085  | -0.17508 | 0.00014  | 0.070993 | 0.12553  | -0.1354  | 0.00337  | 0.063553 |



|          |          |          |          |          |          |          |          |          |
|----------|----------|----------|----------|----------|----------|----------|----------|----------|
| 0.093353 | 0.04376  | 0.128512 | 0.00541  | 0.1058   | 0.02222  | 0.060421 | 0.19244  | 0.118787 |
| 0.036716 | 0.4286   | 0.021596 | 0.64158  | -0.03118 | 0.50145  | -0.02837 | 0.54082  | -0.02943 |
| -0.07691 | 0.0969   | -0.13299 | 0.00399  | -0.08382 | 0.07033  | -0.12996 | 0.00491  | -0.0833  |
| 0.107616 | 0.02001  | 0.453078 | 5.11E-25 | 0.035402 | 0.44533  | 0.159549 | 0.00054  | 0.165706 |
| 0.023438 | 0.6134   | -0.00925 | 0.84202  | -0.07583 | 0.1017   | -0.10517 | 0.02303  | 0.008428 |
| 0.065098 | 0.16017  | -0.12188 | 0.00838  | -0.11706 | 0.01135  | -0.18572 | 5.39E-05 | -0.0681  |
| -0.12106 | 0.00882  | -0.15309 | 0.0009   | 0.022048 | 0.63462  | 0.083965 | 0.06986  | -0.12914 |
| 0.199087 | 1.46E-05 | 0.032549 | 0.48288  | 0.13853  | 0.0027   | 0.081813 | 0.07736  | 0.105362 |
| 0.047529 | 0.30539  | -0.19968 | 1.38E-05 | -0.15084 | 0.00108  | -0.14302 | 0.00195  | -0.24288 |
| -0.00416 | 0.92863  | -0.04379 | 0.34506  | 0.031091 | 0.50271  | -0.0981  | 0.03405  | 0.02326  |
| -0.14648 | 0.0015   | -0.22082 | 1.44E-06 | -0.15438 | 0.00082  | -0.29298 | 1.07E-10 | -0.16526 |
| -0.04294 | 0.35446  | -0.03748 | 0.41902  | -0.27341 | 1.88E-09 | -0.1761  | 0.00013  | -0.21449 |
| 0.000166 | 0.99715  | -0.14115 | 0.00223  | 0.171263 | 0.0002   | 0.148866 | 0.00125  | 0.00962  |
| -0.00213 | 0.96332  | -0.08145 | 0.07867  | 0.004051 | 0.93042  | -0.01614 | 0.7279   | -0.04561 |
| 0.200597 | 1.26E-05 | 0.105737 | 0.0223   | 0.190409 | 3.45E-05 | 0.073317 | 0.11359  | 0.236142 |
| -0.15509 | 0.00077  | -0.14638 | 0.00151  | -0.14839 | 0.0013   | -0.10077 | 0.02945  | -0.10378 |
| -0.12701 | 0.00599  | -0.05246 | 0.25785  | 0.021445 | 0.64391  | 0.063379 | 0.17152  | -0.11455 |
| 0.038853 | 0.40221  | 0.008127 | 0.86095  | -0.04629 | 0.31818  | -0.01312 | 0.77734  | -0.01257 |
| -0.14533 | 0.00164  | -0.18802 | 4.34E-05 | -0.20746 | 6.17E-06 | -0.13003 | 0.00489  | -0.21511 |
| -0.11869 | 0.01025  | -0.04712 | 0.30959  | -0.08401 | 0.0697   | -0.10288 | 0.02621  | -0.03707 |
| 0.034024 | 0.46325  | 0.070448 | 0.12846  | 0.028415 | 0.54019  | -0.02501 | 0.58985  | 0.081705 |
| 0.12065  | 0.00906  | 0.024834 | 0.59243  | -0.07983 | 0.08483  | -0.03393 | 0.46454  | -0.02056 |
| -0.28556 | 3.26E-10 | -0.46076 | 6.38E-26 | -0.31987 | 1.43E-12 | -0.29299 | 1.07E-10 | -0.33207 |
| 0.055748 | 0.2292   | 0.04467  | 0.33544  | 0.063201 | 0.17273  | -0.03985 | 0.39028  | 0.181304 |
| 0.161481 | 0.00046  | 0.03185  | 0.49232  | 0.247561 | 5.96E-08 | 0.216993 | 2.21E-06 | 0.208289 |
| 0.105165 | 0.02304  | 0.029277 | 0.52796  | 0.015715 | 0.73483  | 0.038988 | 0.40058  | -0.10145 |
| 0.249586 | 4.61E-08 | 0.271526 | 2.46E-09 | 0.223403 | 1.08E-06 | 0.286764 | 2.73E-10 | 0.097868 |
| 0.315011 | 3.23E-12 | 0.26457  | 6.40E-09 | 0.244341 | 8.92E-08 | 0.178627 | 0.0001   | 0.30436  |
| -0.10161 | 0.02812  | -0.06818 | 0.14126  | 0.053833 | 0.24561  | 0.040753 | 0.37957  | 0.09726  |
| 0.010899 | 0.81429  | 0.031332 | 0.4994   | 0.04797  | 0.30092  | 0.000894 | 0.98463  | 0.071199 |
| 0.154287 | 0.00082  | 0.193117 | 2.65E-05 | 0.252284 | 3.26E-08 | 0.243725 | 9.64E-08 | 0.197832 |
| -0.00965 | 0.8353   | -0.07972 | 0.08526  | -0.04133 | 0.37286  | -0.07318 | 0.11426  | -0.12974 |
| 0.178782 | 0.0001   | 0.300951 | 3.12E-11 | 0.082781 | 0.07391  | 0.199595 | 1.39E-05 | 0.002084 |
| -0.01677 | 0.71769  | 0.099922 | 0.03085  | -0.04184 | 0.36696  | -0.0477  | 0.30365  | -0.07185 |
| -0.01401 | 0.76267  | 0.025188 | 0.58717  | 0.20784  | 5.93E-06 | 0.037895 | 0.41392  | 0.137363 |
| 0.035203 | 0.44789  | -0.02903 | 0.53144  | -0.04052 | 0.38234  | 0.040004 | 0.3884   | -0.11108 |
| -0.06449 | 0.16409  | -0.24952 | 4.64E-08 | -0.17525 | 0.00014  | -0.18058 | 8.70E-05 | -0.24346 |
| -0.24144 | 1.28E-07 | -0.38908 | 2.50E-18 | -0.24293 | 1.06E-07 | -0.36679 | 2.56E-16 | -0.25416 |
| 0.244313 | 8.96E-08 | 0.241606 | 1.25E-07 | 0.265852 | 5.38E-09 | 0.349763 | 6.95E-15 | 0.123048 |
| 0.105501 | 0.0226   | 0.240656 | 1.41E-07 | 0.025655 | 0.58025  | 0.172818 | 0.00017  | 0.001911 |
| 0.053948 | 0.24461  | 0.174838 | 0.00015  | 0.153624 | 0.00087  | 0.192151 | 2.91E-05 | 0.246546 |
| 0.098655 | 0.03305  | 0.319588 | 1.50E-12 | 0.176056 | 0.00013  | 0.322555 | 9.09E-13 | 0.035612 |
| 0.126042 | 0.00638  | 0.377621 | 2.82E-17 | 0.081401 | 0.07887  | 0.252455 | 3.19E-08 | -0.01335 |
| 0.142248 | 0.00206  | 0.224771 | 9.24E-07 | 0.106452 | 0.0214   | 0.205681 | 7.43E-06 | 0.142166 |
| 0.150296 | 0.00112  | 0.223007 | 1.13E-06 | 0.137669 | 0.00287  | 0.129927 | 0.00492  | 0.244356 |

|          |          |          |          |          |          |          |          |          |
|----------|----------|----------|----------|----------|----------|----------|----------|----------|
| 0.141352 | 0.0022   | -0.01864 | 0.68788  | 0.178575 | 0.0001   | 0.031339 | 0.4993   | 0.123732 |
| -0.03441 | 0.45814  | -0.05612 | 0.22606  | -0.17697 | 0.00012  | -0.14468 | 0.00172  | -0.07562 |
| -0.02142 | 0.64432  | -0.1262  | 0.00632  | -0.15397 | 0.00084  | -0.0247  | 0.59442  | -0.16534 |
| 0.052944 | 0.25351  | 0.032341 | 0.48567  | -0.00741 | 0.87313  | -0.04871 | 0.29351  | 0.043222 |
| -0.29639 | 6.35E-11 | -0.21278 | 3.50E-06 | -0.21357 | 3.21E-06 | -0.27329 | 1.92E-09 | -0.06838 |
| 0.182708 | 7.15E-05 | 0.065875 | 0.15523  | 0.123688 | 0.00745  | 0.04002  | 0.3882   | 0.083077 |
| -0.03163 | 0.49531  | -0.09517 | 0.03979  | -0.14421 | 0.00178  | -0.08825 | 0.05669  | -0.05915 |
| 0.005109 | 0.91232  | 0.018969 | 0.68264  | 0.012872 | 0.78145  | -0.00664 | 0.88623  | 0.017012 |
| 0.025791 | 0.57825  | -0.00012 | 0.998    | 0.047036 | 0.31044  | -0.02381 | 0.60783  | 0.017056 |
| 0.008053 | 0.86221  | 0.016005 | 0.73013  | 0.021708 | 0.63985  | 0.005452 | 0.90646  | 0.017617 |
| -0.00104 | 0.98218  | 0.070558 | 0.12786  | 0.01782  | 0.70091  | 0.019671 | 0.67157  | 0.054962 |
| -0.01776 | 0.70181  | 0.003404 | 0.94152  | -0.0595  | 0.19931  | -0.04213 | 0.36365  | -0.03185 |
| -0.01612 | 0.72831  | 0.018746 | 0.68618  | -0.01641 | 0.72363  | -0.02702 | 0.56025  | -0.00952 |
| 0.0158   | 0.73345  | 0.020867 | 0.65288  | 0.063984 | 0.16746  | 0.062086 | 0.18044  | 0.099954 |
| -0.04699 | 0.31087  | -0.02947 | 0.52531  | 0.037355 | 0.4206   | 0.012621 | 0.78561  | 0.029178 |
| -0.03193 | 0.49129  | 0.030238 | 0.5145   | 0.050411 | 0.27697  | 0.006078 | 0.89578  | 0.096602 |
| 0.097707 | 0.03478  | 0.040188 | 0.38623  | 0.041067 | 0.3759   | 0.070182 | 0.12991  | 0.032721 |
| -0.00582 | 0.90024  | 0.00528  | 0.9094   | 0.032274 | 0.48657  | -0.07088 | 0.12613  | 0.143186 |
| 0.119539 | 0.00972  | 0.096552 | 0.037    | 0.107271 | 0.02042  | 0.014265 | 0.75849  | 0.122239 |
| 0.34015  | 4.11E-14 | 0.059492 | 0.19938  | 0.263755 | 7.15E-09 | 0.154758 | 0.00079  | 0.153345 |
| 0.142003 | 0.0021   | 0.076064 | 0.10065  | -0.03689 | 0.42644  | 0.065071 | 0.16034  | -0.08876 |
| 0.055906 | 0.22788  | 0.133418 | 0.00387  | 0.054637 | 0.23862  | 0.042333 | 0.36136  | 0.077203 |
| -0.03816 | 0.41065  | 0.031607 | 0.49563  | -0.0369  | 0.42629  | 0.000961 | 0.98347  | -0.03006 |
| -0.15511 | 0.00077  | -0.14724 | 0.00142  | -0.13862 | 0.00268  | -0.14978 | 0.00117  | -0.09054 |
| 0.058175 | 0.20953  | -0.02091 | 0.65225  | 0.170218 | 0.00022  | 0.131491 | 0.00442  | 0.159408 |
| 0.000856 | 0.98528  | -0.01748 | 0.70627  | -0.05221 | 0.26016  | -0.02424 | 0.60131  | -0.03982 |
| -0.05923 | 0.20136  | -0.01825 | 0.69407  | 0.100435 | 0.03     | 0.123341 | 0.00762  | 0.076257 |
| 0.060468 | 0.19209  | -0.12347 | 0.00756  | 0.069167 | 0.13557  | -0.04211 | 0.36392  | -0.001   |
| -0.02507 | 0.58892  | -0.03794 | 0.41335  | -0.0322  | 0.48762  | -0.03982 | 0.39055  | 0.010475 |
| 0.018134 | 0.6959   | -0.12438 | 0.00712  | 0.088421 | 0.05621  | -0.00069 | 0.98811  | 0.046945 |
| 0.030509 | 0.51074  | -0.00246 | 0.95769  | -0.02036 | 0.66079  | -0.11788 | 0.01079  | 0.122256 |
| -0.04323 | 0.35122  | 0.013117 | 0.77739  | -0.04651 | 0.31584  | -0.11313 | 0.01444  | 0.065061 |
| 0.109343 | 0.01809  | 0.010257 | 0.82504  | -0.13968 | 0.00248  | -0.0951  | 0.03995  | -0.04539 |
| -0.01248 | 0.78794  | 0.026629 | 0.56595  | -0.07708 | 0.09616  | -0.11719 | 0.01126  | -0.02632 |
| -0.02859 | 0.53776  | 0.124252 | 0.00718  | -0.15129 | 0.00104  | -0.03981 | 0.39075  | -0.09775 |
| -0.09674 | 0.03664  | 0.009277 | 0.84153  | -0.16848 | 0.00025  | -0.17528 | 0.00014  | -0.11914 |
| 0.166502 | 0.0003   | 0.371734 | 9.46E-17 | 0.290354 | 1.59E-10 | 0.297902 | 5.02E-11 | 0.306167 |
| 0.182437 | 7.33E-05 | 0.271771 | 2.37E-09 | 0.106473 | 0.02138  | 0.222747 | 1.16E-06 | -0.00217 |
| 0.138779 | 0.00265  | 0.09806  | 0.03413  | 0.015739 | 0.73444  | 0.037042 | 0.42451  | -0.05543 |
| -0.04426 | 0.33989  | -0.00853 | 0.85408  | -0.02218 | 0.63256  | -0.01242 | 0.78894  | -0.0238  |
| 0.068378 | 0.1401   | -0.08634 | 0.06229  | -0.00577 | 0.90099  | 0.006957 | 0.88081  | -0.00319 |
| 0.041531 | 0.37054  | 0.234325 | 3.03E-07 | 0.068132 | 0.14153  | 0.12179  | 0.00842  | 0.024712 |
| 0.1113   | 0.01612  | -0.05819 | 0.20943  | 0.107647 | 0.01998  | -0.08143 | 0.07877  | -0.00596 |
| 0.120611 | 0.00908  | -0.01104 | 0.81191  | 0.070496 | 0.1282   | 0.027418 | 0.5545   | 0.040109 |
| -0.13694 | 0.00302  | -0.14531 | 0.00164  | 0.015954 | 0.73094  | -0.10147 | 0.02834  | 0.060605 |

|          |          |          |          |          |          |          |          |          |
|----------|----------|----------|----------|----------|----------|----------|----------|----------|
| 0.015516 | 0.73806  | -0.04342 | 0.34912  | -0.02342 | 0.61363  | -0.01463 | 0.75246  | -0.03266 |
| -0.00382 | 0.93445  | 0.063576 | 0.17019  | 0.031523 | 0.49678  | 0.039994 | 0.38852  | 0.018852 |
| 0.006736 | 0.88457  | -0.00427 | 0.92675  | 0.057144 | 0.21773  | 0.008688 | 0.85146  | 0.035974 |
| 0.00496  | 0.91488  | -0.04725 | 0.30827  | 0.059963 | 0.19584  | -0.01187 | 0.79805  | 0.094248 |
| -0.11305 | 0.01451  | -0.25339 | 2.82E-08 | -0.24282 | 1.08E-07 | -0.16151 | 0.00046  | -0.34071 |
| 0.032289 | 0.48638  | -0.07024 | 0.1296   | 0.051037 | 0.27104  | -0.02805 | 0.54544  | 0.075363 |
| 0.029239 | 0.5285   | 0.124926 | 0.00687  | 0.21965  | 1.65E-06 | 0.178678 | 0.0001   | 0.212572 |
| 0.113456 | 0.01416  | 0.164349 | 0.00036  | 0.19602  | 1.99E-05 | 0.205744 | 7.38E-06 | 0.237715 |
| -0.0467  | 0.31392  | 0.051097 | 0.27047  | -0.07169 | 0.12184  | -0.00348 | 0.94022  | -0.02213 |
| -0.10923 | 0.01821  | 0.063967 | 0.16757  | -0.0776  | 0.09393  | 0.012281 | 0.79124  | -0.0572  |
| -0.08623 | 0.06261  | -0.11303 | 0.01453  | -0.05259 | 0.25674  | -0.13898 | 0.00261  | -0.08638 |
| 0.100642 | 0.02966  | 0.024972 | 0.59038  | 0.069863 | 0.13167  | 0.073899 | 0.11074  | 0.0817   |
| 0.397525 | 3.94E-19 | -0.01602 | 0.72982  | 0.186293 | 5.11E-05 | 0.026137 | 0.57316  | 0.176649 |
| -0.26674 | 4.76E-09 | -0.19733 | 1.74E-05 | -0.20593 | 7.24E-06 | -0.25721 | 1.71E-08 | -0.14666 |
| -0.08183 | 0.07728  | 0.119102 | 0.00999  | -0.05719 | 0.21733  | 0.002559 | 0.95602  | -0.04153 |
| -0.15928 | 0.00055  | -0.1842  | 6.22E-05 | -0.03049 | 0.51098  | -0.12422 | 0.0072   | -0.0738  |
| 0.059005 | 0.20309  | -0.00846 | 0.85526  | 0.169684 | 0.00023  | 0.069941 | 0.13124  | 0.067093 |
| 0.123149 | 0.00772  | 0.098718 | 0.03294  | 0.046158 | 0.31958  | 0.018211 | 0.69467  | 0.100166 |
| 0.014613 | 0.75279  | 0.072423 | 0.11807  | 0.019507 | 0.67415  | 0.042981 | 0.35405  | 0.067814 |
| 0.017661 | 0.70346  | 0.079836 | 0.08482  | 0.026945 | 0.56135  | 0.05079  | 0.27336  | 0.039839 |
| 0.110219 | 0.01718  | -0.09837 | 0.03356  | 0.040812 | 0.37889  | -0.09283 | 0.04495  | -0.01476 |
| 0.194347 | 2.35E-05 | 0.076988 | 0.09656  | 0.266962 | 4.62E-09 | 0.112217 | 0.01526  | 0.297602 |
| 0.026275 | 0.57114  | 0.048237 | 0.29823  | 0.010458 | 0.82168  | -0.09665 | 0.0368   | 0.12658  |
| 0.023377 | 0.61433  | 0.086403 | 0.06209  | 0.019559 | 0.67333  | 0.044656 | 0.33559  | 0.026149 |
| -0.02398 | 0.60528  | -0.00258 | 0.95564  | 0.058166 | 0.20959  | -0.01709 | 0.71264  | 0.022467 |
| -0.21063 | 4.41E-06 | -0.22664 | 7.46E-07 | -0.23792 | 1.97E-07 | -0.15935 | 0.00055  | -0.2185  |
| 0.159223 | 0.00055  | 0.32659  | 4.55E-13 | 0.221085 | 1.40E-06 | 0.303525 | 2.08E-11 | 0.092118 |
| 0.058138 | 0.20982  | -0.10829 | 0.01925  | -0.0895  | 0.05325  | -0.09376 | 0.04284  | -0.09574 |
| 0.029856 | 0.51982  | -0.11824 | 0.01055  | 0.238652 | 1.80E-07 | 0.163728 | 0.00038  | 0.102743 |
| -0.02282 | 0.62276  | -0.07168 | 0.12192  | -0.0291  | 0.53043  | -0.01819 | 0.69498  | -0.03127 |
| 0.247696 | 5.86E-08 | 0.394156 | 8.29E-19 | 0.176359 | 0.00013  | 0.243037 | 1.05E-07 | 0.164633 |
| -0.14372 | 0.00185  | -0.22668 | 7.42E-07 | -0.22117 | 1.39E-06 | -0.21257 | 3.58E-06 | -0.1909  |
| 0.084356 | 0.06856  | -0.13442 | 0.00361  | 0.113952 | 0.01374  | 0.039181 | 0.39824  | -0.05167 |
| 0.079298 | 0.08694  | 0.130963 | 0.00459  | 0.128472 | 0.00543  | 0.112748 | 0.01478  | 0.038625 |
| 0.131904 | 0.0043   | 0.059578 | 0.19873  | -0.06665 | 0.15039  | -0.04058 | 0.38165  | -0.0715  |
| -0.06001 | 0.1955   | -0.36136 | 7.49E-16 | -0.01251 | 0.78749  | -0.06942 | 0.13416  | -0.12105 |
| 0.016263 | 0.72594  | -0.2823  | 5.26E-10 | 0.047849 | 0.30214  | -0.14262 | 0.002    | -0.09351 |
| 0.067922 | 0.14276  | 0.077262 | 0.09538  | 0.131568 | 0.0044   | 0.113185 | 0.01439  | 0.098004 |
| 0.236881 | 2.23E-07 | 0.208797 | 5.36E-06 | 0.273647 | 1.82E-09 | 0.307462 | 1.11E-11 | 0.248681 |
| -0.0569  | 0.21972  | -0.01051 | 0.82077  | -0.0741  | 0.10979  | -0.0547  | 0.23812  | -0.02958 |
| 0.064183 | 0.16614  | -0.0036  | 0.93822  | -0.00522 | 0.91042  | 0.002158 | 0.9629   | 0.007245 |
| 0.058346 | 0.20819  | 0.09011  | 0.05165  | 0.043293 | 0.35057  | 0.024522 | 0.59709  | 0.062762 |
| -0.15808 | 0.00061  | -0.1071  | 0.02062  | -0.11596 | 0.01215  | -0.0989  | 0.03261  | -0.06073 |
| 0.135219 | 0.00341  | 0.031822 | 0.4927   | 0.074207 | 0.10926  | -0.02122 | 0.64736  | 0.196231 |
| 0.002814 | 0.95165  | -0.01003 | 0.8289   | 0.037185 | 0.42272  | 0.100369 | 0.03011  | 0.018505 |

|          |          |          |          |          |          |          |          |          |
|----------|----------|----------|----------|----------|----------|----------|----------|----------|
| 0.096236 | 0.03762  | 0.094563 | 0.04109  | 0.037762 | 0.41556  | 0.057284 | 0.2166   | 0.045558 |
| 0.031504 | 0.49704  | -0.12226 | 0.00817  | 0.138886 | 0.00263  | 0.136657 | 0.00308  | -0.03615 |
| -0.10023 | 0.03033  | -0.04128 | 0.37348  | -0.06526 | 0.15913  | -0.04412 | 0.34139  | -0.05725 |
| 0.3121   | 5.22E-12 | 0.142635 | 0.002    | 0.129518 | 0.00506  | 0.201965 | 1.09E-05 | 0.086595 |
| -0.10972 | 0.0177   | -0.07385 | 0.11098  | -0.24315 | 1.04E-07 | -0.18462 | 5.98E-05 | -0.2506  |
| 0.066435 | 0.15174  | -0.00073 | 0.98746  | 0.135575 | 0.00333  | 0.147932 | 0.00135  | 0.057952 |
| 0.034219 | 0.46069  | 0.061945 | 0.18144  | 0.15337  | 0.00088  | 0.12413  | 0.00724  | 0.119215 |
| -0.18885 | 4.01E-05 | -0.24185 | 1.22E-07 | -0.19161 | 3.07E-05 | -0.13349 | 0.00385  | -0.17407 |
| 0.030017 | 0.51758  | -0.03013 | 0.51599  | 0.020006 | 0.66632  | -0.01687 | 0.71616  | 0.066603 |
| -0.11192 | 0.01553  | -0.14837 | 0.0013   | -0.27912 | 8.35E-10 | -0.19876 | 1.51E-05 | -0.23509 |
| -0.12021 | 0.00932  | -0.30161 | 2.81E-11 | -0.31098 | 6.26E-12 | -0.28448 | 3.83E-10 | -0.26396 |
| 0.139513 | 0.00251  | -0.11615 | 0.01201  | 0.215033 | 2.74E-06 | 0.038524 | 0.40621  | 0.09071  |
| 0.120579 | 0.0091   | 0.131731 | 0.00435  | 0.115207 | 0.01273  | -0.01187 | 0.79807  | 0.117078 |
| -0.00727 | 0.87542  | 0.104709 | 0.02364  | 0.022303 | 0.63071  | 0.029872 | 0.5196   | 0.053853 |
| 0.051167 | 0.26981  | -0.19302 | 2.67E-05 | 0.006736 | 0.88457  | -0.08886 | 0.05499  | -0.08951 |
| -0.07253 | 0.11753  | -0.07952 | 0.08606  | -0.0662  | 0.15322  | -0.04937 | 0.28704  | -0.1     |
| 0.075025 | 0.1054   | -0.04318 | 0.35187  | 0.003027 | 0.94799  | -0.01583 | 0.73298  | -0.04473 |
| -0.07366 | 0.1119   | 0.006756 | 0.88423  | -0.07063 | 0.12748  | -0.11218 | 0.01529  | 0.002666 |
| -0.02555 | 0.58187  | -0.02149 | 0.6432   | -0.11494 | 0.01294  | -0.07641 | 0.0991   | -0.0786  |
| 4.08E-05 | 0.9993   | 0.002722 | 0.95323  | -0.06414 | 0.16641  | -0.08197 | 0.07678  | -0.04347 |
| 0.072553 | 0.11741  | 0.097238 | 0.03567  | 0.122193 | 0.00821  | 0.021488 | 0.64324  | 0.161739 |
| 0.083748 | 0.07058  | 0.035976 | 0.43797  | -0.10435 | 0.02412  | -0.03164 | 0.49516  | -0.04627 |
| -0.12521 | 0.00675  | -0.03637 | 0.43301  | -0.08357 | 0.07119  | -0.0337  | 0.46755  | -0.01563 |
| -0.06034 | 0.19302  | 0.061362 | 0.18559  | 0.021717 | 0.63971  | -0.05916 | 0.20191  | 0.100422 |
| -0.24839 | 5.36E-08 | -0.22626 | 7.79E-07 | -0.23948 | 1.63E-07 | -0.3082  | 9.83E-12 | -0.15059 |
| 0.137429 | 0.00292  | 0.018347 | 0.6925   | 0.180434 | 8.82E-05 | 0.003522 | 0.93949  | 0.163562 |
| -0.06074 | 0.19007  | 0.016738 | 0.71828  | -0.01719 | 0.71099  | 0.014495 | 0.75472  | 0.013348 |
| -0.25645 | 1.90E-08 | -0.06377 | 0.16889  | -0.09317 | 0.04417  | -0.10224 | 0.02715  | 0.011326 |
| -0.00835 | 0.85721  | -0.01048 | 0.82122  | 0.197218 | 1.76E-05 | 0.214019 | 3.06E-06 | 0.07893  |
| 0.071255 | 0.12413  | 0.064881 | 0.16157  | 0.087334 | 0.05932  | 0.037403 | 0.42001  | 0.057449 |
| 0.077359 | 0.09497  | 0.099141 | 0.03219  | 0.067305 | 0.14644  | 0.039108 | 0.39913  | 0.073353 |
| 0.078997 | 0.08815  | 0.169626 | 0.00023  | 0.04771  | 0.30355  | -0.01888 | 0.68407  | 0.197558 |
| 0.062082 | 0.18047  | 0.06919  | 0.13544  | -0.01842 | 0.69129  | -0.03857 | 0.4056   | 0.001757 |
| 0.093843 | 0.04266  | 0.115041 | 0.01286  | 0.071289 | 0.12395  | 0.041666 | 0.36898  | 0.053052 |
| -0.20017 | 1.31E-05 | -0.03303 | 0.47642  | -0.12079 | 0.00898  | -0.078   | 0.09226  | -0.04883 |
| 0.115712 | 0.01234  | -0.07991 | 0.08454  | 0.021147 | 0.64853  | -0.09736 | 0.03544  | -0.00194 |
| -0.03432 | 0.45934  | -0.04869 | 0.29373  | 0.01899  | 0.68232  | -0.03227 | 0.4866   | 0.002882 |
| 0.179991 | 9.18E-05 | 0.133657 | 0.00381  | 0.283814 | 4.22E-10 | 0.145101 | 0.00167  | 0.266354 |
| 0.058509 | 0.20692  | 0.063531 | 0.17049  | 0.213872 | 3.11E-06 | 0.13127  | 0.00449  | 0.171641 |
| 0.021822 | 0.63809  | 0.043454 | 0.34877  | 0.065275 | 0.15904  | -0.00705 | 0.87918  | 0.021712 |
| -0.06389 | 0.16805  | -0.07992 | 0.0845   | -0.1987  | 1.52E-05 | -0.1032  | 0.02574  | -0.202   |
| 0.280294 | 7.05E-10 | 0.23752  | 2.06E-07 | 0.256063 | 1.99E-08 | 0.145269 | 0.00165  | 0.360326 |
| 0.356432 | 1.95E-15 | 0.402453 | 1.31E-19 | 0.28898  | 1.96E-10 | 0.366555 | 2.68E-16 | 0.265453 |
| 0.104801 | 0.02352  | -0.02031 | 0.66155  | 0.074818 | 0.10636  | -0.01813 | 0.69599  | 0.039731 |
| 0.075181 | 0.10467  | -0.25635 | 1.92E-08 | 0.008808 | 0.84943  | -0.14179 | 0.00213  | -0.05987 |

|          |          |          |          |          |          |          |          |          |
|----------|----------|----------|----------|----------|----------|----------|----------|----------|
| 0.108609 | 0.01889  | 0.144978 | 0.00168  | 0.099105 | 0.03226  | 0.072983 | 0.11524  | 0.092028 |
| 0.08483  | 0.06701  | 0.097026 | 0.03608  | 0.051028 | 0.27112  | 0.111586 | 0.01584  | 0.001996 |
| 0.057276 | 0.21666  | -0.04399 | 0.34286  | -0.11965 | 0.00965  | -0.11367 | 0.01398  | -0.15723 |
| -0.08297 | 0.07326  | 0.0658   | 0.1557   | 0.118192 | 0.01058  | 0.166788 | 0.00029  | 0.055523 |
| -0.10555 | 0.02253  | -0.07477 | 0.10658  | -0.05598 | 0.22725  | 0.008903 | 0.84783  | -0.03775 |
| 0.048658 | 0.29404  | 0.137849 | 0.00283  | -0.09265 | 0.04538  | 0.010218 | 0.8257   | -0.0142  |
| 0.192253 | 2.88E-05 | 0.077734 | 0.09337  | 0.221933 | 1.27E-06 | 0.077865 | 0.09282  | 0.197352 |
| 0.174747 | 0.00015  | 0.165588 | 0.00033  | 0.333321 | 1.40E-13 | 0.231277 | 4.34E-07 | 0.16195  |
| 0.000648 | 0.98885  | -0.00395 | 0.93215  | -0.08165 | 0.07796  | -0.0701  | 0.13034  | -0.0831  |
| 0.187623 | 4.50E-05 | -0.17257 | 0.00018  | 0.116401 | 0.01183  | 0.016635 | 0.71993  | -0.04938 |
| 0.128302 | 0.00549  | 0.062042 | 0.18076  | 0.247924 | 5.69E-08 | 0.113186 | 0.01439  | 0.17082  |
| 0.153143 | 0.0009   | -0.03181 | 0.49293  | 0.121783 | 0.00843  | -0.02797 | 0.54658  | 0.080046 |
| 0.119858 | 0.00953  | 0.009269 | 0.84166  | 0.033433 | 0.47105  | 0.043524 | 0.34799  | 0.067025 |
| -0.1302  | 0.00483  | -0.33758 | 6.54E-14 | -0.19263 | 2.78E-05 | -0.23436 | 3.02E-07 | -0.18954 |
| 0.043012 | 0.35371  | -0.08434 | 0.06861  | 0.032846 | 0.47889  | -0.02985 | 0.51988  | -0.04747 |
| 0.152128 | 0.00097  | 0.161374 | 0.00046  | 0.19266  | 2.77E-05 | 0.111228 | 0.01619  | 0.236884 |
| 0.127424 | 0.00582  | 0.123204 | 0.00769  | 0.136678 | 0.00308  | 0.123797 | 0.0074   | 0.129972 |
| -0.09065 | 0.05027  | -0.27931 | 8.13E-10 | -0.13083 | 0.00463  | -0.17447 | 0.00015  | -0.17303 |
| 0.186478 | 5.02E-05 | 0.067011 | 0.14821  | 0.167311 | 0.00028  | 0.193392 | 2.58E-05 | 0.135936 |
| -0.04301 | 0.35367  | 0.098664 | 0.03304  | -0.1407  | 0.00231  | -0.11569 | 0.01236  | 0.102049 |
| 0.416751 | 4.79E-21 | 0.13802  | 0.0028   | 0.348049 | 9.58E-15 | 0.209207 | 5.13E-06 | 0.276769 |
| 0.017891 | 0.69977  | 0.19291  | 2.70E-05 | -0.07689 | 0.09698  | 0.035545 | 0.44348  | -0.07113 |
| 0.11226  | 0.01522  | 0.07223  | 0.11905  | 0.184577 | 6.01E-05 | 0.086968 | 0.06039  | 0.23051  |
| -0.12082 | 0.00896  | -0.20213 | 1.07E-05 | 0.077143 | 0.0959   | 0.109972 | 0.01744  | -0.02889 |
| 0.157161 | 0.00065  | 0.138066 | 0.00279  | 0.22638  | 7.68E-07 | 0.117749 | 0.01088  | 0.193468 |
| 0.091651 | 0.04777  | -0.02367 | 0.60997  | 0.076385 | 0.09921  | 0.034297 | 0.45967  | 0.105641 |
| -0.03112 | 0.50229  | 0.00477  | 0.91813  | -0.08649 | 0.06183  | -0.11682 | 0.01152  | -0.0392  |
| -0.02447 | 0.59787  | -0.04625 | 0.3186   | 0.001169 | 0.9799   | -0.04494 | 0.3325   | -0.01943 |
| 0.142092 | 0.00208  | 0.131944 | 0.00429  | 0.024855 | 0.59212  | -0.05027 | 0.27829  | 0.117503 |
| 0.284422 | 3.86E-10 | 0.049834 | 0.28251  | 0.042134 | 0.36362  | -0.0004  | 0.9932   | 0.042053 |
| 0.075212 | 0.10453  | 0.065211 | 0.15944  | 0.064147 | 0.16638  | -0.04014 | 0.38677  | 0.076359 |
| 0.081223 | 0.07953  | 0.094306 | 0.04165  | 0.105964 | 0.02201  | 0.060326 | 0.19314  | 0.125285 |
| 0.195752 | 2.04E-05 | 0.073311 | 0.11362  | 0.077966 | 0.09239  | 0.039507 | 0.39432  | 0.116787 |
| 0.132846 | 0.00403  | 0.103676 | 0.02506  | 0.132887 | 0.00402  | 0.036162 | 0.43561  | 0.130386 |
| -0.03342 | 0.4712   | 0.007073 | 0.87884  | 0.13503  | 0.00346  | 0.101086 | 0.02895  | 0.192295 |
| 0.014326 | 0.75749  | 0.074155 | 0.10951  | 0.221709 | 1.31E-06 | 0.170512 | 0.00021  | 0.129071 |
| -0.08029 | 0.08307  | -0.34834 | 9.08E-15 | -0.1908  | 3.32E-05 | -0.38278 | 9.60E-18 | -0.12333 |
| 0.107038 | 0.02069  | -0.06067 | 0.1906   | 0.020309 | 0.66157  | -0.04494 | 0.33254  | 0.040191 |
| 0.061958 | 0.18134  | 0.206721 | 6.67E-06 | 0.087845 | 0.05784  | 0.03905  | 0.39982  | 0.249358 |
| 0.047374 | 0.30698  | 0.040314 | 0.38473  | -0.13911 | 0.00259  | -0.06265 | 0.17648  | -0.01064 |
| -0.12282 | 0.00788  | -0.00922 | 0.84253  | -0.00013 | 0.99782  | 0.031746 | 0.49374  | 0.085211 |
| -0.07867 | 0.08948  | -0.09194 | 0.04705  | 0.146042 | 0.00155  | 0.039438 | 0.39515  | 0.140211 |
| 0.247924 | 5.69E-08 | 0.124108 | 0.00725  | 0.076224 | 0.09993  | 0.083641 | 0.07095  | 0.082501 |
| 0.161464 | 0.00046  | 0.092978 | 0.04462  | 0.244832 | 8.39E-08 | 0.215356 | 2.64E-06 | 0.193647 |
| 0.011905 | 0.7975   | -0.07169 | 0.12182  | -0.02855 | 0.53824  | -0.01354 | 0.77042  | -0.09683 |

|          |          |          |          |          |          |          |          |          |
|----------|----------|----------|----------|----------|----------|----------|----------|----------|
| 0.353    | 3.77E-15 | 0.388464 | 2.86E-18 | 0.293566 | 9.79E-11 | 0.371942 | 9.07E-17 | 0.208251 |
| 0.194724 | 2.26E-05 | 0.209587 | 4.93E-06 | 0.289295 | 1.87E-10 | 0.282308 | 5.26E-10 | 0.309845 |
| 0.224096 | 9.97E-07 | 0.362665 | 5.80E-16 | 0.330481 | 2.31E-13 | 0.412299 | 1.37E-20 | 0.224631 |
| 0.015811 | 0.73327  | -0.07367 | 0.11187  | -0.10718 | 0.02052  | -0.03121 | 0.50103  | -0.10862 |
| 0.216453 | 2.35E-06 | 0.165875 | 0.00032  | 0.229842 | 5.14E-07 | 0.126092 | 0.00636  | 0.158758 |
| 0.140243 | 0.00238  | -0.16593 | 0.00032  | -0.11629 | 0.01191  | -0.12355 | 0.00752  | -0.18991 |
| -0.01663 | 0.71994  | 0.128184 | 0.00554  | 0.079086 | 0.08779  | 0.151137 | 0.00105  | 0.223652 |
| -0.06499 | 0.16086  | 0.129631 | 0.00502  | 0.163449 | 0.00039  | 0.189695 | 3.69E-05 | 0.210162 |
| 0.083935 | 0.06996  | 0.138408 | 0.00272  | 0.18861  | 4.10E-05 | 0.190323 | 3.48E-05 | 0.132039 |
| -0.06101 | 0.18811  | -0.14012 | 0.00241  | -0.05098 | 0.2716   | -0.1717  | 0.00019  | -0.01108 |
| 0.021581 | 0.64181  | -0.22325 | 1.10E-06 | 0.001916 | 0.96706  | -0.16418 | 0.00037  | -0.01616 |
| -0.13715 | 0.00298  | -0.37542 | 4.45E-17 | -0.34383 | 2.10E-14 | -0.45075 | 9.50E-25 | -0.20877 |
| 0.003749 | 0.93561  | 0.1165   | 0.01175  | 0.047054 | 0.31026  | 0.105408 | 0.02272  | 0.035471 |
| 0.080204 | 0.08338  | -0.0134  | 0.77268  | 0.080949 | 0.08055  | 0.07125  | 0.12416  | 0.091623 |
| 0.032153 | 0.48821  | 0.011769 | 0.79975  | 0.173664 | 0.00016  | 0.05456  | 0.23929  | 0.16407  |
| -0.01743 | 0.70715  | -0.02243 | 0.62871  | -0.16093 | 0.00048  | -0.11576 | 0.0123   | -0.17318 |
| 0.282332 | 5.24E-10 | 0.033372 | 0.47187  | 0.185949 | 5.28E-05 | 0.167914 | 0.00027  | 0.104529 |
| 0.12826  | 0.00551  | 0.099197 | 0.0321   | 0.014386 | 0.75652  | 0.079444 | 0.08636  | 0.082218 |
| 0.154507 | 0.00081  | 0.395764 | 5.82E-19 | 0.0542   | 0.24241  | 0.279202 | 8.25E-10 | 0.083338 |
| 0.06605  | 0.15413  | 0.059035 | 0.20286  | 0.112441 | 0.01505  | 0.113031 | 0.01453  | 0.193419 |
| -0.13563 | 0.00332  | -0.22401 | 1.01E-06 | 0.02261  | 0.62601  | -0.10349 | 0.02532  | 0.024713 |
| 0.020693 | 0.65558  | -0.09062 | 0.05034  | -0.22704 | 7.12E-07 | -0.18114 | 8.26E-05 | -0.12517 |
| -0.07507 | 0.10517  | 0.043623 | 0.3469   | 0.076386 | 0.09921  | 0.115699 | 0.01235  | 0.146458 |
| 0.025174 | 0.58738  | 0.046521 | 0.31578  | 0.063742 | 0.16907  | -0.01439 | 0.75642  | 0.056065 |
| 0.058183 | 0.20947  | -0.04883 | 0.29235  | 0.009689 | 0.83458  | 0.029045 | 0.53124  | 0.000826 |
| 0.050414 | 0.27693  | -0.05285 | 0.25439  | -0.15731 | 0.00065  | -0.13461 | 0.00356  | -0.14519 |
| -0.02894 | 0.53269  | -0.15679 | 0.00067  | -0.15013 | 0.00114  | -0.30608 | 1.38E-11 | -0.10401 |
| -0.03601 | 0.4375   | 0.000545 | 0.99063  | 0.021758 | 0.63908  | -0.0039  | 0.93299  | 0.030829 |
| 0.126957 | 0.00601  | -0.0288  | 0.53468  | -0.08181 | 0.07739  | -0.08065 | 0.08166  | -0.03315 |
| -0.07954 | 0.08599  | 0.159409 | 0.00054  | 0.080648 | 0.08169  | 0.03753  | 0.41844  | 0.188172 |
| 0.304717 | 1.72E-11 | 0.053255 | 0.25073  | 0.282862 | 4.85E-10 | 0.154529 | 0.00081  | 0.227048 |
| 0.237591 | 2.05E-07 | 0.185748 | 5.38E-05 | 0.171686 | 0.00019  | 0.278184 | 9.56E-10 | 0.165039 |
| 0.00197  | 0.96613  | 0.14542  | 0.00163  | 0.147397 | 0.0014   | 0.174986 | 0.00014  | 0.127012 |
| 0.164526 | 0.00036  | 0.196033 | 1.99E-05 | 0.271917 | 2.32E-09 | 0.335575 | 9.37E-14 | 0.240988 |
| -0.12692 | 0.00602  | -0.28967 | 1.77E-10 | -0.29858 | 4.52E-11 | -0.40139 | 1.66E-19 | -0.20306 |
| 0.126106 | 0.00636  | 0.153227 | 0.00089  | -0.02724 | 0.55707  | -0.04376 | 0.34542  | 0.012214 |
| 0.133737 | 0.00379  | 0.08592  | 0.06357  | 0.274329 | 1.66E-09 | 0.265278 | 5.82E-09 | 0.149549 |
| 0.129988 | 0.0049   | 0.074833 | 0.10629  | 0.068356 | 0.14023  | 0.041434 | 0.37165  | 0.154954 |
| 0.224901 | 9.10E-07 | 0.327175 | 4.11E-13 | 0.355341 | 2.41E-15 | 0.327248 | 4.06E-13 | 0.279011 |
| -0.02428 | 0.60067  | 0.086707 | 0.06117  | 0.091714 | 0.04761  | 0.134299 | 0.00364  | 0.156775 |
| 0.233744 | 3.24E-07 | 0.051799 | 0.26393  | 0.091699 | 0.04765  | 0.006467 | 0.88915  | 0.133233 |
| 0.115612 | 0.01242  | 0.100596 | 0.02974  | 0.219226 | 1.73E-06 | 0.061104 | 0.18745  | 0.214058 |
| -0.19558 | 2.08E-05 | -0.15887 | 0.00057  | -0.1583  | 0.0006   | -0.05613 | 0.226    | -0.20545 |
| 0.088542 | 0.05587  | -0.03577 | 0.44065  | 0.005145 | 0.9117   | -0.11074 | 0.01667  | -0.01136 |
| 0.020704 | 0.65541  | 0.149934 | 0.00115  | 0.046929 | 0.31155  | 0.215887 | 2.50E-06 | 0.022229 |

|          |          |          |          |          |          |          |          |          |
|----------|----------|----------|----------|----------|----------|----------|----------|----------|
| -0.05259 | 0.25667  | -0.17944 | 9.66E-05 | -0.25177 | 3.48E-08 | -0.27473 | 1.56E-09 | -0.13507 |
| 0.093597 | 0.04321  | 0.017259 | 0.7099   | 0.110929 | 0.01648  | 0.107139 | 0.02057  | 0.067181 |
| 0.086238 | 0.06259  | 0.097591 | 0.035    | -0.13216 | 0.00423  | -0.04331 | 0.35038  | -0.05356 |
| 0.334388 | 1.16E-13 | 0.083464 | 0.07155  | 0.300342 | 3.43E-11 | 0.15234  | 0.00096  | 0.248469 |
| -0.12451 | 0.00706  | 0.034895 | 0.45187  | -0.18349 | 6.65E-05 | -0.08792 | 0.05762  | -0.13671 |
| 0.132157 | 0.00423  | 0.128721 | 0.00534  | -0.02902 | 0.53162  | 0.029216 | 0.52883  | 0.09664  |
| 0.104934 | 0.02334  | 0.124032 | 0.00728  | 0.242664 | 1.10E-07 | 0.288768 | 2.02E-10 | 0.195346 |
| 0.102291 | 0.02708  | 0.159613 | 0.00054  | 0.268957 | 3.51E-09 | 0.258346 | 1.48E-08 | 0.201397 |
| 0.023233 | 0.61651  | 0.077191 | 0.09569  | 0.120112 | 0.00937  | 0.068296 | 0.14057  | 0.127889 |
| -0.11547 | 0.01253  | -0.04542 | 0.32741  | 0.071821 | 0.12116  | 0.011082 | 0.81123  | 0.036707 |
| -0.06114 | 0.18717  | 0.163204 | 0.0004   | 0.054117 | 0.24313  | 0.07234  | 0.11849  | 0.161494 |
| 0.061763 | 0.18273  | 0.130583 | 0.00471  | -0.01908 | 0.68082  | -0.02824 | 0.5427   | -0.07735 |
| -0.04323 | 0.35122  | -0.02089 | 0.65247  | -0.00245 | 0.95783  | 0.048617 | 0.29445  | 0.005188 |
| 0.008877 | 0.84828  | -0.01883 | 0.68481  | 0.000437 | 0.99248  | -0.0313  | 0.49979  | -0.00045 |
| -0.08116 | 0.07976  | 0.054104 | 0.24324  | -0.18575 | 5.38E-05 | -0.05632 | 0.22443  | -0.10202 |
| -0.01116 | 0.81     | -0.00717 | 0.87722  | -0.07385 | 0.11098  | -0.08865 | 0.05558  | -0.01793 |
| 0.240655 | 1.41E-07 | 0.213755 | 3.15E-06 | 0.288456 | 2.12E-10 | 0.191638 | 3.06E-05 | 0.170563 |
| 0.140427 | 0.00235  | 0.132377 | 0.00416  | 0.299775 | 3.75E-11 | 0.260036 | 1.18E-08 | 0.267155 |
| -0.01247 | 0.78808  | -0.0044  | 0.9245   | -0.03947 | 0.39476  | -0.03165 | 0.49501  | -0.01799 |
| 0.057759 | 0.21281  | -0.03633 | 0.4335   | -0.05567 | 0.22982  | -0.13883 | 0.00264  | 0.04327  |
| 0.128383 | 0.00546  | -0.07729 | 0.09524  | 0.053026 | 0.25277  | -0.12809 | 0.00557  | 0.129259 |
| -0.04966 | 0.28421  | -0.31512 | 3.17E-12 | 0.012823 | 0.78227  | -0.0451  | 0.33078  | -0.10305 |
| -0.29198 | 1.25E-10 | -0.09556 | 0.039    | -0.32965 | 2.67E-13 | -0.13378 | 0.00378  | -0.3167  |
| -0.2379  | 1.97E-07 | -0.11542 | 0.01256  | -0.22636 | 7.70E-07 | -0.14362 | 0.00186  | -0.25841 |
| -0.05761 | 0.21397  | -0.03797 | 0.41296  | 0.180445 | 8.81E-05 | 0.177825 | 0.00011  | 0.033944 |
| -0.10893 | 0.01854  | -0.08485 | 0.06696  | -0.07102 | 0.12537  | -0.05431 | 0.24149  | -0.07059 |
| -0.0022  | 0.96212  | 0.056977 | 0.21908  | -0.0103  | 0.82424  | 0.023364 | 0.61453  | -0.12635 |
| -0.26829 | 3.85E-09 | -0.10999 | 0.01742  | -0.11566 | 0.01238  | 0.007001 | 0.88006  | -0.19682 |
| -0.20299 | 9.82E-06 | -0.05999 | 0.19567  | -0.17859 | 0.0001   | -0.05709 | 0.21817  | -0.22893 |
| -0.1974  | 1.73E-05 | 0.024741 | 0.59382  | -0.06663 | 0.15057  | 0.048646 | 0.29415  | -0.1036  |
| -0.04437 | 0.33869  | 0.066358 | 0.15222  | -0.08236 | 0.07538  | 0.041872 | 0.36661  | -0.11472 |
| -0.08512 | 0.06607  | 0.044393 | 0.33845  | 0.020858 | 0.653    | 0.111161 | 0.01625  | 0.008241 |
| -0.21131 | 4.10E-06 | -0.10068 | 0.02959  | -0.18611 | 5.20E-05 | -0.11538 | 0.0126   | -0.22387 |
| -0.2363  | 2.39E-07 | -0.16757 | 0.00028  | -0.23563 | 2.59E-07 | -0.13838 | 0.00273  | -0.25396 |
| 0.010598 | 0.81932  | -0.06968 | 0.13268  | -0.25966 | 1.24E-08 | -0.1184  | 0.01044  | -0.20817 |
| -0.2283  | 6.15E-07 | -0.30775 | 1.06E-11 | -0.30014 | 3.54E-11 | -0.29741 | 5.42E-11 | -0.27806 |
| -0.17829 | 0.00011  | -0.29335 | 1.01E-10 | -0.22427 | 9.78E-07 | -0.25871 | 1.41E-08 | -0.27739 |
| -0.08814 | 0.057    | -0.00794 | 0.86419  | -0.29567 | 7.09E-11 | -0.17749 | 0.00012  | -0.27221 |
| -0.03392 | 0.46463  | -0.01948 | 0.6745   | 0.111968 | 0.01549  | 0.047283 | 0.3079   | 0.081424 |
| -0.02642 | 0.56902  | 0.099277 | 0.03196  | -0.08174 | 0.07763  | -0.02457 | 0.59643  | -0.06686 |
| -0.11173 | 0.01571  | 0.002798 | 0.95192  | -0.01241 | 0.78907  | 0.030484 | 0.51108  | -0.05918 |
| -0.11057 | 0.01683  | -0.07797 | 0.09236  | -0.13785 | 0.00283  | -0.12802 | 0.0056   | -0.13386 |
| -0.15412 | 0.00083  | 0.030224 | 0.5147   | -0.09432 | 0.04161  | 0.024966 | 0.59046  | -0.0868  |
| -0.19181 | 3.01E-05 | -0.16    | 0.00052  | -0.11789 | 0.01078  | -0.09546 | 0.0392   | -0.14115 |
| -0.13916 | 0.00258  | -0.01691 | 0.71548  | -0.18632 | 5.09E-05 | -0.06971 | 0.1325   | -0.16248 |

|          |          |          |          |          |          |          |          |          |
|----------|----------|----------|----------|----------|----------|----------|----------|----------|
| -0.25671 | 1.83E-08 | -0.13216 | 0.00422  | -0.22139 | 1.35E-06 | -0.10752 | 0.02012  | -0.22078 |
| -0.21469 | 2.85E-06 | 0.035735 | 0.44106  | -0.18875 | 4.04E-05 | -0.02805 | 0.54545  | -0.23262 |
| -0.12499 | 0.00684  | -0.03193 | 0.49126  | 0.008811 | 0.84938  | 0.02821  | 0.54312  | -0.04362 |
| -0.12075 | 0.009    | -0.00136 | 0.97654  | -0.01094 | 0.81363  | 0.013245 | 0.77529  | -0.0778  |
| -0.23164 | 4.16E-07 | -0.23068 | 4.66E-07 | -0.20901 | 5.24E-06 | -0.23487 | 2.84E-07 | -0.2364  |
| 0.003572 | 0.93863  | -0.02291 | 0.62143  | -0.01749 | 0.70615  | -0.09823 | 0.03381  | 0.001698 |
| -0.07917 | 0.08744  | 0.040099 | 0.38727  | -0.16284 | 0.00041  | -0.07082 | 0.12643  | -0.14577 |
| -0.13475 | 0.00353  | 0.048449 | 0.29612  | -0.09389 | 0.04255  | 0.04056  | 0.38183  | -0.16225 |
| -0.15192 | 0.00099  | -0.02411 | 0.60334  | -0.07641 | 0.09912  | 0.027023 | 0.56021  | -0.10135 |
| -0.19291 | 2.70E-05 | -0.05533 | 0.23274  | -0.13318 | 0.00394  | -0.05211 | 0.26104  | -0.17777 |
| -0.14295 | 0.00196  | -0.10697 | 0.02077  | -0.23076 | 4.61E-07 | -0.1681  | 0.00026  | -0.2671  |
| -0.05791 | 0.2116   | 0.013588 | 0.76962  | 0.09203  | 0.04685  | 0.070446 | 0.12847  | 0.052529 |
| -0.27202 | 2.29E-09 | -0.27783 | 1.01E-09 | -0.23784 | 1.99E-07 | -0.2501  | 4.31E-08 | -0.26228 |
| -0.04217 | 0.36318  | 0.05706  | 0.2184   | 0.050059 | 0.28033  | 0.038132 | 0.41101  | -0.00512 |
| -0.20536 | 7.69E-06 | -0.05913 | 0.20212  | -0.24188 | 1.21E-07 | -0.11835 | 0.01048  | -0.2984  |
| -0.21971 | 1.63E-06 | -0.12356 | 0.00751  | -0.1761  | 0.00013  | -0.07892 | 0.08847  | -0.24675 |
| -0.06441 | 0.16464  | -0.03123 | 0.50073  | 0.030544 | 0.51025  | 0.030229 | 0.51463  | -0.0408  |
| -0.19671 | 1.86E-05 | -0.17831 | 0.00011  | -0.11867 | 0.01027  | -0.05536 | 0.23245  | -0.14931 |
| -0.12189 | 0.00837  | 0.048174 | 0.29886  | -0.04658 | 0.31517  | 0.0293   | 0.52764  | -0.09494 |
| -0.1392  | 0.00257  | -0.12977 | 0.00497  | -0.0947  | 0.04079  | -0.06295 | 0.17442  | -0.17002 |
| -0.13425 | 0.00365  | -0.01855 | 0.68926  | -0.20586 | 7.30E-06 | -0.08534 | 0.06539  | -0.26227 |
| -0.18287 | 7.04E-05 | -0.03829 | 0.40907  | -0.19748 | 1.72E-05 | -0.12113 | 0.00878  | -0.18608 |
| -0.28796 | 2.28E-10 | -0.181   | 8.37E-05 | -0.34211 | 2.87E-14 | -0.25625 | 1.95E-08 | -0.35371 |
| -0.1628  | 0.00041  | -0.05485 | 0.23683  | -0.20941 | 5.02E-06 | -0.17216 | 0.00019  | -0.18164 |
| -0.12499 | 0.00684  | -0.05271 | 0.25563  | -0.13405 | 0.00371  | -0.09535 | 0.03942  | -0.15646 |
| -0.2215  | 1.34E-06 | -0.0574  | 0.21565  | -0.25429 | 2.51E-08 | -0.09767 | 0.03484  | -0.22578 |
| -0.12975 | 0.00498  | 0.000526 | 0.99096  | -0.02522 | 0.58665  | 0.052677 | 0.25592  | -0.10649 |
| -0.11519 | 0.01274  | -0.04837 | 0.29695  | -0.13888 | 0.00263  | -0.08077 | 0.08122  | -0.17339 |
| -0.11905 | 0.01003  | -0.01236 | 0.78987  | -0.00728 | 0.8754   | 0.069627 | 0.13298  | -0.04841 |
| -0.10795 | 0.01963  | 0.064917 | 0.16134  | 0.077951 | 0.09246  | 0.222562 | 1.19E-06 | 0.066009 |
| -0.15607 | 0.00071  | -0.19346 | 2.56E-05 | -0.15623 | 0.0007   | -0.14434 | 0.00176  | -0.13694 |
| -0.26482 | 6.19E-09 | -0.13009 | 0.00487  | -0.29819 | 4.80E-11 | -0.22936 | 5.44E-07 | -0.31196 |
| -0.21727 | 2.14E-06 | -0.28001 | 7.35E-10 | -0.20047 | 1.27E-05 | -0.187   | 4.78E-05 | -0.19524 |
| -0.06637 | 0.15214  | 0.073991 | 0.11029  | 0.04543  | 0.32727  | 0.086165 | 0.06281  | 0.004185 |
| -0.25195 | 3.40E-08 | -0.12408 | 0.00726  | -0.23145 | 4.25E-07 | -0.13123 | 0.0045   | -0.29436 |
| -0.08805 | 0.05725  | 0.005493 | 0.90576  | -0.07428 | 0.10892  | -0.03399 | 0.46367  | -0.14988 |
| -0.23587 | 2.52E-07 | -0.0488  | 0.29265  | -0.21889 | 1.79E-06 | -0.08669 | 0.06121  | -0.21018 |
| 0.044327 | 0.33916  | 0.183797 | 6.46E-05 | 0.085373 | 0.06528  | 0.145136 | 0.00166  | 0.016518 |
| 0.039437 | 0.39517  | 0.115198 | 0.01274  | 0.112991 | 0.01456  | 0.0894   | 0.05353  | 0.025738 |
| -0.22373 | 1.04E-06 | -0.15192 | 0.00099  | -0.24352 | 9.89E-08 | -0.17547 | 0.00014  | -0.27463 |
| -0.10405 | 0.02454  | -0.16078 | 0.00049  | -0.13002 | 0.00489  | -0.17695 | 0.00012  | -0.11186 |
| -0.14416 | 0.00179  | -0.03409 | 0.46239  | 0.012229 | 0.79211  | 0.020363 | 0.66073  | -0.07264 |
| -0.14434 | 0.00177  | 0.022177 | 0.63264  | -0.21723 | 2.15E-06 | -0.09548 | 0.03915  | -0.14429 |
| -0.03401 | 0.46347  | 0.035508 | 0.44396  | 0.102487 | 0.02678  | 0.104735 | 0.0236   | 0.026029 |
| -0.03491 | 0.45169  | 0.037068 | 0.42419  | -0.30468 | 1.73E-11 | -0.2039  | 8.95E-06 | -0.23996 |



|          |          |          |          |          |          |          |          |          |
|----------|----------|----------|----------|----------|----------|----------|----------|----------|
| 0.181697 | 7.85E-05 | 0.165119 | 0.00034  | 0.202289 | 1.06E-05 | 0.129467 | 0.00508  | 0.130259 |
| -0.04823 | 0.2983   | -0.01958 | 0.67298  | -0.18308 | 6.91E-05 | -0.08354 | 0.07128  | -0.17791 |
| -0.07898 | 0.08821  | -0.13322 | 0.00393  | -0.14358 | 0.00187  | -0.15525 | 0.00076  | -0.19537 |
| 0.269614 | 3.20E-09 | 0.288776 | 2.02E-10 | 0.155905 | 0.00072  | 0.20666  | 6.71E-06 | 0.071079 |
| -0.06652 | 0.15119  | 0.058739 | 0.20514  | 0.021683 | 0.64024  | 0.07326  | 0.11387  | -0.01493 |
| -0.06327 | 0.17223  | -0.23973 | 1.58E-07 | -0.11341 | 0.0142   | -0.147   | 0.00144  | -0.15864 |
| -0.29161 | 1.32E-10 | -0.09101 | 0.04936  | -0.31553 | 2.96E-12 | -0.17678 | 0.00012  | -0.2475  |
| -0.17303 | 0.00017  | -0.09774 | 0.03471  | -0.15728 | 0.00065  | -0.09546 | 0.0392   | -0.18204 |
| -0.05445 | 0.24026  | 0.028731 | 0.53569  | -0.02169 | 0.64014  | 0.051232 | 0.26921  | -0.0796  |
| -0.00981 | 0.83258  | -0.00906 | 0.84518  | -0.1926  | 2.79E-05 | -0.14625 | 0.00153  | -0.16829 |
| -0.17217 | 0.00018  | -0.14901 | 0.00124  | -0.18603 | 5.24E-05 | -0.11344 | 0.01418  | -0.17501 |
| -0.10562 | 0.02245  | -0.13577 | 0.00328  | -0.07862 | 0.0897   | -0.07961 | 0.0857   | -0.09068 |
| -0.05869 | 0.20549  | -0.00562 | 0.90357  | -0.01779 | 0.70139  | -0.01048 | 0.82136  | -0.03734 |
| -0.06777 | 0.14364  | -0.01618 | 0.72736  | -0.03398 | 0.46385  | -0.01229 | 0.79115  | -0.03491 |
| -0.07066 | 0.12729  | -0.03814 | 0.41086  | -0.04865 | 0.29411  | -0.06861 | 0.13873  | -0.05296 |
| 0.012461 | 0.78825  | -0.0999  | 0.03089  | -0.05761 | 0.21396  | -0.0031  | 0.94669  | -0.07186 |
| -0.095   | 0.04017  | -0.03289 | 0.47833  | -0.08342 | 0.07171  | -0.04137 | 0.3724   | -0.09762 |
| -0.17122 | 0.0002   | -0.15    | 0.00115  | -0.23652 | 2.33E-07 | -0.25669 | 1.84E-08 | -0.21166 |
| -0.10424 | 0.02427  | -0.14494 | 0.00169  | -0.18336 | 6.73E-05 | -0.23998 | 1.53E-07 | -0.17402 |
| 0.044163 | 0.34096  | 0.127961 | 0.00562  | 0.144286 | 0.00177  | 0.075288 | 0.10418  | 0.128099 |
| -0.16152 | 0.00046  | -0.13536 | 0.00338  | -0.07833 | 0.09087  | -0.09536 | 0.03941  | -0.12762 |
| -0.22723 | 6.96E-07 | 0.082736 | 0.07406  | -0.27001 | 3.03E-09 | -0.01391 | 0.7643   | -0.26409 |
| -0.22467 | 9.34E-07 | 0.048762 | 0.29301  | -0.25347 | 2.80E-08 | -0.07247 | 0.11782  | -0.24695 |
| -0.2048  | 8.15E-06 | 0.051035 | 0.27106  | -0.16934 | 0.00024  | -0.01691 | 0.71557  | -0.18094 |
| -0.04008 | 0.38749  | -0.07667 | 0.09795  | -0.06865 | 0.1385   | -0.12418 | 0.00721  | -0.15939 |
| -0.06139 | 0.18539  | 0.053059 | 0.25248  | 0.103834 | 0.02484  | 0.141751 | 0.00214  | 0.088522 |
| -0.05859 | 0.20629  | -0.09479 | 0.04061  | 0.175674 | 0.00014  | 0.039887 | 0.38979  | 0.121328 |
| -0.1315  | 0.00442  | -0.21038 | 4.53E-06 | -0.20771 | 6.01E-06 | -0.23119 | 4.39E-07 | -0.24475 |
| -0.21377 | 3.14E-06 | -0.34507 | 1.67E-14 | -0.23377 | 3.23E-07 | -0.27512 | 1.48E-09 | -0.27872 |
| -0.14889 | 0.00125  | -0.04457 | 0.33648  | -0.22211 | 1.25E-06 | -0.1215  | 0.00858  | -0.20713 |
| -0.16225 | 0.00043  | -0.11751 | 0.01104  | -0.06948 | 0.13379  | -0.03409 | 0.46236  | -0.1269  |
| -0.13153 | 0.00441  | 0.119317 | 0.00986  | -0.03835 | 0.40838  | 0.141809 | 0.00213  | -0.10279 |
| -0.1067  | 0.0211   | 0.106758 | 0.02103  | -0.10934 | 0.0181   | -0.01717 | 0.71126  | -0.14045 |
| -0.16072 | 0.00049  | 0.115335 | 0.01263  | -0.13717 | 0.00297  | 0.0422   | 0.36287  | -0.16218 |
| -0.10951 | 0.01791  | 0.081055 | 0.08015  | 0.022781 | 0.62339  | 0.145449 | 0.00162  | -0.04223 |
| -0.27241 | 2.17E-09 | -0.06182 | 0.18233  | -0.28372 | 4.27E-10 | -0.10861 | 0.01888  | -0.29627 |
| -0.32484 | 6.14E-13 | -0.06468 | 0.16288  | -0.43445 | 6.38E-23 | -0.24875 | 5.13E-08 | -0.39527 |
| 0.023293 | 0.6156   | -0.01289 | 0.78118  | -0.09631 | 0.03748  | -0.00948 | 0.83808  | -0.12833 |
| -0.06592 | 0.15497  | -0.06206 | 0.18065  | -0.03564 | 0.44228  | -0.06216 | 0.17994  | -0.06792 |
| -0.01943 | 0.67534  | 0.068142 | 0.14147  | 0.094168 | 0.04195  | 0.070677 | 0.12722  | 0.036077 |
| -0.01068 | 0.81792  | 0.152269 | 0.00096  | 0.014795 | 0.74981  | 0.060874 | 0.18912  | -0.01382 |
| -0.08924 | 0.05395  | -0.00268 | 0.95391  | 0.016211 | 0.72679  | 0.071179 | 0.12453  | -0.05352 |
| -0.11089 | 0.01651  | -0.09305 | 0.04445  | -0.14527 | 0.00165  | -0.12404 | 0.00728  | -0.14503 |
| -0.1226  | 0.00799  | -0.06665 | 0.15043  | -0.12942 | 0.00509  | -0.11409 | 0.01363  | -0.17965 |
| 0.166037 | 0.00031  | 0.043463 | 0.34867  | 0.120814 | 0.00896  | 0.038841 | 0.40235  | 0.06277  |

|          |          |          |          |          |          |          |          |          |
|----------|----------|----------|----------|----------|----------|----------|----------|----------|
| -0.16572 | 0.00032  | -0.08934 | 0.0537   | -0.14712 | 0.00143  | -0.14327 | 0.00191  | -0.18358 |
| -0.27402 | 1.73E-09 | -0.20676 | 6.64E-06 | -0.14873 | 0.00127  | -0.06462 | 0.16329  | -0.1939  |
| -0.2293  | 5.48E-07 | -0.23128 | 4.34E-07 | -0.1718  | 0.00019  | -0.19572 | 2.05E-05 | -0.19664 |
| -0.14012 | 0.00241  | 0.001403 | 0.97588  | -0.06517 | 0.15972  | -0.00449 | 0.92297  | -0.06103 |
| -0.0678  | 0.14351  | 0.001897 | 0.96738  | -0.05882 | 0.20451  | -0.07951 | 0.0861   | -0.09773 |
| -0.15342 | 0.00088  | -0.17079 | 0.00021  | -0.02217 | 0.6327   | -0.04199 | 0.36531  | -0.12922 |
| -0.1492  | 0.00122  | 0.026356 | 0.56994  | -0.14309 | 0.00194  | -0.04148 | 0.37117  | -0.16837 |
| -0.09243 | 0.0459   | -0.14519 | 0.00166  | -0.07049 | 0.12823  | -0.13124 | 0.0045   | -0.08735 |
| -0.09778 | 0.03465  | -0.04378 | 0.34512  | -0.01188 | 0.79783  | -0.01389 | 0.76458  | -0.04616 |
| -0.1414  | 0.00219  | 0.017232 | 0.71033  | -0.24502 | 8.20E-08 | -0.20123 | 1.18E-05 | -0.24446 |
| 0.15391  | 0.00085  | 0.334846 | 1.07E-13 | 0.072052 | 0.11997  | 0.190284 | 3.49E-05 | 0.012836 |
| -0.18109 | 8.30E-05 | -0.14728 | 0.00141  | -0.14792 | 0.00135  | -0.09716 | 0.03582  | -0.19897 |
| -0.0993  | 0.03192  | -0.03304 | 0.47627  | 0.115675 | 0.01237  | 0.102618 | 0.02659  | 0.057563 |
| 0.081021 | 0.08028  | 0.121268 | 0.00871  | 0.004269 | 0.92669  | 0.060367 | 0.19284  | -0.00503 |
| 0.108939 | 0.01853  | -0.17774 | 0.00011  | -0.01733 | 0.70873  | -0.13445 | 0.0036   | -0.03737 |
| -0.1013  | 0.02861  | -0.02577 | 0.57851  | -0.05298 | 0.25321  | -0.0205  | 0.65853  | -0.07845 |
| -0.20683 | 6.59E-06 | 0.04511  | 0.33069  | -0.06964 | 0.13292  | 0.135664 | 0.00331  | -0.11184 |
| -0.10954 | 0.01789  | 0.038341 | 0.40845  | 0.05216  | 0.26061  | 0.113206 | 0.01438  | 0.0212   |
| -0.05007 | 0.28024  | 0.071296 | 0.12391  | 0.057448 | 0.21529  | 0.123856 | 0.00737  | 0.010145 |
| -0.10012 | 0.03053  | 0.022428 | 0.62879  | 0.07039  | 0.12877  | 0.099976 | 0.03076  | 0.041213 |
| 0.030085 | 0.51664  | 0.028856 | 0.53391  | 0.114961 | 0.01292  | 0.100226 | 0.03034  | 0.105014 |
| -0.1297  | 0.005    | 0.104858 | 0.02344  | -0.13423 | 0.00366  | 0.001564 | 0.97311  | -0.15373 |
| -0.04543 | 0.32728  | 0.030179 | 0.51532  | -0.086   | 0.06333  | -0.0365  | 0.43133  | -0.07046 |
| -0.10395 | 0.02468  | -0.03011 | 0.51632  | -0.16453 | 0.00036  | -0.10464 | 0.02373  | -0.01239 |
| -0.04284 | 0.35562  | -0.08714 | 0.05988  | 0.019891 | 0.66811  | -0.05352 | 0.24841  | -0.0219  |
| -0.15923 | 0.00055  | -0.10086 | 0.02931  | -0.13629 | 0.00317  | -0.1161  | 0.01205  | -0.20038 |
| -0.07934 | 0.08676  | 0.006259 | 0.89269  | 0.065754 | 0.15599  | 0.145461 | 0.00162  | -0.01854 |
| -0.1375  | 0.0029   | -0.04128 | 0.3734   | -0.19625 | 1.94E-05 | -0.15189 | 0.00099  | -0.20132 |
| -0.15187 | 0.00099  | -0.15036 | 0.00112  | -0.17213 | 0.00019  | -0.13203 | 0.00426  | -0.17601 |
| -0.05205 | 0.26165  | 0.118326 | 0.01049  | -0.18214 | 7.53E-05 | -0.12045 | 0.00917  | -0.05628 |
| -0.25935 | 1.29E-08 | -0.00712 | 0.87812  | -0.25895 | 1.36E-08 | -0.10477 | 0.02355  | -0.17853 |
| -0.16497 | 0.00034  | -0.08467 | 0.06754  | -0.20827 | 5.66E-06 | -0.14724 | 0.00142  | -0.19802 |
| -0.21242 | 3.64E-06 | -0.06505 | 0.16046  | -0.16012 | 0.00051  | -0.05183 | 0.26362  | -0.13828 |
| 0.049387 | 0.28685  | 0.009265 | 0.84172  | -0.05729 | 0.21659  | 0.052916 | 0.25377  | -0.13951 |
| -0.10762 | 0.02001  | -0.02994 | 0.51871  | -0.03621 | 0.43503  | 0.010068 | 0.82822  | -0.05835 |
| -0.14812 | 0.00133  | -0.18642 | 5.05E-05 | -0.20664 | 6.73E-06 | -0.25875 | 1.40E-08 | -0.2107  |
| -0.07215 | 0.11948  | -0.05563 | 0.23015  | -0.08215 | 0.07614  | -0.1202  | 0.00932  | -0.07805 |
| -0.15335 | 0.00089  | -0.03128 | 0.50006  | -0.20681 | 6.60E-06 | -0.13436 | 0.00363  | -0.22708 |
| -0.17478 | 0.00015  | -0.1071  | 0.02062  | -0.09052 | 0.05058  | -0.05302 | 0.25282  | -0.09213 |
| -0.25526 | 2.22E-08 | -0.13689 | 0.00303  | -0.25703 | 1.76E-08 | -0.18358 | 6.59E-05 | -0.261   |
| -0.21881 | 1.81E-06 | -0.00909 | 0.84468  | -0.2022  | 1.07E-05 | -0.07694 | 0.09677  | -0.23576 |
| -0.20109 | 1.19E-05 | -0.18651 | 5.00E-05 | 0.003349 | 0.94246  | 0.062276 | 0.17911  | -0.07544 |
| -0.02963 | 0.52303  | -0.16173 | 0.00045  | -0.10986 | 0.01755  | -0.15431 | 0.00082  | -0.10598 |
| -0.03854 | 0.40602  | -0.08881 | 0.05512  | -0.05578 | 0.22893  | -0.06899 | 0.1366   | -0.09766 |
| -0.27281 | 2.05E-09 | -0.21335 | 3.29E-06 | -0.20555 | 7.53E-06 | -0.1196  | 0.00968  | -0.20963 |

|          |          |          |          |          |          |          |          |          |
|----------|----------|----------|----------|----------|----------|----------|----------|----------|
| -0.04668 | 0.31407  | 0.089294 | 0.05381  | -0.09462 | 0.04097  | -0.07254 | 0.11749  | -0.00315 |
| -0.06402 | 0.16723  | -0.09522 | 0.0397   | 0.082978 | 0.07322  | -0.00254 | 0.95642  | 0.016212 |
| -0.14298 | 0.00195  | -0.11459 | 0.01322  | -0.1332  | 0.00393  | -0.12212 | 0.00824  | -0.1445  |
| -0.14607 | 0.00155  | -0.10423 | 0.02429  | 0.010265 | 0.82491  | 0.006615 | 0.88663  | 0.013292 |
| -0.1687  | 0.00025  | -0.20844 | 5.56E-06 | -0.19005 | 3.57E-05 | -0.05867 | 0.20567  | -0.29461 |
| -0.13176 | 0.00434  | -0.01046 | 0.82161  | -0.17703 | 0.00012  | -0.10048 | 0.02992  | -0.18668 |
| 0.081628 | 0.07803  | 0.106799 | 0.02098  | 0.053899 | 0.24504  | 0.016758 | 0.71795  | 0.045611 |
| -0.12315 | 0.00771  | -0.03788 | 0.41408  | -0.14957 | 0.00119  | -0.13848 | 0.00271  | -0.13722 |
| -0.14726 | 0.00142  | -0.1333  | 0.0039   | -0.13687 | 0.00304  | -0.13283 | 0.00403  | -0.17113 |
| -0.17866 | 0.0001   | -0.03846 | 0.40701  | -0.0633  | 0.17204  | -0.03656 | 0.43058  | -0.12881 |
| -0.24205 | 1.19E-07 | -0.06131 | 0.18595  | -0.3088  | 8.94E-12 | -0.19055 | 3.40E-05 | -0.28729 |
| -0.15617 | 0.00071  | -0.03359 | 0.46902  | -0.16774 | 0.00027  | -0.10426 | 0.02425  | -0.17699 |
| -0.07963 | 0.08564  | 0.05353  | 0.24829  | 0.040294 | 0.38497  | 0.115459 | 0.01253  | -0.00582 |
| -0.06511 | 0.16009  | -0.00669 | 0.88527  | -0.11026 | 0.01714  | -0.05363 | 0.24736  | -0.14175 |
| -0.1905  | 3.42E-05 | -0.11188 | 0.01557  | -0.11226 | 0.01522  | -0.0487  | 0.29361  | -0.14063 |
| -0.19509 | 2.18E-05 | -0.10965 | 0.01777  | -0.20791 | 5.88E-06 | -0.15744 | 0.00064  | -0.21227 |
| -0.26576 | 5.45E-09 | -0.16383 | 0.00038  | -0.29874 | 4.41E-11 | -0.19224 | 2.88E-05 | -0.30919 |
| -0.10467 | 0.02369  | -0.0655  | 0.15757  | -0.02213 | 0.6334   | -0.01724 | 0.71013  | -0.08861 |
| -0.00125 | 0.97856  | 0.105173 | 0.02302  | -0.10985 | 0.01757  | -0.07433 | 0.10865  | -0.02234 |
| -0.06305 | 0.17373  | -0.07388 | 0.11082  | -0.06199 | 0.18115  | -0.07911 | 0.08771  | -0.04434 |
| -0.13508 | 0.00345  | -0.03919 | 0.39819  | -0.13023 | 0.00482  | -0.06367 | 0.16955  | -0.10357 |
| -0.31099 | 6.25E-12 | -0.16398 | 0.00037  | -0.34902 | 7.99E-15 | -0.23219 | 3.90E-07 | -0.36356 |
| -0.16671 | 0.0003   | -0.09397 | 0.04239  | -0.13963 | 0.00249  | -0.10451 | 0.02391  | -0.20157 |
| -0.14826 | 0.00131  | -0.03826 | 0.40937  | -0.08555 | 0.06473  | -0.02969 | 0.5222   | -0.06066 |
| -0.00115 | 0.9803   | 0.047871 | 0.30192  | 0.039863 | 0.39007  | 0.064338 | 0.16512  | -0.00716 |
| -0.24677 | 6.58E-08 | -0.22728 | 6.92E-07 | -0.27641 | 1.23E-09 | -0.24154 | 1.26E-07 | -0.34644 |
| -0.29506 | 7.79E-11 | -0.11029 | 0.01711  | -0.3186  | 1.77E-12 | -0.11221 | 0.01526  | -0.30287 |
| -0.07278 | 0.11628  | 0.09699  | 0.03615  | 0.049204 | 0.28864  | 0.132979 | 0.00399  | -0.01202 |
| -0.08631 | 0.06238  | -0.06339 | 0.17144  | 0.088018 | 0.05734  | 0.073223 | 0.11405  | 0.046919 |
| 0.129702 | 0.005    | 0.198644 | 1.53E-05 | -0.14012 | 0.00241  | -0.09787 | 0.03448  | -0.0176  |
| -0.13975 | 0.00247  | -0.02005 | 0.66565  | -0.13782 | 0.00284  | -0.07768 | 0.0936   | -0.18152 |
| -0.11564 | 0.0124   | 0.006579 | 0.88724  | -0.12613 | 0.00635  | -0.02439 | 0.59912  | -0.1885  |
| -0.14715 | 0.00143  | -0.05092 | 0.27216  | -0.08574 | 0.06414  | -0.02607 | 0.57412  | -0.12783 |
| -0.13143 | 0.00444  | -0.01899 | 0.68228  | -0.05657 | 0.22241  | -0.02405 | 0.60416  | -0.07515 |
| -0.10935 | 0.01809  | 0.005214 | 0.91053  | -0.03204 | 0.4898   | 0.018025 | 0.69763  | -0.06755 |
| -0.04947 | 0.28602  | 0.050378 | 0.27728  | -0.02311 | 0.61839  | -0.02215 | 0.63306  | -0.05234 |
| -0.21476 | 2.82E-06 | -0.16113 | 0.00047  | -0.27608 | 1.29E-09 | -0.19034 | 3.47E-05 | -0.26013 |
| -0.1156  | 0.01242  | 0.000644 | 0.98892  | -0.10781 | 0.01979  | -0.06318 | 0.17285  | -0.14202 |
| -0.32061 | 1.27E-12 | -0.22055 | 1.49E-06 | -0.3738  | 6.21E-17 | -0.26328 | 7.63E-09 | -0.33986 |
| -0.09434 | 0.04157  | 0.067984 | 0.1424   | -0.03357 | 0.46922  | -0.00568 | 0.9026   | -0.03998 |
| -0.18021 | 9.00E-05 | -0.16109 | 0.00047  | -0.0822  | 0.07597  | -0.09037 | 0.05097  | -0.12974 |
| -0.09036 | 0.051    | -0.05085 | 0.27282  | -0.16568 | 0.00032  | -0.16807 | 0.00026  | -0.12105 |
| -0.07551 | 0.10315  | 0.031977 | 0.49059  | 0.04636  | 0.31745  | 0.117897 | 0.01078  | 0.003987 |
| -0.12965 | 0.00501  | -0.04202 | 0.36494  | -0.26763 | 4.22E-09 | -0.15888 | 0.00057  | -0.23812 |
| -0.15999 | 0.00052  | 0.025059 | 0.58908  | -0.12522 | 0.00674  | -0.02814 | 0.54411  | -0.1332  |

|          |          |          |          |          |          |          |          |          |
|----------|----------|----------|----------|----------|----------|----------|----------|----------|
| -0.12923 | 0.00516  | -0.0488  | 0.29262  | -0.13249 | 0.00413  | -0.11617 | 0.012    | -0.12405 |
| -0.26302 | 7.90E-09 | -0.12378 | 0.00741  | -0.09    | 0.05195  | 0.019979 | 0.66673  | -0.12392 |
| -0.00648 | 0.88885  | 0.025174 | 0.58738  | 0.174409 | 0.00015  | 0.160181 | 0.00051  | 0.092538 |
| -0.02329 | 0.61564  | 0.096914 | 0.03629  | 0.038428 | 0.40738  | 0.073804 | 0.1112   | -0.03411 |
| -0.24369 | 9.68E-08 | -0.11959 | 0.00969  | -0.26624 | 5.10E-09 | -0.17575 | 0.00013  | -0.2721  |
| -0.11792 | 0.01076  | 0.002767 | 0.95244  | -0.06067 | 0.19063  | 0.016183 | 0.72724  | -0.06668 |
| -0.14161 | 0.00216  | 0.041621 | 0.36949  | -0.12154 | 0.00856  | 0.010643 | 0.81857  | -0.11751 |
| -0.16795 | 0.00027  | -0.12909 | 0.00521  | -0.2166  | 2.31E-06 | -0.16591 | 0.00032  | -0.21831 |
| -0.04624 | 0.31874  | 0.049183 | 0.28885  | -0.05322 | 0.25105  | -0.00585 | 0.89962  | -0.07605 |
| -0.12632 | 0.00627  | -0.03244 | 0.48436  | -0.09343 | 0.04359  | -0.02669 | 0.56505  | -0.09476 |
| -0.02249 | 0.62784  | -0.02453 | 0.59693  | 0.064921 | 0.16131  | -0.02541 | 0.58382  | 0.044763 |
| -0.20034 | 1.29E-05 | -0.25484 | 2.34E-08 | -0.21686 | 2.24E-06 | -0.11631 | 0.01189  | -0.21526 |
| -0.03301 | 0.47671  | 0.067862 | 0.14312  | 0.087732 | 0.05816  | 0.112151 | 0.01532  | 0.032304 |
| -0.0483  | 0.29762  | 0.065711 | 0.15626  | 0.108495 | 0.01901  | 0.132823 | 0.00404  | 0.071133 |
| -0.23069 | 4.65E-07 | -0.0674  | 0.14587  | -0.16403 | 0.00037  | -0.03245 | 0.48419  | -0.15952 |
| -0.0005  | 0.99148  | 0.054958 | 0.23587  | 0.058021 | 0.21074  | 0.066122 | 0.15368  | 0.018061 |
| -0.19665 | 1.87E-05 | -0.11404 | 0.01367  | -0.16919 | 0.00024  | -0.10336 | 0.0255   | -0.19749 |
| -0.18145 | 8.03E-05 | -0.15543 | 0.00075  | -0.31808 | 1.94E-12 | -0.30538 | 1.55E-11 | -0.24769 |
| -0.17998 | 9.19E-05 | -0.09386 | 0.04263  | -0.2699  | 3.08E-09 | -0.18871 | 4.06E-05 | -0.2748  |
| -0.23703 | 2.19E-07 | -0.05609 | 0.22637  | -0.10154 | 0.02822  | -0.01035 | 0.82343  | -0.0838  |
| -0.26781 | 4.11E-09 | -0.20787 | 5.91E-06 | -0.29067 | 1.52E-10 | -0.22359 | 1.06E-06 | -0.31154 |
| -0.14784 | 0.00136  | -0.03018 | 0.51531  | -0.07521 | 0.10455  | -0.08066 | 0.08165  | -0.1095  |
| -0.00428 | 0.92646  | 0.104287 | 0.02421  | -0.07708 | 0.09619  | -0.08022 | 0.08331  | -0.03277 |
| -0.03852 | 0.4063   | 0.074165 | 0.10946  | 0.003799 | 0.93475  | -0.02502 | 0.58967  | 0.075676 |
| -0.20308 | 9.74E-06 | -0.1772  | 0.00012  | -0.09591 | 0.03827  | -0.12709 | 0.00595  | -0.10164 |
| -0.19968 | 1.38E-05 | -0.08531 | 0.06549  | -0.1971  | 1.79E-05 | -0.08213 | 0.07623  | -0.21635 |
| -0.15873 | 0.00058  | -0.13044 | 0.00475  | -0.02257 | 0.62658  | -0.018   | 0.69804  | -0.06624 |
| 0.024219 | 0.60164  | 0.061847 | 0.18213  | 0.006135 | 0.8948   | 0.00325  | 0.94416  | 0.001239 |
| 0.034461 | 0.45753  | 0.033236 | 0.47368  | 0.096285 | 0.03753  | 0.075412 | 0.10361  | 0.077651 |
| -0.07177 | 0.12143  | -0.02571 | 0.57951  | 0.123948 | 0.00732  | 0.155383 | 0.00075  | 0.060259 |
| -0.06018 | 0.19421  | 0.011309 | 0.80744  | 0.010002 | 0.82932  | 0.010271 | 0.8248   | 0.014974 |
| -0.03566 | 0.44205  | -0.02441 | 0.59882  | 0.089863 | 0.0523   | 0.10257  | 0.02666  | 0.043927 |
| 0.011338 | 0.80695  | 0.054614 | 0.23883  | 0.052952 | 0.25344  | 0.02007  | 0.6653   | 0.031474 |
| -0.03013 | 0.51605  | -0.00643 | 0.88982  | 0.054797 | 0.23725  | 0.011551 | 0.80339  | 0.067707 |
| -0.03136 | 0.49907  | -0.03016 | 0.51556  | 0.103736 | 0.02497  | 0.067517 | 0.14517  | 0.129096 |
| 0.027492 | 0.55343  | 0.056481 | 0.22312  | 0.050305 | 0.27798  | 0.034628 | 0.45535  | 0.022083 |
| 0.00805  | 0.86227  | -0.01768 | 0.70312  | 0.200504 | 1.27E-05 | 0.083979 | 0.06981  | 0.187871 |
| 0.006838 | 0.88284  | -0.03199 | 0.49039  | 0.093395 | 0.04366  | 0.011278 | 0.80795  | 0.139188 |
| 0.073795 | 0.11125  | 0.106047 | 0.0219   | 0.072959 | 0.11536  | 0.036879 | 0.42656  | 0.058314 |
| 0.03742  | 0.4198   | 0.11188  | 0.01557  | 0.006475 | 0.88901  | 0.003158 | 0.94573  | 0.014455 |
| 0.031348 | 0.49917  | 0.063805 | 0.16865  | 0.126589 | 0.00616  | 0.075618 | 0.10266  | 0.149007 |
| -0.03304 | 0.47632  | -0.03105 | 0.50331  | 0.055567 | 0.23072  | 0.011227 | 0.80879  | 0.031468 |
| -0.00365 | 0.93726  | 0.138211 | 0.00276  | 0.023445 | 0.61331  | 0.037481 | 0.41904  | 0.015988 |
| -0.00671 | 0.88507  | 0.007828 | 0.86602  | 0.041834 | 0.36705  | -0.01473 | 0.75084  | 0.034347 |
| -0.05888 | 0.20401  | -0.08455 | 0.06791  | -0.07688 | 0.09703  | -0.08247 | 0.07501  | -0.02882 |

|          |         |          |          |          |          |          |         |          |
|----------|---------|----------|----------|----------|----------|----------|---------|----------|
| 0.018479 | 0.6904  | -0.00078 | 0.98652  | -0.01306 | 0.77836  | -0.01842 | 0.69143 | -0.02437 |
| 0.04982  | 0.28264 | 0.095179 | 0.03978  | 0.058883 | 0.20402  | 0.052623 | 0.2564  | -0.0025  |
| 0.09907  | 0.03232 | 0.12678  | 0.00608  | 0.089288 | 0.05383  | 0.081692 | 0.0778  | 0.029211 |
| 0.058806 | 0.20462 | 0.067927 | 0.14274  | 0.084464 | 0.0682   | 0.074571 | 0.10752 | 0.045289 |
| -0.12605 | 0.00638 | -0.15252 | 0.00094  | -0.089   | 0.05462  | -0.13426 | 0.00365 | -0.10192 |
| 0.031657 | 0.49496 | 0.076047 | 0.10072  | 0.086709 | 0.06116  | 0.061576 | 0.18406 | 0.045849 |
| 0.105604 | 0.02247 | 0.159941 | 0.00052  | 0.173812 | 0.00016  | 0.132014 | 0.00427 | 0.192847 |
| 0.043318 | 0.35029 | 0.086384 | 0.06215  | 0.067253 | 0.14675  | 0.03942  | 0.39537 | 0.05492  |
| -0.02833 | 0.54143 | 0.033631 | 0.46844  | 0.091767 | 0.04748  | 0.063265 | 0.17229 | 0.063604 |
| -0.00114 | 0.98045 | 0.017155 | 0.71157  | 0.043111 | 0.35259  | 0.017892 | 0.69976 | 0.033077 |
| 0.02866  | 0.5367  | 0.039832 | 0.39045  | -0.01339 | 0.77287  | -0.0039  | 0.93307 | -0.03208 |
| 0.068275 | 0.1407  | 0.056386 | 0.22391  | 0.08115  | 0.0798   | 0.035076 | 0.44953 | 0.054769 |
| 0.018739 | 0.68629 | 0.005075 | 0.91291  | 0.025868 | 0.57711  | 0.003135 | 0.94613 | -0.0135  |
| 0.057497 | 0.2149  | 0.071237 | 0.12423  | 0.065609 | 0.1569   | 0.045466 | 0.32689 | 0.03396  |
| 0.024673 | 0.59484 | 0.023874 | 0.60682  | 0.038835 | 0.40242  | 0.005147 | 0.91167 | 0.018028 |
| 0.105737 | 0.0223  | 0.131768 | 0.00434  | 0.000702 | 0.98792  | 0.025805 | 0.57803 | 0.007981 |
| 0.06738  | 0.14599 | 0.084051 | 0.06957  | 0.055997 | 0.22712  | 0.048328 | 0.29733 | 0.00603  |
| 0.109447 | 0.01798 | 0.101225 | 0.02872  | 0.005789 | 0.90072  | 0.043349 | 0.34994 | -0.02701 |
| 0.047127 | 0.30951 | 0.058339 | 0.20825  | 0.029879 | 0.5195   | 0.023909 | 0.60629 | -0.0136  |
| 0.025054 | 0.58916 | 0.029811 | 0.52047  | 0.047942 | 0.3012   | 0.029027 | 0.53149 | 0.030438 |
| 0.066779 | 0.14963 | 0.052137 | 0.26083  | 0.040191 | 0.38619  | 0.03069  | 0.50823 | 0.017642 |
| 0.076312 | 0.09954 | 0.078844 | 0.08877  | 0.107246 | 0.02044  | 0.0722   | 0.11921 | 0.047773 |
| 0.028654 | 0.53678 | 0.079351 | 0.08673  | 0.098711 | 0.03295  | 0.045378 | 0.32782 | 0.067301 |
| -0.02993 | 0.51875 | -0.021   | 0.65085  | 0.006188 | 0.89391  | -0.01714 | 0.71182 | 0.017471 |
| -0.02279 | 0.62323 | -0.00531 | 0.90891  | 0.022904 | 0.62152  | -0.0181  | 0.69638 | 0.055667 |
| -0.06598 | 0.15457 | -0.09021 | 0.05139  | -0.00634 | 0.89132  | -0.04089 | 0.37793 | 0.064307 |
| 0.10297  | 0.02607 | 0.174273 | 0.00015  | 0.173333 | 0.00017  | 0.122641 | 0.00797 | 0.14493  |
| 0.004415 | 0.92418 | 0.030054 | 0.51706  | 0.044116 | 0.34147  | 0.005178 | 0.91114 | 0.008843 |
| 0.048633 | 0.29428 | 0.091879 | 0.04721  | 0.084884 | 0.06684  | 0.080806 | 0.08109 | 0.026229 |
| 0.005677 | 0.90263 | 0.04325  | 0.35104  | 0.066426 | 0.15179  | 0.048058 | 0.30003 | 0.016769 |
| 0.044853 | 0.33346 | 0.085928 | 0.06354  | 0.094192 | 0.04189  | 0.086382 | 0.06215 | 0.035189 |
| 0.009418 | 0.83914 | 0.033551 | 0.46949  | 0.111012 | 0.0164   | 0.033978 | 0.46385 | 0.086341 |
| 0.06824  | 0.1409  | 0.089651 | 0.05286  | 0.120556 | 0.00911  | 0.078734 | 0.08922 | 0.075996 |
| -0.06119 | 0.18686 | -0.0723  | 0.1187   | -0.04871 | 0.29353  | -0.10795 | 0.01963 | -0.02053 |
| 0.105379 | 0.02276 | 0.134037 | 0.00371  | 0.102483 | 0.02679  | 0.079106 | 0.08771 | 0.046062 |
| -0.01609 | 0.72873 | -0.00132 | 0.97732  | -0.02174 | 0.63937  | -0.02288 | 0.62181 | -0.01287 |
| 0.050833 | 0.27296 | 0.040592 | 0.38146  | 0.080996 | 0.08037  | 0.028264 | 0.54234 | 0.078393 |
| 0.026594 | 0.56646 | 0.051806 | 0.26387  | 0.108171 | 0.01938  | 0.048598 | 0.29463 | 0.099608 |
| -0.1097  | 0.01771 | -0.06541 | 0.15816  | -0.04765 | 0.30418  | -0.00236 | 0.95946 | -0.03508 |
| -0.11445 | 0.01333 | -0.25283 | 3.04E-08 | 0.054626 | 0.23872  | -0.08716 | 0.05982 | -0.00935 |
| 0.163382 | 0.00039 | 0.158234 | 0.0006   | 0.212769 | 3.50E-06 | 0.079953 | 0.08436 | 0.192415 |
| 0.028223 | 0.54293 | -0.00072 | 0.98754  | 0.131199 | 0.00451  | 0.043627 | 0.34686 | 0.157492 |
| 0.047737 | 0.30328 | 0.146023 | 0.00156  | 0.056441 | 0.22345  | 0.045133 | 0.33045 | 0.063957 |
| -0.08838 | 0.05633 | -0.09889 | 0.03264  | 0.211233 | 4.13E-06 | 0.166551 | 0.0003  | 0.173997 |
| -0.05691 | 0.21965 | 0.048369 | 0.29691  | 0.022097 | 0.63386  | 0.003179 | 0.94537 | 0.014217 |

|          |          |          |         |          |          |          |          |          |
|----------|----------|----------|---------|----------|----------|----------|----------|----------|
| -0.162   | 0.00044  | -0.07119 | 0.12446 | -0.04126 | 0.37365  | -0.0082  | 0.85977  | -0.09733 |
| -0.22825 | 6.18E-07 | -0.07722 | 0.09555 | -0.06906 | 0.13616  | 0.041992 | 0.36524  | -0.14318 |
| 0.030594 | 0.50956  | 0.012896 | 0.78105 | 0.141812 | 0.00213  | 0.05698  | 0.21906  | 0.07122  |
| -0.19862 | 1.53E-05 | -0.07573 | 0.10215 | -0.03164 | 0.4952   | 0.052933 | 0.2536   | -0.04962 |
| -0.05478 | 0.23738  | -0.09671 | 0.03669 | -0.03818 | 0.41037  | -0.09293 | 0.04474  | -0.08326 |
| 0.048989 | 0.29076  | 0.130151 | 0.00485 | 0.048417 | 0.29643  | 0.03469  | 0.45454  | 0.067328 |
| -0.01819 | 0.695    | -0.04343 | 0.34902 | 0.01333  | 0.77387  | -0.04321 | 0.35148  | -0.05818 |
| 0.011253 | 0.80836  | 0.013434 | 0.77217 | 0.163846 | 0.00038  | 0.123047 | 0.00777  | 0.077322 |
| -0.04705 | 0.31033  | 0.096969 | 0.03619 | 0.062053 | 0.18068  | 0.089009 | 0.05458  | 0.037591 |
| -0.00491 | 0.91578  | 0.044903 | 0.33292 | 0.127353 | 0.00585  | 0.094231 | 0.04181  | 0.091281 |
| -0.0341  | 0.4622   | 0.019904 | 0.66792 | 0.074207 | 0.10926  | 0.049113 | 0.28954  | -0.00093 |
| -0.08389 | 0.07011  | 0.031201 | 0.50119 | 0.050535 | 0.27579  | 0.175082 | 0.00014  | 0.026216 |
| 0.057017 | 0.21876  | 0.132127 | 0.00423 | 0.156623 | 0.00068  | 0.095415 | 0.03929  | 0.184678 |
| -0.03299 | 0.47691  | -0.07295 | 0.1154  | 0.043823 | 0.34469  | -0.02539 | 0.58415  | 0.04574  |
| -0.03355 | 0.4695   | -0.04504 | 0.33145 | 0.036842 | 0.42702  | 0.093687 | 0.04301  | -0.06686 |
| 0.047771 | 0.30293  | 0.122094 | 0.00826 | 0.092317 | 0.04616  | 0.058984 | 0.20325  | 0.047021 |
| -0.0956  | 0.0389   | -0.1049  | 0.02338 | 0.101598 | 0.02814  | -0.0078  | 0.86642  | 0.070994 |
| 0.021057 | 0.64992  | 0.120624 | 0.00907 | 0.038464 | 0.40693  | 0.041293 | 0.37329  | 0.015804 |
| 0.029686 | 0.52221  | 0.063025 | 0.17393 | 0.20536  | 7.69E-06 | 0.081698 | 0.07778  | 0.165421 |
| -0.03463 | 0.45537  | -0.13098 | 0.00458 | 0.094526 | 0.04117  | -0.01198 | 0.79625  | 0.051877 |
| 0.078971 | 0.08826  | -0.08994 | 0.05209 | 0.137078 | 0.00299  | -0.05523 | 0.23355  | 0.107341 |
| -0.14955 | 0.00119  | -0.05514 | 0.23436 | -0.06025 | 0.19367  | -0.02701 | 0.56044  | -0.09969 |
| 0.048303 | 0.29758  | 0.101952 | 0.02759 | 0.163291 | 0.0004   | 0.023937 | 0.60588  | 0.12894  |
| -0.02679 | 0.56355  | 0.001825 | 0.96863 | -0.0176  | 0.70437  | -0.09515 | 0.03985  | 0.060723 |
| 0.015461 | 0.73895  | -0.00844 | 0.85561 | 0.045424 | 0.32733  | 0.037837 | 0.41463  | -0.00992 |
| -0.05235 | 0.25887  | -0.06846 | 0.13965 | -0.0818  | 0.07742  | -0.02885 | 0.53401  | -0.14231 |
| -0.04017 | 0.38649  | 0.00457  | 0.92154 | 0.212581 | 3.57E-06 | 0.12521  | 0.00674  | 0.243862 |
| -0.03334 | 0.47232  | 0.047134 | 0.30943 | 0.068056 | 0.14198  | 0.046579 | 0.31517  | 0.018413 |
| -0.01466 | 0.75202  | -0.01628 | 0.7256  | 0.206023 | 7.17E-06 | 0.16325  | 0.0004   | 0.143057 |
| 0.003704 | 0.93637  | 0.032782 | 0.47974 | 0.167754 | 0.00027  | 0.103047 | 0.02596  | 0.101502 |
| -0.11208 | 0.01538  | -0.09073 | 0.05007 | -0.06592 | 0.15495  | -0.03683 | 0.42716  | -0.12912 |
| -0.08605 | 0.06315  | -0.08006 | 0.08393 | 0.040517 | 0.38234  | 0.002534 | 0.95644  | -0.05974 |
| -0.00527 | 0.90964  | 0.107944 | 0.01963 | 0.2273   | 6.91E-07 | 0.221005 | 1.41E-06 | 0.165172 |
| 0.073127 | 0.11453  | 0.102783 | 0.02634 | 0.221464 | 1.34E-06 | 0.082352 | 0.07542  | 0.211495 |
| 0.013271 | 0.77485  | 0.005913 | 0.89859 | 0.158844 | 0.00057  | 0.049977 | 0.28113  | 0.124215 |
| 0.032254 | 0.48685  | 0.176665 | 0.00012 | 0.116533 | 0.01173  | 0.131093 | 0.00455  | 0.055868 |
| 0.029133 | 0.53     | -0.10752 | 0.02012 | -0.01011 | 0.82756  | 0.044576 | 0.33645  | -0.07136 |
| -0.04964 | 0.28436  | 0.115638 | 0.0124  | 0.05922  | 0.20144  | 0.09331  | 0.04386  | 0.051732 |
| -0.04049 | 0.3827   | 0.029734 | 0.52154 | 0.117816 | 0.01083  | 0.071693 | 0.12183  | 0.140112 |
| 0.004782 | 0.91792  | 0.150989 | 0.00106 | 0.157587 | 0.00063  | 0.189041 | 3.93E-05 | 0.118602 |
| -0.01386 | 0.76523  | 0.045706 | 0.32434 | 0.035271 | 0.44701  | 0.025223 | 0.58665  | 0.071576 |
| 0.086562 | 0.06161  | 0.090757 | 0.04999 | 0.187371 | 4.61E-05 | 0.084355 | 0.06856  | 0.149236 |
| 0.01661  | 0.72034  | 0.008828 | 0.8491  | 0.195444 | 2.11E-05 | 0.092655 | 0.04537  | 0.167628 |
| 0.222906 | 1.14E-06 | 0.15173  | 0.001   | 0.313474 | 4.16E-12 | 0.197138 | 1.78E-05 | 0.233087 |
| -0.07138 | 0.12349  | 0.107308 | 0.02037 | -0.01788 | 0.69996  | 0.081932 | 0.07693  | -0.02978 |

|          |          |          |          |          |          |          |          |          |
|----------|----------|----------|----------|----------|----------|----------|----------|----------|
| -0.20681 | 6.61E-06 | -0.06678 | 0.14961  | -0.06819 | 0.1412   | -0.02107 | 0.64974  | -0.10957 |
| 0.010521 | 0.82061  | -0.12422 | 0.0072   | 0.137575 | 0.00289  | -0.00651 | 0.88849  | 0.117537 |
| -0.11383 | 0.01385  | -0.1054  | 0.02273  | -0.06498 | 0.16095  | -0.06776 | 0.14374  | -0.07263 |
| -0.11348 | 0.01414  | -0.11281 | 0.01473  | 0.092047 | 0.04681  | 0.021122 | 0.64891  | 0.041381 |
| 0.06802  | 0.14219  | 0.197545 | 1.71E-05 | 0.202443 | 1.04E-05 | 0.128935 | 0.00526  | 0.145469 |
| 0.020972 | 0.65124  | 0.15325  | 0.00089  | 0.103684 | 0.02505  | 0.135066 | 0.00345  | 0.024635 |
| 0.145751 | 0.00159  | -0.00103 | 0.9823   | 0.130902 | 0.00461  | 0.122071 | 0.00827  | -0.02168 |
| 0.153979 | 0.00084  | 0.232395 | 3.81E-07 | 0.189032 | 3.94E-05 | 0.125172 | 0.00676  | 0.124243 |
| 0.119539 | 0.00972  | 0.234499 | 2.97E-07 | 0.175835 | 0.00013  | 0.151566 | 0.00102  | 0.123594 |
| 0.012004 | 0.79585  | 0.121907 | 0.00836  | 0.168566 | 0.00025  | 0.133601 | 0.00382  | 0.138904 |
| 0.054861 | 0.2367   | 0.090993 | 0.04939  | 0.239833 | 1.56E-07 | 0.155618 | 0.00074  | 0.1421   |
| 0.092252 | 0.04632  | -0.01593 | 0.73129  | 0.390419 | 1.87E-18 | 0.319283 | 1.58E-12 | 0.233774 |
| 0.001965 | 0.96622  | -0.04788 | 0.30183  | 0.146429 | 0.00151  | 0.099876 | 0.03093  | 0.147767 |
| 0.061853 | 0.18209  | -0.04157 | 0.37008  | 0.206907 | 6.54E-06 | 0.09757  | 0.03504  | 0.154247 |
| -0.32229 | 9.51E-13 | -0.31413 | 3.74E-12 | -0.17528 | 0.00014  | -0.24724 | 6.20E-08 | -0.0321  |
| -0.00668 | 0.88559  | 0.076656 | 0.09801  | 0.022014 | 0.63514  | 0.008365 | 0.85693  | 0.029479 |
| -0.03946 | 0.39492  | -0.10118 | 0.02879  | 0.253373 | 2.83E-08 | 0.144686 | 0.00172  | 0.158598 |
| -0.076   | 0.10092  | -0.1399  | 0.00244  | 0.098249 | 0.03379  | -0.04403 | 0.34246  | 0.030363 |
| 0.050658 | 0.27461  | -0.02957 | 0.52377  | 0.237905 | 1.97E-07 | 0.073643 | 0.11198  | 0.207916 |
| -0.21944 | 1.69E-06 | -0.12279 | 0.0079   | -0.01941 | 0.67564  | 0.001541 | 0.97351  | -0.09344 |
| 0.064496 | 0.16408  | 0.111451 | 0.01597  | 0.225472 | 8.52E-07 | 0.232963 | 3.56E-07 | 0.198841 |
| -0.0664  | 0.15193  | -0.16832 | 0.00026  | 0.078168 | 0.09155  | -0.12988 | 0.00494  | 0.080608 |
| -0.07675 | 0.09762  | -0.22542 | 8.57E-07 | -0.004   | 0.93134  | -0.14138 | 0.0022   | 0.001392 |
| -0.02604 | 0.57458  | 0.147858 | 0.00135  | 0.217937 | 1.99E-06 | 0.266243 | 5.10E-09 | 0.157066 |
| -0.05826 | 0.20883  | 0.051424 | 0.26741  | 0.137757 | 0.00285  | 0.169341 | 0.00024  | 0.059219 |
| 0.08032  | 0.08294  | 0.144102 | 0.0018   | 0.31091  | 6.34E-12 | 0.260914 | 1.05E-08 | 0.254755 |
| -0.00492 | 0.91561  | -0.17018 | 0.00022  | 0.062316 | 0.17883  | -0.13053 | 0.00472  | 0.105282 |
| 0.056698 | 0.22135  | 0.111843 | 0.0156   | 0.169916 | 0.00023  | 0.114418 | 0.01336  | 0.080529 |
| 0.124595 | 0.00702  | 0.27831  | 9.39E-10 | 0.176165 | 0.00013  | 0.157079 | 0.00066  | 0.106188 |
| -0.13606 | 0.00322  | -0.10619 | 0.02173  | -0.04733 | 0.30745  | -0.10552 | 0.02257  | -0.07778 |
| -0.03916 | 0.39848  | 0.014328 | 0.75747  | 0.209742 | 4.85E-06 | 0.238469 | 1.84E-07 | 0.090107 |
| -0.29081 | 1.49E-10 | -0.24071 | 1.40E-07 | -0.14177 | 0.00213  | -0.099   | 0.03244  | -0.17237 |
| -0.05795 | 0.21128  | -0.00796 | 0.86385  | 0.017374 | 0.70805  | 0.018391 | 0.69181  | 0.028292 |
| 0.037445 | 0.41949  | 0.051076 | 0.27067  | 0.101441 | 0.02838  | 0.005638 | 0.90329  | 0.100544 |
| -0.01549 | 0.73855  | -0.07213 | 0.11959  | 0.123356 | 0.00761  | -0.04922 | 0.28846  | 0.127258 |
| 0.143472 | 0.00188  | 0.175119 | 0.00014  | 0.283751 | 4.26E-10 | 0.135149 | 0.00343  | 0.217154 |
| 0.03692  | 0.42604  | 0.080542 | 0.08209  | 0.229405 | 5.41E-07 | 0.179591 | 9.53E-05 | 0.161756 |
| -0.16958 | 0.00023  | -0.09713 | 0.03587  | 0.005038 | 0.91353  | 0.074184 | 0.10937  | -0.0443  |
| -0.14564 | 0.0016   | -0.0566  | 0.22218  | 0.028261 | 0.54238  | 0.102315 | 0.02704  | 0.003237 |
| 0.1317   | 0.00436  | 0.253346 | 2.84E-08 | 0.299448 | 3.95E-11 | 0.266277 | 5.07E-09 | 0.234774 |
| -0.11583 | 0.01225  | 0.032715 | 0.48065  | -0.01782 | 0.7009   | 0.130468 | 0.00474  | -0.08121 |
| -0.03387 | 0.46526  | 0.023152 | 0.61774  | 0.128591 | 0.00539  | 0.147388 | 0.0014   | 0.028792 |
| -0.01579 | 0.73356  | 0.068725 | 0.13809  | 0.259719 | 1.23E-08 | 0.187934 | 4.37E-05 | 0.237905 |
| -0.07297 | 0.11529  | -0.03926 | 0.39732  | 0.151165 | 0.00105  | 0.045741 | 0.32397  | 0.183963 |
| -0.03628 | 0.43405  | 0.029404 | 0.52617  | 0.215064 | 2.73E-06 | 0.20327  | 9.55E-06 | 0.151878 |

|          |          |          |          |          |          |          |          |          |
|----------|----------|----------|----------|----------|----------|----------|----------|----------|
| -0.01582 | 0.73307  | -0.00907 | 0.84509  | 0.276223 | 1.27E-09 | 0.246429 | 6.87E-08 | 0.187633 |
| -0.04083 | 0.37871  | 0.063855 | 0.16832  | 0.106398 | 0.02147  | 0.108018 | 0.01955  | 0.068095 |
| -0.04232 | 0.36146  | -0.0381  | 0.41135  | 0.253344 | 2.84E-08 | 0.179945 | 9.22E-05 | 0.224622 |
| -0.04349 | 0.34834  | 0.063647 | 0.16971  | -0.04252 | 0.35921  | -0.03433 | 0.45924  | 0.005628 |
| -0.20228 | 1.06E-05 | -0.30172 | 2.77E-11 | -0.02257 | 0.62657  | -0.19432 | 2.35E-05 | -0.02613 |
| -0.12793 | 0.00563  | -0.035   | 0.45054  | 0.038303 | 0.40891  | 0.05796  | 0.21122  | -0.00844 |
| -0.11809 | 0.01065  | -0.04438 | 0.33857  | -0.08791 | 0.05765  | -0.07593 | 0.10124  | -0.03721 |
| 0.065737 | 0.1561   | -0.15524 | 0.00076  | 0.102638 | 0.02656  | -0.11579 | 0.01228  | 0.045942 |
| -0.08859 | 0.05573  | -0.1298  | 0.00496  | 0.030825 | 0.50637  | -0.01689 | 0.7159   | -0.01689 |
| -0.0972  | 0.03574  | -0.08161 | 0.07811  | -0.0203  | 0.6617   | -0.04946 | 0.28619  | -0.07112 |
| -0.0049  | 0.91581  | 0.021364 | 0.64515  | 0.059998 | 0.19558  | 0.055194 | 0.23387  | 0.038471 |
| -0.06392 | 0.1679   | 0.069836 | 0.13182  | 0.153912 | 0.00085  | 0.175634 | 0.00014  | 0.129958 |
| -0.22798 | 6.39E-07 | -0.0288  | 0.53469  | -0.10228 | 0.02709  | 0.032334 | 0.48577  | -0.13912 |
| 0.049435 | 0.28638  | -0.01448 | 0.7549   | 0.121584 | 0.00853  | 0.041592 | 0.36983  | 0.054239 |
| 0.09069  | 0.05016  | 0.039173 | 0.39834  | 0.208181 | 5.72E-06 | 0.10899  | 0.01847  | 0.140991 |
| -0.02711 | 0.55889  | -0.01778 | 0.70157  | 0.030028 | 0.51742  | 0.007934 | 0.86422  | 0.036805 |
| 0.042791 | 0.35618  | 0.080486 | 0.0823   | 0.099815 | 0.03104  | 0.029018 | 0.53161  | 0.057056 |
| -0.22691 | 7.23E-07 | -0.31862 | 1.77E-12 | -0.16152 | 0.00046  | -0.20348 | 9.34E-06 | -0.17919 |
| -0.04781 | 0.30257  | -0.09662 | 0.03685  | 0.14291  | 0.00196  | 0.045305 | 0.32861  | 0.100242 |
| -0.23161 | 4.18E-07 | -0.18971 | 3.69E-05 | -0.09701 | 0.03611  | -0.05876 | 0.20499  | -0.1812  |
| -0.12029 | 0.00927  | -0.02379 | 0.60815  | 0.061766 | 0.18271  | 0.046363 | 0.31742  | -0.01602 |
| 0.032221 | 0.4873   | 0.07611  | 0.10044  | 0.0844   | 0.06841  | 0.028226 | 0.54288  | 0.126548 |
| 0.029624 | 0.52308  | -0.25641 | 1.91E-08 | 0.013353 | 0.7735   | -0.18561 | 5.45E-05 | -0.10934 |
| 0.209602 | 4.92E-06 | 0.218305 | 1.91E-06 | 0.400615 | 1.98E-19 | 0.226435 | 7.63E-07 | 0.363288 |
| -0.14921 | 0.00122  | -0.25564 | 2.11E-08 | -0.02863 | 0.53716  | -0.16744 | 0.00028  | -0.04207 |
| 0.058107 | 0.21006  | 0.059635 | 0.1983   | -0.02466 | 0.59507  | -0.04629 | 0.31821  | 0.015049 |
| -0.22055 | 1.49E-06 | -0.31032 | 6.97E-12 | -0.11001 | 0.01739  | -0.17114 | 0.0002   | -0.10602 |
| -0.06371 | 0.1693   | -0.05244 | 0.25804  | 0.078565 | 0.08991  | 0.050129 | 0.27967  | 0.032669 |
| -0.02157 | 0.64198  | 0.007022 | 0.8797   | 0.220326 | 1.53E-06 | 0.146446 | 0.00151  | 0.177643 |
| -0.02348 | 0.61281  | 0.033899 | 0.46489  | 0.193363 | 2.59E-05 | 0.172666 | 0.00018  | 0.172221 |
| 0.179261 | 9.82E-05 | 0.220476 | 1.50E-06 | 0.299641 | 3.83E-11 | 0.308689 | 9.09E-12 | 0.19271  |
| -0.10171 | 0.02797  | -0.02941 | 0.52614  | 0.066877 | 0.14903  | 0.108744 | 0.01874  | 0.032036 |
| -0.03805 | 0.41198  | -0.01913 | 0.68011  | 0.103124 | 0.02585  | 0.065875 | 0.15523  | 0.040624 |
| 0.266288 | 5.07E-09 | 0.350218 | 6.38E-15 | 0.438432 | 2.33E-23 | 0.395523 | 6.14E-19 | 0.282208 |
| 0.016878 | 0.71601  | 0.006795 | 0.88357  | 0.099046 | 0.03236  | 0.049971 | 0.28119  | 0.027005 |
| -0.09221 | 0.04641  | -0.02341 | 0.61385  | 0.080962 | 0.0805   | 0.076626 | 0.09815  | 0.012952 |
| -0.0679  | 0.14292  | 0.076074 | 0.1006   | -0.01647 | 0.72254  | 0.014624 | 0.75261  | -0.00217 |
| -0.07413 | 0.10961  | -0.07518 | 0.10467  | 0.192208 | 2.90E-05 | 0.154844 | 0.00079  | 0.078715 |
| -0.0729  | 0.11566  | 0.238702 | 1.79E-07 | 0.053939 | 0.24468  | 0.248406 | 5.35E-08 | 0.031141 |
| 0.251528 | 3.59E-08 | 0.146448 | 0.00151  | 0.338479 | 5.56E-14 | 0.182035 | 7.61E-05 | 0.366709 |
| 0.085025 | 0.06639  | 0.239417 | 1.64E-07 | 0.239462 | 1.63E-07 | 0.399175 | 2.73E-19 | 0.136756 |
| 0.104445 | 0.024    | 0.077513 | 0.09431  | 0.227208 | 6.98E-07 | 0.127719 | 0.00571  | 0.123454 |
| 0.156261 | 0.0007   | 0.067112 | 0.1476   | 0.234383 | 3.01E-07 | 0.125371 | 0.00667  | 0.174092 |
| 0.121526 | 0.00857  | 0.151558 | 0.00102  | 0.368623 | 1.77E-16 | 0.256871 | 1.79E-08 | 0.364114 |
| 0.126623 | 0.00614  | 0.192298 | 2.87E-05 | 0.147174 | 0.00143  | 0.147792 | 0.00136  | 0.164811 |



|          |          |          |          |          |          |          |          |          |
|----------|----------|----------|----------|----------|----------|----------|----------|----------|
| -0.08944 | 0.05341  | -0.15831 | 0.0006   | -0.05716 | 0.21758  | -0.18016 | 9.04E-05 | -0.01394 |
| 0.15708  | 0.00066  | 0.212153 | 3.74E-06 | 0.298981 | 4.25E-11 | 0.13857  | 0.00269  | 0.221868 |
| 0.055895 | 0.22797  | 0.152404 | 0.00095  | 0.205468 | 7.60E-06 | 0.170416 | 0.00022  | 0.132487 |
| -0.10124 | 0.0287   | -0.03676 | 0.42805  | 0.044652 | 0.33564  | 0.019517 | 0.67399  | -0.00977 |
| 0.055766 | 0.22905  | 0.038713 | 0.40391  | 0.080735 | 0.08136  | 0.126687 | 0.00612  | -0.02135 |
| -0.10291 | 0.02616  | 0.005144 | 0.91173  | 0.178377 | 0.00011  | 0.162727 | 0.00041  | 0.135498 |
| -0.12456 | 0.00704  | -0.04027 | 0.38526  | -0.01074 | 0.81698  | 0.020123 | 0.66448  | 0.025392 |
| -0.02899 | 0.53195  | 0.131689 | 0.00436  | 0.125573 | 0.00658  | 0.114892 | 0.01298  | 0.070645 |
| -0.07141 | 0.12329  | 0.051315 | 0.26843  | 0.053799 | 0.24591  | 0.082546 | 0.07474  | -0.0183  |
| 0.031315 | 0.49963  | 0.13316  | 0.00394  | 0.205916 | 7.25E-06 | 0.181794 | 7.78E-05 | 0.162821 |
| 0.134324 | 0.00364  | 0.196257 | 1.94E-05 | 0.273004 | 2.00E-09 | 0.180165 | 9.04E-05 | 0.227482 |
| 0.073486 | 0.11275  | 0.052899 | 0.25392  | 0.145559 | 0.00161  | 0.064067 | 0.16691  | 0.067872 |
| -0.08216 | 0.07612  | -0.08751 | 0.05881  | 0.009446 | 0.83867  | -0.05537 | 0.23241  | -0.03749 |
| 0.146709 | 0.00148  | 0.286053 | 3.03E-10 | 0.258963 | 1.36E-08 | 0.268203 | 3.89E-09 | 0.18545  |
| 0.043332 | 0.35013  | 0.221223 | 1.38E-06 | 0.230362 | 4.84E-07 | 0.193891 | 2.46E-05 | 0.225441 |
| -0.1047  | 0.02365  | -0.1976  | 1.70E-05 | 0.03116  | 0.50175  | -0.0365  | 0.43133  | 0.004055 |
| -0.05622 | 0.22531  | -0.15629 | 0.0007   | -0.02777 | 0.54949  | -0.11477 | 0.01307  | -0.0311  |
| 0.263705 | 7.20E-09 | 0.22742  | 6.81E-07 | 0.19227  | 2.88E-05 | 0.164247 | 0.00037  | 0.173039 |
| -0.0265  | 0.56783  | -0.08372 | 0.07068  | -0.02166 | 0.64064  | -0.08114 | 0.07985  | 0.022838 |
| 0.139463 | 0.00252  | 0.238931 | 1.74E-07 | 0.164313 | 0.00036  | 0.23835  | 1.87E-07 | 0.101027 |
| 0.105365 | 0.02277  | 0.168485 | 0.00025  | 0.254132 | 2.56E-08 | 0.191099 | 3.22E-05 | 0.224559 |
| -0.13536 | 0.00338  | -0.10734 | 0.02033  | 0.100694 | 0.02958  | 0.140286 | 0.00238  | 0.047543 |
| -0.14786 | 0.00135  | -0.09653 | 0.03705  | 0.036301 | 0.43384  | 0.068156 | 0.14139  | -0.0249  |
| -0.0092  | 0.84279  | -0.05745 | 0.21529  | 0.279013 | 8.48E-10 | 0.1609   | 0.00048  | 0.21921  |
| -0.10163 | 0.02809  | -0.04296 | 0.35431  | -0.0843  | 0.06875  | -0.04746 | 0.3061   | -0.0129  |
| -0.01764 | 0.70374  | 0.077376 | 0.09489  | 0.183012 | 6.95E-05 | 0.159724 | 0.00053  | 0.151748 |
| -0.07355 | 0.11245  | -0.17467 | 0.00015  | 0.14491  | 0.00169  | 0.009611 | 0.83589  | 0.08849  |
| 0.119333 | 0.00985  | 0.108824 | 0.01865  | 0.248751 | 5.12E-08 | 0.076065 | 0.10064  | 0.218819 |
| -0.27403 | 1.73E-09 | -0.16089 | 0.00048  | -0.13557 | 0.00333  | -0.11061 | 0.01679  | -0.11236 |
| -0.11505 | 0.01286  | -0.07859 | 0.08982  | -0.04309 | 0.35286  | -0.11292 | 0.01463  | -0.03435 |
| 0.118267 | 0.01053  | 0.174364 | 0.00015  | 0.146466 | 0.0015   | 0.156432 | 0.00069  | 0.154239 |
| 0.029022 | 0.53157  | 0.117877 | 0.01079  | 0.186646 | 4.94E-05 | 0.139388 | 0.00254  | 0.125525 |
| -0.09308 | 0.04439  | -0.11037 | 0.01703  | 0.222945 | 1.14E-06 | 0.166529 | 0.0003   | 0.182873 |
| -0.03747 | 0.41918  | -0.15713 | 0.00066  | 0.000362 | 0.99377  | -0.18604 | 5.24E-05 | 0.041699 |
| -0.23574 | 2.56E-07 | -0.17687 | 0.00012  | -0.03066 | 0.50862  | -0.04686 | 0.31229  | -0.0645  |
| -0.22483 | 9.17E-07 | -0.08819 | 0.05685  | -0.03075 | 0.50741  | 0.048566 | 0.29495  | -0.05476 |
| -0.07548 | 0.10331  | -0.12777 | 0.00569  | 0.117152 | 0.01129  | -0.00654 | 0.88783  | 0.102935 |
| -0.01039 | 0.82289  | 0.017572 | 0.70488  | 0.158562 | 0.00058  | 0.156063 | 0.00071  | 0.066489 |
| 0.008111 | 0.86123  | 0.013662 | 0.76841  | 0.274494 | 1.62E-09 | 0.189939 | 3.61E-05 | 0.166166 |
| 0.183262 | 6.79E-05 | 0.195607 | 2.07E-05 | 0.389506 | 2.28E-18 | 0.382624 | 9.92E-18 | 0.268668 |
| 0.069216 | 0.13529  | 0.065599 | 0.15697  | 0.303279 | 2.16E-11 | 0.212179 | 3.73E-06 | 0.196041 |
| 0.014946 | 0.74734  | -0.02867 | 0.53661  | 0.192015 | 2.95E-05 | 0.118667 | 0.01027  | 0.171307 |
| 0.016188 | 0.72715  | -0.08696 | 0.06041  | 0.064971 | 0.16099  | 0.066433 | 0.15175  | 0.029728 |
| -0.13325 | 0.00392  | -0.1092  | 0.01825  | 0.092931 | 0.04473  | 0.119915 | 0.00949  | -0.03411 |
| 0.115525 | 0.01248  | 0.201927 | 1.10E-05 | 0.290143 | 1.65E-10 | 0.304337 | 1.83E-11 | 0.182984 |

|          |          |          |          |          |          |          |          |          |
|----------|----------|----------|----------|----------|----------|----------|----------|----------|
| -0.03441 | 0.45819  | 0.059306 | 0.20079  | 0.246228 | 7.05E-08 | 0.230109 | 4.98E-07 | 0.18862  |
| -0.16715 | 0.00029  | 0.012065 | 0.79483  | 0.147742 | 0.00137  | 0.230896 | 4.54E-07 | 0.108465 |
| 0.05713  | 0.21784  | 0.162952 | 0.00041  | 0.286572 | 2.81E-10 | 0.253779 | 2.69E-08 | 0.209966 |
| -0.08851 | 0.05597  | -0.02407 | 0.60389  | 0.031232 | 0.50077  | 0.002017 | 0.96532  | -0.02246 |
| -0.01848 | 0.69036  | -0.00909 | 0.84466  | 0.249341 | 4.75E-08 | 0.096435 | 0.03723  | 0.20426  |
| -0.05013 | 0.27966  | -0.04468 | 0.33529  | -0.03193 | 0.49125  | -0.10038 | 0.0301   | -0.04477 |
| -0.03554 | 0.44357  | -0.11076 | 0.01664  | 0.040039 | 0.38799  | -0.09239 | 0.04599  | 0.036082 |
| -0.05152 | 0.26654  | -0.04981 | 0.28276  | 0.034597 | 0.45575  | -0.03087 | 0.50576  | 0.079229 |
| -0.13039 | 0.00477  | -0.0751  | 0.10506  | 0.050891 | 0.27241  | 0.007885 | 0.86505  | -0.0008  |
| -0.08217 | 0.07609  | 0.006059 | 0.89611  | 0.150725 | 0.00109  | 0.133174 | 0.00394  | 0.06422  |
| 0.019398 | 0.67587  | -0.21349 | 3.24E-06 | 0.107711 | 0.0199   | -0.08109 | 0.08003  | 0.045913 |
| -0.0507  | 0.27424  | -0.14763 | 0.00138  | 0.079689 | 0.0854   | 0.085029 | 0.06637  | 0.037249 |
| -0.12988 | 0.00494  | -0.18857 | 4.12E-05 | 0.05849  | 0.20707  | -0.02025 | 0.66252  | -0.01734 |
| -0.06288 | 0.17492  | 0.02527  | 0.58596  | 0.14502  | 0.00168  | 0.102538 | 0.02671  | 0.132756 |
| -0.02812 | 0.54435  | -0.17009 | 0.00022  | 0.006412 | 0.89009  | -0.07506 | 0.10521  | -0.07352 |
| 0.153442 | 0.00088  | 0.273542 | 1.85E-09 | 0.294391 | 8.63E-11 | 0.227841 | 6.49E-07 | 0.275145 |
| 0.05311  | 0.25202  | -0.03626 | 0.43439  | 0.154255 | 0.00082  | 0.054556 | 0.23932  | 0.092104 |
| -0.00179 | 0.96916  | 0.146666 | 0.00148  | 0.238502 | 1.83E-07 | 0.265582 | 5.58E-09 | 0.126941 |
| 0.147864 | 0.00135  | 0.118056 | 0.01067  | 0.28879  | 2.02E-10 | 0.212454 | 3.62E-06 | 0.2043   |
| 0.037212 | 0.42238  | 0.011187 | 0.80947  | 0.234973 | 2.80E-07 | 0.195115 | 2.18E-05 | 0.113567 |
| -0.03556 | 0.44329  | 0.092107 | 0.04666  | -0.00823 | 0.85916  | 0.074732 | 0.10677  | -0.02568 |
| -0.12693 | 0.00602  | -0.17986 | 9.30E-05 | -0.0265  | 0.56786  | -0.16752 | 0.00028  | -0.10364 |
| 0.167057 | 0.00029  | 0.16169  | 0.00045  | 0.44436  | 5.08E-24 | 0.307488 | 1.10E-11 | 0.377298 |
| -0.12774 | 0.0057   | -0.18762 | 4.51E-05 | 0.007161 | 0.87734  | -0.10328 | 0.02563  | -0.00514 |
| 0.056827 | 0.22029  | 0.092966 | 0.04465  | 0.183144 | 6.87E-05 | 0.082679 | 0.07427  | 0.164029 |
| 0.095556 | 0.039    | 0.139345 | 0.00255  | 0.286613 | 2.79E-10 | 0.172527 | 0.00018  | 0.272745 |
| 0.081441 | 0.07872  | 0.005407 | 0.90723  | 0.342833 | 2.52E-14 | 0.289161 | 1.91E-10 | 0.214783 |
| -0.13251 | 0.00412  | -0.07019 | 0.12986  | 0.009338 | 0.8405   | 0.052282 | 0.2595   | -0.0318  |
| 0.206098 | 7.12E-06 | 0.056355 | 0.22416  | 0.217936 | 1.99E-06 | 0.132216 | 0.00421  | 0.122982 |
| 0.108744 | 0.01874  | 0.016247 | 0.7262   | 0.232148 | 3.92E-07 | 0.160344 | 0.0005   | 0.217447 |
| 0.065745 | 0.15605  | 0.066538 | 0.15111  | 0.220003 | 1.58E-06 | 0.152288 | 0.00096  | 0.165438 |
| 0.042021 | 0.36491  | 0.05684  | 0.22019  | 0.193767 | 2.49E-05 | 0.07122  | 0.12432  | 0.166836 |
| -0.05467 | 0.2383   | -0.11908 | 0.01001  | 0.258835 | 1.38E-08 | 0.159977 | 0.00052  | 0.188795 |
| -0.13395 | 0.00373  | -0.09822 | 0.03385  | 0.014518 | 0.75435  | 0.033898 | 0.46491  | -0.02238 |
| -0.11246 | 0.01504  | -0.16001 | 0.00052  | 0.143096 | 0.00194  | -0.0017  | 0.9708   | 0.081487 |
| -0.12533 | 0.00669  | -0.12978 | 0.00497  | 0.070672 | 0.12725  | 0.043931 | 0.3435   | 0.078658 |
| 0.076375 | 0.09926  | 0.162445 | 0.00042  | 0.293946 | 9.24E-11 | 0.306839 | 1.22E-11 | 0.231015 |
| 0.072325 | 0.11857  | 0.232934 | 3.57E-07 | 0.126042 | 0.00638  | 0.17307  | 0.00017  | 0.088382 |
| -0.04599 | 0.32133  | -0.07768 | 0.0936   | 0.038621 | 0.40503  | 0.014314 | 0.75769  | 0.019968 |
| 0.078234 | 0.09127  | 0.000875 | 0.98495  | 0.046411 | 0.31692  | -0.00525 | 0.90996  | 0.048202 |
| -0.09491 | 0.04035  | 0.022226 | 0.63188  | 0.181601 | 7.92E-05 | 0.192    | 2.95E-05 | 0.105066 |
| -0.04512 | 0.33059  | -0.02783 | 0.54857  | 0.084248 | 0.06891  | 0.017185 | 0.71109  | 0.033937 |
| -0.04144 | 0.37161  | 0.035332 | 0.44622  | 0.079523 | 0.08605  | 0.021156 | 0.64838  | 0.000429 |
| 0.031104 | 0.50253  | -0.09392 | 0.04248  | 0.03127  | 0.50024  | -0.07295 | 0.11541  | -0.018   |
| -0.13892 | 0.00262  | -0.06121 | 0.18665  | 0.134802 | 0.00352  | 0.164304 | 0.00036  | 0.032132 |

|          |          |          |          |          |         |          |          |          |
|----------|----------|----------|----------|----------|---------|----------|----------|----------|
| -0.19946 | 1.41E-05 | -0.22995 | 5.08E-07 | -0.05944 | 0.1998  | -0.12608 | 0.00637  | -0.07673 |
| -0.04436 | 0.33878  | -0.05081 | 0.27316  | 0.053807 | 0.24584 | -0.02178 | 0.63873  | 0.064212 |
| -0.01651 | 0.72199  | -0.04244 | 0.36018  | 0.056819 | 0.22036 | -0.01081 | 0.81574  | 0.054289 |
| -0.04415 | 0.34106  | -0.04568 | 0.32458  | 0.055229 | 0.23357 | -0.02301 | 0.61995  | 0.102314 |
| 0.014707 | 0.75125  | -0.05    | 0.28095  | -0.05348 | 0.2487  | -0.08439 | 0.06845  | -0.05468 |
| -0.02474 | 0.59387  | -0.00904 | 0.84549  | -0.00599 | 0.89723 | -0.01134 | 0.80685  | -0.02206 |
| 0.02104  | 0.65017  | 0.063164 | 0.17298  | 0.014504 | 0.75457 | 0.112599 | 0.01491  | 0.011929 |
| -0.02965 | 0.52266  | -0.03135 | 0.49913  | -0.04419 | 0.34062 | -0.02929 | 0.52779  | -0.03275 |
| -0.01766 | 0.70348  | 0.020954 | 0.65152  | 0.00472  | 0.91897 | 0.014822 | 0.74938  | 0.040962 |
| -0.04387 | 0.34421  | -0.03987 | 0.39002  | 0.024474 | 0.59781 | -0.00331 | 0.94308  | 0.020129 |
| -0.02276 | 0.62376  | 0.011335 | 0.80699  | -0.02651 | 0.56773 | 0.016981 | 0.71436  | -0.01707 |
| -0.02189 | 0.63707  | 0.005953 | 0.89791  | 0.00295  | 0.94931 | 0.086877 | 0.06066  | -0.01786 |
| 0.040249 | 0.3855   | -0.00262 | 0.95491  | 0.092668 | 0.04534 | 0.012365 | 0.78985  | 0.092248 |
| 0.004369 | 0.92498  | -0.04538 | 0.32776  | -0.04164 | 0.36932 | -0.01643 | 0.72328  | -0.07398 |
| -0.03628 | 0.43413  | -0.04636 | 0.31749  | -0.00752 | 0.87124 | -0.0197  | 0.6711   | -0.01343 |
| -0.04548 | 0.32669  | -0.06225 | 0.1793   | -0.07184 | 0.12108 | -0.06513 | 0.15999  | -0.07035 |
| 0.033795 | 0.46627  | 0.061976 | 0.18122  | 0.095702 | 0.0387  | 0.110601 | 0.0168   | 0.05528  |
| -0.06417 | 0.1662   | -0.01468 | 0.75173  | 0.050594 | 0.27522 | -0.01533 | 0.74112  | 0.086504 |
| -0.06142 | 0.18515  | 0.002525 | 0.95661  | 0.056566 | 0.22243 | 0.030295 | 0.51371  | 0.051459 |
| 0.036085 | 0.43659  | -0.04582 | 0.32309  | 0.042779 | 0.35631 | 0.007238 | 0.87603  | 0.015297 |
| -0.04973 | 0.28347  | -0.03346 | 0.47072  | -0.03523 | 0.44748 | -0.06254 | 0.17728  | -0.03284 |
| -0.15871 | 0.00058  | -0.25245 | 3.19E-08 | -0.16625 | 0.00031 | -0.23708 | 2.18E-07 | -0.15165 |
| -0.02963 | 0.52301  | -0.03215 | 0.4882   | 0.057994 | 0.21095 | 0.066146 | 0.15353  | 0.060894 |
| 0.012423 | 0.78888  | -0.05953 | 0.19912  | -0.01454 | 0.75393 | -0.0136  | 0.7694   | -0.07152 |
| 0.054159 | 0.24276  | -0.05126 | 0.26895  | -0.01604 | 0.72954 | -0.01261 | 0.78576  | -0.07786 |
| -0.04526 | 0.32904  | -0.06239 | 0.17832  | -0.01415 | 0.76044 | -0.0347  | 0.45439  | -0.0386  |
| -0.07819 | 0.09144  | -0.10417 | 0.02436  | -0.07582 | 0.10174 | -0.08132 | 0.07917  | -0.05217 |
| -0.10682 | 0.02096  | -0.21682 | 2.25E-06 | 0.018588 | 0.68867 | -0.08407 | 0.0695   | -0.02769 |
| -0.03254 | 0.48293  | -0.00243 | 0.95819  | 0.005046 | 0.9134  | -0.00861 | 0.85272  | -0.0212  |
| 0.035574 | 0.44312  | 0.070395 | 0.12875  | 0.038491 | 0.40661 | 0.020854 | 0.65307  | 0.028829 |
| -0.04829 | 0.29775  | -0.04018 | 0.38635  | -0.05303 | 0.2527  | -0.01154 | 0.80358  | -0.00297 |
| -0.04472 | 0.33485  | -0.0513  | 0.26853  | -0.06756 | 0.14494 | -0.07504 | 0.10532  | -0.0263  |
| -0.01225 | 0.79178  | -0.02921 | 0.52889  | 0.042331 | 0.36138 | -0.01562 | 0.73643  | 0.052607 |
| -0.07951 | 0.08609  | -0.06371 | 0.16926  | -0.04112 | 0.37528 | -0.02759 | 0.55206  | -0.02929 |
| -0.16947 | 0.00023  | -0.17699 | 0.00012  | -0.16861 | 0.00025 | -0.03471 | 0.45431  | -0.16145 |
| -0.03132 | 0.49959  | -0.00863 | 0.85248  | -0.04824 | 0.29819 | -0.05387 | 0.24527  | 0.002517 |
| 0.030712 | 0.50792  | 0.103145 | 0.02582  | 0.092206 | 0.04643 | 0.098073 | 0.03411  | 0.115906 |
| 0.056389 | 0.22388  | 0.035329 | 0.44626  | 0.126927 | 0.00602 | 0.092324 | 0.04615  | 0.103645 |
| -0.02738 | 0.55508  | -0.112   | 0.01546  | -0.02108 | 0.64958 | -0.0359  | 0.43893  | -0.03159 |
| -0.06746 | 0.14553  | -0.02049 | 0.6587   | -0.0499  | 0.28191 | -0.05714 | 0.21773  | -0.01863 |
| 0.01919  | 0.67915  | -0.04423 | 0.34026  | 0.03007  | 0.51684 | 0.006281 | 0.89231  | -0.00058 |
| -0.03684 | 0.42707  | -0.09072 | 0.05009  | -0.01085 | 0.81513 | -0.07464 | 0.10719  | 0.032051 |
| -0.04787 | 0.3019   | -0.01259 | 0.7861   | -0.05129 | 0.26871 | -0.05229 | 0.25939  | -0.01383 |
| -0.02392 | 0.60608  | -0.01777 | 0.70176  | 0.014379 | 0.75663 | -0.01515 | 0.74397  | 0.034723 |
| -0.05489 | 0.23648  | -0.05532 | 0.2328   | -0.00166 | 0.97151 | -0.03899 | 0.4005   | 0.066611 |

|          |          |          |          |          |          |          |          |          |
|----------|----------|----------|----------|----------|----------|----------|----------|----------|
| 0.085667 | 0.06435  | 0.000488 | 0.99161  | 0.117648 | 0.01095  | 0.068915 | 0.13701  | 0.129121 |
| -0.05355 | 0.24815  | -0.04756 | 0.30508  | 0.110281 | 0.01712  | 0.054917 | 0.23623  | 0.124925 |
| 0.009435 | 0.83885  | 0.012098 | 0.79428  | 0.044268 | 0.3398   | 0.059247 | 0.20124  | 0.059093 |
| 0.080057 | 0.08396  | 0.062238 | 0.17938  | 0.030649 | 0.50879  | 0.09227  | 0.04627  | 0.021689 |
| -0.07951 | 0.08609  | -0.16422 | 0.00037  | 0.009935 | 0.83045  | 0.035683 | 0.44172  | -0.02548 |
| -0.00048 | 0.99171  | -0.02817 | 0.54374  | -0.01253 | 0.78715  | -0.02999 | 0.51796  | -0.02902 |
| -0.03386 | 0.46546  | -0.04398 | 0.34295  | 0.079232 | 0.08721  | 0.000913 | 0.9843   | 0.096661 |
| 0.014392 | 0.75641  | -0.01326 | 0.77499  | 0.013277 | 0.77476  | -0.02134 | 0.64561  | -0.00094 |
| -0.05477 | 0.2375   | -0.05355 | 0.24807  | 0.080481 | 0.08232  | 0.023266 | 0.61602  | 0.101645 |
| -0.05305 | 0.2526   | -0.03304 | 0.47635  | -0.0369  | 0.42627  | 6.84E-05 | 0.99882  | -0.01302 |
| -0.05924 | 0.20127  | -0.08786 | 0.05779  | -0.03941 | 0.39545  | -0.08425 | 0.0689   | -0.01916 |
| 0.224656 | 9.36E-07 | 0.029416 | 0.52601  | -0.01957 | 0.67323  | -0.08484 | 0.06698  | 0.049477 |
| -0.03733 | 0.42088  | -0.0147  | 0.75134  | -0.06032 | 0.19315  | -0.07446 | 0.10804  | -0.03163 |
| -0.03008 | 0.51671  | -0.02061 | 0.6568   | 0.000586 | 0.98992  | 0.032597 | 0.48223  | -0.01996 |
| 0.002769 | 0.95242  | -0.02242 | 0.62895  | -0.01013 | 0.82714  | -0.03036 | 0.51276  | -0.04404 |
| 0.023454 | 0.61317  | 0.07246  | 0.11788  | 0.074608 | 0.10735  | 0.091006 | 0.04936  | 0.037894 |
| -0.00905 | 0.84541  | 0.082319 | 0.07554  | -0.06366 | 0.16963  | -0.04988 | 0.28209  | 0.046294 |
| -0.04306 | 0.35311  | 0.045311 | 0.32854  | -0.08676 | 0.06102  | -0.05623 | 0.22517  | 0.000874 |
| -0.07801 | 0.0922   | -0.00573 | 0.90167  | -0.1185  | 0.01038  | -0.08641 | 0.06205  | -0.04381 |
| -0.12576 | 0.0065   | -0.05413 | 0.24298  | -0.04052 | 0.38225  | 0.025781 | 0.57839  | -0.04456 |
| 0.149756 | 0.00117  | 0.125498 | 0.00662  | 0.10418  | 0.02436  | -0.04726 | 0.30818  | 0.132609 |
| 0.350139 | 6.47E-15 | 0.412082 | 1.44E-20 | 0.393209 | 1.02E-18 | 0.376956 | 3.24E-17 | 0.33145  |
| 0.219995 | 1.58E-06 | 0.163605 | 0.00039  | 0.251831 | 3.45E-08 | 0.096318 | 0.03746  | 0.181611 |
| 0.224116 | 9.95E-07 | 0.188983 | 3.95E-05 | 0.130045 | 0.00488  | -0.10213 | 0.02732  | 0.16121  |
| 0.264254 | 6.68E-09 | 0.133585 | 0.00383  | 0.256793 | 1.81E-08 | -0.02239 | 0.62931  | 0.176846 |
| 0.300714 | 3.24E-11 | 0.349305 | 7.57E-15 | 0.194101 | 2.40E-05 | 0.168078 | 0.00026  | 0.200376 |
| 0.164383 | 0.00036  | 0.20577  | 7.36E-06 | 0.209566 | 4.94E-06 | 0.079798 | 0.08497  | 0.108316 |
| 0.263263 | 7.64E-09 | 0.172544 | 0.00018  | 0.245157 | 8.06E-08 | 0.084908 | 0.06676  | 0.203828 |
| 0.15231  | 0.00096  | -0.00181 | 0.96894  | 0.115023 | 0.01287  | -0.01368 | 0.76813  | 0.043179 |
| 0.148847 | 0.00126  | 0.293797 | 9.45E-11 | 0.11042  | 0.01698  | 0.102742 | 0.02641  | 0.130838 |
| 0.398902 | 2.90E-19 | 0.382639 | 9.89E-18 | 0.449724 | 1.25E-24 | 0.238727 | 1.78E-07 | 0.316077 |
| 0.255864 | 2.05E-08 | 0.093358 | 0.04375  | 0.267631 | 4.21E-09 | 0.006447 | 0.8895   | 0.198808 |
| 0.202806 | 1.00E-05 | 0.059021 | 0.20296  | 0.147629 | 0.00138  | 0.022355 | 0.62991  | 0.017929 |
| -0.15242 | 0.00095  | -0.09893 | 0.03256  | -0.3234  | 7.87E-13 | -0.07563 | 0.10261  | -0.25552 |
| 0.24421  | 9.07E-08 | 0.514598 | 6.19E-33 | 0.27402  | 1.73E-09 | 0.388292 | 2.97E-18 | 0.145821 |
| 0.305508 | 1.52E-11 | 0.342073 | 2.89E-14 | 0.302409 | 2.48E-11 | 0.27657  | 1.20E-09 | 0.219973 |
| 0.46102  | 5.94E-26 | 0.327102 | 4.16E-13 | 0.345942 | 1.42E-14 | 0.198125 | 1.61E-05 | 0.31981  |
| 0.251541 | 3.59E-08 | 0.253785 | 2.68E-08 | 0.428909 | 2.54E-22 | 0.180059 | 9.13E-05 | 0.326806 |
| 0.194412 | 2.33E-05 | 0.186931 | 4.81E-05 | 0.267781 | 4.13E-09 | 0.146555 | 0.00149  | 0.142438 |
| 0.311268 | 5.98E-12 | 0.290919 | 1.46E-10 | 0.29513  | 7.71E-11 | 0.087053 | 0.06014  | 0.223514 |
| 0.432019 | 1.17E-22 | 0.557473 | 1.73E-39 | 0.554035 | 6.30E-39 | 0.499504 | 7.68E-31 | 0.409222 |
| 0.272448 | 2.16E-09 | 0.429426 | 2.23E-22 | 0.249492 | 4.66E-08 | 0.187386 | 4.61E-05 | 0.214737 |
| 0.172443 | 0.00018  | 0.202095 | 1.08E-05 | 0.198063 | 1.62E-05 | 0.154096 | 0.00083  | 0.123446 |
| 0.279889 | 7.47E-10 | 0.311318 | 5.93E-12 | 0.301803 | 2.73E-11 | 0.158471 | 0.00059  | 0.274914 |
| 0.163202 | 0.0004   | 0.310791 | 6.46E-12 | 0.078392 | 0.09062  | 0.064622 | 0.16326  | 0.002348 |

|          |          |          |          |          |          |          |          |          |
|----------|----------|----------|----------|----------|----------|----------|----------|----------|
| 0.413078 | 1.14E-20 | 0.475861 | 9.16E-28 | 0.381359 | 1.29E-17 | 0.32547  | 5.52E-13 | 0.239    |
| 0.428465 | 2.83E-22 | 0.560667 | 5.15E-40 | 0.603165 | 1.32E-47 | 0.417427 | 4.08E-21 | 0.550348 |
| 0.204302 | 8.58E-06 | 0.083701 | 0.07074  | 0.216511 | 2.33E-06 | -0.07269 | 0.11672  | 0.278719 |
| 0.273456 | 1.87E-09 | 0.367553 | 2.20E-16 | 0.275339 | 1.43E-09 | 0.261326 | 9.92E-09 | 0.228317 |
| 0.400127 | 2.21E-19 | 0.350785 | 5.73E-15 | 0.361458 | 7.35E-16 | 0.220713 | 1.46E-06 | 0.524198 |
| 0.007447 | 0.87248  | -0.00633 | 0.89145  | -0.02743 | 0.55425  | -0.12713 | 0.00594  | -0.03015 |
| 0.158982 | 0.00056  | 0.154597 | 0.0008   | -0.00858 | 0.85323  | -0.05486 | 0.23671  | -0.02537 |
| 0.327205 | 4.09E-13 | 0.393827 | 8.91E-19 | 0.23967  | 1.59E-07 | 0.170148 | 0.00022  | 0.241541 |
| 0.290063 | 1.67E-10 | 0.49153  | 8.91E-30 | 0.39285  | 1.10E-18 | 0.305268 | 1.58E-11 | 0.33103  |
| 0.453009 | 5.20E-25 | 0.470355 | 4.41E-27 | 0.572016 | 6.19E-42 | 0.364174 | 4.31E-16 | 0.472272 |
| 0.346491 | 1.28E-14 | 0.37287  | 7.50E-17 | 0.444788 | 4.54E-24 | 0.186187 | 5.16E-05 | 0.405373 |
| 0.12826  | 0.00551  | 0.310894 | 6.35E-12 | 0.078438 | 0.09043  | 0.051326 | 0.26833  | 0.054449 |
| 0.323996 | 7.11E-13 | 0.301349 | 2.93E-11 | 0.458528 | 1.17E-25 | 0.236505 | 2.33E-07 | 0.337836 |
| 0.237263 | 2.13E-07 | 0.138179 | 0.00277  | 0.133598 | 0.00382  | 0.020653 | 0.6562   | 0.018315 |
| 0.300716 | 3.24E-11 | 0.483346 | 1.03E-28 | 0.161297 | 0.00047  | 0.185186 | 5.67E-05 | 0.134151 |
| 0.426405 | 4.69E-22 | 0.553768 | 6.96E-39 | 0.623696 | 1.06E-51 | 0.489429 | 1.68E-29 | 0.517202 |
| 0.289838 | 1.72E-10 | 0.269519 | 3.25E-09 | 0.264384 | 6.57E-09 | 0.112351 | 0.01514  | 0.160141 |
| 0.344778 | 1.76E-14 | 0.305896 | 1.42E-11 | 0.41891  | 2.87E-21 | 0.191739 | 3.03E-05 | 0.330265 |
| 0.286438 | 2.86E-10 | 0.195948 | 2.00E-05 | 0.157338 | 0.00064  | 0.06855  | 0.1391   | -0.02128 |
| 0.442891 | 7.43E-24 | 0.367831 | 2.08E-16 | 0.421038 | 1.72E-21 | 0.251265 | 3.72E-08 | 0.28875  |
| 0.303801 | 1.99E-11 | 0.23489  | 2.83E-07 | 0.327746 | 3.72E-13 | 0.107551 | 0.02009  | 0.313697 |
| -0.13731 | 0.00295  | -0.01173 | 0.80034  | -0.22596 | 8.06E-07 | 0.005593 | 0.90406  | -0.15669 |
| 0.255327 | 2.19E-08 | 0.184763 | 5.90E-05 | 0.183535 | 6.62E-05 | 0.111658 | 0.01578  | 0.115479 |
| 0.304188 | 1.87E-11 | 0.247924 | 5.69E-08 | 0.305354 | 1.55E-11 | 0.138169 | 0.00277  | 0.258133 |
| 0.211018 | 4.23E-06 | 0.0352   | 0.44793  | 0.130266 | 0.00481  | -0.04791 | 0.30153  | 0.128205 |
| 0.116528 | 0.01173  | 0.230978 | 4.50E-07 | 0.137535 | 0.0029   | 0.188578 | 4.11E-05 | 0.025478 |
| 0.114185 | 0.01355  | 0.133791 | 0.00377  | 0.007145 | 0.87762  | 0.028951 | 0.53257  | -0.09558 |
| 0.396416 | 5.04E-19 | 0.468794 | 6.85E-27 | 0.296173 | 6.56E-11 | 0.206706 | 6.68E-06 | 0.255471 |
| 0.252215 | 3.29E-08 | 0.082264 | 0.07574  | 0.134918 | 0.00349  | -0.02354 | 0.6118   | 0.105916 |
| 0.283843 | 4.20E-10 | 0.171229 | 0.0002   | 0.341183 | 3.40E-14 | 0.126401 | 0.00623  | 0.179649 |
| 0.261585 | 9.58E-09 | 0.043456 | 0.34875  | 0.23352  | 3.33E-07 | -0.00046 | 0.99213  | 0.107537 |
| 0.142281 | 0.00205  | -0.01626 | 0.72606  | 0.099472 | 0.03162  | -0.14378 | 0.00184  | 0.071477 |
| 0.494815 | 3.27E-30 | 0.54484  | 1.85E-37 | 0.58381  | 5.20E-44 | 0.391142 | 1.60E-18 | 0.538503 |
| 0.128243 | 0.00551  | -0.03837 | 0.40806  | -0.03404 | 0.46305  | -0.09119 | 0.04891  | -0.19506 |
| 0.312611 | 4.80E-12 | 0.206007 | 7.18E-06 | 0.251444 | 3.63E-08 | 0.162918 | 0.00041  | 0.03886  |
| 0.126012 | 0.0064   | 0.092098 | 0.04668  | 0.037752 | 0.41568  | -0.02962 | 0.52314  | -0.08313 |
| 0.246897 | 6.48E-08 | 0.22723  | 6.96E-07 | 0.217283 | 2.14E-06 | 0.145507 | 0.00162  | 0.143062 |
| 0.089744 | 0.05261  | 0.174234 | 0.00015  | 0.154847 | 0.00079  | 0.027448 | 0.55406  | 0.068874 |
| 0.222694 | 1.17E-06 | 0.44242  | 8.39E-24 | 0.166561 | 0.0003   | 0.155951 | 0.00072  | 0.143437 |
| 0.298279 | 4.74E-11 | 0.263242 | 7.67E-09 | 0.344694 | 1.79E-14 | 0.097844 | 0.03453  | 0.312594 |
| 0.36307  | 5.36E-16 | 0.15584  | 0.00073  | 0.358829 | 1.23E-15 | -0.01345 | 0.77187  | 0.375359 |
| 0.266114 | 5.19E-09 | 0.219218 | 1.73E-06 | 0.161316 | 0.00047  | 0.074369 | 0.10849  | 0.080691 |
| 0.113933 | 0.01376  | 0.160482 | 0.0005   | 0.103374 | 0.02549  | -0.0229  | 0.62161  | -0.00165 |
| 0.164787 | 0.00035  | 0.011153 | 0.81003  | 0.298991 | 4.24E-11 | 0.026758 | 0.56408  | 0.204588 |
| 0.330505 | 2.30E-13 | 0.401319 | 1.69E-19 | 0.477897 | 5.08E-28 | 0.357847 | 1.49E-15 | 0.326811 |

|          |          |          |          |          |          |          |          |          |
|----------|----------|----------|----------|----------|----------|----------|----------|----------|
| 0.240434 | 1.45E-07 | 0.183825 | 6.44E-05 | 0.203789 | 9.05E-06 | 0.077039 | 0.09635  | 0.136491 |
| 0.125624 | 0.00656  | 0.15952  | 0.00054  | 0.114275 | 0.01347  | 0.041904 | 0.36624  | 0.069148 |
| 0.637754 | 1.10E-54 | 0.416403 | 5.20E-21 | 0.357582 | 1.56E-15 | 0.236033 | 2.47E-07 | 0.291518 |
| 0.233291 | 3.42E-07 | 0.332756 | 1.55E-13 | 0.303637 | 2.04E-11 | 0.300756 | 3.22E-11 | 0.221501 |
| 0.249783 | 4.49E-08 | 0.301587 | 2.82E-11 | 0.224078 | 1.00E-06 | 0.152353 | 0.00096  | 0.14666  |
| 0.249124 | 4.89E-08 | 0.26816  | 3.92E-09 | 0.205232 | 7.79E-06 | 0.115041 | 0.01286  | 0.099686 |
| 0.340004 | 4.22E-14 | 0.267813 | 4.11E-09 | 0.357519 | 1.58E-15 | 0.284903 | 3.59E-10 | 0.214548 |
| 0.314666 | 3.42E-12 | 0.127694 | 0.00572  | 0.436533 | 3.77E-23 | 0.14444  | 0.00175  | 0.332388 |
| 0.170209 | 0.00022  | 0.223779 | 1.03E-06 | 0.186986 | 4.78E-05 | 0.019388 | 0.67602  | 0.225233 |
| 0.202467 | 1.04E-05 | 0.246494 | 6.82E-08 | 0.337852 | 6.23E-14 | 0.209597 | 4.92E-06 | 0.213369 |
| 0.617944 | 1.60E-50 | 0.421262 | 1.63E-21 | 0.335655 | 9.24E-14 | 0.221826 | 1.29E-06 | 0.235497 |
| 0.22705  | 7.11E-07 | 0.228889 | 5.74E-07 | 0.087689 | 0.05828  | 0.020331 | 0.66122  | 0.067404 |
| 0.480029 | 2.73E-28 | 0.579196 | 3.45E-43 | 0.531239 | 2.29E-35 | 0.359149 | 1.15E-15 | 0.502992 |
| 0.0441   | 0.34165  | 0.014541 | 0.75397  | -0.02954 | 0.52427  | -0.04723 | 0.30848  | -0.16436 |
| 0.3943   | 8.04E-19 | 0.439483 | 1.78E-23 | 0.464636 | 2.19E-26 | 0.322903 | 8.57E-13 | 0.386877 |
| 0.298334 | 4.70E-11 | 0.32812  | 3.49E-13 | 0.370617 | 1.19E-16 | 0.250755 | 3.97E-08 | 0.231284 |
| 0.285401 | 3.34E-10 | 0.331939 | 1.79E-13 | 0.262899 | 8.03E-09 | 0.315468 | 2.99E-12 | 0.056653 |
| 0.056666 | 0.22161  | 0.062778 | 0.17563  | 0.109278 | 0.01816  | -0.02555 | 0.58184  | 0.071302 |
| 0.427637 | 3.47E-22 | 0.576415 | 1.07E-42 | 0.505215 | 1.27E-31 | 0.486279 | 4.32E-29 | 0.403304 |
| 0.272356 | 2.19E-09 | 0.196285 | 1.94E-05 | 0.325646 | 5.35E-13 | 0.124151 | 0.00723  | 0.191067 |
| 0.323828 | 7.31E-13 | 0.376165 | 3.82E-17 | 0.460306 | 7.23E-26 | 0.326451 | 4.66E-13 | 0.426888 |
| 0.37176  | 9.41E-17 | 0.377639 | 2.81E-17 | 0.362369 | 6.15E-16 | 0.264743 | 6.26E-09 | 0.2707   |
| 0.344709 | 1.78E-14 | 0.228252 | 6.19E-07 | 0.518672 | 1.62E-33 | 0.216946 | 2.22E-06 | 0.379084 |
| 0.164829 | 0.00035  | 0.245591 | 7.63E-08 | 0.187383 | 4.61E-05 | 0.154856 | 0.00079  | 0.18812  |
| 0.469918 | 4.99E-27 | 0.581089 | 1.59E-43 | 0.621609 | 2.86E-51 | 0.459011 | 1.03E-25 | 0.508412 |
| 0.293281 | 1.02E-10 | 0.455508 | 2.66E-25 | 0.346739 | 1.22E-14 | 0.333053 | 1.47E-13 | 0.253436 |
| 0.334851 | 1.07E-13 | 0.500589 | 5.47E-31 | 0.399285 | 2.66E-19 | 0.379839 | 1.78E-17 | 0.326672 |
| 0.100745 | 0.02949  | 0.107067 | 0.02066  | 0.153873 | 0.00085  | -0.0545  | 0.23977  | 0.146197 |
| 0.435045 | 5.50E-23 | 0.498487 | 1.05E-30 | 0.570594 | 1.09E-41 | 0.38742  | 3.58E-18 | 0.42858  |
| 0.21478  | 2.82E-06 | 0.216522 | 2.33E-06 | 0.207919 | 5.88E-06 | 0.130118 | 0.00486  | 0.16987  |
| 0.388113 | 3.08E-18 | 0.420976 | 1.75E-21 | 0.290062 | 1.67E-10 | 0.171996 | 0.00019  | 0.22808  |
| -0.0242  | 0.60193  | 0.080847 | 0.08093  | 0.103623 | 0.02513  | 0.002773 | 0.95234  | 0.03622  |
| 0.467769 | 9.14E-27 | 0.611247 | 3.50E-49 | 0.605909 | 3.89E-48 | 0.539452 | 1.28E-36 | 0.472775 |
| 0.215971 | 2.47E-06 | 0.160498 | 0.0005   | 0.098342 | 0.03362  | -0.07162 | 0.12223  | 0.016974 |
| 0.083195 | 0.07247  | -0.01377 | 0.7666   | 0.125862 | 0.00646  | 0.006062 | 0.89605  | 0.023925 |
| -0.05442 | 0.24046  | -0.17119 | 0.0002   | -0.05054 | 0.27576  | -0.17465 | 0.00015  | -0.14159 |
| 0.225204 | 8.79E-07 | 0.066359 | 0.15221  | 0.230789 | 4.60E-07 | -0.00897 | 0.84671  | 0.241395 |
| 0.118059 | 0.01067  | 0.159786 | 0.00053  | -0.08567 | 0.06433  | -0.1555  | 0.00075  | -0.05778 |
| 0.512278 | 1.32E-32 | 0.61974  | 6.90E-51 | 0.627075 | 2.11E-52 | 0.557041 | 2.04E-39 | 0.442055 |
| 0.308651 | 9.15E-12 | 0.403357 | 1.07E-19 | 0.411575 | 1.62E-20 | 0.416885 | 4.64E-21 | 0.237349 |
| 0.317797 | 2.03E-12 | 0.25402  | 2.60E-08 | 0.49929  | 8.20E-31 | 0.280547 | 6.80E-10 | 0.364338 |
| 0.245312 | 7.91E-08 | 0.288058 | 2.25E-10 | 0.228035 | 6.34E-07 | 0.092245 | 0.04633  | 0.193048 |
| 0.267119 | 4.52E-09 | 0.460433 | 6.98E-26 | 0.206066 | 7.14E-06 | 0.284374 | 3.89E-10 | 0.151425 |
| 0.107216 | 0.02048  | 0.109104 | 0.01835  | -0.0453  | 0.32866  | -0.08692 | 0.06054  | -0.05533 |
| -0.31552 | 2.97E-12 | -0.32919 | 2.89E-13 | -0.35675 | 1.84E-15 | -0.24398 | 9.34E-08 | -0.24767 |

|          |          |          |          |          |          |          |          |          |
|----------|----------|----------|----------|----------|----------|----------|----------|----------|
| -0.06805 | 0.14201  | -0.17435 | 0.00015  | 0.03734  | 0.42079  | 0.061134 | 0.18723  | 0.059907 |
| -0.30969 | 7.73E-12 | -0.28793 | 2.29E-10 | -0.27254 | 2.13E-09 | -0.14143 | 0.00219  | -0.18895 |
| -0.3137  | 4.01E-12 | -0.20612 | 7.10E-06 | -0.45545 | 2.70E-25 | -0.2797  | 7.69E-10 | -0.30882 |
| -0.22232 | 1.22E-06 | -0.11345 | 0.01416  | -0.26775 | 4.14E-09 | -0.07346 | 0.11289  | -0.15194 |
| -0.29851 | 4.57E-11 | -0.34262 | 2.62E-14 | -0.30083 | 3.18E-11 | -0.18562 | 5.45E-05 | -0.19854 |
| -0.25708 | 1.74E-08 | -0.29685 | 5.91E-11 | -0.28659 | 2.80E-10 | -0.19028 | 3.49E-05 | -0.17884 |
| -0.18873 | 4.05E-05 | -0.14455 | 0.00174  | -0.24557 | 7.65E-08 | -0.09325 | 0.044    | -0.11409 |
| -0.21185 | 3.87E-06 | -0.04587 | 0.32257  | -0.26923 | 3.38E-09 | -0.00525 | 0.90998  | -0.1491  |
| -0.29054 | 1.55E-10 | -0.33139 | 1.97E-13 | -0.28364 | 4.32E-10 | -0.20132 | 1.17E-05 | -0.19615 |
| -0.28104 | 6.33E-10 | -0.52623 | 1.28E-34 | -0.22773 | 6.57E-07 | -0.30238 | 2.49E-11 | -0.17939 |
| -0.34711 | 1.14E-14 | -0.45761 | 1.51E-25 | -0.27391 | 1.76E-09 | -0.23814 | 1.91E-07 | -0.18211 |
| -0.32634 | 4.75E-13 | -0.25543 | 2.17E-08 | -0.28709 | 2.60E-10 | -0.11172 | 0.01572  | -0.19249 |
| 0.053761 | 0.24625  | -0.00451 | 0.92262  | 0.087196 | 0.05972  | -0.12869 | 0.00535  | 0.170323 |
| 0.316667 | 2.45E-12 | 0.405378 | 6.74E-20 | 0.33453  | 1.13E-13 | 0.315104 | 3.18E-12 | 0.239072 |
| 0.160895 | 0.00048  | 0.035847 | 0.43962  | 0.214938 | 2.77E-06 | -0.01674 | 0.71824  | 0.146932 |
| 0.376533 | 3.54E-17 | 0.526946 | 9.99E-35 | 0.531621 | 2.00E-35 | 0.419471 | 2.51E-21 | 0.449182 |
| 0.366117 | 2.93E-16 | 0.588946 | 6.10E-45 | 0.232652 | 3.69E-07 | 0.314292 | 3.64E-12 | 0.213089 |
| 0.023684 | 0.6097   | 0.028625 | 0.53719  | 0.121571 | 0.00854  | 0.097156 | 0.03583  | -0.04454 |
| 0.092725 | 0.0452   | 0.236186 | 2.42E-07 | 0.062699 | 0.17617  | -0.04579 | 0.32343  | 0.117536 |
| 0.456308 | 2.14E-25 | 0.446375 | 3.00E-24 | 0.638424 | 7.89E-55 | 0.415695 | 6.15E-21 | 0.520473 |
| 0.394072 | 8.45E-19 | 0.334744 | 1.09E-13 | 0.484894 | 6.52E-29 | 0.317436 | 2.16E-12 | 0.364381 |
| 0.146803 | 0.00147  | 0.338291 | 5.75E-14 | 0.103001 | 0.02603  | 0.104607 | 0.02378  | -0.00587 |
| 0.450626 | 9.81E-25 | 0.664424 | 8.60E-61 | 0.568866 | 2.15E-41 | 0.542563 | 4.21E-37 | 0.422459 |
| 0.235085 | 2.76E-07 | 0.068451 | 0.13968  | 0.165819 | 0.00032  | 0.000715 | 0.9877   | 0.123323 |
| 0.30876  | 8.99E-12 | 0.159744 | 0.00053  | 0.276626 | 1.19E-09 | 0.179626 | 9.50E-05 | 0.10782  |
| 0.22534  | 8.65E-07 | 0.131273 | 0.00449  | 0.258218 | 1.50E-08 | 0.030016 | 0.51759  | 0.241081 |
| 0.224531 | 9.49E-07 | 0.178544 | 0.0001   | 0.283181 | 4.63E-10 | 0.032379 | 0.48516  | 0.256325 |
| 0.254651 | 2.40E-08 | 0.13094  | 0.00459  | 0.172071 | 0.00019  | -0.05286 | 0.25426  | 0.103543 |
| 0.40063  | 1.97E-19 | 0.279323 | 8.11E-10 | 0.547004 | 8.44E-38 | 0.250015 | 4.36E-08 | 0.435659 |
| 0.185034 | 5.75E-05 | -0.06962 | 0.13303  | 0.163855 | 0.00038  | -0.12258 | 0.00801  | 0.098945 |
| 0.078238 | 0.09126  | 0.195973 | 2.00E-05 | 0.003804 | 0.93466  | -0.05455 | 0.23935  | -0.01144 |
| 0.076276 | 0.0997   | -0.09871 | 0.03295  | 0.159427 | 0.00054  | -0.07493 | 0.10584  | 0.124115 |
| 0.298669 | 4.46E-11 | 0.270001 | 3.04E-09 | 0.557895 | 1.48E-39 | 0.31546  | 3.00E-12 | 0.375163 |
| 0.37065  | 1.18E-16 | 0.307343 | 1.13E-11 | 0.533964 | 8.87E-36 | 0.249177 | 4.85E-08 | 0.402426 |
| 0.210642 | 4.40E-06 | 0.084625 | 0.06768  | 0.252858 | 3.03E-08 | 0.039251 | 0.39741  | 0.130114 |
| 0.067065 | 0.14789  | 0.165591 | 0.00033  | -0.0581  | 0.21014  | -0.148   | 0.00134  | -0.04658 |
| 0.337188 | 7.02E-14 | 0.298405 | 4.65E-11 | 0.226455 | 7.61E-07 | 0.206895 | 6.55E-06 | 0.054399 |
| 0.321673 | 1.06E-12 | -0.01048 | 0.82128  | 0.301521 | 2.85E-11 | -0.00096 | 0.98343  | 0.134443 |
| 0.205267 | 7.76E-06 | -0.04514 | 0.33036  | -0.04473 | 0.33477  | -0.17913 | 9.93E-05 | -0.03531 |
| 0.505053 | 1.34E-31 | 0.584587 | 3.77E-44 | 0.673978 | 3.89E-63 | 0.466335 | 1.37E-26 | 0.617965 |
| 0.224934 | 9.07E-07 | 0.08162  | 0.07806  | 0.285715 | 3.19E-10 | 0.022917 | 0.62132  | 0.274806 |
| 0.475194 | 1.11E-27 | 0.581522 | 1.33E-43 | 0.593513 | 8.79E-46 | 0.417275 | 4.23E-21 | 0.506495 |
| 0.292368 | 1.18E-10 | 0.216923 | 2.23E-06 | 0.360767 | 8.42E-16 | 0.132185 | 0.00422  | 0.274346 |
| 0.087438 | 0.05901  | 0.00582  | 0.90018  | 0.160567 | 0.0005   | -0.06361 | 0.16998  | 0.198364 |
| 0.348    | 9.67E-15 | 0.348647 | 8.57E-15 | 0.173709 | 0.00016  | 0.168989 | 0.00024  | 0.126627 |

|          |          |          |          |          |          |          |          |          |
|----------|----------|----------|----------|----------|----------|----------|----------|----------|
| 0.429036 | 2.46E-22 | 0.376665 | 3.44E-17 | 0.470848 | 3.84E-27 | 0.418086 | 3.49E-21 | 0.313291 |
| 0.28763  | 2.40E-10 | 0.322021 | 9.96E-13 | 0.087504 | 0.05882  | 0.028877 | 0.53362  | 0.054841 |
| 0.339364 | 4.74E-14 | 0.371395 | 1.01E-16 | 0.470608 | 4.11E-27 | 0.200824 | 1.23E-05 | 0.404822 |
| 0.166439 | 0.0003   | 0.161887 | 0.00044  | 0.144533 | 0.00174  | -0.02308 | 0.61886  | 0.045268 |
| 0.32941  | 2.79E-13 | 0.394266 | 8.09E-19 | 0.371514 | 9.89E-17 | 0.274895 | 1.53E-09 | 0.271716 |
| 0.172178 | 0.00018  | 0.43973  | 1.67E-23 | 0.138505 | 0.0027   | 0.208227 | 5.69E-06 | 0.081984 |
| 0.155273 | 0.00076  | 0.199786 | 1.36E-05 | 0.013213 | 0.77581  | 0.02981  | 0.52047  | -0.07463 |
| 0.387213 | 3.74E-18 | 0.464307 | 2.40E-26 | 0.452127 | 6.58E-25 | 0.271417 | 2.49E-09 | 0.343354 |
| 0.311507 | 5.75E-12 | 0.155601 | 0.00074  | 0.375434 | 4.44E-17 | 0.176254 | 0.00013  | 0.223978 |
| 0.024328 | 0.59999  | -0.09683 | 0.03646  | 0.035162 | 0.44842  | -0.22147 | 1.34E-06 | 0.037227 |
| 0.159318 | 0.00055  | 0.097332 | 0.03549  | 0.251065 | 3.81E-08 | 0.008323 | 0.85763  | 0.196218 |
| 0.333541 | 1.35E-13 | 0.384853 | 6.19E-18 | 0.43364  | 7.82E-23 | 0.275429 | 1.42E-09 | 0.419382 |
| 0.347542 | 1.05E-14 | 0.229673 | 5.24E-07 | 0.257257 | 1.70E-08 | 0.006782 | 0.88379  | 0.231402 |
| 0.173683 | 0.00016  | 0.204769 | 8.17E-06 | 0.359473 | 1.08E-15 | 0.293128 | 1.05E-10 | 0.186325 |
| 0.149654 | 0.00118  | 0.122088 | 0.00826  | 0.008316 | 0.85776  | -0.13058 | 0.00471  | -0.00794 |
| 0.133829 | 0.00376  | 0.038424 | 0.40743  | 0.206145 | 7.08E-06 | 0.002567 | 0.95588  | 0.081136 |
| 0.298868 | 4.32E-11 | 0.328359 | 3.35E-13 | 0.381163 | 1.35E-17 | 0.178977 | 0.0001   | 0.31376  |
| 0.320051 | 1.39E-12 | 0.414362 | 8.42E-21 | 0.40217  | 1.39E-19 | 0.382166 | 1.09E-17 | 0.221009 |
| 0.024474 | 0.59782  | 0.173327 | 0.00017  | 0.096452 | 0.03719  | 0.060722 | 0.19023  | 0.002043 |
| 0.014171 | 0.76004  | -0.05577 | 0.22903  | 0.008945 | 0.84712  | -0.19622 | 1.95E-05 | 0.021463 |
| 0.345011 | 1.69E-14 | 0.54983  | 3.00E-38 | 0.378415 | 2.40E-17 | 0.354557 | 2.80E-15 | 0.314843 |
| 0.416328 | 5.30E-21 | 0.577993 | 5.63E-43 | 0.350127 | 6.49E-15 | 0.372646 | 7.86E-17 | 0.275794 |
| 0.336648 | 7.73E-14 | 0.512953 | 1.06E-32 | 0.396207 | 5.28E-19 | 0.338363 | 5.68E-14 | 0.326344 |
| 0.312975 | 4.52E-12 | 0.453937 | 4.06E-25 | 0.426331 | 4.78E-22 | 0.349779 | 6.93E-15 | 0.320707 |
| 0.329284 | 2.85E-13 | 0.459754 | 8.41E-26 | 0.422698 | 1.16E-21 | 0.394832 | 7.15E-19 | 0.277739 |
| 0.236414 | 2.36E-07 | 0.152303 | 0.00096  | 0.243651 | 9.72E-08 | 0.189548 | 3.75E-05 | 0.068241 |
| 0.264659 | 6.33E-09 | 0.208898 | 5.30E-06 | 0.285221 | 3.43E-10 | 0.01723  | 0.71036  | 0.204553 |
| 0.19013  | 3.54E-05 | -0.0182  | 0.69481  | 0.198072 | 1.62E-05 | -0.01763 | 0.70402  | 0.133868 |
| 0.374125 | 5.81E-17 | 0.313325 | 4.27E-12 | 0.229326 | 5.46E-07 | 0.126655 | 0.00613  | 0.149585 |
| 0.263351 | 7.55E-09 | 0.210454 | 4.49E-06 | 0.126323 | 0.00627  | -0.01995 | 0.66724  | 0.074382 |
| 0.141829 | 0.00212  | 0.005881 | 0.89914  | 0.219307 | 1.71E-06 | 0.004905 | 0.91581  | 0.157946 |
| 0.254886 | 2.33E-08 | 0.130098 | 0.00486  | 0.262712 | 8.23E-09 | 0.106328 | 0.02155  | 0.184783 |
| 0.109954 | 0.01746  | 0.131408 | 0.00445  | 0.077679 | 0.0936   | 0.027918 | 0.54729  | 0.004859 |
| 0.354851 | 2.64E-15 | 0.284257 | 3.95E-10 | 0.222549 | 1.19E-06 | 0.098731 | 0.03292  | 0.131433 |
| 0.11574  | 0.01232  | 0.282908 | 4.82E-10 | 0.050358 | 0.27747  | -0.02988 | 0.5195   | 0.065723 |
| 0.410836 | 1.92E-20 | 0.450231 | 1.09E-24 | 0.573551 | 3.36E-42 | 0.363023 | 5.41E-16 | 0.418571 |
| 0.092764 | 0.04511  | -0.12937 | 0.00511  | 0.081506 | 0.07848  | -0.16168 | 0.00045  | 0.13878  |
| 0.163001 | 0.00041  | 0.138786 | 0.00265  | 0.099801 | 0.03106  | 0.148503 | 0.00129  | 0.103986 |
| 0.339266 | 4.82E-14 | 0.326614 | 4.53E-13 | 0.418836 | 2.92E-21 | 0.325946 | 5.08E-13 | 0.208077 |
| 0.348065 | 9.55E-15 | 0.250204 | 4.26E-08 | 0.380956 | 1.41E-17 | 0.161695 | 0.00045  | 0.257478 |
| 0.292375 | 1.17E-10 | 0.313287 | 4.29E-12 | 0.4368   | 3.53E-23 | 0.237805 | 1.99E-07 | 0.314606 |
| 0.354173 | 3.01E-15 | 0.413331 | 1.07E-20 | 0.50305  | 2.53E-31 | 0.268124 | 3.94E-09 | 0.502887 |
| 0.319621 | 1.49E-12 | 0.310491 | 6.78E-12 | 0.262994 | 7.93E-09 | 0.220886 | 1.43E-06 | 0.239618 |
| 0.252933 | 3.00E-08 | 0.41157  | 1.62E-20 | 0.124009 | 0.0073   | 0.1105   | 0.0169   | 0.057314 |
| 0.124019 | 0.00729  | -0.10771 | 0.0199   | 0.245987 | 7.26E-08 | 0.028721 | 0.53583  | 0.015446 |



|          |          |          |          |          |          |          |          |          |
|----------|----------|----------|----------|----------|----------|----------|----------|----------|
| 0.235354 | 2.68E-07 | 0.20985  | 4.79E-06 | 0.293351 | 1.01E-10 | 0.180607 | 8.68E-05 | 0.15123  |
| 0.038879 | 0.4019   | -0.01579 | 0.7336   | 0.051602 | 0.26576  | -0.00421 | 0.92774  | -0.08495 |
| 0.101623 | 0.0281   | 0.122926 | 0.00783  | 0.119919 | 0.00949  | 0.046522 | 0.31576  | 0.08387  |
| 0.322366 | 9.39E-13 | 0.497861 | 1.28E-30 | 0.219838 | 1.61E-06 | 0.270137 | 2.98E-09 | 0.183871 |
| 0.353702 | 3.29E-15 | 0.538226 | 1.98E-36 | 0.493294 | 5.21E-30 | 0.435895 | 4.44E-23 | 0.38934  |
| 0.070908 | 0.12598  | 0.057927 | 0.21148  | -0.0093  | 0.84113  | -0.08608 | 0.06308  | -0.07125 |
| 0.297688 | 5.19E-11 | 0.275439 | 1.41E-09 | 0.378525 | 2.34E-17 | 0.236768 | 2.26E-07 | 0.278216 |
| 0.305114 | 1.61E-11 | 0.151822 | 0.001    | 0.437717 | 2.80E-23 | 0.118908 | 0.01012  | 0.332904 |
| 0.212173 | 3.74E-06 | 0.213441 | 3.26E-06 | 0.331249 | 2.02E-13 | 0.192801 | 2.73E-05 | 0.238401 |
| 0.236649 | 2.29E-07 | 0.249559 | 4.62E-08 | 0.150924 | 0.00107  | 0.167372 | 0.00028  | 0.055582 |
| 0.24373  | 9.63E-08 | 0.442628 | 7.95E-24 | 0.258387 | 1.47E-08 | 0.195813 | 2.03E-05 | 0.252026 |
| 0.174826 | 0.00015  | 0.108979 | 0.01848  | 0.002199 | 0.9622   | -0.18676 | 4.89E-05 | -0.03202 |
| 0.159244 | 0.00055  | 0.02985  | 0.51991  | 0.181705 | 7.85E-05 | -0.03166 | 0.49494  | 0.043804 |
| 0.255976 | 2.02E-08 | 0.36853  | 1.81E-16 | 0.272273 | 2.21E-09 | 0.207384 | 6.22E-06 | 0.232091 |
| 0.229565 | 5.31E-07 | 0.228519 | 6.00E-07 | 0.365294 | 3.45E-16 | 0.273138 | 1.96E-09 | 0.219321 |
| 0.332078 | 1.74E-13 | 0.5078   | 5.59E-32 | 0.359301 | 1.12E-15 | 0.358798 | 1.24E-15 | 0.234164 |
| 0.206919 | 6.53E-06 | 0.106247 | 0.02165  | 0.287067 | 2.61E-10 | 0.120568 | 0.00911  | 0.147693 |
| 0.138058 | 0.00279  | -0.04816 | 0.29899  | 0.103497 | 0.02531  | -0.10601 | 0.02196  | 0.079176 |
| 0.365004 | 3.65E-16 | 0.553582 | 7.46E-39 | 0.442372 | 8.49E-24 | 0.502443 | 3.06E-31 | 0.317261 |
| 0.221371 | 1.36E-06 | 0.35837  | 1.34E-15 | 0.107285 | 0.0204   | 0.133084 | 0.00396  | 0.049632 |
| 0.042269 | 0.36209  | 0.138282 | 0.00275  | 0.036787 | 0.42771  | -0.02933 | 0.52717  | 0.090241 |
| -0.00034 | 0.99415  | 0.194534 | 2.30E-05 | -0.07381 | 0.11118  | -0.04539 | 0.32768  | 0.019071 |
| -0.12645 | 0.00621  | -0.05483 | 0.23699  | -0.23566 | 2.58E-07 | -0.09754 | 0.03509  | -0.1773  |
| 0.216986 | 2.21E-06 | 0.178322 | 0.00011  | 0.251902 | 3.42E-08 | 0.116642 | 0.01165  | 0.223074 |
| 0.272925 | 2.02E-09 | 0.267928 | 4.05E-09 | 0.374012 | 5.94E-17 | 0.227559 | 6.70E-07 | 0.339893 |
| 0.238774 | 1.77E-07 | 0.165135 | 0.00034  | 0.474709 | 1.28E-27 | 0.314214 | 3.68E-12 | 0.391603 |
| 0.08469  | 0.06747  | 0.125365 | 0.00668  | 0.277101 | 1.12E-09 | 0.225326 | 8.67E-07 | 0.252298 |
| 0.316333 | 2.59E-12 | 0.280643 | 6.70E-10 | 0.37056  | 1.20E-16 | 0.239216 | 1.68E-07 | 0.35619  |
| 0.374258 | 5.65E-17 | 0.300635 | 3.28E-11 | 0.614155 | 9.26E-50 | 0.374583 | 5.29E-17 | 0.553224 |
| 0.055551 | 0.23085  | 0.196621 | 1.87E-05 | 0.154885 | 0.00078  | 0.101334 | 0.02855  | 0.120071 |
| 0.071086 | 0.12503  | 0.084235 | 0.06896  | 0.068278 | 0.14068  | 0.07433  | 0.10867  | 0.095136 |
| 0.094151 | 0.04198  | -0.10258 | 0.02665  | 0.022044 | 0.63468  | -0.24909 | 4.91E-08 | 0.098721 |
| 0.107524 | 0.02012  | 0.263764 | 7.14E-09 | 0.2215   | 1.34E-06 | 0.187092 | 4.74E-05 | 0.27379  |
| 0.174162 | 0.00016  | 0.166059 | 0.00031  | 0.206351 | 6.93E-06 | 0.126772 | 0.00608  | 0.192044 |
| 0.052395 | 0.25848  | 0.123243 | 0.00767  | -0.14002 | 0.00242  | -0.0557  | 0.22959  | -0.12065 |
| 0.149505 | 0.00119  | 0.120113 | 0.00937  | 0.225103 | 8.89E-07 | 0.277941 | 9.90E-10 | 0.140783 |
| -0.07371 | 0.11168  | 0.044416 | 0.33819  | -0.1763  | 0.00013  | -0.1653  | 0.00033  | -0.10542 |
| 0.217488 | 2.09E-06 | 0.305922 | 1.42E-11 | 0.221363 | 1.36E-06 | 0.189404 | 3.80E-05 | 0.212211 |
| 0.154808 | 0.00079  | 0.253736 | 2.70E-08 | 0.212297 | 3.69E-06 | 0.158202 | 0.0006   | 0.211893 |
| 0.096114 | 0.03787  | 0.152411 | 0.00095  | -0.11764 | 0.01095  | -0.10113 | 0.02887  | -0.03607 |
| 0.28421  | 3.98E-10 | 0.229003 | 5.67E-07 | 0.375896 | 4.04E-17 | 0.245631 | 7.60E-08 | 0.313547 |
| 0.179313 | 9.77E-05 | 0.30333  | 2.14E-11 | 0.241319 | 1.30E-07 | 0.188334 | 4.21E-05 | 0.25001  |
| 0.130874 | 0.00461  | 0.220289 | 1.53E-06 | 0.308864 | 8.84E-12 | 0.229308 | 5.47E-07 | 0.274858 |
| 0.119344 | 0.00984  | 0.217468 | 2.10E-06 | 0.225426 | 8.57E-07 | 0.157962 | 0.00061  | 0.185286 |
| 0.205718 | 7.40E-06 | 0.348105 | 9.48E-15 | 0.465649 | 1.65E-26 | 0.449193 | 1.43E-24 | 0.369084 |

|          |          |          |          |          |          |          |          |          |
|----------|----------|----------|----------|----------|----------|----------|----------|----------|
| 0.097624 | 0.03494  | 0.186342 | 5.09E-05 | 0.119666 | 0.00964  | 0.085373 | 0.06528  | 0.135941 |
| 0.031536 | 0.4966   | 0.071987 | 0.1203   | -0.24548 | 7.74E-08 | -0.19952 | 1.40E-05 | -0.1774  |
| 0.15716  | 0.00065  | 0.13207  | 0.00425  | 0.106111 | 0.02182  | 0.048194 | 0.29867  | 0.180458 |
| -0.01947 | 0.67479  | 0.165753 | 0.00032  | -0.25568 | 2.09E-08 | -0.21173 | 3.92E-06 | -0.17074 |
| 0.220115 | 1.56E-06 | 0.198825 | 1.50E-05 | 0.167723 | 0.00027  | 0.009798 | 0.83276  | 0.204007 |
| 0.235466 | 2.64E-07 | 0.21583  | 2.51E-06 | 0.370872 | 1.13E-16 | 0.189553 | 3.74E-05 | 0.267899 |
| -0.0512  | 0.26954  | -0.035   | 0.45055  | -0.20843 | 5.57E-06 | -0.26108 | 1.03E-08 | -0.08463 |
| 0.11893  | 0.0101   | 0.123534 | 0.00752  | 0.028315 | 0.54162  | -0.05553 | 0.23099  | 0.076709 |
| 0.034364 | 0.45879  | 0.137824 | 0.00284  | 0.068179 | 0.14125  | -0.0418  | 0.36741  | 0.185007 |
| 0.345734 | 1.47E-14 | 0.452423 | 6.08E-25 | 0.379814 | 1.79E-17 | 0.392105 | 1.30E-18 | 0.307291 |
| 0.065672 | 0.15651  | 0.138879 | 0.00263  | 0.044178 | 0.34079  | -0.05305 | 0.25258  | 0.082701 |
| 0.13499  | 0.00347  | 0.145131 | 0.00166  | 0.104285 | 0.02421  | 0.030445 | 0.51162  | 0.0768   |
| 0.178472 | 0.00011  | 0.05129  | 0.26866  | 0.202859 | 9.96E-06 | -0.03141 | 0.49835  | 0.17243  |
| 0.085197 | 0.06584  | 0.210761 | 4.35E-06 | -0.00988 | 0.8313   | -0.05379 | 0.24603  | 0.049267 |
| 0.061828 | 0.18227  | 0.199089 | 1.46E-05 | 0.104332 | 0.02415  | 0.123069 | 0.00776  | 0.143403 |
| -0.04165 | 0.36918  | -0.0219  | 0.63693  | -0.18704 | 4.76E-05 | -0.26928 | 3.36E-09 | -0.08596 |
| 0.214612 | 2.87E-06 | 0.117351 | 0.01115  | 0.286655 | 2.77E-10 | 0.096084 | 0.03793  | 0.303416 |
| 0.252279 | 3.26E-08 | 0.146799 | 0.00147  | 0.331844 | 1.82E-13 | 0.161686 | 0.00045  | 0.291983 |
| 0.266944 | 4.63E-09 | 0.316657 | 2.46E-12 | 0.435978 | 4.34E-23 | 0.323778 | 7.38E-13 | 0.402816 |
| 0.019516 | 0.67401  | -0.04637 | 0.3174   | 0.135404 | 0.00337  | -0.10014 | 0.03049  | 0.159535 |
| 0.148294 | 0.00131  | 0.200489 | 1.27E-05 | 0.197617 | 1.70E-05 | 0.080602 | 0.08186  | 0.208435 |
| -0.05303 | 0.25273  | 0.115661 | 0.01238  | -0.07087 | 0.12618  | 0.020095 | 0.66492  | -0.01092 |
| 0.035443 | 0.4448   | 0.097433 | 0.0353   | -0.07851 | 0.09013  | -0.04412 | 0.34138  | -0.01785 |
| 0.229649 | 5.26E-07 | 0.180587 | 8.70E-05 | 0.390651 | 1.78E-18 | 0.25006  | 4.34E-08 | 0.310555 |
| 0.117678 | 0.01093  | 0.090965 | 0.04946  | 0.255915 | 2.03E-08 | 0.195634 | 2.07E-05 | 0.194547 |
| 0.089609 | 0.05297  | 0.06125  | 0.1864   | 0.05523  | 0.23356  | -0.02773 | 0.55006  | 0.102047 |
| 0.14801  | 0.00134  | 0.229864 | 5.13E-07 | 0.353552 | 3.39E-15 | 0.379922 | 1.75E-17 | 0.302131 |
| 0.110202 | 0.0172   | 0.330481 | 2.31E-13 | 0.093708 | 0.04296  | 0.16224  | 0.00043  | 0.125388 |
| -0.08618 | 0.06276  | 0.082971 | 0.07325  | 0.032483 | 0.48376  | 0.054027 | 0.24392  | 0.087325 |
| 0.28785  | 2.32E-10 | 0.279894 | 7.47E-10 | 0.403184 | 1.11E-19 | 0.170571 | 0.00021  | 0.378759 |
| 0.127552 | 0.00577  | 0.03426  | 0.46016  | 0.138604 | 0.00268  | -0.02372 | 0.60913  | 0.177626 |
| 0.162863 | 0.00041  | 0.126569 | 0.00616  | 0.079457 | 0.08631  | -0.0897  | 0.05273  | 0.166638 |
| 0.023401 | 0.61397  | 0.115046 | 0.01285  | 0.035861 | 0.43944  | 0.064279 | 0.1655   | 0.11568  |
| 0.187179 | 4.70E-05 | -0.0082  | 0.8598   | 0.156292 | 0.0007   | -0.00951 | 0.83766  | 0.067792 |
| 0.08372  | 0.07068  | 0.115486 | 0.01251  | 0.127368 | 0.00585  | 0.161919 | 0.00044  | -0.02054 |
| 0.333971 | 1.25E-13 | 0.187579 | 4.52E-05 | 0.308961 | 8.70E-12 | 0.240934 | 1.36E-07 | 0.245009 |
| 0.051443 | 0.26724  | 0.16809  | 0.00026  | 0.183135 | 6.87E-05 | 0.225327 | 8.67E-07 | 0.099495 |
| -0.02977 | 0.52108  | -0.01292 | 0.78067  | -0.06247 | 0.17775  | -0.11707 | 0.01134  | -0.05399 |
| 0.342526 | 2.66E-14 | 0.119519 | 0.00973  | 0.290475 | 1.57E-10 | 0.034461 | 0.45752  | 0.213817 |
| 0.033463 | 0.47066  | -0.05312 | 0.25193  | 0.155339 | 0.00076  | 0.020084 | 0.66508  | 0.146953 |
| -0.01931 | 0.67719  | -0.21942 | 1.69E-06 | 0.110349 | 0.01705  | -0.11921 | 0.00992  | 0.126615 |
| 0.409067 | 2.89E-20 | 0.505476 | 1.17E-31 | 0.825557 | #####    | 0.760864 | 2.25E-89 | 0.649288 |
| -0.15987 | 0.00052  | -0.31467 | 3.41E-12 | -0.39018 | 1.97E-18 | -0.40898 | 2.95E-20 | -0.36451 |
| 0.423589 | 9.31E-22 | 0.21494  | 2.77E-06 | 0.646511 | 1.27E-56 | 0.424669 | 7.16E-22 | 0.498834 |
| 0.508212 | 4.90E-32 | 0.641198 | 1.94E-55 | 0.870871 | #####    | 0.762324 | 6.56E-90 | 0.755419 |

|          |          |          |          |          |          |          |          |          |
|----------|----------|----------|----------|----------|----------|----------|----------|----------|
| 0.339978 | 4.24E-14 | 0.353323 | 3.54E-15 | 0.757286 | 4.45E-88 | 0.677257 | 5.82E-64 | 0.584211 |
| -0.24884 | 5.06E-08 | -0.25965 | 1.24E-08 | -0.62079 | 4.22E-51 | -0.39789 | 3.64E-19 | -0.52775 |
| 0.39948  | 2.55E-19 | 0.084    | 0.06974  | 0.493993 | 4.21E-30 | 0.217797 | 2.02E-06 | 0.32577  |
| 0.3849   | 6.12E-18 | 0.2461   | 7.16E-08 | 0.739766 | 4.84E-82 | 0.550733 | 2.15E-38 | 0.603286 |
| 0.522131 | 5.09E-34 | 0.492435 | 6.77E-30 | 0.778873 | 2.91E-96 | 0.707912 | 3.14E-72 | 0.600024 |
| 0.223252 | 1.10E-06 | 0.291686 | 1.30E-10 | 0.416579 | 4.99E-21 | 0.397088 | 4.34E-19 | 0.272261 |
| 0.454679 | 3.32E-25 | 0.242671 | 1.10E-07 | 0.687398 | 1.39E-66 | 0.485924 | 4.80E-29 | 0.49734  |
| 0.468822 | 6.80E-27 | 0.468986 | 6.49E-27 | 0.545902 | 1.26E-37 | 0.490271 | 1.30E-29 | 0.389663 |
| 0.488553 | 2.19E-29 | 0.360376 | 9.09E-16 | 0.739459 | 6.10E-82 | 0.540872 | 7.73E-37 | 0.571894 |
| 0.581902 | 1.14E-43 | 0.539165 | 1.42E-36 | 0.883272 | #####    | 0.696322 | 5.57E-69 | 0.724849 |
| 0.368044 | 1.99E-16 | 0.365583 | 3.26E-16 | 0.651263 | 1.06E-57 | 0.399547 | 2.51E-19 | 0.56963  |
| 0.584879 | 3.34E-44 | 0.633381 | 9.72E-54 | 0.74565  | 5.16E-84 | 0.734981 | 1.77E-80 | 0.6139   |
| 0.316881 | 2.37E-12 | 0.228679 | 5.89E-07 | 0.681186 | 5.78E-65 | 0.476058 | 8.65E-28 | 0.485031 |
| 0.177406 | 0.00012  | 0.181207 | 8.21E-05 | 0.498747 | 9.72E-31 | 0.460637 | 6.60E-26 | 0.267191 |
| 0.29105  | 1.44E-10 | 0.207729 | 6.00E-06 | 0.50431  | 1.70E-31 | 0.269874 | 3.09E-09 | 0.469937 |
| 0.464769 | 2.11E-26 | 0.535592 | 5.01E-36 | 0.560501 | 5.48E-40 | 0.467744 | 9.20E-27 | 0.461332 |
| 0.308268 | 9.73E-12 | 0.349044 | 7.95E-15 | 0.567069 | 4.34E-41 | 0.473939 | 1.59E-27 | 0.455731 |
| 0.393438 | 9.71E-19 | 0.398736 | 3.01E-19 | 0.469291 | 5.96E-27 | 0.453044 | 5.15E-25 | 0.305246 |
| 0.304201 | 1.87E-11 | 0.292411 | 1.17E-10 | 0.744577 | 1.19E-83 | 0.628872 | 8.83E-53 | 0.605015 |
| 0.419862 | 2.29E-21 | 0.435407 | 5.02E-23 | 0.613738 | 1.12E-49 | 0.36634  | 2.80E-16 | 0.580411 |
| 0.421644 | 1.49E-21 | 0.510103 | 2.67E-32 | 0.618695 | 1.13E-50 | 0.670843 | 2.34E-62 | 0.555807 |
| 0.489473 | 1.66E-29 | 0.465671 | 1.64E-26 | 0.821366 | #####    | 0.735506 | 1.20E-80 | 0.577848 |
| 0.429862 | 2.00E-22 | 0.33036  | 2.36E-13 | 0.718923 | 1.82E-75 | 0.545067 | 1.71E-37 | 0.586435 |
| 0.31291  | 4.57E-12 | 0.256352 | 1.92E-08 | 0.618082 | 1.50E-50 | 0.46144  | 5.30E-26 | 0.476341 |
| 0.620894 | 4.01E-51 | 0.378216 | 2.50E-17 | 0.742735 | 4.97E-83 | 0.567598 | 3.53E-41 | 0.595397 |
| 0.315484 | 2.99E-12 | 0.207201 | 6.34E-06 | 0.399915 | 2.31E-19 | 0.235649 | 2.58E-07 | 0.342043 |
| 0.480242 | 2.57E-28 | 0.404779 | 7.72E-20 | 0.769403 | 1.46E-92 | 0.500078 | 6.42E-31 | 0.636835 |
| 0.302836 | 2.32E-11 | 0.301969 | 2.66E-11 | 0.477755 | 5.30E-28 | 0.326124 | 4.93E-13 | 0.418287 |
| 0.202545 | 1.03E-05 | 0.305032 | 1.64E-11 | 0.54455  | 2.06E-37 | 0.542074 | 5.02E-37 | 0.427385 |
| 0.307978 | 1.02E-11 | 0.244018 | 9.29E-08 | 0.374662 | 5.20E-17 | 0.325346 | 5.64E-13 | 0.329986 |
| 0.498929 | 9.18E-31 | 0.64729  | 8.50E-57 | 0.592468 | 1.37E-45 | 0.58619  | 1.94E-44 | 0.522578 |
| 0.354519 | 2.82E-15 | 0.386234 | 4.61E-18 | 0.600626 | 4.04E-47 | 0.463733 | 2.81E-26 | 0.523798 |
| 0.46137  | 5.40E-26 | 0.506151 | 9.46E-32 | 0.709749 | 9.28E-73 | 0.555885 | 3.15E-39 | 0.631533 |
| 0.39627  | 5.21E-19 | 0.304322 | 1.83E-11 | 0.590424 | 3.27E-45 | 0.383894 | 7.58E-18 | 0.518187 |
| 0.370524 | 1.21E-16 | 0.633557 | 8.91E-54 | 0.489322 | 1.74E-29 | 0.641525 | 1.64E-55 | 0.364424 |
| 0.46745  | 9.99E-27 | 0.225395 | 8.60E-07 | 0.532467 | 1.49E-35 | 0.320297 | 1.33E-12 | 0.409166 |
| -0.1975  | 1.72E-05 | -0.24403 | 9.28E-08 | -0.50452 | 1.59E-31 | -0.45633 | 2.13E-25 | -0.36961 |
| 0.317632 | 2.09E-12 | 0.414399 | 8.35E-21 | 0.638028 | 9.63E-55 | 0.564386 | 1.23E-40 | 0.46957  |
| 0.264242 | 6.70E-09 | 0.152534 | 0.00094  | 0.552622 | 1.07E-38 | 0.421672 | 1.48E-21 | 0.374743 |
| 0.426112 | 5.04E-22 | 0.381373 | 1.29E-17 | 0.803439 | #####    | 0.657506 | 3.79E-59 | 0.650251 |
| 0.251828 | 3.46E-08 | 0.335043 | 1.03E-13 | 0.470714 | 3.98E-27 | 0.467339 | 1.03E-26 | 0.382879 |
| 0.206573 | 6.77E-06 | 0.126723 | 0.0061   | 0.356683 | 1.86E-15 | 0.151555 | 0.00102  | 0.22997  |
| 0.486382 | 4.19E-29 | 0.31623  | 2.64E-12 | 0.767152 | 1.04E-91 | 0.620554 | 4.71E-51 | 0.487392 |
| 0.441091 | 1.18E-23 | 0.289291 | 1.87E-10 | 0.776207 | 3.34E-95 | 0.523794 | 2.91E-34 | 0.584773 |
| 0.441757 | 9.95E-24 | 0.408331 | 3.42E-20 | 0.789513 | #####    | 0.662146 | 3.03E-60 | 0.625241 |

|          |          |          |          |          |          |          |          |          |
|----------|----------|----------|----------|----------|----------|----------|----------|----------|
| 0.508457 | 4.53E-32 | 0.601105 | 3.27E-47 | 0.82707  | #####    | 0.721069 | 4.08E-76 | 0.645632 |
| 0.407115 | 4.53E-20 | 0.527462 | 8.38E-35 | 0.646031 | 1.63E-56 | 0.640499 | 2.77E-55 | 0.469872 |
| 0.382063 | 1.12E-17 | 0.190254 | 3.50E-05 | 0.721021 | 4.22E-76 | 0.485147 | 6.05E-29 | 0.462923 |
| 0.440589 | 1.34E-23 | 0.420681 | 1.88E-21 | 0.674874 | 2.32E-63 | 0.581822 | 1.18E-43 | 0.491963 |
| 0.438827 | 2.11E-23 | 0.459364 | 9.35E-26 | 0.686283 | 2.73E-66 | 0.518586 | 1.66E-33 | 0.54255  |
| 0.361579 | 7.18E-16 | 0.337305 | 6.87E-14 | 0.572867 | 4.42E-42 | 0.454441 | 3.54E-25 | 0.444032 |
| 0.415683 | 6.17E-21 | 0.398081 | 3.48E-19 | 0.838615 | #####    | 0.643221 | 6.93E-56 | 0.681006 |
| 0.427972 | 3.19E-22 | 0.384218 | 7.08E-18 | 0.787835 | #####    | 0.561999 | 3.09E-40 | 0.702523 |
| 0.394088 | 8.42E-19 | 0.607308 | 2.08E-48 | 0.591239 | 2.32E-45 | 0.628449 | 1.08E-52 | 0.494613 |
| 0.382215 | 1.08E-17 | 0.296025 | 6.72E-11 | 0.643125 | 7.27E-56 | 0.54151  | 6.15E-37 | 0.462324 |
| 0.430246 | 1.82E-22 | 0.400081 | 2.23E-19 | 0.545308 | 1.56E-37 | 0.459317 | 9.47E-26 | 0.466165 |
| 0.362525 | 5.96E-16 | 0.345174 | 1.64E-14 | 0.654931 | 1.51E-58 | 0.588999 | 5.97E-45 | 0.425911 |
| 0.416879 | 4.65E-21 | 0.482845 | 1.20E-28 | 0.458795 | 1.09E-25 | 0.535364 | 5.43E-36 | 0.335243 |
| 0.28966  | 1.77E-10 | 0.293544 | 9.83E-11 | 0.5595   | 8.03E-40 | 0.355427 | 2.37E-15 | 0.434981 |
| 0.467217 | 1.07E-26 | 0.633588 | 8.78E-54 | 0.781489 | 2.56E-97 | 0.746996 | 1.79E-84 | 0.638231 |
| 0.25891  | 1.37E-08 | 0.149031 | 0.00124  | 0.531496 | 2.09E-35 | 0.336965 | 7.30E-14 | 0.506101 |
| 0.534309 | 7.86E-36 | 0.689023 | 5.17E-67 | 0.717038 | 6.68E-75 | 0.640916 | 2.24E-55 | 0.611596 |
| 0.339684 | 4.47E-14 | 0.409856 | 2.41E-20 | 0.682382 | 2.84E-65 | 0.639003 | 5.89E-55 | 0.534608 |
| 0.404666 | 7.92E-20 | 0.37588  | 4.05E-17 | 0.764671 | 8.87E-91 | 0.617151 | 2.31E-50 | 0.610877 |
| 0.417356 | 4.15E-21 | 0.422334 | 1.26E-21 | 0.526195 | 1.29E-34 | 0.422374 | 1.25E-21 | 0.407845 |
| 0.462126 | 4.39E-26 | 0.453676 | 4.35E-25 | 0.710468 | 5.74E-73 | 0.561916 | 3.19E-40 | 0.582381 |
| 0.392065 | 1.31E-18 | 0.343918 | 2.06E-14 | 0.677332 | 5.57E-64 | 0.558199 | 1.32E-39 | 0.483335 |
| 0.479703 | 3.01E-28 | 0.21553  | 2.59E-06 | 0.59586  | 3.21E-46 | 0.395656 | 5.96E-19 | 0.484375 |
| 0.366405 | 2.76E-16 | 0.43102  | 1.50E-22 | 0.588999 | 5.97E-45 | 0.521001 | 7.44E-34 | 0.534799 |
| 0.440138 | 1.51E-23 | 0.272595 | 2.11E-09 | 0.698211 | 1.69E-69 | 0.442699 | 7.81E-24 | 0.594811 |
| 0.347999 | 9.67E-15 | 0.507025 | 7.16E-32 | 0.543965 | 2.54E-37 | 0.564309 | 1.27E-40 | 0.375057 |
| 0.249909 | 4.42E-08 | 0.305609 | 1.49E-11 | 0.562943 | 2.15E-40 | 0.561819 | 3.31E-40 | 0.382077 |
| 0.454196 | 3.79E-25 | 0.251848 | 3.45E-08 | 0.707028 | 5.63E-72 | 0.404263 | 8.68E-20 | 0.59499  |
| 0.477371 | 5.92E-28 | 0.407647 | 4.01E-20 | 0.800123 | #####    | 0.629428 | 6.74E-53 | 0.636259 |
| 0.43283  | 9.58E-23 | 0.31386  | 3.91E-12 | 0.519275 | 1.32E-33 | 0.422758 | 1.14E-21 | 0.382956 |
| 0.304788 | 1.70E-11 | 0.251589 | 3.56E-08 | 0.643105 | 7.35E-56 | 0.460444 | 6.96E-26 | 0.480952 |
| 0.365461 | 3.34E-16 | 0.255359 | 2.19E-08 | 0.489564 | 1.61E-29 | 0.355101 | 2.52E-15 | 0.407413 |
| 0.34465  | 1.80E-14 | 0.438784 | 2.13E-23 | 0.659759 | 1.12E-59 | 0.671212 | 1.90E-62 | 0.489694 |
| 0.617035 | 2.44E-50 | 0.749534 | 2.40E-85 | 0.781334 | 2.96E-97 | 0.744164 | 1.64E-83 | 0.679234 |
| 0.36975  | 1.41E-16 | 0.299413 | 3.97E-11 | 0.703842 | 4.53E-71 | 0.534526 | 7.29E-36 | 0.521447 |
| 0.334095 | 1.22E-13 | 0.259178 | 1.32E-08 | 0.665103 | 5.90E-61 | 0.506382 | 8.79E-32 | 0.489615 |
| 0.318034 | 1.95E-12 | 0.149114 | 0.00123  | 0.527535 | 8.17E-35 | 0.38526  | 5.67E-18 | 0.345545 |
| 0.345606 | 1.51E-14 | 0.335957 | 8.75E-14 | 0.39742  | 4.04E-19 | 0.312746 | 4.69E-12 | 0.334576 |
| -0.13283 | 0.00403  | -0.34425 | 1.94E-14 | -0.35035 | 6.22E-15 | -0.39564 | 5.98E-19 | -0.33587 |
| 0.549164 | 3.83E-38 | 0.559382 | 8.40E-40 | 0.886017 | #####    | 0.839762 | #####    | 0.706843 |
| 0.285748 | 3.17E-10 | 0.437395 | 3.03E-23 | 0.505472 | 1.17E-31 | 0.525238 | 1.79E-34 | 0.344331 |
| 0.418534 | 3.14E-21 | 0.388553 | 2.80E-18 | 0.793988 | #####    | 0.663204 | 1.69E-60 | 0.625486 |
| 0.356765 | 1.83E-15 | 0.475624 | 9.80E-28 | 0.636024 | 2.62E-54 | 0.557635 | 1.63E-39 | 0.556889 |
| 0.492946 | 5.79E-30 | 0.418543 | 3.13E-21 | 0.633389 | 9.69E-54 | 0.594592 | 5.54E-46 | 0.566094 |
| 0.501947 | 3.58E-31 | 0.583434 | 6.08E-44 | 0.56589  | 6.88E-41 | 0.452735 | 5.60E-25 | 0.478757 |

|          |          |          |          |          |          |          |          |          |
|----------|----------|----------|----------|----------|----------|----------|----------|----------|
| 0.281854 | 5.62E-10 | 0.47401  | 1.56E-27 | 0.447387 | 2.30E-24 | 0.482527 | 1.31E-28 | 0.332912 |
| 0.379577 | 1.88E-17 | 0.365204 | 3.51E-16 | 0.422535 | 1.20E-21 | 0.361563 | 7.20E-16 | 0.349856 |
| 0.442555 | 8.10E-24 | 0.337843 | 6.24E-14 | 0.666395 | 2.87E-61 | 0.449242 | 1.41E-24 | 0.543582 |
| 0.379874 | 1.77E-17 | 0.555982 | 3.04E-39 | 0.565399 | 8.32E-41 | 0.612885 | 1.66E-49 | 0.426829 |
| 0.361292 | 7.60E-16 | 0.457307 | 1.64E-25 | 0.699263 | 8.64E-70 | 0.605044 | 5.73E-48 | 0.65914  |
| 0.432366 | 1.08E-22 | 0.251111 | 3.79E-08 | 0.566613 | 5.19E-41 | 0.445099 | 4.19E-24 | 0.418329 |
| 0.413766 | 9.69E-21 | 0.453383 | 4.71E-25 | 0.762877 | 4.10E-90 | 0.644815 | 3.06E-56 | 0.551782 |
| 0.329459 | 2.76E-13 | 0.202824 | 9.99E-06 | 0.636943 | 1.66E-54 | 0.42253  | 1.20E-21 | 0.436565 |
| 0.354855 | 2.64E-15 | 0.458589 | 1.15E-25 | 0.533893 | 9.09E-36 | 0.58931  | 5.24E-45 | 0.40477  |
| 0.415274 | 6.79E-21 | 0.539864 | 1.11E-36 | 0.505798 | 1.06E-31 | 0.494124 | 4.04E-30 | 0.359983 |
| 0.445689 | 3.59E-24 | 0.569726 | 1.53E-41 | 0.815233 | #####    | 0.638675 | 6.95E-55 | 0.680658 |
| 0.20333  | 9.49E-06 | 0.08064  | 0.08172  | 0.37555  | 4.33E-17 | 0.284354 | 3.90E-10 | 0.237904 |
| 0.418445 | 3.21E-21 | 0.548307 | 5.24E-38 | 0.604276 | 8.06E-48 | 0.652509 | 5.49E-58 | 0.485136 |
| 0.379232 | 2.02E-17 | 0.517644 | 2.27E-33 | 0.748091 | 7.56E-85 | 0.733808 | 4.24E-80 | 0.603953 |
| 0.442819 | 7.57E-24 | 0.46105  | 5.90E-26 | 0.8243   | #####    | 0.73687  | 4.32E-81 | 0.607297 |
| 0.394064 | 8.46E-19 | 0.473745 | 1.68E-27 | 0.575386 | 1.61E-42 | 0.505193 | 1.28E-31 | 0.488045 |
| 0.441629 | 1.03E-23 | 0.453238 | 4.89E-25 | 0.627506 | 1.71E-52 | 0.435769 | 4.58E-23 | 0.407374 |
| 0.378047 | 2.59E-17 | 0.245905 | 7.34E-08 | 0.552566 | 1.09E-38 | 0.43233  | 1.09E-22 | 0.415529 |
| 0.356804 | 1.82E-15 | 0.202618 | 1.02E-05 | 0.694308 | 1.97E-68 | 0.464151 | 2.51E-26 | 0.523495 |
| 0.370441 | 1.23E-16 | 0.42875  | 2.64E-22 | 0.693152 | 4.05E-68 | 0.564967 | 9.84E-41 | 0.588833 |
| 0.368453 | 1.84E-16 | 0.554849 | 4.65E-39 | 0.559167 | 9.12E-40 | 0.619312 | 8.44E-51 | 0.379687 |
| 0.236685 | 2.28E-07 | 0.25467  | 2.39E-08 | 0.415447 | 6.52E-21 | 0.516862 | 2.94E-33 | 0.256616 |
| 0.4762   | 8.30E-28 | 0.671004 | 2.13E-62 | 0.744221 | 1.57E-83 | 0.720949 | 4.43E-76 | 0.641209 |
| 0.284354 | 3.90E-10 | 0.373464 | 6.65E-17 | 0.609343 | 8.31E-49 | 0.476985 | 6.62E-28 | 0.514637 |
| 0.430854 | 1.57E-22 | 0.487834 | 2.71E-29 | 0.593652 | 8.28E-46 | 0.565531 | 7.90E-41 | 0.430845 |
| 0.431683 | 1.28E-22 | 0.389125 | 2.48E-18 | 0.515917 | 4.02E-33 | 0.382808 | 9.54E-18 | 0.418949 |
| -0.19015 | 3.53E-05 | -0.09138 | 0.04844  | -0.36066 | 8.60E-16 | -0.14303 | 0.00194  | -0.30662 |
| 0.429653 | 2.11E-22 | 0.434284 | 6.66E-23 | 0.811301 | #####    | 0.681284 | 5.45E-65 | 0.691527 |
| 0.469741 | 5.25E-27 | 0.486832 | 3.66E-29 | 0.827739 | #####    | 0.641282 | 1.86E-55 | 0.726032 |
| 0.400738 | 1.92E-19 | 0.512852 | 1.09E-32 | 0.427261 | 3.80E-22 | 0.507594 | 5.97E-32 | 0.352586 |
| 0.556976 | 2.09E-39 | 0.513521 | 8.80E-33 | 0.791672 | #####    | 0.694124 | 2.21E-68 | 0.643727 |
| 0.229149 | 5.57E-07 | 0.3795   | 1.91E-17 | 0.508653 | 4.25E-32 | 0.560745 | 4.99E-40 | 0.310506 |
| 0.459419 | 9.21E-26 | 0.484291 | 7.80E-29 | 0.738565 | 1.20E-81 | 0.682516 | 2.62E-65 | 0.50715  |
| 0.575291 | 1.67E-42 | 0.508707 | 4.18E-32 | 0.812258 | #####    | 0.589891 | 4.10E-45 | 0.687671 |
| 0.464837 | 2.07E-26 | 0.39591  | 5.64E-19 | 0.810214 | #####    | 0.641363 | 1.79E-55 | 0.65846  |
| 0.507443 | 6.27E-32 | 0.440358 | 1.43E-23 | 0.705147 | 1.93E-71 | 0.58304  | 7.15E-44 | 0.555226 |
| 0.265093 | 5.96E-09 | 0.338485 | 5.55E-14 | 0.408802 | 3.07E-20 | 0.294296 | 8.76E-11 | 0.367299 |
| 0.412036 | 1.45E-20 | 0.410527 | 2.06E-20 | 0.695644 | 8.53E-69 | 0.660367 | 8.02E-60 | 0.521003 |
| 0.196538 | 1.89E-05 | 0.301857 | 2.71E-11 | 0.529953 | 3.56E-35 | 0.584686 | 3.62E-44 | 0.333014 |
| 0.22076  | 1.45E-06 | 0.166876 | 0.00029  | 0.66369  | 1.29E-60 | 0.430697 | 1.63E-22 | 0.522036 |
| 0.334682 | 1.10E-13 | 0.232418 | 3.80E-07 | 0.640594 | 2.64E-55 | 0.382348 | 1.05E-17 | 0.572852 |
| 0.36669  | 2.61E-16 | 0.283016 | 4.74E-10 | 0.689084 | 4.98E-67 | 0.457567 | 1.52E-25 | 0.540687 |
| 0.34439  | 1.89E-14 | 0.259387 | 1.29E-08 | 0.636664 | 1.91E-54 | 0.550447 | 2.39E-38 | 0.442007 |
| 0.217649 | 2.06E-06 | 0.235702 | 2.57E-07 | 0.524667 | 2.17E-34 | 0.350481 | 6.07E-15 | 0.376358 |
| 0.511641 | 1.62E-32 | 0.4815   | 1.78E-28 | 0.729525 | 9.81E-79 | 0.612168 | 2.30E-49 | 0.586346 |

|          |          |          |          |          |          |          |          |          |
|----------|----------|----------|----------|----------|----------|----------|----------|----------|
| 0.325106 | 5.87E-13 | 0.402654 | 1.25E-19 | 0.695115 | 1.19E-68 | 0.603824 | 9.85E-48 | 0.562231 |
| 0.203433 | 9.39E-06 | -0.02022 | 0.66293  | 0.29594  | 6.80E-11 | 0.214242 | 2.99E-06 | 0.09523  |
| 0.46934  | 5.88E-27 | 0.436562 | 3.75E-23 | 0.669    | 6.64E-62 | 0.496511 | 1.94E-30 | 0.506897 |
| 0.346891 | 1.19E-14 | 0.264996 | 6.04E-09 | 0.535454 | 5.26E-36 | 0.381897 | 1.16E-17 | 0.439321 |
| 0.230611 | 4.70E-07 | 0.259186 | 1.32E-08 | 0.559917 | 6.85E-40 | 0.580794 | 1.80E-43 | 0.330977 |
| 0.498349 | 1.10E-30 | 0.425156 | 6.36E-22 | 0.714295 | 4.35E-74 | 0.645839 | 1.80E-56 | 0.50776  |
| 0.507031 | 7.15E-32 | 0.574918 | 1.94E-42 | 0.68429  | 9.08E-66 | 0.546507 | 1.01E-37 | 0.647867 |
| 0.39738  | 4.07E-19 | 0.459605 | 8.76E-26 | 0.495054 | 3.04E-30 | 0.416203 | 5.46E-21 | 0.443685 |
| 0.46641  | 1.34E-26 | 0.567597 | 3.53E-41 | 0.664275 | 9.34E-61 | 0.615125 | 5.92E-50 | 0.559831 |
| 0.350692 | 5.83E-15 | 0.451371 | 8.05E-25 | 0.545535 | 1.44E-37 | 0.634812 | 4.79E-54 | 0.330942 |
| 0.25936  | 1.29E-08 | 0.216461 | 2.34E-06 | 0.36702  | 2.45E-16 | 0.398308 | 3.31E-19 | 0.292294 |
| 0.405515 | 6.53E-20 | 0.293836 | 9.40E-11 | 0.711096 | 3.77E-73 | 0.576958 | 8.56E-43 | 0.57182  |
| 0.391438 | 1.50E-18 | 0.372626 | 7.89E-17 | 0.541982 | 5.19E-37 | 0.440403 | 1.41E-23 | 0.463654 |
| 0.425747 | 5.51E-22 | 0.388707 | 2.71E-18 | 0.751799 | 3.92E-86 | 0.563131 | 2.00E-40 | 0.590633 |
| 0.521123 | 7.14E-34 | 0.565733 | 7.31E-41 | 0.765943 | 2.97E-91 | 0.617245 | 2.22E-50 | 0.634195 |
| 0.332461 | 1.63E-13 | 0.27757  | 1.04E-09 | 0.606005 | 3.73E-48 | 0.618318 | 1.34E-50 | 0.379376 |
| 0.305511 | 1.52E-11 | 0.192457 | 2.83E-05 | 0.546012 | 1.21E-37 | 0.326885 | 4.32E-13 | 0.414124 |
| 0.385923 | 4.93E-18 | 0.421363 | 1.59E-21 | 0.663303 | 1.60E-60 | 0.500571 | 5.50E-31 | 0.634341 |
| 0.34282  | 2.52E-14 | 0.285805 | 3.15E-10 | 0.648436 | 4.68E-57 | 0.351964 | 4.58E-15 | 0.578028 |
| 0.452668 | 5.70E-25 | 0.594794 | 5.07E-46 | 0.612356 | 2.11E-49 | 0.511778 | 1.55E-32 | 0.495635 |
| 0.483301 | 1.05E-28 | 0.545678 | 1.37E-37 | 0.609683 | 7.13E-49 | 0.502965 | 2.60E-31 | 0.524694 |
| 0.408556 | 3.25E-20 | 0.464066 | 2.57E-26 | 0.59736  | 1.68E-46 | 0.466766 | 1.21E-26 | 0.531179 |
| 0.399103 | 2.77E-19 | 0.31506  | 3.20E-12 | 0.677976 | 3.82E-64 | 0.526159 | 1.31E-34 | 0.590551 |
| 0.351426 | 5.08E-15 | 0.408459 | 3.33E-20 | 0.627848 | 1.45E-52 | 0.511533 | 1.68E-32 | 0.564146 |
| 0.201732 | 1.12E-05 | 0.433786 | 7.54E-23 | 0.425601 | 5.71E-22 | 0.604988 | 5.87E-48 | 0.297529 |
| 0.41484  | 7.53E-21 | 0.515193 | 5.09E-33 | 0.791133 | #####    | 0.704556 | 2.85E-71 | 0.609059 |
| -0.32883 | 3.08E-13 | -0.2205  | 1.50E-06 | -0.35512 | 2.51E-15 | -0.25644 | 1.90E-08 | -0.27061 |
| 0.626409 | 2.90E-52 | 0.583513 | 5.88E-44 | 0.86504  | #####    | 0.699553 | 7.18E-70 | 0.722608 |
| 0.401112 | 1.77E-19 | 0.323788 | 7.36E-13 | 0.527923 | 7.15E-35 | 0.329189 | 2.90E-13 | 0.451438 |
| 0.23101  | 4.48E-07 | 0.123969 | 0.00731  | 0.403062 | 1.14E-19 | 0.293526 | 9.85E-11 | 0.26152  |
| 0.297754 | 5.14E-11 | 0.2676   | 4.23E-09 | 0.564176 | 1.34E-40 | 0.337436 | 6.71E-14 | 0.431862 |
| -0.2863  | 2.92E-10 | -0.28327 | 4.57E-10 | -0.46845 | 7.56E-27 | -0.32903 | 2.97E-13 | -0.48226 |
| 0.195385 | 2.12E-05 | 0.32316  | 8.20E-13 | 0.44365  | 6.10E-24 | 0.434349 | 6.55E-23 | 0.387794 |
| 0.339381 | 4.72E-14 | 0.37215  | 8.69E-17 | 0.68762  | 1.22E-66 | 0.593799 | 7.78E-46 | 0.589007 |
| 0.228746 | 5.84E-07 | 0.142473 | 0.00203  | 0.398948 | 2.87E-19 | 0.30708  | 1.18E-11 | 0.287133 |
| 0.419873 | 2.28E-21 | 0.523159 | 3.61E-34 | 0.773315 | 4.55E-94 | 0.566109 | 6.31E-41 | 0.668683 |
| 0.354529 | 2.81E-15 | 0.239668 | 1.59E-07 | 0.583168 | 6.78E-44 | 0.309446 | 8.04E-12 | 0.594595 |
| 0.504716 | 1.49E-31 | 0.635544 | 3.33E-54 | 0.787229 | 1.10E-99 | 0.666555 | 2.63E-61 | 0.676296 |
| 0.477738 | 5.32E-28 | 0.360328 | 9.17E-16 | 0.68097  | 6.57E-65 | 0.4789   | 3.80E-28 | 0.595444 |
| 0.237305 | 2.12E-07 | 0.064422 | 0.16457  | 0.40298  | 1.16E-19 | 0.207375 | 6.22E-06 | 0.306052 |
| 0.391228 | 1.57E-18 | 0.446991 | 2.56E-24 | 0.799898 | #####    | 0.726792 | 7.06E-78 | 0.626578 |
| 0.382908 | 9.34E-18 | 0.494448 | 3.66E-30 | 0.642445 | 1.03E-55 | 0.662425 | 2.60E-60 | 0.539129 |
| 0.475779 | 9.38E-28 | 0.518058 | 1.98E-33 | 0.56899  | 2.05E-41 | 0.55736  | 1.81E-39 | 0.525845 |
| 0.379535 | 1.90E-17 | 0.398219 | 3.38E-19 | 0.650725 | 1.41E-57 | 0.377375 | 2.97E-17 | 0.580255 |
| 0.374549 | 5.32E-17 | 0.44301  | 7.20E-24 | 0.672274 | 1.03E-62 | 0.560726 | 5.03E-40 | 0.508812 |

|          |          |          |          |          |          |          |          |          |
|----------|----------|----------|----------|----------|----------|----------|----------|----------|
| 0.427368 | 3.71E-22 | 0.267215 | 4.46E-09 | 0.641612 | 1.57E-55 | 0.382573 | 1.00E-17 | 0.523732 |
| 0.240874 | 1.37E-07 | 0.259597 | 1.25E-08 | 0.424745 | 7.03E-22 | 0.370946 | 1.11E-16 | 0.289791 |
| 0.314372 | 3.59E-12 | 0.353157 | 3.66E-15 | 0.470236 | 4.56E-27 | 0.5086   | 4.33E-32 | 0.43591  |
| 0.608635 | 1.15E-48 | 0.380233 | 1.64E-17 | 0.701825 | 1.67E-70 | 0.543635 | 2.87E-37 | 0.588735 |
| 0.464    | 2.61E-26 | 0.488952 | 1.94E-29 | 0.806369 | #####    | 0.728106 | 2.74E-78 | 0.65711  |
| 0.389253 | 2.41E-18 | 0.221539 | 1.33E-06 | 0.632076 | 1.85E-53 | 0.517795 | 2.16E-33 | 0.465698 |
| 0.420219 | 2.10E-21 | 0.499615 | 7.42E-31 | 0.670604 | 2.68E-62 | 0.608517 | 1.21E-48 | 0.522374 |
| -0.30973 | 7.68E-12 | -0.42252 | 1.21E-21 | -0.43884 | 2.10E-23 | -0.44091 | 1.24E-23 | -0.36557 |
| 0.420153 | 2.13E-21 | 0.300463 | 3.37E-11 | 0.730785 | 3.92E-79 | 0.492732 | 6.18E-30 | 0.555524 |
| 0.474356 | 1.41E-27 | 0.287528 | 2.43E-10 | 0.633829 | 7.79E-54 | 0.444857 | 4.46E-24 | 0.461934 |
| -0.38711 | 3.82E-18 | -0.22223 | 1.23E-06 | -0.4382  | 2.48E-23 | -0.23542 | 2.65E-07 | -0.39365 |
| 0.302483 | 2.45E-11 | 0.154977 | 0.00078  | 0.6336   | 8.73E-54 | 0.372074 | 8.83E-17 | 0.49208  |
| 0.246689 | 6.65E-08 | 0.249023 | 4.95E-08 | 0.39249  | 1.19E-18 | 0.462279 | 4.20E-26 | 0.236076 |
| 0.449282 | 1.40E-24 | 0.494942 | 3.15E-30 | 0.483914 | 8.72E-29 | 0.434361 | 6.53E-23 | 0.450379 |
| 0.38216  | 1.09E-17 | 0.338415 | 5.63E-14 | 0.76279  | 4.42E-90 | 0.630691 | 3.64E-53 | 0.535614 |
| 0.466576 | 1.28E-26 | 0.503467 | 2.22E-31 | 0.59878  | 9.04E-47 | 0.613729 | 1.13E-49 | 0.484853 |
| 0.207392 | 6.21E-06 | 0.427109 | 3.95E-22 | 0.477968 | 4.98E-28 | 0.505991 | 9.96E-32 | 0.511985 |
| 0.248765 | 5.11E-08 | 0.267178 | 4.48E-09 | 0.564984 | 9.77E-41 | 0.553017 | 9.21E-39 | 0.421949 |
| 0.32032  | 1.33E-12 | 0.461747 | 4.87E-26 | 0.7262   | 1.08E-77 | 0.708439 | 2.22E-72 | 0.549608 |
| 0.45261  | 5.79E-25 | 0.444858 | 4.46E-24 | 0.515326 | 4.88E-33 | 0.45869  | 1.12E-25 | 0.393748 |
| 0.455317 | 2.80E-25 | 0.320169 | 1.36E-12 | 0.726298 | 1.01E-77 | 0.530378 | 3.08E-35 | 0.561079 |
| 0.462022 | 4.51E-26 | 0.391729 | 1.41E-18 | 0.732609 | 1.03E-79 | 0.637931 | 1.01E-54 | 0.50496  |
| 0.442277 | 8.70E-24 | 0.537234 | 2.81E-36 | 0.619262 | 8.64E-51 | 0.522035 | 5.26E-34 | 0.607219 |
| 0.448016 | 1.95E-24 | 0.473263 | 1.93E-27 | 0.553551 | 7.55E-39 | 0.341448 | 3.24E-14 | 0.517373 |
| 0.173465 | 0.00017  | -0.00649 | 0.88872  | 0.263455 | 7.45E-09 | 0.144124 | 0.00179  | 0.102504 |
| 0.530112 | 3.37E-35 | 0.586865 | 1.46E-44 | 0.660158 | 8.99E-60 | 0.682839 | 2.16E-65 | 0.529969 |
| 0.501262 | 4.43E-31 | 0.702617 | 1.00E-70 | 0.714337 | 4.23E-74 | 0.760461 | 3.16E-89 | 0.557735 |
| 0.45937  | 9.34E-26 | 0.261416 | 9.80E-09 | 0.744548 | 1.22E-83 | 0.53019  | 3.28E-35 | 0.523238 |
| 0.441684 | 1.01E-23 | 0.184784 | 5.89E-05 | 0.557407 | 1.78E-39 | 0.277196 | 1.10E-09 | 0.448992 |
| 0.291347 | 1.37E-10 | 0.232973 | 3.56E-07 | 0.501567 | 4.03E-31 | 0.406699 | 4.98E-20 | 0.33285  |
| 0.385964 | 4.88E-18 | 0.439438 | 1.80E-23 | 0.681491 | 4.82E-65 | 0.610968 | 3.98E-49 | 0.462577 |
| 0.409733 | 2.48E-20 | 0.573992 | 2.82E-42 | 0.714468 | 3.87E-74 | 0.698541 | 1.37E-69 | 0.597675 |
| 0.323011 | 8.41E-13 | 0.34209  | 2.88E-14 | 0.591337 | 2.22E-45 | 0.53978  | 1.14E-36 | 0.467896 |
| 0.361477 | 7.33E-16 | 0.245579 | 7.65E-08 | 0.455265 | 2.84E-25 | 0.332723 | 1.56E-13 | 0.227367 |
| 0.399505 | 2.54E-19 | 0.487171 | 3.31E-29 | 0.705537 | 1.50E-71 | 0.686387 | 2.57E-66 | 0.50172  |
| 0.268626 | 3.67E-09 | 0.26616  | 5.16E-09 | 0.476422 | 7.79E-28 | 0.398392 | 3.25E-19 | 0.258768 |
| 0.388261 | 2.98E-18 | 0.42259  | 1.19E-21 | 0.610509 | 4.90E-49 | 0.501585 | 4.01E-31 | 0.473593 |
| 0.460482 | 6.89E-26 | 0.38364  | 8.00E-18 | 0.744614 | 1.16E-83 | 0.531783 | 1.89E-35 | 0.603744 |
| 0.46936  | 5.84E-27 | 0.326819 | 4.37E-13 | 0.52571  | 1.52E-34 | 0.388328 | 2.94E-18 | 0.479807 |
| 0.176069 | 0.00013  | 0.350884 | 5.62E-15 | 0.475585 | 9.91E-28 | 0.472108 | 2.68E-27 | 0.436806 |
| 0.521498 | 6.30E-34 | 0.585057 | 3.10E-44 | 0.60882  | 1.05E-48 | 0.565706 | 7.38E-41 | 0.50942  |
| 0.424336 | 7.77E-22 | 0.343604 | 2.18E-14 | 0.736523 | 5.60E-81 | 0.594627 | 5.45E-46 | 0.57005  |
| 0.458824 | 1.08E-25 | 0.386842 | 4.05E-18 | 0.656892 | 5.28E-59 | 0.429519 | 2.18E-22 | 0.60427  |
| 0.080901 | 0.08073  | 0.19983  | 1.36E-05 | 0.450224 | 1.09E-24 | 0.35461  | 2.77E-15 | 0.313964 |
| -0.24876 | 5.12E-08 | -0.3769  | 3.28E-17 | -0.63193 | 1.99E-53 | -0.47215 | 2.65E-27 | -0.5555  |

|          |          |          |          |          |          |          |          |          |
|----------|----------|----------|----------|----------|----------|----------|----------|----------|
| 0.405915 | 5.96E-20 | 0.199457 | 1.41E-05 | 0.552593 | 1.08E-38 | 0.456713 | 1.92E-25 | 0.358982 |
| 0.392698 | 1.14E-18 | 0.497853 | 1.28E-30 | 0.526239 | 1.27E-34 | 0.574505 | 2.29E-42 | 0.422548 |
| 0.356507 | 1.92E-15 | 0.400986 | 1.82E-19 | 0.637956 | 9.98E-55 | 0.643573 | 5.78E-56 | 0.446909 |
| 0.415061 | 7.14E-21 | 0.345343 | 1.58E-14 | 0.450116 | 1.12E-24 | 0.346947 | 1.18E-14 | 0.390675 |
| 0.417254 | 4.25E-21 | 0.303255 | 2.17E-11 | 0.740418 | 2.94E-82 | 0.614766 | 6.99E-50 | 0.503441 |
| 0.447115 | 2.47E-24 | 0.389721 | 2.18E-18 | 0.739669 | 5.21E-82 | 0.482193 | 1.45E-28 | 0.623905 |
| 0.409142 | 2.84E-20 | 0.340749 | 3.68E-14 | 0.696266 | 5.77E-69 | 0.525035 | 1.91E-34 | 0.554833 |
| 0.391467 | 1.49E-18 | 0.375345 | 4.52E-17 | 0.805311 | #####    | 0.661692 | 3.88E-60 | 0.655312 |
| 0.515741 | 4.25E-33 | 0.632029 | 1.89E-53 | 0.815119 | #####    | 0.799246 | #####    | 0.688776 |
| 0.4464   | 2.98E-24 | 0.727977 | 3.01E-78 | 0.680075 | 1.11E-64 | 0.752562 | 2.12E-86 | 0.503502 |
| 0.474274 | 1.44E-27 | 0.377244 | 3.05E-17 | 0.496121 | 2.19E-30 | 0.391909 | 1.36E-18 | 0.368352 |
| 0.378571 | 2.32E-17 | 0.462122 | 4.39E-26 | 0.647655 | 7.03E-57 | 0.501822 | 3.72E-31 | 0.567048 |
| 0.388298 | 2.96E-18 | 0.350381 | 6.18E-15 | 0.682596 | 2.50E-65 | 0.578662 | 4.29E-43 | 0.450199 |
| -0.16798 | 0.00027  | -0.24243 | 1.13E-07 | -0.43526 | 5.21E-23 | -0.33702 | 7.24E-14 | -0.37262 |
| 0.436841 | 3.49E-23 | 0.357268 | 1.66E-15 | 0.722655 | 1.34E-76 | 0.583665 | 5.52E-44 | 0.625515 |
| 0.49897  | 9.06E-31 | 0.230454 | 4.79E-07 | 0.653339 | 3.54E-58 | 0.360412 | 9.02E-16 | 0.504142 |
| 0.520486 | 8.84E-34 | 0.512326 | 1.30E-32 | 0.870661 | #####    | 0.695398 | 9.96E-69 | 0.71797  |
| 0.509161 | 3.61E-32 | 0.329843 | 2.58E-13 | 0.669503 | 5.00E-62 | 0.483466 | 9.96E-29 | 0.550587 |
| 0.458116 | 1.31E-25 | 0.537764 | 2.33E-36 | 0.618765 | 1.09E-50 | 0.539852 | 1.11E-36 | 0.486303 |
| 0.438797 | 2.12E-23 | 0.603962 | 9.27E-48 | 0.746331 | 3.03E-84 | 0.669289 | 5.64E-62 | 0.617872 |
| 0.514641 | 6.10E-33 | 0.527102 | 9.47E-35 | 0.83596  | #####    | 0.654045 | 2.43E-58 | 0.706291 |
| 0.300381 | 3.41E-11 | 0.369185 | 1.58E-16 | 0.533286 | 1.12E-35 | 0.432709 | 9.87E-23 | 0.352922 |
| 0.492578 | 6.48E-30 | 0.39438  | 7.89E-19 | 0.804142 | #####    | 0.526252 | 1.27E-34 | 0.664241 |
| 0.397085 | 4.35E-19 | 0.289316 | 1.86E-10 | 0.845969 | #####    | 0.626436 | 2.87E-52 | 0.650979 |
| 0.53485  | 6.50E-36 | 0.465035 | 1.96E-26 | 0.804544 | #####    | 0.62024  | 5.46E-51 | 0.630521 |
| 0.383531 | 8.19E-18 | 0.471874 | 2.87E-27 | 0.632039 | 1.88E-53 | 0.608582 | 1.17E-48 | 0.480357 |
| 0.33353  | 1.35E-13 | 0.398429 | 3.22E-19 | 0.459182 | 9.83E-26 | 0.360634 | 8.64E-16 | 0.358684 |
| 0.55496  | 4.46E-39 | 0.626691 | 2.53E-52 | 0.779895 | 1.13E-96 | 0.647598 | 7.24E-57 | 0.702367 |
| 0.4213   | 1.62E-21 | 0.520635 | 8.41E-34 | 0.562942 | 2.15E-40 | 0.543394 | 3.13E-37 | 0.402424 |
| 0.265008 | 6.03E-09 | 0.125441 | 0.00664  | 0.250735 | 3.98E-08 | 0.20493  | 8.04E-06 | 0.142662 |
| 0.388453 | 2.86E-18 | 0.140771 | 0.0023   | 0.439192 | 1.92E-23 | 0.184596 | 6.00E-05 | 0.425815 |
| 0.497511 | 1.42E-30 | 0.355123 | 2.51E-15 | 0.781156 | 3.50E-97 | 0.660127 | 9.15E-60 | 0.537938 |
| 0.279897 | 7.47E-10 | 0.110264 | 0.01714  | 0.404143 | 8.92E-20 | 0.267052 | 4.56E-09 | 0.237192 |
| 0.371876 | 9.19E-17 | 0.397629 | 3.85E-19 | 0.750031 | 1.62E-85 | 0.649346 | 2.91E-57 | 0.571286 |
| 0.46422  | 2.46E-26 | 0.430243 | 1.82E-22 | 0.779687 | 1.37E-96 | 0.552514 | 1.11E-38 | 0.604087 |
| 0.499031 | 8.89E-31 | 0.45426  | 3.72E-25 | 0.740018 | 3.99E-82 | 0.535303 | 5.55E-36 | 0.566682 |
| 0.421742 | 1.45E-21 | 0.426513 | 4.57E-22 | 0.637735 | 1.11E-54 | 0.543943 | 2.56E-37 | 0.488114 |
| 0.388913 | 2.59E-18 | 0.491986 | 7.76E-30 | 0.541912 | 5.33E-37 | 0.411245 | 1.74E-20 | 0.483891 |
| 0.314761 | 3.37E-12 | 0.415281 | 6.78E-21 | 0.570096 | 1.32E-41 | 0.614892 | 6.59E-50 | 0.443628 |
| 0.438754 | 2.15E-23 | 0.525639 | 1.56E-34 | 0.755268 | 2.34E-87 | 0.653834 | 2.72E-58 | 0.654404 |
| 0.348615 | 8.62E-15 | 0.432804 | 9.64E-23 | 0.370432 | 1.23E-16 | 0.411339 | 1.71E-20 | 0.316088 |
| 0.493384 | 5.07E-30 | 0.522783 | 4.09E-34 | 0.682576 | 2.53E-65 | 0.586545 | 1.67E-44 | 0.593874 |
| 0.351605 | 4.91E-15 | 0.511082 | 1.94E-32 | 0.648984 | 3.51E-57 | 0.605886 | 3.93E-48 | 0.543806 |
| 0.537589 | 2.48E-36 | 0.719984 | 8.70E-76 | 0.758769 | 1.30E-88 | 0.687122 | 1.65E-66 | 0.703468 |
| 0.186914 | 4.82E-05 | 0.200972 | 1.21E-05 | 0.550705 | 2.17E-38 | 0.485039 | 6.25E-29 | 0.312111 |



|          |          |          |          |          |          |          |          |          |
|----------|----------|----------|----------|----------|----------|----------|----------|----------|
| 0.424216 | 8.00E-22 | 0.481735 | 1.66E-28 | 0.858621 | #####    | 0.719193 | 1.51E-75 | 0.720249 |
| -0.2812  | 6.18E-10 | -0.29493 | 7.95E-11 | -0.42229 | 1.27E-21 | -0.33577 | 9.05E-14 | -0.3189  |
| 0.297957 | 4.98E-11 | 0.165884 | 0.00032  | 0.399686 | 2.44E-19 | 0.19835  | 1.58E-05 | 0.280202 |
| 0.393951 | 8.67E-19 | 0.192197 | 2.90E-05 | 0.551429 | 1.66E-38 | 0.271693 | 2.40E-09 | 0.411779 |
| 0.412552 | 1.29E-20 | 0.499137 | 8.61E-31 | 0.687439 | 1.36E-66 | 0.700483 | 3.96E-70 | 0.560255 |
| 0.398028 | 3.53E-19 | 0.534061 | 8.57E-36 | 0.631378 | 2.60E-53 | 0.613947 | 1.02E-49 | 0.557774 |
| 0.060566 | 0.19137  | -0.2252  | 8.79E-07 | -0.44863 | 1.66E-24 | -0.3271  | 4.16E-13 | -0.43082 |
| 0.485386 | 5.64E-29 | 0.543496 | 3.01E-37 | 0.559625 | 7.66E-40 | 0.610593 | 4.72E-49 | 0.463982 |
| -0.30197 | 2.66E-11 | -0.34951 | 7.29E-15 | -0.58787 | 9.59E-45 | -0.52217 | 5.03E-34 | -0.48437 |
| 0.57147  | 7.69E-42 | 0.437607 | 2.87E-23 | 0.819288 | #####    | 0.605793 | 4.10E-48 | 0.643133 |
| 0.475061 | 1.15E-27 | 0.420699 | 1.87E-21 | 0.690628 | 1.93E-67 | 0.547124 | 8.08E-38 | 0.557329 |
| 0.296703 | 6.05E-11 | 0.489127 | 1.84E-29 | 0.522319 | 4.78E-34 | 0.528065 | 6.81E-35 | 0.382334 |
| 0.461168 | 5.71E-26 | 0.303823 | 1.98E-11 | 0.600396 | 4.46E-47 | 0.418552 | 3.12E-21 | 0.366292 |
| 0.392078 | 1.31E-18 | 0.460809 | 6.30E-26 | 0.503701 | 2.06E-31 | 0.455992 | 2.33E-25 | 0.351111 |
| 0.434618 | 6.12E-23 | 0.222773 | 1.16E-06 | 0.700662 | 3.53E-70 | 0.423625 | 9.23E-22 | 0.585193 |
| 0.512004 | 1.44E-32 | 0.621652 | 2.80E-51 | 0.789638 | #####    | 0.641423 | 1.73E-55 | 0.635021 |
| 0.347229 | 1.12E-14 | 0.320722 | 1.24E-12 | 0.548997 | 4.07E-38 | 0.481839 | 1.61E-28 | 0.41962  |
| 0.492447 | 6.74E-30 | 0.683451 | 1.50E-65 | 0.759798 | 5.51E-89 | 0.730731 | 4.08E-79 | 0.59303  |
| 0.391003 | 1.65E-18 | 0.568632 | 2.35E-41 | 0.7613   | 1.56E-89 | 0.716047 | 1.32E-74 | 0.602039 |
| 0.384499 | 6.67E-18 | 0.242687 | 1.10E-07 | 0.592259 | 1.50E-45 | 0.393788 | 8.99E-19 | 0.499566 |
| 0.389285 | 2.39E-18 | 0.247406 | 6.07E-08 | 0.792375 | #####    | 0.558814 | 1.04E-39 | 0.552442 |
| 0.38438  | 6.84E-18 | 0.391905 | 1.36E-18 | 0.703817 | 4.60E-71 | 0.496116 | 2.19E-30 | 0.612476 |
| 0.401779 | 1.52E-19 | 0.466741 | 1.22E-26 | 0.424681 | 7.14E-22 | 0.512431 | 1.26E-32 | 0.282193 |
| 0.320675 | 1.25E-12 | 0.250156 | 4.28E-08 | 0.504704 | 1.50E-31 | 0.377427 | 2.94E-17 | 0.37375  |
| 0.287593 | 2.41E-10 | 0.183179 | 6.84E-05 | 0.403186 | 1.11E-19 | 0.277892 | 9.97E-10 | 0.288891 |
| 0.357016 | 1.74E-15 | 0.434518 | 6.27E-23 | 0.676299 | 1.02E-63 | 0.611009 | 3.90E-49 | 0.460978 |
| 0.488991 | 1.92E-29 | 0.663044 | 1.85E-60 | 0.742467 | 6.11E-83 | 0.728752 | 1.72E-78 | 0.622172 |
| 0.300143 | 3.54E-11 | 0.2796   | 7.79E-10 | 0.474701 | 1.28E-27 | 0.374033 | 5.92E-17 | 0.387199 |
| 0.453699 | 4.32E-25 | 0.44889  | 1.55E-24 | 0.683552 | 1.41E-65 | 0.583491 | 5.94E-44 | 0.543093 |
| 0.245662 | 7.57E-08 | 0.15566  | 0.00074  | 0.512493 | 1.23E-32 | 0.384754 | 6.32E-18 | 0.261698 |
| 0.470168 | 4.65E-27 | 0.488509 | 2.22E-29 | 0.783398 | 4.27E-98 | 0.584896 | 3.32E-44 | 0.62811  |
| -0.33161 | 1.89E-13 | -0.16847 | 0.00025  | -0.51079 | 2.14E-32 | -0.31315 | 4.39E-12 | -0.39412 |
| 0.401823 | 1.51E-19 | 0.192487 | 2.82E-05 | 0.640378 | 2.94E-55 | 0.509935 | 2.82E-32 | 0.469186 |
| -0.12142 | 0.00862  | -0.22962 | 5.28E-07 | -0.42362 | 9.24E-22 | -0.23714 | 2.16E-07 | -0.42095 |
| 0.450706 | 9.60E-25 | 0.471853 | 2.88E-27 | 0.873561 | #####    | 0.71448  | 3.84E-74 | 0.720362 |
| 0.361105 | 7.88E-16 | 0.348812 | 8.30E-15 | 0.63347  | 9.30E-54 | 0.518234 | 1.87E-33 | 0.457987 |
| 0.222074 | 1.25E-06 | 0.17211  | 0.00019  | 0.351248 | 5.25E-15 | 0.222621 | 1.18E-06 | 0.291935 |
| 0.414425 | 8.30E-21 | 0.344095 | 2.00E-14 | 0.697408 | 2.81E-69 | 0.569585 | 1.62E-41 | 0.515906 |
| 0.476183 | 8.35E-28 | 0.331475 | 1.94E-13 | 0.64673  | 1.14E-56 | 0.449825 | 1.21E-24 | 0.538103 |
| 0.33361  | 1.33E-13 | 0.398296 | 3.32E-19 | 0.634087 | 6.86E-54 | 0.485218 | 5.93E-29 | 0.427175 |
| 0.294633 | 8.32E-11 | 0.275502 | 1.40E-09 | 0.502867 | 2.68E-31 | 0.49662  | 1.88E-30 | 0.314118 |
| -0.27374 | 1.80E-09 | -0.17233 | 0.00018  | -0.38735 | 3.63E-18 | -0.26838 | 3.80E-09 | -0.27877 |
| 0.331687 | 1.87E-13 | 0.324488 | 6.53E-13 | 0.519752 | 1.13E-33 | 0.473538 | 1.78E-27 | 0.432446 |
| 0.353821 | 3.22E-15 | 0.416402 | 5.21E-21 | 0.556194 | 2.81E-39 | 0.489739 | 1.53E-29 | 0.527048 |
| 0.442817 | 7.57E-24 | 0.452201 | 6.45E-25 | 0.775904 | 4.40E-95 | 0.648518 | 4.48E-57 | 0.630243 |

|          |          |          |          |          |          |          |          |          |
|----------|----------|----------|----------|----------|----------|----------|----------|----------|
| 0.350171 | 6.43E-15 | 0.396716 | 4.72E-19 | 0.458665 | 1.13E-25 | 0.487652 | 2.87E-29 | 0.360235 |
| 0.419908 | 2.26E-21 | 0.406639 | 5.05E-20 | 0.562047 | 3.03E-40 | 0.497874 | 1.27E-30 | 0.474467 |
| 0.494074 | 4.10E-30 | 0.388378 | 2.91E-18 | 0.759326 | 8.17E-89 | 0.622029 | 2.35E-51 | 0.63155  |
| 0.376583 | 3.50E-17 | 0.413082 | 1.14E-20 | 0.415035 | 7.19E-21 | 0.52838  | 6.12E-35 | 0.339782 |
| 0.322438 | 9.27E-13 | 0.439218 | 1.91E-23 | 0.458975 | 1.04E-25 | 0.608335 | 1.31E-48 | 0.370965 |
| 0.356143 | 2.06E-15 | 0.505309 | 1.24E-31 | 0.552885 | 9.67E-39 | 0.636693 | 1.88E-54 | 0.452776 |
| 0.334697 | 1.10E-13 | 0.437201 | 3.19E-23 | 0.624486 | 7.30E-52 | 0.418807 | 2.94E-21 | 0.588992 |
| 0.242445 | 1.13E-07 | 0.402635 | 1.26E-19 | 0.356584 | 1.90E-15 | 0.438066 | 2.56E-23 | 0.30183  |
| 0.236966 | 2.21E-07 | 0.437599 | 2.88E-23 | 0.403521 | 1.03E-19 | 0.464959 | 2.00E-26 | 0.378534 |
| 0.489943 | 1.44E-29 | 0.452578 | 5.84E-25 | 0.715481 | 1.94E-74 | 0.576321 | 1.11E-42 | 0.595768 |
| 0.36563  | 3.23E-16 | 0.468155 | 8.20E-27 | 0.56659  | 5.24E-41 | 0.544658 | 1.98E-37 | 0.440153 |
| 0.362836 | 5.61E-16 | 0.418431 | 3.22E-21 | 0.635077 | 4.20E-54 | 0.611353 | 3.34E-49 | 0.488148 |
| 0.444464 | 4.94E-24 | 0.52528  | 1.76E-34 | 0.498352 | 1.10E-30 | 0.483882 | 8.80E-29 | 0.403099 |
| 0.504752 | 1.48E-31 | 0.531583 | 2.03E-35 | 0.634739 | 4.97E-54 | 0.411669 | 1.58E-20 | 0.72928  |
| 0.565278 | 8.72E-41 | 0.70839  | 2.29E-72 | 0.693622 | 3.02E-68 | 0.699434 | 7.74E-70 | 0.558988 |
| 0.314301 | 3.63E-12 | 0.284915 | 3.59E-10 | 0.395416 | 6.29E-19 | 0.311303 | 5.94E-12 | 0.268648 |
| 0.452502 | 5.96E-25 | 0.511534 | 1.68E-32 | 0.769464 | 1.38E-92 | 0.750476 | 1.13E-85 | 0.553014 |
| 0.312786 | 4.66E-12 | 0.393668 | 9.23E-19 | 0.694058 | 2.30E-68 | 0.598474 | 1.03E-46 | 0.543864 |
| 0.462784 | 3.66E-26 | 0.267931 | 4.04E-09 | 0.545664 | 1.38E-37 | 0.298275 | 4.74E-11 | 0.493543 |
| 0.337452 | 6.69E-14 | 0.30563  | 1.49E-11 | 0.527526 | 8.19E-35 | 0.369443 | 1.50E-16 | 0.34524  |
| 0.214041 | 3.05E-06 | 0.334293 | 1.18E-13 | 0.551109 | 1.87E-38 | 0.448353 | 1.79E-24 | 0.509492 |
| 0.321474 | 1.09E-12 | 0.143392 | 0.00189  | 0.604089 | 8.76E-48 | 0.409328 | 2.72E-20 | 0.458676 |
| 0.326183 | 4.88E-13 | 0.511292 | 1.82E-32 | 0.499532 | 7.61E-31 | 0.497495 | 1.43E-30 | 0.373008 |
| 0.368409 | 1.85E-16 | 0.165186 | 0.00034  | 0.509884 | 2.86E-32 | 0.327894 | 3.63E-13 | 0.385314 |
| 0.295782 | 6.97E-11 | 0.476197 | 8.31E-28 | 0.690868 | 1.67E-67 | 0.735164 | 1.55E-80 | 0.566068 |
| 0.411787 | 1.54E-20 | 0.353129 | 3.67E-15 | 0.486244 | 4.37E-29 | 0.379805 | 1.79E-17 | 0.36817  |
| -0.38139 | 1.29E-17 | -0.19902 | 1.47E-05 | -0.41375 | 9.72E-21 | -0.2764  | 1.23E-09 | -0.3079  |
| 0.428257 | 2.98E-22 | 0.21175  | 3.91E-06 | 0.708042 | 2.88E-72 | 0.446426 | 2.96E-24 | 0.551403 |
| 0.250135 | 4.29E-08 | 0.06993  | 0.1313   | 0.346511 | 1.28E-14 | 0.201933 | 1.10E-05 | 0.243925 |
| 0.337302 | 6.87E-14 | 0.220729 | 1.46E-06 | 0.483258 | 1.06E-28 | 0.36491  | 3.72E-16 | 0.428415 |
| 0.505871 | 1.03E-31 | 0.420555 | 1.94E-21 | 0.83651  | #####    | 0.646523 | 1.27E-56 | 0.666835 |
| 0.445018 | 4.28E-24 | 0.273569 | 1.84E-09 | 0.825614 | #####    | 0.546316 | 1.08E-37 | 0.617288 |
| 0.387613 | 3.43E-18 | 0.470227 | 4.57E-27 | 0.790728 | #####    | 0.785372 | 6.55E-99 | 0.674513 |
| 0.28692  | 2.67E-10 | 0.458909 | 1.06E-25 | 0.624998 | 5.71E-52 | 0.667754 | 1.34E-61 | 0.522558 |
| 0.403382 | 1.06E-19 | 0.362545 | 5.94E-16 | 0.694656 | 1.59E-68 | 0.557737 | 1.57E-39 | 0.454118 |
| 0.55371  | 7.11E-39 | 0.525851 | 1.45E-34 | 0.682705 | 2.34E-65 | 0.437872 | 2.69E-23 | 0.597605 |
| 0.463531 | 2.98E-26 | 0.495635 | 2.54E-30 | 0.681189 | 5.77E-65 | 0.657863 | 3.13E-59 | 0.576859 |
| 0.435779 | 4.57E-23 | 0.204405 | 8.49E-06 | 0.595588 | 3.61E-46 | 0.470906 | 3.77E-27 | 0.379957 |
| 0.426871 | 4.19E-22 | 0.379508 | 1.91E-17 | 0.518056 | 1.98E-33 | 0.458431 | 1.21E-25 | 0.390105 |
| 0.395601 | 6.03E-19 | 0.379715 | 1.83E-17 | 0.517772 | 2.18E-33 | 0.362961 | 5.47E-16 | 0.442393 |
| 0.311229 | 6.02E-12 | 0.272739 | 2.07E-09 | 0.560396 | 5.71E-40 | 0.402717 | 1.23E-19 | 0.453869 |
| 0.373434 | 6.69E-17 | 0.324006 | 7.10E-13 | 0.503945 | 1.91E-31 | 0.341085 | 3.47E-14 | 0.302732 |
| 0.484665 | 6.98E-29 | 0.58501  | 3.16E-44 | 0.667161 | 1.87E-61 | 0.594652 | 5.39E-46 | 0.493193 |
| 0.386283 | 4.56E-18 | 0.368766 | 1.72E-16 | 0.475819 | 9.27E-28 | 0.417923 | 3.63E-21 | 0.361222 |
| 0.437531 | 2.93E-23 | 0.347303 | 1.10E-14 | 0.678037 | 3.69E-64 | 0.569475 | 1.69E-41 | 0.437998 |

|          |          |          |          |          |          |          |          |          |
|----------|----------|----------|----------|----------|----------|----------|----------|----------|
| 0.351821 | 4.71E-15 | 0.267583 | 4.24E-09 | 0.630167 | 4.70E-53 | 0.476747 | 7.09E-28 | 0.452797 |
| 0.307959 | 1.02E-11 | 0.344432 | 1.88E-14 | 0.527771 | 7.54E-35 | 0.420373 | 2.02E-21 | 0.357933 |
| 0.33797  | 6.10E-14 | 0.500215 | 6.15E-31 | 0.649672 | 2.45E-57 | 0.703343 | 6.26E-71 | 0.528214 |
| 0.084474 | 0.06817  | 0.276367 | 1.24E-09 | 0.375892 | 4.04E-17 | 0.452155 | 6.53E-25 | 0.267096 |
| 0.54729  | 7.61E-38 | 0.40603  | 5.81E-20 | 0.770927 | 3.81E-93 | 0.575465 | 1.56E-42 | 0.647516 |
| 0.550168 | 2.65E-38 | 0.560995 | 4.54E-40 | 0.877069 | #####    | 0.713524 | 7.35E-74 | 0.749776 |
| 0.385244 | 5.69E-18 | 0.443291 | 6.70E-24 | 0.605945 | 3.83E-48 | 0.576473 | 1.04E-42 | 0.438517 |
| 0.461534 | 5.16E-26 | 0.337606 | 6.51E-14 | 0.618836 | 1.05E-50 | 0.446071 | 3.25E-24 | 0.42067  |
| 0.45096  | 8.98E-25 | 0.363947 | 4.50E-16 | 0.819057 | #####    | 0.607654 | 1.78E-48 | 0.715293 |
| 0.533286 | 1.12E-35 | 0.449516 | 1.32E-24 | 0.717798 | 3.96E-75 | 0.640073 | 3.44E-55 | 0.617571 |
| 0.319568 | 1.51E-12 | 0.451178 | 8.47E-25 | 0.567892 | 3.15E-41 | 0.529497 | 4.17E-35 | 0.649107 |
| 0.431318 | 1.40E-22 | 0.240615 | 1.41E-07 | 0.696181 | 6.09E-69 | 0.507002 | 7.22E-32 | 0.589981 |
| 0.539744 | 1.16E-36 | 0.610051 | 6.03E-49 | 0.752688 | 1.91E-86 | 0.710814 | 4.56E-73 | 0.627471 |
| 0.355571 | 2.30E-15 | 0.431791 | 1.24E-22 | 0.736777 | 4.63E-81 | 0.700784 | 3.26E-70 | 0.576235 |
| 0.404777 | 7.73E-20 | 0.291072 | 1.43E-10 | 0.554192 | 5.94E-39 | 0.402637 | 1.25E-19 | 0.455832 |
| 0.389755 | 2.16E-18 | 0.26703  | 4.58E-09 | 0.690537 | 2.04E-67 | 0.461897 | 4.67E-26 | 0.533299 |
| 0.467138 | 1.09E-26 | 0.623583 | 1.12E-51 | 0.689296 | 4.37E-67 | 0.620864 | 4.07E-51 | 0.540606 |
| 0.411987 | 1.47E-20 | 0.368227 | 1.92E-16 | 0.730637 | 4.37E-79 | 0.515448 | 4.69E-33 | 0.583871 |
| 0.443199 | 6.86E-24 | 0.606347 | 3.20E-48 | 0.716997 | 6.87E-75 | 0.666054 | 3.47E-61 | 0.618368 |
| 0.508325 | 4.73E-32 | 0.589546 | 4.74E-45 | 0.728926 | 1.52E-78 | 0.624879 | 6.05E-52 | 0.647018 |
| 0.429719 | 2.08E-22 | 0.426175 | 4.96E-22 | 0.643437 | 6.20E-56 | 0.474255 | 1.45E-27 | 0.479173 |
| 0.531497 | 2.09E-35 | 0.476624 | 7.35E-28 | 0.759014 | 1.06E-88 | 0.582111 | 1.05E-43 | 0.577545 |
| 0.336181 | 8.41E-14 | 0.320608 | 1.27E-12 | 0.385193 | 5.75E-18 | 0.468078 | 8.38E-27 | 0.248061 |
| 0.431801 | 1.24E-22 | 0.348347 | 9.06E-15 | 0.835045 | #####    | 0.624551 | 7.07E-52 | 0.686627 |
| 0.446985 | 2.56E-24 | 0.410255 | 2.20E-20 | 0.715599 | 1.79E-74 | 0.463416 | 3.07E-26 | 0.626748 |
| 0.345172 | 1.64E-14 | 0.447702 | 2.12E-24 | 0.73717  | 3.45E-81 | 0.641597 | 1.59E-55 | 0.564304 |
| 0.507916 | 5.39E-32 | 0.450858 | 9.22E-25 | 0.802294 | #####    | 0.611572 | 3.02E-49 | 0.646452 |
| 0.440182 | 1.49E-23 | 0.453885 | 4.11E-25 | 0.734778 | 2.06E-80 | 0.687712 | 1.15E-66 | 0.593671 |
| 0.501711 | 3.85E-31 | 0.675723 | 1.42E-63 | 0.700665 | 3.52E-70 | 0.638492 | 7.62E-55 | 0.602294 |
| 0.323674 | 7.51E-13 | 0.403759 | 9.73E-20 | 0.488588 | 2.17E-29 | 0.484606 | 7.11E-29 | 0.352889 |
| 0.195581 | 2.08E-05 | 0.214008 | 3.06E-06 | 0.365902 | 3.06E-16 | 0.334969 | 1.04E-13 | 0.229635 |
| 0.256333 | 1.92E-08 | 0.278645 | 8.94E-10 | 0.375556 | 4.33E-17 | 0.310765 | 6.49E-12 | 0.315502 |
| 0.334038 | 1.23E-13 | 0.23429  | 3.04E-07 | 0.508046 | 5.17E-32 | 0.406723 | 4.95E-20 | 0.319946 |
| 0.53768  | 2.40E-36 | 0.59341  | 9.18E-46 | 0.817982 | #####    | 0.591922 | 1.73E-45 | 0.674966 |
| 0.410352 | 2.15E-20 | 0.323564 | 7.65E-13 | 0.748119 | 7.39E-85 | 0.541504 | 6.16E-37 | 0.525112 |
| 0.392409 | 1.22E-18 | 0.405527 | 6.51E-20 | 0.481637 | 1.71E-28 | 0.518502 | 1.71E-33 | 0.345379 |
| 0.484046 | 8.39E-29 | 0.544068 | 2.45E-37 | 0.746564 | 2.52E-84 | 0.568204 | 2.79E-41 | 0.659489 |
| 0.533505 | 1.04E-35 | 0.552349 | 1.18E-38 | 0.799397 | #####    | 0.631803 | 2.11E-53 | 0.707632 |
| 0.554569 | 5.16E-39 | 0.649895 | 2.18E-57 | 0.748845 | 4.16E-85 | 0.593333 | 9.49E-46 | 0.644641 |
| 0.100163 | 0.03045  | 0.317668 | 2.07E-12 | 0.448324 | 1.80E-24 | 0.463296 | 3.18E-26 | 0.377567 |
| 0.422991 | 1.08E-21 | 0.324555 | 6.46E-13 | 0.482989 | 1.15E-28 | 0.353911 | 3.17E-15 | 0.334683 |
| 0.327699 | 3.75E-13 | 0.453913 | 4.08E-25 | 0.621402 | 3.16E-51 | 0.700336 | 4.35E-70 | 0.477    |
| 0.33954  | 4.59E-14 | 0.306526 | 1.29E-11 | 0.383107 | 8.96E-18 | 0.391783 | 1.39E-18 | 0.170773 |
| -0.19577 | 2.04E-05 | -0.0775  | 0.09436  | -0.44353 | 6.29E-24 | -0.19507 | 2.19E-05 | -0.40021 |
| 0.409746 | 2.47E-20 | 0.258321 | 1.48E-08 | 0.81943  | #####    | 0.599505 | 6.59E-47 | 0.654605 |

|          |          |          |          |          |          |          |          |          |
|----------|----------|----------|----------|----------|----------|----------|----------|----------|
| 0.176636 | 0.00012  | 0.155484 | 0.00075  | 0.45637  | 2.11E-25 | 0.36756  | 2.19E-16 | 0.345395 |
| 0.386822 | 4.06E-18 | 0.531592 | 2.02E-35 | 0.550128 | 2.69E-38 | 0.558062 | 1.39E-39 | 0.475705 |
| 0.438867 | 2.09E-23 | 0.641634 | 1.56E-55 | 0.661883 | 3.50E-60 | 0.653164 | 3.88E-58 | 0.558201 |
| 0.476579 | 7.44E-28 | 0.305315 | 1.56E-11 | 0.630014 | 5.07E-53 | 0.522668 | 4.25E-34 | 0.535188 |
| -0.14791 | 0.00135  | -0.20897 | 5.26E-06 | -0.42759 | 3.51E-22 | -0.29196 | 1.25E-10 | -0.37499 |
| 0.280245 | 7.10E-10 | 0.165782 | 0.00032  | 0.386817 | 4.07E-18 | 0.250678 | 4.01E-08 | 0.229031 |
| 0.493017 | 5.67E-30 | 0.350472 | 6.08E-15 | 0.716179 | 1.20E-74 | 0.421725 | 1.46E-21 | 0.604854 |
| 0.444285 | 5.18E-24 | 0.643811 | 5.12E-56 | 0.726975 | 6.19E-78 | 0.694272 | 2.02E-68 | 0.614995 |
| 0.375441 | 4.43E-17 | 0.471327 | 3.35E-27 | 0.588519 | 7.30E-45 | 0.695453 | 9.62E-69 | 0.434945 |
| 0.420679 | 1.88E-21 | 0.460714 | 6.46E-26 | 0.72965  | 8.96E-79 | 0.644582 | 3.45E-56 | 0.595541 |
| 0.220552 | 1.49E-06 | 0.318398 | 1.84E-12 | 0.541592 | 5.97E-37 | 0.461381 | 5.38E-26 | 0.433259 |
| 0.382176 | 1.09E-17 | 0.409408 | 2.67E-20 | 0.816127 | #####    | 0.635796 | 2.94E-54 | 0.672172 |
| 0.546327 | 1.08E-37 | 0.544292 | 2.26E-37 | 0.862291 | #####    | 0.681612 | 4.49E-65 | 0.695852 |
| 0.769853 | 9.83E-93 | 0.669055 | 6.44E-62 | 0.859355 | #####    | 0.71421  | 4.61E-74 | 0.709983 |
| 0.316362 | 2.58E-12 | 0.296258 | 6.48E-11 | 0.674098 | 3.63E-63 | 0.444664 | 4.69E-24 | 0.576902 |
| 0.407561 | 4.09E-20 | 0.342156 | 2.85E-14 | 0.508512 | 4.45E-32 | 0.332616 | 1.59E-13 | 0.508434 |
| 0.415378 | 6.63E-21 | 0.456437 | 2.07E-25 | 0.804479 | #####    | 0.651531 | 9.22E-58 | 0.612195 |
| 0.305646 | 1.48E-11 | 0.363527 | 4.89E-16 | 0.669636 | 4.64E-62 | 0.618819 | 1.06E-50 | 0.461944 |
| 0.361853 | 6.81E-16 | 0.478235 | 4.61E-28 | 0.634577 | 5.38E-54 | 0.66442  | 8.62E-61 | 0.515454 |
| 0.414288 | 8.57E-21 | 0.45792  | 1.39E-25 | 0.515841 | 4.12E-33 | 0.382643 | 9.88E-18 | 0.459387 |
| 0.350621 | 5.91E-15 | 0.324366 | 6.67E-13 | 0.735006 | 1.74E-80 | 0.586948 | 1.41E-44 | 0.578902 |
| 0.211325 | 4.09E-06 | 0.140393 | 0.00236  | 0.405874 | 6.02E-20 | 0.234646 | 2.91E-07 | 0.350289 |
| 0.404303 | 8.60E-20 | 0.467305 | 1.04E-26 | 0.642237 | 1.14E-55 | 0.517708 | 2.22E-33 | 0.600331 |
| 0.45073  | 9.54E-25 | 0.559605 | 7.72E-40 | 0.68527  | 5.04E-66 | 0.645886 | 1.76E-56 | 0.537497 |
| 0.45868  | 1.13E-25 | 0.2909   | 1.47E-10 | 0.526381 | 1.21E-34 | 0.283815 | 4.22E-10 | 0.509974 |
| 0.348448 | 8.89E-15 | 0.236248 | 2.40E-07 | 0.564523 | 1.17E-40 | 0.397287 | 4.16E-19 | 0.380544 |
| -0.4221  | 1.33E-21 | -0.46788 | 8.85E-27 | -0.66537 | 5.08E-61 | -0.64871 | 4.05E-57 | -0.59093 |
| 0.543154 | 3.41E-37 | 0.531637 | 1.99E-35 | 0.640356 | 2.98E-55 | 0.522748 | 4.14E-34 | 0.534158 |
| -0.18173 | 7.83E-05 | -0.42887 | 2.56E-22 | -0.56792 | 3.11E-41 | -0.40743 | 4.21E-20 | -0.53027 |
| 0.21612  | 2.43E-06 | 0.422528 | 1.20E-21 | 0.492361 | 6.92E-30 | 0.438437 | 2.33E-23 | 0.504742 |
| 0.357147 | 1.70E-15 | 0.457088 | 1.74E-25 | 0.413397 | 1.06E-20 | 0.505031 | 1.35E-31 | 0.284078 |
| 0.307436 | 1.11E-11 | 0.39423  | 8.16E-19 | 0.548967 | 4.12E-38 | 0.46714  | 1.09E-26 | 0.468175 |
| 0.361161 | 7.79E-16 | 0.334294 | 1.18E-13 | 0.662236 | 2.88E-60 | 0.602249 | 1.98E-47 | 0.482979 |
| 0.165925 | 0.00032  | 0.469725 | 5.27E-27 | 0.452182 | 6.48E-25 | 0.54017  | 9.93E-37 | 0.321687 |
| 0.335062 | 1.03E-13 | 0.260992 | 1.04E-08 | 0.538638 | 1.71E-36 | 0.453156 | 5.00E-25 | 0.427568 |
| 0.22669  | 7.41E-07 | 0.434014 | 7.12E-23 | 0.442705 | 7.79E-24 | 0.57051  | 1.12E-41 | 0.4271   |
| 0.364001 | 4.46E-16 | 0.323902 | 7.22E-13 | 0.695755 | 7.96E-69 | 0.607924 | 1.58E-48 | 0.546402 |
| 0.31124  | 6.00E-12 | 0.505866 | 1.04E-31 | 0.465201 | 1.87E-26 | 0.432497 | 1.04E-22 | 0.361356 |
| 0.31332  | 4.27E-12 | 0.14155  | 0.00217  | 0.365749 | 3.15E-16 | 0.263765 | 7.14E-09 | 0.245173 |
| 0.286412 | 2.87E-10 | 0.299671 | 3.81E-11 | 0.617027 | 2.45E-50 | 0.509814 | 2.93E-32 | 0.502537 |
| 0.435599 | 4.78E-23 | 0.452739 | 5.59E-25 | 0.652675 | 5.03E-58 | 0.616647 | 2.93E-50 | 0.484573 |
| 0.334477 | 1.14E-13 | 0.250192 | 4.26E-08 | 0.408339 | 3.42E-20 | 0.268911 | 3.53E-09 | 0.320193 |
| 0.425645 | 5.65E-22 | 0.341881 | 3.00E-14 | 0.722608 | 1.38E-76 | 0.555726 | 3.34E-39 | 0.589572 |
| 0.34591  | 1.43E-14 | 0.319244 | 1.59E-12 | 0.68653  | 2.36E-66 | 0.524296 | 2.46E-34 | 0.482906 |
| 0.240137 | 1.50E-07 | 0.220677 | 1.47E-06 | 0.60593  | 3.86E-48 | 0.455301 | 2.81E-25 | 0.401539 |

|          |          |          |          |          |          |          |          |          |
|----------|----------|----------|----------|----------|----------|----------|----------|----------|
| 0.324056 | 7.03E-13 | 0.258485 | 1.45E-08 | 0.778174 | 5.53E-96 | 0.581943 | 1.12E-43 | 0.553093 |
| 0.398566 | 3.13E-19 | 0.318664 | 1.76E-12 | 0.740461 | 2.85E-82 | 0.573043 | 4.12E-42 | 0.558089 |
| 0.389843 | 2.12E-18 | 0.29367  | 9.64E-11 | 0.835519 | #####    | 0.583311 | 6.39E-44 | 0.610513 |
| 0.366681 | 2.62E-16 | 0.288016 | 2.26E-10 | 0.749762 | 2.00E-85 | 0.578176 | 5.23E-43 | 0.55802  |
| 0.501049 | 4.74E-31 | 0.574394 | 2.40E-42 | 0.709505 | 1.09E-72 | 0.578777 | 4.10E-43 | 0.552989 |
| 0.361153 | 7.81E-16 | 0.262112 | 8.93E-09 | 0.685968 | 3.31E-66 | 0.606008 | 3.72E-48 | 0.459238 |
| 0.382877 | 9.40E-18 | 0.338214 | 5.83E-14 | 0.559658 | 7.56E-40 | 0.445243 | 4.03E-24 | 0.502499 |
| 0.450127 | 1.12E-24 | 0.567779 | 3.29E-41 | 0.613399 | 1.31E-49 | 0.535392 | 5.38E-36 | 0.540132 |
| 0.365979 | 3.01E-16 | 0.367506 | 2.22E-16 | 0.579525 | 3.02E-43 | 0.347258 | 1.11E-14 | 0.524198 |
| 0.208069 | 5.79E-06 | 0.333969 | 1.25E-13 | 0.435101 | 5.42E-23 | 0.431666 | 1.28E-22 | 0.325862 |
| 0.254979 | 2.30E-08 | 0.312917 | 4.56E-12 | 0.599283 | 7.26E-47 | 0.601331 | 2.96E-47 | 0.447221 |
| 0.496995 | 1.67E-30 | 0.690401 | 2.22E-67 | 0.757318 | 4.33E-88 | 0.758464 | 1.67E-88 | 0.57471  |
| 0.477508 | 5.69E-28 | 0.54806  | 5.74E-38 | 0.587116 | 1.32E-44 | 0.468594 | 7.25E-27 | 0.497125 |
| 0.395707 | 5.89E-19 | 0.433724 | 7.66E-23 | 0.743617 | 2.51E-83 | 0.757817 | 2.87E-88 | 0.583943 |
| 0.30792  | 1.03E-11 | 0.217956 | 1.99E-06 | 0.583576 | 5.73E-44 | 0.535344 | 5.47E-36 | 0.449258 |
| 0.451531 | 7.71E-25 | 0.418611 | 3.08E-21 | 0.761589 | 1.22E-89 | 0.626658 | 2.58E-52 | 0.559228 |
| 0.408159 | 3.56E-20 | 0.452192 | 6.47E-25 | 0.658039 | 2.84E-59 | 0.608643 | 1.14E-48 | 0.528006 |
| 0.439656 | 1.71E-23 | 0.301562 | 2.84E-11 | 0.518823 | 1.54E-33 | 0.38298  | 9.20E-18 | 0.411092 |
| 0.363507 | 4.91E-16 | 0.267765 | 4.14E-09 | 0.712129 | 1.89E-73 | 0.524901 | 2.00E-34 | 0.529861 |
| 0.386772 | 4.11E-18 | 0.331313 | 2.00E-13 | 0.737918 | 1.96E-81 | 0.594404 | 6.00E-46 | 0.571735 |
| 0.242635 | 1.10E-07 | 0.288169 | 2.21E-10 | 0.585644 | 2.43E-44 | 0.461434 | 5.31E-26 | 0.483751 |
| 0.396388 | 5.07E-19 | 0.293662 | 9.65E-11 | 0.690591 | 1.98E-67 | 0.548625 | 4.67E-38 | 0.52758  |
| 0.437351 | 3.07E-23 | 0.281212 | 6.17E-10 | 0.641827 | 1.41E-55 | 0.474378 | 1.40E-27 | 0.498094 |
| 0.399728 | 2.41E-19 | 0.354683 | 2.73E-15 | 0.821532 | #####    | 0.624739 | 6.47E-52 | 0.625962 |
| 0.512112 | 1.39E-32 | 0.486122 | 4.53E-29 | 0.7219   | 2.28E-76 | 0.525509 | 1.63E-34 | 0.536082 |
| 0.484985 | 6.35E-29 | 0.41381  | 9.59E-21 | 0.775681 | 5.39E-95 | 0.545716 | 1.35E-37 | 0.635798 |
| 0.375107 | 4.75E-17 | 0.399732 | 2.41E-19 | 0.527708 | 7.70E-35 | 0.629428 | 6.74E-53 | 0.457206 |
| 0.429856 | 2.01E-22 | 0.575472 | 1.56E-42 | 0.807461 | #####    | 0.778914 | 2.80E-96 | 0.657314 |
| 0.456355 | 2.12E-25 | 0.485198 | 5.96E-29 | 0.818175 | #####    | 0.682273 | 3.03E-65 | 0.680714 |
| 0.458433 | 1.21E-25 | 0.275084 | 1.49E-09 | 0.648546 | 4.42E-57 | 0.463185 | 3.27E-26 | 0.517244 |
| 0.343901 | 2.07E-14 | 0.404441 | 8.34E-20 | 0.651499 | 9.38E-58 | 0.557046 | 2.03E-39 | 0.569463 |
| 0.434791 | 5.86E-23 | 0.397598 | 3.88E-19 | 0.595636 | 3.53E-46 | 0.591435 | 2.13E-45 | 0.419462 |
| 0.584576 | 3.79E-44 | 0.488423 | 2.27E-29 | 0.707738 | 3.52E-72 | 0.605809 | 4.07E-48 | 0.611438 |
| -0.36593 | 3.04E-16 | -0.27406 | 1.72E-09 | -0.36175 | 6.95E-16 | -0.2044  | 8.49E-06 | -0.29562 |
| 0.463377 | 3.11E-26 | 0.447664 | 2.14E-24 | 0.595719 | 3.41E-46 | 0.541249 | 6.75E-37 | 0.390068 |
| 0.220795 | 1.45E-06 | 0.246867 | 6.50E-08 | 0.464415 | 2.33E-26 | 0.400414 | 2.07E-19 | 0.299208 |
| 0.336178 | 8.41E-14 | 0.194098 | 2.41E-05 | 0.612735 | 1.78E-49 | 0.388952 | 2.57E-18 | 0.489468 |
| -0.09305 | 0.04444  | -0.17969 | 9.44E-05 | -0.40995 | 2.35E-20 | -0.34147 | 3.23E-14 | -0.28641 |
| -0.2839  | 4.16E-10 | -0.21726 | 2.15E-06 | -0.36727 | 2.33E-16 | -0.2984  | 4.65E-11 | -0.24442 |
| 0.353907 | 3.17E-15 | 0.397976 | 3.57E-19 | 0.566943 | 4.56E-41 | 0.537356 | 2.69E-36 | 0.477681 |
| 0.339104 | 4.97E-14 | 0.346897 | 1.19E-14 | 0.687217 | 1.55E-66 | 0.470373 | 4.39E-27 | 0.607259 |
| 0.323925 | 7.19E-13 | 0.224046 | 1.00E-06 | 0.699985 | 5.45E-70 | 0.473669 | 1.72E-27 | 0.55821  |
| -0.35937 | 1.11E-15 | -0.43938 | 1.83E-23 | -0.49515 | 2.95E-30 | -0.31299 | 4.51E-12 | -0.49493 |
| 0.282161 | 5.37E-10 | 0.431539 | 1.32E-22 | 0.54392  | 2.59E-37 | 0.536045 | 4.28E-36 | 0.500262 |
| 0.433691 | 7.72E-23 | 0.475133 | 1.13E-27 | 0.745915 | 4.19E-84 | 0.506144 | 9.49E-32 | 0.659741 |

|          |          |          |          |          |          |          |          |          |
|----------|----------|----------|----------|----------|----------|----------|----------|----------|
| 0.502505 | 3.00E-31 | 0.509088 | 3.70E-32 | 0.855005 | #####    | 0.723945 | 5.38E-77 | 0.722926 |
| 0.389925 | 2.08E-18 | 0.242861 | 1.07E-07 | 0.684409 | 8.46E-66 | 0.555858 | 3.18E-39 | 0.453078 |
| -0.02388 | 0.60673  | -0.22162 | 1.32E-06 | -0.38172 | 1.20E-17 | -0.24014 | 1.50E-07 | -0.31625 |
| 0.477481 | 5.73E-28 | 0.306341 | 1.33E-11 | 0.699548 | 7.20E-70 | 0.389291 | 2.39E-18 | 0.56281  |
| 0.462333 | 4.14E-26 | 0.427878 | 3.27E-22 | 0.681223 | 5.65E-65 | 0.593833 | 7.66E-46 | 0.687421 |
| -0.13755 | 0.0029   | -0.20072 | 1.24E-05 | -0.37854 | 2.33E-17 | -0.24023 | 1.48E-07 | -0.39342 |
| 0.230532 | 4.74E-07 | 0.387951 | 3.19E-18 | 0.418107 | 3.47E-21 | 0.452326 | 6.24E-25 | 0.258959 |
| 0.548122 | 5.61E-38 | 0.645119 | 2.61E-56 | 0.747103 | 1.65E-84 | 0.719643 | 1.10E-75 | 0.611343 |
| 0.454727 | 3.28E-25 | 0.585692 | 2.38E-44 | 0.747078 | 1.68E-84 | 0.663164 | 1.73E-60 | 0.641298 |
| 0.397405 | 4.05E-19 | 0.305252 | 1.58E-11 | 0.738433 | 1.33E-81 | 0.500403 | 5.80E-31 | 0.600013 |
| 0.264814 | 6.19E-09 | 0.22417  | 9.89E-07 | 0.422949 | 1.09E-21 | 0.298549 | 4.54E-11 | 0.334538 |
| 0.396776 | 4.65E-19 | 0.339629 | 4.52E-14 | 0.663047 | 1.84E-60 | 0.501784 | 3.76E-31 | 0.512086 |
| 0.365495 | 3.31E-16 | 0.282886 | 4.83E-10 | 0.697427 | 2.77E-69 | 0.524019 | 2.70E-34 | 0.51299  |
| 0.379104 | 2.08E-17 | 0.157377 | 0.00064  | 0.575158 | 1.77E-42 | 0.443966 | 5.62E-24 | 0.383744 |
| 0.500761 | 5.18E-31 | 0.601996 | 2.21E-47 | 0.709874 | 8.54E-73 | 0.561845 | 3.28E-40 | 0.62304  |
| 0.484414 | 7.52E-29 | 0.471732 | 2.98E-27 | 0.762265 | 6.89E-90 | 0.630733 | 3.57E-53 | 0.59895  |
| 0.443232 | 6.80E-24 | 0.443194 | 6.87E-24 | 0.783364 | 4.41E-98 | 0.674427 | 3.00E-63 | 0.680827 |
| 0.32622  | 4.85E-13 | 0.453301 | 4.81E-25 | 0.540625 | 8.44E-37 | 0.556494 | 2.51E-39 | 0.38448  |
| 0.34157  | 3.17E-14 | 0.304419 | 1.80E-11 | 0.71931  | 1.39E-75 | 0.662789 | 2.12E-60 | 0.47843  |
| 0.079401 | 0.08653  | 0.19118  | 3.20E-05 | 0.308619 | 9.19E-12 | 0.411251 | 1.74E-20 | 0.206588 |
| 0.478578 | 4.17E-28 | 0.55029  | 2.53E-38 | 0.546551 | 9.96E-38 | 0.562759 | 2.31E-40 | 0.504366 |
| 0.470023 | 4.84E-27 | 0.508983 | 3.83E-32 | 0.664474 | 8.37E-61 | 0.662145 | 3.03E-60 | 0.567243 |
| -0.26022 | 1.15E-08 | -0.4093  | 2.74E-20 | -0.46494 | 2.01E-26 | -0.48592 | 4.80E-29 | -0.33943 |
| 0.302824 | 2.32E-11 | 0.301664 | 2.79E-11 | 0.71398  | 5.39E-74 | 0.545009 | 1.74E-37 | 0.563929 |
| 0.474084 | 1.53E-27 | 0.300077 | 3.58E-11 | 0.591373 | 2.19E-45 | 0.457187 | 1.69E-25 | 0.497175 |
| -0.09839 | 0.03353  | -0.24216 | 1.17E-07 | -0.32636 | 4.74E-13 | -0.38038 | 1.59E-17 | -0.31444 |
| 0.048421 | 0.2964   | 0.188652 | 4.08E-05 | 0.378065 | 2.58E-17 | 0.246473 | 6.83E-08 | 0.309285 |
| 0.45353  | 4.52E-25 | 0.336448 | 8.01E-14 | 0.689649 | 3.52E-67 | 0.545499 | 1.46E-37 | 0.487084 |
| 0.430319 | 1.79E-22 | 0.291312 | 1.38E-10 | 0.776175 | 3.44E-95 | 0.564537 | 1.16E-40 | 0.612418 |
| 0.458934 | 1.05E-25 | 0.503281 | 2.35E-31 | 0.717161 | 6.14E-75 | 0.699239 | 8.77E-70 | 0.540355 |
| 0.370895 | 1.12E-16 | 0.458606 | 1.15E-25 | 0.464623 | 2.20E-26 | 0.487379 | 3.11E-29 | 0.233619 |
| 0.551646 | 1.53E-38 | 0.56532  | 8.58E-41 | 0.728283 | 2.41E-78 | 0.645698 | 1.94E-56 | 0.547648 |
| 0.217466 | 2.10E-06 | 0.527115 | 9.43E-35 | 0.501339 | 4.33E-31 | 0.595061 | 4.52E-46 | 0.500505 |
| 0.431097 | 1.48E-22 | 0.402912 | 1.18E-19 | 0.785117 | 8.36E-99 | 0.750854 | 8.37E-86 | 0.547177 |
| 0.437567 | 2.90E-23 | 0.56836  | 2.62E-41 | 0.594878 | 4.89E-46 | 0.525574 | 1.59E-34 | 0.524649 |
| 0.491825 | 8.14E-30 | 0.566889 | 4.66E-41 | 0.542493 | 4.32E-37 | 0.465448 | 1.75E-26 | 0.423275 |
| 0.467351 | 1.03E-26 | 0.598992 | 8.24E-47 | 0.6214   | 3.16E-51 | 0.543858 | 2.64E-37 | 0.60821  |
| 0.334192 | 1.20E-13 | 0.401377 | 1.67E-19 | 0.591638 | 1.95E-45 | 0.41117  | 1.78E-20 | 0.540967 |
| 0.330223 | 2.42E-13 | 0.412189 | 1.40E-20 | 0.631614 | 2.32E-53 | 0.592325 | 1.46E-45 | 0.447219 |
| 0.388408 | 2.89E-18 | 0.483315 | 1.04E-28 | 0.595639 | 3.53E-46 | 0.54627  | 1.10E-37 | 0.394506 |
| 0.230284 | 4.88E-07 | 0.122162 | 0.00822  | 0.361907 | 6.73E-16 | 0.150836 | 0.00108  | 0.358445 |
| 0.400002 | 2.27E-19 | 0.311432 | 5.82E-12 | 0.59698  | 1.98E-46 | 0.49449  | 3.61E-30 | 0.470395 |
| 0.288442 | 2.12E-10 | 0.201958 | 1.09E-05 | 0.377159 | 3.11E-17 | 0.293843 | 9.39E-11 | 0.256184 |
| -0.3424  | 2.73E-14 | -0.42846 | 2.84E-22 | -0.43641 | 3.89E-23 | -0.44974 | 1.24E-24 | -0.36008 |
| -0.13822 | 0.00276  | -0.20747 | 6.16E-06 | -0.37467 | 5.20E-17 | -0.29399 | 9.18E-11 | -0.31443 |

|          |          |          |          |          |          |          |          |          |
|----------|----------|----------|----------|----------|----------|----------|----------|----------|
| 0.135458 | 0.00336  | 0.199197 | 1.45E-05 | 0.359619 | 1.05E-15 | 0.338962 | 5.10E-14 | 0.250315 |
| 0.405385 | 6.73E-20 | 0.336913 | 7.37E-14 | 0.582136 | 1.04E-43 | 0.43432  | 6.60E-23 | 0.487103 |
| 0.373299 | 6.88E-17 | 0.371181 | 1.06E-16 | 0.606062 | 3.64E-48 | 0.495255 | 2.86E-30 | 0.427832 |
| 0.425727 | 5.54E-22 | 0.245823 | 7.41E-08 | 0.594721 | 5.24E-46 | 0.409754 | 2.47E-20 | 0.45843  |
| 0.353597 | 3.36E-15 | 0.459645 | 8.66E-26 | 0.573194 | 3.87E-42 | 0.600253 | 4.75E-47 | 0.456293 |
| 0.299349 | 4.01E-11 | 0.253715 | 2.71E-08 | 0.607982 | 1.54E-48 | 0.493583 | 4.77E-30 | 0.538875 |
| 0.245916 | 7.33E-08 | 0.206177 | 7.06E-06 | 0.339356 | 4.74E-14 | 0.238753 | 1.78E-07 | 0.319386 |
| 0.535955 | 4.41E-36 | 0.579845 | 2.65E-43 | 0.829114 | #####    | 0.702776 | 9.05E-71 | 0.635444 |
| 0.35049  | 6.06E-15 | 0.320879 | 1.21E-12 | 0.508087 | 5.10E-32 | 0.372003 | 8.95E-17 | 0.480259 |
| 0.382885 | 9.39E-18 | 0.331887 | 1.80E-13 | 0.780953 | 4.23E-97 | 0.614547 | 7.73E-50 | 0.608876 |
| 0.396321 | 5.15E-19 | 0.611723 | 2.82E-49 | 0.593626 | 8.37E-46 | 0.690465 | 2.14E-67 | 0.439339 |
| 0.400628 | 1.97E-19 | 0.238625 | 1.80E-07 | 0.646014 | 1.65E-56 | 0.353964 | 3.13E-15 | 0.523053 |
| 0.468143 | 8.23E-27 | 0.277514 | 1.05E-09 | 0.78591  | 3.92E-99 | 0.513441 | 9.03E-33 | 0.610976 |
| 0.307729 | 1.06E-11 | 0.473978 | 1.57E-27 | 0.498038 | 1.21E-30 | 0.56986  | 1.45E-41 | 0.324427 |
| 0.597729 | 1.43E-46 | 0.694977 | 1.30E-68 | 0.781333 | 2.97E-97 | 0.677036 | 6.62E-64 | 0.675117 |
| 0.381335 | 1.30E-17 | 0.478756 | 3.96E-28 | 0.597561 | 1.54E-46 | 0.512376 | 1.28E-32 | 0.465207 |
| 0.446225 | 3.12E-24 | 0.542728 | 3.97E-37 | 0.775849 | 4.63E-95 | 0.71876  | 2.03E-75 | 0.597004 |
| 0.440418 | 1.40E-23 | 0.652318 | 6.08E-58 | 0.483292 | 1.05E-28 | 0.482406 | 1.36E-28 | 0.381024 |
| 0.335674 | 9.20E-14 | 0.291177 | 1.41E-10 | 0.484932 | 6.45E-29 | 0.531886 | 1.83E-35 | 0.200531 |
| 0.426582 | 4.49E-22 | 0.473201 | 1.96E-27 | 0.619614 | 7.32E-51 | 0.510911 | 2.05E-32 | 0.490638 |
| 0.513056 | 1.02E-32 | 0.658492 | 2.22E-59 | 0.630514 | 3.97E-53 | 0.581652 | 1.27E-43 | 0.508556 |
| 0.544212 | 2.33E-37 | 0.589137 | 5.63E-45 | 0.666408 | 2.85E-61 | 0.494535 | 3.56E-30 | 0.621056 |
| 0.392751 | 1.13E-18 | 0.325119 | 5.86E-13 | 0.703982 | 4.14E-71 | 0.608865 | 1.03E-48 | 0.485264 |
| 0.38352  | 8.21E-18 | 0.382171 | 1.09E-17 | 0.54685  | 8.93E-38 | 0.370459 | 1.22E-16 | 0.519741 |
| 0.369489 | 1.49E-16 | 0.318365 | 1.85E-12 | 0.55993  | 6.82E-40 | 0.515103 | 5.25E-33 | 0.377648 |
| 0.450155 | 1.11E-24 | 0.433925 | 7.28E-23 | 0.528162 | 6.59E-35 | 0.438065 | 2.56E-23 | 0.462184 |
| 0.45176  | 7.26E-25 | 0.463107 | 3.35E-26 | 0.584591 | 3.77E-44 | 0.58007  | 2.42E-43 | 0.448845 |
| 0.369554 | 1.47E-16 | 0.468595 | 7.25E-27 | 0.692697 | 5.38E-68 | 0.580544 | 1.99E-43 | 0.606311 |
| 0.256798 | 1.81E-08 | 0.439725 | 1.68E-23 | 0.456511 | 2.03E-25 | 0.524762 | 2.10E-34 | 0.274949 |
| 0.332822 | 1.53E-13 | 0.490329 | 1.28E-29 | 0.542296 | 4.64E-37 | 0.538235 | 1.97E-36 | 0.504549 |
| 0.320731 | 1.24E-12 | 0.310235 | 7.07E-12 | 0.72432  | 4.12E-77 | 0.541988 | 5.18E-37 | 0.556296 |
| 0.361742 | 6.96E-16 | 0.312966 | 4.53E-12 | 0.585279 | 2.83E-44 | 0.459295 | 9.53E-26 | 0.507777 |
| 0.368836 | 1.70E-16 | 0.274138 | 1.70E-09 | 0.752216 | 2.80E-86 | 0.556515 | 2.49E-39 | 0.60251  |
| 0.315966 | 2.76E-12 | 0.604476 | 7.37E-48 | 0.495007 | 3.08E-30 | 0.518751 | 1.57E-33 | 0.464331 |
| 0.488813 | 2.02E-29 | 0.610503 | 4.91E-49 | 0.653279 | 3.65E-58 | 0.598693 | 9.39E-47 | 0.602589 |
| 0.415743 | 6.08E-21 | 0.290576 | 1.54E-10 | 0.668036 | 1.14E-61 | 0.549885 | 2.94E-38 | 0.489854 |
| 0.320305 | 1.33E-12 | 0.303972 | 1.94E-11 | 0.644909 | 2.91E-56 | 0.420123 | 2.15E-21 | 0.54147  |
| -0.1999  | 1.35E-05 | -0.4604  | 7.05E-26 | -0.39681 | 4.62E-19 | -0.34683 | 1.20E-14 | -0.36376 |
| 0.525176 | 1.82E-34 | 0.572435 | 5.24E-42 | 0.838415 | #####    | 0.660397 | 7.89E-60 | 0.714342 |
| 0.356415 | 1.96E-15 | 0.372505 | 8.08E-17 | 0.770889 | 3.94E-93 | 0.589065 | 5.80E-45 | 0.644982 |
| 0.52628  | 1.25E-34 | 0.585152 | 2.98E-44 | 0.784808 | 1.12E-98 | 0.553483 | 7.74E-39 | 0.744702 |
| 0.386907 | 3.99E-18 | 0.481593 | 1.73E-28 | 0.648993 | 3.50E-57 | 0.577639 | 6.50E-43 | 0.576603 |
| -0.19394 | 2.44E-05 | -0.23116 | 4.40E-07 | -0.33455 | 1.12E-13 | -0.28602 | 3.05E-10 | -0.33217 |
| 0.488278 | 2.38E-29 | 0.614387 | 8.32E-50 | 0.72428  | 4.24E-77 | 0.682905 | 2.08E-65 | 0.566763 |
| 0.379703 | 1.83E-17 | 0.345704 | 1.48E-14 | 0.791232 | #####    | 0.617772 | 1.73E-50 | 0.62774  |

|          |          |          |          |          |          |          |          |          |
|----------|----------|----------|----------|----------|----------|----------|----------|----------|
| 0.270438 | 2.86E-09 | 0.25811  | 1.52E-08 | 0.58089  | 1.73E-43 | 0.421088 | 1.70E-21 | 0.499135 |
| 0.372017 | 8.93E-17 | 0.298424 | 4.63E-11 | 0.64321  | 6.97E-56 | 0.474171 | 1.49E-27 | 0.498955 |
| 0.451419 | 7.95E-25 | 0.48219  | 1.45E-28 | 0.712205 | 1.79E-73 | 0.58265  | 8.40E-44 | 0.620659 |
| 0.35964  | 1.05E-15 | 0.217816 | 2.02E-06 | 0.672791 | 7.69E-63 | 0.479241 | 3.44E-28 | 0.549837 |
| 0.448332 | 1.80E-24 | 0.383356 | 8.50E-18 | 0.447693 | 2.13E-24 | 0.383457 | 8.32E-18 | 0.399432 |
| 0.386214 | 4.63E-18 | 0.307527 | 1.10E-11 | 0.711333 | 3.22E-73 | 0.544595 | 2.03E-37 | 0.515092 |
| 0.314698 | 3.40E-12 | 0.31555  | 2.95E-12 | 0.409945 | 2.36E-20 | 0.320537 | 1.28E-12 | 0.359773 |
| 0.411876 | 1.51E-20 | 0.2297   | 5.23E-07 | 0.656966 | 5.08E-59 | 0.526007 | 1.38E-34 | 0.458392 |
| 0.418502 | 3.16E-21 | 0.440605 | 1.34E-23 | 0.844484 | #####    | 0.684277 | 9.15E-66 | 0.67257  |
| 0.220541 | 1.49E-06 | 0.140353 | 0.00237  | 0.470514 | 4.22E-27 | 0.401923 | 1.47E-19 | 0.276966 |
| 0.169532 | 0.00023  | 0.217511 | 2.09E-06 | 0.458497 | 1.18E-25 | 0.394156 | 8.29E-19 | 0.357203 |
| 0.487535 | 2.97E-29 | 0.498469 | 1.06E-30 | 0.635148 | 4.06E-54 | 0.543432 | 3.08E-37 | 0.509834 |
| 0.312953 | 4.54E-12 | 0.247351 | 6.12E-08 | 0.626232 | 3.16E-52 | 0.514135 | 7.20E-33 | 0.423739 |
| -0.35194 | 4.61E-15 | -0.38816 | 3.05E-18 | -0.44891 | 1.54E-24 | -0.39973 | 2.41E-19 | -0.47403 |
| 0.392038 | 1.32E-18 | 0.560008 | 6.62E-40 | 0.579155 | 3.51E-43 | 0.51164  | 1.62E-32 | 0.478897 |
| 0.369529 | 1.48E-16 | 0.445057 | 4.24E-24 | 0.579466 | 3.09E-43 | 0.63724  | 1.43E-54 | 0.51446  |
| 0.43853  | 2.27E-23 | 0.598807 | 8.94E-47 | 0.605354 | 4.99E-48 | 0.612383 | 2.09E-49 | 0.572707 |
| 0.382557 | 1.01E-17 | 0.298121 | 4.86E-11 | 0.520147 | 9.90E-34 | 0.394863 | 7.10E-19 | 0.408335 |
| 0.448359 | 1.79E-24 | 0.423954 | 8.52E-22 | 0.651057 | 1.18E-57 | 0.484422 | 7.51E-29 | 0.466054 |
| 0.446885 | 2.63E-24 | 0.468069 | 8.40E-27 | 0.718725 | 2.08E-75 | 0.624153 | 8.55E-52 | 0.604408 |
| 0.217189 | 2.16E-06 | 0.237264 | 2.13E-07 | 0.431939 | 1.20E-22 | 0.385896 | 4.95E-18 | 0.279224 |
| 0.382784 | 9.59E-18 | 0.144866 | 0.0017   | 0.563372 | 1.82E-40 | 0.293674 | 9.63E-11 | 0.427226 |
| 0.431991 | 1.18E-22 | 0.547315 | 7.54E-38 | 0.77048  | 5.66E-93 | 0.657655 | 3.50E-59 | 0.638231 |
| 0.554894 | 4.57E-39 | 0.689363 | 4.20E-67 | 0.734661 | 2.25E-80 | 0.628999 | 8.30E-53 | 0.639669 |
| 0.440081 | 1.53E-23 | 0.403231 | 1.10E-19 | 0.772611 | 8.53E-94 | 0.601439 | 2.82E-47 | 0.576272 |
| -0.18723 | 4.68E-05 | -0.37311 | 7.14E-17 | -0.26507 | 5.98E-09 | -0.26694 | 4.63E-09 | -0.19593 |
| -0.27585 | 1.34E-09 | -0.40015 | 2.20E-19 | -0.40435 | 8.51E-20 | -0.34656 | 1.26E-14 | -0.31957 |
| -0.28157 | 5.86E-10 | -0.32432 | 6.72E-13 | -0.50261 | 2.90E-31 | -0.30771 | 1.07E-11 | -0.49062 |
| 0.467065 | 1.11E-26 | 0.496323 | 2.06E-30 | 0.751752 | 4.07E-86 | 0.508324 | 4.73E-32 | 0.697828 |
| 0.431837 | 1.23E-22 | 0.566281 | 5.91E-41 | 0.699356 | 8.14E-70 | 0.65319  | 3.83E-58 | 0.600487 |
| 0.36306  | 5.37E-16 | 0.450246 | 1.08E-24 | 0.644733 | 3.19E-56 | 0.712945 | 1.09E-73 | 0.499708 |
| 0.479317 | 3.36E-28 | 0.477103 | 6.40E-28 | 0.690356 | 2.28E-67 | 0.677295 | 5.69E-64 | 0.501992 |
| 0.446256 | 3.10E-24 | 0.427047 | 4.01E-22 | 0.826553 | #####    | 0.677761 | 4.33E-64 | 0.635501 |
| 0.267312 | 4.40E-09 | 0.261164 | 1.01E-08 | 0.515691 | 4.33E-33 | 0.43422  | 6.76E-23 | 0.321379 |
| 0.384371 | 6.85E-18 | 0.542501 | 4.31E-37 | 0.661344 | 4.70E-60 | 0.603946 | 9.33E-48 | 0.531687 |
| 0.340332 | 3.97E-14 | 0.39353  | 9.51E-19 | 0.577576 | 6.66E-43 | 0.484271 | 7.85E-29 | 0.474952 |
| 0.480776 | 2.20E-28 | 0.572199 | 5.76E-42 | 0.842012 | #####    | 0.75226  | 2.70E-86 | 0.721241 |
| 0.433735 | 7.64E-23 | 0.345316 | 1.59E-14 | 0.799002 | #####    | 0.592292 | 1.48E-45 | 0.650507 |
| 0.463627 | 2.90E-26 | 0.557223 | 1.90E-39 | 0.836161 | #####    | 0.720872 | 4.68E-76 | 0.703281 |
| 0.478423 | 4.36E-28 | 0.433845 | 7.43E-23 | 0.640036 | 3.50E-55 | 0.508043 | 5.17E-32 | 0.556444 |
| 0.3125   | 4.89E-12 | 0.265867 | 5.37E-09 | 0.447965 | 1.98E-24 | 0.39691  | 4.52E-19 | 0.272176 |
| 0.511075 | 1.95E-32 | 0.708035 | 2.90E-72 | 0.651585 | 8.96E-58 | 0.615915 | 4.11E-50 | 0.563201 |
| 0.53241  | 1.52E-35 | 0.615727 | 4.48E-50 | 0.677019 | 6.68E-64 | 0.614505 | 7.88E-50 | 0.526705 |
| 0.366857 | 2.53E-16 | 0.157251 | 0.00065  | 0.664872 | 6.71E-61 | 0.462347 | 4.13E-26 | 0.450998 |
| 0.14368  | 0.00185  | 0.168664 | 0.00025  | 0.337593 | 6.52E-14 | 0.204394 | 8.50E-06 | 0.292807 |



|          |          |          |          |          |          |          |          |          |
|----------|----------|----------|----------|----------|----------|----------|----------|----------|
| 0.309942 | 7.42E-12 | 0.221906 | 1.28E-06 | 0.484479 | 7.38E-29 | 0.36313  | 5.29E-16 | 0.375807 |
| 0.419123 | 2.73E-21 | 0.330024 | 2.50E-13 | 0.745425 | 6.15E-84 | 0.495109 | 2.99E-30 | 0.667468 |
| -0.16668 | 0.0003   | -0.29149 | 1.34E-10 | -0.36876 | 1.72E-16 | -0.3275  | 3.88E-13 | -0.36371 |
| 0.402929 | 1.17E-19 | 0.468083 | 8.37E-27 | 0.621451 | 3.08E-51 | 0.521756 | 5.78E-34 | 0.47963  |
| 0.32043  | 1.30E-12 | 0.372486 | 8.12E-17 | 0.639403 | 4.82E-55 | 0.578227 | 5.12E-43 | 0.506337 |
| 0.385638 | 5.23E-18 | 0.456228 | 2.19E-25 | 0.697552 | 2.56E-69 | 0.606754 | 2.67E-48 | 0.531195 |
| 0.605463 | 4.75E-48 | 0.661459 | 4.41E-60 | 0.864056 | #####    | 0.759093 | 9.92E-89 | 0.714291 |
| 0.390637 | 1.79E-18 | 0.40094  | 1.84E-19 | 0.694855 | 1.40E-68 | 0.66724  | 1.79E-61 | 0.52308  |
| 0.471823 | 2.91E-27 | 0.376934 | 3.26E-17 | 0.578318 | 4.93E-43 | 0.350329 | 6.24E-15 | 0.458502 |
| 0.471625 | 3.08E-27 | 0.351793 | 4.74E-15 | 0.852069 | #####    | 0.606481 | 3.01E-48 | 0.72099  |
| 0.329363 | 2.81E-13 | 0.269731 | 3.15E-09 | 0.601974 | 2.23E-47 | 0.313665 | 4.03E-12 | 0.54747  |
| 0.284511 | 3.81E-10 | 0.298649 | 4.47E-11 | 0.590955 | 2.61E-45 | 0.528462 | 5.95E-35 | 0.490469 |
| 0.468319 | 7.83E-27 | 0.417951 | 3.61E-21 | 0.719454 | 1.26E-75 | 0.551851 | 1.42E-38 | 0.665795 |
| 0.135103 | 0.00344  | 0.18864  | 4.09E-05 | 0.323615 | 7.59E-13 | 0.425456 | 5.91E-22 | 0.118332 |
| 0.419367 | 2.57E-21 | 0.221108 | 1.40E-06 | 0.760777 | 2.42E-89 | 0.532404 | 1.53E-35 | 0.595647 |
| 0.386404 | 4.44E-18 | 0.518368 | 1.79E-33 | 0.666738 | 2.37E-61 | 0.634568 | 5.41E-54 | 0.568142 |
| 0.22542  | 8.57E-07 | 0.291012 | 1.44E-10 | 0.513437 | 9.05E-33 | 0.432267 | 1.10E-22 | 0.46477  |
| 0.399128 | 2.76E-19 | 0.538317 | 1.92E-36 | 0.62772  | 1.54E-52 | 0.469572 | 5.50E-27 | 0.543107 |
| 0.535911 | 4.48E-36 | 0.64028  | 3.09E-55 | 0.811134 | #####    | 0.650508 | 1.58E-57 | 0.728635 |
| 0.330907 | 2.14E-13 | 0.427768 | 3.36E-22 | 0.593989 | 7.17E-46 | 0.627531 | 1.69E-52 | 0.450707 |
| 0.38127  | 1.32E-17 | 0.236157 | 2.43E-07 | 0.684722 | 7.01E-66 | 0.405547 | 6.48E-20 | 0.504607 |
| 0.407986 | 3.71E-20 | 0.367316 | 2.30E-16 | 0.626099 | 3.37E-52 | 0.442536 | 8.14E-24 | 0.458731 |
| 0.494895 | 3.19E-30 | 0.499077 | 8.77E-31 | 0.769382 | 1.49E-92 | 0.699677 | 6.63E-70 | 0.63089  |
| 0.37324  | 6.96E-17 | 0.292212 | 1.20E-10 | 0.544194 | 2.34E-37 | 0.290828 | 1.48E-10 | 0.481941 |
| 0.455809 | 2.45E-25 | 0.37797  | 2.63E-17 | 0.821046 | #####    | 0.644028 | 4.58E-56 | 0.64048  |
| 0.349991 | 6.66E-15 | 0.196673 | 1.86E-05 | 0.47317  | 1.98E-27 | 0.292473 | 1.16E-10 | 0.300724 |
| 0.381347 | 1.30E-17 | 0.121501 | 0.00858  | 0.441947 | 9.48E-24 | 0.22899  | 5.68E-07 | 0.377601 |
| 0.32365  | 7.54E-13 | 0.080039 | 0.08403  | 0.579656 | 2.86E-43 | 0.37457  | 5.30E-17 | 0.345807 |
| 0.511662 | 1.61E-32 | 0.434177 | 6.84E-23 | 0.750191 | 1.42E-85 | 0.572796 | 4.54E-42 | 0.626099 |
| 0.456695 | 1.93E-25 | 0.428711 | 2.66E-22 | 0.732457 | 1.15E-79 | 0.562276 | 2.78E-40 | 0.627309 |
| 0.25198  | 3.39E-08 | 0.246023 | 7.23E-08 | 0.444479 | 4.92E-24 | 0.308406 | 9.52E-12 | 0.402112 |
| 0.421688 | 1.47E-21 | 0.28827  | 2.18E-10 | 0.741647 | 1.15E-82 | 0.525115 | 1.86E-34 | 0.571583 |
| 0.416535 | 5.04E-21 | 0.25876  | 1.40E-08 | 0.550735 | 2.15E-38 | 0.376986 | 3.22E-17 | 0.398057 |
| 0.298067 | 4.90E-11 | 0.369787 | 1.40E-16 | 0.587486 | 1.13E-44 | 0.58626  | 1.88E-44 | 0.481256 |
| 0.341706 | 3.09E-14 | 0.463103 | 3.35E-26 | 0.503245 | 2.38E-31 | 0.616911 | 2.59E-50 | 0.435053 |
| 0.444257 | 5.21E-24 | 0.485297 | 5.79E-29 | 0.746875 | 1.97E-84 | 0.726581 | 8.21E-78 | 0.504452 |
| 0.393355 | 9.88E-19 | 0.457998 | 1.36E-25 | 0.709609 | 1.02E-72 | 0.632973 | 1.19E-53 | 0.638573 |
| 0.243909 | 9.42E-08 | 0.291386 | 1.36E-10 | 0.507736 | 5.71E-32 | 0.395271 | 6.49E-19 | 0.461899 |
| 0.389496 | 2.29E-18 | 0.490202 | 1.33E-29 | 0.516101 | 3.78E-33 | 0.518923 | 1.49E-33 | 0.418926 |
| 0.433074 | 9.01E-23 | 0.351802 | 4.73E-15 | 0.650721 | 1.41E-57 | 0.471361 | 3.32E-27 | 0.613592 |
| 0.436928 | 3.42E-23 | 0.538084 | 2.08E-36 | 0.595827 | 3.25E-46 | 0.553023 | 9.19E-39 | 0.520131 |
| 0.352214 | 4.37E-15 | 0.455574 | 2.61E-25 | 0.665099 | 5.91E-61 | 0.550768 | 2.12E-38 | 0.575811 |
| 0.54124  | 6.77E-37 | 0.527847 | 7.34E-35 | 0.71069  | 4.95E-73 | 0.702071 | 1.43E-70 | 0.518675 |
| 0.375664 | 4.23E-17 | 0.350745 | 5.77E-15 | 0.599513 | 6.57E-47 | 0.457576 | 1.52E-25 | 0.517088 |
| 0.477623 | 5.50E-28 | 0.455486 | 2.68E-25 | 0.677332 | 5.57E-64 | 0.470335 | 4.43E-27 | 0.533282 |

|          |          |          |          |          |          |          |          |          |
|----------|----------|----------|----------|----------|----------|----------|----------|----------|
| 0.434557 | 6.21E-23 | 0.456025 | 2.31E-25 | 0.776261 | 3.18E-95 | 0.674582 | 2.75E-63 | 0.630679 |
| 0.455909 | 2.39E-25 | 0.216993 | 2.21E-06 | 0.686759 | 2.05E-66 | 0.488956 | 1.94E-29 | 0.473618 |
| 0.385426 | 5.48E-18 | 0.497119 | 1.61E-30 | 0.614146 | 9.29E-50 | 0.482602 | 1.29E-28 | 0.506747 |
| 0.357788 | 1.50E-15 | 0.238168 | 1.91E-07 | 0.613755 | 1.11E-49 | 0.376818 | 3.34E-17 | 0.540935 |
| 0.18389  | 6.40E-05 | 0.227861 | 6.47E-07 | 0.54316  | 3.40E-37 | 0.357011 | 1.75E-15 | 0.426249 |
| 0.221452 | 1.35E-06 | 0.217573 | 2.07E-06 | 0.419658 | 2.40E-21 | 0.372574 | 7.97E-17 | 0.359579 |
| 0.559563 | 7.84E-40 | 0.509523 | 3.22E-32 | 0.739634 | 5.35E-82 | 0.578261 | 5.05E-43 | 0.595139 |
| 0.376411 | 3.63E-17 | 0.290252 | 1.62E-10 | 0.631137 | 2.93E-53 | 0.372702 | 7.77E-17 | 0.545027 |
| 0.38593  | 4.92E-18 | 0.286806 | 2.71E-10 | 0.464061 | 2.57E-26 | 0.397502 | 3.96E-19 | 0.388455 |
| 0.40819  | 3.54E-20 | 0.488823 | 2.02E-29 | 0.671455 | 1.65E-62 | 0.66199  | 3.30E-60 | 0.500537 |
| 0.375086 | 4.77E-17 | 0.186157 | 5.18E-05 | 0.513716 | 8.26E-33 | 0.250817 | 3.94E-08 | 0.378868 |
| 0.118645 | 0.01028  | 0.234916 | 2.82E-07 | 0.424803 | 6.93E-22 | 0.474557 | 1.33E-27 | 0.23547  |
| 0.380255 | 1.63E-17 | 0.16341  | 0.00039  | 0.581713 | 1.23E-43 | 0.28198  | 5.52E-10 | 0.470562 |
| 0.406493 | 5.22E-20 | 0.344127 | 1.98E-14 | 0.51432  | 6.78E-33 | 0.517586 | 2.32E-33 | 0.358158 |
| 0.416981 | 4.54E-21 | 0.4387   | 2.18E-23 | 0.550639 | 2.22E-38 | 0.5146   | 6.19E-33 | 0.513406 |
| -0.14655 | 0.00149  | -0.31904 | 1.65E-12 | -0.35155 | 4.96E-15 | -0.39317 | 1.03E-18 | -0.33522 |
| -0.2502  | 4.26E-08 | -0.40953 | 2.60E-20 | -0.44877 | 1.60E-24 | -0.49843 | 1.07E-30 | -0.42915 |
| 0.512198 | 1.35E-32 | 0.607927 | 1.58E-48 | 0.696052 | 6.60E-69 | 0.537821 | 2.29E-36 | 0.651933 |
| 0.369131 | 1.60E-16 | 0.518214 | 1.88E-33 | 0.678341 | 3.09E-64 | 0.750147 | 1.47E-85 | 0.567489 |
| 0.504885 | 1.42E-31 | 0.564699 | 1.09E-40 | 0.64677  | 1.11E-56 | 0.567141 | 4.22E-41 | 0.430115 |
| 0.313689 | 4.02E-12 | 0.28147  | 5.94E-10 | 0.470909 | 3.77E-27 | 0.388334 | 2.94E-18 | 0.351676 |
| 0.425867 | 5.35E-22 | 0.634141 | 6.68E-54 | 0.575328 | 1.65E-42 | 0.605977 | 3.78E-48 | 0.522762 |
| 0.301308 | 2.95E-11 | 0.448483 | 1.73E-24 | 0.442351 | 8.54E-24 | 0.4118   | 1.53E-20 | 0.3644   |
| 0.374744 | 5.11E-17 | 0.271125 | 2.60E-09 | 0.453947 | 4.05E-25 | 0.381894 | 1.16E-17 | 0.321766 |
| 0.450551 | 1.00E-24 | 0.367076 | 2.42E-16 | 0.687151 | 1.62E-66 | 0.581933 | 1.13E-43 | 0.577241 |
| 0.31868  | 1.75E-12 | 0.424092 | 8.24E-22 | 0.398612 | 3.10E-19 | 0.369177 | 1.59E-16 | 0.30164  |
| 0.392443 | 1.21E-18 | 0.311562 | 5.70E-12 | 0.557225 | 1.90E-39 | 0.458594 | 1.15E-25 | 0.334825 |
| 0.537253 | 2.79E-36 | 0.538587 | 1.74E-36 | 0.774823 | 1.17E-94 | 0.530069 | 3.42E-35 | 0.693706 |
| 0.48367  | 9.37E-29 | 0.58833  | 7.91E-45 | 0.796086 | #####    | 0.747577 | 1.13E-84 | 0.598483 |
| 0.502818 | 2.72E-31 | 0.617604 | 1.87E-50 | 0.782067 | 1.49E-97 | 0.722564 | 1.43E-76 | 0.689871 |
| 0.45046  | 1.02E-24 | 0.572608 | 4.89E-42 | 0.855573 | #####    | 0.796443 | #####    | 0.711538 |
| 0.301332 | 2.94E-11 | 0.27488  | 1.53E-09 | 0.628671 | 9.73E-53 | 0.436834 | 3.50E-23 | 0.492337 |
| 0.394609 | 7.51E-19 | 0.396335 | 5.13E-19 | 0.676148 | 1.11E-63 | 0.607839 | 1.64E-48 | 0.563959 |
| 0.367045 | 2.43E-16 | 0.45615  | 2.24E-25 | 0.654928 | 1.52E-58 | 0.635951 | 2.72E-54 | 0.562069 |
| 0.342677 | 2.59E-14 | 0.219766 | 1.63E-06 | 0.522566 | 4.40E-34 | 0.37015  | 1.30E-16 | 0.336664 |
| 0.366709 | 2.60E-16 | 0.455055 | 3.01E-25 | 0.707231 | 4.93E-72 | 0.656337 | 7.12E-59 | 0.566937 |
| 0.46791  | 8.78E-27 | 0.490639 | 1.17E-29 | 0.817663 | #####    | 0.67987  | 1.26E-64 | 0.656956 |
| 0.495687 | 2.50E-30 | 0.612847 | 1.69E-49 | 0.791643 | #####    | 0.748319 | 6.31E-85 | 0.665971 |
| 0.285936 | 3.08E-10 | 0.265151 | 5.92E-09 | 0.71199  | 2.07E-73 | 0.505703 | 1.09E-31 | 0.59021  |
| 0.173516 | 0.00016  | 0.190057 | 3.57E-05 | 0.399401 | 2.60E-19 | 0.359688 | 1.04E-15 | 0.334901 |
| 0.437181 | 3.20E-23 | 0.366281 | 2.83E-16 | 0.694356 | 1.91E-68 | 0.553964 | 6.47E-39 | 0.504742 |
| 0.311829 | 5.45E-12 | 0.189714 | 3.69E-05 | 0.576758 | 9.28E-43 | 0.342892 | 2.49E-14 | 0.464031 |
| 0.43178  | 1.24E-22 | 0.426903 | 4.15E-22 | 0.756835 | 6.46E-88 | 0.598381 | 1.08E-46 | 0.603043 |
| 0.294402 | 8.62E-11 | 0.283259 | 4.58E-10 | 0.521579 | 6.13E-34 | 0.348451 | 8.89E-15 | 0.395251 |
| 0.558442 | 1.20E-39 | 0.754887 | 3.20E-87 | 0.722524 | 1.47E-76 | 0.727717 | 3.63E-78 | 0.642288 |

|          |          |          |          |          |          |          |          |          |
|----------|----------|----------|----------|----------|----------|----------|----------|----------|
| 0.48745  | 3.05E-29 | 0.692882 | 4.79E-68 | 0.735514 | 1.19E-80 | 0.703304 | 6.42E-71 | 0.633887 |
| 0.570951 | 9.44E-42 | 0.582322 | 9.61E-44 | 0.888913 | #####    | 0.657979 | 2.94E-59 | 0.742587 |
| 0.228553 | 5.97E-07 | 0.185402 | 5.56E-05 | 0.446699 | 2.76E-24 | 0.371    | 1.10E-16 | 0.35465  |
| 0.510564 | 2.30E-32 | 0.570338 | 1.20E-41 | 0.66084  | 6.19E-60 | 0.626525 | 2.75E-52 | 0.465083 |
| 0.277406 | 1.07E-09 | 0.178399 | 0.00011  | 0.547809 | 6.29E-38 | 0.348967 | 8.07E-15 | 0.471557 |
| 0.484958 | 6.40E-29 | 0.607719 | 1.73E-48 | 0.632794 | 1.30E-53 | 0.522161 | 5.04E-34 | 0.579137 |
| 0.388051 | 3.12E-18 | 0.421954 | 1.38E-21 | 0.697102 | 3.41E-69 | 0.584249 | 4.34E-44 | 0.551133 |
| 0.527448 | 8.42E-35 | 0.640727 | 2.47E-55 | 0.769502 | 1.34E-92 | 0.657141 | 4.62E-59 | 0.668635 |
| 0.39821  | 3.39E-19 | 0.340433 | 3.90E-14 | 0.568566 | 2.42E-41 | 0.299569 | 3.88E-11 | 0.528063 |
| -0.26678 | 4.74E-09 | -0.14955 | 0.00119  | -0.44814 | 1.89E-24 | -0.37285 | 7.53E-17 | -0.32509 |
| 0.388343 | 2.93E-18 | 0.425651 | 5.64E-22 | 0.553102 | 8.92E-39 | 0.497243 | 1.55E-30 | 0.459705 |
| 0.399452 | 2.57E-19 | 0.401534 | 1.61E-19 | 0.499253 | 8.30E-31 | 0.372773 | 7.65E-17 | 0.389185 |
| 0.492245 | 7.17E-30 | 0.369401 | 1.52E-16 | 0.747235 | 1.49E-84 | 0.567384 | 3.84E-41 | 0.523403 |
| 0.373203 | 7.01E-17 | 0.318077 | 1.94E-12 | 0.637793 | 1.08E-54 | 0.560824 | 4.85E-40 | 0.454711 |
| 0.384264 | 7.01E-18 | 0.222086 | 1.25E-06 | 0.551102 | 1.87E-38 | 0.418964 | 2.83E-21 | 0.468132 |
| 0.52631  | 1.24E-34 | 0.70267  | 9.69E-71 | 0.758772 | 1.30E-88 | 0.746289 | 3.13E-84 | 0.639237 |
| 0.31098  | 6.27E-12 | 0.292705 | 1.12E-10 | 0.663785 | 1.23E-60 | 0.502545 | 2.96E-31 | 0.510075 |
| 0.227319 | 6.89E-07 | 0.431455 | 1.35E-22 | 0.472431 | 2.45E-27 | 0.410943 | 1.87E-20 | 0.39578  |
| 0.463429 | 3.06E-26 | 0.348879 | 8.20E-15 | 0.753413 | 1.06E-86 | 0.500723 | 5.25E-31 | 0.667327 |
| 0.355427 | 2.37E-15 | 0.237431 | 2.08E-07 | 0.809331 | #####    | 0.552189 | 1.25E-38 | 0.647776 |
| 0.424333 | 7.78E-22 | 0.461892 | 4.68E-26 | 0.46459  | 2.22E-26 | 0.40958  | 2.57E-20 | 0.348313 |
| 0.203923 | 8.92E-06 | 0.218609 | 1.85E-06 | 0.408384 | 3.38E-20 | 0.310799 | 6.45E-12 | 0.375192 |
| -0.22277 | 1.16E-06 | -0.17434 | 0.00015  | -0.50217 | 3.33E-31 | -0.29943 | 3.96E-11 | -0.50112 |
| 0.447277 | 2.37E-24 | 0.432531 | 1.03E-22 | 0.546193 | 1.13E-37 | 0.425356 | 6.06E-22 | 0.42248  |
| 0.333966 | 1.25E-13 | 0.291828 | 1.28E-10 | 0.595902 | 3.15E-46 | 0.395156 | 6.66E-19 | 0.498896 |
| 0.458898 | 1.06E-25 | 0.437528 | 2.93E-23 | 0.772988 | 6.09E-94 | 0.574693 | 2.13E-42 | 0.618387 |
| 0.23632  | 2.38E-07 | 0.434303 | 6.62E-23 | 0.585581 | 2.50E-44 | 0.627242 | 1.94E-52 | 0.548435 |
| 0.406233 | 5.54E-20 | 0.38482  | 6.23E-18 | 0.808803 | #####    | 0.71662  | 8.90E-75 | 0.63475  |
| 0.470832 | 3.85E-27 | 0.451509 | 7.76E-25 | 0.789983 | #####    | 0.639132 | 5.52E-55 | 0.612057 |
| 0.328046 | 3.53E-13 | 0.40997  | 2.35E-20 | 0.726677 | 7.67E-78 | 0.681124 | 6.00E-65 | 0.621691 |
| 0.207504 | 6.14E-06 | 0.062792 | 0.17553  | 0.336113 | 8.51E-14 | 0.21376  | 3.15E-06 | 0.120336 |
| 0.423115 | 1.04E-21 | 0.43888  | 2.08E-23 | 0.685768 | 3.73E-66 | 0.701516 | 2.04E-70 | 0.564112 |
| 0.197986 | 1.63E-05 | 0.356082 | 2.09E-15 | 0.252253 | 3.27E-08 | 0.234037 | 3.13E-07 | 0.22593  |
| 0.487472 | 3.03E-29 | 0.367264 | 2.33E-16 | 0.532369 | 1.54E-35 | 0.351612 | 4.90E-15 | 0.450678 |
| 0.333817 | 1.28E-13 | 0.213983 | 3.07E-06 | 0.451747 | 7.28E-25 | 0.423003 | 1.07E-21 | 0.378198 |
| 0.387282 | 3.68E-18 | 0.426285 | 4.83E-22 | 0.75613  | 1.15E-87 | 0.61729  | 2.17E-50 | 0.616959 |
| 0.196121 | 1.97E-05 | 0.198451 | 1.56E-05 | 0.416583 | 4.99E-21 | 0.296106 | 6.63E-11 | 0.401328 |
| 0.244238 | 9.04E-08 | 0.343956 | 2.05E-14 | 0.491457 | 9.10E-30 | 0.422078 | 1.34E-21 | 0.398397 |
| 0.340664 | 3.74E-14 | 0.571982 | 6.28E-42 | 0.54917  | 3.82E-38 | 0.590751 | 2.85E-45 | 0.518959 |
| 0.44271  | 7.78E-24 | 0.426144 | 5.00E-22 | 0.739295 | 6.92E-82 | 0.647932 | 6.09E-57 | 0.581204 |
| 0.552807 | 9.96E-39 | 0.530964 | 2.51E-35 | 0.710984 | 4.07E-73 | 0.551553 | 1.59E-38 | 0.608644 |
| 0.440462 | 1.39E-23 | 0.640143 | 3.32E-55 | 0.519746 | 1.13E-33 | 0.526223 | 1.28E-34 | 0.384499 |
| 0.461337 | 5.45E-26 | 0.605685 | 4.30E-48 | 0.601034 | 3.37E-47 | 0.511995 | 1.45E-32 | 0.559366 |
| 0.163145 | 0.0004   | 0.25704  | 1.75E-08 | 0.502977 | 2.59E-31 | 0.465013 | 1.97E-26 | 0.348085 |
| 0.38176  | 1.19E-17 | 0.268399 | 3.79E-09 | 0.711049 | 3.89E-73 | 0.493015 | 5.67E-30 | 0.613219 |

|          |          |          |          |          |          |          |          |          |
|----------|----------|----------|----------|----------|----------|----------|----------|----------|
| 0.259038 | 1.35E-08 | 0.437    | 3.35E-23 | 0.67626  | 1.04E-63 | 0.71984  | 9.61E-76 | 0.554448 |
| 0.417531 | 3.98E-21 | 0.318527 | 1.80E-12 | 0.577676 | 6.40E-43 | 0.411783 | 1.54E-20 | 0.463658 |
| 0.277373 | 1.07E-09 | 0.210721 | 4.37E-06 | 0.715421 | 2.02E-74 | 0.489081 | 1.87E-29 | 0.576423 |
| 0.501193 | 4.53E-31 | 0.595812 | 3.27E-46 | 0.713115 | 9.69E-74 | 0.655623 | 1.04E-58 | 0.579083 |
| 0.372405 | 8.25E-17 | 0.440504 | 1.37E-23 | 0.691651 | 1.03E-67 | 0.552996 | 9.28E-39 | 0.541996 |
| 0.479835 | 2.89E-28 | 0.195705 | 2.05E-05 | 0.610677 | 4.54E-49 | 0.379502 | 1.91E-17 | 0.473107 |
| 0.377382 | 2.97E-17 | 0.567215 | 4.10E-41 | 0.517886 | 2.10E-33 | 0.612885 | 1.66E-49 | 0.379514 |
| 0.399179 | 2.73E-19 | 0.557933 | 1.46E-39 | 0.789618 | #####    | 0.803033 | #####    | 0.665047 |
| 0.447489 | 2.24E-24 | 0.556568 | 2.44E-39 | 0.587322 | 1.21E-44 | 0.52267  | 4.25E-34 | 0.523376 |
| 0.539465 | 1.28E-36 | 0.564986 | 9.77E-41 | 0.669145 | 6.12E-62 | 0.627185 | 2.00E-52 | 0.562567 |
| 0.369109 | 1.61E-16 | 0.331867 | 1.81E-13 | 0.64005  | 3.48E-55 | 0.591732 | 1.88E-45 | 0.444416 |
| 0.487144 | 3.34E-29 | 0.530131 | 3.35E-35 | 0.687947 | 9.96E-67 | 0.652824 | 4.65E-58 | 0.552619 |
| 0.376707 | 3.41E-17 | 0.366465 | 2.73E-16 | 0.515683 | 4.34E-33 | 0.416687 | 4.87E-21 | 0.444542 |
| 0.53449  | 7.38E-36 | 0.548469 | 4.94E-38 | 0.73449  | 2.56E-80 | 0.651943 | 7.41E-58 | 0.565289 |
| 0.337137 | 7.08E-14 | 0.283141 | 4.66E-10 | 0.781277 | 3.13E-97 | 0.581825 | 1.18E-43 | 0.594258 |
| 0.368505 | 1.82E-16 | 0.339518 | 4.61E-14 | 0.693285 | 3.73E-68 | 0.603245 | 1.27E-47 | 0.528915 |
| 0.275254 | 1.45E-09 | 0.250012 | 4.36E-08 | 0.442969 | 7.28E-24 | 0.416887 | 4.64E-21 | 0.305427 |
| 0.355864 | 2.18E-15 | 0.393231 | 1.02E-18 | 0.620381 | 5.11E-51 | 0.598054 | 1.24E-46 | 0.396368 |
| 0.5407   | 8.22E-37 | 0.239689 | 1.58E-07 | 0.50287  | 2.68E-31 | 0.314587 | 3.46E-12 | 0.355345 |
| 0.365204 | 3.51E-16 | 0.340583 | 3.80E-14 | 0.650702 | 1.43E-57 | 0.608333 | 1.31E-48 | 0.42684  |
| 0.333487 | 1.36E-13 | 0.239526 | 1.62E-07 | 0.346385 | 1.31E-14 | 0.416048 | 5.66E-21 | 0.255273 |
| 0.480427 | 2.43E-28 | 0.599424 | 6.83E-47 | 0.606851 | 2.55E-48 | 0.642937 | 8.01E-56 | 0.540519 |
| 0.306491 | 1.30E-11 | 0.395878 | 5.68E-19 | 0.541746 | 5.65E-37 | 0.5136   | 8.58E-33 | 0.333618 |
| 0.369545 | 1.47E-16 | 0.341259 | 3.36E-14 | 0.73971  | 5.05E-82 | 0.662377 | 2.67E-60 | 0.51018  |
| 0.527523 | 8.20E-35 | 0.604358 | 7.77E-48 | 0.661305 | 4.80E-60 | 0.528455 | 5.96E-35 | 0.609263 |
| 0.317686 | 2.07E-12 | 0.370078 | 1.32E-16 | 0.636931 | 1.67E-54 | 0.53415  | 8.31E-36 | 0.559896 |
| 0.512582 | 1.20E-32 | 0.414416 | 8.32E-21 | 0.700684 | 3.48E-70 | 0.561761 | 3.39E-40 | 0.561311 |
| 0.406369 | 5.37E-20 | 0.499415 | 7.89E-31 | 0.815881 | #####    | 0.71943  | 1.28E-75 | 0.682703 |
| 0.414825 | 7.55E-21 | 0.242536 | 1.12E-07 | 0.567359 | 3.88E-41 | 0.380838 | 1.44E-17 | 0.368601 |
| 0.251018 | 3.84E-08 | 0.428037 | 3.14E-22 | 0.416333 | 5.29E-21 | 0.4175   | 4.01E-21 | 0.392785 |
| 0.255458 | 2.16E-08 | 0.224096 | 9.97E-07 | 0.44961  | 1.28E-24 | 0.419729 | 2.36E-21 | 0.342563 |
| 0.472888 | 2.15E-27 | 0.543396 | 3.12E-37 | 0.752089 | 3.10E-86 | 0.712519 | 1.45E-73 | 0.623534 |
| 0.412289 | 1.37E-20 | 0.373698 | 6.34E-17 | 0.591956 | 1.71E-45 | 0.557273 | 1.87E-39 | 0.432713 |
| 0.483975 | 8.57E-29 | 0.518273 | 1.85E-33 | 0.812707 | #####    | 0.629035 | 8.16E-53 | 0.667844 |
| -0.14442 | 0.00175  | -0.28725 | 2.54E-10 | -0.44031 | 1.44E-23 | -0.40527 | 6.90E-20 | -0.42899 |
| -0.26867 | 3.65E-09 | -0.39805 | 3.51E-19 | -0.37338 | 6.76E-17 | -0.35145 | 5.05E-15 | -0.29412 |
| 0.286175 | 2.98E-10 | 0.32496  | 6.02E-13 | 0.341667 | 3.12E-14 | 0.322094 | 9.83E-13 | 0.211105 |
| 0.561118 | 4.33E-40 | 0.730083 | 6.54E-79 | 0.814242 | #####    | 0.766176 | 2.43E-91 | 0.707427 |
| 0.436138 | 4.17E-23 | 0.56668  | 5.05E-41 | 0.798929 | #####    | 0.634015 | 7.11E-54 | 0.716812 |
| 0.517782 | 2.17E-33 | 0.504607 | 1.55E-31 | 0.685486 | 4.42E-66 | 0.527711 | 7.69E-35 | 0.598558 |
| 0.525634 | 1.56E-34 | 0.353321 | 3.54E-15 | 0.752109 | 3.05E-86 | 0.577352 | 7.30E-43 | 0.609382 |
| 0.361046 | 7.97E-16 | 0.492221 | 7.22E-30 | 0.702672 | 9.67E-71 | 0.685607 | 4.11E-66 | 0.578571 |
| 0.345028 | 1.68E-14 | 0.473413 | 1.85E-27 | 0.580734 | 1.84E-43 | 0.485518 | 5.42E-29 | 0.507422 |
| -0.48459 | 7.15E-29 | -0.18034 | 8.89E-05 | -0.44863 | 1.66E-24 | -0.22537 | 8.62E-07 | -0.3247  |
| 0.249628 | 4.58E-08 | 0.511359 | 1.78E-32 | 0.64412  | 4.37E-56 | 0.604852 | 6.24E-48 | 0.560329 |

|          |          |          |          |          |          |          |          |          |
|----------|----------|----------|----------|----------|----------|----------|----------|----------|
| 0.4187   | 3.02E-21 | 0.375173 | 4.68E-17 | 0.735157 | 1.56E-80 | 0.594054 | 6.97E-46 | 0.745739 |
| 0.457939 | 1.38E-25 | 0.523954 | 2.76E-34 | 0.75708  | 5.28E-88 | 0.697228 | 3.15E-69 | 0.619235 |
| 0.392047 | 1.32E-18 | 0.386099 | 4.74E-18 | 0.576815 | 9.07E-43 | 0.362959 | 5.48E-16 | 0.502369 |
| 0.214659 | 2.85E-06 | 0.210713 | 4.37E-06 | 0.480629 | 2.29E-28 | 0.461366 | 5.41E-26 | 0.32317  |
| 0.476989 | 6.61E-28 | 0.584376 | 4.12E-44 | 0.627277 | 1.91E-52 | 0.536463 | 3.69E-36 | 0.542251 |
| 0.320115 | 1.38E-12 | 0.333731 | 1.30E-13 | 0.518317 | 1.82E-33 | 0.50459  | 1.55E-31 | 0.343363 |
| 0.43686  | 3.47E-23 | 0.572233 | 5.68E-42 | 0.565482 | 8.06E-41 | 0.505331 | 1.23E-31 | 0.505105 |
| 0.233342 | 3.40E-07 | 0.289045 | 1.94E-10 | 0.390153 | 1.98E-18 | 0.431305 | 1.40E-22 | 0.238483 |
| 0.438565 | 2.25E-23 | 0.627087 | 2.09E-52 | 0.609888 | 6.50E-49 | 0.716859 | 7.55E-75 | 0.539623 |
| 0.40632  | 5.43E-20 | 0.563641 | 1.64E-40 | 0.628529 | 1.04E-52 | 0.595143 | 4.37E-46 | 0.533984 |
| 0.372697 | 7.77E-17 | 0.327501 | 3.88E-13 | 0.639132 | 5.52E-55 | 0.63874  | 6.73E-55 | 0.527688 |
| 0.211278 | 4.11E-06 | 0.412637 | 1.26E-20 | 0.551489 | 1.62E-38 | 0.595749 | 3.36E-46 | 0.462135 |
| 0.430184 | 1.85E-22 | 0.418319 | 3.30E-21 | 0.697661 | 2.39E-69 | 0.527058 | 9.61E-35 | 0.598042 |
| 0.267566 | 4.25E-09 | 0.189739 | 3.68E-05 | 0.598731 | 9.24E-47 | 0.51301  | 1.04E-32 | 0.401513 |
| 0.476016 | 8.76E-28 | 0.568795 | 2.21E-41 | 0.723746 | 6.19E-77 | 0.746463 | 2.73E-84 | 0.626073 |
| 0.369071 | 1.62E-16 | 0.350472 | 6.08E-15 | 0.564994 | 9.74E-41 | 0.414514 | 8.13E-21 | 0.38787  |
| 0.480352 | 2.49E-28 | 0.344312 | 1.92E-14 | 0.830284 | #####    | 0.604098 | 8.72E-48 | 0.627477 |
| 0.419858 | 2.29E-21 | 0.377453 | 2.92E-17 | 0.655437 | 1.15E-58 | 0.604516 | 7.24E-48 | 0.666432 |
| 0.481183 | 1.95E-28 | 0.348746 | 8.41E-15 | 0.746696 | 2.27E-84 | 0.566514 | 5.39E-41 | 0.576902 |
| 0.345336 | 1.59E-14 | 0.2119   | 3.85E-06 | 0.658603 | 2.10E-59 | 0.505069 | 1.33E-31 | 0.493025 |
| 0.487305 | 3.18E-29 | 0.31157  | 5.69E-12 | 0.804069 | #####    | 0.56659  | 5.23E-41 | 0.595432 |
| 0.255557 | 2.13E-08 | 0.386108 | 4.74E-18 | 0.433463 | 8.18E-23 | 0.520466 | 8.90E-34 | 0.364334 |
| 0.416897 | 4.63E-21 | 0.441511 | 1.06E-23 | 0.766597 | 1.69E-91 | 0.710384 | 6.08E-73 | 0.604927 |
| 0.521922 | 5.47E-34 | 0.574665 | 2.15E-42 | 0.698654 | 1.27E-69 | 0.539972 | 1.07E-36 | 0.669574 |
| -0.29959 | 3.86E-11 | -0.29314 | 1.04E-10 | -0.57636 | 1.09E-42 | -0.41899 | 2.81E-21 | -0.50451 |
| 0.356687 | 1.86E-15 | 0.37514  | 4.71E-17 | 0.624378 | 7.68E-52 | 0.513912 | 7.75E-33 | 0.567258 |
| 0.373852 | 6.14E-17 | 0.433661 | 7.78E-23 | 0.795776 | #####    | 0.742909 | 4.34E-83 | 0.638093 |
| 0.550282 | 2.54E-38 | 0.654288 | 2.13E-58 | 0.778205 | 5.38E-96 | 0.659668 | 1.17E-59 | 0.634275 |
| 0.350179 | 6.42E-15 | 0.372323 | 8.39E-17 | 0.507516 | 6.12E-32 | 0.460049 | 7.76E-26 | 0.374767 |
| 0.331815 | 1.83E-13 | 0.38056  | 1.53E-17 | 0.38939  | 2.34E-18 | 0.392534 | 1.18E-18 | 0.355093 |
| 0.519991 | 1.04E-33 | 0.654468 | 1.94E-58 | 0.749579 | 2.32E-85 | 0.685708 | 3.87E-66 | 0.550262 |
| 0.27612  | 1.28E-09 | 0.428751 | 2.64E-22 | 0.599472 | 6.69E-47 | 0.609678 | 7.15E-49 | 0.503329 |
| 0.233799 | 3.22E-07 | 0.304194 | 1.87E-11 | 0.472305 | 2.54E-27 | 0.453339 | 4.76E-25 | 0.288846 |
| -0.18833 | 4.21E-05 | -0.21995 | 1.59E-06 | -0.37236 | 8.32E-17 | -0.24343 | 1.00E-07 | -0.36634 |
| 0.390311 | 1.92E-18 | 0.292499 | 1.15E-10 | 0.619633 | 7.26E-51 | 0.502175 | 3.33E-31 | 0.488247 |
| 0.379957 | 1.74E-17 | 0.182568 | 7.24E-05 | 0.412519 | 1.30E-20 | 0.21447  | 2.91E-06 | 0.42712  |
| 0.120128 | 0.00936  | 0.198503 | 1.55E-05 | 0.392787 | 1.12E-18 | 0.287661 | 2.39E-10 | 0.267481 |
| 0.456857 | 1.85E-25 | 0.451138 | 8.56E-25 | 0.819499 | #####    | 0.751719 | 4.18E-86 | 0.608262 |
| 0.42984  | 2.01E-22 | 0.171113 | 0.0002   | 0.587144 | 1.30E-44 | 0.335971 | 8.73E-14 | 0.460536 |
| 0.491632 | 8.63E-30 | 0.379615 | 1.87E-17 | 0.632201 | 1.74E-53 | 0.365365 | 3.40E-16 | 0.510575 |
| 0.43622  | 4.09E-23 | 0.391444 | 1.50E-18 | 0.548678 | 4.58E-38 | 0.532359 | 1.55E-35 | 0.418308 |
| 0.443027 | 7.17E-24 | 0.335931 | 8.79E-14 | 0.805527 | #####    | 0.581973 | 1.11E-43 | 0.619828 |
| 0.488441 | 2.26E-29 | 0.384829 | 6.22E-18 | 0.754092 | 6.12E-87 | 0.658652 | 2.04E-59 | 0.570431 |
| 0.4859   | 4.84E-29 | 0.448923 | 1.54E-24 | 0.805381 | #####    | 0.660002 | 9.79E-60 | 0.63644  |
| 0.359591 | 1.06E-15 | 0.279316 | 8.12E-10 | 0.595494 | 3.75E-46 | 0.487302 | 3.18E-29 | 0.476553 |

|          |          |          |          |          |          |          |          |          |
|----------|----------|----------|----------|----------|----------|----------|----------|----------|
| 0.394053 | 8.48E-19 | 0.361215 | 7.71E-16 | 0.774979 | 1.02E-94 | 0.731519 | 2.29E-79 | 0.536864 |
| 0.485296 | 5.79E-29 | 0.341712 | 3.09E-14 | 0.618315 | 1.35E-50 | 0.506064 | 9.73E-32 | 0.494507 |
| 0.338262 | 5.78E-14 | 0.257217 | 1.71E-08 | 0.538966 | 1.52E-36 | 0.394278 | 8.07E-19 | 0.392377 |
| 0.457447 | 1.58E-25 | 0.159739 | 0.00053  | 0.629033 | 8.17E-53 | 0.424202 | 8.03E-22 | 0.44471  |
| 0.515902 | 4.04E-33 | 0.683265 | 1.68E-65 | 0.716706 | 8.39E-75 | 0.629014 | 8.24E-53 | 0.640273 |
| -0.23482 | 2.85E-07 | -0.24511 | 8.11E-08 | -0.45302 | 5.19E-25 | -0.28142 | 5.99E-10 | -0.43853 |
| 0.580494 | 2.03E-43 | 0.574357 | 2.44E-42 | 0.749222 | 3.08E-85 | 0.561421 | 3.86E-40 | 0.682173 |
| 0.190559 | 3.40E-05 | 0.225314 | 8.68E-07 | 0.330715 | 2.22E-13 | 0.166511 | 0.0003   | 0.276129 |
| 0.301618 | 2.81E-11 | 0.30245  | 2.46E-11 | 0.602142 | 2.07E-47 | 0.538689 | 1.68E-36 | 0.395286 |
| 0.496401 | 2.01E-30 | 0.494069 | 4.11E-30 | 0.883262 | #####    | 0.702374 | 1.17E-70 | 0.692762 |
| 0.279275 | 8.17E-10 | 0.407902 | 3.78E-20 | 0.499747 | 7.12E-31 | 0.658495 | 2.22E-59 | 0.267901 |
| 0.486242 | 4.37E-29 | 0.484507 | 7.32E-29 | 0.779133 | 2.29E-96 | 0.698654 | 1.27E-69 | 0.683715 |
| 0.538462 | 1.82E-36 | 0.444155 | 5.35E-24 | 0.846274 | #####    | 0.705221 | 1.84E-71 | 0.71164  |
| -0.11197 | 0.01549  | -0.11065 | 0.01676  | -0.38357 | 8.11E-18 | -0.26424 | 6.70E-09 | -0.25408 |
| 0.469804 | 5.15E-27 | 0.58311  | 6.95E-44 | 0.829836 | #####    | 0.766544 | 1.77E-91 | 0.686445 |
| 0.401831 | 1.51E-19 | 0.424399 | 7.65E-22 | 0.592559 | 1.32E-45 | 0.505838 | 1.05E-31 | 0.436892 |
| 0.445965 | 3.34E-24 | 0.302226 | 2.55E-11 | 0.665857 | 3.88E-61 | 0.567193 | 4.14E-41 | 0.47508  |
| 0.433893 | 7.34E-23 | 0.381358 | 1.29E-17 | 0.698144 | 1.76E-69 | 0.566707 | 5.00E-41 | 0.589871 |
| 0.452195 | 6.46E-25 | 0.457654 | 1.49E-25 | 0.647047 | 9.64E-57 | 0.616964 | 2.52E-50 | 0.513074 |
| 0.381635 | 1.22E-17 | 0.444144 | 5.37E-24 | 0.684124 | 1.00E-65 | 0.578061 | 5.48E-43 | 0.563233 |
| 0.25006  | 4.34E-08 | 0.434715 | 5.97E-23 | 0.460956 | 6.05E-26 | 0.431978 | 1.18E-22 | 0.388453 |
| 0.209502 | 4.97E-06 | 0.211532 | 4.00E-06 | 0.52667  | 1.10E-34 | 0.453226 | 4.91E-25 | 0.381521 |
| 0.363235 | 5.18E-16 | 0.477396 | 5.88E-28 | 0.654855 | 1.58E-58 | 0.665352 | 5.14E-61 | 0.492593 |
| 0.507632 | 5.90E-32 | 0.501147 | 4.60E-31 | 0.784051 | 2.30E-98 | 0.637309 | 1.38E-54 | 0.694338 |
| 0.409648 | 2.53E-20 | 0.55466  | 4.99E-39 | 0.609689 | 7.11E-49 | 0.539604 | 1.21E-36 | 0.600832 |
| 0.499398 | 7.93E-31 | 0.519457 | 1.25E-33 | 0.864785 | #####    | 0.714086 | 5.02E-74 | 0.712195 |
| 0.287053 | 2.61E-10 | 0.320093 | 1.38E-12 | 0.549656 | 3.20E-38 | 0.489557 | 1.62E-29 | 0.301575 |
| 0.455602 | 2.59E-25 | 0.36595  | 3.03E-16 | 0.781416 | 2.75E-97 | 0.62053  | 4.76E-51 | 0.628266 |
| 0.350076 | 6.55E-15 | 0.073256 | 0.11389  | 0.350271 | 6.31E-15 | 0.09084  | 0.04978  | 0.253123 |
| 0.327166 | 4.12E-13 | 0.272988 | 2.00E-09 | 0.387836 | 3.27E-18 | 0.316075 | 2.71E-12 | 0.311266 |
| 0.352444 | 4.19E-15 | 0.433095 | 8.96E-23 | 0.532689 | 1.38E-35 | 0.516638 | 3.17E-33 | 0.377862 |
| 0.353897 | 3.17E-15 | 0.199945 | 1.34E-05 | 0.34016  | 4.10E-14 | 0.275573 | 1.39E-09 | 0.187027 |
| 0.496168 | 2.16E-30 | 0.48061  | 2.31E-28 | 0.614565 | 7.66E-50 | 0.561119 | 4.33E-40 | 0.477742 |
| 0.293932 | 9.26E-11 | 0.134674 | 0.00355  | 0.581646 | 1.27E-43 | 0.346812 | 1.21E-14 | 0.428518 |
| 0.284028 | 4.09E-10 | 0.450733 | 9.53E-25 | 0.527889 | 7.24E-35 | 0.696964 | 3.72E-69 | 0.333106 |
| 0.271953 | 2.31E-09 | 0.364925 | 3.71E-16 | 0.355474 | 2.35E-15 | 0.400542 | 2.01E-19 | 0.340655 |
| 0.230507 | 4.76E-07 | 0.119315 | 0.00986  | 0.454997 | 3.05E-25 | 0.281578 | 5.85E-10 | 0.335211 |
| 0.299162 | 4.13E-11 | 0.386166 | 4.68E-18 | 0.541507 | 6.16E-37 | 0.473358 | 1.88E-27 | 0.510673 |
| 0.41252  | 1.30E-20 | 0.324243 | 6.81E-13 | 0.802434 | #####    | 0.555806 | 3.25E-39 | 0.61091  |
| 0.381444 | 1.27E-17 | 0.339416 | 4.69E-14 | 0.778212 | 5.35E-96 | 0.597951 | 1.30E-46 | 0.509413 |
| 0.492414 | 6.81E-30 | 0.402848 | 1.20E-19 | 0.863133 | #####    | 0.66885  | 7.23E-62 | 0.657443 |
| 0.304673 | 1.73E-11 | 0.43181  | 1.24E-22 | 0.396722 | 4.71E-19 | 0.458078 | 1.33E-25 | 0.237569 |
| 0.569255 | 1.84E-41 | 0.521022 | 7.39E-34 | 0.798186 | #####    | 0.630837 | 3.39E-53 | 0.637569 |
| 0.494622 | 3.47E-30 | 0.459968 | 7.93E-26 | 0.772844 | 6.92E-94 | 0.622945 | 1.52E-51 | 0.59669  |
| 0.599477 | 6.67E-47 | 0.540918 | 7.60E-37 | 0.767696 | 6.49E-92 | 0.493009 | 5.68E-30 | 0.693199 |

|          |          |          |          |          |          |          |          |          |
|----------|----------|----------|----------|----------|----------|----------|----------|----------|
| 0.548598 | 4.71E-38 | 0.264706 | 6.29E-09 | 0.692078 | 7.89E-68 | 0.479606 | 3.09E-28 | 0.558035 |
| 0.395311 | 6.43E-19 | 0.326339 | 4.75E-13 | 0.726366 | 9.58E-78 | 0.563759 | 1.57E-40 | 0.585032 |
| 0.143843 | 0.00183  | 0.299356 | 4.01E-11 | 0.457722 | 1.46E-25 | 0.51877  | 1.56E-33 | 0.325512 |
| 0.454697 | 3.31E-25 | 0.405851 | 6.05E-20 | 0.705937 | 1.15E-71 | 0.563533 | 1.71E-40 | 0.502894 |
| 0.295925 | 6.82E-11 | 0.400329 | 2.11E-19 | 0.488848 | 2.00E-29 | 0.510474 | 2.37E-32 | 0.3352   |
| 0.343628 | 2.18E-14 | 0.481587 | 1.73E-28 | 0.531091 | 2.41E-35 | 0.540098 | 1.02E-36 | 0.500171 |
| 0.374508 | 5.37E-17 | 0.269229 | 3.38E-09 | 0.74284  | 4.58E-83 | 0.510941 | 2.03E-32 | 0.624318 |
| 0.374428 | 5.46E-17 | 0.428093 | 3.10E-22 | 0.686853 | 1.94E-66 | 0.607331 | 2.06E-48 | 0.568199 |
| 0.312005 | 5.30E-12 | 0.339516 | 4.61E-14 | 0.598368 | 1.08E-46 | 0.489359 | 1.72E-29 | 0.466414 |
| 0.399474 | 2.55E-19 | 0.260745 | 1.07E-08 | 0.632384 | 1.59E-53 | 0.376425 | 3.62E-17 | 0.533399 |
| 0.313084 | 4.44E-12 | 0.43616  | 4.15E-23 | 0.603846 | 9.76E-48 | 0.495701 | 2.49E-30 | 0.54765  |
| 0.30542  | 1.54E-11 | 0.316407 | 2.56E-12 | 0.672939 | 7.07E-63 | 0.562781 | 2.29E-40 | 0.547511 |
| 0.356934 | 1.77E-15 | 0.432168 | 1.13E-22 | 0.476229 | 8.24E-28 | 0.459424 | 9.20E-26 | 0.461708 |
| 0.518569 | 1.67E-33 | 0.564322 | 1.26E-40 | 0.714577 | 3.59E-74 | 0.531568 | 2.04E-35 | 0.568685 |
| 0.477718 | 5.35E-28 | 0.40837  | 3.39E-20 | 0.588234 | 8.23E-45 | 0.437969 | 2.62E-23 | 0.473965 |
| 0.475485 | 1.02E-27 | 0.466752 | 1.22E-26 | 0.791783 | #####    | 0.660967 | 5.78E-60 | 0.612504 |
| 0.360541 | 8.80E-16 | 0.252418 | 3.20E-08 | 0.446547 | 2.87E-24 | 0.242399 | 1.14E-07 | 0.392587 |
| 0.377833 | 2.70E-17 | 0.457748 | 1.45E-25 | 0.75606  | 1.22E-87 | 0.736172 | 7.29E-81 | 0.668863 |
| 0.420012 | 2.20E-21 | 0.445157 | 4.13E-24 | 0.706078 | 1.05E-71 | 0.590361 | 3.36E-45 | 0.616615 |
| 0.34758  | 1.05E-14 | 0.327975 | 3.58E-13 | 0.737832 | 2.09E-81 | 0.589956 | 3.99E-45 | 0.527522 |
| 0.447905 | 2.01E-24 | 0.352283 | 4.32E-15 | 0.665345 | 5.16E-61 | 0.568079 | 2.93E-41 | 0.559395 |
| 0.373285 | 6.90E-17 | 0.279399 | 8.02E-10 | 0.553145 | 8.78E-39 | 0.359073 | 1.17E-15 | 0.457442 |
| 0.261107 | 1.02E-08 | 0.51758  | 2.32E-33 | 0.593655 | 8.27E-46 | 0.696745 | 4.27E-69 | 0.467369 |
| 0.182006 | 7.63E-05 | 0.277554 | 1.05E-09 | 0.177547 | 0.00011  | 0.257546 | 1.64E-08 | 0.077423 |
| 0.566543 | 5.33E-41 | 0.572058 | 6.09E-42 | 0.83985  | #####    | 0.711433 | 3.01E-73 | 0.668224 |
| 0.58936  | 5.13E-45 | 0.637626 | 1.18E-54 | 0.864755 | #####    | 0.728029 | 2.90E-78 | 0.764159 |
| 0.30921  | 8.36E-12 | 0.266631 | 4.83E-09 | 0.675694 | 1.44E-63 | 0.614521 | 7.82E-50 | 0.492998 |
| 0.433575 | 7.95E-23 | 0.557376 | 1.80E-39 | 0.620327 | 5.24E-51 | 0.53807  | 2.09E-36 | 0.519909 |
| 0.58065  | 1.91E-43 | 0.404636 | 7.98E-20 | 0.717189 | 6.02E-75 | 0.507214 | 6.74E-32 | 0.622936 |
| 0.325536 | 5.46E-13 | 0.583986 | 4.84E-44 | 0.506612 | 8.17E-32 | 0.601316 | 2.98E-47 | 0.498709 |
| 0.208272 | 5.66E-06 | 0.32257  | 9.07E-13 | 0.43791  | 2.66E-23 | 0.459298 | 9.52E-26 | 0.364221 |
| 0.393765 | 9.04E-19 | 0.4101   | 2.28E-20 | 0.608559 | 1.18E-48 | 0.691271 | 1.30E-67 | 0.359965 |
| -0.27181 | 2.36E-09 | -0.32952 | 2.73E-13 | -0.33938 | 4.73E-14 | -0.48392 | 8.71E-29 | -0.2723  |
| 0.333834 | 1.28E-13 | 0.324634 | 6.37E-13 | 0.655117 | 1.37E-58 | 0.569818 | 1.48E-41 | 0.53544  |
| -0.23922 | 1.68E-07 | -0.32687 | 4.33E-13 | -0.43085 | 1.57E-22 | -0.31193 | 5.36E-12 | -0.35237 |
| 0.497451 | 1.45E-30 | 0.529269 | 4.51E-35 | 0.807138 | #####    | 0.747204 | 1.52E-84 | 0.670544 |
| 0.389528 | 2.27E-18 | 0.321924 | 1.01E-12 | 0.551705 | 1.50E-38 | 0.355654 | 2.27E-15 | 0.502049 |
| 0.498852 | 9.40E-31 | 0.636613 | 1.95E-54 | 0.718884 | 1.87E-75 | 0.701433 | 2.15E-70 | 0.618224 |
| 0.369737 | 1.42E-16 | 0.52031  | 9.37E-34 | 0.537228 | 2.82E-36 | 0.683359 | 1.59E-65 | 0.383273 |
| 0.500202 | 6.17E-31 | 0.531757 | 1.91E-35 | 0.677775 | 4.30E-64 | 0.553051 | 9.09E-39 | 0.592209 |
| -0.27658 | 1.20E-09 | -0.33868 | 5.37E-14 | -0.55033 | 2.49E-38 | -0.44259 | 8.02E-24 | -0.50251 |
| 0.460427 | 6.99E-26 | 0.592519 | 1.34E-45 | 0.676331 | 9.98E-64 | 0.533853 | 9.22E-36 | 0.57562  |
| 0.245742 | 7.49E-08 | 0.245095 | 8.12E-08 | 0.475355 | 1.06E-27 | 0.420058 | 2.18E-21 | 0.24452  |
| 0.49884  | 9.44E-31 | 0.45128  | 8.25E-25 | 0.655313 | 1.23E-58 | 0.491714 | 8.42E-30 | 0.53915  |
| 0.510669 | 2.22E-32 | 0.646869 | 1.06E-56 | 0.687671 | 1.18E-66 | 0.6645   | 8.25E-61 | 0.536298 |

|          |          |          |          |          |          |          |          |          |
|----------|----------|----------|----------|----------|----------|----------|----------|----------|
| 0.438637 | 2.21E-23 | 0.543853 | 2.65E-37 | 0.667193 | 1.84E-61 | 0.586309 | 1.84E-44 | 0.747847 |
| 0.365995 | 3.00E-16 | 0.274772 | 1.55E-09 | 0.523881 | 2.83E-34 | 0.462638 | 3.81E-26 | 0.289133 |
| 0.070462 | 0.12838  | 0.089188 | 0.0541   | 0.386703 | 4.17E-18 | 0.284649 | 3.73E-10 | 0.255868 |
| 0.371483 | 9.95E-17 | 0.37844  | 2.38E-17 | 0.575995 | 1.26E-42 | 0.484618 | 7.08E-29 | 0.448027 |
| 0.519268 | 1.33E-33 | 0.568224 | 2.76E-41 | 0.818813 | #####    | 0.661377 | 4.62E-60 | 0.720761 |
| 0.267669 | 4.19E-09 | 0.186762 | 4.89E-05 | 0.400771 | 1.91E-19 | 0.305017 | 1.64E-11 | 0.290992 |
| 0.43385  | 7.42E-23 | 0.512061 | 1.42E-32 | 0.793253 | #####    | 0.742491 | 6.00E-83 | 0.593734 |
| 0.502037 | 3.48E-31 | 0.540534 | 8.72E-37 | 0.775887 | 4.47E-95 | 0.714593 | 3.56E-74 | 0.732298 |
| 0.352986 | 3.78E-15 | 0.349349 | 7.51E-15 | 0.64495  | 2.85E-56 | 0.597877 | 1.34E-46 | 0.484479 |
| 0.372342 | 8.36E-17 | 0.422169 | 1.31E-21 | 0.722759 | 1.24E-76 | 0.722597 | 1.39E-76 | 0.539086 |
| 0.445245 | 4.03E-24 | 0.426361 | 4.74E-22 | 0.537191 | 2.86E-36 | 0.503589 | 2.13E-31 | 0.475524 |
| 0.530974 | 2.51E-35 | 0.480961 | 2.08E-28 | 0.650227 | 1.83E-57 | 0.511669 | 1.61E-32 | 0.561891 |
| 0.404903 | 7.51E-20 | 0.456892 | 1.83E-25 | 0.613398 | 1.31E-49 | 0.596373 | 2.57E-46 | 0.524159 |
| 0.45439  | 3.59E-25 | 0.303722 | 2.02E-11 | 0.587948 | 9.28E-45 | 0.500765 | 5.18E-31 | 0.385716 |
| 0.439325 | 1.86E-23 | 0.276381 | 1.24E-09 | 0.488714 | 2.08E-29 | 0.350386 | 6.18E-15 | 0.438675 |
| 0.212254 | 3.70E-06 | 0.318614 | 1.77E-12 | 0.502834 | 2.71E-31 | 0.5366   | 3.52E-36 | 0.286289 |
| 0.453122 | 5.05E-25 | 0.576054 | 1.23E-42 | 0.682564 | 2.55E-65 | 0.64079  | 2.39E-55 | 0.524927 |
| 0.422071 | 1.34E-21 | 0.389954 | 2.07E-18 | 0.792556 | #####    | 0.668777 | 7.54E-62 | 0.677786 |
| 0.46698  | 1.14E-26 | 0.606854 | 2.55E-48 | 0.675968 | 1.23E-63 | 0.655196 | 1.31E-58 | 0.551223 |
| 0.391689 | 1.42E-18 | 0.451843 | 7.10E-25 | 0.747809 | 9.45E-85 | 0.680393 | 9.23E-65 | 0.592088 |
| 0.159279 | 0.00055  | 0.194026 | 2.42E-05 | 0.37431  | 5.59E-17 | 0.4177   | 3.83E-21 | 0.226516 |
| 0.475743 | 9.47E-28 | 0.205863 | 7.29E-06 | 0.52392  | 2.79E-34 | 0.294437 | 8.57E-11 | 0.354905 |
| 0.443876 | 5.76E-24 | 0.374686 | 5.18E-17 | 0.733103 | 7.14E-80 | 0.569097 | 1.96E-41 | 0.549494 |
| 0.404951 | 7.42E-20 | 0.384932 | 6.08E-18 | 0.704864 | 2.33E-71 | 0.665338 | 5.18E-61 | 0.549733 |
| 0.559309 | 8.63E-40 | 0.553636 | 7.31E-39 | 0.749777 | 1.98E-85 | 0.685482 | 4.44E-66 | 0.585507 |
| 0.444707 | 4.64E-24 | 0.466552 | 1.28E-26 | 0.782748 | 7.88E-98 | 0.623229 | 1.33E-51 | 0.62394  |
| 0.274354 | 1.65E-09 | 0.275083 | 1.49E-09 | 0.436429 | 3.88E-23 | 0.369432 | 1.51E-16 | 0.296689 |
| 0.376794 | 3.35E-17 | 0.317707 | 2.06E-12 | 0.745284 | 6.87E-84 | 0.630059 | 4.96E-53 | 0.580772 |
| 0.413865 | 9.46E-21 | 0.634604 | 5.31E-54 | 0.589333 | 5.19E-45 | 0.734274 | 3.00E-80 | 0.490078 |
| 0.356129 | 2.07E-15 | 0.381548 | 1.24E-17 | 0.612044 | 2.44E-49 | 0.622158 | 2.21E-51 | 0.459656 |
| 0.395647 | 5.97E-19 | 0.402056 | 1.43E-19 | 0.705587 | 1.45E-71 | 0.624598 | 6.91E-52 | 0.556407 |
| 0.564022 | 1.42E-40 | 0.561237 | 4.14E-40 | 0.64174  | 1.47E-55 | 0.584954 | 3.24E-44 | 0.530494 |
| 0.515169 | 5.13E-33 | 0.534236 | 8.06E-36 | 0.788054 | #####    | 0.719927 | 9.04E-76 | 0.606951 |
| -0.27771 | 1.02E-09 | -0.49996 | 6.66E-31 | -0.49    | 1.41E-29 | -0.46444 | 2.31E-26 | -0.48489 |
| 0.503579 | 2.14E-31 | 0.34837  | 9.02E-15 | 0.644452 | 3.68E-56 | 0.420893 | 1.78E-21 | 0.531207 |
| 0.377042 | 3.18E-17 | 0.173702 | 0.00016  | 0.762568 | 5.33E-90 | 0.509857 | 2.89E-32 | 0.57632  |
| 0.251609 | 3.55E-08 | 0.240351 | 1.46E-07 | 0.443043 | 7.14E-24 | 0.325759 | 5.25E-13 | 0.283966 |
| 0.327113 | 4.15E-13 | 0.331849 | 1.82E-13 | 0.483951 | 8.63E-29 | 0.567061 | 4.36E-41 | 0.268262 |
| 0.248541 | 5.26E-08 | 0.26818  | 3.91E-09 | 0.366824 | 2.54E-16 | 0.463007 | 3.44E-26 | 0.211962 |
| 0.447026 | 2.53E-24 | 0.635343 | 3.68E-54 | 0.531524 | 2.07E-35 | 0.570366 | 1.19E-41 | 0.432329 |
| 0.389032 | 2.53E-18 | 0.378073 | 2.57E-17 | 0.607504 | 1.90E-48 | 0.602577 | 1.71E-47 | 0.419756 |
| 0.466306 | 1.38E-26 | 0.396239 | 5.24E-19 | 0.785878 | 4.04E-99 | 0.567009 | 4.45E-41 | 0.632378 |
| 0.13694  | 0.00302  | 0.267048 | 4.57E-09 | 0.403036 | 1.15E-19 | 0.372302 | 8.43E-17 | 0.289303 |
| 0.44846  | 1.74E-24 | 0.50601  | 9.90E-32 | 0.587708 | 1.03E-44 | 0.604514 | 7.25E-48 | 0.409502 |
| 0.380063 | 1.70E-17 | 0.419645 | 2.41E-21 | 0.551063 | 1.90E-38 | 0.564534 | 1.16E-40 | 0.45032  |



|          |          |          |          |          |          |          |          |          |
|----------|----------|----------|----------|----------|----------|----------|----------|----------|
| 0.431191 | 1.44E-22 | 0.44978  | 1.23E-24 | 0.566859 | 4.71E-41 | 0.585054 | 3.11E-44 | 0.428644 |
| 0.431897 | 1.21E-22 | 0.600722 | 3.87E-47 | 0.580594 | 1.95E-43 | 0.609062 | 9.44E-49 | 0.516923 |
| 0.274234 | 1.68E-09 | 0.166004 | 0.00031  | 0.5613   | 4.04E-40 | 0.341552 | 3.18E-14 | 0.346285 |
| 0.435911 | 4.42E-23 | 0.354379 | 2.90E-15 | 0.793792 | #####    | 0.636617 | 1.95E-54 | 0.582518 |
| 0.36701  | 2.45E-16 | 0.118538 | 0.01035  | 0.424825 | 6.90E-22 | 0.289464 | 1.82E-10 | 0.355439 |
| 0.491444 | 9.14E-30 | 0.543583 | 2.92E-37 | 0.832584 | #####    | 0.698653 | 1.27E-69 | 0.659454 |
| 0.458179 | 1.29E-25 | 0.316174 | 2.66E-12 | 0.849683 | #####    | 0.620247 | 5.44E-51 | 0.639514 |
| 0.41629  | 5.35E-21 | 0.532856 | 1.30E-35 | 0.636646 | 1.92E-54 | 0.587104 | 1.32E-44 | 0.619403 |
| 0.560784 | 4.92E-40 | 0.456331 | 2.13E-25 | 0.819283 | #####    | 0.592276 | 1.49E-45 | 0.675163 |
| 0.547331 | 7.49E-38 | 0.517351 | 2.50E-33 | 0.867721 | #####    | 0.717745 | 4.10E-75 | 0.694767 |
| 0.134229 | 0.00366  | 0.257757 | 1.60E-08 | 0.461643 | 5.01E-26 | 0.427563 | 3.53E-22 | 0.364367 |
| 0.277786 | 1.01E-09 | 0.432137 | 1.14E-22 | 0.628631 | 9.93E-53 | 0.601792 | 2.42E-47 | 0.681448 |
| -0.18165 | 7.89E-05 | -0.3404  | 3.93E-14 | -0.46408 | 2.56E-26 | -0.35581 | 2.20E-15 | -0.41474 |
| 0.528773 | 5.35E-35 | 0.430048 | 1.91E-22 | 0.717772 | 4.03E-75 | 0.686963 | 1.81E-66 | 0.501444 |
| 0.322371 | 9.38E-13 | 0.337251 | 6.94E-14 | 0.491415 | 9.22E-30 | 0.531325 | 2.22E-35 | 0.385734 |
| 0.418634 | 3.06E-21 | 0.446978 | 2.56E-24 | 0.555402 | 3.78E-39 | 0.56143  | 3.84E-40 | 0.522707 |
| 0.417415 | 4.09E-21 | 0.328997 | 2.99E-13 | 0.587523 | 1.11E-44 | 0.43233  | 1.09E-22 | 0.515429 |
| 0.446216 | 3.13E-24 | 0.522907 | 3.93E-34 | 0.544192 | 2.34E-37 | 0.618226 | 1.40E-50 | 0.376376 |
| 0.4645   | 2.28E-26 | 0.410761 | 1.95E-20 | 0.617295 | 2.16E-50 | 0.587361 | 1.19E-44 | 0.499637 |
| 0.600871 | 3.62E-47 | 0.375294 | 4.57E-17 | 0.671531 | 1.58E-62 | 0.645482 | 2.17E-56 | 0.483826 |
| 0.409202 | 2.80E-20 | 0.242342 | 1.14E-07 | 0.457131 | 1.72E-25 | 0.298972 | 4.25E-11 | 0.388928 |
| 0.552371 | 1.17E-38 | 0.609929 | 6.38E-49 | 0.623556 | 1.14E-51 | 0.478747 | 3.97E-28 | 0.553957 |
| 0.47119  | 3.48E-27 | 0.402839 | 1.20E-19 | 0.84657  | #####    | 0.666707 | 2.41E-61 | 0.667296 |
| 0.350747 | 5.77E-15 | 0.343858 | 2.08E-14 | 0.516818 | 2.98E-33 | 0.441552 | 1.05E-23 | 0.344147 |
| 0.53938  | 1.31E-36 | 0.670928 | 2.23E-62 | 0.75834  | 1.86E-88 | 0.6776   | 4.76E-64 | 0.640027 |
| 0.016883 | 0.71594  | 0.252745 | 3.07E-08 | 0.40437  | 8.47E-20 | 0.481264 | 1.90E-28 | 0.312361 |
| 0.205836 | 7.31E-06 | 0.327012 | 4.23E-13 | 0.424504 | 7.46E-22 | 0.369942 | 1.36E-16 | 0.393734 |
| 0.368861 | 1.69E-16 | 0.263106 | 7.81E-09 | 0.489726 | 1.54E-29 | 0.457432 | 1.58E-25 | 0.27589  |
| 0.414864 | 7.48E-21 | 0.574721 | 2.10E-42 | 0.544605 | 2.02E-37 | 0.504962 | 1.38E-31 | 0.469989 |
| 0.264419 | 6.54E-09 | 0.41292  | 1.18E-20 | 0.423725 | 9.01E-22 | 0.503081 | 2.50E-31 | 0.444561 |
| 0.432125 | 1.14E-22 | 0.546994 | 8.47E-38 | 0.634116 | 6.76E-54 | 0.64216  | 1.19E-55 | 0.504619 |
| 0.375587 | 4.30E-17 | 0.541399 | 6.40E-37 | 0.603496 | 1.14E-47 | 0.590085 | 3.78E-45 | 0.466658 |
| 0.404023 | 9.17E-20 | 0.2667   | 4.79E-09 | 0.585815 | 2.26E-44 | 0.407811 | 3.86E-20 | 0.414846 |
| 0.234799 | 2.86E-07 | 0.27286  | 2.04E-09 | 0.448695 | 1.63E-24 | 0.400795 | 1.90E-19 | 0.320125 |
| 0.297621 | 5.25E-11 | 0.367332 | 2.30E-16 | 0.67746  | 5.17E-64 | 0.58917  | 5.55E-45 | 0.509681 |
| 0.468854 | 6.74E-27 | 0.436348 | 3.96E-23 | 0.682038 | 3.48E-65 | 0.564637 | 1.12E-40 | 0.61605  |
| 0.431144 | 1.46E-22 | 0.313798 | 3.95E-12 | 0.69513  | 1.18E-68 | 0.540841 | 7.81E-37 | 0.590152 |
| 0.230717 | 4.64E-07 | 0.201468 | 1.15E-05 | 0.527407 | 8.54E-35 | 0.311388 | 5.86E-12 | 0.418124 |
| 0.356939 | 1.77E-15 | 0.331786 | 1.84E-13 | 0.620381 | 5.11E-51 | 0.47798  | 4.96E-28 | 0.469081 |
| 0.282402 | 5.19E-10 | 0.355775 | 2.22E-15 | 0.593271 | 9.75E-46 | 0.58844  | 7.55E-45 | 0.425958 |
| 0.450341 | 1.06E-24 | 0.549698 | 3.15E-38 | 0.636963 | 1.64E-54 | 0.630752 | 3.54E-53 | 0.564088 |
| 0.314489 | 3.52E-12 | 0.247938 | 5.68E-08 | 0.514239 | 6.96E-33 | 0.383318 | 8.57E-18 | 0.365636 |
| 0.479365 | 3.32E-28 | 0.521643 | 6.00E-34 | 0.6594   | 1.36E-59 | 0.641686 | 1.52E-55 | 0.490311 |
| 0.407725 | 3.94E-20 | 0.488215 | 2.42E-29 | 0.741976 | 8.91E-83 | 0.667793 | 1.31E-61 | 0.610016 |
| 0.398811 | 2.96E-19 | 0.534978 | 6.22E-36 | 0.77462  | 1.41E-94 | 0.747205 | 1.52E-84 | 0.629275 |

|          |          |          |          |          |          |          |          |          |
|----------|----------|----------|----------|----------|----------|----------|----------|----------|
| 0.545136 | 1.67E-37 | 0.667952 | 1.20E-61 | 0.758233 | 2.03E-88 | 0.734134 | 3.33E-80 | 0.691604 |
| 0.435522 | 4.87E-23 | 0.469726 | 5.27E-27 | 0.562211 | 2.85E-40 | 0.485354 | 5.69E-29 | 0.417786 |
| 0.437904 | 2.67E-23 | 0.342035 | 2.91E-14 | 0.793108 | #####    | 0.561835 | 3.29E-40 | 0.584982 |
| 0.252505 | 3.17E-08 | 0.159252 | 0.00055  | 0.439352 | 1.84E-23 | 0.279259 | 8.19E-10 | 0.422916 |
| 0.468024 | 8.51E-27 | 0.438813 | 2.12E-23 | 0.735362 | 1.34E-80 | 0.557084 | 2.01E-39 | 0.603957 |
| 0.519861 | 1.09E-33 | 0.672549 | 8.84E-63 | 0.70861  | 1.98E-72 | 0.723592 | 6.90E-77 | 0.540224 |
| 0.397045 | 4.38E-19 | 0.333548 | 1.34E-13 | 0.710548 | 5.45E-73 | 0.623637 | 1.09E-51 | 0.549273 |
| 0.310456 | 6.82E-12 | 0.379271 | 2.00E-17 | 0.443736 | 5.97E-24 | 0.421184 | 1.66E-21 | 0.257525 |
| 0.465291 | 1.83E-26 | 0.390756 | 1.74E-18 | 0.779296 | 1.97E-96 | 0.537655 | 2.42E-36 | 0.6981   |
| 0.341977 | 2.94E-14 | 0.305487 | 1.52E-11 | 0.595844 | 3.23E-46 | 0.468053 | 8.44E-27 | 0.457026 |
| 0.404985 | 7.37E-20 | 0.466709 | 1.23E-26 | 0.773663 | 3.33E-94 | 0.689077 | 5.00E-67 | 0.604958 |
| 0.374919 | 4.93E-17 | 0.413342 | 1.07E-20 | 0.715097 | 2.52E-74 | 0.517567 | 2.33E-33 | 0.58477  |
| 0.23963  | 1.60E-07 | 0.34692  | 1.18E-14 | 0.50051  | 5.61E-31 | 0.535123 | 5.91E-36 | 0.296801 |
| 0.450597 | 9.88E-25 | 0.469664 | 5.36E-27 | 0.687543 | 1.27E-66 | 0.614576 | 7.63E-50 | 0.570413 |
| 0.446595 | 2.84E-24 | 0.377031 | 3.19E-17 | 0.697892 | 2.07E-69 | 0.530342 | 3.12E-35 | 0.63381  |
| 0.381591 | 1.23E-17 | 0.307158 | 1.16E-11 | 0.566786 | 4.85E-41 | 0.552087 | 1.30E-38 | 0.46403  |
| 0.519572 | 1.20E-33 | 0.544039 | 2.48E-37 | 0.814308 | #####    | 0.604101 | 8.71E-48 | 0.710877 |
| 0.483681 | 9.34E-29 | 0.489333 | 1.73E-29 | 0.712037 | 2.01E-73 | 0.492725 | 6.19E-30 | 0.650134 |
| 0.441539 | 1.05E-23 | 0.4567   | 1.93E-25 | 0.803946 | #####    | 0.743968 | 1.91E-83 | 0.643007 |
| 0.390433 | 1.87E-18 | 0.26375  | 7.16E-09 | 0.587802 | 9.87E-45 | 0.324675 | 6.33E-13 | 0.55293  |
| 0.367027 | 2.44E-16 | 0.211864 | 3.86E-06 | 0.741342 | 1.45E-82 | 0.488877 | 1.98E-29 | 0.567    |
| 0.360884 | 8.23E-16 | 0.42004  | 2.19E-21 | 0.655118 | 1.37E-58 | 0.55119  | 1.81E-38 | 0.57433  |
| 0.305699 | 1.47E-11 | 0.224352 | 9.69E-07 | 0.561801 | 3.33E-40 | 0.426161 | 4.98E-22 | 0.38576  |
| 0.527462 | 8.38E-35 | 0.565163 | 9.12E-41 | 0.751299 | 5.86E-86 | 0.691571 | 1.08E-67 | 0.556433 |
| 0.55694  | 2.12E-39 | 0.682412 | 2.79E-65 | 0.717521 | 4.79E-75 | 0.649593 | 2.55E-57 | 0.584949 |
| 0.29621  | 6.53E-11 | 0.431341 | 1.39E-22 | 0.457614 | 1.51E-25 | 0.459943 | 7.98E-26 | 0.350075 |
| 0.501476 | 4.15E-31 | 0.628062 | 1.31E-52 | 0.520781 | 8.01E-34 | 0.530875 | 2.59E-35 | 0.428745 |
| 0.320023 | 1.40E-12 | 0.303428 | 2.11E-11 | 0.511495 | 1.70E-32 | 0.332497 | 1.62E-13 | 0.430961 |
| 0.411978 | 1.47E-20 | 0.358497 | 1.31E-15 | 0.795302 | #####    | 0.663186 | 1.71E-60 | 0.610116 |
| 0.23166  | 4.15E-07 | 0.207328 | 6.26E-06 | 0.529242 | 4.55E-35 | 0.305283 | 1.57E-11 | 0.516555 |
| 0.412896 | 1.19E-20 | 0.246954 | 6.43E-08 | 0.463124 | 3.33E-26 | 0.323528 | 7.70E-13 | 0.393093 |
| 0.287929 | 2.29E-10 | 0.475696 | 9.60E-28 | 0.463345 | 3.13E-26 | 0.404379 | 8.46E-20 | 0.406311 |
| 0.383442 | 8.34E-18 | 0.319567 | 1.51E-12 | 0.7576   | 3.43E-88 | 0.624523 | 7.17E-52 | 0.563861 |
| 0.295244 | 7.57E-11 | 0.166076 | 0.00031  | 0.441865 | 9.68E-24 | 0.291997 | 1.24E-10 | 0.349835 |
| 0.441731 | 1.00E-23 | 0.427529 | 3.56E-22 | 0.698376 | 1.52E-69 | 0.483437 | 1.00E-28 | 0.616316 |
| 0.30184  | 2.71E-11 | 0.318906 | 1.69E-12 | 0.626558 | 2.70E-52 | 0.475741 | 9.48E-28 | 0.577998 |
| 0.531921 | 1.80E-35 | 0.649082 | 3.34E-57 | 0.820884 | #####    | 0.744781 | 1.02E-83 | 0.683243 |
| 0.432721 | 9.84E-23 | 0.464967 | 2.00E-26 | 0.769138 | 1.84E-92 | 0.694984 | 1.29E-68 | 0.56123  |
| 0.406715 | 4.96E-20 | 0.290763 | 1.50E-10 | 0.783772 | 3.00E-98 | 0.580671 | 1.89E-43 | 0.602623 |
| -0.18399 | 6.35E-05 | -0.1697  | 0.00023  | -0.43876 | 2.14E-23 | -0.27893 | 8.58E-10 | -0.35374 |
| 0.506994 | 7.23E-32 | 0.499503 | 7.68E-31 | 0.824181 | #####    | 0.633004 | 1.17E-53 | 0.703625 |
| 0.54873  | 4.49E-38 | 0.597957 | 1.29E-46 | 0.843094 | #####    | 0.663645 | 1.32E-60 | 0.707613 |
| 0.405265 | 6.91E-20 | 0.430002 | 1.94E-22 | 0.62794  | 1.39E-52 | 0.459213 | 9.74E-26 | 0.515838 |
| 0.374289 | 5.61E-17 | 0.611471 | 3.16E-49 | 0.587681 | 1.04E-44 | 0.582846 | 7.74E-44 | 0.484237 |
| -0.17926 | 9.82E-05 | -0.29465 | 8.29E-11 | -0.40976 | 2.46E-20 | -0.36603 | 2.98E-16 | -0.28408 |

|          |          |          |          |          |          |          |          |          |
|----------|----------|----------|----------|----------|----------|----------|----------|----------|
| 0.449913 | 1.18E-24 | 0.376648 | 3.45E-17 | 0.594247 | 6.42E-46 | 0.480023 | 2.74E-28 | 0.356879 |
| 0.460001 | 7.86E-26 | 0.253583 | 2.75E-08 | 0.772661 | 8.16E-94 | 0.544388 | 2.18E-37 | 0.644607 |
| 0.355363 | 2.40E-15 | 0.26893  | 3.52E-09 | 0.704409 | 3.13E-71 | 0.475128 | 1.13E-27 | 0.580514 |
| 0.298341 | 4.69E-11 | 0.269473 | 3.27E-09 | 0.424982 | 6.64E-22 | 0.412003 | 1.46E-20 | 0.307408 |
| 0.251121 | 3.78E-08 | 0.462641 | 3.81E-26 | 0.58684  | 1.48E-44 | 0.699723 | 6.44E-70 | 0.434832 |
| 0.319543 | 1.51E-12 | 0.550735 | 2.15E-38 | 0.490537 | 1.20E-29 | 0.599994 | 5.32E-47 | 0.441447 |
| 0.46284  | 3.60E-26 | 0.460009 | 7.84E-26 | 0.644293 | 4.00E-56 | 0.415456 | 6.51E-21 | 0.592154 |
| -0.39877 | 2.99E-19 | -0.35859 | 1.29E-15 | -0.62989 | 5.38E-53 | -0.49009 | 1.38E-29 | -0.53667 |
| -0.25424 | 2.53E-08 | -0.47204 | 2.74E-27 | -0.55336 | 8.11E-39 | -0.58843 | 7.59E-45 | -0.51801 |
| 0.525491 | 1.64E-34 | 0.455746 | 2.49E-25 | 0.76888  | 2.31E-92 | 0.499881 | 6.83E-31 | 0.675642 |
| 0.293642 | 9.68E-11 | 0.325829 | 5.19E-13 | 0.57216  | 5.85E-42 | 0.580091 | 2.40E-43 | 0.288518 |
| 0.408858 | 3.03E-20 | 0.513528 | 8.78E-33 | 0.718718 | 2.09E-75 | 0.497102 | 1.62E-30 | 0.670103 |
| 0.431131 | 1.46E-22 | 0.30818  | 9.87E-12 | 0.616677 | 2.88E-50 | 0.456073 | 2.28E-25 | 0.517912 |
| 0.390114 | 2.00E-18 | 0.439208 | 1.91E-23 | 0.422519 | 1.21E-21 | 0.301739 | 2.76E-11 | 0.558782 |
| 0.356666 | 1.87E-15 | 0.24154  | 1.26E-07 | 0.640106 | 3.38E-55 | 0.487392 | 3.10E-29 | 0.506028 |
| 0.371469 | 9.98E-17 | 0.203457 | 9.36E-06 | 0.42183  | 1.42E-21 | 0.223885 | 1.02E-06 | 0.26634  |
| 0.420311 | 2.05E-21 | 0.560064 | 6.48E-40 | 0.669253 | 5.76E-62 | 0.631577 | 2.36E-53 | 0.58736  |
| -0.28259 | 5.04E-10 | -0.3077  | 1.07E-11 | -0.5602  | 6.15E-40 | -0.44379 | 5.88E-24 | -0.51607 |
| 0.253911 | 2.64E-08 | 0.157598 | 0.00063  | 0.372059 | 8.85E-17 | 0.205539 | 7.54E-06 | 0.218984 |
| 0.577358 | 7.28E-43 | 0.505333 | 1.23E-31 | 0.767166 | 1.03E-91 | 0.547789 | 6.34E-38 | 0.691139 |
| 0.481495 | 1.78E-28 | 0.671936 | 1.25E-62 | 0.710174 | 6.99E-73 | 0.693577 | 3.11E-68 | 0.51954  |
| 0.524335 | 2.42E-34 | 0.551151 | 1.84E-38 | 0.749492 | 2.49E-85 | 0.581757 | 1.21E-43 | 0.596067 |
| 0.652072 | 6.93E-58 | 0.688823 | 5.84E-67 | 0.808247 | #####    | 0.757961 | 2.55E-88 | 0.622635 |
| 0.497973 | 1.24E-30 | 0.468445 | 7.56E-27 | 0.819842 | #####    | 0.610842 | 4.21E-49 | 0.70935  |
| 0.305816 | 1.44E-11 | 0.462966 | 3.48E-26 | 0.548707 | 4.53E-38 | 0.587238 | 1.25E-44 | 0.526417 |
| 0.43489  | 5.71E-23 | 0.417011 | 4.51E-21 | 0.811534 | #####    | 0.708325 | 2.39E-72 | 0.583421 |
| 0.397721 | 3.77E-19 | 0.347575 | 1.05E-14 | 0.726956 | 6.27E-78 | 0.609917 | 6.41E-49 | 0.612423 |
| 0.53422  | 8.11E-36 | 0.466325 | 1.37E-26 | 0.867847 | #####    | 0.648195 | 5.31E-57 | 0.706006 |
| -0.35354 | 3.40E-15 | -0.26435 | 6.60E-09 | -0.48872 | 2.08E-29 | -0.27129 | 2.54E-09 | -0.3628  |
| 0.546501 | 1.01E-37 | 0.537464 | 2.59E-36 | 0.634487 | 5.63E-54 | 0.549605 | 3.26E-38 | 0.50939  |
| 0.465816 | 1.58E-26 | 0.558294 | 1.27E-39 | 0.674321 | 3.19E-63 | 0.513272 | 9.55E-33 | 0.602667 |
| 0.352399 | 4.22E-15 | 0.160414 | 0.0005   | 0.373444 | 6.67E-17 | 0.35992  | 9.93E-16 | 0.198687 |
| 0.373718 | 6.31E-17 | 0.375186 | 4.67E-17 | 0.635927 | 2.75E-54 | 0.453797 | 4.21E-25 | 0.572936 |
| 0.537008 | 3.05E-36 | 0.60749  | 1.92E-48 | 0.818272 | #####    | 0.654513 | 1.89E-58 | 0.713408 |
| 0.45621  | 2.20E-25 | 0.277364 | 1.07E-09 | 0.790249 | #####    | 0.564382 | 1.23E-40 | 0.605668 |
| 0.33312  | 1.45E-13 | 0.334524 | 1.13E-13 | 0.466824 | 1.19E-26 | 0.478365 | 4.44E-28 | 0.357682 |
| 0.487598 | 2.91E-29 | 0.38097  | 1.40E-17 | 0.874956 | #####    | 0.680571 | 8.31E-65 | 0.639238 |
| -0.28566 | 3.21E-10 | -0.33807 | 5.99E-14 | -0.48656 | 3.98E-29 | -0.3603  | 9.22E-16 | -0.43538 |
| 0.442219 | 8.84E-24 | 0.533262 | 1.13E-35 | 0.744139 | 1.68E-83 | 0.68237  | 2.86E-65 | 0.612068 |
| 0.151407 | 0.00103  | 0.278518 | 9.11E-10 | 0.293619 | 9.71E-11 | 0.364611 | 3.95E-16 | 0.210348 |
| 0.31372  | 4.00E-12 | 0.148565 | 0.00128  | 0.692674 | 5.45E-68 | 0.54476  | 1.91E-37 | 0.53971  |
| 0.330619 | 2.25E-13 | 0.20023  | 1.30E-05 | 0.359488 | 1.08E-15 | 0.232268 | 3.87E-07 | 0.29056  |
| 0.313965 | 3.84E-12 | 0.393299 | 1.00E-18 | 0.558856 | 1.03E-39 | 0.564172 | 1.34E-40 | 0.504174 |
| 0.285395 | 3.34E-10 | 0.27418  | 1.69E-09 | 0.38184  | 1.17E-17 | 0.416299 | 5.33E-21 | 0.227684 |
| 0.489875 | 1.47E-29 | 0.398237 | 3.37E-19 | 0.75021  | 1.40E-85 | 0.593435 | 9.09E-46 | 0.568948 |

|          |          |          |          |          |          |          |          |          |
|----------|----------|----------|----------|----------|----------|----------|----------|----------|
| 0.196747 | 1.85E-05 | 0.412767 | 1.22E-20 | 0.629862 | 5.46E-53 | 0.637114 | 1.52E-54 | 0.465542 |
| 0.440326 | 1.44E-23 | 0.25491  | 2.32E-08 | 0.618074 | 1.51E-50 | 0.411885 | 1.50E-20 | 0.44054  |
| 0.434315 | 6.60E-23 | 0.350457 | 6.10E-15 | 0.735747 | 1.00E-80 | 0.538383 | 1.87E-36 | 0.607263 |
| 0.181753 | 7.81E-05 | 0.224951 | 9.05E-07 | 0.526038 | 1.36E-34 | 0.480366 | 2.48E-28 | 0.354835 |
| -0.05702 | 0.21875  | -0.23382 | 3.22E-07 | -0.34688 | 1.19E-14 | -0.3828  | 9.56E-18 | -0.25139 |
| 0.444815 | 4.51E-24 | 0.396517 | 4.93E-19 | 0.469356 | 5.85E-27 | 0.364102 | 4.37E-16 | 0.381848 |
| 0.381451 | 1.27E-17 | 0.41218  | 1.40E-20 | 0.436354 | 3.95E-23 | 0.417826 | 3.71E-21 | 0.393679 |
| 0.289478 | 1.82E-10 | 0.266792 | 4.73E-09 | 0.397041 | 4.39E-19 | 0.371492 | 9.93E-17 | 0.270911 |
| 0.552778 | 1.01E-38 | 0.424315 | 7.81E-22 | 0.750354 | 1.25E-85 | 0.587666 | 1.04E-44 | 0.614904 |
| 0.606127 | 3.53E-48 | 0.479921 | 2.82E-28 | 0.697242 | 3.12E-69 | 0.528305 | 6.28E-35 | 0.624912 |
| 0.331476 | 1.94E-13 | 0.431374 | 1.38E-22 | 0.504373 | 1.66E-31 | 0.598222 | 1.15E-46 | 0.298702 |
| -0.07022 | 0.12969  | -0.19233 | 2.86E-05 | -0.35978 | 1.02E-15 | -0.24967 | 4.56E-08 | -0.35582 |
| 0.333504 | 1.35E-13 | 0.506176 | 9.39E-32 | 0.443309 | 6.67E-24 | 0.45602  | 2.32E-25 | 0.292759 |
| 0.392822 | 1.11E-18 | 0.362795 | 5.65E-16 | 0.768974 | 2.13E-92 | 0.603882 | 9.60E-48 | 0.629742 |
| 0.469816 | 5.14E-27 | 0.421981 | 1.37E-21 | 0.574053 | 2.75E-42 | 0.49089  | 1.08E-29 | 0.557313 |
| 0.343772 | 2.12E-14 | 0.316071 | 2.71E-12 | 0.601746 | 2.47E-47 | 0.420252 | 2.08E-21 | 0.499431 |
| 0.553259 | 8.42E-39 | 0.572494 | 5.12E-42 | 0.735161 | 1.55E-80 | 0.607031 | 2.36E-48 | 0.637657 |
| 0.550034 | 2.78E-38 | 0.541815 | 5.51E-37 | 0.804663 | #####    | 0.567809 | 3.25E-41 | 0.657007 |
| 0.009415 | 0.83919  | -0.28766 | 2.39E-10 | -0.11594 | 0.01217  | -0.31555 | 2.96E-12 | -0.09572 |
| 0.255712 | 2.09E-08 | -0.01715 | 0.71159  | 0.361851 | 6.81E-16 | 0.023169 | 0.6175   | 0.211218 |
| 0.357544 | 1.58E-15 | -0.01468 | 0.75175  | 0.420756 | 1.84E-21 | 0.157582 | 0.00063  | 0.177803 |
| 0.12546  | 0.00663  | -0.18833 | 4.21E-05 | 0.249361 | 4.74E-08 | -0.06193 | 0.18157  | 0.130355 |
| -0.00855 | 0.85381  | -0.17634 | 0.00013  | -0.07893 | 0.0884   | -0.16398 | 0.00037  | -0.10089 |
| 0.039897 | 0.38967  | -0.16655 | 0.0003   | 0.054169 | 0.24268  | -0.14963 | 0.00118  | 0.164737 |
| -0.02741 | 0.55458  | -0.35956 | 1.07E-15 | 0.085048 | 0.06631  | -0.23404 | 3.13E-07 | 0.054293 |
| -0.01127 | 0.80801  | -0.23131 | 4.33E-07 | 0.241471 | 1.27E-07 | 0.132587 | 0.0041   | 0.084899 |
| 0.036953 | 0.42563  | -0.17889 | 0.0001   | 0.32959  | 2.70E-13 | -0.00684 | 0.88285  | 0.283145 |
| 0.241746 | 1.23E-07 | -0.07722 | 0.09557  | 0.251661 | 3.53E-08 | 0.057317 | 0.21634  | 0.12363  |
| 0.060377 | 0.19276  | -0.2798  | 7.57E-10 | -0.07298 | 0.11528  | -0.30496 | 1.65E-11 | -0.08834 |
| 0.05374  | 0.24644  | -0.18534 | 5.59E-05 | 0.283823 | 4.21E-10 | -0.02007 | 0.6653   | 0.177299 |
| -0.11457 | 0.01323  | -0.27841 | 9.26E-10 | 0.144987 | 0.00168  | 0.021198 | 0.64773  | 0.030606 |
| 0.124855 | 0.0069   | -0.26394 | 6.97E-09 | 0.422211 | 1.30E-21 | 0.07095  | 0.12576  | 0.224819 |
| -0.08382 | 0.07035  | -0.40547 | 6.60E-20 | 0.122084 | 0.00826  | -0.12358 | 0.0075   | 0.015512 |
| 0.175871 | 0.00013  | -0.18351 | 6.64E-05 | 0.227428 | 6.81E-07 | -0.1465  | 0.0015   | 0.15372  |
| -0.04647 | 0.31635  | -0.34925 | 7.64E-15 | -0.05338 | 0.24961  | -0.3089  | 8.79E-12 | -0.1305  |
| 0.17359  | 0.00016  | -0.01396 | 0.76356  | 0.378904 | 2.16E-17 | 0.15711  | 0.00066  | 0.130136 |
| 0.203556 | 9.27E-06 | -0.13189 | 0.0043   | 0.341428 | 3.26E-14 | 0.109362 | 0.01807  | 0.219453 |
| 0.175819 | 0.00013  | -0.1431  | 0.00193  | 0.32808  | 3.51E-13 | 0.010548 | 0.82016  | 0.286903 |
| 0.228506 | 6.01E-07 | -0.00279 | 0.95213  | 0.400022 | 2.26E-19 | 0.19165  | 3.06E-05 | 0.267351 |
| 0.212927 | 3.44E-06 | -0.17964 | 9.48E-05 | 0.357409 | 1.62E-15 | 0.012461 | 0.78826  | 0.311884 |
| -0.08182 | 0.07732  | 0.260559 | 1.10E-08 | -0.37572 | 4.19E-17 | -0.04069 | 0.38027  | -0.25975 |
| 0.351896 | 4.64E-15 | 0.094776 | 0.04063  | 0.270041 | 3.02E-09 | 0.140867 | 0.00228  | 0.262036 |
| -0.0888  | 0.05516  | -0.37949 | 1.92E-17 | -0.12403 | 0.00729  | -0.40077 | 1.91E-19 | -0.10569 |
| -0.01309 | 0.77786  | -0.3184  | 1.83E-12 | -0.10794 | 0.01964  | -0.18227 | 7.44E-05 | -0.12991 |
| -0.01266 | 0.78498  | -0.42182 | 1.43E-21 | 0.10247  | 0.02681  | -0.21795 | 1.99E-06 | 0.066013 |

|          |          |          |          |          |          |          |          |          |
|----------|----------|----------|----------|----------|----------|----------|----------|----------|
| 0.247447 | 6.04E-08 | -0.19264 | 2.78E-05 | 0.431681 | 1.28E-22 | 0.066945 | 0.14862  | 0.307884 |
| 0.094338 | 0.04158  | -0.16461 | 0.00035  | 0.294632 | 8.32E-11 | 0.050216 | 0.27883  | 0.215163 |
| 0.372965 | 7.36E-17 | 0.289842 | 1.72E-10 | 0.587664 | 1.05E-44 | 0.495507 | 2.64E-30 | 0.374434 |
| 0.095121 | 0.03991  | -0.21849 | 1.87E-06 | 0.45995  | 7.97E-26 | 0.16578  | 0.00032  | 0.319492 |
| -0.04501 | 0.33182  | -0.39309 | 1.05E-18 | 0.093182 | 0.04415  | -0.1725  | 0.00018  | 0.056964 |
| 0.128761 | 0.00532  | -0.22058 | 1.48E-06 | 0.172543 | 0.00018  | -0.13864 | 0.00268  | 0.123775 |
| 0.169917 | 0.00023  | -0.03933 | 0.39643  | 0.164535 | 0.00036  | 0.030959 | 0.50451  | 0.108369 |
| 0.034623 | 0.45541  | -0.41089 | 1.89E-20 | -0.09913 | 0.03222  | -0.37178 | 9.38E-17 | -0.09112 |
| 0.020324 | 0.66133  | -0.0083  | 0.85802  | -0.10666 | 0.02115  | -0.18151 | 7.99E-05 | -0.05038 |
| 0.245684 | 7.54E-08 | -0.09919 | 0.03212  | 0.416696 | 4.86E-21 | 0.047331 | 0.30742  | 0.373164 |
| 0.216098 | 2.44E-06 | 0.053832 | 0.24563  | 0.43886  | 2.09E-23 | 0.410787 | 1.94E-20 | 0.233097 |
| 0.345962 | 1.41E-14 | 0.17336  | 0.00017  | 0.436393 | 3.91E-23 | 0.249048 | 4.93E-08 | 0.349391 |
| -0.00243 | 0.95827  | 0.31317  | 4.38E-12 | -0.29071 | 1.51E-10 | 0.008689 | 0.85145  | -0.18658 |
| 0.009356 | 0.8402   | -0.36219 | 6.37E-16 | 0.263967 | 6.95E-09 | -0.11777 | 0.01086  | 0.17307  |
| 0.291302 | 1.38E-10 | 0.032663 | 0.48134  | 0.52667  | 1.10E-34 | 0.266294 | 5.06E-09 | 0.292617 |
| 0.339996 | 4.22E-14 | 0.125267 | 0.00672  | 0.484379 | 7.60E-29 | 0.27614  | 1.28E-09 | 0.402844 |
| 0.166381 | 0.0003   | -0.19008 | 3.56E-05 | 0.388523 | 2.82E-18 | 0.109176 | 0.01827  | 0.206571 |
| 0.193941 | 2.44E-05 | -0.04509 | 0.33091  | 0.318273 | 1.88E-12 | 0.054898 | 0.23639  | 0.303154 |
| 0.131662 | 0.00437  | -0.07858 | 0.08984  | 0.229437 | 5.39E-07 | -0.01377 | 0.76665  | 0.251805 |
| 0.283267 | 4.57E-10 | -0.08937 | 0.0536   | 0.487236 | 3.25E-29 | 0.125074 | 0.0068   | 0.431535 |
| 0.188121 | 4.30E-05 | 0.008904 | 0.84781  | 0.360323 | 9.18E-16 | 0.209234 | 5.11E-06 | 0.258782 |
| -0.19117 | 3.20E-05 | -0.23644 | 2.35E-07 | -0.12146 | 0.0086   | -0.29034 | 1.60E-10 | -0.08788 |
| 0.165555 | 0.00033  | -0.17177 | 0.00019  | 0.340092 | 4.15E-14 | 0.103135 | 0.02583  | 0.203821 |
| 0.128369 | 0.00547  | -0.11036 | 0.01704  | 0.367384 | 2.27E-16 | 0.083353 | 0.07193  | 0.266256 |
| 0.229482 | 5.36E-07 | 0.085609 | 0.06453  | 0.48269  | 1.25E-28 | 0.3524   | 4.22E-15 | 0.263342 |
| 0.049689 | 0.28391  | -0.15293 | 0.00091  | 0.062086 | 0.18045  | -0.27474 | 1.56E-09 | 0.081586 |
| 0.096345 | 0.03741  | 0.121575 | 0.00854  | 0.220612 | 1.48E-06 | 0.23881  | 1.76E-07 | 0.125171 |
| -0.05954 | 0.19905  | -0.29944 | 3.96E-11 | -0.05455 | 0.23938  | -0.06441 | 0.16464  | -0.18059 |
| 0.043726 | 0.34576  | -0.22267 | 1.17E-06 | 0.169996 | 0.00022  | -0.12088 | 0.00893  | 0.104788 |
| -0.03602 | 0.43741  | -0.10346 | 0.02536  | -0.13473 | 0.00353  | -0.1704  | 0.00022  | -0.16084 |
| 0.146293 | 0.00152  | 0.02961  | 0.52327  | 0.335223 | 9.98E-14 | 0.054188 | 0.24251  | 0.33355  |
| -0.0496  | 0.28475  | -0.3688  | 1.71E-16 | 0.177942 | 0.00011  | -0.18462 | 5.98E-05 | 0.114292 |
| 0.277918 | 9.93E-10 | 0.073179 | 0.11427  | 0.436687 | 3.63E-23 | 0.220363 | 1.52E-06 | 0.318686 |
| 0.018835 | 0.68477  | -0.26368 | 7.23E-09 | -0.01429 | 0.75806  | -0.28367 | 4.31E-10 | 0.014738 |
| -0.05228 | 0.25955  | -0.11663 | 0.01166  | 0.179175 | 9.89E-05 | 0.110534 | 0.01687  | 0.025973 |
| 0.265945 | 5.31E-09 | -0.10288 | 0.02621  | 0.395844 | 5.72E-19 | 0.041907 | 0.36622  | 0.347187 |
| -0.11417 | 0.01356  | 0.175541 | 0.00014  | -0.29787 | 5.05E-11 | -0.00095 | 0.98371  | -0.22384 |
| 0.413432 | 1.05E-20 | 0.236081 | 2.45E-07 | 0.560129 | 6.32E-40 | 0.405211 | 7.00E-20 | 0.323902 |
| 0.038695 | 0.40412  | -0.2474  | 6.08E-08 | 0.08393  | 0.06997  | -0.13514 | 0.00343  | 0.080897 |
| 0.006153 | 0.89449  | -0.16454 | 0.00036  | 0.02516  | 0.58758  | -0.04543 | 0.32729  | -0.0868  |
| 0.125303 | 0.0067   | 0.047289 | 0.30784  | 0.289753 | 1.74E-10 | 0.152662 | 0.00093  | 0.236882 |
| -0.11427 | 0.01348  | -0.39084 | 1.71E-18 | -0.1279  | 0.00564  | -0.38305 | 9.07E-18 | -0.137   |
| -0.01022 | 0.82566  | 0.223504 | 1.07E-06 | -0.18136 | 8.10E-05 | 0.077435 | 0.09464  | -0.08598 |
| 0.012003 | 0.79586  | -0.25721 | 1.71E-08 | 0.281989 | 5.51E-10 | 0.072768 | 0.11632  | 0.147207 |
| -0.00933 | 0.84056  | -0.32461 | 6.39E-13 | 0.199149 | 1.45E-05 | -0.11734 | 0.01116  | 0.157231 |

|          |          |          |          |          |          |          |          |          |
|----------|----------|----------|----------|----------|----------|----------|----------|----------|
| 0.036467 | 0.43175  | -0.23514 | 2.75E-07 | 0.061522 | 0.18445  | -0.18183 | 7.75E-05 | -0.06046 |
| 0.039852 | 0.39021  | -0.26282 | 8.12E-09 | -0.06578 | 0.15583  | -0.29227 | 1.19E-10 | -0.05584 |
| -0.04777 | 0.3029   | -0.43106 | 1.49E-22 | 0.201048 | 1.20E-05 | -0.10462 | 0.02376  | 0.148373 |
| 0.21406  | 3.05E-06 | 0.017138 | 0.71184  | 0.543181 | 3.38E-37 | 0.275403 | 1.42E-09 | 0.467813 |
| 0.013808 | 0.766    | -0.20748 | 6.15E-06 | -0.06393 | 0.1678   | -0.20284 | 9.98E-06 | -0.04752 |
| 0.071709 | 0.12175  | -0.22048 | 1.50E-06 | 0.002314 | 0.96023  | -0.04327 | 0.35077  | -0.10155 |
| -0.09928 | 0.03196  | -0.15583 | 0.00073  | -0.23157 | 4.20E-07 | -0.20022 | 1.30E-05 | -0.23155 |
| 0.153997 | 0.00084  | -0.18343 | 6.69E-05 | 0.256895 | 1.79E-08 | -0.02842 | 0.54015  | 0.180774 |
| 0.054046 | 0.24375  | -0.11457 | 0.01324  | 0.340596 | 3.79E-14 | 0.117077 | 0.01134  | 0.292761 |
| 0.228888 | 5.75E-07 | 0.024592 | 0.59605  | 0.461908 | 4.66E-26 | 0.253122 | 2.92E-08 | 0.239009 |
| -0.05842 | 0.20763  | -0.13931 | 0.00255  | -0.05507 | 0.23488  | -0.20484 | 8.11E-06 | 0.003346 |
| 0.018418 | 0.69138  | -0.25674 | 1.82E-08 | 0.106512 | 0.02133  | -0.07445 | 0.10809  | -0.0137  |
| 0.201084 | 1.19E-05 | -0.03244 | 0.48433  | 0.345847 | 1.44E-14 | 0.20441  | 8.48E-06 | 0.19966  |
| 0.055287 | 0.23308  | -0.23878 | 1.77E-07 | 0.283712 | 4.28E-10 | -0.01166 | 0.80156  | 0.118278 |
| 0.164731 | 0.00035  | -0.2492  | 4.84E-08 | 0.229328 | 5.46E-07 | -0.14061 | 0.00232  | 0.128381 |
| 0.280443 | 6.90E-10 | -0.06001 | 0.19549  | 0.346892 | 1.19E-14 | -0.00827 | 0.85848  | 0.249621 |
| 0.081973 | 0.07678  | -0.09793 | 0.03436  | 0.000237 | 0.99592  | -0.08338 | 0.07183  | -0.05305 |
| 0.233545 | 3.32E-07 | 0.117737 | 0.01089  | 0.326296 | 4.78E-13 | 0.082437 | 0.07512  | 0.230725 |
| 0.155194 | 0.00076  | -0.02885 | 0.53402  | 0.330055 | 2.49E-13 | 0.023055 | 0.61922  | 0.228674 |
| 0.209119 | 5.18E-06 | 0.17338  | 0.00017  | 0.421733 | 1.46E-21 | 0.334024 | 1.24E-13 | 0.298573 |
| -0.04909 | 0.28978  | -0.25723 | 1.71E-08 | -0.0556  | 0.2304   | -0.21128 | 4.11E-06 | -0.11923 |
| 0.035476 | 0.44437  | -0.19119 | 3.20E-05 | -0.131   | 0.00457  | -0.30087 | 3.16E-11 | -0.1413  |
| -0.01352 | 0.77079  | -0.23745 | 2.08E-07 | 0.115868 | 0.01222  | -0.0868  | 0.06089  | -0.02119 |
| 0.294418 | 8.60E-11 | -0.04062 | 0.38112  | 0.370116 | 1.31E-16 | 0.061974 | 0.18123  | 0.131317 |
| -0.0582  | 0.20935  | -0.39229 | 1.25E-18 | 0.088547 | 0.05586  | -0.15615 | 0.00071  | 0.089017 |
| 0.088603 | 0.0557   | -0.35608 | 2.09E-15 | 0.249703 | 4.54E-08 | -0.0943  | 0.04166  | 0.162143 |
| 0.199549 | 1.40E-05 | 0.005624 | 0.90353  | 0.385346 | 5.57E-18 | 0.124148 | 0.00723  | 0.323851 |
| 0.157419 | 0.00064  | -0.09055 | 0.05051  | 0.251298 | 3.70E-08 | -0.01816 | 0.69552  | 0.143477 |
| 0.203534 | 9.29E-06 | 0.099096 | 0.03227  | 0.332599 | 1.59E-13 | 0.105033 | 0.02321  | 0.244353 |
| 0.064153 | 0.16634  | -0.20665 | 6.72E-06 | 0.157641 | 0.00063  | -0.02845 | 0.53971  | 0.093949 |
| -0.09191 | 0.04713  | -0.21297 | 3.43E-06 | -0.01609 | 0.72882  | -0.24425 | 9.02E-08 | -0.01666 |
| 0.068826 | 0.13751  | -0.04218 | 0.36311  | 0.136816 | 0.00305  | 0.012593 | 0.78607  | 0.091953 |
| 0.076907 | 0.09692  | -0.24378 | 9.57E-08 | 0.096124 | 0.03785  | -0.04465 | 0.33569  | 0.02443  |
| -0.02998 | 0.51814  | -0.15995 | 0.00052  | 0.005479 | 0.90601  | -0.04422 | 0.34036  | -0.09223 |
| -0.10388 | 0.02478  | -0.42006 | 2.18E-21 | 0.059105 | 0.20233  | -0.31948 | 1.53E-12 | 0.007502 |
| 0.245305 | 7.91E-08 | 0.136864 | 0.00304  | 0.310856 | 6.39E-12 | 0.135052 | 0.00345  | 0.200243 |
| 0.149486 | 0.0012   | -0.26805 | 3.98E-09 | 0.28775  | 2.36E-10 | -0.04991 | 0.28174  | 0.146317 |
| 0.06761  | 0.14462  | -0.02747 | 0.55369  | 0.3127   | 4.73E-12 | 0.229833 | 5.15E-07 | 0.108273 |
| -0.08488 | 0.06686  | 0.302272 | 2.53E-11 | -0.24504 | 8.18E-08 | 0.050186 | 0.27912  | -0.16844 |
| 0.255794 | 2.06E-08 | 0.192809 | 2.73E-05 | 0.257663 | 1.61E-08 | 0.015474 | 0.73874  | 0.126109 |
| -0.13354 | 0.00384  | 0.227792 | 6.53E-07 | -0.35853 | 1.30E-15 | -0.15597 | 0.00072  | -0.18036 |
| 0.212676 | 3.54E-06 | 0.01415  | 0.76038  | 0.435654 | 4.71E-23 | 0.192535 | 2.80E-05 | 0.318129 |
| 0.141376 | 0.0022   | -0.15449 | 0.00081  | 0.434921 | 5.67E-23 | 0.21111  | 4.19E-06 | 0.233594 |
| 0.231103 | 4.43E-07 | 0.243163 | 1.03E-07 | 0.571162 | 8.69E-42 | 0.584854 | 3.38E-44 | 0.36002  |
| 0.126288 | 0.00628  | -0.04871 | 0.29347  | 0.339369 | 4.73E-14 | 0.166454 | 0.0003   | 0.283564 |

|          |          |          |          |          |          |          |          |          |
|----------|----------|----------|----------|----------|----------|----------|----------|----------|
| 0.291815 | 1.28E-10 | 0.297868 | 5.05E-11 | 0.612685 | 1.82E-49 | 0.430784 | 1.59E-22 | 0.446326 |
| 0.027862 | 0.5481   | -0.07659 | 0.09829  | 0.088225 | 0.05676  | -0.035   | 0.45049  | 0.115582 |
| 0.040846 | 0.37849  | -0.2248  | 9.21E-07 | 0.440698 | 1.31E-23 | 0.114705 | 0.01313  | 0.373435 |
| 0.10379  | 0.0249   | -0.32547 | 5.52E-13 | 0.392196 | 1.27E-18 | 0.027805 | 0.54892  | 0.301477 |
| 0.046841 | 0.31245  | -0.31632 | 2.60E-12 | 0.263604 | 7.30E-09 | -0.04027 | 0.38522  | 0.142217 |
| 0.07576  | 0.10202  | -0.02655 | 0.56717  | 0.146781 | 0.00147  | 0.035564 | 0.44325  | 0.125235 |
| -0.04499 | 0.33198  | -0.35081 | 5.71E-15 | 0.137756 | 0.00285  | -0.13721 | 0.00297  | 0.092848 |
| 0.176047 | 0.00013  | 0.013185 | 0.77628  | 0.501235 | 4.47E-31 | 0.232508 | 3.76E-07 | 0.393734 |
| 0.238275 | 1.88E-07 | -0.02618 | 0.57247  | 0.4874   | 3.09E-29 | 0.300103 | 3.56E-11 | 0.318484 |
| -0.04582 | 0.32309  | -0.1907  | 3.35E-05 | 0.027472 | 0.55372  | -0.04191 | 0.36613  | 0.039334 |
| 0.134655 | 0.00355  | -0.33367 | 1.31E-13 | 0.21037  | 4.53E-06 | -0.15668 | 0.00068  | 0.114199 |
| 0.057397 | 0.21569  | -0.27937 | 8.06E-10 | 0.132122 | 0.00424  | -0.27912 | 8.35E-10 | 0.117504 |
| 0.17249  | 0.00018  | -0.06919 | 0.13541  | 0.461133 | 5.76E-26 | 0.178432 | 0.00011  | 0.323796 |
| 0.087101 | 0.06     | -0.17186 | 0.00019  | 0.316578 | 2.49E-12 | 0.050303 | 0.278    | 0.23064  |
| 0.20961  | 4.91E-06 | -0.07304 | 0.11498  | 0.302734 | 2.36E-11 | 0.082559 | 0.07469  | 0.199559 |
| -0.03946 | 0.39488  | -0.35056 | 5.98E-15 | -0.02557 | 0.58145  | -0.28347 | 4.44E-10 | -0.16561 |
| 0.009557 | 0.8368   | 0.263916 | 7.00E-09 | -0.24446 | 8.79E-08 | 0.006871 | 0.88228  | -0.13821 |
| -0.03617 | 0.43557  | -0.15534 | 0.00076  | 0.26953  | 3.24E-09 | 0.053174 | 0.25145  | 0.232591 |
| 0.046351 | 0.31755  | -0.12383 | 0.00738  | -0.0374  | 0.42004  | -0.1804  | 8.84E-05 | -0.00791 |
| 0.094504 | 0.04122  | -0.15498 | 0.00078  | 0.123663 | 0.00746  | -0.10565 | 0.02241  | 0.00802  |
| 0.067424 | 0.14573  | -0.21356 | 3.22E-06 | 0.364952 | 3.69E-16 | 0.228895 | 5.74E-07 | 0.162059 |
| -0.12898 | 0.00525  | -0.45795 | 1.37E-25 | 0.096371 | 0.03736  | -0.26822 | 3.89E-09 | 0.02851  |
| 0.119423 | 0.00979  | -0.15243 | 0.00095  | -0.01516 | 0.7439   | -0.12088 | 0.00892  | -0.02831 |
| 0.048132 | 0.29929  | -0.38933 | 2.37E-18 | 0.166259 | 0.00031  | -0.12151 | 0.00858  | -0.00156 |
| 0.361535 | 7.24E-16 | 0.135597 | 0.00332  | 0.522084 | 5.18E-34 | 0.267121 | 4.52E-09 | 0.328696 |
| 0.162041 | 0.00044  | -0.07974 | 0.0852   | 0.1759   | 0.00013  | -0.14238 | 0.00204  | 0.121875 |
| 0.02971  | 0.52188  | -0.12696 | 0.00601  | 0.231432 | 4.27E-07 | 0.073133 | 0.1145   | 0.066647 |
| 0.023661 | 0.61004  | -0.22258 | 1.19E-06 | -0.17803 | 0.00011  | -0.1984  | 1.57E-05 | -0.12645 |
| 0.241889 | 1.21E-07 | -0.00182 | 0.96867  | 0.470179 | 4.64E-27 | 0.232975 | 3.55E-07 | 0.341453 |
| 0.23497  | 2.80E-07 | 0.231515 | 4.22E-07 | 0.391449 | 1.50E-18 | 0.375595 | 4.29E-17 | 0.244364 |
| -0.03388 | 0.46518  | -0.20522 | 7.80E-06 | 0.097761 | 0.03468  | -0.00746 | 0.87223  | -0.06582 |
| 0.093916 | 0.0425   | -0.1706  | 0.00021  | 0.335699 | 9.16E-14 | 0.078209 | 0.09138  | 0.196471 |
| 0.136095 | 0.00321  | -0.26735 | 4.38E-09 | 0.305237 | 1.58E-11 | -0.15144 | 0.00103  | 0.244834 |
| 0.226201 | 7.84E-07 | -0.12543 | 0.00665  | 0.304543 | 1.77E-11 | -0.02338 | 0.61435  | 0.181144 |
| 0.177573 | 0.00011  | -0.05414 | 0.24292  | 0.346975 | 1.17E-14 | 0.132925 | 0.00401  | 0.232121 |
| 0.009201 | 0.8428   | -0.14983 | 0.00116  | 0.107759 | 0.01985  | -0.11359 | 0.01405  | 0.022926 |
| 0.234082 | 3.12E-07 | 0.090869 | 0.04971  | 0.286719 | 2.75E-10 | 0.057153 | 0.21766  | 0.145563 |
| -0.10774 | 0.01987  | 0.269983 | 3.04E-09 | -0.37166 | 9.61E-17 | -0.12946 | 0.00508  | -0.23713 |
| 0.094739 | 0.04071  | -0.32521 | 5.78E-13 | 0.144348 | 0.00176  | -0.26953 | 3.24E-09 | 0.066968 |
| 0.076555 | 0.09846  | -0.34672 | 1.23E-14 | 0.271631 | 2.42E-09 | -0.02856 | 0.53819  | 0.195802 |
| -0.05806 | 0.21043  | -0.3387  | 5.34E-14 | 0.186263 | 5.12E-05 | -0.09654 | 0.03701  | 0.124255 |
| 0.133162 | 0.00394  | -0.17335 | 0.00017  | 0.106237 | 0.02167  | -0.12291 | 0.00784  | 0.088828 |
| 0.047192 | 0.30884  | -0.01034 | 0.82367  | 0.211745 | 3.91E-06 | 0.011267 | 0.80813  | 0.293473 |
| 0.23742  | 2.09E-07 | 0.078459 | 0.09034  | 0.321436 | 1.10E-12 | 0.086673 | 0.06127  | 0.288283 |
| 0.150218 | 0.00113  | -0.14806 | 0.00133  | 0.434725 | 5.96E-23 | -0.01502 | 0.74608  | 0.360147 |

|          |          |          |          |          |          |          |          |          |
|----------|----------|----------|----------|----------|----------|----------|----------|----------|
| 0.150583 | 0.0011   | -0.204   | 8.85E-06 | 0.396539 | 4.91E-19 | -0.02747 | 0.55369  | 0.277327 |
| 0.263547 | 7.36E-09 | 0.209813 | 4.81E-06 | 0.438635 | 2.21E-23 | 0.298801 | 4.37E-11 | 0.325901 |
| 0.023861 | 0.60702  | -0.06064 | 0.19083  | 0.293635 | 9.69E-11 | 0.195273 | 2.14E-05 | 0.133666 |
| 0.108594 | 0.01891  | -0.15217 | 0.00097  | 0.412325 | 1.36E-20 | 0.166571 | 0.0003   | 0.27568  |
| -0.03513 | 0.44881  | -0.28107 | 6.30E-10 | 0.055498 | 0.23129  | -0.11081 | 0.0166   | 0.014014 |
| 0.241913 | 1.21E-07 | -0.14021 | 0.00239  | 0.43912  | 1.96E-23 | 0.042044 | 0.36465  | 0.315673 |
| 0.094698 | 0.0408   | -0.12036 | 0.00923  | 0.338455 | 5.58E-14 | 0.26946  | 3.27E-09 | 0.164012 |
| -0.04734 | 0.30735  | -0.11393 | 0.01376  | 0.19769  | 1.68E-05 | -0.04243 | 0.36022  | 0.234219 |
| 0.054481 | 0.23997  | -0.17282 | 0.00017  | 0.227688 | 6.60E-07 | 0.028005 | 0.54605  | 0.118537 |
| 0.140945 | 0.00227  | -0.246   | 7.25E-08 | 0.33871  | 5.33E-14 | 0.040572 | 0.3817   | 0.157503 |
| 0.301367 | 2.92E-11 | 0.225923 | 8.09E-07 | 0.412603 | 1.27E-20 | 0.237114 | 2.17E-07 | 0.284929 |
| 0.146286 | 0.00153  | -0.17172 | 0.00019  | 0.249241 | 4.81E-08 | -0.04448 | 0.33746  | 0.144506 |
| 0.123588 | 0.0075   | -0.04638 | 0.31726  | 0.39642  | 5.04E-19 | 0.130424 | 0.00476  | 0.363434 |
| 0.008698 | 0.85129  | -0.30557 | 1.50E-11 | -0.04059 | 0.38154  | -0.18951 | 3.76E-05 | -0.13226 |
| 0.135596 | 0.00333  | -0.13579 | 0.00328  | 0.356779 | 1.83E-15 | 0.087214 | 0.05967  | 0.265537 |
| 0.288024 | 2.26E-10 | -0.01154 | 0.80354  | 0.477898 | 5.08E-28 | 0.327377 | 3.97E-13 | 0.342008 |
| 0.025617 | 0.58081  | -0.20921 | 5.13E-06 | 0.017758 | 0.70189  | -0.09856 | 0.03322  | -0.00274 |
| -0.09067 | 0.05021  | -0.41883 | 2.92E-21 | 0.027706 | 0.55035  | -0.13467 | 0.00355  | -0.02697 |
| 0.012598 | 0.78598  | -0.28678 | 2.72E-10 | 0.007435 | 0.87269  | -0.23382 | 3.22E-07 | 0.032032 |
| 0.023966 | 0.60544  | -0.38784 | 3.26E-18 | 0.220175 | 1.55E-06 | -0.12733 | 0.00586  | 0.184521 |
| 0.293173 | 1.04E-10 | 0.087647 | 0.05841  | 0.48007  | 2.70E-28 | 0.164673 | 0.00035  | 0.3383   |
| 0.128423 | 0.00545  | -0.19393 | 2.45E-05 | 0.276799 | 1.17E-09 | 0.026805 | 0.56339  | 0.171962 |
| 0.164827 | 0.00035  | -0.1344  | 0.00362  | 0.40822  | 3.51E-20 | 0.126196 | 0.00632  | 0.23445  |
| 0.326296 | 4.79E-13 | 0.111228 | 0.01619  | 0.439845 | 1.63E-23 | 0.210911 | 4.28E-06 | 0.289072 |
| 0.058553 | 0.20658  | -0.19585 | 2.02E-05 | 0.208339 | 5.62E-06 | -0.10162 | 0.0281   | 0.121248 |
| 0.325805 | 5.21E-13 | -0.15    | 0.00115  | 0.387113 | 3.82E-18 | -0.00289 | 0.9504   | 0.29482  |
| 0.038566 | 0.40569  | -0.36192 | 6.72E-16 | 0.088358 | 0.05638  | -0.18865 | 4.08E-05 | 0.070575 |
| 0.006144 | 0.89466  | -0.29279 | 1.10E-10 | -0.11196 | 0.0155   | -0.26455 | 6.42E-09 | -0.20815 |
| -0.02173 | 0.63951  | -0.24544 | 7.78E-08 | -0.08902 | 0.05455  | -0.20254 | 1.03E-05 | -0.11718 |
| -0.12652 | 0.00618  | -0.4925  | 6.62E-30 | -0.13061 | 0.0047   | -0.35953 | 1.07E-15 | -0.1745  |
| 0.265629 | 5.54E-09 | 0.148754 | 0.00126  | 0.326774 | 4.41E-13 | 0.100793 | 0.02942  | 0.151793 |
| 0.301183 | 3.01E-11 | -0.00491 | 0.91568  | 0.561248 | 4.12E-40 | 0.193679 | 2.51E-05 | 0.364888 |
| -0.02678 | 0.56373  | -0.2653  | 5.80E-09 | -0.01619 | 0.72718  | -0.20559 | 7.51E-06 | -0.06981 |
| 0.021566 | 0.64204  | -0.11156 | 0.01587  | 0.23998  | 1.53E-07 | 0.005756 | 0.90127  | 0.191103 |
| 0.116829 | 0.01152  | -0.21685 | 2.24E-06 | 0.261662 | 9.48E-09 | -0.04344 | 0.34887  | 0.197145 |
| -0.04989 | 0.28198  | -0.29369 | 9.62E-11 | 0.010108 | 0.82754  | -0.10932 | 0.01812  | -0.10521 |
| 0.174465 | 0.00015  | -0.11373 | 0.01392  | 0.228909 | 5.73E-07 | -0.08329 | 0.07214  | 0.148177 |
| 0.157108 | 0.00066  | -0.0752  | 0.10456  | 0.32765  | 3.78E-13 | 0.112541 | 0.01496  | 0.211664 |
| 0.181333 | 8.12E-05 | -0.04556 | 0.32584  | 0.418414 | 3.23E-21 | 0.295797 | 6.96E-11 | 0.222642 |
| 0.207983 | 5.84E-06 | -0.11295 | 0.0146   | 0.362406 | 6.10E-16 | 0.078687 | 0.08941  | 0.240053 |
| -0.04683 | 0.31262  | -0.46728 | 1.05E-26 | 0.039901 | 0.38962  | -0.25367 | 2.72E-08 | 0.037826 |
| 0.308195 | 9.85E-12 | 0.045772 | 0.32364  | 0.416799 | 4.74E-21 | 0.193353 | 2.59E-05 | 0.248492 |
| 0.111562 | 0.01587  | -0.0851  | 0.06613  | 0.309365 | 8.15E-12 | 0.032137 | 0.48844  | 0.214857 |
| 0.066614 | 0.15064  | -0.26267 | 8.28E-09 | 0.176815 | 0.00012  | -0.028   | 0.54609  | 0.032774 |
| 0.415862 | 5.91E-21 | 0.211208 | 4.14E-06 | 0.397691 | 3.80E-19 | 0.289978 | 1.69E-10 | 0.154011 |



|          |          |          |          |          |          |          |          |          |
|----------|----------|----------|----------|----------|----------|----------|----------|----------|
| -0.05582 | 0.2286   | -0.2054  | 7.66E-06 | 0.110175 | 0.01723  | 0.009699 | 0.83442  | -0.04523 |
| 0.350354 | 6.22E-15 | 0.259106 | 1.33E-08 | 0.686739 | 2.07E-66 | 0.471222 | 3.45E-27 | 0.521834 |
| -0.15148 | 0.00102  | -0.52505 | 1.90E-34 | -0.04505 | 0.33134  | -0.32708 | 4.17E-13 | -0.07693 |
| 0.289453 | 1.83E-10 | -0.01025 | 0.82517  | 0.356671 | 1.86E-15 | 0.148408 | 0.0013   | 0.214211 |
| 0.167684 | 0.00027  | 0.12086  | 0.00894  | 0.321213 | 1.14E-12 | 0.227953 | 6.40E-07 | 0.189561 |
| 0.163755 | 0.00038  | -0.12423 | 0.00719  | 0.264766 | 6.24E-09 | -0.01078 | 0.81621  | 0.163007 |
| 0.022321 | 0.63042  | -0.1504  | 0.00111  | 0.271916 | 2.32E-09 | 0.04777  | 0.30294  | 0.16302  |
| 0.23669  | 2.28E-07 | -0.08334 | 0.07197  | 0.338689 | 5.35E-14 | 0.099253 | 0.032    | 0.184411 |
| -0.11478 | 0.01307  | -0.33995 | 4.26E-14 | 0.142322 | 0.00205  | 0.021688 | 0.64016  | -0.0099  |
| 0.057899 | 0.2117   | -0.17618 | 0.00013  | 0.070693 | 0.12713  | -0.05342 | 0.24928  | -0.01178 |
| 0.025446 | 0.58334  | -0.17699 | 0.00012  | 0.233093 | 3.51E-07 | 0.009876 | 0.83145  | 0.119224 |
| 0.092372 | 0.04603  | -0.15047 | 0.00111  | 0.333463 | 1.36E-13 | 0.040407 | 0.38363  | 0.254044 |
| 0.051589 | 0.26588  | -0.09923 | 0.03204  | -0.01847 | 0.69048  | -0.079   | 0.08814  | -0.02498 |
| -0.09797 | 0.03429  | -0.31421 | 3.68E-12 | -0.17242 | 0.00018  | -0.27493 | 1.52E-09 | -0.21416 |
| -0.0298  | 0.52066  | -0.14178 | 0.00213  | 0.219171 | 1.74E-06 | 0.143662 | 0.00186  | 0.052474 |
| 0.020798 | 0.65395  | -0.10674 | 0.02105  | -0.03841 | 0.40765  | -0.12581 | 0.00648  | -0.01787 |
| -0.17089 | 0.00021  | -0.42794 | 3.22E-22 | -0.21794 | 1.99E-06 | -0.27725 | 1.09E-09 | -0.20046 |
| 0.218497 | 1.87E-06 | 0.132381 | 0.00416  | 0.249008 | 4.96E-08 | 0.145325 | 0.00164  | 0.100893 |
| 0.31149  | 5.76E-12 | 0.181041 | 8.34E-05 | 0.460412 | 7.02E-26 | 0.373864 | 6.12E-17 | 0.255445 |
| 0.269817 | 3.11E-09 | -0.04329 | 0.3506   | 0.442798 | 7.61E-24 | 0.060522 | 0.1917   | 0.345417 |
| 0.165409 | 0.00033  | -0.08651 | 0.06178  | 0.353376 | 3.51E-15 | 0.013451 | 0.77189  | 0.31835  |
| 0.245297 | 7.92E-08 | 0.179209 | 9.86E-05 | 0.391937 | 1.35E-18 | 0.141108 | 0.00224  | 0.319513 |
| -0.04758 | 0.30483  | -0.40053 | 2.01E-19 | -0.00748 | 0.87192  | -0.25848 | 1.45E-08 | -0.06707 |
| 0.399194 | 2.72E-19 | 0.124408 | 0.00711  | 0.478581 | 4.17E-28 | 0.242199 | 1.16E-07 | 0.250639 |
| 0.046967 | 0.31116  | -0.26654 | 4.89E-09 | 0.210072 | 4.68E-06 | 0.071043 | 0.12526  | 0.108392 |
| 0.010017 | 0.82907  | -0.41419 | 8.76E-21 | -0.00632 | 0.89171  | -0.28978 | 1.74E-10 | -0.08658 |
| 0.116091 | 0.01206  | 0.095657 | 0.03879  | 0.154304 | 0.00082  | 0.102141 | 0.0273   | 0.140125 |
| 0.349062 | 7.93E-15 | -0.09714 | 0.03585  | 0.343066 | 2.41E-14 | 0.075592 | 0.10278  | 0.262108 |
| 0.176227 | 0.00013  | 0.030041 | 0.51724  | 0.519736 | 1.13E-33 | 0.320587 | 1.27E-12 | 0.353712 |
| 0.151344 | 0.00104  | -0.11222 | 0.01525  | 0.296739 | 6.02E-11 | 0.054228 | 0.24216  | 0.178119 |
| -0.04443 | 0.33805  | -0.08517 | 0.06591  | -0.02066 | 0.65601  | -0.0387  | 0.40403  | -0.03302 |
| 0.099132 | 0.03221  | -0.02583 | 0.57763  | 0.33532  | 9.81E-14 | 0.133194 | 0.00393  | 0.192307 |
| 0.038878 | 0.40191  | -0.32411 | 6.97E-13 | 0.258619 | 1.42E-08 | -0.11094 | 0.01647  | 0.189031 |
| 0.0191   | 0.68057  | -0.21018 | 4.63E-06 | 0.244412 | 8.85E-08 | 0.033957 | 0.46413  | 0.113009 |
| 0.24965  | 4.57E-08 | 0.111182 | 0.01623  | 0.394026 | 8.53E-19 | 0.175362 | 0.00014  | 0.29729  |
| -0.05167 | 0.26509  | -0.33193 | 1.79E-13 | -0.04208 | 0.36421  | -0.10244 | 0.02685  | -0.16312 |
| -0.12295 | 0.00781  | -0.20438 | 8.51E-06 | -0.12195 | 0.00833  | -0.29467 | 8.28E-11 | -0.06844 |
| -0.12115 | 0.00877  | -0.29321 | 1.03E-10 | -0.12801 | 0.0056   | -0.36086 | 8.27E-16 | -0.00404 |
| 0.377543 | 2.87E-17 | 0.12131  | 0.00869  | 0.476196 | 8.31E-28 | 0.226118 | 7.92E-07 | 0.302703 |
| 0.136716 | 0.00307  | 0.008809 | 0.84942  | 0.333287 | 1.41E-13 | 0.208859 | 5.32E-06 | 0.172373 |
| 0.136574 | 0.0031   | -0.1175  | 0.01105  | 0.285969 | 3.07E-10 | -0.00886 | 0.8485   | 0.162819 |
| 0.145421 | 0.00163  | -0.08008 | 0.08388  | 0.295885 | 6.86E-11 | -0.04989 | 0.28201  | 0.225592 |
| 0.112702 | 0.01482  | -0.3023  | 2.53E-11 | 0.250229 | 4.24E-08 | -0.08932 | 0.05374  | 0.086054 |
| 0.132042 | 0.00426  | -0.14307 | 0.00194  | 0.190837 | 3.31E-05 | -0.07415 | 0.10952  | 0.147137 |
| 0.285726 | 3.18E-10 | -0.06856 | 0.13903  | 0.459643 | 8.66E-26 | 0.084558 | 0.0679   | 0.358106 |

|          |          |          |          |          |          |          |          |          |
|----------|----------|----------|----------|----------|----------|----------|----------|----------|
| 0.291422 | 1.36E-10 | 0.002585 | 0.95557  | 0.291277 | 1.39E-10 | 0.00853  | 0.85414  | 0.201193 |
| 0.150527 | 0.0011   | -0.14385 | 0.00183  | 0.059284 | 0.20095  | -0.08407 | 0.06952  | -0.00257 |
| 0.105309 | 0.02285  | -0.13074 | 0.00466  | 0.181559 | 7.95E-05 | -0.08046 | 0.08241  | 0.113187 |
| 0.266052 | 5.23E-09 | 0.05167  | 0.26513  | 0.520921 | 7.64E-34 | 0.27345  | 1.87E-09 | 0.364885 |
| 0.331042 | 2.09E-13 | 0.195257 | 2.15E-05 | 0.519317 | 1.30E-33 | 0.233547 | 3.32E-07 | 0.419778 |
| 0.01733  | 0.70875  | -0.34328 | 2.32E-14 | 0.147967 | 0.00134  | -0.16007 | 0.00052  | 0.004388 |
| 0.327123 | 4.15E-13 | 0.328931 | 3.03E-13 | 0.518785 | 1.56E-33 | 0.346155 | 1.36E-14 | 0.389945 |
| 0.123213 | 0.00768  | -0.29313 | 1.05E-10 | 0.093522 | 0.04338  | -0.13419 | 0.00367  | 0.029678 |
| 0.158822 | 0.00057  | -0.20942 | 5.01E-06 | 0.440967 | 1.22E-23 | 0.082286 | 0.07565  | 0.275557 |
| -0.03935 | 0.39624  | -0.24528 | 7.94E-08 | 0.077109 | 0.09604  | -0.09227 | 0.04628  | 0.017219 |
| 0.415527 | 6.40E-21 | 0.189418 | 3.79E-05 | 0.48615  | 4.49E-29 | 0.223281 | 1.09E-06 | 0.275045 |
| 0.215439 | 2.62E-06 | -0.07412 | 0.10968  | 0.380291 | 1.62E-17 | 0.161003 | 0.00048  | 0.196987 |
| -0.03767 | 0.41675  | -0.47088 | 3.80E-27 | -0.13625 | 0.00317  | -0.38662 | 4.25E-18 | -0.13186 |
| 0.175547 | 0.00014  | -0.05582 | 0.22861  | 0.487432 | 3.06E-29 | 0.247237 | 6.21E-08 | 0.290971 |
| 0.383644 | 8.00E-18 | 0.11052  | 0.01688  | 0.55734  | 1.82E-39 | 0.263842 | 7.07E-09 | 0.422648 |
| 0.103254 | 0.02566  | -0.36193 | 6.71E-16 | 0.050882 | 0.27249  | -0.22473 | 9.28E-07 | -0.1025  |
| 0.149385 | 0.0012   | -0.05082 | 0.27307  | 0.188146 | 4.28E-05 | -0.02274 | 0.62406  | 0.047524 |
| 0.13745  | 0.00292  | -0.14398 | 0.00181  | 0.190266 | 3.50E-05 | -0.09667 | 0.03676  | 0.164595 |
| 0.204261 | 8.62E-06 | 0.106172 | 0.02175  | 0.300035 | 3.60E-11 | 0.128079 | 0.00557  | 0.106314 |
| 0.077997 | 0.09226  | -0.20814 | 5.74E-06 | 0.303719 | 2.02E-11 | 0.030967 | 0.50441  | 0.158783 |
| -0.06866 | 0.13847  | -0.32851 | 3.26E-13 | 0.05363  | 0.2474   | -0.04425 | 0.34001  | -0.03243 |
| 0.011537 | 0.80363  | -0.24142 | 1.28E-07 | 0.276449 | 1.23E-09 | 0.034631 | 0.45531  | 0.106726 |
| 0.166664 | 0.0003   | -0.26099 | 1.04E-08 | 0.254735 | 2.37E-08 | -0.09182 | 0.04736  | 0.141913 |
| 0.281596 | 5.83E-10 | 0.068703 | 0.13822  | 0.281867 | 5.61E-10 | 0.042652 | 0.35774  | 0.198156 |
| 0.130824 | 0.00463  | -0.05171 | 0.26476  | 0.274853 | 1.54E-09 | 0.106078 | 0.02187  | 0.251197 |
| 0.348427 | 8.93E-15 | 0.129279 | 0.00514  | 0.701009 | 2.83E-70 | 0.363679 | 4.75E-16 | 0.506753 |
| 0.207156 | 6.37E-06 | -0.16031 | 0.00051  | 0.231746 | 4.11E-07 | 0.020576 | 0.6574   | 0.09933  |
| 0.288105 | 2.23E-10 | -0.028   | 0.54619  | 0.530964 | 2.51E-35 | 0.228055 | 6.33E-07 | 0.273821 |
| -0.11656 | 0.01171  | -0.48662 | 3.90E-29 | -0.22048 | 1.50E-06 | -0.37346 | 6.66E-17 | -0.22955 |
| 0.173536 | 0.00016  | 0.041194 | 0.37443  | 0.420742 | 1.85E-21 | 0.167512 | 0.00028  | 0.316682 |
| 0.136074 | 0.00321  | -0.30385 | 1.97E-11 | 0.228112 | 6.29E-07 | -0.11181 | 0.01563  | 0.126401 |
| 0.052474 | 0.25776  | -0.10485 | 0.02345  | 0.278448 | 9.20E-10 | -0.01028 | 0.82463  | 0.167935 |
| 0.023538 | 0.61189  | 0.017243 | 0.71015  | 0.310209 | 7.10E-12 | 0.14285  | 0.00197  | 0.219936 |
| 0.218041 | 1.97E-06 | -0.16586 | 0.00032  | 0.324911 | 6.07E-13 | -0.03362 | 0.46856  | 0.2687   |
| 0.189459 | 3.78E-05 | -0.06924 | 0.13518  | 0.40641  | 5.32E-20 | 0.099498 | 0.03157  | 0.293312 |
| 0.141687 | 0.00215  | -0.18816 | 4.28E-05 | 0.206432 | 6.87E-06 | -0.04132 | 0.37299  | 0.227084 |
| 0.097874 | 0.03447  | -0.16799 | 0.00027  | 0.14794  | 0.00135  | -0.04567 | 0.32473  | -0.01941 |
| -0.11367 | 0.01398  | -0.35034 | 6.23E-15 | 0.023904 | 0.60638  | -0.23573 | 2.56E-07 | -0.01958 |
| 0.159771 | 0.00053  | -0.20328 | 9.53E-06 | 0.255556 | 2.13E-08 | -0.1492  | 0.00122  | 0.180001 |
| -0.19218 | 2.90E-05 | -0.40989 | 2.39E-20 | -0.08743 | 0.05903  | -0.27896 | 8.55E-10 | -0.14277 |
| -0.10264 | 0.02656  | -0.35967 | 1.04E-15 | -0.29931 | 4.03E-11 | -0.48713 | 3.35E-29 | -0.24071 |
| 0.01909  | 0.68073  | 0.056358 | 0.22413  | 0.349286 | 7.60E-15 | 0.122311 | 0.00814  | 0.370271 |
| 0.005699 | 0.90225  | -0.28524 | 3.42E-10 | 0.207181 | 6.35E-06 | -0.02186 | 0.63754  | 0.101092 |
| 0.207758 | 5.98E-06 | -0.26124 | 1.00E-08 | 0.456093 | 2.27E-25 | 0.021722 | 0.63963  | 0.304085 |
| 0.060325 | 0.19315  | -0.19112 | 3.22E-05 | 0.160985 | 0.00048  | -0.03136 | 0.49902  | 0.101681 |

|          |          |          |          |          |          |          |          |          |
|----------|----------|----------|----------|----------|----------|----------|----------|----------|
| 0.186861 | 4.84E-05 | -0.11917 | 0.00995  | 0.322137 | 9.76E-13 | 0.062817 | 0.17536  | 0.260312 |
| 0.023379 | 0.6143   | -0.24101 | 1.35E-07 | 0.011499 | 0.80427  | -0.22483 | 9.18E-07 | -0.07289 |
| -0.17374 | 0.00016  | -0.31743 | 2.16E-12 | -0.24528 | 7.94E-08 | -0.36149 | 7.30E-16 | -0.1843  |
| 0.005444 | 0.9066   | -0.3575  | 1.59E-15 | 0.103557 | 0.02523  | -0.10631 | 0.02157  | 0.06739  |
| 0.179028 | 0.0001   | -0.08924 | 0.05396  | 0.272844 | 2.04E-09 | 0.059278 | 0.20101  | 0.172477 |
| 0.188683 | 4.07E-05 | -0.09563 | 0.03884  | 0.412603 | 1.27E-20 | 0.115022 | 0.01287  | 0.259743 |
| 0.091473 | 0.0482   | -0.25932 | 1.30E-08 | 0.043601 | 0.34714  | -0.06494 | 0.16119  | -0.01014 |
| -0.05577 | 0.22904  | -0.21612 | 2.43E-06 | 0.269237 | 3.38E-09 | 0.108    | 0.01957  | 0.109494 |
| 0.276899 | 1.15E-09 | 0.343971 | 2.04E-14 | 0.189493 | 3.77E-05 | 0.16664  | 0.0003   | 0.079774 |
| 0.109825 | 0.01759  | -0.08077 | 0.08121  | 0.331571 | 1.91E-13 | 0.125936 | 0.00643  | 0.176064 |
| 0.117788 | 0.01085  | -0.28805 | 2.25E-10 | 0.31883  | 1.71E-12 | 0.008975 | 0.84662  | 0.233195 |
| 0.007784 | 0.86676  | -0.31769 | 2.07E-12 | 0.363473 | 4.95E-16 | 0.059235 | 0.20133  | 0.199345 |
| 0.087347 | 0.05928  | -0.09612 | 0.03786  | 0.312173 | 5.15E-12 | 0.186951 | 4.80E-05 | 0.162224 |
| 0.059588 | 0.19865  | -0.21064 | 4.40E-06 | 0.249463 | 4.68E-08 | -0.15761 | 0.00063  | 0.208818 |
| 0.374613 | 5.25E-17 | 0.316748 | 2.42E-12 | 0.543194 | 3.36E-37 | 0.418357 | 3.27E-21 | 0.467744 |
| 0.167208 | 0.00028  | -0.01839 | 0.69176  | 0.361425 | 7.40E-16 | 0.13733  | 0.00294  | 0.29772  |
| 0.037477 | 0.4191   | -0.12312 | 0.00773  | 0.231436 | 4.26E-07 | -0.03012 | 0.5161   | 0.286382 |
| 0.144849 | 0.0017   | -0.22277 | 1.16E-06 | 0.312886 | 4.59E-12 | 0.020622 | 0.65669  | 0.144584 |
| 0.131967 | 0.00428  | -0.27967 | 7.71E-10 | 0.387743 | 3.34E-18 | 0.02959  | 0.52356  | 0.331939 |
| 0.137368 | 0.00293  | -0.11086 | 0.01654  | 0.179697 | 9.43E-05 | -0.10567 | 0.02238  | 0.195484 |
| 0.021243 | 0.64704  | -0.25498 | 2.30E-08 | 0.149912 | 0.00116  | -0.03121 | 0.50113  | 0.002995 |
| 0.307516 | 1.10E-11 | 0.119359 | 0.00983  | 0.512775 | 1.12E-32 | 0.29561  | 7.16E-11 | 0.345799 |
| 0.022085 | 0.63405  | -0.33979 | 4.38E-14 | 0.201749 | 1.12E-05 | -0.0469  | 0.31183  | 0.110771 |
| 0.066954 | 0.14856  | -0.15142 | 0.00103  | 0.262913 | 8.01E-09 | 0.019344 | 0.67672  | 0.210022 |
| -0.02506 | 0.58908  | -0.24168 | 1.24E-07 | -0.1604  | 0.0005   | -0.26784 | 4.09E-09 | -0.12    |
| 0.110765 | 0.01664  | -0.18725 | 4.66E-05 | 0.195783 | 2.04E-05 | 0.045304 | 0.32862  | 0.094341 |
| 0.432941 | 9.32E-23 | 0.400036 | 2.25E-19 | 0.567347 | 3.90E-41 | 0.402802 | 1.21E-19 | 0.523709 |
| 0.087222 | 0.05964  | -0.30208 | 2.61E-11 | 0.295546 | 7.23E-11 | 0.036088 | 0.43655  | 0.127744 |
| -0.01134 | 0.80695  | -0.04852 | 0.29538  | 0.025521 | 0.58223  | -0.05943 | 0.19984  | 0.025633 |
| 0.171771 | 0.00019  | -0.10716 | 0.02055  | 0.33876  | 5.29E-14 | 0.086745 | 0.06106  | 0.177982 |
| -0.11707 | 0.01134  | -0.32993 | 2.55E-13 | -0.07345 | 0.11295  | -0.17844 | 0.00011  | -0.15706 |
| 0.047745 | 0.3032   | -0.31414 | 3.73E-12 | 0.0988   | 0.0328   | -0.10654 | 0.02129  | -0.06092 |
| 0.291104 | 1.42E-10 | 0.046938 | 0.31146  | 0.483339 | 1.03E-28 | 0.207347 | 6.24E-06 | 0.322944 |
| 0.271546 | 2.45E-09 | 0.08387  | 0.07017  | 0.358501 | 1.31E-15 | 0.211559 | 3.99E-06 | 0.23823  |
| -0.03016 | 0.51557  | -0.05086 | 0.27273  | 0.150893 | 0.00107  | 0.051713 | 0.26474  | 0.141974 |
| 0.307981 | 1.02E-11 | 0.226361 | 7.70E-07 | 0.422859 | 1.11E-21 | 0.329543 | 2.72E-13 | 0.27186  |
| 0.233868 | 3.20E-07 | 0.070287 | 0.12934  | 0.254787 | 2.36E-08 | 0.064436 | 0.16447  | 0.174085 |
| 0.010064 | 0.82828  | -0.07541 | 0.10363  | 0.175939 | 0.00013  | 0.113881 | 0.0138   | 0.031348 |
| -0.00123 | 0.97888  | -0.24782 | 5.77E-08 | 0.149766 | 0.00117  | -0.11871 | 0.01024  | 0.060958 |
| 0.233082 | 3.51E-07 | 0.144744 | 0.00171  | 0.253006 | 2.97E-08 | 0.115757 | 0.01231  | 0.23277  |
| 0.219504 | 1.67E-06 | -0.08442 | 0.06835  | 0.207486 | 6.15E-06 | 0.100395 | 0.03007  | 0.005045 |
| 0.075179 | 0.10468  | -0.31408 | 3.76E-12 | 0.043795 | 0.34499  | -0.16556 | 0.00033  | 0.022468 |
| 0.067396 | 0.14589  | -0.28545 | 3.32E-10 | 0.239691 | 1.58E-07 | 0.029053 | 0.53113  | 0.119277 |
| 0.436352 | 3.95E-23 | 0.179901 | 9.26E-05 | 0.552362 | 1.17E-38 | 0.384984 | 6.02E-18 | 0.307922 |
| 0.365965 | 3.02E-16 | 0.200578 | 1.26E-05 | 0.482935 | 1.16E-28 | 0.287594 | 2.41E-10 | 0.393175 |

|          |          |          |          |          |          |          |          |          |
|----------|----------|----------|----------|----------|----------|----------|----------|----------|
| -0.1249  | 0.00688  | -0.20814 | 5.74E-06 | -0.04521 | 0.32959  | -0.21038 | 4.53E-06 | -0.02811 |
| -0.02088 | 0.65272  | -0.22432 | 9.73E-07 | 0.164136 | 0.00037  | -0.1152  | 0.01273  | 0.176921 |
| -0.01148 | 0.80461  | -0.28378 | 4.24E-10 | 0.013698 | 0.76781  | -0.2737  | 1.81E-09 | -0.08669 |
| 0.100197 | 0.03039  | 0.027884 | 0.54778  | 0.431306 | 1.40E-22 | 0.169298 | 0.00024  | 0.365581 |
| 0.166993 | 0.00029  | -0.02598 | 0.57551  | 0.217895 | 2.00E-06 | 0.017308 | 0.7091   | 0.131505 |
| 0.110506 | 0.0169   | -0.17575 | 0.00013  | -0.05235 | 0.25887  | -0.19099 | 3.26E-05 | -0.04339 |
| 0.20938  | 5.04E-06 | -0.2077  | 6.02E-06 | 0.322534 | 9.12E-13 | -0.07346 | 0.11286  | 0.176268 |
| 0.015151 | 0.744    | -0.22035 | 1.52E-06 | -0.14869 | 0.00127  | -0.25508 | 2.27E-08 | -0.17438 |
| 0.19524  | 2.15E-05 | -0.18442 | 6.10E-05 | 0.327903 | 3.62E-13 | 0.101889 | 0.02769  | 0.235514 |
| 0.280247 | 7.10E-10 | 0.072047 | 0.11999  | 0.485808 | 4.97E-29 | 0.147685 | 0.00137  | 0.397875 |
| -0.02063 | 0.65655  | -0.29312 | 1.05E-10 | -0.12811 | 0.00556  | -0.21775 | 2.03E-06 | -0.08446 |
| 0.07069  | 0.12715  | -0.04736 | 0.30714  | 0.274328 | 1.66E-09 | 0.191007 | 3.25E-05 | 0.182455 |
| 0.221277 | 1.37E-06 | 0.159489 | 0.00054  | 0.442232 | 8.80E-24 | 0.330419 | 2.33E-13 | 0.25383  |
| 0.003364 | 0.9422   | -0.3141  | 3.76E-12 | 0.263611 | 7.29E-09 | 0.030275 | 0.51399  | 0.127265 |
| 0.095252 | 0.03963  | -0.20573 | 7.39E-06 | 0.1071   | 0.02062  | -0.10956 | 0.01786  | 0.036513 |
| 0.126095 | 0.00636  | -0.10197 | 0.02756  | 0.357541 | 1.58E-15 | 0.124522 | 0.00706  | 0.210616 |
| 0.039239 | 0.39754  | 0.283314 | 4.54E-10 | -0.21727 | 2.14E-06 | 0.089556 | 0.05311  | -0.18939 |
| 0.291953 | 1.25E-10 | -0.01035 | 0.82355  | 0.528177 | 6.56E-35 | 0.143601 | 0.00186  | 0.413781 |
| 0.158091 | 0.00061  | -0.08822 | 0.05677  | 0.122167 | 0.00822  | 0.007521 | 0.87122  | 0.077598 |
| -0.17612 | 0.00013  | -0.31987 | 1.43E-12 | -0.1497  | 0.00118  | -0.23945 | 1.63E-07 | -0.20383 |
| 0.259151 | 1.33E-08 | 0.006756 | 0.88423  | 0.338699 | 5.34E-14 | 0.114663 | 0.01316  | 0.299614 |
| -0.04341 | 0.34926  | -0.18357 | 6.60E-05 | 0.289229 | 1.89E-10 | 0.120011 | 0.00943  | 0.175598 |
| -0.06404 | 0.16712  | 0.252642 | 3.11E-08 | -0.2933  | 1.02E-10 | -0.02787 | 0.54792  | -0.20363 |
| -0.05703 | 0.21868  | -0.28766 | 2.39E-10 | 0.03515  | 0.44857  | -0.16815 | 0.00026  | -0.1023  |
| 0.062837 | 0.17522  | -0.30121 | 2.99E-11 | 0.050794 | 0.27332  | -0.13167 | 0.00437  | -0.02682 |
| -0.11779 | 0.01085  | -0.39909 | 2.78E-19 | -0.0985  | 0.03333  | -0.24324 | 1.02E-07 | -0.19754 |
| -0.07994 | 0.08442  | -0.3754  | 4.47E-17 | 0.013113 | 0.77747  | -0.12745 | 0.00581  | -0.01742 |
| 0.013756 | 0.76685  | -0.23825 | 1.89E-07 | 0.123234 | 0.00767  | 0.004952 | 0.915    | -0.08046 |
| 0.216162 | 2.42E-06 | 0.035575 | 0.44311  | 0.456093 | 2.27E-25 | 0.317956 | 1.98E-12 | 0.287265 |
| -0.07325 | 0.11391  | -0.2861  | 3.01E-10 | -0.13453 | 0.00358  | -0.42668 | 4.39E-22 | -0.12819 |
| 0.348348 | 9.06E-15 | 0.123831 | 0.00738  | 0.56955  | 1.64E-41 | 0.286491 | 2.84E-10 | 0.483428 |
| 0.075973 | 0.10105  | -0.27613 | 1.28E-09 | 0.149185 | 0.00122  | -0.0339  | 0.46491  | 0.078089 |
| -0.02941 | 0.5261   | -0.28838 | 2.14E-10 | 0.231358 | 4.30E-07 | -0.00515 | 0.91154  | 0.088852 |
| -0.03077 | 0.5071   | -0.23181 | 4.08E-07 | 0.326078 | 4.97E-13 | 0.119901 | 0.0095   | 0.21961  |
| -0.20437 | 8.52E-06 | -0.3364  | 8.09E-14 | -0.17623 | 0.00013  | -0.24031 | 1.47E-07 | -0.15437 |
| 0.161183 | 0.00047  | -0.10738 | 0.02029  | 0.371736 | 9.45E-17 | 0.066884 | 0.14899  | 0.292639 |
| 0.282373 | 5.21E-10 | -0.06086 | 0.18921  | 0.302057 | 2.62E-11 | -0.056   | 0.22706  | 0.290723 |
| -0.02173 | 0.6395   | -0.3383  | 5.74E-14 | 0.114447 | 0.01333  | -0.04725 | 0.30822  | -0.00052 |
| 0.175976 | 0.00013  | -0.21586 | 2.50E-06 | 0.332281 | 1.68E-13 | -0.0194  | 0.67577  | 0.256666 |
| 0.40277  | 1.22E-19 | -0.06013 | 0.19462  | 0.196491 | 1.90E-05 | 0.04384  | 0.34451  | 0.125981 |
| 0.004654 | 0.9201   | -0.17385 | 0.00016  | -0.03268 | 0.48113  | -0.053   | 0.25305  | -0.12516 |
| 0.026898 | 0.56204  | -0.26066 | 1.08E-08 | 0.202662 | 1.02E-05 | -0.08113 | 0.07987  | 0.068056 |
| 0.11224  | 0.01524  | -0.16144 | 0.00046  | 0.164421 | 0.00036  | -0.06302 | 0.17393  | 0.126469 |
| 0.107904 | 0.01968  | -0.3023  | 2.52E-11 | 0.065037 | 0.16056  | -0.24578 | 7.45E-08 | -0.01466 |
| 0.133637 | 0.00381  | -0.3389  | 5.16E-14 | 0.149284 | 0.00121  | -0.19748 | 1.72E-05 | 0.051548 |

|          |          |          |          |          |          |          |          |          |
|----------|----------|----------|----------|----------|----------|----------|----------|----------|
| 0.100013 | 0.0307   | -0.13056 | 0.00471  | 0.076875 | 0.09706  | -0.10408 | 0.0245   | 0.054394 |
| 0.329184 | 2.90E-13 | 0.179047 | 0.0001   | 0.442032 | 9.27E-24 | 0.265495 | 5.65E-09 | 0.398329 |
| 0.043701 | 0.34604  | -0.1961  | 1.97E-05 | -0.07819 | 0.09148  | -0.21181 | 3.88E-06 | -0.10844 |
| -0.00802 | 0.86272  | -0.43892 | 2.06E-23 | 0.000291 | 0.995    | -0.20204 | 1.08E-05 | -0.08633 |
| -0.06795 | 0.14262  | -0.40246 | 1.31E-19 | 0.164383 | 0.00036  | -0.08342 | 0.07168  | 0.029905 |
| -0.06525 | 0.15917  | -0.11644 | 0.0118   | 0.110558 | 0.01684  | 0.026461 | 0.56841  | 0.058975 |
| -0.00918 | 0.84308  | -0.06983 | 0.13185  | 0.186128 | 5.19E-05 | 0.048434 | 0.29626  | 0.177265 |
| -0.2282  | 6.22E-07 | -0.30713 | 1.17E-11 | -0.0294  | 0.5262   | -0.13629 | 0.00317  | -0.06855 |
| -0.35259 | 4.07E-15 | -0.26031 | 1.14E-08 | -0.20784 | 5.93E-06 | -0.15268 | 0.00093  | -0.19347 |
| -0.15655 | 0.00069  | -0.14983 | 0.00116  | 0.094991 | 0.04018  | 0.044162 | 0.34097  | 0.036893 |
| -0.06104 | 0.18789  | -0.10583 | 0.02218  | 0.317946 | 1.98E-12 | 0.267426 | 4.33E-09 | 0.186513 |
| -0.25739 | 1.67E-08 | -0.24446 | 8.79E-08 | -0.26382 | 7.09E-09 | -0.2146  | 2.87E-06 | -0.23262 |
| 0.053836 | 0.24559  | 0.041569 | 0.37009  | 0.151327 | 0.00104  | 0.067623 | 0.14454  | 0.119579 |
| -0.32569 | 5.31E-13 | -0.2791  | 8.38E-10 | -0.23526 | 2.71E-07 | -0.13366 | 0.00381  | -0.24981 |
| -0.17531 | 0.00014  | -0.24009 | 1.51E-07 | 0.111055 | 0.01635  | 0.093765 | 0.04283  | 0.036142 |
| -0.09043 | 0.05083  | -0.11542 | 0.01256  | 0.058072 | 0.21034  | -0.02471 | 0.59436  | 0.012299 |
| 0.100792 | 0.02942  | 0.042491 | 0.35956  | 0.218885 | 1.79E-06 | 0.095961 | 0.03818  | 0.172855 |
| -0.19757 | 1.70E-05 | -0.2409  | 1.37E-07 | 0.106596 | 0.02123  | 0.072863 | 0.11585  | -0.00714 |
| -0.23507 | 2.77E-07 | -0.34578 | 1.46E-14 | -0.12531 | 0.0067   | -0.21612 | 2.43E-06 | -0.15844 |
| -0.13405 | 0.00371  | -0.24086 | 1.37E-07 | 0.06211  | 0.18028  | -0.03468 | 0.45472  | -0.03376 |
| -0.14317 | 0.00192  | -0.20529 | 7.75E-06 | 0.136732 | 0.00307  | 0.045448 | 0.32708  | 0.04079  |
| 0.096473 | 0.03715  | -0.08534 | 0.06537  | 0.249765 | 4.50E-08 | 0.040258 | 0.38539  | 0.240817 |
| -0.07652 | 0.09863  | -0.22174 | 1.30E-06 | 0.021641 | 0.64088  | -0.12976 | 0.00498  | 0.051997 |
| -0.20353 | 9.29E-06 | -0.21686 | 2.24E-06 | 0.012122 | 0.79388  | -0.00447 | 0.92328  | -0.04813 |
| 0.029798 | 0.52064  | -0.04945 | 0.28623  | 0.22552  | 8.48E-07 | 0.109556 | 0.01787  | 0.151517 |
| -0.36313 | 5.29E-16 | -0.31396 | 3.84E-12 | -0.20063 | 1.25E-05 | -0.14823 | 0.00132  | -0.15556 |
| -0.42393 | 8.56E-22 | -0.41528 | 6.78E-21 | -0.31716 | 2.26E-12 | -0.27142 | 2.49E-09 | -0.27931 |
| -0.2302  | 4.93E-07 | -0.23748 | 2.07E-07 | 0.088162 | 0.05694  | 0.022539 | 0.6271   | 0.043166 |
| 0.084403 | 0.0684   | 0.017463 | 0.70662  | 0.210591 | 4.43E-06 | 0.114254 | 0.01349  | 0.164462 |
| -0.07978 | 0.08505  | -0.16952 | 0.00023  | 0.057109 | 0.21801  | 0.015972 | 0.73066  | -0.03593 |
| -0.17101 | 0.0002   | -0.11922 | 0.00992  | 0.042343 | 0.36124  | 0.063832 | 0.16847  | -0.01134 |
| -0.31646 | 2.54E-12 | -0.28921 | 1.89E-10 | -0.1895  | 3.76E-05 | -0.07434 | 0.10864  | -0.26847 |
| 0.091665 | 0.04773  | 0.034081 | 0.4625   | 0.255385 | 2.18E-08 | 0.24788  | 5.72E-08 | 0.126794 |
| 0.047735 | 0.3033   | -0.0176  | 0.70441  | 0.336653 | 7.73E-14 | 0.218836 | 1.80E-06 | 0.208718 |
| -0.11036 | 0.01704  | -0.05006 | 0.28033  | 0.215153 | 2.70E-06 | 0.205831 | 7.32E-06 | 0.170456 |
| -0.18401 | 6.33E-05 | -0.24655 | 6.76E-08 | 0.124405 | 0.00711  | 0.05915  | 0.20198  | 0.02948  |
| -0.0354  | 0.44535  | -0.23493 | 2.82E-07 | 0.115893 | 0.0122   | -0.09086 | 0.04972  | 0.059749 |
| -0.07562 | 0.10267  | -0.31587 | 2.80E-12 | 0.053592 | 0.24774  | -0.12289 | 0.00784  | -0.04303 |
| 0.022518 | 0.62741  | 0.063569 | 0.17024  | 0.268084 | 3.96E-09 | 0.219174 | 1.74E-06 | 0.165121 |
| -0.00344 | 0.94087  | -0.08458 | 0.06782  | 0.164062 | 0.00037  | 0.097509 | 0.03516  | 0.098656 |
| -0.41237 | 1.34E-20 | -0.34369 | 2.15E-14 | -0.28677 | 2.73E-10 | -0.1744  | 0.00015  | -0.316   |
| -0.00487 | 0.91642  | -0.10868 | 0.01881  | 0.157604 | 0.00063  | 0.059891 | 0.19638  | 0.051207 |
| -0.03849 | 0.40668  | -0.19143 | 3.12E-05 | 0.00804  | 0.86243  | -0.15225 | 0.00096  | -0.03906 |
| -0.12325 | 0.00767  | -0.04052 | 0.38236  | 0.206385 | 6.91E-06 | 0.244836 | 8.39E-08 | 0.101932 |
| -0.20371 | 9.12E-06 | -0.18284 | 7.06E-05 | -0.17281 | 0.00017  | -0.20603 | 7.17E-06 | -0.16933 |

|          |          |          |          |          |          |          |          |          |
|----------|----------|----------|----------|----------|----------|----------|----------|----------|
| 0.002013 | 0.9654   | -0.1314  | 0.00445  | 0.142725 | 0.00199  | -0.00503 | 0.91368  | 0.03625  |
| -0.16346 | 0.00039  | -0.1923  | 2.87E-05 | -0.00365 | 0.93724  | 0.039105 | 0.39916  | -0.10222 |
| 0.073488 | 0.11274  | 0.019282 | 0.67769  | 0.164805 | 0.00035  | 0.18214  | 7.54E-05 | 0.062463 |
| -0.34834 | 9.07E-15 | -0.24656 | 6.76E-08 | -0.22151 | 1.34E-06 | -0.13254 | 0.00412  | -0.13881 |
| -0.10369 | 0.02503  | -0.30852 | 9.34E-12 | 0.144637 | 0.00173  | 0.030667 | 0.50855  | 0.038377 |
| -0.12453 | 0.00705  | -0.30967 | 7.76E-12 | 0.072316 | 0.11861  | -0.12066 | 0.00905  | 0.022583 |
| 0.005469 | 0.90617  | 0.025998 | 0.5752   | 0.069407 | 0.13422  | 0.012855 | 0.78172  | 0.112895 |
| -0.15849 | 0.00059  | -0.27743 | 1.06E-09 | -0.07756 | 0.09409  | -0.13002 | 0.00489  | -0.14794 |
| -0.01276 | 0.78338  | -0.02929 | 0.52776  | 0.03788  | 0.4141   | -0.00305 | 0.94764  | 0.037256 |
| -0.35007 | 6.56E-15 | -0.30946 | 8.02E-12 | -0.1145  | 0.01329  | -0.02942 | 0.52597  | -0.16935 |
| -0.243   | 1.05E-07 | -0.10938 | 0.01805  | -0.2295  | 5.35E-07 | -0.10421 | 0.02432  | -0.18485 |
| -0.16653 | 0.0003   | -0.17534 | 0.00014  | 0.011731 | 0.80039  | -0.05015 | 0.27948  | -0.00392 |
| -0.29352 | 9.86E-11 | -0.38539 | 5.51E-18 | -0.03406 | 0.46279  | -0.05544 | 0.23178  | -0.11957 |
| -0.2572  | 1.72E-08 | -0.33367 | 1.31E-13 | -0.1462  | 0.00153  | -0.13027 | 0.00481  | -0.20742 |
| -0.1106  | 0.0168   | -0.15417 | 0.00083  | 0.189196 | 3.87E-05 | 0.142618 | 0.002    | 0.06301  |
| -0.06643 | 0.15177  | -0.14205 | 0.00209  | 0.069194 | 0.13542  | -0.09087 | 0.04969  | 0.106959 |
| -0.09744 | 0.03528  | -0.1613  | 0.00047  | 0.085954 | 0.06346  | 0.040088 | 0.3874   | 0.017527 |
| -0.00496 | 0.91484  | -0.11586 | 0.01223  | 0.043934 | 0.34347  | 0.064234 | 0.1658   | -0.01033 |
| -0.32176 | 1.04E-12 | -0.38609 | 4.75E-18 | -0.22243 | 1.20E-06 | -0.18233 | 7.40E-05 | -0.30625 |
| -0.26765 | 4.21E-09 | -0.22751 | 6.74E-07 | -0.07934 | 0.08679  | -0.10703 | 0.0207   | -0.10829 |
| 0.030709 | 0.50797  | -0.09052 | 0.05059  | 0.214784 | 2.82E-06 | 0.046062 | 0.32058  | 0.142352 |
| -0.27844 | 9.22E-10 | -0.24869 | 5.16E-08 | -0.10484 | 0.02347  | -0.02701 | 0.56037  | -0.15124 |
| 0.040854 | 0.37839  | -0.09214 | 0.04659  | 0.058697 | 0.20546  | 0.013555 | 0.77017  | -0.06145 |
| -0.16909 | 0.00024  | -0.29662 | 6.13E-11 | 0.11714  | 0.0113   | 0.006888 | 0.88199  | 0.013968 |
| -0.20033 | 1.29E-05 | -0.23432 | 3.03E-07 | 0.012673 | 0.78474  | -0.03844 | 0.40719  | -0.02505 |
| -0.13071 | 0.00467  | -0.01206 | 0.79485  | -0.12668 | 0.00612  | -0.06051 | 0.19181  | -0.14764 |
| -0.0377  | 0.41629  | -0.21605 | 2.45E-06 | 0.134302 | 0.00364  | -0.0259  | 0.5767   | -0.00246 |
| -0.04417 | 0.34084  | -0.08326 | 0.07223  | 0.185759 | 5.37E-05 | 0.062752 | 0.17581  | 0.150323 |
| -0.16639 | 0.0003   | -0.22209 | 1.25E-06 | 0.131146 | 0.00453  | 0.038024 | 0.41233  | 0.106399 |
| -0.23447 | 2.97E-07 | -0.18493 | 5.81E-05 | -0.01337 | 0.77326  | 0.020422 | 0.65981  | -0.09588 |
| 0.026428 | 0.56889  | -0.05804 | 0.2106   | 0.280624 | 6.72E-10 | 0.221928 | 1.28E-06 | 0.217993 |
| -0.25302 | 2.96E-08 | -0.33379 | 1.29E-13 | -0.07162 | 0.12219  | -0.12778 | 0.00569  | -0.08931 |
| -0.33322 | 1.42E-13 | -0.24331 | 1.01E-07 | -0.32878 | 3.11E-13 | -0.2046  | 8.32E-06 | -0.39136 |
| -0.16809 | 0.00026  | -0.05763 | 0.21384  | -0.26496 | 6.07E-09 | -0.21475 | 2.83E-06 | -0.19273 |
| -0.03579 | 0.44031  | -0.21166 | 3.95E-06 | -0.2257  | 8.30E-07 | -0.33905 | 5.01E-14 | -0.20126 |
| 0.074191 | 0.10934  | 0.119323 | 0.00985  | 0.036708 | 0.42871  | 0.030764 | 0.50721  | 0.015508 |
| -0.05253 | 0.25722  | 0.029061 | 0.53101  | -0.06501 | 0.16074  | -0.02409 | 0.60356  | -0.09217 |
| -0.0489  | 0.29163  | 0.249497 | 4.66E-08 | -0.00857 | 0.85345  | 0.167119 | 0.00029  | -0.06363 |
| -0.02083 | 0.65345  | 0.037505 | 0.41874  | -0.0468  | 0.31288  | -0.07871 | 0.0893   | 0.020843 |
| -0.04717 | 0.30907  | -0.1412  | 0.00222  | -0.00844 | 0.85559  | -0.13448 | 0.0036   | -0.01295 |
| -0.10733 | 0.02035  | -0.17858 | 0.0001   | -0.01598 | 0.73055  | -0.08728 | 0.05947  | -0.11853 |
| -0.20322 | 9.59E-06 | -0.01708 | 0.71272  | -0.12891 | 0.00527  | -0.0127  | 0.78425  | -0.15676 |
| -0.16998 | 0.00022  | -0.0936  | 0.0432   | -0.28303 | 4.73E-10 | -0.17865 | 0.0001   | -0.30419 |
| 0.037673 | 0.41667  | 0.345392 | 1.57E-14 | -0.08987 | 0.05228  | 0.059657 | 0.19813  | -0.0442  |
| -0.09188 | 0.04721  | 0.04686  | 0.31226  | -0.11618 | 0.01199  | -0.02524 | 0.58634  | -0.08964 |

|          |          |          |          |          |          |          |          |          |
|----------|----------|----------|----------|----------|----------|----------|----------|----------|
| 0.004789 | 0.91779  | 0.102217 | 0.02719  | 0.009932 | 0.8305   | 0.048886 | 0.29178  | 0.045151 |
| -0.12303 | 0.00778  | 0.057797 | 0.21251  | -0.2639  | 7.02E-09 | -0.19961 | 1.39E-05 | -0.21091 |
| -0.0144  | 0.75633  | 0.100432 | 0.03     | -0.24544 | 7.78E-08 | -0.15949 | 0.00054  | -0.18304 |
| -0.02392 | 0.60614  | 0.030266 | 0.51412  | -0.15987 | 0.00052  | -0.17517 | 0.00014  | -0.14104 |
| -0.09918 | 0.03212  | 0.00134  | 0.97697  | -0.17289 | 0.00017  | 0.018549 | 0.68929  | -0.12504 |
| -0.0837  | 0.07075  | 0.076489 | 0.09875  | -0.1734  | 0.00017  | -0.0572  | 0.2173   | -0.08765 |
| -0.03411 | 0.46206  | 0.120909 | 0.00891  | 0.052963 | 0.25334  | 0.048325 | 0.29735  | 0.006374 |
| 0.156397 | 0.00069  | 0.239192 | 1.68E-07 | 0.089718 | 0.05268  | 0.101325 | 0.02857  | 0.076884 |
| -0.25512 | 2.26E-08 | -0.32767 | 3.77E-13 | -0.25566 | 2.10E-08 | -0.26027 | 1.14E-08 | -0.27816 |
| -0.11405 | 0.01366  | 0.161715 | 0.00045  | -0.16757 | 0.00028  | -0.01287 | 0.78147  | -0.1079  |
| -0.19607 | 1.98E-05 | 0.098017 | 0.03421  | -0.11869 | 0.01025  | 0.054404 | 0.24063  | -0.13206 |
| -0.09341 | 0.04363  | 0.072541 | 0.11747  | -0.15538 | 0.00075  | 0.051636 | 0.26544  | -0.12325 |
| -0.11384 | 0.01384  | 0.130129 | 0.00485  | -0.13461 | 0.00356  | -0.03103 | 0.50357  | -0.16538 |
| -0.1347  | 0.00354  | -0.00965 | 0.83526  | -0.13867 | 0.00267  | -0.1372  | 0.00297  | -0.18826 |
| -0.1434  | 0.00189  | -0.10321 | 0.02573  | -0.14129 | 0.00221  | -0.18967 | 3.70E-05 | -0.19517 |
| -0.08768 | 0.05832  | 0.084585 | 0.06781  | -0.21713 | 2.18E-06 | -0.14663 | 0.00149  | -0.12026 |
| -0.1332  | 0.00393  | -0.29703 | 5.75E-11 | -0.22262 | 1.18E-06 | -0.21846 | 1.88E-06 | -0.32172 |
| -0.15425 | 0.00082  | -0.23937 | 1.65E-07 | -0.11287 | 0.01467  | -0.17918 | 9.89E-05 | -0.1307  |
| -0.08793 | 0.0576   | -0.16338 | 0.00039  | -0.14167 | 0.00215  | -0.11827 | 0.01053  | -0.15716 |
| -0.03701 | 0.42491  | 0.10813  | 0.01942  | -0.20276 | 1.01E-05 | -0.20298 | 9.84E-06 | -0.11985 |
| -0.17049 | 0.00021  | -0.04977 | 0.28309  | -0.15075 | 0.00108  | -0.15174 | 0.001    | -0.05141 |
| -0.19421 | 2.38E-05 | 0.05054  | 0.27574  | -0.22996 | 5.07E-07 | -0.00042 | 0.99284  | -0.27    |
| -0.1081  | 0.01946  | -0.0618  | 0.18249  | -0.25385 | 2.66E-08 | -0.21792 | 2.00E-06 | -0.23301 |
| 0.012145 | 0.79351  | 0.072098 | 0.11973  | 0.070503 | 0.12816  | 0.124513 | 0.00706  | -0.06282 |
| -0.11381 | 0.01386  | 0.109255 | 0.01819  | -0.33658 | 7.83E-14 | -0.10762 | 0.02001  | -0.28697 |
| -0.06277 | 0.17566  | 0.052428 | 0.25817  | -0.0535  | 0.24852  | -0.05138 | 0.26778  | -0.01939 |
| 0.035056 | 0.44979  | 0.142373 | 0.00204  | 0.06386  | 0.16829  | -0.0078  | 0.86656  | 0.088381 |
| -0.10424 | 0.02427  | 0.061496 | 0.18463  | 0.009225 | 0.8424   | 0.101184 | 0.02879  | -0.02691 |
| -0.0324  | 0.48487  | 0.119869 | 0.00952  | -0.13011 | 0.00486  | -0.04967 | 0.28405  | -0.05237 |
| -0.06182 | 0.1823   | 0.182674 | 7.17E-05 | -0.09855 | 0.03325  | -0.01405 | 0.76207  | -0.10285 |
| -0.07933 | 0.08681  | 0.086472 | 0.06188  | -0.17219 | 0.00018  | -0.06839 | 0.14005  | -0.14528 |
| -0.08686 | 0.06072  | 0.082334 | 0.07548  | 0.007265 | 0.87557  | 0.050019 | 0.28072  | -0.05809 |
| -0.03214 | 0.48844  | 0.115006 | 0.01289  | -0.03682 | 0.42733  | 0.018149 | 0.69566  | -0.05592 |
| 0.082109 | 0.07629  | 0.208066 | 5.79E-06 | 0.121671 | 0.00849  | 0.068484 | 0.13948  | 0.100801 |
| 0.121234 | 0.00873  | 0.269098 | 3.44E-09 | 0.107726 | 0.01988  | 0.082097 | 0.07633  | 0.109703 |
| -0.21029 | 4.57E-06 | -0.13356 | 0.00383  | -0.2752  | 1.46E-09 | -0.22854 | 5.98E-07 | -0.31421 |
| -0.05618 | 0.22558  | -0.03477 | 0.45343  | 0.032381 | 0.48513  | 0.028255 | 0.54248  | -0.01957 |
| -0.26497 | 6.07E-09 | -0.22118 | 1.39E-06 | -0.13182 | 0.00432  | -0.04596 | 0.32166  | -0.19554 |
| -0.08762 | 0.05848  | -0.1128  | 0.01473  | 0.025901 | 0.57662  | 0.034469 | 0.45742  | -0.04023 |
| -0.13751 | 0.0029   | -0.02644 | 0.56877  | -0.12596 | 0.00642  | -0.12505 | 0.00682  | -0.16512 |
| -0.05091 | 0.27226  | -0.06674 | 0.14988  | -0.06657 | 0.15089  | -0.14563 | 0.0016   | -0.09277 |
| 0.024569 | 0.59639  | 0.113334 | 0.01427  | 0.051999 | 0.2621   | -0.01302 | 0.77903  | 0.091289 |
| -0.15521 | 0.00076  | -0.11345 | 0.01416  | -0.14995 | 0.00115  | -0.15566 | 0.00074  | -0.11502 |
| -0.09419 | 0.04191  | 0.018472 | 0.69053  | -0.12613 | 0.00635  | -0.11588 | 0.01221  | -0.11831 |
| -0.09363 | 0.04313  | -0.01756 | 0.70509  | -0.03059 | 0.50955  | -0.02261 | 0.62602  | -0.06391 |

|          |          |          |          |          |          |          |          |          |
|----------|----------|----------|----------|----------|----------|----------|----------|----------|
| -0.15251 | 0.00095  | 0.051993 | 0.26215  | -0.03293 | 0.4777   | -0.00394 | 0.9323   | 0.025083 |
| 0.064794 | 0.16213  | 0.335426 | 9.62E-14 | 0.040519 | 0.38232  | 0.150405 | 0.00111  | 0.009647 |
| -0.13955 | 0.00251  | 0.060465 | 0.19211  | -0.24331 | 1.01E-07 | -0.14762 | 0.00138  | -0.20144 |
| -0.21684 | 2.25E-06 | -0.23276 | 3.65E-07 | -0.31552 | 2.97E-12 | -0.17542 | 0.00014  | -0.3806  |
| -0.13247 | 0.00414  | -0.14133 | 0.0022   | -0.11404 | 0.01367  | -0.15381 | 0.00085  | -0.12958 |
| -0.19466 | 2.28E-05 | -0.06914 | 0.13572  | -0.21628 | 2.39E-06 | -0.15015 | 0.00114  | -0.19187 |
| -0.31605 | 2.72E-12 | -0.19789 | 1.65E-05 | -0.38077 | 1.46E-17 | -0.24861 | 5.22E-08 | -0.39013 |
| -0.00852 | 0.8543   | 0.066011 | 0.15438  | 0.001076 | 0.98151  | 0.020877 | 0.65271  | 0.009603 |
| -0.12271 | 0.00794  | -0.19094 | 3.27E-05 | -0.06132 | 0.18592  | -0.11707 | 0.01134  | -0.10402 |
| -0.25749 | 1.65E-08 | -0.13408 | 0.0037   | -0.11583 | 0.01225  | -0.02434 | 0.59986  | -0.17151 |
| -0.05389 | 0.24515  | 0.093956 | 0.04241  | 0.003671 | 0.93694  | 0.009787 | 0.83294  | 0.04182  |
| 0.10059  | 0.02975  | 0.125276 | 0.00671  | -0.02949 | 0.52498  | 0.006408 | 0.89015  | -0.01712 |
| 0.044612 | 0.33606  | 0.133432 | 0.00387  | -0.00651 | 0.88834  | 0.009467 | 0.83832  | -0.02103 |
| -0.14136 | 0.0022   | -0.15029 | 0.00112  | -0.01677 | 0.71769  | -0.04186 | 0.36674  | -0.08713 |
| -0.21422 | 2.99E-06 | -0.26925 | 3.37E-09 | -0.14276 | 0.00198  | -0.18891 | 3.98E-05 | -0.20451 |
| -0.0841  | 0.06939  | -0.10248 | 0.02679  | -0.09445 | 0.04133  | -0.14568 | 0.0016   | -0.0677  |
| -0.06177 | 0.1827   | 0.125337 | 0.00669  | -0.02912 | 0.53017  | 0.000406 | 0.99302  | -0.00574 |
| -0.1665  | 0.0003   | 0.053841 | 0.24555  | -0.31036 | 6.93E-12 | -0.12974 | 0.00498  | -0.22434 |
| -0.01762 | 0.70413  | -0.11552 | 0.01248  | -0.08156 | 0.07828  | -0.14517 | 0.00166  | -0.12945 |
| -0.06087 | 0.18916  | -0.01475 | 0.75063  | -0.2394  | 1.64E-07 | -0.25234 | 3.24E-08 | -0.23963 |
| -0.02514 | 0.5879   | -0.09701 | 0.03611  | -0.26696 | 4.62E-09 | -0.29948 | 3.93E-11 | -0.22218 |
| 0.065864 | 0.1553   | -0.09726 | 0.03562  | -0.06992 | 0.13133  | -0.1846  | 5.99E-05 | -0.08373 |
| -0.22861 | 5.94E-07 | -0.13134 | 0.00447  | -0.22745 | 6.79E-07 | -0.18412 | 6.27E-05 | -0.23994 |
| -0.15294 | 0.00091  | 0.034646 | 0.45511  | -0.1467  | 0.00148  | -0.06961 | 0.13307  | -0.17351 |
| -0.14417 | 0.00179  | -0.14287 | 0.00197  | -0.2275  | 6.75E-07 | -0.23331 | 3.41E-07 | -0.24585 |
| -0.27945 | 7.96E-10 | -0.18694 | 4.81E-05 | -0.25067 | 4.01E-08 | -0.14735 | 0.00141  | -0.25481 |
| -0.15789 | 0.00062  | -0.13502 | 0.00346  | -0.24658 | 6.74E-08 | -0.23589 | 2.51E-07 | -0.25549 |
| -0.20995 | 4.74E-06 | -0.00067 | 0.9884   | -0.2873  | 2.52E-10 | -0.22723 | 6.96E-07 | -0.25504 |
| -0.02822 | 0.54301  | 0.005865 | 0.89941  | -0.09394 | 0.04244  | -0.09724 | 0.03567  | -0.03657 |
| -0.03228 | 0.48643  | 0.177232 | 0.00012  | -0.03298 | 0.47709  | 0.0146   | 0.75301  | -0.05168 |
| -0.09373 | 0.04292  | -0.19965 | 1.38E-05 | -0.21804 | 1.97E-06 | -0.17416 | 0.00016  | -0.26054 |
| -0.19852 | 1.55E-05 | -0.20353 | 9.29E-06 | -0.05703 | 0.21863  | 0.050492 | 0.27619  | -0.11894 |
| -0.06836 | 0.14018  | 0.081472 | 0.07861  | -0.06232 | 0.17877  | 0.00561  | 0.90376  | -0.12032 |
| -0.05179 | 0.26406  | 0.138874 | 0.00263  | -0.13307 | 0.00397  | -0.05393 | 0.24474  | -0.13003 |
| -0.05078 | 0.27342  | 0.133053 | 0.00397  | -0.10345 | 0.02538  | -0.02019 | 0.66349  | -0.08551 |
| -0.0528  | 0.2548   | 0.01186  | 0.79824  | -0.00267 | 0.95411  | -0.01692 | 0.7153   | -0.0358  |
| -0.11457 | 0.01324  | 0.003383 | 0.94188  | -0.09015 | 0.05154  | -0.07795 | 0.09245  | -0.06066 |
| -0.23187 | 4.05E-07 | -0.13965 | 0.00249  | -0.27646 | 1.22E-09 | -0.23686 | 2.23E-07 | -0.28137 |
| -0.0801  | 0.08379  | -0.07821 | 0.09139  | -0.09265 | 0.04539  | -0.10081 | 0.02938  | -0.10155 |
| -0.11925 | 0.0099   | -0.1194  | 0.0098   | -0.27013 | 2.98E-09 | -0.26164 | 9.52E-09 | -0.26197 |
| -0.19513 | 2.17E-05 | 0.150611 | 0.0011   | -0.22768 | 6.61E-07 | 0.066001 | 0.15444  | -0.15655 |
| -0.20453 | 8.38E-06 | -0.05607 | 0.22653  | -0.16722 | 0.00028  | -0.07014 | 0.13016  | -0.16251 |
| -0.03198 | 0.49052  | -0.14049 | 0.00234  | 0.001475 | 0.97464  | -0.16763 | 0.00027  | -0.06216 |
| 0.112454 | 0.01504  | 0.358027 | 1.43E-15 | 0.017638 | 0.70382  | 0.089663 | 0.05283  | 0.046153 |
| -0.14231 | 0.00205  | 0.041042 | 0.3762   | -0.27906 | 8.42E-10 | -0.16877 | 0.00025  | -0.26048 |



|          |          |          |          |          |          |          |          |          |
|----------|----------|----------|----------|----------|----------|----------|----------|----------|
| -0.33701 | 7.25E-14 | -0.18468 | 5.95E-05 | -0.421   | 1.74E-21 | -0.25129 | 3.70E-08 | -0.30813 |
| -0.05033 | 0.27777  | -0.11449 | 0.0133   | -0.04395 | 0.34325  | -0.05017 | 0.27925  | -0.06328 |
| -0.04579 | 0.3234   | 0.139355 | 0.00254  | -0.04823 | 0.29826  | 0.033868 | 0.4653   | 0.010116 |
| 0.089441 | 0.05342  | 0.097483 | 0.0352   | 0.069273 | 0.13497  | 0.019416 | 0.67558  | -0.02435 |
| -0.18181 | 7.77E-05 | -0.20928 | 5.09E-06 | -0.27119 | 2.57E-09 | -0.29225 | 1.20E-10 | -0.26168 |
| -0.07618 | 0.10013  | -0.14384 | 0.00183  | -0.12647 | 0.00621  | -0.21045 | 4.50E-06 | -0.15583 |
| -0.3046  | 1.75E-11 | -0.21408 | 3.04E-06 | -0.33018 | 2.43E-13 | -0.24339 | 1.00E-07 | -0.35133 |
| -0.03201 | 0.49018  | 0.106351 | 0.02153  | 0.043602 | 0.34713  | 0.040415 | 0.38355  | -0.01135 |
| -0.07682 | 0.09729  | -0.03704 | 0.42449  | -0.0802  | 0.0834   | -0.15012 | 0.00114  | -0.04497 |
| -0.0908  | 0.04989  | 0.003143 | 0.94599  | -0.14476 | 0.00171  | -0.19972 | 1.37E-05 | -0.12672 |
| -0.12483 | 0.00691  | -0.07594 | 0.10122  | -0.21049 | 4.47E-06 | -0.06181 | 0.18238  | -0.29159 |
| 0.175311 | 0.00014  | 0.01957  | 0.67316  | 0.042492 | 0.35955  | 0.059729 | 0.19759  | -0.06012 |
| -0.12064 | 0.00906  | -0.04875 | 0.29308  | 0.046526 | 0.31573  | 0.030122 | 0.51611  | -0.05251 |
| -0.11806 | 0.01067  | -0.11797 | 0.01073  | -0.0462  | 0.31915  | 0.00945  | 0.8386   | -0.16363 |
| -0.19109 | 3.23E-05 | -0.10918 | 0.01827  | -0.17829 | 0.00011  | -0.07529 | 0.10419  | -0.27013 |
| -0.14258 | 0.00201  | -0.04587 | 0.32255  | -0.06121 | 0.18669  | -0.0043  | 0.92618  | -0.15503 |
| -0.10612 | 0.02181  | -0.08863 | 0.05562  | -0.05388 | 0.24518  | -0.03169 | 0.49444  | -0.10933 |
| -0.10748 | 0.02017  | -0.06683 | 0.1493   | -0.18805 | 4.33E-05 | -0.07902 | 0.08805  | -0.25949 |
| -0.05332 | 0.25015  | -0.15527 | 0.00076  | -0.11507 | 0.01284  | -0.0896  | 0.05299  | -0.18321 |
| -0.08187 | 0.07715  | -0.10339 | 0.02547  | -0.03128 | 0.50016  | 0.01016  | 0.82668  | -0.15791 |
| -0.12702 | 0.00598  | -0.06067 | 0.19061  | -0.17707 | 0.00012  | -0.05293 | 0.25363  | -0.27439 |
| -0.09414 | 0.04201  | -0.0817  | 0.07777  | -0.08323 | 0.07236  | -0.01609 | 0.72868  | -0.20915 |
| -0.22286 | 1.15E-06 | -0.19645 | 1.91E-05 | -0.36182 | 6.85E-16 | -0.32428 | 6.77E-13 | -0.33352 |
| -0.00097 | 0.9834   | 0.066237 | 0.15297  | 0.044792 | 0.33411  | 0.011827 | 0.7988   | 0.029926 |
| -0.03291 | 0.47808  | 0.004289 | 0.92635  | -0.0571  | 0.21812  | -0.04451 | 0.33714  | -0.01609 |
| 0.035066 | 0.44966  | 0.181622 | 7.91E-05 | -0.08514 | 0.06603  | -0.06578 | 0.15584  | -0.02289 |
| -0.02346 | 0.6131   | 0.112371 | 0.01512  | -0.2807  | 6.65E-10 | -0.15293 | 0.00091  | -0.24248 |
| -0.1558  | 0.00073  | -0.03803 | 0.4123   | -0.10105 | 0.02901  | -0.04864 | 0.29425  | -0.10348 |
| -0.069   | 0.1365   | 0.095542 | 0.03903  | -0.03491 | 0.45164  | 0.033332 | 0.47241  | -0.08186 |
| 0.042375 | 0.36088  | 0.07708  | 0.09617  | -0.09739 | 0.03538  | -0.05537 | 0.23238  | -0.07258 |
| -0.22173 | 1.30E-06 | -0.11266 | 0.01486  | -0.31613 | 2.68E-12 | -0.23043 | 4.80E-07 | -0.29212 |
| -0.06152 | 0.18448  | -0.12122 | 0.00874  | -0.27825 | 9.47E-10 | -0.30699 | 1.20E-11 | -0.21079 |
| -0.17051 | 0.00021  | -0.07079 | 0.12662  | -0.18916 | 3.89E-05 | -0.17907 | 9.99E-05 | -0.08577 |
| -0.11945 | 0.00977  | -0.06711 | 0.1476   | -0.09351 | 0.04341  | -0.0845  | 0.06807  | -0.11949 |
| 0.01867  | 0.68738  | -0.00307 | 0.94723  | -0.09214 | 0.04658  | -0.12607 | 0.00637  | -0.01414 |
| -0.2795  | 7.91E-10 | -0.37003 | 1.33E-16 | -0.21837 | 1.90E-06 | -0.33343 | 1.37E-13 | -0.22942 |
| -0.208   | 5.83E-06 | -0.16498 | 0.00034  | -0.15367 | 0.00086  | -0.17676 | 0.00012  | -0.15169 |
| -0.17698 | 0.00012  | -0.17314 | 0.00017  | -0.15002 | 0.00115  | -0.19753 | 1.71E-05 | -0.2034  |
| -0.21756 | 2.08E-06 | -0.08812 | 0.05705  | -0.20679 | 6.62E-06 | -0.19565 | 2.06E-05 | -0.12768 |
| -0.08216 | 0.07611  | -0.05036 | 0.2775   | -0.1287  | 0.00535  | -0.06773 | 0.14391  | -0.10895 |
| 0.055756 | 0.22913  | -0.03035 | 0.51288  | 0.001779 | 0.96942  | -0.09214 | 0.04657  | 0.031742 |
| -0.12293 | 0.00782  | -0.15924 | 0.00055  | -0.21096 | 4.25E-06 | -0.29334 | 1.01E-10 | -0.18477 |
| -0.15177 | 0.001    | -0.0639  | 0.16801  | -0.12442 | 0.0071   | -0.11781 | 0.01084  | -0.14635 |
| -0.18217 | 7.52E-05 | -0.09808 | 0.0341   | -0.19447 | 2.32E-05 | -0.16604 | 0.00031  | -0.23304 |
| -0.17286 | 0.00017  | -0.03876 | 0.40339  | -0.14134 | 0.0022   | -0.06534 | 0.15861  | -0.17809 |

|          |          |          |          |          |          |          |          |          |
|----------|----------|----------|----------|----------|----------|----------|----------|----------|
| -0.20472 | 8.21E-06 | -0.06606 | 0.15407  | -0.24835 | 5.39E-08 | -0.14966 | 0.00118  | -0.23222 |
| -0.20919 | 5.14E-06 | -0.2223  | 1.22E-06 | -0.09456 | 0.04111  | -0.15965 | 0.00053  | -0.14255 |
| -0.17142 | 0.0002   | -0.20934 | 5.06E-06 | -0.15019 | 0.00113  | -0.19091 | 3.28E-05 | -0.17666 |
| -0.08202 | 0.0766   | 0.027405 | 0.55469  | -0.11717 | 0.01128  | -0.12036 | 0.00923  | -0.09411 |
| -0.04697 | 0.31115  | 0.102146 | 0.0273   | -0.05124 | 0.2691   | -0.04829 | 0.2977   | -0.08666 |
| 0.014308 | 0.75779  | 0.131014 | 0.00457  | 0.054907 | 0.23631  | -0.00097 | 0.98335  | 0.04768  |
| -0.12535 | 0.00668  | -0.07884 | 0.08879  | -0.12647 | 0.00621  | -0.15632 | 0.0007   | -0.12919 |
| -0.09804 | 0.03417  | -0.00894 | 0.84725  | -0.09114 | 0.04903  | -0.11391 | 0.01378  | -0.10739 |
| -0.11676 | 0.01157  | 0.074929 | 0.10584  | -0.08285 | 0.07366  | -0.04885 | 0.29215  | -0.05493 |
| 0.008276 | 0.85843  | 0.078983 | 0.08821  | -0.01536 | 0.74068  | -0.0596  | 0.19855  | -0.04247 |
| -0.08489 | 0.06681  | 0.041029 | 0.37635  | -0.21943 | 1.69E-06 | -0.15581 | 0.00073  | -0.18471 |
| -0.18495 | 5.80E-05 | -0.24915 | 4.87E-08 | -0.18786 | 4.40E-05 | -0.27047 | 2.85E-09 | -0.1819  |
| -0.19843 | 1.56E-05 | -0.14565 | 0.0016   | -0.19305 | 2.67E-05 | -0.2148  | 2.81E-06 | -0.21299 |
| -0.26859 | 3.69E-09 | -0.1136  | 0.01404  | -0.23885 | 1.75E-07 | -0.08913 | 0.05425  | -0.27114 |
| -0.23507 | 2.77E-07 | -0.00067 | 0.98854  | -0.31656 | 2.50E-12 | -0.12461 | 0.00701  | -0.30267 |
| -0.16884 | 0.00025  | 0.010065 | 0.82826  | -0.3389  | 5.15E-14 | -0.217   | 2.21E-06 | -0.26467 |
| -0.0756  | 0.10277  | 0.16831  | 0.00026  | -0.05007 | 0.2802   | 0.110606 | 0.0168   | -0.08312 |
| -0.0682  | 0.14116  | 0.067487 | 0.14535  | -0.05243 | 0.25811  | -0.07382 | 0.1111   | -0.05502 |
| -0.1909  | 3.29E-05 | -0.24969 | 4.55E-08 | -0.21099 | 4.24E-06 | -0.31976 | 1.46E-12 | -0.19424 |
| -0.12116 | 0.00877  | -0.07412 | 0.10968  | -0.07398 | 0.11033  | -0.06668 | 0.15022  | -0.11895 |
| -0.12725 | 0.00589  | -0.1402  | 0.00239  | -0.17895 | 0.0001   | -0.22472 | 9.29E-07 | -0.11341 |
| -0.014   | 0.76281  | -0.0011  | 0.98113  | -0.12697 | 0.006    | -0.18462 | 5.98E-05 | -0.12269 |
| -0.26464 | 6.34E-09 | -0.20277 | 1.00E-05 | -0.26614 | 5.17E-09 | -0.22198 | 1.27E-06 | -0.28587 |
| 0.118625 | 0.0103   | 0.146245 | 0.00153  | -0.04933 | 0.28745  | -0.04782 | 0.30247  | -0.0073  |
| -0.1236  | 0.00749  | -0.06934 | 0.13457  | -0.18377 | 6.48E-05 | -0.18831 | 4.22E-05 | -0.19356 |
| -0.22591 | 8.11E-07 | -0.10921 | 0.01824  | -0.31914 | 1.62E-12 | -0.21355 | 3.22E-06 | -0.31782 |
| -0.13307 | 0.00397  | -0.06774 | 0.14382  | -0.15246 | 0.00095  | -0.21887 | 1.79E-06 | -0.13865 |
| -0.0507  | 0.27417  | -0.11094 | 0.01646  | -0.1348  | 0.00352  | -0.1528  | 0.00092  | -0.14964 |
| -0.04965 | 0.28425  | 0.112012 | 0.01545  | -0.25157 | 3.57E-08 | -0.20076 | 1.23E-05 | -0.16466 |
| -0.18536 | 5.58E-05 | -0.01987 | 0.66851  | -0.28415 | 4.02E-10 | -0.16642 | 0.0003   | -0.28538 |
| -0.08156 | 0.07828  | 0.066482 | 0.15145  | -0.14587 | 0.00157  | -0.08991 | 0.05216  | -0.13378 |
| 0.006272 | 0.89248  | 0.006437 | 0.88965  | 0.019637 | 0.6721   | -0.03394 | 0.46429  | -0.00591 |
| -0.19012 | 3.55E-05 | -0.22545 | 8.54E-07 | -0.25286 | 3.02E-08 | -0.38172 | 1.20E-17 | -0.17024 |
| -0.04356 | 0.34761  | -0.02522 | 0.58662  | -0.14767 | 0.00137  | -0.05131 | 0.26852  | -0.22144 |
| -0.29314 | 1.05E-10 | -0.25003 | 4.35E-08 | -0.26401 | 6.91E-09 | -0.22603 | 8.00E-07 | -0.26474 |
| -0.05411 | 0.24317  | 0.014039 | 0.76221  | -0.19196 | 2.97E-05 | -0.14272 | 0.00199  | -0.15568 |
| 0.021696 | 0.64004  | 0.103432 | 0.02541  | -0.10531 | 0.02285  | -0.0596  | 0.19856  | -0.06572 |
| -0.1663  | 0.00031  | -0.07995 | 0.08436  | -0.14265 | 0.002    | -0.09327 | 0.04395  | -0.1405  |
| -0.24035 | 1.46E-07 | -0.28051 | 6.83E-10 | -0.24547 | 7.75E-08 | -0.19334 | 2.59E-05 | -0.24218 |
| -0.02123 | 0.64729  | 0.15522  | 0.00076  | -0.19702 | 1.80E-05 | 0.023384 | 0.61423  | -0.16925 |
| -0.31965 | 1.49E-12 | -0.19214 | 2.92E-05 | -0.25689 | 1.79E-08 | -0.17468 | 0.00015  | -0.24058 |
| -0.15361 | 0.00087  | -0.02859 | 0.53762  | -0.20184 | 1.11E-05 | -0.13851 | 0.0027   | -0.14122 |
| -0.27834 | 9.34E-10 | -0.1032  | 0.02573  | -0.31555 | 2.95E-12 | -0.12177 | 0.00843  | -0.29337 |
| -0.22833 | 6.13E-07 | -0.21001 | 4.71E-06 | -0.36237 | 6.15E-16 | -0.25634 | 1.92E-08 | -0.41641 |
| 0.088419 | 0.05621  | 0.400505 | 2.03E-19 | -0.0701  | 0.13037  | 0.128161 | 0.00554  | -0.05504 |

|          |          |          |          |          |          |          |          |          |
|----------|----------|----------|----------|----------|----------|----------|----------|----------|
| 0.035419 | 0.44511  | 0.400108 | 2.22E-19 | -0.18712 | 4.73E-05 | 0.028803 | 0.53466  | -0.12934 |
| -0.09101 | 0.04934  | -0.0843  | 0.06876  | -0.04681 | 0.31274  | -0.15382 | 0.00085  | -0.08579 |
| -0.09624 | 0.03762  | 0.001133 | 0.98051  | -0.17208 | 0.00019  | -0.13278 | 0.00405  | -0.13713 |
| -0.06067 | 0.1906   | -0.29338 | 1.01E-10 | -0.13636 | 0.00315  | -0.136   | 0.00323  | -0.21443 |
| 0.028553 | 0.53822  | 0.14059  | 0.00233  | 0.050489 | 0.27623  | -0.00959 | 0.83625  | 0.112647 |
| -0.20982 | 4.81E-06 | -0.06053 | 0.19166  | -0.24535 | 7.86E-08 | -0.10681 | 0.02096  | -0.27065 |
| -0.19444 | 2.33E-05 | -0.25296 | 2.99E-08 | -0.06679 | 0.14955  | -0.13926 | 0.00256  | -0.0868  |
| 0.026843 | 0.56284  | 0.034353 | 0.45893  | -0.11395 | 0.01375  | -0.11405 | 0.01366  | -0.06411 |
| -0.05603 | 0.22684  | -0.10583 | 0.02218  | -0.18087 | 8.47E-05 | -0.27865 | 8.94E-10 | -0.11652 |
| -0.00939 | 0.83954  | 0.085923 | 0.06356  | -0.21228 | 3.69E-06 | -0.18857 | 4.12E-05 | -0.10039 |
| -0.1488  | 0.00126  | -0.05348 | 0.24872  | -0.22084 | 1.44E-06 | -0.18431 | 6.16E-05 | -0.17757 |
| 0.021126 | 0.64885  | -0.06447 | 0.16423  | -0.13513 | 0.00344  | -0.25699 | 1.76E-08 | -0.03757 |
| -0.37665 | 3.45E-17 | -0.4178  | 3.74E-21 | -0.36196 | 6.67E-16 | -0.36525 | 3.48E-16 | -0.31845 |
| -0.09881 | 0.03277  | -0.08437 | 0.06853  | -0.06443 | 0.16451  | -0.09526 | 0.03962  | -0.08685 |
| 0.013864 | 0.76508  | 0.073312 | 0.11361  | -0.00209 | 0.96402  | 0.089928 | 0.05213  | -0.13082 |
| -0.10496 | 0.0233   | -0.02689 | 0.56208  | -0.25137 | 3.67E-08 | -0.16233 | 0.00043  | -0.27229 |
| -0.11486 | 0.013    | -0.02839 | 0.54058  | -0.12902 | 0.00523  | -0.0468  | 0.31288  | -0.17633 |
| 0.038581 | 0.40551  | 0.037024 | 0.42475  | 0.035299 | 0.44665  | 9.97E-05 | 0.99829  | -0.01098 |
| 0.049752 | 0.2833   | 0.062588 | 0.17694  | -0.05407 | 0.2435   | -0.14286 | 0.00197  | -0.04348 |
| -0.05028 | 0.27818  | 0.03286  | 0.4787   | -0.12359 | 0.0075   | -0.18986 | 3.63E-05 | -0.05578 |
| -0.06839 | 0.14006  | 0.000589 | 0.98987  | -0.03054 | 0.51024  | -0.06222 | 0.17951  | -0.04157 |
| -0.10899 | 0.01847  | -0.10284 | 0.02626  | -0.13765 | 0.00288  | -0.19283 | 2.72E-05 | -0.14173 |
| -0.06816 | 0.14134  | -0.09979 | 0.03108  | -0.03935 | 0.39623  | -0.13544 | 0.00336  | -0.06987 |
| -0.10463 | 0.02374  | -0.0743  | 0.10882  | -0.03705 | 0.42443  | -0.06771 | 0.14404  | -0.07007 |
| 0.00186  | 0.96802  | 0.01753  | 0.70554  | 0.016827 | 0.71683  | -0.07785 | 0.09289  | -0.02273 |
| -0.06731 | 0.14639  | 0.011787 | 0.79947  | -0.08859 | 0.05573  | -0.04986 | 0.28222  | -0.09089 |
| -0.06953 | 0.13353  | -0.01749 | 0.70619  | -0.06334 | 0.17175  | -0.09733 | 0.0355   | -0.1016  |
| -0.0104  | 0.82262  | -0.09244 | 0.04586  | -0.03707 | 0.42413  | -0.03891 | 0.40155  | 0.032833 |
| -0.0891  | 0.05433  | -0.00558 | 0.90422  | -0.10275 | 0.0264   | -0.1108  | 0.01661  | -0.13487 |
| -0.08569 | 0.06429  | -0.09833 | 0.03364  | -0.20882 | 5.34E-06 | -0.30947 | 8.01E-12 | -0.15718 |
| -0.19692 | 1.82E-05 | -0.06833 | 0.14035  | -0.18792 | 4.38E-05 | -0.18203 | 7.62E-05 | -0.18692 |
| -0.03894 | 0.4011   | 0.016617 | 0.72022  | -0.02066 | 0.65611  | -0.08456 | 0.06789  | -0.05297 |
| -0.07683 | 0.09726  | -0.10963 | 0.01779  | -0.09358 | 0.04324  | -0.1726  | 0.00018  | -0.08604 |
| -0.05327 | 0.25061  | 0.012871 | 0.78147  | -0.0315  | 0.49714  | -0.05383 | 0.24567  | -0.05095 |
| 0.062979 | 0.17425  | 0.112948 | 0.0146   | -0.06131 | 0.18595  | -0.00816 | 0.86037  | -0.0027  |
| 0.00684  | 0.8828   | 0.019077 | 0.68093  | -0.1999  | 1.35E-05 | -0.18378 | 6.47E-05 | -0.17657 |
| -0.11646 | 0.01178  | -0.24221 | 1.16E-07 | -0.23869 | 1.79E-07 | -0.32432 | 6.73E-13 | -0.15705 |
| -0.1083  | 0.01924  | -0.08239 | 0.0753   | -0.1501  | 0.00114  | -0.2457  | 7.53E-08 | -0.0896  |
| -0.2254  | 8.59E-07 | -0.18264 | 7.19E-05 | -0.28867 | 2.05E-10 | -0.25878 | 1.39E-08 | -0.30858 |
| -0.01218 | 0.79298  | 0.028686 | 0.53633  | -0.07321 | 0.1141   | -0.04217 | 0.36324  | -0.04167 |
| -0.02244 | 0.62854  | -0.0338  | 0.46617  | -0.17677 | 0.00012  | -0.06903 | 0.13633  | -0.3159  |
| -0.38444 | 6.75E-18 | -0.42202 | 1.36E-21 | -0.41782 | 3.71E-21 | -0.40635 | 5.40E-20 | -0.3894  |
| -0.00722 | 0.87639  | 0.226485 | 7.59E-07 | -0.21839 | 1.89E-06 | -0.00718 | 0.87708  | -0.192   |
| -0.18879 | 4.03E-05 | -0.15073 | 0.00109  | -0.19122 | 3.19E-05 | -0.11823 | 0.01056  | -0.23826 |
| -0.06798 | 0.14241  | 0.003182 | 0.94532  | -0.06886 | 0.13734  | -0.06398 | 0.16746  | -0.04254 |

|          |          |          |          |          |          |          |          |          |
|----------|----------|----------|----------|----------|----------|----------|----------|----------|
| -0.166   | 0.00031  | -0.22305 | 1.12E-06 | -0.35404 | 3.09E-15 | -0.26097 | 1.04E-08 | -0.314   |
| -0.08964 | 0.05288  | -0.04967 | 0.2841   | -0.10127 | 0.02866  | -0.12823 | 0.00552  | -0.09131 |
| -0.07925 | 0.08714  | 0.011373 | 0.80637  | -0.12709 | 0.00596  | -0.12793 | 0.00563  | -0.10132 |
| -0.02205 | 0.63466  | 0.043884 | 0.34402  | -0.06391 | 0.16798  | -0.11322 | 0.01437  | -0.04789 |
| -0.15082 | 0.00108  | -0.07491 | 0.10593  | -0.17574 | 0.00013  | -0.1678  | 0.00027  | -0.11593 |
| -0.13409 | 0.0037   | -0.08071 | 0.08145  | -0.14189 | 0.00212  | -0.12092 | 0.0089   | -0.07482 |
| -0.2278  | 6.52E-07 | -0.06093 | 0.18868  | -0.30132 | 2.94E-11 | -0.16923 | 0.00024  | -0.2838  |
| -0.27283 | 2.04E-09 | -0.16415 | 0.00037  | -0.3462  | 1.35E-14 | -0.14042 | 0.00235  | -0.36335 |
| -0.253   | 2.97E-08 | -0.12434 | 0.00714  | -0.16757 | 0.00028  | -0.09041 | 0.05088  | -0.18207 |
| -0.18951 | 3.76E-05 | -0.07192 | 0.12066  | -0.38136 | 1.29E-17 | -0.24899 | 4.97E-08 | -0.34925 |
| -0.13974 | 0.00247  | -0.40211 | 1.41E-19 | -0.32441 | 6.62E-13 | -0.29966 | 3.82E-11 | -0.36099 |
| -0.09819 | 0.0339   | 0.034908 | 0.4517   | -0.19617 | 1.96E-05 | -0.09981 | 0.03104  | -0.21423 |
| -0.19241 | 2.84E-05 | -0.19328 | 2.61E-05 | -0.17947 | 9.63E-05 | -0.1556  | 0.00074  | -0.13674 |
| -0.27401 | 1.73E-09 | -0.16514 | 0.00034  | -0.26504 | 6.01E-09 | -0.23703 | 2.19E-07 | -0.27043 |
| -0.08916 | 0.05416  | -0.0844  | 0.0684   | -0.27328 | 1.92E-09 | -0.2654  | 5.72E-09 | -0.28217 |
| -0.22993 | 5.09E-07 | -0.08954 | 0.05316  | -0.33339 | 1.38E-13 | -0.24512 | 8.10E-08 | -0.33894 |
| 0.043624 | 0.34688  | 0.139353 | 0.00254  | 0.019431 | 0.67534  | 0.047441 | 0.30629  | -0.00476 |
| -0.14874 | 0.00127  | -0.00473 | 0.91889  | -0.17754 | 0.00011  | -0.17719 | 0.00012  | -0.08041 |
| -0.42208 | 1.34E-21 | -0.18776 | 4.45E-05 | -0.43716 | 3.22E-23 | -0.20472 | 8.22E-06 | -0.44484 |
| -0.04419 | 0.34063  | 0.042631 | 0.35798  | -0.13142 | 0.00444  | -0.12884 | 0.0053   | -0.06735 |
| -0.2319  | 4.04E-07 | -0.14405 | 0.0018   | -0.24943 | 4.70E-08 | -0.09782 | 0.03458  | -0.24214 |
| -0.05039 | 0.27718  | -0.00902 | 0.84587  | -0.31073 | 6.53E-12 | -0.21758 | 2.07E-06 | -0.28789 |
| -0.11401 | 0.01369  | -0.01567 | 0.73563  | -0.10692 | 0.02084  | -0.02773 | 0.54994  | -0.06236 |
| -0.02801 | 0.54604  | -0.05121 | 0.26937  | -0.18329 | 6.77E-05 | -0.17806 | 0.00011  | -0.11493 |
| 0.457785 | 1.44E-25 | 0.633684 | 8.37E-54 | 0.748539 | 5.30E-85 | 0.797542 | #####    | 0.617861 |
| 0.401163 | 1.75E-19 | 0.764914 | 7.20E-91 | 0.556099 | 2.91E-39 | 0.768823 | 2.43E-92 | 0.471009 |
| 0.386445 | 4.41E-18 | 0.407343 | 4.30E-20 | 0.657087 | 4.76E-59 | 0.707997 | 2.97E-72 | 0.465002 |
| 0.32408  | 7.01E-13 | 0.530832 | 2.63E-35 | 0.392096 | 1.30E-18 | 0.592381 | 1.42E-45 | 0.242145 |
| 0.402952 | 1.17E-19 | 0.611718 | 2.83E-49 | 0.768089 | 4.61E-92 | 0.787826 | #####    | 0.638879 |
| 0.349216 | 7.70E-15 | 0.545517 | 1.45E-37 | 0.534504 | 7.34E-36 | 0.684119 | 1.01E-65 | 0.394892 |
| 0.242442 | 1.13E-07 | 0.470094 | 4.75E-27 | 0.364279 | 4.22E-16 | 0.601591 | 2.64E-47 | 0.249565 |
| 0.404247 | 8.71E-20 | 0.641248 | 1.89E-55 | 0.735989 | 8.36E-81 | 0.851174 | #####    | 0.529268 |
| 0.359816 | 1.01E-15 | 0.507122 | 6.94E-32 | 0.638531 | 7.48E-55 | 0.7374   | 2.90E-81 | 0.439522 |
| 0.427817 | 3.32E-22 | 0.586882 | 1.45E-44 | 0.636067 | 2.57E-54 | 0.708453 | 2.20E-72 | 0.56546  |
| 0.409841 | 2.42E-20 | 0.55611  | 2.90E-39 | 0.672121 | 1.13E-62 | 0.809078 | #####    | 0.461961 |
| 0.421609 | 1.50E-21 | 0.626463 | 2.83E-52 | 0.771556 | 2.18E-93 | 0.821309 | #####    | 0.5904   |
| 0.411759 | 1.55E-20 | 0.590589 | 3.05E-45 | 0.531276 | 2.26E-35 | 0.726758 | 7.24E-78 | 0.399702 |
| 0.38226  | 1.07E-17 | 0.477531 | 5.65E-28 | 0.355047 | 2.55E-15 | 0.546081 | 1.18E-37 | 0.296341 |
| 0.155862 | 0.00073  | 0.344339 | 1.91E-14 | 0.285315 | 3.38E-10 | 0.479684 | 3.02E-28 | 0.216463 |
| 0.452508 | 5.95E-25 | 0.571169 | 8.66E-42 | 0.578142 | 5.30E-43 | 0.731148 | 3.00E-79 | 0.438604 |
| 0.313034 | 4.48E-12 | 0.578494 | 4.59E-43 | 0.404674 | 7.91E-20 | 0.657635 | 3.54E-59 | 0.20354  |
| 0.42504  | 6.55E-22 | 0.649683 | 2.44E-57 | 0.505352 | 1.22E-31 | 0.676146 | 1.11E-63 | 0.517769 |
| 0.519861 | 1.09E-33 | 0.600297 | 4.66E-47 | 0.75814  | 2.19E-88 | 0.771024 | 3.50E-93 | 0.591843 |
| 0.36943  | 1.51E-16 | 0.578015 | 5.58E-43 | 0.583489 | 5.94E-44 | 0.657983 | 2.93E-59 | 0.509955 |
| 0.199853 | 1.35E-05 | 0.470182 | 4.63E-27 | 0.393094 | 1.05E-18 | 0.669123 | 6.20E-62 | 0.264361 |

|          |          |          |          |          |          |          |          |          |
|----------|----------|----------|----------|----------|----------|----------|----------|----------|
| 0.178516 | 0.00011  | 0.355518 | 2.33E-15 | 0.569015 | 2.03E-41 | 0.628581 | 1.02E-52 | 0.382025 |
| 0.512272 | 1.32E-32 | 0.63951  | 4.56E-55 | 0.725855 | 1.38E-77 | 0.756299 | 1.00E-87 | 0.570045 |
| 0.422791 | 1.13E-21 | 0.562688 | 2.37E-40 | 0.677639 | 4.66E-64 | 0.754859 | 3.27E-87 | 0.47911  |
| 0.331315 | 1.99E-13 | 0.505972 | 1.00E-31 | 0.623357 | 1.25E-51 | 0.718823 | 1.95E-75 | 0.408611 |
| 0.378984 | 2.13E-17 | 0.486683 | 3.83E-29 | 0.651418 | 9.78E-58 | 0.734563 | 2.42E-80 | 0.444423 |
| 0.440441 | 1.40E-23 | 0.663617 | 1.34E-60 | 0.708402 | 2.27E-72 | 0.766844 | 1.36E-91 | 0.588817 |
| 0.431477 | 1.34E-22 | 0.70649  | 8.02E-72 | 0.625549 | 4.39E-52 | 0.85072  | #####    | 0.456178 |
| 0.25451  | 2.44E-08 | 0.488765 | 2.05E-29 | 0.5653   | 8.65E-41 | 0.684885 | 6.35E-66 | 0.440934 |
| 0.281039 | 6.33E-10 | 0.595111 | 4.43E-46 | 0.381932 | 1.15E-17 | 0.655453 | 1.14E-58 | 0.332958 |
| 0.49437  | 3.75E-30 | 0.519896 | 1.08E-33 | 0.726139 | 1.13E-77 | 0.782907 | 6.78E-98 | 0.55185  |
| 0.358756 | 1.25E-15 | 0.512798 | 1.11E-32 | 0.729425 | 1.05E-78 | 0.827763 | #####    | 0.538097 |
| 0.178193 | 0.00011  | 0.371075 | 1.08E-16 | 0.348118 | 9.46E-15 | 0.501069 | 4.71E-31 | 0.251947 |
| 0.313929 | 3.86E-12 | 0.505829 | 1.05E-31 | 0.515531 | 4.56E-33 | 0.680125 | 1.08E-64 | 0.418675 |
| 0.393254 | 1.01E-18 | 0.534486 | 7.39E-36 | 0.657795 | 3.24E-59 | 0.706091 | 1.04E-71 | 0.54445  |
| 0.364984 | 3.67E-16 | 0.552443 | 1.14E-38 | 0.377509 | 2.89E-17 | 0.575335 | 1.64E-42 | 0.237659 |
| 0.2558   | 2.06E-08 | 0.460233 | 7.37E-26 | 0.486987 | 3.50E-29 | 0.63319  | 1.07E-53 | 0.341109 |
| 0.239829 | 1.56E-07 | 0.517377 | 2.48E-33 | 0.424146 | 8.13E-22 | 0.610926 | 4.05E-49 | 0.240291 |
| 0.404405 | 8.41E-20 | 0.517716 | 2.22E-33 | 0.678522 | 2.78E-64 | 0.717602 | 4.53E-75 | 0.585418 |
| 0.369706 | 1.43E-16 | 0.68653  | 2.35E-66 | 0.441075 | 1.19E-23 | 0.650348 | 1.72E-57 | 0.317992 |
| 0.330718 | 2.22E-13 | 0.5087   | 4.19E-32 | 0.473665 | 1.72E-27 | 0.606513 | 2.97E-48 | 0.411962 |
| 0.373139 | 7.10E-17 | 0.593641 | 8.32E-46 | 0.701277 | 2.38E-70 | 0.747378 | 1.33E-84 | 0.5671   |
| 0.362207 | 6.35E-16 | 0.597966 | 1.29E-46 | 0.61658  | 3.02E-50 | 0.672003 | 1.21E-62 | 0.57678  |
| 0.436004 | 4.31E-23 | 0.527422 | 8.49E-35 | 0.673628 | 4.76E-63 | 0.74848  | 5.56E-85 | 0.558484 |
| 0.326377 | 4.72E-13 | 0.559507 | 8.01E-40 | 0.553014 | 9.22E-39 | 0.710585 | 5.31E-73 | 0.616058 |
| 0.400384 | 2.08E-19 | 0.556649 | 2.36E-39 | 0.663644 | 1.33E-60 | 0.737274 | 3.19E-81 | 0.485495 |
| 0.344564 | 1.83E-14 | 0.499372 | 8.00E-31 | 0.598287 | 1.12E-46 | 0.649018 | 3.45E-57 | 0.420062 |
| 0.401798 | 1.52E-19 | 0.530507 | 2.94E-35 | 0.475062 | 1.15E-27 | 0.61346  | 1.27E-49 | 0.301105 |
| 0.249929 | 4.41E-08 | 0.491088 | 1.02E-29 | 0.490446 | 1.24E-29 | 0.701003 | 2.84E-70 | 0.306724 |
| 0.49579  | 2.42E-30 | 0.670185 | 3.40E-62 | 0.752321 | 2.57E-86 | 0.788303 | #####    | 0.603569 |
| 0.309312 | 8.22E-12 | 0.589932 | 4.03E-45 | 0.428161 | 3.05E-22 | 0.648323 | 4.96E-57 | 0.339231 |
| 0.322419 | 9.30E-13 | 0.476748 | 7.09E-28 | 0.403629 | 1.00E-19 | 0.519459 | 1.24E-33 | 0.200631 |
| 0.302922 | 2.29E-11 | 0.487389 | 3.10E-29 | 0.361743 | 6.95E-16 | 0.603812 | 9.90E-48 | 0.292016 |
| 0.418678 | 3.03E-21 | 0.544322 | 2.24E-37 | 0.715689 | 1.68E-74 | 0.784478 | 1.53E-98 | 0.559529 |
| 0.458522 | 1.18E-25 | 0.699322 | 8.32E-70 | 0.689581 | 3.67E-67 | 0.77992  | 1.11E-96 | 0.532716 |
| 0.457498 | 1.55E-25 | 0.734961 | 1.80E-80 | 0.564298 | 1.27E-40 | 0.737947 | 1.92E-81 | 0.494274 |
| 0.392323 | 1.24E-18 | 0.514204 | 7.04E-33 | 0.701859 | 1.64E-70 | 0.7539   | 7.15E-87 | 0.529618 |
| 0.469018 | 6.43E-27 | 0.713881 | 5.77E-74 | 0.71083  | 4.51E-73 | 0.849614 | #####    | 0.558857 |
| 0.096111 | 0.03787  | 0.409771 | 2.46E-20 | 0.294943 | 7.93E-11 | 0.507207 | 6.76E-32 | 0.219722 |
| 0.466254 | 1.40E-26 | 0.5556   | 3.51E-39 | 0.617752 | 1.75E-50 | 0.705191 | 1.88E-71 | 0.481221 |
| 0.377883 | 2.68E-17 | 0.506445 | 8.62E-32 | 0.585597 | 2.48E-44 | 0.620896 | 4.01E-51 | 0.459331 |
| 0.440154 | 1.50E-23 | 0.638941 | 6.08E-55 | 0.668362 | 9.52E-62 | 0.751998 | 3.34E-86 | 0.560421 |
| 0.375399 | 4.47E-17 | 0.592221 | 1.53E-45 | 0.479818 | 2.91E-28 | 0.62724  | 1.95E-52 | 0.300947 |
| 0.288917 | 1.98E-10 | 0.571716 | 6.97E-42 | 0.419841 | 2.30E-21 | 0.692145 | 7.57E-68 | 0.24602  |
| 0.295213 | 7.61E-11 | 0.519673 | 1.16E-33 | 0.500776 | 5.16E-31 | 0.590294 | 3.46E-45 | 0.422895 |
| 0.481174 | 1.96E-28 | 0.554251 | 5.81E-39 | 0.760371 | 3.41E-89 | 0.796703 | #####    | 0.555786 |

|          |          |          |          |          |          |          |          |          |
|----------|----------|----------|----------|----------|----------|----------|----------|----------|
| 0.42672  | 4.34E-22 | 0.58882  | 6.43E-45 | 0.782153 | 1.38E-97 | 0.796756 | #####    | 0.656659 |
| 0.382381 | 1.04E-17 | 0.540811 | 7.90E-37 | 0.754628 | 3.95E-87 | 0.773586 | 3.57E-94 | 0.548229 |
| 0.415714 | 6.12E-21 | 0.546245 | 1.11E-37 | 0.727866 | 3.26E-78 | 0.776294 | 3.09E-95 | 0.594514 |
| 0.452763 | 5.55E-25 | 0.619799 | 6.71E-51 | 0.664506 | 8.22E-61 | 0.820223 | #####    | 0.433963 |
| 0.318731 | 1.74E-12 | 0.621524 | 2.98E-51 | 0.334092 | 1.22E-13 | 0.632808 | 1.29E-53 | 0.174465 |
| 0.463604 | 2.92E-26 | 0.549861 | 2.96E-38 | 0.588095 | 8.73E-45 | 0.642256 | 1.13E-55 | 0.343581 |
| 0.282195 | 5.35E-10 | 0.5789   | 3.90E-43 | 0.52336  | 3.37E-34 | 0.70461  | 2.75E-71 | 0.386068 |
| 0.448263 | 1.83E-24 | 0.529188 | 4.64E-35 | 0.666075 | 3.43E-61 | 0.799995 | #####    | 0.484008 |
| 0.186129 | 5.19E-05 | 0.300075 | 3.58E-11 | 0.313647 | 4.05E-12 | 0.510486 | 2.36E-32 | 0.182826 |
| 0.396642 | 4.79E-19 | 0.702044 | 1.45E-70 | 0.566482 | 5.46E-41 | 0.805691 | #####    | 0.502579 |
| 0.328545 | 3.24E-13 | 0.491044 | 1.03E-29 | 0.341708 | 3.09E-14 | 0.553049 | 9.10E-39 | 0.129847 |
| 0.328093 | 3.50E-13 | 0.504152 | 1.79E-31 | 0.414775 | 7.64E-21 | 0.541131 | 7.04E-37 | 0.241334 |
| 0.416455 | 5.14E-21 | 0.583056 | 7.10E-44 | 0.674194 | 3.43E-63 | 0.756923 | 6.01E-88 | 0.544927 |
| 0.312838 | 4.62E-12 | 0.678579 | 2.69E-64 | 0.536945 | 3.11E-36 | 0.684119 | 1.01E-65 | 0.433711 |
| 0.461079 | 5.85E-26 | 0.540524 | 8.75E-37 | 0.729091 | 1.34E-78 | 0.76035  | 3.47E-89 | 0.566172 |
| 0.383948 | 7.50E-18 | 0.737215 | 3.33E-81 | 0.59804  | 1.25E-46 | 0.766149 | 2.49E-91 | 0.472863 |
| 0.214487 | 2.91E-06 | 0.500268 | 6.05E-31 | 0.44155  | 1.05E-23 | 0.694599 | 1.64E-68 | 0.217117 |
| 0.427861 | 3.28E-22 | 0.608205 | 1.39E-48 | 0.590659 | 2.96E-45 | 0.674596 | 2.72E-63 | 0.473479 |
| 0.483796 | 9.03E-29 | 0.737646 | 2.41E-81 | 0.70462  | 2.73E-71 | 0.813692 | #####    | 0.512513 |
| 0.452212 | 6.43E-25 | 0.658574 | 2.13E-59 | 0.696023 | 6.73E-69 | 0.855305 | #####    | 0.568031 |
| 0.385211 | 5.73E-18 | 0.63219  | 1.75E-53 | 0.547646 | 6.68E-38 | 0.692683 | 5.42E-68 | 0.365258 |
| 0.431671 | 1.28E-22 | 0.649353 | 2.90E-57 | 0.809435 | #####    | 0.856693 | #####    | 0.724283 |
| 0.257929 | 1.56E-08 | 0.514441 | 6.52E-33 | 0.29155  | 1.33E-10 | 0.534354 | 7.74E-36 | 0.195195 |
| 0.285044 | 3.52E-10 | 0.457525 | 1.54E-25 | 0.431649 | 1.29E-22 | 0.601452 | 2.81E-47 | 0.324604 |
| 0.266349 | 5.02E-09 | 0.353365 | 3.51E-15 | 0.196897 | 1.82E-05 | 0.499532 | 7.61E-31 | 0.015533 |
| 0.502406 | 3.10E-31 | 0.623988 | 9.25E-52 | 0.743207 | 3.45E-83 | 0.75124  | 6.14E-86 | 0.600104 |
| 0.511406 | 1.75E-32 | 0.679038 | 2.05E-64 | 0.766254 | 2.27E-91 | 0.767632 | 6.87E-92 | 0.637408 |
| 0.342081 | 2.89E-14 | 0.53882  | 1.60E-36 | 0.661943 | 3.38E-60 | 0.710965 | 4.12E-73 | 0.482067 |
| 0.374499 | 5.38E-17 | 0.597321 | 1.71E-46 | 0.626139 | 3.30E-52 | 0.677785 | 4.27E-64 | 0.525554 |
| 0.512896 | 1.08E-32 | 0.595073 | 4.50E-46 | 0.786478 | 2.27E-99 | 0.784063 | 2.27E-98 | 0.69108  |
| 0.367413 | 2.26E-16 | 0.573187 | 3.89E-42 | 0.620473 | 4.89E-51 | 0.719701 | 1.06E-75 | 0.457783 |
| 0.401657 | 1.57E-19 | 0.602082 | 2.13E-47 | 0.669201 | 5.93E-62 | 0.729148 | 1.29E-78 | 0.568467 |
| 0.379382 | 1.96E-17 | 0.547114 | 8.11E-38 | 0.467681 | 9.37E-27 | 0.586022 | 2.08E-44 | 0.312169 |
| 0.409604 | 2.55E-20 | 0.461497 | 5.21E-26 | 0.695547 | 9.07E-69 | 0.697546 | 2.57E-69 | 0.635152 |
| 0.450229 | 1.09E-24 | 0.544579 | 2.04E-37 | 0.778693 | 3.44E-96 | 0.804669 | #####    | 0.5733   |
| 0.325751 | 5.26E-13 | 0.386214 | 4.63E-18 | 0.328777 | 3.11E-13 | 0.51673  | 3.07E-33 | 0.173986 |
| 0.440098 | 1.52E-23 | 0.638975 | 5.98E-55 | 0.695145 | 1.17E-68 | 0.826476 | #####    | 0.494421 |
| 0.449528 | 1.31E-24 | 0.42268  | 1.16E-21 | 0.670336 | 3.12E-62 | 0.71627  | 1.13E-74 | 0.446037 |
| 0.145056 | 0.00167  | 0.309948 | 7.41E-12 | 0.205546 | 7.54E-06 | 0.475092 | 1.14E-27 | -0.00462 |
| 0.365915 | 3.05E-16 | 0.633674 | 8.41E-54 | 0.487164 | 3.32E-29 | 0.668824 | 7.34E-62 | 0.365431 |
| 0.283895 | 4.17E-10 | 0.645022 | 2.75E-56 | 0.532296 | 1.58E-35 | 0.815548 | #####    | 0.385653 |
| 0.463582 | 2.93E-26 | 0.692442 | 6.30E-68 | 0.747757 | 9.85E-85 | 0.80383  | #####    | 0.608296 |
| 0.377678 | 2.79E-17 | 0.541401 | 6.39E-37 | 0.734592 | 2.37E-80 | 0.766855 | 1.35E-91 | 0.579546 |
| 0.402138 | 1.40E-19 | 0.672668 | 8.26E-63 | 0.732261 | 1.33E-79 | 0.80516  | #####    | 0.630088 |
| 0.30183  | 2.72E-11 | 0.489993 | 1.42E-29 | 0.406231 | 5.55E-20 | 0.55225  | 1.22E-38 | 0.226001 |

|          |          |          |          |          |          |          |          |          |
|----------|----------|----------|----------|----------|----------|----------|----------|----------|
| 0.454146 | 3.84E-25 | 0.646718 | 1.14E-56 | 0.784241 | 1.92E-98 | 0.812731 | #####    | 0.59864  |
| 0.28686  | 2.69E-10 | 0.586014 | 2.08E-44 | 0.514282 | 6.86E-33 | 0.691029 | 1.51E-67 | 0.393263 |
| 0.251688 | 3.52E-08 | 0.476357 | 7.94E-28 | 0.567254 | 4.04E-41 | 0.699011 | 1.01E-69 | 0.481534 |
| 0.387827 | 3.28E-18 | 0.616389 | 3.30E-50 | 0.617694 | 1.80E-50 | 0.710538 | 5.48E-73 | 0.458734 |
| 0.50314  | 2.46E-31 | 0.591621 | 1.97E-45 | 0.682391 | 2.82E-65 | 0.777915 | 7.02E-96 | 0.51952  |
| 0.330587 | 2.27E-13 | 0.611715 | 2.83E-49 | 0.445985 | 3.33E-24 | 0.622978 | 1.50E-51 | 0.298101 |
| 0.328514 | 3.26E-13 | 0.497911 | 1.26E-30 | 0.492294 | 7.06E-30 | 0.592614 | 1.29E-45 | 0.412735 |
| 0.550526 | 2.32E-38 | 0.698465 | 1.44E-69 | 0.762236 | 7.06E-90 | 0.789169 | #####    | 0.60659  |
| 0.346194 | 1.35E-14 | 0.616099 | 3.77E-50 | 0.496471 | 1.97E-30 | 0.668906 | 7.01E-62 | 0.389926 |
| 0.074613 | 0.10733  | 0.359018 | 1.18E-15 | 0.195038 | 2.19E-05 | 0.466245 | 1.40E-26 | 0.118785 |
| 0.203203 | 9.61E-06 | 0.426404 | 4.69E-22 | 0.236107 | 2.45E-07 | 0.485425 | 5.57E-29 | 0.103283 |
| 0.304973 | 1.65E-11 | 0.482736 | 1.24E-28 | 0.643019 | 7.68E-56 | 0.73167  | 2.05E-79 | 0.466462 |
| 0.359023 | 1.18E-15 | 0.703282 | 6.52E-71 | 0.454289 | 3.69E-25 | 0.779692 | 1.36E-96 | 0.364978 |
| 0.259161 | 1.32E-08 | 0.52058  | 8.56E-34 | 0.399309 | 2.65E-19 | 0.573331 | 3.67E-42 | 0.319523 |
| 0.370089 | 1.32E-16 | 0.603329 | 1.23E-47 | 0.534234 | 8.07E-36 | 0.676054 | 1.17E-63 | 0.326498 |
| 0.440744 | 1.29E-23 | 0.401714 | 1.55E-19 | 0.566351 | 5.74E-41 | 0.57994  | 2.55E-43 | 0.461903 |
| 0.417594 | 3.92E-21 | 0.716298 | 1.11E-74 | 0.683769 | 1.24E-65 | 0.789354 | #####    | 0.559204 |
| 0.313828 | 3.93E-12 | 0.538737 | 1.65E-36 | 0.405992 | 5.86E-20 | 0.716415 | 1.02E-74 | 0.283716 |
| 0.355003 | 2.57E-15 | 0.475321 | 1.07E-27 | 0.532078 | 1.71E-35 | 0.651853 | 7.77E-58 | 0.468082 |
| 0.466013 | 1.49E-26 | 0.606479 | 3.02E-48 | 0.651657 | 8.62E-58 | 0.692691 | 5.40E-68 | 0.580652 |
| 0.475873 | 9.13E-28 | 0.557542 | 1.69E-39 | 0.738893 | 9.38E-82 | 0.677201 | 6.01E-64 | 0.638883 |
| 0.33188  | 1.81E-13 | 0.566091 | 6.36E-41 | 0.491837 | 8.11E-30 | 0.678487 | 2.84E-64 | 0.318223 |
| 0.555816 | 3.23E-39 | 0.534935 | 6.31E-36 | 0.751742 | 4.10E-86 | 0.729582 | 9.41E-79 | 0.606001 |
| 0.365415 | 3.37E-16 | 0.660892 | 6.02E-60 | 0.684046 | 1.05E-65 | 0.834155 | #####    | 0.580055 |
| 0.453405 | 4.68E-25 | 0.557981 | 1.43E-39 | 0.82853  | #####    | 0.84193  | #####    | 0.58894  |
| 0.392694 | 1.14E-18 | 0.497918 | 1.26E-30 | 0.695904 | 7.25E-69 | 0.776477 | 2.61E-95 | 0.520775 |
| 0.398088 | 3.48E-19 | 0.569343 | 1.78E-41 | 0.690025 | 2.80E-67 | 0.71169  | 2.53E-73 | 0.576111 |
| 0.299014 | 4.23E-11 | 0.439134 | 1.95E-23 | 0.599743 | 5.94E-47 | 0.659867 | 1.05E-59 | 0.444447 |
| 0.347988 | 9.69E-15 | 0.55242  | 1.15E-38 | 0.734825 | 1.99E-80 | 0.750433 | 1.17E-85 | 0.606481 |
| 0.443597 | 6.19E-24 | 0.628477 | 1.07E-52 | 0.60035  | 4.55E-47 | 0.730823 | 3.81E-79 | 0.512947 |
| 0.27222  | 2.23E-09 | 0.493328 | 5.15E-30 | 0.386578 | 4.28E-18 | 0.610692 | 4.51E-49 | 0.213023 |
| 0.432891 | 9.43E-23 | 0.631135 | 2.93E-53 | 0.626654 | 2.58E-52 | 0.826389 | #####    | 0.408651 |
| 0.424215 | 8.00E-22 | 0.565748 | 7.26E-41 | 0.652799 | 4.71E-58 | 0.731188 | 2.92E-79 | 0.528591 |
| 0.384863 | 6.17E-18 | 0.63342  | 9.54E-54 | 0.653585 | 3.10E-58 | 0.801893 | #####    | 0.502905 |
| 0.520656 | 8.35E-34 | 0.762724 | 4.67E-90 | 0.575932 | 1.29E-42 | 0.754555 | 4.20E-87 | 0.44141  |
| 0.431375 | 1.38E-22 | 0.51244  | 1.25E-32 | 0.744451 | 1.31E-83 | 0.715672 | 1.70E-74 | 0.571538 |
| 0.301819 | 2.72E-11 | 0.583446 | 6.05E-44 | 0.509405 | 3.34E-32 | 0.669927 | 3.93E-62 | 0.460149 |
| -0.02092 | 0.65204  | -0.04539 | 0.32769  | 0.021864 | 0.63744  | -0.01759 | 0.70453  | 0.057639 |
| 0.002063 | 0.96453  | -0.09271 | 0.04524  | 0.003437 | 0.94095  | -0.04309 | 0.35278  | -0.04003 |
| -0.01784 | 0.70055  | 0.007078 | 0.87875  | 0.047421 | 0.3065   | 0.034577 | 0.456    | 0.014765 |
| 0.145407 | 0.00163  | -0.04009 | 0.38741  | 0.05763  | 0.21384  | -0.05088 | 0.27254  | 0.040922 |
| -0.06732 | 0.14637  | -0.07247 | 0.11785  | -0.06187 | 0.18197  | -0.08175 | 0.07759  | -0.03704 |
| -0.02921 | 0.52896  | -0.03339 | 0.47162  | 0.033206 | 0.47407  | -0.02647 | 0.56832  | 0.005179 |
| 0.073929 | 0.1106   | 0.024331 | 0.59995  | 0.051292 | 0.26864  | 0.017704 | 0.70277  | 0.066206 |
| 0.0221   | 0.63382  | -0.04301 | 0.35371  | 0.006696 | 0.88526  | -0.01048 | 0.82132  | -0.0357  |

|          |         |          |          |          |         |          |          |          |
|----------|---------|----------|----------|----------|---------|----------|----------|----------|
| -0.04069 | 0.38036 | -0.09791 | 0.03441  | -0.03165 | 0.49501 | -0.07982 | 0.08489  | 0.001519 |
| -0.00145 | 0.97504 | -0.08111 | 0.07995  | -0.03176 | 0.49354 | -0.04513 | 0.33053  | -0.07752 |
| -0.0123  | 0.791   | -0.03119 | 0.50128  | 0.022587 | 0.62636 | 0.033721 | 0.46724  | -0.02031 |
| 0.02421  | 0.60177 | -0.03567 | 0.44183  | 0.033696 | 0.46757 | -0.01316 | 0.77668  | -0.01376 |
| 0.028036 | 0.54561 | -0.03123 | 0.50083  | 0.038718 | 0.40385 | -0.00348 | 0.94026  | 0.010476 |
| 0.052616 | 0.25647 | -0.03443 | 0.45789  | 0.02556  | 0.58166 | -0.01117 | 0.80978  | -0.00178 |
| 0.134801 | 0.00352 | 0.028004 | 0.54607  | -0.00128 | 0.97795 | -0.02494 | 0.59092  | 0.005117 |
| -0.00693 | 0.88126 | -0.02879 | 0.53485  | 0.031015 | 0.50375 | -0.00396 | 0.9319   | 0.01103  |
| -0.0088  | 0.84954 | -0.0526  | 0.2566   | -0.00696 | 0.88068 | -0.0202  | 0.6633   | -0.048   |
| -0.09332 | 0.04384 | -0.16437 | 0.00036  | -0.12354 | 0.00752 | -0.15687 | 0.00067  | -0.08615 |
| -0.04016 | 0.3866  | -0.11379 | 0.01388  | -0.05973 | 0.19756 | -0.082   | 0.07668  | -0.09842 |
| -0.11164 | 0.01579 | -0.19989 | 1.35E-05 | -0.10527 | 0.0229  | -0.14334 | 0.0019   | -0.09129 |
| -0.09733 | 0.0355  | -0.10943 | 0.018    | -0.09422 | 0.04184 | -0.10333 | 0.02555  | -0.06412 |
| 0.008781 | 0.8499  | 0.040725 | 0.3799   | 0.052626 | 0.25638 | 0.028742 | 0.53553  | 0.055508 |
| -0.03351 | 0.47004 | -0.02494 | 0.59092  | -0.01595 | 0.73095 | -0.01615 | 0.72782  | 0.008247 |
| -0.06666 | 0.15036 | -0.06706 | 0.14789  | -0.02818 | 0.54358 | -0.04683 | 0.31252  | -0.00319 |
| -0.09646 | 0.03718 | -0.12555 | 0.00659  | -0.0546  | 0.23892 | -0.10573 | 0.02231  | -0.01945 |
| -0.02528 | 0.58583 | -0.0671  | 0.14765  | -0.03017 | 0.51551 | -0.03128 | 0.50012  | -0.06365 |
| -0.03374 | 0.467   | -0.07933 | 0.08683  | -0.04001 | 0.38835 | -0.04554 | 0.32609  | -0.06112 |
| 0.023206 | 0.61693 | -0.02819 | 0.54342  | 0.028604 | 0.53749 | 0.01454  | 0.75399  | -0.01521 |
| -0.03253 | 0.48319 | -0.10788 | 0.01971  | -0.06394 | 0.16772 | -0.09335 | 0.04377  | -0.06605 |
| -0.0395  | 0.39436 | -0.008   | 0.86303  | 0.056351 | 0.2242  | 0.085039 | 0.06634  | 0.019143 |
| 0.022143 | 0.63316 | 0.008051 | 0.86225  | 0.06573  | 0.15614 | 0.034276 | 0.45995  | 0.041622 |
| -0.00098 | 0.98312 | -0.01982 | 0.66922  | 0.02949  | 0.52496 | 0.009648 | 0.83527  | -0.00148 |
| -0.02048 | 0.65884 | -0.02018 | 0.66363  | 0.009808 | 0.83258 | -0.03218 | 0.48788  | -0.02801 |
| 0.001838 | 0.96839 | -0.02659 | 0.56657  | 0.027048 | 0.55986 | 0.011418 | 0.80561  | -0.00633 |
| -0.03855 | 0.40594 | -0.04981 | 0.2827   | -0.02226 | 0.63133 | -0.03936 | 0.39614  | -0.04075 |
| -0.04282 | 0.35584 | -0.05924 | 0.20127  | -0.02212 | 0.63344 | -0.06123 | 0.18654  | -0.02309 |
| -0.01224 | 0.79192 | -0.02834 | 0.54122  | 0.018281 | 0.69356 | -0.00501 | 0.91407  | -0.00842 |
| 0.02857  | 0.53797 | -0.02201 | 0.63519  | 0.035887 | 0.43911 | 0.01131  | 0.80741  | -0.00904 |
| -0.00024 | 0.9958  | -0.02014 | 0.66428  | 0.009886 | 0.83127 | -0.00209 | 0.96415  | -0.01249 |
| -0.11192 | 0.01553 | -0.16367 | 0.00038  | -0.14504 | 0.00167 | -0.1557  | 0.00073  | -0.12831 |
| -0.05116 | 0.26987 | -0.07979 | 0.08501  | -0.02135 | 0.64535 | -0.05403 | 0.24391  | -0.04592 |
| 0.043144 | 0.35223 | -0.03818 | 0.41038  | 0.012748 | 0.7835  | -0.00885 | 0.84877  | -0.05731 |
| -0.0864  | 0.06211 | -0.09732 | 0.03551  | -0.12227 | 0.00816 | -0.1875  | 4.56E-05 | -0.07464 |
| -0.02863 | 0.53719 | -0.03546 | 0.44463  | -0.02718 | 0.55798 | -0.04584 | 0.32296  | -0.01235 |
| -0.0678  | 0.14348 | -0.08948 | 0.05331  | -0.04627 | 0.31838 | -0.07792 | 0.09257  | -0.04582 |
| -0.03178 | 0.49326 | -0.04524 | 0.32934  | -0.00834 | 0.85739 | -0.02475 | 0.59365  | -0.03293 |
| -0.02379 | 0.60811 | -0.03234 | 0.48568  | -0.0014  | 0.97596 | -0.01362 | 0.7691   | -0.01535 |
| -0.03277 | 0.47997 | -0.0518  | 0.26393  | -0.0043  | 0.92622 | -0.03242 | 0.48456  | -0.02454 |
| -0.03638 | 0.43288 | -0.02887 | 0.53367  | 0.002146 | 0.96311 | -0.00911 | 0.8443   | -0.01929 |
| -0.07279 | 0.11619 | -0.1053  | 0.02285  | -0.05889 | 0.20395 | -0.08582 | 0.06387  | -0.07163 |
| -0.07299 | 0.1152  | -0.07355 | 0.11243  | -0.01251 | 0.78752 | -0.05287 | 0.25416  | -0.04709 |
| -0.08843 | 0.05618 | -0.09033 | 0.05109  | -0.05161 | 0.26573 | -0.08181 | 0.07738  | -0.06308 |
| -0.06766 | 0.1443  | -0.05474 | 0.23774  | 0.012506 | 0.78752 | -0.03154 | 0.49649  | -0.03802 |



|          |          |          |          |          |          |          |          |          |
|----------|----------|----------|----------|----------|----------|----------|----------|----------|
| 0.112949 | 0.0146   | 0.055828 | 0.22853  | 0.111291 | 0.01613  | 0.096946 | 0.03623  | 0.074699 |
| -0.05415 | 0.24283  | -0.12114 | 0.00878  | -0.07408 | 0.10985  | -0.09763 | 0.03494  | -0.05747 |
| 0.011691 | 0.80106  | -0.13501 | 0.00346  | 0.016634 | 0.71995  | -0.08293 | 0.0734   | 0.051169 |
| 0.025809 | 0.57798  | -0.02976 | 0.52118  | 0.02582  | 0.57781  | 0.006432 | 0.88975  | -0.02385 |
| 0.007141 | 0.87768  | -0.05698 | 0.21906  | 0.006452 | 0.8894   | -0.02045 | 0.65934  | -0.02939 |
| -0.00719 | 0.87681  | -0.03044 | 0.51164  | 0.007629 | 0.86939  | -0.00049 | 0.99151  | -0.0296  |
| -0.08479 | 0.06714  | -0.10922 | 0.01823  | -0.09086 | 0.04974  | -0.09623 | 0.03764  | -0.07086 |
| -0.0552  | 0.23384  | -0.08027 | 0.08315  | -0.03961 | 0.39305  | -0.05812 | 0.20995  | -0.04865 |
| -0.05784 | 0.21213  | -0.12059 | 0.00909  | -0.06521 | 0.15947  | -0.09083 | 0.04981  | -0.0562  |
| 0.035876 | 0.43925  | 0.044661 | 0.33554  | 0.048438 | 0.29623  | 0.053519 | 0.24839  | 0.070165 |
| -0.01881 | 0.68509  | -0.01703 | 0.71363  | 0.023608 | 0.61084  | 0.001915 | 0.96708  | -0.00416 |
| -0.10717 | 0.02054  | -0.16023 | 0.00051  | -0.11974 | 0.0096   | -0.1417  | 0.00214  | -0.09689 |
| -0.02764 | 0.55128  | -0.07837 | 0.09073  | -0.04457 | 0.33651  | -0.05789 | 0.21181  | -0.04957 |
| -0.0431  | 0.35272  | -0.05905 | 0.20274  | -0.0697  | 0.13257  | -0.06061 | 0.19108  | -0.06559 |
| -0.03668 | 0.42912  | -0.09122 | 0.04884  | -0.0199  | 0.66801  | -0.06299 | 0.17417  | -0.03587 |
| -0.07706 | 0.09624  | -0.11031 | 0.01709  | -0.09525 | 0.03964  | -0.09427 | 0.04172  | -0.0397  |
| -0.07095 | 0.12573  | -0.02446 | 0.59797  | -0.02223 | 0.6318   | -0.05388 | 0.24524  | 0.050113 |
| -0.07769 | 0.09355  | -0.09252 | 0.04568  | -0.07199 | 0.1203   | -0.09578 | 0.03855  | -0.0757  |
| -0.03385 | 0.4655   | -0.04657 | 0.31523  | -0.04855 | 0.29514  | -0.04679 | 0.31293  | -0.02183 |
| -0.1479  | 0.00135  | -0.16748 | 0.00028  | -0.35161 | 4.90E-15 | -0.32999 | 2.52E-13 | -0.35125 |
| -0.29333 | 1.02E-10 | -0.37091 | 1.12E-16 | -0.4977  | 1.34E-30 | -0.41264 | 1.26E-20 | -0.49888 |
| -0.03018 | 0.51534  | -0.03737 | 0.42036  | -0.28257 | 5.06E-10 | -0.15585 | 0.00073  | -0.32519 |
| -0.11294 | 0.01461  | 0.021498 | 0.64309  | -0.15239 | 0.00095  | -0.01062 | 0.81901  | -0.22572 |
| -0.09191 | 0.04713  | -0.14559 | 0.00161  | -0.31622 | 2.64E-12 | -0.19514 | 2.17E-05 | -0.27894 |
| -0.10396 | 0.02467  | -0.37793 | 2.65E-17 | -0.34283 | 2.52E-14 | -0.43869 | 2.18E-23 | -0.36962 |
| -0.17096 | 0.00021  | -0.39629 | 5.18E-19 | -0.35694 | 1.77E-15 | -0.506   | 9.94E-32 | -0.31329 |
| -0.11225 | 0.01523  | -0.08488 | 0.06685  | -0.30996 | 7.39E-12 | -0.25093 | 3.88E-08 | -0.3821  |
| -0.01856 | 0.68908  | 0.117905 | 0.01077  | -0.31424 | 3.67E-12 | -0.03217 | 0.48798  | -0.37364 |
| -0.10646 | 0.02139  | -0.27718 | 1.10E-09 | -0.32511 | 5.87E-13 | -0.28908 | 1.93E-10 | -0.38196 |
| -0.00567 | 0.90273  | -0.32617 | 4.89E-13 | 0.032624 | 0.48186  | -0.22977 | 5.18E-07 | -0.12683 |
| -0.19323 | 2.62E-05 | -0.42692 | 4.14E-22 | -0.35509 | 2.53E-15 | -0.42652 | 4.57E-22 | -0.39168 |
| -0.04572 | 0.32419  | 0.170735 | 0.00021  | -0.35598 | 2.13E-15 | -0.12962 | 0.00503  | -0.30633 |
| -0.29542 | 7.37E-11 | -0.15691 | 0.00067  | -0.66883 | 7.31E-62 | -0.4067  | 4.99E-20 | -0.59559 |
| 0.002191 | 0.96233  | -0.01629 | 0.72557  | -0.14604 | 0.00155  | -0.10176 | 0.02789  | -0.24506 |
| -0.10984 | 0.01758  | 0.017419 | 0.70733  | -0.34008 | 4.16E-14 | -0.16247 | 0.00042  | -0.32182 |
| -0.18038 | 8.87E-05 | -0.33681 | 7.50E-14 | -0.31658 | 2.49E-12 | -0.33373 | 1.30E-13 | -0.35715 |
| -0.03991 | 0.38955  | 0.016022 | 0.72985  | -0.30775 | 1.06E-11 | -0.07715 | 0.09587  | -0.38072 |
| -0.1131  | 0.01447  | -0.05403 | 0.24392  | -0.5298  | 3.76E-35 | -0.33639 | 8.09E-14 | -0.50556 |
| -0.15101 | 0.00106  | 0.032414 | 0.4847   | -0.26574 | 5.46E-09 | -0.06419 | 0.16611  | -0.3123  |
| -0.09704 | 0.03604  | 0.083095 | 0.07282  | -0.46569 | 1.63E-26 | -0.13389 | 0.00375  | -0.4575  |
| 0.064681 | 0.16287  | 0.108928 | 0.01854  | -0.1582  | 0.0006   | -0.03957 | 0.39356  | -0.24643 |
| 0.045571 | 0.32577  | 0.028176 | 0.5436   | -0.14554 | 0.00161  | -0.11105 | 0.01636  | -0.23137 |
| -0.13751 | 0.0029   | -0.12484 | 0.00691  | -0.25154 | 3.59E-08 | -0.16792 | 0.00027  | -0.3038  |
| -0.19056 | 3.40E-05 | -0.04483 | 0.33372  | -0.4869  | 3.59E-29 | -0.18433 | 6.15E-05 | -0.48242 |
| 0.039878 | 0.3899   | 0.132347 | 0.00417  | -0.26662 | 4.84E-09 | -0.16947 | 0.00023  | -0.20819 |

|          |          |          |          |          |          |          |          |          |
|----------|----------|----------|----------|----------|----------|----------|----------|----------|
| -0.12363 | 0.00748  | 0.107637 | 0.01999  | -0.30041 | 3.40E-11 | -0.20316 | 9.65E-06 | -0.26272 |
| -0.16016 | 0.00051  | -0.21255 | 3.59E-06 | -0.3698  | 1.40E-16 | -0.36196 | 6.67E-16 | -0.38438 |
| -0.02159 | 0.64171  | -0.06557 | 0.15718  | -0.30699 | 1.20E-11 | -0.28255 | 5.08E-10 | -0.36457 |
| -0.02145 | 0.64376  | -0.08155 | 0.07831  | -0.22532 | 8.68E-07 | -0.16442 | 0.00036  | -0.24371 |
| -0.19578 | 2.04E-05 | 0.045436 | 0.32721  | -0.50887 | 3.96E-32 | -0.20325 | 9.56E-06 | -0.49814 |
| 0.018937 | 0.68315  | -0.07294 | 0.11548  | -0.2328  | 3.63E-07 | -0.16445 | 0.00036  | -0.30763 |
| -0.02814 | 0.54417  | -0.10712 | 0.02059  | -0.20736 | 6.24E-06 | -0.29427 | 8.79E-11 | -0.24706 |
| 0.065382 | 0.15835  | -0.08428 | 0.06881  | -0.03633 | 0.43342  | -0.12995 | 0.00491  | -0.11736 |
| -0.04639 | 0.31715  | -0.06403 | 0.16712  | -0.21247 | 3.62E-06 | -0.09421 | 0.04185  | -0.36758 |
| -0.00429 | 0.92626  | 0.09901  | 0.03242  | -0.23306 | 3.52E-07 | -0.12611 | 0.00635  | -0.26593 |
| -0.01113 | 0.8105   | 0.008759 | 0.85026  | -0.13823 | 0.00276  | -0.08774 | 0.05814  | -0.25959 |
| -0.24548 | 7.74E-08 | -0.25079 | 3.95E-08 | -0.35929 | 1.12E-15 | -0.28209 | 5.43E-10 | -0.39406 |
| 0.206592 | 6.76E-06 | 0.286991 | 2.64E-10 | 0.1162   | 0.01197  | 0.103969 | 0.02465  | 0.061861 |
| -0.02759 | 0.55199  | 0.050513 | 0.27599  | -0.2999  | 3.68E-11 | -0.18721 | 4.69E-05 | -0.32611 |
| 0.093518 | 0.04339  | -0.00527 | 0.90963  | -0.17943 | 9.67E-05 | -0.10296 | 0.02608  | -0.20327 |
| 0.008987 | 0.84642  | -0.27876 | 8.80E-10 | -0.03976 | 0.39132  | -0.27733 | 1.08E-09 | -0.10331 |
| 0.055796 | 0.2288   | 0.209969 | 4.73E-06 | -0.04207 | 0.36431  | -0.00196 | 0.96632  | -0.0645  |
| -0.05169 | 0.26494  | -0.13538 | 0.00338  | -0.29817 | 4.82E-11 | -0.24997 | 4.39E-08 | -0.33158 |
| 0.105795 | 0.02222  | 0.219257 | 1.72E-06 | -0.05374 | 0.24644  | 0.108497 | 0.01901  | -0.13706 |
| -0.21434 | 2.96E-06 | -0.10518 | 0.02302  | -0.46091 | 6.13E-26 | -0.34638 | 1.31E-14 | -0.41476 |
| -0.12395 | 0.00732  | -0.0898  | 0.05246  | -0.55253 | 1.11E-38 | -0.39424 | 8.15E-19 | -0.47712 |
| -0.05354 | 0.24822  | 0.03304  | 0.47628  | -0.18367 | 6.54E-05 | -0.07124 | 0.12422  | -0.28155 |
| 0.052155 | 0.26066  | -0.20599 | 7.20E-06 | -0.22946 | 5.38E-07 | -0.22885 | 5.77E-07 | -0.24958 |
| -0.24374 | 9.62E-08 | -0.34882 | 8.29E-15 | -0.38775 | 3.33E-18 | -0.43339 | 8.32E-23 | -0.40475 |
| 0.225133 | 8.86E-07 | 0.330425 | 2.33E-13 | 0.090268 | 0.05124  | 0.149837 | 0.00116  | -0.05832 |
| -0.17769 | 0.00011  | -0.14631 | 0.00152  | -0.50917 | 3.61E-32 | -0.40438 | 8.45E-20 | -0.4906  |
| -0.05715 | 0.21768  | -0.2399  | 1.54E-07 | -0.20032 | 1.29E-05 | -0.3067  | 1.25E-11 | -0.2793  |
| -0.19566 | 2.06E-05 | -0.17414 | 0.00016  | -0.5243  | 2.45E-34 | -0.42351 | 9.50E-22 | -0.46048 |
| -0.14672 | 0.00148  | -0.16272 | 0.00041  | -0.22098 | 1.42E-06 | -0.12512 | 0.00678  | -0.37893 |
| -0.03289 | 0.47828  | -0.0204  | 0.66016  | -0.3071  | 1.17E-11 | -0.11798 | 0.01072  | -0.37386 |
| -0.08088 | 0.08081  | -0.02142 | 0.64426  | -0.15228 | 0.00096  | -0.05641 | 0.22368  | -0.17008 |
| -0.02529 | 0.58571  | 0.102017 | 0.02749  | -0.18898 | 3.96E-05 | -0.13468 | 0.00355  | -0.15793 |
| -0.08773 | 0.05816  | 0.08396  | 0.06987  | -0.32174 | 1.04E-12 | -0.16046 | 0.0005   | -0.27989 |
| -0.06301 | 0.17401  | -0.10898 | 0.01848  | -0.22899 | 5.68E-07 | -0.33966 | 4.49E-14 | -0.25565 |
| -0.13089 | 0.00461  | -0.11385 | 0.01383  | -0.51837 | 1.78E-33 | -0.36791 | 2.05E-16 | -0.49275 |
| -0.24753 | 5.98E-08 | -0.16745 | 0.00028  | -0.56654 | 5.34E-41 | -0.39188 | 1.36E-18 | -0.56129 |
| -0.12933 | 0.00513  | 0.031394 | 0.49854  | -0.3747  | 5.16E-17 | -0.18017 | 9.04E-05 | -0.37145 |
| -0.07779 | 0.09312  | 0.135915 | 0.00325  | -0.21031 | 4.56E-06 | -0.07743 | 0.09467  | -0.21947 |
| -0.23107 | 4.45E-07 | -0.3791  | 2.08E-17 | -0.41063 | 2.01E-20 | -0.43603 | 4.29E-23 | -0.45258 |
| -0.25135 | 3.68E-08 | -0.25746 | 1.66E-08 | -0.35391 | 3.17E-15 | -0.40744 | 4.20E-20 | -0.36515 |
| -0.16564 | 0.00032  | -0.28777 | 2.35E-10 | -0.32221 | 9.64E-13 | -0.19637 | 1.92E-05 | -0.39025 |
| -0.17238 | 0.00018  | -0.28085 | 6.50E-10 | -0.22937 | 5.43E-07 | -0.14202 | 0.00209  | -0.32881 |
| -0.14894 | 0.00125  | -0.01103 | 0.81216  | -0.35864 | 1.27E-15 | -0.22358 | 1.06E-06 | -0.37304 |
| -0.01799 | 0.69816  | 0.268306 | 3.84E-09 | -0.25646 | 1.89E-08 | 0.098072 | 0.03411  | -0.32488 |
| -0.08728 | 0.05946  | -0.04781 | 0.30258  | -0.36138 | 7.47E-16 | -0.31748 | 2.14E-12 | -0.35965 |

|          |          |          |          |          |          |          |          |          |
|----------|----------|----------|----------|----------|----------|----------|----------|----------|
| 0.095719 | 0.03867  | 0.109993 | 0.01742  | -0.19046 | 3.43E-05 | -0.06328 | 0.17219  | -0.2614  |
| -0.07446 | 0.10806  | -0.13827 | 0.00275  | -0.36348 | 4.94E-16 | -0.38922 | 2.43E-18 | -0.38014 |
| -0.163   | 0.00041  | 0.08821  | 0.0568   | -0.49275 | 6.15E-30 | -0.19363 | 2.52E-05 | -0.44618 |
| -0.18577 | 5.37E-05 | -0.1175  | 0.01105  | -0.48193 | 1.56E-28 | -0.34385 | 2.09E-14 | -0.45847 |
| -0.01054 | 0.82023  | -0.10611 | 0.02182  | -0.18729 | 4.65E-05 | -0.23706 | 2.18E-07 | -0.27081 |
| -0.03267 | 0.48123  | 0.155465 | 0.00075  | -0.24684 | 6.53E-08 | -0.03908 | 0.39949  | -0.24608 |
| -0.01311 | 0.77757  | -0.04351 | 0.34814  | -0.25677 | 1.82E-08 | -0.13189 | 0.0043   | -0.36567 |
| -0.13792 | 0.00282  | 0.038683 | 0.40428  | -0.33063 | 2.25E-13 | -0.22924 | 5.51E-07 | -0.30042 |
| 0.040442 | 0.38322  | 0.268146 | 3.93E-09 | -0.16067 | 0.00049  | 0.017982 | 0.69833  | -0.16705 |
| 0.101714 | 0.02796  | 0.077902 | 0.09266  | -0.09084 | 0.04977  | -0.0605  | 0.19186  | -0.18144 |
| -0.19954 | 1.40E-05 | -0.06642 | 0.15182  | -0.17851 | 0.00011  | -0.08015 | 0.08361  | -0.22585 |
| -0.20027 | 1.30E-05 | -0.14796 | 0.00134  | -0.33373 | 1.30E-13 | -0.15308 | 0.0009   | -0.38565 |
| 0.171793 | 0.00019  | 0.068264 | 0.14076  | -0.00578 | 0.90081  | 0.043141 | 0.35226  | -0.11309 |
| 0.061054 | 0.18781  | 0.139517 | 0.00251  | -0.16732 | 0.00028  | -0.12244 | 0.00807  | -0.18818 |
| -0.09021 | 0.05139  | 0.013234 | 0.77547  | -0.2093  | 5.08E-06 | -0.18432 | 6.15E-05 | -0.23604 |
| -0.12171 | 0.00847  | -0.09183 | 0.04733  | -0.14574 | 0.00159  | -0.13682 | 0.00305  | -0.18613 |
| -0.20116 | 1.19E-05 | -0.25342 | 2.81E-08 | -0.4752  | 1.11E-27 | -0.45327 | 4.85E-25 | -0.46568 |
| 0.069892 | 0.13151  | 0.024886 | 0.59166  | -0.16808 | 0.00026  | -0.03406 | 0.46283  | -0.31544 |
| -0.137   | 0.00301  | -0.11089 | 0.01652  | -0.22775 | 6.55E-07 | -0.24337 | 1.01E-07 | -0.24373 |
| -0.05713 | 0.21782  | -0.10559 | 0.02249  | -0.30354 | 2.07E-11 | -0.19334 | 2.59E-05 | -0.32541 |
| 0.07566  | 0.10247  | 0.204292 | 8.59E-06 | -0.05276 | 0.25516  | 0.145489 | 0.00162  | -0.11796 |
| -0.08656 | 0.0616   | -0.03449 | 0.45717  | -0.26891 | 3.53E-09 | -0.12408 | 0.00726  | -0.30518 |
| -0.19003 | 3.57E-05 | -0.39804 | 3.51E-19 | -0.35358 | 3.37E-15 | -0.37401 | 5.94E-17 | -0.36546 |
| -0.09074 | 0.05003  | -0.15028 | 0.00112  | -0.1681  | 0.00026  | -0.08938 | 0.05358  | -0.29112 |
| -0.14322 | 0.00192  | -0.16681 | 0.00029  | -0.31708 | 2.29E-12 | -0.32117 | 1.15E-12 | -0.34972 |
| -0.20925 | 5.10E-06 | -0.11497 | 0.01291  | -0.52142 | 6.47E-34 | -0.24506 | 8.16E-08 | -0.52668 |
| -0.08745 | 0.05899  | 0.185794 | 5.36E-05 | -0.25979 | 1.22E-08 | -0.10139 | 0.02847  | -0.24148 |
| -0.20211 | 1.08E-05 | -0.23614 | 2.44E-07 | -0.53214 | 1.67E-35 | -0.48771 | 2.82E-29 | -0.50626 |
| -0.15857 | 0.00058  | -0.06124 | 0.18646  | -0.3286  | 3.21E-13 | -0.08734 | 0.05931  | -0.35598 |
| -0.08136 | 0.07901  | -0.2188  | 1.81E-06 | -0.28437 | 3.89E-10 | -0.24661 | 6.72E-08 | -0.33368 |
| -0.09422 | 0.04183  | 0.037949 | 0.41325  | -0.22133 | 1.36E-06 | -0.09195 | 0.04704  | -0.28118 |
| -0.14308 | 0.00194  | -0.16559 | 0.00033  | -0.30859 | 9.24E-12 | -0.28359 | 4.36E-10 | -0.34978 |
| -0.19155 | 3.09E-05 | -0.15112 | 0.00105  | -0.54477 | 1.90E-37 | -0.33117 | 2.05E-13 | -0.54093 |
| -0.13101 | 0.00457  | -0.09389 | 0.04256  | -0.48549 | 5.46E-29 | -0.27167 | 2.41E-09 | -0.51565 |
| -0.0487  | 0.29364  | 0.048611 | 0.29451  | -0.19271 | 2.76E-05 | -0.13262 | 0.00409  | -0.25151 |
| -0.0694  | 0.13423  | -0.13558 | 0.00333  | -0.40367 | 9.93E-20 | -0.3181  | 1.93E-12 | -0.44725 |
| -0.09324 | 0.04401  | -0.10062 | 0.0297   | -0.40726 | 4.38E-20 | -0.31094 | 6.30E-12 | -0.35705 |
| -0.12684 | 0.00605  | -0.06986 | 0.13169  | -0.47326 | 1.93E-27 | -0.27225 | 2.22E-09 | -0.47247 |
| -0.05265 | 0.25617  | -0.18854 | 4.12E-05 | -0.22168 | 1.31E-06 | -0.20924 | 5.11E-06 | -0.28758 |
| -0.08414 | 0.06928  | -0.29541 | 7.38E-11 | -0.24858 | 5.24E-08 | -0.42679 | 4.27E-22 | -0.23152 |
| -0.06695 | 0.14859  | -0.08212 | 0.07625  | -0.15302 | 0.00091  | -0.10428 | 0.02422  | -0.24225 |
| -0.13707 | 0.003    | -0.06511 | 0.16011  | -0.44538 | 3.89E-24 | -0.21651 | 2.33E-06 | -0.40117 |
| -0.05361 | 0.24756  | -0.07    | 0.13089  | -0.28387 | 4.19E-10 | -0.30458 | 1.76E-11 | -0.31256 |
| -0.05292 | 0.25373  | 0.120765 | 0.00899  | -0.35053 | 6.01E-15 | -0.22268 | 1.17E-06 | -0.31546 |
| 0.15559  | 0.00074  | 0.005536 | 0.90502  | -0.16428 | 0.00036  | -0.12788 | 0.00565  | -0.18536 |

|          |          |          |          |          |          |          |          |          |
|----------|----------|----------|----------|----------|----------|----------|----------|----------|
| -0.09397 | 0.04237  | 0.17359  | 0.00016  | -0.35912 | 1.16E-15 | -0.11853 | 0.01036  | -0.30429 |
| -0.19778 | 1.67E-05 | -0.33479 | 1.08E-13 | -0.38582 | 5.03E-18 | -0.41022 | 2.21E-20 | -0.37526 |
| 0.014246 | 0.7588   | 0.044139 | 0.34122  | -0.33463 | 1.11E-13 | -0.21968 | 1.64E-06 | -0.30844 |
| -0.05409 | 0.24337  | -0.10313 | 0.02584  | -0.35379 | 3.24E-15 | -0.21201 | 3.80E-06 | -0.40772 |
| -0.09028 | 0.05122  | -0.12815 | 0.00555  | -0.28135 | 6.05E-10 | -0.17703 | 0.00012  | -0.33012 |
| -0.25181 | 3.47E-08 | -0.031   | 0.50397  | -0.48358 | 9.62E-29 | -0.26255 | 8.42E-09 | -0.45184 |
| 0.141225 | 0.00222  | 0.15567  | 0.00074  | 0.03531  | 0.44651  | 0.011703 | 0.80086  | -0.07625 |
| 0.095353 | 0.03942  | -0.02442 | 0.59867  | -0.08568 | 0.0643   | -0.19272 | 2.75E-05 | -0.19188 |
| -0.13001 | 0.00489  | -0.22188 | 1.28E-06 | -0.26601 | 5.26E-09 | -0.30838 | 9.55E-12 | -0.32939 |
| 0.008349 | 0.8572   | 0.09206  | 0.04678  | -0.27318 | 1.95E-09 | -0.10136 | 0.0285   | -0.33702 |
| -0.19013 | 3.54E-05 | -0.21142 | 4.05E-06 | -0.32789 | 3.63E-13 | -0.18285 | 7.06E-05 | -0.43817 |
| 0.019357 | 0.67651  | 0.253597 | 2.75E-08 | -0.28014 | 7.21E-10 | -0.01161 | 0.80249  | -0.30912 |
| -0.1377  | 0.00286  | -0.16224 | 0.00043  | -0.19877 | 1.51E-05 | -0.29746 | 5.38E-11 | -0.22943 |
| -0.03879 | 0.40299  | 0.156361 | 0.0007   | -0.18335 | 6.73E-05 | -0.02485 | 0.59226  | -0.19991 |
| -0.09245 | 0.04586  | -0.0975  | 0.03516  | -0.36357 | 4.86E-16 | -0.35868 | 1.26E-15 | -0.35416 |
| -0.25847 | 1.45E-08 | -0.11995 | 0.00947  | -0.54187 | 5.40E-37 | -0.25726 | 1.70E-08 | -0.48676 |
| -0.15974 | 0.00053  | -0.25271 | 3.08E-08 | -0.40647 | 5.25E-20 | -0.29314 | 1.05E-10 | -0.40295 |
| -0.15621 | 0.00071  | -0.07235 | 0.11845  | -0.50271 | 2.81E-31 | -0.20463 | 8.29E-06 | -0.48875 |
| -0.0023  | 0.96038  | 0.13218  | 0.00422  | -0.069   | 0.1365   | 0.15798  | 0.00061  | -0.22923 |
| 0.025176 | 0.58734  | -0.02672 | 0.56462  | -0.06014 | 0.19452  | -0.06321 | 0.17267  | 0.02464  |
| -0.02456 | 0.59647  | 0.085676 | 0.06433  | -0.00151 | 0.97398  | 0.054751 | 0.23765  | 0.053388 |
| -0.07899 | 0.08817  | -0.18637 | 5.07E-05 | -0.00942 | 0.83912  | -0.10882 | 0.01866  | 0.026411 |
| -0.00471 | 0.91912  | -0.05925 | 0.20118  | -0.04643 | 0.31669  | -0.05686 | 0.22003  | -0.01324 |
| -0.0612  | 0.18673  | -0.14177 | 0.00213  | -0.05448 | 0.24001  | -0.08905 | 0.05446  | 0.003122 |
| -0.06515 | 0.15986  | -0.08682 | 0.06084  | -0.09321 | 0.0441   | -0.08827 | 0.05664  | -0.04698 |
| -0.037   | 0.42508  | -0.11709 | 0.01133  | -0.07858 | 0.08985  | -0.13055 | 0.00472  | -0.02226 |
| -0.04146 | 0.37138  | -0.11769 | 0.01092  | -0.04997 | 0.28123  | -0.07056 | 0.12786  | -0.0346  |
| -0.01651 | 0.7219   | -0.11418 | 0.01355  | -0.0266  | 0.56644  | -0.07468 | 0.107    | 0.014485 |
| -0.03471 | 0.45432  | -0.13086 | 0.00462  | -0.05872 | 0.2053   | -0.0594  | 0.2001   | -0.01354 |
| -0.18616 | 5.17E-05 | -0.22408 | 9.99E-07 | -0.17272 | 0.00018  | -0.11166 | 0.01577  | -0.15892 |
| 0.087851 | 0.05782  | -0.03703 | 0.42467  | 0.133463 | 0.00386  | 0.052031 | 0.2618   | 0.172851 |
| 0.004282 | 0.92648  | -0.02391 | 0.60626  | -0.07546 | 0.10337  | -0.05673 | 0.22107  | -0.044   |
| -0.05468 | 0.23821  | -0.14142 | 0.00219  | -0.04138 | 0.37233  | -0.12116 | 0.00877  | 0.019797 |
| -0.04784 | 0.30223  | -0.08454 | 0.06796  | -0.09284 | 0.04493  | -0.08585 | 0.06377  | -0.04609 |
| -0.04179 | 0.36756  | -0.11713 | 0.0113   | -0.08045 | 0.08244  | -0.08217 | 0.07608  | -0.02198 |
| -0.08969 | 0.05276  | -0.10895 | 0.01852  | -0.11105 | 0.01635  | -0.11904 | 0.01003  | -0.06846 |
| -0.04323 | 0.35123  | -0.10728 | 0.0204   | -0.07376 | 0.11143  | -0.08176 | 0.07757  | -0.02671 |
| -0.04655 | 0.31543  | -0.14963 | 0.00118  | -0.12617 | 0.00633  | -0.14331 | 0.0019   | -0.12348 |
| -0.07359 | 0.11225  | -0.10424 | 0.02427  | -0.14716 | 0.00143  | -0.13355 | 0.00384  | -0.11808 |
| -0.03614 | 0.43583  | -0.0799  | 0.08457  | -0.02274 | 0.62396  | -0.03552 | 0.44383  | 0.0193   |
| -0.0244  | 0.59892  | -0.11379 | 0.01387  | -0.0615  | 0.1846   | -0.09675 | 0.0366   | 0.020829 |
| -0.08013 | 0.08369  | -0.14622 | 0.00153  | -0.15219 | 0.00097  | -0.17694 | 0.00012  | -0.08478 |
| -0.10048 | 0.02993  | -0.16419 | 0.00037  | -0.14734 | 0.00141  | -0.14573 | 0.00159  | -0.0824  |
| -0.03072 | 0.50779  | -0.04974 | 0.28346  | -0.06051 | 0.19182  | -0.03641 | 0.43252  | -0.03453 |
| 0.025367 | 0.58451  | -0.0501  | 0.27997  | -0.09459 | 0.04104  | -0.15501 | 0.00078  | -0.06083 |

|          |          |          |          |          |          |          |          |          |
|----------|----------|----------|----------|----------|----------|----------|----------|----------|
| 0.0246   | 0.59592  | 0.024196 | 0.60198  | 0.109528 | 0.0179   | 0.104149 | 0.0244   | 0.102598 |
| 0.031451 | 0.49776  | -0.06197 | 0.18125  | -0.06046 | 0.19211  | -0.05905 | 0.20273  | -0.03553 |
| 0.065108 | 0.16011  | -0.06988 | 0.13156  | -0.08774 | 0.05814  | -0.07692 | 0.09686  | -0.11125 |
| 0.015098 | 0.74487  | -0.01315 | 0.77685  | -0.04013 | 0.38687  | -0.04304 | 0.35334  | -0.01268 |
| -0.03854 | 0.40602  | -0.08253 | 0.07478  | -0.03667 | 0.42916  | -0.04467 | 0.33542  | 0.038308 |
| -0.06361 | 0.16995  | -0.15    | 0.00115  | -0.12841 | 0.00545  | -0.12441 | 0.00711  | -0.07908 |
| -0.0292  | 0.52903  | -0.08073 | 0.08139  | 0.109244 | 0.0182   | -0.00385 | 0.93392  | 0.164918 |
| -0.01095 | 0.8135   | -0.10396 | 0.02466  | -0.02549 | 0.58275  | -0.06914 | 0.13571  | 0.072052 |
| -0.21976 | 1.63E-06 | -0.24668 | 6.66E-08 | -0.27325 | 1.93E-09 | -0.26367 | 7.24E-09 | -0.23634 |
| 0.003258 | 0.94402  | 0.022637 | 0.62559  | -0.05838 | 0.20789  | -0.0521  | 0.26115  | 0.029947 |
| -0.01397 | 0.76334  | -0.01768 | 0.70311  | -0.03285 | 0.47879  | -0.06151 | 0.1845   | -0.01229 |
| -0.02712 | 0.55882  | -0.0545  | 0.23985  | -0.10028 | 0.03026  | -0.05134 | 0.26817  | -0.08021 |
| 0.044499 | 0.33729  | 0.027102 | 0.55908  | -0.01567 | 0.73554  | -0.03056 | 0.51009  | 0.041932 |
| 0.033546 | 0.46956  | 0.006364 | 0.8909   | -0.06481 | 0.16204  | -0.06883 | 0.13747  | -0.00877 |
| -0.06038 | 0.19271  | -0.11524 | 0.0127   | -0.10956 | 0.01786  | -0.09623 | 0.03763  | -0.06846 |
| -0.07287 | 0.11582  | -0.14965 | 0.00118  | -0.13558 | 0.00333  | -0.14388 | 0.00183  | -0.05615 |
| -0.02506 | 0.58906  | -0.06828 | 0.14067  | 0.002629 | 0.95481  | -0.04443 | 0.33806  | 0.043264 |
| -0.07336 | 0.11339  | -0.04753 | 0.30542  | 0.056138 | 0.22595  | 0.07271  | 0.11661  | 0.05824  |
| -0.03042 | 0.51192  | -0.06351 | 0.17061  | -0.06328 | 0.17221  | -0.04599 | 0.32135  | -0.01098 |
| -0.09402 | 0.04226  | -0.03606 | 0.43687  | -0.07296 | 0.11536  | -0.07759 | 0.09398  | -0.01386 |
| -0.04482 | 0.33379  | -0.06137 | 0.18555  | -0.05805 | 0.21052  | -0.04473 | 0.33478  | -0.02329 |
| -0.0293  | 0.5277   | -0.12468 | 0.00698  | -0.07169 | 0.12185  | -0.08116 | 0.07975  | -0.02513 |
| -0.06254 | 0.1773   | -0.12915 | 0.00519  | -0.05878 | 0.20481  | -0.06062 | 0.19101  | -0.03004 |
| -0.02063 | 0.65656  | -0.03975 | 0.39137  | -0.0006  | 0.98964  | -0.00595 | 0.89792  | 0.040359 |
| -0.08166 | 0.07793  | -0.14999 | 0.00115  | -0.07193 | 0.1206   | -0.11445 | 0.01333  | -0.02213 |
| -0.04263 | 0.35794  | -0.12941 | 0.0051   | -0.0443  | 0.33941  | -0.03083 | 0.50634  | 0.007008 |
| -0.02802 | 0.54584  | -0.08706 | 0.06011  | -0.02915 | 0.52974  | -0.02874 | 0.5356   | -0.01398 |
| 0.016432 | 0.72321  | 0.013256 | 0.7751   | -0.0732  | 0.11417  | -0.05903 | 0.20291  | -0.01264 |
| -0.12279 | 0.0079   | -0.16027 | 0.00051  | -0.19406 | 2.41E-05 | -0.16163 | 0.00045  | -0.15761 |
| -0.0999  | 0.03089  | -0.12239 | 0.0081   | -0.10144 | 0.02839  | -0.10836 | 0.01917  | -0.08123 |
| -0.20933 | 5.06E-06 | -0.17748 | 0.00012  | -0.1835  | 6.64E-05 | -0.12733 | 0.00586  | -0.09092 |
| -0.04913 | 0.28942  | -0.05504 | 0.23514  | -0.00931 | 0.84093  | -0.05312 | 0.25194  | 0.024842 |
| -0.07164 | 0.12211  | -0.14416 | 0.00179  | -0.10201 | 0.0275   | -0.13171 | 0.00436  | -0.01802 |
| 0.007962 | 0.86374  | -0.0131  | 0.77773  | 0.021982 | 0.63562  | 0.016573 | 0.72094  | 0.08663  |
| -0.09666 | 0.03679  | -0.16068 | 0.00049  | -0.12506 | 0.00681  | -0.12138 | 0.00865  | -0.0536  |
| -0.0807  | 0.08148  | -0.06597 | 0.15462  | 0.001272 | 0.97814  | -0.0541  | 0.24329  | 0.062243 |
| 0.024346 | 0.59973  | -0.07435 | 0.10858  | -0.0063  | 0.89202  | -0.05973 | 0.19759  | 0.010649 |
| 0.001014 | 0.98257  | -0.04522 | 0.3295   | 0.008299 | 0.85804  | -0.02019 | 0.66345  | 0.042563 |
| -0.0101  | 0.82764  | -0.15483 | 0.00079  | 0.080042 | 0.08401  | -0.03473 | 0.45408  | 0.070132 |
| 0.012358 | 0.78997  | 0.021086 | 0.64946  | -0.07884 | 0.08877  | -0.06468 | 0.16289  | 0.080113 |
| -0.05854 | 0.20671  | -0.08071 | 0.08145  | -0.00937 | 0.84003  | -0.04481 | 0.33389  | 0.036761 |
| 0.001515 | 0.97395  | -0.03921 | 0.3979   | -0.05014 | 0.27955  | -0.03661 | 0.42999  | -0.00874 |
| 0.065089 | 0.16023  | 0.011907 | 0.79746  | -0.08982 | 0.0524   | -0.07149 | 0.1229   | -0.05371 |
| 0.053321 | 0.25014  | -0.08554 | 0.06474  | -0.00196 | 0.96623  | -0.02171 | 0.63989  | 0.002743 |
| 0.054486 | 0.23993  | -0.06088 | 0.1891   | -0.08535 | 0.06535  | -0.08092 | 0.08066  | -0.05686 |

|          |          |          |          |          |          |          |          |          |
|----------|----------|----------|----------|----------|----------|----------|----------|----------|
| 0.038738 | 0.4036   | -0.02656 | 0.5669   | -0.0158  | 0.73352  | -0.03675 | 0.42818  | 0.046341 |
| -0.07229 | 0.11877  | -0.14621 | 0.00153  | -0.13258 | 0.0041   | -0.11858 | 0.01032  | -0.06948 |
| -0.07494 | 0.1058   | -0.11877 | 0.01021  | -0.08776 | 0.05807  | -0.08722 | 0.05966  | -0.0446  |
| 0.017738 | 0.70222  | -0.00245 | 0.95796  | -0.01715 | 0.71161  | -0.006   | 0.89716  | 0.00504  |
| 0.028803 | 0.53466  | -0.01106 | 0.81165  | -0.0001  | 0.99823  | -0.0033  | 0.94322  | 0.069444 |
| -0.1373  | 0.00295  | -0.05322 | 0.25108  | -0.29318 | 1.04E-10 | -0.23266 | 3.69E-07 | -0.17961 |
| -0.07951 | 0.08609  | -0.11128 | 0.01613  | -0.14673 | 0.00147  | -0.12309 | 0.00775  | -0.08271 |
| -0.06276 | 0.17576  | -0.07926 | 0.0871   | -0.09833 | 0.03364  | -0.09934 | 0.03185  | -0.001   |
| -0.1058  | 0.02221  | -0.17055 | 0.00021  | -0.12941 | 0.0051   | -0.15035 | 0.00112  | -0.06303 |
| -0.00371 | 0.93634  | -0.0626  | 0.17686  | 0.02922  | 0.52877  | 0.025261 | 0.58609  | 0.099077 |
| 0.010845 | 0.81518  | -0.01927 | 0.67788  | -0.07765 | 0.0937   | -0.0743  | 0.1088   | -0.03682 |
| -0.02713 | 0.55868  | -0.10546 | 0.02265  | 0.032436 | 0.48439  | -0.02512 | 0.58813  | 0.082274 |
| -0.08553 | 0.06478  | -0.13412 | 0.00369  | -0.09761 | 0.03497  | -0.10681 | 0.02096  | -0.06177 |
| -0.04275 | 0.35669  | -0.12837 | 0.00547  | -0.10698 | 0.02076  | -0.10936 | 0.01807  | -0.04195 |
| -0.0955  | 0.03911  | -0.21444 | 2.92E-06 | -0.15828 | 0.0006   | -0.18173 | 7.83E-05 | -0.11892 |
| 0.028896 | 0.53335  | -0.08892 | 0.05484  | -0.05606 | 0.22662  | -0.04385 | 0.34443  | -0.06106 |
| -0.10525 | 0.02292  | -0.12029 | 0.00927  | -0.16521 | 0.00034  | -0.14651 | 0.0015   | -0.10154 |
| -0.05637 | 0.22407  | -0.14164 | 0.00215  | -0.09142 | 0.04834  | -0.10823 | 0.01931  | -0.04872 |
| -0.09635 | 0.0374   | -0.04006 | 0.38778  | -0.16417 | 0.00037  | -0.14286 | 0.00197  | -0.1366  |
| -0.00167 | 0.97128  | -0.05827 | 0.20881  | -0.07969 | 0.08537  | -0.0787  | 0.08935  | -0.0709  |
| -0.01167 | 0.80142  | -0.03982 | 0.39061  | -0.03354 | 0.46963  | -0.03277 | 0.47989  | 0.014317 |
| 0.038308 | 0.40885  | -0.08954 | 0.05314  | -0.08579 | 0.06398  | -0.09401 | 0.0423   | -0.07571 |
| -0.08198 | 0.07677  | -0.08914 | 0.05423  | -0.21362 | 3.20E-06 | -0.20204 | 1.08E-05 | -0.1023  |
| -0.07074 | 0.12688  | -0.02287 | 0.62201  | -0.05351 | 0.24847  | -0.07382 | 0.11112  | 0.016069 |
| -0.11882 | 0.01017  | -0.15677 | 0.00067  | -0.14593 | 0.00157  | -0.11748 | 0.01106  | -0.08847 |
| -0.08535 | 0.06535  | -0.05234 | 0.25896  | -0.08414 | 0.06927  | -0.05436 | 0.24101  | -0.01527 |
| -0.0745  | 0.10787  | -0.13747 | 0.00291  | -0.09297 | 0.04464  | -0.12136 | 0.00865  | -0.04208 |
| -0.01025 | 0.82509  | -0.11361 | 0.01403  | -0.06955 | 0.13341  | -0.10951 | 0.01792  | -0.00678 |
| 0.021207 | 0.64759  | 0.017625 | 0.70402  | 0.027948 | 0.54687  | -0.03572 | 0.44131  | 0.152248 |
| 0.007688 | 0.8684   | 0.058766 | 0.20493  | -0.05038 | 0.27724  | -0.05606 | 0.22656  | 0.03023  |
| 0.103233 | 0.02569  | -0.04986 | 0.28224  | 0.006116 | 0.89514  | -0.03792 | 0.41365  | 0.083177 |
| 0.053489 | 0.24865  | -0.03498 | 0.45073  | 0.062727 | 0.17598  | -0.04004 | 0.38798  | 0.130612 |
| -0.01796 | 0.69867  | -0.08529 | 0.06553  | -0.05124 | 0.26909  | -0.10061 | 0.02972  | 0.010822 |
| -0.09743 | 0.03531  | -0.16574 | 0.00032  | -0.0554  | 0.23214  | -0.10274 | 0.02641  | 0.002377 |
| -0.06524 | 0.15926  | -0.11556 | 0.01246  | -0.11612 | 0.01203  | -0.09169 | 0.04767  | -0.06541 |
| -0.07498 | 0.10559  | -0.12957 | 0.00504  | -0.11337 | 0.01424  | -0.1079  | 0.01968  | -0.05935 |
| -0.05765 | 0.21369  | -0.02336 | 0.61455  | -0.12541 | 0.00666  | -0.07868 | 0.08944  | -0.0403  |
| -0.08365 | 0.07092  | -0.16585 | 0.00032  | -0.17878 | 0.0001   | -0.1778  | 0.00011  | -0.10765 |
| -0.01157 | 0.80315  | -0.04772 | 0.3035   | -0.1674  | 0.00028  | -0.17902 | 0.0001   | -0.02492 |
| -0.02366 | 0.61006  | -0.035   | 0.45055  | -0.04323 | 0.35123  | -0.06217 | 0.17987  | 0.009612 |
| -0.23644 | 2.35E-07 | -0.18711 | 4.73E-05 | -0.2012  | 1.18E-05 | -0.18386 | 6.42E-05 | -0.18127 |
| -0.07633 | 0.09945  | -0.155   | 0.00078  | 0.012264 | 0.79152  | -0.07332 | 0.11355  | 0.057763 |
| -0.08276 | 0.074    | -0.10617 | 0.02175  | -0.22078 | 1.45E-06 | -0.15708 | 0.00066  | -0.11746 |
| -0.02516 | 0.58765  | -0.06161 | 0.18379  | -0.03902 | 0.4002   | -0.02524 | 0.58635  | -0.03846 |
| -0.05452 | 0.23963  | -0.15528 | 0.00076  | -0.08842 | 0.05621  | -0.10025 | 0.0303   | -0.016   |

|          |          |          |          |          |          |          |          |          |
|----------|----------|----------|----------|----------|----------|----------|----------|----------|
| -0.0161  | 0.72865  | -0.11944 | 0.00978  | -0.02895 | 0.53258  | -0.10401 | 0.0246   | 0.056316 |
| -0.00399 | 0.93144  | -0.08177 | 0.0775   | -0.13216 | 0.00422  | -0.17127 | 0.0002   | 0.061372 |
| -0.00483 | 0.91701  | -0.1089  | 0.01857  | -0.0863  | 0.0624   | -0.17186 | 0.00019  | 0.049814 |
| -0.17419 | 0.00015  | -0.15123 | 0.00104  | -0.09678 | 0.03656  | -0.08015 | 0.0836   | 0.015866 |
| -0.05496 | 0.23587  | -0.03931 | 0.39675  | -0.05796 | 0.21124  | -0.09625 | 0.03759  | 0.000164 |
| 0.020944 | 0.65168  | -0.00526 | 0.90978  | -0.13171 | 0.00436  | -0.10515 | 0.02306  | -0.03076 |
| -0.01771 | 0.70259  | -0.03089 | 0.50549  | -0.03011 | 0.51622  | -0.03915 | 0.39863  | -0.01167 |
| 0.2557   | 2.09E-08 | -0.16523 | 0.00034  | -0.0611  | 0.18748  | -0.12282 | 0.00788  | -0.04097 |
| 0.126078 | 0.00637  | -0.20196 | 1.09E-05 | -0.31138 | 5.87E-12 | -0.17702 | 0.00012  | -0.25502 |
| -0.04661 | 0.31481  | -0.01384 | 0.76541  | -0.00985 | 0.83182  | -0.01023 | 0.82543  | 0.039717 |
| -0.01297 | 0.77982  | -0.1086  | 0.0189   | -0.08017 | 0.0835   | -0.07321 | 0.11414  | -0.0343  |
| -0.00292 | 0.94986  | -0.06    | 0.19557  | -0.06239 | 0.17833  | -0.07347 | 0.11282  | 0.008479 |
| -0.01573 | 0.73457  | -0.08832 | 0.0565   | -0.0662  | 0.15319  | -0.0592  | 0.20161  | -0.02779 |
| -0.06691 | 0.14883  | -0.10005 | 0.03063  | -0.03731 | 0.42114  | -0.08439 | 0.06846  | 0.015883 |
| -0.03343 | 0.47104  | -0.06178 | 0.18258  | -0.12284 | 0.00787  | -0.11168 | 0.01576  | -0.01669 |
| 0.015947 | 0.73106  | -0.03988 | 0.38992  | 0.024179 | 0.60224  | 0.01474  | 0.75071  | 0.052008 |
| -0.03254 | 0.48302  | -0.08778 | 0.05802  | -0.1138  | 0.01387  | -0.11739 | 0.01112  | -0.02105 |
| 0.049052 | 0.29014  | -0.00757 | 0.8704   | -0.00479 | 0.91773  | -0.08203 | 0.07659  | 0.172857 |
| -0.06627 | 0.15274  | -0.08498 | 0.06652  | -0.04724 | 0.30832  | -0.0341  | 0.46231  | 0.010313 |
| 0.078191 | 0.09146  | 0.039618 | 0.393    | -0.02067 | 0.65596  | -0.03666 | 0.42931  | 0.046782 |
| 0.013779 | 0.76648  | -0.09952 | 0.03153  | -0.00519 | 0.911    | -0.07791 | 0.09264  | 0.091906 |
| -0.0873  | 0.05941  | -0.19343 | 2.57E-05 | -0.15457 | 0.0008   | -0.18632 | 5.10E-05 | -0.09277 |
| -0.06948 | 0.13382  | -0.01289 | 0.78112  | -0.08137 | 0.07898  | -0.03717 | 0.42289  | -0.0792  |
| -0.01845 | 0.69093  | -0.0267  | 0.56492  | -0.00632 | 0.89167  | -0.08531 | 0.06547  | 0.040791 |
| -0.01221 | 0.79241  | -0.03436 | 0.45887  | 0.111564 | 0.01587  | 0.050879 | 0.27252  | 0.153864 |
| -0.07771 | 0.09349  | -0.18392 | 6.38E-05 | -0.13151 | 0.00442  | -0.18926 | 3.85E-05 | -0.05894 |
| 0.005173 | 0.91123  | -0.1015  | 0.02829  | -0.09849 | 0.03335  | -0.08342 | 0.07169  | -0.05011 |
| -0.09053 | 0.05057  | -0.01099 | 0.81271  | -0.1057  | 0.02234  | -0.0644  | 0.16472  | -0.0276  |
| 0.042688 | 0.35734  | -0.13511 | 0.00344  | 0.009256 | 0.84189  | -0.11376 | 0.0139   | 0.011361 |
| -0.12185 | 0.00839  | -0.14649 | 0.0015   | -0.19169 | 3.05E-05 | -0.10801 | 0.01956  | -0.10935 |
| -0.00197 | 0.96606  | -0.11673 | 0.01159  | 0.060726 | 0.1902   | -0.01858 | 0.68879  | 0.127835 |
| -0.06483 | 0.16193  | -0.13772 | 0.00286  | -0.15628 | 0.0007   | -0.06493 | 0.16127  | -0.11086 |
| 0.003567 | 0.93873  | -0.05473 | 0.23785  | -0.00365 | 0.93726  | -0.00703 | 0.87957  | 0.036929 |
| 0.052868 | 0.25419  | -0.09242 | 0.04592  | -0.03286 | 0.47871  | -0.03656 | 0.43059  | -0.01059 |
| -0.08169 | 0.0778   | -0.184   | 6.34E-05 | -0.07976 | 0.0851   | -0.13352 | 0.00385  | -0.00886 |
| 0.059788 | 0.19715  | -0.02728 | 0.55653  | 0.031284 | 0.50005  | -0.00238 | 0.95917  | 0.117264 |
| 0.031323 | 0.49952  | -0.10456 | 0.02384  | -0.09029 | 0.05119  | -0.0733  | 0.11367  | -0.11627 |
| -0.13651 | 0.00312  | -0.18273 | 7.13E-05 | -0.15882 | 0.00057  | -0.16034 | 0.0005   | -0.10404 |
| -0.05698 | 0.21904  | -0.13227 | 0.00419  | -0.06703 | 0.1481   | -0.11028 | 0.01713  | -0.00621 |
| -0.01399 | 0.76308  | -0.0595  | 0.1993   | -0.052   | 0.26206  | -0.08289 | 0.07352  | 0.032383 |
| -0.07499 | 0.10554  | -0.14163 | 0.00216  | -0.13176 | 0.00434  | -0.11332 | 0.01428  | -0.08006 |
| 0.021905 | 0.63682  | -0.03258 | 0.48251  | 0.055278 | 0.23316  | 0.01973  | 0.67064  | 0.074065 |
| -0.05598 | 0.22727  | -0.12507 | 0.00681  | 0.024711 | 0.59427  | -0.01819 | 0.69494  | 0.076284 |
| -0.04869 | 0.29369  | -0.12722 | 0.00591  | -0.05312 | 0.2519   | -0.05658 | 0.22233  | -0.02216 |
| -0.00947 | 0.8383   | -0.05647 | 0.22323  | 0.029458 | 0.52542  | -0.00123 | 0.97884  | 0.121442 |

|          |          |          |          |          |          |          |          |          |
|----------|----------|----------|----------|----------|----------|----------|----------|----------|
| 0.04562  | 0.32525  | 0.025086 | 0.58869  | -0.01575 | 0.73432  | 0.036713 | 0.42864  | 0.030782 |
| -0.0984  | 0.03351  | -0.10734 | 0.02033  | -0.05936 | 0.20037  | -0.0495  | 0.2858   | -0.00476 |
| -0.02601 | 0.57504  | -0.06948 | 0.13379  | -0.09025 | 0.05127  | -0.06417 | 0.1662   | -0.05654 |
| -0.02945 | 0.52559  | -0.18382 | 6.44E-05 | -0.21636 | 2.37E-06 | -0.20631 | 6.96E-06 | -0.17703 |
| 0.01119  | 0.80942  | -0.09062 | 0.05033  | -0.15038 | 0.00112  | -0.08771 | 0.05822  | -0.14075 |
| -0.03201 | 0.49016  | -0.00269 | 0.95373  | -0.08284 | 0.07371  | -0.06796 | 0.14255  | -0.07078 |
| -0.09659 | 0.03692  | -0.12915 | 0.00519  | -0.13665 | 0.00309  | -0.11448 | 0.01331  | -0.08466 |
| 0.016462 | 0.72272  | -0.0502  | 0.27896  | -0.01691 | 0.71552  | -0.08614 | 0.06289  | 0.056759 |
| -0.01806 | 0.69701  | -0.07967 | 0.08547  | -0.01775 | 0.70207  | -0.03098 | 0.50416  | -0.01006 |
| -0.01447 | 0.75505  | -0.10249 | 0.02678  | -0.10395 | 0.02467  | -0.08616 | 0.06282  | -0.06561 |
| 0.025584 | 0.5813   | -0.01149 | 0.80443  | -0.03025 | 0.51433  | -0.08206 | 0.07648  | 0.035797 |
| 0.005075 | 0.9129   | -0.05769 | 0.21335  | -0.03682 | 0.4273   | -0.03597 | 0.43805  | 0.03594  |
| -0.00057 | 0.99028  | -0.06436 | 0.16499  | -0.00892 | 0.84758  | -0.04058 | 0.38156  | 0.014816 |
| -0.0926  | 0.04549  | -0.17951 | 9.60E-05 | -0.1699  | 0.00023  | -0.18651 | 5.01E-05 | -0.09611 |
| -0.00465 | 0.9201   | 0.005074 | 0.91292  | -0.03339 | 0.47167  | -0.04121 | 0.3743   | 0.04054  |
| -0.08242 | 0.07518  | -0.16865 | 0.00025  | -0.12609 | 0.00636  | -0.12268 | 0.00795  | -0.04583 |
| -0.0232  | 0.61706  | -0.10223 | 0.02717  | -0.00768 | 0.86847  | -0.08756 | 0.05864  | 0.057719 |
| -0.08945 | 0.05341  | -0.14641 | 0.00151  | -0.13332 | 0.0039   | -0.13758 | 0.00289  | -0.0918  |
| 0.042535 | 0.35907  | 0.085894 | 0.06365  | 0.00703  | 0.87956  | -0.01754 | 0.70537  | 0.059695 |
| -0.08431 | 0.0687   | -0.22153 | 1.33E-06 | -0.17595 | 0.00013  | -0.19689 | 1.82E-05 | -0.11133 |
| -0.07845 | 0.09037  | -0.18899 | 3.95E-05 | -0.14508 | 0.00167  | -0.17398 | 0.00016  | -0.07504 |
| -0.08532 | 0.06546  | -0.18495 | 5.80E-05 | -0.17515 | 0.00014  | -0.17815 | 0.00011  | -0.12146 |
| 0.011287 | 0.80781  | -0.09309 | 0.04436  | -0.00935 | 0.84036  | -0.06688 | 0.14902  | 0.077247 |
| -0.0656  | 0.15695  | -0.09081 | 0.04985  | -0.07833 | 0.09087  | -0.08773 | 0.05817  | -0.00514 |
| -0.13031 | 0.00479  | -0.24213 | 1.17E-07 | -0.2071  | 6.41E-06 | -0.21446 | 2.92E-06 | -0.16402 |
| -0.05527 | 0.2332   | -0.06076 | 0.18996  | -0.03197 | 0.49068  | -0.0427  | 0.35719  | 0.042771 |
| 0.031107 | 0.50248  | -0.06935 | 0.13453  | -0.03911 | 0.3991   | -0.05926 | 0.20114  | 0.030087 |
| -0.03916 | 0.39854  | -0.08808 | 0.05717  | 0.023541 | 0.61185  | -0.03303 | 0.47643  | 0.105879 |
| -0.0164  | 0.7237   | -0.13421 | 0.00367  | 0.029075 | 0.53081  | 0.025623 | 0.58073  | 0.002806 |
| 0.031638 | 0.49521  | -0.00582 | 0.90014  | 0.056494 | 0.22302  | 0.010733 | 0.81705  | 0.181101 |
| 0.056115 | 0.22614  | 0.014142 | 0.76051  | -0.05805 | 0.21048  | 0.03769  | 0.41645  | -0.06535 |
| -0.25133 | 3.68E-08 | -0.26149 | 9.70E-09 | -0.20686 | 6.57E-06 | -0.1421  | 0.00208  | -0.14831 |
| -0.04162 | 0.36951  | -0.11426 | 0.01349  | -0.06551 | 0.1575   | -0.05689 | 0.21982  | -0.05225 |
| -0.0501  | 0.27995  | -0.18704 | 4.76E-05 | -0.13035 | 0.00478  | -0.17313 | 0.00017  | -0.08029 |
| 0.031132 | 0.50214  | -0.10232 | 0.02703  | -0.08539 | 0.06522  | -0.05923 | 0.2014   | -0.06194 |
| -0.02442 | 0.59861  | -0.06949 | 0.13377  | 0.035436 | 0.44489  | -0.03946 | 0.39485  | 0.099423 |
| -0.09781 | 0.03458  | -0.13208 | 0.00425  | -0.00802 | 0.86271  | -0.08803 | 0.0573   | 0.069043 |
| -0.01565 | 0.73593  | 0.049499 | 0.28576  | -0.0834  | 0.07176  | -0.09046 | 0.05074  | -0.02141 |
| -0.00169 | 0.97094  | 0.017992 | 0.69816  | -0.09108 | 0.04918  | -0.0837  | 0.07075  | -0.03224 |
| 0.005141 | 0.91177  | 0.104561 | 0.02384  | 0.000237 | 0.99592  | -0.0152  | 0.74327  | 0.030203 |
| -0.02328 | 0.61576  | -0.04709 | 0.30985  | 0.096491 | 0.03712  | 0.016417 | 0.72345  | 0.111004 |
| -0.06307 | 0.17362  | -0.06197 | 0.18125  | -0.06135 | 0.18568  | -0.05156 | 0.26617  | -0.03128 |
| -0.04782 | 0.30239  | -0.10703 | 0.0207   | -0.0539  | 0.24505  | -0.07343 | 0.11305  | -0.01146 |
| 0.059118 | 0.20222  | -0.03525 | 0.44732  | 0.078202 | 0.09141  | -0.02943 | 0.52583  | 0.082229 |
| -0.06256 | 0.17712  | -0.01206 | 0.79485  | -0.02227 | 0.63116  | -0.03757 | 0.41798  | -0.00104 |



|          |         |          |          |          |          |          |          |          |
|----------|---------|----------|----------|----------|----------|----------|----------|----------|
| -0.08153 | 0.0784  | -0.11575 | 0.01231  | -0.09802 | 0.03421  | -0.10746 | 0.02019  | -0.02985 |
| 0.00864  | 0.85228 | -0.12016 | 0.00935  | -0.0143  | 0.75797  | -0.0867  | 0.0612   | -0.0432  |
| -0.1297  | 0.005   | -0.2203  | 1.53E-06 | -0.23262 | 3.71E-07 | -0.22045 | 1.51E-06 | -0.10856 |
| 0.032647 | 0.48155 | -0.01729 | 0.70943  | -0.01635 | 0.72459  | -0.10391 | 0.02474  | 0.101333 |
| -0.08504 | 0.06633 | -0.1865  | 5.01E-05 | -0.10816 | 0.01938  | -0.14574 | 0.00159  | -0.06742 |
| -0.0256  | 0.58108 | -0.11852 | 0.01036  | -0.0826  | 0.07455  | -0.07928 | 0.08703  | -0.04193 |
| -0.13631 | 0.00316 | -0.23036 | 4.84E-07 | -0.19289 | 2.71E-05 | -0.1792  | 9.87E-05 | -0.17254 |
| 0.142867 | 0.00197 | 0.036429 | 0.43223  | 0.121975 | 0.00832  | 0.020955 | 0.6515   | 0.190212 |
| -0.05131 | 0.26845 | -0.07437 | 0.10848  | -0.02114 | 0.64859  | -0.09626 | 0.03757  | 0.047192 |
| -0.01304 | 0.77865 | -0.08256 | 0.07469  | -0.07965 | 0.08556  | -0.09287 | 0.04487  | -0.04322 |
| -0.03663 | 0.42973 | -0.06914 | 0.13575  | -0.00816 | 0.86041  | -0.03228 | 0.48648  | 0.085605 |
| -0.05553 | 0.23104 | -0.00791 | 0.86457  | -0.07976 | 0.08512  | -0.05281 | 0.25471  | 0.012017 |
| -0.06298 | 0.17424 | -0.17812 | 0.00011  | -0.16576 | 0.00032  | -0.15015 | 0.00114  | -0.11077 |
| -0.05366 | 0.24714 | -0.09016 | 0.05153  | -0.04979 | 0.2829   | -0.06996 | 0.13114  | -0.01174 |
| -0.11088 | 0.01652 | -0.08732 | 0.05935  | -0.10085 | 0.02933  | -0.06738 | 0.14596  | -0.0484  |
| -0.15522 | 0.00076 | -0.16673 | 0.0003   | -0.04126 | 0.37368  | -0.00788 | 0.86511  | -0.04577 |
| -0.02087 | 0.65283 | -0.1045  | 0.02392  | -0.03919 | 0.39812  | -0.08    | 0.08417  | -0.07636 |
| -0.03853 | 0.40619 | -0.12939 | 0.0051   | -0.07038 | 0.12885  | -0.10825 | 0.01928  | -0.10074 |
| -0.08512 | 0.06607 | -0.18186 | 7.74E-05 | -0.16961 | 0.00023  | -0.18235 | 7.39E-05 | -0.11658 |
| -0.10125 | 0.02868 | -0.18209 | 7.57E-05 | -0.18088 | 8.46E-05 | -0.19035 | 3.47E-05 | -0.10457 |
| -0.11543 | 0.01255 | -0.20572 | 7.41E-06 | -0.1784  | 0.00011  | -0.21185 | 3.87E-06 | -0.10277 |
| -0.08053 | 0.08215 | -0.14622 | 0.00153  | -0.1268  | 0.00607  | -0.14306 | 0.00194  | -0.04227 |
| -0.05416 | 0.24278 | -0.13328 | 0.00391  | -0.13575 | 0.00329  | -0.1513  | 0.00104  | -0.06259 |
| -0.09568 | 0.03874 | -0.14416 | 0.00179  | -0.1118  | 0.01565  | -0.12859 | 0.00539  | -0.04315 |
| -0.09556 | 0.03899 | -0.19709 | 1.79E-05 | -0.16159 | 0.00046  | -0.20084 | 1.22E-05 | -0.08438 |
| -0.09334 | 0.04379 | -0.20583 | 7.32E-06 | -0.18884 | 4.01E-05 | -0.20417 | 8.70E-06 | -0.09757 |
| -0.07456 | 0.10759 | -0.14319 | 0.00192  | -0.09273 | 0.04519  | -0.13747 | 0.00291  | 0.000131 |
| -0.0492  | 0.28864 | -0.1194  | 0.00981  | -0.08699 | 0.06033  | -0.10813 | 0.01942  | -0.03959 |
| -0.0865  | 0.06179 | -0.15382 | 0.00085  | -0.1071  | 0.02062  | -0.11505 | 0.01285  | -0.05547 |
| -0.028   | 0.54618 | -0.13195 | 0.00428  | -0.07756 | 0.09409  | -0.09266 | 0.04537  | -0.04813 |
| -0.00601 | 0.89685 | -0.0666  | 0.15075  | -0.00694 | 0.88106  | -0.03309 | 0.47566  | 0.014247 |
| -0.05769 | 0.21337 | -0.11537 | 0.0126   | -0.06719 | 0.14713  | -0.09718 | 0.03579  | 0.032733 |
| -0.0251  | 0.5885  | -0.15076 | 0.00108  | -0.10674 | 0.02105  | -0.13423 | 0.00366  | -0.05928 |
| -0.00375 | 0.93565 | -0.16533 | 0.00033  | -0.19799 | 1.63E-05 | -0.16744 | 0.00028  | -0.09594 |
| -0.01837 | 0.69216 | -0.13016 | 0.00484  | -0.09312 | 0.0443   | -0.10738 | 0.02029  | -0.04929 |
| -0.06999 | 0.13094 | -0.13095 | 0.00459  | -0.10967 | 0.01775  | -0.11565 | 0.01239  | -0.05175 |
| -0.08687 | 0.06067 | -0.172   | 0.00019  | -0.18154 | 7.97E-05 | -0.20059 | 1.26E-05 | -0.11831 |
| -0.07451 | 0.1078  | -0.16653 | 0.0003   | -0.08938 | 0.05357  | -0.13294 | 0.004    | -0.05634 |
| 0.126317 | 0.00627 | -0.00849 | 0.85486  | 0.00213  | 0.96339  | -0.03722 | 0.42229  | 0.054192 |
| -0.02958 | 0.52369 | -0.07368 | 0.1118   | -0.10545 | 0.02266  | -0.06818 | 0.14126  | -0.07126 |
| 0.077607 | 0.09391 | 0.012044 | 0.79519  | 0.026657 | 0.56555  | 0.047602 | 0.30465  | -0.00297 |
| -0.0369  | 0.42626 | -0.09651 | 0.03708  | -0.06046 | 0.19217  | -0.10083 | 0.02935  | -0.01304 |
| -0.04978 | 0.28305 | -0.14936 | 0.00121  | -0.13156 | 0.0044   | -0.14058 | 0.00233  | -0.10437 |
| -0.04527 | 0.32893 | -0.07452 | 0.10777  | -0.06057 | 0.19132  | -0.08438 | 0.06848  | 0.004196 |
| 0.006382 | 0.8906  | -0.11343 | 0.01419  | -0.11095 | 0.01646  | -0.11912 | 0.00998  | -0.07909 |

|          |          |          |          |          |          |          |          |          |
|----------|----------|----------|----------|----------|----------|----------|----------|----------|
| 0.19053  | 3.41E-05 | -0.07675 | 0.0976   | -0.05236 | 0.25879  | -0.10306 | 0.02594  | -0.04132 |
| -0.02591 | 0.5765   | -0.10132 | 0.02858  | -0.04807 | 0.29989  | -0.06475 | 0.16245  | 0.000443 |
| 0.05189  | 0.26309  | -0.03295 | 0.47751  | 0.010907 | 0.81415  | 0.034887 | 0.45198  | 0.028891 |
| 0.004765 | 0.9182   | -0.07561 | 0.10269  | -0.00894 | 0.84729  | -0.06008 | 0.19498  | 0.043365 |
| -0.02471 | 0.5943   | -0.07773 | 0.09337  | -0.08945 | 0.0534   | -0.06241 | 0.17817  | -0.04431 |
| -0.03221 | 0.4875   | -0.08641 | 0.06206  | -0.08574 | 0.06413  | -0.0741  | 0.10977  | -0.03406 |
| -0.06046 | 0.19212  | -0.19347 | 2.56E-05 | -0.07166 | 0.12198  | -0.16584 | 0.00032  | -0.07048 |
| -0.03828 | 0.40921  | -0.11668 | 0.01163  | -0.09133 | 0.04856  | -0.12106 | 0.00883  | -0.06461 |
| -0.01853 | 0.68953  | -0.06768 | 0.14421  | -0.10152 | 0.02827  | -0.0694  | 0.13423  | -0.08768 |
| -0.06264 | 0.17661  | -0.13655 | 0.00311  | -0.1323  | 0.00418  | -0.12689 | 0.00603  | -0.07565 |
| -0.00194 | 0.96672  | -0.07126 | 0.12409  | -0.08307 | 0.07292  | -0.07852 | 0.0901   | -0.04656 |
| -0.04345 | 0.34876  | -0.10518 | 0.02302  | -0.00211 | 0.96381  | -0.04742 | 0.30652  | 0.048462 |
| 0.020976 | 0.65117  | -0.03147 | 0.49752  | 0.033335 | 0.47236  | -0.03459 | 0.45582  | 0.081554 |
| -0.02187 | 0.63738  | -0.05144 | 0.26724  | -0.03889 | 0.40177  | -0.046   | 0.3212   | 0.020466 |
| -0.00976 | 0.83342  | -0.04481 | 0.33393  | -0.00031 | 0.99461  | -0.04177 | 0.36779  | 0.059706 |
| -0.14479 | 0.00171  | -0.15302 | 0.00091  | -0.19364 | 2.52E-05 | -0.14119 | 0.00223  | -0.16142 |
| -0.09387 | 0.04261  | -0.14316 | 0.00193  | -0.12517 | 0.00676  | -0.16696 | 0.00029  | -0.05756 |
| 0.009027 | 0.84574  | -0.04024 | 0.38556  | -0.01291 | 0.78087  | -0.06177 | 0.18266  | 0.036523 |
| 0.01908  | 0.68088  | 0.001188 | 0.97957  | -0.01736 | 0.70821  | 0.003526 | 0.93942  | -0.01146 |
| -0.02359 | 0.61104  | -0.09127 | 0.04871  | -0.08311 | 0.07275  | -0.08006 | 0.08394  | -0.03739 |
| -0.0264  | 0.56925  | -0.09515 | 0.03984  | -0.08768 | 0.0583   | -0.08946 | 0.05336  | -0.08244 |
| -0.10903 | 0.01843  | -0.28843 | 2.13E-10 | 0.01726  | 0.70987  | -0.07302 | 0.11508  | 0.021037 |
| 0.076472 | 0.09883  | 0.002916 | 0.94989  | 0.068266 | 0.14075  | 0.028959 | 0.53245  | 0.09999  |
| -0.10499 | 0.02327  | -0.22814 | 6.27E-07 | -0.16068 | 0.00049  | -0.19017 | 3.53E-05 | -0.09791 |
| -0.04562 | 0.32527  | -0.09647 | 0.03716  | -0.04036 | 0.38415  | -0.09107 | 0.04921  | 0.025276 |
| -0.03443 | 0.45795  | -0.03935 | 0.39617  | -0.00517 | 0.91123  | -0.02104 | 0.65024  | 0.043883 |
| -0.0476  | 0.30468  | -0.12254 | 0.00802  | -0.10367 | 0.02507  | -0.10588 | 0.02211  | -0.05121 |
| -0.09828 | 0.03372  | -0.10399 | 0.02462  | -0.14786 | 0.00135  | -0.05716 | 0.21764  | -0.03106 |
| -0.06288 | 0.17494  | -0.10862 | 0.01888  | -0.0683  | 0.14055  | -0.07683 | 0.09727  | -0.02674 |
| -0.08374 | 0.07061  | -0.15613 | 0.00071  | -0.07818 | 0.09149  | -0.15054 | 0.0011   | -0.00974 |
| -0.0583  | 0.20859  | -0.14188 | 0.00212  | -0.10295 | 0.0261   | -0.1222  | 0.0082   | -0.06877 |
| -0.10213 | 0.02732  | -0.04753 | 0.30541  | -0.15318 | 0.0009   | -0.11653 | 0.01173  | -0.09621 |
| 0.10183  | 0.02778  | 0.023784 | 0.60818  | 0.114571 | 0.01323  | 0.027679 | 0.55074  | 0.214139 |
| -0.01547 | 0.73877  | -0.08042 | 0.08257  | 0.017738 | 0.70222  | 0.007746 | 0.86741  | 0.004647 |
| -0.07343 | 0.11301  | -0.12099 | 0.00887  | -0.12508 | 0.0068   | -0.09197 | 0.047    | -0.07852 |
| 0.003148 | 0.94591  | -0.03356 | 0.46936  | -0.00594 | 0.89809  | -0.01826 | 0.69392  | 0.03634  |
| -0.04779 | 0.30273  | -0.11105 | 0.01636  | -0.13558 | 0.00333  | -0.13847 | 0.00271  | -0.03107 |
| -0.01278 | 0.78302  | -0.03926 | 0.39735  | -0.07264 | 0.11696  | -0.07509 | 0.10508  | -0.0004  |
| -0.01838 | 0.69197  | -0.09776 | 0.03468  | -0.02656 | 0.56697  | -0.06832 | 0.14045  | 0.001127 |
| -0.08577 | 0.06402  | -0.14932 | 0.00121  | -0.13026 | 0.00481  | -0.12769 | 0.00572  | -0.07561 |
| -0.06769 | 0.14417  | -0.09563 | 0.03885  | -0.13452 | 0.00359  | -0.10504 | 0.0232   | -0.08333 |
| 0.012036 | 0.79531  | -0.03264 | 0.48162  | -0.03454 | 0.45646  | -0.06397 | 0.16754  | -0.01018 |
| -0.04961 | 0.28463  | -0.09602 | 0.03806  | -0.08766 | 0.05838  | -0.07414 | 0.10958  | -0.04019 |
| -0.02706 | 0.55974  | -0.15437 | 0.00082  | -0.10178 | 0.02785  | -0.07325 | 0.11394  | -0.05818 |
| -0.08587 | 0.06372  | -0.02675 | 0.56419  | -0.095   | 0.04016  | -0.03615 | 0.43578  | -0.0437  |

|          |          |          |          |          |          |          |          |          |
|----------|----------|----------|----------|----------|----------|----------|----------|----------|
| -0.02041 | 0.66002  | -0.08536 | 0.06533  | -0.06091 | 0.18886  | -0.09878 | 0.03283  | -0.03423 |
| -0.08209 | 0.07636  | -0.06417 | 0.16625  | -0.14158 | 0.00216  | -0.13162 | 0.00438  | -0.05167 |
| -0.12124 | 0.00872  | -0.14237 | 0.00204  | -0.16929 | 0.00024  | -0.14814 | 0.00133  | -0.14792 |
| 0.06215  | 0.17999  | 0.080629 | 0.08176  | 0.04697  | 0.31112  | -0.00111 | 0.98093  | 0.060235 |
| 0.191306 | 3.16E-05 | -0.01688 | 0.71604  | 0.017981 | 0.69833  | -0.00849 | 0.85483  | 0.11319  |
| -0.0436  | 0.34712  | -0.03425 | 0.46027  | -0.06587 | 0.15528  | -0.09903 | 0.0324   | 0.017462 |
| -0.04686 | 0.31226  | -0.08408 | 0.06947  | -0.0812  | 0.07962  | -0.0996  | 0.03141  | 0.00588  |
| -0.06321 | 0.17266  | -0.02378 | 0.60817  | -0.18172 | 7.84E-05 | -0.00366 | 0.93711  | -0.12102 |
| -0.0928  | 0.04504  | -0.11999 | 0.00944  | -0.1005  | 0.0299   | -0.12415 | 0.00723  | -0.04937 |
| -0.12299 | 0.00779  | -0.11917 | 0.00995  | -0.1226  | 0.00799  | -0.09495 | 0.04026  | -0.05058 |
| -0.05997 | 0.19577  | -0.12244 | 0.00808  | -0.12269 | 0.00795  | -0.09191 | 0.04714  | -0.08907 |
| 0.02347  | 0.61293  | 0.07157  | 0.12247  | -0.0042  | 0.92785  | 0.013825 | 0.76573  | 0.092768 |
| -0.00315 | 0.94588  | -0.01352 | 0.77072  | -0.0502  | 0.27902  | -0.06232 | 0.17878  | 0.022473 |
| 0.000984 | 0.98309  | -0.0997  | 0.03124  | -0.08323 | 0.07236  | -0.08499 | 0.06649  | -0.0622  |
| 0.017196 | 0.7109   | -0.02573 | 0.57913  | -0.06715 | 0.14738  | -0.08486 | 0.06692  | -0.03604 |
| -0.03137 | 0.49883  | -0.13381 | 0.00377  | 0.010113 | 0.82746  | -0.07278 | 0.11629  | 0.067524 |
| -0.03816 | 0.41063  | -0.11024 | 0.01717  | 0.05609  | 0.22635  | -0.03845 | 0.40712  | 0.127116 |
| -0.09651 | 0.03707  | -0.13194 | 0.00429  | -0.10549 | 0.02262  | -0.14579 | 0.00158  | -0.03323 |
| -0.08364 | 0.07095  | -0.17783 | 0.00011  | -0.13772 | 0.00286  | -0.16127 | 0.00047  | -0.07123 |
| -0.06476 | 0.16235  | -0.1541  | 0.00083  | -0.14796 | 0.00134  | -0.18233 | 7.40E-05 | -0.05943 |
| -0.06012 | 0.19466  | -0.15281 | 0.00092  | -0.12828 | 0.0055   | -0.16067 | 0.00049  | -0.06897 |
| 0.013529 | 0.7706   | 0.009619 | 0.83577  | 0.047659 | 0.30407  | -0.01711 | 0.71233  | 0.094164 |
| -0.03775 | 0.41565  | -0.17292 | 0.00017  | -0.14692 | 0.00145  | -0.15428 | 0.00082  | -0.08129 |
| 0.00499  | 0.91436  | -0.0678  | 0.14348  | -0.07325 | 0.11392  | -0.0526  | 0.25661  | -0.03943 |
| 0.012637 | 0.78534  | -0.07598 | 0.10102  | -0.01875 | 0.68609  | -0.04362 | 0.3469   | 0.01801  |
| -0.02983 | 0.52018  | -0.13909 | 0.00259  | -0.10815 | 0.0194   | -0.12555 | 0.00659  | -0.0413  |
| -0.06158 | 0.18404  | -0.15986 | 0.00052  | -0.14013 | 0.0024   | -0.14602 | 0.00156  | -0.08599 |
| 0.018009 | 0.69789  | -0.03015 | 0.51579  | 0.006616 | 0.88661  | -0.0106  | 0.81935  | 0.023515 |
| -0.09226 | 0.04631  | -0.13165 | 0.00438  | -0.12849 | 0.00542  | -0.1302  | 0.00483  | -0.06881 |
| -0.09024 | 0.05132  | -0.15566 | 0.00074  | -0.11217 | 0.0153   | -0.14594 | 0.00157  | -0.04299 |
| -0.07969 | 0.08539  | -0.14083 | 0.00228  | -0.11082 | 0.01658  | -0.1248  | 0.00693  | -0.04834 |
| -0.06692 | 0.14876  | -0.14019 | 0.00239  | -0.11333 | 0.01427  | -0.11714 | 0.0113   | -0.05964 |
| -0.034   | 0.46351  | -0.14105 | 0.00225  | -0.10395 | 0.02467  | -0.11781 | 0.01084  | -0.05751 |
| -0.02543 | 0.58357  | -0.07845 | 0.0904   | -0.03319 | 0.47436  | -0.04237 | 0.36099  | 0.036291 |
| -0.01847 | 0.69063  | -0.08232 | 0.07552  | -0.03449 | 0.45715  | -0.06584 | 0.15543  | 0.022799 |
| -0.07413 | 0.10965  | -0.11573 | 0.01232  | -0.05115 | 0.26995  | -0.07339 | 0.11324  | -0.0264  |
| -0.02204 | 0.63466  | -0.11561 | 0.01242  | -0.15446 | 0.00081  | -0.10522 | 0.02297  | -0.02577 |
| -0.00073 | 0.98739  | -0.1256  | 0.00657  | -0.07452 | 0.10777  | -0.10312 | 0.02585  | -0.03654 |
| -0.06855 | 0.13912  | -0.103   | 0.02603  | -0.05977 | 0.1973   | -0.05675 | 0.22091  | -0.0374  |
| -0.04424 | 0.34009  | -0.12353 | 0.00753  | -0.10607 | 0.02188  | -0.12573 | 0.00652  | -0.0568  |
| -0.02848 | 0.53922  | -0.13495 | 0.00348  | -0.13317 | 0.00394  | -0.11859 | 0.01032  | -0.10333 |
| -0.05324 | 0.25089  | -0.14808 | 0.00133  | -0.09941 | 0.03173  | -0.12598 | 0.00641  | -0.04047 |
| -0.01632 | 0.72501  | -0.11715 | 0.01129  | -0.10504 | 0.0232   | -0.11013 | 0.01727  | -0.03994 |
| -0.04144 | 0.37159  | -0.13846 | 0.00271  | -0.08558 | 0.06462  | -0.1501  | 0.00114  | 0.005399 |
| -0.10794 | 0.01964  | -0.22744 | 6.80E-07 | -0.17988 | 9.28E-05 | -0.19875 | 1.51E-05 | -0.11867 |

|          |         |          |          |          |         |          |          |          |
|----------|---------|----------|----------|----------|---------|----------|----------|----------|
| -0.03914 | 0.39868 | -0.08235 | 0.07542  | -0.06771 | 0.144   | -0.09318 | 0.04416  | -0.01689 |
| -0.0465  | 0.31595 | -0.15248 | 0.00095  | -0.07412 | 0.10969 | -0.14945 | 0.0012   | 0.016665 |
| -0.05335 | 0.24985 | -0.19004 | 3.57E-05 | -0.1472  | 0.00142 | -0.17203 | 0.00019  | -0.07435 |
| -0.10319 | 0.02575 | -0.18021 | 9.00E-05 | -0.16482 | 0.00035 | -0.17468 | 0.00015  | -0.09832 |
| -0.03412 | 0.46193 | -0.14162 | 0.00216  | -0.11658 | 0.01169 | -0.12894 | 0.00526  | -0.0521  |
| -0.0297  | 0.52202 | -0.15852 | 0.00059  | -0.13501 | 0.00347 | -0.14359 | 0.00187  | -0.06987 |
| -0.07454 | 0.10769 | -0.14978 | 0.00117  | -0.11685 | 0.0115  | -0.14506 | 0.00167  | -0.03553 |
| -0.01983 | 0.66901 | -0.03786 | 0.41431  | -0.05303 | 0.25272 | -0.06334 | 0.17179  | 0.040637 |
| -0.05823 | 0.20913 | -0.09826 | 0.03376  | -0.15112 | 0.00105 | -0.14203 | 0.00209  | -0.08504 |
| -0.00638 | 0.89069 | -0.08256 | 0.07469  | 0.006671 | 0.88568 | -0.02291 | 0.62147  | 0.027634 |
| 0.016912 | 0.71547 | -0.11121 | 0.01621  | -0.04861 | 0.29456 | -0.08044 | 0.08246  | 0.024127 |
| -0.03744 | 0.41958 | -0.15672 | 0.00068  | -0.14355 | 0.00187 | -0.16796 | 0.00027  | -0.0901  |
| -0.05246 | 0.25791 | -0.10601 | 0.02195  | -0.09321 | 0.04409 | -0.10294 | 0.02612  | -0.04099 |
| -0.0483  | 0.29756 | -0.15696 | 0.00066  | -0.14057 | 0.00233 | -0.16344 | 0.00039  | -0.07041 |
| -0.05696 | 0.21923 | -0.15646 | 0.00069  | -0.15393 | 0.00085 | -0.16103 | 0.00048  | -0.08975 |
| -0.06714 | 0.14742 | -0.1473  | 0.00141  | -0.11648 | 0.01177 | -0.158   | 0.00061  | -0.04878 |
| -0.11413 | 0.01359 | -0.17254 | 0.00018  | -0.17704 | 0.00012 | -0.19203 | 2.94E-05 | -0.12559 |
| -0.01574 | 0.73436 | -0.12139 | 0.00864  | -0.09381 | 0.04274 | -0.11662 | 0.01167  | -0.03708 |
| -0.05774 | 0.21299 | -0.14349 | 0.00188  | -0.14298 | 0.00195 | -0.11903 | 0.01004  | -0.09536 |
| -0.09278 | 0.04508 | -0.18457 | 6.01E-05 | -0.16436 | 0.00036 | -0.18009 | 9.10E-05 | -0.0951  |
| -0.0308  | 0.50665 | -0.10561 | 0.02246  | -0.07216 | 0.1194  | -0.09054 | 0.05054  | -0.02224 |
| 0.009938 | 0.8304  | -0.07696 | 0.09671  | -0.07068 | 0.12722 | -0.07568 | 0.10237  | -0.07101 |
| -0.03773 | 0.41592 | -0.03651 | 0.43121  | -0.01221 | 0.79234 | -0.02525 | 0.5863   | 0.004024 |
| -0.05904 | 0.20284 | -0.09312 | 0.04429  | -0.0593  | 0.20082 | -0.07906 | 0.08791  | 0.006958 |
| -0.07075 | 0.12682 | -0.1348  | 0.00352  | -0.08768 | 0.05831 | -0.11261 | 0.0149   | -0.04384 |
| -0.0458  | 0.32333 | -0.12055 | 0.00912  | -0.07355 | 0.11244 | -0.09766 | 0.03487  | -0.02425 |
| -0.04094 | 0.3774  | -0.10174 | 0.02792  | -0.01169 | 0.80102 | -0.05746 | 0.21519  | 0.026263 |
| -0.09376 | 0.04284 | -0.17608 | 0.00013  | -0.16039 | 0.0005  | -0.16108 | 0.00047  | -0.10586 |
| -0.0626  | 0.17687 | -0.14608 | 0.00155  | -0.14479 | 0.00171 | -0.14231 | 0.00205  | -0.08045 |
| -0.02212 | 0.63357 | -0.11628 | 0.01192  | -0.0466  | 0.31492 | -0.06914 | 0.13574  | -0.0157  |
| -0.0879  | 0.05767 | -0.16714 | 0.00029  | -0.14403 | 0.00181 | -0.12767 | 0.00573  | -0.09106 |
| -0.04473 | 0.33483 | -0.09118 | 0.04892  | -0.03193 | 0.49124 | -0.07964 | 0.08559  | 0.025186 |
| -0.02696 | 0.56115 | -0.07828 | 0.0911   | -0.05815 | 0.2097  | -0.05223 | 0.25996  | -0.03459 |
| -0.05899 | 0.20322 | -0.14448 | 0.00175  | -0.1071  | 0.02062 | -0.11638 | 0.01184  | -0.05957 |
| -0.01312 | 0.77743 | -0.06472 | 0.16259  | -0.01639 | 0.72389 | -0.05279 | 0.25493  | 0.03548  |
| -0.02269 | 0.62474 | -0.08319 | 0.07248  | -0.05715 | 0.2177  | -0.06351 | 0.17065  | 0.016552 |
| -0.02357 | 0.61147 | -0.12667 | 0.00612  | -0.09284 | 0.04494 | -0.10259 | 0.02663  | -0.04441 |
| -0.04417 | 0.34092 | -0.16022 | 0.00051  | -0.04248 | 0.35965 | -0.10215 | 0.02729  | -0.03165 |
| -0.08368 | 0.07083 | -0.15339 | 0.00088  | -0.13619 | 0.00319 | -0.1501  | 0.00114  | -0.0676  |
| -0.09864 | 0.03308 | -0.14453 | 0.00174  | -0.14088 | 0.00228 | -0.13863 | 0.00268  | -0.07748 |
| 0.038509 | 0.40639 | -0.0452  | 0.32974  | -0.02313 | 0.61806 | -0.02594 | 0.57599  | 0.001976 |
| -0.04323 | 0.35127 | -0.13569 | 0.0033   | -0.11509 | 0.01282 | -0.11965 | 0.00966  | -0.053   |
| -0.05411 | 0.24316 | -0.126   | 0.0064   | -0.11938 | 0.00982 | -0.09472 | 0.04075  | -0.07989 |
| -0.0675  | 0.14525 | -0.15429 | 0.00082  | -0.09903 | 0.03238 | -0.11892 | 0.01011  | -0.0471  |
| -0.00077 | 0.98674 | -0.09628 | 0.03753  | -0.03704 | 0.4246  | -0.0804  | 0.08263  | 0.022168 |

|          |         |          |          |          |          |          |          |          |
|----------|---------|----------|----------|----------|----------|----------|----------|----------|
| -0.07258 | 0.11727 | -0.1302  | 0.00483  | -0.03227 | 0.48657  | -0.0986  | 0.03314  | 0.029625 |
| -0.06424 | 0.16579 | -0.12905 | 0.00522  | -0.12922 | 0.00516  | -0.10576 | 0.02227  | -0.07533 |
| -0.03494 | 0.45124 | -0.15616 | 0.00071  | 0.037041 | 0.42453  | -0.08022 | 0.08334  | 0.053314 |
| -0.00362 | 0.93788 | -0.12831 | 0.00549  | 0.042808 | 0.35599  | -0.06438 | 0.16487  | 0.109247 |
| -0.04568 | 0.32463 | -0.11893 | 0.0101   | -0.08305 | 0.07297  | -0.1037  | 0.02503  | -0.03897 |
| -0.06933 | 0.13467 | -0.11229 | 0.01519  | -0.05811 | 0.21004  | -0.05967 | 0.19803  | -0.01321 |
| -0.00404 | 0.93065 | -0.04577 | 0.32364  | -0.02757 | 0.55236  | -0.01756 | 0.70503  | -0.00543 |
| -0.11408 | 0.01364 | -0.23702 | 2.19E-07 | -0.20016 | 1.31E-05 | -0.21221 | 3.72E-06 | -0.13938 |
| -0.06864 | 0.1386  | -0.17075 | 0.00021  | -0.09021 | 0.05138  | -0.15048 | 0.00111  | -0.01938 |
| 0.055335 | 0.23267 | -0.08415 | 0.06925  | 0.037089 | 0.42393  | -0.03965 | 0.39256  | 0.066604 |
| -0.03509 | 0.44929 | -0.11683 | 0.01152  | -0.04584 | 0.32287  | -0.0705  | 0.12819  | -0.00483 |
| -0.04081 | 0.37889 | -0.12349 | 0.00755  | -0.08833 | 0.05648  | -0.10528 | 0.02288  | -0.03414 |
| -0.00479 | 0.91785 | -0.0512  | 0.26949  | -0.00804 | 0.8624   | -0.0155  | 0.73838  | 0.005188 |
| -0.03807 | 0.41178 | -0.11746 | 0.01107  | -0.09882 | 0.03275  | -0.09802 | 0.03421  | -0.05314 |
| -0.0333  | 0.47289 | -0.10249 | 0.02677  | -0.06864 | 0.13857  | -0.09622 | 0.03765  | -0.05124 |
| -0.07192 | 0.12065 | -0.17038 | 0.00022  | -0.1298  | 0.00496  | -0.14786 | 0.00135  | -0.08664 |
| 0.061449 | 0.18496 | -0.04807 | 0.29996  | -0.00049 | 0.99151  | -0.01552 | 0.73804  | -0.00108 |
| -0.0543  | 0.24155 | -0.15422 | 0.00083  | -0.15415 | 0.00083  | -0.16784 | 0.00027  | -0.07718 |
| -0.01553 | 0.73783 | -0.12853 | 0.00541  | -0.10986 | 0.01755  | -0.13013 | 0.00485  | -0.04328 |
| -0.09684 | 0.03643 | -0.10045 | 0.02997  | -0.04815 | 0.29915  | -0.07325 | 0.11391  | -0.02143 |
| -0.0519  | 0.26302 | -0.13766 | 0.00287  | -0.11028 | 0.01712  | -0.12781 | 0.00567  | -0.03684 |
| -0.09616 | 0.03777 | -0.14503 | 0.00168  | -0.11571 | 0.01234  | -0.14444 | 0.00175  | -0.07543 |
| -0.04623 | 0.31886 | -0.10763 | 0.01999  | -0.06628 | 0.15268  | -0.08453 | 0.06798  | -0.0175  |
| -0.05595 | 0.22748 | -0.09149 | 0.04815  | -0.0495  | 0.28572  | -0.08091 | 0.08071  | -0.02146 |
| -0.02568 | 0.57994 | -0.04033 | 0.38456  | -0.03065 | 0.5088   | -0.0444  | 0.33835  | 0.018018 |
| -0.06654 | 0.1511  | -0.1151  | 0.01281  | -0.11077 | 0.01663  | -0.14598 | 0.00156  | -0.03994 |
| -0.06594 | 0.15482 | -0.03695 | 0.42565  | -0.04605 | 0.32074  | -0.03811 | 0.41131  | 0.000537 |
| -0.04731 | 0.30766 | -0.09757 | 0.03504  | -0.10079 | 0.02943  | -0.08465 | 0.0676   | -0.04415 |
| -0.03638 | 0.43285 | -0.06442 | 0.16457  | -0.07313 | 0.1145   | -0.0475  | 0.30572  | -0.02591 |
| -0.06395 | 0.1677  | -0.16018 | 0.00051  | -0.09789 | 0.03445  | -0.07731 | 0.09518  | -0.04303 |
| -0.03709 | 0.4239  | -0.10138 | 0.02848  | -0.0023  | 0.96047  | -0.06967 | 0.13274  | 0.093617 |
| -0.09774 | 0.03472 | -0.19325 | 2.61E-05 | -0.14569 | 0.00159  | -0.16501 | 0.00034  | -0.08632 |
| -0.09069 | 0.05016 | -0.17145 | 0.0002   | -0.17602 | 0.00013  | -0.1689  | 0.00025  | -0.10985 |
| -0.04684 | 0.31245 | -0.13148 | 0.00443  | -0.01072 | 0.81729  | -0.09267 | 0.04534  | 0.030057 |
| -0.09293 | 0.04472 | -0.1403  | 0.00237  | -0.05394 | 0.24471  | -0.02508 | 0.58883  | 0.025011 |
| -0.07447 | 0.108   | -0.13901 | 0.00261  | -0.10454 | 0.02387  | -0.14201 | 0.0021   | -0.05425 |
| -0.00749 | 0.8718  | -0.07524 | 0.10441  | -0.07236 | 0.11837  | -0.08145 | 0.07869  | -0.0163  |
| 0.010639 | 0.81864 | -0.03957 | 0.39361  | -0.02825 | 0.54252  | -0.06168 | 0.18329  | 0.020624 |
| -0.15122 | 0.00105 | -0.07946 | 0.08629  | -0.09238 | 0.04601  | -0.04326 | 0.35093  | -0.05697 |
| 0.072424 | 0.11807 | 0.045806 | 0.32328  | 0.124467 | 0.00708  | 0.08829  | 0.05658  | 0.142523 |
| 0.160618 | 0.00049 | 0.102803 | 0.02632  | 0.240143 | 1.50E-07 | 0.123569 | 0.00751  | 0.186376 |
| -0.09469 | 0.04082 | -0.18171 | 7.84E-05 | -0.08767 | 0.05833  | -0.16406 | 0.00037  | -0.02023 |
| -0.12106 | 0.00882 | -0.18035 | 8.89E-05 | -0.21048 | 4.48E-06 | -0.18831 | 4.22E-05 | -0.13912 |
| -0.06378 | 0.16883 | -0.1096  | 0.01783  | -0.12045 | 0.00918  | -0.12482 | 0.00692  | -0.05573 |
| -0.01639 | 0.72391 | -0.14103 | 0.00225  | -0.12483 | 0.00691  | -0.12849 | 0.00542  | -0.05334 |

|          |         |          |         |          |         |          |          |          |
|----------|---------|----------|---------|----------|---------|----------|----------|----------|
| -0.01547 | 0.73876 | -0.10712 | 0.02059 | -0.13262 | 0.00409 | -0.15325 | 0.00089  | -0.07213 |
| -0.01289 | 0.78112 | -0.09081 | 0.04986 | -0.07963 | 0.08564 | -0.08189 | 0.07708  | -0.01368 |
| 0.092036 | 0.04683 | 0.008005 | 0.86302 | 0.04274  | 0.35676 | 0.005161 | 0.91143  | 0.059047 |
| -0.04539 | 0.32771 | -0.14195 | 0.0021  | -0.08151 | 0.07847 | -0.07847 | 0.0903   | -0.01681 |
| 0.006228 | 0.89322 | -0.01012 | 0.82729 | -0.05505 | 0.23508 | -0.0145  | 0.75472  | 0.006453 |
| 0.01784  | 0.70059 | -0.00268 | 0.95394 | 0.0772   | 0.09565 | 0.05042  | 0.27688  | 0.094223 |
| -0.00717 | 0.87715 | -0.07249 | 0.11772 | -0.05485 | 0.23683 | -0.05278 | 0.25501  | 0.001645 |
| -0.05707 | 0.21836 | -0.103   | 0.02603 | -0.1177  | 0.01091 | -0.08334 | 0.07197  | -0.07517 |
| 0.019491 | 0.6744  | 0.007003 | 0.88003 | -0.02658 | 0.56674 | -0.02407 | 0.60389  | -0.00426 |
| -0.01327 | 0.77486 | -0.05776 | 0.21279 | -0.06898 | 0.13665 | -0.06384 | 0.16839  | -0.04368 |
| -0.04716 | 0.30919 | -0.13449 | 0.00359 | -0.12126 | 0.00871 | -0.13198 | 0.00428  | -0.05535 |
| -0.08011 | 0.08374 | -0.17474 | 0.00015 | -0.11982 | 0.00955 | -0.14389 | 0.00182  | -0.11423 |
| 0.06011  | 0.19474 | -0.04783 | 0.30232 | -0.05461 | 0.23886 | -0.06729 | 0.14652  | -0.01592 |
| -0.06212 | 0.18021 | -0.07978 | 0.08504 | -0.06547 | 0.15776 | -0.06463 | 0.1632   | 0.005686 |
| -0.0456  | 0.32548 | -0.12386 | 0.00736 | -0.10594 | 0.02203 | -0.12305 | 0.00776  | -0.03646 |
| -0.04633 | 0.31775 | -0.06476 | 0.16233 | -0.08938 | 0.05359 | -0.07685 | 0.09719  | -0.07516 |
| -0.09187 | 0.04723 | -0.15264 | 0.00094 | -0.12902 | 0.00523 | -0.13244 | 0.00414  | -0.05957 |
| -0.07171 | 0.12172 | -0.1695  | 0.00023 | -0.14336 | 0.0019  | -0.17397 | 0.00016  | -0.09227 |
| -0.05159 | 0.26587 | -0.10816 | 0.01939 | -0.09419 | 0.0419  | -0.05071 | 0.2741   | -0.07026 |
| -0.06533 | 0.15869 | -0.10242 | 0.02688 | -0.11604 | 0.01209 | -0.0942  | 0.04187  | -0.05386 |
| -0.03325 | 0.47354 | -0.04426 | 0.33985 | -0.04901 | 0.29051 | -0.02915 | 0.52979  | -0.00086 |
| -0.0733  | 0.11369 | -0.13697 | 0.00302 | -0.11429 | 0.01346 | -0.10326 | 0.02565  | -0.07148 |
| 0.035252 | 0.44726 | -0.04492 | 0.33269 | -0.00287 | 0.95065 | -0.02847 | 0.53942  | 0.015171 |
| -0.07831 | 0.09094 | -0.1153  | 0.01265 | -0.0878  | 0.05798 | -0.06475 | 0.1624   | -0.05135 |
| 0.054552 | 0.23935 | -0.11323 | 0.01436 | -0.03439 | 0.45839 | -0.0511  | 0.27045  | 0.074786 |
| -0.04417 | 0.3409  | -0.11885 | 0.01015 | -0.01615 | 0.72775 | -0.06507 | 0.16033  | 0.044345 |
| -0.06475 | 0.16241 | -0.1583  | 0.0006  | -0.15717 | 0.00065 | -0.16467 | 0.00035  | -0.0947  |
| -0.07872 | 0.08927 | -0.12472 | 0.00696 | -0.05298 | 0.25322 | -0.06739 | 0.14592  | -0.01057 |
| -0.02494 | 0.59087 | -0.05922 | 0.20147 | 0.00076  | 0.98694 | -0.02671 | 0.56483  | -0.00334 |
| 0.009972 | 0.82983 | -0.08648 | 0.06186 | -0.03085 | 0.50595 | -0.06888 | 0.13718  | 0.07786  |
| 0.037516 | 0.41861 | 0.018004 | 0.69797 | -0.0286  | 0.53749 | -0.07132 | 0.12377  | -0.03011 |
| -0.07949 | 0.08618 | -0.08961 | 0.05297 | -0.01305 | 0.77845 | -0.02913 | 0.53005  | 0.035844 |
| -0.04191 | 0.36621 | -0.12222 | 0.00819 | -0.10612 | 0.02182 | -0.10271 | 0.02645  | -0.05421 |
| 0.024413 | 0.59873 | -0.01178 | 0.79953 | -0.04295 | 0.35442 | -0.06404 | 0.16706  | 0.000481 |
| -0.07672 | 0.09774 | -0.06192 | 0.18164 | -0.06894 | 0.13689 | -0.04619 | 0.31921  | -0.02836 |
| -0.0339  | 0.46486 | -0.05719 | 0.21739 | -0.05001 | 0.28077 | -0.0281  | 0.54473  | -0.03954 |
| -0.0421  | 0.36401 | -0.11021 | 0.0172  | -0.04106 | 0.37604 | -0.0239  | 0.60645  | -0.01738 |
| -0.05285 | 0.25438 | -0.1421  | 0.00208 | -0.00412 | 0.92931 | -0.10624 | 0.02166  | 0.02992  |
| -0.0171  | 0.71244 | -0.03803 | 0.41227 | -0.05896 | 0.20342 | -0.08852 | 0.05593  | 0.027297 |
| -0.02647 | 0.56824 | -0.12623 | 0.00631 | 0.021105 | 0.64917 | -0.07676 | 0.09756  | 0.071909 |
| -0.04086 | 0.37829 | -0.10122 | 0.02873 | -0.08607 | 0.0631  | -0.07113 | 0.1248   | -0.04723 |
| -0.0849  | 0.06679 | -0.17407 | 0.00016 | -0.15272 | 0.00093 | -0.16362 | 0.00038  | -0.08622 |
| -0.01348 | 0.77139 | -0.09421 | 0.04185 | -0.00349 | 0.94013 | -0.04911 | 0.28954  | 0.015767 |
| -0.07219 | 0.11927 | -0.16211 | 0.00044 | -0.15545 | 0.00075 | -0.19176 | 3.02E-05 | -0.08912 |
| 0.097003 | 0.03612 | -0.06986 | 0.13171 | 0.044189 | 0.34068 | 0.008357 | 0.85706  | 0.057372 |

|          |          |          |          |          |          |          |         |          |
|----------|----------|----------|----------|----------|----------|----------|---------|----------|
| -0.03482 | 0.45287  | -0.09387 | 0.04259  | -0.09923 | 0.03204  | -0.09253 | 0.04566 | -0.07067 |
| -0.04196 | 0.36565  | -0.09608 | 0.03793  | -0.06065 | 0.19073  | -0.12035 | 0.00923 | 0.010855 |
| -0.02124 | 0.64703  | 0.068391 | 0.14002  | -0.14832 | 0.00131  | -0.06416 | 0.16632 | -0.02651 |
| -0.05382 | 0.24575  | -0.07392 | 0.11064  | -0.16249 | 0.00042  | -0.13597 | 0.00324 | -0.11696 |
| -0.03741 | 0.41998  | -0.11709 | 0.01134  | -0.07329 | 0.1137   | -0.10395 | 0.02467 | -0.00365 |
| -0.00614 | 0.89471  | -0.14455 | 0.00174  | -0.09415 | 0.04198  | -0.11761 | 0.01097 | -0.04311 |
| -0.13329 | 0.00391  | -0.13219 | 0.00422  | -0.14192 | 0.00211  | -0.05709 | 0.21813 | -0.07294 |
| -0.00508 | 0.91282  | -0.07844 | 0.09041  | -0.07804 | 0.09209  | -0.10128 | 0.02864 | -0.01038 |
| 0.007511 | 0.8714   | -0.0609  | 0.1889   | 0.023105 | 0.61846  | -0.02815 | 0.54403 | 0.025287 |
| -0.03995 | 0.38904  | -0.08516 | 0.06595  | -0.07615 | 0.10028  | -0.06894 | 0.13687 | -0.02448 |
| 0.09156  | 0.04799  | -0.01794 | 0.69897  | -0.13996 | 0.00243  | -0.05615 | 0.22586 | -0.07693 |
| -0.0184  | 0.69161  | -0.13668 | 0.00308  | 0.059741 | 0.1975   | -0.05853 | 0.20672 | 0.110231 |
| -0.06953 | 0.13351  | -0.11179 | 0.01565  | -0.06076 | 0.18997  | -0.08563 | 0.06448 | -0.00506 |
| -0.01673 | 0.71834  | -0.05035 | 0.27757  | 0.051381 | 0.26782  | -0.00522 | 0.91046 | 0.073106 |
| -0.0247  | 0.5945   | -0.1188  | 0.01018  | -0.03422 | 0.46067  | -0.07077 | 0.12673 | 0.032044 |
| -0.02134 | 0.64546  | -0.05225 | 0.25979  | 0.026716 | 0.56469  | 0.061718 | 0.18305 | 0.032535 |
| -0.14725 | 0.00142  | -0.17274 | 0.00018  | -0.14564 | 0.0016   | -0.10027 | 0.03027 | -0.14106 |
| -0.04312 | 0.35249  | -0.06687 | 0.1491   | -0.11019 | 0.01722  | -0.10595 | 0.02202 | -0.06329 |
| -0.02614 | 0.57309  | -0.15427 | 0.00082  | -0.02792 | 0.54724  | -0.13185 | 0.00431 | 0.050118 |
| -0.06062 | 0.19099  | -0.16747 | 0.00028  | -0.13291 | 0.00401  | -0.13822 | 0.00276 | -0.07628 |
| -0.05412 | 0.24314  | -0.13993 | 0.00244  | -0.1031  | 0.02588  | -0.11173 | 0.01571 | -0.04712 |
| -0.02328 | 0.61575  | -0.07078 | 0.12665  | -0.02532 | 0.58525  | -0.08987 | 0.05228 | 0.034138 |
| -0.02284 | 0.62251  | -0.14811 | 0.00133  | -0.06463 | 0.16321  | -0.0801  | 0.08381 | 0.011504 |
| -0.14729 | 0.00141  | -0.20646 | 6.85E-06 | -0.12414 | 0.00724  | -0.14993 | 0.00116 | -0.07589 |
| -0.02804 | 0.54555  | -0.04294 | 0.35447  | -0.04029 | 0.38502  | -0.04486 | 0.33341 | -0.0106  |
| -0.04838 | 0.2968   | -0.10276 | 0.02639  | -0.11469 | 0.01314  | -0.08222 | 0.07588 | -0.08543 |
| -0.06032 | 0.19321  | -0.07182 | 0.12116  | -0.10487 | 0.02343  | -0.10171 | 0.02796 | -0.06848 |
| -0.07348 | 0.11276  | -0.11023 | 0.01718  | -0.09053 | 0.05057  | -0.10446 | 0.02397 | -0.02305 |
| -0.08569 | 0.06427  | -0.16654 | 0.0003   | -0.15518 | 0.00077  | -0.14794 | 0.00135 | -0.10328 |
| -0.01261 | 0.78579  | -0.08359 | 0.07114  | -0.0626  | 0.17684  | -0.0783  | 0.091   | -0.00689 |
| -0.02535 | 0.58475  | -0.05959 | 0.19864  | -0.10404 | 0.02455  | -0.09313 | 0.04427 | -0.04827 |
| -0.09903 | 0.03239  | -0.10362 | 0.02514  | -0.03483 | 0.45275  | 0.004134 | 0.929   | -0.00289 |
| 0.005428 | 0.90688  | 0.020916 | 0.65211  | -0.0142  | 0.75956  | 0.012459 | 0.78828 | 0.062332 |
| 0.042237 | 0.36245  | 0.023505 | 0.6124   | -0.02747 | 0.5537   | -0.00517 | 0.91125 | 0.012835 |
| -0.0105  | 0.82093  | -0.09608 | 0.03793  | -0.05562 | 0.23028  | -0.06493 | 0.16125 | 0.005763 |
| -0.19594 | 2.01E-05 | -0.15706 | 0.00066  | -0.18003 | 9.15E-05 | -0.13017 | 0.00484 | -0.11819 |
| -0.12913 | 0.00519  | -0.09932 | 0.03189  | -0.20181 | 1.11E-05 | -0.14091 | 0.00227 | -0.1233  |
| -0.04481 | 0.33394  | 0.008604 | 0.85289  | -0.04947 | 0.28601  | -0.01192 | 0.79721 | -0.03492 |
| -0.06218 | 0.17977  | -0.1293  | 0.00513  | -0.10278 | 0.02635  | -0.09332 | 0.04383 | -0.06159 |
| -0.00147 | 0.97481  | -0.01279 | 0.78276  | 0.032095 | 0.489    | 0.004383 | 0.92474 | 0.044685 |
| -0.06419 | 0.16608  | -0.121   | 0.00886  | -0.14063 | 0.00232  | -0.12729 | 0.00588 | -0.09373 |
| -0.03219 | 0.48767  | -0.11494 | 0.01294  | -0.01748 | 0.70635  | -0.01827 | 0.69377 | 0.020189 |
| 0.012433 | 0.78872  | -0.03327 | 0.47325  | -0.01431 | 0.75775  | -0.00538 | 0.90767 | -0.00088 |
| 0.052263 | 0.25968  | 0.028027 | 0.54573  | -0.02663 | 0.56598  | -0.01819 | 0.69507 | 0.016539 |
| -0.06994 | 0.13126  | -0.13774 | 0.00286  | -0.16185 | 0.00045  | -0.14908 | 0.00123 | -0.09969 |

|          |         |          |         |          |         |          |         |          |
|----------|---------|----------|---------|----------|---------|----------|---------|----------|
| -0.08466 | 0.06755 | -0.13929 | 0.00255 | -0.1233  | 0.00764 | -0.11811 | 0.01064 | -0.08249 |
| 0.0451   | 0.3308  | 0.010313 | 0.82409 | 0.070249 | 0.12955 | 0.042083 | 0.3642  | 0.063269 |
| -0.04922 | 0.28852 | -0.16686 | 0.00029 | -0.13507 | 0.00345 | -0.16005 | 0.00052 | -0.05617 |
| -0.03869 | 0.40419 | -0.15263 | 0.00094 | -0.10211 | 0.02736 | -0.12574 | 0.00651 | -0.06149 |
| -0.08803 | 0.05732 | -0.1076  | 0.02002 | -0.13264 | 0.00409 | -0.10025 | 0.03031 | -0.09353 |
| -0.03417 | 0.46127 | -0.07204 | 0.12005 | -0.04511 | 0.3307  | -0.0674  | 0.14588 | -0.01357 |
| -0.01715 | 0.71162 | -0.0801  | 0.0838  | -0.00869 | 0.85136 | -0.10188 | 0.0277  | 0.083205 |
| -0.07736 | 0.09497 | -0.12786 | 0.00566 | -0.11662 | 0.01167 | -0.13365 | 0.00381 | -0.05858 |
| 0.014342 | 0.75724 | -0.07584 | 0.10166 | -0.04854 | 0.29525 | -0.06308 | 0.17354 | -0.01141 |
| -0.06217 | 0.17984 | -0.16107 | 0.00048 | -0.12709 | 0.00596 | -0.12341 | 0.00759 | -0.06594 |
| -0.0204  | 0.66019 | -0.05903 | 0.20292 | -0.10903 | 0.01843 | -0.09691 | 0.0363  | -0.06793 |
| 0.074966 | 0.10567 | -0.05732 | 0.21632 | -0.06765 | 0.14439 | -0.13545 | 0.00336 | 0.050579 |
| -0.00937 | 0.83998 | -0.01959 | 0.67289 | 0.001133 | 0.98052 | -0.02963 | 0.52293 | 0.037278 |
| 0.004835 | 0.917   | -0.04587 | 0.3226  | 0.030529 | 0.51046 | 0.002698 | 0.95363 | 0.082512 |
| -0.02884 | 0.5342  | -0.06034 | 0.19306 | -0.04955 | 0.2853  | -0.06044 | 0.1923  | 0.005782 |
| -0.02674 | 0.56433 | -0.07878 | 0.08905 | 0.024105 | 0.60334 | -0.05744 | 0.21533 | 0.098586 |
| 0.118102 | 0.01064 | -0.00264 | 0.9546  | 0.084399 | 0.06842 | 0.028416 | 0.54017 | 0.172362 |
| -0.03217 | 0.48798 | 0.024711 | 0.59426 | -0.11105 | 0.01636 | -0.05254 | 0.25712 | -0.03607 |
| -0.02226 | 0.63142 | -0.10304 | 0.02597 | -0.02024 | 0.66271 | -0.07485 | 0.10622 | 0.026266 |
| -0.01736 | 0.70828 | -0.07684 | 0.0972  | -0.01938 | 0.67619 | -0.02708 | 0.55934 | -0.01552 |
| -0.04596 | 0.3216  | -0.0712  | 0.12442 | -0.13891 | 0.00263 | -0.12397 | 0.00731 | -0.07926 |
| -0.06007 | 0.19507 | -0.08089 | 0.08078 | -0.06956 | 0.13338 | -0.05317 | 0.25152 | -0.01603 |
| -0.0086  | 0.85287 | -0.07054 | 0.12794 | -0.0252  | 0.58702 | -0.0475  | 0.30565 | 0.088383 |
| 0.015621 | 0.73635 | 0.037162 | 0.42301 | 0.004348 | 0.92533 | 0.008875 | 0.8483  | -0.02601 |
| -0.05556 | 0.23077 | -0.1508  | 0.00108 | -0.11677 | 0.01156 | -0.12056 | 0.00911 | -0.08701 |
| -0.05673 | 0.22108 | -0.13983 | 0.00246 | -0.10552 | 0.02258 | -0.15593 | 0.00072 | -0.01299 |
| -0.01183 | 0.79871 | -0.06448 | 0.16419 | 0.008    | 0.86311 | -0.02486 | 0.59198 | 0.046307 |
| 0.076149 | 0.10027 | -0.06808 | 0.14182 | -0.04152 | 0.37071 | -0.05618 | 0.22561 | -0.01143 |
| -0.04726 | 0.30816 | -0.16091 | 0.00048 | -0.11531 | 0.01265 | -0.14305 | 0.00194 | -0.0638  |
| -0.07804 | 0.09209 | -0.08658 | 0.06154 | -0.14665 | 0.00148 | -0.13508 | 0.00345 | -0.05166 |
| -0.05744 | 0.21534 | -0.16306 | 0.0004  | -0.07422 | 0.10918 | -0.14898 | 0.00124 | 0.013846 |
| -0.06953 | 0.13355 | -0.05478 | 0.23742 | -0.17379 | 0.00016 | -0.11883 | 0.01016 | -0.11552 |
| 0.043349 | 0.34994 | 0.011322 | 0.80722 | 0.042692 | 0.35729 | 0.044529 | 0.33697 | 0.064369 |
| 0.012985 | 0.77958 | -0.11557 | 0.01245 | 0.010171 | 0.82648 | -0.0682  | 0.14112 | 0.074202 |
| 0.06505  | 0.16048 | -0.0527  | 0.25573 | -0.00679 | 0.8837  | -0.02369 | 0.60959 | -0.05174 |
| -0.09276 | 0.04511 | -0.10591 | 0.02208 | -0.07644 | 0.09898 | -0.08762 | 0.05849 | 0.0383   |
| -0.12431 | 0.00715 | -0.11471 | 0.01312 | -0.14268 | 0.002   | -0.08259 | 0.07457 | -0.09218 |
| -0.08419 | 0.0691  | -0.14918 | 0.00122 | -0.06531 | 0.15882 | -0.08838 | 0.05631 | -0.05206 |
| -0.1164  | 0.01183 | -0.08511 | 0.06613 | -0.13658 | 0.0031  | -0.08297 | 0.07324 | -0.04866 |
| -0.04533 | 0.32837 | -0.06296 | 0.1744  | -0.04437 | 0.33865 | -0.06244 | 0.17796 | -0.04809 |
| -0.07574 | 0.10211 | -0.09647 | 0.03716 | -0.09189 | 0.04719 | -0.08835 | 0.05642 | -0.08006 |
| -0.04014 | 0.38675 | -0.12726 | 0.00589 | -0.11292 | 0.01463 | -0.12677 | 0.00608 | -0.10027 |
| -0.0291  | 0.53049 | -0.07518 | 0.10468 | -0.03268 | 0.48117 | -0.07195 | 0.1205  | 0.00071  |
| -0.00318 | 0.94538 | -0.13252 | 0.00412 | -0.1004  | 0.03006 | -0.13143 | 0.00444 | -0.02783 |
| -0.07625 | 0.09981 | -0.09752 | 0.03513 | -0.08612 | 0.06295 | -0.10976 | 0.01765 | -0.0321  |



|          |          |          |          |          |          |          |          |          |
|----------|----------|----------|----------|----------|----------|----------|----------|----------|
| -0.07375 | 0.11145  | -0.13285 | 0.00403  | -0.17226 | 0.00018  | -0.1636  | 0.00039  | -0.12865 |
| 0.025769 | 0.57857  | 0.010757 | 0.81665  | -0.04493 | 0.33263  | -0.07666 | 0.09801  | -0.02338 |
| -0.0725  | 0.11769  | -0.06627 | 0.15277  | -0.05737 | 0.21591  | -0.08491 | 0.06674  | -0.0243  |
| -0.01862 | 0.68822  | -0.06801 | 0.14222  | -0.00343 | 0.9411   | -0.05754 | 0.21454  | 0.034807 |
| -0.04027 | 0.38529  | -0.05485 | 0.23678  | -0.04788 | 0.30179  | -0.03166 | 0.49494  | 0.010742 |
| -0.01634 | 0.72464  | -0.04174 | 0.36814  | -0.02671 | 0.56482  | -0.02372 | 0.60908  | 0.022787 |
| -0.00624 | 0.89308  | -0.08756 | 0.05866  | -0.07756 | 0.09411  | -0.10418 | 0.02436  | -0.05859 |
| 0.0252   | 0.58699  | -0.04188 | 0.36655  | -0.03149 | 0.49723  | -0.04393 | 0.34351  | -0.01828 |
| -0.04862 | 0.29438  | -0.15597 | 0.00072  | -0.12432 | 0.00715  | -0.13923 | 0.00257  | -0.0536  |
| -0.06288 | 0.17493  | -0.15578 | 0.00073  | -0.10328 | 0.02562  | -0.13311 | 0.00396  | -0.05941 |
| 0.017789 | 0.7014   | 0.009336 | 0.84053  | -0.05526 | 0.23334  | -0.07289 | 0.11571  | 0.02339  |
| -0.05787 | 0.21196  | -0.11217 | 0.0153   | 0.018477 | 0.69044  | -0.0127  | 0.78429  | 0.095009 |
| -0.05808 | 0.21027  | -0.1037  | 0.02502  | -0.07715 | 0.09585  | -0.07958 | 0.08584  | -0.01612 |
| -0.16874 | 0.00025  | -0.19076 | 3.33E-05 | 0.036441 | 0.43207  | 0.042875 | 0.35524  | 0.05228  |
| 0.029971 | 0.51823  | -0.01344 | 0.77204  | 0.05784  | 0.21217  | -0.04243 | 0.36024  | 0.167125 |
| -0.05593 | 0.22769  | -0.18427 | 6.18E-05 | -0.14461 | 0.00173  | -0.16114 | 0.00047  | -0.09072 |
| -0.05795 | 0.21129  | -0.06586 | 0.15531  | -0.13736 | 0.00293  | -0.14842 | 0.0013   | -0.02524 |
| -0.04589 | 0.32237  | -0.0873  | 0.05941  | -0.03141 | 0.49833  | -0.061   | 0.18818  | -0.00841 |
| -0.03247 | 0.48395  | -0.05558 | 0.23057  | -0.07001 | 0.13088  | -0.05116 | 0.26984  | -0.04252 |
| 0.311011 | 6.23E-12 | 0.37026  | 1.27E-16 | 0.590225 | 3.56E-45 | 0.557397 | 1.78E-39 | 0.765323 |
| 0.383933 | 7.52E-18 | 0.243105 | 1.04E-07 | 0.695794 | 7.77E-69 | 0.383917 | 7.55E-18 | 0.788033 |
| 0.478364 | 4.44E-28 | 0.592971 | 1.11E-45 | 0.769993 | 8.69E-93 | 0.675873 | 1.30E-63 | 0.877239 |
| 0.312107 | 5.21E-12 | 0.312047 | 5.26E-12 | 0.604549 | 7.14E-48 | 0.393614 | 9.34E-19 | 0.823128 |
| 0.338984 | 5.08E-14 | 0.315962 | 2.76E-12 | 0.461408 | 5.34E-26 | 0.282672 | 4.99E-10 | 0.61437  |
| 0.492536 | 6.56E-30 | 0.369866 | 1.38E-16 | 0.754709 | 3.70E-87 | 0.554248 | 5.82E-39 | 0.838749 |
| 0.37649  | 3.57E-17 | 0.700538 | 3.82E-70 | 0.325203 | 5.78E-13 | 0.378701 | 2.26E-17 | 0.56928  |
| 0.223734 | 1.04E-06 | 0.171331 | 0.0002   | 0.40123  | 1.72E-19 | 0.148269 | 0.00131  | 0.563889 |
| 0.531559 | 2.05E-35 | 0.653915 | 2.60E-58 | 0.568579 | 2.40E-41 | 0.517532 | 2.36E-33 | 0.78387  |
| 0.363212 | 5.21E-16 | 0.230133 | 4.97E-07 | 0.72371  | 6.35E-77 | 0.486664 | 3.85E-29 | 0.814128 |
| 0.507288 | 6.59E-32 | 0.621573 | 2.91E-51 | 0.591589 | 2.00E-45 | 0.443972 | 5.61E-24 | 0.817529 |
| 0.328004 | 3.56E-13 | 0.436947 | 3.40E-23 | 0.530794 | 2.67E-35 | 0.398362 | 3.27E-19 | 0.737558 |
| 0.35783  | 1.49E-15 | 0.331394 | 1.97E-13 | 0.715925 | 1.43E-74 | 0.578506 | 4.57E-43 | 0.817476 |
| 0.471496 | 3.19E-27 | 0.429374 | 2.26E-22 | 0.626484 | 2.80E-52 | 0.447264 | 2.38E-24 | 0.782063 |
| 0.269101 | 3.44E-09 | 0.485354 | 5.69E-29 | 0.522935 | 3.89E-34 | 0.560215 | 6.12E-40 | 0.676324 |
| 0.236763 | 2.26E-07 | 0.359731 | 1.03E-15 | 0.406275 | 5.49E-20 | 0.418725 | 3.00E-21 | 0.540922 |
| 0.502625 | 2.89E-31 | 0.577522 | 6.81E-43 | 0.758851 | 1.21E-88 | 0.727175 | 5.36E-78 | 0.83323  |
| 0.360188 | 9.43E-16 | 0.672681 | 8.19E-63 | 0.441738 | 1.00E-23 | 0.513899 | 7.78E-33 | 0.664408 |
| 0.07615  | 0.10026  | 0.132292 | 0.00419  | 0.318079 | 1.94E-12 | 0.124876 | 0.00689  | 0.555307 |
| 0.274721 | 1.57E-09 | 0.171659 | 0.00019  | 0.443395 | 6.52E-24 | 0.214987 | 2.75E-06 | 0.577467 |
| 0.417212 | 4.30E-21 | 0.386437 | 4.41E-18 | 0.766966 | 1.23E-91 | 0.520577 | 8.57E-34 | 0.863151 |
| 0.288746 | 2.03E-10 | 0.333484 | 1.36E-13 | 0.292802 | 1.10E-10 | 0.288074 | 2.24E-10 | 0.530803 |
| 0.427142 | 3.92E-22 | 0.425906 | 5.30E-22 | 0.698225 | 1.67E-69 | 0.642159 | 1.19E-55 | 0.762942 |
| 0.437331 | 3.08E-23 | 0.337946 | 6.12E-14 | 0.703905 | 4.35E-71 | 0.478178 | 4.69E-28 | 0.798405 |
| 0.347445 | 1.07E-14 | 0.305822 | 1.44E-11 | 0.663065 | 1.82E-60 | 0.444158 | 5.35E-24 | 0.839914 |
| 0.384212 | 7.09E-18 | 0.559531 | 7.94E-40 | 0.531268 | 2.26E-35 | 0.477747 | 5.31E-28 | 0.655528 |

|          |          |          |          |          |          |          |          |          |
|----------|----------|----------|----------|----------|----------|----------|----------|----------|
| 0.511782 | 1.55E-32 | 0.513494 | 8.88E-33 | 0.706708 | 6.95E-72 | 0.551145 | 1.84E-38 | 0.778808 |
| 0.392841 | 1.11E-18 | 0.537519 | 2.54E-36 | 0.511417 | 1.74E-32 | 0.491201 | 9.84E-30 | 0.68421  |
| 0.456525 | 2.02E-25 | 0.662855 | 2.05E-60 | 0.484967 | 6.38E-29 | 0.390329 | 1.91E-18 | 0.670115 |
| 0.385198 | 5.75E-18 | 0.747535 | 1.17E-84 | 0.494237 | 3.90E-30 | 0.577914 | 5.81E-43 | 0.621784 |
| 0.393792 | 8.98E-19 | 0.326823 | 4.37E-13 | 0.721424 | 3.18E-76 | 0.503668 | 2.08E-31 | 0.78087  |
| 0.464837 | 2.07E-26 | 0.731857 | 1.79E-79 | 0.555446 | 3.72E-39 | 0.608259 | 1.36E-48 | 0.748053 |
| 0.485105 | 6.13E-29 | 0.46354  | 2.97E-26 | 0.704633 | 2.71E-71 | 0.498466 | 1.06E-30 | 0.762606 |
| 0.423406 | 9.73E-22 | 0.408915 | 2.99E-20 | 0.774151 | 2.15E-94 | 0.610655 | 4.59E-49 | 0.7925   |
| 0.300645 | 3.27E-11 | 0.020963 | 0.65138  | 0.616143 | 3.70E-50 | 0.285175 | 3.45E-10 | 0.69221  |
| 0.360093 | 9.60E-16 | 0.544768 | 1.90E-37 | 0.419235 | 2.65E-21 | 0.392427 | 1.21E-18 | 0.698658 |
| 0.310354 | 6.94E-12 | 0.561025 | 4.49E-40 | 0.389696 | 2.19E-18 | 0.39852  | 3.16E-19 | 0.692239 |
| 0.354762 | 2.69E-15 | 0.452055 | 6.71E-25 | 0.568366 | 2.61E-41 | 0.388139 | 3.06E-18 | 0.748078 |
| 0.286311 | 2.92E-10 | 0.335772 | 9.05E-14 | 0.583317 | 6.38E-44 | 0.470599 | 4.12E-27 | 0.659532 |
| 0.429908 | 1.98E-22 | 0.496341 | 2.05E-30 | 0.767621 | 6.93E-92 | 0.586103 | 2.01E-44 | 0.868459 |
| 0.201304 | 1.17E-05 | 0.019334 | 0.67688  | 0.237995 | 1.95E-07 | 0.054523 | 0.2396   | 0.445762 |
| 0.473273 | 1.92E-27 | 0.441679 | 1.02E-23 | 0.694398 | 1.86E-68 | 0.648243 | 5.17E-57 | 0.739612 |
| 0.367885 | 2.06E-16 | 0.378104 | 2.56E-17 | 0.667336 | 1.69E-61 | 0.521703 | 5.88E-34 | 0.744771 |
| 0.477135 | 6.34E-28 | 0.732987 | 7.78E-80 | 0.58539  | 2.70E-44 | 0.634757 | 4.92E-54 | 0.778786 |
| 0.336776 | 7.56E-14 | 0.152838 | 0.00092  | 0.588493 | 7.39E-45 | 0.301414 | 2.90E-11 | 0.745241 |
| 0.367857 | 2.07E-16 | 0.466161 | 1.43E-26 | 0.587354 | 1.19E-44 | 0.537597 | 2.47E-36 | 0.768175 |
| 0.495928 | 2.32E-30 | 0.50562  | 1.12E-31 | 0.771116 | 3.22E-93 | 0.562386 | 2.66E-40 | 0.874389 |
| 0.331815 | 1.83E-13 | 0.372521 | 8.06E-17 | 0.692616 | 5.65E-68 | 0.553432 | 7.89E-39 | 0.839259 |
| 0.274289 | 1.66E-09 | 0.500433 | 5.74E-31 | 0.512268 | 1.32E-32 | 0.547211 | 7.83E-38 | 0.668863 |
| 0.261036 | 1.03E-08 | 0.212861 | 3.47E-06 | 0.54478  | 1.89E-37 | 0.404151 | 8.90E-20 | 0.718094 |
| 0.397795 | 3.71E-19 | 0.446335 | 3.03E-24 | 0.724247 | 4.34E-77 | 0.579594 | 2.94E-43 | 0.84688  |
| 0.422531 | 1.20E-21 | 0.363463 | 4.96E-16 | 0.478445 | 4.34E-28 | 0.312069 | 5.24E-12 | 0.651067 |
| 0.512555 | 1.21E-32 | 0.462462 | 4.00E-26 | 0.733094 | 7.18E-80 | 0.541218 | 6.83E-37 | 0.852077 |
| 0.315371 | 3.04E-12 | 0.35782  | 1.49E-15 | 0.638721 | 6.80E-55 | 0.527079 | 9.55E-35 | 0.79219  |
| 0.416244 | 5.40E-21 | 0.229789 | 5.17E-07 | 0.739872 | 4.46E-82 | 0.420267 | 2.07E-21 | 0.827141 |
| 0.462071 | 4.45E-26 | 0.644763 | 3.14E-56 | 0.656884 | 5.31E-59 | 0.633483 | 9.25E-54 | 0.804877 |
| 0.515192 | 5.09E-33 | 0.67313  | 6.33E-63 | 0.799024 | #####    | 0.736979 | 3.98E-81 | 0.845483 |
| 0.279859 | 7.51E-10 | 0.575533 | 1.52E-42 | 0.205323 | 7.72E-06 | 0.21507  | 2.73E-06 | 0.519508 |
| 0.318937 | 1.68E-12 | 0.340904 | 3.58E-14 | 0.633235 | 1.04E-53 | 0.402226 | 1.38E-19 | 0.785763 |
| 0.407146 | 4.50E-20 | 0.492701 | 6.24E-30 | 0.663844 | 1.19E-60 | 0.627025 | 2.16E-52 | 0.752815 |
| 0.400688 | 1.95E-19 | 0.50297  | 2.59E-31 | 0.537166 | 2.88E-36 | 0.471554 | 3.14E-27 | 0.660972 |
| 0.507021 | 7.17E-32 | 0.529263 | 4.52E-35 | 0.563942 | 1.46E-40 | 0.428235 | 2.99E-22 | 0.673442 |
| 0.215212 | 2.69E-06 | 0.212978 | 3.43E-06 | 0.278359 | 9.32E-10 | 0.150517 | 0.0011   | 0.472521 |
| 0.504244 | 1.73E-31 | 0.722907 | 1.12E-76 | 0.714254 | 4.48E-74 | 0.702899 | 8.35E-71 | 0.826948 |
| 0.391653 | 1.43E-18 | 0.39056  | 1.82E-18 | 0.739492 | 5.95E-82 | 0.575915 | 1.30E-42 | 0.85656  |
| 0.263911 | 7.00E-09 | 0.041408 | 0.37195  | 0.573954 | 2.86E-42 | 0.233486 | 3.35E-07 | 0.738451 |
| 0.359429 | 1.09E-15 | 0.422632 | 1.17E-21 | 0.687659 | 1.19E-66 | 0.579332 | 3.27E-43 | 0.831079 |
| 0.458821 | 1.08E-25 | 0.599372 | 6.99E-47 | 0.672712 | 8.05E-63 | 0.55275  | 1.02E-38 | 0.856784 |
| 0.270349 | 2.89E-09 | 0.32553  | 5.46E-13 | 0.61163  | 2.94E-49 | 0.505145 | 1.30E-31 | 0.737978 |
| 0.375638 | 4.25E-17 | 0.472109 | 2.68E-27 | 0.700229 | 4.66E-70 | 0.681572 | 4.59E-65 | 0.777858 |
| 0.192737 | 2.75E-05 | 0.203686 | 9.14E-06 | 0.20097  | 1.21E-05 | 0.194694 | 2.27E-05 | 0.440713 |

|          |          |          |          |          |          |          |          |          |
|----------|----------|----------|----------|----------|----------|----------|----------|----------|
| 0.191366 | 3.14E-05 | 0.077799 | 0.09309  | 0.277439 | 1.06E-09 | 0.113334 | 0.01427  | 0.516419 |
| 0.131793 | 0.00433  | 0.308165 | 9.89E-12 | 0.364009 | 4.45E-16 | 0.27125  | 2.55E-09 | 0.573443 |
| 0.32568  | 5.32E-13 | 0.115837 | 0.01225  | 0.510132 | 2.64E-32 | 0.233691 | 3.27E-07 | 0.698426 |
| 0.322259 | 9.56E-13 | 0.397248 | 4.19E-19 | 0.314391 | 3.58E-12 | 0.29661  | 6.14E-11 | 0.618737 |
| 0.331083 | 2.08E-13 | 0.507361 | 6.43E-32 | 0.451272 | 8.26E-25 | 0.459237 | 9.68E-26 | 0.731319 |
| -0.21296 | 3.43E-06 | -0.0833  | 0.0721   | -0.1783  | 0.00011  | -0.12461 | 0.00702  | -0.16486 |
| -0.2098  | 4.82E-06 | -0.03333 | 0.47247  | -0.17662 | 0.00012  | -0.09125 | 0.04876  | -0.18242 |
| 0.009938 | 0.83039  | -0.03979 | 0.391    | 0.154044 | 0.00084  | 0.100091 | 0.03057  | 0.087497 |
| 0.144084 | 0.0018   | 0.158936 | 0.00057  | 0.219869 | 1.61E-06 | 0.276068 | 1.29E-09 | 0.104922 |
| 0.012127 | 0.7938   | 0.072655 | 0.11689  | -0.0627  | 0.17617  | -0.06412 | 0.16656  | -0.08589 |
| 0.138628 | 0.00268  | -0.04794 | 0.30126  | 0.195757 | 2.04E-05 | 0.10736  | 0.02031  | 0.069014 |
| 0.092659 | 0.04536  | -0.04971 | 0.28374  | 0.172347 | 0.00018  | 0.178497 | 0.00011  | 0.041248 |
| -0.03657 | 0.43047  | -0.02476 | 0.59347  | -0.05984 | 0.19673  | 0.041782 | 0.36765  | -0.12278 |
| 0.04829  | 0.2977   | -0.07718 | 0.09572  | 0.109006 | 0.01846  | 0.132414 | 0.00415  | -0.00746 |
| -0.08234 | 0.07547  | -0.03847 | 0.40686  | -0.2445  | 8.75E-08 | -0.21332 | 3.30E-06 | -0.15302 |
| -0.08517 | 0.06592  | -0.12475 | 0.00695  | -0.21669 | 2.29E-06 | -0.13412 | 0.00369  | -0.26656 |
| 0.011493 | 0.80435  | 0.07503  | 0.10537  | -0.11962 | 0.00967  | -0.11541 | 0.01257  | -0.10521 |
| 0.153117 | 0.0009   | 0.082715 | 0.07414  | 0.256651 | 1.85E-08 | 0.252088 | 3.34E-08 | 0.11621  |
| -0.11759 | 0.01099  | -0.12938 | 0.00511  | -0.33082 | 2.18E-13 | -0.25296 | 2.99E-08 | -0.31702 |
| -0.03932 | 0.39653  | -0.03946 | 0.39486  | -0.1944  | 2.33E-05 | -0.12772 | 0.00571  | -0.18767 |
| -0.03617 | 0.43554  | -0.09547 | 0.03917  | -0.18776 | 4.45E-05 | -0.18314 | 6.87E-05 | -0.18552 |
| -0.21731 | 2.14E-06 | -0.11586 | 0.01223  | -0.2317  | 4.13E-07 | -0.08882 | 0.0551   | -0.2532  |
| -0.13869 | 0.00267  | -0.0152  | 0.74317  | -0.25093 | 3.88E-08 | -0.13333 | 0.0039   | -0.23258 |
| -0.11434 | 0.01342  | -0.31905 | 1.64E-12 | -0.24461 | 8.63E-08 | -0.33831 | 5.74E-14 | -0.25988 |
| 0.085319 | 0.06545  | 0.060956 | 0.18853  | 0.018767 | 0.68585  | -0.00621 | 0.89348  | 0.001971 |
| -0.10107 | 0.02898  | 0.087707 | 0.05823  | -0.24722 | 6.22E-08 | -0.11204 | 0.01542  | -0.24503 |
| -0.10038 | 0.03009  | -0.10752 | 0.02012  | -0.20442 | 8.48E-06 | -0.19061 | 3.38E-05 | -0.17072 |
| -0.41952 | 2.48E-21 | -0.44011 | 1.52E-23 | -0.45189 | 7.02E-25 | -0.33444 | 1.15E-13 | -0.44887 |
| -0.27479 | 1.55E-09 | -0.16084 | 0.00048  | -0.37536 | 4.51E-17 | -0.2878  | 2.34E-10 | -0.30157 |
| -0.05228 | 0.25948  | -0.02813 | 0.5442   | -0.21042 | 4.51E-06 | -0.17086 | 0.00021  | -0.1608  |
| -0.14359 | 0.00187  | -0.1364  | 0.00314  | -0.31362 | 4.06E-12 | -0.25449 | 2.45E-08 | -0.3644  |
| -0.27221 | 2.23E-09 | -0.24227 | 1.15E-07 | -0.30745 | 1.11E-11 | -0.28981 | 1.73E-10 | -0.33994 |
| -0.02033 | 0.66132  | -0.13762 | 0.00288  | -0.13317 | 0.00394  | -0.19493 | 2.22E-05 | -0.07152 |
| -0.23854 | 1.82E-07 | -0.34644 | 1.29E-14 | -0.29196 | 1.25E-10 | -0.34375 | 2.13E-14 | -0.33286 |
| -0.05454 | 0.23948  | -0.01968 | 0.6714   | -0.29718 | 5.62E-11 | -0.18031 | 8.92E-05 | -0.25774 |
| -0.10381 | 0.02487  | 0.011904 | 0.79751  | -0.22747 | 6.77E-07 | -0.14128 | 0.00221  | -0.24111 |
| -0.0189  | 0.68373  | -0.00739 | 0.87339  | -0.16751 | 0.00028  | -0.10133 | 0.02857  | -0.16345 |
| 0.100138 | 0.03049  | 0.040269 | 0.38526  | 0.017651 | 0.70362  | -0.07982 | 0.08487  | -0.00651 |
| 0.040624 | 0.38108  | 0.203521 | 9.30E-06 | 0.005701 | 0.9022   | 0.028715 | 0.53591  | 0.038578 |
| -0.11276 | 0.01477  | -0.25278 | 3.06E-08 | -0.3778  | 2.72E-17 | -0.42582 | 5.42E-22 | -0.32141 |
| -0.11772 | 0.0109   | -0.27072 | 2.75E-09 | -0.24746 | 6.03E-08 | -0.29212 | 1.22E-10 | -0.20677 |
| 0.028487 | 0.53916  | -0.0519  | 0.26302  | 0.189493 | 3.77E-05 | 0.190803 | 3.32E-05 | 0.07563  |
| -0.22316 | 1.11E-06 | -0.24356 | 9.83E-08 | -0.35081 | 5.70E-15 | -0.25868 | 1.41E-08 | -0.31351 |
| 0.009581 | 0.8364   | 0.070328 | 0.12911  | 0.057208 | 0.21722  | -0.07107 | 0.12513  | 0.012674 |
| 0.038484 | 0.40669  | 0.085736 | 0.06414  | -0.31087 | 6.38E-12 | -0.27805 | 9.74E-10 | -0.17766 |

|          |          |          |          |          |          |          |          |          |
|----------|----------|----------|----------|----------|----------|----------|----------|----------|
| 0.007757 | 0.86722  | 0.030433 | 0.51179  | -0.27821 | 9.53E-10 | -0.11513 | 0.01279  | -0.23587 |
| -0.11291 | 0.01464  | 0.031496 | 0.49715  | -0.24896 | 4.99E-08 | -0.17165 | 0.00019  | -0.24347 |
| 0.055641 | 0.23009  | 0.314004 | 3.81E-12 | -0.08786 | 0.05781  | -0.01212 | 0.79386  | -0.03355 |
| -0.07317 | 0.11433  | -0.11065 | 0.01675  | 0.227115 | 7.06E-07 | 0.082401 | 0.07525  | 0.217657 |
| 0.043692 | 0.34614  | 0.247081 | 6.33E-08 | -0.20703 | 6.45E-06 | -0.06199 | 0.18115  | -0.16326 |
| 0.171201 | 0.0002   | 0.190913 | 3.28E-05 | -0.05473 | 0.23784  | 0.006661 | 0.88585  | -0.09015 |
| 0.45141  | 7.97E-25 | 0.284225 | 3.97E-10 | -0.12989 | 0.00493  | -0.10815 | 0.0194   | -0.07863 |
| 0.072706 | 0.11664  | 0.3619   | 6.74E-16 | -0.11317 | 0.01441  | 0.103197 | 0.02574  | -0.05651 |
| 0.196152 | 1.96E-05 | 0.331265 | 2.01E-13 | -0.07258 | 0.11726  | -0.04169 | 0.36873  | -0.05507 |
| 0.002354 | 0.95953  | 0.276102 | 1.29E-09 | -0.1823  | 7.43E-05 | -0.10961 | 0.01782  | -0.03685 |
| -0.11479 | 0.01306  | 0.117531 | 0.01103  | -0.44921 | 1.43E-24 | -0.28547 | 3.31E-10 | -0.41301 |
| 0.118089 | 0.01065  | 0.474988 | 1.18E-27 | -0.20091 | 1.22E-05 | 0.013714 | 0.76755  | -0.08918 |
| 0.094834 | 0.04051  | 0.370161 | 1.30E-16 | -0.20106 | 1.20E-05 | 0.015176 | 0.7436   | -0.16547 |
| 0.260244 | 1.15E-08 | 0.680895 | 6.87E-65 | 0.083719 | 0.07068  | 0.376036 | 3.92E-17 | 0.067532 |
| -0.02389 | 0.60666  | 0.376039 | 3.92E-17 | -0.34187 | 3.00E-14 | -0.05085 | 0.27283  | -0.21172 |
| 0.14993  | 0.00116  | 0.36992  | 1.37E-16 | -0.20071 | 1.24E-05 | -0.05512 | 0.23445  | -0.10245 |
| 0.149286 | 0.00121  | 0.577162 | 7.88E-43 | -0.0145  | 0.75459  | 0.240249 | 1.48E-07 | -0.01336 |
| 0.170617 | 0.00021  | 0.6475   | 7.62E-57 | -0.01283 | 0.78208  | 0.303601 | 2.05E-11 | 0.001699 |
| 0.093733 | 0.04291  | 0.321734 | 1.05E-12 | -0.10538 | 0.02275  | 0.131075 | 0.00455  | -0.13255 |
| 0.004762 | 0.91825  | 0.34353  | 2.21E-14 | -0.33894 | 5.12E-14 | -0.10892 | 0.01855  | -0.25974 |
| 0.066324 | 0.15242  | 0.359999 | 9.78E-16 | -0.16599 | 0.00032  | -0.06086 | 0.18924  | -0.07492 |
| 0.041409 | 0.37194  | 0.331342 | 1.98E-13 | -0.1756  | 0.00014  | 0.098688 | 0.03299  | -0.15952 |
| 0.188748 | 4.04E-05 | 0.33314  | 1.44E-13 | -0.03114 | 0.50204  | 0.026049 | 0.57445  | -0.07213 |
| 0.013429 | 0.77225  | 0.159353 | 0.00055  | -0.21837 | 1.90E-06 | -0.13966 | 0.00249  | -0.16268 |
| -0.01612 | 0.7282   | 0.132797 | 0.00404  | -0.25004 | 4.35E-08 | -0.14862 | 0.00128  | -0.12621 |
| 0.1756   | 0.00014  | 0.395415 | 6.29E-19 | -0.03004 | 0.51722  | 0.187594 | 4.52E-05 | -0.10199 |
| 0.036562 | 0.43055  | 0.028588 | 0.53773  | -0.27829 | 9.41E-10 | -0.1732  | 0.00017  | -0.28109 |
| -0.02283 | 0.62257  | -0.03146 | 0.49762  | -0.21433 | 2.96E-06 | -0.17    | 0.00022  | -0.0869  |
| 0.057398 | 0.21569  | 0.158217 | 0.0006   | -0.21071 | 4.37E-06 | -0.05968 | 0.19794  | -0.14617 |
| -0.05967 | 0.19804  | 0.263521 | 7.38E-09 | -0.37086 | 1.13E-16 | -0.20873 | 5.39E-06 | -0.2833  |
| 0.044005 | 0.34269  | 0.101115 | 0.0289   | -0.18222 | 7.48E-05 | -0.10955 | 0.01787  | -0.16874 |
| 0.282203 | 5.34E-10 | 0.531298 | 2.24E-35 | 0.011619 | 0.80227  | 0.141082 | 0.00224  | 0.030003 |
| 0.339372 | 4.73E-14 | 0.49622  | 2.12E-30 | 0.023559 | 0.61158  | 0.257908 | 1.56E-08 | -0.03978 |
| 0.079751 | 0.08515  | 0.345791 | 1.46E-14 | -0.20324 | 9.58E-06 | -0.03171 | 0.49426  | -0.12205 |
| -0.18958 | 3.73E-05 | -0.0197  | 0.67113  | -0.57869 | 4.24E-43 | -0.31776 | 2.04E-12 | -0.46315 |
| 0.07252  | 0.11758  | 0.262275 | 8.73E-09 | -0.08526 | 0.06565  | 0.022274 | 0.63115  | -0.10306 |
| 0.018862 | 0.68434  | 0.253479 | 2.79E-08 | -0.29053 | 1.55E-10 | -0.13074 | 0.00466  | -0.22184 |
| 0.054831 | 0.23696  | 0.088769 | 0.05524  | -0.28553 | 3.27E-10 | -0.12771 | 0.00571  | -0.23402 |
| 0.128234 | 0.00552  | 0.308632 | 9.18E-12 | -0.14637 | 0.00152  | -0.07793 | 0.09256  | -0.08529 |
| 0.468914 | 6.62E-27 | 0.34624  | 1.34E-14 | -0.14549 | 0.00162  | 0.009678 | 0.83478  | -0.03939 |
| -0.00249 | 0.95729  | 0.229851 | 5.13E-07 | -0.19696 | 1.81E-05 | -0.03019 | 0.51513  | -0.2125  |
| 0.073816 | 0.11114  | 0.183139 | 6.87E-05 | -0.28287 | 4.84E-10 | -0.18875 | 4.04E-05 | -0.14055 |
| 0.167104 | 0.00029  | 0.169081 | 0.00024  | 0.010633 | 0.81874  | 0.044837 | 0.33363  | -0.06869 |
| 0.051962 | 0.26243  | 0.354932 | 2.60E-15 | -0.15114 | 0.00105  | 0.037111 | 0.42366  | -0.13561 |
| -0.00246 | 0.95766  | 0.206528 | 6.80E-06 | -0.35572 | 2.24E-15 | -0.03634 | 0.43331  | -0.29916 |

|          |          |          |          |          |          |          |          |          |
|----------|----------|----------|----------|----------|----------|----------|----------|----------|
| -0.09456 | 0.0411   | 0.13457  | 0.00357  | -0.21898 | 1.77E-06 | -0.09868 | 0.03301  | -0.21638 |
| -0.07126 | 0.1241   | -0.07636 | 0.09932  | -0.29587 | 6.88E-11 | -0.19409 | 2.41E-05 | -0.28112 |
| 0.09576  | 0.03858  | -0.01724 | 0.71015  | -0.26074 | 1.07E-08 | -0.21781 | 2.02E-06 | -0.17931 |
| 0.152999 | 0.00091  | 0.357373 | 1.63E-15 | -0.12799 | 0.00561  | -0.07507 | 0.1052   | -0.07128 |
| 0.217139 | 2.17E-06 | 0.371576 | 9.77E-17 | -0.18249 | 7.29E-05 | -0.11017 | 0.01724  | -0.06469 |
| 0.055523 | 0.23108  | 0.221734 | 1.30E-06 | -0.22721 | 6.98E-07 | -0.10257 | 0.02666  | -0.10816 |
| 0.246655 | 6.68E-08 | 0.321651 | 1.06E-12 | -0.07175 | 0.12151  | -0.0174  | 0.70758  | -0.10294 |
| 0.307464 | 1.11E-11 | 0.619842 | 6.58E-51 | 0.126636 | 0.00614  | 0.351624 | 4.89E-15 | 0.139286 |
| 0.036453 | 0.43192  | 0.220077 | 1.57E-06 | -0.12451 | 0.00706  | -0.08703 | 0.06021  | 0.009054 |
| -0.0115  | 0.8042   | 0.116096 | 0.01205  | -0.22471 | 9.31E-07 | -0.0306  | 0.50948  | -0.13685 |
| 0.289811 | 1.73E-10 | 0.544994 | 1.75E-37 | 0.047155 | 0.30922  | 0.257841 | 1.58E-08 | 0.002744 |
| 0.091059 | 0.04923  | 0.27303  | 1.99E-09 | -0.09901 | 0.03243  | -0.00718 | 0.87704  | -0.0224  |
| -0.12756 | 0.00577  | 0.056516 | 0.22283  | -0.49534 | 2.78E-30 | -0.19929 | 1.43E-05 | -0.4686  |
| -0.01759 | 0.70462  | 0.143487 | 0.00188  | -0.33452 | 1.13E-13 | -0.1677  | 0.00027  | -0.28955 |
| 0.072267 | 0.11886  | 0.270705 | 2.75E-09 | -0.10814 | 0.01942  | 0.012899 | 0.781    | -0.13085 |
| -0.03294 | 0.47759  | -0.04442 | 0.33811  | -0.31327 | 4.30E-12 | -0.1526  | 0.00094  | -0.28827 |
| 0.123629 | 0.00748  | 0.153077 | 0.0009   | -0.2573  | 1.69E-08 | -0.13547 | 0.00336  | -0.19395 |
| -0.02672 | 0.56464  | 0.021003 | 0.65076  | -0.31387 | 3.90E-12 | -0.25709 | 1.74E-08 | -0.29566 |
| 0.147586 | 0.00138  | 0.315332 | 3.06E-12 | -0.10898 | 0.01848  | 0.043001 | 0.35383  | -0.16241 |
| 0.010688 | 0.81782  | 0.089837 | 0.05237  | -0.19946 | 1.41E-05 | -0.01547 | 0.73875  | -0.31326 |
| 0.172552 | 0.00018  | 0.431195 | 1.44E-22 | -0.00547 | 0.90614  | 0.080516 | 0.08219  | -0.01661 |
| 0.00682  | 0.88313  | 0.055353 | 0.23252  | -0.14528 | 0.00165  | -0.106   | 0.02197  | -0.24386 |
| 0.18438  | 6.12E-05 | 0.529452 | 4.23E-35 | -0.06465 | 0.16308  | 0.221979 | 1.27E-06 | -0.02611 |
| -0.00181 | 0.96894  | 0.232438 | 3.79E-07 | -0.35542 | 2.37E-15 | -0.14349 | 0.00188  | -0.3202  |
| 0.233676 | 3.27E-07 | 0.505821 | 1.05E-31 | 0.024966 | 0.59046  | 0.212459 | 3.62E-06 | 0.207925 |
| 0.044258 | 0.33992  | 0.202734 | 1.01E-05 | -0.08324 | 0.07232  | 0.001408 | 0.97579  | -0.13218 |
| 0.179719 | 9.42E-05 | 0.410843 | 1.92E-20 | 0.026448 | 0.5686   | 0.234329 | 3.03E-07 | -0.07462 |
| 0.106966 | 0.02078  | 0.253469 | 2.80E-08 | -0.22392 | 1.02E-06 | -0.0698  | 0.132    | -0.1995  |
| -0.02128 | 0.64639  | 0.191487 | 3.11E-05 | -0.42313 | 1.04E-21 | -0.20504 | 7.94E-06 | -0.28872 |
| 0.083983 | 0.0698   | 0.312328 | 5.03E-12 | -0.28134 | 6.06E-10 | -0.07274 | 0.11647  | -0.23932 |
| -0.09822 | 0.03383  | 0.186302 | 5.11E-05 | -0.48944 | 1.68E-29 | -0.26479 | 6.22E-09 | -0.34988 |
| 0.339017 | 5.05E-14 | 0.625551 | 4.38E-52 | 0.102359 | 0.02698  | 0.303012 | 2.25E-11 | 0.087168 |
| 0.017899 | 0.69965  | 0.267736 | 4.15E-09 | -0.23551 | 2.63E-07 | -0.10278 | 0.02635  | -0.12372 |
| 0.173295 | 0.00017  | 0.530526 | 2.92E-35 | 0.043405 | 0.34931  | 0.394435 | 7.80E-19 | -0.01765 |
| 0.057851 | 0.21208  | -0.0071  | 0.87841  | -0.24852 | 5.27E-08 | -0.16697 | 0.00029  | -0.18152 |
| -0.09923 | 0.03204  | -0.03064 | 0.50898  | -0.26387 | 7.04E-09 | -0.15415 | 0.00083  | -0.25304 |
| 0.027469 | 0.55376  | 0.502241 | 3.26E-31 | -0.24282 | 1.08E-07 | 0.024915 | 0.59122  | -0.10758 |
| 0.114501 | 0.01329  | 0.097047 | 0.03603  | -0.16756 | 0.00028  | -0.04732 | 0.30755  | -0.17756 |
| -0.02366 | 0.61005  | 0.139122 | 0.00259  | -0.20736 | 6.23E-06 | -0.07241 | 0.11811  | -0.09791 |
| 0.127662 | 0.00573  | 0.365722 | 3.17E-16 | -0.12736 | 0.00585  | 0.029233 | 0.52859  | -0.02479 |
| 0.038261 | 0.40942  | 0.290854 | 1.48E-10 | -0.09191 | 0.04715  | -0.02997 | 0.51817  | -0.03231 |
| -0.02539 | 0.58424  | 0.108498 | 0.01901  | -0.25525 | 2.22E-08 | -0.09197 | 0.04699  | -0.21841 |
| -0.05286 | 0.25424  | 0.019755 | 0.67025  | -0.35476 | 2.69E-15 | -0.21177 | 3.90E-06 | -0.38736 |
| 0.122373 | 0.00811  | 0.217946 | 1.99E-06 | -0.17897 | 0.0001   | -0.04587 | 0.32262  | -0.05259 |
| 0.123366 | 0.00761  | 0.250565 | 4.06E-08 | -0.14271 | 0.00199  | -0.04668 | 0.31417  | -0.12608 |

|          |          |          |          |          |          |          |          |          |
|----------|----------|----------|----------|----------|----------|----------|----------|----------|
| -0.11936 | 0.00983  | -0.00572 | 0.90185  | -0.43774 | 2.78E-23 | -0.23724 | 2.13E-07 | -0.40579 |
| -0.1485  | 0.00129  | 0.15774  | 0.00062  | -0.52243 | 4.61E-34 | -0.14612 | 0.00154  | -0.48512 |
| 0.025178 | 0.58732  | 0.266499 | 4.92E-09 | -0.16161 | 0.00045  | -0.03435 | 0.45898  | -0.18711 |
| 0.204423 | 8.47E-06 | 0.472257 | 2.57E-27 | -0.02471 | 0.59435  | 0.144538 | 0.00174  | -0.0667  |
| 0.072249 | 0.11896  | 0.286514 | 2.83E-10 | -0.16849 | 0.00025  | -0.05337 | 0.24973  | -0.14672 |
| 0.107044 | 0.02068  | 0.23652  | 2.33E-07 | -0.12745 | 0.00581  | -0.01824 | 0.69415  | -0.14899 |
| 0.017419 | 0.70733  | -0.00759 | 0.86998  | -0.21839 | 1.89E-06 | -0.18524 | 5.64E-05 | -0.29528 |
| 0.025027 | 0.58956  | 0.177914 | 0.00011  | -0.2207  | 1.46E-06 | -0.07996 | 0.08435  | -0.15169 |
| 0.008516 | 0.85438  | 0.07316  | 0.11436  | -0.25833 | 1.48E-08 | -0.1197  | 0.00962  | -0.16958 |
| 0.19147  | 3.11E-05 | -0.0123  | 0.79089  | 0.57573  | 1.40E-42 | 0.319276 | 1.58E-12 | 0.483586 |
| 0.121337 | 0.00867  | 0.275277 | 1.45E-09 | -0.19919 | 1.45E-05 | -0.08401 | 0.0697   | -0.05909 |
| -0.00344 | 0.94088  | 0.241461 | 1.28E-07 | -0.15733 | 0.00064  | -0.09678 | 0.03656  | -0.0776  |
| -0.01575 | 0.73421  | -0.1046  | 0.02379  | -0.36241 | 6.11E-16 | -0.22292 | 1.14E-06 | -0.36807 |
| 0.247671 | 5.87E-08 | 0.472071 | 2.71E-27 | 0.077585 | 0.094    | 0.243716 | 9.65E-08 | 0.111284 |
| -0.14618 | 0.00154  | -0.04631 | 0.31794  | -0.52    | 1.04E-33 | -0.33111 | 2.07E-13 | -0.45031 |
| -0.01471 | 0.75126  | 0.068935 | 0.13689  | -0.41434 | 8.47E-21 | -0.27684 | 1.16E-09 | -0.33767 |
| -0.16926 | 0.00024  | 0.00235  | 0.95961  | -0.54099 | 7.41E-37 | -0.36349 | 4.93E-16 | -0.41951 |
| -0.01532 | 0.74118  | 0.04937  | 0.28702  | -0.26155 | 9.63E-09 | -0.11474 | 0.0131   | -0.22338 |
| 0.084905 | 0.06677  | 0.413609 | 1.00E-20 | -0.24231 | 1.15E-07 | 0.013123 | 0.77729  | -0.11432 |
| 0.307477 | 1.11E-11 | 0.574492 | 2.31E-42 | 0.010955 | 0.81334  | 0.119993 | 0.00945  | 0.09825  |
| 0.024501 | 0.5974   | 0.278298 | 9.40E-10 | -0.15902 | 0.00056  | -0.08144 | 0.07873  | -0.06163 |
| -0.09044 | 0.05081  | 0.2906   | 1.54E-10 | -0.44099 | 1.21E-23 | -0.11066 | 0.01675  | -0.34102 |
| 0.028702 | 0.5361   | 0.173329 | 0.00017  | -0.21162 | 3.96E-06 | -0.12278 | 0.0079   | -0.17718 |
| 0.22629  | 7.76E-07 | 0.514    | 7.53E-33 | -0.06857 | 0.13901  | 0.062378 | 0.1784   | 0.071027 |
| -0.07237 | 0.11836  | -0.11981 | 0.00956  | -0.25574 | 2.08E-08 | -0.20241 | 1.04E-05 | -0.25923 |
| 0.101201 | 0.02876  | 0.389776 | 2.15E-18 | -0.03381 | 0.4661   | 0.112327 | 0.01516  | -0.00684 |
| -0.11712 | 0.01131  | 0.026465 | 0.56835  | -0.24997 | 4.38E-08 | -0.10755 | 0.02009  | -0.29187 |
| 0.051114 | 0.27031  | 0.47107  | 3.60E-27 | -0.02643 | 0.56882  | 0.165251 | 0.00034  | -0.01462 |
| 0.03379  | 0.46633  | 0.349203 | 7.72E-15 | -0.12241 | 0.00809  | 0.092816 | 0.04499  | -0.17105 |
| 0.063355 | 0.17168  | -0.07611 | 0.10043  | -0.30526 | 1.58E-11 | -0.18297 | 6.98E-05 | -0.32892 |
| 0.260174 | 1.16E-08 | 0.368517 | 1.81E-16 | 0.058933 | 0.20364  | 0.224439 | 9.59E-07 | 0.042713 |
| -0.21874 | 1.82E-06 | -0.14838 | 0.0013   | -0.30313 | 2.21E-11 | -0.24318 | 1.03E-07 | -0.27524 |
| 0.041964 | 0.36557  | -0.24692 | 6.46E-08 | 0.098993 | 0.03245  | -0.01093 | 0.8138   | 0.23552  |
| 0.030201 | 0.51502  | 0.307179 | 1.16E-11 | -0.27759 | 1.04E-09 | 0.087464 | 0.05894  | -0.25364 |
| 0.108057 | 0.01951  | 0.418698 | 3.02E-21 | -0.175   | 0.00014  | 0.108217 | 0.01933  | -0.1775  |
| 0.07137  | 0.12353  | 0.259617 | 1.25E-08 | -0.25344 | 2.81E-08 | -0.21694 | 2.22E-06 | -0.1852  |
| 0.242361 | 1.14E-07 | 0.480994 | 2.06E-28 | 0.016633 | 0.71997  | 0.169145 | 0.00024  | 0.004401 |
| -0.11691 | 0.01146  | -0.27132 | 2.53E-09 | 0.095496 | 0.03912  | -0.0272  | 0.55767  | 0.118054 |
| 0.151657 | 0.00101  | 0.455895 | 2.40E-25 | -0.01744 | 0.70695  | 0.224963 | 9.04E-07 | -0.07981 |
| 0.131697 | 0.00436  | 0.479227 | 3.45E-28 | -0.09469 | 0.04082  | 0.052052 | 0.26161  | 0.016149 |
| 0.299633 | 3.84E-11 | 0.277649 | 1.03E-09 | -0.18726 | 4.66E-05 | -0.02239 | 0.62943  | -0.08262 |
| 0.073577 | 0.11231  | 0.086424 | 0.06202  | -0.15674 | 0.00068  | -0.10946 | 0.01797  | -0.17135 |
| 0.071733 | 0.12162  | 0.197556 | 1.71E-05 | -0.15597 | 0.00072  | 0.011452 | 0.80504  | -0.0979  |
| -0.05277 | 0.25507  | -0.08857 | 0.05579  | 0.207263 | 6.30E-06 | 0.052142 | 0.26078  | 0.209929 |
| 0.219447 | 1.68E-06 | 0.325732 | 5.27E-13 | -0.17658 | 0.00013  | -0.10056 | 0.02979  | -0.07193 |

|          |          |          |          |          |          |          |          |          |
|----------|----------|----------|----------|----------|----------|----------|----------|----------|
| 0.253044 | 2.95E-08 | 0.148848 | 0.00126  | -0.40353 | 1.02E-19 | -0.21913 | 1.74E-06 | -0.33052 |
| 0.047931 | 0.30132  | 0.314226 | 3.68E-12 | -0.08323 | 0.07235  | -0.02286 | 0.62216  | -0.02582 |
| 0.011156 | 0.80998  | 0.015878 | 0.73219  | -0.24703 | 6.37E-08 | -0.14109 | 0.00224  | -0.22582 |
| 0.196741 | 1.85E-05 | -0.01521 | 0.74299  | 0.568871 | 2.14E-41 | 0.271544 | 2.45E-09 | 0.493372 |
| 0.074536 | 0.10769  | 0.122176 | 0.00822  | -0.2434  | 1.00E-07 | -0.20384 | 9.00E-06 | -0.20529 |
| 0.142458 | 0.00203  | 0.356509 | 1.92E-15 | -0.15489 | 0.00078  | -0.01791 | 0.69953  | -0.07663 |
| -0.02672 | 0.56469  | 0.036246 | 0.43455  | -0.2483  | 5.42E-08 | -0.01031 | 0.82408  | -0.34395 |
| 0.2905   | 1.56E-10 | 0.482352 | 1.38E-28 | 0.201067 | 1.20E-05 | 0.277264 | 1.09E-09 | 0.120019 |
| 0.033366 | 0.47195  | 0.15598  | 0.00072  | -0.16587 | 0.00032  | -0.07675 | 0.09761  | -0.21383 |
| 0.047302 | 0.30771  | -0.14523 | 0.00165  | 0.492474 | 6.68E-30 | 0.317722 | 2.06E-12 | 0.380022 |
| 0.123021 | 0.00778  | 0.225546 | 8.45E-07 | -0.23291 | 3.58E-07 | -0.13881 | 0.00265  | -0.1137  |
| 0.069125 | 0.13581  | -0.02223 | 0.63188  | -0.21038 | 4.53E-06 | -0.1917  | 3.04E-05 | -0.16609 |
| 0.051852 | 0.26345  | 0.324947 | 6.04E-13 | -0.23622 | 2.41E-07 | -0.07961 | 0.08571  | -0.10145 |
| 0.008525 | 0.85423  | 0.179325 | 9.76E-05 | -0.26295 | 7.98E-09 | -0.09034 | 0.05104  | -0.20896 |
| 0.155583 | 0.00074  | 0.193815 | 2.47E-05 | -0.1122  | 0.01528  | -0.0187  | 0.68689  | -0.22949 |
| -0.01786 | 0.70026  | 0.062352 | 0.17858  | -0.21628 | 2.39E-06 | -0.20938 | 5.04E-06 | -0.16443 |
| 0.026866 | 0.56251  | 0.360622 | 8.66E-16 | -0.31805 | 1.95E-12 | -0.12436 | 0.00713  | -0.20314 |
| 0.219379 | 1.70E-06 | 0.470268 | 4.52E-27 | -0.15125 | 0.00104  | -0.01989 | 0.66807  | -0.04979 |
| 0.217415 | 2.11E-06 | 0.448805 | 1.59E-24 | 0.081968 | 0.0768   | 0.261754 | 9.37E-09 | 0.059358 |
| 0.199274 | 1.44E-05 | 0.596349 | 2.60E-46 | 0.037978 | 0.4129   | 0.244226 | 9.05E-08 | 0.021687 |
| -0.0254  | 0.58409  | 0.324261 | 6.79E-13 | -0.22178 | 1.30E-06 | -0.0584  | 0.20778  | -0.12716 |
| 0.111882 | 0.01557  | 0.433313 | 8.49E-23 | -0.0434  | 0.34933  | 0.189595 | 3.73E-05 | -0.05113 |
| -0.11099 | 0.01642  | 0.049619 | 0.28459  | -0.49003 | 1.40E-29 | -0.24422 | 9.06E-08 | -0.44505 |
| 0.313002 | 4.50E-12 | 0.259258 | 1.31E-08 | -0.29523 | 7.59E-11 | -0.03202 | 0.49002  | -0.21923 |
| -0.06535 | 0.15854  | 0.246644 | 6.69E-08 | -0.40377 | 9.72E-20 | -0.14785 | 0.00135  | -0.35304 |
| 0.272858 | 2.04E-09 | 0.521409 | 6.49E-34 | 0.148211 | 0.00132  | 0.33461  | 1.11E-13 | 0.111987 |
| 0.153963 | 0.00084  | 0.333214 | 1.43E-13 | -0.05492 | 0.23616  | -0.00337 | 0.94213  | -0.01617 |
| -0.17726 | 0.00012  | -0.05489 | 0.23649  | -0.54987 | 2.95E-38 | -0.2587  | 1.41E-08 | -0.53968 |
| 0.096083 | 0.03793  | 0.501729 | 3.83E-31 | -0.19507 | 2.18E-05 | 0.082076 | 0.07641  | -0.10073 |
| 0.17628  | 0.00013  | 0.296217 | 6.52E-11 | -0.13162 | 0.00438  | -0.01466 | 0.75197  | -0.0328  |
| -0.05695 | 0.21926  | 0.130266 | 0.00481  | -0.25261 | 3.12E-08 | -0.02994 | 0.5187   | -0.25704 |
| 0.188249 | 4.24E-05 | 0.593651 | 8.29E-46 | -0.02205 | 0.63453  | 0.234945 | 2.81E-07 | -0.01024 |
| 0.147748 | 0.00137  | 0.37149  | 9.94E-17 | -0.07474 | 0.10675  | 0.059532 | 0.19908  | 0.059685 |
| 0.112936 | 0.01461  | 0.493166 | 5.42E-30 | 0.015682 | 0.73536  | 0.099628 | 0.03135  | 0.09007  |
| -0.08867 | 0.05551  | -0.08029 | 0.08304  | 0.229256 | 5.50E-07 | 0.098423 | 0.03347  | 0.180317 |
| 0.13619  | 0.00319  | 0.189338 | 3.82E-05 | -0.16251 | 0.00042  | -0.13231 | 0.00418  | 0.010318 |
| 0.076908 | 0.09691  | 0.158177 | 0.0006   | -0.14618 | 0.00154  | -0.08244 | 0.07511  | -0.07297 |
| -0.02308 | 0.61885  | 0.098759 | 0.03287  | -0.22376 | 1.04E-06 | -0.12548 | 0.00663  | -0.15604 |
| 0.148908 | 0.00125  | 0.123801 | 0.0074   | -0.14655 | 0.0015   | -0.1325  | 0.00413  | -0.11441 |
| 0.169255 | 0.00024  | 0.498524 | 1.04E-30 | -0.12946 | 0.00508  | 0.138383 | 0.00273  | -0.10715 |
| 0.109802 | 0.01761  | 0.390939 | 1.67E-18 | -0.21394 | 3.09E-06 | 0.011147 | 0.81013  | -0.14206 |
| -0.17523 | 0.00014  | 0.108106 | 0.01945  | -0.54535 | 1.54E-37 | -0.35363 | 3.34E-15 | -0.42141 |
| -0.03956 | 0.39367  | 0.066996 | 0.14831  | -0.4937  | 4.59E-30 | -0.30819 | 9.85E-12 | -0.42233 |
| 0.227859 | 6.48E-07 | 0.342618 | 2.62E-14 | -0.07723 | 0.09552  | -0.00555 | 0.90471  | -0.0747  |
| 0.02145  | 0.64383  | 0.053242 | 0.25084  | -0.17807 | 0.00011  | -0.04733 | 0.30745  | -0.30345 |

|          |          |          |          |          |          |          |          |          |
|----------|----------|----------|----------|----------|----------|----------|----------|----------|
| 0.034524 | 0.4567   | 0.206792 | 6.62E-06 | -0.1731  | 0.00017  | -0.02186 | 0.63744  | -0.13725 |
| 0.098227 | 0.03383  | 0.489831 | 1.49E-29 | -0.17729 | 0.00012  | 0.15604  | 0.00072  | -0.09153 |
| 0.112264 | 0.01522  | 0.380065 | 1.70E-17 | -0.02093 | 0.6519   | 0.119114 | 0.00998  | -0.04416 |
| -0.1385  | 0.00271  | 0.143673 | 0.00185  | -0.54758 | 6.83E-38 | -0.28592 | 3.09E-10 | -0.42077 |
| 0.014654 | 0.75212  | 0.242836 | 1.08E-07 | -0.40096 | 1.83E-19 | -0.06947 | 0.13387  | -0.36139 |
| -0.12895 | 0.00526  | -0.01399 | 0.76303  | -0.61082 | 4.25E-49 | -0.36487 | 3.75E-16 | -0.49119 |
| 0.113266 | 0.01432  | 0.291244 | 1.39E-10 | -0.07963 | 0.08562  | 0.075373 | 0.10378  | -0.1235  |
| 0.116509 | 0.01175  | 0.380857 | 1.44E-17 | -0.1685  | 0.00025  | 0.129777 | 0.00497  | -0.21378 |
| 0.00012  | 0.99793  | 0.292762 | 1.11E-10 | -0.24351 | 9.90E-08 | -0.15228 | 0.00096  | -0.18432 |
| 0.077991 | 0.09229  | 0.295575 | 7.20E-11 | -0.26562 | 5.55E-09 | -0.14155 | 0.00217  | -0.17654 |
| 0.262801 | 8.14E-09 | 0.514272 | 6.89E-33 | -0.02132 | 0.64588  | 0.143544 | 0.00187  | 0.004472 |
| 0.347172 | 1.13E-14 | 0.498273 | 1.13E-30 | 0.162974 | 0.00041  | 0.335881 | 8.87E-14 | 0.153546 |
| -0.15887 | 0.00057  | 0.108548 | 0.01896  | -0.53297 | 1.26E-35 | -0.3087  | 9.07E-12 | -0.41041 |
| 0.179255 | 9.82E-05 | 0.520358 | 9.22E-34 | -0.06296 | 0.17435  | 0.067935 | 0.14269  | 0.225261 |
| 0.245942 | 7.30E-08 | 0.519238 | 1.34E-33 | 0.117899 | 0.01078  | 0.439936 | 1.59E-23 | 0.036788 |
| -0.10907 | 0.01839  | 0.136879 | 0.00304  | -0.43316 | 8.82E-23 | -0.20376 | 9.07E-06 | -0.39698 |
| 0.043592 | 0.34724  | 0.276325 | 1.25E-09 | -0.32521 | 5.77E-13 | -0.1999  | 1.35E-05 | -0.23483 |
| -0.23704 | 2.19E-07 | -0.083   | 0.07315  | -0.62015 | 5.69E-51 | -0.47755 | 5.62E-28 | -0.49321 |
| 0.008997 | 0.84624  | 0.097991 | 0.03426  | -0.28257 | 5.07E-10 | -0.12841 | 0.00545  | -0.2501  |
| 0.089789 | 0.05249  | 0.43457  | 6.19E-23 | -0.17198 | 0.00019  | 0.014754 | 0.75048  | -0.08553 |
| 0.176897 | 0.00012  | 0.44318  | 6.89E-24 | -0.14254 | 0.00202  | -0.00827 | 0.85855  | -0.089   |
| 0.058478 | 0.20716  | 0.22968  | 5.24E-07 | -0.20018 | 1.31E-05 | 0.005948 | 0.898    | -0.13262 |
| 0.165042 | 0.00034  | 0.365644 | 3.22E-16 | -0.05094 | 0.27195  | 0.108719 | 0.01877  | -0.13514 |
| 0.16891  | 0.00025  | 0.519735 | 1.14E-33 | -0.04104 | 0.37622  | 0.108489 | 0.01902  | 0.070736 |
| -0.00495 | 0.91497  | 0.050159 | 0.27937  | -0.3843  | 6.96E-18 | -0.2377  | 2.02E-07 | -0.26416 |
| 0.158718 | 0.00058  | 0.334736 | 1.09E-13 | -0.16928 | 0.00024  | -0.09288 | 0.04485  | -0.11291 |
| -0.1112  | 0.01621  | -0.14334 | 0.0019   | 0.185022 | 5.76E-05 | 0.111505 | 0.01592  | 0.164923 |
| 0.015727 | 0.73464  | 0.355119 | 2.51E-15 | -0.11659 | 0.01169  | 0.084419 | 0.06835  | -0.13488 |
| 0.087324 | 0.05934  | 0.424546 | 7.38E-22 | -0.1325  | 0.00413  | -0.03723 | 0.42218  | -0.08827 |
| 0.032317 | 0.486    | -0.20307 | 9.74E-06 | 0.201558 | 1.14E-05 | 0.01363  | 0.76893  | 0.13235  |
| 0.08509  | 0.06618  | 0.397179 | 4.26E-19 | -0.09239 | 0.046    | 0.108318 | 0.01921  | -0.00247 |
| -0.08077 | 0.08124  | 0.053596 | 0.2477   | -0.2058  | 7.34E-06 | -0.04883 | 0.29236  | -0.25401 |
| 0.178735 | 0.0001   | 0.530849 | 2.62E-35 | 0.006404 | 0.89023  | 0.287309 | 2.52E-10 | -0.03741 |
| 0.194544 | 2.30E-05 | 0.476204 | 8.29E-28 | 0.052699 | 0.25572  | 0.131773 | 0.00434  | 0.039531 |
| 0.152238 | 0.00097  | 0.366177 | 2.89E-16 | -0.05004 | 0.2805   | 0.177775 | 0.00011  | -0.05559 |
| 0.086579 | 0.06155  | 0.21003  | 4.70E-06 | -0.25341 | 2.82E-08 | -0.08194 | 0.07691  | -0.24547 |
| 0.133484 | 0.00385  | 0.537913 | 2.21E-36 | -0.16809 | 0.00026  | 0.120201 | 0.00932  | -0.01993 |
| -0.11878 | 0.0102   | -0.02962 | 0.52309  | -0.49207 | 7.56E-30 | -0.25356 | 2.76E-08 | -0.48608 |
| 0.014569 | 0.75352  | -0.10311 | 0.02587  | -0.31746 | 2.15E-12 | -0.25529 | 2.21E-08 | -0.28269 |
| -0.02447 | 0.59788  | -0.0366  | 0.43006  | -0.27498 | 1.51E-09 | -0.18582 | 5.34E-05 | -0.25918 |
| 0.034174 | 0.46128  | 0.262838 | 8.10E-09 | -0.14257 | 0.00201  | -0.09186 | 0.04725  | -0.06141 |
| 0.179953 | 9.22E-05 | 0.593567 | 8.59E-46 | 0.023969 | 0.60539  | 0.312477 | 4.90E-12 | 0.089469 |
| 0.387253 | 3.71E-18 | 0.247965 | 5.66E-08 | -0.23478 | 2.87E-07 | -0.03353 | 0.46972  | -0.19071 |
| 0.06014  | 0.19452  | 0.125016 | 0.00683  | -0.19547 | 2.10E-05 | -0.13641 | 0.00314  | -0.22575 |
| 0.350532 | 6.01E-15 | 0.202017 | 1.09E-05 | -0.19749 | 1.72E-05 | -0.04815 | 0.29907  | -0.16137 |



|          |          |          |          |          |          |          |          |          |
|----------|----------|----------|----------|----------|----------|----------|----------|----------|
| 0.1539   | 0.00085  | 0.381394 | 1.29E-17 | -0.02913 | 0.53004  | 0.12306  | 0.00776  | 0.038729 |
| 0.191796 | 3.01E-05 | 0.479863 | 2.87E-28 | -0.03952 | 0.39418  | 0.036714 | 0.42863  | 0.106205 |
| -0.06313 | 0.17324  | 0.246454 | 6.85E-08 | -0.45685 | 1.85E-25 | -0.16049 | 0.0005   | -0.3194  |
| 0.065057 | 0.16043  | 0.224208 | 9.85E-07 | -0.31871 | 1.74E-12 | -0.14538 | 0.00163  | -0.23925 |
| 0.17876  | 0.0001   | 0.395017 | 6.86E-19 | -0.19429 | 2.36E-05 | -0.04581 | 0.32328  | -0.0996  |
| 0.110857 | 0.01655  | 0.488426 | 2.27E-29 | -0.10527 | 0.0229   | 0.103742 | 0.02497  | -0.00096 |
| 0.043572 | 0.34746  | 0.314025 | 3.80E-12 | -0.15039 | 0.00112  | 0.062387 | 0.17834  | -0.14326 |
| 0.148373 | 0.0013   | 0.108823 | 0.01865  | -0.09363 | 0.04314  | -0.09165 | 0.04776  | -0.06937 |
| -0.01016 | 0.82664  | 0.24356  | 9.84E-08 | -0.16387 | 0.00038  | -0.03761 | 0.4175   | -0.10658 |
| 0.155694 | 0.00074  | 0.489511 | 1.64E-29 | -0.06988 | 0.13155  | 0.046738 | 0.31352  | 0.03356  |
| 0.037164 | 0.42299  | 0.227662 | 6.62E-07 | -0.37507 | 4.78E-17 | -0.09931 | 0.03191  | -0.284   |
| 0.058    | 0.2109   | 0.23765  | 2.03E-07 | -0.18565 | 5.43E-05 | 0.041383 | 0.37224  | -0.26316 |
| 0.05391  | 0.24494  | 0.206277 | 6.98E-06 | -0.26    | 1.18E-08 | -0.10375 | 0.02496  | -0.21254 |
| 0.179828 | 9.32E-05 | 0.46358  | 2.94E-26 | -0.05464 | 0.23857  | 0.20021  | 1.31E-05 | 0.055749 |
| 0.095988 | 0.03812  | 0.489392 | 1.70E-29 | -0.11512 | 0.0128   | 0.061201 | 0.18675  | -0.06072 |
| -0.0728  | 0.11617  | 0.158686 | 0.00058  | -0.43109 | 1.48E-22 | -0.27466 | 1.58E-09 | -0.37921 |
| -0.03647 | 0.43176  | 0.21166  | 3.95E-06 | -0.29677 | 5.98E-11 | -0.15799 | 0.00061  | -0.3172  |
| -0.02252 | 0.62741  | 0.24407  | 9.23E-08 | -0.27393 | 1.75E-09 | -0.09672 | 0.03668  | -0.2858  |
| 0.088514 | 0.05595  | 0.176585 | 0.00013  | -0.16192 | 0.00044  | -0.1768  | 0.00012  | -0.07931 |
| 0.025111 | 0.58831  | 0.328813 | 3.09E-13 | -0.21209 | 3.77E-06 | 0.000521 | 0.99104  | -0.24214 |
| 0.169353 | 0.00024  | 0.529812 | 3.74E-35 | -0.01651 | 0.72203  | 0.200164 | 1.31E-05 | -0.00519 |
| -0.02436 | 0.59956  | 0.202068 | 1.08E-05 | -0.35628 | 2.01E-15 | -0.17372 | 0.00016  | -0.27755 |
| 0.100441 | 0.02999  | 0.472609 | 2.33E-27 | 0.090992 | 0.04939  | 0.228903 | 5.74E-07 | 0.00753  |
| 0.22248  | 1.20E-06 | 0.52249  | 4.52E-34 | 0.09154  | 0.04804  | 0.256279 | 1.94E-08 | 0.096565 |
| 0.040074 | 0.38757  | 0.117998 | 0.01071  | -0.26958 | 3.22E-09 | -0.20727 | 6.30E-06 | -0.17682 |
| -0.00058 | 0.99006  | -0.06266 | 0.17645  | -0.2569  | 1.79E-08 | -0.25326 | 2.87E-08 | -0.17525 |
| -0.00898 | 0.8466   | -0.01339 | 0.77282  | -0.36442 | 4.10E-16 | -0.20805 | 5.80E-06 | -0.32533 |
| 0.077225 | 0.09554  | 0.089322 | 0.05374  | -0.23935 | 1.65E-07 | -0.1649  | 0.00035  | -0.30436 |
| -0.05061 | 0.27505  | 0.143772 | 0.00184  | -0.23598 | 2.48E-07 | -0.12041 | 0.0092   | -0.10903 |
| -0.03536 | 0.44591  | -0.02599 | 0.57527  | -0.38396 | 7.47E-18 | -0.25401 | 2.61E-08 | -0.37198 |
| -0.1107  | 0.0167   | -0.18481 | 5.87E-05 | 0.197393 | 1.73E-05 | 0.082849 | 0.07367  | 0.152002 |
| 0.143623 | 0.00186  | 0.490072 | 1.38E-29 | -0.01502 | 0.74608  | 0.254392 | 2.48E-08 | -0.00089 |
| 0.011382 | 0.80622  | 0.161465 | 0.00046  | -0.15596 | 0.00072  | -0.06213 | 0.18011  | -0.17174 |
| 0.04481  | 0.33392  | -0.13828 | 0.00275  | -0.30405 | 1.91E-11 | -0.26632 | 5.05E-09 | -0.21461 |
| -0.10833 | 0.0192   | -0.14455 | 0.00174  | -0.43692 | 3.42E-23 | -0.38027 | 1.63E-17 | -0.37047 |
| -0.08223 | 0.07585  | 0.181324 | 8.13E-05 | -0.45873 | 1.11E-25 | -0.2823  | 5.27E-10 | -0.35281 |
| 0.118118 | 0.01063  | 0.222394 | 1.21E-06 | -0.1131  | 0.01447  | -0.00482 | 0.91726  | -0.17564 |
| -0.12842 | 0.00545  | 0.09111  | 0.0491   | -0.58755 | 1.09E-44 | -0.38716 | 3.78E-18 | -0.43443 |
| 0.109444 | 0.01799  | 0.437936 | 2.64E-23 | -0.03472 | 0.45409  | 0.164192 | 0.00037  | 0.006955 |
| 0.151103 | 0.00105  | 0.423649 | 9.18E-22 | 0.000527 | 0.99094  | 0.150216 | 0.00113  | 0.050068 |
| 0.138319 | 0.00274  | 0.325081 | 5.90E-13 | -0.03896 | 0.40091  | 0.017042 | 0.71338  | -0.08322 |
| 0.154185 | 0.00083  | 0.455197 | 2.89E-25 | -0.17866 | 0.0001   | 0.073534 | 0.11252  | -0.06362 |
| 0.179279 | 9.80E-05 | 0.283704 | 4.29E-10 | -0.08676 | 0.06101  | -0.00624 | 0.89302  | -0.02928 |
| 0.013755 | 0.76687  | 0.281132 | 6.24E-10 | -0.28622 | 2.96E-10 | -0.04539 | 0.32765  | -0.2379  |
| 0.01081  | 0.81577  | 0.089181 | 0.05412  | -0.20999 | 4.72E-06 | -0.11743 | 0.01109  | -0.23419 |

|          |          |          |          |          |          |          |          |          |
|----------|----------|----------|----------|----------|----------|----------|----------|----------|
| 0.105279 | 0.02289  | 0.246971 | 6.42E-08 | -0.15393 | 0.00085  | -0.0864  | 0.06211  | -0.01674 |
| 0.127496 | 0.0058   | 0.432204 | 1.12E-22 | -0.14375 | 0.00184  | -0.04111 | 0.37545  | -0.0093  |
| 0.147312 | 0.00141  | 0.3813   | 1.31E-17 | 0.197093 | 1.79E-05 | 0.434701 | 5.99E-23 | 0.12782  |
| 0.166433 | 0.0003   | 0.461423 | 5.32E-26 | -0.07159 | 0.12235  | 0.154592 | 0.0008   | -0.06187 |
| -0.18257 | 7.24E-05 | 0.027333 | 0.55573  | -0.50337 | 2.29E-31 | -0.35859 | 1.29E-15 | -0.38124 |
| 0.111006 | 0.0164   | 0.339636 | 4.51E-14 | -0.0723  | 0.11867  | 0.248993 | 4.97E-08 | -0.21622 |
| -0.16767 | 0.00027  | 0.015414 | 0.73972  | -0.54982 | 3.01E-38 | -0.25905 | 1.34E-08 | -0.4584  |
| 0.137125 | 0.00298  | 0.493062 | 5.59E-30 | -0.1455  | 0.00162  | 0.12734  | 0.00586  | -0.07111 |
| 0.13139  | 0.00445  | 0.529337 | 4.41E-35 | -0.12603 | 0.00639  | 0.142154 | 0.00207  | -0.02942 |
| -0.16357 | 0.00039  | -0.22051 | 1.50E-06 | 0.122849 | 0.00787  | 0.022191 | 0.63242  | 0.117555 |
| 0.002075 | 0.96433  | 0.072907 | 0.11562  | -0.26638 | 5.00E-09 | -0.1286  | 0.00538  | -0.25251 |
| 0.170885 | 0.00021  | 0.397961 | 3.58E-19 | -0.13031 | 0.0048   | 0.068978 | 0.13664  | -0.08306 |
| 0.239008 | 1.72E-07 | 0.439463 | 1.79E-23 | -0.04861 | 0.29453  | 0.113955 | 0.01374  | 0.007929 |
| 0.040004 | 0.3884   | 0.301198 | 3.00E-11 | -0.1775  | 0.00012  | -0.0572  | 0.21731  | -0.19609 |
| 0.034493 | 0.4571   | 0.372353 | 8.34E-17 | -0.26852 | 3.73E-09 | -0.07412 | 0.10966  | -0.16847 |
| 0.122437 | 0.00808  | 0.424953 | 6.69E-22 | -0.17065 | 0.00021  | 0.012623 | 0.78556  | -0.1123  |
| 0.168094 | 0.00026  | 0.471248 | 3.42E-27 | -0.05176 | 0.26431  | 0.135348 | 0.00338  | 0.033669 |
| 0.050757 | 0.27367  | 0.198906 | 1.49E-05 | -0.29373 | 9.55E-11 | -0.05912 | 0.20219  | -0.31045 |
| 0.327814 | 3.68E-13 | 0.617372 | 2.09E-50 | 0.075167 | 0.10474  | 0.263543 | 7.36E-09 | 0.14363  |
| -0.12837 | 0.00547  | 0.057056 | 0.21844  | -0.49417 | 3.99E-30 | -0.25421 | 2.54E-08 | -0.44174 |
| 0.440959 | 1.22E-23 | 0.164624 | 0.00035  | -0.11056 | 0.01684  | 0.027118 | 0.55884  | -0.19103 |
| -0.12606 | 0.00638  | 0.099942 | 0.03082  | -0.44678 | 2.70E-24 | -0.29657 | 6.18E-11 | -0.35904 |
| 0.191228 | 3.18E-05 | 0.470004 | 4.87E-27 | -0.00674 | 0.88449  | 0.161444 | 0.00046  | 0.019208 |
| -0.03152 | 0.49681  | 0.098333 | 0.03363  | -0.33699 | 7.27E-14 | -0.21331 | 3.31E-06 | -0.2578  |
| -0.01753 | 0.70554  | 0.25152  | 3.60E-08 | -0.18209 | 7.57E-05 | -0.03852 | 0.40624  | -0.09926 |
| 0.038778 | 0.40312  | 0.215031 | 2.74E-06 | -0.20211 | 1.08E-05 | 0.039135 | 0.39879  | -0.27957 |
| -0.0498  | 0.28286  | 0.251023 | 3.83E-08 | -0.43094 | 1.53E-22 | -0.1342  | 0.00367  | -0.36046 |
| 0.257377 | 1.68E-08 | 0.367753 | 2.11E-16 | 0.134924 | 0.00349  | 0.25044  | 4.13E-08 | 0.075544 |
| 0.198167 | 1.60E-05 | 0.378068 | 2.57E-17 | 0.007599 | 0.8699   | 0.062553 | 0.17718  | -0.00818 |
| -0.16117 | 0.00047  | -0.03478 | 0.45343  | -0.47111 | 3.57E-27 | -0.29541 | 7.38E-11 | -0.45758 |
| -0.26897 | 3.50E-09 | -0.04543 | 0.32726  | -0.66157 | 4.15E-60 | -0.40664 | 5.05E-20 | -0.55381 |
| 0.083771 | 0.07051  | 0.267492 | 4.30E-09 | -0.34696 | 1.17E-14 | -0.13412 | 0.00369  | -0.28904 |
| 0.028041 | 0.54553  | 0.240005 | 1.52E-07 | -0.23374 | 3.25E-07 | -0.14306 | 0.00194  | -0.12518 |
| 0.082609 | 0.07451  | 0.218807 | 1.81E-06 | 0.020856 | 0.65305  | 0.051164 | 0.26984  | -0.04801 |
| -0.05407 | 0.24351  | 0.13769  | 0.00287  | -0.21705 | 2.20E-06 | -0.09771 | 0.03477  | -0.13648 |
| 0.043929 | 0.34353  | 0.326881 | 4.32E-13 | -0.13694 | 0.00302  | -0.06719 | 0.14712  | -0.04206 |
| 0.052698 | 0.25573  | 0.339457 | 4.66E-14 | -0.15761 | 0.00063  | -0.06029 | 0.19337  | -0.11054 |
| 0.053434 | 0.24914  | 0.074333 | 0.10866  | -0.26672 | 4.77E-09 | -0.13879 | 0.00265  | -0.20389 |
| 0.030332 | 0.51319  | 0.324092 | 6.99E-13 | -0.19769 | 1.68E-05 | 0.004213 | 0.92765  | -0.04546 |
| 0.032233 | 0.48713  | 0.169094 | 0.00024  | -0.25903 | 1.35E-08 | -0.05805 | 0.21051  | -0.27796 |
| 0.045628 | 0.32516  | 0.071496 | 0.12286  | -0.19744 | 1.73E-05 | -0.191   | 3.26E-05 | -0.03855 |
| 0.208654 | 5.44E-06 | 0.439906 | 1.60E-23 | 0.087978 | 0.05746  | 0.22016  | 1.56E-06 | 0.063704 |
| -0.05573 | 0.22936  | -0.01084 | 0.81531  | -0.38097 | 1.41E-17 | -0.25239 | 3.22E-08 | -0.3062  |
| 0.085604 | 0.06455  | 0.200602 | 1.25E-05 | -0.10617 | 0.02175  | -0.02098 | 0.65109  | -0.07889 |
| 0.188977 | 3.96E-05 | 0.334216 | 1.19E-13 | -0.09663 | 0.03684  | -0.03256 | 0.48266  | -0.04871 |

|          |          |          |          |          |          |          |          |          |
|----------|----------|----------|----------|----------|----------|----------|----------|----------|
| 0.011159 | 0.80994  | 0.262    | 9.06E-09 | -0.21711 | 2.18E-06 | -0.07603 | 0.10082  | -0.22279 |
| -0.07826 | 0.09119  | -0.04076 | 0.37948  | -0.28391 | 4.16E-10 | -0.23551 | 2.63E-07 | -0.30155 |
| 0.00311  | 0.94656  | 0.224194 | 9.86E-07 | -0.20051 | 1.27E-05 | -0.07736 | 0.09497  | -0.10013 |
| -0.10159 | 0.02815  | 0.190982 | 3.26E-05 | -0.41258 | 1.28E-20 | -0.13578 | 0.00328  | -0.27639 |
| 0.162458 | 0.00042  | 0.41197  | 1.47E-20 | 0.037228 | 0.42219  | 0.289276 | 1.87E-10 | -0.06443 |
| 0.26138  | 9.85E-09 | 0.404858 | 7.58E-20 | -0.02645 | 0.56859  | 0.058384 | 0.20789  | -0.08176 |
| 0.149626 | 0.00118  | 0.534109 | 8.43E-36 | 0.098465 | 0.03339  | 0.217402 | 2.11E-06 | 0.099268 |
| 0.085323 | 0.06544  | 0.311171 | 6.07E-12 | -0.11681 | 0.01153  | -0.00639 | 0.89045  | -0.02026 |
| 0.063824 | 0.16852  | 0.396407 | 5.05E-19 | -0.20319 | 9.63E-06 | 0.060383 | 0.19272  | -0.10196 |
| 0.05126  | 0.26895  | 0.116408 | 0.01182  | -0.17774 | 0.00011  | -0.07874 | 0.08918  | -0.24424 |
| 0.212687 | 3.53E-06 | 0.562364 | 2.69E-40 | 0.130107 | 0.00486  | 0.291335 | 1.37E-10 | 0.114808 |
| -0.09057 | 0.05046  | -0.04287 | 0.3553   | -0.34694 | 1.18E-14 | -0.13089 | 0.00461  | -0.39433 |
| 0.086075 | 0.06309  | 0.404258 | 8.69E-20 | -0.2443  | 8.97E-08 | -0.01966 | 0.67181  | -0.12962 |
| -0.03098 | 0.50425  | 0.242382 | 1.14E-07 | -0.41714 | 4.38E-21 | -0.23136 | 4.30E-07 | -0.24018 |
| 0.082082 | 0.07639  | 0.289613 | 1.78E-10 | -0.3046  | 1.75E-11 | -0.05091 | 0.27224  | -0.30435 |
| -0.01675 | 0.71811  | 0.137377 | 0.00293  | -0.18056 | 8.72E-05 | -0.0023  | 0.96047  | -0.30999 |
| 0.216197 | 2.41E-06 | 0.336517 | 7.92E-14 | -0.05866 | 0.20574  | 0.049983 | 0.28107  | -0.08375 |
| 0.093515 | 0.0434   | 0.076476 | 0.09881  | -0.21731 | 2.13E-06 | -0.17644 | 0.00013  | -0.16903 |
| 0.159238 | 0.00055  | 0.170366 | 0.00022  | 0.029418 | 0.52598  | -0.0017  | 0.97076  | -0.09768 |
| 0.166724 | 0.0003   | 0.50143  | 4.21E-31 | -0.05587 | 0.2282   | 0.151961 | 0.00099  | 0.016853 |
| -0.05613 | 0.22604  | -0.01811 | 0.69621  | -0.35939 | 1.10E-15 | -0.23331 | 3.42E-07 | -0.40483 |
| 0.168358 | 0.00026  | 0.300503 | 3.35E-11 | -0.11531 | 0.01265  | -0.115   | 0.01289  | -0.06673 |
| 0.035191 | 0.44804  | 0.33731  | 6.86E-14 | -0.12376 | 0.00741  | -0.07471 | 0.10685  | 0.025209 |
| 0.324645 | 6.36E-13 | 0.589115 | 5.68E-45 | 0.00953  | 0.83726  | 0.2939   | 9.31E-11 | 0.053527 |
| 0.013586 | 0.76966  | 0.179112 | 9.95E-05 | -0.16186 | 0.00045  | -0.06225 | 0.17927  | -0.23094 |
| -0.00462 | 0.92066  | -0.14016 | 0.0024   | 0.442512 | 8.19E-24 | 0.314561 | 3.48E-12 | 0.319259 |
| 0.238197 | 1.90E-07 | 0.596217 | 2.75E-46 | 0.126057 | 0.00638  | 0.322456 | 9.25E-13 | 0.120297 |
| 0.014415 | 0.75603  | 0.100136 | 0.03049  | -0.18457 | 6.01E-05 | -0.02724 | 0.55711  | -0.26027 |
| 0.16871  | 0.00025  | 0.411405 | 1.68E-20 | -0.0574  | 0.21567  | 0.066484 | 0.15144  | -0.02694 |
| 0.039465 | 0.39483  | 0.102859 | 0.02623  | -0.32393 | 7.19E-13 | -0.26561 | 5.56E-09 | -0.17663 |
| 0.029823 | 0.5203   | -0.07287 | 0.11582  | -0.16386 | 0.00038  | -0.15771 | 0.00063  | -0.08722 |
| -0.04913 | 0.28941  | 0.271548 | 2.45E-09 | -0.40694 | 4.71E-20 | -0.14612 | 0.00154  | -0.30879 |
| -0.0456  | 0.32542  | 0.277693 | 1.03E-09 | -0.38468 | 6.42E-18 | -0.03187 | 0.49207  | -0.30006 |
| -0.01232 | 0.79065  | -0.04696 | 0.31128  | 0.106425 | 0.02144  | 0.046787 | 0.31302  | 0.132875 |
| 0.020626 | 0.65662  | -0.00488 | 0.91626  | 0.232507 | 3.76E-07 | 0.109931 | 0.01748  | 0.255513 |
| 0.079589 | 0.08579  | -0.0822  | 0.07596  | 0.124998 | 0.00684  | -0.03365 | 0.4682   | 0.077495 |
| 0.052971 | 0.25327  | -0.05706 | 0.21841  | 0.182882 | 7.04E-05 | 0.028971 | 0.53229  | 0.205938 |
| -0.12515 | 0.00677  | -0.15816 | 0.0006   | 0.048767 | 0.29295  | 0.028742 | 0.53554  | 0.095095 |
| -0.01122 | 0.80884  | -0.0388  | 0.40285  | 0.20595  | 7.23E-06 | 0.062501 | 0.17754  | 0.255974 |
| 0.026748 | 0.56423  | -0.00488 | 0.91624  | 0.247546 | 5.97E-08 | 0.112055 | 0.01541  | 0.269993 |
| -0.03903 | 0.40006  | -0.06086 | 0.18922  | -0.01669 | 0.719    | -0.05189 | 0.26308  | -0.01502 |
| -0.01105 | 0.81176  | -0.04902 | 0.29045  | 0.002906 | 0.95006  | -0.03302 | 0.47655  | 0.077483 |
| -0.06784 | 0.14325  | -0.13177 | 0.00434  | -0.10817 | 0.01938  | -0.16309 | 0.0004   | -0.0007  |
| 0.024586 | 0.59614  | 0.004042 | 0.93058  | 0.216891 | 2.23E-06 | 0.08427  | 0.06884  | 0.238846 |
| 0.011147 | 0.81014  | -0.00123 | 0.97885  | 0.25857  | 1.43E-08 | 0.116609 | 0.01168  | 0.276119 |

|          |          |          |          |          |          |          |          |          |
|----------|----------|----------|----------|----------|----------|----------|----------|----------|
| 0.012775 | 0.78305  | -0.03573 | 0.44112  | 0.100184 | 0.03042  | 0.112425 | 0.01507  | 0.131942 |
| 0.053402 | 0.24942  | 0.028705 | 0.53606  | 0.233028 | 3.53E-07 | 0.10621  | 0.0217   | 0.267943 |
| -0.01026 | 0.82505  | 0.00221  | 0.96201  | 0.132175 | 0.00422  | 0.089244 | 0.05395  | 0.09947  |
| 0.003628 | 0.93768  | -0.06523 | 0.1593   | 0.220098 | 1.57E-06 | 0.053518 | 0.24839  | 0.255281 |
| 0.089296 | 0.05381  | -0.00445 | 0.92365  | 0.272134 | 2.25E-09 | 0.054081 | 0.24344  | 0.288292 |
| -0.01226 | 0.79156  | -0.06372 | 0.16924  | 0.140254 | 0.00238  | 0.023114 | 0.61833  | 0.184648 |
| 0.029598 | 0.52345  | 0.010545 | 0.8202   | 0.241785 | 1.23E-07 | 0.110845 | 0.01656  | 0.264648 |
| 0.024248 | 0.6012   | -0.0401  | 0.3872   | 0.209663 | 4.89E-06 | 0.067493 | 0.14532  | 0.236609 |
| 0.012308 | 0.7908   | -0.02888 | 0.5336   | 0.240848 | 1.37E-07 | 0.068483 | 0.13949  | 0.296414 |
| 0.034188 | 0.46109  | -0.02832 | 0.54159  | 0.148981 | 0.00124  | 0.05073  | 0.27393  | 0.19931  |
| 0.00114  | 0.9804   | 0.025521 | 0.58223  | 0.146472 | 0.0015   | 0.070361 | 0.12893  | 0.159833 |
| -0.11585 | 0.01223  | -0.14231 | 0.00205  | 0.03446  | 0.45754  | -0.06267 | 0.17635  | 0.099218 |
| 0.032719 | 0.48059  | -0.11254 | 0.01496  | 0.227653 | 6.63E-07 | 0.043635 | 0.34677  | 0.199239 |
| -0.00039 | 0.99325  | -0.06587 | 0.15525  | 0.194582 | 2.29E-05 | 0.061297 | 0.18606  | 0.240766 |
| 0.015394 | 0.74004  | -0.00015 | 0.99748  | 0.249004 | 4.96E-08 | 0.090037 | 0.05184  | 0.284478 |
| -0.03281 | 0.47937  | -0.03679 | 0.42768  | 0.211265 | 4.12E-06 | 0.074285 | 0.10889  | 0.222375 |
| -0.01069 | 0.81781  | -0.02349 | 0.61264  | 0.10024  | 0.03032  | 0.020962 | 0.65139  | 0.086637 |
| 0.008678 | 0.85163  | 0.034978 | 0.4508   | 0.237781 | 2.00E-07 | 0.12088  | 0.00893  | 0.286253 |
| 0.009674 | 0.83484  | -0.02575 | 0.57889  | 0.24742  | 6.06E-08 | 0.088162 | 0.05694  | 0.281848 |
| -0.00964 | 0.83535  | -0.06876 | 0.13787  | 0.205662 | 7.45E-06 | 0.030323 | 0.51332  | 0.257086 |
| 0.103254 | 0.02566  | 0.071723 | 0.12167  | 0.266649 | 4.82E-09 | 0.131757 | 0.00434  | 0.313844 |
| 0.056285 | 0.22473  | 0.014541 | 0.75397  | 0.314259 | 3.66E-12 | 0.169709 | 0.00023  | 0.285347 |
| -0.00997 | 0.8298   | -0.10357 | 0.02521  | 0.058956 | 0.20346  | -0.02932 | 0.52734  | 0.097452 |
| -0.00247 | 0.95753  | -0.01718 | 0.71122  | 0.175676 | 0.00014  | 0.105571 | 0.02251  | 0.213573 |
| 0.074614 | 0.10732  | -0.03752 | 0.4186   | 0.365659 | 3.21E-16 | 0.089717 | 0.05268  | 0.38112  |
| 0.017057 | 0.71313  | -0.03446 | 0.45751  | 0.269311 | 3.34E-09 | 0.093434 | 0.04358  | 0.298834 |
| 0.033203 | 0.47411  | -0.02639 | 0.56946  | 0.202036 | 1.08E-05 | 0.073622 | 0.11209  | 0.245304 |
| 0.003757 | 0.93546  | -0.10412 | 0.02444  | 0.120867 | 0.00893  | -0.04271 | 0.35711  | 0.14794  |
| 0.066818 | 0.14939  | 0.038551 | 0.40588  | 0.312925 | 4.56E-12 | 0.12991  | 0.00493  | 0.419506 |
| -0.00241 | 0.95863  | -0.05191 | 0.26294  | 0.116839 | 0.01151  | 0.029812 | 0.52044  | 0.163497 |
| 0.041118 | 0.37531  | -0.05726 | 0.21678  | 0.218397 | 1.89E-06 | 0.084502 | 0.06808  | 0.262442 |
| -0.02032 | 0.6614   | -0.06236 | 0.17855  | 0.226158 | 7.88E-07 | 0.051506 | 0.26665  | 0.247991 |
| 0.028281 | 0.5421   | 0.023108 | 0.61842  | 0.182843 | 7.06E-05 | 0.115185 | 0.01275  | 0.193272 |
| 0.221389 | 1.35E-06 | 0.062228 | 0.17945  | 0.340115 | 4.13E-14 | 0.163527 | 0.00039  | 0.370082 |
| 0.127248 | 0.00589  | 0.106306 | 0.02158  | 0.383661 | 7.97E-18 | 0.265232 | 5.85E-09 | 0.389505 |
| 0.004305 | 0.92608  | -0.0811  | 0.08     | 0.040207 | 0.38599  | -0.12574 | 0.00651  | 0.144681 |
| -0.0052  | 0.91075  | 0.003268 | 0.94385  | 0.12949  | 0.00507  | 0.011796 | 0.79931  | 0.184623 |
| 0.031491 | 0.49722  | 0.020277 | 0.66207  | -0.00636 | 0.89089  | -0.03675 | 0.42813  | 0.087913 |
| 0.139766 | 0.00247  | 0.349144 | 7.80E-15 | 0.19876  | 1.51E-05 | 0.180756 | 8.56E-05 | 0.284581 |
| -0.00493 | 0.91533  | -0.06024 | 0.19375  | 0.162231 | 0.00043  | 0.030734 | 0.50762  | 0.215584 |
| 0.087828 | 0.05789  | 0.082618 | 0.07448  | 0.227172 | 7.01E-07 | 0.10162  | 0.0281   | 0.261075 |
| -0.05676 | 0.22083  | -0.06824 | 0.14091  | 0.171928 | 0.00019  | 0.058445 | 0.20742  | 0.218278 |
| 0.153188 | 0.0009   | 0.073695 | 0.11173  | 0.161821 | 0.00045  | 0.125889 | 0.00645  | 0.258426 |
| 0.144512 | 0.00174  | -0.0163  | 0.72529  | 0.085207 | 0.0658   | 0.034826 | 0.45277  | 0.132348 |
| -0.06186 | 0.18201  | -0.10303 | 0.02599  | 0.15385  | 0.00085  | 0.108122 | 0.01943  | 0.137978 |

|          |          |          |          |          |          |          |          |          |
|----------|----------|----------|----------|----------|----------|----------|----------|----------|
| 0.058096 | 0.21014  | -0.05755 | 0.21447  | 0.141732 | 0.00214  | 0.100321 | 0.03019  | 0.06099  |
| 0.079959 | 0.08434  | -0.05478 | 0.23741  | 0.127671 | 0.00573  | 0.014627 | 0.75256  | 0.117274 |
| 0.158313 | 0.0006   | -0.06222 | 0.17953  | 0.141658 | 0.00215  | 0.026273 | 0.57117  | 0.157691 |
| 0.138794 | 0.00265  | 0.160484 | 0.0005   | 0.340872 | 3.60E-14 | 0.38255  | 1.01E-17 | 0.301343 |
| 0.084303 | 0.06874  | 0.020646 | 0.65631  | 0.207118 | 6.40E-06 | 0.115814 | 0.01226  | 0.253204 |
| -0.0135  | 0.7711   | 0.041056 | 0.37604  | 0.202897 | 9.92E-06 | 0.084063 | 0.06953  | 0.298223 |
| -0.02301 | 0.61988  | -0.10506 | 0.02317  | 0.112902 | 0.01464  | -0.02075 | 0.65477  | 0.187488 |
| 0.057777 | 0.21267  | 0.014152 | 0.76034  | 0.261051 | 1.03E-08 | 0.135939 | 0.00325  | 0.27631  |
| 0.162394 | 0.00043  | 0.090834 | 0.04979  | 0.246517 | 6.79E-08 | 0.218162 | 1.94E-06 | 0.254602 |
| 0.012034 | 0.79536  | 0.000847 | 0.98544  | 0.215963 | 2.47E-06 | 0.101723 | 0.02794  | 0.239555 |
| 0.14179  | 0.00213  | 0.029721 | 0.52172  | 0.355776 | 2.21E-15 | 0.203274 | 9.54E-06 | 0.321838 |
| -0.00974 | 0.83373  | -0.05885 | 0.20429  | 0.168732 | 0.00025  | 0.05087  | 0.27261  | 0.19802  |
| 0.000511 | 0.99122  | -0.02236 | 0.6298   | 0.196429 | 1.91E-05 | 0.058053 | 0.21049  | 0.227151 |
| -0.02286 | 0.62227  | -0.02699 | 0.56064  | 0.096497 | 0.03711  | 0.040413 | 0.38357  | 0.134377 |
| 0.035598 | 0.4428   | 0.060913 | 0.18883  | 0.192017 | 2.95E-05 | 0.131272 | 0.00449  | 0.192172 |
| -0.02204 | 0.6347   | -0.06123 | 0.18653  | 0.211359 | 4.08E-06 | 0.060163 | 0.19435  | 0.24213  |
| 0.041832 | 0.36708  | 0.023421 | 0.61367  | 0.247893 | 5.71E-08 | 0.154532 | 0.00081  | 0.209411 |
| 0.051254 | 0.26901  | -0.04855 | 0.2951   | 0.21065  | 4.40E-06 | 0.062216 | 0.17953  | 0.257336 |
| -0.15818 | 0.0006   | -0.11859 | 0.01032  | 0.060197 | 0.19409  | 0.01189  | 0.79775  | 0.100498 |
| 0.020913 | 0.65215  | 0.013602 | 0.76939  | 0.280879 | 6.48E-10 | 0.131901 | 0.0043   | 0.305124 |
| -0.03057 | 0.50989  | -0.13896 | 0.00262  | 0.044736 | 0.33472  | -0.0101  | 0.82766  | 0.087166 |
| 0.062664 | 0.17642  | 0.076075 | 0.10059  | 0.337374 | 6.79E-14 | 0.293433 | 9.99E-11 | 0.320339 |
| 0.109433 | 0.018    | 0.269429 | 3.29E-09 | 0.251231 | 3.73E-08 | 0.274654 | 1.58E-09 | 0.257397 |
| 0.047338 | 0.30734  | 0.230655 | 4.67E-07 | 0.113893 | 0.01379  | 0.35088  | 5.63E-15 | 0.021538 |
| 0.041401 | 0.37204  | 0.07312  | 0.11456  | 0.27313  | 1.96E-09 | 0.19342  | 2.57E-05 | 0.256195 |
| -0.06675 | 0.14978  | -0.03034 | 0.51308  | 0.042233 | 0.36249  | 0.066917 | 0.14879  | 0.067529 |
| 0.079336 | 0.08679  | 0.042613 | 0.35819  | 0.374549 | 5.32E-17 | 0.210226 | 4.60E-06 | 0.373814 |
| 0.097149 | 0.03584  | 0.041139 | 0.37508  | 0.386358 | 4.49E-18 | 0.180028 | 9.15E-05 | 0.384038 |
| 0.070445 | 0.12848  | 0.048113 | 0.29948  | 0.355995 | 2.12E-15 | 0.203219 | 9.60E-06 | 0.350488 |
| -0.03776 | 0.41564  | -0.05449 | 0.23991  | 0.040563 | 0.3818   | 0.023857 | 0.60708  | 0.101376 |
| 0.053174 | 0.25145  | -0.12117 | 0.00877  | 0.259201 | 1.32E-08 | 0.011769 | 0.79976  | 0.281489 |
| 0.079302 | 0.08693  | 0.023198 | 0.61705  | 0.233952 | 3.17E-07 | 0.055636 | 0.23014  | 0.268345 |
| -0.01559 | 0.73678  | 0.009007 | 0.84608  | 0.142692 | 0.00199  | 0.07476  | 0.10663  | 0.102499 |
| 0.067279 | 0.1466   | 0.211001 | 4.24E-06 | 0.30134  | 2.94E-11 | 0.310974 | 6.27E-12 | 0.347132 |
| 0.293133 | 1.05E-10 | 0.320597 | 1.27E-12 | 0.50191  | 3.62E-31 | 0.414121 | 8.91E-21 | 0.51422  |
| 0.009378 | 0.83983  | 0.030791 | 0.50683  | 0.17041  | 0.00022  | 0.092514 | 0.0457   | 0.172844 |
| 0.028672 | 0.53653  | 0.028166 | 0.54374  | 0.231448 | 4.26E-07 | 0.175012 | 0.00014  | 0.228339 |
| 0.105855 | 0.02215  | 0.129542 | 0.00505  | 0.111786 | 0.01566  | 0.055867 | 0.2282   | 0.159816 |
| 0.07229  | 0.11875  | -0.102   | 0.02753  | 0.045537 | 0.32614  | -0.08698 | 0.06036  | 0.093284 |
| 0.006203 | 0.89364  | -0.00096 | 0.98352  | -0.1475  | 0.00139  | -0.13263 | 0.00409  | -0.25069 |
| 0.066358 | 0.15222  | -0.01171 | 0.80067  | 0.352206 | 4.38E-15 | 0.187851 | 4.41E-05 | 0.31972  |
| 0.163331 | 0.00039  | 0.194156 | 2.39E-05 | 0.37582  | 4.10E-17 | 0.320747 | 1.24E-12 | 0.363885 |
| -0.02725 | 0.55688  | 0.018239 | 0.69423  | 0.08276  | 0.07398  | 0.155955 | 0.00072  | 0.036249 |
| -0.02981 | 0.52048  | 0.078839 | 0.08879  | 0.147476 | 0.00139  | 0.206246 | 7.01E-06 | 0.178923 |
| 0.002235 | 0.96159  | -0.03065 | 0.50882  | 0.09391  | 0.04251  | 0.015893 | 0.73193  | 0.125946 |

|          |          |          |          |          |          |          |          |          |
|----------|----------|----------|----------|----------|----------|----------|----------|----------|
| 0.021981 | 0.63565  | -0.01952 | 0.67401  | 0.139055 | 0.0026   | 0.048474 | 0.29587  | 0.168248 |
| -0.09232 | 0.04615  | -0.07285 | 0.1159   | -0.16417 | 0.00037  | -0.19457 | 2.30E-05 | -0.01023 |
| -0.00801 | 0.86299  | -0.07607 | 0.10063  | 0.109506 | 0.01792  | -0.0142  | 0.75951  | 0.131415 |
| 0.182075 | 7.58E-05 | -0.01344 | 0.77205  | 0.374787 | 5.07E-17 | 0.099284 | 0.03194  | 0.349842 |
| 0.055335 | 0.23267  | -0.01481 | 0.74964  | 0.227391 | 6.84E-07 | 0.141056 | 0.00225  | 0.22781  |
| 0.140425 | 0.00235  | 0.114041 | 0.01367  | 0.326137 | 4.92E-13 | 0.190085 | 3.56E-05 | 0.326374 |
| 0.088766 | 0.05525  | -0.03591 | 0.43886  | 0.184315 | 6.16E-05 | 0.093804 | 0.04275  | 0.215991 |
| 0.052256 | 0.25974  | 0.122597 | 0.008    | -0.05322 | 0.25107  | -0.01517 | 0.74368  | -0.14111 |
| -0.0049  | 0.91593  | -0.01177 | 0.7997   | 0.203918 | 8.93E-06 | 0.078039 | 0.09209  | 0.231606 |
| -0.07434 | 0.10862  | -0.06125 | 0.18642  | 0.110105 | 0.0173   | 0.030036 | 0.51731  | 0.093342 |
| 0.051974 | 0.26232  | 0.007234 | 0.87611  | 0.225242 | 8.75E-07 | 0.071977 | 0.12035  | 0.286255 |
| -0.0083  | 0.85808  | -0.06186 | 0.18207  | 0.215521 | 2.60E-06 | 0.055421 | 0.23194  | 0.270694 |
| 0.019763 | 0.67012  | -0.12916 | 0.00518  | 0.192571 | 2.79E-05 | 0.082818 | 0.07378  | 0.200364 |
| 0.011877 | 0.79797  | -0.04756 | 0.30508  | 0.158072 | 0.00061  | 0.026576 | 0.56674  | 0.242327 |
| 0.100203 | 0.03038  | 0.083698 | 0.07076  | 0.304481 | 1.79E-11 | 0.152265 | 0.00096  | 0.312686 |
| -0.03766 | 0.41685  | -0.2498  | 4.48E-08 | 0.112568 | 0.01494  | -0.05879 | 0.20473  | 0.119558 |
| 0.139865 | 0.00245  | 0.218869 | 1.80E-06 | 0.370332 | 1.26E-16 | 0.306841 | 1.22E-11 | 0.348092 |
| -0.2108  | 4.33E-06 | -0.19992 | 1.34E-05 | -0.29332 | 1.02E-10 | -0.14839 | 0.0013   | -0.34667 |
| 0.022335 | 0.63021  | -0.00862 | 0.85264  | 0.233671 | 3.27E-07 | 0.086884 | 0.06064  | 0.274827 |
| 0.043967 | 0.34311  | 0.008687 | 0.85148  | 0.252985 | 2.98E-08 | 0.123933 | 0.00733  | 0.299855 |
| -0.01234 | 0.79025  | 0.05683  | 0.22027  | 0.109687 | 0.01773  | 0.090183 | 0.05146  | 0.157718 |
| 0.037113 | 0.42363  | -0.02412 | 0.60307  | 0.173402 | 0.00017  | 0.06967  | 0.13274  | 0.203395 |
| 0.044853 | 0.33345  | 0.033758 | 0.46675  | 0.121311 | 0.00868  | 0.055962 | 0.22741  | 0.184419 |
| 0.017487 | 0.70624  | -0.0243  | 0.60041  | 0.213318 | 3.30E-06 | 0.078092 | 0.09187  | 0.240671 |
| 0.018694 | 0.687    | -0.03208 | 0.48923  | 0.135523 | 0.00334  | 0.015766 | 0.734    | 0.235341 |
| 0.040088 | 0.3874   | 0.04697  | 0.31113  | -0.05091 | 0.27219  | 0.036447 | 0.432    | -0.02619 |
| 0.259064 | 1.34E-08 | 0.10465  | 0.02372  | 0.158385 | 0.00059  | 0.17022  | 0.00022  | 0.191831 |
| 0.093552 | 0.04331  | 0.052281 | 0.25952  | 0.16863  | 0.00025  | 0.067943 | 0.14264  | 0.201193 |
| 0.122825 | 0.00788  | -0.09364 | 0.0431   | 0.266481 | 4.93E-09 | 0.037446 | 0.41948  | 0.283889 |
| 0.010713 | 0.81739  | 0.12525  | 0.00673  | 0.135446 | 0.00336  | 0.199933 | 1.34E-05 | 0.161958 |
| 0.005213 | 0.91054  | -0.02435 | 0.59968  | 0.224693 | 9.32E-07 | 0.061695 | 0.18321  | 0.277561 |
| 0.113876 | 0.0138   | 0.026844 | 0.56282  | 0.265012 | 6.03E-09 | 0.122524 | 0.00803  | 0.287822 |
| 0.114877 | 0.01299  | 0.09433  | 0.04159  | 0.153946 | 0.00084  | 0.004163 | 0.92851  | 0.22546  |
| 0.064413 | 0.16462  | -0.00485 | 0.91667  | 0.17641  | 0.00013  | 0.021878 | 0.63722  | 0.214052 |
| 0.002883 | 0.95046  | -0.05035 | 0.27753  | 0.294737 | 8.19E-11 | 0.15712  | 0.00066  | 0.281171 |
| 8.15E-05 | 0.9986   | -0.02226 | 0.63136  | 0.22821  | 6.22E-07 | 0.093421 | 0.04361  | 0.272646 |
| 0.002041 | 0.96492  | 0.097865 | 0.03449  | 0.116324 | 0.01188  | 0.072843 | 0.11595  | 0.199035 |
| 0.044932 | 0.33261  | -0.00701 | 0.87995  | 0.171907 | 0.00019  | 0.060126 | 0.19462  | 0.20171  |
| -0.06735 | 0.14616  | 0.045968 | 0.32157  | 0.056541 | 0.22263  | 0.167388 | 0.00028  | 0.079851 |
| 0.246902 | 6.47E-08 | 0.391688 | 1.42E-18 | 0.454415 | 3.57E-25 | 0.4326   | 1.01E-22 | 0.447241 |
| 0.07339  | 0.11322  | 0.078721 | 0.08927  | 0.310791 | 6.46E-12 | 0.196956 | 1.81E-05 | 0.331195 |
| -0.0154  | 0.73993  | -0.08362 | 0.07102  | 0.183808 | 6.45E-05 | 0.041027 | 0.37638  | 0.223196 |
| 0.034958 | 0.45106  | 0.064284 | 0.16547  | 0.213364 | 3.28E-06 | 0.116574 | 0.0117   | 0.274984 |
| -0.00304 | 0.94779  | -0.04642 | 0.31682  | 0.243915 | 9.41E-08 | 0.160467 | 0.0005   | 0.234204 |
| -0.00435 | 0.92525  | -0.02315 | 0.61781  | 0.199493 | 1.40E-05 | 0.113866 | 0.01381  | 0.203582 |

|          |          |          |          |          |          |          |          |          |
|----------|----------|----------|----------|----------|----------|----------|----------|----------|
| 0.007793 | 0.86662  | -0.02972 | 0.52179  | 0.226517 | 7.56E-07 | 0.070788 | 0.12662  | 0.277273 |
| 0.051657 | 0.26525  | -0.0206  | 0.65698  | 0.177667 | 0.00011  | 0.08299  | 0.07318  | 0.230391 |
| 0.04419  | 0.34066  | -0.02713 | 0.55867  | 0.133714 | 0.00379  | 0.025429 | 0.5836   | 0.143419 |
| -0.00014 | 0.99757  | 0.279607 | 7.79E-10 | 0.09632  | 0.03746  | 0.245942 | 7.30E-08 | -0.0079  |
| 0.00803  | 0.8626   | 0.041302 | 0.37318  | 0.028396 | 0.54045  | -0.04987 | 0.28219  | 0.174263 |
| -0.00324 | 0.94438  | -0.02764 | 0.55128  | 0.190857 | 3.30E-05 | 0.084831 | 0.06701  | 0.239358 |
| 0.25861  | 1.42E-08 | 0.251746 | 3.49E-08 | 0.345546 | 1.53E-14 | 0.306183 | 1.36E-11 | 0.392966 |
| -0.03149 | 0.49726  | -0.03707 | 0.42416  | 0.255801 | 2.06E-08 | 0.163871 | 0.00038  | 0.263524 |
| 0.014033 | 0.7623   | -0.03836 | 0.40825  | 0.223076 | 1.12E-06 | 0.108103 | 0.01945  | 0.200836 |
| 0.037127 | 0.42346  | 0.061313 | 0.18594  | 0.229236 | 5.52E-07 | 0.213155 | 3.36E-06 | 0.21456  |
| 0.078374 | 0.0907   | 0.073645 | 0.11197  | 0.262242 | 8.77E-09 | 0.188552 | 4.12E-05 | 0.223364 |
| 0.062441 | 0.17796  | -0.00387 | 0.93347  | 0.257992 | 1.55E-08 | 0.109811 | 0.0176   | 0.272924 |
| 0.037675 | 0.41664  | 0.025645 | 0.5804   | 0.270494 | 2.84E-09 | 0.14789  | 0.00135  | 0.279106 |
| 0.11687  | 0.01149  | 0.097171 | 0.0358   | 0.265887 | 5.35E-09 | 0.175903 | 0.00013  | 0.258393 |
| 0.095267 | 0.0396   | 0.067533 | 0.14507  | 0.302246 | 2.55E-11 | 0.189585 | 3.73E-05 | 0.273835 |
| 0.175526 | 0.00014  | 0.137926 | 0.00282  | 0.283532 | 4.40E-10 | 0.287147 | 2.58E-10 | 0.280382 |
| -0.03323 | 0.47374  | -0.04725 | 0.30821  | 0.138404 | 0.00272  | 0.031115 | 0.50237  | 0.195031 |
| 0.056905 | 0.21966  | 0.129654 | 0.00501  | 0.132521 | 0.00412  | 0.079075 | 0.08784  | 0.21892  |
| 0.168856 | 0.00025  | 0.281475 | 5.94E-10 | 0.0187   | 0.6869   | 0.103754 | 0.02495  | 0.049094 |
| -0.03004 | 0.51731  | -0.08842 | 0.05621  | 0.160933 | 0.00048  | 0.038779 | 0.40311  | 0.147084 |
| 0.184756 | 5.91E-05 | 0.061527 | 0.1844   | 0.440631 | 1.33E-23 | 0.225685 | 8.32E-07 | 0.410989 |
| 0.060248 | 0.19371  | -0.04587 | 0.32265  | 0.288725 | 2.04E-10 | 0.144025 | 0.00181  | 0.289367 |
| 0.03894  | 0.40116  | 0.00286  | 0.95086  | 0.211529 | 4.00E-06 | 0.055443 | 0.23176  | 0.296156 |
| -0.15002 | 0.00115  | -0.02881 | 0.53459  | -0.29251 | 1.15E-10 | -0.20465 | 8.27E-06 | -0.26185 |
| 0.067575 | 0.14483  | -0.02452 | 0.59709  | 0.13225  | 0.0042   | 5.34E-05 | 0.99908  | 0.174646 |
| 0.131884 | 0.00431  | 0.367864 | 2.07E-16 | 0.236773 | 2.26E-07 | 0.394092 | 8.41E-19 | 0.250636 |
| 0.148919 | 0.00125  | 0.161138 | 0.00047  | 0.241596 | 1.25E-07 | 0.177228 | 0.00012  | 0.231276 |
| 0.040088 | 0.3874   | -0.01965 | 0.67194  | 0.185728 | 5.39E-05 | 0.061789 | 0.18255  | 0.19042  |
| 0.005181 | 0.91108  | -0.00668 | 0.88551  | 0.132313 | 0.00418  | 0.041133 | 0.37514  | 0.139862 |
| -0.10551 | 0.02258  | -0.15385 | 0.00085  | 0.024536 | 0.59688  | 0.055577 | 0.23063  | 0.047356 |
| 0.007048 | 0.87926  | -0.08274 | 0.07405  | 0.049769 | 0.28314  | -0.01115 | 0.81001  | 0.0939   |
| -0.05189 | 0.26311  | -0.07175 | 0.12153  | 0.0757   | 0.10229  | 0.026622 | 0.56607  | 0.148565 |
| 0.00054  | 0.99072  | -0.01799 | 0.69819  | 0.134613 | 0.00356  | 0.049523 | 0.28553  | 0.195775 |
| -0.01005 | 0.82853  | -0.08346 | 0.07156  | 0.020921 | 0.65203  | 0.050123 | 0.27972  | 0.011412 |
| 0.05591  | 0.22784  | 0.020427 | 0.65973  | 0.230541 | 4.74E-07 | 0.061541 | 0.18431  | 0.300284 |
| 0.040701 | 0.38018  | -0.05314 | 0.25175  | 0.123794 | 0.0074   | 0.001449 | 0.97509  | 0.155785 |
| -0.16366 | 0.00038  | -0.18882 | 4.02E-05 | -0.10557 | 0.0225   | -0.2019  | 1.10E-05 | -0.02193 |
| 0.099388 | 0.03177  | 0.055716 | 0.22947  | 0.08408  | 0.06947  | 0.054455 | 0.24019  | 0.112764 |
| -0.00908 | 0.84489  | 0.025996 | 0.57522  | 0.123466 | 0.00756  | 0.070223 | 0.12969  | 0.106844 |
| -0.04529 | 0.32872  | -0.16217 | 0.00043  | 0.221833 | 1.29E-06 | 0.038846 | 0.40229  | 0.231088 |
| 0.082031 | 0.07657  | -0.01024 | 0.82531  | -0.09939 | 0.03175  | -0.16132 | 0.00047  | -0.10919 |
| 0.104287 | 0.02421  | 0.068127 | 0.14156  | 0.228006 | 6.37E-07 | 0.124374 | 0.00712  | 0.239964 |
| -0.08654 | 0.06168  | -0.04457 | 0.33653  | 0.15817  | 0.0006   | 0.124552 | 0.00704  | 0.198044 |
| 0.107816 | 0.01978  | -0.02404 | 0.60426  | 0.017776 | 0.70162  | -0.01995 | 0.66713  | -0.05992 |
| 0.048789 | 0.29273  | -0.02971 | 0.52193  | -0.00588 | 0.8991   | -0.06724 | 0.14681  | 0.111832 |

|          |          |          |          |          |          |          |          |          |
|----------|----------|----------|----------|----------|----------|----------|----------|----------|
| 0.104202 | 0.02433  | 0.097878 | 0.03447  | -0.10929 | 0.01815  | 0.011738 | 0.80028  | -0.20507 |
| 0.039962 | 0.3889   | 0.024424 | 0.59856  | 0.175898 | 0.00013  | 0.067782 | 0.14359  | 0.24165  |
| 0.022704 | 0.62457  | -0.1413  | 0.00221  | 0.03725  | 0.42192  | -0.07674 | 0.09765  | 0.034595 |
| 0.009745 | 0.83364  | -0.01795 | 0.69882  | 0.173978 | 0.00016  | 0.09781  | 0.03459  | 0.186064 |
| 0.034759 | 0.45364  | -0.15147 | 0.00103  | 0.072363 | 0.11837  | -0.0518  | 0.26391  | 0.040218 |
| 0.012817 | 0.78236  | 0.007866 | 0.86537  | 0.120974 | 0.00887  | 0.047987 | 0.30075  | 0.164075 |
| 0.188485 | 4.15E-05 | -0.0027  | 0.95351  | 0.351621 | 4.89E-15 | 0.192175 | 2.90E-05 | 0.314808 |
| 0.002523 | 0.95663  | -0.02527 | 0.58589  | 0.221253 | 1.38E-06 | 0.048894 | 0.2917   | 0.260948 |
| 0.093951 | 0.04242  | 0.039467 | 0.3948   | 0.3513   | 5.20E-15 | 0.192925 | 2.70E-05 | 0.350194 |
| -0.00364 | 0.93739  | -0.02397 | 0.60543  | 0.252893 | 3.01E-08 | 0.092322 | 0.04615  | 0.282942 |
| -0.01383 | 0.76558  | -0.02067 | 0.65586  | 0.008056 | 0.86215  | 0.018828 | 0.68487  | 0.030285 |
| 0.008257 | 0.85876  | -0.02446 | 0.598    | 0.214723 | 2.83E-06 | 0.073499 | 0.11269  | 0.262893 |
| -0.17774 | 0.00011  | -0.12763 | 0.00574  | -0.19911 | 1.46E-05 | -0.0558  | 0.2288   | -0.22544 |
| -0.08818 | 0.05688  | -0.01138 | 0.80623  | -0.07218 | 0.11929  | -0.08039 | 0.08266  | 0.017947 |
| -0.00117 | 0.97987  | -0.03113 | 0.50212  | 0.161347 | 0.00046  | 0.031176 | 0.50154  | 0.250762 |
| -0.10045 | 0.02998  | -0.16586 | 0.00032  | -0.00572 | 0.9019   | -0.04423 | 0.3402   | 0.080024 |
| 0.006546 | 0.8878   | -0.00491 | 0.91576  | 0.154248 | 0.00082  | 0.05849  | 0.20707  | 0.168477 |
| 0.015893 | 0.73194  | -0.00644 | 0.88956  | 0.157667 | 0.00063  | 0.048042 | 0.30019  | 0.206866 |
| -0.04291 | 0.35481  | -0.03545 | 0.44465  | 0.240808 | 1.38E-07 | 0.158797 | 0.00057  | 0.287374 |
| -0.04704 | 0.31041  | -0.02778 | 0.54923  | 0.097855 | 0.03451  | -0.04477 | 0.33438  | 0.217264 |
| 0.177753 | 0.00011  | 0.072355 | 0.11841  | 0.201999 | 1.09E-05 | 0.098967 | 0.0325   | 0.265774 |
| -0.05748 | 0.21506  | -0.05691 | 0.2196   | 0.08324  | 0.07231  | 0.035158 | 0.44847  | 0.112287 |
| 0.253548 | 2.77E-08 | 0.340681 | 3.73E-14 | 0.255788 | 2.07E-08 | 0.213867 | 3.11E-06 | 0.306846 |
| -0.01258 | 0.7863   | -0.03156 | 0.49632  | 0.207992 | 5.83E-06 | 0.083307 | 0.07208  | 0.220695 |
| -0.01994 | 0.66737  | -0.04836 | 0.29704  | 0.118905 | 0.01012  | 0.044717 | 0.33493  | 0.148712 |
| -0.01253 | 0.78712  | -0.01756 | 0.70511  | 0.068437 | 0.13975  | 0.03766  | 0.41683  | 0.049848 |
| 0.045131 | 0.33047  | -0.00945 | 0.83858  | 0.048735 | 0.29327  | -0.02285 | 0.62231  | 0.12599  |
| 0.019225 | 0.6786   | 0.013468 | 0.7716   | 0.056467 | 0.22324  | 0.005666 | 0.90281  | 0.138761 |
| 0.046062 | 0.32058  | -0.06757 | 0.14485  | 0.357805 | 1.50E-15 | 0.285121 | 3.48E-10 | 0.298378 |
| -0.01731 | 0.70915  | -0.03131 | 0.49975  | 0.135772 | 0.00328  | 0.036351 | 0.43322  | 0.159381 |
| -0.04089 | 0.378    | -0.1136  | 0.01404  | 0.021945 | 0.6362   | -0.04441 | 0.33829  | 0.030002 |
| 0.314597 | 3.46E-12 | 0.340882 | 3.60E-14 | 0.481924 | 1.57E-28 | 0.407969 | 3.72E-20 | 0.439173 |
| 0.115809 | 0.01227  | 0.078542 | 0.09     | 0.344176 | 1.97E-14 | 0.159153 | 0.00056  | 0.338132 |
| -0.00914 | 0.8439   | -0.0676  | 0.14465  | 0.142636 | 0.002    | 0.002435 | 0.95815  | 0.217915 |
| 0.387267 | 3.70E-18 | 0.227012 | 7.14E-07 | 0.310262 | 7.04E-12 | 0.234714 | 2.89E-07 | 0.34753  |
| 0.020984 | 0.65106  | 0.06089  | 0.189    | 0.304686 | 1.73E-11 | 0.199138 | 1.46E-05 | 0.313227 |
| -0.16375 | 0.00038  | -0.24754 | 5.98E-08 | -0.12087 | 0.00893  | -0.15706 | 0.00066  | -0.06981 |
| 0.101726 | 0.02794  | -0.01245 | 0.78845  | 0.271867 | 2.34E-09 | 0.160827 | 0.00048  | 0.268276 |
| -0.01905 | 0.68138  | -0.06142 | 0.18521  | 0.071003 | 0.12547  | -0.03816 | 0.41063  | 0.155998 |
| -0.05179 | 0.26399  | -0.16441 | 0.00036  | 0.054166 | 0.2427   | -0.10843 | 0.01909  | 0.129355 |
| 0.147282 | 0.00141  | -0.08042 | 0.08254  | 0.324874 | 6.11E-13 | 0.094587 | 0.04104  | 0.334456 |
| 0.078216 | 0.09135  | 0.012995 | 0.77942  | 0.080192 | 0.08343  | 0.037223 | 0.42226  | 0.118495 |
| 0.111053 | 0.01636  | 0.122498 | 0.00805  | 0.355064 | 2.54E-15 | 0.268613 | 3.68E-09 | 0.376534 |
| 0.097966 | 0.0343   | 0.059603 | 0.19854  | 0.182585 | 7.23E-05 | 0.107996 | 0.01958  | 0.18138  |
| -0.02286 | 0.62211  | 0.160128 | 0.00051  | -0.09706 | 0.036    | 0.01931  | 0.67725  | -0.09361 |



|          |          |          |          |          |          |          |          |          |
|----------|----------|----------|----------|----------|----------|----------|----------|----------|
| 0.088302 | 0.05654  | -0.07005 | 0.13062  | 0.129607 | 0.00503  | 0.03405  | 0.46291  | 0.169516 |
| 0.00983  | 0.83221  | -0.05322 | 0.25107  | 0.110441 | 0.01696  | 0.046699 | 0.31393  | 0.152824 |
| 0.002686 | 0.95384  | -0.05114 | 0.27007  | 0.097822 | 0.03457  | 0.051607 | 0.26571  | 0.122684 |
| 0.01132  | 0.80725  | -0.04755 | 0.30515  | 0.158011 | 0.00061  | 0.028699 | 0.53614  | 0.207325 |
| 0.076359 | 0.09933  | -0.01746 | 0.70667  | 0.178019 | 0.00011  | 0.141611 | 0.00216  | 0.161322 |
| 0.017422 | 0.70727  | 0.148307 | 0.00131  | 0.1509   | 0.00107  | 0.178861 | 0.0001   | 0.157258 |
| 0.238898 | 1.75E-07 | 0.090757 | 0.04999  | 0.274151 | 1.70E-09 | 0.145719 | 0.00159  | 0.339769 |
| 0.168163 | 0.00026  | 0.02502  | 0.58967  | 0.297333 | 5.49E-11 | 0.251519 | 3.60E-08 | 0.256018 |
| -0.0639  | 0.16799  | -0.10301 | 0.02601  | 0.13806  | 0.00279  | 0.025189 | 0.58715  | 0.204527 |
| 0.100725 | 0.02953  | 0.038916 | 0.40144  | 0.146032 | 0.00155  | 0.014109 | 0.76105  | 0.221729 |
| 0.029112 | 0.53029  | 0.015519 | 0.73801  | 0.145924 | 0.00157  | 0.035858 | 0.43949  | 0.173276 |
| -0.19035 | 3.47E-05 | -0.21574 | 2.53E-06 | 0.039416 | 0.39541  | -0.08268 | 0.07428  | 0.084783 |
| 0.089931 | 0.05212  | 0.062394 | 0.17829  | 0.185457 | 5.53E-05 | 0.051459 | 0.26709  | 0.331151 |
| 0.067302 | 0.14646  | 0.020446 | 0.65942  | 0.296873 | 5.89E-11 | 0.153174 | 0.0009   | 0.32399  |
| 0.122057 | 0.00828  | 0.069388 | 0.13432  | 0.2227   | 1.17E-06 | 0.128858 | 0.00529  | 0.223786 |
| 0.016159 | 0.72763  | -0.05305 | 0.25255  | 0.24287  | 1.07E-07 | 0.09907  | 0.03232  | 0.250769 |
| -0.14349 | 0.00188  | -0.12199 | 0.00831  | -0.31187 | 5.42E-12 | -0.25752 | 1.65E-08 | -0.25084 |
| 0.022794 | 0.6232   | 0.040595 | 0.38143  | 0.179496 | 9.61E-05 | 0.17045  | 0.00022  | 0.216266 |
| 0.052958 | 0.25338  | -0.09371 | 0.04295  | 0.092279 | 0.04625  | -0.02647 | 0.56826  | 0.160767 |
| 0.047489 | 0.3058   | -0.0053  | 0.90912  | 0.237799 | 1.99E-07 | 0.079691 | 0.08539  | 0.277767 |
| 0.050222 | 0.27877  | -0.07034 | 0.12907  | 0.145624 | 0.0016   | 0.061676 | 0.18335  | 0.169139 |
| 0.02449  | 0.59758  | -0.0093  | 0.84115  | 0.195811 | 2.03E-05 | 0.067507 | 0.14523  | 0.221863 |
| 0.122029 | 0.00829  | 0.021626 | 0.64111  | 0.186786 | 4.88E-05 | 0.037837 | 0.41464  | 0.26985  |
| 0.056435 | 0.2235   | 0.03991  | 0.38951  | 0.13877  | 0.00265  | 0.054344 | 0.24116  | 0.220873 |
| -0.00676 | 0.88411  | -0.01403 | 0.76237  | 0.165927 | 0.00032  | 0.064009 | 0.16729  | 0.200988 |
| -0.09082 | 0.04982  | -0.14479 | 0.00171  | 0.064229 | 0.16583  | -0.00268 | 0.95394  | 0.127327 |
| 0.031653 | 0.495    | 0.127216 | 0.00591  | 0.089182 | 0.05411  | 0.077751 | 0.0933   | 0.18539  |
| 0.026541 | 0.56725  | 0.014996 | 0.74653  | 0.191855 | 3.00E-05 | 0.089398 | 0.05353  | 0.227061 |
| 0.026937 | 0.56148  | 0.122368 | 0.00811  | 0.07841  | 0.09055  | 0.058348 | 0.20818  | 0.129754 |
| 0.012472 | 0.78807  | -0.03006 | 0.51698  | 0.14455  | 0.00174  | 0.050627 | 0.27491  | 0.139464 |
| -0.01648 | 0.72248  | -0.02377 | 0.60843  | 0.193047 | 2.67E-05 | 0.063335 | 0.17182  | 0.227685 |
| 0.039396 | 0.39566  | -0.02727 | 0.55657  | 0.052328 | 0.25908  | 0.011102 | 0.81088  | 0.09064  |
| -0.02026 | 0.66236  | -0.01598 | 0.7306   | 0.107961 | 0.01962  | 0.05687  | 0.21995  | 0.088423 |
| -0.03603 | 0.43735  | -0.09423 | 0.04182  | 0.150821 | 0.00108  | -0.00158 | 0.97292  | 0.196849 |
| 0.095681 | 0.03875  | -0.02886 | 0.53385  | 0.195032 | 2.19E-05 | 0.219593 | 1.66E-06 | 0.186959 |
| 0.02281  | 0.62296  | -0.03063 | 0.50905  | 0.222275 | 1.23E-06 | 0.086876 | 0.06067  | 0.260421 |
| 0.020537 | 0.65801  | -0.00415 | 0.92878  | 0.273538 | 1.85E-09 | 0.121483 | 0.00859  | 0.324328 |
| -0.01849 | 0.6902   | -0.02365 | 0.61018  | 0.16822  | 0.00026  | 0.080309 | 0.08298  | 0.177087 |
| 0.062376 | 0.17842  | 0.004353 | 0.92526  | 0.128328 | 0.00548  | 0.026772 | 0.56387  | 0.181396 |
| 0.001113 | 0.98086  | -0.09584 | 0.03842  | 0.162693 | 0.00042  | -0.02234 | 0.63019  | 0.209062 |
| -0.02157 | 0.64194  | -0.07337 | 0.1133   | 0.077427 | 0.09468  | -0.04954 | 0.28538  | 0.175336 |
| -0.00019 | 0.99666  | -0.06016 | 0.19434  | 0.128378 | 0.00546  | -0.00201 | 0.96543  | 0.185703 |
| 0.203122 | 9.69E-06 | 0.087293 | 0.05944  | 0.342504 | 2.67E-14 | 0.162129 | 0.00044  | 0.356138 |
| -0.02288 | 0.62184  | -0.06057 | 0.19131  | 0.180907 | 8.44E-05 | 0.052164 | 0.26058  | 0.214701 |
| 0.030783 | 0.50695  | -0.0455  | 0.3265   | 0.264846 | 6.17E-09 | 0.068089 | 0.14178  | 0.317845 |

|          |          |          |          |          |          |          |          |          |
|----------|----------|----------|----------|----------|----------|----------|----------|----------|
| 0.019432 | 0.67533  | -0.04549 | 0.32668  | 0.236182 | 2.42E-07 | 0.104257 | 0.02425  | 0.20674  |
| -0.13931 | 0.00255  | -0.19531 | 2.13E-05 | -0.32398 | 7.13E-13 | -0.26152 | 9.66E-09 | -0.22608 |
| 0.013815 | 0.76589  | -0.02378 | 0.6082   | 0.079183 | 0.0874   | -0.03133 | 0.49937  | 0.158399 |
| 0.029418 | 0.52598  | -0.00881 | 0.84942  | -0.07195 | 0.12048  | -0.03982 | 0.39065  | -0.02265 |
| -0.03696 | 0.42555  | -0.12311 | 0.00774  | -0.04168 | 0.36877  | -0.13884 | 0.00264  | 0.033328 |
| -0.01934 | 0.67676  | -0.08714 | 0.05989  | 0.091365 | 0.04847  | -0.01021 | 0.82579  | 0.153804 |
| 0.098527 | 0.03328  | 0.006927 | 0.88133  | 0.271001 | 2.64E-09 | 0.119051 | 0.01002  | 0.272637 |
| -0.02214 | 0.63312  | -0.0294  | 0.52629  | 0.155251 | 0.00076  | 0.059614 | 0.19846  | 0.175844 |
| 0.021501 | 0.64304  | -0.02007 | 0.66531  | 0.269505 | 3.25E-09 | 0.200718 | 1.24E-05 | 0.24355  |
| -0.05067 | 0.2745   | -0.19376 | 2.49E-05 | -0.24075 | 1.39E-07 | -0.31701 | 2.32E-12 | -0.29959 |
| 0.036764 | 0.42801  | -0.00197 | 0.9662   | 0.261223 | 1.01E-08 | 0.120461 | 0.00917  | 0.284544 |
| 0.062874 | 0.17496  | 0.037118 | 0.42356  | 0.182909 | 7.02E-05 | 0.158924 | 0.00057  | 0.131802 |
| 0.014819 | 0.74943  | 0.01867  | 0.68737  | 0.197464 | 1.72E-05 | 0.062243 | 0.17934  | 0.257811 |
| 0.033147 | 0.47486  | 0.005796 | 0.90059  | 0.112544 | 0.01496  | -0.03437 | 0.45869  | 0.120874 |
| -0.05405 | 0.24373  | -0.02565 | 0.58033  | 0.16139  | 0.00046  | 0.086677 | 0.06126  | 0.172046 |
| -0.04847 | 0.29591  | -0.03623 | 0.4348   | 0.207985 | 5.84E-06 | 0.120408 | 0.0092   | 0.201034 |
| -0.10527 | 0.0229   | -0.06976 | 0.13223  | 0.198017 | 1.63E-05 | 0.183328 | 6.75E-05 | 0.182233 |
| 0.026448 | 0.56861  | -0.03869 | 0.40416  | 0.239374 | 1.65E-07 | 0.075232 | 0.10444  | 0.287736 |
| 0.006075 | 0.89583  | 0.127916 | 0.00564  | 0.043137 | 0.35231  | 0.065638 | 0.15672  | 0.118811 |
| -0.01162 | 0.80223  | -0.02039 | 0.66024  | 0.195675 | 2.06E-05 | 0.088575 | 0.05578  | 0.215724 |
| 0.095209 | 0.03972  | 0.014705 | 0.75129  | 0.227718 | 6.58E-07 | 0.105002 | 0.02325  | 0.285781 |
| 0.001829 | 0.96856  | 0.024781 | 0.59322  | 0.145373 | 0.00163  | 0.081148 | 0.07981  | 0.193413 |
| 0.028424 | 0.54006  | 0.0635   | 0.1707   | 0.118369 | 0.01046  | 0.063699 | 0.16936  | 0.227388 |
| 0.091645 | 0.04778  | 0.001963 | 0.96626  | 0.149105 | 0.00123  | -0.01645 | 0.72287  | 0.234927 |
| 0.004975 | 0.91462  | -0.11237 | 0.01512  | 0.116018 | 0.01211  | 0.015368 | 0.74046  | 0.07401  |
| 0.133093 | 0.00396  | 0.029337 | 0.52711  | 0.243698 | 9.67E-08 | 0.128168 | 0.00554  | 0.255107 |
| 0.196196 | 1.95E-05 | 0.230996 | 4.49E-07 | -0.00744 | 0.87267  | 0.036734 | 0.42838  | 0.057932 |
| 0.013264 | 0.77497  | -0.00466 | 0.92001  | 0.228983 | 5.68E-07 | 0.096204 | 0.03769  | 0.182816 |
| -0.01896 | 0.68278  | 0.002559 | 0.95601  | 0.082122 | 0.07624  | 0.006774 | 0.88392  | 0.118865 |
| 0.019476 | 0.67464  | 0.019851 | 0.66874  | 0.164874 | 0.00035  | 0.073788 | 0.11128  | 0.196718 |
| 0.015591 | 0.73685  | 0.053067 | 0.25241  | 0.186762 | 4.89E-05 | 0.127739 | 0.0057   | 0.196249 |
| 0.073173 | 0.1143   | 0.078134 | 0.09169  | -0.19202 | 2.95E-05 | -0.06116 | 0.18706  | -0.14738 |
| -0.04075 | 0.37956  | -0.08637 | 0.0622   | 0.062519 | 0.17742  | -0.02741 | 0.55456  | 0.161617 |
| 0.06424  | 0.16576  | 0.021441 | 0.64397  | 0.16531  | 0.00033  | 0.003618 | 0.93784  | 0.215974 |
| 0.001479 | 0.97457  | -0.03136 | 0.499    | 0.20923  | 5.12E-06 | 0.09654  | 0.03702  | 0.23708  |
| -0.00404 | 0.93063  | 0.001557 | 0.97322  | 0.117477 | 0.01106  | 0.042105 | 0.36395  | 0.135239 |
| 0.036065 | 0.43685  | 0.007825 | 0.86607  | 0.194177 | 2.39E-05 | 0.047117 | 0.3096   | 0.232509 |
| 0.087442 | 0.059    | -0.16055 | 0.0005   | 0.060683 | 0.19051  | -0.0679  | 0.1429   | 0.066817 |
| 0.047106 | 0.30973  | -0.04996 | 0.28131  | 0.276255 | 1.26E-09 | 0.057527 | 0.21465  | 0.303861 |
| 0.010963 | 0.81321  | -0.01942 | 0.67549  | 0.208573 | 5.49E-06 | 0.069985 | 0.13099  | 0.240239 |
| -0.01322 | 0.77563  | -0.025   | 0.58999  | 0.17331  | 0.00017  | 0.076885 | 0.09701  | 0.210734 |
| -0.00738 | 0.87364  | -0.06564 | 0.15668  | 0.094429 | 0.04138  | -0.01872 | 0.68651  | 0.155733 |
| -0.09298 | 0.04461  | -0.06046 | 0.19217  | 0.034149 | 0.46161  | 0.000142 | 0.99756  | 0.143996 |
| 0.013649 | 0.76863  | 0.037603 | 0.41753  | 0.207701 | 6.01E-06 | 0.112435 | 0.01506  | 0.196591 |
| 0.003747 | 0.93563  | 0.030277 | 0.51396  | 0.13628  | 0.00317  | 0.047887 | 0.30177  | 0.187371 |

|          |          |          |         |          |          |          |          |          |
|----------|----------|----------|---------|----------|----------|----------|----------|----------|
| -0.01519 | 0.74339  | -0.01505 | 0.74567 | 0.206822 | 6.60E-06 | 0.068157 | 0.14138  | 0.248301 |
| 0.021213 | 0.6475   | 0.000909 | 0.98438 | 0.146625 | 0.00149  | 0.081666 | 0.0779   | 0.133561 |
| 0.001944 | 0.96658  | -0.029   | 0.53188 | 0.234627 | 2.92E-07 | 0.091844 | 0.0473   | 0.263476 |
| 0.050296 | 0.27806  | 0.035249 | 0.44729 | 0.186012 | 5.25E-05 | 0.110746 | 0.01666  | 0.192441 |
| 0.073103 | 0.11465  | 0.000486 | 0.99165 | 0.285444 | 3.32E-10 | 0.084635 | 0.06765  | 0.257571 |
| -0.0435  | 0.34825  | -0.06834 | 0.1403  | 0.116909 | 0.01146  | 0.038788 | 0.40299  | 0.122072 |
| -0.00799 | 0.8633   | -0.01629 | 0.72544 | 0.218473 | 1.88E-06 | 0.105785 | 0.02223  | 0.24665  |
| 0.087179 | 0.05977  | -0.02011 | 0.66471 | 0.314028 | 3.80E-12 | 0.118966 | 0.01008  | 0.352839 |
| 0.125747 | 0.00651  | 0.107858 | 0.01973 | 0.178847 | 0.0001   | 0.077684 | 0.09358  | 0.209242 |
| 0.057945 | 0.21134  | 0.002878 | 0.95054 | -0.2083  | 5.65E-06 | -0.13498 | 0.00347  | -0.14922 |
| -0.07277 | 0.1163   | -0.03075 | 0.50741 | 0.09345  | 0.04354  | -0.01191 | 0.79736  | 0.124412 |
| 0.064934 | 0.16123  | 0.104992 | 0.02326 | 0.367087 | 2.41E-16 | 0.270503 | 2.83E-09 | 0.369922 |
| 0.162402 | 0.00043  | -0.03062 | 0.50924 | 0.305781 | 1.45E-11 | 0.09669  | 0.03673  | 0.251424 |
| 0.038381 | 0.40796  | -0.02129 | 0.64625 | 0.047706 | 0.30359  | -0.05983 | 0.19685  | 0.156967 |
| 0.076954 | 0.09671  | 0.119655 | 0.00965 | 0.220572 | 1.49E-06 | 0.077226 | 0.09554  | 0.29992  |
| 0.012743 | 0.78359  | 0.021348 | 0.6454  | 0.136004 | 0.00323  | 0.08021  | 0.08336  | 0.170631 |
| 0.08066  | 0.08164  | 0.071638 | 0.12212 | 0.229126 | 5.59E-07 | 0.103381 | 0.02548  | 0.244455 |
| 0.109357 | 0.01808  | 0.159336 | 0.00055 | 0.186795 | 4.87E-05 | 0.08998  | 0.05199  | 0.310531 |
| -0.13278 | 0.00405  | -0.1066  | 0.02122 | 0.163299 | 0.0004   | 0.106493 | 0.02135  | 0.169829 |
| -0.04542 | 0.32736  | -0.16397 | 0.00037 | 0.107265 | 0.02042  | -0.0606  | 0.1911   | 0.147506 |
| 0.009255 | 0.84189  | -0.02253 | 0.62718 | 0.240848 | 1.37E-07 | 0.083155 | 0.07261  | 0.278659 |
| 0.091233 | 0.04879  | 0.12597  | 0.00641 | -0.00122 | 0.97908  | 0.022179 | 0.63261  | -0.00291 |
| -0.02563 | 0.58061  | -0.03631 | 0.43376 | 0.233934 | 3.17E-07 | 0.135448 | 0.00336  | 0.251218 |
| -0.03971 | 0.39187  | -0.05917 | 0.20182 | 0.194075 | 2.41E-05 | 0.012987 | 0.77955  | 0.259407 |
| 0.087304 | 0.0594   | 0.075724 | 0.10218 | 0.395512 | 6.15E-19 | 0.164399 | 0.00036  | 0.365522 |
| -0.11029 | 0.01711  | 0.012212 | 0.79239 | -0.17864 | 0.0001   | -0.05796 | 0.21123  | -0.07297 |
| 0.050797 | 0.2733   | 0.05514  | 0.23433 | 0.109979 | 0.01743  | 0.061323 | 0.18587  | 0.124313 |
| -0.09638 | 0.03734  | -0.0518  | 0.26389 | -0.05136 | 0.268    | -0.04227 | 0.36212  | 0.006527 |
| 0.150159 | 0.00113  | 0.166738 | 0.0003  | 0.295735 | 7.02E-11 | 0.182094 | 7.57E-05 | 0.311771 |
| 0.040247 | 0.38552  | -0.00116 | 0.97998 | 0.210075 | 4.68E-06 | 0.098602 | 0.03315  | 0.262193 |
| -0.00537 | 0.90788  | -0.08843 | 0.05619 | 0.184144 | 6.25E-05 | 0.016551 | 0.72128  | 0.255848 |
| 0.196243 | 1.95E-05 | -0.09354 | 0.04334 | 0.124487 | 0.00707  | -0.01365 | 0.76864  | 0.161157 |
| -0.00879 | 0.84968  | 0.097353 | 0.03545 | 0.164018 | 0.00037  | 0.073225 | 0.11404  | 0.257331 |
| -0.05907 | 0.20261  | -0.04368 | 0.34628 | 0.126856 | 0.00605  | 0.086137 | 0.0629   | 0.132413 |
| 0.31861  | 1.77E-12 | 0.062557 | 0.17716 | 0.344394 | 1.89E-14 | 0.163374 | 0.00039  | 0.328822 |
| -0.00415 | 0.92866  | 0.010515 | 0.82072 | 0.309274 | 8.27E-12 | 0.20756  | 6.10E-06 | 0.299245 |
| -0.03141 | 0.49837  | -0.0505  | 0.27615 | 0.153483 | 0.00088  | 0.016484 | 0.72238  | 0.19541  |
| 0.08229  | 0.07564  | 0.021521 | 0.64273 | 0.117938 | 0.01075  | 0.137664 | 0.00287  | 0.166086 |
| 0.08672  | 0.06113  | -0.03041 | 0.51208 | 0.195176 | 2.16E-05 | 0.03311  | 0.47536  | 0.295675 |
| -0.03968 | 0.39228  | -0.00498 | 0.91458 | 0.085212 | 0.06579  | 0.007863 | 0.86544  | 0.124348 |
| 0.008844 | 0.84883  | 0.10231  | 0.02705 | 0.202093 | 1.08E-05 | 0.172937 | 0.00017  | 0.20081  |
| 0.181061 | 8.33E-05 | 0.166977 | 0.00029 | 0.378883 | 2.17E-17 | 0.341974 | 2.95E-14 | 0.342276 |
| 0.031733 | 0.49391  | 0.071031 | 0.12532 | 0.102119 | 0.02734  | 0.061379 | 0.18547  | 0.26176  |
| 0.113516 | 0.01411  | 0.092355 | 0.04607 | 0.244043 | 9.26E-08 | 0.165444 | 0.00033  | 0.245858 |
| 0.021374 | 0.645    | -0.01476 | 0.75046 | 0.132085 | 0.00425  | 0.013143 | 0.77697  | 0.136483 |

|          |          |          |          |          |          |          |          |          |
|----------|----------|----------|----------|----------|----------|----------|----------|----------|
| 0.019839 | 0.66894  | 0.049481 | 0.28594  | 0.208465 | 5.55E-06 | 0.14672  | 0.00148  | 0.238434 |
| 0.011502 | 0.80421  | 0.10834  | 0.01919  | 0.112113 | 0.01535  | 0.149671 | 0.00118  | 0.163492 |
| 0.07455  | 0.10763  | 0.110153 | 0.01725  | 0.224321 | 9.72E-07 | 0.154673 | 0.0008   | 0.242104 |
| 0.007138 | 0.87773  | -0.02788 | 0.54784  | 0.249137 | 4.88E-08 | 0.100948 | 0.02917  | 0.280197 |
| 0.017776 | 0.70161  | 0.04202  | 0.36492  | 0.15884  | 0.00057  | 0.057486 | 0.21498  | 0.238676 |
| 0.021824 | 0.63806  | 0.198321 | 1.58E-05 | 0.13497  | 0.00347  | 0.181766 | 7.80E-05 | 0.251791 |
| 0.065759 | 0.15596  | 0.115633 | 0.0124   | 0.074166 | 0.10946  | 0.026599 | 0.56639  | 0.173867 |
| -0.03722 | 0.42235  | -0.00975 | 0.83362  | -0.17812 | 0.00011  | -0.08075 | 0.08132  | -0.1812  |
| -0.03186 | 0.49223  | -0.01203 | 0.79541  | 0.171951 | 0.00019  | 0.10073  | 0.02952  | 0.195797 |
| 0.003613 | 0.93794  | -0.03082 | 0.50638  | 0.225551 | 8.45E-07 | 0.067079 | 0.1478   | 0.257921 |
| 0.092162 | 0.04653  | -0.05155 | 0.26626  | 0.228211 | 6.22E-07 | -0.00578 | 0.90081  | 0.231599 |
| 0.021044 | 0.65012  | 0.027939 | 0.54699  | 0.152877 | 0.00092  | 0.088485 | 0.05603  | 0.10785  |
| -0.03953 | 0.39405  | -0.19749 | 1.72E-05 | 0.202607 | 1.02E-05 | 0.038511 | 0.40636  | 0.196079 |
| 0.216706 | 2.28E-06 | 0.116226 | 0.01196  | 0.516418 | 3.41E-33 | 0.36335  | 5.07E-16 | 0.475718 |
| -0.00536 | 0.908    | -0.04268 | 0.35741  | 0.097968 | 0.0343   | -0.01191 | 0.79736  | 0.177519 |
| 0.126705 | 0.00611  | 0.136349 | 0.00315  | 0.242702 | 1.09E-07 | 0.244183 | 9.10E-08 | 0.412564 |
| 0.118753 | 0.01021  | -0.02344 | 0.61341  | 0.182821 | 7.08E-05 | 0.125774 | 0.0065   | 0.149169 |
| -0.00711 | 0.87813  | -0.04285 | 0.35553  | 0.127138 | 0.00594  | 0.020456 | 0.65927  | 0.174579 |
| 0.143332 | 0.0019   | 0.248197 | 5.50E-08 | 0.364891 | 3.74E-16 | 0.314568 | 3.47E-12 | 0.401145 |
| 0.01468  | 0.7517   | -0.0557  | 0.22956  | 0.121188 | 0.00875  | 0.011176 | 0.80965  | 0.145685 |
| -0.10032 | 0.03018  | -0.07951 | 0.08611  | 0.15032  | 0.00112  | 0.138586 | 0.00269  | 0.137605 |
| 0.002085 | 0.96415  | -0.05056 | 0.27553  | 0.111666 | 0.01577  | -0.04909 | 0.28977  | 0.198885 |
| 0.090384 | 0.05094  | -0.00645 | 0.88947  | 0.258262 | 1.49E-08 | 0.164517 | 0.00036  | 0.172089 |
| 0.032586 | 0.48237  | -0.02891 | 0.5331   | 0.237095 | 2.17E-07 | 0.093086 | 0.04437  | 0.247188 |
| 0.216829 | 2.25E-06 | 0.299388 | 3.99E-11 | -0.05651 | 0.22289  | -0.04186 | 0.36675  | -0.01089 |
| -0.00219 | 0.96231  | -0.00661 | 0.88679  | 0.083483 | 0.07148  | 0.002098 | 0.96393  | 0.138272 |
| -0.02395 | 0.60575  | -0.02332 | 0.61526  | 0.155308 | 0.00076  | 0.138172 | 0.00277  | 0.174123 |
| 0.07114  | 0.12474  | -0.07892 | 0.08847  | -0.2784  | 9.26E-10 | -0.2336  | 3.30E-07 | -0.20725 |
| 0.061345 | 0.18572  | 0.074386 | 0.1084   | -0.12633 | 0.00626  | 0.008112 | 0.86121  | -0.30259 |
| -0.00552 | 0.90538  | -0.01317 | 0.77645  | 0.206866 | 6.57E-06 | 0.083788 | 0.07045  | 0.252765 |
| 0.047286 | 0.30787  | 0.007985 | 0.86336  | 0.108004 | 0.01957  | 0.020525 | 0.6582   | 0.17552  |
| -0.01792 | 0.69939  | 0.031437 | 0.49796  | 0.021039 | 0.6502   | 0.071458 | 0.12306  | -0.12946 |
| 0.074591 | 0.10743  | 0.023985 | 0.60515  | 0.127572 | 0.00577  | 0.057526 | 0.21466  | 0.163318 |
| 0.010553 | 0.82007  | 0.023518 | 0.61221  | 0.162432 | 0.00042  | 0.082946 | 0.07333  | 0.181804 |
| -0.1241  | 0.00725  | -0.04214 | 0.36355  | 0.107965 | 0.01961  | 0.117155 | 0.01129  | 0.093422 |
| 0.006755 | 0.88425  | -0.07383 | 0.11106  | 0.086979 | 0.06036  | 0.023146 | 0.61783  | 0.096354 |
| -0.04422 | 0.34036  | -0.03614 | 0.43592  | -0.04485 | 0.33349  | -0.06867 | 0.13839  | 0.07464  |
| 0.169758 | 0.00023  | 0.121264 | 0.00871  | 0.355235 | 2.46E-15 | 0.257621 | 1.62E-08 | 0.406548 |
| -0.00874 | 0.85058  | -0.13172 | 0.00435  | 0.048613 | 0.29448  | -0.10755 | 0.02008  | 0.067444 |
| -0.1545  | 0.00081  | -0.18971 | 3.69E-05 | -0.12007 | 0.0094   | -0.1146  | 0.01321  | -0.05617 |
| 0.001375 | 0.97636  | -0.08998 | 0.052    | 0.13581  | 0.00328  | 0.037556 | 0.41811  | 0.150256 |
| 0.032703 | 0.48081  | -0.02003 | 0.66592  | 0.141937 | 0.00211  | 0.050112 | 0.27982  | 0.164439 |
| 0.002513 | 0.95681  | -0.00363 | 0.93759  | 0.097773 | 0.03466  | 0.041294 | 0.37327  | 0.117139 |
| -0.02636 | 0.56992  | -0.08758 | 0.05859  | 0.057637 | 0.21378  | -0.03386 | 0.46543  | 0.124761 |
| -0.08626 | 0.06253  | -0.0766  | 0.09825  | 0.018117 | 0.69617  | 0.011761 | 0.79989  | 0.054902 |

|           |          |          |          |          |          |          |          |          |
|-----------|----------|----------|----------|----------|----------|----------|----------|----------|
| 0.012105  | 0.79416  | 0.002021 | 0.96526  | 0.148848 | 0.00126  | 0.053835 | 0.2456   | 0.196061 |
| 0.054831  | 0.23696  | -0.02175 | 0.63915  | 0.0071   | 0.87838  | -0.00101 | 0.98271  | 0.084382 |
| 0.049712  | 0.28369  | 0.067043 | 0.14802  | 0.100229 | 0.03034  | 0.005358 | 0.90807  | 0.145322 |
| 0.114008  | 0.0137   | 0.153377 | 0.00088  | 0.249411 | 4.71E-08 | 0.177569 | 0.00011  | 0.282232 |
| -0.00213  | 0.96333  | -0.04523 | 0.32943  | 0.178169 | 0.00011  | 0.067479 | 0.1454   | 0.166605 |
| 0.07779   | 0.09314  | -0.05562 | 0.23026  | 0.374888 | 4.96E-17 | 0.138796 | 0.00265  | 0.374965 |
| 0.047255  | 0.30819  | -0.10129 | 0.02861  | 0.30582  | 1.44E-11 | 0.067363 | 0.14609  | 0.318896 |
| 0.093887  | 0.04256  | 0.053589 | 0.24776  | 0.260797 | 1.06E-08 | 0.070931 | 0.12586  | 0.309052 |
| 0.313626  | 4.06E-12 | 0.451556 | 7.66E-25 | 0.131016 | 0.00457  | 0.254235 | 2.53E-08 | 0.069831 |
| 0.075073  | 0.10517  | -0.00647 | 0.88903  | 0.314473 | 3.53E-12 | 0.156188 | 0.00071  | 0.321405 |
| -0.06085  | 0.18926  | 0.011775 | 0.79966  | 0.104639 | 0.02373  | 0.099805 | 0.03105  | 0.128733 |
| -0.01891  | 0.68353  | -0.04479 | 0.33416  | 0.080993 | 0.08039  | -0.02931 | 0.5275   | 0.15551  |
| 0.052041  | 0.2617   | 0.08026  | 0.08317  | 0.181137 | 8.27E-05 | 0.04316  | 0.35204  | 0.235739 |
| 0.057519  | 0.21472  | 0.01017  | 0.82649  | 0.25969  | 1.23E-08 | 0.106442 | 0.02141  | 0.27591  |
| 0.001335  | 0.97705  | -0.07506 | 0.10525  | 0.137235 | 0.00296  | 0.070605 | 0.12761  | 0.17873  |
| 0.006571  | 0.88738  | -0.05665 | 0.22175  | 0.18555  | 5.48E-05 | 0.039923 | 0.38936  | 0.23914  |
| 0.093927  | 0.04248  | -0.06234 | 0.17866  | 0.234537 | 2.95E-07 | 0.042321 | 0.36149  | 0.227598 |
| -0.06473  | 0.16255  | -0.16796 | 0.00027  | -0.40303 | 1.15E-19 | -0.32451 | 6.50E-13 | -0.35105 |
| 0.146694  | 0.00148  | 0.141206 | 0.00222  | 0.331755 | 1.85E-13 | 0.344081 | 2.00E-14 | 0.244529 |
| 0.051031  | 0.27109  | -0.05163 | 0.26554  | 0.08129  | 0.07928  | 0.016606 | 0.7204   | 0.146772 |
| 0.157983  | 0.00061  | 0.102384 | 0.02694  | 0.23136  | 4.30E-07 | 0.149206 | 0.00122  | 0.260774 |
| -1.34E-05 | 0.99977  | -0.07846 | 0.09036  | 0.085494 | 0.0649   | 0.025893 | 0.57674  | 0.109412 |
| 0.061279  | 0.18619  | 0.097587 | 0.03501  | 0.134468 | 0.0036   | 0.059858 | 0.19662  | 0.144895 |
| -0.12981  | 0.00496  | -0.06785 | 0.14317  | -0.05852 | 0.20687  | -0.04764 | 0.30424  | 0.021904 |
| 0.027595  | 0.55195  | -0.03047 | 0.51122  | 0.204877 | 8.08E-06 | 0.089849 | 0.05234  | 0.227523 |
| 0.083143  | 0.07265  | -0.06923 | 0.13519  | 0.094264 | 0.04174  | 0.063503 | 0.17068  | 0.069802 |
| 0.241438  | 1.28E-07 | -0.05672 | 0.22115  | 0.326368 | 4.73E-13 | 0.123765 | 0.00741  | 0.323758 |
| 0.005289  | 0.90925  | -0.05464 | 0.23856  | 0.200417 | 1.28E-05 | 0.051154 | 0.26994  | 0.248387 |
| 0.019151  | 0.67976  | 0.018069 | 0.69693  | 0.083427 | 0.07168  | -0.02382 | 0.60767  | 0.223328 |
| -0.08161  | 0.07809  | -0.04185 | 0.36685  | 0.059932 | 0.19607  | -0.03155 | 0.49647  | 0.079222 |
| -0.02501  | 0.58979  | -0.09055 | 0.05053  | 0.108145 | 0.01941  | -0.00304 | 0.94772  | 0.163286 |
| 0.024529  | 0.59699  | -0.17512 | 0.00014  | 0.041952 | 0.3657   | -0.08651 | 0.06175  | 0.093404 |
| 0.028961  | 0.53242  | 0.005635 | 0.90333  | 0.212192 | 3.73E-06 | 0.09149  | 0.04816  | 0.230672 |
| 0.021234  | 0.64717  | 0.010479 | 0.82131  | 0.224418 | 9.62E-07 | 0.096525 | 0.03705  | 0.22328  |
| 0.016856  | 0.71637  | -0.03926 | 0.39727  | 0.132543 | 0.00411  | 0.057108 | 0.21802  | 0.15814  |
| 0.01495   | 0.74728  | -0.0251  | 0.58854  | 0.209152 | 5.16E-06 | 0.052502 | 0.2575   | 0.276408 |
| -0.0201   | 0.66478  | -0.01181 | 0.79912  | 0.170958 | 0.00021  | 0.079772 | 0.08507  | 0.163611 |
| -0.00758  | 0.87027  | -0.02902 | 0.53155  | 0.148043 | 0.00133  | 0.058372 | 0.20799  | 0.178982 |
| 0.045974  | 0.3215   | 0.00031  | 0.99466  | 0.24313  | 1.04E-07 | 0.088255 | 0.05667  | 0.274733 |
| -0.06328  | 0.17217  | -0.0672  | 0.14708  | 0.007536 | 0.87097  | -0.03899 | 0.40055  | 0.11147  |
| 0.03292   | 0.47789  | -0.03855 | 0.4059   | 0.105352 | 0.02279  | 0.040128 | 0.38693  | 0.116935 |
| -0.12797  | 0.00562  | -0.21616 | 2.42E-06 | 0.040805 | 0.37896  | -0.10263 | 0.02657  | 0.050711 |
| 0.038806  | 0.40278  | -0.06446 | 0.16429  | 0.18325  | 6.80E-05 | 0.040194 | 0.38615  | 0.182735 |
| 0.016671  | 0.71935  | -0.03896 | 0.40087  | 0.058807 | 0.20461  | -0.04298 | 0.35402  | 0.122139 |
| -0.01468  | 0.75163  | -0.03542 | 0.44511  | 0.17945  | 9.65E-05 | 0.072286 | 0.11877  | 0.209071 |

|          |          |          |          |          |          |          |          |          |
|----------|----------|----------|----------|----------|----------|----------|----------|----------|
| -0.0405  | 0.38252  | -0.05108 | 0.27064  | 0.159954 | 0.00052  | 0.050298 | 0.27805  | 0.179485 |
| -0.06784 | 0.14327  | -0.06384 | 0.16844  | 0.073941 | 0.11054  | 0.03872  | 0.40382  | 0.068365 |
| -0.0257  | 0.57956  | -0.02198 | 0.63569  | 0.107338 | 0.02034  | 0.05926  | 0.20114  | 0.092981 |
| 0.02829  | 0.54197  | -0.00779 | 0.86659  | 0.121489 | 0.00859  | 0.082886 | 0.07354  | 0.118143 |
| 0.023856 | 0.6071   | -0.01419 | 0.75975  | 0.115689 | 0.01236  | 0.042245 | 0.36236  | 0.16068  |
| -0.05086 | 0.27268  | -0.108   | 0.01958  | -0.00356 | 0.93881  | -0.09222 | 0.0464   | 0.076763 |
| 0.04152  | 0.37066  | 0.043937 | 0.34343  | 0.120047 | 0.00941  | 0.051687 | 0.26497  | 0.15013  |
| 0.009821 | 0.83236  | -0.01184 | 0.79863  | 0.2026   | 1.02E-05 | 0.07478  | 0.10654  | 0.22011  |
| -0.05089 | 0.27242  | -0.07279 | 0.11622  | 0.039003 | 0.40039  | -0.02382 | 0.6076   | 0.094772 |
| -0.0167  | 0.71897  | -0.11466 | 0.01316  | 0.070131 | 0.13019  | -0.03295 | 0.47751  | 0.141411 |
| -0.02188 | 0.63718  | -0.04292 | 0.35478  | 0.129385 | 0.00511  | 0.043644 | 0.34667  | 0.17521  |
| -0.01478 | 0.75011  | -0.01401 | 0.7627   | 0.172364 | 0.00018  | 0.069641 | 0.1329   | 0.19049  |
| -0.07518 | 0.10468  | -0.09986 | 0.03096  | -0.00711 | 0.87825  | -0.05839 | 0.20783  | 0.06075  |
| -0.04816 | 0.29903  | -0.1551  | 0.00077  | 0.071745 | 0.12156  | -0.05478 | 0.23741  | 0.121237 |
| -0.00189 | 0.96742  | -0.01729 | 0.70941  | 0.192948 | 2.69E-05 | 0.075197 | 0.1046   | 0.220104 |
| 0.028545 | 0.53834  | -0.00504 | 0.91355  | 0.158048 | 0.00061  | 0.057433 | 0.21541  | 0.192966 |
| 0.025746 | 0.57891  | -0.00924 | 0.84221  | 0.175014 | 0.00014  | 0.057077 | 0.21827  | 0.215684 |
| 0.037148 | 0.42319  | 0.010736 | 0.81702  | 0.192424 | 2.83E-05 | 0.066825 | 0.14935  | 0.230977 |
| 0.020896 | 0.65242  | 0.035988 | 0.43783  | 0.101699 | 0.02798  | 0.062016 | 0.18094  | 0.121104 |
| -0.00481 | 0.91745  | -0.04924 | 0.28826  | 0.183711 | 6.51E-05 | 0.046996 | 0.31086  | 0.208835 |
| 0.042607 | 0.35825  | -0.05414 | 0.24292  | 0.190673 | 3.36E-05 | 0.053201 | 0.25121  | 0.185082 |
| 0.00651  | 0.88842  | -0.02714 | 0.55846  | 0.189068 | 3.92E-05 | 0.063466 | 0.17093  | 0.215211 |
| 0.082226 | 0.07587  | -0.02751 | 0.55317  | 0.067905 | 0.14287  | 0.040274 | 0.3852   | 0.075101 |
| -0.01006 | 0.8284   | -0.01722 | 0.71052  | 0.181756 | 7.81E-05 | 0.07731  | 0.09518  | 0.212083 |
| -0.02061 | 0.65681  | -0.04396 | 0.34324  | 0.085628 | 0.06448  | -0.02558 | 0.58132  | 0.148337 |
| 0.045315 | 0.3285   | -0.00416 | 0.92852  | 0.167911 | 0.00027  | 0.075034 | 0.10536  | 0.201344 |
| -0.0202  | 0.66332  | -0.07794 | 0.0925   | 0.133044 | 0.00397  | -0.00737 | 0.87383  | 0.188877 |
| 0.091438 | 0.04829  | 0.001852 | 0.96816  | 0.123186 | 0.0077   | 0.03617  | 0.4355   | 0.129    |
| -0.06862 | 0.13871  | -0.09143 | 0.0483   | 0.021884 | 0.63714  | -0.08212 | 0.07627  | 0.093285 |
| -0.01163 | 0.80213  | -0.05658 | 0.22232  | 0.183828 | 6.44E-05 | 0.044692 | 0.3352   | 0.225468 |
| 0.094551 | 0.04112  | 0.037295 | 0.42135  | 0.153567 | 0.00087  | 0.091096 | 0.04913  | 0.209323 |
| -0.02093 | 0.65186  | 3.17E-05 | 0.99945  | 0.08833  | 0.05646  | 0.068436 | 0.13976  | 0.075793 |
| 0.038448 | 0.40713  | 0.002433 | 0.95818  | 0.151335 | 0.00104  | 0.063019 | 0.17397  | 0.172895 |
| -0.08914 | 0.05422  | -0.30985 | 7.53E-12 | 0.014898 | 0.74813  | -0.2047  | 8.23E-06 | 0.056748 |
| 0.27525  | 1.45E-09 | 0.106731 | 0.02106  | 0.255704 | 2.09E-08 | 0.085763 | 0.06406  | 0.270624 |
| 0.029098 | 0.53048  | -0.04563 | 0.32514  | 0.188494 | 4.14E-05 | 0.043385 | 0.34954  | 0.220997 |
| -0.02593 | 0.57625  | -0.0596  | 0.19854  | 0.196059 | 1.98E-05 | 0.087815 | 0.05792  | 0.175059 |
| 0.007325 | 0.87455  | -0.01578 | 0.73383  | 0.183705 | 6.52E-05 | 0.056342 | 0.22427  | 0.215181 |
| 0.032547 | 0.4829   | 0.020359 | 0.66079  | 0.190268 | 3.49E-05 | 0.072327 | 0.11856  | 0.235277 |
| -0.00773 | 0.86769  | -0.04207 | 0.36433  | 0.133057 | 0.00397  | 0.018459 | 0.69073  | 0.181441 |
| -0.00119 | 0.97955  | -0.03028 | 0.51397  | 0.174771 | 0.00015  | 0.051513 | 0.26659  | 0.221303 |
| 0.008891 | 0.84804  | -0.02909 | 0.53061  | 0.225877 | 8.14E-07 | 0.082378 | 0.07533  | 0.251275 |
| 0.092104 | 0.04667  | 0.049666 | 0.28413  | 0.232895 | 3.59E-07 | 0.104752 | 0.02358  | 0.251603 |
| -0.02716 | 0.55823  | -0.05637 | 0.22399  | 0.174625 | 0.00015  | 0.105503 | 0.0226   | 0.151586 |
| 0.052441 | 0.25805  | -0.04848 | 0.29579  | 0.106075 | 0.02187  | 0.003367 | 0.94216  | 0.071069 |

|          |          |          |          |          |          |          |          |          |
|----------|----------|----------|----------|----------|----------|----------|----------|----------|
| 0.049199 | 0.28869  | -0.1467  | 0.00148  | 0.087862 | 0.05779  | -0.05426 | 0.24184  | 0.075462 |
| 0.014005 | 0.76277  | -0.03613 | 0.43602  | 0.211684 | 3.94E-06 | 0.056689 | 0.22142  | 0.260837 |
| -0.08053 | 0.08212  | -0.11035 | 0.01705  | 0.267736 | 4.15E-09 | 0.150156 | 0.00114  | 0.197058 |
| -0.00781 | 0.8664   | -0.06562 | 0.15686  | 0.168288 | 0.00026  | 0.024567 | 0.59641  | 0.225643 |
| -0.0558  | 0.22874  | -0.21318 | 3.35E-06 | 0.152204 | 0.00097  | 0.015635 | 0.73612  | 0.120585 |
| 0.083703 | 0.07074  | -0.00377 | 0.93525  | 0.241503 | 1.27E-07 | 0.099203 | 0.03209  | 0.285829 |
| 0.072956 | 0.11538  | 0.13447  | 0.0036   | 0.136366 | 0.00315  | 0.195825 | 2.03E-05 | 0.201653 |
| -0.05457 | 0.23922  | -0.01397 | 0.76339  | 0.197895 | 1.65E-05 | 0.150399 | 0.00111  | 0.225947 |
| -0.14027 | 0.00238  | 0.078615 | 0.08971  | -0.13502 | 0.00346  | -0.03208 | 0.48927  | -0.1721  |
| -0.00598 | 0.89742  | -0.02612 | 0.57334  | -0.02435 | 0.59962  | -0.0494  | 0.28677  | 0.008115 |
| 0.112771 | 0.01476  | 0.185685 | 5.41E-05 | 0.283008 | 4.75E-10 | 0.255991 | 2.01E-08 | 0.261939 |
| -0.12874 | 0.00533  | -0.18637 | 5.07E-05 | -0.16505 | 0.00034  | -0.13865 | 0.00268  | -0.04978 |
| 0.057523 | 0.21469  | 0.018199 | 0.69487  | 0.262675 | 8.28E-09 | 0.150825 | 0.00108  | 0.277129 |
| -0.00925 | 0.84191  | -0.08455 | 0.06793  | 0.098174 | 0.03392  | -0.03684 | 0.42699  | 0.139634 |
| -0.00894 | 0.84725  | -0.05363 | 0.24738  | 0.194333 | 2.35E-05 | 0.055378 | 0.2323   | 0.237792 |
| 0.093758 | 0.04285  | 0.038575 | 0.40559  | 0.191374 | 3.14E-05 | 0.062807 | 0.17543  | 0.286015 |
| -0.05001 | 0.28076  | -0.08309 | 0.07283  | 0.159316 | 0.00055  | -0.01492 | 0.7477   | 0.225388 |
| -0.08692 | 0.06053  | -0.18255 | 7.26E-05 | 0.156288 | 0.0007   | -0.08623 | 0.06262  | 0.194782 |
| -0.07074 | 0.12685  | -0.10175 | 0.0279   | 0.06806  | 0.14195  | -0.00597 | 0.89768  | 0.060973 |
| 0.043188 | 0.35173  | 0.067798 | 0.1435   | 0.190031 | 3.58E-05 | 0.13983  | 0.00246  | 0.193674 |
| 0.00676  | 0.88417  | -0.03633 | 0.43345  | 0.208782 | 5.37E-06 | 0.086367 | 0.0622   | 0.231638 |
| 0.066324 | 0.15243  | 0.085939 | 0.06351  | 0.177341 | 0.00012  | 0.038476 | 0.40679  | 0.228767 |
| 0.04264  | 0.35788  | 0.023152 | 0.61775  | 0.316496 | 2.52E-12 | 0.167151 | 0.00029  | 0.341921 |
| 0.020641 | 0.65639  | -0.00712 | 0.87797  | 0.208773 | 5.37E-06 | 0.076934 | 0.0968   | 0.213136 |
| 0.040671 | 0.38053  | -0.05992 | 0.19614  | 0.087528 | 0.05875  | -0.00624 | 0.8931   | 0.078783 |
| 0.09647  | 0.03716  | 0.029242 | 0.52845  | 0.064415 | 0.16461  | -0.00915 | 0.84373  | 0.182417 |
| 0.001427 | 0.97546  | -0.01739 | 0.70784  | 0.113954 | 0.01374  | 0.007592 | 0.87002  | 0.113869 |
| 0.086512 | 0.06176  | 0.025743 | 0.57895  | 0.206627 | 6.73E-06 | 0.063028 | 0.17391  | 0.267868 |
| 0.083609 | 0.07106  | 0.16025  | 0.00051  | -0.06779 | 0.14357  | -0.09311 | 0.04431  | -0.09723 |
| 0.028557 | 0.53816  | 0.097164 | 0.03581  | 0.164187 | 0.00037  | 0.134602 | 0.00357  | 0.233084 |
| -0.01441 | 0.75607  | 0.007298 | 0.87502  | 0.182454 | 7.32E-05 | 0.093936 | 0.04246  | 0.24865  |
| 0.006678 | 0.88556  | -0.12797 | 0.00562  | 0.245485 | 7.74E-08 | 0.082098 | 0.07633  | 0.241198 |
| -0.25748 | 1.65E-08 | -0.33324 | 1.42E-13 | -0.07523 | 0.10444  | -0.14772 | 0.00137  | -0.04039 |
| -0.12693 | 0.00602  | -0.12287 | 0.00786  | 0.079871 | 0.08468  | 0.030034 | 0.51734  | 0.070312 |
| 0.088288 | 0.05658  | 0.042944 | 0.35447  | 0.266894 | 4.66E-09 | 0.172857 | 0.00017  | 0.303833 |
| 0.076818 | 0.09731  | -0.01601 | 0.73001  | 0.0898   | 0.05246  | -0.03066 | 0.50866  | 0.167777 |
| -0.0062  | 0.89371  | -0.03607 | 0.43676  | 0.213249 | 3.33E-06 | 0.07523  | 0.10445  | 0.25766  |
| -0.00567 | 0.90269  | -0.01675 | 0.71802  | 0.050175 | 0.27922  | -0.01128 | 0.80793  | 0.155853 |
| 0.073461 | 0.11288  | -0.00912 | 0.84417  | 0.030026 | 0.51745  | -0.07688 | 0.09704  | 0.203521 |
| -0.01523 | 0.74272  | -0.0602  | 0.1941   | 0.198945 | 1.48E-05 | 0.051502 | 0.26669  | 0.240343 |
| -0.05133 | 0.26833  | -0.10598 | 0.02199  | 0.036067 | 0.43682  | -0.05254 | 0.25716  | 0.068427 |
| -0.01174 | 0.8002   | -0.05564 | 0.23011  | 0.086827 | 0.06081  | -0.00242 | 0.95839  | 0.118774 |
| 0.012982 | 0.77963  | -0.01255 | 0.78676  | 0.047633 | 0.30433  | -0.01894 | 0.68311  | 0.100865 |
| -0.00054 | 0.99073  | -0.00122 | 0.97904  | 0.145528 | 0.00161  | 0.046799 | 0.31289  | 0.187099 |
| -0.02678 | 0.56383  | -0.08019 | 0.08345  | 0.058115 | 0.21     | -0.02308 | 0.61889  | 0.098859 |

|          |          |          |          |          |          |          |          |          |
|----------|----------|----------|----------|----------|----------|----------|----------|----------|
| -0.01868 | 0.68724  | -0.03706 | 0.4243   | 0.123851 | 0.00737  | 0.030362 | 0.51278  | 0.150166 |
| 0.028996 | 0.53193  | 0.218861 | 1.80E-06 | -0.18579 | 5.36E-05 | -0.00666 | 0.88591  | -0.14808 |
| -0.18029 | 8.94E-05 | -0.02634 | 0.57015  | 0.029683 | 0.52225  | 0.150344 | 0.00112  | 0.006496 |
| 0.028509 | 0.53885  | -0.04891 | 0.29157  | 0.265062 | 5.99E-09 | 0.100609 | 0.02971  | 0.256747 |
| 0.021283 | 0.64641  | -0.00899 | 0.84632  | 0.121438 | 0.00861  | 0.022831 | 0.62264  | 0.139396 |
| 0.067608 | 0.14462  | -0.06652 | 0.15122  | -0.11406 | 0.01365  | -0.15297 | 0.00091  | -0.19309 |
| 0.072116 | 0.11964  | 0.036739 | 0.42832  | 0.281874 | 5.60E-10 | 0.04926  | 0.28809  | 0.326858 |
| 0.029475 | 0.52517  | 0.12187  | 0.00838  | 0.148204 | 0.00132  | 0.156704 | 0.00068  | 0.20413  |
| 0.023668 | 0.60993  | 0.018211 | 0.69467  | 0.23358  | 3.31E-07 | 0.083363 | 0.07189  | 0.318141 |
| 0.039358 | 0.39611  | 0.021196 | 0.64776  | 0.180052 | 9.13E-05 | 0.070068 | 0.13054  | 0.232468 |
| 0.052885 | 0.25404  | -0.00149 | 0.97432  | 0.246867 | 6.50E-08 | 0.174939 | 0.00014  | 0.273645 |
| 0.160753 | 0.00049  | -0.12137 | 0.00865  | 0.384686 | 6.41E-18 | 0.055734 | 0.22931  | 0.300272 |
| 0.245351 | 7.87E-08 | 0.141864 | 0.00212  | 0.384246 | 7.04E-18 | 0.159303 | 0.00055  | 0.408242 |
| -0.07166 | 0.122    | 0.042698 | 0.35723  | 0.291839 | 1.27E-10 | 0.208465 | 5.55E-06 | 0.304934 |
| -0.02601 | 0.57496  | -0.06663 | 0.15056  | 0.098536 | 0.03327  | -0.00763 | 0.8693   | 0.176741 |
| -0.01349 | 0.77121  | -0.01021 | 0.8259   | 0.189477 | 3.77E-05 | 0.080363 | 0.08277  | 0.247471 |
| 0.051323 | 0.26835  | 0.022447 | 0.6285   | 0.128268 | 0.0055   | 0.028735 | 0.53564  | 0.156299 |
| 0.126181 | 0.00633  | 0.012317 | 0.79064  | 0.12044  | 0.00918  | 0.050413 | 0.27694  | 0.118318 |
| -0.10334 | 0.02554  | -0.10142 | 0.02842  | 0.040769 | 0.37938  | -0.00118 | 0.97963  | 0.044521 |
| 0.062172 | 0.17984  | -0.00471 | 0.91915  | 0.10534  | 0.02281  | 0.022056 | 0.63449  | 0.168396 |
| 0.036619 | 0.42983  | 0.053162 | 0.25156  | 0.16888  | 0.00025  | 0.098824 | 0.03275  | 0.181675 |
| 0.054452 | 0.24022  | 0.044623 | 0.33595  | 0.10577  | 0.02225  | 0.043764 | 0.34535  | 0.136527 |
| 0.081773 | 0.0775   | 0.084485 | 0.06814  | 0.360938 | 8.14E-16 | 0.246626 | 6.70E-08 | 0.417473 |
| 0.067573 | 0.14484  | 0.090977 | 0.04943  | 0.236778 | 2.26E-07 | 0.202001 | 1.09E-05 | 0.246817 |
| -0.06488 | 0.16159  | -0.03398 | 0.4638   | 0.020308 | 0.66158  | 0.074463 | 0.10804  | 0.076383 |
| -0.21059 | 4.43E-06 | -0.17011 | 0.00022  | -0.13055 | 0.00472  | -0.12047 | 0.00916  | -0.09975 |
| -0.01759 | 0.7046   | -0.07027 | 0.12945  | 0.192382 | 2.85E-05 | 0.035181 | 0.44817  | 0.253371 |
| 0.016624 | 0.72011  | -0.01572 | 0.73479  | 0.238035 | 1.94E-07 | 0.125491 | 0.00662  | 0.258318 |
| -0.06362 | 0.16986  | -0.09353 | 0.04335  | 0.080153 | 0.08358  | -0.0099  | 0.83103  | 0.121162 |
| 0.242882 | 1.07E-07 | 0.242231 | 1.16E-07 | 0.14964  | 0.00118  | 0.199769 | 1.37E-05 | 0.048524 |
| 0.102902 | 0.02617  | 0.042985 | 0.35401  | 0.156115 | 0.00071  | 0.093866 | 0.04261  | 0.225466 |
| -0.12155 | 0.00855  | -0.20456 | 8.36E-06 | -0.14096 | 0.00226  | -0.14912 | 0.00123  | -0.26471 |
| 0.399695 | 2.43E-19 | 0.169612 | 0.00023  | 0.495607 | 2.56E-30 | 0.33091  | 2.14E-13 | 0.487501 |
| 0.053551 | 0.2481   | 0.022975 | 0.62044  | 0.278518 | 9.11E-10 | 0.160002 | 0.00052  | 0.298052 |
| 0.016729 | 0.71841  | -0.01726 | 0.70994  | 0.224326 | 9.72E-07 | 0.134561 | 0.00358  | 0.189253 |
| -0.12982 | 0.00496  | -0.26367 | 7.24E-09 | -0.05572 | 0.22939  | -0.11367 | 0.01397  | -0.00539 |
| -0.03422 | 0.4607   | -0.05378 | 0.24609  | 0.226816 | 7.30E-07 | 0.102227 | 0.02717  | 0.250102 |
| -0.05936 | 0.2004   | -0.05392 | 0.24483  | 0.21409  | 3.04E-06 | 0.14242  | 0.00203  | 0.190379 |
| 0.068274 | 0.1407   | 0.015227 | 0.74276  | 0.264443 | 6.51E-09 | 0.129098 | 0.00521  | 0.299475 |
| 0.071899 | 0.12076  | 0.028409 | 0.54027  | 0.166677 | 0.0003   | 0.074957 | 0.10571  | 0.208846 |
| 0.016367 | 0.72427  | 0.021447 | 0.64388  | 0.140937 | 0.00227  | 0.101298 | 0.02861  | 0.101932 |
| 0.062337 | 0.17869  | -0.05107 | 0.27077  | 0.218675 | 1.83E-06 | 0.183682 | 6.53E-05 | 0.264642 |
| 0.000309 | 0.99469  | -0.09886 | 0.03269  | 0.241662 | 1.24E-07 | 0.069416 | 0.13416  | 0.262732 |
| 0.118572 | 0.01033  | 0.02421  | 0.60177  | 0.291427 | 1.36E-10 | 0.134523 | 0.00359  | 0.295091 |
| 0.140202 | 0.00239  | 0.059943 | 0.19599  | 0.321437 | 1.10E-12 | 0.132974 | 0.00399  | 0.312891 |



|          |          |          |          |          |          |          |          |          |
|----------|----------|----------|----------|----------|----------|----------|----------|----------|
| 0.173331 | 0.00017  | 0.069112 | 0.13588  | 0.388214 | 3.02E-18 | 0.210677 | 4.39E-06 | 0.358458 |
| 0.014339 | 0.75728  | 0.02178  | 0.63873  | 0.156208 | 0.00071  | 0.087647 | 0.05841  | 0.141899 |
| 0.053328 | 0.25008  | 0.014588 | 0.7532   | 0.225744 | 8.26E-07 | 0.150112 | 0.00114  | 0.273599 |
| 0.031706 | 0.49428  | -0.02583 | 0.57773  | 0.263643 | 7.26E-09 | 0.099516 | 0.03154  | 0.304759 |
| 0.056611 | 0.22205  | 0.028095 | 0.54476  | 0.246611 | 6.71E-08 | 0.110308 | 0.01709  | 0.280201 |
| 0.193575 | 2.53E-05 | 0.001119 | 0.98076  | 0.317428 | 2.16E-12 | 0.081636 | 0.07801  | 0.328694 |
| -0.01494 | 0.74741  | -0.04492 | 0.33271  | 0.069948 | 0.1312   | 0.019327 | 0.67699  | 0.056424 |
| -0.01432 | 0.75765  | -0.00879 | 0.84978  | 0.185061 | 5.74E-05 | 0.139533 | 0.00251  | 0.209958 |
| 0.014291 | 0.75807  | -0.07128 | 0.12401  | 0.158005 | 0.00061  | 0.019152 | 0.67975  | 0.175071 |
| 0.23516  | 2.74E-07 | 0.191859 | 3.00E-05 | 0.403982 | 9.25E-20 | 0.297787 | 5.11E-11 | 0.388566 |
| -0.0018  | 0.96903  | -0.00065 | 0.98876  | 0.110583 | 0.01682  | 0.042893 | 0.35504  | 0.118569 |
| 0.019109 | 0.68043  | -0.03494 | 0.45128  | 0.056435 | 0.2235   | 0.000454 | 0.99219  | 0.101432 |
| -0.00844 | 0.85568  | -0.06699 | 0.14837  | 0.168657 | 0.00025  | 0.02698  | 0.56084  | 0.206382 |
| 0.097505 | 0.03516  | 0.029181 | 0.52931  | 0.331249 | 2.02E-13 | 0.211349 | 4.08E-06 | 0.289463 |
| -0.03397 | 0.464    | -0.04525 | 0.32922  | 0.251039 | 3.82E-08 | 0.146925 | 0.00145  | 0.252473 |
| 0.091014 | 0.04934  | -0.06561 | 0.15688  | 0.278785 | 8.77E-10 | 0.113501 | 0.01412  | 0.310093 |
| 0.122504 | 0.00804  | 0.040856 | 0.37837  | 0.251013 | 3.84E-08 | 0.088763 | 0.05526  | 0.232749 |
| 0.191534 | 3.09E-05 | 0.140389 | 0.00236  | 0.282667 | 4.99E-10 | 0.179259 | 9.82E-05 | 0.340894 |
| -0.02565 | 0.58039  | 0.043263 | 0.35089  | 0.121638 | 0.0085   | 0.133982 | 0.00372  | 0.171134 |
| 0.089603 | 0.05298  | 0.011288 | 0.80778  | 0.193797 | 2.48E-05 | 0.025544 | 0.5819   | 0.215115 |
| 0.076079 | 0.10058  | 0.040802 | 0.379    | 0.164907 | 0.00035  | 0.085479 | 0.06494  | 0.193071 |
| 0.084904 | 0.06677  | 0.055459 | 0.23163  | 0.299721 | 3.78E-11 | 0.172591 | 0.00018  | 0.313786 |
| 0.091417 | 0.04834  | 0.112915 | 0.01463  | 0.218864 | 1.80E-06 | 0.187168 | 4.70E-05 | 0.236075 |
| 0.018407 | 0.69156  | 0.011893 | 0.79769  | 0.242625 | 1.10E-07 | 0.119158 | 0.00996  | 0.262027 |
| 0.159077 | 0.00056  | 0.111658 | 0.01578  | 0.295514 | 7.27E-11 | 0.188068 | 4.32E-05 | 0.291958 |
| 0.074399 | 0.10834  | 0.057313 | 0.21637  | 0.20848  | 5.54E-06 | 0.078606 | 0.08974  | 0.270384 |
| -0.08342 | 0.0717   | -0.03283 | 0.47909  | 0.10728  | 0.0204   | 0.06591  | 0.15501  | 0.112918 |
| 0.058652 | 0.20581  | -0.05617 | 0.22565  | 0.209658 | 4.89E-06 | 0.016777 | 0.71764  | 0.199149 |
| 0.154449 | 0.00081  | 0.031746 | 0.49374  | 0.243285 | 1.02E-07 | 0.134418 | 0.00361  | 0.275096 |
| 0.055517 | 0.23113  | 0.07607  | 0.10062  | 0.125882 | 0.00645  | 0.107061 | 0.02066  | 0.102618 |
| 0.067301 | 0.14647  | 0.048657 | 0.29404  | 0.146224 | 0.00153  | 0.052247 | 0.25982  | 0.192952 |
| 0.145621 | 0.0016   | 0.500681 | 5.32E-31 | 0.154923 | 0.00078  | 0.373691 | 6.35E-17 | 0.227697 |
| 0.001028 | 0.98232  | -0.09703 | 0.03607  | -0.27515 | 1.47E-09 | -0.29767 | 5.21E-11 | -0.22166 |
| -0.04288 | 0.35518  | -0.10068 | 0.0296   | 0.052544 | 0.25712  | -0.04664 | 0.31455  | 0.130725 |
| -0.01159 | 0.80274  | -0.04176 | 0.36795  | 0.17271  | 0.00018  | 0.055443 | 0.23176  | 0.276695 |
| 0.125999 | 0.0064   | 0.168073 | 0.00026  | 0.141033 | 0.00225  | 0.026168 | 0.5727   | 0.135196 |
| -0.08262 | 0.07446  | -0.00212 | 0.96354  | 0.039038 | 0.39996  | 0.030118 | 0.51618  | 0.137834 |
| 0.00914  | 0.84383  | 0.05389  | 0.24511  | 0.161719 | 0.00045  | 0.061027 | 0.18801  | 0.232866 |
| 0.137765 | 0.00285  | -0.00745 | 0.87237  | 0.18583  | 5.34E-05 | 0.059908 | 0.19625  | 0.217085 |
| 0.067703 | 0.14406  | -0.05141 | 0.26752  | -0.11641 | 0.01182  | -0.16341 | 0.00039  | -0.1653  |
| -0.03727 | 0.42161  | -0.07865 | 0.08955  | 0.097038 | 0.03605  | -0.01182 | 0.79885  | 0.128505 |
| 0.116876 | 0.01148  | -0.06859 | 0.13885  | -0.01678 | 0.71766  | 0.044673 | 0.33541  | -0.03043 |
| 0.110021 | 0.01739  | 0.068563 | 0.13903  | 0.118884 | 0.01013  | 0.025839 | 0.57754  | 0.222202 |
| 0.057699 | 0.21329  | 0.026941 | 0.56142  | 0.165082 | 0.00034  | 0.046027 | 0.32095  | 0.193892 |
| -0.01716 | 0.71144  | -0.081   | 0.08036  | 0.135315 | 0.00339  | 0.038532 | 0.40611  | 0.196081 |

|          |          |          |          |          |          |          |          |          |
|----------|----------|----------|----------|----------|----------|----------|----------|----------|
| -0.07826 | 0.09118  | -0.12446 | 0.00708  | -0.18165 | 7.89E-05 | -0.19037 | 3.46E-05 | -0.11845 |
| 0.228513 | 6.00E-07 | 0.160854 | 0.00048  | 0.285201 | 3.44E-10 | 0.247163 | 6.26E-08 | 0.430927 |
| -0.00104 | 0.98219  | -0.01149 | 0.80447  | 0.153686 | 0.00086  | 0.078838 | 0.08879  | 0.176086 |
| -0.0611  | 0.18745  | -0.01258 | 0.78634  | 0.032798 | 0.47952  | -0.0338  | 0.46615  | 0.13465  |
| 0.08326  | 0.07225  | -0.05493 | 0.23609  | 0.161148 | 0.00047  | 0.113522 | 0.0141   | 0.121291 |
| 0.109072 | 0.01838  | 0.065514 | 0.15751  | 0.259017 | 1.35E-08 | 0.152823 | 0.00092  | 0.315115 |
| 0.068244 | 0.14088  | 0.050698 | 0.27424  | 0.215899 | 2.49E-06 | 0.121552 | 0.00855  | 0.23531  |
| -0.00402 | 0.93091  | 0.032518 | 0.48329  | 0.149226 | 0.00122  | 0.120793 | 0.00898  | 0.13362  |
| 0.066759 | 0.14975  | 0.031779 | 0.49329  | 0.145765 | 0.00159  | 0.039304 | 0.39676  | 0.215546 |
| 0.192594 | 2.79E-05 | -0.01327 | 0.77484  | 0.148672 | 0.00127  | 0.058085 | 0.21024  | 0.124025 |
| -0.03872 | 0.40379  | -0.0931  | 0.04433  | -0.04095 | 0.37729  | -0.12121 | 0.00874  | 0.052831 |
| -0.00428 | 0.92654  | -0.2175  | 2.09E-06 | -0.21899 | 1.77E-06 | -0.25305 | 2.95E-08 | -0.35162 |
| -0.06057 | 0.19134  | -0.04774 | 0.30326  | 0.169631 | 0.00023  | 0.093372 | 0.04372  | 0.235173 |
| 0.043721 | 0.34582  | 0.058017 | 0.21077  | 0.185791 | 5.36E-05 | 0.113964 | 0.01373  | 0.218746 |
| 0.082027 | 0.07658  | 0.268925 | 3.53E-09 | 0.238787 | 1.77E-07 | 0.30573  | 1.46E-11 | 0.298548 |
| 0.167134 | 0.00029  | 0.224884 | 9.12E-07 | 0.156442 | 0.00069  | 0.182846 | 7.06E-05 | 0.17087  |
| -0.03498 | 0.45075  | -0.01794 | 0.69897  | 0.102891 | 0.02619  | -0.03972 | 0.39175  | 0.180494 |
| -0.09181 | 0.04738  | -0.21433 | 2.96E-06 | 0.036193 | 0.43521  | -0.03443 | 0.45798  | 0.039617 |
| -0.03851 | 0.40643  | -0.15492 | 0.00078  | -0.01047 | 0.8214   | -0.00807 | 0.86188  | -0.03796 |
| -0.10114 | 0.02886  | -0.06366 | 0.16959  | -0.02734 | 0.55564  | -0.06921 | 0.13534  | 0.017902 |
| 0.047503 | 0.30566  | 0.010498 | 0.821    | 0.198376 | 1.57E-05 | 0.104302 | 0.02419  | 0.216243 |
| 0.001871 | 0.96783  | 0.018681 | 0.6872   | 0.126986 | 0.006    | 0.005331 | 0.90853  | 0.176285 |
| 0.015508 | 0.73819  | 0.032427 | 0.48451  | 0.12323  | 0.00767  | 0.089749 | 0.0526   | 0.102693 |
| -0.01862 | 0.68819  | 0.030989 | 0.50411  | 0.076616 | 0.09819  | 0.027676 | 0.55077  | 0.127433 |
| 0.021347 | 0.64543  | -0.10123 | 0.02871  | 0.25602  | 2.00E-08 | 0.032514 | 0.48334  | 0.331413 |
| -0.00531 | 0.90893  | 0.035381 | 0.44559  | 0.014779 | 0.75008  | -0.04107 | 0.37592  | 0.062122 |
| -0.06328 | 0.17222  | 0.089824 | 0.0524   | 0.122969 | 0.00781  | 0.187753 | 4.45E-05 | 0.115617 |
| 0.025601 | 0.58106  | -0.01558 | 0.73703  | 0.263827 | 7.08E-09 | 0.105748 | 0.02228  | 0.297551 |
| -0.11874 | 0.01023  | 0.006694 | 0.88529  | -0.1026  | 0.02662  | 0.115959 | 0.01215  | -0.2054  |
| 0.236894 | 2.22E-07 | 0.276421 | 1.23E-09 | 0.354783 | 2.68E-15 | 0.292389 | 1.17E-10 | 0.360281 |
| 0.059602 | 0.19855  | 0.120612 | 0.00908  | 0.03365  | 0.46818  | 0.034858 | 0.45235  | -0.08567 |
| 0.056331 | 0.22436  | 0.047149 | 0.30928  | 0.30374  | 2.01E-11 | 0.217681 | 2.05E-06 | 0.275238 |
| 0.012613 | 0.78574  | -0.00116 | 0.97998  | 0.158615 | 0.00058  | 0.058511 | 0.2069   | 0.173455 |
| 0.033775 | 0.46653  | -0.01758 | 0.70482  | 0.13439  | 0.00362  | 0.013533 | 0.77053  | 0.122428 |
| 0.102477 | 0.0268   | -0.10009 | 0.03056  | 0.129932 | 0.00492  | -0.04385 | 0.34435  | 0.117043 |
| 0.07495  | 0.10575  | 0.130676 | 0.00468  | 0.2365   | 2.33E-07 | 0.208988 | 5.25E-06 | 0.289416 |
| 0.063748 | 0.16904  | -0.01311 | 0.77744  | 0.262246 | 8.77E-09 | 0.081387 | 0.07892  | 0.310363 |
| 0.14015  | 0.0024   | -0.03694 | 0.42575  | 0.264994 | 6.04E-09 | 0.061352 | 0.18566  | 0.306096 |
| 0.118999 | 0.01006  | -0.0203  | 0.66179  | 0.127134 | 0.00594  | 0.019619 | 0.67239  | 0.151378 |
| 0.001343 | 0.97692  | -0.07866 | 0.0895   | 0.152317 | 0.00096  | 0.006691 | 0.88534  | 0.217469 |
| 0.067618 | 0.14457  | -0.04765 | 0.30417  | 0.006968 | 0.88062  | -0.13756 | 0.00289  | 0.089336 |
| 0.069583 | 0.13323  | 0.008792 | 0.84971  | 0.203076 | 9.74E-06 | 0.087186 | 0.05975  | 0.20332  |
| -0.01474 | 0.75072  | -0.0475  | 0.30571  | 0.208475 | 5.54E-06 | 0.068875 | 0.13723  | 0.247096 |
| 0.086735 | 0.06109  | -0.0343  | 0.45968  | 0.101479 | 0.02832  | 0.062597 | 0.17687  | 0.068051 |
| -0.00197 | 0.96605  | -0.03699 | 0.42522  | 0.169404 | 0.00024  | 0.055009 | 0.23543  | 0.199984 |

|          |         |          |          |          |          |          |          |          |
|----------|---------|----------|----------|----------|----------|----------|----------|----------|
| -0.02251 | 0.62747 | -0.04445 | 0.33781  | 0.133237 | 0.00392  | 0.02082  | 0.65359  | 0.161115 |
| 0.033961 | 0.46408 | -0.04478 | 0.33421  | 0.162556 | 0.00042  | 0.020123 | 0.66448  | 0.213091 |
| 0.073227 | 0.11403 | 0.135192 | 0.00342  | 0.123831 | 0.00738  | 0.055882 | 0.22807  | 0.229063 |
| 0.050889 | 0.27243 | -0.01418 | 0.75992  | 0.264098 | 6.83E-09 | 0.150578 | 0.0011   | 0.276654 |
| -0.00966 | 0.83505 | -0.01905 | 0.68142  | -0.11163 | 0.0158   | -0.1336  | 0.00382  | -0.17038 |
| 0.030944 | 0.50473 | 0.002103 | 0.96386  | 0.247205 | 6.23E-08 | 0.093363 | 0.04374  | 0.278291 |
| 0.037549 | 0.4182  | 0.029323 | 0.52731  | 0.263398 | 7.51E-09 | 0.095325 | 0.03948  | 0.337624 |
| 0.080379 | 0.08271 | 0.074898 | 0.10599  | 0.153658 | 0.00086  | 0.042599 | 0.35835  | 0.264992 |
| 0.031524 | 0.49677 | 0.139415 | 0.00253  | 0.139619 | 0.0025   | 0.097374 | 0.03541  | 0.230551 |
| -0.02028 | 0.66196 | -0.05219 | 0.26038  | 0.20437  | 8.52E-06 | 0.091129 | 0.04905  | 0.228177 |
| -0.09178 | 0.04745 | -0.10626 | 0.02164  | 0.027549 | 0.55261  | -0.09449 | 0.04125  | 0.060381 |
| 0.096879 | 0.03636 | 0.078368 | 0.09072  | 0.162561 | 0.00042  | 0.097916 | 0.0344   | 0.163235 |
| 0.088045 | 0.05727 | 0.027014 | 0.56035  | 0.309113 | 8.49E-12 | 0.146236 | 0.00153  | 0.330722 |
| -0.01815 | 0.69559 | -0.02231 | 0.63062  | 0.037483 | 0.41902  | -0.02054 | 0.65796  | 0.077997 |
| 0.035623 | 0.44248 | 0.010498 | 0.82099  | 0.087776 | 0.05804  | 0.00228  | 0.9608   | 0.130427 |
| -0.05783 | 0.21224 | -0.19095 | 3.27E-05 | -0.12573 | 0.00652  | -0.10517 | 0.02302  | -0.179   |
| -0.006   | 0.89708 | -0.13766 | 0.00287  | 0.075514 | 0.10314  | -0.02091 | 0.65219  | 0.096579 |
| -0.02796 | 0.54666 | 0.029291 | 0.52777  | 0.095967 | 0.03816  | 0.015884 | 0.73207  | 0.194711 |
| 0.081495 | 0.07852 | -0.01442 | 0.75591  | 0.189222 | 3.87E-05 | 0.089937 | 0.0521   | 0.217136 |
| 0.027056 | 0.55974 | -0.01924 | 0.67841  | 0.25371  | 2.71E-08 | 0.091534 | 0.04805  | 0.295095 |
| 0.10402  | 0.02458 | 0.191777 | 3.02E-05 | 0.429554 | 2.16E-22 | 0.385039 | 5.95E-18 | 0.441117 |
| 0.02677  | 0.5639  | 0.056473 | 0.22319  | 0.303446 | 2.11E-11 | 0.176628 | 0.00012  | 0.346482 |
| 0.165125 | 0.00034 | 0.125431 | 0.00665  | 0.430123 | 1.88E-22 | 0.292592 | 1.14E-10 | 0.43138  |
| -0.01145 | 0.80509 | -0.06575 | 0.15602  | 0.240947 | 1.36E-07 | 0.063935 | 0.16779  | 0.274999 |
| 0.002818 | 0.95158 | -0.02211 | 0.63365  | 0.248888 | 5.03E-08 | 0.083126 | 0.07271  | 0.29385  |
| 0.047784 | 0.3028  | 0.042329 | 0.36141  | 0.341156 | 3.42E-14 | 0.165257 | 0.00034  | 0.364626 |
| -0.04711 | 0.3097  | -0.02562 | 0.58071  | 0.196506 | 1.89E-05 | 0.149343 | 0.00121  | 0.245045 |
| 0.008248 | 0.8589  | -0.02532 | 0.58517  | 0.197857 | 1.66E-05 | 0.059837 | 0.19678  | 0.255864 |
| -0.00935 | 0.84028 | -0.03721 | 0.42237  | 0.18718  | 4.70E-05 | 0.045196 | 0.32977  | 0.221629 |
| 0.02959  | 0.52356 | -0.0203  | 0.66172  | 0.189466 | 3.78E-05 | 0.073435 | 0.113    | 0.203709 |
| 0.001331 | 0.97711 | -0.0094  | 0.83943  | 0.223587 | 1.06E-06 | 0.08204  | 0.07654  | 0.277421 |
| 0.013551 | 0.77023 | -0.01457 | 0.75349  | 0.257012 | 1.76E-08 | 0.096096 | 0.0379   | 0.301674 |
| 0.020607 | 0.65692 | -0.01279 | 0.78286  | 0.272127 | 2.26E-09 | 0.100866 | 0.0293   | 0.309015 |
| -0.03654 | 0.43082 | -0.06026 | 0.19362  | 0.09243  | 0.04589  | -0.00899 | 0.84637  | 0.13215  |
| 0.087962 | 0.0575  | -0.00959 | 0.8363   | 0.188113 | 4.30E-05 | 0.06218  | 0.17978  | 0.216258 |
| -0.00294 | 0.94945 | -0.07253 | 0.11755  | 0.182675 | 7.17E-05 | 0.066629 | 0.15055  | 0.195429 |
| 0.074526 | 0.10774 | -0.02835 | 0.54105  | 0.181494 | 8.00E-05 | 0.045905 | 0.32223  | 0.201804 |
| 0.012284 | 0.7912  | 0.00108  | 0.98144  | 0.099351 | 0.03183  | 0.06089  | 0.18901  | 0.092212 |
| 0.045708 | 0.32432 | -0.00521 | 0.9106   | 0.164812 | 0.00035  | 0.050203 | 0.27895  | 0.212313 |
| 0.059256 | 0.20117 | 0.001327 | 0.97718  | 0.179821 | 9.33E-05 | 0.188941 | 3.97E-05 | 0.190013 |
| 0.074669 | 0.10706 | -0.07655 | 0.09849  | 0.121209 | 0.00874  | 0.031904 | 0.49159  | 0.162507 |
| 0.040768 | 0.3794  | 0.112817 | 0.01472  | 0.200624 | 1.25E-05 | 0.178307 | 0.00011  | 0.268623 |
| -0.13598 | 0.00324 | -0.07399 | 0.11032  | -0.1561  | 0.00071  | -0.1412  | 0.00222  | -0.0531  |
| 0.080462 | 0.08239 | 0.024886 | 0.59166  | 0.314155 | 3.72E-12 | 0.226897 | 7.24E-07 | 0.271766 |
| 0.074993 | 0.10555 | 0.177131 | 0.00012  | 0.073832 | 0.11106  | 0.098516 | 0.0333   | 0.120445 |

|          |          |          |          |          |          |          |          |          |
|----------|----------|----------|----------|----------|----------|----------|----------|----------|
| 0.056956 | 0.21925  | 0.063052 | 0.17375  | 0.150477 | 0.00111  | 0.060328 | 0.19312  | 0.157766 |
| -0.03578 | 0.44048  | 0.068783 | 0.13776  | -0.24547 | 7.75E-08 | -0.10613 | 0.0218   | -0.20846 |
| 0.001961 | 0.96628  | -0.02026 | 0.66231  | 0.251474 | 3.62E-08 | 0.080931 | 0.08062  | 0.308095 |
| 0.10811  | 0.01945  | 0.217141 | 2.17E-06 | 0.106576 | 0.02125  | 0.118762 | 0.01021  | 0.055114 |
| -0.05281 | 0.25469  | -0.30235 | 2.50E-11 | -0.17743 | 0.00012  | -0.2428  | 1.08E-07 | -0.30163 |
| 0.011109 | 0.81077  | -0.03259 | 0.48236  | 0.171652 | 0.00019  | 0.032249 | 0.48692  | 0.212491 |
| 0.008084 | 0.86168  | -0.00404 | 0.93055  | 0.097343 | 0.03547  | 0.031384 | 0.49869  | 0.145231 |
| 0.011612 | 0.80237  | -0.0132  | 0.77605  | 0.113309 | 0.01429  | 0.048697 | 0.29365  | 0.162951 |
| 0.015679 | 0.73542  | -0.00941 | 0.83923  | 0.078012 | 0.0922   | -0.03181 | 0.49282  | 0.158779 |
| -0.03491 | 0.45174  | -0.05384 | 0.24552  | 0.186044 | 5.23E-05 | 0.057189 | 0.21737  | 0.204717 |
| -0.11028 | 0.01712  | -0.13383 | 0.00376  | 0.095345 | 0.03944  | -0.02787 | 0.548    | 0.109069 |
| -0.02567 | 0.58009  | -0.10151 | 0.02827  | 0.097123 | 0.03589  | -0.00129 | 0.97774  | 0.132711 |
| 0.032697 | 0.48089  | -0.00749 | 0.8717   | 0.144991 | 0.00168  | 0.047295 | 0.30779  | 0.22077  |
| 0.046163 | 0.31952  | 0.035616 | 0.44257  | 0.158383 | 0.00059  | 0.036462 | 0.43181  | 0.149559 |
| -0.01538 | 0.74019  | -0.05812 | 0.20995  | 0.049014 | 0.29051  | -0.02273 | 0.62413  | 0.117007 |
| -0.20179 | 1.11E-05 | -0.35759 | 1.56E-15 | -0.25196 | 3.40E-08 | -0.34407 | 2.01E-14 | -0.32494 |
| -0.02232 | 0.63046  | 0.122082 | 0.00827  | 0.250581 | 4.06E-08 | 0.269742 | 3.15E-09 | 0.190377 |
| 0.250508 | 4.09E-08 | 0.121759 | 0.00844  | 0.47994  | 2.81E-28 | 0.225737 | 8.27E-07 | 0.453304 |
| 0.00422  | 0.92753  | -0.15018 | 0.00113  | 0.24846  | 5.32E-08 | -0.00246 | 0.95779  | 0.276969 |
| 0.040032 | 0.38807  | -0.00528 | 0.90939  | 0.18738  | 4.61E-05 | 0.060819 | 0.18952  | 0.205041 |
| 0.012553 | 0.78674  | -0.04079 | 0.37917  | 0.186131 | 5.19E-05 | 0.041881 | 0.36652  | 0.257901 |
| 0.007413 | 0.87307  | -0.00635 | 0.89112  | 0.064643 | 0.16312  | 0.145405 | 0.00163  | 0.03112  |
| -0.15282 | 0.00092  | -0.04955 | 0.28528  | 0.061167 | 0.18699  | 0.118317 | 0.0105   | 0.043252 |
| -0.01964 | 0.672    | 0.005542 | 0.90492  | 0.125041 | 0.00682  | -0.00321 | 0.94481  | 0.220531 |
| -0.00443 | 0.92397  | -0.02703 | 0.56014  | 0.150623 | 0.00109  | 0.044579 | 0.33643  | 0.161196 |
| 0.042595 | 0.35839  | 0.018583 | 0.68876  | 0.141584 | 0.00216  | 0.084147 | 0.06925  | 0.166133 |
| -0.02221 | 0.63217  | -0.05913 | 0.20209  | 0.168047 | 0.00026  | 0.047996 | 0.30066  | 0.189328 |
| 0.053308 | 0.25026  | -0.13818 | 0.00277  | 0.133069 | 0.00397  | -0.03313 | 0.4751   | 0.16992  |
| 0.201195 | 1.18E-05 | 0.230285 | 4.88E-07 | 0.077408 | 0.09476  | 0.06228  | 0.17908  | 0.076899 |
| 0.167653 | 0.00027  | 0.052487 | 0.25763  | 0.194294 | 2.36E-05 | 0.119921 | 0.00949  | 0.209695 |
| -0.08526 | 0.06565  | -0.0948  | 0.04059  | 0.077229 | 0.09552  | -0.07194 | 0.12057  | 0.115977 |
| -0.01333 | 0.77385  | -0.07027 | 0.12941  | 0.178947 | 0.0001   | 0.034027 | 0.46321  | 0.231541 |
| -0.00313 | 0.94629  | 0.002907 | 0.95005  | 0.084251 | 0.06891  | 0.088771 | 0.05524  | 0.074359 |
| 0.115778 | 0.01229  | -0.11802 | 0.0107   | 0.292257 | 1.20E-10 | 0.135921 | 0.00325  | 0.287695 |
| 0.076219 | 0.09995  | -0.19662 | 1.87E-05 | 0.300901 | 3.15E-11 | 0.074993 | 0.10554  | 0.264249 |
| 0.034981 | 0.45075  | -0.00482 | 0.91724  | 0.28211  | 5.41E-10 | 0.137858 | 0.00283  | 0.293952 |
| 0.086958 | 0.06042  | 0.083802 | 0.0704   | 0.068565 | 0.13901  | 0.021169 | 0.64818  | 0.09882  |
| 0.005289 | 0.90925  | -0.12967 | 0.00501  | 0.139777 | 0.00247  | -0.04919 | 0.28877  | 0.234245 |
| -0.07786 | 0.09282  | 0.099041 | 0.03237  | 0.067729 | 0.14391  | 0.151447 | 0.00103  | 0.107355 |
| 0.025256 | 0.58615  | -0.00391 | 0.93287  | 0.205951 | 7.23E-06 | 0.09852  | 0.03329  | 0.214904 |
| -0.02323 | 0.61663  | -0.00605 | 0.89617  | 0.11079  | 0.01661  | 0.085757 | 0.06407  | 0.085182 |
| 0.082055 | 0.07648  | 0.085172 | 0.06592  | 0.302688 | 2.37E-11 | 0.153403 | 0.00088  | 0.356773 |
| 0.00025  | 0.9957   | -0.08047 | 0.08235  | 0.220632 | 1.48E-06 | 0.057572 | 0.2143   | 0.248583 |
| -0.24997 | 4.39E-08 | -0.20045 | 1.27E-05 | -0.00482 | 0.91725  | 0.064628 | 0.16322  | -0.00757 |
| -0.0121  | 0.79429  | -0.03617 | 0.43551  | 0.177994 | 0.00011  | 0.053724 | 0.24657  | 0.211061 |

|          |          |          |          |          |          |          |          |          |
|----------|----------|----------|----------|----------|----------|----------|----------|----------|
| -0.00579 | 0.90061  | -0.01369 | 0.76787  | 0.162571 | 0.00042  | 0.04706  | 0.3102   | 0.208661 |
| -0.11806 | 0.01067  | -0.23812 | 1.92E-07 | -0.21715 | 2.17E-06 | -0.27774 | 1.02E-09 | -0.26451 |
| -0.00146 | 0.97496  | 0.008336 | 0.85742  | 0.192252 | 2.88E-05 | 0.105421 | 0.0227   | 0.232083 |
| -0.00753 | 0.87113  | -0.0475  | 0.30573  | 0.089741 | 0.05262  | -0.0193  | 0.67741  | 0.117686 |
| 0.028925 | 0.53294  | -0.09745 | 0.03526  | 0.140929 | 0.00227  | -0.00943 | 0.83893  | 0.17922  |
| -0.01932 | 0.67715  | -0.13627 | 0.00317  | 0.102444 | 0.02685  | -0.03689 | 0.42648  | 0.096029 |
| 2.33E-05 | 0.9996   | -0.03574 | 0.44099  | 0.086683 | 0.06124  | 0.021395 | 0.64468  | 0.118111 |
| -0.02294 | 0.62095  | -0.02701 | 0.56044  | 0.176953 | 0.00012  | 0.178002 | 0.00011  | 0.18547  |
| -0.02915 | 0.52972  | -0.03392 | 0.46458  | 0.064975 | 0.16096  | -0.00614 | 0.89479  | 0.108102 |
| 0.149016 | 0.00124  | 0.093611 | 0.04318  | 0.195404 | 2.11E-05 | 0.13735  | 0.00294  | 0.298959 |
| 0.005966 | 0.8977   | -0.04626 | 0.31855  | 0.168116 | 0.00026  | 0.067026 | 0.14813  | 0.201524 |
| -0.04482 | 0.33383  | -0.16134 | 0.00046  | -0.21061 | 4.42E-06 | -0.15544 | 0.00075  | -0.18905 |
| 0.126255 | 0.00629  | 0.087868 | 0.05777  | 0.086641 | 0.06137  | 0.143346 | 0.0019   | 0.206679 |
| 0.193011 | 2.68E-05 | 0.129899 | 0.00493  | 0.475713 | 9.56E-28 | 0.328541 | 3.24E-13 | 0.448398 |
| 0.049076 | 0.2899   | -0.08146 | 0.07864  | 0.094841 | 0.0405   | 0.054871 | 0.23662  | 0.112228 |
| 0.03607  | 0.43678  | 0.023003 | 0.62001  | 0.10579  | 0.02223  | 0.010058 | 0.82838  | 0.152875 |
| 0.056658 | 0.22168  | -0.00906 | 0.84518  | 0.250345 | 4.18E-08 | 0.166043 | 0.00031  | 0.252422 |
| 0.007639 | 0.86923  | -0.07366 | 0.1119   | 0.110723 | 0.01668  | 0.000986 | 0.98305  | 0.157572 |
| 0.171961 | 0.00019  | 0.141322 | 0.0022   | 0.321226 | 1.14E-12 | 0.127593 | 0.00576  | 0.407302 |
| 0.050716 | 0.27406  | 0.048181 | 0.2988   | 0.120991 | 0.00886  | 0.02802  | 0.54584  | 0.220679 |
| 0.049568 | 0.28509  | 0.20805  | 5.80E-06 | -0.00596 | 0.89784  | 0.057771 | 0.21271  | -0.00647 |
| -0.00215 | 0.96302  | -0.13438 | 0.00362  | 0.075793 | 0.10187  | -0.06186 | 0.18203  | 0.049759 |
| 0.102163 | 0.02727  | -0.07739 | 0.09484  | -0.08132 | 0.07916  | -0.16786 | 0.00027  | -0.16846 |
| 0.023657 | 0.6101   | 0.237332 | 2.11E-07 | -0.07953 | 0.08603  | 0.07571  | 0.10224  | 0.011756 |
| -0.0553  | 0.23295  | -0.17662 | 0.00012  | 0.141852 | 0.00212  | -0.03078 | 0.507    | 0.155787 |
| 0.025344 | 0.58486  | -0.01046 | 0.8216   | 0.101145 | 0.02885  | 0.036928 | 0.42595  | 0.142401 |
| 0.032827 | 0.47913  | 0.016624 | 0.72011  | 0.142583 | 0.00201  | 0.052603 | 0.25659  | 0.166468 |
| -0.08027 | 0.08312  | -0.11117 | 0.01625  | 0.178548 | 0.0001   | 0.097255 | 0.03564  | 0.197896 |
| -0.01522 | 0.74286  | -0.16931 | 0.00024  | 0.070968 | 0.12566  | -0.01    | 0.82936  | 0.055638 |
| 0.036499 | 0.43134  | 0.119077 | 0.01001  | 0.16356  | 0.00039  | 0.126215 | 0.00631  | 0.24116  |
| 0.134786 | 0.00352  | 0.171852 | 0.00019  | 0.267261 | 4.43E-09 | 0.157062 | 0.00066  | 0.365265 |
| 0.234695 | 2.90E-07 | 0.101991 | 0.02753  | 0.495714 | 2.48E-30 | 0.302275 | 2.53E-11 | 0.484024 |
| -0.10988 | 0.01754  | -0.10669 | 0.02111  | 0.235926 | 2.50E-07 | 0.202381 | 1.05E-05 | 0.189073 |
| -0.13264 | 0.00409  | -0.00066 | 0.98863  | 0.098999 | 0.03244  | 0.105257 | 0.02291  | 0.190289 |
| 0.044012 | 0.34262  | 0.0829   | 0.07349  | 0.313656 | 4.04E-12 | 0.2736   | 1.83E-09 | 0.332139 |
| 0.171577 | 0.00019  | 0.179176 | 9.89E-05 | 0.364821 | 3.79E-16 | 0.268119 | 3.94E-09 | 0.361353 |
| 0.130501 | 0.00473  | -0.01005 | 0.82848  | 0.366299 | 2.82E-16 | 0.149112 | 0.00123  | 0.345837 |
| -0.01279 | 0.7828   | 0.001341 | 0.97694  | 0.130305 | 0.0048   | 0.036182 | 0.43535  | 0.200941 |
| 0.307858 | 1.04E-11 | 0.063242 | 0.17245  | 0.301408 | 2.90E-11 | 0.142521 | 0.00202  | 0.261555 |
| 0.008997 | 0.84624  | 0.012454 | 0.78837  | 0.110513 | 0.01689  | -0.00588 | 0.89914  | 0.172819 |
| 0.003709 | 0.93629  | 0.055216 | 0.23368  | 0.117088 | 0.01133  | 0.111755 | 0.01569  | 0.199475 |
| 0.183866 | 6.42E-05 | -0.02033 | 0.66123  | 0.47275  | 2.23E-27 | 0.16725  | 0.00028  | 0.428396 |
| 0.2257   | 8.30E-07 | 0.042936 | 0.35455  | 0.487197 | 3.28E-29 | 0.254632 | 2.40E-08 | 0.414242 |
| 0.267957 | 4.03E-09 | 0.221714 | 1.31E-06 | 0.395838 | 5.73E-19 | 0.201552 | 1.14E-05 | 0.444816 |
| 0.202479 | 1.04E-05 | 0.101819 | 0.0278   | 0.4619   | 4.67E-26 | 0.337522 | 6.61E-14 | 0.387834 |

|          |          |          |          |          |          |          |          |          |
|----------|----------|----------|----------|----------|----------|----------|----------|----------|
| 0.000391 | 0.99328  | 0.021922 | 0.63655  | 0.142002 | 0.0021   | 0.023634 | 0.61045  | 0.248539 |
| -0.00503 | 0.91361  | 0.008578 | 0.85333  | 0.119152 | 0.00996  | 0.043889 | 0.34397  | 0.211498 |
| -0.01646 | 0.72279  | 0.010163 | 0.82662  | 0.163256 | 0.0004   | 0.124916 | 0.00688  | 0.176544 |
| 0.041562 | 0.37017  | -0.0362  | 0.43515  | 0.167033 | 0.00029  | 0.107497 | 0.02015  | 0.146215 |
| 0.090752 | 0.05     | 0.016381 | 0.72404  | 0.372816 | 7.59E-17 | 0.191859 | 3.00E-05 | 0.37907  |
| -0.01748 | 0.70639  | 0.033129 | 0.4751   | 0.076828 | 0.09726  | 0.027416 | 0.55453  | 0.084447 |
| -0.23703 | 2.19E-07 | -0.13632 | 0.00316  | -0.37396 | 6.01E-17 | -0.08911 | 0.0543   | -0.42369 |
| -0.18524 | 5.64E-05 | -0.23277 | 3.64E-07 | -0.32686 | 4.34E-13 | -0.24337 | 1.01E-07 | -0.38227 |
| -0.22249 | 1.20E-06 | -0.22411 | 9.96E-07 | -0.47626 | 8.17E-28 | -0.23646 | 2.34E-07 | -0.53434 |
| 0.412384 | 1.34E-20 | 0.469213 | 6.09E-27 | 0.719593 | 1.14E-75 | 0.502181 | 3.32E-31 | 0.619268 |
| 0.111598 | 0.01583  | 0.162734 | 0.00041  | 0.298948 | 4.27E-11 | 0.168994 | 0.00024  | 0.282993 |
| 0.158749 | 0.00057  | 0.109001 | 0.01846  | 0.398807 | 2.96E-19 | 0.130239 | 0.00482  | 0.419701 |
| 0.232213 | 3.89E-07 | 0.255437 | 2.16E-08 | 0.427769 | 3.36E-22 | 0.299269 | 4.06E-11 | 0.49619  |
| 0.041972 | 0.36546  | 0.107941 | 0.01964  | 0.355253 | 2.45E-15 | 0.172098 | 0.00019  | 0.420484 |
| 0.417257 | 4.25E-21 | 0.43353  | 8.04E-23 | 0.720086 | 8.10E-76 | 0.538511 | 1.79E-36 | 0.629294 |
| 0.353171 | 3.65E-15 | 0.355504 | 2.33E-15 | 0.662446 | 2.57E-60 | 0.461494 | 5.22E-26 | 0.654477 |
| -0.1632  | 0.0004   | -0.2477  | 5.85E-08 | -0.34905 | 7.94E-15 | -0.26891 | 3.53E-09 | -0.39602 |
| 0.243739 | 9.62E-08 | 0.28986  | 1.72E-10 | 0.437416 | 3.02E-23 | 0.337217 | 6.98E-14 | 0.458964 |
| 0.35606  | 2.10E-15 | 0.341025 | 3.50E-14 | 0.651225 | 1.08E-57 | 0.482104 | 1.49E-28 | 0.628633 |
| 0.400226 | 2.16E-19 | 0.313909 | 3.87E-12 | 0.705872 | 1.20E-71 | 0.442536 | 8.14E-24 | 0.691614 |
| 0.317849 | 2.01E-12 | 0.245677 | 7.55E-08 | 0.540634 | 8.41E-37 | 0.292472 | 1.16E-10 | 0.506048 |
| -0.28171 | 5.74E-10 | -0.34252 | 2.67E-14 | -0.33039 | 2.34E-13 | -0.26864 | 3.67E-09 | -0.31541 |
| 0.276397 | 1.23E-09 | 0.375564 | 4.32E-17 | 0.382545 | 1.01E-17 | 0.320733 | 1.24E-12 | 0.327058 |
| 0.209851 | 4.79E-06 | 0.192801 | 2.73E-05 | 0.321928 | 1.01E-12 | 0.158897 | 0.00057  | 0.281239 |
| 0.381197 | 1.34E-17 | 0.436268 | 4.04E-23 | 0.490244 | 1.31E-29 | 0.362461 | 6.04E-16 | 0.424294 |
| 0.504367 | 1.67E-31 | 0.520394 | 9.11E-34 | 0.766651 | 1.61E-91 | 0.673808 | 4.29E-63 | 0.691097 |
| 0.336087 | 8.55E-14 | 0.377446 | 2.93E-17 | 0.487348 | 3.14E-29 | 0.38734  | 3.64E-18 | 0.470816 |
| 0.444567 | 4.81E-24 | 0.554227 | 5.87E-39 | 0.669848 | 4.11E-62 | 0.589107 | 5.70E-45 | 0.611507 |
| 0.171002 | 0.0002   | -0.00465 | 0.92016  | 0.165935 | 0.00032  | -0.02921 | 0.5289   | 0.305552 |
| 0.298704 | 4.44E-11 | 0.193727 | 2.49E-05 | 0.431575 | 1.31E-22 | 0.229306 | 5.47E-07 | 0.395852 |
| 0.233    | 3.54E-07 | 0.2843   | 3.93E-10 | 0.344271 | 1.93E-14 | 0.249852 | 4.45E-08 | 0.39384  |
| 0.358637 | 1.27E-15 | 0.351943 | 4.60E-15 | 0.487361 | 3.13E-29 | 0.356291 | 2.01E-15 | 0.50236  |
| 0.274796 | 1.55E-09 | 0.484916 | 6.48E-29 | 0.454228 | 3.75E-25 | 0.385535 | 5.35E-18 | 0.498007 |
| 0.045566 | 0.32582  | 0.169684 | 0.00023  | 0.320389 | 1.31E-12 | 0.233715 | 3.26E-07 | 0.268978 |
| 0.290431 | 1.58E-10 | 0.227609 | 6.66E-07 | 0.379045 | 2.10E-17 | 0.180623 | 8.67E-05 | 0.420633 |
| 0.465532 | 1.71E-26 | 0.562183 | 2.88E-40 | 0.806992 | #####    | 0.674278 | 3.27E-63 | 0.710067 |
| 0.479094 | 3.59E-28 | 0.525887 | 1.43E-34 | 0.774514 | 1.55E-94 | 0.602073 | 2.14E-47 | 0.754617 |
| 0.374332 | 5.57E-17 | 0.461368 | 5.40E-26 | 0.469244 | 6.04E-27 | 0.412026 | 1.45E-20 | 0.480957 |
| 0.351277 | 5.22E-15 | 0.235826 | 2.53E-07 | 0.278196 | 9.54E-10 | 0.230159 | 4.95E-07 | 0.312477 |
| 0.367081 | 2.42E-16 | 0.450314 | 1.07E-24 | 0.501253 | 4.44E-31 | 0.449655 | 1.27E-24 | 0.415069 |
| 0.394439 | 7.79E-19 | 0.325503 | 5.49E-13 | 0.76836  | 3.64E-92 | 0.530432 | 3.02E-35 | 0.683846 |
| 0.389079 | 2.50E-18 | 0.398116 | 3.46E-19 | 0.566953 | 4.54E-41 | 0.427124 | 3.93E-22 | 0.494001 |
| 0.463146 | 3.31E-26 | 0.298253 | 4.76E-11 | 0.555072 | 4.27E-39 | 0.314289 | 3.64E-12 | 0.535244 |
| 0.423271 | 1.01E-21 | 0.307885 | 1.04E-11 | 0.650186 | 1.87E-57 | 0.446501 | 2.91E-24 | 0.627662 |
| 0.197253 | 1.76E-05 | 0.114087 | 0.01363  | 0.297258 | 5.55E-11 | 0.12413  | 0.00724  | 0.337412 |

|          |          |          |          |          |          |          |          |          |
|----------|----------|----------|----------|----------|----------|----------|----------|----------|
| 0.07618  | 0.10013  | -0.18825 | 4.24E-05 | 0.057364 | 0.21596  | -0.2051  | 7.90E-06 | 0.138822 |
| 0.281073 | 6.30E-10 | 0.181494 | 8.00E-05 | 0.530341 | 3.12E-35 | 0.241295 | 1.30E-07 | 0.529567 |
| 0.346015 | 1.40E-14 | 0.440939 | 1.23E-23 | 0.530936 | 2.54E-35 | 0.438197 | 2.47E-23 | 0.486209 |
| 0.350581 | 5.95E-15 | 0.343612 | 2.18E-14 | 0.45451  | 3.48E-25 | 0.355402 | 2.38E-15 | 0.428546 |
| 0.176914 | 0.00012  | 0.251259 | 3.72E-08 | 0.375505 | 4.37E-17 | 0.292076 | 1.23E-10 | 0.356796 |
| 0.179336 | 9.75E-05 | 0.27174  | 2.38E-09 | 0.408825 | 3.06E-20 | 0.259263 | 1.31E-08 | 0.472409 |
| 0.144248 | 0.00178  | 0.110616 | 0.01679  | 0.279952 | 7.41E-10 | 0.138986 | 0.00261  | 0.335376 |
| 0.486735 | 3.77E-29 | 0.567126 | 4.25E-41 | 0.823841 | #####    | 0.707165 | 5.14E-72 | 0.750589 |
| 0.111958 | 0.0155   | 0.279427 | 7.99E-10 | 0.338642 | 5.40E-14 | 0.228878 | 5.75E-07 | 0.316879 |
| 0.201095 | 1.19E-05 | 0.131659 | 0.00437  | 0.192492 | 2.82E-05 | 0.110729 | 0.01667  | 0.318688 |
| 0.094327 | 0.0416   | 0.331639 | 1.88E-13 | 0.325987 | 5.05E-13 | 0.358764 | 1.24E-15 | 0.378209 |
| 0.466054 | 1.48E-26 | 0.447262 | 2.38E-24 | 0.781636 | 2.24E-97 | 0.630377 | 4.24E-53 | 0.684932 |
| 0.365648 | 3.21E-16 | 0.381557 | 1.24E-17 | 0.709024 | 1.50E-72 | 0.497635 | 1.37E-30 | 0.656081 |
| 0.272791 | 2.06E-09 | 0.25066  | 4.02E-08 | 0.382997 | 9.17E-18 | 0.283686 | 4.30E-10 | 0.386825 |
| 0.473791 | 1.66E-27 | 0.470401 | 4.35E-27 | 0.731628 | 2.11E-79 | 0.512463 | 1.24E-32 | 0.641667 |
| -0.04542 | 0.32733  | -0.19014 | 3.54E-05 | -0.31444 | 3.55E-12 | -0.17094 | 0.00021  | -0.36658 |
| -0.1416  | 0.00216  | -0.21263 | 3.56E-06 | -0.37739 | 2.96E-17 | -0.23378 | 3.23E-07 | -0.41514 |
| 0.219308 | 1.71E-06 | 0.185906 | 5.30E-05 | 0.383119 | 8.93E-18 | 0.188799 | 4.03E-05 | 0.37375  |
| 0.345068 | 1.67E-14 | 0.38786  | 3.25E-18 | 0.683046 | 1.91E-65 | 0.523948 | 2.76E-34 | 0.65431  |
| 0.122207 | 0.0082   | 0.271991 | 2.30E-09 | 0.383079 | 9.01E-18 | 0.286085 | 3.02E-10 | 0.404558 |
| 0.354684 | 2.73E-15 | 0.475057 | 1.15E-27 | 0.565478 | 8.07E-41 | 0.508915 | 3.91E-32 | 0.585067 |
| 0.351764 | 4.76E-15 | 0.36664  | 2.64E-16 | 0.645109 | 2.63E-56 | 0.481016 | 2.05E-28 | 0.643492 |
| 0.440641 | 1.33E-23 | 0.468787 | 6.86E-27 | 0.789102 | #####    | 0.599871 | 5.62E-47 | 0.766127 |
| 0.470041 | 4.82E-27 | 0.377859 | 2.69E-17 | 0.719404 | 1.30E-75 | 0.43273  | 9.82E-23 | 0.668754 |
| -0.16894 | 0.00025  | -0.23991 | 1.54E-07 | -0.24573 | 7.50E-08 | -0.11049 | 0.01691  | -0.39496 |
| 0.263878 | 7.03E-09 | 0.395158 | 6.65E-19 | 0.31891  | 1.68E-12 | 0.330932 | 2.13E-13 | 0.361744 |
| 0.479642 | 3.06E-28 | 0.413294 | 1.08E-20 | 0.765058 | 6.36E-91 | 0.565197 | 9.00E-41 | 0.689948 |
| -0.21834 | 1.91E-06 | -0.39105 | 1.63E-18 | -0.36015 | 9.49E-16 | -0.27433 | 1.65E-09 | -0.41074 |
| 0.324486 | 6.53E-13 | 0.293888 | 9.32E-11 | 0.389915 | 2.09E-18 | 0.267734 | 4.15E-09 | 0.453455 |
| 0.472481 | 2.41E-27 | 0.290468 | 1.57E-10 | 0.758039 | 2.38E-88 | 0.466015 | 1.49E-26 | 0.673284 |
| 0.499995 | 6.59E-31 | 0.448667 | 1.65E-24 | 0.741709 | 1.09E-82 | 0.579894 | 2.60E-43 | 0.60808  |
| 0.488135 | 2.48E-29 | 0.41825  | 3.36E-21 | 0.720758 | 5.07E-76 | 0.504202 | 1.76E-31 | 0.653295 |
| 0.454389 | 3.59E-25 | 0.313927 | 3.86E-12 | 0.712848 | 1.16E-73 | 0.429731 | 2.07E-22 | 0.600269 |
| 0.348828 | 8.28E-15 | 0.411135 | 1.79E-20 | 0.343841 | 2.09E-14 | 0.385021 | 5.97E-18 | 0.363934 |
| 0.311799 | 5.48E-12 | 0.246346 | 6.94E-08 | 0.721657 | 2.70E-76 | 0.435283 | 5.18E-23 | 0.640743 |
| -0.27564 | 1.38E-09 | -0.26844 | 3.77E-09 | -0.34887 | 8.21E-15 | -0.27651 | 1.21E-09 | -0.38618 |
| -0.21237 | 3.66E-06 | -0.15488 | 0.00078  | -0.40478 | 7.72E-20 | -0.21085 | 4.31E-06 | -0.40644 |
| 0.348115 | 9.46E-15 | 0.275451 | 1.41E-09 | 0.673939 | 3.98E-63 | 0.42632  | 4.79E-22 | 0.627956 |
| 0.085319 | 0.06545  | -0.07956 | 0.08591  | 0.118669 | 0.01027  | -0.16188 | 0.00044  | 0.233384 |
| 0.374698 | 5.16E-17 | 0.25524  | 2.22E-08 | 0.591052 | 2.51E-45 | 0.412485 | 1.31E-20 | 0.62639  |
| 0.390643 | 1.78E-18 | 0.355736 | 2.23E-15 | 0.710769 | 4.69E-73 | 0.500613 | 5.43E-31 | 0.658419 |
| 0.445836 | 3.46E-24 | 0.472558 | 2.36E-27 | 0.779775 | 1.26E-96 | 0.571328 | 8.13E-42 | 0.75847  |
| 0.406738 | 4.94E-20 | 0.336392 | 8.10E-14 | 0.663547 | 1.40E-60 | 0.404637 | 7.98E-20 | 0.584949 |
| -0.02686 | 0.56258  | -0.13143 | 0.00444  | -0.26259 | 8.37E-09 | -0.11185 | 0.0156   | -0.32212 |
| -0.34815 | 9.40E-15 | -0.24423 | 9.04E-08 | -0.41044 | 2.10E-20 | -0.27448 | 1.62E-09 | -0.39022 |

|          |          |          |          |          |          |          |          |          |
|----------|----------|----------|----------|----------|----------|----------|----------|----------|
| 0.291842 | 1.27E-10 | 0.192575 | 2.79E-05 | 0.302195 | 2.57E-11 | 0.147989 | 0.00134  | 0.336029 |
| -0.25202 | 3.37E-08 | -0.34976 | 6.95E-15 | -0.43281 | 9.64E-23 | -0.3893  | 2.38E-18 | -0.45708 |
| 0.08992  | 0.05215  | 0.113507 | 0.01412  | 0.304388 | 1.81E-11 | 0.144385 | 0.00176  | 0.370105 |
| 0.440389 | 1.41E-23 | 0.364749 | 3.84E-16 | 0.773444 | 4.05E-94 | 0.574153 | 2.64E-42 | 0.679784 |
| 0.275339 | 1.43E-09 | 0.295083 | 7.76E-11 | 0.578672 | 4.27E-43 | 0.455429 | 2.72E-25 | 0.532799 |
| 0.238381 | 1.86E-07 | 0.180713 | 8.60E-05 | 0.335473 | 9.54E-14 | 0.182884 | 7.03E-05 | 0.241811 |
| 0.20908  | 5.20E-06 | 0.259676 | 1.24E-08 | 0.312234 | 5.10E-12 | 0.292822 | 1.10E-10 | 0.373781 |
| 0.455578 | 2.61E-25 | 0.439941 | 1.59E-23 | 0.637412 | 1.31E-54 | 0.447339 | 2.33E-24 | 0.572328 |
| -0.1259  | 0.00645  | -0.22679 | 7.33E-07 | -0.33922 | 4.86E-14 | -0.2194  | 1.69E-06 | -0.37251 |
| 0.19998  | 1.34E-05 | 0.246461 | 6.84E-08 | 0.338982 | 5.08E-14 | 0.222131 | 1.25E-06 | 0.297135 |
| -0.01098 | 0.81301  | 0.122296 | 0.00815  | 0.214029 | 3.06E-06 | 0.157803 | 0.00062  | 0.252358 |
| 0.197726 | 1.68E-05 | 0.177407 | 0.00012  | 0.285227 | 3.43E-10 | 0.162305 | 0.00043  | 0.358987 |
| 0.45434  | 3.64E-25 | 0.401669 | 1.56E-19 | 0.759697 | 5.99E-89 | 0.636584 | 1.98E-54 | 0.648896 |
| 0.45018  | 1.10E-24 | 0.319294 | 1.58E-12 | 0.417341 | 4.17E-21 | 0.22193  | 1.27E-06 | 0.471496 |
| 0.525348 | 1.72E-34 | 0.357203 | 1.68E-15 | 0.569716 | 1.54E-41 | 0.353892 | 3.18E-15 | 0.550867 |
| 0.421131 | 1.69E-21 | 0.42432  | 7.80E-22 | 0.660703 | 6.67E-60 | 0.55009  | 2.72E-38 | 0.620984 |
| 0.436081 | 4.23E-23 | 0.376529 | 3.54E-17 | 0.656525 | 6.44E-59 | 0.420844 | 1.81E-21 | 0.651373 |
| 0.263541 | 7.36E-09 | 0.204806 | 8.14E-06 | 0.366315 | 2.81E-16 | 0.198941 | 1.48E-05 | 0.380084 |
| 0.487989 | 2.59E-29 | 0.474811 | 1.24E-27 | 0.785739 | 4.61E-99 | 0.609066 | 9.42E-49 | 0.717274 |
| 0.459663 | 8.62E-26 | 0.136685 | 0.00308  | 0.409109 | 2.86E-20 | 0.158941 | 0.00057  | 0.394847 |
| 0.347154 | 1.13E-14 | 0.356636 | 1.88E-15 | 0.519021 | 1.44E-33 | 0.34594  | 1.42E-14 | 0.488557 |
| 0.338497 | 5.54E-14 | 0.381169 | 1.35E-17 | 0.636056 | 2.58E-54 | 0.549242 | 3.72E-38 | 0.581928 |
| 0.404815 | 7.66E-20 | 0.320852 | 1.21E-12 | 0.374851 | 5.00E-17 | 0.336183 | 8.40E-14 | 0.371181 |
| 0.498474 | 1.06E-30 | 0.519886 | 1.08E-33 | 0.73922  | 7.32E-82 | 0.607453 | 1.95E-48 | 0.69538  |
| 0.249654 | 4.57E-08 | 0.277831 | 1.01E-09 | 0.389185 | 2.45E-18 | 0.238949 | 1.73E-07 | 0.393545 |
| 0.389939 | 2.08E-18 | 0.472821 | 2.19E-27 | 0.566611 | 5.19E-41 | 0.533321 | 1.11E-35 | 0.57099  |
| 0.441053 | 1.19E-23 | 0.427183 | 3.88E-22 | 0.757446 | 3.90E-88 | 0.540176 | 9.91E-37 | 0.691689 |
| 0.249309 | 4.77E-08 | 0.502551 | 2.96E-31 | 0.383336 | 8.53E-18 | 0.427464 | 3.62E-22 | 0.385241 |
| 0.174972 | 0.00014  | 0.161423 | 0.00046  | 0.279763 | 7.61E-10 | 0.131252 | 0.0045   | 0.310171 |
| 0.25657  | 1.87E-08 | 0.357508 | 1.59E-15 | 0.426428 | 4.67E-22 | 0.391961 | 1.34E-18 | 0.383052 |
| 0.423228 | 1.02E-21 | 0.621743 | 2.69E-51 | 0.696295 | 5.67E-69 | 0.618669 | 1.14E-50 | 0.6827   |
| 0.49053  | 1.21E-29 | 0.481703 | 1.67E-28 | 0.796841 | #####    | 0.576272 | 1.13E-42 | 0.756639 |
| 0.55049  | 2.35E-38 | 0.523486 | 3.23E-34 | 0.801816 | #####    | 0.63418  | 6.55E-54 | 0.676768 |
| 0.424136 | 8.16E-22 | 0.516444 | 3.38E-33 | 0.748729 | 4.56E-85 | 0.616967 | 2.52E-50 | 0.685656 |
| 0.280273 | 7.07E-10 | 0.257353 | 1.68E-08 | 0.594003 | 7.13E-46 | 0.352754 | 3.95E-15 | 0.535989 |
| 0.172196 | 0.00018  | 0.388329 | 2.94E-18 | 0.378129 | 2.54E-17 | 0.338605 | 5.43E-14 | 0.438868 |
| 0.473286 | 1.92E-27 | 0.459205 | 9.76E-26 | 0.724148 | 4.66E-77 | 0.51722  | 2.61E-33 | 0.692244 |
| 0.283257 | 4.58E-10 | 0.406405 | 5.33E-20 | 0.532701 | 1.38E-35 | 0.366982 | 2.46E-16 | 0.497109 |
| 0.065983 | 0.15455  | 0.065687 | 0.15641  | 0.272105 | 2.26E-09 | 0.093433 | 0.04358  | 0.32614  |
| 0.122255 | 0.00817  | 0.121762 | 0.00844  | 0.334542 | 1.13E-13 | 0.160788 | 0.00049  | 0.399579 |
| 0.287759 | 2.35E-10 | 0.398468 | 3.20E-19 | 0.39732  | 4.13E-19 | 0.338702 | 5.34E-14 | 0.419206 |
| 0.257464 | 1.66E-08 | 0.23906  | 1.71E-07 | 0.455669 | 2.55E-25 | 0.277579 | 1.04E-09 | 0.496239 |
| -0.118   | 0.01071  | -0.18267 | 7.18E-05 | -0.30862 | 9.19E-12 | -0.1691  | 0.00024  | -0.38648 |
| 0.387252 | 3.71E-18 | 0.40316  | 1.11E-19 | 0.365674 | 3.20E-16 | 0.332703 | 1.56E-13 | 0.347388 |
| 0.557172 | 1.94E-39 | 0.44455  | 4.83E-24 | 0.796339 | #####    | 0.613189 | 1.44E-49 | 0.682403 |



|          |          |          |          |          |          |          |          |          |
|----------|----------|----------|----------|----------|----------|----------|----------|----------|
| 0.293121 | 1.05E-10 | 0.283851 | 4.20E-10 | 0.6271   | 2.08E-52 | 0.413441 | 1.05E-20 | 0.626969 |
| -0.00161 | 0.9724   | 0.121453 | 0.00861  | 0.219864 | 1.61E-06 | 0.134629 | 0.00356  | 0.392768 |
| -0.11492 | 0.01295  | -0.16976 | 0.00023  | -0.24958 | 4.61E-08 | -0.07927 | 0.08706  | -0.32571 |
| 0.344819 | 1.75E-14 | 0.488273 | 2.38E-29 | 0.454003 | 3.99E-25 | 0.437158 | 3.22E-23 | 0.430398 |
| 0.206358 | 6.93E-06 | 0.297831 | 5.08E-11 | 0.354659 | 2.74E-15 | 0.256779 | 1.81E-08 | 0.315441 |
| 0.347808 | 1.00E-14 | 0.385007 | 5.99E-18 | 0.505137 | 1.31E-31 | 0.331454 | 1.95E-13 | 0.56425  |
| 0.541191 | 6.89E-37 | 0.586195 | 1.93E-44 | 0.718776 | 2.01E-75 | 0.6671   | 1.94E-61 | 0.593677 |
| 0.187983 | 4.35E-05 | 0.292356 | 1.18E-10 | 0.318744 | 1.73E-12 | 0.275172 | 1.47E-09 | 0.399826 |
| 0.283202 | 4.61E-10 | 0.26886  | 3.56E-09 | 0.437185 | 3.20E-23 | 0.287476 | 2.45E-10 | 0.412485 |
| 0.354569 | 2.79E-15 | 0.546423 | 1.04E-37 | 0.547661 | 6.64E-38 | 0.512464 | 1.24E-32 | 0.548071 |
| 0.426846 | 4.21E-22 | 0.444201 | 5.29E-24 | 0.724215 | 4.44E-77 | 0.583514 | 5.88E-44 | 0.670523 |
| 0.273717 | 1.80E-09 | 0.236313 | 2.39E-07 | 0.407927 | 3.76E-20 | 0.27529  | 1.44E-09 | 0.417535 |
| 0.53266  | 1.40E-35 | 0.37492  | 4.93E-17 | 0.767858 | 5.64E-92 | 0.517821 | 2.14E-33 | 0.683403 |
| 0.422049 | 1.35E-21 | 0.377886 | 2.67E-17 | 0.742359 | 6.64E-83 | 0.542258 | 4.70E-37 | 0.697873 |
| 0.228046 | 6.34E-07 | 0.243526 | 9.88E-08 | 0.276619 | 1.20E-09 | 0.192005 | 2.95E-05 | 0.312656 |
| 0.358895 | 1.21E-15 | 0.205164 | 7.84E-06 | 0.662673 | 2.26E-60 | 0.385022 | 5.97E-18 | 0.626294 |
| -0.18177 | 7.80E-05 | -0.1853  | 5.61E-05 | -0.35267 | 4.01E-15 | -0.17652 | 0.00013  | -0.27737 |
| 0.3909   | 1.69E-18 | 0.281764 | 5.69E-10 | 0.777815 | 7.70E-96 | 0.549621 | 3.24E-38 | 0.671665 |
| -0.31387 | 3.90E-12 | -0.17031 | 0.00022  | -0.34569 | 1.49E-14 | -0.17889 | 0.0001   | -0.3544  |
| 0.38529  | 5.64E-18 | 0.357316 | 1.65E-15 | 0.342517 | 2.67E-14 | 0.233557 | 3.32E-07 | 0.386564 |
| 0.264518 | 6.45E-09 | 0.068075 | 0.14187  | 0.439377 | 1.83E-23 | 0.107224 | 0.02047  | 0.445317 |
| 0.268429 | 3.77E-09 | 0.419295 | 2.62E-21 | 0.480455 | 2.41E-28 | 0.384659 | 6.45E-18 | 0.482407 |
| 0.180202 | 9.01E-05 | 0.274872 | 1.53E-09 | 0.336165 | 8.43E-14 | 0.272248 | 2.22E-09 | 0.349141 |
| 0.367235 | 2.34E-16 | 0.571356 | 8.04E-42 | 0.469956 | 4.94E-27 | 0.545101 | 1.69E-37 | 0.504413 |
| 0.370018 | 1.34E-16 | 0.408349 | 3.41E-20 | 0.613322 | 1.36E-49 | 0.448848 | 1.57E-24 | 0.625427 |
| 0.225566 | 8.43E-07 | 0.227331 | 6.88E-07 | 0.411346 | 1.70E-20 | 0.212068 | 3.78E-06 | 0.505397 |
| 0.508913 | 3.91E-32 | 0.45688  | 1.84E-25 | 0.803847 | #####    | 0.577597 | 6.61E-43 | 0.700171 |
| 0.21068  | 4.38E-06 | 0.376511 | 3.55E-17 | 0.339101 | 4.97E-14 | 0.323083 | 8.31E-13 | 0.404635 |
| 0.284978 | 3.55E-10 | 0.407485 | 4.16E-20 | 0.428038 | 3.14E-22 | 0.364254 | 4.24E-16 | 0.435172 |
| 0.252023 | 3.37E-08 | 0.126596 | 0.00615  | 0.311221 | 6.02E-12 | 0.18629  | 5.11E-05 | 0.336778 |
| 0.179215 | 9.86E-05 | 0.260252 | 1.15E-08 | 0.387302 | 3.67E-18 | 0.253737 | 2.70E-08 | 0.314038 |
| 0.42567  | 5.61E-22 | 0.371617 | 9.68E-17 | 0.697558 | 2.55E-69 | 0.435014 | 5.54E-23 | 0.625176 |
| 0.302592 | 2.41E-11 | 0.345302 | 1.60E-14 | 0.527093 | 9.50E-35 | 0.307607 | 1.08E-11 | 0.519255 |
| 0.169899 | 0.00023  | 0.176657 | 0.00012  | 0.382432 | 1.03E-17 | 0.152509 | 0.00095  | 0.41152  |
| 0.447616 | 2.17E-24 | 0.476299 | 8.07E-28 | 0.688516 | 7.04E-67 | 0.537774 | 2.32E-36 | 0.639073 |
| 0.304414 | 1.80E-11 | 0.396935 | 4.49E-19 | 0.590088 | 3.77E-45 | 0.411793 | 1.54E-20 | 0.624448 |
| 0.303678 | 2.03E-11 | 0.31073  | 6.53E-12 | 0.598281 | 1.12E-46 | 0.463451 | 3.04E-26 | 0.521972 |
| 0.549079 | 3.95E-38 | 0.575832 | 1.35E-42 | 0.822402 | #####    | 0.689403 | 4.10E-67 | 0.697326 |
| 0.20686  | 6.57E-06 | 0.345168 | 1.64E-14 | 0.364942 | 3.70E-16 | 0.230127 | 4.97E-07 | 0.409682 |
| 0.412609 | 1.27E-20 | 0.480819 | 2.17E-28 | 0.757347 | 4.23E-88 | 0.584364 | 4.14E-44 | 0.650864 |
| 0.257045 | 1.75E-08 | 0.4246   | 7.29E-22 | 0.347932 | 9.79E-15 | 0.263508 | 7.40E-09 | 0.414824 |
| -0.03739 | 0.42016  | -0.09385 | 0.04265  | -0.31668 | 2.45E-12 | -0.11946 | 0.00977  | -0.3082  |
| 0.318532 | 1.80E-12 | 0.418245 | 3.36E-21 | 0.710347 | 6.23E-73 | 0.541122 | 7.07E-37 | 0.665166 |
| 0.190167 | 3.53E-05 | 0.21805  | 1.97E-06 | 0.43001  | 1.93E-22 | 0.281201 | 6.18E-10 | 0.51166  |
| 0.275328 | 1.44E-09 | 0.121954 | 0.00833  | 0.294643 | 8.31E-11 | 0.151746 | 0.001    | 0.339377 |

|          |          |          |          |          |          |          |          |          |
|----------|----------|----------|----------|----------|----------|----------|----------|----------|
| 0.451104 | 8.64E-25 | 0.333996 | 1.24E-13 | 0.680648 | 7.95E-65 | 0.397913 | 3.62E-19 | 0.584578 |
| 0.379807 | 1.79E-17 | 0.362247 | 6.30E-16 | 0.616774 | 2.76E-50 | 0.416978 | 4.54E-21 | 0.628602 |
| 0.214565 | 2.88E-06 | 0.319505 | 1.52E-12 | 0.313834 | 3.92E-12 | 0.286476 | 2.85E-10 | 0.418381 |
| 0.228521 | 6.00E-07 | 0.158207 | 0.0006   | 0.399643 | 2.46E-19 | 0.267576 | 4.25E-09 | 0.365362 |
| -0.13248 | 0.00413  | -0.28613 | 3.00E-10 | -0.23951 | 1.62E-07 | -0.18129 | 8.15E-05 | -0.27705 |
| 0.1624   | 0.00043  | 0.185188 | 5.67E-05 | 0.314123 | 3.74E-12 | 0.254248 | 2.53E-08 | 0.318753 |
| 0.203515 | 9.31E-06 | 0.262953 | 7.97E-09 | 0.489971 | 1.43E-29 | 0.294075 | 9.06E-11 | 0.491911 |
| 0.402199 | 1.39E-19 | 0.506818 | 7.65E-32 | 0.656303 | 7.25E-59 | 0.536903 | 3.16E-36 | 0.595195 |
| 0.223695 | 1.04E-06 | 0.218469 | 1.88E-06 | 0.369156 | 1.59E-16 | 0.255684 | 2.09E-08 | 0.344662 |
| -0.18636 | 5.08E-05 | -0.35362 | 3.35E-15 | -0.42618 | 4.95E-22 | -0.32975 | 2.62E-13 | -0.47123 |
| -0.03495 | 0.45121  | -0.07053 | 0.12801  | -0.25053 | 4.08E-08 | -0.08629 | 0.06243  | -0.34496 |
| 0.376074 | 3.89E-17 | 0.227831 | 6.50E-07 | 0.309846 | 7.54E-12 | 0.296277 | 6.46E-11 | 0.309226 |
| 0.309613 | 7.83E-12 | 0.497749 | 1.32E-30 | 0.482761 | 1.23E-28 | 0.440324 | 1.44E-23 | 0.431811 |
| 0.396019 | 5.50E-19 | 0.309965 | 7.39E-12 | 0.506826 | 7.63E-32 | 0.286161 | 2.98E-10 | 0.482719 |
| 0.41876  | 2.97E-21 | 0.507898 | 5.42E-32 | 0.694696 | 1.55E-68 | 0.543051 | 3.54E-37 | 0.663164 |
| 0.209323 | 5.07E-06 | 0.397317 | 4.13E-19 | 0.376767 | 3.37E-17 | 0.402788 | 1.21E-19 | 0.382356 |
| 0.357497 | 1.59E-15 | 0.42191  | 1.40E-21 | 0.617148 | 2.32E-50 | 0.431675 | 1.28E-22 | 0.631721 |
| 0.357118 | 1.71E-15 | 0.253853 | 2.66E-08 | 0.704472 | 3.01E-71 | 0.461077 | 5.85E-26 | 0.688936 |
| 0.278427 | 9.23E-10 | 0.383071 | 9.02E-18 | 0.409866 | 2.40E-20 | 0.319475 | 1.53E-12 | 0.424227 |
| 0.204721 | 8.21E-06 | 0.194852 | 2.23E-05 | 0.364219 | 4.27E-16 | 0.18518  | 5.68E-05 | 0.383645 |
| 0.502228 | 3.27E-31 | 0.598319 | 1.11E-46 | 0.708931 | 1.60E-72 | 0.604508 | 7.27E-48 | 0.626398 |
| 0.23981  | 1.56E-07 | 0.183901 | 6.40E-05 | 0.285648 | 3.22E-10 | 0.204572 | 8.34E-06 | 0.290252 |
| 0.526778 | 1.06E-34 | 0.628803 | 9.13E-53 | 0.767802 | 5.92E-92 | 0.654246 | 2.18E-58 | 0.728591 |
| 0.372158 | 8.68E-17 | 0.232484 | 3.77E-07 | 0.525329 | 1.73E-34 | 0.210878 | 4.29E-06 | 0.567455 |
| 0.290242 | 1.62E-10 | 0.209612 | 4.91E-06 | 0.498796 | 9.57E-31 | 0.318325 | 1.86E-12 | 0.514426 |
| 0.228438 | 6.05E-07 | 0.214755 | 2.82E-06 | 0.367552 | 2.20E-16 | 0.276355 | 1.24E-09 | 0.384022 |
| 0.508481 | 4.50E-32 | 0.425442 | 5.93E-22 | 0.807167 | #####    | 0.571091 | 8.94E-42 | 0.68213  |
| 0.447006 | 2.55E-24 | 0.479301 | 3.38E-28 | 0.56786  | 3.19E-41 | 0.541353 | 6.51E-37 | 0.546066 |
| 0.233396 | 3.38E-07 | 0.309102 | 8.50E-12 | 0.313805 | 3.94E-12 | 0.318765 | 1.73E-12 | 0.297909 |
| 0.372275 | 8.47E-17 | 0.383147 | 8.88E-18 | 0.564428 | 1.21E-40 | 0.404279 | 8.65E-20 | 0.541757 |
| 0.431234 | 1.43E-22 | 0.253499 | 2.78E-08 | 0.476979 | 6.63E-28 | 0.261144 | 1.02E-08 | 0.429186 |
| 0.203232 | 9.58E-06 | 0.333669 | 1.32E-13 | 0.419962 | 2.23E-21 | 0.399127 | 2.76E-19 | 0.387381 |
| 0.426018 | 5.16E-22 | 0.398462 | 3.20E-19 | 0.568857 | 2.16E-41 | 0.469105 | 6.28E-27 | 0.488626 |
| 0.284928 | 3.58E-10 | 0.232831 | 3.62E-07 | 0.364712 | 3.87E-16 | 0.239567 | 1.61E-07 | 0.257378 |
| 0.525918 | 1.42E-34 | 0.543575 | 2.93E-37 | 0.807012 | #####    | 0.653973 | 2.52E-58 | 0.747657 |
| 0.312515 | 4.87E-12 | 0.269411 | 3.30E-09 | 0.278213 | 9.52E-10 | 0.206482 | 6.84E-06 | 0.338932 |
| 0.262774 | 8.17E-09 | 0.206636 | 6.73E-06 | 0.297415 | 5.42E-11 | 0.190671 | 3.36E-05 | 0.364611 |
| 0.41798  | 3.58E-21 | 0.381153 | 1.35E-17 | 0.385098 | 5.87E-18 | 0.373792 | 6.22E-17 | 0.403827 |
| 0.024743 | 0.59379  | 0.241282 | 1.30E-07 | 0.276086 | 1.29E-09 | 0.295162 | 7.67E-11 | 0.269993 |
| 0.317036 | 2.31E-12 | 0.389797 | 2.14E-18 | 0.556814 | 2.22E-39 | 0.449548 | 1.30E-24 | 0.574788 |
| 0.333521 | 1.35E-13 | 0.240283 | 1.47E-07 | 0.456756 | 1.90E-25 | 0.240041 | 1.52E-07 | 0.406384 |
| 0.059962 | 0.19585  | -0.22915 | 5.57E-07 | -0.01506 | 0.7455   | -0.21197 | 3.82E-06 | -0.10198 |
| -0.06305 | 0.17377  | -0.41302 | 1.15E-20 | -0.13249 | 0.00413  | -0.25916 | 1.32E-08 | -0.14283 |
| 0.124028 | 0.00729  | 0.242514 | 1.12E-07 | 0.260623 | 1.09E-08 | 0.179956 | 9.21E-05 | 0.184073 |
| -0.08552 | 0.06483  | -0.09908 | 0.03231  | -0.02521 | 0.58682  | 0.094934 | 0.0403   | -0.126   |

|          |          |          |          |          |          |          |          |          |
|----------|----------|----------|----------|----------|----------|----------|----------|----------|
| 0.118785 | 0.01019  | -0.1476  | 0.00138  | 0.064128 | 0.16651  | 0.079126 | 0.08763  | -0.07368 |
| -0.00384 | 0.93401  | -0.3035  | 2.09E-11 | -0.05156 | 0.26615  | -0.04661 | 0.31483  | -0.15969 |
| -0.02837 | 0.54081  | -0.09178 | 0.04745  | -0.1677  | 0.00027  | -0.16236 | 0.00043  | -0.14852 |
| 0.234008 | 3.14E-07 | -0.3291  | 2.94E-13 | -0.19676 | 1.85E-05 | -0.28601 | 3.05E-10 | -0.22369 |
| 0.125976 | 0.00641  | -0.00868 | 0.85158  | -0.02125 | 0.64688  | 0.021499 | 0.64307  | -0.20557 |
| 0.133738 | 0.00379  | -0.15273 | 0.00093  | 0.018772 | 0.68577  | 0.032063 | 0.48943  | -0.13588 |
| 0.092313 | 0.04617  | -0.10212 | 0.02734  | -0.06031 | 0.19329  | -0.0552  | 0.2338   | -0.13504 |
| -0.00764 | 0.86923  | -0.09439 | 0.04147  | -0.15053 | 0.0011   | -0.12073 | 0.00901  | -0.17757 |
| 0.160283 | 0.00051  | -0.12439 | 0.00712  | -0.00464 | 0.92034  | -0.02481 | 0.59276  | -0.0909  |
| 0.054242 | 0.24204  | -0.10389 | 0.02475  | 0.033148 | 0.47484  | 0.022714 | 0.62442  | -0.05671 |
| -0.10064 | 0.02966  | 0.087677 | 0.05832  | -0.089   | 0.0546   | -0.10383 | 0.02485  | 0.017187 |
| -0.05634 | 0.22429  | -0.1595  | 0.00054  | -0.12583 | 0.00648  | -0.04505 | 0.33138  | -0.18029 |
| 0.139959 | 0.00243  | -0.16908 | 0.00024  | -0.00785 | 0.86559  | 0.016444 | 0.72302  | -0.14033 |
| 0.010724 | 0.8172   | -0.17865 | 0.0001   | -0.12477 | 0.00694  | -0.0741  | 0.10978  | -0.20276 |
| 0.114228 | 0.01351  | -0.12367 | 0.00746  | 0.080299 | 0.08302  | 0.079037 | 0.08799  | -0.13173 |
| 0.256041 | 2.00E-08 | 0.001238 | 0.97871  | 0.137788 | 0.00285  | 0.139806 | 0.00246  | 0.13332  |
| -0.04328 | 0.35065  | -0.19929 | 1.43E-05 | -0.03527 | 0.44706  | -0.00656 | 0.8875   | -0.15553 |
| 0.065116 | 0.16005  | -0.13329 | 0.00391  | -0.01097 | 0.81316  | -0.02529 | 0.58565  | 0.028557 |
| 0.056883 | 0.21984  | -0.14062 | 0.00232  | 0.02982  | 0.52033  | -0.01652 | 0.72175  | -0.04876 |
| 0.155137 | 0.00077  | -0.01651 | 0.7219   | -0.06104 | 0.18792  | 0.020983 | 0.65106  | -0.10573 |
| 0.123986 | 0.00731  | -0.16062 | 0.00049  | -0.00336 | 0.94229  | -0.059   | 0.20313  | -0.04076 |
| 0.00633  | 0.89149  | -0.25679 | 1.81E-08 | -0.1326  | 0.0041   | -0.15513 | 0.00077  | -0.21925 |
| 0.090382 | 0.05095  | 0.183415 | 6.69E-05 | 0.096661 | 0.03678  | -0.0052  | 0.91082  | 0.195047 |
| 0.015672 | 0.73552  | 0.219489 | 1.68E-06 | 0.142374 | 0.00204  | 0.108739 | 0.01875  | 0.209215 |
| -0.04375 | 0.34545  | -0.28047 | 6.88E-10 | -0.16867 | 0.00025  | -0.06861 | 0.13876  | -0.30884 |
| 0.369792 | 1.40E-16 | -0.04066 | 0.38066  | -0.06301 | 0.17404  | 0.004259 | 0.92687  | -0.14709 |
| -0.06594 | 0.15483  | -0.19449 | 2.32E-05 | -0.0053  | 0.90897  | 0.026644 | 0.56574  | -0.14778 |
| 0.103765 | 0.02493  | -0.05571 | 0.22952  | -0.07147 | 0.12298  | -0.08635 | 0.06224  | -0.14107 |
| 0.136984 | 0.00301  | -0.00614 | 0.89466  | 0.012443 | 0.78855  | 0.005831 | 0.89999  | -0.06447 |
| 0.187956 | 4.36E-05 | -0.10856 | 0.01894  | -0.04585 | 0.32282  | -0.00571 | 0.90211  | -0.12442 |
| 0.108413 | 0.01911  | -0.02715 | 0.55837  | -0.01511 | 0.74467  | -0.01916 | 0.67964  | -0.00348 |
| 0.189986 | 3.59E-05 | -0.08954 | 0.05315  | 0.142016 | 0.0021   | 0.042313 | 0.36158  | 0.046347 |
| -0.06745 | 0.1456   | -0.17427 | 0.00015  | -0.13539 | 0.00337  | -0.07732 | 0.09514  | -0.19555 |
| 0.11705  | 0.01136  | 0.015622 | 0.73634  | 0.135569 | 0.00333  | 0.104305 | 0.02419  | 0.201128 |
| 0.132401 | 0.00415  | 0.005159 | 0.91147  | 0.12081  | 0.00897  | 0.114164 | 0.01357  | -0.00056 |
| -0.08233 | 0.07549  | -0.20798 | 5.84E-06 | -0.02743 | 0.55429  | 0.030736 | 0.50759  | -0.10591 |
| 0.203405 | 9.41E-06 | -0.11192 | 0.01553  | 0.047534 | 0.30534  | 0.0386   | 0.40528  | -0.0101  |
| -0.03478 | 0.45332  | 0.057486 | 0.21498  | 0.027268 | 0.55667  | -0.14691 | 0.00146  | 0.172853 |
| 0.25412  | 2.57E-08 | -0.00942 | 0.8391   | -0.03749 | 0.41895  | 0.004503 | 0.92269  | -0.07824 |
| 0.119189 | 0.00994  | -0.23734 | 2.11E-07 | 0.075323 | 0.10402  | -0.06744 | 0.14562  | -0.08816 |
| 0.112689 | 0.01483  | -0.00025 | 0.99562  | 0.068737 | 0.13802  | 0.049402 | 0.28671  | 0.066208 |
| 0.042569 | 0.35869  | -0.11372 | 0.01394  | 0.112122 | 0.01535  | 0.169346 | 0.00024  | -0.00153 |
| 0.010537 | 0.82034  | -0.04054 | 0.38205  | -0.098   | 0.03425  | -0.02865 | 0.53678  | -0.16531 |
| -0.06672 | 0.14998  | -0.24397 | 9.35E-08 | -0.09211 | 0.04667  | 0.016224 | 0.72657  | -0.14727 |
| 0.118467 | 0.0104   | -0.15031 | 0.00112  | 0.097326 | 0.0355   | 0.060776 | 0.18983  | -0.01996 |

|          |          |          |          |          |          |          |          |          |
|----------|----------|----------|----------|----------|----------|----------|----------|----------|
| -0.1939  | 2.45E-05 | -0.21026 | 4.58E-06 | -0.23192 | 4.03E-07 | -0.16324 | 0.0004   | -0.19186 |
| 0.034387 | 0.45848  | 0.092688 | 0.04529  | -0.0753  | 0.10414  | -0.14225 | 0.00206  | 0.019412 |
| 0.245943 | 7.30E-08 | 0.101849 | 0.02775  | 0.124626 | 0.00701  | 0.17556  | 0.00014  | 0.021768 |
| 0.059458 | 0.19964  | -0.07086 | 0.12622  | -0.04452 | 0.33706  | 0.037387 | 0.42021  | -0.18087 |
| 0.099557 | 0.03147  | -0.08058 | 0.08196  | 0.100041 | 0.03065  | 0.063838 | 0.16843  | -0.07321 |
| 0.175715 | 0.00014  | 0.030645 | 0.50886  | 0.131217 | 0.00451  | 0.118706 | 0.01024  | -0.05567 |
| 0.180807 | 8.52E-05 | 0.016719 | 0.71858  | 0.221251 | 1.38E-06 | 0.15767  | 0.00063  | 0.125611 |
| 0.262481 | 8.50E-09 | 0.110345 | 0.01706  | 0.179626 | 9.49E-05 | 0.123246 | 0.00767  | 0.143406 |
| 0.002261 | 0.96113  | -0.18429 | 6.17E-05 | 0.005797 | 0.90057  | -0.02864 | 0.53695  | -0.1552  |
| 0.098445 | 0.03343  | 0.007579 | 0.87025  | -0.11025 | 0.01715  | -0.07005 | 0.13064  | -0.06588 |
| -0.19782 | 1.66E-05 | -0.07098 | 0.12558  | 0.05054  | 0.27574  | -0.00251 | 0.95679  | 0.081098 |
| 0.162051 | 0.00044  | -0.0628  | 0.17546  | 0.014887 | 0.74831  | 0.028012 | 0.54595  | -0.04697 |
| -0.13521 | 0.00342  | -0.29109 | 1.43E-10 | -0.08918 | 0.05412  | -0.01092 | 0.81397  | -0.1521  |
| -0.04645 | 0.31654  | -0.24504 | 8.18E-08 | 0.08622  | 0.06264  | 0.082751 | 0.07401  | -0.03757 |
| 0.082615 | 0.07449  | -0.14253 | 0.00202  | -0.12175 | 0.00844  | -0.10846 | 0.01905  | -0.13248 |
| 0.141236 | 0.00222  | 0.082106 | 0.0763   | 0.202501 | 1.03E-05 | 0.236163 | 2.43E-07 | 0.045319 |
| 0.029831 | 0.52018  | -0.09529 | 0.03955  | -0.02348 | 0.6127   | -0.02353 | 0.61195  | -0.09625 |
| 0.02653  | 0.5674   | -0.20069 | 1.24E-05 | -0.2158  | 2.52E-06 | -0.23825 | 1.89E-07 | -0.18858 |
| -0.04461 | 0.33603  | 0.05274  | 0.25535  | 0.03478  | 0.45337  | 0.017174 | 0.71127  | 0.175186 |
| 0.149999 | 0.00115  | 0.241275 | 1.30E-07 | 0.263583 | 7.32E-09 | 0.144911 | 0.00169  | 0.28474  |
| 0.002757 | 0.95262  | 0.173992 | 0.00016  | 0.057567 | 0.21434  | 0.094865 | 0.04045  | 0.101428 |
| -0.00333 | 0.94271  | -0.16126 | 0.00047  | -0.20312 | 9.70E-06 | -0.10159 | 0.02814  | -0.20813 |
| -0.03233 | 0.48586  | 0.185877 | 5.31E-05 | 0.150059 | 0.00114  | 0.083672 | 0.07084  | 0.215069 |
| -0.11264 | 0.01487  | -0.21078 | 4.34E-06 | -0.13494 | 0.00348  | -0.0104  | 0.82263  | -0.24219 |
| -0.03951 | 0.39432  | -0.17198 | 0.00019  | -0.03099 | 0.50406  | 0.063932 | 0.16781  | -0.18202 |
| -0.04174 | 0.36811  | -0.00496 | 0.91488  | 0.134653 | 0.00355  | 0.002309 | 0.96031  | 0.210642 |
| 0.023811 | 0.60777  | 0.092981 | 0.04461  | 0.063217 | 0.17262  | -0.01382 | 0.76582  | 0.119965 |
| 0.004548 | 0.92191  | -0.29158 | 1.32E-10 | -0.0781  | 0.09183  | -0.0884  | 0.05628  | -0.2231  |
| 0.002207 | 0.96207  | -0.20167 | 1.13E-05 | -0.07268 | 0.11677  | -0.0377  | 0.41638  | -0.1764  |
| 0.039084 | 0.39942  | 0.110229 | 0.01717  | 0.04472  | 0.3349   | -0.07112 | 0.12486  | 0.168584 |
| -0.12882 | 0.0053   | -0.35337 | 3.51E-15 | -0.28752 | 2.44E-10 | -0.24509 | 8.12E-08 | -0.28719 |
| 0.024983 | 0.59021  | -0.21353 | 3.23E-06 | -0.22876 | 5.83E-07 | -0.1663  | 0.00031  | -0.26867 |
| -0.07259 | 0.11723  | 0.042742 | 0.35673  | 0.007048 | 0.87926  | -0.05973 | 0.19761  | 0.120809 |
| 0.093644 | 0.0431   | 0.18133  | 8.12E-05 | 0.016445 | 0.72301  | -0.05108 | 0.27059  | 0.11576  |
| 0.278687 | 8.89E-10 | 0.009444 | 0.8387   | 0.256881 | 1.79E-08 | 0.212216 | 3.72E-06 | 0.099262 |
| 0.270268 | 2.93E-09 | 0.109987 | 0.01742  | 0.226893 | 7.24E-07 | 0.159368 | 0.00055  | 0.138157 |
| 0.052773 | 0.25505  | -0.26289 | 8.04E-09 | 0.013192 | 0.77616  | -0.05667 | 0.22156  | -0.02536 |
| -0.00581 | 0.90039  | -0.23182 | 4.07E-07 | -0.21911 | 1.75E-06 | -0.13717 | 0.00297  | -0.32154 |
| 0.04902  | 0.29045  | -0.05761 | 0.214    | 0.007029 | 0.87959  | 0.090898 | 0.04963  | -0.04943 |
| -0.16506 | 0.00034  | -0.29407 | 9.07E-11 | -0.19193 | 2.97E-05 | -0.26073 | 1.07E-08 | -0.26185 |
| -0.09261 | 0.04548  | -0.36659 | 2.67E-16 | -0.21471 | 2.84E-06 | -0.24631 | 6.97E-08 | -0.32971 |
| 0.131401 | 0.00445  | -0.0502  | 0.27895  | 0.059175 | 0.20179  | 0.060366 | 0.19284  | 0.054051 |
| -0.0351  | 0.44927  | -0.10316 | 0.0258   | 0.002885 | 0.95043  | -0.0517  | 0.26484  | -0.07258 |
| -0.01505 | 0.74558  | -0.15377 | 0.00086  | 0.134797 | 0.00352  | 0.197104 | 1.79E-05 | -0.01027 |
| 0.095602 | 0.03891  | -0.21949 | 1.68E-06 | -0.13889 | 0.00263  | -0.10498 | 0.02328  | -0.21271 |

|          |          |          |          |          |          |          |          |          |
|----------|----------|----------|----------|----------|----------|----------|----------|----------|
| 0.24639  | 6.90E-08 | 0.075934 | 0.10123  | 0.208096 | 5.77E-06 | 0.124852 | 0.0069   | 0.075617 |
| -0.02562 | 0.58072  | -0.08296 | 0.0733   | -0.18908 | 3.92E-05 | -0.12345 | 0.00757  | -0.15259 |
| 0.035445 | 0.44478  | -0.09842 | 0.03348  | 0.128729 | 0.00534  | 0.021302 | 0.64612  | 0.036364 |
| 0.047581 | 0.30486  | -0.21658 | 2.31E-06 | -0.17512 | 0.00014  | -0.222   | 1.26E-06 | -0.15644 |
| 0.043153 | 0.35212  | -0.19303 | 2.67E-05 | -0.16366 | 0.00038  | -0.14649 | 0.0015   | -0.2235  |
| 0.222896 | 1.14E-06 | 0.155659 | 0.00074  | 0.201633 | 1.13E-05 | 0.187899 | 4.39E-05 | 0.091547 |
| 0.106644 | 0.02117  | -0.07777 | 0.0932   | -0.10416 | 0.02438  | -0.08666 | 0.06132  | -0.12154 |
| 0.094133 | 0.04202  | 0.13695  | 0.00302  | -0.02824 | 0.54268  | -0.08908 | 0.05439  | 0.136308 |
| -0.03376 | 0.46673  | -0.1343  | 0.00364  | -0.10621 | 0.0217   | -0.05207 | 0.26146  | -0.16172 |
| 0.216571 | 2.32E-06 | -0.10584 | 0.02217  | -0.11876 | 0.01021  | -0.05114 | 0.27005  | -0.16889 |
| -0.04672 | 0.31367  | -0.27888 | 8.65E-10 | -0.29749 | 5.35E-11 | -0.32003 | 1.40E-12 | -0.30429 |
| 0.199295 | 1.43E-05 | 0.069838 | 0.13181  | 0.150691 | 0.00109  | 0.133423 | 0.00387  | 0.030309 |
| -0.12362 | 0.00748  | -0.23834 | 1.87E-07 | -0.26898 | 3.50E-09 | -0.13364 | 0.00381  | -0.31716 |
| -0.05961 | 0.19847  | -0.18329 | 6.77E-05 | -0.18951 | 3.76E-05 | -0.08296 | 0.07329  | -0.21712 |
| 0.133552 | 0.00384  | 0.013659 | 0.76845  | 0.157272 | 0.00065  | 0.128338 | 0.00548  | 0.023262 |
| -0.00309 | 0.94698  | -0.18226 | 7.45E-05 | -0.07876 | 0.08913  | 0.002769 | 0.95242  | -0.18943 |
| 0.040819 | 0.3788   | -0.23466 | 2.91E-07 | -0.06256 | 0.17712  | -0.06627 | 0.15275  | -0.15279 |
| -0.07152 | 0.12273  | -0.00066 | 0.98858  | -0.05215 | 0.2607   | -0.11886 | 0.01015  | 0.059118 |
| -0.03078 | 0.50704  | -0.02365 | 0.61025  | 0.015454 | 0.73907  | -0.07272 | 0.11656  | 0.083375 |
| 0.036488 | 0.43148  | -0.16271 | 0.00042  | -0.13822 | 0.00276  | -0.06864 | 0.13861  | -0.25948 |
| 0.003304 | 0.94324  | -0.08466 | 0.06758  | -0.2088  | 5.36E-06 | -0.09411 | 0.04208  | -0.19902 |
| 0.162786 | 0.00041  | -0.04242 | 0.36033  | -0.03147 | 0.49757  | -0.02762 | 0.55155  | -0.09863 |
| 0.012101 | 0.79423  | -0.10666 | 0.02115  | 0.008409 | 0.85618  | -0.02167 | 0.64039  | -0.093   |
| 0.150488 | 0.00111  | 0.095819 | 0.03846  | 0.195309 | 2.13E-05 | 0.175984 | 0.00013  | 0.030711 |
| 0.126004 | 0.0064   | 0.148004 | 0.00134  | 0.126271 | 0.00629  | 0.2068   | 6.61E-06 | 0.047887 |
| 0.386885 | 4.01E-18 | 0.231066 | 4.45E-07 | 0.276821 | 1.16E-09 | 0.229277 | 5.49E-07 | 0.232562 |
| 0.229039 | 5.65E-07 | -0.00757 | 0.87036  | 0.160041 | 0.00052  | 0.128311 | 0.00549  | 0.008842 |
| -0.02004 | 0.66576  | -0.19522 | 2.15E-05 | -0.18467 | 5.96E-05 | -0.11028 | 0.01712  | -0.31285 |
| 0.05488  | 0.23654  | -0.13869 | 0.00267  | 0.036675 | 0.42912  | -0.01235 | 0.79015  | -0.11868 |
| 0.048585 | 0.29476  | -0.10943 | 0.018    | -0.1185  | 0.01038  | -0.09507 | 0.04002  | -0.14578 |
| 0.019726 | 0.6707   | -0.10453 | 0.02388  | -0.11728 | 0.0112   | -0.05126 | 0.26895  | -0.20214 |
| 0.220626 | 1.48E-06 | 0.152323 | 0.00096  | 0.138495 | 0.00271  | 0.191604 | 3.07E-05 | -0.01014 |
| 0.061854 | 0.18208  | -0.33556 | 9.39E-14 | -0.19533 | 2.13E-05 | -0.27792 | 9.93E-10 | -0.1619  |
| 0.055827 | 0.22853  | -0.10254 | 0.02671  | -0.12656 | 0.00617  | -0.17117 | 0.0002   | -0.05387 |
| 0.105399 | 0.02273  | 0.280713 | 6.63E-10 | 0.001306 | 0.97754  | -0.01744 | 0.70701  | 0.178606 |
| -0.0777  | 0.09352  | -0.42076 | 1.84E-21 | -0.19937 | 1.42E-05 | -0.21124 | 4.13E-06 | -0.33597 |
| -0.05931 | 0.20077  | -0.25328 | 2.87E-08 | -0.22679 | 7.32E-07 | -0.2018  | 1.11E-05 | -0.27485 |
| -0.10641 | 0.02145  | -0.26379 | 7.12E-09 | -0.06297 | 0.17431  | -0.10905 | 0.01841  | -0.22345 |
| 0.049018 | 0.29047  | -0.07118 | 0.12455  | -0.01757 | 0.70498  | 0.088152 | 0.05696  | -0.15476 |
| -0.12986 | 0.00494  | -0.19156 | 3.08E-05 | -0.21179 | 3.89E-06 | -0.10845 | 0.01907  | -0.21223 |
| 0.164236 | 0.00037  | 0.198643 | 1.53E-05 | 0.106246 | 0.02166  | 0.031185 | 0.50142  | 0.214951 |
| -0.18928 | 3.84E-05 | -0.07414 | 0.1096   | -0.06241 | 0.17818  | 0.088286 | 0.05659  | -0.11122 |
| 0.053117 | 0.25196  | -0.19251 | 2.81E-05 | -0.12186 | 0.00839  | -0.05331 | 0.25027  | -0.21657 |
| -0.03467 | 0.45486  | -0.20465 | 8.28E-06 | -0.1471  | 0.00143  | -0.09107 | 0.04921  | -0.22883 |
| -0.03957 | 0.39363  | -0.22085 | 1.44E-06 | 0.060847 | 0.18932  | 0.090434 | 0.05081  | -0.01555 |

|          |          |          |          |          |          |          |          |          |
|----------|----------|----------|----------|----------|----------|----------|----------|----------|
| 0.050358 | 0.27747  | 0.139725 | 0.00248  | -0.17755 | 0.00011  | -0.05477 | 0.23745  | -0.16246 |
| 0.070504 | 0.12816  | -0.0618  | 0.18249  | 0.368227 | 1.92E-16 | 0.106807 | 0.02097  | 0.318647 |
| 0.089354 | 0.05365  | -0.0813  | 0.07923  | 0.314087 | 3.76E-12 | 0.128231 | 0.00552  | 0.28933  |
| 0.062267 | 0.17918  | -0.11345 | 0.01416  | 0.292431 | 1.16E-10 | 0.128913 | 0.00527  | 0.210348 |
| 0.116433 | 0.0118   | 0.000626 | 0.98924  | 0.254655 | 2.40E-08 | 0.103764 | 0.02494  | 0.177602 |
| 0.203802 | 9.03E-06 | 0.028784 | 0.53493  | 0.401044 | 1.80E-19 | 0.196302 | 1.93E-05 | 0.493725 |
| 0.135069 | 0.00345  | 0.016993 | 0.71416  | 0.26134  | 9.90E-09 | 0.101036 | 0.02902  | 0.262612 |
| 0.046342 | 0.31764  | -0.07883 | 0.08883  | 0.361718 | 6.99E-16 | 0.01482  | 0.7494   | 0.346967 |
| 0.10925  | 0.01819  | -0.01606 | 0.72922  | 0.440425 | 1.40E-23 | 0.073388 | 0.11324  | 0.606633 |
| 0.194853 | 2.23E-05 | 0.106026 | 0.02193  | 0.575802 | 1.36E-42 | 0.356324 | 1.99E-15 | 0.517519 |
| -0.11699 | 0.0114   | 0.069589 | 0.1332   | -0.24568 | 7.55E-08 | 0.009107 | 0.84439  | -0.32604 |
| -0.13085 | 0.00462  | -0.30415 | 1.88E-11 | 0.298469 | 4.60E-11 | 0.131923 | 0.00429  | 0.147998 |
| 0.032268 | 0.48666  | 0.162238 | 0.00043  | -0.24234 | 1.14E-07 | -0.11304 | 0.01452  | -0.16754 |
| 0.081365 | 0.079    | -0.03539 | 0.44546  | 0.223693 | 1.04E-06 | 0.11115  | 0.01626  | 0.231347 |
| 0.016001 | 0.73019  | 0.102315 | 0.02704  | -0.30851 | 9.35E-12 | -0.18651 | 5.01E-05 | -0.27031 |
| 0.26452  | 6.45E-09 | -0.00155 | 0.97334  | 0.607014 | 2.37E-48 | 0.233742 | 3.25E-07 | 0.560154 |
| 0.091781 | 0.04745  | -0.20258 | 1.02E-05 | 0.305126 | 1.61E-11 | 0.127043 | 0.00597  | 0.214902 |
| 0.124558 | 0.00704  | 0.433274 | 8.57E-23 | -0.162   | 0.00044  | 0.069108 | 0.1359   | -0.11471 |
| 0.05873  | 0.20521  | -0.00956 | 0.83678  | 0.15348  | 0.00088  | -0.00797 | 0.8636   | 0.240854 |
| 0.254112 | 2.57E-08 | 0.055836 | 0.22846  | 0.684837 | 6.54E-66 | 0.35305  | 3.73E-15 | 0.562732 |
| 0.027305 | 0.55614  | 0.140943 | 0.00227  | -0.33366 | 1.32E-13 | -0.02647 | 0.56826  | -0.32782 |
| 0.065552 | 0.15727  | 0.260029 | 1.18E-08 | -0.26399 | 6.93E-09 | -0.0699  | 0.13146  | -0.20984 |
| -0.13511 | 0.00344  | -0.5262  | 1.29E-34 | 0.032007 | 0.4902   | -0.17831 | 0.00011  | -0.09307 |
| 0.078302 | 0.09099  | 0.198349 | 1.58E-05 | -0.13345 | 0.00386  | 0.050731 | 0.27392  | -0.10029 |
| 0.444633 | 4.73E-24 | -0.08511 | 0.06611  | 0.544155 | 2.38E-37 | 0.110813 | 0.01659  | 0.435789 |
| -0.01221 | 0.79244  | 0.176898 | 0.00012  | -0.25687 | 1.79E-08 | -0.12431 | 0.00715  | -0.11781 |
| 0.105086 | 0.02314  | 0.582048 | 1.08E-43 | -0.0937  | 0.04298  | 0.228611 | 5.93E-07 | 0.000212 |
| 0.191481 | 3.11E-05 | -0.07203 | 0.12007  | 0.606332 | 3.22E-48 | 0.200823 | 1.23E-05 | 0.51719  |
| 0.15059  | 0.0011   | -0.06427 | 0.16555  | 0.488422 | 2.28E-29 | 0.122288 | 0.00816  | 0.392589 |
| 0.216243 | 2.40E-06 | -0.02624 | 0.57169  | 0.597375 | 1.67E-46 | 0.350619 | 5.91E-15 | 0.48223  |
| 0.214282 | 2.97E-06 | 0.085076 | 0.06622  | 0.573348 | 3.64E-42 | 0.212911 | 3.45E-06 | 0.485461 |
| -0.22715 | 7.02E-07 | 0.039216 | 0.39782  | -0.45569 | 2.53E-25 | -0.15179 | 0.001    | -0.44896 |
| 0.27087  | 2.69E-09 | 0.353613 | 3.35E-15 | 0.071272 | 0.12404  | 0.226275 | 7.77E-07 | 0.067817 |
| -0.08334 | 0.07198  | 0.216317 | 2.38E-06 | -0.40658 | 5.12E-20 | -0.15012 | 0.00114  | -0.29048 |
| 0.120163 | 0.00934  | -0.0554  | 0.23211  | 0.312472 | 4.91E-12 | 0.14612  | 0.00154  | 0.300138 |
| 0.070877 | 0.12614  | 0.108125 | 0.01943  | 0.324373 | 6.66E-13 | 0.15767  | 0.00063  | 0.376425 |
| 0.218822 | 1.81E-06 | 0.079735 | 0.08521  | 0.542278 | 4.67E-37 | 0.318171 | 1.91E-12 | 0.498352 |
| 0.042674 | 0.3575   | 0.392158 | 1.28E-18 | -0.18481 | 5.87E-05 | 0.148504 | 0.00129  | -0.11943 |
| 0.150969 | 0.00107  | -0.04476 | 0.33444  | 0.560892 | 4.72E-40 | 0.228714 | 5.86E-07 | 0.463406 |
| 0.090583 | 0.05043  | 0.151606 | 0.00101  | -0.1536  | 0.00087  | 0.057375 | 0.21587  | -0.18704 |
| 0.146699 | 0.00148  | -0.0905  | 0.05063  | 0.279979 | 7.38E-10 | -0.03004 | 0.51733  | 0.20156  |
| -0.05348 | 0.24876  | 0.127637 | 0.00574  | -0.32575 | 5.26E-13 | -0.03291 | 0.47797  | -0.33707 |
| 0.068149 | 0.14144  | 0.224813 | 9.19E-07 | -0.23042 | 4.80E-07 | 0.027769 | 0.54943  | -0.20813 |
| -0.00127 | 0.97809  | 0.021619 | 0.64123  | 0.286928 | 2.66E-10 | 0.148751 | 0.00126  | 0.249984 |
| 0.131441 | 0.00444  | 0.052621 | 0.25643  | 0.244529 | 8.72E-08 | 0.094635 | 0.04094  | 0.313379 |

|          |          |          |          |          |          |          |          |          |
|----------|----------|----------|----------|----------|----------|----------|----------|----------|
| 0.132484 | 0.00413  | 0.036232 | 0.43472  | 0.439905 | 1.60E-23 | 0.236858 | 2.23E-07 | 0.363944 |
| -0.13397 | 0.00373  | 0.049923 | 0.28164  | -0.30751 | 1.10E-11 | 0.003033 | 0.94788  | -0.33163 |
| 0.059031 | 0.20289  | 0.005033 | 0.91363  | 0.301075 | 3.06E-11 | 0.187825 | 4.42E-05 | 0.22013  |
| 0.080599 | 0.08187  | -0.21313 | 3.37E-06 | 0.383878 | 7.61E-18 | 0.073212 | 0.1141   | 0.317782 |
| -0.01514 | 0.74424  | 0.193299 | 2.60E-05 | -0.35817 | 1.40E-15 | -0.15554 | 0.00074  | -0.28078 |
| 0.09269  | 0.04529  | -0.02368 | 0.6097   | 0.257005 | 1.76E-08 | 0.097122 | 0.03589  | 0.304808 |
| -0.05056 | 0.27554  | 0.18368  | 6.53E-05 | -0.30467 | 1.73E-11 | -0.13589 | 0.00326  | -0.28885 |
| 0.019946 | 0.66725  | -0.13099 | 0.00458  | 0.431664 | 1.28E-22 | 0.210853 | 4.30E-06 | 0.324622 |
| 0.173518 | 0.00016  | 0.033048 | 0.47618  | 0.30659  | 1.27E-11 | 0.120873 | 0.00893  | 0.253147 |
| 0.209504 | 4.97E-06 | 0.014973 | 0.7469   | 0.414044 | 9.07E-21 | 0.170548 | 0.00021  | 0.299806 |
| -0.04919 | 0.28875  | 0.102702 | 0.02646  | -0.26079 | 1.07E-08 | -0.03937 | 0.396    | -0.23116 |
| -0.06155 | 0.18427  | 0.223578 | 1.06E-06 | -0.29436 | 8.67E-11 | -0.03547 | 0.4444   | -0.26461 |
| -0.1345  | 0.00359  | 0.184734 | 5.92E-05 | -0.3297  | 2.65E-13 | -0.08169 | 0.07781  | -0.26917 |
| -0.10289 | 0.02619  | 0.230778 | 4.61E-07 | -0.2911  | 1.42E-10 | 0.056178 | 0.22562  | -0.34993 |
| -0.05937 | 0.20033  | -0.11025 | 0.01716  | 0.33374  | 1.30E-13 | 0.211073 | 4.20E-06 | 0.287799 |
| -0.04093 | 0.37752  | 0.375928 | 4.01E-17 | -0.30456 | 1.76E-11 | -0.04212 | 0.36381  | -0.171   |
| -0.02699 | 0.56074  | -0.05133 | 0.26827  | 0.355165 | 2.49E-15 | 0.172534 | 0.00018  | 0.317079 |
| -0.19653 | 1.89E-05 | 0.051171 | 0.26977  | -0.55619 | 2.81E-39 | -0.25474 | 2.37E-08 | -0.43116 |
| -0.06524 | 0.15927  | 0.085198 | 0.06583  | -0.35978 | 1.02E-15 | -0.16388 | 0.00038  | -0.27164 |
| 0.162361 | 0.00043  | -0.0124  | 0.78924  | 0.451516 | 7.74E-25 | 0.222446 | 1.20E-06 | 0.351532 |
| 0.175083 | 0.00014  | -0.0895  | 0.05326  | 0.546803 | 9.09E-38 | 0.250745 | 3.97E-08 | 0.446658 |
| 0.065584 | 0.15707  | 0.099176 | 0.03213  | 0.269547 | 3.23E-09 | 0.175034 | 0.00014  | 0.260608 |
| 0.067997 | 0.14233  | 0.223022 | 1.13E-06 | -0.16022 | 0.00051  | 0.047875 | 0.30188  | -0.12711 |
| 0.196484 | 1.90E-05 | 0.367952 | 2.03E-16 | -0.03074 | 0.50748  | 0.111784 | 0.01566  | -0.07202 |
| 0.083322 | 0.07203  | -0.12638 | 0.00624  | 0.385798 | 5.06E-18 | 0.045164 | 0.33011  | 0.298086 |
| 0.2343   | 3.04E-07 | 0.099697 | 0.03124  | 0.55553  | 3.60E-39 | 0.333213 | 1.43E-13 | 0.360616 |
| 0.108938 | 0.01853  | 0.00044  | 0.99244  | 0.292242 | 1.20E-10 | 0.085183 | 0.06588  | 0.300401 |
| 0.004454 | 0.92353  | 0.298096 | 4.87E-11 | -0.26087 | 1.05E-08 | 0.010012 | 0.82915  | -0.17753 |
| -0.29328 | 1.02E-10 | 0.066085 | 0.15392  | -0.57586 | 1.33E-42 | -0.2179  | 2.00E-06 | -0.49125 |
| 0.286245 | 2.95E-10 | 0.081304 | 0.07923  | 0.42919  | 2.37E-22 | 0.159906 | 0.00052  | 0.367396 |
| 0.078743 | 0.08918  | -0.0961  | 0.03789  | 0.376853 | 3.31E-17 | 0.168564 | 0.00025  | 0.282995 |
| 0.153163 | 0.0009   | -0.0004  | 0.99316  | 0.432737 | 9.80E-23 | 0.207043 | 6.45E-06 | 0.389444 |
| 0.15155  | 0.00102  | -0.1175  | 0.01105  | 0.456948 | 1.80E-25 | 0.189373 | 3.81E-05 | 0.344965 |
| 0.10077  | 0.02945  | -0.12099 | 0.00886  | 0.278507 | 9.12E-10 | 0.115268 | 0.01268  | 0.175202 |
| -0.18921 | 3.87E-05 | -0.13036 | 0.00478  | -0.44117 | 1.16E-23 | -0.18637 | 5.07E-05 | -0.37648 |
| 0.03848  | 0.40675  | -0.36159 | 7.16E-16 | 0.063605 | 0.16999  | -0.20718 | 6.36E-06 | -0.05363 |
| 0.154165 | 0.00083  | 0.033859 | 0.46542  | 0.602825 | 1.53E-47 | 0.336935 | 7.34E-14 | 0.544949 |
| 0.008945 | 0.84713  | -0.15174 | 0.001    | 0.145529 | 0.00161  | -0.05002 | 0.28068  | 0.154762 |
| 0.045979 | 0.32146  | -0.17302 | 0.00017  | 0.283562 | 4.38E-10 | -0.00475 | 0.91847  | 0.304547 |
| -0.0351  | 0.44923  | 0.012057 | 0.79497  | -0.19452 | 2.31E-05 | 0.019459 | 0.6749   | -0.23245 |
| 0.008631 | 0.85244  | -0.0986  | 0.03315  | 0.214396 | 2.94E-06 | 0.059819 | 0.19692  | 0.199965 |
| 0.258581 | 1.43E-08 | 0.022048 | 0.63461  | 0.436891 | 3.45E-23 | 0.14529  | 0.00164  | 0.379247 |
| -0.10392 | 0.02472  | -0.33015 | 2.45E-13 | 0.310893 | 6.35E-12 | 0.090758 | 0.04998  | 0.187449 |
| -0.10231 | 0.02705  | 0.047758 | 0.30306  | -0.25942 | 1.28E-08 | -0.02539 | 0.58419  | -0.21754 |
| 0.12274  | 0.00792  | -0.12905 | 0.00522  | 0.304736 | 1.71E-11 | 0.012055 | 0.795    | 0.334962 |

|          |          |          |          |          |          |          |          |          |
|----------|----------|----------|----------|----------|----------|----------|----------|----------|
| 0.113467 | 0.01415  | -0.26336 | 7.54E-09 | 0.403449 | 1.04E-19 | 0.03986  | 0.39011  | 0.372601 |
| -0.00841 | 0.85621  | -0.10733 | 0.02034  | 0.321072 | 1.17E-12 | 0.11365  | 0.014    | 0.282537 |
| 0.080572 | 0.08198  | -0.12521 | 0.00674  | 0.211625 | 3.96E-06 | 0.026009 | 0.57504  | 0.148123 |
| -0.01669 | 0.71907  | 0.189776 | 3.66E-05 | -0.22045 | 1.50E-06 | -0.02027 | 0.66211  | -0.16967 |
| -0.13135 | 0.00447  | 0.206048 | 7.15E-06 | -0.23317 | 3.47E-07 | 0.060025 | 0.19537  | -0.21572 |
| 0.122038 | 0.00829  | 0.015241 | 0.74254  | 0.291702 | 1.30E-10 | 0.112806 | 0.01473  | 0.260684 |
| 0.119187 | 0.00994  | 0.104832 | 0.02347  | 0.314239 | 3.67E-12 | 0.060462 | 0.19213  | 0.329613 |
| 0.156572 | 0.00069  | -0.06707 | 0.14784  | 0.354169 | 3.01E-15 | 0.05698  | 0.21905  | 0.407705 |
| 0.107151 | 0.02056  | -0.0877  | 0.05824  | 0.352148 | 4.43E-15 | 0.132873 | 0.00402  | 0.212341 |
| 0.102573 | 0.02665  | 0.265253 | 5.84E-09 | -0.07211 | 0.11968  | 0.034921 | 0.45153  | 0.010892 |
| 0.042378 | 0.36085  | -0.17294 | 0.00017  | 0.096078 | 0.03794  | -0.08217 | 0.07608  | 0.228232 |
| -0.00224 | 0.96143  | -0.12702 | 0.00598  | 0.25363  | 2.74E-08 | 0.071869 | 0.12091  | 0.282123 |
| 0.050597 | 0.27519  | -0.25213 | 3.32E-08 | 0.301609 | 2.81E-11 | -0.02336 | 0.61454  | 0.397658 |
| 0.299694 | 3.80E-11 | 0.080292 | 0.08305  | 0.549297 | 3.65E-38 | 0.24054  | 1.43E-07 | 0.499666 |
| -0.06241 | 0.17818  | -0.36792 | 2.04E-16 | 0.193025 | 2.67E-05 | -0.02863 | 0.53705  | 0.164679 |
| 0.272491 | 2.14E-09 | -0.10078 | 0.02944  | 0.583297 | 6.43E-44 | 0.265172 | 5.90E-09 | 0.468626 |
| 0.172002 | 0.00019  | -0.04599 | 0.32137  | 0.27736  | 1.08E-09 | 0.046712 | 0.31379  | 0.13548  |
| 0.082842 | 0.07369  | -0.3018  | 2.73E-11 | 0.383216 | 8.75E-18 | -0.03128 | 0.50012  | 0.271636 |
| 0.025323 | 0.58517  | -0.1329  | 0.00402  | 0.452307 | 6.27E-25 | 0.23583  | 2.53E-07 | 0.377993 |
| 0.032443 | 0.4843   | -0.36335 | 5.07E-16 | 0.198725 | 1.52E-05 | -0.05604 | 0.22677  | 0.118219 |
| -0.08553 | 0.06478  | 0.134722 | 0.00354  | -0.48285 | 1.20E-28 | -0.23688 | 2.23E-07 | -0.4146  |
| 0.19514  | 2.17E-05 | -0.03769 | 0.41644  | 0.287487 | 2.45E-10 | 0.046365 | 0.3174   | 0.298619 |
| 0.001246 | 0.97857  | 0.369754 | 1.41E-16 | -0.24505 | 8.16E-08 | 0.132656 | 0.00408  | -0.1967  |
| 0.1098   | 0.01761  | -0.04305 | 0.35323  | 0.2593   | 1.30E-08 | 0.073709 | 0.11166  | 0.236653 |
| 0.177851 | 0.00011  | 0.012744 | 0.78356  | 0.237934 | 1.96E-07 | 0.107069 | 0.02066  | 0.217414 |
| 0.102908 | 0.02616  | -0.08758 | 0.05861  | 0.205267 | 7.76E-06 | 0.00554  | 0.90496  | 0.255133 |
| 0.121069 | 0.00882  | 0.031098 | 0.50261  | 0.262224 | 8.79E-09 | 0.068754 | 0.13792  | 0.227355 |
| -0.03016 | 0.51564  | -0.17863 | 0.0001   | 0.449859 | 1.20E-24 | 0.211798 | 3.89E-06 | 0.330934 |
| 0.184592 | 6.00E-05 | -0.05655 | 0.22257  | 0.268516 | 3.73E-09 | -0.044   | 0.34274  | 0.212964 |
| -0.00658 | 0.88727  | -0.28749 | 2.45E-10 | 0.338958 | 5.10E-14 | 0.045943 | 0.32183  | 0.259676 |
| 0.113031 | 0.01453  | -0.12322 | 0.00768  | 0.226214 | 7.83E-07 | -0.02857 | 0.53804  | 0.140804 |
| 0.067697 | 0.1441   | -0.17168 | 0.00019  | 0.251623 | 3.55E-08 | 0.098983 | 0.03247  | 0.219812 |
| 0.143263 | 0.00191  | 0.273989 | 1.74E-09 | -0.11515 | 0.01277  | 0.01886  | 0.68437  | -0.12981 |
| 0.099591 | 0.03142  | -0.18099 | 8.38E-05 | 0.464309 | 2.40E-26 | 0.222438 | 1.20E-06 | 0.34743  |
| -0.06684 | 0.14927  | 0.328045 | 3.53E-13 | -0.18641 | 5.05E-05 | 0.157134 | 0.00065  | -0.2137  |
| -0.03823 | 0.40981  | 0.138722 | 0.00266  | -0.27988 | 7.48E-10 | -0.06358 | 0.17014  | -0.20645 |
| 0.076621 | 0.09817  | -0.10473 | 0.02361  | 0.527156 | 9.30E-35 | 0.260555 | 1.10E-08 | 0.410399 |
| -0.01755 | 0.7053   | 0.265478 | 5.66E-09 | -0.22826 | 6.18E-07 | -0.02274 | 0.62398  | -0.18826 |
| -0.06559 | 0.15704  | -0.06675 | 0.14981  | 0.309249 | 8.30E-12 | 0.158416 | 0.00059  | 0.264096 |
| -0.09187 | 0.04724  | 0.119253 | 0.0099   | -0.40333 | 1.07E-19 | -0.14457 | 0.00173  | -0.34584 |
| -0.03411 | 0.46209  | 0.233832 | 3.21E-07 | -0.41649 | 5.09E-21 | -0.10142 | 0.02842  | -0.35763 |
| 0.051615 | 0.26564  | -0.04345 | 0.3488   | 0.315683 | 2.89E-12 | 0.134965 | 0.00348  | 0.310254 |
| 0.087703 | 0.05824  | 0.388121 | 3.08E-18 | -0.18637 | 5.07E-05 | -0.01839 | 0.69178  | -0.09291 |
| 0.083684 | 0.0708   | -0.2069  | 6.54E-06 | 0.483405 | 1.01E-28 | 0.181882 | 7.72E-05 | 0.394335 |
| 0.135925 | 0.00325  | 0.414881 | 7.45E-21 | -0.13565 | 0.00331  | 0.121644 | 0.0085   | -0.08636 |



|          |          |          |          |          |          |          |          |          |
|----------|----------|----------|----------|----------|----------|----------|----------|----------|
| -0.03034 | 0.5131   | -0.31103 | 6.21E-12 | 0.158005 | 0.00061  | -0.08135 | 0.07907  | 0.145084 |
| -0.0553  | 0.23298  | -0.17753 | 0.00011  | 0.153169 | 0.0009   | 0.075742 | 0.1021   | 0.123535 |
| 0.233241 | 3.44E-07 | -0.23969 | 1.58E-07 | 0.127432 | 0.00582  | -0.18479 | 5.89E-05 | 0.136741 |
| 0.029638 | 0.52289  | 0.053697 | 0.24681  | -0.26884 | 3.57E-09 | -0.05405 | 0.24371  | -0.2645  |
| -0.04163 | 0.36938  | 0.01445  | 0.75546  | -0.24097 | 1.35E-07 | -0.13468 | 0.00355  | -0.12304 |
| -0.0807  | 0.08149  | 0.256825 | 1.80E-08 | -0.31284 | 4.62E-12 | 0.000439 | 0.99245  | -0.29494 |
| 0.215655 | 2.56E-06 | 0.155887 | 0.00072  | 0.407909 | 3.77E-20 | 0.115491 | 0.01251  | 0.400232 |
| 0.055421 | 0.23194  | -0.04474 | 0.33466  | 0.243091 | 1.04E-07 | 0.044336 | 0.33907  | 0.212312 |
| -0.09156 | 0.04799  | -0.21922 | 1.73E-06 | 0.188813 | 4.02E-05 | 0.013877 | 0.76487  | 0.188141 |
| -0.13747 | 0.00291  | -0.33355 | 1.34E-13 | 0.112597 | 0.01491  | -0.07813 | 0.09169  | 0.077962 |
| 0.062233 | 0.17941  | -0.10846 | 0.01906  | 0.192006 | 2.95E-05 | 0.003762 | 0.93537  | 0.124661 |
| 0.24137  | 1.29E-07 | 0.005058 | 0.91319  | 0.298102 | 4.87E-11 | 0.126071 | 0.00637  | 0.242624 |
| 0.102704 | 0.02646  | -0.03395 | 0.46418  | 0.574451 | 2.34E-42 | 0.325025 | 5.96E-13 | 0.454847 |
| -0.17108 | 0.0002   | -0.52795 | 7.08E-35 | 0.016077 | 0.72895  | -0.27589 | 1.33E-09 | -0.05563 |
| 0.341644 | 3.13E-14 | 0.484801 | 6.71E-29 | 0.284641 | 3.74E-10 | 0.401718 | 1.54E-19 | 0.207576 |
| 0.029593 | 0.52352  | -0.16798 | 0.00027  | 0.160744 | 0.00049  | 0.031314 | 0.49965  | 0.187147 |
| 0.019322 | 0.67707  | -0.24126 | 1.31E-07 | 0.329299 | 2.84E-13 | 0.152286 | 0.00096  | 0.208046 |
| 0.06359  | 0.1701   | 0.223403 | 1.08E-06 | -0.12346 | 0.00756  | 0.124445 | 0.00709  | -0.15009 |
| -0.06975 | 0.13232  | -0.37034 | 1.25E-16 | 0.143497 | 0.00188  | 0.026607 | 0.56628  | 0.033676 |
| 0.302659 | 2.38E-11 | 0.258208 | 1.50E-08 | -0.31148 | 5.77E-12 | -0.11535 | 0.01262  | -0.22524 |
| -0.17495 | 0.00014  | 0.048108 | 0.29953  | -0.41744 | 4.07E-21 | -0.19695 | 1.81E-05 | -0.32513 |
| 0.177584 | 0.00011  | -0.06893 | 0.13689  | 0.468875 | 6.70E-27 | 0.180303 | 8.92E-05 | 0.441106 |
| 0.090381 | 0.05095  | -0.01838 | 0.69203  | 0.435648 | 4.72E-23 | 0.229602 | 5.29E-07 | 0.397125 |
| 0.071258 | 0.12411  | -0.18728 | 4.65E-05 | 0.382578 | 1.00E-17 | 0.015777 | 0.73382  | 0.37687  |
| 0.249655 | 4.57E-08 | 0.44651  | 2.90E-24 | -0.03471 | 0.45433  | 0.166483 | 0.0003   | -0.00157 |
| 0.103088 | 0.0259   | -0.32386 | 7.27E-13 | 0.262542 | 8.43E-09 | -0.18801 | 4.34E-05 | 0.275385 |
| 0.106096 | 0.02184  | -0.19228 | 2.87E-05 | 0.332243 | 1.69E-13 | 0.104295 | 0.0242   | 0.221893 |
| 0.118484 | 0.01039  | 0.308401 | 9.52E-12 | -0.04862 | 0.29437  | 0.177719 | 0.00011  | -0.14239 |
| -0.09465 | 0.04091  | 0.165335 | 0.00033  | -0.37563 | 4.26E-17 | -0.14347 | 0.00188  | -0.32958 |
| 0.076931 | 0.09681  | -0.03293 | 0.47783  | 0.327827 | 3.67E-13 | 0.153799 | 0.00085  | 0.348201 |
| 0.109088 | 0.01837  | 0.243207 | 1.03E-07 | -0.12202 | 0.0083   | -0.04215 | 0.36341  | -0.11352 |
| 0.465261 | 1.84E-26 | -0.03441 | 0.45813  | 0.472716 | 2.26E-27 | 0.152912 | 0.00092  | 0.406477 |
| 0.435549 | 4.84E-23 | 0.342412 | 2.72E-14 | -0.14919 | 0.00122  | -0.02853 | 0.53852  | -0.07453 |
| 0.345903 | 1.43E-14 | 0.241826 | 1.22E-07 | -0.25844 | 1.46E-08 | -0.1514  | 0.00103  | -0.15608 |
| 0.163366 | 0.00039  | -0.1348  | 0.00352  | 0.327672 | 3.77E-13 | 0.122498 | 0.00805  | 0.292997 |
| 0.175701 | 0.00014  | 0.349697 | 7.03E-15 | -0.1627  | 0.00042  | 0.032885 | 0.47836  | -0.1827  |
| 0.355685 | 2.25E-15 | 0.390423 | 1.87E-18 | -0.04567 | 0.32474  | 0.202137 | 1.07E-05 | -0.02401 |
| -0.01468 | 0.75169  | 0.165101 | 0.00034  | -0.21967 | 1.64E-06 | 0.007745 | 0.86744  | -0.1878  |
| 0.174463 | 0.00015  | -0.11749 | 0.01105  | 0.323673 | 7.51E-13 | 0.026093 | 0.57381  | 0.312645 |
| 0.175278 | 0.00014  | -0.27022 | 2.95E-09 | 0.277345 | 1.08E-09 | -0.03709 | 0.42393  | 0.156928 |
| 0.066923 | 0.14875  | -0.21663 | 2.30E-06 | 0.330466 | 2.32E-13 | 0.014644 | 0.75228  | 0.324377 |
| 0.12014  | 0.00936  | -0.18971 | 3.69E-05 | 0.398516 | 3.16E-19 | 0.058848 | 0.2043   | 0.36173  |
| -0.03416 | 0.46149  | -0.38416 | 7.17E-18 | 0.266991 | 4.60E-09 | -0.08606 | 0.06313  | 0.169273 |
| -0.0167  | 0.71888  | 0.119554 | 0.00971  | -0.16629 | 0.00031  | 0.002685 | 0.95385  | -0.24979 |
| 0.034103 | 0.46221  | 0.168769 | 0.00025  | -0.21722 | 2.15E-06 | 0.0209   | 0.65236  | -0.11614 |

|          |          |          |          |          |          |          |          |          |
|----------|----------|----------|----------|----------|----------|----------|----------|----------|
| 0.000199 | 0.99657  | -0.10271 | 0.02645  | 0.273125 | 1.96E-09 | 0.146321 | 0.00152  | 0.234213 |
| 0.212823 | 3.48E-06 | -0.1041  | 0.02447  | 0.600558 | 4.16E-47 | 0.247865 | 5.73E-08 | 0.47952  |
| -0.04187 | 0.36665  | 0.267987 | 4.01E-09 | -0.29802 | 4.94E-11 | -0.08783 | 0.05788  | -0.25337 |
| 0.138566 | 0.00269  | -0.044   | 0.34277  | 0.253808 | 2.68E-08 | 0.0577   | 0.21328  | 0.205554 |
| 0.17234  | 0.00018  | 0.093908 | 0.04252  | 0.346576 | 1.26E-14 | 0.191427 | 3.12E-05 | 0.316619 |
| 0.121502 | 0.00858  | -0.11448 | 0.0133   | 0.295644 | 7.12E-11 | 0.022256 | 0.63143  | 0.287171 |
| 0.064983 | 0.16091  | 0.194841 | 2.24E-05 | -0.24922 | 4.82E-08 | -0.03361 | 0.46865  | -0.23488 |
| -0.19278 | 2.74E-05 | 0.036834 | 0.42712  | -0.39926 | 2.68E-19 | -0.18006 | 9.13E-05 | -0.34368 |
| 0.16453  | 0.00036  | -0.07987 | 0.0847   | 0.338871 | 5.18E-14 | 0.004149 | 0.92875  | 0.342559 |
| 0.299647 | 3.83E-11 | 0.060245 | 0.19374  | 0.431435 | 1.36E-22 | 0.195032 | 2.19E-05 | 0.495337 |
| 0.020193 | 0.66338  | 0.187142 | 4.71E-05 | -0.14821 | 0.00132  | 0.165625 | 0.00033  | -0.24495 |
| 0.418235 | 3.37E-21 | 0.460685 | 6.52E-26 | -0.12788 | 0.00565  | 0.082147 | 0.07615  | -0.01248 |
| -0.18262 | 7.21E-05 | -0.00015 | 0.99749  | -0.37574 | 4.17E-17 | -0.08112 | 0.07991  | -0.41903 |
| -0.02556 | 0.58169  | 0.14062  | 0.00232  | -0.17051 | 0.00021  | 0.08247  | 0.075    | -0.13276 |
| -0.10137 | 0.0285   | 0.007039 | 0.87941  | -0.40692 | 4.73E-20 | -0.24769 | 5.86E-08 | -0.35352 |
| 0.170568 | 0.00021  | -0.07296 | 0.11534  | 0.534193 | 8.18E-36 | 0.214435 | 2.92E-06 | 0.471246 |
| 0.030431 | 0.51181  | -0.13988 | 0.00245  | 0.267872 | 4.08E-09 | 0.080442 | 0.08247  | 0.269688 |
| 0.043561 | 0.34759  | -0.1965  | 1.90E-05 | 0.404684 | 7.89E-20 | 0.183971 | 6.36E-05 | 0.293924 |
| -0.07124 | 0.12423  | -0.31063 | 6.63E-12 | 0.196611 | 1.88E-05 | -0.03713 | 0.42335  | 0.143924 |
| -0.02011 | 0.66463  | -0.27048 | 2.84E-09 | 0.222749 | 1.16E-06 | -0.01772 | 0.70258  | 0.111469 |
| -0.0623  | 0.17891  | -0.08436 | 0.06854  | 0.195467 | 2.10E-05 | 0.110224 | 0.01718  | 0.136947 |
| 0.161747 | 0.00045  | 0.017935 | 0.69907  | 0.319005 | 1.66E-12 | 0.177681 | 0.00011  | 0.25483  |
| -0.0261  | 0.5737   | 0.239661 | 1.59E-07 | -0.15017 | 0.00113  | 0.152635 | 0.00094  | -0.23225 |
| 0.017229 | 0.71038  | 0.044128 | 0.34134  | 0.360045 | 9.69E-16 | 0.123941 | 0.00733  | 0.396741 |
| -0.02241 | 0.629    | -0.12788 | 0.00565  | 0.197697 | 1.68E-05 | -0.06761 | 0.1446   | 0.247968 |
| 0.306725 | 1.25E-11 | 0.065263 | 0.15911  | 0.490651 | 1.16E-29 | 0.275709 | 1.36E-09 | 0.428622 |
| -0.12969 | 0.005    | 0.022338 | 0.63017  | -0.24822 | 5.48E-08 | -0.07902 | 0.08806  | -0.1729  |
| -0.01269 | 0.78439  | 0.282236 | 5.32E-10 | -0.09481 | 0.04056  | 0.210912 | 4.28E-06 | -0.18335 |
| -0.0163  | 0.72534  | 0.212453 | 3.62E-06 | -0.20968 | 4.88E-06 | -0.01105 | 0.81182  | -0.12857 |
| 0.083117 | 0.07274  | 0.01247  | 0.7881   | 0.38342  | 8.38E-18 | 0.181748 | 7.81E-05 | 0.400038 |
| -0.0182  | 0.69489  | -0.20177 | 1.11E-05 | 0.331464 | 1.94E-13 | 0.098209 | 0.03386  | 0.284983 |
| -0.08266 | 0.07434  | -0.21534 | 2.65E-06 | 0.069303 | 0.1348   | 0.004099 | 0.9296   | 0.129862 |
| 0.110613 | 0.01679  | -0.15253 | 0.00094  | 0.308421 | 9.49E-12 | 0.089987 | 0.05197  | 0.27048  |
| -0.26212 | 8.92E-09 | -0.43764 | 2.85E-23 | -0.11562 | 0.01241  | -0.25114 | 3.77E-08 | -0.04087 |
| 0.067347 | 0.14618  | 0.254939 | 2.31E-08 | -0.17128 | 0.0002   | 0.093223 | 0.04406  | -0.18484 |
| 0.10812  | 0.01943  | -0.18218 | 7.51E-05 | 0.470133 | 4.70E-27 | 0.182753 | 7.12E-05 | 0.351842 |
| 0.087457 | 0.05896  | 0.011531 | 0.80373  | 0.261445 | 9.76E-09 | 0.075244 | 0.10438  | 0.32008  |
| 0.140979 | 0.00226  | -0.17383 | 0.00016  | 0.36987  | 1.38E-16 | 0.084888 | 0.06683  | 0.296456 |
| 0.110242 | 0.01716  | -0.02272 | 0.62433  | 0.328289 | 3.39E-13 | 0.138233 | 0.00276  | 0.190429 |
| 0.029088 | 0.53063  | -0.274   | 1.74E-09 | 0.339043 | 5.02E-14 | 0.064543 | 0.16377  | 0.242059 |
| 0.074831 | 0.1063   | -0.22815 | 6.26E-07 | 0.211468 | 4.03E-06 | 0.057651 | 0.21367  | 0.066746 |
| 0.161873 | 0.00044  | 0.128178 | 0.00554  | 0.459648 | 8.65E-26 | 0.21099  | 4.24E-06 | 0.427361 |
| 0.046746 | 0.31344  | 0.379889 | 1.76E-17 | -0.19001 | 3.58E-05 | 0.163308 | 0.00039  | -0.15487 |
| -0.14746 | 0.0014   | -0.00045 | 0.9922   | -0.42659 | 4.49E-22 | -0.1494  | 0.0012   | -0.34874 |
| -0.03597 | 0.43802  | 0.173886 | 0.00016  | -0.27183 | 2.35E-09 | -0.06839 | 0.14003  | -0.2594  |

|          |          |          |          |          |          |          |          |          |
|----------|----------|----------|----------|----------|----------|----------|----------|----------|
| 0.060571 | 0.19134  | 0.44451  | 4.88E-24 | -0.10858 | 0.01892  | 0.236949 | 2.21E-07 | -0.09861 |
| 0.096182 | 0.03773  | -0.22748 | 6.76E-07 | 0.270169 | 2.97E-09 | -0.12692 | 0.00602  | 0.296406 |
| 0.140545 | 0.00233  | -0.11624 | 0.01195  | 0.526292 | 1.25E-34 | 0.204917 | 8.05E-06 | 0.408982 |
| -0.12795 | 0.00562  | -0.02487 | 0.59188  | -0.50503 | 1.35E-31 | -0.26852 | 3.73E-09 | -0.51379 |
| -0.01526 | 0.74229  | 0.05085  | 0.2728   | -0.3452  | 1.63E-14 | -0.17824 | 0.00011  | -0.24727 |
| 0.005969 | 0.89764  | -0.21025 | 4.59E-06 | 0.349061 | 7.93E-15 | 0.016931 | 0.71517  | 0.374535 |
| 0.072393 | 0.11822  | 0.511892 | 1.50E-32 | -0.12315 | 0.00772  | 0.175828 | 0.00013  | -0.03169 |
| -0.10512 | 0.02309  | -0.24345 | 9.97E-08 | 0.18443  | 6.09E-05 | 0.120484 | 0.00916  | 0.034861 |
| 0.241111 | 1.33E-07 | -0.09734 | 0.03548  | 0.489754 | 1.52E-29 | 0.138143 | 0.00277  | 0.420398 |
| -0.1994  | 1.42E-05 | 0.202379 | 1.05E-05 | -0.36973 | 1.42E-16 | -0.05842 | 0.20758  | -0.33845 |
| -0.04083 | 0.37868  | 0.307785 | 1.05E-11 | -0.27678 | 1.17E-09 | -0.0147  | 0.75144  | -0.14041 |
| 0.202111 | 1.08E-05 | 0.103434 | 0.0254   | 0.509374 | 3.37E-32 | 0.231671 | 4.15E-07 | 0.510597 |
| 0.00404  | 0.93062  | -0.13171 | 0.00436  | 0.339865 | 4.33E-14 | 0.095461 | 0.0392   | 0.342057 |
| 0.212251 | 3.70E-06 | -0.1436  | 0.00186  | 0.605546 | 4.58E-48 | 0.200064 | 1.32E-05 | 0.49043  |
| 0.282337 | 5.24E-10 | 0.022914 | 0.62136  | 0.638833 | 6.42E-55 | 0.24496  | 8.26E-08 | 0.541596 |
| 0.112865 | 0.01468  | -0.12261 | 0.00799  | 0.514529 | 6.33E-33 | 0.215132 | 2.71E-06 | 0.575373 |
| 0.150215 | 0.00113  | -0.10918 | 0.01827  | 0.513416 | 9.11E-33 | 0.264517 | 6.45E-09 | 0.327903 |
| 0.249926 | 4.41E-08 | -0.21929 | 1.71E-06 | 0.446238 | 3.11E-24 | 0.08633  | 0.06231  | 0.348737 |
| 0.162801 | 0.00041  | -0.14348 | 0.00188  | 0.420584 | 1.92E-21 | 0.061706 | 0.18313  | 0.309868 |
| 0.166675 | 0.0003   | -0.09975 | 0.03115  | 0.503158 | 2.44E-31 | 0.199117 | 1.46E-05 | 0.42804  |
| 0.18798  | 4.35E-05 | -0.09326 | 0.04398  | 0.380923 | 1.42E-17 | 0.147384 | 0.0014   | 0.294465 |
| 0.092864 | 0.04488  | -0.12449 | 0.00707  | 0.317271 | 2.22E-12 | 0.019404 | 0.67577  | 0.246746 |
| -0.01365 | 0.7686   | -0.09118 | 0.04893  | 0.172226 | 0.00018  | 0.028831 | 0.53427  | 0.171099 |
| 0.011239 | 0.8086   | 0.211748 | 3.91E-06 | -0.19921 | 1.44E-05 | 0.06592  | 0.15495  | -0.1835  |
| 0.10547  | 0.02264  | -0.12008 | 0.00939  | 0.344648 | 1.80E-14 | 0.114402 | 0.01337  | 0.27196  |
| 0.100344 | 0.03015  | -0.21043 | 4.50E-06 | 0.381744 | 1.19E-17 | 0.128139 | 0.00555  | 0.297249 |
| 0.058134 | 0.20985  | -0.20957 | 4.93E-06 | 0.334365 | 1.16E-13 | 0.191687 | 3.05E-05 | 0.204839 |
| 0.030125 | 0.51607  | -0.1885  | 4.14E-05 | 0.197085 | 1.79E-05 | 0.065494 | 0.15764  | 0.217872 |
| 0.07673  | 0.09769  | -0.2122  | 3.73E-06 | 0.435761 | 4.59E-23 | 0.134492 | 0.00359  | 0.316894 |
| 0.085232 | 0.06573  | -0.09034 | 0.05106  | 0.19512  | 2.17E-05 | 0.112165 | 0.01531  | 0.199953 |
| 0.025197 | 0.58704  | -0.20753 | 6.12E-06 | 0.328679 | 3.16E-13 | -0.02742 | 0.55454  | 0.331593 |
| 0.094819 | 0.04054  | -0.11814 | 0.01061  | 0.329626 | 2.68E-13 | 0.135248 | 0.00341  | 0.31971  |
| 0.144166 | 0.00179  | -0.17976 | 9.38E-05 | 0.387669 | 3.39E-18 | 0.031044 | 0.50335  | 0.342268 |
| 0.247235 | 6.21E-08 | -0.04471 | 0.33505  | 0.519691 | 1.15E-33 | 0.221969 | 1.27E-06 | 0.405095 |
| 0.337753 | 6.34E-14 | 0.147568 | 0.00138  | 0.613169 | 1.46E-49 | 0.318864 | 1.70E-12 | 0.543694 |
| 0.197358 | 1.74E-05 | -0.0335  | 0.47022  | 0.344114 | 1.99E-14 | 0.200314 | 1.29E-05 | 0.2542   |
| 0.216914 | 2.23E-06 | -0.12037 | 0.00922  | 0.320049 | 1.39E-12 | 0.048425 | 0.29635  | 0.305394 |
| 0.166853 | 0.00029  | -0.13318 | 0.00394  | 0.363309 | 5.11E-16 | 0.104386 | 0.02408  | 0.344412 |
| 0.276054 | 1.30E-09 | 0.075145 | 0.10484  | 0.4787   | 4.03E-28 | 0.233559 | 3.32E-07 | 0.411066 |
| 0.062038 | 0.18078  | -0.14324 | 0.00192  | 0.485976 | 4.73E-29 | 0.217426 | 2.11E-06 | 0.37805  |
| -0.097   | 0.03613  | -0.30605 | 1.39E-11 | 0.146837 | 0.00146  | -0.0069  | 0.88181  | 0.092304 |
| 0.272583 | 2.12E-09 | 0.065664 | 0.15656  | 0.520674 | 8.30E-34 | 0.135462 | 0.00336  | 0.453832 |
| -0.04432 | 0.33924  | -0.02042 | 0.6599   | 0.215441 | 2.62E-06 | 0.142786 | 0.00198  | 0.255938 |
| 0.179347 | 9.74E-05 | -0.04196 | 0.3656   | 0.36293  | 5.51E-16 | 0.061968 | 0.18127  | 0.287129 |
| 0.345414 | 1.56E-14 | 0.105365 | 0.02277  | 0.524867 | 2.03E-34 | 0.239633 | 1.60E-07 | 0.487619 |

|          |          |          |          |          |          |          |          |          |
|----------|----------|----------|----------|----------|----------|----------|----------|----------|
| 0.090887 | 0.04966  | -0.14185 | 0.00212  | 0.152845 | 0.00092  | -0.08254 | 0.07475  | 0.193528 |
| 0.205092 | 7.90E-06 | -0.06618 | 0.15335  | 0.366456 | 2.74E-16 | 0.092251 | 0.04632  | 0.31341  |
| 0.143023 | 0.00195  | -0.19657 | 1.88E-05 | 0.428624 | 2.72E-22 | 0.056765 | 0.2208   | 0.374051 |
| 0.193293 | 2.60E-05 | -0.0238  | 0.60789  | 0.373963 | 6.00E-17 | 0.155978 | 0.00072  | 0.356308 |
| 0.337577 | 6.54E-14 | 0.204221 | 8.65E-06 | 0.411824 | 1.52E-20 | 0.193648 | 2.51E-05 | 0.387597 |
| 0.134255 | 0.00365  | -0.18734 | 4.63E-05 | 0.357418 | 1.61E-15 | 0.181308 | 8.14E-05 | 0.27436  |
| 0.367634 | 2.16E-16 | 0.122883 | 0.00785  | 0.628581 | 1.02E-52 | 0.3244   | 6.63E-13 | 0.540575 |
| -0.01364 | 0.76882  | 0.276646 | 1.19E-09 | -0.24742 | 6.07E-08 | -0.0724  | 0.11818  | -0.16924 |
| 0.077806 | 0.09307  | -0.18287 | 7.04E-05 | 0.240732 | 1.39E-07 | -0.06298 | 0.17421  | 0.151591 |
| 0.195228 | 2.15E-05 | 0.08191  | 0.07701  | 0.499987 | 6.60E-31 | 0.260397 | 1.12E-08 | 0.463607 |
| -0.01505 | 0.74567  | 0.00814  | 0.86073  | 0.063735 | 0.16912  | 0.075467 | 0.10335  | 0.07172  |
| 0.101504 | 0.02829  | 0.101988 | 0.02754  | 0.045349 | 0.32814  | -0.018   | 0.69798  | 0.103208 |
| -0.09185 | 0.04729  | -0.02893 | 0.53292  | 0.054603 | 0.23892  | 0.097244 | 0.03566  | 0.068678 |
| 0.007953 | 0.8639   | 0.023066 | 0.61906  | 0.031544 | 0.4965   | 0.009373 | 0.83991  | 0.106857 |
| -0.05054 | 0.27571  | -0.02518 | 0.58727  | -0.10528 | 0.02289  | -0.11719 | 0.01126  | 0.002623 |
| -0.03176 | 0.49349  | 0.065469 | 0.15779  | 0.029247 | 0.52838  | -0.01299 | 0.77944  | 0.094936 |
| 0.016211 | 0.72678  | 0.009974 | 0.8298   | -0.01343 | 0.77221  | -0.03198 | 0.49052  | -0.00315 |
| 0.074845 | 0.10624  | 0.066417 | 0.15185  | 0.036585 | 0.43025  | 0.021848 | 0.6377   | 0.084444 |
| -0.08225 | 0.07579  | -0.04157 | 0.3701   | -0.10704 | 0.02069  | -0.04127 | 0.37352  | -0.06631 |
| 0.029627 | 0.52304  | 0.077873 | 0.09278  | 0.085121 | 0.06608  | 0.111205 | 0.01621  | 0.095475 |
| -0.01787 | 0.70009  | -0.0396  | 0.39319  | 0.048303 | 0.29757  | 0.022538 | 0.62711  | 0.142526 |
| 0.1341   | 0.00369  | 0.010324 | 0.82392  | 0.026599 | 0.5664   | -0.03676 | 0.42799  | 0.07798  |
| 0.083796 | 0.07042  | 0.113589 | 0.01405  | -0.02728 | 0.55652  | -0.01938 | 0.6761   | 0.056198 |
| -0.07128 | 0.12398  | -0.05741 | 0.21562  | -0.0125  | 0.78763  | 0.002805 | 0.95179  | -0.04127 |
| -0.0023  | 0.96046  | 0.032097 | 0.48897  | 0.036654 | 0.42939  | 0.070394 | 0.12876  | 0.052405 |
| 0.06532  | 0.15875  | 0.027497 | 0.55337  | -0.03603 | 0.43729  | -0.03675 | 0.4282   | 0.058602 |
| 0.060851 | 0.18929  | 0.061026 | 0.18802  | 0.184329 | 6.15E-05 | 0.080946 | 0.08056  | 0.220074 |
| 0.013459 | 0.77175  | 0.013145 | 0.77693  | -0.01154 | 0.80354  | -0.02342 | 0.61367  | 0.012535 |
| 0.099274 | 0.03196  | 0.061282 | 0.18616  | 0.034809 | 0.45299  | -0.03403 | 0.46321  | 0.040079 |
| 0.021127 | 0.64883  | 0.031082 | 0.50283  | 0.082952 | 0.07331  | 0.048271 | 0.29789  | 0.127795 |
| 0.068685 | 0.13832  | 0.037669 | 0.41671  | 0.061761 | 0.18274  | 0.033177 | 0.47446  | 0.124618 |
| 0.086341 | 0.06228  | 0.069996 | 0.13094  | 0.088864 | 0.05498  | 0.037288 | 0.42145  | 0.149525 |
| -0.05652 | 0.22279  | -0.08661 | 0.06145  | -0.00215 | 0.9631   | 0.022487 | 0.62788  | -0.00149 |
| 0.173492 | 0.00016  | -0.03634 | 0.43332  | 0.018565 | 0.68905  | 0.039692 | 0.39212  | 0.003429 |
| 0.01661  | 0.72033  | 0.018576 | 0.68887  | 0.013675 | 0.76819  | -0.00307 | 0.94729  | 0.053948 |
| 0.024962 | 0.59053  | 0.025132 | 0.588    | 0.092595 | 0.04551  | 0.038737 | 0.40361  | 0.16193  |
| 0.013553 | 0.77021  | 0.013104 | 0.77761  | 0.072115 | 0.11964  | 0.106418 | 0.02144  | 0.074424 |
| 0.034329 | 0.45925  | 0.11918  | 0.00994  | 0.032706 | 0.48076  | 0.056832 | 0.22026  | 0.0677   |
| 0.025465 | 0.58306  | -0.01163 | 0.80207  | 0.168172 | 0.00026  | 0.127624 | 0.00575  | 0.174149 |
| 0.106517 | 0.02132  | -0.03589 | 0.43909  | 0.184153 | 6.25E-05 | 0.204364 | 8.52E-06 | 0.130247 |
| 0.05964  | 0.19826  | 0.074862 | 0.10616  | 0.110221 | 0.01718  | 0.057452 | 0.21525  | 0.142579 |
| 0.095641 | 0.03883  | 0.044257 | 0.33993  | 0.030945 | 0.50472  | 0.044379 | 0.3386   | 0.082548 |
| 0.202122 | 1.07E-05 | 0.239168 | 1.69E-07 | 0.089829 | 0.05239  | 0.092303 | 0.0462   | 0.198923 |
| 0.055475 | 0.23149  | 0.114687 | 0.01314  | -0.02428 | 0.6007   | -0.01379 | 0.76628  | 0.076589 |
| 0.006352 | 0.89111  | -0.07033 | 0.12911  | -0.04832 | 0.29736  | -0.08236 | 0.07539  | -0.01199 |

|          |          |          |         |          |          |          |         |          |
|----------|----------|----------|---------|----------|----------|----------|---------|----------|
| -0.02774 | 0.54992  | -0.00483 | 0.91709 | 0.025066 | 0.58898  | 0.074088 | 0.10983 | 0.067089 |
| 0.017856 | 0.70033  | 0.044436 | 0.33798 | -0.05779 | 0.21252  | -0.08578 | 0.06401 | 0.026403 |
| -0.01136 | 0.8065   | -0.00035 | 0.99401 | 0.010191 | 0.82614  | 0.016031 | 0.72969 | 0.063965 |
| 0.095994 | 0.03811  | 0.067282 | 0.14658 | 0.122894 | 0.00784  | 0.032538 | 0.48302 | 0.165486 |
| 0.126561 | 0.00617  | 0.076872 | 0.09707 | 0.067259 | 0.14671  | 0.058356 | 0.20811 | 0.080609 |
| 0.135673 | 0.00331  | 0.065245 | 0.15923 | 0.023351 | 0.61472  | 0.008845 | 0.84881 | 0.086835 |
| 0.024483 | 0.59768  | 0.053142 | 0.25174 | 0.017964 | 0.69862  | 0.038929 | 0.40128 | 0.032223 |
| -0.0834  | 0.07178  | -0.02051 | 0.65849 | -0.05922 | 0.20147  | -0.02414 | 0.60283 | -0.0111  |
| -0.01124 | 0.80857  | -0.05019 | 0.2791  | -0.08189 | 0.07709  | -0.09051 | 0.05062 | -0.0302  |
| -0.01967 | 0.67166  | -0.07566 | 0.10246 | -0.08077 | 0.08124  | -0.11028 | 0.01712 | -0.01036 |
| -0.05909 | 0.20247  | -0.06628 | 0.15268 | -0.08707 | 0.0601   | -0.06417 | 0.1662  | -0.05902 |
| 0.043667 | 0.34641  | 0.01367  | 0.76827 | 0.118443 | 0.01041  | 0.050365 | 0.2774  | 0.146621 |
| 0.021596 | 0.64157  | 0.033632 | 0.46842 | -0.01302 | 0.77896  | 0.011591 | 0.80272 | 0.036015 |
| 0.079316 | 0.08687  | 0.128291 | 0.0055  | 0.056776 | 0.22071  | 0.03985  | 0.39024 | 0.088578 |
| 0.038318 | 0.40873  | 0.013477 | 0.77146 | -0.01369 | 0.76799  | -0.05993 | 0.19612 | 0.08908  |
| 0.048465 | 0.29596  | 0.041611 | 0.36961 | 0.019813 | 0.66933  | 0.001396 | 0.97599 | 0.060016 |
| 0.071362 | 0.12357  | -0.03615 | 0.43574 | 0.079072 | 0.08785  | 0.005249 | 0.90993 | 0.125955 |
| -0.00057 | 0.99018  | 0.049966 | 0.28124 | 0.046165 | 0.3195   | 0.043569 | 0.3475  | 0.098631 |
| 0.00653  | 0.88807  | -0.04461 | 0.33604 | -0.03742 | 0.41975  | -0.08379 | 0.07045 | -0.03528 |
| 0.118308 | 0.0105   | 0.055515 | 0.23115 | 0.147531 | 0.00139  | 0.133864 | 0.00375 | 0.13587  |
| 0.059799 | 0.19707  | 0.095519 | 0.03908 | 0.134674 | 0.00355  | 0.126948 | 0.00601 | 0.196765 |
| -0.07404 | 0.11008  | -0.01018 | 0.8263  | 0.078782 | 0.08902  | 0.109489 | 0.01794 | 0.059433 |
| 0.025217 | 0.58674  | 0.086206 | 0.06269 | 0.094993 | 0.04017  | 0.058223 | 0.20915 | 0.140332 |
| 0.007344 | 0.87423  | 0.073134 | 0.11449 | 0.050289 | 0.27813  | 0.027278 | 0.55653 | 0.106614 |
| 0.06347  | 0.1709   | 0.121531 | 0.00856 | 0.006336 | 0.89138  | 0.013474 | 0.77151 | 0.123226 |
| 0.081776 | 0.07749  | 0.039255 | 0.39735 | 0.068257 | 0.1408   | 0.017317 | 0.70897 | 0.076819 |
| 0.040536 | 0.38212  | 0.080365 | 0.08277 | 0.016909 | 0.71552  | 0.012577 | 0.78634 | 0.062379 |
| 0.228048 | 6.33E-07 | 0.076357 | 0.09934 | 0.159235 | 0.00055  | 0.100024 | 0.03068 | 0.226037 |
| -0.0169  | 0.71559  | 0.013976 | 0.76324 | -0.09455 | 0.04111  | -0.08936 | 0.05364 | -0.05697 |
| -0.0226  | 0.6262   | -0.11953 | 0.00973 | 0.196694 | 1.86E-05 | 0.030743 | 0.50749 | 0.167351 |
| 0.030328 | 0.51324  | -0.00715 | 0.87747 | 0.003662 | 0.9371   | -0.00203 | 0.96509 | 0.010606 |
| 0.079682 | 0.08542  | 0.072364 | 0.11837 | 0.058575 | 0.2064   | 0.022273 | 0.63116 | 0.119113 |
| -0.02863 | 0.53709  | -0.10216 | 0.02727 | -0.06452 | 0.1639   | -0.16086 | 0.00048 | 0.006143 |
| 0.062123 | 0.18018  | 0.074068 | 0.10992 | 0.034203 | 0.4609   | -0.00856 | 0.85366 | 0.127703 |
| 0.034163 | 0.46142  | 0.046871 | 0.31214 | 0.046186 | 0.31928  | 0.049415 | 0.28657 | 0.003847 |
| 0.140732 | 0.0023   | 0.106659 | 0.02115 | 0.082508 | 0.07487  | 0.017231 | 0.71034 | 0.110573 |
| 0.096676 | 0.03675  | 0.085026 | 0.06638 | 0.08003  | 0.08406  | 0.055273 | 0.23319 | 0.062017 |
| 0.047993 | 0.30069  | 0.03571  | 0.44137 | 0.079591 | 0.08578  | 0.018499 | 0.69009 | 0.166554 |
| 0.058204 | 0.2093   | 0.072015 | 0.12016 | 0.057687 | 0.21338  | 0.032644 | 0.4816  | 0.092802 |
| -0.07156 | 0.12255  | -0.09096 | 0.04947 | -0.02937 | 0.52661  | -0.02714 | 0.55849 | 0.029172 |
| 0.037219 | 0.4223   | 0.040813 | 0.37887 | 0.115186 | 0.01275  | 0.074026 | 0.11013 | 0.161918 |
| 0.073405 | 0.11315  | 0.048252 | 0.29809 | 0.076836 | 0.09723  | 0.031655 | 0.49498 | 0.116282 |
| 0.019243 | 0.67832  | 0.04442  | 0.33815 | 0.034546 | 0.45642  | -0.00276 | 0.95257 | 0.079272 |
| 0.078368 | 0.09072  | 0.054371 | 0.24092 | -0.0476  | 0.30464  | -0.03758 | 0.41775 | -0.00898 |
| 0.076846 | 0.09719  | 0.036673 | 0.42915 | 0.101982 | 0.02755  | 0.029591 | 0.52355 | 0.126847 |

|          |          |          |          |          |          |          |          |          |
|----------|----------|----------|----------|----------|----------|----------|----------|----------|
| -0.03893 | 0.40133  | -0.11713 | 0.0113   | -0.08444 | 0.06828  | -0.14313 | 0.00193  | -0.03709 |
| 0.014594 | 0.75311  | -0.01329 | 0.77453  | -0.02856 | 0.53819  | -0.05031 | 0.27793  | 0.086794 |
| 0.067587 | 0.14475  | 0.044008 | 0.34265  | 0.095027 | 0.0401   | 0.050005 | 0.28086  | 0.09547  |
| 0.076495 | 0.09873  | 0.042855 | 0.35546  | 0.014994 | 0.74657  | -0.01368 | 0.76811  | 0.02735  |
| -0.00526 | 0.90974  | 0.014696 | 0.75143  | 0.014936 | 0.74751  | -0.02093 | 0.65183  | 0.004861 |
| -0.0011  | 0.98105  | 0.010379 | 0.82299  | 0.044154 | 0.34106  | -0.00691 | 0.88167  | 0.019584 |
| 0.080561 | 0.08202  | -0.02507 | 0.58894  | 0.05698  | 0.21905  | -0.08751 | 0.05881  | 0.05483  |
| 0.106415 | 0.02145  | 0.100675 | 0.02961  | 0.024799 | 0.59296  | 0.019142 | 0.67991  | 0.059876 |
| 0.078637 | 0.08961  | 0.031324 | 0.4995   | 0.108318 | 0.01921  | 0.017963 | 0.69863  | 0.158056 |
| 0.11522  | 0.01272  | 0.057096 | 0.21811  | 0.076827 | 0.09727  | 0.036206 | 0.43505  | 0.056407 |
| 0.118298 | 0.01051  | 0.100973 | 0.02913  | 0.072066 | 0.11989  | 0.043131 | 0.35237  | 0.12347  |
| 0.199913 | 1.35E-05 | 0.050408 | 0.277    | 0.013993 | 0.76296  | -0.00131 | 0.97741  | 0.043434 |
| 0.038161 | 0.41064  | 0.06386  | 0.16828  | -0.0318  | 0.49296  | -0.0491  | 0.2897   | 0.03209  |
| 0.027404 | 0.5547   | 0.035003 | 0.45047  | 0.023113 | 0.61835  | 0.007652 | 0.86901  | 0.052727 |
| 0.082486 | 0.07495  | 0.034758 | 0.45365  | -0.06745 | 0.14556  | -0.07766 | 0.09367  | 0.043222 |
| 0.207209 | 6.33E-06 | 0.11149  | 0.01594  | 0.123888 | 0.00735  | 0.042495 | 0.35952  | 0.113817 |
| 0.01086  | 0.81494  | 0.054748 | 0.23767  | 0.011469 | 0.80476  | 0.020471 | 0.65903  | 0.068186 |
| 0.130579 | 0.00471  | 0.147733 | 0.00137  | 0.076176 | 0.10014  | 0.04521  | 0.32962  | 0.152859 |
| 0.034925 | 0.45149  | 0.072789 | 0.11622  | 0.07207  | 0.11988  | 0.050483 | 0.27628  | 0.125346 |
| 0.06868  | 0.13835  | 0.090915 | 0.04959  | 0.102314 | 0.02704  | 0.073611 | 0.11214  | 0.145771 |
| 0.014094 | 0.76131  | -0.02091 | 0.65217  | 0.02101  | 0.65065  | -0.02805 | 0.54542  | 0.067771 |
| -0.08322 | 0.07237  | 0.202564 | 1.03E-05 | -0.27539 | 1.42E-09 | 0.012006 | 0.79581  | -0.21979 |
| -0.12612 | 0.00635  | -0.34265 | 2.60E-14 | -0.12288 | 0.00785  | -0.26877 | 3.60E-09 | -0.17506 |
| 0.152277 | 0.00096  | 0.257898 | 1.57E-08 | 0.239059 | 1.71E-07 | 0.50135  | 4.31E-31 | 0.034642 |
| 0.184359 | 6.13E-05 | 0.451427 | 7.93E-25 | -0.05959 | 0.19864  | 0.202125 | 1.07E-05 | -0.05463 |
| 0.053501 | 0.24855  | 0.19085  | 3.30E-05 | 0.080844 | 0.08095  | 0.279424 | 7.99E-10 | -0.04063 |
| 0.213878 | 3.11E-06 | 0.210966 | 4.25E-06 | 0.332863 | 1.52E-13 | 0.193673 | 2.51E-05 | 0.27934  |
| -0.0701  | 0.13036  | 0.068608 | 0.13877  | -0.02024 | 0.66263  | 0.150589 | 0.0011   | -0.02996 |
| 0.178486 | 0.00011  | 0.377896 | 2.67E-17 | 0.274134 | 1.70E-09 | 0.419706 | 2.37E-21 | 0.230025 |
| -0.04333 | 0.35015  | -0.27425 | 1.67E-09 | -0.02959 | 0.52351  | -0.23948 | 1.62E-07 | -0.00333 |
| 0.097077 | 0.03598  | 0.423135 | 1.04E-21 | 0.057876 | 0.21188  | 0.376209 | 3.78E-17 | -0.04252 |
| 0.199868 | 1.35E-05 | 0.504723 | 1.49E-31 | 0.080406 | 0.08261  | 0.315738 | 2.86E-12 | 0.007565 |
| 0.198724 | 1.52E-05 | 0.432182 | 1.13E-22 | 0.212465 | 3.62E-06 | 0.348705 | 8.47E-15 | 0.182739 |
| 0.033989 | 0.46371  | -0.17298 | 0.00017  | -0.01436 | 0.75692  | -0.26488 | 6.14E-09 | 0.044029 |
| 0.103353 | 0.02552  | 0.301565 | 2.83E-11 | -0.06065 | 0.19076  | 0.251764 | 3.48E-08 | -0.11273 |
| 0.155261 | 0.00076  | 0.321324 | 1.12E-12 | 0.143639 | 0.00186  | 0.304096 | 1.90E-11 | -0.03332 |
| 0.139125 | 0.00259  | 0.393028 | 1.06E-18 | 0.116771 | 0.01156  | 0.212466 | 3.62E-06 | 0.304758 |
| 0.012507 | 0.78749  | 0.237358 | 2.10E-07 | 0.053247 | 0.2508   | 0.257054 | 1.75E-08 | -0.09638 |
| -0.06701 | 0.1482   | -0.07226 | 0.11891  | -0.08321 | 0.07242  | -0.06186 | 0.18201  | -0.17648 |
| -0.11941 | 0.0098   | 0.037034 | 0.42462  | -0.02685 | 0.56278  | 0.095973 | 0.03815  | -0.21233 |
| -0.15594 | 0.00072  | 0.041263 | 0.37363  | -0.28715 | 2.57E-10 | 0.109837 | 0.01758  | -0.35468 |
| -0.29055 | 1.55E-10 | -0.19519 | 2.16E-05 | -0.45375 | 4.27E-25 | -0.23054 | 4.74E-07 | -0.48491 |
| 0.250098 | 4.31E-08 | 0.333715 | 1.30E-13 | 0.305704 | 1.47E-11 | 0.44051  | 1.37E-23 | 0.145153 |
| 0.054504 | 0.23977  | 0.36561  | 3.24E-16 | -0.06891 | 0.13701  | 0.254723 | 2.37E-08 | -0.0955  |
| -0.02306 | 0.61914  | 0.167805 | 0.00027  | 0.123226 | 0.00768  | 0.391063 | 1.63E-18 | -0.08055 |

|          |          |          |          |          |          |          |          |          |
|----------|----------|----------|----------|----------|----------|----------|----------|----------|
| 0.007791 | 0.86664  | 0.156673 | 0.00068  | -0.13175 | 0.00434  | 0.004389 | 0.92464  | -0.1104  |
| 0.058383 | 0.2079   | 0.354471 | 2.84E-15 | -0.01586 | 0.73248  | 0.151219 | 0.00105  | 0.021702 |
| -0.11902 | 0.01005  | -0.33339 | 1.38E-13 | -0.01561 | 0.7365   | -0.22817 | 6.25E-07 | -0.11461 |
| -0.0493  | 0.28766  | 0.162398 | 0.00043  | -0.17795 | 0.00011  | -0.05071 | 0.2741   | -0.07135 |
| 0.21965  | 1.65E-06 | 0.56703  | 4.41E-41 | 0.146292 | 0.00152  | 0.546376 | 1.06E-37 | 0.036141 |
| 0.196066 | 1.98E-05 | 0.503358 | 2.29E-31 | 0.138774 | 0.00265  | 0.503296 | 2.34E-31 | 0.042706 |
| 0.261173 | 1.01E-08 | 0.688228 | 8.40E-67 | 0.235747 | 2.55E-07 | 0.527701 | 7.72E-35 | 0.14652  |
| 0.017696 | 0.7029   | -0.17863 | 0.0001   | -0.02961 | 0.52328  | -0.20766 | 6.04E-06 | 0.107534 |
| 0.04471  | 0.33501  | -0.17242 | 0.00018  | 0.246959 | 6.43E-08 | -0.0526  | 0.25659  | 0.27727  |
| -0.00041 | 0.99296  | 0.24499  | 8.23E-08 | 0.027132 | 0.55864  | 0.276059 | 1.30E-09 | -0.1007  |
| -0.17637 | 0.00013  | 0.19552  | 2.09E-05 | -0.42687 | 4.18E-22 | 0.015054 | 0.74559  | -0.40888 |
| 0.164016 | 0.00037  | 0.398655 | 3.07E-19 | 0.063105 | 0.17339  | 0.169092 | 0.00024  | 0.007726 |
| 0.002802 | 0.95185  | -0.30223 | 2.55E-11 | 0.007715 | 0.86794  | -0.18507 | 5.73E-05 | -0.08298 |
| -0.10604 | 0.02192  | -0.28381 | 4.22E-10 | -0.0783  | 0.091    | -0.38606 | 4.78E-18 | 0.028088 |
| -0.09993 | 0.03084  | 0.014516 | 0.75438  | -0.23897 | 1.73E-07 | -0.04485 | 0.33353  | -0.25583 |
| 0.348472 | 8.85E-15 | 0.568657 | 2.33E-41 | 0.342471 | 2.69E-14 | 0.57006  | 1.34E-41 | 0.17753  |
| 0.115976 | 0.01214  | 0.310586 | 6.68E-12 | 0.19363  | 2.52E-05 | 0.324816 | 6.17E-13 | 0.112276 |
| -0.00661 | 0.88672  | -0.3703  | 1.27E-16 | -0.14172 | 0.00214  | -0.30441 | 1.81E-11 | -0.14906 |
| -0.15208 | 0.00098  | 0.118949 | 0.01009  | -0.48681 | 3.69E-29 | -0.26532 | 5.78E-09 | -0.29118 |
| -0.13581 | 0.00327  | -0.01507 | 0.74534  | -0.40499 | 7.35E-20 | -0.22654 | 7.54E-07 | -0.2433  |
| 0.174562 | 0.00015  | 0.367469 | 2.24E-16 | 0.079189 | 0.08738  | 0.20741  | 6.20E-06 | 0.119915 |
| 0.103576 | 0.0252   | 0.380922 | 1.42E-17 | 0.177006 | 0.00012  | 0.301481 | 2.87E-11 | 0.113886 |
| 0.044628 | 0.33589  | 0.265227 | 5.86E-09 | -0.1957  | 2.05E-05 | 0.086929 | 0.06051  | -0.23445 |
| -0.15565 | 0.00074  | 0.128181 | 0.00554  | -0.16185 | 0.00045  | 0.120769 | 0.00899  | -0.23628 |
| 0.156128 | 0.00071  | 0.240946 | 1.36E-07 | 0.109216 | 0.01823  | 0.247279 | 6.17E-08 | 0.003223 |
| 0.018577 | 0.68886  | 0.371303 | 1.03E-16 | -0.05943 | 0.19985  | 0.314446 | 3.55E-12 | -0.11402 |
| -0.11892 | 0.01011  | 0.088463 | 0.05609  | -0.31518 | 3.14E-12 | 0.024654 | 0.59513  | -0.31859 |
| -0.25962 | 1.25E-08 | -0.06769 | 0.14417  | -0.51907 | 1.42E-33 | -0.16168 | 0.00045  | -0.53201 |
| -0.05854 | 0.20664  | 0.234759 | 2.87E-07 | -0.21043 | 4.50E-06 | 0.068994 | 0.13655  | -0.22848 |
| 0.037991 | 0.41274  | 0.449211 | 1.43E-24 | -0.09419 | 0.04191  | 0.305242 | 1.58E-11 | -0.05648 |
| -0.01191 | 0.79746  | 0.179856 | 9.30E-05 | 0.017888 | 0.69982  | 0.352888 | 3.85E-15 | -0.06512 |
| 0.131161 | 0.00452  | 0.378173 | 2.52E-17 | 0.302872 | 2.31E-11 | 0.39793  | 3.60E-19 | 0.213247 |
| -0.27172 | 2.39E-09 | -0.02794 | 0.547    | -0.55291 | 9.59E-39 | -0.21191 | 3.84E-06 | -0.47958 |
| -0.15124 | 0.00104  | 0.079597 | 0.08576  | -0.37149 | 9.94E-17 | -0.137   | 0.00301  | -0.30665 |
| -0.07112 | 0.12484  | 0.212612 | 3.56E-06 | -0.26441 | 6.55E-09 | 0.061856 | 0.18207  | -0.3182  |
| 0.139945 | 0.00244  | 0.444404 | 5.02E-24 | 0.208508 | 5.52E-06 | 0.444805 | 4.52E-24 | 0.130619 |
| 0.216118 | 2.43E-06 | 0.62024  | 5.46E-51 | 0.33991  | 4.29E-14 | 0.629193 | 7.56E-53 | 0.297013 |
| 0.260613 | 1.09E-08 | 0.51348  | 8.92E-33 | 0.149604 | 0.00118  | 0.371432 | 1.01E-16 | 0.069987 |
| 0.004    | 0.9313   | 0.297163 | 5.63E-11 | -0.07639 | 0.0992   | 0.247649 | 5.89E-08 | -0.16353 |
| 0.010105 | 0.82759  | 0.291964 | 1.25E-10 | -0.09809 | 0.03408  | 0.130953 | 0.00459  | -0.18078 |
| 0.170212 | 0.00022  | 0.639254 | 5.19E-55 | 0.039437 | 0.39516  | 0.466059 | 1.47E-26 | 0.056216 |
| 0.20368  | 9.15E-06 | 0.519135 | 1.39E-33 | 0.17918  | 9.89E-05 | 0.450688 | 9.65E-25 | 0.05656  |
| 0.022055 | 0.6345   | 0.307978 | 1.02E-11 | -0.11752 | 0.01103  | 0.168943 | 0.00024  | -0.24832 |
| -0.05394 | 0.24465  | 0.376426 | 3.62E-17 | -0.22854 | 5.98E-07 | 0.160218 | 0.00051  | -0.23172 |
| -0.29037 | 1.59E-10 | -0.16199 | 0.00044  | -0.68924 | 4.52E-67 | -0.47363 | 1.74E-27 | -0.56588 |

|          |          |          |          |          |          |          |          |          |
|----------|----------|----------|----------|----------|----------|----------|----------|----------|
| -0.11556 | 0.01246  | 0.125839 | 0.00647  | -0.34607 | 1.39E-14 | -0.00307 | 0.94731  | -0.33752 |
| -0.16008 | 0.00052  | -0.05213 | 0.26086  | -0.26909 | 3.45E-09 | -0.01805 | 0.69729  | -0.3459  |
| 0.15788  | 0.00062  | 0.483064 | 1.12E-28 | 0.062889 | 0.17486  | 0.275213 | 1.46E-09 | 0.280564 |
| -0.01292 | 0.78071  | 0.330028 | 2.50E-13 | -0.12059 | 0.0091   | 0.230496 | 4.76E-07 | -0.13743 |
| -0.03686 | 0.42674  | 0.328622 | 3.20E-13 | -0.24228 | 1.15E-07 | 0.149478 | 0.0012   | -0.20181 |
| -0.07059 | 0.12768  | 0.247718 | 5.84E-08 | -0.20004 | 1.33E-05 | 0.218772 | 1.82E-06 | -0.24046 |
| -0.07524 | 0.1044   | 0.33643  | 8.04E-14 | -0.34104 | 3.49E-14 | 0.075151 | 0.10481  | -0.31133 |
| 0.187409 | 4.60E-05 | 0.557977 | 1.43E-39 | 0.062204 | 0.17962  | 0.341346 | 3.30E-14 | 0.107278 |
| -0.11914 | 0.00997  | 0.111755 | 0.01569  | -0.43601 | 4.31E-23 | -0.11945 | 0.00977  | -0.44046 |
| 0.028444 | 0.53978  | 0.509292 | 3.46E-32 | -0.12947 | 0.00508  | 0.259246 | 1.31E-08 | -0.05151 |
| -0.02348 | 0.61283  | 0.30407  | 1.91E-11 | -0.05475 | 0.23762  | 0.124553 | 0.00704  | -0.04296 |
| -0.09911 | 0.03225  | 0.335404 | 9.66E-14 | -0.16528 | 0.00033  | 0.198347 | 1.58E-05 | -0.22746 |
| -0.0678  | 0.14349  | 0.17585  | 0.00013  | -0.35475 | 2.70E-15 | -0.04556 | 0.32586  | -0.29439 |
| 0.072553 | 0.11741  | 0.368952 | 1.66E-16 | -0.12687 | 0.00604  | 0.148818 | 0.00126  | -0.12105 |
| -0.02102 | 0.65044  | 0.382612 | 9.94E-18 | -0.253   | 2.97E-08 | 0.10355  | 0.02524  | -0.23872 |
| 0.182406 | 7.35E-05 | 0.645291 | 2.39E-56 | 0.130217 | 0.00483  | 0.441053 | 1.19E-23 | 0.159747 |
| 0.001729 | 0.97028  | 0.38301  | 9.14E-18 | 0.011445 | 0.80516  | 0.372987 | 7.33E-17 | -0.07495 |
| 0.221843 | 1.29E-06 | 0.499874 | 6.84E-31 | 0.140132 | 0.0024   | 0.298994 | 4.24E-11 | 0.099773 |
| 0.022044 | 0.63467  | 0.388484 | 2.85E-18 | 0.07112  | 0.12485  | 0.403063 | 1.14E-19 | 0.01523  |
| 0.235207 | 2.72E-07 | 0.632779 | 1.31E-53 | 0.212535 | 3.59E-06 | 0.578387 | 4.80E-43 | 0.145845 |
| 0.241148 | 1.33E-07 | 0.501194 | 4.53E-31 | 0.303417 | 2.11E-11 | 0.440192 | 1.49E-23 | 0.417094 |
| -0.14324 | 0.00191  | -0.02186 | 0.6375   | -0.28277 | 4.92E-10 | -0.02179 | 0.63855  | -0.38044 |
| 0.092751 | 0.04514  | 0.495306 | 2.81E-30 | 0.108388 | 0.01913  | 0.517582 | 2.32E-33 | 0.071366 |
| -0.09978 | 0.0311   | -0.05353 | 0.24826  | -0.27371 | 1.81E-09 | -0.16385 | 0.00038  | -0.35063 |
| -0.2884  | 2.14E-10 | -0.09545 | 0.03922  | -0.57101 | 9.21E-42 | -0.27632 | 1.25E-09 | -0.55283 |
| -0.26878 | 3.60E-09 | -0.00837 | 0.85685  | -0.56384 | 1.52E-40 | -0.27499 | 1.51E-09 | -0.51343 |
| 0.08998  | 0.05199  | 0.496827 | 1.76E-30 | -0.13642 | 0.00314  | 0.167817 | 0.00027  | -0.06122 |
| -0.18075 | 8.56E-05 | 0.057439 | 0.21536  | -0.4439  | 5.72E-24 | -0.14346 | 0.00188  | -0.42081 |
| 0.089348 | 0.05367  | 0.266126 | 5.18E-09 | 0.029389 | 0.52639  | 0.118573 | 0.01033  | -0.0285  |
| -0.0128  | 0.78267  | 0.292088 | 1.23E-10 | -0.03442 | 0.45809  | 0.277055 | 1.12E-09 | -0.13792 |
| -0.19822 | 1.60E-05 | -0.02564 | 0.58042  | -0.41744 | 4.07E-21 | -0.11364 | 0.01401  | -0.45574 |
| 0.130823 | 0.00463  | 0.51882  | 1.54E-33 | 0.095022 | 0.04011  | 0.368862 | 1.69E-16 | 0.043154 |
| 0.058579 | 0.20637  | 0.444291 | 5.17E-24 | -0.05496 | 0.23587  | 0.300494 | 3.35E-11 | -0.08431 |
| -0.08015 | 0.08361  | 0.080793 | 0.08114  | -0.3384  | 5.64E-14 | -0.1006  | 0.02974  | -0.28886 |
| 0.011372 | 0.80638  | 0.380945 | 1.41E-17 | -0.30084 | 3.18E-11 | 0.016643 | 0.71981  | -0.20347 |
| -0.25077 | 3.96E-08 | -0.19825 | 1.59E-05 | -0.51303 | 1.03E-32 | -0.36491 | 3.72E-16 | -0.50575 |
| 0.112096 | 0.01537  | 0.600599 | 4.08E-47 | 0.005331 | 0.90853  | 0.365664 | 3.20E-16 | 0.204314 |
| 0.106378 | 0.02149  | 0.490188 | 1.34E-29 | 0.154456 | 0.00081  | 0.487624 | 2.89E-29 | 0.050821 |
| 0.097002 | 0.03612  | 0.515017 | 5.40E-33 | 0.012638 | 0.78532  | 0.333441 | 1.37E-13 | 0.005152 |
| 0.268622 | 3.68E-09 | 0.701436 | 2.15E-70 | 0.344757 | 1.77E-14 | 0.679488 | 1.57E-64 | 0.25027  |
| -0.00388 | 0.93335  | 0.199258 | 1.44E-05 | -0.27015 | 2.98E-09 | -0.06454 | 0.16379  | -0.22968 |
| 0.417436 | 4.07E-21 | 0.471951 | 2.80E-27 | 0.095456 | 0.03921  | 0.338589 | 5.45E-14 | 0.083449 |
| 0.086304 | 0.06239  | 0.385878 | 4.97E-18 | 0.037499 | 0.41882  | 0.234175 | 3.08E-07 | 0.018726 |
| -0.28235 | 5.23E-10 | -0.2355  | 2.63E-07 | -0.56047 | 5.56E-40 | -0.38868 | 2.73E-18 | -0.53795 |
| 0.089796 | 0.05247  | 0.357402 | 1.62E-15 | -0.03166 | 0.49487  | 0.142737 | 0.00199  | -0.04642 |



|          |          |          |          |          |          |          |          |          |
|----------|----------|----------|----------|----------|----------|----------|----------|----------|
| -0.14079 | 0.00229  | 0.071213 | 0.12435  | -0.33349 | 1.36E-13 | -0.09235 | 0.04609  | -0.31515 |
| 0.222956 | 1.14E-06 | 0.576116 | 1.20E-42 | 0.341003 | 3.52E-14 | 0.617227 | 2.23E-50 | 0.221648 |
| -0.05464 | 0.23861  | 0.181913 | 7.70E-05 | -0.11607 | 0.01207  | 0.198208 | 1.60E-05 | -0.21585 |
| -0.18249 | 7.30E-05 | -0.10547 | 0.02263  | -0.37523 | 4.63E-17 | -0.24732 | 6.14E-08 | -0.36646 |
| 0.023701 | 0.60943  | 0.276342 | 1.24E-09 | -0.07101 | 0.12545  | 0.263741 | 7.17E-09 | -0.15151 |
| 0.257877 | 1.57E-08 | 0.673475 | 5.20E-63 | 0.212659 | 3.55E-06 | 0.53423  | 8.08E-36 | 0.196345 |
| -0.0803  | 0.08302  | 0.267901 | 4.06E-09 | -0.17036 | 0.00022  | 0.180912 | 8.44E-05 | -0.19564 |
| -0.11975 | 0.00959  | 0.161818 | 0.00045  | -0.38187 | 1.16E-17 | -0.01988 | 0.66836  | -0.3832  |
| -0.10464 | 0.02374  | 0.159408 | 0.00054  | -0.34769 | 1.02E-14 | -0.10191 | 0.02765  | -0.29242 |
| 0.216786 | 2.26E-06 | 0.320162 | 1.36E-12 | 0.07837  | 0.09071  | 0.274908 | 1.53E-09 | -0.00595 |
| -0.06904 | 0.13629  | -0.31195 | 5.34E-12 | -0.10745 | 0.0202   | -0.37543 | 4.44E-17 | -0.07067 |
| -0.12066 | 0.00905  | -0.27717 | 1.10E-09 | -0.10192 | 0.02764  | -0.26984 | 3.11E-09 | -0.15552 |
| -0.08897 | 0.05469  | 0.087767 | 0.05806  | 0.030331 | 0.51321  | 0.252962 | 2.99E-08 | -0.19335 |
| 0.164482 | 0.00036  | 0.456906 | 1.82E-25 | 0.082153 | 0.07613  | 0.386407 | 4.44E-18 | -0.00608 |
| -0.03926 | 0.39731  | 0.119068 | 0.01001  | 0.114759 | 0.01308  | 0.251759 | 3.49E-08 | -0.00293 |
| 0.059535 | 0.19906  | -0.27381 | 1.78E-09 | 0.00858  | 0.85329  | -0.27062 | 2.79E-09 | -0.03783 |
| 0.051876 | 0.26323  | 0.286852 | 2.69E-10 | -0.03981 | 0.39067  | 0.231012 | 4.48E-07 | -0.09823 |
| -0.07921 | 0.08731  | 0.143563 | 0.00187  | -0.00327 | 0.94378  | 0.353153 | 3.66E-15 | -0.14961 |
| -0.18772 | 4.46E-05 | -0.0072  | 0.87676  | -0.49089 | 1.08E-29 | -0.3284  | 3.32E-13 | -0.41478 |
| 0.055357 | 0.23248  | 0.410003 | 2.33E-20 | -0.13204 | 0.00426  | 0.190252 | 3.50E-05 | -0.14095 |
| -0.01969 | 0.67134  | 0.188273 | 4.23E-05 | -0.21127 | 4.12E-06 | -0.03659 | 0.43014  | -0.08855 |
| -0.07602 | 0.10083  | 0.160937 | 0.00048  | -0.24441 | 8.85E-08 | 0.067875 | 0.14304  | -0.25101 |
| 0.228381 | 6.09E-07 | 0.463211 | 3.25E-26 | 0.071416 | 0.12328  | 0.383593 | 8.08E-18 | 0.007972 |
| -0.04589 | 0.32242  | 0.075724 | 0.10218  | -0.29339 | 1.01E-10 | -0.16571 | 0.00032  | -0.26641 |
| 0.193022 | 2.67E-05 | 0.357255 | 1.67E-15 | 0.009036 | 0.84559  | 0.229754 | 5.19E-07 | 0.024516 |
| 0.200536 | 1.26E-05 | 0.171752 | 0.00019  | -0.03771 | 0.41618  | -0.14109 | 0.00224  | 0.137291 |
| -0.08813 | 0.05701  | -0.03142 | 0.49815  | -0.45225 | 6.37E-25 | -0.36578 | 3.13E-16 | -0.15515 |
| -0.01569 | 0.73528  | 0.012502 | 0.78757  | -0.33342 | 1.37E-13 | -0.3996  | 2.48E-19 | -0.15533 |
| -0.04106 | 0.37596  | 0.013069 | 0.77819  | -0.23755 | 2.05E-07 | -0.29294 | 1.08E-10 | -0.06326 |
| 0.066709 | 0.15006  | -0.09382 | 0.04271  | -0.02859 | 0.53771  | -0.19513 | 2.17E-05 | 0.159054 |
| -0.01028 | 0.82463  | 0.086117 | 0.06296  | -0.26174 | 9.39E-09 | -0.31238 | 4.98E-12 | -0.23313 |
| -0.00705 | 0.87922  | 0.042414 | 0.36044  | -0.32697 | 4.26E-13 | -0.40379 | 9.67E-20 | -0.04205 |
| 0.05987  | 0.19653  | 0.172114 | 0.00019  | -0.21959 | 1.66E-06 | -0.13635 | 0.00315  | 0.05999  |
| -0.05036 | 0.27742  | -0.09942 | 0.03171  | 0.283662 | 4.31E-10 | 0.280106 | 7.24E-10 | 0.112931 |
| 0.02274  | 0.62402  | -0.13007 | 0.00487  | -0.18122 | 8.20E-05 | -0.39221 | 1.27E-18 | -0.13253 |
| 0.143399 | 0.00189  | 0.223021 | 1.13E-06 | -0.22351 | 1.07E-06 | -0.15093 | 0.00107  | 0.04457  |
| -0.10046 | 0.02996  | -0.23374 | 3.25E-07 | -0.35675 | 1.84E-15 | -0.46049 | 6.87E-26 | -0.07101 |
| 0.071491 | 0.12289  | 0.058691 | 0.20551  | -0.16405 | 0.00037  | -0.26938 | 3.31E-09 | 0.046857 |
| -0.06297 | 0.17433  | 0.002249 | 0.96134  | -0.41703 | 4.48E-21 | -0.36369 | 4.74E-16 | -0.05231 |
| -0.11559 | 0.01243  | -0.14433 | 0.00177  | -0.4552  | 2.89E-25 | -0.43865 | 2.20E-23 | -0.14415 |
| -0.00642 | 0.88988  | -0.03944 | 0.39513  | -0.19593 | 2.01E-05 | -0.26933 | 3.33E-09 | -0.19185 |
| 0.180533 | 8.74E-05 | 0.196686 | 1.86E-05 | -0.12474 | 0.00696  | -0.26434 | 6.61E-09 | 0.038262 |
| 0.237645 | 2.03E-07 | 0.288465 | 2.12E-10 | -0.00021 | 0.99638  | -0.05645 | 0.2234   | 0.15611  |
| 0.021395 | 0.64468  | 0.21499  | 2.75E-06 | -0.0858  | 0.06395  | -0.15469 | 0.0008   | -0.01861 |
| 0.000463 | 0.99203  | -0.10785 | 0.01974  | -0.04213 | 0.36371  | -0.24185 | 1.21E-07 | -0.01919 |

|          |          |          |          |          |          |          |          |          |
|----------|----------|----------|----------|----------|----------|----------|----------|----------|
| -0.04983 | 0.28253  | 0.031896 | 0.49171  | -0.49314 | 5.46E-30 | -0.435   | 5.56E-23 | -0.24561 |
| 0.029322 | 0.52732  | -0.01435 | 0.75706  | -0.23387 | 3.20E-07 | -0.02385 | 0.60721  | -0.16195 |
| 0.117929 | 0.01076  | 0.009675 | 0.83482  | -0.09252 | 0.04569  | -0.12686 | 0.00605  | -0.0223  |
| 0.008162 | 0.86036  | 0.096421 | 0.03726  | -0.37045 | 1.23E-16 | -0.30804 | 1.01E-11 | -0.09661 |
| -0.02673 | 0.56446  | -0.04857 | 0.29487  | -0.42314 | 1.04E-21 | -0.24655 | 6.77E-08 | -0.1128  |
| 0.007339 | 0.87432  | -0.14605 | 0.00155  | -0.33966 | 4.49E-14 | -0.43944 | 1.80E-23 | -0.08745 |
| -0.12552 | 0.00661  | -0.25641 | 1.90E-08 | -0.40892 | 2.99E-20 | -0.43525 | 5.22E-23 | -0.3943  |
| 0.029972 | 0.51821  | -0.05101 | 0.27133  | -0.21578 | 2.53E-06 | -0.19404 | 2.42E-05 | -0.10578 |
| -0.01972 | 0.67074  | -0.31416 | 3.72E-12 | -0.27143 | 2.49E-09 | -0.44421 | 5.28E-24 | -0.07323 |
| 0.138136 | 0.00278  | 0.152559 | 0.00094  | -0.03051 | 0.51071  | -0.14124 | 0.00222  | 0.000188 |
| 0.032183 | 0.48781  | 0.095506 | 0.03911  | -0.27103 | 2.63E-09 | -0.26058 | 1.10E-08 | 0.001499 |
| -0.08842 | 0.0562   | -0.0579  | 0.21169  | -0.17929 | 9.79E-05 | -0.26157 | 9.60E-09 | 0.116055 |
| 0.04777  | 0.30294  | 0.110659 | 0.01674  | -0.15625 | 0.0007   | -0.19807 | 1.62E-05 | -0.06781 |
| -0.01433 | 0.75742  | -0.01265 | 0.78508  | -0.33356 | 1.34E-13 | -0.393   | 1.07E-18 | -0.25351 |
| -0.13854 | 0.0027   | -0.31462 | 3.45E-12 | -0.2826  | 5.04E-10 | -0.48354 | 9.75E-29 | -0.25884 |
| 0.03496  | 0.45103  | -0.22008 | 1.57E-06 | -0.13662 | 0.00309  | -0.3314  | 1.97E-13 | -0.11051 |
| 0.188299 | 4.22E-05 | 0.080409 | 0.0826   | -0.01228 | 0.7913   | -0.07544 | 0.10346  | 0.218593 |
| -0.02584 | 0.57747  | 0.032942 | 0.4776   | -0.19004 | 3.57E-05 | -0.27502 | 1.50E-09 | -0.11468 |
| 0.130773 | 0.00465  | 0.014529 | 0.75417  | -0.09682 | 0.03648  | -0.17818 | 0.00011  | 0.169486 |
| -0.08374 | 0.0706   | 0.013381 | 0.77304  | -0.30114 | 3.03E-11 | -0.23339 | 3.39E-07 | -0.0041  |
| -0.16058 | 0.0005   | -0.22483 | 9.18E-07 | -0.41806 | 3.51E-21 | -0.45243 | 6.08E-25 | -0.31201 |
| 0.209302 | 5.08E-06 | 0.143401 | 0.00189  | 0.001193 | 0.97949  | -0.08831 | 0.05652  | 0.008609 |
| 0.052399 | 0.25843  | 0.068231 | 0.14095  | -0.26642 | 4.98E-09 | -0.30231 | 2.52E-11 | -0.08813 |
| -0.08173 | 0.07768  | -0.30234 | 2.51E-11 | -0.26557 | 5.59E-09 | -0.45662 | 1.97E-25 | 0.001194 |
| 0.169857 | 0.00023  | 0.003458 | 0.94059  | 0.070225 | 0.12968  | -0.1043  | 0.02419  | 0.046231 |
| -0.12662 | 0.00614  | -0.00998 | 0.82968  | -0.35258 | 4.08E-15 | -0.27179 | 2.37E-09 | -0.18846 |
| 0.002523 | 0.95664  | -0.0368  | 0.42757  | -0.10942 | 0.01801  | -0.25108 | 3.81E-08 | 0.033896 |
| -0.14676 | 0.00147  | -0.04792 | 0.30143  | -0.41425 | 8.64E-21 | -0.42129 | 1.62E-21 | -0.309   |
| 0.11692  | 0.01145  | -0.12676 | 0.00609  | -0.11427 | 0.01348  | -0.28291 | 4.82E-10 | 0.059195 |
| -0.05849 | 0.20708  | -0.08296 | 0.07327  | -0.2926  | 1.14E-10 | -0.36433 | 4.17E-16 | -0.22723 |
| 0.086828 | 0.06081  | 0.217494 | 2.09E-06 | -0.07781 | 0.09305  | -0.14582 | 0.00158  | -0.0391  |
| 0.122526 | 0.00803  | 0.284425 | 3.86E-10 | -0.2484  | 5.35E-08 | -0.18844 | 4.17E-05 | -0.07514 |
| -0.08922 | 0.054    | -0.07381 | 0.11117  | -0.42672 | 4.35E-22 | -0.37299 | 7.33E-17 | -0.18193 |
| 0.048259 | 0.29801  | 0.174671 | 0.00015  | -0.14762 | 0.00138  | -0.15687 | 0.00067  | -0.11673 |
| -0.00917 | 0.84331  | 0.006988 | 0.88029  | -0.2121  | 3.77E-06 | -0.31847 | 1.81E-12 | 0.047731 |
| -0.02803 | 0.54576  | -0.02465 | 0.59513  | -0.3602  | 9.40E-16 | -0.38167 | 1.21E-17 | -0.10825 |
| 0.028936 | 0.53278  | 0.077439 | 0.09462  | -0.18932 | 3.83E-05 | -0.33128 | 2.00E-13 | -0.09457 |
| -0.00847 | 0.85513  | 0.000244 | 0.99581  | -0.1247  | 0.00698  | -0.20326 | 9.55E-06 | 0.024205 |
| 0.046829 | 0.31258  | -0.06036 | 0.19291  | -0.31848 | 1.81E-12 | -0.3271  | 4.16E-13 | -0.13006 |
| 0.112256 | 0.01522  | 0.079406 | 0.08651  | -0.11518 | 0.01275  | -0.09981 | 0.03104  | -0.0734  |
| 0.111931 | 0.01552  | -0.04591 | 0.32215  | -0.05656 | 0.22247  | -0.25652 | 1.88E-08 | 0.196483 |
| -0.11856 | 0.01034  | -0.10335 | 0.02552  | -0.34032 | 3.98E-14 | -0.39612 | 5.38E-19 | -0.27226 |
| -0.18756 | 4.53E-05 | -0.14823 | 0.00132  | -0.57319 | 3.88E-42 | -0.47464 | 1.30E-27 | -0.25412 |
| 0.10393  | 0.0247   | 0.005169 | 0.91129  | -0.11824 | 0.01055  | -0.30305 | 2.24E-11 | -0.0427  |
| 0.095251 | 0.03963  | -0.06411 | 0.16665  | -0.15087 | 0.00107  | -0.30986 | 7.51E-12 | -0.10559 |

|          |          |          |          |          |          |          |          |          |
|----------|----------|----------|----------|----------|----------|----------|----------|----------|
| -0.08559 | 0.06458  | -0.0566  | 0.22214  | -0.40282 | 1.20E-19 | -0.38818 | 3.04E-18 | -0.13704 |
| -0.12375 | 0.00742  | -0.15892 | 0.00057  | -0.08002 | 0.0841   | -0.2466  | 6.72E-08 | 0.153556 |
| 0.037893 | 0.41395  | -0.02962 | 0.52315  | -0.30427 | 1.85E-11 | -0.43208 | 1.15E-22 | -0.07274 |
| 0.131468 | 0.00443  | 0.195148 | 2.17E-05 | -0.03623 | 0.4347   | 0.005561 | 0.90459  | 0.045525 |
| 0.059593 | 0.19862  | 0.212822 | 3.48E-06 | -0.16863 | 0.00025  | -0.23445 | 2.98E-07 | -0.03479 |
| 0.135717 | 0.0033   | -0.02156 | 0.64215  | -0.04782 | 0.30241  | -0.17968 | 9.45E-05 | 0.060519 |
| -0.03649 | 0.43144  | -0.02269 | 0.62482  | -0.24093 | 1.36E-07 | -0.26432 | 6.63E-09 | 0.053411 |
| 0.061781 | 0.1826   | 0.191069 | 3.23E-05 | -0.10421 | 0.02432  | -0.03333 | 0.47239  | 0.14831  |
| 0.003397 | 0.94164  | -0.19757 | 1.70E-05 | -0.02872 | 0.53591  | -0.28687 | 2.68E-10 | 0.168905 |
| 0.007975 | 0.86353  | -0.03465 | 0.45505  | -0.18325 | 6.80E-05 | -0.15949 | 0.00054  | 0.133734 |
| 0.020586 | 0.65725  | -0.05543 | 0.23189  | -0.38825 | 2.99E-18 | -0.44816 | 1.88E-24 | -0.14478 |
| 0.023991 | 0.60506  | -0.07089 | 0.12608  | 0.013909 | 0.76435  | -0.16821 | 0.00026  | 0.00022  |
| 0.110908 | 0.0165   | -0.01663 | 0.72005  | -0.1398  | 0.00246  | -0.31033 | 6.96E-12 | -0.14241 |
| -0.21277 | 3.50E-06 | -0.12283 | 0.00788  | -0.59895 | 8.42E-47 | -0.39811 | 3.46E-19 | -0.33678 |
| 0.013118 | 0.77738  | 0.039979 | 0.3887   | -0.04663 | 0.3146   | -0.21222 | 3.72E-06 | -0.00497 |
| -0.06401 | 0.16731  | -0.26824 | 3.88E-09 | -0.28579 | 3.15E-10 | -0.39777 | 3.74E-19 | -0.01249 |
| -0.09805 | 0.03416  | -0.12509 | 0.0068   | -0.23978 | 1.57E-07 | -0.29895 | 4.27E-11 | 0.033264 |
| -0.00192 | 0.96706  | -0.10888 | 0.01859  | -0.18118 | 8.24E-05 | -0.15926 | 0.00055  | 0.096526 |
| 0.274072 | 1.72E-09 | 0.256655 | 1.84E-08 | 0.233399 | 3.38E-07 | 0.116147 | 0.01201  | 0.49695  |
| 0.244209 | 9.07E-08 | 0.186779 | 4.88E-05 | 0.105475 | 0.02263  | -0.04498 | 0.33208  | 0.424805 |
| 0.053755 | 0.2463   | 0.133936 | 0.00374  | -0.23651 | 2.33E-07 | -0.12118 | 0.00876  | -0.22911 |
| 0.003887 | 0.93323  | 0.033051 | 0.47614  | -0.29667 | 6.08E-11 | -0.244   | 9.32E-08 | -0.28108 |
| -0.12635 | 0.00626  | -0.1422  | 0.00207  | -0.51422 | 7.01E-33 | -0.50325 | 2.37E-31 | -0.44044 |
| 0.120725 | 0.00902  | 0.286527 | 2.83E-10 | 0.02426  | 0.60101  | 0.050216 | 0.27883  | -0.03458 |
| -0.03692 | 0.4261   | 0.026147 | 0.573    | -0.38018 | 1.66E-17 | -0.369   | 1.64E-16 | -0.30034 |
| 0.005571 | 0.90443  | -0.00597 | 0.89771  | -0.18122 | 8.20E-05 | -0.28087 | 6.48E-10 | -0.14422 |
| -0.16107 | 0.00048  | -0.15552 | 0.00075  | -0.35528 | 2.43E-15 | -0.33387 | 1.27E-13 | -0.33052 |
| 0.021869 | 0.63736  | 0.100662 | 0.02963  | -0.32384 | 7.30E-13 | -0.16579 | 0.00032  | -0.27885 |
| -0.00451 | 0.92254  | 0.207014 | 6.47E-06 | -0.34333 | 2.30E-14 | -0.1686  | 0.00025  | -0.2208  |
| -0.07181 | 0.1212   | 0.065646 | 0.15667  | -0.39276 | 1.13E-18 | -0.27541 | 1.42E-09 | -0.29059 |
| -0.00872 | 0.85086  | 0.110002 | 0.01741  | -0.23156 | 4.20E-07 | -0.21178 | 3.90E-06 | -0.15443 |
| -0.08511 | 0.06611  | -0.16025 | 0.00051  | -0.18616 | 5.18E-05 | -0.28936 | 1.85E-10 | -0.18667 |
| -0.01751 | 0.70581  | 0.214619 | 2.87E-06 | -0.2893  | 1.87E-10 | -0.2335  | 3.34E-07 | -0.20031 |
| -0.08305 | 0.07297  | -0.2046  | 8.31E-06 | -0.40327 | 1.09E-19 | -0.43319 | 8.74E-23 | -0.38826 |
| -0.11106 | 0.01635  | -0.21852 | 1.87E-06 | -0.36511 | 3.58E-16 | -0.39364 | 9.28E-19 | -0.30066 |
| -0.00652 | 0.8882   | 0.098865 | 0.03268  | -0.26375 | 7.15E-09 | -0.26055 | 1.10E-08 | -0.2063  |
| -0.06466 | 0.16299  | 0.061996 | 0.18108  | -0.4344  | 6.46E-23 | -0.26179 | 9.32E-09 | -0.31552 |
| -0.04441 | 0.33828  | 0.065937 | 0.15484  | -0.29063 | 1.53E-10 | -0.10442 | 0.02403  | -0.2796  |
| 0.052226 | 0.26001  | 0.15791  | 0.00062  | -0.25543 | 2.17E-08 | -0.0433  | 0.35045  | -0.23101 |
| 0.06214  | 0.18006  | 0.131159 | 0.00452  | -0.18442 | 6.10E-05 | -0.21112 | 4.18E-06 | -0.13671 |
| 0.063536 | 0.17046  | 0.160034 | 0.00052  | -0.25202 | 3.37E-08 | -0.19586 | 2.02E-05 | -0.16926 |
| 0.11726  | 0.01121  | 0.21395  | 3.08E-06 | -0.0955  | 0.03913  | -0.12603 | 0.00639  | -0.11292 |
| -0.12752 | 0.00579  | 0.047948 | 0.30115  | -0.4124  | 1.33E-20 | -0.25975 | 1.22E-08 | -0.29488 |
| -0.02124 | 0.6471   | 0.067449 | 0.14558  | -0.30798 | 1.02E-11 | -0.32032 | 1.33E-12 | -0.16791 |
| -0.13201 | 0.00427  | 0.060809 | 0.18959  | -0.40779 | 3.88E-20 | -0.31668 | 2.45E-12 | -0.29237 |

|          |          |          |          |          |          |          |          |          |
|----------|----------|----------|----------|----------|----------|----------|----------|----------|
| 0.020413 | 0.65994  | 0.100609 | 0.02972  | -0.32807 | 3.52E-13 | -0.29726 | 5.55E-11 | -0.24362 |
| -0.11015 | 0.01725  | -0.04646 | 0.3164   | -0.40301 | 1.15E-19 | -0.30832 | 9.64E-12 | -0.28356 |
| -0.04525 | 0.32916  | 0.028239 | 0.54269  | -0.4588  | 1.09E-25 | -0.32184 | 1.03E-12 | -0.33507 |
| 0.064581 | 0.16352  | 0.17958  | 9.53E-05 | -0.2181  | 1.95E-06 | -0.23127 | 4.35E-07 | -0.09359 |
| 0.0332   | 0.47416  | -0.05    | 0.28086  | -0.27603 | 1.30E-09 | -0.3321  | 1.74E-13 | -0.10573 |
| -0.04432 | 0.33923  | 0.029743 | 0.52141  | -0.39332 | 9.97E-19 | -0.26027 | 1.14E-08 | -0.314   |
| 0.061121 | 0.18733  | 0.132583 | 0.0041   | -0.31724 | 2.23E-12 | -0.23529 | 2.70E-07 | -0.2304  |
| -0.06231 | 0.17885  | 0.093452 | 0.04354  | -0.32479 | 6.20E-13 | -0.28361 | 4.35E-10 | -0.18347 |
| -0.09287 | 0.04486  | 0.073653 | 0.11193  | -0.4226  | 1.18E-21 | -0.31852 | 1.80E-12 | -0.3369  |
| 0.083337 | 0.07198  | 0.201346 | 1.16E-05 | -0.09699 | 0.03614  | -0.12354 | 0.00752  | 9.42E-05 |
| -0.00832 | 0.85773  | 0.155815 | 0.00073  | -0.35653 | 1.91E-15 | -0.12627 | 0.00629  | -0.27387 |
| 0.060537 | 0.19158  | 0.157788 | 0.00062  | -0.23168 | 4.14E-07 | -0.20033 | 1.29E-05 | -0.2249  |
| -0.05144 | 0.2673   | 0.078423 | 0.09049  | -0.32606 | 4.99E-13 | -0.10819 | 0.01936  | -0.272   |
| 0.014292 | 0.75806  | 0.143008 | 0.00195  | -0.07643 | 0.09899  | -0.1057  | 0.02235  | -0.05049 |
| -0.05552 | 0.23108  | -0.05671 | 0.22125  | -0.42175 | 1.45E-21 | -0.3968  | 4.63E-19 | -0.30404 |
| -0.03656 | 0.43058  | 0.139618 | 0.0025   | -0.34817 | 9.37E-15 | -0.18945 | 3.78E-05 | -0.32065 |
| -0.0655  | 0.15759  | -0.02306 | 0.61911  | -0.40341 | 1.05E-19 | -0.38216 | 1.09E-17 | -0.31478 |
| -0.1081  | 0.01946  | -0.1262  | 0.00632  | -0.39696 | 4.47E-19 | -0.30679 | 1.23E-11 | -0.369   |
| 0.129954 | 0.00491  | 0.225686 | 8.32E-07 | -0.12517 | 0.00676  | -0.13685 | 0.00304  | -0.15661 |
| -0.08143 | 0.07876  | -0.00445 | 0.92363  | -0.30739 | 1.12E-11 | -0.20803 | 5.81E-06 | -0.35548 |
| -0.18615 | 5.18E-05 | 0.022837 | 0.62253  | -0.47297 | 2.10E-27 | -0.33297 | 1.49E-13 | -0.39667 |
| -0.17728 | 0.00012  | -0.03684 | 0.42702  | -0.49047 | 1.23E-29 | -0.32794 | 3.60E-13 | -0.38857 |
| 0.019262 | 0.678    | 0.269571 | 3.22E-09 | -0.31911 | 1.63E-12 | -0.13937 | 0.00254  | -0.16042 |
| -0.01797 | 0.69851  | 0.103259 | 0.02565  | -0.37851 | 2.35E-17 | -0.27488 | 1.53E-09 | -0.26468 |
| 0.213962 | 3.08E-06 | 0.443197 | 6.86E-24 | -0.07981 | 0.08491  | 0.097906 | 0.03441  | -0.0111  |
| 0.120084 | 0.00939  | 0.195014 | 2.20E-05 | -0.24284 | 1.07E-07 | -0.13631 | 0.00316  | -0.15377 |
| 0.003227 | 0.94456  | 0.088497 | 0.056    | -0.16643 | 0.0003   | -0.14885 | 0.00126  | -0.23306 |
| 0.079242 | 0.08717  | 0.103416 | 0.02543  | -0.27878 | 8.77E-10 | -0.18525 | 5.64E-05 | -0.26125 |
| -0.01414 | 0.76049  | 0.127673 | 0.00573  | -0.31474 | 3.38E-12 | -0.21341 | 3.27E-06 | -0.30595 |
| -0.0914  | 0.04838  | -0.0995  | 0.03158  | -0.32496 | 6.03E-13 | -0.34529 | 1.60E-14 | -0.32651 |
| 0.017228 | 0.7104   | 0.280587 | 6.76E-10 | -0.20838 | 5.60E-06 | -0.07968 | 0.08544  | -0.219   |
| -0.13327 | 0.00391  | 0.137991 | 0.00281  | -0.45644 | 2.07E-25 | -0.2615  | 9.69E-09 | -0.38848 |
| 0.203085 | 9.73E-06 | 0.333508 | 1.35E-13 | 0.043125 | 0.35244  | 0.046493 | 0.31607  | -0.02234 |
| 0.087927 | 0.0576   | 0.216616 | 2.30E-06 | -0.24729 | 6.17E-08 | -0.23478 | 2.87E-07 | -0.15922 |
| 0.022749 | 0.62388  | 0.132378 | 0.00416  | -0.40533 | 6.81E-20 | -0.24023 | 1.48E-07 | -0.30431 |
| -0.069   | 0.13654  | 0.036996 | 0.42509  | -0.39552 | 6.14E-19 | -0.3196  | 1.50E-12 | -0.37888 |
| 0.117728 | 0.01089  | 0.299974 | 3.64E-11 | -0.19927 | 1.44E-05 | -0.02839 | 0.54049  | -0.13734 |
| 0.035379 | 0.44562  | 0.174916 | 0.00015  | -0.17902 | 0.0001   | -0.14209 | 0.00208  | -0.16345 |
| 0.016517 | 0.72183  | 0.146631 | 0.00149  | -0.33731 | 6.86E-14 | -0.10661 | 0.02121  | -0.29962 |
| -0.06108 | 0.18763  | 0.2354   | 2.66E-07 | -0.24795 | 5.67E-08 | -0.03314 | 0.47494  | -0.12791 |
| -0.08321 | 0.07242  | 0.062744 | 0.17586  | -0.28722 | 2.55E-10 | -0.18938 | 3.81E-05 | -0.25874 |
| -0.16582 | 0.00032  | 0.036252 | 0.43447  | -0.52434 | 2.42E-34 | -0.29548 | 7.30E-11 | -0.47732 |
| 0.054879 | 0.23655  | 0.342618 | 2.62E-14 | -0.235   | 2.79E-07 | -0.06246 | 0.17784  | -0.19937 |
| -0.12946 | 0.00508  | -0.07159 | 0.12236  | -0.50383 | 1.97E-31 | -0.30507 | 1.63E-11 | -0.49477 |
| -0.02216 | 0.63292  | 0.060813 | 0.18957  | -0.4097  | 2.50E-20 | -0.29146 | 1.35E-10 | -0.37579 |

|          |          |          |          |          |          |          |          |          |
|----------|----------|----------|----------|----------|----------|----------|----------|----------|
| -0.29563 | 7.13E-11 | -0.13084 | 0.00462  | -0.62681 | 2.39E-52 | -0.5109  | 2.06E-32 | -0.48439 |
| -0.07749 | 0.09442  | 0.081293 | 0.07927  | -0.43976 | 1.66E-23 | -0.27499 | 1.51E-09 | -0.35879 |
| -0.06265 | 0.17648  | 0.042883 | 0.35515  | -0.3521  | 4.47E-15 | -0.21287 | 3.46E-06 | -0.36613 |
| 0.095744 | 0.03862  | 0.058907 | 0.20384  | -0.20389 | 8.95E-06 | -0.2059  | 7.26E-06 | -0.17236 |
| -0.07546 | 0.10336  | 0.029424 | 0.52589  | -0.49562 | 2.55E-30 | -0.31329 | 4.29E-12 | -0.3827  |
| 0.102349 | 0.02699  | 0.158204 | 0.0006   | -0.31069 | 6.57E-12 | -0.2644  | 6.55E-09 | -0.23917 |
| 0.08046  | 0.0824   | -0.03383 | 0.46581  | 0.448814 | 1.58E-24 | 0.338294 | 5.75E-14 | 0.365407 |
| 0.072239 | 0.11901  | 0.084396 | 0.06843  | -0.29048 | 1.57E-10 | -0.14873 | 0.00127  | -0.22356 |
| -0.09881 | 0.03278  | -0.00972 | 0.83405  | -0.41697 | 4.55E-21 | -0.30171 | 2.77E-11 | -0.34962 |
| 0.037963 | 0.41308  | 0.159919 | 0.00052  | -0.28322 | 4.60E-10 | -0.27459 | 1.60E-09 | -0.24843 |
| 0.142848 | 0.00197  | 0.363072 | 5.35E-16 | -0.14534 | 0.00164  | -0.02279 | 0.62319  | -0.09483 |
| -0.01049 | 0.82116  | 0.043482 | 0.34846  | -0.37083 | 1.14E-16 | -0.27117 | 2.58E-09 | -0.28265 |
| -0.00776 | 0.86722  | 0.124901 | 0.00688  | -0.14144 | 0.00219  | -0.15564 | 0.00074  | -0.14163 |
| -0.29194 | 1.25E-10 | -0.1752  | 0.00014  | -0.64926 | 3.03E-57 | -0.51892 | 1.49E-33 | -0.51243 |
| -0.11213 | 0.01534  | -0.01213 | 0.79367  | -0.44865 | 1.65E-24 | -0.39993 | 2.31E-19 | -0.39409 |
| 0.155525 | 0.00074  | 0.161556 | 0.00046  | -0.05552 | 0.23112  | -0.11908 | 0.01001  | -0.08986 |
| 0.10617  | 0.02175  | 0.180819 | 8.51E-05 | -0.16459 | 0.00035  | -0.22087 | 1.44E-06 | -0.11333 |
| -0.06796 | 0.14257  | -0.04647 | 0.31631  | -0.38433 | 6.91E-18 | -0.40102 | 1.81E-19 | -0.33606 |
| -0.12447 | 0.00708  | -0.11333 | 0.01427  | -0.41975 | 2.35E-21 | -0.41745 | 4.06E-21 | -0.32439 |
| -0.04842 | 0.2964   | 0.248278 | 5.44E-08 | -0.36214 | 6.44E-16 | -0.17236 | 0.00018  | -0.26291 |
| -0.12799 | 0.00561  | 0.133883 | 0.00375  | -0.36135 | 7.51E-16 | -0.25293 | 3.00E-08 | -0.30038 |
| 0.135279 | 0.0034   | 0.211387 | 4.06E-06 | 0.011942 | 0.79688  | -0.11155 | 0.01588  | 0.045502 |
| -0.14885 | 0.00126  | -0.0608  | 0.18965  | -0.39864 | 3.08E-19 | -0.37906 | 2.09E-17 | -0.37253 |
| -0.19341 | 2.57E-05 | 0.022909 | 0.62145  | -0.488   | 2.58E-29 | -0.28571 | 3.19E-10 | -0.39589 |
| -0.03852 | 0.40629  | -0.24626 | 7.02E-08 | -0.31152 | 5.74E-12 | -0.32797 | 3.58E-13 | -0.2819  |
| -0.07547 | 0.10333  | 0.12428  | 0.00717  | -0.34934 | 7.53E-15 | -0.14165 | 0.00215  | -0.26397 |
| -0.04144 | 0.37163  | -0.05364 | 0.24733  | -0.28337 | 4.50E-10 | -0.27703 | 1.13E-09 | -0.28746 |
| 0.025215 | 0.58676  | 0.064229 | 0.16584  | -0.15841 | 0.00059  | -0.27142 | 2.49E-09 | -0.0943  |
| -0.12228 | 0.00816  | -0.07102 | 0.12538  | -0.41576 | 6.05E-21 | -0.42166 | 1.48E-21 | -0.3266  |
| -0.19125 | 3.18E-05 | -0.08205 | 0.07652  | -0.44971 | 1.25E-24 | -0.39803 | 3.52E-19 | -0.35844 |
| -0.02942 | 0.52598  | 0.129687 | 0.005    | -0.38456 | 6.58E-18 | -0.3521  | 4.47E-15 | -0.28514 |
| 0.193063 | 2.66E-05 | 0.232539 | 3.74E-07 | -0.1215  | 0.00858  | -0.04746 | 0.30609  | -0.05192 |
| -0.14162 | 0.00216  | 0.006419 | 0.88997  | -0.54246 | 4.38E-37 | -0.31046 | 6.82E-12 | -0.47305 |
| 0.053125 | 0.25189  | 0.00251  | 0.95686  | -0.12815 | 0.00555  | -0.2299  | 5.11E-07 | -0.12575 |
| -0.08059 | 0.0819   | 0.043959 | 0.3432   | -0.38195 | 1.14E-17 | -0.31857 | 1.78E-12 | -0.38307 |
| 0.018162 | 0.69545  | 0.053539 | 0.2482   | -0.24684 | 6.53E-08 | -0.24419 | 9.10E-08 | -0.16152 |
| -0.19732 | 1.75E-05 | -0.17156 | 0.0002   | -0.46923 | 6.06E-27 | -0.4581  | 1.32E-25 | -0.37453 |
| 0.022563 | 0.62672  | 0.134813 | 0.00351  | -0.33174 | 1.85E-13 | -0.26287 | 8.06E-09 | -0.24614 |
| -0.00036 | 0.99381  | 0.061333 | 0.1858   | -0.31422 | 3.68E-12 | -0.3269  | 4.31E-13 | -0.26741 |
| 0.040458 | 0.38303  | -0.06704 | 0.14805  | -0.18999 | 3.59E-05 | -0.30703 | 1.19E-11 | -0.25587 |
| 0.149757 | 0.00117  | 0.120798 | 0.00897  | -0.01294 | 0.78028  | -0.04417 | 0.34093  | -0.04886 |
| 0.068507 | 0.13935  | 0.17609  | 0.00013  | -0.27289 | 2.03E-09 | -0.17691 | 0.00012  | -0.26613 |
| 0.009302 | 0.84109  | 0.170349 | 0.00022  | -0.29301 | 1.07E-10 | -0.10625 | 0.02165  | -0.21503 |
| -0.02705 | 0.55988  | 0.262747 | 8.20E-09 | -0.30027 | 3.47E-11 | -0.07388 | 0.11085  | -0.25005 |
| -0.1482  | 0.00132  | -0.03342 | 0.47127  | -0.42457 | 7.35E-22 | -0.36841 | 1.85E-16 | -0.30413 |

|          |          |          |          |          |          |          |          |          |
|----------|----------|----------|----------|----------|----------|----------|----------|----------|
| 0.006297 | 0.89204  | 0.130126 | 0.00486  | -0.29784 | 5.07E-11 | -0.21763 | 2.06E-06 | -0.27739 |
| 0.060415 | 0.19248  | 0.113548 | 0.01408  | -0.18746 | 4.57E-05 | -0.18203 | 7.62E-05 | 0.00424  |
| -0.29302 | 1.06E-10 | -0.27383 | 1.78E-09 | -0.55396 | 6.47E-39 | -0.55918 | 9.08E-40 | -0.44609 |
| -0.03023 | 0.51467  | -0.02904 | 0.5313   | -0.3277  | 3.75E-13 | -0.25472 | 2.38E-08 | -0.28333 |
| -0.06766 | 0.14434  | 0.124511 | 0.00706  | -0.38552 | 5.37E-18 | -0.20685 | 6.58E-06 | -0.27968 |
| 0.09591  | 0.03828  | 0.318824 | 1.71E-12 | -0.18688 | 4.83E-05 | -0.09888 | 0.03265  | -0.13647 |
| -0.084   | 0.06973  | 0.00674  | 0.88449  | -0.34555 | 1.52E-14 | -0.23409 | 3.11E-07 | -0.35282 |
| -0.10991 | 0.0175   | -0.08118 | 0.07967  | -0.41706 | 4.46E-21 | -0.43361 | 7.89E-23 | -0.2897  |
| -0.13865 | 0.00267  | -0.07119 | 0.12449  | -0.52132 | 6.68E-34 | -0.42821 | 3.01E-22 | -0.42529 |
| 0.069924 | 0.13133  | 0.206719 | 6.67E-06 | -0.18461 | 5.99E-05 | -0.11451 | 0.01329  | -0.13384 |
| -0.02496 | 0.59063  | 0.052638 | 0.25627  | -0.2287  | 5.87E-07 | -0.22921 | 5.53E-07 | -0.23163 |
| -0.01246 | 0.7883   | 0.160741 | 0.00049  | -0.30393 | 1.95E-11 | -0.19292 | 2.70E-05 | -0.23517 |
| -0.06796 | 0.14252  | 0.040016 | 0.38826  | -0.42785 | 3.29E-22 | -0.28735 | 2.50E-10 | -0.35704 |
| 0.146007 | 0.00156  | 0.125857 | 0.00646  | -0.08211 | 0.07629  | -0.07285 | 0.11592  | -0.13338 |
| 0.027559 | 0.55246  | 0.105668 | 0.02238  | -0.31276 | 4.68E-12 | -0.20461 | 8.31E-06 | -0.21875 |
| -0.20127 | 1.17E-05 | -0.17409 | 0.00016  | -0.48063 | 2.29E-28 | -0.46533 | 1.81E-26 | -0.44548 |
| -0.01073 | 0.81711  | -0.04028 | 0.38518  | -0.3118  | 5.48E-12 | -0.35851 | 1.31E-15 | -0.24667 |
| -0.01586 | 0.73255  | 0.231814 | 4.08E-07 | -0.28338 | 4.50E-10 | -0.06095 | 0.18854  | -0.24597 |
| -0.0019  | 0.96728  | 0.120339 | 0.00924  | -0.34597 | 1.41E-14 | -0.09968 | 0.03127  | -0.26738 |
| -0.01846 | 0.69071  | -0.12337 | 0.00761  | -0.06868 | 0.13835  | -0.28037 | 6.98E-10 | -0.0795  |
| -0.00735 | 0.87415  | 0.023101 | 0.61852  | -0.32784 | 3.66E-13 | -0.19342 | 2.57E-05 | -0.2402  |
| 0.017017 | 0.71379  | 0.178424 | 0.00011  | -0.27799 | 9.82E-10 | -0.10809 | 0.01947  | -0.19232 |
| -0.10739 | 0.02028  | 0.025281 | 0.58579  | -0.46654 | 1.29E-26 | -0.25871 | 1.41E-08 | -0.40497 |
| 0.216469 | 2.34E-06 | 0.42605  | 5.12E-22 | 0.140591 | 0.00233  | 0.319869 | 1.43E-12 | 0.105453 |
| 0.299466 | 3.94E-11 | 0.537086 | 2.96E-36 | 0.273554 | 1.85E-09 | 0.383982 | 7.44E-18 | 0.2214   |
| 0.3378   | 6.29E-14 | 0.588821 | 6.43E-45 | 0.387698 | 3.37E-18 | 0.451692 | 7.39E-25 | 0.340898 |
| -0.183   | 6.96E-05 | -0.58986 | 4.16E-45 | -0.15414 | 0.00083  | -0.41736 | 4.15E-21 | -0.22749 |
| 0.468211 | 8.07E-27 | 0.734373 | 2.79E-80 | 0.461389 | 5.37E-26 | 0.534114 | 8.41E-36 | 0.359015 |
| 0.288826 | 2.01E-10 | 0.738148 | 1.65E-81 | 0.287958 | 2.28E-10 | 0.545049 | 1.72E-37 | 0.278002 |
| 0.149996 | 0.00115  | 0.54856  | 4.78E-38 | 0.142739 | 0.00199  | 0.300714 | 3.24E-11 | 0.184016 |
| 0.361975 | 6.64E-16 | 0.70334  | 6.28E-71 | 0.247971 | 5.66E-08 | 0.522772 | 4.11E-34 | 0.210154 |
| 0.431545 | 1.32E-22 | 0.823925 | #####    | 0.362012 | 6.60E-16 | 0.600881 | 3.61E-47 | 0.35593  |
| -0.30708 | 1.18E-11 | -0.49054 | 1.20E-29 | -0.32694 | 4.28E-13 | -0.41257 | 1.28E-20 | -0.39824 |
| 0.517557 | 2.34E-33 | 0.790593 | #####    | 0.566242 | 5.99E-41 | 0.650585 | 1.52E-57 | 0.476147 |
| 0.47795  | 5.01E-28 | 0.668261 | 1.01E-61 | 0.53145  | 2.12E-35 | 0.575012 | 1.87E-42 | 0.454784 |
| 0.124025 | 0.00729  | 0.430457 | 1.73E-22 | 0.250388 | 4.16E-08 | 0.403958 | 9.31E-20 | 0.203384 |
| 0.53432  | 7.83E-36 | 0.834792 | #####    | 0.657386 | 4.05E-59 | 0.696421 | 5.24E-69 | 0.631604 |
| 0.285614 | 3.24E-10 | 0.440516 | 1.37E-23 | 0.233492 | 3.34E-07 | 0.316396 | 2.57E-12 | 0.217116 |
| 0.538186 | 2.01E-36 | 0.799972 | #####    | 0.754087 | 6.14E-87 | 0.804876 | #####    | 0.703303 |
| 0.375126 | 4.73E-17 | 0.810533 | #####    | 0.375755 | 4.15E-17 | 0.587637 | 1.06E-44 | 0.353075 |
| 0.339179 | 4.90E-14 | 0.670681 | 2.56E-62 | 0.369758 | 1.41E-16 | 0.517684 | 2.24E-33 | 0.343814 |
| 0.233783 | 3.23E-07 | 0.648269 | 5.10E-57 | 0.097941 | 0.03435  | 0.321448 | 1.10E-12 | 0.11735  |
| 0.36916  | 1.59E-16 | 0.71798  | 3.49E-75 | 0.297233 | 5.57E-11 | 0.556956 | 2.11E-39 | 0.216049 |
| 0.348216 | 9.29E-15 | 0.76198  | 8.77E-90 | 0.342459 | 2.70E-14 | 0.622675 | 1.73E-51 | 0.323046 |
| 0.429517 | 2.18E-22 | 0.766252 | 2.27E-91 | 0.486831 | 3.66E-29 | 0.72519  | 2.22E-77 | 0.331928 |

|          |          |          |          |          |          |          |          |          |
|----------|----------|----------|----------|----------|----------|----------|----------|----------|
| 0.355851 | 2.18E-15 | 0.719343 | 1.36E-75 | 0.244384 | 8.88E-08 | 0.531537 | 2.06E-35 | 0.243142 |
| 0.415606 | 6.28E-21 | 0.652257 | 6.28E-58 | 0.435959 | 4.36E-23 | 0.500411 | 5.78E-31 | 0.42572  |
| 0.391047 | 1.63E-18 | 0.815633 | #####    | 0.354148 | 3.03E-15 | 0.603528 | 1.12E-47 | 0.526377 |
| 0.24158  | 1.26E-07 | 0.567046 | 4.38E-41 | 0.248125 | 5.55E-08 | 0.36557  | 3.26E-16 | 0.348273 |
| 0.347966 | 9.73E-15 | 0.546632 | 9.67E-38 | 0.4123   | 1.36E-20 | 0.399982 | 2.28E-19 | 0.404097 |
| 0.572194 | 5.77E-42 | 0.787505 | #####    | 0.665773 | 4.06E-61 | 0.680117 | 1.09E-64 | 0.642357 |
| 0.268679 | 3.65E-09 | 0.682238 | 3.09E-65 | 0.310407 | 6.88E-12 | 0.528724 | 5.44E-35 | 0.308043 |
| 0.550837 | 2.07E-38 | 0.696535 | 4.87E-69 | 0.685421 | 4.60E-66 | 0.70031  | 4.42E-70 | 0.500717 |
| 0.477097 | 6.41E-28 | 0.84277  | #####    | 0.388864 | 2.62E-18 | 0.536085 | 4.22E-36 | 0.442953 |
| 0.485661 | 5.19E-29 | 0.812537 | #####    | 0.601677 | 2.54E-47 | 0.722054 | 2.04E-76 | 0.541722 |
| 0.497985 | 1.23E-30 | 0.738991 | 8.71E-82 | 0.623909 | 9.61E-52 | 0.636519 | 2.05E-54 | 0.559076 |
| 0.350389 | 6.17E-15 | 0.574659 | 2.16E-42 | 0.393825 | 8.92E-19 | 0.512407 | 1.27E-32 | 0.270222 |
| 0.513287 | 9.50E-33 | 0.683253 | 1.69E-65 | 0.719153 | 1.55E-75 | 0.692487 | 6.12E-68 | 0.651177 |
| 0.198304 | 1.58E-05 | 0.612773 | 1.75E-49 | 0.290512 | 1.56E-10 | 0.566147 | 6.22E-41 | 0.188141 |
| 0.396262 | 5.21E-19 | 0.565044 | 9.55E-41 | 0.330215 | 2.42E-13 | 0.419648 | 2.41E-21 | 0.316812 |
| 0.196019 | 1.99E-05 | 0.477455 | 5.78E-28 | 0.225433 | 8.56E-07 | 0.225264 | 8.73E-07 | 0.472757 |
| 0.381771 | 1.19E-17 | 0.649701 | 2.41E-57 | 0.405309 | 6.84E-20 | 0.454356 | 3.63E-25 | 0.354219 |
| 0.343742 | 2.13E-14 | 0.662402 | 2.63E-60 | 0.452049 | 6.72E-25 | 0.537602 | 2.47E-36 | 0.372559 |
| 0.174181 | 0.00015  | 0.492243 | 7.17E-30 | 0.09802  | 0.0342   | 0.271038 | 2.63E-09 | 0.102123 |
| 0.525405 | 1.69E-34 | 0.747698 | 1.03E-84 | 0.543295 | 3.24E-37 | 0.639991 | 3.58E-55 | 0.463766 |
| 0.467986 | 8.60E-27 | 0.735281 | 1.42E-80 | 0.49727  | 1.54E-30 | 0.49918  | 8.49E-31 | 0.54816  |
| 0.346389 | 1.31E-14 | 0.605775 | 4.13E-48 | 0.412972 | 1.17E-20 | 0.580044 | 2.44E-43 | 0.439625 |
| 0.660072 | 9.42E-60 | 0.736722 | 4.83E-81 | 0.30206  | 2.62E-11 | 0.50149  | 4.13E-31 | 0.260549 |
| 0.491161 | 9.96E-30 | 0.673245 | 5.93E-63 | 0.278793 | 8.76E-10 | 0.538082 | 2.08E-36 | 0.270651 |
| 0.460442 | 6.96E-26 | 0.707691 | 3.64E-72 | 0.363478 | 4.94E-16 | 0.586566 | 1.66E-44 | 0.294576 |
| 0.301298 | 2.96E-11 | 0.667648 | 1.42E-61 | 0.112547 | 0.01496  | 0.376007 | 3.94E-17 | 0.194818 |
| 0.109925 | 0.01749  | 0.534351 | 7.74E-36 | -0.08607 | 0.06311  | 0.187209 | 4.68E-05 | 0.236973 |
| 0.384143 | 7.19E-18 | 0.646175 | 1.51E-56 | 0.548585 | 4.74E-38 | 0.656322 | 7.18E-59 | 0.436475 |
| -0.33947 | 4.64E-14 | -0.67392 | 4.03E-63 | -0.43611 | 4.20E-23 | -0.54376 | 2.74E-37 | -0.42448 |
| 0.473265 | 1.93E-27 | 0.767489 | 7.78E-92 | 0.564073 | 1.39E-40 | 0.695518 | 9.24E-69 | 0.5469   |
| 0.229463 | 5.37E-07 | 0.439265 | 1.89E-23 | 0.30246  | 2.46E-11 | 0.370865 | 1.13E-16 | 0.309671 |
| 0.518199 | 1.89E-33 | 0.738559 | 1.21E-81 | 0.628613 | 1.00E-52 | 0.67197  | 1.23E-62 | 0.544425 |
| 0.131098 | 0.00454  | 0.509888 | 2.86E-32 | 0.08008  | 0.08387  | 0.206184 | 7.05E-06 | 0.155605 |
| 0.188316 | 4.22E-05 | 0.483985 | 8.54E-29 | 0.302387 | 2.49E-11 | 0.488374 | 2.31E-29 | 0.223311 |
| 0.276817 | 1.16E-09 | 0.75782  | 2.86E-88 | 0.289736 | 1.75E-10 | 0.595915 | 3.13E-46 | 0.306675 |
| 0.437788 | 2.75E-23 | 0.768978 | 2.12E-92 | 0.508002 | 5.24E-32 | 0.569549 | 1.64E-41 | 0.504719 |
| 0.341183 | 3.40E-14 | 0.617856 | 1.67E-50 | 0.293673 | 9.63E-11 | 0.493653 | 4.67E-30 | 0.217708 |
| 0.28852  | 2.10E-10 | 0.590804 | 2.78E-45 | 0.086463 | 0.06191  | 0.27545  | 1.41E-09 | 0.078828 |
| 0.375279 | 4.58E-17 | 0.589002 | 5.96E-45 | 0.333468 | 1.36E-13 | 0.484512 | 7.31E-29 | 0.42011  |
| 0.578979 | 3.77E-43 | 0.77788  | 7.25E-96 | 0.71905  | 1.66E-75 | 0.689506 | 3.85E-67 | 0.629941 |
| 0.205733 | 7.39E-06 | 0.650001 | 2.06E-57 | 0.133753 | 0.00378  | 0.396238 | 5.24E-19 | 0.148938 |
| 0.504063 | 1.84E-31 | 0.711299 | 3.29E-73 | 0.624174 | 8.47E-52 | 0.650897 | 1.29E-57 | 0.589839 |
| 0.474455 | 1.37E-27 | 0.698971 | 1.04E-69 | 0.532208 | 1.63E-35 | 0.597146 | 1.84E-46 | 0.356716 |
| 0.210806 | 4.33E-06 | 0.576368 | 1.09E-42 | 0.345521 | 1.53E-14 | 0.504821 | 1.44E-31 | 0.23844  |
| 0.52239  | 4.67E-34 | 0.845078 | #####    | 0.689624 | 3.58E-67 | 0.7443   | 1.48E-83 | 0.60724  |

|          |          |          |          |          |          |          |          |          |
|----------|----------|----------|----------|----------|----------|----------|----------|----------|
| 0.381776 | 1.19E-17 | 0.69632  | 5.58E-69 | 0.326682 | 4.48E-13 | 0.48176  | 1.65E-28 | 0.354121 |
| 0.360848 | 8.29E-16 | 0.700262 | 4.56E-70 | 0.348395 | 8.98E-15 | 0.362075 | 6.52E-16 | 0.335308 |
| 0.306774 | 1.24E-11 | 0.598994 | 8.24E-47 | 0.297543 | 5.31E-11 | 0.48272  | 1.24E-28 | 0.276996 |
| 0.376297 | 3.71E-17 | 0.715534 | 1.87E-74 | 0.40345  | 1.04E-19 | 0.47432  | 1.43E-27 | 0.452337 |
| -0.18423 | 6.21E-05 | -0.44834 | 1.80E-24 | -0.14702 | 0.00144  | -0.19025 | 3.50E-05 | -0.33503 |
| 0.320006 | 1.40E-12 | 0.529413 | 4.29E-35 | 0.375446 | 4.43E-17 | 0.487576 | 2.93E-29 | 0.32772  |
| 0.285823 | 3.14E-10 | 0.709705 | 9.56E-73 | 0.454551 | 3.44E-25 | 0.644388 | 3.81E-56 | 0.335253 |
| 0.308435 | 9.47E-12 | 0.632143 | 1.79E-53 | 0.338715 | 5.33E-14 | 0.464516 | 2.27E-26 | 0.36256  |
| 0.154206 | 0.00083  | 0.385974 | 4.87E-18 | 0.0599   | 0.19631  | 0.168264 | 0.00026  | 0.092718 |
| 0.264485 | 6.48E-09 | 0.585342 | 2.76E-44 | 0.33233  | 1.67E-13 | 0.520303 | 9.39E-34 | 0.282395 |
| 0.418248 | 3.36E-21 | 0.767277 | 9.35E-92 | 0.5034   | 2.26E-31 | 0.619175 | 9.00E-51 | 0.408555 |
| 0.441861 | 9.69E-24 | 0.589575 | 4.68E-45 | 0.499732 | 7.15E-31 | 0.546715 | 9.38E-38 | 0.435694 |
| 0.219428 | 1.69E-06 | 0.469757 | 5.22E-27 | 0.14011  | 0.00241  | 0.263519 | 7.38E-09 | 0.19149  |
| 0.51578  | 4.20E-33 | 0.84981  | #####    | 0.550428 | 2.40E-38 | 0.683171 | 1.77E-65 | 0.468797 |
| 0.342462 | 2.69E-14 | 0.757278 | 4.48E-88 | 0.376099 | 3.87E-17 | 0.626575 | 2.68E-52 | 0.287345 |
| 0.399735 | 2.41E-19 | 0.64011  | 3.37E-55 | 0.495733 | 2.47E-30 | 0.495796 | 2.42E-30 | 0.408507 |
| 0.325179 | 5.80E-13 | 0.501613 | 3.97E-31 | 0.335359 | 9.74E-14 | 0.340042 | 4.19E-14 | 0.280457 |
| 0.382974 | 9.21E-18 | 0.675845 | 1.32E-63 | 0.460137 | 7.57E-26 | 0.592209 | 1.53E-45 | 0.44145  |
| 0.201213 | 1.18E-05 | 0.457676 | 1.48E-25 | 0.262204 | 8.82E-09 | 0.392851 | 1.10E-18 | 0.277251 |
| 0.318963 | 1.67E-12 | 0.647778 | 6.59E-57 | 0.312577 | 4.82E-12 | 0.590075 | 3.79E-45 | 0.221894 |
| 0.317331 | 2.20E-12 | 0.663394 | 1.52E-60 | 0.285854 | 3.12E-10 | 0.412664 | 1.25E-20 | 0.293348 |
| 0.299432 | 3.96E-11 | 0.613506 | 1.25E-49 | 0.331479 | 1.94E-13 | 0.423857 | 8.73E-22 | 0.332596 |
| 0.197638 | 1.69E-05 | 0.639951 | 3.65E-55 | 0.128458 | 0.00543  | 0.38563  | 5.24E-18 | 0.168752 |
| 0.414327 | 8.49E-21 | 0.654827 | 1.60E-58 | 0.323823 | 7.32E-13 | 0.41742  | 4.09E-21 | 0.319815 |
| 0.498131 | 1.18E-30 | 0.742924 | 4.29E-83 | 0.668253 | 1.01E-61 | 0.681353 | 5.23E-65 | 0.616099 |
| 0.43032  | 1.79E-22 | 0.684542 | 7.81E-66 | 0.576323 | 1.11E-42 | 0.531047 | 2.44E-35 | 0.509384 |
| 0.350815 | 5.70E-15 | 0.638862 | 6.33E-55 | 0.354945 | 2.60E-15 | 0.368106 | 1.97E-16 | 0.378479 |
| 0.333783 | 1.29E-13 | 0.70971  | 9.52E-73 | 0.373731 | 6.29E-17 | 0.495529 | 2.63E-30 | 0.321651 |
| 0.38944  | 2.32E-18 | 0.733539 | 5.17E-80 | 0.354366 | 2.90E-15 | 0.488316 | 2.35E-29 | 0.380204 |
| 0.523395 | 3.33E-34 | 0.674812 | 2.41E-63 | 0.614126 | 9.38E-50 | 0.557674 | 1.61E-39 | 0.574508 |
| 0.247116 | 6.30E-08 | 0.497226 | 1.56E-30 | 0.098051 | 0.03415  | 0.262975 | 7.95E-09 | 0.114373 |
| 0.25601  | 2.01E-08 | 0.53811  | 2.06E-36 | 0.320347 | 1.32E-12 | 0.358288 | 1.36E-15 | 0.269522 |
| 0.42594  | 5.26E-22 | 0.736463 | 5.86E-81 | 0.486181 | 4.45E-29 | 0.729199 | 1.24E-78 | 0.324243 |
| 0.368498 | 1.82E-16 | 0.70748  | 4.18E-72 | 0.551513 | 1.61E-38 | 0.689315 | 4.32E-67 | 0.449146 |
| 0.279411 | 8.01E-10 | 0.564949 | 9.91E-41 | 0.256048 | 2.00E-08 | 0.356172 | 2.05E-15 | 0.315425 |
| 0.3139   | 3.88E-12 | 0.638658 | 7.01E-55 | 0.2109   | 4.28E-06 | 0.46445  | 2.31E-26 | 0.210412 |
| 0.497313 | 1.52E-30 | 0.688165 | 8.72E-67 | 0.271493 | 2.47E-09 | 0.412069 | 1.44E-20 | 0.203894 |
| 0.645298 | 2.38E-56 | 0.704218 | 3.55E-71 | 0.592654 | 1.27E-45 | 0.687983 | 9.75E-67 | 0.55801  |
| 0.166595 | 0.0003   | 0.456222 | 2.19E-25 | 0.389966 | 2.07E-18 | 0.498097 | 1.19E-30 | 0.3006   |
| 0.426103 | 5.05E-22 | 0.49632  | 2.06E-30 | 0.427722 | 3.40E-22 | 0.491587 | 8.75E-30 | 0.285377 |
| 0.459039 | 1.02E-25 | 0.683578 | 1.39E-65 | 0.532821 | 1.32E-35 | 0.649789 | 2.31E-57 | 0.383173 |
| 0.277029 | 1.13E-09 | 0.594739 | 5.20E-46 | 0.265917 | 5.33E-09 | 0.427253 | 3.81E-22 | 0.248071 |
| 0.310548 | 6.72E-12 | 0.500831 | 5.07E-31 | 0.40714  | 4.50E-20 | 0.472821 | 2.19E-27 | 0.368439 |
| 0.463608 | 2.91E-26 | 0.82833  | #####    | 0.685667 | 3.97E-66 | 0.833857 | #####    | 0.598772 |
| 0.518136 | 1.93E-33 | 0.763206 | 3.10E-90 | 0.529845 | 3.70E-35 | 0.562022 | 3.06E-40 | 0.474772 |



|          |          |          |          |          |          |          |          |          |
|----------|----------|----------|----------|----------|----------|----------|----------|----------|
| 0.408875 | 3.02E-20 | 0.665259 | 5.41E-61 | 0.355871 | 2.17E-15 | 0.556116 | 2.89E-39 | 0.334497 |
| 0.563676 | 1.62E-40 | 0.66906  | 6.42E-62 | 0.695419 | 9.83E-69 | 0.666549 | 2.63E-61 | 0.593433 |
| 0.574805 | 2.03E-42 | 0.764788 | 8.02E-91 | 0.717171 | 6.09E-75 | 0.756554 | 8.14E-88 | 0.596349 |
| 0.425366 | 6.05E-22 | 0.604876 | 6.17E-48 | 0.528892 | 5.13E-35 | 0.576645 | 9.71E-43 | 0.450701 |
| 0.602051 | 2.16E-47 | 0.787889 | #####    | 0.682628 | 2.45E-65 | 0.646967 | 1.00E-56 | 0.602936 |
| 0.117906 | 0.01077  | 0.513283 | 9.51E-33 | 0.17429  | 0.00015  | 0.344299 | 1.92E-14 | 0.257376 |
| 0.337407 | 6.75E-14 | 0.625509 | 4.47E-52 | 0.379813 | 1.79E-17 | 0.501396 | 4.25E-31 | 0.554411 |
| 0.476662 | 7.27E-28 | 0.661008 | 5.65E-60 | 0.494091 | 4.08E-30 | 0.501711 | 3.85E-31 | 0.429805 |
| 0.448981 | 1.52E-24 | 0.664733 | 7.25E-61 | 0.556216 | 2.78E-39 | 0.518087 | 1.96E-33 | 0.458077 |
| 0.39939  | 2.60E-19 | 0.749886 | 1.82E-85 | 0.425146 | 6.38E-22 | 0.636455 | 2.12E-54 | 0.385887 |
| 0.345748 | 1.47E-14 | 0.723773 | 6.08E-77 | 0.222308 | 1.22E-06 | 0.337127 | 7.09E-14 | 0.305032 |
| 0.253258 | 2.87E-08 | 0.480706 | 2.24E-28 | 0.320251 | 1.34E-12 | 0.335285 | 9.87E-14 | 0.330348 |
| 0.383105 | 8.96E-18 | 0.668738 | 7.70E-62 | 0.380784 | 1.46E-17 | 0.563757 | 1.57E-40 | 0.359971 |
| 0.226711 | 7.39E-07 | 0.524588 | 2.23E-34 | 0.182414 | 7.35E-05 | 0.327058 | 4.19E-13 | 0.198436 |
| 0.379354 | 1.97E-17 | 0.602871 | 1.50E-47 | 0.406735 | 4.94E-20 | 0.496629 | 1.87E-30 | 0.352723 |
| 0.121487 | 0.00859  | 0.471612 | 3.09E-27 | 0.20406  | 8.80E-06 | 0.319806 | 1.45E-12 | 0.249671 |
| 0.391932 | 1.35E-18 | 0.693687 | 2.90E-68 | 0.514726 | 5.94E-33 | 0.655723 | 9.90E-59 | 0.440447 |
| 0.327107 | 4.16E-13 | 0.685384 | 4.71E-66 | 0.154273 | 0.00082  | 0.469497 | 5.62E-27 | 0.14283  |
| 0.452543 | 5.89E-25 | 0.764002 | 1.57E-90 | 0.558667 | 1.10E-39 | 0.609402 | 8.10E-49 | 0.407562 |
| 0.53536  | 5.44E-36 | 0.660481 | 7.54E-60 | 0.686788 | 2.01E-66 | 0.639675 | 4.20E-55 | 0.520535 |
| 0.517416 | 2.45E-33 | 0.829765 | #####    | 0.456275 | 2.16E-25 | 0.583323 | 6.36E-44 | 0.425836 |
| 0.427412 | 3.67E-22 | 0.808377 | #####    | 0.433769 | 7.57E-23 | 0.555147 | 4.16E-39 | 0.441994 |
| 0.425647 | 5.65E-22 | 0.765966 | 2.91E-91 | 0.597323 | 1.70E-46 | 0.697714 | 2.31E-69 | 0.546812 |
| 0.519822 | 1.10E-33 | 0.792805 | #####    | 0.663304 | 1.60E-60 | 0.701164 | 2.56E-70 | 0.589156 |
| 0.433035 | 9.10E-23 | 0.761075 | 1.88E-89 | 0.508284 | 4.79E-32 | 0.54373  | 2.77E-37 | 0.499147 |
| 0.481798 | 1.63E-28 | 0.690957 | 1.58E-67 | 0.402741 | 1.23E-19 | 0.504835 | 1.44E-31 | 0.393003 |
| 0.401448 | 1.64E-19 | 0.729365 | 1.10E-78 | 0.358744 | 1.25E-15 | 0.461248 | 5.58E-26 | 0.272108 |
| -0.27941 | 8.00E-10 | -0.52258 | 4.39E-34 | -0.34206 | 2.90E-14 | -0.41805 | 3.52E-21 | -0.32139 |
| 0.374873 | 4.98E-17 | 0.690894 | 1.64E-67 | 0.631673 | 2.25E-53 | 0.807493 | #####    | 0.510473 |
| 0.41527  | 6.80E-21 | 0.751303 | 5.84E-86 | 0.632144 | 1.79E-53 | 0.696637 | 4.57E-69 | 0.572614 |
| 0.323753 | 7.41E-13 | 0.516469 | 3.35E-33 | 0.198019 | 1.63E-05 | 0.391674 | 1.43E-18 | 0.133853 |
| 0.53229  | 1.59E-35 | 0.769864 | 9.73E-93 | 0.460413 | 7.02E-26 | 0.522864 | 3.98E-34 | 0.387687 |
| -0.26371 | 7.20E-09 | -0.64963 | 2.51E-57 | -0.28372 | 4.28E-10 | -0.494   | 4.20E-30 | -0.34637 |
| 0.395588 | 6.05E-19 | 0.623087 | 1.42E-51 | 0.427993 | 3.18E-22 | 0.498633 | 1.01E-30 | 0.392713 |
| -0.29532 | 7.48E-11 | -0.55823 | 1.30E-39 | -0.28689 | 2.68E-10 | -0.43234 | 1.08E-22 | -0.33331 |
| 0.476599 | 7.40E-28 | 0.68693  | 1.85E-66 | 0.624754 | 6.42E-52 | 0.662134 | 3.05E-60 | 0.591863 |
| 0.536982 | 3.07E-36 | 0.765095 | 6.16E-91 | 0.618455 | 1.26E-50 | 0.754011 | 6.53E-87 | 0.580754 |
| 0.502128 | 3.38E-31 | 0.721694 | 2.63E-76 | 0.595803 | 3.29E-46 | 0.65698  | 5.04E-59 | 0.537598 |
| 0.412246 | 1.38E-20 | 0.811967 | #####    | 0.491776 | 8.27E-30 | 0.705669 | 1.38E-71 | 0.429829 |
| 0.274532 | 1.61E-09 | 0.583881 | 5.05E-44 | 0.235789 | 2.54E-07 | 0.455392 | 2.74E-25 | 0.205031 |
| 0.417362 | 4.15E-21 | 0.763697 | 2.04E-90 | 0.563102 | 2.02E-40 | 0.708197 | 2.60E-72 | 0.51778  |
| 0.360223 | 9.36E-16 | 0.734029 | 3.60E-80 | 0.449511 | 1.32E-24 | 0.545365 | 1.53E-37 | 0.437861 |
| 0.540044 | 1.04E-36 | 0.740581 | 2.60E-82 | 0.671579 | 1.54E-62 | 0.705065 | 2.04E-71 | 0.557007 |
| 0.463519 | 2.99E-26 | 0.689516 | 3.82E-67 | 0.543131 | 3.44E-37 | 0.593384 | 9.29E-46 | 0.49533  |
| 0.262404 | 8.58E-09 | 0.554812 | 4.71E-39 | 0.236462 | 2.34E-07 | 0.330927 | 2.14E-13 | 0.183847 |

|          |          |          |          |          |          |          |          |          |
|----------|----------|----------|----------|----------|----------|----------|----------|----------|
| 0.379467 | 1.92E-17 | 0.747729 | 1.01E-84 | 0.189616 | 3.72E-05 | 0.362155 | 6.41E-16 | 0.201646 |
| 0.586898 | 1.44E-44 | 0.721901 | 2.27E-76 | 0.65941  | 1.35E-59 | 0.624588 | 6.95E-52 | 0.576203 |
| 0.314036 | 3.79E-12 | 0.642059 | 1.25E-55 | 0.22613  | 7.90E-07 | 0.366391 | 2.77E-16 | 0.296497 |
| 0.338895 | 5.16E-14 | 0.717071 | 6.53E-75 | 0.44736  | 2.32E-24 | 0.535312 | 5.53E-36 | 0.40958  |
| 0.471101 | 3.57E-27 | 0.753953 | 6.85E-87 | 0.569543 | 1.65E-41 | 0.618765 | 1.09E-50 | 0.564406 |
| 0.209293 | 5.08E-06 | 0.542182 | 4.83E-37 | 0.350323 | 6.25E-15 | 0.609996 | 6.19E-49 | 0.31171  |
| 0.218349 | 1.90E-06 | 0.547743 | 6.45E-38 | 0.270002 | 3.04E-09 | 0.421177 | 1.67E-21 | 0.216482 |
| 0.323003 | 8.42E-13 | 0.67834  | 3.09E-64 | 0.41232  | 1.36E-20 | 0.531595 | 2.02E-35 | 0.456685 |
| 0.349972 | 6.68E-15 | 0.698642 | 1.28E-69 | 0.301162 | 3.02E-11 | 0.464284 | 2.42E-26 | 0.256422 |
| 0.52986  | 3.68E-35 | 0.754665 | 3.84E-87 | 0.74623  | 3.28E-84 | 0.764955 | 6.95E-91 | 0.623086 |
| 0.35009  | 6.53E-15 | 0.600831 | 3.69E-47 | 0.492071 | 7.56E-30 | 0.599892 | 5.57E-47 | 0.45701  |
| -0.27328 | 1.92E-09 | -0.58124 | 1.50E-43 | -0.17094 | 0.00021  | -0.42018 | 2.12E-21 | -0.24746 |
| 0.385746 | 5.11E-18 | 0.646075 | 1.60E-56 | 0.305276 | 1.57E-11 | 0.488699 | 2.09E-29 | 0.245347 |
| 0.353129 | 3.67E-15 | 0.632443 | 1.54E-53 | 0.240045 | 1.52E-07 | 0.323262 | 8.06E-13 | 0.19612  |
| 0.454167 | 3.82E-25 | 0.787468 | #####    | 0.454623 | 3.38E-25 | 0.552731 | 1.02E-38 | 0.426331 |
| 0.507544 | 6.07E-32 | 0.772392 | 1.04E-93 | 0.421075 | 1.71E-21 | 0.50147  | 4.15E-31 | 0.362771 |
| 0.415883 | 5.89E-21 | 0.754795 | 3.45E-87 | 0.367466 | 2.24E-16 | 0.564919 | 1.00E-40 | 0.278038 |
| 0.29431  | 8.74E-11 | 0.619745 | 6.89E-51 | 0.164903 | 0.00035  | 0.39436  | 7.93E-19 | 0.175075 |
| 0.233591 | 3.30E-07 | 0.544976 | 1.76E-37 | 0.39585  | 5.71E-19 | 0.565504 | 7.99E-41 | 0.193606 |
| 0.30126  | 2.97E-11 | 0.60674  | 2.68E-48 | 0.343601 | 2.19E-14 | 0.419038 | 2.78E-21 | 0.40116  |
| 0.516555 | 3.25E-33 | 0.78441  | 1.64E-98 | 0.657713 | 3.39E-59 | 0.713076 | 9.95E-74 | 0.588468 |
| 0.409102 | 2.87E-20 | 0.701055 | 2.74E-70 | 0.279712 | 7.67E-10 | 0.427299 | 3.77E-22 | 0.332633 |
| 0.514745 | 5.90E-33 | 0.750918 | 7.95E-86 | 0.551978 | 1.36E-38 | 0.50321  | 2.40E-31 | 0.5412   |
| 0.411859 | 1.51E-20 | 0.860119 | #####    | 0.419997 | 2.21E-21 | 0.620908 | 3.98E-51 | 0.411482 |
| 0.572978 | 4.22E-42 | 0.822193 | #####    | 0.577964 | 5.70E-43 | 0.595804 | 3.29E-46 | 0.590853 |
| 0.231941 | 4.02E-07 | 0.523016 | 3.78E-34 | 0.115757 | 0.01231  | 0.407909 | 3.77E-20 | 0.100762 |
| 0.39005  | 2.03E-18 | 0.621495 | 3.02E-51 | 0.494653 | 3.44E-30 | 0.596197 | 2.77E-46 | 0.38372  |
| 0.272661 | 2.09E-09 | 0.553075 | 9.01E-39 | 0.450154 | 1.11E-24 | 0.574683 | 2.14E-42 | 0.381961 |
| 0.30328  | 2.16E-11 | 0.703886 | 4.40E-71 | 0.270859 | 2.69E-09 | 0.50526  | 1.26E-31 | 0.234062 |
| 0.312397 | 4.97E-12 | 0.520332 | 9.30E-34 | 0.410072 | 2.29E-20 | 0.47744  | 5.80E-28 | 0.366023 |
| 0.487345 | 3.14E-29 | 0.691551 | 1.09E-67 | 0.570538 | 1.11E-41 | 0.608804 | 1.06E-48 | 0.454807 |
| 0.426565 | 4.51E-22 | 0.676082 | 1.15E-63 | 0.366836 | 2.54E-16 | 0.449976 | 1.16E-24 | 0.302236 |
| 0.367864 | 2.07E-16 | 0.488771 | 2.05E-29 | 0.373187 | 7.03E-17 | 0.411249 | 1.74E-20 | 0.278713 |
| 0.265955 | 5.30E-09 | 0.644607 | 3.40E-56 | 0.251597 | 3.56E-08 | 0.40874  | 3.12E-20 | 0.243236 |
| 0.305591 | 1.50E-11 | 0.74406  | 1.78E-83 | 0.327692 | 3.76E-13 | 0.52616  | 1.31E-34 | 0.397998 |
| 0.286712 | 2.75E-10 | 0.571466 | 7.70E-42 | 0.152269 | 0.00096  | 0.351532 | 4.98E-15 | 0.150204 |
| -0.30736 | 1.13E-11 | -0.51896 | 1.47E-33 | -0.29038 | 1.59E-10 | -0.29482 | 8.08E-11 | -0.37584 |
| 0.311722 | 5.55E-12 | 0.522684 | 4.23E-34 | 0.336588 | 7.81E-14 | 0.40012  | 2.21E-19 | 0.366954 |
| -0.42506 | 6.51E-22 | -0.60514 | 5.49E-48 | -0.37756 | 2.86E-17 | -0.53242 | 1.52E-35 | -0.17685 |
| 0.526437 | 1.19E-34 | 0.708782 | 1.77E-72 | 0.560931 | 4.65E-40 | 0.645725 | 1.91E-56 | 0.381688 |
| -0.21491 | 2.78E-06 | -0.49581 | 2.41E-30 | -0.24262 | 1.11E-07 | -0.38798 | 3.17E-18 | -0.32282 |
| 0.40262  | 1.26E-19 | 0.599983 | 5.35E-47 | 0.390991 | 1.65E-18 | 0.403174 | 1.11E-19 | 0.575645 |
| 0.350422 | 6.14E-15 | 0.748305 | 6.38E-85 | 0.314324 | 3.62E-12 | 0.519953 | 1.06E-33 | 0.246105 |
| 0.431933 | 1.20E-22 | 0.536286 | 3.93E-36 | 0.426682 | 4.38E-22 | 0.491892 | 7.98E-30 | 0.311175 |
| 0.451284 | 8.24E-25 | 0.617818 | 1.70E-50 | 0.52694  | 1.00E-34 | 0.623447 | 1.20E-51 | 0.403018 |

|          |          |          |          |          |          |          |          |          |
|----------|----------|----------|----------|----------|----------|----------|----------|----------|
| 0.130692 | 0.00467  | 0.440078 | 1.53E-23 | 0.29892  | 4.29E-11 | 0.35898  | 1.19E-15 | 0.31743  |
| 0.370342 | 1.25E-16 | 0.572573 | 4.96E-42 | 0.362658 | 5.81E-16 | 0.349842 | 6.84E-15 | 0.308247 |
| 0.542748 | 3.94E-37 | 0.613124 | 1.49E-49 | 0.254189 | 2.55E-08 | 0.382988 | 9.18E-18 | 0.277764 |
| 0.386588 | 4.27E-18 | 0.746071 | 3.71E-84 | 0.478124 | 4.76E-28 | 0.590597 | 3.04E-45 | 0.397532 |
| 0.333296 | 1.41E-13 | 0.799104 | #####    | 0.361316 | 7.56E-16 | 0.569329 | 1.79E-41 | 0.375462 |
| 0.357555 | 1.57E-15 | 0.701036 | 2.78E-70 | 0.409747 | 2.47E-20 | 0.484142 | 8.15E-29 | 0.395961 |
| 0.381252 | 1.32E-17 | 0.780923 | 4.35E-97 | 0.373039 | 7.25E-17 | 0.515727 | 4.27E-33 | 0.298236 |
| 0.457371 | 1.61E-25 | 0.758708 | 1.37E-88 | 0.743306 | 3.20E-83 | 0.766823 | 1.39E-91 | 0.695624 |
| 0.439762 | 1.66E-23 | 0.610346 | 5.28E-49 | 0.555115 | 4.21E-39 | 0.523404 | 3.32E-34 | 0.498172 |
| 0.489621 | 1.59E-29 | 0.702932 | 8.18E-71 | 0.389417 | 2.33E-18 | 0.468531 | 7.38E-27 | 0.372901 |
| 0.330011 | 2.51E-13 | 0.675148 | 1.98E-63 | 0.425402 | 5.99E-22 | 0.634863 | 4.67E-54 | 0.371646 |
| 0.336888 | 7.41E-14 | 0.535038 | 6.09E-36 | 0.376254 | 3.75E-17 | 0.455445 | 2.71E-25 | 0.346156 |
| 0.212077 | 3.77E-06 | 0.647632 | 7.11E-57 | 0.247703 | 5.85E-08 | 0.563709 | 1.60E-40 | 0.270209 |
| 0.455103 | 2.97E-25 | 0.709749 | 9.28E-73 | 0.570257 | 1.24E-41 | 0.567363 | 3.87E-41 | 0.461356 |
| 0.377205 | 3.08E-17 | 0.697526 | 2.60E-69 | 0.45425  | 3.73E-25 | 0.507956 | 5.32E-32 | 0.466955 |
| 0.654741 | 1.68E-58 | 0.598971 | 8.32E-47 | 0.368726 | 1.74E-16 | 0.371272 | 1.04E-16 | 0.340868 |
| 0.279599 | 7.79E-10 | 0.639473 | 4.65E-55 | 0.243276 | 1.02E-07 | 0.528954 | 5.03E-35 | 0.203173 |
| 0.418556 | 3.12E-21 | 0.710532 | 5.50E-73 | 0.586668 | 1.59E-44 | 0.709876 | 8.53E-73 | 0.488225 |
| 0.325787 | 5.22E-13 | 0.488364 | 2.32E-29 | 0.346871 | 1.19E-14 | 0.413304 | 1.08E-20 | 0.311484 |
| 0.230319 | 4.86E-07 | 0.532963 | 1.26E-35 | 0.427551 | 3.54E-22 | 0.609357 | 8.26E-49 | 0.314762 |
| 0.375731 | 4.17E-17 | 0.562498 | 2.55E-40 | 0.272496 | 2.14E-09 | 0.385432 | 5.47E-18 | 0.210369 |
| 0.189866 | 3.63E-05 | 0.482214 | 1.44E-28 | 0.138925 | 0.00262  | 0.319665 | 1.48E-12 | 0.160146 |
| 0.400131 | 2.20E-19 | 0.601786 | 2.42E-47 | 0.46843  | 7.59E-27 | 0.542554 | 4.23E-37 | 0.35599  |
| 0.451929 | 6.94E-25 | 0.814619 | #####    | 0.665105 | 5.89E-61 | 0.753538 | 9.60E-87 | 0.536668 |
| 0.403464 | 1.04E-19 | 0.728076 | 2.80E-78 | 0.406642 | 5.05E-20 | 0.530784 | 2.67E-35 | 0.416887 |
| 0.323057 | 8.35E-13 | 0.713253 | 8.83E-74 | 0.375681 | 4.22E-17 | 0.580543 | 1.99E-43 | 0.342986 |
| 0.214093 | 3.04E-06 | 0.526196 | 1.29E-34 | 0.301694 | 2.78E-11 | 0.428536 | 2.78E-22 | 0.283341 |
| 0.230213 | 4.92E-07 | 0.485385 | 5.64E-29 | 0.307202 | 1.16E-11 | 0.360663 | 8.59E-16 | 0.330453 |
| 0.211431 | 4.05E-06 | 0.632145 | 1.79E-53 | 0.305134 | 1.61E-11 | 0.540394 | 9.17E-37 | 0.209116 |
| 0.430879 | 1.56E-22 | 0.609904 | 6.45E-49 | 0.414636 | 7.90E-21 | 0.484012 | 8.47E-29 | 0.254028 |
| 0.312013 | 5.29E-12 | 0.638191 | 8.87E-55 | 0.190336 | 3.47E-05 | 0.34951  | 7.29E-15 | 0.171459 |
| 0.467572 | 9.66E-27 | 0.785957 | 3.74E-99 | 0.417312 | 4.20E-21 | 0.511497 | 1.70E-32 | 0.433087 |
| 0.47532  | 1.07E-27 | 0.473753 | 1.68E-27 | 0.540945 | 7.53E-37 | 0.430878 | 1.56E-22 | 0.497647 |
| 0.454523 | 3.47E-25 | 0.588071 | 8.82E-45 | 0.481669 | 1.69E-28 | 0.462581 | 3.87E-26 | 0.419371 |
| 0.469197 | 6.12E-27 | 0.71655  | 9.34E-75 | 0.598893 | 8.61E-47 | 0.646695 | 1.16E-56 | 0.494127 |
| 0.257864 | 1.57E-08 | 0.589348 | 5.15E-45 | 0.220921 | 1.43E-06 | 0.456732 | 1.91E-25 | 0.228886 |
| 0.374171 | 5.75E-17 | 0.671953 | 1.24E-62 | 0.437915 | 2.66E-23 | 0.657364 | 4.10E-59 | 0.363841 |
| 0.289233 | 1.89E-10 | 0.499048 | 8.85E-31 | 0.27272  | 2.08E-09 | 0.3083   | 9.68E-12 | 0.288387 |
| 0.550255 | 2.56E-38 | 0.784792 | 1.14E-98 | 0.783686 | 3.25E-98 | 0.837214 | #####    | 0.690655 |
| 0.443055 | 7.12E-24 | 0.817905 | #####    | 0.465803 | 1.58E-26 | 0.630615 | 3.78E-53 | 0.472489 |
| 0.628637 | 9.90E-53 | 0.748439 | 5.74E-85 | 0.316794 | 2.40E-12 | 0.447918 | 2.00E-24 | 0.326933 |
| 0.419504 | 2.49E-21 | 0.810039 | #####    | 0.317051 | 2.30E-12 | 0.448989 | 1.51E-24 | 0.329943 |
| 0.346769 | 1.22E-14 | 0.491908 | 7.94E-30 | 0.347336 | 1.09E-14 | 0.434334 | 6.57E-23 | 0.279141 |
| 0.483268 | 1.06E-28 | 0.581787 | 1.20E-43 | 0.490309 | 1.29E-29 | 0.541226 | 6.81E-37 | 0.367488 |
| 0.425671 | 5.61E-22 | 0.767804 | 5.91E-92 | 0.396295 | 5.18E-19 | 0.651256 | 1.07E-57 | 0.304741 |

|          |          |          |          |          |          |          |          |          |
|----------|----------|----------|----------|----------|----------|----------|----------|----------|
| 0.562944 | 2.15E-40 | 0.732383 | 1.21E-79 | 0.73402  | 3.62E-80 | 0.708085 | 2.80E-72 | 0.646836 |
| 0.563321 | 1.86E-40 | 0.761892 | 9.45E-90 | 0.651831 | 7.87E-58 | 0.661384 | 4.60E-60 | 0.584118 |
| 0.580273 | 2.23E-43 | 0.846146 | #####    | 0.708968 | 1.56E-72 | 0.770035 | 8.37E-93 | 0.61799  |
| 0.371962 | 9.03E-17 | 0.393493 | 9.59E-19 | 0.449783 | 1.23E-24 | 0.359767 | 1.02E-15 | 0.388525 |
| 0.550452 | 2.38E-38 | 0.860359 | #####    | 0.746092 | 3.65E-84 | 0.781001 | 4.05E-97 | 0.677818 |
| 0.37937  | 1.96E-17 | 0.727717 | 3.63E-78 | 0.283949 | 4.14E-10 | 0.456426 | 2.08E-25 | 0.263278 |
| 0.519838 | 1.10E-33 | 0.778886 | 2.87E-96 | 0.603787 | 1.00E-47 | 0.726449 | 9.03E-78 | 0.540631 |
| 0.311567 | 5.69E-12 | 0.569808 | 1.48E-41 | 0.259218 | 1.31E-08 | 0.341552 | 3.18E-14 | 0.222558 |
| 0.529219 | 4.59E-35 | 0.881821 | #####    | 0.65628  | 7.34E-59 | 0.734838 | 1.97E-80 | 0.62002  |
| 0.465058 | 1.95E-26 | 0.788681 | #####    | 0.556861 | 2.18E-39 | 0.686432 | 2.50E-66 | 0.491735 |
| 0.347748 | 1.01E-14 | 0.560202 | 6.14E-40 | 0.318279 | 1.87E-12 | 0.314607 | 3.45E-12 | 0.347621 |
| 0.47371  | 1.70E-27 | 0.785959 | 3.74E-99 | 0.563219 | 1.93E-40 | 0.620727 | 4.34E-51 | 0.505702 |
| 0.480243 | 2.57E-28 | 0.860394 | #####    | 0.541917 | 5.32E-37 | 0.799416 | #####    | 0.416405 |
| 0.488333 | 2.34E-29 | 0.68732  | 1.46E-66 | 0.614598 | 7.55E-50 | 0.678056 | 3.65E-64 | 0.52537  |
| -0.30279 | 2.34E-11 | -0.64571 | 1.93E-56 | -0.20753 | 6.12E-06 | -0.45772 | 1.46E-25 | -0.20343 |
| 0.361634 | 7.10E-16 | 0.676827 | 7.48E-64 | 0.506453 | 8.60E-32 | 0.578458 | 4.66E-43 | 0.458251 |
| 0.445129 | 4.16E-24 | 0.762504 | 5.63E-90 | 0.423464 | 9.60E-22 | 0.689442 | 4.00E-67 | 0.396648 |
| 0.356269 | 2.01E-15 | 0.756746 | 6.95E-88 | 0.409208 | 2.80E-20 | 0.701743 | 1.76E-70 | 0.355554 |
| 0.38445  | 6.74E-18 | 0.566024 | 6.53E-41 | 0.465732 | 1.62E-26 | 0.454903 | 3.13E-25 | 0.487235 |
| 0.288349 | 2.15E-10 | 0.746965 | 1.84E-84 | 0.155541 | 0.00074  | 0.47661  | 7.38E-28 | 0.200497 |
| 0.265473 | 5.66E-09 | 0.536616 | 3.50E-36 | 0.250311 | 4.20E-08 | 0.429606 | 2.14E-22 | 0.15987  |
| 0.539842 | 1.12E-36 | 0.702524 | 1.06E-70 | 0.475823 | 9.26E-28 | 0.514631 | 6.12E-33 | 0.481559 |
| 0.288635 | 2.06E-10 | 0.536108 | 4.18E-36 | 0.309737 | 7.67E-12 | 0.441055 | 1.19E-23 | 0.261115 |
| 0.325286 | 5.69E-13 | 0.59491  | 4.83E-46 | 0.391573 | 1.46E-18 | 0.438628 | 2.22E-23 | 0.316441 |
| 0.221824 | 1.29E-06 | 0.615591 | 4.77E-50 | 0.441267 | 1.13E-23 | 0.622458 | 1.91E-51 | 0.417566 |
| 0.257457 | 1.66E-08 | 0.546899 | 8.77E-38 | 0.27195  | 2.31E-09 | 0.494993 | 3.10E-30 | 0.2154   |
| 0.35609  | 2.09E-15 | 0.596004 | 3.01E-46 | 0.261073 | 1.03E-08 | 0.333294 | 1.41E-13 | 0.183788 |
| 0.359687 | 1.04E-15 | 0.589848 | 4.17E-45 | 0.321255 | 1.13E-12 | 0.366663 | 2.63E-16 | 0.328013 |
| 0.360794 | 8.37E-16 | 0.776506 | 2.54E-95 | 0.431928 | 1.20E-22 | 0.674171 | 3.48E-63 | 0.400596 |
| 0.500888 | 4.98E-31 | 0.788484 | #####    | 0.469285 | 5.97E-27 | 0.575758 | 1.39E-42 | 0.353813 |
| 0.379923 | 1.75E-17 | 0.655533 | 1.10E-58 | 0.563375 | 1.82E-40 | 0.610165 | 5.73E-49 | 0.550271 |
| 0.522931 | 3.89E-34 | 0.813589 | #####    | 0.652814 | 4.67E-58 | 0.691834 | 9.18E-68 | 0.641171 |
| -0.09635 | 0.0374   | -0.44654 | 2.87E-24 | -0.28313 | 4.66E-10 | -0.41928 | 2.63E-21 | -0.28241 |
| 0.414797 | 7.60E-21 | 0.68936  | 4.20E-67 | 0.222862 | 1.15E-06 | 0.330746 | 2.20E-13 | 0.229343 |
| 0.304291 | 1.84E-11 | 0.603873 | 9.64E-48 | 0.174114 | 0.00016  | 0.456765 | 1.89E-25 | 0.087776 |
| 0.233828 | 3.21E-07 | 0.426944 | 4.11E-22 | 0.277497 | 1.05E-09 | 0.296324 | 6.41E-11 | 0.278154 |
| 0.369419 | 1.51E-16 | 0.587856 | 9.65E-45 | 0.392281 | 1.25E-18 | 0.461576 | 5.10E-26 | 0.326142 |
| 0.534803 | 6.61E-36 | 0.741884 | 9.57E-83 | 0.708478 | 2.16E-72 | 0.699816 | 6.07E-70 | 0.629659 |
| 0.452133 | 6.57E-25 | 0.639025 | 5.83E-55 | 0.550295 | 2.52E-38 | 0.566777 | 4.87E-41 | 0.512831 |
| 0.207043 | 6.45E-06 | 0.687077 | 1.69E-66 | 0.192053 | 2.94E-05 | 0.530054 | 3.44E-35 | 0.370071 |
| 0.486845 | 3.65E-29 | 0.854567 | #####    | 0.605435 | 4.81E-48 | 0.760257 | 3.75E-89 | 0.519839 |
| 0.445198 | 4.08E-24 | 0.694849 | 1.41E-68 | 0.502832 | 2.71E-31 | 0.578313 | 4.94E-43 | 0.446665 |
| 0.592471 | 1.37E-45 | 0.790397 | #####    | 0.824216 | #####    | 0.780346 | 7.45E-97 | 0.696065 |
| 0.446789 | 2.70E-24 | 0.762646 | 4.99E-90 | 0.549972 | 2.84E-38 | 0.70635  | 8.80E-72 | 0.441081 |
| 0.373968 | 6.00E-17 | 0.622016 | 2.36E-51 | 0.382183 | 1.09E-17 | 0.517414 | 2.45E-33 | 0.29058  |

|          |          |          |          |          |          |          |          |          |
|----------|----------|----------|----------|----------|----------|----------|----------|----------|
| 0.371574 | 9.77E-17 | 0.566058 | 6.44E-41 | 0.377963 | 2.63E-17 | 0.57733  | 7.36E-43 | 0.355315 |
| -0.22619 | 7.85E-07 | -0.62857 | 1.02E-52 | -0.46662 | 1.26E-26 | -0.55804 | 1.39E-39 | -0.4546  |
| 0.029265 | 0.52814  | -0.12175 | 0.00844  | 0.246042 | 7.21E-08 | 0.260366 | 1.13E-08 | 0.131    |
| -0.07823 | 0.09127  | -0.10116 | 0.02882  | 0.033059 | 0.47604  | 0.168384 | 0.00026  | 0.020493 |
| -0.1984  | 1.57E-05 | -0.17821 | 0.00011  | 0.069463 | 0.1339   | 0.146041 | 0.00155  | 0.025694 |
| -0.2662  | 5.13E-09 | -0.18826 | 4.24E-05 | 0.044336 | 0.33907  | 0.162019 | 0.00044  | -0.02598 |
| -0.20135 | 1.16E-05 | -0.1878  | 4.43E-05 | 0.034747 | 0.4538   | 0.155754 | 0.00073  | -0.02016 |
| 0.184898 | 5.83E-05 | -0.0609  | 0.18896  | 0.186937 | 4.81E-05 | -0.04999 | 0.28104  | 0.121531 |
| -0.22734 | 6.88E-07 | -0.21741 | 2.11E-06 | 0.090575 | 0.05045  | 0.161817 | 0.00045  | 0.044779 |
| -0.20475 | 8.19E-06 | -0.10841 | 0.0191   | 0.082442 | 0.0751   | 0.181403 | 8.07E-05 | 0.021826 |
| 0.021887 | 0.63709  | 0.108445 | 0.01907  | -0.23325 | 3.44E-07 | -0.21919 | 1.73E-06 | -0.1002  |
| 0.220992 | 1.42E-06 | 0.058896 | 0.20392  | 0.234214 | 3.07E-07 | 0.084427 | 0.06833  | 0.132083 |
| -0.22868 | 5.88E-07 | -0.15195 | 0.00099  | 0.095294 | 0.03954  | 0.186892 | 4.83E-05 | 0.023868 |
| -0.28379 | 4.23E-10 | -0.21573 | 2.54E-06 | -0.03797 | 0.41294  | -0.01554 | 0.73773  | -0.03894 |
| 0.487607 | 2.91E-29 | 0.473738 | 1.68E-27 | 0.37921  | 2.03E-17 | 0.32192  | 1.01E-12 | 0.315303 |
| -0.14444 | 0.00175  | -0.19294 | 2.69E-05 | -0.06298 | 0.17423  | -0.04206 | 0.36446  | -0.00509 |
| -0.12873 | 0.00534  | -0.07276 | 0.11638  | 0.136982 | 0.00301  | 0.128525 | 0.00541  | 0.092484 |
| -0.23766 | 2.03E-07 | -0.17992 | 9.24E-05 | -0.06795 | 0.14262  | 0.03995  | 0.38904  | -0.14228 |
| 0.102705 | 0.02646  | -0.00124 | 0.97876  | 0.190008 | 3.58E-05 | 0.222199 | 1.24E-06 | 0.113662 |
| -0.29263 | 1.13E-10 | -0.23917 | 1.69E-07 | -0.11657 | 0.01171  | -0.00321 | 0.94476  | -0.1949  |
| -0.08438 | 0.06847  | -0.04618 | 0.31931  | -0.04581 | 0.32324  | 0.011532 | 0.80371  | -0.0524  |
| -0.26981 | 3.12E-09 | -0.21282 | 3.48E-06 | -0.13097 | 0.00458  | -0.00866 | 0.85199  | -0.18386 |
| -0.13985 | 0.00245  | -0.31732 | 2.20E-12 | 0.122899 | 0.00784  | -0.02345 | 0.61324  | 0.036542 |
| 0.243875 | 9.46E-08 | 0.185424 | 5.55E-05 | 0.170525 | 0.00021  | 0.064178 | 0.16617  | 0.203481 |
| 0.079067 | 0.08787  | 0.068533 | 0.1392   | -0.17323 | 0.00017  | -0.14819 | 0.00132  | -0.0837  |
| -0.12236 | 0.00812  | -0.02615 | 0.57296  | -0.09469 | 0.04081  | -0.0133  | 0.7744   | -0.04677 |
| 0.026405 | 0.56923  | -0.01962 | 0.67233  | 0.266089 | 5.21E-09 | 0.252174 | 3.31E-08 | 0.167008 |
| -0.28325 | 4.58E-10 | -0.16077 | 0.00049  | -0.16102 | 0.00048  | -0.05349 | 0.24867  | -0.08869 |
| -0.03846 | 0.40696  | -0.05477 | 0.23752  | 0.220438 | 1.51E-06 | 0.164878 | 0.00035  | 0.185801 |
| -0.28539 | 3.34E-10 | -0.33432 | 1.17E-13 | -0.17521 | 0.00014  | -0.11932 | 0.00986  | -0.17387 |
| -0.10312 | 0.02586  | -0.10344 | 0.02539  | 0.158264 | 0.0006   | 0.174915 | 0.00015  | 0.137166 |
| -0.28944 | 1.83E-10 | -0.27622 | 1.27E-09 | -0.07836 | 0.09074  | -0.04453 | 0.33691  | -0.10706 |
| -0.08323 | 0.07234  | -0.2024  | 1.04E-05 | 0.057577 | 0.21426  | 0.033147 | 0.47486  | 0.016548 |
| -0.16181 | 0.00045  | -0.12016 | 0.00934  | 0.055008 | 0.23544  | 0.050287 | 0.27815  | 0.079949 |
| -0.35654 | 1.91E-15 | -0.23091 | 4.54E-07 | -0.17294 | 0.00017  | -0.05475 | 0.23766  | -0.15576 |
| -0.14631 | 0.00152  | -0.15245 | 0.00095  | 0.01116  | 0.80992  | 0.024037 | 0.60436  | 0.071903 |
| -0.19903 | 1.47E-05 | -0.18671 | 4.91E-05 | -0.02495 | 0.59074  | 0.015192 | 0.74333  | -0.03426 |
| -0.1412  | 0.00222  | -0.27443 | 1.63E-09 | 0.101383 | 0.02848  | -0.13116 | 0.00452  | 0.081565 |
| -0.06757 | 0.14483  | -0.09522 | 0.03969  | -0.01061 | 0.8192   | -0.04308 | 0.35297  | 0.038219 |
| -0.19266 | 2.77E-05 | -0.12687 | 0.00604  | -0.01595 | 0.73094  | -0.05904 | 0.20279  | 0.089969 |
| -0.02801 | 0.54597  | -0.00567 | 0.90271  | 0.069454 | 0.13395  | 0.112035 | 0.01542  | 0.082877 |
| -0.27105 | 2.62E-09 | -0.19674 | 1.85E-05 | -0.03705 | 0.42443  | 0.11704  | 0.01137  | -0.07872 |
| -0.20313 | 9.69E-06 | -0.0812  | 0.07963  | -0.07473 | 0.10678  | 0.075635 | 0.10259  | 0.07313  |
| 0.080772 | 0.08122  | -0.03832 | 0.40873  | -0.11365 | 0.01399  | -0.20008 | 1.32E-05 | -0.03464 |
| -0.16657 | 0.0003   | -0.0928  | 0.04503  | -0.01465 | 0.75224  | 0.083158 | 0.0726   | 0.003707 |

|          |          |          |          |          |          |          |          |          |
|----------|----------|----------|----------|----------|----------|----------|----------|----------|
| -0.20436 | 8.53E-06 | -0.27901 | 8.48E-10 | -0.0757  | 0.10229  | -0.043   | 0.35388  | -0.14156 |
| -0.30206 | 2.62E-11 | -0.24362 | 9.76E-08 | -0.29436 | 8.68E-11 | -0.18965 | 3.71E-05 | -0.27183 |
| -0.23337 | 3.39E-07 | -0.1903  | 3.48E-05 | 0.039834 | 0.39042  | 0.076258 | 0.09978  | 0.01217  |
| -0.17075 | 0.00021  | -0.18167 | 7.87E-05 | 0.063797 | 0.16871  | 0.06453  | 0.16386  | -0.01809 |
| -0.14597 | 0.00156  | -0.22247 | 1.20E-06 | 0.062018 | 0.18092  | 0.061287 | 0.18613  | 0.003085 |
| 0.31213  | 5.19E-12 | 0.174455 | 0.00015  | 0.144738 | 0.00171  | 0.043426 | 0.34909  | 0.067254 |
| -0.04372 | 0.34587  | -0.21554 | 2.59E-06 | -0.10846 | 0.01905  | -0.34515 | 1.64E-14 | -0.05293 |
| 0.086225 | 0.06263  | 0.112329 | 0.01516  | -0.02964 | 0.52285  | -0.17524 | 0.00014  | 0.003552 |
| -0.16329 | 0.0004   | -0.20539 | 7.66E-06 | 0.254643 | 2.40E-08 | 0.149086 | 0.00123  | 0.19192  |
| 0.228499 | 6.01E-07 | 0.328111 | 3.49E-13 | 0.179053 | 0.0001   | 0.156114 | 0.00071  | 0.131137 |
| -0.09324 | 0.04402  | -0.14108 | 0.00224  | 0.200862 | 1.22E-05 | 0.114885 | 0.01298  | 0.186993 |
| -0.06638 | 0.15205  | 0.015527 | 0.73788  | 0.071637 | 0.12212  | 0.124449 | 0.00709  | 0.108868 |
| -0.19507 | 2.19E-05 | -0.17643 | 0.00013  | 0.121043 | 0.00883  | 0.189355 | 3.82E-05 | 0.053806 |
| 0.342221 | 2.82E-14 | 0.108167 | 0.01938  | 0.292326 | 1.18E-10 | 0.135011 | 0.00346  | 0.139361 |
| -0.05319 | 0.25129  | 0.004695 | 0.91941  | 0.181608 | 7.92E-05 | 0.220927 | 1.43E-06 | 0.051006 |
| -0.28784 | 2.33E-10 | -0.19109 | 3.23E-05 | 0.0097   | 0.83439  | 0.104578 | 0.02382  | -0.01942 |
| -0.16614 | 0.00031  | -0.1827  | 7.15E-05 | 0.027851 | 0.54826  | 0.087897 | 0.05769  | -0.06904 |
| 0.065738 | 0.15609  | 0.047751 | 0.30314  | 0.233041 | 3.53E-07 | 0.171991 | 0.00019  | 0.109453 |
| -0.04846 | 0.29597  | 0.004767 | 0.91816  | -0.16626 | 0.00031  | -0.254   | 2.61E-08 | -0.15615 |
| 0.061466 | 0.18484  | -0.07669 | 0.09788  | 0.121382 | 0.00864  | 0.097439 | 0.03529  | 0.078022 |
| -0.11712 | 0.01131  | -0.09111 | 0.04909  | 0.066069 | 0.15401  | 0.146243 | 0.00153  | 0.056155 |
| -0.12333 | 0.00762  | -0.12283 | 0.00788  | -0.17709 | 0.00012  | 0.024204 | 0.60185  | -0.23238 |
| 0.044982 | 0.33207  | -0.01826 | 0.69395  | 0.254762 | 2.36E-08 | 0.178923 | 0.0001   | 0.283795 |
| 0.013854 | 0.76525  | -0.10519 | 0.023    | 0.13999  | 0.00243  | 0.189699 | 3.69E-05 | 0.068546 |
| -0.1245  | 0.00707  | -0.10415 | 0.0244   | 0.188567 | 4.12E-05 | 0.184027 | 6.32E-05 | 0.178851 |
| -0.20239 | 1.04E-05 | -0.15241 | 0.00095  | -0.01786 | 0.70031  | 0.018125 | 0.69605  | 0.080028 |
| -0.24976 | 4.51E-08 | -0.15003 | 0.00115  | 0.007231 | 0.87616  | 0.134092 | 0.00369  | -0.04168 |
| -0.12838 | 0.00546  | -0.0333  | 0.47288  | 0.097432 | 0.0353   | 0.035882 | 0.43917  | 0.173546 |
| 0.049012 | 0.29053  | -0.15679 | 0.00067  | 0.005153 | 0.91156  | 0.073152 | 0.1144   | -0.07015 |
| 0.248571 | 5.24E-08 | 0.227751 | 6.56E-07 | 0.013515 | 0.77083  | 0.072075 | 0.11985  | 0.003378 |
| -0.23362 | 3.29E-07 | -0.16749 | 0.00028  | 0.040296 | 0.38494  | 0.090933 | 0.04954  | -0.01006 |
| -0.02486 | 0.5921   | 0.029425 | 0.52588  | 0.186565 | 4.98E-05 | 0.203448 | 9.37E-06 | 0.18303  |
| 0.068558 | 0.13906  | -0.0437  | 0.34604  | -0.2114  | 4.06E-06 | -0.24895 | 4.99E-08 | -0.09332 |
| -0.11253 | 0.01497  | -0.14748 | 0.00139  | 0.166484 | 0.0003   | 0.262633 | 8.32E-09 | 0.037016 |
| -0.14992 | 0.00116  | -0.03405 | 0.46285  | -0.01731 | 0.70905  | 0.074242 | 0.10909  | -0.09275 |
| -0.25234 | 3.23E-08 | -0.21799 | 1.98E-06 | -0.05038 | 0.27728  | 0.065419 | 0.15812  | -0.10858 |
| -0.15954 | 0.00054  | -0.14042 | 0.00235  | 0.052445 | 0.25802  | 0.149013 | 0.00124  | 0.009047 |
| 0.320782 | 1.23E-12 | 0.259386 | 1.29E-08 | 0.083773 | 0.0705   | 0.011245 | 0.80849  | -0.00833 |
| -0.05216 | 0.26065  | 0.142791 | 0.00198  | 0.246407 | 6.89E-08 | 0.343228 | 2.34E-14 | 0.229537 |
| -0.11543 | 0.01255  | -0.25474 | 2.37E-08 | 0.039684 | 0.39221  | 0.025429 | 0.58359  | 0.042271 |
| -0.22893 | 5.72E-07 | -0.14597 | 0.00156  | -0.07896 | 0.08831  | -0.00515 | 0.91168  | -0.05783 |
| 0.030592 | 0.50959  | -0.00554 | 0.90494  | -0.10104 | 0.02901  | -0.26653 | 4.90E-09 | -0.12543 |
| 0.323534 | 7.69E-13 | 0.161184 | 0.00047  | 0.095199 | 0.03974  | -0.05461 | 0.23886  | 0.047415 |
| -0.34028 | 4.01E-14 | -0.22969 | 5.23E-07 | -0.20081 | 1.23E-05 | 0.008771 | 0.85006  | -0.23558 |
| -0.03022 | 0.51476  | 0.007135 | 0.87779  | 0.196123 | 1.97E-05 | 0.225636 | 8.37E-07 | 0.151078 |

|          |          |          |          |          |          |          |          |          |
|----------|----------|----------|----------|----------|----------|----------|----------|----------|
| -0.19037 | 3.46E-05 | -0.10821 | 0.01933  | -0.14731 | 0.00141  | -0.03228 | 0.48645  | -0.09955 |
| -0.03699 | 0.42517  | -0.11076 | 0.01664  | 0.131656 | 0.00437  | 0.1725   | 0.00018  | 0.102231 |
| -0.17704 | 0.00012  | -0.12678 | 0.00608  | 0.024837 | 0.59239  | 0.094821 | 0.04054  | -0.02209 |
| -0.23993 | 1.54E-07 | -0.15101 | 0.00106  | 0.071061 | 0.12516  | 0.183479 | 6.65E-05 | 0.023085 |
| -0.26808 | 3.96E-09 | -0.17746 | 0.00012  | -0.03368 | 0.46773  | -0.0498  | 0.28281  | 0.021939 |
| 0.024829 | 0.59251  | -0.01672 | 0.71854  | 0.200103 | 1.32E-05 | 0.174334 | 0.00015  | 0.178201 |
| -0.21334 | 3.29E-06 | -0.14958 | 0.00119  | 0.06925  | 0.1351   | 0.159053 | 0.00056  | 0.059353 |
| -0.02577 | 0.57853  | -0.23775 | 2.01E-07 | 0.110812 | 0.01659  | 0.05343  | 0.24918  | 0.049711 |
| -0.20559 | 7.51E-06 | -0.34383 | 2.10E-14 | 0.036114 | 0.43622  | -0.11301 | 0.01454  | 0.039573 |
| 0.235267 | 2.71E-07 | 0.077499 | 0.09437  | 0.005196 | 0.91084  | -0.06033 | 0.19315  | 0.02656  |
| -0.17777 | 0.00011  | -0.00458 | 0.92143  | 0.004516 | 0.92246  | 0.152409 | 0.00095  | 0.042712 |
| 0.078678 | 0.08945  | 0.024991 | 0.5901   | 0.255225 | 2.22E-08 | 0.228614 | 5.93E-07 | 0.174269 |
| -0.02141 | 0.64441  | -0.22576 | 8.25E-07 | 0.032187 | 0.48775  | 0.000843 | 0.9855   | -0.02363 |
| 0.347149 | 1.13E-14 | 0.242628 | 1.10E-07 | 0.202615 | 1.02E-05 | 0.067088 | 0.14775  | 0.169741 |
| 0.005443 | 0.90661  | 0.021851 | 0.63764  | 0.236079 | 2.45E-07 | 0.182796 | 7.09E-05 | 0.258546 |
| -0.01262 | 0.7857   | -0.00491 | 0.91579  | 0.239946 | 1.54E-07 | 0.223952 | 1.01E-06 | 0.104713 |
| 0.040701 | 0.38018  | 0.053385 | 0.24957  | 0.203792 | 9.04E-06 | 0.229458 | 5.38E-07 | 0.223466 |
| -0.08106 | 0.08013  | -0.03753 | 0.4184   | 0.163503 | 0.00039  | 0.165712 | 0.00032  | 0.149468 |
| -0.26812 | 3.94E-09 | -0.19738 | 1.74E-05 | -0.10559 | 0.02248  | -0.14743 | 0.0014   | -0.04969 |
| -0.25625 | 1.95E-08 | -0.15811 | 0.00061  | -0.15014 | 0.00114  | -0.14637 | 0.00152  | -0.09296 |
| -0.1218  | 0.00842  | -0.09046 | 0.05075  | 0.134372 | 0.00362  | 0.149114 | 0.00123  | 0.122497 |
| 0.187449 | 4.58E-05 | 0.069541 | 0.13346  | -0.08522 | 0.06576  | -0.11455 | 0.01325  | -0.02704 |
| -0.0298  | 0.52064  | -0.11625 | 0.01194  | -0.12666 | 0.00613  | -0.2182  | 1.94E-06 | -0.09021 |
| -0.05119 | 0.26959  | -0.02704 | 0.55991  | 0.137779 | 0.00285  | 0.049189 | 0.28879  | 0.101108 |
| -0.3732  | 7.01E-17 | -0.30204 | 2.63E-11 | -0.22516 | 8.84E-07 | -0.09875 | 0.03288  | -0.25312 |
| -0.09886 | 0.03269  | -0.06647 | 0.1515   | 0.038427 | 0.40739  | 0.115833 | 0.01225  | 0.018328 |
| -0.24011 | 1.50E-07 | -0.14707 | 0.00144  | 0.005552 | 0.90475  | 0.161241 | 0.00047  | -0.0382  |
| -0.17728 | 0.00012  | -0.13021 | 0.00483  | 0.059196 | 0.20163  | 0.187512 | 4.55E-05 | -0.02477 |
| 0.204603 | 8.32E-06 | 0.278824 | 8.72E-10 | 0.06773  | 0.1439   | -0.00419 | 0.92798  | 0.01209  |
| 0.079188 | 0.08739  | -0.06333 | 0.17183  | 0.36097  | 8.09E-16 | 0.271704 | 2.39E-09 | 0.162039 |
| -0.22667 | 7.42E-07 | -0.16767 | 0.00027  | -0.1011  | 0.02892  | 0.040879 | 0.3781   | -0.1383  |
| -0.09147 | 0.0482   | -0.25341 | 2.82E-08 | -0.35787 | 1.48E-15 | -0.43223 | 1.11E-22 | -0.28788 |
| 0.031012 | 0.50379  | -0.26491 | 6.11E-09 | -0.1991  | 1.46E-05 | -0.39728 | 4.16E-19 | -0.20047 |
| -0.22133 | 1.36E-06 | -0.18997 | 3.60E-05 | -0.08008 | 0.08388  | 0.05977  | 0.19729  | -0.08119 |
| 0.104815 | 0.0235   | -0.06876 | 0.13791  | -0.09023 | 0.05135  | -0.22921 | 5.53E-07 | -0.02143 |
| 0.029971 | 0.51822  | 0.057999 | 0.21091  | -0.31516 | 3.15E-12 | -0.31727 | 2.22E-12 | -0.2115  |
| -0.05153 | 0.26645  | 0.078605 | 0.08974  | 0.158762 | 0.00057  | 0.226497 | 7.58E-07 | 0.158832 |
| -0.03559 | 0.44294  | -0.18995 | 3.60E-05 | 0.164604 | 0.00035  | 0.066454 | 0.15163  | 0.132723 |
| -0.17656 | 0.00013  | -0.13544 | 0.00336  | 0.156498 | 0.00069  | 0.198856 | 1.50E-05 | 0.108985 |
| -0.09046 | 0.05075  | -0.07537 | 0.10378  | 0.138226 | 0.00276  | 0.130725 | 0.00466  | 0.114288 |
| -0.18586 | 5.32E-05 | -0.15321 | 0.00089  | 0.107502 | 0.02014  | 0.136677 | 0.00308  | 0.083448 |
| -0.18657 | 4.98E-05 | -0.08702 | 0.06025  | -0.13874 | 0.00266  | -0.06241 | 0.17815  | -0.0969  |
| -0.01492 | 0.7478   | -0.18762 | 4.50E-05 | -0.11379 | 0.01388  | -0.2516  | 3.56E-08 | -0.14532 |
| -0.35206 | 4.50E-15 | -0.30333 | 2.14E-11 | -0.0896  | 0.05299  | -0.07386 | 0.11094  | -0.11634 |
| 0.089421 | 0.05347  | 0.074614 | 0.10732  | 0.33005  | 2.49E-13 | 0.357706 | 1.53E-15 | 0.251502 |

|          |          |          |          |          |          |          |          |          |
|----------|----------|----------|----------|----------|----------|----------|----------|----------|
| 0.128835 | 0.0053   | 0.123056 | 0.00776  | 0.015639 | 0.73607  | -0.07654 | 0.09852  | 0.034729 |
| -0.08751 | 0.05881  | -0.00078 | 0.9865   | 0.007549 | 0.87076  | 0.090204 | 0.05141  | -0.02557 |
| -0.05582 | 0.22857  | -0.04455 | 0.33672  | 0.190133 | 3.54E-05 | 0.153158 | 0.0009   | 0.192617 |
| 0.162223 | 0.00043  | 0.216693 | 2.28E-06 | 0.404098 | 9.01E-20 | 0.404575 | 8.09E-20 | 0.323304 |
| -0.07542 | 0.10359  | -0.03281 | 0.47941  | 0.112885 | 0.01466  | 0.17687  | 0.00012  | 0.079302 |
| 0.212646 | 3.55E-06 | 0.101242 | 0.0287   | -0.01125 | 0.8084   | -0.12837 | 0.00547  | -0.01598 |
| -0.18404 | 6.32E-05 | -0.12924 | 0.00515  | -0.11658 | 0.0117   | -0.03845 | 0.40709  | -0.10855 |
| -0.13502 | 0.00346  | -0.0579  | 0.21172  | 0.095208 | 0.03972  | 0.212769 | 3.50E-06 | 0.045906 |
| 0.071699 | 0.1218   | -0.02507 | 0.5889   | 0.257015 | 1.76E-08 | 0.303836 | 1.98E-11 | 0.185316 |
| 0.177345 | 0.00012  | 0.02947  | 0.52524  | -0.05661 | 0.22206  | -0.15083 | 0.00108  | -0.03334 |
| -0.1201  | 0.00938  | -0.09669 | 0.03673  | -0.06956 | 0.13337  | -0.01721 | 0.71074  | -0.06262 |
| -0.01794 | 0.69898  | 0.058422 | 0.20759  | 0.194174 | 2.39E-05 | 0.167558 | 0.00028  | 0.24097  |
| -0.2267  | 7.40E-07 | -0.13629 | 0.00317  | -0.04286 | 0.35544  | -0.01087 | 0.81472  | -0.01145 |
| -0.02328 | 0.61575  | -0.05921 | 0.20155  | 0.067212 | 0.147    | 0.069827 | 0.13187  | -0.01319 |
| -0.06132 | 0.18592  | 0.068359 | 0.14021  | 0.120309 | 0.00926  | 0.12282  | 0.00788  | 0.23342  |
| -0.02192 | 0.63666  | 0.047456 | 0.30614  | -0.20305 | 9.76E-06 | -0.11069 | 0.01671  | -0.1271  |
| -0.06574 | 0.15609  | -0.13821 | 0.00276  | 0.020607 | 0.65691  | 0.008357 | 0.85706  | 0.039545 |
| -0.24254 | 1.12E-07 | -0.17889 | 0.0001   | 0.061399 | 0.18532  | 0.146249 | 0.00153  | -0.00622 |
| -0.03527 | 0.44704  | -0.17005 | 0.00022  | 0.121724 | 0.00846  | 0.044457 | 0.33775  | 0.142857 |
| -0.24328 | 1.02E-07 | -0.15208 | 0.00098  | -0.1352  | 0.00342  | -0.0263  | 0.57074  | -0.09438 |
| -0.03788 | 0.41406  | 0.070968 | 0.12566  | 0.094134 | 0.04202  | 0.200577 | 1.26E-05 | 0.088576 |
| -0.24229 | 1.15E-07 | -0.17771 | 0.00011  | 0.045716 | 0.32423  | 0.038085 | 0.41158  | 0.06168  |
| 0.126102 | 0.00636  | 0.116734 | 0.01159  | 0.367754 | 2.11E-16 | 0.484392 | 7.57E-29 | 0.236779 |
| 0.109578 | 0.01785  | -0.02005 | 0.66555  | 0.205669 | 7.44E-06 | 0.168589 | 0.00025  | 0.117938 |
| -0.02817 | 0.54368  | 0.057209 | 0.2172   | 0.259315 | 1.30E-08 | 0.284094 | 4.05E-10 | 0.21791  |
| -0.36508 | 3.60E-16 | -0.27259 | 2.12E-09 | -0.22579 | 8.22E-07 | -0.04218 | 0.36315  | -0.26845 |
| -0.00488 | 0.91621  | 0.179018 | 0.0001   | 0.260975 | 1.04E-08 | 0.507375 | 6.41E-32 | 0.155393 |
| -0.17567 | 0.00014  | -0.17316 | 0.00017  | -0.02471 | 0.59428  | 0.005678 | 0.9026   | -0.03526 |
| -0.31538 | 3.04E-12 | -0.28085 | 6.51E-10 | -0.11195 | 0.0155   | 0.003067 | 0.9473   | -0.17625 |
| -0.13924 | 0.00256  | 0.011704 | 0.80085  | -0.13665 | 0.00309  | 0.060889 | 0.18901  | -0.14731 |
| -0.11604 | 0.0121   | 0.004453 | 0.92354  | 0.160036 | 0.00052  | 0.115399 | 0.01258  | 0.157008 |
| 0.012665 | 0.78487  | -0.00561 | 0.90379  | 0.134246 | 0.00366  | 0.168768 | 0.00025  | 0.050867 |
| -0.07406 | 0.10996  | -0.12381 | 0.00739  | -0.24763 | 5.91E-08 | -0.25148 | 3.61E-08 | -0.25059 |
| 0.019028 | 0.68171  | 0.084307 | 0.06872  | -0.2248  | 9.20E-07 | -0.16083 | 0.00048  | -0.11837 |
| -0.02867 | 0.53652  | -0.0076  | 0.86992  | 0.080135 | 0.08365  | 0.256097 | 1.98E-08 | 0.025809 |
| 0.319459 | 1.54E-12 | 0.096434 | 0.03723  | -0.08839 | 0.0563   | -0.073   | 0.11514  | -0.09936 |
| -0.34632 | 1.32E-14 | -0.27258 | 2.12E-09 | -0.23687 | 2.23E-07 | -0.09435 | 0.04155  | -0.23873 |
| -0.27088 | 2.69E-09 | -0.1668  | 0.00029  | -0.146   | 0.00156  | 0.020734 | 0.65494  | -0.14322 |
| -0.37899 | 2.12E-17 | -0.35198 | 4.57E-15 | -0.31967 | 1.48E-12 | -0.19697 | 1.81E-05 | -0.31056 |
| -0.24718 | 6.25E-08 | -0.15458 | 0.0008   | 0.095487 | 0.03914  | 0.213774 | 3.14E-06 | 0.031251 |
| -0.23253 | 3.75E-07 | -0.12875 | 0.00533  | -0.17798 | 0.00011  | -0.09013 | 0.05161  | -0.18895 |
| -0.20998 | 4.73E-06 | -0.07438 | 0.10842  | 0.00119  | 0.97954  | 0.079761 | 0.08511  | -0.04203 |
| -0.12164 | 0.0085   | -0.06076 | 0.18998  | -0.12483 | 0.00691  | 0.003427 | 0.94113  | -0.08791 |
| 0.367255 | 2.33E-16 | 0.456347 | 2.12E-25 | 0.367417 | 2.26E-16 | 0.338435 | 5.60E-14 | 0.292991 |
| 0.032824 | 0.47918  | 0.040605 | 0.3813   | 0.095238 | 0.03966  | 0.135248 | 0.00341  | 0.044218 |



|          |          |          |          |          |          |          |          |          |
|----------|----------|----------|----------|----------|----------|----------|----------|----------|
| -0.08931 | 0.05377  | 0.113681 | 0.01397  | 0.110388 | 0.01701  | 0.24857  | 5.24E-08 | 0.074225 |
| 0.050612 | 0.27505  | 0.014582 | 0.75329  | 0.013214 | 0.7758   | 0.114616 | 0.0132   | 0.038761 |
| -0.19872 | 1.52E-05 | -0.17176 | 0.00019  | 0.025045 | 0.58929  | 0.107828 | 0.01977  | -0.00545 |
| -0.02564 | 0.58046  | 0.029846 | 0.51997  | 0.198792 | 1.51E-05 | 0.311787 | 5.49E-12 | 0.109348 |
| -0.24262 | 1.10E-07 | -0.18661 | 4.96E-05 | -0.02752 | 0.55304  | 0.095003 | 0.04015  | -0.05504 |
| 0.03682  | 0.4273   | 0.14521  | 0.00165  | 0.180828 | 8.51E-05 | 0.279279 | 8.16E-10 | 0.141127 |
| -0.1682  | 0.00026  | -0.04771 | 0.3036   | -0.00568 | 0.90257  | 0.117865 | 0.0108   | 0.077923 |
| -0.11793 | 0.01075  | -0.0047  | 0.91924  | 0.148809 | 0.00126  | 0.202251 | 1.06E-05 | 0.163386 |
| -0.21827 | 1.92E-06 | -0.02875 | 0.53542  | 0.030553 | 0.51013  | 0.181535 | 7.97E-05 | -0.0062  |
| -0.11744 | 0.01109  | 0.051104 | 0.27041  | -0.05935 | 0.20047  | 0.137229 | 0.00296  | 0.002119 |
| -0.06247 | 0.17777  | -0.06714 | 0.14741  | 0.040897 | 0.37789  | 0.129521 | 0.00506  | 0.124154 |
| -0.04305 | 0.35328  | -0.01328 | 0.77467  | 0.197324 | 1.75E-05 | 0.269927 | 3.07E-09 | 0.12594  |
| -0.25574 | 2.08E-08 | -0.17792 | 0.00011  | -0.18541 | 5.56E-05 | -0.03366 | 0.46806  | -0.15111 |
| -0.19494 | 2.21E-05 | -0.25608 | 1.99E-08 | -0.00526 | 0.90977  | 0.050906 | 0.27227  | -0.03982 |
| -0.23136 | 4.30E-07 | -0.15007 | 0.00114  | -0.04438 | 0.33855  | 0.031032 | 0.50351  | -0.06592 |
| -0.34291 | 2.48E-14 | -0.37645 | 3.60E-17 | -0.15955 | 0.00054  | -0.06329 | 0.17215  | -0.18487 |
| -0.11666 | 0.01164  | -0.03853 | 0.40614  | 0.1621   | 0.00044  | 0.221207 | 1.38E-06 | 0.153007 |
| -0.23678 | 2.26E-07 | -0.17484 | 0.00015  | 0.033038 | 0.47631  | 0.142607 | 0.00201  | 0.034781 |
| -0.14604 | 0.00155  | -0.1367  | 0.00308  | -0.09937 | 0.0318   | -0.00684 | 0.88287  | -0.09007 |
| -0.0423  | 0.36174  | -0.23136 | 4.30E-07 | 0.181139 | 8.27E-05 | 0.163677 | 0.00038  | 0.062891 |
| -0.08062 | 0.0818   | -0.05178 | 0.26409  | 0.27313  | 1.96E-09 | 0.320171 | 1.36E-12 | 0.144315 |
| -0.23607 | 2.46E-07 | -0.30632 | 1.33E-11 | -0.11575 | 0.01231  | -0.08716 | 0.05983  | -0.07262 |
| 0.165378 | 0.00033  | 0.233908 | 3.18E-07 | -0.08447 | 0.06818  | -0.15587 | 0.00072  | -0.01783 |
| -0.26228 | 8.73E-09 | -0.19536 | 2.12E-05 | -0.02875 | 0.53537  | 0.095806 | 0.03849  | -0.05848 |
| 0.079299 | 0.08694  | -0.00273 | 0.95311  | 0.276654 | 1.19E-09 | 0.178934 | 0.0001   | 0.217165 |
| 0.298862 | 4.33E-11 | 0.425854 | 5.37E-22 | 0.303114 | 2.22E-11 | 0.336494 | 7.95E-14 | 0.283393 |
| 0.057875 | 0.21189  | -0.01663 | 0.72002  | 0.139477 | 0.00252  | 0.055698 | 0.22962  | 0.20603  |
| -0.09853 | 0.03328  | -0.33711 | 7.11E-14 | -0.31197 | 5.33E-12 | -0.43391 | 7.31E-23 | -0.28393 |
| -0.05862 | 0.20609  | -0.20552 | 7.56E-06 | -0.02071 | 0.65538  | -0.10403 | 0.02457  | -0.08273 |
| 0.413402 | 1.05E-20 | 0.353144 | 3.66E-15 | 0.308288 | 9.70E-12 | 0.26171  | 9.42E-09 | 0.223443 |
| -0.15562 | 0.00074  | -0.13073 | 0.00466  | 0.035926 | 0.43861  | 0.127253 | 0.00589  | 0.012909 |
| -0.22534 | 8.66E-07 | -0.12787 | 0.00565  | 0.106441 | 0.02142  | 0.187595 | 4.52E-05 | 0.035488 |
| -0.23759 | 2.04E-07 | -0.10644 | 0.02142  | 0.0921   | 0.04668  | 0.158669 | 0.00058  | 0.043739 |
| -0.12724 | 0.0059   | -0.02872 | 0.53584  | -0.01363 | 0.7689   | 0.087344 | 0.05929  | -0.03649 |
| -0.1822  | 7.49E-05 | -0.07644 | 0.09898  | 0.0141   | 0.7612   | 0.168538 | 0.00025  | -0.03426 |
| -0.17738 | 0.00012  | -0.08698 | 0.06036  | 0.001495 | 0.97429  | 0.016344 | 0.72464  | 0.021413 |
| -0.21839 | 1.89E-06 | -0.23008 | 5.00E-07 | -0.06785 | 0.14316  | 0.086666 | 0.06129  | -0.10351 |
| 0.272738 | 2.07E-09 | 0.334536 | 1.13E-13 | 0.081807 | 0.07738  | 0.1494   | 0.0012   | 0.05677  |
| -0.20776 | 5.98E-06 | -0.11915 | 0.00996  | -0.00931 | 0.84095  | 0.139213 | 0.00257  | -0.08913 |
| 0.128952 | 0.00526  | 0.208828 | 5.34E-06 | 0.074557 | 0.10759  | -0.04639 | 0.31712  | 0.111655 |
| -0.18075 | 8.57E-05 | -0.09415 | 0.04199  | -0.0226  | 0.62616  | 0.077966 | 0.09239  | -0.0151  |
| -0.10734 | 0.02033  | -0.10439 | 0.02407  | 0.102352 | 0.02699  | 0.105542 | 0.02255  | 0.106531 |
| 0.09579  | 0.03852  | -0.0208  | 0.65385  | 0.16912  | 0.00024  | 0.24687  | 6.50E-08 | 0.097688 |
| 0.036528 | 0.43098  | 0.138768 | 0.00265  | 0.160634 | 0.00049  | 0.264991 | 6.05E-09 | 0.143319 |
| 0.006513 | 0.88836  | 0.070041 | 0.13069  | 0.120309 | 0.00926  | 0.217585 | 2.07E-06 | 0.09481  |

|          |          |          |          |          |          |          |          |          |
|----------|----------|----------|----------|----------|----------|----------|----------|----------|
| -0.24575 | 7.48E-08 | -0.07956 | 0.0859   | -0.0794  | 0.08655  | 0.10708  | 0.02064  | -0.12942 |
| -0.15346 | 0.00088  | -0.08334 | 0.07197  | -0.06238 | 0.17841  | -0.00672 | 0.88483  | -0.04282 |
| -0.15756 | 0.00063  | -0.10197 | 0.02756  | 0.074115 | 0.1097   | 0.092858 | 0.04489  | 0.148164 |
| 0.009917 | 0.83075  | -0.0946  | 0.04101  | -0.19444 | 2.33E-05 | -0.2292  | 5.54E-07 | -0.15758 |
| -0.24678 | 6.57E-08 | -0.167   | 0.00029  | 0.033973 | 0.46392  | 0.0796   | 0.08575  | -0.015   |
| -0.03422 | 0.46072  | -0.15709 | 0.00066  | 0.083314 | 0.07206  | 0.069032 | 0.13634  | 0.07267  |
| -0.11478 | 0.01307  | -0.11116 | 0.01626  | -0.05631 | 0.22449  | -0.05854 | 0.20665  | 0.002485 |
| -0.22621 | 7.83E-07 | -0.11104 | 0.01637  | -0.01764 | 0.70382  | 0.159379 | 0.00055  | -0.04431 |
| -0.19045 | 3.44E-05 | -0.14449 | 0.00175  | -0.04292 | 0.35473  | 0.090828 | 0.04981  | -0.06617 |
| -0.35784 | 1.49E-15 | -0.23697 | 2.20E-07 | -0.21092 | 4.27E-06 | -0.0275  | 0.55328  | -0.26208 |
| -0.25133 | 3.68E-08 | -0.11422 | 0.01352  | -0.0735  | 0.11268  | 0.069311 | 0.13475  | -0.09668 |
| -0.21605 | 2.45E-06 | -0.15124 | 0.00104  | 0.074305 | 0.10879  | 0.139732 | 0.00247  | -0.04948 |
| -0.13782 | 0.00284  | -0.04851 | 0.29552  | 0.11415  | 0.01358  | 0.194452 | 2.32E-05 | 0.018087 |
| -0.19537 | 2.12E-05 | -0.14284 | 0.00197  | -0.02355 | 0.61177  | 0.095216 | 0.03971  | -0.03899 |
| -0.05548 | 0.23145  | -0.00344 | 0.94098  | 0.315989 | 2.75E-12 | 0.322988 | 8.44E-13 | 0.271129 |
| -0.1441  | 0.0018   | -0.0702  | 0.12984  | -0.02478 | 0.59317  | 0.054564 | 0.23926  | -0.059   |
| -0.04351 | 0.34813  | -0.03012 | 0.51621  | 0.266536 | 4.90E-09 | 0.3117   | 5.57E-12 | 0.192689 |
| -0.29973 | 3.78E-11 | -0.02222 | 0.63196  | -0.21581 | 2.52E-06 | -0.00307 | 0.94723  | -0.20991 |
| -0.16554 | 0.00033  | -0.22391 | 1.02E-06 | 0.017277 | 0.70961  | 0.090051 | 0.0518   | -0.06175 |
| -0.18288 | 7.04E-05 | -0.17577 | 0.00013  | -0.12158 | 0.00854  | -0.12677 | 0.00608  | -0.03459 |
| -0.15999 | 0.00052  | -0.12591 | 0.00644  | -0.07198 | 0.12036  | -0.04606 | 0.32059  | -0.03157 |
| -0.0975  | 0.03518  | -0.04747 | 0.306    | 0.050727 | 0.27397  | 0.182808 | 7.08E-05 | 0.04665  |
| -0.05564 | 0.2301   | -0.05029 | 0.27809  | 0.235691 | 2.57E-07 | 0.176127 | 0.00013  | 0.237592 |
| -0.05735 | 0.21608  | -0.1066  | 0.02122  | 0.185467 | 5.52E-05 | 0.209195 | 5.14E-06 | 0.068443 |
| 0.033054 | 0.47611  | 0.106593 | 0.02123  | 0.368381 | 1.86E-16 | 0.418095 | 3.48E-21 | 0.212667 |
| -0.13907 | 0.0026   | -0.01301 | 0.77914  | 0.041291 | 0.37331  | 0.112976 | 0.01458  | 0.022184 |
| -0.03783 | 0.41467  | 0.172857 | 0.00017  | 0.327635 | 3.79E-13 | 0.434823 | 5.81E-23 | 0.302512 |
| -0.08867 | 0.05551  | -0.24638 | 6.91E-08 | 0.078181 | 0.0915   | 0.11521  | 0.01273  | -0.10808 |
| 0.103685 | 0.02505  | 0.162927 | 0.00041  | 0.003206 | 0.94491  | 0.006011 | 0.89693  | 0.082436 |
| 0.089789 | 0.05249  | -0.12342 | 0.00758  | -0.10448 | 0.02395  | -0.26486 | 6.16E-09 | -0.1238  |
| -0.01763 | 0.70392  | 0.181136 | 8.27E-05 | 0.291465 | 1.35E-10 | 0.325827 | 5.19E-13 | 0.23176  |
| -0.2367  | 2.28E-07 | -0.24877 | 5.11E-08 | -0.18094 | 8.42E-05 | -0.09232 | 0.04616  | -0.15089 |
| -0.1243  | 0.00716  | -0.06176 | 0.18275  | 0.072768 | 0.11632  | 0.171279 | 0.0002   | 0.070795 |
| -0.23431 | 3.03E-07 | -0.17189 | 0.00019  | -0.05646 | 0.22331  | 0.039005 | 0.40037  | -0.09987 |
| -0.0141  | 0.76114  | 0.001383 | 0.97623  | 0.234586 | 2.93E-07 | 0.1778   | 0.00011  | 0.185786 |
| 0.105426 | 0.0227   | 0.132714 | 0.00407  | 0.173821 | 0.00016  | 0.243357 | 1.01E-07 | 0.131912 |
| -0.24361 | 9.77E-08 | -0.20645 | 6.86E-06 | -0.09233 | 0.04614  | -0.05493 | 0.23609  | -0.14947 |
| -0.0458  | 0.32338  | -0.02977 | 0.521    | 0.040399 | 0.38373  | 0.056387 | 0.2239   | 0.020655 |
| -0.1714  | 0.0002   | -0.13713 | 0.00298  | -0.11377 | 0.01389  | -0.04114 | 0.37505  | -0.11736 |
| -0.20825 | 5.68E-06 | -0.15119 | 0.00105  | -0.04949 | 0.28581  | 0.067727 | 0.14392  | -0.06117 |
| -0.18774 | 4.45E-05 | -0.2626  | 8.36E-09 | -0.12393 | 0.00733  | -0.21839 | 1.89E-06 | -0.10954 |
| -0.31764 | 2.08E-12 | -0.24358 | 9.81E-08 | -0.14448 | 0.00175  | -0.01503 | 0.74597  | -0.14464 |
| -0.23857 | 1.82E-07 | -0.14074 | 0.0023   | 0.089116 | 0.05429  | 0.183285 | 6.78E-05 | 0.026895 |
| -0.04673 | 0.31361  | -0.09253 | 0.04567  | 0.161377 | 0.00046  | 0.082675 | 0.07428  | 0.169076 |
| -0.00817 | 0.86024  | -0.00537 | 0.90793  | 0.07276  | 0.11636  | 0.133317 | 0.0039   | 0.069377 |

|          |          |          |          |          |          |          |          |           |
|----------|----------|----------|----------|----------|----------|----------|----------|-----------|
| -0.1415  | 0.00218  | -0.08026 | 0.08318  | 0.022043 | 0.6347   | 0.085306 | 0.06549  | 0.020971  |
| -0.27354 | 1.85E-09 | 0.056172 | 0.22567  | 0.035074 | 0.44956  | 0.12913  | 0.00519  | -1.02E-05 |
| -0.18942 | 3.79E-05 | -0.04424 | 0.34015  | -0.07462 | 0.10729  | 0.039745 | 0.39148  | -0.07161  |
| -0.07521 | 0.10455  | -0.13955 | 0.00251  | 0.147947 | 0.00134  | 0.115792 | 0.01228  | 0.180195  |
| -0.28218 | 5.36E-10 | -0.19135 | 3.15E-05 | -0.11866 | 0.01027  | 0.031826 | 0.49265  | -0.16154  |
| -0.14736 | 0.00141  | -0.06888 | 0.13722  | 0.019267 | 0.67793  | 0.054813 | 0.23711  | 0.021334  |
| 0.05661  | 0.22207  | 0.133348 | 0.00389  | 0.070203 | 0.1298   | 0.222948 | 1.14E-06 | -0.02162  |
| -0.34467 | 1.79E-14 | -0.22339 | 1.08E-06 | -0.0713  | 0.12388  | 0.105647 | 0.02241  | -0.11785  |
| 0.015835 | 0.73288  | -0.06265 | 0.17649  | 0.21555  | 2.59E-06 | 0.209353 | 5.05E-06 | 0.151416  |
| -0.19702 | 1.80E-05 | -0.13874 | 0.00266  | 0.075995 | 0.10095  | 0.171127 | 0.0002   | 0.006014  |
| -0.1647  | 0.00035  | -0.18201 | 7.63E-05 | 0.057281 | 0.21663  | 0.04205  | 0.36458  | -0.04306  |
| 0.03344  | 0.47097  | -0.15542 | 0.00075  | 0.196415 | 1.91E-05 | 0.119623 | 0.00967  | 0.129387  |
| -0.15278 | 0.00093  | -0.13587 | 0.00326  | 0.064498 | 0.16406  | 0.105971 | 0.022    | 0.109502  |
| -0.18981 | 3.65E-05 | -0.08557 | 0.06465  | -0.05275 | 0.25527  | 0.05584  | 0.22843  | -0.04685  |
| -0.20404 | 8.81E-06 | -0.13771 | 0.00286  | 0.069457 | 0.13394  | 0.154589 | 0.0008   | -0.02478  |
| -0.10252 | 0.02673  | -0.07245 | 0.11791  | 0.100222 | 0.03035  | 0.135825 | 0.00327  | 0.09025   |
| 0.122795 | 0.00789  | -0.16389 | 0.00038  | -0.01495 | 0.74729  | -0.20608 | 7.13E-06 | -0.03335  |
| 0.301973 | 2.66E-11 | 0.400618 | 1.98E-19 | 0.151964 | 0.00099  | 0.2909   | 1.47E-10 | 0.058833  |
| -0.26298 | 7.95E-09 | -0.04985 | 0.28231  | -0.16572 | 0.00032  | 0.008844 | 0.84884  | -0.10029  |
| 0.068776 | 0.1378   | 0.005121 | 0.91211  | -0.08776 | 0.05809  | -0.08369 | 0.07079  | -0.15044  |
| -0.15615 | 0.00071  | -0.14269 | 0.00199  | -0.03286 | 0.47873  | 0.084468 | 0.06819  | -0.04998  |
| -0.15537 | 0.00075  | 0.02537  | 0.58446  | -0.20552 | 7.56E-06 | -0.03378 | 0.46651  | -0.11349  |
| 0.234055 | 3.13E-07 | 0.438426 | 2.33E-23 | 0.032474 | 0.48388  | 0.122479 | 0.00806  | 0.004834  |
| -0.46004 | 7.78E-26 | -0.23455 | 2.95E-07 | -0.40503 | 7.30E-20 | -0.11523 | 0.01271  | -0.36147  |
| -0.1032  | 0.02574  | -0.0905  | 0.05064  | 0.100121 | 0.03052  | 0.116093 | 0.01205  | 0.08837   |
| 0.061493 | 0.18465  | 0.013443 | 0.77202  | 0.190859 | 3.30E-05 | 0.215934 | 2.48E-06 | 0.17315   |
| -0.19849 | 1.55E-05 | -0.07211 | 0.11966  | -0.00263 | 0.95472  | 0.132133 | 0.00423  | 0.019512  |
| -0.26523 | 5.86E-09 | -0.23575 | 2.55E-07 | 0.116203 | 0.01197  | 0.184682 | 5.95E-05 | 0.016371  |
| -0.00309 | 0.94684  | -0.11402 | 0.01369  | 0.106504 | 0.02134  | 0.18207  | 7.58E-05 | 0.148149  |
| -0.29876 | 4.39E-11 | -0.19367 | 2.51E-05 | -0.21538 | 2.64E-06 | -0.1376  | 0.00288  | -0.19222  |
| -0.30592 | 1.42E-11 | -0.37278 | 7.64E-17 | -0.15721 | 0.00065  | -0.15218 | 0.00097  | -0.19598  |
| 0.002034 | 0.96503  | -0.0115  | 0.80417  | 0.333467 | 1.36E-13 | 0.40019  | 2.18E-19 | 0.293648  |
| -0.15596 | 0.00072  | -0.0677  | 0.14409  | 0.062014 | 0.18095  | 0.170046 | 0.00022  | 0.044484  |
| -0.1228  | 0.00789  | -0.16804 | 0.00026  | 0.284285 | 3.94E-10 | 0.167128 | 0.00029  | 0.239045  |
| -0.15777 | 0.00062  | -0.15933 | 0.00055  | 0.073894 | 0.11076  | 0.116044 | 0.01209  | -0.00181  |
| -0.17976 | 9.38E-05 | -0.13768 | 0.00287  | -0.06247 | 0.17773  | 0.004998 | 0.91422  | -0.05839  |
| -0.02586 | 0.57717  | -0.04049 | 0.38272  | 0.136175 | 0.00319  | 0.245459 | 7.76E-08 | 0.051999  |
| -0.34477 | 1.76E-14 | -0.26774 | 4.15E-09 | -0.13195 | 0.00429  | -0.00204 | 0.96501  | -0.16352  |
| -0.12961 | 0.00503  | -0.20893 | 5.28E-06 | 0.064045 | 0.16705  | 0.094683 | 0.04083  | 0.016352  |
| -0.12302 | 0.00778  | -0.25156 | 3.58E-08 | -0.00624 | 0.89303  | 0.008709 | 0.85111  | -0.02173  |
| -0.10627 | 0.02162  | -0.15556 | 0.00074  | -0.02218 | 0.63266  | 0.122616 | 0.00799  | -0.1054   |
| 0.025025 | 0.58959  | 0.051829 | 0.26366  | -0.22352 | 1.06E-06 | -0.21475 | 2.82E-06 | -0.16357  |
| -0.17406 | 0.00016  | -0.23865 | 1.80E-07 | 0.035873 | 0.43929  | 0.069146 | 0.13569  | 0.02068   |
| -0.17777 | 0.00011  | -0.10985 | 0.01756  | -0.00528 | 0.9094   | 0.087487 | 0.05887  | -0.04276  |
| -0.13926 | 0.00256  | -0.25535 | 2.19E-08 | -0.14284 | 0.00197  | -0.04703 | 0.31056  | -0.24152  |

|          |          |          |          |          |          |          |          |          |
|----------|----------|----------|----------|----------|----------|----------|----------|----------|
| -0.21308 | 3.39E-06 | -0.28222 | 5.32E-10 | 0.086088 | 0.06305  | 0.038181 | 0.4104   | -0.02712 |
| -0.21873 | 1.82E-06 | -0.34027 | 4.02E-14 | -0.13866 | 0.00267  | -0.09427 | 0.04172  | -0.1817  |
| -0.16665 | 0.0003   | -0.11123 | 0.01619  | 0.087422 | 0.05906  | 0.171373 | 0.0002   | 0.034466 |
| 0.017748 | 0.70206  | -0.01394 | 0.76376  | -0.09071 | 0.0501   | 0.022522 | 0.62735  | 0.028721 |
| -0.20704 | 6.45E-06 | -0.14302 | 0.00195  | -0.09577 | 0.03857  | -0.00391 | 0.93289  | -0.06347 |
| -0.16199 | 0.00044  | -0.11038 | 0.01702  | 0.063184 | 0.17284  | 0.157634 | 0.00063  | 0.010435 |
| 0.021051 | 0.65002  | 0.002067 | 0.96447  | 0.357938 | 1.46E-15 | 0.407048 | 4.60E-20 | 0.178737 |
| -0.24445 | 8.80E-08 | -0.25924 | 1.31E-08 | 0.087178 | 0.05977  | 0.024737 | 0.59388  | 0.058924 |
| -0.24564 | 7.58E-08 | -0.18366 | 6.54E-05 | -0.00582 | 0.90015  | 0.09956  | 0.03147  | -0.03553 |
| -0.07867 | 0.08948  | -0.01287 | 0.78146  | 0.110414 | 0.01699  | 0.176629 | 0.00012  | 0.07088  |
| -0.08766 | 0.05837  | -0.06407 | 0.16687  | 0.236152 | 2.43E-07 | 0.281948 | 5.54E-10 | 0.134843 |
| -0.19126 | 3.18E-05 | -0.17016 | 0.00022  | 0.079287 | 0.08699  | 0.11076  | 0.01664  | 0.026628 |
| -0.00209 | 0.964    | -0.02658 | 0.56665  | 0.277662 | 1.03E-09 | 0.324386 | 6.65E-13 | 0.170525 |
| -0.19688 | 1.82E-05 | -0.12883 | 0.0053   | 0.105481 | 0.02262  | 0.137933 | 0.00282  | 0.053681 |
| -0.15155 | 0.00102  | -0.06601 | 0.15437  | -0.04284 | 0.35559  | -0.00048 | 0.99171  | 0.00564  |
| -0.13685 | 0.00304  | -0.04741 | 0.30657  | 0.010641 | 0.81861  | 0.035018 | 0.45028  | 0.031697 |
| 0.080494 | 0.08227  | -0.14699 | 0.00145  | 0.213493 | 3.24E-06 | 0.090694 | 0.05015  | 0.140907 |
| -0.1099  | 0.01751  | -0.14399 | 0.00181  | 0.158905 | 0.00057  | 0.196702 | 1.86E-05 | 0.068572 |
| -0.12984 | 0.00495  | -0.13514 | 0.00343  | 0.09308  | 0.04438  | 0.147399 | 0.0014   | -0.00373 |
| -0.22939 | 5.42E-07 | -0.0941  | 0.04209  | 0.00253  | 0.95652  | 0.158706 | 0.00058  | -0.03807 |
| 0.108579 | 0.01892  | 0.128632 | 0.00537  | -0.05952 | 0.19919  | -0.12222 | 0.00819  | -0.05359 |
| 0.415265 | 6.81E-21 | 0.462829 | 3.61E-26 | 0.186003 | 5.25E-05 | 0.15339  | 0.00088  | 0.163506 |
| 0.205353 | 7.69E-06 | 0.125863 | 0.00646  | 0.02192  | 0.63659  | -0.07962 | 0.08568  | 0.039343 |
| 0.079783 | 0.08502  | 0.085144 | 0.06601  | 0.233632 | 3.29E-07 | 0.216953 | 2.22E-06 | 0.190048 |
| -0.13312 | 0.00395  | -0.14838 | 0.0013   | 0.009343 | 0.84041  | 0.056093 | 0.22633  | -0.00057 |
| -0.22331 | 1.09E-06 | -0.36271 | 5.75E-16 | 0.030953 | 0.5046   | -0.08096 | 0.08053  | -0.02819 |
| 0.043718 | 0.34584  | -0.00566 | 0.90292  | 0.221079 | 1.40E-06 | 0.147578 | 0.00138  | 0.235225 |
| 0.065473 | 0.15777  | 0.008276 | 0.85844  | 0.185252 | 5.64E-05 | 0.167059 | 0.00029  | 0.171907 |
| -0.28047 | 6.87E-10 | -0.17565 | 0.00014  | 0.060375 | 0.19278  | 0.174082 | 0.00016  | -0.02361 |
| 0.109917 | 0.01749  | 0.050144 | 0.27952  | 0.193402 | 2.58E-05 | 0.28828  | 2.18E-10 | 0.085495 |
| -0.17169 | 0.00019  | -0.13113 | 0.00453  | 0.185768 | 5.37E-05 | 0.189196 | 3.87E-05 | 0.115215 |
| 0.064329 | 0.16518  | 0.072812 | 0.1161   | -0.09099 | 0.04941  | -0.14774 | 0.00137  | -0.14068 |
| -0.21951 | 1.67E-06 | -0.05862 | 0.20603  | -0.14128 | 0.00221  | 0.042646 | 0.35781  | -0.11096 |
| -0.26891 | 3.53E-09 | -0.21657 | 2.32E-06 | -0.06326 | 0.17232  | -0.00164 | 0.97175  | -0.04339 |
| 0.159485 | 0.00054  | 0.088912 | 0.05485  | 0.013833 | 0.76559  | -0.0228  | 0.62305  | 0.016596 |
| -0.26347 | 7.44E-09 | -0.13451 | 0.00359  | -0.12425 | 0.00718  | 0.014943 | 0.7474   | -0.1437  |
| 0.00111  | 0.98091  | -0.09333 | 0.04381  | 0.260426 | 1.12E-08 | 0.284748 | 3.68E-10 | 0.115576 |
| -0.14947 | 0.0012   | -0.09407 | 0.04215  | 0.129587 | 0.00504  | 0.124686 | 0.00698  | 0.072321 |
| -0.16992 | 0.00023  | -0.11787 | 0.0108   | 0.045256 | 0.32913  | 0.147094 | 0.00143  | -0.0021  |
| -0.35538 | 2.39E-15 | -0.3289  | 3.04E-13 | -0.18769 | 4.48E-05 | -0.09441 | 0.04143  | -0.19554 |
| -0.08883 | 0.05507  | -0.16636 | 0.00031  | 0.216884 | 2.24E-06 | 0.092101 | 0.04668  | 0.221781 |
| -0.23964 | 1.59E-07 | -0.17693 | 0.00012  | -0.10812 | 0.01944  | 0.010492 | 0.8211   | -0.05837 |
| -0.1164  | 0.01183  | -0.10396 | 0.02466  | 0.29966  | 3.82E-11 | 0.321639 | 1.06E-12 | 0.177739 |
| -0.14414 | 0.00179  | -0.16763 | 0.00027  | 0.197906 | 1.65E-05 | 0.207454 | 6.17E-06 | 0.111139 |
| -0.08523 | 0.06572  | -0.17944 | 9.66E-05 | 0.005111 | 0.91228  | 0.044001 | 0.34273  | -0.04388 |

|          |          |          |          |          |          |          |          |          |
|----------|----------|----------|----------|----------|----------|----------|----------|----------|
| -0.0372  | 0.42253  | -0.23896 | 1.73E-07 | -0.00803 | 0.86258  | -0.01367 | 0.76827  | -0.09374 |
| -0.0388  | 0.40286  | -0.10536 | 0.02278  | 0.253095 | 2.93E-08 | 0.242547 | 1.12E-07 | 0.185942 |
| -0.15542 | 0.00075  | -0.15605 | 0.00071  | -0.24214 | 1.17E-07 | -0.08044 | 0.08249  | -0.18799 |
| -0.11153 | 0.0159   | -0.02148 | 0.64331  | 0.077632 | 0.0938   | 0.080218 | 0.08333  | 0.077818 |
| -0.00333 | 0.94284  | 0.066167 | 0.1534   | 0.254635 | 2.40E-08 | 0.328085 | 3.51E-13 | 0.193947 |
| -0.25243 | 3.20E-08 | -0.12333 | 0.00762  | -0.07065 | 0.12735  | 0.049621 | 0.28457  | -0.10692 |
| 0.016704 | 0.71881  | -0.05866 | 0.20575  | 0.158134 | 0.0006   | 0.157464 | 0.00064  | 0.157296 |
| 0.307908 | 1.03E-11 | 0.12075  | 0.009    | 0.099956 | 0.0308   | -0.15059 | 0.0011   | 0.05614  |
| -0.29237 | 1.17E-10 | -0.25087 | 3.91E-08 | -0.09902 | 0.03241  | 0.012668 | 0.78483  | -0.13847 |
| -0.27908 | 8.40E-10 | -0.18677 | 4.88E-05 | -0.0631  | 0.17339  | 0.076458 | 0.09889  | -0.10465 |
| -0.15257 | 0.00094  | -0.1452  | 0.00166  | 0.180662 | 8.64E-05 | 0.185248 | 5.64E-05 | 0.064938 |
| -0.05923 | 0.20139  | -0.14166 | 0.00215  | 0.136717 | 0.00307  | 0.086934 | 0.06049  | 0.093854 |
| -0.10559 | 0.02248  | -0.1892  | 3.87E-05 | -0.03446 | 0.45756  | 0.025646 | 0.58039  | -0.05835 |
| -0.13473 | 0.00353  | -0.06961 | 0.1331   | -0.03369 | 0.46761  | -0.04423 | 0.34022  | -0.00548 |
| -0.00124 | 0.97867  | -0.02883 | 0.53421  | 0.130584 | 0.00471  | 0.10572  | 0.02232  | 0.136471 |
| -0.19972 | 1.37E-05 | -0.13488 | 0.0035   | -0.05854 | 0.20668  | -0.05827 | 0.2088   | 0.028198 |
| -0.05381 | 0.24583  | 0.02707  | 0.55953  | 0.155826 | 0.00073  | 0.142826 | 0.00197  | 0.242882 |
| 0.367277 | 2.32E-16 | 0.10724  | 0.02045  | 0.399254 | 2.68E-19 | 0.081343 | 0.07908  | 0.352925 |
| 0.034467 | 0.45745  | 0.186563 | 4.98E-05 | 0.324109 | 6.97E-13 | 0.474922 | 1.20E-27 | 0.173686 |
| -0.01972 | 0.6708   | -0.0137  | 0.76773  | 0.127244 | 0.00589  | 0.097029 | 0.03607  | 0.137086 |
| -0.00833 | 0.85754  | -0.16643 | 0.0003   | -0.29689 | 5.87E-11 | -0.35082 | 5.69E-15 | -0.26433 |
| -0.23568 | 2.57E-07 | -0.25031 | 4.20E-08 | 0.020445 | 0.65944  | 0.079514 | 0.08608  | -0.07061 |
| -0.03335 | 0.47214  | 0.000895 | 0.98461  | 0.299764 | 3.76E-11 | 0.198318 | 1.58E-05 | 0.156359 |
| -0.14051 | 0.00234  | 0.030877 | 0.50565  | 0.180802 | 8.53E-05 | 0.207168 | 6.36E-06 | 0.188051 |
| -0.24642 | 6.88E-08 | -0.15489 | 0.00078  | 0.032814 | 0.47931  | 0.119501 | 0.00974  | 0.017834 |
| -0.02635 | 0.5701   | -0.02072 | 0.6551   | 0.068757 | 0.13791  | 0.093902 | 0.04253  | 0.045111 |
| -0.08862 | 0.05566  | -0.02696 | 0.56108  | 0.067693 | 0.14412  | 0.081706 | 0.07775  | 0.100495 |
| -0.19441 | 2.33E-05 | -0.18101 | 8.36E-05 | -0.18106 | 8.33E-05 | -0.08848 | 0.05603  | -0.07032 |
| -0.23714 | 2.16E-07 | -0.19275 | 2.74E-05 | 0.096281 | 0.03753  | 0.206736 | 6.66E-06 | 0.025663 |
| -0.02313 | 0.61808  | -0.11959 | 0.00969  | 0.23732  | 2.11E-07 | 0.230279 | 4.88E-07 | 0.108377 |
| 0.197403 | 1.73E-05 | 0.133992 | 0.00372  | -0.10098 | 0.02911  | -0.13268 | 0.00408  | -0.11508 |
| -0.14982 | 0.00117  | -0.10184 | 0.02776  | 0.12928  | 0.00514  | 0.227183 | 7.00E-07 | 0.054718 |
| -0.21393 | 3.09E-06 | -0.1504  | 0.00111  | 0.140482 | 0.00234  | 0.202297 | 1.06E-05 | 0.055904 |
| -0.13592 | 0.00325  | -0.09859 | 0.03318  | 0.081859 | 0.07719  | 0.185623 | 5.44E-05 | 0.035936 |
| -0.21344 | 3.26E-06 | -0.18106 | 8.33E-05 | -0.19309 | 2.66E-05 | 0.015527 | 0.73788  | -0.24316 |
| -0.1833  | 6.77E-05 | -0.10505 | 0.02319  | 0.018934 | 0.6832   | 0.100277 | 0.03026  | 0.028734 |
| -0.32048 | 1.29E-12 | -0.21282 | 3.49E-06 | -0.22298 | 1.13E-06 | -0.16582 | 0.00032  | -0.1871  |
| -0.12326 | 0.00766  | -0.22601 | 8.02E-07 | -0.06556 | 0.15721  | -0.05658 | 0.22229  | -0.04952 |
| 0.32025  | 1.34E-12 | 0.243805 | 9.54E-08 | -0.02631 | 0.5706   | 0.028774 | 0.53507  | 0.050321 |
| 0.545475 | 1.47E-37 | 0.344796 | 1.75E-14 | 0.103403 | 0.02545  | 0.144154 | 0.00179  | 0.097742 |
| -0.06323 | 0.17253  | -0.07947 | 0.08624  | 0.012276 | 0.79133  | -0.01098 | 0.81285  | 0.133311 |
| -0.10777 | 0.01983  | -0.19042 | 3.44E-05 | 0.136903 | 0.00303  | 0.12712  | 0.00594  | 0.031999 |
| -0.16449 | 0.00036  | -0.18338 | 6.71E-05 | 0.092545 | 0.04562  | 0.064504 | 0.16402  | 0.020355 |
| -0.1374  | 0.00293  | -0.19971 | 1.37E-05 | -0.08734 | 0.05929  | -0.15326 | 0.00089  | -0.06139 |
| -0.43211 | 1.15E-22 | -0.37466 | 5.20E-17 | -0.24534 | 7.88E-08 | -0.13978 | 0.00247  | -0.25215 |

|          |          |          |          |          |          |          |          |          |
|----------|----------|----------|----------|----------|----------|----------|----------|----------|
| 0.021704 | 0.6399   | 0.157992 | 0.00061  | 0.264095 | 6.83E-09 | 0.288386 | 2.14E-10 | 0.249331 |
| 0.007234 | 0.87611  | -0.02665 | 0.56566  | 0.378799 | 2.21E-17 | 0.334976 | 1.04E-13 | 0.236052 |
| -0.10433 | 0.02416  | -0.18152 | 7.98E-05 | -0.08362 | 0.071    | -0.07468 | 0.10702  | -0.08488 |
| -0.31193 | 5.36E-12 | -0.21637 | 2.37E-06 | -0.10455 | 0.02386  | -0.00079 | 0.98647  | -0.16048 |
| -0.17457 | 0.00015  | -0.13969 | 0.00248  | 0.019071 | 0.68102  | 0.040075 | 0.38756  | -0.02621 |
| -0.15478 | 0.00079  | -0.13677 | 0.00306  | 0.163908 | 0.00038  | 0.080455 | 0.08242  | 0.13351  |
| -0.46381 | 2.75E-26 | -0.22889 | 5.75E-07 | -0.42425 | 7.93E-22 | -0.20379 | 9.05E-06 | -0.39397 |
| 0.168867 | 0.00025  | 0.286566 | 2.81E-10 | 0.118978 | 0.01007  | -0.03    | 0.51786  | 0.098817 |
| -0.10149 | 0.0283   | -0.01502 | 0.74621  | 0.134724 | 0.00354  | 0.174316 | 0.00015  | 0.07582  |
| -0.10286 | 0.02624  | -0.04951 | 0.28562  | 0.185069 | 5.73E-05 | 0.235845 | 2.52E-07 | 0.156141 |
| -0.06325 | 0.17241  | -0.0774  | 0.09478  | 0.16192  | 0.00044  | 0.169771 | 0.00023  | 0.116205 |
| 0.162089 | 0.00044  | -0.03819 | 0.4103   | -0.20457 | 8.35E-06 | -0.31189 | 5.40E-12 | -0.13179 |
| -0.1544  | 0.00081  | -0.13641 | 0.00314  | 0.090949 | 0.0495   | 0.138767 | 0.00265  | 0.082435 |
| -0.0169  | 0.71571  | -0.09112 | 0.04907  | 0.135051 | 0.00345  | 0.178683 | 0.0001   | 0.057139 |
| -0.03665 | 0.42946  | -0.14997 | 0.00115  | 0.117489 | 0.01105  | 0.09238  | 0.04601  | 0.042725 |
| -0.09826 | 0.03377  | -0.00908 | 0.84489  | 0.04444  | 0.33793  | 0.121398 | 0.00864  | 0.019176 |
| -0.12507 | 0.00681  | -0.11094 | 0.01647  | -0.14265 | 0.002    | -0.06445 | 0.1644   | -0.12015 |
| 0.090253 | 0.05128  | 0.056491 | 0.22304  | 0.338158 | 5.89E-14 | 0.317823 | 2.02E-12 | 0.256642 |
| -0.03975 | 0.39147  | -0.08099 | 0.0804   | -0.13559 | 0.00333  | 0.009873 | 0.83149  | -0.05802 |
| -0.05617 | 0.22572  | -0.06291 | 0.17475  | -0.21561 | 2.57E-06 | -0.24949 | 4.66E-08 | -0.15269 |
| 0.156992 | 0.00066  | 0.177929 | 0.00011  | -0.01439 | 0.75651  | -0.06484 | 0.16183  | 0.019772 |
| -0.00608 | 0.89567  | -0.0384  | 0.40769  | 0.121676 | 0.00848  | 0.136947 | 0.00302  | 0.090781 |
| -0.18179 | 7.78E-05 | -0.0676  | 0.1447   | -0.01788 | 0.69996  | 0.060318 | 0.1932   | -0.01054 |
| -0.11732 | 0.01117  | -0.1918  | 3.01E-05 | 0.049387 | 0.28685  | 0.154173 | 0.00083  | -0.02987 |
| 0.088858 | 0.055    | 0.106803 | 0.02097  | 0.102334 | 0.02701  | -0.05318 | 0.25136  | 0.050968 |
| -0.39423 | 8.15E-19 | -0.27931 | 8.13E-10 | -0.26447 | 6.49E-09 | -0.06977 | 0.1322   | -0.23568 |
| 0.194139 | 2.40E-05 | 0.0545   | 0.2398   | -0.11517 | 0.01276  | -0.14043 | 0.00235  | -0.13095 |
| -0.15974 | 0.00053  | -0.14368 | 0.00185  | 0.115768 | 0.0123   | 0.093544 | 0.04333  | 0.05839  |
| 0.037571 | 0.41792  | -0.07898 | 0.08823  | 0.260731 | 1.07E-08 | 0.282605 | 5.04E-10 | 0.179974 |
| 0.207269 | 6.29E-06 | 0.190379 | 3.46E-05 | 0.126594 | 0.00615  | 0.089725 | 0.05266  | 0.17453  |
| -0.02543 | 0.58365  | -0.08127 | 0.07934  | 0.077208 | 0.09561  | 0.027929 | 0.54714  | 0.019393 |
| 0.234755 | 2.88E-07 | 0.075133 | 0.1049   | -0.17052 | 0.00021  | -0.20938 | 5.04E-06 | -0.09122 |
| 0.02076  | 0.65453  | 0.029849 | 0.51993  | 0.121101 | 0.0088   | 0.073094 | 0.11469  | 0.269102 |
| -0.07314 | 0.11445  | -0.26143 | 9.78E-09 | 0.060973 | 0.1884   | 0.025918 | 0.57638  | -0.01931 |
| 0.105118 | 0.0231   | 0.056655 | 0.2217   | 0.218732 | 1.82E-06 | 0.261955 | 9.12E-09 | 0.203535 |
| 0.022088 | 0.634    | -0.16744 | 0.00028  | 0.099962 | 0.03079  | 0.083309 | 0.07208  | 0.03879  |
| -0.26371 | 7.20E-09 | -0.21975 | 1.63E-06 | -0.03091 | 0.50514  | 0.0474   | 0.30671  | -0.05828 |
| -0.13167 | 0.00437  | -0.15391 | 0.00085  | 0.165944 | 0.00032  | 0.229611 | 5.28E-07 | 0.037797 |
| -0.16228 | 0.00043  | 0.015613 | 0.73648  | 0.059227 | 0.20139  | 0.196091 | 1.97E-05 | 0.074977 |
| -0.20335 | 9.46E-06 | -0.18752 | 4.55E-05 | 0.032745 | 0.48025  | 0.105886 | 0.02211  | 0.011355 |
| -0.17152 | 0.0002   | -0.12002 | 0.00943  | -0.08083 | 0.08101  | 0.001097 | 0.98114  | -0.05905 |
| -0.02368 | 0.60978  | -0.08128 | 0.07931  | 0.036767 | 0.42796  | 0.069319 | 0.13471  | 0.061509 |
| -0.05218 | 0.26048  | -0.09642 | 0.03727  | 0.217559 | 2.08E-06 | 0.291918 | 1.26E-10 | 0.085918 |
| -0.2136  | 3.20E-06 | -0.09888 | 0.03266  | -0.10578 | 0.02225  | 0.005555 | 0.9047   | -0.06697 |
| -0.0969  | 0.03632  | -0.15733 | 0.00064  | 0.028482 | 0.53923  | 0.061658 | 0.18348  | -0.06345 |

|          |          |          |          |          |          |          |          |          |
|----------|----------|----------|----------|----------|----------|----------|----------|----------|
| 0.023332 | 0.61502  | -0.07438 | 0.10844  | 0.138974 | 0.00261  | -0.00208 | 0.9642   | 0.189413 |
| 0.003291 | 0.94345  | 0.181737 | 7.82E-05 | 0.038092 | 0.41149  | 0.302289 | 2.53E-11 | 0.086049 |
| -0.10701 | 0.02073  | -0.0672  | 0.14705  | 0.123396 | 0.00759  | 0.166567 | 0.0003   | 0.060684 |
| -0.14839 | 0.0013   | -0.19518 | 2.16E-05 | -0.10499 | 0.02326  | -0.12114 | 0.00878  | -0.09268 |
| -0.00303 | 0.94799  | 0.029923 | 0.51889  | 0.205305 | 7.73E-06 | 0.220782 | 1.45E-06 | 0.20906  |
| -0.22652 | 7.56E-07 | -0.27795 | 9.89E-10 | -0.03197 | 0.49071  | -0.06209 | 0.18039  | -0.05481 |
| -0.20024 | 1.30E-05 | -0.11326 | 0.01433  | 0.075079 | 0.10514  | 0.177188 | 0.00012  | 0.032887 |
| -0.24994 | 4.40E-08 | -0.18424 | 6.20E-05 | -0.01095 | 0.81349  | 0.049023 | 0.29043  | 0.002643 |
| -0.04841 | 0.29651  | 0.057968 | 0.21115  | 0.243379 | 1.01E-07 | 0.288592 | 2.08E-10 | 0.145662 |
| -0.03168 | 0.49463  | 0.191188 | 3.20E-05 | -0.16642 | 0.0003   | -0.073   | 0.11515  | -0.10751 |
| 0.005888 | 0.89902  | -0.13224 | 0.0042   | -0.02155 | 0.64227  | 0.071069 | 0.12512  | -0.11921 |
| 0.210903 | 4.28E-06 | 0.081019 | 0.08029  | 0.096028 | 0.03804  | -0.03976 | 0.39129  | 0.041013 |
| -0.07189 | 0.12078  | 0.020095 | 0.66491  | 0.022849 | 0.62236  | 0.123241 | 0.00767  | 0.061888 |
| -0.08706 | 0.06012  | -0.15867 | 0.00058  | 0.232033 | 3.97E-07 | 0.144362 | 0.00176  | 0.171605 |
| -0.22044 | 1.51E-06 | -0.18959 | 3.73E-05 | 0.015939 | 0.73119  | 0.132019 | 0.00427  | -0.02469 |
| -0.3199  | 1.43E-12 | -0.2938  | 9.45E-11 | -0.12945 | 0.00508  | -0.0785  | 0.09018  | -0.13471 |
| -0.21661 | 2.31E-06 | -0.13068 | 0.00468  | -0.02125 | 0.64691  | 0.134334 | 0.00363  | -0.06619 |
| -0.28498 | 3.55E-10 | -0.29531 | 7.49E-11 | -0.07624 | 0.09987  | 0.022852 | 0.62231  | -0.09123 |
| -0.16738 | 0.00028  | 0.038284 | 0.40914  | -0.01741 | 0.70749  | 0.017632 | 0.70392  | 0.086623 |
| -0.12723 | 0.0059   | -0.17373 | 0.00016  | 0.076383 | 0.09922  | 0.128759 | 0.00533  | 0.083747 |
| -0.00795 | 0.86396  | 0.040985 | 0.37686  | 0.37839  | 2.41E-17 | 0.335887 | 8.86E-14 | 0.308195 |
| -0.1819  | 7.70E-05 | -0.11862 | 0.0103   | -0.20917 | 5.15E-06 | -0.10004 | 0.03065  | -0.16592 |
| -0.22578 | 8.23E-07 | -0.04315 | 0.35216  | -0.04057 | 0.38171  | 0.103238 | 0.02568  | -0.06553 |
| -0.16952 | 0.00023  | -0.08296 | 0.07327  | 0.088312 | 0.05651  | 0.103909 | 0.02473  | 0.046697 |
| -0.18713 | 4.72E-05 | -0.11687 | 0.01149  | 0.04005  | 0.38786  | 0.172555 | 0.00018  | -0.00819 |
| 0.045544 | 0.32606  | 0.032503 | 0.48349  | 0.236371 | 2.37E-07 | 0.263602 | 7.30E-09 | 0.212258 |
| -0.21079 | 4.33E-06 | -0.09738 | 0.03541  | 0.151313 | 0.00104  | 0.240835 | 1.38E-07 | 0.097053 |
| -0.22626 | 7.79E-07 | -0.14444 | 0.00175  | 0.065755 | 0.15599  | 0.185388 | 5.57E-05 | 0.007251 |
| -0.25409 | 2.58E-08 | -0.18889 | 3.99E-05 | -0.01812 | 0.69615  | 0.10993  | 0.01748  | -0.05925 |
| -0.26539 | 5.73E-09 | -0.04029 | 0.38497  | -0.15304 | 0.00091  | -0.0239  | 0.60645  | -0.13943 |
| -0.20863 | 5.45E-06 | -0.19573 | 2.05E-05 | 0.023619 | 0.61067  | 0.142499 | 0.00202  | -0.03152 |
| -0.11859 | 0.01032  | -0.15561 | 0.00074  | 0.030509 | 0.51073  | 0.058123 | 0.20994  | -0.0429  |
| -0.10628 | 0.02162  | -0.02979 | 0.52076  | 0.03712  | 0.42354  | 0.188332 | 4.21E-05 | 0.015216 |
| -0.12078 | 0.00898  | -0.06167 | 0.18337  | 0.112862 | 0.01468  | 0.18686  | 4.84E-05 | 0.065692 |
| -0.18909 | 3.91E-05 | -0.17545 | 0.00014  | 0.135269 | 0.0034   | 0.16053  | 0.0005   | 0.063279 |
| 0.067166 | 0.14728  | 0.157127 | 0.00066  | 0.330095 | 2.47E-13 | 0.456068 | 2.29E-25 | 0.216333 |
| 0.503856 | 1.96E-31 | 0.143036 | 0.00194  | -0.13068 | 0.00468  | -0.1972  | 1.77E-05 | -0.08151 |
| -0.23405 | 3.13E-07 | -0.31781 | 2.02E-12 | 0.0377   | 0.41633  | -0.12478 | 0.00694  | -0.00166 |
| -0.30531 | 1.56E-11 | -0.24727 | 6.18E-08 | -0.06205 | 0.18071  | -0.01729 | 0.70947  | -0.06888 |
| -0.23088 | 4.55E-07 | -0.1633  | 0.0004   | 0.055198 | 0.23383  | 0.146506 | 0.0015   | -0.00515 |
| -0.07854 | 0.09001  | -0.14542 | 0.00163  | 0.070981 | 0.12559  | -0.04321 | 0.35147  | 0.11956  |
| -0.09029 | 0.05119  | -0.01854 | 0.68938  | 0.083645 | 0.07093  | 0.122189 | 0.00821  | 0.022814 |
| -0.01376 | 0.76675  | -0.21721 | 2.16E-06 | -0.00618 | 0.89399  | 0.057691 | 0.21335  | -0.19524 |
| -0.14599 | 0.00156  | -0.06984 | 0.13182  | 0.14038  | 0.00236  | 0.122888 | 0.00785  | 0.173831 |
| -0.07691 | 0.09693  | 0.073475 | 0.11281  | 0.076168 | 0.10018  | 0.154456 | 0.00081  | 0.078737 |

|          |          |          |          |          |          |          |          |          |
|----------|----------|----------|----------|----------|----------|----------|----------|----------|
| -0.13086 | 0.00462  | -0.19511 | 2.18E-05 | 0.065295 | 0.15891  | 0.107177 | 0.02053  | -0.01163 |
| -0.16244 | 0.00042  | -0.09613 | 0.03783  | 0.043869 | 0.34419  | 0.122606 | 0.00799  | 0.011418 |
| -0.21922 | 1.73E-06 | -0.17866 | 0.0001   | 0.083655 | 0.0709   | 0.009276 | 0.84154  | 0.069745 |
| -0.21629 | 2.39E-06 | -0.31638 | 2.57E-12 | -0.19714 | 1.78E-05 | -0.20689 | 6.55E-06 | -0.16869 |
| -0.10073 | 0.02952  | -0.24055 | 1.43E-07 | 0.115311 | 0.01265  | 0.049876 | 0.2821   | 0.070436 |
| -0.34533 | 1.59E-14 | -0.20305 | 9.76E-06 | -0.13245 | 0.00414  | 0.049988 | 0.28102  | -0.16139 |
| -0.26728 | 4.42E-09 | -0.26185 | 9.25E-09 | 0.051586 | 0.26591  | 0.10259  | 0.02663  | -0.02687 |
| 0.018298 | 0.69329  | -0.08951 | 0.05324  | 0.357121 | 1.71E-15 | 0.285957 | 3.08E-10 | 0.269698 |
| -0.06176 | 0.18277  | -0.17069 | 0.00021  | 0.260871 | 1.05E-08 | 0.197922 | 1.64E-05 | 0.151062 |
| 0.018365 | 0.69223  | -0.10949 | 0.01794  | 0.113416 | 0.01419  | 0.168973 | 0.00024  | 0.131353 |
| -0.21272 | 3.52E-06 | -0.15543 | 0.00075  | 0.040898 | 0.37788  | 0.181818 | 7.76E-05 | -0.02462 |
| -0.1777  | 0.00011  | -0.11909 | 0.01     | 0.045815 | 0.32318  | 0.164975 | 0.00034  | 0.002263 |
| 0.398449 | 3.21E-19 | 0.419296 | 2.62E-21 | 0.240237 | 1.48E-07 | 0.202951 | 9.86E-06 | 0.25924  |
| -0.19157 | 3.08E-05 | -0.11334 | 0.01426  | 0.119723 | 0.00961  | 0.135678 | 0.00331  | 0.140411 |
| -0.02478 | 0.59323  | -0.05529 | 0.23306  | 0.211627 | 3.96E-06 | 0.203729 | 9.10E-06 | 0.187932 |
| -0.04874 | 0.29323  | -0.08617 | 0.0628   | 0.263069 | 7.85E-09 | 0.273734 | 1.80E-09 | 0.164848 |
| -0.15545 | 0.00075  | -0.13506 | 0.00345  | 0.049963 | 0.28126  | 0.121236 | 0.00873  | 0.01931  |
| -0.16445 | 0.00036  | -0.23507 | 2.77E-07 | 0.133107 | 0.00396  | 0.140885 | 0.00228  | 0.045719 |
| -0.08853 | 0.0559   | -0.02651 | 0.56768  | 0.331297 | 2.00E-13 | 0.228661 | 5.90E-07 | 0.249093 |
| -0.27891 | 8.61E-10 | -0.15489 | 0.00078  | -0.27735 | 1.08E-09 | -0.20374 | 9.09E-06 | -0.18759 |
| -0.29165 | 1.31E-10 | -0.09182 | 0.04735  | -0.13901 | 0.00261  | 0.061911 | 0.18168  | -0.11738 |
| -0.24165 | 1.25E-07 | -0.09752 | 0.03513  | -0.10867 | 0.01882  | -0.0442  | 0.3406   | 0.007663 |
| -0.14494 | 0.00169  | -0.29816 | 4.82E-11 | 0.238707 | 1.79E-07 | 0.152033 | 0.00098  | 0.089356 |
| -0.02043 | 0.65963  | 0.003729 | 0.93594  | 0.156118 | 0.00071  | 0.177437 | 0.00012  | 0.133604 |
| -0.08326 | 0.07226  | -0.0691  | 0.13594  | 0.148073 | 0.00133  | 0.159115 | 0.00056  | 0.112077 |
| 0.086853 | 0.06074  | -0.00316 | 0.94576  | 0.199126 | 1.46E-05 | 0.082826 | 0.07375  | 0.197602 |
| -0.02136 | 0.64522  | -0.13939 | 0.00254  | 0.206223 | 7.02E-06 | 0.089304 | 0.05378  | 0.138646 |
| 0.026585 | 0.5666   | -0.04555 | 0.32601  | 0.130571 | 0.00471  | 0.143032 | 0.00194  | 0.083152 |
| -0.04263 | 0.35798  | -0.09218 | 0.04648  | -0.04209 | 0.36417  | 0.021306 | 0.64606  | 0.020866 |
| 0.021966 | 0.63588  | 0.020413 | 0.65995  | 0.144375 | 0.00176  | 0.169188 | 0.00024  | 0.121174 |
| -0.01139 | 0.80607  | 0.044148 | 0.34112  | -0.17788 | 0.00011  | -0.16874 | 0.00025  | -0.12698 |
| -0.16056 | 0.0005   | -0.15968 | 0.00053  | -0.00369 | 0.93665  | 0.074632 | 0.10724  | -0.04285 |
| -0.04149 | 0.37097  | -0.09041 | 0.05088  | 0.001321 | 0.97728  | -0.06093 | 0.18868  | 0.02457  |
| 0.064927 | 0.16127  | -0.04884 | 0.2922   | -0.1573  | 0.00065  | -0.1712  | 0.0002   | -0.17321 |
| 0.080248 | 0.08322  | 0.065322 | 0.15874  | -0.15653 | 0.00069  | -0.25545 | 2.16E-08 | -0.1928  |
| -0.11373 | 0.01392  | -0.11685 | 0.0115   | 0.102762 | 0.02638  | 0.183201 | 6.83E-05 | 0.093266 |
| -0.14248 | 0.00202  | -0.12558 | 0.00658  | 0.069362 | 0.13447  | 0.133629 | 0.00382  | 0.037442 |
| -0.25654 | 1.87E-08 | -0.2285  | 6.01E-07 | -0.21172 | 3.92E-06 | -0.05018 | 0.27915  | -0.19243 |
| -0.15363 | 0.00087  | -0.159   | 0.00056  | 0.081786 | 0.07746  | 0.076012 | 0.10088  | 0.104116 |
| -0.17251 | 0.00018  | -0.06018 | 0.1942   | 0.065471 | 0.15778  | 0.176425 | 0.00013  | 0.026886 |
| -0.06483 | 0.16191  | -0.12346 | 0.00756  | 0.151375 | 0.00103  | 0.111401 | 0.01602  | 0.117791 |
| -0.11093 | 0.01647  | -0.09311 | 0.04432  | 0.136704 | 0.00307  | 0.142386 | 0.00204  | 0.154733 |
| -0.1425  | 0.00202  | -0.13635 | 0.00315  | -0.0785  | 0.09019  | -0.02969 | 0.5222   | -0.07243 |
| -0.0465  | 0.31604  | -0.04682 | 0.31266  | 0.042148 | 0.36347  | 0.071284 | 0.12398  | -0.01868 |
| 0.019688 | 0.6713   | -0.03518 | 0.44822  | -0.07784 | 0.09291  | -0.10537 | 0.02277  | -0.13529 |



|          |          |          |          |          |          |          |          |          |
|----------|----------|----------|----------|----------|----------|----------|----------|----------|
| -0.24763 | 5.91E-08 | -0.21791 | 2.00E-06 | 0.012054 | 0.79501  | 0.047182 | 0.30894  | -0.04835 |
| -0.19826 | 1.59E-05 | -0.1835  | 6.64E-05 | 0.129067 | 0.00522  | 0.141226 | 0.00222  | 0.069289 |
| -0.07806 | 0.09202  | -0.12196 | 0.00833  | -0.04052 | 0.38227  | 0.015478 | 0.73868  | -0.05966 |
| -0.00616 | 0.89441  | -0.01689 | 0.71583  | 0.056269 | 0.22487  | 0.113249 | 0.01434  | 0.049153 |
| -0.37317 | 7.06E-17 | -0.22403 | 1.01E-06 | -0.32363 | 7.57E-13 | -0.16977 | 0.00023  | -0.34933 |
| -0.09736 | 0.03544  | -0.11216 | 0.01531  | 0.141577 | 0.00216  | 0.190942 | 3.27E-05 | 0.133127 |
| 0.014211 | 0.75938  | 0.019362 | 0.67644  | -0.27324 | 1.93E-09 | -0.30122 | 2.99E-11 | -0.23003 |
| -0.16008 | 0.00052  | -0.10401 | 0.02459  | 0.107458 | 0.0202   | 0.116583 | 0.01169  | 0.077555 |
| -0.19137 | 3.14E-05 | -0.15369 | 0.00086  | -0.24048 | 1.44E-07 | -0.13281 | 0.00404  | -0.19606 |
| -0.28628 | 2.93E-10 | -0.22357 | 1.06E-06 | -0.09737 | 0.03542  | 0.008853 | 0.84868  | -0.20058 |
| -0.29136 | 1.37E-10 | -0.28228 | 5.28E-10 | -0.09762 | 0.03495  | -0.06395 | 0.16772  | -0.13266 |
| -0.16312 | 0.0004   | -0.10732 | 0.02036  | 0.114299 | 0.01345  | 0.091819 | 0.04736  | 0.12069  |
| -0.09972 | 0.0312   | 0.010282 | 0.82462  | 0.234921 | 2.82E-07 | 0.303449 | 2.10E-11 | 0.149688 |
| -0.07971 | 0.08529  | -0.01622 | 0.72662  | 0.102092 | 0.02738  | 0.271218 | 2.56E-09 | -0.0026  |
| -0.1909  | 3.29E-05 | -0.05554 | 0.2309   | -0.16525 | 0.00034  | -0.04964 | 0.28438  | -0.0701  |
| -0.27065 | 2.77E-09 | -0.16759 | 0.00028  | -0.13283 | 0.00403  | -0.05109 | 0.27055  | -0.12443 |
| -0.10627 | 0.02163  | -0.12593 | 0.00643  | 0.005163 | 0.9114   | 0.053826 | 0.24568  | -0.02238 |
| -0.16597 | 0.00032  | -0.12795 | 0.00562  | -0.00227 | 0.96095  | 0.06702  | 0.14816  | -0.02383 |
| -0.11972 | 0.00961  | -0.06858 | 0.13893  | -0.01569 | 0.73523  | 0.068548 | 0.13911  | -0.04889 |
| -0.15983 | 0.00053  | -0.06726 | 0.1467   | 0.159352 | 0.00055  | 0.242947 | 1.06E-07 | 0.097692 |
| 0.0504   | 0.27707  | 0.153581 | 0.00087  | -0.0036  | 0.93818  | 0.000953 | 0.98362  | -0.05569 |
| 0.171642 | 0.00019  | -0.04294 | 0.35456  | -0.04794 | 0.30123  | -0.19854 | 1.55E-05 | -0.10428 |
| -0.15787 | 0.00062  | -0.2468  | 6.56E-08 | 0.024631 | 0.59547  | 0.128267 | 0.0055   | -0.09418 |
| -0.18085 | 8.49E-05 | -0.11792 | 0.01076  | -0.00484 | 0.91694  | 0.024821 | 0.59262  | -0.03325 |
| -0.18112 | 8.28E-05 | -0.19514 | 2.17E-05 | -0.01575 | 0.73423  | 0.035921 | 0.43868  | -0.05691 |
| -0.00316 | 0.94565  | -0.08026 | 0.08316  | 0.019761 | 0.67016  | -0.00776 | 0.86725  | 0.081073 |
| 0.000296 | 0.99491  | 0.112702 | 0.01482  | 0.103242 | 0.02568  | 0.353219 | 3.61E-15 | 0.016142 |
| -0.076   | 0.10095  | 0.063666 | 0.16958  | 0.189447 | 3.78E-05 | 0.279489 | 7.92E-10 | 0.110776 |
| -0.15715 | 0.00065  | -0.0757  | 0.10227  | -0.07279 | 0.11621  | 0.105291 | 0.02287  | -0.03307 |
| 0.291164 | 1.41E-10 | 0.077915 | 0.09261  | -0.07891 | 0.08849  | -0.01535 | 0.74074  | -0.06478 |
| 0.25217  | 3.31E-08 | 0.258519 | 1.44E-08 | 0.100217 | 0.03036  | 0.066797 | 0.14952  | 0.03347  |
| 0.116352 | 0.01186  | 0.153632 | 0.00087  | 0.014954 | 0.74722  | -0.15002 | 0.00115  | -0.0031  |
| -0.26801 | 4.00E-09 | -0.19019 | 3.52E-05 | -0.1261  | 0.00636  | 0.037612 | 0.41742  | -0.12664 |
| -0.18008 | 9.11E-05 | -0.07894 | 0.0884   | 0.021916 | 0.63664  | 0.14387  | 0.00183  | 0.038519 |
| -0.13749 | 0.00291  | -0.11676 | 0.01157  | 0.10936  | 0.01808  | 0.126106 | 0.00636  | 0.096263 |
| -0.28096 | 6.40E-10 | -0.38959 | 2.24E-18 | -0.01999 | 0.66653  | -0.03495 | 0.45113  | -0.08904 |
| -0.28371 | 4.28E-10 | -0.22654 | 7.54E-07 | -0.03094 | 0.50472  | 0.063204 | 0.17271  | -0.07661 |
| 0.011152 | 0.81005  | -0.07525 | 0.10434  | 0.183867 | 6.42E-05 | 0.116076 | 0.01207  | 0.149677 |
| -0.2453  | 7.91E-08 | -0.5528  | 1.00E-38 | -0.14873 | 0.00127  | -0.26    | 1.18E-08 | -0.16771 |
| -0.21396 | 3.08E-06 | -0.25457 | 2.42E-08 | -0.11072 | 0.01669  | -0.20186 | 1.10E-05 | -0.0633  |
| 0.087136 | 0.0599   | -0.04068 | 0.38044  | 0.228571 | 5.96E-07 | 0.150942 | 0.00107  | 0.165769 |
| -0.11219 | 0.01528  | -0.13065 | 0.00469  | 0.0097   | 0.8344   | 0.003052 | 0.94756  | 0.047329 |
| 0.017072 | 0.7129   | 0.105952 | 0.02202  | 0.121078 | 0.00881  | 0.068044 | 0.14205  | 0.215924 |
| -0.12446 | 0.00708  | -0.15318 | 0.0009   | 0.035303 | 0.4466   | -0.00457 | 0.92155  | 0.016602 |
| -0.22743 | 6.80E-07 | -0.19071 | 3.35E-05 | 0.004371 | 0.92495  | 0.074836 | 0.10628  | -0.01401 |

|          |          |          |          |          |          |          |          |          |
|----------|----------|----------|----------|----------|----------|----------|----------|----------|
| -0.23597 | 2.49E-07 | -0.31564 | 2.91E-12 | -0.0986  | 0.03315  | -0.17524 | 0.00014  | 0.001532 |
| -0.22105 | 1.41E-06 | -0.14272 | 0.00199  | -0.05467 | 0.23833  | -0.00656 | 0.88762  | -0.04442 |
| -0.19687 | 1.83E-05 | -0.14565 | 0.0016   | 0.097717 | 0.03477  | 0.2329   | 3.59E-07 | 0.046434 |
| 0.047626 | 0.30441  | 0.031573 | 0.4961   | 0.338269 | 5.78E-14 | 0.373415 | 6.71E-17 | 0.222229 |
| 0.143721 | 0.00185  | 0.136953 | 0.00302  | 0.027687 | 0.55062  | -0.05801 | 0.21081  | 0.030803 |
| -0.2099  | 4.76E-06 | 0.016058 | 0.72926  | -0.11074 | 0.01666  | 0.035291 | 0.44675  | -0.02789 |
| -0.07947 | 0.08628  | -0.05011 | 0.27986  | 0.18277  | 7.11E-05 | 0.137878 | 0.00283  | 0.109695 |
| -0.11835 | 0.01047  | -0.0781  | 0.09183  | 0.145584 | 0.00161  | 0.136464 | 0.00313  | 0.170874 |
| -0.30725 | 1.15E-11 | -0.28354 | 4.39E-10 | -0.12087 | 0.00894  | -0.02595 | 0.57592  | -0.16222 |
| -0.12493 | 0.00687  | -0.08926 | 0.0539   | 0.057529 | 0.21464  | 0.136236 | 0.00318  | 0.004408 |
| -0.1809  | 8.45E-05 | -0.12343 | 0.00758  | 0.009368 | 0.84     | 0.058457 | 0.20732  | 0.014039 |
| -0.071   | 0.12546  | 0.088116 | 0.05707  | 0.166652 | 0.0003   | 0.253865 | 2.66E-08 | 0.10554  |
| -0.3578  | 1.50E-15 | -0.31018 | 7.14E-12 | -0.13275 | 0.00406  | -0.07767 | 0.09365  | -0.23192 |
| -0.0552  | 0.23383  | 0.031243 | 0.50061  | 0.111887 | 0.01556  | 0.156992 | 0.00066  | 0.163862 |
| 0.059417 | 0.19995  | 0.080625 | 0.08177  | -0.17645 | 0.00013  | -0.16546 | 0.00033  | -0.19682 |
| -0.07715 | 0.09587  | 0.091288 | 0.04866  | 0.022342 | 0.63011  | 0.151937 | 0.00099  | 0.140304 |
| -0.30403 | 1.92E-11 | -0.17834 | 0.00011  | -0.07778 | 0.09317  | 0.125798 | 0.00649  | -0.11164 |
| 0.097153 | 0.03583  | 0.216467 | 2.34E-06 | 0.167724 | 0.00027  | 0.430103 | 1.89E-22 | 0.097886 |
| -0.20859 | 5.47E-06 | -0.14232 | 0.00205  | 0.14683  | 0.00146  | 0.215333 | 2.65E-06 | 0.086285 |
| -0.00676 | 0.8841   | -0.05047 | 0.27638  | 0.209505 | 4.97E-06 | 0.193737 | 2.49E-05 | 0.116205 |
| 0.06371  | 0.16929  | -0.0281  | 0.54472  | -0.05449 | 0.23993  | -0.20684 | 6.58E-06 | -0.02602 |
| -0.04468 | 0.33531  | -0.28345 | 4.45E-10 | 0.104968 | 0.02329  | 0.027505 | 0.55325  | -0.01968 |
| -0.41204 | 1.45E-20 | -0.30642 | 1.31E-11 | -0.27543 | 1.42E-09 | -0.1515  | 0.00102  | -0.22063 |
| 0.133129 | 0.00395  | 0.253557 | 2.76E-08 | 0.287279 | 2.53E-10 | 0.377083 | 3.16E-17 | 0.198919 |
| -0.29422 | 8.87E-11 | -0.14061 | 0.00232  | -0.02148 | 0.64343  | 0.169885 | 0.00023  | -0.06174 |
| -0.20093 | 1.21E-05 | -0.11893 | 0.0101   | -0.16463 | 0.00035  | -0.02307 | 0.61902  | -0.11941 |
| -0.16967 | 0.00023  | -0.14628 | 0.00153  | -0.05008 | 0.28013  | -0.01066 | 0.81827  | -0.05827 |
| -0.13494 | 0.00348  | -0.09299 | 0.04459  | 0.085727 | 0.06417  | 0.108904 | 0.01857  | 0.030023 |
| -0.20793 | 5.87E-06 | -0.28574 | 3.17E-10 | -0.19649 | 1.90E-05 | -0.15069 | 0.00109  | -0.14299 |
| -0.1545  | 0.00081  | -0.1775  | 0.00012  | 0.035935 | 0.4385   | 0.059231 | 0.20136  | -0.02878 |
| 0.14078  | 0.00229  | 0.170791 | 0.00021  | -0.04974 | 0.28344  | 0.01695  | 0.71487  | -0.08869 |
| -0.09248 | 0.04579  | -0.06251 | 0.17749  | 0.174125 | 0.00016  | 0.190202 | 3.52E-05 | 0.144624 |
| -0.07672 | 0.09776  | -0.12599 | 0.00641  | -0.1455  | 0.00162  | -0.17071 | 0.00021  | -0.07199 |
| -0.45393 | 4.07E-25 | -0.40767 | 3.98E-20 | -0.26956 | 3.23E-09 | -0.13142 | 0.00445  | -0.31836 |
| 0.356314 | 2.00E-15 | 0.238939 | 1.74E-07 | 0.253932 | 2.63E-08 | 0.165135 | 0.00034  | 0.202678 |
| 0.050984 | 0.27154  | -0.09044 | 0.05079  | -0.11935 | 0.00984  | -0.21293 | 3.44E-06 | -0.10721 |
| 0.274675 | 1.58E-09 | 0.14723  | 0.00142  | 0.356468 | 1.94E-15 | 0.078155 | 0.0916   | 0.255299 |
| -0.14776 | 0.00136  | -0.15399 | 0.00084  | 0.082863 | 0.07362  | 0.171502 | 0.0002   | 0.019605 |
| -0.27407 | 1.72E-09 | -0.28912 | 1.92E-10 | -0.13408 | 0.0037   | -0.08092 | 0.08067  | -0.11344 |
| 0.367195 | 2.36E-16 | 0.30696  | 1.20E-11 | 0.331218 | 2.03E-13 | 0.269516 | 3.25E-09 | 0.220392 |
| -0.09896 | 0.03252  | -0.04275 | 0.35661  | 0.089147 | 0.05421  | 0.277052 | 1.12E-09 | -0.01834 |
| 0.181377 | 8.09E-05 | 0.073691 | 0.11175  | -0.06929 | 0.13489  | -0.11861 | 0.01031  | -0.00178 |
| -0.14005 | 0.00242  | -0.01107 | 0.8114   | 0.030392 | 0.51236  | 0.136455 | 0.00313  | -0.02275 |
| 0.113975 | 0.01372  | 0.143743 | 0.00184  | 0.189327 | 3.83E-05 | 0.264632 | 6.35E-09 | 0.062391 |
| -0.05901 | 0.20307  | -0.0495  | 0.2857   | 0.015916 | 0.73157  | 0.116299 | 0.0119   | -0.09933 |

|          |          |          |          |          |          |          |          |          |
|----------|----------|----------|----------|----------|----------|----------|----------|----------|
| -0.09334 | 0.04379  | -0.02617 | 0.5726   | 0.049178 | 0.2889   | 0.059465 | 0.19958  | 0.02069  |
| -0.11429 | 0.01346  | -0.01374 | 0.76717  | 0.064589 | 0.16347  | 0.191786 | 3.02E-05 | 0.036671 |
| -0.15015 | 0.00114  | -0.08469 | 0.06746  | 0.041895 | 0.36635  | 0.134316 | 0.00364  | 0.050056 |
| -0.21467 | 2.85E-06 | -0.13361 | 0.00382  | -0.18737 | 4.61E-05 | -0.03634 | 0.43339  | -0.17444 |
| -0.23804 | 1.94E-07 | -0.13703 | 0.003    | -0.25679 | 1.81E-08 | -0.11284 | 0.01469  | -0.22059 |
| 0.113758 | 0.0139   | 0.002999 | 0.94846  | 0.005411 | 0.90717  | -0.14587 | 0.00157  | 0.067115 |
| 0.097887 | 0.03445  | -0.08997 | 0.05202  | 0.117102 | 0.01132  | 0.086994 | 0.06032  | 0.151434 |
| 0.14915  | 0.00123  | 0.209921 | 4.75E-06 | 0.317465 | 2.15E-12 | 0.409686 | 2.50E-20 | 0.211342 |
| -0.10609 | 0.02186  | -0.02896 | 0.53237  | 0.076799 | 0.09739  | 0.19899  | 1.48E-05 | 0.03133  |
| -0.08339 | 0.0718   | -0.01976 | 0.67015  | 0.110421 | 0.01698  | 0.195119 | 2.17E-05 | 0.069632 |
| -0.31409 | 3.76E-12 | -0.22672 | 7.39E-07 | -0.19476 | 2.25E-05 | -0.06103 | 0.18795  | -0.20315 |
| -0.27069 | 2.76E-09 | -0.06484 | 0.16182  | -0.15516 | 0.00077  | 0.027627 | 0.55148  | -0.14436 |
| -0.17596 | 0.00013  | -0.03067 | 0.50855  | 0.018994 | 0.68224  | 0.150034 | 0.00115  | -0.0062  |
| -0.20482 | 8.13E-06 | -0.10652 | 0.02132  | -0.03931 | 0.39665  | 0.090394 | 0.05092  | -0.05903 |
| -0.26017 | 1.16E-08 | -0.11162 | 0.01581  | -0.15464 | 0.0008   | 0.002701 | 0.95357  | -0.04722 |
| -0.26723 | 4.45E-09 | -0.20976 | 4.84E-06 | -0.05366 | 0.24714  | 0.081821 | 0.07733  | -0.09834 |
| -0.30638 | 1.32E-11 | -0.2018  | 1.11E-05 | -0.02352 | 0.6121   | 0.066085 | 0.15392  | -0.06212 |
| -0.07579 | 0.10186  | -0.18252 | 7.28E-05 | 0.013837 | 0.76552  | -0.0639  | 0.16805  | 0.002136 |
| -0.13303 | 0.00398  | -0.14325 | 0.00191  | 0.015501 | 0.73831  | 0.056139 | 0.22594  | 0.017658 |
| -0.15458 | 0.0008   | -0.17303 | 0.00017  | 0.100102 | 0.03055  | 0.128959 | 0.00525  | 0.041616 |
| -0.15705 | 0.00066  | -0.10354 | 0.02525  | -0.00076 | 0.98696  | 0.090316 | 0.05112  | -0.10567 |
| -0.36321 | 5.21E-16 | -0.22373 | 1.04E-06 | -0.2798  | 7.57E-10 | -0.15224 | 0.00097  | -0.28445 |
| 0.066567 | 0.15093  | 0.019725 | 0.67072  | -0.0852  | 0.06584  | -0.19167 | 3.05E-05 | -0.11748 |
| -0.19795 | 1.64E-05 | -0.18564 | 5.44E-05 | 0.068272 | 0.14071  | 0.02108  | 0.64955  | 0.09959  |
| -0.29656 | 6.19E-11 | -0.31214 | 5.18E-12 | -0.17636 | 0.00013  | -0.22703 | 7.13E-07 | -0.0765  |
| -0.0359  | 0.439    | -0.1479  | 0.00135  | 0.085119 | 0.06608  | 0.058955 | 0.20347  | 0.025954 |
| -0.37052 | 1.21E-16 | -0.15295 | 0.00091  | -0.30276 | 2.35E-11 | -0.1165  | 0.01175  | -0.24392 |
| -0.13699 | 0.00301  | -0.10116 | 0.02883  | -0.06474 | 0.16249  | -0.00429 | 0.92629  | -0.08183 |
| -0.05542 | 0.23192  | -0.08464 | 0.06763  | 0.193754 | 2.49E-05 | 0.33835  | 5.69E-14 | 0.10402  |
| 0.291729 | 1.29E-10 | -0.11392 | 0.01377  | -0.1815  | 8.00E-05 | -0.23254 | 3.74E-07 | -0.18418 |
| 0.410397 | 2.12E-20 | 0.06453  | 0.16386  | 0.073061 | 0.11485  | -0.08028 | 0.0831   | 0.093665 |
| -0.17401 | 0.00016  | -0.14392 | 0.00182  | -0.00372 | 0.93615  | 0.022745 | 0.62395  | 0.036813 |
| 0.206629 | 6.73E-06 | -0.09103 | 0.0493   | -0.20663 | 6.73E-06 | -0.31424 | 3.67E-12 | -0.14618 |
| -0.03226 | 0.48677  | 0.01322  | 0.77569  | -0.07332 | 0.11359  | 0.07103  | 0.12533  | -0.05127 |
| -0.06898 | 0.13665  | 0.098892 | 0.03263  | 0.118462 | 0.0104   | 0.207531 | 6.12E-06 | 0.106382 |
| -0.32038 | 1.32E-12 | -0.27909 | 8.39E-10 | -0.21268 | 3.54E-06 | -0.07648 | 0.09881  | -0.23217 |
| -0.06877 | 0.13783  | -0.0745  | 0.10787  | 0.081035 | 0.08023  | 0.115882 | 0.01221  | 0.06421  |
| 0.03754  | 0.41831  | -0.05233 | 0.25909  | 0.280873 | 6.48E-10 | 0.193005 | 2.68E-05 | 0.27823  |
| -0.18581 | 5.35E-05 | -0.33742 | 6.73E-14 | -0.07641 | 0.0991   | -0.13859 | 0.00269  | -0.05033 |
| -0.16961 | 0.00023  | -0.0865  | 0.0618   | -0.04192 | 0.3661   | -0.00038 | 0.99353  | -0.02882 |
| -0.19732 | 1.75E-05 | -0.28818 | 2.21E-10 | 0.145343 | 0.00164  | 0.048183 | 0.29878  | 0.068986 |
| -0.05631 | 0.22452  | 0.015578 | 0.73706  | 0.10842  | 0.0191   | 0.129261 | 0.00515  | 0.147117 |
| -0.14748 | 0.00139  | -0.13812 | 0.00278  | 0.044645 | 0.33571  | 0.115068 | 0.01284  | -0.01452 |
| 0.071391 | 0.12341  | 0.277886 | 9.97E-10 | 0.277148 | 1.11E-09 | 0.473734 | 1.69E-27 | 0.139677 |
| -0.24545 | 7.77E-08 | -0.32489 | 6.09E-13 | -0.09436 | 0.04152  | -0.08154 | 0.07837  | -0.16085 |

|          |          |          |          |          |          |          |          |          |
|----------|----------|----------|----------|----------|----------|----------|----------|----------|
| -0.18836 | 4.20E-05 | -0.13425 | 0.00365  | -0.08432 | 0.06867  | -0.03473 | 0.45396  | -0.00368 |
| -0.19306 | 2.66E-05 | -0.14434 | 0.00176  | 0.094786 | 0.04061  | 0.199652 | 1.38E-05 | 0.015685 |
| -0.07811 | 0.09179  | -0.15207 | 0.00098  | 0.074189 | 0.10934  | 0.037209 | 0.42242  | 0.10468  |
| -0.19389 | 2.45E-05 | -0.06873 | 0.13808  | -0.05283 | 0.25449  | 0.082538 | 0.07476  | -0.02262 |
| -0.02103 | 0.65035  | -0.1432  | 0.00192  | 0.01753  | 0.70555  | -0.0033  | 0.94329  | -0.05119 |
| -0.15097 | 0.00107  | -0.05028 | 0.27824  | 0.099248 | 0.03201  | 0.221945 | 1.27E-06 | 0.050259 |
| 0.185139 | 5.70E-05 | -0.20789 | 5.89E-06 | 0.084031 | 0.06964  | 0.087144 | 0.05987  | 0.037892 |
| -0.0559  | 0.22789  | -0.20093 | 1.21E-05 | 0.210108 | 4.66E-06 | 0.188142 | 4.29E-05 | 0.133818 |
| -0.19887 | 1.49E-05 | -0.17141 | 0.0002   | 0.091994 | 0.04693  | 0.095647 | 0.03881  | 0.01185  |
| -0.16143 | 0.00046  | -0.25451 | 2.44E-08 | -0.05691 | 0.21963  | -0.0854  | 0.0652   | -0.04484 |
| -0.14759 | 0.00138  | -0.11536 | 0.01261  | 0.080419 | 0.08256  | 0.197838 | 1.66E-05 | 0.043536 |
| -0.20286 | 9.95E-06 | -0.09404 | 0.04223  | 0.030045 | 0.51719  | 0.15961  | 0.00054  | -0.03616 |
| -0.08017 | 0.08351  | -0.02872 | 0.53579  | 0.224709 | 9.30E-07 | 0.33358  | 1.34E-13 | 0.141299 |
| -0.26567 | 5.51E-09 | -0.18374 | 6.49E-05 | -0.07038 | 0.1288   | 0.036165 | 0.43557  | -0.0934  |
| -0.2514  | 3.65E-08 | -0.17111 | 0.0002   | -0.03105 | 0.50321  | 0.119295 | 0.00987  | -0.08322 |
| -0.24809 | 5.57E-08 | -0.29897 | 4.25E-11 | 0.032874 | 0.47851  | 0.037345 | 0.42074  | -0.05122 |
| -0.04488 | 0.33313  | -0.06588 | 0.1552   | 0.301286 | 2.96E-11 | 0.301622 | 2.81E-11 | 0.201847 |
| -0.21648 | 2.34E-06 | -0.19299 | 2.68E-05 | -0.10278 | 0.02635  | -0.03683 | 0.42722  | -0.10345 |
| -0.12988 | 0.00494  | -0.09362 | 0.04317  | 0.065737 | 0.1561   | 0.068934 | 0.1369   | 0.074378 |
| -0.14077 | 0.0023   | -0.14066 | 0.00231  | -0.01355 | 0.77027  | 0.036266 | 0.43429  | -0.02742 |
| -0.11428 | 0.01347  | -0.06599 | 0.15453  | -0.02981 | 0.52042  | 0.036122 | 0.43612  | -0.03016 |
| -0.11708 | 0.01134  | -0.03641 | 0.43245  | 0.236316 | 2.39E-07 | 0.290486 | 1.56E-10 | 0.186453 |
| -0.19652 | 1.89E-05 | -0.08663 | 0.06141  | -0.0732  | 0.11415  | 0.083281 | 0.07217  | -0.05206 |
| -0.2321  | 3.94E-07 | -0.19664 | 1.87E-05 | -0.01209 | 0.79446  | 0.115558 | 0.01246  | -0.06691 |
| -0.12667 | 0.00612  | -0.11648 | 0.01177  | 0.147994 | 0.00134  | 0.150076 | 0.00114  | 0.109981 |
| -0.17314 | 0.00017  | -0.24435 | 8.91E-08 | -0.03379 | 0.46629  | 0.061443 | 0.18501  | -0.1474  |
| -0.20742 | 6.20E-06 | -0.16665 | 0.0003   | 0.032273 | 0.48659  | 0.1482   | 0.00132  | -0.05164 |
| -0.05946 | 0.1996   | -0.02686 | 0.56263  | -0.01166 | 0.80163  | -0.03423 | 0.46053  | 0.110994 |
| -0.15782 | 0.00062  | -0.10077 | 0.02946  | 0.035359 | 0.44588  | 0.145598 | 0.00161  | -0.01916 |
| -0.19369 | 2.50E-05 | -0.12928 | 0.00514  | -0.07851 | 0.09014  | -0.03965 | 0.39263  | -0.07697 |
| -0.22423 | 9.82E-07 | -0.1898  | 3.66E-05 | -0.00638 | 0.89062  | 0.099107 | 0.03225  | -0.13354 |
| -0.28175 | 5.70E-10 | -0.21224 | 3.71E-06 | -0.09589 | 0.03831  | 0.038231 | 0.40979  | -0.14411 |
| 0.01088  | 0.8146   | -0.07641 | 0.09912  | 0.063841 | 0.16841  | 0.132334 | 0.00417  | -0.02149 |
| 0.043884 | 0.34402  | -0.11232 | 0.01516  | 0.321754 | 1.04E-12 | 0.159152 | 0.00056  | 0.216522 |
| -0.05249 | 0.25757  | 0.010744 | 0.81688  | 0.257542 | 1.64E-08 | 0.281656 | 5.78E-10 | 0.199331 |
| -0.08526 | 0.06563  | 0.012534 | 0.78705  | 0.073259 | 0.11387  | 0.108054 | 0.01951  | 0.098166 |
| -0.11878 | 0.0102   | -0.01378 | 0.76653  | -0.10442 | 0.02404  | -0.07864 | 0.0896   | -0.01307 |
| 0.016194 | 0.72706  | -0.13116 | 0.00452  | 0.275755 | 1.35E-09 | 0.202302 | 1.05E-05 | 0.202517 |
| -0.20495 | 8.02E-06 | -0.12513 | 0.00678  | 0.011482 | 0.80455  | 0.116349 | 0.01187  | 0.012914 |
| -0.16046 | 0.0005   | -0.07616 | 0.10021  | 0.038101 | 0.41138  | 0.135948 | 0.00324  | 0.005823 |
| -0.19403 | 2.42E-05 | -0.17966 | 9.47E-05 | 0.088455 | 0.05611  | 0.169988 | 0.00022  | -0.00705 |
| 0.069189 | 0.13544  | -0.23531 | 2.69E-07 | -0.00089 | 0.98471  | -0.00152 | 0.9739   | -0.02876 |
| -0.25856 | 1.43E-08 | -0.23952 | 1.62E-07 | -0.00771 | 0.868    | 0.071285 | 0.12397  | -0.04164 |
| -0.36996 | 1.36E-16 | -0.26147 | 9.73E-09 | -0.18024 | 8.97E-05 | -0.01135 | 0.80678  | -0.2252  |
| -0.16872 | 0.00025  | -0.14525 | 0.00165  | -0.00117 | 0.97989  | 0.021747 | 0.63925  | -0.00549 |

|          |          |          |          |          |          |          |          |          |
|----------|----------|----------|----------|----------|----------|----------|----------|----------|
| 0.110839 | 0.01657  | -0.08719 | 0.05975  | 0.185991 | 5.26E-05 | 0.13307  | 0.00397  | 0.131294 |
| -0.21005 | 4.69E-06 | -0.20049 | 1.27E-05 | -0.04818 | 0.29881  | 0.040725 | 0.3799   | -0.05129 |
| -0.37658 | 3.51E-17 | -0.36423 | 4.26E-16 | -0.25022 | 4.25E-08 | -0.07856 | 0.08991  | -0.3091  |
| -0.07856 | 0.08995  | -0.20197 | 1.09E-05 | 0.217137 | 2.18E-06 | 0.145782 | 0.00158  | 0.050286 |
| -0.03788 | 0.41405  | -0.1224  | 0.0081   | 0.2951   | 7.74E-11 | 0.214186 | 3.00E-06 | 0.227647 |
| -0.04889 | 0.29175  | -0.03984 | 0.3903   | 0.306333 | 1.33E-11 | 0.376279 | 3.73E-17 | 0.167418 |
| -0.11009 | 0.01732  | -0.08588 | 0.06369  | 0.21004  | 4.69E-06 | 0.349984 | 6.66E-15 | 0.139853 |
| -0.1425  | 0.00202  | -0.07507 | 0.10519  | 0.176739 | 0.00012  | 0.171498 | 0.0002   | 0.112781 |
| -0.07918 | 0.08741  | -0.23411 | 3.11E-07 | 0.099589 | 0.03142  | -0.0086  | 0.85288  | 0.101768 |
| -0.2261  | 7.93E-07 | -0.24912 | 4.88E-08 | -0.07242 | 0.11807  | 0.02454  | 0.59683  | -0.09886 |
| -0.21363 | 3.19E-06 | -0.20337 | 9.44E-06 | -0.01343 | 0.77215  | 0.079252 | 0.08713  | -0.03671 |
| -0.2171  | 2.18E-06 | -0.13997 | 0.00243  | 0.039954 | 0.38899  | 0.166248 | 0.00031  | -0.01413 |
| -0.08266 | 0.07432  | -0.02608 | 0.57405  | 0.071105 | 0.12493  | 0.155028 | 0.00078  | -0.00705 |
| -0.00209 | 0.9641   | 0.124651 | 0.007    | -0.10892 | 0.01855  | -0.15491 | 0.00078  | -0.00146 |
| -0.17359 | 0.00016  | -0.26071 | 1.08E-08 | 0.031192 | 0.50132  | -0.03181 | 0.49287  | -0.00075 |
| -0.08213 | 0.07623  | -0.16545 | 0.00033  | 0.028679 | 0.53643  | 0.034442 | 0.45777  | -0.01373 |
| -0.22279 | 1.16E-06 | -0.24478 | 8.45E-08 | 0.084695 | 0.06745  | 0.042424 | 0.36032  | 0.06443  |
| -0.21256 | 3.58E-06 | -0.21489 | 2.78E-06 | 0.064672 | 0.16293  | 0.085787 | 0.06398  | 0.005581 |
| 0.178641 | 0.0001   | 0.429322 | 2.29E-22 | -0.03969 | 0.3921   | 0.119912 | 0.00949  | 0.056419 |
| -0.1604  | 0.0005   | -0.20494 | 8.03E-06 | 0.262945 | 7.98E-09 | 0.141745 | 0.00214  | 0.220839 |
| -0.24005 | 1.52E-07 | -0.07816 | 0.09156  | -0.0141  | 0.76125  | 0.112112 | 0.01535  | -0.01711 |
| -0.25896 | 1.36E-08 | -0.23854 | 1.82E-07 | 0.007035 | 0.87948  | -0.04504 | 0.33144  | -0.06565 |
| -0.11271 | 0.01482  | -0.08351 | 0.07141  | 0.03735  | 0.42068  | 0.119917 | 0.00949  | 0.038877 |
| -0.14038 | 0.00236  | -0.1144  | 0.01337  | -0.01166 | 0.80153  | 0.105352 | 0.02279  | -0.0325  |
| -0.21359 | 3.21E-06 | -0.1775  | 0.00012  | 0.091073 | 0.04919  | 0.204869 | 8.09E-06 | 0.006293 |
| -0.16261 | 0.00042  | -0.12347 | 0.00756  | -0.02139 | 0.64481  | 0.061588 | 0.18397  | -0.05979 |
| -0.27972 | 7.66E-10 | -0.32291 | 8.56E-13 | -0.18163 | 7.90E-05 | -0.09874 | 0.0329   | -0.18443 |
| -0.0785  | 0.09016  | -0.24922 | 4.83E-08 | 0.148281 | 0.00131  | 0.16422  | 0.00037  | 0.008017 |
| -0.12965 | 0.00502  | -0.12358 | 0.0075   | -0.05705 | 0.2185   | 0.050362 | 0.27744  | -0.08709 |
| -0.177   | 0.00012  | -0.09546 | 0.03919  | 0.200257 | 1.30E-05 | 0.27577  | 1.35E-09 | 0.137048 |
| -0.13725 | 0.00296  | -0.02061 | 0.65688  | 0.074517 | 0.10778  | 0.103855 | 0.02481  | 0.10004  |
| -0.17405 | 0.00016  | -0.13694 | 0.00302  | -0.09311 | 0.04432  | -0.01622 | 0.7267   | -0.06603 |
| -0.31647 | 2.53E-12 | -0.22173 | 1.30E-06 | -0.14989 | 0.00116  | 0.021326 | 0.64575  | -0.16861 |
| -0.17534 | 0.00014  | -0.16898 | 0.00024  | 0.111909 | 0.01554  | 0.147028 | 0.00144  | 0.040876 |
| 0.018043 | 0.69736  | -0.07418 | 0.10939  | 0.293045 | 1.06E-10 | 0.297769 | 5.13E-11 | 0.224597 |
| -0.35999 | 9.80E-16 | -0.33377 | 1.29E-13 | -0.36126 | 7.65E-16 | -0.19469 | 2.27E-05 | -0.30269 |
| 0.018124 | 0.69606  | -0.04359 | 0.34723  | 0.181935 | 7.68E-05 | 0.220293 | 1.53E-06 | 0.084381 |
| -0.04581 | 0.32319  | -0.0343  | 0.45967  | 0.071332 | 0.12372  | 0.114738 | 0.0131   | 0.089105 |
| 0.037929 | 0.4135   | -0.0628  | 0.17548  | 0.180844 | 8.49E-05 | 0.286029 | 3.04E-10 | 0.052749 |
| -0.22977 | 5.18E-07 | -0.08376 | 0.07056  | 0.004483 | 0.92303  | 0.104317 | 0.02417  | 0.004783 |
| -0.28593 | 3.09E-10 | -0.23789 | 1.97E-07 | -0.09022 | 0.05136  | 0.043224 | 0.35133  | -0.15206 |
| 0.056076 | 0.22646  | 0.18454  | 6.03E-05 | 0.204041 | 8.81E-06 | 0.256455 | 1.89E-08 | 0.235211 |
| -0.10206 | 0.02742  | -0.14882 | 0.00126  | 0.203726 | 9.11E-06 | 0.213079 | 3.39E-06 | 0.141241 |
| -0.22294 | 1.14E-06 | -0.16642 | 0.0003   | -0.01529 | 0.74177  | -0.00955 | 0.83686  | -0.02754 |
| 0.02106  | 0.64987  | -0.13045 | 0.00475  | 0.18924  | 3.86E-05 | 0.201171 | 1.18E-05 | 0.014883 |

|          |          |          |          |          |          |          |          |          |
|----------|----------|----------|----------|----------|----------|----------|----------|----------|
| 0.041029 | 0.37635  | -0.09726 | 0.03562  | -0.30255 | 2.43E-11 | -0.39062 | 1.79E-18 | -0.26427 |
| -0.07892 | 0.08847  | -0.05285 | 0.25435  | 0.151117 | 0.00105  | 0.145594 | 0.00161  | 0.105077 |
| -0.0478  | 0.30265  | -0.02526 | 0.58613  | 0.168317 | 0.00026  | 0.329851 | 2.58E-13 | 0.076846 |
| -0.01425 | 0.75872  | -0.14967 | 0.00118  | 0.36725  | 2.34E-16 | 0.270899 | 2.68E-09 | 0.272592 |
| -0.08101 | 0.08033  | 0.028712 | 0.53595  | 0.205838 | 7.31E-06 | 0.226562 | 7.52E-07 | 0.229482 |
| -0.03569 | 0.44158  | 0.009886 | 0.83127  | 0.108722 | 0.01876  | 0.135733 | 0.00329  | 0.113616 |
| -0.25494 | 2.31E-08 | -0.48895 | 1.94E-29 | -0.04284 | 0.35558  | -0.19954 | 1.40E-05 | -0.07    |
| -0.08926 | 0.05391  | -0.12376 | 0.00741  | 0.045931 | 0.32196  | 0.194609 | 2.29E-05 | -0.07074 |
| -0.26985 | 3.10E-09 | -0.29255 | 1.14E-10 | -0.11768 | 0.01092  | -0.08886 | 0.05499  | -0.15788 |
| -0.39369 | 9.19E-19 | -0.34652 | 1.27E-14 | -0.28072 | 6.63E-10 | -0.16943 | 0.00023  | -0.2691  |
| -0.11104 | 0.01637  | -0.03715 | 0.42317  | 0.260515 | 1.11E-08 | 0.300955 | 3.12E-11 | 0.213919 |
| -0.03967 | 0.39243  | 0.034501 | 0.45699  | 0.326276 | 4.80E-13 | 0.320508 | 1.29E-12 | 0.220027 |
| -0.15722 | 0.00065  | -0.12254 | 0.00803  | 0.173201 | 0.00017  | 0.157507 | 0.00064  | 0.149118 |
| -0.3562  | 2.04E-15 | -0.21794 | 1.99E-06 | -0.10279 | 0.02633  | 0.107579 | 0.02005  | -0.13246 |
| -0.12281 | 0.00789  | -0.05784 | 0.2122   | 0.052889 | 0.25401  | 0.08658  | 0.06155  | 0.014086 |
| -0.19963 | 1.39E-05 | -0.11303 | 0.01453  | 0.01492  | 0.74777  | 0.037902 | 0.41383  | -0.00438 |
| -0.18537 | 5.58E-05 | -0.31664 | 2.46E-12 | -0.02001 | 0.66631  | -0.12412 | 0.00724  | -0.03234 |
| -0.36117 | 7.78E-16 | -0.3702  | 1.29E-16 | -0.21529 | 2.66E-06 | -0.10919 | 0.01826  | -0.23822 |
| -0.16325 | 0.0004   | -0.06514 | 0.15989  | -0.0737  | 0.11171  | 0.098248 | 0.03379  | -0.10318 |
| -0.07708 | 0.09618  | 0.035927 | 0.4386   | 0.081722 | 0.07769  | 0.107003 | 0.02073  | 0.081055 |
| 0.070183 | 0.12991  | 0.186366 | 5.07E-05 | -0.12796 | 0.00562  | -0.13558 | 0.00333  | -0.07723 |
| -0.0832  | 0.07246  | 0.059017 | 0.203    | 0.07323  | 0.11402  | 0.208584 | 5.48E-06 | 0.078672 |
| -0.01716 | 0.7115   | 0.119144 | 0.00997  | 0.131539 | 0.00441  | 0.170157 | 0.00022  | 0.088131 |
| -0.2081  | 5.77E-06 | -0.14515 | 0.00166  | 0.072031 | 0.12008  | 0.141218 | 0.00222  | 0.041702 |
| -0.12191 | 0.00836  | -0.07906 | 0.08789  | 0.14036  | 0.00236  | 0.244117 | 9.18E-08 | 0.037618 |
| 0.058432 | 0.20752  | 0.033982 | 0.4638   | 0.230471 | 4.78E-07 | 0.196009 | 1.99E-05 | 0.202198 |
| -0.05591 | 0.22782  | -0.03155 | 0.49636  | 0.133213 | 0.00393  | 0.112963 | 0.01459  | 0.136667 |
| -0.08857 | 0.05581  | 0.077308 | 0.09519  | 0.110883 | 0.01652  | 0.182202 | 7.49E-05 | 0.186603 |
| -0.1681  | 0.00026  | -0.0671  | 0.14767  | 0.029187 | 0.52924  | 0.063112 | 0.17334  | 0.039509 |
| -0.08165 | 0.07796  | 0.026744 | 0.56428  | 0.197965 | 1.64E-05 | 0.275423 | 1.42E-09 | 0.225272 |
| -0.23146 | 4.25E-07 | -0.15773 | 0.00062  | 0.062907 | 0.17474  | 0.189567 | 3.74E-05 | 0.01359  |
| -0.04599 | 0.32137  | -0.14646 | 0.0015   | 0.110018 | 0.01739  | 0.047699 | 0.30367  | 0.12836  |
| -0.00837 | 0.85688  | -0.01654 | 0.72146  | 0.290373 | 1.59E-10 | 0.287793 | 2.34E-10 | 0.213146 |
| -0.08361 | 0.07106  | -0.15339 | 0.00088  | 0.016248 | 0.72618  | 0.144265 | 0.00177  | -0.06686 |
| 0.241441 | 1.28E-07 | 0.43484  | 5.79E-23 | 0.080055 | 0.08396  | 0.156566 | 0.00069  | 0.082397 |
| -0.20808 | 5.78E-06 | -0.19198 | 2.96E-05 | 0.012431 | 0.78876  | 0.137953 | 0.00281  | -0.09526 |
| -0.02289 | 0.6218   | 0.00788  | 0.86514  | 0.131608 | 0.00439  | 0.138094 | 0.00278  | 0.094544 |
| -0.02479 | 0.59304  | -0.09435 | 0.04156  | 0.219069 | 1.76E-06 | 0.16392  | 0.00038  | 0.122251 |
| 0.106712 | 0.02108  | 0.114308 | 0.01345  | 0.080461 | 0.0824   | 0.007939 | 0.86414  | -0.01753 |
| -0.07805 | 0.09202  | -0.14545 | 0.00162  | 0.0373   | 0.42129  | 0.042082 | 0.36421  | 0.076769 |
| -0.06633 | 0.15237  | -0.22337 | 1.08E-06 | 0.176822 | 0.00012  | 0.113935 | 0.01376  | 0.101815 |
| -0.18234 | 7.40E-05 | -0.10415 | 0.0244   | -0.02204 | 0.63476  | 0.124669 | 0.00699  | -0.03956 |
| 0.053034 | 0.2527   | 0.161878 | 0.00044  | 0.271413 | 2.49E-09 | 0.293468 | 9.94E-11 | 0.276713 |
| -0.0802  | 0.08338  | -0.10568 | 0.02236  | 0.110166 | 0.01724  | 0.15737  | 0.00064  | 0.130199 |
| -0.303   | 2.26E-11 | -0.25613 | 1.98E-08 | -0.24208 | 1.18E-07 | -0.21022 | 4.61E-06 | -0.20213 |

|          |          |          |          |          |          |          |          |          |
|----------|----------|----------|----------|----------|----------|----------|----------|----------|
| -0.00723 | 0.87617  | 0.006128 | 0.89493  | -0.09499 | 0.04018  | -0.23217 | 3.91E-07 | -0.05933 |
| -0.15048 | 0.00111  | -0.32056 | 1.28E-12 | 0.09578  | 0.03854  | 0.02449  | 0.59757  | 0.032453 |
| 0.105595 | 0.02248  | -0.09671 | 0.0367   | 0.199638 | 1.38E-05 | 0.175708 | 0.00014  | 0.042524 |
| 0.337986 | 6.08E-14 | 0.187089 | 4.74E-05 | 0.084212 | 0.06904  | 0.043412 | 0.34924  | 0.036638 |
| -0.21033 | 4.55E-06 | -0.07736 | 0.09496  | 0.067206 | 0.14704  | 0.056878 | 0.21988  | 0.035459 |
| -0.19596 | 2.00E-05 | -0.19559 | 2.08E-05 | -0.01354 | 0.77048  | 0.052596 | 0.25664  | -0.01613 |
| -0.13772 | 0.00286  | -0.12262 | 0.00798  | 0.053391 | 0.24952  | 0.089048 | 0.05448  | 0.039039 |
| -0.25962 | 1.25E-08 | -0.21465 | 2.86E-06 | -0.02711 | 0.55901  | 0.104408 | 0.02405  | -0.07614 |
| -0.11773 | 0.01089  | -0.24045 | 1.44E-07 | 0.116601 | 0.01168  | 0.15119  | 0.00105  | -0.01001 |
| -0.17568 | 0.00014  | -0.14693 | 0.00145  | 0.00873  | 0.85076  | 0.057297 | 0.21649  | 0.041165 |
| 0.184617 | 5.98E-05 | 0.033539 | 0.46965  | -0.08966 | 0.05283  | -0.19803 | 1.63E-05 | -0.04993 |
| -0.09186 | 0.04726  | -0.09496 | 0.04024  | 0.026873 | 0.56241  | 0.053189 | 0.25132  | -0.00738 |
| -0.11626 | 0.01193  | -0.07099 | 0.12556  | 0.142735 | 0.00199  | 0.245107 | 8.11E-08 | 0.086786 |
| -0.23792 | 1.96E-07 | -0.20708 | 6.42E-06 | -0.0897  | 0.05274  | -0.09804 | 0.03416  | -0.0459  |
| -0.05388 | 0.24518  | -0.07104 | 0.12527  | 0.246872 | 6.50E-08 | 0.200289 | 1.29E-05 | 0.226899 |
| -0.17428 | 0.00015  | -0.12532 | 0.0067   | 0.045294 | 0.32872  | 0.13531  | 0.00339  | -0.00012 |
| -0.2098  | 4.82E-06 | -0.16009 | 0.00052  | 0.10417  | 0.02437  | 0.216666 | 2.29E-06 | 0.032068 |
| 0.040144 | 0.38674  | -0.41381 | 9.58E-21 | -0.00702 | 0.87966  | -0.10624 | 0.02166  | -0.06137 |
| -0.15949 | 0.00054  | -0.09583 | 0.03844  | 0.062277 | 0.1791   | 0.168109 | 0.00026  | 0.013157 |
| -0.36711 | 2.40E-16 | -0.25553 | 2.14E-08 | -0.17638 | 0.00013  | -0.0226  | 0.62619  | -0.20277 |
| -0.07135 | 0.12363  | 0.042078 | 0.36425  | 0.055057 | 0.23503  | 0.06427  | 0.16556  | 0.04588  |
| -0.08247 | 0.075    | -0.01644 | 0.72312  | 0.025184 | 0.58723  | 0.115789 | 0.01228  | 0.009765 |
| -0.01243 | 0.78881  | 0.012703 | 0.78424  | 0.193918 | 2.45E-05 | 0.287882 | 2.31E-10 | 0.057697 |
| 0.024321 | 0.60011  | -0.13877 | 0.00265  | 0.185707 | 5.40E-05 | 0.115983 | 0.01214  | 0.096324 |
| -0.31272 | 4.71E-12 | -0.2353  | 2.69E-07 | -0.09372 | 0.04295  | -0.01187 | 0.79812  | -0.10726 |
| -0.18448 | 6.06E-05 | -0.04239 | 0.36072  | 0.006155 | 0.89447  | 0.067781 | 0.1436   | 0.013452 |
| -0.20132 | 1.17E-05 | -0.03331 | 0.47274  | 0.085752 | 0.06409  | 0.259066 | 1.34E-08 | 0.027299 |
| 0.102381 | 0.02694  | -0.00969 | 0.83459  | 0.038871 | 0.40199  | -0.14681 | 0.00147  | 0.047334 |
| -0.18636 | 5.08E-05 | -0.08447 | 0.06817  | -0.02663 | 0.56595  | 0.096515 | 0.03707  | -0.10246 |
| -0.20667 | 6.70E-06 | -0.3433  | 2.31E-14 | 0.061321 | 0.18588  | -0.11705 | 0.01136  | -0.04918 |
| -0.0681  | 0.14174  | -0.06394 | 0.16777  | 0.188681 | 4.07E-05 | 0.287508 | 2.44E-10 | 0.150404 |
| -0.13289 | 0.00402  | -0.15666 | 0.00068  | 0.2131   | 3.38E-06 | 0.217487 | 2.09E-06 | 0.104196 |
| -0.0801  | 0.0838   | -0.07665 | 0.09803  | 0.115109 | 0.01281  | 0.111959 | 0.0155   | 0.061214 |
| 0.004243 | 0.92713  | 0.01631  | 0.72518  | -0.15109 | 0.00106  | -0.19891 | 1.49E-05 | -0.16134 |
| -0.01969 | 0.67122  | 0.024308 | 0.6003   | 0.235253 | 2.71E-07 | 0.227496 | 6.75E-07 | 0.209317 |
| -0.25729 | 1.70E-08 | -0.11623 | 0.01195  | -0.00285 | 0.95094  | 0.043381 | 0.34958  | 0.002691 |
| -0.12771 | 0.00572  | -0.16701 | 0.00029  | 0.077709 | 0.09347  | -0.00739 | 0.87348  | 0.017749 |
| -0.31195 | 5.35E-12 | -0.22751 | 6.74E-07 | -0.14711 | 0.00143  | 0.012965 | 0.7799   | -0.18763 |
| -0.03722 | 0.42229  | -0.10163 | 0.02808  | 0.090416 | 0.05086  | 0.082759 | 0.07399  | 0.038746 |
| -0.1307  | 0.00467  | -0.11262 | 0.01489  | -0.04091 | 0.37771  | -0.04098 | 0.37689  | -0.05799 |
| 0.230584 | 4.71E-07 | 0.043918 | 0.34364  | -0.12379 | 0.0074   | -0.20405 | 8.81E-06 | -0.11068 |
| -0.00864 | 0.85232  | 0.046854 | 0.31232  | -0.18533 | 5.59E-05 | -0.23308 | 3.51E-07 | -0.13731 |
| -0.14706 | 0.00144  | -0.21332 | 3.30E-06 | 0.146131 | 0.00154  | 0.103253 | 0.02566  | 0.053902 |
| -0.02673 | 0.56455  | -0.10547 | 0.02264  | 0.092545 | 0.04562  | -0.00671 | 0.88504  | 0.131988 |
| -0.21066 | 4.39E-06 | -0.10716 | 0.02054  | -0.05121 | 0.2694   | -0.01041 | 0.82247  | -0.06473 |

|          |          |          |          |          |          |          |          |          |
|----------|----------|----------|----------|----------|----------|----------|----------|----------|
| 0.305143 | 1.61E-11 | 0.251263 | 3.72E-08 | 0.363794 | 4.64E-16 | 0.203178 | 9.64E-06 | 0.293456 |
| -0.1092  | 0.01825  | -0.17561 | 0.00014  | 0.004397 | 0.9245   | 0.033311 | 0.47268  | -0.02666 |
| -0.37634 | 3.68E-17 | -0.26484 | 6.17E-09 | -0.14658 | 0.00149  | -0.01036 | 0.8233   | -0.17447 |
| -0.32233 | 9.44E-13 | -0.26266 | 8.29E-09 | -0.02633 | 0.57027  | 0.072004 | 0.12022  | -0.08213 |
| -0.17301 | 0.00017  | -0.142   | 0.0021   | 0.072633 | 0.117    | 0.125117 | 0.00679  | 0.065568 |
| -0.2677  | 4.18E-09 | -0.17223 | 0.00018  | -0.22098 | 1.42E-06 | -0.08921 | 0.05405  | -0.22432 |
| -0.16886 | 0.00025  | -0.12701 | 0.00599  | 0.130719 | 0.00466  | 0.193292 | 2.60E-05 | 0.029538 |
| 0.40467  | 7.92E-20 | 0.100106 | 0.03055  | -0.19581 | 2.03E-05 | -0.15589 | 0.00072  | -0.1114  |
| -0.12009 | 0.00938  | 0.008414 | 0.8561   | -0.25    | 4.37E-08 | -0.23469 | 2.90E-07 | -0.16209 |
| 0.023225 | 0.61664  | 0.26471  | 6.28E-09 | -0.14959 | 0.00119  | -0.11096 | 0.01645  | -0.11336 |
| 0.283412 | 4.48E-10 | 0.234037 | 3.13E-07 | 0.166856 | 0.00029  | 0.065981 | 0.15457  | 0.293659 |
| 0.080336 | 0.08288  | -0.09875 | 0.03288  | 0.160434 | 0.0005   | 0.163363 | 0.00039  | 0.110788 |
| -0.10409 | 0.02448  | -0.07282 | 0.11605  | 0.06698  | 0.1484   | 0.094459 | 0.04131  | -0.00663 |
| 0.579156 | 3.51E-43 | 0.288082 | 2.24E-10 | 0.156894 | 0.00067  | 0.117274 | 0.0112   | 0.119462 |
| -0.19151 | 3.10E-05 | -0.16009 | 0.00052  | -0.119   | 0.01006  | 0.009407 | 0.83933  | -0.09952 |
| -0.14918 | 0.00122  | -0.08846 | 0.05611  | 0.125885 | 0.00645  | 0.190576 | 3.39E-05 | 0.074117 |
| -0.04861 | 0.29452  | 0.069195 | 0.13541  | 0.01148  | 0.80457  | 0.164604 | 0.00035  | 0.038926 |
| -0.01073 | 0.81703  | -0.16188 | 0.00044  | 0.079709 | 0.08531  | 0.076572 | 0.09839  | 0.007264 |
| -0.06318 | 0.17289  | 0.024256 | 0.60109  | 0.211081 | 4.20E-06 | 0.249565 | 4.62E-08 | 0.131619 |
| -0.20882 | 5.34E-06 | -0.28824 | 2.19E-10 | 0.081974 | 0.07678  | 0.042501 | 0.35945  | -0.05414 |
| -0.27686 | 1.15E-09 | -0.24113 | 1.33E-07 | -0.08235 | 0.07543  | 0.047093 | 0.30986  | -0.14884 |
| -0.23031 | 4.86E-07 | -0.08126 | 0.07939  | -0.18389 | 6.40E-05 | -0.07672 | 0.09773  | -0.1378  |
| -0.29777 | 5.13E-11 | -0.13786 | 0.00283  | -0.23312 | 3.49E-07 | -0.03217 | 0.48803  | -0.23351 |
| -0.23609 | 2.45E-07 | -0.23453 | 2.95E-07 | 0.070012 | 0.13085  | 0.130087 | 0.00487  | -0.01291 |
| 0.243797 | 9.55E-08 | -0.02707 | 0.55955  | 0.268447 | 3.77E-09 | -0.03456 | 0.45621  | 0.235206 |
| -0.25314 | 2.92E-08 | -0.19233 | 2.86E-05 | -0.01442 | 0.75598  | 0.125795 | 0.00649  | -0.06323 |
| -0.22945 | 5.38E-07 | -0.13256 | 0.00411  | -0.04332 | 0.35029  | 0.062124 | 0.18018  | -0.00883 |
| -0.22342 | 1.08E-06 | -0.14298 | 0.00195  | -0.12558 | 0.00658  | 0.00269  | 0.95376  | -0.16193 |
| -0.16158 | 0.00046  | -0.08515 | 0.06598  | 0.022547 | 0.62697  | 0.14045  | 0.00235  | -0.00668 |
| -0.02533 | 0.58505  | 0.051503 | 0.26668  | 0.079017 | 0.08807  | 0.105794 | 0.02222  | 0.081939 |
| -0.17449 | 0.00015  | -0.07731 | 0.09518  | 0.039588 | 0.39335  | 0.21574  | 2.54E-06 | -0.01409 |
| -0.12804 | 0.00559  | 0.053296 | 0.25036  | 0.127042 | 0.00597  | 0.312208 | 5.13E-12 | 0.133242 |
| -0.105   | 0.02326  | 0.01962  | 0.67236  | 0.191935 | 2.97E-05 | 0.270096 | 3.00E-09 | 0.181479 |
| -0.26845 | 3.76E-09 | -0.12764 | 0.00574  | -0.17916 | 9.91E-05 | -0.03352 | 0.46988  | -0.09891 |
| -0.18291 | 7.02E-05 | -0.06942 | 0.13413  | -0.03881 | 0.40274  | -0.01202 | 0.79553  | -0.00097 |
| 0.132725 | 0.00406  | 0.009605 | 0.836    | -0.09421 | 0.04184  | -0.27985 | 7.52E-10 | -0.03501 |
| -0.35374 | 3.27E-15 | -0.49068 | 1.15E-29 | -0.11954 | 0.00972  | -0.18381 | 6.45E-05 | -0.24928 |
| 0.091528 | 0.04807  | 0.030162 | 0.51556  | 0.168835 | 0.00025  | 0.255268 | 2.21E-08 | 0.149673 |
| -0.06475 | 0.1624   | 0.014847 | 0.74896  | 0.196257 | 1.94E-05 | 0.278717 | 8.85E-10 | 0.148159 |
| 0.0577   | 0.21328  | 0.08025  | 0.08321  | 0.274873 | 1.53E-09 | 0.388535 | 2.81E-18 | 0.198946 |
| -0.00875 | 0.85043  | 0.054206 | 0.24235  | 0.128434 | 0.00544  | 0.175829 | 0.00013  | 0.11144  |
| -0.0971  | 0.03592  | -0.06885 | 0.13736  | 0.157397 | 0.00064  | 0.184662 | 5.96E-05 | 0.131747 |
| -0.00442 | 0.92404  | -0.08101 | 0.08031  | 0.278293 | 9.41E-10 | 0.201293 | 1.17E-05 | 0.226889 |
| 0.002591 | 0.95547  | -0.32072 | 1.24E-12 | -0.19174 | 3.03E-05 | -0.35832 | 1.36E-15 | -0.12298 |
| -0.50294 | 2.61E-31 | -0.19349 | 2.55E-05 | -0.37068 | 1.17E-16 | -0.1552  | 0.00076  | -0.33205 |



|          |          |          |          |          |          |          |          |          |
|----------|----------|----------|----------|----------|----------|----------|----------|----------|
| -0.05953 | 0.19912  | -0.07706 | 0.09627  | 0.062047 | 0.18072  | 0.124019 | 0.00729  | -0.00046 |
| -0.10529 | 0.02287  | 0.006906 | 0.88169  | 0.066454 | 0.15162  | 0.07322  | 0.11407  | 0.036886 |
| -0.34941 | 7.42E-15 | -0.21576 | 2.53E-06 | -0.11822 | 0.01056  | 0.077428 | 0.09467  | -0.16977 |
| -0.09454 | 0.04114  | -0.12752 | 0.00579  | 0.130337 | 0.00479  | 0.170362 | 0.00022  | 0.083978 |
| -0.10865 | 0.01885  | -0.12313 | 0.00773  | 0.012622 | 0.78559  | 0.10016  | 0.03045  | -0.04442 |
| -0.06427 | 0.16557  | 0.012288 | 0.79113  | 0.1304   | 0.00477  | 0.081753 | 0.07758  | 0.210762 |
| -0.154   | 0.00084  | 0.016826 | 0.71686  | 0.087374 | 0.0592   | 0.224111 | 9.96E-07 | 0.102977 |
| 0.097314 | 0.03553  | 0.208747 | 5.39E-06 | -0.10384 | 0.02483  | -0.09275 | 0.04514  | 0.065045 |
| -0.00557 | 0.90452  | -0.04294 | 0.35446  | 0.348177 | 9.35E-15 | 0.326804 | 4.38E-13 | 0.226107 |
| -0.18471 | 5.93E-05 | -0.07392 | 0.11064  | 0.043494 | 0.34833  | 0.138554 | 0.00269  | 0.010942 |
| -0.1862  | 5.16E-05 | -0.14665 | 0.00148  | -0.04384 | 0.34453  | 0.098057 | 0.03414  | -0.08885 |
| 0.130417 | 0.00476  | -0.11162 | 0.01582  | 0.133115 | 0.00395  | -0.10027 | 0.03028  | 0.023813 |
| -0.0878  | 0.05796  | 0.03054  | 0.51031  | 0.014496 | 0.75471  | 0.094108 | 0.04208  | 0.019844 |
| 0.242965 | 1.06E-07 | 0.17159  | 0.00019  | 0.031765 | 0.49348  | -0.06868 | 0.13834  | 0.027817 |
| -0.11642 | 0.01181  | -0.04695 | 0.31132  | -0.04119 | 0.37451  | -0.02451 | 0.5973   | -0.01615 |
| -0.02776 | 0.54957  | -0.12469 | 0.00698  | 0.102383 | 0.02694  | 0.113417 | 0.01419  | 0.062997 |
| -0.15142 | 0.00103  | 0.006332 | 0.89144  | 0.13994  | 0.00244  | 0.250028 | 4.35E-08 | 0.093153 |
| -0.17576 | 0.00013  | -0.24866 | 5.18E-08 | -0.06535 | 0.15855  | 0.034296 | 0.45968  | -0.09753 |
| -0.01935 | 0.67659  | -0.10901 | 0.01845  | 0.174301 | 0.00015  | 0.157238 | 0.00065  | 0.142657 |
| -0.1975  | 1.72E-05 | -0.08517 | 0.06594  | -0.17147 | 0.0002   | -0.00116 | 0.98012  | -0.08566 |
| -0.23918 | 1.69E-07 | -0.21255 | 3.59E-06 | -0.15007 | 0.00114  | -0.02611 | 0.57353  | -0.12977 |
| -0.14052 | 0.00234  | -0.13392 | 0.00374  | -0.09268 | 0.04531  | -0.05219 | 0.26035  | -0.06181 |
| 0.011725 | 0.8005   | -0.09425 | 0.04176  | 0.158062 | 0.00061  | 0.199881 | 1.35E-05 | 0.23171  |
| -0.25094 | 3.87E-08 | -0.10836 | 0.01916  | -0.01235 | 0.79004  | 0.169853 | 0.00023  | -0.04382 |
| -0.0459  | 0.32225  | -0.01396 | 0.76355  | 0.095297 | 0.03954  | 0.083038 | 0.07301  | 0.14937  |
| -0.09648 | 0.03715  | -0.12281 | 0.00789  | -0.03149 | 0.49721  | -0.04814 | 0.29925  | 0.053973 |
| -0.16451 | 0.00036  | -0.17765 | 0.00011  | -0.05454 | 0.23944  | 0.038829 | 0.40249  | -0.09146 |
| -0.15803 | 0.00061  | 0.006613 | 0.88667  | 0.013381 | 0.77304  | 0.127738 | 0.0057   | 0.043315 |
| 0.117694 | 0.01091  | 0.275431 | 1.42E-09 | 0.361032 | 7.99E-16 | 0.363494 | 4.93E-16 | 0.413155 |
| -0.2083  | 5.64E-06 | -0.13744 | 0.00292  | -0.10668 | 0.02113  | -0.00245 | 0.95796  | -0.17544 |
| -0.25197 | 3.39E-08 | -0.2776  | 1.04E-09 | -0.01775 | 0.70207  | -0.04662 | 0.3147   | -0.01283 |
| -0.15019 | 0.00113  | -0.04637 | 0.3174   | 0.078889 | 0.08859  | 0.266264 | 5.08E-09 | -0.01141 |
| -0.0863  | 0.0624   | 0.011998 | 0.79595  | 0.046803 | 0.31285  | 0.133277 | 0.00391  | 0.119339 |
| -0.22268 | 1.17E-06 | -0.1829  | 7.02E-05 | -0.08023 | 0.0833   | 0.038505 | 0.40644  | -0.09339 |
| -0.17402 | 0.00016  | -0.09596 | 0.03817  | -0.10086 | 0.0293   | -0.08379 | 0.07046  | 0.000274 |
| -0.1897  | 3.69E-05 | -0.13457 | 0.00357  | 0.02769  | 0.55057  | 0.135573 | 0.00333  | -0.00359 |
| 0.006436 | 0.88969  | -0.07344 | 0.11296  | 0.187114 | 4.73E-05 | 0.143049 | 0.00194  | 0.136242 |
| -0.08738 | 0.05919  | -0.03824 | 0.40962  | 0.074492 | 0.1079   | 0.146996 | 0.00145  | 0.074251 |
| -0.08313 | 0.07269  | -0.03883 | 0.40245  | 0.068121 | 0.14159  | 0.097706 | 0.03479  | 0.035377 |
| -0.2491  | 4.90E-08 | -0.15681 | 0.00067  | -0.01474 | 0.75073  | 0.075759 | 0.10202  | -0.10745 |
| -0.19979 | 1.36E-05 | -0.20045 | 1.27E-05 | 0.112259 | 0.01522  | 0.148653 | 0.00127  | -0.00548 |
| 0.086553 | 0.06163  | 0.110585 | 0.01682  | -0.1897  | 3.69E-05 | -0.24471 | 8.52E-08 | -0.04736 |
| -0.1286  | 0.00538  | -0.00316 | 0.94571  | 0.204226 | 8.65E-06 | 0.220765 | 1.45E-06 | 0.192173 |
| -0.00332 | 0.94302  | -0.0973  | 0.03555  | 0.267371 | 4.37E-09 | 0.22617  | 7.87E-07 | 0.186    |
| -0.06289 | 0.17485  | -0.20346 | 9.36E-06 | 0.095284 | 0.03956  | 0.079338 | 0.08678  | 0.034887 |

|          |          |          |          |          |          |          |          |          |
|----------|----------|----------|----------|----------|----------|----------|----------|----------|
| 0.065173 | 0.15969  | -0.09366 | 0.04306  | 0.182561 | 7.25E-05 | 0.205749 | 7.38E-06 | 0.040186 |
| -0.0618  | 0.18244  | -0.1145  | 0.01329  | 0.140784 | 0.00229  | 0.117453 | 0.01108  | 0.113486 |
| -0.25831 | 1.48E-08 | -0.28095 | 6.41E-10 | -0.10684 | 0.02093  | 0.026035 | 0.57465  | -0.15611 |
| -0.02566 | 0.58018  | -0.09716 | 0.03582  | 0.21399  | 3.07E-06 | 0.137118 | 0.00299  | 0.12917  |
| -0.28477 | 3.66E-10 | -0.19322 | 2.62E-05 | -0.15393 | 0.00085  | -0.04842 | 0.29637  | -0.1254  |
| 0.017218 | 0.71055  | -0.15661 | 0.00068  | 0.191181 | 3.20E-05 | 0.084104 | 0.06939  | 0.180209 |
| 0.008512 | 0.85444  | -0.1999  | 1.35E-05 | 0.104996 | 0.02326  | 0.147314 | 0.00141  | -0.06843 |
| 0.119846 | 0.00953  | 0.168206 | 0.00026  | 0.2811   | 6.27E-10 | 0.283735 | 4.27E-10 | 0.158365 |
| -0.17363 | 0.00016  | -0.16417 | 0.00037  | 0.009854 | 0.83181  | 0.05324  | 0.25086  | 0.040637 |
| -0.00303 | 0.94794  | -0.0602  | 0.19405  | 0.22165  | 1.32E-06 | 0.090959 | 0.04948  | 0.169005 |
| 0.248898 | 5.03E-08 | 0.049443 | 0.28631  | 0.08337  | 0.07187  | -0.07532 | 0.10405  | 0.091962 |
| -0.19049 | 3.42E-05 | 0.002637 | 0.95467  | 0.08059  | 0.08191  | 0.209461 | 4.99E-06 | 0.045568 |
| -0.05858 | 0.20635  | 0.074141 | 0.10957  | 0.155917 | 0.00072  | 0.206754 | 6.64E-06 | 0.167851 |
| 0.088121 | 0.05705  | 0.180151 | 9.05E-05 | 0.225079 | 8.92E-07 | 0.40165  | 1.57E-19 | 0.066128 |
| -0.15792 | 0.00061  | -0.288   | 2.27E-10 | -0.19304 | 2.67E-05 | -0.17935 | 9.74E-05 | -0.10538 |
| -0.01749 | 0.70625  | 0.036085 | 0.43659  | 0.25375  | 2.70E-08 | 0.232269 | 3.86E-07 | 0.199515 |
| -0.24164 | 1.25E-07 | -0.18947 | 3.77E-05 | -0.05372 | 0.2466   | 0.064885 | 0.16155  | -0.11578 |
| -0.0216  | 0.64156  | 0.060629 | 0.19091  | 0.070879 | 0.12613  | 0.133639 | 0.00381  | 0.116405 |
| -0.22728 | 6.92E-07 | -0.1186  | 0.01031  | -0.17141 | 0.0002   | -0.02435 | 0.59961  | -0.13354 |
| 0.1979   | 1.65E-05 | 0.31559  | 2.93E-12 | 0.049977 | 0.28112  | 0.149491 | 0.00119  | -0.02323 |
| -0.28488 | 3.61E-10 | -0.18194 | 7.68E-05 | 0.023308 | 0.61538  | 0.175851 | 0.00013  | -0.02651 |
| -0.22978 | 5.18E-07 | -0.15767 | 0.00063  | -0.06041 | 0.19255  | 0.032344 | 0.48563  | -0.06793 |
| -0.27442 | 1.63E-09 | -0.16612 | 0.00031  | 0.015091 | 0.74498  | 0.140647 | 0.00232  | -0.062   |
| -0.24451 | 8.73E-08 | -0.27722 | 1.10E-09 | -0.01077 | 0.81652  | 0.025816 | 0.57788  | -0.07151 |
| -0.23615 | 2.43E-07 | -0.18563 | 5.44E-05 | -0.09469 | 0.04082  | 0.051117 | 0.27028  | -0.19422 |
| -0.24042 | 1.45E-07 | -0.16435 | 0.00036  | 0.088122 | 0.05705  | 0.195327 | 2.13E-05 | 0.055083 |
| -0.11613 | 0.01203  | -0.09778 | 0.03465  | 0.023485 | 0.61271  | 0.144343 | 0.00176  | -0.03194 |
| 0.117733 | 0.01089  | 0.177485 | 0.00012  | 0.358152 | 1.40E-15 | 0.358296 | 1.36E-15 | 0.280328 |
| -0.08259 | 0.07459  | -0.00856 | 0.85362  | 0.12871  | 0.00534  | 0.231686 | 4.14E-07 | 0.080359 |
| 0.040786 | 0.37919  | 0.06349  | 0.17077  | -0.24833 | 5.40E-08 | -0.24939 | 4.72E-08 | -0.21039 |
| 0.095172 | 0.0398   | 0.100727 | 0.02952  | 0.425164 | 6.35E-22 | 0.407943 | 3.74E-20 | 0.369454 |
| -0.27934 | 8.09E-10 | -0.40359 | 1.01E-19 | -0.17652 | 0.00013  | -0.12281 | 0.00788  | -0.21708 |
| -0.12947 | 0.00508  | -0.15923 | 0.00055  | -0.05129 | 0.26864  | 0.037573 | 0.41791  | -0.08387 |
| -0.35795 | 1.46E-15 | -0.17067 | 0.00021  | -0.05351 | 0.24844  | 0.075405 | 0.10364  | -0.02345 |
| -0.14821 | 0.00132  | -0.09129 | 0.04865  | -0.01501 | 0.7463   | 0.053469 | 0.24883  | -0.00724 |
| -0.17526 | 0.00014  | -0.17407 | 0.00016  | -0.05229 | 0.25939  | -0.05178 | 0.26415  | -0.0591  |
| -0.09507 | 0.04002  | -0.1548  | 0.00079  | -0.01439 | 0.75642  | 0.022734 | 0.6241   | -0.02298 |
| 0.215045 | 2.74E-06 | 0.062348 | 0.17861  | 0.159938 | 0.00052  | -0.06773 | 0.1439   | 0.255185 |
| -0.34391 | 2.06E-14 | -0.26404 | 6.88E-09 | -0.26329 | 7.61E-09 | -0.17137 | 0.0002   | -0.19439 |
| 0.357489 | 1.59E-15 | 0.359548 | 1.07E-15 | 0.183239 | 6.81E-05 | 0.289978 | 1.69E-10 | 0.138704 |
| -0.0834  | 0.07175  | -0.14225 | 0.00206  | 0.160219 | 0.00051  | 0.227603 | 6.67E-07 | 0.092036 |
| -0.1564  | 0.00069  | -0.07858 | 0.08986  | 0.062934 | 0.17455  | 0.172654 | 0.00018  | 0.000373 |
| -0.073   | 0.11516  | 0.031678 | 0.49467  | 0.170291 | 0.00022  | 0.136663 | 0.00308  | 0.156028 |
| -0.13202 | 0.00426  | -0.0205  | 0.65862  | -0.13009 | 0.00487  | -0.02233 | 0.63033  | -0.1385  |
| -0.19109 | 3.23E-05 | -0.0898  | 0.05248  | 0.108772 | 0.01871  | 0.258478 | 1.45E-08 | 0.044314 |

|          |          |          |          |          |          |          |          |          |
|----------|----------|----------|----------|----------|----------|----------|----------|----------|
| 0.403741 | 9.77E-20 | 0.081419 | 0.0788   | 0.106949 | 0.0208   | -0.01503 | 0.74605  | 0.173108 |
| -0.18993 | 3.61E-05 | -0.02012 | 0.66448  | -0.04045 | 0.38313  | 0.115155 | 0.01277  | -0.05999 |
| -0.08359 | 0.07113  | -0.03856 | 0.40575  | 0.136698 | 0.00308  | 0.169356 | 0.00024  | 0.143138 |
| -0.01559 | 0.7368   | -0.15319 | 0.0009   | 0.28767  | 2.38E-10 | 0.235939 | 2.50E-07 | 0.128476 |
| -0.19133 | 3.15E-05 | -0.03695 | 0.42571  | -0.11442 | 0.01336  | -0.01686 | 0.71636  | -0.02376 |
| -0.06583 | 0.15553  | -0.12637 | 0.00625  | 0.221162 | 1.39E-06 | 0.145767 | 0.00159  | 0.158332 |
| -0.27763 | 1.04E-09 | -0.16733 | 0.00028  | -0.06386 | 0.1683   | -0.08556 | 0.06467  | 0.032462 |
| -0.21496 | 2.76E-06 | -0.19894 | 1.48E-05 | 0.084061 | 0.06954  | 0.100719 | 0.02954  | 0.061266 |
| 0.199332 | 1.43E-05 | 0.009295 | 0.84121  | 0.094707 | 0.04078  | -0.07163 | 0.12214  | 0.041649 |
| 0.010319 | 0.82399  | -0.10862 | 0.01888  | 0.08874  | 0.05532  | 0.141286 | 0.00221  | 0.037704 |
| -0.06554 | 0.15738  | -0.23533 | 2.69E-07 | 0.044134 | 0.34127  | 0.055759 | 0.2291   | -0.00322 |
| -0.16498 | 0.00034  | -0.1982  | 1.60E-05 | 0.155046 | 0.00077  | 0.181992 | 7.64E-05 | -0.00277 |
| 0.078477 | 0.09027  | 0.027979 | 0.54643  | -0.07545 | 0.10343  | -0.11025 | 0.01715  | -0.00988 |
| -0.06944 | 0.13405  | 0.061062 | 0.18775  | 0.187428 | 4.59E-05 | 0.235217 | 2.72E-07 | 0.159945 |
| 0.046593 | 0.31503  | 0.188702 | 4.06E-05 | 0.012921 | 0.78064  | 0.076006 | 0.10091  | 0.024572 |
| -0.26893 | 3.52E-09 | -0.1331  | 0.00396  | -0.16948 | 0.00023  | -0.01881 | 0.68513  | -0.14843 |
| -0.16364 | 0.00038  | -0.17595 | 0.00013  | 0.180653 | 8.64E-05 | 0.184001 | 6.34E-05 | 0.064458 |
| -0.00367 | 0.93695  | 0.074134 | 0.10961  | 0.129697 | 0.005    | 0.211207 | 4.14E-06 | 0.092717 |
| -0.0929  | 0.0448   | -0.12602 | 0.00639  | 0.148771 | 0.00126  | 0.133494 | 0.00385  | 0.075288 |
| 0.062909 | 0.17473  | -0.11726 | 0.01121  | 0.159875 | 0.00052  | 0.026355 | 0.56996  | 0.068592 |
| -0.06718 | 0.14722  | -0.11359 | 0.01405  | 0.215498 | 2.60E-06 | 0.167285 | 0.00028  | 0.110779 |
| 0.023737 | 0.60889  | -0.09529 | 0.03954  | 0.201743 | 1.12E-05 | 0.166814 | 0.00029  | 0.067854 |
| -0.24327 | 1.02E-07 | -0.122   | 0.00831  | 0.027328 | 0.5558   | 0.135263 | 0.0034   | -0.00929 |
| -0.11595 | 0.01216  | -0.09675 | 0.03661  | 0.135001 | 0.00347  | 0.209565 | 4.94E-06 | 0.044156 |
| -0.12283 | 0.00788  | -0.12477 | 0.00694  | 0.01264  | 0.78529  | 0.052771 | 0.25507  | 0.023531 |
| -0.21349 | 3.24E-06 | -0.20166 | 1.13E-05 | -0.026   | 0.57521  | -0.0298  | 0.52055  | -0.00479 |
| -0.10764 | 0.01998  | -0.15683 | 0.00067  | -0.02124 | 0.64703  | -0.0325  | 0.48356  | -0.08165 |
| -0.22172 | 1.31E-06 | -0.30914 | 8.45E-12 | 0.063519 | 0.17058  | 0.010808 | 0.81581  | 0.004809 |
| -0.22122 | 1.38E-06 | -0.22333 | 1.09E-06 | 0.082394 | 0.07527  | 0.098211 | 0.03386  | 0.041806 |
| -0.20922 | 5.12E-06 | -0.26296 | 7.96E-09 | 0.058526 | 0.20678  | 0.04395  | 0.34329  | 0.031283 |
| -0.26275 | 8.19E-09 | -0.28954 | 1.80E-10 | 0.086296 | 0.06241  | 0.038454 | 0.40706  | 0.020357 |
| -0.16449 | 0.00036  | -0.19494 | 2.21E-05 | 0.105444 | 0.02267  | 0.083477 | 0.0715   | 0.076126 |
| -0.14332 | 0.0019   | -0.21315 | 3.36E-06 | 0.069618 | 0.13303  | 0.014025 | 0.76243  | 0.076765 |
| -0.09259 | 0.04551  | -0.23001 | 5.04E-07 | 0.135948 | 0.00324  | 0.035694 | 0.44158  | 0.142987 |
| -0.09628 | 0.03753  | -0.15424 | 0.00082  | 0.118914 | 0.01011  | 0.076883 | 0.09702  | 0.012974 |
| -0.18402 | 6.33E-05 | -0.33384 | 1.28E-13 | 0.062989 | 0.17418  | -0.06161 | 0.18381  | -0.03199 |
| 0.112296 | 0.01519  | -0.0181  | 0.69651  | -0.03519 | 0.44802  | -0.14272 | 0.00199  | 0.021786 |
| -0.07075 | 0.12681  | -0.07392 | 0.11066  | 0.194015 | 2.43E-05 | 0.163867 | 0.00038  | 0.188968 |
| -0.16809 | 0.00026  | -0.06809 | 0.14177  | 0.098337 | 0.03363  | 0.203356 | 9.46E-06 | 0.038149 |
| -0.13392 | 0.00374  | -0.07943 | 0.08641  | -0.06391 | 0.16796  | 0.061832 | 0.18224  | -0.05731 |
| -0.10927 | 0.01817  | -0.08933 | 0.0537   | 0.027125 | 0.55875  | 0.11416  | 0.01357  | 0.009302 |
| -0.27896 | 8.54E-10 | -0.2352  | 2.73E-07 | -0.08118 | 0.07969  | 0.060163 | 0.19435  | -0.1035  |
| -0.10602 | 0.02194  | -0.10984 | 0.01757  | 0.24247  | 1.13E-07 | 0.254885 | 2.33E-08 | 0.155319 |
| -0.17301 | 0.00017  | -0.12026 | 0.00928  | 0.154608 | 0.0008   | 0.176962 | 0.00012  | 0.116782 |
| -0.13254 | 0.00412  | -0.16506 | 0.00034  | 0.127194 | 0.00591  | 0.225624 | 8.38E-07 | 0.036209 |

|          |          |          |          |          |          |          |          |          |
|----------|----------|----------|----------|----------|----------|----------|----------|----------|
| -0.00662 | 0.88658  | -0.06511 | 0.16009  | 0.256474 | 1.89E-08 | 0.305856 | 1.43E-11 | 0.127776 |
| -0.21572 | 2.54E-06 | -0.16254 | 0.00042  | 0.123981 | 0.00731  | 0.18089  | 8.46E-05 | 0.060394 |
| 0.110627 | 0.01677  | 0.039525 | 0.39411  | 0.143721 | 0.00185  | 0.195748 | 2.04E-05 | 0.079869 |
| 0.378843 | 2.19E-17 | 0.282274 | 5.29E-10 | 0.293207 | 1.03E-10 | 0.135525 | 0.00334  | 0.18799  |
| 0.070803 | 0.12654  | -0.01387 | 0.76505  | 0.321389 | 1.11E-12 | 0.354726 | 2.71E-15 | 0.173246 |
| -0.22594 | 8.08E-07 | -0.24069 | 1.40E-07 | -0.24351 | 9.90E-08 | -0.18398 | 6.35E-05 | -0.16874 |
| -0.22013 | 1.56E-06 | -0.15212 | 0.00097  | 0.012801 | 0.78262  | 0.113624 | 0.01402  | -0.04671 |
| -0.3824  | 1.04E-17 | -0.17305 | 0.00017  | -0.32652 | 4.60E-13 | -0.20883 | 5.34E-06 | -0.24546 |
| -0.16693 | 0.00029  | -0.01351 | 0.77089  | 0.044861 | 0.33337  | 0.075371 | 0.10379  | 0.082685 |
| -0.22662 | 7.47E-07 | -0.09797 | 0.03429  | -0.11682 | 0.01152  | 0.017292 | 0.70936  | -0.11936 |
| -0.05455 | 0.23934  | -0.15114 | 0.00105  | 0.079217 | 0.08727  | 0.143489 | 0.00188  | -0.00366 |
| -0.19276 | 2.74E-05 | -0.13554 | 0.00334  | -0.00553 | 0.90507  | 0.115107 | 0.01281  | -0.04766 |
| -0.27104 | 2.63E-09 | -0.37814 | 2.53E-17 | -0.08683 | 0.06081  | -0.03544 | 0.44478  | -0.11279 |
| 0.172312 | 0.00018  | 0.175648 | 0.00014  | 0.255912 | 2.03E-08 | 0.14305  | 0.00194  | 0.219665 |
| -0.24548 | 7.74E-08 | -0.16769 | 0.00027  | 0.047655 | 0.30411  | 0.137507 | 0.0029   | 0.037375 |
| -0.08721 | 0.05969  | -0.11874 | 0.01022  | -0.17118 | 0.0002   | -0.15881 | 0.00057  | -0.08971 |
| -0.04503 | 0.3316   | 0.018734 | 0.68636  | 0.040072 | 0.3876   | 0.113973 | 0.01372  | 0.056009 |
| -0.19142 | 3.13E-05 | -0.20589 | 7.27E-06 | 0.016971 | 0.71452  | 0.037005 | 0.42498  | -0.03991 |
| -0.08298 | 0.0732   | -0.10614 | 0.02179  | 0.15647  | 0.00069  | 0.149294 | 0.00121  | 0.115157 |
| 0.188459 | 4.16E-05 | 0.099045 | 0.03236  | 0.144209 | 0.00178  | -0.04746 | 0.30612  | 0.156767 |
| 0.114144 | 0.01358  | -0.07203 | 0.12007  | -0.0244  | 0.59892  | -0.11469 | 0.01314  | -0.09206 |
| 0.205922 | 7.25E-06 | 0.161694 | 0.00045  | 0.134405 | 0.00361  | -0.06237 | 0.17843  | 0.058066 |
| -0.17798 | 0.00011  | -0.155   | 0.00078  | 0.019345 | 0.6767   | 0.129304 | 0.00513  | -0.05108 |
| -0.02761 | 0.55168  | 0.086939 | 0.06048  | -0.04353 | 0.34793  | 0.167374 | 0.00028  | -0.0236  |
| -0.19917 | 1.45E-05 | -0.11291 | 0.01463  | -0.08497 | 0.06655  | 0.041398 | 0.37207  | -0.13538 |
| 0.021205 | 0.64763  | 0.028942 | 0.5327   | -0.05715 | 0.21772  | -0.12211 | 0.00825  | -0.08869 |
| -0.01321 | 0.77582  | -0.09635 | 0.0374   | 0.206073 | 7.14E-06 | 0.164198 | 0.00037  | 0.11662  |
| -0.36639 | 2.77E-16 | -0.24446 | 8.80E-08 | -0.18402 | 6.33E-05 | 0.001555 | 0.97327  | -0.2088  |
| -0.13597 | 0.00324  | -0.05382 | 0.24569  | 0.19077  | 3.33E-05 | 0.204949 | 8.02E-06 | 0.165531 |
| -0.199   | 1.47E-05 | -0.1352  | 0.00342  | -0.04562 | 0.32529  | 0.058573 | 0.20642  | -0.05465 |
| -0.21285 | 3.47E-06 | -0.18537 | 5.57E-05 | -0.09677 | 0.03657  | -0.01403 | 0.76235  | -0.09873 |
| -0.18074 | 8.57E-05 | -0.14917 | 0.00123  | 0.037024 | 0.42474  | 0.146214 | 0.00153  | -0.01773 |
| -0.08427 | 0.06885  | -0.15099 | 0.00106  | 0.121201 | 0.00875  | 0.077264 | 0.09537  | 0.071383 |
| -0.06392 | 0.16791  | -0.09902 | 0.0324   | 0.099146 | 0.03218  | 0.143506 | 0.00188  | 0.037248 |
| -0.32615 | 4.91E-13 | -0.16935 | 0.00024  | -0.17493 | 0.00015  | -0.01672 | 0.71858  | -0.17513 |
| -0.09913 | 0.03221  | -0.05534 | 0.23266  | -0.09284 | 0.04493  | -0.23777 | 2.00E-07 | -0.03947 |
| -0.1192  | 0.00993  | -0.13005 | 0.00488  | -0.00807 | 0.86188  | 0.08394  | 0.06994  | 0.014352 |
| 0.076061 | 0.10066  | -0.00407 | 0.93014  | 0.398297 | 3.32E-19 | 0.397445 | 4.01E-19 | 0.233471 |
| -0.39673 | 4.70E-19 | -0.46835 | 7.76E-27 | -0.32092 | 1.20E-12 | -0.28703 | 2.62E-10 | -0.26881 |
| -0.04242 | 0.36038  | -0.1206  | 0.00909  | 0.363417 | 5.00E-16 | 0.343853 | 2.09E-14 | 0.265714 |
| -0.19041 | 3.45E-05 | -0.06909 | 0.13602  | -0.08519 | 0.06587  | 0.152652 | 0.00093  | -0.12138 |
| 0.064402 | 0.16469  | 0.000145 | 0.9975   | -0.04379 | 0.34509  | -0.22247 | 1.20E-06 | -0.12081 |
| -0.09574 | 0.03862  | -0.13937 | 0.00254  | -0.00786 | 0.86554  | 0.05325  | 0.25078  | -0.01989 |
| -0.05797 | 0.21113  | -0.18342 | 6.69E-05 | 0.163959 | 0.00037  | 0.167042 | 0.00029  | 0.096471 |
| -0.28568 | 3.20E-10 | -0.16843 | 0.00026  | -0.15193 | 0.00099  | 0.025413 | 0.58383  | -0.15503 |

|          |          |          |          |          |          |          |          |          |
|----------|----------|----------|----------|----------|----------|----------|----------|----------|
| -0.29641 | 6.32E-11 | -0.28083 | 6.52E-10 | -0.07746 | 0.09453  | -0.03095 | 0.50469  | -0.11307 |
| -0.16568 | 0.00032  | -0.1035  | 0.02531  | 0.098397 | 0.03352  | 0.187252 | 4.67E-05 | 0.060053 |
| 0.136129 | 0.0032   | 0.073997 | 0.11027  | 0.042865 | 0.35535  | -0.15121 | 0.00105  | 0.156136 |
| -0.09332 | 0.04384  | -0.07501 | 0.10545  | 0.171875 | 0.00019  | 0.198691 | 1.52E-05 | 0.146116 |
| -0.12904 | 0.00523  | -0.22979 | 5.17E-07 | -0.15138 | 0.00103  | -0.03392 | 0.46464  | -0.10978 |
| -0.30113 | 3.04E-11 | -0.18214 | 7.53E-05 | -0.1654  | 0.00033  | -0.00324 | 0.94438  | -0.1319  |
| -0.18833 | 4.21E-05 | -0.10883 | 0.01864  | 0.07318  | 0.11426  | 0.196059 | 1.98E-05 | 0.005344 |
| 0.038263 | 0.4094   | 0.062065 | 0.1806   | -0.08493 | 0.06669  | -0.15555 | 0.00074  | -0.06616 |
| -0.14017 | 0.0024   | -0.08959 | 0.05302  | 0.036704 | 0.42876  | 0.110689 | 0.01671  | 5.42E-05 |
| -0.12176 | 0.00844  | -0.11444 | 0.01334  | 0.198099 | 1.62E-05 | 0.27443  | 1.63E-09 | 0.117059 |
| -0.25027 | 4.22E-08 | -0.30112 | 3.04E-11 | -0.09028 | 0.05121  | -0.01021 | 0.8258   | -0.11983 |
| -0.13383 | 0.00376  | -0.07608 | 0.10058  | 0.220828 | 1.44E-06 | 0.213432 | 3.26E-06 | 0.097352 |
| -0.18204 | 7.61E-05 | -0.17333 | 0.00017  | 0.024746 | 0.59374  | 0.117838 | 0.01082  | -0.06529 |
| -0.07088 | 0.12614  | -0.04933 | 0.28738  | -0.27381 | 1.78E-09 | -0.3017  | 2.77E-11 | -0.17286 |
| -0.15765 | 0.00063  | -0.06824 | 0.1409   | -0.14393 | 0.00182  | -0.03694 | 0.4258   | -0.08771 |
| -0.30193 | 2.67E-11 | -0.30732 | 1.13E-11 | -0.12154 | 0.00856  | -0.05415 | 0.24283  | -0.12944 |
| 0.352346 | 4.26E-15 | 0.118245 | 0.01054  | -0.00581 | 0.90039  | -0.09273 | 0.04518  | 0.046034 |
| 0.202973 | 9.84E-06 | 0.220504 | 1.50E-06 | 0.025958 | 0.57579  | -0.03872 | 0.4038   | -0.03351 |
| -0.11884 | 0.01016  | -0.15996 | 0.00052  | -0.02911 | 0.53033  | -0.10492 | 0.02336  | 0.002545 |
| -0.24535 | 7.87E-08 | -0.11138 | 0.01604  | -0.10013 | 0.0305   | 0.079221 | 0.08725  | -0.09213 |
| -0.04701 | 0.31072  | -0.24005 | 1.52E-07 | -0.22696 | 7.19E-07 | -0.40682 | 4.84E-20 | -0.21738 |
| 0.04595  | 0.32176  | 0.036237 | 0.43466  | 0.267016 | 4.59E-09 | 0.216164 | 2.42E-06 | 0.215482 |
| -0.29056 | 1.55E-10 | -0.23526 | 2.71E-07 | -0.09214 | 0.04658  | -0.00197 | 0.96613  | -0.05492 |
| -0.29779 | 5.11E-11 | -0.20217 | 1.07E-05 | -0.1276  | 0.00576  | 0.001413 | 0.9757   | -0.14704 |
| 0.307838 | 1.04E-11 | 0.028814 | 0.53451  | 0.095902 | 0.03829  | -0.00141 | 0.97579  | 0.108684 |
| -0.2199  | 1.60E-06 | -0.19164 | 3.06E-05 | -0.08534 | 0.0654   | -0.01813 | 0.69604  | -0.09967 |
| -0.13428 | 0.00365  | -0.05335 | 0.24984  | 0.152945 | 0.00091  | 0.202277 | 1.06E-05 | 0.117478 |
| -0.15306 | 0.00091  | -0.19716 | 1.77E-05 | 0.108904 | 0.01857  | 0.174128 | 0.00016  | 0.050665 |
| -0.15416 | 0.00083  | 0.02476  | 0.59354  | -0.12738 | 0.00584  | 0.062821 | 0.17533  | -0.02924 |
| -0.19797 | 1.64E-05 | 0.050641 | 0.27478  | -0.25556 | 2.13E-08 | -0.01905 | 0.68133  | -0.17556 |
| -0.13895 | 0.00262  | -0.06238 | 0.17842  | 0.039328 | 0.39647  | 0.029962 | 0.51835  | -0.01154 |
| -0.13878 | 0.00265  | -0.13572 | 0.0033   | 0.106574 | 0.02125  | 0.176239 | 0.00013  | 0.04573  |
| 0.273558 | 1.85E-09 | 0.134223 | 0.00366  | 0.068144 | 0.14146  | -0.00296 | 0.94909  | 0.084305 |
| -0.15074 | 0.00108  | -0.12055 | 0.00912  | 0.131115 | 0.00454  | 0.046197 | 0.31917  | 0.124116 |
| -0.01103 | 0.81215  | -0.03578 | 0.44044  | 0.229081 | 5.62E-07 | 0.27354  | 1.85E-09 | 0.151944 |
| -0.24128 | 1.30E-07 | -0.15066 | 0.00109  | -0.00134 | 0.9769   | 0.1329   | 0.00401  | -0.05154 |
| -0.24455 | 8.70E-08 | -0.23257 | 3.73E-07 | -0.10331 | 0.02558  | 0.027193 | 0.55776  | -0.15095 |
| -0.01547 | 0.73887  | 0.044201 | 0.34054  | 0.185798 | 5.35E-05 | 0.250204 | 4.26E-08 | 0.087498 |
| -0.16368 | 0.00038  | -0.14104 | 0.00225  | 0.086297 | 0.06241  | 0.174721 | 0.00015  | 0.077063 |
| -0.02332 | 0.61523  | -0.01875 | 0.68612  | 0.046364 | 0.31742  | 0.026221 | 0.57193  | 0.134638 |
| 0.013649 | 0.76863  | 0.008145 | 0.86065  | 0.234383 | 3.01E-07 | 0.228337 | 6.13E-07 | 0.238155 |
| -0.07909 | 0.08776  | -0.11243 | 0.01506  | 0.162779 | 0.00041  | 0.187485 | 4.56E-05 | 0.012101 |
| 0.062546 | 0.17723  | -0.09789 | 0.03444  | -0.04966 | 0.28416  | -0.17562 | 0.00014  | 0.006504 |
| -0.32358 | 7.63E-13 | -0.15606 | 0.00071  | -0.33602 | 8.65E-14 | -0.12632 | 0.00627  | -0.27453 |
| 0.143717 | 0.00185  | 0.012334 | 0.79037  | 0.139198 | 0.00257  | -0.08107 | 0.08011  | 0.110606 |

|           |          |          |          |          |          |          |          |          |
|-----------|----------|----------|----------|----------|----------|----------|----------|----------|
| 0.028438  | 0.53986  | -0.04477 | 0.33441  | 0.220121 | 1.56E-06 | 0.202078 | 1.08E-05 | 0.20766  |
| -0.1358   | 0.00328  | -0.11301 | 0.01455  | 0.124409 | 0.00711  | 0.218127 | 1.95E-06 | 0.061783 |
| -0.25285  | 3.03E-08 | -0.21612 | 2.43E-06 | -0.07235 | 0.11844  | 0.017416 | 0.70738  | -0.09999 |
| -0.00513  | 0.91194  | -0.08938 | 0.05358  | 0.204395 | 8.50E-06 | 0.184904 | 5.82E-05 | 0.180516 |
| -0.13806  | 0.00279  | -0.10924 | 0.0182   | 0.03426  | 0.46015  | 0.078963 | 0.08829  | -0.00678 |
| -0.11677  | 0.01156  | 0.040431 | 0.38335  | 0.201365 | 1.16E-05 | 0.207807 | 5.95E-06 | 0.258746 |
| -0.10361  | 0.02515  | -0.20094 | 1.21E-05 | -0.04861 | 0.29447  | -0.02128 | 0.64643  | -0.10755 |
| -0.22416  | 9.90E-07 | -0.03127 | 0.50026  | -0.06787 | 0.14308  | 0.112229 | 0.01525  | -0.11811 |
| -0.11541  | 0.01257  | 0.008241 | 0.85903  | 0.243339 | 1.01E-07 | 0.29783  | 5.08E-11 | 0.156946 |
| 0.196465  | 1.90E-05 | 0.101998 | 0.02752  | 0.034339 | 0.45912  | -0.02334 | 0.61488  | 0.064813 |
| -0.15828  | 0.0006   | -0.13267 | 0.00408  | 0.031531 | 0.49667  | 0.018897 | 0.68378  | 0.01654  |
| -0.09867  | 0.03303  | -0.10558 | 0.0225   | 0.081768 | 0.07752  | 0.093409 | 0.04364  | 0.039989 |
| 0.126595  | 0.00615  | -0.08178 | 0.07749  | -0.15397 | 0.00084  | -0.19597 | 2.00E-05 | -0.08409 |
| 0.045434  | 0.32723  | -0.06859 | 0.13889  | -0.29444 | 8.57E-11 | -0.28187 | 5.61E-10 | -0.18511 |
| -0.11743  | 0.0111   | -0.08997 | 0.05202  | 0.061743 | 0.18287  | 0.092029 | 0.04685  | 0.066123 |
| -0.15176  | 0.001    | 0.026705 | 0.56484  | -0.09465 | 0.04089  | 0.143512 | 0.00188  | -0.12557 |
| -0.13335  | 0.00389  | -0.058   | 0.21088  | -0.02658 | 0.56665  | 0.122932 | 0.00782  | -0.01758 |
| 0.124077  | 0.00726  | -0.06603 | 0.15425  | 0.206043 | 7.16E-06 | 0.21948  | 1.68E-06 | 0.095524 |
| -2.20E-05 | 0.99962  | -0.02836 | 0.54094  | 0.179408 | 9.69E-05 | 0.157959 | 0.00061  | 0.074397 |
| -0.02477  | 0.59341  | 0.018746 | 0.68617  | 0.107851 | 0.01974  | 0.133432 | 0.00387  | 0.084595 |
| -0.13926  | 0.00256  | -0.11872 | 0.01024  | 0.140366 | 0.00236  | 0.199839 | 1.36E-05 | 0.0447   |
| -0.16683  | 0.00029  | -0.04245 | 0.36006  | -0.02325 | 0.61633  | 0.072644 | 0.11695  | -0.02605 |
| -0.29641  | 6.33E-11 | -0.13005 | 0.00488  | -0.14874 | 0.00127  | 0.037791 | 0.4152   | -0.15115 |
| -0.08532  | 0.06544  | -0.26877 | 3.60E-09 | 0.08926  | 0.0539   | 0.053528 | 0.2483   | -0.04238 |
| -0.18787  | 4.40E-05 | -0.29594 | 6.80E-11 | -0.17535 | 0.00014  | -0.07441 | 0.10829  | -0.24096 |
| -0.08315  | 0.07263  | -0.13187 | 0.00431  | 0.077583 | 0.09401  | 0.085778 | 0.06401  | 0.025589 |
| -0.2565   | 1.88E-08 | -0.17657 | 0.00013  | 0.001384 | 0.9762   | 0.092768 | 0.0451   | -0.01864 |
| -0.18169  | 7.86E-05 | -0.1651  | 0.00034  | -0.12267 | 0.00796  | -0.06152 | 0.18449  | -0.12958 |
| -0.33844  | 5.60E-14 | -0.18075 | 8.57E-05 | -0.28645 | 2.86E-10 | -0.10506 | 0.02317  | -0.23323 |
| -0.23563  | 2.59E-07 | -0.32423 | 6.82E-13 | 0.026814 | 0.56326  | 0.023475 | 0.61285  | -0.06018 |
| -0.16257  | 0.00042  | -0.12841 | 0.00545  | 0.041844 | 0.36694  | 0.129938 | 0.00492  | 0.012129 |
| -0.10317  | 0.02578  | 0.069798 | 0.13203  | 0.071132 | 0.12478  | 0.181169 | 8.24E-05 | 0.025055 |
| -0.20836  | 5.61E-06 | -0.14856 | 0.00128  | 0.056224 | 0.22524  | 0.178128 | 0.00011  | 0.00605  |
| -0.2586   | 1.43E-08 | -0.19908 | 1.46E-05 | -0.02094 | 0.65175  | 0.07098  | 0.12559  | -0.06232 |
| -0.39706  | 4.37E-19 | -0.23963 | 1.60E-07 | -0.27685 | 1.16E-09 | -0.14154 | 0.00217  | -0.2064  |
| 0.0662    | 0.1532   | 0.029052 | 0.53114  | 0.09265  | 0.04538  | 0.181947 | 7.67E-05 | 0.090992 |
| -0.06109  | 0.18752  | -0.1682  | 0.00026  | 0.265595 | 5.57E-09 | 0.171142 | 0.0002   | 0.227179 |
| 0.00675   | 0.88433  | -0.06411 | 0.16665  | -0.33953 | 4.60E-14 | -0.31102 | 6.22E-12 | -0.29537 |
| 0.040037  | 0.38801  | -0.03854 | 0.40605  | 0.188431 | 4.17E-05 | 0.153091 | 0.0009   | 0.144479 |
| -0.17246  | 0.00018  | -0.13644 | 0.00313  | 7.77E-05 | 0.99866  | 0.141358 | 0.0022   | -0.08817 |
| -0.02951  | 0.52475  | -0.03055 | 0.5102   | 0.126845 | 0.00605  | 0.103804 | 0.02488  | 0.026915 |
| -0.05047  | 0.27644  | -0.10823 | 0.01931  | 0.086067 | 0.06312  | 0.1256   | 0.00657  | -0.03186 |
| -0.32254  | 9.11E-13 | -0.17136 | 0.0002   | -0.12327 | 0.00766  | 0.021817 | 0.63817  | -0.17334 |
| -0.17365  | 0.00016  | -0.03925 | 0.39747  | 0.0928   | 0.04503  | 0.171683 | 0.00019  | 0.055885 |
| 0.26142   | 9.80E-09 | 0.100607 | 0.02972  | 0.076771 | 0.09751  | -0.10322 | 0.0257   | 0.060972 |

|          |          |          |          |          |          |          |          |          |
|----------|----------|----------|----------|----------|----------|----------|----------|----------|
| -0.14199 | 0.0021   | -0.08135 | 0.07905  | -0.0458  | 0.3233   | 0.05898  | 0.20328  | -0.02719 |
| 0.310172 | 7.15E-12 | 0.174966 | 0.00014  | 0.148767 | 0.00126  | -0.03266 | 0.48132  | 0.15539  |
| -0.07259 | 0.11722  | -0.21634 | 2.37E-06 | 0.087502 | 0.05883  | -0.01146 | 0.80497  | 0.089431 |
| 0.099473 | 0.03162  | 0.063109 | 0.17336  | -0.18445 | 6.08E-05 | -0.12063 | 0.00907  | -0.15866 |
| 0.076698 | 0.09783  | 0.035529 | 0.44369  | -0.05017 | 0.27924  | -0.03473 | 0.45404  | -0.14088 |
| 0.105447 | 0.02267  | -0.00609 | 0.89564  | 0.514933 | 5.55E-33 | 0.375223 | 4.63E-17 | 0.377719 |
| -0.1719  | 0.00019  | -0.05073 | 0.2739   | 0.213389 | 3.28E-06 | 0.201113 | 1.19E-05 | 0.123531 |
| -0.10761 | 0.02002  | -0.0525  | 0.25753  | 0.039254 | 0.39736  | 0.082822 | 0.07377  | -0.01267 |
| -0.36428 | 4.22E-16 | -0.21648 | 2.34E-06 | -0.26993 | 3.07E-09 | -0.10112 | 0.02889  | -0.21476 |
| 0.032585 | 0.48239  | 0.183517 | 6.63E-05 | 0.199254 | 1.44E-05 | 0.303149 | 2.21E-11 | 0.223799 |
| -0.11098 | 0.01643  | 0.004879 | 0.91625  | 0.107364 | 0.02031  | 0.179932 | 9.23E-05 | 0.069702 |
| 0.056395 | 0.22383  | 0.022463 | 0.62825  | 0.252014 | 3.37E-08 | 0.279557 | 7.84E-10 | 0.211565 |
| -0.1053  | 0.02286  | -0.08955 | 0.05313  | -0.03405 | 0.46291  | 0.033433 | 0.47106  | -0.02829 |
| -0.38274 | 9.68E-18 | -0.28324 | 4.59E-10 | -0.30096 | 3.12E-11 | -0.109   | 0.01847  | -0.31615 |
| -0.0702  | 0.12983  | -0.10194 | 0.02761  | 0.235729 | 2.56E-07 | 0.258809 | 1.39E-08 | 0.165143 |
| -0.3866  | 4.26E-18 | -0.13612 | 0.0032   | -0.31221 | 5.12E-12 | -0.12883 | 0.0053   | -0.2813  |
| -0.24055 | 1.43E-07 | -0.24059 | 1.42E-07 | -0.00087 | 0.98503  | 0.0168   | 0.71727  | -0.01307 |
| -0.15613 | 0.00071  | -0.13561 | 0.00332  | 0.047729 | 0.30336  | 0.097494 | 0.03518  | 0.03765  |
| -0.10754 | 0.0201   | -0.0791  | 0.08772  | 0.025096 | 0.58853  | 0.098531 | 0.03328  | 0.005754 |
| -0.22697 | 7.18E-07 | -0.3952  | 6.60E-19 | -0.1948  | 2.24E-05 | -0.16405 | 0.00037  | -0.20161 |
| -0.05889 | 0.204    | -0.1326  | 0.0041   | 0.088274 | 0.05662  | 0.174791 | 0.00015  | -0.00897 |
| -0.04436 | 0.33883  | -0.08961 | 0.05297  | -0.07571 | 0.10224  | 0.06504  | 0.16055  | -0.14283 |
| -0.33824 | 5.80E-14 | -0.24458 | 8.66E-08 | -0.14975 | 0.00117  | -0.00215 | 0.96308  | -0.18431 |
| -0.15844 | 0.00059  | -0.13244 | 0.00414  | 0.119188 | 0.00994  | 0.151827 | 0.001    | 0.095993 |
| -0.0641  | 0.16672  | -0.0242  | 0.60191  | 0.319316 | 1.57E-12 | 0.310323 | 6.97E-12 | 0.233642 |
| -0.03268 | 0.48114  | -0.15072 | 0.00109  | 0.387351 | 3.63E-18 | 0.254016 | 2.60E-08 | 0.213927 |
| -0.1757  | 0.00014  | -0.10706 | 0.02067  | -0.01502 | 0.7462   | 0.054901 | 0.23636  | 0.041266 |
| -0.09674 | 0.03662  | -0.06928 | 0.13491  | 0.074462 | 0.10804  | 0.150676 | 0.00109  | -0.01523 |
| -0.09333 | 0.04382  | -0.12333 | 0.00763  | 0.102681 | 0.02649  | 0.224379 | 9.66E-07 | 0.013485 |
| 0.162755 | 0.00041  | -0.01626 | 0.726    | 0.133833 | 0.00376  | -0.00676 | 0.88415  | 0.097207 |
| -0.1231  | 0.00774  | -0.09065 | 0.05026  | 0.185305 | 5.61E-05 | 0.229971 | 5.06E-07 | 0.140814 |
| -0.05962 | 0.19838  | 0.135789 | 0.00328  | -0.04962 | 0.28457  | 0.125293 | 0.00671  | 0.066481 |
| -0.11588 | 0.01221  | -0.09435 | 0.04156  | 0.006234 | 0.89312  | 0.036312 | 0.4337   | -0.00666 |
| -0.06619 | 0.15323  | -0.08079 | 0.08115  | 0.143855 | 0.00183  | 0.159074 | 0.00056  | 0.071295 |
| -0.05788 | 0.21185  | -0.09227 | 0.04628  | 0.208859 | 5.32E-06 | 0.200617 | 1.25E-05 | 0.142216 |
| -0.12501 | 0.00683  | -0.05741 | 0.21555  | 0.164089 | 0.00037  | 0.221236 | 1.38E-06 | 0.145766 |
| -0.01253 | 0.78704  | -0.05065 | 0.27468  | 0.133189 | 0.00393  | 0.214296 | 2.97E-06 | 0.057328 |
| -0.3317  | 1.86E-13 | -0.19768 | 1.69E-05 | -0.20041 | 1.28E-05 | -0.01995 | 0.66719  | -0.20517 |
| 0.099858 | 0.03096  | 0.192147 | 2.91E-05 | 0.000596 | 0.98976  | -0.02584 | 0.57755  | 0.009326 |
| -0.21223 | 3.71E-06 | -0.12303 | 0.00777  | 0.073751 | 0.11146  | 0.177578 | 0.00011  | 0.014081 |
| -0.18903 | 3.94E-05 | -0.09716 | 0.03581  | 0.009177 | 0.84321  | 0.187306 | 4.64E-05 | -0.02098 |
| -0.19079 | 3.32E-05 | -0.09037 | 0.05099  | 0.122276 | 0.00816  | 0.216809 | 2.26E-06 | 0.11759  |
| -0.06149 | 0.1847   | -0.10962 | 0.0178   | 0.13443  | 0.00361  | 0.143395 | 0.00189  | 0.078045 |
| 0.121797 | 0.00842  | -0.18915 | 3.89E-05 | 0.184357 | 6.13E-05 | 0.206798 | 6.61E-06 | 0.075208 |
| -0.15027 | 0.00113  | -0.17583 | 0.00013  | -0.05724 | 0.21699  | -0.04688 | 0.31203  | -0.03221 |

|          |          |          |          |          |          |          |          |          |
|----------|----------|----------|----------|----------|----------|----------|----------|----------|
| -0.0434  | 0.34935  | 0.050858 | 0.27272  | 0.131254 | 0.0045   | 0.182634 | 7.20E-05 | 0.192319 |
| -0.11637 | 0.01185  | -0.04025 | 0.38551  | 0.046088 | 0.3203   | 0.172281 | 0.00018  | -0.00433 |
| -0.04375 | 0.34546  | 0.007061 | 0.87904  | 0.215414 | 2.63E-06 | 0.174023 | 0.00016  | 0.17133  |
| -0.1052  | 0.02299  | -0.00435 | 0.92538  | -0.07895 | 0.08834  | 0.015432 | 0.73942  | -0.00521 |
| -0.14007 | 0.00241  | -0.26833 | 3.82E-09 | 0.004211 | 0.92769  | -0.00211 | 0.96365  | -0.07563 |
| 0.015224 | 0.74282  | -0.03909 | 0.39936  | 0.043829 | 0.34462  | 0.045179 | 0.32996  | -0.0157  |
| 0.054753 | 0.23763  | 0.054731 | 0.23782  | -0.11124 | 0.01618  | -0.11372 | 0.01394  | -0.09917 |
| 0.188881 | 3.99E-05 | 0.065072 | 0.16034  | 0.256394 | 1.91E-08 | 0.051208 | 0.26943  | 0.253795 |
| -0.15564 | 0.00074  | -0.07483 | 0.10631  | 0.05253  | 0.25725  | 0.137165 | 0.00298  | 0.088182 |
| -0.12341 | 0.00758  | -0.18894 | 3.97E-05 | -0.10204 | 0.02746  | -0.08273 | 0.07408  | -0.09441 |
| -0.10459 | 0.02381  | -0.08547 | 0.06498  | 0.077638 | 0.09378  | 0.01016  | 0.82667  | 0.100361 |
| 0.224858 | 9.14E-07 | 0.202427 | 1.04E-05 | 0.034518 | 0.45678  | -0.01692 | 0.71539  | 0.025225 |
| -0.12776 | 0.0057   | 0.004309 | 0.92601  | -0.05917 | 0.20182  | 0.197825 | 1.66E-05 | -0.09151 |
| -0.14607 | 0.00155  | 0.019574 | 0.6731   | -0.04428 | 0.33967  | 0.038408 | 0.40762  | 0.045223 |
| 0.059833 | 0.19681  | -0.03206 | 0.48945  | 0.319855 | 1.44E-12 | 0.199858 | 1.35E-05 | 0.299243 |
| -0.15551 | 0.00075  | -0.08529 | 0.06555  | 0.091519 | 0.04809  | 0.153052 | 0.00091  | 0.048301 |
| 0.037306 | 0.42122  | 0.026224 | 0.57188  | 0.156031 | 0.00072  | 0.178144 | 0.00011  | 0.19108  |
| -0.03922 | 0.39782  | -0.00989 | 0.83115  | 0.100876 | 0.02928  | 0.111878 | 0.01557  | 0.086823 |
| -0.10026 | 0.03028  | -0.0738  | 0.1112   | 0.02235  | 0.62998  | 0.082248 | 0.07579  | 0.001942 |
| 0.006418 | 0.88999  | 0.207817 | 5.94E-06 | 0.177042 | 0.00012  | 0.344369 | 1.90E-14 | 0.145744 |
| -0.02285 | 0.6224   | 0.099265 | 0.03198  | 0.119072 | 0.01001  | 0.279279 | 8.16E-10 | 0.066673 |
| -0.08362 | 0.071    | -0.03047 | 0.51132  | 0.073029 | 0.11501  | 0.174494 | 0.00015  | 0.02111  |
| 0.111096 | 0.01631  | 0.170963 | 0.00021  | -0.00764 | 0.86925  | -0.10653 | 0.02131  | 0.034245 |
| -0.06234 | 0.17868  | -0.11211 | 0.01536  | -0.02326 | 0.61617  | 0.065373 | 0.15841  | -0.01168 |
| 0.088946 | 0.05476  | -0.03386 | 0.46534  | -0.05573 | 0.22934  | -0.13105 | 0.00456  | -0.12295 |
| -0.18381 | 6.45E-05 | -0.34651 | 1.28E-14 | 0.052751 | 0.25525  | -0.01396 | 0.76354  | 0.021973 |
| -0.00379 | 0.93493  | 0.026645 | 0.56572  | 0.093652 | 0.04309  | 0.130655 | 0.00468  | 0.116053 |
| -0.33577 | 9.04E-14 | -0.2496  | 4.60E-08 | -0.12973 | 0.00499  | 0.020213 | 0.66306  | -0.15927 |
| -0.10077 | 0.02945  | 0.022672 | 0.62505  | 0.074615 | 0.10732  | 0.160795 | 0.00049  | 0.13103  |
| 0.13022  | 0.00482  | 0.090958 | 0.04948  | -0.10937 | 0.01807  | -0.19587 | 2.02E-05 | -0.05911 |
| 0.289901 | 1.71E-10 | 0.412522 | 1.30E-20 | 0.146225 | 0.00153  | 0.161157 | 0.00047  | 0.051429 |
| -0.08283 | 0.07372  | -0.05732 | 0.2163   | 0.111085 | 0.01632  | 0.206534 | 6.80E-06 | 0.120267 |
| -0.26787 | 4.08E-09 | -0.17079 | 0.00021  | 0.035386 | 0.44554  | 0.152564 | 0.00094  | -0.01153 |
| -0.18206 | 7.59E-05 | -0.23967 | 1.59E-07 | -0.02256 | 0.62672  | 0.022386 | 0.62943  | -0.0389  |
| 0.020923 | 0.652    | -0.05539 | 0.23222  | 0.11867  | 0.01027  | 0.092711 | 0.04524  | 0.128635 |
| -0.16733 | 0.00028  | -0.10961 | 0.01781  | 0.093297 | 0.04389  | 0.173672 | 0.00016  | 0.069721 |
| 0.098406 | 0.0335   | -0.04555 | 0.32603  | -0.28558 | 3.25E-10 | -0.23462 | 2.92E-07 | -0.24501 |
| -0.17887 | 0.0001   | -0.26428 | 6.66E-09 | 0.063286 | 0.17215  | 0.032249 | 0.48692  | -0.01251 |
| 0.087125 | 0.05993  | -0.04829 | 0.29774  | -0.31281 | 4.64E-12 | -0.32083 | 1.22E-12 | -0.17904 |
| -0.18305 | 6.93E-05 | -0.11543 | 0.01256  | 0.132506 | 0.00412  | 0.097092 | 0.03595  | 0.16193  |
| -0.06846 | 0.13961  | -0.041   | 0.37669  | 0.131018 | 0.00457  | 0.111876 | 0.01557  | 0.140913 |
| 0.058949 | 0.20352  | 0.05327  | 0.25059  | 0.35101  | 5.49E-15 | 0.393206 | 1.02E-18 | 0.232028 |
| -0.11046 | 0.01694  | -0.20382 | 9.02E-06 | 0.076682 | 0.0979   | 0.116335 | 0.01188  | -0.00314 |
| 0.230946 | 4.52E-07 | 0.085591 | 0.06459  | 0.105482 | 0.02262  | -0.03861 | 0.40515  | 0.08411  |
| -0.11712 | 0.01131  | -0.34096 | 3.54E-14 | -0.12789 | 0.00565  | -0.1366  | 0.0031   | -0.16129 |



|          |          |          |          |          |          |          |          |          |
|----------|----------|----------|----------|----------|----------|----------|----------|----------|
| -0.15953 | 0.00054  | -0.12862 | 0.00537  | -0.03709 | 0.42387  | 0.068045 | 0.14204  | -0.04747 |
| -0.26132 | 9.93E-09 | -0.29331 | 1.02E-10 | -0.19698 | 1.81E-05 | -0.18638 | 5.07E-05 | -0.15972 |
| -0.19018 | 3.52E-05 | -0.2239  | 1.02E-06 | -0.23236 | 3.82E-07 | -0.13438 | 0.00362  | -0.21905 |
| -0.16505 | 0.00034  | -0.09712 | 0.03589  | 0.013798 | 0.76617  | 0.087615 | 0.0585   | -0.02487 |
| -0.12842 | 0.00545  | -0.09938 | 0.03178  | 0.017602 | 0.7044   | 0.029932 | 0.51877  | -0.02437 |
| -0.0849  | 0.06679  | -0.10141 | 0.02843  | 0.070808 | 0.12651  | 0.157069 | 0.00066  | 0.019511 |
| -0.17263 | 0.00018  | -0.1066  | 0.02122  | 0.056708 | 0.22126  | 0.164053 | 0.00037  | 0.0031   |
| -0.08505 | 0.0663   | -0.0678  | 0.14347  | 0.134867 | 0.0035   | 0.140134 | 0.0024   | 0.100073 |
| 0.067985 | 0.1424   | 0.002211 | 0.962    | 0.007987 | 0.86333  | -0.15927 | 0.00055  | -0.04318 |
| -0.18936 | 3.82E-05 | -0.09617 | 0.03776  | 0.08787  | 0.05777  | 0.205834 | 7.32E-06 | 0.016063 |
| 0.146673 | 0.00148  | -0.07513 | 0.10492  | -0.07743 | 0.09464  | -0.26429 | 6.65E-09 | -0.12536 |
| -0.2022  | 1.07E-05 | -0.14246 | 0.00203  | -0.00307 | 0.94729  | 0.096421 | 0.03726  | -0.03153 |
| -0.09182 | 0.04735  | -0.11596 | 0.01216  | 0.079109 | 0.0877   | 0.082811 | 0.0738   | 0.059    |
| -0.04402 | 0.3425   | -0.0404  | 0.38373  | -0.24038 | 1.46E-07 | -0.00739 | 0.87338  | -0.20227 |
| 0.242963 | 1.06E-07 | -0.002   | 0.9657   | -0.07646 | 0.09888  | -0.12481 | 0.00692  | 0.03944  |
| -0.05538 | 0.23226  | -0.16749 | 0.00028  | 0.147887 | 0.00135  | 0.051518 | 0.26654  | 0.087368 |
| 0.257193 | 1.72E-08 | 0.257915 | 1.56E-08 | 0.193495 | 2.55E-05 | 0.106624 | 0.02119  | 0.152006 |
| -0.05256 | 0.257    | -0.03168 | 0.4946   | -0.09563 | 0.03885  | 0.025187 | 0.58718  | -0.08052 |
| -0.19882 | 1.50E-05 | 0.02217  | 0.63275  | 0.02291  | 0.62143  | 0.173089 | 0.00017  | 0.055066 |
| -0.27959 | 7.81E-10 | -0.13477 | 0.00352  | -0.08266 | 0.07433  | 0.057248 | 0.21689  | -0.1187  |
| -0.20971 | 4.86E-06 | -0.1491  | 0.00123  | -0.14286 | 0.00197  | -0.02303 | 0.61958  | -0.18545 |
| 0.175075 | 0.00014  | -0.05652 | 0.22277  | 0.198119 | 1.61E-05 | 0.20179  | 1.11E-05 | 0.202679 |
| -0.06399 | 0.16745  | -0.06659 | 0.15081  | 0.131337 | 0.00447  | 0.219753 | 1.63E-06 | -0.01925 |
| -0.08195 | 0.07685  | -0.18856 | 4.12E-05 | 0.210295 | 4.57E-06 | 0.155857 | 0.00073  | 0.163877 |
| -0.04278 | 0.35626  | -0.13879 | 0.00265  | 0.318167 | 1.91E-12 | 0.249529 | 4.64E-08 | 0.193814 |
| 0.022397 | 0.62927  | -0.03776 | 0.41553  | -0.2275  | 6.75E-07 | -0.25349 | 2.79E-08 | -0.23655 |
| -0.14948 | 0.0012   | -0.11479 | 0.01306  | 0.083881 | 0.07014  | 0.129411 | 0.0051   | 0.091932 |
| -0.3195  | 1.53E-12 | -0.27596 | 1.31E-09 | -0.11787 | 0.01079  | -0.00321 | 0.94487  | -0.17287 |
| -0.25789 | 1.57E-08 | -0.18436 | 6.13E-05 | -0.10264 | 0.02656  | 0.04202  | 0.36492  | -0.15449 |
| 0.047318 | 0.30755  | 0.088437 | 0.05616  | 0.287626 | 2.40E-10 | 0.27137  | 2.51E-09 | 0.217088 |
| -0.11765 | 0.01094  | -0.06066 | 0.19072  | 0.101022 | 0.02905  | 0.132245 | 0.0042   | 0.126906 |
| 0.173058 | 0.00017  | 0.176895 | 0.00012  | 0.438271 | 2.43E-23 | 0.569139 | 1.93E-41 | 0.286142 |
| -0.08342 | 0.07171  | -0.2286  | 5.94E-07 | 0.176263 | 0.00013  | 0.074568 | 0.10754  | 0.150466 |
| -0.11551 | 0.01249  | -0.12295 | 0.00782  | 0.180851 | 8.49E-05 | 0.139896 | 0.00245  | 0.099823 |
| -0.25107 | 3.81E-08 | -0.30535 | 1.55E-11 | -0.31535 | 3.05E-12 | -0.1638  | 0.00038  | -0.30938 |
| -0.11461 | 0.0132   | 0.047911 | 0.30152  | 0.016401 | 0.72372  | 0.160737 | 0.00049  | 0.043561 |
| 0.314889 | 3.30E-12 | 0.259573 | 1.25E-08 | 0.198318 | 1.58E-05 | 0.146609 | 0.00149  | 0.096554 |
| -0.27935 | 8.08E-10 | -0.40665 | 5.04E-20 | -0.17918 | 9.89E-05 | -0.23402 | 3.14E-07 | -0.17661 |
| -0.17572 | 0.00014  | -0.17967 | 9.46E-05 | 0.008416 | 0.85606  | -0.03179 | 0.49313  | 0.009581 |
| -0.13458 | 0.00357  | -0.24674 | 6.60E-08 | 0.101441 | 0.02838  | 0.018988 | 0.68234  | 0.07779  |
| -0.31274 | 4.70E-12 | -0.3889  | 2.60E-18 | -0.06602 | 0.15432  | -0.15384 | 0.00085  | -0.12829 |
| 0.279164 | 8.30E-10 | 0.008305 | 0.85794  | 0.117919 | 0.01076  | -0.05446 | 0.24019  | 0.132365 |
| -0.00947 | 0.83835  | -0.13071 | 0.00466  | 0.123332 | 0.00762  | 0.115357 | 0.01261  | 0.084819 |
| -0.08203 | 0.07657  | 0.025555 | 0.58173  | -0.08537 | 0.06528  | -0.20955 | 4.95E-06 | -0.08327 |
| -0.17509 | 0.00014  | -0.11579 | 0.01228  | 0.167603 | 0.00027  | 0.177013 | 0.00012  | 0.135667 |

|          |          |          |          |          |          |          |          |          |
|----------|----------|----------|----------|----------|----------|----------|----------|----------|
| -0.18478 | 5.89E-05 | -0.14537 | 0.00163  | -0.00985 | 0.83182  | 0.107284 | 0.0204   | -0.05211 |
| -0.08483 | 0.06703  | -0.12832 | 0.00549  | -0.15467 | 0.0008   | -0.09712 | 0.0359   | -0.03463 |
| -0.26813 | 3.93E-09 | -0.15131 | 0.00104  | -0.01579 | 0.73358  | 0.106725 | 0.02107  | -0.06139 |
| -0.16407 | 0.00037  | -0.27625 | 1.26E-09 | 0.049904 | 0.28183  | 0.006806 | 0.88337  | 0.058949 |
| -0.20465 | 8.27E-06 | -0.28816 | 2.22E-10 | -0.08598 | 0.06337  | 0.005592 | 0.90407  | -0.08525 |
| 0.10085  | 0.02932  | -0.01774 | 0.7022   | -0.11105 | 0.01636  | -0.20554 | 7.54E-06 | -0.10515 |
| -0.05385 | 0.24545  | -0.11549 | 0.01251  | -0.07432 | 0.10874  | -0.02013 | 0.66439  | -0.03372 |
| -0.06562 | 0.15685  | -0.04169 | 0.36866  | 0.0727   | 0.11666  | 0.064483 | 0.16416  | 0.10025  |
| 0.067566 | 0.14488  | -0.04872 | 0.29339  | -0.20311 | 9.70E-06 | -0.25258 | 3.14E-08 | -0.13038 |
| -0.24546 | 7.76E-08 | -0.161   | 0.00048  | -0.01442 | 0.75596  | 0.066587 | 0.1508   | -0.0015  |
| 0.043301 | 0.35047  | -0.08497 | 0.06655  | -0.22706 | 7.10E-07 | -0.31458 | 3.47E-12 | -0.15419 |
| -0.03968 | 0.39226  | -0.01755 | 0.70527  | 0.119338 | 0.00984  | 0.15175  | 0.001    | 0.133835 |
| -0.02844 | 0.53978  | 0.032033 | 0.48984  | 0.208228 | 5.69E-06 | 0.182916 | 7.01E-05 | 0.190491 |
| 0.009863 | 0.83167  | -0.20291 | 9.91E-06 | -0.12818 | 0.00554  | -0.25549 | 2.15E-08 | -0.17908 |
| 0.292908 | 1.08E-10 | 0.093097 | 0.04434  | 0.181337 | 8.12E-05 | 0.052102 | 0.26115  | 0.126002 |
| -0.24035 | 1.46E-07 | -0.24907 | 4.92E-08 | -0.21639 | 2.36E-06 | -0.07164 | 0.12211  | -0.19119 |
| 0.436678 | 3.64E-23 | 0.265624 | 5.55E-09 | -0.00805 | 0.86226  | -0.0085  | 0.85461  | 0.052231 |
| -0.17329 | 0.00017  | -0.06145 | 0.18495  | -0.05182 | 0.26378  | 0.089117 | 0.05429  | -0.08929 |
| -0.01161 | 0.80238  | -0.15963 | 0.00054  | 0.03606  | 0.4369   | 0.057124 | 0.21789  | 0.004072 |
| -0.15292 | 0.00092  | -0.14226 | 0.00206  | -0.01318 | 0.77642  | 0.037568 | 0.41796  | -0.06115 |
| 0.060537 | 0.19159  | -0.06412 | 0.16655  | -0.02116 | 0.64839  | -0.18737 | 4.62E-05 | -0.03884 |
| -0.09237 | 0.04603  | -0.02545 | 0.58323  | 0.157773 | 0.00062  | 0.120591 | 0.00909  | 0.218589 |
| -0.19133 | 3.15E-05 | -0.16537 | 0.00033  | -0.06756 | 0.14491  | 0.006298 | 0.89204  | -0.07381 |
| 0.044905 | 0.33289  | 0.058202 | 0.20932  | 0.322062 | 9.89E-13 | 0.362036 | 6.57E-16 | 0.196332 |
| -0.13822 | 0.00276  | -0.21786 | 2.01E-06 | 0.019444 | 0.67514  | 0.001227 | 0.9789   | -0.06747 |
| -0.2029  | 9.91E-06 | -0.14169 | 0.00215  | -0.02053 | 0.65811  | 0.08842  | 0.05621  | -0.04664 |
| 0.035438 | 0.44487  | -0.10215 | 0.02729  | 0.226665 | 7.43E-07 | 0.256563 | 1.87E-08 | 0.069646 |
| 0.108262 | 0.01928  | -0.08266 | 0.07433  | 0.017741 | 0.70217  | -0.19538 | 2.12E-05 | -0.01961 |
| -0.089   | 0.05462  | 0.132458 | 0.00414  | 0.113718 | 0.01394  | 0.275967 | 1.31E-09 | 0.114922 |
| -0.17971 | 9.42E-05 | -0.21113 | 4.18E-06 | -0.01246 | 0.78823  | 0.090508 | 0.05062  | -0.07363 |
| 0.089123 | 0.05427  | 0.073411 | 0.11313  | 0.23219  | 3.90E-07 | 0.338769 | 5.28E-14 | 0.125405 |
| -0.2511  | 3.79E-08 | -0.28301 | 4.74E-10 | -0.17648 | 0.00013  | -0.09815 | 0.03396  | -0.19951 |
| -0.07662 | 0.09819  | -0.08697 | 0.06037  | 0.169054 | 0.00024  | 0.230604 | 4.70E-07 | 0.080964 |
| -0.13981 | 0.00246  | -0.02252 | 0.62738  | 0.081676 | 0.07786  | 0.098372 | 0.03356  | 0.12102  |
| -0.11703 | 0.01138  | -0.03615 | 0.43575  | 0.131589 | 0.00439  | 0.188138 | 4.29E-05 | 0.116005 |
| -0.21959 | 1.66E-06 | -0.20436 | 8.53E-06 | 0.072463 | 0.11787  | 0.141243 | 0.00222  | -0.00954 |
| -0.2566  | 1.86E-08 | -0.35776 | 1.51E-15 | -0.08972 | 0.05269  | -0.03261 | 0.48208  | -0.10951 |
| -0.07396 | 0.11044  | -0.17139 | 0.0002   | -0.06446 | 0.16434  | -0.03872 | 0.40383  | -0.09765 |
| -0.20395 | 8.90E-06 | -0.14158 | 0.00216  | -0.03973 | 0.39161  | 0.022039 | 0.63476  | -0.02097 |
| -0.06375 | 0.16901  | 0.038813 | 0.40269  | -0.08387 | 0.07018  | 0.081474 | 0.0786   | -0.06237 |
| -0.30508 | 1.62E-11 | -0.51559 | 4.47E-33 | -0.08243 | 0.07514  | -0.16469 | 0.00035  | -0.22144 |
| -0.11358 | 0.01406  | -0.16454 | 0.00036  | -0.03997 | 0.38878  | -0.03485 | 0.45242  | -0.00323 |
| -0.19364 | 2.52E-05 | -0.04532 | 0.3285   | 0.159497 | 0.00054  | 0.278972 | 8.53E-10 | 0.021967 |
| -0.14947 | 0.0012   | -0.15964 | 0.00053  | 0.132862 | 0.00402  | 0.180093 | 9.10E-05 | 0.074983 |
| -0.297   | 5.78E-11 | -0.17237 | 0.00018  | -0.23336 | 3.40E-07 | -0.1026  | 0.02662  | -0.20561 |

|          |          |          |          |          |          |          |          |          |
|----------|----------|----------|----------|----------|----------|----------|----------|----------|
| -0.1369  | 0.00303  | -0.13146 | 0.00443  | 0.015367 | 0.74048  | 0.07769  | 0.09355  | 0.002859 |
| -0.19039 | 3.45E-05 | -0.15892 | 0.00057  | -0.06571 | 0.15624  | 0.056147 | 0.22588  | -0.11359 |
| -0.08087 | 0.08086  | -0.09035 | 0.05103  | 0.110111 | 0.01729  | 0.200365 | 1.29E-05 | 0.081217 |
| -0.01318 | 0.77628  | 0.098149 | 0.03397  | -0.17046 | 0.00021  | -0.08467 | 0.06754  | -0.15345 |
| -0.12828 | 0.0055   | -0.07474 | 0.10675  | 0.158587 | 0.00058  | 0.254273 | 2.52E-08 | 0.078222 |
| -0.18014 | 9.06E-05 | -0.09996 | 0.03078  | -0.07187 | 0.12093  | 0.009257 | 0.84185  | 0.020615 |
| 0.172025 | 0.00019  | 0.079939 | 0.08442  | 0.162352 | 0.00043  | -0.02593 | 0.57625  | 0.162861 |
| -0.20839 | 5.60E-06 | -0.19659 | 1.88E-05 | -0.06299 | 0.17419  | -0.04769 | 0.30371  | -0.03667 |
| 0.033301 | 0.47282  | -0.1788  | 0.0001   | -0.0197  | 0.67113  | -0.28944 | 1.83E-10 | 0.023803 |
| -0.10984 | 0.01757  | -0.04568 | 0.32457  | -0.11697 | 0.01141  | -0.03402 | 0.46332  | -0.06704 |
| 0.050335 | 0.27769  | -0.18474 | 5.92E-05 | -0.13452 | 0.00359  | -0.19784 | 1.66E-05 | -0.25331 |
| -0.18086 | 8.48E-05 | -0.23584 | 2.53E-07 | -0.06751 | 0.14522  | -0.1542  | 0.00083  | -0.05045 |
| -0.13731 | 0.00294  | -0.12288 | 0.00785  | -0.0133  | 0.77439  | 0.089942 | 0.05209  | -0.06498 |
| 0.348839 | 8.26E-15 | 0.434688 | 6.01E-23 | 0.170327 | 0.00022  | 0.216696 | 2.28E-06 | 0.097174 |
| -0.21405 | 3.05E-06 | -0.1082  | 0.01935  | -0.0086  | 0.85298  | 0.059332 | 0.20059  | -0.01021 |
| -0.03865 | 0.40466  | -0.00045 | 0.99225  | 0.247027 | 6.37E-08 | 0.317259 | 2.22E-12 | 0.132513 |
| -0.30039 | 3.41E-11 | -0.38393 | 7.52E-18 | -0.20117 | 1.18E-05 | -0.14472 | 0.00172  | -0.22407 |
| -0.12396 | 0.00732  | -0.08323 | 0.07234  | 0.143169 | 0.00192  | 0.211316 | 4.10E-06 | 0.039139 |
| -0.03328 | 0.47304  | -0.07389 | 0.11077  | 0.08298  | 0.07321  | 0.030888 | 0.5055   | 0.132311 |
| -0.11857 | 0.01033  | -0.04229 | 0.36188  | 0.012306 | 0.79083  | 0.066832 | 0.1493   | 0.014676 |
| -0.02237 | 0.62971  | -0.06801 | 0.14225  | 0.06128  | 0.18618  | 0.031537 | 0.49659  | 0.080479 |
| -0.20145 | 1.15E-05 | -0.16277 | 0.00041  | -0.26846 | 3.76E-09 | -0.15402 | 0.00084  | -0.15699 |
| -0.02241 | 0.62905  | -0.06802 | 0.14221  | 0.012427 | 0.78882  | 0.134156 | 0.00368  | -0.07267 |
| -0.03056 | 0.51005  | -0.25046 | 4.12E-08 | 0.223054 | 1.12E-06 | 0.15898  | 0.00056  | 0.076331 |
| 0.034791 | 0.45322  | 0.002789 | 0.95207  | 0.211532 | 4.00E-06 | 0.165835 | 0.00032  | 0.13154  |
| -0.1011  | 0.02893  | -0.01511 | 0.74461  | 0.109506 | 0.01792  | 0.164129 | 0.00037  | 0.096296 |
| -0.21747 | 2.10E-06 | -0.06595 | 0.15476  | -0.12008 | 0.0094   | 0.066239 | 0.15296  | -0.15945 |
| -0.08674 | 0.06106  | -0.01394 | 0.76386  | 0.109864 | 0.01755  | 0.22319  | 1.11E-06 | 0.108135 |
| -0.19179 | 3.01E-05 | -0.20385 | 8.99E-06 | -0.06187 | 0.18197  | -0.01042 | 0.82223  | -0.02904 |
| -0.13169 | 0.00436  | -0.23629 | 2.39E-07 | 0.181717 | 7.84E-05 | 0.158125 | 0.0006   | 0.097929 |
| -0.14413 | 0.00179  | -0.28938 | 1.85E-10 | 0.004773 | 0.91807  | 0.02187  | 0.63735  | -0.0932  |
| -0.21342 | 3.27E-06 | -0.19482 | 2.24E-05 | 0.073815 | 0.11115  | 0.146071 | 0.00155  | 0.0388   |
| -0.11525 | 0.0127   | -0.21037 | 4.53E-06 | 0.147446 | 0.0014   | 0.18123  | 8.20E-05 | 0.020589 |
| 0.16665  | 0.0003   | 0.140901 | 0.00227  | 0.143617 | 0.00186  | 0.021773 | 0.63884  | 0.135015 |
| -0.06028 | 0.19351  | -0.1543  | 0.00082  | 0.089092 | 0.05436  | 0.10106  | 0.02899  | 0.037547 |
| -0.16251 | 0.00042  | 0.052778 | 0.255    | -0.05967 | 0.19806  | 0.052184 | 0.2604   | 0.029843 |
| -0.02345 | 0.61326  | -0.00874 | 0.85062  | 0.158869 | 0.00057  | 0.209709 | 4.86E-06 | 0.155969 |
| -0.13273 | 0.00406  | -0.0297  | 0.52197  | -0.02112 | 0.64898  | 0.095056 | 0.04004  | 0.010938 |
| -0.23934 | 1.65E-07 | -0.24327 | 1.02E-07 | -0.18371 | 6.51E-05 | -0.17064 | 0.00021  | -0.13624 |
| -0.12722 | 0.00591  | -0.0843  | 0.06873  | 0.160318 | 0.00051  | 0.210476 | 4.48E-06 | 0.059682 |
| 0.009643 | 0.83536  | -0.08908 | 0.05439  | 0.087573 | 0.05862  | 0.083879 | 0.07015  | 0.075617 |
| -0.23688 | 2.23E-07 | -0.25952 | 1.26E-08 | -0.08892 | 0.05482  | -0.06798 | 0.1424   | -0.1039  |
| 0.01552  | 0.73799  | 0.020879 | 0.65268  | 0.180779 | 8.54E-05 | 0.163498 | 0.00039  | 0.189942 |
| -0.26691 | 4.65E-09 | -0.29154 | 1.33E-10 | 0.025515 | 0.58232  | 0.035159 | 0.44846  | -0.05228 |
| -0.12306 | 0.00776  | -0.12675 | 0.00609  | 0.291185 | 1.41E-10 | 0.187245 | 4.67E-05 | 0.23657  |

|          |          |          |          |          |          |          |          |          |
|----------|----------|----------|----------|----------|----------|----------|----------|----------|
| 0.229769 | 5.18E-07 | 0.03229  | 0.48636  | 0.115164 | 0.01276  | 0.02666  | 0.56551  | 0.011858 |
| -0.19832 | 1.58E-05 | -0.17485 | 0.00015  | 0.097471 | 0.03523  | 0.096419 | 0.03726  | 0.04566  |
| -0.2193  | 1.71E-06 | -0.21588 | 2.50E-06 | 0.125933 | 0.00643  | 0.152912 | 0.00092  | 0.090769 |
| -0.19142 | 3.12E-05 | -0.26179 | 9.32E-09 | 0.000675 | 0.98839  | 0.028455 | 0.53962  | -0.00298 |
| -0.13228 | 0.00419  | -0.14404 | 0.0018   | 0.053868 | 0.24531  | 0.088502 | 0.05598  | 0.046443 |
| -0.31542 | 3.02E-12 | -0.31536 | 3.05E-12 | -0.13859 | 0.00269  | -0.11755 | 0.01102  | -0.18743 |
| -0.25561 | 2.11E-08 | -0.22366 | 1.05E-06 | 0.051152 | 0.26995  | 0.143518 | 0.00188  | -0.01892 |
| -0.18239 | 7.36E-05 | -0.11908 | 0.01001  | 0.00675  | 0.88434  | 0.047127 | 0.3095   | -0.02691 |
| -0.10429 | 0.0242   | -0.11657 | 0.0117   | 0.056154 | 0.22582  | 0.053721 | 0.2466   | 0.040881 |
| -0.23567 | 2.58E-07 | -0.16027 | 0.00051  | -0.02057 | 0.65748  | 0.106833 | 0.02094  | -0.04134 |
| -0.13821 | 0.00276  | -0.08007 | 0.08391  | 0.043906 | 0.34378  | 0.084219 | 0.06901  | 0.067807 |
| -0.1493  | 0.00121  | -0.15538 | 0.00075  | 0.111443 | 0.01598  | 0.201902 | 1.10E-05 | 0.048779 |
| -0.07264 | 0.11695  | -0.10038 | 0.03009  | 0.093643 | 0.04311  | 0.118605 | 0.01031  | 0.008327 |
| -0.15204 | 0.00098  | -0.1775  | 0.00012  | 0.214672 | 2.85E-06 | 0.207357 | 6.24E-06 | 0.151526 |
| -0.16669 | 0.0003   | -0.2123  | 3.68E-06 | -0.07835 | 0.09078  | 0.000548 | 0.99058  | -0.09889 |
| -0.25855 | 1.44E-08 | -0.13548 | 0.00335  | -0.08942 | 0.05348  | 0.052125 | 0.26094  | -0.14225 |
| -0.23614 | 2.44E-07 | -0.16821 | 0.00026  | -0.02354 | 0.61188  | 0.108857 | 0.01862  | -0.04724 |
| 0.127494 | 0.0058   | 0.289783 | 1.74E-10 | -0.04647 | 0.31635  | -0.01023 | 0.82543  | -0.058   |
| -0.01329 | 0.77447  | 0.118895 | 0.01012  | -0.28008 | 7.27E-10 | -0.25814 | 1.52E-08 | -0.1915  |
| -0.1789  | 0.0001   | -0.08803 | 0.05731  | 0.123946 | 0.00733  | 0.172845 | 0.00017  | 0.074924 |
| -0.10736 | 0.02031  | -0.20324 | 9.57E-06 | 0.2096   | 4.92E-06 | 0.13691  | 0.00303  | 0.113973 |
| 0.291181 | 1.41E-10 | 0.299809 | 3.73E-11 | 0.049259 | 0.28811  | -0.04717 | 0.30906  | 0.063054 |
| -0.09007 | 0.05177  | -0.07092 | 0.12592  | 0.247898 | 5.71E-08 | 0.18815  | 4.28E-05 | 0.156244 |
| -0.25179 | 3.47E-08 | -0.17853 | 0.0001   | -0.14734 | 0.00141  | -0.05884 | 0.20434  | -0.19437 |
| -0.16369 | 0.00038  | -0.14837 | 0.0013   | 0.08279  | 0.07388  | 0.160162 | 0.00051  | 0.039803 |
| -0.06341 | 0.17128  | -0.17367 | 0.00016  | 0.109001 | 0.01846  | 0.106747 | 0.02104  | 0.093338 |
| 0.201585 | 1.13E-05 | 0.249964 | 4.39E-08 | 0.445977 | 3.33E-24 | 0.6065   | 2.99E-48 | 0.274532 |
| 0.001269 | 0.97818  | 0.085245 | 0.06568  | 0.106146 | 0.02178  | 0.212851 | 3.47E-06 | 0.05606  |
| 0.050701 | 0.27421  | 0.16946  | 0.00023  | 0.094509 | 0.04121  | 0.329917 | 2.55E-13 | 0.018556 |
| 0.067428 | 0.1457   | 0.345677 | 1.49E-14 | 0.200429 | 1.28E-05 | 0.503648 | 2.09E-31 | 0.134027 |
| -0.05369 | 0.24689  | 0.119882 | 0.00951  | 0.077528 | 0.09424  | 0.151614 | 0.00101  | 0.096824 |
| -0.18096 | 8.40E-05 | -0.10819 | 0.01936  | 0.022982 | 0.62033  | 0.169304 | 0.00024  | -0.01786 |
| -0.19428 | 2.36E-05 | -0.02744 | 0.55421  | 0.100779 | 0.02944  | 0.285332 | 3.37E-10 | 0.0268   |
| -0.2252  | 8.80E-07 | -0.17937 | 9.72E-05 | -0.04625 | 0.31863  | 0.07356  | 0.11239  | -0.0941  |
| -0.26161 | 9.56E-09 | -0.17829 | 0.00011  | -0.05129 | 0.26865  | 0.098999 | 0.03244  | -0.09137 |
| -0.18078 | 8.55E-05 | -0.10432 | 0.02416  | 0.207073 | 6.43E-06 | 0.235141 | 2.75E-07 | 0.139351 |
| -0.2726  | 2.11E-09 | -0.13512 | 0.00344  | 0.139639 | 0.00249  | 0.09512  | 0.03991  | 0.117958 |
| -0.0493  | 0.28774  | -0.09453 | 0.04115  | -0.07365 | 0.11194  | 0.033777 | 0.4665   | -0.05137 |
| -0.02791 | 0.54738  | -0.15053 | 0.0011   | 0.026981 | 0.56083  | -0.02097 | 0.6513   | 0.07745  |
| -0.14704 | 0.00144  | -0.13282 | 0.00404  | 0.024927 | 0.59105  | 0.141636 | 0.00215  | -0.05493 |
| -0.0837  | 0.07075  | -0.04517 | 0.33009  | 0.148209 | 0.00132  | 0.139353 | 0.00254  | 0.177854 |
| 0.312887 | 4.58E-12 | 0.063285 | 0.17215  | 0.123789 | 0.0074   | -0.01758 | 0.70473  | 0.138529 |
| -0.07384 | 0.11101  | -0.02599 | 0.57538  | 0.078613 | 0.08971  | 0.153452 | 0.00088  | 0.021952 |
| -0.35311 | 3.69E-15 | -0.28606 | 3.03E-10 | -0.1735  | 0.00016  | -0.03171 | 0.49418  | -0.23589 |
| -0.20715 | 6.37E-06 | -0.20317 | 9.64E-06 | 0.061646 | 0.18356  | 0.015306 | 0.74148  | -0.05496 |

|          |          |          |          |          |          |          |          |          |
|----------|----------|----------|----------|----------|----------|----------|----------|----------|
| -0.15625 | 0.0007   | -0.0755  | 0.10321  | 0.147884 | 0.00135  | 0.194284 | 2.36E-05 | 0.157335 |
| -0.39082 | 1.72E-18 | -0.35679 | 1.82E-15 | -0.13991 | 0.00244  | -0.12787 | 0.00565  | -0.18907 |
| 0.006945 | 0.88102  | -0.0673  | 0.14648  | 0.050207 | 0.27892  | 0.032207 | 0.48749  | 0.048562 |
| -0.07334 | 0.1135   | -0.03068 | 0.50833  | -0.066   | 0.15442  | -0.05644 | 0.22348  | -0.02805 |
| -0.21785 | 2.01E-06 | -0.24904 | 4.94E-08 | -0.00027 | 0.99541  | 0.013062 | 0.7783   | -0.13596 |
| -0.10157 | 0.02818  | -0.00762 | 0.86951  | 0.147344 | 0.00141  | 0.088997 | 0.05462  | 0.272649 |
| -0.06442 | 0.16456  | -0.06263 | 0.17663  | 0.182602 | 7.22E-05 | 0.158905 | 0.00057  | 0.165175 |
| -0.20548 | 7.59E-06 | -0.0889  | 0.05488  | 0.070007 | 0.13088  | 0.078576 | 0.08986  | 0.063475 |
| -0.2181  | 1.96E-06 | -0.29392 | 9.28E-11 | 0.00795  | 0.86395  | -0.0309  | 0.50526  | -0.05671 |
| -0.07382 | 0.11112  | -0.09089 | 0.04966  | 0.110341 | 0.01706  | 0.170616 | 0.00021  | -0.01179 |
| -0.02126 | 0.64674  | 0.10186  | 0.02773  | -0.03106 | 0.50313  | -0.10841 | 0.01911  | -0.0293  |
| 0.051612 | 0.26567  | 0.09857  | 0.0332   | -0.24047 | 1.44E-07 | -0.22012 | 1.56E-06 | -0.16885 |
| -0.13818 | 0.00277  | -0.14005 | 0.00242  | 0.103684 | 0.02505  | 0.105081 | 0.02315  | 0.077377 |
| -0.01907 | 0.68109  | -0.04619 | 0.31922  | 0.150125 | 0.00114  | 0.140442 | 0.00235  | 0.173292 |
| -0.13325 | 0.00392  | -0.39626 | 5.22E-19 | 0.100701 | 0.02957  | -0.05936 | 0.20037  | -0.01643 |
| 0.073514 | 0.11262  | 0.083221 | 0.07238  | -0.24687 | 6.50E-08 | -0.24894 | 5.00E-08 | -0.1278  |
| -0.06239 | 0.17834  | -0.15158 | 0.00102  | -0.27755 | 1.05E-09 | -0.40683 | 4.84E-20 | -0.16317 |
| -0.27076 | 2.73E-09 | -0.16713 | 0.00029  | -0.11045 | 0.01696  | 0.018976 | 0.68252  | -0.15399 |
| 0.051186 | 0.26964  | -0.10186 | 0.02773  | -0.19738 | 1.74E-05 | -0.27441 | 1.64E-09 | -0.16675 |
| -0.26209 | 8.95E-09 | -0.14325 | 0.00191  | -0.0279  | 0.54755  | 0.111906 | 0.01555  | -0.04698 |
| -0.14624 | 0.00153  | -0.0485  | 0.29564  | -0.07999 | 0.08422  | 0.012681 | 0.78461  | -0.07031 |
| 0.338302 | 5.74E-14 | 0.330845 | 2.17E-13 | 0.188405 | 4.18E-05 | 0.120538 | 0.00912  | 0.087823 |
| -0.12173 | 0.00845  | -0.01936 | 0.67652  | 0.020075 | 0.66523  | 0.112295 | 0.01519  | 0.014045 |
| -0.16718 | 0.00028  | -0.12886 | 0.00529  | 0.182358 | 7.39E-05 | 0.228891 | 5.74E-07 | 0.089567 |
| -0.26189 | 9.20E-09 | -0.16256 | 0.00042  | 0.026255 | 0.57142  | 0.13037  | 0.00478  | 0.007222 |
| -0.07015 | 0.13008  | -0.04427 | 0.3398   | 0.116004 | 0.01212  | 0.096187 | 0.03772  | 0.11057  |
| -0.02276 | 0.62368  | -0.15397 | 0.00084  | -0.00384 | 0.93399  | 0.131362 | 0.00446  | -0.10712 |
| 0.050346 | 0.27759  | -0.14104 | 0.00225  | -0.29735 | 5.47E-11 | -0.36247 | 6.03E-16 | -0.28051 |
| -0.25758 | 1.63E-08 | -0.1457  | 0.00159  | -0.18945 | 3.78E-05 | -0.01804 | 0.69744  | -0.15176 |
| -0.12335 | 0.00761  | -0.06886 | 0.1373   | 0.063406 | 0.17134  | 0.114389 | 0.01338  | 0.05326  |
| -0.12604 | 0.00638  | -0.12829 | 0.00549  | 0.077185 | 0.09571  | 0.108738 | 0.01875  | 0.020276 |
| 0.044477 | 0.33754  | 0.011653 | 0.80169  | 0.235368 | 2.67E-07 | 0.241301 | 1.30E-07 | 0.15717  |
| 0.004721 | 0.91896  | -0.00112 | 0.98077  | 0.356806 | 1.82E-15 | 0.313488 | 4.15E-12 | 0.282909 |
| 0.012112 | 0.79405  | -0.03734 | 0.42085  | 0.262382 | 8.61E-09 | 0.295796 | 6.96E-11 | 0.13694  |
| 0.023918 | 0.60617  | 0.118092 | 0.01065  | 0.30125  | 2.98E-11 | 0.329963 | 2.53E-13 | 0.318605 |
| 0.150185 | 0.00113  | -0.19327 | 2.61E-05 | -0.08453 | 0.06801  | -0.38065 | 1.50E-17 | -0.0982  |
| -0.24654 | 6.78E-08 | -0.08522 | 0.06577  | -0.22981 | 5.16E-07 | 0.033919 | 0.46463  | -0.24169 |
| -0.09422 | 0.04182  | -0.314   | 3.82E-12 | -0.25149 | 3.61E-08 | -0.48466 | 7.00E-29 | -0.24491 |
| -0.18784 | 4.41E-05 | -0.35207 | 4.50E-15 | -0.19177 | 3.02E-05 | -0.18952 | 3.76E-05 | -0.19712 |
| -0.04343 | 0.349    | -0.03354 | 0.46963  | 0.136985 | 0.00301  | 0.144009 | 0.00181  | 0.068361 |
| -0.04148 | 0.3711   | -0.06598 | 0.15459  | 0.231141 | 4.41E-07 | 0.262042 | 9.01E-09 | 0.161531 |
| 0.084842 | 0.06697  | 0.044788 | 0.33416  | 0.04545  | 0.32706  | -0.11056 | 0.01684  | 0.095584 |
| -0.1853  | 5.61E-05 | -0.16074 | 0.00049  | 0.025925 | 0.57627  | 0.164544 | 0.00036  | -0.03487 |
| -0.06999 | 0.13099  | -0.14909 | 0.00123  | -0.01163 | 0.80214  | -0.00629 | 0.89215  | 0.011865 |
| -0.24458 | 8.66E-08 | -0.35459 | 2.78E-15 | 0.036133 | 0.43597  | 0.00495  | 0.91504  | -0.01523 |

|          |          |          |          |          |          |          |          |          |
|----------|----------|----------|----------|----------|----------|----------|----------|----------|
| -0.32852 | 3.25E-13 | -0.43859 | 2.24E-23 | -0.21768 | 2.05E-06 | -0.08396 | 0.06989  | -0.26738 |
| -0.32263 | 8.97E-13 | -0.32433 | 6.71E-13 | -0.06625 | 0.15287  | 0.024209 | 0.60178  | -0.11781 |
| 0.163913 | 0.00038  | 0.207166 | 6.36E-06 | -0.03733 | 0.42087  | -0.14796 | 0.00134  | -0.07855 |
| -0.14741 | 0.0014   | -0.07506 | 0.10523  | 0.16927  | 0.00024  | 0.183953 | 6.37E-05 | 0.077707 |
| -0.27901 | 8.49E-10 | 0.022313 | 0.63054  | -0.21952 | 1.67E-06 | 0.024036 | 0.60439  | -0.18461 |
| -0.10756 | 0.02007  | -0.10513 | 0.02308  | 0.026212 | 0.57206  | 0.063583 | 0.17014  | 0.032592 |
| 0.142005 | 0.0021   | 0.071614 | 0.12224  | -0.22166 | 1.31E-06 | -0.17712 | 0.00012  | -0.18717 |
| -0.32968 | 2.66E-13 | -0.32123 | 1.14E-12 | -0.26418 | 6.75E-09 | -0.19478 | 2.25E-05 | -0.24808 |
| -0.28972 | 1.75E-10 | -0.24889 | 5.03E-08 | -0.21688 | 2.24E-06 | -0.11664 | 0.01165  | -0.19977 |
| -0.17108 | 0.0002   | -0.24722 | 6.22E-08 | -0.12162 | 0.00852  | -0.12405 | 0.00728  | -0.13786 |
| -0.20114 | 1.19E-05 | -0.14234 | 0.00205  | -0.02071 | 0.65529  | 0.114185 | 0.01355  | -0.04289 |
| 0.143684 | 0.00185  | 0.024594 | 0.59602  | -0.09155 | 0.04802  | -0.24092 | 1.36E-07 | -0.07492 |
| -0.16694 | 0.00029  | -0.31873 | 1.74E-12 | 0.051953 | 0.26252  | -0.01214 | 0.79356  | -0.02875 |
| -0.11239 | 0.0151   | -0.05696 | 0.21925  | 0.010502 | 0.82092  | 0.083625 | 0.071    | 0.001435 |
| -0.04789 | 0.30169  | -0.06928 | 0.13491  | 0.209633 | 4.90E-06 | 0.149016 | 0.00124  | 0.201985 |
| -0.20052 | 1.26E-05 | -0.06374 | 0.16911  | -0.08197 | 0.0768   | 0.071865 | 0.12094  | -0.0752  |
| 0.009178 | 0.84319  | 0.041964 | 0.36556  | 0.308556 | 9.29E-12 | 0.325917 | 5.11E-13 | 0.146842 |
| 0.044968 | 0.33222  | -0.03691 | 0.42617  | 0.204151 | 8.71E-06 | 0.20364  | 9.19E-06 | 0.14395  |
| -0.16671 | 0.0003   | -0.10515 | 0.02305  | -0.03951 | 0.39433  | 0.063771 | 0.16888  | -0.04234 |
| -0.00386 | 0.93372  | 0.031509 | 0.49697  | 0.160389 | 0.0005   | 0.175477 | 0.00014  | 0.118912 |
| -0.23569 | 2.57E-07 | -0.0642  | 0.16601  | -0.27465 | 1.58E-09 | -0.02154 | 0.6424   | -0.2356  |
| -0.06855 | 0.13908  | 0.035497 | 0.4441   | 0.04032  | 0.38467  | 0.020498 | 0.65862  | 0.101509 |
| -0.10577 | 0.02225  | -0.01985 | 0.66871  | 0.134936 | 0.00348  | 0.230663 | 4.67E-07 | 0.180219 |
| -0.21758 | 2.07E-06 | -0.16143 | 0.00046  | 0.03781  | 0.41497  | 0.126394 | 0.00624  | 0.009208 |
| -0.00102 | 0.98253  | 0.050073 | 0.2802   | -0.25417 | 2.55E-08 | -0.21844 | 1.88E-06 | -0.21856 |
| -0.05817 | 0.20953  | -0.0717  | 0.12182  | 0.071427 | 0.12323  | 0.082694 | 0.07421  | 0.040569 |
| 0.244939 | 8.28E-08 | 0.255532 | 2.14E-08 | 0.069475 | 0.13384  | 0.091584 | 0.04793  | -0.02606 |
| 0.344784 | 1.76E-14 | 0.211659 | 3.95E-06 | 0.034155 | 0.46152  | 0.025119 | 0.58819  | 0.138433 |
| -0.12417 | 0.00722  | -0.02471 | 0.59425  | 0.031904 | 0.49159  | 0.059407 | 0.20002  | -0.02276 |
| -0.18213 | 7.54E-05 | -0.10512 | 0.0231   | 0.095896 | 0.03831  | 0.170851 | 0.00021  | 0.080454 |
| -0.10102 | 0.02905  | -0.14765 | 0.00138  | 0.16363  | 0.00038  | 0.102263 | 0.02712  | 0.109808 |
| -0.33645 | 8.02E-14 | -0.28451 | 3.81E-10 | -0.01118 | 0.80959  | 0.091569 | 0.04797  | -0.07843 |
| 0.000766 | 0.98683  | 0.044602 | 0.33617  | 0.152404 | 0.00095  | 0.256994 | 1.76E-08 | 0.152056 |
| 0.180072 | 9.12E-05 | 0.238931 | 1.74E-07 | 0.051416 | 0.26749  | -0.05867 | 0.2057   | 0.033942 |
| -0.19984 | 1.36E-05 | -0.17886 | 0.0001   | -0.00107 | 0.98158  | 0.029423 | 0.5259   | -0.00954 |
| -0.10102 | 0.02906  | -0.02721 | 0.55751  | 0.125699 | 0.00653  | 0.237135 | 2.16E-07 | 0.101508 |
| 0.074856 | 0.10619  | 0.023685 | 0.60968  | -0.17902 | 0.0001   | -0.22916 | 5.57E-07 | -0.12732 |
| -0.39058 | 1.81E-18 | -0.31239 | 4.97E-12 | -0.34732 | 1.10E-14 | -0.3062  | 1.36E-11 | -0.26936 |
| -0.06203 | 0.18087  | -0.13398 | 0.00372  | 0.093617 | 0.04317  | 0.153614 | 0.00087  | -0.00445 |
| -0.12633 | 0.00626  | -0.06934 | 0.13459  | 0.01741  | 0.70747  | 0.078568 | 0.0899   | 0.025856 |
| -0.19981 | 1.36E-05 | -0.3369  | 7.39E-14 | -0.1339  | 0.00374  | -0.15112 | 0.00105  | -0.16672 |
| -0.22478 | 9.23E-07 | -0.19046 | 3.43E-05 | -0.16102 | 0.00048  | -0.01854 | 0.68948  | -0.19193 |
| -0.14003 | 0.00242  | -0.09211 | 0.04666  | 0.029275 | 0.52798  | 0.047999 | 0.30063  | 0.084029 |
| 0.160481 | 0.0005   | 0.072159 | 0.11942  | -0.00304 | 0.94771  | -0.16476 | 0.00035  | -0.07025 |
| -0.03895 | 0.40104  | -0.0771  | 0.09609  | 0.099798 | 0.03106  | 0.096652 | 0.0368   | 0.071506 |

|          |          |          |          |          |          |           |          |          |
|----------|----------|----------|----------|----------|----------|-----------|----------|----------|
| -0.18711 | 4.73E-05 | -0.10706 | 0.02066  | 0.102465 | 0.02682  | 0.144723  | 0.00171  | 0.104932 |
| -0.319   | 1.66E-12 | -0.15238 | 0.00096  | -0.11029 | 0.01711  | -0.13044  | 0.00475  | -0.05485 |
| -0.15985 | 0.00053  | -0.18425 | 6.19E-05 | -0.18783 | 4.41E-05 | -0.11009  | 0.01732  | -0.19866 |
| 0.109134 | 0.01832  | 0.031956 | 0.49089  | 0.053383 | 0.24959  | 0.128012  | 0.0056   | 0.086078 |
| -0.12817 | 0.00554  | -0.06489 | 0.16149  | -0.03384 | 0.46569  | 0.078322  | 0.09091  | -0.03912 |
| -0.05533 | 0.23275  | 0.050246 | 0.27855  | 0.074668 | 0.10707  | 0.132319  | 0.00418  | 0.045814 |
| -0.35228 | 4.32E-15 | -0.17085 | 0.00021  | -0.12604 | 0.00638  | 0.008286  | 0.85827  | -0.12228 |
| -0.11049 | 0.01692  | -0.06405 | 0.16704  | 0.149474 | 0.0012   | 0.22442   | 9.61E-07 | 0.116204 |
| 0.112096 | 0.01537  | 0.102906 | 0.02616  | 0.270116 | 2.99E-09 | 0.453977  | 4.01E-25 | 0.10697  |
| 0.091265 | 0.04872  | -0.14286 | 0.00197  | 0.141784 | 0.00213  | 0.222625  | 1.18E-06 | -0.00131 |
| 0.166504 | 0.0003   | 0.365801 | 3.12E-16 | -0.02234 | 0.63006  | 0.027235  | 0.55715  | -0.00208 |
| 0.144084 | 0.0018   | 0.114849 | 0.01301  | -0.1266  | 0.00615  | -0.11731  | 0.01118  | -0.09054 |
| -0.13614 | 0.0032   | -0.16301 | 0.0004   | -0.03795 | 0.41327  | -0.02815  | 0.54395  | -0.07026 |
| -0.05226 | 0.2597   | -0.09849 | 0.03336  | -0.25541 | 2.17E-08 | -0.25635  | 1.92E-08 | -0.27052 |
| -0.10684 | 0.02093  | -0.18259 | 7.23E-05 | -0.32115 | 1.15E-12 | -0.41336  | 1.07E-20 | -0.24349 |
| 0.347804 | 1.00E-14 | 0.152301 | 0.00096  | -0.28367 | 4.31E-10 | -0.16501  | 0.00034  | -0.26474 |
| 0.009111 | 0.84432  | 0.05618  | 0.2256   | 0.239096 | 1.70E-07 | 0.230992  | 4.49E-07 | 0.254    |
| 0.053888 | 0.24513  | 0.068638 | 0.13859  | 0.222344 | 1.22E-06 | 0.221003  | 1.42E-06 | 0.263911 |
| -0.02608 | 0.57397  | -0.00149 | 0.97441  | 0.196034 | 1.99E-05 | 0.188791  | 4.03E-05 | 0.184322 |
| -0.10398 | 0.02463  | -0.20193 | 1.10E-05 | -0.1259  | 0.00644  | 0.052752  | 0.25524  | -0.21753 |
| -0.22201 | 1.26E-06 | -0.19936 | 1.42E-05 | -0.07728 | 0.09531  | -0.0829   | 0.0735   | -0.10532 |
| -0.0655  | 0.15758  | -0.03919 | 0.3981   | 0.028467 | 0.53944  | 0.064402  | 0.1647   | -0.02375 |
| 0.263536 | 7.37E-09 | 0.177509 | 0.00012  | 0.292717 | 1.11E-10 | 0.179104  | 9.96E-05 | 0.276502 |
| -0.17669 | 0.00012  | -0.13402 | 0.00371  | 0.141627 | 0.00216  | 0.176809  | 0.00012  | 0.086365 |
| -0.2218  | 1.29E-06 | -0.0824  | 0.07523  | -0.00564 | 0.90322  | 0.171518  | 0.0002   | -0.01281 |
| -0.37393 | 6.04E-17 | -0.36844 | 1.84E-16 | -0.19196 | 2.96E-05 | -0.09816  | 0.03395  | -0.22221 |
| -0.01649 | 0.72233  | -0.04926 | 0.28807  | -0.18355 | 6.61E-05 | -0.14301  | 0.00195  | -0.21673 |
| -0.2275  | 6.75E-07 | -0.17979 | 9.36E-05 | -0.01297 | 0.77989  | 0.116569  | 0.0117   | -0.05573 |
| -0.19245 | 2.83E-05 | -0.09152 | 0.0481   | 0.008545 | 0.85389  | 0.127458  | 0.00581  | -0.02091 |
| -0.05318 | 0.25139  | -0.03964 | 0.3927   | 0.002905 | 0.95008  | 0.080676  | 0.08158  | 0.014892 |
| 0.021502 | 0.64302  | 0.026783 | 0.56371  | 0.259768 | 1.22E-08 | 0.230885  | 4.55E-07 | 0.221852 |
| 0.393878 | 8.81E-19 | 0.157464 | 0.00064  | 0.325025 | 5.96E-13 | 0.207939  | 5.87E-06 | 0.176683 |
| -0.08872 | 0.05537  | -0.03011 | 0.51622  | 0.053449 | 0.24901  | 0.099168  | 0.03215  | 0.045848 |
| -0.25515 | 2.25E-08 | -0.21455 | 2.89E-06 | -0.10125 | 0.02868  | -3.76E-06 | 0.99994  | -0.09636 |
| -0.09057 | 0.05047  | -0.13558 | 0.00333  | 0.087326 | 0.05934  | 0.088156  | 0.05695  | 0.09199  |
| -0.32438 | 6.65E-13 | -0.22792 | 6.43E-07 | -0.20338 | 9.43E-06 | -0.08345  | 0.07159  | -0.18298 |
| -0.12836 | 0.00547  | -0.1338  | 0.00377  | 0.071947 | 0.12051  | 0.039966  | 0.38885  | 0.091053 |
| -0.19364 | 2.52E-05 | -0.14492 | 0.00169  | -0.0043  | 0.92621  | 0.03879   | 0.40297  | -0.06434 |
| -0.18235 | 7.39E-05 | -0.06464 | 0.16311  | 0.002109 | 0.96375  | 0.083565  | 0.0712   | 0.009319 |
| -0.13664 | 0.00309  | -0.24187 | 1.21E-07 | 0.108196 | 0.01935  | -0.00981  | 0.83258  | 0.101194 |
| -0.06276 | 0.17574  | 0.045745 | 0.32392  | 0.30523  | 1.58E-11 | 0.238195  | 1.90E-07 | 0.323933 |
| 0.00522  | 0.91042  | -0.04563 | 0.32519  | 0.163545 | 0.00039  | 0.107285  | 0.0204   | 0.095426 |
| -0.15905 | 0.00056  | -0.09994 | 0.03083  | -0.08275 | 0.074    | -0.0032   | 0.94508  | -0.08343 |
| -0.20884 | 5.33E-06 | -0.19776 | 1.67E-05 | 0.058208 | 0.20927  | 0.047908  | 0.30155  | 0.018299 |
| 0.252192 | 3.30E-08 | 0.239313 | 1.66E-07 | 0.151033 | 0.00106  | 0.164607  | 0.00035  | -0.01028 |

|          |          |          |          |          |          |          |          |          |
|----------|----------|----------|----------|----------|----------|----------|----------|----------|
| -0.20191 | 1.10E-05 | -0.11307 | 0.01449  | 0.013203 | 0.77598  | 0.074259 | 0.10901  | 0.074029 |
| 0.264204 | 6.73E-09 | 0.302339 | 2.51E-11 | 0.151007 | 0.00106  | 0.206983 | 6.49E-06 | 0.041159 |
| -0.2637  | 7.21E-09 | -0.23195 | 4.01E-07 | -0.03192 | 0.49139  | 0.07171  | 0.12174  | -0.05854 |
| -0.04926 | 0.2881   | -0.19962 | 1.39E-05 | 0.151849 | 0.001    | 0.209167 | 5.15E-06 | 0.010219 |
| -0.28462 | 3.74E-10 | -0.18904 | 3.93E-05 | -0.18182 | 7.76E-05 | -0.1202  | 0.00932  | -0.06186 |
| -0.15613 | 0.00071  | -0.32963 | 2.68E-13 | 0.024244 | 0.60126  | -0.08212 | 0.07626  | -0.01126 |
| -0.06197 | 0.18129  | -0.04554 | 0.32609  | 0.187912 | 4.38E-05 | 0.192657 | 2.77E-05 | 0.193535 |
| -0.12066 | 0.00905  | -0.10943 | 0.018    | 0.097261 | 0.03563  | 0.182    | 7.63E-05 | -0.00597 |
| 0.063456 | 0.171    | 0.198568 | 1.54E-05 | 0.276932 | 1.14E-09 | 0.33287  | 1.52E-13 | 0.224124 |
| -0.29202 | 1.24E-10 | -0.23689 | 2.23E-07 | 0.006264 | 0.89261  | 0.078182 | 0.09149  | -0.04557 |
| -0.16025 | 0.00051  | -0.14472 | 0.00171  | 0.007501 | 0.87157  | 0.050741 | 0.27383  | -0.00678 |
| -0.08188 | 0.07713  | -0.0299  | 0.51919  | 0.193947 | 2.44E-05 | 0.137005 | 0.00301  | 0.293922 |
| -0.13751 | 0.0029   | -0.11083 | 0.01657  | -0.05988 | 0.19649  | -0.05388 | 0.24517  | 0.013636 |
| 0.017426 | 0.70722  | 0.042642 | 0.35786  | 0.191001 | 3.26E-05 | 0.214815 | 2.81E-06 | 0.187969 |
| 0.091049 | 0.04925  | 0.033575 | 0.46918  | -0.0755  | 0.10322  | -0.15008 | 0.00114  | -0.10575 |
| -0.23097 | 4.51E-07 | -0.16014 | 0.00051  | 0.150797 | 0.00108  | 0.212603 | 3.57E-06 | 0.066825 |
| -0.19628 | 1.94E-05 | -0.13476 | 0.00353  | 0.181425 | 8.05E-05 | 0.207255 | 6.30E-06 | 0.11903  |
| -0.17226 | 0.00018  | -0.10049 | 0.02991  | 0.154169 | 0.00083  | 0.193728 | 2.49E-05 | 0.176598 |
| -0.28882 | 2.01E-10 | -0.30995 | 7.41E-12 | -0.13035 | 0.00478  | -0.07572 | 0.10219  | -0.13718 |
| 0.309832 | 7.55E-12 | 0.473483 | 1.81E-27 | 0.219362 | 1.70E-06 | 0.259499 | 1.27E-08 | 0.310128 |
| -0.08967 | 0.05281  | -0.0258  | 0.5781   | 0.075738 | 0.10212  | 0.129965 | 0.00491  | 0.092451 |
| -0.00927 | 0.84163  | 0.076243 | 0.09985  | 0.150731 | 0.00109  | 0.138225 | 0.00276  | 0.207661 |
| 0.110033 | 0.01737  | 0.055639 | 0.23011  | 0.428245 | 2.99E-22 | 0.486191 | 4.44E-29 | 0.317967 |
| -0.06515 | 0.15985  | 0.034539 | 0.4565   | 0.025521 | 0.58224  | 0.124527 | 0.00705  | 0.263734 |
| -0.15475 | 0.00079  | -0.11564 | 0.0124   | 0.069097 | 0.13596  | 0.077636 | 0.09379  | 0.115947 |
| -0.04984 | 0.28249  | -0.00366 | 0.93717  | 0.087539 | 0.05872  | 0.198209 | 1.60E-05 | 0.041982 |
| -0.08513 | 0.06605  | -0.08352 | 0.07134  | 0.129267 | 0.00515  | 0.128464 | 0.00543  | 0.160008 |
| -0.0179  | 0.69963  | 0.071543 | 0.12261  | 0.306883 | 1.22E-11 | 0.254522 | 2.44E-08 | 0.316296 |
| -0.08738 | 0.05917  | 0.080091 | 0.08382  | 0.163898 | 0.00038  | 0.236079 | 2.45E-07 | 0.236311 |
| -0.10435 | 0.02412  | -0.14349 | 0.00188  | 0.114899 | 0.01297  | 0.135608 | 0.00332  | 0.056684 |
| -0.13516 | 0.00343  | -0.07105 | 0.12524  | 0.043837 | 0.34454  | 0.240605 | 1.42E-07 | 0.006756 |
| 0.008585 | 0.8532   | 0.150825 | 0.00108  | 0.259393 | 1.28E-08 | 0.368965 | 1.66E-16 | 0.287412 |
| -0.23827 | 1.88E-07 | -0.2647  | 6.29E-09 | -0.2163  | 2.38E-06 | -0.10871 | 0.01878  | -0.21778 |
| 0.002492 | 0.95717  | 0.09404  | 0.04223  | 0.074375 | 0.10846  | 0.210734 | 4.36E-06 | 0.080391 |
| -0.11251 | 0.01499  | 0.014642 | 0.75231  | 0.078274 | 0.09111  | 0.100205 | 0.03038  | 0.211257 |
| 0.389291 | 2.39E-18 | -0.16191 | 0.00044  | -0.17145 | 0.0002   | -0.29409 | 9.04E-11 | -0.20612 |
| -0.13002 | 0.00489  | -0.05181 | 0.2638   | 0.067113 | 0.1476   | 0.132167 | 0.00422  | 0.044325 |
| -0.04419 | 0.34065  | 0.073171 | 0.11431  | 0.192965 | 2.69E-05 | 0.214268 | 2.98E-06 | 0.218024 |
| -0.03307 | 0.47592  | 0.096282 | 0.03753  | 0.178172 | 0.00011  | 0.304473 | 1.79E-11 | 0.178722 |
| -0.19228 | 2.88E-05 | -0.1471  | 0.00143  | -0.07991 | 0.08451  | -0.0126  | 0.786    | -0.03518 |
| -0.11045 | 0.01695  | -0.1159  | 0.0122   | -0.00795 | 0.86401  | 0.07291  | 0.11561  | -0.03133 |
| -0.36647 | 2.73E-16 | -0.38609 | 4.75E-18 | -0.27292 | 2.02E-09 | -0.21759 | 2.07E-06 | -0.32723 |
| -0.00767 | 0.86866  | -0.06141 | 0.18525  | 0.026771 | 0.56388  | -0.04001 | 0.38837  | 0.071828 |
| -0.02043 | 0.65968  | -0.04389 | 0.34391  | 0.044795 | 0.33408  | -0.00693 | 0.88126  | 0.110905 |
| -0.01128 | 0.80791  | -0.01287 | 0.78152  | 0.131352 | 0.00447  | 0.028744 | 0.5355   | 0.182926 |



|           |         |          |         |          |          |          |         |          |
|-----------|---------|----------|---------|----------|----------|----------|---------|----------|
| -0.04717  | 0.30901 | -0.08979 | 0.05248 | 0.0492   | 0.28869  | -0.03496 | 0.45102 | 0.097504 |
| 0.111501  | 0.01593 | 0.073727 | 0.11157 | 0.128411 | 0.00545  | 0.088749 | 0.0553  | 0.123665 |
| -0.02829  | 0.54195 | -0.02969 | 0.52221 | 0.054263 | 0.24186  | 0.003436 | 0.94098 | 0.059608 |
| -0.02605  | 0.57448 | -0.06055 | 0.19147 | 0.00189  | 0.96751  | -0.04831 | 0.29755 | 0.029473 |
| 0.037312  | 0.42114 | 0.013483 | 0.77135 | 0.071867 | 0.12093  | 0.041539 | 0.37045 | 0.110694 |
| 0.016652  | 0.71966 | 0.003178 | 0.94539 | 0.112495 | 0.01501  | 0.041855 | 0.36681 | 0.136212 |
| 0.027897  | 0.5476  | 0.00059  | 0.98986 | 0.0563   | 0.22462  | -0.03491 | 0.45167 | 0.13197  |
| -0.00538  | 0.90775 | -0.00948 | 0.83804 | 0.045528 | 0.32623  | 0.087385 | 0.05917 | 0.08219  |
| -0.01136  | 0.80655 | 0.002018 | 0.96532 | 0.078007 | 0.09222  | 0.034508 | 0.4569  | 0.096303 |
| 0.008122  | 0.86104 | 0.027181 | 0.55793 | 0.023603 | 0.61091  | -0.01035 | 0.8234  | 0.112573 |
| -0.06612  | 0.15371 | -0.00593 | 0.8983  | -0.05578 | 0.22895  | -0.08295 | 0.07333 | 0.009788 |
| 0.028619  | 0.53728 | -0.01707 | 0.71292 | 0.110623 | 0.01678  | 0.049542 | 0.28534 | 0.145632 |
| 0.021265  | 0.64669 | 0.07308  | 0.11476 | 0.120941 | 0.00889  | 0.092584 | 0.04553 | 0.136875 |
| 0.008368  | 0.85688 | 0.010447 | 0.82185 | 0.147007 | 0.00144  | 0.063994 | 0.1674  | 0.192749 |
| 0.099055  | 0.03235 | -0.03942 | 0.39542 | 0.087889 | 0.05771  | 0.058954 | 0.20348 | 0.049111 |
| 0.00357   | 0.93866 | -0.00909 | 0.84472 | -0.01939 | 0.67601  | -0.03197 | 0.49066 | -0.01862 |
| 0.003434  | 0.94099 | -0.02662 | 0.56611 | 0.055156 | 0.23419  | 0.003136 | 0.94612 | 0.083546 |
| 0.035129  | 0.44885 | -0.0409  | 0.37784 | 0.068265 | 0.14076  | 0.091659 | 0.04775 | 0.093286 |
| 0.00582   | 0.90018 | -0.03815 | 0.41079 | 0.035068 | 0.44964  | 0.000339 | 0.99416 | 0.071413 |
| -0.08211  | 0.07627 | -0.01114 | 0.81021 | -0.06303 | 0.17388  | -0.03959 | 0.39338 | -0.03262 |
| -0.00382  | 0.93435 | -0.04621 | 0.31899 | 0.104825 | 0.02348  | -0.0101  | 0.82768 | 0.148393 |
| -0.00599  | 0.89722 | -0.01399 | 0.76301 | 0.054026 | 0.24392  | 0.018796 | 0.68539 | 0.058593 |
| -0.04034  | 0.38442 | -0.0103  | 0.82434 | 0.046299 | 0.31809  | 0.024752 | 0.59365 | 0.066    |
| 0.029816  | 0.52039 | 0.007805 | 0.86641 | 0.093295 | 0.04389  | -0.00966 | 0.83511 | 0.131886 |
| -0.06341  | 0.17129 | -0.08464 | 0.06764 | 0.039818 | 0.39061  | -0.0543  | 0.24158 | 0.102482 |
| 0.096989  | 0.03615 | 0.069399 | 0.13426 | 0.101285 | 0.02863  | 0.089087 | 0.05437 | 0.095618 |
| -0.0278   | 0.54901 | -0.01144 | 0.80521 | 0.114491 | 0.0133   | 0.086045 | 0.06318 | 0.122028 |
| -2.85E-05 | 0.99951 | 0.018605 | 0.68841 | 0.058231 | 0.20909  | 0.016172 | 0.72741 | 0.102791 |
| 0.014544  | 0.75392 | 0.014677 | 0.75174 | 0.109288 | 0.01815  | 0.04377  | 0.34527 | 0.112924 |
| -0.00613  | 0.89482 | -0.02861 | 0.53734 | 0.039156 | 0.39854  | -0.00219 | 0.96237 | 0.068199 |
| -0.06623  | 0.15303 | -0.05889 | 0.204   | 0.010579 | 0.81964  | 0.059652 | 0.19817 | 0.042309 |
| 0.057292  | 0.21654 | -0.08264 | 0.07439 | 0.195596 | 2.07E-05 | 0.043363 | 0.34978 | 0.16482  |
| -0.04863  | 0.29429 | -0.03512 | 0.44895 | 5.12E-05 | 0.99912  | -0.00208 | 0.9643  | 0.038701 |
| -0.0326   | 0.48216 | -0.03714 | 0.42324 | 0.116383 | 0.01184  | 0.095644 | 0.03882 | 0.091632 |
| 0.038534  | 0.40609 | -0.01075 | 0.8168  | 0.037306 | 0.42122  | 0.012208 | 0.79245 | 0.052521 |
| 0.097054  | 0.03602 | 0.105721 | 0.02232 | 0.175501 | 0.00014  | 0.124239 | 0.00719 | 0.135475 |
| 0.107674  | 0.01994 | 0.071821 | 0.12116 | 0.096957 | 0.03621  | 0.044207 | 0.34048 | 0.109154 |
| -0.07021  | 0.12975 | -0.08706 | 0.06013 | 0.080981 | 0.08043  | 0.032727 | 0.48047 | 0.10273  |
| -0.06022  | 0.19394 | -0.12257 | 0.00801 | -0.06133 | 0.18581  | -0.07527 | 0.10425 | -0.02786 |
| -0.00708  | 0.87878 | 0.0184   | 0.69167 | 0.079081 | 0.08781  | 0.03237  | 0.48529 | 0.145255 |
| 0.030218  | 0.51478 | 0.025754 | 0.57879 | 0.138009 | 0.0028   | 0.069306 | 0.13479 | 0.159721 |
| -0.06531  | 0.15879 | 0.002022 | 0.96523 | -0.04777 | 0.30297  | -0.01216 | 0.79326 | -0.01514 |
| 0.020531  | 0.6581  | 0.091935 | 0.04708 | 0.116491 | 0.01176  | 0.111967 | 0.01549 | 0.120158 |
| -0.00421  | 0.92773 | 0.01218  | 0.79293 | 0.113028 | 0.01453  | 0.048166 | 0.29895 | 0.149118 |
| -0.04666  | 0.31428 | -0.05007 | 0.28024 | 0.014105 | 0.76112  | -0.0216  | 0.64152 | 0.026202 |

|          |         |          |         |          |          |          |         |          |
|----------|---------|----------|---------|----------|----------|----------|---------|----------|
| 0.014246 | 0.75881 | -0.00207 | 0.96438 | 0.148173 | 0.00132  | 0.05591  | 0.22784 | 0.171639 |
| 0.012946 | 0.78022 | 0.004646 | 0.92023 | 0.092451 | 0.04585  | 0.046636 | 0.31458 | 0.088612 |
| -0.00599 | 0.89725 | -0.00174 | 0.97008 | 0.098987 | 0.03246  | 0.049971 | 0.28118 | 0.113834 |
| -0.01994 | 0.66728 | -0.03137 | 0.49894 | 0.112719 | 0.0148   | 0.070232 | 0.12964 | 0.130989 |
| 0.071944 | 0.12052 | 0.009819 | 0.8324  | 0.119603 | 0.00968  | 0.082346 | 0.07544 | 0.158043 |
| -0.03741 | 0.41997 | -0.05163 | 0.26546 | 0.069061 | 0.13617  | 0.040617 | 0.38116 | 0.100565 |
| 0.014457 | 0.75534 | -0.02995 | 0.5185  | 0.180544 | 8.73E-05 | 0.12309  | 0.00774 | 0.169732 |
| -0.10043 | 0.03002 | -0.06885 | 0.13737 | -0.08269 | 0.07421  | -0.02146 | 0.64367 | -0.00658 |
| 0.041032 | 0.37632 | 0.058675 | 0.20564 | -0.00197 | 0.9661   | 0.026894 | 0.56209 | 0.031419 |
| 0.068887 | 0.13716 | 0.006505 | 0.8885  | 0.079716 | 0.08529  | 0.026818 | 0.5632  | 0.095132 |
| -0.03038 | 0.51253 | -0.04307 | 0.35301 | -0.00747 | 0.87209  | -0.03406 | 0.46273 | 0.03433  |
| -0.04295 | 0.35445 | -0.07874 | 0.08921 | -0.02312 | 0.6183   | -0.0614  | 0.18532 | 0.025631 |
| -0.01144 | 0.8052  | 0.021192 | 0.64783 | 0.037821 | 0.41483  | -0.01897 | 0.68256 | 0.147925 |
| 0.020544 | 0.65789 | -0.00483 | 0.91701 | 0.072307 | 0.11866  | 0.02048  | 0.6589  | 0.129041 |
| 0.004751 | 0.91845 | -0.07002 | 0.13081 | -0.02064 | 0.65648  | -0.04215 | 0.36341 | 0.072811 |
| -0.02123 | 0.64728 | -0.15778 | 0.00062 | 0.068052 | 0.142    | 0.034348 | 0.459   | 0.042806 |
| 0.033946 | 0.46427 | 0.001961 | 0.96628 | 0.033404 | 0.47144  | -0.01297 | 0.77979 | 0.089038 |
| -0.02236 | 0.62982 | -0.03906 | 0.39975 | 0.116883 | 0.01148  | 0.032395 | 0.48494 | 0.15414  |
| -0.008   | 0.86314 | -0.04494 | 0.33252 | 0.055682 | 0.22975  | -0.01528 | 0.74193 | 0.061601 |
| 0.030687 | 0.50828 | -0.01546 | 0.7389  | 0.081296 | 0.07926  | 0.039855 | 0.39017 | 0.114379 |
| 0.006979 | 0.88044 | 0.003398 | 0.94161 | 0.05135  | 0.26811  | 0.018948 | 0.68298 | 0.060523 |
| -0.00225 | 0.96136 | -0.02365 | 0.61019 | 0.102076 | 0.0274   | 0.006076 | 0.89582 | 0.169809 |
| -0.02851 | 0.53885 | -0.00751 | 0.87136 | 0.047591 | 0.30476  | 0.0212   | 0.6477  | 0.057184 |
| -0.02565 | 0.5804  | -0.02361 | 0.61087 | 0.010259 | 0.82501  | -0.00045 | 0.99218 | 0.015045 |
| -0.02244 | 0.6286  | -0.04074 | 0.37973 | 0.05253  | 0.25725  | -0.00061 | 0.9895  | 0.08475  |
| -0.00308 | 0.94707 | -0.0128  | 0.78271 | 0.064235 | 0.16579  | 0.014505 | 0.75456 | 0.091208 |
| -0.02978 | 0.52092 | -0.09168 | 0.04769 | -0.00274 | 0.95287  | -0.07483 | 0.10629 | 0.076234 |
| -0.02936 | 0.52674 | -0.02268 | 0.62493 | 0.01245  | 0.78843  | -0.01584 | 0.73286 | 0.049332 |
| -0.02389 | 0.60664 | -0.09453 | 0.04116 | 0.001261 | 0.97832  | -0.06447 | 0.16423 | 0.056255 |
| 0.004008 | 0.93117 | -0.0147  | 0.75138 | 0.077982 | 0.09232  | 0.016648 | 0.71972 | 0.118976 |
| 0.035762 | 0.44071 | -0.01612 | 0.7283  | 0.089714 | 0.05269  | 0.008425 | 0.85592 | 0.147846 |
| 0.025145 | 0.58781 | -0.03222 | 0.4873  | 0.085813 | 0.0639   | 0.038127 | 0.41106 | 0.130818 |
| 0.018564 | 0.68907 | -0.02196 | 0.63596 | 0.107351 | 0.02032  | 0.024384 | 0.59916 | 0.130576 |
| -0.00778 | 0.86682 | -0.02751 | 0.55323 | 0.115717 | 0.01234  | 0.03413  | 0.46185 | 0.153057 |
| -0.06517 | 0.15971 | -0.07752 | 0.09428 | 0.113712 | 0.01394  | 0.007872 | 0.86527 | 0.194652 |
| 0.077728 | 0.0934  | 0.03207  | 0.48934 | 0.034535 | 0.45655  | 0.007469 | 0.87211 | 0.116607 |
| 0.081481 | 0.07857 | -0.00052 | 0.9911  | 0.105417 | 0.02271  | 0.062978 | 0.17425 | 0.149295 |
| 0.004302 | 0.92612 | 0.012067 | 0.79481 | 0.050804 | 0.27324  | 0.02532  | 0.58521 | 0.055496 |
| 0.042527 | 0.35916 | 0.004563 | 0.92165 | 0.014619 | 0.7527   | -0.01644 | 0.72301 | 0.081297 |
| 0.065288 | 0.15895 | -0.01485 | 0.74898 | 0.061824 | 0.18229  | 0.005416 | 0.90708 | 0.125975 |
| 0.086769 | 0.06098 | 0.001328 | 0.97716 | 0.076604 | 0.09825  | 0.013568 | 0.76996 | 0.144668 |
| -0.05983 | 0.19686 | -0.08967 | 0.0528  | 0.053372 | 0.24969  | -0.04283 | 0.35573 | 0.021339 |
| 0.052976 | 0.25323 | -0.04553 | 0.32616 | 0.037324 | 0.421    | -0.02966 | 0.52264 | 0.113586 |
| 0.030808 | 0.5066  | -0.01055 | 0.8201  | 0.050913 | 0.2722   | -0.01471 | 0.75122 | 0.11977  |
| -0.00337 | 0.94218 | 0.001035 | 0.9822  | 0.070257 | 0.1295   | 0.087678 | 0.05832 | 0.091054 |

|          |         |          |         |          |          |          |          |          |
|----------|---------|----------|---------|----------|----------|----------|----------|----------|
| -0.00214 | 0.96325 | -0.01726 | 0.7099  | -0.02229 | 0.63084  | -0.05958 | 0.19872  | 0.02923  |
| 0.015253 | 0.74233 | -0.04209 | 0.36416 | 0.031158 | 0.50178  | -0.00897 | 0.84666  | 0.055636 |
| 0.011123 | 0.81054 | 0.034753 | 0.45371 | 0.1347   | 0.00354  | 0.093984 | 0.04235  | 0.135141 |
| -0.00085 | 0.98539 | -0.01961 | 0.6725  | 0.049116 | 0.28951  | 0.012985 | 0.77958  | 0.058981 |
| -0.00401 | 0.93116 | -0.01778 | 0.70158 | 0.089056 | 0.05446  | 0.043252 | 0.35102  | 0.09146  |
| -0.02184 | 0.63784 | 0.008458 | 0.85535 | 0.074046 | 0.11003  | 0.020823 | 0.65356  | 0.111227 |
| -0.05497 | 0.23575 | -0.0283  | 0.5418  | 0.070996 | 0.12551  | 0.087402 | 0.05912  | 0.058003 |
| -0.01859 | 0.68867 | -0.03912 | 0.39897 | 0.006078 | 0.89578  | -0.05566 | 0.22993  | 0.048815 |
| -0.0212  | 0.64772 | -0.03107 | 0.50306 | 0.060392 | 0.19265  | 0.010968 | 0.81312  | 0.109241 |
| 0.006299 | 0.89201 | -0.0268  | 0.56351 | 0.073779 | 0.11132  | -0.00106 | 0.98177  | 0.134788 |
| 0.014541 | 0.75396 | -0.06766 | 0.1443  | 0.056689 | 0.22142  | -0.00346 | 0.94058  | 0.034066 |
| -0.01962 | 0.67238 | -0.03947 | 0.39477 | 0.073441 | 0.11297  | 0.00596  | 0.89778  | 0.127497 |
| 0.047265 | 0.30809 | 0.00858  | 0.85329 | 0.101002 | 0.02908  | 0.050085 | 0.28009  | 0.130617 |
| 0.032391 | 0.48501 | -0.03294 | 0.47757 | 0.063682 | 0.16948  | 0.010367 | 0.8232   | 0.096633 |
| 0.029815 | 0.52041 | -0.0185  | 0.69007 | 0.068393 | 0.14001  | 0.038556 | 0.40582  | 0.069303 |
| 0.065393 | 0.15828 | 0.035974 | 0.438   | 0.101491 | 0.02831  | 0.027457 | 0.55393  | 0.151847 |
| -0.03676 | 0.42801 | -0.03383 | 0.46578 | 0.038353 | 0.40829  | -0.00652 | 0.88828  | 0.068571 |
| 0.05133  | 0.26829 | 0.053556 | 0.24806 | 0.143124 | 0.00193  | 0.217301 | 2.14E-06 | 0.136821 |
| 0.008601 | 0.85293 | -0.01087 | 0.8147  | 0.141481 | 0.00218  | 0.044716 | 0.33494  | 0.180111 |
| 0.057486 | 0.21499 | 0.040962 | 0.37713 | 0.024961 | 0.59055  | 0.006603 | 0.88684  | 0.123583 |
| 0.002505 | 0.95694 | -0.03254 | 0.48293 | 0.078543 | 0.09     | 0.030215 | 0.51483  | 0.122352 |
| -0.01451 | 0.75453 | -0.06837 | 0.14015 | 0.076012 | 0.10088  | -0.00752 | 0.87123  | 0.134828 |
| -0.00082 | 0.98585 | -0.02863 | 0.5371  | 0.098394 | 0.03352  | 0.018712 | 0.6867   | 0.145158 |
| -0.00495 | 0.91504 | 0.02097  | 0.65126 | 0.150474 | 0.00111  | 0.100147 | 0.03048  | 0.104457 |
| -0.03412 | 0.46203 | -0.05224 | 0.2599  | 0.006469 | 0.88912  | -0.01359 | 0.76956  | 0.060715 |
| 0.028331 | 0.54139 | 0.022721 | 0.6243  | 0.109781 | 0.01763  | 0.049973 | 0.28117  | 0.097348 |
| 0.080947 | 0.08056 | 0.124181 | 0.00721 | 0.148359 | 0.0013   | 0.137831 | 0.00284  | 0.146875 |
| 0.031025 | 0.50361 | 0.006328 | 0.89152 | 0.118176 | 0.01059  | 0.039751 | 0.39141  | 0.161833 |
| 0.041664 | 0.369   | -0.01533 | 0.74116 | 0.022934 | 0.62106  | -0.04694 | 0.31148  | 0.004306 |
| -0.01328 | 0.77473 | -0.0297  | 0.52204 | 0.036654 | 0.42939  | 0.000621 | 0.98933  | 0.076668 |
| 0.079263 | 0.08708 | 0.013489 | 0.77125 | 0.119109 | 0.00999  | 0.039429 | 0.39526  | 0.177865 |
| -0.02177 | 0.63896 | -0.04323 | 0.35126 | 0.042746 | 0.35669  | -0.01084 | 0.81524  | 0.081273 |
| -0.01409 | 0.76139 | -0.03339 | 0.47167 | 0.038043 | 0.4121   | -0.03517 | 0.4483   | 0.0983   |
| 0.070292 | 0.12931 | -0.04463 | 0.33585 | 0.026868 | 0.56248  | -0.01618 | 0.7273   | 0.013123 |
| 0.137307 | 0.00295 | 0.018079 | 0.69678 | 0.097336 | 0.03548  | 0.015413 | 0.73973  | 0.142504 |
| -0.05825 | 0.20896 | -0.04756 | 0.30503 | -0.02972 | 0.52173  | -0.05386 | 0.2454   | -0.02293 |
| -0.00459 | 0.92121 | -0.08038 | 0.08271 | 0.002842 | 0.95115  | -0.017   | 0.714    | 0.000144 |
| 0.100359 | 0.03013 | 0.107534 | 0.02011 | 0.254673 | 2.39E-08 | 0.154201 | 0.00083  | 0.285243 |
| 0.031126 | 0.50222 | 0.03155  | 0.49641 | 0.1264   | 0.00623  | 0.060488 | 0.19195  | 0.149648 |
| -0.00747 | 0.87214 | -0.01599 | 0.73037 | -0.01688 | 0.71593  | -0.01526 | 0.74224  | -0.00309 |
| 0.012698 | 0.78434 | 0.041353 | 0.37259 | 0.033334 | 0.47238  | 0.051361 | 0.268    | 0.059306 |
| 0.025367 | 0.58451 | -0.01171 | 0.80075 | 0.064072 | 0.16688  | 0.017667 | 0.70336  | 0.107638 |
| 0.097362 | 0.03543 | 0.031136 | 0.50208 | 0.009521 | 0.83742  | 0.051117 | 0.27029  | 0.010689 |
| 0.028356 | 0.54102 | -0.0559  | 0.22791 | -0.00657 | 0.88742  | 0.002975 | 0.94887  | -0.02492 |
| -0.02278 | 0.62345 | -0.01194 | 0.79687 | -0.02456 | 0.59652  | -0.03274 | 0.48025  | 0.03348  |

|           |         |          |          |          |          |          |         |          |
|-----------|---------|----------|----------|----------|----------|----------|---------|----------|
| -0.02627  | 0.57114 | -0.05258 | 0.25679  | -0.0367  | 0.42887  | -0.01145 | 0.80505 | 0.000333 |
| -0.01938  | 0.6762  | -0.06189 | 0.18184  | -0.01476 | 0.75033  | -0.01875 | 0.68604 | 0.01284  |
| -0.05065  | 0.27472 | -0.04086 | 0.37834  | -0.03771 | 0.41616  | -0.03573 | 0.44116 | 0.012899 |
| -0.04551  | 0.32642 | -0.06294 | 0.17448  | -0.01705 | 0.71321  | -0.01759 | 0.70459 | 0.013441 |
| -0.10205  | 0.02744 | -0.06365 | 0.16967  | -0.09109 | 0.04915  | -0.02883 | 0.53433 | -0.08363 |
| 0.041041  | 0.37621 | 0.12658  | 0.00616  | -0.01269 | 0.78446  | 0.024825 | 0.59257 | 0.042252 |
| -0.0425   | 0.35941 | -0.05864 | 0.2059   | -0.06955 | 0.13339  | -0.07023 | 0.12963 | -0.03498 |
| -0.11001  | 0.01739 | -0.22109 | 1.40E-06 | -0.05509 | 0.23473  | -0.08551 | 0.06484 | -0.05271 |
| -0.02047  | 0.65901 | -0.09012 | 0.05161  | 0.014641 | 0.75233  | -0.03406 | 0.46273 | 0.072076 |
| -0.04243  | 0.36022 | -0.08726 | 0.05954  | -0.01763 | 0.70393  | -0.03078 | 0.50697 | 0.027748 |
| 0.045449  | 0.32707 | 0.073956 | 0.11046  | 0.045053 | 0.3313   | 0.075285 | 0.10419 | 0.055155 |
| -0.02853  | 0.53859 | -0.06929 | 0.1349   | -0.04606 | 0.32061  | -0.02903 | 0.53143 | -0.01712 |
| 0.099664  | 0.03129 | 0.077414 | 0.09473  | 0.176203 | 0.00013  | 0.131327 | 0.00447 | 0.22173  |
| -0.09609  | 0.03792 | -0.0117  | 0.80083  | -0.00657 | 0.88744  | -0.02895 | 0.53257 | 0.074118 |
| 0.005949  | 0.89798 | -0.01756 | 0.70509  | 0.034909 | 0.45169  | 0.000934 | 0.98394 | 0.073711 |
| -0.03811  | 0.41129 | -0.04335 | 0.34997  | 0.011109 | 0.81078  | -0.01398 | 0.76317 | 0.04771  |
| -0.0029   | 0.95012 | -0.05248 | 0.25767  | -0.00113 | 0.98061  | -0.02543 | 0.58352 | 0.024414 |
| -0.02886  | 0.53382 | -0.01208 | 0.79463  | -0.07869 | 0.0894   | -0.06207 | 0.18057 | 0.023236 |
| -0.00102  | 0.98244 | -0.03609 | 0.43658  | 0.045851 | 0.3228   | 0.005676 | 0.90263 | 0.087689 |
| -0.03975  | 0.39148 | 0.05698  | 0.21905  | -0.01447 | 0.75517  | 0.004291 | 0.92632 | 0.062394 |
| 0.077149  | 0.09587 | 0.068164 | 0.14135  | 0.111112 | 0.0163   | 0.066095 | 0.15385 | 0.166242 |
| 0.049487  | 0.28587 | -0.03558 | 0.44301  | 0.084771 | 0.0672   | 0.029234 | 0.52856 | 0.084469 |
| 0.034784  | 0.45331 | -0.01181 | 0.79905  | 0.09225  | 0.04632  | 0.013413 | 0.77252 | 0.029182 |
| -0.00714  | 0.87776 | -0.04921 | 0.28854  | 0.020989 | 0.65098  | -0.01934 | 0.67681 | 0.070607 |
| 0.023761  | 0.60853 | -0.02241 | 0.62901  | 0.000236 | 0.99595  | 0.008891 | 0.84804 | 0.041712 |
| -0.02436  | 0.59955 | -0.04922 | 0.28851  | 0.041661 | 0.36903  | 0.013719 | 0.76746 | 0.073098 |
| -0.05832  | 0.20838 | -0.1003  | 0.03022  | -0.09283 | 0.04496  | -0.07439 | 0.1084  | -0.04657 |
| 0.008644  | 0.85221 | -0.02535 | 0.58471  | 0.019702 | 0.67109  | -0.00381 | 0.93453 | 0.049797 |
| 0.014382  | 0.75657 | 0.049155 | 0.28912  | -0.0408  | 0.37901  | -0.00843 | 0.85586 | 0.008776 |
| -0.07302  | 0.11506 | -0.06319 | 0.17283  | -0.20192 | 1.10E-05 | -0.07321 | 0.11412 | -0.08827 |
| -0.03708  | 0.4241  | -0.02223 | 0.63189  | -0.12825 | 0.00551  | -0.06658 | 0.15082 | -0.08361 |
| 0.063829  | 0.16849 | -0.05453 | 0.23959  | -0.06692 | 0.14876  | -0.02358 | 0.61127 | -0.04528 |
| 0.014582  | 0.7533  | -0.05734 | 0.21613  | -0.05377 | 0.24617  | 0.015216 | 0.74295 | -0.01556 |
| 0.017189  | 0.71101 | 0.003867 | 0.93357  | 0.014147 | 0.76044  | 0.017746 | 0.70209 | 0.042397 |
| 0.028477  | 0.5393  | 0.049952 | 0.28137  | 0.074215 | 0.10922  | 0.042667 | 0.35757 | 0.10937  |
| -0.05461  | 0.23887 | -0.06953 | 0.13353  | -0.01474 | 0.75065  | -0.0326  | 0.48215 | 0.010211 |
| -0.03627  | 0.43429 | -0.05845 | 0.20741  | 9.78E-05 | 0.99832  | -0.0498  | 0.2828  | 0.075053 |
| -0.02342  | 0.61362 | -0.04584 | 0.32291  | -0.00488 | 0.91626  | -0.01287 | 0.78155 | 0.038372 |
| -0.03313  | 0.47502 | -0.03302 | 0.47661  | 0.023907 | 0.60632  | 0.004153 | 0.92868 | 0.043956 |
| 0.005943  | 0.89808 | -0.00782 | 0.86613  | -0.00923 | 0.8423   | -0.00169 | 0.97088 | 0.044728 |
| 0.009219  | 0.84251 | 0.014252 | 0.7587   | 0.011084 | 0.81118  | 0.003022 | 0.94807 | 0.032379 |
| -9.07E-05 | 0.99844 | -0.00558 | 0.90426  | 0.049255 | 0.28815  | 0.016535 | 0.72154 | 0.080236 |
| -0.02095  | 0.65157 | 0.056357 | 0.22414  | -0.00945 | 0.83862  | 0.012557 | 0.78666 | 0.027447 |
| -0.11063  | 0.01677 | -0.11198 | 0.01547  | -0.04283 | 0.35574  | -0.05034 | 0.27764 | 0.029388 |
| -0.03078  | 0.50701 | -0.00675 | 0.88437  | -0.05704 | 0.21856  | -0.04382 | 0.34476 | -0.0026  |

|          |         |          |         |           |         |          |         |          |
|----------|---------|----------|---------|-----------|---------|----------|---------|----------|
| -0.02371 | 0.60925 | 0.004701 | 0.9193  | -0.00799  | 0.86327 | -0.0433  | 0.35047 | -0.01196 |
| -0.03677 | 0.42791 | -0.00878 | 0.84983 | 0.008524  | 0.85424 | 0.036707 | 0.42871 | 0.03381  |
| -0.0623  | 0.17894 | -0.02166 | 0.64058 | -0.13141  | 0.00445 | -0.08005 | 0.08398 | -0.12248 |
| -0.11602 | 0.01211 | -0.1075  | 0.02015 | -0.17344  | 0.00017 | -0.14164 | 0.00215 | -0.15775 |
| -0.01794 | 0.69907 | -0.02519 | 0.58715 | 0.000413  | 0.9929  | -0.01851 | 0.68993 | -0.00698 |
| 0.126324 | 0.00627 | 0.077542 | 0.09418 | 0.102329  | 0.02702 | 0.091425 | 0.04832 | 0.073941 |
| -0.10802 | 0.01954 | -0.09431 | 0.04164 | -0.03267  | 0.48119 | -0.01313 | 0.77722 | 0.018069 |
| -0.0416  | 0.3698  | -0.01675 | 0.71811 | -0.01548  | 0.73869 | -0.01779 | 0.70135 | 0.029209 |
| -0.06887 | 0.13726 | -0.04406 | 0.34213 | -0.08791  | 0.05765 | -0.06965 | 0.13287 | -0.01046 |
| 0.035993 | 0.43776 | -0.1056  | 0.02247 | -0.01935  | 0.67664 | -0.01824 | 0.69426 | -0.02109 |
| 0.078274 | 0.09111 | 0.125254 | 0.00672 | 0.074714  | 0.10685 | 0.063577 | 0.17019 | 0.166307 |
| -0.03197 | 0.49075 | -0.08386 | 0.0702  | -0.0942   | 0.04188 | -0.08651 | 0.06175 | -0.05991 |
| -0.06203 | 0.18082 | -0.01909 | 0.68077 | 0.03092   | 0.50506 | 0.027885 | 0.54777 | 0.038669 |
| -0.02998 | 0.51803 | -0.02873 | 0.53572 | -0.10088  | 0.02927 | 0.012494 | 0.7877  | -0.09896 |
| 0.058317 | 0.20842 | 0.065888 | 0.15515 | 0.032933  | 0.47772 | 0.033119 | 0.47524 | 0.041305 |
| 0.017711 | 0.70266 | -0.00929 | 0.84134 | 0.006182  | 0.89401 | 0.003836 | 0.93411 | -0.02151 |
| -0.00631 | 0.89176 | -0.02175 | 0.63923 | -0.01788  | 0.69992 | -0.01484 | 0.74907 | -0.00086 |
| 0.096102 | 0.03789 | -0.05784 | 0.21214 | 0.044769  | 0.33437 | 5.24E-05 | 0.9991  | 0.032844 |
| 0.07641  | 0.0991  | 0.014759 | 0.75041 | 0.139432  | 0.00253 | 0.043583 | 0.34734 | 0.173317 |
| 0.025507 | 0.58244 | -0.03036 | 0.51281 | 0.032943  | 0.47759 | 0.015887 | 0.73203 | 0.055024 |
| -0.12784 | 0.00567 | -0.09499 | 0.04017 | -0.08721  | 0.05969 | -0.06384 | 0.16842 | -0.0319  |
| 0.041585 | 0.36991 | 0.004874 | 0.91634 | 0.044146  | 0.34114 | -0.02334 | 0.61494 | 0.083026 |
| -0.00911 | 0.84433 | -0.10646 | 0.02139 | -0.00254  | 0.95639 | -0.00619 | 0.89389 | 0.077389 |
| -0.03204 | 0.4898  | -0.01044 | 0.82193 | -0.01793  | 0.69915 | -0.02104 | 0.65023 | 0.003727 |
| -0.10624 | 0.02167 | -0.02342 | 0.61365 | -0.12456  | 0.00704 | -0.04334 | 0.35008 | -0.02909 |
| -0.02578 | 0.57837 | -0.07888 | 0.08863 | -0.05345  | 0.249   | -0.05531 | 0.23291 | -0.01838 |
| -0.03545 | 0.44475 | -0.01338 | 0.77304 | -0.01092  | 0.81401 | -0.02421 | 0.60184 | 0.014422 |
| -0.0324  | 0.4849  | -0.04516 | 0.3302  | -9.39E-06 | 0.99984 | -0.02825 | 0.54251 | 0.026111 |
| -0.02709 | 0.55927 | -0.02546 | 0.58309 | -0.04423  | 0.34025 | -0.02262 | 0.62585 | -0.01398 |
| -0.02937 | 0.52667 | -0.07617 | 0.10016 | -0.00814  | 0.86074 | -0.03558 | 0.44308 | 0.032602 |
| 0.004049 | 0.93047 | -0.01247 | 0.78806 | 0.018011  | 0.69786 | -0.00022 | 0.9962  | 0.018248 |
| -0.03033 | 0.51324 | -0.08475 | 0.06727 | -1.01E-05 | 0.99983 | -0.04411 | 0.34158 | 0.029595 |
| 0.091623 | 0.04783 | 0.001155 | 0.98014 | -0.00562  | 0.9036  | 0.017424 | 0.70724 | -0.02114 |
| -0.04504 | 0.33142 | -0.02818 | 0.54352 | 0.066312  | 0.1525  | 0.059481 | 0.19946 | 0.061334 |
| -0.02698 | 0.56077 | -0.05941 | 0.2     | 0.004931  | 0.91536 | -0.03141 | 0.49837 | 0.049214 |
| 0.009102 | 0.84447 | -0.0322  | 0.48764 | -0.01574  | 0.73444 | -0.01573 | 0.73464 | 0.006636 |
| -0.02049 | 0.65867 | -0.0429  | 0.35492 | 0.015385  | 0.7402  | -0.0304  | 0.51224 | 0.053485 |
| -0.04621 | 0.31901 | -0.02194 | 0.6362  | -0.01212  | 0.79391 | -0.01054 | 0.8203  | 0.024168 |
| -0.06495 | 0.16113 | -0.09236 | 0.04606 | -0.07536  | 0.10385 | -0.06801 | 0.14224 | -0.03511 |
| -0.04009 | 0.38743 | -0.04894 | 0.29123 | 0.014071  | 0.76168 | -0.02554 | 0.58193 | 0.041293 |
| -0.05594 | 0.22759 | -0.0283  | 0.54186 | -0.02447  | 0.59786 | -0.02585 | 0.57739 | 0.007585 |
| -0.05643 | 0.22353 | -0.02779 | 0.54915 | -0.00205  | 0.96469 | -0.00502 | 0.91376 | 0.019019 |
| 0.020547 | 0.65785 | -0.02027 | 0.66218 | 0.023791  | 0.60808 | 0.007603 | 0.86983 | 0.069772 |
| -0.04317 | 0.35189 | -0.06682 | 0.14936 | -0.01111  | 0.81082 | -0.03115 | 0.50191 | 0.050489 |
| -0.05689 | 0.21976 | -0.07455 | 0.1076  | -0.01303  | 0.77878 | -0.05185 | 0.26344 | 0.027306 |

|          |         |          |         |          |          |          |         |          |
|----------|---------|----------|---------|----------|----------|----------|---------|----------|
| -0.04717 | 0.30906 | -0.02675 | 0.56412 | -0.06945 | 0.13397  | -0.03967 | 0.39241 | -0.03238 |
| -0.05511 | 0.23454 | -0.09328 | 0.04392 | -0.05763 | 0.21383  | -0.06633 | 0.15242 | -0.02975 |
| 0.010451 | 0.82178 | -0.0112  | 0.8093  | 0.035804 | 0.44018  | 0.009691 | 0.83455 | 0.067356 |
| -0.05553 | 0.23099 | -0.07903 | 0.088   | 0.029311 | 0.52749  | -0.04001 | 0.38829 | 0.089356 |
| -0.02455 | 0.59665 | -0.02389 | 0.60658 | 0.021654 | 0.64069  | 0.000215 | 0.9963  | 0.047426 |
| -0.02592 | 0.57634 | -0.04601 | 0.32114 | -0.00586 | 0.89955  | -0.01721 | 0.71076 | 0.012541 |
| 0.007204 | 0.87661 | 0.008085 | 0.86167 | 0.023306 | 0.61541  | -0.01645 | 0.7229  | 0.01416  |
| 0.013753 | 0.76691 | 0.057731 | 0.21303 | 0.044793 | 0.33411  | 0.038784 | 0.40305 | 0.01902  |
| -0.00488 | 0.9163  | -0.0106  | 0.81922 | 0.017524 | 0.70565  | 0.019048 | 0.68139 | 0.015596 |
| 0.034837 | 0.45262 | 0.014228 | 0.75911 | 0.035418 | 0.44512  | 0.02268  | 0.62494 | 0.027213 |
| -0.052   | 0.26209 | -0.08697 | 0.0604  | 0.01062  | 0.81895  | -0.01225 | 0.79169 | 0.023173 |
| 0.027896 | 0.54762 | 0.028761 | 0.53526 | -0.12695 | 0.00601  | -0.11829 | 0.01051 | -0.0043  |
| -0.11331 | 0.01428 | -0.06858 | 0.13892 | -0.0107  | 0.81756  | 0.098166 | 0.03394 | 0.003145 |
| -0.0228  | 0.62309 | -0.0516  | 0.26578 | -0.01731 | 0.70903  | -0.01313 | 0.77717 | -0.00101 |
| -0.07529 | 0.10418 | -0.05451 | 0.23975 | -0.06973 | 0.13243  | -0.05042 | 0.2769  | -0.02184 |
| -0.0917  | 0.04764 | -0.13683 | 0.00305 | -0.05291 | 0.25378  | -0.05344 | 0.24905 | 0.009584 |
| -0.04854 | 0.29518 | 0.012541 | 0.78694 | 0.029492 | 0.52493  | 0.084466 | 0.0682  | 0.018779 |
| -0.00721 | 0.87656 | -0.04137 | 0.3724  | -0.00086 | 0.98526  | -0.02436 | 0.59955 | 0.047554 |
| -0.07134 | 0.12367 | -0.04545 | 0.32705 | 0.0615   | 0.1846   | 0.011251 | 0.8084  | 0.037714 |
| 0.016205 | 0.72687 | 0.02545  | 0.58328 | 0.037422 | 0.41978  | 0.052256 | 0.25974 | 0.017934 |
| 0.060068 | 0.19505 | 0.004493 | 0.92286 | -0.00521 | 0.91061  | -0.04197 | 0.36548 | 0.091611 |
| 0.048683 | 0.29379 | -0.00851 | 0.85451 | 0.019927 | 0.66754  | 0.024832 | 0.59246 | 0.009013 |
| -0.03587 | 0.43928 | -0.08195 | 0.07687 | -0.10645 | 0.0214   | -0.07091 | 0.12595 | -0.065   |
| 0.005245 | 0.91    | -0.03488 | 0.45203 | -0.00729 | 0.8751   | -0.04109 | 0.37562 | 0.064653 |
| 0.002271 | 0.96097 | -0.00587 | 0.8993  | 0.067891 | 0.14295  | 0.016729 | 0.71841 | 0.104567 |
| -0.13686 | 0.00304 | -0.1112  | 0.01621 | -0.21182 | 3.88E-06 | -0.07141 | 0.12331 | -0.1762  |
| 0.017438 | 0.70703 | -0.00625 | 0.89289 | 0.037733 | 0.41592  | 0.036395 | 0.43266 | 0.025244 |
| -0.00527 | 0.90962 | -0.028   | 0.54609 | 0.009229 | 0.84233  | 0.009844 | 0.83198 | 0.04569  |
| -0.07411 | 0.10975 | -0.05687 | 0.21995 | -0.03749 | 0.41898  | -0.0259  | 0.57664 | -0.02736 |
| -0.05056 | 0.27558 | -0.06538 | 0.15839 | 0.012165 | 0.79317  | -0.01588 | 0.73209 | 0.037244 |
| -0.029   | 0.53181 | -0.06932 | 0.13473 | 0.009607 | 0.83597  | 0.011038 | 0.81195 | 0.029265 |
| -0.01476 | 0.75031 | -0.03815 | 0.41075 | 0.019646 | 0.67196  | -0.01421 | 0.75933 | 0.045528 |
| 0.035485 | 0.44426 | 0.034233 | 0.46051 | 0.017389 | 0.70781  | -0.01318 | 0.77638 | 0.06144  |
| 0.059856 | 0.19664 | 0.070168 | 0.12999 | 0.077523 | 0.09426  | 0.059037 | 0.20284 | 0.117124 |
| -0.06107 | 0.18768 | -0.04155 | 0.37035 | -0.00736 | 0.87392  | 0.071814 | 0.1212  | -0.02666 |
| -0.06398 | 0.16748 | -0.07966 | 0.08553 | -0.02605 | 0.5744   | -0.0563  | 0.22458 | -0.04625 |
| -0.07342 | 0.1131  | -0.06959 | 0.1332  | -0.14148 | 0.00218  | -0.09904 | 0.03237 | -0.05629 |
| -0.02442 | 0.59861 | -0.07613 | 0.10035 | -0.04891 | 0.29155  | -0.0557  | 0.22961 | 0.014557 |
| -0.11596 | 0.01215 | -0.0481  | 0.29966 | -0.11693 | 0.01145  | -0.04705 | 0.3103  | -0.07077 |
| -0.03403 | 0.46319 | -0.07728 | 0.09529 | -0.05024 | 0.27864  | -0.0582  | 0.20933 | -0.00296 |
| -0.03493 | 0.45148 | -0.07013 | 0.1302  | 0.010511 | 0.82078  | -0.05163 | 0.26546 | 0.179597 |
| 0.038346 | 0.40838 | -0.00952 | 0.83745 | 0.04673  | 0.31361  | -0.00072 | 0.98769 | 0.08123  |
| -0.08055 | 0.08205 | -0.08669 | 0.06121 | -0.07294 | 0.11548  | -0.07186 | 0.12097 | -0.02082 |
| -0.04722 | 0.30857 | -0.05784 | 0.2122  | -0.04143 | 0.37173  | -0.0379  | 0.41382 | -0.01561 |
| -0.01116 | 0.80994 | 0.016868 | 0.71618 | -0.13937 | 0.00254  | -0.11387 | 0.01381 | -0.03566 |

|          |          |          |          |          |          |          |          |          |
|----------|----------|----------|----------|----------|----------|----------|----------|----------|
| -0.02562 | 0.58075  | -0.0407  | 0.38017  | -0.01498 | 0.7468   | -0.01792 | 0.69932  | 0.015439 |
| 0.014448 | 0.75549  | 0.003689 | 0.93664  | 0.109204 | 0.01824  | 0.096109 | 0.03788  | 0.103757 |
| -0.04363 | 0.34682  | -0.09063 | 0.05031  | -0.05222 | 0.26004  | -0.05422 | 0.2422   | -0.00254 |
| 0.748577 | 5.14E-85 | 0.442325 | 8.60E-24 | 0.724296 | 4.19E-77 | 0.601355 | 2.93E-47 | 0.597316 |
| 0.705126 | 1.96E-71 | 0.460621 | 6.63E-26 | 0.764992 | 6.73E-91 | 0.601094 | 3.29E-47 | 0.701807 |
| 0.745903 | 4.23E-84 | 0.558177 | 1.33E-39 | 0.627315 | 1.88E-52 | 0.57133  | 8.13E-42 | 0.553824 |
| 0.69028  | 2.39E-67 | 0.588305 | 7.99E-45 | 0.534325 | 7.82E-36 | 0.567387 | 3.83E-41 | 0.420021 |
| 0.601984 | 2.22E-47 | 0.241974 | 1.20E-07 | 0.265361 | 5.75E-09 | 0.326519 | 4.60E-13 | 0.175671 |
| 0.714286 | 4.38E-74 | 0.205943 | 7.23E-06 | 0.152792 | 0.00092  | 0.043836 | 0.34454  | 0.140439 |
| 0.68215  | 3.26E-65 | 0.241446 | 1.28E-07 | 0.443644 | 6.11E-24 | 0.235896 | 2.51E-07 | 0.309437 |
| 0.790799 | #####    | 0.536371 | 3.81E-36 | 0.615331 | 5.38E-50 | 0.582936 | 7.46E-44 | 0.489926 |
| 0.81373  | #####    | 0.392977 | 1.07E-18 | 0.461024 | 5.94E-26 | 0.373248 | 6.95E-17 | 0.35478  |
| 0.69953  | 7.28E-70 | 0.241088 | 1.33E-07 | 0.479775 | 2.94E-28 | 0.240336 | 1.46E-07 | 0.407725 |
| 0.77675  | 2.04E-95 | 0.738728 | 1.06E-81 | 0.546824 | 9.02E-38 | 0.611731 | 2.81E-49 | 0.493384 |
| 0.719791 | 9.94E-76 | 0.403142 | 1.12E-19 | 0.655919 | 8.92E-59 | 0.412828 | 1.21E-20 | 0.572244 |
| 0.703481 | 5.73E-71 | 0.388138 | 3.06E-18 | 0.478523 | 4.24E-28 | 0.414435 | 8.28E-21 | 0.368308 |
| 0.662991 | 1.90E-60 | 0.488075 | 2.53E-29 | 0.307723 | 1.06E-11 | 0.313981 | 3.83E-12 | 0.306103 |
| 0.475939 | 8.95E-28 | 0.138585 | 0.00269  | 0.134181 | 0.00367  | 0.062931 | 0.17457  | 0.11675  |
| 0.811427 | #####    | 0.403753 | 9.75E-20 | 0.544454 | 2.13E-37 | 0.46183  | 4.76E-26 | 0.410734 |
| 0.572176 | 5.81E-42 | 0.554082 | 6.19E-39 | 0.395967 | 5.57E-19 | 0.483297 | 1.05E-28 | 0.394583 |
| 0.633099 | 1.12E-53 | 0.461612 | 5.05E-26 | 0.497737 | 1.33E-30 | 0.515518 | 4.58E-33 | 0.387472 |
| 0.808955 | #####    | 0.532675 | 1.39E-35 | 0.419109 | 2.74E-21 | 0.36471  | 3.87E-16 | 0.382843 |
| 0.68269  | 2.36E-65 | 0.259533 | 1.26E-08 | 0.187164 | 4.70E-05 | 0.270968 | 2.65E-09 | 0.15977  |
| 0.645173 | 2.54E-56 | 0.351012 | 5.49E-15 | 0.290114 | 1.65E-10 | 0.269935 | 3.06E-09 | 0.219012 |
| 0.673234 | 5.97E-63 | 0.585751 | 2.33E-44 | 0.292303 | 1.19E-10 | 0.447406 | 2.29E-24 | 0.304089 |
| 0.800194 | #####    | 0.461976 | 4.57E-26 | 0.745758 | 4.74E-84 | 0.51717  | 2.66E-33 | 0.624101 |
| 0.468757 | 6.92E-27 | 0.088755 | 0.05528  | 0.07065  | 0.12737  | -0.08822 | 0.05678  | 0.098377 |
| 0.65706  | 4.83E-59 | 0.367919 | 2.04E-16 | 0.219021 | 1.77E-06 | 0.185236 | 5.65E-05 | 0.110846 |
| 0.636977 | 1.63E-54 | 0.205336 | 7.71E-06 | 0.299408 | 3.97E-11 | 0.150213 | 0.00113  | 0.295297 |
| 0.505583 | 1.13E-31 | 0.031961 | 0.49082  | 0.27394  | 1.75E-09 | 0.029488 | 0.52499  | 0.180649 |
| 0.431617 | 1.30E-22 | -0.01371 | 0.76766  | 0.157852 | 0.00062  | -0.09294 | 0.04471  | 0.142131 |
| 0.737226 | 3.31E-81 | 0.472045 | 2.73E-27 | 0.512037 | 1.43E-32 | 0.605542 | 4.59E-48 | 0.385905 |
| 0.562176 | 2.89E-40 | 0.203773 | 9.06E-06 | 0.234608 | 2.93E-07 | 0.048813 | 0.2925   | 0.250371 |
| 0.573649 | 3.23E-42 | 0.575933 | 1.29E-42 | 0.319107 | 1.63E-12 | 0.43823  | 2.45E-23 | 0.260375 |
| 0.770122 | 7.76E-93 | 0.461245 | 5.59E-26 | 0.513394 | 9.17E-33 | 0.563903 | 1.48E-40 | 0.350779 |
| 0.60245  | 1.81E-47 | 0.435491 | 4.91E-23 | 0.083816 | 0.07036  | 0.265043 | 6.00E-09 | 0.072219 |
| 0.558751 | 1.07E-39 | 0.269151 | 3.42E-09 | 0.191917 | 2.98E-05 | 0.186251 | 5.13E-05 | 0.172606 |
| 0.735907 | 8.89E-81 | 0.377776 | 2.74E-17 | 0.743751 | 2.26E-83 | 0.519174 | 1.37E-33 | 0.582913 |
| 0.774338 | 1.81E-94 | 0.325824 | 5.19E-13 | 0.520397 | 9.10E-34 | 0.277742 | 1.02E-09 | 0.440038 |
| 0.763769 | 1.92E-90 | 0.348627 | 8.60E-15 | 0.466079 | 1.47E-26 | 0.229816 | 5.16E-07 | 0.4316   |
| 0.624431 | 7.49E-52 | 0.407367 | 4.27E-20 | 0.032464 | 0.48401  | 0.127939 | 0.00563  | 0.042096 |
| 0.567716 | 3.37E-41 | 0.295645 | 7.12E-11 | 0.017124 | 0.71207  | 0.100161 | 0.03045  | 0.000508 |
| 0.735491 | 1.21E-80 | 0.613268 | 1.39E-49 | 0.720128 | 7.86E-76 | 0.587327 | 1.20E-44 | 0.65665  |
| 0.595691 | 3.45E-46 | 0.307838 | 1.04E-11 | 0.252531 | 3.16E-08 | 0.166416 | 0.0003   | 0.206976 |
| 0.571993 | 6.25E-42 | 0.044338 | 0.33904  | 0.26957  | 3.22E-09 | -0.00254 | 0.95642  | 0.111352 |

|          |          |          |          |          |          |          |          |          |
|----------|----------|----------|----------|----------|----------|----------|----------|----------|
| 0.697338 | 2.93E-69 | 0.622865 | 1.58E-51 | 0.488991 | 1.92E-29 | 0.645465 | 2.19E-56 | 0.418997 |
| 0.589473 | 4.89E-45 | 0.466484 | 1.31E-26 | 0.313161 | 4.38E-12 | 0.445274 | 4.00E-24 | 0.254239 |
| 0.719915 | 9.12E-76 | 0.570673 | 1.05E-41 | 0.424345 | 7.75E-22 | 0.404816 | 7.66E-20 | 0.366146 |
| 0.74247  | 6.09E-83 | 0.471089 | 3.58E-27 | 0.459633 | 8.69E-26 | 0.511385 | 1.76E-32 | 0.284211 |
| 0.568776 | 2.23E-41 | 0.164184 | 0.00037  | 0.10712  | 0.02059  | 0.02243  | 0.62876  | 0.013039 |
| 0.809477 | #####    | 0.674241 | 3.34E-63 | 0.743069 | 3.84E-83 | 0.759239 | 8.78E-89 | 0.584493 |
| 0.534506 | 7.33E-36 | 0.217754 | 2.03E-06 | 0.215275 | 2.67E-06 | 0.280643 | 6.70E-10 | 0.088089 |
| 0.80965  | #####    | 0.457585 | 1.52E-25 | 0.743279 | 3.26E-83 | 0.554093 | 6.17E-39 | 0.604492 |
| 0.764964 | 6.90E-91 | 0.464232 | 2.45E-26 | 0.517274 | 2.57E-33 | 0.421937 | 1.39E-21 | 0.455123 |
| 0.618679 | 1.14E-50 | 0.573195 | 3.87E-42 | 0.536941 | 3.12E-36 | 0.448868 | 1.56E-24 | 0.521659 |
| 0.760428 | 3.25E-89 | 0.364574 | 3.98E-16 | 0.530097 | 3.39E-35 | 0.255574 | 2.13E-08 | 0.432605 |
| 0.600607 | 4.07E-47 | 0.237622 | 2.04E-07 | 0.393841 | 8.89E-19 | 0.366306 | 2.82E-16 | 0.255045 |
| 0.72603  | 1.22E-77 | 0.402431 | 1.31E-19 | 0.591567 | 2.01E-45 | 0.478632 | 4.11E-28 | 0.503863 |
| 0.629792 | 5.65E-53 | 0.270037 | 3.02E-09 | 0.243889 | 9.44E-08 | 0.263314 | 7.59E-09 | 0.181227 |
| 0.72422  | 4.43E-77 | 0.354997 | 2.57E-15 | 0.450498 | 1.01E-24 | 0.378466 | 2.37E-17 | 0.360737 |
| 0.588303 | 8.00E-45 | 0.227801 | 6.52E-07 | 0.258037 | 1.54E-08 | 0.132541 | 0.00411  | 0.280134 |
| 0.745437 | 6.10E-84 | 0.457206 | 1.68E-25 | 0.224389 | 9.65E-07 | 0.2348   | 2.86E-07 | 0.222708 |
| 0.585005 | 3.17E-44 | 0.383316 | 8.57E-18 | 0.312777 | 4.67E-12 | 0.316229 | 2.64E-12 | 0.325779 |
| 0.720477 | 6.16E-76 | 0.361531 | 7.25E-16 | 0.21177  | 3.90E-06 | 0.231501 | 4.23E-07 | 0.184641 |
| 0.733347 | 5.96E-80 | 0.438489 | 2.30E-23 | 0.587643 | 1.05E-44 | 0.540141 | 1.00E-36 | 0.442404 |
| 0.667602 | 1.46E-61 | 0.235879 | 2.51E-07 | 0.189093 | 3.91E-05 | 0.066339 | 0.15233  | 0.111932 |
| 0.527266 | 8.96E-35 | 0.392169 | 1.28E-18 | 0.17389  | 0.00016  | 0.281738 | 5.72E-10 | 0.174234 |
| 0.808527 | #####    | 0.482135 | 1.47E-28 | 0.491353 | 9.40E-30 | 0.378953 | 2.14E-17 | 0.460085 |
| 0.547464 | 7.14E-38 | 0.259895 | 1.20E-08 | 0.194168 | 2.39E-05 | 0.196281 | 1.94E-05 | 0.01401  |
| 0.778267 | 5.08E-96 | 0.603292 | 1.25E-47 | 0.757278 | 4.48E-88 | 0.661965 | 3.34E-60 | 0.653305 |
| 0.54712  | 8.09E-38 | 0.152491 | 0.00095  | -0.03745 | 0.41941  | -0.11442 | 0.01335  | -0.0331  |
| 0.58968  | 4.48E-45 | 0.306151 | 1.37E-11 | 0.335272 | 9.89E-14 | 0.333333 | 1.40E-13 | 0.270323 |
| 0.809198 | #####    | 0.453044 | 5.15E-25 | 0.666296 | 3.03E-61 | 0.538924 | 1.55E-36 | 0.544692 |
| 0.552368 | 1.17E-38 | -0.0226  | 0.6262   | 0.06018  | 0.19422  | -0.08474 | 0.06731  | 0.008338 |
| 0.626946 | 2.24E-52 | 0.054904 | 0.23633  | 0.267632 | 4.21E-09 | -0.02009 | 0.66503  | 0.224293 |
| 0.497357 | 1.49E-30 | 0.270645 | 2.78E-09 | 0.417309 | 4.20E-21 | 0.350037 | 6.60E-15 | 0.275762 |
| 0.470934 | 3.74E-27 | 0.019316 | 0.67717  | 0.132778 | 0.00405  | 0.016948 | 0.71489  | 0.119286 |
| 0.74615  | 3.49E-84 | 0.528267 | 6.36E-35 | 0.404456 | 8.31E-20 | 0.47723  | 6.17E-28 | 0.29997  |
| 0.77615  | 3.52E-95 | 0.573802 | 3.04E-42 | 0.702523 | 1.06E-70 | 0.653072 | 4.08E-58 | 0.55301  |
| 0.657049 | 4.85E-59 | 0.235447 | 2.65E-07 | 0.377564 | 2.86E-17 | 0.282578 | 5.06E-10 | 0.309339 |
| 0.670387 | 3.03E-62 | 0.372993 | 7.32E-17 | 0.223044 | 1.12E-06 | 0.156992 | 0.00066  | 0.249106 |
| 0.724512 | 3.60E-77 | 0.465963 | 1.51E-26 | 0.466637 | 1.25E-26 | 0.56073  | 5.02E-40 | 0.330728 |
| 0.843562 | #####    | 0.587417 | 1.16E-44 | 0.63568  | 3.11E-54 | 0.546514 | 1.01E-37 | 0.568602 |
| 0.846528 | #####    | 0.553866 | 6.71E-39 | 0.689387 | 4.14E-67 | 0.530374 | 3.08E-35 | 0.593447 |
| 0.789441 | #####    | 0.681702 | 4.26E-65 | 0.564453 | 1.20E-40 | 0.527786 | 7.50E-35 | 0.438594 |
| 0.812731 | #####    | 0.619223 | 8.80E-51 | 0.721116 | 3.94E-76 | 0.737153 | 3.49E-81 | 0.571759 |
| 0.753664 | 8.67E-87 | 0.481909 | 1.58E-28 | 0.554073 | 6.21E-39 | 0.456445 | 2.07E-25 | 0.425287 |
| 0.694389 | 1.87E-68 | 0.409483 | 2.63E-20 | 0.528729 | 5.43E-35 | 0.545778 | 1.32E-37 | 0.410425 |
| 0.679725 | 1.37E-64 | 0.351464 | 5.04E-15 | 0.256063 | 1.99E-08 | 0.251818 | 3.46E-08 | 0.140029 |
| 0.744729 | 1.06E-83 | 0.487517 | 2.98E-29 | 0.533224 | 1.15E-35 | 0.361215 | 7.71E-16 | 0.459712 |



|          |          |          |          |          |          |          |          |          |
|----------|----------|----------|----------|----------|----------|----------|----------|----------|
| 0.815933 | #####    | 0.564541 | 1.16E-40 | 0.59033  | 3.40E-45 | 0.541839 | 5.47E-37 | 0.502461 |
| 0.782948 | 6.52E-98 | 0.591404 | 2.16E-45 | 0.666864 | 2.21E-61 | 0.663173 | 1.72E-60 | 0.5422   |
| 0.689165 | 4.74E-67 | 0.437701 | 2.81E-23 | 0.423739 | 8.98E-22 | 0.360429 | 8.99E-16 | 0.45424  |
| 0.802066 | #####    | 0.354279 | 2.95E-15 | 0.405256 | 6.93E-20 | 0.349145 | 7.80E-15 | 0.351822 |
| 0.624079 | 8.86E-52 | 0.233158 | 3.48E-07 | 0.383168 | 8.84E-18 | 0.127996 | 0.00561  | 0.330726 |
| 0.807004 | #####    | 0.562006 | 3.08E-40 | 0.748582 | 5.12E-85 | 0.627458 | 1.75E-52 | 0.646816 |
| 0.560883 | 4.74E-40 | 0.117173 | 0.01127  | 0.138861 | 0.00264  | 0.158242 | 0.0006   | 0.112863 |
| 0.727889 | 3.21E-78 | 0.385363 | 5.55E-18 | 0.39268  | 1.15E-18 | 0.392829 | 1.11E-18 | 0.320439 |
| 0.68433  | 8.87E-66 | 0.488566 | 2.18E-29 | 0.235435 | 2.65E-07 | 0.274157 | 1.70E-09 | 0.232657 |

| p.MMplur | MMroyalb | p.MMroya | MMsiennap | MMsien   | MMivory  | p.MMivor | MMfloralvp | MMflor  |
|----------|----------|----------|-----------|----------|----------|----------|------------|---------|
| 2.27E-07 | 0.323919 | 7.20E-13 | 0.112281  | 0.0152   | 0.175774 | 0.00013  | 0.152192   | 0.00097 |
| 0.45207  | -0.00642 | 0.8899   | 0.046716  | 0.31375  | 0.038012 | 0.41248  | -0.14863   | 0.00128 |
| 0.28511  | 0.007668 | 0.86873  | 0.07255   | 0.11742  | 0.095105 | 0.03994  | -0.02173   | 0.63955 |
| 0.58413  | 0.031708 | 0.49426  | 0.024339  | 0.59983  | 0.028771 | 0.53511  | -0.01036   | 0.82331 |
| 0.71183  | 0.083064 | 0.07292  | 0.084014  | 0.06969  | 0.120332 | 0.00924  | 0.037731   | 0.41595 |
| 0.3525   | 0.107034 | 0.0207   | 0.057027  | 0.21867  | 0.065702 | 0.15632  | 0.028671   | 0.53654 |
| 0.00354  | 0.153271 | 0.00089  | 0.102021  | 0.02749  | 0.072222 | 0.1191   | 0.10582    | 0.02219 |
| 0.93205  | 0.124666 | 0.00699  | 0.0884    | 0.05627  | 0.063507 | 0.17065  | -0.05811   | 0.21001 |
| 0.77695  | 0.065309 | 0.15882  | 0.038534  | 0.40608  | 0.090287 | 0.05119  | -0.05628   | 0.22477 |
| 0.98952  | 0.088018 | 0.05735  | 0.040059  | 0.38774  | 0.188518 | 4.14E-05 | -0.09208   | 0.04672 |
| 0.55939  | 0.098269 | 0.03375  | 0.122473  | 0.00806  | 0.130173 | 0.00484  | 0.103517   | 0.02528 |
| 0.08862  | 0.122892 | 0.00784  | 0.048791  | 0.29271  | 0.21127  | 4.12E-06 | -0.02425   | 0.60116 |
| 0.7079   | 0.026459 | 0.56845  | 0.123978  | 0.00731  | 0.048619 | 0.29442  | -0.14378   | 0.00184 |
| 0.01568  | 0.152139 | 0.00097  | 0.089979  | 0.05199  | 0.084874 | 0.06687  | 0.063947   | 0.16771 |
| 0.87146  | 0.051485 | 0.26685  | 0.192994  | 2.68E-05 | 0.101596 | 0.02814  | -0.05047   | 0.27636 |
| 0.80443  | 0.055884 | 0.22806  | 0.081155  | 0.07978  | 0.103187 | 0.02576  | -0.09232   | 0.04615 |
| 0.99575  | 0.029796 | 0.52067  | 0.228613  | 5.93E-07 | 0.076765 | 0.09754  | -0.11037   | 0.01703 |
| 0.17315  | 0.123661 | 0.00746  | 0.1298    | 0.00496  | 0.156609 | 0.00068  | 0.132123   | 0.00424 |
| 0.71355  | 0.08186  | 0.07719  | 0.042732  | 0.35684  | -0.00126 | 0.97839  | -0.07464   | 0.10718 |
| 0.9372   | 0.049488 | 0.28587  | 0.142981  | 0.00195  | 0.048489 | 0.29572  | -0.09449   | 0.04124 |
| 0.03369  | 0.171383 | 0.0002   | 0.106535  | 0.0213   | 0.0713   | 0.1239   | 0.027194   | 0.55774 |
| 0.05137  | -0.03987 | 0.38999  | 0.042152  | 0.36342  | 0.060667 | 0.19063  | 0.061208   | 0.1867  |
| 0.00414  | 0.194207 | 2.38E-05 | 0.099316  | 0.03189  | 0.086474 | 0.06187  | 0.051198   | 0.26952 |
| 0.29435  | 0.117476 | 0.01106  | 0.074846  | 0.10623  | 0.054373 | 0.24091  | 0.02014    | 0.6642  |
| 0.85432  | 0.017308 | 0.7091   | 0.031388  | 0.49863  | 0.235768 | 2.55E-07 | -0.02522   | 0.58673 |
| 0.09878  | 0.130511 | 0.00473  | 0.230809  | 4.59E-07 | 0.040216 | 0.38589  | -0.04042   | 0.38344 |
| 0.91972  | 0.021779 | 0.63875  | 0.095908  | 0.03828  | 0.100843 | 0.02934  | -7.35E-05  | 0.99874 |
| 0.22695  | 0.170872 | 0.00021  | 0.052958  | 0.25338  | 0.287924 | 2.30E-10 | -0.07777   | 0.0932  |
| 0.65308  | 0.048573 | 0.29488  | 0.101958  | 0.02758  | 0.096985 | 0.03615  | -0.05412   | 0.24309 |
| 0.00461  | -0.10103 | 0.02903  | 0.084333  | 0.06864  | 0.071183 | 0.12451  | -0.0511    | 0.27045 |
| 0.27758  | -0.04495 | 0.33245  | 0.073842  | 0.11102  | 0.047407 | 0.30664  | -0.11277   | 0.01476 |
| 0.06294  | 0.137447 | 0.00292  | 0.03339   | 0.47163  | 0.079477 | 0.08623  | -0.12282   | 0.00788 |
| 0.99851  | 0.053295 | 0.25038  | 0.25758   | 1.63E-08 | 0.039926 | 0.38932  | -0.12623   | 0.00631 |
| 0.28386  | -0.03018 | 0.51535  | -0.01772  | 0.70249  | -0.02623 | 0.57178  | -0.04574   | 0.324   |
| 0.10957  | 0.154081 | 0.00084  | 0.135162  | 0.00343  | 0.17319  | 0.00017  | 0.047138   | 0.3094  |
| 0.16778  | -0.06727 | 0.14663  | 0.023266  | 0.61601  | 0.014819 | 0.74942  | -0.08821   | 0.0568  |
| 0.14382  | 0.099367 | 0.0318   | 0.393187  | 1.03E-18 | 0.141394 | 0.00219  | 0.020631   | 0.65654 |
| 0.44871  | -0.02135 | 0.64537  | 0.012415  | 0.78901  | 0.052392 | 0.2585   | 0.005017   | 0.91389 |
| 0.69235  | -0.04818 | 0.29881  | 0.015167  | 0.74374  | 0.147319 | 0.00141  | 0.005602   | 0.9039  |
| 0.0019   | 0.202682 | 1.01E-05 | 0.162873  | 0.00041  | 0.068218 | 0.14103  | 0.013119   | 0.77737 |
| 0.51866  | -0.02308 | 0.61888  | 0.322149  | 9.74E-13 | 0.076451 | 0.09892  | -0.12308   | 0.00775 |
| 0.9109   | 0.089986 | 0.05197  | 0.03086   | 0.50588  | 0.069715 | 0.13249  | -0.15467   | 0.0008  |
| 7.02E-24 | 0.48472  | 6.87E-29 | 0.073921  | 0.11064  | 0.02884  | 0.53415  | 0.163137   | 0.0004  |
| 1.36E-25 | 0.546571 | 9.89E-38 | 0.060733  | 0.19015  | 0.015224 | 0.74282  | 0.045867   | 0.32263 |

|          |          |          |          |         |          |          |          |          |
|----------|----------|----------|----------|---------|----------|----------|----------|----------|
| 0.00668  | 0.08622  | 0.06265  | 0.039397 | 0.39564 | -0.0515  | 0.26668  | 0.002195 | 0.96227  |
| 0.36236  | 0.101562 | 0.02819  | -0.04413 | 0.34127 | -0.03094 | 0.50477  | -0.22695 | 7.19E-07 |
| 0.00241  | 0.207618 | 6.07E-06 | 0.041649 | 0.36917 | 0.053562 | 0.24801  | -0.03729 | 0.42136  |
| 8.42E-09 | 0.331172 | 2.05E-13 | 0.002579 | 0.95567 | 0.095255 | 0.03963  | 0.091997 | 0.04693  |
| 5.03E-06 | 0.275938 | 1.32E-09 | 0.095066 | 0.04002 | 0.111143 | 0.01627  | 0.003542 | 0.93915  |
| 0.00015  | 0.149927 | 0.00116  | -0.02398 | 0.60519 | 0.017863 | 0.70023  | -0.11959 | 0.00969  |
| 5.67E-16 | 0.503253 | 2.37E-31 | 0.055387 | 0.23223 | 0.028641 | 0.53696  | 0.174932 | 0.00014  |
| 3.34E-09 | 0.291032 | 1.44E-10 | 0.061388 | 0.1854  | 0.059001 | 0.20312  | 0.100532 | 0.02984  |
| 5.81E-06 | 0.24894  | 5.00E-08 | 0.118619 | 0.0103  | 0.11973  | 0.0096   | -0.0319  | 0.49162  |
| 8.73E-08 | 0.241602 | 1.25E-07 | -0.10015 | 0.03047 | -0.02682 | 0.56311  | 0.158488 | 0.00059  |
| 1.93E-16 | 0.38178  | 1.18E-17 | 0.046124 | 0.31993 | 0.147891 | 0.00135  | 0.141577 | 0.00216  |
| 1.25E-08 | 0.254815 | 2.35E-08 | -0.11735 | 0.01115 | -0.01582 | 0.73319  | -0.07916 | 0.08749  |
| 2.29E-35 | 0.70327  | 6.57E-71 | 0.013255 | 0.77511 | 0.107599 | 0.02003  | 0.195721 | 2.05E-05 |
| 9.54E-21 | 0.309212 | 8.35E-12 | -0.06842 | 0.13984 | -0.02025 | 0.66244  | 0.121416 | 0.00863  |
| 2.15E-18 | 0.543516 | 2.99E-37 | 0.004131 | 0.92906 | 0.12311  | 0.00773  | 0.139543 | 0.00251  |
| 5.45E-07 | 0.221111 | 1.40E-06 | -0.03433 | 0.4592  | 0.035877 | 0.43923  | 0.186421 | 5.05E-05 |
| 0.59998  | 0.109284 | 0.01816  | -0.00356 | 0.93888 | 0.024491 | 0.59755  | -0.07028 | 0.12935  |
| 4.71E-43 | 0.778439 | 4.34E-96 | 0.061886 | 0.18186 | 0.162583 | 0.00042  | 0.183912 | 6.39E-05 |
| 0.00048  | 0.227477 | 6.77E-07 | -0.01653 | 0.7217  | 0.028073 | 0.54507  | -0.0981  | 0.03406  |
| 0.0218   | -0.05501 | 0.23542  | 0.048724 | 0.29338 | 0.030457 | 0.51146  | 0.015742 | 0.73439  |
| 6.81E-44 | 0.690829 | 1.71E-67 | 0.046625 | 0.3147  | 0.134774 | 0.00352  | 0.279474 | 7.94E-10 |
| 1.61E-06 | 0.173331 | 0.00017  | -0.0829  | 0.0735  | -0.10314 | 0.02583  | 0.057721 | 0.21311  |
| 1.09E-16 | 0.408769 | 3.10E-20 | 0.090185 | 0.05146 | 0.047355 | 0.30717  | 0.01183  | 0.79874  |
| 0.01209  | -0.14815 | 0.00132  | 0.108723 | 0.01876 | 0.009152 | 0.84364  | 0.045178 | 0.32996  |
| 9.46E-15 | 0.558876 | 1.02E-39 | 0.012843 | 0.78193 | 0.200337 | 1.29E-05 | 0.032707 | 0.48075  |
| 1.95E-07 | 0.390822 | 1.72E-18 | 0.061931 | 0.18154 | 0.133514 | 0.00385  | -0.0219  | 0.63688  |
| 0.00144  | 0.144744 | 0.00171  | 0.011299 | 0.8076  | 0.012754 | 0.78339  | -0.06887 | 0.13728  |
| 3.34E-07 | 0.344557 | 1.83E-14 | -0.0079  | 0.86487 | 0.105673 | 0.02238  | 0.139389 | 0.00254  |
| 1.14E-19 | 0.595287 | 4.10E-46 | 0.035728 | 0.44114 | 0.101591 | 0.02815  | 0.053006 | 0.25295  |
| 0.00114  | 0.239842 | 1.56E-07 | -0.08836 | 0.05637 | 0.112449 | 0.01505  | -0.05578 | 0.22889  |
| 3.88E-05 | 0.366959 | 2.48E-16 | 0.093536 | 0.04335 | 0.013741 | 0.7671   | -0.06936 | 0.13448  |
| 4.81E-25 | 0.490904 | 1.08E-29 | 0.02356  | 0.61157 | 0.063484 | 0.17081  | 0.19996  | 1.34E-05 |
| 2.77E-17 | 0.517634 | 2.28E-33 | 0.038683 | 0.40427 | 0.056448 | 0.22339  | 0.142067 | 0.00209  |
| 6.38E-15 | -0.35137 | 5.13E-15 | -0.05685 | 0.22015 | -0.0117  | 0.80094  | 0.015972 | 0.73066  |
| 3.63E-15 | 0.42688  | 4.18E-22 | 0.010333 | 0.82377 | 0.099645 | 0.03132  | -0.06594 | 0.15485  |
| 1.13E-26 | 0.611441 | 3.21E-49 | 0.148472 | 0.00129 | 0.168362 | 0.00026  | 0.134188 | 0.00367  |
| 3.02E-10 | 0.26378  | 7.13E-09 | -0.05325 | 0.25075 | -0.00713 | 0.87782  | -0.08238 | 0.07531  |
| 0.61227  | -0.15419 | 0.00083  | 0.00038  | 0.99346 | -0.03865 | 0.40463  | 0.009424 | 0.83905  |
| 1.66E-25 | 0.606493 | 3.00E-48 | 0.050678 | 0.27443 | 0.065888 | 0.15515  | 0.175609 | 0.00014  |
| 0.00047  | 0.124504 | 0.00706  | -0.08528 | 0.06557 | 0.03203  | 0.48988  | 0.068583 | 0.13891  |
| 5.31E-15 | 0.467825 | 9.00E-27 | -0.00338 | 0.9419  | 0.052893 | 0.25397  | 0.079898 | 0.08458  |
| 1.05E-08 | 0.351884 | 4.65E-15 | -0.03806 | 0.41189 | 0.164227 | 0.00037  | 0.056377 | 0.22398  |
| 2.42E-20 | 0.414884 | 7.45E-21 | -0.03232 | 0.48591 | 0.054391 | 0.24075  | -0.06972 | 0.13248  |
| 3.51E-17 | 0.506948 | 7.34E-32 | 0.076672 | 0.09794 | 0.112333 | 0.01515  | 0.053132 | 0.25183  |
| 0.001    | 0.270992 | 2.65E-09 | 0.052529 | 0.25726 | 0.002675 | 0.95402  | -0.01721 | 0.71076  |

|          |          |          |          |         |          |         |          |          |
|----------|----------|----------|----------|---------|----------|---------|----------|----------|
| 7.68E-07 | 0.308877 | 8.82E-12 | 0.053274 | 0.25056 | 0.038542 | 0.40598 | 0.124667 | 0.00699  |
| 5.19E-05 | 0.249536 | 4.64E-08 | -0.00251 | 0.95683 | 0.019419 | 0.67553 | 0.002164 | 0.96281  |
| 1.22E-57 | 0.704945 | 2.21E-71 | 0.130055 | 0.00488 | 0.130333 | 0.00479 | 0.159477 | 0.00054  |
| 1.52E-11 | 0.47883  | 3.88E-28 | -0.00172 | 0.97039 | 0.068449 | 0.13968 | 0.128704 | 0.00535  |
| 4.19E-28 | 0.499807 | 6.98E-31 | 0.034845 | 0.45252 | 0.094108 | 0.04208 | 0.296327 | 6.41E-11 |
| 5.06E-28 | 0.581226 | 1.51E-43 | 0.08414  | 0.06927 | 0.100289 | 0.03024 | 0.171856 | 0.00019  |
| 1.91E-10 | 0.369798 | 1.40E-16 | 0.008404 | 0.85627 | -0.03376 | 0.46667 | 0.062379 | 0.17839  |
| 2.63E-08 | 0.38406  | 7.32E-18 | 0.106049 | 0.0219  | 0.042932 | 0.3546  | 0.02189  | 0.63704  |
| 1.08E-26 | 0.592724 | 1.23E-45 | 0.024737 | 0.59388 | 0.140138 | 0.0024  | 0.182299 | 7.43E-05 |
| 4.46E-20 | 0.514671 | 6.04E-33 | 0.056063 | 0.22657 | 0.089204 | 0.05406 | -0.02124 | 0.64712  |
| 0.04117  | -0.02904 | 0.53133  | -0.08726 | 0.05954 | -0.06165 | 0.18356 | -0.2273  | 6.91E-07 |
| 2.14E-25 | 0.547839 | 6.22E-38 | 0.109109 | 0.01834 | 0.07961  | 0.0857  | 0.116634 | 0.01166  |
| 1.74E-14 | 0.313509 | 4.14E-12 | 0.049583 | 0.28494 | 0.060797 | 0.18968 | -0.03597 | 0.43804  |
| 1.36E-21 | 0.449951 | 1.17E-24 | 0.002482 | 0.95734 | 0.034785 | 0.4533  | 0.145866 | 0.00157  |
| 0.28329  | 0.178272 | 0.00011  | -0.0124  | 0.78924 | 0.064328 | 0.16518 | -0.07708 | 0.09618  |
| 0.00018  | 0.195034 | 2.19E-05 | -0.01705 | 0.71325 | 0.022189 | 0.63245 | -0.14721 | 0.00142  |
| 1.04E-15 | 0.470702 | 4.00E-27 | 0.01388  | 0.76482 | 0.10382  | 0.02486 | 0.223697 | 1.04E-06 |
| 1.60E-16 | 0.388476 | 2.85E-18 | 0.085637 | 0.06445 | -0.04868 | 0.29382 | -0.11384 | 0.01384  |
| 5.89E-13 | 0.412087 | 1.43E-20 | -0.08576 | 0.06408 | 0.027513 | 0.55313 | 0.000621 | 0.98932  |
| 2.99E-07 | 0.423046 | 1.06E-21 | 0.154281 | 0.00082 | 0.102805 | 0.02631 | -0.03477 | 0.45347  |
| 1.75E-05 | -0.18553 | 5.49E-05 | 0.041004 | 0.37664 | 0.029911 | 0.51905 | -0.03065 | 0.50877  |
| 1.05E-07 | 0.293965 | 9.21E-11 | 0.077846 | 0.0929  | 0.044637 | 0.3358  | -0.03416 | 0.46148  |
| 2.66E-28 | -0.55753 | 1.69E-39 | 0.033899 | 0.4649  | -0.04457 | 0.3365  | -0.09945 | 0.03166  |
| 1.44E-28 | 0.656946 | 5.13E-59 | -0.01425 | 0.75872 | 0.12487  | 0.0069  | 0.211378 | 4.07E-06 |
| 0.00035  | 0.174609 | 0.00015  | -0.05951 | 0.19926 | -0.02345 | 0.6132  | -0.11145 | 0.01597  |
| 0.33632  | 0.241698 | 1.24E-07 | 0.040988 | 0.37683 | 0.076003 | 0.10092 | 0.055403 | 0.2321   |
| 0.07785  | -0.01768 | 0.70311  | -0.04145 | 0.37151 | -0.09774 | 0.03472 | -0.11015 | 0.01726  |
| 2.76E-07 | 0.298234 | 4.77E-11 | -0.01819 | 0.69494 | 0.104762 | 0.02357 | 0.011788 | 0.79944  |
| 9.93E-17 | 0.468926 | 6.60E-27 | 0.084052 | 0.06957 | 0.129494 | 0.00507 | 0.181221 | 8.20E-05 |
| 2.86E-14 | -0.36063 | 8.64E-16 | 0.024834 | 0.59243 | -0.0244  | 0.59895 | -0.08028 | 0.08308  |
| 0.59883  | 0.041605 | 0.36969  | 0.018999 | 0.68216 | -0.02809 | 0.54479 | 0.056423 | 0.2236   |
| 0.07347  | -0.07089 | 0.12609  | -0.01389 | 0.76473 | -0.02812 | 0.54437 | -0.19655 | 1.89E-05 |
| 0.07367  | -0.17546 | 0.00014  | 0.136642 | 0.00309 | -0.07491 | 0.10592 | 0.034209 | 0.46082  |
| 2.96E-09 | -0.25588 | 2.04E-08 | 0.007607 | 0.86977 | -0.03496 | 0.45108 | -0.12579 | 0.00649  |
| 4.81E-09 | 0.430213 | 1.84E-22 | 0.007746 | 0.86741 | 0.098096 | 0.03407 | 0.17319  | 0.00017  |
| 0.24725  | -0.05245 | 0.25798  | -0.04109 | 0.37569 | 0.152913 | 0.00092 | -0.0323  | 0.48619  |
| 5.22E-07 | 0.272049 | 2.28E-09 | -0.08314 | 0.07265 | -0.04083 | 0.37869 | -0.06958 | 0.13327  |
| 0.02852  | -0.01676 | 0.71797  | 0.087006 | 0.06028 | 0.02204  | 0.63474 | 0.007245 | 0.87592  |
| 0.00328  | -0.16023 | 0.00051  | 0.116882 | 0.01148 | -0.02336 | 0.61465 | 0.10646  | 0.02139  |
| 2.92E-20 | -0.47497 | 1.18E-27 | -0.07728 | 0.09531 | -0.116   | 0.01212 | -0.08195 | 0.07686  |
| 4.36E-10 | 0.403386 | 1.06E-19 | -0.04914 | 0.28924 | 0.124607 | 0.00702 | 0.027682 | 0.55069  |
| 0.00024  | 0.194052 | 2.42E-05 | 0.022353 | 0.62994 | 0.018423 | 0.6913  | -0.22148 | 1.34E-06 |
| 4.72E-33 | 0.565848 | 6.99E-41 | 0.049696 | 0.28384 | 0.092652 | 0.04537 | 0.135161 | 0.00343  |
| 5.04E-16 | 0.394265 | 8.10E-19 | 0.073808 | 0.11118 | 0.059838 | 0.19678 | 0.084997 | 0.06648  |
| 4.51E-33 | 0.59765  | 1.48E-46 | 0.091461 | 0.04823 | 0.050937 | 0.27198 | 0.086734 | 0.06109  |

|          |          |          |          |          |          |         |          |          |
|----------|----------|----------|----------|----------|----------|---------|----------|----------|
| 3.63E-24 | -0.42628 | 4.83E-22 | -0.08015 | 0.08359  | -0.08235 | 0.07544 | -0.27543 | 1.42E-09 |
| 5.68E-32 | 0.53611  | 4.18E-36 | 0.002508 | 0.95689  | 0.040234 | 0.38568 | 0.206439 | 6.87E-06 |
| 4.63E-16 | -0.46653 | 1.29E-26 | -0.15029 | 0.00112  | -0.02607 | 0.57409 | -0.09545 | 0.03921  |
| 2.50E-07 | -0.20651 | 6.82E-06 | 0.008236 | 0.85911  | 0.003605 | 0.93807 | -0.02277 | 0.62351  |
| 1.05E-07 | -0.42972 | 2.07E-22 | -0.08493 | 0.06668  | -0.1233  | 0.00764 | -0.08718 | 0.05976  |
| 0.73953  | 0.010386 | 0.82288  | 0.219784 | 1.62E-06 | 0.125589 | 0.00658 | 0.033542 | 0.46962  |
| 9.65E-13 | -0.39831 | 3.31E-19 | -0.01354 | 0.77038  | -0.08094 | 0.0806  | -0.08171 | 0.07774  |
| 2.10E-23 | 0.599728 | 5.98E-47 | 0.15604  | 0.00072  | 0.105612 | 0.02246 | 0.102506 | 0.02675  |
| 7.81E-06 | -0.15116 | 0.00105  | 0.068988 | 0.13659  | 0.0356   | 0.44278 | -0.02275 | 0.62386  |
| 6.16E-18 | 0.349343 | 7.52E-15 | -0.06722 | 0.14697  | -0.0243  | 0.60039 | -0.0804  | 0.08262  |
| 6.61E-51 | 0.707087 | 5.42E-72 | 0.103654 | 0.02509  | 0.030812 | 0.50654 | 0.172981 | 0.00017  |
| 1.13E-12 | -0.36626 | 2.84E-16 | -0.02319 | 0.61723  | -0.16601 | 0.00031 | -0.15928 | 0.00055  |
| 1.24E-12 | -0.4204  | 2.01E-21 | -0.06745 | 0.14555  | -0.10528 | 0.02289 | 0.009355 | 0.84021  |
| 5.47E-32 | 0.632152 | 1.78E-53 | 0.004281 | 0.92648  | 0.153904 | 0.00085 | 0.197889 | 1.65E-05 |
| 9.06E-06 | 0.241303 | 1.30E-07 | 0.123971 | 0.00731  | 0.126037 | 0.00639 | -0.02418 | 0.6022   |
| 0.04925  | 0.193835 | 2.47E-05 | 0.039524 | 0.39412  | 0.03721  | 0.42241 | -0.16711 | 0.00029  |
| 2.20E-20 | 0.472344 | 2.51E-27 | 0.038662 | 0.40453  | 0.030583 | 0.50972 | -0.02733 | 0.55579  |
| 6.01E-14 | -0.44427 | 5.20E-24 | -0.06879 | 0.1377   | -0.0434  | 0.34932 | -0.10062 | 0.0297   |
| 1.32E-20 | 0.472996 | 2.08E-27 | -0.02168 | 0.64021  | -0.01224 | 0.79194 | 0.04377  | 0.34528  |
| 0.23426  | -0.11436 | 0.01341  | 0.037096 | 0.42384  | -0.00135 | 0.97672 | 0.077199 | 0.09565  |
| 5.26E-28 | 0.500572 | 5.50E-31 | 0.013928 | 0.76403  | 0.010872 | 0.81473 | 0.101951 | 0.02759  |
| 2.24E-09 | 0.289319 | 1.86E-10 | 0.105706 | 0.02234  | 0.0927   | 0.04526 | 0.043291 | 0.35059  |
| 0.0031   | 0.247599 | 5.93E-08 | -0.00594 | 0.89821  | 0.022056 | 0.63449 | -0.05611 | 0.22621  |
| 1.36E-06 | -0.15927 | 0.00055  | 0.041372 | 0.37237  | -0.0239  | 0.60649 | -0.108   | 0.01957  |
| 2.03E-16 | 0.36307  | 5.36E-16 | 0.046746 | 0.31344  | 0.021757 | 0.63909 | 0.21823  | 1.93E-06 |
| 4.83E-07 | 0.326667 | 4.49E-13 | -0.0121  | 0.79426  | 0.068505 | 0.13936 | -0.11734 | 0.01116  |
| 3.32E-13 | 0.453038 | 5.16E-25 | 0.126181 | 0.00633  | -0.0032  | 0.94496 | 0.094867 | 0.04044  |
| 3.79E-18 | 0.410029 | 2.31E-20 | 0.014579 | 0.75335  | 0.064013 | 0.16727 | 0.171242 | 0.0002   |
| 0.81319  | -0.13446 | 0.0036   | 0.016052 | 0.72936  | -0.01484 | 0.74913 | 0.035458 | 0.4446   |
| 1.32E-07 | 0.24596  | 7.29E-08 | 0.060493 | 0.19191  | 0.042121 | 0.36376 | -0.04326 | 0.35089  |
| 5.98E-27 | -0.53558 | 5.04E-36 | 0.023752 | 0.60866  | -0.05835 | 0.20819 | 0.041114 | 0.37536  |
| 2.26E-17 | 0.543902 | 2.60E-37 | 0.090289 | 0.05119  | 0.113238 | 0.01435 | -0.03328 | 0.47309  |
| 0.02493  | 0.107566 | 0.02007  | 0.002485 | 0.95729  | -0.01488 | 0.74845 | -0.06277 | 0.17567  |
| 0.00044  | 0.164468 | 0.00036  | -0.02914 | 0.52987  | 0.02139  | 0.64476 | -0.07748 | 0.09445  |
| 1.26E-09 | 0.283244 | 4.59E-10 | -0.07759 | 0.09398  | 0.141018 | 0.00225 | 0.01023  | 0.82549  |
| 0.02886  | 0.147807 | 0.00136  | -0.02479 | 0.59314  | -0.00675 | 0.8843  | -0.14551 | 0.00162  |
| 2.23E-06 | -0.19704 | 1.80E-05 | 0.036356 | 0.43315  | -0.02631 | 0.57066 | 0.150613 | 0.0011   |
| 1.39E-35 | 0.629832 | 5.54E-53 | 0.083542 | 0.07128  | 0.05214  | 0.2608  | 0.037367 | 0.42046  |
| 8.09E-22 | 0.446719 | 2.74E-24 | -0.0445  | 0.33727  | 0.010514 | 0.82073 | 0.09565  | 0.03881  |
| 5.07E-24 | 0.427338 | 3.73E-22 | 0.019389 | 0.676    | 0.057177 | 0.21746 | 0.307397 | 1.12E-11 |
| 4.74E-12 | 0.472245 | 2.58E-27 | 0.06858  | 0.13893  | 0.159762 | 0.00053 | 0.1788   | 0.0001   |
| 0.59732  | -0.14033 | 0.00237  | 0.07786  | 0.09284  | -0.09249 | 0.04575 | 0.019164 | 0.67956  |
| 6.13E-12 | 0.322837 | 8.66E-13 | -0.11114 | 0.01627  | -0.07126 | 0.12413 | 0.092492 | 0.04575  |
| 2.38E-14 | 0.393954 | 8.67E-19 | 0.056229 | 0.2252   | -0.00258 | 0.95568 | 0.018135 | 0.69589  |
| 1.51E-24 | 0.520396 | 9.11E-34 | -0.05625 | 0.22503  | 0.021317 | 0.64588 | 0.065852 | 0.15537  |

|          |          |          |          |          |          |          |          |          |
|----------|----------|----------|----------|----------|----------|----------|----------|----------|
| 6.24E-11 | 0.371039 | 1.09E-16 | 0.075807 | 0.10181  | 0.170611 | 0.00021  | -0.01459 | 0.75317  |
| 0.00234  | 0.296794 | 5.96E-11 | 0.100559 | 0.0298   | 0.127452 | 0.00581  | -0.02123 | 0.64719  |
| 1.15E-09 | 0.251572 | 3.57E-08 | -0.10001 | 0.0307   | -0.11939 | 0.00981  | -0.12099 | 0.00886  |
| 3.05E-18 | 0.50884  | 4.01E-32 | 0.060766 | 0.1899   | 0.188467 | 4.16E-05 | 0.079585 | 0.0858   |
| 0.87721  | 0.086457 | 0.06192  | -0.00832 | 0.85771  | -0.06574 | 0.15611  | -0.13301 | 0.00398  |
| 3.27E-17 | 0.491306 | 9.53E-30 | -0.12072 | 0.00902  | 0.036525 | 0.43101  | -0.03623 | 0.43478  |
| 1.32E-07 | 0.243771 | 9.58E-08 | -0.08888 | 0.05493  | 0.080976 | 0.08045  | -0.02947 | 0.5253   |
| 0.00013  | 0.252503 | 3.17E-08 | 0.032722 | 0.48055  | 0.026061 | 0.57427  | 0.055077 | 0.23486  |
| 0.01577  | 0.253411 | 2.82E-08 | 0.092158 | 0.04654  | 0.092551 | 0.04561  | -0.07052 | 0.12806  |
| 6.45E-17 | 0.632617 | 1.42E-53 | 0.133369 | 0.00389  | 0.218018 | 1.97E-06 | 0.087278 | 0.05948  |
| 4.13E-09 | 0.341407 | 3.27E-14 | 0.04043  | 0.38336  | -0.04338 | 0.34963  | 0.062341 | 0.17866  |
| 1.16E-20 | 0.567416 | 3.79E-41 | 0.072345 | 0.11847  | 0.10982  | 0.01759  | 0.111768 | 0.01567  |
| 3.62E-32 | 0.554627 | 5.05E-39 | 0.007246 | 0.8759   | 0.099635 | 0.03134  | 0.261573 | 9.60E-09 |
| 1.94E-06 | -0.13383 | 0.00376  | 0.02109  | 0.6494   | 0.025571 | 0.58149  | 0.005325 | 0.90863  |
| 8.64E-05 | 0.304285 | 1.84E-11 | -0.05152 | 0.26653  | 0.052589 | 0.25672  | 0.022639 | 0.62556  |
| 6.30E-44 | 0.663129 | 1.76E-60 | 0.038357 | 0.40825  | 0.131056 | 0.00456  | 0.191881 | 2.99E-05 |
| 4.01E-10 | 0.314751 | 3.37E-12 | 0.036707 | 0.42872  | -0.07806 | 0.09201  | 0.052421 | 0.25824  |
| 1.07E-07 | 0.220372 | 1.52E-06 | 0.042318 | 0.36153  | -0.03363 | 0.46842  | 0.215642 | 2.56E-06 |
| 0.56377  | 0.026521 | 0.56754  | -0.04773 | 0.3033   | -0.0513  | 0.26858  | -0.04599 | 0.32131  |
| 5.58E-16 | 0.407193 | 4.45E-20 | -0.07691 | 0.09689  | 0.018486 | 0.6903   | 0.026742 | 0.5643   |
| 2.92E-05 | 0.195789 | 2.04E-05 | 0.040003 | 0.38841  | 0.092397 | 0.04597  | -0.20735 | 6.24E-06 |
| 0.01056  | 0.241816 | 1.22E-07 | 0.026751 | 0.56418  | 0.093979 | 0.04236  | -0.20415 | 8.71E-06 |
| 2.46E-17 | 0.346528 | 1.27E-14 | 0.025625 | 0.5807   | 0.059713 | 0.19771  | -0.00194 | 0.96673  |
| 4.97E-21 | 0.494947 | 3.14E-30 | 0.006318 | 0.89169  | 0.063276 | 0.17222  | -0.00495 | 0.91502  |
| 1.76E-28 | 0.491453 | 9.12E-30 | 0.005576 | 0.90435  | 0.056581 | 0.2223   | 0.070046 | 0.13066  |
| 1.59E-20 | 0.38125  | 1.32E-17 | 0.005815 | 0.90027  | 0.03816  | 0.41066  | 0.146009 | 0.00156  |
| 2.22E-08 | 0.286643 | 2.78E-10 | 0.050947 | 0.27189  | 0.070789 | 0.12661  | 0.026955 | 0.5612   |
| 8.36E-07 | 0.248328 | 5.41E-08 | -0.01131 | 0.80742  | -0.02486 | 0.592    | 0.0303   | 0.51364  |
| 8.83E-07 | 0.205477 | 7.59E-06 | 0.020705 | 0.65539  | -0.12235 | 0.00812  | 0.212567 | 3.58E-06 |
| 0.85121  | 0.099391 | 0.03176  | -0.01171 | 0.80078  | -0.01039 | 0.82275  | -0.02651 | 0.56766  |
| 0.13946  | 0.153791 | 0.00085  | -0.02746 | 0.55384  | 0.063548 | 0.17038  | -0.02589 | 0.57679  |
| 1.13E-22 | 0.428591 | 2.74E-22 | -0.06586 | 0.15531  | -0.10881 | 0.01866  | 0.079799 | 0.08496  |
| 5.89E-12 | 0.44645  | 2.94E-24 | 0.181702 | 7.85E-05 | 0.095616 | 0.03888  | 0.019212 | 0.67881  |
| 3.40E-13 | 0.486649 | 3.87E-29 | 0.110812 | 0.01659  | 0.15903  | 0.00056  | -0.00783 | 0.86603  |
| 0.27032  | -0.07208 | 0.1198   | 0.111758 | 0.01568  | 0.049602 | 0.28476  | 0.065476 | 0.15775  |
| 7.76E-08 | 0.330494 | 2.30E-13 | -0.04094 | 0.37738  | 0.008139 | 0.86076  | -0.01263 | 0.78543  |
| 5.01E-07 | 0.16798  | 0.00027  | -0.0507  | 0.2742   | 0.053071 | 0.25238  | -0.07216 | 0.11942  |
| 8.22E-24 | 0.502317 | 3.18E-31 | 0.082385 | 0.0753   | -0.03233 | 0.48583  | 0.056389 | 0.22388  |
| 3.05E-17 | 0.372083 | 8.81E-17 | -0.03827 | 0.40933  | 0.085762 | 0.06406  | 0.321793 | 1.03E-12 |
| 6.54E-07 | 0.318778 | 1.72E-12 | 0.094259 | 0.04175  | 0.039557 | 0.39373  | 0.006257 | 0.89273  |
| 0.34854  | 0.115478 | 0.01252  | 0.00063  | 0.98916  | 0.042791 | 0.35618  | -0.07531 | 0.10407  |
| 2.02E-10 | 0.32925  | 2.86E-13 | -0.10385 | 0.02482  | -0.02805 | 0.54538  | -0.03433 | 0.4592   |
| 6.18E-15 | 0.459879 | 8.12E-26 | 0.084185 | 0.06912  | 0.087229 | 0.05962  | 0.069945 | 0.13122  |
| 8.02E-23 | 0.601619 | 2.61E-47 | 0.086014 | 0.06328  | 0.081919 | 0.07698  | 0.037888 | 0.41401  |
| 0.53871  | -0.01937 | 0.67628  | -0.02152 | 0.64273  | -0.0201  | 0.66485  | -0.02082 | 0.65356  |

|          |          |          |          |         |          |         |          |          |
|----------|----------|----------|----------|---------|----------|---------|----------|----------|
| 6.46E-13 | 0.337476 | 6.66E-14 | 0.093143 | 0.04424 | 0.00071  | 0.98779 | 0.048115 | 0.29946  |
| 8.82E-13 | 0.392667 | 1.15E-18 | 0.028364 | 0.54091 | 0.03322  | 0.47389 | 0.230911 | 4.54E-07 |
| 2.40E-28 | 0.505037 | 1.35E-31 | 0.081071 | 0.08009 | -0.02732 | 0.55597 | 0.027705 | 0.55035  |
| 3.05E-10 | -0.33663 | 7.76E-14 | 0.063448 | 0.17105 | -0.03582 | 0.43992 | -0.0518  | 0.26388  |
| 3.71E-31 | 0.586871 | 1.46E-44 | 0.06535  | 0.15855 | 0.066671 | 0.15029 | 0.079428 | 0.08643  |
| 4.12E-06 | 0.342111 | 2.87E-14 | -0.00042 | 0.9927  | 0.055954 | 0.22748 | -0.11173 | 0.01571  |
| 7.58E-23 | 0.426693 | 4.37E-22 | -0.0056  | 0.90386 | 0.054296 | 0.24157 | 0.186504 | 5.01E-05 |
| 0.00021  | 0.198352 | 1.58E-05 | 0.049545 | 0.28532 | -0.00159 | 0.97269 | 0.024861 | 0.59203  |
| 1.24E-26 | 0.606419 | 3.10E-48 | 0.059067 | 0.20262 | 0.137859 | 0.00283 | 0.090688 | 0.05016  |
| 0.12068  | -0.12673 | 0.0061   | -0.04033 | 0.38456 | 0.050792 | 0.27335 | 0.011869 | 0.79809  |
| 2.26E-31 | 0.573824 | 3.01E-42 | 0.032924 | 0.47784 | 0.099895 | 0.0309  | 0.353566 | 3.38E-15 |
| 1.23E-16 | 0.400432 | 2.06E-19 | 0.022902 | 0.62156 | 0.108589 | 0.01891 | -0.06296 | 0.17439  |
| 0.25229  | 0.014007 | 0.76273  | -0.10898 | 0.01848 | 0.005474 | 0.90608 | -0.03168 | 0.49468  |
| 4.58E-08 | -0.15566 | 0.00074  | -0.00882 | 0.84922 | 0.075156 | 0.10479 | -0.07822 | 0.09132  |
| 0.18743  | 0.153988 | 0.00084  | -0.03615 | 0.43575 | -0.01474 | 0.75067 | 0.009098 | 0.84455  |
| 3.52E-25 | 0.545886 | 1.27E-37 | -0.01563 | 0.73625 | 0.121404 | 0.00863 | 0.058579 | 0.20638  |
| 1.19E-16 | 0.404827 | 7.64E-20 | -0.00889 | 0.84812 | 0.053762 | 0.24624 | 0.229462 | 5.37E-07 |
| 1.20E-19 | 0.499441 | 7.83E-31 | -0.01534 | 0.741   | 0.103539 | 0.02525 | 0.236039 | 2.47E-07 |
| 0.03007  | 0.104806 | 0.02351  | -0.03669 | 0.429   | 0.040877 | 0.37813 | 0.04605  | 0.3207   |
| 1.41E-07 | -0.23153 | 4.22E-07 | -0.03249 | 0.48372 | 0.071904 | 0.12073 | 0.0666   | 0.15072  |
| 0.00363  | 0.276776 | 1.17E-09 | -0.03151 | 0.49694 | 0.074509 | 0.10782 | 0.092598 | 0.0455   |
| 4.11E-42 | 0.73459  | 2.37E-80 | 0.045334 | 0.3283  | 0.094483 | 0.04126 | 0.144954 | 0.00169  |
| 1.14E-07 | 0.326545 | 4.58E-13 | 0.049549 | 0.28527 | 0.017342 | 0.70856 | -0.12163 | 0.00851  |
| 1.26E-08 | 0.30822  | 9.81E-12 | -0.03538 | 0.44556 | -0.06035 | 0.19295 | -0.00851 | 0.85452  |
| 1.36E-31 | 0.581362 | 1.43E-43 | 0.054091 | 0.24336 | 0.105976 | 0.02199 | 0.016654 | 0.71963  |
| 0.00427  | 0.168414 | 0.00026  | -0.03168 | 0.49462 | -0.10178 | 0.02786 | 0.006231 | 0.89317  |
| 9.54E-08 | -0.39331 | 9.99E-19 | -0.0501  | 0.27991 | -0.08565 | 0.0644  | -0.12982 | 0.00496  |
| 1.54E-15 | 0.416792 | 4.75E-21 | 0.067384 | 0.14596 | 0.048382 | 0.29679 | -0.09146 | 0.04824  |
| 1.28E-06 | 0.253304 | 2.86E-08 | 0.071587 | 0.12239 | 0.036711 | 0.42867 | 0.030104 | 0.51636  |
| 0.99201  | -0.01925 | 0.67824  | -0.06916 | 0.13558 | 0.054115 | 0.24314 | 0.084365 | 0.06853  |
| 2.21E-11 | 0.292965 | 1.07E-10 | 0.101321 | 0.02857 | 0.074978 | 0.10561 | 0.121878 | 0.00837  |
| 3.86E-27 | 0.594847 | 4.96E-46 | 0.073024 | 0.11504 | 0.086289 | 0.06243 | 0.070227 | 0.12967  |
| 8.96E-08 | 0.25111  | 3.79E-08 | -0.05247 | 0.25781 | -0.04744 | 0.30627 | 0.114102 | 0.01362  |
| 2.23E-12 | 0.43758  | 2.90E-23 | 0.134552 | 0.00358 | 0.070198 | 0.12982 | -0.00448 | 0.92312  |
| 5.66E-12 | 0.367485 | 2.23E-16 | 0.005011 | 0.914   | -0.02189 | 0.63699 | 0.17129  | 0.0002   |
| 0.80383  | -0.02689 | 0.56214  | 0.088423 | 0.0562  | -0.05561 | 0.23032 | -0.19512 | 2.18E-05 |
| 3.03E-10 | 0.355237 | 2.46E-15 | -0.03309 | 0.47568 | 0.005761 | 0.90119 | 0.25463  | 2.40E-08 |
| 1.34E-09 | 0.196056 | 1.98E-05 | -0.00818 | 0.86001 | -0.0108  | 0.81591 | 0.195169 | 2.16E-05 |
| 0.06589  | -0.01251 | 0.78747  | -0.10779 | 0.01981 | -0.0923  | 0.0462  | 0.077043 | 0.09633  |
| 3.24E-18 | 0.512078 | 1.41E-32 | 0.069595 | 0.13316 | 0.152499 | 0.00095 | 0.060226 | 0.19388  |
| 1.47E-15 | 0.459892 | 8.09E-26 | 0.088687 | 0.05547 | 0.081729 | 0.07767 | 0.154666 | 0.0008   |
| 5.27E-09 | 0.288397 | 2.14E-10 | -0.01552 | 0.73805 | 0.06257  | 0.17707 | -0.11954 | 0.00972  |
| 1.54E-32 | 0.617166 | 2.30E-50 | -0.01246 | 0.78834 | 0.058031 | 0.21066 | 0.044033 | 0.34238  |
| 1.01E-12 | 0.380852 | 1.44E-17 | 0.132111 | 0.00424 | 0.01409  | 0.76137 | 0.040549 | 0.38196  |
| 1.82E-15 | 0.414912 | 7.40E-21 | 0.002015 | 0.96536 | -0.01258 | 0.78621 | -0.05947 | 0.19958  |

|          |          |          |          |          |          |         |          |          |
|----------|----------|----------|----------|----------|----------|---------|----------|----------|
| 1.58E-08 | 0.385333 | 5.59E-18 | 0.251047 | 3.82E-08 | 0.13608  | 0.00321 | 0.070265 | 0.12946  |
| 1.18E-05 | 0.273161 | 1.95E-09 | -0.00474 | 0.91862  | 0.050895 | 0.27238 | 0.133042 | 0.00397  |
| 0.00196  | 0.143522 | 0.00188  | 0.076705 | 0.0978   | -0.04947 | 0.28607 | 0.035278 | 0.44692  |
| 0.00194  | 0.161253 | 0.00047  | 0.087308 | 0.05939  | 0.079407 | 0.08651 | 0.001273 | 0.97811  |
| 2.95E-11 | 0.284932 | 3.58E-10 | -0.07782 | 0.09301  | 0.018704 | 0.68683 | 0.063429 | 0.17118  |
| 0.00391  | 0.116979 | 0.01141  | -0.05733 | 0.21622  | -0.07652 | 0.0986  | -0.13307 | 0.00397  |
| 2.27E-14 | 0.519613 | 1.18E-33 | 0.052354 | 0.25885  | 0.101072 | 0.02897 | 0.033645 | 0.46825  |
| 5.90E-10 | 0.221034 | 1.41E-06 | 0.044607 | 0.33612  | 0.021583 | 0.64178 | 0.011249 | 0.80843  |
| 3.17E-08 | 0.246389 | 6.91E-08 | -0.01932 | 0.67706  | 0.045938 | 0.32189 | 0.085306 | 0.06549  |
| 0.06107  | -0.21825 | 1.92E-06 | -0.05561 | 0.23039  | -0.04177 | 0.36775 | -0.10662 | 0.02119  |
| 1.57E-30 | 0.610278 | 5.44E-49 | 0.053663 | 0.24711  | 0.029229 | 0.52864 | 0.098463 | 0.0334   |
| 0.6593   | 0.063873 | 0.1682   | -0.02083 | 0.6535   | -0.01164 | 0.80191 | -0.09627 | 0.03756  |
| 6.89E-05 | -0.23389 | 3.19E-07 | 0.048856 | 0.29207  | 0.012906 | 0.78089 | 0.085083 | 0.0662   |
| 1.05E-21 | 0.496891 | 1.73E-30 | 0.039099 | 0.39923  | 0.023767 | 0.60844 | 0.00921  | 0.84265  |
| 3.50E-18 | -0.44031 | 1.44E-23 | -0.06897 | 0.13667  | 0.049715 | 0.28366 | -0.20812 | 5.75E-06 |
| 4.26E-22 | -0.52638 | 1.21E-34 | -0.03764 | 0.41705  | -0.10845 | 0.01906 | -0.07748 | 0.09446  |
| 4.05E-05 | 0.310843 | 6.41E-12 | -0.00913 | 0.84392  | 0.020511 | 0.65841 | -0.0742  | 0.10931  |
| 2.76E-34 | 0.535064 | 6.03E-36 | 0.015397 | 0.74     | 0.024528 | 0.597   | -0.00486 | 0.91657  |
| 9.23E-48 | 0.740449 | 2.87E-82 | 0.118548 | 0.01035  | 0.098259 | 0.03377 | 0.218044 | 1.97E-06 |
| 1.86E-44 | 0.60475  | 6.53E-48 | 0.041603 | 0.3697   | 0.033828 | 0.46583 | 0.237727 | 2.01E-07 |
| 1.47E-05 | 0.333017 | 1.48E-13 | 0.030259 | 0.51421  | 0.130726 | 0.00466 | 0.120645 | 0.00906  |
| 1.82E-06 | 0.307658 | 1.07E-11 | 0.004819 | 0.91728  | 0.017916 | 0.69937 | -0.05555 | 0.23088  |
| 3.86E-15 | 0.324559 | 6.45E-13 | 0.024639 | 0.59535  | 0.01991  | 0.66782 | 0.147775 | 0.00136  |
| 0.03736  | -0.11469 | 0.01314  | 0.009423 | 0.83906  | -0.00523 | 0.91027 | 0.429169 | 2.38E-22 |
| 2.36E-29 | 0.577672 | 6.41E-43 | 0.025235 | 0.58648  | 0.129749 | 0.00498 | 0.005813 | 0.90031  |
| 1.45E-07 | -0.2958  | 6.95E-11 | 0.063966 | 0.16758  | 0.0044   | 0.92444 | -0.10486 | 0.02344  |
| 0.01616  | -0.12182 | 0.00841  | 0.101258 | 0.02867  | -0.03901 | 0.40031 | -0.01389 | 0.76457  |
| 0.27958  | 0.160341 | 0.0005   | -0.07015 | 0.13011  | 0.003588 | 0.93836 | -0.06003 | 0.19535  |
| 2.08E-11 | 0.33269  | 1.56E-13 | -0.02646 | 0.56842  | 0.032305 | 0.48615 | 0.073925 | 0.11062  |
| 2.34E-08 | 0.213288 | 3.31E-06 | 0.015996 | 0.73027  | -0.09167 | 0.04773 | 0.08195  | 0.07686  |
| 1.98E-09 | 0.388126 | 3.07E-18 | 0.064495 | 0.16408  | 0.020282 | 0.66199 | 0.146789 | 0.00147  |
| 2.43E-25 | -0.55846 | 1.19E-39 | -0.00081 | 0.98606  | -0.0634  | 0.1714  | -0.16544 | 0.00033  |
| 1.79E-09 | -0.27092 | 2.67E-09 | -0.00133 | 0.97708  | -0.03914 | 0.39869 | -0.038   | 0.41262  |
| 1.02E-09 | 0.412436 | 1.32E-20 | 0.376336 | 3.69E-17 | 0.016684 | 0.71914 | -0.02331 | 0.61542  |
| 1.63E-18 | 0.533459 | 1.06E-35 | 0.109407 | 0.01803  | 0.070834 | 0.12637 | 0.093913 | 0.04251  |
| 6.80E-19 | 0.437289 | 3.12E-23 | 0.017406 | 0.70753  | 0.03064  | 0.50892 | 0.130569 | 0.00471  |
| 1.67E-18 | 0.397465 | 4.00E-19 | -0.00639 | 0.8905   | -0.00466 | 0.91994 | 0.050075 | 0.28018  |
| 0.00862  | 0.18539  | 5.56E-05 | 0.038073 | 0.41172  | 0.0562   | 0.22543 | -0.03475 | 0.45377  |
| 5.42E-09 | 0.199821 | 1.36E-05 | -0.04939 | 0.28686  | -0.09512 | 0.0399  | 0.054225 | 0.24219  |
| 4.87E-05 | 0.144996 | 0.00168  | -0.02362 | 0.61063  | 0.04678  | 0.31309 | -0.01782 | 0.70094  |
| 7.96E-30 | 0.490671 | 1.16E-29 | -0.01487 | 0.74859  | 0.013201 | 0.77601 | -0.00232 | 0.96011  |
| 0.0129   | 0.178051 | 0.00011  | -0.06806 | 0.14194  | -0.12089 | 0.00892 | 0.084275 | 0.06883  |
| 1.82E-11 | 0.380072 | 1.70E-17 | -0.0083  | 0.85798  | 0.026405 | 0.56922 | 0.077938 | 0.09251  |
| 0.2198   | 0.047638 | 0.30428  | -0.09837 | 0.03356  | -0.0519  | 0.26296 | 0.062701 | 0.17616  |
| 8.21E-12 | 0.392677 | 1.15E-18 | 0.025538 | 0.58198  | -0.01419 | 0.7597  | 0.005568 | 0.90449  |



|          |          |          |          |          |          |          |          |          |
|----------|----------|----------|----------|----------|----------|----------|----------|----------|
| 4.47E-18 | 0.485758 | 5.05E-29 | 0.089271 | 0.05387  | 0.106314 | 0.02157  | 0.227069 | 7.09E-07 |
| 2.29E-14 | 0.3782   | 2.50E-17 | -0.01915 | 0.67975  | -0.03289 | 0.47835  | 0.010631 | 0.81877  |
| 6.11E-08 | -0.20668 | 6.69E-06 | 0.002256 | 0.96122  | -0.0238  | 0.60791  | -0.15118 | 0.00105  |
| 0.01161  | 0.224383 | 9.65E-07 | -0.04649 | 0.3161   | 0.023996 | 0.60499  | -0.13551 | 0.00334  |
| 5.40E-10 | 0.434771 | 5.89E-23 | 0.058918 | 0.20375  | 0.15782  | 0.00062  | 0.071585 | 0.12239  |
| 1.61E-17 | 0.491237 | 9.73E-30 | 0.017613 | 0.70422  | 0.099226 | 0.03205  | 0.047658 | 0.30408  |
| 2.08E-25 | 0.549998 | 2.82E-38 | 0.186855 | 4.84E-05 | 0.044369 | 0.33871  | 0.027103 | 0.55905  |
| 1.72E-22 | 0.528855 | 5.20E-35 | -0.00248 | 0.95737  | 0.043457 | 0.34874  | -0.07114 | 0.12474  |
| 1.37E-29 | 0.582846 | 7.75E-44 | 0.078282 | 0.09107  | 0.103816 | 0.02486  | 0.073743 | 0.1115   |
| 6.46E-20 | 0.51824  | 1.87E-33 | -0.01054 | 0.82031  | 0.092945 | 0.04469  | 0.122691 | 0.00795  |
| 0.00195  | 0.284124 | 4.03E-10 | 0.065131 | 0.15996  | 0.164243 | 0.00037  | -0.01985 | 0.66878  |
| 2.92E-21 | 0.52247  | 4.55E-34 | 0.03929  | 0.39693  | 0.078026 | 0.09214  | 0.121138 | 0.00878  |
| 4.83E-32 | 0.583864 | 5.09E-44 | 0.020388 | 0.66033  | 0.009079 | 0.84486  | 0.153402 | 0.00088  |
| 0.67739  | -0.01529 | 0.74175  | -0.08235 | 0.07544  | -0.00538 | 0.90777  | -0.06041 | 0.19253  |
| 0.00015  | 0.326764 | 4.41E-13 | -0.01369 | 0.76788  | -0.00538 | 0.90773  | 0.097331 | 0.03549  |
| 6.53E-10 | 0.332332 | 1.67E-13 | 0.136442 | 0.00313  | 0.13481  | 0.00351  | 0.032623 | 0.48187  |
| 6.91E-23 | 0.434526 | 6.26E-23 | -0.01496 | 0.74708  | -0.05265 | 0.25614  | 0.119754 | 0.00959  |
| 5.51E-13 | 0.442094 | 9.12E-24 | 0.128805 | 0.00531  | 0.153558 | 0.00087  | 0.116571 | 0.0117   |
| 6.91E-12 | 0.383935 | 7.52E-18 | 0.017448 | 0.70686  | -0.01604 | 0.72961  | 0.113211 | 0.01437  |
| 2.93E-13 | 0.302365 | 2.50E-11 | 0.117489 | 0.01106  | 0.091385 | 0.04842  | 0.005876 | 0.89923  |
| 6.85E-10 | 0.405999 | 5.85E-20 | 0.042248 | 0.36232  | 0.095041 | 0.04007  | 0.121525 | 0.00857  |
| 1.04E-12 | 0.312763 | 4.68E-12 | -0.05262 | 0.2564   | -0.0497  | 0.28384  | 0.166086 | 0.00031  |
| 1.90E-18 | 0.494423 | 3.69E-30 | 0.021291 | 0.64629  | -0.00225 | 0.96135  | 0.205257 | 7.77E-06 |
| 7.92E-38 | 0.675401 | 1.71E-63 | 0.01326  | 0.77504  | 0.102441 | 0.02685  | 0.034315 | 0.45943  |
| 9.01E-19 | 0.504196 | 1.76E-31 | 0.010736 | 0.81701  | 0.113569 | 0.01406  | 0.037187 | 0.42271  |
| 0.76267  | -0.12167 | 0.00849  | -0.09204 | 0.04683  | -0.20338 | 9.44E-06 | 0.050403 | 0.27704  |
| 7.73E-37 | 0.666238 | 3.13E-61 | 0.175922 | 0.00013  | 0.110891 | 0.01651  | 0.179935 | 9.23E-05 |
| 6.03E-10 | 0.489518 | 1.64E-29 | 0.100896 | 0.02925  | 0.175542 | 0.00014  | -0.02386 | 0.60699  |
| 1.76E-19 | 0.342887 | 2.49E-14 | -0.02311 | 0.61842  | -0.00826 | 0.8587   | -0.05062 | 0.27497  |
| 2.06E-16 | 0.518308 | 1.82E-33 | 0.062648 | 0.17653  | 0.046597 | 0.31498  | -0.05463 | 0.23866  |
| 1.48E-09 | 0.281885 | 5.59E-10 | -0.04763 | 0.30432  | 0.163561 | 0.00039  | 0.221637 | 1.32E-06 |
| 4.37E-18 | 0.50639  | 8.77E-32 | 0.070703 | 0.12708  | 0.118134 | 0.01062  | -0.05114 | 0.2701   |
| 1.40E-13 | 0.438794 | 2.13E-23 | 0.06791  | 0.14284  | 0.086133 | 0.06291  | 0.022037 | 0.63479  |
| 0.00026  | -0.24553 | 7.69E-08 | 0.007061 | 0.87904  | -0.04197 | 0.36549  | -0.05498 | 0.23567  |
| 8.50E-12 | 0.450246 | 1.08E-24 | -0.06481 | 0.16204  | 0.061422 | 0.18516  | 0.099087 | 0.03229  |
| 1.73E-38 | 0.646364 | 1.37E-56 | 0.062246 | 0.17933  | 0.121463 | 0.0086   | 0.02801  | 0.54598  |
| 0.08808  | 0.042299 | 0.36174  | -0.06645 | 0.15162  | -0.04377 | 0.34523  | -0.08346 | 0.07155  |
| 0.00702  | 0.278749 | 8.81E-10 | 0.032059 | 0.48949  | 0.004204 | 0.9278   | -0.10136 | 0.02851  |
| 0.09174  | 0.031365 | 0.49894  | -0.01264 | 0.78521  | -0.08913 | 0.05425  | 0.058185 | 0.20945  |
| 0.84762  | 0.119213 | 0.00992  | 0.025303 | 0.58546  | 0.014679 | 0.75171  | -0.03566 | 0.44198  |
| 4.89E-12 | 0.30203  | 2.63E-11 | -0.06589 | 0.15513  | 0.061598 | 0.1839   | 0.110739 | 0.01666  |
| 6.94E-11 | -0.43242 | 1.06E-22 | 0.07897  | 0.08826  | -0.02453 | 0.59697  | -0.08314 | 0.07266  |
| 6.40E-09 | 0.361647 | 7.09E-16 | 0.100957 | 0.02915  | 0.063838 | 0.16843  | 0.13129  | 0.00448  |
| 1.25E-19 | 0.514799 | 5.80E-33 | 0.089791 | 0.05249  | 0.024882 | 0.59172  | 0.153597 | 0.00087  |
| 9.04E-31 | 0.497236 | 1.55E-30 | -0.05739 | 0.21571  | 0.004059 | 0.93028  | 0.236855 | 2.24E-07 |

|          |          |          |          |         |          |         |          |          |
|----------|----------|----------|----------|---------|----------|---------|----------|----------|
| 1.70E-17 | 0.536082 | 4.22E-36 | -0.00811 | 0.86132 | 0.072673 | 0.1168  | 0.165253 | 0.00034  |
| 5.78E-14 | 0.275252 | 1.45E-09 | -0.05756 | 0.21436 | 0.009447 | 0.83866 | 0.299413 | 3.97E-11 |
| 6.28E-06 | 0.332384 | 1.65E-13 | -0.02218 | 0.63253 | 0.03871  | 0.40394 | 0.024263 | 0.60098  |
| 0.00219  | -0.20372 | 9.12E-06 | -0.11089 | 0.01652 | -0.17189 | 0.00019 | -0.2071  | 6.40E-06 |
| 8.31E-16 | 0.403224 | 1.10E-19 | 0.051845 | 0.26352 | -0.04943 | 0.28642 | 0.28087  | 6.48E-10 |
| 0.00185  | -0.12301 | 0.00778  | -0.05368 | 0.24696 | -0.09217 | 0.04651 | -0.19243 | 2.83E-05 |
| 0.00133  | 0.085133 | 0.06604  | -0.04844 | 0.29616 | -0.02498 | 0.59025 | 0.100465 | 0.02995  |
| 0.00106  | 0.174104 | 0.00016  | -0.11418 | 0.01355 | 0.045799 | 0.32336 | -0.09013 | 0.0516   |
| 0.17757  | -0.05832 | 0.20836  | -0.04021 | 0.38599 | 0.063898 | 0.16803 | 0.110712 | 0.01669  |
| 9.23E-17 | 0.484777 | 6.76E-29 | 0.094456 | 0.04132 | 0.111949 | 0.0155  | 0.082367 | 0.07537  |
| 5.14E-18 | 0.44627  | 3.09E-24 | 0.012337 | 0.79032 | 0.118344 | 0.01048 | 0.046277 | 0.31832  |
| 0.04081  | 0.0638   | 0.16869  | 0.00193  | 0.96682 | -0.08211 | 0.07628 | -0.07833 | 0.09089  |
| 2.03E-06 | -0.31629 | 2.61E-12 | 0.043711 | 0.34592 | -0.0761  | 0.1005  | 0.103277 | 0.02563  |
| 2.24E-16 | 0.47988  | 2.85E-28 | -0.0212  | 0.64773 | 0.134411 | 0.00361 | 0.143306 | 0.00191  |
| 0.30879  | 0.044025 | 0.34247  | -0.01327 | 0.77481 | -0.06381 | 0.16859 | -0.10525 | 0.02292  |
| 2.12E-10 | -0.36966 | 1.44E-16 | 0.012193 | 0.7927  | -0.06969 | 0.13264 | -0.11677 | 0.01156  |
| 1.16E-08 | 0.330146 | 2.45E-13 | -0.00342 | 0.94121 | 0.072399 | 0.11819 | 0.064303 | 0.16535  |
| 4.31E-05 | 0.180918 | 8.44E-05 | -0.0177  | 0.70275 | -0.03747 | 0.41913 | -0.11378 | 0.01389  |
| 0.00038  | 0.172319 | 0.00018  | -0.15711 | 0.00066 | 0.088597 | 0.05572 | -0.11744 | 0.01109  |
| 3.01E-11 | 0.407159 | 4.48E-20 | -0.00679 | 0.88364 | 0.115809 | 0.01227 | 0.130125 | 0.00486  |
| 1.48E-28 | 0.498121 | 1.18E-30 | 0.021409 | 0.64446 | -0.02092 | 0.65202 | 0.107782 | 0.01982  |
| 4.17E-08 | 0.396611 | 4.83E-19 | 0.018149 | 0.69567 | 0.050191 | 0.27907 | -0.14172 | 0.00214  |
| 0.00081  | 0.214391 | 2.94E-06 | 0.094237 | 0.04179 | -0.03002 | 0.51747 | 0.116047 | 0.01209  |
| 0.00012  | 0.293359 | 1.01E-10 | 0.057346 | 0.2161  | 0.084641 | 0.06763 | -0.0674  | 0.14585  |
| 1.40E-10 | -0.34226 | 2.79E-14 | 0.165259 | 0.00034 | -0.06697 | 0.14843 | -0.15225 | 0.00097  |
| 8.35E-05 | 0.237628 | 2.04E-07 | -0.07581 | 0.10181 | -0.02428 | 0.60066 | 0.103246 | 0.02567  |
| 5.49E-05 | 0.165667 | 0.00032  | 0.007117 | 0.87809 | -0.13014 | 0.00485 | 0.0884   | 0.05627  |
| 4.09E-26 | 0.582736 | 8.10E-44 | -0.00423 | 0.92732 | 0.154201 | 0.00083 | 0.059257 | 0.20116  |
| 3.09E-30 | 0.561355 | 3.96E-40 | 0.095988 | 0.03812 | 0.055215 | 0.23369 | 0.181073 | 8.32E-05 |
| 7.67E-07 | 0.360272 | 9.27E-16 | -0.03957 | 0.3936  | 0.082387 | 0.0753  | 0.131586 | 0.00439  |
| 1.75E-17 | 0.413016 | 1.15E-20 | 0.04358  | 0.34738 | 0.056855 | 0.22007 | 0.098597 | 0.03316  |
| 3.32E-30 | 0.588199 | 8.36E-45 | -0.00734 | 0.87422 | 0.097075 | 0.03598 | 0.13794  | 0.00282  |
| 2.72E-07 | 0.335337 | 9.78E-14 | 0.125878 | 0.00645 | 0.067382 | 0.14598 | -0.06591 | 0.15503  |
| 0.91481  | 0.063245 | 0.17243  | 0.05522  | 0.23364 | 0.059067 | 0.20261 | 0.165216 | 0.00034  |
| 3.77E-13 | 0.391727 | 1.41E-18 | 0.056488 | 0.22307 | 0.017034 | 0.71351 | 0.192068 | 2.93E-05 |
| 1.64E-11 | -0.373   | 7.31E-17 | -0.08608 | 0.06307 | -0.053   | 0.25297 | -0.07218 | 0.11929  |
| 1.96E-10 | -0.26053 | 1.10E-08 | 0.027705 | 0.55037 | -0.02082 | 0.65363 | -0.08765 | 0.0584   |
| 0.10301  | -0.07383 | 0.11108  | 0.088331 | 0.05646 | 0.009894 | 0.83113 | 0.054773 | 0.23746  |
| 0.05637  | 0.173436 | 0.00017  | -0.07836 | 0.09074 | 0.121475 | 0.00859 | -0.00444 | 0.92381  |
| 3.65E-07 | 0.224384 | 9.65E-07 | -0.01872 | 0.68662 | -0.08479 | 0.06713 | -0.03826 | 0.4094   |
| 0.14617  | -0.0933  | 0.04388  | -0.01312 | 0.77741 | 0.004272 | 0.92664 | -0.077   | 0.09651  |
| 1.70E-14 | -0.49077 | 1.12E-29 | -0.03059 | 0.50957 | -0.10207 | 0.02742 | -0.22945 | 5.38E-07 |
| 0.00012  | 0.332112 | 1.73E-13 | -0.05961 | 0.19851 | 0.143185 | 0.00192 | -0.13566 | 0.00331  |
| 7.04E-16 | 0.441948 | 9.47E-24 | 0.089866 | 0.05229 | 0.026452 | 0.56855 | 0.199809 | 1.36E-05 |
| 0.60886  | 0.102906 | 0.02616  | -0.03417 | 0.46128 | 0.073198 | 0.11417 | 0.138873 | 0.00263  |

|          |          |          |          |         |          |         |          |          |
|----------|----------|----------|----------|---------|----------|---------|----------|----------|
| 3.99E-22 | 0.517339 | 2.51E-33 | 0.040559 | 0.38184 | 0.119052 | 0.01002 | 0.134062 | 0.0037   |
| 4.43E-28 | 0.571213 | 8.51E-42 | 0.02673  | 0.56448 | 0.044189 | 0.34067 | 0.166012 | 0.00031  |
| 4.47E-08 | 0.291024 | 1.44E-10 | 0.043379 | 0.34961 | -0.04542 | 0.32743 | 0.207499 | 6.14E-06 |
| 5.38E-14 | 0.361876 | 6.77E-16 | 0.026441 | 0.5687  | 0.039752 | 0.3914  | -0.13967 | 0.00249  |
| 2.91E-11 | 0.44669  | 2.77E-24 | 0.008596 | 0.85302 | 0.157545 | 0.00063 | 0.020904 | 0.65229  |
| 0.68128  | 0.051447 | 0.2672   | -0.03365 | 0.46822 | -0.0801  | 0.08378 | -0.13662 | 0.00309  |
| 0.00124  | -0.22726 | 6.94E-07 | -0.04881 | 0.2925  | -0.09102 | 0.04934 | -0.00062 | 0.98926  |
| 0.00109  | 0.072824 | 0.11604  | -0.06404 | 0.16708 | -0.06554 | 0.15737 | 0.102399 | 0.02691  |
| 0.00132  | 0.141245 | 0.00222  | -0.10409 | 0.02448 | 0.000712 | 0.98776 | 0.062535 | 0.17731  |
| 0.40094  | -0.01565 | 0.73592  | -0.05407 | 0.24355 | -0.07102 | 0.12538 | -0.14481 | 0.0017   |
| 0.00011  | 0.170756 | 0.00021  | -0.09785 | 0.03453 | -0.06616 | 0.15344 | 0.087616 | 0.0585   |
| 0.00153  | 0.197476 | 1.72E-05 | -0.01993 | 0.66749 | 0.05423  | 0.24214 | 0.128869 | 0.00529  |
| 3.96E-14 | 0.398327 | 3.30E-19 | -0.00359 | 0.93835 | 0.013264 | 0.77498 | 0.121652 | 0.0085   |
| 1.70E-11 | 0.43418  | 6.83E-23 | 0.042758 | 0.35655 | 0.043104 | 0.35267 | -0.00771 | 0.86801  |
| 9.48E-25 | 0.441776 | 9.90E-24 | -0.03313 | 0.47512 | -0.00564 | 0.90323 | 0.026222 | 0.5719   |
| 1.45E-21 | 0.554611 | 5.08E-39 | 0.085268 | 0.06561 | 0.12706  | 0.00597 | 0.090961 | 0.04947  |
| 1.08E-08 | 0.276591 | 1.20E-09 | -0.00212 | 0.96354 | 0.047576 | 0.30491 | 0.141423 | 0.00219  |
| 0.00018  | 0.131833 | 0.00432  | 0.000414 | 0.99288 | -0.01906 | 0.68123 | 0.035044 | 0.44994  |
| 0.06923  | -0.23942 | 1.64E-07 | -0.02068 | 0.65577 | -0.02281 | 0.62289 | 0.022153 | 0.633    |
| 0.00126  | -0.31695 | 2.34E-12 | 0.065979 | 0.15457 | -0.10601 | 0.02195 | -0.01997 | 0.6669   |
| 8.61E-09 | -0.3819  | 1.16E-17 | -0.04407 | 0.34195 | 0.003304 | 0.94323 | -0.04294 | 0.35449  |
| 0.00048  | 0.072657 | 0.11688  | 0.047463 | 0.30607 | 0.058572 | 0.20643 | 0.207104 | 6.40E-06 |
| 9.00E-06 | 0.347531 | 1.06E-14 | -0.10542 | 0.02271 | 0.152243 | 0.00097 | 0.087431 | 0.05903  |
| 2.84E-10 | -0.40466 | 7.94E-20 | -0.00211 | 0.96373 | -0.07742 | 0.09468 | -0.18203 | 7.61E-05 |
| 8.09E-05 | 0.335261 | 9.91E-14 | 0.04782  | 0.30244 | 0.051378 | 0.26784 | -0.03894 | 0.40118  |
| 1.42E-05 | 0.254394 | 2.48E-08 | 0.018219 | 0.69455 | 0.08679  | 0.06092 | 0.153598 | 0.00087  |
| 1.37E-08 | 0.231594 | 4.19E-07 | -0.09076 | 0.04998 | -0.13048 | 0.00474 | -0.00479 | 0.91774  |
| 0.06973  | 0.193578 | 2.53E-05 | 0.041839 | 0.36699 | 0.076694 | 0.09785 | -0.03383 | 0.46577  |
| 2.93E-08 | 0.336349 | 8.16E-14 | 0.06361  | 0.16996 | 0.128169 | 0.00554 | -0.00375 | 0.93563  |
| 1.16E-17 | 0.405858 | 6.04E-20 | 0.059926 | 0.19611 | 0.106682 | 0.02112 | 0.116124 | 0.01203  |
| 4.53E-05 | 0.197938 | 1.64E-05 | 0.065411 | 0.15817 | -0.01771 | 0.70266 | 0.078363 | 0.09074  |
| 1.10E-24 | -0.59962 | 6.27E-47 | -0.11665 | 0.01165 | -0.10466 | 0.0237  | -0.21308 | 3.39E-06 |
| 0.0394   | 0.224045 | 1.00E-06 | 0.072182 | 0.1193  | 0.077153 | 0.09585 | -0.03864 | 0.40482  |
| 1.65E-16 | 0.458468 | 1.19E-25 | 0.113636 | 0.01401 | 0.087676 | 0.05832 | 0.19566  | 2.06E-05 |
| 1.17E-11 | 0.453447 | 4.63E-25 | -0.04381 | 0.34483 | 0.099357 | 0.03182 | 0.080288 | 0.08306  |
| 0.6351   | 0.223397 | 1.08E-06 | -0.08614 | 0.06289 | 0.090017 | 0.05189 | -0.00317 | 0.9456   |
| 4.49E-08 | -0.23604 | 2.46E-07 | -0.04095 | 0.37729 | -0.02615 | 0.5729  | -0.02592 | 0.57629  |
| 5.87E-12 | 0.297857 | 5.06E-11 | 0.022647 | 0.62544 | 0.000721 | 0.98761 | -0.11625 | 0.01194  |
| 4.66E-21 | 0.610491 | 4.94E-49 | 0.110559 | 0.01684 | 0.12973  | 0.00499 | 0.19006  | 3.57E-05 |
| 2.80E-24 | 0.503757 | 2.02E-31 | -0.01946 | 0.67492 | 0.016042 | 0.72952 | 0.162213 | 0.00043  |
| 0.00021  | 0.151621 | 0.00101  | 0.014391 | 0.75643 | -0.0852  | 0.06584 | 0.090836 | 0.04979  |
| 1.69E-60 | 0.821978 | #####    | 0.093554 | 0.04331 | 0.141421 | 0.00219 | 0.2482   | 5.49E-08 |
| 1.13E-39 | 0.691519 | 1.11E-67 | 0.117104 | 0.01132 | 0.143544 | 0.00187 | 0.142126 | 0.00208  |
| 0.14497  | -0.04037 | 0.38411  | -0.02492 | 0.59108 | -0.07182 | 0.12117 | 0.037857 | 0.41438  |
| 0.43654  | 0.194771 | 2.25E-05 | 0.035023 | 0.45022 | -0.04473 | 0.33474 | 0.043532 | 0.3479   |

|          |          |          |          |         |          |          |          |          |
|----------|----------|----------|----------|---------|----------|----------|----------|----------|
| 7.57E-22 | 0.503776 | 2.01E-31 | 0.028613 | 0.53736 | 0.068551 | 0.13909  | 0.157882 | 0.00062  |
| 4.35E-07 | -0.35548 | 2.34E-15 | -0.10009 | 0.03057 | -0.11968 | 0.00963  | -0.09649 | 0.03712  |
| 0.00093  | -0.2157  | 2.55E-06 | 0.024265 | 0.60095 | -0.07638 | 0.09925  | -0.03944 | 0.39514  |
| 3.38E-15 | 0.379911 | 1.75E-17 | -0.05563 | 0.23015 | -0.07846 | 0.09034  | 0.219266 | 1.72E-06 |
| 4.81E-05 | -0.14922 | 0.00122  | -0.01857 | 0.68892 | 0.059904 | 0.19628  | -0.06422 | 0.16587  |
| 3.15E-09 | -0.25917 | 1.32E-08 | 0.020119 | 0.66453 | -0.004   | 0.93135  | -0.08622 | 0.06266  |
| 1.64E-16 | 0.427852 | 3.29E-22 | 0.067463 | 0.14549 | 0.016543 | 0.72141  | 0.093073 | 0.0444   |
| 9.33E-13 | -0.42281 | 1.13E-21 | -0.00383 | 0.93427 | -0.08585 | 0.06379  | -0.04545 | 0.32701  |
| 0.0007   | 0.151434 | 0.00103  | 0.054022 | 0.24396 | 0.062916 | 0.17468  | 0.017634 | 0.70389  |
| 7.88E-21 | 0.48807  | 2.53E-29 | 0.005578 | 0.9043  | 0.088062 | 0.05722  | 0.053779 | 0.24609  |
| 1.90E-16 | 0.424385 | 7.68E-22 | -0.13068 | 0.00467 | -0.05901 | 0.20301  | 0.099168 | 0.03215  |
| 5.25E-16 | 0.451804 | 7.17E-25 | 0.061032 | 0.18797 | 0.031858 | 0.49222  | 0.137674 | 0.00287  |
| 0.00272  | 0.100667 | 0.02962  | -0.12554 | 0.0066  | -0.09884 | 0.03273  | -0.03893 | 0.40133  |
| 0.03611  | 0.227236 | 6.96E-07 | 0.033806 | 0.46612 | 0.181529 | 7.97E-05 | 0.082944 | 0.07334  |
| 0.01857  | 0.212113 | 3.76E-06 | 0.004271 | 0.92666 | 0.018163 | 0.69544  | 0.00428  | 0.92651  |
| 0.06375  | 0.179146 | 9.92E-05 | -0.0165  | 0.72217 | 0.063521 | 0.17056  | -0.18719 | 4.69E-05 |
| 0.11065  | 0.11888  | 0.01013  | -0.05758 | 0.21422 | -0.00539 | 0.90756  | 0.070168 | 0.12999  |
| 4.20E-08 | -0.35644 | 1.95E-15 | -0.01372 | 0.76742 | -0.07772 | 0.09344  | -0.01964 | 0.67203  |
| 0.29726  | 0.117648 | 0.01095  | 0.026694 | 0.56501 | 0.017218 | 0.71056  | -0.22976 | 5.19E-07 |
| 2.27E-14 | 0.302513 | 2.44E-11 | -0.00471 | 0.9191  | 0.101611 | 0.02812  | 0.114373 | 0.01339  |
| 0.04281  | -0.15692 | 0.00067  | -0.00648 | 0.88887 | -0.08157 | 0.07826  | 0.070425 | 0.12858  |
| 0.00212  | -0.28679 | 2.72E-10 | -0.03354 | 0.46961 | -0.04799 | 0.30075  | -0.02975 | 0.52131  |
| 1.13E-05 | 0.318716 | 1.74E-12 | -0.02606 | 0.57433 | -0.04378 | 0.34514  | 0.146314 | 0.00152  |
| 3.44E-08 | 0.338729 | 5.31E-14 | 0.176424 | 0.00013 | 0.07245  | 0.11793  | -0.17415 | 0.00016  |
| 0.00349  | 0.224323 | 9.72E-07 | -0.0251  | 0.58845 | 0.095978 | 0.03814  | 0.014427 | 0.75584  |
| 5.13E-09 | 0.43171  | 1.27E-22 | 0.092911 | 0.04477 | 0.118861 | 0.01015  | -0.13729 | 0.00295  |
| 6.78E-07 | 0.421349 | 1.60E-21 | 0.023526 | 0.61208 | 0.084556 | 0.06791  | 0.145201 | 0.00165  |
| 1.41E-14 | 0.445264 | 4.01E-24 | -0.04017 | 0.38645 | 0.021485 | 0.64329  | 0.104894 | 0.02339  |
| 5.51E-07 | 0.389828 | 2.13E-18 | 0.052215 | 0.26011 | 0.05275  | 0.25526  | -0.06744 | 0.14564  |
| 9.26E-05 | 0.332421 | 1.64E-13 | -0.05852 | 0.2068  | 0.042907 | 0.35488  | -0.06471 | 0.16268  |
| 0.00344  | 0.180308 | 8.92E-05 | 0.013041 | 0.77866 | -0.04185 | 0.36691  | -0.19423 | 2.38E-05 |
| 8.39E-10 | 0.284422 | 3.86E-10 | 0.003281 | 0.94363 | 0.004169 | 0.92841  | 0.204769 | 8.17E-06 |
| 7.57E-17 | 0.355429 | 2.37E-15 | 0.037772 | 0.41543 | 0.037796 | 0.41514  | 0.141758 | 0.00214  |
| 1.65E-05 | -0.18862 | 4.09E-05 | 0.024385 | 0.59914 | 0.018927 | 0.6833   | 0.190451 | 3.43E-05 |
| 0.00048  | 0.34781  | 1.00E-14 | 0.033598 | 0.46887 | 0.079262 | 0.08709  | -0.08084 | 0.08097  |
| 0.02372  | 0.164143 | 0.00037  | -0.09466 | 0.04088 | 0.000639 | 0.98902  | -0.09519 | 0.03976  |
| 0.03262  | 0.20056  | 1.26E-05 | -0.0055  | 0.90559 | 0.027014 | 0.56036  | -0.00487 | 0.91643  |
| 1.38E-08 | 0.222799 | 1.16E-06 | -0.14474 | 0.00171 | -0.0384  | 0.40778  | 0.016957 | 0.71475  |
| 0.009    | 0.189468 | 3.77E-05 | -0.13311 | 0.00395 | -0.07575 | 0.10205  | 0.061708 | 0.18312  |
| 0.00038  | 0.204608 | 8.31E-06 | 0.054819 | 0.23706 | 0.025493 | 0.58265  | -0.02305 | 0.61929  |
| 0.12837  | 0.19061  | 3.38E-05 | 0.157835 | 0.00062 | 0.048323 | 0.29738  | -0.08049 | 0.08229  |
| 2.56E-08 | -0.25785 | 1.58E-08 | 0.005312 | 0.90885 | 0.023053 | 0.61926  | 0.073772 | 0.11135  |
| 2.65E-52 | 0.783945 | 2.54E-98 | 0.096351 | 0.03739 | 0.122073 | 0.00827  | 0.190127 | 3.54E-05 |
| 7.13E-14 | 0.423945 | 8.54E-22 | 0.114427 | 0.01335 | 0.053223 | 0.25102  | 0.036247 | 0.43454  |
| 0.00955  | 0.072171 | 0.11935  | 0.016282 | 0.72563 | -0.07945 | 0.08634  | -0.09161 | 0.04786  |

|          |          |          |          |         |          |         |          |          |
|----------|----------|----------|----------|---------|----------|---------|----------|----------|
| 0.49304  | -0.01739 | 0.70786  | -0.09185 | 0.04727 | -0.05285 | 0.25432 | -0.15504 | 0.00077  |
| 0.3342   | 0.087021 | 0.06023  | 0.054987 | 0.23563 | 0.010436 | 0.82203 | -0.09634 | 0.03742  |
| 5.77E-08 | 0.305485 | 1.52E-11 | -0.00327 | 0.94377 | -0.05277 | 0.25504 | 0.106752 | 0.02104  |
| 5.85E-14 | 0.54745  | 7.18E-38 | 0.051189 | 0.2696  | 0.123835 | 0.00738 | 0.127098 | 0.00595  |
| 0.08846  | 0.170232 | 0.00022  | 0.005154 | 0.91155 | 0.111155 | 0.01626 | -0.10006 | 0.03062  |
| 9.74E-08 | 0.300156 | 3.54E-11 | 0.043664 | 0.34645 | 0.005559 | 0.90463 | 0.135923 | 0.00325  |
| 5.60E-20 | 0.416316 | 5.31E-21 | 0.075409 | 0.10362 | 0.0445   | 0.33728 | 0.263729 | 7.18E-09 |
| 0.00111  | 0.200639 | 1.25E-05 | -0.03704 | 0.42457 | 0.057395 | 0.21571 | -0.1262  | 0.00632  |
| 1.03E-11 | 0.373739 | 6.28E-17 | 0.053244 | 0.25083 | 0.065549 | 0.15729 | -0.06171 | 0.18312  |
| 1.11E-18 | 0.56344  | 1.77E-40 | 0.046442 | 0.3166  | 0.155871 | 0.00072 | 0.001667 | 0.97134  |
| 0.00019  | -0.2748  | 1.55E-09 | 0.006881 | 0.88211 | -0.07739 | 0.09482 | -0.07332 | 0.11359  |
| 6.12E-21 | 0.556169 | 2.83E-39 | 0.080029 | 0.08407 | 0.107112 | 0.0206  | 0.190263 | 3.50E-05 |
| 2.05E-08 | 0.334503 | 1.13E-13 | -0.01365 | 0.76863 | -0.00536 | 0.90808 | -0.03326 | 0.47336  |
| 2.32E-29 | 0.572612 | 4.89E-42 | 0.072446 | 0.11795 | 0.104565 | 0.02383 | 0.194252 | 2.37E-05 |
| 0.00584  | 0.211554 | 3.99E-06 | -0.04321 | 0.35151 | 0.062112 | 0.18026 | -0.01249 | 0.78785  |
| 6.01E-32 | 0.579862 | 2.63E-43 | 0.075798 | 0.10185 | 0.077008 | 0.09648 | 0.209422 | 5.01E-06 |
| 8.30E-08 | 0.267433 | 4.33E-09 | -0.04211 | 0.36394 | 0.085764 | 0.06405 | -0.02377 | 0.60843  |
| 2.91E-15 | 0.431949 | 1.19E-22 | -0.06552 | 0.15748 | 0.001681 | 0.97111 | 0.223159 | 1.11E-06 |
| 1.46E-05 | 0.359292 | 1.12E-15 | 0.09155  | 0.04801 | 0.064539 | 0.1638  | 0.122167 | 0.00822  |
| 2.14E-06 | 0.338051 | 6.01E-14 | 0.045221 | 0.3295  | 0.077677 | 0.09361 | -0.03758 | 0.41777  |
| 3.20E-27 | 0.526334 | 1.23E-34 | 0.01526  | 0.74222 | 0.032204 | 0.48753 | 0.26681  | 4.72E-09 |
| 1.51E-08 | -0.3646  | 3.96E-16 | -0.01673 | 0.71838 | -0.07912 | 0.08767 | 0.018331 | 0.69276  |
| 7.02E-14 | -0.37449 | 5.39E-17 | -0.02471 | 0.59432 | -0.06473 | 0.16254 | -0.11932 | 0.00986  |
| 0.00029  | 0.34854  | 8.74E-15 | 0.050056 | 0.28037 | 0.064561 | 0.16366 | -0.08962 | 0.05295  |
| 5.78E-21 | 0.528535 | 5.80E-35 | 0.093401 | 0.04365 | 0.092182 | 0.04648 | 0.034664 | 0.45487  |
| 5.27E-20 | 0.432194 | 1.12E-22 | 0.091535 | 0.04805 | 0.066492 | 0.15139 | 0.145266 | 0.00165  |
| 4.35E-15 | 0.429057 | 2.44E-22 | 0.128254 | 0.00551 | 0.075185 | 0.10465 | 0.141606 | 0.00216  |
| 4.29E-12 | 0.430551 | 1.69E-22 | 0.048662 | 0.29399 | 0.105623 | 0.02244 | -0.04385 | 0.34436  |
| 1.60E-07 | 0.307333 | 1.13E-11 | 0.178867 | 0.0001  | 0.030324 | 0.5133  | 0.197745 | 1.67E-05 |
| 1.61E-15 | 0.450609 | 9.85E-25 | -0.04644 | 0.31662 | -0.00881 | 0.84938 | 0.228731 | 5.85E-07 |
| 2.16E-14 | 0.449193 | 1.43E-24 | -0.03501 | 0.45039 | 0.085511 | 0.06484 | 0.175795 | 0.00013  |
| 5.12E-12 | 0.218232 | 1.93E-06 | -0.00801 | 0.86289 | -0.05091 | 0.27223 | 0.254631 | 2.40E-08 |
| 4.00E-19 | -0.44495 | 4.35E-24 | 0.067055 | 0.14795 | -0.09834 | 0.03362 | 0.005386 | 0.90759  |
| 6.14E-24 | 0.494022 | 4.17E-30 | 0.115116 | 0.0128  | 0.117935 | 0.01075 | 0.081377 | 0.07895  |
| 9.09E-08 | -0.44231 | 8.64E-24 | -0.09424 | 0.04178 | -0.13243 | 0.00415 | -0.14222 | 0.00206  |
| 4.95E-11 | 0.402956 | 1.17E-19 | -0.0415  | 0.37091 | 0.047375 | 0.30696 | 0.188549 | 4.12E-05 |
| 9.10E-29 | 0.556547 | 2.46E-39 | 0.031845 | 0.49239 | 0.074652 | 0.10714 | 0.046263 | 0.31847  |
| 5.51E-21 | 0.44574  | 3.54E-24 | -0.00768 | 0.86859 | 0.046747 | 0.31342 | 0.043168 | 0.35196  |
| 1.54E-13 | 0.433909 | 7.31E-23 | 0.083077 | 0.07288 | 0.13974  | 0.00247 | -0.02651 | 0.56776  |
| 8.41E-37 | 0.613594 | 1.20E-49 | 0.106635 | 0.02118 | 0.075569 | 0.10288 | 0.251495 | 3.61E-08 |
| 7.91E-06 | -0.24606 | 7.19E-08 | -0.00883 | 0.84913 | -0.01376 | 0.76681 | -0.12928 | 0.00514  |
| 1.67E-42 | 0.646876 | 1.05E-56 | 0.15036  | 0.00112 | 0.069131 | 0.13577 | 0.186037 | 5.23E-05 |
| 1.27E-29 | 0.556387 | 2.61E-39 | 0.030657 | 0.50869 | 0.037852 | 0.41444 | 0.189815 | 3.65E-05 |
| 0.00023  | 0.335127 | 1.01E-13 | 0.0711   | 0.12496 | -0.01048 | 0.82135 | -0.02533 | 0.58509  |
| 4.28E-07 | 0.340203 | 4.07E-14 | -0.02449 | 0.59752 | 0.021764 | 0.63899 | -0.06615 | 0.15348  |

|          |          |          |          |          |          |          |          |          |
|----------|----------|----------|----------|----------|----------|----------|----------|----------|
| 5.39E-06 | -0.26304 | 7.87E-09 | 0.05084  | 0.27289  | 0.021758 | 0.63907  | -0.08977 | 0.05255  |
| 1.23E-11 | 0.462973 | 3.47E-26 | -0.0149  | 0.74815  | 0.052061 | 0.26153  | 0.031641 | 0.49517  |
| 3.61E-06 | 0.30623  | 1.35E-11 | 0.0585   | 0.20699  | -0.01404 | 0.76214  | 0.012696 | 0.78436  |
| 2.35E-10 | -0.25688 | 1.79E-08 | -0.01291 | 0.78079  | 0.037757 | 0.41562  | -0.16592 | 0.00032  |
| 0.00152  | -0.19062 | 3.38E-05 | -0.06005 | 0.19518  | -0.03327 | 0.47321  | 0.085808 | 0.06391  |
| 4.09E-13 | 0.406627 | 5.06E-20 | -0.00513 | 0.9119   | 0.071139 | 0.12475  | 0.148908 | 0.00125  |
| 8.05E-19 | 0.478991 | 3.70E-28 | 0.014904 | 0.74803  | 0.131055 | 0.00456  | 0.004115 | 0.92933  |
| 2.89E-22 | 0.559554 | 7.87E-40 | 0.150761 | 0.00108  | 0.154963 | 0.00078  | -0.03694 | 0.42573  |
| 3.41E-40 | 0.733673 | 4.69E-80 | 0.039483 | 0.39462  | 0.164197 | 0.00037  | 0.112279 | 0.0152   |
| 0.00556  | 0.234049 | 3.13E-07 | -0.01868 | 0.68716  | 0.181202 | 8.22E-05 | 0.002399 | 0.95876  |
| 7.84E-07 | -0.37113 | 1.07E-16 | -0.05762 | 0.21395  | -0.08169 | 0.0778   | 0.075994 | 0.10096  |
| 2.26E-07 | 0.249171 | 4.86E-08 | -0.01944 | 0.67523  | -0.07976 | 0.08512  | 0.039643 | 0.39269  |
| 9.12E-07 | 0.251217 | 3.74E-08 | 0.024946 | 0.59077  | -0.02183 | 0.63798  | 0.052202 | 0.26024  |
| 2.49E-17 | 0.494947 | 3.14E-30 | 0.0954   | 0.03932  | 0.0515   | 0.2667   | 0.050326 | 0.27778  |
| 0.0012   | 0.145623 | 0.0016   | -0.06158 | 0.18399  | -0.02566 | 0.58019  | 0.20069  | 1.24E-05 |
| 0.51431  | 0.110119 | 0.01729  | -0.0245  | 0.59746  | -0.03589 | 0.43908  | 0.04129  | 0.37332  |
| 0.04082  | -0.09725 | 0.03564  | -0.01263 | 0.7855   | -0.05149 | 0.26677  | -0.04805 | 0.30013  |
| 0.01933  | 0.005912 | 0.8986   | -0.18518 | 5.68E-05 | -0.13015 | 0.00485  | 0.003032 | 0.9479   |
| 1.94E-08 | 0.434265 | 6.69E-23 | 0.029372 | 0.52662  | 0.132341 | 0.00417  | -0.16528 | 0.00033  |
| 0.02888  | -0.09157 | 0.04796  | 0.136146 | 0.0032   | 0.018331 | 0.69276  | 0.017911 | 0.69946  |
| 0.13164  | 0.162816 | 0.00041  | 0.020916 | 0.6521   | 0.026136 | 0.57318  | -0.12994 | 0.00492  |
| 0.03344  | -0.01783 | 0.70077  | 0.006896 | 0.88185  | 0.004973 | 0.91465  | 0.046568 | 0.31528  |
| 4.00E-39 | 0.665287 | 5.33E-61 | 0.11054  | 0.01686  | 0.149197 | 0.00122  | 0.226885 | 7.25E-07 |
| 1.83E-16 | 0.504826 | 1.44E-31 | 0.020773 | 0.65434  | 0.1649   | 0.00035  | 0.016644 | 0.71979  |
| 1.34E-05 | 0.126015 | 0.0064   | -0.05069 | 0.27433  | 0.034558 | 0.45625  | -0.03467 | 0.45475  |
| 1.27E-08 | -0.26459 | 6.39E-09 | 0.044573 | 0.33649  | -0.01055 | 0.8202   | 0.033167 | 0.4746   |
| 0.33463  | -0.0899  | 0.05221  | -0.06523 | 0.15931  | -0.028   | 0.54618  | 0.010462 | 0.8216   |
| 6.55E-10 | 0.248047 | 5.60E-08 | -0.01054 | 0.82026  | -0.01406 | 0.76183  | 0.129369 | 0.00511  |
| 7.66E-32 | 0.484688 | 6.94E-29 | -0.00356 | 0.93882  | 0.052946 | 0.25349  | 0.105223 | 0.02296  |
| 2.34E-08 | 0.233377 | 3.39E-07 | -0.04767 | 0.30391  | 0.012227 | 0.79214  | 0.056119 | 0.22611  |
| 0.89815  | -0.13865 | 0.00268  | 0.065288 | 0.15895  | 0.090957 | 0.04948  | -0.0334  | 0.47147  |
| 9.95E-09 | -0.34435 | 1.91E-14 | -0.03632 | 0.43359  | -0.04911 | 0.28953  | -0.1387  | 0.00267  |
| 5.42E-39 | 0.621246 | 3.40E-51 | -0.04124 | 0.37387  | 0.156093 | 0.00071  | 0.213748 | 3.15E-06 |
| 2.25E-28 | 0.553474 | 7.77E-39 | 0.06164  | 0.1836   | 0.144447 | 0.00175  | 0.137967 | 0.00281  |
| 6.70E-18 | 0.535627 | 4.95E-36 | -0.0088  | 0.84965  | 0.105593 | 0.02248  | 0.146961 | 0.00145  |
| 0.00088  | 0.252692 | 3.09E-08 | -0.00234 | 0.95972  | 0.08466  | 0.06756  | 0.056867 | 0.21997  |
| 4.36E-10 | 0.3148   | 3.34E-12 | -0.01281 | 0.78248  | 0.047668 | 0.30397  | 0.023558 | 0.61159  |
| 0.00704  | 0.031591 | 0.49585  | -0.04706 | 0.31023  | 0.01789  | 0.69979  | -0.02158 | 0.64179  |
| 7.05E-10 | 0.326841 | 4.35E-13 | 0.036924 | 0.426    | 0.028167 | 0.54373  | 0.209891 | 4.77E-06 |
| 0.27308  | -0.01847 | 0.69055  | -0.00757 | 0.87034  | -0.047   | 0.31086  | -0.01344 | 0.7721   |
| 0.23447  | 0.049193 | 0.28875  | -0.06093 | 0.18871  | -0.01052 | 0.82068  | -0.16443 | 0.00036  |
| 4.07E-12 | 0.320775 | 1.23E-12 | -0.00174 | 0.97001  | 0.035661 | 0.44201  | 0.153185 | 0.0009   |
| 6.41E-09 | 0.2792   | 8.26E-10 | -0.07142 | 0.12327  | -0.00871 | 0.85113  | 0.293405 | 1.00E-10 |
| 1.14E-14 | 0.43755  | 2.92E-23 | 0.128472 | 0.00543  | 0.039038 | 0.39997  | -0.02323 | 0.61662  |
| 0.21391  | 0.229308 | 5.47E-07 | 0.089341 | 0.05369  | 0.091041 | 0.04927  | -0.06384 | 0.16844  |

|          |          |          |          |         |          |          |          |          |
|----------|----------|----------|----------|---------|----------|----------|----------|----------|
| 0.00224  | 0.210424 | 4.51E-06 | 0.044989 | 0.33199 | 0.006045 | 0.89635  | 0.172836 | 0.00017  |
| 4.33E-05 | 0.350562 | 5.98E-15 | 0.06499  | 0.16087 | 0.092743 | 0.04516  | -0.12724 | 0.00589  |
| 1.29E-07 | 0.164251 | 0.00036  | 0.044635 | 0.33581 | 0.01525  | 0.74239  | 0.142713 | 0.00199  |
| 6.92E-06 | 0.297367 | 5.46E-11 | -0.03291 | 0.47797 | 0.033788 | 0.46636  | 0.050672 | 0.27448  |
| 0.00178  | 0.197115 | 1.78E-05 | -0.05582 | 0.22858 | 0.010908 | 0.81414  | -0.05027 | 0.27831  |
| 5.72E-13 | 0.335159 | 1.01E-13 | -0.02712 | 0.55876 | 0.013708 | 0.76765  | 0.173133 | 0.00017  |
| 4.64E-17 | -0.42788 | 3.27E-22 | -0.02495 | 0.59068 | -0.02541 | 0.58389  | -0.19313 | 2.65E-05 |
| 2.22E-12 | 0.477167 | 6.28E-28 | 0.104853 | 0.02345 | 0.184356 | 6.13E-05 | 0.106232 | 0.02167  |
| 1.63E-09 | 0.298846 | 4.34E-11 | -0.03894 | 0.40113 | 0.015227 | 0.74277  | 0.0234   | 0.61398  |
| 0.01593  | -0.05194 | 0.26265  | 0.054499 | 0.23982 | -0.04763 | 0.30439  | -0.04326 | 0.35094  |
| 3.15E-19 | 0.463405 | 3.08E-26 | 0.047466 | 0.30604 | 0.047237 | 0.30838  | 0.104435 | 0.02401  |
| 3.22E-06 | 0.295744 | 7.01E-11 | -0.03252 | 0.48328 | -0.04405 | 0.34218  | -0.01386 | 0.76522  |
| 1.17E-08 | 0.395572 | 6.07E-19 | 0.081531 | 0.07839 | 0.158907 | 0.00057  | 0.182422 | 7.34E-05 |
| 4.09E-05 | 0.202799 | 1.00E-05 | -0.10352 | 0.02528 | -0.00931 | 0.84089  | -0.0328  | 0.47951  |
| 3.36E-16 | 0.412581 | 1.28E-20 | 0.022732 | 0.62415 | 0.17288  | 0.00017  | 0.0565   | 0.22297  |
| 3.25E-12 | 0.248292 | 5.43E-08 | -0.09446 | 0.0413  | 0.027758 | 0.5496   | -0.03509 | 0.44939  |
| 6.62E-11 | 0.366509 | 2.71E-16 | 0.078669 | 0.08949 | 0.023829 | 0.6075   | -0.09432 | 0.04161  |
| 0.0002   | 0.180272 | 8.95E-05 | -0.07155 | 0.12255 | -0.02238 | 0.62948  | 0.084904 | 0.06678  |
| 2.32E-18 | 0.414268 | 8.61E-21 | 0.018936 | 0.68317 | 0.138003 | 0.0028   | 0.150931 | 0.00107  |
| 1.28E-18 | 0.462519 | 3.94E-26 | -0.02317 | 0.61741 | -0.00256 | 0.95599  | -0.02212 | 0.63345  |
| 4.02E-06 | 0.310158 | 7.16E-12 | 0.021301 | 0.64613 | 0.053742 | 0.24641  | -0.12188 | 0.00837  |
| 1.94E-33 | 0.561199 | 4.20E-40 | -0.05287 | 0.25415 | 0.132077 | 0.00425  | 0.182177 | 7.51E-05 |
| 1.18E-09 | 0.353496 | 3.43E-15 | -0.01603 | 0.72965 | 0.007053 | 0.87919  | 0.082792 | 0.07387  |
| 7.96E-13 | -0.55122 | 1.79E-38 | -0.07334 | 0.11349 | -0.16899 | 0.00024  | -0.18137 | 8.09E-05 |
| 8.93E-11 | -0.40783 | 3.85E-20 | -0.05983 | 0.19687 | -0.1552  | 0.00076  | 0.01709  | 0.71261  |
| 7.15E-22 | 0.480733 | 2.22E-28 | 0.060682 | 0.19052 | -0.06357 | 0.17025  | 0.119078 | 0.01001  |
| 3.84E-11 | 0.424196 | 8.04E-22 | 0.027686 | 0.55063 | 0.100841 | 0.02934  | 0.005079 | 0.91283  |
| 4.68E-08 | -0.34557 | 1.52E-14 | -0.0213  | 0.64615 | -0.04917 | 0.28898  | -0.12078 | 0.00899  |
| 8.95E-10 | 0.23764  | 2.03E-07 | -0.03112 | 0.5023  | -0.04306 | 0.35314  | -0.07659 | 0.09829  |
| 1.66E-11 | 0.331248 | 2.02E-13 | -0.01199 | 0.79609 | 0.046773 | 0.31316  | -0.1074  | 0.02026  |
| 5.80E-11 | 0.369065 | 1.62E-16 | 0.051182 | 0.26968 | 0.046445 | 0.31657  | -0.00908 | 0.84487  |
| 8.81E-05 | -0.28587 | 3.12E-10 | 0.033438 | 0.47099 | 0.015243 | 0.7425   | 0.114694 | 0.01313  |
| 5.52E-17 | 0.442398 | 8.43E-24 | 0.04085  | 0.37844 | 0.107434 | 0.02022  | 0.209652 | 4.89E-06 |
| 5.45E-07 | 0.245648 | 7.58E-08 | 0.003166 | 0.9456  | 0.03809  | 0.41152  | 0.163564 | 0.00039  |
| 8.54E-10 | 0.285414 | 3.33E-10 | 0.078422 | 0.0905  | -0.02628 | 0.57104  | 0.066374 | 0.15212  |
| 4.56E-30 | 0.591855 | 1.78E-45 | 0.056351 | 0.2242  | 0.165063 | 0.00034  | 0.163066 | 0.0004   |
| 2.92E-06 | 0.267176 | 4.49E-09 | 0.012522 | 0.78725 | -0.03183 | 0.49264  | 0.128821 | 0.0053   |
| 5.73E-15 | 0.32023  | 1.35E-12 | -0.03776 | 0.41556 | -0.06324 | 0.17249  | 0.142569 | 0.00201  |
| 1.53E-07 | 0.218278 | 1.92E-06 | -0.17073 | 0.00021 | -0.02751 | 0.55313  | 0.173461 | 0.00017  |
| 8.12E-12 | -0.35852 | 1.30E-15 | -0.08239 | 0.07527 | -0.04313 | 0.35242  | -0.03519 | 0.44802  |
| 1.67E-41 | 0.455699 | 2.53E-25 | 0.090527 | 0.05057 | -0.01613 | 0.72804  | 0.11185  | 0.0156   |
| 2.60E-23 | 0.544647 | 1.99E-37 | -0.0555  | 0.23131 | 0.125121 | 0.00678  | -0.05811 | 0.21001  |
| 4.97E-08 | -0.26175 | 9.37E-09 | -0.04337 | 0.3497  | 0.030567 | 0.50993  | 0.083531 | 0.07132  |
| 0.00475  | 0.176695 | 0.00012  | -0.08358 | 0.07114 | 0.076001 | 0.10093  | -0.098   | 0.03424  |
| 0.06353  | 0.056489 | 0.22306  | -0.08204 | 0.07654 | 0.03727  | 0.42167  | -0.14385 | 0.00183  |

|          |          |          |          |          |          |         |          |          |
|----------|----------|----------|----------|----------|----------|---------|----------|----------|
| 1.40E-05 | -0.22144 | 1.35E-06 | 0.004572 | 0.9215   | -0.09309 | 0.04436 | -0.00566 | 0.90291  |
| 0.00436  | 0.159914 | 0.00052  | 0.047739 | 0.30325  | 0.000542 | 0.99067 | -0.04747 | 0.30604  |
| 0.60323  | 0.13598  | 0.00324  | -0.03465 | 0.4551   | 0.03736  | 0.42055 | 0.143877 | 0.00183  |
| 0.89644  | -0.05011 | 0.27981  | -0.02808 | 0.54504  | -0.11325 | 0.01434 | -0.07911 | 0.08769  |
| 0.41155  | -0.06661 | 0.15068  | 0.023015 | 0.61984  | -0.08124 | 0.07945 | -0.15043 | 0.00111  |
| 5.72E-10 | 0.421435 | 1.57E-21 | 0.054877 | 0.23657  | 0.098847 | 0.03271 | -0.05982 | 0.19687  |
| 0.04102  | 0.081808 | 0.07738  | 0.151721 | 0.00101  | 0.067657 | 0.14433 | 0.229309 | 5.47E-07 |
| 8.50E-39 | 0.678124 | 3.51E-64 | 0.058136 | 0.20983  | 0.096238 | 0.03762 | 0.1196   | 0.00968  |
| 0.02144  | 0.159592 | 0.00054  | -0.0653  | 0.15885  | -0.04006 | 0.38779 | 0.044564 | 0.33659  |
| 0.27382  | -0.17245 | 0.00018  | -0.10239 | 0.02692  | -0.09551 | 0.03909 | -0.17368 | 0.00016  |
| 1.87E-12 | 0.473497 | 1.80E-27 | 0.076931 | 0.09681  | 0.057847 | 0.21211 | 0.190277 | 3.49E-05 |
| 0.44729  | 0.109765 | 0.01765  | 0.060395 | 0.19263  | -0.02772 | 0.55013 | -0.03501 | 0.45035  |
| 2.27E-07 | 0.412418 | 1.33E-20 | 0.040081 | 0.38749  | 0.127708 | 0.00571 | 0.090464 | 0.05074  |
| 4.89E-06 | 0.168259 | 0.00026  | -0.05995 | 0.19594  | 0.00486  | 0.91658 | -0.0613  | 0.18605  |
| 0.05866  | 0.089769 | 0.05254  | -0.0444  | 0.33834  | 0.057838 | 0.21218 | -0.17793 | 0.00011  |
| 8.99E-06 | 0.100685 | 0.02959  | -0.04063 | 0.38102  | -0.1446  | 0.00173 | -0.09018 | 0.05147  |
| 0.01231  | 0.032646 | 0.48157  | -0.06767 | 0.14423  | -0.00622 | 0.89343 | -0.08617 | 0.06279  |
| 2.17E-07 | 0.347137 | 1.14E-14 | -0.03969 | 0.39217  | -0.08416 | 0.06922 | 0.173811 | 0.00016  |
| 5.42E-13 | 0.461318 | 5.48E-26 | 0.003379 | 0.94195  | 0.110722 | 0.01668 | 0.154934 | 0.00078  |
| 6.45E-10 | 0.450208 | 1.10E-24 | -0.00434 | 0.9254   | 0.123341 | 0.00762 | -0.00717 | 0.87717  |
| 0.0005   | 0.152164 | 0.00097  | -0.01071 | 0.81753  | 0.023361 | 0.61457 | 0.067624 | 0.14453  |
| 7.30E-35 | 0.638591 | 7.25E-55 | 0.100911 | 0.02923  | 0.122565 | 0.00801 | 0.093768 | 0.04283  |
| 2.15E-12 | 0.561536 | 3.69E-40 | 0.017757 | 0.70191  | 0.024814 | 0.59273 | 0.073906 | 0.11071  |
| 0.00016  | 0.099298 | 0.03192  | 0.03272  | 0.48058  | 0.110284 | 0.01712 | -0.07554 | 0.103    |
| 0.87043  | -0.04611 | 0.32012  | -0.06046 | 0.19216  | -0.07529 | 0.10417 | -0.03192 | 0.49138  |
| 1.69E-07 | -0.28677 | 2.72E-10 | 0.075266 | 0.10428  | -0.03531 | 0.4465  | -0.12325 | 0.00767  |
| 8.02E-19 | 0.490603 | 1.18E-29 | -0.00571 | 0.90199  | 0.040071 | 0.3876  | 0.030645 | 0.50885  |
| 6.05E-19 | 0.488323 | 2.34E-29 | 0.043126 | 0.35243  | 0.140573 | 0.00233 | 0.082296 | 0.07562  |
| 0.70138  | 0.069039 | 0.13629  | 0.22519  | 8.80E-07 | 0.046132 | 0.31984 | 0.018584 | 0.68875  |
| 6.90E-17 | 0.438175 | 2.49E-23 | 0.020772 | 0.65435  | 0.010351 | 0.82346 | 0.219142 | 1.74E-06 |
| 2.21E-07 | 0.327148 | 4.13E-13 | 0.128855 | 0.00529  | 0.039592 | 0.39331 | -0.02846 | 0.53955  |
| 8.97E-32 | 0.627084 | 2.10E-52 | 0.07092  | 0.12591  | 0.087952 | 0.05753 | 0.277323 | 1.08E-09 |
| 1.89E-19 | 0.500444 | 5.73E-31 | -0.01744 | 0.70694  | 0.069708 | 0.13253 | 0.007371 | 0.87378  |
| 4.31E-07 | 0.232495 | 3.76E-07 | 0.037342 | 0.42077  | -0.02241 | 0.62913 | -0.05189 | 0.26313  |
| 6.59E-05 | 0.256544 | 1.87E-08 | 0.014718 | 0.75107  | -0.05089 | 0.2724  | -0.05326 | 0.2507   |
| 1.82E-05 | 0.192913 | 2.70E-05 | 0.020405 | 0.66007  | -0.05261 | 0.25656 | -0.11651 | 0.01174  |
| 8.37E-11 | 0.467176 | 1.08E-26 | 0.06181  | 0.1824   | 0.030795 | 0.50678 | 0.020082 | 0.66513  |
| 1.01E-20 | 0.483465 | 9.96E-29 | -0.0002  | 0.9966   | -0.03884 | 0.40241 | -0.00191 | 0.96709  |
| 5.59E-34 | 0.573456 | 3.49E-42 | 0.100548 | 0.02981  | 0.109837 | 0.01758 | 0.180227 | 8.99E-05 |
| 4.50E-22 | -0.48753 | 2.98E-29 | -0.04278 | 0.35629  | -0.09553 | 0.03905 | -0.13802 | 0.0028   |
| 0.06199  | 0.011119 | 0.81061  | 0.047112 | 0.30966  | -0.0702  | 0.12984 | -0.12595 | 0.00642  |
| 1.02E-10 | 0.416116 | 5.57E-21 | -0.0957  | 0.03871  | -0.01002 | 0.82899 | -0.01515 | 0.74396  |
| 7.98E-13 | 0.263631 | 7.27E-09 | 0.005239 | 0.9101   | -0.16033 | 0.00051 | 0.121711 | 0.00846  |
| 1.46E-09 | 0.452449 | 6.04E-25 | 0.03886  | 0.40213  | 0.07327  | 0.11382 | -0.00303 | 0.94794  |
| 3.88E-08 | 0.256107 | 1.98E-08 | -0.02871 | 0.53604  | -0.01993 | 0.66745 | 0.008008 | 0.86297  |



|          |          |          |          |          |          |         |          |          |
|----------|----------|----------|----------|----------|----------|---------|----------|----------|
| 2.03E-15 | 0.394503 | 7.68E-19 | 0.05698  | 0.21905  | 0.044902 | 0.33293 | 0.00483  | 0.91708  |
| 3.60E-11 | 0.496746 | 1.80E-30 | 0.003123 | 0.94634  | 0.087789 | 0.058   | -0.04312 | 0.35246  |
| 4.26E-15 | 0.357736 | 1.52E-15 | -0.01129 | 0.80778  | 0.021653 | 0.64069 | 0.09336  | 0.04374  |
| 2.42E-09 | 0.301229 | 2.99E-11 | 0.057487 | 0.21497  | 0.101814 | 0.0278  | -0.13568 | 0.0033   |
| 6.17E-14 | 0.552487 | 1.12E-38 | 0.057982 | 0.21105  | 0.055266 | 0.23325 | -0.00138 | 0.97621  |
| 4.88E-19 | -0.55578 | 3.28E-39 | -0.11359 | 0.01404  | -0.11289 | 0.01465 | -0.08936 | 0.05363  |
| 4.28E-11 | 0.226132 | 7.90E-07 | 0.118967 | 0.01008  | 0.037116 | 0.42359 | 0.249824 | 4.47E-08 |
| 3.13E-09 | 0.340974 | 3.54E-14 | 0.0429   | 0.35496  | -0.03574 | 0.44104 | -0.07439 | 0.10839  |
| 6.41E-10 | -0.29828 | 4.74E-11 | 0.010517 | 0.82068  | 0.031173 | 0.50158 | 0.020656 | 0.65616  |
| 9.70E-16 | -0.39184 | 1.38E-18 | -0.03    | 0.51781  | -0.01672 | 0.71857 | -0.06228 | 0.1791   |
| 9.37E-06 | -0.31423 | 3.68E-12 | -0.10293 | 0.02613  | -0.05142 | 0.26748 | 0.043348 | 0.34995  |
| 0.03566  | 0.220776 | 1.45E-06 | -0.08883 | 0.05508  | -0.02185 | 0.63763 | 0.016915 | 0.71543  |
| 1.37E-05 | 0.041449 | 0.37148  | -0.02602 | 0.57486  | -0.15474 | 0.00079 | 0.098783 | 0.03283  |
| 0.3374   | 0.045918 | 0.3221   | -0.00628 | 0.89228  | 0.013534 | 0.77051 | 0.107176 | 0.02053  |
| 2.89E-05 | 0.138854 | 0.00264  | -0.08822 | 0.05678  | -0.03799 | 0.41269 | -0.06863 | 0.13864  |
| 1.06E-16 | 0.45138  | 8.03E-25 | -0.0386  | 0.40533  | 0.022771 | 0.62355 | 0.158279 | 0.0006   |
| 0.70926  | 0.029739 | 0.52147  | -0.06096 | 0.18848  | -0.02003 | 0.666   | -0.17328 | 0.00017  |
| 4.18E-30 | 0.584923 | 3.28E-44 | 0.049712 | 0.28369  | 0.055769 | 0.22902 | 0.137685 | 0.00287  |
| 7.27E-09 | 0.367666 | 2.15E-16 | 0.084714 | 0.06739  | 0.022248 | 0.63154 | 0.13866  | 0.00267  |
| 2.59E-14 | 0.486028 | 4.66E-29 | 0.093271 | 0.04395  | 0.045691 | 0.3245  | 0.206719 | 6.67E-06 |
| 0.32496  | -0.00262 | 0.95502  | 0.092141 | 0.04658  | 0.04527  | 0.32897 | -0.08196 | 0.07684  |
| 0.00214  | 0.115388 | 0.01259  | 0.064713 | 0.16266  | 0.061411 | 0.18524 | -0.0766  | 0.09826  |
| 0.61433  | 0.01987  | 0.66845  | -0.06678 | 0.1496   | -0.02348 | 0.61277 | -0.13663 | 0.00309  |
| 1.31E-38 | 0.653524 | 3.21E-58 | 0.015395 | 0.74003  | 0.084349 | 0.06858 | 0.199913 | 1.35E-05 |
| 4.84E-14 | 0.497032 | 1.65E-30 | 0.088327 | 0.05647  | 0.073691 | 0.11175 | 0.138293 | 0.00275  |
| 0.00014  | 0.225034 | 8.96E-07 | -0.09148 | 0.04819  | -0.04222 | 0.36262 | -0.11305 | 0.01451  |
| 0.0052   | 0.16004  | 0.00052  | -0.02957 | 0.52384  | -0.02338 | 0.61434 | -0.14199 | 0.0021   |
| 5.02E-23 | 0.454376 | 3.61E-25 | -0.03868 | 0.40432  | 0.04441  | 0.33826 | -0.00435 | 0.9253   |
| 1.51E-10 | 0.407036 | 4.61E-20 | 0.013753 | 0.7669   | -0.01261 | 0.78587 | 0.021412 | 0.64443  |
| 2.06E-23 | 0.486893 | 3.60E-29 | 0.065462 | 0.15784  | 0.068799 | 0.13767 | 0.15759  | 0.00063  |
| 8.32E-07 | 0.304462 | 1.79E-11 | 0.214497 | 2.90E-06 | 0.025497 | 0.5826  | -0.08996 | 0.05205  |
| 1.45E-10 | 0.269072 | 3.45E-09 | 0.04559  | 0.32557  | 0.020571 | 0.65748 | 0.160377 | 0.0005   |
| 0.22553  | 0.095033 | 0.04009  | -0.00511 | 0.91238  | 0.037912 | 0.41371 | -0.01724 | 0.7102   |
| 0.13205  | 0.183882 | 6.41E-05 | 0.054909 | 0.23629  | 0.037453 | 0.41939 | 0.003135 | 0.94613  |
| 0.00187  | -0.05813 | 0.20991  | 0.086291 | 0.06243  | 0.019411 | 0.67566 | 0.014616 | 0.75275  |
| 1.03E-05 | 0.289983 | 1.69E-10 | 0.135871 | 0.00326  | 0.083174 | 0.07254 | 0.160864 | 0.00048  |
| 4.61E-39 | 0.619035 | 9.61E-51 | 0.068791 | 0.13771  | -0.02521 | 0.5868  | 0.072491 | 0.11772  |
| 5.47E-31 | 0.570472 | 1.14E-41 | 0.049204 | 0.28865  | 0.099334 | 0.03186 | -0.03096 | 0.5045   |
| 2.86E-13 | 0.441013 | 1.21E-23 | 0.104041 | 0.02455  | 0.034051 | 0.4629  | 0.204755 | 8.19E-06 |
| 5.34E-13 | -0.37726 | 3.05E-17 | -0.04855 | 0.29507  | -0.05985 | 0.19672 | -0.066   | 0.15447  |
| 1.55E-10 | 0.366045 | 2.97E-16 | -0.03175 | 0.49364  | -0.00632 | 0.89171 | 0.239805 | 1.56E-07 |
| 5.76E-35 | 0.633965 | 7.28E-54 | 0.074667 | 0.10707  | 0.101026 | 0.02904 | 0.315376 | 3.04E-12 |
| 0.00032  | 0.221751 | 1.30E-06 | -0.07387 | 0.11088  | 0.086543 | 0.06166 | 0.076311 | 0.09954  |
| 0.01697  | 0.115607 | 0.01242  | 0.076565 | 0.09842  | 0.089147 | 0.05421 | -0.04463 | 0.33588  |
| 0.08919  | 0.07549  | 0.10325  | 0.0758   | 0.10184  | 0.000636 | 0.98906 | -0.09115 | 0.04899  |

|          |          |          |          |         |          |         |          |          |
|----------|----------|----------|----------|---------|----------|---------|----------|----------|
| 0.15097  | 0.219755 | 1.63E-06 | 0.029308 | 0.52753 | 0.111551 | 0.01588 | -0.12557 | 0.00659  |
| 0.01273  | 0.138355 | 0.00273  | 0.051433 | 0.26733 | -0.02297 | 0.6205  | -0.04655 | 0.3155   |
| 2.74E-21 | 0.518774 | 1.56E-33 | 0.058063 | 0.21041 | 0.080845 | 0.08094 | 0.201261 | 1.17E-05 |
| 0.00338  | 0.013152 | 0.77683  | -0.00292 | 0.94982 | 0.059669 | 0.19804 | 0.117822 | 0.01083  |
| 2.01E-23 | 0.423895 | 8.65E-22 | -0.01774 | 0.70224 | 0.022855 | 0.62226 | 0.08977  | 0.05254  |
| 1.52E-14 | 0.470853 | 3.83E-27 | 0.054195 | 0.24245 | 0.142896 | 0.00196 | -0.12593 | 0.00643  |
| 3.50E-07 | 0.376612 | 3.48E-17 | 0.032154 | 0.48821 | 0.134654 | 0.00355 | -0.01117 | 0.80981  |
| 0.0457   | 0.106633 | 0.02118  | -0.03761 | 0.41739 | -0.04444 | 0.33789 | 0.150362 | 0.00112  |
| 2.25E-16 | 0.3566   | 1.89E-15 | -0.04671 | 0.31386 | 0.01816  | 0.69549 | 0.141547 | 0.00217  |
| 5.37E-32 | 0.57483  | 2.01E-42 | 0.040735 | 0.37978 | 0.047733 | 0.30332 | 0.220517 | 1.49E-06 |
| 4.82E-34 | 0.620479 | 4.88E-51 | -0.05133 | 0.2683  | 0.122234 | 0.00818 | 0.074029 | 0.11011  |
| 2.94E-11 | 0.390897 | 1.69E-18 | -0.06353 | 0.17047 | -0.04595 | 0.32174 | 0.150874 | 0.00107  |
| 5.80E-13 | 0.446653 | 2.79E-24 | 0.038116 | 0.4112  | 0.081173 | 0.07971 | -0.02624 | 0.5717   |
| 1.47E-13 | 0.412667 | 1.25E-20 | -0.11809 | 0.01065 | 0.034784 | 0.45331 | 0.01293  | 0.78049  |
| 6.71E-17 | 0.411517 | 1.64E-20 | 0.030361 | 0.51279 | 0.071977 | 0.12035 | -0.01382 | 0.76574  |
| 1.18E-26 | 0.483017 | 1.14E-28 | 0.016519 | 0.7218  | 0.065374 | 0.1584  | 0.131628 | 0.00438  |
| 0.00566  | -0.03546 | 0.44463  | -0.10138 | 0.02848 | 0.016922 | 0.71531 | -0.20133 | 1.16E-05 |
| 1.71E-07 | 0.359789 | 1.02E-15 | 0.099517 | 0.03154 | 0.072006 | 0.1202  | 0.073296 | 0.11369  |
| 1.45E-10 | 0.248217 | 5.48E-08 | -0.12485 | 0.00691 | -0.04632 | 0.31789 | 0.085318 | 0.06545  |
| 1.97E-12 | 0.266117 | 5.19E-09 | -0.08061 | 0.08184 | 0.124383 | 0.00712 | -0.05658 | 0.22235  |
| 1.59E-14 | -0.30873 | 9.03E-12 | -0.00435 | 0.92528 | 0.036055 | 0.43697 | -0.07232 | 0.11861  |
| 0.00021  | 0.243549 | 9.85E-08 | -0.02876 | 0.53525 | 0.023144 | 0.61787 | 0.032425 | 0.48455  |
| 1.71E-05 | 0.288764 | 2.02E-10 | -0.12909 | 0.00521 | 0.059119 | 0.20222 | -0.09949 | 0.03158  |
| 1.26E-20 | 0.491044 | 1.03E-29 | 0.167705 | 0.00027 | 0.101099 | 0.02893 | 0.103732 | 0.02498  |
| 4.36E-24 | 0.555728 | 3.34E-39 | 0.038616 | 0.40509 | 0.091622 | 0.04783 | 0.045749 | 0.32389  |
| 0.09724  | 0.134464 | 0.0036   | -0.14051 | 0.00234 | 0.043832 | 0.34459 | -0.07235 | 0.11844  |
| 2.03E-05 | 0.20766  | 6.04E-06 | -0.05138 | 0.26786 | 0.022444 | 0.62854 | 0.096139 | 0.03782  |
| 0.00015  | 0.272033 | 2.29E-09 | 0.054896 | 0.23641 | 0.029891 | 0.51934 | 0.009052 | 0.84532  |
| 6.77E-14 | -0.3318  | 1.83E-13 | 0.100785 | 0.02943 | -0.07476 | 0.10662 | -0.03946 | 0.39488  |
| 4.55E-09 | 0.404739 | 7.79E-20 | -0.01549 | 0.7385  | 0.080665 | 0.08162 | -0.09616 | 0.03778  |
| 0.00034  | -0.12521 | 0.00674  | 0.028983 | 0.53211 | 0.038543 | 0.40598 | 0.0468   | 0.31288  |
| 6.75E-21 | 0.44169  | 1.01E-23 | 0.009124 | 0.8441  | 0.010722 | 0.81725 | 0.120988 | 0.00887  |
| 1.10E-28 | 0.560164 | 6.24E-40 | 0.026989 | 0.56071 | 0.139163 | 0.00258 | 0.219313 | 1.71E-06 |
| 3.45E-08 | 0.28956  | 1.80E-10 | 0.162585 | 0.00042 | 0.042956 | 0.35432 | 0.070682 | 0.12719  |
| 1.26E-08 | 0.257935 | 1.56E-08 | 0.007065 | 0.87898 | -0.02763 | 0.55141 | 0.027787 | 0.54918  |
| 0.00188  | 0.048853 | 0.2921   | -0.06004 | 0.19525 | -0.02167 | 0.6404  | 0.01309  | 0.77785  |
| 6.97E-14 | 0.403436 | 1.05E-19 | 0.105488 | 0.02262 | 0.017705 | 0.70276 | 0.196114 | 1.97E-05 |
| 0.00058  | 0.225205 | 8.79E-07 | -0.13471 | 0.00354 | -0.01248 | 0.78791 | -0.09556 | 0.03899  |
| 1.25E-54 | 0.733133 | 6.98E-80 | 0.075568 | 0.10289 | 0.118299 | 0.01051 | 0.152309 | 0.00096  |
| 0.54058  | 0.066101 | 0.15381  | 0.045564 | 0.32584 | -0.02252 | 0.62731 | -0.17503 | 0.00014  |
| 2.57E-25 | 0.596515 | 2.42E-46 | -0.10469 | 0.02366 | 0.123685 | 0.00745 | 0.095213 | 0.03971  |
| 5.96E-06 | -0.18972 | 3.68E-05 | 0.03224  | 0.48704 | 0.060534 | 0.1916  | 0.017738 | 0.70222  |
| 0.00219  | 0.083287 | 0.07215  | 0.136236 | 0.00318 | 0.042911 | 0.35483 | 0.214088 | 3.04E-06 |
| 6.24E-07 | 0.322722 | 8.84E-13 | -0.01397 | 0.76337 | -0.04222 | 0.36266 | -0.09855 | 0.03324  |
| 1.38E-05 | 0.322594 | 9.03E-13 | 0.092369 | 0.04604 | 0.050705 | 0.27417 | -0.15296 | 0.00091  |

|          |          |          |          |          |          |         |          |          |
|----------|----------|----------|----------|----------|----------|---------|----------|----------|
| 3.28E-08 | 0.44775  | 2.09E-24 | 0.058232 | 0.20908  | 0.103282 | 0.02562 | -0.03771 | 0.41622  |
| 0.0412   | 0.071245 | 0.12418  | 0.019702 | 0.67108  | 0.024048 | 0.60421 | -0.04293 | 0.35465  |
| 4.09E-17 | 0.401676 | 1.56E-19 | 0.05006  | 0.28033  | 0.082981 | 0.07321 | 0.101899 | 0.02767  |
| 3.02E-29 | 0.538806 | 1.61E-36 | 0.010066 | 0.82824  | 0.064968 | 0.16101 | 0.262883 | 8.05E-09 |
| 3.91E-11 | 0.342875 | 2.50E-14 | 0.046443 | 0.31659  | 0.122544 | 0.00802 | 0.064305 | 0.16533  |
| 3.81E-32 | 0.692524 | 5.98E-68 | 0.14733  | 0.00141  | 0.134398 | 0.00362 | 0.101703 | 0.02797  |
| 8.02E-10 | 0.240192 | 1.49E-07 | 0.040232 | 0.3857   | -0.00537 | 0.90787 | 0.080308 | 0.08298  |
| 0.00117  | 0.188509 | 4.14E-05 | -0.0097  | 0.83439  | 0.012143 | 0.79354 | -0.19156 | 3.08E-05 |
| 1.41E-23 | 0.44201  | 9.32E-24 | 0.013839 | 0.76549  | 0.026181 | 0.57251 | 0.25223  | 3.28E-08 |
| 1.36E-07 | -0.32804 | 3.54E-13 | -0.01719 | 0.71098  | -0.05989 | 0.19635 | -0.10508 | 0.02315  |
| 5.34E-09 | 0.402501 | 1.29E-19 | 0.048277 | 0.29783  | 0.155041 | 0.00077 | -0.05055 | 0.27569  |
| 9.39E-11 | 0.462634 | 3.81E-26 | 0.017563 | 0.70502  | 0.165602 | 0.00033 | 0.004618 | 0.92072  |
| 4.65E-14 | 0.500946 | 4.89E-31 | 0.074403 | 0.10832  | 0.130768 | 0.00465 | 0.102992 | 0.02604  |
| 5.14E-08 | 0.282549 | 5.08E-10 | 0.013269 | 0.77489  | 0.025343 | 0.58487 | 0.103258 | 0.02565  |
| 0.00753  | 0.350108 | 6.51E-15 | -0.03999 | 0.38862  | 0.120514 | 0.00914 | 0.056457 | 0.22332  |
| 4.60E-25 | 0.529339 | 4.40E-35 | 0.070926 | 0.12588  | 0.102996 | 0.02603 | 0.114392 | 0.01338  |
| 6.62E-07 | 0.35907  | 1.17E-15 | -0.007   | 0.88007  | 0.048786 | 0.29276 | 0.019727 | 0.67069  |
| 3.40E-17 | -0.45518 | 2.90E-25 | -0.06409 | 0.16673  | -0.11103 | 0.01637 | -0.08741 | 0.0591   |
| 7.40E-05 | 0.327161 | 4.12E-13 | 0.013507 | 0.77097  | 0.125818 | 0.00648 | 0.006268 | 0.89253  |
| 0.00091  | -0.18309 | 6.90E-05 | 0.008727 | 0.85081  | 0.004985 | 0.91445 | -0.00196 | 0.96634  |
| 4.37E-06 | 0.283176 | 4.63E-10 | 0.069873 | 0.13162  | 0.016    | 0.7302  | 0.026131 | 0.57325  |
| 2.01E-40 | 0.669373 | 5.38E-62 | 0.006933 | 0.88122  | 0.090285 | 0.0512  | 0.205503 | 7.57E-06 |
| 9.24E-19 | -0.41479 | 7.61E-21 | 0.046749 | 0.3134   | -0.03195 | 0.49101 | -0.22239 | 1.21E-06 |
| 5.72E-05 | 0.232557 | 3.74E-07 | 0.084617 | 0.0677   | 0.037532 | 0.41841 | -0.03769 | 0.41645  |
| 0.15753  | 0.123404 | 0.00759  | 0.044998 | 0.3319   | 0.016197 | 0.72701 | -0.02547 | 0.58304  |
| 2.54E-08 | 0.39274  | 1.13E-18 | 0.085477 | 0.06495  | 0.031903 | 0.4916  | 0.084907 | 0.06677  |
| 4.40E-10 | 0.341875 | 3.00E-14 | -0.00179 | 0.96915  | 0.041059 | 0.376   | -0.08346 | 0.07155  |
| 2.48E-13 | 0.395461 | 6.22E-19 | 0.059656 | 0.19814  | 0.009728 | 0.83392 | 0.185017 | 5.76E-05 |
| 6.99E-30 | 0.626401 | 2.91E-52 | 0.064076 | 0.16685  | 0.113149 | 0.01443 | 0.082518 | 0.07483  |
| 0.23543  | -0.19714 | 1.78E-05 | -0.02982 | 0.52028  | -0.09002 | 0.05189 | -0.11458 | 0.01323  |
| 4.63E-05 | 0.209081 | 5.20E-06 | -0.0275  | 0.55325  | 0.028398 | 0.54043 | 0.038901 | 0.40163  |
| 2.36E-11 | 0.490746 | 1.13E-29 | 0.064765 | 0.16232  | 0.075851 | 0.10161 | -0.04482 | 0.33377  |
| 2.09E-14 | 0.535508 | 5.16E-36 | 0.079541 | 0.08598  | 0.066301 | 0.15257 | 0.158716 | 0.00058  |
| 4.55E-08 | 0.293983 | 9.19E-11 | 0.077733 | 0.09338  | -0.02432 | 0.60007 | 0.002087 | 0.96412  |
| 5.35E-35 | 0.554172 | 5.99E-39 | 0.033002 | 0.4768   | 0.049719 | 0.28362 | 0.170414 | 0.00022  |
| 8.67E-09 | 0.22294  | 1.14E-06 | 0.013868 | 0.76502  | 0.068844 | 0.13741 | 0.179913 | 9.25E-05 |
| 3.22E-30 | 0.67311  | 6.41E-63 | 0.062445 | 0.17793  | 0.130519 | 0.00473 | 0.07376  | 0.11141  |
| 1.57E-11 | 0.366508 | 2.71E-16 | 0.108422 | 0.0191   | 0.035627 | 0.44244 | 0.149715 | 0.00117  |
| 6.05E-44 | 0.620445 | 4.96E-51 | 0.187201 | 4.69E-05 | 0.136521 | 0.00311 | 0.242288 | 1.15E-07 |
| 6.51E-25 | 0.393201 | 1.02E-18 | 0.148081 | 0.00133  | 0.104264 | 0.02424 | -0.02224 | 0.63163  |
| 9.97E-69 | 0.788492 | #####    | 0.135627 | 0.00332  | 0.133668 | 0.00381 | 0.260781 | 1.07E-08 |
| 6.57E-08 | 0.278656 | 8.93E-10 | 0.019698 | 0.67115  | -0.00057 | 0.99015 | 0.148436 | 0.0013   |
| 1.32E-07 | -0.22734 | 6.87E-07 | 0.048453 | 0.29608  | 0.005342 | 0.90834 | 0.031962 | 0.4908   |
| 2.93E-09 | -0.23516 | 2.74E-07 | -0.01091 | 0.81418  | -0.06324 | 0.17247 | -0.04916 | 0.28908  |
| 1.11E-11 | 0.260682 | 1.08E-08 | 0.115379 | 0.01259  | -0.00404 | 0.93068 | 0.085011 | 0.06643  |

|          |          |          |          |          |          |          |          |          |
|----------|----------|----------|----------|----------|----------|----------|----------|----------|
| 1.31E-08 | 0.232614 | 3.71E-07 | 0.133944 | 0.00373  | -0.0613  | 0.18605  | 0.000172 | 0.99705  |
| 2.54E-09 | -0.26155 | 9.62E-09 | 0.024559 | 0.59654  | -0.05216 | 0.26065  | 0.101939 | 0.02761  |
| 3.43E-30 | 0.636645 | 1.92E-54 | -0.02555 | 0.58178  | 0.152425 | 0.00095  | 0.104308 | 0.02418  |
| 1.32E-26 | 0.618522 | 1.22E-50 | 0.126312 | 0.00627  | 0.164216 | 0.00037  | 0.258859 | 1.38E-08 |
| 4.80E-07 | 0.333248 | 1.42E-13 | 0.298383 | 4.66E-11 | 0.110614 | 0.01679  | 0.096503 | 0.03709  |
| 1.09E-09 | -0.30478 | 1.70E-11 | -0.07115 | 0.12471  | -0.0982  | 0.03388  | -0.04692 | 0.31169  |
| 7.56E-24 | 0.370063 | 1.33E-16 | -0.00021 | 0.99645  | -0.0624  | 0.17825  | 0.077494 | 0.09439  |
| 0.00055  | 0.245367 | 7.85E-08 | 0.080478 | 0.08234  | -0.00197 | 0.96616  | 0.063501 | 0.1707   |
| 8.93E-07 | -0.20752 | 6.13E-06 | 0.014073 | 0.76164  | -0.00598 | 0.89753  | -0.05803 | 0.21067  |
| 9.83E-19 | 0.390889 | 1.69E-18 | -0.00444 | 0.92384  | -0.03277 | 0.47996  | 0.082635 | 0.07442  |
| 3.17E-44 | 0.622852 | 1.59E-51 | 0.024115 | 0.60319  | 0.09602  | 0.03806  | 0.162358 | 0.00043  |
| 1.05E-09 | -0.31526 | 3.10E-12 | 0.032649 | 0.48153  | -0.0213  | 0.64615  | -0.20718 | 6.35E-06 |
| 2.12E-32 | 0.482911 | 1.17E-28 | 0.10552  | 0.02257  | 0.056803 | 0.22049  | 0.13156  | 0.0044   |
| 1.94E-20 | 0.527377 | 8.62E-35 | 0.172457 | 0.00018  | 0.061617 | 0.18376  | 0.139994 | 0.00243  |
| 8.35E-10 | -0.39141 | 1.51E-18 | -0.10469 | 0.02366  | -0.11286 | 0.01468  | -0.04743 | 0.30644  |
| 4.16E-42 | 0.599697 | 6.06E-47 | 0.119871 | 0.00952  | 0.076941 | 0.09677  | 0.296834 | 5.93E-11 |
| 3.55E-11 | -0.33603 | 8.64E-14 | -0.04585 | 0.32285  | -0.11005 | 0.01736  | 0.044406 | 0.33831  |
| 3.86E-12 | 0.319014 | 1.66E-12 | -0.02377 | 0.60837  | -0.0399  | 0.38962  | 0.132247 | 0.0042   |
| 3.02E-28 | -0.46259 | 3.86E-26 | -0.00085 | 0.98531  | -0.06016 | 0.19435  | -0.261   | 1.04E-08 |
| 7.05E-23 | 0.506469 | 8.55E-32 | 0.026144 | 0.57306  | 0.06671  | 0.15005  | 0.14614  | 0.00154  |
| 3.72E-31 | 0.558656 | 1.11E-39 | 0.008902 | 0.84784  | 0.070704 | 0.12707  | 0.168197 | 0.00026  |
| 2.25E-16 | 0.414504 | 8.14E-21 | 0.123282 | 0.00765  | 0.079681 | 0.08543  | 0.207145 | 6.38E-06 |
| 2.38E-34 | 0.59114  | 2.41E-45 | 0.151444 | 0.00103  | 0.050078 | 0.28015  | 0.266203 | 5.13E-09 |
| 3.28E-09 | 0.353641 | 3.33E-15 | 0.154276 | 0.00082  | 0.136829 | 0.00305  | 0.041998 | 0.36517  |
| 3.72E-36 | 0.648769 | 3.93E-57 | -0.0031  | 0.94676  | 0.119458 | 0.00977  | 0.228239 | 6.20E-07 |
| 6.43E-36 | 0.609391 | 8.14E-49 | 0.00609  | 0.89558  | 0.161962 | 0.00044  | 0.349676 | 7.06E-15 |
| 3.77E-18 | 0.437387 | 3.04E-23 | 0.020946 | 0.65165  | 0.189662 | 3.71E-05 | 0.012074 | 0.79469  |
| 2.54E-23 | 0.528743 | 5.40E-35 | 0.024187 | 0.60211  | 0.12924  | 0.00516  | -0.06361 | 0.16995  |
| 1.09E-34 | 0.664311 | 9.16E-61 | 0.080234 | 0.08327  | 0.102001 | 0.02752  | 0.351818 | 4.71E-15 |
| 1.69E-39 | 0.706106 | 1.03E-71 | 0.124706 | 0.00697  | 0.112655 | 0.01486  | 0.230331 | 4.85E-07 |
| 3.04E-16 | -0.34211 | 2.87E-14 | -0.0836  | 0.07107  | -0.02018 | 0.66358  | -0.07583 | 0.1017   |
| 8.42E-10 | 0.369925 | 1.36E-16 | 0.050326 | 0.27778  | -0.00864 | 0.85231  | -0.00717 | 0.87726  |
| 1.66E-10 | 0.253584 | 2.75E-08 | 0.018516 | 0.68982  | -0.08769 | 0.05828  | 0.11749  | 0.01105  |
| 3.31E-38 | 0.658684 | 2.01E-59 | 0.075844 | 0.10164  | 0.063786 | 0.16878  | 0.097261 | 0.03562  |
| 3.55E-16 | 0.382876 | 9.41E-18 | 0.115989 | 0.01213  | 0.04263  | 0.35799  | -0.08299 | 0.07319  |
| 1.16E-31 | 0.521736 | 5.82E-34 | 0.077259 | 0.09539  | 0.08876  | 0.05527  | 0.210074 | 4.68E-06 |
| 1.76E-12 | 0.465365 | 1.79E-26 | 0.132278 | 0.00419  | 0.062517 | 0.17743  | 0.205423 | 7.64E-06 |
| 7.10E-63 | 0.671741 | 1.40E-62 | 0.056749 | 0.22093  | 0.094133 | 0.04202  | 0.177691 | 0.00011  |
| 3.99E-56 | 0.725109 | 2.35E-77 | 0.113795 | 0.01387  | 0.109671 | 0.01775  | 0.275346 | 1.43E-09 |
| 6.32E-27 | 0.566017 | 6.54E-41 | 0.08673  | 0.0611   | 0.035828 | 0.43986  | -0.08348 | 0.0715   |
| 6.67E-24 | 0.495724 | 2.47E-30 | -0.01998 | 0.66668  | 0.083978 | 0.06981  | 0.154112 | 0.00083  |
| 7.30E-07 | 0.257526 | 1.64E-08 | 0.099436 | 0.03168  | 0.089674 | 0.0528   | 0.113265 | 0.01432  |
| 5.48E-23 | 0.451507 | 7.76E-25 | 0.02783  | 0.54856  | 0.086397 | 0.0621   | 0.215881 | 2.50E-06 |
| 2.02E-09 | -0.29488 | 8.00E-11 | -0.01193 | 0.79715  | -0.11902 | 0.01004  | -0.08405 | 0.06956  |
| 9.27E-09 | 0.380382 | 1.59E-17 | 0.226889 | 7.24E-07 | 0.098268 | 0.03375  | -0.00438 | 0.92476  |

|          |          |          |          |          |          |          |          |          |
|----------|----------|----------|----------|----------|----------|----------|----------|----------|
| 1.19E-40 | 0.637279 | 1.40E-54 | 0.09055  | 0.05052  | 0.15828  | 0.0006   | 0.144408 | 0.00176  |
| 0.00375  | 0.219092 | 1.75E-06 | 0.270315 | 2.91E-09 | 0.064242 | 0.16575  | -0.06631 | 0.15254  |
| 3.17E-52 | 0.663019 | 1.87E-60 | 0.081878 | 0.07712  | 0.103986 | 0.02463  | 0.163937 | 0.00037  |
| 6.56E-40 | 0.654015 | 2.47E-58 | -0.02224 | 0.6317   | 0.119137 | 0.00997  | 0.044163 | 0.34096  |
| 1.07E-62 | 0.66147  | 4.39E-60 | 0.03535  | 0.446    | 0.115078 | 0.01283  | 0.117818 | 0.01083  |
| 1.61E-17 | 0.477843 | 5.16E-28 | -0.04246 | 0.35996  | 0.004992 | 0.91432  | 0.077756 | 0.09328  |
| 1.13E-27 | 0.474941 | 1.19E-27 | -0.07175 | 0.12153  | 0.06574  | 0.15608  | 0.217404 | 2.11E-06 |
| 5.28E-16 | 0.353488 | 3.43E-15 | -0.00977 | 0.83324  | 0.023275 | 0.61588  | 0.338341 | 5.70E-14 |
| 3.59E-17 | -0.31712 | 2.27E-12 | 0.063334 | 0.17182  | 0.062386 | 0.17835  | 0.01881  | 0.68516  |
| 5.68E-11 | -0.26987 | 3.09E-09 | 0.025676 | 0.57995  | 0.044394 | 0.33844  | -0.06624 | 0.15292  |
| 1.87E-36 | 0.50553  | 1.15E-31 | 0.00031  | 0.99466  | -0.01585 | 0.73257  | 0.179269 | 9.81E-05 |
| 6.02E-32 | 0.520022 | 1.03E-33 | 0.028598 | 0.53757  | 0.098973 | 0.03249  | 0.133206 | 0.00393  |
| 1.63E-14 | 0.476828 | 6.93E-28 | 0.115693 | 0.01235  | 0.240749 | 1.39E-07 | 0.10999  | 0.01742  |
| 1.10E-18 | 0.446173 | 3.17E-24 | -0.02465 | 0.59511  | 0.063274 | 0.17223  | 0.211189 | 4.15E-06 |
| 3.38E-62 | 0.703571 | 5.40E-71 | 0.078019 | 0.09217  | 0.124187 | 0.00721  | 0.201591 | 1.13E-05 |
| 2.92E-30 | 0.515238 | 5.02E-33 | 0.0284   | 0.5404   | 0.037748 | 0.41573  | 0.128603 | 0.00538  |
| 1.03E-09 | 0.345659 | 1.49E-14 | 0.012269 | 0.79145  | 0.055669 | 0.22986  | 0.086433 | 0.062    |
| 0.10103  | 0.103746 | 0.02496  | 0.04885  | 0.29213  | 0.100349 | 0.03014  | -0.10879 | 0.01869  |
| 5.62E-36 | 0.623947 | 9.43E-52 | 0.062882 | 0.17491  | 0.186202 | 5.15E-05 | 0.349592 | 7.17E-15 |
| 6.57E-32 | 0.547007 | 8.43E-38 | 0.112305 | 0.01518  | 0.076436 | 0.09899  | 0.042135 | 0.36361  |
| 7.97E-24 | 0.474737 | 1.27E-27 | 0.058358 | 0.20809  | 0.059245 | 0.20125  | 0.086291 | 0.06243  |
| 2.22E-34 | 0.558824 | 1.04E-39 | 0.079817 | 0.08489  | 0.110171 | 0.01723  | 0.205668 | 7.44E-06 |
| 1.01E-27 | 0.613248 | 1.40E-49 | 0.059994 | 0.1956   | 0.112327 | 0.01516  | 0.108534 | 0.01897  |
| 7.10E-15 | -0.29791 | 5.02E-11 | -0.05188 | 0.2632   | -0.03394 | 0.46431  | -0.24486 | 8.36E-08 |
| 4.16E-43 | 0.471073 | 3.60E-27 | 0.078464 | 0.09032  | 0.0492   | 0.28868  | 0.127209 | 0.00591  |
| 5.10E-18 | -0.33926 | 4.83E-14 | -0.027   | 0.56058  | -0.00924 | 0.84214  | -0.12049 | 0.00915  |
| 1.10E-13 | 0.306636 | 1.27E-11 | 0.03946  | 0.39489  | 0.011547 | 0.80346  | 0.008415 | 0.85608  |
| 1.51E-07 | 0.285275 | 3.40E-10 | 0.140348 | 0.00237  | 0.002847 | 0.95108  | 0.117629 | 0.01096  |
| 0.00069  | -0.18632 | 5.10E-05 | 0.047668 | 0.30398  | -0.19658 | 1.88E-05 | -0.02472 | 0.59414  |
| 0.00673  | 0.111792 | 0.01565  | -0.08324 | 0.07232  | 0.003797 | 0.93479  | -0.11799 | 0.01071  |
| 2.00E-39 | 0.535408 | 5.35E-36 | -0.02782 | 0.54869  | 0.088775 | 0.05523  | 0.111914 | 0.01554  |
| 4.68E-17 | -0.42898 | 2.49E-22 | -0.04068 | 0.38042  | -0.15021 | 0.00113  | 0.002327 | 0.96001  |
| 1.26E-17 | 0.409041 | 2.91E-20 | -0.10402 | 0.02458  | 0.046568 | 0.31528  | 0.001517 | 0.97393  |
| 3.44E-30 | 0.62115  | 3.55E-51 | 0.036407 | 0.43251  | 0.092562 | 0.04559  | 0.160516 | 0.0005   |
| 5.82E-18 | 0.45888  | 1.07E-25 | 0.019068 | 0.68107  | 0.023696 | 0.60951  | -0.10305 | 0.02595  |
| 1.18E-51 | 0.708064 | 2.84E-72 | 0.103568 | 0.02521  | 0.175788 | 0.00013  | 0.360498 | 8.87E-16 |
| 3.02E-28 | 0.542335 | 4.58E-37 | 0.022959 | 0.62068  | 0.083114 | 0.07275  | 0.139149 | 0.00258  |
| 7.70E-36 | 0.626971 | 2.21E-52 | 0.051444 | 0.26723  | 0.094324 | 0.04161  | 0.091667 | 0.04773  |
| 0.00079  | 0.183688 | 6.53E-05 | -0.05204 | 0.26168  | 0.01797  | 0.69852  | -0.10882 | 0.01866  |
| 1.04E-23 | 0.593149 | 1.03E-45 | 0.150638 | 0.00109  | 0.129419 | 0.00509  | 0.237236 | 2.13E-07 |
| 4.30E-26 | 0.516584 | 3.22E-33 | 0.073821 | 0.11112  | 0.085092 | 0.06617  | 0.188683 | 4.07E-05 |
| 6.13E-08 | -0.18321 | 6.83E-05 | -0.11308 | 0.01449  | -0.0169  | 0.71567  | 0.048525 | 0.29536  |
| 4.30E-30 | 0.460478 | 6.90E-26 | 0.126534 | 0.00618  | 0.055226 | 0.23359  | 0.089402 | 0.05352  |
| 7.74E-27 | 0.582846 | 7.75E-44 | 0.09058  | 0.05044  | 0.13629  | 0.00317  | 0.215106 | 2.72E-06 |
| 4.23E-17 | 0.548723 | 4.50E-38 | 0.203046 | 9.77E-06 | 0.10439  | 0.02407  | 0.149011 | 0.00124  |

|          |          |          |          |          |          |          |          |          |
|----------|----------|----------|----------|----------|----------|----------|----------|----------|
| 4.27E-44 | 0.664721 | 7.29E-61 | 0.120457 | 0.00917  | 0.146637 | 0.00149  | 0.14171  | 0.00214  |
| 3.34E-31 | 0.627291 | 1.90E-52 | 0.037644 | 0.41703  | 0.08516  | 0.06596  | 0.129941 | 0.00492  |
| 4.05E-07 | 0.235297 | 2.70E-07 | -0.00478 | 0.91801  | -0.01932 | 0.67716  | -0.06962 | 0.13302  |
| 5.93E-35 | 0.572637 | 4.84E-42 | 0.157885 | 0.00062  | 0.145289 | 0.00164  | 0.182932 | 7.00E-05 |
| 8.08E-09 | 0.190079 | 3.56E-05 | 0.044431 | 0.33803  | -0.01128 | 0.8079   | -0.00366 | 0.93704  |
| 2.05E-31 | 0.625436 | 4.63E-52 | 0.079791 | 0.08499  | 0.110713 | 0.01669  | 0.420502 | 1.96E-21 |
| 9.36E-39 | 0.602383 | 1.86E-47 | 0.077271 | 0.09534  | 0.13706  | 0.003    | 0.240385 | 1.46E-07 |
| 6.20E-08 | 0.307017 | 1.19E-11 | 0.127975 | 0.00561  | -0.02732 | 0.55592  | 0.108825 | 0.01865  |
| 4.11E-29 | 0.49544  | 2.70E-30 | 0.032971 | 0.47721  | 0.120319 | 0.00925  | 0.243508 | 9.90E-08 |
| 3.82E-28 | 0.571462 | 7.71E-42 | 0.183282 | 6.78E-05 | 0.076473 | 0.09882  | 0.229733 | 5.21E-07 |
| 1.15E-18 | 0.550245 | 2.57E-38 | 0.143234 | 0.00192  | 0.0793   | 0.08693  | 0.053287 | 0.25044  |
| 3.89E-31 | -0.5228  | 4.06E-34 | -0.09631 | 0.03747  | -0.0628  | 0.1755   | -0.14797 | 0.00134  |
| 6.15E-43 | 0.643741 | 5.31E-56 | 0.077126 | 0.09597  | 0.071176 | 0.12455  | 0.209695 | 4.87E-06 |
| 7.68E-21 | 0.520661 | 8.34E-34 | 0.048689 | 0.29373  | 0.095515 | 0.03909  | 0.256448 | 1.90E-08 |
| 4.99E-12 | 0.264717 | 6.28E-09 | 0.035157 | 0.44848  | 0.033402 | 0.47147  | 0.142429 | 0.00203  |
| 8.26E-39 | 0.71585  | 1.51E-74 | 0.090404 | 0.05089  | 0.156761 | 0.00067  | -0.01656 | 0.72109  |
| 2.47E-14 | 0.41459  | 7.98E-21 | 0.098681 | 0.03301  | 0.118815 | 0.01017  | 0.112472 | 0.01503  |
| 3.95E-36 | 0.620345 | 5.20E-51 | 0.028525 | 0.53861  | 0.085977 | 0.06339  | 0.160305 | 0.00051  |
| 5.31E-12 | 0.20893  | 5.28E-06 | 0.025053 | 0.58918  | 0.017922 | 0.69929  | -0.07355 | 0.11245  |
| 3.83E-06 | -0.30554 | 1.51E-11 | -0.05058 | 0.27537  | -0.09509 | 0.03997  | -0.1334  | 0.00388  |
| 1.85E-43 | 0.653687 | 2.94E-58 | 0.074444 | 0.10813  | 0.122387 | 0.0081   | 0.245182 | 8.03E-08 |
| 2.30E-09 | 0.427906 | 3.25E-22 | 0.075702 | 0.10228  | 0.051944 | 0.2626   | 0.042465 | 0.35986  |
| 5.26E-22 | 0.625376 | 4.77E-52 | 0.141777 | 0.00213  | 0.148769 | 0.00126  | 0.01643  | 0.72325  |
| 2.18E-14 | 0.446994 | 2.55E-24 | 0.012177 | 0.79297  | 0.070975 | 0.12562  | 0.134348 | 0.00363  |
| 4.32E-13 | 0.356762 | 1.83E-15 | 0.046405 | 0.31699  | 0.10297  | 0.02607  | 0.059958 | 0.19588  |
| 7.31E-40 | 0.549971 | 2.85E-38 | -0.00911 | 0.84431  | 0.059704 | 0.19778  | 0.02755  | 0.55259  |
| 6.16E-14 | -0.38212 | 1.10E-17 | -0.00766 | 0.8688   | -0.09004 | 0.05182  | -0.1568  | 0.00067  |
| 2.64E-20 | 0.434696 | 6.00E-23 | -0.05902 | 0.20297  | 0.099502 | 0.03157  | 0.002009 | 0.96546  |
| 7.00E-29 | 0.60387  | 9.65E-48 | 0.018345 | 0.69254  | 0.112753 | 0.01477  | 0.071194 | 0.12446  |
| 1.18E-26 | 0.478393 | 4.40E-28 | 0.034556 | 0.45628  | 0.062468 | 0.17777  | 0.0488   | 0.29262  |
| 3.03E-20 | -0.44595 | 3.36E-24 | -0.01737 | 0.70814  | -0.0478  | 0.3026   | 0.067181 | 0.14718  |
| 3.56E-48 | 0.639936 | 3.68E-55 | 0.135055 | 0.00345  | 0.094006 | 0.0423   | 0.270383 | 2.88E-09 |
| 0.00334  | -0.17828 | 0.00011  | -0.03668 | 0.42909  | -0.10087 | 0.02928  | -0.10982 | 0.01759  |
| 1.10E-43 | 0.655696 | 1.00E-58 | 0.20636  | 6.92E-06 | 0.121706 | 0.00847  | 0.349016 | 7.99E-15 |
| 2.62E-26 | 0.523517 | 3.20E-34 | 0.058228 | 0.20912  | 0.142055 | 0.00209  | 0.220868 | 1.44E-06 |
| 6.44E-17 | 0.436768 | 3.56E-23 | 0.003372 | 0.94206  | 0.114985 | 0.0129   | 0.203411 | 9.41E-06 |
| 4.77E-28 | 0.529355 | 4.38E-35 | 0.02499  | 0.59011  | 0.007158 | 0.87739  | 0.161217 | 0.00047  |
| 8.26E-14 | 0.3426   | 2.63E-14 | 0.14031  | 0.00237  | -0.05755 | 0.2145   | 0.081969 | 0.0768   |
| 0.03553  | 0.058972 | 0.20334  | -0.03891 | 0.40155  | -0.05811 | 0.21005  | -0.12784 | 0.00567  |
| 1.59E-15 | -0.36651 | 2.71E-16 | -0.13993 | 0.00244  | -0.05298 | 0.25316  | -0.2173  | 2.14E-06 |
| 1.74E-23 | 0.548687 | 4.56E-38 | 0.081284 | 0.0793   | 0.117381 | 0.01113  | 0.122184 | 0.00821  |
| 3.21E-27 | 0.462991 | 3.46E-26 | 0.036312 | 0.4337   | -0.01293 | 0.78053  | 0.057448 | 0.21529  |
| 4.85E-36 | -0.60559 | 4.50E-48 | -0.00556 | 0.90454  | -0.09827 | 0.03375  | -0.28261 | 5.03E-10 |
| 1.87E-19 | 0.494224 | 3.92E-30 | 0.012555 | 0.7867   | 0.20684  | 6.58E-06 | 0.06303  | 0.1739   |
| 1.32E-14 | 0.384771 | 6.30E-18 | 0.067293 | 0.14651  | 0.050484 | 0.27627  | 0.082176 | 0.07605  |

|          |          |          |          |          |          |          |          |          |
|----------|----------|----------|----------|----------|----------|----------|----------|----------|
| 0.32549  | 0.013348 | 0.77359  | -0.01174 | 0.80017  | 0.058347 | 0.20818  | 0.081447 | 0.0787   |
| 2.99E-13 | 0.551052 | 1.91E-38 | -0.08336 | 0.0719   | 0.185099 | 5.72E-05 | 0.044225 | 0.34027  |
| 8.84E-11 | 0.337077 | 7.16E-14 | 0.016441 | 0.72306  | 0.02059  | 0.65718  | 0.079493 | 0.08617  |
| 3.28E-47 | 0.685893 | 3.46E-66 | 0.118723 | 0.01023  | 0.121986 | 0.00832  | 0.304234 | 1.86E-11 |
| 1.51E-06 | 0.336445 | 8.02E-14 | 0.066029 | 0.15426  | 0.132653 | 0.00408  | 0.118123 | 0.01063  |
| 1.76E-45 | 0.69908  | 9.71E-70 | -0.05702 | 0.21873  | 0.194871 | 2.23E-05 | 0.172086 | 0.00019  |
| 4.80E-11 | 0.423096 | 1.05E-21 | 0.03811  | 0.41127  | 0.067396 | 0.14589  | -0.00863 | 0.85236  |
| 7.15E-20 | 0.461153 | 5.73E-26 | 0.001522 | 0.97384  | 0.12277  | 0.00791  | 0.043971 | 0.34307  |
| 3.54E-20 | 0.384309 | 6.94E-18 | 0.03555  | 0.44342  | 0.051636 | 0.26544  | 0.244534 | 8.71E-08 |
| 1.21E-22 | -0.46121 | 5.64E-26 | -0.12364 | 0.00747  | -0.045   | 0.33183  | 0.029024 | 0.53153  |
| 1.00E-50 | 0.669315 | 5.56E-62 | 0.058969 | 0.20337  | 0.115443 | 0.01255  | 0.02074  | 0.65485  |
| 4.91E-18 | -0.49169 | 8.48E-30 | -0.01399 | 0.76296  | -0.14803 | 0.00134  | -0.18147 | 8.02E-05 |
| 3.93E-32 | 0.54665  | 9.61E-38 | 0.077044 | 0.09632  | 0.164335 | 0.00036  | 0.166328 | 0.00031  |
| 1.66E-38 | 0.60687  | 2.53E-48 | 0.04679  | 0.31298  | 0.106482 | 0.02137  | 0.074282 | 0.1089   |
| 3.78E-30 | 0.40989  | 2.39E-20 | 0.151337 | 0.00104  | 0.046607 | 0.31488  | 0.038522 | 0.40623  |
| 5.57E-22 | 0.406868 | 4.79E-20 | 0.129204 | 0.00517  | 0.082474 | 0.07499  | 0.174075 | 0.00016  |
| 1.20E-14 | -0.35112 | 5.38E-15 | -0.01911 | 0.68034  | -0.12757 | 0.00577  | -0.17141 | 0.0002   |
| 1.54E-22 | 0.331801 | 1.83E-13 | 0.009048 | 0.84538  | 0.000135 | 0.99768  | 0.27258  | 2.12E-09 |
| 2.53E-11 | -0.33776 | 6.33E-14 | -0.04481 | 0.33393  | -0.13671 | 0.00307  | -0.1063  | 0.02159  |
| 6.53E-09 | 0.267417 | 4.34E-09 | 0.037122 | 0.42351  | 0.014029 | 0.76237  | -0.18009 | 9.10E-05 |
| 1.42E-11 | 0.218996 | 1.77E-06 | 0.13054  | 0.00472  | 0.091821 | 0.04735  | -0.01748 | 0.70635  |
| 4.79E-14 | 0.411064 | 1.82E-20 | -0.01649 | 0.72229  | 0.088389 | 0.0563   | -0.04471 | 0.33496  |
| 0.00964  | 0.01498  | 0.7468   | 0.0672   | 0.14707  | -0.01761 | 0.70428  | -0.01601 | 0.73009  |
| 1.71E-62 | 0.689194 | 4.66E-67 | 0.098032 | 0.03418  | 0.096581 | 0.03694  | 0.170585 | 0.00021  |
| 3.94E-27 | -0.52074 | 8.12E-34 | -0.11722 | 0.01124  | -0.11159 | 0.01584  | -0.13424 | 0.00366  |
| 1.28E-23 | 0.503864 | 1.95E-31 | 0.022439 | 0.62862  | 0.046486 | 0.31614  | 0.099867 | 0.03095  |
| 1.10E-26 | 0.459294 | 9.53E-26 | 0.045295 | 0.32871  | 0.013107 | 0.77756  | -0.01817 | 0.69531  |
| 4.90E-58 | 0.784027 | 2.35E-98 | 0.134122 | 0.00369  | 0.146355 | 0.00152  | 0.244598 | 8.64E-08 |
| 5.51E-16 | 0.37506  | 4.79E-17 | -0.04397 | 0.34302  | 0.085839 | 0.06382  | 0.203922 | 8.92E-06 |
| 1.44E-30 | 0.511707 | 1.59E-32 | 0.022245 | 0.63159  | 0.081076 | 0.08007  | -0.02552 | 0.5822   |
| 6.47E-15 | 0.396357 | 5.11E-19 | -0.01556 | 0.73741  | -0.02023 | 0.66278  | 0.154693 | 0.0008   |
| 9.03E-11 | -0.33852 | 5.52E-14 | -0.03371 | 0.46743  | -0.01792 | 0.6993   | -0.11664 | 0.01165  |
| 2.41E-42 | 0.635465 | 3.46E-54 | 0.112148 | 0.01532  | 0.008451 | 0.85547  | 0.121403 | 0.00863  |
| 2.91E-12 | 0.422722 | 1.15E-21 | 0.0162   | 0.72697  | 0.068306 | 0.14052  | 0.215069 | 2.73E-06 |
| 8.12E-11 | 0.335907 | 8.83E-14 | 0.096478 | 0.03714  | 0.152294 | 0.00096  | 0.219091 | 1.75E-06 |
| 3.20E-35 | 0.536704 | 3.39E-36 | 0.056244 | 0.22508  | 0.028313 | 0.54165  | 0.204549 | 8.36E-06 |
| 4.65E-29 | 0.609244 | 8.70E-49 | 0.063169 | 0.17295  | 0.067892 | 0.14294  | -0.00073 | 0.98745  |
| 0.00058  | 0.253911 | 2.64E-08 | -0.01936 | 0.6764   | -0.02673 | 0.56453  | -0.07581 | 0.1018   |
| 1.59E-13 | 0.360011 | 9.76E-16 | 0.044771 | 0.33434  | -0.06652 | 0.15124  | -0.00232 | 0.96017  |
| 4.25E-28 | 0.593232 | 9.91E-46 | 0.10049  | 0.02991  | 0.107724 | 0.01989  | 0.089211 | 0.05404  |
| 8.33E-11 | -0.35904 | 1.18E-15 | 0.017083 | 0.71272  | -0.03224 | 0.48699  | -0.18589 | 5.31E-05 |
| 1.27E-12 | 0.459201 | 9.78E-26 | 0.210131 | 4.65E-06 | 0.253303 | 2.86E-08 | 0.167697 | 0.00027  |
| 3.15E-30 | 0.568447 | 2.53E-41 | 0.130994 | 0.00458  | 0.046064 | 0.32055  | 0.113406 | 0.0142   |
| 4.56E-09 | -0.25696 | 1.77E-08 | 0.075957 | 0.10113  | -0.00981 | 0.83257  | -0.03284 | 0.47892  |
| 1.23E-50 | 0.662097 | 3.11E-60 | -0.02114 | 0.64858  | 0.111929 | 0.01552  | 0.159475 | 0.00054  |

|          |          |          |          |          |          |          |          |          |
|----------|----------|----------|----------|----------|----------|----------|----------|----------|
| 5.46E-56 | 0.800941 | #####    | 0.087283 | 0.05946  | 0.150377 | 0.00112  | 0.190487 | 3.42E-05 |
| 9.56E-28 | 0.510988 | 2.00E-32 | 0.083714 | 0.0707   | 0.12346  | 0.00756  | 0.178556 | 0.0001   |
| 1.88E-12 | 0.268701 | 3.64E-09 | -0.03962 | 0.39303  | 0.032753 | 0.48013  | 0.078344 | 0.09082  |
| 1.85E-06 | 0.211972 | 3.82E-06 | -0.01704 | 0.71337  | 0.062157 | 0.17994  | 0.058976 | 0.20331  |
| 2.49E-24 | -0.53424 | 8.06E-36 | -0.24148 | 1.27E-07 | -0.18422 | 6.21E-05 | -0.20097 | 1.21E-05 |
| 3.89E-17 | 0.311235 | 6.01E-12 | -0.02504 | 0.58936  | -0.00615 | 0.8945   | 0.100125 | 0.03051  |
| 8.93E-13 | 0.463225 | 3.24E-26 | 0.036256 | 0.43442  | -0.02647 | 0.56823  | 0.062965 | 0.17434  |
| 1.29E-36 | 0.660943 | 5.85E-60 | 0.080352 | 0.08282  | 0.113347 | 0.01425  | 0.24177  | 1.23E-07 |
| 3.92E-08 | 0.303631 | 2.04E-11 | 0.180712 | 8.60E-05 | 0.034924 | 0.4515   | -0.07769 | 0.09357  |
| 2.21E-29 | 0.572684 | 4.75E-42 | 0.130634 | 0.00469  | 0.14148  | 0.00218  | 0.102555 | 0.02668  |
| 2.31E-38 | 0.658615 | 2.08E-59 | 0.130883 | 0.00461  | 0.093399 | 0.04366  | 0.144268 | 0.00177  |
| 6.18E-15 | -0.44022 | 1.48E-23 | -0.1135  | 0.01412  | -0.05876 | 0.20499  | 0.001095 | 0.98117  |
| 2.14E-10 | 0.405888 | 6.00E-20 | 0.115071 | 0.01284  | 0.134883 | 0.0035   | 0.085535 | 0.06477  |
| 5.42E-16 | -0.3663  | 2.82E-16 | 0.043392 | 0.34946  | -0.04242 | 0.36034  | -0.26215 | 8.88E-09 |
| 5.51E-38 | 0.615291 | 5.48E-50 | 0.075561 | 0.10292  | 0.098557 | 0.03323  | 0.142688 | 0.00199  |
| 1.75E-17 | 0.405387 | 6.72E-20 | 0.01959  | 0.67284  | 0.075431 | 0.10352  | 0.00575  | 0.90137  |
| 1.14E-37 | 0.654236 | 2.19E-58 | 0.137453 | 0.00291  | 0.150946 | 0.00107  | 0.402986 | 1.16E-19 |
| 1.41E-36 | 0.629936 | 5.26E-53 | 0.12888  | 0.00528  | 0.141144 | 0.00223  | 0.212186 | 3.73E-06 |
| 1.26E-09 | 0.316822 | 2.39E-12 | 0.041899 | 0.36631  | 0.124912 | 0.00688  | 0.238885 | 1.75E-07 |
| 1.61E-37 | 0.721484 | 3.05E-76 | 0.127505 | 0.00579  | 0.175953 | 0.00013  | 0.300082 | 3.58E-11 |
| 1.79E-51 | 0.732235 | 1.35E-79 | 0.157783 | 0.00062  | 0.1564   | 0.00069  | 0.36725  | 2.34E-16 |
| 1.58E-09 | 0.343157 | 2.37E-14 | 0.051186 | 0.26964  | 0.085326 | 0.06543  | 0.201199 | 1.18E-05 |
| 6.71E-17 | 0.463363 | 3.12E-26 | 0.05191  | 0.26292  | 0.081378 | 0.07895  | -0.12374 | 0.00742  |
| 2.50E-16 | 0.388263 | 2.98E-18 | 0.126131 | 0.00635  | 0.105079 | 0.02315  | 0.11187  | 0.01558  |
| 3.55E-37 | 0.622873 | 1.57E-51 | 0.193563 | 2.54E-05 | 0.119197 | 0.00993  | 0.293046 | 1.06E-10 |
| 8.72E-51 | 0.656567 | 6.29E-59 | 0.085999 | 0.06332  | 0.061528 | 0.1844   | 0.212813 | 3.49E-06 |
| 2.62E-35 | 0.501402 | 4.24E-31 | 0.001107 | 0.98097  | 0.03185  | 0.49232  | 0.068691 | 0.13829  |
| 1.75E-07 | 0.249827 | 4.47E-08 | 0.068177 | 0.14127  | -0.06859 | 0.13887  | 0.274974 | 1.51E-09 |
| 4.44E-43 | 0.659419 | 1.34E-59 | 0.008959 | 0.84689  | 0.119008 | 0.01005  | 0.017262 | 0.70984  |
| 1.48E-32 | 0.561428 | 3.85E-40 | 0.028941 | 0.53271  | 0.098837 | 0.03273  | 0.197285 | 1.75E-05 |
| 1.34E-16 | 0.417768 | 3.77E-21 | 0.062568 | 0.17708  | 0.063882 | 0.16814  | 0.190559 | 3.40E-05 |
| 8.37E-19 | 0.524758 | 2.10E-34 | 0.095835 | 0.03843  | 0.115347 | 0.01262  | 0.154347 | 0.00082  |
| 2.60E-21 | 0.423022 | 1.07E-21 | 0.087313 | 0.05938  | 0.131729 | 0.00435  | 0.193277 | 2.61E-05 |
| 5.41E-22 | 0.466182 | 1.42E-26 | 0.079246 | 0.08715  | 0.076165 | 0.1002   | 0.212105 | 3.76E-06 |
| 1.70E-08 | -0.33364 | 1.32E-13 | -0.12425 | 0.00718  | -0.04935 | 0.28719  | -0.1923  | 2.87E-05 |
| 1.16E-42 | 0.67355  | 4.98E-63 | 0.115448 | 0.01254  | 0.07311  | 0.11461  | 0.15801  | 0.00061  |
| 0.40171  | -0.04501 | 0.33179  | 0.019078 | 0.68091  | -0.0775  | 0.09435  | -0.09341 | 0.04364  |
| 2.83E-46 | 0.596252 | 2.71E-46 | 0.189225 | 3.86E-05 | 0.155094 | 0.00077  | 0.325751 | 5.26E-13 |
| 8.63E-17 | -0.4262  | 4.93E-22 | -0.15542 | 0.00075  | -0.0813  | 0.07926  | -0.19291 | 2.70E-05 |
| 7.24E-28 | 0.554148 | 6.04E-39 | 0.018481 | 0.69038  | 0.140235 | 0.00239  | 0.051682 | 0.26501  |
| 8.76E-20 | 0.354059 | 3.08E-15 | -0.00925 | 0.84191  | 0.006508 | 0.88846  | -0.05182 | 0.26372  |
| 5.52E-17 | -0.57066 | 1.06E-41 | -0.19417 | 2.39E-05 | -0.16875 | 0.00025  | -0.04645 | 0.31655  |
| 9.64E-38 | 0.56688  | 4.67E-41 | 0.088555 | 0.05584  | 0.176433 | 0.00013  | 0.201786 | 1.11E-05 |
| 3.25E-19 | 0.460236 | 7.37E-26 | 0.050199 | 0.27899  | 0.132145 | 0.00423  | 0.320441 | 1.30E-12 |
| 2.11E-06 | 0.408008 | 3.69E-20 | 0.086398 | 0.0621   | 0.104404 | 0.02405  | -0.03919 | 0.39808  |



|          |          |          |          |          |          |          |           |          |
|----------|----------|----------|----------|----------|----------|----------|-----------|----------|
| 1.37E-17 | 0.398415 | 3.23E-19 | -0.00611 | 0.89524  | -0.04443 | 0.33805  | 0.037109  | 0.42367  |
| 2.49E-38 | 0.624787 | 6.32E-52 | 0.065935 | 0.15486  | 0.10308  | 0.02591  | 0.023007  | 0.61996  |
| 7.32E-36 | 0.556556 | 2.45E-39 | -0.00557 | 0.90444  | 0.060079 | 0.19497  | -9.67E-05 | 0.99834  |
| 5.28E-20 | 0.377354 | 2.99E-17 | 0.034349 | 0.45899  | -0.0027  | 0.95364  | 0.123087  | 0.00775  |
| 3.64E-14 | 0.436486 | 3.82E-23 | 0.046946 | 0.31137  | 0.044254 | 0.33996  | 0.057611  | 0.21398  |
| 5.92E-34 | 0.537723 | 2.37E-36 | 0.041577 | 0.37     | 0.05821  | 0.20925  | 0.272382  | 2.18E-09 |
| 6.28E-35 | -0.66497 | 6.35E-61 | -0.12659 | 0.00616  | -0.12687 | 0.00604  | -0.26366  | 7.25E-09 |
| 9.61E-22 | 0.477003 | 6.59E-28 | 0.03643  | 0.43222  | 0.061826 | 0.18228  | 0.089449  | 0.0534   |
| 4.58E-06 | -0.3067  | 1.25E-11 | 0.048122 | 0.29939  | -0.08727 | 0.0595   | -0.02916  | 0.52955  |
| 1.26E-14 | 0.308843 | 8.87E-12 | -0.01329 | 0.7745   | 0.087603 | 0.05853  | 0.267259  | 4.44E-09 |
| 1.50E-26 | 0.608124 | 1.44E-48 | 0.079817 | 0.08489  | 0.136277 | 0.00317  | 0.244094  | 9.20E-08 |
| 1.65E-28 | 0.57536  | 1.63E-42 | 0.131015 | 0.00457  | 0.058496 | 0.20702  | 0.101125  | 0.02888  |
| 9.52E-37 | 0.457343 | 1.62E-25 | 0.00406  | 0.93028  | 0.023277 | 0.61584  | 0.15102   | 0.00106  |
| 7.02E-11 | 0.398135 | 3.44E-19 | 0.131598 | 0.00439  | 0.202331 | 1.05E-05 | 0.03195   | 0.49097  |
| 5.04E-15 | 0.423483 | 9.55E-22 | 0.106321 | 0.02156  | -0.02416 | 0.60245  | 0.121778  | 0.00843  |
| 6.50E-37 | 0.576611 | 9.85E-43 | 0.122313 | 0.00814  | 0.073767 | 0.11138  | 0.106598  | 0.02122  |
| 2.54E-13 | 0.35621  | 2.04E-15 | -0.06902 | 0.13642  | 0.082798 | 0.07385  | 0.10438   | 0.02408  |
| 0.00144  | 0.201833 | 1.11E-05 | -0.00778 | 0.86683  | 0.101283 | 0.02863  | -0.05296  | 0.25333  |
| 4.83E-20 | -0.53331 | 1.11E-35 | -0.0909  | 0.04962  | -0.21457 | 2.88E-06 | -0.17669  | 0.00012  |
| 2.69E-24 | -0.52788 | 7.25E-35 | -0.08426 | 0.06886  | -0.08442 | 0.06833  | -0.09745  | 0.03527  |
| 9.99E-24 | -0.48154 | 1.76E-28 | -0.14862 | 0.00128  | -0.12138 | 0.00864  | -0.13409  | 0.0037   |
| 3.92E-15 | 0.283162 | 4.64E-10 | 0.0119   | 0.79758  | 0.104534 | 0.02387  | 0.100299  | 0.03022  |
| 1.40E-07 | 0.165787 | 0.00032  | 0.104345 | 0.02413  | 0.070001 | 0.1309   | 0.178065  | 0.00011  |
| 4.87E-12 | 0.270906 | 2.68E-09 | 0.133671 | 0.0038   | -0.01994 | 0.66732  | 0.149654  | 0.00118  |
| 5.46E-11 | 0.389455 | 2.31E-18 | 0.095725 | 0.03866  | 0.030826 | 0.50635  | 0.124689  | 0.00698  |
| 3.73E-21 | -0.45283 | 5.46E-25 | -0.03846 | 0.40701  | -0.09233 | 0.04613  | -0.08367  | 0.07084  |
| 1.26E-11 | -0.38924 | 2.42E-18 | -0.00106 | 0.98172  | -0.12251 | 0.00804  | -0.09718  | 0.03579  |
| 1.41E-08 | 0.387011 | 3.90E-18 | 0.025565 | 0.58158  | 0.131109 | 0.00454  | 0.023944  | 0.60577  |
| 2.87E-35 | 0.582359 | 9.47E-44 | 0.12258  | 0.008    | 0.14158  | 0.00216  | 0.047757  | 0.30307  |
| 3.70E-72 | 0.819527 | #####    | 0.081853 | 0.07722  | 0.113357 | 0.01425  | 0.194611  | 2.29E-05 |
| 3.05E-06 | 0.21823  | 1.93E-06 | 0.003577 | 0.93855  | 0.033785 | 0.4664   | 0.139152  | 0.00258  |
| 4.12E-12 | 0.343329 | 2.30E-14 | 0.102623 | 0.02658  | 0.005012 | 0.91398  | -0.06826  | 0.14077  |
| 1.48E-38 | 0.677684 | 4.53E-64 | 0.110945 | 0.01646  | 0.103073 | 0.02592  | 0.070431  | 0.12855  |
| 2.66E-16 | -0.36374 | 4.69E-16 | -0.25851 | 1.44E-08 | -0.11366 | 0.01398  | -0.13733  | 0.00294  |
| 3.29E-05 | 0.230741 | 4.63E-07 | 0.007332 | 0.87445  | 0.097986 | 0.03427  | 0.078675  | 0.08946  |
| 3.02E-26 | 0.555437 | 3.73E-39 | 0.118139 | 0.01062  | 0.128076 | 0.00558  | 0.269323  | 3.34E-09 |
| 2.19E-09 | 0.33966  | 4.49E-14 | -0.01194 | 0.79689  | 0.077    | 0.09651  | -0.1531   | 0.0009   |
| 1.15E-31 | 0.537992 | 2.15E-36 | 0.019738 | 0.67052  | 0.088375 | 0.05634  | -0.00888  | 0.84818  |
| 7.97E-43 | 0.637014 | 1.60E-54 | 0.059297 | 0.20085  | 0.113973 | 0.01372  | 0.061911  | 0.18168  |
| 3.78E-25 | 0.56632  | 5.82E-41 | 0.004362 | 0.9251   | 0.100546 | 0.02982  | 0.126439  | 0.00622  |
| 5.96E-10 | 0.430474 | 1.72E-22 | 0.113858 | 0.01382  | 0.126213 | 0.00631  | 0.133786  | 0.00377  |
| 1.07E-19 | 0.395294 | 6.46E-19 | -0.00029 | 0.99504  | -0.0484  | 0.2966   | 0.096001  | 0.03809  |
| 1.54E-11 | 0.380388 | 1.59E-17 | 0.084733 | 0.06733  | 0.089251 | 0.05393  | 0.157358  | 0.00064  |
| 4.89E-60 | 0.711346 | 3.19E-73 | 0.028564 | 0.53806  | 0.126554 | 0.00617  | 0.157031  | 0.00066  |
| 1.40E-28 | 0.641255 | 1.89E-55 | 0.025251 | 0.58624  | 0.122537 | 0.00803  | 0.157677  | 0.00063  |

|          |          |          |          |         |          |          |          |          |
|----------|----------|----------|----------|---------|----------|----------|----------|----------|
| 1.30E-42 | 0.642149 | 1.20E-55 | 0.104642 | 0.02373 | 0.087929 | 0.0576   | 0.040835 | 0.37861  |
| 0.00012  | -0.21234 | 3.67E-06 | -0.07623 | 0.09992 | -0.07388 | 0.11082  | -0.16659 | 0.0003   |
| 1.27E-28 | 0.560116 | 6.35E-40 | 0.085911 | 0.0636  | 0.125633 | 0.00656  | 0.07042  | 0.12861  |
| 6.23E-19 | -0.38617 | 4.67E-18 | -0.10972 | 0.0177  | -0.04527 | 0.32899  | -0.14068 | 0.00231  |
| 2.98E-12 | -0.4165  | 5.09E-21 | -0.12108 | 0.00881 | -0.06862 | 0.13871  | 0.014115 | 0.76096  |
| 1.01E-17 | -0.49112 | 1.01E-29 | -0.09369 | 0.043   | -0.19833 | 1.58E-05 | 0.057075 | 0.21829  |
| 0.00107  | 0.179717 | 9.42E-05 | 0.027037 | 0.56002 | 0.020671 | 0.65591  | 0.120564 | 0.00911  |
| 0.0013   | 0.143495 | 0.00188  | 0.082235 | 0.07584 | -0.06196 | 0.18133  | -0.05765 | 0.21371  |
| 2.14E-25 | 0.401883 | 1.49E-19 | 0.102567 | 0.02666 | 0.008409 | 0.85619  | 0.095771 | 0.03856  |
| 2.12E-06 | 0.26815  | 3.92E-09 | -0.03413 | 0.46182 | 0.082784 | 0.0739   | 0.065949 | 0.15477  |
| 4.55E-44 | 0.665799 | 4.00E-61 | 0.076627 | 0.09814 | 0.167157 | 0.00029  | 0.149852 | 0.00116  |
| 3.50E-30 | 0.577308 | 7.43E-43 | 0.002306 | 0.96037 | 0.090031 | 0.05186  | 0.053454 | 0.24896  |
| 7.10E-52 | 0.774518 | 1.54E-94 | 0.085338 | 0.06539 | 0.160501 | 0.0005   | 0.142437 | 0.00203  |
| 9.23E-15 | 0.369624 | 1.45E-16 | -0.05431 | 0.24146 | 0.059004 | 0.2031   | 0.019214 | 0.67877  |
| 2.23E-13 | 0.323012 | 8.41E-13 | -0.13936 | 0.00254 | 0.089149 | 0.05421  | 0.131714 | 0.00436  |
| 4.32E-56 | 0.679491 | 1.57E-64 | 0.099063 | 0.03233 | 0.185212 | 5.66E-05 | 0.295305 | 7.50E-11 |
| 4.73E-24 | 0.468288 | 7.90E-27 | 0.010135 | 0.82708 | 0.071255 | 0.12413  | 0.010118 | 0.82737  |
| 0.00512  | 0.197056 | 1.79E-05 | 0.044535 | 0.3369  | 0.07823  | 0.09129  | 0.072285 | 0.11877  |
| 2.10E-31 | 0.496352 | 2.04E-30 | 0.059394 | 0.20012 | 0.11482  | 0.01303  | 0.106169 | 0.02175  |
| 1.45E-06 | -0.10686 | 0.02091  | -0.02269 | 0.62485 | 0.02115  | 0.64847  | -0.20942 | 5.01E-06 |
| 4.21E-31 | 0.47247  | 2.42E-27 | 0.071787 | 0.12134 | 0.092096 | 0.04669  | 0.237196 | 2.14E-07 |
| 3.65E-43 | 0.551185 | 1.82E-38 | 0.113056 | 0.01451 | 0.028997 | 0.53191  | 0.272324 | 2.20E-09 |
| 0.00526  | -0.20434 | 8.55E-06 | -0.06438 | 0.16485 | -0.13315 | 0.00394  | -0.09365 | 0.04308  |
| 4.30E-14 | -0.30515 | 1.60E-11 | -0.11521 | 0.01273 | 0.03278  | 0.47977  | -0.1345  | 0.00359  |
| 1.68E-05 | -0.21578 | 2.52E-06 | -0.03579 | 0.44041 | 0.007804 | 0.86642  | -0.04399 | 0.34281  |
| 1.43E-20 | 0.478845 | 3.86E-28 | -0.08491 | 0.06674 | 0.008271 | 0.85852  | 0.037851 | 0.41446  |
| 1.25E-48 | 0.645362 | 2.31E-56 | 0.088545 | 0.05586 | 0.100836 | 0.02935  | 0.132518 | 0.00412  |
| 1.44E-14 | -0.34225 | 2.80E-14 | -0.15325 | 0.00089 | -0.03584 | 0.43972  | -0.1804  | 8.84E-05 |
| 1.13E-17 | -0.55313 | 8.84E-39 | -0.11876 | 0.01021 | -0.14421 | 0.00178  | -0.07862 | 0.08967  |
| 1.14E-11 | 0.323781 | 7.37E-13 | 0.102037 | 0.02746 | 0.105796 | 0.02222  | 0.119295 | 0.00987  |
| 2.43E-11 | 0.278777 | 8.78E-10 | 0.100612 | 0.02971 | 0.045377 | 0.32783  | 0.152686 | 0.00093  |
| 9.15E-24 | 0.532381 | 1.54E-35 | 0.128006 | 0.0056  | 0.080323 | 0.08293  | 0.126693 | 0.00611  |
| 4.70E-19 | 0.552829 | 9.88E-39 | 0.073984 | 0.11033 | 0.249541 | 4.63E-08 | 0.115734 | 0.01232  |
| 7.33E-31 | 0.541573 | 6.01E-37 | 0.084204 | 0.06906 | 0.118406 | 0.01044  | 0.035345 | 0.44606  |
| 0.00018  | 0.151813 | 0.001    | -0.01803 | 0.6975  | 0.037538 | 0.41834  | 0.10133  | 0.02856  |
| 1.44E-07 | -0.19543 | 2.11E-05 | 0.167029 | 0.00029 | -0.052   | 0.26212  | -0.05924 | 0.20128  |
| 7.98E-09 | 0.275116 | 1.48E-09 | -0.05384 | 0.24551 | 0.072815 | 0.11609  | -0.11845 | 0.01041  |
| 2.32E-06 | -0.2201  | 1.57E-06 | 0.036683 | 0.42902 | -0.07022 | 0.12971  | -0.15498 | 0.00078  |
| 4.45E-10 | -0.3626  | 5.88E-16 | -0.09972 | 0.0312  | -0.10607 | 0.02187  | -0.11957 | 0.0097   |
| 0.00014  | -0.27727 | 1.09E-09 | 0.028103 | 0.54464 | -0.16258 | 0.00042  | -0.22916 | 5.57E-07 |
| 4.21E-09 | 0.37229  | 8.45E-17 | -0.08771 | 0.05823 | 0.04966  | 0.2842   | 0.012944 | 0.78026  |
| 8.69E-14 | 0.357341 | 1.64E-15 | 0.128924 | 0.00527 | -0.01692 | 0.71536  | 0.082557 | 0.07469  |
| 1.22E-41 | 0.643428 | 6.23E-56 | 0.096875 | 0.03637 | 0.012061 | 0.79489  | 0.280668 | 6.68E-10 |
| 1.67E-11 | 0.253271 | 2.87E-08 | 0.028927 | 0.53291 | 0.02577  | 0.57855  | -0.05949 | 0.19939  |
| 2.45E-31 | 0.536904 | 3.16E-36 | 0.106484 | 0.02136 | 0.099955 | 0.0308   | 0.236698 | 2.28E-07 |

|          |          |          |          |          |          |          |          |          |
|----------|----------|----------|----------|----------|----------|----------|----------|----------|
| 2.13E-44 | 0.565617 | 7.64E-41 | 0.062032 | 0.18082  | 0.098447 | 0.03343  | 0.191614 | 3.07E-05 |
| 6.16E-08 | -0.39276 | 1.13E-18 | -0.01886 | 0.68441  | -0.04871 | 0.29355  | -0.18773 | 4.46E-05 |
| 7.37E-17 | 0.390362 | 1.90E-18 | 0.113695 | 0.01396  | 0.07704  | 0.09634  | -0.03181 | 0.49285  |
| 3.54E-28 | 0.471131 | 3.54E-27 | 0.212904 | 3.45E-06 | 0.042589 | 0.35846  | 0.118895 | 0.01012  |
| 8.50E-44 | 0.717509 | 4.83E-75 | 0.043471 | 0.34858  | 0.145236 | 0.00165  | 0.222306 | 1.22E-06 |
| 4.50E-28 | 0.526756 | 1.07E-34 | 0.002311 | 0.96027  | 0.037685 | 0.41651  | 0.198484 | 1.55E-05 |
| 9.53E-31 | 0.625154 | 5.30E-52 | 0.103267 | 0.02564  | 0.156818 | 0.00067  | 0.207329 | 6.25E-06 |
| 2.67E-21 | 0.554956 | 4.46E-39 | 0.030966 | 0.50442  | 0.111952 | 0.0155   | 0.049107 | 0.2896   |
| 1.50E-25 | -0.55798 | 1.43E-39 | -0.08001 | 0.08413  | -0.13232 | 0.00418  | -0.2182  | 1.93E-06 |
| 2.44E-07 | -0.28488 | 3.61E-10 | 0.0008   | 0.98624  | 0.038237 | 0.40971  | 0.045247 | 0.32923  |
| 3.35E-07 | 0.276881 | 1.15E-09 | 0.166507 | 0.0003   | -0.00513 | 0.91204  | 0.028208 | 0.54314  |
| 1.63E-22 | 0.545206 | 1.62E-37 | 0.003141 | 0.94602  | 0.078636 | 0.08962  | 0.166164 | 0.00031  |
| 4.86E-18 | 0.347883 | 9.88E-15 | 0.032221 | 0.4873   | 0.1284   | 0.00546  | 0.202215 | 1.06E-05 |
| 8.79E-33 | -0.65922 | 1.50E-59 | -0.08422 | 0.06901  | -0.14679 | 0.00147  | -0.13525 | 0.00341  |
| 9.70E-17 | -0.52795 | 7.10E-35 | -0.05396 | 0.24453  | -0.13482 | 0.00351  | -0.20874 | 5.39E-06 |
| 1.51E-29 | 0.500975 | 4.85E-31 | 0.091057 | 0.04923  | 0.041336 | 0.37278  | 0.1497   | 0.00118  |
| 6.02E-07 | 0.22362  | 1.05E-06 | 0.027266 | 0.5567   | 0.118497 | 0.01038  | 0.114073 | 0.01364  |
| 1.93E-22 | 0.526162 | 1.30E-34 | 0.106676 | 0.02113  | 0.187851 | 4.41E-05 | 0.016678 | 0.71925  |
| 2.56E-08 | 0.188654 | 4.08E-05 | -0.06937 | 0.13445  | 0.011515 | 0.80399  | -0.04549 | 0.3266   |
| 1.34E-25 | 0.487495 | 3.00E-29 | 0.007466 | 0.87216  | 0.006414 | 0.89006  | 0.185472 | 5.52E-05 |
| 8.72E-24 | -0.46101 | 5.96E-26 | -0.10605 | 0.0219   | -0.14211 | 0.00208  | 0.011652 | 0.80171  |
| 0.00018  | -0.24432 | 8.95E-08 | -0.03724 | 0.42202  | -0.09187 | 0.04723  | -0.10643 | 0.02143  |
| 1.03E-23 | 0.573536 | 3.38E-42 | 0.065788 | 0.15578  | 0.161836 | 0.00045  | 0.132285 | 0.00419  |
| 2.88E-06 | -0.17795 | 0.00011  | -0.00396 | 0.93193  | -0.05857 | 0.20646  | -0.2009  | 1.22E-05 |
| 3.69E-16 | 0.385669 | 5.20E-18 | -0.0134  | 0.7727   | 0.05369  | 0.24687  | 0.142059 | 0.00209  |
| 5.64E-26 | 0.499976 | 6.63E-31 | 0.071343 | 0.12367  | 0.079206 | 0.08731  | 0.15348  | 0.00088  |
| 1.96E-06 | -0.1653  | 0.00033  | 0.005803 | 0.90047  | -0.02522 | 0.58667  | -0.22159 | 1.32E-06 |
| 1.83E-24 | 0.491279 | 9.61E-30 | -0.0005  | 0.99144  | -0.0418  | 0.36748  | 0.033364 | 0.47197  |
| 1.59E-30 | 0.572666 | 4.78E-42 | 0.059713 | 0.19771  | 0.103874 | 0.02478  | 0.175419 | 0.00014  |
| 3.91E-52 | 0.531193 | 2.32E-35 | 0.09977  | 0.03111  | 0.024364 | 0.59946  | 0.172379 | 0.00018  |
| 1.55E-22 | 0.508476 | 4.50E-32 | 0.162424 | 0.00043  | 0.08805  | 0.05725  | -0.11652 | 0.01174  |
| 1.30E-11 | 0.299372 | 4.00E-11 | -0.07871 | 0.08933  | 0.014094 | 0.76131  | -0.21246 | 3.62E-06 |
| 5.23E-15 | 0.401658 | 1.56E-19 | -0.09149 | 0.04815  | 0.079145 | 0.08755  | 0.121776 | 0.00843  |
| 1.32E-10 | -0.29496 | 7.91E-11 | -0.12119 | 0.00875  | 0.030581 | 0.50975  | -0.14582 | 0.00158  |
| 4.91E-11 | -0.29814 | 4.84E-11 | -0.04103 | 0.37631  | -0.04046 | 0.38304  | -0.22266 | 1.17E-06 |
| 1.62E-06 | -0.19649 | 1.90E-05 | 0.027642 | 0.55126  | -0.04117 | 0.37469  | -0.12385 | 0.00737  |
| 5.71E-21 | 0.475519 | 1.01E-27 | 0.082642 | 0.07439  | 0.137703 | 0.00286  | 0.265749 | 5.45E-09 |
| 1.07E-30 | 0.590799 | 2.79E-45 | 0.056655 | 0.2217   | 0.071405 | 0.12334  | -0.0497  | 0.28381  |
| 3.57E-13 | 0.339726 | 4.44E-14 | -0.07097 | 0.12567  | 0.181879 | 7.72E-05 | 0.041159 | 0.37484  |
| 4.37E-34 | 0.574246 | 2.55E-42 | 0.024064 | 0.60396  | 0.053117 | 0.25196  | 0.205459 | 7.61E-06 |
| 1.80E-07 | -0.2611  | 1.02E-08 | -0.04034 | 0.38438  | -0.05791 | 0.2116   | -0.07078 | 0.12669  |
| 3.06E-26 | 0.511318 | 1.80E-32 | 0.064424 | 0.16455  | 0.055887 | 0.22804  | 0.132976 | 0.00399  |
| 4.40E-34 | 0.557433 | 1.76E-39 | 0.117261 | 0.01121  | 0.054466 | 0.2401   | 0.269539 | 3.24E-09 |
| 1.24E-12 | -0.29762 | 5.25E-11 | 0.043816 | 0.34477  | -0.00975 | 0.83363  | -0.1119  | 0.01555  |
| 4.18E-10 | 0.266683 | 4.80E-09 | -0.08621 | 0.06268  | 0.023958 | 0.60556  | 0.062414 | 0.17815  |

|          |          |          |          |          |          |          |          |          |
|----------|----------|----------|----------|----------|----------|----------|----------|----------|
| 2.25E-05 | -0.26156 | 9.62E-09 | -0.0905  | 0.05065  | -0.15323 | 0.00089  | -0.14502 | 0.00168  |
| 1.79E-25 | 0.601019 | 3.40E-47 | 0.034753 | 0.45371  | 0.087919 | 0.05763  | 0.238791 | 1.77E-07 |
| 1.77E-18 | 0.308159 | 9.90E-12 | -0.01914 | 0.67995  | -0.0226  | 0.62617  | 0.157902 | 0.00062  |
| 1.43E-06 | 0.158062 | 0.00061  | -0.03645 | 0.43199  | 0.051609 | 0.26569  | -0.04228 | 0.36191  |
| 3.82E-06 | 0.20757  | 6.10E-06 | -0.09223 | 0.04638  | 0.039976 | 0.38874  | 0.07249  | 0.11773  |
| 3.22E-33 | 0.605155 | 5.45E-48 | 0.02941  | 0.52609  | 0.099779 | 0.0311   | 0.350306 | 6.27E-15 |
| 1.95E-20 | 0.466669 | 1.24E-26 | 0.048094 | 0.29967  | 0.068219 | 0.14102  | 0.082885 | 0.07354  |
| 1.47E-07 | 0.386076 | 4.77E-18 | 0.119996 | 0.00944  | 0.073537 | 0.1125   | 0.058789 | 0.20475  |
| 3.65E-16 | -0.31992 | 1.42E-12 | -0.0482  | 0.29857  | -0.02853 | 0.53851  | -0.10112 | 0.02889  |
| 5.17E-49 | 0.6659   | 3.78E-61 | 0.052564 | 0.25694  | 0.07683  | 0.09726  | 0.12557  | 0.00659  |
| 0.00016  | 0.122721 | 0.00793  | 0.018577 | 0.68886  | -0.12939 | 0.0051   | -0.04322 | 0.35138  |
| 0.00028  | -0.1727  | 0.00018  | 0.066015 | 0.15435  | 0.046656 | 0.31437  | -0.07837 | 0.09073  |
| 3.43E-27 | 0.586091 | 2.02E-44 | 0.040503 | 0.3825   | 0.108837 | 0.01864  | 0.080118 | 0.08372  |
| 3.35E-24 | 0.488701 | 2.09E-29 | 0.148147 | 0.00132  | 0.091141 | 0.04902  | 0.31614  | 2.68E-12 |
| 2.09E-18 | 0.482089 | 1.49E-28 | 0.10451  | 0.02391  | 0.066556 | 0.15099  | 0.208644 | 5.44E-06 |
| 1.78E-12 | -0.35628 | 2.01E-15 | -0.12492 | 0.00688  | -0.06908 | 0.13604  | -0.08432 | 0.06869  |
| 2.83E-07 | 0.325602 | 5.39E-13 | -0.02654 | 0.56731  | -0.10745 | 0.0202   | -0.12059 | 0.00909  |
| 0.00606  | 0.075214 | 0.10452  | -0.06588 | 0.1552   | -0.04929 | 0.28778  | 0.000143 | 0.99755  |
| 3.61E-11 | 0.191902 | 2.98E-05 | 0.0215   | 0.64306  | 0.008031 | 0.86258  | 0.038079 | 0.41166  |
| 2.80E-13 | 0.347882 | 9.88E-15 | 0.072881 | 0.11575  | -0.03684 | 0.42707  | 0.153442 | 0.00088  |
| 1.63E-20 | 0.422564 | 1.19E-21 | 0.010694 | 0.81771  | 0.024132 | 0.60294  | 0.073919 | 0.11065  |
| 1.32E-16 | -0.51615 | 3.72E-33 | -0.00101 | 0.98271  | -0.08919 | 0.05411  | -0.13149 | 0.00442  |
| 2.67E-24 | 0.53193  | 1.80E-35 | 0.002182 | 0.9625   | 0.046812 | 0.31275  | 0.235941 | 2.50E-07 |
| 3.88E-36 | 0.544203 | 2.33E-37 | 0.045582 | 0.32566  | 0.018803 | 0.68527  | 0.080825 | 0.08102  |
| 5.51E-08 | 0.196175 | 1.96E-05 | -0.02909 | 0.53064  | -0.0225  | 0.62775  | 0.282454 | 5.15E-10 |
| 4.31E-19 | 0.51809  | 1.96E-33 | 0.039381 | 0.39584  | 0.180722 | 8.59E-05 | -0.03335 | 0.47219  |
| 3.85E-31 | 0.475212 | 1.10E-27 | 0.085542 | 0.06474  | -0.0521  | 0.26117  | 0.101691 | 0.02799  |
| 6.93E-15 | 0.405828 | 6.08E-20 | -0.03596 | 0.43815  | 0.012051 | 0.79507  | 0.065747 | 0.15604  |
| 7.90E-15 | 0.417142 | 4.37E-21 | 0.121717 | 0.00846  | 0.131159 | 0.00452  | 0.237382 | 2.10E-07 |
| 4.10E-09 | 0.239907 | 1.54E-07 | 0.047269 | 0.30805  | -0.02754 | 0.55275  | -0.16543 | 0.00033  |
| 2.10E-31 | 0.618786 | 1.08E-50 | 0.195112 | 2.18E-05 | 0.067652 | 0.14437  | 0.082194 | 0.07598  |
| 2.06E-06 | 0.286901 | 2.67E-10 | 0.135208 | 0.00342  | 0.089388 | 0.05356  | 0.007095 | 0.87846  |
| 3.26E-24 | 0.429393 | 2.25E-22 | 0.35924  | 1.13E-15 | 0.147386 | 0.0014   | 0.111424 | 0.016    |
| 2.70E-29 | 0.567413 | 3.80E-41 | 0.062177 | 0.17981  | 0.060517 | 0.19173  | 0.345619 | 1.51E-14 |
| 2.06E-10 | 0.215812 | 2.52E-06 | 0.16685  | 0.00029  | 0.012089 | 0.79444  | 0.043314 | 0.35032  |
| 2.37E-20 | 0.465874 | 1.55E-26 | 0.0704   | 0.12872  | 0.055586 | 0.23056  | 0.021366 | 0.64513  |
| 5.06E-14 | 0.331729 | 1.85E-13 | -0.03575 | 0.44081  | 0.056503 | 0.22295  | 0.068095 | 0.14175  |
| 5.34E-27 | 0.634914 | 4.55E-54 | 0.059052 | 0.20273  | 0.137639 | 0.00288  | 0.091474 | 0.0482   |
| 1.30E-13 | 0.303997 | 1.93E-11 | 0.006736 | 0.88457  | 0.123088 | 0.00775  | 0.055999 | 0.22711  |
| 2.46E-19 | 0.457247 | 1.66E-25 | 0.004995 | 0.91428  | 0.056219 | 0.22528  | -0.07669 | 0.09787  |
| 3.07E-15 | 0.397432 | 4.02E-19 | 0.003185 | 0.94527  | 0.078892 | 0.08858  | -0.05507 | 0.23494  |
| 8.12E-18 | 0.469537 | 5.56E-27 | 0.052806 | 0.25475  | 0.055769 | 0.22902  | 0.144899 | 0.00169  |
| 1.88E-08 | 0.446102 | 3.22E-24 | 0.261428 | 9.79E-09 | 0.232087 | 3.95E-07 | 0.050168 | 0.27929  |
| 4.03E-34 | 0.498935 | 9.16E-31 | 0.090879 | 0.04968  | 0.040306 | 0.38483  | -0.04261 | 0.35817  |
| 1.47E-06 | 0.238538 | 1.82E-07 | 0.034735 | 0.45395  | 0.047025 | 0.31055  | 0.155173 | 0.00077  |

|          |          |          |          |          |          |          |          |          |
|----------|----------|----------|----------|----------|----------|----------|----------|----------|
| 8.94E-05 | -0.18465 | 5.96E-05 | -0.03139 | 0.49866  | -0.01776 | 0.70195  | -0.07954 | 0.08598  |
| 3.26E-55 | 0.694039 | 2.33E-68 | 0.08964  | 0.05289  | 0.177324 | 0.00012  | 0.183951 | 6.37E-05 |
| 8.65E-49 | 0.730436 | 5.05E-79 | 0.044552 | 0.33672  | 0.135694 | 0.0033   | 0.279098 | 8.38E-10 |
| 5.72E-07 | 0.143096 | 0.00194  | -0.07936 | 0.08671  | -0.04966 | 0.28421  | 0.133396 | 0.00388  |
| 3.32E-22 | 0.568743 | 2.25E-41 | 0.213    | 3.42E-06 | 0.22931  | 5.47E-07 | 0.056668 | 0.22159  |
| 1.69E-07 | 0.252041 | 3.36E-08 | -0.04163 | 0.36937  | 0.016513 | 0.7219   | 0.051229 | 0.26924  |
| 7.86E-12 | -0.37476 | 5.09E-17 | 0.021584 | 0.64176  | -0.08262 | 0.07447  | -0.18796 | 4.36E-05 |
| 1.24E-08 | -0.24864 | 5.20E-08 | 0.030495 | 0.51094  | -0.0411  | 0.37549  | -0.02504 | 0.58933  |
| 3.41E-23 | 0.508323 | 4.73E-32 | 0.080779 | 0.08119  | 0.116313 | 0.01189  | 0.136115 | 0.00321  |
| 2.31E-35 | 0.60342  | 1.18E-47 | 0.107812 | 0.01979  | 0.111788 | 0.01565  | 0.200512 | 1.27E-05 |
| 7.11E-25 | 0.437329 | 3.09E-23 | 0.012809 | 0.78249  | 0.038275 | 0.40925  | 0.115359 | 0.01261  |
| 4.38E-25 | 0.482734 | 1.24E-28 | -0.00065 | 0.9888   | 0.092436 | 0.04588  | 0.022472 | 0.62811  |
| 1.63E-08 | 0.231474 | 4.24E-07 | -0.08827 | 0.05664  | -0.05259 | 0.25673  | -0.05549 | 0.23138  |
| 0.00031  | -0.09955 | 0.03148  | 0.015941 | 0.73116  | 0.015985 | 0.73044  | -0.08793 | 0.05761  |
| 2.63E-43 | -0.63807 | 9.43E-55 | -0.08799 | 0.05743  | -0.10296 | 0.02608  | -0.15783 | 0.00062  |
| 6.82E-20 | 0.430005 | 1.93E-22 | 0.000686 | 0.9882   | 0.028169 | 0.5437   | -0.00428 | 0.92649  |
| 1.55E-27 | 0.567635 | 3.48E-41 | -0.00549 | 0.90573  | 0.058034 | 0.21064  | -0.0216  | 0.64156  |
| 8.43E-38 | 0.628561 | 1.03E-52 | 0.08833  | 0.05646  | 0.039385 | 0.39579  | 0.192393 | 2.84E-05 |
| 5.28E-15 | 0.260905 | 1.05E-08 | -0.12316 | 0.00771  | -0.0117  | 0.80083  | 0.007964 | 0.86371  |
| 5.26E-33 | 0.532479 | 1.49E-35 | 0.080945 | 0.08056  | 0.106476 | 0.02137  | 0.041972 | 0.36547  |
| 5.94E-37 | 0.643902 | 4.89E-56 | 0.095224 | 0.03969  | 0.120015 | 0.00943  | 0.108954 | 0.01851  |
| 1.99E-24 | 0.54598  | 1.23E-37 | -0.05891 | 0.2038   | 0.050161 | 0.27936  | 0.032056 | 0.48952  |
| 6.89E-10 | 0.28127  | 6.12E-10 | 0.038339 | 0.40846  | 0.042706 | 0.35714  | 0.160299 | 0.00051  |
| 7.44E-05 | -0.14288 | 0.00197  | 0.076517 | 0.09863  | 0.060189 | 0.19415  | -0.11311 | 0.01446  |
| 1.49E-16 | 0.467817 | 9.02E-27 | 0.107985 | 0.01959  | 0.123229 | 0.00768  | 0.077917 | 0.0926   |
| 4.05E-08 | 0.227072 | 7.09E-07 | 0.018724 | 0.68652  | 0.005593 | 0.90406  | 0.03942  | 0.39537  |
| 4.47E-15 | 0.421829 | 1.42E-21 | 0.057616 | 0.21395  | -0.00243 | 0.95816  | 0.098035 | 0.03418  |
| 2.01E-29 | -0.55623 | 2.77E-39 | -0.11844 | 0.01042  | -0.12641 | 0.00623  | -0.09053 | 0.05056  |
| 1.12E-20 | 0.41215  | 1.41E-20 | -0.00302 | 0.94803  | 0.013105 | 0.7776   | 0.051509 | 0.26662  |
| 3.00E-23 | 0.507656 | 5.85E-32 | 0.044515 | 0.33712  | 0.113655 | 0.01399  | 0.043166 | 0.35198  |
| 2.84E-31 | 0.553401 | 7.98E-39 | 0.151371 | 0.00103  | 0.086009 | 0.06329  | 0.071741 | 0.12158  |
| 3.07E-33 | 0.503451 | 2.23E-31 | -0.00349 | 0.94004  | 0.053147 | 0.25169  | 0.154244 | 0.00082  |
| 7.81E-25 | 0.562197 | 2.86E-40 | 0.065387 | 0.15832  | 0.127242 | 0.0059   | 0.161858 | 0.00045  |
| 2.02E-26 | 0.52981  | 3.74E-35 | 0.017886 | 0.69985  | 0.090755 | 0.04999  | 0.040141 | 0.38677  |
| 3.92E-32 | 0.509964 | 2.79E-32 | 0.093652 | 0.04309  | 0.044928 | 0.33265  | 0.289357 | 1.85E-10 |
| 3.84E-15 | 0.360288 | 9.24E-16 | 0.022434 | 0.6287   | 0.074798 | 0.10646  | 0.264448 | 6.51E-09 |
| 1.49E-13 | -0.40944 | 2.65E-20 | -0.0461  | 0.32021  | -0.17274 | 0.00018  | -0.25509 | 2.26E-08 |
| 7.83E-10 | -0.1675  | 0.00028  | -0.02651 | 0.56762  | 0.027396 | 0.55481  | -0.09954 | 0.0315   |
| 7.36E-11 | 0.288337 | 2.16E-10 | 0.05471  | 0.238    | 0.156043 | 0.00071  | 0.086992 | 0.06032  |
| 4.10E-27 | -0.46387 | 2.71E-26 | -0.08034 | 0.08284  | -0.03837 | 0.40803  | -0.27276 | 2.06E-09 |
| 1.59E-34 | 0.579746 | 2.76E-43 | 0.043851 | 0.34438  | 0.059389 | 0.20016  | 0.13896  | 0.00262  |
| 9.53E-11 | -0.17546 | 0.00014  | 0.001528 | 0.97373  | -0.06518 | 0.15962  | -0.18642 | 5.05E-05 |
| 7.49E-09 | -0.27623 | 1.26E-09 | -0.09254 | 0.04564  | -0.02466 | 0.59506  | -0.08866 | 0.05555  |
| 9.69E-28 | 0.499752 | 7.11E-31 | 0.016494 | 0.72222  | 0.118901 | 0.01012  | 0.175047 | 0.00014  |
| 1.22E-10 | 0.328321 | 3.37E-13 | -0.05602 | 0.2269   | -0.01401 | 0.76267  | 0.034213 | 0.46077  |

|          |          |          |          |          |          |          |          |          |
|----------|----------|----------|----------|----------|----------|----------|----------|----------|
| 3.47E-18 | 0.405865 | 6.03E-20 | -0.11689 | 0.01147  | 0.05751  | 0.21479  | 0.232039 | 3.97E-07 |
| 1.89E-45 | 0.60143  | 2.84E-47 | 0.052144 | 0.26076  | 0.108688 | 0.0188   | 0.21942  | 1.69E-06 |
| 1.59E-13 | 0.313685 | 4.02E-12 | 0.048004 | 0.30058  | 0.056793 | 0.22057  | 0.161198 | 0.00047  |
| 9.31E-59 | 0.726059 | 1.19E-77 | 0.091069 | 0.0492   | 0.113866 | 0.01381  | 0.225858 | 8.15E-07 |
| 8.84E-30 | 0.532611 | 1.42E-35 | -0.03838 | 0.40802  | 0.084488 | 0.06813  | 0.08695  | 0.06045  |
| 8.47E-22 | -0.44296 | 7.30E-24 | -0.15088 | 0.00107  | -0.1567  | 0.00068  | -0.14125 | 0.00222  |
| 7.19E-17 | 0.331755 | 1.85E-13 | -0.05246 | 0.25785  | -0.01312 | 0.77732  | 0.108664 | 0.01883  |
| 4.01E-36 | 0.63753  | 1.24E-54 | 0.027875 | 0.54792  | 0.143192 | 0.00192  | 0.145107 | 0.00167  |
| 2.54E-22 | 0.411501 | 1.64E-20 | 0.008824 | 0.84917  | 0.031848 | 0.49236  | 0.253966 | 2.62E-08 |
| 0.00148  | 0.202471 | 1.04E-05 | -0.03299 | 0.477    | 0.114326 | 0.01343  | -0.01854 | 0.68947  |
| 1.10E-41 | 0.433875 | 7.37E-23 | -0.06936 | 0.13447  | -0.07057 | 0.1278   | 0.144744 | 0.00171  |
| 4.37E-22 | -0.45795 | 1.37E-25 | -0.10987 | 0.01754  | -0.05776 | 0.21279  | -0.20005 | 1.33E-05 |
| 3.48E-15 | 0.387863 | 3.25E-18 | -0.005   | 0.91413  | 0.077001 | 0.09651  | 0.069192 | 0.13543  |
| 0.00019  | 0.218774 | 1.81E-06 | 0.153736 | 0.00086  | 0.089111 | 0.05431  | 0.101977 | 0.02755  |
| 3.33E-13 | 0.245572 | 7.65E-08 | 0.075487 | 0.10326  | 0.001662 | 0.97142  | 0.076441 | 0.09897  |
| 0.00454  | 0.130851 | 0.00462  | 0.025349 | 0.58478  | 0.137903 | 0.00282  | 0.119041 | 0.01003  |
| 5.43E-23 | 0.465101 | 1.93E-26 | 0.035266 | 0.44708  | 0.0147   | 0.75138  | 0.26544  | 5.69E-09 |
| 2.82E-13 | 0.307838 | 1.04E-11 | -0.03029 | 0.51382  | 0.052809 | 0.25473  | 0.245704 | 7.53E-08 |
| 1.82E-15 | 0.365493 | 3.32E-16 | -0.06416 | 0.16631  | -0.04934 | 0.28732  | -0.07113 | 0.12479  |
| 7.00E-33 | 0.57115  | 8.73E-42 | 0.041335 | 0.37279  | 0.025066 | 0.58898  | 0.23391  | 3.18E-07 |
| 6.91E-12 | 0.273987 | 1.74E-09 | 0.075294 | 0.10415  | -0.04333 | 0.35013  | 0.00199  | 0.9658   |
| 7.73E-15 | 0.466225 | 1.41E-26 | 0.235605 | 2.60E-07 | 0.183261 | 6.79E-05 | -0.00996 | 0.83001  |
| 2.96E-51 | 0.696349 | 5.48E-69 | 0.137891 | 0.00283  | 0.122093 | 0.00826  | 0.494425 | 3.68E-30 |
| 2.20E-18 | 0.394602 | 7.52E-19 | 0.049298 | 0.28772  | 0.009879 | 0.83139  | 0.270835 | 2.70E-09 |
| 2.15E-17 | 0.39451  | 7.67E-19 | 0.056929 | 0.21947  | 0.146836 | 0.00146  | 0.144686 | 0.00172  |
| 9.66E-31 | 0.562486 | 2.56E-40 | 0.159346 | 0.00055  | 0.144157 | 0.00179  | 0.14159  | 0.00216  |
| 8.95E-45 | 0.72774  | 3.57E-78 | 0.011453 | 0.80502  | 0.130366 | 0.00478  | 0.184888 | 5.83E-05 |
| 8.77E-10 | 0.352728 | 3.97E-15 | 0.077365 | 0.09494  | 0.061638 | 0.18361  | -0.04599 | 0.32134  |
| 3.75E-11 | 0.276424 | 1.23E-09 | 0.06625  | 0.15289  | 0.010212 | 0.8258   | 0.054628 | 0.2387   |
| 2.42E-05 | -0.18416 | 6.24E-05 | 0.018028 | 0.69759  | -0.05634 | 0.2243   | -0.06716 | 0.14733  |
| 8.04E-14 | 0.339542 | 4.59E-14 | 0.012762 | 0.78327  | -0.07079 | 0.12659  | -0.08142 | 0.07879  |
| 3.26E-23 | 0.454438 | 3.55E-25 | 0.067538 | 0.14504  | 0.090073 | 0.05175  | -0.06344 | 0.17113  |
| 1.97E-08 | 0.22418  | 9.88E-07 | 0.026094 | 0.57379  | 0.039475 | 0.39471  | 0.176457 | 0.00013  |
| 0.01546  | 0.088534 | 0.05589  | -0.01787 | 0.70007  | -0.09095 | 0.04949  | -0.09502 | 0.04012  |
| 0.00011  | 0.21454  | 2.89E-06 | 0.117003 | 0.01139  | 0.004555 | 0.9218   | 0.119105 | 0.00999  |
| 0.01392  | 0.172634 | 0.00018  | 0.025303 | 0.58546  | -0.0361  | 0.4364   | 0.06297  | 0.17431  |
| 2.20E-18 | 0.45925  | 9.65E-26 | -0.02452 | 0.59705  | 0.068259 | 0.14079  | 0.234769 | 2.87E-07 |
| 5.29E-11 | 0.332628 | 1.58E-13 | -0.00886 | 0.84861  | 0.129228 | 0.00516  | -0.03166 | 0.49488  |
| 2.54E-27 | 0.522435 | 4.60E-34 | -0.02669 | 0.56511  | 0.041338 | 0.37276  | 0.168871 | 0.00025  |
| 1.81E-22 | 0.465898 | 1.54E-26 | 0.090353 | 0.05102  | 0.131895 | 0.0043   | 0.04131  | 0.37309  |
| 1.80E-05 | 0.27245  | 2.16E-09 | 0.004229 | 0.92737  | 0.119664 | 0.00964  | -0.07314 | 0.11446  |
| 6.57E-07 | 0.182783 | 7.10E-05 | 0.026737 | 0.56438  | 0.017374 | 0.70805  | -0.08549 | 0.06489  |
| 4.45E-12 | 0.311343 | 5.91E-12 | -0.03559 | 0.4429   | 0.040285 | 0.38508  | 0.133917 | 0.00374  |
| 2.98E-23 | 0.563363 | 1.83E-40 | -0.10979 | 0.01763  | 0.136769 | 0.00306  | 0.085302 | 0.0655   |
| 1.45E-17 | 0.360525 | 8.83E-16 | 0.19078  | 3.33E-05 | 0.081951 | 0.07686  | 0.28008  | 7.27E-10 |

|          |          |          |          |          |          |          |          |          |
|----------|----------|----------|----------|----------|----------|----------|----------|----------|
| 4.50E-13 | -0.38011 | 1.68E-17 | -0.08072 | 0.08142  | -0.01812 | 0.69618  | -0.04362 | 0.34694  |
| 5.43E-05 | 0.337499 | 6.64E-14 | -0.09063 | 0.05031  | 0.118651 | 0.01028  | -0.08131 | 0.07921  |
| 6.20E-16 | 0.400849 | 1.88E-19 | -0.0709  | 0.126    | 0.069537 | 0.13349  | 0.242905 | 1.07E-07 |
| 1.42E-06 | -0.18068 | 8.62E-05 | -0.11749 | 0.01106  | -0.08561 | 0.06452  | -0.08796 | 0.05752  |
| 7.05E-06 | -0.37065 | 1.18E-16 | -0.03679 | 0.42773  | -0.16095 | 0.00048  | -0.11006 | 0.01735  |
| 2.89E-11 | -0.27018 | 2.96E-09 | -0.06437 | 0.16491  | -0.04668 | 0.31407  | -0.01861 | 0.68827  |
| 1.89E-54 | 0.659591 | 1.22E-59 | 0.069998 | 0.13092  | 0.087083 | 0.06005  | 0.258293 | 1.49E-08 |
| 2.96E-07 | -0.28652 | 2.83E-10 | 0.032761 | 0.48003  | -0.11504 | 0.01286  | -0.09449 | 0.04125  |
| 4.10E-18 | -0.39448 | 7.73E-19 | -0.10562 | 0.02245  | -0.09987 | 0.03094  | -0.24539 | 7.83E-08 |
| 2.98E-27 | -0.58597 | 2.12E-44 | -0.06426 | 0.16566  | -0.116   | 0.01212  | -0.12708 | 0.00596  |
| 1.32E-06 | 0.166013 | 0.00031  | 0.067261 | 0.14671  | 0.00882  | 0.84924  | 0.04456  | 0.33663  |
| 2.53E-11 | 0.413102 | 1.13E-20 | 0.037106 | 0.42372  | 0.099757 | 0.03113  | 0.096636 | 0.03683  |
| 8.15E-11 | 0.329693 | 2.65E-13 | -0.02528 | 0.58581  | 0.103275 | 0.02563  | 0.104516 | 0.0239   |
| 7.13E-23 | 0.530553 | 2.90E-35 | 0.079722 | 0.08526  | 0.204715 | 8.22E-06 | 0.097285 | 0.03558  |
| 2.81E-36 | 0.628792 | 9.18E-53 | 0.139858 | 0.00245  | 0.157981 | 0.00061  | 0.243044 | 1.05E-07 |
| 1.36E-14 | 0.400462 | 2.05E-19 | 0.09824  | 0.0338   | 0.119308 | 0.00986  | 0.029762 | 0.52115  |
| 3.55E-11 | 0.341939 | 2.97E-14 | -0.00555 | 0.90473  | 0.041193 | 0.37444  | 0.113763 | 0.0139   |
| 1.73E-12 | 0.517295 | 2.55E-33 | 0.058151 | 0.20972  | 0.11462  | 0.01319  | 0.070148 | 0.1301   |
| 2.64E-32 | 0.445074 | 4.22E-24 | 0.067058 | 0.14793  | 0.009508 | 0.83763  | 0.21707  | 2.19E-06 |
| 2.29E-21 | 0.470851 | 3.83E-27 | 0.002813 | 0.95166  | 0.041058 | 0.37601  | 0.129754 | 0.00498  |
| 5.52E-22 | 0.548335 | 5.19E-38 | 0.036783 | 0.42776  | 0.093405 | 0.04364  | -0.0182  | 0.69482  |
| 3.69E-25 | 0.482489 | 1.33E-28 | 0.042936 | 0.35456  | 0.040587 | 0.38151  | 0.131196 | 0.00451  |
| 1.96E-17 | 0.475105 | 1.14E-27 | 0.093963 | 0.0424   | 0.106737 | 0.02105  | 0.119075 | 0.01001  |
| 2.86E-37 | 0.657607 | 3.59E-59 | 0.003156 | 0.94577  | 0.202233 | 1.06E-05 | 0.25872  | 1.40E-08 |
| 1.34E-17 | 0.337034 | 7.21E-14 | 0.042531 | 0.35912  | -0.0208  | 0.65389  | -0.03541 | 0.44528  |
| 7.97E-54 | 0.626441 | 2.86E-52 | 0.131329 | 0.00447  | 0.075204 | 0.10457  | 0.303726 | 2.01E-11 |
| 2.17E-28 | 0.521809 | 5.68E-34 | 0.049663 | 0.28416  | 0.018147 | 0.6957   | -0.02123 | 0.64723  |
| 2.12E-09 | 0.466388 | 1.35E-26 | 0.114726 | 0.01311  | 0.165822 | 0.00032  | 0.092448 | 0.04585  |
| 2.85E-10 | 0.285401 | 3.34E-10 | 0.076868 | 0.09709  | 0.010544 | 0.82022  | 0.260433 | 1.12E-08 |
| 1.48E-18 | 0.414988 | 7.27E-21 | 0.10854  | 0.01897  | 0.116651 | 0.01165  | 0.146938 | 0.00145  |
| 2.49E-07 | -0.23131 | 4.33E-07 | -0.07234 | 0.11851  | -0.0298  | 0.52056  | 0.054184 | 0.24254  |
| 1.82E-24 | 0.375041 | 4.81E-17 | 0.032994 | 0.4769   | 0.095966 | 0.03817  | 0.257928 | 1.56E-08 |
| 1.61E-54 | 0.686211 | 2.86E-66 | 0.129888 | 0.00493  | 0.092272 | 0.04627  | 0.092852 | 0.04491  |
| 2.66E-27 | 0.541956 | 5.24E-37 | 0.001334 | 0.97706  | 0.128489 | 0.00542  | 0.120596 | 0.00909  |
| 6.79E-09 | 0.240647 | 1.41E-07 | 0.157852 | 0.00062  | -0.02934 | 0.52706  | 0.014805 | 0.74966  |
| 0.00034  | -0.18198 | 7.65E-05 | 0.018465 | 0.69064  | -0.07373 | 0.11157  | -0.13313 | 0.00395  |
| 6.34E-22 | -0.58684 | 1.47E-44 | -0.07241 | 0.11811  | -0.13184 | 0.00432  | -0.12382 | 0.00739  |
| 1.28E-12 | -0.32002 | 1.40E-12 | -0.21172 | 3.92E-06 | -0.00964 | 0.83546  | -0.23971 | 1.58E-07 |
| 6.28E-32 | 0.495774 | 2.44E-30 | -0.02284 | 0.62246  | 0.076108 | 0.10045  | 0.198435 | 1.56E-05 |
| 1.05E-33 | 0.505896 | 1.03E-31 | 0.09507  | 0.04001  | 0.063576 | 0.17019  | 0.129289 | 0.00514  |
| 5.37E-25 | 0.455492 | 2.67E-25 | 0.085959 | 0.06345  | 0.006728 | 0.88471  | 0.085306 | 0.06549  |
| 2.05E-18 | 0.437187 | 3.20E-23 | 0.104468 | 0.02396  | 0.069856 | 0.13171  | -0.00996 | 0.83007  |
| 8.82E-21 | 0.393228 | 1.02E-18 | 0.03936  | 0.39608  | 0.044949 | 0.33242  | 0.069544 | 0.13345  |
| 7.51E-16 | 0.374847 | 5.01E-17 | -0.09024 | 0.05132  | -0.03897 | 0.40076  | -0.02565 | 0.58028  |
| 2.45E-22 | 0.436782 | 3.54E-23 | -0.01675 | 0.71801  | -0.00432 | 0.92577  | 0.389088 | 2.50E-18 |

|          |          |          |           |          |          |          |          |          |
|----------|----------|----------|-----------|----------|----------|----------|----------|----------|
| 2.03E-06 | 0.367845 | 2.07E-16 | 0.094455  | 0.04132  | 0.104734 | 0.02361  | -0.12731 | 0.00587  |
| 1.56E-36 | 0.536332 | 3.87E-36 | 0.047118  | 0.3096   | 0.07092  | 0.12591  | 0.037834 | 0.41467  |
| 0.12412  | 0.114083 | 0.01363  | -0.04     | 0.3885   | -0.05978 | 0.19721  | -0.00601 | 0.8969   |
| 3.15E-28 | 0.588395 | 7.70E-45 | 0.085821  | 0.06387  | 0.223591 | 1.06E-06 | 0.23882  | 1.76E-07 |
| 5.78E-09 | 0.277596 | 1.04E-09 | -0.02033  | 0.66131  | 0.015655 | 0.7358   | -0.03533 | 0.44621  |
| 0.00936  | -0.2346  | 2.93E-07 | 0.070319  | 0.12916  | -0.09275 | 0.04514  | -0.03938 | 0.3959   |
| 2.50E-17 | 0.408229 | 3.51E-20 | -0.01441  | 0.75617  | -0.08613 | 0.06293  | 0.305693 | 1.47E-11 |
| 2.60E-35 | 0.588441 | 7.55E-45 | 0.068159  | 0.14137  | 0.009677 | 0.83479  | -0.0069  | 0.88182  |
| 1.53E-32 | 0.596664 | 2.27E-46 | 0.104432  | 0.02401  | 0.126989 | 0.006    | 0.331649 | 1.88E-13 |
| 0.00131  | 0.212877 | 3.46E-06 | 0.033581  | 0.4691   | 0.072615 | 0.11709  | 0.197404 | 1.73E-05 |
| 3.39E-14 | 0.388792 | 2.66E-18 | 0.041362  | 0.37249  | 0.035405 | 0.44529  | -0.05664 | 0.22185  |
| 2.82E-46 | 0.653096 | 4.03E-58 | 0.112224  | 0.01525  | 0.16631  | 0.00031  | 0.418751 | 2.98E-21 |
| 5.61E-14 | 0.43793  | 2.65E-23 | 0.119052  | 0.01002  | 0.050677 | 0.27443  | 0.237734 | 2.01E-07 |
| 2.24E-14 | 0.43027  | 1.81E-22 | 0.02456   | 0.59652  | 0.096803 | 0.03651  | 0.177288 | 0.00012  |
| 7.33E-05 | 0.146208 | 0.00153  | 0.019215  | 0.67875  | -0.07632 | 0.09951  | 0.053761 | 0.24625  |
| 4.15E-78 | 0.777722 | 8.39E-96 | 0.098787  | 0.03282  | 0.10801  | 0.01956  | 0.280192 | 7.15E-10 |
| 9.35E-26 | -0.53263 | 1.41E-35 | -0.14932  | 0.00121  | -0.12132 | 0.00868  | -0.11967 | 0.00964  |
| 1.86E-39 | 0.602095 | 2.12E-47 | 0.010919  | 0.81396  | 0.036394 | 0.43266  | 0.180045 | 9.14E-05 |
| 1.59E-25 | 0.541253 | 6.74E-37 | -0.004    | 0.93128  | 0.071336 | 0.12371  | 0.380567 | 1.53E-17 |
| 2.27E-06 | 0.293784 | 9.47E-11 | 0.18846   | 4.16E-05 | 0.022079 | 0.63415  | 0.150599 | 0.0011   |
| 3.66E-26 | 0.574298 | 2.49E-42 | 0.102909  | 0.02616  | 0.319619 | 1.50E-12 | 0.068332 | 0.14036  |
| 2.44E-15 | 0.43342  | 8.26E-23 | 0.018944  | 0.68303  | -0.01319 | 0.77617  | 0.21029  | 4.57E-06 |
| 4.22E-11 | 0.348532 | 8.75E-15 | 0.11242   | 0.01507  | 0.094792 | 0.0406   | 0.062966 | 0.17433  |
| 4.53E-37 | 0.60526  | 5.20E-48 | 0.076729  | 0.0977   | 0.068009 | 0.14225  | 0.145932 | 0.00157  |
| 0.0005   | 0.177363 | 0.00012  | 0.011214  | 0.80901  | 0.101213 | 0.02874  | 0.024874 | 0.59183  |
| 1.17E-21 | -0.49697 | 1.68E-30 | -0.15815  | 0.0006   | -0.07549 | 0.10327  | -0.17034 | 0.00022  |
| 2.29E-30 | 0.588231 | 8.24E-45 | 0.039358  | 0.39612  | 0.132104 | 0.00424  | 0.131874 | 0.00431  |
| 1.23E-18 | -0.50447 | 1.62E-31 | -0.0587   | 0.20545  | -0.06652 | 0.15122  | -0.18803 | 4.33E-05 |
| 1.28E-39 | 0.58879  | 6.52E-45 | 0.031946  | 0.49102  | 0.062782 | 0.1756   | 0.001948 | 0.96652  |
| 1.75E-30 | 0.602634 | 1.67E-47 | 0.09681   | 0.03649  | 0.093319 | 0.04384  | 0.304485 | 1.78E-11 |
| 1.13E-09 | 0.527579 | 8.05E-35 | 0.120376  | 0.00922  | 0.089438 | 0.05343  | 0.061761 | 0.18274  |
| 6.05E-21 | 0.333407 | 1.38E-13 | 0.142165  | 0.00207  | 0.092883 | 0.04484  | 0.032261 | 0.48676  |
| 2.27E-35 | 0.626744 | 2.47E-52 | 0.222353  | 1.22E-06 | 0.084851 | 0.06695  | 0.13108  | 0.00455  |
| 2.58E-11 | 0.260361 | 1.13E-08 | 0.040054  | 0.38781  | 0.022143 | 0.63316  | -0.01874 | 0.68633  |
| 4.07E-08 | 0.142271 | 0.00206  | 0.020431  | 0.65966  | 0.067981 | 0.14242  | 0.03519  | 0.44806  |
| 1.03E-15 | 0.319849 | 1.44E-12 | 0.011632  | 0.80205  | 0.042706 | 0.35713  | 0.02047  | 0.65906  |
| 2.04E-13 | 0.394332 | 7.98E-19 | 0.056887  | 0.2198   | 0.241979 | 1.20E-07 | 0.112747 | 0.01478  |
| 1.86E-05 | 0.426004 | 5.17E-22 | 0.091962  | 0.04701  | 0.085275 | 0.06559  | 0.151819 | 0.001    |
| 1.11E-18 | 0.428663 | 2.69E-22 | 0.039453  | 0.39497  | 0.153421 | 0.00088  | 0.079421 | 0.08645  |
| 1.23E-14 | 0.318926 | 1.68E-12 | 0.012111  | 0.79406  | 0.074993 | 0.10554  | -0.08861 | 0.05568  |
| 3.25E-40 | 0.673989 | 3.87E-63 | 0.005218  | 0.91046  | 0.059739 | 0.19751  | 0.19868  | 1.52E-05 |
| 5.16E-13 | 0.324894 | 6.09E-13 | 0.047382  | 0.30689  | 0.089309 | 0.05377  | 0.150469 | 0.00111  |
| 1.49E-12 | 0.18771  | 4.47E-05 | -9.68E-05 | 0.99834  | -0.03516 | 0.44845  | 0.143869 | 0.00183  |
| 8.93E-22 | 0.407426 | 4.22E-20 | -0.05039  | 0.27717  | 0.000468 | 0.99195  | 0.061411 | 0.18524  |
| 1.88E-19 | 0.382886 | 9.39E-18 | 0.033129  | 0.4751   | 0.041386 | 0.37221  | 0.232934 | 3.57E-07 |



|          |          |          |          |          |           |          |          |          |
|----------|----------|----------|----------|----------|-----------|----------|----------|----------|
| 1.44E-10 | 0.361566 | 7.20E-16 | 0.030124 | 0.51609  | 0.031685  | 0.49457  | -0.05322 | 0.25109  |
| 1.69E-23 | 0.446024 | 3.29E-24 | 0.153576 | 0.00087  | 0.087413  | 0.05909  | 0.18008  | 9.11E-05 |
| 1.80E-19 | 0.502681 | 2.84E-31 | 0.019841 | 0.6689   | 0.090622  | 0.05033  | 0.13564  | 0.00331  |
| 4.45E-24 | 0.476722 | 7.14E-28 | 0.139542 | 0.00251  | 0.084239  | 0.06894  | 0.265755 | 5.45E-09 |
| 1.56E-06 | 0.302543 | 2.43E-11 | 0.088455 | 0.05611  | 0.110905  | 0.0165   | 0.178725 | 0.0001   |
| 4.54E-38 | 0.602254 | 1.97E-47 | 0.054116 | 0.24314  | 0.084214  | 0.06903  | 0.209354 | 5.05E-06 |
| 1.61E-24 | 0.495927 | 2.32E-30 | 0.043852 | 0.34437  | 0.105427  | 0.02269  | 0.177596 | 0.00011  |
| 2.15E-12 | 0.398644 | 3.07E-19 | 0.123806 | 0.00739  | 0.160766  | 0.00049  | 0.067388 | 0.14594  |
| 1.74E-14 | 0.48319  | 1.08E-28 | 0.08435  | 0.06858  | 0.225991  | 8.03E-07 | 0.066006 | 0.15441  |
| 2.48E-27 | 0.453781 | 4.23E-25 | 0.032881 | 0.47842  | -0.00172  | 0.97035  | 0.218723 | 1.83E-06 |
| 3.81E-23 | 0.525416 | 1.68E-34 | -0.07317 | 0.11432  | 0.085975  | 0.0634   | 0.229384 | 5.42E-07 |
| 3.93E-07 | -0.28995 | 1.69E-10 | -0.04223 | 0.36255  | -0.11256  | 0.01495  | -0.11951 | 0.00974  |
| 1.39E-18 | 0.510969 | 2.02E-32 | 0.026426 | 0.56892  | 0.127822  | 0.00567  | 0.177891 | 0.00011  |
| 5.95E-10 | 0.352851 | 3.87E-15 | 0.105783 | 0.02224  | -2.94E-05 | 0.99949  | 0.100362 | 0.03012  |
| 2.83E-19 | 0.408556 | 3.25E-20 | 0.035168 | 0.44834  | 0.019284  | 0.67767  | 0.187376 | 4.61E-05 |
| 1.15E-26 | 0.489833 | 1.49E-29 | 0.096631 | 0.03684  | 0.147458  | 0.0014   | 0.145188 | 0.00166  |
| 2.67E-10 | 0.284666 | 3.72E-10 | -0.01308 | 0.77794  | 0.006654  | 0.88597  | 0.085162 | 0.06595  |
| 1.64E-15 | 0.549965 | 2.85E-38 | 0.060431 | 0.19237  | 0.134424  | 0.00361  | 0.119689 | 0.00963  |
| 6.80E-19 | 0.36625  | 2.85E-16 | -0.0221  | 0.63384  | -0.081    | 0.08034  | -0.00183 | 0.96854  |
| 8.07E-12 | 0.31883  | 1.71E-12 | -0.03139 | 0.49865  | -0.02711  | 0.55901  | 0.009273 | 0.84159  |
| 6.70E-10 | 0.419688 | 2.38E-21 | 0.072298 | 0.11871  | 0.089352  | 0.05366  | 0.157808 | 0.00062  |
| 1.09E-13 | 0.438375 | 2.36E-23 | 0.166998 | 0.00029  | 0.144591  | 0.00173  | 0.075121 | 0.10495  |
| 0.00014  | -0.09899 | 0.03247  | -0.00554 | 0.90503  | 0.020664  | 0.65603  | -0.02724 | 0.5571   |
| 2.21E-44 | 0.631959 | 1.96E-53 | 0.115273 | 0.01268  | 0.043494  | 0.34832  | 0.172606 | 0.00018  |
| 2.83E-38 | 0.593809 | 7.74E-46 | 0.066711 | 0.15004  | 0.085582  | 0.06462  | 0.165533 | 0.00033  |
| 3.43E-16 | 0.449441 | 1.34E-24 | 0.222725 | 1.17E-06 | 0.124613  | 0.00701  | -0.0426  | 0.35835  |
| 2.45E-17 | 0.557952 | 1.44E-39 | 0.003869 | 0.93355  | 0.069738  | 0.13236  | 0.120729 | 0.00901  |
| 5.15E-30 | 0.581097 | 1.59E-43 | 0.049818 | 0.28267  | 0.136469  | 0.00313  | 0.002191 | 0.96234  |
| 2.03E-19 | 0.415276 | 6.79E-21 | 0.07354  | 0.11249  | 0.045908  | 0.3222   | 0.265414 | 5.71E-09 |
| 1.95E-20 | 0.477391 | 5.89E-28 | 0.05673  | 0.22109  | 0.111945  | 0.01551  | 0.105305 | 0.02285  |
| 6.86E-17 | 0.506481 | 8.52E-32 | 0.147244 | 0.00142  | 0.131786  | 0.00433  | 0.203232 | 9.58E-06 |
| 1.77E-48 | 0.725255 | 2.12E-77 | 0.101312 | 0.02859  | 0.075486  | 0.10326  | 0.053907 | 0.24497  |
| 1.24E-09 | 0.317463 | 2.15E-12 | 0.115657 | 0.01238  | -0.01223  | 0.7921   | -0.07513 | 0.10491  |
| 0.00023  | 0.289692 | 1.76E-10 | 0.028638 | 0.53701  | 0.056764  | 0.22081  | -0.04828 | 0.29782  |
| 1.70E-24 | 0.506399 | 8.75E-32 | 0.135575 | 0.00333  | 0.160659  | 0.00049  | 0.332506 | 1.62E-13 |
| 2.78E-09 | 0.320168 | 1.36E-12 | -0.0386  | 0.4053   | 0.000901  | 0.98452  | -0.25502 | 2.29E-08 |
| 5.15E-66 | 0.721444 | 3.13E-76 | 0.105488 | 0.02262  | 0.121565  | 0.00854  | 0.329102 | 2.94E-13 |
| 1.21E-41 | 0.640626 | 2.60E-55 | 0.03338  | 0.47177  | 0.112852  | 0.01469  | 0.149765 | 0.00117  |
| 0.00023  | -0.18625 | 5.13E-05 | -0.08216 | 0.07611  | 0.057453  | 0.21524  | -0.02612 | 0.57336  |
| 1.88E-43 | 0.658662 | 2.03E-59 | 0.079231 | 0.08721  | 0.119546  | 0.00972  | 0.401492 | 1.62E-19 |
| 3.14E-15 | 0.45746  | 1.57E-25 | 0.091669 | 0.04772  | 0.13375   | 0.00378  | -0.03486 | 0.45235  |
| 9.78E-53 | 0.661621 | 4.04E-60 | 0.056691 | 0.2214   | 0.111394  | 0.01603  | 0.087358 | 0.05924  |
| 4.48E-16 | 0.35715  | 1.70E-15 | -0.04027 | 0.38521  | -0.04926  | 0.28809  | -0.0513  | 0.26855  |
| 6.67E-12 | 0.308715 | 9.05E-12 | -0.07704 | 0.09634  | 0.036108  | 0.43629  | 0.084781 | 0.06717  |
| 3.09E-24 | 0.454131 | 3.85E-25 | 0.009883 | 0.83132  | 0.040007  | 0.38837  | 0.134367 | 0.00362  |

|          |          |          |          |         |          |          |          |          |
|----------|----------|----------|----------|---------|----------|----------|----------|----------|
| 7.00E-16 | 0.33529  | 9.86E-14 | -0.04414 | 0.34125 | 0.008791 | 0.84973  | 0.012247 | 0.79181  |
| 5.41E-23 | 0.461511 | 5.19E-26 | 0.118066 | 0.01066 | 0.044894 | 0.33302  | 0.121851 | 0.00839  |
| 1.89E-17 | 0.296553 | 6.19E-11 | -0.05442 | 0.24048 | -0.05855 | 0.20658  | 0.102533 | 0.02671  |
| 1.13E-12 | 0.361952 | 6.67E-16 | 0.043375 | 0.34965 | 0.108104 | 0.01945  | 0.185907 | 5.30E-05 |
| 2.29E-17 | -0.41416 | 8.82E-21 | -0.12004 | 0.00942 | -0.1089  | 0.01857  | -0.14336 | 0.0019   |
| 3.32E-43 | 0.592184 | 1.55E-45 | 0.097961 | 0.03431 | 0.095878 | 0.03834  | 0.253573 | 2.76E-08 |
| 2.88E-25 | 0.543252 | 3.29E-37 | 0.073607 | 0.11216 | 0.088628 | 0.05563  | 0.187956 | 4.36E-05 |
| 1.72E-11 | 0.248501 | 5.29E-08 | -0.02233 | 0.63024 | 0.022905 | 0.62151  | 0.170485 | 0.00021  |
| 1.98E-07 | 0.351097 | 5.40E-15 | 0.147672 | 0.00137 | 0.113992 | 0.01371  | -0.03558 | 0.44298  |
| 4.58E-11 | 0.314927 | 3.27E-12 | -0.02745 | 0.55398 | -0.01399 | 0.76307  | -0.07253 | 0.11751  |
| 1.27E-19 | 0.56212  | 2.95E-40 | 0.08582  | 0.06388 | 0.216883 | 2.24E-06 | 0.162346 | 0.00043  |
| 4.34E-16 | 0.571213 | 8.51E-42 | 0.117038 | 0.01137 | 0.184172 | 6.24E-05 | 0.172874 | 0.00017  |
| 2.51E-40 | 0.572905 | 4.35E-42 | 0.069487 | 0.13377 | 0.150578 | 0.0011   | 0.08426  | 0.06888  |
| 2.79E-35 | 0.678755 | 2.42E-64 | 0.070527 | 0.12803 | 0.168501 | 0.00025  | 0.172545 | 0.00018  |
| 8.03E-14 | 0.450441 | 1.03E-24 | 0.015569 | 0.7372  | 0.195112 | 2.18E-05 | 0.141997 | 0.0021   |
| 9.92E-12 | 0.232268 | 3.87E-07 | -0.06169 | 0.18322 | -0.01363 | 0.76889  | 0.108232 | 0.01931  |
| 8.09E-22 | 0.321622 | 1.07E-12 | 0.022834 | 0.62258 | 0.020237 | 0.66269  | 0.13054  | 0.00472  |
| 1.53E-14 | 0.430244 | 1.82E-22 | 0.025888 | 0.57682 | 0.117681 | 0.01092  | -0.13603 | 0.00322  |
| 1.47E-56 | 0.71375  | 6.31E-74 | 0.092403 | 0.04596 | 0.09225  | 0.04632  | 0.234012 | 3.14E-07 |
| 5.26E-19 | 0.357593 | 1.56E-15 | 0.105484 | 0.02262 | 0.132479 | 0.00413  | 0.002172 | 0.96266  |
| 4.77E-33 | 0.467341 | 1.03E-26 | -0.00541 | 0.90711 | 0.070939 | 0.12581  | 0.048208 | 0.29853  |
| 2.99E-12 | 0.285614 | 3.24E-10 | 0.097702 | 0.03479 | 0.004676 | 0.91973  | 0.240878 | 1.37E-07 |
| 6.39E-13 | -0.44343 | 6.45E-24 | -0.07799 | 0.09231 | -0.11516 | 0.01277  | -0.11606 | 0.01208  |
| 7.10E-12 | -0.31578 | 2.84E-12 | 0.030472 | 0.51124 | -0.00388 | 0.93331  | -0.05173 | 0.26454  |
| 3.66E-29 | 0.576813 | 9.07E-43 | 0.065619 | 0.15685 | 0.080226 | 0.0833   | 0.240198 | 1.49E-07 |
| 2.12E-13 | 0.426759 | 4.30E-22 | 0.04059  | 0.38148 | 0.069737 | 0.13237  | 0.098635 | 0.03309  |
| 3.95E-44 | 0.578412 | 4.75E-43 | 0.011127 | 0.81047 | 0.026445 | 0.56865  | 0.2169   | 2.23E-06 |
| 6.14E-08 | -0.34469 | 1.79E-14 | -0.11646 | 0.01179 | -0.07757 | 0.09405  | -0.12719 | 0.00592  |
| 9.28E-15 | 0.265337 | 5.77E-09 | 0.094821 | 0.04054 | 0.004986 | 0.91442  | 0.06054  | 0.19156  |
| 4.69E-49 | 0.672554 | 8.81E-63 | 0.069737 | 0.13237 | 0.063255 | 0.17236  | 0.116312 | 0.01189  |
| 3.02E-07 | -0.14093 | 0.00227  | -0.00834 | 0.85739 | -0.05979 | 0.1971   | -0.10344 | 0.02539  |
| 2.10E-21 | 0.367685 | 2.14E-16 | -0.01015 | 0.82687 | 0.065529 | 0.15741  | 0.181316 | 8.13E-05 |
| 6.84E-19 | 0.475312 | 1.07E-27 | -0.07381 | 0.11119 | 0.01266  | 0.78496  | 0.183411 | 6.70E-05 |
| 4.63E-49 | 0.672535 | 8.91E-63 | 0.069098 | 0.13596 | 0.065326 | 0.15871  | 0.306117 | 1.38E-11 |
| 3.10E-07 | 0.262704 | 8.24E-09 | 0.013944 | 0.76377 | 0.056477 | 0.22316  | 0.131421 | 0.00444  |
| 0.00668  | 0.136571 | 0.0031   | 0.006061 | 0.89607 | -0.03842 | 0.40748  | 0.023721 | 0.60913  |
| 3.61E-33 | 0.656813 | 5.51E-59 | 0.087112 | 0.05997 | 0.117107 | 0.01132  | 0.269647 | 3.19E-09 |
| 2.11E-51 | 0.717529 | 4.76E-75 | 0.008946 | 0.84711 | 0.075548 | 0.10298  | 0.133069 | 0.00397  |
| 1.77E-44 | 0.611717 | 2.83E-49 | 0.067018 | 0.14817 | 0.077403 | 0.09478  | 0.050115 | 0.2798   |
| 7.66E-27 | 0.49864  | 1.00E-30 | 0.00939  | 0.83962 | 0.106524 | 0.02131  | 0.269697 | 3.17E-09 |
| 7.70E-37 | 0.649663 | 2.46E-57 | 0.148218 | 0.00132 | 0.095303 | 0.03952  | 0.167043 | 0.00029  |
| 1.76E-33 | 0.519419 | 1.26E-33 | 0.039801 | 0.39082 | 0.013109 | 0.77753  | 0.136288 | 0.00317  |
| 3.16E-15 | 0.368207 | 1.93E-16 | 0.083506 | 0.07141 | 0.093479 | 0.04348  | -0.16362 | 0.00038  |
| 2.29E-19 | 0.448119 | 1.90E-24 | 0.060986 | 0.18831 | 0.034164 | 0.46142  | 0.038558 | 0.40579  |
| 3.40E-11 | 0.391581 | 1.46E-18 | 0.06434  | 0.1651  | 0.068501 | 0.13938  | 0.027138 | 0.55856  |

|          |          |          |          |          |          |         |          |          |
|----------|----------|----------|----------|----------|----------|---------|----------|----------|
| 1.86E-20 | 0.543665 | 2.83E-37 | 0.149666 | 0.00118  | 0.045773 | 0.32362 | 0.205426 | 7.63E-06 |
| 7.02E-39 | 0.642972 | 7.87E-56 | 0.073932 | 0.11058  | 0.093364 | 0.04374 | 0.064288 | 0.16545  |
| 0.00044  | 0.097391 | 0.03538  | -0.0203  | 0.66176  | 0.058762 | 0.20496 | -0.0739  | 0.11074  |
| 4.69E-37 | 0.589184 | 5.52E-45 | 0.013521 | 0.77074  | -0.00352 | 0.93951 | 0.32353  | 7.70E-13 |
| 0.00208  | -0.12004 | 0.00942  | -0.14267 | 0.002    | 0.017739 | 0.70221 | -0.0912  | 0.04887  |
| 1.35E-31 | 0.65333  | 3.55E-58 | 0.085041 | 0.06633  | 0.16269  | 0.00042 | 0.290866 | 1.48E-10 |
| 5.43E-14 | 0.376465 | 3.59E-17 | -0.18585 | 5.33E-05 | 0.013787 | 0.76635 | 0.216252 | 2.40E-06 |
| 8.01E-39 | 0.691578 | 1.07E-67 | 0.018312 | 0.69307  | 0.156772 | 0.00067 | 0.225645 | 8.36E-07 |
| 3.10E-18 | 0.470242 | 4.55E-27 | 0.09165  | 0.04777  | 0.148353 | 0.0013  | 0.037334 | 0.42087  |
| 5.48E-33 | 0.568749 | 2.25E-41 | 0.009217 | 0.84253  | 0.075095 | 0.10507 | 0.190116 | 3.55E-05 |
| 1.98E-27 | 0.573565 | 3.34E-42 | -0.02127 | 0.64656  | 0.14748  | 0.00139 | 0.026031 | 0.57472  |
| 4.99E-15 | 0.373364 | 6.78E-17 | -0.05599 | 0.22722  | 0.00854  | 0.85397 | 0.159205 | 0.00055  |
| 1.81E-18 | 0.335532 | 9.44E-14 | 0.056855 | 0.22007  | 0.074107 | 0.10974 | 0.194948 | 2.21E-05 |
| 1.20E-07 | 0.237203 | 2.14E-07 | 0.000368 | 0.99367  | 0.044965 | 0.33225 | -0.17876 | 0.0001   |
| 1.25E-20 | 0.412508 | 1.30E-20 | -0.01557 | 0.73719  | -0.00837 | 0.85679 | 0.15046  | 0.00111  |
| 4.27E-45 | 0.680748 | 7.49E-65 | 0.012262 | 0.79156  | 0.107089 | 0.02063 | 0.135317 | 0.00339  |
| 5.24E-13 | -0.38406 | 7.31E-18 | -0.17854 | 0.0001   | -0.13575 | 0.00329 | -0.19636 | 1.92E-05 |
| 1.06E-09 | -0.2648  | 6.21E-09 | -0.16082 | 0.00049  | -0.0542  | 0.24242 | -0.15382 | 0.00085  |
| 2.75E-44 | 0.595894 | 3.16E-46 | 0.072555 | 0.1174   | 0.080664 | 0.08163 | 0.180288 | 8.94E-05 |
| 8.71E-49 | 0.716017 | 1.35E-74 | 0.021398 | 0.64464  | 0.13762  | 0.00288 | 0.358395 | 1.34E-15 |
| 9.34E-29 | 0.48552  | 5.42E-29 | 0.04059  | 0.38149  | 0.115688 | 0.01236 | 0.128544 | 0.0054   |
| 8.58E-58 | 0.723066 | 1.00E-76 | 0.036755 | 0.42811  | 0.146815 | 0.00147 | 0.204688 | 8.24E-06 |
| 1.35E-06 | 0.302792 | 2.34E-11 | 0.085253 | 0.06566  | 0.061896 | 0.18179 | 0.078376 | 0.09069  |
| 2.25E-48 | 0.62142  | 3.13E-51 | 0.028202 | 0.54323  | 0.064468 | 0.16426 | 0.15631  | 0.0007   |
| 1.45E-39 | 0.652644 | 5.12E-58 | 0.038797 | 0.40288  | 0.1205   | 0.00915 | 0.091239 | 0.04878  |
| 1.90E-07 | -0.3342  | 1.20E-13 | -0.08501 | 0.06644  | -0.13673 | 0.00307 | -0.11181 | 0.01563  |
| 2.17E-42 | 0.64598  | 1.68E-56 | 0.138485 | 0.00271  | 0.098497 | 0.03334 | 0.348425 | 8.93E-15 |
| 9.83E-22 | 0.570735 | 1.03E-41 | 0.112917 | 0.01463  | 0.060416 | 0.19247 | 0.190434 | 3.44E-05 |
| 1.73E-31 | 0.571302 | 8.22E-42 | 0.136411 | 0.00314  | 0.087478 | 0.05889 | 0.16288  | 0.00041  |
| 6.11E-11 | 0.323806 | 7.34E-13 | -0.01545 | 0.73905  | -0.04348 | 0.3485  | 0.17021  | 0.00022  |
| 5.64E-57 | 0.610962 | 3.99E-49 | 0.087682 | 0.0583   | 0.088525 | 0.05592 | 0.258028 | 1.54E-08 |
| 5.81E-23 | -0.50769 | 5.79E-32 | -0.07879 | 0.08898  | -0.10306 | 0.02594 | -0.25979 | 1.22E-08 |
| 4.00E-12 | 0.428008 | 3.17E-22 | 0.006305 | 0.89191  | 0.158896 | 0.00057 | -0.01616 | 0.72753  |
| 8.03E-12 | -0.38776 | 3.33E-18 | -0.10796 | 0.01962  | 0.020275 | 0.6621  | -0.15664 | 0.00068  |
| 2.18E-28 | 0.542615 | 4.14E-37 | 0.129414 | 0.0051   | 0.114957 | 0.01292 | 0.225316 | 8.68E-07 |
| 7.03E-40 | 0.617081 | 2.39E-50 | 0.073197 | 0.11418  | 0.140751 | 0.0023  | 0.098702 | 0.03297  |
| 3.21E-16 | 0.336348 | 8.16E-14 | 0.116265 | 0.01193  | 0.068928 | 0.13693 | 0.026393 | 0.56941  |
| 1.57E-25 | 0.48038  | 2.47E-28 | 0.084212 | 0.06903  | 0.012591 | 0.7861  | 0.05576  | 0.22909  |
| 1.14E-08 | 0.351662 | 4.85E-15 | 0.012191 | 0.79274  | 0.112158 | 0.01531 | -0.00206 | 0.9645   |
| 1.50E-07 | 0.203134 | 9.68E-06 | -0.10688 | 0.02088  | -0.07062 | 0.1275  | -0.08177 | 0.0775   |
| 3.58E-05 | 0.28915  | 1.91E-10 | -0.06627 | 0.15276  | -0.10141 | 0.02844 | -0.00425 | 0.92709  |
| 1.32E-34 | -0.65047 | 1.61E-57 | -0.15154 | 0.00102  | -0.15175 | 0.001   | -0.09827 | 0.03376  |
| 1.90E-05 | -0.14482 | 0.0017   | 0.004777 | 0.918    | 0.021612 | 0.64133 | -0.03991 | 0.3895   |
| 3.83E-16 | -0.44427 | 5.19E-24 | -0.14665 | 0.00148  | -0.03064 | 0.50888 | -0.18333 | 6.75E-05 |
| 2.58E-37 | -0.59272 | 1.23E-45 | -0.03707 | 0.4241   | -0.05319 | 0.25131 | -0.08787 | 0.05776  |

|          |          |          |          |          |          |          |          |          |
|----------|----------|----------|----------|----------|----------|----------|----------|----------|
| 2.65E-14 | -0.39334 | 9.93E-19 | -0.03753 | 0.41847  | -0.11735 | 0.01115  | -0.20973 | 4.85E-06 |
| 3.59E-06 | 0.271271 | 2.54E-09 | 0.094327 | 0.0416   | 0.013892 | 0.76462  | -0.04551 | 0.3264   |
| 7.91E-19 | 0.465949 | 1.52E-26 | 0.057727 | 0.21306  | 0.042578 | 0.35858  | 0.050286 | 0.27816  |
| 1.35E-21 | 0.452542 | 5.89E-25 | 0.068134 | 0.14152  | 0.038751 | 0.40344  | 0.167969 | 0.00027  |
| 5.36E-48 | 0.761626 | 1.18E-89 | 0.075591 | 0.10279  | 0.153023 | 0.00091  | 0.140066 | 0.00242  |
| 9.93E-11 | -0.36653 | 2.70E-16 | -0.06906 | 0.13616  | -0.05338 | 0.24958  | -0.0497  | 0.28382  |
| 0.51724  | -0.09999 | 0.03074  | 0.027025 | 0.56019  | 0.027083 | 0.55935  | -0.10969 | 0.01773  |
| 7.85E-06 | -0.28508 | 3.50E-10 | 0.010611 | 0.8191   | -0.00564 | 0.90331  | -0.12555 | 0.00659  |
| 2.37E-13 | 0.387568 | 3.46E-18 | 0.14226  | 0.00206  | 0.051723 | 0.26464  | 0.168048 | 0.00026  |
| 6.53E-27 | 0.478967 | 3.73E-28 | 0.070808 | 0.12651  | -0.0276  | 0.55191  | 0.084122 | 0.06934  |
| 1.87E-05 | 0.280532 | 6.81E-10 | -0.04351 | 0.34811  | 0.115137 | 0.01278  | 0.077702 | 0.0935   |
| 0.00018  | 0.238487 | 1.83E-07 | 0.087024 | 0.06023  | -0.01173 | 0.80045  | 0.05864  | 0.20591  |
| 8.27E-25 | 0.422917 | 1.10E-21 | -0.01579 | 0.73365  | 0.01163  | 0.80208  | 0.033755 | 0.4668   |
| 3.23E-13 | 0.459005 | 1.03E-25 | 0.11079  | 0.01661  | 0.055679 | 0.22978  | 0.011486 | 0.80448  |
| 2.78E-31 | 0.639038 | 5.79E-55 | 0.102679 | 0.0265   | 0.041938 | 0.36586  | 0.145821 | 0.00158  |
| 0.00012  | 0.212743 | 3.51E-06 | 0.104152 | 0.0244   | 0.091757 | 0.04751  | -0.06415 | 0.16633  |
| 1.19E-05 | 0.099919 | 0.03086  | -0.06775 | 0.14377  | -0.10267 | 0.02651  | -0.02081 | 0.65373  |
| 2.58E-37 | 0.680437 | 9.00E-65 | 0.075047 | 0.10529  | 0.140306 | 0.00237  | 0.107978 | 0.0196   |
| 9.13E-18 | 0.35462  | 2.76E-15 | 0.128663 | 0.00536  | -0.002   | 0.96556  | 0.266612 | 4.85E-09 |
| 1.11E-18 | 0.394842 | 7.13E-19 | 0.043673 | 0.34634  | 0.082571 | 0.07465  | -0.14823 | 0.00132  |
| 2.88E-24 | 0.497225 | 1.56E-30 | 0.010787 | 0.81616  | 0.025818 | 0.57785  | 0.234875 | 2.84E-07 |
| 5.89E-07 | 0.219978 | 1.59E-06 | -0.05867 | 0.20568  | -0.08863 | 0.05564  | -0.00462 | 0.92072  |
| 1.00E-20 | 0.389844 | 2.12E-18 | -0.04632 | 0.31788  | -0.09387 | 0.04261  | 0.339602 | 4.54E-14 |
| 1.49E-19 | 0.484831 | 6.65E-29 | 0.102925 | 0.02614  | 0.143596 | 0.00186  | 0.211889 | 3.85E-06 |
| 0.00274  | 0.116411 | 0.01182  | -0.02366 | 0.61004  | 0.037036 | 0.42459  | -0.04194 | 0.36589  |
| 1.30E-54 | 0.672277 | 1.03E-62 | 0.079818 | 0.08489  | 0.14341  | 0.00189  | 0.320934 | 1.20E-12 |
| 1.91E-05 | 0.234101 | 3.11E-07 | -0.03219 | 0.4877   | 0.049603 | 0.28475  | -0.02784 | 0.54847  |
| 1.32E-27 | -0.58439 | 4.08E-44 | -0.12396 | 0.00732  | -0.12721 | 0.00591  | -0.11532 | 0.01264  |
| 9.79E-13 | 0.332006 | 1.77E-13 | 0.036088 | 0.43655  | 0.005383 | 0.90763  | 0.281571 | 5.86E-10 |
| 3.62E-37 | 0.656816 | 5.50E-59 | 0.108208 | 0.01934  | 0.037541 | 0.41829  | 0.127652 | 0.00574  |
| 2.21E-23 | -0.4621  | 4.41E-26 | -0.16837 | 0.00026  | -0.13782 | 0.00284  | -0.22045 | 1.51E-06 |
| 3.57E-16 | -0.34434 | 1.91E-14 | -0.138   | 0.0028   | -0.05468 | 0.23826  | -0.10748 | 0.02017  |
| 1.17E-17 | 0.386838 | 4.05E-18 | 0.035406 | 0.44528  | 0.01076  | 0.81661  | 0.110246 | 0.01716  |
| 9.15E-37 | 0.588138 | 8.57E-45 | 0.129465 | 0.00508  | 0.086881 | 0.06065  | 0.1806   | 8.69E-05 |
| 1.97E-21 | 0.486408 | 4.16E-29 | 0.090596 | 0.0504   | 0.077182 | 0.09573  | 0.182665 | 7.18E-05 |
| 6.20E-08 | 0.307428 | 1.11E-11 | 0.006494 | 0.8887   | 0.030613 | 0.5093   | 0.002249 | 0.96135  |
| 2.83E-09 | 0.349571 | 7.20E-15 | 0.078404 | 0.09057  | 0.08838  | 0.05632  | 0.062477 | 0.17771  |
| 8.42E-19 | 0.527267 | 8.95E-35 | 0.119187 | 0.00994  | 0.128831 | 0.0053   | 0.139853 | 0.00245  |
| 5.10E-05 | 0.242314 | 1.15E-07 | -0.01127 | 0.80801  | 0.060807 | 0.1896   | 0.062654 | 0.17648  |
| 0.19452  | 0.041055 | 0.37605  | 0.010019 | 0.82904  | 0.041897 | 0.36633  | -0.05314 | 0.25174  |
| 2.22E-13 | 0.379821 | 1.79E-17 | 0.048205 | 0.29855  | 0.129568 | 0.00504  | 0.108812 | 0.01867  |
| 2.02E-10 | 0.442751 | 7.70E-24 | 0.229983 | 5.06E-07 | 0.237359 | 2.10E-07 | 0.196525 | 1.89E-05 |
| 1.88E-10 | 0.322062 | 9.89E-13 | -0.01851 | 0.68998  | 0.010147 | 0.82689  | -0.11517 | 0.01276  |
| 3.59E-60 | 0.695559 | 9.01E-69 | 0.018381 | 0.69196  | 0.044503 | 0.33725  | 0.194593 | 2.29E-05 |
| 7.01E-13 | 0.354981 | 2.58E-15 | 0.13865  | 0.00268  | 0.121536 | 0.00856  | 0.198958 | 1.48E-05 |

|          |          |          |          |          |          |         |          |          |
|----------|----------|----------|----------|----------|----------|---------|----------|----------|
| 1.03E-31 | 0.590242 | 3.53E-45 | 0.131987 | 0.00427  | 0.069554 | 0.13339 | 0.232098 | 3.94E-07 |
| 1.52E-08 | 0.306791 | 1.23E-11 | -0.01182 | 0.79898  | -0.04023 | 0.38577 | 0.186069 | 5.22E-05 |
| 6.55E-20 | -0.50632 | 8.97E-32 | -0.06336 | 0.17162  | -0.08124 | 0.07945 | -0.13301 | 0.00398  |
| 2.05E-19 | 0.390027 | 2.04E-18 | 0.031326 | 0.49948  | 0.082631 | 0.07443 | 0.088549 | 0.05585  |
| 2.16E-34 | 0.524449 | 2.33E-34 | 0.226165 | 7.87E-07 | 0.052241 | 0.25988 | 0.103599 | 0.02517  |
| 8.26E-06 | 0.298874 | 4.32E-11 | -0.00099 | 0.98296  | 0.086268 | 0.0625  | -0.09164 | 0.0478   |
| 1.23E-43 | 0.637601 | 1.19E-54 | 0.106351 | 0.02153  | 0.118846 | 0.01015 | 0.225109 | 8.89E-07 |
| 6.00E-12 | 0.420859 | 1.80E-21 | 0.036841 | 0.42703  | 0.097237 | 0.03567 | 0.174311 | 0.00015  |
| 2.50E-23 | 0.553939 | 6.53E-39 | 0.041636 | 0.36933  | 0.133884 | 0.00375 | 0.275378 | 1.43E-09 |
| 2.58E-35 | 0.556845 | 2.20E-39 | 0.035609 | 0.44267  | -0.03515 | 0.44853 | 0.045433 | 0.32724  |
| 0.01363  | 0.07512  | 0.10495  | -0.12269 | 0.00795  | -0.00457 | 0.92148 | 0.038863 | 0.40209  |
| 7.61E-10 | -0.29964 | 3.83E-11 | -0.12753 | 0.00578  | -0.08216 | 0.0761  | -0.02668 | 0.56519  |
| 4.66E-09 | -0.30676 | 1.24E-11 | -0.05004 | 0.28053  | -0.09348 | 0.04347 | -0.0615  | 0.18461  |
| 6.87E-25 | 0.448447 | 1.74E-24 | 0.043865 | 0.34422  | 0.07513  | 0.10491 | 0.220371 | 1.52E-06 |
| 7.90E-30 | 0.528131 | 6.66E-35 | 0.039966 | 0.38885  | 0.069803 | 0.132   | 0.172421 | 0.00018  |
| 3.30E-22 | 0.510692 | 2.21E-32 | -0.04343 | 0.34904  | 0.020473 | 0.65901 | 0.15682  | 0.00067  |
| 5.55E-05 | 0.134657 | 0.00355  | 0.000347 | 0.99403  | 0.035368 | 0.44576 | 0.010109 | 0.82753  |
| 8.20E-26 | 0.476166 | 8.39E-28 | 0.144107 | 0.0018   | 0.085698 | 0.06426 | 0.197139 | 1.78E-05 |
| 5.76E-25 | 0.379374 | 1.96E-17 | 0.056072 | 0.2265   | -0.05498 | 0.23567 | 0.251862 | 3.44E-08 |
| 1.24E-54 | 0.788427 | #####    | 0.07785  | 0.09288  | 0.139803 | 0.00246 | 0.305343 | 1.56E-11 |
| 6.45E-15 | -0.46619 | 1.42E-26 | -0.07801 | 0.09221  | -0.05008 | 0.28014 | -0.18913 | 3.90E-05 |
| 3.62E-53 | 0.733067 | 7.33E-80 | 0.139249 | 0.00256  | 0.152238 | 0.00097 | 0.221701 | 1.31E-06 |
| 0.00568  | -0.20558 | 7.51E-06 | -0.09528 | 0.03958  | 0.024508 | 0.59731 | -0.09118 | 0.04893  |
| 3.52E-19 | -0.37886 | 2.19E-17 | -0.1335  | 0.00385  | -0.07342 | 0.11309 | -0.15462 | 0.0008   |
| 8.15E-28 | 0.513276 | 9.53E-33 | 0.042706 | 0.35714  | 0.018316 | 0.693   | -0.05036 | 0.2775   |
| 7.63E-26 | 0.579443 | 3.12E-43 | 0.086546 | 0.06166  | 0.131492 | 0.00442 | 0.148443 | 0.00129  |
| 9.02E-14 | 0.384848 | 6.19E-18 | 0.046731 | 0.3136   | 0.033005 | 0.47676 | 0.179741 | 9.40E-05 |
| 1.14E-20 | 0.383678 | 7.94E-18 | -0.10271 | 0.02646  | -0.01919 | 0.67916 | 0.198015 | 1.63E-05 |
| 0.0674   | -0.1402  | 0.00239  | -0.02554 | 0.58195  | -0.0618  | 0.18249 | -0.07151 | 0.12276  |
| 5.65E-42 | 0.459374 | 9.32E-26 | 0.055568 | 0.23071  | 0.031572 | 0.49612 | 0.1204   | 0.0092   |
| 4.11E-20 | -0.48735 | 3.13E-29 | -0.16542 | 0.00033  | -0.04643 | 0.31677 | -0.16622 | 0.00031  |
| 3.44E-42 | 0.655334 | 1.22E-58 | 0.037704 | 0.41628  | 0.121092 | 0.00881 | 0.262164 | 8.86E-09 |
| 3.06E-28 | 0.46295  | 3.49E-26 | 0.044676 | 0.33538  | 0.061411 | 0.18524 | 0.066775 | 0.14965  |
| 2.48E-10 | -0.31971 | 1.47E-12 | -0.01732 | 0.70887  | -0.14298 | 0.00195 | -0.06543 | 0.15806  |
| 1.31E-09 | -0.36354 | 4.88E-16 | -0.08416 | 0.0692   | -0.14217 | 0.00207 | -0.15707 | 0.00066  |
| 5.16E-20 | -0.51552 | 4.57E-33 | 0.010439 | 0.82198  | -0.13844 | 0.00272 | -0.00772 | 0.86793  |
| 6.46E-46 | 0.677048 | 6.57E-64 | 0.046061 | 0.32059  | 0.092252 | 0.04632 | 0.339348 | 4.75E-14 |
| 1.56E-21 | 0.381569 | 1.24E-17 | 0.079776 | 0.08505  | 0.067458 | 0.14552 | -0.04626 | 0.31848  |
| 5.48E-28 | 0.580112 | 2.38E-43 | 0.110919 | 0.01649  | 0.077567 | 0.09408 | 0.008992 | 0.84633  |
| 4.90E-17 | -0.35542 | 2.37E-15 | -0.16529 | 0.00033  | -0.09711 | 0.03592 | -0.22513 | 8.86E-07 |
| 1.24E-23 | 0.398878 | 2.92E-19 | 0.195128 | 2.17E-05 | 0.060431 | 0.19237 | 0.162989 | 0.00041  |
| 2.89E-18 | 0.428416 | 2.86E-22 | 0.044656 | 0.33559  | 0.083982 | 0.0698  | 0.168132 | 0.00026  |
| 1.23E-11 | 0.280477 | 6.86E-10 | 0.125041 | 0.00682  | -0.06825 | 0.14084 | 0.146103 | 0.00155  |
| 1.07E-43 | 0.651921 | 7.50E-58 | 0.098694 | 0.03298  | 0.087929 | 0.0576  | 0.144192 | 0.00178  |
| 1.38E-43 | 0.68473  | 6.97E-66 | 0.031146 | 0.50194  | 0.071885 | 0.12083 | 0.047579 | 0.30489  |

|          |          |          |          |          |          |          |          |          |
|----------|----------|----------|----------|----------|----------|----------|----------|----------|
| 1.09E-08 | -0.25737 | 1.68E-08 | -0.07315 | 0.11439  | 0.005861 | 0.89948  | -0.14425 | 0.00178  |
| 5.67E-16 | 0.329142 | 2.92E-13 | 0.003976 | 0.93171  | 0.06181  | 0.1824   | 0.026799 | 0.56347  |
| 1.85E-12 | 0.425328 | 6.10E-22 | 0.062027 | 0.18086  | 0.056361 | 0.22411  | 0.029173 | 0.52943  |
| 3.15E-29 | 0.603691 | 1.04E-47 | 0.157661 | 0.00063  | 0.207303 | 6.27E-06 | 0.243013 | 1.05E-07 |
| 6.24E-43 | 0.632253 | 1.69E-53 | 0.042354 | 0.36112  | 0.070333 | 0.12909  | 0.262319 | 8.68E-09 |
| 5.18E-40 | 0.434314 | 6.60E-23 | 0.026186 | 0.57244  | -0.01209 | 0.79449  | 0.111719 | 0.01572  |
| 0.00049  | -0.25348 | 2.79E-08 | -0.15985 | 0.00053  | -0.07094 | 0.12578  | -0.07642 | 0.09905  |
| 5.27E-09 | 0.451192 | 8.44E-25 | -0.03195 | 0.49103  | 0.12224  | 0.00818  | 0.077314 | 0.09516  |
| 1.01E-19 | 0.469798 | 5.16E-27 | 0.120024 | 0.00943  | 0.057268 | 0.21673  | 0.056889 | 0.21979  |
| 1.70E-30 | 0.517973 | 2.04E-33 | 0.041611 | 0.36961  | 0.07057  | 0.1278   | 0.096018 | 0.03806  |
| 2.71E-58 | 0.813632 | #####    | 0.104625 | 0.02375  | 0.143353 | 0.0019   | 0.158547 | 0.00058  |
| 5.74E-46 | 0.605704 | 4.27E-48 | 0.080248 | 0.08322  | 0.131218 | 0.00451  | 0.176103 | 0.00013  |
| 5.65E-09 | 0.351685 | 4.83E-15 | -0.00648 | 0.889    | 0.163094 | 0.0004   | -0.08213 | 0.0762   |
| 0.00013  | -0.25745 | 1.66E-08 | -0.02145 | 0.64377  | -0.07126 | 0.12409  | -0.10848 | 0.01903  |
| 2.13E-09 | 0.435572 | 4.81E-23 | 0.077672 | 0.09363  | 0.125819 | 0.00648  | -0.02925 | 0.52839  |
| 1.71E-05 | 0.284133 | 4.03E-10 | -0.10553 | 0.02257  | -0.04572 | 0.32419  | 0.139484 | 0.00252  |
| 1.73E-35 | 0.569539 | 1.65E-41 | 0.029846 | 0.51998  | 0.09632  | 0.03746  | 0.06308  | 0.17355  |
| 8.09E-11 | 0.410833 | 1.92E-20 | 0.017346 | 0.7085   | 0.107288 | 0.0204   | -0.06988 | 0.13156  |
| 2.87E-11 | 0.374891 | 4.96E-17 | 0.08327  | 0.07221  | 0.091455 | 0.04824  | 0.158994 | 0.00056  |
| 0.01457  | -0.17235 | 0.00018  | -0.03784 | 0.41455  | 0.093116 | 0.0443   | -0.07151 | 0.12278  |
| 1.24E-16 | 0.38986  | 2.11E-18 | 0.071036 | 0.1253   | 0.072195 | 0.11923  | 0.08693  | 0.06051  |
| 1.49E-34 | 0.574567 | 2.24E-42 | 0.058414 | 0.20766  | 0.140215 | 0.00239  | 0.115355 | 0.01261  |
| 1.26E-32 | 0.581606 | 1.29E-43 | -0.02055 | 0.65783  | 0.027093 | 0.5592   | -0.02813 | 0.54426  |
| 1.23E-07 | 0.174518 | 0.00015  | 0.049718 | 0.28363  | -0.07787 | 0.0928   | -0.09058 | 0.05045  |
| 3.55E-36 | 0.494603 | 3.49E-30 | -0.00681 | 0.88326  | 0.003244 | 0.94426  | 0.086699 | 0.06119  |
| 8.93E-05 | 0.283994 | 4.11E-10 | -0.0158  | 0.73351  | 0.169437 | 0.00023  | 0.012461 | 0.78826  |
| 0.00893  | 0.159146 | 0.00056  | 0.030518 | 0.51061  | 0.091395 | 0.04839  | 0.011452 | 0.80504  |
| 1.26E-05 | 0.180939 | 8.42E-05 | 0.042784 | 0.35626  | -0.083   | 0.07313  | 0.114383 | 0.01339  |
| 4.39E-14 | 0.393077 | 1.05E-18 | -0.0499  | 0.28184  | 0.007521 | 0.87122  | -0.01328 | 0.77475  |
| 0.01995  | 0.007958 | 0.86382  | -0.00663 | 0.88636  | -0.03161 | 0.49561  | -0.02901 | 0.53168  |
| 4.18E-24 | 0.328038 | 3.54E-13 | -0.03246 | 0.48401  | -0.02995 | 0.51855  | 0.134728 | 0.00353  |
| 6.63E-21 | 0.451478 | 7.82E-25 | 0.062974 | 0.17428  | 0.06731  | 0.14641  | -0.00419 | 0.92808  |
| 0.17946  | 0.18093  | 8.43E-05 | 0.033657 | 0.46809  | 0.172279 | 0.00018  | 0.023157 | 0.61767  |
| 1.40E-34 | 0.625749 | 3.99E-52 | 0.062149 | 0.18     | 0.075872 | 0.10151  | 0.105423 | 0.0227   |
| 3.10E-06 | -0.12057 | 0.00911  | -0.01825 | 0.69403  | -0.01862 | 0.6881   | 0.100114 | 0.03053  |
| 1.99E-23 | 0.514068 | 7.36E-33 | -0.03521 | 0.44778  | 0.102316 | 0.02704  | 0.123079 | 0.00775  |
| 3.01E-19 | 0.581204 | 1.52E-43 | 0.210718 | 4.37E-06 | 0.149039 | 0.00124  | 0.122655 | 0.00797  |
| 1.71E-31 | 0.506841 | 7.60E-32 | 0.072111 | 0.11966  | -0.00752 | 0.87118  | 0.057514 | 0.21476  |
| 1.45E-08 | 0.305305 | 1.57E-11 | -0.03021 | 0.51494  | 0.072444 | 0.11796  | -0.19397 | 2.43E-05 |
| 4.13E-13 | -0.29242 | 1.17E-10 | 0.005499 | 0.90566  | -0.08713 | 0.0599   | -0.1107  | 0.0167   |
| 1.71E-30 | -0.5563  | 2.70E-39 | -0.06652 | 0.15119  | -0.09029 | 0.05118  | -0.14124 | 0.00222  |
| 1.11E-08 | -0.31457 | 3.47E-12 | -0.06368 | 0.16948  | -0.1157  | 0.01235  | -0.07983 | 0.08485  |
| 3.50E-18 | -0.47218 | 2.63E-27 | -0.0671  | 0.14765  | -0.09935 | 0.03183  | -0.17642 | 0.00013  |
| 3.04E-26 | 0.499413 | 7.90E-31 | 0.142959 | 0.00195  | 0.233645 | 3.28E-07 | 0.148103 | 0.00133  |
| 0.01365  | 0.160063 | 0.00052  | -0.00076 | 0.98687  | 0.042769 | 0.35643  | 0.0605   | 0.19186  |

|          |          |          |          |          |          |         |          |          |
|----------|----------|----------|----------|----------|----------|---------|----------|----------|
| 1.01E-13 | 0.308324 | 9.64E-12 | -0.01264 | 0.78524  | -0.02115 | 0.64849 | 0.177252 | 0.00012  |
| 1.87E-27 | 0.531806 | 1.88E-35 | -0.0202  | 0.66326  | 0.041184 | 0.37454 | 0.255093 | 2.26E-08 |
| 7.87E-86 | 0.698421 | 1.48E-69 | 0.155603 | 0.00074  | 0.12461  | 0.00701 | 0.354673 | 2.74E-15 |
| 5.92E-05 | 0.329157 | 2.91E-13 | 0.117318 | 0.01117  | 0.105864 | 0.02213 | -0.09066 | 0.05023  |
| 1.59E-56 | 0.77275  | 7.54E-94 | 0.116589 | 0.01169  | 0.110601 | 0.0168  | 0.151389 | 0.00103  |
| 1.23E-48 | 0.718226 | 2.95E-75 | 0.105535 | 0.02256  | 0.164385 | 0.00036 | 0.339588 | 4.55E-14 |
| 1.22E-06 | 0.084619 | 0.0677   | -0.03412 | 0.46201  | -0.04033 | 0.38455 | 0.102954 | 0.02609  |
| 2.20E-13 | 0.455245 | 2.86E-25 | 0.144834 | 0.0017   | 0.109562 | 0.01786 | 0.098323 | 0.03365  |
| 4.72E-37 | 0.582238 | 9.95E-44 | 0.116287 | 0.01191  | 0.076122 | 0.10038 | 0.11323  | 0.01436  |
| 1.37E-24 | -0.48005 | 2.72E-28 | -0.14013 | 0.0024   | -0.12485 | 0.00691 | -0.0715  | 0.12285  |
| 7.91E-44 | 0.617597 | 1.88E-50 | 0.004761 | 0.91826  | 0.090079 | 0.05173 | 0.205057 | 7.93E-06 |
| 4.01E-40 | 0.638427 | 7.88E-55 | 0.0261   | 0.5737   | 0.127508 | 0.00579 | 0.136799 | 0.00305  |
| 2.78E-43 | 0.665102 | 5.90E-61 | 0.100083 | 0.03058  | 0.139214 | 0.00257 | 0.227897 | 6.45E-07 |
| 0.01156  | -0.16518 | 0.00034  | 0.066844 | 0.14923  | -0.01591 | 0.73158 | -0.08905 | 0.05449  |
| 1.91E-23 | 0.441819 | 9.79E-24 | 0.007085 | 0.87864  | 0.086161 | 0.06283 | -0.06615 | 0.15348  |
| 7.08E-67 | 0.766049 | 2.71E-91 | 0.070338 | 0.12906  | 0.08845  | 0.05613 | 0.145893 | 0.00157  |
| 0.00011  | 0.163036 | 0.0004   | 0.06799  | 0.14237  | 0.064645 | 0.1631  | 0.089876 | 0.05226  |
| 1.24E-14 | 0.46304  | 3.41E-26 | 0.06643  | 0.15177  | 0.01929  | 0.67757 | 0.128103 | 0.00557  |
| 2.15E-13 | 0.22927  | 5.50E-07 | -0.03674 | 0.42836  | -0.04168 | 0.36887 | 0.209151 | 5.16E-06 |
| 5.58E-06 | 0.102473 | 0.0268   | -0.13008 | 0.00487  | -0.1132  | 0.01438 | 0.087751 | 0.05811  |
| 0.03345  | 0.027424 | 0.55442  | -0.08239 | 0.0753   | -0.01249 | 0.78776 | 0.020281 | 0.662    |
| 0.00011  | 0.160129 | 0.00051  | 0.069988 | 0.13098  | -0.02637 | 0.56974 | -0.01607 | 0.72912  |
| 0.00035  | 0.268607 | 3.68E-09 | 0.240853 | 1.37E-07 | 0.112866 | 0.01467 | 0.143424 | 0.00189  |
| 7.74E-25 | 0.40648  | 5.24E-20 | -0.05365 | 0.24722  | 0.019602 | 0.67266 | 0.132762 | 0.00405  |
| 2.06E-46 | 0.687613 | 1.22E-66 | 0.119947 | 0.00947  | 0.094514 | 0.0412  | 0.248637 | 5.20E-08 |
| 1.20E-07 | 0.177    | 0.00012  | -0.04733 | 0.30744  | -0.00911 | 0.84433 | 0.013747 | 0.76701  |
| 5.21E-09 | -0.20073 | 1.24E-05 | -0.05695 | 0.21928  | -0.14479 | 0.00171 | -0.04395 | 0.34328  |
| 6.69E-15 | 0.4063   | 5.46E-20 | -0.11784 | 0.01081  | 0.050345 | 0.2776  | 0.181173 | 8.24E-05 |
| 1.57E-06 | -0.22283 | 1.15E-06 | 0.040483 | 0.38274  | -0.0662  | 0.15319 | -0.23266 | 3.69E-07 |
| 1.01E-30 | 0.662847 | 2.06E-60 | -0.03294 | 0.47768  | 0.105179 | 0.02302 | 0.084376 | 0.0685   |
| 1.52E-19 | 0.487016 | 3.47E-29 | -0.03551 | 0.44389  | 0.005941 | 0.89811 | 0.033276 | 0.47314  |
| 4.80E-26 | 0.60919  | 8.91E-49 | 0.059847 | 0.1967   | 0.132849 | 0.00403 | -0.02827 | 0.54231  |
| 1.43E-25 | 0.481303 | 1.88E-28 | 0.018428 | 0.69122  | 0.105811 | 0.0222  | 0.133343 | 0.00389  |
| 9.98E-18 | 0.393143 | 1.04E-18 | -0.02086 | 0.65296  | 0.057361 | 0.21598 | -0.0519  | 0.26299  |
| 3.07E-37 | 0.640104 | 3.38E-55 | 0.171331 | 0.0002   | 0.106456 | 0.0214  | 0.421444 | 1.56E-21 |
| 1.17E-17 | -0.41829 | 3.32E-21 | -0.00034 | 0.99413  | -0.06638 | 0.1521  | -0.16428 | 0.00036  |
| 1.74E-16 | 0.556914 | 2.14E-39 | 0.103935 | 0.0247   | 0.142797 | 0.00198 | 0.098733 | 0.03291  |
| 7.32E-47 | 0.663614 | 1.35E-60 | 0.078392 | 0.09062  | 0.128914 | 0.00527 | 0.171556 | 0.0002   |
| 1.71E-49 | 0.614399 | 8.27E-50 | 0.121844 | 0.00839  | 0.002736 | 0.95298 | 0.104569 | 0.02383  |
| 3.51E-25 | 0.5614   | 3.89E-40 | -0.0202  | 0.66325  | 0.127001 | 0.00599 | -0.01189 | 0.79777  |
| 3.59E-06 | 0.185474 | 5.52E-05 | 0.008619 | 0.85263  | 0.063662 | 0.16961 | 0.044105 | 0.34159  |
| 1.54E-29 | 0.578547 | 4.50E-43 | 0.061504 | 0.18457  | 0.127786 | 0.00568 | 0.034325 | 0.4593   |
| 1.35E-33 | 0.645122 | 2.61E-56 | 0.025843 | 0.57748  | 0.012085 | 0.7945  | 0.001764 | 0.96967  |
| 0.00356  | 0.023551 | 0.61171  | -0.07411 | 0.10975  | -0.04061 | 0.38122 | -0.06019 | 0.19415  |
| 1.50E-11 | 0.300324 | 3.44E-11 | 0.188253 | 4.24E-05 | 0.044734 | 0.33474 | 0.011608 | 0.80243  |

|          |          |          |          |          |          |         |          |          |
|----------|----------|----------|----------|----------|----------|---------|----------|----------|
| 1.17E-12 | 0.381238 | 1.33E-17 | -0.0657  | 0.15636  | -0.05293 | 0.2536  | 0.252392 | 3.21E-08 |
| 4.70E-13 | -0.37979 | 1.80E-17 | -0.12632 | 0.00627  | -0.08014 | 0.08362 | -0.12009 | 0.00939  |
| 2.84E-31 | 0.670509 | 2.83E-62 | 0.229611 | 5.28E-07 | 0.152416 | 0.00095 | 0.239757 | 1.57E-07 |
| 6.76E-08 | -0.16669 | 0.0003   | -0.02692 | 0.56168  | 0.089629 | 0.05292 | 0.006808 | 0.88334  |
| 7.42E-23 | 0.395316 | 6.43E-19 | 0.072295 | 0.11872  | 0.02837  | 0.54083 | 0.048293 | 0.29767  |
| 2.43E-24 | 0.498424 | 1.07E-30 | 0.077185 | 0.09571  | 0.101668 | 0.02803 | -0.00085 | 0.98531  |
| 2.79E-21 | 0.553815 | 6.84E-39 | 0.005496 | 0.9057   | 0.092885 | 0.04483 | 0.195682 | 2.06E-05 |
| 5.88E-23 | 0.466913 | 1.16E-26 | 0.065667 | 0.15654  | 0.110412 | 0.01699 | 0.272111 | 2.26E-09 |
| 5.05E-06 | 0.199044 | 1.47E-05 | -0.06915 | 0.13564  | -0.05773 | 0.21301 | -0.0437  | 0.34602  |
| 2.76E-30 | 0.584467 | 3.96E-44 | 0.078128 | 0.09172  | 0.05235  | 0.25888 | 0.135079 | 0.00345  |
| 1.40E-44 | 0.69261  | 5.67E-68 | -0.01881 | 0.68511  | 0.174787 | 0.00015 | 0.095876 | 0.03835  |
| 2.14E-09 | 0.209629 | 4.90E-06 | 0.003661 | 0.93712  | 0.03884  | 0.40236 | 0.18606  | 5.22E-05 |
| 5.08E-42 | 0.588289 | 8.04E-45 | 0.050659 | 0.27461  | 0.033045 | 0.47622 | 0.140003 | 0.00243  |
| 1.61E-19 | 0.520356 | 9.23E-34 | 0.083233 | 0.07234  | 0.025706 | 0.5795  | 0.197179 | 1.77E-05 |
| 2.59E-26 | 0.518789 | 1.55E-33 | 0.129051 | 0.00522  | 0.143872 | 0.00183 | 0.022224 | 0.63191  |
| 2.17E-17 | 0.429402 | 2.25E-22 | 0.02641  | 0.56916  | 0.041111 | 0.3754  | -0.07367 | 0.11187  |
| 7.65E-24 | 0.511737 | 1.57E-32 | -0.02872 | 0.53582  | 0.084136 | 0.06929 | 0.017851 | 0.70042  |
| 0.00085  | -0.09456 | 0.0411   | -0.03346 | 0.47074  | -0.06168 | 0.18333 | -0.17736 | 0.00012  |
| 3.42E-10 | -0.24549 | 7.73E-08 | 0.055988 | 0.2272   | -0.05419 | 0.24248 | -0.03946 | 0.39489  |
| 4.59E-26 | 0.648737 | 4.00E-57 | 0.045481 | 0.32672  | 0.099509 | 0.03156 | 0.081638 | 0.078    |
| 4.48E-42 | 0.665589 | 4.50E-61 | 0.106791 | 0.02099  | 0.113863 | 0.01382 | 0.03143  | 0.49805  |
| 3.15E-09 | -0.22787 | 6.47E-07 | -0.11108 | 0.01633  | 0.0171   | 0.71244 | -0.08713 | 0.05992  |
| 1.18E-27 | 0.517171 | 2.66E-33 | -0.00903 | 0.84576  | 0.108396 | 0.01912 | 0.143206 | 0.00192  |
| 1.69E-62 | 0.773587 | 3.56E-94 | 0.0839   | 0.07008  | 0.166254 | 0.00031 | 0.260239 | 1.15E-08 |
| 1.42E-05 | -0.12361 | 0.00749  | 0.00043  | 0.99261  | 0.068102 | 0.14171 | -0.14597 | 0.00156  |
| 1.15E-22 | 0.519976 | 1.05E-33 | 0.115784 | 0.01229  | 0.163455 | 0.00039 | 0.204652 | 8.27E-06 |
| 1.85E-09 | 0.370752 | 1.15E-16 | 0.039444 | 0.39509  | 0.125316 | 0.0067  | 0.184452 | 6.08E-05 |
| 9.12E-12 | 0.373778 | 6.23E-17 | -0.01605 | 0.72935  | 0.032471 | 0.48392 | 0.092956 | 0.04467  |
| 8.18E-29 | 0.544795 | 1.88E-37 | 0.108892 | 0.01858  | 0.064386 | 0.1648  | 0.206246 | 7.01E-06 |
| 1.60E-09 | -0.30966 | 7.76E-12 | 0.081711 | 0.07773  | -0.02058 | 0.65736 | -0.02694 | 0.56147  |
| 5.94E-20 | -0.41635 | 5.28E-21 | -0.05801 | 0.21079  | -0.03723 | 0.42219 | -0.12501 | 0.00684  |
| 1.28E-11 | 0.341384 | 3.28E-14 | -0.0958  | 0.03849  | 0.114476 | 0.01331 | 0.114868 | 0.013    |
| 2.28E-20 | 0.533023 | 1.23E-35 | 0.244092 | 9.21E-08 | 0.099385 | 0.03177 | 0.200325 | 1.29E-05 |
| 3.65E-35 | 0.558683 | 1.10E-39 | 0.031619 | 0.49547  | 0.028869 | 0.53373 | 0.082239 | 0.07582  |
| 6.66E-13 | 0.48331  | 1.04E-28 | 0.064698 | 0.16276  | 0.066755 | 0.14977 | 0.144983 | 0.00168  |
| 2.92E-28 | 0.548637 | 4.65E-38 | 0.032395 | 0.48494  | 0.060185 | 0.19419 | 0.307946 | 1.02E-11 |
| 1.37E-27 | 0.540876 | 7.72E-37 | -0.02501 | 0.58977  | 0.173822 | 0.00016 | 0.184088 | 6.29E-05 |
| 4.51E-47 | 0.696374 | 5.39E-69 | 0.031067 | 0.50303  | 0.107731 | 0.01988 | 0.111548 | 0.01588  |
| 1.15E-16 | 0.410641 | 2.01E-20 | 0.087118 | 0.05995  | 0.077153 | 0.09585 | 0.108304 | 0.01923  |
| 1.54E-10 | -0.274   | 1.73E-09 | -0.0423  | 0.36171  | -0.00893 | 0.84731 | -0.00358 | 0.93857  |
| 4.24E-40 | 0.658102 | 2.75E-59 | 0.104391 | 0.02407  | 0.17108  | 0.0002  | 0.290345 | 1.60E-10 |
| 4.69E-08 | -0.34767 | 1.03E-14 | 0.020949 | 0.6516   | -0.06776 | 0.14375 | 0.040082 | 0.38747  |
| 5.34E-05 | -0.10234 | 0.027    | -0.07036 | 0.12897  | -0.04426 | 0.33989 | 0.024723 | 0.59409  |
| 4.27E-47 | 0.631836 | 2.08E-53 | 0.088397 | 0.05627  | 0.082572 | 0.07464 | 0.07691  | 0.09691  |
| 4.09E-07 | -0.27592 | 1.32E-09 | -0.0944  | 0.04145  | -0.17042 | 0.00022 | -0.0757  | 0.10228  |



|          |          |          |          |          |          |          |          |          |
|----------|----------|----------|----------|----------|----------|----------|----------|----------|
| 5.44E-15 | 0.408881 | 3.02E-20 | 0.020686 | 0.65569  | 0.101383 | 0.02847  | 0.011784 | 0.79951  |
| 1.30E-12 | 0.441681 | 1.01E-23 | 0.019483 | 0.67453  | 0.160632 | 0.00049  | 0.098581 | 0.03318  |
| 2.83E-12 | -0.35153 | 4.98E-15 | -0.20314 | 9.67E-06 | -0.04647 | 0.31627  | -0.05635 | 0.2242   |
| 6.67E-30 | 0.588099 | 8.71E-45 | 0.051206 | 0.26945  | 0.223319 | 1.09E-06 | 0.153136 | 0.0009   |
| 5.88E-37 | 0.691187 | 1.37E-67 | 0.103904 | 0.02474  | 0.159084 | 0.00056  | 0.275838 | 1.34E-09 |
| 1.13E-19 | -0.33461 | 1.11E-13 | -0.00938 | 0.8397   | -0.03887 | 0.40198  | -0.12009 | 0.00939  |
| 2.79E-15 | 0.464911 | 2.03E-26 | 0.072191 | 0.11925  | 0.08145  | 0.07869  | 0.022991 | 0.6202   |
| 6.19E-21 | 0.475785 | 9.36E-28 | 0.055654 | 0.22998  | 0.047707 | 0.30359  | -0.00454 | 0.92197  |
| 1.61E-19 | 0.476243 | 8.20E-28 | 0.137812 | 0.00284  | 0.150447 | 0.00111  | 0.009182 | 0.84312  |
| 3.92E-13 | 0.329273 | 2.85E-13 | 0.044605 | 0.33614  | 0.174686 | 0.00015  | -0.03521 | 0.44774  |
| 2.08E-19 | 0.391752 | 1.40E-18 | 0.044608 | 0.33611  | 0.052366 | 0.25874  | 0.092111 | 0.04665  |
| 1.84E-35 | 0.636314 | 2.27E-54 | 0.041275 | 0.37349  | 0.037689 | 0.41646  | 0.051973 | 0.26233  |
| 1.43E-13 | 0.378527 | 2.34E-17 | 0.22046  | 1.50E-06 | 0.104253 | 0.02426  | 0.00761  | 0.86973  |
| 6.62E-22 | -0.47241 | 2.46E-27 | -0.04553 | 0.32616  | -0.0594  | 0.20011  | -0.22148 | 1.34E-06 |
| 4.14E-13 | 0.343748 | 2.13E-14 | 0.050249 | 0.27851  | 0.055101 | 0.23466  | -0.01252 | 0.78729  |
| 3.43E-14 | 0.40773  | 3.93E-20 | 0.051908 | 0.26293  | -0.01913 | 0.68012  | 0.026864 | 0.56253  |
| 5.42E-22 | -0.5     | 6.57E-31 | -0.04158 | 0.37     | -0.12687 | 0.00604  | -0.14951 | 0.00119  |
| 6.17E-27 | 0.534687 | 6.89E-36 | -0.04357 | 0.34752  | 0.078942 | 0.08837  | 0.031978 | 0.49058  |
| 3.58E-13 | 0.327169 | 4.11E-13 | 0.064424 | 0.16455  | 0.065424 | 0.15809  | 0.123341 | 0.00762  |
| 8.46E-10 | 0.452502 | 5.95E-25 | 0.232862 | 3.60E-07 | 0.096937 | 0.03625  | 0.13505  | 0.00346  |
| 7.74E-10 | 0.427705 | 3.41E-22 | 0.08758  | 0.0586   | 0.081496 | 0.07852  | 0.185725 | 5.39E-05 |
| 5.81E-12 | 0.418942 | 2.85E-21 | -0.04619 | 0.31923  | 0.15703  | 0.00066  | 0.128164 | 0.00554  |
| 5.59E-32 | 0.496109 | 2.20E-30 | 0.132852 | 0.00403  | 0.056409 | 0.22371  | 0.287841 | 2.32E-10 |
| 2.46E-06 | 0.319113 | 1.63E-12 | 0.110423 | 0.01698  | 0.075023 | 0.1054   | 0.04901  | 0.29055  |
| 5.64E-10 | -0.27468 | 1.57E-09 | 0.032132 | 0.4885   | -0.03569 | 0.44166  | -0.03339 | 0.47167  |
| 1.21E-44 | 0.570479 | 1.14E-41 | 0.013647 | 0.76866  | 0.035733 | 0.44108  | 0.192865 | 2.71E-05 |
| 2.53E-30 | 0.567852 | 3.20E-41 | -0.00985 | 0.83186  | 0.136634 | 0.00309  | 0.126653 | 0.00613  |
| 6.91E-30 | 0.496531 | 1.93E-30 | 0.140127 | 0.00241  | 0.062054 | 0.18067  | 0.15471  | 0.00079  |
| 6.77E-32 | 0.568226 | 2.76E-41 | 0.102889 | 0.02619  | 0.121358 | 0.00866  | 0.013769 | 0.76665  |
| 1.03E-17 | 0.396071 | 5.44E-19 | 0.037456 | 0.41935  | 0.089875 | 0.05226  | 0.179962 | 9.21E-05 |
| 1.48E-17 | 0.476624 | 7.35E-28 | 0.15775  | 0.00062  | 0.061868 | 0.18198  | 0.122629 | 0.00798  |
| 2.78E-34 | 0.562427 | 2.62E-40 | 0.071123 | 0.12483  | 0.117367 | 0.01114  | 0.199462 | 1.41E-05 |
| 9.44E-09 | 0.290615 | 1.53E-10 | -0.00213 | 0.96346  | 0.127401 | 0.00583  | 0.087497 | 0.05884  |
| 9.55E-11 | 0.335853 | 8.92E-14 | 0.103473 | 0.02535  | -0.04842 | 0.29641  | -0.07628 | 0.09969  |
| 2.23E-12 | 0.426865 | 4.19E-22 | -0.0035  | 0.93989  | 0.038419 | 0.40748  | 0.102988 | 0.02604  |
| 1.39E-14 | 0.368611 | 1.78E-16 | 0.028043 | 0.54551  | 0.094947 | 0.04027  | 0.024095 | 0.6035   |
| 2.97E-54 | 0.730994 | 3.36E-79 | 0.085659 | 0.06438  | 0.114895 | 0.01297  | 0.192105 | 2.92E-05 |
| 5.62E-17 | -0.27318 | 1.95E-09 | 0.00085  | 0.98539  | -0.04902 | 0.29047  | -0.12454 | 0.00705  |
| 8.32E-09 | -0.22258 | 1.18E-06 | -0.03041 | 0.51214  | -0.01638 | 0.72399  | -0.08475 | 0.06728  |
| 1.62E-84 | 0.783374 | 4.36E-98 | 0.155505 | 0.00075  | 0.18641  | 5.05E-05 | 0.343096 | 2.40E-14 |
| 2.72E-21 | 0.503141 | 2.46E-31 | 0.044224 | 0.34029  | 0.163522 | 0.00039  | 0.144446 | 0.00175  |
| 1.58E-47 | 0.65592  | 8.91E-59 | 0.11837  | 0.01046  | 0.136869 | 0.00304  | 0.349422 | 7.41E-15 |
| 2.02E-09 | -0.21414 | 3.02E-06 | -0.00259 | 0.9555   | -0.00379 | 0.93491  | -0.15475 | 0.00079  |
| 4.34E-13 | 0.393877 | 8.82E-19 | 0.016673 | 0.71932  | 0.0007   | 0.98796  | -0.10218 | 0.02724  |
| 8.35E-29 | 0.57453  | 2.27E-42 | 0.087723 | 0.05819  | 0.035189 | 0.44807  | -0.06018 | 0.19421  |

|          |          |          |          |          |          |          |          |          |
|----------|----------|----------|----------|----------|----------|----------|----------|----------|
| 1.33E-15 | 0.536901 | 3.16E-36 | 0.126244 | 0.0063   | 0.165576 | 0.00033  | 0.065111 | 0.16008  |
| 3.03E-39 | 0.661802 | 3.66E-60 | 0.008319 | 0.8577   | 0.15194  | 0.00099  | 0.165537 | 0.00033  |
| 1.88E-10 | 0.218976 | 1.77E-06 | -0.05656 | 0.22246  | 0.102773 | 0.02636  | 0.031938 | 0.49114  |
| 3.45E-18 | 0.423241 | 1.01E-21 | 0.009086 | 0.84475  | 0.060315 | 0.19322  | 0.028518 | 0.53872  |
| 1.13E-41 | 0.566177 | 6.15E-41 | 0.065082 | 0.16027  | 0.098817 | 0.03277  | 0.099267 | 0.03198  |
| 7.04E-30 | 0.573575 | 3.33E-42 | 0.046278 | 0.31831  | 0.030758 | 0.50729  | 0.103043 | 0.02596  |
| 3.06E-30 | 0.544929 | 1.80E-37 | 0.01278  | 0.78297  | 0.055715 | 0.22947  | 0.113572 | 0.01406  |
| 8.67E-22 | 0.527711 | 7.69E-35 | -0.03364 | 0.46829  | 0.150663 | 0.00109  | 0.184438 | 6.08E-05 |
| 4.32E-08 | -0.22141 | 1.35E-06 | -0.04456 | 0.33659  | -0.00426 | 0.92687  | -0.02518 | 0.58723  |
| 6.70E-16 | -0.37449 | 5.38E-17 | -0.04033 | 0.38454  | -0.1548  | 0.00079  | -0.14098 | 0.00226  |
| 3.31E-07 | 0.225096 | 8.90E-07 | 0.002187 | 0.9624   | 0.024556 | 0.59659  | -0.02739 | 0.55497  |
| 9.86E-07 | 0.366886 | 2.51E-16 | 0.062024 | 0.18088  | 0.162347 | 0.00043  | 0.000459 | 0.99211  |
| 5.41E-45 | -0.58768 | 1.04E-44 | -0.11995 | 0.00947  | -0.10033 | 0.03017  | -0.23361 | 3.30E-07 |
| 1.37E-24 | 0.584814 | 3.43E-44 | 0.040289 | 0.38502  | 0.101834 | 0.02777  | 0.022136 | 0.63326  |
| 7.98E-07 | 0.241125 | 1.33E-07 | 0.059746 | 0.19746  | -0.00096 | 0.98357  | 0.063129 | 0.17322  |
| 2.44E-30 | 0.64425  | 4.09E-56 | 0.125874 | 0.00646  | 0.244838 | 8.39E-08 | 0.243405 | 1.00E-07 |
| 1.76E-15 | 0.547049 | 8.31E-38 | 0.180382 | 8.86E-05 | 0.23913  | 1.70E-07 | 0.116683 | 0.01162  |
| 2.29E-38 | 0.663269 | 1.63E-60 | 0.167081 | 0.00029  | 0.142414 | 0.00203  | 0.237391 | 2.10E-07 |
| 1.86E-78 | 0.857751 | #####    | 0.135159 | 0.00343  | 0.151792 | 0.001    | 0.310705 | 6.55E-12 |
| 1.42E-29 | 0.455278 | 2.83E-25 | 0.153202 | 0.0009   | 0.047315 | 0.30758  | 0.184787 | 5.89E-05 |
| 7.61E-64 | 0.792679 | #####    | 0.038519 | 0.40627  | 0.127695 | 0.00572  | 0.259942 | 1.19E-08 |
| 7.91E-66 | 0.744466 | 1.30E-83 | 0.121311 | 0.00868  | 0.162712 | 0.00041  | 0.298369 | 4.67E-11 |
| 5.51E-14 | 0.482805 | 1.21E-28 | 0.099469 | 0.03163  | 0.072177 | 0.11933  | 0.036852 | 0.42689  |
| 1.19E-48 | 0.697302 | 3.00E-69 | 0.131934 | 0.00429  | 0.080219 | 0.08333  | 0.208891 | 5.30E-06 |
| 0.0105   | 0.137683 | 0.00287  | -0.02073 | 0.65494  | -0.0599  | 0.19634  | -0.12694 | 0.00601  |
| 8.76E-19 | 0.465284 | 1.83E-26 | -0.03776 | 0.4156   | 0.06812  | 0.1416   | 0.085115 | 0.0661   |
| 1.21E-11 | 0.300777 | 3.21E-11 | -0.03035 | 0.51301  | -0.0366  | 0.43002  | -0.00282 | 0.95153  |
| 5.81E-44 | 0.58131  | 1.46E-43 | 0.022015 | 0.63511  | 0.024945 | 0.59078  | -0.02816 | 0.54382  |
| 1.43E-08 | 0.200784 | 1.23E-05 | -0.00624 | 0.89297  | -0.05376 | 0.24625  | -0.08778 | 0.05802  |
| 8.35E-41 | 0.586889 | 1.45E-44 | 0.012051 | 0.79506  | 0.033712 | 0.46737  | 0.084503 | 0.06808  |
| 2.65E-23 | 0.394327 | 7.99E-19 | 0.056443 | 0.22344  | 0.050806 | 0.27322  | 0.122531 | 0.00803  |
| 1.20E-23 | 0.529006 | 4.94E-35 | -0.0269  | 0.56203  | 0.048545 | 0.29516  | -0.05889 | 0.20394  |
| 0.00041  | 0.323841 | 7.30E-13 | -0.04003 | 0.38812  | 0.140607 | 0.00232  | 0.055494 | 0.23133  |
| 1.78E-36 | 0.459188 | 9.81E-26 | -0.05225 | 0.25976  | 0.024277 | 0.60076  | 0.153663 | 0.00086  |
| 0.0008   | 0.184804 | 5.88E-05 | -0.07182 | 0.12119  | 0.006708 | 0.88505  | 0.062907 | 0.17474  |
| 0.0045   | -0.144   | 0.00181  | 0.001961 | 0.96628  | -0.02402 | 0.6046   | -0.11614 | 0.01202  |
| 3.72E-42 | 0.504982 | 1.37E-31 | 0.08303  | 0.07304  | 0.014092 | 0.76133  | 0.151367 | 0.00103  |
| 4.31E-20 | -0.43243 | 1.06E-22 | -0.09399 | 0.04234  | -0.03535 | 0.446    | -0.11486 | 0.013    |
| 4.05E-17 | 0.486198 | 4.43E-29 | 0.041884 | 0.36647  | 0.108634 | 0.01886  | 0.185573 | 5.47E-05 |
| 4.37E-34 | -0.57549 | 1.55E-42 | -0.10715 | 0.02056  | -0.16284 | 0.00041  | -0.11591 | 0.01219  |
| 1.23E-47 | 0.670929 | 2.23E-62 | 0.058322 | 0.20838  | 0.124763 | 0.00694  | 0.125731 | 0.00652  |
| 3.39E-31 | 0.600311 | 4.63E-47 | 0.088998 | 0.05462  | 0.070422 | 0.1286   | 0.085998 | 0.06333  |
| 0.00079  | 0.184649 | 5.97E-05 | 0.03602  | 0.43741  | 0.068328 | 0.14039  | -0.04378 | 0.3452   |
| 6.66E-08 | 0.202448 | 1.04E-05 | 0.162307 | 0.00043  | 0.063118 | 0.17329  | 0.123407 | 0.00759  |
| 1.56E-06 | 0.336714 | 7.64E-14 | 0.088634 | 0.05562  | 0.111231 | 0.01618  | 0.033954 | 0.46417  |

|          |          |          |          |          |          |          |          |          |
|----------|----------|----------|----------|----------|----------|----------|----------|----------|
| 2.97E-38 | 0.582677 | 8.31E-44 | 0.088205 | 0.05681  | 0.1074   | 0.02026  | 0.277944 | 9.89E-10 |
| 1.44E-51 | 0.743694 | 2.37E-83 | 0.100809 | 0.02939  | 0.167002 | 0.00029  | 0.344127 | 1.98E-14 |
| 7.98E-06 | -0.42179 | 1.44E-21 | -0.06117 | 0.18695  | -0.12566 | 0.00655  | -0.19645 | 1.91E-05 |
| 2.29E-30 | 0.588274 | 8.09E-45 | 0.067369 | 0.14606  | 0.234941 | 2.81E-07 | 0.159991 | 0.00052  |
| 1.05E-44 | 0.743156 | 3.59E-83 | 0.170793 | 0.00021  | 0.149429 | 0.0012   | 0.039539 | 0.39394  |
| 5.74E-13 | -0.30163 | 2.80E-11 | 0.002559 | 0.95602  | -0.00228 | 0.96084  | -0.16784 | 0.00027  |
| 2.73E-23 | 0.511688 | 1.60E-32 | 0.065828 | 0.15553  | 0.008061 | 0.86207  | 0.030812 | 0.50654  |
| 8.16E-08 | -0.253   | 2.97E-08 | 0.017283 | 0.70951  | -0.11767 | 0.01093  | -0.14097 | 0.00226  |
| 3.54E-10 | 0.125318 | 0.0067   | 0.033269 | 0.47324  | -0.02525 | 0.58626  | 0.089023 | 0.05455  |
| 2.29E-17 | 0.514577 | 6.23E-33 | 0.124643 | 0.007    | 0.169324 | 0.00024  | -0.02099 | 0.65098  |
| 0.00116  | -0.21287 | 3.47E-06 | -0.06904 | 0.1363   | 0.045398 | 0.32761  | -0.08142 | 0.07878  |
| 1.80E-52 | 0.692131 | 7.64E-68 | 0.03278  | 0.47977  | 0.087559 | 0.05866  | 0.10802  | 0.01955  |
| 6.18E-29 | 0.542211 | 4.78E-37 | 0.086381 | 0.06215  | 0.033145 | 0.47489  | 0.075383 | 0.10374  |
| 6.78E-46 | 0.714277 | 4.41E-74 | 0.061205 | 0.18672  | 0.135016 | 0.00346  | 0.109447 | 0.01798  |
| 2.02E-27 | 0.369457 | 1.50E-16 | -0.0222  | 0.63229  | 0.084016 | 0.06968  | 0.183335 | 6.74E-05 |
| 4.10E-13 | 0.372381 | 8.29E-17 | 0.141406 | 0.00219  | 0.011919 | 0.79726  | -0.05683 | 0.22023  |
| 7.58E-26 | 0.549138 | 3.87E-38 | 0.07449  | 0.10791  | 0.166572 | 0.0003   | 0.27592  | 1.32E-09 |
| 3.70E-30 | 0.519013 | 1.44E-33 | 0.114153 | 0.01357  | 0.130882 | 0.00461  | 0.227754 | 6.55E-07 |
| 1.03E-21 | 0.529588 | 4.04E-35 | 0.092254 | 0.04631  | 0.093338 | 0.0438   | 0.18303  | 6.94E-05 |
| 6.01E-48 | 0.599887 | 5.58E-47 | 0.008748 | 0.85045  | 0.183915 | 6.39E-05 | 0.058138 | 0.20982  |
| 7.14E-60 | 0.760138 | 4.14E-89 | 0.081373 | 0.07897  | 0.128495 | 0.00542  | 0.10439  | 0.02407  |
| 3.05E-30 | 0.671338 | 1.76E-62 | 0.207593 | 6.08E-06 | 0.196336 | 1.93E-05 | 0.159152 | 0.00056  |
| 7.79E-55 | 0.608975 | 9.82E-49 | -0.00757 | 0.87035  | 0.097481 | 0.03521  | 0.161035 | 0.00048  |
| 1.57E-23 | 0.514286 | 6.86E-33 | 0.101483 | 0.02832  | 0.147456 | 0.0014   | 0.182135 | 7.54E-05 |
| 5.71E-37 | 0.597592 | 1.52E-46 | 0.096042 | 0.03801  | 0.120139 | 0.00936  | 0.124895 | 0.00688  |
| 1.42E-12 | -0.26807 | 3.96E-09 | -0.07152 | 0.12272  | -0.05321 | 0.25115  | -0.22054 | 1.49E-06 |
| 1.02E-20 | 0.504873 | 1.42E-31 | -0.06811 | 0.14164  | 0.038279 | 0.4092   | 0.134304 | 0.00364  |
| 4.00E-20 | 0.426036 | 5.13E-22 | 0.035096 | 0.44927  | 0.067815 | 0.1434   | 0.11203  | 0.01543  |
| 5.22E-61 | 0.747258 | 1.46E-84 | 0.069877 | 0.13159  | 0.114391 | 0.01338  | 0.237639 | 2.03E-07 |
| 2.92E-54 | 0.770946 | 3.75E-93 | 0.015508 | 0.73818  | 0.152972 | 0.00091  | 0.224853 | 9.15E-07 |
| 9.38E-34 | 0.645652 | 1.99E-56 | 0.138634 | 0.00268  | 0.121493 | 0.00858  | 0.227979 | 6.39E-07 |
| 2.08E-37 | 0.502667 | 2.85E-31 | -0.00347 | 0.94034  | 0.048179 | 0.29882  | 0.000804 | 0.98618  |
| 2.84E-17 | 0.45687  | 1.84E-25 | 0.161161 | 0.00047  | 0.080318 | 0.08295  | 0.117138 | 0.0113   |
| 2.26E-29 | -0.56569 | 7.42E-41 | -0.04922 | 0.28847  | -0.0828  | 0.07384  | -0.01541 | 0.73976  |
| 1.66E-30 | 0.46661  | 1.26E-26 | 0.040732 | 0.37982  | 0.050628 | 0.2749   | 0.002391 | 0.95891  |
| 1.38E-15 | 0.256017 | 2.01E-08 | 0.118814 | 0.01018  | 0.029334 | 0.52715  | -0.07397 | 0.11041  |
| 8.88E-10 | -0.33444 | 1.15E-13 | -0.10318 | 0.02576  | -0.0531  | 0.25216  | -0.01834 | 0.69254  |
| 6.55E-24 | 0.464313 | 2.40E-26 | 0.033676 | 0.46783  | 0.129291 | 0.00514  | 0.013332 | 0.77384  |
| 8.90E-33 | 0.502611 | 2.90E-31 | 0.039864 | 0.39006  | 0.084257 | 0.06889  | 0.224799 | 9.21E-07 |
| 2.58E-08 | 0.257606 | 1.63E-08 | -0.04061 | 0.38129  | 0.039921 | 0.38938  | 0.059626 | 0.19837  |
| 2.98E-17 | 0.404616 | 8.01E-20 | 0.057811 | 0.21239  | -0.03201 | 0.49018  | 0.086972 | 0.06038  |
| 1.36E-19 | 0.357273 | 1.66E-15 | -0.05115 | 0.26998  | -0.00804 | 0.86251  | 0.077605 | 0.09392  |
| 1.73E-40 | 0.620284 | 5.35E-51 | 0.064723 | 0.1626   | 0.077977 | 0.09235  | 0.104752 | 0.02358  |
| 1.09E-08 | 0.235798 | 2.54E-07 | -0.09803 | 0.03419  | -0.03336 | 0.47199  | -0.05772 | 0.2131   |
| 1.81E-13 | 0.390992 | 1.65E-18 | -0.00529 | 0.90926  | 0.07047  | 0.12834  | 0.102983 | 0.02605  |

|          |          |          |          |          |          |          |          |          |
|----------|----------|----------|----------|----------|----------|----------|----------|----------|
| 1.45E-12 | 0.397273 | 4.17E-19 | 0.056053 | 0.22666  | 0.038007 | 0.41253  | -0.01599 | 0.73044  |
| 4.64E-25 | 0.529241 | 4.55E-35 | -0.11319 | 0.01439  | 0.061736 | 0.18292  | -0.04127 | 0.37354  |
| 6.28E-31 | 0.53083  | 2.63E-35 | 0.081234 | 0.07949  | 0.154203 | 0.00083  | 0.112292 | 0.01519  |
| 1.36E-33 | 0.585384 | 2.71E-44 | -0.06179 | 0.18255  | 0.092462 | 0.04582  | 0.024286 | 0.60064  |
| 5.03E-30 | 0.464106 | 2.54E-26 | -0.00305 | 0.94759  | -0.00917 | 0.84331  | 0.284326 | 3.91E-10 |
| 7.12E-25 | 0.502645 | 2.87E-31 | 0.01716  | 0.71148  | 0.054681 | 0.23825  | -0.14102 | 0.00225  |
| 1.04E-16 | 0.373073 | 7.20E-17 | 0.102784 | 0.02634  | -0.02768 | 0.55072  | -0.06401 | 0.16728  |
| 0.00019  | -0.24961 | 4.59E-08 | -0.00905 | 0.84536  | -0.06503 | 0.16062  | -0.07669 | 0.09786  |
| 4.33E-29 | 0.568974 | 2.06E-41 | 0.028402 | 0.54037  | 0.127749 | 0.0057   | 0.05466  | 0.23843  |
| 4.34E-05 | 0.129036 | 0.00523  | -0.02265 | 0.62536  | 0.047825 | 0.30238  | -0.1096  | 0.01782  |
| 1.08E-12 | 0.305356 | 1.55E-11 | -0.01463 | 0.75254  | 0.098512 | 0.03331  | 0.045153 | 0.33024  |
| 5.31E-25 | 0.391429 | 1.50E-18 | -0.07686 | 0.09714  | -0.02517 | 0.58737  | 0.220817 | 1.44E-06 |
| 4.52E-14 | 0.343275 | 2.32E-14 | -0.01458 | 0.75341  | -0.00107 | 0.98153  | 0.071121 | 0.12484  |
| 6.13E-08 | 0.206242 | 7.01E-06 | 0.000211 | 0.99637  | 0.025707 | 0.57949  | -0.08884 | 0.05504  |
| 2.09E-21 | 0.493846 | 4.40E-30 | 0.067135 | 0.14746  | 0.016674 | 0.71931  | 0.24857  | 5.24E-08 |
| 7.02E-40 | 0.676909 | 7.13E-64 | 0.030966 | 0.50442  | 0.085191 | 0.06585  | 0.153733 | 0.00086  |
| 2.02E-30 | 0.573874 | 2.95E-42 | 0.036523 | 0.43104  | 0.057402 | 0.21565  | 0.210472 | 4.48E-06 |
| 3.52E-06 | 0.410679 | 1.99E-20 | 0.102952 | 0.0261   | 0.150569 | 0.0011   | 0.266563 | 4.88E-09 |
| 3.05E-26 | 0.433028 | 9.12E-23 | 0.008369 | 0.85686  | 0.012422 | 0.78891  | 0.156456 | 0.00069  |
| 1.95E-12 | 0.280171 | 7.18E-10 | -0.0771  | 0.09609  | -0.04707 | 0.31007  | 0.148678 | 0.00127  |
| 7.25E-11 | 0.258313 | 1.48E-08 | 0.065465 | 0.15782  | 0.008652 | 0.85207  | -0.03945 | 0.39503  |
| 1.74E-22 | 0.496788 | 1.78E-30 | 0.131838 | 0.00432  | 0.139712 | 0.00248  | -0.00587 | 0.8993   |
| 0.00183  | -0.06885 | 0.13738  | 0.01768  | 0.70315  | 0.018262 | 0.69387  | 0.004652 | 0.92013  |
| 6.80E-10 | 0.31106  | 6.18E-12 | 0.079425 | 0.08644  | -0.02028 | 0.66202  | -0.00369 | 0.93668  |
| 2.93E-13 | 0.369784 | 1.40E-16 | 0.003576 | 0.93857  | -0.04206 | 0.36445  | -0.05036 | 0.27745  |
| 1.95E-09 | -0.34012 | 4.13E-14 | -0.0056  | 0.90402  | -0.05877 | 0.20492  | -0.11628 | 0.01191  |
| 1.82E-07 | -0.2441  | 9.20E-08 | -0.23534 | 2.68E-07 | 0.005484 | 0.90591  | -0.15111 | 0.00105  |
| 7.03E-05 | -0.02954 | 0.5243   | 0.013474 | 0.77151  | -0.04931 | 0.28762  | -0.01642 | 0.72335  |
| 2.11E-30 | 0.434894 | 5.71E-23 | 0.038984 | 0.40062  | 0.046927 | 0.31156  | 0.133209 | 0.00393  |
| 4.62E-16 | -0.46687 | 1.18E-26 | -0.05378 | 0.24608  | -0.2166  | 2.31E-06 | -0.02392 | 0.60614  |
| 2.03E-08 | 0.414401 | 8.34E-21 | 0.087124 | 0.05993  | 0.106546 | 0.02129  | -0.07745 | 0.09457  |
| 2.13E-18 | -0.46297 | 3.47E-26 | -0.14277 | 0.00198  | -0.11596 | 0.01215  | -0.09938 | 0.03178  |
| 3.47E-51 | 0.659311 | 1.43E-59 | 0.038584 | 0.40548  | 0.104697 | 0.02366  | 0.036288 | 0.43401  |
| 1.41E-32 | 0.646154 | 1.53E-56 | 0.063891 | 0.16808  | 0.057388 | 0.21576  | 0.332434 | 1.64E-13 |
| 9.49E-21 | 0.378232 | 2.49E-17 | -0.03386 | 0.46537  | 0.012587 | 0.78616  | 0.054322 | 0.24134  |
| 1.06E-23 | 0.414608 | 7.95E-21 | 0.016676 | 0.71928  | 0.044128 | 0.34133  | 0.201594 | 1.13E-05 |
| 1.30E-07 | 0.318651 | 1.76E-12 | 0.091948 | 0.04705  | 0.009189 | 0.84302  | -0.17873 | 0.0001   |
| 3.14E-07 | 0.290071 | 1.66E-10 | 0.019978 | 0.66675  | 0.0031   | 0.94673  | 0.125363 | 0.00668  |
| 2.59E-39 | 0.566105 | 6.32E-41 | 0.014685 | 0.75162  | 0.037067 | 0.4242   | 0.229683 | 5.24E-07 |
| 1.15E-12 | -0.42071 | 1.87E-21 | -0.14101 | 0.00226  | -0.12279 | 0.0079   | -0.06791 | 0.14286  |
| 7.06E-10 | -0.33712 | 7.10E-14 | -0.00504 | 0.91342  | -0.05288 | 0.25412  | -0.18843 | 4.17E-05 |
| 4.88E-11 | 0.473917 | 1.60E-27 | 0.185655 | 5.43E-05 | 0.195787 | 2.04E-05 | -0.00885 | 0.84873  |
| 1.61E-10 | 0.274505 | 1.61E-09 | 0.088637 | 0.05561  | 0.065589 | 0.15703  | 0.26275  | 8.19E-09 |
| 1.23E-30 | 0.50567  | 1.10E-31 | -0.03929 | 0.3969   | 0.083386 | 0.07181  | 0.070045 | 0.13066  |
| 9.16E-21 | 0.509998 | 2.76E-32 | 0.057766 | 0.21276  | 0.012168 | 0.79312  | 0.084924 | 0.06671  |

|          |          |          |          |          |          |          |          |          |
|----------|----------|----------|----------|----------|----------|----------|----------|----------|
| 2.56E-14 | -0.39696 | 4.47E-19 | -0.13749 | 0.00291  | -0.1353  | 0.0034   | -0.23095 | 4.52E-07 |
| 3.45E-10 | -0.40148 | 1.63E-19 | -0.0099  | 0.83103  | -0.02933 | 0.52726  | -0.04837 | 0.29687  |
| 4.73E-12 | 0.373887 | 6.10E-17 | 0.089981 | 0.05199  | 0.08993  | 0.05212  | 0.197397 | 1.73E-05 |
| 8.92E-07 | -0.20804 | 5.80E-06 | 0.008    | 0.86311  | 0.021246 | 0.64699  | -0.12856 | 0.0054   |
| 9.19E-10 | 0.380249 | 1.63E-17 | 0.120428 | 0.00919  | 0.064475 | 0.16421  | 0.11817  | 0.01059  |
| 2.59E-38 | 0.566292 | 5.88E-41 | 0.005292 | 0.9092   | 0.051233 | 0.2692   | 0.34803  | 9.62E-15 |
| 7.38E-11 | 0.438342 | 2.39E-23 | 0.119522 | 0.00973  | 0.220943 | 1.42E-06 | 0.046379 | 0.31726  |
| 5.15E-33 | 0.582696 | 8.24E-44 | 0.174913 | 0.00015  | 0.070143 | 0.13013  | 0.120432 | 0.00919  |
| 3.55E-39 | 0.635711 | 3.06E-54 | 0.034096 | 0.4623   | 0.129566 | 0.00504  | 0.293752 | 9.52E-11 |
| 9.62E-18 | 0.499937 | 6.71E-31 | 0.237906 | 1.97E-07 | 0.063967 | 0.16757  | 0.181882 | 7.72E-05 |
| 5.93E-11 | 0.243078 | 1.04E-07 | 0.06957  | 0.1333   | -0.0161  | 0.72857  | 0.019137 | 0.67998  |
| 1.32E-34 | 0.669616 | 4.69E-62 | 0.034785 | 0.45331  | 0.188841 | 4.01E-05 | 0.144733 | 0.00171  |
| 1.10E-32 | 0.698077 | 1.84E-69 | 0.047827 | 0.30237  | 0.141451 | 0.00218  | 0.274887 | 1.53E-09 |
| 2.24E-31 | 0.652802 | 4.70E-58 | 0.027285 | 0.55642  | 0.179446 | 9.65E-05 | 0.146401 | 0.00151  |
| 5.97E-45 | 0.577351 | 7.30E-43 | 0.129911 | 0.00493  | 0.076953 | 0.09672  | 0.361527 | 7.25E-16 |
| 5.67E-40 | 0.660403 | 7.87E-60 | 0.085513 | 0.06484  | 0.264886 | 6.13E-09 | 0.26788  | 4.07E-09 |
| 2.60E-28 | 0.572788 | 4.55E-42 | 0.057868 | 0.21194  | 0.088018 | 0.05734  | 0.089252 | 0.05393  |
| 0.00019  | 0.218305 | 1.91E-06 | 0.103683 | 0.02505  | 0.090133 | 0.05159  | 0.044085 | 0.34181  |
| 2.66E-18 | 0.45929  | 9.54E-26 | -0.06281 | 0.1754   | 0.077719 | 0.09344  | 0.191288 | 3.17E-05 |
| 2.16E-26 | 0.410384 | 2.13E-20 | 0.039421 | 0.39535  | 0.05306  | 0.25247  | 0.02296  | 0.62066  |
| 1.05E-21 | 0.422214 | 1.30E-21 | 0.029197 | 0.52909  | 0.05197  | 0.26236  | 0.014    | 0.76284  |
| 5.58E-28 | 0.519546 | 1.21E-33 | 0.013898 | 0.76452  | 0.044395 | 0.33842  | 0.144104 | 0.0018   |
| 7.73E-40 | 0.647704 | 6.85E-57 | 0.026906 | 0.56192  | 0.132097 | 0.00424  | 0.255947 | 2.02E-08 |
| 1.66E-18 | 0.47987  | 2.86E-28 | -0.01173 | 0.80044  | 0.085581 | 0.06462  | 0.025685 | 0.57981  |
| 5.21E-32 | 0.555661 | 3.43E-39 | -0.00653 | 0.88804  | 0.102166 | 0.02727  | -0.04463 | 0.3359   |
| 2.25E-05 | 0.198678 | 1.52E-05 | 0.069078 | 0.13607  | 0.07571  | 0.10224  | -0.099   | 0.03245  |
| 5.59E-48 | 0.650469 | 1.61E-57 | 0.014387 | 0.75649  | 0.12129  | 0.0087   | 0.13737  | 0.00293  |
| 1.88E-49 | 0.607467 | 1.94E-48 | 0.147463 | 0.0014   | 0.018582 | 0.68878  | 0.228133 | 6.27E-07 |
| 1.82E-60 | 0.77728  | 1.26E-95 | 0.099098 | 0.03227  | 0.150488 | 0.00111  | 0.2576   | 1.63E-08 |
| 5.90E-46 | 0.723454 | 7.61E-77 | 0.083239 | 0.07232  | 0.17034  | 0.00022  | 0.31162  | 5.64E-12 |
| 5.43E-12 | 0.487051 | 3.43E-29 | 0.102142 | 0.0273   | 0.129844 | 0.00495  | 0.080223 | 0.08331  |
| 1.36E-32 | 0.557983 | 1.43E-39 | -0.06581 | 0.15566  | 0.072145 | 0.11949  | 0.130398 | 0.00477  |
| 3.22E-15 | 0.309131 | 8.46E-12 | 0.073251 | 0.11391  | 0.104544 | 0.02386  | 0.077129 | 0.09596  |
| 8.54E-20 | 0.450067 | 1.14E-24 | 0.068601 | 0.13881  | 0.180157 | 9.05E-05 | 0.122782 | 0.0079   |
| 2.58E-49 | 0.621833 | 2.57E-51 | 0.120551 | 0.00912  | 0.095507 | 0.0391   | 0.242269 | 1.15E-07 |
| 1.19E-64 | 0.571651 | 7.16E-42 | 0.076115 | 0.10042  | 0.027199 | 0.55767  | 0.090851 | 0.04975  |
| 2.78E-06 | -0.19603 | 1.99E-05 | 0.092833 | 0.04495  | 0.004175 | 0.9283   | -0.04446 | 0.33771  |
| 2.01E-16 | 0.352892 | 3.84E-15 | 0.082216 | 0.07591  | -0.05582 | 0.22863  | 0.02295  | 0.62082  |
| 5.47E-39 | 0.704912 | 2.26E-71 | 0.027885 | 0.54778  | 0.177076 | 0.00012  | 0.029778 | 0.52092  |
| 2.21E-25 | 0.428525 | 2.79E-22 | -0.03188 | 0.49196  | 0.000634 | 0.9891   | 0.115051 | 0.01285  |
| 3.33E-45 | 0.778286 | 5.00E-96 | 0.198354 | 1.57E-05 | 0.146438 | 0.00151  | 0.154862 | 0.00079  |
| 1.06E-41 | 0.65626  | 7.42E-59 | 0.12419  | 0.00721  | 0.046772 | 0.31317  | 0.083931 | 0.06997  |
| 4.17E-18 | 0.50464  | 1.53E-31 | -0.02856 | 0.53808  | 0.049106 | 0.28961  | 0.042959 | 0.3543   |
| 5.84E-08 | 0.264165 | 6.77E-09 | 0.055218 | 0.23366  | 0.076777 | 0.09748  | 0.132679 | 0.00408  |
| 6.40E-16 | 0.465047 | 1.95E-26 | 0.000824 | 0.98582  | 0.031236 | 0.50071  | 0.12445  | 0.00709  |

|          |          |          |          |          |          |          |          |          |
|----------|----------|----------|----------|----------|----------|----------|----------|----------|
| 1.04E-70 | 0.836478 | #####    | 0.103966 | 0.02465  | 0.105481 | 0.02262  | 0.133854 | 0.00376  |
| 5.43E-41 | 0.692731 | 5.26E-68 | 0.14938  | 0.00121  | 0.149596 | 0.00119  | 0.119    | 0.01006  |
| 1.38E-24 | 0.452892 | 5.37E-25 | 0.068759 | 0.1379   | 0.072374 | 0.11832  | 0.123092 | 0.00774  |
| 0.00129  | 0.173997 | 0.00016  | -0.01542 | 0.7396   | -0.08919 | 0.05408  | 0.093631 | 0.04314  |
| 1.01E-40 | 0.651481 | 9.46E-58 | 0.108755 | 0.01873  | 0.1978   | 1.66E-05 | 0.320086 | 1.38E-12 |
| 1.26E-10 | 0.360677 | 8.57E-16 | 0.023099 | 0.61856  | 0.01693  | 0.71518  | -0.01537 | 0.74044  |
| 5.81E-46 | 0.691993 | 8.31E-68 | 0.146017 | 0.00156  | 0.165912 | 0.00032  | 0.360983 | 8.07E-16 |
| 2.39E-19 | 0.487801 | 2.74E-29 | -0.0054  | 0.9074   | 0.022765 | 0.62364  | 0.01721  | 0.71068  |
| 2.10E-24 | 0.533744 | 9.57E-36 | 0.065305 | 0.15884  | 0.016552 | 0.72128  | 0.044979 | 0.3321   |
| 4.95E-51 | 0.753296 | 1.17E-86 | 0.106431 | 0.02143  | 0.085043 | 0.06633  | 0.177991 | 0.00011  |
| 1.18E-19 | 0.401558 | 1.60E-19 | -0.06815 | 0.14144  | 0.071876 | 0.12088  | 0.046552 | 0.31545  |
| 1.05E-10 | 0.422559 | 1.19E-21 | 0.038499 | 0.40651  | 0.008437 | 0.85571  | 0.172209 | 0.00018  |
| 7.59E-39 | 0.621115 | 3.61E-51 | 0.240274 | 1.48E-07 | 0.173074 | 0.00017  | 0.118031 | 0.01069  |
| 0.00516  | 0.091057 | 0.04923  | -0.01258 | 0.78627  | 0.11823  | 0.01055  | -0.14799 | 0.00134  |
| 5.21E-23 | 0.511035 | 1.97E-32 | 0.02587  | 0.57709  | 0.054085 | 0.24341  | 0.239834 | 1.56E-07 |
| 5.54E-20 | 0.515014 | 5.40E-33 | 0.103294 | 0.0256   | 0.203563 | 9.26E-06 | 0.249754 | 4.51E-08 |
| 1.39E-18 | 0.249631 | 4.58E-08 | -0.04987 | 0.28213  | -0.06059 | 0.1912   | 0.124634 | 0.007    |
| 5.11E-15 | 0.439567 | 1.75E-23 | 0.075533 | 0.10305  | 0.069423 | 0.13413  | 0.347896 | 9.86E-15 |
| 6.40E-47 | 0.664724 | 7.28E-61 | 0.105366 | 0.02277  | 0.086569 | 0.06158  | 0.135009 | 0.00347  |
| 2.53E-12 | -0.5071  | 6.99E-32 | -0.07953 | 0.08601  | -0.17214 | 0.00019  | -0.07616 | 0.10023  |
| 2.14E-19 | -0.50465 | 1.52E-31 | -0.14443 | 0.00175  | -0.10463 | 0.02374  | -0.07423 | 0.10916  |
| 0.00023  | 0.196069 | 1.98E-05 | -0.07392 | 0.11063  | 0.031485 | 0.49731  | -0.07693 | 0.09682  |
| 1.57E-19 | 0.461634 | 5.02E-26 | 0.10096  | 0.02915  | 0.030144 | 0.5158   | 0.00175  | 0.96992  |
| 4.07E-37 | 0.689506 | 3.84E-67 | 0.12105  | 0.00883  | 0.187857 | 4.40E-05 | 0.241196 | 1.32E-07 |
| 1.35E-12 | 0.433846 | 7.43E-23 | 0.133988 | 0.00372  | 0.243437 | 9.99E-08 | 0.173598 | 0.00016  |
| 3.15E-55 | 0.697487 | 2.67E-69 | 0.082974 | 0.07323  | 0.068739 | 0.13801  | 0.214022 | 3.06E-06 |
| 7.83E-54 | 0.657583 | 3.64E-59 | 0.114802 | 0.01305  | 0.121019 | 0.00885  | 0.190567 | 3.40E-05 |
| 2.61E-29 | 0.541658 | 5.83E-37 | 0.056956 | 0.21925  | -0.02014 | 0.66421  | 0.203475 | 9.35E-06 |
| 2.43E-10 | -0.30031 | 3.45E-11 | -0.05768 | 0.21342  | -0.05531 | 0.23286  | -0.02457 | 0.59633  |
| 5.48E-09 | -0.28545 | 3.32E-10 | -0.05369 | 0.24685  | -0.07844 | 0.09044  | -0.10996 | 0.01745  |
| 3.51E-25 | 0.545797 | 1.31E-37 | -0.00111 | 0.98089  | 0.046003 | 0.3212   | 0.034916 | 0.45161  |
| 9.37E-20 | 0.4916   | 8.72E-30 | -0.00607 | 0.89597  | 0.155083 | 0.00077  | 0.275397 | 1.42E-09 |
| 2.48E-22 | 0.402852 | 1.20E-19 | 0.027779 | 0.5493   | 0.009122 | 0.84413  | 0.242147 | 1.17E-07 |
| 1.91E-05 | -0.16699 | 0.00029  | 0.002003 | 0.96557  | 0.017011 | 0.71387  | -0.08669 | 0.06123  |
| 3.04E-07 | 0.309948 | 7.41E-12 | -0.01531 | 0.74137  | 0.020255 | 0.66241  | -0.02793 | 0.54711  |
| 1.04E-18 | 0.414548 | 8.06E-21 | -0.00241 | 0.95862  | -0.00099 | 0.98302  | 0.001425 | 0.97551  |
| 2.53E-28 | 0.489572 | 1.61E-29 | 0.014517 | 0.75437  | 0.051531 | 0.26642  | 0.111966 | 0.01549  |
| 1.93E-09 | 0.227133 | 7.04E-07 | 0.047942 | 0.3012   | -0.00817 | 0.86021  | -0.04179 | 0.36754  |
| 2.32E-06 | -0.25208 | 3.35E-08 | 0.044839 | 0.3336   | -0.04487 | 0.33323  | -0.2041  | 8.76E-06 |
| 5.12E-10 | -0.25535 | 2.19E-08 | 0.000732 | 0.98741  | -0.00481 | 0.91743  | -0.00615 | 0.8946   |
| 7.57E-18 | 0.427416 | 3.66E-22 | 0.158989 | 0.00056  | 0.181659 | 7.88E-05 | 0.12589  | 0.00645  |
| 2.58E-25 | 0.515422 | 4.73E-33 | 0.002592 | 0.95545  | 0.072419 | 0.11809  | 0.109738 | 0.01768  |
| 7.50E-07 | 0.286077 | 3.02E-10 | 0.108164 | 0.01938  | 0.020927 | 0.65193  | 0.147219 | 0.00142  |
| 4.59E-45 | 0.764214 | 1.31E-90 | 0.029997 | 0.51786  | 0.108027 | 0.01954  | 0.090311 | 0.05113  |
| 2.78E-25 | 0.544515 | 2.09E-37 | 0.100179 | 0.03042  | 0.040801 | 0.37902  | 0.091183 | 0.04892  |

|          |          |          |          |          |          |          |          |          |
|----------|----------|----------|----------|----------|----------|----------|----------|----------|
| 4.06E-27 | 0.608099 | 1.46E-48 | 0.062747 | 0.17584  | 0.168421 | 0.00026  | 0.190711 | 3.35E-05 |
| 6.93E-28 | 0.453664 | 4.37E-25 | 0.108583 | 0.01892  | 0.121836 | 0.0084   | -0.00515 | 0.9116   |
| 2.24E-40 | 0.666613 | 2.54E-61 | 0.055476 | 0.23148  | 0.128098 | 0.00557  | 0.263764 | 7.14E-09 |
| 2.87E-05 | 0.251581 | 3.57E-08 | 0.136645 | 0.00309  | -0.00742 | 0.87289  | 0.085924 | 0.06355  |
| 1.91E-05 | 0.130857 | 0.00462  | -0.03977 | 0.39124  | -0.04438 | 0.33863  | -0.08847 | 0.05607  |
| 4.53E-11 | 0.294901 | 7.98E-11 | 0.051842 | 0.26354  | 0.054667 | 0.23837  | -0.05589 | 0.22805  |
| 2.78E-06 | 0.34513  | 1.65E-14 | 0.052707 | 0.25564  | 0.122986 | 0.0078   | 0.157622 | 0.00063  |
| 1.61E-27 | 0.583982 | 4.84E-44 | 0.099214 | 0.03207  | 0.03314  | 0.47495  | 0.237376 | 2.10E-07 |
| 2.79E-29 | 0.447099 | 2.48E-24 | 0.017088 | 0.71264  | 0.121416 | 0.00863  | 0.165847 | 0.00032  |
| 7.16E-41 | 0.645724 | 1.91E-56 | 0.132955 | 0.004    | 0.076606 | 0.09824  | 0.0998   | 0.03106  |
| 3.88E-32 | 0.542068 | 5.04E-37 | -0.01373 | 0.76721  | 0.077452 | 0.09457  | 0.192586 | 2.79E-05 |
| 1.63E-62 | 0.714758 | 3.18E-74 | 0.121826 | 0.0084   | 0.113567 | 0.01407  | 0.171086 | 0.0002   |
| 1.53E-09 | 0.224361 | 9.68E-07 | 0.018879 | 0.68407  | 0.05624  | 0.22511  | 0.002796 | 0.95194  |
| 2.03E-07 | 0.318561 | 1.79E-12 | 0.16565  | 0.00032  | 0.038888 | 0.40179  | 0.078076 | 0.09193  |
| 1.40E-05 | -0.16381 | 0.00038  | 0.066508 | 0.15129  | 0.020798 | 0.65394  | -0.0869  | 0.06061  |
| 4.06E-42 | 0.699598 | 6.98E-70 | 0.080445 | 0.08246  | 0.143403 | 0.00189  | 0.166453 | 0.0003   |
| 1.47E-20 | 0.45783  | 1.42E-25 | -0.01    | 0.82927  | 0.070548 | 0.12791  | 0.169489 | 0.00023  |
| 4.57E-15 | 0.340803 | 3.65E-14 | -0.01025 | 0.8252   | 0.053166 | 0.25152  | -0.10753 | 0.02011  |
| 5.51E-11 | 0.338575 | 5.47E-14 | -0.00198 | 0.96593  | 0.055043 | 0.23515  | -0.01141 | 0.80567  |
| 2.37E-11 | 0.385161 | 5.79E-18 | -0.02433 | 0.59991  | 0.054028 | 0.24391  | 0.062771 | 0.17567  |
| 1.82E-14 | 0.383853 | 7.65E-18 | -0.03948 | 0.39468  | 0.104884 | 0.02341  | 0.011886 | 0.79782  |
| 2.24E-08 | 0.20045  | 1.27E-05 | -0.05466 | 0.23844  | 0.068372 | 0.14013  | 0.10278  | 0.02635  |
| 6.90E-08 | 0.315861 | 2.80E-12 | 0.068269 | 0.14073  | -0.03204 | 0.48978  | 0.047882 | 0.30181  |
| 1.62E-30 | 0.645485 | 2.16E-56 | -0.00359 | 0.93828  | 0.165313 | 0.00033  | 0.072204 | 0.11919  |
| 1.81E-10 | -0.29872 | 4.42E-11 | 0.009231 | 0.8423   | -0.02729 | 0.55641  | -0.11995 | 0.00947  |
| 1.53E-21 | 0.405233 | 6.96E-20 | 0.029799 | 0.52063  | 0.10227  | 0.02711  | 0.23867  | 1.79E-07 |
| 1.50E-27 | 0.570301 | 1.22E-41 | 0.102833 | 0.02627  | 0.09548  | 0.03916  | 0.101869 | 0.02772  |
| 6.35E-28 | 0.569183 | 1.90E-41 | 0.144815 | 0.0017   | 0.133422 | 0.00387  | 0.014935 | 0.74752  |
| 1.59E-06 | -0.17439 | 0.00015  | -0.23581 | 2.53E-07 | -0.04217 | 0.36327  | -0.13913 | 0.00259  |
| 1.66E-31 | 0.481566 | 1.74E-28 | 0.013339 | 0.77373  | 0.067036 | 0.14806  | 0.202288 | 1.06E-05 |
| 0.14953  | 0.089067 | 0.05443  | 0.131371 | 0.00446  | 0.092662 | 0.04535  | -0.08083 | 0.08098  |
| 3.87E-07 | 0.266081 | 5.21E-09 | -0.01637 | 0.72427  | 0.046962 | 0.31121  | 0.162161 | 0.00043  |
| 3.62E-26 | 0.425633 | 5.66E-22 | -0.06314 | 0.17317  | 0.054985 | 0.23564  | 0.030608 | 0.50937  |
| 7.57E-11 | 0.444137 | 5.38E-24 | 0.212899 | 3.45E-06 | 0.196755 | 1.85E-05 | 0.170546 | 0.00021  |
| 2.77E-14 | 0.388993 | 2.55E-18 | 0.061174 | 0.18694  | 0.080564 | 0.08201  | 0.033882 | 0.46513  |
| 5.83E-32 | 0.559093 | 9.37E-40 | 0.011764 | 0.79984  | 0.044591 | 0.33629  | 0.248558 | 5.25E-08 |
| 3.43E-10 | 0.459487 | 9.04E-26 | -0.01331 | 0.77413  | 0.045826 | 0.32307  | 0.088044 | 0.05727  |
| 3.88E-34 | 0.593323 | 9.53E-46 | 0.122983 | 0.0078   | 0.057469 | 0.21512  | 0.101063 | 0.02898  |
| 0.00545  | -0.20906 | 5.21E-06 | -0.09703 | 0.03607  | -0.04163 | 0.36941  | -0.15047 | 0.00111  |
| 5.35E-41 | 0.604317 | 7.91E-48 | 0.03481  | 0.45297  | 0.056063 | 0.22657  | 0.113657 | 0.01399  |
| 3.11E-17 | -0.44089 | 1.25E-23 | -0.0767  | 0.0978   | -0.08828 | 0.05661  | -0.34818 | 9.35E-15 |
| 6.10E-11 | 0.326996 | 4.24E-13 | -0.06871 | 0.1382   | 0.00082  | 0.98591  | -0.01691 | 0.71544  |
| 2.12E-05 | -0.25148 | 3.61E-08 | -0.03495 | 0.45112  | -0.00952 | 0.83749  | -0.20083 | 1.23E-05 |
| 1.13E-44 | 0.650222 | 1.84E-57 | 0.120128 | 0.00936  | 0.131637 | 0.00438  | 0.203473 | 9.35E-06 |
| 4.09E-32 | 0.462764 | 3.68E-26 | 0.060153 | 0.19442  | 0.024844 | 0.59228  | 0.093365 | 0.04373  |

|          |          |          |          |          |          |          |          |          |
|----------|----------|----------|----------|----------|----------|----------|----------|----------|
| 1.24E-27 | 0.670323 | 3.14E-62 | 0.082625 | 0.07445  | 0.24767  | 5.88E-08 | 0.146882 | 0.00146  |
| 2.28E-16 | 0.300282 | 3.47E-11 | -0.03272 | 0.48055  | -0.0058  | 0.90044  | 0.120148 | 0.00935  |
| 3.52E-11 | -0.35055 | 6.00E-15 | -0.07697 | 0.09663  | -0.1253  | 0.00671  | -0.12971 | 0.00499  |
| 8.80E-16 | 0.302635 | 2.39E-11 | -0.0615  | 0.1846   | 0.019694 | 0.6712   | 0.02861  | 0.53741  |
| 1.76E-08 | -0.333   | 1.48E-13 | -0.0603  | 0.19337  | -0.1211  | 0.0088   | -0.16422 | 0.00037  |
| 9.53E-27 | -0.5931  | 1.05E-45 | -0.13844 | 0.00272  | -0.17351 | 0.00016  | -0.15599 | 0.00072  |
| 1.49E-20 | 0.481579 | 1.74E-28 | 0.105486 | 0.02262  | -0.03132 | 0.49953  | 0.000627 | 0.98921  |
| 2.77E-28 | 0.490877 | 1.09E-29 | 0.088527 | 0.05591  | 0.038165 | 0.4106   | 0.11598  | 0.01214  |
| 7.90E-29 | 0.624118 | 8.70E-52 | 0.024226 | 0.60152  | 0.121894 | 0.00837  | 0.15143  | 0.00103  |
| 8.40E-07 | 0.343532 | 2.21E-14 | -0.02701 | 0.56038  | 0.099182 | 0.03212  | -0.09764 | 0.0349   |
| 1.14E-13 | -0.36893 | 1.67E-16 | -0.14236 | 0.00204  | -0.1825  | 7.29E-05 | -0.06988 | 0.1316   |
| 1.86E-06 | -0.29224 | 1.20E-10 | 0.066926 | 0.14873  | -0.15203 | 0.00098  | -0.1173  | 0.01119  |
| 4.07E-13 | 0.247843 | 5.75E-08 | -0.01162 | 0.80233  | -0.06694 | 0.14863  | 0.107109 | 0.02061  |
| 4.39E-28 | 0.547577 | 6.85E-38 | 0.071259 | 0.12411  | 0.065703 | 0.15632  | 0.1872   | 4.69E-05 |
| 5.19E-27 | 0.43168  | 1.28E-22 | 0.245795 | 7.44E-08 | 0.076023 | 0.10083  | -0.02797 | 0.54649  |
| 1.10E-06 | -0.34057 | 3.81E-14 | -0.0908  | 0.04988  | -0.07418 | 0.10941  | -0.12321 | 0.00769  |
| 1.72E-42 | 0.541553 | 6.06E-37 | 0.006907 | 0.88166  | 0.090619 | 0.05034  | 0.182913 | 7.02E-05 |
| 9.01E-08 | 0.4366   | 3.71E-23 | 0.052796 | 0.25485  | 0.171237 | 0.0002   | 0.056172 | 0.22567  |
| 6.63E-13 | 0.29774  | 5.15E-11 | -0.052   | 0.26212  | 0.171749 | 0.00019  | 0.062053 | 0.18068  |
| 1.16E-29 | 0.489176 | 1.81E-29 | 0.075552 | 0.10296  | 0.052972 | 0.25326  | 0.076482 | 0.09878  |
| 5.46E-11 | -0.34559 | 1.51E-14 | -0.15198 | 0.00099  | -0.14955 | 0.00119  | -0.15903 | 0.00056  |
| 9.15E-33 | 0.558242 | 1.29E-39 | 0.002069 | 0.96443  | 0.102123 | 0.02733  | 0.114601 | 0.01321  |
| 1.58E-06 | 0.342965 | 2.46E-14 | 0.028504 | 0.53891  | 0.178541 | 0.0001   | 0.141321 | 0.0022   |
| 0.0004   | 0.01943  | 0.67537  | 0.009915 | 0.83078  | -0.04072 | 0.38     | -0.09687 | 0.03639  |
| 1.98E-48 | 0.697885 | 2.07E-69 | 0.119669 | 0.00964  | 0.179565 | 9.55E-05 | 0.031408 | 0.49836  |
| 1.56E-10 | -0.38335 | 8.52E-18 | -0.05267 | 0.25597  | -0.12789 | 0.00565  | -0.06685 | 0.14921  |
| 1.11E-34 | 0.451347 | 8.10E-25 | 0.038158 | 0.41068  | 0.067873 | 0.14305  | 0.216784 | 2.26E-06 |
| 5.91E-41 | 0.65328  | 3.65E-58 | 0.062629 | 0.17665  | 0.087237 | 0.0596   | 0.222012 | 1.26E-06 |
| 9.09E-09 | -0.23092 | 4.53E-07 | -0.02908 | 0.53076  | -0.03564 | 0.44221  | -0.11221 | 0.01526  |
| 3.48E-14 | 0.464664 | 2.17E-26 | 0.105273 | 0.02289  | 0.055487 | 0.23139  | -0.00396 | 0.93203  |
| 9.11E-21 | -0.51415 | 7.16E-33 | -0.10122 | 0.02874  | -0.15428 | 0.00082  | -0.12138 | 0.00865  |
| 4.02E-08 | -0.29183 | 1.27E-10 | 0.046248 | 0.31863  | -0.04173 | 0.36825  | -0.00274 | 0.95284  |
| 1.17E-18 | 0.482387 | 1.37E-28 | 0.028673 | 0.53652  | 0.074013 | 0.11019  | 0.179741 | 9.40E-05 |
| 2.76E-10 | 0.426313 | 4.80E-22 | 0.083877 | 0.07015  | 0.02349  | 0.61262  | 0.047208 | 0.30867  |
| 1.74E-50 | 0.622005 | 2.37E-51 | 0.060065 | 0.19507  | 0.07095  | 0.12575  | 0.143417 | 0.00189  |
| 1.51E-51 | 0.644321 | 3.94E-56 | 0.040461 | 0.383    | 0.075367 | 0.10381  | 0.212447 | 3.63E-06 |
| 3.50E-22 | 0.313991 | 3.82E-12 | -0.01203 | 0.7955   | 0.004902 | 0.91585  | 0.21627  | 2.39E-06 |
| 2.36E-15 | 0.331361 | 1.98E-13 | -0.02719 | 0.55782  | 0.113018 | 0.01454  | 0.156073 | 0.00071  |
| 1.61E-26 | 0.525459 | 1.66E-34 | 0.071335 | 0.12371  | 0.153061 | 0.00091  | -0.02294 | 0.62096  |
| 2.79E-05 | -0.14508 | 0.00167  | -0.1449  | 0.00169  | 0.004368 | 0.92499  | -0.10421 | 0.02432  |
| 3.31E-52 | 0.647657 | 7.02E-57 | 0.103476 | 0.02534  | 0.084676 | 0.06751  | 0.267547 | 4.26E-09 |
| 5.82E-26 | 0.614958 | 6.39E-50 | 0.026118 | 0.57343  | 0.128955 | 0.00526  | 0.204504 | 8.40E-06 |
| 2.44E-06 | 0.298199 | 4.80E-11 | -0.11885 | 0.01015  | 0.092878 | 0.04485  | 0.021396 | 0.64467  |
| 7.43E-05 | 0.307455 | 1.11E-11 | -0.02995 | 0.51853  | 0.008263 | 0.85866  | -0.00023 | 0.99602  |
| 0.00253  | 0.217591 | 2.07E-06 | 0.021505 | 0.64298  | -0.00152 | 0.97393  | 0.063608 | 0.16997  |



|          |          |          |          |         |          |          |          |          |
|----------|----------|----------|----------|---------|----------|----------|----------|----------|
| 2.38E-45 | 0.601994 | 2.21E-47 | 0.051454 | 0.26714 | 0.002601 | 0.9553   | 0.206915 | 6.53E-06 |
| 1.04E-30 | 0.351137 | 5.36E-15 | 0.101588 | 0.02815 | -0.01078 | 0.81627  | 0.062615 | 0.17676  |
| 1.36E-05 | -0.09034 | 0.05105  | 0.014149 | 0.7604  | 0.088536 | 0.05589  | -0.05035 | 0.27755  |
| 8.29E-41 | 0.668931 | 6.91E-62 | 0.051391 | 0.26772 | 0.134591 | 0.00357  | 0.124963 | 0.00685  |
| 2.20E-10 | -0.30063 | 3.28E-11 | 0.000344 | 0.99409 | -0.07183 | 0.12113  | -0.15413 | 0.00083  |
| 1.00E-38 | 0.548186 | 5.48E-38 | 0.023217 | 0.61676 | 0.074541 | 0.10767  | 0.192165 | 2.91E-05 |
| 8.48E-29 | 0.297986 | 4.96E-11 | -0.10399 | 0.02462 | -0.00921 | 0.84267  | 0.230742 | 4.63E-07 |
| 2.06E-20 | -0.47204 | 2.73E-27 | -0.09775 | 0.03471 | -0.1204  | 0.0092   | -0.10013 | 0.0305   |
| 0.00039  | 0.273205 | 1.94E-09 | 0.014161 | 0.76019 | 0.033022 | 0.47653  | 0.038086 | 0.41157  |
| 6.73E-31 | 0.677604 | 4.75E-64 | 0.134939 | 0.00348 | 0.173688 | 0.00016  | 0.202122 | 1.07E-05 |
| 9.53E-21 | -0.57797 | 5.68E-43 | -0.10538 | 0.02276 | -0.19572 | 2.05E-05 | -0.20048 | 1.27E-05 |
| 3.35E-18 | 0.547388 | 7.34E-38 | 0.039105 | 0.39916 | 0.174297 | 0.00015  | -0.04752 | 0.30549  |
| 8.36E-25 | -0.44165 | 1.02E-23 | -0.08706 | 0.06011 | -0.0106  | 0.81924  | -0.21509 | 2.72E-06 |
| 8.46E-19 | -0.509   | 3.80E-32 | -0.12242 | 0.00809 | -0.24265 | 1.10E-07 | -0.0883  | 0.05655  |
| 2.67E-10 | 0.338605 | 5.44E-14 | 0.050217 | 0.27882 | 0.152194 | 0.00097  | 0.114592 | 0.01322  |
| 1.79E-16 | 0.493668 | 4.64E-30 | 0.039635 | 0.39279 | 0.081356 | 0.07903  | 0.142127 | 0.00208  |
| 2.26E-29 | 0.579403 | 3.17E-43 | 0.108127 | 0.01943 | 0.107023 | 0.02071  | 0.254891 | 2.32E-08 |
| 3.32E-19 | 0.445619 | 3.66E-24 | 0.024361 | 0.5995  | 0.179402 | 9.69E-05 | 0.123842 | 0.00738  |
| 2.49E-42 | 0.634042 | 7.02E-54 | 0.098808 | 0.03278 | 0.106328 | 0.02155  | 0.073129 | 0.11452  |
| 5.20E-28 | 0.545456 | 1.48E-37 | 0.041587 | 0.36989 | 0.031251 | 0.50051  | 0.081003 | 0.08035  |
| 7.63E-08 | 0.186868 | 4.84E-05 | 0.140098 | 0.00241 | 0.016408 | 0.72359  | 0.164288 | 0.00036  |
| 7.36E-24 | 0.549349 | 3.58E-38 | 0.123719 | 0.00743 | 0.095296 | 0.03954  | 0.060539 | 0.19157  |
| 1.95E-06 | -0.35236 | 4.25E-15 | -0.12942 | 0.00509 | -0.07073 | 0.12693  | -0.21051 | 4.46E-06 |
| 5.39E-20 | 0.55202  | 1.33E-38 | -0.02735 | 0.55542 | 0.15925  | 0.00055  | -0.05111 | 0.27034  |
| 1.35E-09 | -0.40999 | 2.34E-20 | -0.04389 | 0.34391 | -0.15286 | 0.00092  | -0.02862 | 0.53728  |
| 1.66E-07 | 0.310829 | 6.42E-12 | -0.04725 | 0.30826 | -0.02512 | 0.58822  | 0.1516   | 0.00102  |
| 3.92E-53 | 0.62076  | 4.27E-51 | 0.03988  | 0.38987 | 0.112942 | 0.01461  | 0.355614 | 2.29E-15 |
| 5.81E-26 | -0.41255 | 1.29E-20 | -0.03755 | 0.41817 | -0.07273 | 0.11654  | -0.19403 | 2.42E-05 |
| 4.90E-10 | -0.24725 | 6.19E-08 | -0.06515 | 0.15984 | -0.09034 | 0.05105  | 0.022847 | 0.62239  |
| 6.78E-10 | 0.326556 | 4.57E-13 | 0.105141 | 0.02307 | 0.090415 | 0.05086  | 0.239337 | 1.65E-07 |
| 2.03E-51 | 0.601117 | 3.25E-47 | 0.080613 | 0.08182 | 0.061091 | 0.18754  | 0.169607 | 0.00023  |
| 2.32E-23 | 0.518626 | 1.64E-33 | 0.060575 | 0.19131 | 0.124564 | 0.00704  | 0.272759 | 2.07E-09 |
| 1.15E-16 | 0.35268  | 4.00E-15 | -0.07135 | 0.12362 | -0.02707 | 0.55947  | -0.02744 | 0.55421  |
| 7.88E-22 | 0.388441 | 2.87E-18 | -0.02169 | 0.64018 | 0.00368  | 0.93678  | 0.130793 | 0.00464  |
| 2.34E-47 | 0.713326 | 8.40E-74 | 0.103544 | 0.02525 | 0.095016 | 0.04012  | 0.275694 | 1.36E-09 |
| 1.24E-52 | 0.637466 | 1.28E-54 | 0.063676 | 0.16952 | 0.068964 | 0.13672  | 0.23098  | 4.50E-07 |
| 4.80E-08 | -0.24897 | 4.98E-08 | -0.1214  | 0.00864 | 0.015865 | 0.73239  | -0.06294 | 0.17453  |
| 2.32E-26 | 0.402292 | 1.36E-19 | -0.03844 | 0.40727 | -0.00918 | 0.84312  | 0.123888 | 0.00735  |
| 9.59E-05 | -0.21843 | 1.89E-06 | 0.049324 | 0.28747 | -0.07325 | 0.11393  | -0.07812 | 0.09177  |
| 7.26E-37 | 0.637017 | 1.60E-54 | 0.040978 | 0.37695 | 0.136204 | 0.00319  | 0.255481 | 2.15E-08 |
| 3.48E-41 | 0.531172 | 2.34E-35 | 0.077242 | 0.09547 | 0.077572 | 0.09406  | 0.21449  | 2.91E-06 |
| 8.48E-35 | 0.667476 | 1.57E-61 | 0.111076 | 0.01633 | 0.17153  | 0.0002   | 0.199936 | 1.34E-05 |
| 1.66E-05 | 0.229492 | 5.36E-07 | 0.052352 | 0.25887 | 0.082915 | 0.07344  | -0.02995 | 0.51847  |
| 9.17E-16 | -0.4381  | 2.54E-23 | -0.16557 | 0.00033 | 0.009093 | 0.84463  | -0.07468 | 0.10703  |
| 3.18E-14 | -0.29831 | 4.71E-11 | -0.1147  | 0.01313 | 0.013588 | 0.76963  | -0.26236 | 8.64E-09 |

|          |          |          |          |          |          |          |          |          |
|----------|----------|----------|----------|----------|----------|----------|----------|----------|
| 3.77E-05 | -0.13509 | 0.00345  | 0.157688 | 0.00063  | -0.05275 | 0.25528  | -0.12871 | 0.00534  |
| 5.65E-47 | 0.627614 | 1.62E-52 | 0.079195 | 0.08736  | 0.013378 | 0.77309  | 0.170315 | 0.00022  |
| 7.47E-18 | 0.412767 | 1.22E-20 | 0.08588  | 0.06369  | 0.157885 | 0.00062  | 0.164928 | 0.00034  |
| 5.87E-42 | 0.623886 | 9.71E-52 | 0.180263 | 8.96E-05 | 0.147238 | 0.00142  | 0.250284 | 4.21E-08 |
| 1.13E-40 | 0.616076 | 3.81E-50 | 0.012786 | 0.78287  | 0.087026 | 0.06022  | 0.153851 | 0.00085  |
| 1.26E-05 | 0.189742 | 3.68E-05 | 0.084568 | 0.06786  | -0.07221 | 0.11917  | 0.180651 | 8.65E-05 |
| 5.15E-71 | 0.742937 | 4.25E-83 | 0.016392 | 0.72386  | 0.10984  | 0.01757  | 0.253664 | 2.73E-08 |
| 0.00032  | 0.297178 | 5.62E-11 | 0.008339 | 0.85736  | 0.160241 | 0.00051  | 0.08696  | 0.06042  |
| 6.32E-44 | 0.624683 | 6.64E-52 | 0.057905 | 0.21165  | 0.139513 | 0.00251  | 0.181108 | 8.29E-05 |
| 9.50E-30 | 0.537862 | 2.25E-36 | 0.043609 | 0.34706  | 0.110336 | 0.01707  | 0.095107 | 0.03993  |
| 7.32E-29 | 0.667767 | 1.33E-61 | 0.117509 | 0.01104  | 0.194089 | 2.41E-05 | 0.218622 | 1.85E-06 |
| 5.02E-14 | 0.20153  | 1.14E-05 | -0.02663 | 0.56601  | -0.07331 | 0.1136   | 0.103049 | 0.02596  |
| 5.89E-38 | 0.522386 | 4.68E-34 | -0.0129  | 0.78095  | 0.061175 | 0.18693  | 0.168171 | 0.00026  |
| 4.23E-16 | 0.393146 | 1.03E-18 | -0.0175  | 0.70604  | 0.057544 | 0.21452  | 0.198077 | 1.62E-05 |
| 1.45E-12 | 0.325575 | 5.42E-13 | -0.02111 | 0.64904  | -0.03558 | 0.44308  | 0.182562 | 7.25E-05 |
| 1.08E-19 | 0.584403 | 4.07E-44 | 0.130714 | 0.00466  | 0.108086 | 0.01947  | 0.065355 | 0.15852  |
| 0.0248   | 0.149003 | 0.00124  | -0.01411 | 0.76109  | 0.095505 | 0.03911  | 0.151382 | 0.00103  |
| 6.36E-15 | 0.387733 | 3.34E-18 | 0.105525 | 0.02257  | -0.05291 | 0.25385  | -0.05964 | 0.19829  |
| 0.00281  | -0.08955 | 0.05313  | -0.01361 | 0.76927  | 0.046449 | 0.31653  | 0.089959 | 0.05205  |
| 1.03E-90 | 0.678162 | 3.43E-64 | 0.083951 | 0.0699   | 0.076934 | 0.0968   | 0.394906 | 7.03E-19 |
| 9.79E-08 | -0.23588 | 2.51E-07 | -0.02006 | 0.66547  | -0.01509 | 0.74499  | -0.23091 | 4.53E-07 |
| 1.80E-11 | 0.403356 | 1.07E-19 | -0.01108 | 0.81125  | 0.045325 | 0.3284   | 0.289242 | 1.88E-10 |
| 2.29E-19 | 0.486682 | 3.83E-29 | 0.116175 | 0.01199  | 0.10092  | 0.02921  | 0.294156 | 8.95E-11 |
| 6.61E-15 | 0.324702 | 6.30E-13 | 0.061576 | 0.18406  | -0.02299 | 0.62023  | 0.277417 | 1.07E-09 |
| 2.11E-14 | 0.380508 | 1.55E-17 | 0.068133 | 0.14153  | 0.055991 | 0.22717  | 0.247364 | 6.11E-08 |
| 3.98E-08 | -0.1546  | 0.0008   | 0.037677 | 0.41661  | 0.064758 | 0.16237  | -0.053   | 0.25297  |
| 2.11E-24 | 0.460685 | 6.52E-26 | -0.01747 | 0.70657  | 0.005813 | 0.9003   | 0.051288 | 0.26869  |
| 3.93E-30 | 0.539597 | 1.22E-36 | 0.07573  | 0.10216  | 0.094709 | 0.04078  | 0.164859 | 0.00035  |
| 6.39E-54 | 0.658107 | 2.74E-59 | -0.00411 | 0.92946  | 0.019298 | 0.67745  | 0.128364 | 0.00547  |
| 2.81E-28 | 0.647315 | 8.39E-57 | 0.116927 | 0.01145  | 0.114001 | 0.0137   | 0.256516 | 1.88E-08 |
| 8.73E-07 | 0.159498 | 0.00054  | -0.10487 | 0.02342  | -0.01236 | 0.78999  | 0.093344 | 0.04378  |
| 2.23E-08 | 0.376407 | 3.63E-17 | 0.074577 | 0.1075   | 0.093943 | 0.04244  | 0.137655 | 0.00287  |
| 9.42E-07 | 0.280258 | 7.09E-10 | 0.022655 | 0.62531  | 0.124968 | 0.00685  | -0.06203 | 0.18081  |
| 9.74E-27 | 0.447887 | 2.02E-24 | 0.032966 | 0.47728  | 0.007533 | 0.87103  | 0.012376 | 0.78966  |
| 1.26E-29 | 0.533497 | 1.04E-35 | -0.0094  | 0.83945  | 0.054102 | 0.24326  | 0.113829 | 0.01384  |
| 0.04311  | 0.135898 | 0.00326  | 0.098032 | 0.03418  | 0.091728 | 0.04758  | 0.224815 | 9.19E-07 |
| 2.65E-28 | 0.463092 | 3.36E-26 | -0.00265 | 0.95443  | 0.070734 | 0.12691  | 0.265316 | 5.79E-09 |
| 8.78E-29 | 0.573536 | 3.38E-42 | -0.0007  | 0.98803  | 0.062251 | 0.17929  | 0.124195 | 0.00721  |
| 5.14E-28 | 0.513315 | 9.42E-33 | 0.219593 | 1.66E-06 | 0.019179 | 0.67932  | 0.192544 | 2.80E-05 |
| 4.91E-13 | 0.451999 | 6.81E-25 | 0.009842 | 0.83201  | 0.104826 | 0.02348  | 0.031065 | 0.50305  |
| 1.77E-59 | 0.701422 | 2.17E-70 | 0.047338 | 0.30734  | 0.113286 | 0.01431  | 0.109552 | 0.01787  |
| 8.98E-37 | 0.552562 | 1.09E-38 | 0.129925 | 0.00492  | 0.024264 | 0.60096  | 0.032039 | 0.48976  |
| 3.80E-28 | 0.51569  | 4.33E-33 | 0.071547 | 0.12259  | 0.204927 | 8.04E-06 | 0.137336 | 0.00294  |
| 2.51E-24 | 0.504676 | 1.51E-31 | 0.031842 | 0.49244  | 0.126874 | 0.00604  | 0.098099 | 0.03406  |
| 7.39E-22 | 0.492049 | 7.61E-30 | -0.0032  | 0.94504  | 0.095964 | 0.03817  | 0.247507 | 6.00E-08 |

|          |          |          |          |          |          |          |          |          |
|----------|----------|----------|----------|----------|----------|----------|----------|----------|
| 3.16E-08 | -0.27501 | 1.50E-09 | -0.00093 | 0.98406  | -0.04195 | 0.36575  | -0.13204 | 0.00426  |
| 0.00354  | 0.115924 | 0.01218  | -0.06348 | 0.17083  | -0.05941 | 0.19999  | 0.080805 | 0.08109  |
| 7.33E-44 | 0.588973 | 6.03E-45 | 0.064405 | 0.16467  | 0.127784 | 0.00569  | 0.19408  | 2.41E-05 |
| 1.51E-22 | 0.524973 | 1.95E-34 | 0.066505 | 0.15131  | 0.130695 | 0.00467  | 0.191074 | 3.23E-05 |
| 3.95E-78 | 0.536307 | 3.90E-36 | 0.060459 | 0.19216  | -0.03712 | 0.42357  | 0.06143  | 0.1851   |
| 4.41E-25 | 0.462557 | 3.89E-26 | 0.082403 | 0.07524  | 0.03706  | 0.42429  | 0.170579 | 0.00021  |
| 1.67E-46 | 0.681246 | 5.58E-65 | 0.033252 | 0.47347  | 0.129901 | 0.00493  | 0.293424 | 1.00E-10 |
| 1.19E-48 | 0.695603 | 8.76E-69 | 0.118863 | 0.01014  | 0.133614 | 0.00382  | 0.306343 | 1.33E-11 |
| 1.26E-31 | 0.587621 | 1.06E-44 | -0.19253 | 2.81E-05 | 0.06119  | 0.18682  | -0.0048  | 0.91762  |
| 4.66E-09 | 0.461988 | 4.56E-26 | 0.049842 | 0.28243  | 0.080112 | 0.08374  | 0.019258 | 0.67808  |
| 7.44E-13 | 0.395674 | 5.94E-19 | -0.02292 | 0.62133  | -0.03417 | 0.4614   | 0.009772 | 0.83319  |
| 4.00E-41 | 0.631728 | 2.19E-53 | 0.0346   | 0.4557   | 0.097947 | 0.03434  | -0.00324 | 0.94432  |
| 1.31E-27 | 0.41753  | 3.98E-21 | -0.02585 | 0.57732  | 0.104373 | 0.02409  | 0.110361 | 0.01704  |
| #####    | 0.70341  | 6.00E-71 | 0.09885  | 0.03271  | 0.112859 | 0.01468  | 0.21353  | 3.23E-06 |
| 7.04E-10 | 0.344641 | 1.80E-14 | 0.048725 | 0.29337  | 0.154434 | 0.00081  | 0.156125 | 0.00071  |
| 3.02E-43 | 0.642516 | 9.93E-56 | 0.043704 | 0.346    | 0.028283 | 0.54207  | 0.112317 | 0.01517  |
| 2.81E-66 | 0.771925 | 1.57E-93 | 0.125558 | 0.00659  | 0.136982 | 0.00301  | 0.218477 | 1.88E-06 |
| 3.33E-31 | 0.614912 | 6.53E-50 | 0.04102  | 0.37645  | 0.053506 | 0.2485   | -0.08506 | 0.06626  |
| 2.44E-13 | -0.32332 | 7.97E-13 | -0.06887 | 0.13728  | -0.0605  | 0.19187  | -0.07481 | 0.10639  |
| 1.92E-40 | 0.563585 | 1.68E-40 | 0.095649 | 0.03881  | 0.062578 | 0.17701  | 0.182797 | 7.09E-05 |
| 2.26E-24 | 0.595011 | 4.62E-46 | 0.028983 | 0.53212  | 0.098467 | 0.03339  | -0.00974 | 0.83366  |
| 6.40E-32 | 0.623246 | 1.32E-51 | 0.063316 | 0.17195  | 0.104738 | 0.0236   | 0.174902 | 0.00015  |
| 1.18E-24 | 0.537249 | 2.80E-36 | 0.051045 | 0.27097  | 0.069932 | 0.13129  | 0.190446 | 3.44E-05 |
| 1.27E-49 | 0.692388 | 6.51E-68 | 0.180584 | 8.70E-05 | 0.113918 | 0.01377  | 0.223572 | 1.06E-06 |
| 2.10E-09 | -0.2928  | 1.10E-10 | -0.17688 | 0.00012  | -0.0918  | 0.04739  | -0.24813 | 5.55E-08 |
| 1.42E-06 | 0.2709   | 2.68E-09 | -0.0073  | 0.87496  | 0.129148 | 0.00519  | 0.013355 | 0.77347  |
| 1.30E-37 | 0.47155  | 3.14E-27 | 0.063058 | 0.1737   | 0.098166 | 0.03394  | -0.00556 | 0.90457  |
| 5.61E-19 | 0.460703 | 6.48E-26 | 0.175636 | 0.00014  | 0.104204 | 0.02432  | 0.118887 | 0.01013  |
| 7.03E-21 | 0.515029 | 5.38E-33 | -0.0262  | 0.57217  | 0.060366 | 0.19285  | 0.034695 | 0.45447  |
| 1.88E-11 | 0.360501 | 8.87E-16 | 0.060359 | 0.1929   | 0.030751 | 0.50739  | 0.114398 | 0.01337  |
| 9.83E-37 | 0.572712 | 4.70E-42 | 0.10064  | 0.02966  | 0.068071 | 0.14189  | 0.078274 | 0.09111  |
| 9.01E-16 | 0.399532 | 2.52E-19 | 0.089301 | 0.05379  | -0.03359 | 0.46898  | 0.197152 | 1.78E-05 |
| 3.47E-19 | 0.429503 | 2.19E-22 | -0.02388 | 0.60675  | 0.101047 | 0.02901  | 0.043223 | 0.35134  |
| 2.11E-15 | 0.334054 | 1.23E-13 | -0.01375 | 0.76698  | -0.01626 | 0.72603  | 0.245627 | 7.60E-08 |
| 2.11E-11 | 0.256191 | 1.96E-08 | 0.034649 | 0.45507  | 0.115527 | 0.01248  | 0.034083 | 0.46248  |
| 5.75E-20 | -0.47863 | 4.11E-28 | -0.07973 | 0.08523  | -0.20665 | 6.72E-06 | -0.09467 | 0.04087  |
| 8.39E-05 | 0.140916 | 0.00227  | -0.02797 | 0.54657  | -0.09383 | 0.04269  | 0.004115 | 0.92933  |
| 1.12E-45 | 0.683017 | 1.95E-65 | 0.185003 | 5.77E-05 | 0.121264 | 0.00871  | 0.28373  | 4.27E-10 |
| 3.49E-30 | -0.49477 | 3.32E-30 | -0.10926 | 0.01818  | -0.08473 | 0.06735  | -0.06287 | 0.17501  |
| 4.67E-14 | -0.37694 | 3.25E-17 | -0.03299 | 0.477    | -0.10442 | 0.02403  | -0.14329 | 0.00191  |
| 3.06E-23 | 0.496729 | 1.81E-30 | 0.048012 | 0.30049  | -0.0169  | 0.71566  | 0.161614 | 0.00045  |
| 5.20E-23 | 0.416331 | 5.29E-21 | 0.065354 | 0.15853  | -0.0534  | 0.24942  | 0.083243 | 0.07231  |
| 1.85E-29 | 0.519626 | 1.18E-33 | 0.033072 | 0.47587  | 0.13688  | 0.00304  | 0.038126 | 0.41107  |
| 0.00278  | 0.155087 | 0.00077  | -0.0438  | 0.34499  | 0.019136 | 0.68     | -0.09533 | 0.03946  |
| 6.83E-06 | 0.36526  | 3.47E-16 | 0.112376 | 0.01511  | 0.100775 | 0.02944  | -0.01187 | 0.79813  |

|          |          |          |          |          |          |          |          |          |
|----------|----------|----------|----------|----------|----------|----------|----------|----------|
| 0.00099  | 0.226016 | 8.01E-07 | -0.08928 | 0.05385  | 0.009305 | 0.84106  | -0.09335 | 0.04377  |
| 1.12E-09 | 0.347144 | 1.13E-14 | -0.00441 | 0.92436  | 0.064412 | 0.16463  | -0.09459 | 0.04103  |
| 3.15E-05 | 0.223944 | 1.01E-06 | -0.02344 | 0.6134   | 0.172002 | 0.00019  | -0.01628 | 0.72569  |
| 2.25E-31 | 0.606169 | 3.47E-48 | 0.05998  | 0.19571  | 0.056153 | 0.22583  | 0.153888 | 0.00085  |
| 8.27E-32 | 0.529461 | 4.22E-35 | 0.019599 | 0.67271  | 0.079995 | 0.0842   | 0.196454 | 1.90E-05 |
| 6.14E-60 | 0.598357 | 1.09E-46 | 0.179294 | 9.79E-05 | 0.106554 | 0.02128  | 0.083435 | 0.07165  |
| 5.33E-14 | 0.372368 | 8.31E-17 | 0.045742 | 0.32396  | -0.0064  | 0.89021  | 0.085796 | 0.06395  |
| 1.25E-16 | 0.540736 | 8.11E-37 | 0.047108 | 0.3097   | 0.168495 | 0.00025  | 0.040327 | 0.38458  |
| 4.35E-10 | 0.469139 | 6.22E-27 | 0.051451 | 0.26716  | 0.241454 | 1.28E-07 | 0.021475 | 0.64344  |
| 1.78E-33 | 0.73268  | 9.75E-80 | 0.05821  | 0.20925  | 0.16871  | 0.00025  | 0.073734 | 0.11154  |
| 4.03E-08 | 0.311329 | 5.92E-12 | 0.019847 | 0.6688   | 0.144384 | 0.00176  | 0.136691 | 0.00308  |
| 4.06E-47 | 0.758485 | 1.65E-88 | 0.112573 | 0.01493  | 0.20206  | 1.08E-05 | 0.169978 | 0.00022  |
| 6.72E-39 | 0.587216 | 1.26E-44 | -0.0388  | 0.40287  | 0.06101  | 0.18813  | 0.22478  | 9.23E-07 |
| 2.31E-46 | 0.753601 | 9.12E-87 | 0.028756 | 0.53534  | 0.12972  | 0.00499  | 0.15301  | 0.00091  |
| 2.71E-22 | 0.451384 | 8.02E-25 | 0.031575 | 0.49607  | 0.097741 | 0.03472  | 0.145322 | 0.00164  |
| 2.33E-38 | 0.630892 | 3.30E-53 | 0.128961 | 0.00525  | 0.084689 | 0.06747  | 0.238642 | 1.80E-07 |
| 2.85E-09 | 0.300105 | 3.56E-11 | 0.076592 | 0.0983   | 0.046112 | 0.32005  | 0.173502 | 0.00016  |
| 3.13E-47 | 0.731603 | 2.15E-79 | 0.062378 | 0.1784   | 0.144732 | 0.00171  | 0.15198  | 0.00099  |
| 2.67E-17 | 0.411458 | 1.66E-20 | 0.078329 | 0.09088  | 0.139848 | 0.00245  | 0.326585 | 4.55E-13 |
| 9.19E-50 | 0.705439 | 1.60E-71 | 0.105404 | 0.02272  | 0.133606 | 0.00382  | 0.196816 | 1.84E-05 |
| 1.56E-35 | 0.679658 | 1.42E-64 | 0.061746 | 0.18285  | 0.152512 | 0.00095  | 0.13993  | 0.00244  |
| 1.68E-63 | 0.774757 | 1.24E-94 | 0.072298 | 0.11871  | 0.118889 | 0.01013  | 0.239325 | 1.66E-07 |
| 4.25E-14 | 0.411135 | 1.79E-20 | -0.01065 | 0.81838  | 0.099209 | 0.03208  | 0.147239 | 0.00142  |
| 2.41E-06 | 0.33708  | 7.15E-14 | 0.089353 | 0.05365  | 0.064642 | 0.16312  | 0.142199 | 0.00207  |
| 7.40E-07 | 0.370553 | 1.20E-16 | 0.004815 | 0.91735  | 0.116118 | 0.01204  | -0.08708 | 0.06008  |
| 8.11E-27 | 0.567219 | 4.10E-41 | 0.111999 | 0.01546  | 0.111916 | 0.01554  | 0.168478 | 0.00025  |
| 1.04E-15 | 0.401178 | 1.74E-19 | 0.050841 | 0.27288  | -0.00743 | 0.87282  | -0.0639  | 0.16803  |
| 2.03E-41 | 0.604783 | 6.43E-48 | 0.081144 | 0.07982  | 0.168559 | 0.00025  | 0.070951 | 0.12575  |
| 9.97E-15 | 0.536516 | 3.62E-36 | 0.049994 | 0.28097  | 0.142829 | 0.00197  | -0.0024  | 0.95869  |
| 3.05E-23 | 0.494064 | 4.12E-30 | 0.052341 | 0.25897  | 0.1781   | 0.00011  | 0.273978 | 1.74E-09 |
| 5.20E-32 | -0.51324 | 9.66E-33 | -0.10282 | 0.02629  | -0.03545 | 0.44473  | -0.23086 | 4.56E-07 |
| 7.30E-06 | 0.317951 | 1.98E-12 | 0.028522 | 0.53866  | 0.133784 | 0.00377  | -0.07833 | 0.09087  |
| 3.70E-36 | 0.583058 | 7.10E-44 | -0.02076 | 0.65451  | 0.12049  | 0.00915  | 0.227375 | 6.85E-07 |
| 8.74E-14 | 0.389304 | 2.38E-18 | 0.044155 | 0.34104  | 0.095954 | 0.03819  | 0.195249 | 2.15E-05 |
| 7.24E-43 | 0.622802 | 1.63E-51 | 0.026321 | 0.57046  | 0.089745 | 0.05261  | 0.1868   | 4.87E-05 |
| 9.72E-14 | 0.504601 | 1.55E-31 | 0.034363 | 0.45881  | 0.196453 | 1.91E-05 | 0.152543 | 0.00094  |
| 2.37E-40 | 0.607148 | 2.24E-48 | 0.062724 | 0.176    | 0.091161 | 0.04897  | 0.367803 | 2.09E-16 |
| 9.86E-15 | 0.440959 | 1.22E-23 | 0.096526 | 0.03705  | 0.107229 | 0.02046  | 0.15209  | 0.00098  |
| 1.52E-50 | 0.711839 | 2.29E-73 | 0.083801 | 0.07041  | 0.135316 | 0.00339  | 0.215207 | 2.69E-06 |
| 7.13E-14 | 0.360173 | 9.46E-16 | 0.026839 | 0.5629   | 0.043475 | 0.34853  | 0.078361 | 0.09075  |
| 1.12E-29 | 0.563189 | 1.96E-40 | 0.055711 | 0.22951  | 0.192329 | 2.86E-05 | 0.13667  | 0.00308  |
| 1.24E-17 | 0.431161 | 1.45E-22 | 0.132148 | 0.00423  | 0.197871 | 1.65E-05 | 0.07591  | 0.10134  |
| 5.62E-12 | 0.369959 | 1.35E-16 | 0.024346 | 0.59974  | 0.112445 | 0.01505  | -0.03183 | 0.49256  |
| 9.60E-48 | 0.660238 | 8.61E-60 | 0.02063  | 0.65656  | 0.122103 | 0.00825  | 0.320617 | 1.26E-12 |
| 3.76E-08 | 0.323857 | 7.28E-13 | -0.0468  | 0.31283  | 0.089578 | 0.05305  | 0.187638 | 4.50E-05 |

|          |          |          |          |          |          |          |          |          |
|----------|----------|----------|----------|----------|----------|----------|----------|----------|
| 1.26E-06 | 0.400056 | 2.24E-19 | 0.079903 | 0.08455  | 0.141323 | 0.0022   | -0.00756 | 0.8705   |
| 5.10E-10 | 0.386804 | 4.08E-18 | 0.104086 | 0.02449  | 0.140968 | 0.00226  | 0.042086 | 0.36417  |
| 6.68E-42 | 0.612493 | 1.98E-49 | -0.01068 | 0.81803  | 0.033928 | 0.46451  | 0.201183 | 1.18E-05 |
| 1.20E-15 | 0.361655 | 7.07E-16 | -0.0646  | 0.1634   | -0.00686 | 0.88248  | 0.079213 | 0.08728  |
| 3.71E-22 | 0.616035 | 3.89E-50 | 0.127136 | 0.00594  | 0.186861 | 4.84E-05 | 0.03275  | 0.48018  |
| 9.33E-35 | 0.656653 | 6.01E-59 | 0.048932 | 0.29132  | 0.151124 | 0.00105  | 0.123024 | 0.00778  |
| 3.11E-21 | 0.49568  | 2.51E-30 | 0.007595 | 0.86997  | 0.099747 | 0.03115  | 0.062241 | 0.17936  |
| 3.82E-17 | -0.30363 | 2.04E-11 | -0.02788 | 0.5479   | -0.00101 | 0.98263  | -0.14652 | 0.0015   |
| 3.30E-35 | 0.624335 | 7.84E-52 | 0.0689   | 0.13709  | 0.134511 | 0.00359  | 0.244608 | 8.63E-08 |
| 2.05E-20 | 0.490423 | 1.25E-29 | 0.044045 | 0.34224  | 0.142512 | 0.00202  | 0.139912 | 0.00244  |
| 1.38E-17 | 0.364023 | 4.44E-16 | 0.000508 | 0.99127  | 0.02922  | 0.52877  | -0.01146 | 0.80495  |
| 1.01E-18 | 0.52135  | 6.62E-34 | 0.103061 | 0.02594  | 0.116041 | 0.01209  | 0.06884  | 0.13743  |
| 7.97E-09 | 0.333496 | 1.36E-13 | 0.154548 | 0.00081  | 0.204222 | 8.65E-06 | 0.134794 | 0.00352  |
| 6.29E-24 | 0.548881 | 4.25E-38 | 0.070202 | 0.1298   | 0.185331 | 5.60E-05 | 0.141294 | 0.00221  |
| 4.23E-50 | 0.722617 | 1.37E-76 | 0.128183 | 0.00554  | 0.15825  | 0.0006   | 0.434939 | 5.64E-23 |
| 3.33E-20 | 0.501611 | 3.97E-31 | 0.114678 | 0.01315  | 0.033491 | 0.47029  | 0.276394 | 1.23E-09 |
| 7.35E-07 | 0.252564 | 3.14E-08 | 0.093583 | 0.04324  | 0.193572 | 2.53E-05 | 0.023804 | 0.60788  |
| 1.31E-20 | 0.496069 | 2.22E-30 | 0.078325 | 0.0909   | 0.026554 | 0.56705  | 0.069458 | 0.13393  |
| 6.78E-22 | 0.468396 | 7.66E-27 | 0.015393 | 0.74006  | 0.137171 | 0.00297  | 0.308153 | 9.91E-12 |
| 2.36E-31 | 0.613748 | 1.12E-49 | 0.027747 | 0.54975  | 0.157818 | 0.00062  | 0.149209 | 0.00122  |
| 4.12E-26 | 0.694783 | 1.46E-68 | 0.134932 | 0.00348  | 0.23723  | 2.14E-07 | 0.2428   | 1.08E-07 |
| 1.94E-31 | 0.562498 | 2.55E-40 | 0.048083 | 0.29979  | 0.109165 | 0.01828  | 0.231718 | 4.12E-07 |
| 4.57E-13 | 0.363398 | 5.02E-16 | 0.070972 | 0.12564  | 0.195896 | 2.01E-05 | 0.112788 | 0.01474  |
| 9.10E-20 | 0.48997  | 1.43E-29 | -0.06343 | 0.17115  | 0.132431 | 0.00415  | 0.018507 | 0.68997  |
| 1.82E-14 | 0.382612 | 9.94E-18 | -0.02573 | 0.5791   | 0.113698 | 0.01396  | -0.00934 | 0.8404   |
| 1.00E-16 | 0.356547 | 1.91E-15 | 0.06168  | 0.18332  | 0.087438 | 0.05901  | 0.318219 | 1.89E-12 |
| 4.33E-14 | -0.24364 | 9.74E-08 | -0.04155 | 0.37028  | 0.026851 | 0.56272  | -0.10057 | 0.02977  |
| 2.07E-31 | -0.51027 | 2.53E-32 | -0.07444 | 0.10813  | -0.06069 | 0.19044  | -0.18292 | 7.01E-05 |
| 9.52E-18 | 0.571862 | 6.58E-42 | 0.044872 | 0.33325  | 0.170678 | 0.00021  | 0.076329 | 0.09946  |
| 1.22E-15 | 0.470906 | 3.77E-27 | 0.034469 | 0.45742  | 0.169922 | 0.00023  | 0.085682 | 0.06431  |
| 1.95E-05 | 0.232217 | 3.89E-07 | -0.07255 | 0.11742  | 0.045658 | 0.32484  | 0.078027 | 0.09214  |
| 2.35E-17 | 0.426054 | 5.11E-22 | 0.015392 | 0.74008  | 0.155541 | 0.00074  | 0.134855 | 0.0035   |
| 2.97E-13 | 0.373903 | 6.08E-17 | 0.005377 | 0.90773  | 0.064577 | 0.16355  | 0.000887 | 0.98474  |
| 4.02E-36 | 0.674161 | 3.50E-63 | 0.04296  | 0.35428  | 0.095954 | 0.03819  | 0.093236 | 0.04403  |
| 6.46E-16 | -0.25389 | 2.65E-08 | -0.06722 | 0.14696  | -0.05996 | 0.19584  | -0.12134 | 0.00867  |
| 3.70E-10 | 0.279686 | 7.70E-10 | 0.12388  | 0.00736  | 0.067665 | 0.14429  | 0.176365 | 0.00013  |
| 6.11E-13 | 0.428908 | 2.54E-22 | -0.0134  | 0.77273  | 0.001938 | 0.96668  | 0.002814 | 0.95164  |
| 4.55E-74 | 0.852379 | #####    | 0.071618 | 0.12222  | 0.147498 | 0.00139  | 0.255389 | 2.18E-08 |
| 3.60E-07 | 0.246435 | 6.87E-08 | 0.030111 | 0.51627  | 0.027766 | 0.54949  | 0.158413 | 0.00059  |
| 1.28E-14 | -0.31084 | 6.41E-12 | 0.003559 | 0.93886  | -0.05882 | 0.20453  | -0.10555 | 0.02254  |
| 8.55E-51 | 0.616903 | 2.60E-50 | 0.046784 | 0.31305  | 0.131442 | 0.00444  | 0.17601  | 0.00013  |
| 7.27E-14 | 0.447984 | 1.97E-24 | 0.071265 | 0.12408  | 0.050933 | 0.27202  | 0.025085 | 0.5887   |
| 3.65E-09 | 0.321688 | 1.05E-12 | 0.041823 | 0.36718  | 0.062672 | 0.17636  | -0.11323 | 0.01435  |
| 1.27E-11 | 0.519522 | 1.22E-33 | 0.063652 | 0.16968  | 0.238203 | 1.90E-07 | 0.053328 | 0.25008  |
| 1.54E-28 | 0.6178   | 1.71E-50 | 0.191804 | 3.01E-05 | 0.215594 | 2.58E-06 | 0.401429 | 1.65E-19 |

|          |          |          |          |          |          |          |          |          |
|----------|----------|----------|----------|----------|----------|----------|----------|----------|
| 6.01E-24 | 0.522717 | 4.18E-34 | 0.147796 | 0.00136  | 0.178027 | 0.00011  | 0.200424 | 1.28E-05 |
| 5.47E-20 | 0.543907 | 2.60E-37 | 0.034347 | 0.45902  | 0.098593 | 0.03316  | 0.358415 | 1.33E-15 |
| 1.18E-10 | 0.183465 | 6.66E-05 | 0.035466 | 0.44451  | -0.03693 | 0.42588  | -0.03424 | 0.46046  |
| 2.66E-13 | 0.506389 | 8.77E-32 | 0.079424 | 0.08644  | 0.210851 | 4.31E-06 | 0.026284 | 0.571    |
| 1.95E-14 | 0.392983 | 1.07E-18 | 0.141403 | 0.00219  | 0.108366 | 0.01916  | 0.28855  | 2.09E-10 |
| 1.50E-11 | 0.4598   | 8.30E-26 | 0.092317 | 0.04616  | 0.161836 | 0.00045  | 0.187079 | 4.74E-05 |
| 3.81E-20 | 0.534328 | 7.81E-36 | 0.086166 | 0.06281  | 0.066911 | 0.14882  | 0.242655 | 1.10E-07 |
| 6.22E-44 | 0.651943 | 7.41E-58 | 0.062597 | 0.17688  | 0.119184 | 0.00994  | 0.306928 | 1.21E-11 |
| 2.21E-14 | 0.49057  | 1.19E-29 | 0.18242  | 7.34E-05 | 0.169907 | 0.00023  | 0.323546 | 7.68E-13 |
| 3.15E-16 | 0.394496 | 7.70E-19 | 0.00942  | 0.83912  | 0.090578 | 0.05044  | 0.148119 | 0.00133  |
| 1.42E-19 | 0.380416 | 1.58E-17 | 0.075965 | 0.10109  | 0.069396 | 0.13428  | 0.116891 | 0.01147  |
| 2.66E-17 | 0.417204 | 4.30E-21 | 0.048677 | 0.29385  | 0.106891 | 0.02087  | 0.190842 | 3.31E-05 |
| 3.56E-15 | 0.491644 | 8.60E-30 | 0.143719 | 0.00185  | 0.16751  | 0.00028  | 0.158632 | 0.00058  |
| 5.67E-08 | 0.36196  | 6.66E-16 | 0.041878 | 0.36655  | 0.080969 | 0.08047  | 0.108714 | 0.01877  |
| 1.14E-19 | 0.506595 | 8.22E-32 | 0.115688 | 0.01236  | 0.140555 | 0.00233  | 0.132709 | 0.00407  |
| 1.81E-37 | 0.529962 | 3.55E-35 | 0.086107 | 0.06299  | 0.014489 | 0.75482  | 0.206939 | 6.52E-06 |
| 1.22E-06 | 0.214107 | 3.03E-06 | -0.07923 | 0.08723  | 0.029396 | 0.52628  | 0.155686 | 0.00074  |
| 5.03E-19 | 0.407321 | 4.32E-20 | 0.07968  | 0.08543  | -0.00318 | 0.94543  | 0.001187 | 0.9796   |
| 0.01573  | 0.181381 | 8.08E-05 | 0.046708 | 0.31383  | 0.106048 | 0.0219   | 0.246677 | 6.66E-08 |
| 4.97E-13 | 0.428389 | 2.88E-22 | 0.033665 | 0.46798  | 0.079435 | 0.0864   | 0.062003 | 0.18103  |
| 9.32E-09 | 0.292661 | 1.12E-10 | 0.100478 | 0.02993  | 0.085269 | 0.06561  | 0.125049 | 0.00682  |
| 2.49E-20 | -0.33355 | 1.34E-13 | -0.00492 | 0.91561  | -0.03136 | 0.49896  | -0.2405  | 1.43E-07 |
| 1.45E-21 | 0.538552 | 1.76E-36 | 0.114801 | 0.01305  | 0.151512 | 0.00102  | 0.385146 | 5.81E-18 |
| 0.03638  | -0.0921  | 0.04669  | 0.066164 | 0.15342  | -0.00403 | 0.93076  | -0.04326 | 0.35092  |
| 6.58E-24 | 0.640674 | 2.53E-55 | 0.162497 | 0.00042  | 0.085396 | 0.06521  | 0.038546 | 0.40594  |
| 3.30E-12 | 0.416196 | 5.47E-21 | 0.061634 | 0.18364  | 0.036986 | 0.42522  | -0.08085 | 0.08092  |
| 3.37E-15 | 0.542341 | 4.56E-37 | 0.100988 | 0.0291   | 0.116273 | 0.01192  | -0.11155 | 0.01588  |
| 1.61E-21 | 0.445596 | 3.68E-24 | -0.07444 | 0.10813  | 0.075384 | 0.10374  | 0.106812 | 0.02096  |
| 1.27E-29 | 0.509908 | 2.84E-32 | 0.019363 | 0.67641  | 0.09965  | 0.03132  | 0.14688  | 0.00146  |
| 5.18E-10 | 0.309955 | 7.40E-12 | -0.03193 | 0.49123  | 0.061942 | 0.18146  | 0.181918 | 7.69E-05 |
| 4.44E-19 | 0.50987  | 2.88E-32 | 0.071194 | 0.12446  | 0.028986 | 0.53208  | 0.0365   | 0.43133  |
| 4.37E-37 | 0.64235  | 1.08E-55 | 0.092981 | 0.04461  | 0.126214 | 0.00631  | 0.104601 | 0.02379  |
| 8.42E-49 | 0.742427 | 6.30E-83 | 0.058204 | 0.2093   | 0.128354 | 0.00547  | 0.111178 | 0.01623  |
| 3.70E-61 | 0.777295 | 1.24E-95 | 0.04362  | 0.34693  | 0.076522 | 0.09861  | 0.241118 | 1.33E-07 |
| 0.46793  | 0.112543 | 0.01496  | 0.001856 | 0.9681   | 0.122874 | 0.00785  | -0.04119 | 0.37447  |
| 0.13283  | 0.099401 | 0.03174  | 0.094078 | 0.04214  | 0.055124 | 0.23446  | 0.283006 | 4.75E-10 |
| 0.72751  | -0.01773 | 0.70239  | 0.032969 | 0.47724  | 0.02306  | 0.61915  | 0.063893 | 0.16807  |
| 0.10907  | -0.03724 | 0.42204  | 0.027097 | 0.55914  | 0.074749 | 0.10668  | 0.139907 | 0.00244  |
| 0.00018  | -0.07538 | 0.10375  | 0.034235 | 0.46048  | 0.031201 | 0.50119  | -0.07732 | 0.09513  |
| 0.91468  | -0.10356 | 0.02523  | 0.002974 | 0.94889  | 0.012271 | 0.79142  | -0.07157 | 0.12248  |
| 0.19815  | -0.05467 | 0.23833  | -0.0078  | 0.86651  | -0.01266 | 0.78491  | 0.03866  | 0.40455  |
| 0.00353  | 0.03005  | 0.51712  | -0.05255 | 0.25705  | -0.02593 | 0.57618  | 0.032595 | 0.48226  |
| 7.83E-05 | -0.24872 | 5.14E-08 | -0.04654 | 0.31558  | -0.02144 | 0.64394  | 0.058082 | 0.21026  |
| 0.49282  | -0.00551 | 0.90545  | 0.017067 | 0.71297  | -0.03165 | 0.49506  | 0.074958 | 0.10571  |
| 0.08038  | 0.09675  | 0.03661  | -0.01199 | 0.79616  | -0.04805 | 0.30008  | -0.06823 | 0.14094  |

|          |          |          |          |         |          |         |          |          |
|----------|----------|----------|----------|---------|----------|---------|----------|----------|
| 0.09275  | 0.082734 | 0.07407  | 0.025848 | 0.5774  | -0.01714 | 0.71186 | 0.155908 | 0.00072  |
| 0.00806  | -0.23182 | 4.07E-07 | -0.0955  | 0.03911 | -0.09151 | 0.0481  | -0.03447 | 0.45747  |
| 0.00165  | -0.22221 | 1.24E-06 | -0.04545 | 0.32709 | -0.0241  | 0.60339 | 0.082279 | 0.07568  |
| 0.41264  | -0.00789 | 0.86504  | -0.07578 | 0.10192 | -0.08503 | 0.06638 | -0.00209 | 0.96399  |
| 6.42E-06 | -0.15311 | 0.0009   | -0.04672 | 0.31373 | -0.07169 | 0.12183 | 0.035629 | 0.44241  |
| 0.57355  | -0.07527 | 0.10426  | -0.06844 | 0.13973 | -0.01112 | 0.81066 | 0.079401 | 0.08653  |
| 0.00085  | 0.055512 | 0.23118  | 0.002009 | 0.96546 | -0.02801 | 0.54593 | 0.11541  | 0.01257  |
| 0.00011  | -0.15479 | 0.00079  | -0.0376  | 0.41751 | -0.02295 | 0.6208  | 0.009122 | 0.84414  |
| 0.71655  | 0.014011 | 0.76267  | 0.091407 | 0.04836 | 0.028777 | 0.53503 | 0.025857 | 0.57727  |
| 0.25041  | -0.05738 | 0.21587  | 0.042285 | 0.36191 | 0.079842 | 0.08479 | 0.112774 | 0.01476  |
| 0.13454  | -0.1452  | 0.00166  | 0.000379 | 0.99349 | -0.00363 | 0.93759 | 0.087122 | 0.05994  |
| 0.00341  | -0.07129 | 0.12393  | 0.147394 | 0.0014  | 0.011414 | 0.80568 | -0.00099 | 0.98302  |
| 0.29872  | 0.049058 | 0.29008  | 0.11767  | 0.01093 | -0.08815 | 0.05696 | 0.032379 | 0.48517  |
| 0.27699  | -0.0751  | 0.10505  | -0.05113 | 0.27014 | -0.02848 | 0.53931 | 0.076259 | 0.09978  |
| 0.00869  | -0.27514 | 1.48E-09 | 0.002393 | 0.95887 | -0.08288 | 0.07358 | -0.04325 | 0.351    |
| 0.22538  | -0.11428 | 0.01347  | -0.08496 | 0.0666  | -0.01439 | 0.75648 | -0.0298  | 0.52067  |
| 0.97223  | -0.06283 | 0.17525  | -0.0059  | 0.89884 | -0.01729 | 0.70947 | 0.153823 | 0.00085  |
| 0.00701  | -0.13926 | 0.00256  | -0.07167 | 0.12196 | -0.11052 | 0.01688 | -0.06671 | 0.15003  |
| 0.18497  | -0.14569 | 0.00159  | -0.00909 | 0.84473 | -0.01572 | 0.73471 | 0.094224 | 0.04182  |
| 0.91653  | -0.06631 | 0.1525   | 0.00748  | 0.87193 | 0.069973 | 0.13106 | -0.0057  | 0.90223  |
| 0.84121  | -0.04032 | 0.38469  | -0.05263 | 0.25634 | -0.11732 | 0.01117 | -0.0025  | 0.95699  |
| 0.04309  | -0.09219 | 0.04647  | 0.011617 | 0.8023  | -0.02073 | 0.65497 | 0.090341 | 0.05105  |
| 0.0212   | 0.204216 | 8.66E-06 | -0.05676 | 0.22088 | 0.087229 | 0.05962 | 0.056347 | 0.22423  |
| 0.00015  | 0.040332 | 0.38452  | -0.02881 | 0.53452 | -0.05679 | 0.22057 | 0.037787 | 0.41526  |
| 0.00068  | -0.24763 | 5.90E-08 | -0.16595 | 0.00032 | -0.17567 | 0.00014 | 0.00195  | 0.96648  |
| 0.59387  | -0.08303 | 0.07304  | -0.09786 | 0.03451 | -0.10709 | 0.02063 | 0.066382 | 0.15207  |
| 0.20955  | -0.04764 | 0.3043   | -0.03949 | 0.39454 | -0.07164 | 0.12209 | 0.102865 | 0.02622  |
| 8.77E-05 | -0.26586 | 5.37E-09 | -0.06553 | 0.15739 | -0.06968 | 0.13268 | -0.00014 | 0.99767  |
| 2.05E-06 | 0.200687 | 1.24E-05 | -0.0231  | 0.61856 | 0.014672 | 0.75183 | 0.181393 | 8.07E-05 |
| 0.16802  | -0.14775 | 0.00137  | -0.0451  | 0.3308  | -0.03775 | 0.41577 | 0.040741 | 0.37971  |
| 2.47E-05 | -0.19105 | 3.24E-05 | -0.04652 | 0.31581 | -0.13065 | 0.00468 | -0.08402 | 0.06969  |
| 0.55524  | -0.06988 | 0.13155  | -0.07681 | 0.09735 | -0.03251 | 0.48338 | 0.030989 | 0.5041   |
| 0.65889  | -0.03877 | 0.4032   | 0.075819 | 0.10175 | -0.00895 | 0.84709 | 0.103773 | 0.02492  |
| 1.21E-06 | -0.23365 | 3.28E-07 | -0.05492 | 0.23623 | -0.09195 | 0.04704 | -0.05143 | 0.26732  |
| 2.42E-05 | -0.10609 | 0.02185  | -0.03503 | 0.45012 | -0.03935 | 0.39617 | 0.019961 | 0.66701  |
| 0.46555  | 0.006076 | 0.89582  | 0.071554 | 0.12256 | -0.04307 | 0.35307 | -0.09398 | 0.04235  |
| 0.05646  | -0.01098 | 0.81291  | -0.08107 | 0.08011 | -0.06532 | 0.15874 | 0.00937  | 0.83995  |
| 0.00908  | -0.19448 | 2.32E-05 | 0.063856 | 0.16831 | -0.0703  | 0.12929 | 0.018051 | 0.69723  |
| 0.80895  | -0.10493 | 0.02335  | 0.173606 | 0.00016 | -0.05531 | 0.23289 | 0.064715 | 0.16265  |
| 0.16407  | 0.044941 | 0.33251  | -0.10133 | 0.02855 | -0.0533  | 0.25029 | 0.184282 | 6.17E-05 |
| 0.00098  | -0.16015 | 0.00051  | -0.10457 | 0.02383 | -0.06814 | 0.14151 | 0.050372 | 0.27734  |
| 0.01241  | 0.114894 | 0.01297  | 0.056341 | 0.22427 | 0.024271 | 0.60086 | 0.217767 | 2.03E-06 |
| 0.15263  | 0.070752 | 0.12681  | 0.125212 | 0.00674 | -0.02871 | 0.53593 | 0.179306 | 9.78E-05 |
| 0.00094  | -0.18578 | 5.36E-05 | -0.05714 | 0.21776 | -0.01012 | 0.82738 | -0.02739 | 0.55496  |
| 0.22002  | -0.13606 | 0.00322  | -0.08309 | 0.07283 | -0.05106 | 0.2708  | 0.058846 | 0.20431  |

|          |           |          |          |          |          |         |          |          |
|----------|-----------|----------|----------|----------|----------|---------|----------|----------|
| 0.87987  | -0.03433  | 0.45919  | -0.00125 | 0.97843  | -0.01415 | 0.76035 | 0.207623 | 6.06E-06 |
| 0.00026  | -0.27532  | 1.44E-09 | -0.0399  | 0.38962  | -0.0744  | 0.10834 | 0.044687 | 0.33526  |
| 3.79E-10 | -0.30174  | 2.76E-11 | 0.112674 | 0.01484  | -0.02096 | 0.65143 | 0.034097 | 0.46229  |
| 2.48E-05 | -0.21558  | 2.58E-06 | -0.0977  | 0.0348   | -0.06304 | 0.17386 | 0.085641 | 0.06443  |
| 1.79E-08 | 0.41165   | 1.59E-20 | 0.06158  | 0.18403  | 0.12521  | 0.00674 | 0.151215 | 0.00105  |
| 0.01574  | -0.2789   | 8.62E-10 | -0.09227 | 0.04628  | -0.08469 | 0.06748 | -0.01278 | 0.78294  |
| 0.22867  | -0.09994  | 0.03082  | -0.07108 | 0.12506  | -0.0529  | 0.25389 | 0.066207 | 0.15316  |
| 1.12E-05 | 0.174755  | 0.00015  | -0.01946 | 0.67481  | 0.017133 | 0.71191 | 0.111197 | 0.01622  |
| 9.42E-06 | 0.276148  | 1.28E-09 | -0.01444 | 0.75569  | 0.0452   | 0.32973 | 0.138852 | 0.00264  |
| 0.03692  | 0.006509  | 0.88844  | 0.037739 | 0.41584  | 0.067392 | 0.14592 | 0.028376 | 0.54074  |
| 2.17E-10 | -0.40801  | 3.68E-20 | -0.04086 | 0.37837  | -0.08786 | 0.05781 | 0.01032  | 0.82399  |
| 0.0884   | -0.09734  | 0.03547  | -0.06257 | 0.17703  | -0.00259 | 0.95543 | -0.01833 | 0.69276  |
| 0.15679  | -0.15247  | 0.00095  | -0.04011 | 0.38716  | -0.03676 | 0.42805 | 0.038101 | 0.41139  |
| 0.19366  | -0.05536  | 0.23246  | 0.004789 | 0.9178   | -0.02755 | 0.55263 | 0.127117 | 0.00594  |
| 0.69583  | -0.06853  | 0.13923  | 0.007297 | 0.87503  | -0.00862 | 0.8526  | 0.179171 | 9.90E-05 |
| 0.62136  | -0.05165  | 0.26529  | 0.038367 | 0.40813  | 0.005734 | 0.90164 | 0.009845 | 0.83196  |
| 0.00126  | -0.15955  | 0.00054  | -0.04205 | 0.36461  | -0.02722 | 0.55733 | 0.043132 | 0.35235  |
| 0.01975  | -0.09186  | 0.04725  | -0.00287 | 0.95074  | 0.022336 | 0.6302  | 0.07687  | 0.09708  |
| 0.00065  | 0.131725  | 0.00435  | -0.02557 | 0.58151  | 0.096703 | 0.0367  | -0.05061 | 0.27508  |
| 0.20444  | -0.13648  | 0.00312  | -0.01348 | 0.77135  | -0.02883 | 0.53428 | 0.083768 | 0.07052  |
| 0.00044  | 0.008183  | 0.86001  | 0.039342 | 0.39631  | -0.00436 | 0.92509 | 0.072255 | 0.11892  |
| 0.45265  | -0.02876  | 0.53532  | 0.062006 | 0.18101  | 0.017218 | 0.71056 | 0.087551 | 0.05868  |
| 0.01022  | -0.18014  | 9.06E-05 | -0.04313 | 0.35233  | -0.115   | 0.01289 | -0.02878 | 0.53493  |
| 0.00043  | -0.17162  | 0.00019  | -0.00048 | 0.99181  | -0.01138 | 0.80623 | -0.01087 | 0.81475  |
| 7.67E-08 | 0.141464  | 0.00218  | 0.111569 | 0.01586  | -0.06998 | 0.13101 | 0.143303 | 0.00191  |
| 0.23373  | -0.14582  | 0.00158  | -0.11375 | 0.01391  | -0.1074  | 0.02026 | 0.047067 | 0.31012  |
| 0.00229  | 0.135429  | 0.00336  | 0.249327 | 4.76E-08 | 0.04424  | 0.34012 | -0.04168 | 0.36885  |
| 0.02632  | 0.213795  | 3.13E-06 | 0.248243 | 5.46E-08 | 0.118412 | 0.01044 | 0.161771 | 0.00045  |
| 0.84454  | -0.07888  | 0.08862  | 0.018142 | 0.69577  | -0.07154 | 0.12263 | 0.217618 | 2.06E-06 |
| 0.04827  | -0.00641  | 0.89019  | -0.06512 | 0.16003  | -0.00193 | 0.96674 | -0.11788 | 0.01079  |
| 2.21E-22 | 0.444952  | 4.35E-24 | 0.065143 | 0.15988  | 0.084232 | 0.06897 | 0.237593 | 2.04E-07 |
| 0.02488  | 0.153188  | 0.0009   | 0.01083  | 0.81544  | 0.049677 | 0.28403 | 0.226135 | 7.90E-07 |
| 0.93898  | -0.07658  | 0.09837  | -0.08277 | 0.07396  | -0.05406 | 0.24365 | 0.126899 | 0.00603  |
| 0.6874   | -0.02747  | 0.55377  | -0.04479 | 0.33417  | -0.04563 | 0.32515 | 0.035043 | 0.44996  |
| 0.83507  | -0.08654  | 0.06167  | -0.0355  | 0.4441   | -0.06987 | 0.13161 | -0.04606 | 0.32064  |
| 2.68E-08 | -0.2607   | 1.08E-08 | -0.04861 | 0.29449  | -0.02045 | 0.65929 | -0.04527 | 0.32902  |
| 0.05304  | -0.21928  | 1.72E-06 | -0.1058  | 0.02222  | -0.11455 | 0.01325 | 0.032057 | 0.48952  |
| 0.05506  | -0.08272  | 0.0741   | 0.148531 | 0.00129  | 0.00161  | 0.97232 | -0.0265  | 0.5678   |
| 0.09893  | 0.086356  | 0.06223  | 0.090083 | 0.05172  | -0.01745 | 0.70675 | 0.2723   | 2.20E-09 |
| 0.43651  | -0.10113  | 0.02888  | 0.163968 | 0.00037  | -0.02992 | 0.51894 | -0.02037 | 0.66058  |
| 0.06493  | 0.0471    | 0.30978  | 0.054671 | 0.23833  | 0.030697 | 0.50813 | 0.010899 | 0.81429  |
| 0.94737  | -6.34E-05 | 0.99891  | 0.012335 | 0.79035  | 0.034765 | 0.45356 | 0.084955 | 0.06661  |
| 4.55E-07 | 0.209107  | 5.18E-06 | 0.020777 | 0.65426  | -0.04881 | 0.29253 | -0.02685 | 0.5628   |
| 0.23251  | 0.026666  | 0.56542  | -0.03946 | 0.39489  | 0.076067 | 0.10063 | 0.02477  | 0.59339  |
| 0.10156  | 0.061912  | 0.18167  | 0.148571 | 0.00128  | -0.01274 | 0.78365 | 0.145937 | 0.00157  |



|          |          |          |          |          |          |         |          |          |
|----------|----------|----------|----------|----------|----------|---------|----------|----------|
| 0.00763  | -0.1041  | 0.02446  | -0.0927  | 0.04526  | 0.054586 | 0.23906 | -0.06767 | 0.14427  |
| 0.25814  | 0.023779 | 0.60826  | 0.062957 | 0.17439  | 0.065037 | 0.16056 | 0.194358 | 2.34E-05 |
| 6.13E-05 | -0.28107 | 6.30E-10 | -0.05466 | 0.2384   | -0.03063 | 0.50906 | 0.050951 | 0.27184  |
| 0.04043  | -0.1471  | 0.00143  | -0.06266 | 0.17643  | -0.07437 | 0.1085  | 0.112935 | 0.01461  |
| 0.01409  | -0.10653 | 0.02131  | -0.06345 | 0.17104  | -0.00111 | 0.98098 | 0.093632 | 0.04313  |
| 7.58E-12 | -0.2922  | 1.21E-10 | -0.09256 | 0.04559  | -0.0512  | 0.26954 | 0.00295  | 0.9493   |
| 1.72E-17 | -0.43637 | 3.93E-23 | -0.11535 | 0.01262  | -0.10527 | 0.0229  | -0.01293 | 0.78057  |
| 0.0007   | -0.26638 | 5.01E-09 | -0.0703  | 0.12929  | -0.05444 | 0.24033 | 0.053642 | 0.2473   |
| 0.3363   | 0.035687 | 0.44166  | 0.148447 | 0.00129  | 0.066257 | 0.15285 | 0.041538 | 0.37045  |
| 0.00889  | 0.142976 | 0.00195  | 0.010819 | 0.81562  | 0.010335 | 0.82374 | 0.183442 | 6.68E-05 |
| 2.05E-05 | 0.266074 | 5.22E-09 | -0.0816  | 0.07815  | 0.04005  | 0.38785 | -0.03303 | 0.47644  |
| 7.42E-07 | 0.168708 | 0.00025  | -0.03423 | 0.46054  | 0.037611 | 0.41743 | 0.042546 | 0.35894  |
| 0.53647  | 0.050055 | 0.28037  | -0.06066 | 0.1907   | 0.034005 | 0.4635  | -0.00715 | 0.87748  |
| 0.14703  | -0.10362 | 0.02513  | -0.0142  | 0.7596   | -0.07429 | 0.10888 | 0.051195 | 0.26956  |
| 0.51425  | 0.127832 | 0.00567  | 0.026857 | 0.56263  | 0.046669 | 0.31423 | 0.050529 | 0.27584  |
| 0.07108  | 0.087119 | 0.05995  | 0.054053 | 0.24369  | 0.028569 | 0.53799 | 0.169052 | 0.00024  |
| 0.00267  | -0.16973 | 0.00023  | -0.02424 | 0.60132  | 0.002584 | 0.95559 | 0.044693 | 0.33519  |
| 0.87291  | 0.108028 | 0.01954  | 0.186576 | 4.97E-05 | 0.144376 | 0.00176 | 0.015191 | 0.74334  |
| 0.0224   | 0.043077 | 0.35297  | 0.007741 | 0.86749  | 0.023611 | 0.61079 | 0.254468 | 2.46E-08 |
| 0.03384  | 0.116115 | 0.01204  | -0.03301 | 0.47671  | -0.03603 | 0.43734 | -0.09079 | 0.04991  |
| 0.07011  | -0.03411 | 0.46208  | -0.08215 | 0.07613  | -0.06365 | 0.1697  | 0.130458 | 0.00475  |
| 0.01438  | 0.254235 | 2.53E-08 | 0.065113 | 0.16007  | 0.049255 | 0.28814 | 0.163334 | 0.00039  |
| 0.57856  | -0.04713 | 0.30949  | 0.004289 | 0.92636  | -0.01229 | 0.7911  | 0.08186  | 0.07719  |
| 0.53054  | -0.08618 | 0.06277  | -0.0613  | 0.18604  | -0.05189 | 0.26309 | -0.05904 | 0.20285  |
| 0.68642  | 0.020505 | 0.6585   | 0.180818 | 8.51E-05 | 0.140253 | 0.00238 | 0.089321 | 0.05374  |
| 0.3576   | 0.03344  | 0.47096  | 0.063701 | 0.16935  | 0.02964  | 0.52286 | 0.173776 | 0.00016  |
| 0.02055  | -0.18099 | 8.38E-05 | -0.02688 | 0.56236  | -0.01752 | 0.70569 | 0.087793 | 0.05799  |
| 0.02359  | -0.06531 | 0.15878  | -0.12316 | 0.00771  | -0.02445 | 0.59812 | 0.040757 | 0.37953  |
| 0.23591  | -0.04741 | 0.30658  | -0.03916 | 0.39848  | -0.05421 | 0.24233 | 0.135242 | 0.00341  |
| 0.47328  | -0.00084 | 0.98562  | 0.041065 | 0.37593  | -0.09603 | 0.03804 | -0.03067 | 0.50848  |
| 0.19916  | 0.020553 | 0.65776  | -0.05701 | 0.21883  | -0.01858 | 0.68882 | 0.030465 | 0.51135  |
| 0.04778  | 0.066704 | 0.15009  | -0.04898 | 0.29089  | 0.087426 | 0.05905 | -0.0088  | 0.84956  |
| 0.62758  | -0.1031  | 0.02589  | -0.00371 | 0.93627  | 0.000983 | 0.9831  | 0.01414  | 0.76055  |
| 0.98136  | -0.04749 | 0.30581  | 0.013374 | 0.77316  | 0.025346 | 0.58483 | 0.108875 | 0.0186   |
| 3.17E-07 | 0.320041 | 1.39E-12 | 0.054118 | 0.24312  | 0.150672 | 0.00109 | 0.159806 | 0.00053  |
| 0.01533  | 0.07118  | 0.12453  | 0.063709 | 0.16929  | -0.02553 | 0.5821  | 0.264439 | 6.52E-09 |
| 3.31E-09 | 0.358334 | 1.35E-15 | 0.023598 | 0.611    | 0.080533 | 0.08212 | 0.108288 | 0.01925  |
| 0.62072  | 0.070061 | 0.13057  | 0.030332 | 0.51319  | -0.00777 | 0.86699 | 0.122074 | 0.00827  |
| 2.55E-08 | 0.107291 | 0.02039  | 0.06472  | 0.16262  | -0.0807  | 0.0815  | 0.191028 | 3.25E-05 |
| 0.00048  | -0.19439 | 2.34E-05 | -0.11001 | 0.0174   | -0.05984 | 0.19676 | -0.09612 | 0.03786  |
| 0.56491  | -0.04781 | 0.30249  | -0.10121 | 0.02875  | -0.07558 | 0.10285 | -0.0066  | 0.88697  |
| 2.61E-05 | -0.12867 | 0.00536  | 0.076791 | 0.09742  | -0.05186 | 0.26335 | -0.12896 | 0.00525  |
| 0.20999  | -0.14756 | 0.00139  | -0.04179 | 0.36761  | -0.02977 | 0.521   | 0.100834 | 0.02935  |
| 0.25692  | -0.17251 | 0.00018  | -0.11206 | 0.0154   | -0.09309 | 0.04436 | 0.047837 | 0.30227  |
| 3.92E-05 | 0.142116 | 0.00208  | -0.07966 | 0.08552  | -0.04415 | 0.34105 | 0.109886 | 0.01753  |

|          |          |          |          |          |          |         |          |          |
|----------|----------|----------|----------|----------|----------|---------|----------|----------|
| 0.00056  | -0.22768 | 6.61E-07 | -0.05206 | 0.26157  | -0.03244 | 0.48441 | 0.046769 | 0.3132   |
| 0.00559  | -0.18021 | 9.00E-05 | -0.03093 | 0.50489  | -0.05444 | 0.2403  | 0.065449 | 0.15792  |
| 0.00374  | -0.17618 | 0.00013  | 0.194022 | 2.42E-05 | 0.028365 | 0.5409  | 0.072486 | 0.11775  |
| 0.0346   | -0.13677 | 0.00306  | -0.06349 | 0.17076  | -0.08103 | 0.08025 | -0.01284 | 0.782    |
| 0.46988  | -0.04789 | 0.30169  | -0.06047 | 0.19207  | -0.02694 | 0.56138 | -0.03142 | 0.49814  |
| 2.64E-06 | -0.26781 | 4.11E-09 | -0.04107 | 0.37591  | -0.04592 | 0.32209 | 0.045616 | 0.32529  |
| 0.60813  | -0.06608 | 0.15394  | -0.05948 | 0.19946  | 0.084264 | 0.06886 | -0.03652 | 0.43108  |
| 0.0364   | 0.000117 | 0.99799  | 0.07814  | 0.09167  | 0.021521 | 0.64274 | -0.05246 | 0.25789  |
| 0.0005   | 0.195198 | 2.16E-05 | 0.083179 | 0.07253  | 0.01298  | 0.77966 | 0.230135 | 4.97E-07 |
| 0.82319  | -0.03643 | 0.43217  | 0.042842 | 0.35561  | 0.018794 | 0.68541 | 0.150124 | 0.00114  |
| 0.95992  | -0.07692 | 0.09687  | 0.064585 | 0.1635   | 0.064187 | 0.16611 | 0.138641 | 0.00268  |
| 0.00277  | -0.22504 | 8.96E-07 | -0.04691 | 0.31177  | -0.03128 | 0.50004 | 0.046217 | 0.31895  |
| 0.27815  | 0.081677 | 0.07786  | -0.02351 | 0.61225  | -0.09833 | 0.03364 | -0.02269 | 0.62477  |
| 0.42428  | -0.07209 | 0.11977  | -0.12361 | 0.00749  | 0.00065  | 0.98882 | 0.166212 | 0.00031  |
| 0.11213  | -0.17202 | 0.00019  | -0.03817 | 0.41054  | -0.04188 | 0.36658 | 0.026327 | 0.57037  |
| 0.00104  | -0.25276 | 3.07E-08 | -0.06763 | 0.14447  | -0.04316 | 0.35202 | 0.0405   | 0.38254  |
| 2.61E-10 | -0.31605 | 2.72E-12 | -0.04612 | 0.31996  | -0.03983 | 0.39048 | 0.05394  | 0.24468  |
| 0.44868  | -0.07062 | 0.12751  | -0.01383 | 0.76571  | -0.0297  | 0.52201 | 0.053907 | 0.24497  |
| 0.6873   | 0.092549 | 0.04562  | 0.110017 | 0.01739  | 0.076214 | 0.09998 | -0.0596  | 0.19854  |
| 0.00151  | -0.20696 | 6.50E-06 | -0.02851 | 0.53886  | -0.04267 | 0.35752 | 0.007851 | 0.86562  |
| 0.93049  | 0.069473 | 0.13385  | 0.134302 | 0.00364  | -0.01584 | 0.73276 | 0.046742 | 0.31348  |
| 0.00017  | -0.24613 | 7.13E-08 | -0.06404 | 0.16706  | -0.03776 | 0.41561 | -0.01456 | 0.75371  |
| 0.13936  | 0.098951 | 0.03253  | -0.05104 | 0.27104  | -0.05926 | 0.20114 | 0.020195 | 0.66334  |
| 0.25954  | -0.08388 | 0.07016  | 0.013437 | 0.77211  | -0.03306 | 0.47602 | 0.133856 | 0.00376  |
| 0.08121  | -0.03521 | 0.44775  | -0.04192 | 0.36605  | 0.023752 | 0.60867 | 0.077372 | 0.09491  |
| 9.36E-05 | -0.23361 | 3.30E-07 | -0.02583 | 0.5777   | -0.02149 | 0.64328 | 0.064829 | 0.16191  |
| 0.16493  | 0.092663 | 0.04535  | 0.006935 | 0.88118  | 0.03261  | 0.48206 | -0.09695 | 0.03621  |
| 0.94141  | 0.010194 | 0.8261   | 0.011307 | 0.80747  | 0.019067 | 0.68109 | -0.00752 | 0.87132  |
| 0.06903  | -0.14597 | 0.00156  | 0.097079 | 0.03597  | -0.03825 | 0.40955 | 0.056233 | 0.22516  |
| 0.13378  | -0.11325 | 0.01434  | -0.05169 | 0.26496  | -0.02668 | 0.5652  | 0.085097 | 0.06616  |
| 0.00101  | -0.12759 | 0.00576  | 0.033231 | 0.47375  | -0.00049 | 0.99161 | 0.100079 | 0.03059  |
| 0.5857   | -0.08983 | 0.05239  | -0.01074 | 0.8169   | -0.00443 | 0.92402 | 0.055004 | 0.23548  |
| 1.31E-10 | -0.28953 | 1.80E-10 | -0.05863 | 0.20595  | -0.06843 | 0.13982 | -0.08715 | 0.05984  |
| 0.75996  | -0.02663 | 0.56601  | -0.13844 | 0.00272  | -0.01178 | 0.79963 | 0.112626 | 0.01489  |
| 0.44703  | -0.03368 | 0.46779  | -0.00478 | 0.91801  | -0.01421 | 0.75934 | 0.106298 | 0.02159  |
| 2.76E-08 | 0.191537 | 3.09E-05 | 0.002851 | 0.951    | -0.00145 | 0.97512 | 0.163771 | 0.00038  |
| 0.34629  | -0.02062 | 0.65667  | -0.04303 | 0.35354  | -0.00062 | 0.98931 | 0.117886 | 0.01078  |
| 0.00397  | -0.17911 | 9.95E-05 | -0.06813 | 0.14155  | -0.04204 | 0.36475 | 0.060219 | 0.19393  |
| 0.24596  | -0.08169 | 0.07781  | 0.044792 | 0.33412  | 0.028638 | 0.53701 | 0.111741 | 0.0157   |
| 0.12461  | -0.08654 | 0.06168  | 0.002344 | 0.95971  | -0.01472 | 0.75097 | 0.040853 | 0.3784   |
| 0.35411  | -0.08764 | 0.05844  | -0.05504 | 0.23519  | -0.03591 | 0.43877 | 0.060256 | 0.19366  |
| 0.00098  | 0.13131  | 0.00448  | 0.020349 | 0.66094  | 0.043365 | 0.34976 | 0.288421 | 2.13E-10 |
| 0.13958  | 0.055923 | 0.22774  | 0.059575 | 0.19875  | 0.067724 | 0.14394 | 0.205643 | 7.46E-06 |
| 0.84835  | 0.030877 | 0.50565  | 0.060372 | 0.1928   | -0.07937 | 0.08665 | 0.007039 | 0.87941  |
| 0.37965  | 0.023311 | 0.61533  | 0.024931 | 0.591    | 0.045354 | 0.32808 | 0.0659   | 0.15507  |

|          |          |          |          |         |          |         |          |          |
|----------|----------|----------|----------|---------|----------|---------|----------|----------|
| 0.77853  | -0.10845 | 0.01906  | -0.12127 | 0.00871 | -0.02663 | 0.56587 | 0.08862  | 0.05566  |
| 6.45E-05 | 0.109854 | 0.01756  | -0.05968 | 0.19795 | -0.08549 | 0.0649  | -0.00873 | 0.85081  |
| 0.5061   | -0.04474 | 0.3347   | -0.03068 | 0.5083  | -0.02755 | 0.55253 | 0.095379 | 0.03937  |
| 0.05709  | -0.15495 | 0.00078  | -0.02893 | 0.5328  | -0.027   | 0.56053 | 0.044816 | 0.33386  |
| 1.79E-08 | 0.141322 | 0.0022   | 0.081191 | 0.07965 | -0.00196 | 0.96636 | 0.265331 | 5.77E-09 |
| 0.00336  | 0.128363 | 0.00547  | 0.049532 | 0.28544 | -0.02799 | 0.54624 | -0.08612 | 0.06296  |
| 2.93E-05 | -0.29712 | 5.67E-11 | -0.14407 | 0.0018  | -0.06637 | 0.15212 | 0.036888 | 0.42645  |
| 0.0005   | -0.19986 | 1.35E-05 | -0.03677 | 0.42797 | -0.04142 | 0.37179 | 0.052675 | 0.25594  |
| 0.75576  | -0.01091 | 0.81406  | -0.01016 | 0.82666 | -0.01675 | 0.71813 | -0.00404 | 0.93067  |
| 0.00166  | -0.19845 | 1.56E-05 | -0.05559 | 0.23055 | -0.03286 | 0.47865 | 0.015057 | 0.74553  |
| 2.83E-06 | -0.27181 | 2.36E-09 | -0.05173 | 0.26461 | -0.02204 | 0.63479 | 0.004872 | 0.91638  |
| 0.00252  | 0.136837 | 0.00305  | 0.004759 | 0.91831 | 0.05008  | 0.28014 | 0.175186 | 0.00014  |
| 0.00599  | -0.08569 | 0.06428  | 0.006005 | 0.89703 | -0.00817 | 0.86019 | 0.071096 | 0.12498  |
| 1.51E-08 | -0.33901 | 5.05E-14 | -0.05296 | 0.25338 | -0.08904 | 0.05449 | -0.12284 | 0.00787  |
| 0.00109  | 0.162612 | 0.00042  | 0.060541 | 0.19156 | 0.093164 | 0.04419 | 0.174407 | 0.00015  |
| 0.0453   | 0.270567 | 2.81E-09 | 0.169759 | 0.00023 | 0.100944 | 0.02917 | -0.00125 | 0.97851  |
| 0.00018  | 0.200519 | 1.27E-05 | 0.015379 | 0.74029 | 0.007213 | 0.87647 | 0.045552 | 0.32598  |
| 3.02E-06 | 0.075412 | 0.10361  | 0.074555 | 0.1076  | -0.03247 | 0.48398 | 0.125365 | 0.00668  |
| 0.81564  | -0.08307 | 0.0729   | -0.07361 | 0.11216 | -0.08406 | 0.06955 | 0.107636 | 0.01999  |
| 0.84129  | -0.0763  | 0.09958  | -0.03618 | 0.43544 | -0.02896 | 0.53248 | 0.019747 | 0.67037  |
| 0.85588  | -0.07582 | 0.10176  | -0.02814 | 0.54413 | -0.06096 | 0.18851 | 0.106117 | 0.02182  |
| 6.17E-08 | -0.45626 | 2.17E-25 | -0.17295 | 0.00017 | -0.11461 | 0.0132  | 0.012391 | 0.78942  |
| 0.00241  | 0.177008 | 0.00012  | 0.050439 | 0.2767  | 0.049055 | 0.29011 | 0.13703  | 0.003    |
| 0.23528  | -0.13423 | 0.00366  | -0.07794 | 0.09249 | -0.03573 | 0.44118 | 0.064463 | 0.16429  |
| 0.00154  | -0.13548 | 0.00335  | -0.08119 | 0.07967 | -0.01692 | 0.71528 | -0.12387 | 0.00736  |
| 0.19323  | 0.006849 | 0.88264  | -0.0481  | 0.29962 | 0.002487 | 0.95726 | 0.102742 | 0.0264   |
| 0.43462  | 0.027739 | 0.54987  | 0.059655 | 0.19815 | 0.070486 | 0.12825 | 0.267625 | 4.22E-09 |
| 7.52E-05 | -0.24739 | 6.08E-08 | -0.04333 | 0.35012 | -0.04209 | 0.36408 | 0.062369 | 0.17846  |
| 0.00062  | -0.23093 | 4.52E-07 | -0.00578 | 0.90083 | -0.01711 | 0.71221 | 0.0309   | 0.50534  |
| 0.09151  | -0.25717 | 1.72E-08 | -0.15776 | 0.00062 | -0.10221 | 0.02719 | -0.04218 | 0.36306  |
| 0.00202  | 0.083458 | 0.07157  | -0.07954 | 0.08598 | 0.012727 | 0.78385 | 0.098648 | 0.03306  |
| 0.14831  | 0.115739 | 0.01232  | -0.01272 | 0.78396 | 0.094718 | 0.04076 | 0.135096 | 0.00344  |
| 0.00017  | -0.22425 | 9.80E-07 | -0.03282 | 0.47922 | -0.02243 | 0.62883 | 0.0437   | 0.34604  |
| 0.45446  | -0.02811 | 0.54458  | -0.10093 | 0.0292  | -0.00044 | 0.99238 | 0.103327 | 0.02556  |
| 0.00139  | -0.2142  | 3.00E-06 | -0.03611 | 0.43621 | -0.05797 | 0.21113 | 0.054332 | 0.24126  |
| 0.01608  | -0.0164  | 0.7237   | -0.11552 | 0.01249 | -0.08568 | 0.0643  | 0.07765  | 0.09373  |
| 0.05692  | -0.11928 | 0.00988  | -0.0205  | 0.65862 | 0.009019 | 0.84588 | 0.087351 | 0.05927  |
| 9.87E-25 | 0.505718 | 1.09E-31 | 0.039041 | 0.39993 | 0.103226 | 0.0257  | 0.25397  | 2.62E-08 |
| 0.05927  | 0.055929 | 0.22769  | -0.09781 | 0.0346  | -0.02684 | 0.56294 | 0.125427 | 0.00665  |
| 3.54E-06 | 0.210223 | 4.60E-06 | -0.00906 | 0.84512 | 0.023825 | 0.60757 | 0.243232 | 1.02E-07 |
| 0.0034   | -0.13967 | 0.00249  | 0.018418 | 0.69137 | 0.002969 | 0.94898 | 0.06361  | 0.16996  |
| 0.00153  | -0.16169 | 0.00045  | -0.01942 | 0.67558 | -0.01531 | 0.74145 | 0.057391 | 0.21574  |
| 0.00412  | -0.12268 | 0.00795  | -0.07329 | 0.11374 | -0.03288 | 0.47842 | 0.137688 | 0.00287  |
| 0.14585  | -0.12969 | 0.005    | -0.10084 | 0.02935 | -0.06435 | 0.16504 | 0.0932   | 0.04411  |
| 0.00096  | -0.19472 | 2.26E-05 | -0.02685 | 0.56271 | -0.02888 | 0.53364 | 0.051151 | 0.26996  |

|          |          |          |          |         |          |         |          |          |
|----------|----------|----------|----------|---------|----------|---------|----------|----------|
| 0.13052  | -0.16741 | 0.00028  | -0.0843  | 0.06874 | -0.08557 | 0.06467 | 0.016725 | 0.71849  |
| 0.06786  | 0.041655 | 0.36911  | -0.02977 | 0.52109 | -0.01078 | 0.81626 | 0.125085 | 0.0068   |
| 0.00059  | 0.058114 | 0.21     | -0.0397  | 0.39197 | -0.05291 | 0.25382 | 0.069312 | 0.13475  |
| 0.36541  | 0.053112 | 0.25201  | 0.094426 | 0.04139 | 0.016582 | 0.72079 | 0.181223 | 8.20E-05 |
| 3.23E-07 | -0.22742 | 6.81E-07 | 0.003893 | 0.93314 | -0.07107 | 0.1251  | 0.016393 | 0.72384  |
| 0.00222  | 0.089061 | 0.05444  | -0.05056 | 0.27555 | -0.07655 | 0.09849 | 0.003715 | 0.93619  |
| 0.00012  | 0.241678 | 1.24E-07 | 0.028165 | 0.54375 | 0.049949 | 0.28139 | 0.29444  | 8.57E-11 |
| 0.01317  | -0.14257 | 0.00201  | -0.03388 | 0.4651  | -0.04886 | 0.292   | 0.006588 | 0.88708  |
| 0.03258  | -0.15396 | 0.00084  | -0.03079 | 0.50679 | -0.00848 | 0.85496 | 0.099722 | 0.03119  |
| 0.00014  | 0.189916 | 3.62E-05 | 0.046727 | 0.31363 | 0.045288 | 0.32878 | 0.152872 | 0.00092  |
| 0.00078  | -0.1704  | 0.00022  | -0.09439 | 0.04146 | -0.0396  | 0.39316 | 0.047161 | 0.30916  |
| 4.06E-06 | -0.28182 | 5.65E-10 | -0.0633  | 0.17207 | -0.05954 | 0.19902 | 0.026719 | 0.56464  |
| 1.73E-08 | -0.25504 | 2.28E-08 | -0.02373 | 0.60903 | -0.06474 | 0.16251 | 0.083634 | 0.07097  |
| 0.00091  | -0.22751 | 6.74E-07 | -0.01941 | 0.67563 | -0.03035 | 0.51291 | 0.088141 | 0.05699  |
| 0.48526  | 0.008719 | 0.85094  | -0.0247  | 0.59445 | 0.011091 | 0.81107 | 0.141932 | 0.00211  |
| 7.21E-05 | 0.212852 | 3.47E-06 | 0.084386 | 0.06846 | 0.043113 | 0.35257 | 0.119345 | 0.00984  |
| 0.04809  | -0.10922 | 0.01823  | -0.06109 | 0.18755 | -0.04016 | 0.38654 | -0.02873 | 0.53565  |
| 0.27824  | -0.04721 | 0.30865  | -0.06036 | 0.19285 | -0.02755 | 0.55266 | -0.09244 | 0.04587  |
| 0.00028  | -0.25711 | 1.74E-08 | -0.02512 | 0.58817 | -0.02162 | 0.64127 | 0.07058  | 0.12774  |
| 0.4336   | 0.024044 | 0.60426  | 0.048014 | 0.30048 | 0.007155 | 0.87744 | -0.02795 | 0.54688  |
| 0.07349  | 0.141419 | 0.00219  | -0.00579 | 0.90077 | 0.001157 | 0.9801  | 0.080462 | 0.0824   |
| 0.00915  | 0.050298 | 0.27804  | 0.023916 | 0.60618 | -0.1172  | 0.01126 | 0.10734  | 0.02033  |
| 0.62091  | 0.083519 | 0.07136  | -0.01125 | 0.80837 | -0.01458 | 0.75326 | -0.05639 | 0.22383  |
| 0.00097  | -0.26939 | 3.30E-09 | -0.08211 | 0.07628 | -0.0752  | 0.10457 | -0.00058 | 0.99004  |
| 0.11674  | -0.10261 | 0.0266   | 0.01994  | 0.66734 | -0.0084  | 0.85639 | 0.054694 | 0.23813  |
| 0.10269  | -0.10753 | 0.02011  | 0.011401 | 0.8059  | -0.03543 | 0.44501 | -0.05188 | 0.26316  |
| 0.13228  | -0.12418 | 0.00721  | -0.07751 | 0.09433 | -0.08872 | 0.05539 | 0.093665 | 0.04306  |
| 0.19944  | -0.03259 | 0.48236  | -0.06506 | 0.16039 | -0.03184 | 0.49242 | 0.121777 | 0.00843  |
| 1.34E-06 | -0.31109 | 6.15E-12 | -0.11213 | 0.01533 | -0.08871 | 0.05541 | 0.012999 | 0.77934  |
| 0.03329  | 0.054663 | 0.2384   | -0.0875  | 0.05883 | -0.05201 | 0.26201 | -0.03073 | 0.5077   |
| 0.0068   | -0.25548 | 2.15E-08 | -0.01359 | 0.7696  | -0.05139 | 0.26774 | 0.043121 | 0.35248  |
| 0.81042  | -0.12733 | 0.00586  | -0.08096 | 0.08052 | -0.02066 | 0.65609 | 0.093059 | 0.04443  |
| 0.00183  | 0.283752 | 4.26E-10 | 0.132215 | 0.00421 | 0.137436 | 0.00292 | 0.076708 | 0.09779  |
| 3.80E-06 | -0.16925 | 0.00024  | 0.022773 | 0.62351 | -0.01072 | 0.81728 | 0.130111 | 0.00486  |
| 0.06457  | -0.16631 | 0.00031  | -0.01708 | 0.71283 | -0.02181 | 0.6383  | 0.048303 | 0.29757  |
| 0.0001   | -0.26868 | 3.65E-09 | -0.05986 | 0.19664 | -0.04287 | 0.35531 | 0.035249 | 0.4473   |
| 0.00626  | -0.12322 | 0.00768  | -0.10255 | 0.02669 | -0.05717 | 0.21751 | -0.03342 | 0.47118  |
| 0.46078  | 0.060778 | 0.18982  | 0.026221 | 0.57193 | -0.00497 | 0.91473 | 0.000857 | 0.98526  |
| 0.00015  | -0.36236 | 6.16E-16 | -0.04178 | 0.36772 | -0.08602 | 0.06326 | -0.06288 | 0.17489  |
| 0.00023  | 0.13422  | 0.00366  | 0.019548 | 0.6735  | -0.00758 | 0.87023 | -0.08616 | 0.06282  |
| 0.77845  | -0.04498 | 0.33209  | 0.036767 | 0.42796 | 0.037173 | 0.42288 | 0.070804 | 0.12654  |
| 5.16E-07 | 0.130972 | 0.00458  | -0.01384 | 0.76542 | -0.09288 | 0.04483 | 0.235567 | 2.61E-07 |
| 3.99E-05 | -0.19728 | 1.75E-05 | -0.07005 | 0.13065 | -0.01105 | 0.8117  | -0.00339 | 0.9417   |
| 0.18898  | -0.14999 | 0.00115  | 0.085032 | 0.06636 | -0.04105 | 0.37615 | 0.016325 | 0.72494  |
| 0.12446  | -0.08355 | 0.07125  | 0.065702 | 0.15632 | 0.035893 | 0.43903 | 0.003166 | 0.94559  |

|          |          |          |          |          |          |         |          |          |
|----------|----------|----------|----------|----------|----------|---------|----------|----------|
| 0.00027  | 0.2517   | 3.51E-08 | 0.084721 | 0.06737  | 0.109066 | 0.01839 | 0.018394 | 0.69177  |
| 5.27E-17 | 0.464021 | 2.60E-26 | 0.141595 | 0.00216  | 0.17434  | 0.00015 | 0.062622 | 0.1767   |
| 2.13E-08 | 0.246702 | 6.64E-08 | 0.053361 | 0.24979  | 0.034537 | 0.45653 | 0.1094   | 0.01803  |
| 5.01E-16 | 0.343982 | 2.04E-14 | 0.045715 | 0.32424  | 0.09035  | 0.05103 | 0.197996 | 1.63E-05 |
| 0.14134  | -0.01599 | 0.73034  | -0.04348 | 0.34848  | -0.0323  | 0.48618 | -0.07153 | 0.1227   |
| 0.01804  | 0.029637 | 0.5229   | -0.05622 | 0.2253   | -0.07972 | 0.08527 | 0.164003 | 0.00037  |
| 0.8498   | 0.004163 | 0.9285   | 0.087512 | 0.0588   | 0.065789 | 0.15577 | 0.035618 | 0.44255  |
| 0.01213  | 0.063475 | 0.17087  | -0.04425 | 0.33996  | 0.002305 | 0.96039 | -0.03575 | 0.44092  |
| 0.57333  | -0.04185 | 0.3669   | -0.03481 | 0.453    | -0.0257  | 0.57956 | 0.144791 | 0.00171  |
| 2.50E-09 | 0.199364 | 1.42E-05 | -0.09181 | 0.04737  | -0.00759 | 0.87007 | -0.0318  | 0.49298  |
| 0.87415  | -0.05149 | 0.26675  | -0.03712 | 0.42355  | -0.0006  | 0.98968 | 0.13928  | 0.00256  |
| 0.00772  | -0.21339 | 3.28E-06 | -0.09015 | 0.05155  | -0.05859 | 0.20627 | 0.047069 | 0.3101   |
| 0.00432  | -0.14183 | 0.00212  | -0.02995 | 0.51849  | -0.05086 | 0.27266 | 0.046667 | 0.31426  |
| 0.09731  | -0.12573 | 0.00652  | -0.01244 | 0.78855  | -0.04268 | 0.35741 | -0.03974 | 0.39158  |
| 0.41115  | -0.09142 | 0.04833  | -0.07278 | 0.11628  | -0.01701 | 0.71394 | 0.029533 | 0.52435  |
| 0.00057  | 0.199007 | 1.47E-05 | 0.055882 | 0.22808  | 0.038516 | 0.40631 | 0.36354  | 4.88E-16 |
| 0.02099  | -0.15544 | 0.00075  | -0.04843 | 0.29627  | -0.04031 | 0.38473 | 0.056344 | 0.22425  |
| 0.65974  | -0.0763  | 0.09958  | -0.01231 | 0.79073  | -0.04376 | 0.34536 | -0.01632 | 0.72506  |
| 0.21893  | -0.08269 | 0.07422  | -0.00042 | 0.99278  | -0.0102  | 0.82595 | 0.124101 | 0.00725  |
| 0.07126  | 0.088892 | 0.05491  | -0.02373 | 0.60901  | -0.03655 | 0.43066 | 0.157188 | 0.00065  |
| 0.1575   | 0.052462 | 0.25787  | 0.002718 | 0.95328  | 0.030794 | 0.5068  | 0.146129 | 0.00154  |
| 0.00219  | -0.23853 | 1.83E-07 | 0.001076 | 0.9815   | -0.03012 | 0.51618 | 0.104507 | 0.02391  |
| 0.00011  | -0.24512 | 8.09E-08 | -0.03861 | 0.40511  | -0.0168  | 0.71725 | 0.053534 | 0.24825  |
| 0.39473  | 0.085992 | 0.06335  | -0.13449 | 0.00359  | -0.08429 | 0.06877 | -0.07614 | 0.10031  |
| 2.42E-07 | -0.28134 | 6.06E-10 | 0.281702 | 5.75E-10 | -0.0264  | 0.56937 | 0.11673  | 0.01159  |
| 0.02438  | -0.1577  | 0.00063  | -0.01004 | 0.8287   | -0.03777 | 0.41548 | 0.092769 | 0.0451   |
| 0.02622  | -0.19318 | 2.63E-05 | -0.06289 | 0.17488  | -0.05202 | 0.26194 | 0.035867 | 0.43937  |
| 0.05187  | -0.12993 | 0.00492  | -0.06748 | 0.14538  | -0.04697 | 0.31116 | 0.085296 | 0.06552  |
| 0.09237  | 0.065726 | 0.15617  | 0.31631  | 2.60E-12 | 0.02437  | 0.59937 | -0.02483 | 0.59255  |
| 0.00341  | -0.11031 | 0.01709  | 0.011228 | 0.80878  | 0.022677 | 0.62498 | 0.046376 | 0.31729  |
| 0.71256  | -0.04689 | 0.3119   | 0.024468 | 0.59791  | -0.05028 | 0.27819 | 0.160265 | 0.00051  |
| 0.67805  | -0.02912 | 0.53013  | 0.047575 | 0.30493  | 0.068497 | 0.13941 | 0.122306 | 0.00815  |
| 6.23E-05 | -0.2602  | 1.15E-08 | -0.09877 | 0.03285  | -0.02619 | 0.57231 | 0.097976 | 0.03429  |
| 0.09671  | 0.121206 | 0.00874  | 0.164866 | 0.00035  | -0.00706 | 0.87901 | 0.044922 | 0.33272  |
| 0.03231  | 0.115793 | 0.01228  | 0.108525 | 0.01898  | 0.08465  | 0.0676  | 0.311968 | 5.33E-12 |
| 0.00095  | 0.101098 | 0.02893  | -0.03766 | 0.41684  | -0.00799 | 0.86332 | 0.06613  | 0.15363  |
| 4.39E-07 | 0.261566 | 9.61E-09 | 0.02072  | 0.65516  | 0.085612 | 0.06453 | 0.24695  | 6.43E-08 |
| 0.00979  | -0.12792 | 0.00563  | -0.01382 | 0.76581  | -0.0676  | 0.14465 | -0.0076  | 0.86994  |
| 8.36E-09 | 0.287369 | 2.49E-10 | 0.032493 | 0.48363  | -0.09332 | 0.04384 | 0.195973 | 2.00E-05 |
| 1.49E-05 | 0.088803 | 0.05515  | -0.07458 | 0.10746  | -0.02177 | 0.63889 | -0.06917 | 0.13554  |
| 0.00136  | -0.22316 | 1.11E-06 | -0.04663 | 0.31468  | -0.0354  | 0.44537 | 0.017999 | 0.69805  |
| 0.28695  | 0.014785 | 0.74998  | 0.19024  | 3.50E-05 | 0.068627 | 0.13866 | 0.090405 | 0.05089  |
| 0.74343  | -0.05192 | 0.26284  | 0.026692 | 0.56504  | 0.022157 | 0.63294 | 0.172417 | 0.00018  |
| 4.69E-08 | 0.239093 | 1.70E-07 | 0.13256  | 0.00411  | 0.055351 | 0.23254 | 0.319542 | 1.51E-12 |
| 2.58E-06 | 0.18034  | 8.89E-05 | 0.001331 | 0.97711  | -0.00389 | 0.93317 | 0.01312  | 0.77735  |

|          |          |          |          |          |          |         |          |          |
|----------|----------|----------|----------|----------|----------|---------|----------|----------|
| 2.84E-05 | 0.197478 | 1.72E-05 | 0.072331 | 0.11854  | 0.038595 | 0.40534 | 0.167981 | 0.00027  |
| 0.00132  | 0.090989 | 0.0494   | 0.127782 | 0.00569  | 0.018719 | 0.68659 | 0.086699 | 0.0612   |
| 0.75373  | -0.07304 | 0.11495  | 0.025168 | 0.58747  | -0.02904 | 0.53126 | 0.07427  | 0.10896  |
| 0.5516   | -0.07208 | 0.11984  | 0.014274 | 0.75834  | -0.10878 | 0.0187  | 0.068349 | 0.14026  |
| 3.08E-06 | -0.24041 | 1.45E-07 | -0.09599 | 0.03812  | -0.06954 | 0.13349 | 0.02047  | 0.65905  |
| 0.0045   | 0.014417 | 0.756    | -0.01325 | 0.77516  | 0.029279 | 0.52793 | 0.0717   | 0.12179  |
| 0.70595  | -0.05703 | 0.21864  | -0.00311 | 0.94661  | -0.05399 | 0.24424 | 0.020446 | 0.65943  |
| 0.00021  | -0.15983 | 0.00053  | 0.209    | 5.24E-06 | -0.07522 | 0.10451 | -0.15027 | 0.00113  |
| 0.19294  | 0.015912 | 0.73163  | 0.071412 | 0.1233   | 0.052436 | 0.2581  | -0.00917 | 0.84328  |
| 0.90539  | 0.045438 | 0.32719  | 0.141783 | 0.00213  | 0.045223 | 0.32948 | -0.08488 | 0.06684  |
| 3.27E-30 | -0.54761 | 6.78E-38 | -0.12235 | 0.00812  | -0.14149 | 0.00218 | -0.04809 | 0.29973  |
| 0.58014  | -0.03308 | 0.4757   | 0.024    | 0.60493  | -0.01017 | 0.82657 | 0.024317 | 0.60017  |
| 0.23056  | -0.15862 | 0.00058  | -0.10483 | 0.02348  | -0.12352 | 0.00753 | 0.10669  | 0.02111  |
| 0.09769  | -0.23164 | 4.16E-07 | -0.09247 | 0.0458   | -0.08861 | 0.05569 | 0.041501 | 0.37088  |
| 0.54831  | -0.02603 | 0.57468  | -0.01706 | 0.71316  | -0.00396 | 0.93206 | 0.162894 | 0.00041  |
| 0.91641  | 0.039615 | 0.39304  | 0.031056 | 0.50318  | 0.020524 | 0.65821 | 0.222855 | 1.15E-06 |
| 0.86791  | 0.020777 | 0.65426  | 0.059899 | 0.19632  | 0.001313 | 0.97743 | -0.02142 | 0.64422  |
| 0.88578  | -0.01784 | 0.7006   | 0.037067 | 0.4242   | -0.04614 | 0.31977 | 0.00349  | 0.94003  |
| 0.05781  | -0.00634 | 0.89136  | 0.030674 | 0.50845  | 0.134683 | 0.00355 | 0.104408 | 0.02405  |
| 5.44E-05 | -0.16775 | 0.00027  | 0.088194 | 0.05685  | -0.06284 | 0.1752  | -0.10838 | 0.01914  |
| 2.13E-33 | 0.420663 | 1.89E-21 | 0.076606 | 0.09824  | 0.050583 | 0.27532 | 0.350556 | 5.98E-15 |
| 0.85813  | -0.00137 | 0.97648  | 0.050385 | 0.27721  | -0.01331 | 0.77421 | 0.009631 | 0.83556  |
| 0.29327  | -0.06142 | 0.18514  | 0.044963 | 0.33227  | 0.011471 | 0.80473 | 0.059801 | 0.19705  |
| 0.55928  | -0.10738 | 0.02028  | -0.01313 | 0.77711  | -0.0077  | 0.86815 | 0.017878 | 0.69999  |
| 1.12E-06 | -0.23071 | 4.65E-07 | -0.12332 | 0.00763  | -0.04291 | 0.35483 | -0.13606 | 0.00322  |
| 0.02119  | -0.11845 | 0.01041  | 0.001224 | 0.97895  | -0.01601 | 0.73004 | 0.1211   | 0.0088   |
| 0.02918  | -0.15409 | 0.00083  | -0.16582 | 0.00032  | -0.09048 | 0.05069 | -0.03488 | 0.45206  |
| 0.72248  | -0.07293 | 0.11553  | 0.097123 | 0.03589  | -0.08742 | 0.05905 | 0.029899 | 0.51923  |
| 0.66807  | 0.031263 | 0.50035  | -0.04567 | 0.32473  | -0.04622 | 0.31893 | 0.156141 | 0.00071  |
| 0.04506  | -0.24982 | 4.47E-08 | -0.07617 | 0.10018  | -0.11689 | 0.01147 | 0.060032 | 0.19532  |
| 0.15136  | -0.1286  | 0.00538  | -0.03584 | 0.43966  | -0.06972 | 0.13248 | 0.061119 | 0.18734  |
| 0.05477  | -0.12952 | 0.00506  | -0.09007 | 0.05174  | -0.07706 | 0.09625 | 0.114092 | 0.01363  |
| 0.39017  | 0.005029 | 0.91369  | -0.05627 | 0.22486  | -0.05604 | 0.22679 | 0.157932 | 0.00061  |
| 0.35495  | -0.07199 | 0.12031  | 0.033195 | 0.47422  | -0.00488 | 0.91616 | 0.245176 | 8.04E-08 |
| 0.00231  | 0.138135 | 0.00278  | 0.026432 | 0.56883  | 0.044414 | 0.33822 | 0.367064 | 2.42E-16 |
| 0.00032  | 0.164963 | 0.00034  | 0.116238 | 0.01195  | 0.085077 | 0.06622 | 0.310474 | 6.80E-12 |
| 0.00083  | 0.068251 | 0.14084  | -0.00599 | 0.8973   | -0.02548 | 0.58287 | 0.047881 | 0.30182  |
| 0.42525  | 0.071434 | 0.12319  | 0.063987 | 0.16744  | -0.00244 | 0.95814 | 0.021052 | 0.64999  |
| 0.80143  | -0.02186 | 0.63745  | 0.006965 | 0.88067  | -0.02674 | 0.5643  | 0.049138 | 0.28929  |
| 0.00017  | -0.31921 | 1.60E-12 | -0.14211 | 0.00208  | -0.07407 | 0.10993 | -0.01029 | 0.82454  |
| 1.55E-05 | 0.126668 | 0.00612  | 0.012424 | 0.78888  | -0.01436 | 0.75701 | 0.110941 | 0.01646  |
| 0.73408  | 0.009962 | 0.83     | 0.068635 | 0.13861  | 0.018286 | 0.69348 | -0.07528 | 0.10419  |
| 0.00135  | -0.1795  | 9.61E-05 | -0.10199 | 0.02754  | -0.00071 | 0.98786 | -0.12632 | 0.00627  |
| 0.00212  | 0.147245 | 0.00142  | 0.010486 | 0.8212   | 0.023143 | 0.61788 | 0.339227 | 4.86E-14 |
| 3.94E-05 | 0.268394 | 3.79E-09 | -0.00032 | 0.99452  | -0.00812 | 0.86112 | 0.25993  | 1.20E-08 |

|          |          |          |          |          |          |          |          |          |
|----------|----------|----------|----------|----------|----------|----------|----------|----------|
| 0.66721  | 0.003043 | 0.94771  | 0.032281 | 0.48649  | -0.00017 | 0.99715  | 0.204449 | 8.45E-06 |
| 0.52597  | 0.004732 | 0.91876  | -0.07708 | 0.09615  | 0.008456 | 0.85538  | -0.07447 | 0.10802  |
| 2.86E-16 | -0.46902 | 6.43E-27 | -0.10963 | 0.01779  | -0.14054 | 0.00233  | -0.02585 | 0.57735  |
| 0.00022  | -0.19438 | 2.34E-05 | -0.06612 | 0.15373  | -0.11299 | 0.01456  | -0.08493 | 0.06668  |
| 8.05E-06 | -0.30159 | 2.82E-11 | -0.09301 | 0.04454  | -0.19747 | 1.72E-05 | -0.05496 | 0.23582  |
| 9.37E-11 | -0.48885 | 2.00E-29 | -0.17748 | 0.00012  | -0.12767 | 0.00573  | -0.02028 | 0.662    |
| 0.02804  | 0.103517 | 0.02528  | 0.075482 | 0.10329  | 0.028699 | 0.53615  | 0.202133 | 1.07E-05 |
| 1.01E-09 | -0.24584 | 7.40E-08 | -0.05001 | 0.2808   | -0.04024 | 0.3856   | 0.054937 | 0.23605  |
| 0.00531  | -0.18793 | 4.37E-05 | -0.03307 | 0.47592  | -0.03381 | 0.46601  | 0.038418 | 0.4075   |
| 3.57E-05 | -0.25433 | 2.50E-08 | -0.08144 | 0.07874  | -0.09006 | 0.05177  | -0.07506 | 0.10523  |
| 0.00257  | -0.23075 | 4.62E-07 | -0.05124 | 0.26916  | -0.03634 | 0.4334   | 0.071027 | 0.12534  |
| 0.02404  | -0.17817 | 0.00011  | -0.08138 | 0.07895  | -0.05757 | 0.21429  | 0.082117 | 0.07626  |
| 0.69066  | -0.06262 | 0.17674  | 0.050884 | 0.27247  | -0.0139  | 0.76449  | 0.156847 | 0.00067  |
| 0.02809  | 0.074817 | 0.10637  | 0.008774 | 0.85001  | 0.022083 | 0.63408  | 0.259201 | 1.32E-08 |
| 0.91046  | -0.07293 | 0.11549  | -0.01312 | 0.77742  | 0.00343  | 0.94106  | 0.15592  | 0.00072  |
| 0.66286  | -0.00074 | 0.98722  | 0.198031 | 1.63E-05 | 0.058923 | 0.20372  | 0.108717 | 0.01877  |
| 0.40959  | -0.10846 | 0.01906  | -0.00634 | 0.89131  | -0.03692 | 0.42606  | 0.169693 | 0.00023  |
| 0.072    | 0.048937 | 0.29127  | -0.01434 | 0.75721  | -0.03024 | 0.51452  | 0.248629 | 5.20E-08 |
| 0.36885  | 0.027718 | 0.55017  | -0.01338 | 0.77313  | -0.01277 | 0.78307  | 0.218364 | 1.90E-06 |
| 0.001    | 0.176044 | 0.00013  | 0.029125 | 0.53011  | 0.010143 | 0.82695  | 0.369247 | 1.56E-16 |
| 0.1663   | -0.13555 | 0.00334  | -0.03883 | 0.40244  | -0.03369 | 0.46761  | 0.078175 | 0.09152  |
| 0.00159  | -0.1978  | 1.67E-05 | 0.037406 | 0.41997  | -0.01779 | 0.70137  | 0.067452 | 0.14556  |
| 0.00345  | -0.1866  | 4.96E-05 | -0.02471 | 0.59424  | -0.02489 | 0.59153  | 0.034285 | 0.45983  |
| 0.0396   | 0.017073 | 0.71288  | 0.092972 | 0.04463  | -0.02871 | 0.53598  | 0.151743 | 0.001    |
| 0.0164   | -0.15642 | 0.00069  | -0.07753 | 0.09422  | -0.07547 | 0.10336  | 0.090396 | 0.05091  |
| 4.71E-05 | 0.109458 | 0.01797  | -0.10455 | 0.02386  | -0.05309 | 0.25222  | 0.098154 | 0.03396  |
| 1.11E-12 | 0.290137 | 1.65E-10 | -0.04385 | 0.34434  | -0.00054 | 0.99073  | 0.175852 | 0.00013  |
| 0.37382  | -0.1534  | 0.00088  | -0.09904 | 0.03237  | -0.11486 | 0.013    | -0.0204  | 0.66007  |
| 0.00534  | -0.12679 | 0.00608  | -0.10795 | 0.01962  | -0.01348 | 0.77142  | 0.060216 | 0.19395  |
| 0.81741  | -0.04961 | 0.28469  | 0.155411 | 0.00075  | 0.027272 | 0.5566   | 0.147567 | 0.00138  |
| 1.96E-05 | -0.31986 | 1.44E-12 | -0.13917 | 0.00258  | -0.01269 | 0.78449  | -0.0047  | 0.9194   |
| 0.00023  | 0.148206 | 0.00132  | 0.000728 | 0.98748  | -0.01894 | 0.68315  | 0.019324 | 0.67704  |
| 0.03625  | -0.14258 | 0.00201  | -0.05511 | 0.23458  | -0.03345 | 0.47086  | 0.046068 | 0.32052  |
| 0.00049  | -0.22925 | 5.51E-07 | -0.06283 | 0.17528  | -0.03791 | 0.41371  | 0.071788 | 0.12134  |
| 1.28E-06 | -0.22293 | 1.14E-06 | 0.006432 | 0.88975  | -0.00255 | 0.95614  | 0.192573 | 2.79E-05 |
| 0.91036  | -0.04865 | 0.29408  | -0.00299 | 0.94865  | -0.02341 | 0.61378  | 0.157714 | 0.00062  |
| 0.00273  | -0.17255 | 0.00018  | -0.00651 | 0.88837  | -0.04986 | 0.28224  | 0.020965 | 0.65134  |
| 0.03236  | -0.08528 | 0.06556  | -0.00944 | 0.83876  | -0.02486 | 0.592    | 0.003179 | 0.94537  |
| 0.07842  | -0.08825 | 0.05668  | -0.01558 | 0.73694  | -0.04214 | 0.36355  | -0.02769 | 0.55058  |
| 0.00492  | -0.09778 | 0.03465  | -0.01046 | 0.82167  | -0.01239 | 0.78942  | 0.022881 | 0.62187  |
| 0.83323  | -0.00265 | 0.95443  | -0.03047 | 0.51131  | 0.013915 | 0.76424  | 0.054997 | 0.23554  |
| 0.09684  | -0.04354 | 0.34782  | -0.02227 | 0.63124  | -0.03258 | 0.48252  | 0.20513  | 7.87E-06 |
| 1.40E-05 | 0.237947 | 1.96E-07 | 0.06287  | 0.17499  | 0.032551 | 0.48285  | 0.024422 | 0.5986   |
| 0.0806   | 0.08481  | 0.06708  | 0.032796 | 0.47955  | 0.01772  | 0.7025   | 0.045016 | 0.3317   |
| 0.76826  | -0.08602 | 0.06325  | -0.02548 | 0.58282  | -0.00712 | 0.878    | 0.116361 | 0.01186  |

|          |          |          |          |         |          |         |          |          |
|----------|----------|----------|----------|---------|----------|---------|----------|----------|
| 0.92565  | -0.04649 | 0.31606  | 0.002318 | 0.96016 | -0.02273 | 0.6241  | 0.047991 | 0.30071  |
| 1.46E-06 | 0.316494 | 2.52E-12 | 0.055466 | 0.23156 | 0.138571 | 0.00269 | 0.197345 | 1.74E-05 |
| 1.66E-23 | 0.4328   | 9.65E-23 | -0.08231 | 0.07556 | 0.008905 | 0.84779 | 0.04006  | 0.38773  |
| 0.14725  | -0.04022 | 0.38581  | 0.01736  | 0.70827 | 0.042258 | 0.36221 | 0.035195 | 0.448    |
| 0.04555  | -0.19242 | 2.84E-05 | -0.05205 | 0.26163 | -0.04463 | 0.33588 | -0.00186 | 0.96809  |
| 0.00852  | -0.30355 | 2.07E-11 | -0.13724 | 0.00296 | -0.13089 | 0.00461 | 0.078081 | 0.09191  |
| 5.86E-09 | 0.240027 | 1.52E-07 | 0.09815  | 0.03397 | 0.056694 | 0.22138 | 0.12978  | 0.00497  |
| 0.21776  | -0.01334 | 0.77365  | -0.0881  | 0.0571  | -0.00328 | 0.94364 | 0.120403 | 0.0092   |
| 9.80E-06 | 0.279501 | 7.91E-10 | 0.022267 | 0.63125 | 0.044804 | 0.33399 | 0.153049 | 0.00091  |
| 0.30376  | -0.02767 | 0.55086  | 0.052751 | 0.25525 | 0.051397 | 0.26767 | 0.062584 | 0.17697  |
| 7.11E-07 | 0.245694 | 7.54E-08 | 0.010421 | 0.82229 | 0.076958 | 0.09669 | 0.110287 | 0.01712  |
| 7.95E-05 | -0.23506 | 2.77E-07 | -0.10334 | 0.02554 | -0.0672  | 0.14704 | -0.01271 | 0.78411  |
| 0.34456  | -0.08728 | 0.05946  | -0.00416 | 0.92849 | -0.11189 | 0.01556 | -0.01448 | 0.75489  |
| 0.49383  | -0.11659 | 0.01169  | -0.01751 | 0.70593 | 0.047614 | 0.30453 | -0.02778 | 0.54927  |
| 0.11591  | 0.049704 | 0.28377  | 0.057838 | 0.21219 | 0.023473 | 0.61289 | 0.166214 | 0.00031  |
| 0.71933  | -0.1662  | 0.00031  | 0.045167 | 0.33008 | -0.0955  | 0.03911 | -0.00221 | 0.96205  |
| 0.23372  | -0.12152 | 0.00857  | -0.0437  | 0.3461  | -0.01686 | 0.71627 | -0.00192 | 0.96698  |
| 0.13092  | 0.00044  | 0.99244  | -0.0075  | 0.8716  | -0.00284 | 0.95113 | 0.171306 | 0.0002   |
| 4.27E-05 | 0.14463  | 0.00173  | 0.00737  | 0.8738  | 0.036857 | 0.42683 | 0.178062 | 0.00011  |
| 0.00146  | -0.18051 | 8.76E-05 | -0.03953 | 0.39401 | -0.0183  | 0.6932  | 0.062043 | 0.18074  |
| 0.20486  | 0.071202 | 0.12441  | 0.012767 | 0.78318 | -0.02645 | 0.56851 | 0.105416 | 0.02271  |
| 0.70789  | 0.024898 | 0.59148  | -0.01677 | 0.71782 | -0.02348 | 0.61277 | 0.163816 | 0.00038  |
| 0.20544  | 0.018128 | 0.696    | -0.00578 | 0.90094 | -0.00076 | 0.98696 | 0.125322 | 0.00669  |
| 0.35592  | 0.056627 | 0.22193  | -0.0291  | 0.5304  | 0.011019 | 0.81228 | 0.124416 | 0.0071   |
| 1.35E-05 | 0.230825 | 4.58E-07 | -0.03557 | 0.44321 | -0.03514 | 0.44865 | 0.129602 | 0.00503  |
| 0.0821   | -0.06962 | 0.13304  | -0.12779 | 0.00568 | -0.08679 | 0.06091 | 0.12895  | 0.00526  |
| 0.05344  | -0.11479 | 0.01306  | -0.01875 | 0.68606 | -0.09588 | 0.03835 | -0.16721 | 0.00028  |
| 0.02336  | 0.015918 | 0.73152  | 0.073028 | 0.11502 | 0.035019 | 0.45027 | 0.101248 | 0.02869  |
| 0.63722  | 0.06844  | 0.13974  | 0.074619 | 0.1073  | 0.025193 | 0.5871  | -0.02019 | 0.66337  |
| 0.84739  | -0.18372 | 6.51E-05 | -0.16686 | 0.00029 | -0.03099 | 0.50409 | 0.035174 | 0.44827  |
| 4.62E-17 | -0.49299 | 5.72E-30 | -0.13067 | 0.00468 | -0.05206 | 0.26155 | -0.12    | 0.00944  |
| 0.65427  | -0.10376 | 0.02494  | -0.05573 | 0.22937 | -0.02753 | 0.55288 | 0.079788 | 0.085    |
| 0.44812  | -0.05798 | 0.21109  | -0.03728 | 0.42158 | -0.00141 | 0.97569 | 0.150618 | 0.0011   |
| 9.07E-08 | 0.234302 | 3.04E-07 | 0.055312 | 0.23287 | -0.06503 | 0.16061 | 0.158117 | 0.0006   |
| 0.38586  | -0.08721 | 0.05969  | 0.030707 | 0.50799 | 0.007203 | 0.87662 | 0.168826 | 0.00025  |
| 0.0363   | 0.171726 | 0.00019  | 0.097081 | 0.03597 | 0.087415 | 0.05908 | 0.009157 | 0.84355  |
| 0.36185  | -0.17094 | 0.00021  | -0.11272 | 0.0148  | -0.1231  | 0.00774 | 0.01971  | 0.67095  |
| 0.06105  | -0.20053 | 1.26E-05 | -0.05712 | 0.21791 | -0.0892  | 0.05407 | 0.011444 | 0.80518  |
| 0.004    | 0.139782 | 0.00247  | -0.03809 | 0.41155 | -0.06861 | 0.13875 | 0.085524 | 0.0648   |
| 3.87E-06 | -0.1607  | 0.00049  | -0.01938 | 0.67622 | 0.05167  | 0.26513 | 0.045704 | 0.32436  |
| 0.26021  | 0.235502 | 2.63E-07 | 0.134126 | 0.00369 | 0.03181  | 0.49287 | 0.115036 | 0.01286  |
| 0.21667  | 0.063572 | 0.17022  | -0.02606 | 0.57432 | 0.030782 | 0.50697 | -0.03644 | 0.43206  |
| 0.00988  | 0.175026 | 0.00014  | -0.00953 | 0.83734 | 0.08106  | 0.08014 | -0.08014 | 0.08362  |
| 0.12187  | -0.18427 | 6.18E-05 | -0.15725 | 0.00065 | -0.0895  | 0.05327 | -0.01835 | 0.69252  |
| 8.92E-06 | -0.16094 | 0.00048  | 0.042936 | 0.35456 | 0.043224 | 0.35134 | -0.01501 | 0.74634  |



|          |          |          |          |          |          |          |          |          |
|----------|----------|----------|----------|----------|----------|----------|----------|----------|
| 0.02046  | -0.03652 | 0.43106  | 0.038744 | 0.40353  | -0.06223 | 0.17943  | 0.023004 | 0.62     |
| 4.83E-18 | 0.362332 | 6.19E-16 | 0.043257 | 0.35097  | 0.014148 | 0.76041  | 0.123118 | 0.00773  |
| 0.41312  | -0.04156 | 0.37016  | 0.154177 | 0.00083  | 0.076091 | 0.10053  | 0.00769  | 0.86836  |
| 0.00226  | -0.16693 | 0.00029  | 0.018931 | 0.68325  | -0.14183 | 0.00212  | -0.15357 | 0.00087  |
| 0.00075  | 0.117774 | 0.01086  | 0.043811 | 0.34483  | 0.003145 | 0.94596  | 0.049446 | 0.28627  |
| 0.13704  | 0.03972  | 0.39178  | -0.14433 | 0.00177  | 0.01572  | 0.73474  | 0.166227 | 0.00031  |
| 1.45E-06 | -0.32363 | 7.57E-13 | -0.09514 | 0.03985  | -0.14871 | 0.00127  | 0.009023 | 0.84581  |
| 0.95414  | -0.03139 | 0.49859  | -0.1071  | 0.02062  | -0.01631 | 0.72516  | -0.06384 | 0.16841  |
| 4.39E-06 | 0.100267 | 0.03028  | 0.020058 | 0.6655   | 0.031515 | 0.4969   | 0.3743   | 5.60E-17 |
| 0.42803  | 0.067091 | 0.14773  | 0.199582 | 1.39E-05 | 0.168522 | 0.00025  | 0.123717 | 0.00744  |
| 0.90613  | -0.06976 | 0.13227  | -0.02017 | 0.66373  | -0.03472 | 0.45419  | 0.109491 | 0.01794  |
| 0.62489  | 0.026867 | 0.56249  | -0.07587 | 0.10152  | 0.003715 | 0.93618  | -0.14564 | 0.0016   |
| 3.57E-06 | 0.226909 | 7.23E-07 | 0.016869 | 0.71616  | 0.035549 | 0.44343  | -0.16708 | 0.00029  |
| 0.966    | 0.057236 | 0.21699  | 0.01624  | 0.72631  | 0.026876 | 0.56236  | 0.032926 | 0.47782  |
| 0.00105  | -0.23867 | 1.79E-07 | -0.0692  | 0.13541  | -0.05285 | 0.25432  | 0.038642 | 0.40477  |
| 8.07E-06 | -0.244   | 9.32E-08 | 0.011816 | 0.79898  | 0.069926 | 0.13132  | 0.103025 | 0.02599  |
| 0.31525  | -0.10388 | 0.02478  | -0.13541 | 0.00337  | -0.12046 | 0.00917  | -0.11656 | 0.01171  |
| 0.00144  | -0.16428 | 0.00036  | 0.012357 | 0.78998  | -0.0005  | 0.99137  | 0.052225 | 0.26003  |
| 7.55E-19 | 0.481451 | 1.80E-28 | 0.111829 | 0.01562  | 0.033258 | 0.47339  | 0.188268 | 4.24E-05 |
| 0.03463  | -0.08284 | 0.07369  | -0.08332 | 0.07203  | -0.02498 | 0.59024  | 0.035195 | 0.448    |
| 0.04933  | -0.17262 | 0.00018  | -0.05128 | 0.26876  | -0.04091 | 0.37771  | -0.04096 | 0.37714  |
| 0.02957  | 0.169182 | 0.00024  | 0.244347 | 8.92E-08 | 0.228253 | 6.19E-07 | 0.085503 | 0.06487  |
| 0.00049  | -0.23959 | 1.60E-07 | -0.05088 | 0.27251  | -0.0358  | 0.44017  | 0.050269 | 0.27832  |
| 0.00239  | -0.16561 | 0.00033  | 0.024728 | 0.59401  | -0.00611 | 0.89523  | 0.201473 | 1.15E-05 |
| 6.67E-13 | 0.33718  | 7.03E-14 | -0.01128 | 0.80789  | -0.04781 | 0.30254  | 0.093308 | 0.04386  |
| 0.15031  | -0.15868 | 0.00058  | -0.05387 | 0.24532  | -0.03167 | 0.49482  | 0.063065 | 0.17366  |
| 6.67E-10 | 0.290832 | 1.48E-10 | 0.085535 | 0.06477  | 0.002004 | 0.96555  | 0.276935 | 1.14E-09 |
| 0.26702  | 0.113891 | 0.01379  | 0.168858 | 0.00025  | 0.044041 | 0.3423   | 0.012128 | 0.79379  |
| 0.00085  | 0.230251 | 4.90E-07 | 0.011607 | 0.80245  | 0.047347 | 0.30725  | 0.311207 | 6.04E-12 |
| 0.07881  | -0.09107 | 0.04921  | -0.05016 | 0.27934  | 0.048543 | 0.29518  | -0.05161 | 0.26572  |
| 0.2032   | -0.00153 | 0.97364  | 0.114776 | 0.01307  | 0.092241 | 0.04634  | 0.00039  | 0.99329  |
| 0.51109  | -0.03573 | 0.44111  | -0.00283 | 0.95145  | -0.02775 | 0.54977  | 0.144095 | 0.0018   |
| 0.00822  | -0.20524 | 7.78E-06 | 0.001539 | 0.97354  | -0.10367 | 0.02506  | 0.039775 | 0.39112  |
| 0.60209  | -0.08606 | 0.06314  | -0.04714 | 0.30934  | -0.03843 | 0.40735  | 0.062951 | 0.17443  |
| 0.57287  | -0.01353 | 0.77059  | 0.020562 | 0.65762  | 0.114812 | 0.01304  | 0.058737 | 0.20515  |
| 0.52387  | -0.08552 | 0.06482  | -0.10185 | 0.02775  | -0.07336 | 0.11339  | -0.09541 | 0.0393   |
| 0.16457  | 0.009017 | 0.84591  | -0.07481 | 0.1064   | -0.06017 | 0.19433  | -0.00109 | 0.9813   |
| 0.00189  | -0.23577 | 2.55E-07 | -0.0558  | 0.22879  | -0.0447  | 0.3351   | 0.042999 | 0.35385  |
| 3.41E-06 | 0.233785 | 3.23E-07 | -0.0077  | 0.86827  | 0.060346 | 0.19299  | -0.01574 | 0.73444  |
| 0.03375  | -0.1576  | 0.00063  | -0.10747 | 0.02018  | -0.06674 | 0.14987  | 0.094987 | 0.04019  |
| 5.59E-10 | 0.325876 | 5.14E-13 | 0.055038 | 0.23519  | 0.111505 | 0.01592  | 0.364349 | 4.16E-16 |
| 1.35E-09 | 0.398683 | 3.05E-19 | 0.015801 | 0.73343  | 0.172752 | 0.00018  | 0.20953  | 4.96E-06 |
| 0.93598  | -0.00918 | 0.84312  | 0.03878  | 0.4031   | 0.014649 | 0.7522   | 0.06063  | 0.1909   |
| 0.00493  | -0.04369 | 0.34612  | -0.07492 | 0.10587  | -0.00903 | 0.84562  | 0.130865 | 0.00462  |
| 0.00778  | 0.095252 | 0.03963  | -0.10265 | 0.02654  | -0.03046 | 0.51142  | 0.054324 | 0.24133  |

|          |          |          |          |          |           |         |          |          |
|----------|----------|----------|----------|----------|-----------|---------|----------|----------|
| 0.96657  | -0.0539  | 0.24501  | 0.042528 | 0.35914  | 0.004282  | 0.92647 | 0.032723 | 0.48053  |
| 0.00831  | -0.1329  | 0.00401  | -0.11273 | 0.0148   | -0.04803  | 0.30027 | 0.017583 | 0.7047   |
| 7.92E-13 | -0.27774 | 1.02E-09 | -0.08041 | 0.08261  | -0.10969  | 0.01772 | -0.07087 | 0.12618  |
| 0.61424  | 0.005018 | 0.91388  | 0.035366 | 0.44579  | 0.000988  | 0.98302 | 0.141588 | 0.00216  |
| 0.02276  | -0.10875 | 0.01873  | 0.047187 | 0.30889  | -0.03407  | 0.46264 | -0.01906 | 0.68123  |
| 0.48381  | -0.0992  | 0.03209  | 0.020246 | 0.66255  | 0.001665  | 0.97138 | 0.025169 | 0.58745  |
| 1.04E-13 | 0.348694 | 8.49E-15 | 0.0553   | 0.23297  | 0.101175  | 0.0288  | 0.271961 | 2.31E-09 |
| 0.31355  | -0.03796 | 0.41307  | 0.156463 | 0.00069  | -0.06345  | 0.17106 | 0.077869 | 0.0928   |
| 0.83166  | -0.02648 | 0.56813  | -0.01688 | 0.71592  | -0.03079  | 0.50687 | 0.187934 | 4.37E-05 |
| 0.14597  | -0.06353 | 0.17052  | -0.03355 | 0.46949  | -0.0015   | 0.97418 | 0.100341 | 0.03016  |
| 0.90752  | 0.08105  | 0.08017  | 0.028496 | 0.53903  | 0.078094  | 0.09186 | 0.016798 | 0.7173   |
| 0.38362  | -0.02856 | 0.53817  | 0.059279 | 0.201    | 0.124677  | 0.00698 | 0.136782 | 0.00306  |
| 3.58E-05 | 0.224599 | 9.42E-07 | 0.033669 | 0.46794  | -0.04798  | 0.30085 | 0.287331 | 2.51E-10 |
| 0.02735  | 0.05303  | 0.25274  | 0.021929 | 0.63644  | 0.0124    | 0.78927 | 0.069316 | 0.13473  |
| 0.00012  | 0.184478 | 6.06E-05 | 0.002755 | 0.95265  | -1.71E-05 | 0.99971 | 0.054433 | 0.24038  |
| 0.67778  | -0.10896 | 0.0185   | -0.01752 | 0.70568  | -0.00749  | 0.87168 | 0.143978 | 0.00181  |
| 0.80504  | -0.08407 | 0.0695   | -0.06915 | 0.13565  | -0.04706  | 0.31018 | 0.038045 | 0.41207  |
| 0.05252  | 0.00756  | 0.87056  | -0.02218 | 0.63257  | -0.10676  | 0.02103 | 0.093746 | 0.04288  |
| 0.03304  | -0.17045 | 0.00021  | 0.116221 | 0.01196  | -0.02351  | 0.6123  | 0.059517 | 0.19919  |
| 0.00086  | -0.1133  | 0.0143   | 0.058551 | 0.20659  | 0.103287  | 0.02561 | 0.105562 | 0.02252  |
| 0.13034  | 0.071905 | 0.12073  | 0.010534 | 0.8204   | -0.02221  | 0.63216 | 0.140654 | 0.00231  |
| 0.00107  | -0.20656 | 6.78E-06 | -0.15391 | 0.00085  | -0.08389  | 0.07012 | 0.053686 | 0.24691  |
| 0.43059  | -0.0922  | 0.04645  | -0.03516 | 0.44838  | 0.025114  | 0.58827 | 0.108091 | 0.01947  |
| 0.88104  | -0.08036 | 0.08279  | -0.07632 | 0.09948  | -0.07503  | 0.10536 | -0.06073 | 0.1902   |
| 0.98992  | -0.07731 | 0.09517  | -0.04599 | 0.3213   | -0.05145  | 0.26713 | 0.189162 | 3.89E-05 |
| 4.98E-08 | 0.250918 | 3.88E-08 | 0.070755 | 0.1268   | 0.027451  | 0.55402 | 0.260763 | 1.07E-08 |
| 1.74E-08 | 0.28627  | 2.94E-10 | 0.036465 | 0.43177  | 0.004344  | 0.92541 | 0.174895 | 0.00015  |
| 0.99198  | 0.088274 | 0.05662  | 0.039752 | 0.3914   | 0.06534   | 0.15862 | -0.06588 | 0.15517  |
| 0.15642  | -0.16003 | 0.00052  | -0.15679 | 0.00067  | -0.15413  | 0.00083 | -0.02249 | 0.6279   |
| 0.33397  | 0.015715 | 0.73482  | -0.12698 | 0.006    | 0.011355  | 0.80666 | -0.02637 | 0.56976  |
| 0.02892  | -0.1713  | 0.0002   | -0.10353 | 0.02527  | -0.15221  | 0.00097 | -0.00817 | 0.86017  |
| 1.58E-09 | 0.339698 | 4.46E-14 | 0.013364 | 0.77331  | -0.0341   | 0.46223 | 0.086823 | 0.06083  |
| 0.90546  | -0.03905 | 0.39986  | -0.11839 | 0.01045  | -0.04252  | 0.35923 | 0.075218 | 0.1045   |
| 2.18E-07 | -0.19806 | 1.62E-05 | -0.01798 | 0.69841  | 0.004895  | 0.91599 | 0.066813 | 0.14942  |
| 0.00029  | -0.24765 | 5.89E-08 | -0.05738 | 0.21585  | -0.03014  | 0.51586 | 0.039263 | 0.39725  |
| 0.00466  | -0.245   | 8.22E-08 | -0.09388 | 0.04258  | -0.05615  | 0.22585 | 0.028727 | 0.53574  |
| 0.04565  | 0.035297 | 0.44668  | 0.054354 | 0.24107  | -0.02569  | 0.57966 | -0.01327 | 0.77485  |
| 0.1094   | -0.22172 | 1.31E-06 | -0.07044 | 0.12852  | -0.09506  | 0.04003 | -0.09427 | 0.04173  |
| 0.33283  | -0.15868 | 0.00058  | -0.0592  | 0.20163  | -0.00032  | 0.99447 | 0.033161 | 0.47468  |
| 0.00265  | -0.19253 | 2.80E-05 | 0.026899 | 0.56203  | -0.02787  | 0.54798 | 0.093631 | 0.04313  |
| 0.00116  | 0.107929 | 0.01965  | 0.126139 | 0.00634  | -0.00222  | 0.96192 | 0.193964 | 2.44E-05 |
| 3.80E-11 | 0.269053 | 3.46E-09 | 0.142489 | 0.00202  | -0.00782  | 0.86607 | 0.349417 | 7.41E-15 |
| 0.15877  | -0.09568 | 0.03876  | 0.095396 | 0.03933  | -0.01259  | 0.78609 | 0.022555 | 0.62684  |
| 0.00341  | -0.16085 | 0.00048  | -0.04942 | 0.28656  | -0.05237  | 0.25866 | -0.14109 | 0.00224  |
| 0.07067  | 0.152974 | 0.00091  | 0.394909 | 7.03E-19 | 0.070572  | 0.12779 | 0.25201  | 3.38E-08 |

|          |          |          |          |          |          |         |          |          |
|----------|----------|----------|----------|----------|----------|---------|----------|----------|
| 0.00074  | 0.12133  | 0.00867  | -0.08394 | 0.06993  | -0.05505 | 0.23513 | -0.01317 | 0.77659  |
| 8.50E-06 | 0.172818 | 0.00017  | -0.10036 | 0.03012  | 0.117647 | 0.01095 | -0.03902 | 0.40024  |
| 0.03944  | -0.10205 | 0.02744  | -0.05956 | 0.19883  | -0.0394  | 0.39556 | 0.074465 | 0.10803  |
| 2.77E-07 | -0.25149 | 3.61E-08 | -0.07623 | 0.09991  | 0.015124 | 0.74445 | 0.047969 | 0.30093  |
| 0.00372  | 0.106376 | 0.0215   | -0.03454 | 0.45644  | 0.059067 | 0.20262 | 0.128393 | 0.00546  |
| 1.06E-06 | -0.2532  | 2.90E-08 | -0.05684 | 0.22017  | -0.10518 | 0.02301 | -0.13322 | 0.00393  |
| 0.84899  | 0.1176   | 0.01098  | 0.011477 | 0.80463  | 0.058105 | 0.21007 | -0.10554 | 0.02255  |
| 5.75E-06 | -0.23222 | 3.89E-07 | 0.058988 | 0.20322  | 0.051817 | 0.26377 | 0.070814 | 0.12648  |
| 0.17829  | 0.111727 | 0.01571  | 0.026914 | 0.5618   | -0.03886 | 0.40212 | 0.230856 | 4.56E-07 |
| 0.10744  | 0.132686 | 0.00407  | 0.049519 | 0.28557  | 0.062495 | 0.17759 | 0.193783 | 2.48E-05 |
| 0.02219  | 0.147064 | 0.00144  | 0.081587 | 0.07819  | 0.015269 | 0.74209 | 0.229461 | 5.37E-07 |
| 0.33721  | 0.065404 | 0.15821  | 0.020381 | 0.66044  | -0.016   | 0.73027 | 0.157253 | 0.00065  |
| 0.02122  | 0.147175 | 0.00143  | 0.064115 | 0.16659  | -0.02577 | 0.57859 | 0.127583 | 0.00576  |
| 0.53326  | -0.1124  | 0.01509  | -0.20538 | 7.67E-06 | -0.0909  | 0.04963 | 0.042713 | 0.35706  |
| 0.22092  | -0.0667  | 0.15009  | -0.02328 | 0.61574  | -0.07095 | 0.12575 | 0.010901 | 0.81425  |
| 0.00548  | -0.20192 | 1.10E-05 | -0.03101 | 0.50387  | -0.03263 | 0.48185 | -0.01598 | 0.73055  |
| 0.59877  | 0.034311 | 0.45948  | 0.077905 | 0.09265  | 0.092381 | 0.04601 | 0.141719 | 0.00214  |
| 0.1523   | 0.005158 | 0.91149  | -0.11082 | 0.01658  | 0.072124 | 0.1196  | -0.0907  | 0.05013  |
| 0.26993  | -0.01875 | 0.68619  | 0.074841 | 0.10626  | 0.010566 | 0.81986 | -0.05636 | 0.22415  |
| 0.38372  | 0.10513  | 0.02308  | 0.037319 | 0.42106  | 0.10655  | 0.02128 | 0.027558 | 0.55249  |
| 0.17622  | -0.06096 | 0.18847  | 0.068729 | 0.13807  | -0.01376 | 0.76681 | -0.03247 | 0.48394  |
| 0.2687   | 0.101069 | 0.02897  | 0.043132 | 0.35235  | 0.145935 | 0.00157 | 0.060903 | 0.18891  |
| 0.00022  | -0.22489 | 9.11E-07 | -0.02319 | 0.61715  | -0.04052 | 0.38234 | 0.084746 | 0.06729  |
| 0.00017  | 0.210869 | 4.30E-06 | 0.04427  | 0.33978  | -0.03636 | 0.43309 | 0.159504 | 0.00054  |
| 0.7479   | 0.099496 | 0.03158  | 0.014069 | 0.76172  | 0.009498 | 0.8378  | 0.11284  | 0.0147   |
| 0.01823  | 0.058495 | 0.20703  | -0.01342 | 0.77233  | 0.073299 | 0.11367 | 0.113257 | 0.01433  |
| 0.30497  | -0.01202 | 0.79564  | 0.20174  | 1.12E-05 | 0.080939 | 0.08059 | 0.072826 | 0.11603  |
| 0.0088   | -0.19421 | 2.38E-05 | -0.03056 | 0.50997  | -0.02661 | 0.56626 | 0.098382 | 0.03354  |
| 0.46777  | 0.137581 | 0.00289  | 0.105541 | 0.02255  | 0.167253 | 0.00028 | 0.003834 | 0.93414  |
| 0.80348  | -0.0207  | 0.65545  | -0.01279 | 0.78289  | -0.06118 | 0.18689 | 0.048242 | 0.29818  |
| 0.20601  | 0.10295  | 0.0261   | -0.03106 | 0.50309  | -0.0235  | 0.61244 | 0.049594 | 0.28484  |
| 0.15454  | -0.13828 | 0.00275  | -0.02824 | 0.54268  | -0.04326 | 0.35093 | 0.034187 | 0.46111  |
| 0.62144  | 0.017867 | 0.70015  | -0.02863 | 0.53716  | -0.03663 | 0.42967 | -0.09842 | 0.03348  |
| 0.01078  | 0.131664 | 0.00437  | 0.061048 | 0.18786  | 0.051211 | 0.2694  | 0.320723 | 1.24E-12 |
| 0.70779  | -0.05802 | 0.21075  | 0.054484 | 0.23995  | 0.05705  | 0.21848 | 0.063532 | 0.17048  |
| 0.01517  | -0.11909 | 0.01     | -0.07626 | 0.09976  | -0.09789 | 0.03444 | 0.014086 | 0.76143  |
| 0.91243  | 0.101462 | 0.02835  | 0.032872 | 0.47854  | 0.050218 | 0.27881 | 0.166378 | 0.0003   |
| 0.50834  | 0.053301 | 0.25032  | 0.103324 | 0.02556  | 0.079083 | 0.08781 | 0.258063 | 1.53E-08 |
| 7.53E-06 | -0.30669 | 1.26E-11 | -0.03135 | 0.49909  | -0.05101 | 0.27133 | 0.01652  | 0.7218   |
| 0.09717  | -0.10079 | 0.02943  | -0.07174 | 0.1216   | -0.08533 | 0.0654  | 0.035896 | 0.439    |
| 0.00134  | 0.12432  | 0.00715  | -0.00491 | 0.91569  | 0.019412 | 0.67565 | -0.02144 | 0.64395  |
| 0.04807  | -0.09105 | 0.04926  | 0.046906 | 0.31178  | 0.012921 | 0.78063 | -0.00223 | 0.96166  |
| 0.13672  | -0.05752 | 0.21469  | 0.011628 | 0.80211  | -0.01011 | 0.82756 | 0.122634 | 0.00798  |
| 0.04268  | 0.114904 | 0.01297  | 0.025768 | 0.57858  | -0.03276 | 0.4801  | 0.068902 | 0.13708  |
| 0.04801  | -0.12161 | 0.00852  | -0.10065 | 0.02964  | -0.03428 | 0.45983 | 0.011433 | 0.80536  |

|          |          |          |          |          |          |         |          |          |
|----------|----------|----------|----------|----------|----------|---------|----------|----------|
| 2.68E-06 | -0.2452  | 8.02E-08 | -0.08977 | 0.05253  | -0.04887 | 0.29193 | -0.00829 | 0.8582   |
| 0.42515  | -0.08682 | 0.06083  | -0.12857 | 0.00539  | -0.12998 | 0.0049  | 0.123259 | 0.00766  |
| 0.02177  | -0.11697 | 0.01142  | 0.049041 | 0.29024  | 0.02848  | 0.53925 | 0.163766 | 0.00038  |
| 0.00252  | 0.087081 | 0.06006  | -0.09441 | 0.04142  | -0.04194 | 0.36586 | 0.074068 | 0.10992  |
| 0.06639  | 0.054267 | 0.24182  | -0.05836 | 0.20805  | -0.00293 | 0.94959 | 0.076563 | 0.09842  |
| 0.19173  | 0.016247 | 0.72621  | -0.04983 | 0.2825   | -0.00238 | 0.95906 | 0.118764 | 0.01021  |
| 0.38505  | -0.11723 | 0.01124  | -0.08668 | 0.06126  | -0.05714 | 0.21774 | 0.045617 | 0.32528  |
| 0.61862  | -0.10154 | 0.02823  | -0.10611 | 0.02182  | -0.10436 | 0.02411 | 0.0702   | 0.12982  |
| 0.02716  | -0.04384 | 0.34446  | -0.04547 | 0.32686  | -0.02844 | 0.53978 | 0.103021 | 0.026    |
| 0.29466  | -0.06638 | 0.15207  | 0.051293 | 0.26863  | -0.02086 | 0.653   | 0.056373 | 0.22401  |
| 0.51474  | -0.18619 | 5.16E-05 | -0.05555 | 0.23087  | -0.01023 | 0.82547 | 0.030104 | 0.51636  |
| 0.00014  | -0.20121 | 1.18E-05 | 0.033947 | 0.46427  | 0.001942 | 0.96662 | 0.02922  | 0.52877  |
| 0.69887  | 0.018546 | 0.68934  | 0.089799 | 0.05247  | -0.01545 | 0.73917 | -0.13344 | 0.00387  |
| 0.82089  | 0.010319 | 0.824    | -0.01349 | 0.77119  | -0.0181  | 0.69644 | 0.207391 | 6.21E-06 |
| 0.00587  | 0.14692  | 0.00145  | 0.012656 | 0.78502  | 0.005361 | 0.90801 | 0.152199 | 0.00097  |
| 0.23329  | -0.19502 | 2.20E-05 | -0.04948 | 0.28592  | -0.10992 | 0.01749 | -0.00021 | 0.99645  |
| 1.52E-06 | -0.15469 | 0.0008   | -0.00087 | 0.985    | 0.009564 | 0.83669 | 0.121986 | 0.00832  |
| 2.70E-06 | -0.16428 | 0.00036  | -0.06044 | 0.1923   | -0.0248  | 0.59288 | -0.04456 | 0.33658  |
| 0.04674  | -0.01305 | 0.7785   | 0.001884 | 0.96761  | 0.017402 | 0.7076  | 0.065834 | 0.15549  |
| 0.44082  | -0.03024 | 0.51443  | -0.05453 | 0.23954  | -0.07021 | 0.12977 | -0.02122 | 0.64743  |
| 0.00599  | -0.17617 | 0.00013  | 0.089439 | 0.05342  | 0.002759 | 0.95258 | 0.035425 | 0.44503  |
| 2.07E-07 | -0.33206 | 1.75E-13 | -0.14467 | 0.00172  | -0.06783 | 0.14331 | 0.007325 | 0.87455  |
| 0.46245  | -0.01876 | 0.68588  | -0.00098 | 0.98318  | 0.046844 | 0.31242 | -0.04713 | 0.30951  |
| 1.15E-15 | 0.450913 | 9.09E-25 | 0.013407 | 0.77261  | 0.10273  | 0.02642 | 0.076679 | 0.09792  |
| 6.03E-14 | 0.338453 | 5.59E-14 | 0.041564 | 0.37015  | 0.048077 | 0.29984 | 0.071349 | 0.12364  |
| 9.37E-10 | 0.226534 | 7.55E-07 | -0.07232 | 0.1186   | 0.022815 | 0.62288 | 0.089857 | 0.05231  |
| 0.50995  | -0.06566 | 0.15657  | -0.00656 | 0.88764  | -0.02522 | 0.58673 | 0.045155 | 0.33021  |
| 0.002    | 0.10522  | 0.02296  | -0.04744 | 0.30627  | 0.014039 | 0.7622  | -0.17162 | 0.00019  |
| 0.00185  | 0.230853 | 4.57E-07 | 0.236602 | 2.30E-07 | 0.056152 | 0.22583 | 0.084901 | 0.06678  |
| 0.40065  | 0.058941 | 0.20358  | -0.00296 | 0.94913  | -0.06581 | 0.15566 | 0.02287  | 0.62203  |
| 0.00011  | -0.17742 | 0.00012  | -0.08971 | 0.0527   | -0.01443 | 0.75584 | 0.111517 | 0.01591  |
| 0.99625  | -0.11889 | 0.01012  | -0.01989 | 0.6682   | -0.01482 | 0.74948 | 0.030779 | 0.507    |
| 0.07854  | -0.09648 | 0.03714  | 0.022097 | 0.63387  | 0.032614 | 0.482   | 0.146164 | 0.00154  |
| 0.34707  | -0.11087 | 0.01653  | -0.02846 | 0.53953  | -0.02569 | 0.57967 | 0.103684 | 0.02505  |
| 0.00207  | 0.117714 | 0.0109   | 0.021193 | 0.64781  | 0.037599 | 0.41758 | 0.173944 | 0.00016  |
| 0.06239  | -0.0305  | 0.5108   | 0.057622 | 0.2139   | 0.118369 | 0.01046 | -0.12201 | 0.0083   |
| 0.1772   | -0.07844 | 0.09044  | -0.01316 | 0.77661  | -0.01991 | 0.66785 | 0.00811  | 0.86125  |
| 3.93E-13 | 0.377276 | 3.03E-17 | 0.000734 | 0.98738  | 0.112495 | 0.01501 | 0.234309 | 3.03E-07 |
| 0.21421  | 0.002322 | 0.96008  | 0.039674 | 0.39233  | -0.03276 | 0.48005 | 0.108834 | 0.01864  |
| 6.59E-08 | 0.26518  | 5.89E-09 | 0.047988 | 0.30074  | 0.067936 | 0.14268 | 0.169777 | 0.00023  |
| 0.19921  | -0.11662 | 0.01166  | -0.05624 | 0.22512  | -0.03438 | 0.45853 | 0.195761 | 2.04E-05 |
| 0.04209  | -0.09194 | 0.04706  | 0.027812 | 0.54882  | -0.06139 | 0.18538 | 0.013127 | 0.77723  |
| 0.0038   | 0.132569 | 0.00411  | -0.02376 | 0.60861  | 0.082673 | 0.07429 | 0.140894 | 0.00227  |
| 0.00792  | 0.110532 | 0.01687  | 0.037564 | 0.41802  | -0.00762 | 0.86952 | 0.207257 | 6.30E-06 |
| 9.59E-05 | 0.20424  | 8.63E-06 | -0.09792 | 0.03439  | -0.00921 | 0.84257 | 0.050529 | 0.27584  |

|          |          |          |          |         |          |          |          |          |
|----------|----------|----------|----------|---------|----------|----------|----------|----------|
| 9.50E-06 | 0.198775 | 1.51E-05 | 0.079698 | 0.08536 | 0.045558 | 0.32591  | 0.099707 | 0.03122  |
| 0.03424  | 0.004683 | 0.91961  | -0.0234  | 0.614   | -0.02649 | 0.56799  | 0.190385 | 3.46E-05 |
| 0.3407   | -0.15719 | 0.00065  | -0.00881 | 0.84936 | -0.04185 | 0.36683  | 0.010652 | 0.81842  |
| 0.63466  | -0.10233 | 0.02701  | -0.04064 | 0.38095 | -0.03875 | 0.40347  | 0.097519 | 0.03514  |
| 0.06296  | -0.04115 | 0.37492  | 0.091793 | 0.04742 | 0.111193 | 0.01622  | 0.053768 | 0.24618  |
| 6.36E-07 | 0.240517 | 1.43E-07 | -0.00633 | 0.8915  | 0.016647 | 0.71973  | 0.191031 | 3.25E-05 |
| 0.00044  | -0.23268 | 3.68E-07 | -0.11827 | 0.01053 | -0.02418 | 0.60226  | -0.02431 | 0.60022  |
| 0.00318  | -0.07986 | 0.08473  | -0.05341 | 0.24933 | -0.03695 | 0.42564  | 0.086099 | 0.06302  |
| 0.55435  | -0.08354 | 0.07129  | -0.01184 | 0.79862 | -0.01036 | 0.82324  | 0.212774 | 3.50E-06 |
| 0.41978  | -0.04459 | 0.33625  | -0.07391 | 0.1107  | -0.02944 | 0.52569  | 0.032199 | 0.48759  |
| 0.42239  | -0.05045 | 0.27662  | 0.094462 | 0.04131 | 0.048653 | 0.29409  | 0.077581 | 0.09402  |
| 0.01628  | 0.200606 | 1.25E-05 | 0.083705 | 0.07073 | 0.047933 | 0.30129  | 0.05423  | 0.24214  |
| 0.71254  | 0.02428  | 0.60072  | 0.153326 | 0.00089 | 0.033154 | 0.47477  | -0.04274 | 0.35678  |
| 0.06617  | -0.15817 | 0.0006   | -0.02348 | 0.61277 | -0.0072  | 0.87668  | 0.127728 | 0.00571  |
| 0.54578  | 0.135995 | 0.00323  | 0.15518  | 0.00077 | 0.045844 | 0.32287  | -0.19318 | 2.63E-05 |
| 0.19538  | -0.10954 | 0.01788  | -0.04788 | 0.30183 | -0.07614 | 0.10032  | 0.041892 | 0.36638  |
| 0.47895  | 0.115403 | 0.01258  | 0.121092 | 0.00881 | 0.096955 | 0.03621  | 0.109818 | 0.0176   |
| 0.65022  | 0.031839 | 0.49247  | -0.07633 | 0.09947 | -0.02476 | 0.59361  | 0.113675 | 0.01397  |
| 4.88E-12 | 0.331699 | 1.86E-13 | 0.044863 | 0.33335 | 0.179341 | 9.75E-05 | 0.363869 | 4.57E-16 |
| 0.89059  | 0.048804 | 0.29259  | -0.08006 | 0.08396 | -0.06054 | 0.1916   | 0.039525 | 0.39411  |
| 0.46143  | 0.004456 | 0.92348  | 0.044709 | 0.33501 | 0.072425 | 0.11806  | 0.216355 | 2.37E-06 |
| 0.14057  | 0.059729 | 0.19759  | 0.00208  | 0.96425 | -0.00997 | 0.82993  | 0.007657 | 0.86893  |
| 0.04889  | 0.125373 | 0.00667  | -0.05603 | 0.22687 | -0.00053 | 0.99085  | 0.034445 | 0.45774  |
| 0.03096  | 0.023336 | 0.61495  | 0.053492 | 0.24862 | -0.03682 | 0.42725  | 0.096755 | 0.0366   |
| 1.69E-10 | 0.283088 | 4.69E-10 | 0.087813 | 0.05793 | -0.00779 | 0.86672  | 0.259091 | 1.34E-08 |
| 0.09273  | -0.06466 | 0.163    | 0.008124 | 0.86101 | 0.004499 | 0.92276  | 0.067445 | 0.1456   |
| 0.7469   | -0.03305 | 0.47616  | 0.041475 | 0.37118 | -0.00087 | 0.98497  | 0.104628 | 0.02375  |
| 0.00437  | -0.03991 | 0.38948  | 0.044073 | 0.34194 | 0.223578 | 1.06E-06 | 0.008662 | 0.8519   |
| 0.00531  | -0.19518 | 2.16E-05 | -0.03006 | 0.51703 | -0.01637 | 0.72415  | 0.040593 | 0.38145  |
| 1.63E-05 | 0.281724 | 5.73E-10 | 0.063117 | 0.1733  | 0.069253 | 0.13508  | 0.267699 | 4.17E-09 |
| 1.22E-16 | 0.374796 | 5.06E-17 | -0.01453 | 0.75412 | 0.022387 | 0.62941  | 0.326116 | 4.94E-13 |
| 0.36787  | 0.042442 | 0.36012  | 0.009499 | 0.83778 | 0.011334 | 0.80701  | 0.104403 | 0.02405  |
| 0.90099  | -0.11932 | 0.00986  | -0.11361 | 0.01403 | -0.047   | 0.31083  | 0.128713 | 0.00534  |
| 7.56E-05 | 0.140544 | 0.00233  | 0.053837 | 0.24558 | 0.025236 | 0.58646  | 0.283625 | 4.34E-10 |
| 0.00013  | -0.27525 | 1.45E-09 | -0.10573 | 0.0223  | -0.04774 | 0.30327  | -0.02929 | 0.52785  |
| 0.25303  | -0.02327 | 0.61593  | -0.01866 | 0.68752 | -0.02098 | 0.65114  | -0.05327 | 0.25061  |
| 0.00811  | 0.173787 | 0.00016  | 0.019839 | 0.66893 | 0.020406 | 0.66005  | 0.067063 | 0.1479   |
| 0.01604  | 0.153423 | 0.00088  | 0.067082 | 0.14778 | 0.070444 | 0.12848  | 0.152011 | 0.00098  |
| 0.98808  | -0.03708 | 0.42403  | 0.028745 | 0.53549 | -0.01306 | 0.77833  | 0.213733 | 3.16E-06 |
| 0.00116  | -0.23779 | 2.00E-07 | -0.08622 | 0.06265 | -0.13429 | 0.00365  | -0.05896 | 0.20345  |
| 0.00025  | 0.162673 | 0.00042  | -0.03939 | 0.39577 | 0.078019 | 0.09217  | 0.120308 | 0.00926  |
| 0.25122  | -0.15384 | 0.00085  | -0.00387 | 0.93349 | -0.01209 | 0.79436  | 0.054627 | 0.23871  |
| 0.01179  | -0.12527 | 0.00672  | 0.022945 | 0.62089 | -0.03092 | 0.50499  | -0.13998 | 0.00243  |
| 0.33473  | -0.10903 | 0.01843  | 0.047913 | 0.3015  | 0.01919  | 0.67915  | 0.174298 | 0.00015  |
| 0.25527  | -0.02788 | 0.54783  | 0.015208 | 0.74307 | -0.00093 | 0.98407  | 0.241505 | 1.27E-07 |

|          |          |          |          |          |          |         |          |          |
|----------|----------|----------|----------|----------|----------|---------|----------|----------|
| 0.0391   | 0.087053 | 0.06014  | 0.032689 | 0.481    | -0.01685 | 0.71646 | 0.082633 | 0.07443  |
| 6.81E-09 | 0.326544 | 4.58E-13 | 0.028755 | 0.53535  | 0.086658 | 0.06132 | 0.038742 | 0.40355  |
| 1.11E-05 | 0.138505 | 0.0027   | -0.01631 | 0.72526  | 0.009138 | 0.84387 | 0.158186 | 0.0006   |
| 0.00406  | -0.18743 | 4.59E-05 | -0.05482 | 0.23709  | -0.07955 | 0.08593 | 0.039274 | 0.39712  |
| 1.08E-07 | 0.339585 | 4.55E-14 | 0.056636 | 0.22185  | 0.035438 | 0.44486 | 0.307897 | 1.03E-11 |
| 0.42676  | 0.051734 | 0.26454  | -0.07029 | 0.12931  | 0.014027 | 0.7624  | 0.101769 | 0.02787  |
| 0.00313  | -0.11133 | 0.01608  | 0.064974 | 0.16097  | 0.052569 | 0.25689 | 0.091315 | 0.04859  |
| 0.00016  | 0.241847 | 1.22E-07 | -0.00836 | 0.85694  | 0.172539 | 0.00018 | 0.183877 | 6.41E-05 |
| 0.55729  | -0.01719 | 0.71102  | 0.016248 | 0.72619  | 0.003951 | 0.93214 | 0.192974 | 2.69E-05 |
| 0.16445  | -0.02717 | 0.55809  | 0.009635 | 0.83549  | 0.027192 | 0.55777 | 0.050439 | 0.2767   |
| 0.36765  | -0.02239 | 0.62941  | 0.210919 | 4.27E-06 | -0.00589 | 0.89904 | 0.024722 | 0.59411  |
| 0.00021  | 0.202515 | 1.03E-05 | -0.06582 | 0.15557  | 0.092757 | 0.04513 | 0.117808 | 0.01084  |
| 7.06E-06 | -0.25955 | 1.26E-08 | -0.02682 | 0.56316  | 0.023282 | 0.61578 | 0.021115 | 0.64902  |
| 0.66806  | -0.0241  | 0.60336  | -0.01575 | 0.73429  | -0.04433 | 0.33912 | 0.177675 | 0.00011  |
| 0.04021  | 0.08091  | 0.0807   | -0.1363  | 0.00316  | 0.034739 | 0.45389 | 0.053885 | 0.24516  |
| 7.20E-07 | 0.108582 | 0.01892  | -0.10464 | 0.02373  | -0.01114 | 0.81027 | 0.128854 | 0.00529  |
| 0.32389  | -0.03468 | 0.45464  | 0.002689 | 0.95378  | 0.011149 | 0.8101  | 0.210054 | 4.69E-06 |
| 0.00121  | -0.22374 | 1.04E-06 | 0.019658 | 0.67178  | -0.04591 | 0.32217 | 0.017531 | 0.70553  |
| 0.2717   | 0.009097 | 0.84457  | -0.06062 | 0.19095  | -0.04707 | 0.31009 | -0.0538  | 0.24595  |
| 0.03815  | -0.17817 | 0.00011  | -0.03668 | 0.42904  | -0.03018 | 0.51532 | 0.084457 | 0.06823  |
| 1.70E-05 | -0.27287 | 2.03E-09 | -0.11127 | 0.01615  | -0.06942 | 0.13415 | -0.0033  | 0.94328  |
| 0.02089  | -0.10912 | 0.01833  | -0.05702 | 0.21876  | -0.02854 | 0.53841 | 0.023959 | 0.60554  |
| 1.38E-05 | 0.312823 | 4.63E-12 | 0.069454 | 0.13395  | 0.151017 | 0.00106 | 0.192173 | 2.90E-05 |
| 0.01601  | -0.22778 | 6.54E-07 | 0.008291 | 0.85818  | -0.04537 | 0.32789 | 0.017167 | 0.71137  |
| 0.37086  | 0.062581 | 0.17699  | -0.01694 | 0.7151   | -0.01656 | 0.72118 | -0.04204 | 0.36473  |
| 0.05055  | -0.13375 | 0.00379  | -0.05733 | 0.21621  | -0.02977 | 0.52102 | 0.076486 | 0.09877  |
| 7.12E-06 | -0.29693 | 5.84E-11 | -0.07239 | 0.11824  | -0.03415 | 0.46156 | 0.028007 | 0.54602  |
| 1.49E-05 | -0.24351 | 9.89E-08 | -0.05092 | 0.27213  | -0.02947 | 0.52528 | 0.024439 | 0.59833  |
| 6.45E-05 | 0.21989  | 1.60E-06 | 0.003782 | 0.93503  | 0.042716 | 0.35703 | -0.00615 | 0.89454  |
| 0.00603  | -0.19906 | 1.47E-05 | 0.037647 | 0.41698  | -0.09708 | 0.03596 | 0.062393 | 0.17829  |
| 0.00117  | 0.035971 | 0.43804  | -0.03442 | 0.45801  | 0.006256 | 0.89274 | 0.157342 | 0.00064  |
| 0.22116  | 0.048233 | 0.29827  | 0.065951 | 0.15475  | 0.004338 | 0.9255  | 0.202257 | 1.06E-05 |
| 0.0004   | -0.25551 | 2.14E-08 | -0.03849 | 0.40661  | -0.03106 | 0.50319 | 0.042432 | 0.36024  |
| 0.00038  | -0.21653 | 2.33E-06 | -0.07232 | 0.11861  | 0.027582 | 0.55213 | 0.052049 | 0.26164  |
| 0.00487  | -0.18397 | 6.36E-05 | -0.00516 | 0.91147  | 0.000226 | 0.99611 | 0.089005 | 0.0546   |
| 3.10E-05 | 0.228001 | 6.37E-07 | 0.00133  | 0.97714  | 0.032063 | 0.48944 | 0.258641 | 1.42E-08 |
| 5.36E-06 | 0.238192 | 1.90E-07 | -0.00106 | 0.9817   | 0.014529 | 0.75416 | 0.152527 | 0.00094  |
| 0.32252  | -0.14967 | 0.00118  | -0.09365 | 0.04309  | -0.03363 | 0.46848 | 0.064668 | 0.16295  |
| 0.0062   | -0.18546 | 5.53E-05 | -0.00592 | 0.89847  | -0.05377 | 0.24617 | 0.011416 | 0.80565  |
| 0.00098  | -0.17469 | 0.00015  | -0.0716  | 0.1223   | -0.05243 | 0.25813 | 0.014625 | 0.7526   |
| 1.28E-09 | -0.37077 | 1.15E-16 | -0.0469  | 0.31186  | -0.08595 | 0.06346 | -0.09962 | 0.03136  |
| 0.01156  | 0.084709 | 0.0674   | -0.01195 | 0.79675  | -0.08108 | 0.08005 | 0.114962 | 0.01292  |
| 3.27E-27 | 0.455087 | 2.98E-25 | -0.08194 | 0.07691  | 0.068677 | 0.13837 | 0.077747 | 0.09331  |
| 0.03417  | 0.181324 | 8.13E-05 | 0.008319 | 0.85771  | 0.024954 | 0.59064 | 0.12078  | 0.00898  |
| 0.01877  | 0.021765 | 0.63897  | -0.02819 | 0.54339  | -0.03338 | 0.47171 | 0.099017 | 0.03241  |

|          |          |          |          |         |          |         |          |          |
|----------|----------|----------|----------|---------|----------|---------|----------|----------|
| 0.0005   | 0.195092 | 2.18E-05 | 0.020992 | 0.65092 | 0.019634 | 0.67216 | 0.301786 | 2.74E-11 |
| 0.07966  | -0.06857 | 0.13901  | -0.00679 | 0.88368 | 0.080043 | 0.08401 | -0.00518 | 0.91103  |
| 0.61053  | -0.09964 | 0.03132  | -0.03716 | 0.42302 | -0.03748 | 0.41906 | 0.111465 | 0.01596  |
| 0.14733  | -0.08066 | 0.08162  | -0.00649 | 0.88869 | -0.02622 | 0.57195 | -0.10251 | 0.02675  |
| 0.99864  | -0.07862 | 0.08969  | 0.008746 | 0.85048 | 0.023474 | 0.61287 | -0.11881 | 0.01018  |
| 0.9081   | -0.08379 | 0.07046  | -0.02853 | 0.53853 | -0.06918 | 0.13549 | 0.135104 | 0.00344  |
| 0.83389  | 0.042699 | 0.35722  | -0.06827 | 0.14071 | 0.045209 | 0.32963 | 0.021632 | 0.64102  |
| 0.00045  | -0.21484 | 2.80E-06 | -0.02665 | 0.56564 | -0.04907 | 0.28997 | -0.12438 | 0.00712  |
| 0.00282  | -0.12254 | 0.00802  | -0.0011  | 0.98101 | -0.00826 | 0.85864 | 0.032515 | 0.48334  |
| 0.37782  | -0.04268 | 0.35739  | 0.0641   | 0.16669 | 0.018933 | 0.68321 | 0.014225 | 0.75914  |
| 0.01141  | 0.183912 | 6.39E-05 | 0.130026 | 0.00489 | 0.096874 | 0.03637 | -0.02383 | 0.60756  |
| 0.36273  | 0.041454 | 0.37142  | 0.072449 | 0.11794 | -0.02869 | 0.53634 | -0.06446 | 0.16434  |
| 0.05213  | -0.22375 | 1.04E-06 | -0.01588 | 0.73216 | -0.06183 | 0.18225 | 0.063818 | 0.16857  |
| 0.02954  | -0.10349 | 0.02532  | 0.019992 | 0.66653 | 0.029043 | 0.53126 | -0.00354 | 0.93915  |
| 0.00019  | 0.133298 | 0.0039   | 0.068592 | 0.13886 | 0.019059 | 0.68123 | 0.151467 | 0.00103  |
| 0.83104  | -0.05857 | 0.20643  | -0.04835 | 0.29711 | -0.02948 | 0.52517 | 0.111912 | 0.01554  |
| 0.07548  | 0.119704 | 0.00962  | -0.03183 | 0.49265 | 0.001545 | 0.97343 | 0.073541 | 0.11248  |
| 2.15E-19 | 0.422627 | 1.18E-21 | 0.110578 | 0.01682 | 0.086765 | 0.061   | 0.037828 | 0.41474  |
| 2.76E-06 | 0.111851 | 0.0156   | -0.03526 | 0.4471  | 0.041104 | 0.37548 | 0.183086 | 6.90E-05 |
| 2.22E-05 | -0.10582 | 0.02219  | -0.05669 | 0.22142 | 0.019115 | 0.68033 | 0.032186 | 0.48777  |
| 0.0905   | 0.075895 | 0.10141  | -0.02186 | 0.63758 | -0.01148 | 0.80452 | 0.128006 | 0.0056   |
| 0.00922  | 0.18113  | 8.27E-05 | -0.08601 | 0.06328 | 0.064756 | 0.16238 | 0.030887 | 0.50551  |
| 0.00082  | 0.146474 | 0.0015   | 0.02813  | 0.54426 | 0.115457 | 0.01254 | 0.049797 | 0.28286  |
| 0.01699  | -0.06813 | 0.14157  | -0.03891 | 0.40148 | -0.03857 | 0.40567 | 0.176943 | 0.00012  |
| 0.02854  | -0.11563 | 0.0124   | -0.0299  | 0.51922 | -0.05812 | 0.20996 | 0.121374 | 0.00865  |
| 0.63938  | -0.18212 | 7.55E-05 | -0.08407 | 0.06952 | -0.16496 | 0.00034 | -0.02512 | 0.58825  |
| 0.12599  | -0.07883 | 0.08884  | -0.04496 | 0.33232 | -0.14972 | 0.00117 | -0.04165 | 0.36912  |
| 0.00418  | 0.097655 | 0.03488  | -0.17572 | 0.00014 | -0.04644 | 0.31659 | 0.082294 | 0.07563  |
| 0.96042  | 0.080175 | 0.0835   | -0.12826 | 0.00551 | 0.050262 | 0.27839 | -0.04695 | 0.3113   |
| 0.04237  | 0.184344 | 6.14E-05 | -0.03431 | 0.45944 | 0.070153 | 0.13007 | 0.035595 | 0.44284  |
| 0.0116   | 0.153277 | 0.00089  | -0.01904 | 0.68155 | 0.045775 | 0.3236  | 0.0934   | 0.04365  |
| 1.08E-09 | 0.307865 | 1.04E-11 | -0.02533 | 0.58501 | 0.029883 | 0.51945 | 0.16329  | 0.0004   |
| 0.47142  | 0.073589 | 0.11225  | 0.151084 | 0.00106 | 0.124524 | 0.00705 | 0.092891 | 0.04482  |
| 0.22111  | -0.05292 | 0.25374  | 0.010781 | 0.81625 | 0.058496 | 0.20702 | 0.172151 | 0.00019  |
| 0.001    | -0.11021 | 0.01719  | 0.027816 | 0.54877 | -0.00225 | 0.96134 | 0.091616 | 0.04785  |
| 0.1676   | -0.00888 | 0.84821  | -0.05798 | 0.21106 | 0.005488 | 0.90584 | 0.077817 | 0.09302  |
| 0.00888  | -0.2101  | 4.67E-06 | -0.03297 | 0.47728 | -0.02809 | 0.54486 | 0.060661 | 0.19067  |
| 0.19505  | 0.084688 | 0.06747  | -0.11065 | 0.01675 | 0.123201 | 0.00769 | -0.09    | 0.05195  |
| 0.00021  | -0.23274 | 3.65E-07 | -0.0546  | 0.23892 | -0.03592 | 0.43871 | -0.01838 | 0.69196  |
| 0.11311  | 0.018743 | 0.68622  | -0.08547 | 0.06499 | 0.016175 | 0.72737 | 0.060074 | 0.19501  |
| 0.01744  | -0.23509 | 2.76E-07 | -0.11602 | 0.01211 | -0.07856 | 0.08994 | -0.04655 | 0.31547  |
| 0.23648  | -0.00264 | 0.95471  | 0.007365 | 0.87388 | 0.00191  | 0.96716 | 0.184137 | 6.26E-05 |
| 0.01544  | -0.1629  | 0.00041  | -0.05579 | 0.22886 | -0.06505 | 0.16049 | 0.022517 | 0.62743  |
| 0.95188  | 0.009366 | 0.84002  | 0.041572 | 0.37006 | 0.007919 | 0.86449 | 0.01069  | 0.81777  |
| 0.01099  | -0.23792 | 1.97E-07 | -0.05252 | 0.25733 | -0.06598 | 0.15457 | 0.001771 | 0.96955  |

|          |          |          |          |         |          |         |          |          |
|----------|----------|----------|----------|---------|----------|---------|----------|----------|
| 1.21E-05 | -0.28639 | 2.88E-10 | -0.14679 | 0.00147 | -0.0054  | 0.90743 | -0.0994  | 0.03175  |
| 0.60804  | -0.1208  | 0.00897  | 0.020063 | 0.66542 | -0.00824 | 0.85904 | -0.02087 | 0.65287  |
| 0.01592  | 0.084082 | 0.06947  | -0.01222 | 0.79227 | 0.026972 | 0.56096 | 0.211717 | 3.92E-06 |
| 0.00038  | -0.25423 | 2.53E-08 | -0.02018 | 0.66355 | -0.10032 | 0.03019 | 0.029756 | 0.52123  |
| 0.00327  | -0.01028 | 0.82458  | -0.00338 | 0.94186 | -0.04073 | 0.37988 | 0.131884 | 0.00431  |
| 0.0093   | 0.021714 | 0.63975  | -0.0043  | 0.92611 | -0.09267 | 0.04533 | 0.140155 | 0.0024   |
| 3.04E-11 | 0.213942 | 3.09E-06 | -0.00362 | 0.93786 | -0.04338 | 0.34964 | 0.230639 | 4.68E-07 |
| 0.09011  | -0.13433 | 0.00363  | -0.02567 | 0.58    | 0.008702 | 0.85122 | 0.03653  | 0.43094  |
| 0.22173  | -0.04095 | 0.37729  | -0.02118 | 0.64804 | -0.00281 | 0.95172 | 0.139985 | 0.00243  |
| 0.57241  | 0.165276 | 0.00033  | 0.099806 | 0.03105 | -0.01295 | 0.78023 | 0.006543 | 0.88786  |
| 0.47409  | -0.17811 | 0.00011  | -0.07879 | 0.08897 | -0.05124 | 0.26914 | -0.10554 | 0.02255  |
| 0.75002  | -0.02859 | 0.53771  | 0.025574 | 0.58145 | -0.00777 | 0.86695 | 0.040431 | 0.38336  |
| 0.06168  | 0.077212 | 0.0956   | -0.11987 | 0.00952 | 0.075779 | 0.10193 | -0.05741 | 0.21563  |
| 3.65E-07 | 0.175933 | 0.00013  | -0.00805 | 0.86221 | -0.02946 | 0.52541 | 0.040193 | 0.38617  |
| 3.96E-07 | -0.3442  | 1.96E-14 | -0.01036 | 0.82333 | -0.09498 | 0.0402  | -0.06711 | 0.1476   |
| 0.07828  | 0.023047 | 0.61935  | 0.030733 | 0.50763 | 0.017006 | 0.71395 | 0.279822 | 7.55E-10 |
| 0.00188  | 0.161604 | 0.00045  | -0.03583 | 0.43988 | 0.033661 | 0.46803 | 0.181153 | 8.26E-05 |
| 0.55228  | -0.02426 | 0.601    | -0.01369 | 0.76793 | -0.0114  | 0.80593 | 0.171786 | 0.00019  |
| 0.34238  | 0.058839 | 0.20437  | 0.087432 | 0.05903 | 0.010215 | 0.82575 | 0.006738 | 0.88454  |
| 0.03146  | -0.21433 | 2.96E-06 | -0.03467 | 0.45484 | -0.0869  | 0.06059 | -0.05102 | 0.27121  |
| 0.07097  | -0.10917 | 0.01828  | -0.14541 | 0.00163 | 0.028333 | 0.54135 | -0.08501 | 0.06644  |
| 0.00013  | 0.208915 | 5.29E-06 | 0.086028 | 0.06323 | 0.059589 | 0.19864 | 0.060696 | 0.19042  |
| 0.7759   | -0.08571 | 0.06421  | -0.11278 | 0.01475 | -0.06874 | 0.13803 | 0.00305  | 0.94758  |
| 5.57E-16 | 0.401884 | 1.49E-19 | -0.02227 | 0.63122 | 0.032825 | 0.47917 | 0.04669  | 0.31402  |
| 0.3215   | -0.07221 | 0.11916  | -0.01883 | 0.68481 | -0.00114 | 0.98033 | 0.136774 | 0.00306  |
| 8.03E-05 | -0.18973 | 3.68E-05 | 0.006373 | 0.89074 | -0.03532 | 0.44632 | -0.01678 | 0.71757  |
| 1.71E-06 | 0.288366 | 2.15E-10 | 0.054335 | 0.24124 | 0.111292 | 0.01612 | 0.304497 | 1.78E-11 |
| 0.62434  | -0.09964 | 0.03132  | -0.10106 | 0.02899 | -0.00724 | 0.87595 | 0.047761 | 0.30304  |
| 0.05285  | 0.106346 | 0.02153  | -0.03286 | 0.47871 | 0.002003 | 0.96557 | 0.155852 | 0.00073  |
| 0.16733  | 0.142775 | 0.00198  | 0.125291 | 0.00671 | -0.00174 | 0.97004 | 0.103743 | 0.02496  |
| 0.35579  | -0.17558 | 0.00014  | 0.040033 | 0.38806 | -0.09056 | 0.05048 | 0.072781 | 0.11626  |
| 0.66592  | 0.065421 | 0.1581   | 0.049501 | 0.28574 | 0.130536 | 0.00472 | 0.158046 | 0.00061  |
| 0.96325  | 0.084265 | 0.06886  | 0.055743 | 0.22924 | 0.023739 | 0.60886 | 0.014298 | 0.75796  |
| 0.00013  | 0.291102 | 1.42E-10 | 0.153583 | 0.00087 | 0.031726 | 0.49401 | 0.193956 | 2.44E-05 |
| 0.00873  | -0.03626 | 0.43435  | 0.04761  | 0.30457 | 0.011393 | 0.80603 | -0.14049 | 0.00234  |
| 0.0034   | -0.25926 | 1.31E-08 | -0.06132 | 0.18588 | -0.04192 | 0.36604 | 0.095226 | 0.03969  |
| 3.27E-06 | 0.268468 | 3.75E-09 | 0.049853 | 0.28232 | -0.01776 | 0.70193 | 0.102361 | 0.02697  |
| 0.16563  | -0.10809 | 0.01947  | -0.08343 | 0.07167 | -0.08814 | 0.05701 | -0.07488 | 0.10605  |
| 0.43582  | -0.11943 | 0.00979  | -0.05365 | 0.24724 | -0.01866 | 0.68747 | -0.07188 | 0.12087  |
| 0.00262  | 0.113346 | 0.01426  | -0.0096  | 0.83613 | -0.03739 | 0.42014 | 0.195224 | 2.15E-05 |
| 0.14093  | -0.14778 | 0.00136  | -0.01655 | 0.72126 | -0.04599 | 0.32129 | 0.129629 | 0.00502  |
| 9.36E-05 | -0.21225 | 3.71E-06 | 0.001761 | 0.96973 | -0.04917 | 0.28895 | -0.01083 | 0.81546  |
| 0.0009   | -0.18708 | 4.74E-05 | -0.10968 | 0.01774 | -0.10611 | 0.02183 | 0.003886 | 0.93326  |
| 0.00311  | 0.080369 | 0.08275  | -0.02804 | 0.54554 | -0.08039 | 0.08268 | 0.069045 | 0.13626  |
| 7.31E-14 | 0.271863 | 2.34E-09 | -0.01042 | 0.82229 | 0.013782 | 0.76643 | 0.280171 | 7.18E-10 |



|          |          |          |          |          |          |          |          |          |
|----------|----------|----------|----------|----------|----------|----------|----------|----------|
| 5.36E-15 | -0.42346 | 9.62E-22 | -0.09556 | 0.039    | -0.09539 | 0.03935  | 0.007465 | 0.87218  |
| 6.84E-05 | -0.12888 | 0.00528  | 0.014048 | 0.76205  | -0.00075 | 0.98702  | 0.068515 | 0.1393   |
| 0.13393  | -0.15452 | 0.00081  | -0.05966 | 0.19815  | -0.0262  | 0.57218  | 0.030014 | 0.51761  |
| 0.49184  | -0.1246  | 0.00702  | -0.04498 | 0.33208  | -0.02326 | 0.61617  | 0.180888 | 8.46E-05 |
| 0.20832  | -0.03801 | 0.41254  | 0.069441 | 0.13402  | 0.088663 | 0.05554  | 0.080511 | 0.08221  |
| 0.32893  | 0.027358 | 0.55537  | 0.024349 | 0.59968  | 0.202919 | 9.90E-06 | 0.135357 | 0.00338  |
| 0.13405  | -0.14169 | 0.00215  | -0.11782 | 0.01083  | -0.07695 | 0.09671  | 0.022895 | 0.62166  |
| 0.00487  | 0.017289 | 0.70942  | -0.06134 | 0.18578  | -0.03055 | 0.51018  | 0.128282 | 0.0055   |
| 0.00044  | -0.24717 | 6.26E-08 | -0.03856 | 0.40571  | -0.08491 | 0.06676  | -0.01373 | 0.76735  |
| 0.04141  | 0.183467 | 6.66E-05 | 0.066683 | 0.15022  | 0.09615  | 0.0378   | 0.04074  | 0.37972  |
| 0.54479  | 0.015791 | 0.7336   | 0.043582 | 0.34735  | 0.022314 | 0.63053  | 0.008194 | 0.85981  |
| 1.98E-10 | -0.37051 | 1.21E-16 | -0.16992 | 0.00023  | -0.09931 | 0.03191  | -0.05136 | 0.26798  |
| 0.04897  | -0.08741 | 0.05908  | -0.03079 | 0.50683  | -0.01821 | 0.69467  | -0.02082 | 0.65357  |
| 0.04253  | 0.074811 | 0.1064   | -0.02591 | 0.57647  | 0.011358 | 0.80662  | -0.00077 | 0.98669  |
| 0.5514   | -0.06991 | 0.1314   | -0.07891 | 0.08852  | -0.06234 | 0.17863  | -0.05248 | 0.25769  |
| 0.2341   | 0.047277 | 0.30796  | -0.10607 | 0.02187  | -0.01426 | 0.75863  | -0.08935 | 0.05368  |
| 0.19764  | -0.05512 | 0.2345   | -0.07938 | 0.08663  | -0.04526 | 0.32912  | -0.05288 | 0.25408  |
| 0.01232  | 0.027081 | 0.55937  | -0.07534 | 0.10395  | -0.0822  | 0.07597  | 0.116083 | 0.01206  |
| 0.00397  | 0.283708 | 4.28E-10 | 0.112912 | 0.01463  | 0.117173 | 0.01127  | 0.129975 | 0.00491  |
| 1.56E-12 | -0.3984  | 3.25E-19 | -0.07887 | 0.08865  | -0.01235 | 0.79007  | -0.04406 | 0.34204  |
| 0.75559  | 0.048197 | 0.29864  | -0.09453 | 0.04117  | 0.016959 | 0.71471  | -0.21436 | 2.95E-06 |
| 0.35159  | 0.007517 | 0.8713   | 0.025383 | 0.58427  | 0.00105  | 0.98195  | 0.048542 | 0.29518  |
| 0.00211  | -0.27854 | 9.08E-10 | -0.19369 | 2.50E-05 | -0.11272 | 0.01481  | -0.10138 | 0.02848  |
| 2.07E-05 | 0.078665 | 0.0895   | -0.03402 | 0.46326  | -0.05982 | 0.19693  | -0.00925 | 0.84206  |
| 0.00105  | -0.21102 | 4.23E-06 | -0.00094 | 0.98388  | -0.05175 | 0.26436  | -0.09989 | 0.03091  |
| 0.37954  | -0.05465 | 0.23852  | -0.01117 | 0.80976  | -0.01557 | 0.73722  | 0.130282 | 0.0048   |
| 0.00199  | 0.173606 | 0.00016  | 0.09664  | 0.03683  | 0.086854 | 0.06073  | 0.09282  | 0.04498  |
| 0.91849  | 0.100356 | 0.03013  | 0.126881 | 0.00604  | 0.046036 | 0.32085  | -0.15117 | 0.00105  |
| 0.88259  | -0.14299 | 0.00195  | -0.02191 | 0.6368   | 0.015809 | 0.7333   | 0.061443 | 0.18501  |
| 7.07E-19 | 0.428607 | 2.73E-22 | -0.02574 | 0.57896  | 0.016384 | 0.72399  | 0.274002 | 1.73E-09 |
| 0.99489  | -0.04731 | 0.30766  | -0.01624 | 0.72633  | -0.02533 | 0.5851   | 0.152287 | 0.00096  |
| 0.17086  | -0.1172  | 0.01125  | -0.01514 | 0.74417  | -0.04481 | 0.33389  | 0.038918 | 0.40142  |
| 0.06614  | 0.036658 | 0.42933  | -0.02295 | 0.62076  | 0.004857 | 0.91662  | 0.118821 | 0.01017  |
| 0.5342   | -0.12307 | 0.00776  | -0.02865 | 0.53677  | -0.02705 | 0.55979  | 0.074768 | 0.1066   |
| 0.04621  | 0.0072   | 0.87668  | -0.06156 | 0.18418  | 0.013317 | 0.7741   | -0.01526 | 0.74226  |
| 2.68E-08 | 0.111475 | 0.01595  | -0.08692 | 0.06054  | -0.04768 | 0.30385  | 0.041105 | 0.37546  |
| 0.03494  | -0.05332 | 0.25018  | -0.07724 | 0.09547  | 0.007744 | 0.86744  | 0.130742 | 0.00466  |
| 0.03963  | -0.04561 | 0.32532  | -0.04171 | 0.36851  | -0.03648 | 0.43162  | 0.195929 | 2.01E-05 |
| 0.00079  | 0.176934 | 0.00012  | -0.02638 | 0.56958  | -0.06459 | 0.16343  | 0.080642 | 0.08171  |
| 6.69E-11 | -0.39469 | 7.37E-19 | -0.03994 | 0.38915  | -0.07536 | 0.10383  | 0.010895 | 0.81436  |
| 0.13122  | -0.10557 | 0.02251  | 0.072369 | 0.11834  | -0.01577 | 0.73399  | 0.209342 | 5.06E-06 |
| 0.14189  | -0.06979 | 0.13209  | -0.01593 | 0.73138  | -0.11229 | 0.01519  | -0.12512 | 0.00678  |
| 0.002    | 0.106031 | 0.02192  | -0.0987  | 0.03298  | -0.00983 | 0.83223  | 0.159315 | 0.00055  |
| 0.30775  | -0.05106 | 0.27078  | -0.01359 | 0.76963  | -0.03715 | 0.42322  | -0.06457 | 0.16356  |
| 0.04878  | -0.17023 | 0.00022  | 0.041724 | 0.36831  | -0.03971 | 0.39192  | 0.112373 | 0.01512  |

|          |          |          |          |         |          |         |          |          |
|----------|----------|----------|----------|---------|----------|---------|----------|----------|
| 0.00162  | 0.105775 | 0.02225  | -0.06671 | 0.15005 | -0.08329 | 0.07214 | 0.146617 | 0.00149  |
| 3.57E-06 | -0.33124 | 2.02E-13 | -0.09815 | 0.03397 | -0.11614 | 0.01202 | 0.020838 | 0.65333  |
| 0.14813  | -0.10736 | 0.02031  | 0.004887 | 0.91612 | -0.01932 | 0.67717 | 0.045886 | 0.32244  |
| 0.00124  | 0.266416 | 4.98E-09 | 0.150492 | 0.00111 | 0.045497 | 0.32656 | 0.0354   | 0.44535  |
| 2.24E-06 | -0.1079  | 0.01969  | -0.13075 | 0.00465 | 0.010632 | 0.81874 | 0.10141  | 0.02843  |
| 0.11214  | 0.082555 | 0.0747   | 0.116677 | 0.01163 | 0.088448 | 0.05613 | 0.12873  | 0.00534  |
| 0.85072  | -0.02896 | 0.53237  | -0.09729 | 0.03558 | -0.13389 | 0.00375 | -0.09139 | 0.04841  |
| 0.94009  | 0.122334 | 0.00813  | -0.08876 | 0.05526 | 0.104748 | 0.02359 | -0.06539 | 0.15832  |
| 0.09075  | -0.1093  | 0.01814  | -0.09202 | 0.04688 | -0.0278  | 0.54895 | 0.164855 | 0.00035  |
| 0.49024  | 0.004535 | 0.92214  | -0.06218 | 0.17976 | -0.03948 | 0.39462 | 0.084079 | 0.06948  |
| 0.00028  | 0.149005 | 0.00124  | 0.047423 | 0.30647 | 0.091656 | 0.04775 | 0.129686 | 0.005    |
| 2.04E-06 | -0.2059  | 7.26E-06 | 0.014969 | 0.74698 | 0.046796 | 0.31292 | 0.008145 | 0.86066  |
| 0.77047  | 0.044568 | 0.33654  | 0.011359 | 0.80659 | -0.05911 | 0.20227 | 0.077143 | 0.09589  |
| 9.92E-06 | 0.155631 | 0.00074  | -0.01843 | 0.69124 | -0.03835 | 0.40828 | 0.126135 | 0.00634  |
| 1.46E-05 | -0.28717 | 2.57E-10 | -0.05483 | 0.23695 | -0.04307 | 0.35308 | 0.02474  | 0.59383  |
| 0.23143  | -0.11779 | 0.01085  | 0.001545 | 0.97344 | -0.06523 | 0.15935 | 0.019837 | 0.66895  |
| 0.03243  | -0.00438 | 0.92487  | -0.01875 | 0.68603 | 0.001773 | 0.96953 | 0.110112 | 0.01729  |
| 0.29243  | -0.11076 | 0.01665  | 0.030901 | 0.50532 | 0.048526 | 0.29534 | 0.110119 | 0.01729  |
| 0.0656   | -0.05907 | 0.20263  | 0.042813 | 0.35593 | 0.004436 | 0.92383 | -0.05902 | 0.20298  |
| 8.71E-06 | -0.17389 | 0.00016  | -0.00835 | 0.85723 | 0.017181 | 0.71115 | 0.059135 | 0.2021   |
| 0.73729  | 0.018015 | 0.69779  | 0.013116 | 0.77741 | -0.01364 | 0.76877 | 0.047433 | 0.30637  |
| 0.00687  | -0.16914 | 0.00024  | -0.05061 | 0.27507 | -0.03324 | 0.47361 | 0.018867 | 0.68426  |
| 0.46616  | 0.014697 | 0.75141  | -0.0078  | 0.86645 | -0.00341 | 0.94134 | 0.00376  | 0.93541  |
| 0.00445  | -0.06424 | 0.16575  | -0.01732 | 0.70895 | -0.00041 | 0.99299 | -0.01307 | 0.77817  |
| 0.3807   | 0.084991 | 0.06649  | 0.009112 | 0.8443  | 0.013855 | 0.76524 | 0.084689 | 0.06747  |
| 0.96903  | -0.08364 | 0.07097  | -0.01249 | 0.78783 | -0.02528 | 0.58583 | 0.04515  | 0.33027  |
| 3.03E-09 | 0.214975 | 2.76E-06 | -0.00765 | 0.86905 | -0.02032 | 0.66133 | 0.026718 | 0.56465  |
| 3.05E-06 | 0.209164 | 5.15E-06 | 0.106772 | 0.02101 | 0.073026 | 0.11503 | 0.137163 | 0.00298  |
| 0.04401  | 0.164703 | 0.00035  | 0.102538 | 0.02671 | 0.081205 | 0.07959 | 0.09575  | 0.0386   |
| 0.04634  | 0.188564 | 4.12E-05 | 0.150058 | 0.00114 | 0.02141  | 0.64444 | 0.100496 | 0.0299   |
| 0.00023  | -0.26242 | 8.56E-09 | -0.09854 | 0.03325 | -0.0644  | 0.16474 | 0.008313 | 0.85781  |
| 0.35712  | -0.14707 | 0.00144  | -0.0353  | 0.44665 | -0.01642 | 0.72343 | 0.109028 | 0.01843  |
| 4.34E-05 | -0.13274 | 0.00406  | -0.01369 | 0.7679  | 0.061759 | 0.18276 | 0.135643 | 0.00331  |
| 0.00878  | -0.13265 | 0.00408  | 0.018882 | 0.68401 | -0.07005 | 0.13064 | 0.031763 | 0.49351  |
| 0.06545  | -0.08549 | 0.0649   | 0.074781 | 0.10654 | 0.039798 | 0.39085 | -0.00085 | 0.9854   |
| 0.01352  | 0.23237  | 3.82E-07 | 0.02927  | 0.52806 | 0.097014 | 0.0361  | 0.065693 | 0.15638  |
| 0.80929  | 0.000829 | 0.98575  | -0.11309 | 0.01448 | -0.03711 | 0.42363 | -0.05044 | 0.27673  |
| 0.8159   | -0.08017 | 0.0835   | 0.009752 | 0.83352 | -0.00221 | 0.96198 | 0.134698 | 0.00354  |
| 8.19E-05 | 0.246689 | 6.65E-08 | 0.050612 | 0.27505 | -0.0761  | 0.10047 | 0.12643  | 0.00622  |
| 0.00039  | 0.23838  | 1.86E-07 | 0.030129 | 0.51602 | 0.035634 | 0.44234 | 0.039857 | 0.39015  |
| 0.68748  | -0.04945 | 0.28623  | -0.11178 | 0.01566 | -0.06909 | 0.13598 | 0.01026  | 0.82499  |
| 1.00E-09 | 0.245274 | 7.94E-08 | -0.0251  | 0.58849 | -0.06879 | 0.13771 | 0.220053 | 1.57E-06 |
| 0.57441  | -0.04191 | 0.36621  | -0.03384 | 0.46568 | 0.089754 | 0.05259 | 0.082745 | 0.07403  |
| 0.75096  | -0.05993 | 0.19605  | -0.01599 | 0.73038 | -0.02151 | 0.64286 | 0.092355 | 0.04607  |
| 0.01118  | -0.17143 | 0.0002   | -0.02681 | 0.56331 | -0.0275  | 0.55325 | -0.01933 | 0.67691  |

|          |          |          |          |          |          |         |          |          |
|----------|----------|----------|----------|----------|----------|---------|----------|----------|
| 6.66E-12 | 0.325486 | 5.50E-13 | -0.02074 | 0.65481  | 0.070157 | 0.13005 | 0.230142 | 4.96E-07 |
| 0.05443  | -0.04749 | 0.30577  | -0.07041 | 0.12869  | 0.034831 | 0.45271 | -0.04144 | 0.37161  |
| 0.01964  | 0.067656 | 0.14434  | 0.023911 | 0.60626  | 0.036674 | 0.42914 | 0.092684 | 0.0453   |
| 0.28764  | -0.00836 | 0.85703  | -0.00154 | 0.9736   | -0.02265 | 0.62541 | 0.108213 | 0.01933  |
| 0.10236  | 0.08344  | 0.07163  | -0.03414 | 0.46173  | -0.03005 | 0.51714 | -0.00973 | 0.83387  |
| 0.45632  | 0.128777 | 0.00532  | 0.169155 | 0.00024  | 0.120328 | 0.00925 | 0.053551 | 0.24811  |
| 0.00056  | -0.22771 | 6.58E-07 | -0.06515 | 0.15985  | -0.02297 | 0.62054 | 0.04965  | 0.28429  |
| 0.9229   | -0.07449 | 0.10792  | 0.041095 | 0.37559  | -0.04795 | 0.30116 | 0.122563 | 0.00801  |
| 0.00729  | -0.20976 | 4.84E-06 | -0.0374  | 0.42004  | -0.02699 | 0.56065 | 0.030355 | 0.51287  |
| 4.50E-06 | -0.30541 | 1.54E-11 | -0.13094 | 0.00459  | -0.11108 | 0.01633 | -0.16775 | 0.00027  |
| 0.09199  | -0.11708 | 0.01134  | -0.1651  | 0.00034  | -0.01335 | 0.77349 | -0.13296 | 0.004    |
| 0.00018  | -0.14859 | 0.00128  | -0.10664 | 0.02117  | -0.0265  | 0.56777 | -0.06324 | 0.17247  |
| 8.36E-11 | 0.324634 | 6.37E-13 | 0.232758 | 3.65E-07 | 0.111195 | 0.01622 | 0.204081 | 8.78E-06 |
| 0.02482  | 0.031323 | 0.49952  | -0.05809 | 0.21023  | -0.01416 | 0.76029 | 0.170062 | 0.00022  |
| 0.17646  | -0.00394 | 0.93228  | 0.057063 | 0.21838  | -0.01572 | 0.73475 | 0.136584 | 0.0031   |
| 0.01799  | -0.20256 | 1.03E-05 | -0.06293 | 0.17459  | -0.04097 | 0.37708 | 0.056955 | 0.21926  |
| 0.00852  | 0.114919 | 0.01295  | 0.044031 | 0.3424   | 0.012562 | 0.78658 | 0.320166 | 1.36E-12 |
| 0.3636   | -0.03027 | 0.51405  | -0.0024  | 0.95876  | 0.005197 | 0.91082 | -0.02003 | 0.66591  |
| 0.03284  | 0.124315 | 0.00715  | 0.025235 | 0.58648  | 0.031129 | 0.50218 | 0.247714 | 5.84E-08 |
| 0.00043  | 0.218218 | 1.93E-06 | 0.127515 | 0.00579  | 0.135749 | 0.00329 | 0.201594 | 1.13E-05 |
| 0.45294  | -0.05555 | 0.23088  | 0.025447 | 0.58333  | -0.01528 | 0.74185 | 0.136258 | 0.00317  |
| 0.62017  | -0.05518 | 0.23396  | 0.000421 | 0.99276  | -0.02991 | 0.51906 | 0.066014 | 0.15436  |
| 0.00057  | 0.153046 | 0.00091  | 0.053425 | 0.24922  | 0.069011 | 0.13646 | 0.131484 | 0.00443  |
| 0.98966  | -0.02363 | 0.61044  | 0.053224 | 0.251    | 0.01298  | 0.77966 | 0.17414  | 0.00016  |
| 0.00586  | 0.059818 | 0.19692  | -0.03972 | 0.3918   | 0.007521 | 0.87124 | 0.230898 | 4.54E-07 |
| 0.25495  | 0.05116  | 0.26988  | 0.029815 | 0.52041  | 0.05288  | 0.25409 | 0.169722 | 0.00023  |
| 0.0313   | 0.103241 | 0.02568  | 0.008355 | 0.8571   | -0.07369 | 0.11176 | -0.12292 | 0.00783  |
| 0.11453  | -0.05993 | 0.19606  | 0.075495 | 0.10323  | 0.062548 | 0.17722 | 0.050141 | 0.27955  |
| 2.30E-10 | 0.326084 | 4.96E-13 | 0.001288 | 0.97786  | 0.059357 | 0.2004  | 0.162132 | 0.00044  |
| 3.99E-13 | 0.313589 | 4.08E-12 | 0.020763 | 0.65449  | 0.120309 | 0.00926 | 0.264351 | 6.60E-09 |
| 2.58E-09 | -0.30382 | 1.98E-11 | -0.0747  | 0.10693  | -0.01335 | 0.77358 | -0.02073 | 0.65504  |
| 0.00097  | -0.23848 | 1.84E-07 | -0.07811 | 0.09178  | -0.08234 | 0.07546 | 0.015791 | 0.73359  |
| 0.21188  | -0.08798 | 0.05744  | -0.00143 | 0.97537  | -0.0211  | 0.64923 | 0.116976 | 0.01141  |
| 0.67534  | -0.00864 | 0.85236  | 0.020365 | 0.66069  | -0.00425 | 0.92699 | 0.163814 | 0.00038  |
| 6.28E-06 | -0.22474 | 9.27E-07 | -0.02475 | 0.5937   | -0.01362 | 0.76908 | 0.052393 | 0.25849  |
| 2.16E-05 | 0.180635 | 8.66E-05 | -0.02602 | 0.57494  | -0.00896 | 0.8468  | 0.218075 | 1.96E-06 |
| 0.83093  | -0.04732 | 0.30752  | -0.0515  | 0.26668  | -0.01382 | 0.76588 | 0.105443 | 0.02267  |
| 0.31067  | -0.07592 | 0.10127  | 0.005254 | 0.90984  | -0.02022 | 0.66291 | 0.044052 | 0.34217  |
| 0.06776  | 0.04573  | 0.32408  | 0.07364  | 0.112    | -0.03228 | 0.48656 | 0.011977 | 0.7963   |
| 0.61968  | -0.02528 | 0.58587  | -0.19664 | 1.87E-05 | -0.07942 | 0.08647 | -0.16203 | 0.00044  |
| 0.91501  | 0.003801 | 0.93471  | -0.08704 | 0.06019  | -0.02467 | 0.59495 | -0.01056 | 0.81994  |
| 7.32E-05 | 0.221466 | 1.34E-06 | -0.04013 | 0.38686  | 0.047154 | 0.30923 | 0.209169 | 5.15E-06 |
| 0.08909  | -0.31674 | 2.42E-12 | -0.06696 | 0.14853  | -0.11982 | 0.00955 | 0.120065 | 0.0094   |
| 1.96E-09 | -0.41605 | 5.65E-21 | -0.15762 | 0.00063  | -0.14631 | 0.00152 | -0.11782 | 0.01083  |
| 0.01795  | -0.22817 | 6.25E-07 | -0.05051 | 0.27601  | -0.05198 | 0.26225 | 0.021547 | 0.64233  |

|          |          |          |          |          |          |         |          |          |
|----------|----------|----------|----------|----------|----------|---------|----------|----------|
| 9.14E-06 | -0.32176 | 1.04E-12 | -0.13858 | 0.00269  | -0.09268 | 0.04532 | -0.02991 | 0.51913  |
| 0.00216  | -0.26418 | 6.76E-09 | -0.07411 | 0.10971  | -0.07358 | 0.11231 | -0.05173 | 0.26456  |
| 1.70E-05 | -0.37554 | 4.34E-17 | -0.17838 | 0.00011  | -0.16303 | 0.0004  | -0.06694 | 0.14867  |
| 1.20E-11 | -0.37044 | 1.23E-16 | -0.02566 | 0.58022  | -0.07863 | 0.08963 | -0.08553 | 0.06479  |
| 0.07883  | 0.056781 | 0.22067  | 0.046719 | 0.31372  | 0.015242 | 0.74253 | 0.162981 | 0.00041  |
| 0.00098  | -0.2744  | 1.64E-09 | -0.09014 | 0.05156  | -0.07898 | 0.08821 | -0.00471 | 0.91917  |
| 0.07277  | -0.14704 | 0.00144  | -0.10405 | 0.02454  | -0.03433 | 0.45928 | 0.011639 | 0.80193  |
| 0.55427  | 0.163383 | 0.00039  | 0.056385 | 0.22391  | 0.078135 | 0.09169 | -0.1362  | 0.00319  |
| 2.79E-06 | -0.26398 | 6.94E-09 | 0.013302 | 0.77435  | -0.00188 | 0.96767 | 0.04855  | 0.2951   |
| 0.78159  | -0.03186 | 0.49213  | 0.031727 | 0.49399  | 0.037418 | 0.41982 | 0.180191 | 9.02E-05 |
| 0.05285  | -0.09814 | 0.03398  | 0.113582 | 0.01405  | 0.019447 | 0.6751  | 0.064977 | 0.16095  |
| 0.00405  | 0.069846 | 0.13177  | -0.05953 | 0.19909  | -0.01719 | 0.71102 | 0.057448 | 0.21529  |
| 0.03186  | 0.025989 | 0.57534  | -0.06585 | 0.15541  | -0.03171 | 0.49423 | 0.054688 | 0.23819  |
| 0.14372  | -0.22116 | 1.39E-06 | 0.080187 | 0.08345  | -0.07552 | 0.10311 | -0.04678 | 0.31313  |
| 5.31E-13 | -0.41097 | 1.86E-20 | -0.08257 | 0.07466  | -0.09024 | 0.05132 | -0.04731 | 0.30764  |
| 3.13E-06 | -0.30393 | 1.95E-11 | -0.06652 | 0.1512   | -0.07017 | 0.12998 | 0.020278 | 0.66206  |
| 0.27305  | -0.01536 | 0.74055  | -0.07349 | 0.11276  | -0.01754 | 0.7054  | -0.08798 | 0.05746  |
| 0.18497  | 0.049974 | 0.28116  | -0.04615 | 0.31967  | 0.093547 | 0.04332 | -0.08174 | 0.07764  |
| 0.23799  | 0.110064 | 0.01734  | 0.036609 | 0.42995  | 0.029682 | 0.52227 | 0.185694 | 5.41E-05 |
| 0.00106  | -0.10014 | 0.03049  | 0.040095 | 0.38732  | -0.04735 | 0.30722 | 0.142808 | 0.00198  |
| 2.99E-19 | 0.191184 | 3.20E-05 | 0.06065  | 0.19075  | -0.08572 | 0.0642  | 0.12236  | 0.00812  |
| 0.00022  | 0.230679 | 4.66E-07 | 0.024043 | 0.60429  | 0.17337  | 0.00017 | 0.093307 | 0.04387  |
| 0.01716  | -0.03147 | 0.49751  | -0.05469 | 0.23817  | -0.00783 | 0.86602 | -0.09578 | 0.03853  |
| 0.58967  | 0.097074 | 0.03598  | 0.062873 | 0.17497  | -0.01483 | 0.74917 | 0.026962 | 0.5611   |
| 0.55691  | 0.076683 | 0.0979   | 0.03672  | 0.42856  | 0.154071 | 0.00084 | 0.010378 | 0.82301  |
| 0.08959  | -0.16996 | 0.00022  | -0.14288 | 0.00197  | -0.09152 | 0.04808 | 0.09604  | 0.03802  |
| 0.00135  | -0.12071 | 0.00903  | 0.018503 | 0.69003  | -0.01723 | 0.71035 | -0.09914 | 0.03219  |
| 2.26E-09 | 0.197574 | 1.70E-05 | -0.11261 | 0.0149   | -0.07464 | 0.10721 | 0.072821 | 0.11606  |
| 0.07886  | 0.052717 | 0.25555  | 0.015252 | 0.74235  | -0.03764 | 0.41703 | 0.207784 | 5.96E-06 |
| 0.00067  | -0.32412 | 6.95E-13 | -0.0361  | 0.43639  | -0.057   | 0.21887 | 0.066282 | 0.15269  |
| 0.80596  | 0.097157 | 0.03582  | -0.01483 | 0.74927  | 0.0619   | 0.18175 | 0.086763 | 0.061    |
| 0.00764  | -0.24504 | 8.18E-08 | -0.0626  | 0.17682  | -0.10606 | 0.02189 | 0.021898 | 0.63692  |
| 0.01059  | 0.096323 | 0.03745  | -0.197   | 1.80E-05 | -0.02034 | 0.66111 | 0.139087 | 0.00259  |
| 2.87E-05 | 0.173329 | 0.00017  | -0.03769 | 0.4164   | 0.02393  | 0.60598 | 0.130094 | 0.00487  |
| 0.27591  | -0.06903 | 0.13637  | -0.07377 | 0.11135  | -0.11314 | 0.01443 | 0.036429 | 0.43223  |
| 0.89193  | -0.00395 | 0.93223  | 0.024022 | 0.60459  | 0.025491 | 0.58268 | 0.014858 | 0.74879  |
| 0.36339  | -0.0454  | 0.32763  | 0.124071 | 0.00727  | -0.07574 | 0.10209 | 0.009518 | 0.83747  |
| 0.46944  | -0.08178 | 0.07749  | 0.031796 | 0.49306  | -0.05022 | 0.27881 | 0.068059 | 0.14196  |
| 0.94984  | -0.08912 | 0.05428  | -0.0746  | 0.10739  | -0.06767 | 0.14427 | 0.042297 | 0.36177  |
| 0.00863  | -0.17226 | 0.00018  | -0.02078 | 0.65428  | -0.04092 | 0.37768 | 0.056365 | 0.22408  |
| 3.75E-08 | 0.234915 | 2.82E-07 | 0.018796 | 0.68539  | 0.025555 | 0.58173 | 0.117351 | 0.01115  |
| 0.80703  | -0.06426 | 0.16561  | -0.04371 | 0.34594  | -0.1002  | 0.0304  | 0.024268 | 0.6009   |
| 0.00074  | 0.144232 | 0.00178  | -0.04199 | 0.36531  | -0.00516 | 0.91149 | -0.06885 | 0.13737  |
| 0.41535  | -0.01928 | 0.67781  | 0.015626 | 0.73626  | -0.0602  | 0.19405 | 0.153238 | 0.00089  |
| 0.65424  | 0.039991 | 0.38856  | 0.045977 | 0.32147  | 0.04337  | 0.3497  | 0.050639 | 0.2748   |

|          |          |          |          |          |          |         |          |          |
|----------|----------|----------|----------|----------|----------|---------|----------|----------|
| 0.99461  | 0.024695 | 0.59451  | -0.03448 | 0.45727  | 0.089203 | 0.05406 | 0.102887 | 0.02619  |
| 0.40694  | 0.128902 | 0.00527  | 0.051822 | 0.26372  | 0.149453 | 0.0012  | -0.01139 | 0.80606  |
| 0.02915  | 0.050642 | 0.27476  | -0.013   | 0.77941  | -0.02809 | 0.54481 | -0.06246 | 0.17781  |
| 0.73087  | -0.11106 | 0.01635  | -0.10065 | 0.02964  | -0.13008 | 0.00487 | -0.03287 | 0.4785   |
| 0.00025  | -0.19754 | 1.71E-05 | -0.11958 | 0.0097   | -0.15577 | 0.00073 | 0.044213 | 0.34041  |
| 0.5688   | 0.073324 | 0.11355  | 0.04917  | 0.28898  | 0.034957 | 0.45106 | -0.04946 | 0.28612  |
| 0.00277  | -0.22422 | 9.84E-07 | -0.05931 | 0.20076  | -0.07149 | 0.1229  | -0.03924 | 0.39758  |
| 0.31715  | -0.07906 | 0.08791  | 0.013553 | 0.7702   | -0.01859 | 0.68866 | 0.042446 | 0.36008  |
| 0.77539  | 0.169005 | 0.00024  | 0.101261 | 0.02867  | 0.053778 | 0.2461  | -0.08376 | 0.07056  |
| 0.08222  | 0.094192 | 0.04189  | -0.01727 | 0.70973  | -0.05556 | 0.23076 | 0.112567 | 0.01494  |
| 0.49081  | 0.106091 | 0.02185  | 0.07839  | 0.09063  | 0.074987 | 0.10557 | 0.124022 | 0.00729  |
| 0.05622  | -0.00529 | 0.90921  | -0.02383 | 0.60756  | -0.0397  | 0.39201 | 0.074848 | 0.10622  |
| 0.00086  | -0.20121 | 1.18E-05 | 0.055124 | 0.23446  | 0.026026 | 0.57478 | 0.085031 | 0.06637  |
| 0.43209  | 0.006323 | 0.8916   | 0.09598  | 0.03814  | 0.130663 | 0.00468 | 0.083436 | 0.07164  |
| 0.02707  | -0.19407 | 2.41E-05 | -0.09246 | 0.04581  | -0.05911 | 0.20225 | 0.045416 | 0.32742  |
| 0.0111   | 0.214222 | 2.99E-06 | 0.114215 | 0.01352  | 0.079234 | 0.0872  | 0.271554 | 2.45E-09 |
| 0.34655  | -0.00346 | 0.9406   | 0.077944 | 0.09248  | -0.0168  | 0.71722 | 0.028103 | 0.54464  |
| 0.07651  | 0.11158  | 0.01585  | 0.076279 | 0.09968  | 0.17144  | 0.0002  | 0.094651 | 0.0409   |
| 0.00835  | -0.12922 | 0.00516  | -0.03201 | 0.49015  | -0.05369 | 0.24685 | 0.122117 | 0.00825  |
| 4.39E-06 | -0.30437 | 1.82E-11 | -0.11306 | 0.0145   | -0.08841 | 0.05623 | 0.043932 | 0.34349  |
| 0.00132  | 0.132232 | 0.0042   | 0.085644 | 0.06443  | -0.04125 | 0.37382 | 0.017788 | 0.70142  |
| 0.27214  | -0.05022 | 0.27883  | 0.000322 | 0.99446  | 0.058261 | 0.20885 | -0.09521 | 0.03972  |
| 0.00133  | -0.15447 | 0.00081  | -0.07973 | 0.08523  | 0.013605 | 0.76935 | -0.02001 | 0.66632  |
| 1.32E-08 | -0.33553 | 9.45E-14 | -0.11313 | 0.01445  | -0.08434 | 0.06861 | 0.092731 | 0.04519  |
| 0.00037  | -0.28829 | 2.17E-10 | -0.05613 | 0.22598  | -0.07943 | 0.08642 | 0.024265 | 0.60095  |
| 0.00061  | -0.10337 | 0.02549  | -0.0278  | 0.549    | 0.051123 | 0.27023 | -0.07501 | 0.10549  |
| 0.41912  | -0.12477 | 0.00694  | -0.03052 | 0.51063  | -0.03607 | 0.43674 | 0.039183 | 0.39822  |
| 2.43E-06 | 0.123236 | 0.00767  | 0.042011 | 0.36503  | 0.000494 | 0.99151 | 0.063888 | 0.1681   |
| 0.9596   | -0.07994 | 0.0844   | -0.06115 | 0.1871   | -0.09445 | 0.04134 | -0.05357 | 0.24791  |
| 0.12221  | 0.175954 | 0.00013  | 0.081696 | 0.07779  | 0.052043 | 0.26169 | 0.071164 | 0.12461  |
| 0.82512  | -0.1156  | 0.01242  | -0.24722 | 6.22E-08 | -0.05676 | 0.22085 | 0.010096 | 0.82773  |
| 0.54584  | -0.00663 | 0.8863   | 0.047831 | 0.30232  | -0.00098 | 0.98317 | -0.07874 | 0.0892   |
| 0.07921  | 0.204138 | 8.73E-06 | 0.182798 | 7.09E-05 | 0.038894 | 0.40171 | 0.12233  | 0.00813  |
| 0.76337  | -0.09023 | 0.05135  | -0.06726 | 0.14673  | -0.05251 | 0.25744 | 0.043449 | 0.34883  |
| 1.71E-18 | 0.253691 | 2.72E-08 | 0.058693 | 0.2055   | -0.04064 | 0.38085 | 0.301133 | 3.03E-11 |
| 6.08E-07 | 0.318441 | 1.82E-12 | 0.076507 | 0.09867  | 0.026768 | 0.56393 | 0.038479 | 0.40676  |
| 0.02714  | 0.150885 | 0.00107  | 0.012749 | 0.78349  | 0.000311 | 0.99464 | 0.238766 | 1.77E-07 |
| 0.38034  | 0.095785 | 0.03853  | 0.047484 | 0.30586  | -0.00555 | 0.90477 | 0.04724  | 0.30835  |
| 0.01798  | -0.15061 | 0.0011   | -0.00224 | 0.96148  | 0.003391 | 0.94175 | 0.045282 | 0.32885  |
| 0.03895  | 0.041782 | 0.36764  | -0.03877 | 0.40322  | -0.0246  | 0.59598 | 0.141103 | 0.00224  |
| 0.06776  | -0.2268  | 7.32E-07 | -0.09134 | 0.04853  | -0.0692  | 0.13537 | 0.002829 | 0.95139  |
| 0.16761  | 0.060546 | 0.19152  | -0.04974 | 0.28337  | 0.006258 | 0.89272 | 0.065374 | 0.1584   |
| 0.0032   | -0.24361 | 9.77E-08 | -0.02499 | 0.59017  | -0.03653 | 0.43094 | 0.124941 | 0.00686  |
| 0.65189  | 0.012944 | 0.78026  | 0.026837 | 0.56292  | 0.023761 | 0.60852 | 0.029265 | 0.52814  |
| 4.53E-06 | 0.191239 | 3.18E-05 | -0.06577 | 0.15591  | 0.013533 | 0.77053 | 0.082888 | 0.07353  |

|          |          |          |          |          |          |         |          |          |
|----------|----------|----------|----------|----------|----------|---------|----------|----------|
| 0.51012  | 0.097222 | 0.0357   | 0.148258 | 0.00131  | -0.00897 | 0.84667 | 0.299141 | 4.14E-11 |
| 4.23E-07 | 0.256147 | 1.97E-08 | -0.04272 | 0.35696  | 0.059384 | 0.2002  | 0.035602 | 0.44276  |
| 0.18413  | -0.14427 | 0.00177  | -0.0222  | 0.63232  | -0.02194 | 0.63631 | 0.073271 | 0.11381  |
| 0.1346   | -0.17023 | 0.00022  | -0.09137 | 0.04846  | -0.09641 | 0.03727 | 0.124437 | 0.00709  |
| 0.00076  | -0.20334 | 9.47E-06 | -0.06333 | 0.17185  | -0.01916 | 0.67969 | 0.068043 | 0.14206  |
| 0.02491  | 0.116948 | 0.01143  | -0.0275  | 0.55332  | 0.032895 | 0.47823 | 0.10322  | 0.02571  |
| 0.11268  | -0.07116 | 0.12462  | 0.107469 | 0.02018  | 0.017865 | 0.70019 | 0.059307 | 0.20078  |
| 3.06E-11 | -0.28707 | 2.60E-10 | 0.051961 | 0.26245  | -0.00225 | 0.9614  | -0.02466 | 0.59503  |
| 2.46E-20 | -0.5334  | 1.08E-35 | -0.09427 | 0.04172  | -0.13157 | 0.0044  | -0.09156 | 0.04798  |
| 3.90E-06 | 0.12142  | 0.00862  | -0.0777  | 0.09353  | 0.026764 | 0.56399 | 0.265436 | 5.69E-09 |
| 0.31105  | 0.079803 | 0.08495  | 0.181336 | 8.12E-05 | 0.02952  | 0.52455 | 0.025946 | 0.57597  |
| 0.45089  | -0.10641 | 0.02145  | -0.02683 | 0.56309  | -0.02594 | 0.576   | 0.071339 | 0.12369  |
| 0.19431  | 0.149165 | 0.00123  | -0.04167 | 0.36891  | 0.079243 | 0.08716 | 0.150173 | 0.00113  |
| 0.63331  | 0.110297 | 0.01711  | 0.121959 | 0.00833  | 0.093652 | 0.04309 | 0.100741 | 0.0295   |
| 0.00107  | 0.18418  | 6.23E-05 | -0.01594 | 0.73109  | 0.025554 | 0.58174 | 0.228687 | 5.88E-07 |
| 0.03972  | -0.10563 | 0.02244  | -0.10921 | 0.01824  | -0.07732 | 0.09513 | -0.06409 | 0.16673  |
| 0.00023  | 0.252288 | 3.26E-08 | 0.440916 | 1.24E-23 | 0.062807 | 0.17543 | 0.154942 | 0.00078  |
| 0.01466  | 0.17698  | 0.00012  | -0.03928 | 0.39706  | 0.025196 | 0.58705 | 0.112555 | 0.01495  |
| 0.09318  | 0.171558 | 0.0002   | -0.0955  | 0.03911  | 0.060481 | 0.192   | 0.125747 | 0.00651  |
| 0.85928  | -0.10687 | 0.02089  | -0.03593 | 0.43859  | -0.03858 | 0.40556 | 0.069607 | 0.13309  |
| 0.00467  | -0.20383 | 9.01E-06 | -0.03482 | 0.45287  | -0.0336  | 0.46883 | 0.039217 | 0.39781  |
| 4.96E-11 | 0.241365 | 1.29E-07 | 0.070824 | 0.12643  | -0.01604 | 0.72963 | 0.177451 | 0.00012  |
| 0.9669   | -0.09541 | 0.03931  | -0.04181 | 0.36734  | -0.01774 | 0.70215 | 0.052496 | 0.25755  |
| 0.00131  | -0.21239 | 3.65E-06 | -0.18472 | 5.93E-05 | -0.01378 | 0.76654 | -0.02842 | 0.54018  |
| 2.68E-05 | 0.295233 | 7.59E-11 | 0.070797 | 0.12657  | 0.163397 | 0.00039 | -0.00872 | 0.85094  |
| 0.02     | -0.09831 | 0.03367  | -0.036   | 0.43764  | -0.03452 | 0.45672 | -0.04161 | 0.36961  |
| 0.00553  | -0.15417 | 0.00083  | -0.01006 | 0.8284   | 0.036281 | 0.43409 | -0.17952 | 9.59E-05 |
| 0.00429  | 0.204785 | 8.16E-06 | 0.137878 | 0.00283  | 0.065931 | 0.15488 | 0.192251 | 2.88E-05 |
| 3.92E-06 | 0.119103 | 0.00999  | 0.072121 | 0.11961  | 0.037407 | 0.41996 | 0.17088  | 0.00021  |
| 0.0006   | 0.23813  | 1.92E-07 | -0.04453 | 0.33695  | 0.041632 | 0.36937 | 0.074119 | 0.10968  |
| 0.21197  | -0.07756 | 0.09412  | 0.022659 | 0.62526  | 0.02188  | 0.63719 | 0.119524 | 0.00973  |
| 0.01349  | -0.14902 | 0.00124  | -0.05787 | 0.21192  | -0.03665 | 0.42945 | 0.079359 | 0.0867   |
| 0.87544  | -0.08537 | 0.06528  | -0.00315 | 0.94583  | -0.12144 | 0.00861 | 0.15093  | 0.00107  |
| 0.93571  | 0.037785 | 0.41528  | 0.050162 | 0.27934  | -0.00199 | 0.96577 | 0.011739 | 0.80026  |
| 0.90151  | 0.011816 | 0.79897  | 0.008581 | 0.85327  | 0.044268 | 0.33981 | 0.002332 | 0.95992  |
| 0.13005  | 0.026327 | 0.57037  | 0.037027 | 0.4247   | 0.025361 | 0.58459 | 0.05534  | 0.23263  |
| 0.08859  | 0.019255 | 0.67812  | -0.11453 | 0.01326  | -0.12429 | 0.00716 | 0.148115 | 0.00133  |
| 0.13634  | -0.08687 | 0.06068  | 0.087366 | 0.05922  | -0.02197 | 0.63585 | -0.02378 | 0.6082   |
| 0.12446  | 0.097543 | 0.03509  | 0.128975 | 0.00525  | 0.038047 | 0.41205 | 0.016958 | 0.71473  |
| 0.00077  | -0.22549 | 8.51E-07 | -0.03174 | 0.49377  | -0.02991 | 0.51901 | 0.039862 | 0.39008  |
| 0.0917   | 0.075371 | 0.10379  | 0.285212 | 3.43E-10 | 0.034319 | 0.45939 | -0.00957 | 0.83654  |
| 0.00562  | 0.02092  | 0.65205  | 0.037036 | 0.42458  | -0.01099 | 0.81279 | 0.089366 | 0.05362  |
| 2.81E-06 | -0.28221 | 5.33E-10 | -0.04298 | 0.35402  | -0.04417 | 0.34091 | 0.054214 | 0.24228  |
| 0.95261  | -0.00335 | 0.94246  | -0.09514 | 0.03987  | -0.01594 | 0.73113 | 0.000978 | 0.98318  |
| 0.99786  | 0.08903  | 0.05453  | -0.05049 | 0.27619  | 0.038155 | 0.41072 | -0.03558 | 0.44303  |

|          |          |          |          |          |          |         |          |          |
|----------|----------|----------|----------|----------|----------|---------|----------|----------|
| 6.82E-05 | 0.219621 | 1.65E-06 | 0.017174 | 0.71127  | 0.090373 | 0.05097 | 0.061089 | 0.18756  |
| 0.01177  | -0.18758 | 4.52E-05 | -0.06006 | 0.19512  | -0.04977 | 0.28313 | 0.017299 | 0.70925  |
| 1.31E-05 | -0.22023 | 1.54E-06 | -0.09089 | 0.04966  | -0.03876 | 0.40328 | 0.037036 | 0.42459  |
| 4.77E-05 | -0.24443 | 8.83E-08 | -0.00795 | 0.86391  | -0.0242  | 0.60193 | 0.032874 | 0.4785   |
| 1.86E-06 | -0.322   | 9.99E-13 | -0.06904 | 0.1363   | -0.03874 | 0.40362 | 0.057501 | 0.21486  |
| 0.2176   | 0.043777 | 0.3452   | 0.028965 | 0.53237  | 0.046436 | 0.31666 | 0.025474 | 0.58294  |
| 5.87E-10 | 0.28846  | 2.12E-10 | 0.018232 | 0.69433  | 0.025992 | 0.57529 | 0.247435 | 6.05E-08 |
| 8.65E-09 | -0.36808 | 1.98E-16 | -0.00374 | 0.93582  | -0.08329 | 0.07215 | -0.03584 | 0.43965  |
| 9.81E-06 | -0.27982 | 7.55E-10 | -0.05823 | 0.20907  | -0.08504 | 0.06633 | -0.04755 | 0.30518  |
| 0.08988  | 0.181999 | 7.63E-05 | -0.02215 | 0.63312  | 0.095884 | 0.03833 | 0.037257 | 0.42183  |
| 1.26E-06 | 0.196284 | 1.94E-05 | -0.02729 | 0.55629  | 0.011918 | 0.79729 | 0.139969 | 0.00243  |
| 0.00287  | -0.00143 | 0.9754   | 0.028035 | 0.54562  | -0.01872 | 0.68651 | 0.114012 | 0.01369  |
| 0.58006  | 0.029936 | 0.51871  | 0.073242 | 0.11396  | 0.028681 | 0.5364  | 0.147887 | 0.00135  |
| 0.36365  | -0.03537 | 0.4457   | 0.071784 | 0.12135  | 0.061126 | 0.18729 | 0.1807   | 8.61E-05 |
| 0.04401  | -0.17801 | 0.00011  | -0.03254 | 0.48297  | -0.04413 | 0.34132 | -0.00977 | 0.8332   |
| 5.97E-08 | -0.33834 | 5.70E-14 | -0.13979 | 0.00246  | -0.08539 | 0.06523 | -0.06083 | 0.18947  |
| 0.27554  | -0.04444 | 0.33794  | 0.034329 | 0.45925  | -0.03918 | 0.3982  | 0.101043 | 0.02901  |
| 0.18268  | -0.13347 | 0.00386  | 0.062155 | 0.17996  | 0.095591 | 0.03893 | 0.101635 | 0.02808  |
| 0.76874  | -0.01275 | 0.78342  | 0.057541 | 0.21454  | 0.038006 | 0.41255 | 0.135918 | 0.00325  |
| 5.18E-07 | -0.2408  | 1.38E-07 | -0.03023 | 0.51455  | 0.068273 | 0.14071 | -0.00101 | 0.98267  |
| 0.56702  | 0.02965  | 0.52271  | 0.022497 | 0.62772  | 0.045906 | 0.32222 | 0.084681 | 0.0675   |
| 0.02391  | -0.00582 | 0.90022  | 0.013471 | 0.77155  | -0.08309 | 0.07284 | 0.182437 | 7.33E-05 |
| 9.40E-10 | 0.339538 | 4.59E-14 | -0.01411 | 0.76104  | -0.0141  | 0.76118 | 0.001022 | 0.98243  |
| 0.47362  | 0.115186 | 0.01274  | 0.265564 | 5.59E-09 | 0.036808 | 0.42745 | 0.042372 | 0.36091  |
| 0.37416  | -0.03873 | 0.4037   | -0.07312 | 0.11458  | -0.05009 | 0.28004 | 0.005795 | 0.9006   |
| 0.00173  | -0.18676 | 4.89E-05 | -0.00713 | 0.87793  | -0.02169 | 0.64019 | 0.026345 | 0.57011  |
| 0.0062   | 0.161201 | 0.00047  | 0.031313 | 0.49965  | 0.02202  | 0.63504 | 0.019641 | 0.67204  |
| 0.91368  | -0.05913 | 0.20215  | -0.00864 | 0.85235  | -0.02797 | 0.54653 | 0.070698 | 0.1271   |
| 0.52004  | -0.112   | 0.01546  | -0.10722 | 0.02048  | -0.03078 | 0.50702 | 0.013942 | 0.76379  |
| 0.1266   | 0.023134 | 0.61803  | -0.01076 | 0.81667  | -0.02322 | 0.61665 | 0.142535 | 0.00202  |
| 0.00287  | -0.11902 | 0.01005  | -0.01779 | 0.70136  | -0.05873 | 0.20518 | 0.107816 | 0.01978  |
| 2.65E-09 | 0.099096 | 0.03227  | 0.024908 | 0.59133  | -0.0358  | 0.44017 | 0.030942 | 0.50475  |
| 0.02461  | 0.232589 | 3.72E-07 | 0.07096  | 0.1257   | 0.091821 | 0.04735 | -0.07442 | 0.10825  |
| 0.48562  | -0.03369 | 0.46767  | -0.01351 | 0.77099  | 0.054782 | 0.23738 | 0.015253 | 0.74234  |
| 0.13666  | -0.11873 | 0.01023  | 0.08458  | 0.06783  | -0.02447 | 0.59789 | 0.04947  | 0.28604  |
| 0.63599  | -0.06512 | 0.16006  | 0.052458 | 0.2579   | -0.11906 | 0.01002 | 0.024109 | 0.60328  |
| 2.69E-32 | 0.465341 | 1.80E-26 | -0.00619 | 0.89392  | 0.067509 | 0.14522 | 0.249594 | 4.60E-08 |
| 0.40683  | -0.1108  | 0.0166   | -0.13061 | 0.0047   | -0.08976 | 0.05258 | 0.051537 | 0.26636  |
| 0.06371  | -0.01183 | 0.79874  | 0.039293 | 0.3969   | -0.06974 | 0.13233 | 0.052457 | 0.25791  |
| 0.39218  | 0.08485  | 0.06695  | 0.090773 | 0.04995  | 0.05374  | 0.24643 | 0.090989 | 0.0494   |
| 0.37831  | -0.12821 | 0.00553  | -0.01094 | 0.8136   | -0.07423 | 0.10916 | 0.051053 | 0.27088  |
| 0.00016  | -0.19569 | 2.05E-05 | 0.062311 | 0.17887  | -0.02401 | 0.60477 | 0.005752 | 0.90134  |
| 1.14E-05 | -0.18442 | 6.10E-05 | -0.01362 | 0.76912  | 0.02309  | 0.61869 | 0.098475 | 0.03338  |
| 0.29311  | -0.11939 | 0.00981  | -0.01527 | 0.742    | 0.059142 | 0.20204 | 0.11879  | 0.01019  |
| 0.00325  | -0.2342  | 3.07E-07 | 0.007268 | 0.87552  | -0.04711 | 0.30971 | 0.061556 | 0.1842   |

|          |          |          |          |          |          |         |          |          |
|----------|----------|----------|----------|----------|----------|---------|----------|----------|
| 0.92204  | 0.093775 | 0.04281  | 0.151499 | 0.00102  | 0.076018 | 0.10085 | 0.014162 | 0.76018  |
| 0.89896  | -0.03686 | 0.42681  | 0.090556 | 0.0505   | -0.01175 | 0.8001  | 0.049815 | 0.2827   |
| 6.07E-07 | -0.33055 | 2.28E-13 | -0.06841 | 0.13989  | -0.0681  | 0.14172 | -0.02698 | 0.56092  |
| 0.02417  | 0.132078 | 0.00425  | 0.052547 | 0.2571   | 0.007204 | 0.87661 | 0.207473 | 6.16E-06 |
| 6.53E-13 | 0.346075 | 1.38E-14 | -0.12602 | 0.00639  | 0.017729 | 0.70236 | 0.104214 | 0.02431  |
| 0.00029  | -0.24942 | 4.71E-08 | -0.03664 | 0.42954  | -0.03202 | 0.49008 | 0.200165 | 1.31E-05 |
| 0.04487  | 0.133351 | 0.00389  | 0.117507 | 0.01104  | -0.00156 | 0.97325 | 0.112267 | 0.01521  |
| 0.40481  | 0.044694 | 0.33518  | 0.031976 | 0.49062  | -0.0253  | 0.58545 | 0.088904 | 0.05487  |
| 0.00399  | -0.09475 | 0.04068  | 0.001987 | 0.96584  | -0.0546  | 0.23898 | 0.040815 | 0.37884  |
| 0.00056  | -0.19304 | 2.67E-05 | -0.03414 | 0.46173  | -0.08692 | 0.06052 | 0.102085 | 0.02739  |
| 0.10612  | 0.011505 | 0.80416  | -0.02493 | 0.59101  | 0.019129 | 0.68011 | -0.06835 | 0.14026  |
| 0.52108  | -0.0853  | 0.06551  | -0.00675 | 0.88435  | -0.0222  | 0.63231 | 0.163831 | 0.00038  |
| 0.02589  | -0.08656 | 0.06163  | 0.061757 | 0.18277  | 0.01012  | 0.82734 | -0.06968 | 0.13269  |
| 0.55785  | -0.04229 | 0.36184  | 0.100692 | 0.02958  | -0.00877 | 0.85009 | -0.06579 | 0.15578  |
| 5.92E-08 | 0.274159 | 1.70E-09 | 0.018679 | 0.68724  | 0.020016 | 0.66616 | 0.281543 | 5.88E-10 |
| 0.00025  | -0.23933 | 1.66E-07 | -0.06812 | 0.14163  | -0.01071 | 0.81753 | 0.043484 | 0.34844  |
| 1.84E-06 | -0.27024 | 2.94E-09 | -0.20402 | 8.83E-06 | -0.12573 | 0.00652 | 0.042117 | 0.36382  |
| 0.05038  | 0.111146 | 0.01627  | 0.017416 | 0.70738  | 0.010528 | 0.82049 | 0.247701 | 5.85E-08 |
| 0.00095  | 0.173074 | 0.00017  | -0.0828  | 0.07383  | -0.002   | 0.96563 | -0.05976 | 0.19734  |
| 0.24853  | -0.04413 | 0.34137  | -0.10929 | 0.01815  | -0.07172 | 0.12169 | 0.062548 | 0.17722  |
| 0.00557  | -0.15902 | 0.00056  | 0.00838  | 0.85668  | -0.0196  | 0.67263 | 0.052533 | 0.25722  |
| 0.00199  | -0.21538 | 2.64E-06 | -0.02224 | 0.63162  | -0.01274 | 0.78365 | 0.125674 | 0.00654  |
| 0.07336  | 0.088441 | 0.05615  | -0.00431 | 0.92599  | 0.043162 | 0.35202 | 0.191957 | 2.97E-05 |
| 0.03046  | -0.15707 | 0.00066  | -0.04802 | 0.30041  | -0.01329 | 0.77448 | 0.005699 | 0.90224  |
| 4.01E-15 | 0.313492 | 4.15E-12 | -0.00189 | 0.96746  | 0.021839 | 0.63783 | 0.150566 | 0.0011   |
| 0.4103   | -0.10589 | 0.0221   | -0.03046 | 0.51141  | -0.03754 | 0.41831 | 0.072103 | 0.11971  |
| 3.39E-14 | 0.453819 | 4.19E-25 | 0.026822 | 0.56315  | 0.007038 | 0.87943 | 0.141995 | 0.0021   |
| 1.27E-06 | 0.309443 | 8.05E-12 | -0.03137 | 0.49887  | -0.00062 | 0.9893  | 0.106468 | 0.02138  |
| 0.70832  | 0.092916 | 0.04476  | 0.095206 | 0.03973  | 0.032398 | 0.4849  | 0.087668 | 0.05835  |
| 3.61E-11 | 0.344781 | 1.76E-14 | 0.021976 | 0.63572  | 0.103389 | 0.02547 | 0.296457 | 6.28E-11 |
| 0.0102   | 0.044283 | 0.33965  | 0.0281   | 0.54469  | -0.02716 | 0.55824 | 0.177013 | 0.00012  |
| 0.00144  | 0.113359 | 0.01424  | -0.1031  | 0.02588  | -0.01486 | 0.74883 | -0.0599  | 0.19631  |
| 1.78E-07 | -0.30189 | 2.69E-11 | -0.11319 | 0.01439  | -0.08867 | 0.05551 | -0.15237 | 0.00096  |
| 0.00179  | -0.21271 | 3.52E-06 | -0.03982 | 0.39058  | -0.04614 | 0.31975 | 0.103597 | 0.02517  |
| 8.93E-10 | 0.336911 | 7.37E-14 | 0.07362  | 0.1121   | 0.024037 | 0.60437 | 0.176752 | 0.00012  |
| 0.17679  | -0.04397 | 0.34305  | 0.071041 | 0.12527  | 0.041643 | 0.36924 | 0.053302 | 0.25031  |
| 1.58E-05 | 0.145921 | 0.00157  | 0.070659 | 0.12732  | 0.00828  | 0.85836 | 0.050184 | 0.27914  |
| 0.63508  | -0.00709 | 0.87855  | -0.00072 | 0.9877   | -0.0023  | 0.96055 | 0.146537 | 0.0015   |
| 0.00044  | -0.18853 | 4.13E-05 | 0.057585 | 0.21419  | -0.10627 | 0.02163 | -0.08375 | 0.07058  |
| 6.88E-13 | 0.416224 | 5.43E-21 | 0.138493 | 0.00271  | 0.082327 | 0.07551 | 0.280119 | 7.23E-10 |
| 0.30713  | -0.147   | 0.00144  | -0.16087 | 0.00048  | -0.11365 | 0.014   | 0.027204 | 0.55759  |
| 3.13E-09 | -0.28665 | 2.77E-10 | -0.09042 | 0.05085  | -0.03617 | 0.43549 | 0.094778 | 0.04063  |
| 0.06097  | -0.08392 | 0.07002  | 0.064674 | 0.16292  | -0.00792 | 0.86443 | -0.00938 | 0.83979  |
| 0.06428  | -0.17595 | 0.00013  | -0.05549 | 0.23134  | -0.07128 | 0.124   | -0.04619 | 0.31918  |
| 0.56911  | 0.048449 | 0.29611  | -0.0881  | 0.05711  | 0.011197 | 0.80931 | 0.151116 | 0.00105  |



|          |          |          |          |          |          |         |          |          |
|----------|----------|----------|----------|----------|----------|---------|----------|----------|
| 0.43006  | -0.04218 | 0.36306  | 0.182768 | 7.11E-05 | 0.023666 | 0.60997 | -0.05742 | 0.21552  |
| 5.72E-05 | 0.229688 | 5.23E-07 | 0.02898  | 0.53215  | 0.052462 | 0.25786 | 0.331658 | 1.88E-13 |
| 0.88083  | 0.020925 | 0.65197  | 0.120011 | 0.00943  | -0.01523 | 0.74275 | 0.119189 | 0.00994  |
| 0.00013  | 0.228843 | 5.78E-07 | 0.083217 | 0.07239  | 0.056023 | 0.2269  | 0.176948 | 0.00012  |
| 0.38789  | -0.17351 | 0.00016  | -0.09944 | 0.03167  | -0.066   | 0.15447 | 0.138436 | 0.00272  |
| 0.80538  | 0.024479 | 0.59773  | 0.035369 | 0.44575  | 0.062815 | 0.17537 | 0.05172  | 0.26466  |
| 0.02841  | -0.08679 | 0.06093  | 0.080806 | 0.08109  | -0.02372 | 0.60915 | 0.067548 | 0.14498  |
| 0.23589  | 0.022832 | 0.62261  | 0.054533 | 0.23952  | -0.00889 | 0.84808 | -0.11909 | 0.01     |
| 0.43881  | 0.066495 | 0.15137  | 0.169087 | 0.00024  | 0.03062  | 0.50919 | 0.005114 | 0.91224  |
| 0.88927  | 0.061382 | 0.18545  | -0.08074 | 0.08132  | 0.001549 | 0.97337 | -0.00027 | 0.99542  |
| 0.00312  | 0.27532  | 1.44E-09 | 0.163354 | 0.00039  | 0.058707 | 0.20538 | 0.201668 | 1.13E-05 |
| 0.59961  | 0.083945 | 0.06992  | 0.101173 | 0.02881  | 0.033676 | 0.46783 | -0.00624 | 0.89296  |
| 0.23301  | -0.0763  | 0.09959  | -0.01438 | 0.75661  | -0.01499 | 0.74669 | 0.212647 | 3.55E-06 |
| 0.24521  | 0.029489 | 0.52498  | 0.003737 | 0.93581  | -0.01335 | 0.77349 | 0.111576 | 0.01585  |
| 0.06888  | 0.185546 | 5.48E-05 | 0.18928  | 3.84E-05 | 0.11641  | 0.01182 | -0.15383 | 0.00085  |
| 2.79E-06 | -0.26548 | 5.66E-09 | -0.04716 | 0.30922  | -0.04482 | 0.33376 | 0.005352 | 0.90817  |
| 0.04201  | -0.16926 | 0.00024  | -0.00402 | 0.93097  | -0.03773 | 0.41595 | 0.04784  | 0.30224  |
| 0.07768  | 0.15633  | 0.0007   | 0.05724  | 0.21695  | 0.138238 | 0.00276 | 0.143827 | 0.00183  |
| 0.0023   | -0.26151 | 9.68E-09 | -0.02685 | 0.56273  | -0.02081 | 0.65368 | 0.059321 | 0.20067  |
| 0.4505   | 0.04215  | 0.36344  | 0.018139 | 0.69582  | -0.04354 | 0.34787 | -0.00216 | 0.9628   |
| 3.30E-07 | -0.29083 | 1.48E-10 | 0.000831 | 0.98572  | -0.11786 | 0.01081 | -0.0078  | 0.86657  |
| 0.00907  | -0.11403 | 0.01368  | 0.048865 | 0.29198  | 0.001714 | 0.97053 | 0.089872 | 0.05227  |
| 1.07E-06 | 0.330043 | 2.49E-13 | -0.06996 | 0.13114  | 0.084957 | 0.0666  | 0.03556  | 0.4433   |
| 0.99726  | -0.05529 | 0.23306  | -0.12053 | 0.00913  | -0.12247 | 0.00806 | 0.010762 | 0.81657  |
| 1.81E-05 | -0.26383 | 7.08E-09 | -0.05682 | 0.22037  | -0.0448  | 0.33401 | 0.025769 | 0.57857  |
| 0.17161  | 0.026141 | 0.5731   | -0.02525 | 0.58618  | -0.02135 | 0.64543 | 0.202319 | 1.05E-05 |
| 2.62E-06 | -0.20592 | 7.25E-06 | -0.04214 | 0.36359  | -0.01063 | 0.81876 | 0.005944 | 0.89807  |
| 7.48E-15 | 0.422564 | 1.19E-21 | 0.009095 | 0.84459  | 0.024117 | 0.60317 | 0.067457 | 0.14553  |
| 0.00036  | 0.193428 | 2.57E-05 | 0.018957 | 0.68284  | 0.035086 | 0.4494  | 0.111682 | 0.01575  |
| 0.56061  | -0.01309 | 0.77782  | -0.03533 | 0.44626  | -0.01219 | 0.79276 | 0.1004   | 0.03006  |
| 0.23449  | -0.10527 | 0.0229   | -0.03058 | 0.50982  | -0.02028 | 0.66204 | 0.110198 | 0.01721  |
| 0.10726  | -0.09496 | 0.04023  | -0.02363 | 0.61055  | 0.004971 | 0.91468 | 0.057987 | 0.211    |
| 0.01672  | 0.027189 | 0.55782  | -0.05114 | 0.27005  | -0.03147 | 0.49757 | 0.146489 | 0.0015   |
| 1.22E-06 | -0.19954 | 1.40E-05 | -0.04421 | 0.34046  | -0.02569 | 0.5798  | 0.066297 | 0.15259  |
| 1.56E-09 | 0.283417 | 4.47E-10 | 0.068079 | 0.14185  | 0.117196 | 0.01126 | 0.170358 | 0.00022  |
| 0.31724  | -0.11442 | 0.01336  | -0.02089 | 0.65245  | 0.003337 | 0.94267 | 0.163063 | 0.0004   |
| 0.01586  | -0.17469 | 0.00015  | 0.063718 | 0.16924  | 0.019191 | 0.67914 | 0.038748 | 0.40348  |
| 0.06231  | -0.18174 | 7.82E-05 | -0.01881 | 0.68511  | -0.02704 | 0.56003 | 0.090133 | 0.05159  |
| 0.12702  | -0.05019 | 0.27904  | -0.00485 | 0.91676  | -0.02337 | 0.61437 | 0.029327 | 0.52726  |
| 3.35E-07 | 0.155003 | 0.00078  | 0.005417 | 0.90707  | 0.031138 | 0.50205 | -0.03001 | 0.51763  |
| 8.77E-05 | -0.26108 | 1.02E-08 | -0.00932 | 0.84074  | -0.04688 | 0.31202 | -0.02458 | 0.59618  |
| 2.05E-07 | 0.207373 | 6.23E-06 | -0.00756 | 0.87055  | 0.09427  | 0.04172 | 0.272638 | 2.10E-09 |
| 0.36968  | 0.012338 | 0.7903   | -0.02135 | 0.64536  | 0.034966 | 0.45095 | 0.154635 | 0.0008   |
| 0.52892  | -0.12069 | 0.00904  | 0.094612 | 0.04098  | -0.03963 | 0.39287 | -0.01735 | 0.70848  |
| 0.39193  | 0.013895 | 0.76457  | -0.01815 | 0.69557  | -0.01952 | 0.6739  | 0.093813 | 0.04273  |

|          |          |          |          |          |          |          |          |          |
|----------|----------|----------|----------|----------|----------|----------|----------|----------|
| 0.11193  | 0.14097  | 0.00226  | 0.091949 | 0.04704  | -0.02885 | 0.53402  | -0.06859 | 0.13887  |
| 7.98E-14 | -0.43918 | 1.92E-23 | -0.12435 | 0.00714  | -0.15501 | 0.00078  | -0.1487  | 0.00127  |
| 0.76309  | 0.082261 | 0.07574  | 0.147319 | 0.00141  | -0.00705 | 0.8792   | 0.121221 | 0.00873  |
| 0.06947  | 0.116236 | 0.01195  | 0.125302 | 0.0067   | -0.0042  | 0.92781  | -0.00217 | 0.96266  |
| 0.05433  | 0.010891 | 0.81442  | -0.00753 | 0.87114  | -0.02862 | 0.53722  | 0.003169 | 0.94554  |
| 0.05785  | -0.04459 | 0.33629  | 0.169607 | 0.00023  | 0.067218 | 0.14696  | 0.102268 | 0.02711  |
| 0.36037  | 0.057498 | 0.21488  | -0.08884 | 0.05505  | -0.03632 | 0.43361  | 0.02835  | 0.54112  |
| 0.00012  | -0.20673 | 6.66E-06 | -0.00872 | 0.85097  | -0.06378 | 0.1688   | -0.07918 | 0.0874   |
| 8.37E-05 | -0.28133 | 6.07E-10 | -0.08342 | 0.0717   | -0.02545 | 0.58335  | 0.053623 | 0.24747  |
| 0.52302  | -0.07553 | 0.10305  | -0.02029 | 0.66189  | -0.01346 | 0.77173  | 0.039778 | 0.39109  |
| 3.78E-06 | 0.328992 | 3.00E-13 | 0.068501 | 0.13938  | 0.081466 | 0.07863  | 0.041749 | 0.36803  |
| 0.04536  | 0.073812 | 0.11116  | -0.05344 | 0.24904  | -0.02219 | 0.63238  | 0.021308 | 0.64603  |
| 8.59E-06 | 0.215318 | 2.66E-06 | 0.044229 | 0.34024  | 0.096585 | 0.03693  | 0.244431 | 8.83E-08 |
| 0.00034  | 0.205023 | 7.96E-06 | 0.027074 | 0.55948  | -0.02861 | 0.53747  | 0.041993 | 0.36523  |
| 1.43E-10 | 0.335758 | 9.07E-14 | 0.023573 | 0.61137  | 0.087654 | 0.05839  | -0.00095 | 0.98362  |
| 8.98E-06 | 0.222822 | 1.15E-06 | -0.07847 | 0.09031  | -0.02049 | 0.65867  | 0.074353 | 0.10856  |
| 7.36E-09 | 0.319321 | 1.57E-12 | 0.045141 | 0.33036  | 0.0265   | 0.56785  | 0.25764  | 1.62E-08 |
| 3.83E-10 | -0.34367 | 2.16E-14 | -0.19025 | 3.50E-05 | -0.04811 | 0.29954  | -0.17767 | 0.00011  |
| 3.22E-10 | 0.336422 | 8.05E-14 | 0.07167  | 0.12195  | 0.14295  | 0.00196  | 0.242723 | 1.09E-07 |
| 0.41835  | -0.08873 | 0.05536  | -0.04776 | 0.30309  | -0.00434 | 0.92552  | 0.077328 | 0.0951   |
| 0.02381  | 0.033622 | 0.46856  | -0.02659 | 0.56654  | -0.00821 | 0.85949  | 0.161057 | 0.00048  |
| 1.52E-07 | -0.25376 | 2.69E-08 | -0.09958 | 0.03143  | -0.04616 | 0.31951  | 0.004847 | 0.91679  |
| 0.89782  | 0.048266 | 0.29794  | -0.11214 | 0.01533  | 0.08346  | 0.07156  | 0.002162 | 0.96283  |
| 1.89E-06 | 0.357349 | 1.64E-15 | 0.095518 | 0.03908  | 0.117364 | 0.01114  | 0.067515 | 0.14518  |
| 0.00544  | -0.07047 | 0.12834  | 0.064237 | 0.16578  | 0.036353 | 0.43319  | 0.044612 | 0.33606  |
| 0.31023  | 0.108555 | 0.01895  | 0.017918 | 0.69935  | 0.043901 | 0.34383  | 0.19712  | 1.78E-05 |
| 0.73229  | -0.07125 | 0.12417  | -0.02626 | 0.57129  | 0.025893 | 0.57674  | 0.063804 | 0.16866  |
| 0.89897  | 0.041024 | 0.37641  | 0.175817 | 0.00013  | 0.559094 | 9.37E-40 | 0.02132  | 0.64584  |
| 0.00253  | 0.227896 | 6.45E-07 | 0.007379 | 0.87364  | 0.096582 | 0.03694  | 0.265058 | 5.99E-09 |
| 6.33E-44 | 0.527616 | 7.95E-35 | 0.030712 | 0.50793  | 0.082531 | 0.07479  | 0.088049 | 0.05726  |
| 3.96E-12 | 0.22477  | 9.24E-07 | -0.07968 | 0.08541  | -0.03897 | 0.40077  | 0.049713 | 0.28367  |
| 1.61E-20 | 0.310403 | 6.88E-12 | 0.02317  | 0.61748  | 0.013755 | 0.76688  | 0.052069 | 0.26145  |
| 1.22E-12 | 0.138846 | 0.00264  | -0.00744 | 0.87262  | -0.01046 | 0.82167  | 0.112264 | 0.01522  |
| 1.12E-48 | 0.56367  | 1.62E-40 | 0.046588 | 0.31507  | 0.125534 | 0.0066   | 0.233783 | 3.23E-07 |
| 0.00118  | 0.044757 | 0.3345   | -0.09044 | 0.05078  | -0.04137 | 0.37237  | 0.027981 | 0.5464   |
| 8.10E-15 | 0.250124 | 4.30E-08 | -0.03147 | 0.49752  | 0.088018 | 0.05734  | -0.03345 | 0.47084  |
| 0.05999  | -0.03632 | 0.43358  | -0.0664  | 0.15197  | 0.000541 | 0.9907   | -0.08366 | 0.0709   |
| 8.63E-16 | 0.222374 | 1.21E-06 | -0.04643 | 0.31675  | -0.02005 | 0.66568  | -0.03566 | 0.44199  |
| 0.00739  | -0.03387 | 0.46527  | -0.05006 | 0.28035  | -0.0089  | 0.84789  | -0.08087 | 0.08084  |
| 0.00774  | 0.041705 | 0.36853  | 0.011214 | 0.80902  | 0.096808 | 0.0365   | 0.143147 | 0.00193  |
| 2.10E-52 | 0.562433 | 2.62E-40 | 0.014034 | 0.76228  | 0.069463 | 0.1339   | 0.125996 | 0.0064   |
| 4.34E-20 | 0.262049 | 9.00E-09 | -0.00667 | 0.88567  | 0.011025 | 0.81217  | -0.02692 | 0.56166  |
| 4.12E-39 | 0.455533 | 2.64E-25 | 0.018691 | 0.68705  | 0.12665  | 0.00613  | 0.153618 | 0.00087  |
| 5.60E-17 | 0.267664 | 4.19E-09 | -0.07667 | 0.09794  | 0.024398 | 0.59896  | 0.152365 | 0.00096  |
| 8.62E-12 | 0.264036 | 6.89E-09 | 0.031671 | 0.49476  | 0.07121  | 0.12437  | 0.111387 | 0.01603  |

|          |          |          |          |         |          |          |          |          |
|----------|----------|----------|----------|---------|----------|----------|----------|----------|
| 1.60E-13 | 0.212081 | 3.77E-06 | -0.08164 | 0.07801 | 0.043944 | 0.34336  | 0.022099 | 0.63384  |
| 6.45E-06 | 0.082379 | 0.07533  | -0.02826 | 0.54246 | 0.031179 | 0.50149  | 0.10225  | 0.02714  |
| 0.04058  | -0.07609 | 0.10052  | -0.0839  | 0.07006 | -0.11991 | 0.0095   | 0.007206 | 0.87659  |
| 9.41E-21 | 0.334645 | 1.11E-13 | -0.02088 | 0.6527  | 0.114739 | 0.0131   | 0.175095 | 0.00014  |
| 2.93E-09 | 0.083112 | 0.07276  | -0.09091 | 0.04961 | 0.048707 | 0.29355  | 0.102285 | 0.02709  |
| 4.94E-10 | 0.276552 | 1.21E-09 | 0.047108 | 0.3097  | 0.105387 | 0.02275  | 0.208115 | 5.76E-06 |
| 0.00031  | -0.04546 | 0.327    | -0.06627 | 0.15276 | -0.0583  | 0.20858  | 0.110518 | 0.01688  |
| 0.11893  | -0.05594 | 0.22757  | -0.13765 | 0.00287 | -0.04524 | 0.32926  | -0.06417 | 0.16623  |
| 1.15E-35 | 0.428439 | 2.85E-22 | 0.114489 | 0.0133  | 0.052367 | 0.25873  | 0.118955 | 0.01009  |
| 2.15E-12 | 0.146843 | 0.00146  | -0.07578 | 0.10195 | 0.019144 | 0.67987  | 0.043339 | 0.35004  |
| 5.12E-31 | 0.41279  | 1.22E-20 | 0.059992 | 0.19562 | 0.06629  | 0.15264  | 0.016762 | 0.71788  |
| 1.50E-31 | 0.3102   | 7.11E-12 | -0.01441 | 0.75606 | 0.005192 | 0.9109   | 0.069237 | 0.13518  |
| 4.89E-49 | 0.536905 | 3.16E-36 | 0.044634 | 0.33583 | 0.127538 | 0.00578  | 0.152229 | 0.00097  |
| 3.54E-15 | 0.235209 | 2.72E-07 | -0.04408 | 0.34184 | 0.081927 | 0.07695  | 0.080084 | 0.08385  |
| 3.37E-29 | 0.493277 | 5.23E-30 | 0.086829 | 0.06081 | 0.18145  | 8.03E-05 | 0.142148 | 0.00208  |
| 0.74018  | -0.13181 | 0.00433  | -0.08608 | 0.06308 | -0.06099 | 0.18829  | -0.20872 | 5.40E-06 |
| 1.08E-24 | 0.358693 | 1.26E-15 | -0.02963 | 0.52303 | 0.02819  | 0.5434   | 0.141162 | 0.00223  |
| 4.10E-09 | 0.293416 | 1.00E-10 | -0.08745 | 0.05898 | -0.05926 | 0.20114  | 0.077458 | 0.09454  |
| 4.93E-06 | 0.192439 | 2.83E-05 | -0.02436 | 0.59951 | 0.132899 | 0.00401  | 0.019846 | 0.66882  |
| 3.39E-16 | 0.274339 | 1.65E-09 | -0.03474 | 0.45388 | 0.007838 | 0.86585  | -0.07419 | 0.10935  |
| 1.10E-30 | 0.423361 | 9.84E-22 | 0.01937  | 0.67631 | 0.077413 | 0.09474  | 0.096139 | 0.03782  |
| 3.41E-06 | 0.104389 | 0.02407  | -0.1129  | 0.01465 | 0.044829 | 0.33372  | 0.010471 | 0.82145  |
| 2.27E-23 | 0.326053 | 4.99E-13 | -0.02272 | 0.6244  | 0.029533 | 0.52436  | 0.04231  | 0.36162  |
| 1.15E-06 | 0.04905  | 0.29016  | -0.03829 | 0.40901 | -0.06533 | 0.15867  | -0.10355 | 0.02524  |
| 3.03E-14 | 0.203514 | 9.31E-06 | -0.053   | 0.25298 | 0.005435 | 0.90675  | -0.02586 | 0.57723  |
| 0.13723  | -0.03944 | 0.39512  | -0.12683 | 0.00606 | 0.053929 | 0.24477  | 0.078514 | 0.09012  |
| 1.27E-19 | 0.367234 | 2.34E-16 | -0.03201 | 0.49016 | 0.091267 | 0.04871  | 0.105043 | 0.02319  |
| 1.70E-12 | 0.217476 | 2.10E-06 | -0.05286 | 0.25428 | 0.017931 | 0.69913  | -0.00934 | 0.84048  |
| 5.62E-15 | 0.269629 | 3.20E-09 | -0.02605 | 0.57442 | -0.00115 | 0.98028  | 0.006148 | 0.89459  |
| 1.42E-36 | 0.412755 | 1.23E-20 | 0.003834 | 0.93414 | 0.046366 | 0.3174   | 0.116121 | 0.01203  |
| 1.13E-39 | 0.506449 | 8.61E-32 | 0.03321  | 0.47402 | 0.091858 | 0.04726  | 0.274726 | 1.56E-09 |
| 1.79E-15 | 0.292799 | 1.10E-10 | 0.003649 | 0.93731 | 0.070455 | 0.12842  | 0.077133 | 0.09594  |
| 0.00088  | 0.134693 | 0.00354  | -0.05903 | 0.20288 | -0.02758 | 0.55213  | -0.11678 | 0.01155  |
| 3.30E-05 | 0.216355 | 2.37E-06 | 0.152614 | 0.00094 | 0.177622 | 0.00011  | 0.310936 | 6.31E-12 |
| 0.00899  | 0.174791 | 0.00015  | 0.108137 | 0.01942 | 0.122298 | 0.00815  | 0.179257 | 9.82E-05 |
| 5.31E-05 | 0.173653 | 0.00016  | 0.063422 | 0.17123 | 0.064265 | 0.1656   | 0.271    | 2.64E-09 |
| 0.00495  | 0.141034 | 0.00225  | 0.070575 | 0.12777 | 0.168192 | 0.00026  | 0.149745 | 0.00117  |
| 0.00264  | 0.144269 | 0.00177  | 0.092959 | 0.04466 | 0.092979 | 0.04462  | 0.189637 | 3.71E-05 |
| 0.00049  | 0.152022 | 0.00098  | 0.075173 | 0.10471 | 0.080516 | 0.08219  | 0.283883 | 4.18E-10 |
| 0.06927  | 0.147814 | 0.00136  | 0.14188  | 0.00212 | 0.173134 | 0.00017  | 0.127121 | 0.00594  |
| 0.00058  | 0.248516 | 5.28E-08 | 0.114439 | 0.01334 | 0.140322 | 0.00237  | 0.285827 | 3.14E-10 |
| 0.00011  | 0.167503 | 0.00028  | 0.127963 | 0.00562 | 0.148974 | 0.00124  | 0.206806 | 6.61E-06 |
| 0.0042   | 0.173276 | 0.00017  | 0.147738 | 0.00137 | 0.188963 | 3.96E-05 | 0.220402 | 1.51E-06 |
| 0.30431  | -0.05556 | 0.23076  | 0.023955 | 0.60561 | 0.001154 | 0.98016  | -0.03691 | 0.4262   |
| 0.00257  | 0.166629 | 0.0003   | 0.089651 | 0.05286 | 0.111054 | 0.01636  | 0.158671 | 0.00058  |

|          |          |          |          |          |          |          |          |          |
|----------|----------|----------|----------|----------|----------|----------|----------|----------|
| 0.00572  | 0.155915 | 0.00072  | 0.187127 | 4.72E-05 | 0.215233 | 2.68E-06 | 0.296465 | 6.28E-11 |
| 0.25136  | 0.089305 | 0.05378  | 0.104409 | 0.02404  | 0.168298 | 0.00026  | 0.195638 | 2.07E-05 |
| 0.00371  | 0.204178 | 8.69E-06 | 0.152589 | 0.00094  | 0.169832 | 0.00023  | 0.285068 | 3.51E-10 |
| 1.37E-07 | 0.244264 | 9.01E-08 | 0.062052 | 0.18068  | 0.073146 | 0.11443  | 0.238566 | 1.82E-07 |
| 7.00E-10 | 0.281367 | 6.03E-10 | 0.095677 | 0.03875  | 0.098688 | 0.03299  | 0.235148 | 2.74E-07 |
| 5.01E-05 | 0.20894  | 5.28E-06 | 0.154572 | 0.0008   | 0.149704 | 0.00118  | 0.342402 | 2.72E-14 |
| 0.02266  | 0.168855 | 0.00025  | 0.115351 | 0.01262  | 0.124337 | 0.00714  | 0.173996 | 0.00016  |
| 0.14447  | 0.120248 | 0.00929  | 0.088062 | 0.05722  | 0.1062   | 0.02171  | 0.166216 | 0.00031  |
| 0.48444  | 0.077963 | 0.09241  | 0.241993 | 1.19E-07 | 0.201132 | 1.19E-05 | 0.198008 | 1.63E-05 |
| 0.01525  | 0.143935 | 0.00182  | 0.154161 | 0.00083  | 0.182776 | 7.10E-05 | 0.323698 | 7.48E-13 |
| 0.00436  | 0.215436 | 2.62E-06 | 0.147655 | 0.00137  | 0.176047 | 0.00013  | 0.189718 | 3.68E-05 |
| 0.00314  | 0.133571 | 0.00383  | 0.149415 | 0.0012   | 0.181838 | 7.75E-05 | 0.239156 | 1.69E-07 |
| 0.09116  | 0.184694 | 5.94E-05 | 0.12411  | 0.00725  | 0.147669 | 0.00137  | 0.163253 | 0.0004   |
| 1.10E-06 | 0.273021 | 1.99E-09 | 0.141501 | 0.00218  | 0.182442 | 7.33E-05 | 0.311156 | 6.09E-12 |
| 0.00126  | 0.183098 | 6.90E-05 | 0.142799 | 0.00198  | 0.166291 | 0.00031  | 0.261045 | 1.03E-08 |
| 2.58E-10 | 0.363465 | 4.95E-16 | 0.206424 | 6.88E-06 | 0.167723 | 0.00027  | 0.173359 | 0.00017  |
| 0.00021  | 0.211971 | 3.82E-06 | 0.554781 | 4.77E-39 | 0.189464 | 3.78E-05 | 0.272829 | 2.05E-09 |
| 0.35491  | 0.024697 | 0.59448  | 0.102189 | 0.02723  | 0.117769 | 0.01086  | 0.172818 | 0.00017  |
| 0.15497  | 0.107377 | 0.02029  | 0.209239 | 5.11E-06 | 0.08805  | 0.05725  | 0.177278 | 0.00012  |
| 0.02648  | 0.181158 | 8.25E-05 | 0.138378 | 0.00273  | 0.07752  | 0.09428  | 0.174604 | 0.00015  |
| 0.57687  | 0.087947 | 0.05755  | 0.10209  | 0.02738  | 0.178204 | 0.00011  | 0.205039 | 7.95E-06 |
| 0.00012  | 0.191863 | 2.99E-05 | 0.155518 | 0.00075  | 0.170723 | 0.00021  | 0.322599 | 9.02E-13 |
| 4.15E-06 | 0.246656 | 6.68E-08 | 0.223875 | 1.02E-06 | 0.074824 | 0.10634  | 0.131551 | 0.0044   |
| 0.00736  | 0.092147 | 0.04657  | 0.086323 | 0.06233  | 0.106944 | 0.0208   | 0.101537 | 0.02823  |
| 8.96E-07 | 0.213961 | 3.08E-06 | 0.095013 | 0.04013  | 0.129887 | 0.00493  | 0.27242  | 2.17E-09 |
| 0.00013  | 0.109432 | 0.018    | 0.089054 | 0.05446  | 0.057882 | 0.21183  | 0.260278 | 1.14E-08 |
| 0.00045  | 0.185348 | 5.59E-05 | 0.102256 | 0.02713  | 0.142373 | 0.00204  | 0.241291 | 1.30E-07 |
| 6.33E-08 | 0.319764 | 1.46E-12 | 0.124697 | 0.00698  | 0.119866 | 0.00952  | 0.175912 | 0.00013  |
| 3.69E-05 | 0.235068 | 2.77E-07 | 0.1504   | 0.00111  | 0.177613 | 0.00011  | 0.32863  | 3.19E-13 |
| 0.00069  | 0.204203 | 8.67E-06 | 0.14687  | 0.00146  | 0.180479 | 8.78E-05 | 0.25578  | 2.07E-08 |
| 0.64097  | 0.095663 | 0.03878  | 0.092772 | 0.0451   | 0.123824 | 0.00738  | 0.11328  | 0.01431  |
| 0.00076  | 0.185301 | 5.61E-05 | 0.203765 | 9.07E-06 | 0.171507 | 0.0002   | 0.252157 | 3.31E-08 |
| 0.00077  | 0.152218 | 0.00097  | 0.162478 | 0.00042  | 0.161802 | 0.00045  | 0.306669 | 1.26E-11 |
| 0.03667  | 0.096611 | 0.03688  | 0.158298 | 0.0006   | 0.149861 | 0.00116  | 0.252299 | 3.25E-08 |
| 0.04868  | 0.122287 | 0.00816  | 0.121801 | 0.00842  | 0.145957 | 0.00156  | 0.177486 | 0.00012  |
| 0.01324  | 0.174943 | 0.00014  | 0.201376 | 1.16E-05 | 0.228725 | 5.86E-07 | 0.249167 | 4.86E-08 |
| 0.0044   | 0.226419 | 7.65E-07 | 0.127156 | 0.00593  | 0.107038 | 0.02069  | 0.11899  | 0.01006  |
| 0.21373  | 0.141103 | 0.00224  | 0.218965 | 1.78E-06 | 0.125344 | 0.00668  | 0.070265 | 0.12945  |
| 0.00049  | 0.2009   | 1.22E-05 | 0.175176 | 0.00014  | 0.212256 | 3.70E-06 | 0.303018 | 2.25E-11 |
| 0.00018  | 0.211898 | 3.85E-06 | 0.18573  | 5.39E-05 | 0.150955 | 0.00107  | 0.232935 | 3.57E-07 |
| 0.04062  | 0.093619 | 0.04316  | 0.144308 | 0.00177  | 0.14977  | 0.00117  | 0.184385 | 6.11E-05 |
| 7.09E-09 | 0.370573 | 1.20E-16 | 0.206792 | 6.62E-06 | 0.216619 | 2.30E-06 | 0.317021 | 2.31E-12 |
| 0.84514  | -0.00307 | 0.9473   | 0.061191 | 0.18682  | 0.061784 | 0.18258  | 0.06824  | 0.1409   |
| 0.03597  | 0.118459 | 0.0104   | 0.114473 | 0.01331  | 0.127766 | 0.00569  | 0.212185 | 3.73E-06 |
| 0.32474  | 0.066129 | 0.15364  | 0.200927 | 1.21E-05 | 0.250622 | 4.03E-08 | 0.20919  | 5.14E-06 |

|          |          |          |          |          |          |          |          |          |
|----------|----------|----------|----------|----------|----------|----------|----------|----------|
| 3.10E-06 | 0.264337 | 6.61E-09 | 0.189293 | 3.84E-05 | 0.198278 | 1.59E-05 | 0.3943   | 8.03E-19 |
| 0.00503  | 0.187331 | 4.63E-05 | 0.244139 | 9.15E-08 | 0.252471 | 3.18E-08 | 0.294551 | 8.42E-11 |
| 0.00292  | 0.121148 | 0.00878  | 0.137143 | 0.00298  | 0.067716 | 0.14398  | 0.106832 | 0.02094  |
| 0.99679  | 0.035982 | 0.4379   | 0.042644 | 0.35784  | 0.025123 | 0.58814  | -0.01047 | 0.82146  |
| 0.03105  | -0.05997 | 0.19582  | -0.01414 | 0.76058  | -0.03069 | 0.50821  | -0.07136 | 0.12358  |
| 0.01005  | 0.160724 | 0.00049  | 0.122216 | 0.00819  | 0.135698 | 0.0033   | 0.282095 | 5.43E-10 |
| 9.22E-05 | 0.220322 | 1.53E-06 | 0.203349 | 9.47E-06 | 0.221208 | 1.38E-06 | 0.360201 | 9.40E-16 |
| 2.93E-05 | 0.20183  | 1.11E-05 | 0.183396 | 6.71E-05 | 0.198196 | 1.60E-05 | 0.210671 | 4.39E-06 |
| 0.98684  | 0.003947 | 0.93221  | 0.072341 | 0.11849  | 0.077709 | 0.09347  | 0.108408 | 0.01911  |
| 0.42968  | 0.213063 | 3.39E-06 | 0.128506 | 0.00542  | 0.182552 | 7.25E-05 | 0.112338 | 0.01515  |
| 2.89E-05 | 0.285896 | 3.10E-10 | 0.195781 | 2.04E-05 | 0.2219   | 1.28E-06 | 0.31485  | 3.32E-12 |
| 0.72773  | 0.126084 | 0.00637  | 0.109816 | 0.0176   | 0.11417  | 0.01356  | 0.170273 | 0.00022  |
| 0.00333  | 0.138729 | 0.00266  | 0.087109 | 0.05997  | 0.115582 | 0.01244  | 0.175032 | 0.00014  |
| 0.26584  | 0.094851 | 0.04047  | 0.046837 | 0.3125   | 0.03917  | 0.39838  | 0.176922 | 0.00012  |
| 1.42E-05 | 0.227304 | 6.90E-07 | 0.155695 | 0.00073  | 0.204985 | 7.99E-06 | 0.30698  | 1.20E-11 |
| 0.83843  | 0.056601 | 0.22214  | 0.224694 | 9.32E-07 | 0.17347  | 0.00017  | 0.205224 | 7.80E-06 |
| 0.20837  | 0.070735 | 0.12691  | 0.157234 | 0.00065  | 0.116686 | 0.01162  | 0.263426 | 7.48E-09 |
| 0.00012  | 0.178882 | 0.0001   | 0.125021 | 0.00683  | 0.183805 | 6.46E-05 | 0.255452 | 2.16E-08 |
| 3.70E-05 | 0.22021  | 1.55E-06 | 0.139768 | 0.00247  | 0.153771 | 0.00086  | 0.33268  | 1.57E-13 |
| 3.75E-05 | 0.218929 | 1.78E-06 | 0.148098 | 0.00133  | 0.166531 | 0.0003   | 0.29645  | 6.29E-11 |
| 0.32448  | 0.095123 | 0.0399   | 0.082154 | 0.07613  | 0.12039  | 0.00921  | 0.170776 | 0.00021  |
| 0.06283  | 0.145503 | 0.00162  | 0.13924  | 0.00256  | 0.186641 | 4.94E-05 | 0.196758 | 1.85E-05 |
| 6.38E-05 | 0.211711 | 3.93E-06 | 0.106909 | 0.02085  | 0.141004 | 0.00226  | 0.216275 | 2.39E-06 |
| 0.14097  | 0.13602  | 0.00323  | 0.10588  | 0.02212  | 0.265272 | 5.82E-09 | 0.254903 | 2.32E-08 |
| 0.00084  | 0.092882 | 0.04484  | 0.079818 | 0.08489  | 0.095379 | 0.03937  | 0.181497 | 8.00E-05 |
| 0.0037   | 0.142523 | 0.00202  | 0.611706 | 2.84E-49 | 0.140662 | 0.00231  | 0.236656 | 2.29E-07 |
| 0.07016  | 0.099431 | 0.03169  | 0.177899 | 0.00011  | 0.173315 | 0.00017  | 0.22152  | 1.34E-06 |
| 0.00163  | 0.232297 | 3.85E-07 | 0.266167 | 5.15E-09 | 0.172081 | 0.00019  | 0.253876 | 2.65E-08 |
| 3.23E-05 | 0.219483 | 1.68E-06 | 0.101533 | 0.02824  | 0.061131 | 0.18725  | 0.125349 | 0.00668  |
| 3.08E-05 | 0.244204 | 9.08E-08 | 0.36066  | 8.60E-16 | 0.11461  | 0.0132   | 0.284272 | 3.94E-10 |
| 0.17043  | 0.095281 | 0.03957  | 0.133839 | 0.00376  | 0.154154 | 0.00083  | 0.174671 | 0.00015  |
| 0.81052  | 0.083437 | 0.07164  | 0.133131 | 0.00395  | 0.084509 | 0.06806  | 0.052744 | 0.25531  |
| 0.39848  | -0.02018 | 0.66363  | 0.059515 | 0.19921  | 0.101318 | 0.02858  | 0.14015  | 0.0024   |
| 0.01354  | 0.178635 | 0.0001   | 0.104189 | 0.02434  | 0.144723 | 0.00171  | 0.216322 | 2.38E-06 |
| 0.00062  | 0.17895  | 0.0001   | 0.13004  | 0.00488  | 0.15761  | 0.00063  | 0.281354 | 6.04E-10 |
| 0.00885  | 0.151961 | 0.00099  | 0.124371 | 0.00713  | 0.12989  | 0.00493  | 0.232322 | 3.84E-07 |
| 0.4882   | 0.03458  | 0.45597  | 0.05911  | 0.20229  | 0.079903 | 0.08456  | 0.062574 | 0.17704  |
| 0.38977  | 0.005411 | 0.90716  | 0.022699 | 0.62465  | 0.066423 | 0.15182  | 0.009125 | 0.84408  |
| 0.02643  | 0.131532 | 0.00441  | 0.12207  | 0.00827  | 0.154917 | 0.00078  | 0.246847 | 6.52E-08 |
| 0.08528  | 0.063218 | 0.17262  | 0.137428 | 0.00292  | 0.140598 | 0.00232  | 0.23632  | 2.38E-07 |
| 0.11244  | 0.143832 | 0.00183  | 0.116869 | 0.01149  | 0.182541 | 7.26E-05 | 0.157092 | 0.00066  |
| 0.63413  | 0.090135 | 0.05159  | 0.09695  | 0.03622  | 0.14427  | 0.00177  | 0.115863 | 0.01223  |
| 0.35167  | 0.08834  | 0.05644  | 0.124639 | 0.007    | 0.14068  | 0.00231  | 0.150131 | 0.00114  |
| 0.9416   | 0.019005 | 0.68206  | 0.070116 | 0.13028  | 0.08816  | 0.05694  | 0.197888 | 1.65E-05 |
| 0.00401  | 0.184635 | 5.97E-05 | 0.116352 | 0.01186  | 0.183206 | 6.83E-05 | 0.173513 | 0.00016  |

|          |          |          |          |          |          |          |          |          |
|----------|----------|----------|----------|----------|----------|----------|----------|----------|
| 0.02031  | 0.130872 | 0.00461  | 0.228966 | 5.69E-07 | 0.189538 | 3.75E-05 | 0.256559 | 1.87E-08 |
| 0.08143  | 0.082903 | 0.07348  | 0.149049 | 0.00124  | 0.145215 | 0.00165  | 0.327323 | 4.01E-13 |
| 0.00024  | 0.217361 | 2.12E-06 | 0.172524 | 0.00018  | 0.179194 | 9.88E-05 | 0.238697 | 1.79E-07 |
| 0.00763  | 0.191358 | 3.14E-05 | 0.093475 | 0.04348  | 0.437324 | 3.09E-23 | 0.20043  | 1.28E-05 |
| 0.26717  | 0.100059 | 0.03062  | 0.149528 | 0.00119  | 0.191208 | 3.19E-05 | 0.204966 | 8.01E-06 |
| 0.00451  | 0.098454 | 0.03341  | 0.077329 | 0.09509  | 0.053339 | 0.24998  | 0.204481 | 8.42E-06 |
| 0.01441  | 0.201498 | 1.14E-05 | 0.155007 | 0.00078  | 0.197718 | 1.68E-05 | 0.255676 | 2.10E-08 |
| 0.00048  | 0.157105 | 0.00066  | 0.094932 | 0.0403   | 0.102972 | 0.02607  | 0.271753 | 2.38E-09 |
| 0.09023  | -0.08065 | 0.08167  | 0.068111 | 0.14166  | 0.103034 | 0.02598  | 0.133284 | 0.00391  |
| 0.00012  | 0.211846 | 3.87E-06 | 0.162149 | 0.00043  | 0.195863 | 2.02E-05 | 0.352684 | 4.00E-15 |
| 0.00274  | 0.168129 | 0.00026  | 0.128598 | 0.00538  | 0.147613 | 0.00138  | 0.225349 | 8.65E-07 |
| 0.00278  | 0.213054 | 3.40E-06 | 0.144568 | 0.00173  | 0.179764 | 9.38E-05 | 0.086101 | 0.06301  |
| 0.08086  | 0.089416 | 0.05348  | 0.130556 | 0.00472  | 0.14448  | 0.00175  | 0.181988 | 7.64E-05 |
| 0.04311  | 0.134276 | 0.00365  | 0.144411 | 0.00176  | 0.311584 | 5.68E-12 | 0.204936 | 8.03E-06 |
| 0.00011  | 0.189378 | 3.81E-05 | 0.144564 | 0.00174  | 0.169748 | 0.00023  | 0.28506  | 3.51E-10 |
| 0.03205  | -0.04468 | 0.33534  | 0.025252 | 0.58622  | 0.060556 | 0.19144  | -0.00563 | 0.90347  |
| 0.00389  | 0.171977 | 0.00019  | 0.145936 | 0.00157  | 0.186175 | 5.17E-05 | 0.23915  | 1.69E-07 |
| 0.06926  | 0.093649 | 0.04309  | 0.165816 | 0.00032  | 0.167728 | 0.00027  | 0.247409 | 6.07E-08 |
| 0.10106  | 0.111875 | 0.01557  | 0.143809 | 0.00184  | 0.181324 | 8.13E-05 | 0.218335 | 1.91E-06 |
| 0.28121  | 0.0928   | 0.04503  | 0.106521 | 0.02132  | 0.179083 | 9.98E-05 | 0.197895 | 1.65E-05 |
| 0.25257  | 0.073754 | 0.11145  | 0.149782 | 0.00117  | 0.205202 | 7.81E-06 | 0.148654 | 0.00127  |
| 0.00084  | 0.17052  | 0.00021  | 0.136954 | 0.00302  | 0.183854 | 6.43E-05 | 0.202204 | 1.07E-05 |
| 2.13E-06 | 0.270672 | 2.77E-09 | 0.17462  | 0.00015  | 0.191628 | 3.06E-05 | 0.499283 | 8.22E-31 |
| 0.00062  | 0.22917  | 5.56E-07 | 0.052699 | 0.25571  | 0.068774 | 0.13781  | 0.127585 | 0.00576  |
| 0.00034  | 0.203475 | 9.34E-06 | 0.12761  | 0.00575  | 0.141308 | 0.00221  | 0.335857 | 8.91E-14 |
| 0.02458  | 0.159471 | 0.00054  | 0.152484 | 0.00095  | 0.181561 | 7.95E-05 | 0.243588 | 9.80E-08 |
| 0.67594  | 0.049043 | 0.29023  | 0.062664 | 0.17641  | 0.108527 | 0.01898  | 0.136002 | 0.00323  |
| 0.00099  | 0.246615 | 6.71E-08 | 0.170485 | 0.00021  | 0.197942 | 1.64E-05 | 0.322853 | 8.64E-13 |
| 0.01197  | 0.115212 | 0.01272  | 0.118643 | 0.01028  | 0.119371 | 0.00982  | 0.295515 | 7.26E-11 |
| 0.01892  | 0.099435 | 0.03168  | 0.052828 | 0.25455  | 0.076676 | 0.09793  | 0.215116 | 2.72E-06 |
| 0.977    | 0.074146 | 0.10955  | 0.072213 | 0.11914  | 0.108666 | 0.01883  | 0.183445 | 6.68E-05 |
| 0.20246  | 0.152587 | 0.00094  | 0.139419 | 0.00253  | 0.138136 | 0.00278  | 0.270173 | 2.96E-09 |
| 0.31615  | 0.115277 | 0.01267  | 0.122753 | 0.00792  | 0.172342 | 0.00018  | 0.218476 | 1.88E-06 |
| 0.00142  | 0.199    | 1.48E-05 | 0.191467 | 3.11E-05 | 0.21164  | 3.96E-06 | 0.353001 | 3.77E-15 |
| 0.22364  | 0.098339 | 0.03362  | 0.152211 | 0.00097  | 0.150208 | 0.00113  | 0.13357  | 0.00383  |
| 0.1423   | -0.00877 | 0.85015  | 0.034383 | 0.45854  | 0.025601 | 0.58106  | 0.134165 | 0.00368  |
| 0.0005   | 0.187055 | 4.75E-05 | 0.145934 | 0.00157  | 0.165102 | 0.00034  | 0.300563 | 3.32E-11 |
| 0.02085  | 0.110038 | 0.01737  | 0.125386 | 0.00667  | 0.097702 | 0.03479  | 0.214293 | 2.97E-06 |
| 0.71286  | 0.052285 | 0.25947  | 0.118469 | 0.0104   | 0.150594 | 0.0011   | 0.180165 | 9.04E-05 |
| 0.13996  | 0.111299 | 0.01612  | 0.128614 | 0.00538  | 0.144757 | 0.00171  | 0.184558 | 6.02E-05 |
| 0.06578  | 0.163775 | 0.00038  | 0.176317 | 0.00013  | 0.11928  | 0.00988  | 0.227296 | 6.91E-07 |
| 0.40594  | 0.064895 | 0.16148  | 0.15101  | 0.00106  | 0.169583 | 0.00023  | 0.087836 | 0.05786  |
| 0.65543  | 0.047875 | 0.30188  | 0.16855  | 0.00025  | 0.158734 | 0.00058  | 0.171497 | 0.0002   |
| 0.00011  | 0.244027 | 9.28E-08 | 0.133925 | 0.00374  | 0.144275 | 0.00177  | 0.355855 | 2.18E-15 |
| 0.08204  | 0.139573 | 0.0025   | 0.114621 | 0.01319  | 0.150582 | 0.0011   | 0.217904 | 2.00E-06 |

|          |          |          |          |          |          |          |          |          |
|----------|----------|----------|----------|----------|----------|----------|----------|----------|
| 0.06488  | 0.113815 | 0.01386  | 0.111969 | 0.01549  | 0.145457 | 0.00162  | 0.160792 | 0.00049  |
| 0.51331  | 0.019413 | 0.67564  | 0.136695 | 0.00308  | 0.202591 | 1.02E-05 | 0.060164 | 0.19434  |
| 0.11285  | 0.165856 | 0.00032  | 0.116749 | 0.01157  | 0.175549 | 0.00014  | 0.197327 | 1.75E-05 |
| 0.03539  | 0.156324 | 0.0007   | 0.132296 | 0.00418  | 0.178464 | 0.00011  | 0.222501 | 1.20E-06 |
| 0.01177  | 0.177665 | 0.00011  | 0.142842 | 0.00197  | 0.182947 | 6.99E-05 | 0.198478 | 1.56E-05 |
| 0.02367  | 0.135685 | 0.0033   | 0.133572 | 0.00383  | 0.158337 | 0.00059  | 0.214231 | 2.99E-06 |
| 2.92E-05 | 0.200424 | 1.28E-05 | 0.14254  | 0.00202  | 0.164143 | 0.00037  | 0.295363 | 7.44E-11 |
| 0.51528  | 0.071285 | 0.12397  | 0.165661 | 0.00032  | 0.179226 | 9.85E-05 | 0.185623 | 5.44E-05 |
| 0.0039   | 0.161319 | 0.00047  | 0.165706 | 0.00032  | 0.190291 | 3.49E-05 | 0.277707 | 1.02E-09 |
| 0.06313  | 0.11246  | 0.01504  | 0.171033 | 0.0002   | 0.199607 | 1.39E-05 | 0.218865 | 1.80E-06 |
| 0.00044  | 0.127248 | 0.00589  | 0.083327 | 0.07202  | 0.154014 | 0.00084  | 0.149221 | 0.00122  |
| 0.00056  | 0.190085 | 3.56E-05 | 0.14643  | 0.00151  | 0.184931 | 5.81E-05 | 0.262371 | 8.62E-09 |
| 0.02653  | 0.133629 | 0.00382  | 0.095619 | 0.03887  | 0.114428 | 0.01335  | 0.189159 | 3.89E-05 |
| 0.00219  | 0.168194 | 0.00026  | 0.167083 | 0.00029  | 0.146287 | 0.00152  | 0.222597 | 1.18E-06 |
| 0.36282  | 0.030934 | 0.50486  | 0.047861 | 0.30202  | 0.088606 | 0.05569  | -0.00287 | 0.95066  |
| 0.00018  | 0.225726 | 8.28E-07 | 0.15121  | 0.00105  | 0.183235 | 6.81E-05 | 0.296038 | 6.70E-11 |
| 0.65033  | 0.047009 | 0.31072  | 0.13562  | 0.00332  | 0.160472 | 0.0005   | 0.236244 | 2.41E-07 |
| 0.00039  | 0.179263 | 9.81E-05 | 0.154636 | 0.0008   | 0.167562 | 0.00028  | 0.34834  | 9.07E-15 |
| 0.0018   | 0.159557 | 0.00054  | 0.125268 | 0.00672  | 0.159025 | 0.00056  | 0.285655 | 3.22E-10 |
| 0.00042  | 0.178726 | 0.0001   | 0.143671 | 0.00185  | 0.173565 | 0.00016  | 0.265368 | 5.74E-09 |
| 0.05104  | 0.109346 | 0.01809  | 0.136706 | 0.00307  | 0.141376 | 0.0022   | 0.190645 | 3.37E-05 |
| 3.00E-06 | 0.281437 | 5.97E-10 | 0.156606 | 0.00068  | 0.185099 | 5.72E-05 | 0.328685 | 3.16E-13 |
| 0.10623  | 0.093177 | 0.04416  | 0.12038  | 0.00922  | 0.178291 | 0.00011  | 0.173125 | 0.00017  |
| 0.00132  | 0.189717 | 3.69E-05 | 0.160656 | 0.00049  | 0.168122 | 0.00026  | 0.306792 | 1.23E-11 |
| 0.04856  | 0.140446 | 0.00235  | 0.119818 | 0.00955  | 0.130479 | 0.00474  | 0.153952 | 0.00084  |
| 0.09766  | 0.118613 | 0.0103   | 0.120538 | 0.00912  | 0.204939 | 8.03E-06 | 0.208123 | 5.75E-06 |
| 0.00039  | 0.187742 | 4.45E-05 | 0.204459 | 8.44E-06 | 0.253514 | 2.78E-08 | 0.301954 | 2.67E-11 |
| 0.03216  | 0.166751 | 0.0003   | 0.206398 | 6.90E-06 | 0.199102 | 1.46E-05 | 0.278173 | 9.57E-10 |
| 0.07988  | 0.156161 | 0.00071  | 0.135658 | 0.00331  | 0.12276  | 0.00791  | 0.108655 | 0.01884  |
| 0.00012  | 0.244108 | 9.19E-08 | 0.147436 | 0.0014   | 0.157343 | 0.00064  | 0.297629 | 5.24E-11 |
| 0.00286  | 0.182524 | 7.27E-05 | 0.139362 | 0.00254  | 0.176694 | 0.00012  | 0.230772 | 4.61E-07 |
| 0.40394  | 0.06253  | 0.17734  | 0.132242 | 0.0042   | 0.144157 | 0.00179  | 0.171277 | 0.0002   |
| 0.13492  | 0.088747 | 0.05531  | 0.163228 | 0.0004   | 0.167897 | 0.00027  | 0.181097 | 8.30E-05 |
| 0.00198  | 0.193662 | 2.51E-05 | 0.14318  | 0.00192  | 0.170978 | 0.00021  | 0.277386 | 1.07E-09 |
| 0.01231  | 0.158857 | 0.00057  | 0.131745 | 0.00435  | 0.166924 | 0.00029  | 0.242966 | 1.06E-07 |
| 0.00036  | 0.217495 | 2.09E-06 | 0.187109 | 4.73E-05 | 0.192216 | 2.89E-05 | 0.29204  | 1.24E-10 |
| 0.04597  | 0.134023 | 0.00371  | 0.148624 | 0.00128  | 0.178076 | 0.00011  | 0.188934 | 3.97E-05 |
| 0.00039  | 0.211428 | 4.05E-06 | 0.151815 | 0.001    | 0.171328 | 0.0002   | 0.355774 | 2.22E-15 |
| 0.03047  | 0.132928 | 0.00401  | 0.127611 | 0.00575  | 0.157398 | 0.00064  | 0.230581 | 4.71E-07 |
| 1.92E-05 | 0.236176 | 2.43E-07 | 0.143014 | 0.00195  | 0.153492 | 0.00088  | 0.345941 | 1.42E-14 |
| 0.00502  | 0.134402 | 0.00362  | 0.073944 | 0.11052  | 0.098923 | 0.03258  | 0.23365  | 3.28E-07 |
| 0.02264  | 0.141228 | 0.00222  | 0.128626 | 0.00537  | 0.208306 | 5.64E-06 | 0.213188 | 3.35E-06 |
| 0.07936  | 0.09013  | 0.0516   | 0.113622 | 0.01402  | 0.146107 | 0.00155  | 0.196771 | 1.85E-05 |
| 0.4518   | -0.02549 | 0.58273  | 0.065946 | 0.15478  | 0.067593 | 0.14472  | 0.112679 | 0.01484  |
| 0.18181  | 0.111362 | 0.01606  | 0.113552 | 0.01408  | 0.160105 | 0.00051  | 0.196395 | 1.92E-05 |

|          |          |          |          |          |          |          |          |          |
|----------|----------|----------|----------|----------|----------|----------|----------|----------|
| 0.00426  | 0.168434 | 0.00026  | 0.135055 | 0.00345  | 0.160993 | 0.00048  | 0.275284 | 1.45E-09 |
| 0.00049  | 0.212625 | 3.56E-06 | 0.148065 | 0.00133  | 0.175149 | 0.00014  | 0.301984 | 2.65E-11 |
| 0.11299  | 0.11348  | 0.01414  | 0.15156  | 0.00102  | 0.111857 | 0.01559  | 0.166263 | 0.00031  |
| 0.01182  | 0.13608  | 0.00321  | 0.079393 | 0.08656  | 0.099146 | 0.03219  | 0.267554 | 4.26E-09 |
| 0.01844  | 0.181037 | 8.34E-05 | 0.135087 | 0.00345  | 0.158945 | 0.00057  | 0.29839  | 4.66E-11 |
| 0.41911  | 0.037712 | 0.41618  | 0.104465 | 0.02397  | 0.115633 | 0.0124   | 0.129195 | 0.00517  |
| 0.12206  | 0.123811 | 0.00739  | 0.112276 | 0.0152   | 0.140784 | 0.00229  | 0.195343 | 2.13E-05 |
| 0.00355  | 0.164586 | 0.00035  | 0.139929 | 0.00244  | 0.176598 | 0.00012  | 0.231512 | 4.23E-07 |
| 0.00042  | 0.174858 | 0.00015  | 0.115747 | 0.01231  | 0.144211 | 0.00178  | 0.22875  | 5.84E-07 |
| 0.02076  | 0.107494 | 0.02015  | 0.136832 | 0.00305  | 0.156058 | 0.00071  | 0.231605 | 4.18E-07 |
| 7.52E-05 | 0.178155 | 0.00011  | 0.134354 | 0.00363  | 0.171282 | 0.0002   | 0.260749 | 1.07E-08 |
| 0.09714  | 0.115194 | 0.01274  | 0.146689 | 0.00148  | 0.168435 | 0.00026  | 0.232347 | 3.83E-07 |
| 0.00043  | 0.174846 | 0.00015  | 0.168414 | 0.00026  | 0.187243 | 4.67E-05 | 0.334325 | 1.17E-13 |
| 6.22E-05 | 0.203241 | 9.57E-06 | 0.160932 | 0.00048  | 0.186312 | 5.10E-05 | 0.349589 | 7.18E-15 |
| 0.00021  | 0.188403 | 4.18E-05 | 0.142182 | 0.00207  | 0.169575 | 0.00023  | 0.275241 | 1.45E-09 |
| 0.00202  | 0.185553 | 5.48E-05 | 0.125655 | 0.00655  | 0.126199 | 0.00632  | 0.259247 | 1.31E-08 |
| 0.00673  | 0.153931 | 0.00085  | 0.138815 | 0.00264  | 0.176056 | 0.00013  | 0.24104  | 1.34E-07 |
| 0.42205  | 0.050137 | 0.27959  | 0.069338 | 0.1346   | 0.107288 | 0.02039  | 0.073336 | 0.11349  |
| 0.00013  | 0.196557 | 1.89E-05 | 0.141062 | 0.00225  | 0.174302 | 0.00015  | 0.320005 | 1.40E-12 |
| 0.00057  | 0.176417 | 0.00013  | 0.170953 | 0.00021  | 0.174208 | 0.00015  | 0.290151 | 1.64E-10 |
| 0.08858  | 0.151209 | 0.00105  | 0.171594 | 0.00019  | 0.176573 | 0.00013  | 0.202441 | 1.04E-05 |
| 0.73978  | 0.078761 | 0.08911  | 0.150114 | 0.00114  | 0.18348  | 6.65E-05 | 0.215974 | 2.47E-06 |
| 0.76038  | 0.064735 | 0.16252  | 0.091937 | 0.04707  | 0.126334 | 0.00626  | 0.166671 | 0.0003   |
| 0.14181  | 0.088596 | 0.05572  | 0.176742 | 0.00012  | 0.194239 | 2.37E-05 | 0.200471 | 1.27E-05 |
| 0.0048   | 0.212228 | 3.71E-06 | 0.123076 | 0.00775  | 0.20629  | 6.98E-06 | 0.201825 | 1.11E-05 |
| 0.10425  | 0.100037 | 0.03066  | 0.118461 | 0.0104   | 0.151214 | 0.00105  | 0.234132 | 3.10E-07 |
| 0.00054  | 0.203159 | 9.66E-06 | 0.179637 | 9.49E-05 | 0.222512 | 1.19E-06 | 0.240822 | 1.38E-07 |
| 0.49977  | 0.068916 | 0.137    | 0.11923  | 0.00991  | 0.120091 | 0.00939  | 0.11397  | 0.01373  |
| 0.00415  | 0.144    | 0.00181  | 0.139677 | 0.00248  | 0.173067 | 0.00017  | 0.243036 | 1.05E-07 |
| 0.00204  | 0.114828 | 0.01303  | 0.065382 | 0.15835  | 0.110069 | 0.01734  | 0.191332 | 3.15E-05 |
| 0.02215  | 0.125905 | 0.00644  | 0.187015 | 4.77E-05 | 0.132279 | 0.00419  | 0.159575 | 0.00054  |
| 0.01084  | 0.160304 | 0.00051  | 0.155139 | 0.00077  | 0.197092 | 1.79E-05 | 0.255044 | 2.28E-08 |
| 0.05748  | 0.123256 | 0.00766  | 0.114843 | 0.01302  | 0.14858  | 0.00128  | 0.191559 | 3.08E-05 |
| 1.07E-06 | 0.251776 | 3.48E-08 | 0.128411 | 0.00545  | 0.236674 | 2.28E-07 | 0.440742 | 1.29E-23 |
| 0.02547  | 0.184061 | 6.30E-05 | 0.339956 | 4.26E-14 | 0.201573 | 1.14E-05 | 0.124852 | 0.0069   |
| 0.00217  | 0.154925 | 0.00078  | 0.124668 | 0.00699  | 0.149418 | 0.0012   | 0.292666 | 1.12E-10 |
| 0.74501  | 0.059343 | 0.20051  | 0.129801 | 0.00496  | 0.109215 | 0.01823  | 0.211112 | 4.19E-06 |
| 0.00804  | 0.153949 | 0.00084  | 0.183715 | 6.51E-05 | 0.19186  | 3.00E-05 | 0.256104 | 1.98E-08 |
| 0.01948  | 0.142495 | 0.00202  | 0.299559 | 3.88E-11 | 0.097775 | 0.03466  | 0.107869 | 0.01972  |
| 0.00044  | 0.172209 | 0.00018  | 0.112306 | 0.01518  | 0.114467 | 0.01332  | 0.236269 | 2.40E-07 |
| 0.61256  | 0.075737 | 0.10212  | 0.117257 | 0.01122  | 0.137738 | 0.00286  | 0.080535 | 0.08212  |
| 0.00116  | 0.215647 | 2.56E-06 | 0.081837 | 0.07727  | 0.110015 | 0.01739  | 0.272166 | 2.24E-09 |
| 0.00032  | 0.208413 | 5.58E-06 | 0.185664 | 5.42E-05 | 0.176187 | 0.00013  | 0.296164 | 6.57E-11 |
| 0.60737  | 0.007902 | 0.86476  | 0.036304 | 0.43381  | 0.026745 | 0.56426  | 0.019913 | 0.66777  |
| 0.03623  | 0.144212 | 0.00178  | 0.10923  | 0.01821  | 0.080691 | 0.08152  | 0.071455 | 0.12308  |



|          |          |          |          |          |          |          |          |          |
|----------|----------|----------|----------|----------|----------|----------|----------|----------|
| 0.01582  | 0.13474  | 0.00353  | 0.238506 | 1.83E-07 | 0.212694 | 3.53E-06 | 0.184315 | 6.16E-05 |
| 0.0003   | 0.16544  | 0.00033  | 0.135145 | 0.00343  | 0.160024 | 0.00052  | 0.216722 | 2.28E-06 |
| 0.09413  | 0.128923 | 0.00527  | 0.146063 | 0.00155  | 0.137577 | 0.00289  | 0.18822  | 4.25E-05 |
| 0.00458  | 0.151478 | 0.00102  | 0.106249 | 0.02165  | 0.128889 | 0.00528  | 0.224709 | 9.30E-07 |
| 0.12446  | 0.082606 | 0.07452  | 0.141655 | 0.00215  | 0.131405 | 0.00445  | 0.229859 | 5.13E-07 |
| 9.86E-06 | 0.225247 | 8.75E-07 | 0.453978 | 4.01E-25 | 0.139247 | 0.00256  | 0.272751 | 2.07E-09 |
| 6.59E-07 | 0.195888 | 2.02E-05 | 0.118053 | 0.01067  | 0.258277 | 1.49E-08 | 0.283095 | 4.69E-10 |
| 0.02232  | 0.140622 | 0.00232  | 0.144391 | 0.00176  | 0.16041  | 0.0005   | 0.241492 | 1.27E-07 |
| 0.09663  | 0.085987 | 0.06336  | 0.113364 | 0.01424  | 0.141867 | 0.00212  | 0.142732 | 0.00199  |
| 0.03534  | 0.181312 | 8.14E-05 | 0.110309 | 0.01709  | 0.126596 | 0.00615  | 0.207127 | 6.39E-06 |
| 0.07317  | 0.12889  | 0.00528  | 0.159741 | 0.00053  | 0.175953 | 0.00013  | 0.238034 | 1.94E-07 |
| 0.38559  | 0.032194 | 0.48765  | 0.09229  | 0.04623  | 0.112805 | 0.01473  | 0.072269 | 0.11886  |
| 0.19597  | 0.071766 | 0.12145  | 0.142551 | 0.00201  | 0.144265 | 0.00177  | 0.195479 | 2.10E-05 |
| 0.00557  | 0.135836 | 0.00327  | 0.08959  | 0.05302  | 0.081879 | 0.07712  | 0.181652 | 7.88E-05 |
| 0.91667  | 0.071597 | 0.12233  | 0.101864 | 0.02773  | 0.107554 | 0.02008  | 0.043507 | 0.34819  |
| 0.36282  | 0.030934 | 0.50486  | 0.047861 | 0.30202  | 0.088606 | 0.05569  | -0.00287 | 0.95066  |
| 0.00089  | 0.200001 | 1.33E-05 | 0.148663 | 0.00127  | 0.170383 | 0.00022  | 0.260925 | 1.05E-08 |
| 6.76E-05 | 0.187674 | 4.48E-05 | 0.151731 | 0.001    | 0.156084 | 0.00071  | 0.227622 | 6.65E-07 |
| 0.00046  | 0.154814 | 0.00079  | 0.137767 | 0.00285  | 0.140819 | 0.00229  | 0.244494 | 8.76E-08 |
| 7.63E-05 | 0.191513 | 3.10E-05 | 0.130904 | 0.0046   | 0.132024 | 0.00426  | 0.237945 | 1.96E-07 |
| 0.08898  | 0.07594  | 0.1012   | 0.131114 | 0.00454  | 0.139439 | 0.00253  | 0.15709  | 0.00066  |
| 0.00011  | 0.180117 | 9.08E-05 | 0.119498 | 0.00975  | 0.137301 | 0.00295  | 0.181324 | 8.13E-05 |
| 8.25E-06 | 0.253357 | 2.84E-08 | 0.099148 | 0.03218  | 0.173254 | 0.00017  | 0.188982 | 3.95E-05 |
| 0.10851  | 0.138804 | 0.00265  | 0.062538 | 0.17729  | 0.071513 | 0.12277  | 0.104013 | 0.02459  |
| 0.01111  | 0.118697 | 0.01025  | 0.133614 | 0.00382  | 0.150231 | 0.00113  | 0.232326 | 3.84E-07 |
| 9.05E-06 | 0.160233 | 0.00051  | 0.084287 | 0.06879  | 0.102614 | 0.02659  | 0.286174 | 2.98E-10 |
| 0.00125  | 0.172318 | 0.00018  | 0.14393  | 0.00182  | 0.198248 | 1.59E-05 | 0.228705 | 5.87E-07 |
| 0.01976  | -0.12581 | 0.00648  | -0.06844 | 0.13972  | -0.03083 | 0.50636  | -0.13352 | 0.00384  |
| 0.83668  | -0.02396 | 0.60556  | -0.02046 | 0.65923  | -0.03265 | 0.48155  | -0.12173 | 0.00846  |
| 0.65962  | 0.020339 | 0.66109  | -0.01094 | 0.81361  | 0.003136 | 0.94612  | -0.19437 | 2.34E-05 |
| 0.00181  | 0.201981 | 1.09E-05 | 0.045196 | 0.32977  | -0.02368 | 0.60974  | 0.011294 | 0.80768  |
| 1.59E-12 | -0.34965 | 7.10E-15 | -0.04176 | 0.36789  | -0.07746 | 0.09454  | -0.20519 | 7.83E-06 |
| 1.83E-12 | -0.32587 | 5.15E-13 | -0.05294 | 0.25351  | -0.04502 | 0.3317   | -0.15453 | 0.00081  |
| 0.93894  | -0.01463 | 0.75252  | 0.06947  | 0.13386  | 0.046885 | 0.312    | -0.00659 | 0.88701  |
| 9.26E-09 | -0.24754 | 5.97E-08 | 0.017845 | 0.70051  | -0.06486 | 0.16174  | -0.20179 | 1.11E-05 |
| 0.12955  | 0.182984 | 6.97E-05 | 0.164875 | 0.00035  | -0.03875 | 0.40342  | -0.08191 | 0.07701  |
| 0.08701  | -0.15333 | 0.00089  | 0.031594 | 0.49581  | -0.02295 | 0.6208   | -0.06272 | 0.17604  |
| 7.44E-05 | -0.22476 | 9.25E-07 | -0.00983 | 0.83229  | -0.08392 | 0.07001  | -0.15918 | 0.00056  |
| 1.64E-05 | -0.22336 | 1.09E-06 | -0.02045 | 0.65934  | 0.005105 | 0.91239  | -0.25536 | 2.19E-08 |
| 0.12789  | 0.092202 | 0.04644  | 0.081336 | 0.07911  | -0.01907 | 0.68102  | -0.07038 | 0.12883  |
| 9.72E-06 | -0.20638 | 6.91E-06 | -0.04001 | 0.38828  | -0.05057 | 0.27542  | -0.20716 | 6.36E-06 |
| 0.11995  | 0.107177 | 0.02053  | 0.038317 | 0.40874  | -0.0192  | 0.67891  | -0.06482 | 0.16194  |
| 0.00189  | -0.10191 | 0.02766  | -0.00738 | 0.87364  | -0.07573 | 0.10214  | -0.11623 | 0.01195  |
| 0.00113  | 0.091158 | 0.04898  | -0.05334 | 0.24993  | -0.00179 | 0.96917  | -0.0744  | 0.10832  |
| 0.51494  | 0.004394 | 0.92456  | 0.043328 | 0.35017  | -0.03254 | 0.48295  | -0.16948 | 0.00023  |

|          |          |          |          |          |          |         |          |          |
|----------|----------|----------|----------|----------|----------|---------|----------|----------|
| 0.5905   | 0.008576 | 0.85336  | -0.02245 | 0.62847  | -0.04036 | 0.38417 | 0.038835 | 0.40243  |
| 8.15E-07 | -0.1565  | 0.00069  | 0.009    | 0.84619  | -0.02386 | 0.60705 | -0.07724 | 0.09549  |
| 0.03794  | -0.10559 | 0.02249  | -0.04703 | 0.3105   | -0.07983 | 0.08483 | -0.04963 | 0.28444  |
| 0.01727  | -0.13157 | 0.0044   | -0.04271 | 0.35711  | -0.07311 | 0.11463 | -0.04824 | 0.29816  |
| 4.53E-11 | -0.22043 | 1.51E-06 | 0.061689 | 0.18325  | -0.03966 | 0.39247 | -0.19024 | 3.51E-05 |
| 7.18E-05 | 0.14737  | 0.00141  | 0.001994 | 0.96572  | 0.042709 | 0.35711 | 0.004137 | 0.92896  |
| 0.01801  | -0.09486 | 0.04045  | 0.188105 | 4.30E-05 | 0.078642 | 0.0896  | -0.07634 | 0.09943  |
| 0.00035  | -0.12847 | 0.00543  | 0.219188 | 1.73E-06 | 0.060589 | 0.1912  | -0.16524 | 0.00034  |
| 7.66E-06 | -0.21152 | 4.01E-06 | 0.038692 | 0.40416  | -0.03684 | 0.42705 | -0.17558 | 0.00014  |
| 0.00142  | -0.08566 | 0.06439  | 0.212231 | 3.71E-06 | 0.026783 | 0.56371 | -0.22653 | 7.55E-07 |
| 0.13703  | -0.06395 | 0.1677   | -0.02548 | 0.58289  | -0.01716 | 0.71147 | -0.22887 | 5.76E-07 |
| 0.43381  | 0.042481 | 0.35968  | 0.013695 | 0.76786  | 0.045669 | 0.32473 | -0.05937 | 0.2003   |
| 0.00296  | -0.14355 | 0.00187  | 0.027719 | 0.55016  | -0.14057 | 0.00233 | -0.12282 | 0.00788  |
| 0.06162  | -0.11359 | 0.01404  | -0.0383  | 0.409    | 0.006669 | 0.88572 | -0.15651 | 0.00069  |
| 0.0007   | -0.04753 | 0.30534  | 0.040462 | 0.38298  | 0.024571 | 0.59636 | -0.16783 | 0.00027  |
| 5.24E-17 | -0.3369  | 7.40E-14 | 0.007992 | 0.86325  | -0.04249 | 0.35962 | -0.20048 | 1.27E-05 |
| 0.00902  | -0.13185 | 0.00431  | -0.0501  | 0.27991  | -0.02907 | 0.53085 | -0.21788 | 2.00E-06 |
| 0.55894  | -0.00164 | 0.97187  | -0.00769 | 0.8684   | 0.056612 | 0.22205 | -0.17207 | 0.00019  |
| 0.08721  | -0.09367 | 0.04305  | -0.00532 | 0.90876  | -0.0555  | 0.2313  | -0.08717 | 0.05978  |
| 1.43E-05 | -0.23219 | 3.90E-07 | 0.018031 | 0.69754  | -0.05118 | 0.26967 | -0.28756 | 2.42E-10 |
| 0.21572  | -0.03724 | 0.4221   | 0.058096 | 0.21015  | 0.019438 | 0.67523 | -0.07437 | 0.10847  |
| 0.11397  | 0.075371 | 0.10379  | 0.006665 | 0.88578  | -0.02888 | 0.53353 | -0.12708 | 0.00596  |
| 0.11382  | 0.098924 | 0.03258  | 0.050046 | 0.28046  | 0.128138 | 0.00555 | -0.07196 | 0.12042  |
| 6.96E-05 | -0.15691 | 0.00067  | 0.016188 | 0.72715  | 0.055285 | 0.23309 | -0.16268 | 0.00042  |
| 0.00207  | -0.12944 | 0.00508  | -0.00851 | 0.85454  | -0.02771 | 0.55035 | -0.21629 | 2.39E-06 |
| 8.74E-12 | -0.35309 | 3.70E-15 | -0.01276 | 0.78324  | -0.01507 | 0.7454  | -0.23386 | 3.20E-07 |
| 0.71445  | 0.124229 | 0.00719  | 0.018885 | 0.68397  | -0.01433 | 0.75748 | -0.1323  | 0.00418  |
| 1.75E-10 | -0.30666 | 1.26E-11 | 0.001623 | 0.9721   | -0.03836 | 0.40819 | -0.1625  | 0.00042  |
| 0.00021  | -0.15424 | 0.00083  | -0.02166 | 0.64058  | -0.00403 | 0.93071 | -0.17614 | 0.00013  |
| 0.36585  | 0.009525 | 0.83734  | 0.043128 | 0.3524   | -0.01914 | 0.67995 | 0.00703  | 0.87957  |
| 9.92E-06 | -0.25048 | 4.11E-08 | -0.03518 | 0.44816  | 0.042076 | 0.36428 | -0.19607 | 1.98E-05 |
| 0.00044  | 0.227424 | 6.81E-07 | -0.04742 | 0.30648  | 0.029508 | 0.52472 | -0.06263 | 0.17665  |
| 1.39E-06 | -0.24683 | 6.53E-08 | 0.047403 | 0.30667  | 0.003912 | 0.93281 | -0.19059 | 3.39E-05 |
| 4.35E-07 | -0.2334  | 3.38E-07 | 0.00951  | 0.8376   | -0.03546 | 0.44458 | -0.15787 | 0.00062  |
| 0.6853   | 0.034003 | 0.46352  | 0.308322 | 9.65E-12 | 0.072718 | 0.11658 | 0.012811 | 0.78245  |
| 0.01631  | 0.089478 | 0.05332  | 0.006138 | 0.89476  | 0.004232 | 0.92732 | -0.09219 | 0.04647  |
| 0.4605   | -0.03373 | 0.46708  | 0.02544  | 0.58343  | -0.0149  | 0.74814 | -0.17034 | 0.00022  |
| 1.12E-16 | -0.35979 | 1.02E-15 | -0.06725 | 0.14679  | -0.07879 | 0.08898 | -0.25959 | 1.25E-08 |
| 0.2778   | 0.084186 | 0.06912  | 0.009266 | 0.8417   | 0.055684 | 0.22973 | -0.11102 | 0.01639  |
| 0.01986  | 0.131873 | 0.00431  | 0.02707  | 0.55954  | 0.021522 | 0.64272 | -0.04363 | 0.34683  |
| 0.26735  | -0.02848 | 0.53929  | -0.04948 | 0.28598  | -0.1137  | 0.01396 | -0.07557 | 0.1029   |
| 0.71095  | -0.07316 | 0.11434  | 0.032052 | 0.48958  | -0.02271 | 0.62453 | -0.15092 | 0.00107  |
| 0.00029  | -0.15593 | 0.00072  | 0.013107 | 0.77756  | -0.05219 | 0.26036 | -0.28235 | 5.23E-10 |
| 2.21E-09 | 0.252095 | 3.34E-08 | 0.196163 | 1.96E-05 | -0.03114 | 0.50209 | 0.042751 | 0.35663  |
| 1.41E-11 | -0.35774 | 1.52E-15 | -0.04361 | 0.34703  | -0.04817 | 0.29894 | -0.21767 | 2.05E-06 |

|          |          |          |          |          |          |          |          |          |
|----------|----------|----------|----------|----------|----------|----------|----------|----------|
| 5.01E-05 | -0.20324 | 9.58E-06 | -0.01484 | 0.74908  | -0.05565 | 0.23003  | -0.23586 | 2.52E-07 |
| 1.15E-05 | -0.2023  | 1.05E-05 | -0.01989 | 0.66806  | -0.06527 | 0.15909  | -0.26575 | 5.45E-09 |
| 0.09327  | 0.086785 | 0.06094  | 0.201745 | 1.12E-05 | -0.0228  | 0.62309  | -0.14119 | 0.00223  |
| 1.46E-18 | -0.44443 | 4.98E-24 | -0.03706 | 0.4243   | -0.07953 | 0.08603  | -0.22603 | 8.00E-07 |
| 3.64E-15 | -0.32085 | 1.21E-12 | 0.021761 | 0.63903  | 0.082548 | 0.07473  | -0.23903 | 1.72E-07 |
| 0.1598   | -0.02014 | 0.66421  | 0.042436 | 0.36019  | -0.0376  | 0.4176   | -0.09232 | 0.04615  |
| 0.33781  | -0.01965 | 0.67193  | 0.176435 | 0.00013  | -0.02449 | 0.59754  | -0.12431 | 0.00715  |
| 1.01E-10 | 0.298097 | 4.87E-11 | -0.00695 | 0.88095  | 0.062688 | 0.17625  | 0.042634 | 0.35795  |
| 1.69E-06 | -0.18946 | 3.78E-05 | 0.066927 | 0.14873  | -0.03724 | 0.4221   | -0.25211 | 3.33E-08 |
| 0.00587  | -0.17034 | 0.00022  | -0.04139 | 0.37216  | -0.04375 | 0.3455   | -0.17739 | 0.00012  |
| 6.82E-25 | -0.47339 | 1.86E-27 | -0.04031 | 0.38478  | -0.03787 | 0.41427  | -0.17165 | 0.00019  |
| 3.40E-05 | -0.20555 | 7.54E-06 | -0.01774 | 0.70212  | -0.06911 | 0.13589  | -0.20315 | 9.66E-06 |
| 0.46965  | -0.09132 | 0.04858  | 0.029859 | 0.51978  | -0.08063 | 0.08174  | -0.0936  | 0.04319  |
| 0.4186   | -0.05049 | 0.27623  | -0.01503 | 0.74605  | -0.04132 | 0.37301  | -0.10239 | 0.02693  |
| 0.04531  | 0.117271 | 0.01121  | 0.079432 | 0.08641  | 0.022524 | 0.62732  | 0.031631 | 0.4953   |
| 0.36592  | -0.04396 | 0.34317  | -0.00735 | 0.87418  | -0.04001 | 0.38838  | -0.14813 | 0.00133  |
| 0.21544  | -0.08025 | 0.08319  | -0.00299 | 0.94861  | -0.04403 | 0.34244  | -0.17568 | 0.00014  |
| 0.11218  | -0.06591 | 0.15502  | 0.018194 | 0.69495  | -0.03797 | 0.413    | -0.16965 | 0.00023  |
| 0.0048   | -0.15218 | 0.00097  | 0.0413   | 0.3732   | -0.02787 | 0.548    | -0.15671 | 0.00068  |
| 1.53E-07 | -0.27011 | 2.99E-09 | -0.02819 | 0.54341  | -0.05553 | 0.231    | -0.21697 | 2.21E-06 |
| 0.33083  | -0.08065 | 0.08167  | 0.006467 | 0.88914  | -0.07008 | 0.13049  | -0.14757 | 0.00138  |
| 7.40E-16 | -0.35487 | 2.64E-15 | -0.07344 | 0.11297  | -0.01493 | 0.74769  | -0.30036 | 3.42E-11 |
| 0.00076  | 0.173862 | 0.00016  | 0.040548 | 0.38197  | 0.019166 | 0.67952  | -0.03876 | 0.40335  |
| 0.00021  | -0.19753 | 1.71E-05 | 0.03929  | 0.39693  | -0.00922 | 0.84243  | -0.13861 | 0.00268  |
| 0.93909  | 0.036087 | 0.43657  | 0.074086 | 0.10984  | 0.061188 | 0.18684  | 0.116779 | 0.01155  |
| 0.0151   | 0.003377 | 0.94198  | -0.02216 | 0.63296  | -0.10414 | 0.02441  | -0.19944 | 1.41E-05 |
| 0.03384  | 0.022983 | 0.62032  | -0.04896 | 0.29105  | -0.06373 | 0.16917  | 0.037802 | 0.41506  |
| 7.78E-15 | -0.3498  | 6.90E-15 | -0.01493 | 0.74759  | -0.09444 | 0.04136  | -0.2453  | 7.92E-08 |
| 0.01618  | 0.193155 | 2.64E-05 | 0.063764 | 0.16893  | 0.092512 | 0.0457   | -0.10017 | 0.03044  |
| 0.00922  | -0.11174 | 0.0157   | -0.00195 | 0.96653  | -0.02221 | 0.63208  | -0.201   | 1.20E-05 |
| 0.00208  | 0.229808 | 5.16E-07 | 0.063706 | 0.16932  | 0.077457 | 0.09455  | -0.1086  | 0.0189   |
| 3.31E-05 | -0.22395 | 1.01E-06 | 0.029566 | 0.5239   | -0.02479 | 0.5931   | -0.18806 | 4.32E-05 |
| 0.0003   | 0.218867 | 1.80E-06 | 0.082919 | 0.07342  | -0.03501 | 0.45042  | 0.106973 | 0.02077  |
| 0.30469  | 0.076795 | 0.09741  | 0.085487 | 0.06492  | -0.0053  | 0.90908  | 0.007523 | 0.8712   |
| 0.77553  | 0.035437 | 0.44488  | 0.151964 | 0.00099  | -0.02882 | 0.5345   | -0.00837 | 0.8569   |
| 0.01708  | 0.158667 | 0.00058  | 0.053515 | 0.24842  | 0.002435 | 0.95815  | 0.084298 | 0.06875  |
| 0.01931  | 0.154581 | 0.0008   | 0.069277 | 0.13495  | -0.01905 | 0.6813   | 0.008344 | 0.85728  |
| 0.00666  | 0.147681 | 0.00137  | 0.102487 | 0.02678  | -0.03117 | 0.5016   | -0.08236 | 0.0754   |
| 0.01466  | -0.0929  | 0.0448   | 0.066276 | 0.15273  | -0.02929 | 0.52779  | -0.10383 | 0.02485  |
| 8.52E-10 | -0.27193 | 2.32E-09 | 0.006393 | 0.89041  | -0.19242 | 2.84E-05 | -0.22504 | 8.96E-07 |
| 0.00512  | -0.04356 | 0.3476   | 0.082346 | 0.07544  | -0.00442 | 0.92417  | -0.16036 | 0.0005   |
| 2.59E-05 | -0.1833  | 6.77E-05 | 0.040743 | 0.37968  | 0.001457 | 0.97495  | -0.1085  | 0.01901  |
| 0.40676  | 0.071255 | 0.12413  | 0.008106 | 0.86131  | -0.06448 | 0.1642   | -0.15562 | 0.00074  |
| 8.78E-11 | -0.27231 | 2.20E-09 | -0.01204 | 0.7952   | -0.07634 | 0.09939  | -0.20168 | 1.12E-05 |
| 0.00178  | -0.18897 | 3.96E-05 | -0.05819 | 0.20944  | -0.07603 | 0.10079  | -0.09542 | 0.03927  |

|          |          |          |          |         |          |         |          |          |
|----------|----------|----------|----------|---------|----------|---------|----------|----------|
| 0.21912  | -0.00742 | 0.87293  | -0.05952 | 0.19917 | -0.05621 | 0.22536 | -0.0942  | 0.04188  |
| 1.25E-07 | -0.21898 | 1.77E-06 | 0.006931 | 0.88125 | -0.0412  | 0.37431 | -0.08565 | 0.06442  |
| 3.59E-12 | -0.39484 | 7.13E-19 | -0.01529 | 0.74181 | -0.08853 | 0.0559  | -0.15213 | 0.00097  |
| 0.76983  | 0.010089 | 0.82786  | 0.008288 | 0.85823 | 0.037677 | 0.41661 | 0.008533 | 0.85409  |
| 0.25062  | 0.161757 | 0.00045  | 0.086298 | 0.06241 | 0.002718 | 0.95328 | 0.150804 | 0.00108  |
| 0.01318  | 0.095503 | 0.03911  | 0.018981 | 0.68246 | 0.017238 | 0.71022 | 0.054882 | 0.23653  |
| 0.74019  | 0.034871 | 0.45219  | 0.029174 | 0.52942 | -0.00099 | 0.98293 | -0.05669 | 0.22141  |
| 2.35E-11 | -0.31719 | 2.25E-12 | -0.00959 | 0.8363  | -0.03268 | 0.48112 | -0.27507 | 1.49E-09 |
| 0.03288  | 0.120145 | 0.00935  | -0.00555 | 0.90475 | 0.027573 | 0.55226 | -0.15397 | 0.00084  |
| 0.14946  | 0.124061 | 0.00727  | 0.050416 | 0.27691 | -0.00558 | 0.90433 | -0.06846 | 0.13962  |
| 0.61665  | 0.107836 | 0.01976  | 0.172335 | 0.00018 | 0.049497 | 0.28578 | -0.15618 | 0.00071  |
| 6.47E-20 | -0.32973 | 2.63E-13 | 0.034532 | 0.45659 | -0.00763 | 0.86943 | -0.16116 | 0.00047  |
| 1.20E-07 | -0.35376 | 3.26E-15 | -0.03125 | 0.50051 | -0.06256 | 0.17715 | -0.20424 | 8.63E-06 |
| 0.0031   | 0.21114  | 4.17E-06 | 0.046957 | 0.31126 | 0.092954 | 0.04467 | -0.1882  | 4.26E-05 |
| 3.13E-08 | -0.31355 | 4.11E-12 | 0.14372  | 0.00185 | -0.00681 | 0.88333 | -0.1014  | 0.02844  |
| 0.66057  | 0.043852 | 0.34437  | 0.00287  | 0.95068 | -0.01197 | 0.79644 | -0.07721 | 0.0956   |
| 0.02001  | -0.08086 | 0.0809   | -0.00193 | 0.96685 | -0.01034 | 0.82365 | -0.20196 | 1.09E-05 |
| 0.31971  | 0.053241 | 0.25085  | 0.013771 | 0.76662 | 0.00218  | 0.96252 | -0.16997 | 0.00022  |
| 0.83477  | -0.08647 | 0.0619   | -0.02386 | 0.60696 | -0.0661  | 0.1538  | -0.07411 | 0.10974  |
| 0.00019  | -0.14171 | 0.00214  | 0.011864 | 0.79818 | -0.02331 | 0.61541 | -0.16085 | 0.00048  |
| 0.07016  | -0.04671 | 0.3138   | 0.050737 | 0.27386 | 0.10928  | 0.01816 | -0.12784 | 0.00566  |
| 0.01872  | 0.08865  | 0.05557  | -0.08265 | 0.07437 | -0.06119 | 0.1868  | 0.002425 | 0.95832  |
| 0.00209  | -0.23622 | 2.41E-07 | -0.02074 | 0.65479 | -0.0313  | 0.49984 | -0.02305 | 0.61937  |
| 0.03902  | -0.15625 | 0.0007   | -0.00877 | 0.85006 | -0.05108 | 0.27063 | -0.11961 | 0.00968  |
| 0.70801  | 0.016632 | 0.71999  | 0.059783 | 0.19718 | 0.024625 | 0.59556 | -0.02731 | 0.55608  |
| 0.06248  | -0.07578 | 0.10191  | 0.062102 | 0.18033 | -0.01262 | 0.78562 | -0.13544 | 0.00336  |
| 0.11304  | 0.122373 | 0.00811  | 0.010731 | 0.8171  | 0.053562 | 0.248   | 0.044194 | 0.34062  |
| 0.07288  | -0.09691 | 0.0363   | -0.01899 | 0.68228 | 0.011571 | 0.80306 | -0.08749 | 0.05885  |
| 0.30597  | -0.05088 | 0.27252  | 0.153847 | 0.00085 | -0.02717 | 0.55816 | -0.1051  | 0.02312  |
| 1.22E-18 | -0.4199  | 2.26E-21 | -0.01084 | 0.81522 | -0.07385 | 0.11097 | -0.21428 | 2.97E-06 |
| 0.02033  | -0.02765 | 0.55117  | 0.065534 | 0.15738 | -0.0511  | 0.27048 | -0.10287 | 0.02621  |
| 0.86665  | -0.06872 | 0.13815  | 0.034052 | 0.46289 | -0.04943 | 0.28639 | -0.17199 | 0.00019  |
| 2.26E-06 | -0.27134 | 2.52E-09 | -0.03474 | 0.4539  | 0.034752 | 0.45373 | -0.28254 | 5.08E-10 |
| 0.0357   | -0.08054 | 0.08211  | 0.160361 | 0.0005  | -0.02916 | 0.52962 | -0.14243 | 0.00203  |
| 0.02687  | 0.020348 | 0.66096  | -0.0954  | 0.03933 | -0.14045 | 0.00235 | -0.07632 | 0.09948  |
| 7.92E-05 | -0.1505  | 0.00111  | 0.026912 | 0.56184 | 0.012216 | 0.79233 | -0.05899 | 0.20319  |
| 0.63752  | 0.026293 | 0.57087  | -0.00097 | 0.98331 | -0.01264 | 0.78524 | -0.07767 | 0.09365  |
| 2.90E-12 | -0.31361 | 4.07E-12 | 0.01366  | 0.76844 | -0.03078 | 0.50699 | -0.24814 | 5.53E-08 |
| 2.99E-11 | -0.44405 | 5.51E-24 | -0.09125 | 0.04876 | -0.12186 | 0.00839 | -0.15446 | 0.00081  |
| 5.39E-08 | -0.25732 | 1.69E-08 | 0.051347 | 0.26813 | 0.000342 | 0.99412 | -0.15578 | 0.00073  |
| 4.21E-05 | -0.16573 | 0.00032  | 0.150132 | 0.00114 | -0.02753 | 0.55285 | -0.14138 | 0.00219  |
| 1.47E-05 | -0.10484 | 0.02347  | 0.032062 | 0.48945 | 0.074143 | 0.10956 | -0.06641 | 0.15191  |
| 0.03642  | -0.02343 | 0.61356  | 0.059731 | 0.19758 | -0.01887 | 0.68426 | -0.10928 | 0.01816  |
| 0.00369  | 0.096936 | 0.03625  | -0.05088 | 0.27247 | 0.036988 | 0.42519 | -0.0099  | 0.831    |
| 0.00032  | 0.134295 | 0.00364  | 0.046907 | 0.31177 | -0.00996 | 0.83    | -0.06706 | 0.14794  |

|          |          |          |          |         |          |         |          |          |
|----------|----------|----------|----------|---------|----------|---------|----------|----------|
| 0.05875  | -0.05447 | 0.24004  | 0.009902 | 0.831   | 0.050034 | 0.28058 | -0.1674  | 0.00028  |
| 8.83E-05 | -0.19408 | 2.41E-05 | -0.03868 | 0.4043  | -0.04127 | 0.37358 | -0.27176 | 2.38E-09 |
| 0.73224  | 0.003172 | 0.9455   | 0.023827 | 0.60754 | -0.01638 | 0.72412 | -0.14895 | 0.00125  |
| 0.07039  | -0.06789 | 0.14298  | -0.01801 | 0.69788 | -0.0682  | 0.14114 | -0.20616 | 7.07E-06 |
| 0.00803  | -0.14574 | 0.00159  | -0.02729 | 0.5564  | -0.03977 | 0.39117 | -0.16745 | 0.00028  |
| 0.51862  | -0.13279 | 0.00404  | -0.01025 | 0.82523 | 0.092337 | 0.04612 | -0.15276 | 0.00093  |
| 1.91E-06 | -0.19895 | 1.48E-05 | -0.00988 | 0.83129 | -0.01674 | 0.71828 | -0.11659 | 0.01169  |
| 0.56361  | 0.04402  | 0.34252  | 0.016241 | 0.7263  | 0.042631 | 0.35799 | -0.01522 | 0.74295  |
| 0.13291  | 0.07549  | 0.10325  | 0.123373 | 0.0076  | 0.035671 | 0.44188 | -0.00315 | 0.9459   |
| 0.02236  | 0.223516 | 1.07E-06 | 0.115396 | 0.01258 | 0.01775  | 0.70203 | 0.020427 | 0.65973  |
| 1.64E-16 | -0.34237 | 2.74E-14 | -0.02789 | 0.5477  | -0.06619 | 0.15326 | -0.2288  | 5.81E-07 |
| 0.94167  | 0.05814  | 0.20981  | 0.108977 | 0.01849 | -0.00441 | 0.92429 | -0.17802 | 0.00011  |
| 4.59E-06 | 0.299891 | 3.69E-11 | 0.025885 | 0.57686 | 0.11269  | 0.01483 | 0.011677 | 0.80129  |
| 3.33E-05 | 0.235723 | 2.56E-07 | -0.07207 | 0.11987 | 0.022259 | 0.63137 | 0.112031 | 0.01543  |
| 0.69492  | 0.046279 | 0.31831  | 0.051367 | 0.26795 | 0.007732 | 0.86764 | -0.06696 | 0.14851  |
| 5.49E-07 | -0.22607 | 7.96E-07 | 0.003275 | 0.94374 | -0.02216 | 0.63284 | -0.19898 | 1.48E-05 |
| 0.41165  | 0.019056 | 0.68126  | 0.068185 | 0.14122 | 0.006763 | 0.8841  | -0.15766 | 0.00063  |
| 0.07523  | 0.064603 | 0.16338  | 0.02149  | 0.64322 | -0.02643 | 0.56886 | -0.01782 | 0.70086  |
| 0.06572  | 0.066752 | 0.14979  | 0.086289 | 0.06243 | 0.014229 | 0.75909 | 0.136375 | 0.00315  |
| 0.96885  | 0.022615 | 0.62592  | 0.036182 | 0.43535 | -0.02285 | 0.62234 | -0.03146 | 0.4976   |
| 8.51E-09 | -0.26992 | 3.07E-09 | 0.020719 | 0.65517 | -0.04892 | 0.29141 | -0.251   | 3.85E-08 |
| 0.83299  | -0.02988 | 0.51943  | -0.00157 | 0.97303 | -0.00559 | 0.90415 | -0.14633 | 0.00152  |
| 1.94E-06 | -0.15476 | 0.00079  | -0.05377 | 0.24618 | -0.06194 | 0.18147 | -0.17032 | 0.00022  |
| 1.29E-06 | 0.278689 | 8.89E-10 | -0.07026 | 0.12948 | -0.02333 | 0.61498 | -0.04673 | 0.31364  |
| 0.25591  | -0.04385 | 0.34441  | 0.130139 | 0.00485 | 0.097616 | 0.03495 | -0.15934 | 0.00055  |
| 0.00029  | -0.13416 | 0.00368  | -0.02038 | 0.66039 | 0.003391 | 0.94174 | -0.19598 | 2.00E-05 |
| 1.74E-05 | -0.12921 | 0.00517  | -0.01317 | 0.77645 | 0.001551 | 0.97334 | -0.19032 | 3.48E-05 |
| 0.05103  | 0.022277 | 0.63111  | 0.077901 | 0.09267 | -0.07953 | 0.08601 | -0.02161 | 0.64136  |
| 0.1006   | 0.101279 | 0.02864  | 0.006148 | 0.89458 | -0.00232 | 0.9602  | -0.14655 | 0.00149  |
| 5.93E-12 | -0.30265 | 2.39E-11 | 0.030834 | 0.50624 | -0.04774 | 0.30324 | -0.26621 | 5.12E-09 |
| 6.61E-13 | -0.30512 | 1.61E-11 | 0.021782 | 0.6387  | -0.02698 | 0.56088 | -0.19544 | 2.11E-05 |
| 0.77231  | 0.013367 | 0.77327  | 0.141753 | 0.00214 | -0.01143 | 0.80538 | -0.01693 | 0.71516  |
| 9.21E-05 | -0.16576 | 0.00032  | -0.02574 | 0.57903 | -0.02403 | 0.6045  | -0.08486 | 0.06692  |
| 0.46678  | -0.01134 | 0.80695  | -0.03512 | 0.44901 | -0.07309 | 0.11471 | -0.09176 | 0.0475   |
| 9.76E-07 | -0.22364 | 1.05E-06 | -0.05712 | 0.21794 | -0.02058 | 0.65737 | -0.1142  | 0.01353  |
| 4.08E-08 | -0.3017  | 2.77E-11 | -0.05022 | 0.2788  | -0.06826 | 0.14078 | -0.10824 | 0.01929  |
| 0.21435  | -0.0251  | 0.58845  | 0.016506 | 0.72202 | 0.01425  | 0.75874 | -0.12988 | 0.00494  |
| 6.39E-28 | 0.541449 | 6.29E-37 | 0.085865 | 0.06374 | 0.06659  | 0.15079 | 0.054096 | 0.24331  |
| 4.28E-29 | 0.467607 | 9.56E-27 | 0.033167 | 0.4746  | 0.036562 | 0.43055 | 0.073179 | 0.11427  |
| 2.37E-25 | 0.52264  | 4.29E-34 | -0.00039 | 0.99338 | 0.048329 | 0.29732 | 0.161624 | 0.00045  |
| 1.33E-55 | 0.766553 | 1.75E-91 | 0.085917 | 0.06358 | 0.127728 | 0.00571 | 0.362857 | 5.59E-16 |
| 1.11E-28 | 0.604482 | 7.35E-48 | 0.107545 | 0.02009 | 0.10975  | 0.01767 | -0.00286 | 0.95079  |
| 1.65E-08 | 0.292168 | 1.21E-10 | 0.052853 | 0.25433 | 0.102092 | 0.02738 | 0.040189 | 0.3862   |
| 8.64E-24 | 0.498889 | 9.30E-31 | 0.041538 | 0.37045 | -0.05138 | 0.26778 | 0.010754 | 0.8167   |
| 8.39E-13 | 0.381405 | 1.28E-17 | 0.045947 | 0.32179 | 0.075787 | 0.1019  | 0.0242   | 0.60191  |

|          |          |          |          |          |          |         |          |          |
|----------|----------|----------|----------|----------|----------|---------|----------|----------|
| 3.87E-12 | 0.475366 | 1.06E-27 | 0.087145 | 0.05987  | 0.095826 | 0.03845 | -0.07363 | 0.11204  |
| 3.29E-39 | 0.658586 | 2.11E-59 | 0.029668 | 0.52246  | 0.097393 | 0.03538 | -0.04564 | 0.32508  |
| 1.66E-14 | 0.43142  | 1.36E-22 | 0.079809 | 0.08492  | 0.001418 | 0.97563 | 0.084106 | 0.06939  |
| 5.09E-63 | 0.776863 | 1.84E-95 | 0.102355 | 0.02698  | 0.146013 | 0.00156 | 0.184941 | 5.80E-05 |
| 1.65E-42 | 0.645097 | 2.64E-56 | 0.010708 | 0.81747  | 0.080927 | 0.08063 | 0.193165 | 2.64E-05 |
| 0.27362  | 0.123491 | 0.00755  | 0.046511 | 0.31588  | -0.01841 | 0.69149 | -0.14175 | 0.00214  |
| 8.90E-52 | 0.732008 | 1.60E-79 | 0.129352 | 0.00512  | 0.136801 | 0.00305 | 0.056506 | 0.22292  |
| 1.36E-59 | 0.751234 | 6.17E-86 | 0.023729 | 0.60901  | 0.102816 | 0.0263  | 0.166131 | 0.00031  |
| 9.32E-08 | 0.357845 | 1.49E-15 | 0.08516  | 0.06596  | 0.00888  | 0.84821 | 0.03797  | 0.41299  |
| 8.75E-39 | 0.619569 | 7.48E-51 | 0.008613 | 0.85273  | 0.066617 | 0.15062 | -0.0011  | 0.98112  |
| 3.42E-12 | 0.488218 | 2.42E-29 | 0.104822 | 0.02349  | 0.102251 | 0.02714 | 0.079514 | 0.08609  |
| 9.96E-13 | 0.467971 | 8.64E-27 | 0.085362 | 0.06531  | 0.049976 | 0.28113 | -0.07361 | 0.11213  |
| 2.92E-27 | 0.497062 | 1.64E-30 | -0.07367 | 0.11186  | 0.030528 | 0.51047 | 0.110018 | 0.01739  |
| 2.21E-61 | 0.78216  | 1.37E-97 | 0.078277 | 0.0911   | 0.138293 | 0.00275 | 0.248676 | 5.17E-08 |
| 3.61E-14 | 0.334148 | 1.21E-13 | 0.109854 | 0.01756  | 0.016618 | 0.7202  | -0.04055 | 0.38191  |
| 1.74E-23 | 0.481249 | 1.91E-28 | 0.005198 | 0.9108   | 0.088619 | 0.05566 | 0.008933 | 0.84733  |
| 9.08E-53 | 0.708779 | 1.77E-72 | 0.040787 | 0.37918  | 0.060513 | 0.19176 | 0.119684 | 0.00963  |
| 1.26E-34 | 0.658364 | 2.38E-59 | 0.083193 | 0.07248  | 0.111321 | 0.0161  | 0.030658 | 0.50868  |
| 1.74E-19 | 0.538427 | 1.84E-36 | -0.05661 | 0.22207  | 0.130683 | 0.00467 | 0.045933 | 0.32194  |
| 8.58E-14 | 0.413256 | 1.09E-20 | 0.050501 | 0.27611  | -0.04738 | 0.30687 | 0.080022 | 0.08409  |
| 5.18E-46 | 0.64925  | 3.06E-57 | -0.03314 | 0.475    | 0.066136 | 0.1536  | 0.195125 | 2.17E-05 |
| 9.98E-13 | 0.449574 | 1.30E-24 | 0.036788 | 0.4277   | 0.119535 | 0.00972 | 0.055129 | 0.23442  |
| 1.28E-41 | 0.660329 | 8.19E-60 | 0.052799 | 0.25481  | 0.062952 | 0.17443 | 0.107014 | 0.02072  |
| 8.73E-38 | 0.631284 | 2.72E-53 | 0.045146 | 0.33031  | 0.132046 | 0.00426 | 0.088198 | 0.05684  |
| 2.17E-29 | 0.554584 | 5.13E-39 | 0.046717 | 0.31374  | 0.005109 | 0.91231 | 0.093563 | 0.04329  |
| 1.49E-28 | 0.585781 | 2.30E-44 | 0.084641 | 0.06763  | 0.035362 | 0.44584 | -0.0507  | 0.27425  |
| 3.00E-26 | 0.516603 | 3.20E-33 | 0.040803 | 0.37899  | 0.083699 | 0.07075 | 0.043971 | 0.34306  |
| 2.13E-29 | 0.520307 | 9.38E-34 | -0.02122 | 0.64733  | 0.040337 | 0.38447 | 0.031176 | 0.50153  |
| 1.89E-30 | 0.566824 | 4.78E-41 | 0.052658 | 0.25608  | 0.050078 | 0.28015 | 0.12285  | 0.00787  |
| 7.17E-13 | 0.389597 | 2.24E-18 | 0.182918 | 7.01E-05 | 0.045806 | 0.32328 | 0.017424 | 0.70725  |
| 7.33E-13 | 0.404279 | 8.65E-20 | -0.04712 | 0.30954  | 0.035664 | 0.44196 | 0.13017  | 0.00484  |
| 3.05E-42 | 0.6137   | 1.14E-49 | 0.102725 | 0.02643  | 0.102495 | 0.02677 | 0.011469 | 0.80477  |
| 5.42E-22 | 0.517621 | 2.29E-33 | 0.045693 | 0.32448  | 0.004616 | 0.92075 | 0.04514  | 0.33037  |
| 1.06E-39 | 0.616142 | 3.70E-50 | 0.074968 | 0.10566  | 0.072816 | 0.11608 | 0.00273  | 0.95308  |
| 4.10E-51 | 0.65055  | 1.55E-57 | 0.062684 | 0.17627  | 0.083432 | 0.07166 | 0.08254  | 0.07476  |
| 2.33E-54 | 0.776932 | 1.73E-95 | 0.079245 | 0.08715  | 0.129347 | 0.00512 | 0.252038 | 3.36E-08 |
| 3.55E-33 | 0.585959 | 2.13E-44 | 0.040118 | 0.38705  | -0.00369 | 0.93663 | 0.00095  | 0.98366  |
| 0.02907  | 0.206133 | 7.09E-06 | -0.03487 | 0.4522   | 0.012636 | 0.78535 | -0.06056 | 0.19142  |
| 1.93E-38 | 0.667911 | 1.23E-61 | 0.017398 | 0.70766  | 0.157043 | 0.00066 | -0.03352 | 0.46993  |
| 4.41E-05 | 0.137059 | 0.003    | 0.006778 | 0.88386  | -0.12385 | 0.00737 | -0.02957 | 0.52391  |
| 4.33E-13 | 0.317122 | 2.27E-12 | -0.02751 | 0.55319  | -0.00963 | 0.8356  | -0.05381 | 0.24584  |
| 8.54E-60 | 0.719867 | 9.43E-76 | 0.031565 | 0.4962   | 0.122225 | 0.00819 | 0.226171 | 7.87E-07 |
| 2.60E-14 | 0.384813 | 6.24E-18 | 0.053141 | 0.25175  | -0.02813 | 0.54429 | 0.036577 | 0.43036  |
| 4.57E-13 | 0.405923 | 5.95E-20 | -0.03221 | 0.48743  | 0.11349  | 0.01413 | -0.03217 | 0.488    |
| 1.64E-44 | 0.623344 | 1.26E-51 | 0.021335 | 0.64561  | 0.067848 | 0.14321 | 0.212169 | 3.74E-06 |

|          |          |          |          |         |          |         |          |          |
|----------|----------|----------|----------|---------|----------|---------|----------|----------|
| 6.17E-16 | 0.439664 | 1.70E-23 | 0.014121 | 0.76086 | 0.063782 | 0.16881 | 0.098263 | 0.03376  |
| 1.00E-36 | 0.636926 | 1.67E-54 | -0.00237 | 0.95923 | 0.049758 | 0.28324 | 0.120958 | 0.00888  |
| 1.15E-34 | 0.655413 | 1.17E-58 | 0.085763 | 0.06406 | 0.023751 | 0.60867 | -0.04992 | 0.28165  |
| 1.39E-45 | 0.649594 | 2.55E-57 | 0.081733 | 0.07765 | 0.10853  | 0.01898 | 0.138127 | 0.00278  |
| 4.10E-10 | 0.39215  | 1.29E-18 | 0.023893 | 0.60654 | 0.038565 | 0.40571 | -0.18263 | 7.20E-05 |
| 4.21E-12 | 0.221747 | 1.30E-06 | -0.02967 | 0.52241 | -0.07823 | 0.0913  | -0.03185 | 0.49233  |
| 2.92E-58 | 0.6059   | 3.91E-48 | 0.020307 | 0.6616  | 0.026999 | 0.56058 | 0.006302 | 0.89197  |
| 1.79E-09 | 0.398799 | 2.97E-19 | 0.127337 | 0.00586 | 0.076983 | 0.09659 | -0.07153 | 0.1227   |
| 4.38E-29 | 0.519329 | 1.30E-33 | 0.053031 | 0.25273 | -0.02822 | 0.54303 | 0.12219  | 0.00821  |
| 4.51E-16 | 0.386474 | 4.38E-18 | 0.074392 | 0.10837 | -0.0093  | 0.84109 | 0.067213 | 0.147    |
| 1.05E-14 | 0.43696  | 3.39E-23 | 0.07566  | 0.10247 | 0.009333 | 0.84057 | 0.063303 | 0.17203  |
| 1.60E-22 | 0.483186 | 1.08E-28 | 0.051164 | 0.26985 | -0.01628 | 0.72571 | 0.052653 | 0.25613  |
| 3.24E-35 | 0.643948 | 4.77E-56 | -0.00693 | 0.88135 | 0.142433 | 0.00203 | 0.110068 | 0.01734  |
| 3.47E-40 | 0.645022 | 2.75E-56 | 0.046704 | 0.31388 | 0.093863 | 0.04262 | 0.236657 | 2.29E-07 |
| 1.08E-26 | 0.542862 | 3.79E-37 | 0.023337 | 0.61494 | 0.030494 | 0.51094 | -0.02251 | 0.62752  |
| 7.38E-08 | 0.444044 | 5.51E-24 | -0.02617 | 0.57268 | 0.16782  | 0.00027 | -0.07093 | 0.12584  |
| 5.03E-10 | 0.273704 | 1.81E-09 | 0.008023 | 0.86272 | -0.01679 | 0.71744 | -0.1321  | 0.00424  |
| 3.79E-86 | 0.701729 | 1.78E-70 | 0.044799 | 0.33404 | 0.02929  | 0.52778 | 0.12881  | 0.00531  |
| 1.28E-09 | 0.229207 | 5.54E-07 | -0.04805 | 0.30012 | -0.10996 | 0.01745 | 0.041801 | 0.36743  |
| 1.58E-28 | 0.506739 | 7.85E-32 | 0.028928 | 0.53289 | 0.03973  | 0.39166 | 0.207689 | 6.02E-06 |
| 1.24E-34 | 0.612372 | 2.10E-49 | 0.022933 | 0.62107 | 0.030237 | 0.51451 | 0.125969 | 0.00641  |
| 1.37E-14 | 0.420744 | 1.85E-21 | 0.003802 | 0.93469 | 0.047821 | 0.30243 | -0.00685 | 0.88268  |
| 5.91E-16 | 0.471377 | 3.30E-27 | 0.044807 | 0.33395 | 0.143179 | 0.00192 | -0.01226 | 0.79163  |
| 2.14E-24 | 0.572531 | 5.05E-42 | -0.01463 | 0.75255 | 0.065684 | 0.15643 | -0.05462 | 0.23874  |
| 7.02E-10 | 0.367429 | 2.25E-16 | -0.00821 | 0.85963 | -0.04798 | 0.30083 | -0.03625 | 0.43447  |
| 2.64E-29 | 0.555157 | 4.14E-39 | 0.014737 | 0.75077 | 0.027213 | 0.55747 | 0.111982 | 0.01547  |
| 8.34E-28 | 0.602957 | 1.45E-47 | 0.062643 | 0.17656 | 0.043523 | 0.34801 | 0.029805 | 0.52055  |
| 3.82E-38 | 0.594741 | 5.19E-46 | 0.006604 | 0.88682 | 0.093496 | 0.04344 | 0.068458 | 0.13964  |
| 2.81E-14 | 0.445943 | 3.36E-24 | 0.018764 | 0.68588 | 0.088429 | 0.05619 | 0.027873 | 0.54794  |
| 1.34E-14 | 0.519239 | 1.34E-33 | -0.04422 | 0.34028 | 0.172292 | 0.00018 | 0.007239 | 0.87601  |
| 1.44E-34 | 0.536787 | 3.29E-36 | 0.075283 | 0.1042  | 0.024766 | 0.59345 | 0.210166 | 4.63E-06 |
| 2.11E-30 | 0.537502 | 2.56E-36 | 0.129682 | 0.005   | 0.020571 | 0.65748 | 0.173264 | 0.00017  |
| 2.73E-10 | 0.325676 | 5.33E-13 | 0.065676 | 0.15649 | 0.017743 | 0.70214 | 0.048188 | 0.29873  |
| 2.41E-28 | 0.499779 | 7.05E-31 | 0.038913 | 0.40148 | 0.070215 | 0.12973 | 0.160373 | 0.0005   |
| 3.98E-39 | 0.593282 | 9.70E-46 | 0.027665 | 0.55094 | 0.086507 | 0.06177 | 0.194836 | 2.24E-05 |
| 6.47E-41 | 0.663952 | 1.12E-60 | 0.022778 | 0.62345 | 0.136287 | 0.00317 | 0.210478 | 4.48E-06 |
| 8.03E-38 | 0.549927 | 2.89E-38 | 0.041047 | 0.37614 | 0.014705 | 0.75128 | 0.138899 | 0.00263  |
| 2.06E-22 | 0.468741 | 6.95E-27 | 0.124021 | 0.00729 | 0.11601  | 0.01212 | 0.153998 | 0.00084  |
| 5.32E-15 | 0.463025 | 3.42E-26 | 0.065001 | 0.1608  | 0.051504 | 0.26667 | -0.0852  | 0.06581  |
| 5.18E-50 | 0.687732 | 1.14E-66 | 0.13007  | 0.00487 | 0.065463 | 0.15783 | 0.18473  | 5.92E-05 |
| 1.78E-35 | 0.687147 | 1.62E-66 | 0.041198 | 0.37439 | 0.144781 | 0.00171 | 0.104296 | 0.0242   |
| 1.11E-43 | 0.622327 | 2.04E-51 | 0.023924 | 0.60608 | 0.11368  | 0.01397 | 0.160643 | 0.00049  |
| 1.41E-22 | 0.444504 | 4.89E-24 | 0.105357 | 0.02278 | 0.057927 | 0.21148 | 0.124032 | 0.00728  |
| 8.71E-24 | 0.455172 | 2.91E-25 | 0.02302  | 0.61976 | -0.00541 | 0.90725 | 0.010344 | 0.82358  |
| 8.61E-39 | 0.653699 | 2.92E-58 | 0.075245 | 0.10438 | 0.135943 | 0.00324 | 0.125593 | 0.00658  |

|          |          |          |          |         |          |          |          |          |
|----------|----------|----------|----------|---------|----------|----------|----------|----------|
| 6.32E-36 | 0.719816 | 9.77E-76 | 0.064401 | 0.1647  | 0.1208   | 0.00897  | 0.165443 | 0.00033  |
| 5.09E-47 | 0.644463 | 3.66E-56 | 0.015306 | 0.74147 | 0.047932 | 0.3013   | 0.122804 | 0.00789  |
| 7.43E-15 | 0.500741 | 5.22E-31 | 0.136524 | 0.00311 | 0.181397 | 8.07E-05 | 0.068786 | 0.13774  |
| 5.22E-39 | 0.551031 | 1.92E-38 | -0.0365  | 0.43132 | 0.077095 | 0.0961   | -0.00758 | 0.87026  |
| 1.72E-21 | 0.376317 | 3.70E-17 | 0.013282 | 0.77467 | -0.08478 | 0.06716  | -0.02353 | 0.61207  |
| 5.51E-60 | 0.67291  | 7.19E-63 | 0.129495 | 0.00507 | 0.10413  | 0.02443  | 0.288254 | 2.18E-10 |
| 1.48E-47 | 0.614116 | 9.42E-50 | 0.049193 | 0.28875 | 0.021654 | 0.64068  | 0.019043 | 0.68147  |
| 2.90E-18 | 0.40136  | 1.67E-19 | 0.025309 | 0.58537 | -0.11582 | 0.01226  | 0.06101  | 0.18813  |
| 6.13E-28 | 0.417219 | 4.29E-21 | 0.018877 | 0.6841  | -0.0703  | 0.12926  | 0.011811 | 0.79906  |
| 4.30E-38 | 0.49274  | 6.16E-30 | -0.01108 | 0.8112  | -0.06295 | 0.17447  | 0.043586 | 0.34731  |
| 1.01E-23 | 0.53871  | 1.67E-36 | -0.0126  | 0.78595 | 0.092584 | 0.04553  | 0.033952 | 0.46419  |
| 3.12E-51 | 0.694917 | 1.35E-68 | 0.122264 | 0.00817 | 0.135363 | 0.00338  | 0.065658 | 0.1566   |
| 3.50E-64 | 0.76698  | 1.21E-91 | 0.102236 | 0.02716 | 0.160214 | 0.00051  | 0.181821 | 7.76E-05 |
| 4.36E-23 | 0.42269  | 1.16E-21 | 0.04717  | 0.30906 | -0.02001 | 0.66621  | -0.06684 | 0.14928  |
| 2.72E-52 | 0.668345 | 9.61E-62 | 0.045044 | 0.3314  | 0.103988 | 0.02462  | 0.070417 | 0.12863  |
| 3.16E-13 | 0.413291 | 1.08E-20 | 0.005696 | 0.9023  | -0.0107  | 0.81759  | -0.16025 | 0.00051  |
| 2.64E-16 | 0.403062 | 1.14E-19 | -0.07074 | 0.12691 | 0.004462 | 0.92339  | 0.008831 | 0.84905  |
| 7.88E-19 | 0.484965 | 6.39E-29 | 0.121175 | 0.00876 | 0.111721 | 0.01572  | -0.03413 | 0.46186  |
| 2.19E-12 | 0.389742 | 2.17E-18 | 0.022982 | 0.62033 | 0.08477  | 0.06721  | -0.12723 | 0.0059   |
| 5.62E-22 | 0.583669 | 5.52E-44 | 0.081851 | 0.07722 | 0.116401 | 0.01183  | -0.00305 | 0.94764  |
| 4.14E-59 | 0.698947 | 1.06E-69 | -0.00435 | 0.92536 | 0.044865 | 0.33333  | 0.072666 | 0.11684  |
| 2.19E-15 | 0.350217 | 6.38E-15 | 0.079073 | 0.08784 | -0.01654 | 0.72153  | -0.11717 | 0.01128  |
| 1.31E-12 | 0.240782 | 1.39E-07 | 0.057047 | 0.21851 | -0.0462  | 0.31911  | 0.15314  | 0.0009   |
| 1.42E-26 | 0.539679 | 1.18E-36 | 0.114201 | 0.01354 | 0.070972 | 0.12564  | 0.135337 | 0.00339  |
| 5.49E-61 | 0.713286 | 8.63E-74 | 0.131881 | 0.00431 | 0.121002 | 0.00886  | 0.028077 | 0.54502  |
| 7.64E-35 | 0.619492 | 7.76E-51 | -0.02639 | 0.56941 | 0.10339  | 0.02547  | 0.001381 | 0.97626  |
| 1.99E-33 | 0.579396 | 3.18E-43 | 0.07548  | 0.10329 | -0.02195 | 0.63607  | 0.01554  | 0.73767  |
| 9.82E-40 | 0.639122 | 5.55E-55 | -0.01916 | 0.67966 | 0.059405 | 0.20004  | 0.07459  | 0.10744  |
| 2.25E-33 | 0.582501 | 8.93E-44 | -0.00712 | 0.87807 | 0.008221 | 0.85936  | 0.063884 | 0.16812  |
| 3.17E-24 | 0.483747 | 9.16E-29 | 0.095203 | 0.03973 | 0.043332 | 0.35013  | 0.034298 | 0.45966  |
| #####    | 0.784655 | 1.30E-98 | 0.111274 | 0.01614 | 0.112544 | 0.01496  | 0.194115 | 2.40E-05 |
| 3.29E-43 | 0.647916 | 6.14E-57 | 0.008649 | 0.85213 | 0.035941 | 0.43843  | -0.00225 | 0.96134  |
| 1.85E-11 | 0.398884 | 2.91E-19 | 0.112381 | 0.01511 | -0.02182 | 0.63809  | -0.00538 | 0.90764  |
| 1.86E-42 | 0.615815 | 4.30E-50 | 0.09382  | 0.04271 | 0.103682 | 0.02505  | 0.040871 | 0.37819  |
| 2.65E-22 | 0.46026  | 7.32E-26 | 0.158145 | 0.0006  | -0.0181  | 0.69641  | 0.139343 | 0.00255  |
| 0.00062  | 0.216132 | 2.43E-06 | -0.05601 | 0.22697 | -0.06608 | 0.15393  | -0.14056 | 0.00233  |
| 0.0006   | 0.228682 | 5.88E-07 | 0.023959 | 0.60554 | 0.032012 | 0.49012  | -0.09015 | 0.05156  |
| 0.00011  | 0.251988 | 3.39E-08 | -0.0184  | 0.69163 | -0.04773 | 0.30334  | -0.09997 | 0.03078  |
| 2.51E-34 | 0.600778 | 3.77E-47 | -0.03436 | 0.45885 | 0.107137 | 0.02057  | 0.12144  | 0.00861  |
| 8.06E-44 | 0.710247 | 6.66E-73 | -0.00369 | 0.93653 | 0.067987 | 0.14238  | 0.004771 | 0.9181   |
| 1.55E-22 | 0.457025 | 1.77E-25 | -0.00295 | 0.94932 | 0.089329 | 0.05372  | 0.010641 | 0.81861  |
| 1.91E-25 | 0.473746 | 1.68E-27 | 0.108502 | 0.01901 | 0.028705 | 0.53606  | 0.084294 | 0.06876  |
| 4.97E-31 | 0.570885 | 9.70E-42 | -0.07258 | 0.11729 | 0.131461 | 0.00443  | 0.09987  | 0.03094  |
| 4.44E-45 | 0.555987 | 3.03E-39 | 0.076772 | 0.09751 | 0.016377 | 0.72411  | 0.108612 | 0.01889  |
| #####    | 0.798339 | #####    | 0.056624 | 0.22195 | 0.080982 | 0.08043  | 0.240607 | 1.42E-07 |



|          |          |          |          |          |          |          |          |          |
|----------|----------|----------|----------|----------|----------|----------|----------|----------|
| 1.16E-31 | 0.649789 | 2.30E-57 | 0.013672 | 0.76825  | 0.122543 | 0.00802  | 0.246629 | 6.70E-08 |
| 2.51E-34 | 0.649721 | 2.39E-57 | 0.058034 | 0.21064  | 0.178047 | 0.00011  | 0.15633  | 0.0007   |
| 1.93E-29 | 0.647375 | 8.13E-57 | 0.145095 | 0.00167  | 0.091198 | 0.04888  | -0.02227 | 0.63127  |
| 1.36E-06 | 0.383628 | 8.02E-18 | 0.10411  | 0.02445  | 0.093365 | 0.04373  | -0.16518 | 0.00034  |
| 3.24E-49 | 0.740487 | 2.79E-82 | 0.061444 | 0.185    | 0.098267 | 0.03375  | 0.136933 | 0.00302  |
| 1.40E-34 | 0.540939 | 7.54E-37 | 0.041844 | 0.36693  | 0.047317 | 0.30756  | 0.071739 | 0.12159  |
| 7.93E-41 | 0.654756 | 1.66E-58 | 0.005555 | 0.90469  | 0.05292  | 0.25373  | 0.040288 | 0.38504  |
| 1.01E-25 | 0.61066  | 4.58E-49 | 0.057459 | 0.2152   | 0.20001  | 1.33E-05 | 0.096067 | 0.03796  |
| 5.23E-38 | 0.592374 | 1.43E-45 | 0.036527 | 0.43098  | 0.048717 | 0.29344  | 0.063177 | 0.17289  |
| 4.02E-07 | 0.212426 | 3.63E-06 | -0.02206 | 0.63435  | -0.00392 | 0.93259  | -0.06598 | 0.15458  |
| 1.54E-18 | 0.522042 | 5.25E-34 | 0.040455 | 0.38307  | 0.146644 | 0.00148  | 0.273572 | 1.84E-09 |
| 0.84549  | -0.07254 | 0.11747  | 0.059114 | 0.20225  | -0.04425 | 0.34001  | 0.05684  | 0.22019  |
| 0.04299  | -0.09766 | 0.03487  | -0.047   | 0.31082  | -0.0687  | 0.13825  | -0.01277 | 0.78314  |
| 0.30343  | 0.093088 | 0.04436  | 0.050817 | 0.27311  | 0.034524 | 0.4567   | -0.10157 | 0.02819  |
| 0.09764  | -0.05646 | 0.2233   | 0.031579 | 0.49602  | 0.063137 | 0.17316  | 0.049248 | 0.28822  |
| 0.04072  | -0.15127 | 0.00104  | -0.01314 | 0.77701  | -0.05749 | 0.21495  | -0.03892 | 0.40137  |
| 0.27463  | -0.09146 | 0.04823  | 0.206673 | 6.70E-06 | -0.04477 | 0.33438  | -0.05456 | 0.23925  |
| 0.01123  | -0.20574 | 7.39E-06 | 0.006115 | 0.89514  | -0.03748 | 0.41906  | -0.02681 | 0.56336  |
| 0.11529  | 0.049791 | 0.28293  | 0.039687 | 0.39217  | 0.012766 | 0.7832   | 0.073818 | 0.11113  |
| 0.96855  | 0.039777 | 0.39111  | -0.00231 | 0.96033  | -0.02393 | 0.60595  | -0.01557 | 0.73711  |
| 0.0445   | -0.09547 | 0.03917  | -0.00204 | 0.96492  | -0.01211 | 0.79413  | -0.05324 | 0.25082  |
| 0.00231  | -0.18473 | 5.92E-05 | 0.020943 | 0.65169  | -0.00413 | 0.92916  | -0.09008 | 0.05173  |
| 0.68088  | 0.013619 | 0.76911  | 0.04856  | 0.29501  | -0.00983 | 0.83224  | 0.003054 | 0.94751  |
| 0.47755  | -0.08927 | 0.05387  | -0.01309 | 0.77788  | -0.0312  | 0.50117  | -0.02355 | 0.61176  |
| 0.61262  | 0.011348 | 0.80677  | 0.00977  | 0.83322  | -0.02929 | 0.52784  | -0.05521 | 0.23374  |
| 0.52985  | -0.02803 | 0.54574  | 0.038187 | 0.41032  | -0.02613 | 0.57321  | -0.05622 | 0.22527  |
| 0.35695  | -0.13162 | 0.00439  | -0.02939 | 0.52632  | -0.01061 | 0.81913  | -0.1353  | 0.00339  |
| 0.00159  | 0.153889 | 0.00085  | 0.038827 | 0.40252  | 0.130349 | 0.00478  | 0.102305 | 0.02706  |
| 0.11532  | -0.13733 | 0.00294  | -0.04326 | 0.35097  | -0.05149 | 0.26676  | -0.05475 | 0.23764  |
| 0.1057   | -0.11376 | 0.01391  | -0.11258 | 0.01493  | -0.08278 | 0.07391  | 0.004161 | 0.92855  |
| 0.7421   | -0.08671 | 0.06116  | -0.09248 | 0.04577  | -0.07886 | 0.08869  | 0.018158 | 0.69552  |
| 0.00813  | 0.0487   | 0.29362  | -0.04689 | 0.31193  | -0.06093 | 0.18874  | -0.00736 | 0.87397  |
| 0.3977   | 0.016653 | 0.71965  | 0.006237 | 0.89306  | 0.023421 | 0.61367  | 0.099145 | 0.03219  |
| 0.0054   | 0.190188 | 3.52E-05 | 0.015794 | 0.73355  | -0.0426  | 0.35835  | 0.081505 | 0.07848  |
| 0.93043  | 0.028297 | 0.54187  | -0.0464  | 0.31701  | -0.01593 | 0.7313   | 0.157207 | 0.00065  |
| 0.51754  | -0.00248 | 0.95743  | 0.017076 | 0.71283  | -0.01429 | 0.75803  | -0.04783 | 0.30233  |
| 0.07123  | -0.12381 | 0.00739  | -0.0221  | 0.63376  | -0.0478  | 0.30266  | -0.06899 | 0.13659  |
| 0.79352  | 0.036273 | 0.4342   | 0.036719 | 0.42857  | 0.026466 | 0.56834  | 0.029965 | 0.51831  |
| 0.04257  | -0.08121 | 0.07956  | 0.036552 | 0.43067  | -0.01068 | 0.81798  | -0.07109 | 0.12501  |
| 0.01776  | -0.09446 | 0.04132  | -0.03839 | 0.4079   | -0.00799 | 0.86326  | 0.002852 | 0.95098  |
| 0.00131  | -0.12056 | 0.00911  | -0.02592 | 0.57642  | 0.085426 | 0.06511  | -0.03293 | 0.47782  |
| 0.00295  | -0.19403 | 2.42E-05 | -0.0628  | 0.17548  | -0.05023 | 0.27873  | -0.02785 | 0.5483   |
| 0.00011  | -0.05531 | 0.23289  | -0.08035 | 0.08284  | 0.054465 | 0.24011  | 0.045387 | 0.32773  |
| 0.48818  | -0.00857 | 0.85347  | 0.014087 | 0.76142  | 0.004397 | 0.9245   | -0.03552 | 0.44381  |
| 0.8435   | -0.05035 | 0.27755  | -0.00915 | 0.84359  | -0.04435 | 0.33892  | -0.05986 | 0.19664  |

|          |          |          |          |          |          |         |          |         |
|----------|----------|----------|----------|----------|----------|---------|----------|---------|
| 0.42673  | 0.032148 | 0.48829  | 0.030497 | 0.51091  | -0.01721 | 0.71063 | -0.06922 | 0.13525 |
| 0.02271  | -0.0356  | 0.44275  | 0.089736 | 0.05263  | 0.052913 | 0.25379 | 0.012213 | 0.79237 |
| 0.00651  | -0.15915 | 0.00056  | -0.04414 | 0.34125  | -0.03617 | 0.43547 | -0.01991 | 0.66775 |
| 0.00118  | -0.16825 | 0.00026  | -0.02162 | 0.64116  | -0.05232 | 0.25914 | -0.03806 | 0.4119  |
| 0.00327  | -0.13395 | 0.00373  | -0.02189 | 0.63703  | -0.04061 | 0.38123 | -0.0244  | 0.5989  |
| 0.81201  | 0.037713 | 0.41617  | 0.045746 | 0.32391  | -0.00093 | 0.98396 | -0.03309 | 0.47562 |
| 0.48861  | -0.04007 | 0.38763  | 0.097979 | 0.03428  | 0.051284 | 0.26872 | 0.008267 | 0.85858 |
| 0.02191  | -0.10814 | 0.01942  | 0.001783 | 0.96934  | -0.0052  | 0.91075 | -0.01975 | 0.67038 |
| 0.57051  | -0.01376 | 0.76677  | 0.049185 | 0.28883  | 0.06856  | 0.13904 | -0.04022 | 0.38588 |
| 0.08634  | -0.08239 | 0.0753   | 0.006451 | 0.88942  | -0.03024 | 0.51449 | -0.04151 | 0.37072 |
| 0.88129  | 0.000422 | 0.99275  | -0.00197 | 0.96618  | -0.00986 | 0.83177 | -0.01274 | 0.78368 |
| 0.35015  | 0.076441 | 0.09897  | 0.082676 | 0.07427  | 0.063665 | 0.16959 | 0.091555 | 0.048   |
| 0.34121  | -0.04582 | 0.32314  | -0.00799 | 0.86333  | -0.02875 | 0.53544 | -0.01629 | 0.72549 |
| 0.62733  | -0.03217 | 0.48796  | -0.0057  | 0.90229  | -0.02644 | 0.56878 | -0.03576 | 0.44073 |
| 0.99073  | -0.01686 | 0.71626  | 0.003705 | 0.93636  | -0.02081 | 0.65368 | -0.01598 | 0.73054 |
| 0.04759  | -0.1108  | 0.01661  | -0.03823 | 0.40986  | -0.058   | 0.21092 | 0.039137 | 0.39877 |
| 0.31714  | -0.07364 | 0.11201  | 0.077878 | 0.09276  | -0.06638 | 0.15205 | -0.06155 | 0.18426 |
| 0.06352  | 0.105103 | 0.02312  | 0.057732 | 0.21302  | 0.020703 | 0.65542 | -0.03151 | 0.49698 |
| 0.14825  | -0.12709 | 0.00596  | -0.00551 | 0.9054   | -0.0606  | 0.19111 | -0.07441 | 0.10829 |
| 0.58287  | 0.038285 | 0.40912  | 0.205409 | 7.65E-06 | -0.03669 | 0.42891 | 0.085097 | 0.06615 |
| 0.20316  | -0.07686 | 0.09712  | 0.012271 | 0.79141  | -0.01762 | 0.70414 | -0.03291 | 0.47802 |
| 0.37108  | -0.00947 | 0.83834  | 0.043777 | 0.3452   | -0.00453 | 0.92228 | 0.046689 | 0.31403 |
| 3.45E-05 | -0.16108 | 0.00048  | -0.06953 | 0.13353  | -0.0626  | 0.17686 | 0.060026 | 0.19537 |
| 0.47467  | 0.040068 | 0.38764  | 0.230155 | 4.96E-07 | 0.052874 | 0.25414 | -0.01429 | 0.75816 |
| 0.02193  | -0.13458 | 0.00357  | 0.015907 | 0.73171  | 0.004637 | 0.92039 | 0.03307  | 0.47589 |
| 1.68E-05 | -0.17857 | 0.0001   | -0.01229 | 0.79113  | -0.03826 | 0.40938 | -0.05777 | 0.21271 |
| 0.46112  | -0.04961 | 0.28472  | 0.026022 | 0.57484  | -0.04104 | 0.37627 | -0.05566 | 0.22993 |
| 0.46322  | -0.02702 | 0.56025  | -0.03278 | 0.47975  | -0.04907 | 0.28992 | 0.032549 | 0.48288 |
| 0.41328  | 7.42E-05 | 0.99872  | 0.002227 | 0.96172  | 0.02078  | 0.65422 | 0.029675 | 0.52237 |
| 0.05823  | -0.12561 | 0.00657  | -0.0055  | 0.90571  | 0.02392  | 0.60613 | -0.00969 | 0.83463 |
| 0.26018  | -0.10189 | 0.02769  | -0.02464 | 0.59539  | -0.05158 | 0.26596 | -0.08867 | 0.05551 |
| 0.16078  | -0.10389 | 0.02475  | -0.00453 | 0.92219  | -0.02392 | 0.60613 | 0.149197 | 0.00122 |
| 0.00065  | -0.09602 | 0.03806  | -0.10071 | 0.02955  | 0.008223 | 0.85934 | 0.074322 | 0.10871 |
| 0.00049  | -0.19299 | 2.68E-05 | -0.02    | 0.66635  | -0.04699 | 0.31087 | -0.08888 | 0.05494 |
| 0.0021   | -0.15266 | 0.00093  | -0.02567 | 0.57996  | -0.05453 | 0.23956 | 0.023517 | 0.61221 |
| 0.31763  | -0.04226 | 0.36221  | 0.002229 | 0.96168  | 0.046299 | 0.31809 | 0.032546 | 0.48292 |
| 0.01372  | -0.14243 | 0.00203  | -0.00882 | 0.84916  | -0.06654 | 0.15108 | 0.137167 | 0.00297 |
| 0.0234   | -0.10588 | 0.02211  | -0.00744 | 0.87264  | -0.07253 | 0.11752 | 0.146629 | 0.00149 |
| 0.00173  | -0.26014 | 1.16E-08 | -0.06564 | 0.15671  | -0.09237 | 0.04604 | 0.017556 | 0.70514 |
| 0.13358  | -0.11016 | 0.01725  | -0.01023 | 0.82542  | -0.03785 | 0.41442 | -0.03333 | 0.47244 |
| 0.77971  | 0.024275 | 0.60079  | 0.025087 | 0.58867  | 0.029809 | 0.52049 | -0.09939 | 0.03176 |
| 0.07962  | 0.036157 | 0.43568  | 0.048299 | 0.29761  | -0.00386 | 0.93376 | 0.007257 | 0.87571 |
| 0.99433  | -0.02928 | 0.52797  | 0.047634 | 0.30433  | 0.005863 | 0.89945 | 0.007578 | 0.87027 |
| 0.66586  | 0.040381 | 0.38394  | 0.030016 | 0.51759  | -0.02331 | 0.61535 | -0.00771 | 0.86807 |
| 0.02006  | 0.10791  | 0.01967  | 0.112068 | 0.01539  | 0.041452 | 0.37145 | 0.006424 | 0.88988 |

|          |          |          |          |         |          |         |          |          |
|----------|----------|----------|----------|---------|----------|---------|----------|----------|
| 0.28592  | -0.13793 | 0.00282  | 0.038573 | 0.40561 | -0.09962 | 0.03137 | -0.01487 | 0.74863  |
| 0.06241  | -0.14005 | 0.00242  | -0.01931 | 0.67724 | -0.06449 | 0.1641  | -0.01372 | 0.76748  |
| 0.47365  | -0.08753 | 0.05874  | -0.01329 | 0.77452 | -0.00372 | 0.93613 | -0.04258 | 0.35853  |
| 0.44699  | -0.10514 | 0.02307  | 0.006534 | 0.88801 | -0.02315 | 0.61775 | 0.012649 | 0.78515  |
| 0.86804  | -0.07882 | 0.08888  | -0.00811 | 0.86124 | 0.022347 | 0.63003 | -0.03267 | 0.4812   |
| 0.4306   | -0.10408 | 0.0245   | -0.02342 | 0.61363 | -0.04712 | 0.30955 | -0.05905 | 0.20276  |
| 0.8976   | -0.03619 | 0.43532  | 0.013053 | 0.77846 | -0.02719 | 0.55781 | -0.04834 | 0.29725  |
| 0.03166  | -0.15422 | 0.00083  | -0.03359 | 0.46893 | -0.05283 | 0.25454 | -0.06496 | 0.16104  |
| 0.00992  | -0.16405 | 0.00037  | -0.04405 | 0.34225 | -0.05181 | 0.26385 | -0.05796 | 0.2112   |
| 0.09646  | -0.10091 | 0.02923  | -0.02241 | 0.629   | -0.05216 | 0.26062 | -0.03913 | 0.39881  |
| 0.55684  | -0.03454 | 0.45648  | 0.007177 | 0.87708 | -0.02333 | 0.615   | -0.05946 | 0.19963  |
| 0.04065  | -0.14842 | 0.0013   | -0.03642 | 0.43235 | -0.05502 | 0.23532 | -0.07493 | 0.10583  |
| 0.04567  | -0.12761 | 0.00575  | -0.00735 | 0.8742  | -0.04033 | 0.38453 | -0.08085 | 0.08091  |
| 0.14369  | -0.07849 | 0.09022  | 0.003224 | 0.9446  | -0.02299 | 0.62018 | -0.09578 | 0.03855  |
| 0.12614  | -0.05799 | 0.21098  | 0.015561 | 0.73733 | -0.01313 | 0.77723 | -0.04317 | 0.35193  |
| 0.06645  | -0.13218 | 0.00422  | -0.03526 | 0.44719 | -0.05027 | 0.27834 | -0.03905 | 0.39987  |
| 0.16382  | -0.14114 | 0.00223  | -0.02101 | 0.6506  | -0.06768 | 0.14421 | -0.00394 | 0.93233  |
| 0.41498  | 0.035177 | 0.44823  | 0.052544 | 0.25712 | 0.012244 | 0.79187 | -0.03113 | 0.50217  |
| 0.6972   | 0.010935 | 0.81368  | 0.023633 | 0.61046 | -0.00898 | 0.84651 | -0.05084 | 0.27285  |
| 0.04922  | -0.11802 | 0.01069  | 0.047586 | 0.30481 | 0.030752 | 0.50737 | -0.0725  | 0.11767  |
| 0.94075  | -0.05058 | 0.27537  | 0.170839 | 0.00021 | -0.03492 | 0.45158 | -0.0027  | 0.95356  |
| 3.67E-07 | -0.25222 | 3.29E-08 | -0.04436 | 0.33879 | -0.01277 | 0.78317 | -0.0145  | 0.75461  |
| 0.51365  | 0.008746 | 0.85048  | 0.048046 | 0.30015 | -0.03934 | 0.39628 | 0.045209 | 0.32963  |
| 0.14498  | -0.10535 | 0.0228   | 0.011768 | 0.79978 | -0.03119 | 0.50138 | -0.03207 | 0.48929  |
| 0.24791  | -0.08997 | 0.05201  | 0.113717 | 0.01394 | -0.01288 | 0.78134 | 0.026208 | 0.57212  |
| 0.04159  | -0.00045 | 0.99221  | -0.01659 | 0.7206  | -0.07078 | 0.12667 | 0.183619 | 6.57E-05 |
| 1.34E-33 | 0.480116 | 2.66E-28 | 0.055837 | 0.22846 | 0.028464 | 0.53948 | 0.120283 | 0.00927  |
| 2.40E-16 | 0.432424 | 1.06E-22 | 0.092735 | 0.04518 | 0.101753 | 0.0279  | 0.368564 | 1.79E-16 |
| 2.22E-38 | 0.536921 | 3.14E-36 | 0.10593  | 0.02205 | 0.019254 | 0.67814 | 0.161015 | 0.00048  |
| 2.28E-07 | 0.152519 | 0.00094  | 0.064735 | 0.16252 | -0.11163 | 0.0158  | 0.042944 | 0.35446  |
| 6.30E-12 | 0.198817 | 1.50E-05 | -0.01822 | 0.69454 | -0.07058 | 0.12774 | -0.07049 | 0.12826  |
| 8.40E-31 | 0.53432  | 7.83E-36 | 0.042508 | 0.35938 | 0.069936 | 0.13126 | 0.140617 | 0.00232  |
| 1.04E-06 | 0.295699 | 7.06E-11 | 0.042859 | 0.35542 | 0.035251 | 0.44727 | 0.03718  | 0.42279  |
| 0.00104  | 0.304435 | 1.80E-11 | 0.140371 | 0.00236 | 0.044969 | 0.33221 | -0.05309 | 0.25222  |
| 2.49E-27 | 0.502848 | 2.69E-31 | 0.066145 | 0.15354 | 0.066382 | 0.15207 | 0.193208 | 2.63E-05 |
| 9.87E-26 | 0.525255 | 1.78E-34 | 0.01482  | 0.7494  | 0.070742 | 0.12687 | 0.099053 | 0.03235  |
| 1.30E-09 | 0.263523 | 7.38E-09 | -0.07779 | 0.09315 | -0.02456 | 0.59653 | 0.014621 | 0.75266  |
| 3.60E-49 | 0.627422 | 1.78E-52 | 0.053696 | 0.24682 | 0.044519 | 0.33708 | 0.141264 | 0.00221  |
| 8.75E-36 | 0.501909 | 3.62E-31 | 0.05917  | 0.20182 | -0.01301 | 0.77911 | 0.181702 | 7.85E-05 |
| 8.21E-06 | 0.206353 | 6.93E-06 | 0.128919 | 0.00527 | 0.048346 | 0.29714 | -0.0126  | 0.786    |
| 1.76E-32 | 0.502677 | 2.84E-31 | -0.00134 | 0.97698 | 0.027679 | 0.55074 | 0.17264  | 0.00018  |
| 7.04E-38 | 0.599405 | 6.89E-47 | 0.078945 | 0.08836 | 0.114982 | 0.01291 | 0.083052 | 0.07296  |
| 1.29E-22 | 0.406891 | 4.77E-20 | 0.05576  | 0.22909 | -0.07395 | 0.11051 | 0.148585 | 0.00128  |
| 9.73E-08 | 0.318789 | 1.72E-12 | 0.042942 | 0.35449 | 0.079855 | 0.08474 | 0.098668 | 0.03303  |
| 5.38E-37 | 0.560092 | 6.41E-40 | 0.138604 | 0.00268 | 0.039034 | 0.40001 | 0.250974 | 3.86E-08 |

|          |          |          |          |         |          |         |          |          |
|----------|----------|----------|----------|---------|----------|---------|----------|----------|
| 9.78E-58 | 0.637953 | 1.00E-54 | 0.061051 | 0.18784 | 0.054389 | 0.24077 | 0.126593 | 0.00616  |
| 1.91E-34 | 0.571547 | 7.46E-42 | 0.143482 | 0.00188 | 0.167577 | 0.00028 | 0.182518 | 7.28E-05 |
| 6.99E-41 | 0.604526 | 7.21E-48 | 0.119958 | 0.00947 | 0.092869 | 0.04487 | 0.347839 | 9.96E-15 |
| 5.43E-29 | 0.499803 | 6.99E-31 | 0.091748 | 0.04753 | 0.029875 | 0.51957 | 0.148266 | 0.00131  |
| 3.02E-10 | 0.33062  | 2.25E-13 | -0.01743 | 0.70721 | 0.025228 | 0.58658 | 0.095911 | 0.03828  |
| 6.58E-27 | 0.435673 | 4.69E-23 | -0.04332 | 0.35029 | -0.00976 | 0.83339 | 0.19311  | 2.65E-05 |
| 4.01E-05 | 0.288662 | 2.06E-10 | 0.034784 | 0.45332 | 0.085793 | 0.06396 | 0.093342 | 0.04379  |
| 1.36E-30 | 0.482088 | 1.49E-28 | 0.127682 | 0.00572 | -0.01798 | 0.69833 | 0.054814 | 0.23711  |
| 1.04E-17 | 0.36337  | 5.05E-16 | 0.07018  | 0.12992 | -0.01648 | 0.72236 | 0.30553  | 1.51E-11 |
| 1.51E-42 | 0.615427 | 5.15E-50 | 0.088911 | 0.05485 | 0.074116 | 0.10969 | 0.176694 | 0.00012  |
| 3.85E-35 | 0.608078 | 1.47E-48 | 0.049721 | 0.2836  | 0.037386 | 0.42023 | 0.087965 | 0.0575   |
| 1.14E-05 | 0.207169 | 6.36E-06 | 0.116793 | 0.01154 | -0.01155 | 0.80336 | 0.06068  | 0.19053  |
| 0.27453  | 0.138401 | 0.00272  | -0.03911 | 0.3991  | 0.001795 | 0.96914 | -0.08363 | 0.07098  |
| 1.80E-38 | 0.545649 | 1.38E-37 | 0.038161 | 0.41065 | 0.034593 | 0.4558  | 0.176777 | 0.00012  |
| 2.20E-31 | 0.523134 | 3.64E-34 | -0.01752 | 0.70571 | 0.090874 | 0.04969 | 0.082636 | 0.07442  |
| 6.20E-26 | 0.497353 | 1.50E-30 | 0.018172 | 0.69529 | 0.090385 | 0.05094 | 0.1667   | 0.0003   |
| 5.39E-13 | 0.319979 | 1.41E-12 | 0.031918 | 0.49141 | -0.00182 | 0.96873 | 0.384493 | 6.68E-18 |
| 0.01744  | 0.159649 | 0.00053  | 0.056086 | 0.22638 | -0.09872 | 0.03294 | 0.116067 | 0.01207  |
| 4.27E-40 | 0.61222  | 2.25E-49 | 0.083645 | 0.07093 | 0.05679  | 0.2206  | 0.246607 | 6.72E-08 |
| 8.33E-27 | 0.532168 | 1.66E-35 | 0.154274 | 0.00082 | 0.007984 | 0.86337 | 0.009735 | 0.83381  |
| 5.70E-44 | 0.56794  | 3.09E-41 | 0.070707 | 0.12706 | 0.05644  | 0.22346 | 0.156597 | 0.00068  |
| 0.23046  | -0.00587 | 0.89934  | 0.060668 | 0.19062 | -0.04228 | 0.36192 | 0.027239 | 0.55709  |
| 0.0007   | 0.127475 | 0.0058   | -0.06837 | 0.14017 | -0.06132 | 0.18589 | 0.022918 | 0.62131  |
| 9.48E-17 | 0.414471 | 8.21E-21 | 0.060917 | 0.1888  | -0.01765 | 0.7036  | 0.120198 | 0.00932  |
| 5.00E-27 | 0.620694 | 4.41E-51 | 0.082156 | 0.07612 | 0.144366 | 0.00176 | 0.218923 | 1.78E-06 |
| 6.57E-23 | 0.440169 | 1.50E-23 | 0.002177 | 0.96257 | -0.00908 | 0.84482 | 0.037425 | 0.41974  |
| 3.05E-34 | 0.552117 | 1.29E-38 | 0.091815 | 0.04737 | 0.105047 | 0.02319 | 0.338761 | 5.28E-14 |
| 4.28E-06 | 0.347453 | 1.07E-14 | 0.001417 | 0.97564 | 0.07804  | 0.09208 | 0.077956 | 0.09244  |
| 8.02E-12 | 0.317858 | 2.01E-12 | -0.13795 | 0.00281 | -0.06792 | 0.14276 | 0.015389 | 0.74013  |
| 2.44E-09 | 0.267714 | 4.17E-09 | 0.059648 | 0.1982  | -0.0046  | 0.92099 | 0.172738 | 0.00018  |
| 2.06E-23 | 0.43242  | 1.06E-22 | 0.081979 | 0.07676 | 0.06448  | 0.16418 | -0.01075 | 0.81678  |
| 1.52E-22 | 0.501623 | 3.96E-31 | -0.057   | 0.21892 | 0.101439 | 0.02839 | 0.164177 | 0.00037  |
| 6.72E-12 | 0.2966   | 6.15E-11 | 0.073766 | 0.11138 | 0.069676 | 0.13271 | -0.0091  | 0.84458  |
| 1.00E-12 | 0.350113 | 6.50E-15 | 0.008459 | 0.85533 | 0.029146 | 0.52981 | 0.0297   | 0.52202  |
| 1.21E-05 | 0.201327 | 1.17E-05 | 0.085268 | 0.06561 | -0.02959 | 0.52359 | 0.043416 | 0.34919  |
| 1.80E-25 | 0.406094 | 5.72E-20 | 0.086038 | 0.0632  | -0.00063 | 0.98915 | 0.216382 | 2.36E-06 |
| 0.00013  | 0.177009 | 0.00012  | 0.028427 | 0.54001 | -0.01856 | 0.68906 | -0.02233 | 0.63035  |
| 3.33E-12 | 0.412886 | 1.19E-20 | 0.094683 | 0.04083 | 0.131089 | 0.00455 | 0.233009 | 3.54E-07 |
| 4.76E-25 | 0.436084 | 4.23E-23 | 0.041434 | 0.37165 | 0.020342 | 0.66106 | 0.064491 | 0.16411  |
| 5.44E-06 | 0.171744 | 0.00019  | -0.08971 | 0.0527  | -0.05583 | 0.22849 | 0.00333  | 0.94279  |
| 0.17321  | 0.1161   | 0.01205  | -0.08151 | 0.07845 | -0.08839 | 0.05628 | -0.1051  | 0.02312  |
| 0.00023  | 0.273489 | 1.86E-09 | 0.110274 | 0.01713 | 0.075604 | 0.10273 | 0.075641 | 0.10256  |
| 4.39E-07 | 0.304627 | 1.74E-11 | 0.066816 | 0.1494  | 0.076242 | 0.09985 | 0.078372 | 0.0907   |
| 0.00041  | 0.1839   | 6.40E-05 | -0.07744 | 0.09464 | -0.00486 | 0.91658 | -0.00431 | 0.92591  |
| 1.26E-32 | 0.572789 | 4.55E-42 | 0.101248 | 0.02869 | 0.09704  | 0.03605 | 0.099919 | 0.03086  |

|          |          |          |           |          |          |         |          |          |
|----------|----------|----------|-----------|----------|----------|---------|----------|----------|
| 2.36E-08 | 0.218938 | 1.78E-06 | -0.00012  | 0.99796  | 0.023926 | 0.60604 | 0.134796 | 0.00352  |
| 0.12109  | 0.187864 | 4.40E-05 | 0.047291  | 0.30782  | 0.046425 | 0.31678 | 0.164084 | 0.00037  |
| 3.23E-05 | 0.168474 | 0.00026  | 0.040275  | 0.38519  | 0.039941 | 0.38915 | 0.107242 | 0.02045  |
| 0.01652  | 0.084808 | 0.06708  | 0.048834  | 0.29229  | -0.00355 | 0.93898 | 0.155185 | 0.00077  |
| 0.00843  | 0.120459 | 0.00917  | 0.11085   | 0.01655  | 0.005119 | 0.91216 | 0.099091 | 0.03228  |
| 1.45E-34 | 0.657438 | 3.94E-59 | 0.080363  | 0.08278  | 0.14764  | 0.00138 | 0.18595  | 5.28E-05 |
| 3.23E-36 | 0.650629 | 1.48E-57 | 0.03215   | 0.48825  | 0.076843 | 0.0972  | 0.103538 | 0.02525  |
| 1.11E-08 | 0.435652 | 4.72E-23 | 0.056204  | 0.2254   | 0.126461 | 0.00621 | 0.077514 | 0.0943   |
| 3.96E-61 | 0.694159 | 2.16E-68 | 0.083023  | 0.07306  | 0.06486  | 0.16171 | 0.190402 | 3.45E-05 |
| 1.36E-25 | 0.356514 | 1.92E-15 | 0.035689  | 0.44164  | -0.03921 | 0.39784 | 0.067011 | 0.14822  |
| 9.34E-20 | 0.474653 | 1.30E-27 | 0.125644  | 0.00655  | 0.032439 | 0.48435 | 0.07024  | 0.12959  |
| 1.79E-36 | 0.547827 | 6.25E-38 | 0.102085  | 0.02739  | 0.0423   | 0.36173 | 0.205024 | 7.96E-06 |
| 1.85E-07 | 0.220144 | 1.56E-06 | 0.13753   | 0.0029   | -0.00936 | 0.84012 | 0.196681 | 1.86E-05 |
| 4.38E-19 | 0.46598  | 1.51E-26 | 0.051052  | 0.27089  | 0.046781 | 0.31307 | 0.19298  | 2.68E-05 |
| 3.34E-33 | 0.583353 | 6.28E-44 | 0.111644  | 0.01579  | 0.120952 | 0.00889 | 0.169833 | 0.00023  |
| 1.36E-42 | 0.619934 | 6.30E-51 | 0.057781  | 0.21264  | 0.088801 | 0.05515 | 0.336187 | 8.40E-14 |
| 1.01E-18 | 0.455    | 3.05E-25 | 0.124491  | 0.00707  | 0.05811  | 0.21004 | 0.087221 | 0.05965  |
| 1.93E-22 | 0.464148 | 2.51E-26 | 0.043321  | 0.35025  | 0.165946 | 0.00032 | 0.188166 | 4.28E-05 |
| 6.67E-20 | 0.432595 | 1.02E-22 | -8.63E-05 | 0.99852  | 0.04147  | 0.37124 | 0.116981 | 0.01141  |
| 5.98E-50 | 0.702522 | 1.07E-70 | 0.080637  | 0.08173  | 0.142731 | 0.00199 | 0.176597 | 0.00012  |
| 4.97E-33 | 0.602182 | 2.04E-47 | 0.096721  | 0.03667  | 0.115046 | 0.01286 | 0.146275 | 0.00153  |
| 4.80E-11 | 0.308062 | 1.01E-11 | 0.05593   | 0.22767  | -0.02974 | 0.52145 | 0.117264 | 0.01121  |
| 4.64E-13 | 0.316385 | 2.57E-12 | 0.075437  | 0.10349  | -0.02318 | 0.61739 | 0.16102  | 0.00048  |
| 6.30E-47 | 0.614847 | 6.73E-50 | 0.06327   | 0.17226  | 0.084717 | 0.06738 | 0.130434 | 0.00475  |
| 3.61E-06 | 0.252026 | 3.37E-08 | 0.137161  | 0.00298  | 0.123642 | 0.00747 | -0.0639  | 0.16799  |
| 0.01458  | 0.05035  | 0.27754  | 0.034963  | 0.45099  | -0.0184  | 0.6917  | 0.104081 | 0.02449  |
| 9.35E-16 | 0.285714 | 3.19E-10 | -0.05298  | 0.25317  | -0.07414 | 0.10957 | 0.100938 | 0.02918  |
| 1.11E-22 | 0.517419 | 2.45E-33 | 0.095112  | 0.03992  | 0.035724 | 0.44119 | 0.127911 | 0.00564  |
| 7.19E-36 | 0.572941 | 4.29E-42 | 0.111773  | 0.01567  | 0.079628 | 0.08564 | 0.263227 | 7.68E-09 |
| 1.16E-09 | 0.398838 | 2.94E-19 | 0.191543  | 3.09E-05 | 0.148172 | 0.00132 | 0.052428 | 0.25817  |
| 1.16E-28 | 0.531646 | 1.99E-35 | 0.077946  | 0.09248  | 0.116382 | 0.01184 | 0.159474 | 0.00054  |
| 5.82E-30 | 0.549715 | 3.13E-38 | 0.031996  | 0.49035  | 0.089896 | 0.05221 | 0.150902 | 0.00107  |
| 9.39E-43 | 0.635346 | 3.67E-54 | 0.057572  | 0.2143   | 0.088104 | 0.0571  | 0.085081 | 0.06621  |
| 8.43E-18 | 0.395405 | 6.30E-19 | 0.078283  | 0.09107  | -0.03588 | 0.43917 | 0.128788 | 0.00531  |
| 1.12E-24 | 0.441067 | 1.19E-23 | 0.031301  | 0.49981  | 0.001706 | 0.97067 | -0.08176 | 0.07756  |
| 3.11E-12 | 0.435724 | 4.63E-23 | 0.048988  | 0.29077  | 0.124897 | 0.00688 | 0.337664 | 6.44E-14 |
| 1.66E-39 | 0.68887  | 5.67E-67 | 0.088246  | 0.0567   | 0.106784 | 0.021   | 0.167431 | 0.00028  |
| 0.27603  | -0.03221 | 0.48742  | 0.047998  | 0.30064  | -0.0917  | 0.04765 | -0.03557 | 0.44315  |
| 1.26E-40 | 0.615766 | 4.40E-50 | 0.123573  | 0.00751  | 0.108864 | 0.01861 | 0.228444 | 6.05E-07 |
| 9.97E-17 | 0.387085 | 3.84E-18 | 0.023963  | 0.60549  | 0.023367 | 0.61448 | 0.202757 | 1.01E-05 |
| 6.30E-13 | 0.188927 | 3.98E-05 | 0.051266  | 0.26889  | 0.02458  | 0.59622 | 0.098088 | 0.03408  |
| 2.01E-05 | 0.304246 | 1.85E-11 | -0.01692  | 0.71539  | 0.065269 | 0.15907 | 0.082142 | 0.07617  |
| 1.05E-32 | 0.499344 | 8.07E-31 | 0.09867   | 0.03303  | 0.053797 | 0.24593 | 0.251448 | 3.63E-08 |
| 6.77E-23 | 0.446531 | 2.88E-24 | 0.071866  | 0.12093  | 0.060221 | 0.19392 | 0.052825 | 0.25458  |
| 3.68E-41 | 0.608935 | 1.00E-48 | 0.150979  | 0.00107  | 0.09124  | 0.04878 | 0.211985 | 3.81E-06 |

|          |          |          |          |         |          |          |          |          |
|----------|----------|----------|----------|---------|----------|----------|----------|----------|
| 5.33E-24 | 0.421009 | 1.74E-21 | -0.04985 | 0.2824  | -0.01493 | 0.74762  | 0.162286 | 0.00043  |
| 2.37E-33 | 0.510522 | 2.33E-32 | 0.069873 | 0.13161 | 0.071949 | 0.1205   | 0.250531 | 4.08E-08 |
| 2.64E-12 | 0.343237 | 2.34E-14 | 0.079044 | 0.08796 | 0.025841 | 0.57752  | 0.016807 | 0.71717  |
| 1.10E-24 | 0.515201 | 5.08E-33 | 0.080176 | 0.0835  | 0.12748  | 0.0058   | 0.371737 | 9.45E-17 |
| 2.37E-44 | 0.597321 | 1.71E-46 | 0.095861 | 0.03838 | 0.062648 | 0.17653  | 0.202524 | 1.03E-05 |
| 5.45E-33 | 0.570047 | 1.35E-41 | 0.089613 | 0.05296 | 0.081958 | 0.07683  | 0.124332 | 0.00714  |
| 5.49E-26 | 0.517824 | 2.14E-33 | 0.119768 | 0.00958 | 0.090685 | 0.05017  | 0.506922 | 7.40E-32 |
| 1.24E-55 | 0.701803 | 1.70E-70 | 0.083841 | 0.07027 | 0.118887 | 0.01013  | 0.260595 | 1.09E-08 |
| 7.74E-20 | 0.482758 | 1.23E-28 | 0.027486 | 0.55352 | 0.055295 | 0.23301  | 0.156136 | 0.00071  |
| 7.82E-32 | 0.598109 | 1.21E-46 | 0.07252  | 0.11757 | 0.167387 | 0.00028  | 0.351575 | 4.94E-15 |
| 0.01083  | -0.17969 | 9.44E-05 | -0.02841 | 0.54028 | -0.15193 | 0.00099  | 0.056568 | 0.22241  |
| 0.30518  | -0.1118  | 0.01564  | -0.01264 | 0.78535 | -0.18998 | 3.59E-05 | 0.126098 | 0.00636  |
| 0.00513  | -0.16837 | 0.00026  | 0.002389 | 0.95894 | -0.14757 | 0.00138  | 0.062151 | 0.17999  |
| 0.04473  | -0.17313 | 0.00017  | -0.01986 | 0.66863 | -0.18607 | 5.22E-05 | 0.113233 | 0.01435  |
| 3.64E-05 | -0.11027 | 0.01713  | -0.09339 | 0.04369 | -0.07483 | 0.10629  | 0.028624 | 0.53722  |
| 0.13084  | -0.21854 | 1.86E-06 | -0.05735 | 0.21608 | -0.21415 | 3.02E-06 | 0.070096 | 0.13038  |
| 0.00752  | 0.216774 | 2.26E-06 | -0.03739 | 0.42019 | -0.036   | 0.43768  | 0.185233 | 5.65E-05 |
| 0.01822  | 0.068253 | 0.14083  | -0.04349 | 0.34834 | -0.17987 | 9.29E-05 | 0.097468 | 0.03523  |
| 0.00721  | 0.233426 | 3.37E-07 | -0.04868 | 0.2938  | -0.10202 | 0.02748  | 0.193706 | 2.50E-05 |
| 0.00141  | -0.24412 | 9.17E-08 | -0.06191 | 0.18167 | -0.1005  | 0.0299   | 0.067046 | 0.148    |
| 0.10556  | -0.06391 | 0.16793  | -0.13607 | 0.00322 | -0.12059 | 0.00909  | -0.08086 | 0.0809   |
| 0.00896  | -0.15532 | 0.00076  | -0.00581 | 0.9003  | -0.11035 | 0.01705  | 0.062189 | 0.17972  |
| 0.00073  | -0.27393 | 1.75E-09 | -0.16269 | 0.00042 | -0.17108 | 0.0002   | 0.062479 | 0.1777   |
| 2.54E-07 | 0.198748 | 1.51E-05 | -0.07376 | 0.11142 | -0.04148 | 0.37107  | 0.252449 | 3.19E-08 |
| 0.00489  | -0.18784 | 4.41E-05 | 0.00757  | 0.87039 | -0.11541 | 0.01257  | 0.049317 | 0.28754  |
| 3.97E-05 | 0.214561 | 2.88E-06 | 0.068047 | 0.14203 | -0.088   | 0.05741  | 0.01454  | 0.75399  |
| 0.91562  | -0.06087 | 0.18914  | -0.07023 | 0.12967 | -0.13435 | 0.00363  | 0.112326 | 0.01516  |
| 0.10706  | 0.011857 | 0.79829  | -0.03937 | 0.39598 | -0.15574 | 0.00073  | 0.184034 | 6.32E-05 |
| 0.00187  | 0.106257 | 0.02164  | -0.05352 | 0.2484  | -0.09888 | 0.03266  | 0.208564 | 5.49E-06 |
| 0.32677  | 0.126456 | 0.00621  | -0.14759 | 0.00138 | -0.03459 | 0.45588  | 0.120109 | 0.00938  |
| 0.16378  | 0.205192 | 7.82E-06 | -0.07925 | 0.08713 | -0.01436 | 0.7569   | 0.105611 | 0.02246  |
| 3.84E-07 | 0.296519 | 6.22E-11 | 0.022089 | 0.63398 | -0.02068 | 0.65583  | 0.264547 | 6.42E-09 |
| 1.05E-25 | 0.299047 | 4.20E-11 | 0.009063 | 0.84513 | -0.17927 | 9.81E-05 | 0.125889 | 0.00645  |
| 8.88E-06 | -0.20786 | 5.92E-06 | -0.1726  | 0.00018 | -0.12403 | 0.00728  | 0.091514 | 0.0481   |
| 0.86992  | 0.007344 | 0.87423  | -0.08784 | 0.05786 | -0.12726 | 0.00589  | 0.138262 | 0.00275  |
| 0.52268  | -0.02694 | 0.56136  | -0.06062 | 0.19098 | -0.16938 | 0.00024  | 0.132985 | 0.00399  |
| 0.20433  | -0.156   | 0.00072  | -0.14204 | 0.00209 | -0.14967 | 0.00118  | 0.039058 | 0.39973  |
| 0.0012   | -0.1564  | 0.00069  | -0.08221 | 0.07591 | -0.11333 | 0.01427  | 0.074096 | 0.10979  |
| 0.25072  | 0.018135 | 0.69589  | 0.012065 | 0.79484 | -0.12222 | 0.00819  | 0.079015 | 0.08808  |
| 0.00154  | -0.24274 | 1.09E-07 | -0.12124 | 0.00873 | -0.17963 | 9.49E-05 | 0.086665 | 0.0613   |
| 0.23618  | 0.13914  | 0.00258  | -0.01025 | 0.82508 | -0.10606 | 0.02188  | 0.071656 | 0.12203  |
| 0.03894  | -0.11088 | 0.01652  | -0.06862 | 0.13868 | -0.11725 | 0.01122  | 0.027081 | 0.55938  |
| 0.77798  | -0.03441 | 0.45819  | -0.05089 | 0.27244 | -0.19989 | 1.35E-05 | 0.142099 | 0.00208  |
| 1.38E-06 | -0.26841 | 3.78E-09 | -0.016   | 0.73013 | -0.10688 | 0.02088  | -0.01302 | 0.77902  |
| 0.00037  | 0.126043 | 0.00638  | -0.05926 | 0.20116 | -0.15534 | 0.00076  | 0.18458  | 6.00E-05 |

|          |          |          |          |          |          |          |          |          |
|----------|----------|----------|----------|----------|----------|----------|----------|----------|
| 0.1053   | -0.09247 | 0.0458   | -0.10872 | 0.01876  | -0.11453 | 0.01327  | 0.029219 | 0.52878  |
| 0.12025  | -0.14752 | 0.00139  | -0.05991 | 0.19623  | -0.11178 | 0.01567  | 0.007164 | 0.87729  |
| 0.0001   | -0.14331 | 0.0019   | -0.11155 | 0.01587  | -0.07487 | 0.10611  | 0.121104 | 0.0088   |
| 0.00038  | -0.16493 | 0.00034  | -0.15746 | 0.00064  | -0.11032 | 0.01708  | 0.025075 | 0.58885  |
| 0.49366  | 0.044341 | 0.33901  | 0.035608 | 0.44268  | -0.10169 | 0.028    | 0.20952  | 4.96E-06 |
| 6.85E-19 | 0.279466 | 7.95E-10 | 0.041888 | 0.36643  | -0.10876 | 0.01873  | 0.260168 | 1.16E-08 |
| 0.48989  | -0.00022 | 0.99625  | -0.06029 | 0.19343  | -0.04936 | 0.28716  | 0.236986 | 2.20E-07 |
| 0.00151  | -0.11594 | 0.01217  | -0.08726 | 0.05952  | -0.12617 | 0.00633  | 0.003726 | 0.936    |
| 0.0104   | 0.032572 | 0.48256  | -0.00393 | 0.93243  | -0.11449 | 0.0133   | 0.170101 | 0.00022  |
| 7.88E-05 | 0.16352  | 0.00039  | -0.08622 | 0.06265  | -0.1133  | 0.0143   | 0.099233 | 0.03203  |
| 0.3103   | -0.13782 | 0.00284  | -0.12583 | 0.00647  | -0.15949 | 0.00054  | -0.05896 | 0.20344  |
| 1.29E-07 | -0.27938 | 8.04E-10 | 0.005398 | 0.90739  | -0.15228 | 0.00096  | -0.01975 | 0.67039  |
| 0.13785  | -0.03773 | 0.41596  | -0.00187 | 0.96792  | -0.08615 | 0.06286  | 0.145702 | 0.00159  |
| 0.002    | -0.25387 | 2.65E-08 | -0.03251 | 0.48344  | -0.16525 | 0.00034  | 0.048931 | 0.29133  |
| 0.00017  | -0.30685 | 1.22E-11 | -0.0742  | 0.10929  | -0.14642 | 0.00151  | 0.083165 | 0.07257  |
| 0.56087  | -0.07377 | 0.11135  | -0.05872 | 0.2053   | -0.08876 | 0.05528  | 0.054059 | 0.24364  |
| 3.01E-06 | -0.14758 | 0.00138  | -0.13492 | 0.00349  | -0.06474 | 0.1625   | 0.03943  | 0.39525  |
| 0.5291   | -0.05335 | 0.24988  | -0.04525 | 0.32918  | -0.17599 | 0.00013  | 0.095783 | 0.03854  |
| 2.79E-09 | 0.134877 | 0.0035   | -0.02606 | 0.57426  | -0.12515 | 0.00677  | 0.207169 | 6.36E-06 |
| 0.01843  | -0.15155 | 0.00102  | -0.17144 | 0.0002   | -0.0588  | 0.20465  | 0.049569 | 0.28508  |
| 0.90551  | -0.06064 | 0.19086  | 0.032181 | 0.48784  | -0.1518  | 0.001    | 0.038925 | 0.40134  |
| 0.88071  | -0.05822 | 0.20916  | -0.07207 | 0.11985  | -0.18269 | 7.16E-05 | 0.027446 | 0.5541   |
| 0.00151  | 0.059444 | 0.19974  | -0.02059 | 0.65725  | -0.07061 | 0.12759  | 0.182761 | 7.11E-05 |
| 0.00779  | 0.001227 | 0.9789   | -0.00804 | 0.86237  | -0.03823 | 0.40981  | -0.04742 | 0.30647  |
| 0.01317  | -0.02292 | 0.62129  | -0.04899 | 0.29079  | -0.0613  | 0.18602  | -0.02308 | 0.6189   |
| 0.65965  | -0.06311 | 0.17338  | -0.05315 | 0.25165  | -0.14814 | 0.00133  | 0.116913 | 0.01146  |
| 0.06635  | 0.145204 | 0.00165  | 0.048435 | 0.29626  | -0.04748 | 0.30585  | 0.109487 | 0.01794  |
| 1.12E-07 | 0.225074 | 8.92E-07 | -0.10749 | 0.02016  | -0.03434 | 0.45911  | 0.19743  | 1.73E-05 |
| 8.47E-08 | -0.32518 | 5.80E-13 | -0.02752 | 0.55306  | -0.13255 | 0.00411  | 0.073077 | 0.11477  |
| 9.07E-05 | -0.13463 | 0.00356  | -0.1947  | 2.27E-05 | -0.05757 | 0.21428  | 0.039214 | 0.39785  |
| 0.00049  | -0.20518 | 7.83E-06 | -0.04143 | 0.37175  | -0.10729 | 0.02039  | 0.092474 | 0.04579  |
| 0.6569   | 0.047403 | 0.30668  | 0.044679 | 0.33534  | -0.10071 | 0.02955  | 0.042255 | 0.36225  |
| 7.80E-05 | -0.27762 | 1.04E-09 | -0.05731 | 0.2164   | -0.1249  | 0.00688  | 0.019781 | 0.66984  |
| 0.0004   | -0.24154 | 1.26E-07 | -0.04158 | 0.36992  | -0.21694 | 2.22E-06 | 0.057164 | 0.21757  |
| 0.00826  | -0.03541 | 0.44517  | -0.07888 | 0.08863  | -0.09783 | 0.03455  | 0.049071 | 0.28996  |
| 0.67762  | -0.05048 | 0.27627  | -0.12981 | 0.00496  | -0.12781 | 0.00568  | -0.00402 | 0.93095  |
| 5.94E-09 | -0.28613 | 3.00E-10 | -0.14611 | 0.00155  | -0.14753 | 0.00139  | 0.046217 | 0.31895  |
| 6.90E-05 | -0.1776  | 0.00011  | -0.12693 | 0.00602  | -0.09495 | 0.04026  | 0.12981  | 0.00496  |
| 0.00015  | -0.27613 | 1.28E-09 | -0.12034 | 0.00924  | -0.18426 | 6.19E-05 | 0.02036  | 0.66078  |
| 0.02772  | -0.09903 | 0.03239  | -0.07063 | 0.12746  | -0.15486 | 0.00079  | 0.034126 | 0.46191  |
| 0.49802  | 0.099138 | 0.0322   | -0.10596 | 0.02201  | -0.0652  | 0.15949  | 0.067888 | 0.14297  |
| 1.37E-29 | 0.418169 | 3.42E-21 | 0.052787 | 0.25493  | 0.000165 | 0.99715  | 0.243927 | 9.40E-08 |
| 1.84E-19 | 0.403787 | 9.67E-20 | 0.028186 | 0.54345  | -0.0889  | 0.05489  | 0.248096 | 5.57E-08 |
| 0.18303  | 0.014464 | 0.75524  | 0.063963 | 0.1676   | -0.19565 | 2.06E-05 | 0.127516 | 0.00579  |
| 8.94E-05 | 0.132503 | 0.00413  | -0.04829 | 0.29767  | -0.09749 | 0.0352   | 0.151533 | 0.00102  |

|          |          |          |          |          |          |          |          |          |
|----------|----------|----------|----------|----------|----------|----------|----------|----------|
| 0.00245  | 0.058967 | 0.20338  | -0.07848 | 0.09026  | -0.10523 | 0.02295  | 0.202591 | 1.02E-05 |
| 0.02886  | -0.08198 | 0.07675  | -0.09257 | 0.04556  | -0.06914 | 0.13571  | 0.11003  | 0.01738  |
| 3.77E-08 | 0.234575 | 2.94E-07 | 0.05709  | 0.21817  | -0.05713 | 0.21781  | 0.245128 | 8.09E-08 |
| 3.76E-05 | -0.19781 | 1.66E-05 | -0.09546 | 0.03919  | -0.16477 | 0.00035  | 0.06251  | 0.17748  |
| 0.36022  | 0.05735  | 0.21607  | -0.03234 | 0.48572  | -0.09015 | 0.05156  | 0.083363 | 0.07189  |
| 0.43527  | 0.064464 | 0.16429  | -0.04831 | 0.29753  | -0.09401 | 0.04229  | 0.144086 | 0.0018   |
| 3.00E-05 | 0.220271 | 1.54E-06 | -0.01614 | 0.72801  | -0.02951 | 0.52471  | 0.202036 | 1.08E-05 |
| 0.02613  | -0.17975 | 9.39E-05 | -0.05738 | 0.2158   | -0.14925 | 0.00122  | 0.091947 | 0.04705  |
| 6.95E-09 | -0.2825  | 5.12E-10 | -0.11482 | 0.01304  | -0.15874 | 0.00058  | 0.012695 | 0.78437  |
| 6.99E-07 | 0.081622 | 0.07806  | -0.06302 | 0.17399  | -0.10708 | 0.02064  | 0.074678 | 0.10702  |
| 0.1867   | -0.14751 | 0.00139  | -0.04787 | 0.3019   | -0.1607  | 0.00049  | 0.081765 | 0.07753  |
| 0.46759  | 0.161543 | 0.00046  | -0.07423 | 0.10915  | -0.04187 | 0.36666  | 0.050556 | 0.27558  |
| 0.00015  | -0.22322 | 1.10E-06 | -0.04132 | 0.37296  | -0.09843 | 0.03346  | 0.008792 | 0.84971  |
| 0.76328  | -0.02717 | 0.55806  | 0.018122 | 0.69609  | -0.14073 | 0.0023   | 0.046244 | 0.31867  |
| 0.19391  | -0.09039 | 0.05092  | -0.20485 | 8.11E-06 | -0.18583 | 5.34E-05 | -0.00451 | 0.9226   |
| 0.12361  | -0.08618 | 0.06277  | -0.09694 | 0.03625  | -0.17244 | 0.00018  | 0.041898 | 0.36632  |
| 0.00061  | -0.29066 | 1.52E-10 | -0.17771 | 0.00011  | -0.18923 | 3.86E-05 | 0.104845 | 0.02346  |
| 0.03497  | -0.08666 | 0.06131  | -0.02019 | 0.66345  | -0.09686 | 0.03639  | 0.103305 | 0.02559  |
| 0.19078  | -0.14033 | 0.00237  | -0.24981 | 4.47E-08 | -0.15243 | 0.00095  | 0.113264 | 0.01433  |
| 0.16871  | -0.01725 | 0.70997  | 0.009556 | 0.83682  | -0.12799 | 0.00561  | 0.043312 | 0.35035  |
| 0.87525  | -0.11479 | 0.01306  | -0.09372 | 0.04294  | -0.22075 | 1.46E-06 | 0.025863 | 0.57719  |
| 0.00259  | 0.189562 | 3.74E-05 | -0.05674 | 0.22097  | -0.03573 | 0.44108  | 0.057754 | 0.21285  |
| 0.64655  | -0.04606 | 0.32065  | -0.02781 | 0.54887  | -0.09819 | 0.03389  | 0.15408  | 0.00084  |
| 0.01508  | -0.19827 | 1.59E-05 | -0.0626  | 0.17685  | -0.18528 | 5.62E-05 | 0.050531 | 0.27582  |
| 0.00676  | 0.125198 | 0.00675  | 0.037298 | 0.42132  | -0.08819 | 0.05686  | 0.112447 | 0.01505  |
| 0.01352  | -0.14097 | 0.00226  | -0.10069 | 0.02959  | -0.07728 | 0.0953   | 0.018304 | 0.69319  |
| 0.00183  | -0.23293 | 3.58E-07 | 0.000399 | 0.99314  | -0.09499 | 0.04019  | 0.04029  | 0.38502  |
| 0.08181  | 0.128415 | 0.00545  | -0.08508 | 0.06621  | -0.09716 | 0.03581  | 0.109183 | 0.01827  |
| 0.13583  | -0.04534 | 0.32826  | -0.03494 | 0.45124  | -0.13274 | 0.00406  | 0.123282 | 0.00765  |
| 0.06304  | 0.040334 | 0.38449  | -0.1802  | 9.01E-05 | -0.15894 | 0.00057  | 0.093231 | 0.04404  |
| 0.03328  | -0.1107  | 0.0167   | -0.15188 | 0.00099  | -0.11933 | 0.00985  | -0.01964 | 0.67203  |
| 0.00898  | 0.145189 | 0.00166  | -0.09105 | 0.04926  | -0.10261 | 0.02661  | 0.140074 | 0.00241  |
| 0.34984  | -0.09682 | 0.03648  | -0.0096  | 0.83605  | -0.14527 | 0.00165  | 0.060982 | 0.18834  |
| 0.08584  | -0.00051 | 0.99123  | -0.13778 | 0.00285  | -0.04521 | 0.32966  | 0.06088  | 0.18908  |
| 0.11636  | -0.14945 | 0.0012   | -0.00753 | 0.87105  | -0.20078 | 1.23E-05 | 0.058826 | 0.20447  |
| 0.18042  | -0.05608 | 0.22647  | 0.020151 | 0.66405  | -0.14655 | 0.00149  | 0.076174 | 0.10015  |
| 1.51E-06 | -0.25599 | 2.01E-08 | -0.15074 | 0.00109  | -0.11407 | 0.01364  | 0.034462 | 0.45751  |
| 0.05634  | -0.08471 | 0.06739  | -0.10394 | 0.02469  | -0.1602  | 0.00051  | 0.027145 | 0.55846  |
| 7.33E-11 | -0.31621 | 2.65E-12 | 0.054236 | 0.2421   | -0.03968 | 0.39221  | 0.061405 | 0.18528  |
| 0.07069  | -0.14479 | 0.00171  | -0.13558 | 0.00333  | -0.15035 | 0.00112  | 0.097958 | 0.03432  |
| 0.27863  | 0.019566 | 0.67322  | -0.05954 | 0.19904  | -0.10445 | 0.02398  | 0.129135 | 0.00519  |
| 0.07139  | -0.11378 | 0.01389  | -0.03693 | 0.42597  | -0.14613 | 0.00154  | 0.101424 | 0.02841  |
| 1.58E-14 | -0.4773  | 6.05E-28 | -0.12646 | 0.00621  | -0.14671 | 0.00148  | 0.040635 | 0.38095  |
| 0.16785  | -0.16584 | 0.00032  | -0.00077 | 0.98675  | -0.08563 | 0.06446  | 0.075715 | 0.10222  |
| 4.69E-13 | -0.36916 | 1.59E-16 | -0.11228 | 0.0152   | -0.23172 | 4.12E-07 | -0.04523 | 0.32939  |



|          |          |          |          |          |          |          |          |          |
|----------|----------|----------|----------|----------|----------|----------|----------|----------|
| 2.00E-11 | -0.48506 | 6.22E-29 | -0.06277 | 0.17569  | -0.15484 | 0.00079  | 0.041144 | 0.37501  |
| 0.84449  | -0.03559 | 0.44289  | -0.12463 | 0.00701  | -0.18588 | 5.31E-05 | 0.107316 | 0.02036  |
| 0.2554   | -0.18416 | 6.25E-05 | -0.10588 | 0.02211  | -0.17551 | 0.00014  | -0.03343 | 0.47106  |
| 5.16E-07 | -0.36353 | 4.89E-16 | -0.18026 | 8.96E-05 | -0.21776 | 2.03E-06 | 0.070725 | 0.12696  |
| 0.00136  | -0.23268 | 3.68E-07 | -0.1936  | 2.53E-05 | -0.21684 | 2.25E-06 | 0.015525 | 0.73791  |
| 0.29805  | -0.07245 | 0.11792  | -0.08904 | 0.05449  | -0.1223  | 0.00815  | -0.03536 | 0.44588  |
| 0.00097  | -0.17024 | 0.00022  | -0.0583  | 0.20854  | -0.19404 | 2.42E-05 | 0.084604 | 0.06775  |
| 0.56617  | -0.01711 | 0.71227  | -0.18011 | 9.09E-05 | -0.00943 | 0.83899  | 0.055657 | 0.22996  |
| 0.00629  | -0.22187 | 1.28E-06 | -0.03375 | 0.4668   | -0.1313  | 0.00448  | 0.079225 | 0.08723  |
| 0.00661  | 0.135948 | 0.00324  | -0.03037 | 0.51267  | -0.15527 | 0.00076  | 0.035657 | 0.44206  |
| 0.4101   | -0.12064 | 0.00906  | -0.09135 | 0.0485   | -0.16033 | 0.00051  | -0.00984 | 0.83201  |
| 0.00782  | -0.18098 | 8.38E-05 | -0.05515 | 0.2342   | -0.20455 | 8.36E-06 | -0.02312 | 0.61827  |
| 0.08424  | -0.19814 | 1.61E-05 | -0.0342  | 0.46089  | -0.18209 | 7.57E-05 | -0.01195 | 0.79667  |
| 0.68867  | -0.14191 | 0.00211  | -0.09579 | 0.03853  | -0.15121 | 0.00105  | 0.07965  | 0.08555  |
| 0.00398  | -0.24471 | 8.52E-08 | -0.00719 | 0.87689  | -0.18789 | 4.39E-05 | 0.090844 | 0.04977  |
| 1.98E-05 | 0.181459 | 8.03E-05 | -0.10519 | 0.02301  | -0.08901 | 0.05458  | 0.234604 | 2.93E-07 |
| 1.21E-07 | -0.23188 | 4.05E-07 | -0.20529 | 7.75E-06 | -0.1086  | 0.0189   | 0.043654 | 0.34656  |
| 0.20584  | 0.11022  | 0.01718  | -0.057   | 0.21891  | -0.01782 | 0.70098  | 0.128413 | 0.00545  |
| 0.00021  | -0.16032 | 0.00051  | -0.0181  | 0.69647  | -0.07471 | 0.10686  | -0.08858 | 0.05578  |
| 0.36378  | -0.03648 | 0.43163  | -0.0687  | 0.13824  | -0.11473 | 0.01311  | -0.02703 | 0.56018  |
| 0.6971   | -0.04234 | 0.36128  | -0.02785 | 0.54821  | -0.13798 | 0.00281  | 0.019098 | 0.68061  |
| 2.94E-13 | 0.466922 | 1.16E-26 | 0.075889 | 0.10143  | 0.185252 | 5.64E-05 | 0.013944 | 0.76377  |
| 7.22E-20 | 0.507227 | 6.72E-32 | 0.020951 | 0.65156  | 0.062874 | 0.17496  | 0.024289 | 0.60059  |
| 4.75E-21 | 0.524193 | 2.54E-34 | 0.075499 | 0.10321  | 0.158215 | 0.0006   | 0.012545 | 0.78686  |
| 1.59E-17 | 0.470127 | 4.70E-27 | 0.091619 | 0.04784  | 0.038756 | 0.40339  | 0.073521 | 0.11258  |
| 4.44E-31 | 0.661345 | 4.70E-60 | 0.116344 | 0.01187  | 0.206389 | 6.90E-06 | 0.115381 | 0.01259  |
| 2.25E-41 | 0.656663 | 5.98E-59 | 0.120235 | 0.0093   | 0.114991 | 0.0129   | 0.116695 | 0.01161  |
| 0.00339  | 0.202699 | 1.01E-05 | 0.096326 | 0.03745  | 0.117592 | 0.01098  | 0.02339  | 0.61414  |
| 1.67E-25 | 0.511759 | 1.56E-32 | 0.090725 | 0.05007  | 0.0956   | 0.03891  | -0.01885 | 0.6846   |
| 5.35E-10 | 0.367638 | 2.16E-16 | 0.125814 | 0.00648  | -0.00022 | 0.99624  | 0.07066  | 0.12731  |
| 5.09E-19 | 0.459403 | 9.25E-26 | 0.118308 | 0.0105   | 0.100227 | 0.03034  | 0.036382 | 0.43283  |
| 5.95E-12 | 0.319529 | 1.52E-12 | 0.08461  | 0.06773  | 0.054013 | 0.24404  | 0.069856 | 0.13171  |
| 2.95E-33 | 0.601628 | 2.60E-47 | 0.184745 | 5.91E-05 | 0.098216 | 0.03385  | 0.070135 | 0.13017  |
| 1.58E-14 | 0.430599 | 1.67E-22 | 0.095227 | 0.03968  | 0.079979 | 0.08426  | 0.020163 | 0.66385  |
| 1.87E-27 | 0.572613 | 4.88E-42 | 0.112448 | 0.01505  | 0.111401 | 0.01602  | 0.127876 | 0.00565  |
| 3.39E-30 | 0.574377 | 2.42E-42 | 0.161494 | 0.00046  | 0.116271 | 0.01192  | 0.198461 | 1.56E-05 |
| 4.62E-11 | 0.455729 | 2.51E-25 | 0.138609 | 0.00268  | 0.182227 | 7.48E-05 | 0.128755 | 0.00533  |
| 5.16E-28 | 0.570498 | 1.13E-41 | 0.10322  | 0.02571  | 0.141532 | 0.00217  | 0.28573  | 3.18E-10 |
| 5.50E-06 | 0.25364  | 2.73E-08 | 0.048574 | 0.29487  | 0.112736 | 0.01479  | -0.03567 | 0.44187  |
| 9.38E-19 | 0.516275 | 3.57E-33 | 0.077208 | 0.09561  | 0.152198 | 0.00097  | -0.01183 | 0.79877  |
| 2.87E-11 | 0.369418 | 1.51E-16 | -0.02525 | 0.58626  | 0.089    | 0.05461  | -0.02328 | 0.61576  |
| 2.70E-26 | 0.561799 | 3.34E-40 | 0.075032 | 0.10536  | 0.129064 | 0.00522  | 0.146    | 0.00156  |
| 2.71E-15 | 0.42088  | 1.79E-21 | 0.041844 | 0.36693  | 0.104653 | 0.02372  | 0.099186 | 0.03212  |
| 0.00029  | 0.167676 | 0.00027  | 0.004987 | 0.91441  | 0.09764  | 0.03491  | 0.010344 | 0.82357  |
| 2.68E-13 | 0.441107 | 1.18E-23 | 0.030764 | 0.50721  | 0.098756 | 0.03287  | -0.02806 | 0.54528  |

|          |          |          |          |         |          |          |          |          |
|----------|----------|----------|----------|---------|----------|----------|----------|----------|
| 2.55E-09 | 0.347424 | 1.08E-14 | 0.079567 | 0.08588 | 0.155103 | 0.00077  | 0.125935 | 0.00643  |
| 3.63E-25 | 0.580605 | 1.94E-43 | 0.127981 | 0.00561 | 0.075957 | 0.10113  | 0.043241 | 0.35114  |
| 2.36E-12 | 0.408004 | 3.69E-20 | 0.010074 | 0.82812 | 0.157787 | 0.00062  | 0.081162 | 0.07975  |
| 4.19E-05 | 0.278138 | 9.62E-10 | 0.051007 | 0.27131 | 0.148167 | 0.00132  | -0.02103 | 0.6503   |
| 0.03609  | 0.186679 | 4.93E-05 | 0.007445 | 0.87252 | 0.116888 | 0.01148  | 0.114297 | 0.01346  |
| 0.78121  | -0.01143 | 0.80536  | -0.00074 | 0.9873  | 0.041485 | 0.37107  | -0.01693 | 0.71517  |
| 1.00E-22 | 0.551421 | 1.67E-38 | 0.11099  | 0.01642 | 0.170153 | 0.00022  | 0.021595 | 0.64159  |
| 3.21E-06 | 0.363184 | 5.24E-16 | 0.063267 | 0.17228 | 0.138473 | 0.00271  | 0.077022 | 0.09642  |
| 2.19E-29 | 0.591011 | 2.55E-45 | 0.136376 | 0.00315 | 0.152746 | 0.00093  | 0.059414 | 0.19997  |
| 1.99E-11 | 0.412178 | 1.40E-20 | 0.03898  | 0.40067 | 0.18855  | 4.12E-05 | 0.003521 | 0.9395   |
| 7.12E-14 | 0.464451 | 2.31E-26 | 0.001344 | 0.97689 | 0.113309 | 0.01429  | 0.142566 | 0.00201  |
| 5.49E-13 | 0.420237 | 2.09E-21 | -0.03569 | 0.44163 | 0.154384 | 0.00082  | 0.066127 | 0.15365  |
| 5.80E-12 | 0.385832 | 5.02E-18 | 0.055243 | 0.23345 | 0.127646 | 0.00574  | 0.162578 | 0.00042  |
| 3.67E-34 | 0.628893 | 8.74E-53 | 0.072173 | 0.11935 | 0.159633 | 0.00053  | 0.103682 | 0.02505  |
| 8.10E-16 | 0.433585 | 7.93E-23 | 0.086741 | 0.06107 | 0.142653 | 0.002    | 0.019251 | 0.67818  |
| 9.99E-21 | 0.515706 | 4.30E-33 | -0.03199 | 0.49039 | 0.158239 | 0.0006   | 0.045263 | 0.32906  |
| 2.13E-16 | 0.463674 | 2.86E-26 | 0.033997 | 0.46361 | 0.141979 | 0.0021   | 0.08535  | 0.06535  |
| 2.30E-09 | 0.354744 | 2.70E-15 | 0.057718 | 0.21314 | 0.13062  | 0.00469  | 0.022005 | 0.63528  |
| 3.68E-20 | 0.457478 | 1.56E-25 | -0.00418 | 0.92824 | 0.077572 | 0.09406  | 0.029528 | 0.52442  |
| 1.62E-12 | 0.390932 | 1.68E-18 | 0.102292 | 0.02708 | 0.141687 | 0.00215  | 0.109446 | 0.01799  |
| 6.68E-32 | 0.594406 | 5.99E-46 | 0.032738 | 0.48034 | 0.131023 | 0.00457  | 0.131117 | 0.00454  |
| 0.67365  | 0.01812  | 0.69612  | 0.07452  | 0.10777 | 0.084539 | 0.06796  | 0.248871 | 5.05E-08 |
| 6.81E-08 | 0.287978 | 2.28E-10 | 0.019677 | 0.67147 | 0.114609 | 0.0132   | 0.085344 | 0.06537  |
| 6.33E-05 | 0.208619 | 5.46E-06 | 0.031849 | 0.49234 | 0.058265 | 0.20882  | 0.162052 | 0.00044  |
| 0.055    | 0.168581 | 0.00025  | 0.022574 | 0.62656 | 0.080895 | 0.08075  | -0.13138 | 0.00446  |
| 0.00012  | 0.14     | 0.00243  | -0.08239 | 0.07528 | -0.00236 | 0.9595   | 0.102855 | 0.02624  |
| 0.21966  | 0.014035 | 0.76228  | -0.07768 | 0.09361 | -0.13901 | 0.00261  | -0.15555 | 0.00074  |
| 2.49E-06 | 0.124694 | 0.00698  | -0.10733 | 0.02035 | -0.02141 | 0.64439  | -0.03139 | 0.49858  |
| 0.01989  | 0.051804 | 0.26389  | -0.04423 | 0.34018 | -0.13415 | 0.00368  | -0.04037 | 0.38409  |
| 6.03E-09 | 0.251623 | 3.55E-08 | -0.01985 | 0.6687  | -0.01074 | 0.81693  | -0.14454 | 0.00174  |
| 0.00104  | 0.011335 | 0.807    | -0.04234 | 0.36126 | -0.09516 | 0.03983  | -0.12348 | 0.00755  |
| 1.51E-24 | 0.365085 | 3.60E-16 | -0.03558 | 0.44298 | -0.02094 | 0.65167  | 0.2176   | 2.07E-06 |
| 0.00164  | -0.0209  | 0.65243  | -0.08991 | 0.05218 | -0.11    | 0.0174   | 0.03995  | 0.38904  |
| 3.41E-26 | 0.363731 | 4.70E-16 | -0.05447 | 0.24004 | -0.01888 | 0.68398  | 0.046866 | 0.3122   |
| 0.24345  | -0.00948 | 0.83818  | -0.14279 | 0.00198 | -0.00986 | 0.83166  | -0.10675 | 0.02104  |
| 1.05E-18 | 0.261224 | 1.01E-08 | 0.023127 | 0.61813 | -0.00881 | 0.84946  | 0.001109 | 0.98094  |
| 0.00028  | 0.005719 | 0.9019   | -0.14055 | 0.00233 | -0.03548 | 0.44431  | -0.12349 | 0.00755  |
| 0.22838  | 0.006807 | 0.88336  | -0.06628 | 0.15267 | 0.009824 | 0.83231  | -0.06228 | 0.17905  |
| 1.07E-08 | 0.19978  | 1.36E-05 | 0.104798 | 0.02352 | 0.037891 | 0.41397  | 0.097035 | 0.03606  |
| 6.66E-07 | 0.119392 | 0.00981  | -0.00867 | 0.85179 | -0.14429 | 0.00177  | 0.099793 | 0.03107  |
| 3.63E-06 | 0.221466 | 1.34E-06 | -0.04927 | 0.28799 | -0.05169 | 0.26495  | 0.145742 | 0.00159  |
| 0.00015  | 0.097631 | 0.03493  | -0.13658 | 0.0031  | -0.09212 | 0.04664  | 0.026911 | 0.56184  |
| 3.56E-06 | 0.049691 | 0.28389  | -0.10253 | 0.02672 | -0.08744 | 0.05901  | -0.06515 | 0.15985  |
| 3.32E-10 | 0.23524  | 2.71E-07 | -0.04475 | 0.33455 | 0.043048 | 0.3533   | 0.06543  | 0.15805  |
| 0.04204  | -0.01952 | 0.67396  | 0.054397 | 0.2407  | 0.075867 | 0.10153  | -0.19492 | 2.22E-05 |

|          |          |          |          |          |          |         |          |          |
|----------|----------|----------|----------|----------|----------|---------|----------|----------|
| 0.3523   | -0.00559 | 0.90411  | -0.03281 | 0.47941  | -0.17796 | 0.00011 | -0.04097 | 0.37702  |
| 0.60713  | -0.03692 | 0.42601  | 0.14362  | 0.00186  | -0.03535 | 0.446   | -0.01557 | 0.73723  |
| 1.67E-26 | 0.441533 | 1.05E-23 | -0.07081 | 0.12649  | -0.00108 | 0.98136 | 0.021767 | 0.63894  |
| 5.25E-09 | 0.177414 | 0.00012  | -0.05563 | 0.23016  | 0.004775 | 0.91803 | 0.003275 | 0.94372  |
| 3.92E-07 | 0.181384 | 8.08E-05 | -0.09761 | 0.03497  | -0.06919 | 0.13543 | -0.05332 | 0.25017  |
| 0.0021   | 0.173976 | 0.00016  | -0.04387 | 0.34413  | -0.05373 | 0.24653 | -0.08182 | 0.07734  |
| 7.42E-08 | 0.1893   | 3.84E-05 | -0.05784 | 0.2122   | 0.000233 | 0.996   | 0.05708  | 0.21824  |
| 9.47E-14 | 0.270133 | 2.98E-09 | -0.03678 | 0.4278   | -0.06816 | 0.14138 | 0.084376 | 0.0685   |
| 1.17E-12 | 0.203773 | 9.06E-06 | -0.07489 | 0.106    | 0.002396 | 0.95882 | 0.055364 | 0.23243  |
| 0.00146  | 0.029393 | 0.52633  | 0.001976 | 0.96603  | -0.06675 | 0.14979 | 0.082757 | 0.07399  |
| 0.07685  | -0.01978 | 0.66989  | -0.17301 | 0.00017  | -0.09798 | 0.03428 | 0.077103 | 0.09607  |
| 3.84E-17 | 0.328948 | 3.02E-13 | -0.02212 | 0.63343  | 0.014055 | 0.76194 | 0.073816 | 0.11114  |
| 1.28E-29 | 0.388954 | 2.57E-18 | 9.52E-05 | 0.99836  | -0.06714 | 0.14745 | 0.105701 | 0.02234  |
| 1.26E-18 | 0.348621 | 8.61E-15 | 0.057942 | 0.21136  | -0.04524 | 0.32928 | 0.085537 | 0.06476  |
| 3.69E-11 | 0.286526 | 2.83E-10 | -0.06502 | 0.16067  | -0.03618 | 0.43537 | 0.131072 | 0.00455  |
| 1.35E-36 | 0.529293 | 4.47E-35 | -0.00409 | 0.92977  | 0.016414 | 0.72351 | 0.132063 | 0.00425  |
| 2.08E-10 | 0.166477 | 0.0003   | -0.09133 | 0.04856  | 0.006534 | 0.888   | 0.072116 | 0.11964  |
| 5.69E-12 | 0.269214 | 3.39E-09 | -0.1365  | 0.00312  | -0.03267 | 0.48131 | 0.162148 | 0.00043  |
| 0.00572  | 0.01096  | 0.81326  | 0.025786 | 0.57832  | 0.122227 | 0.00819 | -0.07921 | 0.08731  |
| 3.07E-09 | 0.176283 | 0.00013  | -0.11086 | 0.01655  | -0.05982 | 0.19694 | 0.014506 | 0.75454  |
| 5.87E-08 | 0.04045  | 0.38313  | -0.03193 | 0.49126  | -0.07764 | 0.09375 | 0.143398 | 0.00189  |
| 0.70193  | -0.06529 | 0.15893  | -0.00803 | 0.86262  | -0.11009 | 0.01732 | -0.03444 | 0.45779  |
| 0.00244  | 0.043604 | 0.34711  | -0.19446 | 2.32E-05 | -0.03231 | 0.48603 | 0.118364 | 0.01047  |
| 3.50E-19 | 0.287298 | 2.52E-10 | -0.07233 | 0.11852  | -0.0287  | 0.53617 | 0.028249 | 0.54255  |
| 2.55E-13 | 0.256386 | 1.91E-08 | 0.005441 | 0.90664  | 0.014735 | 0.75079 | -0.02537 | 0.58444  |
| 1.33E-13 | 0.245312 | 7.90E-08 | -0.0646  | 0.16339  | -0.02758 | 0.55209 | 0.122969 | 0.00781  |
| 2.31E-13 | 0.217466 | 2.10E-06 | 0.032877 | 0.47847  | -0.08012 | 0.0837  | 0.092284 | 0.04624  |
| 3.23E-19 | 0.332117 | 1.73E-13 | 0.036026 | 0.43734  | -0.03513 | 0.44889 | -0.02183 | 0.63793  |
| 0.00152  | 0.022977 | 0.6204   | -0.03126 | 0.50045  | 0.027587 | 0.55206 | -0.06364 | 0.16977  |
| 0.03749  | 0.046682 | 0.3141   | 0.103966 | 0.02465  | -0.01237 | 0.78983 | 0.128873 | 0.00528  |
| 2.39E-13 | 0.221193 | 1.39E-06 | 0.00073  | 0.98744  | 0.000822 | 0.98586 | 0.088268 | 0.05664  |
| 4.70E-15 | 0.30564  | 1.48E-11 | 0.130251 | 0.00481  | -0.05502 | 0.23536 | 0.151399 | 0.00103  |
| 1.12E-30 | 0.503826 | 1.98E-31 | -0.01808 | 0.69676  | 0.085752 | 0.06409 | 0.141653 | 0.00215  |
| 7.96E-21 | 0.358422 | 1.33E-15 | -0.00348 | 0.9403   | -0.02438 | 0.59926 | -0.0169  | 0.71568  |
| 7.15E-08 | 0.157413 | 0.00064  | -0.07701 | 0.09647  | -0.081   | 0.08038 | 0.166566 | 0.0003   |
| 2.68E-08 | 0.092151 | 0.04656  | 0.005445 | 0.90657  | -0.02815 | 0.54396 | 0.012137 | 0.79365  |
| 5.39E-12 | 0.216139 | 2.43E-06 | -0.01145 | 0.80514  | 0.001636 | 0.97187 | 0.148587 | 0.00128  |
| 3.25E-24 | 0.411193 | 1.77E-20 | 0.004328 | 0.92568  | 0.127013 | 0.00599 | -0.08863 | 0.05564  |
| 0.00223  | 0.048468 | 0.29592  | -0.0374  | 0.42     | -0.15532 | 0.00076 | 0.035169 | 0.44832  |
| 4.90E-10 | 0.256955 | 1.77E-08 | -0.0657  | 0.15633  | 0.011281 | 0.8079  | -0.03597 | 0.43804  |
| 7.84E-31 | 0.486346 | 4.24E-29 | -0.00741 | 0.87304  | 0.059319 | 0.20069 | 0.112428 | 0.01507  |
| 1.46E-07 | 0.126094 | 0.00636  | -0.04075 | 0.37961  | -0.04037 | 0.38405 | -0.13903 | 0.0026   |
| 2.58E-12 | 0.398511 | 3.17E-19 | -0.02116 | 0.6483   | -0.07889 | 0.08858 | 0.167294 | 0.00028  |
| 8.49E-11 | 0.217986 | 1.98E-06 | -0.0521  | 0.26115  | -0.06038 | 0.1927  | 0.112312 | 0.01517  |
| 3.83E-18 | 0.333074 | 1.46E-13 | 0.012506 | 0.78752  | -0.00788 | 0.86515 | 0.24141  | 1.28E-07 |

|          |          |          |          |         |          |          |          |          |
|----------|----------|----------|----------|---------|----------|----------|----------|----------|
| 7.17E-05 | 0.116147 | 0.01201  | -0.08478 | 0.06717 | -0.13666 | 0.00308  | -0.07324 | 0.11396  |
| 0.00283  | -0.08753 | 0.05874  | -0.05088 | 0.27252 | -0.06822 | 0.14104  | 0.035729 | 0.44113  |
| 0.38297  | 0.000735 | 0.98736  | -0.07207 | 0.11987 | -0.03019 | 0.51515  | -0.03625 | 0.43451  |
| 1.79E-17 | 0.312161 | 5.16E-12 | 0.017653 | 0.70358 | -0.08466 | 0.06758  | 0.119993 | 0.00945  |
| 2.48E-24 | 0.40406  | 9.09E-20 | -0.05339 | 0.24953 | -0.00695 | 0.88093  | 0.132884 | 0.00402  |
| 3.85E-05 | 0.087772 | 0.05805  | -0.08145 | 0.07869 | -0.1088  | 0.01868  | 0.152918 | 0.00092  |
| 2.23E-16 | 0.290808 | 1.49E-10 | -0.0408  | 0.37905 | -0.0183  | 0.69318  | -0.0277  | 0.55037  |
| 0.00685  | -0.04751 | 0.30554  | -0.08777 | 0.05804 | -0.11575 | 0.01231  | 0.005373 | 0.90781  |
| 1.35E-07 | 0.140776 | 0.00229  | -0.01631 | 0.72518 | -0.02775 | 0.54968  | 0.11098  | 0.01643  |
| 0.03874  | 0.031761 | 0.49353  | 0.067466 | 0.14547 | 0.025449 | 0.5833   | -0.12237 | 0.00811  |
| 9.80E-09 | 0.139246 | 0.00256  | -0.06639 | 0.15199 | -0.06109 | 0.18752  | -0.13959 | 0.0025   |
| 2.50E-06 | 0.177301 | 0.00012  | -0.04528 | 0.32883 | 0.001934 | 0.96676  | -0.0829  | 0.07348  |
| 0.05145  | 0.002116 | 0.96362  | -0.01127 | 0.80802 | 0.068018 | 0.1422   | -0.14369 | 0.00185  |
| 2.99E-06 | 0.215151 | 2.70E-06 | -0.08582 | 0.06386 | -0.04835 | 0.29714  | -0.05172 | 0.26463  |
| 2.79E-08 | 0.189218 | 3.87E-05 | 0.036    | 0.43766 | 0.071605 | 0.12229  | 0.12407  | 0.00727  |
| 0.40626  | 0.033991 | 0.46369  | -0.10604 | 0.02192 | -0.09767 | 0.03486  | -0.1825  | 7.29E-05 |
| 0.14242  | -0.00307 | 0.94733  | -0.08081 | 0.08107 | -0.09952 | 0.03153  | 0.144057 | 0.0018   |
| 7.13E-10 | 0.17259  | 0.00018  | 0.092177 | 0.0465  | -0.09129 | 0.04866  | 0.071205 | 0.1244   |
| 1.78E-12 | 0.283844 | 4.20E-10 | -0.02976 | 0.52114 | -0.08616 | 0.06283  | 0.110554 | 0.01685  |
| 4.57E-37 | 0.407207 | 4.43E-20 | -0.0711  | 0.12497 | 0.031393 | 0.49855  | 0.019921 | 0.66764  |
| 1.24E-35 | 0.498008 | 1.22E-30 | 0.040553 | 0.38192 | 0.063283 | 0.17217  | 0.260879 | 1.05E-08 |
| 8.36E-11 | 0.256737 | 1.82E-08 | 0.001638 | 0.97183 | -0.01828 | 0.69357  | 0.026139 | 0.57313  |
| 9.39E-31 | 0.519164 | 1.37E-33 | -0.04857 | 0.29489 | 0.029611 | 0.52326  | 0.093941 | 0.04245  |
| 3.65E-40 | 0.491376 | 9.33E-30 | -0.01723 | 0.71042 | -0.0832  | 0.07247  | 0.000647 | 0.98887  |
| 0.00909  | -0.01654 | 0.7215   | 0.006643 | 0.88615 | -0.10218 | 0.02725  | 0.000482 | 0.99172  |
| 0.00906  | 0.005404 | 0.90729  | -0.10806 | 0.0195  | -0.06188 | 0.18187  | -0.1075  | 0.02014  |
| 2.53E-08 | 0.105446 | 0.02267  | 0.015044 | 0.74575 | 0.017887 | 0.69984  | -0.04037 | 0.38412  |
| 1.18E-28 | 0.391319 | 1.54E-18 | -0.0489  | 0.29162 | 0.012669 | 0.78481  | 0.206655 | 6.71E-06 |
| 2.60E-06 | 0.099051 | 0.03235  | -0.11367 | 0.01398 | -0.01091 | 0.81403  | 0.122856 | 0.00786  |
| 1.23E-12 | 0.19832  | 1.58E-05 | 0.117243 | 0.01123 | -0.06365 | 0.16971  | -0.00196 | 0.96636  |
| 7.42E-08 | 0.210914 | 4.28E-06 | 0.140023 | 0.00242 | -0.06832 | 0.14042  | -0.00938 | 0.83984  |
| 3.84E-21 | 0.248604 | 5.22E-08 | -0.06021 | 0.19403 | -0.04086 | 0.37827  | 0.020237 | 0.66269  |
| 0.00023  | 0.109119 | 0.01833  | -0.01486 | 0.74875 | -0.19822 | 1.60E-05 | 0.029474 | 0.52518  |
| 2.53E-05 | 0.089681 | 0.05278  | 0.014744 | 0.75065 | -0.13097 | 0.00458  | 0.025542 | 0.58193  |
| 2.41E-09 | 0.211112 | 4.19E-06 | -0.04355 | 0.34773 | -0.04852 | 0.29542  | 0.203085 | 9.73E-06 |
| 1.32E-06 | 0.088108 | 0.05709  | -0.05037 | 0.27733 | -0.0083  | 0.85795  | -0.1179  | 0.01078  |
| 0.00029  | 0.088138 | 0.057    | -0.11375 | 0.01391 | -0.11755 | 0.01101  | 0.041869 | 0.36665  |
| 0.00511  | 0.10322  | 0.02571  | -0.00556 | 0.90461 | -0.03755 | 0.41817  | 0.074744 | 0.10671  |
| 0.00357  | -0.02238 | 0.62948  | 0.019349 | 0.67664 | 0.010992 | 0.81273  | 0.083229 | 0.07235  |
| 0.00342  | 0.054139 | 0.24294  | -0.15391 | 0.00085 | -0.11924 | 0.0099   | 0.117951 | 0.01074  |
| 0.01104  | -0.01945 | 0.67506  | 0.05289  | 0.25399 | 0.033737 | 0.46703  | -0.04895 | 0.29119  |
| 9.62E-12 | 0.207255 | 6.30E-06 | -0.10586 | 0.02215 | -0.07535 | 0.10388  | -0.04093 | 0.37756  |
| 4.20E-07 | 0.233885 | 3.19E-07 | -0.0804  | 0.08265 | 0.002152 | 0.96301  | 0.014845 | 0.749    |
| 1.12E-09 | 0.132341 | 0.00417  | -0.11292 | 0.01463 | -0.03511 | 0.44914  | -0.05987 | 0.19651  |
| 6.12E-22 | 0.325667 | 5.33E-13 | 0.001848 | 0.96823 | -0.05089 | 0.27246  | 0.124898 | 0.00688  |

|          |          |          |          |         |          |         |          |          |
|----------|----------|----------|----------|---------|----------|---------|----------|----------|
| 4.29E-07 | -0.10682 | 0.02095  | 0.032414 | 0.48469 | -0.01876 | 0.686   | -0.08426 | 0.06887  |
| 1.57E-05 | 0.044228 | 0.34025  | -0.11309 | 0.01447 | -0.06518 | 0.15965 | 0.123201 | 0.00769  |
| 0.00027  | -0.03839 | 0.40779  | 0.059165 | 0.20186 | 0.019827 | 0.66911 | -0.105   | 0.02325  |
| 4.65E-08 | 0.138717 | 0.00266  | -0.11541 | 0.01257 | -0.07196 | 0.12044 | 0.050943 | 0.27192  |
| 6.76E-36 | 0.46407  | 2.56E-26 | 0.023364 | 0.61453 | 0.040657 | 0.3807  | 0.147214 | 0.00142  |
| 4.15E-31 | 0.529054 | 4.85E-35 | -0.04239 | 0.36067 | 0.095694 | 0.03872 | 0.131677 | 0.00437  |
| 4.52E-19 | 0.349648 | 7.10E-15 | -0.07659 | 0.09831 | -0.04122 | 0.37412 | 0.139199 | 0.00257  |
| 0.00836  | 0.058413 | 0.20767  | -0.13318 | 0.00394 | -0.07153 | 0.12269 | -0.15628 | 0.0007   |
| 0.11334  | 0.058361 | 0.20807  | 0.014033 | 0.7623  | -0.02089 | 0.65257 | -0.13517 | 0.00343  |
| 4.46E-37 | 0.519151 | 1.38E-33 | 0.145129 | 0.00166 | 0.009066 | 0.84509 | 0.108164 | 0.01939  |
| 1.28E-11 | 0.162652 | 0.00042  | -0.10505 | 0.02318 | -0.10423 | 0.02428 | 0.068247 | 0.14086  |
| 0.04646  | 0.014619 | 0.75269  | -0.01805 | 0.69725 | -0.10597 | 0.022   | 0.030308 | 0.51352  |
| 0.00326  | 0.10162  | 0.0281   | 0.01176  | 0.7999  | -0.12209 | 0.00826 | 0.04614  | 0.31976  |
| 4.78E-13 | 0.185514 | 5.50E-05 | 0.029014 | 0.53168 | -0.09442 | 0.0414  | -0.01777 | 0.70174  |
| 2.54E-35 | 0.494401 | 3.71E-30 | 0.008954 | 0.84697 | 0.03363  | 0.46845 | 0.082298 | 0.07561  |
| 5.43E-05 | 0.121233 | 0.00873  | 0.057362 | 0.21598 | -0.09181 | 0.04739 | 0.154641 | 0.0008   |
| 7.90E-18 | 0.295666 | 7.10E-11 | 0.034079 | 0.46253 | -0.04565 | 0.32496 | 0.15598  | 0.00072  |
| 2.91E-13 | 0.199537 | 1.40E-05 | 0.026845 | 0.56281 | -0.03783 | 0.41467 | 0.004336 | 0.92555  |
| 5.23E-14 | 0.313777 | 3.96E-12 | 0.01017  | 0.8265  | -0.12253 | 0.00803 | 0.173801 | 0.00016  |
| 0.04817  | -0.02772 | 0.55016  | 0.111566 | 0.01586 | -0.04862 | 0.29446 | 0.180777 | 8.55E-05 |
| 2.50E-27 | 0.460451 | 6.95E-26 | -0.06347 | 0.17094 | -0.00772 | 0.8679  | 0.154463 | 0.00081  |
| 0.00469  | -0.09494 | 0.04029  | 0.004786 | 0.91785 | -0.13083 | 0.00463 | -0.15909 | 0.00056  |
| 3.21E-06 | 0.073521 | 0.11258  | 0.003558 | 0.93887 | -0.11153 | 0.0159  | 0.116897 | 0.01147  |
| 3.14E-05 | 0.058906 | 0.20385  | -0.14489 | 0.00169 | -0.05799 | 0.21097 | -0.01785 | 0.70048  |
| 2.15E-26 | 0.419777 | 2.33E-21 | 0.005236 | 0.91016 | -0.03568 | 0.44178 | 0.18367  | 6.54E-05 |
| 1.95E-07 | 0.117548 | 0.01101  | 0.050742 | 0.27381 | -0.01281 | 0.7824  | 0.117897 | 0.01078  |
| 5.88E-28 | 0.369796 | 1.40E-16 | -0.0234  | 0.614   | -0.06173 | 0.18293 | 0.003279 | 0.94365  |
| 7.88E-08 | 0.112906 | 0.01464  | -0.07782 | 0.09302 | -0.08188 | 0.0771  | 0.118991 | 0.01006  |
| 1.18E-08 | 0.104365 | 0.0241   | -0.08898 | 0.05467 | -0.03531 | 0.44655 | -0.12046 | 0.00917  |
| 2.15E-20 | 0.404167 | 8.87E-20 | -0.02927 | 0.52807 | -0.01168 | 0.8013  | -0.0276  | 0.55185  |
| 0.00688  | 0.027651 | 0.55113  | -0.0692  | 0.13536 | -0.0653  | 0.15885 | -0.03415 | 0.46155  |
| 9.06E-06 | 0.105101 | 0.02312  | -0.10223 | 0.02717 | -0.06452 | 0.16395 | 0.111608 | 0.01582  |
| 2.49E-10 | 0.326396 | 4.70E-13 | -0.08349 | 0.07146 | -0.03632 | 0.4336  | 0.067722 | 0.14395  |
| 1.27E-05 | 0.057272 | 0.2167   | -0.1198  | 0.00956 | -0.03704 | 0.42448 | 0.054209 | 0.24233  |
| 2.62E-29 | 0.426802 | 4.26E-22 | -0.02659 | 0.56652 | 0.023051 | 0.61928 | -0.01863 | 0.68807  |
| 1.69E-37 | 0.462351 | 4.12E-26 | -0.0323  | 0.48621 | -0.06137 | 0.1855  | 0.227115 | 7.06E-07 |
| 8.89E-09 | 0.24809  | 5.57E-08 | -0.11214 | 0.01533 | -0.0904  | 0.05089 | 0.222246 | 1.23E-06 |
| 1.86E-10 | 0.228776 | 5.82E-07 | 0.024562 | 0.5965  | -0.12434 | 0.00714 | 0.048662 | 0.29399  |
| 2.28E-08 | 0.255971 | 2.02E-08 | -0.16048 | 0.0005  | -0.0807  | 0.08148 | 0.061227 | 0.18656  |
| 2.44E-05 | 0.04245  | 0.36003  | -0.06324 | 0.17247 | -0.11424 | 0.0135  | 0.012197 | 0.79263  |
| 6.49E-32 | 0.455952 | 2.36E-25 | -0.03636 | 0.43307 | 0.017409 | 0.70749 | -0.00504 | 0.91343  |
| 3.43E-17 | 0.315476 | 2.99E-12 | -0.08243 | 0.07515 | 0.016527 | 0.72168 | 0.036683 | 0.42902  |
| 1.65E-06 | 0.146578 | 0.00149  | -0.00903 | 0.84566 | -0.0451  | 0.33084 | 0.162229 | 0.00043  |
| 2.32E-16 | 0.325555 | 5.44E-13 | 0.009039 | 0.84553 | -0.00283 | 0.95139 | 0.09136  | 0.04848  |
| 3.31E-21 | 0.31537  | 3.04E-12 | -0.09388 | 0.04258 | -0.03868 | 0.40432 | 0.189981 | 3.59E-05 |

|          |          |          |          |         |          |         |          |          |
|----------|----------|----------|----------|---------|----------|---------|----------|----------|
| 1.05E-13 | 0.194055 | 2.42E-05 | -0.00533 | 0.90852 | 0.013745 | 0.76704 | -0.03395 | 0.46428  |
| 4.20E-23 | 0.448137 | 1.89E-24 | 0.045207 | 0.32966 | 0.029993 | 0.51791 | 0.153123 | 0.0009   |
| 0.13581  | 0.026535 | 0.56733  | -0.06622 | 0.15306 | -0.10131 | 0.02858 | -0.08776 | 0.05808  |
| 0.10431  | 0.030857 | 0.50593  | -0.05408 | 0.24344 | -0.08716 | 0.05984 | 0.01962  | 0.67237  |
| 1.60E-19 | 0.278069 | 9.72E-10 | -0.00106 | 0.9817  | -0.03399 | 0.46365 | -0.0189  | 0.6838   |
| 3.36E-18 | 0.225558 | 8.44E-07 | -0.0828  | 0.07384 | -0.04529 | 0.32876 | -0.00552 | 0.90537  |
| 1.46E-13 | 0.237632 | 2.03E-07 | 0.143081 | 0.00194 | -0.07778 | 0.09318 | -0.00627 | 0.89258  |
| 1.76E-11 | 0.148817 | 0.00126  | -0.05455 | 0.23934 | -0.05623 | 0.22522 | 0.190775 | 3.33E-05 |
| 0.01421  | 0.013425 | 0.77231  | -0.15895 | 0.00057 | -0.05165 | 0.26532 | -0.13249 | 0.00413  |
| 3.91E-28 | 0.451401 | 7.98E-25 | 0.025169 | 0.58745 | -0.03371 | 0.46736 | 0.163615 | 0.00038  |
| 4.18E-14 | 0.285425 | 3.33E-10 | 0.042722 | 0.35695 | -0.10537 | 0.02277 | 0.101718 | 0.02795  |
| 0.00034  | -0.08431 | 0.06871  | 0.033483 | 0.4704  | 0.107489 | 0.02016 | -0.15683 | 0.00067  |
| 6.75E-07 | 0.123759 | 0.00742  | 0.006913 | 0.88156 | 0.020214 | 0.66305 | -0.20301 | 9.81E-06 |
| 0.73499  | 0.020152 | 0.66402  | -0.00536 | 0.9081  | -0.07845 | 0.09039 | -0.04807 | 0.29987  |
| 5.74E-09 | 0.143664 | 0.00186  | -0.06489 | 0.1615  | -0.14298 | 0.00195 | 0.0534   | 0.24944  |
| 2.19E-11 | 0.239152 | 1.69E-07 | -0.07884 | 0.0888  | -0.04013 | 0.38685 | -0.01767 | 0.70338  |
| 3.25E-39 | 0.508674 | 4.23E-32 | -0.01303 | 0.77883 | 0.039527 | 0.39408 | 0.043675 | 0.34633  |
| 1.01E-06 | 0.185845 | 5.33E-05 | -0.09776 | 0.03468 | -0.02133 | 0.64567 | 0.044244 | 0.34007  |
| 0.00056  | 0.078143 | 0.09165  | -0.05067 | 0.27453 | -0.09797 | 0.03429 | 0.147527 | 0.00139  |
| 3.71E-18 | 0.244065 | 9.24E-08 | -0.07642 | 0.09906 | -0.06801 | 0.14222 | 0.20275  | 1.01E-05 |
| 4.72E-31 | 0.381322 | 1.30E-17 | -0.01161 | 0.80247 | -0.01865 | 0.68764 | -0.01027 | 0.82484  |
| 1.00E-24 | 0.394056 | 8.48E-19 | 0.005683 | 0.90252 | 0.010823 | 0.81555 | 0.115564 | 0.01245  |
| 0.02888  | 0.030854 | 0.50597  | 0.009289 | 0.84132 | -0.03924 | 0.39757 | 0.091202 | 0.04887  |
| 2.41E-05 | -0.05479 | 0.23734  | 0.00222  | 0.96184 | -0.06982 | 0.13193 | -0.22034 | 1.52E-06 |
| 3.51E-18 | 0.288105 | 2.23E-10 | 0.022207 | 0.63217 | 0.029402 | 0.5262  | 0.235516 | 2.63E-07 |
| 1.03E-12 | 0.162419 | 0.00043  | 0.041949 | 0.36573 | -0.07255 | 0.1174  | 0.023376 | 0.61435  |
| 1.46E-08 | 0.197422 | 1.73E-05 | -0.07041 | 0.12866 | -0.13794 | 0.00281 | -0.10065 | 0.02964  |
| 7.41E-20 | 0.238075 | 1.93E-07 | 0.004665 | 0.91991 | -0.13309 | 0.00396 | 0.006818 | 0.88318  |
| 2.26E-24 | 0.438563 | 2.25E-23 | 0.012307 | 0.79082 | -0.05162 | 0.26556 | 0.151604 | 0.00101  |
| 1.54E-09 | 0.114814 | 0.01304  | -0.01837 | 0.69213 | -0.04486 | 0.33334 | -0.08255 | 0.07474  |
| 1.98E-29 | 0.39508  | 6.77E-19 | -0.07353 | 0.11251 | -0.01496 | 0.74715 | 0.090885 | 0.04966  |
| 0.05666  | 0.024287 | 0.60062  | 0.003171 | 0.94552 | -0.07828 | 0.09108 | -0.05287 | 0.25414  |
| 1.26E-10 | 0.254379 | 2.48E-08 | -0.01421 | 0.75945 | -0.05433 | 0.24132 | 0.040612 | 0.38123  |
| 6.54E-08 | 0.194905 | 2.22E-05 | -0.11556 | 0.01246 | -0.01081 | 0.81579 | 0.175052 | 0.00014  |
| 6.14E-06 | 0.07376  | 0.11142  | 0.025784 | 0.57835 | -0.12507 | 0.00681 | 0.08813  | 0.05703  |
| 6.66E-23 | 0.312833 | 4.63E-12 | -0.01499 | 0.7467  | -0.06302 | 0.17397 | 0.048303 | 0.29757  |
| 1.29E-37 | 0.465179 | 1.88E-26 | -0.02439 | 0.59906 | -0.0266  | 0.56639 | 0.147964 | 0.00134  |
| 2.26E-21 | 0.36233  | 6.20E-16 | -0.05877 | 0.20493 | -0.04436 | 0.33877 | 0.117084 | 0.01134  |
| 1.90E-53 | 0.648318 | 4.98E-57 | 0.015592 | 0.73683 | 0.016521 | 0.72177 | 0.129565 | 0.00504  |
| 0.00027  | -0.03802 | 0.41237  | 0.066999 | 0.14829 | 0.100702 | 0.02956 | -0.00159 | 0.97272  |
| 1.24E-44 | 0.570668 | 1.06E-41 | -0.01554 | 0.73774 | 0.006819 | 0.88315 | 0.090222 | 0.05136  |
| 6.30E-05 | 0.141935 | 0.00211  | -0.05564 | 0.23012 | -0.10137 | 0.02849 | 0.144464 | 0.00175  |
| 2.51E-14 | 0.230693 | 4.65E-07 | -0.06952 | 0.13359 | -0.03015 | 0.51577 | 0.158273 | 0.0006   |
| 7.90E-49 | 0.564442 | 1.21E-40 | -0.03484 | 0.45264 | 0.022847 | 0.62239 | 0.111188 | 0.01623  |
| 4.49E-07 | -0.08029 | 0.08306  | 0.030387 | 0.51243 | 0.093148 | 0.04423 | -0.01453 | 0.75419  |

|          |          |          |          |          |          |          |          |          |
|----------|----------|----------|----------|----------|----------|----------|----------|----------|
| 5.20E-21 | 0.540423 | 9.07E-37 | 0.085081 | 0.06621  | 0.133822 | 0.00377  | 0.184768 | 5.90E-05 |
| 0.06341  | 0.19723  | 1.76E-05 | 0.181626 | 7.90E-05 | 0.149253 | 0.00122  | -0.12488 | 0.00689  |
| 0.0376   | 0.218577 | 1.86E-06 | 0.146858 | 0.00146  | 0.083662 | 0.07087  | 0.162498 | 0.00042  |
| 3.17E-15 | 0.544722 | 1.94E-37 | 0.064917 | 0.16134  | 0.142968 | 0.00195  | 0.11276  | 0.01477  |
| 2.27E-34 | 0.678473 | 2.86E-64 | 0.079955 | 0.08435  | 0.168566 | 0.00025  | 0.224131 | 9.93E-07 |
| 1.56E-07 | 0.448701 | 1.63E-24 | 0.200538 | 1.26E-05 | 0.25365  | 2.73E-08 | 0.15438  | 0.00082  |
| 3.56E-25 | 0.621359 | 3.22E-51 | 0.127391 | 0.00584  | 0.143703 | 0.00185  | 0.031745 | 0.49376  |
| 8.33E-41 | 0.696457 | 5.12E-69 | 0.100417 | 0.03003  | 0.155747 | 0.00073  | 0.266241 | 5.10E-09 |
| 3.30E-07 | 0.353424 | 3.47E-15 | 0.142236 | 0.00206  | 0.134392 | 0.00362  | -0.04541 | 0.32743  |
| 2.99E-17 | 0.562429 | 2.62E-40 | 0.153722 | 0.00086  | 0.160186 | 0.00051  | 0.051809 | 0.26384  |
| 0.00017  | 0.419766 | 2.34E-21 | 0.120324 | 0.00925  | 0.097649 | 0.03489  | 0.091565 | 0.04797  |
| 0.00043  | 0.413721 | 9.79E-21 | 0.109485 | 0.01794  | 0.220356 | 1.52E-06 | 0.078418 | 0.09051  |
| 4.29E-12 | 0.488407 | 2.29E-29 | 0.152841 | 0.00092  | 0.1641   | 0.00037  | 0.165214 | 0.00034  |
| 4.79E-11 | 0.511112 | 1.93E-32 | 0.172497 | 0.00018  | 0.264249 | 6.69E-09 | 0.177524 | 0.00011  |
| 2.26E-11 | 0.483806 | 9.00E-29 | 0.103138 | 0.02583  | 0.169063 | 0.00024  | 0.01947  | 0.67473  |
| 0.01088  | 0.230259 | 4.90E-07 | 0.139309 | 0.00255  | 0.066159 | 0.15345  | 0.012471 | 0.78809  |
| 5.39E-29 | 0.613135 | 1.48E-49 | 0.129639 | 0.00502  | 0.167127 | 0.00029  | 0.109677 | 0.01774  |
| 7.73E-26 | 0.633897 | 7.53E-54 | 0.096396 | 0.03731  | 0.141044 | 0.00225  | 0.184086 | 6.29E-05 |
| 3.56E-30 | 0.720658 | 5.43E-76 | 0.132652 | 0.00408  | 0.164106 | 0.00037  | 0.268528 | 3.72E-09 |
| 9.81E-16 | 0.536841 | 3.23E-36 | 0.200641 | 1.25E-05 | 0.229087 | 5.61E-07 | 0.217184 | 2.16E-06 |
| 9.38E-14 | 0.521144 | 7.09E-34 | 0.154359 | 0.00082  | 0.193175 | 2.63E-05 | 0.22444  | 9.59E-07 |
| 5.79E-06 | 0.327086 | 4.17E-13 | 0.152266 | 0.00096  | 0.167723 | 0.00027  | 0.173539 | 0.00016  |
| 4.03E-07 | 0.370884 | 1.12E-16 | 0.075718 | 0.10221  | 0.141286 | 0.00221  | 0.217986 | 1.98E-06 |
| 1.80E-28 | 0.664269 | 9.38E-61 | 0.174115 | 0.00016  | 0.199041 | 1.47E-05 | 0.188452 | 4.16E-05 |
| 5.50E-45 | 0.728839 | 1.61E-78 | 0.140031 | 0.00242  | 0.188411 | 4.18E-05 | 0.264717 | 6.28E-09 |
| 4.91E-12 | 0.49248  | 6.67E-30 | 0.217306 | 2.14E-06 | 0.229467 | 5.37E-07 | 0.143541 | 0.00187  |
| 5.07E-25 | 0.591178 | 2.38E-45 | 0.218201 | 1.93E-06 | 0.225172 | 8.82E-07 | 0.112323 | 0.01516  |
| 4.84E-17 | 0.536749 | 3.34E-36 | 0.0974   | 0.03536  | 0.191997 | 2.96E-05 | 0.194262 | 2.37E-05 |
| 9.41E-21 | 0.527526 | 8.20E-35 | 0.142273 | 0.00206  | 0.191845 | 3.00E-05 | 0.234236 | 3.06E-07 |
| 1.22E-24 | 0.65284  | 4.61E-58 | 0.132552 | 0.00411  | 0.18375  | 6.49E-05 | 0.19994  | 1.34E-05 |
| 5.54E-07 | 0.433115 | 8.92E-23 | 0.028219 | 0.54298  | 0.149168 | 0.00122  | 0.118537 | 0.01035  |
| 4.88E-05 | 0.380194 | 1.65E-17 | 0.139753 | 0.00247  | 0.124801 | 0.00693  | 0.174864 | 0.00015  |
| 5.26E-05 | 0.356044 | 2.10E-15 | 0.076432 | 0.09901  | 0.165569 | 0.00033  | -0.00986 | 0.83173  |
| 9.53E-17 | 0.488789 | 2.04E-29 | 0.095614 | 0.03888  | 0.128328 | 0.00548  | 0.194985 | 2.20E-05 |
| 1.91E-15 | 0.505192 | 1.28E-31 | 0.087491 | 0.05886  | 0.188507 | 4.14E-05 | 0.216067 | 2.45E-06 |
| 2.85E-23 | 0.515479 | 4.64E-33 | 0.084237 | 0.06895  | 0.137013 | 0.00301  | 0.338463 | 5.58E-14 |
| 4.33E-16 | 0.556249 | 2.75E-39 | 0.160686 | 0.00049  | 0.219287 | 1.71E-06 | 0.274996 | 1.51E-09 |
| 2.19E-17 | 0.565288 | 8.68E-41 | 0.187354 | 4.62E-05 | 0.237036 | 2.19E-07 | 0.222701 | 1.17E-06 |
| 5.17E-18 | 0.594762 | 5.15E-46 | 0.209365 | 5.04E-06 | 0.19414  | 2.40E-05 | 0.377141 | 3.12E-17 |
| 1.85E-12 | 0.509477 | 3.26E-32 | 0.100273 | 0.03027  | 0.172086 | 0.00019  | 0.085661 | 0.06437  |
| 0.83173  | 0.034455 | 0.4576   | 0.035885 | 0.43913  | -0.01021 | 0.82587  | 0.06934  | 0.13459  |
| 0.10779  | -0.12609 | 0.00636  | 0.019843 | 0.66887  | -0.03751 | 0.41866  | 0.030033 | 0.51736  |
| 0.22467  | 0.046515 | 0.31584  | -0.01596 | 0.7309   | 0.002854 | 0.95095  | -0.11061 | 0.01679  |
| 0.06774  | 0.071954 | 0.12047  | 0.059565 | 0.19883  | 0.006291 | 0.89215  | -0.0287  | 0.53612  |
| 0.85485  | -0.0831  | 0.07281  | -0.05719 | 0.21732  | -0.08424 | 0.06894  | -0.16103 | 0.00048  |

|          |          |          |          |          |          |         |          |          |
|----------|----------|----------|----------|----------|----------|---------|----------|----------|
| 1.56E-06 | -0.22396 | 1.01E-06 | 0.004943 | 0.91516  | -0.05904 | 0.2028  | -0.14826 | 0.00131  |
| 0.36071  | -0.01397 | 0.76327  | 0.064248 | 0.16571  | 0.004963 | 0.91482 | -0.02736 | 0.55533  |
| 0.86544  | 0.040162 | 0.38653  | 0.021017 | 0.65053  | -0.0526  | 0.2566  | -0.12917 | 0.00518  |
| 0.141    | -0.0726  | 0.11718  | 0.126925 | 0.00602  | 0.022794 | 0.6232  | -0.01154 | 0.80361  |
| 0.00015  | -0.13809 | 0.00278  | -0.05359 | 0.24771  | -0.05992 | 0.19619 | -0.14121 | 0.00222  |
| 0.00565  | -0.11953 | 0.00973  | 0.040675 | 0.38048  | 0.011164 | 0.80985 | -0.04744 | 0.30628  |
| 0.48711  | 0.003792 | 0.93487  | -0.07325 | 0.11394  | -0.05693 | 0.21943 | -0.22961 | 5.28E-07 |
| 0.27245  | -0.09344 | 0.04357  | 0.002853 | 0.95097  | -0.09507 | 0.04001 | -0.24215 | 1.17E-07 |
| 0.16596  | -0.06224 | 0.17938  | 0.088073 | 0.05719  | 0.00281  | 0.9517  | -0.01949 | 0.67449  |
| 0.00036  | -0.16018 | 0.00051  | 0.080366 | 0.08276  | -0.04305 | 0.35326 | -0.17878 | 0.0001   |
| 0.28402  | -0.04281 | 0.35594  | 0.120074 | 0.0094   | 0.001282 | 0.97796 | -0.04514 | 0.33036  |
| 0.2714   | 0.09712  | 0.0359   | 0.10776  | 0.01985  | 0.013807 | 0.76603 | 0.030591 | 0.5096   |
| 0.00022  | -0.2304  | 4.81E-07 | -0.03238 | 0.48521  | -0.06192 | 0.18164 | -0.08186 | 0.07719  |
| 0.03036  | -0.17583 | 0.00013  | 0.008441 | 0.85564  | -0.03939 | 0.3957  | -0.02449 | 0.59764  |
| 0.12555  | -0.05416 | 0.2428   | 0.053263 | 0.25066  | -0.00378 | 0.93507 | -0.01402 | 0.76252  |
| 1.94E-06 | -0.20448 | 8.42E-06 | 0.030627 | 0.5091   | 0.005978 | 0.89748 | -0.03274 | 0.48025  |
| 8.20E-06 | -0.22468 | 9.33E-07 | 0.039909 | 0.38953  | 0.017629 | 0.70396 | -0.03696 | 0.42557  |
| 0.19274  | 0.058126 | 0.20991  | 0.119167 | 0.00995  | 0.009897 | 0.83108 | -0.00787 | 0.86523  |
| 0.00572  | -0.14788 | 0.00135  | 0.023713 | 0.60925  | -0.04335 | 0.34991 | -0.05904 | 0.20283  |
| 0.47844  | 0.011982 | 0.79621  | -0.03452 | 0.45678  | -0.04868 | 0.2938  | -0.02638 | 0.56961  |
| 0.01238  | -0.09858 | 0.03319  | 0.087871 | 0.05776  | 0.000148 | 0.99745 | -0.04305 | 0.35332  |
| 0.9077   | -0.03208 | 0.48921  | 0.029555 | 0.52405  | 0.013365 | 0.7733  | -0.00673 | 0.88469  |
| 0.0016   | -0.08222 | 0.07589  | 0.15892  | 0.00057  | 0.076994 | 0.09654 | 0.062196 | 0.17967  |
| 0.00014  | -0.20175 | 1.12E-05 | -0.01907 | 0.68099  | -0.03268 | 0.48111 | -0.07031 | 0.12922  |
| 9.92E-05 | -0.15305 | 0.00091  | -0.0173  | 0.70928  | -0.06083 | 0.18944 | -0.10413 | 0.02442  |
| 0.00099  | -0.25136 | 3.67E-08 | -0.00421 | 0.92777  | -0.06884 | 0.13745 | -0.09811 | 0.03404  |
| 2.75E-05 | -0.26917 | 3.41E-09 | 0.008595 | 0.85304  | -0.03502 | 0.45032 | -0.07633 | 0.09947  |
| 0.4271   | -0.16121 | 0.00047  | 0.0578   | 0.21249  | -0.03774 | 0.41582 | -0.05487 | 0.23666  |
| 0.00145  | -0.11329 | 0.0143   | 0.069091 | 0.136    | -0.00023 | 0.99606 | 0.007176 | 0.87709  |
| 1.87E-11 | -0.26525 | 5.84E-09 | 0.068414 | 0.13989  | 0.041633 | 0.36936 | -0.05598 | 0.22728  |
| 0.00035  | -0.31567 | 2.89E-12 | -0.05079 | 0.2734   | -0.02048 | 0.65884 | -0.06496 | 0.16109  |
| 2.20E-05 | -0.207   | 6.48E-06 | 0.028007 | 0.54602  | -0.03919 | 0.3981  | -0.07229 | 0.11875  |
| 0.7796   | -0.066   | 0.15446  | 0.0132   | 0.77603  | 0.009803 | 0.83267 | -0.02684 | 0.5629   |
| 0.00015  | -0.17598 | 0.00013  | 0.0455   | 0.32653  | -0.0094  | 0.83945 | -0.0284  | 0.54043  |
| 0.01089  | -0.12599 | 0.0064   | 0.048763 | 0.29299  | -0.00753 | 0.87111 | -0.03832 | 0.40875  |
| 0.06971  | 0.127018 | 0.00598  | 0.068379 | 0.14009  | 0.023802 | 0.60791 | 0.086305 | 0.06238  |
| 0.00517  | 0.161647 | 0.00045  | 0.23079  | 4.60E-07 | 0.083784 | 0.07046 | 0.014938 | 0.74747  |
| 0.1576   | -0.05765 | 0.21366  | -0.00955 | 0.83694  | -0.06271 | 0.17607 | -0.07276 | 0.11638  |
| 0.00016  | -0.20705 | 6.44E-06 | -0.03004 | 0.51732  | -0.07236 | 0.1184  | -0.0791  | 0.08775  |
| 0.01234  | 0.236241 | 2.41E-07 | 0.123659 | 0.00746  | 0.136923 | 0.00303 | 0.0163   | 0.72534  |
| 7.50E-10 | -0.2972  | 5.60E-11 | 0.001724 | 0.97035  | -0.05108 | 0.27061 | -0.05855 | 0.20659  |
| 0.08967  | 0.055406 | 0.23207  | 0.140819 | 0.00229  | 0.050756 | 0.27369 | 0.002673 | 0.95407  |
| 0.04755  | -0.00491 | 0.91567  | 0.078389 | 0.09063  | -0.11755 | 0.01101 | -0.12053 | 0.00913  |
| 0.81128  | 0.020545 | 0.65788  | -0.01183 | 0.79867  | -0.05287 | 0.25416 | 0.06541  | 0.15817  |
| 0.04462  | -0.17239 | 0.00018  | -0.05366 | 0.2471   | -0.05546 | 0.23158 | -0.0825  | 0.07491  |



|          |          |          |          |          |          |         |           |         |
|----------|----------|----------|----------|----------|----------|---------|-----------|---------|
| 0.0522   | 0.055787 | 0.22887  | -0.03062 | 0.50914  | 0.016439 | 0.72309 | -0.02774  | 0.54989 |
| 0.33539  | 0.056708 | 0.22126  | 0.043854 | 0.34435  | 0.040129 | 0.38692 | 0.002486  | 0.95727 |
| 0.20866  | -0.03145 | 0.49782  | 0.131625 | 0.00438  | 0.024593 | 0.59603 | -0.02242  | 0.6289  |
| 0.12705  | -0.12714 | 0.00594  | -0.03426 | 0.46012  | -0.04364 | 0.34667 | -0.04716  | 0.30917 |
| 0.03264  | -0.08259 | 0.07459  | 0.066016 | 0.15434  | -0.00995 | 0.83026 | -0.05659  | 0.22221 |
| 0.02796  | -0.05408 | 0.24345  | 0.090531 | 0.05056  | -0.00718 | 0.87702 | -0.04069  | 0.3803  |
| 0.41096  | -0.01265 | 0.78518  | -0.05266 | 0.25604  | -0.09068 | 0.05019 | -0.06852  | 0.13926 |
| 0.00188  | -0.12256 | 0.00801  | 0.01218  | 0.79292  | -0.02954 | 0.52421 | -0.04068  | 0.38037 |
| 0.00549  | -0.17184 | 0.00019  | -0.00576 | 0.90118  | -0.04791 | 0.30148 | -0.06665  | 0.15044 |
| 0.00051  | -0.1722  | 0.00018  | 0.032477 | 0.48384  | -0.02091 | 0.6522  | -0.07125  | 0.12414 |
| 0.00754  | -0.12334 | 0.00762  | 0.033426 | 0.47115  | -0.02084 | 0.65327 | -0.01895  | 0.68295 |
| 0.01188  | -0.12428 | 0.00717  | 0.0463   | 0.31808  | -0.00352 | 0.93958 | -0.05946  | 0.1996  |
| 0.05247  | -0.23794 | 1.96E-07 | 0.045945 | 0.32181  | -0.06026 | 0.19363 | -0.04635  | 0.31754 |
| 0.35554  | 0.047844 | 0.30219  | 0.150658 | 0.00109  | 0.083377 | 0.07184 | -0.04037  | 0.38413 |
| 0.24502  | -0.00783 | 0.86593  | 0.026796 | 0.56352  | 0.122451 | 0.00807 | -9.18E-05 | 0.99842 |
| 0.03754  | -0.17377 | 0.00016  | -0.10521 | 0.02298  | -0.12225 | 0.00818 | -0.12701  | 0.00599 |
| 0.00951  | -0.21906 | 1.76E-06 | -0.02617 | 0.5727   | -0.06735 | 0.14618 | -0.03425  | 0.46025 |
| 0.00048  | -0.11027 | 0.01713  | 0.042959 | 0.35429  | 0.001094 | 0.98119 | -0.12349  | 0.00754 |
| 0.63778  | 0.003355 | 0.94235  | 0.033218 | 0.47392  | -0.01528 | 0.74185 | -0.07996  | 0.08434 |
| 0.5371   | 0.01259  | 0.78612  | 0.227264 | 6.94E-07 | 0.036448 | 0.43199 | 0.0404    | 0.38372 |
| 0.13753  | -0.05549 | 0.23139  | 0.13191  | 0.0043   | -0.02753 | 0.55285 | -0.07827  | 0.09113 |
| 0.36134  | -0.0375  | 0.41886  | -0.04232 | 0.36153  | -0.03967 | 0.39241 | -0.01539  | 0.7401  |
| 0.37221  | 0.131219 | 0.00451  | 0.151666 | 0.00101  | 0.053967 | 0.24444 | 0.074868  | 0.10613 |
| 0.19117  | -0.04108 | 0.37572  | 0.061578 | 0.18405  | 0.038355 | 0.40827 | 0.038825  | 0.40255 |
| 7.84E-06 | -0.24815 | 5.53E-08 | 0.020036 | 0.66584  | -0.04523 | 0.32938 | -0.04203  | 0.36486 |
| 0.5303   | -0.15218 | 0.00097  | -0.07109 | 0.125    | -0.09607 | 0.03796 | -0.17401  | 0.00016 |
| 0.67269  | 0.042935 | 0.35456  | 0.064374 | 0.16488  | 0.041263 | 0.37364 | 0.03389   | 0.46501 |
| 0.64695  | -0.04308 | 0.35291  | 0.070295 | 0.12929  | -0.00048 | 0.9918  | 0.029918  | 0.51896 |
| 0.04917  | -0.07348 | 0.11276  | 0.307623 | 1.08E-11 | 0.101023 | 0.02905 | 0.04344   | 0.34893 |
| 0.59881  | -0.01423 | 0.75902  | 0.028611 | 0.5374   | 0.027846 | 0.54833 | 0.012412  | 0.78908 |
| 0.15195  | 0.075063 | 0.10522  | -0.01878 | 0.68565  | -0.07058 | 0.12774 | -0.04615  | 0.31967 |
| 0.62573  | -0.02505 | 0.58917  | 0.047218 | 0.30857  | -0.04435 | 0.33888 | -0.0742   | 0.10928 |
| 0.00018  | 0.238379 | 1.86E-07 | 0.090154 | 0.05154  | 0.02745  | 0.55403 | -0.03539  | 0.44546 |
| 0.74284  | 0.077241 | 0.09547  | 0.183526 | 6.63E-05 | 0.086567 | 0.06159 | 0.031118  | 0.50233 |
| 0.59195  | 0.026695 | 0.56499  | 0.084468 | 0.06819  | 0.044278 | 0.3397  | 0.027696  | 0.55049 |
| 0.03243  | 0.124044 | 0.00728  | 0.368841 | 1.70E-16 | 0.012626 | 0.78553 | 0.088987  | 0.05464 |
| 0.00571  | 0.166521 | 0.0003   | -0.03863 | 0.4049   | 0.024898 | 0.59147 | -0.15449  | 0.00081 |
| 0.06099  | 0.13808  | 0.00279  | 0.1498   | 0.00117  | -0.00674 | 0.8845  | -0.00418  | 0.92827 |
| 0.57021  | 0.033627 | 0.46848  | 0.028702 | 0.53611  | 0.041577 | 0.37001 | 0.161994  | 0.00044 |
| 0.21373  | 0.007054 | 0.87916  | 0.109953 | 0.01746  | 0.035039 | 0.45001 | 0.031095  | 0.50264 |
| 0.41232  | 0.008045 | 0.86234  | 0.142441 | 0.00203  | 0.080253 | 0.0832  | 0.10732   | 0.02036 |
| 0.48823  | 0.046542 | 0.31556  | 0.084444 | 0.06827  | -0.00991 | 0.83092 | 0.001068  | 0.98163 |
| 0.11676  | -0.12655 | 0.00617  | -0.05928 | 0.20101  | -0.08154 | 0.07835 | -0.10027  | 0.03027 |
| 8.39E-06 | -0.2519  | 3.42E-08 | -0.02194 | 0.63621  | -0.0543  | 0.24153 | -0.10835  | 0.01918 |
| 0.1544   | -0.10127 | 0.02865  | 0.031491 | 0.49721  | 0.048525 | 0.29536 | -0.04194  | 0.36578 |

|          |          |          |          |          |          |         |          |          |
|----------|----------|----------|----------|----------|----------|---------|----------|----------|
| 0.22126  | -0.04543 | 0.32732  | 0.067238 | 0.14684  | -0.00696 | 0.88073 | -0.04164 | 0.36928  |
| 7.05E-05 | -0.24622 | 7.05E-08 | -0.06763 | 0.14452  | -0.09528 | 0.03958 | -0.17622 | 0.00013  |
| 0.54857  | -0.07806 | 0.092    | -0.09022 | 0.05135  | -0.11005 | 0.01735 | -0.10089 | 0.02926  |
| 0.89858  | 0.038288 | 0.40909  | -0.03152 | 0.49687  | -0.01969 | 0.67125 | -0.03287 | 0.47856  |
| 0.39664  | -0.03159 | 0.49585  | 0.056332 | 0.22435  | 0.017767 | 0.70175 | -0.11281 | 0.01472  |
| 0.00136  | -0.14219 | 0.00207  | 0.026492 | 0.56795  | -0.03735 | 0.42062 | -0.06352 | 0.17058  |
| 0.76501  | 0.025816 | 0.57788  | 0.087377 | 0.05919  | 0.022908 | 0.62146 | -0.0424  | 0.36064  |
| 0.36985  | -0.11736 | 0.01114  | -0.03262 | 0.48186  | -0.11564 | 0.01239 | -0.14412 | 0.00179  |
| 3.77E-05 | -0.26216 | 8.87E-09 | 0.131352 | 0.00447  | -0.04832 | 0.29745 | -0.01444 | 0.75567  |
| 5.45E-05 | -0.19617 | 1.96E-05 | 0.072243 | 0.11899  | -0.00873 | 0.85074 | -0.04237 | 0.36093  |
| 0.81015  | 0.027967 | 0.5466   | 0.106015 | 0.02194  | 0.045316 | 0.32849 | 0.036877 | 0.42658  |
| 0.015    | -0.10786 | 0.01974  | 0.011289 | 0.80777  | -0.0306  | 0.50947 | -0.09418 | 0.04193  |
| 0.00107  | -0.10454 | 0.02387  | 0.090458 | 0.05075  | -0.00749 | 0.87176 | -0.01146 | 0.80483  |
| 0.78277  | 0.030133 | 0.51596  | 0.143982 | 0.00181  | 0.110527 | 0.01687 | 0.100613 | 0.02971  |
| 0.00192  | -0.13107 | 0.00455  | -0.02435 | 0.59968  | -0.07591 | 0.10132 | -0.10094 | 0.02918  |
| 0.6632   | 0.033783 | 0.46642  | 0.120537 | 0.00912  | 0.031982 | 0.49054 | 0.049869 | 0.28217  |
| 0.28815  | 0.078095 | 0.09185  | 0.112331 | 0.01515  | 0.026574 | 0.56676 | 0.107765 | 0.01984  |
| 0.02674  | -0.09575 | 0.03861  | 0.066722 | 0.14998  | -0.00447 | 0.92329 | -0.05192 | 0.2628   |
| 0.70484  | 0.021615 | 0.64128  | 0.254351 | 2.49E-08 | 0.071265 | 0.12408 | -0.03477 | 0.45352  |
| 0.13558  | -0.1377  | 0.00286  | 0.001999 | 0.96564  | -0.09137 | 0.04845 | -0.04072 | 0.37992  |
| 0.36524  | -0.01507 | 0.74525  | 0.046351 | 0.31755  | 0.027127 | 0.55871 | -0.04791 | 0.30154  |
| 0.9704   | -0.09243 | 0.0459   | -0.03197 | 0.49066  | -0.03989 | 0.38977 | -0.03648 | 0.43153  |
| 0.90192  | -0.00048 | 0.99181  | 0.185312 | 5.61E-05 | -0.02799 | 0.54626 | -0.09696 | 0.0362   |
| 0.01264  | -0.11584 | 0.01224  | 0.014782 | 0.75002  | -0.03272 | 0.48052 | -0.03848 | 0.4067   |
| 0.1121   | 0.055006 | 0.23546  | 0.106055 | 0.02189  | -0.03336 | 0.47204 | 0.071721 | 0.12168  |
| 3.49E-05 | -0.26544 | 5.69E-09 | -0.04767 | 0.304    | -0.08386 | 0.07022 | -0.09631 | 0.03747  |
| 0.81971  | 0.02999  | 0.51796  | -0.00282 | 0.95148  | 0.055557 | 0.23079 | -0.15224 | 0.00097  |
| 0.09038  | 0.128947 | 0.00526  | -0.00919 | 0.84294  | -0.09175 | 0.04752 | -0.02081 | 0.65371  |
| 0.00021  | -0.13089 | 0.00461  | 0.083826 | 0.07032  | 0.007137 | 0.87776 | -0.02236 | 0.62984  |
| 0.289    | 0.083984 | 0.06979  | 0.237321 | 2.11E-07 | 0.031391 | 0.49859 | 0.027543 | 0.55269  |
| 0.01047  | 0.12769  | 0.00572  | 0.074829 | 0.10631  | 0.140957 | 0.00226 | -0.05027 | 0.27827  |
| 0.01546  | -0.07883 | 0.08881  | 0.065846 | 0.15541  | 0.073414 | 0.11311 | -0.0589  | 0.20388  |
| 0.00742  | -0.17164 | 0.00019  | 0.0607   | 0.19039  | -0.04608 | 0.32034 | -0.09606 | 0.03797  |
| 0.02858  | -0.12056 | 0.00911  | 0.228844 | 5.78E-07 | 0.006977 | 0.88046 | -0.02144 | 0.64405  |
| 0.75935  | 0.004609 | 0.92088  | 0.081085 | 0.08004  | 0.003251 | 0.94414 | -0.03996 | 0.38891  |
| 0.21898  | -0.15173 | 0.001    | -0.03693 | 0.42588  | -0.06896 | 0.13672 | -0.11056 | 0.01684  |
| 0.73162  | 0.053367 | 0.24973  | 0.131609 | 0.00439  | 0.130529 | 0.00472 | -0.00665 | 0.88607  |
| 0.00049  | -0.22055 | 1.49E-06 | -0.04684 | 0.31245  | -0.11766 | 0.01094 | -0.19001 | 3.58E-05 |
| 0.00384  | 0.067416 | 0.14578  | -0.02756 | 0.55252  | -0.06792 | 0.14281 | -0.06898 | 0.13665  |
| 0.64036  | 0.012167 | 0.79313  | 0.041804 | 0.36739  | -0.01122 | 0.80886 | -0.00087 | 0.98501  |
| 0.32231  | -0.09743 | 0.0353   | 0.021391 | 0.64474  | -0.01459 | 0.75324 | -0.01672 | 0.71857  |
| 0.00014  | -0.22244 | 1.20E-06 | -0.00828 | 0.85831  | -0.11806 | 0.01067 | -0.16445 | 0.00036  |
| 0.24794  | 0.078912 | 0.08849  | 0.034778 | 0.45339  | -0.02257 | 0.62662 | -0.0598  | 0.19707  |
| 0.75788  | 0.010648 | 0.81848  | 0.019662 | 0.67172  | 0.007843 | 0.86577 | -0.06007 | 0.19502  |
| 0.69657  | 0.002745 | 0.95282  | 0.093349 | 0.04377  | -0.001   | 0.98281 | -0.05967 | 0.19806  |

|          |          |          |          |          |          |          |          |          |
|----------|----------|----------|----------|----------|----------|----------|----------|----------|
| 0.67213  | 0.059541 | 0.199    | 0.09199  | 0.04694  | 0.087426 | 0.05905  | 0.069989 | 0.13097  |
| 0.038    | -0.075   | 0.10551  | 0.105977 | 0.02199  | 0.012612 | 0.78575  | -0.00566 | 0.90287  |
| 0.05842  | -0.1072  | 0.0205   | -0.05193 | 0.26273  | -0.0755  | 0.10318  | -0.10727 | 0.02041  |
| 0.33032  | -0.01987 | 0.66838  | 0.07784  | 0.09292  | 0.009177 | 0.84321  | 0.04033  | 0.38455  |
| 6.27E-08 | -0.27862 | 8.97E-10 | 0.015217 | 0.74293  | -0.00797 | 0.86353  | 0.01503  | 0.74598  |
| 0.05303  | 0.135157 | 0.00343  | -0.05045 | 0.27661  | 0.031421 | 0.49818  | -0.03472 | 0.45417  |
| 0.07747  | -0.08785 | 0.05782  | 0.047798 | 0.30266  | -0.00863 | 0.85239  | -0.06993 | 0.13133  |
| 3.44E-05 | -0.28541 | 3.34E-10 | -0.03313 | 0.47511  | -0.17234 | 0.00018  | -0.15401 | 0.00084  |
| 0.92985  | -0.12995 | 0.00491  | -0.12042 | 0.00919  | -0.18783 | 4.42E-05 | -0.17325 | 0.00017  |
| 5.46E-05 | -0.22523 | 8.76E-07 | 0.00065  | 0.98882  | 0.04398  | 0.34296  | -0.07955 | 0.08592  |
| 0.3716   | -0.15101 | 0.00106  | -0.11609 | 0.01206  | -0.12486 | 0.0069   | -0.10737 | 0.0203   |
| 0.52411  | -0.06696 | 0.14854  | 0.208802 | 5.35E-06 | -0.00994 | 0.83033  | -0.04352 | 0.34803  |
| 0.30547  | 0.001354 | 0.97672  | -0.05659 | 0.22227  | -0.09326 | 0.04398  | -0.05317 | 0.25148  |
| 0.25136  | -0.13164 | 0.00438  | -0.03007 | 0.51683  | -0.05901 | 0.20303  | -0.13263 | 0.00409  |
| 0.86493  | 0.033781 | 0.46646  | 0.108678 | 0.01881  | 0.013667 | 0.76833  | 0.042555 | 0.35884  |
| 0.00027  | -0.06451 | 0.16397  | 0.045218 | 0.32953  | -0.05674 | 0.22099  | -0.09259 | 0.04553  |
| 0.0268   | -0.07516 | 0.10477  | 0.062193 | 0.17969  | -0.00515 | 0.9116   | -0.0631  | 0.17338  |
| 3.80E-06 | 0.213591 | 3.20E-06 | 0.11094  | 0.01647  | 0.070576 | 0.12777  | 0.852613 | #####    |
| 0.0029   | 0.080744 | 0.08132  | -0.0018  | 0.96901  | 0.040034 | 0.38805  | 0.523144 | 3.62E-34 |
| 1.96E-09 | 0.317607 | 2.10E-12 | 0.112584 | 0.01493  | 0.113126 | 0.01445  | 0.862015 | #####    |
| 1.18E-05 | 0.19741  | 1.73E-05 | 0.093724 | 0.04293  | 0.07048  | 0.12829  | 0.838119 | #####    |
| 4.84E-06 | 0.296337 | 6.40E-11 | 0.068901 | 0.13708  | 0.144733 | 0.00171  | 0.508734 | 4.14E-32 |
| 7.95E-06 | 0.248268 | 5.45E-08 | 0.092814 | 0.045    | 0.061983 | 0.18117  | 0.85993  | #####    |
| 1.59E-06 | 0.193953 | 2.44E-05 | 0.004508 | 0.92259  | -0.01323 | 0.77557  | 0.439339 | 1.85E-23 |
| 4.72E-08 | 0.216626 | 2.30E-06 | 0.034173 | 0.4613   | 0.0507   | 0.27422  | 0.820265 | #####    |
| 0.96332  | -0.11653 | 0.01173  | 0.049134 | 0.28933  | -0.05406 | 0.24358  | 0.617571 | 1.90E-50 |
| 4.01E-11 | 0.292648 | 1.13E-10 | -0.00337 | 0.9421   | 0.031994 | 0.49037  | 0.775201 | 8.32E-95 |
| 0.00085  | 0.182384 | 7.37E-05 | 0.088553 | 0.05584  | 0.071163 | 0.12462  | 0.820945 | #####    |
| 2.23E-13 | 0.348054 | 9.57E-15 | 0.06323  | 0.17253  | 0.018287 | 0.69346  | 0.878967 | #####    |
| 2.61E-05 | 0.151444 | 0.00103  | 0.076587 | 0.09832  | 0.021043 | 0.65014  | 0.690945 | 1.59E-67 |
| 0.00453  | 0.088323 | 0.05648  | 0.030246 | 0.5144   | 0.00403  | 0.93079  | 0.769647 | 1.18E-92 |
| 3.51E-06 | 0.168019 | 0.00027  | 0.075815 | 0.10177  | 0.027976 | 0.54647  | 0.831436 | #####    |
| 0.00158  | 0.130967 | 0.00458  | 0.006188 | 0.8939   | 0.035006 | 0.45043  | 0.672629 | 8.44E-63 |
| 0.93384  | 0.002397 | 0.95879  | 0.018097 | 0.69649  | 0.03961  | 0.39309  | 0.553412 | 7.95E-39 |
| 0.08775  | 0.009504 | 0.83769  | 0.038614 | 0.40511  | 0.034795 | 0.45318  | 0.563865 | 1.51E-40 |
| 3.39E-06 | 0.218107 | 1.95E-06 | 0.116502 | 0.01175  | 0.015179 | 0.74354  | 0.826699 | #####    |
| 6.94E-06 | 0.116344 | 0.01187  | 0.088286 | 0.05659  | -0.02557 | 0.58145  | 0.705568 | 1.47E-71 |
| 0.22948  | 0.060014 | 0.19545  | 0.053626 | 0.24744  | 0.022347 | 0.63003  | 0.493353 | 5.11E-30 |
| 2.84E-07 | 0.273237 | 1.93E-09 | 0.126049 | 0.00638  | 0.095935 | 0.03823  | 0.841921 | #####    |
| 1.54E-06 | 0.211388 | 4.06E-06 | -0.03167 | 0.4948   | -0.04223 | 0.36254  | 0.657914 | 3.04E-59 |
| 0.00065  | 0.178946 | 0.0001   | 0.036425 | 0.43228  | -0.02564 | 0.58049  | 0.367525 | 2.21E-16 |
| 5.62E-06 | 0.252646 | 3.11E-08 | 0.090078 | 0.05173  | 0.044094 | 0.34171  | 0.829759 | #####    |
| 7.03E-05 | 0.173379 | 0.00017  | 0.145159 | 0.00166  | 0.061002 | 0.18819  | 0.744546 | 1.22E-83 |
| 2.82E-12 | 0.371786 | 9.36E-17 | 0.063437 | 0.17113  | 0.111518 | 0.01591  | 0.758628 | 1.46E-88 |
| 1.71E-09 | 0.356865 | 1.80E-15 | 0.115757 | 0.01231  | 0.113818 | 0.01385  | 0.81612  | #####    |

|          |          |          |          |          |          |         |          |          |
|----------|----------|----------|----------|----------|----------|---------|----------|----------|
| 4.34E-05 | 0.13645  | 0.00313  | 0.047267 | 0.30806  | 0.050268 | 0.27833 | 0.831742 | #####    |
| 1.35E-08 | 0.301759 | 2.75E-11 | 0.088978 | 0.05467  | 0.052673 | 0.25595 | 0.870474 | #####    |
| 0.00125  | 0.123301 | 0.00764  | 0.066022 | 0.15431  | 0.053056 | 0.25251 | 0.58305  | 7.12E-44 |
| 0.71303  | -0.05629 | 0.22467  | -0.00428 | 0.92659  | 0.030585 | 0.50969 | 0.758281 | 1.95E-88 |
| 0.00553  | 0.182834 | 7.07E-05 | 0.10745  | 0.02021  | 0.075847 | 0.10162 | 0.769394 | 1.47E-92 |
| 9.96E-08 | 0.250699 | 4.00E-08 | 0.026879 | 0.56232  | 0.028728 | 0.53573 | 0.706725 | 6.87E-72 |
| 2.14E-05 | 0.165648 | 0.00032  | -0.04497 | 0.33222  | -0.00038 | 0.99342 | 0.661182 | 5.14E-60 |
| 0.08853  | 0.12798  | 0.00561  | 0.064926 | 0.16128  | 0.042165 | 0.36327 | 0.746589 | 2.47E-84 |
| 1.90E-07 | 0.257535 | 1.64E-08 | 0.077245 | 0.09545  | 0.131923 | 0.00429 | 0.693838 | 2.64E-68 |
| 0.01403  | 0.143594 | 0.00187  | 0.061771 | 0.18267  | 0.058447 | 0.2074  | 0.749227 | 3.07E-85 |
| 0.02086  | 0.157867 | 0.00062  | 0.09131  | 0.0486   | 0.074878 | 0.10608 | 0.825838 | #####    |
| 4.65E-08 | 0.327661 | 3.78E-13 | 0.116487 | 0.01176  | 0.092771 | 0.0451  | 0.828187 | #####    |
| 5.83E-06 | 0.209132 | 5.17E-06 | 0.071201 | 0.12442  | 0.070263 | 0.12947 | 0.897255 | #####    |
| 0.00123  | 0.179617 | 9.50E-05 | 0.054656 | 0.23846  | 0.064099 | 0.1667  | 0.858469 | #####    |
| 0.00116  | 0.197288 | 1.75E-05 | 0.149185 | 0.00122  | 0.110603 | 0.0168  | 0.61907  | 9.45E-51 |
| 1.30E-05 | 0.263337 | 7.57E-09 | 0.048241 | 0.2982   | 0.051266 | 0.26889 | 0.677654 | 4.61E-64 |
| 5.98E-05 | 0.186578 | 4.97E-05 | 0.055326 | 0.23275  | 0.003384 | 0.94186 | 0.369951 | 1.36E-16 |
| 3.39E-07 | 0.2445   | 8.75E-08 | 0.063592 | 0.17008  | 0.051719 | 0.26468 | 0.595095 | 4.46E-46 |
| 0.00018  | 0.216116 | 2.43E-06 | 0.117899 | 0.01078  | 0.112629 | 0.01489 | 0.749976 | 1.69E-85 |
| 1.84E-05 | 0.249302 | 4.78E-08 | 0.085939 | 0.06351  | 0.077691 | 0.09355 | 0.861111 | #####    |
| 0.98428  | -0.04055 | 0.38196  | 0.059254 | 0.20118  | 0.082456 | 0.07505 | 0.597344 | 1.69E-46 |
| 0.0003   | 0.05924  | 0.2013   | 0.009852 | 0.83184  | -0.00894 | 0.84722 | 0.448844 | 1.57E-24 |
| 1.28E-08 | 0.223412 | 1.08E-06 | 0.064273 | 0.16555  | 0.071543 | 0.12261 | 0.738441 | 1.32E-81 |
| 2.81E-05 | 0.23868  | 1.79E-07 | 0.059439 | 0.19978  | 0.081705 | 0.07775 | 0.765262 | 5.34E-91 |
| 3.43E-07 | 0.208478 | 5.54E-06 | 0.148547 | 0.00128  | 0.144989 | 0.00168 | 0.468893 | 6.66E-27 |
| 0.00053  | 0.242072 | 1.18E-07 | 0.06554  | 0.15734  | 0.143268 | 0.00191 | 0.406808 | 4.86E-20 |
| 4.16E-13 | 0.313578 | 4.09E-12 | -0.03192 | 0.49139  | -0.00962 | 0.83569 | 0.230243 | 4.90E-07 |
| 4.80E-07 | 0.378069 | 2.57E-17 | 0.070183 | 0.1299   | 0.101069 | 0.02897 | 0.049686 | 0.28394  |
| 2.77E-21 | 0.340604 | 3.78E-14 | 0.065924 | 0.15492  | 0.028276 | 0.54217 | 0.288669 | 2.05E-10 |
| 3.45E-08 | -0.19127 | 3.17E-05 | 0.064811 | 0.16203  | -0.06021 | 0.19401 | -0.22418 | 9.88E-07 |
| 0.00012  | 0.119985 | 0.00945  | 0.080402 | 0.08263  | 0.02268  | 0.62493 | 0.136097 | 0.00321  |
| 0.34516  | 0.088696 | 0.05544  | 0.060175 | 0.19426  | 0.052701 | 0.2557  | 0.054049 | 0.24372  |
| 8.91E-10 | 0.264218 | 6.72E-09 | 0.002782 | 0.95218  | 0.034619 | 0.45547 | 0.052154 | 0.26067  |
| 7.61E-07 | 0.402648 | 1.25E-19 | 0.187712 | 4.47E-05 | 0.037443 | 0.41951 | 0.197535 | 1.71E-05 |
| 4.11E-26 | 0.505958 | 1.01E-31 | -0.03476 | 0.45365  | 0.036297 | 0.4339  | 0.191857 | 3.00E-05 |
| 1.09E-49 | 0.739597 | 5.50E-82 | 0.105603 | 0.02247  | 0.13817  | 0.00277 | 0.10555  | 0.02254  |
| 0.08882  | 0.200126 | 1.32E-05 | 0.156254 | 0.0007   | 0.089555 | 0.05311 | 0.084044 | 0.06959  |
| 5.66E-06 | 0.381009 | 1.39E-17 | 0.209825 | 4.80E-06 | 0.15003  | 0.00115 | 0.051515 | 0.26657  |
| 9.96E-05 | -0.16987 | 0.00023  | 0.040751 | 0.37959  | -0.08984 | 0.05235 | -0.19913 | 1.46E-05 |
| 5.66E-14 | 0.380175 | 1.66E-17 | 0.133633 | 0.00381  | 0.052396 | 0.25846 | 0.178862 | 0.0001   |
| 1.39E-17 | 0.421512 | 1.54E-21 | 0.009333 | 0.84058  | 0.070175 | 0.12995 | 0.055096 | 0.2347   |
| 0.00132  | 0.165165 | 0.00034  | -0.02065 | 0.65621  | 0.050189 | 0.27909 | 0.013629 | 0.76895  |
| 0.00265  | 0.178123 | 0.00011  | 0.040275 | 0.38519  | 0.080264 | 0.08316 | 0.10849  | 0.01902  |
| 6.59E-08 | 0.459173 | 9.85E-26 | 0.176494 | 0.00013  | 0.173355 | 0.00017 | 0.132986 | 0.00399  |
| 1.11E-08 | -0.29994 | 3.66E-11 | 0.041257 | 0.3737   | -0.00527 | 0.90958 | -0.09205 | 0.04681  |

|          |          |          |          |          |          |          |          |          |
|----------|----------|----------|----------|----------|----------|----------|----------|----------|
| 0.35564  | -0.01305 | 0.7785   | 0.057942 | 0.21136  | -0.01271 | 0.78419  | -0.04382 | 0.34478  |
| 2.33E-39 | 0.609421 | 8.03E-49 | 0.159997 | 0.00052  | 0.109664 | 0.01776  | 0.337632 | 6.48E-14 |
| 0.03001  | 0.121462 | 0.0086   | -0.06624 | 0.15292  | -0.05288 | 0.25405  | 0.116695 | 0.01161  |
| 3.65E-12 | 0.370509 | 1.21E-16 | 0.019445 | 0.67513  | 0.009784 | 0.83299  | -0.05443 | 0.2404   |
| 0.00018  | 0.27733  | 1.08E-09 | 0.145362 | 0.00163  | 0.19394  | 2.44E-05 | 0.078831 | 0.08882  |
| 4.13E-05 | 0.241277 | 1.30E-07 | 0.03057  | 0.50989  | -0.06789 | 0.14293  | 0.104573 | 0.02382  |
| 2.25E-36 | 0.608262 | 1.35E-48 | 0.069455 | 0.13394  | 0.117306 | 0.01118  | 0.331768 | 1.84E-13 |
| 1.72E-18 | 0.514439 | 6.52E-33 | 0.127088 | 0.00596  | 0.128171 | 0.00554  | 0.338322 | 5.72E-14 |
| 0.0794   | 0.165067 | 0.00034  | 0.150351 | 0.00112  | 0.093935 | 0.04246  | 0.057374 | 0.21588  |
| 0.31209  | -0.00109 | 0.98126  | -0.0464  | 0.31704  | -0.09799 | 0.03427  | -0.1328  | 0.00404  |
| 0.00525  | 0.185421 | 5.55E-05 | 0.16222  | 0.00043  | 0.065702 | 0.15632  | 0.108727 | 0.01876  |
| 0.00514  | 0.210742 | 4.36E-06 | 0.033526 | 0.46983  | 0.068119 | 0.14161  | 0.205736 | 7.39E-06 |
| 3.46E-06 | 0.35203  | 4.53E-15 | 0.038988 | 0.40057  | 0.030994 | 0.50403  | 0.140047 | 0.00242  |
| 2.04E-51 | 0.594935 | 4.78E-46 | 0.092986 | 0.0446   | 0.093237 | 0.04402  | 0.20064  | 1.25E-05 |
| 3.20E-08 | 0.376051 | 3.91E-17 | 0.139018 | 0.00261  | -0.00137 | 0.97651  | 0.30502  | 1.64E-11 |
| 0.00114  | 0.216267 | 2.39E-06 | 0.062117 | 0.18023  | 0.037164 | 0.42299  | 0.218681 | 1.83E-06 |
| 0.05589  | -0.09394 | 0.04246  | -0.04603 | 0.32091  | -0.00164 | 0.9718   | -0.08054 | 0.08211  |
| 1.58E-08 | 0.285257 | 3.41E-10 | 0.099577 | 0.03144  | 0.021084 | 0.64949  | 0.06923  | 0.13521  |
| 3.03E-44 | 0.698273 | 1.62E-69 | 0.173149 | 0.00017  | 0.127218 | 0.0059   | 0.378277 | 2.46E-17 |
| 2.64E-74 | 0.688299 | 8.04E-67 | 0.19848  | 1.55E-05 | 0.067105 | 0.14765  | 0.28934  | 1.86E-10 |
| 8.79E-41 | 0.725146 | 2.29E-77 | 0.140844 | 0.00228  | 0.194068 | 2.41E-05 | 0.426481 | 4.60E-22 |
| 0.01341  | 0.217786 | 2.02E-06 | -0.0343  | 0.45965  | 0.131949 | 0.00429  | 0.103798 | 0.02489  |
| 0.41027  | 0.068984 | 0.13661  | 0.071597 | 0.12233  | 0.046807 | 0.31281  | -0.0117  | 0.80097  |
| 0.10218  | 0.022437 | 0.62865  | 0.079631 | 0.08562  | -0.01571 | 0.73498  | -0.01022 | 0.8257   |
| 1.23E-10 | 0.219498 | 1.67E-06 | 0.009425 | 0.83904  | 0.052511 | 0.25742  | 0.131333 | 0.00447  |
| 4.24E-09 | 0.135834 | 0.00327  | -0.00309 | 0.94686  | -0.01123 | 0.80874  | 0.042702 | 0.35718  |
| 9.76E-15 | 0.337023 | 7.23E-14 | 0.024773 | 0.59334  | 0.104452 | 0.02399  | 0.086387 | 0.06214  |
| 5.70E-19 | 0.468178 | 8.15E-27 | 0.034591 | 0.45583  | 0.108881 | 0.01859  | 0.255186 | 2.24E-08 |
| 3.62E-22 | 0.499797 | 7.01E-31 | 0.139075 | 0.0026   | 0.135156 | 0.00343  | 0.285283 | 3.40E-10 |
| 0.39042  | 0.073447 | 0.11295  | 0.04465  | 0.33565  | 0.02207  | 0.63428  | 0.192557 | 2.80E-05 |
| 3.49E-05 | 0.25157  | 3.57E-08 | 0.066218 | 0.15309  | 0.053617 | 0.24752  | 0.097278 | 0.03559  |
| 1.97E-40 | 0.675168 | 1.96E-63 | 0.153929 | 0.00085  | 0.102303 | 0.02706  | 0.215996 | 2.47E-06 |
| 0.51862  | 0.021222 | 0.64735  | -0.04124 | 0.3739   | 0.033148 | 0.47484  | 0.041844 | 0.36693  |
| 0.04037  | 0.121859 | 0.00838  | 0.083682 | 0.07081  | -0.04055 | 0.38192  | -0.00625 | 0.89293  |
| 5.53E-12 | 0.484449 | 7.44E-29 | 0.070401 | 0.12872  | 0.057639 | 0.21376  | 0.223633 | 1.05E-06 |
| 1.43E-07 | 0.287696 | 2.37E-10 | 0.058921 | 0.20374  | 0.073411 | 0.11312  | 0.230249 | 4.90E-07 |
| 2.90E-25 | 0.558251 | 1.29E-39 | 0.133327 | 0.0039   | 0.102076 | 0.0274   | 0.325463 | 5.52E-13 |
| 1.50E-12 | 0.249097 | 4.90E-08 | -0.01693 | 0.71522  | 0.084812 | 0.06707  | 0.104051 | 0.02453  |
| 4.88E-08 | 0.184346 | 6.14E-05 | 0.108847 | 0.01863  | 0.030784 | 0.50693  | 0.099035 | 0.03238  |
| 1.98E-32 | 0.668669 | 8.01E-62 | 0.035514 | 0.44388  | 0.12952  | 0.00506  | 0.277129 | 1.11E-09 |
| 1.70E-21 | 0.502539 | 2.97E-31 | 0.05587  | 0.22817  | 0.109943 | 0.01747  | 0.25762  | 1.62E-08 |
| 1.17E-31 | 0.650602 | 1.50E-57 | 0.083721 | 0.07068  | 0.110275 | 0.01713  | 0.479335 | 3.35E-28 |
| 1.81E-12 | 0.282457 | 5.15E-10 | 0.09097  | 0.04945  | -0.01324 | 0.77544  | 0.178025 | 0.00011  |
| 1.31E-29 | 0.634659 | 5.17E-54 | 0.058161 | 0.20964  | 0.20882  | 5.34E-06 | 0.272455 | 2.16E-09 |
| 1.12E-32 | 0.627393 | 1.81E-52 | 0.10033  | 0.03017  | 0.101915 | 0.02765  | 0.337331 | 6.84E-14 |

|          |          |          |          |          |          |          |          |          |
|----------|----------|----------|----------|----------|----------|----------|----------|----------|
| 1.40E-31 | 0.589339 | 5.17E-45 | 0.045622 | 0.32523  | 0.100107 | 0.03054  | 0.306732 | 1.25E-11 |
| 1.08E-14 | 0.345697 | 1.48E-14 | 0.129836 | 0.00495  | 0.087869 | 0.05777  | 0.134879 | 0.0035   |
| 0.00168  | 0.247384 | 6.09E-08 | -0.04872 | 0.29341  | 0.037904 | 0.41381  | 0.02602  | 0.57487  |
| 2.13E-33 | 0.52631  | 1.24E-34 | 0.089395 | 0.05354  | 0.06147  | 0.18482  | 0.121974 | 0.00832  |
| 0.02544  | 0.077279 | 0.09531  | 0.038145 | 0.41084  | 0.022502 | 0.62765  | 0.027065 | 0.55961  |
| 0.01414  | 0.205706 | 7.41E-06 | 0.038895 | 0.4017   | 0.054422 | 0.24048  | 0.009458 | 0.83847  |
| 2.45E-06 | 0.258261 | 1.49E-08 | 0.14168  | 0.00215  | 0.116948 | 0.01143  | 0.068804 | 0.13764  |
| 0.43831  | 0.085973 | 0.0634   | -0.00723 | 0.87614  | 0.049114 | 0.28953  | 0.122316 | 0.00814  |
| 0.00437  | -0.21286 | 3.47E-06 | -0.04149 | 0.37096  | -0.09112 | 0.04907  | -0.13575 | 0.00329  |
| 1.43E-05 | 0.345278 | 1.60E-14 | 0.028912 | 0.53312  | 0.104672 | 0.02369  | 0.21509  | 2.72E-06 |
| 0.00046  | 0.237964 | 1.95E-07 | 0.03485  | 0.45246  | 0.150602 | 0.0011   | 0.078963 | 0.08829  |
| 6.13E-34 | 0.676262 | 1.04E-63 | 0.134829 | 0.00351  | 0.214007 | 3.06E-06 | 0.246172 | 7.10E-08 |
| 1.20E-08 | 0.407929 | 3.76E-20 | 0.082464 | 0.07502  | 0.127134 | 0.00594  | 0.110642 | 0.01676  |
| 0.52141  | 0.105964 | 0.02201  | 0.066436 | 0.15173  | -0.00197 | 0.96619  | 0.013553 | 0.77021  |
| 2.10E-05 | 0.315379 | 3.04E-12 | 0.214264 | 2.98E-06 | 0.090669 | 0.05021  | 0.123236 | 0.00767  |
| 4.27E-36 | 0.700022 | 5.32E-70 | 0.14748  | 0.00139  | 0.107484 | 0.02016  | 0.30407  | 1.91E-11 |
| 0.2936   | -0.14331 | 0.00191  | 0.16015  | 0.00051  | -0.13435 | 0.00363  | -0.17906 | 1.00E-04 |
| 1.19E-11 | 0.31559  | 2.93E-12 | 0.093586 | 0.04324  | 0.033517 | 0.46994  | 0.061502 | 0.18459  |
| 2.35E-08 | 0.434792 | 5.86E-23 | 0.114585 | 0.01322  | 0.108914 | 0.01855  | 0.106119 | 0.02181  |
| 5.46E-39 | 0.609086 | 9.34E-49 | 0.025151 | 0.58772  | 0.111874 | 0.01557  | 0.158044 | 0.00061  |
| 7.81E-32 | 0.678891 | 2.24E-64 | 0.147387 | 0.0014   | 0.155122 | 0.00077  | 0.331148 | 2.05E-13 |
| 4.62E-16 | 0.340899 | 3.58E-14 | 0.139311 | 0.00255  | -0.00811 | 0.86125  | -0.01969 | 0.67133  |
| 1.10E-10 | 0.451088 | 8.68E-25 | 0.108498 | 0.01901  | 0.173281 | 0.00017  | 0.091474 | 0.0482   |
| 0.04828  | 0.081771 | 0.07751  | 0.016882 | 0.71596  | 0.021396 | 0.64467  | -0.05242 | 0.25825  |
| 0.53311  | -0.15534 | 0.00076  | -0.07083 | 0.12642  | -0.05823 | 0.20908  | -0.04823 | 0.29835  |
| 1.34E-10 | 0.246647 | 6.68E-08 | -0.025   | 0.58992  | 0.009081 | 0.84484  | 0.165713 | 0.00032  |
| 2.71E-33 | 0.569012 | 2.03E-41 | 0.077157 | 0.09583  | 0.110055 | 0.01735  | 0.404321 | 8.57E-20 |
| 1.56E-08 | 0.351352 | 5.15E-15 | 0.178908 | 0.0001   | 0.076643 | 0.09807  | 0.054585 | 0.23908  |
| 0.00064  | 0.254672 | 2.39E-08 | 0.029597 | 0.52346  | 0.078471 | 0.0903   | 0.071716 | 0.12171  |
| 7.60E-27 | 0.648485 | 4.56E-57 | 0.109245 | 0.0182   | 0.145498 | 0.00162  | 0.199258 | 1.44E-05 |
| 4.13E-05 | 0.266669 | 4.81E-09 | 0.03807  | 0.41177  | 0.014308 | 0.75778  | 0.176762 | 0.00012  |
| 3.57E-13 | 0.445438 | 3.84E-24 | 0.167458 | 0.00028  | 0.133494 | 0.00385  | 0.064578 | 0.16354  |
| 5.52E-17 | 0.54793  | 6.02E-38 | 0.134007 | 0.00372  | 0.190042 | 3.57E-05 | 0.349177 | 7.76E-15 |
| 2.04E-44 | 0.661785 | 3.69E-60 | 0.134251 | 0.00365  | 0.124412 | 0.00711  | 0.411903 | 1.50E-20 |
| 0.01421  | 0.177042 | 0.00012  | 0.037706 | 0.41625  | 0.10925  | 0.01819  | 0.065102 | 0.16014  |
| 1.62E-21 | 0.574926 | 1.94E-42 | 0.176457 | 0.00013  | 0.168564 | 0.00025  | 0.133732 | 0.00379  |
| 7.32E-26 | 0.484659 | 6.99E-29 | 0.075562 | 0.10292  | 0.086671 | 0.06128  | 0.26998  | 3.05E-09 |
| 3.94E-11 | 0.333515 | 1.35E-13 | 0.02283  | 0.62265  | 0.074033 | 0.11009  | 0.194796 | 2.25E-05 |
| 4.37E-09 | 0.319162 | 1.61E-12 | 0.013164 | 0.77662  | 0.083871 | 0.07017  | 0.282291 | 5.27E-10 |
| 1.26E-06 | 0.337249 | 6.94E-14 | 0.034769 | 0.45351  | 0.108409 | 0.01911  | 0.250967 | 3.86E-08 |
| 6.33E-34 | 0.431529 | 1.32E-22 | 0.190757 | 3.33E-05 | 0.024936 | 0.59092  | 0.191631 | 3.06E-05 |
| 6.11E-05 | 0.257495 | 1.65E-08 | 0.090902 | 0.04962  | 0.093913 | 0.04251  | 0.200039 | 1.33E-05 |
| 2.03E-09 | 0.246567 | 6.75E-08 | -0.01727 | 0.70976  | 0.127076 | 0.00596  | 0.024069 | 0.60389  |
| 3.01E-49 | 0.543938 | 2.57E-37 | 0.112484 | 0.01502  | 0.062547 | 0.17722  | 0.252395 | 3.21E-08 |
| 4.86E-06 | 0.223168 | 1.11E-06 | 0.122465 | 0.00806  | 0.110041 | 0.01737  | 0.051285 | 0.26871  |

|          |          |          |          |          |          |          |          |          |
|----------|----------|----------|----------|----------|----------|----------|----------|----------|
| 0.39759  | -0.0804  | 0.08261  | -0.11994 | 0.00948  | -0.07396 | 0.11046  | -0.11362 | 0.01402  |
| 8.65E-14 | -0.33371 | 1.31E-13 | -0.17973 | 9.40E-05 | -0.06716 | 0.14731  | -0.3523  | 4.30E-15 |
| 7.10E-22 | 0.370436 | 1.23E-16 | 0.026565 | 0.56689  | 0.017385 | 0.70788  | 0.078448 | 0.09039  |
| 0.05056  | 0.142108 | 0.00208  | 0.017093 | 0.71256  | 0.042291 | 0.36183  | 0.222018 | 1.26E-06 |
| 5.71E-16 | 0.407261 | 4.38E-20 | 0.078941 | 0.08838  | 0.153774 | 0.00086  | 0.271645 | 2.41E-09 |
| 2.59E-10 | 0.369126 | 1.60E-16 | 0.118586 | 0.01032  | 0.097248 | 0.03565  | 0.189824 | 3.65E-05 |
| 0.00011  | 0.238629 | 1.80E-07 | 0.060764 | 0.18992  | 0.027065 | 0.55962  | 0.222408 | 1.21E-06 |
| 2.48E-10 | 0.326225 | 4.84E-13 | 0.031742 | 0.4938   | 0.100439 | 0.02999  | 0.206711 | 6.67E-06 |
| 5.36E-32 | 0.652028 | 7.09E-58 | 0.088337 | 0.05644  | 0.152511 | 0.00095  | 0.235056 | 2.77E-07 |
| 8.43E-24 | 0.440962 | 1.22E-23 | 0.095891 | 0.03832  | 0.114094 | 0.01362  | 0.316578 | 2.49E-12 |
| 0.00061  | 0.205944 | 7.23E-06 | 0.107352 | 0.02032  | 0.048721 | 0.29341  | 0.163546 | 0.00039  |
| 3.76E-06 | 0.298261 | 4.75E-11 | 0.091702 | 0.04764  | 0.07087  | 0.12618  | 0.097575 | 0.03503  |
| 1.27E-09 | 0.351526 | 4.98E-15 | 0.025959 | 0.57577  | 0.082639 | 0.0744   | 0.198838 | 1.50E-05 |
| 1.80E-07 | 0.226282 | 7.77E-07 | 0.010339 | 0.82366  | 0.030141 | 0.51586  | 0.059337 | 0.20055  |
| 6.51E-11 | 0.392639 | 1.16E-18 | 0.082523 | 0.07481  | 0.066558 | 0.15098  | 0.204777 | 8.17E-06 |
| 0.58759  | 0.03257  | 0.48259  | 0.105042 | 0.0232   | 0.003693 | 0.93656  | -0.06328 | 0.17217  |
| 2.50E-33 | 0.500134 | 6.31E-31 | 0.102006 | 0.02751  | 0.069751 | 0.13229  | 0.275951 | 1.32E-09 |
| 0.79739  | 0.080625 | 0.08177  | 0.009621 | 0.83573  | 0.016356 | 0.72445  | 0.2363   | 2.39E-07 |
| 7.34E-43 | 0.684488 | 8.06E-66 | 0.160887 | 0.00048  | 0.128766 | 0.00532  | 0.102384 | 0.02694  |
| 0.01244  | 0.239079 | 1.71E-07 | 0.097572 | 0.03504  | 0.13978  | 0.00247  | 0.12287  | 0.00786  |
| 0.17325  | 0.26539  | 5.73E-09 | 0.099214 | 0.03207  | 0.06736  | 0.14611  | 0.139095 | 0.00259  |
| 1.12E-16 | 0.358446 | 1.32E-15 | 0.14264  | 0.002    | 0.032397 | 0.48492  | 0.219509 | 1.67E-06 |
| 0.00154  | 0.222085 | 1.25E-06 | -0.11794 | 0.01075  | 0.022224 | 0.63192  | 0.115661 | 0.01238  |
| 0.48057  | -0.07615 | 0.10025  | 0.019321 | 0.67708  | -0.00683 | 0.88304  | 0.135258 | 0.0034   |
| 0.04726  | 0.257123 | 1.73E-08 | 0.162745 | 0.00041  | 0.159978 | 0.00052  | 0.103892 | 0.02476  |
| 2.37E-18 | 0.472858 | 2.17E-27 | 0.09541  | 0.0393   | 0.101384 | 0.02847  | 0.256156 | 1.97E-08 |
| 1.94E-46 | 0.657902 | 3.06E-59 | 0.130876 | 0.00461  | 0.164027 | 0.00037  | 0.373365 | 6.78E-17 |
| 4.14E-35 | 0.614555 | 7.70E-50 | 0.124334 | 0.00714  | 0.10977  | 0.01765  | 0.354102 | 3.05E-15 |
| 3.03E-09 | 0.306156 | 1.37E-11 | 0.033851 | 0.46552  | 0.096633 | 0.03684  | 0.072042 | 0.12002  |
| 4.76E-34 | 0.649535 | 2.63E-57 | 0.184727 | 5.92E-05 | 0.18944  | 3.78E-05 | 0.36705  | 2.43E-16 |
| 2.88E-30 | 0.533413 | 1.07E-35 | 0.04972  | 0.28361  | 0.087207 | 0.05969  | 0.261225 | 1.01E-08 |
| 1.30E-36 | 0.651156 | 1.12E-57 | 0.143501 | 0.00188  | 0.157618 | 0.00063  | 0.307985 | 1.02E-11 |
| 2.57E-17 | 0.357839 | 1.49E-15 | 0.067609 | 0.14462  | 0.059347 | 0.20048  | 0.29585  | 6.90E-11 |
| 2.80E-10 | 0.440335 | 1.43E-23 | 0.056529 | 0.22273  | 0.130136 | 0.00485  | 0.215452 | 2.62E-06 |
| 6.61E-15 | 0.501866 | 3.67E-31 | 0.226488 | 7.59E-07 | 0.115971 | 0.01214  | 0.255994 | 2.01E-08 |
| 4.19E-19 | 0.397918 | 3.61E-19 | 0.064755 | 0.16239  | 0.06757  | 0.14485  | 0.261181 | 1.01E-08 |
| 8.69E-06 | 0.201333 | 1.16E-05 | 0.001209 | 0.97921  | 0.020452 | 0.65934  | 0.101211 | 0.02875  |
| 4.34E-22 | 0.451734 | 7.31E-25 | 0.050787 | 0.27339  | 0.084971 | 0.06656  | 0.288642 | 2.06E-10 |
| 7.67E-15 | 0.489876 | 1.47E-29 | 0.169062 | 0.00024  | 0.087805 | 0.05795  | 0.250139 | 4.29E-08 |
| 4.58E-31 | 0.582163 | 1.03E-43 | 0.164081 | 0.00037  | 0.123278 | 0.00765  | 0.205897 | 7.27E-06 |
| 0.00233  | 0.32312  | 8.26E-13 | 0.047075 | 0.31004  | 0.093287 | 0.04391  | 0.12674  | 0.0061   |
| 0.0021   | 0.101334 | 0.02855  | -0.00254 | 0.9563   | 0.140191 | 0.00239  | 0.006928 | 0.88131  |
| 0.00056  | -0.19697 | 1.81E-05 | 0.001495 | 0.9743   | -0.04321 | 0.35149  | -0.11359 | 0.01404  |
| 1.42E-43 | 0.594359 | 6.12E-46 | 0.180138 | 9.06E-05 | 0.128148 | 0.00555  | 0.237078 | 2.18E-07 |
| 0.01013  | 0.122824 | 0.00788  | 0.02637  | 0.56974  | 0.043575 | 0.34743  | 0.151383 | 0.00103  |

|          |          |          |           |          |          |          |          |          |
|----------|----------|----------|-----------|----------|----------|----------|----------|----------|
| 1.02E-07 | 0.240345 | 1.46E-07 | 0.049153  | 0.28914  | 0.031398 | 0.49849  | 0.062015 | 0.18094  |
| 2.70E-32 | 0.570252 | 1.24E-41 | 0.137472  | 0.00291  | 0.155189 | 0.00077  | 0.228737 | 5.85E-07 |
| 2.38E-19 | 0.456818 | 1.87E-25 | 0.089893  | 0.05222  | 0.062433 | 0.17802  | 0.214647 | 2.86E-06 |
| 1.58E-30 | 0.42865  | 2.70E-22 | 0.11204   | 0.01542  | -0.03108 | 0.50284  | 0.004205 | 0.92778  |
| 4.89E-09 | 0.277914 | 9.93E-10 | 0.186052  | 5.23E-05 | 0.123211 | 0.00768  | 0.034155 | 0.46152  |
| 1.24E-22 | 0.60136  | 2.92E-47 | 0.082538  | 0.07476  | 0.079445 | 0.08636  | 0.103664 | 0.02508  |
| 3.16E-05 | 0.292528 | 1.15E-10 | 0.061782  | 0.18259  | 0.045822 | 0.32311  | 0.020994 | 0.6509   |
| 2.78E-05 | -0.29269 | 1.12E-10 | -0.04934  | 0.28729  | -0.0455  | 0.32649  | -0.33399 | 1.24E-13 |
| 9.61E-07 | 0.376717 | 3.41E-17 | 0.171207  | 0.0002   | 0.135379 | 0.00338  | 0.236587 | 2.31E-07 |
| 1.12E-47 | 0.68713  | 1.64E-66 | 0.070417  | 0.12863  | 0.135736 | 0.00329  | 0.237949 | 1.96E-07 |
| 7.50E-34 | 0.637994 | 9.79E-55 | 0.161422  | 0.00046  | 0.174272 | 0.00015  | 0.267804 | 4.11E-09 |
| 4.18E-32 | 0.62751  | 1.71E-52 | 0.096072  | 0.03795  | 0.130918 | 0.0046   | 0.164688 | 0.00035  |
| 9.71E-13 | 0.385689 | 5.18E-18 | 0.086827  | 0.06081  | 0.076152 | 0.10025  | 0.126807 | 0.00607  |
| 9.14E-08 | 0.216309 | 2.38E-06 | 0.03043   | 0.51184  | 0.038511 | 0.40636  | 0.242071 | 1.18E-07 |
| 7.44E-06 | 0.302888 | 2.30E-11 | 0.045837  | 0.32296  | 0.091168 | 0.04896  | 0.088361 | 0.05638  |
| 0.49055  | 0.005197 | 0.91081  | -0.00355  | 0.93904  | -0.06238 | 0.17836  | -0.04085 | 0.37849  |
| 0.63376  | -0.0291  | 0.53045  | 0.037348  | 0.42069  | 0.03861  | 0.40516  | 0.164649 | 0.00035  |
| 0.22288  | 0.124281 | 0.00717  | 0.040494  | 0.38262  | 0.008908 | 0.84775  | 0.117872 | 0.01079  |
| 2.98E-20 | 0.509874 | 2.87E-32 | 0.16884   | 0.00025  | 0.11384  | 0.01384  | 0.268541 | 3.72E-09 |
| 0.00095  | -0.12967 | 0.00501  | -0.09798  | 0.03428  | -0.0358  | 0.44026  | -0.14859 | 0.00128  |
| 6.60E-11 | 0.205037 | 7.95E-06 | 0.110015  | 0.01739  | 0.072741 | 0.11646  | 0.274503 | 1.62E-09 |
| 4.85E-22 | 0.394318 | 8.00E-19 | 0.045673  | 0.32469  | 0.058136 | 0.20983  | 0.245785 | 7.45E-08 |
| 0.0425   | 0.154582 | 0.0008   | 0.049695  | 0.28385  | 0.0421   | 0.36401  | 0.039333 | 0.39641  |
| 2.17E-12 | 0.233824 | 3.21E-07 | -0.01657  | 0.72094  | -0.01124 | 0.8086   | 0.05053  | 0.27583  |
| 0.82661  | 0.133775 | 0.00378  | 0.006953  | 0.88088  | 0.045826 | 0.32307  | -0.03032 | 0.51333  |
| 1.69E-14 | 0.22942  | 5.40E-07 | 0.005199  | 0.91078  | -0.0248  | 0.59302  | 0.087212 | 0.05967  |
| 4.90E-09 | 0.274888 | 1.53E-09 | 0.079989  | 0.08422  | 0.077217 | 0.09558  | 0.028347 | 0.54116  |
| 9.75E-11 | 0.392818 | 1.11E-18 | -0.07962  | 0.08565  | 0.045978 | 0.32146  | 0.146699 | 0.00148  |
| 0.31299  | 0.111881 | 0.01557  | 0.095995  | 0.03811  | 0.002134 | 0.96332  | -0.05031 | 0.27794  |
| 0.31145  | -0.07317 | 0.11433  | 0.006071  | 0.8959   | -0.02729 | 0.55632  | -0.15503 | 0.00077  |
| 8.25E-44 | 0.656943 | 5.14E-59 | 0.118763  | 0.01021  | 0.159796 | 0.00053  | 0.225781 | 8.23E-07 |
| 3.60E-06 | 0.323551 | 7.67E-13 | 0.025458  | 0.58316  | 0.222533 | 1.19E-06 | 0.064646 | 0.1631   |
| 1.26E-08 | 0.287971 | 2.28E-10 | 0.040092  | 0.38735  | 0.071206 | 0.12439  | 0.105356 | 0.02279  |
| 3.00E-20 | 0.413265 | 1.09E-20 | 0.065005  | 0.16077  | 0.048817 | 0.29246  | 0.088307 | 0.05653  |
| 2.63E-22 | 0.500357 | 5.88E-31 | 0.139352  | 0.00254  | 0.042778 | 0.35632  | 0.070116 | 0.13027  |
| 6.55E-33 | 0.498431 | 1.07E-30 | 0.112879  | 0.01466  | 0.056233 | 0.22517  | 0.03457  | 0.45609  |
| 6.02E-11 | 0.360527 | 8.82E-16 | -0.00173  | 0.97028  | 0.11684  | 0.01151  | 0.171645 | 0.00019  |
| 0.34147  | -0.01133 | 0.80704  | -0.00346  | 0.94054  | -0.05043 | 0.27679  | -0.14431 | 0.00177  |
| 2.56E-08 | -0.29587 | 6.88E-11 | -0.18787  | 4.40E-05 | -0.08455 | 0.06792  | -0.23048 | 4.77E-07 |
| 1.06E-06 | -0.20442 | 8.47E-06 | 0.024636  | 0.59539  | -0.1054  | 0.02273  | -0.1261  | 0.00636  |
| 1.81E-36 | 0.573843 | 2.99E-42 | 0.071274  | 0.12403  | 0.059523 | 0.19915  | 0.242935 | 1.06E-07 |
| 0.23011  | 0.150009 | 0.00115  | 0.021282  | 0.64644  | 0.000821 | 0.98589  | -0.17625 | 0.00013  |
| 0.11411  | 0.019284 | 0.67767  | -9.88E-05 | 0.9983   | -0.04207 | 0.36439  | 0.073054 | 0.11489  |
| 7.09E-46 | 0.626627 | 2.61E-52 | 0.111472  | 0.01595  | 0.104835 | 0.02347  | 0.17982  | 9.33E-05 |
| 9.27E-06 | 0.407155 | 4.49E-20 | 0.091365  | 0.04847  | 0.177265 | 0.00012  | 0.088074 | 0.05719  |



|          |          |          |          |          |          |          |          |          |
|----------|----------|----------|----------|----------|----------|----------|----------|----------|
| 0.8223   | 0.140768 | 0.0023   | -0.07074 | 0.12689  | 0.08824  | 0.05672  | -0.1569  | 0.00067  |
| 0.0042   | 0.039442 | 0.39511  | 0.092216 | 0.0464   | 0.07333  | 0.11352  | -0.02514 | 0.58795  |
| 3.38E-28 | 0.576163 | 1.18E-42 | 0.101844 | 0.02776  | 0.087808 | 0.05794  | 0.072207 | 0.11917  |
| 4.61E-28 | 0.497869 | 1.28E-30 | 0.046716 | 0.31375  | 0.096655 | 0.0368   | 0.141203 | 0.00222  |
| 8.47E-38 | 0.655874 | 9.13E-59 | 0.077934 | 0.09253  | 0.177676 | 0.00011  | 0.24051  | 1.43E-07 |
| 0.22568  | 0.130157 | 0.00484  | 0.11453  | 0.01327  | -0.00282 | 0.95152  | 0.080337 | 0.08287  |
| 1.50E-14 | 0.461814 | 4.78E-26 | 0.09588  | 0.03834  | 0.107172 | 0.02053  | 0.055306 | 0.23292  |
| 1.84E-42 | 0.670311 | 3.16E-62 | 0.117054 | 0.01136  | 0.137735 | 0.00286  | 0.358206 | 1.39E-15 |
| 4.97E-31 | 0.59458  | 5.56E-46 | 0.098814 | 0.03277  | 0.13842  | 0.00272  | 0.284051 | 4.07E-10 |
| 1.12E-09 | 0.326071 | 4.97E-13 | 0.141973 | 0.0021   | 0.0405   | 0.38254  | 0.07546  | 0.10338  |
| 8.62E-06 | 0.284763 | 3.67E-10 | 0.183789 | 6.47E-05 | 0.067966 | 0.14251  | 0.094243 | 0.04178  |
| 0.00076  | 0.213119 | 3.37E-06 | 0.026326 | 0.57038  | 0.014567 | 0.75354  | 0.106667 | 0.02114  |
| 0.67453  | -0.02309 | 0.61874  | 0.000488 | 0.99162  | -0.02541 | 0.58386  | -0.01239 | 0.78951  |
| 3.90E-26 | 0.483215 | 1.07E-28 | 0.070719 | 0.12699  | 0.094805 | 0.04057  | 0.11019  | 0.01721  |
| 0.00012  | -0.22515 | 8.84E-07 | -0.10908 | 0.01838  | -0.14886 | 0.00125  | -0.18882 | 4.02E-05 |
| 0.70851  | 0.082443 | 0.0751   | -0.09022 | 0.05136  | 0.01154  | 0.80357  | -0.02679 | 0.56366  |
| 1.53E-32 | 0.574138 | 2.66E-42 | 0.029675 | 0.52236  | 0.126591 | 0.00616  | 0.383012 | 9.14E-18 |
| 2.76E-33 | 0.581623 | 1.28E-43 | 0.0867   | 0.06119  | 0.104689 | 0.02367  | 0.294309 | 8.74E-11 |
| 3.56E-44 | 0.679874 | 1.25E-64 | 0.176216 | 0.00013  | 0.15276  | 0.00093  | 0.379131 | 2.06E-17 |
| 3.37E-18 | 0.422129 | 1.33E-21 | 0.067261 | 0.1467   | 0.082233 | 0.07584  | 0.154752 | 0.00079  |
| 4.59E-23 | 0.53006  | 3.43E-35 | 0.090535 | 0.05055  | 0.065988 | 0.15452  | 0.101761 | 0.02789  |
| 1.78E-23 | 0.514743 | 5.90E-33 | 0.079185 | 0.08739  | 0.070337 | 0.12906  | 0.078966 | 0.08828  |
| 0.87418  | -0.03603 | 0.4373   | -0.05174 | 0.26446  | -0.08305 | 0.07298  | -0.05006 | 0.28033  |
| 1.13E-09 | 0.327481 | 3.90E-13 | 0.104138 | 0.02442  | 0.016419 | 0.72342  | 0.127458 | 0.00581  |
| 3.16E-11 | 0.532861 | 1.30E-35 | 0.027576 | 0.55222  | 0.188055 | 4.32E-05 | 0.211148 | 4.17E-06 |
| 3.57E-19 | 0.430537 | 1.70E-22 | 0.010913 | 0.81404  | 0.05942  | 0.19993  | 0.272502 | 2.14E-09 |
| 3.51E-18 | 0.429068 | 2.44E-22 | 0.19214  | 2.91E-05 | 0.177322 | 0.00012  | 0.191606 | 3.07E-05 |
| 0.00772  | 0.230825 | 4.58E-07 | 0.215511 | 2.60E-06 | 0.226926 | 7.21E-07 | 0.132998 | 0.00399  |
| 9.40E-10 | 0.397612 | 3.87E-19 | 0.001438 | 0.97528  | 0.038832 | 0.40246  | 0.054795 | 0.23727  |
| 0.0018   | 0.117986 | 0.01072  | 0.004251 | 0.927    | -0.02099 | 0.65093  | 0.028258 | 0.54243  |
| 1.66E-30 | 0.670321 | 3.15E-62 | 0.069095 | 0.13598  | 0.142853 | 0.00197  | 0.192532 | 2.80E-05 |
| 2.55E-62 | 0.561168 | 4.25E-40 | 0.14747  | 0.00139  | 0.059424 | 0.19989  | 0.208671 | 5.43E-06 |
| 8.91E-24 | 0.526156 | 1.31E-34 | 0.150357 | 0.00112  | 0.153316 | 0.00089  | 0.17033  | 0.00022  |
| 2.80E-05 | 0.233979 | 3.16E-07 | 0.00628  | 0.89233  | -0.04116 | 0.3748   | -0.08915 | 0.0542   |
| 2.03E-25 | 0.500423 | 5.76E-31 | 0.119921 | 0.00949  | 0.108672 | 0.01882  | 0.233496 | 3.34E-07 |
| 0.02243  | 0.071106 | 0.12492  | -0.04452 | 0.33709  | 0.00555  | 0.90479  | 0.114065 | 0.01365  |
| 3.02E-06 | 0.322739 | 8.81E-13 | 0.23207  | 3.96E-07 | 0.173514 | 0.00016  | 0.118995 | 0.01006  |
| 0.00053  | 0.242084 | 1.18E-07 | 0.122866 | 0.00786  | 0.089201 | 0.05406  | 0.171875 | 0.00019  |
| 4.49E-09 | 0.31001  | 7.34E-12 | 0.113422 | 0.01419  | 0.060406 | 0.19255  | 0.203873 | 8.97E-06 |
| 4.28E-36 | 0.688655 | 6.47E-67 | 0.112277 | 0.0152   | 0.11802  | 0.01069  | 0.260585 | 1.10E-08 |
| 1.02E-13 | 0.319595 | 1.50E-12 | 0.027241 | 0.55706  | 0.107544 | 0.0201   | 0.268768 | 3.60E-09 |
| 4.69E-20 | 0.525391 | 1.70E-34 | 0.064761 | 0.16235  | 0.032707 | 0.48075  | 0.253921 | 2.64E-08 |
| 0.31655  | -0.04882 | 0.29242  | 0.10538  | 0.02276  | 0.024189 | 0.60209  | 0.059001 | 0.20312  |
| 4.37E-45 | 0.697014 | 3.60E-69 | 0.067093 | 0.14772  | 0.108433 | 0.01908  | 0.333927 | 1.26E-13 |
| 4.85E-07 | 0.246567 | 6.75E-08 | 0.028137 | 0.54416  | 0.111943 | 0.01551  | 0.040892 | 0.37795  |

|          |          |          |          |          |          |          |          |          |
|----------|----------|----------|----------|----------|----------|----------|----------|----------|
| 2.20E-07 | 0.258753 | 1.40E-08 | 0.013828 | 0.76567  | 0.033441 | 0.47095  | 0.05102  | 0.2712   |
| 2.38E-21 | 0.404333 | 8.55E-20 | 0.076745 | 0.09763  | 0.055237 | 0.2335   | 0.181822 | 7.76E-05 |
| 1.87E-16 | 0.375425 | 4.45E-17 | -0.0277  | 0.5504   | 0.067305 | 0.14644  | 0.077416 | 0.09472  |
| 4.69E-16 | 0.376404 | 3.63E-17 | 0.101315 | 0.02858  | 0.110575 | 0.01683  | 0.142827 | 0.00197  |
| 2.05E-17 | 0.45557  | 2.62E-25 | 0.036255 | 0.43444  | 0.064484 | 0.16416  | 0.125448 | 0.00664  |
| 1.61E-13 | 0.434485 | 6.33E-23 | 0.07861  | 0.08973  | 0.101433 | 0.0284   | 0.179416 | 9.68E-05 |
| 4.99E-08 | -0.32155 | 1.08E-12 | -0.09436 | 0.04153  | -0.12007 | 0.0094   | -0.09789 | 0.03444  |
| 0.85859  | -0.01289 | 0.78121  | 0.004324 | 0.92575  | 0.015584 | 0.73695  | -0.1371  | 0.00299  |
| 3.49E-44 | 0.649793 | 2.30E-57 | 0.067925 | 0.14275  | 0.070597 | 0.12765  | 0.344428 | 1.88E-14 |
| 0.89783  | 0.063204 | 0.17271  | -0.09491 | 0.04036  | 0.043218 | 0.35139  | -0.09283 | 0.04496  |
| 9.00E-37 | 0.646863 | 1.06E-56 | 0.150846 | 0.00108  | 0.069168 | 0.13556  | 0.33425  | 1.19E-13 |
| 8.40E-13 | 0.238771 | 1.77E-07 | 0.036228 | 0.43477  | 0.0319   | 0.49165  | 0.034096 | 0.4623   |
| 8.25E-33 | 0.512902 | 1.08E-32 | 0.090057 | 0.05179  | 0.094586 | 0.04104  | 0.295687 | 7.08E-11 |
| 2.02E-11 | 0.330042 | 2.49E-13 | 0.014935 | 0.74753  | 0.10412  | 0.02444  | 0.120292 | 0.00927  |
| 2.35E-10 | 0.463855 | 2.72E-26 | 0.086973 | 0.06038  | 0.094074 | 0.04215  | 0.196609 | 1.88E-05 |
| 0.00011  | -0.13081 | 0.00463  | 0.096728 | 0.03665  | -0.07566 | 0.10247  | -0.18012 | 9.07E-05 |
| 3.37E-08 | 0.267431 | 4.33E-09 | 0.054559 | 0.2393   | -0.03235 | 0.48551  | 0.101761 | 0.02789  |
| 2.18E-25 | 0.508709 | 4.18E-32 | 0.147161 | 0.00143  | 0.10948  | 0.01795  | 0.250487 | 4.11E-08 |
| 9.05E-20 | 0.490762 | 1.12E-29 | 0.03321  | 0.47403  | 0.028447 | 0.53973  | 0.013343 | 0.77367  |
| 2.60E-05 | 0.260575 | 1.10E-08 | 0.08406  | 0.06954  | 0.02912  | 0.53018  | -0.04418 | 0.34072  |
| 4.42E-28 | 0.590415 | 3.28E-45 | 0.103242 | 0.02568  | 0.175139 | 0.00014  | 0.165313 | 0.00033  |
| 1.29E-15 | 0.413034 | 1.15E-20 | 0.124579 | 0.00703  | 0.073087 | 0.11473  | 0.279714 | 7.67E-10 |
| 7.62E-08 | 0.165082 | 0.00034  | 0.058307 | 0.2085   | -0.08147 | 0.07861  | -0.01746 | 0.70663  |
| 1.09E-09 | 0.302331 | 2.51E-11 | -0.00253 | 0.95654  | 0.117445 | 0.01108  | 0.083076 | 0.07288  |
| 0.38741  | -0.06492 | 0.16129  | -0.10063 | 0.02967  | -0.01889 | 0.68383  | -0.00907 | 0.84498  |
| 1.18E-13 | 0.367396 | 2.27E-16 | 0.05686  | 0.22003  | 0.06537  | 0.15843  | 0.136498 | 0.00312  |
| 1.00E-10 | 0.339151 | 4.92E-14 | 0.151791 | 0.001    | 0.04422  | 0.34033  | 0.194855 | 2.23E-05 |
| 0.08566  | 0.1615   | 0.00046  | -0.03945 | 0.39503  | 9.24E-05 | 0.99841  | 0.200454 | 1.27E-05 |
| 1.78E-10 | 0.307903 | 1.03E-11 | 0.045788 | 0.32347  | 0.040008 | 0.38835  | 0.14189  | 0.00211  |
| 5.57E-07 | 0.307178 | 1.16E-11 | 0.041077 | 0.37579  | 0.05021  | 0.27889  | -0.00469 | 0.91946  |
| 0.30257  | -0.01856 | 0.68912  | 0.080401 | 0.08263  | -0.02777 | 0.5494   | -0.12927 | 0.00515  |
| 4.30E-11 | 0.378058 | 2.58E-17 | 0.106273 | 0.02162  | 0.089867 | 0.05229  | 0.1275   | 0.00579  |
| 3.63E-28 | 0.575403 | 1.60E-42 | 0.352771 | 3.93E-15 | 0.166602 | 0.0003   | 0.226956 | 7.19E-07 |
| 3.29E-31 | 0.63286  | 1.26E-53 | 0.266392 | 4.99E-09 | 0.156925 | 0.00067  | 0.223803 | 1.03E-06 |
| 1.85E-09 | 0.315993 | 2.74E-12 | 0.200972 | 1.21E-05 | 0.224276 | 9.77E-07 | 0.233836 | 3.21E-07 |
| 5.08E-11 | 0.370067 | 1.33E-16 | 0.295721 | 7.04E-11 | 0.128197 | 0.00553  | 0.303008 | 2.26E-11 |
| 2.13E-20 | 0.515141 | 5.18E-33 | 0.123082 | 0.00775  | 0.110532 | 0.01687  | 0.232579 | 3.73E-07 |
| 5.68E-07 | 0.271862 | 2.34E-09 | 0.113396 | 0.01421  | 0.109864 | 0.01755  | 0.278024 | 9.78E-10 |
| 1.62E-39 | 0.693124 | 4.12E-68 | 0.216532 | 2.32E-06 | 0.192398 | 2.84E-05 | 0.453614 | 4.42E-25 |
| 5.95E-09 | 0.350783 | 5.73E-15 | 0.097329 | 0.0355   | -0.02245 | 0.62844  | 0.137652 | 0.00287  |
| 5.05E-29 | 0.560052 | 6.51E-40 | 0.116056 | 0.01208  | 0.095612 | 0.03889  | 0.308941 | 8.73E-12 |
| 9.70E-08 | 0.431138 | 1.46E-22 | 0.175811 | 0.00013  | 0.112648 | 0.01487  | -0.04027 | 0.38522  |
| 0.00025  | 0.283511 | 4.41E-10 | 0.131198 | 0.00451  | 0.155379 | 0.00075  | 0.004702 | 0.91928  |
| 8.24E-22 | 0.463648 | 2.88E-26 | 0.074886 | 0.10604  | 0.066924 | 0.14875  | 0.30938  | 8.13E-12 |
| 0.66462  | 0.000969 | 0.98334  | 0.02068  | 0.65578  | 0.020962 | 0.65139  | -0.06757 | 0.14488  |

|          |          |          |          |          |          |          |          |          |
|----------|----------|----------|----------|----------|----------|----------|----------|----------|
| 2.17E-11 | 0.24399  | 9.32E-08 | 0.018106 | 0.69634  | 0.017968 | 0.69855  | -0.07546 | 0.1034   |
| 0.07134  | 0.12669  | 0.00612  | -0.03197 | 0.49074  | 0.009567 | 0.83664  | 0.106731 | 0.02106  |
| 8.93E-28 | 0.570878 | 9.72E-42 | 0.100664 | 0.02963  | 0.121429 | 0.00862  | 0.238083 | 1.93E-07 |
| 2.30E-05 | 0.296941 | 5.83E-11 | -0.05194 | 0.26267  | 0.078456 | 0.09036  | 0.020249 | 0.6625   |
| 0.01403  | 0.218981 | 1.77E-06 | -0.0549  | 0.23641  | 0.058095 | 0.21016  | 0.090132 | 0.05159  |
| 1.90E-05 | -0.28679 | 2.72E-10 | -0.04294 | 0.35451  | -0.07776 | 0.09324  | -0.22855 | 5.97E-07 |
| 0.00047  | 0.342481 | 2.69E-14 | 0.143505 | 0.00188  | 0.125233 | 0.00673  | 0.049369 | 0.28703  |
| 1.39E-14 | 0.291862 | 1.27E-10 | 0.340487 | 3.86E-14 | 0.117784 | 0.01085  | 0.172605 | 0.00018  |
| 8.03E-52 | 0.732532 | 1.09E-79 | 0.15305  | 0.00091  | 0.159014 | 0.00056  | 0.220652 | 1.47E-06 |
| 2.28E-58 | 0.751966 | 3.42E-86 | 0.085717 | 0.0642   | 0.114336 | 0.01342  | 0.185486 | 5.51E-05 |
| 0.00054  | 0.184403 | 6.10E-05 | 0.032503 | 0.4835   | 0.038623 | 0.405    | 0.123194 | 0.00769  |
| 7.68E-61 | 0.763048 | 3.55E-90 | 0.179187 | 9.88E-05 | 0.169895 | 0.00023  | 0.182099 | 7.56E-05 |
| 1.49E-06 | 0.142671 | 0.002    | 0.08749  | 0.05886  | 0.045094 | 0.33087  | 0.012914 | 0.78075  |
| 0.01214  | 0.262775 | 8.17E-09 | 0.023626 | 0.61056  | 0.083757 | 0.07056  | 0.080308 | 0.08298  |
| 2.50E-13 | 0.423123 | 1.04E-21 | 0.095235 | 0.03967  | 0.058529 | 0.20676  | 0.190064 | 3.56E-05 |
| 0.00225  | 0.189456 | 3.78E-05 | 0.096338 | 0.03742  | 0.010141 | 0.82699  | 0.005442 | 0.90663  |
| 0.00243  | 0.139733 | 0.00247  | 0.023608 | 0.61084  | 0.028575 | 0.53791  | 0.145399 | 0.00163  |
| 5.84E-05 | 0.298044 | 4.91E-11 | 0.074638 | 0.10721  | 0.104392 | 0.02407  | 0.027257 | 0.55682  |
| 7.46E-05 | -0.35242 | 4.20E-15 | -0.08577 | 0.06402  | -0.0897  | 0.05274  | -0.10628 | 0.02161  |
| 1.15E-22 | -0.50986 | 2.88E-32 | 0.023394 | 0.61408  | -0.14063 | 0.00232  | -0.23131 | 4.33E-07 |
| 1.42E-14 | 0.308598 | 9.23E-12 | 0.054124 | 0.24307  | 0.042571 | 0.35866  | 0.1634   | 0.00039  |
| 6.30E-32 | 0.596463 | 2.47E-46 | 0.193282 | 2.61E-05 | 0.129569 | 0.00504  | 0.316578 | 2.49E-12 |
| 1.36E-08 | 0.350776 | 5.74E-15 | 0.07934  | 0.08677  | 0.08419  | 0.06911  | 0.046866 | 0.3122   |
| 0.00081  | 0.145677 | 0.0016   | -0.07763 | 0.09383  | 0.109303 | 0.01814  | 0.03276  | 0.48004  |
| 2.96E-22 | 0.489827 | 1.49E-29 | 0.090615 | 0.05035  | 0.192673 | 2.77E-05 | 0.159062 | 0.00056  |
| 0.74768  | 0.112024 | 0.01544  | -0.00098 | 0.98322  | 0.078386 | 0.09065  | -0.01591 | 0.73166  |
| 1.02E-39 | 0.57657  | 1.00E-42 | 0.108301 | 0.01923  | 0.099818 | 0.03103  | 0.124526 | 0.00705  |
| 4.42E-26 | 0.597446 | 1.62E-46 | 0.072961 | 0.11535  | 0.145143 | 0.00166  | 0.33931  | 4.78E-14 |
| 6.23E-24 | 0.384549 | 6.60E-18 | 0.086246 | 0.06257  | 0.047878 | 0.30185  | 0.14305  | 0.00194  |
| 3.71E-20 | 0.51063  | 2.25E-32 | 0.171577 | 0.00019  | 0.13281  | 0.00404  | 0.087676 | 0.05832  |
| 9.27E-26 | 0.560159 | 6.25E-40 | 0.102319 | 0.02704  | 0.14944  | 0.0012   | 0.268274 | 3.86E-09 |
| 3.93E-05 | 0.11937  | 0.00982  | 0.06184  | 0.18218  | 0.044689 | 0.33523  | 0.124687 | 0.00698  |
| 7.92E-16 | 0.29194  | 1.25E-10 | 0.074007 | 0.11022  | 0.065729 | 0.15615  | 0.167313 | 0.00028  |
| 3.88E-29 | 0.554368 | 5.56E-39 | 0.067265 | 0.14668  | 0.095614 | 0.03888  | 0.220886 | 1.43E-06 |
| 0.00032  | 0.078149 | 0.09163  | 0.014483 | 0.75491  | -0.00186 | 0.96809  | 0.013397 | 0.77277  |
| 1.43E-09 | 0.414865 | 7.48E-21 | 0.037561 | 0.41805  | 0.047889 | 0.30174  | 0.161371 | 0.00046  |
| 0.03812  | 0.20784  | 5.93E-06 | 0.082623 | 0.07446  | 0.077935 | 0.09252  | 0.059519 | 0.19917  |
| 1.42E-23 | 0.490009 | 1.41E-29 | 0.13898  | 0.00261  | 0.081358 | 0.07903  | 0.188315 | 4.22E-05 |
| 4.33E-60 | 0.768818 | 2.44E-92 | 0.127132 | 0.00594  | 0.125931 | 0.00643  | 0.191319 | 3.16E-05 |
| 1.72E-06 | 0.278668 | 8.91E-10 | -0.01485 | 0.74896  | 0.088633 | 0.05562  | -0.08697 | 0.06038  |
| 1.86E-08 | 0.389944 | 2.08E-18 | 0.2143   | 2.97E-06 | 0.157506 | 0.00064  | -0.0165  | 0.72213  |
| 1.71E-09 | -0.30696 | 1.20E-11 | -0.04056 | 0.3818   | -0.07228 | 0.11879  | -0.13644 | 0.00313  |
| 0.00014  | 0.402869 | 1.19E-19 | 0.243026 | 1.05E-07 | 0.166132 | 0.00031  | 0.164297 | 0.00036  |
| 2.16E-05 | 0.232955 | 3.56E-07 | 0.098236 | 0.03381  | 0.009492 | 0.8379   | 0.093862 | 0.04262  |
| 1.80E-35 | 0.637073 | 1.55E-54 | 0.180034 | 9.15E-05 | 0.031677 | 0.49469  | 0.219423 | 1.69E-06 |

|          |          |          |          |          |          |         |          |          |
|----------|----------|----------|----------|----------|----------|---------|----------|----------|
| 0.01034  | -0.06915 | 0.13564  | 0.140507 | 0.00234  | -0.06852 | 0.13927 | -0.11816 | 0.0106   |
| 7.98E-14 | 0.431373 | 1.38E-22 | 0.045452 | 0.32704  | 0.05843  | 0.20753 | 0.214435 | 2.92E-06 |
| 7.99E-05 | 0.319481 | 1.53E-12 | -0.00559 | 0.90408  | -0.0125  | 0.78761 | -0.01337 | 0.77317  |
| 4.71E-14 | 0.5117   | 1.59E-32 | -0.04933 | 0.28741  | 0.061181 | 0.1869  | 0.085683 | 0.0643   |
| 0.34196  | 0.214368 | 2.95E-06 | 0.014716 | 0.7511   | 0.005349 | 0.90823 | 0.042074 | 0.36431  |
| 3.02E-05 | 0.295118 | 7.72E-11 | 0.094625 | 0.04096  | 0.095636 | 0.03884 | -0.00928 | 0.84143  |
| 1.76E-42 | 0.605269 | 5.18E-48 | 0.053316 | 0.25018  | 0.105895 | 0.0221  | 0.168869 | 0.00025  |
| 1.29E-09 | 0.339428 | 4.68E-14 | 0.074373 | 0.10846  | 0.065091 | 0.16021 | 0.19055  | 3.40E-05 |
| 5.23E-19 | 0.405579 | 6.43E-20 | 0.168874 | 0.00025  | 0.090766 | 0.04997 | 0.101133 | 0.02887  |
| 0.70848  | -0.02987 | 0.51957  | -0.01634 | 0.72473  | -0.00221 | 0.96206 | 0.131699 | 0.00436  |
| 1.26E-16 | 0.340342 | 3.97E-14 | 0.05474  | 0.23774  | -0.02882 | 0.53436 | 0.171039 | 0.0002   |
| 3.54E-11 | 0.2015   | 1.14E-05 | -0.00701 | 0.87986  | 0.053097 | 0.25214 | 0.118517 | 0.01037  |
| 1.45E-07 | 0.242878 | 1.07E-07 | 0.047892 | 0.30171  | 0.004077 | 0.92998 | 0.142311 | 0.00205  |
| 0.00011  | 0.324357 | 6.68E-13 | 0.168088 | 0.00026  | 0.113994 | 0.01371 | -0.01317 | 0.7766   |
| 1.99E-05 | 0.268297 | 3.84E-09 | 0.097385 | 0.03539  | 0.047464 | 0.30606 | 0.138345 | 0.00273  |
| 1.76E-06 | 0.225787 | 8.22E-07 | 0.021165 | 0.64825  | -0.03133 | 0.49944 | -0.02489 | 0.59157  |
| 3.50E-06 | 0.228771 | 5.82E-07 | 0.085476 | 0.06495  | 0.085485 | 0.06493 | 0.244827 | 8.40E-08 |
| 1.83E-19 | 0.457883 | 1.40E-25 | 0.041987 | 0.3653   | 0.043532 | 0.34791 | 0.181012 | 8.36E-05 |
| 7.55E-34 | 0.579237 | 3.40E-43 | 0.109149 | 0.0183   | 0.165883 | 0.00032 | 0.363915 | 4.53E-16 |
| 4.88E-09 | 0.390018 | 2.04E-18 | 0.190824 | 3.31E-05 | 0.079761 | 0.08511 | 0.125059 | 0.00681  |
| 7.18E-05 | 0.339062 | 5.00E-14 | 0.027141 | 0.55851  | 0.083375 | 0.07185 | 0.035879 | 0.43922  |
| 1.01E-12 | 0.430358 | 1.77E-22 | 0.122202 | 0.0082   | 0.101114 | 0.0289  | 0.218815 | 1.81E-06 |
| 8.40E-06 | 0.173609 | 0.00016  | 0.104655 | 0.02371  | 0.001187 | 0.97959 | -0.06627 | 0.15278  |
| 0.00042  | 0.241673 | 1.24E-07 | 0.032168 | 0.48801  | 0.012989 | 0.77951 | 0.155861 | 0.00073  |
| 4.34E-18 | 0.432347 | 1.08E-22 | 0.081609 | 0.0781   | 0.105688 | 0.02236 | 0.07632  | 0.0995   |
| 7.06E-11 | 0.250097 | 4.32E-08 | 0.0393   | 0.39681  | 0.084116 | 0.06935 | 0.177781 | 0.00011  |
| 5.64E-31 | 0.565643 | 7.57E-41 | 0.096014 | 0.03807  | 0.074264 | 0.10898 | 0.207662 | 6.04E-06 |
| 0.49027  | 0.007613 | 0.86966  | -0.06726 | 0.14673  | 0.064375 | 0.16487 | 0.191149 | 3.21E-05 |
| 1.52E-05 | 0.173947 | 0.00016  | -0.01514 | 0.74416  | -0.01956 | 0.67328 | 0.037404 | 0.42     |
| 0.00055  | 0.30963  | 7.81E-12 | 0.247592 | 5.93E-08 | 0.056151 | 0.22585 | 0.064751 | 0.16242  |
| 1.29E-26 | 0.411039 | 1.83E-20 | 0.164383 | 0.00036  | 0.05937  | 0.2003  | 0.122505 | 0.00804  |
| 4.93E-17 | 0.516213 | 3.64E-33 | 0.114113 | 0.01361  | 0.135533 | 0.00334 | 0.101947 | 0.0276   |
| 1.29E-60 | 0.671616 | 1.51E-62 | 0.131671 | 0.00437  | 0.081167 | 0.07974 | 0.213082 | 3.39E-06 |
| 1.30E-31 | 0.469134 | 6.23E-27 | 0.075999 | 0.10094  | 0.062686 | 0.17626 | 0.041692 | 0.36868  |
| 4.02E-42 | 0.519401 | 1.27E-33 | 0.058897 | 0.20392  | 0.109747 | 0.01767 | 0.145215 | 0.00165  |
| 0.10145  | 0.116876 | 0.01148  | -0.04266 | 0.35763  | 0.01782  | 0.70091 | 0.174752 | 0.00015  |
| 0.48985  | 0.018044 | 0.69734  | -0.08563 | 0.06446  | 0.025038 | 0.5894  | -0.04559 | 0.32556  |
| 3.45E-19 | -0.40303 | 1.15E-19 | -0.05921 | 0.20156  | 0.015043 | 0.74576 | -0.25016 | 4.28E-08 |
| 1.61E-20 | 0.431759 | 1.25E-22 | 0.009046 | 0.84542  | 0.102567 | 0.02666 | 0.147591 | 0.00138  |
| 6.08E-07 | 0.403216 | 1.10E-19 | 0.046021 | 0.32101  | 0.125008 | 0.00683 | 0.090156 | 0.05153  |
| 0.78498  | 0.059074 | 0.20256  | 0.112712 | 0.01481  | 0.019761 | 0.67015 | 0.093087 | 0.04437  |
| 3.20E-06 | 0.178278 | 0.00011  | -0.01199 | 0.79613  | -0.00799 | 0.86327 | 0.140397 | 0.00236  |
| 6.16E-05 | 0.313554 | 4.11E-12 | 0.08025  | 0.08321  | 0.134308 | 0.00364 | 0.111961 | 0.01549  |
| 8.59E-13 | 0.418799 | 2.95E-21 | 0.072331 | 0.11854  | 0.05997  | 0.19579 | 0.149951 | 0.00115  |
| 6.14E-73 | 0.49884  | 9.44E-31 | 0.089629 | 0.05292  | 0.02671  | 0.56477 | 0.227101 | 7.07E-07 |

|          |          |          |          |         |          |         |          |          |
|----------|----------|----------|----------|---------|----------|---------|----------|----------|
| 4.29E-07 | 0.341073 | 3.47E-14 | 0.092255 | 0.04631 | 0.062087 | 0.18044 | 0.260892 | 1.05E-08 |
| 4.06E-06 | 0.226953 | 7.19E-07 | 0.087297 | 0.05942 | -0.04826 | 0.29799 | 0.015939 | 0.73119  |
| 0.01557  | -0.09089 | 0.04965  | 0.020698 | 0.6555  | -0.08249 | 0.07492 | -0.09235 | 0.04609  |
| 1.54E-15 | -0.49902 | 8.91E-31 | -0.03505 | 0.44986 | -0.13613 | 0.0032  | -0.0929  | 0.04481  |
| 1.85E-13 | 0.423031 | 1.07E-21 | -0.00578 | 0.90092 | 0.104878 | 0.02341 | 0.196169 | 1.96E-05 |
| 1.14E-16 | 0.388915 | 2.59E-18 | 0.003054 | 0.94752 | 0.081899 | 0.07705 | 0.154329 | 0.00082  |
| 1.26E-08 | 0.172466 | 0.00018  | 0.035468 | 0.44447 | 0.039294 | 0.39689 | 0.22434  | 9.70E-07 |
| 2.54E-49 | 0.763495 | 2.42E-90 | 0.153265 | 0.00089 | 0.139215 | 0.00257 | 0.315392 | 3.03E-12 |
| 0.00012  | -0.01167 | 0.80148  | 0.007626 | 0.86945 | 0.06476  | 0.16236 | -0.08262 | 0.07446  |
| 5.67E-31 | 0.552274 | 1.21E-38 | 0.065019 | 0.16068 | 0.123497 | 0.00754 | 0.269001 | 3.49E-09 |
| 2.30E-40 | 0.656675 | 5.94E-59 | 0.138523 | 0.0027  | 0.151595 | 0.00102 | 0.357594 | 1.56E-15 |
| 1.30E-36 | 0.638785 | 6.58E-55 | 0.099242 | 0.03202 | 0.141409 | 0.00219 | 0.269487 | 3.26E-09 |
| 1.29E-36 | 0.660393 | 7.91E-60 | 0.145923 | 0.00157 | 0.162669 | 0.00042 | 0.315485 | 2.99E-12 |
| 1.76E-06 | 0.361869 | 6.78E-16 | 0.099407 | 0.03173 | 0.120934 | 0.0089  | 0.175931 | 0.00013  |
| 1.29E-06 | 0.366769 | 2.57E-16 | 0.088355 | 0.05639 | 0.079744 | 0.08518 | 0.083144 | 0.07265  |
| 1.76E-11 | 0.383476 | 8.28E-18 | 0.10336  | 0.02551 | 0.102293 | 0.02707 | 0.215627 | 2.57E-06 |
| 2.68E-53 | 0.708593 | 2.00E-72 | 0.086437 | 0.06198 | 0.138903 | 0.00263 | 0.288895 | 1.98E-10 |
| 0.00212  | 0.199608 | 1.39E-05 | 0.041741 | 0.36812 | 0.073752 | 0.11146 | 0.16764  | 0.00027  |
| 1.51E-26 | 0.565376 | 8.39E-41 | 0.142933 | 0.00196 | 0.115571 | 0.01245 | 0.300795 | 3.20E-11 |
| 1.38E-11 | 0.38332  | 8.56E-18 | 0.079314 | 0.08688 | 0.096851 | 0.03641 | 0.243505 | 9.90E-08 |
| 6.22E-20 | 0.470224 | 4.58E-27 | 0.116662 | 0.01164 | 0.093587 | 0.04323 | 0.275708 | 1.36E-09 |
| 0.00052  | 0.235433 | 2.65E-07 | 0.061249 | 0.1864  | 0.142788 | 0.00198 | 0.228642 | 5.91E-07 |
| 5.54E-05 | 0.296837 | 5.93E-11 | 0.066265 | 0.1528  | 0.063255 | 0.17236 | 0.201739 | 1.12E-05 |
| 9.31E-05 | 0.234699 | 2.90E-07 | 0.098474 | 0.03338 | 0.050562 | 0.27553 | 0.135436 | 0.00336  |
| 1.51E-11 | 0.437028 | 3.33E-23 | -0.08454 | 0.06796 | 0.067271 | 0.14665 | 0.156137 | 0.00071  |
| 2.20E-11 | 0.348941 | 8.11E-15 | 0.147483 | 0.00139 | 0.060128 | 0.1946  | 0.16859  | 0.00025  |
| 5.80E-14 | 0.395817 | 5.75E-19 | 0.003959 | 0.93201 | 0.103287 | 0.02561 | 0.127257 | 0.00589  |
| 7.80E-23 | 0.473154 | 1.99E-27 | 0.043533 | 0.3479  | 0.086907 | 0.06057 | 0.285954 | 3.08E-10 |
| 1.30E-24 | 0.55568  | 3.40E-39 | 0.153669 | 0.00086 | 0.13683  | 0.00305 | 0.341953 | 2.96E-14 |
| 1.74E-16 | 0.419028 | 2.79E-21 | -0.01017 | 0.82651 | 0.067171 | 0.14724 | 0.265183 | 5.89E-09 |
| 0.11004  | 0.185062 | 5.74E-05 | 0.081294 | 0.07926 | 0.082914 | 0.07344 | -0.11737 | 0.01114  |
| 0.73073  | -0.03857 | 0.40559  | -0.02024 | 0.66265 | -0.04932 | 0.28748 | -0.11907 | 0.01001  |
| 7.32E-46 | 0.62556  | 4.36E-52 | 0.098755 | 0.03287 | 0.103764 | 0.02494 | 0.213785 | 3.14E-06 |
| 2.68E-14 | 0.25894  | 1.36E-08 | -0.0634  | 0.17138 | -0.05754 | 0.21456 | 0.061075 | 0.18766  |
| 2.14E-05 | 0.13319  | 0.00393  | -0.08878 | 0.05521 | 0.031499 | 0.4971  | 0.082633 | 0.07443  |
| 3.70E-05 | 0.298745 | 4.41E-11 | 0.027234 | 0.55716 | 0.015722 | 0.7347  | 0.048654 | 0.29407  |
| 0.50546  | 0.047756 | 0.30309  | -0.03714 | 0.42335 | 0.10474  | 0.0236  | 0.047998 | 0.30064  |
| 0.00011  | 0.198058 | 1.62E-05 | 0.096961 | 0.0362  | 0.021182 | 0.64798 | 0.099808 | 0.03105  |
| 0.68158  | 0.120949 | 0.00889  | 0.056416 | 0.22366 | -0.00807 | 0.8619  | -0.03057 | 0.50991  |
| 4.43E-10 | 0.285911 | 3.10E-10 | 0.033993 | 0.46365 | 0.094532 | 0.04116 | 0.273312 | 1.91E-09 |
| 1.01E-19 | 0.456632 | 1.96E-25 | 0.029255 | 0.52827 | 0.077112 | 0.09603 | 0.175411 | 0.00014  |
| 0.00177  | 0.175277 | 0.00014  | 0.0089   | 0.84788 | 0.025308 | 0.58539 | 0.039181 | 0.39825  |
| 0.00018  | 0.220265 | 1.54E-06 | 0.022248 | 0.63154 | 0.054809 | 0.23715 | 0.046806 | 0.31281  |
| 5.12E-13 | 0.464865 | 2.06E-26 | 0.074308 | 0.10878 | 0.037066 | 0.42421 | 0.077387 | 0.09485  |
| 1.05E-29 | 0.496518 | 1.94E-30 | 0.13515  | 0.00343 | 0.069185 | 0.13547 | 0.155493 | 0.00075  |

|          |          |          |          |          |          |         |          |          |
|----------|----------|----------|----------|----------|----------|---------|----------|----------|
| 2.64E-21 | 0.413158 | 1.12E-20 | -0.03877 | 0.40316  | 0.011789 | 0.79943 | 0.270757 | 2.73E-09 |
| 1.60E-05 | 0.352839 | 3.88E-15 | 0.021888 | 0.63708  | 0.062615 | 0.17675 | 0.025057 | 0.58912  |
| 0.51988  | -0.01141 | 0.80582  | -0.03567 | 0.44193  | 0.039272 | 0.39715 | -0.10594 | 0.02204  |
| 1.09E-19 | -0.46667 | 1.24E-26 | -0.00709 | 0.87852  | -0.00287 | 0.95063 | -0.0948  | 0.04059  |
| 4.81E-24 | 0.578666 | 4.28E-43 | -0.00911 | 0.84427  | 0.05968  | 0.19796 | 0.269664 | 3.18E-09 |
| 9.49E-25 | 0.646314 | 1.41E-56 | 0.097332 | 0.03549  | 0.141635 | 0.00215 | 0.149038 | 0.00124  |
| 0.86586  | 0.010885 | 0.81451  | -0.01794 | 0.69894  | 0.035024 | 0.45021 | -0.08679 | 0.06092  |
| 0.07239  | 0.043269 | 0.35083  | 0.03962  | 0.39297  | -0.00274 | 0.9529  | 0.055973 | 0.22732  |
| 8.04E-11 | 0.332834 | 1.53E-13 | 0.108452 | 0.01906  | 0.03081  | 0.50657 | 0.196867 | 1.83E-05 |
| 0.98163  | 0.036663 | 0.42927  | 0.056616 | 0.22202  | 0.021897 | 0.63694 | -0.05179 | 0.26405  |
| 6.36E-05 | -0.17751 | 0.00012  | 0.028139 | 0.54413  | -0.05201 | 0.26199 | -0.17052 | 0.00021  |
| 5.77E-06 | -0.19742 | 1.73E-05 | -0.07964 | 0.08558  | -0.0644  | 0.16473 | -0.19663 | 1.87E-05 |
| 1.37E-39 | 0.581073 | 1.60E-43 | 0.077013 | 0.09646  | 0.097672 | 0.03485 | 0.228735 | 5.85E-07 |
| 0.47654  | -0.04401 | 0.34261  | 0.083712 | 0.07071  | 0.022775 | 0.62348 | -0.00875 | 0.85036  |
| 7.53E-13 | 0.452615 | 5.78E-25 | 0.040097 | 0.38729  | 0.030273 | 0.51401 | -0.03678 | 0.42779  |
| 1.42E-08 | 0.310393 | 6.89E-12 | -0.02445 | 0.59822  | 0.051126 | 0.2702  | 0.025602 | 0.58103  |
| 0.39138  | 0.100548 | 0.02981  | 0.019513 | 0.67405  | 0.089127 | 0.05426 | 0.042602 | 0.35831  |
| 0.00093  | 0.22166  | 1.31E-06 | 0.080422 | 0.08255  | 0.150336 | 0.00112 | 0.096497 | 0.03711  |
| 1.85E-10 | 0.379681 | 1.84E-17 | 0.308766 | 8.98E-12 | 0.169894 | 0.00023 | 0.111767 | 0.01567  |
| 1.46E-06 | 0.285222 | 3.43E-10 | 0.047527 | 0.30541  | 0.008768 | 0.85012 | 0.173921 | 0.00016  |
| 0.01256  | 0.299634 | 3.84E-11 | 0.073806 | 0.11119  | 0.178176 | 0.00011 | 0.071547 | 0.12259  |
| 5.63E-49 | 0.694449 | 1.81E-68 | 0.121866 | 0.00838  | 0.147784 | 0.00136 | 0.313573 | 4.10E-12 |
| 1.05E-30 | 0.590236 | 3.54E-45 | 0.129792 | 0.00497  | 0.147712 | 0.00137 | 0.25895  | 1.36E-08 |
| 4.08E-09 | 0.377291 | 3.02E-17 | 0.062875 | 0.17496  | 0.093121 | 0.04429 | 0.15254  | 0.00094  |
| 1.14E-11 | 0.430548 | 1.69E-22 | -0.0143  | 0.75799  | 0.060523 | 0.19169 | 0.018351 | 0.69245  |
| 4.21E-32 | 0.478419 | 4.37E-28 | 0.10373  | 0.02498  | 0.074466 | 0.10802 | 0.224726 | 9.28E-07 |
| 0.07827  | 0.002887 | 0.95039  | 0.029255 | 0.52828  | -0.00839 | 0.85659 | 0.059847 | 0.1967   |
| 2.15E-23 | 0.524282 | 2.47E-34 | 0.105955 | 0.02202  | 0.099255 | 0.032   | 0.102322 | 0.02703  |
| 0.08611  | 0.158723 | 0.00058  | 0.056602 | 0.22213  | -0.01164 | 0.80195 | 0.01219  | 0.79276  |
| 6.37E-41 | 0.752042 | 3.22E-86 | 0.184063 | 6.30E-05 | 0.177259 | 0.00012 | 0.336036 | 8.63E-14 |
| 1.27E-30 | 0.63204  | 1.88E-53 | 0.185984 | 5.26E-05 | 0.069194 | 0.13542 | 0.21117  | 4.16E-06 |
| 1.10E-19 | 0.536714 | 3.38E-36 | 0.085277 | 0.06558  | 0.101916 | 0.02765 | 0.002287 | 0.96068  |
| 1.28E-12 | 0.4038   | 9.64E-20 | 0.057692 | 0.21334  | 0.04106  | 0.37599 | 0.059985 | 0.19567  |
| 0.00533  | 0.186355 | 5.08E-05 | -0.02544 | 0.58339  | -0.01289 | 0.78114 | 0.057109 | 0.21801  |
| 5.26E-24 | 0.50037  | 5.86E-31 | 0.075919 | 0.1013   | 0.123078 | 0.00775 | 0.281371 | 6.03E-10 |
| 1.31E-08 | 0.349162 | 7.78E-15 | 0.029703 | 0.52198  | 0.059865 | 0.19657 | 0.143366 | 0.0019   |
| 1.20E-05 | 0.248172 | 5.51E-08 | 0.067511 | 0.14521  | 0.102612 | 0.0266  | 0.026172 | 0.57264  |
| 2.30E-07 | 0.17679  | 0.00012  | 0.050073 | 0.28021  | -0.02105 | 0.6501  | 0.038826 | 0.40253  |
| 5.11E-09 | 0.364725 | 3.86E-16 | -0.03998 | 0.38869  | 0.152109 | 0.00098 | 0.126397 | 0.00624  |
| 0.04277  | 0.068395 | 0.14     | -0.10751 | 0.02014  | -0.06674 | 0.14988 | -0.0436  | 0.34713  |
| 0.14972  | -0.18185 | 7.74E-05 | -0.02566 | 0.58012  | -0.16175 | 0.00045 | -0.0051  | 0.91243  |
| 1.85E-30 | 0.628558 | 1.03E-52 | 0.123469 | 0.00756  | 0.115871 | 0.01222 | 0.208366 | 5.61E-06 |
| 5.92E-06 | 0.193541 | 2.54E-05 | 0.131303 | 0.00448  | -0.04274 | 0.35677 | 0.13803  | 0.0028   |
| 1.95E-27 | 0.549494 | 3.39E-38 | 0.059933 | 0.19606  | 0.156668 | 0.00068 | 0.138786 | 0.00265  |
| 9.22E-12 | 0.374223 | 5.69E-17 | 0.076987 | 0.09657  | 0.056414 | 0.22367 | 0.324364 | 6.67E-13 |

|          |          |          |          |          |          |          |          |          |
|----------|----------|----------|----------|----------|----------|----------|----------|----------|
| 1.36E-05 | 0.30705  | 1.18E-11 | 0.081341 | 0.07909  | 0.097358 | 0.03544  | 0.159892 | 0.00052  |
| 1.06E-34 | 0.662851 | 2.05E-60 | 0.161207 | 0.00047  | 0.196307 | 1.93E-05 | 0.428022 | 3.16E-22 |
| 1.51E-14 | 0.307957 | 1.02E-11 | 0.045791 | 0.32344  | 0.097107 | 0.03592  | 0.203583 | 9.24E-06 |
| 9.60E-11 | 0.43091  | 1.55E-22 | 0.076703 | 0.09781  | 0.033864 | 0.46535  | 0.110993 | 0.01641  |
| 4.11E-08 | 0.341545 | 3.19E-14 | 0.118958 | 0.01008  | 0.169779 | 0.00023  | 0.064942 | 0.16117  |
| 0.06512  | 0.146594 | 0.00149  | -0.06059 | 0.19118  | 0.070463 | 0.12838  | -0.07172 | 0.12169  |
| 2.86E-44 | 0.413258 | 1.09E-20 | 0.050369 | 0.27736  | 0.056284 | 0.22475  | 0.122949 | 0.00782  |
| 8.03E-67 | 0.731214 | 2.86E-79 | 0.028578 | 0.53787  | 0.092819 | 0.04499  | 0.202745 | 1.01E-05 |
| 0.00343  | 0.123427 | 0.00758  | -0.03217 | 0.48802  | 0.010553 | 0.82008  | 0.006351 | 0.89113  |
| 2.16E-13 | 0.373816 | 6.19E-17 | 0.061907 | 0.18171  | 0.140406 | 0.00236  | 0.180843 | 8.49E-05 |
| 8.42E-06 | 0.13738  | 0.00293  | -0.02684 | 0.56284  | -0.00913 | 0.84408  | 0.027066 | 0.55959  |
| 7.80E-10 | 0.278647 | 8.94E-10 | 0.065552 | 0.15727  | 0.043325 | 0.35021  | 0.058708 | 0.20538  |
| 0.04839  | 0.080784 | 0.08117  | -0.13069 | 0.00467  | 0.082134 | 0.0762   | 0.004124 | 0.92917  |
| 0.00791  | 0.044845 | 0.33355  | 0.036687 | 0.42897  | -0.0099  | 0.83097  | 0.010524 | 0.82056  |
| 2.97E-60 | 0.772469 | 9.68E-94 | 0.058498 | 0.207    | 0.089087 | 0.05437  | 0.186515 | 5.00E-05 |
| 0.00289  | 0.190357 | 3.46E-05 | -0.06004 | 0.19527  | 0.101267 | 0.02866  | 0.075881 | 0.10147  |
| 0.12767  | 0.050122 | 0.27973  | -0.02579 | 0.57822  | -0.01539 | 0.74016  | 0.003424 | 0.94117  |
| 3.62E-93 | 0.798908 | #####    | 0.175734 | 0.00013  | 0.154732 | 0.00079  | 0.359419 | 1.10E-15 |
| 1.73E-10 | 0.230601 | 4.70E-07 | 0.083643 | 0.07094  | 0.009779 | 0.83307  | 0.150745 | 0.00108  |
| 1.10E-18 | 0.478878 | 3.82E-28 | 0.07487  | 0.10612  | 0.103196 | 0.02574  | 0.217273 | 2.14E-06 |
| 1.25E-16 | 0.378091 | 2.56E-17 | 0.110287 | 0.01712  | 0.009467 | 0.83833  | -0.00354 | 0.93924  |
| 7.75E-10 | 0.392257 | 1.26E-18 | 0.012691 | 0.78445  | 0.075551 | 0.10297  | 0.209561 | 4.94E-06 |
| 3.83E-28 | 0.497371 | 1.49E-30 | 0.111733 | 0.01571  | 0.04972  | 0.28361  | 0.178354 | 0.00011  |
| 2.05E-31 | 0.548484 | 4.91E-38 | 0.019226 | 0.67857  | 0.085677 | 0.06432  | 0.178417 | 0.00011  |
| 8.68E-38 | 0.550844 | 2.06E-38 | 0.198731 | 1.52E-05 | 0.187258 | 4.66E-05 | 0.279895 | 7.47E-10 |
| 0.00459  | 0.17436  | 0.00015  | 0.069851 | 0.13174  | 0.051859 | 0.26338  | 0.222895 | 1.14E-06 |
| 1.26E-08 | 0.401478 | 1.63E-19 | 0.058789 | 0.20475  | 0.028289 | 0.54198  | 0.098827 | 0.03275  |
| 0.0146   | 0.200503 | 1.27E-05 | 0.093927 | 0.04248  | 0.076035 | 0.10077  | 0.283948 | 4.14E-10 |
| 0.60753  | 0.146149 | 0.00154  | 0.055601 | 0.23043  | 0.031831 | 0.49259  | 0.101845 | 0.02776  |
| 7.70E-08 | 0.340905 | 3.58E-14 | 0.018903 | 0.68369  | 0.05771  | 0.2132   | 0.164729 | 0.00035  |
| 9.34E-35 | 0.573486 | 3.45E-42 | 0.086674 | 0.06127  | 0.154914 | 0.00078  | 0.220099 | 1.57E-06 |
| 5.64E-05 | 0.150511 | 0.0011   | -0.01105 | 0.81183  | 0.062146 | 0.18002  | 0.048707 | 0.29355  |
| 6.83E-10 | 0.363523 | 4.90E-16 | 0.030497 | 0.51091  | 0.125985 | 0.00641  | 0.136584 | 0.0031   |
| 8.46E-07 | 0.341377 | 3.29E-14 | -0.00329 | 0.9434   | 0.141161 | 0.00223  | 0.006558 | 0.8876   |
| 3.31E-21 | 0.562932 | 2.16E-40 | 0.070946 | 0.12578  | 0.057381 | 0.21582  | 0.128987 | 0.00524  |
| 3.93E-22 | 0.488757 | 2.06E-29 | 0.135181 | 0.00342  | 0.081503 | 0.07849  | 0.160903 | 0.00048  |
| 5.13E-25 | 0.486136 | 4.51E-29 | 0.059744 | 0.19748  | 0.086506 | 0.06178  | 0.285617 | 3.23E-10 |
| 5.57E-38 | 0.641473 | 1.69E-55 | 0.165625 | 0.00033  | 0.096353 | 0.03739  | 0.21984  | 1.61E-06 |
| 4.23E-19 | 0.49902  | 8.92E-31 | 0.075174 | 0.1047   | 0.085435 | 0.06508  | 0.249903 | 4.42E-08 |
| 6.55E-42 | 0.662561 | 2.41E-60 | 0.07229  | 0.11875  | 0.167335 | 0.00028  | 0.065297 | 0.1589   |
| 2.45E-54 | 0.738062 | 1.76E-81 | 0.019563 | 0.67327  | 0.084518 | 0.06803  | 0.258607 | 1.43E-08 |
| 1.74E-27 | 0.571696 | 7.03E-42 | 0.091693 | 0.04766  | 0.120263 | 0.00928  | 0.24187  | 1.21E-07 |
| 0.02851  | 0.01284  | 0.78198  | 0.076289 | 0.09964  | 0.022191 | 0.63242  | -0.06141 | 0.18527  |
| 0.01174  | -0.18449 | 6.06E-05 | -0.03084 | 0.5061   | 0.009554 | 0.83686  | -0.22984 | 5.14E-07 |
| 5.01E-11 | 0.383147 | 8.88E-18 | 0.160162 | 0.00051  | 0.141402 | 0.00219  | 0.286941 | 2.66E-10 |

|          |          |          |          |          |          |          |          |          |
|----------|----------|----------|----------|----------|----------|----------|----------|----------|
| 1.20E-33 | 0.544181 | 2.35E-37 | 0.072847 | 0.11592  | 0.120459 | 0.00917  | 0.107659 | 0.01996  |
| 1.20E-28 | 0.575691 | 1.43E-42 | 0.18976  | 3.67E-05 | 0.144338 | 0.00176  | 0.288198 | 2.20E-10 |
| 7.10E-26 | 0.457662 | 1.49E-25 | 0.091237 | 0.04878  | 0.054289 | 0.24163  | 0.28902  | 1.95E-10 |
| 5.16E-08 | 0.319023 | 1.65E-12 | 0.089725 | 0.05266  | 0.139305 | 0.00255  | 0.125315 | 0.0067   |
| 6.27E-12 | 0.34898  | 8.05E-15 | 0.166248 | 0.00031  | 0.217922 | 1.99E-06 | 0.215181 | 2.70E-06 |
| 6.52E-12 | -0.39313 | 1.04E-18 | -0.10368 | 0.02505  | -0.05271 | 0.2556   | -0.14683 | 0.00146  |
| 0.00206  | 0.197335 | 1.74E-05 | -0.03097 | 0.5043   | 0.089064 | 0.05443  | 0.257205 | 1.72E-08 |
| 1.03E-32 | 0.666367 | 2.92E-61 | 0.013493 | 0.7712   | 0.095599 | 0.03891  | 0.075582 | 0.10283  |
| 1.64E-11 | 0.332885 | 1.51E-13 | 0.051185 | 0.26965  | -0.00644 | 0.88956  | 0.087361 | 0.05924  |
| 0.17374  | -0.019   | 0.68215  | -0.05828 | 0.2087   | 0.076243 | 0.09984  | -0.00814 | 0.86072  |
| 3.03E-07 | 0.295768 | 6.99E-11 | 0.171545 | 0.0002   | 0.023612 | 0.61078  | 0.123508 | 0.00754  |
| 0.02118  | 0.156533 | 0.00069  | 0.043911 | 0.34373  | 0.047412 | 0.30658  | 0.037418 | 0.41982  |
| 0.3775   | 0.112559 | 0.01495  | 0.070516 | 0.12809  | 0.058597 | 0.20623  | 0.056695 | 0.22137  |
| 1.03E-10 | 0.356028 | 2.11E-15 | 0.080937 | 0.0806   | 0.098376 | 0.03355  | 0.044951 | 0.3324   |
| 1.08E-23 | -0.5961  | 2.89E-46 | -0.12176 | 0.00844  | -0.12097 | 0.00887  | -0.22415 | 9.91E-07 |
| 0.5076   | 0.171324 | 0.0002   | 0.01809  | 0.69661  | 0.046538 | 0.3156   | 0.172579 | 0.00018  |
| 1.33E-13 | -0.30807 | 1.00E-11 | -0.10507 | 0.02317  | -0.10186 | 0.02774  | -0.24749 | 6.01E-08 |
| 0.06152  | -0.00141 | 0.97576  | 0.092343 | 0.0461   | 0.03302  | 0.47656  | -0.06654 | 0.1511   |
| 7.09E-09 | 0.372788 | 7.63E-17 | 0.109144 | 0.01831  | 0.095304 | 0.03952  | 0.26955  | 3.23E-09 |
| 7.64E-28 | 0.53829  | 1.94E-36 | 0.082378 | 0.07533  | 0.094417 | 0.04141  | 0.253112 | 2.93E-08 |
| 8.95E-40 | 0.658947 | 1.74E-59 | 0.185986 | 5.26E-05 | 0.09314  | 0.04425  | 0.154506 | 0.00081  |
| 5.91E-10 | 0.383545 | 8.17E-18 | -0.02642 | 0.56898  | -0.00867 | 0.85183  | 0.207131 | 6.39E-06 |
| 0.46049  | 0.039212 | 0.39787  | 0.043732 | 0.34569  | 0.10684  | 0.02093  | -0.02209 | 0.63397  |
| 9.62E-26 | 0.469643 | 5.39E-27 | -0.05125 | 0.26907  | -0.00525 | 0.90992  | 0.20654  | 6.79E-06 |
| 6.30E-14 | 0.393014 | 1.06E-18 | 0.128282 | 0.0055   | 0.070039 | 0.1307   | 0.139145 | 0.00258  |
| 5.43E-18 | 0.428232 | 3.00E-22 | 0.067201 | 0.14707  | 0.132463 | 0.00414  | 0.316638 | 2.46E-12 |
| 1.60E-09 | 0.222265 | 1.23E-06 | 0.016977 | 0.71442  | 0.011171 | 0.80973  | 0.231653 | 4.16E-07 |
| 1.34E-32 | 0.573177 | 3.90E-42 | 0.154277 | 0.00082  | 0.110403 | 0.017    | 0.248083 | 5.58E-08 |
| 7.39E-49 | 0.755868 | 1.43E-87 | 0.105057 | 0.02318  | 0.142515 | 0.00202  | 0.158522 | 0.00059  |
| 8.91E-47 | 0.736895 | 4.24E-81 | 0.155887 | 0.00072  | 0.158768 | 0.00057  | 0.331919 | 1.79E-13 |
| 0.0001   | 0.211085 | 4.20E-06 | 0.069822 | 0.1319   | -0.02016 | 0.66384  | 0.143502 | 0.00188  |
| 1.56E-27 | 0.524695 | 2.15E-34 | 0.015613 | 0.73648  | 0.136863 | 0.00304  | 0.241662 | 1.24E-07 |
| 0.00697  | 0.209423 | 5.01E-06 | 0.035368 | 0.44577  | 0.073772 | 0.11135  | -0.00172 | 0.97042  |
| 2.53E-06 | 0.353502 | 3.42E-15 | -0.02601 | 0.575    | 0.117022 | 0.01138  | 0.110259 | 0.01714  |
| 3.38E-09 | 0.308568 | 9.27E-12 | -0.02306 | 0.61914  | 0.001639 | 0.97182  | 0.153552 | 0.00087  |
| 5.58E-09 | 0.235958 | 2.49E-07 | -0.03161 | 0.49566  | 0.058823 | 0.20449  | 0.142923 | 0.00196  |
| 1.06E-22 | 0.466484 | 1.31E-26 | 0.052381 | 0.2586   | 0.081197 | 0.07962  | 0.287053 | 2.61E-10 |
| 0.00683  | 0.236359 | 2.37E-07 | 0.154199 | 0.00083  | 0.135594 | 0.00333  | 0.083531 | 0.07132  |
| 0.94384  | 0.074851 | 0.10621  | 0.004949 | 0.91506  | 0.043744 | 0.34557  | -0.02649 | 0.56795  |
| 1.23E-19 | 0.533134 | 1.18E-35 | 0.008843 | 0.84885  | 0.149507 | 0.00119  | 0.136964 | 0.00302  |
| 1.49E-16 | 0.420825 | 1.81E-21 | 0.015145 | 0.74411  | 0.062375 | 0.17842  | 0.199802 | 1.36E-05 |
| 1.19E-09 | 0.36591  | 3.05E-16 | 0.067346 | 0.14619  | 0.06926  | 0.13504  | 0.209024 | 5.23E-06 |
| 1.06E-20 | 0.420449 | 1.99E-21 | 0.040144 | 0.38674  | 0.123131 | 0.00772  | 0.288248 | 2.19E-10 |
| 0.07917  | 0.113981 | 0.01372  | -0.00526 | 0.90982  | 0.033597 | 0.46888  | 0.090627 | 0.05032  |
| 1.85E-19 | 0.480861 | 2.14E-28 | 0.190283 | 3.49E-05 | 0.164263 | 0.00036  | 0.386198 | 4.64E-18 |



|          |          |          |          |          |          |         |          |          |
|----------|----------|----------|----------|----------|----------|---------|----------|----------|
| 0.03323  | 0.103587 | 0.02518  | 0.066452 | 0.15164  | 0.06803  | 0.14213 | -0.08649 | 0.06181  |
| 2.89E-26 | 0.423171 | 1.03E-21 | -0.00542 | 0.90702  | 0.072523 | 0.11756 | 0.049461 | 0.28613  |
| 6.51E-07 | 0.325041 | 5.94E-13 | 0.048087 | 0.29974  | 0.069869 | 0.13164 | 0.03508  | 0.44947  |
| 2.42E-23 | 0.473813 | 1.65E-27 | 0.120563 | 0.00911  | 0.09638  | 0.03734 | 0.020655 | 0.65617  |
| 1.05E-43 | 0.678464 | 2.87E-64 | 0.114472 | 0.01331  | 0.138155 | 0.00277 | 0.276243 | 1.26E-09 |
| 0.00425  | 0.24314  | 1.04E-07 | 0.006985 | 0.88034  | 0.125715 | 0.00652 | 0.225407 | 8.59E-07 |
| 1.57E-23 | 0.375422 | 4.45E-17 | 0.053561 | 0.24801  | 0.078694 | 0.08938 | 0.226964 | 7.18E-07 |
| 0.07993  | -0.06869 | 0.13829  | 0.073468 | 0.11284  | -0.03665 | 0.42938 | -0.25241 | 3.21E-08 |
| 0.00426  | 0.140222 | 0.00239  | 0.020654 | 0.65619  | -0.00398 | 0.93163 | 0.093515 | 0.04339  |
| 0.52232  | -0.03244 | 0.48429  | 0.046665 | 0.31428  | -0.08122 | 0.07953 | 0.030951 | 0.50462  |
| 9.77E-15 | 0.357409 | 1.62E-15 | 0.071977 | 0.12036  | 0.046903 | 0.31181 | 0.123947 | 0.00733  |
| 1.16E-12 | 0.46289  | 3.55E-26 | 0.108891 | 0.01858  | 0.127048 | 0.00597 | 0.165312 | 0.00033  |
| 0.03975  | 0.065072 | 0.16034  | -0.03602 | 0.43746  | 0.011148 | 0.81013 | 0.057738 | 0.21298  |
| 0.00497  | 0.19648  | 1.90E-05 | 0.084674 | 0.06752  | 0.00993  | 0.83053 | 0.019133 | 0.68004  |
| 5.31E-08 | 0.301034 | 3.08E-11 | 0.12202  | 0.0083   | 0.088089 | 0.05714 | 0.152472 | 0.00095  |
| 1.21E-37 | 0.455965 | 2.35E-25 | 0.048688 | 0.29374  | 0.082407 | 0.07523 | 0.294302 | 8.75E-11 |
| 0.01285  | 0.154132 | 0.00083  | 0.100125 | 0.03051  | 0.037171 | 0.42291 | 0.068277 | 0.14069  |
| 1.72E-06 | 0.169687 | 0.00023  | 0.104672 | 0.02369  | -0.00667 | 0.88565 | 0.146926 | 0.00145  |
| 8.10E-14 | -0.30205 | 2.62E-11 | -0.07729 | 0.09525  | -0.02214 | 0.63321 | -0.20276 | 1.01E-05 |
| 0.00086  | 0.188563 | 4.12E-05 | 0.067231 | 0.14689  | 0.068572 | 0.13897 | 0.022042 | 0.63471  |
| 2.76E-29 | 0.479097 | 3.59E-28 | 0.081806 | 0.07738  | 0.08855  | 0.05585 | 0.206783 | 6.62E-06 |
| 0.00022  | 0.17141  | 0.0002   | 0.003524 | 0.93946  | 0.021182 | 0.64798 | 0.046826 | 0.31261  |
| 2.07E-11 | 0.27541  | 1.42E-09 | -0.00326 | 0.94404  | -0.01927 | 0.67786 | 0.028072 | 0.54509  |
| 0.01615  | 0.175591 | 0.00014  | -0.03123 | 0.50078  | -0.03646 | 0.43179 | 0.072935 | 0.11548  |
| 0.00364  | 0.223757 | 1.04E-06 | 0.123873 | 0.00736  | 0.091659 | 0.04775 | 0.202998 | 9.82E-06 |
| 5.84E-32 | 0.575628 | 1.46E-42 | 0.120371 | 0.00922  | 0.098652 | 0.03306 | 0.152296 | 0.00096  |
| 0.15468  | 0.08867  | 0.05552  | 0.033487 | 0.47034  | 0.040472 | 0.38287 | 0.128465 | 0.00543  |
| 0.01216  | -0.13365 | 0.00381  | -0.0572  | 0.21726  | -0.05476 | 0.23761 | -0.10146 | 0.02836  |
| 0.53927  | -0.025   | 0.59001  | -0.08564 | 0.06444  | -0.0815  | 0.07851 | 0.031821 | 0.49271  |
| 8.14E-05 | -0.17735 | 0.00012  | -0.05397 | 0.24443  | 0.092632 | 0.04542 | -0.24458 | 8.67E-08 |
| 0.0031   | 0.220319 | 1.53E-06 | 0.094907 | 0.04036  | 0.100111 | 0.03054 | 0.056212 | 0.22534  |
| 0.00163  | 0.20586  | 7.30E-06 | 0.039373 | 0.39593  | 0.071282 | 0.12399 | 0.186388 | 5.06E-05 |
| 8.21E-31 | 0.510669 | 2.22E-32 | 0.048906 | 0.29158  | 0.110363 | 0.01704 | 0.3176   | 2.10E-12 |
| 5.05E-08 | 0.110548 | 0.01685  | 0.029509 | 0.52469  | -0.00774 | 0.8675  | 0.167516 | 0.00028  |
| 1.65E-15 | -0.35691 | 1.78E-15 | 0.014224 | 0.75916  | -0.05457 | 0.23918 | -0.1568  | 0.00067  |
| 0.00604  | 0.116172 | 0.012    | -0.00036 | 0.99384  | 0.062531 | 0.17734 | 0.218594 | 1.85E-06 |
| 7.65E-39 | 0.662949 | 1.94E-60 | 0.199155 | 1.45E-05 | 0.069374 | 0.1344  | 0.152048 | 0.00098  |
| 0.63948  | 0.070571 | 0.12779  | 0.020414 | 0.65993  | 0.066905 | 0.14886 | 0.067435 | 0.14566  |
| 0.27718  | 0.036099 | 0.43641  | 0.043721 | 0.34582  | 0.03084  | 0.50616 | 0.02485  | 0.59219  |
| 3.01E-32 | 0.558092 | 1.37E-39 | -0.03217 | 0.48799  | 0.090495 | 0.05066 | 0.135452 | 0.00336  |
| 0.01436  | 0.196967 | 1.81E-05 | 0.119886 | 0.00951  | 0.064808 | 0.16204 | 0.145039 | 0.00167  |
| 4.83E-23 | 0.476138 | 8.45E-28 | 0.182354 | 7.39E-05 | 0.105395 | 0.02274 | 0.296733 | 6.02E-11 |
| 7.76E-34 | 0.665862 | 3.87E-61 | 0.140889 | 0.00228  | 0.17496  | 0.00014 | 0.454383 | 3.60E-25 |
| 2.04E-28 | 0.59669  | 2.24E-46 | 0.039066 | 0.39963  | 0.098983 | 0.03247 | 0.164283 | 0.00036  |
| 0.57557  | 0.194147 | 2.39E-05 | -0.00717 | 0.87724  | 0.041236 | 0.37394 | -0.00876 | 0.85033  |

|          |          |          |          |          |          |          |          |          |
|----------|----------|----------|----------|----------|----------|----------|----------|----------|
| 1.34E-34 | 0.482762 | 1.23E-28 | 0.151101 | 0.00106  | 0.115153 | 0.01277  | 0.196958 | 1.81E-05 |
| 0.00115  | 0.24776  | 5.81E-08 | 0.067651 | 0.14437  | 0.017805 | 0.70115  | 0.153804 | 0.00085  |
| 0.00047  | 0.048864 | 0.29199  | 0.012782 | 0.78295  | -0.01033 | 0.82381  | 0.028456 | 0.5396   |
| 0.21318  | 0.062044 | 0.18074  | 0.064654 | 0.16305  | 0.012942 | 0.78029  | 0.083826 | 0.07032  |
| 0.00093  | 0.139833 | 0.00246  | -0.01998 | 0.66671  | 0.02518  | 0.58728  | 0.053797 | 0.24593  |
| 0.03016  | -0.04555 | 0.32596  | -0.07529 | 0.10419  | 0.009921 | 0.83069  | -0.06364 | 0.16977  |
| 1.80E-18 | 0.458122 | 1.31E-25 | 0.097656 | 0.03488  | 0.090218 | 0.05137  | 0.233295 | 3.42E-07 |
| 0.81885  | -0.08198 | 0.07676  | -0.07462 | 0.10731  | -0.00504 | 0.91345  | -0.08134 | 0.07908  |
| 0.77403  | -0.03057 | 0.50989  | 0.029756 | 0.52123  | 0.019051 | 0.68134  | -0.0996  | 0.0314   |
| 0.57776  | 0.129256 | 0.00515  | -0.01864 | 0.6878   | -0.02151 | 0.6429   | 0.073606 | 0.11217  |
| 2.31E-26 | 0.523142 | 3.63E-34 | 0.138962 | 0.00262  | 0.112155 | 0.01531  | 0.053976 | 0.24436  |
| 1.45E-48 | 0.729852 | 7.73E-79 | 0.122869 | 0.00786  | 0.154965 | 0.00078  | 0.21859  | 1.85E-06 |
| 4.04E-10 | 0.275999 | 1.31E-09 | -0.00945 | 0.8386   | -0.02564 | 0.58051  | 0.090704 | 0.05012  |
| 4.01E-15 | 0.422656 | 1.17E-21 | -0.03254 | 0.48301  | 0.147369 | 0.00141  | 0.034981 | 0.45076  |
| 1.93E-16 | 0.470384 | 4.37E-27 | 0.077877 | 0.09277  | 0.12238  | 0.00811  | 0.261881 | 9.21E-09 |
| 0.44987  | 0.07492  | 0.10589  | 0.150102 | 0.00114  | 0.017465 | 0.70659  | 0.067301 | 0.14646  |
| 8.28E-12 | 0.403746 | 9.76E-20 | 0.024632 | 0.59545  | 0.04807  | 0.29991  | 0.154421 | 0.00081  |
| 4.53E-06 | 0.156035 | 0.00072  | -0.02187 | 0.63731  | -0.02738 | 0.55508  | 0.103853 | 0.02481  |
| 0.05307  | 0.090382 | 0.05095  | 0.040814 | 0.37885  | 0.060394 | 0.19264  | 0.04524  | 0.3293   |
| 0.00324  | 0.15257  | 0.00094  | 0.072685 | 0.11674  | -0.01312 | 0.77733  | 0.080287 | 0.08307  |
| 1.23E-23 | 0.400385 | 2.08E-19 | 0.084448 | 0.06826  | -0.05502 | 0.23538  | -0.033   | 0.47682  |
| 6.07E-13 | 0.379156 | 2.05E-17 | 0.103479 | 0.02534  | 0.089999 | 0.05194  | 0.030094 | 0.51651  |
| 3.10E-22 | 0.476439 | 7.75E-28 | 0.035914 | 0.43876  | 0.09952  | 0.03154  | 0.092068 | 0.04676  |
| 1.47E-30 | 0.511641 | 1.62E-32 | 0.04986  | 0.28226  | 0.022344 | 0.63007  | 0.230394 | 4.82E-07 |
| 6.11E-06 | 0.307123 | 1.17E-11 | 0.04293  | 0.35462  | 0.036911 | 0.42615  | 0.074668 | 0.10707  |
| 5.60E-09 | 0.355722 | 2.24E-15 | 0.118088 | 0.01065  | 0.08235  | 0.07543  | 0.114682 | 0.01314  |
| 0.05342  | 0.08169  | 0.07781  | -0.03953 | 0.39408  | 0.027925 | 0.54719  | -0.02175 | 0.63921  |
| 6.93E-32 | 0.306358 | 1.32E-11 | 0.079006 | 0.08811  | -0.03872 | 0.40387  | 0.038518 | 0.40628  |
| 0.0005   | 0.137455 | 0.00291  | 0.02293  | 0.62113  | -0.03505 | 0.44987  | -0.08436 | 0.06853  |
| 0.00049  | 0.174115 | 0.00016  | 0.070208 | 0.12977  | 0.073424 | 0.11306  | 0.164451 | 0.00036  |
| 3.73E-44 | 0.61527  | 5.54E-50 | 0.124054 | 0.00727  | 0.026815 | 0.56324  | 0.125435 | 0.00665  |
| 4.38E-05 | 0.086634 | 0.06139  | 0.099031 | 0.03239  | -0.01058 | 0.81969  | 0.163739 | 0.00038  |
| 0.78115  | 0.027253 | 0.55689  | 0.064796 | 0.16212  | 0.028754 | 0.53536  | -0.05092 | 0.27216  |
| 2.89E-08 | 0.198637 | 1.53E-05 | -0.00738 | 0.87362  | 0.000969 | 0.98334  | 0.020064 | 0.6654   |
| 7.83E-18 | 0.512255 | 1.33E-32 | 0.063461 | 0.17097  | 0.087312 | 0.05938  | 0.207825 | 5.94E-06 |
| 4.04E-05 | 0.171633 | 0.00019  | 0.093337 | 0.0438   | 0.018267 | 0.69379  | 0.05035  | 0.27755  |
| 3.31E-08 | 0.322905 | 8.56E-13 | 0.031977 | 0.4906   | 0.04639  | 0.31714  | 0.099362 | 0.03181  |
| 0.12265  | 0.096559 | 0.03698  | -0.07118 | 0.12453  | 0.086537 | 0.06168  | 0.049433 | 0.2864   |
| 1.19E-27 | 0.557964 | 1.44E-39 | 0.110736 | 0.01667  | 0.101805 | 0.02782  | 0.246611 | 6.72E-08 |
| 2.86E-54 | 0.704172 | 3.65E-71 | 0.133403 | 0.00388  | 0.194356 | 2.35E-05 | 0.299073 | 4.19E-11 |
| 1.86E-07 | 0.286971 | 2.65E-10 | 0.041734 | 0.3682   | -0.05546 | 0.23165  | -0.11399 | 0.01371  |
| 6.19E-10 | 0.287358 | 2.50E-10 | 0.01657  | 0.72098  | 0.078559 | 0.08993  | 0.225555 | 8.44E-07 |
| 5.14E-50 | 0.725539 | 1.73E-77 | 0.177616 | 0.00011  | 0.143494 | 0.00188  | 0.281959 | 5.53E-10 |
| 1.87E-32 | 0.479091 | 3.59E-28 | 0.19646  | 1.90E-05 | 0.079586 | 0.0858   | 0.347955 | 9.75E-15 |
| 1.67E-16 | 0.500897 | 4.97E-31 | 0.087367 | 0.05922  | 0.100059 | 0.03062  | 0.283956 | 4.13E-10 |

|          |          |          |          |          |          |          |          |          |
|----------|----------|----------|----------|----------|----------|----------|----------|----------|
| 2.43E-30 | 0.605991 | 3.75E-48 | 0.145534 | 0.00161  | 0.152829 | 0.00092  | 0.113317 | 0.01428  |
| 9.87E-09 | 0.295261 | 7.55E-11 | 0.038199 | 0.41018  | 0.026647 | 0.5657   | 0.091318 | 0.04858  |
| 4.96E-14 | -0.32503 | 5.95E-13 | -0.1943  | 2.36E-05 | -0.0686  | 0.13881  | -0.29217 | 1.21E-10 |
| 4.85E-06 | -0.30624 | 1.35E-11 | -0.03366 | 0.4681   | -0.0995  | 0.03156  | -0.03419 | 0.46112  |
| 3.83E-34 | 0.586704 | 1.56E-44 | 0.144579 | 0.00173  | 0.197578 | 1.70E-05 | 0.296499 | 6.24E-11 |
| 3.35E-34 | 0.573139 | 3.96E-42 | 0.162399 | 0.00043  | 0.081622 | 0.07805  | 0.510332 | 2.48E-32 |
| 2.74E-33 | 0.64986  | 2.22E-57 | 0.249638 | 4.58E-08 | 0.134474 | 0.0036   | 0.194539 | 2.30E-05 |
| 1.07E-06 | -0.26687 | 4.68E-09 | -0.08812 | 0.05706  | -0.15747 | 0.00064  | -0.07789 | 0.09273  |
| 9.73E-08 | 0.23961  | 1.60E-07 | 0.00444  | 0.92376  | 0.008901 | 0.84787  | 0.150014 | 0.00115  |
| 2.05E-11 | 0.305019 | 1.64E-11 | 0.073779 | 0.11132  | -0.0208  | 0.65399  | 0.193896 | 2.45E-05 |
| 0.54923  | 0.050505 | 0.27607  | 0.046926 | 0.31157  | 0.031107 | 0.50249  | -0.05053 | 0.27584  |
| 0.00845  | 0.131156 | 0.00453  | -0.02594 | 0.57612  | -0.02933 | 0.52727  | -0.04661 | 0.31487  |
| 0.00012  | 0.274757 | 1.56E-09 | 0.000778 | 0.98662  | 0.15049  | 0.00111  | 0.034935 | 0.45136  |
| 0.00498  | 0.248462 | 5.31E-08 | 0.088847 | 0.05503  | 0.119563 | 0.00971  | 0.19895  | 1.48E-05 |
| 0.09225  | 0.015056 | 0.74555  | 0.071409 | 0.12332  | 0.053535 | 0.24824  | 0.158809 | 0.00057  |
| 0.65074  | -0.07227 | 0.11883  | -0.01806 | 0.69708  | -0.02578 | 0.57847  | 0.028478 | 0.53929  |
| 0.00107  | 0.190582 | 3.39E-05 | 0.086029 | 0.06323  | 0.069074 | 0.1361   | 0.189282 | 3.84E-05 |
| 0.0058   | 0.130521 | 0.00473  | 0.044656 | 0.33559  | 0.005021 | 0.91383  | -0.00834 | 0.85733  |
| 2.79E-47 | 0.651949 | 7.39E-58 | 0.050507 | 0.27605  | 0.078834 | 0.08881  | 0.22037  | 1.52E-06 |
| 4.87E-24 | 0.581171 | 1.54E-43 | 0.126316 | 0.00627  | 0.11469  | 0.01314  | 0.155562 | 0.00074  |
| 3.32E-29 | 0.589211 | 5.46E-45 | 0.157382 | 0.00064  | 0.111612 | 0.01582  | 0.125153 | 0.00677  |
| 2.83E-08 | 0.316882 | 2.37E-12 | -0.05351 | 0.24849  | 0.173098 | 0.00017  | 0.039791 | 0.39094  |
| 3.67E-22 | 0.456533 | 2.02E-25 | 0.052518 | 0.25736  | 0.056231 | 0.22518  | 0.204785 | 8.16E-06 |
| 6.04E-17 | 0.425701 | 5.57E-22 | 0.103321 | 0.02556  | 0.050905 | 0.27228  | 0.063742 | 0.16907  |
| 4.78E-12 | 0.391874 | 1.37E-18 | 0.130224 | 0.00482  | 0.09471  | 0.04078  | 0.168085 | 0.00026  |
| 4.20E-17 | 0.502836 | 2.70E-31 | 0.032084 | 0.48915  | 0.106766 | 0.02102  | 0.196711 | 1.86E-05 |
| 0.57919  | 0.078284 | 0.09107  | 0.063617 | 0.16991  | 0.049969 | 0.28121  | 0.070015 | 0.13083  |
| 0.00012  | 0.243501 | 9.91E-08 | 0.030517 | 0.51063  | 0.099538 | 0.03151  | 0.077171 | 0.09577  |
| 1.25E-12 | 0.338951 | 5.11E-14 | -0.061   | 0.18821  | 0.043146 | 0.3522   | 0.170446 | 0.00022  |
| 0.98509  | 0.126039 | 0.00639  | 0.025455 | 0.58321  | 0.105996 | 0.02197  | 0.155442 | 0.00075  |
| 0.00204  | 0.192563 | 2.80E-05 | 0.017088 | 0.71265  | 0.056016 | 0.22696  | -0.08972 | 0.05268  |
| 0.00219  | 0.121172 | 0.00876  | 0.048997 | 0.29068  | 0.040872 | 0.37818  | -0.00068 | 0.98834  |
| 6.28E-10 | 0.27496  | 1.51E-09 | 0.121491 | 0.00859  | 0.077112 | 0.09603  | 0.119791 | 0.00957  |
| 3.65E-05 | 0.22197  | 1.27E-06 | 0.016453 | 0.72288  | 0.020965 | 0.65135  | 0.0519   | 0.263    |
| 2.27E-12 | 0.310701 | 6.56E-12 | -0.0047  | 0.91925  | -0.04475 | 0.33454  | 0.040129 | 0.38692  |
| 8.60E-05 | 0.268679 | 3.65E-09 | 0.095077 | 0.04     | -0.00779 | 0.86675  | 0.061523 | 0.18444  |
| 2.71E-05 | 0.145128 | 0.00166  | -0.08846 | 0.05609  | -0.0355  | 0.44407  | 0.020222 | 0.66293  |
| 7.29E-14 | 0.424111 | 8.21E-22 | 0.02203  | 0.63489  | 0.11534  | 0.01263  | 0.120029 | 0.00942  |
| 6.75E-19 | 0.45033  | 1.06E-24 | 0.064243 | 0.16574  | 0.099303 | 0.03191  | 0.18463  | 5.98E-05 |
| 3.32E-25 | 0.44924  | 1.42E-24 | 0.055061 | 0.235    | 0.060211 | 0.19399  | 0.051666 | 0.26517  |
| 3.18E-11 | 0.301281 | 2.96E-11 | 0.046749 | 0.31341  | 0.058886 | 0.204    | 0.291872 | 1.27E-10 |
| 4.91E-10 | 0.291261 | 1.39E-10 | 0.04368  | 0.34627  | 0.0553   | 0.23296  | 0.141853 | 0.00212  |
| 6.52E-23 | 0.29918  | 4.12E-11 | -0.01257 | 0.78649  | -0.0284  | 0.54036  | -0.04002 | 0.38818  |
| 3.31E-36 | 0.611619 | 2.96E-49 | 0.113687 | 0.01396  | 0.081677 | 0.07785  | 0.2991   | 4.17E-11 |
| 9.80E-06 | 0.257732 | 1.60E-08 | 0.016702 | 0.71885  | 0.084942 | 0.06665  | 0.09114  | 0.04903  |

|          |          |          |          |          |          |         |          |          |
|----------|----------|----------|----------|----------|----------|---------|----------|----------|
| 0.32965  | -0.01526 | 0.74216  | 0.009046 | 0.84542  | -0.0166  | 0.72054 | 0.124833 | 0.00691  |
| 4.52E-66 | 0.786915 | 1.49E-99 | 0.073105 | 0.11464  | 0.131652 | 0.00437 | 0.281109 | 6.26E-10 |
| 7.72E-06 | 0.097818 | 0.03458  | -0.06268 | 0.17631  | -0.00727 | 0.87544 | 0.163949 | 0.00037  |
| 0.2371   | 0.016906 | 0.71556  | 0.042083 | 0.3642   | 0.088097 | 0.05712 | -0.06888 | 0.13723  |
| 1.63E-22 | 0.572238 | 5.67E-42 | 0.116985 | 0.01141  | 0.16862  | 0.00025 | 0.271024 | 2.63E-09 |
| 0.009    | 0.227891 | 6.45E-07 | 0.030717 | 0.50786  | -0.07125 | 0.12414 | 0.194766 | 2.25E-05 |
| 4.11E-51 | 0.786267 | 2.78E-99 | 0.140665 | 0.00231  | 0.131615 | 0.00439 | 0.155811 | 0.00073  |
| 2.47E-15 | 0.341214 | 3.38E-14 | 0.03471  | 0.45428  | 0.044567 | 0.33655 | 0.081799 | 0.07741  |
| 2.16E-11 | 0.315949 | 2.76E-12 | 0.274909 | 1.53E-09 | 0.142482 | 0.00202 | 0.162103 | 0.00044  |
| 1.72E-08 | -0.23419 | 3.08E-07 | 0.036488 | 0.43148  | -0.14026 | 0.00238 | -0.22133 | 1.36E-06 |
| 1.06E-12 | 0.297126 | 5.67E-11 | 0.130313 | 0.00479  | 0.075367 | 0.10381 | 0.016328 | 0.72489  |
| 1.42E-23 | 0.552399 | 1.16E-38 | 0.137387 | 0.00293  | 0.137181 | 0.00297 | 0.279623 | 7.77E-10 |
| 5.48E-19 | 0.409052 | 2.90E-20 | 0.079898 | 0.08458  | 0.133323 | 0.0039  | 0.121901 | 0.00836  |
| 0.00323  | -0.18861 | 4.10E-05 | 0.023164 | 0.61757  | 0.016636 | 0.71992 | -0.1493  | 0.00121  |
| 0.06865  | 0.176734 | 0.00012  | 0.018301 | 0.69325  | 0.074971 | 0.10565 | 0.169465 | 0.00023  |
| 1.19E-32 | 0.591257 | 2.30E-45 | 0.154305 | 0.00082  | 0.154471 | 0.00081 | 0.326984 | 4.25E-13 |
| 3.73E-56 | 0.736314 | 6.55E-81 | 0.126949 | 0.00601  | 0.148649 | 0.00127 | 0.299194 | 4.11E-11 |
| 5.27E-15 | 0.334905 | 1.06E-13 | 0.074633 | 0.10723  | 0.145034 | 0.00168 | 0.283293 | 4.55E-10 |
| 0.00506  | 0.142657 | 0.002    | 0.004568 | 0.92157  | 0.054122 | 0.24309 | -0.0059  | 0.89874  |
| 0.01542  | -0.08089 | 0.08077  | 0.083385 | 0.07182  | 0.037399 | 0.42006 | -0.19339 | 2.58E-05 |
| 3.54E-10 | 0.352612 | 4.05E-15 | 0.097247 | 0.03565  | 0.102794 | 0.02633 | 0.269339 | 3.33E-09 |
| 7.64E-16 | 0.382735 | 9.69E-18 | 0.021217 | 0.64743  | 0.06589  | 0.15514 | 0.28059  | 6.75E-10 |
| 1.71E-37 | 0.655377 | 1.19E-58 | 0.069635 | 0.13294  | 0.165244 | 0.00034 | 0.255821 | 2.06E-08 |
| 1.78E-36 | 0.500734 | 5.23E-31 | 0.018071 | 0.6969   | 0.102843 | 0.02626 | 0.058616 | 0.20609  |
| 1.02E-14 | 0.492605 | 6.42E-30 | 0.070685 | 0.12718  | 0.126466 | 0.00621 | 0.275925 | 1.32E-09 |
| 0.31003  | -0.03941 | 0.39551  | 0.168255 | 0.00026  | -0.04694 | 0.31142 | -0.16504 | 0.00034  |
| 1.04E-11 | 0.251958 | 3.40E-08 | 0.04523  | 0.32941  | 0.046644 | 0.31449 | 0.283359 | 4.51E-10 |
| 1.18E-12 | 0.399064 | 2.80E-19 | 0.012613 | 0.78574  | 0.126189 | 0.00632 | 0.108063 | 0.0195   |
| 1.91E-15 | 0.261185 | 1.01E-08 | 0.087511 | 0.0588   | 0.000621 | 0.98931 | 0.250481 | 4.11E-08 |
| 1.30E-10 | -0.29375 | 9.51E-11 | -0.00495 | 0.91496  | -0.03395 | 0.46423 | -0.14018 | 0.0024   |
| 0.27985  | 0.109723 | 0.01769  | 0.009381 | 0.83977  | 0.01156  | 0.80324 | 0.104479 | 0.02395  |
| 2.92E-08 | 0.278873 | 8.65E-10 | 0.024508 | 0.59731  | 0.005244 | 0.91001 | 0.213254 | 3.32E-06 |
| 0.27057  | 0.221128 | 1.40E-06 | 0.033595 | 0.46891  | -0.00031 | 0.99462 | 0.025099 | 0.58849  |
| 0.35779  | 0.172564 | 0.00018  | 0.039887 | 0.3898   | 0.045036 | 0.33149 | 0.023424 | 0.61362  |
| 5.44E-09 | 0.406399 | 5.34E-20 | 0.189878 | 3.63E-05 | 0.135504 | 0.00335 | 0.018173 | 0.69528  |
| 0.55568  | 0.044659 | 0.33555  | 0.055964 | 0.2274   | 0.09725  | 0.03565 | 0.090937 | 0.04953  |
| 3.53E-13 | 0.474603 | 1.31E-27 | -0.04718 | 0.30892  | 0.086295 | 0.06242 | 0.051448 | 0.26719  |
| 6.01E-09 | 0.314856 | 3.31E-12 | 0.305832 | 1.44E-11 | 0.136276 | 0.00317 | 0.220168 | 1.55E-06 |
| 1.02E-38 | 0.57059  | 1.09E-41 | 0.061236 | 0.1865   | 0.012529 | 0.78714 | 0.208869 | 5.32E-06 |
| 2.80E-57 | 0.765895 | 3.09E-91 | 0.118896 | 0.01012  | 0.166955 | 0.00029 | 0.300344 | 3.43E-11 |
| 0.00012  | 0.282462 | 5.14E-10 | 0.116359 | 0.01186  | 0.1003   | 0.03022 | 0.15212  | 0.00097  |
| 4.92E-12 | 0.473415 | 1.85E-27 | 0.022074 | 0.63421  | 0.037097 | 0.42383 | 0.032754 | 0.48012  |
| 1.15E-11 | 0.223462 | 1.07E-06 | -0.01246 | 0.7882   | -0.01072 | 0.81727 | 0.209217 | 5.12E-06 |
| 0.48743  | 0.013971 | 0.76332  | 0.010375 | 0.82307  | -0.01679 | 0.71736 | -0.03801 | 0.41251  |
| 0.05331  | 0.125102 | 0.00679  | 0.018767 | 0.68584  | 0.027384 | 0.55499 | -0.00556 | 0.90462  |

|          |          |          |          |          |          |          |          |          |
|----------|----------|----------|----------|----------|----------|----------|----------|----------|
| 3.57E-13 | 0.284429 | 3.85E-10 | -0.0112  | 0.80931  | 0.087275 | 0.05949  | 0.119846 | 0.00953  |
| 0.04177  | 0.03088  | 0.50561  | 0.012654 | 0.78506  | -0.04914 | 0.28924  | 0.062089 | 0.18043  |
| 4.55E-07 | -0.26981 | 3.12E-09 | -0.11325 | 0.01434  | -0.07838 | 0.09068  | -0.22039 | 1.52E-06 |
| 0.21313  | 0.214858 | 2.79E-06 | 0.059399 | 0.20008  | 0.125804 | 0.00649  | -0.02274 | 0.62398  |
| 7.63E-13 | 0.416326 | 5.30E-21 | 0.068185 | 0.14122  | 0.092386 | 0.046    | 0.272243 | 2.22E-09 |
| 0.29357  | 0.135866 | 0.00326  | 0.092779 | 0.04508  | 0.072812 | 0.1161   | 0.211107 | 4.19E-06 |
| 3.60E-19 | 0.491994 | 7.74E-30 | 0.152038 | 0.00098  | 0.098712 | 0.03295  | 0.214255 | 2.98E-06 |
| 1.60E-49 | 0.683956 | 1.11E-65 | 0.101648 | 0.02806  | 0.160799 | 0.00049  | 0.175738 | 0.00013  |
| 4.50E-08 | -0.34421 | 1.96E-14 | -0.06912 | 0.13583  | -0.12944 | 0.00509  | -0.2971  | 5.69E-11 |
| 8.12E-18 | 0.478273 | 4.56E-28 | 0.162912 | 0.00041  | 0.126588 | 0.00616  | 0.136509 | 0.00312  |
| 0.93381  | 0.072177 | 0.11933  | 0.023293 | 0.61561  | -0.00972 | 0.83407  | -0.12744 | 0.00582  |
| 4.81E-24 | 0.561858 | 3.26E-40 | 0.081414 | 0.07882  | 0.077673 | 0.09363  | 0.399023 | 2.82E-19 |
| 1.32E-10 | 0.241921 | 1.20E-07 | 0.032665 | 0.48132  | 0.064599 | 0.16341  | 0.07308  | 0.11476  |
| 1.23E-27 | 0.497208 | 1.56E-30 | 0.075946 | 0.10118  | 0.088082 | 0.05716  | 0.109439 | 0.01799  |
| 1.49E-06 | 0.350835 | 5.68E-15 | 0.132274 | 0.00419  | 0.037538 | 0.41834  | -0.02039 | 0.66032  |
| 0.2954   | 0.134347 | 0.00363  | 0.02549  | 0.58269  | 0.01652  | 0.72179  | 0.14824  | 0.00132  |
| 3.29E-51 | 0.696289 | 5.69E-69 | 0.091382 | 0.04842  | 0.155776 | 0.00073  | 0.284032 | 4.09E-10 |
| 0.008    | 0.185126 | 5.70E-05 | 0.192866 | 2.71E-05 | 0.073877 | 0.11084  | 0.189401 | 3.80E-05 |
| 0.75161  | 0.075887 | 0.10144  | 0.096345 | 0.03741  | -0.00237 | 0.9592   | 0.063887 | 0.1681   |
| 1.40E-10 | 0.437224 | 3.17E-23 | 0.210193 | 4.62E-06 | 0.119536 | 0.00972  | 0.085723 | 0.06418  |
| 0.00221  | 0.197083 | 1.79E-05 | 0.000108 | 0.99814  | 0.076826 | 0.09727  | 0.171547 | 0.0002   |
| 2.05E-28 | 0.58036  | 2.15E-43 | 0.026441 | 0.5687   | 0.120829 | 0.00896  | 0.118082 | 0.01065  |
| 1.16E-39 | 0.61653  | 3.09E-50 | 0.047391 | 0.3068   | 0.190598 | 3.39E-05 | 0.179582 | 9.53E-05 |
| 3.99E-42 | 0.606684 | 2.75E-48 | 0.058572 | 0.20643  | 0.045374 | 0.32787  | 0.205836 | 7.31E-06 |
| 0.02086  | 0.066353 | 0.15225  | 0.090536 | 0.05055  | 0.081102 | 0.07998  | -0.00929 | 0.84127  |
| 3.17E-72 | 0.658333 | 2.43E-59 | 0.228157 | 6.25E-07 | 0.098339 | 0.03362  | 0.354954 | 2.59E-15 |
| 4.14E-08 | 0.327959 | 3.59E-13 | 0.13923  | 0.00257  | 0.049218 | 0.2885   | 0.072772 | 0.1163   |
| 0.91605  | 0.012519 | 0.7873   | -0.08942 | 0.05347  | 0.001194 | 0.97947  | -0.07158 | 0.12244  |
| 0.01547  | 0.180671 | 8.63E-05 | -0.00578 | 0.90089  | 0.060582 | 0.19125  | -0.03075 | 0.50735  |
| 1.03E-26 | 0.46311  | 3.34E-26 | 0.017406 | 0.70754  | 0.022149 | 0.63307  | 0.216962 | 2.22E-06 |
| 1.02E-14 | 0.492243 | 7.17E-30 | 0.100207 | 0.03038  | 0.107357 | 0.02031  | 0.15297  | 0.00091  |
| 1.57E-09 | 0.340966 | 3.54E-14 | -0.15121 | 0.00105  | 0.05872  | 0.20528  | 0.064093 | 0.16673  |
| 0.06902  | 0.020958 | 0.65146  | 0.097566 | 0.03505  | 0.020224 | 0.6629   | 0.004385 | 0.9247   |
| 0.56072  | 0.008256 | 0.85878  | 0.005315 | 0.9088   | -0.00279 | 0.95206  | 0.056451 | 0.22337  |
| 6.79E-06 | 0.32665  | 4.50E-13 | 0.006687 | 0.8854   | 0.048236 | 0.29825  | -0.1209  | 0.00892  |
| 2.45E-17 | 0.508403 | 4.61E-32 | -0.00184 | 0.96845  | 0.120765 | 0.00899  | 0.194377 | 2.34E-05 |
| 3.70E-32 | 0.474436 | 1.38E-27 | 0.074384 | 0.10841  | 0.052438 | 0.25808  | 0.284814 | 3.64E-10 |
| 3.60E-09 | 0.285184 | 3.45E-10 | 0.016266 | 0.72589  | -0.01476 | 0.75036  | 0.072741 | 0.11646  |
| 0.02635  | 0.219764 | 1.63E-06 | 0.093187 | 0.04414  | 0.009427 | 0.839    | 0.115398 | 0.01258  |
| 1.14E-13 | 0.447637 | 2.16E-24 | 0.080033 | 0.08405  | 0.140434 | 0.00235  | 0.321476 | 1.09E-12 |
| 0.92064  | -0.00795 | 0.86398  | 0.054435 | 0.24037  | 0.029326 | 0.52728  | 0.001033 | 0.98224  |
| 1.79E-22 | 0.521047 | 7.33E-34 | 0.128854 | 0.00529  | 0.06415  | 0.16636  | 0.176056 | 0.00013  |
| 7.48E-05 | 0.070879 | 0.12613  | -0.01622 | 0.72662  | -0.00349 | 0.94001  | 0.117377 | 0.01113  |
| 7.43E-24 | 0.461361 | 5.41E-26 | 0.119856 | 0.00953  | 0.140748 | 0.0023   | 0.142118 | 0.00208  |
| 2.14E-09 | 0.227888 | 6.45E-07 | 0.126734 | 0.0061   | 0.100764 | 0.02946  | 0.099078 | 0.0323   |

|          |          |          |          |          |          |          |          |          |
|----------|----------|----------|----------|----------|----------|----------|----------|----------|
| 0.73359  | 0.011879 | 0.79794  | 0.027415 | 0.55454  | 0.011335 | 0.80699  | 0.169847 | 0.00023  |
| 0.08979  | 0.036636 | 0.42962  | -0.08436 | 0.06855  | 0.050075 | 0.28018  | 0.019863 | 0.66855  |
| 0.00116  | 0.139913 | 0.00244  | 0.097531 | 0.03511  | -0.02768 | 0.55071  | 0.003998 | 0.93133  |
| 1.29E-06 | -0.15334 | 0.00089  | -0.00248 | 0.9574   | -0.04184 | 0.36699  | -0.23414 | 3.09E-07 |
| 0.00117  | -0.11169 | 0.01575  | 0.113024 | 0.01454  | 0.003135 | 0.94614  | 0.016011 | 0.73003  |
| 0.71592  | 0.044439 | 0.33794  | 0.082736 | 0.07406  | 0.076047 | 0.10072  | 0.162464 | 0.00042  |
| 8.31E-55 | 0.803549 | #####    | 0.177634 | 0.00011  | 0.190165 | 3.53E-05 | 0.184656 | 5.96E-05 |
| 0.9114   | 0.106556 | 0.02127  | 0.087464 | 0.05893  | -0.01731 | 0.70909  | -0.02547 | 0.583    |
| 1.23E-15 | 0.414454 | 8.24E-21 | 0.076139 | 0.10031  | 0.098119 | 0.03402  | 0.166527 | 0.0003   |
| 1.12E-05 | 0.250444 | 4.13E-08 | 0.175086 | 0.00014  | 0.047937 | 0.30125  | 0.050131 | 0.27964  |
| 5.52E-14 | 0.479566 | 3.13E-28 | 0.157958 | 0.00061  | 0.074864 | 0.10615  | 0.127913 | 0.00564  |
| 1.22E-10 | 0.344953 | 1.70E-14 | 0.013316 | 0.7741   | 0.086496 | 0.06181  | 0.081265 | 0.07937  |
| 3.44E-56 | 0.696167 | 6.14E-69 | 0.102256 | 0.02713  | 0.13218  | 0.00422  | 0.26024  | 1.15E-08 |
| 7.40E-10 | 0.397245 | 4.19E-19 | 0.133167 | 0.00394  | 0.194476 | 2.32E-05 | 0.038156 | 0.4107   |
| 1.02E-17 | -0.44411 | 5.42E-24 | -0.11597 | 0.01215  | -0.13088 | 0.00461  | -0.33024 | 2.41E-13 |
| 0.01045  | 0.231049 | 4.46E-07 | 0.10239  | 0.02693  | 0.122411 | 0.00809  | 0.005605 | 0.90386  |
| 3.66E-07 | -0.19638 | 1.92E-05 | 0.014589 | 0.75318  | -0.02274 | 0.62407  | -0.20369 | 9.14E-06 |
| 9.70E-09 | 0.269891 | 3.08E-09 | -0.04035 | 0.38436  | 0.018599 | 0.68851  | 0.03373  | 0.46713  |
| 0.44516  | -0.05155 | 0.26624  | 0.032079 | 0.48922  | 0.023718 | 0.60917  | 0.081711 | 0.07773  |
| 7.38E-12 | 0.314271 | 3.65E-12 | 0.126011 | 0.0064   | 0.098095 | 0.03407  | 0.032938 | 0.47766  |
| 2.89E-09 | 0.22393  | 1.02E-06 | 0.062523 | 0.17739  | 0.057373 | 0.21589  | 0.133853 | 0.00376  |
| 2.81E-24 | 0.542826 | 3.84E-37 | 0.072241 | 0.119    | 0.13622  | 0.00318  | 0.297676 | 5.20E-11 |
| 0.00834  | 0.146722 | 0.00148  | 0.062892 | 0.17484  | 0.051753 | 0.26436  | 0.131386 | 0.00446  |
| 2.69E-62 | 0.8608   | #####    | 0.161311 | 0.00047  | 0.15755  | 0.00063  | 0.252328 | 3.24E-08 |
| 0.00113  | -0.09129 | 0.04866  | 0.033913 | 0.46471  | -0.02722 | 0.55732  | -0.03097 | 0.5044   |
| 2.03E-13 | 0.347369 | 1.09E-14 | -0.08929 | 0.05383  | 0.077893 | 0.0927   | 0.063411 | 0.1713   |
| 4.10E-20 | 0.40926  | 2.76E-20 | 0.015422 | 0.73958  | -0.01959 | 0.6729   | 0.141494 | 0.00218  |
| 0.27564  | -0.13896 | 0.00262  | 0.018906 | 0.68365  | -0.13575 | 0.00329  | -0.19709 | 1.79E-05 |
| 4.42E-15 | 0.461325 | 5.47E-26 | 0.085989 | 0.06336  | 0.112444 | 0.01505  | 0.275446 | 1.41E-09 |
| 2.14E-74 | 0.83356  | #####    | 0.113887 | 0.0138   | 0.167992 | 0.00027  | 0.239293 | 1.66E-07 |
| 0.00573  | 0.248596 | 5.22E-08 | -0.00096 | 0.9835   | 0.120411 | 0.0092   | 0.153335 | 0.00089  |
| 4.36E-21 | 0.513075 | 1.02E-32 | 0.128232 | 0.00552  | 0.109781 | 0.01763  | 0.181522 | 7.98E-05 |
| 1.42E-21 | 0.519993 | 1.04E-33 | 0.077829 | 0.09297  | 0.108576 | 0.01893  | 0.239236 | 1.67E-07 |
| 0.00051  | 0.255843 | 2.05E-08 | 0.066548 | 0.15104  | 0.089611 | 0.05296  | 0.205278 | 7.75E-06 |
| 0.0538   | 0.168126 | 0.00026  | 0.000518 | 0.99109  | 0.019152 | 0.67975  | 0.043919 | 0.34364  |
| 1.64E-08 | 0.346797 | 1.21E-14 | 0.084917 | 0.06673  | -0.03777 | 0.41541  | -0.05731 | 0.2164   |
| 9.78E-29 | 0.608582 | 1.17E-48 | 0.058103 | 0.21009  | 0.104989 | 0.02327  | 0.262769 | 8.17E-09 |
| 1.21E-13 | 0.578081 | 5.43E-43 | 0.120481 | 0.00916  | 0.214239 | 2.99E-06 | 0.187203 | 4.69E-05 |
| 1.58E-39 | 0.696292 | 5.68E-69 | 0.115571 | 0.01245  | 0.139894 | 0.00245  | 0.31578  | 2.84E-12 |
| 2.35E-11 | 0.428739 | 2.64E-22 | 0.19429  | 2.36E-05 | 0.161874 | 0.00044  | 0.118413 | 0.01043  |
| 6.51E-10 | 0.402889 | 1.19E-19 | 0.060989 | 0.18828  | 0.05331  | 0.25024  | 0.218297 | 1.91E-06 |
| 0.07987  | 0.136274 | 0.00317  | -0.03665 | 0.42944  | 0.037508 | 0.41871  | 0.046738 | 0.31352  |
| 8.42E-11 | 0.292088 | 1.23E-10 | -0.01122 | 0.80899  | -0.01721 | 0.71061  | 0.113425 | 0.01419  |
| 0.05452  | 0.226235 | 7.81E-07 | -0.00249 | 0.95719  | 0.088478 | 0.05605  | -0.0067  | 0.88525  |
| 3.54E-06 | 0.214102 | 3.03E-06 | 0.037414 | 0.41987  | 0.018815 | 0.68507  | 0.020442 | 0.65949  |

|          |          |          |          |          |          |          |          |          |
|----------|----------|----------|----------|----------|----------|----------|----------|----------|
| 1.36E-15 | 0.403789 | 9.67E-20 | 0.044178 | 0.34079  | 0.091196 | 0.04889  | 0.184107 | 6.28E-05 |
| 0.00173  | 0.198091 | 1.62E-05 | -0.02779 | 0.54918  | 0.051367 | 0.26794  | -0.10462 | 0.02375  |
| 0.2123   | 0.014634 | 0.75245  | -0.02758 | 0.55212  | -0.00544 | 0.90674  | 0.170773 | 0.00021  |
| 7.54E-07 | 0.280524 | 6.82E-10 | 0.066252 | 0.15287  | 0.089101 | 0.05433  | 0.257438 | 1.66E-08 |
| 0.47881  | 0.181726 | 7.83E-05 | -0.10028 | 0.03026  | 0.073273 | 0.1138   | -0.09636 | 0.03737  |
| 0.04227  | 0.100595 | 0.02974  | 0.098131 | 0.034    | 0.03646  | 0.43184  | 0.079287 | 0.08699  |
| 2.60E-13 | 0.294329 | 8.71E-11 | 0.071582 | 0.12241  | 0.037889 | 0.41399  | 0.192925 | 2.70E-05 |
| 0.65891  | -0.03081 | 0.50652  | 0.070352 | 0.12898  | 0.024594 | 0.59602  | -0.08801 | 0.05738  |
| 7.96E-11 | 0.459048 | 1.02E-25 | 0.187011 | 4.77E-05 | 0.061697 | 0.1832   | 0.051748 | 0.26441  |
| 0.00105  | 0.177378 | 0.00012  | 0.085656 | 0.06439  | 0.05935  | 0.20045  | 0.049818 | 0.28266  |
| 0.69501  | 0.005054 | 0.91326  | -0.02473 | 0.59405  | -0.06288 | 0.17492  | 0.110979 | 0.01643  |
| 0.00334  | 0.143474 | 0.00188  | 0.022737 | 0.62406  | 0.060109 | 0.19475  | 0.184585 | 6.00E-05 |
| 3.57E-09 | 0.270998 | 2.64E-09 | 0.21921  | 1.73E-06 | 0.097592 | 0.035    | 0.096671 | 0.03676  |
| 2.37E-32 | 0.633491 | 9.21E-54 | 0.063263 | 0.17231  | 0.10963  | 0.01779  | 0.132058 | 0.00425  |
| 0.03722  | 0.214463 | 2.92E-06 | 0.007847 | 0.8657   | 0.094484 | 0.04126  | 0.030039 | 0.51727  |
| 3.07E-26 | 0.540323 | 9.40E-37 | 0.122487 | 0.00805  | 0.053309 | 0.25024  | -0.01084 | 0.81524  |
| 1.56E-27 | 0.571236 | 8.44E-42 | 0.05077  | 0.27355  | 0.073899 | 0.11074  | 0.105708 | 0.02233  |
| 6.91E-15 | 0.244873 | 8.35E-08 | -0.01241 | 0.78913  | 0.011524 | 0.80384  | 0.070394 | 0.12876  |
| 5.73E-18 | 0.206884 | 6.55E-06 | -0.0144  | 0.75625  | 0.007626 | 0.86945  | 0.08607  | 0.0631   |
| 4.02E-54 | 0.643487 | 6.05E-56 | 0.125823 | 0.00648  | 0.040392 | 0.38381  | 0.223583 | 1.06E-06 |
| 0.11472  | -0.02696 | 0.56111  | 0.05781  | 0.2124   | 0.010015 | 0.8291   | -0.15946 | 0.00054  |
| 0.67458  | -0.08283 | 0.07375  | -0.06172 | 0.18306  | -0.02145 | 0.64376  | -0.18603 | 5.24E-05 |
| 5.34E-46 | 0.696178 | 6.10E-69 | 0.14513  | 0.00166  | 0.157002 | 0.00066  | 0.221743 | 1.30E-06 |
| 7.32E-23 | 0.58515  | 2.99E-44 | 0.132396 | 0.00416  | 0.150515 | 0.0011   | 0.080647 | 0.08169  |
| 0.33209  | 0.156908 | 0.00067  | 0.196203 | 1.95E-05 | 0.069243 | 0.13514  | 0.211005 | 4.23E-06 |
| 9.20E-21 | 0.544669 | 1.97E-37 | 0.080248 | 0.08322  | 0.092497 | 0.04574  | 0.184912 | 5.82E-05 |
| 5.39E-18 | 0.391322 | 1.54E-18 | 0.060029 | 0.19534  | 0.052529 | 0.25725  | 0.158603 | 0.00058  |
| 1.41E-13 | -0.39357 | 9.42E-19 | -0.16164 | 0.00045  | -0.1015  | 0.02829  | -0.34623 | 1.34E-14 |
| 3.78E-14 | 0.444944 | 4.36E-24 | 0.020783 | 0.65417  | 0.113904 | 0.01378  | 0.209104 | 5.19E-06 |
| 0.89547  | -0.00506 | 0.91322  | -0.0091  | 0.84444  | -0.06614 | 0.15358  | 0.032597 | 0.48223  |
| 3.41E-13 | 0.392397 | 1.22E-18 | 0.090044 | 0.05182  | 0.037047 | 0.42446  | 0.056845 | 0.22015  |
| 7.37E-25 | 0.6229   | 1.55E-51 | 0.075975 | 0.10104  | 0.130244 | 0.00482  | 0.227084 | 7.08E-07 |
| 7.64E-32 | 0.613487 | 1.26E-49 | 0.13042  | 0.00476  | 0.131594 | 0.00439  | 0.330898 | 2.15E-13 |
| 0.08509  | 0.144353 | 0.00176  | 0.14685  | 0.00146  | 0.056859 | 0.22004  | 0.107352 | 0.02032  |
| 2.17E-08 | 0.480707 | 2.24E-28 | 0.00061  | 0.98951  | 0.178564 | 0.0001   | 0.034226 | 0.46059  |
| 9.78E-11 | 0.235521 | 2.62E-07 | 0.1338   | 0.00377  | 0.130567 | 0.00471  | 0.205179 | 7.83E-06 |
| 2.53E-10 | 0.271171 | 2.58E-09 | 0.064538 | 0.1638   | -0.00503 | 0.91374  | 0.122414 | 0.00809  |
| 1.22E-17 | 0.354528 | 2.81E-15 | -0.03395 | 0.46424  | 0.06249  | 0.17762  | 0.124768 | 0.00694  |
| 1.85E-11 | 0.363988 | 4.47E-16 | 0.034923 | 0.45151  | 0.010416 | 0.82238  | 0.048746 | 0.29317  |
| 0.00023  | 0.312361 | 5.00E-12 | 0.150104 | 0.00114  | 0.079558 | 0.08591  | 0.144457 | 0.00175  |
| 6.46E-07 | 0.24827  | 5.45E-08 | 0.093484 | 0.04346  | 0.040759 | 0.3795   | 0.044398 | 0.33839  |
| 3.86E-31 | 0.495678 | 2.51E-30 | 0.096398 | 0.0373   | 0.059613 | 0.19846  | 0.067768 | 0.14368  |
| 1.43E-09 | 0.414509 | 8.14E-21 | 0.127545 | 0.00578  | 0.18546  | 5.53E-05 | 0.147659 | 0.00137  |
| 4.22E-36 | 0.705721 | 1.33E-71 | 0.021262 | 0.64673  | 0.188883 | 3.99E-05 | 0.317067 | 2.29E-12 |
| 6.12E-15 | -0.47132 | 3.36E-27 | -0.04973 | 0.2835   | -0.1873  | 4.65E-05 | -0.20479 | 8.16E-06 |

|          |          |          |          |          |          |          |          |          |
|----------|----------|----------|----------|----------|----------|----------|----------|----------|
| 0.00017  | 0.237473 | 2.07E-07 | 0.127763 | 0.00569  | 0.071664 | 0.12198  | -0.08253 | 0.0748   |
| 0.00011  | 0.143369 | 0.0019   | -0.0236  | 0.611    | 0.034363 | 0.4588   | -0.01903 | 0.68166  |
| 1.91E-14 | -0.31112 | 6.12E-12 | -0.06807 | 0.14191  | -0.15199 | 0.00098  | -0.25866 | 1.42E-08 |
| 6.47E-29 | 0.606938 | 2.46E-48 | 0.126402 | 0.00623  | 0.242736 | 1.09E-07 | 0.276013 | 1.30E-09 |
| 2.24E-32 | 0.623438 | 1.20E-51 | 0.138949 | 0.00262  | 0.215742 | 2.54E-06 | 0.442585 | 8.04E-24 |
| 2.76E-31 | 0.542344 | 4.56E-37 | 0.167188 | 0.00028  | 0.032903 | 0.47812  | 0.187483 | 4.56E-05 |
| 0.22032  | 0.145786 | 0.00158  | -0.07838 | 0.09066  | 0.045171 | 0.33004  | 0.014588 | 0.75321  |
| 3.84E-14 | 0.508409 | 4.60E-32 | 0.144634 | 0.00173  | 0.230614 | 4.70E-07 | 0.273788 | 1.79E-09 |
| 4.10E-11 | 0.42891  | 2.54E-22 | 0.138092 | 0.00278  | 0.13071  | 0.00467  | 0.183908 | 6.39E-05 |
| 9.87E-23 | 0.539874 | 1.10E-36 | 0.115072 | 0.01283  | 0.06848  | 0.1395   | 0.219157 | 1.74E-06 |
| 0.00649  | 0.286975 | 2.64E-10 | -0.08371 | 0.0707   | 0.081097 | 0.08     | -0.0256  | 0.58104  |
| 2.99E-36 | 0.633127 | 1.10E-53 | 0.182065 | 7.59E-05 | 0.18578  | 5.36E-05 | 0.437952 | 2.63E-23 |
| 1.53E-08 | 0.391183 | 1.59E-18 | 0.147573 | 0.00138  | 0.114144 | 0.01358  | 0.267082 | 4.54E-09 |
| 0.06196  | -0.10127 | 0.02866  | 0.020618 | 0.65675  | -0.03917 | 0.39841  | -0.15577 | 0.00073  |
| 2.11E-14 | 0.430221 | 1.83E-22 | 0.016672 | 0.71934  | 0.135111 | 0.00344  | 0.06462  | 0.16327  |
| 5.64E-09 | 0.318431 | 1.83E-12 | -0.00395 | 0.93211  | -0.06079 | 0.18976  | 0.162928 | 0.00041  |
| 2.33E-35 | 0.556091 | 2.92E-39 | 0.117721 | 0.0109   | 0.119166 | 0.00995  | 0.255084 | 2.27E-08 |
| 4.28E-12 | 0.316769 | 2.41E-12 | 0.041019 | 0.37647  | 0.056117 | 0.22613  | 0.212187 | 3.73E-06 |
| 8.62E-10 | 0.346921 | 1.18E-14 | 0.198861 | 1.50E-05 | 0.125522 | 0.00661  | 0.253413 | 2.82E-08 |
| 6.23E-10 | 0.444964 | 4.34E-24 | 0.26709  | 4.54E-09 | 0.121285 | 0.0087   | 0.120342 | 0.00924  |
| 5.52E-06 | 0.238429 | 1.85E-07 | 0.003167 | 0.94557  | 0.031304 | 0.49977  | 0.022227 | 0.63187  |
| 3.57E-14 | -0.38936 | 2.35E-18 | -0.07797 | 0.09238  | -0.06728 | 0.14659  | -0.16028 | 0.00051  |
| 1.02E-10 | 0.340544 | 3.82E-14 | 0.051975 | 0.26231  | 0.084045 | 0.06959  | 0.183426 | 6.69E-05 |
| 0.00432  | -0.08689 | 0.06062  | 0.046738 | 0.31352  | -0.00958 | 0.83641  | 0.055857 | 0.22829  |
| 0.00048  | 0.241109 | 1.33E-07 | 0.058682 | 0.20557  | 0.008695 | 0.85135  | 0.081989 | 0.07672  |
| 0.99326  | 0.004534 | 0.92216  | 0.062661 | 0.17643  | -0.00234 | 0.95976  | 0.109745 | 0.01767  |
| 1.68E-13 | 0.388254 | 2.99E-18 | -0.0021  | 0.96396  | 0.081737 | 0.07764  | 0.218065 | 1.96E-06 |
| 0.00015  | 0.262156 | 8.87E-09 | 0.029981 | 0.51808  | 0.065314 | 0.15878  | 0.062017 | 0.18093  |
| 8.15E-08 | 0.210288 | 4.57E-06 | 0.080681 | 0.08156  | 0.02823  | 0.54283  | 0.066719 | 0.15     |
| 0.00433  | 0.17827  | 0.00011  | 0.025007 | 0.58986  | -0.03093 | 0.50496  | 0.155896 | 0.00072  |
| 3.15E-34 | 0.531309 | 2.23E-35 | 0.094867 | 0.04044  | 0.14568  | 0.0016   | 0.338845 | 5.20E-14 |
| 9.60E-12 | 0.412481 | 1.31E-20 | 0.050176 | 0.27922  | 0.085157 | 0.06596  | 0.060492 | 0.19191  |
| 1.78E-14 | 0.417549 | 3.97E-21 | 0.03543  | 0.44497  | 0.058789 | 0.20475  | 0.042902 | 0.35494  |
| 0.0007   | -0.14549 | 0.00162  | -0.04184 | 0.36704  | -0.07525 | 0.10437  | -0.04821 | 0.29855  |
| 1.93E-25 | 0.553302 | 8.28E-39 | 0.032518 | 0.48329  | 0.051028 | 0.27112  | 0.009499 | 0.83779  |
| 6.11E-05 | -0.18642 | 5.05E-05 | 0.009143 | 0.84379  | -0.02386 | 0.60696  | 0.026112 | 0.57353  |
| 1.44E-06 | -0.12489 | 0.00689  | -0.06695 | 0.1486   | 0.020979 | 0.65113  | -0.16652 | 0.0003   |
| 2.28E-08 | -0.39148 | 1.49E-18 | -0.0877  | 0.05826  | -0.08535 | 0.06534  | -0.02958 | 0.52368  |
| 6.13E-23 | 0.520967 | 7.52E-34 | 0.180123 | 9.07E-05 | 0.072895 | 0.11569  | 0.249558 | 4.62E-08 |
| 4.78E-44 | 0.682547 | 2.57E-65 | 0.110942 | 0.01646  | 0.159255 | 0.00055  | 0.28572  | 3.19E-10 |
| 4.73E-46 | 0.602144 | 2.07E-47 | 0.098866 | 0.03268  | 0.083174 | 0.07254  | 0.107623 | 0.02     |
| 1.36E-29 | 0.552535 | 1.10E-38 | 0.081026 | 0.08026  | 0.122523 | 0.00803  | 0.053969 | 0.24442  |
| 4.02E-37 | 0.611441 | 3.21E-49 | 0.072483 | 0.11776  | 0.15352  | 0.00087  | 0.119831 | 0.00954  |
| 1.24E-30 | 0.595348 | 4.00E-46 | 0.102349 | 0.02699  | 0.059641 | 0.19825  | 0.064577 | 0.16355  |
| 2.95E-33 | 0.574448 | 2.35E-42 | 0.095349 | 0.03943  | 0.072664 | 0.11685  | 0.235328 | 2.69E-07 |



|          |          |          |          |          |          |          |          |          |
|----------|----------|----------|----------|----------|----------|----------|----------|----------|
| 0.00019  | 0.248692 | 5.16E-08 | 0.015192 | 0.74333  | 0.043646 | 0.34664  | -0.04195 | 0.36576  |
| 0.00184  | 0.128638 | 0.00537  | -0.02972 | 0.5218   | -0.01154 | 0.80362  | 0.151761 | 0.001    |
| 5.34E-34 | 0.495889 | 2.35E-30 | 0.147912 | 0.00135  | 0.0592   | 0.2016   | 0.110782 | 0.01662  |
| 5.48E-25 | 0.437635 | 2.86E-23 | 0.140029 | 0.00242  | 0.082462 | 0.07503  | 0.245907 | 7.34E-08 |
| 0.27204  | 0.100724 | 0.02953  | 0.115706 | 0.01234  | 0.008082 | 0.86171  | 0.012177 | 0.79298  |
| 5.25E-11 | 0.439509 | 1.77E-23 | 0.202088 | 1.08E-05 | 0.147163 | 0.00143  | 0.103745 | 0.02496  |
| 4.53E-13 | 0.364411 | 4.11E-16 | 0.244611 | 8.63E-08 | 0.071412 | 0.1233   | 0.101279 | 0.02864  |
| 0.91772  | 0.067659 | 0.14432  | 0.105827 | 0.02218  | 0.052338 | 0.25899  | 0.166496 | 0.0003   |
| 4.25E-11 | 0.349558 | 7.22E-15 | 0.156465 | 0.00069  | 0.159844 | 0.00053  | 0.217496 | 2.09E-06 |
| 4.14E-46 | 0.588279 | 8.08E-45 | 0.10082  | 0.02937  | 0.104312 | 0.02418  | 0.223811 | 1.03E-06 |
| 1.48E-15 | 0.477361 | 5.94E-28 | 0.10543  | 0.02269  | 0.093175 | 0.04417  | 0.235196 | 2.73E-07 |
| 8.46E-26 | 0.504047 | 1.85E-31 | 0.085338 | 0.06539  | 0.188464 | 4.16E-05 | 0.228664 | 5.90E-07 |
| 0.00749  | 0.197857 | 1.66E-05 | 0.089471 | 0.05334  | 0.079939 | 0.08441  | 0.135077 | 0.00345  |
| 6.30E-23 | 0.562879 | 2.20E-40 | 0.093053 | 0.04444  | 0.085494 | 0.0649   | 0.242279 | 1.15E-07 |
| 0.40291  | 0.101981 | 0.02755  | 0.008233 | 0.85916  | 0.010511 | 0.82078  | 0.111254 | 0.01616  |
| 5.30E-25 | 0.584971 | 3.22E-44 | 0.047474 | 0.30595  | 0.117266 | 0.01121  | 0.206342 | 6.94E-06 |
| 0.00822  | 0.147072 | 0.00144  | -0.05896 | 0.20341  | 0.007377 | 0.87367  | 0.079529 | 0.08603  |
| 8.02E-10 | 0.244305 | 8.96E-08 | -0.02631 | 0.57056  | 0.033627 | 0.46848  | 0.122214 | 0.0082   |
| 1.50E-12 | 0.354045 | 3.09E-15 | -0.01667 | 0.71933  | 0.025701 | 0.57958  | 0.202235 | 1.06E-05 |
| 3.64E-21 | 0.449977 | 1.16E-24 | -0.0434  | 0.34932  | 0.052008 | 0.26201  | 0.180067 | 9.12E-05 |
| 1.69E-23 | 0.519151 | 1.38E-33 | -0.00574 | 0.9015   | 0.098734 | 0.03291  | 0.088856 | 0.055    |
| 2.23E-44 | 0.665222 | 5.52E-61 | 0.147753 | 0.00136  | 0.211835 | 3.87E-06 | 0.296807 | 5.95E-11 |
| 2.43E-21 | 0.538503 | 1.80E-36 | -0.01182 | 0.7989   | 0.109324 | 0.01811  | 0.173133 | 0.00017  |
| 0.00068  | 0.191564 | 3.08E-05 | 0.003472 | 0.94035  | 0.041526 | 0.37059  | 0.173406 | 0.00017  |
| 2.16E-08 | 0.276952 | 1.14E-09 | 0.066329 | 0.1524   | 0.055526 | 0.23105  | 0.046583 | 0.31513  |
| 3.56E-07 | 0.317364 | 2.18E-12 | 0.098155 | 0.03396  | 0.079792 | 0.08499  | 0.045012 | 0.33175  |
| 0.67407  | 0.070155 | 0.13006  | -0.00321 | 0.94478  | 0.037287 | 0.42145  | 0.009242 | 0.84211  |
| 1.44E-21 | 0.403287 | 1.08E-19 | 0.051703 | 0.26482  | 0.01221  | 0.79243  | 0.14527  | 0.00165  |
| 1.34E-07 | -0.27021 | 2.95E-09 | 0.070443 | 0.12848  | -0.04864 | 0.29425  | -0.07484 | 0.10626  |
| 1.45E-18 | 0.476207 | 8.29E-28 | 0.013602 | 0.76939  | 0.011799 | 0.79927  | 0.145157 | 0.00166  |
| 1.00E-51 | 0.741757 | 1.06E-82 | 0.049662 | 0.28418  | 0.132526 | 0.00412  | 0.155749 | 0.00073  |
| 1.38E-13 | 0.461168 | 5.71E-26 | 0.124128 | 0.00724  | 0.115844 | 0.01224  | 0.087507 | 0.05881  |
| 3.01E-16 | 0.496168 | 2.16E-30 | 0.105073 | 0.02316  | 0.103203 | 0.02573  | 0.094068 | 0.04216  |
| 1.21E-20 | 0.537696 | 2.39E-36 | 0.076774 | 0.0975   | 0.12576  | 0.0065   | 0.326027 | 5.01E-13 |
| 0.25197  | 0.016075 | 0.72899  | 0.015268 | 0.7421   | 0.034979 | 0.45078  | -0.05857 | 0.20641  |
| 3.55E-18 | 0.494701 | 3.39E-30 | 0.118616 | 0.0103   | 0.084637 | 0.06764  | 0.100485 | 0.02992  |
| 5.12E-21 | 0.475741 | 9.48E-28 | 0.050822 | 0.27306  | 0.138592 | 0.00269  | 0.388291 | 2.97E-18 |
| 0.02926  | 0.201104 | 1.19E-05 | 0.076522 | 0.09861  | 0.095345 | 0.03944  | 0.088836 | 0.05506  |
| 0.00218  | 0.212668 | 3.54E-06 | 0.028668 | 0.53658  | 0.010459 | 0.82166  | -0.07675 | 0.09762  |
| 2.14E-08 | -0.25269 | 3.09E-08 | -0.12781 | 0.00567  | -0.00479 | 0.91772  | -0.05616 | 0.22576  |
| 0.16836  | 0.095671 | 0.03877  | -0.02925 | 0.52838  | -0.04193 | 0.36595  | 0.224977 | 9.02E-07 |
| 0.83677  | 0.081419 | 0.0788   | 0.06532  | 0.15874  | 0.083835 | 0.07029  | 0.154342 | 0.00082  |
| 2.26E-59 | 0.741465 | 1.32E-82 | 0.112522 | 0.01498  | 0.142461 | 0.00203  | 0.117804 | 0.01084  |
| 3.00E-07 | -0.37522 | 4.64E-17 | -0.01011 | 0.82745  | -0.11645 | 0.01179  | -0.08409 | 0.06944  |
| 8.12E-45 | 0.632989 | 1.18E-53 | 0.112156 | 0.01531  | 0.041922 | 0.36604  | 0.216159 | 2.42E-06 |

|          |          |          |          |          |          |          |          |          |
|----------|----------|----------|----------|----------|----------|----------|----------|----------|
| 3.90E-11 | 0.373724 | 6.30E-17 | 0.069676 | 0.13271  | 0.193408 | 2.57E-05 | 0.207849 | 5.92E-06 |
| 0.00716  | 0.22089  | 1.43E-06 | 0.129528 | 0.00506  | 0.005729 | 0.90174  | 0.182323 | 7.41E-05 |
| 8.18E-37 | 0.598375 | 1.08E-46 | 0.174909 | 0.00015  | 0.133457 | 0.00386  | 0.395753 | 5.83E-19 |
| 2.52E-50 | 0.611805 | 2.72E-49 | 0.123729 | 0.00743  | 0.07035  | 0.129    | 0.129277 | 0.00514  |
| 1.63E-44 | 0.678554 | 2.72E-64 | 0.081043 | 0.0802   | 0.137574 | 0.00289  | 0.120481 | 0.00916  |
| 3.78E-40 | 0.448387 | 1.77E-24 | -0.01701 | 0.71396  | 0.098716 | 0.03294  | 0.187545 | 4.54E-05 |
| 4.36E-32 | 0.594848 | 4.96E-46 | 0.142025 | 0.00209  | 0.059631 | 0.19833  | 0.037307 | 0.42121  |
| 7.61E-46 | 0.710094 | 7.37E-73 | 0.105204 | 0.02298  | 0.136535 | 0.00311  | 0.206864 | 6.57E-06 |
| 2.47E-16 | 0.371279 | 1.04E-16 | 0.085164 | 0.06594  | 0.131546 | 0.00441  | 0.268063 | 3.97E-09 |
| 5.51E-16 | 0.459258 | 9.63E-26 | 0.112513 | 0.01499  | 0.117126 | 0.01131  | 0.14371  | 0.00185  |
| 9.13E-52 | 0.69415  | 2.18E-68 | 0.115811 | 0.01226  | 0.09674  | 0.03663  | 0.171993 | 0.00019  |
| 8.61E-25 | 0.467597 | 9.59E-27 | -0.00421 | 0.92763  | 0.069063 | 0.13616  | -0.01968 | 0.67136  |
| 4.60E-39 | 0.610008 | 6.15E-49 | 0.118671 | 0.01027  | 0.109122 | 0.01833  | 0.201584 | 1.13E-05 |
| 4.73E-06 | 0.157649 | 0.00063  | 0.116364 | 0.01185  | 0.048616 | 0.29445  | 0.152903 | 0.00092  |
| 1.75E-06 | 0.24397  | 9.35E-08 | 0.061587 | 0.18398  | 0.063688 | 0.16944  | 0.190113 | 3.55E-05 |
| 0.003    | 0.174665 | 0.00015  | 0.047265 | 0.30809  | 0.118502 | 0.01038  | 0.082411 | 0.07521  |
| 0.40591  | 0.077609 | 0.0939   | -0.00375 | 0.9355   | 0.086989 | 0.06033  | 0.002234 | 0.9616   |
| 8.67E-47 | 0.683109 | 1.84E-65 | 0.037263 | 0.42175  | 0.133472 | 0.00386  | 0.03923  | 0.39765  |
| 4.57E-14 | 0.428    | 3.17E-22 | 0.191374 | 3.14E-05 | 0.145292 | 0.00164  | 0.211054 | 4.21E-06 |
| 4.29E-28 | 0.509752 | 2.99E-32 | 0.178235 | 0.00011  | 0.040129 | 0.38692  | 0.210844 | 4.31E-06 |
| 1.85E-54 | 0.725314 | 2.03E-77 | 0.028789 | 0.53486  | 0.145011 | 0.00168  | 0.168136 | 0.00026  |
| 5.73E-08 | 0.306635 | 1.27E-11 | 0.035709 | 0.44139  | 0.082275 | 0.0757   | -0.12363 | 0.00748  |
| 4.09E-26 | 0.603307 | 1.24E-47 | 0.047328 | 0.30745  | 0.120657 | 0.00905  | 0.117198 | 0.01126  |
| 9.13E-15 | 0.519494 | 1.23E-33 | 0.159438 | 0.00054  | 0.140544 | 0.00233  | 0.253193 | 2.90E-08 |
| 1.93E-24 | 0.527165 | 9.27E-35 | 0.073091 | 0.11471  | 0.079033 | 0.08801  | 0.17562  | 0.00014  |
| 2.62E-44 | 0.649948 | 2.12E-57 | 0.140589 | 0.00233  | 0.092049 | 0.0468   | 0.14309  | 0.00194  |
| 2.03E-30 | 0.481387 | 1.84E-28 | -0.04381 | 0.34482  | 0.078452 | 0.09037  | 0.204286 | 8.59E-06 |
| 2.32E-22 | 0.567726 | 3.36E-41 | 0.072165 | 0.11939  | 0.191167 | 3.20E-05 | 0.196669 | 1.86E-05 |
| 1.03E-14 | 0.453268 | 4.85E-25 | 0.117705 | 0.01091  | 0.012591 | 0.78611  | 0.039543 | 0.3939   |
| 7.76E-51 | 0.602911 | 1.48E-47 | 0.073264 | 0.11385  | 0.119399 | 0.00981  | 0.160445 | 0.0005   |
| 0.00016  | 0.202343 | 1.05E-05 | 0.088239 | 0.05672  | 0.042013 | 0.36501  | 0.054154 | 0.24281  |
| 0.00068  | 0.15836  | 0.00059  | 0.049869 | 0.28217  | 0.082612 | 0.0745   | 0.036052 | 0.43701  |
| 4.29E-06 | 0.400048 | 2.25E-19 | 0.123445 | 0.00757  | 0.168594 | 0.00025  | 0.166846 | 0.00029  |
| 4.08E-45 | 0.577562 | 6.70E-43 | 0.015739 | 0.73443  | 0.111984 | 0.01547  | 0.33109  | 2.07E-13 |
| 4.84E-16 | 0.48345  | 1.00E-28 | 0.101347 | 0.02853  | 0.063244 | 0.17243  | -0.00773 | 0.86773  |
| 1.50E-08 | 0.370438 | 1.23E-16 | 0.111158 | 0.01585  | 0.044614 | 0.33604  | 0.129658 | 0.00501  |
| 3.10E-21 | 0.482635 | 1.27E-28 | 0.069144 | 0.1357   | 0.093723 | 0.04293  | 0.022378 | 0.62955  |
| 8.79E-35 | 0.628742 | 9.41E-53 | 0.102878 | 0.0262   | 0.105327 | 0.02282  | 0.26627  | 5.08E-09 |
| 2.04E-10 | 0.383904 | 7.57E-18 | 0.149503 | 0.00119  | 0.127834 | 0.00567  | 0.271081 | 2.61E-09 |
| 0.14969  | 0.14835  | 0.0013   | -0.04484 | 0.33361  | 0.010333 | 0.82377  | -0.11942 | 0.00979  |
| 3.81E-24 | 0.501927 | 3.60E-31 | 0.15606  | 0.00071  | 0.155329 | 0.00076  | 0.202589 | 1.02E-05 |
| 7.30E-24 | 0.498667 | 9.96E-31 | 0.009911 | 0.83085  | 0.026422 | 0.56898  | 0.153677 | 0.00086  |
| 2.03E-14 | 0.465054 | 1.95E-26 | 0.057091 | 0.21816  | 0.146452 | 0.00151  | 0.031761 | 0.49353  |
| 5.10E-08 | 0.403285 | 1.08E-19 | 0.131892 | 0.0043   | 0.159619 | 0.00054  | 0.151998 | 0.00098  |
| 0.01798  | 0.174346 | 0.00015  | 0.100619 | 0.0297   | 0.046611 | 0.31484  | 0.144296 | 0.00177  |

|          |          |          |          |         |          |          |          |          |
|----------|----------|----------|----------|---------|----------|----------|----------|----------|
| 6.71E-33 | 0.596571 | 2.36E-46 | 0.152228 | 0.00097 | 0.108013 | 0.01956  | 0.155069 | 0.00077  |
| 2.18E-07 | 0.212655 | 3.55E-06 | 0.094036 | 0.04224 | 0.100532 | 0.02984  | 0.00202  | 0.96528  |
| 1.03E-55 | 0.785364 | 6.60E-99 | 0.099194 | 0.0321  | 0.172008 | 0.00019  | 0.292413 | 1.17E-10 |
| 5.81E-06 | 0.239651 | 1.59E-07 | -0.01796 | 0.69872 | 0.008775 | 0.85     | 0.170401 | 0.00022  |
| 2.98E-39 | 0.611299 | 3.42E-49 | 0.066995 | 0.14831 | 0.10599  | 0.02198  | 0.284994 | 3.55E-10 |
| 2.90E-15 | 0.385078 | 5.90E-18 | 0.007546 | 0.87081 | 0.022469 | 0.62815  | 0.186357 | 5.08E-05 |
| 6.60E-32 | 0.528122 | 6.68E-35 | 0.04857  | 0.29491 | 0.104765 | 0.02356  | 0.143556 | 0.00187  |
| 8.13E-22 | 0.54365  | 2.85E-37 | 0.15225  | 0.00096 | 0.152346 | 0.00096  | 0.217782 | 2.03E-06 |
| 1.10E-05 | 0.355902 | 2.16E-15 | -0.03051 | 0.51077 | 0.091705 | 0.04763  | 0.011152 | 0.81005  |
| 2.91E-11 | 0.375608 | 4.28E-17 | 0.086838 | 0.06078 | 0.075935 | 0.10123  | 0.215273 | 2.67E-06 |
| 3.20E-05 | 0.231919 | 4.03E-07 | -0.03464 | 0.45524 | -0.01576 | 0.73416  | -0.10328 | 0.02562  |
| 2.22E-19 | 0.45052  | 1.01E-24 | 0.102627 | 0.02657 | 0.114624 | 0.01319  | 0.228039 | 6.34E-07 |
| 2.96E-08 | 0.318953 | 1.67E-12 | 0.114002 | 0.0137  | 0.108067 | 0.0195   | 0.057688 | 0.21337  |
| 3.10E-14 | 0.4038   | 9.65E-20 | 0.066331 | 0.15239 | 0.071883 | 0.12084  | 0.124452 | 0.00709  |
| 5.89E-23 | 0.475822 | 9.26E-28 | 0.003304 | 0.94323 | 0.096421 | 0.03726  | 0.050371 | 0.27735  |
| 6.28E-31 | 0.48822  | 2.42E-29 | 0.132504 | 0.00413 | 0.045794 | 0.3234   | 0.149172 | 0.00122  |
| 2.26E-11 | 0.303108 | 2.22E-11 | 0.04956  | 0.28516 | 0.00748  | 0.87193  | 0.153361 | 0.00088  |
| 4.39E-18 | 0.504091 | 1.82E-31 | 0.131685 | 0.00436 | 0.094705 | 0.04078  | 0.187304 | 4.64E-05 |
| 6.25E-14 | -0.40783 | 3.84E-20 | -0.03016 | 0.51558 | -0.09523 | 0.03968  | -0.11666 | 0.01164  |
| 1.10E-49 | 0.745222 | 7.21E-84 | 0.052501 | 0.25751 | 0.123192 | 0.00769  | 0.092818 | 0.04499  |
| 4.56E-28 | 0.519502 | 1.23E-33 | 0.147882 | 0.00135 | 0.092538 | 0.04564  | 0.147712 | 0.00137  |
| 1.14E-27 | 0.62121  | 3.46E-51 | -0.01435 | 0.75716 | 0.116657 | 0.01164  | 0.041512 | 0.37075  |
| 5.73E-25 | 0.499576 | 7.51E-31 | -0.00745 | 0.87235 | 0.016836 | 0.71669  | 0.152201 | 0.00097  |
| 1.59E-31 | 0.548567 | 4.77E-38 | 0.109585 | 0.01784 | 0.184038 | 6.32E-05 | 0.230138 | 4.97E-07 |
| 5.28E-36 | 0.59449  | 5.78E-46 | 0.126812 | 0.00607 | 0.099985 | 0.03075  | 0.084853 | 0.06694  |
| 2.63E-38 | 0.447978 | 1.97E-24 | 0.04702  | 0.31061 | 0.00667  | 0.88569  | 0.109073 | 0.01838  |
| 8.78E-35 | 0.660442 | 7.70E-60 | 0.113917 | 0.01377 | 0.179392 | 9.70E-05 | 0.075799 | 0.10184  |
| 0.06982  | 0.040036 | 0.38802  | 0.027863 | 0.54809 | 0.04193  | 0.36595  | 0.081206 | 0.07959  |
| 1.15E-29 | 0.577407 | 7.14E-43 | 0.079641 | 0.08558 | 0.188404 | 4.18E-05 | 0.318615 | 1.77E-12 |
| 0.00013  | 0.177058 | 0.00012  | 0.043975 | 0.34302 | 0.089138 | 0.05423  | 0.195144 | 2.17E-05 |
| 2.17E-53 | 0.693801 | 2.70E-68 | 0.129379 | 0.00511 | 0.12828  | 0.0055   | 0.18253  | 7.27E-05 |
| 2.84E-24 | 0.547297 | 7.59E-38 | 0.048704 | 0.29358 | 0.130105 | 0.00486  | 0.123947 | 0.00732  |
| 2.49E-16 | 0.416725 | 4.82E-21 | 0.008636 | 0.85234 | 0.078353 | 0.09078  | 0.029551 | 0.52411  |
| 1.72E-21 | 0.530823 | 2.64E-35 | -0.0222  | 0.63225 | 0.160565 | 0.0005   | 0.138034 | 0.0028   |
| 1.31E-12 | 0.301803 | 2.73E-11 | -0.04774 | 0.30324 | 0.088709 | 0.05541  | 0.021459 | 0.6437   |
| 6.63E-22 | 0.490148 | 1.35E-29 | 0.03254  | 0.483   | 0.096295 | 0.03751  | -0.03902 | 0.40015  |
| 2.35E-42 | 0.615871 | 4.19E-50 | 0.111924 | 0.01553 | 0.085553 | 0.06471  | 0.0954   | 0.03932  |
| 2.26E-29 | 0.513292 | 9.48E-33 | 0.078858 | 0.08871 | 0.08089  | 0.08077  | 0.075258 | 0.10431  |
| 1.73E-23 | 0.622974 | 1.50E-51 | 0.082629 | 0.07444 | 0.101339 | 0.02854  | 0.090069 | 0.05176  |
| 2.07E-41 | 0.607027 | 2.36E-48 | 0.116231 | 0.01195 | 0.12377  | 0.00741  | 0.361588 | 7.17E-16 |
| 6.99E-05 | 0.348292 | 9.15E-15 | 0.120239 | 0.0093  | 0.141102 | 0.00224  | 0.065814 | 0.15561  |
| 0.50109  | 0.002312 | 0.96026  | 0.032463 | 0.48403 | -0.03262 | 0.48186  | 0.196635 | 1.87E-05 |
| 3.01E-40 | 0.664607 | 7.77E-61 | 0.108366 | 0.01916 | 0.106764 | 0.02102  | 0.22026  | 1.54E-06 |
| 1.86E-52 | 0.691827 | 9.22E-68 | 0.068446 | 0.1397  | 0.145747 | 0.00159  | 0.137669 | 0.00287  |
| 1.44E-34 | 0.542173 | 4.85E-37 | 0.098168 | 0.03393 | 0.097719 | 0.03476  | 0.170073 | 0.00022  |

|          |          |          |          |          |          |          |          |          |
|----------|----------|----------|----------|----------|----------|----------|----------|----------|
| 5.10E-37 | 0.649049 | 3.40E-57 | 0.118945 | 0.01009  | 0.171428 | 0.0002   | 0.20214  | 1.07E-05 |
| 0.07311  | 0.066597 | 0.15074  | -0.05363 | 0.24743  | 0.059022 | 0.20295  | 0.012574 | 0.78638  |
| 0.0002   | 0.167638 | 0.00027  | 0.004721 | 0.91895  | 0.091288 | 0.04866  | 0.078557 | 0.08994  |
| 0.00502  | 0.214262 | 2.98E-06 | 0.160263 | 0.00051  | 0.106286 | 0.02161  | 0.134213 | 0.00366  |
| 9.93E-34 | 0.667369 | 1.66E-61 | 0.107734 | 0.01988  | 0.106592 | 0.02123  | 0.226824 | 7.30E-07 |
| 0.00557  | 0.291119 | 1.42E-10 | 0.084626 | 0.06768  | 0.107882 | 0.01971  | 0.184534 | 6.03E-05 |
| 3.49E-59 | 0.68776  | 1.12E-66 | 0.045958 | 0.32167  | 0.101258 | 0.02867  | 0.105583 | 0.02249  |
| 7.67E-05 | 0.187533 | 4.54E-05 | 0.032159 | 0.48814  | 0.036283 | 0.43407  | 0.167265 | 0.00028  |
| 4.94E-46 | 0.651343 | 1.02E-57 | 0.195617 | 2.07E-05 | 0.15171  | 0.00101  | 0.374537 | 5.34E-17 |
| 2.14E-65 | 0.755723 | 1.61E-87 | 0.05708  | 0.21825  | 0.10756  | 0.02008  | 0.173292 | 0.00017  |
| 2.29E-33 | 0.548174 | 5.51E-38 | 0.074795 | 0.10647  | 0.098477 | 0.03337  | 0.109251 | 0.01819  |
| 9.56E-15 | 0.348011 | 9.65E-15 | -0.04489 | 0.33302  | 0.010536 | 0.82036  | 0.085231 | 0.06573  |
| 1.55E-07 | 0.346786 | 1.21E-14 | 0.029455 | 0.52545  | 0.137932 | 0.00282  | 0.176068 | 0.00013  |
| 0.07406  | 0.199482 | 1.41E-05 | 0.095099 | 0.03995  | 0.036639 | 0.42958  | -0.05528 | 0.23311  |
| 6.18E-27 | 0.528461 | 5.95E-35 | 0.038164 | 0.4106   | 0.075031 | 0.10537  | 0.108686 | 0.0188   |
| 9.68E-15 | 0.305897 | 1.42E-11 | 0.023928 | 0.60601  | 0.053444 | 0.24905  | -0.01071 | 0.81752  |
| 2.10E-19 | 0.507476 | 6.20E-32 | 0.040329 | 0.38456  | 0.096339 | 0.03742  | 0.321407 | 1.10E-12 |
| 2.58E-18 | 0.419103 | 2.74E-21 | 0.079538 | 0.08599  | 0.14002  | 0.00242  | 0.1971   | 1.79E-05 |
| 4.48E-11 | 0.407702 | 3.96E-20 | 0.124313 | 0.00715  | 0.114164 | 0.01357  | 0.139889 | 0.00245  |
| 3.10E-21 | 0.462503 | 3.95E-26 | 0.046395 | 0.31709  | 0.113456 | 0.01416  | 0.125819 | 0.00648  |
| 4.61E-08 | 0.247002 | 6.39E-08 | 0.168489 | 0.00025  | 0.020993 | 0.65091  | 0.171471 | 0.0002   |
| 3.82E-69 | 0.73644  | 5.96E-81 | 0.058855 | 0.20424  | 0.113078 | 0.01449  | 0.239548 | 1.61E-07 |
| 3.39E-35 | 0.624831 | 6.19E-52 | 0.062315 | 0.17884  | 0.106305 | 0.02158  | 0.156185 | 0.00071  |
| 1.69E-14 | 0.368098 | 1.97E-16 | 0.022276 | 0.63112  | -0.01851 | 0.68993  | -0.14763 | 0.00138  |
| 4.95E-20 | 0.499766 | 7.07E-31 | 0.078567 | 0.0899   | 0.108593 | 0.01891  | 0.141985 | 0.0021   |
| 1.33E-11 | 0.386592 | 4.27E-18 | 0.102034 | 0.02747  | 0.047667 | 0.30399  | 0.104337 | 0.02414  |
| 1.71E-14 | 0.397573 | 3.90E-19 | -0.04218 | 0.36305  | 0.041362 | 0.37249  | 0.226316 | 7.74E-07 |
| 6.80E-10 | 0.490245 | 1.31E-29 | 0.018801 | 0.68531  | 0.167593 | 0.00028  | 0.068389 | 0.14003  |
| 1.80E-06 | 0.275571 | 1.39E-09 | 0.103907 | 0.02474  | 0.029694 | 0.5221   | 0.165087 | 0.00034  |
| 5.84E-26 | 0.586777 | 1.52E-44 | 0.104496 | 0.02393  | 0.188481 | 4.15E-05 | 0.375372 | 4.49E-17 |
| 9.46E-10 | 0.356293 | 2.01E-15 | 0.07299  | 0.11521  | 0.058285 | 0.20866  | 0.112355 | 0.01513  |
| 9.27E-29 | 0.583264 | 6.52E-44 | 0.023636 | 0.61041  | 0.128805 | 0.00531  | 0.150624 | 0.00109  |
| 5.46E-22 | 0.529925 | 3.60E-35 | 0.175913 | 0.00013  | 0.155852 | 0.00073  | 0.243531 | 9.87E-08 |
| 1.61E-42 | 0.595642 | 3.52E-46 | 0.051218 | 0.26934  | 0.151133 | 0.00105  | 0.187762 | 4.44E-05 |
| 4.32E-21 | 0.485222 | 5.92E-29 | 0.075086 | 0.10511  | 0.138988 | 0.00261  | 0.230435 | 4.80E-07 |
| 2.05E-54 | 0.664185 | 9.82E-61 | 0.122839 | 0.00787  | 0.117133 | 0.0113   | 0.213895 | 3.10E-06 |
| 6.04E-23 | 0.514071 | 7.36E-33 | 0.028953 | 0.53254  | 0.073271 | 0.11381  | 0.104    | 0.02461  |
| 3.71E-24 | 0.536616 | 3.50E-36 | 0.086352 | 0.06224  | 0.11276  | 0.01477  | 0.146796 | 0.00147  |
| 3.86E-26 | 0.553702 | 7.14E-39 | 0.086618 | 0.06144  | 0.281527 | 5.89E-10 | 0.198719 | 1.52E-05 |
| 5.24E-05 | 0.313991 | 3.82E-12 | 0.117246 | 0.01122  | 0.16673  | 0.0003   | 0.062349 | 0.1786   |
| 1.27E-17 | 0.347422 | 1.08E-14 | -0.00416 | 0.92864  | -0.02222 | 0.63194  | 0.211683 | 3.94E-06 |
| 3.60E-10 | 0.252348 | 3.23E-08 | 0.039546 | 0.39386  | 0.047964 | 0.30098  | 0.066215 | 0.15311  |
| 0.0002   | 0.290286 | 1.61E-10 | 0.050655 | 0.27464  | 0.100134 | 0.0305   | 0.027128 | 0.55869  |
| 0.00026  | 0.272909 | 2.02E-09 | 0.071155 | 0.12466  | 0.087458 | 0.05895  | 0.061608 | 0.18383  |
| 0.0003   | 0.21138  | 4.07E-06 | 0.044632 | 0.33585  | 0.138585 | 0.00269  | -0.01215 | 0.7934   |

|          |          |          |          |          |          |         |          |          |
|----------|----------|----------|----------|----------|----------|---------|----------|----------|
| 1.19E-35 | 0.604358 | 7.77E-48 | 0.04042  | 0.38348  | 0.119634 | 0.00966 | 0.133323 | 0.0039   |
| 4.62E-15 | 0.419115 | 2.73E-21 | 0.080292 | 0.08305  | 0.144955 | 0.00169 | 0.177397 | 0.00012  |
| 3.15E-21 | 0.585268 | 2.84E-44 | 0.11046  | 0.01694  | 0.090378 | 0.05096 | 0.085314 | 0.06546  |
| 0.0951   | -0.02298 | 0.62033  | 0.050095 | 0.27999  | 0.04626  | 0.31851 | -0.02272 | 0.62429  |
| 1.60E-25 | 0.539003 | 1.50E-36 | 0.055151 | 0.23423  | 0.106865 | 0.0209  | 0.091284 | 0.04867  |
| 0.00775  | 0.051821 | 0.26373  | 0.018558 | 0.68915  | -0.02595 | 0.57589 | 0.216736 | 2.27E-06 |
| 7.10E-55 | 0.72329  | 8.55E-77 | 0.149774 | 0.00117  | 0.15325  | 0.00089 | 0.459846 | 8.20E-26 |
| 3.94E-73 | 0.801566 | #####    | 0.088405 | 0.05625  | 0.135047 | 0.00346 | 0.219388 | 1.70E-06 |
| 7.90E-23 | 0.469166 | 6.17E-27 | 0.101882 | 0.0277   | 0.079174 | 0.08744 | 0.343109 | 2.39E-14 |
| 2.97E-09 | 0.30626  | 1.34E-11 | 0.010542 | 0.82026  | 0.005039 | 0.91351 | 0.086336 | 0.06229  |
| 2.63E-43 | 0.640172 | 3.27E-55 | 0.115701 | 0.01235  | 0.155754 | 0.00073 | 0.408196 | 3.53E-20 |
| 1.65E-21 | 0.408415 | 3.36E-20 | -0.01886 | 0.68431  | 0.050397 | 0.2771  | 0.069153 | 0.13565  |
| 6.04E-26 | 0.5045   | 1.60E-31 | 0.096111 | 0.03787  | 0.097045 | 0.03604 | 0.160035 | 0.00052  |
| 5.13E-13 | -0.37519 | 4.67E-17 | -0.20354 | 9.29E-06 | -0.08259 | 0.07459 | -0.07579 | 0.1019   |
| 0.19046  | 0.20591  | 7.26E-06 | 0.073366 | 0.11335  | 0.128834 | 0.0053  | 0.217488 | 2.09E-06 |
| 2.42E-32 | 0.519269 | 1.33E-33 | 0.032949 | 0.4775   | 0.079637 | 0.0856  | 0.116749 | 0.01157  |
| 5.86E-14 | 0.441546 | 1.05E-23 | 0.099932 | 0.03084  | 0.157222 | 0.00065 | 0.15134  | 0.00104  |
| 5.52E-30 | 0.56243  | 2.62E-40 | 0.13656  | 0.00311  | 0.131229 | 0.0045  | 0.28567  | 3.21E-10 |
| 7.91E-18 | 0.515234 | 5.03E-33 | 0.044275 | 0.33973  | 0.120373 | 0.00922 | -0.05756 | 0.21438  |
| 2.58E-12 | 0.419185 | 2.69E-21 | 0.035924 | 0.43864  | 0.131106 | 0.00454 | -0.07297 | 0.11531  |
| 3.03E-16 | 0.445248 | 4.03E-24 | 0.050855 | 0.27275  | 0.112051 | 0.01541 | 0.229494 | 5.35E-07 |
| 4.90E-23 | 0.524109 | 2.62E-34 | 0.068231 | 0.14095  | 0.115051 | 0.01285 | 0.099532 | 0.03152  |
| 5.67E-24 | 0.56807  | 2.94E-41 | 0.099025 | 0.0324   | 0.158161 | 0.0006  | 0.080164 | 0.08354  |
| 7.56E-45 | 0.727266 | 5.02E-78 | 0.076534 | 0.09855  | 0.169458 | 0.00023 | 0.241092 | 1.33E-07 |
| 1.20E-33 | 0.626829 | 2.37E-52 | -0.02021 | 0.66305  | 0.124763 | 0.00694 | 0.144252 | 0.00178  |
| 0.00012  | 0.212391 | 3.65E-06 | 0.061406 | 0.18528  | -0.01601 | 0.73002 | -0.07209 | 0.11979  |
| 8.93E-36 | 0.511852 | 1.52E-32 | -0.01918 | 0.67931  | -0.00126 | 0.97842 | 0.152504 | 0.00095  |
| 7.29E-27 | 0.542212 | 4.78E-37 | 0.084008 | 0.06971  | 0.100658 | 0.02963 | 0.159539 | 0.00054  |
| 2.87E-05 | 0.251972 | 3.39E-08 | 0.079708 | 0.08532  | 0.085904 | 0.06362 | 0.058346 | 0.20819  |
| 1.07E-38 | 0.664255 | 9.45E-61 | 0.086855 | 0.06073  | 0.120023 | 0.00943 | 0.305748 | 1.46E-11 |
| 4.89E-39 | 0.578822 | 4.02E-43 | 0.071951 | 0.12049  | 0.107002 | 0.02073 | 0.239427 | 1.64E-07 |
| 7.25E-24 | 0.529567 | 4.07E-35 | 0.021249 | 0.64694  | 0.075822 | 0.10174 | 0.078096 | 0.09185  |
| 4.51E-15 | 0.453605 | 4.43E-25 | 0.060429 | 0.19238  | 0.110636 | 0.01677 | 0.302999 | 2.26E-11 |
| 6.88E-05 | 0.129046 | 0.00522  | -0.01853 | 0.68957  | 0.040842 | 0.37854 | 0.029417 | 0.52599  |
| 8.08E-25 | 0.534469 | 7.43E-36 | 0.049844 | 0.28241  | 0.112182 | 0.01529 | 0.219216 | 1.73E-06 |
| 1.11E-08 | 0.425106 | 6.44E-22 | 0.063542 | 0.17042  | 0.150285 | 0.00112 | 0.015233 | 0.74267  |
| 0.00014  | 0.201626 | 1.13E-05 | 0.052112 | 0.26106  | 0.012445 | 0.78852 | 0.028544 | 0.53834  |
| 7.41E-26 | 0.448338 | 1.79E-24 | 0.039259 | 0.3973   | 0.07434  | 0.10862 | 0.027237 | 0.55712  |
| 1.58E-41 | 0.624678 | 6.66E-52 | 0.098382 | 0.03354  | 0.140263 | 0.00238 | 0.290123 | 1.65E-10 |
| 2.64E-15 | 0.466172 | 1.43E-26 | 0.162582 | 0.00042  | 0.178292 | 0.00011 | 0.285103 | 3.49E-10 |
| 0.00242  | 0.163562 | 0.00039  | 0.041406 | 0.37198  | 0.064314 | 0.16528 | 0.125775 | 0.0065   |
| 3.29E-13 | 0.401896 | 1.48E-19 | 0.043688 | 0.34617  | 0.143441 | 0.00189 | 0.098698 | 0.03298  |
| 5.68E-30 | 0.609405 | 8.09E-49 | 0.179237 | 9.84E-05 | 0.129666 | 0.00501 | 0.200089 | 1.32E-05 |
| 2.31E-60 | 0.748954 | 3.81E-85 | 0.11434  | 0.01342  | 0.118605 | 0.01031 | 0.216886 | 2.24E-06 |
| 1.44E-07 | 0.374453 | 5.43E-17 | 0.082367 | 0.07537  | 0.157513 | 0.00064 | 0.078172 | 0.09153  |

|          |          |          |          |         |          |          |          |          |
|----------|----------|----------|----------|---------|----------|----------|----------|----------|
| 1.56E-26 | 0.554769 | 4.79E-39 | 0.126693 | 0.00611 | 0.131831 | 0.00432  | 0.093757 | 0.04285  |
| 2.89E-22 | 0.542638 | 4.10E-37 | 0.111595 | 0.01584 | 0.155566 | 0.00074  | 0.16602  | 0.00031  |
| 4.74E-08 | 0.289018 | 1.95E-10 | 0.076155 | 0.10024 | 0.086879 | 0.06066  | 0.178359 | 0.00011  |
| 5.58E-15 | 0.489374 | 1.71E-29 | 0.087683 | 0.0583  | 0.133976 | 0.00372  | 0.206311 | 6.96E-06 |
| 4.25E-40 | 0.683264 | 1.68E-65 | 0.12746  | 0.00581 | 0.13812  | 0.00278  | 0.228184 | 6.24E-07 |
| 1.39E-24 | 0.606765 | 2.65E-48 | 0.089372 | 0.0536  | 0.152029 | 0.00098  | 0.269437 | 3.28E-09 |
| 0.00231  | 0.20039  | 1.28E-05 | 0.002178 | 0.96256 | 0.137655 | 0.00287  | 0.1329   | 0.00401  |
| 5.73E-16 | 0.38734  | 3.64E-18 | 0.113721 | 0.01393 | 0.108506 | 0.019    | 0.300706 | 3.24E-11 |
| 8.47E-15 | 0.545353 | 1.54E-37 | 0.128042 | 0.00559 | 0.145873 | 0.00157  | 0.160037 | 0.00052  |
| 8.53E-12 | 0.38226  | 1.07E-17 | 0.149135 | 0.00123 | 0.117944 | 0.01075  | 0.249129 | 4.88E-08 |
| 7.07E-19 | 0.372061 | 8.85E-17 | 0.07225  | 0.11895 | 0.073169 | 0.11432  | 0.203261 | 9.55E-06 |
| 3.05E-25 | 0.495436 | 2.70E-30 | 0.116934 | 0.01144 | 0.170922 | 0.00021  | 0.096363 | 0.03737  |
| 2.52E-17 | 0.477092 | 6.42E-28 | 0.110012 | 0.0174  | 0.163576 | 0.00039  | 0.267774 | 4.13E-09 |
| 8.27E-10 | 0.418485 | 3.17E-21 | 0.058754 | 0.20502 | 0.09927  | 0.03197  | 0.117526 | 0.01103  |
| 0.00284  | 0.218188 | 1.94E-06 | 0.059858 | 0.19662 | 0.149847 | 0.00116  | 0.060885 | 0.18904  |
| 1.52E-08 | 0.234918 | 2.82E-07 | -0.04529 | 0.32874 | 0.072977 | 0.11527  | -0.03813 | 0.41098  |
| 4.70E-06 | 0.265112 | 5.95E-09 | 0.02352  | 0.61217 | 0.060757 | 0.18997  | 0.229554 | 5.32E-07 |
| 2.63E-12 | 0.451497 | 7.78E-25 | 0.039604 | 0.39317 | 0.192445 | 2.83E-05 | 0.124947 | 0.00686  |
| 3.05E-62 | 0.755919 | 1.37E-87 | 0.117831 | 0.01082 | 0.117489 | 0.01106  | 0.22804  | 6.34E-07 |
| 8.69E-18 | 0.481842 | 1.61E-28 | 0.12428  | 0.00717 | 0.135642 | 0.00331  | 0.434384 | 6.49E-23 |
| 2.87E-50 | 0.708188 | 2.62E-72 | 0.111321 | 0.0161  | 0.152087 | 0.00098  | 0.332341 | 1.66E-13 |
| 8.65E-56 | 0.700878 | 3.07E-70 | 0.126837 | 0.00606 | 0.078289 | 0.09105  | 0.248056 | 5.60E-08 |
| 2.59E-26 | 0.534028 | 8.67E-36 | 0.102435 | 0.02686 | 0.159218 | 0.00055  | 0.293012 | 1.07E-10 |
| 8.94E-15 | 0.413633 | 9.99E-21 | 0.072655 | 0.11689 | 0.136055 | 0.00322  | 0.18023  | 8.98E-05 |
| 5.82E-18 | 0.577017 | 8.36E-43 | 0.128841 | 0.0053  | 0.175263 | 0.00014  | 0.095182 | 0.03978  |
| 1.18E-21 | 0.504693 | 1.50E-31 | 0.137153 | 0.00298 | 0.117429 | 0.0111   | 0.207312 | 6.27E-06 |
| 3.66E-31 | 0.595719 | 3.41E-46 | 0.057711 | 0.21319 | 0.135667 | 0.00331  | 0.275128 | 1.48E-09 |
| 0.00024  | 0.268076 | 3.96E-09 | 0.059043 | 0.2028  | 0.17246  | 0.00018  | 0.157021 | 0.00066  |
| 1.02E-33 | 0.558736 | 1.07E-39 | -0.00726 | 0.87565 | 0.083863 | 0.0702   | 0.190026 | 3.58E-05 |
| 7.75E-30 | 0.712485 | 1.48E-73 | 0.172445 | 0.00018 | 0.155427 | 0.00075  | 0.275892 | 1.33E-09 |
| 5.58E-18 | 0.556627 | 2.38E-39 | 0.058158 | 0.20966 | 0.159407 | 0.00054  | 0.16247  | 0.00042  |
| 1.01E-11 | 0.387105 | 3.83E-18 | 0.150941 | 0.00107 | 0.160798 | 0.00049  | 0.223648 | 1.05E-06 |
| 0.00145  | 0.220813 | 1.45E-06 | 0.043982 | 0.34294 | 0.058436 | 0.20749  | -0.02826 | 0.54244  |
| 1.23E-21 | 0.473719 | 1.69E-27 | 0.140041 | 0.00242 | 0.09552  | 0.03908  | 0.356715 | 1.85E-15 |
| 4.65E-09 | 0.364374 | 4.14E-16 | 0.138429 | 0.00272 | 0.071545 | 0.12261  | 0.191952 | 2.97E-05 |
| 3.09E-08 | 0.225161 | 8.83E-07 | 0.070077 | 0.13049 | 0.039525 | 0.39411  | 0.168253 | 0.00026  |
| 1.66E-23 | 0.508738 | 4.14E-32 | 0.076057 | 0.10068 | 0.052392 | 0.2585   | 0.218209 | 1.93E-06 |
| 0.01389  | 0.161102 | 0.00047  | 0.042823 | 0.35582 | 0.047801 | 0.30264  | 0.080313 | 0.08296  |
| 2.17E-15 | 0.457476 | 1.56E-25 | 0.030991 | 0.50408 | 0.121128 | 0.00879  | 0.092041 | 0.04682  |
| 8.08E-15 | 0.463879 | 2.70E-26 | 0.089099 | 0.05434 | 0.186786 | 4.88E-05 | 0.22202  | 1.26E-06 |
| 2.07E-62 | 0.741619 | 1.17E-82 | 0.10853  | 0.01898 | 0.077018 | 0.09644  | 0.189785 | 3.66E-05 |
| 2.01E-12 | 0.390387 | 1.89E-18 | 0.021636 | 0.64096 | 0.116124 | 0.01203  | 0.187709 | 4.47E-05 |
| 2.38E-53 | 0.710767 | 4.70E-73 | 0.083013 | 0.0731  | 0.136949 | 0.00302  | 0.094982 | 0.0402   |
| 1.01E-23 | 0.542175 | 4.85E-37 | 0.033278 | 0.47311 | 0.1019   | 0.02767  | 0.10897  | 0.01849  |
| 1.29E-08 | 0.388733 | 2.70E-18 | 0.02718  | 0.55794 | 0.09336  | 0.04375  | 0.123259 | 0.00766  |

|          |          |          |          |          |          |          |          |          |
|----------|----------|----------|----------|----------|----------|----------|----------|----------|
| 0.54655  | 0.073956 | 0.11046  | 0.168602 | 0.00025  | 0.202311 | 1.05E-05 | 0.131736 | 0.00435  |
| 2.09E-08 | -0.40427 | 8.67E-20 | -0.14754 | 0.00139  | -0.16486 | 0.00035  | -0.06579 | 0.15578  |
| 0.00275  | 0.138214 | 0.00276  | 0.028117 | 0.54444  | 0.000685 | 0.98821  | 0.183669 | 6.54E-05 |
| 0.60046  | 0.0585   | 0.20699  | 0.057368 | 0.21593  | 0.054974 | 0.23574  | 0.01339  | 0.77289  |
| 1.41E-05 | 0.071427 | 0.12322  | -0.03983 | 0.3905   | 0.039754 | 0.39138  | 0.041109 | 0.37541  |
| 0.01852  | 0.03856  | 0.40576  | 0.068538 | 0.13917  | 0.105709 | 0.02233  | 0.168498 | 0.00025  |
| 3.52E-11 | 0.354476 | 2.84E-15 | 0.052434 | 0.25812  | 0.047443 | 0.30627  | 0.091932 | 0.04708  |
| 0.98532  | 0.096343 | 0.03741  | -0.00129 | 0.9779   | 0.069488 | 0.13376  | 0.105156 | 0.02305  |
| 0.034    | 0.259583 | 1.25E-08 | 0.065237 | 0.15928  | 0.13135  | 0.00447  | 0.041544 | 0.37039  |
| 0.00017  | -0.15021 | 0.00113  | 0.039713 | 0.39186  | 0.031521 | 0.4968   | -0.0609  | 0.18891  |
| 0.99138  | 0.109734 | 0.01768  | 0.178439 | 0.00011  | 0.114565 | 0.01324  | -0.12329 | 0.00765  |
| 0.04736  | 0.187315 | 4.64E-05 | 0.041037 | 0.37625  | -0.00084 | 0.98548  | 0.130429 | 0.00476  |
| 0.01281  | 0.19592  | 2.01E-05 | 0.093285 | 0.04392  | 0.114578 | 0.01323  | 0.1592   | 0.00055  |
| 0.84036  | 0.060351 | 0.19296  | 0.095315 | 0.0395   | 0.113407 | 0.0142   | -0.07889 | 0.08858  |
| 0.5546   | -0.13841 | 0.00272  | 0.080396 | 0.08265  | -0.00652 | 0.88819  | 0.045025 | 0.33161  |
| 0.06638  | -0.03752 | 0.41857  | 0.064643 | 0.16312  | 0.09541  | 0.0393   | 0.132367 | 0.00416  |
| 0.42528  | 0.052541 | 0.25715  | 0.09476  | 0.04067  | 0.002852 | 0.95099  | 0.045493 | 0.3266   |
| 1.21E-05 | -0.24301 | 1.05E-07 | -0.07244 | 0.11796  | -0.14782 | 0.00136  | -0.02372 | 0.60919  |
| 0.21879  | -0.02951 | 0.52473  | 0.236135 | 2.44E-07 | 0.037206 | 0.42246  | -0.11058 | 0.01682  |
| 0.7425   | 0.131294 | 0.00448  | -0.01637 | 0.72423  | -0.02944 | 0.52561  | -0.0395  | 0.39441  |
| 0.21381  | -0.1604  | 0.0005   | -0.06147 | 0.18485  | -0.06139 | 0.18536  | 0.111168 | 0.01624  |
| 0.11689  | 0.264755 | 6.24E-09 | 0.116777 | 0.01155  | 0.356014 | 2.12E-15 | 0.029744 | 0.5214   |
| 0.07131  | 0.197016 | 1.80E-05 | 0.160367 | 0.0005   | 0.078903 | 0.08853  | 0.091683 | 0.04769  |
| 0.00058  | 0.10694  | 0.02081  | 0.037374 | 0.42038  | 0.045298 | 0.32868  | 0.007849 | 0.86567  |
| 4.59E-05 | 0.176907 | 0.00012  | 0.088893 | 0.0549   | 0.045776 | 0.32359  | 0.018001 | 0.69803  |
| 0.73765  | 0.034226 | 0.46059  | -0.14339 | 0.00189  | 0.002321 | 0.96011  | -0.01652 | 0.72173  |
| 0.46596  | 0.002039 | 0.96495  | 0.050256 | 0.27845  | -0.07259 | 0.11721  | -0.17483 | 0.00015  |
| 6.56E-06 | -0.04967 | 0.28406  | 0.016307 | 0.72523  | 0.055128 | 0.23442  | -0.06295 | 0.17445  |
| 5.63E-06 | 0.189866 | 3.63E-05 | -0.01189 | 0.79768  | -0.04229 | 0.36184  | 0.036333 | 0.43344  |
| 0.30383  | 0.061852 | 0.18209  | 0.122797 | 0.00789  | -0.05467 | 0.23836  | -0.08535 | 0.06534  |
| 0.04509  | -0.18954 | 3.75E-05 | -0.00741 | 0.87318  | -0.14859 | 0.00128  | -0.1954  | 2.11E-05 |
| 0.35179  | 0.037126 | 0.42346  | -0.00088 | 0.98479  | -0.01631 | 0.72523  | 0.212344 | 3.67E-06 |
| 0.63993  | -0.01285 | 0.78177  | 0.052195 | 0.26029  | -0.02703 | 0.56017  | 0.023158 | 0.61766  |
| 0.05914  | 0.126132 | 0.00635  | -0.0213  | 0.64615  | 0.034986 | 0.45069  | -0.03906 | 0.39976  |
| 4.71E-07 | 0.317136 | 2.27E-12 | 0.001322 | 0.97727  | 0.093617 | 0.04317  | 0.031382 | 0.49871  |
| 5.86E-05 | 0.27792  | 9.93E-10 | 0.06995  | 0.13119  | 0.212804 | 3.49E-06 | 0.065827 | 0.15553  |
| 9.51E-08 | 0.299613 | 3.85E-11 | 0.03414  | 0.46172  | 0.036449 | 0.43197  | 0.089078 | 0.0544   |
| 5.94E-05 | 0.139549 | 0.00251  | 0.08258  | 0.07462  | 0.051247 | 0.26907  | 0.17775  | 0.00011  |
| 0.00032  | -0.14668 | 0.00148  | 0.00097  | 0.98332  | 0.059175 | 0.20179  | -0.01144 | 0.80526  |
| 0.13388  | 0.072284 | 0.11878  | 0.057643 | 0.21373  | 0.054648 | 0.23853  | 0.129871 | 0.00494  |
| 0.10741  | 0.121759 | 0.00844  | 0.208978 | 5.26E-06 | 0.042963 | 0.35425  | 0.218499 | 1.87E-06 |
| 0.65968  | -0.03428 | 0.4599   | -0.0254  | 0.58405  | -0.01456 | 0.75359  | -0.0247  | 0.59449  |
| 0.49009  | 0.076512 | 0.09865  | -0.01796 | 0.69868  | 0.048574 | 0.29487  | -0.02066 | 0.65609  |
| 0.68603  | 0.034585 | 0.45591  | 0.004675 | 0.91974  | -0.00777 | 0.86693  | -0.02976 | 0.52121  |
| 0.01136  | 0.114765 | 0.01308  | 0.03234  | 0.48569  | 0.017483 | 0.7063   | 0.017423 | 0.70727  |

|          |          |          |          |          |          |         |          |          |
|----------|----------|----------|----------|----------|----------|---------|----------|----------|
| 0.1493   | 0.073747 | 0.11148  | 0.077075 | 0.09619  | -0.01129 | 0.80781 | -0.01414 | 0.76049  |
| 0.08532  | 0.152304 | 0.00096  | 0.062839 | 0.17521  | 0.110962 | 0.01644 | 0.168999 | 0.00024  |
| 0.00121  | 0.169573 | 0.00023  | 0.034693 | 0.45449  | 0.048667 | 0.29395 | 0.114724 | 0.01311  |
| 0.29797  | 0.007195 | 0.87676  | 0.110378 | 0.01702  | 0.040701 | 0.38018 | 0.045476 | 0.32678  |
| 0.32654  | 0.056826 | 0.22031  | 0.06562  | 0.15684  | 0.114534 | 0.01326 | 0.078094 | 0.09186  |
| 0.04597  | 0.116729 | 0.01159  | 0.122989 | 0.0078   | -0.01165 | 0.80178 | 0.215066 | 2.73E-06 |
| 0.08475  | 0.042037 | 0.36473  | 0.034435 | 0.45786  | 0.007507 | 0.87147 | 0.039205 | 0.39796  |
| 0.92877  | -0.01963 | 0.6722   | -0.01354 | 0.77049  | -0.01721 | 0.71061 | -0.02841 | 0.5403   |
| 0.65213  | -0.04473 | 0.33483  | 0.005207 | 0.91064  | 0.015074 | 0.74525 | 0.004572 | 0.9215   |
| 0.48118  | -0.02514 | 0.58783  | 0.140462 | 0.00235  | 0.036468 | 0.43174 | 0.012229 | 0.79211  |
| 0.60967  | -0.00393 | 0.93258  | 0.015636 | 0.73611  | 0.001066 | 0.98166 | 0.003181 | 0.94534  |
| 0.00201  | 0.142011 | 0.0021   | -0.00164 | 0.97186  | -0.01935 | 0.67658 | 0.140323 | 0.00237  |
| 0.01211  | -0.1164  | 0.01183  | 0.011328 | 0.80711  | -0.03557 | 0.44311 | -0.0343  | 0.45963  |
| 0.43765  | -0.00566 | 0.90283  | 0.059803 | 0.19703  | 0.023548 | 0.61174 | -0.04162 | 0.36951  |
| 0.86278  | 0.020627 | 0.65661  | 0.041157 | 0.37487  | -0.03318 | 0.47439 | 0.0162   | 0.72696  |
| 0.59778  | -0.018   | 0.69798  | -0.00582 | 0.90012  | 0.001258 | 0.97837 | 0.044841 | 0.33359  |
| 0.05102  | 0.068444 | 0.13972  | 0.01237  | 0.78976  | -0.0272  | 0.55765 | 0.006113 | 0.89518  |
| 0.05313  | -0.09657 | 0.03696  | 0.075353 | 0.10388  | 0.07246  | 0.11788 | 0.085139 | 0.06602  |
| 0.82067  | 0.068722 | 0.13811  | 0.050147 | 0.27949  | 0.066384 | 0.15206 | 0.107422 | 0.02024  |
| 0.57226  | 0.117974 | 0.01073  | 0.019025 | 0.68175  | 0.17179  | 0.00019 | 0.052991 | 0.25309  |
| 0.22627  | 0.099309 | 0.0319   | -0.02403 | 0.60446  | -0.06035 | 0.19297 | 0.028465 | 0.53947  |
| 0.06006  | 0.053136 | 0.25179  | 0.028994 | 0.53195  | 0.164102 | 0.00037 | 0.054865 | 0.23667  |
| 0.24388  | 0.10085  | 0.02932  | -0.00474 | 0.91859  | -0.01458 | 0.75329 | 0.014086 | 0.76144  |
| 0.08258  | 0.056079 | 0.22644  | -0.02752 | 0.55299  | 0.070542 | 0.12795 | -0.13396 | 0.00373  |
| 0.00239  | 0.076335 | 0.09944  | 0.117023 | 0.01138  | 0.019054 | 0.68129 | 0.170568 | 0.00021  |
| 0.17583  | 0.097179 | 0.03578  | 0.017752 | 0.70199  | -0.06037 | 0.1928  | 0.066114 | 0.15373  |
| 0.98854  | -0.00519 | 0.9109   | 0.021257 | 0.64682  | 0.047959 | 0.30104 | -0.01012 | 0.82732  |
| 4.58E-07 | 0.288697 | 2.04E-10 | 0.06569  | 0.1564   | -0.01869 | 0.68699 | 0.051005 | 0.27134  |
| 0.1142   | -0.02789 | 0.54764  | 0.069831 | 0.13184  | 0.088169 | 0.05692 | 0.006446 | 0.8895   |
| 0.01467  | 0.054504 | 0.23977  | 0.154001 | 0.00084  | -0.02446 | 0.59808 | -0.0816  | 0.07814  |
| 0.05013  | 0.060898 | 0.18894  | 0.042089 | 0.36413  | -0.04548 | 0.32669 | 0.001611 | 0.9723   |
| 0.0301   | -0.11812 | 0.01063  | -0.03499 | 0.45059  | -0.02843 | 0.54    | 0.025933 | 0.57615  |
| 0.00049  | -0.12895 | 0.00526  | -0.02551 | 0.58241  | -0.0434  | 0.3494  | -0.02399 | 0.60507  |
| 0.0853   | 0.089518 | 0.05321  | 0.000781 | 0.98657  | 0.049992 | 0.28098 | 0.056165 | 0.22573  |
| 0.33817  | 0.076725 | 0.09771  | -0.02616 | 0.57287  | 0.000698 | 0.988   | -0.06998 | 0.13101  |
| 0.23933  | -0.00996 | 0.82995  | 0.014781 | 0.75005  | 0.019119 | 0.68027 | -0.02609 | 0.57391  |
| 0.71314  | 0.002919 | 0.94983  | 0.028511 | 0.53882  | -0.00834 | 0.85739 | 0.056254 | 0.22499  |
| 0.84092  | 0.006148 | 0.89459  | -0.01226 | 0.79152  | -0.02126 | 0.64678 | -0.03084 | 0.50616  |
| 0.33719  | 0.003803 | 0.93468  | 0.001162 | 0.98002  | 0.124703 | 0.00697 | -0.02029 | 0.66189  |
| 0.63348  | 0.020612 | 0.65684  | -0.01277 | 0.78319  | 0.006704 | 0.88511 | -0.01858 | 0.68879  |
| 0.48488  | 0.065129 | 0.15997  | -0.00284 | 0.95126  | -0.00758 | 0.87026 | 0.05226  | 0.25971  |
| 0.14082  | 0.079582 | 0.08581  | 0.002618 | 0.95501  | -0.04525 | 0.32923 | 0.056213 | 0.22533  |
| 0.03814  | 0.14836  | 0.0013   | 0.085812 | 0.0639   | 0.046108 | 0.32009 | 0.046569 | 0.31528  |
| 0.06254  | 0.145987 | 0.00156  | 0.037074 | 0.42412  | 0.036968 | 0.42545 | 0.065765 | 0.15592  |
| 0.11236  | 0.067988 | 0.14238  | 0.389687 | 2.20E-18 | 0.097196 | 0.03575 | 0.143554 | 0.00187  |



|          |          |          |          |          |          |         |           |          |
|----------|----------|----------|----------|----------|----------|---------|-----------|----------|
| 0.00954  | 0.277486 | 1.06E-09 | 0.094652 | 0.0409   | 0.131342 | 0.00447 | 0.106634  | 0.02118  |
| 2.08E-07 | 0.298361 | 4.68E-11 | 0.031224 | 0.50088  | 0.05664  | 0.22182 | 0.195094  | 2.18E-05 |
| 0.13279  | 0.016284 | 0.72561  | 0.030252 | 0.51431  | 0.091416 | 0.04834 | 0.069761  | 0.13224  |
| 0.06151  | -0.0276  | 0.5519   | -0.06095 | 0.1886   | -0.11331 | 0.01429 | -8.22E-06 | 0.99986  |
| 0.56269  | 0.035125 | 0.44889  | -0.03376 | 0.46672  | -0.04135 | 0.37267 | 0.026192  | 0.57235  |
| 0.02731  | -0.00417 | 0.92842  | -0.02995 | 0.51845  | -0.01891 | 0.6836  | 0.027714  | 0.55023  |
| 7.93E-05 | -0.0872  | 0.0597   | -0.04274 | 0.35681  | -0.08839 | 0.05629 | -0.0141   | 0.76123  |
| 0.01446  | 0.12628  | 0.00628  | 0.062839 | 0.17521  | 0.076979 | 0.09661 | 0.134538  | 0.00358  |
| 0.58782  | -0.02868 | 0.53641  | -0.00809 | 0.86151  | -0.00805 | 0.86222 | -0.03992  | 0.38939  |
| 0.00425  | -0.03158 | 0.49604  | 0.011317 | 0.8073   | 0.056672 | 0.22156 | 0.156374  | 0.0007   |
| 0.08294  | -0.22718 | 7.00E-07 | -0.04062 | 0.38111  | -0.06986 | 0.13167 | -0.002    | 0.96557  |
| 0.11565  | -0.05618 | 0.22558  | 0.051069 | 0.27073  | 0.099755 | 0.03114 | 0.02932   | 0.52736  |
| 2.58E-09 | -0.30984 | 7.55E-12 | 0.09935  | 0.03183  | -0.05258 | 0.2568  | -0.03088  | 0.50563  |
| 4.03E-07 | -0.22415 | 9.92E-07 | -0.07862 | 0.08969  | -0.0234  | 0.61404 | -0.26049  | 1.11E-08 |
| 0.00071  | -0.21097 | 4.25E-06 | -0.08941 | 0.05349  | -0.0828  | 0.07385 | -0.1308   | 0.00464  |
| 0.87659  | -0.01343 | 0.77224  | -0.00198 | 0.96605  | -0.05343 | 0.24914 | 0.09198   | 0.04697  |
| 0.14691  | 0.005862 | 0.89946  | 0.116136 | 0.01202  | 0.064521 | 0.16392 | -0.08161  | 0.0781   |
| 0.74391  | 0.184801 | 5.88E-05 | 0.117517 | 0.01104  | 0.047276 | 0.30797 | -0.07348  | 0.1128   |
| 0.99743  | -0.02215 | 0.63309  | -0.07591 | 0.10134  | -0.03323 | 0.47377 | -0.05056  | 0.27559  |
| 0.21179  | 0.135398 | 0.00337  | 0.10367  | 0.02507  | -0.04249 | 0.35963 | 0.153795  | 0.00085  |
| 0.31306  | -0.002   | 0.96569  | 0.032997 | 0.47686  | -0.05747 | 0.21507 | -0.12063  | 0.00907  |
| 0.65605  | -0.0218  | 0.63843  | -0.01399 | 0.763    | -0.06898 | 0.13664 | 0.093496  | 0.04344  |
| 0.01162  | 0.135579 | 0.00333  | 0.065161 | 0.15977  | 0.006423 | 0.8899  | 0.083377  | 0.07184  |
| 0.50891  | -0.20575 | 7.38E-06 | -0.15109 | 0.00106  | -0.08483 | 0.06702 | 0.034631  | 0.45531  |
| 0.1083   | 0.018804 | 0.68526  | -0.06593 | 0.1549   | -0.01991 | 0.66783 | 0.117443  | 0.01109  |
| 0.0002   | 0.218717 | 1.83E-06 | 0.179287 | 9.79E-05 | -0.06082 | 0.18953 | 0.160408  | 0.0005   |
| 0.78044  | 0.107469 | 0.02018  | 0.054205 | 0.24237  | 0.023432 | 0.6135  | -0.1158   | 0.01227  |
| 0.64155  | 0.03614  | 0.43589  | 0.014433 | 0.75573  | 0.015033 | 0.74592 | -0.05547  | 0.23152  |
| 0.02578  | 0.196343 | 1.93E-05 | 0.131208 | 0.00451  | 0.072283 | 0.11878 | 0.207597  | 6.08E-06 |
| 0.59743  | 0.097326 | 0.0355   | -0.10269 | 0.02648  | -0.02291 | 0.62147 | 0.041454  | 0.37142  |
| 0.12332  | 0.069851 | 0.13174  | -0.10593 | 0.02205  | -0.05095 | 0.27187 | 0.082745  | 0.07403  |
| 0.00041  | 0.150795 | 0.00108  | 0.298675 | 4.45E-11 | 0.100072 | 0.0306  | 0.164352  | 0.00036  |
| 0.10919  | -0.05701 | 0.21878  | 0.102938 | 0.02612  | -0.01757 | 0.70488 | -0.09253  | 0.04566  |
| 1.81E-05 | -0.16262 | 0.00042  | 0.064322 | 0.16522  | 0.054425 | 0.24046 | -0.08841  | 0.05624  |
| 0.23749  | -0.03594 | 0.4384   | -0.02121 | 0.64749  | -0.01387 | 0.76501 | 0.004772  | 0.91809  |
| 0.06519  | -0.09382 | 0.04271  | -0.19863 | 1.53E-05 | -0.01392 | 0.76415 | -0.16511  | 0.00034  |
| 0.00149  | 0.2249   | 9.10E-07 | 0.214158 | 3.01E-06 | 0.021365 | 0.64514 | 0.077325  | 0.09511  |
| 0.45769  | 0.089434 | 0.05344  | 0.250072 | 4.33E-08 | 0.114741 | 0.0131  | 0.016169  | 0.72746  |
| 0.11922  | 0.008672 | 0.85173  | -0.02361 | 0.61079  | -0.05603 | 0.22682 | -0.13761  | 0.00288  |
| 2.07E-06 | -0.29905 | 4.21E-11 | -0.10757 | 0.02006  | -0.0371  | 0.42374 | -0.10544  | 0.02267  |
| 0.73347  | 0.082296 | 0.07562  | 0.101976 | 0.02756  | 0.158948 | 0.00057 | -0.01584  | 0.73284  |
| 0.12073  | 0.072452 | 0.11792  | 0.08925  | 0.05393  | 0.078004 | 0.09223 | 0.057846  | 0.21212  |
| 2.16E-07 | 0.384543 | 6.61E-18 | 0.045772 | 0.32363  | 0.095099 | 0.03995 | 0.111116  | 0.01629  |
| 8.81E-08 | 0.233321 | 3.41E-07 | 0.198932 | 1.49E-05 | 0.006329 | 0.89151 | 0.127394  | 0.00584  |
| 0.38622  | 0.068779 | 0.13778  | -0.00241 | 0.95855  | -0.07172 | 0.12168 | 0.000773  | 0.98672  |

|          |          |          |          |          |          |          |          |          |
|----------|----------|----------|----------|----------|----------|----------|----------|----------|
| 0.04565  | -0.00493 | 0.91538  | 0.046763 | 0.31326  | 0.22961  | 5.28E-07 | -0.04785 | 0.30214  |
| 1.29E-08 | 0.33081  | 2.18E-13 | 0.005776 | 0.90093  | 0.066478 | 0.15147  | 0.162794 | 0.00041  |
| 0.0008   | -0.29902 | 4.23E-11 | -0.06789 | 0.14296  | -0.15388 | 0.00085  | -0.1174  | 0.01111  |
| 2.45E-05 | 0.451272 | 8.26E-25 | 0.026762 | 0.56402  | 0.215274 | 2.67E-06 | 0.072149 | 0.11947  |
| 7.37E-05 | -0.1116  | 0.01584  | -0.00839 | 0.85645  | 0.005463 | 0.90627  | -0.09183 | 0.04733  |
| 0.0965   | 0.010564 | 0.8199   | 0.02407  | 0.60387  | 0.0052   | 0.91076  | 0.069973 | 0.13106  |
| 4.23E-05 | 0.277496 | 1.05E-09 | -0.01535 | 0.74069  | 0.092407 | 0.04595  | 0.160089 | 0.00052  |
| 0.22607  | 0.278081 | 9.70E-10 | 0.030714 | 0.5079   | 0.189398 | 3.80E-05 | 0.071968 | 0.1204   |
| 0.20198  | 0.080812 | 0.08106  | 0.070465 | 0.12837  | 0.131113 | 0.00454  | -0.0182  | 0.69486  |
| 0.00315  | 0.188003 | 4.34E-05 | 0.124262 | 0.00718  | 0.177244 | 0.00012  | 0.160918 | 0.00048  |
| 0.09562  | 0.070547 | 0.12792  | -0.07679 | 0.09743  | 0.052424 | 0.25821  | -0.05803 | 0.21071  |
| 0.00353  | 0.213882 | 3.11E-06 | -0.03445 | 0.45766  | 0.062006 | 0.18101  | 0.206489 | 6.83E-06 |
| 0.50677  | 0.027981 | 0.5464   | 0.116133 | 0.01202  | 0.01846  | 0.69071  | -0.0948  | 0.04058  |
| 0.55021  | -0.0935  | 0.04342  | 0.005004 | 0.91412  | -0.13988 | 0.00245  | -0.17251 | 0.00018  |
| 0.65112  | 0.060046 | 0.19522  | 0.096768 | 0.03657  | -0.00554 | 0.90503  | -0.20716 | 6.37E-06 |
| 0.03163  | -0.03084 | 0.50615  | 0.020407 | 0.66004  | -0.04892 | 0.29145  | -0.07867 | 0.08949  |
| 0.66983  | -0.07305 | 0.1149   | 0.065553 | 0.15726  | -0.01509 | 0.74495  | 0.016347 | 0.72459  |
| 0.92117  | 0.037682 | 0.41656  | 0.063857 | 0.1683   | 0.043122 | 0.35247  | -0.1006  | 0.02973  |
| 3.87E-07 | 0.155145 | 0.00077  | -0.00151 | 0.97401  | -0.03164 | 0.49522  | 0.037986 | 0.4128   |
| 0.00434  | 0.172122 | 0.00019  | 0.064132 | 0.16647  | 0.057039 | 0.21858  | 0.157879 | 0.00062  |
| 0.31769  | -0.02129 | 0.64637  | 0.046993 | 0.31089  | 0.02671  | 0.56478  | -0.01261 | 0.78579  |
| 0.9447   | -0.00275 | 0.95266  | -0.01454 | 0.75405  | -0.02279 | 0.62323  | -0.01206 | 0.79486  |
| 0.18898  | -0.10339 | 0.02546  | -0.08009 | 0.08383  | -0.01979 | 0.66975  | 0.092122 | 0.04663  |
| 0.0004   | -0.12767 | 0.00573  | 0.055288 | 0.23307  | 0.012897 | 0.78103  | -0.00722 | 0.87642  |
| 0.36328  | 0.074745 | 0.1067   | 0.053007 | 0.25295  | 0.059447 | 0.19972  | -0.01336 | 0.77342  |
| 0.53858  | -0.03952 | 0.39413  | 0.076858 | 0.09713  | -0.03911 | 0.39907  | -0.07326 | 0.11386  |
| 0.0027   | 0.292631 | 1.13E-10 | 0.036891 | 0.4264   | 0.065432 | 0.15803  | -0.0237  | 0.60942  |
| 0.10719  | 0.193392 | 2.58E-05 | 0.153859 | 0.00085  | 0.094781 | 0.04062  | -0.00116 | 0.98007  |
| 0.02706  | 0.029419 | 0.52596  | 0.044577 | 0.33644  | -0.02842 | 0.54013  | -0.02649 | 0.56791  |
| 0.83801  | 0.028585 | 0.53777  | -0.01834 | 0.69265  | -0.0446  | 0.33621  | -0.05501 | 0.23547  |
| 0.01207  | -0.19757 | 1.70E-05 | -0.00359 | 0.93839  | -0.02512 | 0.58824  | -0.00999 | 0.82956  |
| 0.11987  | 0.151646 | 0.00101  | 0.112975 | 0.01458  | 0.179102 | 9.96E-05 | 0.011276 | 0.80798  |
| 0.79899  | 0.032128 | 0.48856  | -0.01897 | 0.68263  | -0.00746 | 0.8723   | 0.053506 | 0.2485   |
| 8.88E-05 | 0.172312 | 0.00018  | -0.06724 | 0.14684  | 0.044606 | 0.33613  | 0.135026 | 0.00346  |
| 0.12843  | 0.081361 | 0.07902  | 0.045569 | 0.32579  | 0.069999 | 0.13092  | 0.021716 | 0.63973  |
| 0.00223  | 0.086497 | 0.0618   | 0.079298 | 0.08694  | -0.04527 | 0.32901  | -0.0226  | 0.62609  |
| 0.00906  | 0.033096 | 0.47555  | -0.06855 | 0.1391   | -0.06437 | 0.1649   | 0.028232 | 0.5428   |
| 0.14088  | 0.192075 | 2.93E-05 | 0.080944 | 0.08057  | 0.028517 | 0.53874  | 0.054441 | 0.24032  |
| 0.15607  | 0.073195 | 0.11419  | -0.02282 | 0.62283  | -0.08075 | 0.08129  | -0.0388  | 0.4028   |
| 0.00171  | 0.125893 | 0.00645  | 0.105918 | 0.02207  | -0.05659 | 0.22223  | -0.04953 | 0.28544  |
| 0.15028  | -0.04817 | 0.29895  | 0.075903 | 0.10137  | 0.010072 | 0.82814  | -0.02838 | 0.54068  |
| 0.08794  | 0.127311 | 0.00587  | -0.04868 | 0.29378  | 0.062777 | 0.17563  | 0.049508 | 0.28568  |
| 0.57076  | 0.134084 | 0.0037   | -0.01215 | 0.79347  | 0.054764 | 0.23753  | -0.20296 | 9.86E-06 |
| 0.00015  | 0.218565 | 1.86E-06 | -0.04589 | 0.32244  | -0.01096 | 0.81318  | -0.05116 | 0.26988  |
| 0.49189  | 0.107416 | 0.02025  | 0.186794 | 4.87E-05 | 0.111582 | 0.01585  | 0.088437 | 0.05616  |

|          |          |          |          |          |          |         |          |          |
|----------|----------|----------|----------|----------|----------|---------|----------|----------|
| 7.57E-07 | 0.250719 | 3.99E-08 | 0.038264 | 0.40939  | -0.05788 | 0.21186 | 0.051874 | 0.26325  |
| 0.00896  | -0.20461 | 8.31E-06 | 0.028875 | 0.53365  | -0.1152  | 0.01273 | -0.03484 | 0.45256  |
| 4.22E-06 | 0.24263  | 1.10E-07 | 0.065062 | 0.1604   | -0.07406 | 0.10998 | 0.068868 | 0.13727  |
| 0.02293  | 0.089191 | 0.05409  | 0.062497 | 0.17757  | -0.08165 | 0.07794 | 0.111025 | 0.01638  |
| 0.56375  | 0.047651 | 0.30415  | 0.043256 | 0.35098  | -0.02402 | 0.60456 | 0.142563 | 0.00201  |
| 0.6653   | 0.106542 | 0.02129  | 0.09575  | 0.0386   | 0.085761 | 0.06406 | 0.079071 | 0.08785  |
| 0.76266  | 0.090566 | 0.05047  | 0.043568 | 0.34751  | 0.06654  | 0.15109 | 0.159152 | 0.00056  |
| 0.68458  | 0.134971 | 0.00347  | 0.07573  | 0.10216  | 0.080315 | 0.08296 | -0.03143 | 0.49799  |
| 0.00024  | 0.098321 | 0.03365  | 0.050237 | 0.27863  | -0.00451 | 0.92263 | -0.03683 | 0.42718  |
| 0.07244  | -0.05379 | 0.24597  | 0.011996 | 0.79598  | -0.07246 | 0.11786 | -0.15013 | 0.00114  |
| 0.09898  | 0.176484 | 0.00013  | 0.006982 | 0.88038  | 0.051909 | 0.26293 | -0.06222 | 0.17953  |
| 5.89E-05 | 0.195898 | 2.01E-05 | 0.023128 | 0.61812  | -0.00181 | 0.96895 | 0.055532 | 0.23101  |
| 7.78E-10 | 0.413817 | 9.57E-21 | 0.122087 | 0.00826  | 0.100389 | 0.03008 | 0.029942 | 0.51863  |
| 0.16879  | 0.189152 | 3.89E-05 | 0.053043 | 0.25262  | 0.090651 | 0.05026 | 0.040811 | 0.37889  |
| 0.54187  | -0.02737 | 0.55514  | 0.03462  | 0.45545  | 0.062134 | 0.18011 | -0.19239 | 2.84E-05 |
| 6.12E-05 | 0.295357 | 7.44E-11 | -0.03647 | 0.43176  | 0.105823 | 0.02219 | 0.047275 | 0.30798  |
| 0.30243  | 0.009778 | 0.83309  | -0.02821 | 0.54311  | -0.06616 | 0.15343 | 0.055144 | 0.23429  |
| 0.00206  | 0.067956 | 0.14256  | -0.01676 | 0.71793  | -0.02075 | 0.65465 | 0.177394 | 0.00012  |
| 0.03805  | 0.024411 | 0.59876  | 0.002258 | 0.96118  | -0.01518 | 0.74347 | 0.037274 | 0.42161  |
| 0.14677  | -0.00733 | 0.8744   | 0.017608 | 0.70429  | 0.013932 | 0.76396 | 0.038516 | 0.4063   |
| 0.00102  | 0.191098 | 3.23E-05 | 0.089191 | 0.05409  | -0.0081  | 0.86142 | 0.218507 | 1.87E-06 |
| 0.1188   | -0.16006 | 0.00052  | 0.023857 | 0.60708  | -0.08388 | 0.07014 | -0.12393 | 0.00733  |
| 0.00092  | -0.12555 | 0.00659  | 0.210934 | 4.27E-06 | 0.085522 | 0.06481 | 0.022218 | 0.632    |
| 0.35025  | 0.194842 | 2.24E-05 | 0.136617 | 0.00309  | 0.041582 | 0.36995 | 0.002651 | 0.95444  |
| 0.72117  | 0.088845 | 0.05503  | 0.091024 | 0.04932  | 0.089272 | 0.05387 | -0.00972 | 0.83413  |
| 0.19967  | -0.02441 | 0.59871  | 0.028488 | 0.53915  | 0.034318 | 0.45939 | -0.01114 | 0.81018  |
| 0.00404  | 0.122972 | 0.0078   | 0.083007 | 0.07312  | -0.00153 | 0.97373 | 0.052775 | 0.25503  |
| 0.03975  | 0.142141 | 0.00208  | 0.072705 | 0.11664  | 0.073985 | 0.11032 | 0.124607 | 0.00702  |
| 0.12372  | -0.0608  | 0.18969  | 0.010413 | 0.82243  | 0.013194 | 0.77613 | 0.089016 | 0.05457  |
| 0.98413  | -0.15611 | 0.00071  | -0.00728 | 0.87525  | -0.01481 | 0.74953 | -0.06422 | 0.1659   |
| 0.00845  | 0.204468 | 8.43E-06 | 0.006905 | 0.8817   | 0.048474 | 0.29586 | 0.017704 | 0.70277  |
| 0.15097  | -0.07854 | 0.09001  | 0.025015 | 0.58973  | -0.00399 | 0.9314  | 0.119045 | 0.01003  |
| 0.85042  | -0.01419 | 0.75979  | 0.037023 | 0.42476  | 0.047014 | 0.31067 | 0.046476 | 0.31625  |
| 0.32305  | 0.087753 | 0.0581   | 0.028696 | 0.53619  | 0.015081 | 0.74515 | 0.022432 | 0.62873  |
| 0.01232  | -0.18313 | 6.87E-05 | -0.0907  | 0.05013  | -0.15546 | 0.00075 | -0.2059  | 7.27E-06 |
| 0.24984  | 0.055231 | 0.23355  | 0.022686 | 0.62484  | 0.031848 | 0.49235 | 0.11415  | 0.01358  |
| 0.00058  | 0.117726 | 0.01089  | 0.019217 | 0.67872  | -0.04417 | 0.34088 | -0.0183  | 0.69327  |
| 0.08049  | -0.11407 | 0.01364  | -0.02881 | 0.53455  | -0.0535  | 0.24858 | -0.08307 | 0.07289  |
| 7.84E-08 | 0.312777 | 4.67E-12 | 0.182985 | 6.97E-05 | 0.101623 | 0.0281  | 0.181626 | 7.90E-05 |
| 5.60E-07 | -0.31566 | 2.90E-12 | -0.10668 | 0.02112  | -0.1048  | 0.02352 | -0.13336 | 0.00389  |
| 0.04031  | -0.1175  | 0.01105  | 0.069604 | 0.13311  | 0.018991 | 0.68229 | -0.05603 | 0.22688  |
| 1.62E-05 | 0.144221 | 0.00178  | -0.11031 | 0.01709  | 0.054131 | 0.24301 | -0.09841 | 0.0335   |
| 0.08316  | -0.02274 | 0.62396  | 0.00535  | 0.90821  | -0.01599 | 0.73034 | 0.044322 | 0.33921  |
| 0.05058  | 0.195537 | 2.09E-05 | 0.084235 | 0.06896  | -0.00194 | 0.96657 | -0.00655 | 0.88768  |
| 0.01246  | 0.310285 | 7.02E-12 | 0.096018 | 0.03806  | 0.074349 | 0.10858 | 0.10953  | 0.0179   |

|          |          |          |          |          |          |          |          |          |
|----------|----------|----------|----------|----------|----------|----------|----------|----------|
| 0.03242  | 0.179228 | 9.85E-05 | 0.06913  | 0.13578  | -0.01714 | 0.71183  | -0.04344 | 0.34891  |
| 0.00725  | 0.208387 | 5.59E-06 | 0.12582  | 0.00648  | 0.090164 | 0.05151  | 0.192452 | 2.83E-05 |
| 0.41641  | -0.01592 | 0.73147  | 0.132655 | 0.00408  | 0.118451 | 0.01041  | 0.084546 | 0.06794  |
| 0.22701  | 0.183594 | 6.58E-05 | 0.045595 | 0.32552  | 0.124073 | 0.00727  | 0.13006  | 0.00488  |
| 0.30498  | 0.082865 | 0.07361  | 0.306086 | 1.38E-11 | 0.025553 | 0.58175  | 0.002148 | 0.96307  |
| 0.0287   | -0.06974 | 0.13238  | 0.003973 | 0.93176  | -0.00931 | 0.84102  | -0.01598 | 0.73048  |
| 0.01719  | 0.151677 | 0.00101  | 0.094248 | 0.04177  | 0.048414 | 0.29647  | 0.2292   | 5.54E-07 |
| 0.09549  | -0.01296 | 0.78003  | -0.03925 | 0.39746  | -0.02025 | 0.66244  | 0.105405 | 0.02272  |
| 0.89686  | 0.001103 | 0.98103  | -0.09416 | 0.04195  | -0.00187 | 0.96785  | 0.04488  | 0.33317  |
| 0.00077  | -0.17119 | 0.0002   | -0.11757 | 0.011    | -0.07719 | 0.09571  | 0.028575 | 0.53791  |
| 0.03774  | -0.05007 | 0.28026  | -0.03955 | 0.39382  | -0.04706 | 0.31018  | 0.052824 | 0.25459  |
| 3.54E-06 | 0.442572 | 8.07E-24 | 0.120302 | 0.00926  | 0.287526 | 2.44E-10 | 0.15989  | 0.00052  |
| 0.01342  | 0.275656 | 1.37E-09 | 0.062408 | 0.17819  | 0.01706  | 0.71309  | 0.006885 | 0.88204  |
| 0.00448  | 0.219501 | 1.67E-06 | 0.084384 | 0.06847  | 0.103227 | 0.0257   | 0.053894 | 0.24508  |
| 0.86815  | -0.0122  | 0.79262  | 0.005269 | 0.90959  | -0.01468 | 0.75173  | 0.000955 | 0.98358  |
| 2.32E-05 | 0.135155 | 0.00343  | 0.014954 | 0.74722  | -0.05925 | 0.20123  | 0.078123 | 0.09174  |
| 0.00223  | -0.20867 | 5.43E-06 | -0.05187 | 0.26328  | -0.07403 | 0.1101   | 0.00284  | 0.9512   |
| 0.44031  | 0.1611   | 0.00047  | 0.159475 | 0.00054  | 0.053153 | 0.25164  | -0.02742 | 0.55443  |
| 0.00267  | 0.157803 | 0.00062  | 0.104789 | 0.02353  | 0.08905  | 0.05447  | 0.097309 | 0.03553  |
| 0.26734  | 0.038975 | 0.40073  | 0.002544 | 0.95627  | 0.00692  | 0.88144  | -0.01256 | 0.78669  |
| 0.22022  | 0.114456 | 0.01333  | 0.082477 | 0.07498  | 0.03112  | 0.50231  | 0.008111 | 0.86122  |
| 0.15783  | 0.007262 | 0.87563  | 0.119161 | 0.00996  | 0.076249 | 0.09982  | -0.00313 | 0.94629  |
| 0.00871  | -0.20895 | 5.27E-06 | -0.08463 | 0.06765  | -0.03321 | 0.474    | 0.018001 | 0.69803  |
| 0.01163  | -0.12296 | 0.00781  | 0.03572  | 0.44124  | 0.07359  | 0.11225  | 0.165173 | 0.00034  |
| 0.06964  | 0.001454 | 0.975    | 0.003129 | 0.94623  | -0.01566 | 0.73574  | 0.068694 | 0.13827  |
| 0.71736  | 0.141775 | 0.00213  | 0.031655 | 0.49498  | 0.049613 | 0.28465  | -0.06033 | 0.19313  |
| 0.03399  | 0.035283 | 0.44686  | 0.022859 | 0.62221  | 0.007212 | 0.87648  | 0.044021 | 0.34251  |
| 0.00599  | 0.166017 | 0.00031  | 0.029484 | 0.52504  | 0.024583 | 0.59618  | 0.085321 | 0.06544  |
| 0.00531  | 0.150412 | 0.00111  | 0.017693 | 0.70294  | 0.018331 | 0.69276  | 0.108163 | 0.01939  |
| 0.04186  | 0.066837 | 0.14927  | 0.028166 | 0.54374  | 0.034024 | 0.46324  | 0.078644 | 0.08959  |
| 0.41007  | 0.059103 | 0.20234  | 0.039703 | 0.39199  | -0.01153 | 0.80379  | -0.00743 | 0.87271  |
| 0.80753  | 0.091871 | 0.04723  | 0.051619 | 0.2656   | 0.042601 | 0.35832  | 0.117649 | 0.01095  |
| 3.87E-08 | 0.281808 | 5.66E-10 | 0.013658 | 0.76847  | 0.131911 | 0.0043   | 0.154255 | 0.00082  |
| 0.54457  | 0.058757 | 0.205    | 0.033173 | 0.47452  | 0.020408 | 0.66002  | -0.01973 | 0.67063  |
| 0.26144  | -0.17413 | 0.00016  | -0.07771 | 0.09347  | 0.024766 | 0.59345  | 0.030563 | 0.50999  |
| 0.96585  | 0.072801 | 0.11616  | 0.064014 | 0.16726  | 0.054181 | 0.24258  | 0.03918  | 0.39825  |
| 0.91751  | -0.05311 | 0.25198  | 0.067287 | 0.14655  | -0.03401 | 0.46348  | -0.00485 | 0.91675  |
| 0.00195  | 0.163014 | 0.0004   | 0.127774 | 0.00569  | 0.036414 | 0.43242  | -0.01766 | 0.70346  |
| 0.02672  | 0.138932 | 0.00262  | -0.02448 | 0.59765  | 0.082347 | 0.07544  | 0.033172 | 0.47453  |
| 0.57826  | 0.048887 | 0.29177  | 0.062063 | 0.18061  | 0.080198 | 0.08341  | -0.18075 | 8.56E-05 |
| 0.11496  | -0.04157 | 0.3701   | -0.11305 | 0.01452  | 0.045969 | 0.32156  | -0.11951 | 0.00974  |
| 0.00443  | 0.197741 | 1.67E-05 | 0.248892 | 5.03E-08 | 0.200806 | 1.23E-05 | 0.183291 | 6.77E-05 |
| 0.16256  | 0.139422 | 0.00253  | 0.033781 | 0.46646  | 0.073228 | 0.11403  | 0.171141 | 0.0002   |
| 0.63825  | 0.079549 | 0.08594  | 0.086006 | 0.0633   | 0.151877 | 0.00099  | 0.064962 | 0.16105  |
| 0.19036  | 0.111411 | 0.01601  | 0.035959 | 0.4382   | 0.131579 | 0.0044   | 0.10867  | 0.01882  |

|          |          |          |          |          |          |          |          |          |
|----------|----------|----------|----------|----------|----------|----------|----------|----------|
| 0.01777  | 0.233686 | 3.27E-07 | 0.028104 | 0.54463  | 0.3333   | 1.40E-13 | 0.130055 | 0.00488  |
| 0.03826  | 0.244597 | 8.64E-08 | 0.086321 | 0.06234  | 0.099527 | 0.03153  | 0.060695 | 0.19042  |
| 0.00037  | 0.238693 | 1.79E-07 | 0.049446 | 0.28628  | 0.011482 | 0.80455  | 0.165278 | 0.00033  |
| 0.88212  | 0.077748 | 0.09331  | 0.323704 | 7.47E-13 | 0.023149 | 0.61779  | -0.0441  | 0.34163  |
| 4.71E-07 | 0.399542 | 2.52E-19 | 0.203795 | 9.04E-06 | 0.174537 | 0.00015  | 0.200632 | 1.25E-05 |
| 0.22653  | 0.1412   | 0.00222  | 0.036662 | 0.42929  | -0.01818 | 0.69518  | -0.04694 | 0.31142  |
| 0.29902  | -0.19969 | 1.38E-05 | 0.015086 | 0.74507  | 0.022305 | 0.63067  | -0.01641 | 0.72353  |
| 0.06935  | 0.275533 | 1.40E-09 | 0.267479 | 4.30E-09 | 0.108506 | 0.019    | 0.045404 | 0.32754  |
| 0.00018  | 0.215852 | 2.51E-06 | 0.09552  | 0.03907  | 0.086106 | 0.06299  | 0.166477 | 0.0003   |
| 0.66528  | 0.06089  | 0.189    | 0.190172 | 3.53E-05 | 0.001112 | 0.98088  | 0.077808 | 0.09306  |
| 0.63853  | 0.068162 | 0.14136  | -0.03751 | 0.41871  | 0.009378 | 0.83982  | 0.070098 | 0.13037  |
| 0.82738  | 0.038149 | 0.41079  | 0.025149 | 0.58774  | 0.071546 | 0.1226   | 0.122115 | 0.00825  |
| 0.00409  | -0.15044 | 0.00111  | -0.06315 | 0.17305  | -0.06195 | 0.18143  | 0.065737 | 0.1561   |
| 0.33416  | 0.103833 | 0.02484  | 0.079739 | 0.0852   | 0.051866 | 0.26332  | 0.03417  | 0.46133  |
| 0.31596  | -0.06361 | 0.16996  | 0.033301 | 0.47281  | -0.14143 | 0.00219  | 0.052376 | 0.25864  |
| 0.00764  | -0.06156 | 0.18414  | -0.0909  | 0.04962  | -0.16279 | 0.00041  | 0.029978 | 0.51813  |
| 4.10E-05 | -0.29429 | 8.76E-11 | -0.07115 | 0.1247   | -0.0975  | 0.03518  | 0.018041 | 0.69738  |
| 0.00421  | -0.1984  | 1.57E-05 | 0.052303 | 0.25931  | 0.000795 | 0.98633  | 0.054104 | 0.24324  |
| 1.96E-06 | 0.192947 | 2.69E-05 | -0.0203  | 0.66164  | -0.07707 | 0.0962   | 0.023701 | 0.60943  |
| 0.47331  | 0.03596  | 0.43818  | 0.092491 | 0.04575  | -0.09861 | 0.03314  | 0.010116 | 0.82741  |
| 0.1516   | 0.056819 | 0.22036  | 0.113061 | 0.0145   | -0.01185 | 0.79835  | -0.08793 | 0.0576   |
| 0.89808  | 0.043544 | 0.34777  | 0.017445 | 0.70691  | -0.01012 | 0.8273   | 0.160216 | 0.00051  |
| 0.37114  | 0.071582 | 0.12241  | 0.02412  | 0.60312  | 0.055912 | 0.22783  | 0.146112 | 0.00155  |
| 1.46E-05 | 0.21774  | 2.04E-06 | 0.120556 | 0.00911  | 0.026244 | 0.57159  | -0.0331  | 0.47545  |
| 0.0007   | 0.196034 | 1.99E-05 | -0.0233  | 0.61557  | -0.03217 | 0.48799  | -0.08791 | 0.05766  |
| 0.03023  | 0.081926 | 0.07695  | 0.075754 | 0.10205  | -0.03227 | 0.48658  | 0.055582 | 0.23059  |
| 0.09788  | 0.035659 | 0.44203  | -0.01486 | 0.74877  | -0.0159  | 0.7318   | 0.06171  | 0.1831   |
| 0.48337  | -0.01338 | 0.77306  | 0.038147 | 0.41082  | -0.04986 | 0.28228  | -0.03528 | 0.44695  |
| 0.00759  | -0.12622 | 0.00631  | -0.04401 | 0.3426   | -0.02996 | 0.5184   | 0.014159 | 0.76024  |
| 0.55399  | 0.102282 | 0.02709  | -0.02521 | 0.58681  | -0.03853 | 0.40619  | -0.01781 | 0.70114  |
| 0.00889  | -0.14973 | 0.00117  | -0.02725 | 0.5569   | 0.030734 | 0.50763  | 0.153784 | 0.00086  |
| 0.00047  | -0.2504  | 4.15E-08 | 0.005429 | 0.90685  | -0.16595 | 0.00032  | 0.024738 | 0.59387  |
| 0.00543  | -0.09779 | 0.03462  | 0.033514 | 0.46998  | -0.07691 | 0.0969   | -0.04315 | 0.35216  |
| 2.24E-05 | -0.07935 | 0.08675  | 0.100251 | 0.0303   | 0.07811  | 0.09179  | -0.14754 | 0.00139  |
| 6.10E-10 | -0.33034 | 2.37E-13 | -0.11037 | 0.01703  | -0.07007 | 0.13054  | -0.03091 | 0.50522  |
| 0.04007  | 0.292861 | 1.09E-10 | 0.16818  | 0.00026  | 0.121078 | 0.00881  | 0.012885 | 0.78123  |
| 0.38851  | -0.06833 | 0.1404   | -0.02809 | 0.54477  | -0.03084 | 0.50622  | -0.07368 | 0.11178  |
| 0.00193  | -0.18193 | 7.68E-05 | 0.063768 | 0.1689   | -0.04615 | 0.31961  | -0.00417 | 0.92831  |
| 0.22504  | 0.074312 | 0.10876  | 0.08818  | 0.05689  | 0.060405 | 0.19256  | 0.128969 | 0.00525  |
| 0.29062  | -0.06374 | 0.16908  | -0.03619 | 0.43525  | -0.01948 | 0.67458  | 0.106997 | 0.02074  |
| 5.79E-07 | -0.15901 | 0.00056  | 0.002928 | 0.94969  | 0.038741 | 0.40357  | -0.11005 | 0.01736  |
| 0.96625  | 0.017996 | 0.69809  | 0.09059  | 0.05041  | 0.174756 | 0.00015  | -0.04764 | 0.30429  |
| 0.00262  | 0.233017 | 3.54E-07 | 0.051575 | 0.26601  | 0.016467 | 0.72265  | 0.011308 | 0.80744  |
| 0.33381  | 0.004747 | 0.91851  | 0.051959 | 0.26246  | 0.065671 | 0.15651  | -0.03498 | 0.45081  |
| 0.2644   | 0.126844 | 0.00605  | 0.082424 | 0.07517  | 0.15271  | 0.00093  | 0.087196 | 0.05972  |

|          |          |          |          |         |          |          |          |          |
|----------|----------|----------|----------|---------|----------|----------|----------|----------|
| 0.99012  | 0.091622 | 0.04784  | 0.08342  | 0.0717  | 0.132787 | 0.00405  | 0.006011 | 0.89692  |
| 0.70669  | 0.003451 | 0.94072  | 0.045545 | 0.32604 | 0.066428 | 0.15179  | 0.003775 | 0.93516  |
| 0.00038  | -0.10631 | 0.02158  | 0.064104 | 0.16666 | -0.1083  | 0.01923  | -0.11944 | 0.00978  |
| 0.11618  | 0.041835 | 0.36704  | -0.12145 | 0.00861 | -0.13828 | 0.00275  | 0.029099 | 0.53047  |
| 0.00081  | -0.01184 | 0.79851  | -0.01198 | 0.79624 | 0.064525 | 0.16389  | 0.05355  | 0.24811  |
| 0.0266   | 0.058277 | 0.20873  | 0.046066 | 0.32054 | 0.079994 | 0.0842   | 0.046721 | 0.3137   |
| 1.35E-09 | 0.392899 | 1.09E-18 | 0.115922 | 0.01218 | 0.202891 | 9.93E-06 | 0.164038 | 0.00037  |
| 0.1606   | -0.06358 | 0.17015  | 0.012134 | 0.79369 | -0.03861 | 0.4051   | -0.0192  | 0.67905  |
| 0.15472  | -0.06901 | 0.13647  | -0.00094 | 0.98386 | -0.04327 | 0.35087  | -0.03226 | 0.48684  |
| 0.33904  | -0.04802 | 0.30041  | -0.00564 | 0.90319 | 0.01114  | 0.81025  | 0.086747 | 0.06105  |
| 0.62486  | 0.064217 | 0.16591  | 0.104065 | 0.02452 | -0.00324 | 0.94435  | -0.01171 | 0.80081  |
| 0.38933  | -0.03854 | 0.40601  | 0.00496  | 0.91487 | 0.106439 | 0.02142  | 0.121332 | 0.00867  |
| 0.01817  | -0.05708 | 0.21822  | 0.000739 | 0.9873  | -0.04897 | 0.29095  | 0.005352 | 0.90817  |
| 0.03233  | 0.019732 | 0.67061  | -0.0118  | 0.7993  | -0.00932 | 0.84084  | -0.14985 | 0.00116  |
| 0.57729  | 0.078294 | 0.09103  | 0.094919 | 0.04033 | -0.04308 | 0.35296  | -0.21355 | 3.22E-06 |
| 0.03313  | 0.083976 | 0.06982  | 0.065115 | 0.16006 | 0.025378 | 0.58436  | -0.07106 | 0.12519  |
| 0.00107  | 0.06663  | 0.15054  | 0.051216 | 0.26935 | -0.07635 | 0.09938  | 0.051754 | 0.26436  |
| 1.94E-05 | 0.20903  | 5.23E-06 | 0.030206 | 0.51494 | -0.02886 | 0.53391  | -0.02496 | 0.59058  |
| 0.00126  | -0.14374 | 0.00184  | 0.023641 | 0.61033 | -0.0372  | 0.42259  | -0.14866 | 0.00127  |
| 0.0034   | 0.115686 | 0.01236  | 0.031993 | 0.49039 | 0.043576 | 0.34741  | 0.052419 | 0.25825  |
| 4.33E-06 | -0.20857 | 5.49E-06 | -0.06875 | 0.13797 | -0.10361 | 0.02515  | -0.23109 | 4.44E-07 |
| 0.87203  | 0.056521 | 0.2228   | 0.000685 | 0.98822 | 0.092784 | 0.04507  | -0.00681 | 0.88324  |
| 0.04341  | 0.177957 | 0.00011  | 0.090709 | 0.05011 | 0.062477 | 0.17771  | 0.010518 | 0.82067  |
| 0.99766  | 0.049796 | 0.28288  | -0.00862 | 0.85266 | -0.04637 | 0.31739  | 0.141809 | 0.00213  |
| 0.41274  | -0.03907 | 0.39961  | 0.030696 | 0.50814 | 0.107077 | 0.02065  | 0.018267 | 0.69378  |
| 2.78E-06 | -0.17705 | 0.00012  | 0.055278 | 0.23316 | -0.11084 | 0.01656  | -0.06192 | 0.18163  |
| 0.18826  | 0.113941 | 0.01375  | 0.024493 | 0.59753 | -0.09585 | 0.03839  | 0.090713 | 0.0501   |
| 3.95E-11 | 0.267918 | 4.05E-09 | 0.01848  | 0.69039 | -0.02398 | 0.60525  | 0.005818 | 0.90022  |
| 0.49235  | 0.117564 | 0.011    | 0.121521 | 0.00857 | 0.099056 | 0.03234  | -0.02169 | 0.64007  |
| 0.00032  | 0.185512 | 5.50E-05 | 0.097097 | 0.03594 | 0.081476 | 0.07859  | 0.22051  | 1.50E-06 |
| 0.02123  | 0.235697 | 2.57E-07 | 0.101869 | 0.02772 | 0.277294 | 1.09E-09 | 0.030049 | 0.51713  |
| 0.01546  | -0.18107 | 8.32E-05 | -0.02429 | 0.60062 | -0.03803 | 0.41221  | -0.14202 | 0.00209  |
| 0.14272  | 0.085848 | 0.06379  | -0.00815 | 0.86064 | -0.02882 | 0.53446  | 0.126026 | 0.00639  |
| 0.00013  | 0.273026 | 1.99E-09 | 0.006266 | 0.89257 | 0.110542 | 0.01686  | 0.154078 | 0.00084  |
| 0.61155  | 0.056992 | 0.21896  | 0.02201  | 0.63519 | -0.02819 | 0.54347  | -0.00409 | 0.92969  |
| 0.00155  | 0.089166 | 0.05416  | 0.086811 | 0.06086 | -0.08449 | 0.06813  | -0.05046 | 0.2765   |
| 3.72E-09 | -0.35079 | 5.72E-15 | -0.12909 | 0.00521 | -0.03076 | 0.50723  | -0.17479 | 0.00015  |
| 0.08223  | 0.059845 | 0.19672  | 0.042226 | 0.36257 | -0.0608  | 0.18962  | -0.16393 | 0.00037  |
| 0.11547  | -0.00171 | 0.97063  | 0.064963 | 0.16104 | 0.087804 | 0.05796  | -0.01306 | 0.77831  |
| 0.36255  | 0.082338 | 0.07547  | 0.123099 | 0.00774 | 0.122226 | 0.00819  | -0.06582 | 0.15555  |
| 0.01171  | -0.05332 | 0.25018  | -0.14969 | 0.00118 | -0.02638 | 0.56961  | -0.00528 | 0.90938  |
| 8.70E-10 | 0.403429 | 1.05E-19 | 0.063062 | 0.17368 | 0.090935 | 0.04954  | 0.068213 | 0.14106  |
| 0.01548  | -0.1646  | 0.00035  | -0.00631 | 0.89191 | 0.039844 | 0.3903   | 0.059299 | 0.20085  |
| 0.125    | 0.045916 | 0.32212  | 0.097311 | 0.03553 | -0.09775 | 0.03471  | -0.06273 | 0.17598  |
| 1.12E-07 | -0.25608 | 1.99E-08 | -0.05281 | 0.25468 | -0.11651 | 0.01175  | -0.08678 | 0.06097  |

|          |          |          |          |          |          |          |          |          |
|----------|----------|----------|----------|----------|----------|----------|----------|----------|
| 0.5662   | -0.07776 | 0.09324  | 0.042436 | 0.36019  | -0.01252 | 0.78735  | 0.058369 | 0.20801  |
| 0.11749  | 0.189325 | 3.83E-05 | 0.00658  | 0.88723  | 0.09116  | 0.04898  | -0.03299 | 0.4769   |
| 0.22827  | 0.018814 | 0.68509  | -0.04794 | 0.30118  | -0.08524 | 0.06572  | 0.083721 | 0.07068  |
| 0.00557  | 0.116529 | 0.01173  | -0.0602  | 0.19407  | -0.03133 | 0.49939  | 0.034598 | 0.45574  |
| 0.02272  | 0.215511 | 2.60E-06 | 0.09012  | 0.05163  | 0.167229 | 0.00028  | -0.11419 | 0.01354  |
| 0.00748  | 0.110517 | 0.01688  | -0.00178 | 0.96937  | -0.0107  | 0.81763  | -0.00607 | 0.89597  |
| 0.49915  | -0.03093 | 0.50498  | -0.0622  | 0.17963  | -0.02657 | 0.56687  | -0.06966 | 0.13277  |
| 0.00012  | 0.297455 | 5.38E-11 | -0.01187 | 0.798    | 0.089864 | 0.0523   | -0.08893 | 0.05481  |
| 0.12861  | 0.117873 | 0.01079  | 0.071433 | 0.12319  | 0.031186 | 0.5014   | 0.078277 | 0.0911   |
| 0.14982  | -0.17639 | 0.00013  | -0.06395 | 0.1677   | -0.12036 | 0.00923  | -0.22468 | 9.33E-07 |
| 0.28938  | 0.083152 | 0.07262  | 0.085074 | 0.06623  | 0.04191  | 0.36618  | -0.07822 | 0.09135  |
| 0.84342  | 0.026027 | 0.57478  | 0.112679 | 0.01484  | 0.112483 | 0.01502  | 0.011228 | 0.80878  |
| 0.00191  | -0.07827 | 0.09111  | -0.02862 | 0.53731  | -0.03847 | 0.40686  | -0.07504 | 0.10532  |
| 0.00362  | 0.239735 | 1.58E-07 | -0.01745 | 0.70681  | 0.012441 | 0.78859  | -0.03707 | 0.42416  |
| 0.63805  | -0.02844 | 0.53989  | 0.074251 | 0.10905  | 0.032751 | 0.48016  | -0.04428 | 0.33966  |
| 0.00061  | -0.19522 | 2.15E-05 | 0.082687 | 0.07424  | -0.07122 | 0.12432  | -0.04071 | 0.38008  |
| 0.71207  | 0.101629 | 0.02809  | 0.133647 | 0.00381  | 0.103531 | 0.02526  | 0.085855 | 0.06377  |
| 0.0141   | -0.08874 | 0.05533  | 0.241228 | 1.31E-07 | 0.026723 | 0.56458  | 0.070262 | 0.12947  |
| 0.0035   | -0.07105 | 0.12524  | 0.112879 | 0.01466  | 0.087468 | 0.05893  | -0.03264 | 0.48167  |
| 0.63601  | -0.04012 | 0.38702  | -0.01852 | 0.6897   | 0.093332 | 0.04381  | -0.09565 | 0.03881  |
| 0.60147  | -0.0351  | 0.44924  | -0.06005 | 0.19518  | -0.06176 | 0.18273  | -0.15407 | 0.00084  |
| 2.39E-06 | -0.2001  | 1.32E-05 | 0.143957 | 0.00182  | -0.03244 | 0.48439  | -0.0688  | 0.13767  |
| 0.03393  | -0.17284 | 0.00017  | -0.03177 | 0.49338  | -0.12711 | 0.00595  | 0.002316 | 0.96019  |
| 0.00021  | -0.21315 | 3.36E-06 | -0.06274 | 0.17588  | -0.12386 | 0.00737  | -0.28016 | 7.19E-10 |
| 0.00971  | -0.06006 | 0.1951   | 0.035443 | 0.4448   | 0.014684 | 0.75163  | 0.059349 | 0.20046  |
| 0.62726  | -0.03172 | 0.49413  | 0.029874 | 0.51957  | -0.05335 | 0.24992  | -0.00699 | 0.88017  |
| 0.38832  | 0.008118 | 0.86111  | -0.05442 | 0.24049  | 0.030759 | 0.50728  | -0.02062 | 0.65675  |
| 0.83181  | 0.076711 | 0.09778  | 0.058045 | 0.21055  | 0.069714 | 0.1325   | -0.08923 | 0.05398  |
| 0.78166  | 0.094659 | 0.04088  | 0.056061 | 0.22658  | -0.02564 | 0.58045  | -0.03266 | 0.48142  |
| 0.0001   | 0.328631 | 3.19E-13 | 0.048917 | 0.29147  | 0.045347 | 0.32816  | 0.041987 | 0.3653   |
| 0.93948  | 0.055961 | 0.22742  | 0.021401 | 0.64459  | -0.0288  | 0.53467  | -0.18046 | 8.80E-05 |
| 0.00789  | 0.281581 | 5.85E-10 | 0.090383 | 0.05094  | 0.241448 | 1.28E-07 | 0.01885  | 0.68452  |
| 0.04957  | -0.08808 | 0.05716  | 0.124657 | 0.00699  | -0.03718 | 0.42279  | 0.000575 | 0.99011  |
| 0.17175  | -0.04246 | 0.35991  | 0.074433 | 0.10818  | 0.053202 | 0.2512   | 0.031123 | 0.50227  |
| 1.95E-05 | 0.201099 | 1.19E-05 | 0.041945 | 0.36578  | -0.03596 | 0.43814  | 0.017954 | 0.69877  |
| 0.14318  | -0.0429  | 0.35496  | -0.0743  | 0.10883  | -0.11119 | 0.01622  | -0.09402 | 0.04227  |
| 0.00049  | 0.131849 | 0.00432  | 0.056014 | 0.22698  | -0.01923 | 0.67855  | 0.063086 | 0.17351  |
| 0.4612   | 0.0895   | 0.05326  | 0.127538 | 0.00578  | 0.020985 | 0.65104  | 0.073242 | 0.11396  |
| 0.02811  | 0.022407 | 0.62911  | -0.01645 | 0.7229   | -0.0176  | 0.70443  | 0.233684 | 3.27E-07 |
| 0.03701  | -0.08671 | 0.06117  | -0.01986 | 0.66864  | -0.07413 | 0.10962  | 0.061862 | 0.18203  |
| 0.15067  | 0.064815 | 0.162    | 0.026435 | 0.56879  | 0.009289 | 0.84133  | 0.003519 | 0.93954  |
| 0.00151  | 0.193224 | 2.62E-05 | 0.324147 | 6.93E-13 | 0.074664 | 0.10709  | 0.020647 | 0.65629  |
| 0.34163  | -0.01489 | 0.7483   | 0.00126  | 0.97833  | 0.041777 | 0.36771  | 0.018673 | 0.68733  |
| 0.08447  | 0.156313 | 0.0007   | 0.116363 | 0.01186  | -0.00463 | 0.92053  | 0.165874 | 0.00032  |
| 0.58181  | 0.063977 | 0.16751  | 0.162775 | 0.00041  | 0.01576  | 0.7341   | 0.031036 | 0.50345  |

|          |          |          |          |          |          |          |          |         |
|----------|----------|----------|----------|----------|----------|----------|----------|---------|
| 0.47292  | 0.100289 | 0.03024  | 0.080786 | 0.08117  | 0.00013  | 0.99777  | 0.147695 | 0.00137 |
| 0.00417  | 0.126496 | 0.00619  | 0.060595 | 0.19116  | 0.063302 | 0.17204  | 0.069499 | 0.1337  |
| 0.00105  | 0.131876 | 0.00431  | 0.212869 | 3.47E-06 | -0.06242 | 0.17809  | 0.027321 | 0.5559  |
| 0.71207  | 0.044239 | 0.34012  | -0.00954 | 0.83708  | 0.026901 | 0.56199  | -0.1119  | 0.01555 |
| 0.28272  | 0.022471 | 0.62812  | 0.196445 | 1.91E-05 | 0.220941 | 1.42E-06 | 0.002902 | 0.95013 |
| 0.7477   | 0.018706 | 0.68681  | 0.005961 | 0.89778  | 0.012884 | 0.78126  | 0.002826 | 0.95144 |
| 0.18857  | 0.145501 | 0.00162  | -0.00311 | 0.94657  | 0.05465  | 0.23851  | 0.1081   | 0.01946 |
| 0.29008  | 0.055392 | 0.23219  | 0.086074 | 0.06309  | 0.106008 | 0.02195  | 0.141975 | 0.0021  |
| 1.01E-07 | -0.25335 | 2.84E-08 | -0.05302 | 0.25285  | 0.045789 | 0.32346  | 0.027824 | 0.54864 |
| 0.20377  | -0.0609  | 0.18891  | 0.095861 | 0.03838  | 0.065121 | 0.16002  | 0.079809 | 0.08492 |
| 6.63E-08 | -0.17944 | 9.65E-05 | -0.00318 | 0.94538  | -0.01472 | 0.75099  | -0.13524 | 0.00341 |
| 1.41E-06 | -0.23764 | 2.03E-07 | 0.040196 | 0.38613  | 0.010211 | 0.82581  | -0.07951 | 0.08612 |
| 0.31542  | -0.14125 | 0.00222  | 0.038696 | 0.40411  | -0.05365 | 0.24723  | 0.02933  | 0.52721 |
| 0.00112  | -0.27909 | 8.39E-10 | -0.09869 | 0.03299  | -0.14694 | 0.00145  | -0.10314 | 0.02583 |
| 0.56709  | -0.19036 | 3.47E-05 | 0.034424 | 0.458    | -0.05687 | 0.21998  | -0.09077 | 0.04996 |
| 0.61219  | 0.094483 | 0.04126  | 0.145575 | 0.00161  | -0.00177 | 0.96963  | 0.10521  | 0.02298 |
| 0.59699  | -0.1539  | 0.00085  | -0.01781 | 0.70109  | -0.10829 | 0.01924  | 0.045289 | 0.32878 |
| 0.08321  | 0.020358 | 0.6608   | -0.04437 | 0.33872  | -0.15407 | 0.00084  | -0.09985 | 0.03098 |
| 1.67E-10 | 0.412846 | 1.20E-20 | 0.040744 | 0.37968  | 0.071371 | 0.12352  | -0.0091  | 0.84453 |
| 0.04139  | 0.098844 | 0.03272  | 0.018817 | 0.68504  | 0.082397 | 0.07526  | -0.05706 | 0.21843 |
| 0.01435  | 0.117151 | 0.01129  | 0.009542 | 0.83706  | 0.045979 | 0.32146  | 0.078512 | 0.09013 |
| 0.00285  | 0.193791 | 2.48E-05 | -0.0977  | 0.03481  | 0.039322 | 0.39654  | 0.148631 | 0.00128 |
| 7.11E-07 | -0.29348 | 9.93E-11 | -0.04288 | 0.35515  | -0.06341 | 0.17134  | -0.06349 | 0.17079 |
| 0.76033  | 0.212779 | 3.50E-06 | 0.051734 | 0.26454  | 0.101285 | 0.02863  | 0.033297 | 0.47287 |
| 3.68E-06 | 0.264205 | 6.73E-09 | 0.047641 | 0.30426  | 0.06414  | 0.16642  | -0.00798 | 0.86341 |
| 0.02999  | -0.02266 | 0.62518  | -0.09897 | 0.0325   | -0.04254 | 0.35901  | -0.05394 | 0.24466 |
| 0.23396  | 0.056562 | 0.22246  | 0.096432 | 0.03723  | 0.061284 | 0.18615  | 0.038177 | 0.41045 |
| 0.18425  | -0.05132 | 0.26843  | 0.01592  | 0.73149  | 0.008331 | 0.8575   | 0.103036 | 0.02598 |
| 0.08493  | 0.084353 | 0.06857  | 0.079478 | 0.08623  | 0.088364 | 0.05637  | 0.16876  | 0.00025 |
| 0.02531  | -0.04146 | 0.37139  | 0.281678 | 5.77E-10 | -0.02638 | 0.56956  | -0.06578 | 0.15585 |
| 0.78195  | 0.067143 | 0.14742  | 0.074993 | 0.10555  | 0.130327 | 0.00479  | -0.10687 | 0.02089 |
| 1.60E-06 | 0.24311  | 1.04E-07 | 0.037123 | 0.4235   | 0.184202 | 6.22E-05 | 0.060067 | 0.19506 |
| 0.01124  | -0.16936 | 0.00024  | -0.01768 | 0.70321  | -0.15158 | 0.00102  | -0.02537 | 0.58441 |
| 0.31032  | 0.03027  | 0.51405  | 0.076228 | 0.09991  | 0.007049 | 0.87925  | -0.10337 | 0.02549 |
| 0.72544  | 0.057611 | 0.21399  | 0.020393 | 0.66025  | -0.11012 | 0.01728  | 0.103962 | 0.02466 |
| 0.36161  | -0.04513 | 0.3305   | 0.066928 | 0.14872  | 0.041643 | 0.36925  | 0.053574 | 0.2479  |
| 0.42241  | 0.140198 | 0.00239  | -0.0707  | 0.1271   | -0.04613 | 0.31983  | 0.100533 | 0.02984 |
| 0.38702  | 0.083574 | 0.07117  | 0.021679 | 0.64029  | 0.026945 | 0.56136  | -0.05456 | 0.23931 |
| 0.20668  | 0.130356 | 0.00478  | 0.158131 | 0.0006   | 0.202374 | 1.05E-05 | -0.05497 | 0.23578 |
| 0.13997  | 0.152526 | 0.00094  | 0.032642 | 0.48162  | 0.090121 | 0.05162  | -0.08421 | 0.06903 |
| 4.14E-05 | 0.128693 | 0.00535  | -0.03479 | 0.45318  | -0.03382 | 0.46598  | 0.07434  | 0.10862 |
| 5.11E-05 | 0.170969 | 0.00021  | 0.032845 | 0.47889  | 0.075262 | 0.1043   | -0.03049 | 0.51093 |
| 0.41096  | 0.053585 | 0.2478   | 0.043102 | 0.35269  | -0.00932 | 0.84078  | -0.02253 | 0.62729 |
| 0.55162  | -0.13837 | 0.00273  | -0.05723 | 0.21703  | -0.09103 | 0.04931  | -0.11295 | 0.0146  |
| 0.00884  | 0.00543  | 0.90684  | 0.050231 | 0.27868  | -0.03422 | 0.46071  | -0.0712  | 0.12441 |



|          |          |          |          |          |           |         |          |          |
|----------|----------|----------|----------|----------|-----------|---------|----------|----------|
| 0.6569   | -0.04236 | 0.36103  | 0.040855 | 0.37838  | -0.02683  | 0.56303 | -0.17858 | 0.0001   |
| 0.80268  | -0.02301 | 0.61994  | 0.180143 | 9.06E-05 | 0.143747  | 0.00184 | -0.1181  | 0.01064  |
| 0.48056  | 0.061614 | 0.18379  | 0.111315 | 0.0161   | 0.123621  | 0.00748 | 0.018005 | 0.69796  |
| 0.23839  | -0.01402 | 0.7625   | -0.0005  | 0.99147  | -0.01197  | 0.7964  | 0.006768 | 0.88402  |
| 0.00064  | -0.21997 | 1.59E-06 | -0.03851 | 0.4064   | -0.09856  | 0.03322 | 0.042145 | 0.3635   |
| 0.66042  | 0.015283 | 0.74184  | 0.142195 | 0.00207  | 0.039026  | 0.40011 | 0.084657 | 0.06758  |
| 0.10481  | 0.118857 | 0.01015  | 0.087918 | 0.05763  | 0.108615  | 0.01888 | 0.112688 | 0.01483  |
| 0.01383  | 0.225987 | 8.04E-07 | 0.126118 | 0.00635  | 0.012836  | 0.78205 | 0.028903 | 0.53325  |
| 8.87E-08 | 0.141229 | 0.00222  | 0.010238 | 0.82536  | -0.02932  | 0.52734 | -0.06012 | 0.19468  |
| 0.59991  | -0.0703  | 0.12924  | 0.334626 | 1.11E-13 | -0.05184  | 0.26353 | 0.040847 | 0.37848  |
| 0.09413  | -0.24304 | 1.05E-07 | -0.0232  | 0.61702  | -0.06269  | 0.17621 | -0.0511  | 0.27044  |
| 0.72709  | 0.148606 | 0.00128  | -0.00715 | 0.87754  | 0.025683  | 0.57983 | -0.03668 | 0.4291   |
| 8.17E-07 | 0.184674 | 5.95E-05 | -0.06562 | 0.15683  | -0.08884  | 0.05504 | -0.02516 | 0.58764  |
| 9.80E-08 | 0.260823 | 1.06E-08 | 0.03361  | 0.46871  | 0.062142  | 0.18005 | 0.073661 | 0.1119   |
| 8.18E-06 | 0.286926 | 2.66E-10 | 0.085055 | 0.06629  | -0.02597  | 0.5756  | 0.081706 | 0.07775  |
| 0.02002  | 0.023845 | 0.60726  | -0.02249 | 0.6279   | 0.044091  | 0.34175 | -0.02735 | 0.55549  |
| 0.23474  | -0.0723  | 0.11871  | 0.015821 | 0.73311  | 0.028748  | 0.53545 | -0.08557 | 0.06466  |
| 0.00023  | -0.23262 | 3.71E-07 | -0.08454 | 0.06795  | -0.12518  | 0.00676 | 0.022589 | 0.62632  |
| 0.32639  | -0.02875 | 0.53539  | -0.05557 | 0.2307   | -0.03291  | 0.47809 | 0.079799 | 0.08496  |
| 0.95512  | 0.046468 | 0.31633  | 0.057515 | 0.21475  | 0.14725   | 0.00142 | 0.070045 | 0.13066  |
| 0.1124   | 0.022016 | 0.6351   | 0.062914 | 0.17469  | 0.01347   | 0.77156 | 0.039228 | 0.39768  |
| 0.12894  | -0.06336 | 0.17162  | 0.099147 | 0.03218  | 0.132969  | 0.00399 | 0.04975  | 0.28332  |
| 0.00358  | 0.180958 | 8.40E-05 | 0.140981 | 0.00226  | 0.103612  | 0.02515 | -0.01877 | 0.68578  |
| 0.12348  | 0.184783 | 5.89E-05 | -0.05362 | 0.24753  | 0.093179  | 0.04416 | -0.16083 | 0.00048  |
| 3.58E-08 | -0.30897 | 8.69E-12 | -0.12392 | 0.00734  | -0.07659  | 0.0983  | -0.28466 | 3.72E-10 |
| 0.17914  | 0.2077   | 6.02E-06 | 0.070519 | 0.12807  | 0.085884  | 0.06368 | -0.12367 | 0.00746  |
| 3.44E-05 | 0.338927 | 5.13E-14 | 0.121785 | 0.00842  | 0.047078  | 0.31001 | -0.05953 | 0.19912  |
| 2.42E-05 | 0.327964 | 3.58E-13 | 0.046925 | 0.31159  | 0.088095  | 0.05713 | -0.05779 | 0.2126   |
| 0.10277  | -0.05395 | 0.24456  | -0.02364 | 0.61042  | -0.04379  | 0.34502 | -0.12976 | 0.00498  |
| 0.79207  | -0.00405 | 0.93039  | 0.074868 | 0.10613  | 0.018607  | 0.68837 | -0.09953 | 0.03152  |
| 0.94754  | -0.05118 | 0.26972  | -0.01251 | 0.78743  | -0.02736  | 0.55529 | 0.044679 | 0.33534  |
| 0.34177  | -0.05962 | 0.19845  | 0.082874 | 0.07358  | 0.054012  | 0.24405 | -0.06117 | 0.18695  |
| 0.69191  | -0.03276 | 0.48008  | 0.013757 | 0.76684  | -0.01532  | 0.7412  | 0.0139   | 0.76448  |
| 0.21876  | 0.061809 | 0.1824   | 0.029697 | 0.52205  | -3.87E-05 | 0.99933 | -0.04388 | 0.34402  |
| 0.05207  | 0.193079 | 2.66E-05 | 0.106777 | 0.02101  | 0.056394  | 0.22384 | 0.206225 | 7.02E-06 |
| 0.00049  | 0.197045 | 1.80E-05 | 0.001629 | 0.972    | 0.048216  | 0.29844 | 0.133328 | 0.0039   |
| 0.38667  | 0.051432 | 0.26734  | 0.037444 | 0.4195   | -0.09229  | 0.04624 | 0.048761 | 0.29301  |
| 5.16E-07 | -0.13075 | 0.00465  | -0.15206 | 0.00098  | -0.05292  | 0.2537  | -0.10044 | 0.02999  |
| 0.01981  | -0.03727 | 0.42161  | 0.04255  | 0.3589   | 0.002779  | 0.95224 | 0.119016 | 0.01005  |
| 0.00213  | 0.128956 | 0.00526  | -0.00278 | 0.95214  | 0.071029  | 0.12533 | 0.095389 | 0.03935  |
| 0.19174  | -0.0653  | 0.15887  | 0.086941 | 0.06047  | 0.054474  | 0.24003 | -0.00534 | 0.90834  |
| 2.43E-06 | 0.239366 | 1.65E-07 | -0.01084 | 0.81532  | 0.077049  | 0.0963  | -0.08917 | 0.05416  |
| 0.80849  | -0.02537 | 0.58449  | -0.13959 | 0.0025   | -0.10767  | 0.01995 | 0.18866  | 4.08E-05 |
| 0.92065  | 0.025438 | 0.58346  | 0.051288 | 0.26869  | 0.023846  | 0.60724 | -0.01328 | 0.77477  |
| 0.11697  | -0.09967 | 0.03128  | -0.15937 | 0.00055  | -0.04218  | 0.36307 | -0.0991  | 0.03226  |

|          |          |          |          |          |          |          |          |          |
|----------|----------|----------|----------|----------|----------|----------|----------|----------|
| 0.15942  | 0.049261 | 0.28808  | 0.018966 | 0.68269  | 0.064332 | 0.16515  | -0.08248 | 0.07498  |
| 0.44759  | -0.0264  | 0.56933  | -0.0036  | 0.93811  | -0.03974 | 0.39158  | -0.12398 | 0.00731  |
| 0.01693  | 0.229411 | 5.41E-07 | -0.02438 | 0.59918  | -0.04876 | 0.29305  | 0.063221 | 0.1726   |
| 0.04842  | -0.05411 | 0.24317  | -0.10008 | 0.0306   | -0.00623 | 0.89313  | -0.11822 | 0.01056  |
| 7.06E-05 | 0.279757 | 7.62E-10 | 0.017724 | 0.70244  | 0.164967 | 0.00034  | 0.042587 | 0.35848  |
| 0.00249  | 0.074839 | 0.10627  | 0.068943 | 0.13684  | 0.110178 | 0.01723  | 0.05908  | 0.20251  |
| 0.03841  | 0.246945 | 6.44E-08 | 0.131644 | 0.00438  | 0.117015 | 0.01139  | 0.022159 | 0.63292  |
| 2.05E-05 | 0.234446 | 2.98E-07 | 0.164313 | 0.00036  | -0.03373 | 0.4671   | 0.057989 | 0.21099  |
| 0.03957  | -0.02081 | 0.65369  | 0.352359 | 4.25E-15 | -0.054   | 0.24413  | -0.04813 | 0.29931  |
| 0.00766  | 0.187309 | 4.64E-05 | 0.067034 | 0.14807  | 0.247618 | 5.91E-08 | 0.104453 | 0.02398  |
| 0.00213  | 0.170585 | 0.00021  | 0.04904  | 0.29026  | 0.009324 | 0.84073  | 0.077444 | 0.0946   |
| 0.00295  | -0.15653 | 0.00069  | -0.09496 | 0.04025  | -0.04932 | 0.28752  | -0.14309 | 0.00194  |
| 0.13121  | -0.08208 | 0.07641  | 0.013896 | 0.76455  | -0.00646 | 0.88929  | 0.006552 | 0.88769  |
| 0.56923  | 0.064119 | 0.16656  | 0.069412 | 0.13419  | 0.039214 | 0.39785  | 0.034214 | 0.46076  |
| 7.01E-05 | -0.14097 | 0.00226  | -0.00446 | 0.92345  | 0.003485 | 0.94014  | 0.017649 | 0.70364  |
| 0.00011  | -0.27539 | 1.43E-09 | -0.03893 | 0.40127  | -0.08817 | 0.05691  | -0.07885 | 0.08873  |
| 0.64322  | 0.07249  | 0.11773  | 0.018663 | 0.68748  | 0.131657 | 0.00437  | 0.002969 | 0.94897  |
| 0.24668  | 0.023262 | 0.61607  | 0.058182 | 0.20948  | 0.140351 | 0.00237  | -0.01187 | 0.79805  |
| 0.07678  | -0.09844 | 0.03344  | 0.042505 | 0.35941  | 0.021859 | 0.63752  | 0.008047 | 0.86232  |
| 0.36348  | 0.199994 | 1.33E-05 | 0.092089 | 0.04671  | 0.070314 | 0.12919  | 0.076041 | 0.10075  |
| 0.14268  | 0.117846 | 0.01081  | 0.174798 | 0.00015  | 0.075823 | 0.10173  | 0.219779 | 1.62E-06 |
| 0.04607  | 0.206946 | 6.51E-06 | 0.080985 | 0.08041  | 0.054944 | 0.236    | -0.04388 | 0.34405  |
| 0.99897  | 0.009803 | 0.83267  | -0.00781 | 0.86637  | -0.03345 | 0.47079  | -0.08129 | 0.07928  |
| 0.42379  | 0.048199 | 0.29862  | 0.031986 | 0.49048  | 0.03214  | 0.4884   | 0.059218 | 0.20146  |
| 0.05326  | 0.222698 | 1.17E-06 | -0.00236 | 0.95945  | 0.076417 | 0.09907  | -0.04031 | 0.38483  |
| 0.41822  | 0.087632 | 0.05845  | 0.143527 | 0.00187  | 0.08807  | 0.0572   | -0.00626 | 0.89271  |
| 0.41221  | 0.029754 | 0.52126  | -0.01534 | 0.7409   | -0.09338 | 0.0437   | -0.05456 | 0.23926  |
| 0.00051  | 0.333071 | 1.46E-13 | 0.105988 | 0.02198  | 0.293157 | 1.04E-10 | 0.055086 | 0.23478  |
| 0.03527  | 0.087649 | 0.0584   | 0.087624 | 0.05847  | 0.106526 | 0.02131  | 0.075328 | 0.10399  |
| 0.9244   | -0.05109 | 0.27053  | 0.137791 | 0.00285  | 0.109285 | 0.01816  | 0.06448  | 0.16419  |
| 0.47466  | -0.07521 | 0.10455  | -0.01796 | 0.69871  | 0.035285 | 0.44683  | 0.075626 | 0.10263  |
| 0.70197  | 0.166335 | 0.00031  | 0.053204 | 0.25118  | 0.151084 | 0.00106  | 0.005011 | 0.914    |
| 0.09213  | -0.00024 | 0.99594  | 0.109219 | 0.01823  | 0.079989 | 0.08422  | 0.108647 | 0.01885  |
| 0.26125  | 0.167402 | 0.00028  | 0.11299  | 0.01457  | -0.00325 | 0.94418  | -0.08037 | 0.08274  |
| 0.15795  | 0.146364 | 0.00152  | 0.010392 | 0.82277  | -0.00784 | 0.86575  | -0.16876 | 0.00025  |
| 0.00775  | -0.15149 | 0.00102  | 0.019875 | 0.66837  | -0.05429 | 0.24163  | 0.110628 | 0.01677  |
| 0.23047  | -0.05769 | 0.2134   | -0.00285 | 0.95102  | -0.01924 | 0.67837  | -0.04632 | 0.31791  |
| 0.20025  | 0.120368 | 0.00922  | 0.032097 | 0.48898  | -0.04145 | 0.37145  | 0.116239 | 0.01195  |
| 0.28554  | 0.07597  | 0.10107  | -0.02168 | 0.64032  | 0.02999  | 0.51796  | 0.061794 | 0.1825   |
| 0.08911  | 0.157026 | 0.00066  | -0.01324 | 0.77532  | 0.007911 | 0.86461  | 0.080995 | 0.08038  |
| 0.54922  | 0.022147 | 0.6331   | 0.097949 | 0.03433  | 0.068955 | 0.13678  | 0.073794 | 0.11125  |
| 0.01154  | -0.1748  | 0.00015  | -0.06361 | 0.16997  | -0.03551 | 0.44391  | 0.065618 | 0.15685  |
| 6.58E-06 | 0.307737 | 1.06E-11 | 0.141241 | 0.00222  | 0.038533 | 0.4061   | 0.052983 | 0.25316  |
| 4.99E-05 | 0.095828 | 0.03845  | 0.092583 | 0.04554  | 0.063972 | 0.16754  | 0.031174 | 0.50157  |
| 1.09E-07 | 0.225067 | 8.93E-07 | 0.085132 | 0.06604  | 0.026517 | 0.56759  | 0.208972 | 5.26E-06 |

|          |          |          |          |          |          |          |          |          |
|----------|----------|----------|----------|----------|----------|----------|----------|----------|
| 0.00031  | 0.208426 | 5.57E-06 | 0.04189  | 0.3664   | 0.085369 | 0.06529  | 0.124287 | 0.00716  |
| 0.80613  | -0.02253 | 0.62729  | 0.031715 | 0.49417  | 0.070242 | 0.12958  | 0.08883  | 0.05508  |
| 0.77812  | -0.00912 | 0.84416  | 0.037942 | 0.41334  | -0.02679 | 0.5636   | 0.094669 | 0.04086  |
| 0.33211  | -0.0126  | 0.78598  | -0.05891 | 0.20379  | 0.130852 | 0.00462  | -0.15816 | 0.0006   |
| 0.01267  | -0.10113 | 0.02888  | 0.040417 | 0.38352  | 0.088827 | 0.05508  | 0.043254 | 0.351    |
| 2.13E-07 | 0.221798 | 1.29E-06 | 0.128477 | 0.00543  | -0.01472 | 0.75103  | 0.209658 | 4.89E-06 |
| 0.73216  | 0.018321 | 0.69293  | 0.044758 | 0.33448  | 0.118622 | 0.0103   | -0.07965 | 0.08556  |
| 0.01287  | 0.075587 | 0.10281  | -0.06165 | 0.18351  | -0.05863 | 0.20595  | 0.139012 | 0.00261  |
| 0.00025  | 0.122103 | 0.00825  | -0.03966 | 0.39253  | -0.04857 | 0.29488  | -0.0293  | 0.5276   |
| 0.00341  | 0.173378 | 0.00017  | -0.01115 | 0.81006  | -0.13975 | 0.00247  | -0.00796 | 0.86376  |
| 0.33768  | -0.04975 | 0.28337  | 0.066446 | 0.15167  | 0.009388 | 0.83965  | 0.049288 | 0.28782  |
| 0.74633  | 0.03472  | 0.45415  | 0.072231 | 0.11905  | 0.024756 | 0.59359  | -0.0794  | 0.08654  |
| 0.02105  | 0.22726  | 6.94E-07 | 0.212628 | 3.56E-06 | 0.188007 | 4.34E-05 | 0.134476 | 0.0036   |
| 0.00016  | 0.188687 | 4.07E-05 | -0.04997 | 0.28117  | 0.020029 | 0.66596  | -0.09992 | 0.03085  |
| 0.00134  | 0.163758 | 0.00038  | 0.008803 | 0.84953  | -0.00794 | 0.86414  | -0.02293 | 0.62109  |
| 0.15703  | -0.02688 | 0.56237  | 0.019675 | 0.67151  | 0.051936 | 0.26268  | -0.15944 | 0.00054  |
| 0.00466  | -0.12621 | 0.00631  | 0.097907 | 0.03441  | -0.02153 | 0.64265  | -0.07962 | 0.08566  |
| 0.00188  | 0.186943 | 4.80E-05 | -0.08834 | 0.05643  | 0.034509 | 0.45689  | -0.02475 | 0.59361  |
| 0.94815  | 0.018971 | 0.6826   | 0.01461  | 0.75283  | -0.00222 | 0.96188  | 0.027795 | 0.54906  |
| 0.73075  | 0.009873 | 0.8315   | 0.072362 | 0.11838  | 0.144442 | 0.00175  | 0.142131 | 0.00208  |
| 0.82418  | -0.00526 | 0.90967  | 0.090776 | 0.04994  | -0.02398 | 0.60528  | -0.09838 | 0.03354  |
| 0.50951  | -0.11453 | 0.01327  | 0.033488 | 0.47033  | -0.00889 | 0.84801  | -0.06512 | 0.16     |
| 0.0001   | 0.163536 | 0.00039  | -0.01417 | 0.76005  | 0.009041 | 0.8455   | -0.0304  | 0.51226  |
| 0.8678   | 0.047918 | 0.30144  | 0.198413 | 1.57E-05 | 0.133759 | 0.00378  | 0.02773  | 0.55     |
| 0.95859  | 0.048226 | 0.29835  | 0.132265 | 0.00419  | 0.082225 | 0.07587  | 0.01489  | 0.74826  |
| 5.76E-06 | 0.328382 | 3.33E-13 | 0.075312 | 0.10407  | 0.080658 | 0.08165  | 0.121091 | 0.00881  |
| 0.22699  | 0.006334 | 0.89142  | -0.03748 | 0.41911  | -0.02757 | 0.55223  | 0.050597 | 0.2752   |
| 0.07699  | -0.21159 | 3.98E-06 | 0.067529 | 0.1451   | -0.075   | 0.10551  | -0.03956 | 0.39367  |
| 0.01685  | -0.00251 | 0.95681  | 0.118145 | 0.01061  | 0.057847 | 0.21211  | -0.0252  | 0.58706  |
| 0.67004  | 0.035082 | 0.44945  | 0.057335 | 0.21619  | 0.006898 | 0.88181  | -0.26247 | 8.51E-09 |
| 0.0022   | -0.14164 | 0.00215  | 0.059267 | 0.20108  | 0.015789 | 0.73363  | -0.08103 | 0.08026  |
| 0.15819  | -0.08542 | 0.06514  | 0.155147 | 0.00077  | 0.045322 | 0.32843  | 0.089234 | 0.05397  |
| 0.90908  | 0.201894 | 1.10E-05 | 0.069192 | 0.13543  | 0.04439  | 0.33848  | 0.030068 | 0.51686  |
| 0.60308  | -0.04842 | 0.2964   | -0.07824 | 0.09126  | -0.11664 | 0.01165  | 0.078698 | 0.08937  |
| 0.07634  | -0.04129 | 0.37326  | 0.129627 | 0.00502  | 0.288989 | 1.96E-10 | 0.051826 | 0.26368  |
| 2.67E-05 | 0.283852 | 4.20E-10 | 0.130032 | 0.00489  | 0.048766 | 0.29296  | 0.058735 | 0.20517  |
| 0.12114  | 0.171575 | 0.00019  | 0.16056  | 0.0005   | 0.108702 | 0.01879  | -0.18601 | 5.25E-05 |
| 0.09549  | 0.165251 | 0.00034  | -0.00906 | 0.84518  | 0.024069 | 0.60388  | 0.031911 | 0.4915   |
| 0.22962  | 0.05353  | 0.24829  | 0.211469 | 4.03E-06 | 0.059193 | 0.20165  | 0.157336 | 0.00064  |
| 0.93224  | -0.02149 | 0.6432   | 0.046394 | 0.3171   | 0.016863 | 0.71626  | 0.029231 | 0.52861  |
| 0.96348  | 0.068295 | 0.14058  | 0.265684 | 5.50E-09 | 0.085749 | 0.0641   | 0.152699 | 0.00093  |
| 0.90135  | 0.049442 | 0.28631  | 0.067913 | 0.14282  | 0.034937 | 0.45132  | 0.037964 | 0.41307  |
| 0.20041  | 0.145675 | 0.0016   | 0.035984 | 0.43788  | -0.00901 | 0.84595  | 0.099888 | 0.03091  |
| 0.56841  | 0.096609 | 0.03689  | 0.067823 | 0.14335  | 0.005767 | 0.90109  | 0.024575 | 0.5963   |
| 0.10065  | 0.145285 | 0.00164  | 0.01412  | 0.76087  | 0.068352 | 0.14025  | 0.020201 | 0.66325  |

|          |           |          |          |          |          |          |          |          |
|----------|-----------|----------|----------|----------|----------|----------|----------|----------|
| 1.02E-05 | 0.254159  | 2.56E-08 | 0.058425 | 0.20757  | 0.226709 | 7.39E-07 | 0.112866 | 0.01467  |
| 4.55E-07 | -0.28665  | 2.77E-10 | -0.11875 | 0.01022  | -0.12582 | 0.00648  | -0.03971 | 0.39189  |
| 0.39482  | 0.029264  | 0.52815  | 0.027784 | 0.54922  | 0.020446 | 0.65943  | -0.06888 | 0.13719  |
| 0.40374  | 0.048316  | 0.29745  | 0.02776  | 0.54957  | 0.060631 | 0.1909   | 0.058218 | 0.20919  |
| 0.43993  | 0.009823  | 0.83234  | -0.03397 | 0.46396  | -0.12103 | 0.00884  | -0.09289 | 0.04483  |
| 0.12981  | -0.08461  | 0.06773  | 0.032132 | 0.4885   | 0.234045 | 3.13E-07 | -0.05605 | 0.22671  |
| 0.25268  | 0.019827  | 0.66912  | -0.00432 | 0.92586  | -0.11418 | 0.01355  | -0.0492  | 0.28869  |
| 0.01793  | 0.137325  | 0.00294  | 0.107902 | 0.01968  | 0.049875 | 0.28211  | 0.032643 | 0.4816   |
| 0.63297  | 0.02873   | 0.5357   | -0.01397 | 0.76329  | -0.00098 | 0.98307  | -0.02263 | 0.62562  |
| 0.11754  | -0.074    | 0.11024  | 0.086703 | 0.06118  | -0.05463 | 0.23869  | -0.04328 | 0.35075  |
| 0.40453  | 0.16722   | 0.00028  | -0.00142 | 0.97566  | -0.02695 | 0.5613   | -0.03166 | 0.49488  |
| 0.00018  | -0.1708   | 0.00021  | -0.07208 | 0.11984  | -0.05656 | 0.22249  | -0.13671 | 0.00307  |
| 0.6524   | -0.08442  | 0.06835  | -0.03393 | 0.46452  | 0.028419 | 0.54013  | -0.15478 | 0.00079  |
| 0.049    | 0.131845  | 0.00432  | -0.0204  | 0.66012  | -0.04413 | 0.34137  | -0.02121 | 0.64757  |
| 0.92731  | -0.05204  | 0.26172  | -0.0706  | 0.12763  | -0.10564 | 0.02241  | 0.07392  | 0.11064  |
| 0.00018  | -0.20395  | 8.90E-06 | 0.040625 | 0.38108  | -0.09634 | 0.03743  | 0.019566 | 0.67321  |
| 0.01928  | -0.07537  | 0.10378  | 0.067906 | 0.14286  | -0.07083 | 0.12638  | 0.043725 | 0.34577  |
| 2.76E-07 | 0.371025  | 1.09E-16 | 0.0473   | 0.30773  | 0.023949 | 0.60569  | 0.068788 | 0.13773  |
| 0.13348  | 0.024732  | 0.59396  | -0.02493 | 0.59101  | -0.04892 | 0.29141  | 0.022902 | 0.62155  |
| 9.99E-05 | 0.119297  | 0.00987  | 0.027801 | 0.54897  | 0.028716 | 0.5359   | 0.118145 | 0.01061  |
| 0.1684   | 0.095286  | 0.03956  | 0.093029 | 0.0445   | 0.043153 | 0.35212  | 0.098096 | 0.03406  |
| 0.30553  | 0.107775  | 0.01983  | 0.079748 | 0.08516  | 0.055589 | 0.23053  | 0.107676 | 0.01994  |
| 0.00027  | -0.1046   | 0.02378  | 0.046852 | 0.31234  | -0.02042 | 0.65978  | 0.042742 | 0.35673  |
| 0.23124  | -0.04539  | 0.32767  | 0.039614 | 0.39304  | 0.026028 | 0.57476  | 0.085997 | 0.06333  |
| 7.95E-07 | 0.287278  | 2.53E-10 | 0.18651  | 5.01E-05 | 0.089651 | 0.05286  | 0.024157 | 0.60257  |
| 3.78E-06 | 0.213778  | 3.14E-06 | 0.044628 | 0.33589  | -0.06571 | 0.15628  | 0.259138 | 1.33E-08 |
| 0.21705  | 0.05573   | 0.22934  | 0.08591  | 0.0636   | 0.042524 | 0.35919  | 0.067547 | 0.14499  |
| 1.52E-11 | 0.461146  | 5.74E-26 | 0.192172 | 2.91E-05 | 0.169023 | 0.00024  | 0.241407 | 1.28E-07 |
| 0.11693  | -0.02853  | 0.53851  | -0.03518 | 0.44814  | -0.08338 | 0.07183  | -0.11397 | 0.01373  |
| 0.03009  | -0.07376  | 0.11143  | -0.04226 | 0.36215  | -0.09088 | 0.04968  | -0.13727 | 0.00295  |
| 3.66E-05 | -0.29904  | 4.21E-11 | -0.04028 | 0.38517  | -0.07204 | 0.12003  | -0.0306  | 0.50953  |
| 0.58237  | -0.01044  | 0.82199  | -0.01939 | 0.67596  | -0.08434 | 0.0686   | 0.15292  | 0.00092  |
| 0.00372  | 0.215891  | 2.49E-06 | 0.026614 | 0.56618  | 0.057509 | 0.2148   | 0.066275 | 0.15273  |
| 0.0429   | 0.122783  | 0.0079   | 0.045169 | 0.33006  | 0.033212 | 0.474    | -0.05528 | 0.23318  |
| 0.97874  | -7.56E-05 | 0.9987   | 0.143018 | 0.00195  | -0.01052 | 0.8207   | 0.000997 | 0.98286  |
| 0.00973  | -0.09582  | 0.03845  | 0.050943 | 0.27192  | -0.00092 | 0.98418  | 0.029604 | 0.52337  |
| 0.84489  | -0.13235  | 0.00417  | 0.11234  | 0.01515  | -0.06745 | 0.14554  | -0.0411  | 0.37554  |
| 0.00031  | 0.349484  | 7.32E-15 | 0.157289 | 0.00065  | 0.172769 | 0.00018  | 0.157217 | 0.00065  |
| 0.11827  | 0.053126  | 0.25188  | 0.102608 | 0.0266   | 0.015648 | 0.73591  | 0.028084 | 0.54492  |
| 0.01183  | 0.215955  | 2.48E-06 | 0.157584 | 0.00063  | 0.187341 | 4.63E-05 | 0.113919 | 0.01377  |
| 0.0635   | 0.141701  | 0.00214  | -0.01653 | 0.72157  | 0.034686 | 0.45459  | -0.01845 | 0.6908   |
| 0.00015  | -0.12161  | 0.00852  | 0.052847 | 0.25438  | -0.09779 | 0.03463  | -0.07502 | 0.10541  |
| 0.03187  | 0.067983  | 0.14241  | 0.065317 | 0.15876  | 0.058934 | 0.20363  | 0.055025 | 0.23531  |
| 0.00022  | 0.074422  | 0.10823  | -0.06689 | 0.14894  | -0.13981 | 0.00246  | 0.04479  | 0.33414  |
| 0.62619  | -0.14761  | 0.00138  | -0.09608 | 0.03794  | 0.06015  | 0.19444  | -0.16393 | 0.00037  |

|          |          |          |          |          |          |         |          |          |
|----------|----------|----------|----------|----------|----------|---------|----------|----------|
| 0.07012  | 0.025752 | 0.57883  | 0.062908 | 0.17473  | 0.0688   | 0.13766 | 0.161865 | 0.00045  |
| 0.05785  | 0.082671 | 0.07429  | 0.000834 | 0.98565  | 0.020814 | 0.65369 | -0.11973 | 0.0096   |
| 0.86979  | 0.030118 | 0.51617  | 0.116448 | 0.01179  | 0.060201 | 0.19407 | 0.124953 | 0.00686  |
| 0.84063  | 0.006876 | 0.8822   | 0.059539 | 0.19902  | 0.042432 | 0.36024 | -0.02409 | 0.60363  |
| 9.44E-07 | -0.30114 | 3.03E-11 | -0.02429 | 0.60062  | -0.07452 | 0.10775 | -0.07347 | 0.11284  |
| 0.78033  | 0.034926 | 0.45148  | 0.100352 | 0.03014  | 0.072388 | 0.11824 | 0.095445 | 0.03923  |
| 1.34E-05 | 0.291787 | 1.28E-10 | 0.078653 | 0.08955  | 0.132839 | 0.00403 | 0.187117 | 4.73E-05 |
| 0.0447   | 0.10521  | 0.02298  | 0.048157 | 0.29904  | -0.00658 | 0.88728 | -0.18974 | 3.68E-05 |
| 0.49162  | -0.00962 | 0.83571  | 0.039921 | 0.38939  | -0.0793  | 0.08694 | -0.07176 | 0.12148  |
| 0.49853  | 0.128232 | 0.00552  | 0.076964 | 0.09667  | 0.071117 | 0.12486 | 0.066961 | 0.14852  |
| 0.63606  | -0.07308 | 0.11475  | -0.03311 | 0.47534  | -0.01317 | 0.77647 | -0.00862 | 0.85259  |
| 0.00702  | -0.21363 | 3.19E-06 | -0.0504  | 0.27705  | -0.16994 | 0.00022 | -0.07393 | 0.11059  |
| 0.03392  | 0.253732 | 2.70E-08 | 0.074561 | 0.10757  | 0.123528 | 0.00753 | 0.093777 | 0.04281  |
| 3.68E-07 | 0.14013  | 0.0024   | -0.0268  | 0.56352  | 0.019443 | 0.67515 | 0.11571  | 0.01234  |
| 0.87623  | 0.041319 | 0.37299  | 0.058731 | 0.2052   | 0.016999 | 0.71407 | -0.02817 | 0.54371  |
| 0.00189  | -0.10183 | 0.02778  | -0.02798 | 0.54639  | -0.01638 | 0.72404 | -0.05809 | 0.21023  |
| 0.00023  | -0.08503 | 0.06636  | -0.03186 | 0.49217  | -0.06733 | 0.14627 | 0.039885 | 0.38981  |
| 0.00255  | 0.059773 | 0.19726  | -0.04708 | 0.30994  | -0.13548 | 0.00335 | 0.083541 | 0.07129  |
| 0.03156  | -0.07522 | 0.10448  | -0.03114 | 0.50198  | -0.10342 | 0.02542 | -0.03795 | 0.41329  |
| 0.93644  | 0.085015 | 0.06642  | 0.07609  | 0.10053  | 0.034833 | 0.45268 | 0.057358 | 0.21601  |
| 0.50216  | 0.182624 | 7.21E-05 | 0.139092 | 0.00259  | 0.158049 | 0.00061 | 0.03867  | 0.40443  |
| 0.10628  | 0.260367 | 1.13E-08 | 0.296826 | 5.94E-11 | 0.176979 | 0.00012 | 0.074411 | 0.10828  |
| 0.80419  | 0.021349 | 0.6454   | 0.084406 | 0.0684   | -0.01527 | 0.74199 | 0.053992 | 0.24422  |
| 0.01511  | 0.011096 | 0.81099  | 0.16125  | 0.00047  | 0.035094 | 0.4493  | -0.00062 | 0.9894   |
| 0.00977  | -0.08941 | 0.05351  | 0.04028  | 0.38513  | 0.040164 | 0.3865  | -0.05315 | 0.25166  |
| 0.00468  | 0.229046 | 5.64E-07 | 0.111943 | 0.01551  | 0.113533 | 0.01409 | 0.091376 | 0.04844  |
| 0.00114  | -0.02477 | 0.59344  | 0.008148 | 0.86059  | 0.07285  | 0.11591 | -0.01078 | 0.81624  |
| 0.53494  | -0.08543 | 0.06511  | -0.03931 | 0.3967   | -0.08892 | 0.05484 | -0.17795 | 0.00011  |
| 0.9683   | 0.068898 | 0.1371   | 0.077101 | 0.09608  | 0.073051 | 0.1149  | 0.021332 | 0.64565  |
| 0.5351   | 0.036433 | 0.43217  | 0.029657 | 0.52261  | 0.031315 | 0.49963 | 0.06927  | 0.13499  |
| 0.00111  | 0.244469 | 8.78E-08 | 0.030051 | 0.51711  | 0.03219  | 0.48771 | -0.02958 | 0.52376  |
| 0.61472  | 0.067461 | 0.14551  | -0.00605 | 0.89628  | -0.01737 | 0.70811 | -0.07959 | 0.08578  |
| 0.97412  | 0.053833 | 0.24561  | 0.096896 | 0.03633  | 0.090378 | 0.05096 | 0.040898 | 0.37788  |
| 0.12639  | 0.133725 | 0.00379  | 0.070392 | 0.12876  | 0.139393 | 0.00254 | 0.026141 | 0.5731   |
| 0.12352  | 0.010871 | 0.81475  | -0.11241 | 0.01509  | 0.021291 | 0.64628 | 0.069726 | 0.13243  |
| 0.27849  | 0.070044 | 0.13067  | 0.068751 | 0.13794  | 0.072629 | 0.11702 | 3.40E-05 | 0.99941  |
| 0.40158  | 0.063924 | 0.16786  | 0.105076 | 0.02315  | 0.117095 | 0.01133 | 0.147945 | 0.00134  |
| 1.78E-05 | 0.223031 | 1.13E-06 | 0.093775 | 0.04281  | 0.072123 | 0.1196  | 0.273392 | 1.89E-09 |
| 4.24E-07 | 0.210905 | 4.28E-06 | 0.048949 | 0.29116  | 0.168299 | 0.00026 | 0.137539 | 0.0029   |
| 0.80484  | 0.051794 | 0.26398  | 0.015414 | 0.73972  | 0.106028 | 0.02193 | -0.02634 | 0.57021  |
| 0.10881  | 0.197101 | 1.79E-05 | 0.078051 | 0.09204  | 0.012162 | 0.79321 | 0.00834  | 0.85735  |
| 0.0006   | 0.273939 | 1.75E-09 | 0.017608 | 0.7043   | 0.00879  | 0.84974 | 0.036365 | 0.43303  |
| 0.05145  | 0.122801 | 0.00789  | 0.347224 | 1.12E-14 | 0.002495 | 0.95712 | 0.029406 | 0.52614  |
| 0.0148   | -0.16197 | 0.00044  | 0.063614 | 0.16993  | 0.006342 | 0.89128 | 0.048537 | 0.29524  |
| 0.15189  | -0.01834 | 0.69266  | 0.077847 | 0.09289  | 0.039388 | 0.39575 | 0.000742 | 0.98725  |

|          |          |          |          |          |          |          |          |          |
|----------|----------|----------|----------|----------|----------|----------|----------|----------|
| 0.00057  | 0.263046 | 7.87E-09 | 0.161918 | 0.00044  | -0.00074 | 0.98725  | -0.03519 | 0.44799  |
| 0.93838  | 0.054887 | 0.23648  | 0.015122 | 0.74447  | 0.176079 | 0.00013  | -0.0746  | 0.10738  |
| 0.0744   | 0.073161 | 0.11436  | 0.133825 | 0.00376  | 0.04835  | 0.29711  | -0.02041 | 0.66005  |
| 0.73651  | 0.030475 | 0.51121  | 0.192405 | 2.84E-05 | 0.011127 | 0.81047  | -0.00655 | 0.88777  |
| 0.00396  | 0.213881 | 3.11E-06 | 0.358298 | 1.36E-15 | 0.063203 | 0.17272  | 0.074796 | 0.10647  |
| 0.8312   | 0.033606 | 0.46876  | 0.05613  | 0.22602  | -0.06623 | 0.15298  | -0.1612  | 0.00047  |
| 0.0352   | 0.183377 | 6.72E-05 | 0.069248 | 0.13511  | 0.205476 | 7.59E-06 | 0.027093 | 0.55921  |
| 0.01829  | -0.16859 | 0.00025  | 0.186105 | 5.20E-05 | -0.00899 | 0.84632  | 0.039299 | 0.39682  |
| 0.28811  | 0.029549 | 0.52413  | -0.04124 | 0.37384  | -0.02262 | 0.62578  | -0.03776 | 0.41557  |
| 0.00168  | -0.11514 | 0.01278  | -0.09191 | 0.04714  | -0.02044 | 0.65947  | 0.11493  | 0.01295  |
| 0.08765  | -0.10611 | 0.02183  | -0.02833 | 0.54137  | -0.06005 | 0.19521  | 0.071616 | 0.12223  |
| 0.55566  | -0.03145 | 0.49782  | -0.07886 | 0.08871  | -0.0716  | 0.1223   | 0.076112 | 0.10043  |
| 0.29066  | 0.038403 | 0.40768  | -0.00339 | 0.94173  | -0.0174  | 0.70769  | 0.10706  | 0.02067  |
| 0.24159  | 0.080291 | 0.08305  | 0.155397 | 0.00075  | 0.030767 | 0.50717  | -0.07138 | 0.12347  |
| 0.00015  | -0.24312 | 1.04E-07 | -0.02043 | 0.65964  | -0.07426 | 0.109    | 0.020953 | 0.65154  |
| 0.27971  | -0.10504 | 0.0232   | -0.01488 | 0.74835  | -0.03422 | 0.4607   | 0.136662 | 0.00308  |
| 0.36404  | -0.05658 | 0.22232  | 0.038739 | 0.40359  | -0.00394 | 0.93235  | 0.008408 | 0.8562   |
| 1.11E-07 | -0.32501 | 5.98E-13 | -0.13423 | 0.00366  | -0.15949 | 0.00054  | -0.04585 | 0.32278  |
| 0.13174  | 0.064751 | 0.16242  | 0.19492  | 2.22E-05 | -0.04356 | 0.34755  | 0.048179 | 0.29881  |
| 0.85545  | 0.025944 | 0.57599  | -0.06034 | 0.19304  | -0.12495 | 0.00686  | -0.0128  | 0.78263  |
| 0.70536  | 0.055099 | 0.23467  | 0.059668 | 0.19805  | 0.060449 | 0.19223  | 0.047003 | 0.31079  |
| 0.06122  | 0.060015 | 0.19545  | 0.057121 | 0.21791  | 0.024756 | 0.59359  | 0.048547 | 0.29513  |
| 0.02762  | 0.23603  | 2.47E-07 | 0.144849 | 0.0017   | 0.113047 | 0.01451  | 0.070648 | 0.12738  |
| 0.00084  | 0.161859 | 0.00045  | -0.04263 | 0.35794  | 0.099163 | 0.03216  | 0.025855 | 0.57731  |
| 0.08785  | 0.023989 | 0.60509  | 0.02193  | 0.63642  | 0.015885 | 0.73206  | 0.065673 | 0.15651  |
| 0.73889  | 0.107166 | 0.02054  | 0.144499 | 0.00174  | -0.0214  | 0.64454  | -0.04385 | 0.34434  |
| 0.12883  | 0.136029 | 0.00322  | 0.00236  | 0.95943  | 0.010533 | 0.82042  | -0.03768 | 0.41657  |
| 0.0015   | 0.193523 | 2.55E-05 | 0.063696 | 0.16938  | 0.051862 | 0.26335  | 0.069213 | 0.13531  |
| 0.87403  | -0.0046  | 0.92098  | 0.125498 | 0.00662  | -0.14452 | 0.00174  | 0.041955 | 0.36567  |
| 0.00036  | -0.09449 | 0.04124  | 0.013832 | 0.76561  | 0.012061 | 0.7949   | 0.082196 | 0.07598  |
| 0.12586  | -0.07704 | 0.09635  | 0.035903 | 0.4389   | -0.00778 | 0.86687  | 0.143093 | 0.00194  |
| 0.00279  | 0.185435 | 5.54E-05 | 0.158484 | 0.00059  | 0.079834 | 0.08483  | 0.279796 | 7.58E-10 |
| 0.01348  | 0.153017 | 0.00091  | 0.02326  | 0.61611  | 0.000479 | 0.99176  | -0.0441  | 0.34162  |
| 0.34999  | 0.105126 | 0.02309  | 0.000617 | 0.9894   | 0.056462 | 0.22328  | -0.11916 | 0.00996  |
| 0.00404  | 0.137357 | 0.00293  | 0.045121 | 0.33057  | 0.053273 | 0.25057  | -0.0102  | 0.82603  |
| 0.00093  | -0.27948 | 7.93E-10 | 0.024011 | 0.60475  | -0.14092 | 0.00227  | -0.13053 | 0.00472  |
| 0.4626   | -0.00674 | 0.88445  | 0.017279 | 0.70957  | 0.085255 | 0.06565  | 0.05209  | 0.26126  |
| 0.02273  | 0.036113 | 0.43623  | 0.155748 | 0.00073  | 0.048346 | 0.29714  | -0.03857 | 0.40563  |
| 0.15785  | -0.03096 | 0.50452  | -0.04239 | 0.36067  | -0.09035 | 0.05103  | 0.084029 | 0.06964  |
| 3.59E-07 | -0.22688 | 7.25E-07 | 0.046611 | 0.31483  | 0.000255 | 0.99561  | -0.08871 | 0.05542  |
| 0.10976  | -0.05601 | 0.22698  | -0.18878 | 4.03E-05 | -0.00972 | 0.83401  | -0.2021  | 1.08E-05 |
| 9.42E-07 | 0.192573 | 2.79E-05 | 0.158776 | 0.00057  | 0.061935 | 0.18151  | 0.025988 | 0.57535  |
| 6.74E-08 | 0.29426  | 8.81E-11 | 0.102168 | 0.02726  | 0.033154 | 0.47478  | 0.043779 | 0.34517  |
| 2.32E-06 | -0.22614 | 7.90E-07 | 0.191012 | 3.25E-05 | 0.025462 | 0.5831   | -0.03448 | 0.45725  |
| 1.77E-09 | 0.314203 | 3.69E-12 | 0.0222   | 0.63228  | 0.06362  | 0.1699   | -0.03878 | 0.40308  |

|          |          |          |          |          |          |         |          |          |
|----------|----------|----------|----------|----------|----------|---------|----------|----------|
| 0.01219  | 0.14284  | 0.00197  | 0.111459 | 0.01597  | 0.07687  | 0.09708 | 0.059632 | 0.19832  |
| 0.00109  | -0.18144 | 8.04E-05 | -0.03017 | 0.51541  | 0.008311 | 0.85784 | -0.00573 | 0.90176  |
| 0.75751  | 0.063597 | 0.17005  | 0.117591 | 0.01099  | 0.100435 | 0.03    | 0.089434 | 0.05344  |
| 0.91743  | 0.09588  | 0.03834  | 0.089598 | 0.053    | 0.066306 | 0.15254 | -0.03739 | 0.42012  |
| 0.04159  | 0.101867 | 0.02772  | 0.278706 | 8.87E-10 | 0.05747  | 0.21511 | 0.08135  | 0.07906  |
| 2.01E-06 | 0.299372 | 4.00E-11 | 0.010761 | 0.81659  | 0.011998 | 0.79595 | 0.115573 | 0.01245  |
| 0.00032  | 0.097133 | 0.03587  | -0.00524 | 0.91005  | 0.032946 | 0.47755 | -0.06688 | 0.14902  |
| 0.58741  | 0.082308 | 0.07558  | 0.038964 | 0.40086  | 0.088198 | 0.05683 | 0.049036 | 0.2903   |
| 0.01495  | -0.13544 | 0.00336  | 0.011831 | 0.79873  | -0.02823 | 0.54286 | -0.0385  | 0.40655  |
| 0.02655  | 0.22996  | 5.07E-07 | 0.064287 | 0.16545  | 0.020906 | 0.65226 | 0.036115 | 0.43621  |
| 0.00684  | 0.010441 | 0.82195  | 0.092025 | 0.04686  | 0.092553 | 0.04561 | 0.083205 | 0.07244  |
| 0.99595  | 0.012158 | 0.7933   | -0.03558 | 0.44306  | 0.006528 | 0.88811 | -0.13555 | 0.00334  |
| 0.06611  | 0.247576 | 5.95E-08 | -0.00634 | 0.89124  | 0.07643  | 0.09901 | -0.05935 | 0.20047  |
| 2.47E-12 | -0.25011 | 4.31E-08 | -0.02241 | 0.629    | -0.122   | 0.00831 | -0.19095 | 3.27E-05 |
| 0.53223  | 0.113191 | 0.01439  | 0.266069 | 5.22E-09 | 0.124333 | 0.00714 | 0.011752 | 0.80004  |
| 0.4534   | 0.072353 | 0.11842  | 0.01941  | 0.67568  | 0.028945 | 0.53266 | -0.02957 | 0.5238   |
| 0.4088   | -0.02286 | 0.6222   | -0.02431 | 0.60029  | -0.0072  | 0.87663 | -0.0342  | 0.4609   |
| 6.96E-06 | -0.30199 | 2.65E-11 | -0.06082 | 0.1895   | -0.08938 | 0.05359 | -0.05303 | 0.25273  |
| 0.21112  | -0.06832 | 0.14043  | 0.036674 | 0.42914  | 0.010674 | 0.81805 | -0.06721 | 0.14702  |
| 0.3511   | 0.031238 | 0.50069  | 0.012247 | 0.79181  | 0.061898 | 0.18177 | -0.02455 | 0.59663  |
| 2.19E-06 | 0.272592 | 2.11E-09 | 0.084324 | 0.06867  | 0.001536 | 0.97359 | 0.248179 | 5.51E-08 |
| 1.48E-07 | 0.331343 | 1.98E-13 | 0.078048 | 0.09205  | 0.11125  | 0.01617 | 0.280829 | 6.52E-10 |
| 0.6658   | -0.05983 | 0.19685  | -0.02947 | 0.52523  | 0.011381 | 0.80623 | -0.03133 | 0.49947  |
| 0.0142   | -0.02245 | 0.62844  | 0.108766 | 0.01872  | -0.00707 | 0.87895 | -0.12109 | 0.00881  |
| 0.03513  | 0.192107 | 2.92E-05 | 0.074573 | 0.10752  | 0.031832 | 0.49257 | 0.114986 | 0.0129   |
| 0.15865  | 0.207279 | 6.29E-06 | 0.025739 | 0.57901  | 0.042675 | 0.35748 | -0.00966 | 0.83503  |
| 0.00159  | -0.15035 | 0.00112  | 0.079023 | 0.08805  | 0.097405 | 0.03535 | -0.08596 | 0.06344  |
| 0.73501  | 0.036593 | 0.43015  | 0.024994 | 0.59005  | 0.040541 | 0.38206 | 0.069032 | 0.13634  |
| 0.14518  | -0.0612  | 0.18676  | 0.012655 | 0.78504  | 0.021556 | 0.64219 | 0.040822 | 0.37877  |
| 0.00354  | -0.10079 | 0.02942  | -0.02979 | 0.5208   | -0.04045 | 0.38315 | 0.031525 | 0.49676  |
| 0.01956  | -0.06708 | 0.14781  | -0.04376 | 0.34542  | -0.04567 | 0.32474 | 0.056255 | 0.22498  |
| 0.27395  | 0.100271 | 0.03027  | 0.077754 | 0.09329  | -0.00297 | 0.94901 | -0.03548 | 0.44431  |
| 0.03071  | -0.12231 | 0.00814  | -0.18683 | 4.86E-05 | -0.03281 | 0.47936 | 0.018393 | 0.69178  |
| 0.33515  | -0.09417 | 0.04194  | -0.10992 | 0.01749  | -0.0017  | 0.97085 | -0.07758 | 0.09402  |
| 0.19405  | -0.1407  | 0.00231  | -0.01397 | 0.7634   | -0.03883 | 0.40245 | -0.07102 | 0.12535  |
| 7.71E-07 | 0.214904 | 2.78E-06 | -0.0586  | 0.20624  | -0.06227 | 0.17917 | 0.058671 | 0.20566  |
| 1.21E-06 | 0.079368 | 0.08667  | 0.045362 | 0.328    | -0.17523 | 0.00014 | 0.084055 | 0.06956  |
| 0.37275  | -0.02827 | 0.5423   | 0.039735 | 0.3916   | 0.013852 | 0.76528 | 0.07476  | 0.10663  |
| 0.00033  | 0.273728 | 1.80E-09 | 0.119619 | 0.00967  | 0.009277 | 0.84152 | 0.047729 | 0.30336  |
| 6.08E-06 | -0.28347 | 4.44E-10 | -0.05122 | 0.26928  | -0.12738 | 0.00584 | -0.2467  | 6.64E-08 |
| 4.44E-07 | -0.2965  | 6.24E-11 | 0.097022 | 0.03608  | -0.05858 | 0.20636 | -0.10751 | 0.02013  |
| 0.06272  | 0.141713 | 0.00214  | -0.06124 | 0.18648  | 0.110341 | 0.01706 | -0.0263  | 0.57081  |
| 0.0004   | -0.18616 | 5.17E-05 | -0.01002 | 0.82901  | -0.09078 | 0.04992 | -0.20353 | 9.30E-06 |
| 0.74897  | 0.180136 | 9.06E-05 | -0.04726 | 0.30809  | 0.011714 | 0.80068 | -0.14854 | 0.00129  |
| 0.03996  | 0.204649 | 8.28E-06 | 0.055071 | 0.23491  | 0.176653 | 0.00012 | 0.063128 | 0.17323  |

|          |          |          |          |          |          |          |          |          |
|----------|----------|----------|----------|----------|----------|----------|----------|----------|
| 0.05156  | 0.120061 | 0.0094   | 0.078414 | 0.09053  | 0.083683 | 0.0708   | 0.06345  | 0.17104  |
| 0.1196   | -0.14298 | 0.00195  | 0.033789 | 0.46634  | 0.034722 | 0.45412  | 0.069302 | 0.13481  |
| 0.03394  | 0.019041 | 0.6815   | -0.02415 | 0.60261  | 0.015425 | 0.73954  | 0.073446 | 0.11295  |
| 0.25553  | 0.071692 | 0.12184  | 0.055246 | 0.23342  | 0.01096  | 0.81326  | 0.035981 | 0.43791  |
| 3.45E-05 | 0.243322 | 1.01E-07 | 0.022975 | 0.62043  | 0.028142 | 0.54409  | 0.198224 | 1.60E-05 |
| 0.01526  | 0.226145 | 7.89E-07 | 0.06552  | 0.15747  | 0.028499 | 0.53899  | 0.108578 | 0.01892  |
| 0.00047  | 0.225934 | 8.08E-07 | 0.137611 | 0.00288  | 0.017296 | 0.70931  | -0.10593 | 0.02205  |
| 0.45483  | 0.119527 | 0.00973  | 0.068534 | 0.13919  | 0.122026 | 0.0083   | 0.005237 | 0.91014  |
| 0.00182  | -0.08266 | 0.07432  | 0.063898 | 0.16803  | 0.009811 | 0.83253  | -0.10544 | 0.02267  |
| 0.46472  | -0.03236 | 0.48537  | 0.069689 | 0.13264  | 0.011493 | 0.80437  | 0.203602 | 9.22E-06 |
| 0.31951  | 0.15552  | 0.00075  | -0.04066 | 0.38063  | -0.0087  | 0.85119  | -0.00959 | 0.83632  |
| 0.29917  | -0.02732 | 0.55592  | 0.106086 | 0.02186  | 0.200331 | 1.29E-05 | -0.07062 | 0.12755  |
| 1.69E-05 | 0.402025 | 1.44E-19 | 0.008697 | 0.85132  | 0.087252 | 0.05956  | 0.119866 | 0.00952  |
| 0.03241  | -0.17544 | 0.00014  | -0.0506  | 0.27514  | 0.009751 | 0.83354  | -0.05887 | 0.20415  |
| 0.51274  | 0.031167 | 0.50166  | 0.047443 | 0.30627  | 0.026688 | 0.5651   | 0.060898 | 0.18894  |
| 0.02807  | -0.07588 | 0.10146  | -0.02496 | 0.59054  | -0.01597 | 0.73071  | -0.20952 | 4.96E-06 |
| 0.71746  | 0.011229 | 0.80877  | 0.027643 | 0.55125  | 0.017265 | 0.7098   | -0.00617 | 0.89429  |
| 0.29403  | 0.068815 | 0.13758  | -0.02359 | 0.61111  | -0.01717 | 0.71127  | -0.12105 | 0.00883  |
| 0.15554  | -0.03909 | 0.39939  | 0.006741 | 0.88449  | -0.07792 | 0.09259  | -0.04359 | 0.34726  |
| 5.75E-05 | 0.285684 | 3.20E-10 | 0.009679 | 0.83475  | 0.010281 | 0.82464  | 0.005398 | 0.90738  |
| 0.98217  | 0.146869 | 0.00146  | 0.176927 | 0.00012  | 0.135444 | 0.00336  | 0.029074 | 0.53083  |
| 0.1524   | 0.051792 | 0.264    | -0.01674 | 0.71831  | 0.038127 | 0.41107  | -0.13879 | 0.00265  |
| 0.00026  | 0.342672 | 2.59E-14 | 0.10931  | 0.01813  | 0.008023 | 0.86271  | 0.194659 | 2.28E-05 |
| 0.07416  | 0.121277 | 0.0087   | 0.062273 | 0.17913  | 0.141499 | 0.00218  | -0.06834 | 0.14035  |
| 0.63528  | 0.004808 | 0.91747  | 0.070545 | 0.12793  | 0.063191 | 0.1728   | 0.106721 | 0.02107  |
| 0.36922  | 0.01118  | 0.80959  | 0.005716 | 0.90196  | 0.030973 | 0.50432  | 0.057044 | 0.21854  |
| 0.71382  | 0.014665 | 0.75193  | 0.012294 | 0.79104  | 0.012091 | 0.7944   | 0.105981 | 0.02199  |
| 0.07955  | 0.088036 | 0.05729  | -0.00628 | 0.8923   | -0.01926 | 0.67797  | -0.08573 | 0.06415  |
| 0.04202  | -0.01272 | 0.78403  | 0.133247 | 0.00392  | 0.016722 | 0.71853  | -0.03828 | 0.40913  |
| 0.03463  | -0.09791 | 0.03441  | 0.02024  | 0.66265  | 0.014184 | 0.75983  | 0.057717 | 0.21314  |
| 0.05367  | -0.176   | 0.00013  | -0.02345 | 0.61322  | -0.078   | 0.09227  | 0.004917 | 0.9156   |
| 0.26537  | -0.11391 | 0.01378  | 0.017545 | 0.70531  | -0.06223 | 0.17947  | 0.081059 | 0.08014  |
| 0.46297  | -0.10274 | 0.02641  | -0.02401 | 0.60474  | -0.05832 | 0.20841  | 0.063473 | 0.17089  |
| 0.00035  | 0.141428 | 0.00219  | 0.126079 | 0.00637  | -0.01371 | 0.76758  | 0.074348 | 0.10858  |
| 0.47156  | 0.02808  | 0.54497  | 0.020748 | 0.65472  | -0.0667  | 0.15011  | 0.053269 | 0.25061  |
| 0.28662  | -0.14027 | 0.00238  | 0.004075 | 0.93001  | -0.09913 | 0.03221  | -0.04035 | 0.38431  |
| 0.86111  | -0.05389 | 0.24513  | 0.016936 | 0.71509  | 0.008608 | 0.85281  | 0.013529 | 0.77059  |
| 0.01433  | -0.1673  | 0.00028  | 0.02465  | 0.59519  | 0.01894  | 0.68311  | 0.039741 | 0.39153  |
| 0.00349  | -0.19665 | 1.87E-05 | 0.034272 | 0.46     | 0.0372   | 0.42255  | 0.048401 | 0.29659  |
| 0.01221  | 0.302425 | 2.47E-11 | 0.160837 | 0.00048  | 0.125263 | 0.00672  | 0.088406 | 0.05625  |
| 0.19139  | 0.109209 | 0.01824  | 0.088138 | 0.057    | 0.074791 | 0.10649  | -0.0832  | 0.07244  |
| 0.02152  | 0.007275 | 0.87541  | 0.053213 | 0.25111  | 0.198111 | 1.61E-05 | -0.00939 | 0.83969  |
| 0.02061  | 0.20747  | 6.16E-06 | 0.193387 | 2.58E-05 | 0.157785 | 0.00062  | -0.06109 | 0.18757  |
| 0.26185  | -0.008   | 0.86308  | 0.029011 | 0.53171  | 0.056516 | 0.22283  | 0.072078 | 0.11983  |
| 0.00298  | 0.207431 | 6.19E-06 | 0.177154 | 0.00012  | 0.057599 | 0.21408  | 0.124572 | 0.00703  |



|          |          |          |          |          |          |         |          |          |
|----------|----------|----------|----------|----------|----------|---------|----------|----------|
| 0.04979  | -0.00371 | 0.93623  | -0.06011 | 0.19472  | 0.005278 | 0.90943 | 0.026423 | 0.56897  |
| 0.02055  | 0.251728 | 3.50E-08 | 0.020185 | 0.6635   | 0.133746 | 0.00379 | 0.030853 | 0.50598  |
| 4.04E-07 | -0.21846 | 1.88E-06 | -0.02043 | 0.65965  | -0.02719 | 0.5578  | 0.047481 | 0.30589  |
| 0.36179  | -0.04692 | 0.31169  | 0.014719 | 0.75106  | 0.034382 | 0.45855 | -0.03102 | 0.50368  |
| 0.78321  | 0.01383  | 0.76564  | 0.041425 | 0.37176  | 0.020967 | 0.65131 | -0.06117 | 0.18697  |
| 0.34148  | -0.0455  | 0.3265   | -0.02937 | 0.52658  | -0.00554 | 0.90491 | -0.05041 | 0.27695  |
| 0.63153  | -0.01399 | 0.76303  | 0.033183 | 0.47438  | 0.014954 | 0.74722 | 0.006159 | 0.89439  |
| 0.67895  | -0.0319  | 0.49168  | -0.0012  | 0.97932  | -0.02355 | 0.6117  | -0.03581 | 0.44004  |
| 3.95E-05 | 0.258814 | 1.39E-08 | 0.115694 | 0.01235  | 0.004569 | 0.92155 | 0.156002 | 0.00072  |
| 0.51859  | 0.03976  | 0.39131  | 0.060558 | 0.19143  | 0.052525 | 0.2573  | 0.076755 | 0.09758  |
| 0.91952  | 0.019512 | 0.67407  | -0.00968 | 0.83472  | -0.0277  | 0.55039 | 0.07466  | 0.10711  |
| 0.89771  | 0.020498 | 0.65861  | 0.0429   | 0.35495  | 0.030658 | 0.50867 | 0.037842 | 0.41457  |
| 0.27876  | -0.03325 | 0.47349  | 0.010436 | 0.82204  | -0.00176 | 0.96978 | 0.01556  | 0.73734  |
| 0.4493   | 0.032851 | 0.47882  | 0.071171 | 0.12458  | 0.028032 | 0.54566 | 0.034756 | 0.45368  |
| 0.55332  | 0.06751  | 0.14521  | 0.047525 | 0.30543  | 0.021196 | 0.64777 | 0.006526 | 0.88815  |
| 0.06271  | -0.08444 | 0.0683   | -0.00809 | 0.86155  | -0.02905 | 0.53123 | 0.026734 | 0.56442  |
| 0.18417  | -0.07728 | 0.0953   | -0.00136 | 0.97656  | -0.02045 | 0.65931 | -0.02164 | 0.64087  |
| 0.00561  | 0.094419 | 0.0414   | 0.088999 | 0.05461  | 0.024792 | 0.59306 | -0.13245 | 0.00414  |
| 0.07269  | 0.133284 | 0.00391  | -0.01511 | 0.74465  | 0.003202 | 0.94498 | 0.080908 | 0.0807   |
| 0.17414  | 0.044108 | 0.34156  | 0.044041 | 0.3423   | 0.018708 | 0.68678 | -0.07487 | 0.10612  |
| 0.32876  | -0.01608 | 0.72889  | 0.020584 | 0.65728  | 0.106883 | 0.02088 | -0.03339 | 0.47168  |
| 0.10731  | 0.079272 | 0.08705  | 0.084241 | 0.06894  | -0.0023  | 0.9604  | -0.08446 | 0.06823  |
| 0.21189  | 0.046792 | 0.31296  | -0.01261 | 0.78576  | -0.02877 | 0.5352  | 0.016757 | 0.71797  |
| 7.26E-07 | -0.21277 | 3.50E-06 | -0.07981 | 0.08493  | -0.02718 | 0.55795 | -0.05309 | 0.25224  |
| 0.00702  | 0.16713  | 0.00029  | -0.0155  | 0.7383   | 0.001757 | 0.96979 | -0.06304 | 0.17386  |
| 0.0004   | 0.211719 | 3.92E-06 | -0.07846 | 0.09036  | 0.057729 | 0.21305 | 0.029882 | 0.51946  |
| 0.00022  | 0.156349 | 0.0007   | -0.00435 | 0.92535  | -0.01412 | 0.76095 | 0.048066 | 0.29995  |
| 0.13152  | -0.02058 | 0.65732  | -0.06856 | 0.13906  | -0.02341 | 0.61385 | 0.040667 | 0.38058  |
| 0.00058  | 0.222439 | 1.20E-06 | 0.340534 | 3.83E-14 | 0.020073 | 0.66526 | 0.091    | 0.04937  |
| 0.06135  | 0.075737 | 0.10212  | 0.282346 | 5.23E-10 | 0.017346 | 0.7085  | -0.01787 | 0.70011  |
| 1.02E-05 | -0.13821 | 0.00276  | 0.025593 | 0.58117  | -0.03624 | 0.43467 | -0.03063 | 0.50909  |
| 0.74794  | -0.02031 | 0.66155  | -0.04064 | 0.38088  | -0.05132 | 0.26836 | -0.10231 | 0.02705  |
| 0.93293  | 0.085401 | 0.06519  | 0.155806 | 0.00073  | 0.103107 | 0.02587 | 0.069809 | 0.13197  |
| 0.0248   | -0.00608 | 0.89571  | 0.034275 | 0.45996  | 0.024479 | 0.59774 | 0.106971 | 0.02077  |
| 0.6826   | 0.073117 | 0.11458  | 0.175034 | 0.00014  | 0.047882 | 0.30181 | -0.11885 | 0.01015  |
| 0.12735  | -0.04964 | 0.28437  | -0.03896 | 0.4009   | -0.01426 | 0.75854 | 0.107834 | 0.01976  |
| 0.00429  | -0.17953 | 9.58E-05 | 0.012642 | 0.78525  | -0.01237 | 0.78971 | 0.017792 | 0.70136  |
| 0.12862  | 0.073686 | 0.11177  | -0.04916 | 0.28906  | -0.01416 | 0.76022 | 0.015355 | 0.74068  |
| 1.26E-07 | 0.322671 | 8.91E-13 | 0.041558 | 0.37022  | 0.08285  | 0.07367 | 0.041554 | 0.37027  |
| 0.01004  | -0.18723 | 4.68E-05 | -0.07588 | 0.10146  | -0.05528 | 0.23314 | -0.22409 | 9.98E-07 |
| 8.72E-07 | 0.310699 | 6.56E-12 | 0.066923 | 0.14875  | 0.147805 | 0.00136 | 0.142676 | 0.002    |
| 0.80697  | 0.006638 | 0.88623  | 0.028169 | 0.54371  | 0.04642  | 0.31683 | 0.063957 | 0.16764  |
| 0.01982  | 0.236465 | 2.34E-07 | 0.173632 | 0.00016  | 0.075681 | 0.10238 | 0.062471 | 0.17775  |
| 0.79019  | 0.013914 | 0.76425  | 0.274224 | 1.68E-09 | 0.025194 | 0.58708 | -0.00353 | 0.93932  |
| 0.15276  | 0.016595 | 0.72058  | 0.009945 | 0.83028  | 0.016161 | 0.7276  | 0.02601  | 0.57503  |

|          |          |          |          |          |          |          |          |          |
|----------|----------|----------|----------|----------|----------|----------|----------|----------|
| 0.02565  | 0.17031  | 0.00022  | 0.306212 | 1.35E-11 | -0.01642 | 0.72336  | -0.01949 | 0.67441  |
| 0.46054  | 0.012279 | 0.79128  | 0.042071 | 0.36434  | 0.071468 | 0.12301  | -0.00041 | 0.99303  |
| 3.03E-07 | -0.28161 | 5.82E-10 | 0.046512 | 0.31587  | -0.01105 | 0.8118   | 0.026372 | 0.56971  |
| 0.23423  | -0.02833 | 0.54139  | 0.136164 | 0.00319  | 0.035371 | 0.44572  | 0.079117 | 0.08767  |
| 0.49679  | 0.042934 | 0.35458  | 0.062053 | 0.18068  | 0.093475 | 0.04348  | -0.06517 | 0.15971  |
| 0.05982  | 0.082504 | 0.07488  | 0.09367  | 0.04305  | 0.121049 | 0.00883  | 0.13107  | 0.00455  |
| 0.04064  | 0.244121 | 9.17E-08 | 0.163001 | 0.00041  | 0.231652 | 4.16E-07 | -0.01117 | 0.80978  |
| 0.01833  | 0.078324 | 0.0909   | 0.295785 | 6.97E-11 | 0.148476 | 0.00129  | 0.030836 | 0.50621  |
| 0.01057  | 0.20061  | 1.25E-05 | 0.065279 | 0.15901  | 0.0442   | 0.34055  | 0.007679 | 0.86855  |
| 0.0414   | 0.196222 | 1.95E-05 | 0.178315 | 0.00011  | 0.074249 | 0.10906  | 0.103237 | 0.02568  |
| 0.67149  | 0.120873 | 0.00893  | 0.412906 | 1.18E-20 | 0.05308  | 0.25229  | 0.010089 | 0.82787  |
| 0.23384  | -0.00253 | 0.95652  | 0.135447 | 0.00336  | 0.120323 | 0.00925  | 0.07965  | 0.08555  |
| 0.20635  | -0.02523 | 0.58648  | 0.065905 | 0.15504  | 0.040104 | 0.38721  | -0.05274 | 0.25536  |
| 0.00838  | -0.17211 | 0.00019  | 0.064449 | 0.16439  | -0.05925 | 0.20125  | -0.07062 | 0.12753  |
| 0.48692  | 0.050951 | 0.27185  | -0.0164  | 0.72369  | 0.056183 | 0.22558  | -0.14255 | 0.00201  |
| 0.69388  | 0.087697 | 0.05826  | 0.085647 | 0.06442  | 0.074136 | 0.1096   | 0.047061 | 0.31019  |
| 0.22928  | 0.010503 | 0.82092  | -0.0941  | 0.04209  | 0.041034 | 0.37629  | -0.32853 | 3.25E-13 |
| 0.00216  | 0.285524 | 3.28E-10 | 0.093668 | 0.04305  | 0.05115  | 0.26998  | 0.032645 | 0.48158  |
| 0.71039  | -0.02839 | 0.54051  | -0.05677 | 0.22072  | 0.020038 | 0.66581  | -0.04136 | 0.37246  |
| 0.09137  | -0.14775 | 0.00137  | -0.06983 | 0.13186  | 0.029219 | 0.52877  | -0.13653 | 0.00311  |
| 0.17569  | -0.02455 | 0.59669  | 0.02441  | 0.59877  | -0.03274 | 0.48027  | -0.07396 | 0.11043  |
| 0.84096  | 0.002928 | 0.94969  | 0.354658 | 2.74E-15 | 0.016074 | 0.729    | -0.09288 | 0.04485  |
| 2.74E-09 | 0.282662 | 4.99E-10 | -0.00581 | 0.90031  | -0.01787 | 0.70017  | -0.06569 | 0.1564   |
| 0.00243  | 0.169302 | 0.00024  | 0.23417  | 3.08E-07 | 0.09642  | 0.03726  | -0.07312 | 0.11454  |
| 0.14916  | 0.148541 | 0.00129  | 0.038521 | 0.40624  | 0.0462   | 0.31913  | -0.12124 | 0.00873  |
| 0.15587  | -0.02675 | 0.56416  | 0.074365 | 0.1085   | 0.044685 | 0.33527  | -0.01216 | 0.79317  |
| 0.40853  | -0.00741 | 0.87308  | 0.044063 | 0.34205  | 0.021813 | 0.63823  | -0.02501 | 0.58979  |
| 0.42929  | 0.042779 | 0.35632  | -0.07548 | 0.10329  | 0.037811 | 0.41496  | -0.06768 | 0.14419  |
| 6.95E-06 | -0.1621  | 0.00044  | -0.02172 | 0.63965  | -0.00512 | 0.91205  | -0.07098 | 0.12559  |
| 0.01726  | -0.09929 | 0.03193  | 0.115925 | 0.01218  | 0.042537 | 0.35905  | 0.108656 | 0.01884  |
| 0.27434  | -0.10431 | 0.02418  | 0.078882 | 0.08862  | -0.06612 | 0.15372  | 0.036302 | 0.43383  |
| 0.93649  | -0.07125 | 0.12414  | 0.071831 | 0.12111  | -0.07909 | 0.08776  | 0.073209 | 0.11412  |
| 0.55379  | 0.052575 | 0.25684  | -0.03277 | 0.47989  | -0.01718 | 0.71112  | 0.021301 | 0.64613  |
| 0.38863  | 0.07398  | 0.11035  | 0.317858 | 2.01E-12 | 0.058309 | 0.20848  | 0.099857 | 0.03096  |
| 0.33953  | -0.05996 | 0.19588  | -0.04332 | 0.35021  | -0.05565 | 0.22999  | 0.060676 | 0.19057  |
| 0.23691  | 0.148999 | 0.00124  | -0.13538 | 0.00338  | -0.01244 | 0.78867  | 0.035045 | 0.44993  |
| 1.16E-08 | 0.465945 | 1.52E-26 | 0.160467 | 0.0005   | 0.062928 | 0.17459  | 0.083524 | 0.07134  |
| 0.44801  | 0.104825 | 0.02349  | 0.042892 | 0.35504  | 0.02304  | 0.61946  | 0.052957 | 0.25339  |
| 0.02503  | 0.302455 | 2.46E-11 | 0.070448 | 0.12846  | 0.030774 | 0.50707  | 0.034432 | 0.4579   |
| 7.33E-05 | 0.319613 | 1.50E-12 | 0.009916 | 0.83077  | 0.033449 | 0.47085  | 0.024109 | 0.60329  |
| 0.48521  | -0.07269 | 0.11671  | 0.02026  | 0.66234  | -0.09393 | 0.04247  | -0.00817 | 0.86026  |
| 0.01874  | -0.12209 | 0.00826  | 0.230553 | 4.73E-07 | -0.02445 | 0.5982   | 0.098945 | 0.03254  |
| 8.79E-06 | 0.332192 | 1.71E-13 | 0.024244 | 0.60126  | 0.031814 | 0.49282  | 0.209777 | 4.83E-06 |
| 0.17002  | 0.003064 | 0.94735  | -0.0064  | 0.89033  | -0.00159 | 0.9726   | -0.02156 | 0.64215  |
| 0.03002  | 0.237805 | 1.99E-07 | 0.078423 | 0.09049  | 0.166375 | 0.00031  | 0.149551 | 0.00119  |

|          |          |          |          |          |          |          |          |          |
|----------|----------|----------|----------|----------|----------|----------|----------|----------|
| 0.00584  | -0.10551 | 0.02259  | 0.01123  | 0.80875  | -0.02528 | 0.58576  | -0.05983 | 0.19687  |
| 0.02268  | 0.01533  | 0.74109  | 0.036692 | 0.42891  | -0.09237 | 0.04603  | -0.00034 | 0.9941   |
| 2.52E-05 | 0.224032 | 1.00E-06 | 0.040569 | 0.38172  | 0.059979 | 0.19572  | 0.207616 | 6.07E-06 |
| 0.01056  | 0.097374 | 0.03541  | 0.036779 | 0.42781  | -0.00574 | 0.90161  | 0.070841 | 0.12634  |
| 0.21809  | 0.218218 | 1.93E-06 | 0.029718 | 0.52176  | 0.054655 | 0.23847  | 0.094469 | 0.04129  |
| 0.13903  | 0.040021 | 0.3882   | 0.097458 | 0.03525  | 0.087572 | 0.05862  | 0.091851 | 0.04728  |
| 0.92951  | 0.121524 | 0.00857  | 0.067734 | 0.14388  | 0.040623 | 0.38109  | 0.072393 | 0.11822  |
| 0.01367  | 0.024288 | 0.6006   | 0.066565 | 0.15094  | 0.054541 | 0.23945  | 0.062011 | 0.18098  |
| 0.80204  | 0.021924 | 0.63652  | 0.033047 | 0.4762   | 0.007563 | 0.87051  | 0.016581 | 0.72081  |
| 0.00117  | 0.181364 | 8.10E-05 | 0.080103 | 0.08378  | 0.033859 | 0.46542  | 0.129806 | 0.00496  |
| 0.92579  | 0.030347 | 0.51298  | 0.036972 | 0.42539  | 0.015414 | 0.73972  | -0.03235 | 0.48553  |
| 0.065    | -0.0562  | 0.22542  | -0.00976 | 0.83346  | 0.00611  | 0.89523  | 0.119526 | 0.00973  |
| 9.82E-10 | -0.31284 | 4.62E-12 | -0.1153  | 0.01266  | -0.07354 | 0.11249  | -0.00211 | 0.96367  |
| 0.17566  | 0.068629 | 0.13865  | 0.13234  | 0.00417  | -0.0309  | 0.50532  | 0.039583 | 0.39342  |
| 0.26679  | 0.16396  | 0.00037  | 0.051292 | 0.26864  | 0.066834 | 0.14929  | -0.01525 | 0.74237  |
| 0.00212  | -0.15898 | 0.00056  | -0.02248 | 0.62805  | -0.01324 | 0.7753   | 0.077164 | 0.0958   |
| 0.00894  | -0.01468 | 0.75176  | 0.05526  | 0.23331  | 0.070974 | 0.12563  | 0.155597 | 0.00074  |
| 0.53246  | 0.015703 | 0.73502  | 0.061645 | 0.18356  | 0.056486 | 0.22308  | 0.020951 | 0.65156  |
| 0.40237  | -0.06868 | 0.13835  | 0.031122 | 0.50228  | -0.04882 | 0.29245  | -0.00144 | 0.97531  |
| 0.69999  | -0.05172 | 0.26468  | 0.067196 | 0.1471   | -0.04674 | 0.31348  | 0.034904 | 0.45176  |
| 0.00182  | -0.11993 | 0.00948  | -0.01152 | 0.80397  | -0.07381 | 0.11119  | -0.09135 | 0.04851  |
| 0.0111   | -0.14943 | 0.0012   | 0.015284 | 0.74184  | -0.06004 | 0.19527  | 0.052289 | 0.25944  |
| 0.7039   | -0.02978 | 0.52091  | -0.04327 | 0.35078  | -0.09903 | 0.03238  | -0.09873 | 0.03291  |
| 0.09471  | 0.265752 | 5.45E-09 | 0.076323 | 0.09949  | 0.074594 | 0.10742  | -0.1171  | 0.01132  |
| 0.29822  | 0.215478 | 2.61E-06 | 0.136475 | 0.00312  | 0.102985 | 0.02605  | 0.040369 | 0.38408  |
| 0.00294  | 0.150198 | 0.00113  | -0.07631 | 0.09955  | -0.01565 | 0.73591  | -0.05075 | 0.27375  |
| 0.45449  | -0.01076 | 0.81658  | -0.03172 | 0.4941   | 0.008952 | 0.847    | -0.06931 | 0.13475  |
| 0.02246  | 0.08295  | 0.07332  | -0.0358  | 0.44023  | 0.054282 | 0.2417   | -0.04596 | 0.32164  |
| 0.01054  | -0.09889 | 0.03264  | -0.01193 | 0.79702  | -0.00285 | 0.95104  | 0.026503 | 0.5678   |
| 0.0169   | -0.17384 | 0.00016  | 0.009232 | 0.84228  | 0.011856 | 0.79832  | 0.173684 | 0.00016  |
| 0.46621  | -0.03522 | 0.44766  | -0.08508 | 0.0662   | -0.01634 | 0.72468  | -0.01499 | 0.7466   |
| 5.13E-05 | 0.125996 | 0.0064   | 0.035748 | 0.44089  | -0.09356 | 0.0433   | -0.08256 | 0.0747   |
| 0.20105  | 0.003909 | 0.93285  | 0.035055 | 0.44981  | -0.03933 | 0.39642  | 0.079328 | 0.08682  |
| 0.1262   | 0.110763 | 0.01664  | 0.044419 | 0.33816  | 0.028071 | 0.5451   | -0.02233 | 0.63027  |
| 0.03247  | 0.143748 | 0.00184  | 0.123074 | 0.00775  | 0.050108 | 0.27987  | 0.182073 | 7.58E-05 |
| 3.06E-05 | 0.350778 | 5.74E-15 | 0.103262 | 0.02565  | 0.135065 | 0.00345  | 0.011485 | 0.80449  |
| 0.55944  | -0.06621 | 0.15312  | -0.03262 | 0.48194  | 0.027537 | 0.55278  | -0.0578  | 0.21247  |
| 0.23216  | -0.00731 | 0.87486  | -0.06154 | 0.18431  | 0.109897 | 0.01751  | 0.032456 | 0.48412  |
| 0.32109  | 0.069656 | 0.13282  | 0.348573 | 8.69E-15 | 0.021229 | 0.64725  | 0.019873 | 0.6684   |
| 0.00177  | 0.248104 | 5.56E-08 | 0.257895 | 1.57E-08 | 0.078281 | 0.09108  | 0.035936 | 0.43848  |
| 0.13883  | -0.0587  | 0.20542  | 0.153384 | 0.00088  | -0.03255 | 0.48281  | 0.111671 | 0.01576  |
| 0.00452  | 0.245937 | 7.31E-08 | 0.114198 | 0.01354  | 0.165228 | 0.00034  | -0.11244 | 0.01505  |
| 0.00556  | 0.176618 | 0.00012  | 0.184122 | 6.27E-05 | 0.219476 | 1.68E-06 | 0.057715 | 0.21316  |
| 0.00023  | 0.094615 | 0.04098  | 0.03088  | 0.50561  | 0.060084 | 0.19493  | 0.021746 | 0.63926  |
| 0.00606  | 0.182464 | 7.31E-05 | 0.115895 | 0.0122   | 0.140137 | 0.0024   | 0.122754 | 0.00791  |

|          |          |          |           |         |          |          |          |          |
|----------|----------|----------|-----------|---------|----------|----------|----------|----------|
| 0.10129  | -0.03773 | 0.41599  | 0.004898  | 0.91593 | 0.002189 | 0.96237  | -0.23154 | 4.21E-07 |
| 0.00261  | 0.132289 | 0.00419  | 0.127086  | 0.00596 | -0.02011 | 0.66475  | 0.095075 | 0.04     |
| 0.97211  | 0.057458 | 0.21521  | -0.15868  | 0.00058 | -0.02126 | 0.64675  | -0.10423 | 0.02429  |
| 0.05641  | 0.214729 | 2.83E-06 | 0.042847  | 0.35555 | 0.257096 | 1.74E-08 | 0.048595 | 0.29466  |
| 0.00042  | 0.373413 | 6.72E-17 | 0.124445  | 0.00709 | 0.072309 | 0.11865  | 0.091278 | 0.04868  |
| 0.54572  | 0.079951 | 0.08437  | -8.57E-05 | 0.99853 | 0.051518 | 0.26654  | -0.05674 | 0.22104  |
| 0.04763  | -0.19158 | 3.08E-05 | -0.08113  | 0.07988 | -0.0697  | 0.13258  | -0.03561 | 0.44266  |
| 0.46133  | 0.050734 | 0.2739   | -0.17747  | 0.00012 | -0.03159 | 0.4959   | -0.08158 | 0.0782   |
| 0.0041   | 0.182553 | 7.25E-05 | 0.156882  | 0.00067 | 0.151827 | 0.001    | 0.15519  | 0.00077  |
| 0.0053   | 0.289987 | 1.68E-10 | 0.085326  | 0.06543 | 0.124183 | 0.00721  | 0.071369 | 0.12353  |
| 0.00966  | 0.212123 | 3.76E-06 | 0.016837  | 0.71668 | 0.073389 | 0.11323  | 0.047123 | 0.30954  |
| 8.35E-08 | 0.32538  | 5.60E-13 | 0.122426  | 0.00808 | 0.091413 | 0.04835  | 0.133444 | 0.00387  |
| 0.24035  | 0.195013 | 2.20E-05 | -0.01621  | 0.72684 | 0.161021 | 0.00048  | 0.039318 | 0.39659  |
| 0.03337  | -0.05564 | 0.2301   | -0.04415  | 0.34109 | -0.01858 | 0.68885  | -0.01774 | 0.70219  |
| 0.71276  | -0.01302 | 0.77892  | -0.00468  | 0.91961 | 0.049326 | 0.28745  | -0.03028 | 0.51398  |
| 5.96E-05 | 0.24144  | 1.28E-07 | 0.057947  | 0.21132 | 0.038015 | 0.41244  | 0.256444 | 1.90E-08 |
| 7.37E-05 | 0.259694 | 1.23E-08 | 0.059994  | 0.19561 | 0.022914 | 0.62137  | 0.156561 | 0.00069  |
| 0.88466  | 0.048183 | 0.29878  | -0.01054  | 0.82028 | 0.069577 | 0.13326  | 0.125613 | 0.00657  |
| 0.16243  | 0.280012 | 7.34E-10 | 0.085404  | 0.06518 | 0.111023 | 0.01639  | -0.12028 | 0.00927  |
| 0.00233  | 0.353637 | 3.34E-15 | 0.018491  | 0.69022 | 0.065072 | 0.16034  | 0.067259 | 0.14671  |
| 0.57946  | 0.134114 | 0.00369  | -0.05881  | 0.20462 | 0.107937 | 0.01964  | 0.031599 | 0.49575  |
| 0.00499  | 0.241791 | 1.22E-07 | 0.094474  | 0.04128 | 0.196616 | 1.87E-05 | -0.00511 | 0.91233  |
| 0.20315  | 0.12576  | 0.0065   | 0.057225  | 0.21708 | 0.01187  | 0.79808  | 0.114049 | 0.01366  |
| 0.00027  | -0.11842 | 0.01043  | 0.004484  | 0.923   | 0.084069 | 0.06951  | -0.09516 | 0.03983  |
| 0.87211  | -0.07552 | 0.1031   | -0.00127  | 0.97808 | -0.04128 | 0.37343  | -0.142   | 0.0021   |
| 0.00021  | 0.103032 | 0.02598  | -0.01028  | 0.82471 | -0.02983 | 0.52024  | -0.00142 | 0.9756   |
| 0.15425  | 0.047799 | 0.30265  | 0.016655  | 0.71961 | 0.002545 | 0.95626  | -0.00389 | 0.93315  |
| 0.0031   | 0.091878 | 0.04721  | -0.00507  | 0.91302 | 0.080698 | 0.0815   | -0.11003 | 0.01738  |
| 0.29493  | -0.03933 | 0.39646  | 0.038244  | 0.40963 | -0.05593 | 0.22764  | 0.097987 | 0.03427  |
| 0.88338  | 0.070679 | 0.12721  | 0.033623  | 0.46854 | 0.002852 | 0.951    | 0.088358 | 0.05638  |
| 0.00437  | -0.2148  | 2.81E-06 | -0.06876  | 0.13788 | -0.03726 | 0.42181  | -0.02296 | 0.62063  |
| 0.12457  | -0.05568 | 0.2298   | 0.106771  | 0.02101 | 0.070198 | 0.12983  | 0.044995 | 0.33193  |
| 0.88871  | 0.093325 | 0.04382  | 0.159494  | 0.00054 | 0.082855 | 0.07365  | -0.02116 | 0.64826  |
| 0.39309  | 0.009007 | 0.84608  | 0.065106  | 0.16012 | 0.024725 | 0.59405  | 0.131492 | 0.00442  |
| 0.01792  | 0.176642 | 0.00012  | 0.031422  | 0.49817 | 0.032423 | 0.48457  | 0.110679 | 0.01672  |
| 0.09512  | 0.130283 | 0.0048   | 0.033595  | 0.46891 | 0.006487 | 0.88881  | 0.17899  | 0.0001   |
| 3.73E-06 | 0.228704 | 5.87E-07 | -0.09638  | 0.03733 | -0.03052 | 0.5106   | 0.178289 | 0.00011  |
| 0.78435  | 0.057776 | 0.21268  | 0.094615  | 0.04098 | 0.111675 | 0.01576  | 0.000837 | 0.98561  |
| 0.76892  | 0.105828 | 0.02218  | 0.080341  | 0.08286 | 0.119908 | 0.0095   | 0.062075 | 0.18052  |
| 0.76343  | 0.016661 | 0.71951  | 0.000726  | 0.98752 | 0.151394 | 0.00103  | 0.080095 | 0.08381  |
| 0.00103  | -0.16838 | 0.00026  | 0.042833  | 0.35571 | 0.028813 | 0.53452  | 0.044398 | 0.33839  |
| 0.00079  | 0.12038  | 0.00922  | -0.00374  | 0.93571 | 0.001448 | 0.97511  | 0.014731 | 0.75086  |
| 0.35431  | 0.152963 | 0.00091  | 0.0003    | 0.99485 | 0.02729  | 0.55636  | 0.108697 | 0.01879  |
| 0.02705  | 0.135503 | 0.00335  | 0.071492  | 0.12288 | 0.072949 | 0.11541  | 0.199685 | 1.38E-05 |
| 1.64E-07 | -0.25835 | 1.48E-08 | -0.05503  | 0.23522 | -0.08451 | 0.06804  | -0.14714 | 0.00143  |

|          |          |          |          |          |          |          |          |          |
|----------|----------|----------|----------|----------|----------|----------|----------|----------|
| 0.46267  | 0.027367 | 0.55524  | 0.059429 | 0.19985  | 0.038102 | 0.41137  | 0.000989 | 0.983    |
| 0.02187  | -0.12403 | 0.00729  | 0.049987 | 0.28103  | -0.01741 | 0.70753  | -0.0255  | 0.58249  |
| 0.95774  | -0.00673 | 0.88459  | 0.129429 | 0.00509  | -0.00757 | 0.87041  | 0.056035 | 0.22681  |
| 0.0001   | 0.194546 | 2.30E-05 | 0.059761 | 0.19735  | 0.101722 | 0.02795  | 0.092804 | 0.04502  |
| 0.00117  | -0.28639 | 2.89E-10 | 0.093366 | 0.04373  | -0.03174 | 0.49381  | -0.05921 | 0.20149  |
| 0.94316  | 0.060728 | 0.19018  | 0.081186 | 0.07967  | 0.075651 | 0.10251  | 0.024434 | 0.59842  |
| 0.08862  | 0.068513 | 0.13931  | 0.022049 | 0.6346   | -0.05294 | 0.25354  | 0.083898 | 0.07008  |
| 0.06605  | 0.189503 | 3.76E-05 | 0.033453 | 0.47079  | 0.176226 | 0.00013  | 0.021429 | 0.64416  |
| 0.16633  | 0.098891 | 0.03263  | 0.109085 | 0.01837  | 0.059653 | 0.19817  | 0.124252 | 0.00718  |
| 0.00228  | 0.145593 | 0.00161  | -0.00496 | 0.91488  | 0.01622  | 0.72665  | 0.015875 | 0.73223  |
| 6.35E-05 | -0.16709 | 0.00029  | -0.02045 | 0.65936  | 0.023732 | 0.60897  | 0.065274 | 0.15904  |
| 0.76436  | 0.178303 | 0.00011  | 0.076089 | 0.10053  | 0.232454 | 3.78E-07 | -0.04695 | 0.31133  |
| 0.00286  | 0.213116 | 3.37E-06 | 0.075287 | 0.10418  | -0.00287 | 0.95075  | -0.0965  | 0.0371   |
| 0.00031  | 0.349209 | 7.71E-15 | 0.024065 | 0.60395  | -0.0162  | 0.72697  | 0.013893 | 0.7646   |
| 0.00036  | 0.156958 | 0.00066  | 0.044631 | 0.33586  | 0.212356 | 3.66E-06 | 0.059393 | 0.20013  |
| 0.19924  | 0.181538 | 7.97E-05 | -0.01403 | 0.76242  | 0.016172 | 0.72741  | -0.05218 | 0.26042  |
| 0.47528  | -0.00978 | 0.83305  | 0.223872 | 1.02E-06 | 0.155225 | 0.00076  | 0.00976  | 0.83338  |
| 8.39E-11 | -0.43038 | 1.76E-22 | -0.08069 | 0.08154  | -0.17676 | 0.00012  | -0.26717 | 4.49E-09 |
| 0.45296  | 0.177207 | 0.00012  | 0.102128 | 0.02732  | 0.153275 | 0.00089  | -0.0361  | 0.43644  |
| 0.02314  | 0.112916 | 0.01463  | 0.051893 | 0.26307  | -0.00985 | 0.83184  | 0.028232 | 0.5428   |
| 0.00706  | -0.18603 | 5.24E-05 | -0.08355 | 0.07124  | -0.02523 | 0.58648  | -0.21363 | 3.19E-06 |
| 0.64606  | 0.036911 | 0.42615  | 0.004799 | 0.91762  | 0.001547 | 0.97341  | 0.000346 | 0.99404  |
| 0.86713  | 0.081619 | 0.07807  | 0.073921 | 0.11063  | 0.070295 | 0.12929  | -0.10791 | 0.01967  |
| 0.02859  | 0.148022 | 0.00134  | 0.313487 | 4.15E-12 | 0.085729 | 0.06416  | 0.067158 | 0.14733  |
| 0.21939  | 0.035824 | 0.43992  | 0.058769 | 0.20491  | 0.045732 | 0.32407  | 0.04304  | 0.35338  |
| 0.42059  | 0.042587 | 0.35848  | 0.053192 | 0.25129  | 0.059298 | 0.20085  | -0.00958 | 0.8364   |
| 0.04102  | -0.06161 | 0.18379  | 0.044514 | 0.33713  | 0.03095  | 0.50464  | -0.00195 | 0.96646  |
| 0.09002  | 0.223889 | 1.02E-06 | 0.088165 | 0.05693  | 0.126523 | 0.00618  | -0.06273 | 0.17596  |
| 0.00014  | -0.01199 | 0.79602  | 0.073994 | 0.11028  | 0.028749 | 0.53543  | -0.11483 | 0.01302  |
| 0.01124  | -0.02763 | 0.55143  | -0.04194 | 0.36585  | 0.005308 | 0.90893  | -0.1347  | 0.00354  |
| 0.35904  | 0.093875 | 0.04259  | -0.00362 | 0.93777  | 0.028601 | 0.53753  | -0.07176 | 0.12146  |
| 0.51744  | -0.03809 | 0.41149  | 0.193346 | 2.59E-05 | 0.045887 | 0.32243  | 0.031201 | 0.50119  |
| 3.54E-06 | -0.2117  | 3.93E-06 | -0.01257 | 0.7865   | -0.0042  | 0.9279   | 0.099521 | 0.03154  |
| 0.54663  | 0.067404 | 0.14584  | 0.012191 | 0.79274  | 0.267759 | 4.14E-09 | 0.055127 | 0.23443  |
| 0.82228  | 0.036803 | 0.42751  | -0.00338 | 0.94193  | 0.246346 | 6.94E-08 | 0.049931 | 0.28157  |
| 0.45271  | 0.048374 | 0.29686  | 0.029443 | 0.52562  | 0.004923 | 0.91551  | -0.03466 | 0.45495  |
| 0.01529  | -0.10321 | 0.02572  | 0.030115 | 0.51622  | -0.00382 | 0.93446  | -0.02088 | 0.65266  |
| 0.75462  | -0.03863 | 0.40495  | 0.212532 | 3.59E-06 | -0.01224 | 0.79189  | 0.014213 | 0.75935  |
| 0.01779  | 0.133791 | 0.00377  | 0.340434 | 3.90E-14 | 0.121566 | 0.00854  | 0.005811 | 0.90032  |
| 0.94728  | -0.03872 | 0.40377  | -0.03221 | 0.48745  | -0.04245 | 0.36007  | 0.039525 | 0.39411  |
| 3.16E-06 | -0.27537 | 1.43E-09 | -0.07922 | 0.08724  | -0.08582 | 0.06388  | -0.03407 | 0.46259  |
| 0.99055  | 0.005865 | 0.8994   | 0.014122 | 0.76084  | 0.021157 | 0.64836  | 0.050568 | 0.27547  |
| 0.78505  | 0.01035  | 0.82348  | 0.087419 | 0.05907  | 0.009359 | 0.84014  | 0.10766  | 0.01996  |
| 0.11546  | -0.0095  | 0.8377   | 0.033776 | 0.46652  | 0.055404 | 0.23208  | 0.025147 | 0.58778  |
| 0.18255  | -0.0675  | 0.14528  | 0.02528  | 0.5858   | -0.01175 | 0.8001   | -0.035   | 0.45049  |

|          |          |          |          |          |          |          |          |          |
|----------|----------|----------|----------|----------|----------|----------|----------|----------|
| 0.86893  | 0.065037 | 0.16056  | 0.089164 | 0.05416  | 0.036288 | 0.43401  | 0.049976 | 0.28114  |
| 2.80E-05 | 0.159546 | 0.00054  | 0.041421 | 0.37181  | 0.021207 | 0.64759  | 0.074858 | 0.10618  |
| 8.47E-08 | 0.356996 | 1.75E-15 | -0.09622 | 0.03765  | 0.048449 | 0.29612  | -0.08846 | 0.05609  |
| 0.00973  | 0.2227   | 1.17E-06 | 0.148638 | 0.00128  | 0.025053 | 0.58918  | 0.20182  | 1.11E-05 |
| 1.91E-06 | -0.18713 | 4.72E-05 | -0.05673 | 0.22105  | -0.06064 | 0.19083  | 0.054877 | 0.23656  |
| 0.16077  | 0.07702  | 0.09643  | 0.058936 | 0.20362  | 0.072905 | 0.11563  | 0.059476 | 0.1995   |
| 0.73607  | 0.075659 | 0.10248  | 0.041633 | 0.36936  | 0.023928 | 0.60602  | 0.031073 | 0.50296  |
| 0.16518  | 0.163514 | 0.00039  | 0.299702 | 3.80E-11 | 0.208974 | 5.26E-06 | 0.031274 | 0.50019  |
| 0.09298  | 0.105922 | 0.02206  | 0.010428 | 0.82216  | 0.149049 | 0.00124  | 0.037362 | 0.42052  |
| 0.04061  | 0.17288  | 0.00017  | 0.403449 | 1.04E-19 | 0.105069 | 0.02316  | 0.044543 | 0.33681  |
| 0.1425   | 0.117143 | 0.0113   | 0.027462 | 0.55386  | 0.064916 | 0.16134  | 0.040702 | 0.38017  |
| 0.45017  | -0.04607 | 0.32046  | 0.001759 | 0.96976  | 0.012554 | 0.78672  | 0.045257 | 0.32912  |
| 0.20089  | 0.048132 | 0.29929  | -0.00456 | 0.92171  | 0.001766 | 0.96964  | -0.00532 | 0.90877  |
| 0.08783  | 0.175373 | 0.00014  | 0.138123 | 0.00278  | 0.163196 | 0.0004   | 0.090403 | 0.05089  |
| 0.62471  | 0.024217 | 0.60166  | 0.003584 | 0.93842  | -0.03143 | 0.49803  | 0.006091 | 0.89555  |
| 0.05402  | 0.143189 | 0.00192  | 0.049012 | 0.29053  | 0.026639 | 0.56581  | 0.014058 | 0.76189  |
| 0.18205  | 0.096195 | 0.03771  | 0.031615 | 0.49552  | 0.034457 | 0.45758  | -0.02095 | 0.65164  |
| 0.24727  | 0.092434 | 0.04589  | 0.087713 | 0.05822  | 0.132348 | 0.00417  | 0.000693 | 0.98809  |
| 0.02753  | 0.059482 | 0.19945  | -0.00322 | 0.94463  | -0.08446 | 0.06822  | 0.020151 | 0.66404  |
| 0.0127   | -0.13342 | 0.00387  | 0.016104 | 0.72851  | -0.02927 | 0.52808  | 0.087837 | 0.05786  |
| 0.00306  | 0.140067 | 0.00242  | 0.091683 | 0.04769  | 0.082029 | 0.07658  | -0.04285 | 0.35556  |
| 0.01039  | 0.117054 | 0.01136  | 0.01724  | 0.7102   | 0.004863 | 0.91652  | 0.144822 | 0.0017   |
| 0.01642  | 0.019279 | 0.67774  | -0.05676 | 0.22085  | -0.042   | 0.36513  | 0.029746 | 0.52137  |
| 0.35247  | 0.082961 | 0.07328  | 0.045065 | 0.33118  | 0.013874 | 0.76491  | 0.022847 | 0.62238  |
| 0.62504  | -0.02395 | 0.60567  | -0.00587 | 0.89936  | -0.00107 | 0.9816   | 0.030091 | 0.51655  |
| 0.02521  | 0.107088 | 0.02063  | 0.080797 | 0.08112  | 0.062669 | 0.17638  | 0.07828  | 0.09109  |
| 0.77425  | 0.008071 | 0.8619   | -0.0173  | 0.70928  | 0.012574 | 0.78639  | -0.00979 | 0.83291  |
| 0.81874  | -0.02742 | 0.55444  | -0.01836 | 0.69238  | -0.01487 | 0.74861  | 0.004544 | 0.92199  |
| 0.54343  | 0.082622 | 0.07446  | 0.087512 | 0.0588   | 0.036291 | 0.43397  | 0.0865   | 0.06179  |
| 0.01589  | 0.122796 | 0.00789  | 0.062162 | 0.17991  | -0.05288 | 0.25411  | -0.01403 | 0.76229  |
| 0.06429  | 0.126035 | 0.00639  | 0.120465 | 0.00917  | 0.119371 | 0.00982  | 0.112156 | 0.01531  |
| 0.21057  | 0.05511  | 0.23458  | 0.035133 | 0.44879  | 0.06287  | 0.17499  | 0.045752 | 0.32385  |
| 0.23082  | -0.01691 | 0.7155   | -0.00783 | 0.86599  | -0.01387 | 0.76501  | -0.04594 | 0.32192  |
| 0.17727  | 0.033247 | 0.47353  | -0.01141 | 0.80577  | -0.00853 | 0.85419  | 0.033167 | 0.47459  |
| 0.00259  | -0.17481 | 0.00015  | -0.03923 | 0.39761  | -0.06985 | 0.13175  | -0.07847 | 0.09028  |
| 0.00138  | 0.405853 | 6.04E-20 | 0.075374 | 0.10378  | 0.262823 | 8.11E-09 | 0.071998 | 0.12025  |
| 0.59556  | 0.019186 | 0.67921  | 0.247689 | 5.86E-08 | 0.079656 | 0.08552  | 0.155699 | 0.00073  |
| 7.08E-05 | 0.224666 | 9.35E-07 | 0.094163 | 0.04196  | 0.03969  | 0.39214  | 0.101475 | 0.02833  |
| 0.51049  | 0.013791 | 0.76628  | 0.029885 | 0.51942  | -0.00719 | 0.87684  | 0.070375 | 0.12886  |
| 0.05411  | -0.08965 | 0.05285  | -0.02473 | 0.59405  | 0.000779 | 0.9866   | -0.02012 | 0.66446  |
| 9.45E-05 | 0.190303 | 3.48E-05 | 0.035567 | 0.44321  | 0.027961 | 0.54668  | -0.02365 | 0.61027  |
| 0.00613  | -0.11598 | 0.01214  | -0.0052  | 0.91077  | -0.01162 | 0.80231  | -0.05395 | 0.24456  |
| 6.69E-08 | -0.20399 | 8.86E-06 | -0.06445 | 0.16439  | -0.00598 | 0.8974   | -0.02696 | 0.56114  |
| 0.15529  | -0.03769 | 0.41648  | -0.04209 | 0.36415  | -0.05376 | 0.24628  | 0.012908 | 0.78085  |
| 0.95394  | 0.006156 | 0.89445  | -0.02918 | 0.52939  | 0.102786 | 0.02634  | -0.02371 | 0.60937  |

|          |          |          |          |          |          |         |          |          |
|----------|----------|----------|----------|----------|----------|---------|----------|----------|
| 0.01333  | 0.136728 | 0.00307  | 0.096583 | 0.03694  | -0.0112  | 0.80931 | -0.02674 | 0.56436  |
| 0.08542  | 0.12415  | 0.00723  | 0.003627 | 0.93768  | -0.01213 | 0.79372 | -0.05585 | 0.22836  |
| 0.38199  | -0.00934 | 0.84039  | 0.062836 | 0.17522  | 0.034603 | 0.45567 | 0.002555 | 0.95608  |
| 0.07631  | 0.127093 | 0.00595  | 0.020283 | 0.66197  | 0.079736 | 0.08521 | -0.06244 | 0.17797  |
| 0.06225  | -0.08052 | 0.08216  | 0.053736 | 0.24647  | 0.030164 | 0.51553 | 0.001402 | 0.9759   |
| 7.87E-05 | 0.190963 | 3.27E-05 | -0.00404 | 0.93053  | 0.073615 | 0.11212 | -0.02535 | 0.58477  |
| 0.31918  | -0.03337 | 0.4719   | -0.01768 | 0.70314  | 0.015878 | 0.73218 | -0.00772 | 0.8679   |
| 0.03006  | -0.05076 | 0.27367  | -0.02287 | 0.62198  | -0.00451 | 0.92259 | -0.009   | 0.84623  |
| 0.8581   | 0.038728 | 0.40372  | -0.00825 | 0.85887  | -0.01607 | 0.72912 | -0.01018 | 0.82627  |
| 0.0168   | 0.185684 | 5.41E-05 | 0.084805 | 0.06709  | 0.075748 | 0.10207 | 0.013293 | 0.7745   |
| 0.48155  | 0.025705 | 0.57952  | -0.02408 | 0.60368  | -0.03061 | 0.50935 | -0.06986 | 0.13167  |
| 0.60745  | -0.07505 | 0.10528  | -0.02553 | 0.58215  | -0.02248 | 0.62795 | 0.021822 | 0.63809  |
| 0.01132  | -0.14622 | 0.00153  | 0.02087  | 0.65283  | -0.04513 | 0.33051 | -0.12715 | 0.00593  |
| 0.00044  | 0.150906 | 0.00107  | 0.027535 | 0.55282  | 0.06398  | 0.16749 | 0.015165 | 0.74378  |
| 0.85084  | 0.05412  | 0.2431   | -0.01983 | 0.66905  | -0.03604 | 0.43712 | -0.00176 | 0.96975  |
| 0.14942  | -0.08587 | 0.06374  | -0.0061  | 0.89536  | -0.02266 | 0.62526 | -0.00866 | 0.85188  |
| 0.95873  | -0.00647 | 0.88915  | 0.042125 | 0.36372  | 0.063012 | 0.17402 | 0.147557 | 0.00139  |
| 0.00268  | -0.0937  | 0.04297  | -0.13647 | 0.00313  | -0.00926 | 0.84185 | -0.02104 | 0.65022  |
| 0.7799   | -0.08495 | 0.06663  | 0.004652 | 0.92014  | -0.01068 | 0.81803 | -0.05368 | 0.247    |
| 2.84E-08 | 0.163684 | 0.00038  | 0.008314 | 0.85779  | -0.00154 | 0.97355 | 0.04747  | 0.30599  |
| 6.78E-13 | 0.319668 | 1.48E-12 | -0.01855 | 0.68932  | -0.00068 | 0.98835 | 0.068853 | 0.13736  |
| 0.08196  | 0.087187 | 0.05975  | 0.118777 | 0.0102   | 0.038616 | 0.40508 | 0.010927 | 0.81382  |
| 0.8081   | 0.016533 | 0.72158  | -0.09501 | 0.04015  | 0.04126  | 0.37367 | 0.035437 | 0.44487  |
| 0.22345  | 0.017266 | 0.70978  | 0.077782 | 0.09317  | 0.052272 | 0.25959 | 0.05475  | 0.23765  |
| 0.36758  | 0.006545 | 0.88783  | 0.150467 | 0.00111  | 0.106645 | 0.02117 | 0.099976 | 0.03076  |
| 0.10156  | -0.0804  | 0.08262  | -0.02912 | 0.5302   | -0.03962 | 0.39292 | 0.015203 | 0.74316  |
| 0.00252  | -0.11839 | 0.01045  | -0.04819 | 0.29874  | -0.05823 | 0.20908 | 0.03208  | 0.4892   |
| 8.06E-06 | -0.33766 | 6.44E-14 | -0.09515 | 0.03984  | -0.15734 | 0.00064 | -0.11958 | 0.0097   |
| 0.77064  | -0.10226 | 0.02713  | -0.09321 | 0.04409  | -0.0457  | 0.32439 | 0.181924 | 7.69E-05 |
| 0.02744  | -0.20081 | 1.23E-05 | -0.19241 | 2.84E-05 | -0.16653 | 0.0003  | 0.000344 | 0.99408  |
| 0.00677  | 0.284666 | 3.72E-10 | 0.018716 | 0.68664  | 0.018756 | 0.68602 | 0.004105 | 0.92951  |
| 0.17997  | 0.06751  | 0.14521  | 0.019468 | 0.67476  | 0.019854 | 0.6687  | 0.081654 | 0.07794  |
| 0.00051  | -0.01532 | 0.74117  | 0.034122 | 0.46196  | 0.017599 | 0.70445 | 0.035355 | 0.44592  |
| 0.30866  | 0.08434  | 0.06861  | 0.040211 | 0.38594  | 0.007093 | 0.87849 | -0.03352 | 0.46987  |
| 0.08679  | 0.27967  | 7.72E-10 | 0.172442 | 0.00018  | 0.086292 | 0.06243 | 0.07679  | 0.09743  |
| 5.63E-05 | 0.265375 | 5.74E-09 | -0.0071  | 0.8783   | 0.075113 | 0.10498 | 0.055443 | 0.23176  |
| 0.30502  | -0.13548 | 0.00335  | -0.05719 | 0.21739  | -0.13836 | 0.00273 | -0.08762 | 0.05848  |
| 0.01101  | 0.176833 | 0.00012  | 0.004393 | 0.92457  | -0.01836 | 0.69225 | 0.104724 | 0.02362  |
| 8.02E-05 | 0.110559 | 0.01684  | -0.04963 | 0.28453  | -0.05163 | 0.26553 | 0.210934 | 4.27E-06 |
| 0.00932  | -0.15352 | 0.00087  | 0.007753 | 0.86729  | -0.05113 | 0.27014 | 0.145316 | 0.00164  |
| 0.73539  | 0.023464 | 0.61302  | -0.11935 | 0.00984  | -0.05451 | 0.23968 | -0.00949 | 0.8379   |
| 4.82E-07 | 0.324417 | 6.61E-13 | -0.00442 | 0.92405  | 0.043911 | 0.34372 | 0.092271 | 0.04627  |
| 0.3392   | 0.021335 | 0.64561  | 0.084934 | 0.06668  | -0.02636 | 0.56982 | -0.05062 | 0.27496  |
| 0.30452  | -0.00657 | 0.8874   | -0.02074 | 0.65484  | 0.144734 | 0.00171 | -0.04403 | 0.3424   |
| 0.4567   | 0.110048 | 0.01736  | 0.048288 | 0.29772  | 0.061524 | 0.18443 | 0.06817  | 0.14131  |

|          |          |          |          |          |          |         |          |          |
|----------|----------|----------|----------|----------|----------|---------|----------|----------|
| 0.72381  | 0.181326 | 8.12E-05 | 0.023715 | 0.60922  | -0.00625 | 0.89289 | 0.00463  | 0.92051  |
| 0.98437  | 0.141997 | 0.0021   | 0.092574 | 0.04556  | -0.0027  | 0.95357 | -0.07126 | 0.12409  |
| 2.12E-06 | 0.102161 | 0.02727  | 0.053166 | 0.25152  | -0.10897 | 0.0185  | 0.023357 | 0.61464  |
| 3.51E-05 | 0.114306 | 0.01345  | -0.00553 | 0.90511  | 0.004558 | 0.92175 | 0.060942 | 0.18863  |
| 0.25617  | -0.13975 | 0.00247  | -0.09356 | 0.04328  | -0.07945 | 0.08632 | -0.08059 | 0.08189  |
| 0.00249  | -0.21501 | 2.75E-06 | -0.09697 | 0.03618  | -0.08818 | 0.05687 | -0.23285 | 3.61E-07 |
| 0.00081  | 0.302268 | 2.54E-11 | 0.132753 | 0.00405  | 0.089864 | 0.05229 | -0.0338  | 0.46618  |
| 0.13894  | -0.0319  | 0.4917   | 0.005293 | 0.90917  | -0.02335 | 0.61473 | -0.05793 | 0.21149  |
| 0.00446  | 0.043526 | 0.34797  | 0.026679 | 0.56523  | 0.005998 | 0.89714 | 0.091744 | 0.04754  |
| 0.03182  | 0.158517 | 0.00059  | 0.084604 | 0.06775  | 0.056569 | 0.2224  | 0.031087 | 0.50276  |
| 0.25639  | -0.07993 | 0.08447  | 0.01877  | 0.6858   | -0.0148  | 0.74965 | -0.07592 | 0.10129  |
| 0.58917  | -0.03081 | 0.50652  | -0.03012 | 0.51608  | 0.045405 | 0.32754 | -0.00582 | 0.90022  |
| 0.01004  | 0.112659 | 0.01486  | -0.0046  | 0.92108  | 0.142217 | 0.00206 | 0.059298 | 0.20085  |
| 0.40724  | 0.128807 | 0.00531  | 0.055711 | 0.2295   | 0.079677 | 0.08544 | -0.12364 | 0.00747  |
| 0.61007  | 0.216294 | 2.39E-06 | 0.072849 | 0.11591  | 0.048897 | 0.29166 | 0.046852 | 0.31235  |
| 0.43032  | 0.01501  | 0.74631  | 0.173635 | 0.00016  | -0.01249 | 0.7878  | 0.108163 | 0.01939  |
| 0.0852   | 0.137523 | 0.0029   | 0.023794 | 0.60803  | 0.000974 | 0.98326 | -0.02747 | 0.55381  |
| 0.23843  | -0.00883 | 0.84902  | 0.033576 | 0.46916  | 0.010413 | 0.82243 | 0.058095 | 0.21016  |
| 0.56434  | -0.01686 | 0.71627  | -0.00511 | 0.91238  | 0.014246 | 0.75881 | 0.050111 | 0.27984  |
| 0.55858  | 0.0138   | 0.76613  | 0.002915 | 0.94991  | 0.00506  | 0.91316 | 0.143064 | 0.00194  |
| 0.3788   | -0.01779 | 0.70146  | 0.007352 | 0.8741   | 0.031819 | 0.49275 | 0.058931 | 0.20366  |
| 8.76E-07 | -0.24593 | 7.32E-08 | -0.02245 | 0.62847  | -0.05254 | 0.25718 | 0.058291 | 0.20862  |
| 0.22048  | -0.07855 | 0.08999  | 0.089558 | 0.05311  | 0.01465  | 0.75219 | 0.03693  | 0.42592  |
| 5.05E-05 | 0.290617 | 1.53E-10 | 0.069512 | 0.13363  | 0.064223 | 0.16588 | 0.037904 | 0.4138   |
| 0.9983   | 0.077464 | 0.09452  | 0.088233 | 0.05674  | 0.015593 | 0.73681 | 0.028946 | 0.53264  |
| 0.59719  | 0.132463 | 0.00414  | 0.042414 | 0.36044  | 0.117453 | 0.01108 | 0.031873 | 0.49201  |
| 0.00433  | -0.11215 | 0.01532  | 0.037772 | 0.41544  | -0.03523 | 0.4476  | -0.06337 | 0.17159  |
| 0.08821  | 0.112926 | 0.01462  | 0.124764 | 0.00694  | 0.047458 | 0.30611 | 0.12163  | 0.00851  |
| 0.22134  | 0.010661 | 0.81827  | 0.021022 | 0.65046  | 0.003188 | 0.94522 | 0.047146 | 0.30931  |
| 0.6982   | 0.030358 | 0.51284  | -0.0736  | 0.11221  | -0.06975 | 0.13231 | -0.04122 | 0.37415  |
| 0.29002  | -0.00697 | 0.88052  | 0.018778 | 0.68567  | -0.0324  | 0.48486 | -0.08015 | 0.08361  |
| 0.94363  | 0.036676 | 0.42911  | 0.003204 | 0.94495  | -0.04388 | 0.34402 | 0.010605 | 0.8192   |
| 0.28878  | 0.110044 | 0.01736  | 0.052979 | 0.25319  | 0.018113 | 0.69624 | 0.057443 | 0.21532  |
| 0.01295  | 0.09207  | 0.04675  | 0.042225 | 0.36258  | -0.00607 | 0.89598 | 0.051598 | 0.26579  |
| 0.96498  | 0.015131 | 0.74433  | 0.041472 | 0.37121  | 0.016715 | 0.71865 | -0.03457 | 0.4561   |
| 1.98E-08 | -0.30231 | 2.52E-11 | -0.03145 | 0.49782  | -0.00406 | 0.93029 | -0.0349  | 0.45184  |
| 0.22154  | -0.13679 | 0.00306  | -0.03863 | 0.40489  | -0.08413 | 0.0693  | 0.090685 | 0.05017  |
| 0.00616  | 0.178276 | 0.00011  | -0.00663 | 0.88643  | 0.062022 | 0.1809  | -0.17996 | 9.21E-05 |
| 4.26E-06 | 0.32482  | 6.17E-13 | 0.28903  | 1.95E-10 | 0.172177 | 0.00018 | 0.021209 | 0.64756  |
| 0.02636  | -0.03251 | 0.48337  | -0.10755 | 0.02009  | -0.07653 | 0.09858 | -0.25687 | 1.79E-08 |
| 0.10163  | 0.124442 | 0.00709  | 0.058037 | 0.21061  | 0.088128 | 0.05703 | -0.08132 | 0.07917  |
| 0.8459   | -0.01754 | 0.70541  | 0.014053 | 0.76197  | -0.09161 | 0.04787 | -0.06066 | 0.19065  |
| 0.9873   | 0.037863 | 0.41432  | 0.046257 | 0.31853  | -0.00649 | 0.88872 | 0.080327 | 0.08291  |
| 0.34698  | -0.16115 | 0.00047  | -0.02787 | 0.54794  | -0.09965 | 0.03132 | 0.067751 | 0.14378  |
| 0.72034  | 0.030787 | 0.50689  | 0.008446 | 0.85556  | -0.02494 | 0.59085 | -0.03039 | 0.51245  |



|          |          |          |          |          |           |          |          |         |
|----------|----------|----------|----------|----------|-----------|----------|----------|---------|
| 0.74561  | 0.003232 | 0.94446  | 0.012058 | 0.79495  | -0.0149   | 0.74813  | -0.03258 | 0.48247 |
| 0.74352  | -0.0134  | 0.77279  | 0.011915 | 0.79733  | -0.01095  | 0.81335  | -0.0305  | 0.51089 |
| 0.43931  | -0.00688 | 0.88214  | 0.041851 | 0.36686  | -0.04341  | 0.34924  | -0.07207 | 0.11986 |
| 0.40062  | 0.084972 | 0.06656  | 0.098358 | 0.03359  | 0.058387  | 0.20787  | 0.014844 | 0.74902 |
| 0.01625  | 0.091993 | 0.04694  | 0.034078 | 0.46253  | 0.096296  | 0.0375   | 0.090138 | 0.05158 |
| 0.00212  | 0.321602 | 1.07E-12 | 0.014144 | 0.76048  | 0.00421   | 0.9277   | 0.005786 | 0.90077 |
| 3.14E-15 | 0.421932 | 1.39E-21 | 0.1325   | 0.00413  | 0.043041  | 0.35338  | -0.01599 | 0.7303  |
| 0.63356  | 0.043627 | 0.34685  | 0.033549 | 0.46952  | 0.050832  | 0.27297  | 0.097311 | 0.03553 |
| 0.11717  | 0.175428 | 0.00014  | 0.065528 | 0.15742  | 0.058991  | 0.20319  | 0.15873  | 0.00058 |
| 0.78223  | 0.002619 | 0.95498  | -0.00185 | 0.96812  | 0.00419   | 0.92805  | 0.029771 | 0.52102 |
| 0.02888  | 0.107131 | 0.02058  | -0.0784  | 0.09059  | -0.02644  | 0.56871  | 0.069668 | 0.13275 |
| 0.05732  | 0.185331 | 5.60E-05 | 0.182385 | 7.37E-05 | 0.104771  | 0.02356  | 0.031261 | 0.50037 |
| 0.78467  | -0.03217 | 0.48797  | 0.051478 | 0.26692  | 0.05915   | 0.20198  | 0.103809 | 0.02487 |
| 7.58E-07 | 0.126447 | 0.00622  | 0.098656 | 0.03305  | 0.037302  | 0.42127  | 0.061461 | 0.18488 |
| 6.95E-06 | -0.24798 | 5.65E-08 | 0.081327 | 0.07914  | -0.01988  | 0.66828  | -0.04633 | 0.31773 |
| 0.8223   | 0.008872 | 0.84835  | 0.096987 | 0.03615  | 0.056345  | 0.22424  | -0.07624 | 0.09984 |
| 0.71426  | -0.02486 | 0.59204  | -0.14955 | 0.00119  | -0.05875  | 0.20503  | -0.17349 | 0.00016 |
| 0.05033  | 0.22341  | 1.08E-06 | 0.046689 | 0.31403  | 0.087899  | 0.05768  | 0.086968 | 0.06039 |
| 0.33379  | 0.040546 | 0.382    | 0.020839 | 0.65331  | 0.001867  | 0.96791  | -0.12671 | 0.00611 |
| 0.38548  | 0.058288 | 0.20864  | 0.028545 | 0.53833  | 0.012431  | 0.78875  | 0.072819 | 0.11607 |
| 8.91E-10 | -0.30851 | 9.35E-12 | 0.005013 | 0.91396  | 0.004487  | 0.92296  | -0.13425 | 0.00366 |
| 0.2253   | 0.11734  | 0.01116  | 0.086864 | 0.0607   | 0.016375  | 0.72413  | 0.044658 | 0.33557 |
| 0.03303  | 0.053773 | 0.24614  | 0.027483 | 0.55357  | 0.018287  | 0.69347  | 0.005832 | 0.89998 |
| 0.53534  | -0.10167 | 0.02802  | -0.09954 | 0.03151  | -0.01466  | 0.75201  | -0.02067 | 0.65599 |
| 0.02143  | 0.00287  | 0.95068  | -0.0531  | 0.25215  | -0.06497  | 0.16102  | -0.02994 | 0.51871 |
| 0.00097  | 0.14814  | 0.00133  | 0.098021 | 0.0342   | 0.248183  | 5.51E-08 | 0.027879 | 0.54786 |
| 0.38035  | 0.053326 | 0.2501   | 0.091458 | 0.04824  | 0.066971  | 0.14846  | 0.087304 | 0.0594  |
| 0.04515  | -0.17924 | 9.84E-05 | -0.11408 | 0.01364  | 0.026184  | 0.57246  | -0.03344 | 0.47102 |
| 0.00048  | 0.342945 | 2.47E-14 | 0.256958 | 1.77E-08 | 0.111579  | 0.01585  | 0.050042 | 0.2805  |
| 0.00023  | 0.15139  | 0.00103  | 0.030037 | 0.5173   | -1.24E-05 | 0.99979  | 0.170568 | 0.00021 |
| 0.89595  | -0.00422 | 0.92748  | 0.071998 | 0.12025  | 0.099008  | 0.03243  | 0.04883  | 0.29233 |
| 0.0018   | -0.19779 | 1.67E-05 | 0.082172 | 0.07607  | -0.01709  | 0.71257  | 0.008652 | 0.85207 |
| 0.17583  | -0.12569 | 0.00653  | 0.045856 | 0.32275  | 0.00872   | 0.85093  | -0.03632 | 0.43359 |
| 0.00832  | -0.12686 | 0.00605  | -0.00299 | 0.9487   | -0.02437  | 0.59932  | 0.03501  | 0.45039 |
| 0.00389  | -0.12264 | 0.00797  | -0.0057  | 0.90215  | -0.01873  | 0.68646  | 0.005266 | 0.90963 |
| 8.29E-07 | -0.2954  | 7.39E-11 | 0.027361 | 0.55532  | -0.11419  | 0.01354  | 0.006739 | 0.88451 |
| 0.64185  | 0.034797 | 0.45315  | -0.00067 | 0.98843  | 0.01298   | 0.77966  | -0.02136 | 0.64524 |
| 0.52969  | 0.029884 | 0.51944  | -0.01519 | 0.74331  | 0.043164  | 0.352    | 0.077592 | 0.09397 |
| 0.33355  | 0.019424 | 0.67546  | -0.01645 | 0.723    | 0.021197  | 0.64775  | -0.00375 | 0.93562 |
| 0.85559  | -0.00071 | 0.98786  | -0.00288 | 0.95056  | 0.009278  | 0.84151  | -0.04509 | 0.33095 |
| 0.55175  | 0.031022 | 0.50365  | -0.00869 | 0.85147  | -0.00832  | 0.85766  | 0.026695 | 0.56499 |
| 0.50761  | 0.02181  | 0.63827  | -0.00432 | 0.92578  | -0.00421  | 0.92763  | 0.041914 | 0.36613 |
| 0.43483  | 0.042363 | 0.36102  | -0.01753 | 0.70559  | -0.0128   | 0.78257  | 0.003374 | 0.94203 |
| 0.20399  | -0.02422 | 0.60163  | -0.0096  | 0.83615  | -0.01796  | 0.6986   | 0.022098 | 0.63385 |
| 0.64467  | 0.001007 | 0.98268  | 0.183826 | 6.44E-05 | 0.003695  | 0.93653  | 0.14635  | 0.00152 |

|          |          |          |          |          |          |          |          |          |
|----------|----------|----------|----------|----------|----------|----------|----------|----------|
| 0.1782   | 0.075183 | 0.10466  | 0.045133 | 0.33045  | 0.042682 | 0.35741  | 0.149358 | 0.00121  |
| 0.19029  | 0.060012 | 0.19547  | 0.049636 | 0.28442  | 0.030403 | 0.51221  | 0.078252 | 0.0912   |
| 0.00273  | -0.23765 | 2.03E-07 | -0.08697 | 0.06038  | -0.09166 | 0.04775  | -0.062   | 0.18105  |
| 0.15364  | -0.10744 | 0.02022  | -0.01365 | 0.76868  | -0.01914 | 0.67999  | 0.019147 | 0.67983  |
| 1.78E-10 | -0.36871 | 1.74E-16 | -0.05322 | 0.25103  | -0.15149 | 0.00102  | -0.05677 | 0.22074  |
| 0.96089  | 0.097103 | 0.03593  | 0.013695 | 0.76786  | -0.01645 | 0.72293  | -0.10392 | 0.02472  |
| 0.7854   | 0.214055 | 3.05E-06 | 0.078576 | 0.08987  | 0.136377 | 0.00315  | 0.022268 | 0.63124  |
| 0.1868   | -0.01936 | 0.67646  | -0.04594 | 0.32183  | -0.05836 | 0.20811  | 0.056776 | 0.22071  |
| 0.03151  | 0.100887 | 0.02926  | 0.127493 | 0.0058   | -0.03236 | 0.48545  | -0.0211  | 0.6492   |
| 0.51926  | 0.106633 | 0.02118  | 0.013428 | 0.77226  | -0.03611 | 0.43623  | -0.01273 | 0.78388  |
| 0.00017  | -0.23065 | 4.68E-07 | -0.01993 | 0.66753  | -0.06758 | 0.1448   | -0.08734 | 0.0593   |
| 0.14196  | 0.227076 | 7.09E-07 | 0.267426 | 4.33E-09 | 0.119684 | 0.00963  | -0.00997 | 0.82984  |
| 0.06932  | 0.150216 | 0.00113  | 0.04472  | 0.3349   | 0.036343 | 0.43331  | 0.135349 | 0.00338  |
| 4.37E-06 | -0.21156 | 3.99E-06 | -0.06836 | 0.14021  | -0.10019 | 0.03041  | -0.12836 | 0.00547  |
| 0.0003   | 0.09752  | 0.03514  | -0.00581 | 0.90033  | 0.0091   | 0.84451  | 0.094442 | 0.04135  |
| 0.55312  | 0.043523 | 0.34801  | 0.142447 | 0.00203  | 0.01695  | 0.71487  | 0.009937 | 0.83041  |
| 0.68168  | -0.12054 | 0.00912  | -0.04541 | 0.32752  | -0.00574 | 0.90154  | -0.07794 | 0.09248  |
| 0.0023   | -0.07918 | 0.0874   | 0.002803 | 0.95183  | 0.059543 | 0.19899  | 0.033877 | 0.46518  |
| 0.63916  | -0.04469 | 0.33524  | 0.168289 | 0.00026  | 0.060504 | 0.19183  | 0.066695 | 0.15014  |
| 0.19675  | -0.12771 | 0.00571  | -0.00479 | 0.91772  | -0.13225 | 0.0042   | -0.20944 | 5.00E-06 |
| 0.78977  | -0.03361 | 0.46866  | -0.02691 | 0.56191  | -0.05164 | 0.26542  | 0.097129 | 0.03588  |
| 0.02011  | -0.25042 | 4.14E-08 | 0.024204 | 0.60186  | -0.16611 | 0.00031  | -0.09185 | 0.04728  |
| 3.76E-06 | 0.208156 | 5.73E-06 | 0.0289   | 0.53328  | 0.120053 | 0.00941  | 0.2327   | 3.67E-07 |
| 0.1916   | 0.125037 | 0.00682  | -0.01985 | 0.66869  | 0.002472 | 0.95751  | -0.12477 | 0.00694  |
| 2.14E-05 | 0.380616 | 1.51E-17 | 0.092099 | 0.04668  | 0.162219 | 0.00043  | 0.089882 | 0.05225  |
| 0.99778  | 0.115181 | 0.01275  | 0.234714 | 2.89E-07 | 0.29687  | 5.89E-11 | -0.00971 | 0.83416  |
| 1.59E-05 | 0.228859 | 5.77E-07 | 0.02147  | 0.64352  | 0.066367 | 0.15216  | 0.161763 | 0.00045  |
| 0.09118  | 0.088767 | 0.05525  | 0.054432 | 0.2404   | 0.165098 | 0.00034  | -0.0166  | 0.72048  |
| 0.90023  | 0.023038 | 0.61948  | 0.055524 | 0.23108  | 0.149274 | 0.00121  | 0.054677 | 0.23828  |
| 0.44707  | -0.06549 | 0.15767  | 0.06218  | 0.17978  | -0.07288 | 0.11578  | 0.0077   | 0.86819  |
| 0.00633  | 0.170343 | 0.00022  | 0.107478 | 0.02017  | 0.123279 | 0.00765  | 0.036449 | 0.43197  |
| 0.52262  | 0.065845 | 0.15542  | 0.151322 | 0.00104  | 0.064138 | 0.16643  | -0.03471 | 0.45428  |
| 0.04915  | 0.328258 | 3.41E-13 | 0.079501 | 0.08613  | 0.120507 | 0.00914  | 0.14904  | 0.00124  |
| 0.23629  | 0.152069 | 0.00098  | -0.00362 | 0.93774  | 0.073088 | 0.11472  | -0.12244 | 0.00808  |
| 0.92922  | 0.107274 | 0.02041  | 0.06609  | 0.15389  | 0.088346 | 0.05642  | -0.07684 | 0.09721  |
| 0.58564  | 0.182659 | 7.18E-05 | 0.216335 | 2.38E-06 | 0.207521 | 6.13E-06 | 0.022575 | 0.62654  |
| 0.62159  | 0.149234 | 0.00122  | 0.314386 | 3.58E-12 | 0.132427 | 0.00415  | 0.030215 | 0.51481  |
| 0.29634  | 0.094804 | 0.04057  | 0.159765 | 0.00053  | 0.215244 | 2.68E-06 | -0.01066 | 0.81823  |
| 0.47722  | 0.097432 | 0.0353   | 0.105341 | 0.02281  | 0.231076 | 4.45E-07 | 0.016339 | 0.72471  |
| 0.01853  | 0.278582 | 9.03E-10 | 0.109232 | 0.01821  | 0.051871 | 0.26327  | 0.064054 | 0.16699  |
| 0.92616  | -0.1107  | 0.0167   | -0.11228 | 0.0152   | -0.07415 | 0.10955  | -0.08787 | 0.05775  |
| 0.01926  | 0.031588 | 0.4959   | -0.16363 | 0.00038  | -0.04934 | 0.28733  | -0.06892 | 0.137    |
| 0.32886  | 0.159485 | 0.00054  | 0.012603 | 0.7859   | -0.00674 | 0.88456  | 0.069624 | 0.133    |
| 4.28E-05 | 0.169109 | 0.00024  | 0.230394 | 4.82E-07 | 0.045183 | 0.32991  | 0.095869 | 0.03836  |
| 2.95E-07 | 0.331847 | 1.82E-13 | 0.044461 | 0.3377   | 0.077659 | 0.09369  | 0.089162 | 0.05417  |

|          |          |          |          |          |          |          |          |         |
|----------|----------|----------|----------|----------|----------|----------|----------|---------|
| 0.07005  | -0.01006 | 0.82834  | -0.06381 | 0.16864  | -0.00424 | 0.92722  | 0.049348 | 0.28723 |
| 4.85E-07 | 0.335161 | 1.01E-13 | 0.046865 | 0.31221  | 0.005217 | 0.91047  | 0.166815 | 0.00029 |
| 0.01543  | 0.134637 | 0.00356  | 0.092065 | 0.04676  | 0.009639 | 0.83543  | 0.021583 | 0.64177 |
| 0.00039  | 0.248142 | 5.53E-08 | 0.057988 | 0.211    | -0.00612 | 0.89502  | 0.044395 | 0.33842 |
| 0.00105  | 0.133257 | 0.00392  | -0.02916 | 0.52958  | 0.073317 | 0.11358  | 0.025282 | 0.58577 |
| 0.46045  | -0.05382 | 0.24574  | -0.03276 | 0.47999  | 0.092144 | 0.04657  | 0.044493 | 0.33736 |
| 0.32622  | 0.064654 | 0.16304  | 0.035724 | 0.4412   | 0.033659 | 0.46806  | -0.02361 | 0.61079 |
| 0.14218  | -0.00126 | 0.97838  | 0.044796 | 0.33407  | 0.027883 | 0.5478   | 0.052929 | 0.25365 |
| 0.31166  | 0.117384 | 0.01113  | 0.008663 | 0.85189  | -0.00677 | 0.88403  | -0.11869 | 0.01025 |
| 0.71193  | -0.15889 | 0.00057  | -0.17926 | 9.82E-05 | -0.17022 | 0.00022  | -0.06924 | 0.13516 |
| 0.3681   | 0.098746 | 0.03289  | 0.137852 | 0.00283  | 0.061717 | 0.18306  | -0.03718 | 0.42278 |
| 0.00202  | -0.13434 | 0.00363  | 0.031032 | 0.50352  | -0.00943 | 0.83891  | 0.110259 | 0.01714 |
| 0.00025  | 0.29182  | 1.28E-10 | 0.032353 | 0.48551  | 0.134715 | 0.00354  | 0.044245 | 0.34006 |
| 0.0002   | 0.105803 | 0.02221  | 0.146661 | 0.00148  | 0.051068 | 0.27075  | 0.072359 | 0.11839 |
| 0.23984  | -0.16568 | 0.00032  | -0.06133 | 0.18581  | -0.16284 | 0.00041  | -0.05291 | 0.25385 |
| 0.00012  | 0.028226 | 0.54288  | -0.06961 | 0.13309  | -0.08272 | 0.07411  | -0.05834 | 0.20827 |
| 0.26509  | 0.082851 | 0.07366  | 0.168266 | 0.00026  | -0.05911 | 0.20229  | -0.12356 | 0.00751 |
| 0.64963  | -0.0511  | 0.27048  | -0.04499 | 0.33198  | -0.01374 | 0.76707  | 0.016078 | 0.72895 |
| 0.01773  | 0.159616 | 0.00054  | 0.014236 | 0.75897  | -0.002   | 0.96563  | -0.00059 | 0.98993 |
| 0.70362  | -0.07357 | 0.11234  | 0.013216 | 0.77576  | -0.04436 | 0.3388   | -0.14601 | 0.00156 |
| 0.00621  | -0.06606 | 0.15406  | 0.042361 | 0.36105  | 0.136832 | 0.00305  | 0.130435 | 0.00475 |
| 0.03635  | 0.151048 | 0.00106  | 0.064496 | 0.16408  | 0.133839 | 0.00376  | 0.099349 | 0.03183 |
| 0.99937  | -0.01598 | 0.73056  | 0.060632 | 0.19089  | 0.126227 | 0.00631  | 0.146923 | 0.00145 |
| 0.20807  | 0.070536 | 0.12798  | 0.141304 | 0.00221  | 0.044798 | 0.33405  | -0.05328 | 0.25053 |
| 0.40625  | -0.08649 | 0.06182  | -0.06065 | 0.19074  | -0.13493 | 0.00348  | -0.06649 | 0.1514  |
| 0.69935  | 0.101339 | 0.02854  | -0.03627 | 0.43428  | -0.05078 | 0.27349  | -0.04062 | 0.38118 |
| 5.89E-06 | 0.36522  | 3.50E-16 | 0.096931 | 0.03626  | 0.224451 | 9.58E-07 | 0.140034 | 0.00242 |
| 0.00068  | -0.06365 | 0.16968  | 0.126702 | 0.00611  | -0.02541 | 0.58383  | -0.06808 | 0.14184 |
| 0.89041  | -0.01204 | 0.79526  | -0.1401  | 0.00241  | -0.05676 | 0.22081  | -0.09601 | 0.03808 |
| 0.00386  | 0.291853 | 1.27E-10 | 0.137487 | 0.00291  | 0.135617 | 0.00332  | -0.01614 | 0.72798 |
| 0.00031  | -0.0757  | 0.10227  | -0.057   | 0.21891  | 0.039745 | 0.39148  | -0.01178 | 0.79952 |
| 0.14284  | 0.115385 | 0.01259  | 0.097973 | 0.03429  | 0.056386 | 0.2239   | 0.132312 | 0.00418 |
| 0.1127   | 0.108221 | 0.01932  | 0.245149 | 8.07E-08 | 0.010747 | 0.81683  | 0.078888 | 0.08859 |
| 0.0094   | 0.079    | 0.08814  | -0.07494 | 0.10579  | -0.08694 | 0.06046  | 0.04911  | 0.28957 |
| 0.5527   | 0.044075 | 0.34193  | 0.220035 | 1.58E-06 | 0.003903 | 0.93297  | 0.060798 | 0.18967 |
| 0.26791  | -0.01126 | 0.80827  | 0.176777 | 0.00012  | 0.219775 | 1.62E-06 | 0.092626 | 0.04544 |
| 0.78403  | 0.057883 | 0.21183  | 0.072794 | 0.11619  | 0.074081 | 0.10986  | 0.149921 | 0.00116 |
| 0.46377  | 0.026689 | 0.56508  | 0.070047 | 0.13065  | 0.048122 | 0.29939  | 0.051321 | 0.26838 |
| 0.95395  | 0.021759 | 0.63907  | 0.076731 | 0.09769  | 0.120248 | 0.00929  | 0.102333 | 0.02701 |
| 0.08044  | 0.046793 | 0.31295  | 0.171614 | 0.00019  | 0.042565 | 0.35873  | 0.146568 | 0.00149 |
| 0.02595  | 0.214529 | 2.89E-06 | 0.3462   | 1.35E-14 | 0.262198 | 8.82E-09 | 0.069868 | 0.13164 |
| 0.40091  | 0.069016 | 0.13643  | 0.068108 | 0.14167  | 0.031036 | 0.50346  | 0.082866 | 0.07361 |
| 0.21998  | 0.129006 | 0.00524  | 0.333173 | 1.44E-13 | 0.067364 | 0.14608  | 0.001765 | 0.96966 |
| 6.54E-05 | -0.04603 | 0.32097  | 0.376523 | 3.54E-17 | -0.00551 | 0.9055   | -0.1476  | 0.00138 |
| 0.72231  | 0.154553 | 0.0008   | 0.055758 | 0.22912  | 0.179902 | 9.26E-05 | -0.01494 | 0.74739 |

|          |          |          |          |          |          |          |          |          |
|----------|----------|----------|----------|----------|----------|----------|----------|----------|
| 0.44723  | 0.001309 | 0.97749  | 0.044956 | 0.33235  | 0.030738 | 0.50757  | -0.0393  | 0.39686  |
| 0.29985  | 0.131055 | 0.00456  | 0.080913 | 0.08069  | 0.061931 | 0.18154  | 0.080278 | 0.0831   |
| 0.04152  | 0.201833 | 1.11E-05 | 0.049518 | 0.28558  | 0.020848 | 0.65316  | 0.000768 | 0.9868   |
| 1.05E-06 | 0.293906 | 9.30E-11 | 0.28471  | 3.70E-10 | 0.183199 | 6.83E-05 | 0.265853 | 5.38E-09 |
| 6.22E-05 | 0.250971 | 3.86E-08 | 0.208712 | 5.41E-06 | 0.103208 | 0.02573  | 0.135022 | 0.00346  |
| 0.15475  | 0.121043 | 0.00883  | 0.039444 | 0.39508  | -0.03657 | 0.43042  | 0.019451 | 0.67503  |
| 5.71E-08 | -0.10133 | 0.02856  | 0.063865 | 0.16825  | 0.038213 | 0.41     | -0.05737 | 0.21592  |
| 0.00017  | -0.02607 | 0.57414  | 0.000225 | 0.99612  | 0.076843 | 0.0972   | -0.17898 | 0.0001   |
| 0.46158  | 0.082941 | 0.07335  | 0.006079 | 0.89576  | -0.00885 | 0.84867  | -0.01906 | 0.68127  |
| 0.30723  | -0.08479 | 0.06716  | 0.043217 | 0.3514   | 0.08504  | 0.06634  | 0.069396 | 0.13428  |
| 0.00338  | 0.041648 | 0.36919  | 0.016914 | 0.71545  | -0.10348 | 0.02534  | 0.150268 | 0.00113  |
| 0.17431  | 0.034267 | 0.46006  | 0.04384  | 0.3445   | 0.015359 | 0.74062  | 0.1402   | 0.00239  |
| 0.19544  | 0.124236 | 0.00719  | 0.091129 | 0.04905  | 0.144783 | 0.00171  | -0.06603 | 0.15428  |
| 0.07195  | 0.130698 | 0.00467  | 0.060038 | 0.19527  | -0.0287  | 0.53612  | -0.04139 | 0.37221  |
| 0.83746  | 0.059179 | 0.20176  | 0.063628 | 0.16984  | 0.01063  | 0.81878  | -0.04211 | 0.36391  |
| 0.90623  | -0.00753 | 0.87115  | 0.066693 | 0.15015  | -0.0124  | 0.78929  | -0.02793 | 0.54714  |
| 0.08219  | 0.151788 | 0.001    | 0.015182 | 0.74349  | 0.014284 | 0.75818  | 0.127319 | 0.00587  |
| 0.34327  | -0.16096 | 0.00048  | -0.03049 | 0.51099  | -0.06087 | 0.18912  | -0.0672  | 0.14705  |
| 0.02338  | 0.02208  | 0.63412  | -0.16807 | 0.00026  | -0.0215  | 0.643    | -0.02477 | 0.59333  |
| 0.00479  | -0.16129 | 0.00047  | -0.08683 | 0.06079  | -0.0603  | 0.1933   | -0.11899 | 0.01006  |
| 0.00208  | 0.1661   | 0.00031  | 0.006687 | 0.8854   | -0.01181 | 0.79906  | 0.117322 | 0.01117  |
| 0.00037  | 0.226622 | 7.47E-07 | -0.12387 | 0.00736  | 0.058464 | 0.20727  | -0.12822 | 0.00552  |
| 0.00032  | -0.06373 | 0.16918  | -0.0261  | 0.57366  | -0.0425  | 0.35945  | -0.0176  | 0.70444  |
| 0.55818  | 0.052926 | 0.25367  | -0.05555 | 0.23083  | -0.01491 | 0.74796  | -0.09549 | 0.03913  |
| 0.29587  | -0.10379 | 0.02489  | -0.0996  | 0.0314   | -0.10394 | 0.02468  | -0.06873 | 0.13804  |
| 0.20104  | 0.074624 | 0.10727  | 0.061474 | 0.18479  | 0.010757 | 0.81666  | -0.07454 | 0.10767  |
| 2.97E-09 | 0.216442 | 2.35E-06 | -0.02556 | 0.58164  | 0.025491 | 0.58267  | 0.050589 | 0.27527  |
| 0.03453  | 0.128957 | 0.00525  | 0.111927 | 0.01552  | 0.021495 | 0.64314  | 0.022581 | 0.62645  |
| 0.03142  | 0.203184 | 9.63E-06 | 0.041684 | 0.36877  | 0.099958 | 0.03079  | 0.036503 | 0.43129  |
| 0.01769  | 0.172563 | 0.00018  | 0.079835 | 0.08482  | 0.06784  | 0.14325  | 0.143441 | 0.00189  |
| 0.95421  | 0.048544 | 0.29517  | -0.07769 | 0.09357  | 0.053152 | 0.25165  | 0.054624 | 0.23873  |
| 0.43164  | 0.047914 | 0.30149  | 0.198298 | 1.58E-05 | 0.036269 | 0.43425  | 0.0773   | 0.09522  |
| 0.39346  | 0.07644  | 0.09897  | -0.0001  | 0.9982   | 0.010054 | 0.82844  | -0.0409  | 0.37789  |
| 0.01733  | 0.091538 | 0.04804  | 0.117182 | 0.01127  | 0.054224 | 0.2422   | 0.05856  | 0.20652  |
| 0.00109  | 0.149587 | 0.00119  | -0.0109  | 0.81421  | 0.06414  | 0.16642  | 0.142467 | 0.00203  |
| 0.18935  | 0.213301 | 3.31E-06 | 0.10784  | 0.01975  | 0.089139 | 0.05423  | -0.11302 | 0.01453  |
| 1.85E-10 | 0.394235 | 8.15E-19 | 0.128251 | 0.00551  | 0.136353 | 0.00315  | 0.099103 | 0.03226  |
| 2.89E-05 | 0.283458 | 4.44E-10 | -0.01158 | 0.80297  | 0.087962 | 0.0575   | -0.14592 | 0.00157  |
| 0.01525  | 0.238595 | 1.81E-07 | 0.080763 | 0.08125  | 0.149028 | 0.00124  | 0.026666 | 0.56542  |
| 4.94E-05 | 0.149728 | 0.00117  | 0.02026  | 0.66234  | -0.02969 | 0.52216  | 0.142019 | 0.00209  |
| 1.28E-11 | 0.468649 | 7.14E-27 | -0.02001 | 0.66627  | 0.113428 | 0.01419  | 0.147559 | 0.00138  |
| 0.0016   | 0.296775 | 5.98E-11 | 0.048353 | 0.29708  | 0.165168 | 0.00034  | 0.058318 | 0.20841  |
| 0.1079   | 0.002432 | 0.9582   | -0.05426 | 0.2419   | -0.05192 | 0.26278  | -0.02173 | 0.63944  |
| 0.09768  | 0.080071 | 0.0839   | 0.088682 | 0.05548  | -0.00799 | 0.86321  | 0.079274 | 0.08704  |
| 0.92442  | 0.162257 | 0.00043  | -0.03452 | 0.45677  | 0.095714 | 0.03868  | -0.07467 | 0.10706  |

|          |          |          |          |          |          |          |          |          |
|----------|----------|----------|----------|----------|----------|----------|----------|----------|
| 0.40967  | -0.09187 | 0.04724  | -0.20616 | 7.07E-06 | -0.07256 | 0.11739  | -0.06875 | 0.13794  |
| 0.21699  | -0.00362 | 0.93787  | 0.048551 | 0.2951   | 0.09017  | 0.05149  | 0.124588 | 0.00702  |
| 0.48632  | -0.07838 | 0.09069  | -0.11097 | 0.01644  | -0.08886 | 0.05499  | -0.09414 | 0.04201  |
| 0.44567  | 0.044807 | 0.33395  | 0.001294 | 0.97774  | 0.006453 | 0.88939  | -0.05613 | 0.22605  |
| 0.00144  | 0.223277 | 1.09E-06 | 0.179419 | 9.68E-05 | 0.058166 | 0.20959  | -0.04013 | 0.38691  |
| 0.33327  | -0.14511 | 0.00167  | 0.076909 | 0.09691  | 0.037913 | 0.41369  | 0.018456 | 0.69078  |
| 0.01121  | -0.18116 | 8.25E-05 | -0.04422 | 0.34032  | -0.00601 | 0.89693  | -0.00739 | 0.87347  |
| 3.71E-06 | -0.19474 | 2.26E-05 | 0.046667 | 0.31426  | 0.040345 | 0.38437  | -0.07047 | 0.12835  |
| 0.03027  | 0.087465 | 0.05893  | 0.062439 | 0.17798  | 0.044571 | 0.33651  | -0.02853 | 0.5385   |
| 0.88183  | 0.078318 | 0.09093  | 0.22291  | 1.14E-06 | 0.154177 | 0.00083  | 0.031542 | 0.49652  |
| 0.49781  | 0.119279 | 0.00988  | 0.136041 | 0.00322  | 0.076477 | 0.0988   | 0.076355 | 0.09935  |
| 0.00103  | 0.276726 | 1.18E-09 | 0.064611 | 0.16332  | 0.010453 | 0.82175  | -0.0004  | 0.99305  |
| 0.02637  | -0.0843  | 0.06876  | 0.08534  | 0.06538  | -0.06684 | 0.14924  | 0.031857 | 0.49223  |
| 0.01961  | 0.128116 | 0.00556  | 0.121001 | 0.00886  | -0.00574 | 0.90158  | 0.045726 | 0.32413  |
| 0.19885  | 0.118966 | 0.01008  | -0.00728 | 0.87525  | -0.03529 | 0.44677  | 0.05343  | 0.24917  |
| 4.51E-06 | 0.421658 | 1.48E-21 | 0.328187 | 3.45E-13 | 0.083917 | 0.07002  | 0.088729 | 0.05535  |
| 0.02787  | 0.243854 | 9.48E-08 | 0.102511 | 0.02675  | 0.204203 | 8.67E-06 | 0.168687 | 0.00025  |
| 2.24E-06 | 0.351364 | 5.14E-15 | 0.356802 | 1.82E-15 | 0.152935 | 0.00091  | 0.021996 | 0.63542  |
| 0.14824  | 0.076279 | 0.09968  | 0.079801 | 0.08495  | 0.063309 | 0.17199  | 0.090641 | 0.05028  |
| 1.82E-05 | 0.127542 | 0.00578  | -0.16473 | 0.00035  | -0.01293 | 0.78049  | -0.06863 | 0.13863  |
| 0.04372  | -0.09411 | 0.04206  | -0.12764 | 0.00574  | -0.05904 | 0.2028   | -0.09637 | 0.03735  |
| 0.00021  | -0.21564 | 2.56E-06 | 0.015307 | 0.74146  | -0.03026 | 0.51413  | 0.073887 | 0.1108   |
| 0.65309  | 0.032406 | 0.4848   | -0.06547 | 0.15777  | -0.09258 | 0.04555  | -0.05741 | 0.21557  |
| 0.47231  | 0.00091  | 0.98435  | -0.06581 | 0.15561  | -0.14785 | 0.00135  | -0.0244  | 0.59897  |
| 0.00143  | -0.25341 | 2.82E-08 | 0.092684 | 0.0453   | -0.16418 | 0.00037  | 0.001762 | 0.96971  |
| 4.84E-14 | -0.34322 | 2.34E-14 | -0.01046 | 0.82158  | -0.17264 | 0.00018  | -0.30524 | 1.58E-11 |
| 0.08653  | -0.09665 | 0.0368   | 0.086371 | 0.06218  | -0.10421 | 0.02432  | 0.004658 | 0.92004  |
| 0.39412  | 0.038756 | 0.40339  | 0.088815 | 0.05512  | 0.017038 | 0.71344  | -0.00133 | 0.97718  |
| 0.87859  | 0.057826 | 0.21228  | -0.02317 | 0.61754  | -0.01406 | 0.76188  | -0.1184  | 0.01044  |
| 0.03859  | 0.074652 | 0.10714  | 0.183355 | 6.73E-05 | 0.053012 | 0.2529   | 0.001855 | 0.96811  |
| 0.15885  | -0.13795 | 0.00281  | 0.070318 | 0.12917  | -0.06563 | 0.15679  | -0.03456 | 0.45623  |
| 1.13E-05 | 0.214702 | 2.84E-06 | 0.043558 | 0.34762  | -0.04566 | 0.32488  | 0.045523 | 0.32628  |
| 0.00041  | -0.11059 | 0.01681  | 0.056742 | 0.22099  | -0.01491 | 0.74798  | -0.01555 | 0.73755  |
| 0.56144  | -0.03294 | 0.47769  | 0.086951 | 0.06044  | -0.0098  | 0.83278  | -0.07737 | 0.0949   |
| 0.00838  | 0.258245 | 1.50E-08 | 0.08382  | 0.07034  | 0.253838 | 2.66E-08 | -0.02965 | 0.52266  |
| 0.65775  | -0.00875 | 0.85038  | -0.01387 | 0.76494  | 0.023501 | 0.61245  | -0.06021 | 0.19403  |
| 0.14397  | -0.19235 | 2.85E-05 | -0.03454 | 0.45651  | -0.06779 | 0.14355  | 0.011605 | 0.80249  |
| 0.06922  | 0.003725 | 0.936    | 0.2169   | 2.23E-06 | 0.058609 | 0.20614  | 0.108893 | 0.01858  |
| 0.32365  | 0.110538 | 0.01686  | 0.09705  | 0.03603  | 0.109697 | 0.01772  | 0.154461 | 0.00081  |
| 2.96E-10 | -0.29717 | 5.63E-11 | -0.00851 | 0.85446  | -0.06896 | 0.13676  | -0.01243 | 0.78877  |
| 5.97E-05 | 0.322881 | 8.60E-13 | 0.203181 | 9.63E-06 | 0.074136 | 0.1096   | 0.007025 | 0.87966  |
| 0.8317   | 0.071218 | 0.12433  | 0.104349 | 0.02413  | 0.002188 | 0.96239  | 0.018033 | 0.69752  |
| 0.49376  | 0.164439 | 0.00036  | -0.09531 | 0.03951  | 0.016092 | 0.72871  | -0.03446 | 0.45756  |
| 0.01348  | 0.07748  | 0.09445  | 0.190278 | 3.49E-05 | 0.01726  | 0.70987  | -0.04599 | 0.32134  |
| 1.65E-05 | 0.34309  | 2.40E-14 | 0.151876 | 0.00099  | 0.105074 | 0.02315  | 0.017518 | 0.70574  |

|          |          |          |          |          |          |          |          |          |
|----------|----------|----------|----------|----------|----------|----------|----------|----------|
| 0.00498  | -0.10865 | 0.01885  | 0.023861 | 0.60703  | -0.03259 | 0.48239  | -0.19279 | 2.73E-05 |
| 0.73767  | 0.070547 | 0.12792  | 0.00343  | 0.94108  | -0.03123 | 0.50076  | -0.26277 | 8.17E-09 |
| 0.64144  | 0.129648 | 0.00502  | 0.037157 | 0.42308  | 0.041247 | 0.37382  | 0.071912 | 0.12069  |
| 1.57E-10 | 0.432501 | 1.04E-22 | 0.169401 | 0.00024  | -0.00741 | 0.87313  | 0.058709 | 0.20537  |
| 0.83969  | 0.067123 | 0.14754  | 0.053979 | 0.24433  | -0.01107 | 0.81143  | 0.031592 | 0.49584  |
| 2.88E-05 | 0.231029 | 4.47E-07 | 0.11825  | 0.01054  | 0.029569 | 0.52385  | 0.237277 | 2.12E-07 |
| 5.38E-05 | -0.22605 | 7.98E-07 | -0.04677 | 0.31317  | -0.08985 | 0.05234  | -0.01218 | 0.7929   |
| 0.01119  | 0.161982 | 0.00044  | 0.008872 | 0.84836  | 0.022883 | 0.62184  | 0.055265 | 0.23326  |
| 0.35605  | 0.008343 | 0.85731  | 0.000797 | 0.9863   | 0.057739 | 0.21296  | -0.00956 | 0.83671  |
| 0.7211   | 0.083659 | 0.07089  | 0.026526 | 0.56745  | 0.090983 | 0.04942  | 0.029186 | 0.52924  |
| 0.93032  | 0.195554 | 2.08E-05 | -0.1499  | 0.00116  | 0.069339 | 0.1346   | 0.047526 | 0.30543  |
| 6.29E-08 | 0.174097 | 0.00016  | -0.01555 | 0.73749  | -0.02927 | 0.52801  | 0.133386 | 0.00388  |
| 0.9812   | 0.083675 | 0.07083  | 0.056707 | 0.22127  | 0.083881 | 0.07014  | -0.02361 | 0.61077  |
| 2.69E-06 | -0.24004 | 1.52E-07 | -0.02495 | 0.5907   | -0.02711 | 0.55894  | -0.02503 | 0.58954  |
| 9.55E-07 | 0.276014 | 1.30E-09 | 0.256088 | 1.99E-08 | 0.057804 | 0.21245  | 0.079016 | 0.08808  |
| 0.00558  | 0.140123 | 0.00241  | 0.075125 | 0.10493  | 0.070197 | 0.12983  | 0.264049 | 6.87E-09 |
| 0.88107  | 0.203894 | 8.95E-06 | 0.065049 | 0.16048  | 0.082796 | 0.07385  | -0.03683 | 0.4272   |
| 0.05871  | 0.15774  | 0.00062  | 0.058284 | 0.20868  | 0.083705 | 0.07073  | 0.073824 | 0.1111   |
| 0.19908  | 0.146152 | 0.00154  | 0.313503 | 4.14E-12 | 0.065412 | 0.15816  | 0.005349 | 0.90821  |
| 0.00031  | 0.230207 | 4.93E-07 | 0.041529 | 0.37056  | -0.00165 | 0.97165  | -0.14546 | 0.00162  |
| 0.0994   | -0.02455 | 0.59667  | -0.00503 | 0.9137   | -0.0143  | 0.75787  | 0.02021  | 0.66312  |
| 0.12748  | -0.02129 | 0.64636  | -0.12645 | 0.00621  | -0.07816 | 0.0916   | -0.15789 | 0.00062  |
| 0.00301  | 0.189495 | 3.77E-05 | -0.09766 | 0.03488  | -0.03638 | 0.43282  | 0.082697 | 0.0742   |
| 4.38E-05 | -0.22224 | 1.23E-06 | -0.06255 | 0.17721  | -0.01746 | 0.70672  | -0.19264 | 2.78E-05 |
| 0.91573  | -0.00503 | 0.91371  | 0.006552 | 0.8877   | -0.08433 | 0.06863  | -0.08143 | 0.07876  |
| 0.58509  | 0.177573 | 0.00011  | 0.165749 | 0.00032  | -0.0047  | 0.91929  | 0.02621  | 0.57208  |
| 1.84E-07 | -0.11631 | 0.01189  | -0.01279 | 0.78289  | -0.06251 | 0.17748  | -0.08812 | 0.05706  |
| 0.05714  | 0.013142 | 0.77698  | 0.023772 | 0.60836  | -0.03195 | 0.49101  | 0.022952 | 0.62078  |
| 1.09E-05 | 0.21875  | 1.82E-06 | 0.060026 | 0.19537  | 0.206762 | 6.64E-06 | 0.060545 | 0.19153  |
| 0.08865  | -0.18999 | 3.59E-05 | -0.06371 | 0.1693   | 0.006714 | 0.88495  | -0.10095 | 0.02916  |
| 0.01567  | 0.077086 | 0.09614  | 0.102416 | 0.02689  | 0.120169 | 0.00934  | 0.008712 | 0.85106  |
| 0.14472  | 0.323562 | 7.66E-13 | 0.128264 | 0.00551  | 0.165664 | 0.00032  | 0.025378 | 0.58435  |
| 0.1477   | 0.059727 | 0.19761  | -0.00329 | 0.94347  | 0.020823 | 0.65355  | -0.05038 | 0.27724  |
| 5.52E-05 | -0.18692 | 4.82E-05 | -0.02571 | 0.57946  | -0.03841 | 0.40758  | 0.042402 | 0.36057  |
| 0.03451  | 0.05915  | 0.20198  | -0.10935 | 0.01808  | -0.05807 | 0.21032  | 0.041478 | 0.37115  |
| 0.70268  | 0.003049 | 0.94761  | 0.033853 | 0.46551  | -0.03448 | 0.45724  | 0.043868 | 0.3442   |
| 0.00904  | -0.1211  | 0.0088   | 0.012825 | 0.78223  | 0.039915 | 0.38945  | -0.08606 | 0.06315  |
| 0.31315  | -0.03514 | 0.44876  | -0.01763 | 0.70393  | -0.02081 | 0.65379  | -0.04642 | 0.31679  |
| 0.65143  | 0.00174  | 0.97008  | 0.014705 | 0.75129  | -0.06135 | 0.18569  | 0.015871 | 0.73229  |
| 0.00528  | -0.23842 | 1.85E-07 | 0.117773 | 0.01086  | -0.08077 | 0.08123  | -0.03055 | 0.51019  |
| 0.52725  | 0.035055 | 0.4498   | 0.035209 | 0.44782  | 0.047936 | 0.30126  | 0.02722  | 0.55736  |
| 0.0168   | 0.08574  | 0.06413  | 0.015388 | 0.74014  | 0.031954 | 0.49092  | 0.099148 | 0.03218  |
| 0.96708  | 0.141685 | 0.00215  | 0.003695 | 0.93653  | 0.127372 | 0.00584  | 0.012895 | 0.78106  |
| 0.79604  | 0.033008 | 0.47671  | 0.044462 | 0.3377   | 0.125506 | 0.00661  | 0.036109 | 0.43628  |
| 0.04992  | 0.007129 | 0.87789  | 0.030074 | 0.51678  | 0.002638 | 0.95466  | -0.04362 | 0.34689  |

|          |          |          |          |          |          |          |          |          |
|----------|----------|----------|----------|----------|----------|----------|----------|----------|
| 0.04173  | 0.103695 | 0.02503  | 0.099159 | 0.03216  | 0.018343 | 0.69257  | -0.01553 | 0.73782  |
| 0.00032  | -0.18501 | 5.76E-05 | 0.019594 | 0.67278  | -0.02617 | 0.57268  | -0.14176 | 0.00213  |
| 0.23469  | 0.020009 | 0.66626  | -0.03821 | 0.41     | 0.062779 | 0.17562  | -0.00833 | 0.85753  |
| 0.93831  | 0.10994  | 0.01747  | 0.048831 | 0.29232  | 0.008314 | 0.85779  | -0.04616 | 0.31954  |
| 0.32421  | 0.031651 | 0.49504  | 0.111177 | 0.01624  | 0.050195 | 0.27903  | -0.17132 | 0.0002   |
| 4.01E-06 | -0.28872 | 2.04E-10 | -0.00354 | 0.93914  | -0.11049 | 0.01691  | -0.16103 | 0.00048  |
| 4.41E-05 | 0.266122 | 5.18E-09 | 0.004559 | 0.92173  | 0.074744 | 0.10671  | -0.04931 | 0.28761  |
| 1.87E-07 | -0.29225 | 1.20E-10 | 0.019498 | 0.67429  | -0.05242 | 0.25824  | -0.19646 | 1.90E-05 |
| 0.1578   | -0.11212 | 0.01534  | 0.024583 | 0.59618  | -0.06468 | 0.16291  | -0.12901 | 0.00524  |
| 0.34405  | 0.028918 | 0.53304  | 0.037076 | 0.42409  | 0.027432 | 0.5543   | -0.03291 | 0.47808  |
| 0.72007  | 0.176646 | 0.00012  | 0.048788 | 0.29274  | 0.006563 | 0.88751  | -0.05776 | 0.21277  |
| 0.60975  | 0.01993  | 0.6675   | 0.090983 | 0.04942  | 0.078847 | 0.08876  | -0.15936 | 0.00055  |
| 0.01862  | 0.222616 | 1.18E-06 | 0.165872 | 0.00032  | 0.058297 | 0.20857  | 0.021524 | 0.64269  |
| 0.81227  | 0.073279 | 0.11377  | 0.026377 | 0.56964  | 0.00237  | 0.95927  | 0.082598 | 0.07455  |
| 0.00013  | 0.296516 | 6.23E-11 | 0.088066 | 0.05721  | 0.260387 | 1.12E-08 | 0.235326 | 2.69E-07 |
| 0.55585  | 0.078912 | 0.0885   | -0.02431 | 0.60026  | 0.004506 | 0.92264  | -0.25177 | 3.48E-08 |
| 4.12E-09 | 0.27576  | 1.35E-09 | 0.109248 | 0.0182   | -0.01431 | 0.75777  | 0.105587 | 0.02249  |
| 0.00268  | -0.20313 | 9.69E-06 | -0.08884 | 0.05504  | -0.02807 | 0.54512  | -0.10334 | 0.02554  |
| 0.45626  | 0.12553  | 0.0066   | 0.240061 | 1.51E-07 | 0.11247  | 0.01503  | 0.064205 | 0.166    |
| 0.4141   | 0.033542 | 0.46961  | 0.124972 | 0.00685  | 0.131093 | 0.00455  | 0.019701 | 0.67109  |
| 0.88574  | 0.087441 | 0.059    | 0.219659 | 1.64E-06 | 0.12345  | 0.00757  | -0.0235  | 0.61241  |
| 0.385    | -0.07579 | 0.10188  | -0.05931 | 0.20076  | -0.10373 | 0.02498  | -0.03628 | 0.43407  |
| 0.07577  | 0.144712 | 0.00172  | -0.00787 | 0.86539  | 0.013927 | 0.76405  | -0.04659 | 0.31506  |
| 0.59165  | 0.067046 | 0.148    | 0.060728 | 0.19018  | 0.051563 | 0.26612  | 0.046508 | 0.31591  |
| 9.62E-08 | -0.37026 | 1.27E-16 | -0.10957 | 0.01786  | -0.07614 | 0.1003   | -0.12667 | 0.00613  |
| 0.00073  | -0.14525 | 0.00165  | 0.059884 | 0.19643  | 0.070973 | 0.12563  | 0.15418  | 0.00083  |
| 0.49147  | 0.166021 | 0.00031  | 0.108709 | 0.01878  | -0.02783 | 0.54855  | 0.059391 | 0.20014  |
| 0.57367  | -0.03308 | 0.47578  | 0.065464 | 0.15783  | 0.048973 | 0.29092  | 0.018444 | 0.69097  |
| 2.12E-05 | 0.233858 | 3.20E-07 | -0.02979 | 0.52073  | 0.053393 | 0.2495   | -0.04662 | 0.31473  |
| 0.91808  | 0.106524 | 0.02131  | -0.06314 | 0.17312  | 0.032497 | 0.48358  | -0.04239 | 0.36066  |
| 0.08128  | -0.14413 | 0.00179  | 0.10541  | 0.02272  | -0.00148 | 0.97451  | 0.03228  | 0.48649  |
| 0.8717   | -0.04052 | 0.38229  | 0.023609 | 0.61082  | 0.000891 | 0.98469  | 0.065859 | 0.15533  |
| 3.70E-05 | -0.1805  | 8.77E-05 | 0.012012 | 0.79571  | -0.00226 | 0.96115  | -0.10103 | 0.02904  |
| 0.00119  | 0.047313 | 0.3076   | -0.06959 | 0.13321  | 0.02686  | 0.5626   | 0.064163 | 0.16627  |
| 0.11709  | 0.128434 | 0.00544  | 0.107111 | 0.0206   | 0.100016 | 0.0307   | -0.06844 | 0.13976  |
| 0.61706  | 0.159874 | 0.00052  | 0.25692  | 1.78E-08 | 0.12062  | 0.00908  | -0.03643 | 0.43226  |
| 0.05285  | 0.158198 | 0.0006   | 0.109856 | 0.01756  | 0.206089 | 7.12E-06 | 0.038663 | 0.40451  |
| 0.14846  | 0.025003 | 0.58992  | 0.111992 | 0.01547  | 0.107595 | 0.02004  | 0.091826 | 0.04734  |
| 0.0039   | -0.04514 | 0.33038  | 0.06624  | 0.15295  | 0.139994 | 0.00243  | 0.060081 | 0.19496  |
| 0.33711  | 0.126255 | 0.00629  | -0.03171 | 0.49423  | 0.041973 | 0.36546  | 0.062762 | 0.17574  |
| 0.01568  | 0.010218 | 0.82569  | -0.03645 | 0.43193  | -0.01163 | 0.80206  | -0.12589 | 0.00645  |
| 0.04546  | -0.03829 | 0.40909  | 0.089374 | 0.0536   | 0.053503 | 0.24852  | -0.12563 | 0.00656  |
| 7.57E-12 | 0.302962 | 2.27E-11 | 0.040699 | 0.38021  | -0.10021 | 0.03038  | 0.064938 | 0.1612   |
| 0.51118  | -0.02336 | 0.61458  | 0.017955 | 0.69876  | -0.08151 | 0.07848  | -0.08047 | 0.08236  |
| 5.58E-05 | -0.15983 | 0.00053  | 0.129854 | 0.00495  | 0.068026 | 0.14215  | -0.10466 | 0.02371  |

|          |          |          |          |          |          |          |          |          |
|----------|----------|----------|----------|----------|----------|----------|----------|----------|
| 0.15847  | 0.069014 | 0.13644  | 0.053326 | 0.2501   | 0.048716 | 0.29346  | 0.091171 | 0.04895  |
| 2.67E-06 | 0.429771 | 2.05E-22 | 0.160106 | 0.00051  | 0.136185 | 0.00319  | 0.191722 | 3.04E-05 |
| 0.48421  | 0.052109 | 0.26109  | 0.054369 | 0.24094  | 0.050637 | 0.27481  | 0.006359 | 0.89098  |
| 0.47925  | -0.01937 | 0.6763   | -0.01908 | 0.68094  | -0.03274 | 0.48032  | -0.00582 | 0.90015  |
| 0.57703  | 0.033772 | 0.46657  | 0.016741 | 0.71823  | -0.00936 | 0.84007  | -0.01734 | 0.70864  |
| 0.85175  | 0.017906 | 0.69953  | 0.011577 | 0.80296  | -0.00599 | 0.89734  | 0.049343 | 0.28728  |
| 0.01671  | 0.334078 | 1.22E-13 | 0.168666 | 0.00025  | 0.0358   | 0.44022  | 0.059261 | 0.20113  |
| 0.61945  | -0.01704 | 0.7134   | 0.002386 | 0.95899  | -0.00074 | 0.9872   | 0.007586 | 0.87013  |
| 0.79679  | 0.036905 | 0.42623  | 0.167576 | 0.00028  | -0.02753 | 0.55282  | -0.02333 | 0.61501  |
| 0.00153  | -0.26399 | 6.92E-09 | -0.04225 | 0.36227  | -0.08405 | 0.06957  | -0.0381  | 0.4114   |
| 0.16895  | -0.11459 | 0.01322  | 0.155258 | 0.00076  | 0.023693 | 0.60956  | -0.15113 | 0.00105  |
| 0.00453  | 0.137144 | 0.00298  | 0.017995 | 0.69812  | -0.0116  | 0.80257  | 0.144088 | 0.0018   |
| 0.44044  | -0.03949 | 0.39454  | 0.008014 | 0.86287  | 0.001355 | 0.9767   | 0.052281 | 0.25952  |
| 0.65795  | -0.04053 | 0.38214  | 0.047211 | 0.30865  | -0.04543 | 0.32731  | -0.14738 | 0.0014   |
| 0.85659  | 0.118816 | 0.01017  | 0.053863 | 0.24535  | 0.034356 | 0.4589   | -0.12189 | 0.00837  |
| 0.18943  | 0.13504  | 0.00346  | 0.02511  | 0.58833  | 0.074374 | 0.10846  | -0.027   | 0.56061  |
| 0.16455  | -0.01627 | 0.72584  | 0.01211  | 0.79408  | 0.022281 | 0.63104  | -0.12502 | 0.00683  |
| 0.00087  | -0.18889 | 3.99E-05 | -0.16291 | 0.00041  | -0.05016 | 0.27939  | -0.02417 | 0.60239  |
| 0.53403  | 0.017101 | 0.71244  | 0.13592  | 0.00325  | 0.094388 | 0.04147  | 0.123225 | 0.00768  |
| 0.02422  | -0.05304 | 0.25264  | -0.07995 | 0.08439  | 0.045728 | 0.3241   | -0.12254 | 0.00803  |
| 0.00035  | -0.17496 | 0.00014  | 0.023137 | 0.61798  | -0.00713 | 0.87779  | -0.03438 | 0.45857  |
| 0.47184  | 0.076354 | 0.09935  | 0.072724 | 0.11654  | 0.087794 | 0.05798  | 0.198449 | 1.56E-05 |
| 0.51653  | -0.04565 | 0.32494  | 0.202452 | 1.04E-05 | 0.063984 | 0.16746  | 0.111092 | 0.01632  |
| 0.76571  | 0.023972 | 0.60534  | 0.183601 | 6.58E-05 | -0.03513 | 0.44886  | 0.101201 | 0.02876  |
| 0.69855  | -0.00647 | 0.88915  | 0.044728 | 0.33481  | -0.05421 | 0.24233  | 0.021589 | 0.64168  |
| 0.50296  | 0.035462 | 0.44456  | 0.057659 | 0.2136   | -0.0382  | 0.41011  | 0.145094 | 0.00167  |
| 0.22213  | -0.06463 | 0.16322  | -0.15978 | 0.00053  | -0.04163 | 0.36935  | -0.06177 | 0.18271  |
| 0.06252  | 0.251227 | 3.73E-08 | 0.150748 | 0.00108  | 0.131181 | 0.00452  | 0.033521 | 0.46989  |
| 0.00557  | 0.215258 | 2.67E-06 | 0.097957 | 0.03432  | 0.163606 | 0.00039  | 0.069399 | 0.13426  |
| 0.01755  | -0.16573 | 0.00032  | 0.102724 | 0.02643  | -0.01833 | 0.69279  | -0.0762  | 0.10003  |
| 0.72817  | 0.005421 | 0.90699  | 0.029465 | 0.52531  | 0.075585 | 0.10282  | 0.039233 | 0.39761  |
| 0.0926   | 0.14613  | 0.00154  | -0.02811 | 0.54461  | 0.190557 | 3.40E-05 | 0.113603 | 0.01404  |
| 0.07063  | -0.02724 | 0.55712  | 0.114601 | 0.01321  | 0.084698 | 0.06744  | 0.019027 | 0.68172  |
| 9.61E-08 | 0.255078 | 2.27E-08 | 0.112222 | 0.01525  | 0.215537 | 2.59E-06 | 0.07243  | 0.11803  |
| 0.16009  | -0.04136 | 0.37245  | -0.02539 | 0.58421  | -0.04311 | 0.35258  | -0.11453 | 0.01327  |
| 0.09679  | -0.06096 | 0.18852  | 0.134705 | 0.00354  | 0.102873 | 0.02621  | -0.12822 | 0.00552  |
| 0.84628  | 0.11026  | 0.01714  | 0.115619 | 0.01241  | 0.114207 | 0.01353  | -0.0931  | 0.04434  |
| 0.07887  | -0.09109 | 0.04916  | 0.008308 | 0.85789  | -0.01332 | 0.77398  | -0.10385 | 0.02482  |
| 0.00208  | 0.344743 | 1.77E-14 | 0.074414 | 0.10827  | 0.132504 | 0.00413  | 0.045853 | 0.32278  |
| 0.25232  | 0.011445 | 0.80516  | 0.050913 | 0.27221  | 0.020702 | 0.65544  | 0.122872 | 0.00785  |
| 0.27718  | 0.101965 | 0.02757  | -0.04302 | 0.35362  | 0.014026 | 0.76242  | 0.042192 | 0.36296  |
| 0.41775  | 0.101164 | 0.02882  | 0.049929 | 0.28159  | 0.058097 | 0.21014  | -0.01593 | 0.73134  |
| 0.01664  | 0.029192 | 0.52916  | 0.057277 | 0.21666  | 0.21216  | 3.74E-06 | -0.1212  | 0.00875  |
| 0.55045  | 0.084714 | 0.06739  | 0.079232 | 0.08721  | 0.12279  | 0.0079   | 0.066196 | 0.15322  |
| 0.18974  | -0.1318  | 0.00433  | 0.150686 | 0.00109  | 0.054827 | 0.23699  | 0.009721 | 0.83404  |



|          |          |          |          |         |          |          |           |          |
|----------|----------|----------|----------|---------|----------|----------|-----------|----------|
| 0.00025  | 0.28766  | 2.39E-10 | 0.10332  | 0.02556 | 0.084328 | 0.06865  | 0.061262  | 0.18631  |
| 0.63692  | 0.103366 | 0.0255   | 0.099402 | 0.03174 | 0.034105 | 0.46219  | -0.05607  | 0.22651  |
| 0.1841   | 0.024845 | 0.59227  | 0.000855 | 0.98531 | -0.00955 | 0.83693  | 0.331276  | 2.01E-13 |
| 6.40E-08 | -0.25906 | 1.34E-08 | -0.154   | 0.00084 | -0.09832 | 0.03366  | -0.21466  | 2.85E-06 |
| 0.49172  | 0.086437 | 0.06199  | 0.003603 | 0.93811 | -0.03718 | 0.42281  | -0.08613  | 0.06293  |
| 0.54852  | -0.0291  | 0.53042  | 0.04825  | 0.2981  | 0.009769 | 0.83324  | -0.01343  | 0.7723   |
| 5.56E-07 | -0.34017 | 4.09E-14 | 0.069787 | 0.13209 | -0.07261 | 0.1171   | -0.04837  | 0.29694  |
| 0.13256  | -0.12778 | 0.00569  | -0.01512 | 0.74446 | -0.04361 | 0.34707  | 0.086711  | 0.06116  |
| 0.90677  | 0.110031 | 0.01738  | 0.129659 | 0.00501 | 0.024338 | 0.59985  | -0.06843  | 0.13982  |
| 0.99851  | 0.027339 | 0.55563  | 0.012671 | 0.78478 | -0.00024 | 0.99586  | 0.089497  | 0.05327  |
| 0.0592   | 0.082162 | 0.0761   | -0.03321 | 0.47397 | 0.07111  | 0.1249   | -0.08289  | 0.07354  |
| 0.00093  | -0.13443 | 0.00361  | 0.023533 | 0.61198 | 0.075513 | 0.10314  | -0.01839  | 0.69177  |
| 0.05582  | 0.286353 | 2.90E-10 | 0.120231 | 0.0093  | 0.12703  | 0.00598  | 0.164331  | 0.00036  |
| 0.00993  | -0.08913 | 0.05426  | 0.00781  | 0.86632 | 0.003928 | 0.93253  | 0.000913  | 0.9843   |
| 0.035    | 0.066124 | 0.15367  | 0.075854 | 0.10159 | 0.00633  | 0.89149  | -0.10052  | 0.02986  |
| 0.80828  | -0.06437 | 0.16491  | 0.055586 | 0.23056 | 0.04655  | 0.31547  | 0.181362  | 8.10E-05 |
| 0.70968  | 0.001538 | 0.97355  | 0.1124   | 0.01509 | 0.041382 | 0.37226  | -0.02677  | 0.56383  |
| 0.10277  | -0.10102 | 0.02905  | -0.01423 | 0.75909 | -0.04552 | 0.32634  | -0.02325  | 0.61624  |
| 0.03148  | 0.091147 | 0.04901  | 0.086465 | 0.0619  | 0.057381 | 0.21582  | 0.200475  | 1.27E-05 |
| 0.4933   | 0.141147 | 0.00223  | 0.094837 | 0.0405  | 0.047254 | 0.3082   | 0.067155  | 0.14734  |
| 0.0006   | 0.266506 | 4.92E-09 | 0.066586 | 0.15081 | 0.10531  | 0.02285  | 0.016046  | 0.72946  |
| 2.55E-05 | 0.332042 | 1.75E-13 | 0.169677 | 0.00023 | 0.196175 | 1.96E-05 | 0.136357  | 0.00315  |
| 5.36E-09 | 0.449633 | 1.28E-24 | 0.143778 | 0.00184 | 0.068218 | 0.14103  | 0.068904  | 0.13706  |
| 0.86223  | 0.066993 | 0.14833  | 0.043368 | 0.34973 | 0.020044 | 0.66572  | -0.09584  | 0.03843  |
| 0.1975   | 0.006244 | 0.89294  | 0.031373 | 0.49884 | 0.051592 | 0.26586  | -4.86E-05 | 0.99917  |
| 0.0089   | 0.1554   | 0.00075  | -0.12228 | 0.00816 | 0.037129 | 0.42343  | 0.008649  | 0.85212  |
| 0.1527   | 0.123941 | 0.00733  | 0.087003 | 0.06029 | 0.114406 | 0.01337  | 0.194036  | 2.42E-05 |
| 0.95913  | -0.01082 | 0.81566  | -0.02293 | 0.6212  | -0.00794 | 0.8641   | -0.11782  | 0.01083  |
| 0.68175  | 0.049025 | 0.29041  | 0.115594 | 0.01243 | 0.094677 | 0.04085  | 0.065248  | 0.15921  |
| 0.00662  | 0.122431 | 0.00808  | 0.054213 | 0.24229 | 0.116036 | 0.0121   | 0.015596  | 0.73676  |
| 0.0004   | 0.251535 | 3.59E-08 | -0.02435 | 0.5996  | 0.020467 | 0.65909  | -0.04494  | 0.33256  |
| 0.12754  | -0.01565 | 0.73583  | 0.01864  | 0.68786 | 0.237281 | 2.12E-07 | -0.06758  | 0.14482  |
| 0.01249  | 0.134179 | 0.00367  | 0.081488 | 0.07855 | 0.099903 | 0.03089  | -0.01869  | 0.68698  |
| 0.00047  | 0.071861 | 0.12095  | -0.09992 | 0.03087 | 0.074829 | 0.10631  | 0.023548  | 0.61174  |
| 0.01188  | 0.228657 | 5.90E-07 | -0.11549 | 0.01251 | 0.089085 | 0.05438  | 0.009863  | 0.83166  |
| 0.35848  | 0.059802 | 0.19704  | -0.0106  | 0.81932 | 0.075173 | 0.10471  | 0.071763  | 0.12146  |
| 0.33589  | 0.002269 | 0.961    | -0.0162  | 0.72699 | 0.031261 | 0.50036  | 0.06003   | 0.19534  |
| 0.00012  | -0.08914 | 0.05423  | -0.13129 | 0.00448 | 0.018683 | 0.68717  | -0.04827  | 0.29795  |
| 0.51241  | -0.11649 | 0.01176  | -0.05268 | 0.25585 | -0.06235 | 0.17858  | 0.039428  | 0.39528  |
| 6.14E-07 | 0.238627 | 1.80E-07 | 0.05274  | 0.25535 | 0.03929  | 0.39694  | 0.124237  | 0.00719  |
| 0.00032  | -0.17515 | 0.00014  | -0.09966 | 0.03129 | -0.06835 | 0.14026  | -0.12041  | 0.0092   |
| 4.82E-10 | -0.33622 | 8.35E-14 | -0.01499 | 0.74658 | 0.031046 | 0.50332  | -0.1568   | 0.00067  |
| 0.64193  | -0.06787 | 0.1431   | 0.002203 | 0.96212 | -0.01073 | 0.81718  | -0.01957  | 0.67322  |
| 0.00144  | -0.1664  | 0.0003   | -0.00904 | 0.84556 | -0.03102 | 0.50361  | -0.06835  | 0.14025  |
| 0.06526  | -0.07522 | 0.10448  | 0.019965 | 0.66696 | -0.01717 | 0.71132  | 0.129675  | 0.00501  |

|          |          |          |          |          |          |          |          |          |
|----------|----------|----------|----------|----------|----------|----------|----------|----------|
| 0.04963  | 0.240081 | 1.51E-07 | -0.07058 | 0.12774  | 0.150955 | 0.00107  | -0.00862 | 0.85268  |
| 0.4979   | 0.092962 | 0.04465  | -0.12139 | 0.00864  | 0.077805 | 0.09307  | -0.16583 | 0.00032  |
| 5.59E-05 | -0.252   | 3.38E-08 | -0.05152 | 0.26648  | -0.01955 | 0.67348  | -0.02066 | 0.65606  |
| 0.37064  | 0.126819 | 0.00606  | -0.01529 | 0.74167  | 0.137339 | 0.00294  | -0.04307 | 0.35307  |
| 0.00032  | 0.262248 | 8.77E-09 | -0.02768 | 0.55074  | 0.084139 | 0.06928  | -0.03173 | 0.49391  |
| 0.00039  | 0.200998 | 1.20E-05 | 0.163619 | 0.00038  | 0.08668  | 0.06125  | -0.03945 | 0.39499  |
| 0.00065  | 0.242797 | 1.08E-07 | 0.047623 | 0.30443  | 0.033023 | 0.47652  | -0.0408  | 0.37905  |
| 0.00423  | 0.159007 | 0.00056  | 0.078162 | 0.09157  | 0.07156  | 0.12253  | 0.133086 | 0.00396  |
| 6.28E-05 | 0.206891 | 6.55E-06 | 0.123629 | 0.00748  | 0.089244 | 0.05395  | 0.15622  | 0.0007   |
| 0.0159   | 0.083972 | 0.06983  | 0.103615 | 0.02514  | 0.087198 | 0.05971  | 0.196584 | 1.88E-05 |
| 0.08693  | 0.075075 | 0.10516  | 0.123569 | 0.00751  | 0.086974 | 0.06037  | 0.246807 | 6.55E-08 |
| 0.09211  | 0.119181 | 0.00994  | 0.083684 | 0.0708   | 0.051623 | 0.26556  | 0.060315 | 0.19322  |
| 0.27703  | 0.064838 | 0.16185  | 0.034566 | 0.45615  | 0.035572 | 0.44314  | 0.133818 | 0.00377  |
| 0.03171  | 0.125609 | 0.00657  | 0.130256 | 0.00481  | 0.217578 | 2.07E-06 | 0.106799 | 0.02098  |
| 8.22E-09 | 0.216042 | 2.45E-06 | 0.044772 | 0.33434  | 0.110389 | 0.01701  | 0.172714 | 0.00018  |
| 0.21596  | 0.170518 | 0.00021  | 0.042005 | 0.36509  | 0.097563 | 0.03505  | 0.040303 | 0.38487  |
| 0.47511  | 0.153084 | 0.0009   | 0.004023 | 0.93091  | 0.048565 | 0.29496  | -0.06418 | 0.16614  |
| 9.03E-06 | 0.338668 | 5.37E-14 | 0.107875 | 0.01971  | 0.06778  | 0.1436   | 0.143198 | 0.00192  |
| 1.29E-10 | -0.33038 | 2.35E-13 | -0.03504 | 0.44993  | 0.044617 | 0.33601  | -0.25048 | 4.11E-08 |
| 0.00236  | 0.02942  | 0.52595  | 0.167899 | 0.00027  | 0.006558 | 0.8876   | -0.00494 | 0.91513  |
| 0.18789  | -0.01657 | 0.721    | 0.035998 | 0.4377   | 0.018327 | 0.69283  | 0.071658 | 0.12201  |
| 0.13046  | 0.081076 | 0.08008  | 0.09102  | 0.04932  | 0.051893 | 0.26307  | 0.077272 | 0.09534  |
| 1.38E-06 | -0.29807 | 4.89E-11 | -0.10335 | 0.02552  | -0.02754 | 0.55277  | -0.16631 | 0.00031  |
| 0.8651   | 0.110675 | 0.01673  | 0.058468 | 0.20724  | 0.156042 | 0.00071  | -0.11467 | 0.01316  |
| 0.00041  | 0.253004 | 2.97E-08 | 0.039297 | 0.39685  | 0.122349 | 0.00812  | -0.02033 | 0.66129  |
| 0.26942  | -0.06718 | 0.14718  | -0.01697 | 0.7145   | -0.02686 | 0.5626   | -0.09606 | 0.03798  |
| 0.46657  | 0.100151 | 0.03047  | 0.007946 | 0.86402  | -0.00053 | 0.99089  | 0.073548 | 0.11245  |
| 0.68475  | 0.058215 | 0.20922  | 0.018228 | 0.69441  | 0.068947 | 0.13682  | 0.02364  | 0.61036  |
| 0.00543  | -0.03337 | 0.47186  | -0.05823 | 0.20912  | -0.04472 | 0.33489  | 0.051907 | 0.26294  |
| 0.75276  | 0.11838  | 0.01046  | 0.027659 | 0.55102  | 0.1315   | 0.00442  | 0.126896 | 0.00603  |
| 0.02247  | -0.02903 | 0.53144  | -0.00252 | 0.95668  | -0.01043 | 0.82212  | 0.00807  | 0.86192  |
| 0.00067  | 0.07     | 0.13091  | -0.04355 | 0.3477   | 0.017711 | 0.70265  | 0.121309 | 0.00869  |
| 0.73371  | -0.09413 | 0.04202  | 0.011168 | 0.80979  | -0.02292 | 0.62123  | -0.04787 | 0.30195  |
| 0.69143  | 0.051908 | 0.26293  | 0.126402 | 0.00623  | 0.016471 | 0.72258  | 0.009214 | 0.84258  |
| 0.94652  | 0.011044 | 0.81185  | 0.099963 | 0.03079  | 0.014181 | 0.75988  | -0.01322 | 0.77568  |
| 0.19767  | 0.154864 | 0.00079  | 0.053774 | 0.24613  | 0.015733 | 0.73454  | 0.005417 | 0.90706  |
| 0.70309  | 0.030903 | 0.50528  | -0.01628 | 0.72561  | 0.027694 | 0.55052  | -0.00496 | 0.91482  |
| 0.80186  | -0.00181 | 0.96883  | -0.00096 | 0.98345  | -0.01112 | 0.8106   | 0.075417 | 0.10358  |
| 0.21919  | 0.0366   | 0.43007  | 0.047038 | 0.31042  | 0.027004 | 0.5605   | -0.02773 | 0.54995  |
| 0.99618  | -0.01854 | 0.68945  | -0.0257  | 0.57953  | -0.0262  | 0.57224  | 0.067639 | 0.14444  |
| 0.14594  | 0.161832 | 0.00045  | 0.318934 | 1.68E-12 | 0.020791 | 0.65406  | 0.085198 | 0.06583  |
| 0.86418  | -0.05267 | 0.25598  | -0.00136 | 0.97659  | -0.01795 | 0.69888  | 0.003576 | 0.93858  |
| 0.04066  | 0.088454 | 0.05612  | 0.070902 | 0.12601  | 0.061904 | 0.18173  | 0.073867 | 0.1109   |
| 1.00E-06 | 0.161939 | 0.00044  | 0.057243 | 0.21693  | 0.121657 | 0.00849  | 0.094338 | 0.04158  |
| 0.47156  | -0.06201 | 0.18095  | 0.386034 | 4.81E-18 | -0.00925 | 0.84193  | -0.01517 | 0.74373  |

|          |          |          |          |          |          |          |          |          |
|----------|----------|----------|----------|----------|----------|----------|----------|----------|
| 0.15251  | 0.254555 | 2.43E-08 | 0.094771 | 0.04064  | 0.145316 | 0.00164  | 0.050704 | 0.27417  |
| 0.6616   | 0.15306  | 0.00091  | 0.058876 | 0.20408  | 0.038689 | 0.4042   | 0.006235 | 0.89311  |
| 0.02738  | 0.244261 | 9.01E-08 | 0.124451 | 0.00709  | 0.026391 | 0.56944  | -0.06665 | 0.15039  |
| 0.50612  | 0.032224 | 0.48725  | -0.06877 | 0.13785  | -0.04502 | 0.33167  | -0.0033  | 0.94327  |
| 0.2122   | 0.120556 | 0.00911  | 0.033605 | 0.46878  | 0.033211 | 0.47401  | 0.047263 | 0.30811  |
| 0.00327  | 0.217884 | 2.00E-06 | 0.027015 | 0.56033  | 0.04415  | 0.3411   | 0.08304  | 0.07301  |
| 0.047    | 0.035389 | 0.44549  | 0.00879  | 0.84975  | 0.13236  | 0.00417  | 0.061232 | 0.18652  |
| 0.05846  | 0.068998 | 0.13653  | 0.024683 | 0.59469  | 0.106881 | 0.02088  | 0.070295 | 0.12929  |
| 0.88456  | 0.09568  | 0.03875  | 0.086663 | 0.0613   | 0.086865 | 0.0607   | 0.060232 | 0.19384  |
| 0.02426  | 0.167261 | 0.00028  | 0.219581 | 1.66E-06 | 0.104604 | 0.02378  | 0.209913 | 4.76E-06 |
| 0.02335  | 0.222337 | 1.22E-06 | 0.10003  | 0.03067  | 0.085781 | 0.064    | 0.077602 | 0.09393  |
| 0.00182  | 0.103118 | 0.02586  | 0.074389 | 0.10839  | 0.143439 | 0.00189  | 0.151624 | 0.00101  |
| 0.06057  | 0.131566 | 0.0044   | -0.02156 | 0.64218  | 0.051017 | 0.27123  | 0.002761 | 0.95255  |
| 0.31214  | 0.052204 | 0.26022  | 0.085232 | 0.06573  | 0.032457 | 0.48411  | -0.20301 | 9.80E-06 |
| 0.28186  | 0.128667 | 0.00536  | -0.00681 | 0.88327  | 0.077052 | 0.09629  | -0.13152 | 0.00441  |
| 0.39342  | 0.05401  | 0.24406  | 0.029375 | 0.52659  | 0.110354 | 0.01705  | -0.08883 | 0.05507  |
| 0.00092  | -0.12388 | 0.00736  | -0.01741 | 0.70742  | -0.06485 | 0.16177  | -0.06494 | 0.1612   |
| 0.36644  | 0.063994 | 0.16739  | 0.063774 | 0.16886  | 0.089269 | 0.05388  | 0.091588 | 0.04792  |
| 0.34882  | 0.185059 | 5.74E-05 | 0.132139 | 0.00423  | 0.21964  | 1.65E-06 | 0.059664 | 0.19808  |
| 1.32E-05 | 0.186968 | 4.79E-05 | 0.082704 | 0.07418  | 0.081255 | 0.07941  | 0.218842 | 1.80E-06 |
| 0.05183  | 0.00631  | 0.89182  | 0.113177 | 0.0144   | 0.153082 | 0.0009   | 0.041896 | 0.36633  |
| 3.86E-10 | 0.331098 | 2.07E-13 | 0.103262 | 0.02565  | 0.036677 | 0.42909  | 0.11534  | 0.01263  |
| 0.7368   | 0.043714 | 0.34589  | 0.021594 | 0.64161  | 0.021305 | 0.64608  | 0.042876 | 0.35522  |
| 0.87126  | -0.01268 | 0.78465  | 0.021968 | 0.63584  | 0.010585 | 0.81954  | 0.056756 | 0.22087  |
| 0.00021  | -0.18612 | 5.19E-05 | 0.000391 | 0.99327  | -0.10159 | 0.02815  | -0.08098 | 0.08044  |
| 1.45E-06 | 0.245136 | 8.08E-08 | 0.162952 | 0.00041  | -0.03786 | 0.41441  | 0.106086 | 0.02186  |
| 6.04E-05 | -0.30973 | 7.68E-12 | 0.013998 | 0.76288  | -0.1187  | 0.01025  | 0.022636 | 0.62561  |
| 0.00014  | 0.24813  | 5.54E-08 | -0.01043 | 0.82214  | 0.007953 | 0.86391  | 0.080201 | 0.0834   |
| 7.84E-05 | -0.20832 | 5.63E-06 | 0.031457 | 0.49769  | 0.062415 | 0.17814  | 0.047734 | 0.30331  |
| 1.81E-08 | -0.33619 | 8.39E-14 | 0.035524 | 0.44376  | -0.09747 | 0.03522  | -0.01605 | 0.72933  |
| 0.78042  | 0.006184 | 0.89397  | 0.019908 | 0.66784  | 0.007314 | 0.87475  | 0.094336 | 0.04158  |
| 0.66782  | -0.05636 | 0.22411  | -0.03066 | 0.5087   | -0.02114 | 0.64866  | 0.069944 | 0.13122  |
| 0.68965  | 0.163343 | 0.00039  | 0.10118  | 0.0288   | 0.088933 | 0.05479  | 0.034578 | 0.456    |
| 1.48E-07 | -0.07785 | 0.09289  | -0.16178 | 0.00045  | 0.051642 | 0.26539  | -0.1136  | 0.01404  |
| 0.71159  | -0.07638 | 0.09925  | -0.03712 | 0.4236   | -0.03815 | 0.41073  | -0.07758 | 0.09403  |
| 0.11303  | 0.040231 | 0.38571  | 0.25754  | 1.64E-08 | 0.021917 | 0.63662  | 0.003536 | 0.93926  |
| 6.25E-09 | -0.33533 | 9.79E-14 | -0.10049 | 0.02991  | -0.11568 | 0.01236  | 0.021282 | 0.64644  |
| 0.0027   | -0.18149 | 8.00E-05 | -0.03771 | 0.41625  | -0.04012 | 0.38706  | -0.05253 | 0.25723  |
| 0.11398  | -0.11297 | 0.01459  | -0.08906 | 0.05445  | -0.12379 | 0.0074   | -0.12676 | 0.00609  |
| 0.55143  | 0.060624 | 0.19095  | 0.054819 | 0.23706  | 0.030213 | 0.51485  | -0.00961 | 0.83591  |
| 0.01965  | 0.174584 | 0.00015  | 0.048497 | 0.29564  | 0.190805 | 3.32E-05 | -0.05289 | 0.25397  |
| 0.00051  | 0.250574 | 4.06E-08 | 0.188615 | 4.10E-05 | 0.093229 | 0.04404  | 0.050364 | 0.27742  |
| 0.13843  | 0.15351  | 0.00087  | 0.076345 | 0.09939  | 0.132567 | 0.00411  | 0.066356 | 0.15223  |
| 1.96E-08 | -0.31759 | 2.10E-12 | 0.154613 | 0.0008   | -0.04378 | 0.34519  | -0.06411 | 0.16663  |
| 0.00956  | 0.275683 | 1.37E-09 | 0.056488 | 0.22307  | 0.034833 | 0.45267  | 0.057596 | 0.21411  |

|          |          |          |          |          |          |          |          |          |
|----------|----------|----------|----------|----------|----------|----------|----------|----------|
| 0.0039   | 0.138502 | 0.0027   | 0.028277 | 0.54216  | 0.069696 | 0.1326   | -0.0237  | 0.60949  |
| 0.01228  | 0.194545 | 2.30E-05 | 0.281056 | 6.31E-10 | 0.208994 | 5.25E-06 | 0.067036 | 0.14806  |
| 0.00173  | 0.266682 | 4.80E-09 | 0.023985 | 0.60515  | 0.051542 | 0.26632  | -0.00821 | 0.85949  |
| 0.00059  | 0.328015 | 3.55E-13 | 0.191269 | 3.17E-05 | 0.205112 | 7.89E-06 | 0.058519 | 0.20684  |
| 0.2723   | 0.203259 | 9.56E-06 | 0.295922 | 6.82E-11 | 0.084393 | 0.06844  | 0.180343 | 8.89E-05 |
| 0.13666  | 0.063073 | 0.1736   | 0.105155 | 0.02305  | 0.043495 | 0.34832  | -0.01206 | 0.79494  |
| 0.34024  | -0.01452 | 0.7543   | -0.01607 | 0.72901  | -0.05692 | 0.21955  | -0.09942 | 0.03171  |
| 0.08291  | 0.080823 | 0.08102  | 0.106078 | 0.02187  | 0.097739 | 0.03472  | 0.05625  | 0.22502  |
| 0.03938  | 0.269418 | 3.29E-09 | 0.086018 | 0.06327  | 0.083716 | 0.07069  | 0.188476 | 4.15E-05 |
| 0.31871  | 0.131769 | 0.00434  | 0.001857 | 0.96807  | -0.01097 | 0.81315  | 0.016085 | 0.72883  |
| 0.44466  | 0.043741 | 0.3456   | -0.01029 | 0.82441  | -0.01377 | 0.7666   | -0.03466 | 0.45487  |
| 0.01421  | 0.252659 | 3.10E-08 | 0.225297 | 8.70E-07 | 0.327152 | 4.13E-13 | 0.10162  | 0.0281   |
| 1.82E-05 | -0.24122 | 1.31E-07 | -0.15612 | 0.00071  | -0.1753  | 0.00014  | -0.0209  | 0.65231  |
| 0.00066  | 0.136431 | 0.00313  | 0.140301 | 0.00237  | -0.00667 | 0.88567  | 0.015614 | 0.73647  |
| 1.56E-06 | -0.13837 | 0.00273  | -0.06719 | 0.14714  | -0.0153  | 0.74152  | 0.014705 | 0.75128  |
| 0.34785  | 0.01178  | 0.79957  | 0.020121 | 0.66451  | -0.06469 | 0.16283  | -0.06647 | 0.15154  |
| 0.02742  | 0.321002 | 1.18E-12 | 0.049727 | 0.28355  | 0.090469 | 0.05072  | -0.02788 | 0.54785  |
| 0.00018  | 0.235228 | 2.72E-07 | 0.107114 | 0.0206   | 0.050037 | 0.28055  | -0.0347  | 0.4544   |
| 0.70217  | 0.089413 | 0.05349  | 0.00956  | 0.83675  | -0.04491 | 0.33285  | 0.038437 | 0.40727  |
| 0.04339  | -0.14538 | 0.00163  | -0.04139 | 0.37219  | -0.02229 | 0.63088  | -0.15589 | 0.00072  |
| 0.87999  | -0.02932 | 0.52732  | -0.04527 | 0.32894  | -0.04173 | 0.36827  | 0.016762 | 0.71789  |
| 0.95213  | 0.195649 | 2.06E-05 | 0.157603 | 0.00063  | 0.2473   | 6.16E-08 | 0.10503  | 0.02321  |
| 0.00075  | -0.03384 | 0.46571  | 0.0622   | 0.17964  | -0.00456 | 0.92179  | -0.05405 | 0.24375  |
| 0.00027  | 0.093006 | 0.04455  | -0.01399 | 0.76302  | 0.042883 | 0.35515  | 0.051029 | 0.27111  |
| 0.05488  | 0.128379 | 0.00546  | 0.110918 | 0.01649  | 0.037521 | 0.41854  | 0.034574 | 0.45605  |
| 0.00012  | -0.16073 | 0.00049  | 0.105931 | 0.02205  | 0.019068 | 0.68107  | 0.12756  | 0.00577  |
| 0.00094  | -0.05225 | 0.25982  | 0.154114 | 0.00083  | 0.120723 | 0.00902  | -0.15252 | 0.00094  |
| 3.29E-05 | -0.32056 | 1.28E-12 | 0.032401 | 0.48487  | -0.01105 | 0.8117   | -0.18806 | 4.32E-05 |
| 0.96948  | 0.140845 | 0.00228  | 0.123453 | 0.00756  | 0.067718 | 0.14397  | 0.024845 | 0.59227  |
| 0.03241  | 0.285889 | 3.11E-10 | 0.052207 | 0.26019  | 0.073461 | 0.11288  | -0.01961 | 0.67258  |
| 0.00321  | 0.202878 | 9.94E-06 | 0.040004 | 0.3884   | 0.025822 | 0.57779  | -0.05017 | 0.27924  |
| 7.00E-05 | -0.24947 | 4.68E-08 | 0.110772 | 0.01663  | -0.05161 | 0.26571  | -0.08491 | 0.06675  |
| 0.01824  | -0.14539 | 0.00163  | -0.00373 | 0.93599  | -0.01255 | 0.78684  | -0.02395 | 0.6057   |
| 0.61131  | 0.019835 | 0.66899  | -0.10511 | 0.02311  | -0.01649 | 0.72223  | -0.13353 | 0.00384  |
| 0.38344  | -0.01022 | 0.82572  | 0.187402 | 4.60E-05 | -0.03892 | 0.40142  | 0.041318 | 0.373    |
| 0.0107   | -0.12007 | 0.0094   | 0.010257 | 0.82503  | -0.00639 | 0.89052  | -0.19421 | 2.38E-05 |
| 0.10567  | 0.089057 | 0.05446  | -0.01549 | 0.73852  | -0.04916 | 0.28909  | -0.00323 | 0.94455  |
| 0.04042  | -0.07691 | 0.09689  | -0.0575  | 0.21485  | -0.01843 | 0.69111  | -0.06127 | 0.18623  |
| 0.26855  | -0.03262 | 0.48192  | 0.29475  | 8.17E-11 | -0.04087 | 0.37819  | -0.06358 | 0.17015  |
| 0.01872  | 0.118705 | 0.01025  | 0.080464 | 0.08239  | 0.0179   | 0.69963  | 0.08061  | 0.08183  |
| 0.00535  | 0.211877 | 3.86E-06 | 0.096772 | 0.03657  | 0.050369 | 0.27736  | 0.104328 | 0.02416  |
| 0.67186  | 0.029005 | 0.5318   | 0.042939 | 0.35452  | 0.046869 | 0.31216  | 0.093687 | 0.04301  |
| 0.18108  | 0.198043 | 1.62E-05 | 0.06129  | 0.18611  | 0.024439 | 0.59834  | 0.050412 | 0.27695  |
| 0.08059  | 0.260128 | 1.16E-08 | 0.060848 | 0.18931  | 0.121658 | 0.00849  | -0.03853 | 0.40609  |
| 0.42944  | 0.000422 | 0.99274  | 0.102809 | 0.02631  | 0.070336 | 0.12907  | 0.168418 | 0.00026  |

|          |          |          |          |          |          |          |          |         |
|----------|----------|----------|----------|----------|----------|----------|----------|---------|
| 0.0001   | 0.246379 | 6.91E-08 | 0.006275 | 0.89243  | 0.158533 | 0.00058  | 0.054068 | 0.24356 |
| 0.16727  | 0.050691 | 0.27431  | -0.08694 | 0.06046  | -0.08564 | 0.06444  | 0.139185 | 0.00257 |
| 0.00678  | 0.204266 | 8.61E-06 | -0.04026 | 0.38541  | 0.086403 | 0.06209  | 0.066102 | 0.15381 |
| 0.01607  | -0.17388 | 0.00016  | 0.007741 | 0.8675   | -0.00759 | 0.87008  | -0.03017 | 0.51551 |
| 0.70468  | -0.07221 | 0.11915  | 0.004881 | 0.91622  | 0.034286 | 0.45981  | 0.071637 | 0.12212 |
| 0.00593  | 0.220207 | 1.55E-06 | 0.059191 | 0.20166  | 0.134632 | 0.00356  | -0.09382 | 0.04271 |
| 1.10E-06 | 0.273443 | 1.88E-09 | 0.048092 | 0.29969  | 0.122438 | 0.00808  | 0.030467 | 0.51132 |
| 0.36451  | 0.118834 | 0.01016  | 0.092134 | 0.0466   | 0.168154 | 0.00026  | 0.040005 | 0.38839 |
| 0.0047   | -0.10416 | 0.02438  | 0.02984  | 0.52005  | 0.005606 | 0.90383  | -0.04641 | 0.31688 |
| 0.05327  | 0.081996 | 0.0767   | 0.188847 | 4.01E-05 | 0.121516 | 0.00857  | -0.08215 | 0.07614 |
| 2.66E-07 | -0.28005 | 7.31E-10 | -0.06695 | 0.1486   | -0.02921 | 0.52888  | 0.036419 | 0.43235 |
| 0.07949  | 0.016016 | 0.72994  | 0.030763 | 0.50722  | 0.256994 | 1.76E-08 | -0.0436  | 0.34712 |
| 0.0153   | 0.256763 | 1.82E-08 | 0.184413 | 6.10E-05 | 0.123273 | 0.00765  | 0.130843 | 0.00462 |
| 0.7261   | 0.091827 | 0.04734  | 0.021408 | 0.64448  | 0.085091 | 0.06618  | -0.06624 | 0.15296 |
| 0.11017  | -0.15053 | 0.0011   | 0.005071 | 0.91297  | -0.04816 | 0.29904  | -0.02824 | 0.54267 |
| 0.2863   | 0.068021 | 0.14219  | 0.024072 | 0.60384  | 0.043184 | 0.35177  | 0.018222 | 0.69449 |
| 0.70976  | 0.010135 | 0.82709  | 0.062099 | 0.18035  | 0.020223 | 0.66291  | 0.087332 | 0.05932 |
| 0.00609  | 0.156228 | 0.0007   | 0.014559 | 0.75367  | 0.137454 | 0.00291  | 0.0544   | 0.24067 |
| 0.02966  | 0.298912 | 4.29E-11 | -0.06267 | 0.1764   | 0.122946 | 0.00782  | -0.02034 | 0.66114 |
| 0.00239  | 0.073535 | 0.11251  | -0.14466 | 0.00172  | -0.11211 | 0.01535  | -0.01978 | 0.66988 |
| 0.45537  | 0.057815 | 0.21236  | 0.013395 | 0.77281  | -0.00424 | 0.92712  | 0.094767 | 0.04065 |
| 2.28E-05 | -0.33539 | 9.68E-14 | -0.04804 | 0.30024  | -0.14646 | 0.00151  | 0.041228 | 0.37403 |
| 0.13095  | -0.04296 | 0.35432  | 0.062637 | 0.1766   | -0.00747 | 0.87208  | 0.088312 | 0.05652 |
| 0.00016  | 0.268513 | 3.73E-09 | 0.084469 | 0.06819  | -0.00185 | 0.96818  | -0.10496 | 0.0233  |
| 0.18039  | -0.10156 | 0.02819  | -0.001   | 0.98275  | -0.04224 | 0.36246  | -0.02667 | 0.56534 |
| 0.07698  | 0.024776 | 0.5933   | 0.148344 | 0.0013   | 0.189224 | 3.86E-05 | 0.002805 | 0.9518  |
| 0.85619  | 0.047919 | 0.30143  | 0.038989 | 0.40056  | 0.017901 | 0.69961  | 0.045398 | 0.32761 |
| 0.583    | 0.086181 | 0.06276  | 0.174344 | 0.00015  | 0.09502  | 0.04012  | 0.037984 | 0.41282 |
| 0.85347  | 0.062788 | 0.17556  | 0.121156 | 0.00877  | 0.198673 | 1.53E-05 | 0.081192 | 0.07964 |
| 0.21342  | 0.047663 | 0.30402  | 0.078577 | 0.08986  | -0.00028 | 0.99511  | -0.17552 | 0.00014 |
| 0.923    | -0.02078 | 0.65418  | -0.0102  | 0.82607  | -0.02909 | 0.53062  | 0.00176  | 0.96974 |
| 0.0516   | 0.127139 | 0.00594  | 0.027966 | 0.5466   | 0.057455 | 0.21523  | 0.020651 | 0.65623 |
| 0.00197  | -0.02068 | 0.65578  | -0.01236 | 0.78994  | -0.00219 | 0.96238  | -0.14281 | 0.00198 |
| 0.67548  | 0.044714 | 0.33496  | 0.081741 | 0.07762  | 0.030948 | 0.50466  | 0.006649 | 0.88605 |
| 1.29E-07 | -0.34597 | 1.41E-14 | -0.10159 | 0.02814  | -0.19737 | 1.74E-05 | 0.03113  | 0.50217 |
| 0.28878  | -0.00645 | 0.8895   | -0.05561 | 0.23032  | -0.09532 | 0.0395   | 0.04629  | 0.31819 |
| 0.00416  | -0.15035 | 0.00112  | -0.03155 | 0.49638  | -0.04952 | 0.28558  | -0.01386 | 0.76522 |
| 0.11176  | -0.1056  | 0.02247  | 0.025418 | 0.58375  | -0.05398 | 0.24431  | -0.0383  | 0.40897 |
| 0.72049  | 0.052846 | 0.25439  | 0.105746 | 0.02228  | 0.202766 | 1.01E-05 | -0.06506 | 0.16044 |
| 0.00021  | 0.09579  | 0.03852  | -0.13534 | 0.00339  | -0.10534 | 0.02281  | 0.028968 | 0.53233 |
| 1.44E-09 | 0.306169 | 1.36E-11 | 0.032498 | 0.48355  | 0.02298  | 0.62037  | 0.045119 | 0.3306  |
| 0.50313  | 0.036952 | 0.42564  | 0.080003 | 0.08417  | 0.008076 | 0.86182  | 0.141953 | 0.0021  |
| 0.00023  | 0.223496 | 1.07E-06 | 0.126775 | 0.00608  | 0.009607 | 0.83596  | 0.058889 | 0.20398 |
| 0.66084  | -0.02444 | 0.59828  | 0.061676 | 0.18335  | -0.02741 | 0.5546   | 0.111384 | 0.01604 |
| 7.55E-06 | 0.266963 | 4.62E-09 | 0.279035 | 8.46E-10 | 0.041591 | 0.36984  | 0.040277 | 0.38517 |

|          |          |          |          |          |          |          |          |          |
|----------|----------|----------|----------|----------|----------|----------|----------|----------|
| 0.45804  | -0.06586 | 0.15531  | -0.05988 | 0.19647  | -0.09751 | 0.03515  | 0.002803 | 0.95183  |
| 0.48686  | -0.05505 | 0.23511  | 0.04063  | 0.38102  | -0.04066 | 0.38068  | -0.11666 | 0.01164  |
| 0.98703  | -0.10286 | 0.02623  | -0.0104  | 0.82261  | -0.02057 | 0.65742  | 0.011457 | 0.80496  |
| 0.60333  | 0.052565 | 0.25693  | 0.047733 | 0.30332  | 0.03514  | 0.4487   | 0.172932 | 0.00017  |
| 0.10496  | -0.08176 | 0.07756  | -0.04983 | 0.28258  | 0.011612 | 0.80238  | -0.04304 | 0.35335  |
| 0.66137  | -0.01332 | 0.77399  | -0.02394 | 0.60586  | 0.010525 | 0.82055  | -0.0227  | 0.6246   |
| 0.82604  | 0.151083 | 0.00106  | 0.109286 | 0.01816  | 0.222454 | 1.20E-06 | -0.018   | 0.69809  |
| 9.15E-05 | 0.236715 | 2.27E-07 | 0.131061 | 0.00456  | 0.104952 | 0.02332  | 0.214781 | 2.82E-06 |
| 0.13672  | 0.114862 | 0.013    | 0.157627 | 0.00063  | -0.03607 | 0.43683  | -0.13701 | 0.00301  |
| 4.75E-06 | -0.19811 | 1.61E-05 | 0.11947  | 0.00976  | 0.049415 | 0.28658  | -0.10339 | 0.02546  |
| 4.55E-07 | 0.323571 | 7.64E-13 | 0.151816 | 0.001    | 0.132045 | 0.00426  | 0.17952  | 9.59E-05 |
| 0.09849  | -0.02534 | 0.58491  | 0.105937 | 0.02204  | 0.054649 | 0.23852  | 0.100693 | 0.02958  |
| 0.48325  | -0.01671 | 0.71878  | 0.039493 | 0.3945   | 0.146352 | 0.00152  | 0.070319 | 0.12916  |
| 0.96619  | -0.00587 | 0.89927  | 0.005095 | 0.91255  | 0.001132 | 0.98054  | 0.019888 | 0.66816  |
| 0.23168  | 0.092376 | 0.04602  | -0.01216 | 0.79326  | 0.024833 | 0.59245  | 0.083911 | 0.07004  |
| 0.72871  | -0.02073 | 0.65503  | 0.001686 | 0.97101  | 0.008837 | 0.84895  | 0.031637 | 0.49522  |
| 0.00627  | -0.10263 | 0.02658  | 0.01164  | 0.80191  | 0.020242 | 0.66261  | -0.0589  | 0.20391  |
| 0.00248  | 0.104846 | 0.02346  | -0.00495 | 0.91497  | -0.01971 | 0.67103  | 0.079952 | 0.08436  |
| 0.09007  | 0.122668 | 0.00796  | 0.053275 | 0.25055  | 0.053974 | 0.24438  | 0.06883  | 0.13749  |
| 0.15354  | -0.18153 | 7.98E-05 | -0.04441 | 0.33821  | 0.01977  | 0.67001  | -0.00903 | 0.84564  |
| 0.73823  | 0.089369 | 0.05361  | 0.124612 | 0.00701  | 0.021214 | 0.64748  | -0.02245 | 0.62847  |
| 0.00459  | -0.14579 | 0.00158  | 0.007615 | 0.86963  | 0.016078 | 0.72894  | 0.042426 | 0.3603   |
| 0.00824  | -0.12588 | 0.00645  | 0.038498 | 0.40653  | -0.01667 | 0.71935  | -0.02108 | 0.64952  |
| 0.47765  | 0.004154 | 0.92867  | 0.031614 | 0.49554  | 0.139785 | 0.00247  | -0.03824 | 0.40963  |
| 0.00271  | -0.08218 | 0.07603  | 0.018766 | 0.68586  | 0.025016 | 0.58973  | 0.020535 | 0.65804  |
| 0.01984  | 0.151206 | 0.00105  | 0.14344  | 0.00189  | 0.017766 | 0.70177  | -0.01364 | 0.76873  |
| 0.27296  | -0.07861 | 0.08974  | -0.0957  | 0.03871  | -0.06602 | 0.15433  | -0.08187 | 0.07713  |
| 0.92976  | 0.001876 | 0.96774  | 0.065119 | 0.16004  | 0.020726 | 0.65506  | 0.045312 | 0.32853  |
| 0.1631   | 0.07261  | 0.11712  | 0.033041 | 0.47627  | 0.047842 | 0.30221  | 0.081111 | 0.07994  |
| 0.56925  | -0.07252 | 0.11758  | 0.042132 | 0.36364  | 0.032704 | 0.48079  | 0.000925 | 0.98409  |
| 0.01128  | -0.14121 | 0.00222  | -0.10837 | 0.01916  | -0.02942 | 0.52589  | -0.00754 | 0.87088  |
| 0.19767  | 0.139533 | 0.00251  | 0.025865 | 0.57716  | -0.03774 | 0.41587  | 0.198568 | 1.54E-05 |
| 0.00906  | 0.108023 | 0.01954  | -0.00045 | 0.99232  | 0.002317 | 0.96017  | 0.220279 | 1.53E-06 |
| 0.06452  | 0.096003 | 0.03809  | -0.00766 | 0.86895  | -0.00744 | 0.87255  | 0.190928 | 3.28E-05 |
| 3.92E-09 | -0.2379  | 1.97E-07 | -0.07792 | 0.09257  | -0.10155 | 0.02821  | 0.216718 | 2.28E-06 |
| 0.79239  | 0.037122 | 0.42352  | 0.064796 | 0.16212  | 0.07308  | 0.11476  | 0.005801 | 0.9005   |
| 0.28104  | 0.150564 | 0.0011   | 0.242014 | 1.19E-07 | 0.119191 | 0.00994  | 0.011257 | 0.8083   |
| 0.66894  | 0.091145 | 0.04901  | 0.068381 | 0.14008  | -0.03134 | 0.4993   | 0.040714 | 0.38003  |
| 0.5743   | 0.040164 | 0.3865   | 0.058438 | 0.20747  | 0.001249 | 0.97852  | 0.211172 | 4.16E-06 |
| 0.3937   | 0.009812 | 0.83251  | 0.092384 | 0.046    | 0.07671  | 0.09778  | 0.103683 | 0.02505  |
| 4.07E-07 | 0.420526 | 1.95E-21 | 0.255414 | 2.17E-08 | 0.116225 | 0.01196  | 0.145991 | 0.00156  |
| 0.00012  | 0.03378  | 0.46646  | -0.01358 | 0.76974  | -0.11732 | 0.01117  | 0.032012 | 0.49013  |
| 6.88E-10 | 0.467407 | 1.01E-26 | 0.101268 | 0.02866  | 0.179297 | 9.78E-05 | 0.172696 | 0.00018  |
| 2.58E-10 | 0.331748 | 1.85E-13 | -0.01233 | 0.79038  | -0.03889 | 0.40177  | 0.196638 | 1.87E-05 |
| 4.85E-15 | 0.434388 | 6.48E-23 | -0.03756 | 0.41807  | 0.168993 | 0.00024  | -0.01477 | 0.75029  |

|          |          |          |          |          |          |          |          |          |
|----------|----------|----------|----------|----------|----------|----------|----------|----------|
| 0.73534  | 0.074014 | 0.11018  | 0.026965 | 0.56107  | 0.007256 | 0.87573  | 0.023854 | 0.60712  |
| 1.43E-08 | -0.32151 | 1.09E-12 | -0.03713 | 0.42339  | -0.06963 | 0.13299  | 0.029846 | 0.51998  |
| 0.00488  | 0.04061  | 0.38125  | -0.01486 | 0.74883  | -0.08353 | 0.07133  | -0.06235 | 0.17856  |
| 0.92893  | 0.007349 | 0.87414  | 0.067287 | 0.14655  | 0.042929 | 0.35463  | 0.11439  | 0.01338  |
| 0.658    | 0.158902 | 0.00057  | 0.210716 | 4.37E-06 | 0.065672 | 0.15651  | 0.100279 | 0.03026  |
| 0.7417   | 0.003758 | 0.93545  | 0.046926 | 0.31158  | 0.087041 | 0.06018  | 0.005059 | 0.91317  |
| 0.10234  | -0.15182 | 0.001    | 0.186629 | 4.95E-05 | -0.01811 | 0.69623  | 0.055286 | 0.23308  |
| 0.74088  | 0.031688 | 0.49453  | 0.08744  | 0.05901  | 0.026385 | 0.56952  | -0.01268 | 0.78462  |
| 0.5685   | 0.135163 | 0.00343  | 0.110019 | 0.01739  | 0.134642 | 0.00356  | -0.0299  | 0.51921  |
| 4.12E-07 | 0.229267 | 5.50E-07 | 0.040395 | 0.38378  | 0.057542 | 0.21453  | 0.086885 | 0.06064  |
| 0.06956  | 0.216409 | 2.36E-06 | 0.055063 | 0.23498  | -0.03077 | 0.50706  | -0.03343 | 0.47116  |
| 0.01487  | 0.12947  | 0.00508  | 0.12646  | 0.00621  | 0.092588 | 0.04552  | 0.318751 | 1.73E-12 |
| 0.00103  | 0.198185 | 1.60E-05 | 0.110744 | 0.01666  | 0.089898 | 0.05221  | 0.30358  | 2.06E-11 |
| 0.00163  | 0.107001 | 0.02074  | 0.027164 | 0.55817  | 0.116159 | 0.01201  | 0.231843 | 4.06E-07 |
| 0.28057  | 0.025666 | 0.58009  | -0.11615 | 0.01201  | -0.09922 | 0.03206  | 0.070715 | 0.12702  |
| 1.16E-06 | 0.298173 | 4.82E-11 | 0.058    | 0.21091  | 0.072849 | 0.11591  | 0.009221 | 0.84247  |
| 0.0002   | -0.03811 | 0.41125  | -0.07614 | 0.1003   | -0.06092 | 0.18881  | 0.030103 | 0.51638  |
| 0.00421  | 0.333241 | 1.42E-13 | 0.217818 | 2.02E-06 | 0.092803 | 0.04502  | 0.006096 | 0.89548  |
| 0.00147  | -0.07075 | 0.12684  | 0.052241 | 0.25987  | 0.033011 | 0.47667  | -0.04047 | 0.38284  |
| 0.74231  | 0.069651 | 0.13285  | 0.051303 | 0.26854  | 0.112608 | 0.0149   | -0.17336 | 0.00017  |
| 0.06949  | -0.04749 | 0.30582  | 0.029823 | 0.5203   | -0.02722 | 0.55742  | -0.08794 | 0.05757  |
| 0.0028   | 0.221819 | 1.29E-06 | -0.06552 | 0.1575   | 0.095706 | 0.03869  | -0.03095 | 0.50469  |
| 0.01553  | 0.002882 | 0.95048  | -0.04644 | 0.31659  | -0.03203 | 0.48991  | -0.07832 | 0.09092  |
| 0.30487  | 0.194498 | 2.31E-05 | 0.15839  | 0.00059  | 0.088997 | 0.05462  | 0.015972 | 0.73065  |
| 0.04747  | 0.051619 | 0.2656   | -0.02252 | 0.62745  | -0.0281  | 0.54474  | 0.018957 | 0.68283  |
| 0.05335  | 0.001555 | 0.97327  | 0.012146 | 0.79349  | -0.03159 | 0.49585  | -0.1281  | 0.00557  |
| 0.0026   | 0.017249 | 0.71006  | -0.01595 | 0.73098  | -0.06802 | 0.1422   | 0.1283   | 0.00549  |
| 0.39895  | 0.23725  | 2.13E-07 | -0.01007 | 0.82814  | -0.01509 | 0.74496  | 0.104116 | 0.02444  |
| 1.32E-10 | 0.281273 | 6.12E-10 | 0.004288 | 0.92636  | -0.03409 | 0.46242  | 0.275142 | 1.48E-09 |
| 0.49543  | 0.022132 | 0.63332  | 0.109147 | 0.0183   | 0.308531 | 9.33E-12 | -0.09629 | 0.03752  |
| 0.00011  | 0.33552  | 9.46E-14 | 0.083904 | 0.07006  | 0.219842 | 1.61E-06 | 0.105519 | 0.02257  |
| 0.00164  | 0.269061 | 3.46E-09 | 0.167325 | 0.00028  | 0.07715  | 0.09586  | 0.08891  | 0.05486  |
| 0.01102  | 0.10047  | 0.02994  | 0.100695 | 0.02957  | -0.03505 | 0.44989  | 0.1063   | 0.02159  |
| 0.42601  | -0.04416 | 0.34096  | 0.069262 | 0.13503  | -0.02128 | 0.64639  | -0.01627 | 0.72591  |
| 3.64E-05 | 0.355387 | 2.39E-15 | 0.044034 | 0.34237  | 0.166417 | 0.0003   | 0.021443 | 0.64394  |
| 0.4422   | 0.104901 | 0.02338  | 0.084795 | 0.06713  | 0.031703 | 0.49432  | -0.02498 | 0.59022  |
| 0.88613  | 0.114182 | 0.01355  | 0.142313 | 0.00205  | 0.075686 | 0.10235  | 0.020935 | 0.65182  |
| 0.00371  | -0.24924 | 4.81E-08 | 0.044271 | 0.33977  | -0.05582 | 0.22861  | 0.049922 | 0.28166  |
| 0.00116  | 0.175941 | 0.00013  | 0.041565 | 0.37014  | 0.089425 | 0.05346  | 0.081522 | 0.07842  |
| 1.78E-09 | 0.335713 | 9.14E-14 | 0.105405 | 0.02272  | 0.027327 | 0.55582  | 0.123257 | 0.00766  |
| 0.13073  | 0.208832 | 5.34E-06 | 0.106852 | 0.02091  | 0.242108 | 1.18E-07 | 0.020906 | 0.65227  |
| 4.72E-05 | 0.158578 | 0.00058  | 0.027774 | 0.54937  | 0.144223 | 0.00178  | 0.021617 | 0.64125  |
| 8.25E-05 | 0.187665 | 4.49E-05 | 0.079705 | 0.08533  | 0.103521 | 0.02528  | 0.089489 | 0.05329  |
| 0.00169  | -0.17691 | 0.00012  | 0.137208 | 0.00297  | 0.045202 | 0.3297   | 0.014637 | 0.7524   |
| 0.03151  | 0.213029 | 3.41E-06 | 0.081982 | 0.07675  | 0.14813  | 0.00133  | 0.047282 | 0.30792  |

|          |          |          |          |          |          |          |          |          |
|----------|----------|----------|----------|----------|----------|----------|----------|----------|
| 0.86492  | 0.052933 | 0.25361  | 0.110397 | 0.017    | 0.161375 | 0.00046  | 0.134492 | 0.00359  |
| 0.86416  | -0.00524 | 0.91006  | -0.01298 | 0.77965  | -0.02387 | 0.60682  | 0.008024 | 0.8627   |
| 0.03259  | 0.174988 | 0.00014  | -0.02785 | 0.54828  | 0.036634 | 0.42963  | 0.108112 | 0.01944  |
| 1.05E-09 | 0.175817 | 0.00013  | -0.11448 | 0.01331  | -0.07247 | 0.11782  | 0.086061 | 0.06313  |
| 0.0003   | -0.16249 | 0.00042  | -0.00965 | 0.83528  | -0.08472 | 0.06738  | -0.07251 | 0.11761  |
| 0.46927  | 0.130241 | 0.00482  | 0.053299 | 0.25034  | 0.022561 | 0.62676  | 0.128957 | 0.00525  |
| 0.00513  | 0.118015 | 0.0107   | 0.026408 | 0.56919  | -0.01189 | 0.79782  | 0.261098 | 1.02E-08 |
| 0.34765  | 0.088318 | 0.0565   | 0.045109 | 0.33071  | 0.073731 | 0.11156  | -0.03216 | 0.4881   |
| 0.04555  | -0.0948  | 0.04059  | -0.13595 | 0.00324  | -0.12224 | 0.00818  | 0.105856 | 0.02215  |
| 0.0808   | 0.086937 | 0.06048  | 0.023505 | 0.6124   | -0.01151 | 0.80404  | 0.018742 | 0.68624  |
| 0.74026  | -0.05218 | 0.26042  | 0.065383 | 0.15834  | 0.02501  | 0.58982  | -0.12668 | 0.00612  |
| 0.84021  | 0.02441  | 0.59877  | 0.046603 | 0.31493  | -0.01965 | 0.67196  | -0.10773 | 0.01987  |
| 0.06449  | 0.027497 | 0.55335  | 0.114226 | 0.01351  | 0.035382 | 0.44559  | -0.13782 | 0.00284  |
| 0.44488  | 0.004418 | 0.92414  | -0.09462 | 0.04097  | 0.07089  | 0.12607  | 0.108583 | 0.01892  |
| 0.92323  | 0.084357 | 0.06856  | -0.01345 | 0.77192  | 0.043912 | 0.34371  | -0.12644 | 0.00622  |
| 0.69626  | 0.023398 | 0.61402  | 0.043341 | 0.35003  | 0.016311 | 0.72516  | -0.01763 | 0.70392  |
| 0.84777  | 0.000945 | 0.98374  | 0.047642 | 0.30424  | 0.152534 | 0.00094  | 0.003416 | 0.94132  |
| 0.16859  | 0.152436 | 0.00095  | 0.116729 | 0.01159  | 0.205879 | 7.28E-06 | 0.121284 | 0.0087   |
| 0.00022  | 0.23025  | 4.90E-07 | 0.03525  | 0.44729  | 0.075496 | 0.10322  | -0.09884 | 0.03273  |
| 0.01705  | 0.148327 | 0.00131  | 0.32903  | 2.98E-13 | 0.144219 | 0.00178  | 0.06114  | 0.18719  |
| 0.73418  | 0.041748 | 0.36804  | 0.108097 | 0.01946  | 0.008739 | 0.8506   | 0.154292 | 0.00082  |
| 0.11395  | 0.012705 | 0.78422  | 0.041486 | 0.37106  | 0.046713 | 0.31378  | -0.01839 | 0.69188  |
| 0.76642  | 0.030009 | 0.51769  | 0.037059 | 0.4243   | 0.128963 | 0.00525  | 0.005452 | 0.90646  |
| 0.4389   | 0.064066 | 0.16692  | 0.051719 | 0.26467  | 0.055422 | 0.23194  | 0.060764 | 0.18992  |
| 0.41381  | -0.00873 | 0.85075  | 0.018274 | 0.69367  | 0.010324 | 0.82392  | 0.099094 | 0.03228  |
| 0.23679  | -0.01116 | 0.80986  | -0.0134  | 0.77267  | -0.12163 | 0.00851  | -0.00853 | 0.85409  |
| 0.95602  | 0.012544 | 0.78688  | 0.129753 | 0.00498  | 0.071785 | 0.12135  | 0.020983 | 0.65107  |
| 0.00037  | -0.15968 | 0.00053  | 0.061419 | 0.18518  | -0.13297 | 0.00399  | -0.17269 | 0.00018  |
| 0.8942   | 0.103486 | 0.02533  | -0.09238 | 0.04602  | 0.020309 | 0.66157  | -0.00168 | 0.97109  |
| 0.13749  | 0.105566 | 0.02252  | 0.147311 | 0.00141  | 0.058287 | 0.20865  | 0.086283 | 0.06245  |
| 5.62E-08 | 0.186456 | 5.03E-05 | -0.02226 | 0.63142  | 0.069644 | 0.13289  | -0.03349 | 0.47036  |
| 0.70545  | -0.02209 | 0.634    | 0.011737 | 0.8003   | -0.0114  | 0.80587  | 0.004912 | 0.91568  |
| 0.00273  | -0.07222 | 0.11909  | -0.01346 | 0.77173  | 0.274529 | 1.61E-09 | -0.01674 | 0.71823  |
| 0.69427  | -0.01958 | 0.67293  | -0.00425 | 0.92707  | 0.001062 | 0.98174  | -0.03157 | 0.49615  |
| 1.15E-05 | -0.27841 | 9.25E-10 | 0.156252 | 0.0007   | -0.09036 | 0.05101  | -0.04932 | 0.28755  |
| 0.56322  | 0.08354  | 0.07129  | 0.021754 | 0.63915  | 0.054169 | 0.24268  | -0.0549  | 0.23634  |
| 0.05621  | 0.229033 | 5.65E-07 | 0.062689 | 0.17624  | 0.146865 | 0.00146  | 0.100194 | 0.0304   |
| 0.15068  | 0.055925 | 0.22772  | -0.0173  | 0.70924  | -0.02397 | 0.60537  | 0.12245  | 0.00807  |
| 0.18948  | 0.188161 | 4.28E-05 | 0.15103  | 0.00106  | 0.064152 | 0.16634  | 0.016084 | 0.72884  |
| 0.44936  | 0.038945 | 0.40109  | -0.01647 | 0.72254  | 0.149206 | 0.00122  | 0.025981 | 0.57545  |
| 0.25523  | -0.00633 | 0.89155  | -0.13509 | 0.00345  | -0.01348 | 0.77139  | -0.21925 | 1.72E-06 |
| 0.27758  | 0.115258 | 0.01269  | 0.334882 | 1.06E-13 | -0.0322  | 0.48764  | 0.102315 | 0.02704  |
| 0.1023   | 0.015578 | 0.73706  | 0.043117 | 0.35253  | 0.006692 | 0.88533  | 0.048448 | 0.29613  |
| 0.62238  | -0.05702 | 0.21874  | 0.020777 | 0.65427  | -0.01774 | 0.70216  | 0.011814 | 0.79901  |
| 0.51811  | 0.028384 | 0.54062  | 0.135625 | 0.00332  | 0.045662 | 0.3248   | -0.00144 | 0.97529  |



|          |          |          |          |          |          |          |          |          |
|----------|----------|----------|----------|----------|----------|----------|----------|----------|
| 0.02141  | -0.06748 | 0.14541  | -0.12639 | 0.00624  | -0.0034  | 0.94158  | 0.040327 | 0.38458  |
| 0.09638  | 0.152418 | 0.00095  | 0.021608 | 0.64138  | 0.314882 | 3.30E-12 | 0.033804 | 0.46614  |
| 0.57237  | -0.07329 | 0.11372  | -0.10958 | 0.01785  | -0.0094  | 0.83942  | -0.22499 | 9.01E-07 |
| 0.02452  | 0.11167  | 0.01577  | 0.084621 | 0.06769  | 0.039434 | 0.3952   | -0.07774 | 0.09334  |
| 0.42325  | -0.01147 | 0.80475  | -0.0132  | 0.77606  | 0.121434 | 0.00862  | 0.04128  | 0.37343  |
| 0.96791  | 0.009712 | 0.83421  | 0.015451 | 0.73911  | 0.060943 | 0.18862  | 0.202572 | 1.03E-05 |
| 4.15E-08 | -0.27143 | 2.49E-09 | -0.00465 | 0.92016  | -0.0299  | 0.51927  | 0.034444 | 0.45774  |
| 6.14E-08 | -0.30679 | 1.23E-11 | 0.032532 | 0.4831   | -0.03448 | 0.45726  | -0.07934 | 0.08679  |
| 0.30822  | -0.09706 | 0.03601  | 0.035245 | 0.44734  | 0.004506 | 0.92263  | -0.02339 | 0.61411  |
| 0.62437  | -0.01226 | 0.79167  | 0.052394 | 0.25848  | 0.011008 | 0.81246  | -0.06029 | 0.19342  |
| 0.37204  | 0.079407 | 0.08651  | 0.063239 | 0.17247  | 0.085886 | 0.06367  | -0.03179 | 0.49319  |
| 0.34606  | -0.02593 | 0.57615  | 0.155351 | 0.00076  | 0.000246 | 0.99578  | -0.00961 | 0.83599  |
| 0.75361  | 0.008841 | 0.84887  | 0.139288 | 0.00256  | 0.069073 | 0.1361   | 0.043273 | 0.35079  |
| 0.9057   | 0.064678 | 0.16289  | 0.111417 | 0.01601  | 0.039736 | 0.39159  | -0.01932 | 0.67713  |
| 5.53E-05 | 0.269578 | 3.22E-09 | 0.260911 | 1.05E-08 | 0.034082 | 0.46249  | 0.042086 | 0.36416  |
| 0.50291  | 0.014729 | 0.75089  | 0.035465 | 0.44452  | -0.04204 | 0.36471  | 0.169681 | 0.00023  |
| 0.9005   | -0.02589 | 0.57674  | 0.126328 | 0.00626  | 0.021687 | 0.64016  | 0.184723 | 5.92E-05 |
| 0.32897  | 0.086015 | 0.06327  | 0.134375 | 0.00362  | 0.041812 | 0.3673   | 0.130904 | 0.0046   |
| 0.41784  | -0.06107 | 0.1877   | 0.029261 | 0.52819  | -0.00147 | 0.97476  | -0.06939 | 0.13428  |
| 0.16147  | -0.05511 | 0.23457  | 0.044176 | 0.34082  | -0.00148 | 0.97461  | 0.017355 | 0.70835  |
| 0.00783  | -0.03    | 0.5178   | 0.130429 | 0.00476  | 0.059936 | 0.19604  | -0.06806 | 0.14198  |
| 3.75E-06 | 0.139921 | 0.00244  | 0.080518 | 0.08218  | 0.205199 | 7.82E-06 | 0.13287  | 0.00402  |
| 0.64192  | 0.001685 | 0.97103  | -0.05786 | 0.21203  | 0.023548 | 0.61175  | -0.10005 | 0.03064  |
| 0.03031  | 0.278038 | 9.76E-10 | 0.056821 | 0.22035  | 0.121785 | 0.00842  | 0.133413 | 0.00387  |
| 0.26419  | 0.237396 | 2.09E-07 | -0.02548 | 0.58284  | 0.001542 | 0.97349  | -0.11283 | 0.01471  |
| 0.13673  | 0.098363 | 0.03358  | 0.011165 | 0.80983  | 0.009011 | 0.846    | -0.00527 | 0.9096   |
| 0.68585  | -0.0612  | 0.18675  | 0.008272 | 0.8585   | -0.01289 | 0.78115  | -0.13064 | 0.00469  |
| 0.35567  | -0.00957 | 0.83664  | 0.011601 | 0.80257  | 0.001398 | 0.97595  | 0.056999 | 0.2189   |
| 0.00513  | 0.079126 | 0.08763  | -0.03478 | 0.45334  | -0.04208 | 0.36422  | -0.01515 | 0.74397  |
| 0.03339  | -0.0924  | 0.04598  | -0.2327  | 3.67E-07 | -0.05337 | 0.24972  | 0.004441 | 0.92375  |
| 0.00022  | 0.226745 | 7.36E-07 | 0.092935 | 0.04472  | 0.034183 | 0.46116  | -0.22862 | 5.93E-07 |
| 2.63E-09 | -0.25269 | 3.09E-08 | -0.08119 | 0.07966  | -0.07225 | 0.11895  | -0.19927 | 1.44E-05 |
| 0.23575  | 0.108501 | 0.01901  | 0.117777 | 0.01086  | 0.056285 | 0.22474  | 0.103729 | 0.02498  |
| 0.11624  | 0.109208 | 0.01824  | 0.280742 | 6.61E-10 | 0.088431 | 0.05618  | 0.100747 | 0.02949  |
| 0.09102  | -0.12105 | 0.00883  | -0.09259 | 0.04551  | 0.110253 | 0.01715  | -0.05122 | 0.26936  |
| 0.2353   | -0.04224 | 0.36243  | -0.08111 | 0.07996  | -0.04216 | 0.36337  | -0.04237 | 0.36095  |
| 0.66043  | -0.14472 | 0.00171  | 0.012108 | 0.79412  | -0.06301 | 0.17406  | 0.092326 | 0.04614  |
| 0.58752  | -0.02062 | 0.65677  | 0.305751 | 1.46E-11 | 0.080642 | 0.08171  | 0.043617 | 0.34696  |
| 1.36E-06 | -0.3207  | 1.25E-12 | -0.17263 | 0.00018  | -0.09809 | 0.03407  | -0.03506 | 0.44979  |
| 0.001    | 0.141328 | 0.0022   | -0.10375 | 0.02496  | 0.007597 | 0.86994  | 0.030516 | 0.51064  |
| 0.92828  | 0.009701 | 0.83438  | 0.013272 | 0.77484  | 0.076257 | 0.09978  | 0.015684 | 0.73533  |
| 0.20033  | -0.12352 | 0.00753  | -0.03208 | 0.48922  | -0.04347 | 0.34864  | -0.01215 | 0.79342  |
| 0.00348  | -0.07994 | 0.0844   | 0.019834 | 0.66901  | 0.100583 | 0.02976  | 0.123294 | 0.00764  |
| 0.99068  | -0.05163 | 0.26553  | -0.00069 | 0.98813  | -0.02309 | 0.61875  | 0.064457 | 0.16433  |
| 0.69698  | -0.00164 | 0.97174  | 0.077866 | 0.09281  | 0.050089 | 0.28004  | -0.20418 | 8.69E-06 |

|          |          |          |           |          |          |          |          |          |
|----------|----------|----------|-----------|----------|----------|----------|----------|----------|
| 0.00079  | 0.153426 | 0.00088  | -0.04005  | 0.38785  | -0.02743 | 0.55432  | 0.39649  | 4.96E-19 |
| 0.0015   | -0.20503 | 7.95E-06 | -0.03339  | 0.47165  | -0.022   | 0.63528  | 0.159466 | 0.00054  |
| 0.00907  | 0.117132 | 0.0113   | 0.007445  | 0.87251  | -0.00079 | 0.98639  | 0.1944   | 2.34E-05 |
| 0.19168  | -0.0341  | 0.46226  | 0.07068   | 0.1272   | -0.03068 | 0.50836  | 0.262871 | 8.06E-09 |
| 0.94542  | -0.03694 | 0.42582  | -0.01457  | 0.75358  | -0.02927 | 0.528    | -0.02871 | 0.53597  |
| 0.00015  | 0.146275 | 0.00153  | 0.050342  | 0.27763  | 0.030955 | 0.50457  | 0.303189 | 2.19E-11 |
| 0.02093  | 0.101418 | 0.02842  | -1.45E-05 | 0.99975  | -0.01519 | 0.74338  | 0.177106 | 0.00012  |
| 0.67217  | -0.05451 | 0.23975  | 0.00012   | 0.99794  | 0.026808 | 0.56334  | 0.203687 | 9.14E-06 |
| 0.27072  | -0.12848 | 0.00543  | 0.026539  | 0.56727  | -0.02709 | 0.55929  | -0.05669 | 0.22145  |
| 0.041    | -0.03076 | 0.50723  | -0.10918  | 0.01827  | -0.00286 | 0.95091  | 0.077139 | 0.09591  |
| 1.72E-09 | 0.22107  | 1.40E-06 | 0.032692  | 0.48095  | 0.022462 | 0.62827  | 0.169294 | 0.00024  |
| 2.64E-06 | 0.218546 | 1.86E-06 | 0.082007  | 0.07666  | 0.140345 | 0.00237  | 0.024064 | 0.60396  |
| 0.63946  | -0.05813 | 0.20985  | 0.016255  | 0.72607  | -0.00311 | 0.94663  | 0.046723 | 0.31368  |
| 1.79E-06 | 0.136688 | 0.00308  | 0.088176  | 0.0569   | 0.022385 | 0.62945  | -0.10951 | 0.01792  |
| 0.79878  | -0.02002 | 0.66608  | 0.060248  | 0.19372  | 0.119866 | 0.00952  | 0.160457 | 0.0005   |
| 0.67192  | 0.035441 | 0.44482  | 0.200837  | 1.22E-05 | 0.062825 | 0.1753   | 0.039057 | 0.39974  |
| 0.60153  | 0.076952 | 0.09672  | 0.262205  | 8.82E-09 | 0.138572 | 0.00269  | 0.035004 | 0.45046  |
| 0.22052  | 0.066217 | 0.15309  | 0.046238  | 0.31874  | 0.06442  | 0.16458  | -0.01468 | 0.75166  |
| 0.09271  | -0.08792 | 0.05762  | 0.269672  | 3.18E-09 | 0.07845  | 0.09038  | 0.050927 | 0.27207  |
| 0.81852  | -0.00579 | 0.9007   | 0.258761  | 1.40E-08 | 0.01449  | 0.75481  | 0.03156  | 0.49628  |
| 0.01644  | -0.10589 | 0.02211  | -0.1129   | 0.01464  | -0.08957 | 0.05307  | 0.047164 | 0.30912  |
| 0.14621  | -0.0312  | 0.50125  | 0.175469  | 0.00014  | -0.02064 | 0.65636  | 0.051599 | 0.26578  |
| 0.06867  | 0.156153 | 0.00071  | 0.118682  | 0.01026  | 0.229521 | 5.34E-07 | 0.032556 | 0.48277  |
| 0.04732  | 0.074013 | 0.11019  | -0.03255  | 0.4829   | 0.078253 | 0.0912   | -0.05857 | 0.20643  |
| 0.15516  | 0.140731 | 0.0023   | 0.011983  | 0.79619  | 0.071485 | 0.12292  | 0.124979 | 0.00685  |
| 0.10397  | -0.06845 | 0.13968  | 0.033994  | 0.46364  | 0.061109 | 0.18742  | -0.03239 | 0.48497  |
| 0.06549  | 0.023523 | 0.61212  | -0.07766  | 0.0937   | -0.05382 | 0.24569  | 0.048765 | 0.29297  |
| 5.35E-11 | 0.298535 | 4.55E-11 | 0.148241  | 0.00131  | 0.118136 | 0.01062  | 0.219718 | 1.63E-06 |
| 0.01702  | 0.237139 | 2.16E-07 | 0.277204  | 1.10E-09 | 0.137032 | 0.003    | 0.084456 | 0.06823  |
| 0.00354  | 0.123676 | 0.00746  | -0.04143  | 0.37175  | -0.01241 | 0.78903  | 0.000536 | 0.99079  |
| 0.01278  | 0.278846 | 8.69E-10 | 0.139653  | 0.00249  | 0.165858 | 0.00032  | 0.046823 | 0.31264  |
| 0.34171  | 0.202762 | 1.01E-05 | 0.067455  | 0.14554  | 0.060933 | 0.18869  | -0.01239 | 0.7894   |
| 0.17089  | 0.21365  | 3.18E-06 | 0.035562  | 0.44326  | 0.077438 | 0.09463  | -0.04509 | 0.33092  |
| 0.02264  | 0.249441 | 4.69E-08 | 0.045803  | 0.32331  | 0.116199 | 0.01198  | -0.04518 | 0.3299   |
| 0.09786  | 0.204536 | 8.37E-06 | 0.040566  | 0.38177  | 0.069479 | 0.13381  | -0.06371 | 0.16926  |
| 0.04899  | 0.125182 | 0.00676  | 0.016572  | 0.72095  | 0.037896 | 0.4139   | 0.010324 | 0.82392  |
| 0.72722  | -0.04551 | 0.32638  | -0.00258  | 0.95559  | 0.03034  | 0.51308  | 0.04877  | 0.29292  |
| 0.6102   | -0.02696 | 0.56113  | -0.03854  | 0.406    | -0.04717 | 0.30904  | 0.023001 | 0.62004  |
| 0.18415  | 0.039447 | 0.39504  | -0.11205  | 0.01541  | -0.0301  | 0.51639  | 0.03535  | 0.44599  |
| 0.02352  | 0.147001 | 0.00144  | -0.04079  | 0.37919  | 0.023681 | 0.60974  | 0.074235 | 0.10912  |
| 0.85205  | -0.03635 | 0.43327  | 0.131477  | 0.00443  | -0.03963 | 0.39288  | -0.05962 | 0.19839  |
| 0.78855  | -0.08973 | 0.05266  | 0.158339  | 0.00059  | -0.0378  | 0.41515  | -0.05171 | 0.26479  |
| 0.12263  | 0.077955 | 0.09244  | 0.206012  | 7.18E-06 | 0.017079 | 0.71278  | 0.004687 | 0.91955  |
| 0.21042  | 0.043645 | 0.34666  | 0.121022  | 0.00885  | -0.01052 | 0.82058  | -0.02431 | 0.60023  |
| 0.4801   | 0.096178 | 0.03774  | 0.142851  | 0.00197  | -0.05133 | 0.26827  | -0.02011 | 0.66467  |

|          |          |          |          |          |          |         |          |          |
|----------|----------|----------|----------|----------|----------|---------|----------|----------|
| 0.86913  | -0.00297 | 0.94888  | 0.194156 | 2.39E-05 | -0.03075 | 0.50734 | -0.13079 | 0.00464  |
| 0.9346   | -0.01932 | 0.67715  | 0.248677 | 5.17E-08 | -0.01994 | 0.66727 | -0.11815 | 0.01061  |
| 0.83137  | -0.05313 | 0.25183  | 0.16156  | 0.00046  | -0.02859 | 0.53768 | -0.05039 | 0.27718  |
| 0.31721  | 0.096572 | 0.03696  | 0.211643 | 3.95E-06 | 0.016424 | 0.72334 | 0.017614 | 0.7042   |
| 0.01511  | 0.163915 | 0.00038  | 0.300298 | 3.46E-11 | 0.042589 | 0.35846 | 0.065261 | 0.15912  |
| 2.96E-07 | -0.29588 | 6.86E-11 | -0.06904 | 0.13632  | -0.01989 | 0.66805 | -0.06495 | 0.16115  |
| 0.38358  | 0.069425 | 0.13411  | 0.062052 | 0.18068  | 0.097246 | 0.03565 | -0.00538 | 0.90775  |
| 0.07879  | -0.03539 | 0.44554  | -0.00799 | 0.86326  | -0.02198 | 0.6356  | -0.03415 | 0.46159  |
| 0.73833  | 0.010815 | 0.81569  | -0.08487 | 0.06689  | -0.06419 | 0.16607 | 0.025359 | 0.58463  |
| 0.47199  | -0.05827 | 0.20882  | 0.038534 | 0.40608  | 0.043805 | 0.34489 | 0.061818 | 0.18233  |
| 2.29E-13 | -0.38715 | 3.79E-18 | -0.1584  | 0.00059  | -0.1639  | 0.00038 | -0.22351 | 1.07E-06 |
| 0.00044  | -0.22498 | 9.02E-07 | -0.17272 | 0.00018  | -0.05749 | 0.21491 | -0.19849 | 1.55E-05 |
| 1.84E-06 | 0.291013 | 1.44E-10 | 0.195092 | 2.18E-05 | -0.01169 | 0.80115 | 0.036882 | 0.42652  |
| 0.87775  | 0.053944 | 0.24464  | 0.045305 | 0.32861  | -0.06491 | 0.16141 | -0.07781 | 0.09303  |
| 3.82E-08 | 0.386031 | 4.81E-18 | 0.100821 | 0.02937  | 0.087132 | 0.05991 | 0.10848  | 0.01903  |
| 0.4089   | 0.082924 | 0.07341  | -0.0053  | 0.90899  | 0.0241   | 0.60342 | -0.00942 | 0.83917  |
| 0.45693  | 0.122689 | 0.00795  | -0.07792 | 0.09257  | 0.017138 | 0.71184 | 0.022288 | 0.63094  |
| 0.29746  | 0.082516 | 0.07484  | 0.100221 | 0.03035  | 0.038879 | 0.40189 | -0.00881 | 0.84942  |
| 0.00501  | 0.167912 | 0.00027  | 0.091627 | 0.04782  | 0.104327 | 0.02416 | 0.187183 | 4.70E-05 |
| 0.07696  | -0.14994 | 0.00115  | -0.08322 | 0.07237  | -0.05611 | 0.22615 | -0.12839 | 0.00546  |
| 0.3948   | -0.17596 | 0.00013  | -0.13051 | 0.00473  | -0.11315 | 0.01443 | -0.04211 | 0.36391  |
| 0.81306  | -0.05263 | 0.2563   | -0.02022 | 0.66291  | -0.00553 | 0.90508 | -0.02471 | 0.59426  |
| 0.01324  | 0.056403 | 0.22376  | 0.03839  | 0.40785  | 0.076721 | 0.09773 | -0.02595 | 0.5759   |
| 0.55256  | 0.037529 | 0.41845  | 0.10148  | 0.02832  | 0.126653 | 0.00613 | -0.00657 | 0.88739  |
| 0.00221  | 0.149304 | 0.00121  | 0.15324  | 0.00089  | 0.133199 | 0.00393 | 0.109188 | 0.01826  |
| 0.21403  | -0.01435 | 0.75709  | 0.017302 | 0.7092   | -0.08105 | 0.08016 | 0.086845 | 0.06076  |
| 0.00393  | -0.21734 | 2.13E-06 | -0.12947 | 0.00508  | -0.13532 | 0.00339 | -0.09951 | 0.03156  |
| 0.00089  | -0.1813  | 8.14E-05 | -0.03198 | 0.49051  | 0.018268 | 0.69376 | 0.021755 | 0.63913  |
| 0.9497   | -0.01095 | 0.81343  | 0.086604 | 0.06148  | 0.013822 | 0.76578 | -0.0578  | 0.21251  |
| 0.00151  | -0.23332 | 3.41E-07 | -0.0039  | 0.93308  | 0.13629  | 0.00317 | -0.0409  | 0.37784  |
| 0.30739  | -0.0203  | 0.66176  | 0.063588 | 0.17011  | 0.073562 | 0.11238 | 0.001329 | 0.97715  |
| 0.00257  | 0.077459 | 0.09454  | -0.02658 | 0.56665  | 0.036998 | 0.42507 | 0.004978 | 0.91456  |
| 0.01282  | -0.26106 | 1.03E-08 | -0.03098 | 0.50425  | -0.0348  | 0.45314 | -0.04332 | 0.35026  |
| 0.11438  | 0.105708 | 0.02233  | -0.00671 | 0.88498  | 0.073018 | 0.11507 | 0.033907 | 0.4648   |
| 0.26256  | -0.01321 | 0.77585  | 0.090667 | 0.05022  | 0.007787 | 0.86672 | -0.07466 | 0.1071   |
| 0.57244  | 0.080095 | 0.08381  | -0.0055  | 0.9056   | -0.02186 | 0.63753 | -0.02844 | 0.53986  |
| 0.96929  | 0.037707 | 0.41624  | -0.00625 | 0.89289  | -0.02048 | 0.65887 | -0.06343 | 0.1712   |
| 0.78303  | 0.014036 | 0.76226  | 0.166588 | 0.0003   | -0.02422 | 0.60163 | 0.047111 | 0.30967  |
| 3.68E-05 | 0.106382 | 0.02149  | 0.125385 | 0.00667  | 0.051245 | 0.26908 | 0.219542 | 1.67E-06 |
| 0.55592  | -0.03335 | 0.47216  | 0.119839 | 0.00954  | -0.11648 | 0.01177 | -0.06378 | 0.16881  |
| 0.11319  | 0.001354 | 0.97672  | 0.153428 | 0.00088  | 0.009858 | 0.83174 | 0.153671 | 0.00086  |
| 0.02531  | -0.02901 | 0.5318   | 0.160955 | 0.00048  | 0.177982 | 0.00011 | 0.045293 | 0.32873  |
| 1.09E-06 | 0.165848 | 0.00032  | 0.071671 | 0.12194  | -0.11975 | 0.00959 | 0.055938 | 0.22761  |
| 0.63467  | 0.01079  | 0.81611  | 0.026404 | 0.56925  | 0.024681 | 0.59471 | 0.044513 | 0.33714  |
| 0.70894  | -0.01465 | 0.75214  | 0.06158  | 0.18403  | 0.053686 | 0.24691 | 0.068453 | 0.13966  |

|          |          |          |          |          |          |          |          |          |
|----------|----------|----------|----------|----------|----------|----------|----------|----------|
| 0.71907  | -0.06359 | 0.17008  | 0.085977 | 0.06339  | -0.00326 | 0.94406  | -0.03607 | 0.43678  |
| 0.00051  | 0.30123  | 2.99E-11 | 0.133578 | 0.00383  | 0.106418 | 0.02144  | 0.149784 | 0.00117  |
| 0.25035  | 0.126598 | 0.00615  | 0.00639  | 0.89047  | -0.03981 | 0.39069  | 0.029621 | 0.52313  |
| 0.0621   | 0.0993   | 0.03192  | 0.087854 | 0.05781  | 0.087316 | 0.05937  | 0.131804 | 0.00433  |
| 0.51682  | -0.0022  | 0.96225  | 0.140844 | 0.00228  | 0.051356 | 0.26805  | 0.09651  | 0.03708  |
| 0.55067  | 0.1738   | 0.00016  | 0.016418 | 0.72343  | 0.02297  | 0.62051  | 0.019901 | 0.66796  |
| 0.09067  | 0.068032 | 0.14212  | 0.015239 | 0.74256  | 0.03293  | 0.47776  | 0.079148 | 0.08754  |
| 0.67497  | -0.03632 | 0.43359  | 0.080876 | 0.08082  | 0.102547 | 0.02669  | 0.263859 | 7.05E-09 |
| 0.9247   | -0.02707 | 0.55957  | -0.08017 | 0.08353  | 0.04941  | 0.28662  | -0.03033 | 0.51327  |
| 0.47627  | 0.063227 | 0.17255  | 0.055731 | 0.22934  | 0.086238 | 0.06259  | 0.070577 | 0.12776  |
| 0.31934  | -0.01049 | 0.82111  | 0.052643 | 0.25622  | -0.02707 | 0.55951  | -0.24979 | 4.49E-08 |
| 0.00532  | 0.108381 | 0.01914  | 0.107633 | 0.01999  | 0.064121 | 0.16655  | -0.0065  | 0.88863  |
| 0.20277  | 0.03017  | 0.51545  | 0.04299  | 0.35395  | 0.086946 | 0.06046  | 0.208868 | 5.32E-06 |
| 0.21685  | -0.05131 | 0.26847  | 0.012837 | 0.78203  | 0.002475 | 0.95745  | 0.037233 | 0.42213  |
| 0.86396  | -0.00458 | 0.92138  | -0.05631 | 0.22453  | 0.001545 | 0.97343  | -0.05764 | 0.21377  |
| 2.00E-05 | 0.247144 | 6.28E-08 | 0.197897 | 1.65E-05 | 0.094657 | 0.04089  | 0.158351 | 0.00059  |
| 0.01916  | 0.072633 | 0.117    | 0.069901 | 0.13146  | -0.01433 | 0.75742  | 0.132312 | 0.00418  |
| 0.0844   | 0.153684 | 0.00086  | 0.07472  | 0.10682  | 0.114006 | 0.0137   | 0.066891 | 0.14894  |
| 8.98E-08 | 0.252991 | 2.97E-08 | 0.058425 | 0.20758  | -0.0304  | 0.51228  | 0.074365 | 0.10851  |
| 2.32E-10 | -0.344   | 2.03E-14 | -0.17139 | 0.0002   | -0.05208 | 0.26135  | -0.15314 | 0.0009   |
| 0.00933  | 0.073288 | 0.11373  | -0.08128 | 0.0793   | 0.008397 | 0.85638  | -0.15748 | 0.00064  |
| 8.76E-05 | -0.23415 | 3.09E-07 | -0.0841  | 0.06942  | -0.02745 | 0.55407  | -0.20179 | 1.11E-05 |
| 0.01494  | 0.154283 | 0.00082  | -0.10697 | 0.02078  | -0.067   | 0.14827  | -0.11259 | 0.01492  |
| 0.36524  | 0.069751 | 0.13229  | 0.015682 | 0.73537  | -0.00781 | 0.86631  | 0.042822 | 0.35583  |
| 0.27876  | -0.04885 | 0.29213  | -0.02019 | 0.6634   | 0.000861 | 0.98519  | -0.12291 | 0.00784  |
| 0.34364  | -0.09543 | 0.03926  | -0.07164 | 0.12213  | -0.09411 | 0.04208  | -0.01053 | 0.82051  |
| 0.05688  | -0.08417 | 0.06918  | 0.002671 | 0.95409  | -0.08841 | 0.05623  | 0.006803 | 0.88343  |
| 2.38E-09 | -0.25252 | 3.16E-08 | -0.17261 | 0.00018  | -0.11173 | 0.01571  | 0.00746  | 0.87227  |
| 0.38505  | 0.022724 | 0.62426  | 0.027961 | 0.54668  | 0.003877 | 0.9334   | -0.00209 | 0.96399  |
| 0.00014  | -0.1383  | 0.00274  | 0.012446 | 0.7885   | 0.014567 | 0.75354  | 0.030748 | 0.50743  |
| 0.54951  | 0.092113 | 0.04665  | 0.101136 | 0.02886  | 0.058275 | 0.20875  | 0.106123 | 0.02181  |
| 0.16429  | 0.12789  | 0.00565  | 0.05963  | 0.19833  | 0.058543 | 0.20665  | 0.102841 | 0.02626  |
| 0.01467  | 0.149585 | 0.00119  | 0.011022 | 0.81222  | -0.04216 | 0.36329  | 0.091164 | 0.04897  |
| 0.01291  | 0.146627 | 0.00149  | -0.05506 | 0.23501  | 0.060342 | 0.19302  | -0.02734 | 0.5557   |
| 9.88E-05 | 0.295984 | 6.76E-11 | 0.030364 | 0.51275  | -0.03427 | 0.45999  | 0.067444 | 0.14561  |
| 0.00096  | 0.290007 | 1.68E-10 | 0.06509  | 0.16022  | 0.249436 | 4.70E-08 | 0.041348 | 0.37265  |
| 0.05633  | -0.14962 | 0.00118  | -0.04374 | 0.34555  | -0.03337 | 0.47185  | -0.01799 | 0.69827  |
| 0.00012  | 0.269853 | 3.10E-09 | 0.234002 | 3.15E-07 | 0.084418 | 0.06836  | 0.198467 | 1.56E-05 |
| 0.00245  | -0.01877 | 0.68582  | 0.045829 | 0.32304  | -0.00096 | 0.98346  | 0.027732 | 0.54998  |
| 0.09833  | -0.05324 | 0.25087  | 0.013026 | 0.7789   | -0.00199 | 0.96576  | 0.008997 | 0.84625  |
| 0.03596  | 0.227812 | 6.51E-07 | -0.05047 | 0.27638  | 0.079271 | 0.08705  | 0.032604 | 0.48213  |
| 0.31083  | -0.00423 | 0.92731  | -0.12323 | 0.00767  | 0.049037 | 0.29029  | -0.07444 | 0.10814  |
| 0.5517   | -0.04725 | 0.30826  | -0.00979 | 0.83281  | 0.028886 | 0.53348  | 0.017146 | 0.7117   |
| 0.24578  | -0.0546  | 0.23894  | 0.029679 | 0.52231  | 0.008752 | 0.85039  | 0.007126 | 0.87794  |
| 0.0739   | -0.10233 | 0.02701  | -0.00405 | 0.93044  | 0.006112 | 0.8952   | -0.02962 | 0.52316  |

|          |          |          |          |          |          |          |          |          |
|----------|----------|----------|----------|----------|----------|----------|----------|----------|
| 0.92666  | 0.011547 | 0.80346  | 0.009241 | 0.84212  | 0.01356  | 0.77008  | -0.04732 | 0.30755  |
| 0.25881  | 0.210794 | 4.33E-06 | 0.076388 | 0.0992   | 0.173314 | 0.00017  | 0.013245 | 0.77528  |
| 2.07E-05 | 0.298922 | 4.29E-11 | 0.041847 | 0.36691  | 0.045054 | 0.33129  | 0.049834 | 0.28251  |
| 0.00012  | 0.247958 | 5.67E-08 | 0.062081 | 0.18048  | 0.025743 | 0.57895  | 0.060301 | 0.19332  |
| 0.09558  | 0.206986 | 6.48E-06 | 0.082212 | 0.07592  | 0.073492 | 0.11273  | 0.079621 | 0.08566  |
| 3.59E-05 | -0.17494 | 0.00014  | 0.012422 | 0.78891  | -0.05262 | 0.2564   | 0.037051 | 0.4244   |
| 0.10357  | 0.163328 | 0.00039  | 0.041077 | 0.3758   | 0.092523 | 0.04568  | 0.183446 | 6.68E-05 |
| 4.64E-12 | 0.2815   | 5.92E-10 | -0.00016 | 0.99729  | -0.05199 | 0.26217  | 0.162442 | 0.00042  |
| 0.96715  | 0.05584  | 0.22843  | 0.024474 | 0.59781  | -0.02326 | 0.61606  | -0.15922 | 0.00055  |
| 0.00134  | 0.170944 | 0.00021  | 0.029165 | 0.52954  | 0.002659 | 0.9543   | 0.129018 | 0.00523  |
| 0.00026  | 0.225812 | 8.20E-07 | 0.169763 | 0.00023  | 0.031402 | 0.49843  | 0.152972 | 0.00091  |
| 0.08392  | 0.153766 | 0.00086  | 0.006736 | 0.88457  | 0.07044  | 0.1285   | 0.048319 | 0.29742  |
| 0.78964  | -0.02859 | 0.53766  | 0.019131 | 0.68008  | 0.026608 | 0.56626  | 0.050333 | 0.27771  |
| 1.75E-05 | -0.217   | 2.21E-06 | 0.010186 | 0.82623  | 0.210591 | 4.43E-06 | -0.09782 | 0.03458  |
| 0.00175  | -0.15357 | 0.00087  | -0.02953 | 0.52439  | -0.06337 | 0.17157  | -0.01085 | 0.81515  |
| 0.02138  | -0.05794 | 0.21137  | -0.07676 | 0.09757  | -0.09025 | 0.05129  | -0.06824 | 0.14092  |
| 0.00079  | 0.037799 | 0.41511  | 0.182944 | 6.99E-05 | -0.03443 | 0.45793  | 0.067707 | 0.14404  |
| 2.79E-08 | -0.31465 | 3.43E-12 | 0.022978 | 0.6204   | -0.08791 | 0.05765  | -0.18486 | 5.85E-05 |
| 0.68532  | -0.10215 | 0.02729  | 0.066077 | 0.15396  | -0.07956 | 0.08591  | -0.01527 | 0.74199  |
| 0.91986  | 0.090657 | 0.05024  | 0.073933 | 0.11058  | 0.058398 | 0.20779  | 0.122692 | 0.00795  |
| 0.00321  | -0.2195  | 1.67E-06 | 0.002999 | 0.94846  | -0.07767 | 0.09366  | 0.013475 | 0.77149  |
| 0.4204   | 0.007168 | 0.87723  | -0.00739 | 0.8735   | -0.0035  | 0.93984  | 0.145908 | 0.00157  |
| 0.96364  | 0.10765  | 0.01997  | 0.161899 | 0.00044  | -0.04239 | 0.36069  | -0.02567 | 0.58006  |
| 0.6089   | -0.02097 | 0.65133  | 0.263449 | 7.45E-09 | 0.024204 | 0.60185  | -0.02175 | 0.63921  |
| 0.02444  | -0.03616 | 0.43559  | 0.103266 | 0.02564  | 0.031227 | 0.50083  | 0.143865 | 0.00183  |
| 0.46946  | 0.181735 | 7.82E-05 | 0.150449 | 0.00111  | 0.02111  | 0.64909  | -0.05197 | 0.26241  |
| 0.23082  | 0.090961 | 0.04947  | 0.035164 | 0.44839  | 0.031622 | 0.49543  | 0.059013 | 0.20303  |
| 0.36306  | 0.05193  | 0.26273  | 0.144058 | 0.0018   | 0.001985 | 0.96587  | -0.04251 | 0.35939  |
| 0.76822  | 0.032414 | 0.48469  | 0.036657 | 0.42935  | 0.046747 | 0.31343  | 0.017566 | 0.70498  |
| 0.82391  | 0.106475 | 0.02137  | 0.038451 | 0.40709  | 0.05205  | 0.26162  | -0.00461 | 0.92093  |
| 0.1924   | 0.082078 | 0.0764   | -0.00175 | 0.9699   | 0.019879 | 0.6683   | 0.101355 | 0.02852  |
| 0.00018  | 0.185032 | 5.75E-05 | 0.031013 | 0.50377  | -0.05914 | 0.20206  | 0.066153 | 0.15349  |
| 0.10632  | 0.149329 | 0.00121  | 0.085625 | 0.06449  | 0.046527 | 0.31571  | 0.116002 | 0.01212  |
| 0.01567  | 0.209356 | 5.05E-06 | 0.092357 | 0.04607  | 0.053061 | 0.25246  | 0.087915 | 0.05764  |
| 3.29E-05 | 0.323038 | 8.37E-13 | 0.10928  | 0.01816  | 0.047297 | 0.30776  | -0.14821 | 0.00132  |
| 0.03031  | -0.09944 | 0.03167  | 0.067748 | 0.1438   | -0.08403 | 0.06965  | -0.06104 | 0.18791  |
| 0.05585  | 0.167228 | 0.00028  | -0.05025 | 0.27855  | 0.043911 | 0.34373  | 0.032283 | 0.48645  |
| 0.00356  | 0.212007 | 3.80E-06 | 0.039939 | 0.38918  | -0.02147 | 0.64346  | -0.14648 | 0.0015   |
| 0.15685  | 0.217077 | 2.19E-06 | -0.03927 | 0.39719  | 0.078521 | 0.09009  | -0.06758 | 0.14479  |
| 0.55513  | -0.02213 | 0.63339  | 0.100163 | 0.03045  | -0.06086 | 0.18919  | 0.004003 | 0.93126  |
| 0.16372  | 0.198242 | 1.59E-05 | 0.042935 | 0.35457  | 0.062286 | 0.17904  | 0.101016 | 0.02906  |
| 0.16616  | 0.045865 | 0.32265  | -0.00156 | 0.97323  | -0.0267  | 0.56492  | -0.03392 | 0.46455  |
| 0.00033  | -0.21717 | 2.17E-06 | -0.02724 | 0.55705  | -0.01494 | 0.74741  | -0.09189 | 0.04718  |
| 0.07859  | 0.146912 | 0.00145  | -0.03644 | 0.43204  | -0.06854 | 0.13914  | -0.10597 | 0.022    |
| 0.02838  | -0.03145 | 0.4978   | -0.07473 | 0.10678  | -0.08197 | 0.07678  | -0.02717 | 0.55807  |

|          |          |          |          |          |          |         |          |          |
|----------|----------|----------|----------|----------|----------|---------|----------|----------|
| 5.38E-16 | -0.38769 | 3.37E-18 | -0.06862 | 0.13871  | -0.06532 | 0.15872 | -0.21655 | 2.32E-06 |
| 0.26572  | 0.174719 | 0.00015  | -0.06027 | 0.19359  | 0.045373 | 0.32788 | -0.02547 | 0.58306  |
| 0.93014  | 0.057534 | 0.2146   | 0.071142 | 0.12473  | 0.022982 | 0.62033 | -0.01177 | 0.79966  |
| 0.76855  | 0.120037 | 0.00942  | 0.051401 | 0.26763  | 0.039028 | 0.40009 | -0.00198 | 0.96596  |
| 0.48847  | 0.028036 | 0.54561  | -0.02054 | 0.65789  | 0.001852 | 0.96816 | -0.03969 | 0.39218  |
| 0.71737  | -0.02689 | 0.56212  | -0.02945 | 0.52553  | -0.02032 | 0.66139 | -0.00394 | 0.93235  |
| 0.47062  | 0.032981 | 0.47708  | 0.149869 | 0.00116  | 0.062564 | 0.17711 | 0.013971 | 0.76332  |
| 0.36507  | 0.064634 | 0.16317  | 0.297043 | 5.74E-11 | 0.073959 | 0.11045 | 0.056494 | 0.22302  |
| 0.8488   | 0.051114 | 0.27031  | 0.080323 | 0.08293  | 0.075133 | 0.10489 | 0.02779  | 0.54914  |
| 0.00174  | -0.19125 | 3.18E-05 | -0.0872  | 0.05971  | -0.10604 | 0.02192 | -0.19553 | 2.09E-05 |
| 0.07056  | -0.04377 | 0.34531  | -0.13695 | 0.00302  | 0.047278 | 0.30795 | -0.02957 | 0.5239   |
| 0.41252  | 0.078406 | 0.09056  | 0.06112  | 0.18734  | 0.051561 | 0.26614 | 0.013199 | 0.77604  |
| 0.01032  | 0.272061 | 2.28E-09 | 0.20819  | 5.71E-06 | 0.044977 | 0.33213 | 0.002877 | 0.95055  |
| 0.75725  | -0.02977 | 0.52098  | 0.02149  | 0.64322  | 0.055712 | 0.2295  | 0.044283 | 0.33964  |
| 0.0338   | -0.07588 | 0.10148  | -0.1595  | 0.00054  | -0.00879 | 0.84969 | -0.12684 | 0.00606  |
| 4.08E-07 | 0.249488 | 4.66E-08 | 0.092207 | 0.04643  | -0.01945 | 0.67512 | 0.095814 | 0.03847  |
| 0.01613  | 0.165805 | 0.00032  | 0.137065 | 0.003    | 0.082541 | 0.07475 | 0.156543 | 0.00069  |
| 0.21651  | 0.077931 | 0.09254  | 0.193375 | 2.58E-05 | -0.00219 | 0.96239 | 0.029282 | 0.52789  |
| 0.26939  | -0.00508 | 0.91277  | 0.356018 | 2.11E-15 | 0.02396  | 0.60552 | -0.00156 | 0.97314  |
| 0.02277  | -0.00912 | 0.84423  | -0.01405 | 0.76202  | 0.108413 | 0.01911 | 0.021417 | 0.64434  |
| 0.00086  | -0.11663 | 0.01166  | 0.000146 | 0.99749  | -0.05323 | 0.25092 | 0.046892 | 0.31193  |
| 0.67097  | 0.033467 | 0.4706   | 0.066019 | 0.15432  | 0.075325 | 0.104   | -0.05636 | 0.22411  |
| 0.17608  | -0.00627 | 0.89248  | 0.04784  | 0.30224  | 0.073625 | 0.11207 | 0.062128 | 0.18015  |
| 0.65191  | 0.00867  | 0.85177  | -0.0449  | 0.33292  | -0.0303  | 0.51362 | -0.06819 | 0.14121  |
| 0.19869  | 0.129281 | 0.00514  | 0.021733 | 0.63946  | 0.07415  | 0.10953 | -0.02137 | 0.64502  |
| 0.51025  | 0.184659 | 5.96E-05 | 0.173207 | 0.00017  | 0.033454 | 0.47078 | -0.12621 | 0.00631  |
| 0.01529  | 0.117937 | 0.01075  | 0.071286 | 0.12397  | -0.06045 | 0.19221 | -0.06802 | 0.14216  |
| 0.48843  | 0.116269 | 0.01192  | 0.03391  | 0.46475  | 0.019196 | 0.67905 | -0.10781 | 0.01979  |
| 0.0194   | -0.09787 | 0.03448  | 0.040192 | 0.38617  | 0.024179 | 0.60223 | -0.04694 | 0.31144  |
| 0.07989  | -0.01472 | 0.75108  | 0.095731 | 0.03864  | 0.032293 | 0.48632 | -0.00102 | 0.98244  |
| 0.36081  | 0.003973 | 0.93175  | 0.061698 | 0.18319  | 0.028663 | 0.53666 | 0.020305 | 0.66163  |
| 0.06065  | 0.156847 | 0.00067  | 0.010068 | 0.82821  | 0.071353 | 0.12362 | 0.044342 | 0.339    |
| 2.62E-09 | -0.23297 | 3.56E-07 | -0.09441 | 0.04141  | -0.11525 | 0.0127  | -0.14079 | 0.00229  |
| 0.58862  | 0.029146 | 0.52981  | -0.12213 | 0.00824  | 0.005499 | 0.90565 | -0.15    | 0.00115  |
| 1.22E-05 | 0.172862 | 0.00017  | -0.05574 | 0.22923  | -0.07558 | 0.10282 | 0.225674 | 8.33E-07 |
| 0.9247   | -0.04937 | 0.28699  | -0.01937 | 0.67636  | -0.0196  | 0.67271 | -0.02334 | 0.61493  |
| 0.29065  | -0.03842 | 0.40752  | 0.063526 | 0.17053  | 0.055158 | 0.23417 | -0.01905 | 0.68143  |
| 0.00178  | -0.15781 | 0.00062  | 0.037406 | 0.41997  | 0.020987 | 0.651   | -0.06953 | 0.13352  |
| 0.00571  | -0.06665 | 0.1504   | 0.054844 | 0.23685  | 0.0026   | 0.95531 | -0.0486  | 0.2946   |
| 0.72441  | -0.02452 | 0.59709  | 0.014559 | 0.75367  | -0.07781 | 0.09303 | 0.041382 | 0.37226  |
| 0.07479  | 0.253671 | 2.72E-08 | 0.19943  | 1.41E-05 | 0.165118 | 0.00034 | 0.105042 | 0.0232   |
| 0.08524  | -0.1342  | 0.00367  | -0.15075 | 0.00108  | -0.02835 | 0.54114 | -0.1707  | 0.00021  |
| 0.83243  | -0.01811 | 0.69625  | -0.00338 | 0.94189  | -0.04937 | 0.28704 | 0.084844 | 0.06697  |
| 0.47034  | 0.08852  | 0.05593  | 0.098814 | 0.03277  | 0.086886 | 0.06064 | 0.088222 | 0.05677  |
| 2.91E-05 | 0.287656 | 2.39E-10 | 0.032239 | 0.48705  | 0.154735 | 0.00079 | 0.149436 | 0.0012   |

|          |          |          |          |          |          |          |          |          |
|----------|----------|----------|----------|----------|----------|----------|----------|----------|
| 0.0029   | -0.08039 | 0.08265  | 0.047822 | 0.30241  | -0.04105 | 0.37615  | -0.1099  | 0.01752  |
| 0.02701  | 0.198922 | 1.49E-05 | 0.145732 | 0.00159  | 0.157753 | 0.00062  | -0.00254 | 0.95633  |
| 0.07978  | 0.093768 | 0.04283  | 0.140089 | 0.00241  | 0.032801 | 0.47949  | -0.01218 | 0.79295  |
| 6.97E-08 | 0.355954 | 2.14E-15 | -0.04151 | 0.37079  | -0.01871 | 0.68677  | -0.06398 | 0.16749  |
| 0.38346  | -0.0314  | 0.49842  | -0.06606 | 0.15406  | 0.071923 | 0.12064  | -0.05386 | 0.24541  |
| 2.44E-17 | 0.36444  | 4.09E-16 | 0.242525 | 1.12E-07 | 0.088106 | 0.05709  | 0.048113 | 0.29948  |
| 0.01635  | 0.147295 | 0.00141  | 0.196458 | 1.90E-05 | 0.001851 | 0.96817  | 0.080342 | 0.08285  |
| 0.13224  | 0.098794 | 0.0328   | -0.07146 | 0.12306  | -0.02778 | 0.54933  | -0.12999 | 0.0049   |
| 0.00908  | -0.10182 | 0.0278   | -0.06158 | 0.18406  | -0.08696 | 0.06043  | -0.16462 | 0.00035  |
| 0.59466  | 0.109862 | 0.01755  | -0.00036 | 0.99378  | 0.040619 | 0.38114  | 0.276149 | 1.28E-09 |
| 0.00098  | 0.241689 | 1.24E-07 | 0.039642 | 0.39271  | 0.095929 | 0.03824  | 0.128405 | 0.00545  |
| 1.30E-05 | 0.220188 | 1.55E-06 | 0.00444  | 0.92376  | 0.016102 | 0.72855  | 0.052689 | 0.2558   |
| 0.02683  | -0.01967 | 0.67164  | -0.11287 | 0.01467  | -0.03596 | 0.43817  | -0.00516 | 0.9114   |
| 0.0564   | 0.039309 | 0.39671  | -0.01732 | 0.70889  | 0.019663 | 0.67169  | -0.00407 | 0.93008  |
| 0.00015  | -0.25441 | 2.47E-08 | -0.0859  | 0.06363  | 0.009336 | 0.84054  | 0.045496 | 0.32657  |
| 0.00134  | 0.28438  | 3.88E-10 | 0.102482 | 0.02679  | 0.04237  | 0.36094  | 0.124875 | 0.00689  |
| 0.01113  | 0.121023 | 0.00885  | 0.16651  | 0.0003   | 0.017043 | 0.71337  | -0.10655 | 0.02128  |
| 0.32113  | 0.026911 | 0.56184  | 0.196366 | 1.92E-05 | -0.0265  | 0.56788  | -0.00975 | 0.8336   |
| 0.14885  | 0.16963  | 0.00023  | 0.118836 | 0.01016  | 0.342156 | 2.85E-14 | 0.031888 | 0.49182  |
| 0.33404  | 0.097934 | 0.03436  | 0.022614 | 0.62594  | 0.010033 | 0.8288   | 0.046022 | 0.321    |
| 0.61974  | 0.276203 | 1.27E-09 | 0.186962 | 4.80E-05 | 0.214761 | 2.82E-06 | -0.10655 | 0.02128  |
| 0.00336  | 0.256191 | 1.96E-08 | 0.087996 | 0.05741  | 0.240899 | 1.37E-07 | 0.032628 | 0.48182  |
| 0.00469  | 0.088412 | 0.05623  | -0.04054 | 0.38206  | 0.006802 | 0.88345  | 0.070296 | 0.12929  |
| 0.86841  | 0.0598   | 0.19706  | 0.135128 | 0.00344  | -0.01694 | 0.71505  | -0.0319  | 0.49169  |
| 0.38136  | -0.0447  | 0.33512  | 0.016974 | 0.71447  | 0.071147 | 0.1247   | -0.03113 | 0.50216  |
| 0.91605  | 0.093486 | 0.04346  | 0.031922 | 0.49135  | 0.016685 | 0.71913  | -0.08182 | 0.07733  |
| 0.99297  | 0.034565 | 0.45617  | 0.067811 | 0.14343  | 0.082076 | 0.07641  | 0.059462 | 0.19961  |
| 0.6644   | 0.216301 | 2.38E-06 | 0.071137 | 0.12476  | 0.06655  | 0.15103  | -0.05774 | 0.21297  |
| 0.07823  | 0.208274 | 5.66E-06 | 0.132243 | 0.0042   | 0.160837 | 0.00048  | 0.067553 | 0.14495  |
| 0.28821  | 0.223483 | 1.07E-06 | 0.066374 | 0.15212  | 0.076379 | 0.09924  | -0.09966 | 0.0313   |
| 0.08003  | 0.12196  | 0.00833  | 0.020887 | 0.65256  | 0.034496 | 0.45707  | 0.144721 | 0.00172  |
| 0.0098   | -0.06919 | 0.13541  | 0.165998 | 0.00031  | -0.02731 | 0.55606  | -0.05942 | 0.19993  |
| 0.22174  | 0.254068 | 2.59E-08 | 0.051274 | 0.26882  | 0.047693 | 0.30372  | -0.0742  | 0.10927  |
| 0.00347  | -0.08409 | 0.06943  | 0.116913 | 0.01146  | 0.019264 | 0.67798  | 0.107699 | 0.01992  |
| 0.56167  | -0.07545 | 0.10343  | 0.003893 | 0.93314  | -0.00405 | 0.9304   | 0.081719 | 0.0777   |
| 0.00932  | 0.24875  | 5.12E-08 | 0.054954 | 0.23591  | 0.019184 | 0.67925  | 0.186781 | 4.88E-05 |
| 0.0562   | -0.09505 | 0.04005  | 0.134585 | 0.00357  | 0.035658 | 0.44204  | 0.012226 | 0.79216  |
| 0.0195   | 0.149441 | 0.0012   | 0.060665 | 0.19065  | 0.039667 | 0.39241  | 0.098775 | 0.03284  |
| 0.09276  | 0.130168 | 0.00484  | 0.039442 | 0.39511  | 0.143488 | 0.00188  | 0.052577 | 0.25682  |
| 0.13635  | 0.209069 | 5.20E-06 | 0.111327 | 0.01609  | 0.171122 | 0.0002   | -0.01138 | 0.80619  |
| 0.34054  | 0.033514 | 0.46998  | -0.00041 | 0.99293  | 0.03454  | 0.45649  | -0.05597 | 0.22731  |
| 0.03723  | 0.013849 | 0.76532  | -0.19054 | 3.40E-05 | -0.1881  | 4.30E-05 | 0.071938 | 0.12056  |
| 0.65142  | 0.05792  | 0.21154  | 0.167789 | 0.00027  | 0.049556 | 0.28521  | 0.141106 | 0.00224  |
| 0.36875  | -0.00832 | 0.85771  | -0.04912 | 0.28952  | -0.07677 | 0.0975   | -0.07879 | 0.08899  |
| 0.64939  | 0.052007 | 0.26202  | 0.02897  | 0.5323   | -0.00024 | 0.99592  | -0.00877 | 0.85005  |

|          |          |          |          |          |          |          |          |          |
|----------|----------|----------|----------|----------|----------|----------|----------|----------|
| 0.18671  | 0.00519  | 0.91094  | 0.044345 | 0.33897  | 0.100982 | 0.02911  | -0.08561 | 0.06452  |
| 4.27E-05 | 0.152239 | 0.00097  | 0.087571 | 0.05863  | 0.065434 | 0.15802  | 0.166184 | 0.00031  |
| 7.69E-05 | 0.256043 | 2.00E-08 | 0.034045 | 0.46298  | -0.0054  | 0.90731  | 0.063146 | 0.1731   |
| 0.29105  | 0.088654 | 0.05556  | -0.01845 | 0.69079  | -0.08781 | 0.05794  | 0.024494 | 0.59752  |
| 0.00196  | -0.14449 | 0.00175  | 0.043755 | 0.34544  | 0.000216 | 0.99628  | -0.01974 | 0.67056  |
| 0.00429  | 0.273452 | 1.87E-09 | 0.046165 | 0.3195   | 0.026145 | 0.57303  | 0.034359 | 0.45885  |
| 0.11413  | 0.191946 | 2.97E-05 | 0.051114 | 0.27031  | 0.096461 | 0.03718  | -0.10012 | 0.03053  |
| 0.32895  | 0.016463 | 0.72271  | 0.017498 | 0.70606  | 0.074118 | 0.10968  | 0.088783 | 0.0552   |
| 2.78E-11 | -0.37132 | 1.03E-16 | 0.009712 | 0.8342   | -0.15863 | 0.00058  | -0.09088 | 0.04968  |
| 3.61E-05 | -0.18693 | 4.81E-05 | 0.038701 | 0.40405  | -0.13548 | 0.00335  | -0.15532 | 0.00076  |
| 0.45337  | 0.043237 | 0.35118  | 0.191556 | 3.08E-05 | 0.034862 | 0.4523   | 0.110496 | 0.01691  |
| 8.40E-11 | 0.371843 | 9.25E-17 | 0.107007 | 0.02073  | 0.037305 | 0.42123  | 0.197081 | 1.79E-05 |
| 0.22034  | 0.058881 | 0.20404  | 0.146499 | 0.0015   | 0.024937 | 0.5909   | -0.20103 | 1.20E-05 |
| 0.00293  | 0.312533 | 4.86E-12 | 0.160004 | 0.00052  | 0.043897 | 0.34388  | 0.04536  | 0.32802  |
| 0.06723  | 0.10109  | 0.02894  | 0.044322 | 0.33922  | -0.04951 | 0.28563  | -0.14903 | 0.00124  |
| 0.06632  | 0.198294 | 1.58E-05 | 0.307808 | 1.05E-11 | 0.053007 | 0.25294  | -0.00014 | 0.99759  |
| 0.11     | 0.084303 | 0.06873  | 0.077263 | 0.09538  | 0.06287  | 0.175    | 0.068494 | 0.13943  |
| 2.24E-05 | 0.223749 | 1.04E-06 | 0.135172 | 0.00343  | 0.071817 | 0.12118  | 0.178418 | 0.00011  |
| 0.06623  | 0.083873 | 0.07017  | -0.00768 | 0.86858  | -0.02848 | 0.53923  | 0.135779 | 0.00328  |
| 0.80066  | -0.09121 | 0.04886  | -0.16595 | 0.00032  | -0.16587 | 0.00032  | -0.21427 | 2.98E-06 |
| 0.00241  | -0.18138 | 8.09E-05 | -0.05736 | 0.21602  | -0.08569 | 0.06428  | 0.065074 | 0.16032  |
| 0.58896  | -0.04606 | 0.32056  | -0.08533 | 0.06543  | -0.06387 | 0.16825  | -0.10824 | 0.0193   |
| 0.12164  | 0.172023 | 0.00019  | 0.124533 | 0.00705  | 0.19597  | 2.00E-05 | 0.045855 | 0.32276  |
| 0.65146  | 0.196078 | 1.98E-05 | -0.06862 | 0.13869  | 0.114224 | 0.01352  | -0.17155 | 0.0002   |
| 2.59E-05 | 0.188034 | 4.33E-05 | 0.014952 | 0.74725  | 0.01906  | 0.68121  | -0.17414 | 0.00016  |
| 0.13094  | -0.02641 | 0.56911  | -0.02153 | 0.64258  | -0.11848 | 0.01039  | 0.057135 | 0.2178   |
| 0.05754  | -0.0377  | 0.41628  | 0.033692 | 0.46762  | 0.090111 | 0.05165  | 0.107551 | 0.02009  |
| 0.00161  | -0.05003 | 0.28062  | 0.056337 | 0.22431  | 0.052111 | 0.26106  | -0.09713 | 0.03588  |
| 0.00126  | -0.04579 | 0.32345  | 0.026199 | 0.57225  | -0.00733 | 0.87445  | -0.19076 | 3.33E-05 |
| 0.7623   | 0.071886 | 0.12083  | 0.140715 | 0.0023   | 0.119307 | 0.00986  | 0.105151 | 0.02305  |
| 0.4641   | 0.035185 | 0.44812  | 0.010733 | 0.81705  | 0.002344 | 0.95972  | -0.02169 | 0.6402   |
| 0.29201  | 0.282441 | 5.16E-10 | 0.084707 | 0.06741  | 0.058183 | 0.20946  | 0.014758 | 0.75041  |
| 3.13E-06 | 0.220032 | 1.58E-06 | -0.00978 | 0.83299  | 0.04214  | 0.36355  | 0.119972 | 0.00946  |
| 1.97E-17 | 0.218956 | 1.78E-06 | 0.06862  | 0.1387   | 0.028782 | 0.53496  | 0.108048 | 0.01952  |
| 0.10465  | 0.043291 | 0.35058  | -0.03658 | 0.43031  | -0.08533 | 0.06541  | -0.09574 | 0.03863  |
| 0.20429  | 0.045816 | 0.32317  | -0.07993 | 0.08444  | -0.10615 | 0.02177  | 0.042211 | 0.36274  |
| 0.00036  | -0.19181 | 3.01E-05 | -0.01619 | 0.72713  | 0.028194 | 0.54334  | -0.0461  | 0.32019  |
| 2.45E-06 | -0.35772 | 1.52E-15 | -0.01193 | 0.79702  | -0.11664 | 0.01165  | -0.05717 | 0.2175   |
| 0.43362  | 0.055298 | 0.23298  | 0.009344 | 0.84039  | 0.046385 | 0.3172   | -0.04981 | 0.2827   |
| 0.00151  | 0.208241 | 5.68E-06 | 0.159639 | 0.00053  | 0.191145 | 3.21E-05 | -0.01834 | 0.6926   |
| 0.00089  | 0.348533 | 8.75E-15 | 0.050164 | 0.27933  | 0.115018 | 0.01288  | 0.044299 | 0.33947  |
| 2.96E-08 | 0.220199 | 1.55E-06 | 0.028696 | 0.53618  | 0.10932  | 0.01812  | 0.055917 | 0.22779  |
| 1.04E-07 | -0.22405 | 1.00E-06 | -0.0988  | 0.0328   | -0.12234 | 0.00813  | -0.01227 | 0.79141  |
| 0.87099  | 0.006734 | 0.88461  | -0.00358 | 0.93846  | -0.07937 | 0.08665  | -0.14198 | 0.0021   |
| 0.38101  | 0.064767 | 0.16231  | 0.135073 | 0.00345  | 0.164836 | 0.00035  | 0.04566  | 0.32482  |



|          |          |          |          |          |          |          |          |          |
|----------|----------|----------|----------|----------|----------|----------|----------|----------|
| 0.00144  | 0.343595 | 2.19E-14 | 0.12006  | 0.0094   | 0.187331 | 4.63E-05 | 0.005007 | 0.91406  |
| 5.94E-08 | 0.374052 | 5.89E-17 | 0.260591 | 1.09E-08 | 0.115761 | 0.0123   | 0.075542 | 0.10301  |
| 0.04001  | 0.280007 | 7.35E-10 | 0.008452 | 0.85545  | 0.148835 | 0.00126  | -0.10432 | 0.02417  |
| 0.00932  | -0.04291 | 0.35482  | 0.088969 | 0.05469  | 0.104982 | 0.02328  | 0.064048 | 0.16703  |
| 0.68767  | -0.00632 | 0.89165  | -0.00552 | 0.90523  | -0.03022 | 0.51472  | -0.0203  | 0.66169  |
| 0.31621  | -0.03621 | 0.43495  | 0.017661 | 0.70346  | -0.00242 | 0.95835  | -0.03423 | 0.46053  |
| 0.74107  | -0.01637 | 0.72424  | -0.00429 | 0.9264   | -0.01928 | 0.67767  | -0.01061 | 0.81916  |
| 0.67582  | -0.0183  | 0.69333  | 0.088992 | 0.05463  | 0.015042 | 0.74578  | -0.0167  | 0.71895  |
| 0.22982  | 0.168544 | 0.00025  | 0.127346 | 0.00585  | 0.24083  | 1.38E-07 | 0.093907 | 0.04252  |
| 0.03089  | 0.090209 | 0.05139  | 0.411405 | 1.68E-20 | 0.042659 | 0.35767  | 0.009419 | 0.83914  |
| 0.02802  | -0.2396  | 1.60E-07 | -0.01577 | 0.7339   | -0.0629  | 0.17478  | -0.03294 | 0.47763  |
| 0.11486  | -0.13955 | 0.00251  | -0.0639  | 0.16801  | -0.03893 | 0.40122  | 0.011104 | 0.81086  |
| 0.04466  | -0.08079 | 0.08115  | -0.00884 | 0.8489   | -0.04965 | 0.28431  | -0.10872 | 0.01877  |
| 0.36176  | 0.072816 | 0.11608  | -0.04545 | 0.32706  | -0.05158 | 0.26598  | -0.11746 | 0.01107  |
| 0.91709  | 0.04655  | 0.31548  | 0.084838 | 0.06699  | 0.032185 | 0.48779  | 0.114056 | 0.01365  |
| 0.81578  | 0.143633 | 0.00186  | 0.098455 | 0.03341  | 0.23481  | 2.86E-07 | -0.01384 | 0.76553  |
| 0.86185  | 0.101857 | 0.02774  | -0.03287 | 0.47862  | 0.034617 | 0.45548  | -0.18442 | 6.10E-05 |
| 0.02584  | -0.16891 | 0.00025  | 0.138458 | 0.00271  | -0.12335 | 0.00762  | -0.01701 | 0.7139   |
| 0.59651  | 0.015592 | 0.73683  | 0.035796 | 0.44027  | 0.014413 | 0.75606  | -0.10465 | 0.02372  |
| 0.38695  | 0.074079 | 0.10987  | -0.03226 | 0.4868   | 0.032824 | 0.47918  | -0.08091 | 0.08071  |
| 0.0051   | 0.234452 | 2.98E-07 | 0.028125 | 0.54433  | 0.017657 | 0.70351  | 0.020784 | 0.65416  |
| 4.69E-06 | -0.21166 | 3.95E-06 | -0.00969 | 0.8346   | 0.037713 | 0.41617  | 0.067765 | 0.14369  |
| 2.70E-12 | -0.31234 | 5.01E-12 | -0.08851 | 0.05596  | -0.08836 | 0.05638  | -0.11345 | 0.01417  |
| 0.03429  | -0.22028 | 1.53E-06 | -0.01371 | 0.76756  | -0.03858 | 0.40557  | 0.01338  | 0.77306  |
| 0.00849  | 0.225178 | 8.82E-07 | 0.045938 | 0.32189  | 0.157907 | 0.00062  | -0.00465 | 0.9201   |
| 0.0207   | 0.188435 | 4.17E-05 | -0.01088 | 0.81453  | -0.0205  | 0.65862  | 0.070122 | 0.13024  |
| 0.01302  | -0.01276 | 0.78326  | 0.081501 | 0.0785   | 0.056984 | 0.21902  | 0.012974 | 0.77975  |
| 0.48013  | 0.070822 | 0.12644  | 0.21295  | 3.44E-06 | 0.061484 | 0.18471  | 0.092247 | 0.04633  |
| 0.47831  | 0.118086 | 0.01065  | 0.081461 | 0.07865  | 0.044067 | 0.34201  | 0.001636 | 0.97188  |
| 0.00597  | -0.0996  | 0.03139  | 0.159668 | 0.00053  | -0.02928 | 0.52797  | -0.10381 | 0.02487  |
| 0.06559  | -0.09124 | 0.04878  | -0.08184 | 0.07728  | -0.11926 | 0.00989  | -0.0167  | 0.71892  |
| 0.0257   | -0.24994 | 4.40E-08 | -0.02172 | 0.63962  | -0.04729 | 0.30785  | -0.03059 | 0.50966  |
| 0.64133  | 0.03544  | 0.44483  | -0.00177 | 0.96951  | -0.05906 | 0.20268  | 0.052187 | 0.26037  |
| 0.00203  | -0.21747 | 2.10E-06 | 0.001566 | 0.97308  | -0.02995 | 0.51847  | -0.04703 | 0.31048  |
| 0.27835  | -0.05635 | 0.22423  | 0.09028  | 0.05121  | 0.105989 | 0.02198  | 0.112253 | 0.01522  |
| 0.0328   | -0.11462 | 0.01319  | 0.019672 | 0.67155  | -0.00536 | 0.90806  | -0.05238 | 0.2586   |
| 0.10232  | -0.03986 | 0.39015  | 0.035325 | 0.44632  | 0.0275   | 0.55332  | -0.00554 | 0.90503  |
| 0.48389  | 0.23061  | 4.70E-07 | 0.03887  | 0.402    | 0.039224 | 0.39773  | 0.053341 | 0.24996  |
| 0.86192  | 0.117777 | 0.01086  | 0.092265 | 0.04629  | 0.007827 | 0.86604  | 0.00607  | 0.89592  |
| 0.10071  | 0.228957 | 5.70E-07 | 0.029335 | 0.52714  | -0.00383 | 0.93419  | 0.002299 | 0.96048  |
| 0.16242  | 0.179792 | 9.35E-05 | 0.027964 | 0.54664  | -0.00032 | 0.9945   | 0.013071 | 0.77815  |
| 0.29086  | -0.02821 | 0.54306  | 0.055011 | 0.23542  | 0.055549 | 0.23087  | -0.00073 | 0.98752  |
| 1.42E-06 | -0.2337  | 3.26E-07 | 0.009796 | 0.83278  | -0.03672 | 0.42858  | -0.05165 | 0.26533  |
| 0.0657   | 0.20686  | 6.57E-06 | 0.032428 | 0.4845   | 0.015073 | 0.74527  | 0.028886 | 0.53349  |
| 0.40968  | -0.05485 | 0.23679  | -0.01429 | 0.75811  | -0.0428  | 0.35607  | 0.099703 | 0.03123  |

|          |          |          |          |          |          |         |          |          |
|----------|----------|----------|----------|----------|----------|---------|----------|----------|
| 0.00523  | 0.188676 | 4.07E-05 | 0.14362  | 0.00186  | 0.054914 | 0.23625 | -0.14147 | 0.00218  |
| 0.66114  | 0.059079 | 0.20252  | 0.166406 | 0.0003   | 0.109098 | 0.01836 | 0.066033 | 0.15424  |
| 0.71852  | -0.00203 | 0.96502  | 0.024531 | 0.59695  | 0.000233 | 0.996   | -0.08332 | 0.07203  |
| 0.67164  | 0.050258 | 0.27843  | 0.00554  | 0.90496  | -0.01955 | 0.67346 | 0.003733 | 0.93588  |
| 0.2114   | 0.068965 | 0.13672  | 0.087523 | 0.05876  | 0.142281 | 0.00205 | 0.040714 | 0.38003  |
| 0.49842  | -0.15498 | 0.00078  | -0.11783 | 0.01082  | -0.11731 | 0.01118 | 0.065835 | 0.15548  |
| 0.38588  | -0.06968 | 0.1327   | -0.03621 | 0.43504  | -0.04479 | 0.33409 | -0.04687 | 0.31219  |
| 0.36794  | 0.0557   | 0.22959  | 0.027599 | 0.55189  | 0.014213 | 0.75934 | 0.013188 | 0.77623  |
| 0.90929  | 0.040917 | 0.37766  | 0.080931 | 0.08062  | 0.049274 | 0.28795 | 0.078668 | 0.08949  |
| 0.37681  | 0.048716 | 0.29346  | 0.032321 | 0.48595  | 0.024657 | 0.59508 | 0.036946 | 0.42571  |
| 0.12397  | -0.07091 | 0.12598  | 0.220728 | 1.46E-06 | 0.014691 | 0.75152 | 0.117553 | 0.01101  |
| 0.8067   | 0.002619 | 0.95499  | 0.399062 | 2.80E-19 | 0.014474 | 0.75507 | -0.0185  | 0.69013  |
| 0.39023  | 0.042349 | 0.36118  | 0.344988 | 1.69E-14 | 0.018396 | 0.69172 | -0.0049  | 0.9159   |
| 0.41064  | -0.00289 | 0.95037  | 0.008466 | 0.85522  | 0.033957 | 0.46413 | -0.05282 | 0.25459  |
| 0.15174  | 0.064114 | 0.1666   | 0.050293 | 0.27809  | 0.030183 | 0.51527 | 0.071896 | 0.12078  |
| 0.44807  | -0.06929 | 0.13489  | 0.013717 | 0.7675   | 0.002612 | 0.9551  | 0.048067 | 0.29994  |
| 0.01342  | -0.07773 | 0.0934   | 0.308816 | 8.91E-12 | -0.03967 | 0.3924  | -0.01609 | 0.72877  |
| 0.02968  | -0.11605 | 0.01208  | 0.333535 | 1.35E-13 | -0.04156 | 0.37023 | -0.01695 | 0.7149   |
| 0.03633  | -0.05789 | 0.21176  | 0.090227 | 0.05135  | 0.146728 | 0.00148 | 0.036579 | 0.43033  |
| 0.12117  | 0.197793 | 1.67E-05 | -0.00531 | 0.90888  | 0.07976  | 0.08512 | 0.089462 | 0.05336  |
| 0.25681  | 0.023562 | 0.61154  | -0.0121  | 0.79428  | -0.01937 | 0.67635 | 0.065165 | 0.15974  |
| 0.23965  | -0.02379 | 0.60807  | 0.050456 | 0.27653  | 0.07102  | 0.12538 | 0.043596 | 0.3472   |
| 0.08877  | 0.103171 | 0.02578  | 0.063265 | 0.17229  | 0.055641 | 0.23009 | 0.071522 | 0.12272  |
| 0.84025  | 0.042693 | 0.35728  | 0.028996 | 0.53193  | 0.050665 | 0.27455 | 0.086181 | 0.06276  |
| 0.00225  | -0.14064 | 0.00232  | -0.01429 | 0.75808  | 0.034185 | 0.46113 | 0.084263 | 0.06887  |
| 4.88E-05 | -0.1676  | 0.00027  | 0.043368 | 0.34972  | 0.044356 | 0.33884 | 0.032286 | 0.48641  |
| 0.0941   | 0.035791 | 0.44033  | 0.059339 | 0.20054  | 0.020094 | 0.66493 | -0.00836 | 0.85706  |
| 0.00426  | -0.1033  | 0.02559  | -0.00712 | 0.87798  | 0.044223 | 0.3403  | 0.025104 | 0.58841  |
| 5.14E-06 | -0.12779 | 0.00568  | 0.060606 | 0.19107  | 0.047196 | 0.30879 | 0.037117 | 0.42358  |
| 7.11E-05 | 0.292024 | 1.24E-10 | 0.328087 | 3.51E-13 | 0.117847 | 0.01081 | 0.186905 | 4.82E-05 |
| 0.05625  | 0.051954 | 0.26251  | 0.084898 | 0.0668   | 0.099367 | 0.0318  | 0.026097 | 0.57375  |
| 0.03194  | 0.12496  | 0.00686  | 0.188374 | 4.19E-05 | 0.010486 | 0.8212  | -0.07709 | 0.09612  |
| 0.00045  | -0.2229  | 1.14E-06 | -0.10102 | 0.02905  | -0.06495 | 0.1611  | -0.10264 | 0.02656  |
| 0.27662  | 0.030652 | 0.50875  | 0.007479 | 0.87194  | -0.02721 | 0.55748 | -0.13503 | 0.00346  |
| 0.00036  | 0.212373 | 3.66E-06 | -0.06255 | 0.17721  | 0.125562 | 0.00659 | 0.225741 | 8.27E-07 |
| 0.5659   | 0.064571 | 0.16359  | -0.06324 | 0.17246  | 0.010964 | 0.81319 | 0.050648 | 0.27471  |
| 0.9184   | 0.20086  | 1.22E-05 | -0.09758 | 0.03503  | 0.026975 | 0.56092 | 0.044317 | 0.33927  |
| 0.0002   | -0.08361 | 0.07106  | -0.14705 | 0.00144  | 0.0376   | 0.41757 | -0.1792  | 9.87E-05 |
| 0.01423  | -0.02985 | 0.51993  | 0.012727 | 0.78385  | -0.01767 | 0.70325 | 0.040427 | 0.3834   |
| 0.05441  | 0.015023 | 0.74609  | -0.11985 | 0.00953  | -0.12716 | 0.00593 | -0.07653 | 0.09859  |
| 1.55E-10 | 0.31675  | 2.42E-12 | 0.152336 | 0.00096  | -0.00081 | 0.98608 | 0.059173 | 0.2018   |
| 0.56247  | 0.061726 | 0.18299  | -0.06918 | 0.1355   | -0.03424 | 0.46045 | -0.20715 | 6.38E-06 |
| 0.18431  | -0.04257 | 0.35868  | -0.01415 | 0.76038  | -0.02652 | 0.56748 | 0.126836 | 0.00606  |
| 0.16976  | 0.02592  | 0.57634  | 0.003583 | 0.93844  | 0.028242 | 0.54266 | 0.036339 | 0.43337  |
| 0.02321  | -0.12824 | 0.00551  | -0.00625 | 0.89279  | -0.03708 | 0.42406 | 0.053449 | 0.249    |

|          |          |          |          |          |          |          |          |          |
|----------|----------|----------|----------|----------|----------|----------|----------|----------|
| 0.65441  | 0.063852 | 0.16834  | 0.050847 | 0.27282  | 0.086993 | 0.06032  | 0.098283 | 0.03372  |
| 0.44137  | -0.03151 | 0.49692  | 0.007686 | 0.86843  | -0.00054 | 0.99071  | 0.071462 | 0.12304  |
| 0.91311  | 0.017172 | 0.71129  | 0.030155 | 0.51565  | 0.021247 | 0.64698  | 0.096158 | 0.03778  |
| 0.60334  | 0.013998 | 0.76287  | 0.011718 | 0.80061  | 0.030173 | 0.51541  | 0.041984 | 0.36533  |
| 0.73654  | 0.075292 | 0.10416  | 0.053721 | 0.2466   | 0.102295 | 0.02707  | 0.101811 | 0.02781  |
| 0.71426  | 0.05287  | 0.25418  | 0.041749 | 0.36803  | 0.042186 | 0.36303  | 0.048903 | 0.2916   |
| 0.40786  | -0.01106 | 0.81157  | 0.018197 | 0.69489  | 0.040694 | 0.38026  | 0.026493 | 0.56794  |
| 0.00185  | 0.249252 | 4.81E-08 | 0.095202 | 0.03974  | 0.074919 | 0.10589  | 0.062214 | 0.17955  |
| 2.92E-06 | 0.22965  | 5.26E-07 | -0.06873 | 0.13806  | -0.01335 | 0.77349  | 0.049937 | 0.28151  |
| 0.47832  | 2.84E-05 | 0.99951  | 0.060077 | 0.19499  | 0.086053 | 0.06316  | -0.04053 | 0.38216  |
| 4.42E-08 | -0.14746 | 0.0014   | -0.03719 | 0.42264  | -0.04742 | 0.30655  | 0.009191 | 0.84298  |
| 0.10252  | -0.13565 | 0.00331  | -0.01659 | 0.72062  | -0.02205 | 0.63451  | -0.00799 | 0.86334  |
| 0.08678  | -0.09885 | 0.0327   | 0.000851 | 0.98537  | 0.03222  | 0.48731  | -0.01764 | 0.70383  |
| 0.72205  | -0.00088 | 0.98484  | 0.056468 | 0.22323  | 0.043275 | 0.35076  | 0.081874 | 0.07714  |
| 0.79445  | 0.090053 | 0.0518   | 0.033764 | 0.46667  | 0.203946 | 8.90E-06 | 0.058026 | 0.2107   |
| 0.00414  | 0.17065  | 0.00021  | 0.037091 | 0.4239   | 0.102787 | 0.02634  | 0.070108 | 0.13032  |
| 2.06E-05 | -0.36351 | 4.91E-16 | -0.10082 | 0.02937  | -0.11123 | 0.01618  | -0.08721 | 0.05969  |
| 0.01267  | -0.12159 | 0.00853  | 0.155261 | 0.00076  | -0.1109  | 0.01651  | -0.11815 | 0.01061  |
| 0.88034  | 0.091343 | 0.04852  | 0.085099 | 0.06615  | 0.069727 | 0.13243  | -0.14739 | 0.0014   |
| 0.30716  | 0.01359  | 0.76959  | 0.073291 | 0.11371  | 0.019773 | 0.66997  | 0.093236 | 0.04403  |
| 0.2297   | 0.176752 | 0.00012  | 0.077213 | 0.09559  | 0.097385 | 0.03539  | 0.036195 | 0.4352   |
| 0.08695  | -0.12437 | 0.00712  | -0.09349 | 0.04346  | -0.02991 | 0.51904  | 0.136812 | 0.00305  |
| 0.05961  | 0.151385 | 0.00103  | 0.006342 | 0.89128  | -0.01061 | 0.81904  | 0.007025 | 0.87965  |
| 0.0001   | 0.056591 | 0.22222  | -0.00824 | 0.85899  | 0.008971 | 0.84669  | 0.231996 | 3.99E-07 |
| 0.04367  | 0.101163 | 0.02882  | -0.00497 | 0.91469  | 0.002677 | 0.954    | -0.12896 | 0.00525  |
| 0.00011  | -0.26295 | 7.97E-09 | -0.06    | 0.19555  | -0.1018  | 0.02782  | -0.07847 | 0.09028  |
| 0.03953  | -0.06743 | 0.14567  | -0.00697 | 0.8806   | -0.01419 | 0.75967  | -0.00373 | 0.936    |
| 0.65942  | 0.016325 | 0.72494  | 0.055869 | 0.22819  | 0.051538 | 0.26636  | 0.091477 | 0.04819  |
| 0.24895  | -0.15304 | 0.00091  | -0.07733 | 0.09511  | -0.13951 | 0.00251  | -0.07914 | 0.08757  |
| 0.38578  | 0.010334 | 0.82374  | 0.044492 | 0.33736  | 0.028596 | 0.53761  | 0.007625 | 0.86946  |
| 0.98801  | 0.055472 | 0.23151  | -0.01235 | 0.79002  | -0.00755 | 0.87078  | -0.02246 | 0.62822  |
| 0.69828  | 0.059546 | 0.19897  | -0.05282 | 0.25459  | -0.01104 | 0.81196  | 0.098512 | 0.03331  |
| 0.00199  | -0.10039 | 0.03008  | 0.006542 | 0.88787  | -0.04309 | 0.3528   | -0.0507  | 0.27421  |
| 0.00402  | -0.11461 | 0.0132   | 0.009065 | 0.8451   | -0.03313 | 0.47504  | 0.001075 | 0.98151  |
| 0.32929  | 0.08252  | 0.07483  | 0.066502 | 0.15133  | 0.067514 | 0.14519  | 0.0256   | 0.58106  |
| 0.00011  | 0.284236 | 3.96E-10 | -0.07825 | 0.09119  | 0.13283  | 0.00403  | 0.100631 | 0.02968  |
| 0.88275  | 0.139377 | 0.00254  | 0.073379 | 0.11328  | 0.027039 | 0.55998  | -0.09657 | 0.03697  |
| 0.03629  | -0.00422 | 0.92746  | 0.087326 | 0.05934  | 0.05276  | 0.25517  | -0.05872 | 0.20525  |
| 0.00329  | 0.216622 | 2.30E-06 | 0.023302 | 0.61548  | 0.018206 | 0.69475  | 0.086665 | 0.0613   |
| 0.02968  | 0.068142 | 0.14147  | 0.070262 | 0.12948  | 0.108165 | 0.01938  | 0.064156 | 0.16632  |
| 0.41259  | 0.213804 | 3.13E-06 | 0.085854 | 0.06377  | 0.063743 | 0.16907  | 0.158004 | 0.00061  |
| 0.03604  | 0.075804 | 0.10182  | 0.130633 | 0.00469  | 0.117898 | 0.01078  | 0.016516 | 0.72185  |
| 0.13609  | 0.119149 | 0.00996  | 0.036324 | 0.43356  | 0.00503  | 0.91367  | -0.00077 | 0.98682  |
| 0.78561  | -0.04741 | 0.30656  | 0.336773 | 7.56E-14 | 0.025768 | 0.57859  | -0.01042 | 0.82233  |
| 0.00229  | 0.123808 | 0.00739  | 0.113179 | 0.0144   | 0.084202 | 0.06907  | 0.019825 | 0.66915  |

|          |          |          |          |          |          |          |          |          |
|----------|----------|----------|----------|----------|----------|----------|----------|----------|
| 0.13607  | 0.082298 | 0.07561  | 0.272113 | 2.26E-09 | 0.053968 | 0.24443  | 0.048009 | 0.30053  |
| 0.36934  | 0.047756 | 0.30308  | -0.0763  | 0.09961  | -0.06824 | 0.14088  | 0.100427 | 0.03001  |
| 0.41161  | 0.098856 | 0.0327   | 0.102703 | 0.02646  | 0.100084 | 0.03058  | 0.039599 | 0.39322  |
| 0.47301  | 0.010825 | 0.81552  | 0.05915  | 0.20198  | 0.100535 | 0.02984  | 0.032055 | 0.48954  |
| 0.00542  | 0.158282 | 0.0006   | -0.05302 | 0.25286  | -0.08119 | 0.07967  | 0.086821 | 0.06083  |
| 0.12027  | -0.0739  | 0.11075  | -0.03279 | 0.47966  | -0.04729 | 0.30781  | -0.04207 | 0.36435  |
| 0.0283   | -0.12519 | 0.00675  | -0.04537 | 0.32786  | -0.05634 | 0.22427  | -0.01143 | 0.80542  |
| 0.41984  | 0.110187 | 0.01722  | 0.08128  | 0.07932  | 0.311542 | 5.72E-12 | 0.157144 | 0.00065  |
| 0.06935  | 0.157499 | 0.00064  | 0.101193 | 0.02878  | 0.063755 | 0.16899  | 0.013932 | 0.76397  |
| 2.04E-06 | -0.24586 | 7.38E-08 | -0.03751 | 0.41874  | -0.10731 | 0.02037  | -0.01632 | 0.72502  |
| 0.11078  | 0.034392 | 0.45843  | 0.071387 | 0.12343  | 0.119064 | 0.01002  | -0.11071 | 0.01669  |
| 0.38457  | -0.13445 | 0.0036   | 0.02455  | 0.59667  | -0.03724 | 0.42201  | 0.03987  | 0.39     |
| 0.00076  | -0.16136 | 0.00046  | -0.0015  | 0.97424  | -0.02209 | 0.63399  | -0.03621 | 0.43505  |
| 0.54547  | 0.062763 | 0.17573  | 0.072485 | 0.11775  | 0.063874 | 0.16819  | 0.022956 | 0.62073  |
| 0.23807  | -0.01116 | 0.80998  | 0.177057 | 0.00012  | -0.02001 | 0.66625  | -0.11205 | 0.01541  |
| 0.00846  | 0.122122 | 0.00824  | 0.339808 | 4.37E-14 | 0.078738 | 0.0892   | 0.112606 | 0.01491  |
| 0.15472  | 0.092337 | 0.04611  | 0.100932 | 0.02919  | -0.04889 | 0.29177  | 0.078001 | 0.09225  |
| 0.01365  | -0.19598 | 2.00E-05 | -0.07398 | 0.11037  | -0.1049  | 0.02338  | 0.029344 | 0.52701  |
| 0.09395  | 0.285068 | 3.51E-10 | 0.059226 | 0.2014   | 0.071283 | 0.12398  | 0.003458 | 0.94059  |
| 0.71146  | -0.01547 | 0.73878  | -0.00655 | 0.88767  | -0.02556 | 0.58163  | -0.03815 | 0.41076  |
| 0.50304  | -0.03532 | 0.4464   | 0.058899 | 0.2039   | 0.020846 | 0.6532   | 0.027861 | 0.54812  |
| 1.56E-08 | 0.391249 | 1.56E-18 | -0.01621 | 0.72679  | 0.078305 | 0.09098  | -0.03203 | 0.48995  |
| 2.81E-07 | -0.1437  | 0.00185  | -0.01215 | 0.79349  | 0.100393 | 0.03007  | -0.0935  | 0.04343  |
| 6.77E-11 | -0.28702 | 2.63E-10 | -0.06176 | 0.18272  | -0.01245 | 0.78846  | -0.19246 | 2.82E-05 |
| 0.01023  | -0.20477 | 8.18E-06 | -0.07341 | 0.11314  | -0.10356 | 0.02522  | -0.04833 | 0.29735  |
| 0.03176  | 0.230678 | 4.66E-07 | 0.046538 | 0.3156   | -0.01064 | 0.81862  | 0.007162 | 0.87733  |
| 0.48556  | -0.04944 | 0.28632  | -0.09823 | 0.03382  | -0.09682 | 0.03647  | -0.15128 | 0.00104  |
| 4.34E-06 | 0.280553 | 6.79E-10 | 0.047483 | 0.30586  | 0.026433 | 0.56882  | 0.094814 | 0.04055  |
| 0.00138  | 0.161614 | 0.00045  | -0.07312 | 0.11455  | 0.029797 | 0.52066  | 0.028588 | 0.53772  |
| 0.66435  | 0.145913 | 0.00157  | 0.114931 | 0.01295  | 0.119812 | 0.00955  | 0.039505 | 0.39435  |
| 0.40724  | -0.21266 | 3.54E-06 | -0.03514 | 0.44868  | -0.137   | 0.00301  | 0.10855  | 0.01895  |
| 0.74396  | 0.055645 | 0.23006  | 0.09441  | 0.04142  | 0.012745 | 0.78355  | -0.01984 | 0.66891  |
| 3.90E-07 | 0.250707 | 3.99E-08 | 0.071207 | 0.12439  | 0.056915 | 0.21958  | 0.150481 | 0.00111  |
| 0.00176  | 0.20691  | 6.54E-06 | -0.0394  | 0.3956   | 0.12686  | 0.00605  | 0.071625 | 0.12219  |
| 0.00072  | -0.03859 | 0.40535  | -0.01421 | 0.75937  | 0.067887 | 0.14297  | -0.05447 | 0.24008  |
| 3.23E-05 | 0.33428  | 1.18E-13 | 0.099007 | 0.03243  | 0.046049 | 0.32072  | -0.02989 | 0.51934  |
| 0.0047   | -0.05046 | 0.27649  | -0.04914 | 0.28925  | -0.06852 | 0.13926  | -0.20236 | 1.05E-05 |
| 0.31565  | 0.08498  | 0.06653  | 0.128555 | 0.0054   | 0.128133 | 0.00555  | -0.03534 | 0.44609  |
| 9.26E-07 | 0.261958 | 9.11E-09 | 0.098982 | 0.03247  | 0.087892 | 0.0577   | 0.038376 | 0.40802  |
| 0.0001   | 0.259067 | 1.34E-08 | 0.025407 | 0.58392  | 0.006986 | 0.88033  | -0.06813 | 0.14155  |
| 0.34256  | 0.061944 | 0.18145  | 0.063293 | 0.1721   | -0.03836 | 0.40826  | -0.03774 | 0.41583  |
| 0.97271  | 0.064629 | 0.16321  | 0.043956 | 0.34322  | 0.017256 | 0.70994  | -0.00732 | 0.87458  |
| 4.23E-06 | -0.28216 | 5.37E-10 | 0.032641 | 0.48163  | -0.01855 | 0.68928  | -0.16878 | 0.00025  |
| 0.01551  | 0.143288 | 0.00191  | -0.02545 | 0.58328  | 0.016997 | 0.7141   | 0.091943 | 0.04706  |
| 0.88149  | 0.061407 | 0.18526  | 0.06534  | 0.15862  | 0.187189 | 4.69E-05 | -0.01533 | 0.74103  |

|          |          |          |          |          |          |         |          |          |
|----------|----------|----------|----------|----------|----------|---------|----------|----------|
| 0.00065  | 0.152431 | 0.00095  | 0.155612 | 0.00074  | 0.052544 | 0.25712 | 0.045235 | 0.32936  |
| 6.90E-06 | -0.18752 | 4.55E-05 | 0.01196  | 0.79659  | -0.03081 | 0.50659 | -0.08123 | 0.07948  |
| 0.00593  | 0.236468 | 2.34E-07 | 0.15449  | 0.00081  | 0.157746 | 0.00062 | -0.01632 | 0.72494  |
| 0.26249  | -0.05085 | 0.27279  | 0.21994  | 1.59E-06 | 0.130512 | 0.00473 | -0.0497  | 0.28382  |
| 0.66286  | -0.07605 | 0.1007   | -0.00625 | 0.89283  | -0.01722 | 0.71047 | -0.02836 | 0.54098  |
| 0.00201  | 0.209826 | 4.80E-06 | 0.042712 | 0.35708  | 0.0321   | 0.48893 | 0.162501 | 0.00042  |
| 0.36286  | -0.07658 | 0.09837  | -0.16423 | 0.00037  | -0.06423 | 0.1658  | -0.14253 | 0.00202  |
| 0.08728  | 0.205461 | 7.61E-06 | 0.388861 | 2.62E-18 | 0.121004 | 0.00886 | 0.058222 | 0.20916  |
| 0.09525  | 0.038154 | 0.41074  | 0.0169   | 0.71567  | 0.000821 | 0.98588 | -0.09137 | 0.04845  |
| 0.22549  | 0.116819 | 0.01152  | 0.016539 | 0.72149  | 0.019424 | 0.67546 | 0.046927 | 0.31157  |
| 0.15903  | 0.056372 | 0.22402  | -0.04127 | 0.3736   | -0.05608 | 0.22645 | 0.106071 | 0.02187  |
| 0.00139  | 0.231647 | 4.16E-07 | 0.023578 | 0.61129  | 0.059215 | 0.20148 | 0.047181 | 0.30895  |
| 0.1401   | 0.075457 | 0.1034   | 0.141773 | 0.00213  | 0.094188 | 0.0419  | -0.03784 | 0.41465  |
| 0.83142  | -0.02759 | 0.55206  | -0.06149 | 0.18468  | -0.06047 | 0.19208 | 0.054519 | 0.23964  |
| 0.00067  | 0.223225 | 1.10E-06 | -0.04316 | 0.35204  | 0.030292 | 0.51375 | 0.084062 | 0.06953  |
| 0.7649   | 0.029582 | 0.52367  | 0.008514 | 0.8544   | 0.0191   | 0.68057 | -0.01638 | 0.72409  |
| 0.01414  | 0.12004  | 0.00942  | 0.024946 | 0.59076  | -0.00436 | 0.92514 | 0.035073 | 0.44957  |
| 0.09992  | 0.100087 | 0.03058  | 0.057606 | 0.21403  | 0.062938 | 0.17452 | 0.08704  | 0.06018  |
| 0.04189  | -0.04211 | 0.36384  | 0.015242 | 0.74251  | 0.019195 | 0.67907 | -0.14086 | 0.00228  |
| 0.00044  | -0.17309 | 0.00017  | -0.05211 | 0.26107  | -0.01914 | 0.67988 | -0.07285 | 0.1159   |
| 0.20544  | -0.12361 | 0.00749  | 0.001827 | 0.96859  | -0.03055 | 0.51014 | -0.04879 | 0.29271  |
| 0.05075  | 0.259773 | 1.22E-08 | 0.219873 | 1.61E-06 | 0.138088 | 0.00279 | 0.191721 | 3.04E-05 |
| 0.22581  | 0.072316 | 0.11861  | 0.021831 | 0.63796  | -0.047   | 0.31085 | -0.03738 | 0.42036  |
| 1.20E-06 | 0.41276  | 1.23E-20 | 0.148814 | 0.00126  | 0.160146 | 0.00051 | 0.038044 | 0.41208  |
| 0.02166  | 0.288809 | 2.01E-10 | 0.041613 | 0.36959  | 0.076366 | 0.0993  | -0.01069 | 0.81773  |
| 0.93028  | 0.113932 | 0.01376  | 0.001572 | 0.97297  | 0.024082 | 0.60369 | 0.03331  | 0.47269  |
| 0.2284   | 0.161246 | 0.00047  | 0.05211  | 0.26108  | -0.05302 | 0.25287 | -0.05455 | 0.2394   |
| 0.75818  | 0.032122 | 0.48864  | 0.09066  | 0.05024  | 0.087372 | 0.0592  | 0.150616 | 0.0011   |
| 0.88127  | 0.048839 | 0.29224  | -0.01788 | 0.69997  | -0.04076 | 0.37948 | -0.04053 | 0.38216  |
| 0.00012  | -0.14668 | 0.00148  | 0.185737 | 5.39E-05 | 0.046031 | 0.32091 | 0.04055  | 0.38195  |
| 0.07938  | 0.065099 | 0.16016  | -0.06726 | 0.14672  | -0.01256 | 0.78662 | -0.22462 | 9.40E-07 |
| 0.32068  | -0.15004 | 0.00115  | 0.01241  | 0.7891   | -0.12015 | 0.00935 | -0.10611 | 0.02183  |
| 0.25191  | -0.02834 | 0.5413   | -0.00115 | 0.98016  | 0.002981 | 0.94878 | 0.066374 | 0.15212  |
| 0.03207  | 0.032929 | 0.47778  | 0.086102 | 0.06301  | -0.05903 | 0.20288 | -0.0479  | 0.30161  |
| 0.05021  | -0.08086 | 0.08087  | -0.06268 | 0.17634  | -0.06454 | 0.16381 | -0.00899 | 0.84638  |
| 0.00105  | 0.122855 | 0.00786  | 0.033611 | 0.4687   | 0.040933 | 0.37746 | 0.027832 | 0.54853  |
| 0.00766  | 0.119852 | 0.00953  | -0.05289 | 0.25401  | -0.06424 | 0.16573 | 0.00979  | 0.83289  |
| 0.0333   | -0.03504 | 0.44996  | 0.150078 | 0.00114  | 0.127057 | 0.00597 | -0.04292 | 0.35473  |
| 0.00023  | 0.125844 | 0.00647  | 0.188814 | 4.02E-05 | 0.112642 | 0.01487 | 0.047815 | 0.30249  |
| 0.32313  | 0.047685 | 0.30381  | -0.02664 | 0.56578  | -0.05368 | 0.24696 | 0.080491 | 0.08228  |
| 0.06885  | -0.03452 | 0.45672  | 0.1105   | 0.0169   | 0.029678 | 0.52233 | 0.094054 | 0.0422   |
| 0.61356  | 0.083272 | 0.07221  | -0.0171  | 0.71244  | -0.05869 | 0.20554 | -0.08614 | 0.0629   |
| 0.03674  | 0.018399 | 0.69169  | 0.044647 | 0.33568  | 0.006965 | 0.88068 | 0.044127 | 0.34135  |
| 0.00614  | -0.17264 | 0.00018  | 0.171335 | 0.0002   | -0.06906 | 0.13616 | -0.06464 | 0.16311  |
| 0.07393  | 0.274183 | 1.69E-09 | 0.033316 | 0.47261  | 0.104876 | 0.02342 | 0.108724 | 0.01876  |

|          |          |          |          |          |          |          |          |          |
|----------|----------|----------|----------|----------|----------|----------|----------|----------|
| 0.01603  | 0.229456 | 5.38E-07 | 0.094734 | 0.04072  | 0.197632 | 1.69E-05 | 0.115538 | 0.01247  |
| 0.01083  | 0.036662 | 0.42928  | 0.051063 | 0.27079  | 0.025162 | 0.58756  | -0.07848 | 0.09027  |
| 0.35713  | 0.041084 | 0.37571  | 0.064201 | 0.16602  | 0.048422 | 0.29639  | 0.050038 | 0.28054  |
| 8.78E-07 | -0.16559 | 0.00033  | 0.022592 | 0.62627  | -0.01151 | 0.80406  | -0.1396  | 0.0025   |
| 0.08019  | 0.108487 | 0.01902  | 0.11188  | 0.01557  | 0.091241 | 0.04877  | -0.05191 | 0.2629   |
| 0.6725   | 0.003071 | 0.94722  | 0.048284 | 0.29777  | -0.05887 | 0.20411  | 0.063051 | 0.17375  |
| 3.52E-08 | 0.361757 | 6.93E-16 | 0.037215 | 0.42236  | 0.076778 | 0.09748  | 0.241673 | 1.24E-07 |
| 0.00886  | -0.14971 | 0.00117  | 0.027406 | 0.55467  | 0.018354 | 0.6924   | 0.049607 | 0.28471  |
| 0.00017  | -0.11997 | 0.00946  | 0.16761  | 0.00027  | -0.02609 | 0.57386  | -0.09329 | 0.0439   |
| 0.83837  | -0.01268 | 0.78465  | 0.077875 | 0.09277  | 0.043775 | 0.34522  | 0.059303 | 0.20081  |
| 0.31948  | 0.122528 | 0.00803  | 0.091272 | 0.0487   | 0.05723  | 0.21703  | 0.051033 | 0.27108  |
| 0.33864  | -0.02846 | 0.53959  | -0.08257 | 0.07466  | -0.0331  | 0.47554  | -0.0117  | 0.80094  |
| 0.74561  | 0.12319  | 0.00769  | 0.052497 | 0.25755  | 0.008417 | 0.85605  | -0.03374 | 0.46701  |
| 3.82E-05 | 0.216856 | 2.24E-06 | 0.364888 | 3.74E-16 | 0.206844 | 6.58E-06 | 0.163068 | 0.0004   |
| 0.00019  | 0.318259 | 1.88E-12 | 0.077001 | 0.09651  | 0.15042  | 0.00111  | 0.088481 | 0.05604  |
| 4.39E-05 | 0.317169 | 2.26E-12 | 0.184102 | 6.28E-05 | 0.149094 | 0.00123  | 0.188593 | 4.11E-05 |
| 0.02435  | 0.12158  | 0.00854  | 0.303437 | 2.11E-11 | 0.087107 | 0.05998  | -0.0061  | 0.89535  |
| 0.00056  | 0.132945 | 0.004    | 0.31436  | 3.60E-12 | 0.111146 | 0.01627  | 0.055665 | 0.22989  |
| 0.00139  | 0.310363 | 6.93E-12 | 0.086613 | 0.06145  | 0.173686 | 0.00016  | 0.057733 | 0.21302  |
| 0.00084  | 0.159985 | 0.00052  | 0.298848 | 4.34E-11 | 0.115792 | 0.01228  | 0.02582  | 0.57782  |
| 0.0554   | 0.109644 | 0.01778  | 0.053144 | 0.25172  | 0.025041 | 0.58935  | 0.05061  | 0.27507  |
| 0.00627  | 0.23988  | 1.55E-07 | 0.053956 | 0.24454  | 0.200887 | 1.22E-05 | 0.122036 | 0.00829  |
| 0.10891  | 0.095262 | 0.03961  | 0.003202 | 0.94498  | -0.00013 | 0.99784  | 0.027933 | 0.54709  |
| 0.00035  | 0.230764 | 4.61E-07 | 0.105404 | 0.02272  | 0.140452 | 0.00235  | 0.166603 | 0.0003   |
| 0.14577  | 0.071849 | 0.12102  | 0.023083 | 0.6188   | 0.028444 | 0.53977  | 0.012296 | 0.79099  |
| 2.44E-05 | 0.244773 | 8.46E-08 | 0.172543 | 0.00018  | 0.007843 | 0.86576  | 0.049999 | 0.28091  |
| 0.13105  | 0.151956 | 0.00099  | 0.122267 | 0.00817  | 0.100381 | 0.03009  | 0.103838 | 0.02483  |
| 0.07706  | 0.106178 | 0.02174  | 0.174834 | 0.00015  | 0.038291 | 0.40905  | 0.082134 | 0.0762   |
| 0.5267   | 0.003165 | 0.94561  | 0.02255  | 0.62692  | 0.03949  | 0.39454  | -0.00158 | 0.97287  |
| 0.00502  | 0.1812   | 8.22E-05 | 0.06768  | 0.1442   | 0.0266   | 0.56638  | 0.107103 | 0.02061  |
| 0.01     | 0.177841 | 0.00011  | 0.389036 | 2.53E-18 | 0.007078 | 0.87876  | 0.073237 | 0.11398  |
| 0.04289  | 0.180662 | 8.64E-05 | 0.079567 | 0.08588  | 0.021172 | 0.64813  | 0.070106 | 0.13033  |
| 0.124    | 0.129414 | 0.0051   | 0.054088 | 0.24338  | 0.049572 | 0.28505  | 0.08328  | 0.07218  |
| 1.12E-05 | 0.274617 | 1.59E-09 | 0.008334 | 0.85746  | 0.101241 | 0.0287   | 0.023462 | 0.61305  |
| 0.00096  | 0.313583 | 4.09E-12 | 0.045073 | 0.33109  | 0.130818 | 0.00463  | -0.13789 | 0.00283  |
| 0.19921  | 0.150276 | 0.00112  | 0.025969 | 0.57563  | 0.148798 | 0.00126  | -0.00752 | 0.87129  |
| 0.03687  | 0.214903 | 2.78E-06 | -0.00089 | 0.98472  | 0.182875 | 7.04E-05 | -0.03267 | 0.48131  |
| 0.9732   | -0.13279 | 0.00404  | 0.006836 | 0.88287  | -0.04578 | 0.3236   | 0.09919  | 0.03211  |
| 1.51E-05 | -0.21461 | 2.87E-06 | -0.01198 | 0.7962   | 0.043945 | 0.34335  | 0.027666 | 0.55092  |
| 0.17023  | 0.145166 | 0.00166  | 0.251935 | 3.41E-08 | 0.102223 | 0.02718  | -0.12479 | 0.00693  |
| 0.72526  | 0.108786 | 0.01869  | -0.03593 | 0.43852  | -0.02972 | 0.52172  | 0.021886 | 0.63711  |
| 0.01819  | -0.17811 | 0.00011  | -0.21057 | 4.44E-06 | -0.19829 | 1.59E-05 | -0.14721 | 0.00142  |
| 0.91069  | 0.067594 | 0.14471  | 0.078377 | 0.09068  | -0.04167 | 0.36892  | -0.13674 | 0.00307  |
| 0.00201  | -0.13872 | 0.00266  | 0.028246 | 0.54259  | 0.016302 | 0.72531  | -0.24892 | 5.01E-08 |
| 0.50997  | 0.003403 | 0.94153  | 0.146011 | 0.00156  | -0.00021 | 0.99631  | -0.07038 | 0.12883  |

|          |          |          |          |          |          |          |          |          |
|----------|----------|----------|----------|----------|----------|----------|----------|----------|
| 0.05464  | 0.035508 | 0.44396  | -0.07081 | 0.12651  | 0.025155 | 0.58766  | -0.03086 | 0.50583  |
| 4.71E-07 | 0.154546 | 0.00081  | 0.131695 | 0.00436  | 0.09758  | 0.03502  | 0.073561 | 0.11239  |
| 0.00036  | 0.252144 | 3.32E-08 | 0.028876 | 0.53363  | 0.13483  | 0.00351  | 0.11885  | 0.01015  |
| 0.4263   | -0.05725 | 0.21684  | -0.02862 | 0.53724  | -0.01083 | 0.81536  | -0.21067 | 4.39E-06 |
| 0.16987  | 0.015156 | 0.74392  | 0.101273 | 0.02865  | 0.032314 | 0.48604  | -0.1017  | 0.02798  |
| 0.00863  | -0.02108 | 0.64961  | 0.035301 | 0.44662  | 0.041606 | 0.36967  | -0.06219 | 0.17969  |
| 0.00387  | 0.290922 | 1.46E-10 | 0.21891  | 1.79E-06 | 0.082255 | 0.07577  | 0.144879 | 0.00169  |
| 6.25E-06 | -0.2829  | 4.82E-10 | 0.032611 | 0.48204  | -0.1268  | 0.00607  | -0.10286 | 0.02623  |
| 0.00493  | 0.237058 | 2.18E-07 | 0.007824 | 0.86609  | -0.03291 | 0.478    | 0.110746 | 0.01666  |
| 0.00093  | 0.253097 | 2.93E-08 | 0.258395 | 1.47E-08 | 0.108271 | 0.01926  | -0.08925 | 0.05393  |
| 0.98641  | -0.05259 | 0.25674  | 0.081415 | 0.07882  | 0.075948 | 0.10117  | -0.10056 | 0.02979  |
| 1.39E-09 | -0.20768 | 6.03E-06 | -0.02858 | 0.53786  | 0.03717  | 0.42291  | -0.02132 | 0.64583  |
| 0.38942  | -0.0191  | 0.68054  | 0.015969 | 0.7307   | -0.06365 | 0.16966  | -0.02164 | 0.64094  |
| 0.47521  | 0.111259 | 0.01616  | 0.301561 | 2.84E-11 | 0.127699 | 0.00572  | -0.07634 | 0.09943  |
| 0.43551  | -0.02874 | 0.53552  | 0.073127 | 0.11453  | -0.09849 | 0.03334  | -0.10822 | 0.01932  |
| 0.07254  | 0.193377 | 2.58E-05 | 0.073234 | 0.11399  | 0.035434 | 0.44491  | 0.041857 | 0.36679  |
| 0.2391   | -0.05497 | 0.23578  | 0.135972 | 0.00324  | 0.027171 | 0.55807  | 0.058051 | 0.2105   |
| 0.97945  | 0.127734 | 0.0057   | 0.080117 | 0.08372  | 0.061764 | 0.18272  | -0.0506  | 0.27521  |
| 0.9838   | 0.07885  | 0.08875  | 0.136636 | 0.00309  | -0.01953 | 0.67385  | 0.065539 | 0.15735  |
| 3.05E-07 | -0.26608 | 5.21E-09 | -0.0245  | 0.5974   | -0.01869 | 0.68712  | -0.07016 | 0.13006  |
| 0.09757  | 0.176974 | 0.00012  | 0.016129 | 0.72811  | 0.338902 | 5.15E-14 | -0.01921 | 0.67886  |
| 0.00637  | 0.100906 | 0.02923  | 0.106277 | 0.02162  | 0.091219 | 0.04883  | -0.00345 | 0.94078  |
| 0.1946   | 0.237086 | 2.17E-07 | 0.103151 | 0.02581  | 0.091543 | 0.04803  | 0.106719 | 0.02108  |
| 0.23428  | -0.05271 | 0.25565  | 0.004315 | 0.9259   | -0.06514 | 0.15993  | -0.0999  | 0.03089  |
| 0.08235  | 0.056066 | 0.22655  | 0.039721 | 0.39176  | 0.018403 | 0.69162  | 0.009973 | 0.82981  |
| 0.1427   | 0.171493 | 0.0002   | 0.085086 | 0.06619  | 0.136894 | 0.00303  | 0.13341  | 0.00387  |
| 0.5492   | 0.046917 | 0.31167  | 0.004529 | 0.92225  | 0.005133 | 0.91192  | 0.168535 | 0.00025  |
| 0.00011  | 0.356113 | 2.08E-15 | 0.147498 | 0.00139  | 0.021282 | 0.64643  | 0.061135 | 0.18723  |
| 0.40071  | 0.078837 | 0.0888   | 0.297455 | 5.38E-11 | -0.04045 | 0.38308  | 0.025035 | 0.58944  |
| 0.01586  | -0.02196 | 0.63592  | 0.04838  | 0.29681  | 0.022644 | 0.62548  | -0.08189 | 0.0771   |
| 0.0021   | 0.089747 | 0.0526   | 0.123945 | 0.00733  | 0.016218 | 0.72667  | -0.19128 | 3.17E-05 |
| 1.73E-11 | 0.368169 | 1.94E-16 | 0.181104 | 8.29E-05 | -0.00576 | 0.9012   | 0.00292  | 0.94981  |
| 4.83E-05 | -0.09348 | 0.04348  | 0.013152 | 0.77682  | 0.041389 | 0.37218  | -0.14225 | 0.00206  |
| 0.72582  | -0.11371 | 0.01394  | -0.09062 | 0.05033  | -0.00365 | 0.93734  | -0.0897  | 0.05273  |
| 0.00123  | 0.220641 | 1.47E-06 | 0.119817 | 0.00955  | 0.049989 | 0.28102  | -0.10173 | 0.02793  |
| 1.82E-06 | 0.253193 | 2.90E-08 | 0.109194 | 0.01825  | 0.051212 | 0.2694   | 0.165658 | 0.00032  |
| 0.00138  | -0.2023  | 1.06E-05 | -0.14081 | 0.00229  | -0.06295 | 0.17447  | -0.0453  | 0.32867  |
| 0.3023   | 0.011537 | 0.80362  | 0.075983 | 0.10101  | 0.048031 | 0.3003   | -0.12799 | 0.00561  |
| 0.02413  | 0.022817 | 0.62284  | 0.055259 | 0.23331  | -0.02431 | 0.60033  | -0.07025 | 0.12956  |
| 0.00274  | -0.08276 | 0.07399  | 0.064537 | 0.16381  | 0.06811  | 0.14166  | 0.025744 | 0.57894  |
| 5.08E-08 | 0.249245 | 4.81E-08 | 0.08238  | 0.07532  | 0.036702 | 0.42878  | -0.0451  | 0.33076  |
| 0.00307  | 0.154182 | 0.00083  | 0.063259 | 0.17234  | 0.023846 | 0.60725  | -0.05289 | 0.254    |
| 0.98169  | 0.006736 | 0.88457  | 0.139539 | 0.00251  | -0.02223 | 0.6318   | 0.048003 | 0.30059  |
| 0.16654  | 0.171167 | 0.0002   | 0.052815 | 0.25467  | 0.060191 | 0.19414  | -0.04961 | 0.28471  |
| 0.93581  | 0.110518 | 0.01688  | 0.018347 | 0.69251  | 0.0647   | 0.16275  | -0.06695 | 0.14861  |

|          |          |          |          |          |          |         |          |          |
|----------|----------|----------|----------|----------|----------|---------|----------|----------|
| 0.0005   | 0.369698 | 1.43E-16 | 0.105323 | 0.02283  | 0.073026 | 0.11503 | 0.239626 | 1.60E-07 |
| 0.43366  | 0.076806 | 0.09736  | 0.089279 | 0.05385  | -0.05177 | 0.26416 | -0.21317 | 3.35E-06 |
| 0.00676  | -0.10221 | 0.0272   | -0.0632  | 0.17277  | -0.07513 | 0.10489 | -0.07219 | 0.11925  |
| 0.99664  | -0.06276 | 0.17576  | 0.042539 | 0.35902  | 0.040028 | 0.38812 | 0.082575 | 0.07463  |
| 7.94E-06 | 0.206014 | 7.18E-06 | -0.05326 | 0.25068  | -0.08454 | 0.06795 | 0.150373 | 0.00112  |
| 4.66E-07 | -0.31959 | 1.50E-12 | -0.00881 | 0.84932  | 0.060946 | 0.18859 | -0.01426 | 0.75855  |
| 0.0092   | 0.049657 | 0.28422  | -0.00299 | 0.94858  | 0.086018 | 0.06327 | -0.0023  | 0.9605   |
| 0.89608  | 0.051488 | 0.26682  | 0.008382 | 0.85664  | 0.068288 | 0.14062 | -0.07011 | 0.13031  |
| 0.03776  | 0.033995 | 0.46363  | -0.00832 | 0.85776  | 0.097256 | 0.03564 | 0.087784 | 0.05801  |
| 0.87915  | 0.060793 | 0.18971  | 0.048177 | 0.29884  | -0.02412 | 0.60311 | 0.060309 | 0.19326  |
| 0.00476  | 0.232592 | 3.72E-07 | -0.13036 | 0.00478  | 0.043496 | 0.3483  | -0.09807 | 0.03411  |
| 0.19236  | 0.004644 | 0.92028  | -0.12871 | 0.00534  | -0.02782 | 0.54865 | -0.16933 | 0.00024  |
| 0.5862   | 0.068979 | 0.13664  | 0.289658 | 1.77E-10 | -0.02606 | 0.57429 | 0.011488 | 0.80444  |
| 0.09459  | -0.10772 | 0.0199   | -0.03205 | 0.48967  | -0.02132 | 0.64584 | -0.09318 | 0.04416  |
| 0.01049  | -0.06472 | 0.16261  | -0.03407 | 0.46265  | -0.0676  | 0.14466 | 0.001893 | 0.96745  |
| 0.36073  | -0.08006 | 0.08393  | 0.005543 | 0.90491  | -0.06469 | 0.1628  | 0.099    | 0.03244  |
| 0.22166  | 0.194372 | 2.34E-05 | 0.031192 | 0.50132  | -0.04511 | 0.33068 | 0.051846 | 0.2635   |
| 1.02E-05 | -0.21408 | 3.04E-06 | -0.06532 | 0.15874  | -0.08699 | 0.06033 | -0.00011 | 0.9981   |
| 0.00074  | -0.14049 | 0.00234  | -0.1369  | 0.00303  | 0.00411  | 0.92941 | -0.13587 | 0.00326  |
| 0.16205  | 0.157128 | 0.00066  | 0.035136 | 0.44876  | -0.01281 | 0.78243 | 0.028823 | 0.53438  |
| 0.02377  | 0.166625 | 0.0003   | 0.19969  | 1.38E-05 | 0.083808 | 0.07038 | -0.00128 | 0.97799  |
| 1.32E-05 | 0.137918 | 0.00282  | 0.06685  | 0.1492   | -0.06433 | 0.16519 | 0.058526 | 0.20679  |
| 0.05391  | 0.00808  | 0.86174  | -0.00106 | 0.98177  | -0.03129 | 0.49994 | -0.01942 | 0.67548  |
| 0.00013  | -0.18854 | 4.13E-05 | 0.119537 | 0.00972  | 0.005396 | 0.90741 | 0.016279 | 0.72568  |
| 0.24868  | -0.04524 | 0.32933  | 0.173399 | 0.00017  | 0.025079 | 0.58879 | 0.016989 | 0.71423  |
| 0.00227  | -0.1165  | 0.01176  | 0.042625 | 0.35805  | -0.07411 | 0.10972 | -0.11359 | 0.01404  |
| 0.35501  | -0.0142  | 0.75956  | -0.03621 | 0.435    | 0.02232  | 0.63044 | -0.0206  | 0.65701  |
| 0.43018  | -0.09477 | 0.04065  | -0.1092  | 0.01824  | -0.04534 | 0.32822 | 0.003438 | 0.94094  |
| 0.01799  | -0.06307 | 0.17365  | -0.08506 | 0.06629  | -0.04299 | 0.35395 | -0.07102 | 0.1254   |
| 0.05919  | -0.09787 | 0.03448  | -0.10027 | 0.03027  | -0.03947 | 0.39482 | -0.19697 | 1.81E-05 |
| 0.05447  | 0.047521 | 0.30547  | 0.064809 | 0.16203  | 0.083978 | 0.06981 | 0.069592 | 0.13318  |
| 0.00907  | -0.10656 | 0.02127  | 0.056306 | 0.22456  | 0.009431 | 0.83893 | 0.098733 | 0.03291  |
| 0.71114  | 0.204595 | 8.32E-06 | 0.12153  | 0.00856  | 0.059804 | 0.19703 | 0.030867 | 0.50579  |
| 0.29841  | 0.141497 | 0.00218  | 0.051205 | 0.26946  | -0.01256 | 0.78668 | 0.096457 | 0.03718  |
| 0.00977  | -0.28354 | 4.39E-10 | -0.11295 | 0.0146   | -0.15068 | 0.00109 | -0.03287 | 0.47856  |
| 0.00018  | -0.23816 | 1.91E-07 | -0.02007 | 0.66524  | -0.09304 | 0.04448 | 0.100241 | 0.03032  |
| 1.94E-11 | 0.390183 | 1.97E-18 | 0.220985 | 1.42E-06 | 0.118748 | 0.01022 | 0.246436 | 6.86E-08 |
| 0.21855  | -0.01726 | 0.7099   | 0.112008 | 0.01545  | 0.041712 | 0.36845 | -0.04557 | 0.32578  |
| 0.53665  | -0.01293 | 0.78041  | -0.02509 | 0.58865  | 0.044725 | 0.33485 | -0.01602 | 0.72993  |
| 1.22E-11 | 0.431159 | 1.45E-22 | 0.108084 | 0.01948  | 0.063146 | 0.1731  | 0.0922   | 0.04644  |
| 9.07E-08 | 0.309892 | 7.48E-12 | 0.121908 | 0.00836  | 0.013112 | 0.77747 | 0.074331 | 0.10866  |
| 0.9534   | 0.043809 | 0.34484  | -0.03124 | 0.50068  | -0.01974 | 0.67054 | -0.29639 | 6.34E-11 |
| 5.95E-08 | 0.1271   | 0.00595  | 0.024162 | 0.6025   | 0.080976 | 0.08045 | 0.021423 | 0.64425  |
| 0.20267  | 0.07763  | 0.09381  | 0.030888 | 0.50549  | -0.02298 | 0.62042 | -0.18079 | 8.54E-05 |
| 0.73889  | -0.05062 | 0.27502  | 0.028951 | 0.53257  | 0.017675 | 0.70322 | 0.152149 | 0.00097  |



|          |          |          |          |          |          |          |          |          |
|----------|----------|----------|----------|----------|----------|----------|----------|----------|
| 0.90374  | 0.04967  | 0.2841   | 0.007584 | 0.87016  | -0.07059 | 0.1277   | -0.10139 | 0.02847  |
| 0.00709  | -0.01642 | 0.72335  | 0.110329 | 0.01707  | -0.04581 | 0.32326  | 0.027153 | 0.55833  |
| 0.00779  | -0.18701 | 4.77E-05 | -0.08604 | 0.06319  | -0.10866 | 0.01883  | -0.00847 | 0.85515  |
| 0.05326  | 0.119879 | 0.00951  | -0.05493 | 0.23607  | -0.05881 | 0.20458  | -0.02129 | 0.64636  |
| 0.15566  | 0.12344  | 0.00757  | 0.047824 | 0.30239  | 0.05699  | 0.21897  | 0.179944 | 9.22E-05 |
| 4.20E-08 | -0.23813 | 1.92E-07 | 0.103649 | 0.0251   | -0.05236 | 0.25884  | -0.09739 | 0.03539  |
| 0.00111  | 0.191745 | 3.03E-05 | 0.044968 | 0.33222  | 0.026151 | 0.57295  | 0.149892 | 0.00116  |
| 0.03618  | -0.06618 | 0.15331  | 0.007184 | 0.87695  | -0.01815 | 0.69564  | -0.11393 | 0.01376  |
| 0.29151  | 0.074571 | 0.10752  | 0.022561 | 0.62675  | 0.00868  | 0.85161  | 0.070318 | 0.12917  |
| 0.08642  | 0.075392 | 0.1037   | -0.02698 | 0.56091  | -0.03524 | 0.44735  | 0.055408 | 0.23205  |
| 0.88662  | 0.059727 | 0.1976   | -0.13457 | 0.00357  | -0.1099  | 0.01751  | -0.00967 | 0.83499  |
| 0.05699  | 0.145646 | 0.0016   | 0.060963 | 0.18847  | 0.094327 | 0.0416   | 0.141142 | 0.00223  |
| 0.00021  | -0.28385 | 4.20E-10 | -0.01678 | 0.71763  | -0.1006  | 0.02973  | 0.047928 | 0.30135  |
| 0.45071  | -0.07296 | 0.11534  | -0.05168 | 0.26508  | -0.12534 | 0.00669  | 0.083819 | 0.07035  |
| 0.15718  | 0.087263 | 0.05952  | 0.058047 | 0.21054  | -0.05418 | 0.24259  | -0.1148  | 0.01305  |
| 0.01474  | 0.051094 | 0.2705   | -0.04342 | 0.34918  | 0.01794  | 0.699    | 0.26719  | 4.48E-09 |
| 0.06683  | -0.07166 | 0.12201  | 0.011299 | 0.8076   | -0.03236 | 0.4854   | 0.032983 | 0.47705  |
| 0.01902  | -0.21428 | 2.97E-06 | -0.06018 | 0.19425  | -0.12621 | 0.00631  | -0.02564 | 0.58041  |
| 2.23E-06 | 0.209117 | 5.18E-06 | 0.076876 | 0.09706  | 0.051237 | 0.26916  | -0.15182 | 0.001    |
| 0.02593  | 0.057168 | 0.21753  | 0.041822 | 0.36719  | 0.034383 | 0.45854  | 0.025023 | 0.58963  |
| 0.00109  | -0.12867 | 0.00536  | 0.039928 | 0.3893   | 0.083675 | 0.07083  | 0.037304 | 0.42124  |
| 0.00033  | 0.110673 | 0.01673  | 0.053639 | 0.24732  | 0.041922 | 0.36604  | 0.082714 | 0.07414  |
| 0.08387  | -0.16672 | 0.0003   | -0.02799 | 0.5463   | -0.03608 | 0.4367   | -0.11862 | 0.0103   |
| 0.6153   | 0.089282 | 0.05384  | 0.120895 | 0.00892  | 0.068053 | 0.14199  | 0.042804 | 0.35604  |
| 0.02046  | 0.260005 | 1.18E-08 | 0.210806 | 4.33E-06 | 0.191816 | 3.01E-05 | -0.12188 | 0.00837  |
| 0.00015  | 0.299356 | 4.01E-11 | 0.182906 | 7.02E-05 | 0.180361 | 8.88E-05 | -0.02897 | 0.5323   |
| 0.55703  | 0.051466 | 0.26702  | 0.046279 | 0.3183   | 0.059412 | 0.19999  | -0.04857 | 0.29488  |
| 0.00025  | -0.1051  | 0.02313  | -0.074   | 0.11028  | -0.00829 | 0.85827  | -0.13101 | 0.00457  |
| 0.30187  | 0.134996 | 0.00347  | 0.176995 | 0.00012  | 0.080221 | 0.08332  | -0.03454 | 0.45651  |
| 0.92193  | 0.144976 | 0.00168  | 0.232401 | 3.80E-07 | 0.116948 | 0.01143  | -0.01116 | 0.80989  |
| 0.00013  | 0.20533  | 7.71E-06 | -0.0589  | 0.2039   | 0.036467 | 0.43174  | -0.17184 | 0.00019  |
| 0.45066  | -0.00459 | 0.92116  | 0.020967 | 0.65132  | -0.00426 | 0.92684  | 0.014587 | 0.75322  |
| 4.48E-07 | 0.293028 | 1.06E-10 | 0.098066 | 0.03412  | 0.050695 | 0.27426  | -0.00873 | 0.85068  |
| 0.02899  | -0.08312 | 0.07272  | -0.08828 | 0.0566   | -0.00212 | 0.96355  | -0.06542 | 0.15809  |
| 0.00088  | 0.184837 | 5.86E-05 | 0.158789 | 0.00057  | 0.062161 | 0.17992  | 0.147178 | 0.00143  |
| 0.71842  | 0.150288 | 0.00112  | 0.037333 | 0.42089  | 0.09809  | 0.03408  | 0.016254 | 0.72609  |
| 0.92192  | -0.01635 | 0.72462  | 0.024519 | 0.59713  | -0.07914 | 0.08759  | 0.048623 | 0.29438  |
| 0.02961  | 0.189715 | 3.69E-05 | 0.098759 | 0.03287  | 0.026104 | 0.57364  | -0.03993 | 0.3893   |
| 0.93829  | 0.114228 | 0.01351  | 0.033523 | 0.46987  | 0.074764 | 0.10662  | -0.11098 | 0.01643  |
| 0.50226  | 0.103015 | 0.02601  | -0.05591 | 0.22786  | 0.046738 | 0.31352  | -0.06791 | 0.14281  |
| 0.10902  | 0.231601 | 4.18E-07 | 0.052617 | 0.25646  | 0.075912 | 0.10133  | 0.047742 | 0.30323  |
| 0.03086  | 0.154074 | 0.00084  | 0.086062 | 0.06313  | 0.093468 | 0.0435   | 0.239491 | 1.62E-07 |
| 0.71699  | -0.06256 | 0.17715  | 0.034023 | 0.46326  | 0.172685 | 0.00018  | 0.002801 | 0.95186  |
| 0.00119  | 0.127911 | 0.00564  | 0.051707 | 0.26478  | 0.095741 | 0.03862  | 0.059354 | 0.20042  |
| 0.00209  | -0.01627 | 0.7258   | -0.03972 | 0.39181  | 0.009792 | 0.83286  | 0.05814  | 0.2098   |

|          |          |          |          |          |          |         |          |          |
|----------|----------|----------|----------|----------|----------|---------|----------|----------|
| 0.84156  | 0.08139  | 0.07891  | 0.034956 | 0.45108  | 0.020653 | 0.6562  | 0.109858 | 0.01755  |
| 0.00097  | -0.26965 | 3.19E-09 | -0.0453  | 0.32863  | -0.15436 | 0.00082 | -0.19841 | 1.57E-05 |
| 0.00325  | -0.11304 | 0.01452  | -0.01542 | 0.73966  | 0.067833 | 0.14329 | 0.044992 | 0.33196  |
| 3.99E-05 | -0.24633 | 6.96E-08 | -0.03835 | 0.40834  | -0.09629 | 0.03751 | 0.028261 | 0.54238  |
| 0.93979  | 0.043381 | 0.34958  | 0.00851  | 0.85448  | 0.14702  | 0.00144 | -0.07182 | 0.12115  |
| 0.2313   | -0.00231 | 0.96027  | 0.11127  | 0.01615  | 0.015759 | 0.73411 | -0.03083 | 0.50634  |
| 0.75859  | -0.09025 | 0.05129  | -0.04708 | 0.31002  | -0.00394 | 0.93239 | 0.092441 | 0.04587  |
| 0.00161  | -0.12533 | 0.00669  | 0.059271 | 0.20106  | 0.030045 | 0.51718 | -0.01096 | 0.81319  |
| 0.52915  | -0.06093 | 0.18869  | 0.040572 | 0.3817   | 0.007157 | 0.8774  | 0.045983 | 0.32141  |
| 0.60332  | 0.060912 | 0.18884  | -0.02013 | 0.66429  | 0.045857 | 0.32274 | 0.083328 | 0.07201  |
| 0.1501   | -0.03675 | 0.42816  | 0.103308 | 0.02558  | 0.062551 | 0.1772  | 0.022366 | 0.62973  |
| 0.60075  | -0.02896 | 0.53247  | -0.00964 | 0.83545  | 0.024457 | 0.59807 | -0.07393 | 0.11058  |
| 0.00076  | -0.20178 | 1.11E-05 | 0.018046 | 0.6973   | 0.05969  | 0.19789 | -0.04082 | 0.37884  |
| 0.2371   | 0.033658 | 0.46807  | 0.020074 | 0.66524  | -0.02503 | 0.58946 | -0.12788 | 0.00565  |
| 0.41434  | 0.014374 | 0.75671  | 0.049088 | 0.28979  | 0.082599 | 0.07455 | 0.011526 | 0.80381  |
| 0.46298  | -0.10994 | 0.01747  | -0.08835 | 0.0564   | 0.070789 | 0.12661 | -0.24882 | 5.08E-08 |
| 0.12694  | 0.035577 | 0.44307  | 0.168432 | 0.00026  | -0.00961 | 0.83599 | -0.02812 | 0.54443  |
| 0.65094  | 0.004616 | 0.92076  | 0.006927 | 0.88132  | -0.00131 | 0.97746 | 0.056201 | 0.22543  |
| 0.00603  | -0.11695 | 0.01143  | 0.015417 | 0.73968  | 0.095677 | 0.03875 | 0.052531 | 0.25724  |
| 0.00195  | -0.09782 | 0.03458  | 0.034662 | 0.45489  | 0.106123 | 0.02181 | 0.118925 | 0.0101   |
| 0.5673   | -0.07359 | 0.11225  | 0.034763 | 0.45359  | 0.057119 | 0.21793 | 0.03554  | 0.44356  |
| 0.00258  | -0.15761 | 0.00063  | -0.01139 | 0.806    | 0.080114 | 0.08373 | 0.054538 | 0.23948  |
| 0.01125  | -0.13041 | 0.00476  | 0.02799  | 0.54627  | 0.054367 | 0.24096 | 0.135908 | 0.00325  |
| 0.21898  | -0.07669 | 0.09787  | 0.023396 | 0.61404  | 0.03078  | 0.50698 | 0.008422 | 0.85596  |
| 0.33612  | -0.05725 | 0.21687  | 0.066948 | 0.1486   | 0.047367 | 0.30705 | 0.062178 | 0.1798   |
| 5.62E-14 | 0.266073 | 5.22E-09 | 0.219711 | 1.64E-06 | 0.032485 | 0.48373 | 0.051642 | 0.26539  |
| 0.25533  | -0.15531 | 0.00076  | -0.05837 | 0.20802  | -0.00987 | 0.83148 | -0.16419 | 0.00037  |
| 0.00658  | -0.14471 | 0.00172  | 0.011499 | 0.80427  | -0.02143 | 0.64417 | -0.04166 | 0.369    |
| 0.00087  | 0.286399 | 2.88E-10 | 0.066465 | 0.15155  | 0.09398  | 0.04236 | 0.082135 | 0.0762   |
| 0.6644   | 0.049225 | 0.28844  | -0.04743 | 0.30645  | 0.018224 | 0.69447 | 0.267381 | 4.36E-09 |
| 0.35654  | -0.04682 | 0.31262  | 0.011599 | 0.80259  | -0.03108 | 0.50289 | 0.013693 | 0.7679   |
| 0.5184   | 0.018989 | 0.68232  | 0.138234 | 0.00276  | 0.034468 | 0.45743 | 0.027675 | 0.55079  |
| 3.63E-07 | -0.26698 | 4.61E-09 | -0.00416 | 0.92849  | -0.02772 | 0.55013 | -0.08029 | 0.08307  |
| 0.72682  | -0.10507 | 0.02316  | -0.01837 | 0.69213  | -0.02036 | 0.66082 | -0.03296 | 0.47742  |
| 0.06081  | 0.12314  | 0.00772  | -0.01956 | 0.67327  | -0.00763 | 0.86936 | -0.10126 | 0.02867  |
| 1.46E-16 | -0.3743  | 5.61E-17 | -0.15221 | 0.00097  | -0.08523 | 0.06572 | -0.26186 | 9.23E-09 |
| 0.00448  | 0.253956 | 2.62E-08 | -0.02323 | 0.61659  | 0.066075 | 0.15397 | 0.135227 | 0.00341  |
| 0.51426  | -0.00618 | 0.89408  | 0.009718 | 0.8341   | 0.004927 | 0.91544 | 0.004734 | 0.91873  |
| 0.96352  | 0.043704 | 0.346    | 0.106115 | 0.02182  | 0.068474 | 0.13954 | 0.076119 | 0.1004   |
| 0.0731   | -0.0463  | 0.31804  | 0.000222 | 0.99618  | -0.01509 | 0.74501 | 0.002539 | 0.95636  |
| 0.07009  | -0.11027 | 0.01713  | 0.036042 | 0.43714  | 0.018741 | 0.68625 | 0.081712 | 0.07773  |
| 0.43794  | 0.009475 | 0.83819  | 0.046204 | 0.31909  | 0.071332 | 0.12373 | 0.066237 | 0.15297  |
| 0.00205  | 0.218589 | 1.85E-06 | 0.097684 | 0.03483  | 0.090354 | 0.05102 | 0.198336 | 1.58E-05 |
| 0.28097  | -0.02994 | 0.51867  | -0.02332 | 0.61522  | -0.03924 | 0.39756 | -0.02924 | 0.52855  |
| 0.15784  | -0.1138  | 0.01387  | -0.03427 | 0.46001  | -0.08775 | 0.05812 | -0.00026 | 0.99545  |

|          |          |          |          |          |          |          |          |          |
|----------|----------|----------|----------|----------|----------|----------|----------|----------|
| 0.75492  | 0.007331 | 0.87445  | 0.067987 | 0.14238  | 0.065356 | 0.15852  | 0.0214   | 0.64461  |
| 0.00101  | 0.21815  | 1.95E-06 | 0.16152  | 0.00046  | 0.060281 | 0.19347  | 0.096657 | 0.03679  |
| 0.00022  | -0.03644 | 0.43214  | 0.057574 | 0.21428  | 0.085803 | 0.06393  | -0.04001 | 0.3883   |
| 0.12851  | 0.116462 | 0.01178  | 0.046661 | 0.31432  | 0.049393 | 0.28679  | 0.038381 | 0.40795  |
| 0.24071  | 0.071242 | 0.1242   | 0.027889 | 0.54771  | 0.074397 | 0.10835  | 0.023028 | 0.61963  |
| 0.0017   | 0.217842 | 2.01E-06 | 0.218907 | 1.79E-06 | 0.164774 | 0.00035  | 0.165339 | 0.00033  |
| 0.14936  | 0.140504 | 0.00234  | 0.095254 | 0.03963  | 0.090526 | 0.05058  | 0.08436  | 0.06855  |
| 0.0254   | -0.04858 | 0.29481  | 0.064732 | 0.16254  | 0.056469 | 0.22322  | -0.00612 | 0.89514  |
| 7.93E-07 | 0.205055 | 7.93E-06 | -0.11077 | 0.01663  | -0.01525 | 0.74231  | -0.0082  | 0.85974  |
| 0.01738  | 0.098205 | 0.03387  | -0.08498 | 0.06654  | -0.01026 | 0.82498  | 0.040984 | 0.37687  |
| 0.01464  | -0.1062  | 0.02171  | 0.035341 | 0.44611  | 0.049404 | 0.28669  | 0.027554 | 0.55254  |
| 0.07623  | -0.07001 | 0.13088  | 0.036858 | 0.42682  | 0.053107 | 0.25205  | 0.011426 | 0.80548  |
| 0.06908  | 0.042909 | 0.35486  | 0.144262 | 0.00177  | 0.059619 | 0.19842  | 0.047667 | 0.30399  |
| 0.0002   | 0.268715 | 3.63E-09 | 0.087616 | 0.0585   | 0.021937 | 0.63632  | 0.154639 | 0.0008   |
| 0.85145  | 0.130819 | 0.00463  | 0.107812 | 0.01979  | 0.07226  | 0.1189   | 0.008711 | 0.85108  |
| 0.26464  | -0.03387 | 0.46524  | 0.128073 | 0.00558  | 0.057649 | 0.21368  | 0.093793 | 0.04277  |
| 0.8856   | 0.004537 | 0.9221   | 0.10383  | 0.02484  | 0.029077 | 0.53079  | 0.030029 | 0.51741  |
| 2.20E-08 | -0.30824 | 9.77E-12 | -0.12188 | 0.00838  | -0.08274 | 0.07404  | -0.17356 | 0.00016  |
| 0.05761  | 0.143378 | 0.0019   | 0.24283  | 1.08E-07 | 0.033316 | 0.47261  | -0.03213 | 0.48849  |
| 0.00198  | 0.202479 | 1.04E-05 | -0.00302 | 0.94819  | -0.01642 | 0.72334  | 0.162621 | 0.00042  |
| 0.96027  | 0.110607 | 0.01679  | 0.062001 | 0.18104  | 0.024423 | 0.59858  | 0.074584 | 0.10747  |
| 0.34503  | -0.0058  | 0.90046  | -0.02017 | 0.66374  | 0.141406 | 0.00219  | -0.02779 | 0.54917  |
| 0.00276  | 0.29217  | 1.21E-10 | 0.028342 | 0.54123  | 0.019101 | 0.68055  | -0.00948 | 0.8381   |
| 0.21738  | 0.155428 | 0.00075  | 0.114341 | 0.01342  | 0.132675 | 0.00408  | 0.082698 | 0.0742   |
| 0.6482   | 0.162131 | 0.00044  | 0.059784 | 0.19718  | 0.058899 | 0.2039   | 0.095091 | 0.03997  |
| 0.06369  | 0.161894 | 0.00044  | 0.18736  | 4.62E-05 | 0.066764 | 0.14972  | 0.067607 | 0.14463  |
| 0.48282  | 0.236677 | 2.28E-07 | 0.047905 | 0.30158  | 0.076975 | 0.09662  | -0.02289 | 0.62175  |
| 0.00846  | -0.11989 | 0.00951  | 0.055244 | 0.23344  | 0.00074  | 0.98727  | -0.07633 | 0.09948  |
| 0.05957  | 0.0281   | 0.54469  | 0.021774 | 0.63884  | -0.01084 | 0.81535  | -0.04892 | 0.29143  |
| 0.52028  | 0.037669 | 0.41671  | 0.153136 | 0.0009   | 0.052804 | 0.25477  | 0.152907 | 0.00092  |
| 0.06642  | 0.301495 | 2.87E-11 | 0.164666 | 0.00035  | 0.222126 | 1.25E-06 | 0.115598 | 0.01243  |
| 0.67734  | 0.016959 | 0.71472  | 0.190662 | 3.36E-05 | 0.11759  | 0.01099  | 0.077479 | 0.09445  |
| 0.09848  | 0.233541 | 3.32E-07 | -0.0163  | 0.72534  | 0.074817 | 0.10637  | -0.12844 | 0.00544  |
| 3.05E-05 | -0.13702 | 0.00301  | -0.05457 | 0.23924  | 0.054671 | 0.23834  | -0.02685 | 0.56281  |
| 0.11767  | -0.13426 | 0.00365  | 0.009081 | 0.84483  | -0.07552 | 0.1031   | -0.06119 | 0.18684  |
| 0.14022  | -0.00494 | 0.91523  | -0.09858 | 0.03319  | -0.00115 | 0.9803   | -0.02247 | 0.6281   |
| 0.00043  | -0.18109 | 8.31E-05 | 0.052096 | 0.26121  | 0.042692 | 0.3573   | -0.14456 | 0.00174  |
| 0.88431  | -0.04807 | 0.2999   | 0.035705 | 0.44144  | 0.050353 | 0.27752  | 0.024342 | 0.59979  |
| 5.79E-07 | 0.298549 | 4.54E-11 | 0.017521 | 0.7057   | 0.135893 | 0.00326  | 0.063115 | 0.17331  |
| 3.99E-05 | -0.16544 | 0.00033  | -0.05693 | 0.21943  | -0.0524  | 0.25841  | 0.001304 | 0.97758  |
| 0.04172  | 0.231216 | 4.38E-07 | 0.071729 | 0.12164  | 0.118506 | 0.01037  | 0.02036  | 0.66077  |
| 0.71484  | 0.034672 | 0.45477  | 0.003585 | 0.93841  | -0.01997 | 0.66684  | 0.186245 | 5.13E-05 |
| 0.01318  | 0.034334 | 0.45918  | -0.06764 | 0.14442  | -0.04765 | 0.30416  | 0.065939 | 0.15483  |
| 0.0024   | -0.18665 | 4.94E-05 | -0.04056 | 0.38186  | 0.004964 | 0.9148   | -0.23095 | 4.51E-07 |
| 0.001    | 0.18603  | 5.24E-05 | 0.078904 | 0.08853  | -0.02428 | 0.60075  | 0.048486 | 0.29574  |

|          |          |          |          |         |          |          |          |          |
|----------|----------|----------|----------|---------|----------|----------|----------|----------|
| 9.31E-05 | 0.262267 | 8.74E-09 | 0.177358 | 0.00012 | 0.118579 | 0.01033  | 0.060068 | 0.19506  |
| 2.16E-13 | 0.072231 | 0.11905  | -0.14546 | 0.00162 | -0.10601 | 0.02195  | 0.067093 | 0.14772  |
| 0.00018  | 0.187926 | 4.38E-05 | 0.043591 | 0.34725 | 0.231319 | 4.32E-07 | 0.021805 | 0.63836  |
| 0.13778  | 0.045737 | 0.32401  | 0.086678 | 0.06126 | 0.083525 | 0.07134  | 0.05802  | 0.21074  |
| 0.44992  | 0.005413 | 0.90712  | -0.02271 | 0.62442 | -0.00537 | 0.90782  | -0.10529 | 0.02287  |
| 4.61E-08 | 0.339413 | 4.70E-14 | -0.00276 | 0.9526  | 0.029328 | 0.52724  | 0.153055 | 0.00091  |
| 4.21E-07 | -0.23879 | 1.77E-07 | -0.16682 | 0.00029 | 0.007822 | 0.86613  | -0.16961 | 0.00023  |
| 0.33089  | 0.045487 | 0.32666  | 0.046256 | 0.31855 | 0.044026 | 0.34246  | 0.053976 | 0.24436  |
| 3.60E-12 | 0.364148 | 4.33E-16 | 0.100297 | 0.03023 | 0.181997 | 7.64E-05 | -0.07673 | 0.0977   |
| 0.17401  | 0.107085 | 0.02064  | 0.124036 | 0.00728 | 0.217664 | 2.05E-06 | 0.035992 | 0.43777  |
| 0.18457  | 0.071359 | 0.12358  | -0.14074 | 0.0023  | 0.062938 | 0.17452  | 0.052444 | 0.25803  |
| 0.00783  | -0.05955 | 0.19896  | 0.045862 | 0.32269 | 0.063414 | 0.17128  | -0.06161 | 0.18384  |
| 9.60E-06 | 0.255509 | 2.14E-08 | 0.108322 | 0.01921 | 0.081062 | 0.08012  | 0.149555 | 0.00119  |
| 0.25351  | 0.078299 | 0.09101  | 0.099056 | 0.03234 | 0.057459 | 0.2152   | 0.050757 | 0.27367  |
| 7.44E-08 | 0.261947 | 9.13E-09 | 0.139842 | 0.00246 | 0.022729 | 0.62419  | 0.218157 | 1.94E-06 |
| 0.25028  | -0.04564 | 0.32502  | -0.02094 | 0.6518  | -0.03696 | 0.42555  | -0.01646 | 0.72277  |
| 0.00749  | 0.250947 | 3.87E-08 | 0.083138 | 0.07267 | 0.147684 | 0.00137  | 0.029441 | 0.52564  |
| 0.9774   | 0.060167 | 0.19432  | 0.086727 | 0.06111 | 0.087835 | 0.05787  | 0.030488 | 0.51102  |
| 2.10E-10 | -0.24921 | 4.83E-08 | -0.02037 | 0.66056 | -0.0862  | 0.0627   | -0.00857 | 0.85346  |
| 0.40666  | 0.133475 | 0.00386  | 0.028816 | 0.53447 | 0.283418 | 4.47E-10 | -0.02333 | 0.61508  |
| 0.00825  | 0.183322 | 6.75E-05 | 0.065317 | 0.15876 | 0.079998 | 0.08419  | 0.015068 | 0.74536  |
| 0.42466  | 0.09223  | 0.04637  | 0.084987 | 0.06651 | 0.041    | 0.37669  | 0.095325 | 0.03948  |
| 0.11885  | -0.01548 | 0.73872  | 0.071627 | 0.12217 | 0.03802  | 0.41238  | -0.02084 | 0.65329  |
| 0.04106  | 0.108116 | 0.01944  | 0.09789  | 0.03444 | 0.04835  | 0.29711  | 0.011331 | 0.80706  |
| 0.30711  | 0.093783 | 0.0428   | 0.115222 | 0.01272 | 0.055876 | 0.22813  | 0.01706  | 0.71308  |
| 0.17976  | -0.01357 | 0.76992  | 0.080474 | 0.08235 | -0.0073  | 0.87503  | 0.025607 | 0.58096  |
| 0.88306  | -0.08544 | 0.06506  | -0.00947 | 0.8383  | -0.01762 | 0.70416  | 0.04693  | 0.31154  |
| 0.1551   | 0.019631 | 0.67221  | 0.03808  | 0.41164 | 0.014278 | 0.75829  | -0.02859 | 0.53763  |
| 0.38859  | 0.0625   | 0.17755  | 0.076302 | 0.09958 | -0.09538 | 0.03936  | 0.106324 | 0.02156  |
| 0.05056  | -0.04887 | 0.29189  | 0.102407 | 0.0269  | -0.10562 | 0.02244  | -0.10828 | 0.01926  |
| 0.00413  | -0.02964 | 0.52281  | 0.003744 | 0.93569 | 0.010401 | 0.82262  | 0.03532  | 0.44637  |
| 3.67E-09 | 0.363132 | 5.29E-16 | 0.028383 | 0.54064 | -0.04702 | 0.31057  | 0.052905 | 0.25386  |
| 0.00061  | 0.185111 | 5.71E-05 | -0.04599 | 0.32135 | 0.050205 | 0.27893  | 0.036175 | 0.43545  |
| 0.78616  | 0.075096 | 0.10507  | -0.06958 | 0.13326 | 0.07141  | 0.12331  | -0.19811 | 1.61E-05 |
| 0.10932  | 0.084525 | 0.06801  | -0.04113 | 0.37519 | -0.08969 | 0.05276  | 0.004948 | 0.91507  |
| 0.84903  | 0.11857  | 0.01033  | 0.04711  | 0.30968 | 0.056524 | 0.22277  | 0.186525 | 5.00E-05 |
| 0.01017  | 0.065454 | 0.15789  | -0.03691 | 0.42621 | -0.09826 | 0.03377  | 0.158121 | 0.0006   |
| 0.00014  | 0.20028  | 1.30E-05 | 0.055294 | 0.23301 | 0.139977 | 0.00243  | 0.034081 | 0.4625   |
| 0.83331  | -0.00499 | 0.91428  | -0.01585 | 0.73262 | -0.04895 | 0.29114  | -0.06969 | 0.13265  |
| 5.86E-05 | 0.304716 | 1.72E-11 | 0.051954 | 0.26251 | 0.083645 | 0.07093  | -0.10066 | 0.02963  |
| 0.46372  | 0.066392 | 0.15201  | 0.120654 | 0.00906 | 0.11092  | 0.01649  | 0.05251  | 0.25743  |
| 0.26767  | 0.030779 | 0.50701  | 0.127469 | 0.00581 | 0.160673 | 0.00049  | 0.02496  | 0.59055  |
| 0.00347  | 0.348049 | 9.58E-15 | 0.169895 | 0.00023 | 0.001152 | 0.98019  | 0.059538 | 0.19903  |
| 0.97289  | 0.004625 | 0.9206   | 0.073782 | 0.11131 | 0.042994 | 0.3539   | 0.023575 | 0.61134  |
| 0.00049  | -0.14647 | 0.0015   | 0.101352 | 0.02852 | -0.05579 | 0.22886  | 0.083491 | 0.07146  |

|          |          |          |          |          |          |          |          |          |
|----------|----------|----------|----------|----------|----------|----------|----------|----------|
| 0.45377  | -0.02262 | 0.62592  | 0.045269 | 0.32899  | -0.04487 | 0.33326  | 0.020254 | 0.66242  |
| 0.96281  | 0.087972 | 0.05747  | 0.058585 | 0.20633  | 0.109486 | 0.01794  | 0.141663 | 0.00215  |
| 4.36E-06 | -0.15543 | 0.00075  | -0.0399  | 0.38967  | 0.007622 | 0.86951  | -0.11931 | 0.00986  |
| 0.00342  | 0.253061 | 2.95E-08 | 0.026643 | 0.56575  | 0.337121 | 7.10E-14 | 0.041487 | 0.37105  |
| 0.01077  | 0.195621 | 2.07E-05 | 0.075494 | 0.10323  | 0.147219 | 0.00142  | 0.013756 | 0.76685  |
| 0.04528  | 0.050924 | 0.2721   | 0.034908 | 0.45171  | 0.075524 | 0.10309  | 0.024899 | 0.59147  |
| 0.76612  | 0.190347 | 3.47E-05 | 0.042274 | 0.36203  | 0.096552 | 0.037    | 0.088541 | 0.05587  |
| 0.5924   | 0.055438 | 0.2318   | 0.165857 | 0.00032  | -0.00079 | 0.98639  | 0.073129 | 0.11452  |
| 0.83427  | -0.06437 | 0.16491  | 0.062389 | 0.17832  | 0.058523 | 0.20681  | 0.074999 | 0.10552  |
| 9.25E-07 | 0.122483 | 0.00805  | 0.011159 | 0.80993  | 0.008426 | 0.8559   | 0.125254 | 0.00672  |
| 0.15677  | 0.126816 | 0.00606  | 0.033105 | 0.47543  | -0.01032 | 0.82396  | -0.0104  | 0.82264  |
| 0.55129  | -0.06167 | 0.18339  | -0.00562 | 0.90359  | -0.04223 | 0.36251  | -0.04874 | 0.29323  |
| 0.10608  | 0.008531 | 0.85412  | 0.075794 | 0.10186  | 0.002046 | 0.96483  | 0.030795 | 0.50678  |
| 0.68975  | 0.124007 | 0.0073   | 0.060782 | 0.18979  | 0.036572 | 0.43042  | 0.006206 | 0.89359  |
| 0.91247  | 0.046596 | 0.31499  | 0.126085 | 0.00637  | 0.076454 | 0.09891  | 0.013436 | 0.77213  |
| 0.17056  | 0.162615 | 0.00042  | 0.056537 | 0.22266  | 0.022627 | 0.62574  | -0.0127  | 0.78431  |
| 0.01615  | -0.02104 | 0.65018  | 0.008143 | 0.86069  | 0.02255  | 0.62691  | -0.0831  | 0.07281  |
| 0.01348  | 0.076314 | 0.09953  | 0.026541 | 0.56724  | 0.088501 | 0.05598  | -0.00569 | 0.90246  |
| 0.35389  | 0.139062 | 0.0026   | 0.026998 | 0.56058  | 0.022374 | 0.62962  | 0.030748 | 0.50743  |
| 0.32834  | 0.060761 | 0.18994  | 0.023398 | 0.61402  | 0.130864 | 0.00462  | -0.02164 | 0.64085  |
| 0.23426  | -0.00933 | 0.84071  | 0.02845  | 0.53969  | 0.042147 | 0.36347  | 0.057094 | 0.21813  |
| 0.04235  | -0.07963 | 0.08563  | -0.07641 | 0.0991   | 0.024331 | 0.59995  | -0.12801 | 0.0056   |
| 2.34E-05 | 0.258925 | 1.37E-08 | -0.06688 | 0.149    | 0.074854 | 0.10619  | 0.05951  | 0.19924  |
| 0.5284   | 0.046927 | 0.31157  | 0.022732 | 0.62415  | 0.041817 | 0.36724  | -0.02321 | 0.61692  |
| 0.55711  | 0.053382 | 0.2496   | 0.112289 | 0.01519  | 0.073113 | 0.1146   | 0.04627  | 0.3184   |
| 0.08257  | 0.086388 | 0.06213  | 0.077006 | 0.09649  | -0.01309 | 0.77778  | 0.151959 | 0.00099  |
| 0.23694  | 0.116057 | 0.01208  | 0.052181 | 0.26043  | 0.086198 | 0.06271  | 0.054137 | 0.24296  |
| 0.0008   | 0.187253 | 4.66E-05 | 0.30793  | 1.03E-11 | 0.054885 | 0.2365   | 0.126276 | 0.00629  |
| 7.92E-09 | -0.31731 | 2.20E-12 | -0.08565 | 0.06439  | -0.17411 | 0.00016  | -0.17326 | 0.00017  |
| 0.53593  | -0.04512 | 0.33055  | -0.04377 | 0.34526  | 0.063313 | 0.17197  | -0.02247 | 0.62813  |
| 0.09034  | -0.03054 | 0.51028  | 0.029496 | 0.52488  | 0.027856 | 0.54819  | -0.03574 | 0.44101  |
| 2.20E-10 | 0.281611 | 5.82E-10 | -0.0291  | 0.53046  | 0.141725 | 0.00214  | 0.192186 | 2.90E-05 |
| 0.27911  | 0.098288 | 0.03371  | 0.025281 | 0.58579  | -0.03002 | 0.51752  | -0.01204 | 0.79521  |
| 0.04977  | 0.164028 | 0.00037  | 0.139058 | 0.0026   | -0.00901 | 0.84597  | -0.11641 | 0.01182  |
| 0.61621  | -0.23608 | 2.45E-07 | -0.09262 | 0.04544  | -0.17603 | 0.00013  | -0.07021 | 0.12974  |
| 0.06697  | -0.13533 | 0.00339  | -0.00944 | 0.83877  | -0.00738 | 0.87357  | 0.032258 | 0.48679  |
| 5.98E-07 | -0.25912 | 1.33E-08 | -0.03165 | 0.49499  | -0.01969 | 0.67123  | -0.08776 | 0.05807  |
| 0.90768  | -0.06318 | 0.17288  | -0.07144 | 0.12314  | 0.054207 | 0.24235  | -0.05159 | 0.26589  |
| 0.09855  | -0.24407 | 9.23E-08 | -0.02374 | 0.60886  | -0.03772 | 0.41612  | -0.09555 | 0.03902  |
| 4.64E-06 | 0.284506 | 3.81E-10 | 0.097604 | 0.03498  | 0.108992 | 0.01847  | 0.096532 | 0.03704  |
| 0.00448  | 0.410182 | 2.23E-20 | 0.130388 | 0.00477  | 0.155359 | 0.00075  | 0.036098 | 0.43643  |
| 0.06019  | 0.10266  | 0.02653  | 0.310024 | 7.32E-12 | 0.170586 | 0.00021  | 0.037859 | 0.41437  |
| 0.05758  | -0.06185 | 0.18208  | 0.053561 | 0.24801  | 0.014497 | 0.75469  | -0.01137 | 0.8064   |
| 0.00088  | 0.112809 | 0.01472  | -0.08679 | 0.06093  | 0.009447 | 0.83866  | -0.02868 | 0.53635  |
| 0.00411  | 0.222211 | 1.24E-06 | -0.00773 | 0.86772  | 0.017717 | 0.70256  | 0.117036 | 0.01137  |

|          |          |          |          |          |          |          |          |          |
|----------|----------|----------|----------|----------|----------|----------|----------|----------|
| 0.98372  | -0.01342 | 0.77239  | -0.03557 | 0.44319  | -0.0277  | 0.55049  | -0.02639 | 0.56946  |
| 0.26734  | -0.06481 | 0.16206  | 0.243986 | 9.33E-08 | 0.041736 | 0.36817  | 0.060836 | 0.1894   |
| 0.92095  | -0.01443 | 0.75575  | -0.01613 | 0.72815  | 0.036786 | 0.42773  | -0.05867 | 0.20565  |
| 0.01147  | 0.037576 | 0.41786  | 0.144512 | 0.00174  | -0.00544 | 0.90673  | 0.110578 | 0.01682  |
| 0.0789   | -0.04417 | 0.3409   | 0.04899  | 0.29075  | 0.021776 | 0.6388   | 0.050997 | 0.27141  |
| 0.16431  | 0.206102 | 7.11E-06 | 0.032275 | 0.48656  | 0.013016 | 0.77906  | -0.03353 | 0.46973  |
| 0.45301  | -0.01149 | 0.80441  | 0.01408  | 0.76153  | 0.027348 | 0.55551  | -0.05069 | 0.27432  |
| 0.72472  | -0.02189 | 0.63698  | -0.00116 | 0.97997  | 0.005093 | 0.91259  | -0.02164 | 0.64084  |
| 9.61E-05 | -0.16847 | 0.00026  | -0.01177 | 0.79966  | 0.066957 | 0.14854  | -0.00321 | 0.94484  |
| 0.00066  | -0.12971 | 0.00499  | 0.035113 | 0.44905  | 0.003857 | 0.93374  | -0.04878 | 0.29285  |
| 0.52953  | -0.03119 | 0.50134  | 0.005051 | 0.91332  | -0.02206 | 0.63439  | 0.019691 | 0.67125  |
| 0.67769  | -0.00877 | 0.85014  | 0.000601 | 0.98966  | 0.001774 | 0.9695   | -0.00056 | 0.99038  |
| 3.94E-05 | -0.14702 | 0.00144  | 0.004985 | 0.91444  | -0.00306 | 0.94745  | 0.061487 | 0.18469  |
| 0.04668  | -0.11841 | 0.01044  | 0.024792 | 0.59305  | -0.06761 | 0.14459  | 0.050365 | 0.2774   |
| 0.03887  | -0.0705  | 0.12815  | 0.074174 | 0.10942  | 0.082844 | 0.07369  | 0.060909 | 0.18886  |
| 0.44666  | -0.00669 | 0.88531  | 0.049569 | 0.28508  | 0.071326 | 0.12376  | -0.01278 | 0.78289  |
| 0.00546  | 0.180262 | 8.96E-05 | 0.077528 | 0.09424  | 0.023377 | 0.61433  | 0.124392 | 0.00712  |
| 0.12578  | -0.19039 | 3.45E-05 | 0.049989 | 0.28101  | -0.04821 | 0.29855  | -0.10892 | 0.01855  |
| 0.06683  | 0.081717 | 0.07771  | -0.01952 | 0.67388  | -0.07221 | 0.11915  | -0.1618  | 0.00045  |
| 0.46112  | 0.082077 | 0.07641  | 0.114518 | 0.01328  | 0.047931 | 0.30132  | 0.061966 | 0.18129  |
| 0.96735  | 0.032816 | 0.47928  | 0.027483 | 0.55356  | 0.138992 | 0.00261  | 0.014041 | 0.76216  |
| 0.51807  | 0.045062 | 0.33121  | 0.003518 | 0.93955  | 0.039517 | 0.39421  | 0.010782 | 0.81624  |
| 0.19888  | 0.063717 | 0.16924  | 0.032578 | 0.48248  | 0.036843 | 0.42702  | 0.112618 | 0.0149   |
| 0.53737  | -0.02611 | 0.57362  | 0.0625   | 0.17755  | 0.041311 | 0.37308  | 0.071627 | 0.12218  |
| 0.10111  | -0.06729 | 0.14656  | 0.057051 | 0.21848  | 0.014067 | 0.76175  | -0.04088 | 0.37814  |
| 0.00589  | 0.156283 | 0.0007   | 0.173073 | 0.00017  | 0.069181 | 0.13549  | 0.054928 | 0.23613  |
| 0.83626  | 0.145771 | 0.00159  | 0.02444  | 0.59832  | 0.020813 | 0.65371  | -0.06275 | 0.17584  |
| 0.42427  | 0.111245 | 0.01617  | 0.02724  | 0.55707  | 0.020157 | 0.66394  | 0.028872 | 0.53369  |
| 0.24812  | 0.042245 | 0.36236  | -0.00168 | 0.9712   | 0.027391 | 0.55488  | 0.031315 | 0.49962  |
| 0.28357  | 0.226198 | 7.84E-07 | 0.089748 | 0.0526   | 0.146121 | 0.00154  | 0.031091 | 0.5027   |
| 0.00017  | -0.17498 | 0.00014  | 0.153634 | 0.00087  | 0.021529 | 0.64261  | -0.05556 | 0.23078  |
| 0.69721  | 0.07916  | 0.0875   | 0.062686 | 0.17626  | 0.002274 | 0.96092  | 0.052429 | 0.25816  |
| 0.40495  | 0.028535 | 0.53848  | 0.044967 | 0.33223  | 0.042851 | 0.35551  | 0.05575  | 0.22918  |
| 0.35978  | 0.021552 | 0.64225  | 0.038437 | 0.40726  | 0.030509 | 0.51074  | 0.027817 | 0.54874  |
| 0.26122  | 0.100486 | 0.02992  | 0.126632 | 0.00614  | 0.286597 | 2.80E-10 | 0.100666 | 0.02962  |
| 0.21581  | -0.02127 | 0.64657  | -0.04935 | 0.28717  | -0.00532 | 0.90865  | 0.049646 | 0.28433  |
| 0.77947  | 0.027755 | 0.54964  | 0.006723 | 0.88479  | 0.007738 | 0.86754  | -0.02126 | 0.6468   |
| 0.21592  | 0.133859 | 0.00376  | 0.078636 | 0.08962  | 0.083652 | 0.07091  | 0.012037 | 0.79531  |
| 0.56908  | 0.1303   | 0.0048   | -0.15252 | 0.00094  | 0.011451 | 0.80505  | -0.1345  | 0.00359  |
| 3.57E-13 | 0.287536 | 2.43E-10 | 0.030781 | 0.50697  | 0.051287 | 0.26869  | -0.00814 | 0.86075  |
| 4.64E-15 | 0.346957 | 1.17E-14 | 0.017269 | 0.70973  | 0.013506 | 0.77098  | 0.154861 | 0.00079  |
| 0.00097  | 0.183002 | 6.96E-05 | 0.082324 | 0.07552  | 0.101183 | 0.02879  | 0.050674 | 0.27447  |
| 0.30689  | -0.04454 | 0.3368   | 0.039469 | 0.39479  | 0.00772  | 0.86785  | -0.10841 | 0.01911  |
| 0.19863  | 0.167675 | 0.00027  | 0.082287 | 0.07565  | 0.036808 | 0.42745  | -0.05005 | 0.2804   |
| 1.91E-12 | -0.25716 | 1.73E-08 | 0.243618 | 9.76E-08 | 0.011779 | 0.79959  | -0.20514 | 7.86E-06 |

|          |          |          |          |          |          |          |          |          |
|----------|----------|----------|----------|----------|----------|----------|----------|----------|
| 7.54E-11 | 0.444355 | 5.08E-24 | 0.326592 | 4.55E-13 | 0.044027 | 0.34245  | 0.098775 | 0.03284  |
| 0.72701  | 0.058817 | 0.20454  | 0.094869 | 0.04044  | 0.021713 | 0.63977  | 0.147984 | 0.00134  |
| 0.63167  | -0.06273 | 0.17595  | -0.03281 | 0.47934  | -0.09867 | 0.03302  | -0.18076 | 8.56E-05 |
| 0.07524  | -0.01606 | 0.72928  | 0.053616 | 0.24753  | 0.015836 | 0.73286  | -0.19874 | 1.52E-05 |
| 0.31368  | 0.112485 | 0.01501  | 0.080338 | 0.08287  | 0.120955 | 0.00888  | -0.04739 | 0.30677  |
| 0.0078   | 0.177144 | 0.00012  | 0.049919 | 0.28169  | 0.044079 | 0.34187  | 0.071578 | 0.12243  |
| 0.04385  | 0.061027 | 0.18801  | -0.0004  | 0.99309  | -0.03549 | 0.44422  | 0.053985 | 0.24428  |
| 0.28758  | 0.026279 | 0.57108  | 0.056362 | 0.2241   | 0.082948 | 0.07333  | -0.11045 | 0.01695  |
| 0.17926  | -0.03891 | 0.40152  | 0.021502 | 0.64303  | 0.14899  | 0.00124  | -0.05131 | 0.26846  |
| 0.07905  | -0.01796 | 0.69873  | -0.04496 | 0.33236  | 0.090542 | 0.05053  | -0.15324 | 0.00089  |
| 0.55042  | 0.044424 | 0.33811  | 0.083374 | 0.07185  | -0.00657 | 0.88736  | -0.14204 | 0.00209  |
| 0.04102  | 0.242132 | 1.17E-07 | 0.095125 | 0.0399   | 0.171004 | 0.0002   | -0.02334 | 0.61488  |
| 0.00128  | 0.262976 | 7.95E-09 | 0.086051 | 0.06316  | 0.147851 | 0.00135  | 0.059335 | 0.20057  |
| 0.00175  | 0.276157 | 1.28E-09 | 0.060844 | 0.18933  | 0.204414 | 8.48E-06 | 0.114709 | 0.01312  |
| 0.00059  | -0.08097 | 0.08046  | 0.017451 | 0.70681  | 0.079138 | 0.08758  | -0.1001  | 0.03056  |
| 3.81E-05 | 0.308811 | 8.91E-12 | 0.071007 | 0.12545  | 0.188224 | 4.25E-05 | 0.11019  | 0.01721  |
| 0.76379  | 0.012919 | 0.78068  | 0.389432 | 2.32E-18 | 0.042044 | 0.36465  | 0.00531  | 0.90889  |
| 0.17689  | 0.069083 | 0.13604  | 0.02377  | 0.60839  | 0.025727 | 0.57919  | 0.006109 | 0.89525  |
| 0.29148  | 0.089593 | 0.05301  | 0.043785 | 0.34511  | 0.092086 | 0.04671  | 0.000622 | 0.98931  |
| 0.10497  | 0.177954 | 0.00011  | 0.074704 | 0.1069   | 0.022674 | 0.62502  | 0.055094 | 0.23472  |
| 0.68334  | -0.06478 | 0.16224  | -0.08586 | 0.06375  | -0.17545 | 0.00014  | -0.13936 | 0.00254  |
| 0.2462   | -0.036   | 0.43772  | 0.056248 | 0.22504  | -0.00692 | 0.88141  | -0.22468 | 9.34E-07 |
| 0.07513  | 0.165587 | 0.00033  | 0.011916 | 0.79732  | -0.00652 | 0.88828  | -0.04222 | 0.36265  |
| 2.10E-08 | 0.348324 | 9.10E-15 | 0.06171  | 0.1831   | 0.095555 | 0.039    | 0.071326 | 0.12376  |
| 0.00089  | 0.221899 | 1.28E-06 | 0.017066 | 0.71299  | 0.175369 | 0.00014  | 0.038297 | 0.40897  |
| 0.00952  | 0.257164 | 1.72E-08 | 0.138192 | 0.00277  | 0.067218 | 0.14696  | 0.149603 | 0.00118  |
| 0.01647  | 0.163783 | 0.00038  | 0.045375 | 0.32786  | 0.001956 | 0.96637  | 0.085218 | 0.06577  |
| 2.53E-06 | 0.30168  | 2.78E-11 | 0.077173 | 0.09576  | 0.076809 | 0.09735  | 0.068505 | 0.13936  |
| 0.14352  | 0.03321  | 0.47403  | -0.00436 | 0.92518  | -0.01218 | 0.79294  | 0.006039 | 0.89644  |
| 0.85483  | 0.012804 | 0.78257  | 0.030128 | 0.51603  | -0.00123 | 0.97886  | -0.03871 | 0.40399  |
| 0.11861  | 0.043287 | 0.35063  | 0.039185 | 0.39819  | 0.012002 | 0.79588  | 0.148432 | 0.0013   |
| 0.23015  | 0.007217 | 0.87638  | -0.02581 | 0.57794  | -0.03148 | 0.49741  | -0.15724 | 0.00065  |
| 0.00179  | 0.215157 | 2.70E-06 | 0.016309 | 0.7252   | -0.00943 | 0.839    | 0.063646 | 0.16972  |
| 0.93316  | 0.050258 | 0.27843  | -0.05523 | 0.23356  | 0.043415 | 0.3492   | -0.15385 | 0.00085  |
| 0.78797  | -0.07566 | 0.10245  | -0.00319 | 0.94515  | -0.04453 | 0.33691  | 0.00106  | 0.98177  |
| 0.02253  | 0.050312 | 0.27791  | 0.068421 | 0.13985  | 0.089833 | 0.05238  | 0.063093 | 0.17347  |
| 0.12173  | 0.122801 | 0.00789  | 0.028384 | 0.54063  | 0.079614 | 0.08569  | 0.184218 | 6.21E-05 |
| 0.13843  | 0.271883 | 2.34E-09 | -0.01734 | 0.70857  | 0.025351 | 0.58475  | -0.1062  | 0.02172  |
| 0.60567  | 0.029743 | 0.52142  | 0.055429 | 0.23188  | 0.029304 | 0.52759  | 0.082176 | 0.07605  |
| 3.17E-06 | 0.13383  | 0.00376  | 0.039082 | 0.39944  | 0.048793 | 0.2927   | -0.11523 | 0.01271  |
| 5.61E-05 | -0.2906  | 1.54E-10 | -0.01399 | 0.76296  | -0.0467  | 0.31387  | 0.097202 | 0.03574  |
| 0.19497  | -0.14001 | 0.00243  | -0.18439 | 6.11E-05 | -0.0216  | 0.64157  | -0.19025 | 3.50E-05 |
| 0.00527  | -0.15518 | 0.00077  | 0.123519 | 0.00753  | -0.03333 | 0.47249  | -0.1089  | 0.01857  |
| 0.0385   | -0.18943 | 3.79E-05 | 0.022496 | 0.62775  | -0.05754 | 0.21457  | -0.08623 | 0.06262  |
| 0.45251  | 0.219493 | 1.68E-06 | 0.115206 | 0.01273  | 0.079388 | 0.08659  | 0.073843 | 0.11101  |

|          |          |          |          |          |          |          |          |          |
|----------|----------|----------|----------|----------|----------|----------|----------|----------|
| 0.00056  | -0.03089 | 0.50551  | -0.05782 | 0.21236  | 0.021435 | 0.64406  | -0.09244 | 0.04588  |
| 0.60258  | 0.094024 | 0.04226  | 0.060536 | 0.19159  | 0.030904 | 0.50528  | 0.05293  | 0.25364  |
| 0.00243  | 0.260102 | 1.17E-08 | 0.042914 | 0.3548   | 0.042988 | 0.35397  | 0.094583 | 0.04105  |
| 0.11886  | -0.08863 | 0.05562  | -0.02039 | 0.66033  | -0.02649 | 0.56797  | -0.01708 | 0.71282  |
| 0.15918  | -0.13142 | 0.00444  | 0.02306  | 0.61915  | 0.028326 | 0.54146  | 0.015    | 0.74647  |
| 0.06249  | 0.003785 | 0.93499  | 0.041232 | 0.37399  | 0.104315 | 0.02417  | 0.00627  | 0.89251  |
| 0.00046  | 0.296066 | 6.67E-11 | 0.039514 | 0.39424  | 0.166416 | 0.0003   | -0.08938 | 0.05357  |
| 0.22235  | 0.141716 | 0.00214  | 0.061111 | 0.1874   | 0.227934 | 6.42E-07 | 0.028542 | 0.53838  |
| 0.67668  | -0.04393 | 0.34347  | 0.287291 | 2.52E-10 | 0.069354 | 0.13451  | -0.01693 | 0.71514  |
| 0.45874  | -0.00664 | 0.88625  | 0.010884 | 0.81454  | 0.000965 | 0.98341  | 0.061518 | 0.18447  |
| 0.02035  | 0.144476 | 0.00175  | 0.121631 | 0.00851  | 0.028519 | 0.5387   | 0.089442 | 0.05341  |
| 0.81679  | -0.04138 | 0.37226  | 0.217879 | 2.00E-06 | 0.008151 | 0.86055  | 0.014872 | 0.74856  |
| 0.00441  | 0.231358 | 4.30E-07 | 0.066409 | 0.1519   | 0.136573 | 0.0031   | 0.139245 | 0.00256  |
| 0.00449  | -0.20119 | 1.18E-05 | -0.02671 | 0.56476  | -0.02457 | 0.59633  | 0.027503 | 0.55327  |
| 0.07533  | 0.0735   | 0.11268  | 0.004728 | 0.91883  | -0.02658 | 0.56668  | 0.103162 | 0.02579  |
| 0.69893  | 0.046665 | 0.31428  | 0.125358 | 0.00668  | -0.01212 | 0.79389  | -0.01036 | 0.82334  |
| 0.24863  | -0.03513 | 0.44885  | 0.044419 | 0.33816  | 0.054333 | 0.24125  | 0.031251 | 0.50051  |
| 0.01933  | 0.169111 | 0.00024  | 0.0106   | 0.81929  | 0.081205 | 0.07959  | 0.143793 | 0.00184  |
| 3.94E-11 | 0.252342 | 3.23E-08 | -0.01774 | 0.70219  | 0.052013 | 0.26196  | 0.0695   | 0.13369  |
| 0.33215  | 0.132403 | 0.00415  | 0.070098 | 0.13037  | 0.217291 | 2.14E-06 | 0.000107 | 0.99817  |
| 0.89578  | 0.007471 | 0.87208  | 0.149037 | 0.00124  | 0.089213 | 0.05403  | 0.130347 | 0.00478  |
| 0.06936  | 0.149056 | 0.00124  | 0.036142 | 0.43586  | 0.072413 | 0.11812  | 0.083697 | 0.07076  |
| 0.36969  | -0.03019 | 0.51519  | 0.005064 | 0.91309  | -0.00479 | 0.91785  | -0.05547 | 0.23151  |
| 0.28752  | 0.087533 | 0.05874  | 0.032032 | 0.48986  | 0.019428 | 0.67539  | 0.106153 | 0.02177  |
| 0.4555   | 0.007906 | 0.8647   | 0.051471 | 0.26697  | 0.021607 | 0.64141  | 0.089393 | 0.05355  |
| 0.04156  | -0.08022 | 0.08331  | 0.071713 | 0.12173  | 0.033787 | 0.46638  | 0.044963 | 0.33227  |
| 0.22476  | 0.095388 | 0.03935  | 0.026497 | 0.56788  | 0.033709 | 0.4674   | 0.203034 | 9.78E-06 |
| 0.01223  | 0.210012 | 4.71E-06 | 0.14537  | 0.00163  | 0.039119 | 0.39899  | 0.017707 | 0.70272  |
| 0.02387  | 0.17053  | 0.00021  | 0.03981  | 0.39071  | 0.085376 | 0.06527  | 0.118622 | 0.0103   |
| 0.36086  | 0.027974 | 0.54649  | 0.059166 | 0.20185  | 0.06737  | 0.14605  | 0.170873 | 0.00021  |
| 0.27545  | 0.067419 | 0.14576  | 0.030586 | 0.50967  | -0.03543 | 0.44499  | 0.030492 | 0.51097  |
| 0.00652  | 0.129899 | 0.00493  | 0.040066 | 0.38766  | 0.071341 | 0.12368  | 0.110384 | 0.01702  |
| 0.07451  | -0.10156 | 0.0282   | -0.01147 | 0.80475  | -0.01476 | 0.75034  | 0.106156 | 0.02177  |
| 0.14553  | -0.02471 | 0.59428  | 0.030104 | 0.51637  | 0.04786  | 0.30204  | 0.110443 | 0.01696  |
| 0.25894  | -0.02611 | 0.57355  | 0.048382 | 0.29679  | 0.073422 | 0.11307  | 0.154587 | 0.0008   |
| 0.5189   | 0.079692 | 0.08538  | -0.02372 | 0.60912  | 0.02323  | 0.61656  | 0.142698 | 0.00199  |
| 0.97086  | 0.04734  | 0.30733  | 0.072406 | 0.11816  | 0.02699  | 0.56071  | -0.08124 | 0.07946  |
| 0.68492  | 0.058024 | 0.21072  | 0.021038 | 0.65021  | 0.078487 | 0.09023  | 0.072444 | 0.11796  |
| 0.00609  | -0.0306  | 0.50945  | 0.022378 | 0.62955  | 0.037781 | 0.41533  | 0.052088 | 0.26128  |
| 0.85781  | 0.082314 | 0.07556  | 0.17154  | 0.0002   | 0.02374  | 0.60885  | 0.044627 | 0.3359   |
| 0.34551  | 0.087726 | 0.05818  | 0.274107 | 1.71E-09 | -0.02239 | 0.62936  | -0.04551 | 0.32643  |
| 0.18587  | 0.109833 | 0.01758  | 0.028188 | 0.54343  | 0.017658 | 0.7035   | 0.051644 | 0.26537  |
| 0.93414  | 0.134936 | 0.00348  | 0.287793 | 2.34E-10 | 0.037299 | 0.4213   | -0.06982 | 0.13189  |
| 0.4221   | 0.077593 | 0.09397  | 0.061441 | 0.18502  | 0.085232 | 0.06573  | 0.0972   | 0.03574  |
| 0.89925  | 0.024973 | 0.59037  | 0.054588 | 0.23904  | 0.047824 | 0.3024   | -0.01748 | 0.70635  |



|          |          |          |          |          |          |          |          |          |
|----------|----------|----------|----------|----------|----------|----------|----------|----------|
| 0.48479  | -0.01256 | 0.78659  | 0.049095 | 0.28971  | 0.091829 | 0.04733  | 0.072846 | 0.11593  |
| 0.49905  | 0.078035 | 0.0921   | 0.048436 | 0.29625  | 0.043057 | 0.3532   | 0.048665 | 0.29397  |
| 0.13744  | -0.00597 | 0.89768  | -0.01536 | 0.74052  | 0.008472 | 0.85511  | 0.052332 | 0.25904  |
| 0.84589  | 0.112381 | 0.01511  | -0.00656 | 0.88748  | -0.00504 | 0.91349  | -0.01132 | 0.80723  |
| 0.08034  | 0.124039 | 0.00728  | 0.121614 | 0.00852  | 0.066228 | 0.15302  | 0.257607 | 1.63E-08 |
| 0.49124  | 0.075849 | 0.10161  | 0.03199  | 0.49043  | 0.028418 | 0.54015  | 0.064559 | 0.16367  |
| 0.58792  | 0.022041 | 0.63472  | 0.054323 | 0.24134  | 0.052714 | 0.25558  | 0.010814 | 0.81571  |
| 0.96454  | 0.033988 | 0.46373  | 0.03115  | 0.50189  | 0.038749 | 0.40347  | 0.021266 | 0.64668  |
| 0.00174  | 0.276126 | 1.28E-09 | 0.085804 | 0.06393  | 0.311433 | 5.82E-12 | 0.10446  | 0.02398  |
| 0.51038  | 0.093678 | 0.04303  | 0.039459 | 0.3949   | 0.049435 | 0.28639  | 0.218967 | 1.78E-06 |
| 0.81361  | -0.13681 | 0.00305  | -0.00808 | 0.86179  | -0.02599 | 0.57533  | -0.01852 | 0.68979  |
| 0.79098  | 0.044894 | 0.33302  | 0.063292 | 0.17211  | 0.135383 | 0.00338  | 0.091123 | 0.04907  |
| 0.78761  | 0.085158 | 0.06596  | 0.085315 | 0.06546  | 0.007029 | 0.87958  | 0.052381 | 0.2586   |
| 0.00621  | 0.135295 | 0.0034   | 0.034141 | 0.46171  | 0.031909 | 0.49153  | 0.032705 | 0.48077  |
| 0.62212  | -0.01413 | 0.76073  | 0.149261 | 0.00122  | 0.039734 | 0.39161  | 0.08272  | 0.07412  |
| 0.41734  | -0.07942 | 0.08645  | 0.117103 | 0.01132  | 0.017609 | 0.70428  | 0.082439 | 0.07511  |
| 0.28699  | -0.01775 | 0.70195  | 0.043432 | 0.34902  | 0.077567 | 0.09408  | 0.021241 | 0.64706  |
| 0.06663  | 0.072247 | 0.11897  | -0.02585 | 0.57743  | 0.018306 | 0.69317  | 0.010834 | 0.81537  |
| 0.7228   | -0.02256 | 0.62679  | 0.054397 | 0.2407   | 0.070029 | 0.13075  | 0.068561 | 0.13904  |
| 0.85312  | 0.065238 | 0.15927  | 0.044124 | 0.34139  | 0.025627 | 0.58067  | -0.04029 | 0.38505  |
| 0.02653  | 0.186064 | 5.22E-05 | -0.0541  | 0.24331  | 0.057803 | 0.21246  | 0.048417 | 0.29643  |
| 0.00088  | -0.2718  | 2.36E-09 | -0.07288 | 0.11576  | -0.10345 | 0.02538  | -0.00392 | 0.93268  |
| 0.00126  | -0.30097 | 3.11E-11 | -0.0828  | 0.07383  | -0.11499 | 0.0129   | 0.011455 | 0.80499  |
| 0.7561   | 0.075457 | 0.1034   | -0.05236 | 0.25883  | -0.02019 | 0.66341  | -0.09117 | 0.04895  |
| 1.06E-06 | 0.319725 | 1.47E-12 | 0.030159 | 0.5156   | 0.015007 | 0.74636  | 0.098507 | 0.03332  |
| 1.58E-07 | 0.357745 | 1.52E-15 | 0.082918 | 0.07343  | 0.036999 | 0.42505  | 0.177173 | 0.00012  |
| 6.66E-16 | -0.22352 | 1.06E-06 | -0.03281 | 0.47941  | -0.04312 | 0.35253  | -0.15481 | 0.00079  |
| 0.18232  | -0.15385 | 0.00085  | 0.06826  | 0.14079  | -0.10076 | 0.02947  | -0.03675 | 0.42822  |
| 0.00018  | -0.34285 | 2.51E-14 | -0.04307 | 0.35308  | -0.11613 | 0.01202  | -0.02742 | 0.55444  |
| 0.00801  | -0.14184 | 0.00212  | -0.03484 | 0.45253  | -0.22224 | 1.23E-06 | 0.023556 | 0.61163  |
| 0.02895  | 0.154806 | 0.00079  | 0.077385 | 0.09485  | 0.070065 | 0.13056  | -0.01346 | 0.77178  |
| 0.18708  | -0.07783 | 0.09295  | 0.015012 | 0.74627  | 0.000857 | 0.98526  | 0.07305  | 0.11491  |
| 0.5593   | 0.129076 | 0.00521  | 0.039869 | 0.39     | 0.208836 | 5.33E-06 | 0.019899 | 0.668    |
| 0.88736  | 0.081052 | 0.08016  | 0.056882 | 0.21985  | 0.023999 | 0.60494  | -0.00017 | 0.99703  |
| 0.52732  | 0.060093 | 0.19487  | 0.031454 | 0.49772  | 0.011498 | 0.80428  | 0.008344 | 0.85727  |
| 0.11458  | 0.083701 | 0.07074  | 0.030504 | 0.51081  | 0.007539 | 0.87092  | -0.02254 | 0.62715  |
| 0.90513  | 0.021884 | 0.63713  | -0.02541 | 0.58381  | 0.02938  | 0.52651  | -0.00522 | 0.91035  |
| 0.93481  | 0.128622 | 0.00537  | 0.126285 | 0.00628  | 0.215599 | 2.58E-06 | 0.061464 | 0.18486  |
| 0.02087  | 0.006041 | 0.89641  | 0.044198 | 0.34058  | 0.016759 | 0.71794  | -0.03219 | 0.48766  |
| 0.14219  | 0.097001 | 0.03612  | 0.402096 | 1.42E-19 | 0.091599 | 0.04789  | 0.053396 | 0.24947  |
| 0.34128  | 0.140451 | 0.00235  | 0.077099 | 0.09608  | 0.147165 | 0.00143  | 0.11665  | 0.01165  |
| 0.1269   | 0.01604  | 0.72955  | 0.221486 | 1.34E-06 | 0.096224 | 0.03765  | 0.252427 | 3.20E-08 |
| 0.11932  | -0.1218  | 0.00842  | -0.0025  | 0.95707  | -0.05196 | 0.26241  | -0.20572 | 7.40E-06 |
| 0.77337  | 0.04118  | 0.3746   | 0.180063 | 9.12E-05 | 0.028662 | 0.53667  | 0.023249 | 0.61628  |
| 2.45E-07 | 0.306392 | 1.32E-11 | 0.113521 | 0.01411  | -0.00168 | 0.97107  | 0.184659 | 5.96E-05 |

|          |          |          |          |          |          |         |          |          |
|----------|----------|----------|----------|----------|----------|---------|----------|----------|
| 0.00273  | -0.02636 | 0.56982  | 0.143775 | 0.00184  | 0.032521 | 0.48326 | -0.03698 | 0.42526  |
| 9.91E-09 | 0.311034 | 6.21E-12 | 0.068991 | 0.13657  | 0.052917 | 0.25375 | 0.144569 | 0.00173  |
| 0.62489  | 0.011788 | 0.79944  | -0.08237 | 0.07535  | -0.00509 | 0.91268 | 0.172773 | 0.00018  |
| 0.00011  | -0.08929 | 0.05381  | -0.02106 | 0.64987  | 0.087631 | 0.05845 | -0.08753 | 0.05874  |
| 0.01792  | -0.11649 | 0.01176  | -0.13256 | 0.00411  | 0.074281 | 0.1089  | -0.1928  | 2.73E-05 |
| 0.68683  | -0.10901 | 0.01845  | -0.11782 | 0.01083  | -0.02482 | 0.59268 | -0.0804  | 0.08264  |
| 0.05457  | 0.070862 | 0.12622  | -0.05058 | 0.27535  | 0.007892 | 0.86493 | -0.09801 | 0.03423  |
| 0.07696  | 0.238981 | 1.73E-07 | 0.063431 | 0.17117  | 0.103753 | 0.02495 | 0.127294 | 0.00587  |
| 0.00186  | 0.210159 | 4.64E-06 | 0.056693 | 0.22139  | 0.084623 | 0.06768 | 0.072644 | 0.11695  |
| 0.28684  | 0.128231 | 0.00552  | 0.075392 | 0.1037   | 0.103202 | 0.02573 | 0.070544 | 0.12794  |
| 0.00193  | 0.085708 | 0.06423  | 0.022871 | 0.62202  | 0.049782 | 0.28301 | 0.052651 | 0.25615  |
| 6.78E-14 | 0.386782 | 4.10E-18 | 0.035576 | 0.44309  | 0.032346 | 0.48561 | 0.032028 | 0.48991  |
| 0.43654  | 0.062569 | 0.17707  | 0.328495 | 3.27E-13 | 0.059128 | 0.20215 | 0.091626 | 0.04783  |
| 9.41E-09 | -0.17562 | 0.00014  | -0.02226 | 0.63133  | -0.01584 | 0.73283 | -0.06129 | 0.18607  |
| 0.37233  | -0.02297 | 0.62059  | -0.05373 | 0.24653  | -0.05652 | 0.2228  | 0.016948 | 0.71489  |
| 0.01152  | -0.18994 | 3.61E-05 | -0.0628  | 0.17551  | -0.01005 | 0.82858 | -0.17288 | 0.00017  |
| 0.23933  | -0.10876 | 0.01872  | -0.02795 | 0.54682  | -0.05067 | 0.27452 | 0.024182 | 0.60219  |
| 0.95274  | 0.016563 | 0.7211   | 0.109276 | 0.01817  | -0.06465 | 0.16307 | 0.055148 | 0.23426  |
| 0.14966  | 0.144946 | 0.00169  | 0.033046 | 0.4762   | 0.003299 | 0.94332 | 0.028279 | 0.54212  |
| 0.10954  | -0.06887 | 0.13724  | -0.00785 | 0.86563  | -0.04989 | 0.28197 | -0.07312 | 0.11455  |
| 2.57E-06 | -0.20538 | 7.67E-06 | 0.020739 | 0.65486  | -0.01623 | 0.72644 | -0.14739 | 0.0014   |
| 0.0181   | 0.086418 | 0.06204  | 0.048728 | 0.29334  | 0.149549 | 0.00119 | 0.206674 | 6.70E-06 |
| 0.02825  | 0.199712 | 1.37E-05 | 0.05497  | 0.23577  | 0.124543 | 0.00705 | 0.135117 | 0.00344  |
| 0.13108  | 0.181073 | 8.32E-05 | 0.064266 | 0.16559  | 0.038089 | 0.41153 | 0.188271 | 4.23E-05 |
| 0.02553  | 0.206059 | 7.15E-06 | 0.110996 | 0.01641  | 0.098615 | 0.03313 | 0.136326 | 0.00316  |
| 0.2245   | 0.047096 | 0.30983  | 0.063817 | 0.16857  | 0.055431 | 0.23186 | 0.06759  | 0.14474  |
| 5.79E-07 | 0.183189 | 6.84E-05 | 0.064213 | 0.16594  | 0.043717 | 0.34586 | -0.13727 | 0.00295  |
| 1.31E-06 | 0.175562 | 0.00014  | -0.06873 | 0.13805  | -0.01768 | 0.7032  | -0.00039 | 0.99324  |
| 0.10811  | 0.000215 | 0.99631  | 0.054876 | 0.23657  | -0.03896 | 0.40092 | -0.05253 | 0.25726  |
| 0.34005  | 0.037458 | 0.41933  | 0.103054 | 0.02595  | 0.041817 | 0.36724 | -0.11871 | 0.01024  |
| 0.64702  | 0.050438 | 0.2767   | -0.00367 | 0.93704  | 0.101907 | 0.02766 | 0.031686 | 0.49456  |
| 0.00081  | 0.279536 | 7.87E-10 | 0.151225 | 0.00105  | 0.07031  | 0.12921 | -0.00192 | 0.96708  |
| 0.08367  | 0.143095 | 0.00194  | 0.128646 | 0.00537  | -0.03468 | 0.45472 | -0.04938 | 0.28695  |
| 0.84859  | -0.04672 | 0.31367  | 0.025592 | 0.58118  | -0.05513 | 0.23437 | -0.06757 | 0.14485  |
| 2.45E-08 | -0.25361 | 2.74E-08 | -0.14934 | 0.00121  | 0.006449 | 0.88946 | -0.07585 | 0.10161  |
| 0.01155  | 0.128263 | 0.00551  | 0.05081  | 0.27318  | 0.026762 | 0.56402 | 0.063137 | 0.17316  |
| 0.77179  | 0.142626 | 0.002    | 0.031309 | 0.49971  | 0.028117 | 0.54444 | -0.04646 | 0.31641  |
| 7.40E-05 | 0.165879 | 0.00032  | 0.133227 | 0.00392  | -0.03974 | 0.39157 | 0.075196 | 0.1046   |
| 3.40E-16 | 0.356679 | 1.86E-15 | 0.037029 | 0.42468  | -0.02381 | 0.60773 | 0.202271 | 1.06E-05 |
| 0.00096  | -0.19858 | 1.54E-05 | 0.078121 | 0.09175  | -0.06495 | 0.16113 | 0.059164 | 0.20188  |
| 0.09034  | -0.09122 | 0.04882  | -0.03905 | 0.39988  | -0.00412 | 0.92932 | -0.06832 | 0.14041  |
| 0.02425  | 0.206277 | 6.98E-06 | -0.02426 | 0.60106  | -0.01646 | 0.72271 | -0.11297 | 0.01458  |
| 0.14358  | 0.134836 | 0.00351  | 0.008348 | 0.85722  | 0.01648  | 0.72243 | -0.00914 | 0.84388  |
| 0.00037  | -0.10421 | 0.02431  | -0.04124 | 0.37384  | -0.03798 | 0.41283 | -0.17083 | 0.00021  |
| 0.1615   | 0.090494 | 0.05066  | 0.070255 | 0.12951  | 0.0987   | 0.03297 | 0.080296 | 0.08303  |

|          |          |          |          |          |          |          |          |          |
|----------|----------|----------|----------|----------|----------|----------|----------|----------|
| 0.01072  | -0.1848  | 5.88E-05 | 0.047049 | 0.31031  | -0.01048 | 0.82128  | -0.18912 | 3.90E-05 |
| 0.02786  | 0.118945 | 0.01009  | 0.038932 | 0.40125  | 0.038174 | 0.41048  | 0.019786 | 0.66976  |
| 0.15156  | 0.149308 | 0.00121  | -0.14196 | 0.0021   | -0.03422 | 0.46071  | -0.10602 | 0.02193  |
| 0.63006  | 0.11417  | 0.01356  | 0.010341 | 0.82362  | 0.016667 | 0.71942  | -0.02114 | 0.64864  |
| 0.00547  | 0.167153 | 0.00029  | 0.107784 | 0.01982  | 0.09292  | 0.04475  | 0.048112 | 0.29949  |
| 0.04909  | 0.065123 | 0.16001  | 0.080225 | 0.0833   | 0.054216 | 0.24227  | -0.0141  | 0.76119  |
| 0.4401   | -0.00252 | 0.95662  | 0.338949 | 5.11E-14 | 0.041251 | 0.37378  | -0.01527 | 0.74199  |
| 0.0095   | 0.044471 | 0.33759  | 0.037611 | 0.41743  | -0.02457 | 0.59637  | 0.085051 | 0.0663   |
| 0.16591  | 0.034958 | 0.45105  | 0.097157 | 0.03582  | 0.039841 | 0.39034  | -0.0098  | 0.8327   |
| 0.04607  | -0.20393 | 8.92E-06 | 0.054852 | 0.23678  | 0.011438 | 0.80527  | -0.01418 | 0.75992  |
| 0.053    | 0.019439 | 0.67522  | 0.139117 | 0.00259  | 0.142939 | 0.00196  | 0.124784 | 0.00694  |
| 0.91676  | -0.01952 | 0.67389  | -0.00462 | 0.92072  | 0.016551 | 0.72128  | 0.028265 | 0.54232  |
| 0.0201   | 0.052978 | 0.2532   | -0.13185 | 0.00432  | -0.07726 | 0.0954   | 0.085758 | 0.06407  |
| 0.24203  | -0.01491 | 0.74791  | 0.059288 | 0.20092  | -0.10928 | 0.01816  | 0.002073 | 0.96437  |
| 0.01083  | 0.293086 | 1.05E-10 | 0.023887 | 0.60664  | 0.008849 | 0.84874  | -0.05239 | 0.25855  |
| 1.50E-07 | 0.260515 | 1.11E-08 | 0.05306  | 0.25247  | 0.106829 | 0.02094  | 0.188535 | 4.13E-05 |
| 0.00145  | 0.197129 | 1.78E-05 | 0.071871 | 0.12091  | 0.082141 | 0.07617  | 0.147115 | 0.00143  |
| 0.0093   | 0.1224   | 0.0081   | 0.065636 | 0.15674  | 0.083026 | 0.07305  | 0.119715 | 0.00961  |
| 0.00028  | 0.115093 | 0.01282  | -0.06418 | 0.16613  | -0.02878 | 0.53495  | 0.067045 | 0.14801  |
| 0.08544  | 0.091084 | 0.04917  | 0.053496 | 0.24859  | 0.189637 | 3.71E-05 | 0.023257 | 0.61615  |
| 0.32643  | 0.031847 | 0.49236  | 0.011812 | 0.79904  | 0.08788  | 0.05774  | 0.012564 | 0.78655  |
| 0.00053  | 0.248433 | 5.33E-08 | 0.04447  | 0.33761  | 0.073781 | 0.11131  | 0.193691 | 2.50E-05 |
| 0.1285   | 0.17174  | 0.00019  | 0.047255 | 0.30819  | 0.050395 | 0.27712  | 0.061745 | 0.18285  |
| 0.40458  | 0.106598 | 0.02122  | 0.059405 | 0.20004  | 0.029603 | 0.52338  | 0.143595 | 0.00186  |
| 0.39423  | 0.057015 | 0.21877  | 0.018449 | 0.69089  | 0.143074 | 0.00194  | -0.01234 | 0.79029  |
| 0.38126  | 0.084678 | 0.06751  | 0.02133  | 0.64568  | 0.112133 | 0.01533  | -0.02781 | 0.54892  |
| 0.54914  | 0.082923 | 0.07341  | -0.0167  | 0.71887  | 0.026932 | 0.56155  | 0.117687 | 0.01092  |
| 0.16296  | 0.132897 | 0.00401  | 0.003167 | 0.94558  | -0.00145 | 0.97515  | 0.111464 | 0.01596  |
| 0.02266  | -0.01619 | 0.72713  | 0.027717 | 0.55019  | 0.073322 | 0.11356  | 0.104487 | 0.02394  |
| 0.1532   | 0.12787  | 0.00565  | 0.132842 | 0.00403  | 0.059931 | 0.19608  | 0.11749  | 0.01105  |
| 0.11138  | 0.146528 | 0.0015   | 0.044181 | 0.34075  | 0.022177 | 0.63264  | 0.009887 | 0.83125  |
| 0.00766  | 0.195601 | 2.07E-05 | 0.034294 | 0.45971  | 0.114264 | 0.01348  | 0.049732 | 0.28349  |
| 3.03E-05 | 0.299045 | 4.21E-11 | 0.021166 | 0.64823  | 0.002161 | 0.96285  | 0.118728 | 0.01023  |
| 0.02677  | 0.300913 | 3.14E-11 | 0.109211 | 0.01823  | 0.062789 | 0.17555  | -0.02197 | 0.63575  |
| 0.14371  | 0.122367 | 0.00811  | 0.047542 | 0.30526  | 0.073799 | 0.11123  | 0.122165 | 0.00822  |
| 0.00113  | 0.273588 | 1.84E-09 | 0.072203 | 0.11919  | 0.311552 | 5.71E-12 | 0.096681 | 0.03674  |
| 0.00797  | 0.163432 | 0.00039  | 0.061628 | 0.18369  | -0.00909 | 0.84464  | 0.103859 | 0.0248   |
| 0.00304  | 0.227537 | 6.72E-07 | 0.076732 | 0.09768  | 0.041003 | 0.37666  | 0.122037 | 0.00829  |
| 0.14219  | 0.131564 | 0.0044   | 0.096927 | 0.03627  | -0.00692 | 0.88152  | -0.00482 | 0.91719  |
| 0.09948  | 0.077008 | 0.09648  | -0.02349 | 0.61265  | -0.00517 | 0.91134  | -0.0786  | 0.08978  |
| 5.35E-10 | -0.17175 | 0.00019  | -0.06547 | 0.15782  | 0.015855 | 0.73256  | -0.13672 | 0.00307  |
| 0.06459  | 0.200891 | 1.22E-05 | 0.028265 | 0.54233  | 0.110165 | 0.01724  | -0.01593 | 0.7314   |
| 0.00355  | 0.238039 | 1.94E-07 | 0.225184 | 8.81E-07 | 0.099522 | 0.03153  | -0.06962 | 0.13304  |
| 0.32487  | 0.065515 | 0.15751  | 0.063558 | 0.17031  | 0.130485 | 0.00474  | -0.15578 | 0.00073  |
| 0.11957  | 0.022741 | 0.624    | 0.016431 | 0.72322  | -0.05282 | 0.25464  | -0.02003 | 0.66597  |

|          |          |          |          |          |          |          |          |         |
|----------|----------|----------|----------|----------|----------|----------|----------|---------|
| 0.08263  | 0.163054 | 0.0004   | 0.08856  | 0.05582  | 0.038954 | 0.40099  | 0.102948 | 0.0261  |
| 0.07313  | 0.067947 | 0.14262  | 0.023176 | 0.61739  | 0.061356 | 0.18563  | -0.00163 | 0.97195 |
| 0.07925  | 0.158195 | 0.0006   | 0.02574  | 0.57901  | -0.015   | 0.74643  | -0.02728 | 0.55649 |
| 0.05051  | 0.047827 | 0.30237  | 0.061349 | 0.18568  | -0.03178 | 0.49334  | 0.015165 | 0.74377 |
| 3.21E-06 | -0.21933 | 1.71E-06 | -0.11514 | 0.01278  | -0.0475  | 0.30565  | 0.009659 | 0.83508 |
| 2.36E-06 | 0.152847 | 0.00092  | -0.06305 | 0.17374  | -0.01484 | 0.749    | -0.00695 | 0.88093 |
| 0.00698  | 0.265414 | 5.71E-09 | 0.085761 | 0.06406  | 0.136487 | 0.00312  | 0.123095 | 0.00774 |
| 0.63107  | 0.080687 | 0.08154  | 0.115006 | 0.01289  | 0.071612 | 0.12226  | 0.034767 | 0.45354 |
| 3.38E-12 | 0.398137 | 3.44E-19 | 0.150644 | 0.00109  | 0.343887 | 2.07E-14 | 0.178121 | 0.00011 |
| 0.00273  | -0.06248 | 0.17771  | 0.044478 | 0.33752  | -0.02513 | 0.58797  | -0.10303 | 0.02598 |
| 0.22872  | 0.012558 | 0.78666  | -0.01723 | 0.71037  | -0.01958 | 0.673    | 0.027132 | 0.55863 |
| 0.20396  | -0.03067 | 0.50856  | 0.043247 | 0.35107  | 0.044984 | 0.33205  | 0.112964 | 0.01459 |
| 0.02592  | 0.279094 | 8.38E-10 | 0.07812  | 0.09175  | 0.059533 | 0.19907  | -0.01724 | 0.71021 |
| 7.67E-07 | 0.287323 | 2.51E-10 | 0.13333  | 0.0039   | 0.051776 | 0.26415  | -0.03903 | 0.40008 |
| 0.14885  | 0.202494 | 1.03E-05 | 0.11604  | 0.01209  | 0.105668 | 0.02238  | 0.117032 | 0.01137 |
| 0.30019  | 0.006997 | 0.88014  | 0.019348 | 0.67665  | 0.002048 | 0.9648   | 0.021256 | 0.64683 |
| 0.08528  | -0.03165 | 0.49508  | 0.023026 | 0.61966  | -0.01425 | 0.75867  | -0.0897  | 0.05272 |
| 0.06901  | -0.06396 | 0.1676   | -0.06358 | 0.17016  | 0.026723 | 0.56459  | 0.022521 | 0.62736 |
| 0.03658  | 0.000212 | 0.99635  | -0.12855 | 0.0054   | -0.06663 | 0.15054  | -0.09185 | 0.04729 |
| 0.1954   | 0.063068 | 0.17363  | 0.036631 | 0.42967  | 0.062226 | 0.17946  | 0.052427 | 0.25818 |
| 0.07454  | -0.09237 | 0.04603  | 0.120434 | 0.00918  | -0.03716 | 0.423    | -0.03346 | 0.47064 |
| 0.25197  | 0.153083 | 0.0009   | 0.077641 | 0.09376  | 0.16122  | 0.00047  | 0.055422 | 0.23194 |
| 0.4206   | 0.013488 | 0.77128  | 0.180085 | 9.11E-05 | 0.229378 | 5.43E-07 | 0.010686 | 0.81785 |
| 0.02784  | 0.082003 | 0.07667  | 0.042962 | 0.35427  | 0.017255 | 0.70996  | 0.089825 | 0.0524  |
| 0.00258  | 0.062069 | 0.18056  | -0.05609 | 0.22637  | -0.01761 | 0.70428  | -0.03944 | 0.39515 |
| 0.21977  | -0.11342 | 0.01419  | 0.011543 | 0.80353  | -0.02602 | 0.5749   | -0.09698 | 0.03616 |
| 1.82E-06 | 0.250634 | 4.03E-08 | 0.057435 | 0.21539  | -0.08284 | 0.07369  | 0.089947 | 0.05208 |
| 0.99567  | 0.140769 | 0.0023   | 0.014678 | 0.75173  | 0.013367 | 0.77328  | -0.04726 | 0.30812 |
| 0.01762  | -0.0857  | 0.06425  | 0.089916 | 0.05216  | 0.041262 | 0.37364  | 0.087715 | 0.05821 |
| 0.00819  | 0.055268 | 0.23324  | -0.04834 | 0.29718  | 0.012292 | 0.79105  | 0.043709 | 0.34595 |
| 0.14438  | -0.11405 | 0.01366  | -0.05282 | 0.25465  | -0.04836 | 0.297    | -0.06334 | 0.17178 |
| 0.40819  | 0.139329 | 0.00255  | 0.014777 | 0.7501   | 0.060389 | 0.19268  | 0.034284 | 0.45984 |
| 0.89758  | 0.063171 | 0.17293  | 0.026231 | 0.57178  | -0.00849 | 0.85483  | -0.07049 | 0.12822 |
| 0.4473   | 0.114761 | 0.01308  | 0.067115 | 0.14758  | 0.050838 | 0.27291  | -0.02195 | 0.63614 |
| 1.12E-05 | -0.10472 | 0.02363  | -0.02444 | 0.5983   | -0.0535  | 0.24854  | -0.1204  | 0.00921 |
| 0.34947  | 0.061657 | 0.18348  | 0.031868 | 0.49209  | -0.01093 | 0.81381  | 0.048589 | 0.29472 |
| 0.17418  | -0.05001 | 0.28084  | 0.177369 | 0.00012  | 0.125454 | 0.00664  | -0.08826 | 0.05666 |
| 0.3756   | -0.05928 | 0.20097  | 0.016622 | 0.72014  | 0.005578 | 0.90431  | 0.045048 | 0.33136 |
| 0.0257   | -0.04735 | 0.30718  | -0.0698  | 0.13203  | -0.11462 | 0.0132   | -0.06662 | 0.15062 |
| 0.3625   | 0.047797 | 0.30267  | 0.077154 | 0.09585  | 0.085394 | 0.06521  | 0.10686  | 0.02091 |
| 0.00235  | 0.314061 | 3.78E-12 | 0.147343 | 0.00141  | 0.002073 | 0.96436  | 0.045546 | 0.32603 |
| 0.07133  | 0.185813 | 5.35E-05 | 0.299327 | 4.02E-11 | 0.048627 | 0.29434  | 0.004148 | 0.92876 |
| 0.30142  | 0.00506  | 0.91316  | -0.04203 | 0.36482  | -0.08964 | 0.05289  | -0.16497 | 0.00034 |
| 0.00828  | 0.143425 | 0.00189  | 0.003145 | 0.94595  | -0.0328  | 0.47953  | 0.020562 | 0.65762 |
| 0.2136   | 0.018095 | 0.69652  | -0.12338 | 0.0076   | -0.08212 | 0.07624  | 0.046159 | 0.31956 |

|          |          |          |          |          |          |         |          |          |
|----------|----------|----------|----------|----------|----------|---------|----------|----------|
| 0.49644  | 0.044203 | 0.34052  | 0.05365  | 0.24722  | 0.073184 | 0.11425 | 0.025657 | 0.58022  |
| 0.18132  | 0.163402 | 0.00039  | 0.100854 | 0.02932  | 0.030648 | 0.50881 | 0.024754 | 0.59362  |
| 2.71E-11 | -0.40646 | 5.26E-20 | -0.07124 | 0.12421  | -0.08084 | 0.08095 | -0.15948 | 0.00054  |
| 0.00227  | -0.27394 | 1.75E-09 | 0.104004 | 0.0246   | -0.07081 | 0.12651 | -0.13528 | 0.0034   |
| 0.23556  | -0.04817 | 0.29891  | -0.00378 | 0.93504  | 0.028506 | 0.53889 | -0.02385 | 0.60725  |
| 0.35643  | 0.157332 | 0.00064  | 0.12627  | 0.00629  | 0.107686 | 0.01993 | 0.08081  | 0.08107  |
| 0.07158  | 0.183184 | 6.84E-05 | 0.131326 | 0.00447  | 0.056779 | 0.22069 | 0.085221 | 0.06576  |
| 0.00704  | 0.091841 | 0.0473   | 0.055207 | 0.23376  | 0.037495 | 0.41887 | 0.072348 | 0.11845  |
| 6.00E-14 | 0.249225 | 4.82E-08 | -0.00727 | 0.87543  | -0.0676  | 0.14469 | 0.098033 | 0.03418  |
| 1.17E-10 | -0.35456 | 2.80E-15 | -0.13679 | 0.00306  | -0.0933  | 0.04388 | -0.11571 | 0.01234  |
| 0.56156  | -0.02708 | 0.55939  | -0.10914 | 0.01831  | 0.033972 | 0.46394 | 0.007203 | 0.87663  |
| 0.00418  | -0.07663 | 0.09812  | 0.069788 | 0.13209  | -0.05809 | 0.21017 | -0.05777 | 0.21275  |
| 0.56809  | -0.11797 | 0.01073  | -0.11204 | 0.01542  | -0.02686 | 0.56262 | -0.13808 | 0.00279  |
| 2.60E-05 | 0.079878 | 0.08465  | -0.04568 | 0.32463  | -0.03576 | 0.44069 | -0.16226 | 0.00043  |
| 0.08643  | -0.10805 | 0.01952  | 0.033052 | 0.47613  | -0.05801 | 0.21083 | -0.02694 | 0.5614   |
| 0.08235  | 0.054986 | 0.23563  | 0.178687 | 0.0001   | 0.018817 | 0.68504 | 0.032638 | 0.48168  |
| 0.00309  | 0.24447  | 8.78E-08 | 0.165058 | 0.00034  | 0.019673 | 0.67154 | 0.121849 | 0.00839  |
| 0.00029  | 0.183473 | 6.66E-05 | 0.056145 | 0.22589  | 0.008215 | 0.85946 | -0.03683 | 0.42722  |
| 9.12E-07 | -0.30069 | 3.25E-11 | -0.11951 | 0.00974  | -0.14768 | 0.00137 | -0.13007 | 0.00487  |
| 0.00665  | -0.20652 | 6.81E-06 | -0.01599 | 0.73043  | -0.05322 | 0.25101 | 0.017608 | 0.70429  |
| 0.41542  | 0.186324 | 5.09E-05 | 0.002427 | 0.95828  | 0.111189 | 0.01622 | -0.22171 | 1.31E-06 |
| 0.00701  | 0.245221 | 7.99E-08 | 0.05293  | 0.25364  | 0.052342 | 0.25895 | -0.04249 | 0.35961  |
| 0.91858  | 0.118219 | 0.01056  | 0.087746 | 0.05812  | 0.007444 | 0.87253 | -0.06643 | 0.15175  |
| 6.58E-05 | 0.000741 | 0.98726  | 0.103367 | 0.0255   | -0.15044 | 0.00111 | -0.05628 | 0.22478  |
| 0.00232  | 0.262065 | 8.98E-09 | -0.06814 | 0.14147  | -0.03495 | 0.45118 | 0.114185 | 0.01355  |
| 0.03962  | -0.02676 | 0.56398  | -0.15713 | 0.00065  | -0.03231 | 0.48603 | -0.06334 | 0.17175  |
| 0.00547  | -0.12181 | 0.00841  | 0.066423 | 0.15181  | 0.067584 | 0.14477 | -0.0295  | 0.52485  |
| 0.00089  | 0.00273  | 0.95308  | -0.054   | 0.24417  | -0.06728 | 0.1466  | 0.121704 | 0.00847  |
| 0.00284  | 0.136602 | 0.0031   | 0.124499 | 0.00707  | 0.034919 | 0.45156 | 0.146535 | 0.0015   |
| 0.78129  | 0.080026 | 0.08408  | 0.108992 | 0.01847  | 0.157316 | 0.00065 | 0.083671 | 0.07085  |
| 0.56705  | 0.021416 | 0.64435  | 0.097891 | 0.03444  | -0.01823 | 0.69434 | 0.0066   | 0.88688  |
| 0.03528  | 0.187883 | 4.39E-05 | 0.116241 | 0.01194  | 0.022591 | 0.62629 | 0.071939 | 0.12055  |
| 0.23001  | 0.002224 | 0.96177  | 0.023742 | 0.60882  | -0.00079 | 0.98646 | 0.089742 | 0.05262  |
| 1.16E-08 | -0.29544 | 7.35E-11 | -0.12116 | 0.00877  | -0.03857 | 0.40567 | -0.24905 | 4.93E-08 |
| 0.06056  | 0.15998  | 0.00052  | 0.083706 | 0.07073  | 0.063844 | 0.16839 | 0.142466 | 0.00203  |
| 1.48E-08 | 0.437669 | 2.83E-23 | 0.194634 | 2.28E-05 | 0.154007 | 0.00084 | -0.05942 | 0.19992  |
| 0.00536  | 0.160799 | 0.00049  | 0.01618  | 0.72728  | -0.05735 | 0.21607 | 0.019139 | 0.67996  |
| 1.69E-05 | 0.298505 | 4.57E-11 | 0.052547 | 0.25709  | 0.005642 | 0.90321 | 0.03363  | 0.46844  |
| 0.00118  | -0.17108 | 0.0002   | -0.04114 | 0.37508  | -0.06112 | 0.18736 | -0.10245 | 0.02683  |
| 0.30997  | -0.03831 | 0.40883  | -0.04808 | 0.29986  | 0.053894 | 0.24508 | 0.03761  | 0.41744  |
| 0.0001   | -0.14849 | 0.00129  | -0.05745 | 0.21529  | -0.09728 | 0.03558 | -0.06523 | 0.15934  |
| 0.22109  | -0.03768 | 0.41662  | 0.054143 | 0.2429   | 0.043852 | 0.34437 | -0.07457 | 0.10752  |
| 0.00012  | -0.26929 | 3.35E-09 | 0.000301 | 0.99483  | 0.000593 | 0.9898  | 0.067702 | 0.14407  |
| 0.14588  | -0.00742 | 0.87293  | 0.034739 | 0.4539   | -0.12593 | 0.00643 | -0.14285 | 0.00197  |
| 0.33026  | 0.049562 | 0.28515  | 0.054082 | 0.24343  | -0.01549 | 0.73854 | 0.057335 | 0.21619  |

|          |          |          |          |          |          |          |          |          |
|----------|----------|----------|----------|----------|----------|----------|----------|----------|
| 8.83E-07 | -0.23451 | 2.96E-07 | 0.058859 | 0.20421  | -0.09475 | 0.04069  | -0.07376 | 0.11141  |
| 0.00622  | 0.236186 | 2.42E-07 | 0.090351 | 0.05103  | 0.092085 | 0.04672  | 0.157706 | 0.00063  |
| 0.07343  | -0.01495 | 0.74736  | -0.00887 | 0.84839  | 0.015408 | 0.73982  | 0.051613 | 0.26565  |
| 0.39103  | -0.03861 | 0.40513  | -0.08472 | 0.06738  | -0.10501 | 0.02324  | 0.020159 | 0.66391  |
| 0.00046  | -0.24604 | 7.22E-08 | -0.09789 | 0.03445  | -0.18083 | 8.50E-05 | 0.052117 | 0.26101  |
| 0.02143  | -0.07276 | 0.11635  | 0.056985 | 0.21901  | -0.00369 | 0.93653  | 0.054863 | 0.23669  |
| 0.10479  | 0.232997 | 3.55E-07 | 0.077731 | 0.09338  | 0.065073 | 0.16033  | 0.065569 | 0.15716  |
| 0.07035  | 0.024817 | 0.59269  | -0.02126 | 0.64677  | 0.079814 | 0.0849   | -0.12947 | 0.00507  |
| 9.37E-07 | 0.318246 | 1.88E-12 | 0.148187 | 0.00132  | 0.176093 | 0.00013  | 0.065118 | 0.16004  |
| 0.0825   | 0.161612 | 0.00045  | 0.323989 | 7.12E-13 | 0.094251 | 0.04176  | 0.024038 | 0.60435  |
| 0.98658  | 0.06422  | 0.16589  | 0.071602 | 0.12231  | 0.034342 | 0.45908  | -0.01045 | 0.82181  |
| 0.38897  | 0.082279 | 0.07568  | 0.042663 | 0.35762  | 0.032078 | 0.48923  | 0.238366 | 1.86E-07 |
| 0.07483  | 0.035465 | 0.44452  | -0.01673 | 0.71845  | 0.005324 | 0.90864  | -0.05947 | 0.19954  |
| 0.3773   | 0.040743 | 0.37969  | 0.035293 | 0.44673  | 0.184652 | 5.96E-05 | -0.04558 | 0.32565  |
| 0.00037  | 0.094737 | 0.04072  | 0.091527 | 0.04807  | 0.015555 | 0.73742  | -0.09442 | 0.04139  |
| 0.70483  | -0.01291 | 0.78088  | 0.065974 | 0.15461  | -0.12344 | 0.00757  | -0.03827 | 0.40934  |
| 0.3032   | 0.090982 | 0.04942  | -0.09988 | 0.03093  | 0.028898 | 0.53331  | -0.13169 | 0.00436  |
| 0.06557  | -0.06912 | 0.13581  | 0.095905 | 0.03829  | -0.14966 | 0.00118  | -0.02748 | 0.55367  |
| 0.91906  | 0.076435 | 0.09899  | 0.001448 | 0.97511  | 0.05181  | 0.26384  | 0.039008 | 0.40032  |
| 0.23576  | 0.213732 | 3.16E-06 | -0.03292 | 0.47795  | 0.112858 | 0.01468  | 0.112466 | 0.01503  |
| 0.03382  | 0.200684 | 1.24E-05 | -0.0092  | 0.8429   | -0.07311 | 0.1146   | -0.09651 | 0.03709  |
| 0.011    | 0.261133 | 1.02E-08 | 0.116749 | 0.01157  | 0.158157 | 0.0006   | -0.0223  | 0.63076  |
| 0.71218  | 0.178508 | 0.00011  | 0.042249 | 0.36232  | 0.105797 | 0.02222  | 0.060432 | 0.19236  |
| 0.64811  | -0.0001  | 0.99822  | 0.022506 | 0.6276   | -0.0206  | 0.65709  | 0.009701 | 0.83438  |
| 0.0616   | -0.12876 | 0.00532  | -0.1241  | 0.00725  | -0.06068 | 0.19053  | -0.22878 | 5.82E-07 |
| 2.44E-06 | -0.23519 | 2.73E-07 | -0.05564 | 0.23012  | -0.08385 | 0.07025  | -0.0548  | 0.23725  |
| 0.72046  | -0.02232 | 0.63045  | -0.0076  | 0.86985  | -0.10865 | 0.01884  | 0.069668 | 0.13275  |
| 0.00205  | 0.153204 | 0.0009   | 0.074555 | 0.1076   | 0.028923 | 0.53297  | 0.112306 | 0.01518  |
| 5.86E-09 | 0.267552 | 4.26E-09 | 0.02541  | 0.58387  | -0.01188 | 0.79796  | 0.161698 | 0.00045  |
| 0.11821  | -0.05743 | 0.21544  | 0.02617  | 0.57268  | 0.005998 | 0.89714  | -0.03465 | 0.45504  |
| 0.00316  | -0.30175 | 2.75E-11 | -0.15278 | 0.00093  | -0.10273 | 0.02643  | -0.06377 | 0.1689   |
| 0.02695  | -0.14536 | 0.00164  | -0.03371 | 0.46736  | -0.05599 | 0.22719  | 0.010649 | 0.81846  |
| 0.02076  | -0.06253 | 0.17734  | -0.03461 | 0.45555  | -0.00571 | 0.90197  | -0.00192 | 0.96695  |
| 0.43431  | -0.03054 | 0.51025  | 0.056855 | 0.22007  | -0.0383  | 0.40896  | -0.03099 | 0.50405  |
| 0.51159  | 0.017924 | 0.69924  | -0.04353 | 0.3479   | -0.01334 | 0.77378  | -0.04691 | 0.31169  |
| 0.40835  | -0.07272 | 0.11656  | 0.109851 | 0.01756  | -0.05566 | 0.22992  | 0.019781 | 0.66984  |
| 0.06169  | 0.23867  | 1.79E-07 | 0.015266 | 0.74213  | 0.024262 | 0.60098  | -0.01363 | 0.76887  |
| 0.91673  | -0.09389 | 0.04255  | 0.150386 | 0.00112  | -0.0389  | 0.40163  | -0.12236 | 0.00812  |
| 2.79E-08 | 0.185568 | 5.47E-05 | 0.00446  | 0.92342  | -0.08853 | 0.05591  | 0.062892 | 0.17484  |
| 0.10363  | -0.02358 | 0.61122  | 0.035087 | 0.44938  | -0.02793 | 0.54715  | -0.09639 | 0.03732  |
| 0.32805  | 0.1007   | 0.02957  | 0.107844 | 0.01975  | 0.092733 | 0.04518  | 0.238912 | 1.74E-07 |
| 0.60218  | 0.039479 | 0.39466  | 0.085118 | 0.06609  | 0.107407 | 0.02025  | -0.01467 | 0.75183  |
| 0.02001  | 0.2596   | 1.25E-08 | 0.074401 | 0.10833  | 0.125772 | 0.0065   | -0.11832 | 0.01049  |
| 0.00165  | 0.36807  | 1.98E-16 | 0.176361 | 0.00013  | 0.121465 | 0.0086   | 0.03575  | 0.44086  |
| 0.62245  | 0.091387 | 0.04841  | 0.127691 | 0.00572  | 0.018574 | 0.6889   | -0.05352 | 0.24835  |

|          |          |          |          |          |          |          |          |         |
|----------|----------|----------|----------|----------|----------|----------|----------|---------|
| 4.68E-08 | 0.411543 | 1.63E-20 | 0.026832 | 0.563    | 0.140928 | 0.00227  | -0.01476 | 0.75033 |
| 0.00809  | 0.035025 | 0.45019  | 0.06112  | 0.18733  | 0.03053  | 0.51045  | -0.01172 | 0.80065 |
| 0.00244  | 0.31669  | 2.44E-12 | 0.058777 | 0.20484  | 0.151165 | 0.00105  | 0.030935 | 0.50485 |
| 0.00023  | 0.104581 | 0.02381  | 0.095274 | 0.03958  | 0.043109 | 0.35261  | 0.163141 | 0.0004  |
| 0.75148  | -0.04383 | 0.34456  | -0.15018 | 0.00113  | -0.0503  | 0.27806  | -0.05874 | 0.20514 |
| 0.04547  | 0.192156 | 2.91E-05 | 0.007427 | 0.87283  | 0.071006 | 0.12545  | 0.162818 | 0.00041 |
| 2.12E-08 | -0.22793 | 6.42E-07 | 0.095196 | 0.03975  | 0.019159 | 0.67964  | -0.02211 | 0.63366 |
| 0.04186  | 0.154393 | 0.00082  | 0.198946 | 1.48E-05 | -0.05363 | 0.2474   | 0.073977 | 0.11036 |
| 0.13606  | 0.01521  | 0.74304  | 0.055673 | 0.22982  | -0.06394 | 0.16777  | -0.09033 | 0.05108 |
| 0.03725  | -0.0657  | 0.15631  | 0.076419 | 0.09906  | 0.059191 | 0.20167  | 0.150333 | 0.00112 |
| 0.76647  | 0.04807  | 0.29992  | 0.058068 | 0.21037  | 0.050186 | 0.27912  | -0.05012 | 0.27971 |
| 0.10045  | 0.068644 | 0.13856  | -0.00462 | 0.92068  | -0.06763 | 0.14451  | -0.048   | 0.30061 |
| 0.85113  | 0.111674 | 0.01576  | 0.063181 | 0.17287  | 0.073885 | 0.11081  | 0.148844 | 0.00126 |
| 0.08133  | -0.06923 | 0.13523  | 0.019935 | 0.66742  | 0.026675 | 0.56529  | 0.01562  | 0.73637 |
| 0.6066   | 0.074451 | 0.1081   | 0.087595 | 0.05856  | 0.042641 | 0.35787  | 0.05476  | 0.23757 |
| 0.00569  | 0.087202 | 0.0597   | 0.020192 | 0.6634   | 0.022128 | 0.63338  | 0.047242 | 0.30833 |
| 0.00284  | -0.12826 | 0.00551  | -0.02217 | 0.63273  | -0.03457 | 0.45608  | -0.08231 | 0.07558 |
| 0.25372  | -0.01958 | 0.67297  | -0.09475 | 0.04068  | 0.009209 | 0.84268  | -0.052   | 0.26209 |
| 1.23E-07 | -0.24404 | 9.26E-08 | -0.09195 | 0.04705  | -0.08548 | 0.06493  | -0.09519 | 0.03975 |
| 0.09504  | -0.09931 | 0.03191  | 0.080721 | 0.08141  | -0.00243 | 0.95821  | -0.0168  | 0.71727 |
| 0.76464  | 0.004855 | 0.91667  | 0.096855 | 0.03641  | 0.028832 | 0.53425  | 0.045202 | 0.32971 |
| 0.04366  | 0.186442 | 5.04E-05 | 0.041114 | 0.37536  | 0.185008 | 5.77E-05 | -0.0372  | 0.42248 |
| 0.19216  | 0.034075 | 0.46258  | -0.01647 | 0.7226   | -0.01379 | 0.76626  | -0.02756 | 0.55248 |
| 0.12667  | 0.134721 | 0.00354  | 0.175913 | 0.00013  | 0.106332 | 0.02155  | 0.005838 | 0.89986 |
| 0.03611  | 0.149609 | 0.00118  | 0.008232 | 0.85918  | 0.023976 | 0.60529  | 0.03817  | 0.41053 |
| 0.46806  | 0.065692 | 0.15639  | 0.044757 | 0.33449  | 0.104521 | 0.02389  | 0.038636 | 0.40484 |
| 0.27241  | 0.08938  | 0.05358  | 0.048502 | 0.29558  | 0.041085 | 0.3757   | 0.07432  | 0.10872 |
| 0.6495   | 0.088821 | 0.0551   | 0.077062 | 0.09625  | 0.041483 | 0.37109  | 0.013645 | 0.76868 |
| 0.50413  | 0.040596 | 0.38141  | -0.03722 | 0.42231  | 0.020962 | 0.65139  | 0.117501 | 0.01105 |
| 0.51388  | -0.10488 | 0.02341  | -0.00701 | 0.87989  | -0.07594 | 0.10119  | 0.03527  | 0.44702 |
| 0.28005  | 0.008135 | 0.86082  | 0.120348 | 0.00923  | -0.00363 | 0.93769  | -0.05132 | 0.26837 |
| 0.021    | 0.171959 | 0.00019  | 0.033649 | 0.4682   | 0.101453 | 0.02836  | 0.042362 | 0.36103 |
| 0.00028  | 0.012344 | 0.79021  | -0.02924 | 0.5285   | -0.05795 | 0.21133  | 0.020566 | 0.65756 |
| 0.00016  | 0.354907 | 2.62E-15 | 0.096931 | 0.03626  | 0.27761  | 1.04E-09 | 0.100686 | 0.02959 |
| 0.00077  | 0.236309 | 2.39E-07 | 0.153104 | 0.0009   | 0.091732 | 0.04757  | 0.073021 | 0.11505 |
| 0.40212  | -0.08527 | 0.06559  | -0.00198 | 0.96593  | -0.03039 | 0.51238  | 0.102506 | 0.02676 |
| 3.68E-05 | 0.163068 | 0.0004   | 0.033408 | 0.47139  | 0.014131 | 0.76069  | 0.046017 | 0.32105 |
| 0.16457  | -0.01971 | 0.67099  | -0.00737 | 0.87378  | -0.08388 | 0.07016  | 0.004114 | 0.92935 |
| 0.4683   | 0.069441 | 0.13402  | 0.020571 | 0.65748  | 0.027924 | 0.54722  | 0.027428 | 0.55436 |
| 0.11477  | -0.14195 | 0.00211  | 0.039412 | 0.39547  | 0.01533  | 0.74109  | -0.01042 | 0.82234 |
| 0.00916  | 0.06541  | 0.15817  | 0.009132 | 0.84397  | 0.003798 | 0.93477  | 0.057977 | 0.21108 |
| 0.92948  | -0.00301 | 0.94826  | -0.01663 | 0.72008  | -0.01434 | 0.75722  | -0.03863 | 0.40497 |
| 0.0001   | -0.12158 | 0.00854  | -0.15768 | 0.00063  | -0.05663 | 0.2219   | -0.09177 | 0.04747 |
| 2.85E-05 | 0.191747 | 3.03E-05 | 0.086259 | 0.06252  | 0.078253 | 0.0912   | -0.04874 | 0.29324 |
| 0.54697  | -0.10917 | 0.01828  | 0.018313 | 0.69305  | -0.01268 | 0.78464  | -0.01014 | 0.82697 |

|          |          |          |          |          |          |         |          |          |
|----------|----------|----------|----------|----------|----------|---------|----------|----------|
| 0.53705  | -0.00604 | 0.8965   | 0.231002 | 4.49E-07 | -0.01085 | 0.81511 | 0.037719 | 0.41609  |
| 0.46225  | -0.071   | 0.12551  | -0.1664  | 0.0003   | -0.00924 | 0.84221 | -0.01399 | 0.76297  |
| 0.18922  | -0.07349 | 0.11274  | -0.12258 | 0.008    | 0.017255 | 0.70996 | -0.11404 | 0.01367  |
| 4.57E-06 | 0.272924 | 2.02E-09 | 0.033383 | 0.47172  | -0.0716  | 0.12232 | -0.08671 | 0.06117  |
| 0.29614  | 0.001067 | 0.98165  | 0.173827 | 0.00016  | 0.083238 | 0.07232 | 0.023268 | 0.61598  |
| 0.65102  | -0.03025 | 0.51437  | -0.01959 | 0.67278  | -0.06488 | 0.16158 | -0.07529 | 0.10415  |
| 0.02795  | 0.095616 | 0.03888  | 0.122973 | 0.0078   | 0.17062  | 0.00021 | -0.00734 | 0.8743   |
| 0.58366  | 0.057037 | 0.2186   | 0.003677 | 0.93683  | 0.097743 | 0.03472 | 0.033893 | 0.46497  |
| 0.00015  | -0.20076 | 1.23E-05 | 0.069588 | 0.1332   | -0.04025 | 0.38548 | -0.05122 | 0.26932  |
| 0.00448  | 0.169966 | 0.00022  | 0.063217 | 0.17262  | 0.013139 | 0.77703 | 0.208403 | 5.58E-06 |
| 0.29557  | 0.070664 | 0.12729  | -0.04155 | 0.37035  | -0.0757  | 0.10231 | -0.13575 | 0.00329  |
| 0.01654  | -0.17242 | 0.00018  | 0.051543 | 0.26631  | -0.09068 | 0.05017 | -0.0418  | 0.3674   |
| 0.07923  | 0.089542 | 0.05315  | 0.173604 | 0.00016  | -0.02033 | 0.66125 | -0.08543 | 0.06511  |
| 0.56257  | 0.081324 | 0.07915  | 0.128571 | 0.00539  | 0.030528 | 0.51047 | -0.01209 | 0.79448  |
| 0.0209   | 0.102958 | 0.02609  | -0.03337 | 0.47192  | 0.010083 | 0.82797 | -0.03735 | 0.42067  |
| 0.03094  | -0.06607 | 0.15401  | 0.028544 | 0.53835  | -0.04537 | 0.3279  | -0.21603 | 2.46E-06 |
| 0.00022  | 0.248107 | 5.56E-08 | 0.049119 | 0.28948  | 0.032139 | 0.48841 | -0.0862  | 0.06271  |
| 0.13542  | -0.16913 | 0.00024  | -0.04986 | 0.28222  | -0.09388 | 0.04258 | -0.17717 | 0.00012  |
| 0.97543  | 0.04619  | 0.31923  | 0.008938 | 0.84725  | 0.068699 | 0.13824 | 0.174225 | 0.00015  |
| 0.10647  | -0.1089  | 0.01857  | -0.14238 | 0.00204  | -0.03079 | 0.50688 | -0.11006 | 0.01735  |
| 0.00098  | 0.159224 | 0.00055  | 0.063815 | 0.16858  | 0.038489 | 0.40663 | -0.01558 | 0.73701  |
| 2.01E-09 | -0.33899 | 5.07E-14 | -0.03245 | 0.48417  | -0.08742 | 0.05908 | -0.11618 | 0.01199  |
| 3.35E-07 | 0.380322 | 1.61E-17 | 0.093182 | 0.04415  | 0.135485 | 0.00335 | 0.139584 | 0.0025   |
| 0.42524  | -0.04884 | 0.29225  | 0.032588 | 0.48235  | 0.038672 | 0.4044  | -0.03683 | 0.42723  |
| 4.76E-09 | 0.297986 | 4.96E-11 | 0.088676 | 0.0555   | 0.05846  | 0.2073  | 0.212939 | 3.44E-06 |
| 0.79461  | 0.105339 | 0.02281  | 0.053993 | 0.24422  | 0.065192 | 0.15956 | 0.046474 | 0.31627  |
| 0.3226   | -0.05151 | 0.26658  | -0.01303 | 0.77876  | -0.02089 | 0.65249 | 0.02723  | 0.55721  |
| 0.87096  | 0.011378 | 0.80628  | 0.015925 | 0.73142  | 0.03291  | 0.47803 | 0.003635 | 0.93756  |
| 0.03194  | 0.152668 | 0.00093  | 0.028708 | 0.53602  | 0.031262 | 0.50036 | 0.110339 | 0.01706  |
| 0.25811  | 0.01261  | 0.78578  | -0.00381 | 0.93461  | 0.045339 | 0.32825 | -0.07276 | 0.11635  |
| 0.08065  | 0.028122 | 0.54438  | 0.126003 | 0.0064   | 0.08401  | 0.06971 | 0.03452  | 0.45676  |
| 0.44662  | -0.08188 | 0.07712  | 0.067671 | 0.14425  | -0.02784 | 0.54848 | -0.04874 | 0.29321  |
| 0.08484  | 0.278501 | 9.13E-10 | 0.089529 | 0.05318  | 0.04654  | 0.31558 | 0.179338 | 9.75E-05 |
| 0.59301  | 0.003028 | 0.94797  | 0.026192 | 0.57235  | 0.00982  | 0.83237 | -0.07299 | 0.11521  |
| 0.08127  | 0.144395 | 0.00176  | 0.017967 | 0.69856  | 0.056789 | 0.2206  | 0.05031  | 0.27793  |
| 0.40478  | 0.095728 | 0.03865  | 0.091046 | 0.04926  | 0.03236  | 0.48542 | 0.060493 | 0.19191  |
| 0.71872  | 0.02674  | 0.56434  | 0.054965 | 0.23582  | 0.048121 | 0.2994  | -0.04233 | 0.36144  |
| 2.78E-07 | 0.262084 | 8.96E-09 | 0.085446 | 0.06505  | 0.033861 | 0.46539 | -0.14065 | 0.00232  |
| 0.0094   | 0.233074 | 3.51E-07 | 0.035401 | 0.44534  | 0.039309 | 0.3967  | -0.1059  | 0.02209  |
| 0.00239  | -0.16684 | 0.00029  | -0.12925 | 0.00515  | -0.08247 | 0.07501 | -0.00554 | 0.90488  |
| 0.13862  | 0.177394 | 0.00012  | 0.079689 | 0.08539  | 0.096039 | 0.03802 | -0.13683 | 0.00305  |
| 8.10E-07 | -0.10256 | 0.02667  | -0.01135 | 0.80676  | 0.029573 | 0.5238  | -0.25803 | 1.54E-08 |
| 0.24301  | 0.102496 | 0.02677  | 0.045237 | 0.32933  | 0.014207 | 0.75944 | -0.00768 | 0.86857  |
| 0.16688  | 0.129149 | 0.00519  | 0.057391 | 0.21574  | 0.047128 | 0.3095  | 0.010789 | 0.81613  |
| 1.50E-07 | 0.319925 | 1.42E-12 | 0.045847 | 0.32285  | 0.052313 | 0.25922 | 0.102441 | 0.02685  |



|          |          |          |          |          |          |          |          |          |
|----------|----------|----------|----------|----------|----------|----------|----------|----------|
| 1.04E-09 | 0.281756 | 5.70E-10 | -0.0033  | 0.94323  | 0.040786 | 0.37919  | 0.13518  | 0.00342  |
| 0.5533   | 0.110546 | 0.01686  | 0.051136 | 0.27011  | 0.09683  | 0.03645  | -0.01071 | 0.81743  |
| 4.13E-06 | -0.34308 | 2.41E-14 | -0.04371 | 0.34594  | -0.05173 | 0.26457  | 0.03878  | 0.40309  |
| 0.3505   | -0.00566 | 0.90299  | 0.060295 | 0.19337  | 0.148058 | 0.00133  | 0.053464 | 0.24887  |
| 1.35E-05 | -0.12545 | 0.00664  | -0.03317 | 0.47452  | -0.04432 | 0.33926  | -0.1213  | 0.00869  |
| 0.72448  | 0.134224 | 0.00366  | 0.046864 | 0.31222  | 0.104188 | 0.02435  | 0.052793 | 0.25486  |
| 0.40816  | -0.04662 | 0.31479  | 0.039673 | 0.39234  | -0.07297 | 0.11529  | 0.014064 | 0.7618   |
| 0.00066  | 0.223599 | 1.06E-06 | 0.00742  | 0.87294  | 0.356602 | 1.89E-15 | 0.080456 | 0.08242  |
| 0.02173  | 0.167241 | 0.00028  | 0.101442 | 0.02838  | 0.050285 | 0.27817  | 0.045645 | 0.32498  |
| 0.09189  | 0.120466 | 0.00917  | 0.049076 | 0.2899   | 0.010296 | 0.82438  | -0.00305 | 0.9476   |
| 0.05195  | 0.011246 | 0.80849  | 0.025474 | 0.58294  | -0.0082  | 0.85975  | 0.030939 | 0.50479  |
| 0.05834  | 0.114455 | 0.01333  | -0.06911 | 0.1359   | -0.09411 | 0.04207  | 0.063003 | 0.17408  |
| 0.39107  | -0.00993 | 0.83053  | -0.00329 | 0.94341  | 0.282888 | 4.83E-10 | -0.04445 | 0.3378   |
| 0.27381  | -0.04953 | 0.28549  | 0.104742 | 0.02359  | -0.00409 | 0.92972  | 0.188116 | 4.30E-05 |
| 0.04512  | 0.093563 | 0.04329  | 0.021114 | 0.64904  | 0.100488 | 0.02991  | 0.013949 | 0.76369  |
| 0.60513  | 0.03126  | 0.50038  | 0.078314 | 0.09094  | 0.11109  | 0.01632  | 0.094856 | 0.04046  |
| 0.23935  | -0.04152 | 0.37067  | -0.00815 | 0.86063  | 0.022769 | 0.62358  | -0.1429  | 0.00196  |
| 0.37468  | 0.007423 | 0.87289  | 0.012451 | 0.78843  | 0.020578 | 0.65736  | -0.04112 | 0.37528  |
| 0.6263   | -0.01233 | 0.7905   | -0.0026  | 0.95526  | 0.048433 | 0.29628  | 0.094253 | 0.04176  |
| 0.72906  | -0.01389 | 0.76465  | 0.038666 | 0.40447  | 0.051833 | 0.26362  | -0.00907 | 0.84497  |
| 0.93519  | 0.047817 | 0.30247  | 0.01388  | 0.76483  | 0.039977 | 0.38872  | 0.008431 | 0.85581  |
| 0.26686  | -0.15916 | 0.00056  | -0.0952  | 0.03975  | -0.07267 | 0.11684  | 0.038326 | 0.40862  |
| 0.34914  | 0.10779  | 0.01981  | 0.051898 | 0.26302  | 0.04794  | 0.30122  | -0.07867 | 0.08949  |
| 0.06151  | 0.149538 | 0.00119  | 0.24047  | 1.44E-07 | 0.013831 | 0.76562  | -0.07369 | 0.11173  |
| 0.33695  | 0.213038 | 3.40E-06 | 0.021688 | 0.64016  | 0.068823 | 0.13753  | 0.130035 | 0.00489  |
| 0.45424  | 0.08829  | 0.05658  | -0.01262 | 0.78557  | -0.08077 | 0.08124  | -0.04197 | 0.36549  |
| 0.24368  | 0.176347 | 0.00013  | 0.145412 | 0.00163  | 0.069889 | 0.13153  | 0.022968 | 0.62055  |
| 0.00665  | -0.01896 | 0.68274  | 0.088919 | 0.05483  | 0.02187  | 0.63735  | -0.00319 | 0.94526  |
| 0.01229  | -0.16814 | 0.00026  | -0.0047  | 0.9193   | -0.03264 | 0.48168  | -0.08134 | 0.0791   |
| 0.00105  | -0.16678 | 0.00029  | 0.089945 | 0.05208  | -0.03085 | 0.50601  | 0.077303 | 0.0952   |
| 0.11553  | 0.128626 | 0.00537  | 0.062526 | 0.17737  | 0.074856 | 0.10619  | 0.160494 | 0.0005   |
| 0.33943  | 0.207663 | 6.04E-06 | 0.062883 | 0.1749   | 0.056427 | 0.22357  | 0.055466 | 0.23157  |
| 2.47E-05 | 0.204947 | 8.02E-06 | 0.185572 | 5.47E-05 | 0.156174 | 0.00071  | 0.183004 | 6.96E-05 |
| 0.00049  | -0.18285 | 7.05E-05 | -0.04631 | 0.31801  | -0.03286 | 0.47872  | -0.02971 | 0.52185  |
| 0.18     | -0.00843 | 0.85576  | 0.083278 | 0.07218  | 0.09772  | 0.03476  | -0.04154 | 0.37048  |
| 0.02266  | -0.08973 | 0.05264  | 0.034669 | 0.45481  | 0.019879 | 0.6683   | 0.020524 | 0.65821  |
| 0.83293  | -0.039   | 0.40045  | 0.009239 | 0.84217  | 0.013393 | 0.77283  | 0.066956 | 0.14855  |
| 0.75891  | -0.05636 | 0.22408  | 0.003848 | 0.9339   | -0.13406 | 0.0037   | -0.09422 | 0.04183  |
| 0.86265  | 0.077088 | 0.09613  | 0.055341 | 0.23262  | 0.034166 | 0.46138  | 0.134386 | 0.00362  |
| 0.0924   | -0.17797 | 0.00011  | -0.01259 | 0.78606  | -0.07384 | 0.11103  | 0.027275 | 0.55657  |
| 0.64535  | 0.126959 | 0.00601  | 0.299809 | 3.73E-11 | 0.162575 | 0.00042  | -0.02501 | 0.58989  |
| 1.17E-05 | -0.17229 | 0.00018  | 0.048806 | 0.29257  | -0.11469 | 0.01314  | -0.11686 | 0.0115   |
| 0.28514  | 0.067086 | 0.14776  | 0.189798 | 3.66E-05 | 0.075669 | 0.10243  | 0.128628 | 0.00537  |
| 0.47606  | 0.118509 | 0.01037  | -0.02138 | 0.64486  | -0.02317 | 0.61748  | -0.08881 | 0.05512  |
| 0.24805  | -0.02276 | 0.62369  | -0.00291 | 0.94991  | -0.05638 | 0.22399  | -0.04677 | 0.31316  |

|          |          |          |           |          |          |          |          |          |
|----------|----------|----------|-----------|----------|----------|----------|----------|----------|
| 0.0004   | -0.19884 | 1.50E-05 | -0.05141  | 0.26756  | 0.030472 | 0.51125  | -0.12565 | 0.00655  |
| 7.05E-13 | 0.426421 | 4.67E-22 | 0.107516  | 0.02013  | 0.097658 | 0.03488  | 0.237334 | 2.11E-07 |
| 1.03E-09 | 0.178156 | 0.00011  | 0.031666  | 0.49483  | 0.070698 | 0.12711  | 0.130865 | 0.00462  |
| 5.03E-05 | -0.16287 | 0.00041  | -0.03319  | 0.47429  | -0.01125 | 0.80837  | -0.02664 | 0.56574  |
| 0.65937  | -0.08911 | 0.0543   | -2.54E-06 | 0.99996  | -0.00648 | 0.88885  | -0.10368 | 0.02506  |
| 0.46526  | -0.06066 | 0.19069  | 0.005061  | 0.91313  | -0.04051 | 0.38237  | -0.06596 | 0.15467  |
| 0.01626  | 0.079841 | 0.0848   | 0.034738  | 0.45392  | 0.047045 | 0.31035  | -0.0264  | 0.56937  |
| 0.04241  | -0.03002 | 0.5175   | 0.117877  | 0.01079  | 0.011423 | 0.80553  | -0.00573 | 0.90177  |
| 0.05671  | 0.083499 | 0.07143  | 0.049703  | 0.28377  | 0.003411 | 0.9414   | -0.09946 | 0.03163  |
| 0.00058  | 0.15735  | 0.00064  | -0.09307  | 0.0444   | -0.04725 | 0.30825  | -0.04537 | 0.32791  |
| 0.00135  | 0.247293 | 6.16E-08 | 0.107807  | 0.01979  | 0.076719 | 0.09774  | 0.049914 | 0.28174  |
| 0.58067  | -0.01483 | 0.74921  | -0.04231  | 0.36162  | -0.07495 | 0.10576  | -0.04292 | 0.3547   |
| 0.003    | 0.170374 | 0.00022  | 0.057303  | 0.21645  | 0.064239 | 0.16577  | 0.31035  | 6.94E-12 |
| 0.23432  | -0.09579 | 0.03853  | 0.0436    | 0.34715  | 0.004574 | 0.92147  | 0.008111 | 0.86123  |
| 0.00034  | 0.154686 | 0.0008   | 0.110546  | 0.01686  | 0.084101 | 0.0694   | 0.228936 | 5.71E-07 |
| 0.12601  | 0.001345 | 0.97688  | -0.03224  | 0.48699  | 0.053792 | 0.24597  | 0.033711 | 0.46738  |
| 0.18672  | -0.14474 | 0.00171  | 0.100942  | 0.02918  | -0.08454 | 0.06795  | 0.041947 | 0.36576  |
| 0.36773  | 0.141687 | 0.00215  | -0.05945  | 0.19973  | 0.002036 | 0.96501  | -0.12971 | 0.005    |
| 0.592    | 0.085914 | 0.06359  | 0.079658  | 0.08552  | -0.04551 | 0.3264   | -0.06829 | 0.14062  |
| 0.92253  | 0.025379 | 0.58434  | -0.01522  | 0.7428   | 0.079028 | 0.08802  | -0.0259  | 0.57657  |
| 1.98E-10 | -0.35834 | 1.35E-15 | 0.057878  | 0.21187  | -0.1068  | 0.02098  | -0.11425 | 0.01349  |
| 3.29E-05 | 0.297765 | 5.13E-11 | 0.071364  | 0.12355  | 0.010017 | 0.82907  | 0.12115  | 0.00877  |
| 0.66756  | 0.077906 | 0.09264  | 0.029486  | 0.52502  | 0.045427 | 0.3273   | 0.003444 | 0.94083  |
| 0.04065  | -0.17353 | 0.00016  | -0.05216  | 0.26059  | -0.0646  | 0.16337  | 0.041869 | 0.36665  |
| 0.35598  | 0.123502 | 0.00754  | 0.005925  | 0.89839  | 0.034397 | 0.45836  | 0.039161 | 0.39849  |
| 0.85514  | 0.069071 | 0.13612  | 0.009298  | 0.84116  | 0.061505 | 0.18457  | 0.008593 | 0.85307  |
| 0.00371  | -0.02593 | 0.57619  | -0.08057  | 0.08198  | 0.057089 | 0.21817  | 0.002688 | 0.9538   |
| 0.25927  | 0.016394 | 0.72383  | -0.01789  | 0.69981  | 0.028501 | 0.53896  | -0.03843 | 0.40735  |
| 0.46012  | 0.045564 | 0.32584  | 0.064518  | 0.16393  | 0.153561 | 0.00087  | -0.04026 | 0.38536  |
| 0.30909  | 0.08335  | 0.07194  | 0.152814  | 0.00092  | 0.071171 | 0.12458  | 0.023696 | 0.60951  |
| 4.73E-05 | 0.18427  | 6.18E-05 | -0.05222  | 0.2601   | -0.09095 | 0.04951  | -0.07512 | 0.10497  |
| 2.30E-09 | 0.450085 | 1.13E-24 | 0.101508  | 0.02828  | 0.227662 | 6.62E-07 | -0.0124  | 0.78921  |
| 0.39571  | 0.14077  | 0.0023   | 0.043816  | 0.34477  | 0.055703 | 0.22958  | 0.011126 | 0.81049  |
| 2.64E-05 | 0.215059 | 2.73E-06 | 0.137377  | 0.00293  | -0.04334 | 0.35008  | 0.027299 | 0.55622  |
| 0.01805  | 0.240659 | 1.41E-07 | 0.108745  | 0.01874  | 0.022773 | 0.62351  | 0.003505 | 0.93979  |
| 2.85E-07 | 0.298607 | 4.50E-11 | 0.093345  | 0.04378  | 0.080264 | 0.08316  | 0.138078 | 0.00279  |
| 0.929    | -0.00241 | 0.95866  | 0.092779  | 0.04508  | -0.03476 | 0.45367  | 0.036172 | 0.43548  |
| 0.07193  | 0.140332 | 0.00237  | 0.04964   | 0.28439  | 0.003793 | 0.93485  | -0.20687 | 6.56E-06 |
| 0.25228  | -0.13258 | 0.0041   | -0.0285   | 0.53897  | -0.08199 | 0.07671  | -0.06569 | 0.15639  |
| 0.79074  | 0.011161 | 0.80991  | 0.246305  | 6.98E-08 | 0.058553 | 0.20658  | 0.062095 | 0.18038  |
| 0.00013  | -0.19916 | 1.45E-05 | -0.01698  | 0.71433  | -0.05465 | 0.23849  | -0.01948 | 0.6745   |
| 5.62E-06 | 0.154098 | 0.00083  | -0.08451  | 0.06805  | -0.03443 | 0.45787  | 0.013974 | 0.76328  |
| 0.00019  | -0.17463 | 0.00015  | -0.06288  | 0.17494  | -0.07718 | 0.09575  | -0.12524 | 0.00673  |
| 0.32868  | -0.01146 | 0.80492  | -0.05401  | 0.2441   | 0.054436 | 0.24036  | -0.17301 | 0.00017  |
| 0.33564  | 0.066579 | 0.15085  | 0.015964  | 0.73078  | -0.12593 | 0.00643  | -0.08039 | 0.08266  |

|          |          |          |           |          |          |          |          |          |
|----------|----------|----------|-----------|----------|----------|----------|----------|----------|
| 0.0099   | -0.03401 | 0.46338  | 0.010721  | 0.81726  | -0.02933 | 0.52721  | 0.088061 | 0.05722  |
| 1.16E-05 | 0.21564  | 2.56E-06 | 0.121256  | 0.00872  | 0.096141 | 0.03781  | 0.072687 | 0.11673  |
| 0.58598  | -0.01712 | 0.71215  | -0.10663  | 0.02118  | -0.09216 | 0.04654  | -0.02801 | 0.54594  |
| 1.21E-05 | 0.293548 | 9.82E-11 | 0.079755  | 0.08513  | 0.051934 | 0.26269  | -0.06955 | 0.1334   |
| 0.06012  | -0.22598 | 8.04E-07 | -0.08059  | 0.08189  | -0.0487  | 0.29362  | -0.12751 | 0.00579  |
| 1.58E-06 | -0.1146  | 0.01321  | -0.26763  | 4.21E-09 | -0.0552  | 0.23384  | -0.11336 | 0.01424  |
| 0.00206  | 0.274906 | 1.53E-09 | 0.062868  | 0.17501  | -0.00273 | 0.95308  | -0.05919 | 0.20165  |
| 0.23917  | -0.03049 | 0.51099  | 0.076891  | 0.09699  | 0.139577 | 0.0025   | -0.13597 | 0.00324  |
| 0.0168   | 0.15559  | 0.00074  | 0.132241  | 0.0042   | 0.089001 | 0.05461  | 0.061917 | 0.18164  |
| 0.0401   | 0.125057 | 0.00681  | -0.07903  | 0.088    | -0.01071 | 0.81745  | -0.10362 | 0.02514  |
| 0.48146  | -0.09218 | 0.04648  | -0.05637  | 0.22407  | -0.06089 | 0.18902  | -0.00641 | 0.89013  |
| 0.02988  | 0.219804 | 1.62E-06 | 0.257526  | 1.64E-08 | 0.081107 | 0.07996  | -0.09607 | 0.03795  |
| 0.89481  | -0.03653 | 0.43092  | 0.005245  | 0.91     | 0.010422 | 0.82228  | -0.0768  | 0.09738  |
| 3.24E-06 | 0.160276 | 0.00051  | 0.128822  | 0.0053   | -0.03529 | 0.44676  | 0.077068 | 0.09622  |
| 0.17298  | -0.00671 | 0.88502  | -0.02841  | 0.54019  | -0.02444 | 0.59835  | -0.03461 | 0.45552  |
| 0.89441  | -0.03558 | 0.44308  | 0.093112  | 0.04431  | 0.007095 | 0.87847  | 0.016771 | 0.71775  |
| 0.12265  | -0.03799 | 0.41277  | 0.093566  | 0.04328  | 0.043531 | 0.34792  | 5.69E-05 | 0.99902  |
| 0.30382  | 0.016798 | 0.7173   | 0.047103  | 0.30975  | 0.017554 | 0.70516  | -0.01904 | 0.6815   |
| 6.05E-05 | -0.23088 | 4.55E-07 | -0.04916  | 0.28904  | -0.0102  | 0.82597  | -0.03163 | 0.49537  |
| 0.01334  | 0.164651 | 0.00035  | 0.073745  | 0.11149  | 0.073488 | 0.11274  | 0.183837 | 6.44E-05 |
| 0.59264  | 0.078682 | 0.08943  | -0.12927  | 0.00515  | -0.03104 | 0.50343  | -0.08748 | 0.05889  |
| 0.05552  | -0.09177 | 0.04746  | -0.01707  | 0.71291  | -0.08861 | 0.05568  | -0.13182 | 0.00432  |
| 8.17E-06 | 0.205314 | 7.72E-06 | 0.037279  | 0.42156  | 0.105534 | 0.02256  | 0.053137 | 0.25178  |
| 0.17397  | 0.117248 | 0.01122  | 0.024891  | 0.59159  | -0.00733 | 0.87453  | 0.025744 | 0.57894  |
| 0.00468  | 0.000831 | 0.9857   | 0.033803  | 0.46616  | -0.00665 | 0.88609  | -0.05157 | 0.26605  |
| 3.18E-05 | -0.17577 | 0.00013  | -0.05147  | 0.26696  | -0.02236 | 0.62977  | 0.030518 | 0.51061  |
| 0.67475  | 0.095715 | 0.03868  | 0.072499  | 0.11768  | 0.193561 | 2.54E-05 | 0.095356 | 0.03941  |
| 0.16952  | 0.263721 | 7.19E-09 | 0.007403  | 0.87323  | 0.070727 | 0.12695  | -0.11554 | 0.01247  |
| 0.03826  | 0.203852 | 8.99E-06 | 0.016061  | 0.72921  | -0.01663 | 0.71998  | 0.016423 | 0.72336  |
| 0.78766  | 0.128901 | 0.00527  | 0.032356  | 0.48547  | -0.01594 | 0.73116  | 0.071204 | 0.1244   |
| 6.96E-08 | 0.207395 | 6.21E-06 | 0.072543  | 0.11746  | -0.06713 | 0.14752  | 0.213045 | 3.40E-06 |
| 0.83582  | 0.117982 | 0.01072  | 0.044757  | 0.33449  | 0.039465 | 0.39483  | 0.015162 | 0.74383  |
| 0.09669  | -0.09157 | 0.04795  | 0.226256  | 7.79E-07 | 0.042923 | 0.3547   | 0.037953 | 0.4132   |
| 0.01032  | 0.330574 | 2.27E-13 | 0.005734  | 0.90165  | 0.243635 | 9.74E-08 | -0.01349 | 0.77118  |
| 0.27696  | -0.19354 | 2.54E-05 | -0.0094   | 0.8395   | -0.02667 | 0.5653   | -0.12694 | 0.00601  |
| 0.21505  | 0.217218 | 2.16E-06 | 0.078881  | 0.08862  | 0.050786 | 0.27341  | 0.061774 | 0.18265  |
| 0.10998  | 0.132982 | 0.00399  | 0.099874  | 0.03093  | 0.043782 | 0.34515  | 0.064563 | 0.16364  |
| 0.07849  | -0.03387 | 0.46528  | 0.018706  | 0.68681  | 0.002801 | 0.95186  | -0.0422  | 0.36282  |
| 0.0022   | 0.104418 | 0.02403  | 0.034394  | 0.45839  | 0.053093 | 0.25217  | -0.05761 | 0.214    |
| 0.30931  | -0.12798 | 0.00561  | -0.02733  | 0.55573  | -0.02836 | 0.54099  | -0.01409 | 0.76134  |
| 1.91E-07 | 0.439808 | 1.64E-23 | 0.143692  | 0.00185  | 0.127891 | 0.00565  | -0.07956 | 0.08591  |
| 0.17523  | 0.157887 | 0.00062  | -0.08016  | 0.08355  | 0.112976 | 0.01458  | 0.032399 | 0.48489  |
| 1.65E-05 | 0.075569 | 0.10289  | -0.06459  | 0.16348  | 0.00273  | 0.95307  | 0.04591  | 0.32218  |
| 0.00152  | 0.193901 | 2.45E-05 | -2.93E-05 | 0.9995   | 0.104755 | 0.02358  | -0.07927 | 0.08704  |
| 4.40E-06 | -0.1835  | 6.64E-05 | -0.07519  | 0.10462  | -0.03972 | 0.39172  | -0.15284 | 0.00092  |

|          |          |          |          |          |          |          |          |          |
|----------|----------|----------|----------|----------|----------|----------|----------|----------|
| 0.00081  | 0.268538 | 3.72E-09 | 0.078618 | 0.08969  | 0.10751  | 0.02014  | 0.237481 | 2.07E-07 |
| 0.86662  | 0.006741 | 0.88448  | 0.023455 | 0.61316  | 0.056317 | 0.22447  | 0.032295 | 0.4863   |
| 0.52604  | -0.04372 | 0.34588  | 0.043202 | 0.35158  | 0.080622 | 0.08179  | -0.01866 | 0.6875   |
| 0.18124  | -0.08811 | 0.0571   | 0.095224 | 0.03969  | 0.081492 | 0.07853  | -0.07848 | 0.09026  |
| 0.0384   | 0.253132 | 2.92E-08 | 0.070455 | 0.12842  | 0.114611 | 0.0132   | 0.108165 | 0.01938  |
| 7.10E-08 | 0.117026 | 0.01138  | -0.07943 | 0.08642  | -0.0676  | 0.14466  | 0.193383 | 2.58E-05 |
| 2.71E-07 | 0.114206 | 0.01353  | 0.012143 | 0.79354  | -0.05437 | 0.24091  | 0.061679 | 0.18333  |
| 0.84202  | 0.038286 | 0.40912  | 0.039629 | 0.39287  | 0.109127 | 0.01833  | 0.098043 | 0.03416  |
| 0.31744  | 0.110896 | 0.01651  | 0.107317 | 0.02036  | 0.13053  | 0.00472  | 0.045464 | 0.32691  |
| 0.93185  | -0.01708 | 0.71269  | 0.062234 | 0.17941  | -0.05801 | 0.21086  | 0.027667 | 0.55091  |
| 0.06972  | 0.024852 | 0.59217  | -0.06361 | 0.16993  | 0.055006 | 0.23546  | 0.042817 | 0.35589  |
| 0.1095   | 0.049226 | 0.28843  | -0.07727 | 0.09535  | 0.082843 | 0.07369  | 0.038603 | 0.40525  |
| 0.11981  | 0.179591 | 9.53E-05 | 0.077269 | 0.09535  | 0.226508 | 7.57E-07 | -0.09628 | 0.03753  |
| 0.00141  | -0.02369 | 0.60957  | 0.040384 | 0.38391  | -0.01026 | 0.82501  | 0.022251 | 0.6315   |
| 0.76762  | 0.038156 | 0.41071  | 0.057379 | 0.21584  | 0.033418 | 0.47125  | 0.039859 | 0.39012  |
| 0.13672  | -0.06808 | 0.14187  | 0.030182 | 0.51528  | 0.019088 | 0.68075  | -0.03357 | 0.46919  |
| 0.67275  | 0.03398  | 0.46383  | 0.029629 | 0.52301  | 0.002015 | 0.96536  | -0.00506 | 0.91318  |
| 0.94703  | 0.02215  | 0.63304  | 0.04143  | 0.37171  | 0.025917 | 0.57639  | 0.043381 | 0.34959  |
| 0.12935  | 0.011173 | 0.8097   | -0.17144 | 0.0002   | -0.10528 | 0.02289  | -0.1623  | 0.00043  |
| 0.24385  | 0.135804 | 0.00328  | 0.204044 | 8.81E-06 | 0.191991 | 2.96E-05 | -0.02127 | 0.64667  |
| 0.60604  | 0.097142 | 0.03585  | 0.272412 | 2.17E-09 | 0.076751 | 0.0976   | -0.06025 | 0.19373  |
| 0.00064  | -0.20941 | 5.02E-06 | -0.01833 | 0.69286  | -0.04228 | 0.362    | -0.09634 | 0.03741  |
| 0.00113  | 0.259568 | 1.25E-08 | 0.080302 | 0.08301  | 0.161504 | 0.00046  | 0.113707 | 0.01395  |
| 0.13873  | -0.0946  | 0.04101  | -0.00903 | 0.84573  | -0.09251 | 0.0457   | -0.07882 | 0.08887  |
| 0.57243  | 0.05541  | 0.23204  | 0.145647 | 0.0016   | 0.056216 | 0.22531  | -0.06625 | 0.1529   |
| 1.09E-07 | -0.22266 | 1.17E-06 | -0.02729 | 0.55633  | -0.07397 | 0.1104   | -0.17103 | 0.0002   |
| 0.03191  | 0.130495 | 0.00473  | 0.092522 | 0.04568  | 0.170578 | 0.00021  | 0.065117 | 0.16005  |
| 0.57604  | 0.085731 | 0.06415  | 0.066136 | 0.1536   | 0.086103 | 0.063    | 0.06131  | 0.18597  |
| 0.75071  | 0.101956 | 0.02759  | 0.09041  | 0.05087  | 0.08255  | 0.07472  | 0.05223  | 0.25998  |
| 0.30133  | 0.122764 | 0.00791  | 0.103412 | 0.02543  | 0.082032 | 0.07657  | 0.089969 | 0.05202  |
| 0.00761  | 0.132018 | 0.00427  | 0.079916 | 0.0845   | 0.0675   | 0.14527  | 0.074458 | 0.10806  |
| 0.95605  | 0.014746 | 0.75061  | -0.00119 | 0.97954  | -0.01706 | 0.71316  | 0.046532 | 0.31567  |
| 0.16548  | 0.086685 | 0.06124  | -0.06451 | 0.164    | -0.09939 | 0.03175  | 0.095399 | 0.03932  |
| 0.04547  | 0.090217 | 0.05137  | 0.062797 | 0.17549  | 0.005626 | 0.90349  | 0.137928 | 0.00282  |
| 0.78764  | 0.038207 | 0.41009  | 0.055642 | 0.23009  | 0.008209 | 0.85956  | 0.103881 | 0.02477  |
| 0.43668  | 0.103351 | 0.02552  | 0.10597  | 0.022    | 0.017459 | 0.70669  | 0.046675 | 0.31417  |
| 0.75669  | -0.11672 | 0.0116   | 0.009658 | 0.83511  | 0.050756 | 0.27368  | 0.076387 | 0.09921  |
| 0.14081  | -0.07374 | 0.11152  | -0.135   | 0.00347  | -0.0955  | 0.03912  | 0.068451 | 0.13967  |
| 0.7586   | -0.04776 | 0.30308  | 0.031009 | 0.50383  | 0.053971 | 0.2444   | -0.03661 | 0.42997  |
| 0.00083  | -0.13566 | 0.00331  | 0.097387 | 0.03539  | -0.02663 | 0.56599  | -0.03034 | 0.5131   |
| 2.95E-05 | 0.172619 | 0.00018  | -0.01403 | 0.76235  | 0.018451 | 0.69086  | 0.152727 | 0.00093  |
| 5.81E-06 | 0.105134 | 0.02308  | 0.05666  | 0.22166  | 0.017768 | 0.70175  | 0.223078 | 1.12E-06 |
| 0.00014  | -0.2128  | 3.49E-06 | -0.01873 | 0.68635  | -0.04043 | 0.38339  | -0.06588 | 0.15518  |
| 0.07131  | 0.066298 | 0.15259  | 0.035002 | 0.45048  | -0.00241 | 0.95864  | 0.018629 | 0.68803  |
| 0.04979  | -0.04152 | 0.37069  | 0.092378 | 0.04602  | 0.087559 | 0.05866  | 0.085225 | 0.06575  |

|          |          |          |          |          |          |          |          |          |
|----------|----------|----------|----------|----------|----------|----------|----------|----------|
| 0.00498  | 0.169366 | 0.00024  | 0.201226 | 1.18E-05 | 0.078837 | 0.0888   | 0.161699 | 0.00045  |
| 1.24E-09 | -0.28689 | 2.68E-10 | -0.15499 | 0.00078  | -0.07192 | 0.12063  | -0.15809 | 0.00061  |
| 0.31018  | 0.06103  | 0.18798  | -0.06643 | 0.15176  | -0.05343 | 0.24919  | 0.020327 | 0.66128  |
| 0.04119  | 0.100794 | 0.02941  | -0.04963 | 0.28451  | -0.09518 | 0.03977  | 0.146148 | 0.00154  |
| 0.41816  | 0.055457 | 0.23164  | 0.101859 | 0.02774  | 0.024587 | 0.59612  | -0.08762 | 0.05849  |
| 0.2623   | 0.092454 | 0.04584  | 0.107888 | 0.0197   | 0.159476 | 0.00054  | 0.180862 | 8.48E-05 |
| 0.04798  | 0.157516 | 0.00064  | 0.238874 | 1.75E-07 | 0.123268 | 0.00766  | 0.108128 | 0.01943  |
| 0.73278  | 0.096742 | 0.03663  | 0.076139 | 0.10031  | 0.08462  | 0.0677   | 0.080928 | 0.08063  |
| 0.00011  | -0.21546 | 2.61E-06 | -0.08774 | 0.05815  | -0.03371 | 0.46735  | -0.0614  | 0.18535  |
| 0.30219  | 0.074603 | 0.10737  | -0.01465 | 0.75221  | 0.054572 | 0.23919  | 0.00696  | 0.88076  |
| 0.39169  | 0.129491 | 0.00507  | 0.047528 | 0.3054   | 0.236695 | 2.28E-07 | 0.137379 | 0.00293  |
| 0.1924   | 0.053409 | 0.24936  | 0.031925 | 0.4913   | 0.033211 | 0.47401  | 0.049963 | 0.28126  |
| 0.19738  | 0.086094 | 0.06303  | 0.055262 | 0.23329  | 0.022621 | 0.62584  | 0.087686 | 0.05829  |
| 0.88117  | 0.027947 | 0.54689  | -0.1107  | 0.0167   | 0.010871 | 0.81476  | -0.21011 | 4.66E-06 |
| 0.00036  | -0.15943 | 0.00054  | 0.033643 | 0.46828  | -0.06587 | 0.15527  | -0.03526 | 0.44717  |
| 0.94202  | 0.048402 | 0.29658  | 0.056064 | 0.22656  | 0.080812 | 0.08107  | 0.01088  | 0.8146   |
| 0.47004  | 0.076731 | 0.09769  | 0.072455 | 0.1179   | 0.066512 | 0.15127  | -0.00656 | 0.88761  |
| 0.16431  | -0.07858 | 0.08983  | 0.0561   | 0.22627  | 0.057032 | 0.21863  | 0.001055 | 0.98187  |
| 0.58407  | 0.037016 | 0.42484  | 0.049269 | 0.28801  | 0.012364 | 0.78987  | 0.010537 | 0.82035  |
| 0.04063  | 0.159569 | 0.00054  | 0.099067 | 0.03232  | 0.209207 | 5.13E-06 | 0.121487 | 0.00859  |
| 0.00308  | 0.042264 | 0.36215  | 0.017002 | 0.71402  | -0.0348  | 0.45307  | 0.102086 | 0.02739  |
| 0.00108  | 0.255397 | 2.18E-08 | 0.082755 | 0.074    | 0.043744 | 0.34556  | -0.04741 | 0.30663  |
| 0.00179  | 0.199852 | 1.35E-05 | 0.19689  | 1.82E-05 | -0.03396 | 0.46414  | -0.00566 | 0.90291  |
| 2.52E-10 | 0.074622 | 0.10729  | -0.08985 | 0.05232  | -0.11759 | 0.01099  | 0.174397 | 0.00015  |
| 0.00257  | -0.11692 | 0.01145  | -0.01015 | 0.82682  | -0.14543 | 0.00163  | 0.02455  | 0.59667  |
| 0.36517  | 0.042    | 0.36515  | 0.125363 | 0.00668  | 0.074921 | 0.10588  | -0.01434 | 0.75722  |
| 0.52213  | 0.09686  | 0.0364   | 0.077945 | 0.09248  | 0.110494 | 0.01691  | -0.11692 | 0.01145  |
| 0.10871  | -0.01712 | 0.71217  | -0.01452 | 0.75435  | 0.000465 | 0.992    | 0.089881 | 0.05225  |
| 0.49249  | 0.011226 | 0.80882  | 0.091224 | 0.04882  | 0.054507 | 0.23974  | 0.011783 | 0.79952  |
| 0.01779  | 0.241583 | 1.26E-07 | 0.268478 | 3.75E-09 | 0.296484 | 6.26E-11 | 0.126519 | 0.00619  |
| 0.00386  | 0.277994 | 9.82E-10 | 0.252219 | 3.29E-08 | 0.226563 | 7.52E-07 | 0.041362 | 0.37249  |
| 0.00017  | -0.06525 | 0.15921  | -0.02537 | 0.58447  | -0.03112 | 0.50231  | -0.14128 | 0.00221  |
| 2.79E-05 | -0.18819 | 4.27E-05 | -0.04796 | 0.30105  | -0.01339 | 0.77287  | -0.17378 | 0.00016  |
| 0.0052   | 0.059496 | 0.19935  | -0.0071  | 0.87844  | -0.00743 | 0.87278  | 0.033563 | 0.46934  |
| 0.59533  | 0.071919 | 0.12066  | 0.040311 | 0.38477  | 0.077271 | 0.09534  | -0.06556 | 0.15719  |
| 0.21997  | -0.18254 | 7.26E-05 | -0.04031 | 0.38473  | -0.09717 | 0.03579  | -0.07174 | 0.12158  |
| 9.63E-10 | -0.35154 | 4.97E-15 | -0.09516 | 0.03982  | -0.03414 | 0.46168  | -0.0977  | 0.03479  |
| 0.97018  | -0.09205 | 0.04679  | 0.016126 | 0.72817  | -0.07757 | 0.09408  | -0.02263 | 0.62576  |
| 0.00446  | 0.21515  | 2.71E-06 | -0.01478 | 0.75013  | 0.12401  | 0.0073   | 0.004197 | 0.92792  |
| 0.45028  | 0.017893 | 0.69974  | 0.029115 | 0.53024  | 0.037011 | 0.4249   | -0.08154 | 0.07836  |
| 0.01008  | 0.184818 | 5.87E-05 | 0.059837 | 0.19678  | 0.08216  | 0.07611  | 0.208194 | 5.71E-06 |
| 0.38125  | 0.055642 | 0.23009  | 0.165943 | 0.00032  | 0.018787 | 0.68553  | 0.00555  | 0.90478  |
| 0.20914  | 0.066605 | 0.1507   | -0.105   | 0.02325  | -0.08269 | 0.07423  | -0.10749 | 0.02015  |
| 2.26E-07 | 0.335224 | 9.98E-14 | -0.02709 | 0.5593   | -0.04496 | 0.33231  | 0.136501 | 0.00312  |
| 0.21703  | -0.02727 | 0.5567   | 0.050754 | 0.27371  | 0.062127 | 0.18016  | 0.205207 | 7.81E-06 |

|          |          |          |          |         |          |          |          |          |
|----------|----------|----------|----------|---------|----------|----------|----------|----------|
| 0.00099  | 0.269495 | 3.26E-09 | 0.09063  | 0.05031 | 0.145174 | 0.00166  | 0.053815 | 0.24578  |
| 0.00109  | 0.367427 | 2.25E-16 | 0.155221 | 0.00076 | 0.242227 | 1.16E-07 | 0.078584 | 0.08983  |
| 0.0071   | 0.079182 | 0.08741  | 0.093925 | 0.04248 | 0.075439 | 0.10348  | 0.02015  | 0.66405  |
| 0.00485  | 0.082072 | 0.07642  | 0.015908 | 0.7317  | 0.220311 | 1.53E-06 | 0.115993 | 0.01213  |
| 0.00021  | 0.336044 | 8.61E-14 | 0.083913 | 0.07003 | 0.146263 | 0.00153  | 0.092349 | 0.04609  |
| 0.00197  | -0.09996 | 0.0308   | -0.00106 | 0.98176 | 0.01668  | 0.71921  | 0.07703  | 0.09638  |
| 0.66268  | 0.075154 | 0.1048   | 0.022031 | 0.63488 | -0.02956 | 0.52403  | 0.115091 | 0.01282  |
| 0.08936  | 0.28231  | 5.26E-10 | 0.059285 | 0.20095 | 0.063701 | 0.16935  | -0.02236 | 0.62978  |
| 0.30186  | 0.017124 | 0.71207  | -0.05697 | 0.21916 | -0.01369 | 0.76798  | -0.00291 | 0.95     |
| 0.00285  | -0.30523 | 1.58E-11 | -0.08804 | 0.05727 | -0.12695 | 0.00601  | 0.09245  | 0.04585  |
| 0.00269  | -0.08834 | 0.05644  | 0.021737 | 0.6394  | 0.023125 | 0.61816  | 0.038846 | 0.40229  |
| 0.12727  | 0.02737  | 0.5552   | 0.006962 | 0.88073 | -0.01456 | 0.7537   | 0.058262 | 0.20885  |
| 6.41E-06 | 0.2538   | 2.68E-08 | 0.130008 | 0.00489 | 0.07413  | 0.10963  | 0.050696 | 0.27426  |
| 0.41671  | -0.0911  | 0.04913  | -0.03665 | 0.42947 | -0.08538 | 0.06527  | -0.01275 | 0.7835   |
| 6.14E-06 | 0.354536 | 2.81E-15 | 0.021442 | 0.64396 | 0.016325 | 0.72494  | 0.078331 | 0.09087  |
| 0.25609  | 0.142889 | 0.00196  | 0.127973 | 0.00561 | 0.126505 | 0.00619  | -0.16134 | 0.00046  |
| 0.02967  | -0.16506 | 0.00034  | 0.026225 | 0.57187 | -0.07332 | 0.11359  | -0.22529 | 8.71E-07 |
| 0.33936  | 0.02306  | 0.61914  | 0.074181 | 0.10938 | 0.008611 | 0.85276  | 0.055593 | 0.2305   |
| 0.02147  | -0.03399 | 0.46364  | -0.11615 | 0.01202 | -0.00252 | 0.95674  | -0.18265 | 7.19E-05 |
| 0.12175  | -0.09169 | 0.04768  | -0.09378 | 0.04279 | -0.09869 | 0.033    | 0.004667 | 0.91987  |
| 0.3216   | 0.114647 | 0.01317  | 0.016229 | 0.7265  | -0.0025  | 0.95704  | 0.108015 | 0.01955  |
| 0.19278  | 0.098831 | 0.03274  | -0.01452 | 0.75435 | -0.04013 | 0.38687  | -0.09259 | 0.04553  |
| 0.00175  | 0.175063 | 0.00014  | -0.01035 | 0.82349 | -0.02428 | 0.60069  | 0.138393 | 0.00273  |
| 0.78072  | -0.01066 | 0.8183   | 0.123628 | 0.00748 | 0.070661 | 0.12731  | 0.006526 | 0.88814  |
| 0.06639  | -0.05094 | 0.27198  | -0.04038 | 0.3839  | -0.03691 | 0.42611  | -0.0477  | 0.30366  |
| 0.70983  | 0.014565 | 0.75357  | -0.04537 | 0.32789 | -0.04106 | 0.37604  | -0.01441 | 0.75608  |
| 0.68481  | -0.03642 | 0.4323   | -0.03306 | 0.47606 | -0.04032 | 0.38469  | 0.002152 | 0.963    |
| 0.26806  | 0.034198 | 0.46096  | 0.0183   | 0.69326 | -0.00283 | 0.95129  | -0.06388 | 0.16812  |
| 4.41E-06 | -0.17553 | 0.00014  | 0.052964 | 0.25333 | 0.018245 | 0.69414  | -0.05154 | 0.26637  |
| 0.79946  | -0.07862 | 0.0897   | -0.01669 | 0.71898 | -0.0131  | 0.7776   | 0.05507  | 0.23492  |
| 0.39421  | 0.039227 | 0.39768  | -0.00667 | 0.8857  | -0.02708 | 0.55937  | 0.116407 | 0.01182  |
| 0.95093  | 0.016836 | 0.7167   | -0.02273 | 0.62424 | -0.01405 | 0.76208  | -0.02733 | 0.55572  |
| 0.71143  | 0.025397 | 0.58406  | -0.00759 | 0.87011 | 0.037964 | 0.41307  | -0.03768 | 0.41658  |
| 0.79897  | 0.072047 | 0.11999  | 0.120193 | 0.00933 | 0.080432 | 0.08251  | 0.088455 | 0.05611  |
| 0.9083   | -0.04458 | 0.33642  | 0.055967 | 0.22737 | -0.0682  | 0.14115  | 0.062737 | 0.17591  |
| 0.72615  | 0.02896  | 0.53244  | -0.01046 | 0.82165 | -0.02031 | 0.6616   | 0.078318 | 0.09093  |
| 0.53133  | 0.018863 | 0.68432  | -0.01883 | 0.68486 | -0.02611 | 0.57362  | 0.034585 | 0.45591  |
| 0.39567  | 0.049741 | 0.28341  | 0.04342  | 0.34915 | 0.007741 | 0.86749  | 0.00109  | 0.98125  |
| 0.18216  | 0.067397 | 0.14589  | 0.00053  | 0.99089 | -0.00689 | 0.88194  | -0.01543 | 0.73944  |
| 0.41649  | 0.04063  | 0.38102  | -0.00216 | 0.96287 | 0.008589 | 0.85314  | 0.03378  | 0.46646  |
| 0.0025   | -0.12969 | 0.005    | -0.00803 | 0.86261 | -0.00187 | 0.96777  | 0.050906 | 0.27227  |
| 0.126    | 0.043012 | 0.3537   | 0.053699 | 0.2468  | -0.00431 | 0.92607  | -0.05818 | 0.20947  |
| 0.99285  | -0.01063 | 0.81879  | -0.01851 | 0.68992 | -0.02277 | 0.62354  | -0.04688 | 0.31203  |
| 0.18679  | 0.101945 | 0.0276   | 0.112796 | 0.01474 | 0.071434 | 0.12319  | 0.103804 | 0.02488  |
| 0.38801  | -0.02961 | 0.52323  | -0.01356 | 0.77005 | -0.00984 | 0.83197  | -0.01156 | 0.80326  |

|          |          |          |          |          |          |         |          |          |
|----------|----------|----------|----------|----------|----------|---------|----------|----------|
| 0.15143  | -0.04805 | 0.30007  | -0.01359 | 0.76955  | -0.05838 | 0.20795 | -0.0261  | 0.57375  |
| 0.6792   | 0.046803 | 0.31285  | 0.059805 | 0.19702  | 0.036415 | 0.4324  | 0.04661  | 0.31485  |
| 0.84941  | 0.016612 | 0.72031  | 0.001461 | 0.97489  | 0.024854 | 0.59213 | -0.06395 | 0.16765  |
| 0.03749  | -0.04816 | 0.29902  | 0.12423  | 0.00719  | 0.121668 | 0.00849 | -0.12079 | 0.00898  |
| 0.00035  | 0.0769   | 0.09695  | -0.03356 | 0.46936  | -0.03281 | 0.4794  | -0.03657 | 0.4305   |
| 0.88194  | 0.003908 | 0.93288  | 0.013336 | 0.77378  | -0.00772 | 0.86779 | 0.008059 | 0.8621   |
| 0.06274  | -0.0624  | 0.17823  | -0.00739 | 0.87352  | -0.00831 | 0.85779 | 0.003458 | 0.94059  |
| 0.08908  | 0.01479  | 0.7499   | -0.0073  | 0.87502  | 0.026016 | 0.57494 | 0.001499 | 0.97423  |
| 1.41E-05 | 0.245922 | 7.32E-08 | 0.063582 | 0.17015  | 0.167321 | 0.00028 | 0.138196 | 0.00276  |
| 0.00643  | 0.080468 | 0.08237  | 0.040269 | 0.38526  | -0.00112 | 0.98072 | -0.00452 | 0.92239  |
| 0.37251  | -0.00338 | 0.94196  | 0.030549 | 0.51019  | 0.0426   | 0.35834 | -0.03306 | 0.47599  |
| 0.83612  | -0.06399 | 0.1674   | -0.00519 | 0.91088  | -0.05366 | 0.24713 | -0.13832 | 0.00274  |
| 0.01068  | -0.12492 | 0.00687  | 0.004236 | 0.92726  | 0.09138  | 0.04843 | 0.031046 | 0.50332  |
| 0.01482  | 0.042375 | 0.36088  | 0.017723 | 0.70246  | -0.00753 | 0.87108 | 0.036299 | 0.43388  |
| 0.20445  | 0.10939  | 0.01804  | 0.101765 | 0.02788  | 0.037684 | 0.41652 | -0.00124 | 0.97863  |
| 0.99502  | 0.018334 | 0.69272  | 0.024583 | 0.59618  | 0.051798 | 0.26394 | 0.037823 | 0.4148   |
| 0.17495  | -0.0244  | 0.59887  | 0.003626 | 0.93772  | 0.108839 | 0.01864 | 0.00556  | 0.90462  |
| 2.39E-10 | 0.228861 | 5.76E-07 | 0.021133 | 0.64874  | 0.016631 | 0.72    | 0.218084 | 1.96E-06 |
| 0.73272  | 0.024672 | 0.59485  | -0.02359 | 0.61116  | -0.04192 | 0.36612 | -0.06077 | 0.18991  |
| 0.091    | 0.109266 | 0.01818  | -0.01986 | 0.6686   | -0.03737 | 0.42047 | -0.00952 | 0.83748  |
| 0.64322  | 0.014018 | 0.76255  | 0.00628  | 0.89234  | -0.00897 | 0.8467  | -0.02113 | 0.64886  |
| 0.01704  | 0.142049 | 0.00209  | 0.009618 | 0.83578  | 0.043866 | 0.34422 | -0.053   | 0.25298  |
| 0.11727  | 0.127105 | 0.00595  | -0.00329 | 0.94349  | -0.01646 | 0.7227  | -0.02285 | 0.62233  |
| 0.1235   | 0.094613 | 0.04098  | 0.039141 | 0.39873  | 0.087684 | 0.0583  | -0.02898 | 0.53223  |
| 0.91674  | -0.0023  | 0.96052  | -0.02005 | 0.66556  | -0.02651 | 0.56767 | -0.01397 | 0.76329  |
| 0.4169   | 0.021727 | 0.63956  | -0.05176 | 0.26431  | 0.068767 | 0.13785 | 0.001942 | 0.96662  |
| 0.01819  | 0.158619 | 0.00058  | 0.005542 | 0.90493  | 0.039979 | 0.38869 | -0.07715 | 0.09585  |
| 0.09164  | 0.102796 | 0.02633  | 0.053291 | 0.25041  | 0.169968 | 0.00022 | -0.04297 | 0.35418  |
| 0.09256  | 0.003954 | 0.93209  | -0.02642 | 0.56906  | 0.006057 | 0.89614 | -0.00622 | 0.89336  |
| 0.29277  | 0.055958 | 0.22744  | 0.01213  | 0.79376  | -0.02757 | 0.55231 | 0.015381 | 0.74026  |
| 0.01723  | -0.06403 | 0.16718  | -0.0055  | 0.90562  | -0.05126 | 0.26895 | -0.0053  | 0.9091   |
| 0.93642  | -0.03999 | 0.38851  | -0.02293 | 0.62119  | -0.02018 | 0.66357 | -0.01977 | 0.66995  |
| 0.35718  | 0.001556 | 0.97324  | 0.073439 | 0.11298  | -0.00865 | 0.85208 | -0.02988 | 0.51949  |
| 3.35E-05 | 0.164696 | 0.00035  | 0.08405  | 0.06957  | 0.113525 | 0.0141  | 0.227295 | 6.91E-07 |
| 9.17E-07 | -0.24734 | 6.12E-08 | 0.093059 | 0.04443  | 0.029238 | 0.52851 | -0.03615 | 0.43579  |
| 0.00152  | 0.132424 | 0.00415  | 0.01871  | 0.68675  | 0.008431 | 0.85581 | 0.279586 | 7.81E-10 |
| 0.01319  | 0.077864 | 0.09282  | 0.019092 | 0.6807   | -0.00362 | 0.93782 | -0.02464 | 0.59526  |
| 0.00183  | 0.089753 | 0.05259  | -0.01395 | 0.76367  | -0.05312 | 0.25194 | 0.058507 | 0.20694  |
| 0.00461  | 0.113922 | 0.01377  | 0.02266  | 0.62524  | -0.00535 | 0.90814 | 0.082313 | 0.07556  |
| 0.0193   | 0.075994 | 0.10096  | -0.01624 | 0.72638  | -0.01923 | 0.67849 | 0.075962 | 0.1011   |
| 0.05383  | 0.11315  | 0.01442  | 0.019268 | 0.67791  | -0.02424 | 0.6013  | 0.005774 | 0.90097  |
| 0.8292   | 0.057893 | 0.21175  | 0.073047 | 0.11492  | -0.01446 | 0.75534 | -0.0048  | 0.91762  |
| 0.00588  | 0.119966 | 0.00946  | -0.00824 | 0.85898  | 0.091765 | 0.04749 | 0.034812 | 0.45296  |
| 0.23681  | 0.101998 | 0.02752  | 0.27218  | 2.24E-09 | 0.000769 | 0.98678 | 0.028324 | 0.54148  |
| 0.87068  | -0.0055  | 0.90556  | 0.016378 | 0.72408  | 0.005831 | 0.9     | 0.052591 | 0.2567   |

|          |          |          |          |          |          |         |          |          |
|----------|----------|----------|----------|----------|----------|---------|----------|----------|
| 0.79445  | 0.000806 | 0.98614  | 0.03361  | 0.46871  | -0.04002 | 0.38827 | -0.01451 | 0.7544   |
| 0.00061  | 0.183882 | 6.41E-05 | 0.025446 | 0.58335  | 0.013203 | 0.77598 | 0.199158 | 1.45E-05 |
| 0.95752  | 0.000832 | 0.98569  | 0.087102 | 0.06     | -0.05222 | 0.2601  | -0.01409 | 0.76142  |
| 0.75208  | -0.00778 | 0.86689  | -0.04056 | 0.38182  | -0.02157 | 0.64205 | 0.112669 | 0.01485  |
| 0.51838  | -0.00021 | 0.99633  | -0.01516 | 0.74383  | -0.01833 | 0.69283 | -0.04289 | 0.35503  |
| 0.0079   | 0.1474   | 0.0014   | 0.005073 | 0.91293  | -0.03092 | 0.50509 | 0.003379 | 0.94195  |
| 0.00244  | 0.147018 | 0.00144  | 0.034054 | 0.46285  | -0.00449 | 0.92283 | 0.004689 | 0.9195   |
| 0.02624  | -0.0984  | 0.03351  | -0.01402 | 0.76254  | 0.073973 | 0.11038 | -0.0337  | 0.46754  |
| 0.96909  | -0.01372 | 0.76749  | 0.00255  | 0.95618  | -0.01512 | 0.74445 | -0.02999 | 0.51789  |
| 0.51452  | -0.00955 | 0.83701  | -0.02311 | 0.61837  | -0.03382 | 0.46596 | -0.07304 | 0.11494  |
| 0.00738  | 0.101733 | 0.02793  | -0.04403 | 0.34239  | -0.05145 | 0.26721 | -0.02385 | 0.60717  |
| 0.7845   | 0.011596 | 0.80264  | -0.00074 | 0.98725  | 0.019095 | 0.68065 | 0.026513 | 0.56766  |
| 0.32094  | 0.020004 | 0.66635  | -0.0187  | 0.6869   | -0.01655 | 0.72132 | -0.04153 | 0.37049  |
| 0.97365  | 0.062764 | 0.17572  | 0.000347 | 0.99403  | -0.00576 | 0.90125 | -0.09335 | 0.04376  |
| 0.41641  | -0.00775 | 0.86737  | 0.015322 | 0.74122  | 0.036934 | 0.42587 | 0.026747 | 0.56424  |
| 1.62E-07 | 0.2465   | 6.81E-08 | -0.00244 | 0.95802  | -0.01626 | 0.72596 | 0.01028  | 0.82465  |
| 0.00066  | 0.196219 | 1.95E-05 | 0.065172 | 0.1597   | 0.059931 | 0.19608 | 0.05512  | 0.23449  |
| 0.30917  | 0.060209 | 0.19401  | -0.02269 | 0.62485  | -0.02175 | 0.63914 | 0.092594 | 0.04551  |
| 0.23066  | -0.01281 | 0.78241  | -0.01581 | 0.73329  | -0.03441 | 0.45821 | 0.006386 | 0.89054  |
| 0.12507  | 0.067379 | 0.146    | -0.01371 | 0.76769  | -0.02744 | 0.55422 | -0.01996 | 0.667    |
| 3.75E-08 | 0.309864 | 7.51E-12 | 0.086275 | 0.06248  | 0.054881 | 0.23653 | 0.067533 | 0.14507  |
| 0.12791  | 0.111272 | 0.01614  | -0.01087 | 0.81477  | 0.054752 | 0.23764 | -0.11604 | 0.01209  |
| 2.03E-07 | 0.170586 | 0.00021  | -0.0246  | 0.59586  | 0.07096  | 0.1257  | -0.02652 | 0.56752  |
| 0.82289  | 0.083285 | 0.07216  | 0.146165 | 0.00154  | -0.00482 | 0.91729 | -0.07325 | 0.11393  |
| 0.17534  | 0.140996 | 0.00226  | 0.025522 | 0.58222  | -0.04009 | 0.38736 | 0.037292 | 0.4214   |
| 0.38182  | 0.01203  | 0.79542  | -0.02355 | 0.61168  | -0.00966 | 0.8351  | 0.035739 | 0.441    |
| 0.01251  | 0.093465 | 0.04351  | -0.0487  | 0.29357  | -0.02262 | 0.62581 | -0.0431  | 0.35274  |
| 0.33951  | 0.05279  | 0.2549   | 0.050457 | 0.27653  | -0.03654 | 0.43084 | -0.06274 | 0.17588  |
| 0.00938  | 0.150548 | 0.0011   | 0.191385 | 3.14E-05 | 0.059139 | 0.20206 | 0.210786 | 4.33E-06 |
| 0.17176  | 0.031974 | 0.49065  | -0.00511 | 0.91224  | 0.02053  | 0.65812 | -0.01287 | 0.78147  |
| 2.70E-09 | -0.3225  | 9.18E-13 | 0.010247 | 0.82521  | -0.0478  | 0.30265 | -0.04912 | 0.28947  |
| 0.39498  | 0.037791 | 0.4152   | 0.015341 | 0.7409   | 0.064307 | 0.16532 | -0.07261 | 0.11714  |
| 0.03734  | 0.059497 | 0.19934  | 0.044027 | 0.34244  | -0.00682 | 0.88316 | -0.05584 | 0.22847  |
| 0.04497  | 0.005337 | 0.90842  | 0.170158 | 0.00022  | -0.02184 | 0.63785 | -0.01388 | 0.7648   |
| 0.09147  | -0.23098 | 4.50E-07 | 0.142829 | 0.00197  | -0.03996 | 0.38897 | -0.05672 | 0.22113  |
| 0.00624  | 0.19441  | 2.33E-05 | 0.036225 | 0.43481  | -0.00887 | 0.84838 | 0.039753 | 0.39138  |
| 0.87057  | -0.012   | 0.79591  | 0.179603 | 9.52E-05 | 0.106167 | 0.02175 | 0.180862 | 8.48E-05 |
| 0.02466  | 0.126382 | 0.00624  | -0.01848 | 0.69039  | -0.02782 | 0.54876 | -0.01984 | 0.66889  |
| 0.7456   | -0.02478 | 0.59318  | -0.02404 | 0.60436  | -0.04311 | 0.35262 | -0.02849 | 0.53914  |
| 0.88073  | 0.011755 | 0.79999  | 0.000904 | 0.98446  | -0.00353 | 0.93939 | -0.05304 | 0.25266  |
| 0.7847   | 0.037991 | 0.41274  | 0.028364 | 0.54091  | 0.026544 | 0.56719 | 0.041029 | 0.37636  |
| 0.00193  | 0.162376 | 0.00043  | -0.00807 | 0.86194  | 0.003237 | 0.94438 | 0.009323 | 0.84076  |
| 0.54896  | 0.006129 | 0.89491  | -0.00134 | 0.97701  | -0.01229 | 0.79113 | -0.02042 | 0.65979  |
| 0.56341  | -0.08911 | 0.05432  | -0.01667 | 0.7193   | -0.01278 | 0.783   | -0.06133 | 0.18582  |
| 0.67674  | 0.019094 | 0.68067  | 0.047145 | 0.30932  | 0.068633 | 0.13862 | 0.117647 | 0.01095  |



|          |          |          |          |          |          |         |          |          |
|----------|----------|----------|----------|----------|----------|---------|----------|----------|
| 0.46664  | -0.00686 | 0.88246  | -0.02509 | 0.58864  | -0.03984 | 0.3903  | -0.02044 | 0.65952  |
| 0.31769  | 0.094183 | 0.04191  | 0.020679 | 0.65579  | 0.083643 | 0.07094 | -0.03825 | 0.40957  |
| 0.99202  | 0.018013 | 0.69782  | 0.038261 | 0.40942  | -0.00959 | 0.83633 | 0.214195 | 3.00E-06 |
| 0.16827  | -0.0347  | 0.45435  | 0.088194 | 0.05685  | 0.071537 | 0.12265 | -0.04964 | 0.28437  |
| 6.21E-07 | 0.241145 | 1.33E-07 | 0.080545 | 0.08208  | 0.129794 | 0.00497 | -0.00494 | 0.91524  |
| 2.87E-06 | 0.177788 | 0.00011  | 0.009269 | 0.84167  | -0.01437 | 0.75684 | 0.107963 | 0.01961  |
| 7.93E-05 | 0.225148 | 8.85E-07 | 0.105372 | 0.02276  | -0.00332 | 0.94288 | -0.02835 | 0.54112  |
| 0.46578  | -0.08301 | 0.07311  | -0.00698 | 0.88046  | -0.07566 | 0.10246 | -0.09684 | 0.03644  |
| 0.02969  | 0.126281 | 0.00628  | 0.1458   | 0.00158  | 0.156917 | 0.00067 | 0.070241 | 0.12959  |
| 0.00059  | 0.213319 | 3.30E-06 | 0.021393 | 0.64471  | -0.00291 | 0.95002 | 0.026815 | 0.56325  |
| 0.709    | 0.005754 | 0.9013   | 0.006112 | 0.89519  | -0.00213 | 0.9634  | 0.087303 | 0.0594   |
| 0.0002   | 0.205339 | 7.70E-06 | 0.11216  | 0.01531  | 0.06643  | 0.15177 | 0.107569 | 0.02007  |
| 6.57E-06 | -0.19471 | 2.26E-05 | -0.12024 | 0.0093   | -0.08962 | 0.05295 | -0.08748 | 0.05889  |
| 0.03163  | -0.13612 | 0.0032   | 0.041739 | 0.36814  | 0.074507 | 0.10783 | 0.048808 | 0.29255  |
| 0.0722   | 0.053844 | 0.24552  | -0.04381 | 0.34483  | -0.05873 | 0.2052  | -0.01885 | 0.68447  |
| 0.53092  | -0.0267  | 0.56487  | 0.095515 | 0.03909  | 0.047606 | 0.30461 | -0.00147 | 0.97476  |
| 0.03918  | 0.081947 | 0.07687  | 0.115771 | 0.0123   | 0.042074 | 0.36431 | -0.03641 | 0.43244  |
| 0.00121  | -0.13715 | 0.00298  | -0.02434 | 0.59985  | -0.02215 | 0.63308 | 0.022204 | 0.63222  |
| 0.33481  | -0.02438 | 0.5992   | 0.001054 | 0.98187  | 0.056604 | 0.22212 | 0.004806 | 0.9175   |
| 0.539    | -0.0096  | 0.83602  | 0.085623 | 0.06449  | 0.039331 | 0.39643 | -0.00477 | 0.9182   |
| 0.1491   | 0.150319 | 0.00112  | 0.045112 | 0.33067  | -0.01902 | 0.68178 | -0.12924 | 0.00516  |
| 2.20E-07 | 0.247947 | 5.67E-08 | 0.114592 | 0.01322  | -0.03081 | 0.50664 | 0.184068 | 6.30E-05 |
| 0.01161  | -0.13957 | 0.0025   | -0.13015 | 0.00485  | -0.11881 | 0.01018 | -0.02083 | 0.65347  |
| 0.00466  | -0.21332 | 3.30E-06 | -0.03819 | 0.41035  | -0.09307 | 0.0444  | -0.14542 | 0.00163  |
| 0.02069  | 0.068061 | 0.14195  | -0.04656 | 0.31538  | 0.085214 | 0.06578 | -0.008   | 0.86306  |
| 0.60935  | 0.083002 | 0.07314  | 0.052986 | 0.25313  | 0.056052 | 0.22667 | 0.046012 | 0.3211   |
| 0.06374  | -0.11401 | 0.01369  | 0.004402 | 0.92441  | -0.05457 | 0.23923 | -0.0672  | 0.14707  |
| 0.09769  | 0.090134 | 0.05159  | 0.092977 | 0.04462  | 0.020243 | 0.66261 | -0.00141 | 0.97569  |
| 0.32611  | 0.113592 | 0.01404  | 0.081499 | 0.07851  | 0.046905 | 0.3118  | 0.174345 | 0.00015  |
| 0.54372  | 0.172276 | 0.00018  | 0.151276 | 0.00104  | 0.108823 | 0.01865 | 0.164905 | 0.00035  |
| 0.4897   | 0.099115 | 0.03224  | 0.042598 | 0.35835  | 0.154781 | 0.00079 | 0.004073 | 0.93005  |
| 0.48832  | 0.012598 | 0.78599  | 0.150901 | 0.00107  | -0.0045  | 0.9227  | -0.08815 | 0.05697  |
| 0.07321  | 0.03084  | 0.50616  | 0.05912  | 0.20221  | -0.02783 | 0.54855 | -0.13366 | 0.00381  |
| 0.19308  | -0.1028  | 0.02631  | 0.011917 | 0.79729  | 0.002236 | 0.96157 | -0.11009 | 0.01731  |
| 0.59705  | -0.04854 | 0.29522  | -0.00015 | 0.99748  | 0.05757  | 0.21431 | 0.022871 | 0.62202  |
| 0.04199  | 0.021818 | 0.63816  | 0.19408  | 2.41E-05 | 0.027379 | 0.55506 | 0.047135 | 0.30942  |
| 0.16456  | 0.106714 | 0.02108  | 0.032201 | 0.48757  | 0.044436 | 0.33798 | 0.066498 | 0.15135  |
| 0.6978   | 0.131316 | 0.00448  | 0.111467 | 0.01596  | 0.021297 | 0.6462  | -0.00611 | 0.89515  |
| 0.52042  | -0.0358  | 0.44022  | -0.01348 | 0.77136  | -0.06807 | 0.14193 | 0.143738 | 0.00185  |
| 0.05617  | 0.028526 | 0.53861  | 0.103982 | 0.02463  | -0.00562 | 0.90367 | 0.057739 | 0.21297  |
| 0.22833  | -0.02617 | 0.57274  | 0.009561 | 0.83674  | 0.029765 | 0.5211  | -0.07261 | 0.1171   |
| 0.00027  | 0.162853 | 0.00041  | -0.1108  | 0.01661  | -0.06319 | 0.1728  | -0.12026 | 0.00929  |
| 0.22474  | 0.00206  | 0.96458  | -0.06587 | 0.15527  | -0.05698 | 0.21908 | 0.043012 | 0.3537   |
| 0.76055  | 0.060836 | 0.1894   | 0.05016  | 0.27937  | 0.061708 | 0.18312 | 0.003694 | 0.93654  |
| 0.24652  | -0.00926 | 0.84173  | 0.098778 | 0.03283  | 0.062759 | 0.17576 | 0.057465 | 0.21515  |

|          |          |          |          |          |          |          |          |          |
|----------|----------|----------|----------|----------|----------|----------|----------|----------|
| 0.01565  | -0.0333  | 0.47278  | -0.04218 | 0.36308  | -0.07217 | 0.11937  | -0.23003 | 5.03E-07 |
| 0.1706   | 0.198104 | 1.61E-05 | 0.022556 | 0.62682  | 0.000429 | 0.99262  | -0.16794 | 0.00027  |
| 0.29141  | 0.042795 | 0.35613  | -0.0263  | 0.57082  | -0.08222 | 0.07591  | -0.05874 | 0.20514  |
| 0.00217  | 0.335818 | 8.97E-14 | 0.194446 | 2.32E-05 | 0.122956 | 0.00781  | 0.128849 | 0.00529  |
| 0.77553  | -0.00516 | 0.91142  | -0.05177 | 0.26417  | 0.016361 | 0.72436  | -0.05544 | 0.23178  |
| 0.42492  | 0.053504 | 0.24852  | -0.11562 | 0.01241  | -0.12779 | 0.00568  | 0.028187 | 0.54344  |
| 9.58E-05 | -0.1765  | 0.00013  | -0.1454  | 0.00163  | -0.10377 | 0.02493  | -0.05968 | 0.19799  |
| 0.00425  | -0.11558 | 0.01244  | -0.10646 | 0.02139  | -0.02836 | 0.54097  | -0.03158 | 0.49599  |
| 0.74557  | 0.143177 | 0.00192  | 0.063272 | 0.17224  | 0.060752 | 0.19001  | 0.102325 | 0.02703  |
| 1.19E-06 | -0.23296 | 3.56E-07 | -0.06345 | 0.17103  | -0.0962  | 0.0377   | -0.0662  | 0.1532   |
| 0.16769  | -0.06524 | 0.15925  | -0.01495 | 0.74729  | -0.04997 | 0.28123  | -0.03284 | 0.47901  |
| 0.49893  | 0.066927 | 0.14873  | 0.270474 | 2.84E-09 | 0.14271  | 0.00199  | 0.000429 | 0.99262  |
| 1.80E-08 | -0.28194 | 5.55E-10 | -0.09921 | 0.03208  | -0.07196 | 0.12046  | 0.037881 | 0.41409  |
| 2.63E-06 | -0.25315 | 2.91E-08 | -0.0813  | 0.07924  | -0.07579 | 0.10188  | 0.080964 | 0.08049  |
| 0.00014  | -0.21488 | 2.78E-06 | -0.06603 | 0.15428  | -0.05584 | 0.22847  | 0.027669 | 0.55088  |
| 3.37E-05 | -0.22522 | 8.77E-07 | -0.04092 | 0.37765  | -0.06147 | 0.18482  | 0.069407 | 0.13422  |
| 0.46492  | 0.015803 | 0.73339  | -0.03139 | 0.49866  | -0.06292 | 0.17466  | -0.16522 | 0.00034  |
| 0.00069  | -0.17711 | 0.00012  | -0.01422 | 0.75921  | -0.05138 | 0.2678   | -0.1755  | 0.00014  |
| 0.04739  | 0.117546 | 0.01102  | 0.02084  | 0.65329  | 0.003279 | 0.94366  | 0.055301 | 0.23296  |
| 0.91974  | 0.038679 | 0.40432  | 0.016808 | 0.71715  | -0.00335 | 0.9424   | -0.01199 | 0.79612  |
| 0.0042   | 0.318398 | 1.84E-12 | 0.084136 | 0.06929  | 0.204582 | 8.33E-06 | 0.147268 | 0.00142  |
| 0.98007  | 0.13178  | 0.00434  | -0.05353 | 0.24833  | -0.05001 | 0.28081  | -0.10528 | 0.02289  |
| 1.60E-05 | 0.253415 | 2.82E-08 | -0.02917 | 0.52948  | -0.04996 | 0.28125  | -0.02028 | 0.662    |
| 0.2356   | -0.01034 | 0.82361  | 0.068975 | 0.13666  | -0.0481  | 0.2996   | -0.1221  | 0.00826  |
| 0.00052  | 0.328705 | 3.15E-13 | 0.182876 | 7.04E-05 | 0.115953 | 0.01216  | 0.051871 | 0.26327  |
| 0.68656  | -0.19804 | 1.62E-05 | -0.1476  | 0.00138  | -0.0863  | 0.06241  | -0.0959  | 0.03831  |
| 0.47972  | 0.060606 | 0.19107  | -0.11223 | 0.01525  | 0.1317   | 0.00436  | -0.04019 | 0.38622  |
| 0.10662  | -0.02391 | 0.6063   | 0.095438 | 0.03924  | 0.10166  | 0.02804  | 0.006285 | 0.89224  |
| 0.00017  | -0.11005 | 0.01736  | 0.063584 | 0.17013  | -0.01549 | 0.73848  | -0.15429 | 0.00082  |
| 0.00011  | 0.100616 | 0.0297   | 0.063531 | 0.1705   | 0.099706 | 0.03122  | 0.054479 | 0.23999  |
| 7.48E-06 | 0.173615 | 0.00016  | -0.0144  | 0.75635  | -0.00715 | 0.87754  | 0.052463 | 0.25785  |
| 0.80261  | 0.078569 | 0.08989  | 0.092637 | 0.04541  | 0.12225  | 0.00818  | 0.02973  | 0.5216   |
| 1.42E-06 | -0.24806 | 5.59E-08 | -0.09903 | 0.03239  | -0.16505 | 0.00034  | -0.03846 | 0.40694  |
| 0.01022  | 0.090246 | 0.0513   | -0.05196 | 0.26246  | -0.10269 | 0.02649  | -0.0769  | 0.09694  |
| 0.00498  | -0.21537 | 2.64E-06 | -0.15353 | 0.00087  | -0.17447 | 0.00015  | -0.10929 | 0.01815  |
| 0.1371   | 0.191954 | 2.97E-05 | 0.100665 | 0.02962  | 0.150902 | 0.00107  | -0.01067 | 0.81814  |
| 0.00803  | -0.19572 | 2.05E-05 | -0.02987 | 0.51966  | -0.0423  | 0.36168  | -0.10141 | 0.02843  |
| 0.06657  | 0.072642 | 0.11696  | -0.09793 | 0.03437  | -0.04097 | 0.37699  | -0.04734 | 0.30729  |
| 1.46E-05 | 0.259348 | 1.29E-08 | -0.0016  | 0.97255  | -0.01238 | 0.78965  | 0.212741 | 3.51E-06 |
| 0.2027   | 0.104901 | 0.02338  | 0.112516 | 0.01499  | 0.088986 | 0.05465  | -0.03338 | 0.47172  |
| 0.04644  | 0.147438 | 0.0014   | 0.129853 | 0.00495  | 0.036686 | 0.42898  | 0.029993 | 0.51792  |
| 0.00684  | 0.208588 | 5.48E-06 | 0.068579 | 0.13894  | 0.033701 | 0.46751  | 0.02043  | 0.65968  |
| 0.40751  | 0.012108 | 0.79412  | 0.040287 | 0.38505  | 0.041709 | 0.36849  | 0.027843 | 0.54838  |
| 0.21003  | 0.007398 | 0.87331  | 0.028422 | 0.54009  | 0.026781 | 0.56374  | 0.017341 | 0.70857  |
| 0.55436  | -0.07998 | 0.08427  | -0.04514 | 0.33034  | -0.01215 | 0.79338  | 0.032683 | 0.48108  |

|          |          |          |          |          |          |          |          |          |
|----------|----------|----------|----------|----------|----------|----------|----------|----------|
| 0.35905  | 0.120643 | 0.00906  | 0.047291 | 0.30782  | 7.96E-05 | 0.99863  | 0.101054 | 0.029    |
| 0.68176  | 0.041801 | 0.36743  | 0.161928 | 0.00044  | 0.072468 | 0.11784  | -0.00231 | 0.96025  |
| 0.02907  | 0.151189 | 0.00105  | 0.073992 | 0.11029  | 0.015755 | 0.73418  | 0.21989  | 1.60E-06 |
| 0.15141  | 0.005352 | 0.90817  | 0.015584 | 0.73696  | -0.02502 | 0.58973  | -0.07005 | 0.13066  |
| 0.08214  | 0.248403 | 5.35E-08 | 0.073354 | 0.1134   | 0.261335 | 9.91E-09 | 0.030163 | 0.51555  |
| 0.71346  | 0.101198 | 0.02877  | 0.184755 | 5.91E-05 | 0.1241   | 0.00725  | 0.004122 | 0.92921  |
| 3.88E-05 | 0.43108  | 1.48E-22 | 0.221373 | 1.36E-06 | 0.22137  | 1.36E-06 | 0.181101 | 8.29E-05 |
| 1.90E-05 | 0.270409 | 2.87E-09 | 0.185471 | 5.52E-05 | 0.011726 | 0.80048  | 0.049781 | 0.28302  |
| 0.0002   | -0.09651 | 0.03709  | 0.070034 | 0.13072  | -0.00696 | 0.88074  | -0.06602 | 0.15431  |
| 1.50E-07 | 0.310243 | 7.06E-12 | -0.08747 | 0.05892  | -0.01455 | 0.75379  | 0.039056 | 0.39976  |
| 0.04202  | 0.123255 | 0.00766  | 0.149432 | 0.0012   | 0.085563 | 0.06468  | 0.116884 | 0.01148  |
| 0.27001  | 0.082288 | 0.07565  | 0.097478 | 0.03521  | 0.076722 | 0.09773  | 0.07713  | 0.09595  |
| 0.5946   | 0.056367 | 0.22406  | 0.028168 | 0.54371  | -0.00065 | 0.98888  | 0.046133 | 0.31983  |
| 0.47054  | -0.02287 | 0.62198  | -0.0443  | 0.33947  | -0.06498 | 0.16091  | -0.10824 | 0.0193   |
| 2.80E-05 | 0.29772  | 5.17E-11 | 0.052551 | 0.25706  | 0.164427 | 0.00036  | 0.228998 | 5.67E-07 |
| 0.88616  | 0.063822 | 0.16854  | 0.037859 | 0.41437  | 0.061242 | 0.18645  | 0.021133 | 0.64873  |
| 0.06195  | 0.056921 | 0.21953  | -0.03514 | 0.44867  | -0.13868 | 0.00267  | 0.114745 | 0.01309  |
| 0.00063  | -0.28565 | 3.22E-10 | -0.10152 | 0.02826  | -0.15785 | 0.00062  | -0.04275 | 0.35662  |
| 0.04054  | -0.00757 | 0.87035  | -0.12128 | 0.0087   | -0.04362 | 0.34695  | -0.11023 | 0.01717  |
| 0.27437  | 0.135392 | 0.00337  | 0.099572 | 0.03145  | -0.0488  | 0.29266  | -0.01572 | 0.73479  |
| 0.45376  | 0.086827 | 0.06081  | 0.062854 | 0.1751   | 0.222782 | 1.16E-06 | 0.010057 | 0.8284   |
| 0.02149  | 0.185301 | 5.61E-05 | 0.126532 | 0.00618  | 0.039517 | 0.3942   | 0.039095 | 0.39927  |
| 2.66E-06 | 0.310675 | 6.58E-12 | 0.120734 | 0.00901  | 0.041025 | 0.3764   | 0.074183 | 0.10937  |
| 0.00177  | -0.02492 | 0.59117  | -0.0117  | 0.80092  | -0.09598 | 0.03814  | 0.004641 | 0.92033  |
| 0.34065  | -0.09977 | 0.03112  | -0.06887 | 0.13724  | -0.11753 | 0.01102  | 0.062193 | 0.17969  |
| 0.00261  | 0.192406 | 2.84E-05 | 0.11482  | 0.01303  | 0.003423 | 0.94119  | 0.061912 | 0.18167  |
| 0.40048  | 0.090872 | 0.0497   | -0.00719 | 0.87683  | -0.02641 | 0.56918  | -0.0262  | 0.57217  |
| 0.00036  | -0.13868 | 0.00267  | -0.02716 | 0.55825  | -0.00012 | 0.99795  | -0.05482 | 0.23705  |
| 0.18555  | 0.222124 | 1.25E-06 | 0.186303 | 5.10E-05 | 0.1343   | 0.00364  | 0.082175 | 0.07605  |
| 0.0105   | 0.124105 | 0.00725  | -0.04268 | 0.35748  | -0.03169 | 0.49446  | 0.024518 | 0.59716  |
| 3.76E-09 | -0.197   | 1.80E-05 | -0.1056  | 0.02247  | -0.02325 | 0.61629  | -0.12639 | 0.00624  |
| 0.0005   | -0.06532 | 0.15872  | -0.0683  | 0.14057  | 0.057318 | 0.21633  | -0.00193 | 0.96683  |
| 6.12E-07 | 0.299976 | 3.64E-11 | 0.056933 | 0.21944  | 0.11785  | 0.01081  | -0.06205 | 0.18073  |
| 0.58008  | 0.140655 | 0.00231  | 0.00812  | 0.86107  | 0.069737 | 0.13237  | 0.059396 | 0.2001   |
| 0.83741  | 0.07352  | 0.11259  | 0.021164 | 0.64826  | 0.040549 | 0.38196  | -0.08476 | 0.06724  |
| 0.00178  | 0.247465 | 6.03E-08 | 0.010208 | 0.82586  | 0.133773 | 0.00378  | 0.047532 | 0.30537  |
| 0.02099  | 0.248585 | 5.23E-08 | 0.140373 | 0.00236  | 0.107939 | 0.01964  | -0.08236 | 0.07539  |
| 0.00147  | 0.289422 | 1.83E-10 | 0.04991  | 0.28177  | 0.187058 | 4.75E-05 | 0.057168 | 0.21753  |
| 0.96178  | -0.00401 | 0.93116  | 0.09154  | 0.04804  | -0.03887 | 0.40195  | 0.039091 | 0.39933  |
| 0.9378   | 0.033616 | 0.46864  | 0.044799 | 0.33404  | 0.072701 | 0.11666  | 0.104801 | 0.02352  |
| 0.5041   | 0.019706 | 0.67102  | 0.002127 | 0.96343  | 0.002104 | 0.96382  | 0.070099 | 0.13037  |
| 1.69E-06 | 0.222014 | 1.26E-06 | 0.037881 | 0.41409  | 0.097182 | 0.03578  | 0.205177 | 7.83E-06 |
| 0.00428  | -0.21224 | 3.71E-06 | -0.0419  | 0.36627  | -0.04439 | 0.33852  | -0.25466 | 2.40E-08 |
| 0.00072  | 0.15347  | 0.00088  | 0.051081 | 0.27063  | 0.033668 | 0.46795  | 0.349329 | 7.54E-15 |
| 0.9343   | 0.068955 | 0.13678  | 0.120882 | 0.00893  | 0.106507 | 0.02133  | -0.14055 | 0.00233  |

|          |          |          |          |          |          |          |          |          |
|----------|----------|----------|----------|----------|----------|----------|----------|----------|
| 0.78618  | 0.147568 | 0.00138  | 0.002905 | 0.95009  | 0.015432 | 0.73943  | 0.003368 | 0.94214  |
| 0.14283  | 0.148282 | 0.00131  | -0.00298 | 0.94879  | 0.073422 | 0.11307  | -0.05569 | 0.2297   |
| 0.00062  | 0.138951 | 0.00262  | 0.063973 | 0.16753  | 0.024241 | 0.6013   | 0.086071 | 0.0631   |
| 0.35795  | 0.035493 | 0.44415  | 0.085238 | 0.06571  | 0.036598 | 0.4301   | -0.03103 | 0.50348  |
| 9.90E-10 | -0.39786 | 3.66E-19 | -0.12139 | 0.00864  | -0.15514 | 0.00077  | -0.00692 | 0.88149  |
| 0.04141  | -0.10877 | 0.01871  | 0.069108 | 0.13591  | 0.034712 | 0.45425  | -0.01558 | 0.73709  |
| 9.40E-06 | -0.26786 | 4.08E-09 | -0.04638 | 0.31727  | -0.06954 | 0.13347  | -0.07037 | 0.12888  |
| 0.00267  | -0.20717 | 6.36E-06 | -0.10808 | 0.01948  | -0.09258 | 0.04554  | -0.12743 | 0.00582  |
| 0.00166  | -0.13324 | 0.00392  | 0.070841 | 0.12634  | 0.025169 | 0.58745  | 0.007537 | 0.87096  |
| 0.0881   | -0.16914 | 0.00024  | -0.13358 | 0.00383  | -0.20841 | 5.58E-06 | -0.00822 | 0.85938  |
| 0.17567  | 0.076195 | 0.10006  | 0.029457 | 0.52543  | 0.0293   | 0.52763  | 0.12117  | 0.00876  |
| 0.09781  | -0.07703 | 0.0964   | -0.00519 | 0.91101  | -0.05127 | 0.26883  | 0.01515  | 0.74402  |
| 0.38845  | -0.01653 | 0.72157  | 0.012111 | 0.79408  | -0.00964 | 0.83539  | -0.00169 | 0.97091  |
| 0.91775  | -0.00062 | 0.98938  | 0.028125 | 0.54433  | -0.0077  | 0.86818  | 0.007879 | 0.86515  |
| 0.01963  | 0.105055 | 0.02318  | 0.084125 | 0.06932  | -0.10267 | 0.02652  | 0.00827  | 0.85853  |
| 1.08E-08 | -0.25925 | 1.31E-08 | 0.041805 | 0.36738  | -0.05005 | 0.28039  | -0.07825 | 0.09121  |
| 3.74E-05 | 0.324511 | 6.51E-13 | 0.08136  | 0.07902  | 0.229152 | 5.57E-07 | -0.11057 | 0.01683  |
| 0.56474  | -0.02099 | 0.651    | -0.01678 | 0.71767  | 0.021245 | 0.647    | -0.00301 | 0.9482   |
| 0.35982  | -0.04357 | 0.34754  | -0.09897 | 0.03249  | 0.020182 | 0.66356  | 0.092312 | 0.04617  |
| 1.27E-07 | 0.252647 | 3.11E-08 | -0.00391 | 0.93286  | 0.130272 | 0.00481  | 0.195822 | 2.03E-05 |
| 0.7256   | 0.088189 | 0.05686  | 0.212321 | 3.68E-06 | 0.104453 | 0.02398  | 0.172534 | 0.00018  |
| 0.07967  | -0.08975 | 0.0526   | -0.07229 | 0.11875  | -0.17986 | 9.29E-05 | -0.05163 | 0.26545  |
| 0.76287  | 0.088554 | 0.05584  | 0.050551 | 0.27563  | 0.034002 | 0.46353  | -0.0773  | 0.0952   |
| 0.84     | 0.044762 | 0.33445  | 0.008425 | 0.85591  | 0.112447 | 0.01505  | -0.05664 | 0.2218   |
| 0.07325  | 0.08586  | 0.06375  | 0.040814 | 0.37885  | 0.157302 | 0.00065  | -0.13557 | 0.00333  |
| 0.79309  | 0.116881 | 0.01148  | 0.100884 | 0.02927  | 0.11574  | 0.01232  | 0.011166 | 0.80982  |
| 1.13E-06 | -0.28875 | 2.03E-10 | -0.08432 | 0.06867  | -0.08567 | 0.06433  | 0.056362 | 0.2241   |
| 0.26271  | 0.089126 | 0.05427  | 0.017019 | 0.71375  | 0.00432  | 0.92583  | -0.00503 | 0.9136   |
| 0.45653  | 0.128784 | 0.00532  | 0.042802 | 0.35606  | 0.017429 | 0.70717  | 0.154497 | 0.00081  |
| 0.38175  | -0.06607 | 0.15399  | 0.087089 | 0.06003  | -0.05147 | 0.26701  | -0.01046 | 0.8216   |
| 0.46681  | 0.102135 | 0.02731  | 0.009623 | 0.8357   | 0.007923 | 0.86442  | 0.073249 | 0.11392  |
| 0.34194  | 0.069904 | 0.13144  | 0.051115 | 0.27031  | 0.067219 | 0.14696  | 0.063632 | 0.16981  |
| 0.86209  | 0.030987 | 0.50413  | -0.00799 | 0.86326  | -0.03307 | 0.47591  | -0.03823 | 0.40981  |
| 3.88E-05 | 0.103019 | 0.026    | -0.01641 | 0.72351  | -0.00508 | 0.91283  | 0.066288 | 0.15265  |
| 0.00035  | 0.130306 | 0.0048   | -0.06898 | 0.13664  | 0.058138 | 0.20982  | -0.02527 | 0.58598  |
| 0.01645  | 0.263017 | 7.90E-09 | 0.095707 | 0.03869  | 0.062453 | 0.17788  | 0.075943 | 0.10119  |
| 0.00134  | 0.137171 | 0.00297  | 0.013995 | 0.76292  | 0.019032 | 0.68164  | 0.086002 | 0.06331  |
| 0.71585  | -0.03518 | 0.44819  | -0.03872 | 0.40387  | -0.00758 | 0.87027  | 0.151355 | 0.00103  |
| 0.17972  | -0.04295 | 0.35439  | -0.05926 | 0.20114  | -0.04075 | 0.37966  | -0.07969 | 0.0854   |
| 5.29E-10 | -0.3067  | 1.25E-11 | -0.14074 | 0.0023   | -0.05437 | 0.24094  | -0.14502 | 0.00168  |
| 0.00275  | 0.26973  | 3.15E-09 | 0.16808  | 0.00026  | 0.007382 | 0.87359  | -0.05498 | 0.23567  |
| 3.71E-10 | -0.30488 | 1.68E-11 | -0.03961 | 0.39312  | -0.01348 | 0.77141  | -0.09034 | 0.05106  |
| 0.00714  | -0.10591 | 0.02208  | -0.04704 | 0.31039  | -0.00591 | 0.89862  | -0.18596 | 5.27E-05 |
| 0.32219  | 0.114676 | 0.01315  | 0.002703 | 0.95354  | 0.037148 | 0.42319  | 0.085207 | 0.0658   |
| 0.0219   | 0.178415 | 0.00011  | 0.07648  | 0.09879  | 0.100885 | 0.02927  | 0.118439 | 0.01042  |

|          |          |          |          |          |          |          |          |          |
|----------|----------|----------|----------|----------|----------|----------|----------|----------|
| 0.12813  | 0.098156 | 0.03396  | 0.049666 | 0.28414  | 0.065831 | 0.15551  | -0.12319 | 0.0077   |
| 6.49E-07 | 0.327174 | 4.11E-13 | 0.109326 | 0.01811  | 0.01148  | 0.80457  | 0.012208 | 0.79245  |
| 2.77E-10 | -0.26365 | 7.25E-09 | -0.04431 | 0.33934  | -0.10153 | 0.02825  | -0.03405 | 0.46292  |
| 0.78969  | -0.00877 | 0.85014  | 0.073125 | 0.11454  | 0.041217 | 0.37417  | 0.005071 | 0.91298  |
| 0.10925  | -0.01387 | 0.76498  | -0.00821 | 0.85956  | -0.00022 | 0.99619  | -0.04012 | 0.38698  |
| 0.00054  | -0.08755 | 0.05869  | 0.055681 | 0.22975  | 0.10471  | 0.02364  | 0.06812  | 0.1416   |
| 0.05516  | 0.070391 | 0.12877  | 0.017746 | 0.7021   | 0.053541 | 0.24819  | -0.0153  | 0.74156  |
| 0.01264  | 0.165034 | 0.00034  | 0.034697 | 0.45444  | 0.023716 | 0.60921  | -0.05555 | 0.23087  |
| 0.35896  | 0.018699 | 0.68691  | 0.077787 | 0.09315  | 0.051372 | 0.2679   | -0.00315 | 0.94591  |
| 0.01655  | -0.21888 | 1.79E-06 | -0.03619 | 0.4352   | -0.06532 | 0.15876  | 0.044348 | 0.33894  |
| 0.21264  | 0.056639 | 0.22183  | 0.14419  | 0.00178  | 0.006884 | 0.88205  | 0.005441 | 0.90665  |
| 0.005    | 0.091805 | 0.04739  | 0.024525 | 0.59705  | 0.17026  | 0.00022  | -0.04126 | 0.37361  |
| 0.84751  | 0.106097 | 0.02184  | -0.07529 | 0.10415  | 0.030369 | 0.51268  | -0.19133 | 3.15E-05 |
| 7.13E-06 | 0.247952 | 5.67E-08 | 0.054651 | 0.2385   | 0.192347 | 2.86E-05 | 0.235318 | 2.69E-07 |
| 1.51E-05 | 0.217558 | 2.08E-06 | 0.096894 | 0.03633  | 0.062254 | 0.17927  | 0.066693 | 0.15016  |
| 0.26503  | -0.17933 | 9.76E-05 | -0.05939 | 0.20015  | 0.005687 | 0.90245  | 0.011466 | 0.8048   |
| 6.49E-05 | -0.21525 | 2.68E-06 | -0.01421 | 0.75947  | -0.03385 | 0.46554  | -0.16834 | 0.00026  |
| 0.01124  | 0.160188 | 0.00051  | 0.139198 | 0.00257  | -0.02397 | 0.60541  | 0.010744 | 0.81688  |
| 0.01071  | 0.054348 | 0.24112  | -0.04199 | 0.36527  | -0.06987 | 0.1316   | -0.00861 | 0.85285  |
| 0.44136  | 0.035603 | 0.44275  | -0.05385 | 0.24549  | -0.03624 | 0.43458  | -0.01004 | 0.82867  |
| 0.00206  | 0.10617  | 0.02175  | 0.007009 | 0.87993  | -0.07878 | 0.08904  | -0.05904 | 0.20285  |
| 0.7055   | 0.015124 | 0.74444  | 0.028142 | 0.54409  | 0.03624  | 0.43462  | 0.063292 | 0.17211  |
| 0.00089  | 0.139313 | 0.00255  | 0.077224 | 0.09555  | 0.01656  | 0.72115  | 0.145292 | 0.00164  |
| 0.831    | -0.0235  | 0.61248  | 0.092644 | 0.04539  | 0.020111 | 0.66466  | -0.15974 | 0.00053  |
| 4.34E-05 | -0.15564 | 0.00074  | -0.09051 | 0.05061  | -0.02601 | 0.57497  | -0.23779 | 2.00E-07 |
| 0.65232  | 0.069182 | 0.13549  | 0.111503 | 0.01592  | 0.075638 | 0.10257  | -0.08442 | 0.06836  |
| 4.08E-06 | 0.25785  | 1.58E-08 | 0.027646 | 0.55122  | 0.068689 | 0.1383   | 0.119863 | 0.00952  |
| 0.61882  | 0.070967 | 0.12566  | 0.184921 | 5.82E-05 | 0.080245 | 0.08323  | 0.011432 | 0.80538  |
| 0.03332  | 0.180957 | 8.40E-05 | 0.036436 | 0.43214  | 0.12617  | 0.00633  | 0.085911 | 0.0636   |
| 0.00024  | -0.16826 | 0.00026  | 0.058475 | 0.20718  | -0.1067  | 0.0211   | -0.06027 | 0.19354  |
| 0.01481  | 0.189292 | 3.84E-05 | 0.100349 | 0.03014  | 0.055382 | 0.23227  | 0.065287 | 0.15896  |
| 0.00595  | -0.10947 | 0.01796  | 0.062758 | 0.17577  | 0.017825 | 0.70084  | -0.13366 | 0.00381  |
| 0.85668  | 0.018261 | 0.69388  | 0.03281  | 0.47936  | 0.075035 | 0.10535  | 0.079199 | 0.08734  |
| 0.50412  | 0.061435 | 0.18507  | 0.052766 | 0.25511  | 0.045062 | 0.33121  | 0.030243 | 0.51443  |
| 0.63774  | 0.110671 | 0.01673  | -0.00013 | 0.99785  | 0.046224 | 0.31888  | 0.115189 | 0.01274  |
| 1.49E-05 | 0.146848 | 0.00146  | 0.057903 | 0.21167  | 0.048058 | 0.30003  | 0.087004 | 0.06029  |
| 0.09358  | 0.135875 | 0.00326  | 0.02612  | 0.57341  | 0.0611   | 0.18748  | 0.131745 | 0.00435  |
| 0.21518  | 0.069027 | 0.13636  | 0.051696 | 0.26489  | 0.070805 | 0.12653  | 0.117666 | 0.01093  |
| 6.19E-07 | -0.17918 | 9.89E-05 | -0.01119 | 0.80941  | -0.11343 | 0.01419  | -0.21968 | 1.64E-06 |
| 0.0287   | -0.12192 | 0.00835  | 0.017177 | 0.71121  | -0.02476 | 0.59346  | -0.00981 | 0.83249  |
| 0.94804  | 0.04158  | 0.36997  | 0.055782 | 0.22891  | 0.078911 | 0.0885   | 0.017542 | 0.70536  |
| 0.07064  | 0.052581 | 0.25679  | 0.066686 | 0.1502   | 0.051154 | 0.26994  | -0.12473 | 0.00696  |
| 0.01125  | 0.109178 | 0.01827  | -0.00845 | 0.85554  | 0.032272 | 0.4866   | 0.066159 | 0.15345  |
| 0.03493  | 0.182314 | 7.42E-05 | 0.055891 | 0.22801  | 0.056812 | 0.22042  | 0.212584 | 3.57E-06 |
| 0.43426  | -0.01403 | 0.76231  | 0.04073  | 0.37984  | -0.03846 | 0.40704  | 0.113204 | 0.01438  |

|          |          |          |          |          |          |          |          |          |
|----------|----------|----------|----------|----------|----------|----------|----------|----------|
| 0.02698  | 0.087669 | 0.05834  | -0.06624 | 0.15294  | -0.10571 | 0.02233  | -0.0809  | 0.08073  |
| 0.78761  | 0.078032 | 0.09212  | 0.130108 | 0.00486  | -0.04565 | 0.32492  | -0.10922 | 0.01822  |
| 0.12264  | 0.047061 | 0.31018  | -0.03854 | 0.40595  | 0.001817 | 0.96876  | 0.076186 | 0.1001   |
| 0.00619  | 0.223735 | 1.04E-06 | 0.061113 | 0.18738  | 0.110093 | 0.01731  | 0.207394 | 6.21E-06 |
| 0.74562  | 0.064904 | 0.16142  | 0.103684 | 0.02505  | -0.00822 | 0.85937  | 0.048698 | 0.29363  |
| 0.06051  | 0.238919 | 1.74E-07 | -0.06365 | 0.1697   | 0.113548 | 0.01408  | -0.16711 | 0.00029  |
| 0.13736  | 0.085406 | 0.06517  | 0.07872  | 0.08927  | 0.080737 | 0.08135  | 0.078503 | 0.09017  |
| 0.57773  | 0.078173 | 0.09153  | 0.065254 | 0.15917  | 0.021396 | 0.64466  | 0.061389 | 0.1854   |
| 0.08066  | 0.029617 | 0.52318  | 0.094211 | 0.04185  | 0.018765 | 0.68587  | 0.004639 | 0.92036  |
| 0.53992  | 0.081034 | 0.08023  | 0.006401 | 0.89028  | 0.067383 | 0.14597  | 0.088972 | 0.05469  |
| 0.20849  | -0.00281 | 0.95175  | 0.17343  | 0.00017  | 0.057051 | 0.21848  | 0.032622 | 0.48189  |
| 0.01765  | 0.044312 | 0.33933  | 0.016987 | 0.71427  | -0.0269  | 0.56201  | 0.021801 | 0.63842  |
| 0.23529  | 0.110153 | 0.01725  | 0.107875 | 0.01971  | 0.072475 | 0.1178   | -0.02527 | 0.58594  |
| 0.13427  | 0.084937 | 0.06667  | 0.036015 | 0.43748  | 0.096896 | 0.03633  | 0.157551 | 0.00063  |
| 0.58074  | -0.0353  | 0.4467   | -0.0214  | 0.64454  | -0.13142 | 0.00445  | -0.04575 | 0.32392  |
| 0.00016  | 0.311509 | 5.75E-12 | -0.00515 | 0.91154  | 0.145155 | 0.00166  | 0.084575 | 0.06784  |
| 0.23346  | -0.107   | 0.02074  | 0.176531 | 0.00013  | -0.01853 | 0.68965  | -0.01275 | 0.78341  |
| 7.67E-08 | -0.22801 | 6.36E-07 | 0.090602 | 0.05038  | -0.05615 | 0.22585  | -0.03177 | 0.49336  |
| 0.15689  | 0.057767 | 0.21275  | 0.200083 | 1.32E-05 | 0.046478 | 0.31622  | 0.063572 | 0.17022  |
| 4.04E-05 | 0.146672 | 0.00148  | -0.02686 | 0.56258  | -0.03041 | 0.51215  | 0.052182 | 0.26041  |
| 0.13746  | -0.04057 | 0.38166  | 0.074391 | 0.10838  | 0.028173 | 0.54365  | 0.214718 | 2.84E-06 |
| 0.24376  | -0.02006 | 0.66543  | 0.06847  | 0.13956  | 0.050744 | 0.2738   | 0.142812 | 0.00198  |
| 4.86E-09 | 0.269465 | 3.27E-09 | 0.014598 | 0.75303  | 0.025827 | 0.57771  | 0.113884 | 0.0138   |
| 4.59E-14 | -0.38609 | 4.75E-18 | -0.05439 | 0.2408   | -0.18013 | 9.07E-05 | -0.12354 | 0.00752  |
| 0.58043  | -0.03328 | 0.47306  | 0.012344 | 0.79019  | 0.02388  | 0.60673  | 0.148489 | 0.00129  |
| 0.9835   | 0.070727 | 0.12695  | 0.097842 | 0.03453  | 0.112537 | 0.01497  | 0.036487 | 0.43149  |
| 0.74926  | 0.017742 | 0.70215  | 0.069143 | 0.13571  | 0.07279  | 0.11621  | 0.136427 | 0.00314  |
| 0.3005   | 0.087917 | 0.05763  | 0.07405  | 0.11001  | 0.389086 | 2.50E-18 | -0.01366 | 0.76849  |
| 0.18008  | 0.020418 | 0.65987  | 0.07277  | 0.11631  | 0.072083 | 0.11981  | 0.046747 | 0.31342  |
| 0.36041  | -0.08483 | 0.067    | -0.10783 | 0.01976  | 0.032323 | 0.48592  | -0.10584 | 0.02216  |
| 7.09E-07 | 0.228874 | 5.76E-07 | 0.164273 | 0.00036  | 0.114361 | 0.0134   | -0.11978 | 0.00957  |
| 0.35833  | 0.172028 | 0.00019  | -0.0007  | 0.9879   | 0.033732 | 0.4671   | -0.22459 | 9.43E-07 |
| 6.99E-05 | 0.173772 | 0.00016  | 0.020534 | 0.65805  | 0.07106  | 0.12516  | 0.000569 | 0.99022  |
| 0.00036  | -0.05218 | 0.26042  | 0.007525 | 0.87116  | -0.0291  | 0.53046  | 0.04221  | 0.36276  |
| 0.01266  | -0.04571 | 0.32425  | 0.09318  | 0.04415  | 0.109606 | 0.01782  | 0.018171 | 0.69532  |
| 0.46883  | -0.06998 | 0.13103  | 0.023003 | 0.62001  | -0.00674 | 0.88451  | 0.026357 | 0.56993  |
| 0.03611  | 0.03498  | 0.45077  | -0.0982  | 0.03388  | 0.002288 | 0.96066  | -0.01667 | 0.71943  |
| 0.00868  | -0.07905 | 0.08795  | 0.069361 | 0.13447  | 0.055667 | 0.22987  | 0.038671 | 0.40441  |
| 1.17E-07 | -0.22328 | 1.09E-06 | 0.049176 | 0.28891  | -0.03912 | 0.39903  | -0.02737 | 0.55521  |
| 0.13924  | -0.11087 | 0.01653  | 0.017946 | 0.6989   | 0.020382 | 0.66042  | 0.113646 | 0.014    |
| 0.71628  | -0.14749 | 0.00139  | -0.00897 | 0.84672  | 0.00373  | 0.93593  | 0.012262 | 0.79156  |
| 0.00932  | -0.05861 | 0.20611  | -0.02194 | 0.63634  | -0.05306 | 0.2525   | 0.040025 | 0.38815  |
| 1.18E-05 | 0.323104 | 8.28E-13 | -0.00965 | 0.83531  | 0.089199 | 0.05407  | -0.05835 | 0.20817  |
| 0.04877  | 0.058056 | 0.21046  | 0.052157 | 0.26064  | 0.04728  | 0.30794  | 0.071757 | 0.1215   |
| 0.42357  | -0.05573 | 0.22936  | -0.00373 | 0.93594  | -0.00383 | 0.93415  | -0.02753 | 0.55283  |

|          |          |          |          |          |          |          |          |          |
|----------|----------|----------|----------|----------|----------|----------|----------|----------|
| 3.04E-08 | 0.322781 | 8.75E-13 | 0.001093 | 0.98121  | 0.038625 | 0.40498  | 0.188389 | 4.19E-05 |
| 0.41788  | -0.06898 | 0.13663  | 0.014004 | 0.76278  | -0.03877 | 0.40323  | 0.088221 | 0.05677  |
| 0.0125   | -0.04491 | 0.3328   | -0.00868 | 0.85158  | 0.084397 | 0.06843  | -0.11586 | 0.01223  |
| 0.82314  | 0.017785 | 0.70147  | 0.014069 | 0.76171  | -0.01905 | 0.68141  | 0.140895 | 0.00227  |
| 0.32608  | 0.086493 | 0.06181  | 0.077291 | 0.09526  | -0.01647 | 0.72256  | -0.0753  | 0.10411  |
| 0.03005  | -0.1041  | 0.02446  | -0.04156 | 0.37021  | 0.001862 | 0.968    | 0.0474   | 0.30671  |
| 0.02544  | 0.258413 | 1.46E-08 | -0.04823 | 0.29832  | 0.040555 | 0.38189  | -0.00143 | 0.97548  |
| 0.62089  | 0.05343  | 0.24918  | 0.045193 | 0.3298   | 0.024177 | 0.60226  | 0.03767  | 0.4167   |
| 0.00905  | 0.092632 | 0.04542  | 0.130262 | 0.00481  | 0.113311 | 0.01429  | 0.149048 | 0.00124  |
| 0.04527  | 0.146246 | 0.00153  | -0.00264 | 0.95461  | 0.081008 | 0.08033  | 0.032424 | 0.48455  |
| 0.5529   | 0.031837 | 0.4925   | 0.010898 | 0.81429  | 0.021987 | 0.63556  | 0.171625 | 0.00019  |
| 0.8654   | 0.112604 | 0.01491  | 0.155166 | 0.00077  | 0.135155 | 0.00343  | 0.054243 | 0.24204  |
| 0.03007  | 0.136085 | 0.00321  | 0.078028 | 0.09213  | 0.063123 | 0.17326  | 0.034678 | 0.45469  |
| 0.2697   | -0.00731 | 0.87477  | 0.071692 | 0.12184  | 0.080092 | 0.08382  | 0.091609 | 0.04787  |
| 1.52E-05 | -0.19674 | 1.85E-05 | -0.0974  | 0.03536  | -0.09087 | 0.04971  | -0.09496 | 0.04024  |
| 0.0005   | -0.01167 | 0.80149  | -0.00565 | 0.90305  | -0.14077 | 0.0023   | 0.019952 | 0.66715  |
| 0.08426  | -0.00382 | 0.93438  | -0.04468 | 0.33538  | 0.028776 | 0.53505  | 0.04657  | 0.31527  |
| 0.89652  | 0.095981 | 0.03813  | -0.00396 | 0.932    | 0.102623 | 0.02658  | -0.01044 | 0.82196  |
| 2.55E-08 | 0.314462 | 3.54E-12 | -0.09555 | 0.03902  | 0.02913  | 0.53003  | 0.108978 | 0.01849  |
| 1.57E-05 | -0.14093 | 0.00227  | -0.1163  | 0.0119   | -0.03918 | 0.39828  | 0.030262 | 0.51417  |
| 0.03353  | -0.11539 | 0.01259  | 0.026813 | 0.56328  | 0.096662 | 0.03678  | 0.123691 | 0.00745  |
| 0.03515  | 0.186711 | 4.91E-05 | 0.066761 | 0.14974  | 0.187486 | 4.56E-05 | 0.237909 | 1.97E-07 |
| 1.80E-13 | -0.37414 | 5.79E-17 | -0.13568 | 0.00331  | -0.08925 | 0.05392  | -0.21292 | 3.45E-06 |
| 0.64064  | 0.032371 | 0.48527  | 0.056779 | 0.22069  | 0.033299 | 0.47283  | -0.01503 | 0.74592  |
| 0.00946  | -0.09625 | 0.0376   | -0.00686 | 0.8824   | 0.016289 | 0.72552  | -0.10614 | 0.02178  |
| 0.29114  | 0.050672 | 0.27448  | 0.056335 | 0.22432  | 0.054615 | 0.23881  | 0.128952 | 0.00526  |
| 3.65E-09 | -0.16615 | 0.00031  | 0.097224 | 0.0357   | 0.004864 | 0.91651  | -0.26776 | 4.14E-09 |
| 0.84528  | 0.012998 | 0.77936  | -0.02685 | 0.56271  | -0.02591 | 0.57647  | 0.090989 | 0.0494   |
| 0.89033  | 0.10414  | 0.02441  | 0.049631 | 0.28447  | 0.025851 | 0.57736  | 0.063479 | 0.17084  |
| 2.36E-05 | 0.157885 | 0.00062  | -0.04784 | 0.30226  | -0.07407 | 0.10994  | 0.067003 | 0.14826  |
| 0.2618   | 0.091254 | 0.04874  | -0.02624 | 0.57169  | 0.012763 | 0.78324  | 0.16595  | 0.00032  |
| 0.42611  | -0.01954 | 0.67363  | -0.09023 | 0.05135  | -0.04782 | 0.30241  | -0.20067 | 1.25E-05 |
| 7.27E-10 | -0.2709  | 2.68E-09 | -0.06079 | 0.18971  | -0.02056 | 0.65762  | -0.00776 | 0.86724  |
| 0.03194  | 0.216158 | 2.42E-06 | 0.114678 | 0.01315  | 0.046511 | 0.31588  | 0.041471 | 0.37122  |
| 2.98E-05 | 0.31824  | 1.89E-12 | 0.122911 | 0.00784  | 0.116274 | 0.01192  | 0.070401 | 0.12871  |
| 0.43712  | -0.00684 | 0.88277  | 0.114808 | 0.01304  | 0.091133 | 0.04904  | 0.125168 | 0.00676  |
| 0.49422  | 0.055122 | 0.23448  | -0.00046 | 0.99218  | 0.047529 | 0.30539  | -0.07046 | 0.1284   |
| 1.10E-05 | -0.07271 | 0.1166   | 0.005606 | 0.90383  | 0.050433 | 0.27675  | 0.079595 | 0.08576  |
| 0.75033  | 0.122248 | 0.00818  | 0.065428 | 0.15806  | 0.167948 | 0.00027  | -0.06959 | 0.13321  |
| 0.01001  | -0.02637 | 0.56967  | 0.19952  | 1.40E-05 | 0.027499 | 0.55334  | 0.075118 | 0.10496  |
| 0.07012  | -0.08061 | 0.08182  | 0.011704 | 0.80085  | -0.00839 | 0.85649  | 0.044097 | 0.34168  |
| 0.03254  | 0.058395 | 0.2078   | 0.038163 | 0.41062  | 0.135286 | 0.0034   | 0.027955 | 0.54677  |
| 0.5861   | -0.0536  | 0.24766  | 0.004215 | 0.92761  | -0.00766 | 0.86879  | 0.044522 | 0.33704  |
| 0.00056  | 0.328148 | 3.47E-13 | 0.327004 | 4.23E-13 | 0.158006 | 0.00061  | 0.01539  | 0.74011  |
| 0.08215  | 0.172955 | 0.00017  | 0.065104 | 0.16013  | 0.05153  | 0.26642  | 0.069695 | 0.1326   |

|          |          |          |          |         |          |          |          |          |
|----------|----------|----------|----------|---------|----------|----------|----------|----------|
| 4.03E-07 | 0.4288   | 2.61E-22 | 0.067278 | 0.1466  | 0.067929 | 0.14273  | 0.115708 | 0.01234  |
| 0.27074  | 0.065468 | 0.1578   | 0.044057 | 0.34212 | 0.045526 | 0.32625  | 0.040962 | 0.37713  |
| 0.07298  | -0.06948 | 0.13381  | -0.06615 | 0.15349 | -0.09396 | 0.04241  | 0.062923 | 0.17463  |
| 0.57376  | 0.033184 | 0.47437  | 0.092251 | 0.04632 | 0.02919  | 0.52919  | -0.04648 | 0.3162   |
| 0.02253  | 0.087279 | 0.05948  | 0.06465  | 0.16307 | 0.033394 | 0.47158  | 0.091168 | 0.04896  |
| 0.88557  | 0.017962 | 0.69865  | -0.04004 | 0.38794 | 0.10444  | 0.024    | 0.066749 | 0.14981  |
| 0.34453  | 0.136503 | 0.00312  | 0.069546 | 0.13344 | -0.00787 | 0.86526  | 0.060287 | 0.19343  |
| 0.02892  | 0.276357 | 1.24E-09 | 0.120965 | 0.00888 | 0.084461 | 0.06822  | 0.130403 | 0.00476  |
| 1.13E-05 | 0.13595  | 0.00324  | 0.005844 | 0.89978 | -0.02868 | 0.53643  | 0.071374 | 0.1235   |
| 0.50565  | 0.053105 | 0.25207  | 0.050335 | 0.27769 | 0.055494 | 0.23133  | 0.009655 | 0.83516  |
| 0.13056  | 0.141079 | 0.00224  | 0.0343   | 0.45963 | -0.02008 | 0.6651   | 0.047435 | 0.30635  |
| 0.07924  | 0.084545 | 0.06794  | -0.01979 | 0.66968 | -0.04674 | 0.31354  | -0.00817 | 0.86021  |
| 8.86E-07 | 0.281814 | 5.65E-10 | 0.135501 | 0.00335 | 0.168362 | 0.00026  | 0.246571 | 6.75E-08 |
| 0.86942  | 0.082996 | 0.07316  | 0.079722 | 0.08527 | 0.058216 | 0.2092   | -0.08659 | 0.06153  |
| 0.79335  | 0.187406 | 4.60E-05 | 0.084846 | 0.06696 | 0.108429 | 0.01909  | 0.218355 | 1.90E-06 |
| 0.00023  | -0.12903 | 0.00523  | 0.033289 | 0.47297 | -0.01428 | 0.75827  | 0.022496 | 0.62775  |
| 0.00286  | 0.177515 | 0.00012  | 0.027595 | 0.55194 | -0.03945 | 0.39496  | 0.129058 | 0.00522  |
| 0.04215  | 0.166941 | 0.00029  | 0.037029 | 0.42468 | 0.021601 | 0.64151  | 0.034422 | 0.45804  |
| 0.22102  | 0.153149 | 0.0009   | -0.01077 | 0.81638 | -0.01275 | 0.78344  | 0.076796 | 0.0974   |
| 0.04304  | -0.01853 | 0.68957  | 0.100931 | 0.02919 | 0.250502 | 4.10E-08 | 0.024181 | 0.60221  |
| 0.21665  | 0.099821 | 0.03102  | 0.078893 | 0.08857 | -0.01843 | 0.69123  | 0.105619 | 0.02245  |
| 0.52543  | -0.05979 | 0.19716  | -0.02754 | 0.5527  | -0.02984 | 0.52012  | 0.045716 | 0.32424  |
| 0.10378  | 0.115389 | 0.01259  | 0.027549 | 0.55261 | 0.052497 | 0.25755  | 0.072475 | 0.1178   |
| 9.81E-06 | 0.354786 | 2.68E-15 | 0.071407 | 0.12333 | 0.119155 | 0.00996  | 0.131124 | 0.00454  |
| 0.00016  | 0.307176 | 1.16E-11 | -0.01991 | 0.66777 | -0.00198 | 0.96596  | -0.00587 | 0.89936  |
| 0.00298  | 0.247607 | 5.92E-08 | 0.136392 | 0.00314 | -0.00033 | 0.99431  | 0.091153 | 0.04899  |
| 0.82345  | 0.102177 | 0.02725  | 0.078377 | 0.09068 | 0.002153 | 0.963    | -0.00351 | 0.93974  |
| 9.25E-05 | 0.275032 | 1.50E-09 | 0.05872  | 0.20529 | 0.039905 | 0.38958  | 0.074492 | 0.1079   |
| 0.23559  | 0.120697 | 0.00903  | -0.00192 | 0.96696 | -0.00954 | 0.83703  | 0.089813 | 0.05243  |
| 0.23924  | -0.00061 | 0.98952  | -0.0532  | 0.25126 | 0.002243 | 0.96145  | -0.07514 | 0.10488  |
| 0.9935   | 0.066902 | 0.14888  | 0.053388 | 0.24955 | 0.091107 | 0.04911  | 0.066764 | 0.14972  |
| 0.23882  | -0.05045 | 0.27655  | 0.005933 | 0.89824 | 0.031093 | 0.50268  | 0.051448 | 0.26719  |
| 5.88E-13 | 0.371035 | 1.09E-16 | 0.06265  | 0.17651 | 0.07416  | 0.10948  | 0.200545 | 1.26E-05 |
| 0.32853  | 0.226774 | 7.34E-07 | -0.03704 | 0.42449 | 0.070627 | 0.12749  | 0.020509 | 0.65845  |
| 0.00806  | 0.115519 | 0.01249  | 0.024098 | 0.60345 | -0.09244 | 0.04588  | 0.017162 | 0.71145  |
| 0.524    | 0.100126 | 0.03051  | 0.016113 | 0.72837 | 0.02756  | 0.55244  | -0.13024 | 0.00482  |
| 0.97292  | 0.083504 | 0.07141  | 0.129035 | 0.00523 | 0.034101 | 0.46224  | 0.173421 | 0.00017  |
| 0.66724  | 0.025965 | 0.57568  | 0.056124 | 0.22606 | 0.075604 | 0.10273  | 0.045442 | 0.32715  |
| 8.94E-13 | 0.08492  | 0.06672  | -0.088   | 0.05741 | -0.13321 | 0.00393  | -0.02629 | 0.57086  |
| 0.0597   | 0.161337 | 0.00047  | 0.072545 | 0.11745 | 0.014061 | 0.76184  | 0.205862 | 7.29E-06 |
| 0.00581  | -0.08846 | 0.05611  | 0.000627 | 0.98921 | -0.00982 | 0.83241  | 0.014801 | 0.74972  |
| 0.04034  | -0.00356 | 0.93885  | -0.01057 | 0.8198  | -0.01423 | 0.75908  | 0.045738 | 0.324    |
| 0.27792  | 0.161626 | 0.00045  | 0.044592 | 0.33628 | 0.002603 | 0.95526  | -0.18422 | 6.21E-05 |
| 3.07E-07 | 0.213479 | 3.24E-06 | 0.064733 | 0.16253 | 0.056644 | 0.22179  | 0.031989 | 0.49043  |
| 0.26273  | 0.218463 | 1.88E-06 | -0.11565 | 0.01239 | 0.071289 | 0.12395  | -0.13814 | 0.00278  |



|          |          |          |          |          |          |          |          |          |
|----------|----------|----------|----------|----------|----------|----------|----------|----------|
| 8.43E-10 | -0.29054 | 1.55E-10 | -0.10097 | 0.02912  | -0.08855 | 0.05584  | -0.2641  | 6.82E-09 |
| 0.1682   | -0.11483 | 0.01302  | 0.017274 | 0.70965  | -0.00142 | 0.97556  | -0.03673 | 0.4284   |
| 0.38837  | 0.069538 | 0.13348  | 0.038969 | 0.4008   | 0.152008 | 0.00098  | 0.008332 | 0.85748  |
| 0.59993  | 0.023336 | 0.61496  | -0.03358 | 0.46912  | 0.037705 | 0.41626  | 0.010423 | 0.82226  |
| 0.47938  | 0.06062  | 0.19098  | 0.151388 | 0.00103  | 0.13726  | 0.00296  | 0.093086 | 0.04437  |
| 0.00506  | 0.1014   | 0.02845  | 0.148838 | 0.00126  | 0.053547 | 0.24814  | 0.185872 | 5.32E-05 |
| 0.84943  | 0.072123 | 0.1196   | 0.170809 | 0.00021  | 0.138387 | 0.00273  | -0.05675 | 0.22095  |
| 3.36E-08 | 0.183041 | 6.93E-05 | 0.016059 | 0.72924  | -0.07476 | 0.10665  | -0.11283 | 0.0147   |
| 0.88417  | 0.075191 | 0.10462  | 0.057427 | 0.21546  | 0.131484 | 0.00443  | -0.07524 | 0.10438  |
| 0.01959  | 0.090913 | 0.04959  | 0.107239 | 0.02045  | -0.00045 | 0.99225  | -0.00902 | 0.8459   |
| 0.96011  | 0.037453 | 0.41938  | 0.048789 | 0.29273  | 0.096976 | 0.03617  | 0.035205 | 0.44786  |
| 0.0071   | -0.05764 | 0.21374  | 0.025283 | 0.58575  | 0.004649 | 0.92019  | -0.12253 | 0.00803  |
| 0.00162  | -0.19663 | 1.87E-05 | -0.08606 | 0.06314  | -0.11873 | 0.01023  | -0.15559 | 0.00074  |
| 0.54289  | -0.0863  | 0.06241  | 0.047677 | 0.30388  | -0.05225 | 0.25981  | -0.00834 | 0.85731  |
| 0.70604  | 0.042269 | 0.36208  | 0.077339 | 0.09505  | 0.129114 | 0.0052   | -0.12861 | 0.00538  |
| 1.04E-12 | 0.16964  | 0.00023  | -0.01194 | 0.79692  | -0.10049 | 0.02991  | 0.169979 | 0.00022  |
| 0.89275  | 0.084963 | 0.06658  | 0.106761 | 0.02102  | 0.098718 | 0.03294  | 0.071622 | 0.1222   |
| 0.08948  | -0.07825 | 0.09123  | -0.07727 | 0.09534  | -0.02923 | 0.52859  | -0.01618 | 0.72722  |
| 0.00014  | 0.306182 | 1.36E-11 | 0.150037 | 0.00115  | 0.207128 | 6.39E-06 | 0.090416 | 0.05086  |
| 0.11989  | 0.196588 | 1.88E-05 | -0.02582 | 0.57787  | 0.018529 | 0.68962  | 0.026724 | 0.56457  |
| 0.08958  | 0.166443 | 0.0003   | 0.337005 | 7.25E-14 | 0.007629 | 0.8694   | -0.01142 | 0.80565  |
| 0.17187  | 0.138498 | 0.0027   | 0.054294 | 0.24159  | 0.034893 | 0.4519   | 0.114617 | 0.0132   |
| 0.1202   | 0.148795 | 0.00126  | -0.00445 | 0.92359  | 0.14394  | 0.00182  | -0.03951 | 0.39426  |
| 0.00519  | 0.192298 | 2.87E-05 | 0.150915 | 0.00107  | 0.17066  | 0.00021  | 0.12027  | 0.00928  |
| 0.09399  | -0.01161 | 0.80233  | -0.07088 | 0.12613  | -0.04167 | 0.36898  | 0.011211 | 0.80906  |
| 0.12287  | 0.175772 | 0.00013  | 0.071596 | 0.12234  | 0.110829 | 0.01657  | 0.027296 | 0.55626  |
| 9.66E-06 | 0.319123 | 1.63E-12 | 0.055626 | 0.23022  | 0.060022 | 0.1954   | 0.035009 | 0.45039  |
| 0.01445  | 0.060757 | 0.18997  | 0.094776 | 0.04063  | 0.113524 | 0.0141   | 0.037392 | 0.42015  |
| 0.27378  | 0.32019  | 1.36E-12 | 0.075214 | 0.10452  | 0.329071 | 2.96E-13 | 0.052386 | 0.25855  |
| 0.10287  | 0.008706 | 0.85116  | 0.024605 | 0.59585  | -0.16687 | 0.00029  | -0.13861 | 0.00268  |
| 0.07267  | 0.09686  | 0.0364   | 0.080728 | 0.08138  | 0.038606 | 0.4052   | 0.042979 | 0.35407  |
| 0.00045  | 0.056709 | 0.22126  | 0.023451 | 0.61321  | 0.0451   | 0.3308   | 0.106536 | 0.0213   |
| 0.39209  | -0.06007 | 0.19503  | 0.299494 | 3.92E-11 | -0.00306 | 0.94738  | -0.12022 | 0.00931  |
| 0.6376   | 0.008234 | 0.85915  | 0.082137 | 0.07619  | 0.01521  | 0.74304  | -0.01955 | 0.67351  |
| 5.10E-05 | 0.206203 | 7.04E-06 | 0.070201 | 0.12981  | 0.046605 | 0.31491  | 0.049879 | 0.28208  |
| 0.00284  | 0.103375 | 0.02549  | 0.024402 | 0.59889  | -0.05359 | 0.24776  | -0.07613 | 0.10033  |
| 0.29377  | -0.06328 | 0.1722   | -0.00669 | 0.88539  | -0.00262 | 0.95504  | -0.02335 | 0.6147   |
| 0.93924  | -0.04465 | 0.33569  | -0.01119 | 0.80945  | -0.00732 | 0.87461  | 0.000514 | 0.99116  |
| 0.83137  | -0.03515 | 0.44855  | -0.0179  | 0.69956  | -0.02163 | 0.64104  | 0.002499 | 0.95704  |
| 0.48274  | 0.046746 | 0.31344  | -0.00018 | 0.9969   | -0.00824 | 0.85908  | -0.01538 | 0.74027  |
| 0.19006  | 0.069519 | 0.13359  | 0.006056 | 0.89615  | -0.01518 | 0.7436   | 0.198202 | 1.60E-05 |
| 0.98219  | 0.014276 | 0.75831  | 0.059146 | 0.20201  | 0.065719 | 0.15621  | 0.076233 | 0.09989  |
| 0.06242  | 0.096352 | 0.03739  | 0.083603 | 0.07108  | 0.066795 | 0.14953  | 0.098244 | 0.03379  |
| 0.20502  | 0.049569 | 0.28508  | 0.02498  | 0.59025  | 0.007973 | 0.86356  | 0.0386   | 0.40528  |
| 0.10811  | 0.076308 | 0.09956  | 0.050545 | 0.27569  | 0.053256 | 0.25072  | 0.177065 | 0.00012  |

|          |          |          |          |          |          |          |          |          |
|----------|----------|----------|----------|----------|----------|----------|----------|----------|
| 0.77717  | 0.017428 | 0.70718  | 0.036798 | 0.42758  | 0.056683 | 0.22147  | 0.071079 | 0.12507  |
| 5.65E-10 | -0.30208 | 2.61E-11 | -0.06793 | 0.14273  | -0.1312  | 0.00451  | -0.23985 | 1.55E-07 |
| 0.00892  | 0.086798 | 0.0609   | 0.058978 | 0.2033   | 0.088117 | 0.05706  | 0.040047 | 0.38789  |
| 1.70E-05 | 0.390711 | 1.76E-18 | 0.090856 | 0.04974  | 0.097227 | 0.03569  | 0.011674 | 0.80135  |
| 0.16261  | 0.165659 | 0.00032  | 0.108834 | 0.01864  | 0.112239 | 0.01524  | 0.121378 | 0.00865  |
| 0.54346  | 0.046163 | 0.31952  | -0.00429 | 0.92639  | -0.00022 | 0.99624  | -0.04408 | 0.34183  |
| 0.60068  | 0.086845 | 0.06076  | 0.066767 | 0.1497   | 0.120251 | 0.00929  | 0.10986  | 0.01755  |
| 0.29551  | 0.055729 | 0.22936  | 0.049773 | 0.2831   | 0.04437  | 0.3387   | 0.009371 | 0.83994  |
| 0.34926  | -0.00068 | 0.98826  | 0.131611 | 0.00439  | 0.055492 | 0.23134  | 0.082882 | 0.07355  |
| 0.05437  | -0.05481 | 0.23712  | 0.119534 | 0.00972  | 0.084707 | 0.06741  | 0.092339 | 0.04611  |
| 7.27E-05 | -0.12031 | 0.00926  | 0.008434 | 0.85576  | 0.057838 | 0.21218  | -0.1263  | 0.00627  |
| 2.74E-05 | 0.190499 | 3.42E-05 | 0.134639 | 0.00356  | 0.022786 | 0.62331  | 0.044186 | 0.3407   |
| 0.48496  | -0.09574 | 0.03862  | 0.001917 | 0.96705  | -0.00397 | 0.93179  | 0.057347 | 0.2161   |
| 2.90E-13 | 0.405052 | 7.26E-20 | 0.108569 | 0.01893  | 0.005916 | 0.89854  | 0.158788 | 0.00057  |
| 0.17335  | 0.051814 | 0.2638   | 0.024254 | 0.60111  | 0.052702 | 0.25569  | 0.117184 | 0.01127  |
| 0.94801  | 0.052564 | 0.25694  | -0.14862 | 0.00128  | -0.07798 | 0.09233  | -0.13977 | 0.00247  |
| 0.15515  | 0.097514 | 0.03515  | 0.16494  | 0.00034  | 0.060886 | 0.18903  | 0.043264 | 0.35088  |
| 0.90061  | 0.085595 | 0.06458  | 0.004308 | 0.92603  | 0.007072 | 0.87885  | 0.017252 | 0.71001  |
| 0.20421  | 0.084881 | 0.06685  | 0.012432 | 0.78874  | -0.01334 | 0.77376  | -0.01082 | 0.81557  |
| 0.62423  | 0.115514 | 0.01249  | -0.05255 | 0.2571   | -0.03504 | 0.45005  | -0.02322 | 0.6167   |
| 0.34269  | -0.01566 | 0.73572  | 0.056542 | 0.22262  | 0.000761 | 0.98692  | -0.14601 | 0.00156  |
| 0.02415  | -0.07636 | 0.0993   | -0.00251 | 0.95681  | -0.03204 | 0.48975  | 0.029973 | 0.51819  |
| 0.30242  | 0.046062 | 0.32058  | 0.0855   | 0.06488  | 0.016658 | 0.71956  | -0.03296 | 0.47732  |
| 0.00378  | 0.014928 | 0.74764  | 0.036905 | 0.42624  | 0.001485 | 0.97447  | 0.152389 | 0.00095  |
| 0.07241  | -0.10201 | 0.02751  | 0.022425 | 0.62883  | -0.05654 | 0.22265  | -0.07363 | 0.11207  |
| 0.14445  | -0.04074 | 0.37975  | 0.055368 | 0.23239  | -0.00095 | 0.98374  | -0.00234 | 0.95976  |
| 0.00083  | 0.324687 | 6.31E-13 | 0.06639  | 0.15202  | 0.102624 | 0.02658  | -0.06909 | 0.13603  |
| 0.00016  | 0.342221 | 2.82E-14 | -0.04042 | 0.38343  | 0.097115 | 0.0359   | 0.047494 | 0.30575  |
| 0.18593  | 0.156187 | 0.00071  | 0.073964 | 0.11043  | 0.018412 | 0.69148  | 0.084507 | 0.06806  |
| 0.00264  | -0.20476 | 8.18E-06 | 0.016863 | 0.71627  | -0.12619 | 0.00632  | -0.11797 | 0.01072  |
| 8.24E-09 | 0.307374 | 1.12E-11 | 0.031011 | 0.50381  | 0.055428 | 0.23189  | 0.202693 | 1.01E-05 |
| 0.01251  | 0.126196 | 0.00632  | -0.06929 | 0.13486  | 0.083531 | 0.07132  | -0.05478 | 0.23736  |
| 4.91E-07 | 0.304113 | 1.89E-11 | 0.268132 | 3.93E-09 | 0.056075 | 0.22647  | 0.120963 | 0.00888  |
| 0.00556  | 0.314846 | 3.32E-12 | 0.351579 | 4.93E-15 | 0.442001 | 9.35E-24 | 0.046895 | 0.31189  |
| 0.02024  | -0.04477 | 0.33435  | -0.00113 | 0.98054  | -0.02963 | 0.52294  | 0.043217 | 0.35141  |
| 0.01441  | 0.109609 | 0.01781  | -0.02015 | 0.66405  | -0.06213 | 0.1801   | 0.007915 | 0.86455  |
| 0.0009   | 0.110897 | 0.01651  | -0.08561 | 0.06453  | -0.15207 | 0.00098  | -0.10929 | 0.01816  |
| 0.40901  | 0.098076 | 0.0341   | -0.01322 | 0.77574  | -0.02058 | 0.65734  | -0.08709 | 0.06003  |
| 0.96168  | -0.06154 | 0.18432  | 0.109103 | 0.01835  | -0.07226 | 0.11892  | -0.01313 | 0.77721  |
| 0.00027  | -0.20645 | 6.86E-06 | -0.01148 | 0.80453  | -0.00174 | 0.97015  | -0.0236  | 0.61101  |
| 0.00246  | 0.020602 | 0.657    | -0.0575  | 0.21485  | -0.07562 | 0.10267  | -0.1352  | 0.00342  |
| 0.00675  | -0.15895 | 0.00057  | 0.079151 | 0.08753  | 0.059205 | 0.20156  | -0.1073  | 0.02038  |
| 0.50978  | 0.106242 | 0.02166  | 0.086111 | 0.06298  | 0.074506 | 0.10784  | 0.008154 | 0.8605   |
| 8.63E-05 | 0.139729 | 0.00248  | -0.02682 | 0.56315  | -0.05166 | 0.26525  | -0.06186 | 0.18205  |
| 0.10197  | 0.012948 | 0.78019  | 0.044085 | 0.34181  | 0.076989 | 0.09656  | -0.00692 | 0.88142  |

|          |          |          |          |          |          |          |          |          |
|----------|----------|----------|----------|----------|----------|----------|----------|----------|
| 0.0694   | 0.273628 | 1.83E-09 | -0.0038  | 0.93472  | 0.081803 | 0.07739  | -0.06968 | 0.13267  |
| 0.10753  | 0.295043 | 7.81E-11 | 0.054722 | 0.2379   | 0.057025 | 0.21869  | 0.024146 | 0.60274  |
| 2.76E-07 | -0.26018 | 1.16E-08 | -0.19576 | 2.04E-05 | -0.07414 | 0.10959  | -0.16896 | 0.00024  |
| 0.7628   | 0.064234 | 0.1658   | 0.155247 | 0.00076  | 0.027973 | 0.54651  | 0.021132 | 0.64875  |
| 0.63386  | 0.188434 | 4.17E-05 | 0.027006 | 0.56047  | 0.109954 | 0.01746  | 0.084685 | 0.06748  |
| 0.74586  | 0.006407 | 0.89017  | 0.028007 | 0.54602  | -0.00364 | 0.93741  | -0.04946 | 0.28611  |
| 0.30764  | -0.05563 | 0.23017  | 0.107809 | 0.01979  | 0.05907  | 0.20259  | -0.00118 | 0.97969  |
| 0.36541  | 0.115612 | 0.01242  | 0.038863 | 0.40209  | 0.03546  | 0.44458  | -0.0062  | 0.89374  |
| 0.39166  | 0.141877 | 0.00212  | 0.102353 | 0.02698  | 0.065818 | 0.15559  | 0.111547 | 0.01588  |
| 0.2782   | 0.148277 | 0.00131  | 0.082866 | 0.07361  | 0.088339 | 0.05644  | 0.085125 | 0.06607  |
| 0.49028  | 0.118499 | 0.01038  | 0.065464 | 0.15783  | 0.071997 | 0.12025  | 0.042802 | 0.35606  |
| 0.00155  | 0.155759 | 0.00073  | 0.047696 | 0.30369  | 0.081009 | 0.08033  | -0.02803 | 0.54574  |
| 0.00865  | 0.144182 | 0.00179  | 0.108279 | 0.01926  | 0.06109  | 0.18755  | 0.013327 | 0.77392  |
| 0.23771  | 0.037824 | 0.4148   | 0.163788 | 0.00038  | 0.084148 | 0.06925  | -0.13963 | 0.00249  |
| 0.01039  | 0.268408 | 3.79E-09 | 0.015277 | 0.74196  | -0.02725 | 0.55686  | 0.0285   | 0.53898  |
| 6.41E-09 | -0.23261 | 3.71E-07 | -0.04927 | 0.28795  | -0.05206 | 0.26154  | -0.22228 | 1.23E-06 |
| 0.0007   | 0.211768 | 3.90E-06 | 0.189451 | 3.78E-05 | 0.062768 | 0.1757   | 0.053154 | 0.25163  |
| 1.40E-05 | 0.14182  | 0.00213  | 0.01268  | 0.78462  | -0.12272 | 0.00793  | 0.038933 | 0.40124  |
| 0.57429  | 0.193034 | 2.67E-05 | 0.125964 | 0.00642  | 0.10065  | 0.02965  | 0.009054 | 0.84529  |
| 0.36529  | 0.238038 | 1.94E-07 | 0.090032 | 0.05185  | 0.116374 | 0.01185  | 0.037099 | 0.42381  |
| 0.00271  | 0.081068 | 0.0801   | -0.01518 | 0.74353  | -0.01666 | 0.71949  | 0.059669 | 0.19804  |
| 0.00097  | 0.192017 | 2.95E-05 | 0.16561  | 0.00033  | 0.012455 | 0.78836  | -0.04185 | 0.36683  |
| 0.70577  | 0.085911 | 0.06359  | 0.072123 | 0.1196   | 0.096015 | 0.03807  | -0.06183 | 0.18223  |
| 0.60584  | 0.004106 | 0.92949  | 0.087824 | 0.0579   | -0.01461 | 0.7529   | 0.076415 | 0.09908  |
| 1.03E-08 | -0.10208 | 0.02739  | -0.03763 | 0.41713  | 0.052864 | 0.25423  | -0.10963 | 0.01779  |
| 0.00777  | 0.233958 | 3.16E-07 | 0.099317 | 0.03189  | 0.17193  | 0.00019  | 0.116276 | 0.01192  |
| 0.00077  | -0.12597 | 0.00641  | -0.01644 | 0.72308  | -0.16588 | 0.00032  | -0.1748  | 0.00015  |
| 0.34252  | 0.036468 | 0.43174  | 0.050567 | 0.27548  | 0.05469  | 0.23817  | 0.086458 | 0.06192  |
| 0.00084  | 0.08326  | 0.07225  | -0.05062 | 0.275    | -0.02526 | 0.58607  | 0.028272 | 0.54223  |
| 6.01E-06 | 0.315011 | 3.23E-12 | 0.359442 | 1.09E-15 | 0.215181 | 2.70E-06 | 0.170195 | 0.00022  |
| 0.01102  | -0.20386 | 8.98E-06 | -0.05876 | 0.20497  | -0.15315 | 0.0009   | -0.05868 | 0.20562  |
| 0.28714  | 0.006595 | 0.88698  | 0.068258 | 0.14079  | -0.0413  | 0.37322  | -0.04125 | 0.37374  |
| 0.00023  | -0.20275 | 1.01E-05 | -0.12286 | 0.00786  | -0.0409  | 0.37781  | -0.17733 | 0.00012  |
| 0.00283  | -0.06659 | 0.15077  | -0.14228 | 0.00205  | 0.017208 | 0.71071  | -0.13968 | 0.00248  |
| 0.27928  | 0.111095 | 0.01632  | 0.001398 | 0.97596  | 0.052171 | 0.26051  | -0.03309 | 0.47568  |
| 0.42168  | 0.019861 | 0.66858  | -0.03361 | 0.4687   | 0.004088 | 0.92979  | -0.12014 | 0.00936  |
| 0.86003  | 0.007406 | 0.87318  | 0.117247 | 0.01122  | -0.01433 | 0.75743  | 0.043731 | 0.34571  |
| 2.15E-08 | 0.16036  | 0.0005   | 0.056124 | 0.22607  | -0.01188 | 0.79795  | 0.149818 | 0.00117  |
| 0.46853  | 0.081241 | 0.07946  | 0.095102 | 0.03995  | 0.084303 | 0.06874  | 0.101949 | 0.0276   |
| 0.81116  | -0.02457 | 0.59637  | 0.018687 | 0.68711  | 0.089821 | 0.05241  | -0.02282 | 0.62273  |
| 0.52974  | 0.071898 | 0.12076  | 0.124464 | 0.00708  | 0.212877 | 3.46E-06 | -0.01974 | 0.67045  |
| 6.50E-12 | -0.38339 | 8.44E-18 | 0.023815 | 0.60771  | -0.06393 | 0.16783  | -0.17187 | 0.00019  |
| 2.37E-11 | 0.449175 | 1.44E-24 | 0.005618 | 0.90362  | 0.158039 | 0.00061  | 0.262612 | 8.35E-09 |
| 0.0014   | -0.09166 | 0.04775  | -0.02493 | 0.59099  | -0.08222 | 0.07588  | -0.01143 | 0.80541  |
| 0.38613  | 0.025912 | 0.57647  | 0.03729  | 0.42141  | 0.070281 | 0.12937  | 0.248267 | 5.45E-08 |

|          |          |          |          |          |           |          |          |          |
|----------|----------|----------|----------|----------|-----------|----------|----------|----------|
| 0.49613  | -0.04045 | 0.38315  | 0.050921 | 0.27212  | 0.006717  | 0.88489  | 0.067377 | 0.14601  |
| 0.00358  | 0.238642 | 1.80E-07 | 0.04727  | 0.30803  | 0.064571  | 0.16359  | 0.131747 | 0.00435  |
| 0.08831  | 0.074207 | 0.10926  | 0.125591 | 0.00658  | 0.079998  | 0.08419  | -0.01671 | 0.71867  |
| 0.00182  | 0.128293 | 0.00549  | 0.228899 | 5.74E-07 | -0.10459  | 0.0238   | 0.112126 | 0.01534  |
| 0.09365  | -0.01359 | 0.76957  | -0.02182 | 0.63806  | -0.03372  | 0.46726  | 0.000446 | 0.99233  |
| 0.0245   | 0.117264 | 0.01121  | 0.044558 | 0.33665  | 0.024854  | 0.59214  | 0.140128 | 0.0024   |
| 0.52814  | 0.019153 | 0.67973  | 0.010624 | 0.81888  | 0.026381  | 0.56958  | 0.005119 | 0.91215  |
| 0.0095   | 0.243218 | 1.03E-07 | 0.008379 | 0.85669  | 0.001703  | 0.97072  | 0.12578  | 0.0065   |
| 0.31803  | 0.159705 | 0.00053  | 0.070556 | 0.12787  | 0.076772  | 0.09751  | 0.026709 | 0.56478  |
| 2.72E-06 | -0.3939  | 8.77E-19 | -0.03905 | 0.39977  | -0.13347  | 0.00386  | 0.040461 | 0.383    |
| 0.37503  | 0.123187 | 0.0077   | 0.115496 | 0.0125   | 0.132439  | 0.00414  | 0.017548 | 0.70526  |
| 2.59E-07 | 0.135959 | 0.00324  | -0.15333 | 0.00089  | -0.01172  | 0.80059  | 0.019311 | 0.67724  |
| 0.00802  | 0.259125 | 1.33E-08 | 0.100447 | 0.02998  | 0.160612  | 0.00049  | 0.050631 | 0.27487  |
| 0.00013  | -0.07238 | 0.1183   | 0.065469 | 0.1578   | 0.010253  | 0.8251   | -0.03531 | 0.44647  |
| 0.00015  | -0.21358 | 3.21E-06 | 0.097498 | 0.03518  | -0.08727  | 0.05951  | -0.10722 | 0.02047  |
| 0.78264  | 0.08643  | 0.062    | 0.098783 | 0.03282  | -0.00036  | 0.99375  | -0.0798  | 0.08494  |
| 0.04158  | 0.20149  | 1.15E-05 | 0.120278 | 0.00928  | -0.04421  | 0.34043  | 0.041419 | 0.37183  |
| 0.04123  | 0.237082 | 2.17E-07 | 0.067817 | 0.14339  | 0.125179  | 0.00676  | -0.08782 | 0.0579   |
| 0.02402  | 0.111323 | 0.0161   | 0.238094 | 1.92E-07 | 0.019676  | 0.6715   | 0.015927 | 0.73138  |
| 0.00853  | 0.226065 | 7.96E-07 | 0.055837 | 0.22845  | 0.017764  | 0.70181  | 0.084476 | 0.06816  |
| 0.94513  | 0.004304 | 0.92609  | 0.325747 | 5.26E-13 | 0.0551    | 0.23466  | 0.014923 | 0.74772  |
| 0.32437  | 0.049096 | 0.28971  | 0.041824 | 0.36717  | 0.009686  | 0.83463  | -0.00348 | 0.9402   |
| 0.00067  | -0.21438 | 2.94E-06 | -0.05194 | 0.26262  | -0.08398  | 0.06979  | -0.05309 | 0.25216  |
| 0.72502  | 0.169564 | 0.00023  | 0.234825 | 2.85E-07 | 0.207209  | 6.33E-06 | 0.013877 | 0.76487  |
| 0.33403  | 0.060118 | 0.19468  | 0.051905 | 0.26296  | -0.00259  | 0.95546  | -0.13714 | 0.00298  |
| 0.40094  | 0.176728 | 0.00012  | 0.138682 | 0.00267  | 0.027596  | 0.55193  | -0.13553 | 0.00334  |
| 0.50817  | 0.036409 | 0.43248  | 0.018109 | 0.6963   | 0.042512  | 0.35933  | 0.047983 | 0.30079  |
| 0.50776  | -0.04239 | 0.36069  | 0.031829 | 0.49261  | -0.00431  | 0.92604  | -0.14834 | 0.00131  |
| 0.95503  | 0.005885 | 0.89907  | 0.146957 | 0.00145  | 0.162759  | 0.00041  | 0.050338 | 0.27767  |
| 0.00753  | 0.09145  | 0.04826  | -0.02688 | 0.56235  | 0.053746  | 0.24638  | -0.09649 | 0.03713  |
| 0.51076  | 0.107225 | 0.02047  | 0.268339 | 3.82E-09 | 0.129336  | 0.00512  | 0.010702 | 0.81758  |
| 1.61E-12 | 0.304424 | 1.80E-11 | 0.146508 | 0.0015   | 0.018605  | 0.68841  | 0.04721  | 0.30866  |
| 0.9275   | 0.033683 | 0.46774  | 0.089851 | 0.05233  | 0.013429  | 0.77225  | 0.125843 | 0.00647  |
| 3.54E-08 | 0.279392 | 8.03E-10 | 0.041833 | 0.36706  | 0.073567  | 0.11236  | 0.245367 | 7.85E-08 |
| 0.66037  | 0.073862 | 0.11092  | -0.04457 | 0.33652  | -0.03983  | 0.39048  | 0.115945 | 0.01216  |
| 0.05991  | 0.106176 | 0.02174  | 0.023152 | 0.61775  | -6.58E-05 | 0.99887  | 0.03472  | 0.45415  |
| 0.94439  | 0.026756 | 0.56411  | 0.095681 | 0.03874  | 0.107725  | 0.01989  | -0.06685 | 0.14916  |
| 0.68414  | 0.073255 | 0.11389  | 0.118841 | 0.01016  | 0.075833  | 0.10169  | -0.02003 | 0.66593  |
| 0.01329  | 0.051393 | 0.26771  | 0.178024 | 0.00011  | -0.06134  | 0.18575  | 0.126413 | 0.00623  |
| 1.84E-06 | -0.22552 | 8.47E-07 | 0.006551 | 0.88772  | -0.0472   | 0.30873  | -0.09143 | 0.04831  |
| 0.89787  | 0.029231 | 0.52861  | 0.145694 | 0.00159  | 0.031411  | 0.49831  | -0.03711 | 0.42367  |
| 0.81285  | 0.066489 | 0.15141  | 0.015101 | 0.74482  | 0.049493  | 0.28582  | 0.088616 | 0.05567  |
| 0.00349  | 0.070617 | 0.12755  | 0.000279 | 0.9952   | 0.074266  | 0.10897  | 0.121512 | 0.00857  |
| 0.0837   | -0.10266 | 0.02652  | 0.071003 | 0.12547  | 0.049864  | 0.28222  | -0.00193 | 0.96676  |
| 0.00213  | 0.249772 | 4.50E-08 | 0.014839 | 0.74909  | 0.085553  | 0.06471  | 0.051955 | 0.2625   |

|          |          |          |          |          |          |          |          |          |
|----------|----------|----------|----------|----------|----------|----------|----------|----------|
| 0.19082  | -0.00357 | 0.93859  | -0.02288 | 0.62189  | 0.005274 | 0.9095   | -0.1066  | 0.02122  |
| 0.00179  | -0.139   | 0.00261  | -0.01566 | 0.73578  | 0.009058 | 0.84521  | -0.10317 | 0.02577  |
| 0.0013   | -0.06931 | 0.13475  | -0.02091 | 0.65224  | -0.05552 | 0.23111  | -0.11439 | 0.01338  |
| 0.00267  | 0.19457  | 2.30E-05 | 0.058913 | 0.20379  | 0.14076  | 0.0023   | 0.005541 | 0.90494  |
| 0.98251  | 0.124007 | 0.0073   | 0.162629 | 0.00042  | 0.094034 | 0.04224  | 0.017354 | 0.70837  |
| 0.0484   | 0.147098 | 0.00143  | 0.210015 | 4.71E-06 | 0.241125 | 1.33E-07 | 0.081093 | 0.08001  |
| 3.40E-09 | 0.269105 | 3.44E-09 | 0.010791 | 0.8161   | 0.177628 | 0.00011  | 0.152831 | 0.00092  |
| 0.25026  | -0.08415 | 0.06924  | 0.281734 | 5.72E-10 | 0.026933 | 0.56153  | 0.054112 | 0.24317  |
| 0.30588  | -0.02142 | 0.64425  | 0.453007 | 5.20E-25 | -0.00582 | 0.90011  | 0.129998 | 0.0049   |
| 0.27836  | -0.01276 | 0.78328  | 0.021998 | 0.63538  | 0.024874 | 0.59184  | 0.092369 | 0.04604  |
| 0.01076  | 0.149223 | 0.00122  | -0.03474 | 0.45389  | -0.06993 | 0.13128  | -0.02066 | 0.65615  |
| 6.56E-07 | -0.14839 | 0.0013   | -0.04241 | 0.36052  | -0.01365 | 0.76866  | -0.05351 | 0.24851  |
| 5.85E-06 | -0.03846 | 0.40694  | 0.059246 | 0.20125  | -0.01312 | 0.77742  | -0.23395 | 3.17E-07 |
| 0.3369   | 0.04475  | 0.33457  | -0.07563 | 0.1026   | 0.014574 | 0.75343  | 0.029112 | 0.53029  |
| 2.24E-09 | -0.3245  | 6.52E-13 | -0.08409 | 0.06944  | -0.16291 | 0.00041  | -0.02521 | 0.5868   |
| 0.07613  | 0.149006 | 0.00124  | 0.017336 | 0.70866  | 0.00564  | 0.90324  | -0.00814 | 0.86076  |
| 1.37E-10 | -0.34753 | 1.06E-14 | -0.08316 | 0.07259  | -0.13504 | 0.00346  | -0.13739 | 0.00293  |
| 0.00236  | 0.149515 | 0.00119  | 0.049888 | 0.28198  | 0.099404 | 0.03174  | 0.134184 | 0.00367  |
| 0.78922  | 0.039278 | 0.39708  | 0.098027 | 0.03419  | 0.027644 | 0.55123  | -0.0473  | 0.3077   |
| 0.01517  | 0.200782 | 1.23E-05 | 0.054956 | 0.23589  | 0.147526 | 0.00139  | 0.106033 | 0.02192  |
| 0.09544  | 0.089698 | 0.05273  | 0.077484 | 0.09443  | 0.063029 | 0.1739   | 0.085268 | 0.06561  |
| 0.09052  | 0.078684 | 0.08942  | 0.008177 | 0.86012  | -0.01232 | 0.79052  | -0.00536 | 0.90807  |
| 0.96592  | 0.049907 | 0.2818   | 0.014675 | 0.75178  | 0.016839 | 0.71665  | -0.03854 | 0.40597  |
| 0.01465  | -0.07798 | 0.09235  | -0.01441 | 0.7561   | -0.011   | 0.81264  | -0.03177 | 0.4934   |
| 0.88334  | 0.003656 | 0.93719  | -0.00687 | 0.88237  | -0.03203 | 0.48992  | -0.01376 | 0.76685  |
| 0.04978  | 0.083491 | 0.07146  | -0.01509 | 0.74507  | -0.02956 | 0.52405  | 0.034209 | 0.46081  |
| 0.37203  | 0.117545 | 0.01102  | 0.019778 | 0.66988  | 0.083428 | 0.07167  | 0.11407  | 0.01364  |
| 0.68579  | 0.003075 | 0.94717  | 0.020832 | 0.65342  | -0.02264 | 0.62554  | -0.04621 | 0.31906  |
| 0.55346  | 0.034107 | 0.46216  | 0.044134 | 0.34127  | 0.050775 | 0.27351  | -0.01522 | 0.7429   |
| 0.24493  | 0.009069 | 0.84503  | -0.00408 | 0.92988  | 0.001341 | 0.97695  | 0.028237 | 0.54272  |
| 0.00372  | 0.090499 | 0.05065  | -0.01407 | 0.76166  | -0.0233  | 0.61555  | 0.014137 | 0.7606   |
| 0.63463  | 0.022121 | 0.63349  | -0.02043 | 0.6597   | -0.01725 | 0.70996  | 0.025783 | 0.57837  |
| 3.02E-05 | 0.236618 | 2.30E-07 | 0.026367 | 0.56978  | -0.01561 | 0.73656  | -0.02419 | 0.60213  |
| 0.41608  | 0.090131 | 0.0516   | -0.0388  | 0.40282  | 0.139269 | 0.00256  | -0.10125 | 0.02869  |
| 0.00112  | 0.0963   | 0.0375   | 0.148754 | 0.00126  | 0.022882 | 0.62185  | 0.122367 | 0.00812  |
| 0.89879  | 0.004586 | 0.92127  | 0.030286 | 0.51384  | 0.074133 | 0.10961  | -0.1058  | 0.02222  |
| 0.27178  | -0.06302 | 0.17394  | 0.038979 | 0.40068  | 0.02479  | 0.59309  | 0.035351 | 0.44598  |
| 0.35305  | 0.105372 | 0.02277  | -0.00534 | 0.90829  | 0.198936 | 1.49E-05 | 0.032662 | 0.48135  |
| 0.00024  | 0.090965 | 0.04946  | -0.05999 | 0.19562  | -0.03813 | 0.41105  | 0.076104 | 0.10046  |
| 0.06883  | 0.175479 | 0.00014  | 0.024569 | 0.59639  | 0.042022 | 0.3649   | 0.068    | 0.14231  |
| 0.00034  | 0.263952 | 6.96E-09 | 0.143426 | 0.00189  | 0.084526 | 0.068    | 0.138723 | 0.00266  |
| 0.01683  | 0.213239 | 3.33E-06 | 0.021507 | 0.64294  | 0.075863 | 0.10155  | 0.02923  | 0.52862  |
| 0.01291  | 0.210636 | 4.41E-06 | 0.099646 | 0.03132  | 0.108973 | 0.01849  | 0.027323 | 0.55587  |
| 0.04258  | -0.0075  | 0.87158  | 0.07226  | 0.1189   | 0.021849 | 0.63767  | -0.01549 | 0.7385   |
| 0.00093  | -0.10373 | 0.02499  | 0.054555 | 0.23933  | 0.018909 | 0.68359  | 0.032487 | 0.4837   |

|          |          |          |          |          |          |         |          |          |
|----------|----------|----------|----------|----------|----------|---------|----------|----------|
| 0.00643  | 0.030362 | 0.51278  | 0.085369 | 0.06529  | 0.093165 | 0.04419 | -0.00058 | 0.98999  |
| 0.06597  | -0.07111 | 0.12491  | 0.101424 | 0.02841  | -0.05213 | 0.26089 | -0.11837 | 0.01046  |
| 0.89319  | 0.025573 | 0.58147  | 0.007416 | 0.87301  | -0.00132 | 0.97738 | 0.140058 | 0.00242  |
| 0.50171  | 0.100669 | 0.02962  | 0.049112 | 0.28955  | 0.052949 | 0.25346 | -0.02676 | 0.56401  |
| 8.26E-08 | 0.234212 | 3.07E-07 | 0.127221 | 0.0059   | 0.050569 | 0.27546 | 0.182328 | 7.41E-05 |
| 0.00729  | 0.231517 | 4.22E-07 | -0.12716 | 0.00593  | 0.120169 | 0.00934 | -0.05931 | 0.20079  |
| 0.54097  | 0.091462 | 0.04823  | 0.045624 | 0.32521  | 0.085219 | 0.06577 | 0.035477 | 0.44436  |
| 0.0004   | -0.25709 | 1.74E-08 | -0.0471  | 0.30974  | -0.08332 | 0.07203 | -0.00974 | 0.83372  |
| 0.69533  | -0.036   | 0.4377   | -0.09703 | 0.03607  | -0.10989 | 0.01752 | -0.07431 | 0.10877  |
| 0.03045  | 0.220836 | 1.44E-06 | 0.07952  | 0.08606  | 0.171924 | 0.00019 | 0.086579 | 0.06155  |
| 0.87352  | 0.052058 | 0.26155  | 0.144019 | 0.00181  | 0.082195 | 0.07598 | 0.063549 | 0.17037  |
| 0.00048  | 0.229615 | 5.28E-07 | 0.035066 | 0.44966  | 0.013434 | 0.77216 | 0.144907 | 0.00169  |
| 0.01796  | -0.18497 | 5.79E-05 | -0.04425 | 0.34003  | -0.04065 | 0.38076 | -0.11076 | 0.01665  |
| 0.00463  | 0.145778 | 0.00158  | 0.002233 | 0.96161  | 0.0499   | 0.28187 | 0.072256 | 0.11892  |
| 0.05005  | 0.250869 | 3.91E-08 | 0.066138 | 0.15359  | 0.046186 | 0.31927 | 0.122742 | 0.00792  |
| 2.38E-09 | 0.461141 | 5.75E-26 | 0.182384 | 7.37E-05 | 0.078444 | 0.09041 | 0.167014 | 0.00029  |
| 0.14034  | 0.052166 | 0.26057  | 0.167003 | 0.00029  | 0.056741 | 0.22099 | 0.071617 | 0.12223  |
| 1.88E-05 | 0.096501 | 0.0371   | 0.016587 | 0.7207   | -0.03774 | 0.41586 | 0.223704 | 1.04E-06 |
| 1.30E-14 | -0.36881 | 1.71E-16 | 0.039667 | 0.39241  | -0.09853 | 0.03328 | -0.08642 | 0.06203  |
| 0.00665  | 0.377334 | 3.00E-17 | 0.146024 | 0.00156  | 0.147475 | 0.00139 | 0.09803  | 0.03419  |
| 0.45881  | -0.03171 | 0.49429  | 0.017623 | 0.70406  | 0.010407 | 0.82252 | -0.01632 | 0.7251   |
| 1.62E-06 | -0.23716 | 2.15E-07 | -0.02476 | 0.59351  | -0.0402  | 0.38604 | 0.028699 | 0.53615  |
| 1.24E-08 | 0.272858 | 2.04E-09 | 0.041809 | 0.36734  | 0.068945 | 0.13683 | 0.226401 | 7.66E-07 |
| 5.58E-06 | 0.305243 | 1.58E-11 | 0.015915 | 0.73159  | 0.007564 | 0.8705  | -0.01512 | 0.74448  |
| 1.11E-07 | 0.324208 | 6.85E-13 | 0.056153 | 0.22582  | 0.077664 | 0.09366 | 0.114524 | 0.01327  |
| 0.18066  | 0.11053  | 0.01687  | 0.325562 | 5.43E-13 | 0.157065 | 0.00066 | -0.01064 | 0.81857  |
| 0.07871  | 0.193914 | 2.45E-05 | 0.02383  | 0.60749  | 0.012827 | 0.78219 | -0.00616 | 0.89437  |
| 0.06784  | 0.262385 | 8.61E-09 | 0.036313 | 0.4337   | 0.134213 | 0.00366 | 0.013023 | 0.77895  |
| 0.80587  | 0.071627 | 0.12217  | 0.094763 | 0.04066  | 0.06804  | 0.14207 | 0.011255 | 0.80833  |
| 2.08E-12 | -0.42163 | 1.49E-21 | 0.08924  | 0.05396  | -0.10825 | 0.01928 | -0.17397 | 0.00016  |
| 0.0092   | -0.0602  | 0.19406  | 0.015565 | 0.73727  | -0.0018  | 0.96912 | -0.21464 | 2.86E-06 |
| 9.15E-06 | 0.352766 | 3.94E-15 | 0.246544 | 6.77E-08 | 0.075977 | 0.10104 | 0.010963 | 0.81321  |
| 0.14725  | 0.12607  | 0.00637  | 0.056041 | 0.22676  | 0.067532 | 0.14508 | 0.134819 | 0.00351  |
| 0.88455  | 0.040371 | 0.38406  | 0.04209  | 0.36412  | 0.029937 | 0.5187  | 0.022226 | 0.63188  |
| 0.56494  | -0.05128 | 0.26873  | 0.0561   | 0.22627  | 0.029864 | 0.51972 | 0.097312 | 0.03553  |
| 0.00336  | -0.15758 | 0.00063  | 0.086866 | 0.06069  | -0.01484 | 0.74905 | 0.064477 | 0.1642   |
| 0.2633   | 0.138449 | 0.00271  | 0.058437 | 0.20748  | 0.047446 | 0.30624 | 0.120406 | 0.0092   |
| 0.00231  | 0.075145 | 0.10484  | -0.01067 | 0.81816  | -0.0105  | 0.82104 | 0.006561 | 0.88754  |
| 0.08978  | 0.117864 | 0.0108   | 0.082516 | 0.07484  | 0.172547 | 0.00018 | 0.123133 | 0.00772  |
| 6.08E-07 | 0.130483 | 0.00474  | 0.149108 | 0.00123  | 0.06012  | 0.19466 | 0.133317 | 0.0039   |
| 0.00092  | 0.088119 | 0.05706  | 0.314582 | 3.47E-12 | 0.041252 | 0.37376 | 0.025964 | 0.5757   |
| 8.04E-05 | 0.081269 | 0.07936  | -0.08831 | 0.05653  | -0.0367  | 0.42883 | 0.104362 | 0.02411  |
| 0.00052  | 0.15218  | 0.00097  | 0.072475 | 0.11781  | 0.013119 | 0.77737 | 0.2446   | 8.64E-08 |
| 0.20689  | -0.0234  | 0.61399  | 0.012542 | 0.78691  | -0.01262 | 0.78563 | 0.027405 | 0.55469  |
| 0.052    | -0.03167 | 0.49483  | -0.13138 | 0.00446  | -0.12082 | 0.00896 | 0.127706 | 0.00572  |

|          |          |          |          |          |          |          |          |          |
|----------|----------|----------|----------|----------|----------|----------|----------|----------|
| 0.28166  | 0.062976 | 0.17426  | 0.03487  | 0.4522   | 0.00611  | 0.89523  | 0.010172 | 0.82646  |
| 0.01068  | 0.108853 | 0.01862  | -0.0228  | 0.62305  | -0.0876  | 0.05855  | 0.055552 | 0.23084  |
| 0.00989  | -0.18625 | 5.13E-05 | 0.003104 | 0.94665  | 0.012848 | 0.78184  | -0.07125 | 0.12417  |
| 5.27E-07 | 0.222886 | 1.14E-06 | -0.07502 | 0.10541  | -0.02056 | 0.65758  | 0.029709 | 0.52189  |
| 1.76E-10 | 0.443219 | 6.82E-24 | 0.008291 | 0.85817  | 0.135198 | 0.00342  | 0.007181 | 0.87701  |
| 1.82E-06 | 0.317754 | 2.05E-12 | -0.01553 | 0.73779  | 0.116004 | 0.01212  | -0.03828 | 0.40918  |
| 0.69825  | 0.064511 | 0.16398  | 0.004592 | 0.92117  | 0.005949 | 0.89798  | -0.00319 | 0.94518  |
| 0.22711  | 0.087917 | 0.05763  | 0.048287 | 0.29774  | 0.075588 | 0.1028   | -0.0031  | 0.94674  |
| 0.2888   | -0.014   | 0.76288  | -0.02821 | 0.54306  | 0.007834 | 0.86592  | 0.136259 | 0.00317  |
| 0.8336   | -0.02299 | 0.62027  | -0.04133 | 0.37286  | 0.010982 | 0.81289  | 0.088008 | 0.05737  |
| 0.59526  | 0.012976 | 0.77972  | 0.280228 | 7.12E-10 | 0.017464 | 0.70661  | -0.07808 | 0.0919   |
| 0.00578  | 0.253837 | 2.67E-08 | 0.026773 | 0.56386  | 0.029771 | 0.52102  | 0.210295 | 4.57E-06 |
| 0.25311  | 0.159108 | 0.00056  | 0.007468 | 0.87212  | 0.098784 | 0.03282  | -0.01644 | 0.72305  |
| 0.97137  | -0.0398  | 0.39088  | 0.027721 | 0.55012  | 0.000553 | 0.99049  | -0.08656 | 0.0616   |
| 6.34E-05 | 0.226401 | 7.66E-07 | 0.126401 | 0.00623  | 0.039346 | 0.39626  | 0.034012 | 0.4634   |
| 0.77033  | 0.073095 | 0.11469  | 0.007401 | 0.87326  | -0.05385 | 0.24549  | 0.071247 | 0.12417  |
| 0.14061  | -0.02952 | 0.52452  | -0.00751 | 0.87138  | -0.06341 | 0.1713   | -0.05538 | 0.23229  |
| 0.47086  | 0.027405 | 0.55469  | 0.024905 | 0.59138  | 0.014022 | 0.76249  | 0.04719  | 0.30886  |
| 3.35E-05 | 0.29267  | 1.12E-10 | 0.041134 | 0.37513  | 0.156236 | 0.0007   | 0.073434 | 0.11301  |
| 0.00178  | -0.27097 | 2.65E-09 | -0.08174 | 0.07761  | -0.1984  | 1.57E-05 | -0.20797 | 5.84E-06 |
| 0.95737  | -0.04646 | 0.31638  | -0.09945 | 0.03165  | -0.03506 | 0.44972  | -0.12804 | 0.00559  |
| 0.09556  | -0.0385  | 0.4065   | 0.069431 | 0.13408  | 0.102464 | 0.02682  | -0.11783 | 0.01082  |
| 0.44747  | 0.025973 | 0.57557  | 0.030683 | 0.50833  | 0.000229 | 0.99606  | 0.03767  | 0.4167   |
| 2.45E-05 | -0.2894  | 1.84E-10 | -0.06396 | 0.16763  | -0.14577 | 0.00159  | -0.09072 | 0.05008  |
| 0.07464  | 0.316667 | 2.45E-12 | 0.082212 | 0.07592  | 0.08175  | 0.07759  | -0.04486 | 0.33338  |
| 0.17248  | 0.184353 | 6.13E-05 | 0.047494 | 0.30575  | 0.105782 | 0.02224  | 0.004339 | 0.92549  |
| 0.63597  | 0.10028  | 0.03026  | -0.00554 | 0.90491  | 0.057113 | 0.21798  | -0.02852 | 0.53874  |
| 4.99E-06 | 0.180205 | 9.01E-05 | 0.009956 | 0.83009  | 0.082957 | 0.07329  | 0.096081 | 0.03793  |
| 6.88E-07 | 0.367575 | 2.19E-16 | 0.169602 | 0.00023  | 0.129668 | 0.00501  | 0.244665 | 8.57E-08 |
| 0.16629  | -0.00618 | 0.89397  | -0.10215 | 0.02729  | -0.11284 | 0.0147   | 0.053757 | 0.24628  |
| 0.11826  | -0.12096 | 0.00888  | 0.089461 | 0.05337  | -0.01003 | 0.82888  | -0.03376 | 0.46668  |
| 0.00054  | -0.29788 | 5.04E-11 | -0.02133 | 0.64568  | -0.0833  | 0.07209  | -0.05404 | 0.24379  |
| 0.01628  | 0.130462 | 0.00475  | -0.00073 | 0.98751  | 0.048684 | 0.29377  | -0.02598 | 0.57549  |
| 0.04442  | 0.132531 | 0.00412  | 0.066401 | 0.15195  | 0.071965 | 0.12042  | 0.149071 | 0.00123  |
| 0.66933  | -0.00328 | 0.9436   | 0.031877 | 0.49196  | -0.07794 | 0.09251  | 0.00077  | 0.98675  |
| 0.34059  | -0.07458 | 0.10748  | 0.017657 | 0.70352  | 0.041435 | 0.37164  | -0.0123  | 0.79091  |
| 0.69068  | 0.005284 | 0.90933  | 0.023974 | 0.60531  | 0.012607 | 0.78584  | 0.005128 | 0.912    |
| 0.08953  | 0.102104 | 0.02736  | 0.084044 | 0.06959  | 0.058878 | 0.20406  | 0.064696 | 0.16277  |
| 0.02824  | 0.036886 | 0.42648  | 0.195081 | 2.18E-05 | -0.02165 | 0.64079  | 0.088759 | 0.05527  |
| 0.05728  | -0.1286  | 0.00538  | -0.08699 | 0.06032  | -0.08639 | 0.06214  | -0.0332  | 0.47422  |
| 0.4523   | 0.028958 | 0.53247  | 0.302531 | 2.43E-11 | 0.108572 | 0.01893  | 0.167521 | 0.00028  |
| 0.47319  | 0.041195 | 0.37442  | 0.034899 | 0.45182  | 0.001222 | 0.97899  | 0.01458  | 0.75333  |
| 0.28361  | -0.03154 | 0.4965   | 0.009291 | 0.84128  | -0.01889 | 0.68392  | 0.056683 | 0.22147  |
| 0.70735  | 0.062125 | 0.18017  | 0.053493 | 0.24862  | 0.14852  | 0.00129  | 0.04695  | 0.31133  |
| 0.22979  | 0.077649 | 0.09373  | -0.03884 | 0.40237  | -0.03987 | 0.39004  | -0.06592 | 0.15497  |

|          |          |          |          |          |          |          |          |          |
|----------|----------|----------|----------|----------|----------|----------|----------|----------|
| 1.95E-06 | 0.307067 | 1.18E-11 | 0.097002 | 0.03612  | 0.19985  | 1.35E-05 | 0.188834 | 4.01E-05 |
| 0.3331   | 0.149318 | 0.00121  | 0.124654 | 0.00699  | 0.15435  | 0.00082  | -0.1239  | 0.00735  |
| 1.35E-10 | 0.319776 | 1.46E-12 | 0.042891 | 0.35505  | 0.03597  | 0.43805  | 0.009733 | 0.83384  |
| 0.0001   | -0.23206 | 3.96E-07 | 0.071924 | 0.12063  | -0.25398 | 2.62E-08 | -0.06007 | 0.19502  |
| 0.70875  | 0.107754 | 0.01985  | 0.029833 | 0.52014  | 0.04058  | 0.3816   | -0.15185 | 0.001    |
| 0.00039  | 0.247966 | 5.66E-08 | 0.030204 | 0.51498  | 0.309779 | 7.62E-12 | -0.10131 | 0.02859  |
| 0.99691  | -0.0525  | 0.25756  | 0.006754 | 0.88427  | -0.06293 | 0.17456  | 0.011415 | 0.80566  |
| 9.88E-06 | 0.379718 | 1.83E-17 | 0.293674 | 9.63E-11 | 0.125071 | 0.00681  | -0.01241 | 0.78915  |
| 2.12E-11 | -0.37288 | 7.50E-17 | -0.03456 | 0.45626  | -0.02562 | 0.58081  | -0.00404 | 0.93065  |
| 3.93E-05 | 0.189077 | 3.92E-05 | 0.109374 | 0.01806  | 0.0373   | 0.4213   | 0.104586 | 0.02381  |
| 0.00434  | -0.06152 | 0.18448  | 0.127344 | 0.00586  | 0.075768 | 0.10198  | -0.10941 | 0.01802  |
| 4.40E-05 | -0.2568  | 1.81E-08 | -0.14447 | 0.00175  | -0.08282 | 0.07379  | -0.29977 | 3.76E-11 |
| 0.40681  | 0.107879 | 0.01971  | 0.051583 | 0.26594  | 0.167811 | 0.00027  | -0.08567 | 0.06435  |
| 0.0628   | 0.19724  | 1.76E-05 | 0.192039 | 2.94E-05 | 0.098702 | 0.03297  | 0.097692 | 0.03481  |
| 0.87444  | 0.01969  | 0.67128  | 0.245693 | 7.54E-08 | 0.028379 | 0.54069  | -0.0518  | 0.26397  |
| 8.94E-05 | -0.12283 | 0.00788  | 0.035991 | 0.43778  | 0.015518 | 0.73803  | -0.08674 | 0.06108  |
| 0.00035  | -0.10702 | 0.02071  | 0.048213 | 0.29847  | -0.0663  | 0.15261  | -0.11164 | 0.01579  |
| 0.59738  | 0.044059 | 0.3421   | 0.304877 | 1.68E-11 | 0.083801 | 0.07041  | 0.034233 | 0.46051  |
| 0.00022  | -0.13519 | 0.00342  | -0.17481 | 0.00015  | -0.01703 | 0.71363  | -0.14542 | 0.00163  |
| 0.98031  | -0.09951 | 0.03155  | 0.004267 | 0.92673  | -0.07993 | 0.08447  | -0.17198 | 0.00019  |
| 0.26789  | 0.000346 | 0.99404  | 0.085927 | 0.06355  | 0.043439 | 0.34894  | -0.02665 | 0.56558  |
| 0.31323  | 0.21491  | 2.78E-06 | 0.272031 | 2.29E-09 | 0.267348 | 4.38E-09 | 0.006214 | 0.89347  |
| 0.00362  | 0.179238 | 9.84E-05 | 0.055747 | 0.2292   | 0.056886 | 0.21982  | 0.090961 | 0.04947  |
| 0.79207  | -0.05791 | 0.21161  | 0.048516 | 0.29545  | -0.00323 | 0.94442  | -0.21078 | 4.34E-06 |
| 0.00044  | 0.311061 | 6.18E-12 | 0.097706 | 0.03479  | -0.00024 | 0.99591  | 0.094249 | 0.04177  |
| 0.07675  | 0.001174 | 0.97981  | 0.02474  | 0.59384  | -0.00336 | 0.94223  | 0.039519 | 0.39418  |
| 0.01983  | 0.142224 | 0.00206  | 0.103496 | 0.02531  | 0.054598 | 0.23896  | 0.085251 | 0.06566  |
| 0.10743  | 0.13079  | 0.00464  | 0.09066  | 0.05024  | 0.016996 | 0.71412  | -0.00591 | 0.89868  |
| 0.00664  | -0.13319 | 0.00393  | 0.007046 | 0.87929  | -0.072   | 0.12026  | 0.000666 | 0.98854  |
| 0.77923  | 0.092599 | 0.0455   | 0.10336  | 0.02551  | 0.086326 | 0.06232  | -0.13778 | 0.00285  |
| 0.06487  | 0.094341 | 0.04157  | -0.00865 | 0.85209  | 0.049555 | 0.28522  | -0.22896 | 5.70E-07 |
| 0.67609  | 0.071126 | 0.12481  | 0.062724 | 0.176    | 0.098206 | 0.03386  | 0.069109 | 0.1359   |
| 0.04549  | -0.18615 | 5.18E-05 | -0.04502 | 0.33164  | -0.06813 | 0.14156  | -0.00475 | 0.91841  |
| 0.35569  | 0.093701 | 0.04298  | -0.01948 | 0.67452  | 0.052124 | 0.26095  | -0.12984 | 0.00495  |
| 0.04799  | 0.148459 | 0.00129  | -0.03146 | 0.49758  | -0.01739 | 0.70784  | 0.180054 | 9.13E-05 |
| 0.08795  | 0.219381 | 1.70E-06 | 0.072756 | 0.11638  | 0.096879 | 0.03636  | -0.05633 | 0.22434  |
| 0.44412  | 0.104685 | 0.02367  | 0.077632 | 0.0938   | 0.015844 | 0.73273  | -0.0855  | 0.06489  |
| 1.53E-07 | -0.32077 | 1.23E-12 | 0.004744 | 0.91856  | -0.09003 | 0.05186  | -0.08512 | 0.06608  |
| 0.37255  | -0.03061 | 0.50929  | 0.020734 | 0.65494  | 0.011605 | 0.80248  | 0.006105 | 0.89532  |
| 0.08296  | 0.106781 | 0.021    | 0.050879 | 0.27253  | 0.02463  | 0.59548  | 0.110191 | 0.01721  |
| 0.08139  | 0.142085 | 0.00208  | 0.030026 | 0.51745  | 0.102233 | 0.02716  | -0.13418 | 0.00367  |
| 0.19398  | 0.102565 | 0.02667  | -0.05716 | 0.21756  | -0.03061 | 0.50927  | 0.024498 | 0.59745  |
| 0.08646  | 0.109227 | 0.01822  | 0.04942  | 0.28653  | 0.133778 | 0.00378  | -0.00958 | 0.8365   |
| 0.06117  | 0.013263 | 0.77499  | -0.04707 | 0.31005  | -0.03168 | 0.49459  | -0.02351 | 0.61237  |
| 0.07767  | -0.03981 | 0.39068  | 0.111561 | 0.01587  | 0.080507 | 0.08222  | -0.08362 | 0.07103  |



|          |          |          |          |          |          |          |          |          |
|----------|----------|----------|----------|----------|----------|----------|----------|----------|
| 0.2912   | 0.12194  | 0.00834  | 0.003476 | 0.94028  | 0.11039  | 0.01701  | 0.160011 | 0.00052  |
| 0.01531  | 0.047171 | 0.30906  | -0.07463 | 0.10723  | -0.0547  | 0.23807  | -0.0348  | 0.45315  |
| 0.04674  | -0.14472 | 0.00172  | -0.01277 | 0.78314  | -0.12399 | 0.0073   | 0.000963 | 0.98344  |
| 0.34569  | -0.01274 | 0.78369  | 0.030946 | 0.5047   | 0.045556 | 0.32593  | -0.13599 | 0.00323  |
| 0.34507  | 0.135666 | 0.00331  | 0.109558 | 0.01787  | 0.053924 | 0.24482  | -0.07043 | 0.12853  |
| 0.46776  | -0.04145 | 0.37149  | 0.066036 | 0.15422  | -0.11629 | 0.01191  | 0.094501 | 0.04122  |
| 0.96394  | 0.149657 | 0.00118  | 0.039258 | 0.39732  | 0.122598 | 0.008    | -0.02435 | 0.59969  |
| 0.53839  | 0.022564 | 0.6267   | 0.010504 | 0.8209   | -0.001   | 0.98278  | -0.05353 | 0.2483   |
| 0.00165  | 0.23596  | 2.49E-07 | 0.110924 | 0.01648  | 0.134845 | 0.00351  | 0.099303 | 0.03191  |
| 0.9278   | 0.027971 | 0.54654  | -0.0609  | 0.18895  | -0.0272  | 0.5577   | 0.024246 | 0.60123  |
| 0.00284  | 0.158109 | 0.00061  | 0.1258   | 0.00649  | 0.27217  | 2.24E-09 | 0.028556 | 0.53818  |
| 0.70202  | 0.088302 | 0.05654  | 0.206061 | 7.14E-06 | 0.047782 | 0.30283  | 0.067267 | 0.14667  |
| 0.02429  | 0.07689  | 0.09699  | 0.037946 | 0.41329  | 0.026507 | 0.56774  | 0.054973 | 0.23574  |
| 0.44799  | 0.055391 | 0.2322   | 0.05145  | 0.26717  | -0.08345 | 0.0716   | -0.124   | 0.0073   |
| 0.00325  | 0.159164 | 0.00056  | 0.093151 | 0.04422  | 0.135153 | 0.00343  | 0.070266 | 0.12945  |
| 0.74253  | 0.028019 | 0.54585  | 0.033654 | 0.46813  | 0.055016 | 0.23537  | 0.074749 | 0.10668  |
| 0.00211  | 0.198568 | 1.54E-05 | 0.063464 | 0.17094  | 0.016522 | 0.72176  | 0.026647 | 0.56569  |
| 0.09865  | 0.010453 | 0.82176  | 0.040635 | 0.38095  | 0.045005 | 0.33182  | 8.93E-05 | 0.99846  |
| 0.10812  | -0.06569 | 0.1564   | 0.000766 | 0.98682  | -0.14128 | 0.00221  | -0.00667 | 0.88576  |
| 0.67671  | 0.101765 | 0.02788  | -0.14869 | 0.00127  | 0.030892 | 0.50544  | -0.23902 | 1.72E-07 |
| 0.02615  | 0.144641 | 0.00173  | 0.066252 | 0.15288  | 0.072192 | 0.11925  | -0.07449 | 0.1079   |
| 0.35096  | 0.153313 | 0.00089  | 0.045207 | 0.32966  | 0.096619 | 0.03687  | 0.002984 | 0.94871  |
| 0.14975  | 0.039752 | 0.39139  | 0.080329 | 0.0829   | 0.084204 | 0.06906  | 0.089099 | 0.05434  |
| 0.59027  | 0.008492 | 0.85478  | 0.005684 | 0.90251  | -0.00785 | 0.86562  | -0.04493 | 0.33263  |
| 0.90877  | -0.02232 | 0.63041  | 0.00435  | 0.9253   | -0.00258 | 0.95568  | 0.011555 | 0.80332  |
| 0.11868  | 0.020168 | 0.66377  | 0.024123 | 0.60307  | 0.072882 | 0.11575  | 0.06762  | 0.14456  |
| 0.47124  | 0.142935 | 0.00196  | 0.322348 | 9.42E-13 | 0.012595 | 0.78604  | -0.00264 | 0.95469  |
| 0.78363  | -0.14298 | 0.00195  | -0.0943  | 0.04167  | -0.09735 | 0.03546  | -0.07846 | 0.09033  |
| 0.73382  | -0.01469 | 0.75147  | 0.059129 | 0.20214  | -0.00147 | 0.97479  | -0.05507 | 0.23495  |
| 7.71E-06 | -0.13625 | 0.00318  | -0.09944 | 0.03168  | -0.02899 | 0.53206  | -0.19692 | 1.82E-05 |
| 0.00898  | 0.138767 | 0.00265  | -0.00111 | 0.98099  | 0.050564 | 0.27551  | -0.01505 | 0.74558  |
| 0.02597  | 0.148504 | 0.00129  | -0.03941 | 0.39554  | -0.03496 | 0.45101  | 0.168648 | 0.00025  |
| 0.60349  | 0.109612 | 0.01781  | -0.03308 | 0.4757   | -0.01224 | 0.792    | 0.10737  | 0.0203   |
| 8.27E-06 | 0.196562 | 1.88E-05 | -0.0619  | 0.18178  | -0.04624 | 0.31868  | 0.076516 | 0.09863  |
| 4.92E-11 | 0.355527 | 2.32E-15 | 0.019026 | 0.68174  | 0.041359 | 0.37252  | 0.283714 | 4.28E-10 |
| 0.02702  | -0.19204 | 2.94E-05 | -0.0569  | 0.21967  | -0.02085 | 0.65311  | 0.006465 | 0.88919  |
| 3.40E-06 | 0.173685 | 0.00016  | 0.006684 | 0.88545  | 0.097324 | 0.0355   | 0.05549  | 0.23136  |
| 0.50449  | 0.092317 | 0.04616  | 0.039692 | 0.39211  | -0.02796 | 0.54668  | 0.096064 | 0.03797  |
| 0.01079  | 0.154183 | 0.00083  | 0.030993 | 0.50405  | 0.00992  | 0.8307   | 0.024732 | 0.59396  |
| 0.11251  | 0.075435 | 0.1035   | -0.16393 | 0.00037  | -0.02586 | 0.5772   | 0.085233 | 0.06572  |
| 0.23791  | 0.203903 | 8.94E-06 | 0.084571 | 0.06786  | 0.030628 | 0.50909  | 0.182009 | 7.63E-05 |
| 0.00147  | -0.28131 | 6.08E-10 | -0.03485 | 0.45241  | -0.12932 | 0.00513  | 0.055833 | 0.22849  |
| 1.61E-09 | -0.23955 | 1.61E-07 | -0.04046 | 0.38301  | -0.17308 | 0.00017  | -0.24145 | 1.28E-07 |
| 0.03282  | 0.065467 | 0.15781  | -0.00416 | 0.92848  | -0.0144  | 0.75626  | 0.054416 | 0.24053  |
| 0.03004  | -0.08744 | 0.059    | 0.112201 | 0.01527  | -0.00107 | 0.98166  | 0.127417 | 0.00583  |

|          |          |          |          |          |          |          |          |          |
|----------|----------|----------|----------|----------|----------|----------|----------|----------|
| 0.80416  | -0.02982 | 0.52034  | 0.006066 | 0.89598  | -0.04223 | 0.36252  | -0.01063 | 0.81879  |
| 0.07588  | 0.068898 | 0.1371   | -0.03729 | 0.42146  | -0.06197 | 0.18124  | -0.06473 | 0.16256  |
| 0.26894  | 0.04782  | 0.30244  | -0.0064  | 0.89033  | -0.09991 | 0.03088  | 0.181227 | 8.20E-05 |
| 5.17E-06 | 0.161723 | 0.00045  | 0.006156 | 0.89444  | 0.118766 | 0.01021  | 0.146839 | 0.00146  |
| 0.0007   | 0.219387 | 1.70E-06 | 0.029261 | 0.52818  | 0.035921 | 0.43867  | 0.071899 | 0.12076  |
| 0.22637  | -0.14318 | 0.00192  | 0.131677 | 0.00437  | -0.02905 | 0.53115  | -0.04193 | 0.36595  |
| 5.26E-05 | 0.283642 | 4.33E-10 | 0.184189 | 6.23E-05 | 0.041277 | 0.37347  | 0.074781 | 0.10654  |
| 3.51E-15 | -0.37138 | 1.02E-16 | -0.20973 | 4.85E-06 | -0.15899 | 0.00056  | -0.13233 | 0.00417  |
| 0.10799  | 0.098207 | 0.03386  | 0.148653 | 0.00127  | 0.096407 | 0.03728  | -0.08411 | 0.06939  |
| 0.67215  | -0.01574 | 0.73438  | -0.06565 | 0.15662  | -0.09269 | 0.0453   | -0.18904 | 3.93E-05 |
| 0.03599  | 0.211704 | 3.93E-06 | 0.05697  | 0.21914  | 0.064391 | 0.16477  | 0.067071 | 0.14785  |
| 0.93291  | 0.062315 | 0.17884  | 0.251536 | 3.59E-08 | 0.182064 | 7.59E-05 | 0.047307 | 0.30766  |
| 0.10909  | -0.10113 | 0.02888  | -0.10375 | 0.02496  | 0.089453 | 0.05338  | 0.116114 | 0.01204  |
| 0.93947  | 0.126061 | 0.00638  | 0.09522  | 0.0397   | 0.041658 | 0.36907  | 0.059254 | 0.20119  |
| 0.19306  | 0.00667  | 0.8857   | 0.061465 | 0.18485  | 0.039849 | 0.39024  | 0.032147 | 0.4883   |
| 0.02292  | -0.09729 | 0.03556  | 0.031305 | 0.49977  | -0.00737 | 0.87381  | 0.020967 | 0.65132  |
| 0.86325  | 0.101084 | 0.02895  | 0.081504 | 0.07849  | 0.122442 | 0.00808  | -0.0041  | 0.92966  |
| 2.04E-05 | 0.226256 | 7.79E-07 | 0.173234 | 0.00017  | 0.092354 | 0.04608  | 0.000334 | 0.99426  |
| 0.01477  | -0.02639 | 0.56943  | 0.020144 | 0.66415  | -0.05607 | 0.22654  | -0.11454 | 0.01326  |
| 4.57E-05 | 0.210953 | 4.26E-06 | -0.01016 | 0.82666  | 0.18474  | 5.91E-05 | 0.062855 | 0.1751   |
| 0.99149  | 0.151918 | 0.00099  | 0.119662 | 0.00965  | -0.00386 | 0.93368  | -0.0415  | 0.37093  |
| 0.9825   | -0.07845 | 0.09038  | 0.016349 | 0.72455  | -0.09306 | 0.04442  | 0.04387  | 0.34417  |
| 0.55141  | -0.03843 | 0.40734  | -0.08446 | 0.06821  | -0.02789 | 0.54773  | -0.18088 | 8.46E-05 |
| 5.30E-06 | -0.15204 | 0.00098  | -0.09501 | 0.04014  | -0.0265  | 0.56789  | -0.08788 | 0.05774  |
| 0.00141  | 0.224498 | 9.53E-07 | 0.080572 | 0.08197  | 0.001912 | 0.96713  | 0.105722 | 0.02232  |
| 0.70697  | 0.060637 | 0.19085  | 0.016225 | 0.72655  | 0.000132 | 0.99774  | -0.00874 | 0.8505   |
| 0.00042  | 0.351046 | 5.45E-15 | 0.070286 | 0.12934  | 0.285086 | 3.50E-10 | 0.009828 | 0.83225  |
| 0.06589  | 0.086188 | 0.06274  | -0.00487 | 0.91648  | 0.176366 | 0.00013  | 0.012172 | 0.79305  |
| 0.02045  | 0.091459 | 0.04823  | -0.04562 | 0.3252   | -0.00143 | 0.97534  | 0.042693 | 0.35728  |
| 0.46297  | 0.090427 | 0.05083  | -0.02496 | 0.59062  | 0.020832 | 0.65342  | -0.01165 | 0.8017   |
| 4.65E-10 | 0.225817 | 8.19E-07 | -0.00801 | 0.86286  | -0.00865 | 0.85204  | 0.129296 | 0.00514  |
| 0.00982  | 0.194339 | 2.35E-05 | 0.096132 | 0.03783  | 0.185438 | 5.54E-05 | 0.044754 | 0.33453  |
| 3.53E-05 | 0.256901 | 1.79E-08 | -0.0235  | 0.61251  | 0.043458 | 0.34872  | 0.13023  | 0.00482  |
| 0.24678  | 0.079948 | 0.08438  | 0.086712 | 0.06115  | 0.043389 | 0.3495   | -0.01084 | 0.81519  |
| 0.00159  | 0.092998 | 0.04457  | 0.024533 | 0.59693  | -0.0201  | 0.66489  | 0.041329 | 0.37286  |
| 1.33E-05 | 0.237859 | 1.98E-07 | 0.138921 | 0.00262  | 0.118238 | 0.01055  | 0.19643  | 1.91E-05 |
| 0.18213  | 0.055936 | 0.22763  | 0.026196 | 0.57229  | 0.056884 | 0.21983  | 0.136037 | 0.00322  |
| 0.10124  | -0.06268 | 0.17633  | 0.017725 | 0.70243  | 0.013279 | 0.77472  | -0.04828 | 0.29783  |
| 0.58544  | 0.056687 | 0.22143  | -0.01405 | 0.76198  | 0.011542 | 0.80355  | -0.06932 | 0.13472  |
| 0.11428  | 0.106149 | 0.02178  | 0.052221 | 0.26006  | 0.086296 | 0.06241  | 0.037067 | 0.4242   |
| 0.00015  | -0.21982 | 1.62E-06 | -0.00183 | 0.96849  | 0.057613 | 0.21397  | -0.04808 | 0.29981  |
| 0.91456  | 0.00318  | 0.94535  | 0.017468 | 0.70654  | -0.03293 | 0.4777   | 0.196909 | 1.82E-05 |
| 0.00394  | 0.269642 | 3.19E-09 | 0.160902 | 0.00048  | 0.002523 | 0.95663  | 0.105702 | 0.02234  |
| 1.24E-06 | 0.204996 | 7.98E-06 | 0.046107 | 0.32011  | 0.117359 | 0.01114  | 0.150789 | 0.00108  |
| 0.52753  | -0.03639 | 0.43274  | 0.168152 | 0.00026  | -0.0186  | 0.68848  | -0.0746  | 0.1074   |

|          |          |          |          |          |          |          |          |          |
|----------|----------|----------|----------|----------|----------|----------|----------|----------|
| 3.67E-08 | 0.335053 | 1.03E-13 | 0.035774 | 0.44055  | 0.27869  | 8.89E-10 | 0.161909 | 0.00044  |
| 9.73E-11 | 0.259568 | 1.25E-08 | 0.031358 | 0.49904  | -0.11469 | 0.01313  | 0.114737 | 0.0131   |
| 0.01012  | 0.243912 | 9.41E-08 | -0.06586 | 0.1553   | 0.082225 | 0.07588  | -0.16381 | 0.00038  |
| 0.01683  | 0.188994 | 3.95E-05 | 0.095595 | 0.03892  | 0.103579 | 0.0252   | -0.14754 | 0.00139  |
| 0.91638  | 0.004819 | 0.91728  | 0.039743 | 0.39151  | -0.02545 | 0.5833   | 0.132977 | 0.00399  |
| 0.50451  | -0.03336 | 0.47201  | -0.08375 | 0.07059  | -0.08267 | 0.07431  | -0.02194 | 0.63624  |
| 0.02242  | 0.043217 | 0.35141  | -0.05178 | 0.26409  | -0.05266 | 0.25608  | -0.02095 | 0.65153  |
| 0.54191  | 0.149064 | 0.00123  | -0.00467 | 0.91985  | 0.03081  | 0.50657  | 0.141594 | 0.00216  |
| 0.00803  | 0.229766 | 5.19E-07 | -0.01358 | 0.76976  | 0.063293 | 0.1721   | 0.101144 | 0.02885  |
| 0.96381  | 0.027927 | 0.54717  | -0.06975 | 0.13231  | -0.08327 | 0.0722   | -0.0203  | 0.66175  |
| 0.29323  | 0.183759 | 6.48E-05 | 0.011807 | 0.79914  | 0.058762 | 0.20496  | 0.183584 | 6.59E-05 |
| 0.00142  | 0.131563 | 0.0044   | 0.039179 | 0.39827  | 0.003944 | 0.93226  | 0.081537 | 0.07837  |
| 1.62E-09 | 0.389699 | 2.19E-18 | 0.06375  | 0.16902  | 0.085556 | 0.0647   | -0.04218 | 0.36308  |
| 0.17232  | 0.055846 | 0.22837  | -0.00075 | 0.98704  | 0.012667 | 0.78484  | 0.010302 | 0.82429  |
| 0.0388   | 0.247027 | 6.37E-08 | 0.132831 | 0.00403  | 0.144371 | 0.00176  | -0.00182 | 0.96875  |
| 0.03226  | -0.09049 | 0.05066  | -0.09488 | 0.04041  | -0.03354 | 0.46958  | -0.11841 | 0.01044  |
| 0.85321  | 0.09533  | 0.03947  | 0.054157 | 0.24278  | 0.226457 | 7.61E-07 | 0.13704  | 0.003    |
| 0.75034  | 0.13264  | 0.00409  | 0.084532 | 0.06798  | 0.012117 | 0.79397  | 0.012575 | 0.78636  |
| 0.00579  | -0.07286 | 0.11587  | 0.078756 | 0.08913  | -0.01587 | 0.73228  | -0.0395  | 0.39446  |
| 0.00437  | 0.263871 | 7.04E-09 | 0.265518 | 5.63E-09 | -0.00726 | 0.87572  | -0.04953 | 0.28545  |
| 0.09525  | 0.123376 | 0.0076   | 0.003906 | 0.93292  | -0.00835 | 0.85721  | 0.010389 | 0.82283  |
| 0.00014  | 0.278565 | 9.05E-10 | 0.05272  | 0.25553  | 0.040913 | 0.37771  | 0.024743 | 0.59379  |
| 0.83785  | 0.001622 | 0.97212  | 0.029706 | 0.52194  | 0.079525 | 0.08604  | 0.002892 | 0.9503   |
| 0.22964  | 0.066933 | 0.14869  | -0.06076 | 0.18999  | 0.065841 | 0.15544  | -0.18279 | 7.10E-05 |
| 0.13705  | -0.02136 | 0.64524  | 0.076708 | 0.09779  | -0.00416 | 0.9286   | -0.03198 | 0.49051  |
| 0.2049   | -0.04699 | 0.31093  | -0.11458 | 0.01323  | -0.07161 | 0.12224  | -0.16336 | 0.00039  |
| 1.01E-07 | -0.27269 | 2.08E-09 | -0.12663 | 0.00614  | -0.09364 | 0.04312  | -0.17754 | 0.00011  |
| 4.97E-05 | -0.04341 | 0.34925  | -0.22686 | 7.27E-07 | 0.005303 | 0.90901  | -0.23508 | 2.77E-07 |
| 0.15064  | 0.058424 | 0.20758  | -0.09919 | 0.03211  | -0.03105 | 0.50325  | -0.01269 | 0.78439  |
| 0.39645  | 0.026845 | 0.56281  | 0.028733 | 0.53566  | 0.046734 | 0.31356  | 0.101801 | 0.02782  |
| 0.5185   | 0.04468  | 0.33532  | 0.056695 | 0.22137  | 0.034335 | 0.45917  | -0.06677 | 0.14965  |
| 0.00528  | 0.112398 | 0.01509  | -0.01156 | 0.80323  | -0.01271 | 0.78409  | 0.055377 | 0.23232  |
| 0.14671  | 0.122544 | 0.00802  | 0.066945 | 0.14862  | 0.048323 | 0.29737  | 0.014898 | 0.74813  |
| 0.36843  | 0.069367 | 0.13444  | 0.094496 | 0.04123  | 0.067249 | 0.14677  | 0.01419  | 0.75972  |
| 0.03444  | 0.066315 | 0.15248  | 0.003762 | 0.93538  | 0.018627 | 0.68806  | 0.14034  | 0.00237  |
| 0.87573  | -0.01048 | 0.8213   | 0.036773 | 0.42789  | -0.00502 | 0.91387  | 0.081927 | 0.07695  |
| 0.00081  | 0.247669 | 5.88E-08 | 0.129823 | 0.00496  | 0.0931   | 0.04434  | 0.180691 | 8.61E-05 |
| 1.46E-07 | -0.22792 | 6.43E-07 | 0.017615 | 0.70418  | -0.04332 | 0.35021  | 0.073945 | 0.11052  |
| 0.49428  | 0.079261 | 0.08709  | -0.00673 | 0.8847   | 0.009417 | 0.83917  | -0.00702 | 0.87966  |
| 0.00032  | -0.11222 | 0.01526  | 0.004493 | 0.92286  | -0.14269 | 0.00199  | -0.21985 | 1.61E-06 |
| 0.00547  | 0.28739  | 2.49E-10 | 0.106213 | 0.0217   | 0.096423 | 0.03725  | 0.184222 | 6.21E-05 |
| 0.00911  | -0.10142 | 0.02842  | 0.148228 | 0.00132  | 0.224514 | 9.51E-07 | 0.002362 | 0.95941  |
| 0.94048  | 0.089993 | 0.05196  | -0.0289  | 0.53336  | 0.040295 | 0.38495  | 0.025828 | 0.57771  |
| 1.13E-06 | 0.322045 | 9.91E-13 | 0.026727 | 0.56453  | -0.01418 | 0.75989  | 0.024638 | 0.59535  |
| 0.17034  | 0.031103 | 0.50254  | -0.06097 | 0.1884   | -0.07507 | 0.10521  | 0.048354 | 0.29707  |

|          |          |          |          |          |          |          |          |          |
|----------|----------|----------|----------|----------|----------|----------|----------|----------|
| 0.01019  | 0.306852 | 1.22E-11 | 0.13227  | 0.00419  | 0.305038 | 1.63E-11 | 0.045209 | 0.32963  |
| 0.52576  | -0.03313 | 0.47505  | -0.0117  | 0.80095  | -0.01373 | 0.76732  | 0.02646  | 0.56843  |
| 0.07211  | -0.07415 | 0.10952  | -0.01264 | 0.78536  | 0.049155 | 0.28912  | 0.029898 | 0.51924  |
| 0.00032  | 0.136137 | 0.0032   | 0.103663 | 0.02508  | 0.017407 | 0.70752  | -0.05361 | 0.24762  |
| 0.85586  | 0.113331 | 0.01427  | 0.410946 | 1.87E-20 | 0.061358 | 0.18562  | 0.002173 | 0.96264  |
| 0.14169  | 0.081928 | 0.07694  | 0.082245 | 0.0758   | -0.06359 | 0.17012  | -0.01742 | 0.70728  |
| 0.00519  | -0.07493 | 0.10585  | -0.23024 | 4.91E-07 | 0.029731 | 0.52158  | -0.12734 | 0.00586  |
| 0.02278  | 0.232152 | 3.92E-07 | 0.051457 | 0.2671   | 0.046724 | 0.31366  | 0.008787 | 0.84979  |
| 1.07E-07 | -0.40964 | 2.53E-20 | -0.13097 | 0.00458  | -0.12991 | 0.00493  | -0.09476 | 0.04068  |
| 0.61611  | -0.01567 | 0.7355   | -0.05778 | 0.21267  | -0.05393 | 0.24479  | 0.153931 | 0.00085  |
| 0.00034  | -0.15398 | 0.00084  | -0.06073 | 0.19017  | -0.04386 | 0.34425  | 0.066977 | 0.14842  |
| 2.91E-06 | -0.22312 | 1.11E-06 | 0.239452 | 1.63E-07 | 0.039439 | 0.39514  | 0.10416  | 0.02439  |
| 0.83575  | -0.02978 | 0.52087  | 0.041652 | 0.36914  | -0.07263 | 0.11704  | -0.12123 | 0.00873  |
| 0.32541  | 0.07123  | 0.12426  | 0.027353 | 0.55544  | -0.03386 | 0.46546  | -0.00203 | 0.96504  |
| 2.44E-07 | 0.214797 | 2.81E-06 | 0.095643 | 0.03882  | 0.044927 | 0.33266  | 0.112592 | 0.01492  |
| 0.02491  | -0.00305 | 0.94762  | 0.114758 | 0.01308  | 0.066882 | 0.149    | -0.04497 | 0.3322   |
| 0.01325  | -0.06264 | 0.17655  | -0.04176 | 0.36788  | 0.016908 | 0.71554  | -0.18168 | 7.86E-05 |
| 0.78637  | -0.04134 | 0.37279  | 0.042454 | 0.35998  | 0.042099 | 0.36402  | -0.02924 | 0.52846  |
| 2.72E-06 | -0.2809  | 6.46E-10 | -0.04585 | 0.32283  | -0.05957 | 0.19879  | -0.11156 | 0.01587  |
| 0.42411  | -0.01066 | 0.8182   | 0.160226 | 0.00051  | 0.07368  | 0.11181  | -0.12449 | 0.00707  |
| 0.07775  | 0.183076 | 6.91E-05 | 0.17204  | 0.00019  | 0.034758 | 0.45365  | 0.000931 | 0.98399  |
| 0.65769  | 0.027362 | 0.5553   | 0.018444 | 0.69097  | -0.0078  | 0.8665   | 0.036666 | 0.42924  |
| 1.75E-13 | -0.32668 | 4.48E-13 | -0.02972 | 0.5217   | -0.05826 | 0.20885  | -0.07135 | 0.12364  |
| 8.14E-05 | 0.336196 | 8.38E-14 | 0.162679 | 0.00042  | 0.066086 | 0.15391  | 0.095776 | 0.03855  |
| 5.65E-06 | 0.203248 | 9.57E-06 | 0.013892 | 0.76462  | -0.01662 | 0.72016  | -0.03797 | 0.41299  |
| 0.02838  | -0.21923 | 1.72E-06 | -0.06143 | 0.18508  | -0.14305 | 0.00194  | -0.02066 | 0.65608  |
| 0.03449  | 0.010738 | 0.81698  | -0.05652 | 0.22278  | -0.02313 | 0.61809  | -0.04795 | 0.3011   |
| 1.82E-11 | 0.373339 | 6.82E-17 | 0.056191 | 0.22551  | 0.031056 | 0.50318  | 0.099697 | 0.03124  |
| 0.03563  | 0.11087  | 0.01653  | 0.035535 | 0.44362  | 0.060739 | 0.1901   | -0.12391 | 0.00734  |
| 0.12443  | 0.12616  | 0.00633  | 0.023131 | 0.61806  | 0.0573   | 0.21647  | 0.160018 | 0.00052  |
| 1.66E-05 | 0.201311 | 1.17E-05 | 0.043877 | 0.34409  | 0.089637 | 0.0529   | 0.037178 | 0.42281  |
| 0.00499  | -0.16909 | 0.00024  | -0.0442  | 0.3406   | 0.044574 | 0.33648  | -0.00707 | 0.87893  |
| 0.96417  | -0.01083 | 0.81549  | 0.059354 | 0.20042  | -0.09411 | 0.04206  | -0.06221 | 0.1796   |
| 0.121    | -0.07145 | 0.12308  | -0.10052 | 0.02987  | -0.05965 | 0.19816  | 0.090048 | 0.05181  |
| 0.00293  | 0.139059 | 0.0026   | 0.036898 | 0.42631  | 0.045023 | 0.33163  | 0.074617 | 0.10731  |
| 0.01633  | -0.22115 | 1.39E-06 | -0.01766 | 0.7034   | -0.09166 | 0.04774  | -0.13533 | 0.00339  |
| 9.96E-08 | -0.28388 | 4.18E-10 | -0.02185 | 0.63772  | -0.07482 | 0.10633  | -0.08765 | 0.0584   |
| 2.56E-08 | -0.28595 | 3.08E-10 | -0.0555  | 0.23124  | -0.03952 | 0.39417  | -0.05131 | 0.26849  |
| 0.00777  | 0.085509 | 0.06485  | -0.04398 | 0.34293  | -0.00608 | 0.89571  | 0.029298 | 0.52766  |
| 0.96714  | 0.03049  | 0.51101  | 0.117704 | 0.01091  | 0.008123 | 0.86103  | 0.008944 | 0.84714  |
| 6.77E-08 | 0.332966 | 1.49E-13 | -0.01498 | 0.74676  | 0.0885   | 0.05599  | 0.013395 | 0.7728   |
| 0.44263  | 0.046495 | 0.31605  | -0.09782 | 0.03458  | 0.008138 | 0.86077  | -0.24324 | 1.02E-07 |
| 0.77358  | -0.07812 | 0.09174  | -0.10148 | 0.02833  | -0.10046 | 0.02995  | -0.00555 | 0.90478  |
| 0.00207  | 0.096752 | 0.03661  | -0.00327 | 0.94385  | -0.02242 | 0.62886  | 0.120185 | 0.00933  |
| 8.91E-08 | 0.303042 | 2.24E-11 | 0.022862 | 0.62216  | 0.02022  | 0.66296  | 0.047574 | 0.30494  |

|          |          |          |          |         |          |          |          |          |
|----------|----------|----------|----------|---------|----------|----------|----------|----------|
| 0.00743  | 0.10642  | 0.02144  | -0.03214 | 0.48834 | -0.08379 | 0.07044  | -0.17292 | 0.00017  |
| 0.10266  | -0.00352 | 0.93951  | 0.013908 | 0.76435 | -0.00704 | 0.87945  | -0.07646 | 0.09887  |
| 0.00033  | -0.09676 | 0.0366   | -0.01035 | 0.82343 | -0.00514 | 0.91175  | 0.033449 | 0.47085  |
| 0.35135  | 0.076276 | 0.0997   | 0.03453  | 0.45663 | 0.047583 | 0.30485  | 0.163912 | 0.00038  |
| 0.14008  | -0.0561  | 0.22628  | 0.019986 | 0.66663 | 0.084733 | 0.06733  | 0.160647 | 0.00049  |
| 0.07288  | 0.225749 | 8.26E-07 | 0.046058 | 0.32062 | 0.040392 | 0.38381  | 0.082817 | 0.07378  |
| 0.20197  | 0.026667 | 0.5654   | 0.081994 | 0.0767  | -0.01458 | 0.75336  | 0.041414 | 0.37188  |
| 0.71387  | 0.050983 | 0.27154  | 0.051076 | 0.27067 | 0.001915 | 0.96709  | 0.003461 | 0.94054  |
| 0.71315  | 0.041444 | 0.37153  | 0.001866 | 0.96792 | -0.02937 | 0.5267   | -0.00572 | 0.90195  |
| 0.70416  | 0.043938 | 0.34342  | 0.042296 | 0.36178 | -0.00256 | 0.95607  | 0.012746 | 0.78354  |
| 0.23584  | 0.077733 | 0.09337  | 0.073506 | 0.11266 | 0.046291 | 0.31817  | 0.108054 | 0.01951  |
| 0.49233  | 0.004009 | 0.93115  | 0.024957 | 0.5906  | 0.026393 | 0.56941  | 0.011086 | 0.81115  |
| 0.8374   | 0.044319 | 0.33925  | 0.039126 | 0.39891 | 0.09177  | 0.04747  | 0.035165 | 0.44839  |
| 0.0308   | 0.120173 | 0.00934  | 0.05035  | 0.27755 | 0.02555  | 0.5818   | 0.022973 | 0.62046  |
| 0.52936  | 0.043638 | 0.34673  | 0.020152 | 0.66402 | 0.000457 | 0.99213  | 0.201161 | 1.19E-05 |
| 0.0369   | 0.132888 | 0.00402  | -0.02465 | 0.59511 | 0.038674 | 0.40438  | 0.23618  | 2.42E-07 |
| 0.48056  | 0.010166 | 0.82657  | 0.025174 | 0.58737 | 0.007997 | 0.86316  | 0.002328 | 0.95998  |
| 0.00192  | 0.190864 | 3.30E-05 | 0.056731 | 0.22108 | 0.051062 | 0.2708   | 0.268956 | 3.51E-09 |
| 0.00818  | 0.224502 | 9.52E-07 | 0.10746  | 0.02019 | 0.086975 | 0.06037  | 0.007107 | 0.87827  |
| 0.00089  | 0.133984 | 0.00372  | 0.065253 | 0.15918 | 0.025993 | 0.57528  | 0.060387 | 0.19269  |
| 0.05526  | -0.12281 | 0.00789  | 0.011402 | 0.80587 | -0.07298 | 0.11527  | -0.09424 | 0.04179  |
| 0.09563  | 0.108845 | 0.01863  | 0.156326 | 0.0007  | 0.081536 | 0.07837  | 0.077465 | 0.09451  |
| 0.51697  | -0.00368 | 0.93682  | 0.089624 | 0.05293 | 0.182087 | 7.57E-05 | 0.074769 | 0.10659  |
| 0.05054  | -0.0713  | 0.12392  | 0.032724 | 0.48052 | -0.02209 | 0.63389  | -0.02613 | 0.57327  |
| 0.00054  | 0.157548 | 0.00063  | 0.020739 | 0.65486 | 0.016485 | 0.72236  | 0.085558 | 0.0647   |
| 0.39061  | 0.015848 | 0.73267  | 0.018387 | 0.69187 | -0.0345  | 0.45695  | 0.0351   | 0.44922  |
| 0.09978  | 0.195773 | 2.04E-05 | 0.175564 | 0.00014 | 0.262752 | 8.19E-09 | 0.034628 | 0.45535  |
| 0.98274  | -0.03952 | 0.39422  | -0.0601  | 0.1948  | -0.06033 | 0.19313  | -0.04621 | 0.319    |
| 0.82138  | 0.029126 | 0.53009  | 0.048036 | 0.30026 | 0.012242 | 0.79189  | 0.000541 | 0.9907   |
| 0.31138  | 0.256089 | 1.99E-08 | -0.05747 | 0.21511 | 0.053395 | 0.24949  | -0.07697 | 0.09664  |
| 0.00817  | 0.151152 | 0.00105  | 0.077715 | 0.09345 | 0.031748 | 0.49371  | 0.02207  | 0.63428  |
| 0.16041  | 0.183262 | 6.79E-05 | 0.036082 | 0.43663 | 0.121476 | 0.00859  | 0.078526 | 0.09007  |
| 0.32774  | -0.09728 | 0.03559  | 0.038817 | 0.40264 | 0.030056 | 0.51703  | 0.01663  | 0.72001  |
| 0.5705   | 0.184438 | 6.08E-05 | 0.040609 | 0.38127 | 0.110808 | 0.0166   | 0.050593 | 0.27524  |
| 0.0347   | -0.08573 | 0.06415  | -0.03158 | 0.49602 | -0.03581 | 0.44011  | 0.037262 | 0.42177  |
| 0.00997  | -0.17295 | 0.00017  | 0.063373 | 0.17156 | -0.08274 | 0.07404  | 0.104261 | 0.02425  |
| 1.36E-11 | 0.423771 | 8.91E-22 | 0.108227 | 0.01931 | 0.164509 | 0.00036  | 0.152342 | 0.00096  |
| 0.9627   | -0.11947 | 0.00976  | 0.01509  | 0.745   | -0.06083 | 0.18943  | -0.01212 | 0.79398  |
| 0.23188  | -0.09835 | 0.0336   | 0.021513 | 0.64285 | -0.01764 | 0.70372  | 0.010471 | 0.82145  |
| 0.60787  | 0.056655 | 0.2217   | 0.063824 | 0.16853 | 0.105729 | 0.02231  | 0.099039 | 0.03237  |
| 0.94517  | 0.005629 | 0.90343  | 0.065258 | 0.15914 | -0.04429 | 0.33957  | -0.02945 | 0.52556  |
| 0.59425  | -0.01136 | 0.8065   | -0.01958 | 0.67298 | -0.05519 | 0.23391  | -0.00871 | 0.85111  |
| 0.89779  | -0.05944 | 0.19978  | -0.06865 | 0.13853 | 0.035092 | 0.44933  | 0.0339   | 0.46488  |
| 0.38716  | 0.057145 | 0.21772  | 0.046864 | 0.31221 | 0.038313 | 0.40879  | 0.140059 | 0.00242  |
| 0.19109  | 0.276951 | 1.14E-09 | 0.024246 | 0.60124 | 0.09365  | 0.04309  | -0.0278  | 0.54899  |

|          |          |          |          |          |          |          |          |          |
|----------|----------|----------|----------|----------|----------|----------|----------|----------|
| 0.48145  | -0.03487 | 0.45222  | -0.00807 | 0.86191  | -0.01353 | 0.77065  | -0.04656 | 0.3154   |
| 0.6845   | 0.025015 | 0.58974  | -0.00661 | 0.88664  | -0.01488 | 0.74836  | -0.03031 | 0.51347  |
| 0.438    | 0.060732 | 0.19015  | 0.020208 | 0.66314  | 0.022514 | 0.62747  | 0.178724 | 0.0001   |
| 0.04177  | 0.138132 | 0.00278  | 0.030245 | 0.51441  | 0.191989 | 2.96E-05 | 0.180771 | 8.55E-05 |
| 3.71E-14 | -0.2948  | 8.11E-11 | -0.02587 | 0.57706  | -0.08593 | 0.06355  | -0.25904 | 1.35E-08 |
| 0.10383  | 0.202265 | 1.06E-05 | 0.244765 | 8.46E-08 | 0.092148 | 0.04657  | -0.06318 | 0.17284  |
| 3.58E-06 | 0.414185 | 8.78E-21 | 0.047995 | 0.30067  | 0.18287  | 7.04E-05 | 0.115677 | 0.01237  |
| 2.01E-07 | 0.346396 | 1.30E-14 | 0.122905 | 0.00784  | 0.140606 | 0.00232  | 0.136919 | 0.00303  |
| 0.63337  | -0.04699 | 0.31087  | 0.023593 | 0.61106  | -0.00471 | 0.91919  | -0.05102 | 0.2712   |
| 0.21731  | -0.0657  | 0.15634  | 0.012387 | 0.78948  | 0.015924 | 0.73143  | 0.03814  | 0.4109   |
| 0.06215  | 0.056189 | 0.22553  | 0.070762 | 0.12676  | 0.073776 | 0.11134  | -0.00411 | 0.92935  |
| 0.07777  | 0.192154 | 2.91E-05 | 0.247871 | 5.73E-08 | 0.074419 | 0.10825  | -0.01906 | 0.68118  |
| 0.00012  | 0.295824 | 6.93E-11 | 0.017074 | 0.71287  | 0.054198 | 0.24243  | -0.0045  | 0.92272  |
| 0.00148  | 0.052308 | 0.25926  | -0.08343 | 0.07166  | -0.00208 | 0.96421  | -0.10556 | 0.02252  |
| 0.3705   | -0.06256 | 0.17715  | 0.033487 | 0.47035  | -0.0849  | 0.06678  | -0.03065 | 0.50876  |
| 0.11123  | -0.04566 | 0.32483  | -0.04953 | 0.28546  | 0.024542 | 0.59679  | -0.22182 | 1.29E-06 |
| 0.14772  | 0.053498 | 0.24857  | -0.01957 | 0.67311  | -0.09181 | 0.04738  | -0.05677 | 0.22077  |
| 0.03044  | 0.008504 | 0.85457  | 0.036674 | 0.42913  | 0.094813 | 0.04056  | 0.06685  | 0.14919  |
| 0.1434   | 0.037299 | 0.42131  | -0.00422 | 0.92752  | -0.00229 | 0.96059  | 0.032911 | 0.47802  |
| 0.39036  | 0.006236 | 0.89308  | 0.028036 | 0.5456   | 0.024991 | 0.59009  | 0.024236 | 0.60138  |
| 0.7504   | -0.10261 | 0.0266   | 0.050256 | 0.27844  | -0.15352 | 0.00087  | 0.022972 | 0.62049  |
| 5.26E-11 | 0.343944 | 2.05E-14 | -0.03047 | 0.51121  | 0.074188 | 0.10935  | 0.033331 | 0.47241  |
| 0.00616  | 0.265672 | 5.51E-09 | -0.0062  | 0.8937   | -0.002   | 0.9656   | 0.108002 | 0.01957  |
| 0.57298  | 0.088563 | 0.05581  | 0.072726 | 0.11653  | 0.07409  | 0.10982  | 0.036627 | 0.42972  |
| 0.62819  | 0.018562 | 0.68909  | -0.00781 | 0.86637  | -0.05012 | 0.27974  | 0.100217 | 0.03036  |
| 1.87E-06 | -0.14915 | 0.00123  | -0.01201 | 0.79567  | -0.02585 | 0.57731  | -0.11826 | 0.01053  |
| 0.04664  | -0.08677 | 0.06098  | -0.0624  | 0.17828  | -0.10777 | 0.01983  | -0.03492 | 0.4515   |
| 0.03863  | -0.17354 | 0.00016  | 0.151903 | 0.00099  | -0.04991 | 0.28173  | -0.09281 | 0.04501  |
| 0.0264   | 0.02359  | 0.61111  | -0.11109 | 0.01632  | -0.0382  | 0.41021  | -0.03973 | 0.39166  |
| 0.5002   | -0.08953 | 0.05318  | -0.05734 | 0.21619  | -0.07702 | 0.09642  | 0.101885 | 0.0277   |
| 0.00035  | 0.079168 | 0.08746  | 0.056078 | 0.22645  | -0.08722 | 0.05966  | 0.137819 | 0.00284  |
| 3.29E-05 | -0.20168 | 1.12E-05 | 0.062918 | 0.17466  | 0.02346  | 0.61307  | -0.02984 | 0.52011  |
| 0.26512  | -0.14537 | 0.00163  | -0.0182  | 0.69487  | 0.000561 | 0.99035  | -0.18579 | 5.36E-05 |
| 0.40498  | 0.059171 | 0.20182  | -0.0211  | 0.64921  | 0.029487 | 0.525    | -0.04677 | 0.3132   |
| 0.12285  | -0.03364 | 0.46826  | -0.06426 | 0.16566  | -0.01124 | 0.80853  | -0.09081 | 0.04986  |
| 0.00883  | -0.10592 | 0.02206  | -0.19742 | 1.73E-05 | -0.04824 | 0.29817  | -0.08925 | 0.05394  |
| 0.04341  | -0.06696 | 0.1485   | -0.07206 | 0.11994  | 0.006617 | 0.88659  | 0.107554 | 0.02008  |
| 0.03423  | 0.124849 | 0.00691  | 0.029388 | 0.52639  | 0.018794 | 0.68542  | 0.155831 | 0.00073  |
| 5.17E-08 | 0.186428 | 5.04E-05 | 0.094864 | 0.04045  | -0.09499 | 0.04018  | -0.02485 | 0.5922   |
| 0.52375  | -0.05348 | 0.24871  | 0.061682 | 0.1833   | 0.072581 | 0.11726  | 0.052454 | 0.25794  |
| 0.87592  | -0.00639 | 0.89052  | 0.026613 | 0.56619  | 0.000448 | 0.99229  | 0.065959 | 0.1547   |
| 0.17574  | 0.19573  | 2.05E-05 | 0.087486 | 0.05887  | 0.059675 | 0.198    | 0.005509 | 0.90548  |
| 0.19017  | 0.003694 | 0.93654  | 0.204192 | 8.68E-06 | 0.08321  | 0.07242  | -0.0552  | 0.23378  |
| 1.95E-05 | 0.293147 | 1.04E-10 | 0.062198 | 0.17966  | 0.088043 | 0.05727  | -0.02993 | 0.51875  |
| 0.69     | 0.108972 | 0.01849  | 0.048572 | 0.29489  | 0.058084 | 0.21024  | -0.05574 | 0.22926  |

|          |          |          |          |          |          |          |          |          |
|----------|----------|----------|----------|----------|----------|----------|----------|----------|
| 0.3259   | 0.056843 | 0.22017  | 0.041365 | 0.37245  | 0.039651 | 0.39261  | 0.054985 | 0.23565  |
| 0.43579  | 0.016524 | 0.72173  | -0.08058 | 0.08194  | -0.05587 | 0.22814  | -0.09709 | 0.03596  |
| 0.21691  | 0.105292 | 0.02287  | 0.012845 | 0.78189  | 0.164541 | 0.00036  | -0.07022 | 0.12969  |
| 0.06151  | 0.088537 | 0.05589  | -0.01847 | 0.69056  | -0.04935 | 0.2872   | -0.1547  | 0.0008   |
| 4.05E-08 | -0.25168 | 3.52E-08 | -0.07909 | 0.08778  | -0.01632 | 0.72499  | -0.01411 | 0.76103  |
| 0.21128  | 0.035304 | 0.44659  | -0.04104 | 0.37617  | 0.002102 | 0.96387  | -0.0647  | 0.16273  |
| 0.00992  | 0.09688  | 0.03636  | -0.00715 | 0.87752  | -0.06062 | 0.19099  | 0.122616 | 0.00799  |
| 0.00016  | -0.08565 | 0.06441  | -0.05698 | 0.21902  | -0.0363  | 0.43385  | -0.1445  | 0.00174  |
| 0.15071  | 0.112528 | 0.01498  | -0.05296 | 0.2534   | 0.003563 | 0.93879  | 0.081576 | 0.07823  |
| 2.76E-07 | -0.24857 | 5.24E-08 | 0.020033 | 0.66588  | -0.04185 | 0.3669   | 0.01529  | 0.74174  |
| 6.96E-09 | -0.26285 | 8.08E-09 | 0.057078 | 0.21826  | -0.01745 | 0.70681  | -0.0121  | 0.79429  |
| 0.05011  | 0.03753  | 0.41844  | -0.11829 | 0.01052  | -0.06553 | 0.1574   | -0.01242 | 0.78895  |
| 0.01134  | 0.242193 | 1.16E-07 | 0.040617 | 0.38117  | -0.02081 | 0.65383  | -0.02945 | 0.52548  |
| 0.24544  | 0.169188 | 0.00024  | 0.059913 | 0.19621  | 0.185075 | 5.73E-05 | 0.028622 | 0.53724  |
| 0.05324  | -0.04133 | 0.37282  | -0.02629 | 0.57095  | -0.1043  | 0.02419  | -0.00505 | 0.91326  |
| 0.03072  | -0.07557 | 0.10289  | -0.00211 | 0.96381  | 0.097934 | 0.03436  | 0.039735 | 0.39161  |
| 0.33479  | 0.026595 | 0.56645  | 0.022771 | 0.62354  | 0.020904 | 0.65229  | -0.0051  | 0.91253  |
| 0.95418  | 0.176082 | 0.00013  | 0.041915 | 0.36612  | -0.0473  | 0.30771  | 0.028734 | 0.53565  |
| 0.08975  | -0.05992 | 0.19616  | 0.118319 | 0.0105   | 0.1034   | 0.02545  | 0.006143 | 0.89467  |
| 0.34855  | 0.086568 | 0.06159  | 0.013508 | 0.77094  | 0.052991 | 0.25309  | -0.08523 | 0.06573  |
| 0.00045  | 0.298698 | 4.44E-11 | 0.08542  | 0.06513  | 0.063923 | 0.16786  | 0.079305 | 0.08692  |
| 0.3184   | -0.0832  | 0.07244  | -0.00877 | 0.85001  | -0.03732 | 0.42102  | -0.00271 | 0.9535   |
| 0.73628  | 0.064729 | 0.16256  | 0.027379 | 0.55506  | 0.009063 | 0.84514  | -0.04485 | 0.33351  |
| 0.03002  | 0.274366 | 1.65E-09 | -0.05314 | 0.25175  | 0.081784 | 0.07746  | 0.070011 | 0.13085  |
| 0.0011   | -0.17044 | 0.00022  | -0.00531 | 0.9089   | -0.11764 | 0.01095  | 0.0578   | 0.21249  |
| 0.00039  | 0.286029 | 3.04E-10 | 0.06901  | 0.13646  | 0.090209 | 0.05139  | 0.079228 | 0.08722  |
| 0.77359  | 0.058303 | 0.20852  | 0.081924 | 0.07696  | 0.048648 | 0.29413  | -0.13094 | 0.00459  |
| 0.80715  | 0.198803 | 1.51E-05 | 0.003942 | 0.93229  | 0.150473 | 0.00111  | 0.012198 | 0.79262  |
| 0.08842  | 0.107793 | 0.01981  | 0.083728 | 0.07065  | 0.001112 | 0.98089  | -0.07024 | 0.12959  |
| 0.21528  | 0.158268 | 0.0006   | 0.024991 | 0.59009  | 0.007065 | 0.87898  | 0.034481 | 0.45726  |
| 0.11341  | 0.132681 | 0.00408  | 0.02407  | 0.60387  | 0.00846  | 0.85533  | 0.03941  | 0.39548  |
| 1.71E-05 | 0.320801 | 1.22E-12 | 0.042034 | 0.36476  | 0.098873 | 0.03266  | 0.225792 | 8.22E-07 |
| 0.96979  | 0.088342 | 0.05643  | 0.020328 | 0.66127  | 0.013871 | 0.76496  | 0.120584 | 0.0091   |
| 0.25255  | 0.200657 | 1.25E-05 | 0.073725 | 0.11159  | 0.066333 | 0.15237  | 0.052286 | 0.25946  |
| 0.29232  | 0.028522 | 0.53866  | 0.040603 | 0.38133  | 0.054956 | 0.23589  | 0.143328 | 0.0019   |
| 0.96667  | -0.00708 | 0.87867  | -0.02827 | 0.54225  | -0.04031 | 0.38477  | 0.150956 | 0.00107  |
| 0.95047  | -0.01576 | 0.73402  | 0.015339 | 0.74094  | 0.003888 | 0.93323  | 0.097704 | 0.03479  |
| 5.02E-09 | 0.355293 | 2.43E-15 | 0.294335 | 8.71E-11 | 0.063091 | 0.17348  | 0.191822 | 3.01E-05 |
| 0.00019  | 0.236839 | 2.24E-07 | -0.00315 | 0.94596  | 0.206531 | 6.80E-06 | 0.045865 | 0.32265  |
| 0.63979  | 0.22951  | 5.34E-07 | 0.134155 | 0.00368  | 0.035463 | 0.44454  | 0.085681 | 0.06431  |
| 1.09E-05 | -0.16231 | 0.00043  | -0.05022 | 0.2788   | 0.00041  | 0.99295  | -0.15356 | 0.00087  |
| 9.18E-16 | 0.418935 | 2.85E-21 | 0.087864 | 0.05778  | 0.206368 | 6.92E-06 | 0.224067 | 1.00E-06 |
| 5.68E-09 | 0.162599 | 0.00042  | 0.189525 | 3.75E-05 | -0.03659 | 0.43019  | -0.05354 | 0.24816  |
| 0.39164  | 0.067772 | 0.14365  | 0.001272 | 0.97813  | -0.04895 | 0.29113  | 0.037038 | 0.42456  |
| 0.1965   | -0.1078  | 0.0198   | -0.07932 | 0.08685  | -0.12415 | 0.00723  | -0.01485 | 0.74892  |

|          |          |          |          |          |          |          |          |          |
|----------|----------|----------|----------|----------|----------|----------|----------|----------|
| 0.04685  | 0.136181 | 0.00319  | 0.02959  | 0.52356  | 0.023301 | 0.61549  | -0.04533 | 0.32833  |
| 0.96569  | -0.07085 | 0.12627  | -0.05027 | 0.27832  | -0.0035  | 0.93993  | -0.06238 | 0.17838  |
| 0.00065  | -0.1337  | 0.0038   | -0.10451 | 0.0239   | -0.06655 | 0.15103  | -0.19019 | 3.52E-05 |
| 0.23109  | 0.137879 | 0.00283  | -0.00511 | 0.91238  | -0.02298 | 0.62041  | -0.05092 | 0.27209  |
| 0.41572  | 0.011375 | 0.80633  | 0.096045 | 0.03801  | 0.100367 | 0.03011  | 0.069262 | 0.13503  |
| 0.75957  | 0.058724 | 0.20525  | 0.07897  | 0.08826  | 0.082003 | 0.07667  | 0.048089 | 0.29973  |
| 1.74E-05 | 0.383064 | 9.04E-18 | 0.045972 | 0.32153  | 0.040452 | 0.3831   | 0.053151 | 0.25165  |
| 0.00044  | 0.135875 | 0.00326  | -0.05483 | 0.23699  | -0.07027 | 0.12941  | 0.045775 | 0.32361  |
| 0.07279  | -0.00608 | 0.89577  | 0.030736 | 0.5076   | 0.087511 | 0.0588   | 0.11496  | 0.01292  |
| 0.28694  | -0.10615 | 0.02177  | -0.09379 | 0.04278  | -0.14596 | 0.00156  | -0.09548 | 0.03915  |
| 0.00021  | 0.252289 | 3.26E-08 | 0.029158 | 0.52965  | 0.035084 | 0.44943  | -0.00193 | 0.96683  |
| 0.084    | 0.266285 | 5.07E-09 | -0.02391 | 0.60627  | 0.047892 | 0.30171  | -0.12011 | 0.00937  |
| 0.14813  | 0.154355 | 0.00082  | -0.02943 | 0.52578  | -0.0404  | 0.38374  | -0.21582 | 2.51E-06 |
| 3.75E-05 | -0.11444 | 0.01334  | -0.04732 | 0.3075   | -0.02004 | 0.66581  | -0.04113 | 0.37518  |
| 0.30601  | 0.061458 | 0.1849   | 0.009421 | 0.8391   | -0.0658  | 0.15571  | -0.03266 | 0.48134  |
| 2.23E-07 | 0.381181 | 1.34E-17 | 0.212033 | 3.79E-06 | 0.275174 | 1.47E-09 | 0.089937 | 0.0521   |
| 0.00491  | 0.227185 | 7.00E-07 | 0.052297 | 0.25937  | 0.073066 | 0.11483  | -0.11489 | 0.01298  |
| 0.00017  | -0.2445  | 8.75E-08 | -0.07388 | 0.11082  | -0.16053 | 0.0005   | 0.026268 | 0.57124  |
| 0.00325  | 0.24447  | 8.78E-08 | -0.03788 | 0.41408  | 0.14396  | 0.00182  | -0.12862 | 0.00537  |
| 0.02744  | 0.112787 | 0.01474  | 0.076937 | 0.09679  | 0.044644 | 0.33572  | 0.060217 | 0.19394  |
| 1.17E-09 | 0.182292 | 7.43E-05 | -0.07028 | 0.1294   | -0.04515 | 0.33025  | -0.02996 | 0.5184   |
| 0.12482  | -0.17462 | 0.00015  | 0.132234 | 0.0042   | 0.017053 | 0.71321  | 0.024453 | 0.59813  |
| 4.75E-07 | 0.333593 | 1.33E-13 | 0.355686 | 2.25E-15 | 0.102583 | 0.02664  | 0.091288 | 0.04866  |
| 0.53348  | -0.01042 | 0.82231  | -0.02803 | 0.54575  | -0.05052 | 0.27588  | -0.13569 | 0.0033   |
| 2.56E-05 | 0.211856 | 3.87E-06 | 0.283936 | 4.14E-10 | 0.027378 | 0.55508  | 0.087222 | 0.05964  |
| 0.02242  | 0.333305 | 1.40E-13 | 0.098229 | 0.03382  | 0.015154 | 0.74395  | -0.0686  | 0.13879  |
| 0.39804  | 0.052835 | 0.25449  | 0.312012 | 5.29E-12 | 0.04629  | 0.31819  | 0.023061 | 0.61913  |
| 0.6753   | 0.069343 | 0.13458  | 0.047516 | 0.30553  | 0.169955 | 0.00022  | 0.122457 | 0.00807  |
| 0.01105  | 0.257793 | 1.59E-08 | 0.100249 | 0.03031  | 0.090503 | 0.05063  | 0.013454 | 0.77183  |
| 0.36455  | 0.067634 | 0.14447  | 0.045196 | 0.32977  | 0.078827 | 0.08884  | 0.013865 | 0.76507  |
| 0.09933  | 0.067308 | 0.14642  | -0.0053  | 0.90907  | -0.01989 | 0.66816  | 0.052939 | 0.25356  |
| 0.00671  | 0.148673 | 0.00127  | 0.156164 | 0.00071  | 0.197514 | 1.71E-05 | 0.053736 | 0.24647  |
| 0.01155  | 0.121925 | 0.00835  | 0.0528   | 0.25481  | 0.06349  | 0.17077  | 0.145283 | 0.00164  |
| 0.00477  | 0.138012 | 0.0028   | 0.012394 | 0.78937  | -0.01944 | 0.67522  | 0.036473 | 0.43167  |
| 2.87E-05 | 0.31227  | 5.07E-12 | 0.210712 | 4.37E-06 | 0.043672 | 0.34636  | 0.004578 | 0.9214   |
| 0.00521  | 0.25942  | 1.28E-08 | -0.00206 | 0.96455  | 0.222539 | 1.19E-06 | 0.017438 | 0.70702  |
| 0.00763  | -0.10291 | 0.02617  | 0.006519 | 0.88826  | -0.10597 | 0.02201  | -0.03551 | 0.44388  |
| 0.38618  | 0.053477 | 0.24876  | 0.053837 | 0.24558  | 0.048599 | 0.29462  | 0.170684 | 0.00021  |
| 4.74E-08 | 0.177606 | 0.00011  | 0.079908 | 0.08453  | 0.060283 | 0.19346  | 0.139716 | 0.00248  |
| 0.81869  | 0.140664 | 0.00231  | 0.062315 | 0.17884  | 0.072485 | 0.11775  | 0.109423 | 0.01801  |
| 0.06579  | 0.265968 | 5.29E-09 | 0.083968 | 0.06985  | 0.175425 | 0.00014  | -0.04719 | 0.30882  |
| 0.00239  | 0.239199 | 1.68E-07 | -0.01789 | 0.6998   | -0.05049 | 0.27623  | -0.10246 | 0.02682  |
| 0.07489  | 0.102584 | 0.02664  | 0.061945 | 0.18144  | -0.00622 | 0.89343  | -0.12298 | 0.0078   |
| 2.51E-05 | 0.2614   | 9.82E-09 | 0.105146 | 0.02306  | 0.185562 | 5.47E-05 | 0.096836 | 0.03644  |
| 0.03646  | 0.039682 | 0.39223  | -0.01537 | 0.74047  | 0.040511 | 0.38241  | -0.26888 | 3.55E-09 |



|          |          |          |          |          |          |          |          |          |
|----------|----------|----------|----------|----------|----------|----------|----------|----------|
| 5.68E-06 | 0.225989 | 8.03E-07 | 0.064126 | 0.16651  | 0.048289 | 0.29772  | 0.02196  | 0.63596  |
| 7.54E-12 | 0.313416 | 4.20E-12 | 0.073637 | 0.11201  | 0.043697 | 0.34608  | 0.025346 | 0.58482  |
| 9.39E-07 | 0.185312 | 5.61E-05 | -0.02466 | 0.59504  | 0.036579 | 0.43033  | -0.03964 | 0.39269  |
| 0.01888  | -0.15099 | 0.00106  | -0.02533 | 0.58502  | 0.005279 | 0.90942  | -0.05522 | 0.23361  |
| 0.00057  | 0.217497 | 2.09E-06 | 0.024624 | 0.59558  | 0.032476 | 0.48385  | 0.08943  | 0.05345  |
| 3.62E-05 | -0.26886 | 3.56E-09 | -0.0515  | 0.26673  | -0.11786 | 0.0108   | -0.20025 | 1.30E-05 |
| 1.05E-06 | 0.318411 | 1.83E-12 | 0.098674 | 0.03302  | 0.053449 | 0.249    | -0.01983 | 0.66905  |
| 4.63E-06 | 0.384193 | 7.12E-18 | 0.129052 | 0.00522  | 0.031822 | 0.4927   | 0.040279 | 0.38514  |
| 0.00426  | 0.11291  | 0.01464  | -0.02291 | 0.62137  | 0.058217 | 0.2092   | -0.01206 | 0.79489  |
| 0.81128  | 0.037925 | 0.41354  | -0.09176 | 0.0475   | 0.063624 | 0.16987  | 0.003748 | 0.93562  |
| 0.72756  | 0.027924 | 0.54721  | -0.07988 | 0.08463  | 0.079163 | 0.08748  | -0.09173 | 0.04758  |
| 5.37E-06 | -0.09321 | 0.0441   | 0.091419 | 0.04833  | 0.05759  | 0.21415  | 0.038337 | 0.40849  |
| 0.44444  | 0.155899 | 0.00072  | 0.089928 | 0.05213  | 0.121068 | 0.00882  | -0.06856 | 0.13902  |
| 0.04783  | 0.271007 | 2.64E-09 | -0.0821  | 0.07633  | 0.084108 | 0.06938  | -0.1699  | 0.00023  |
| 0.00037  | 0.235161 | 2.74E-07 | 0.27902  | 8.47E-10 | 0.128041 | 0.00559  | 0.169836 | 0.00023  |
| 0.00017  | -0.11253 | 0.01497  | 0.052278 | 0.25954  | -0.04072 | 0.38001  | -0.06848 | 0.13949  |
| 0.02388  | 0.01976  | 0.67018  | 0.045741 | 0.32396  | -0.0574  | 0.21571  | -0.06525 | 0.15922  |
| 0.0759   | 0.178042 | 0.00011  | 0.140095 | 0.00241  | 0.107876 | 0.01971  | -0.10023 | 0.03033  |
| 0.07198  | 0.135029 | 0.00346  | 0.116641 | 0.01165  | -0.00544 | 0.90674  | -0.00625 | 0.89291  |
| 2.57E-05 | 0.307227 | 1.15E-11 | 0.17065  | 0.00021  | 0.131846 | 0.00432  | 0.074089 | 0.10983  |
| 0.59423  | 0.120777 | 0.00899  | -0.02597 | 0.57557  | 0.1066   | 0.02122  | -0.00542 | 0.90692  |
| 0.00676  | -0.09602 | 0.03805  | 0.006101 | 0.89538  | -0.05962 | 0.19839  | -0.02999 | 0.51791  |
| 0.00151  | 0.11245  | 0.01505  | 0.019403 | 0.67578  | -0.03343 | 0.47116  | -0.03654 | 0.4308   |
| 0.22655  | 0.163836 | 0.00038  | 0.370515 | 1.21E-16 | 0.139437 | 0.00253  | -0.08321 | 0.07241  |
| 0.98579  | 0.138912 | 0.00263  | -0.04089 | 0.37801  | -0.03808 | 0.41167  | -0.203   | 9.81E-06 |
| 0.00166  | -0.06245 | 0.17788  | -0.08266 | 0.07432  | 0.01232  | 0.79059  | -0.08132 | 0.07916  |
| 0.0246   | -0.01695 | 0.71479  | 0.062823 | 0.17532  | 0.076577 | 0.09837  | -0.01582 | 0.7331   |
| 0.50631  | 0.184746 | 5.91E-05 | 0.229914 | 5.10E-07 | 0.101276 | 0.02864  | 0.062088 | 0.18043  |
| 0.47486  | 0.05746  | 0.21519  | 0.136858 | 0.00304  | 0.064937 | 0.16121  | 0.015368 | 0.74047  |
| 4.27E-05 | 0.27092  | 2.67E-09 | 0.050136 | 0.2796   | 0.082009 | 0.07665  | 0.202614 | 1.02E-05 |
| 7.11E-07 | 0.166922 | 0.00029  | -0.05447 | 0.24009  | -0.02181 | 0.63824  | 0.232173 | 3.91E-07 |
| 0.00034  | 0.194944 | 2.21E-05 | 0.006858 | 0.88249  | 0.061996 | 0.18108  | -0.01945 | 0.67512  |
| 0.00599  | 0.115115 | 0.0128   | 0.030352 | 0.51292  | 0.12564  | 0.00656  | 0.012131 | 0.79374  |
| 1.35E-07 | 0.292751 | 1.11E-10 | 0.153932 | 0.00085  | 0.136498 | 0.00312  | 0.035813 | 0.44005  |
| 9.76E-06 | -0.12016 | 0.00935  | 0.01038  | 0.82298  | 0.020939 | 0.65175  | -0.13547 | 0.00335  |
| 0.79236  | 0.011912 | 0.79738  | 0.056778 | 0.22069  | 0.015766 | 0.734    | -0.12502 | 0.00683  |
| 0.00119  | 0.15229  | 0.00096  | -0.10117 | 0.02881  | 0.046428 | 0.31675  | 0.183386 | 6.71E-05 |
| 0.00078  | 0.072365 | 0.11836  | -0.00591 | 0.89867  | 0.081258 | 0.0794   | 0.137596 | 0.00289  |
| 8.49E-10 | 0.38798  | 3.17E-18 | 0.085742 | 0.06412  | 0.083166 | 0.07257  | 0.042846 | 0.35557  |
| 0.00067  | 0.174938 | 0.00014  | 0.109309 | 0.01813  | 0.089835 | 0.05237  | 0.060578 | 0.19128  |
| 0.00392  | 0.251074 | 3.81E-08 | 0.088073 | 0.05719  | 0.103306 | 0.02559  | 0.18385  | 6.43E-05 |
| 3.05E-06 | 0.425643 | 5.65E-22 | 0.098692 | 0.03299  | 0.190922 | 3.28E-05 | 0.154989 | 0.00078  |
| 7.62E-06 | -0.21488 | 2.79E-06 | -0.05504 | 0.23514  | -0.07256 | 0.11738  | -0.15735 | 0.00064  |
| 0.80654  | 0.117537 | 0.01102  | 0.021837 | 0.63786  | 0.114961 | 0.01292  | -0.06025 | 0.19374  |
| 0.63184  | 0.044179 | 0.34078  | 0.036966 | 0.42547  | 0.034835 | 0.45265  | -0.08077 | 0.08123  |

|          |          |          |          |          |          |          |          |          |
|----------|----------|----------|----------|----------|----------|----------|----------|----------|
| 0.00345  | -0.09256 | 0.04558  | -0.02099 | 0.65089  | -0.11041 | 0.01699  | 0.01105  | 0.81176  |
| 0.14719  | 0.157258 | 0.00065  | 0.08354  | 0.07129  | 0.10601  | 0.02195  | 0.015032 | 0.74595  |
| 0.24798  | -0.03214 | 0.48843  | -0.01629 | 0.72547  | -0.00419 | 0.92811  | -0.06237 | 0.17842  |
| 5.31E-08 | 0.20616  | 7.07E-06 | 0.09384  | 0.04267  | 0.09522  | 0.0397   | 0.120785 | 0.00898  |
| 0.00307  | -0.05979 | 0.19713  | -0.00215 | 0.96312  | 0.004146 | 0.9288   | -0.07088 | 0.12615  |
| 0.03682  | 0.185967 | 5.27E-05 | 0.121069 | 0.00882  | 0.129213 | 0.00516  | -0.0327  | 0.48078  |
| 2.13E-05 | 0.277901 | 9.95E-10 | 0.021654 | 0.64067  | 0.060846 | 0.18932  | 0.039156 | 0.39854  |
| 1.16E-05 | 0.268365 | 3.81E-09 | 0.065725 | 0.15617  | 0.106104 | 0.02183  | 0.085782 | 0.06399  |
| 0.00565  | 0.175711 | 0.00014  | 0.05557  | 0.23069  | 0.107348 | 0.02032  | 0.042584 | 0.35851  |
| 0.42872  | 0.183512 | 6.63E-05 | -0.08835 | 0.0564   | 0.057064 | 0.21837  | -0.1916  | 3.07E-05 |
| 0.00046  | 0.214585 | 2.88E-06 | 0.121974 | 0.00832  | 0.091486 | 0.04817  | 0.121576 | 0.00854  |
| 0.095    | -0.15682 | 0.00067  | -0.09908 | 0.0323   | -0.05411 | 0.24316  | 0.02835  | 0.54111  |
| 0.91097  | 0.056497 | 0.22299  | 0.259471 | 1.27E-08 | 0.100911 | 0.02923  | 0.01375  | 0.76695  |
| 0.99227  | 0.057418 | 0.21552  | 0.042117 | 0.36382  | 0.036657 | 0.42935  | 0.038025 | 0.41232  |
| 0.02749  | -0.05841 | 0.20772  | 0.000952 | 0.98364  | 0.064165 | 0.16626  | -0.006   | 0.89718  |
| 0.69908  | 0.006379 | 0.89065  | 0.053641 | 0.24731  | 0.274167 | 1.69E-09 | 0.074956 | 0.10572  |
| 0.00021  | 0.253684 | 2.72E-08 | -0.05682 | 0.22038  | 0.077978 | 0.09234  | 0.003752 | 0.93555  |
| 4.50E-09 | 0.280434 | 6.91E-10 | -0.08956 | 0.05309  | -0.04424 | 0.34008  | 0.058079 | 0.21028  |
| 0.69823  | 0.000774 | 0.98668  | 0.057483 | 0.21501  | 0.215203 | 2.69E-06 | 0.044471 | 0.33759  |
| 0.35082  | 0.186612 | 4.96E-05 | 0.11077  | 0.01663  | 0.102831 | 0.02627  | 0.019877 | 0.66833  |
| 0.00515  | 0.289392 | 1.84E-10 | -0.04602 | 0.32099  | -0.025   | 0.59002  | 0.068018 | 0.1422   |
| 0.02595  | -0.11732 | 0.01117  | 0.005597 | 0.90398  | -0.04937 | 0.28704  | -0.14333 | 0.0019   |
| 2.44E-12 | -0.36051 | 8.86E-16 | -0.00455 | 0.92189  | -0.04259 | 0.35841  | 0.007003 | 0.88003  |
| 1.46E-08 | -0.27135 | 2.52E-09 | 0.074566 | 0.10755  | 0.062549 | 0.17721  | -0.00282 | 0.95145  |
| 0.46431  | 0.03618  | 0.43538  | -0.0087  | 0.85131  | -0.05721 | 0.21717  | -0.03131 | 0.49972  |
| 0.12769  | -0.05436 | 0.24102  | 0.085762 | 0.06406  | 0.0363   | 0.43386  | 0.082633 | 0.07443  |
| 0.00626  | -0.25807 | 1.53E-08 | -0.09177 | 0.04749  | -0.11124 | 0.01618  | 0.091707 | 0.04763  |
| 1.84E-05 | -0.1042  | 0.02434  | 0.034031 | 0.46316  | -0.06893 | 0.13692  | -0.2081  | 5.76E-06 |
| 5.72E-07 | -0.14829 | 0.00131  | 0.081632 | 0.07802  | -0.02476 | 0.59356  | -0.04967 | 0.28406  |
| 0.02517  | -0.00955 | 0.83689  | 0.062497 | 0.17757  | -0.03251 | 0.48342  | -0.10505 | 0.02318  |
| 0.01312  | -0.12581 | 0.00648  | -0.00364 | 0.93738  | -0.02882 | 0.53444  | 0.015873 | 0.73226  |
| 0.85902  | -0.05294 | 0.25352  | 0.041539 | 0.37044  | -0.01475 | 0.75059  | 0.16845  | 0.00026  |
| 1.02E-06 | -0.24241 | 1.13E-07 | -0.035   | 0.45046  | -0.08732 | 0.05935  | 0.047817 | 0.30247  |
| 2.62E-08 | -0.22362 | 1.05E-06 | 0.12153  | 0.00856  | -0.10688 | 0.02088  | -0.01694 | 0.71499  |
| 5.73E-06 | -0.24139 | 1.29E-07 | 0.053762 | 0.24624  | -0.0989  | 0.03262  | -0.13296 | 0.004    |
| 9.72E-10 | -0.32028 | 1.34E-12 | 0.085324 | 0.06543  | 0.047768 | 0.30297  | 0.153808 | 0.00085  |
| 1.07E-09 | -0.32688 | 4.33E-13 | 0.113483 | 0.01414  | -0.10991 | 0.0175   | -0.09165 | 0.04777  |
| 2.23E-09 | -0.32985 | 2.58E-13 | -0.03943 | 0.3952   | -0.08523 | 0.06572  | 0.043648 | 0.34662  |
| 0.07878  | 0.115694 | 0.01235  | 0.158706 | 0.00058  | 0.100599 | 0.02973  | 0.066418 | 0.15185  |
| 0.14913  | -0.00622 | 0.89342  | 0.071484 | 0.12293  | 0.038612 | 0.40514  | 0.131066 | 0.00455  |
| 0.20178  | -0.05959 | 0.19864  | -0.00022 | 0.99629  | -0.04905 | 0.29012  | 0.072311 | 0.11864  |
| 0.00375  | -0.0966  | 0.0369   | 0.061003 | 0.18818  | -0.00416 | 0.92851  | 0.066574 | 0.15089  |
| 0.0609   | -0.03883 | 0.40252  | 0.143422 | 0.00189  | -0.00867 | 0.85181  | -0.03627 | 0.43418  |
| 0.00223  | -0.14403 | 0.00181  | 0.099554 | 0.03148  | -0.00954 | 0.83711  | 0.075853 | 0.1016   |
| 0.00042  | -0.25801 | 1.54E-08 | -0.02681 | 0.56336  | -0.02957 | 0.52378  | 0.034329 | 0.45925  |

|          |          |          |          |          |          |         |          |          |
|----------|----------|----------|----------|----------|----------|---------|----------|----------|
| 1.45E-06 | -0.22827 | 6.17E-07 | -0.00523 | 0.91031  | -0.00385 | 0.9339  | -0.0958  | 0.0385   |
| 3.71E-07 | -0.27036 | 2.89E-09 | -0.08175 | 0.07759  | -0.07044 | 0.12852 | -0.04715 | 0.30924  |
| 0.34694  | -0.06768 | 0.14419  | 0.024318 | 0.60015  | -0.01953 | 0.67376 | 0.026874 | 0.56238  |
| 0.0931   | -0.09636 | 0.03738  | -0.04811 | 0.29955  | -0.04646 | 0.31644 | 0.043625 | 0.34688  |
| 2.36E-07 | -0.24378 | 9.57E-08 | -0.02666 | 0.56551  | -0.03144 | 0.4979  | 0.018731 | 0.68641  |
| 0.97081  | -0.05581 | 0.22868  | 0.115124 | 0.01279  | -0.05015 | 0.27944 | 0.136568 | 0.0031   |
| 0.00159  | -0.11485 | 0.01301  | 0.057312 | 0.21637  | 0.06862  | 0.1387  | 0.068957 | 0.13676  |
| 0.00043  | -0.2161  | 2.44E-06 | -0.06104 | 0.18791  | -0.08538 | 0.06526 | 0.002402 | 0.95871  |
| 0.02852  | -0.1417  | 0.00214  | 0.027578 | 0.55219  | -0.0149  | 0.74812 | 0.025154 | 0.58767  |
| 0.00011  | -0.21936 | 1.70E-06 | -0.00284 | 0.95127  | -0.07798 | 0.09235 | 0.006804 | 0.88341  |
| 4.53E-09 | -0.30584 | 1.44E-11 | -0.02158 | 0.64187  | -0.08093 | 0.08064 | -0.01057 | 0.81974  |
| 0.25725  | 0.039424 | 0.39532  | 0.036116 | 0.43619  | 0.003887 | 0.93323 | 0.194517 | 2.31E-05 |
| 8.72E-09 | -0.22935 | 5.45E-07 | -0.01742 | 0.70724  | -0.03291 | 0.47808 | 0.10125  | 0.02868  |
| 0.91208  | 0.015168 | 0.74372  | 0.029854 | 0.51986  | -0.00995 | 0.83016 | 0.168786 | 0.00025  |
| 4.65E-11 | -0.36241 | 6.10E-16 | -0.07481 | 0.10638  | -0.09766 | 0.03486 | -0.00798 | 0.86348  |
| 6.60E-08 | -0.29187 | 1.27E-10 | -0.05316 | 0.25156  | -0.09488 | 0.04041 | -0.03881 | 0.4027   |
| 0.37903  | -0.07339 | 0.11322  | -0.00412 | 0.92917  | -0.03413 | 0.46187 | 0.047802 | 0.30262  |
| 0.00121  | -0.16574 | 0.00032  | -0.00731 | 0.87485  | -0.06299 | 0.17419 | -0.01049 | 0.82121  |
| 0.04029  | -0.10729 | 0.0204   | -0.03077 | 0.50709  | -0.04205 | 0.36453 | 0.069979 | 0.13103  |
| 0.00022  | -0.20192 | 1.10E-05 | 0.006937 | 0.88115  | -0.05236 | 0.2588  | 0.036607 | 0.42997  |
| 8.74E-09 | -0.29002 | 1.68E-10 | -0.07889 | 0.0886   | -0.08537 | 0.0653  | -0.01816 | 0.69549  |
| 5.21E-05 | -0.22023 | 1.54E-06 | 0.082473 | 0.07499  | -0.04313 | 0.35234 | 0.059705 | 0.19777  |
| 3.29E-15 | -0.3541  | 3.06E-15 | -0.04437 | 0.33871  | -0.09119 | 0.04891 | -0.035   | 0.45046  |
| 7.89E-05 | -0.19392 | 2.45E-05 | 0.408872 | 3.02E-20 | 0.006218 | 0.89339 | -0.03347 | 0.47056  |
| 0.00069  | -0.17897 | 0.0001   | -0.00477 | 0.91809  | -0.03494 | 0.45132 | 0.014154 | 0.76032  |
| 8.23E-07 | -0.22075 | 1.45E-06 | 0.239287 | 1.66E-07 | 0.0199   | 0.66797 | -0.08616 | 0.06282  |
| 0.02135  | -0.13639 | 0.00314  | -0.02499 | 0.59014  | -0.06169 | 0.18325 | -0.04311 | 0.3526   |
| 0.00017  | -0.19987 | 1.35E-05 | -0.00623 | 0.89317  | -0.06199 | 0.18111 | -0.04512 | 0.33056  |
| 0.29649  | -0.1134  | 0.01421  | -0.01759 | 0.70451  | -0.04989 | 0.282   | 0.084959 | 0.0666   |
| 0.15439  | 0.140536 | 0.00233  | 0.106187 | 0.02173  | 0.046602 | 0.31494 | 0.105058 | 0.02318  |
| 0.00302  | -0.12516 | 0.00677  | 0.119972 | 0.00946  | 0.122706 | 0.00794 | 0.094226 | 0.04182  |
| 5.34E-12 | -0.33988 | 4.32E-14 | 0.055258 | 0.23333  | -0.07092 | 0.1259  | -0.03404 | 0.46306  |
| 2.15E-05 | -0.15407 | 0.00084  | 0.124523 | 0.00705  | -0.0442  | 0.34058 | -0.12241 | 0.00809  |
| 0.92813  | -0.02066 | 0.65615  | 0.015906 | 0.73172  | -0.03292 | 0.47793 | 0.010709 | 0.81746  |
| 8.68E-11 | -0.30646 | 1.30E-11 | -0.04305 | 0.35327  | -0.09114 | 0.04902 | -0.08889 | 0.05491  |
| 0.00116  | -0.18628 | 5.11E-05 | -0.00886 | 0.84854  | -0.0456  | 0.32544 | 0.079637 | 0.0856   |
| 4.63E-06 | -0.26856 | 3.71E-09 | -0.05039 | 0.27717  | -0.103   | 0.02602 | -0.04853 | 0.29534  |
| 0.72182  | -0.02385 | 0.60713  | -0.01934 | 0.6768   | -0.02865 | 0.53686 | 0.037876 | 0.41416  |
| 0.57903  | -0.00775 | 0.86733  | -0.01628 | 0.72566  | -0.04059 | 0.38146 | 0.074018 | 0.11017  |
| 1.59E-09 | -0.30204 | 2.63E-11 | -0.03964 | 0.39276  | -0.061   | 0.18818 | -0.02374 | 0.60885  |
| 0.01559  | -0.10134 | 0.02854  | 0.393565 | 9.44E-19 | -0.02025 | 0.66252 | -0.0026  | 0.95536  |
| 0.11695  | -0.09178 | 0.04746  | -0.0206  | 0.65704  | -0.04359 | 0.34721 | 0.103933 | 0.0247   |
| 0.00177  | -0.15264 | 0.00094  | 0.222133 | 1.25E-06 | -0.01136 | 0.80655 | 0.121391 | 0.00864  |
| 0.57475  | 0.025188 | 0.58717  | 0.012761 | 0.78328  | -0.0264  | 0.56927 | 0.189504 | 3.76E-05 |
| 1.53E-07 | -0.29808 | 4.89E-11 | 0.058983 | 0.20325  | -0.01478 | 0.75012 | -0.01945 | 0.67504  |

|          |          |          |          |          |          |         |          |          |
|----------|----------|----------|----------|----------|----------|---------|----------|----------|
| 0.00481  | 0.093651 | 0.04309  | -0.03273 | 0.48049  | -0.11307 | 0.01449 | 0.0688   | 0.13766  |
| 0.00011  | -0.25872 | 1.40E-08 | 0.072527 | 0.11754  | -0.04924 | 0.28826 | 0.058352 | 0.20814  |
| 2.12E-05 | -0.29901 | 4.23E-11 | -0.02762 | 0.55155  | -0.05835 | 0.20815 | -0.02184 | 0.63775  |
| 0.12506  | 0.020462 | 0.65918  | 0.122735 | 0.00792  | 0.069449 | 0.13398 | 0.161743 | 0.00045  |
| 0.74769  | 0.007094 | 0.87849  | 0.032677 | 0.48115  | 0.089146 | 0.05421 | 0.010133 | 0.82712  |
| 0.00058  | -0.20845 | 5.56E-06 | 0.180646 | 8.65E-05 | -0.09099 | 0.04941 | -0.06724 | 0.1468   |
| 6.01E-08 | -0.25734 | 1.68E-08 | 0.104058 | 0.02453  | -0.00648 | 0.88894 | 0.070935 | 0.12583  |
| 7.61E-05 | -0.14888 | 0.00125  | 0.011325 | 0.80716  | 0.030485 | 0.51107 | -0.01067 | 0.81817  |
| 0.08575  | -0.13529 | 0.0034   | -0.01571 | 0.73484  | -0.06462 | 0.16329 | -0.01051 | 0.82087  |
| 0.00026  | -0.30289 | 2.30E-11 | 0.006591 | 0.88704  | -0.07242 | 0.11808 | 0.026356 | 0.56994  |
| 0.00014  | -0.18591 | 5.30E-05 | 0.070549 | 0.12791  | 0.054166 | 0.2427  | 0.029194 | 0.52913  |
| 0.05019  | -0.09108 | 0.04917  | 0.061868 | 0.18198  | 0.034141 | 0.46172 | 0.087426 | 0.05905  |
| 0.4208   | -0.07223 | 0.11908  | 0.029044 | 0.53126  | -0.0024  | 0.95877 | 0.084499 | 0.06809  |
| 0.45162  | -0.05632 | 0.22449  | 0.065657 | 0.1566   | 0.054832 | 0.23695 | 0.091625 | 0.04783  |
| 0.25334  | -0.05989 | 0.19638  | 0.060007 | 0.19551  | 0.007442 | 0.87256 | 0.108812 | 0.01867  |
| 0.12096  | -0.09646 | 0.03718  | 0.003676 | 0.93685  | -0.06627 | 0.15278 | -0.05324 | 0.25085  |
| 0.03495  | -0.11911 | 0.00999  | 0.033791 | 0.46632  | 0.015328 | 0.74111 | 0.044172 | 0.34086  |
| 3.95E-06 | -0.12054 | 0.00912  | -0.02163 | 0.64098  | -0.01923 | 0.67848 | 0.056321 | 0.22444  |
| 0.00016  | -0.19154 | 3.09E-05 | 0.056364 | 0.22408  | -0.01754 | 0.70541 | 0.126128 | 0.00635  |
| 0.00557  | 0.067645 | 0.14441  | -0.02747 | 0.55377  | -0.0278  | 0.54901 | 0.209078 | 5.20E-06 |
| 0.00575  | -0.12029 | 0.00927  | 0.018587 | 0.6887   | -0.06191 | 0.1817  | 0.037916 | 0.41366  |
| 6.84E-09 | -0.32023 | 1.35E-12 | 0.140514 | 0.00234  | -0.07552 | 0.10312 | -0.05285 | 0.25438  |
| 6.43E-08 | -0.23375 | 3.24E-07 | 0.010414 | 0.82241  | -0.04173 | 0.36825 | -0.01483 | 0.74925  |
| 8.42E-05 | -0.22149 | 1.34E-06 | -0.06281 | 0.17541  | -0.06498 | 0.16096 | -0.01137 | 0.80649  |
| 0.00055  | -0.14572 | 0.00159  | -0.00021 | 0.99645  | -0.04148 | 0.37114 | 0.046641 | 0.31453  |
| 0.05593  | 0.057836 | 0.2122   | 0.041714 | 0.36842  | 0.002776 | 0.9523  | 0.115146 | 0.01278  |
| 0.00868  | 0.126277 | 0.00629  | 0.030749 | 0.50741  | 0.004601 | 0.92101 | 0.225421 | 8.57E-07 |
| 8.48E-08 | -0.24598 | 7.27E-08 | -0.00507 | 0.91299  | -0.05251 | 0.25741 | -0.0341  | 0.46229  |
| 8.85E-10 | -0.3523  | 4.30E-15 | -0.00305 | 0.94761  | 0.006786 | 0.88373 | -0.02384 | 0.60728  |
| 6.39E-06 | -0.21196 | 3.82E-06 | 0.086649 | 0.06134  | -0.10566 | 0.0224  | 0.038664 | 0.4045   |
| 0.00603  | -0.14468 | 0.00172  | 0.01668  | 0.7192   | -0.03246 | 0.48414 | 0.017608 | 0.70429  |
| 0.02633  | -0.18393 | 6.38E-05 | -0.06546 | 0.15788  | -0.08474 | 0.06731 | -0.01225 | 0.79173  |
| 0.00235  | -0.19591 | 2.01E-05 | 0.006259 | 0.89269  | -0.035   | 0.45049 | 0.039452 | 0.39498  |
| 0.00043  | -0.23436 | 3.01E-07 | -0.01368 | 0.76806  | -0.05466 | 0.23844 | -0.04323 | 0.35128  |
| 0.36248  | -0.06485 | 0.16177  | -0.00035 | 0.99405  | -0.0452  | 0.3297  | -0.05333 | 0.25008  |
| 6.47E-11 | -0.33176 | 1.84E-13 | -0.02375 | 0.60865  | -0.07976 | 0.08511 | -0.07106 | 0.12517  |
| 6.48E-19 | -0.39535 | 6.38E-19 | -0.06385 | 0.16834  | -0.04348 | 0.34848 | -0.02534 | 0.58492  |
| 0.00548  | -0.0893  | 0.05381  | 0.021927 | 0.63648  | -0.07952 | 0.08606 | -0.01364 | 0.7688   |
| 0.14275  | -0.10898 | 0.01849  | 0.381243 | 1.33E-17 | -0.02808 | 0.54492 | 0.016336 | 0.72476  |
| 0.43669  | 0.013863 | 0.7651   | 0.0055   | 0.90563  | -0.01238 | 0.78957 | 0.168843 | 0.00025  |
| 0.76582  | -0.07236 | 0.11841  | -0.01191 | 0.79746  | -0.0204  | 0.66007 | 0.07676  | 0.09756  |
| 0.24837  | -0.09796 | 0.03432  | -0.01789 | 0.69975  | -0.05089 | 0.27242 | 0.072229 | 0.11906  |
| 0.00168  | -0.1332  | 0.00393  | 0.021411 | 0.64444  | 0.040091 | 0.38736 | 0.018558 | 0.68915  |
| 9.48E-05 | -0.19657 | 1.88E-05 | -0.02152 | 0.64272  | -0.05747 | 0.21509 | 0.04741  | 0.30661  |
| 0.17568  | 0.13227  | 0.00419  | 0.053307 | 0.25026  | -0.05072 | 0.274   | 0.133233 | 0.00392  |

|          |          |          |          |          |          |         |          |          |
|----------|----------|----------|----------|----------|----------|---------|----------|----------|
| 6.59E-05 | -0.20875 | 5.38E-06 | 0.006904 | 0.88171  | -0.04718 | 0.30895 | 0.056655 | 0.2217   |
| 2.45E-05 | -0.20387 | 8.97E-06 | 0.005969 | 0.89764  | -0.0729  | 0.11564 | -0.05577 | 0.22903  |
| 1.87E-05 | -0.16814 | 0.00026  | -0.01981 | 0.66944  | -0.01146 | 0.80498 | -0.03541 | 0.44521  |
| 0.18802  | -0.08488 | 0.06684  | 0.044525 | 0.337    | -0.01435 | 0.75703 | 0.177425 | 0.00012  |
| 0.03474  | -0.11524 | 0.0127   | 0.002315 | 0.9602   | -0.02979 | 0.52072 | 0.103493 | 0.02532  |
| 0.00516  | -0.15546 | 0.00075  | -0.07992 | 0.08448  | -0.11429 | 0.01346 | -0.04023 | 0.3857   |
| 0.00026  | -0.20892 | 5.29E-06 | 0.009965 | 0.82994  | -0.08158 | 0.07821 | 0.031562 | 0.49625  |
| 0.05927  | -0.12714 | 0.00594  | 0.00972  | 0.83407  | -0.0242  | 0.60186 | 0.099685 | 0.03125  |
| 0.3195   | -0.06561 | 0.15691  | 0.043183 | 0.35179  | -0.01791 | 0.69952 | 0.062625 | 0.17668  |
| 8.79E-08 | -0.31866 | 1.76E-12 | -0.06979 | 0.13208  | -0.07626 | 0.09978 | 0.158115 | 0.00061  |
| 0.78205  | -0.10233 | 0.02702  | 0.026415 | 0.56909  | -0.05603 | 0.22684 | 0.044089 | 0.34176  |
| 1.48E-05 | -0.22477 | 9.24E-07 | -0.03103 | 0.50357  | -0.06363 | 0.16985 | 0.063062 | 0.17368  |
| 0.21437  | 0.043741 | 0.3456   | 0.022953 | 0.62078  | -0.01857 | 0.6889  | 0.12456  | 0.00704  |
| 0.91372  | -0.08716 | 0.05983  | 0.186937 | 4.81E-05 | 0.071659 | 0.12201 | -0.03667 | 0.42925  |
| 0.42038  | 0.019486 | 0.67448  | 0.349828 | 6.86E-15 | 0.063779 | 0.16883 | -0.00755 | 0.8707   |
| 0.09038  | -0.10204 | 0.02745  | -0.0277  | 0.5504   | -0.05092 | 0.27218 | 0.007948 | 0.86398  |
| 0.0156   | -0.18532 | 5.60E-05 | 0.001995 | 0.96571  | -0.05474 | 0.2377  | 0.018432 | 0.69116  |
| 0.6477   | -0.00267 | 0.95407  | -0.0092  | 0.8429   | -0.00387 | 0.93359 | 0.024084 | 0.60366  |
| 0.82692  | -0.00828 | 0.85829  | 0.027515 | 0.5531   | -0.01618 | 0.7273  | 0.108413 | 0.01911  |
| 0.37422  | 0.023674 | 0.60984  | 0.025164 | 0.58753  | 0.023654 | 0.61014 | 0.104347 | 0.02413  |
| 0.02323  | 0.115923 | 0.01218  | 0.032607 | 0.48209  | 0.017836 | 0.70066 | 0.039714 | 0.39185  |
| 0.00086  | -0.14625 | 0.00153  | -0.02208 | 0.63419  | -0.00431 | 0.92602 | -0.06604 | 0.15421  |
| 0.12839  | -0.12307 | 0.00775  | 0.006939 | 0.88112  | -0.01679 | 0.71746 | 0.061888 | 0.18184  |
| 0.78937  | 0.029032 | 0.53142  | 0.189375 | 3.81E-05 | 0.124238 | 0.00719 | 0.202201 | 1.07E-05 |
| 0.63695  | -0.02509 | 0.58861  | 0.073106 | 0.11463  | 0.020294 | 0.66181 | 0.107658 | 0.01996  |
| 1.28E-05 | -0.21297 | 3.43E-06 | -0.04725 | 0.30824  | -0.10999 | 0.01742 | 0.018397 | 0.69171  |
| 0.68943  | -0.02851 | 0.53878  | 0.206433 | 6.87E-06 | -0.05856 | 0.20651 | 0.017059 | 0.7131   |
| 1.17E-05 | -0.2349  | 2.83E-07 | -0.01354 | 0.77038  | -0.00465 | 0.92017 | 0.05135  | 0.2681   |
| 0.00013  | -0.17872 | 0.0001   | 0.073558 | 0.1124   | 0.028709 | 0.536   | 0.055335 | 0.23267  |
| 0.22477  | 0.041274 | 0.37351  | 0.227065 | 7.10E-07 | 0.031206 | 0.50112 | 0.106287 | 0.0216   |
| 0.0001   | -0.23542 | 2.66E-07 | 0.077312 | 0.09517  | -0.0498  | 0.28288 | -0.0397  | 0.39207  |
| 1.63E-05 | -0.17504 | 0.00014  | 0.077869 | 0.0928   | 0.015417 | 0.73968 | 0.066979 | 0.14841  |
| 0.00275  | -0.101   | 0.02909  | -0.0137  | 0.76778  | 0.033367 | 0.47193 | -0.0908  | 0.04987  |
| 0.00252  | -0.21066 | 4.40E-06 | 0.09736  | 0.03544  | -0.05261 | 0.25653 | -0.01914 | 0.67994  |
| 0.20812  | -0.07413 | 0.10964  | 0.024271 | 0.60085  | -0.0046  | 0.92102 | 0.054053 | 0.24368  |
| 4.38E-06 | -0.19231 | 2.87E-05 | 0.023225 | 0.61664  | -0.05197 | 0.26232 | 0.072368 | 0.11835  |
| 0.09203  | 0.034169 | 0.46134  | 0.173044 | 0.00017  | -0.0248  | 0.59289 | 0.051475 | 0.26694  |
| 7.08E-07 | -0.27466 | 1.58E-09 | -0.01864 | 0.68787  | -0.0577  | 0.21331 | 0.063647 | 0.16971  |
| 0.0466   | -0.0949  | 0.04036  | 0.045261 | 0.32908  | 0.030605 | 0.5094  | 0.03915  | 0.39861  |
| 1.04E-08 | -0.29252 | 1.15E-10 | -0.00481 | 0.91745  | 0.001965 | 0.96622 | 0.007772 | 0.86697  |
| 2.55E-07 | -0.26541 | 5.71E-09 | -0.0509  | 0.27228  | -0.07731 | 0.0952  | -0.04915 | 0.28916  |
| 0.10348  | -0.09726 | 0.03562  | 0.027191 | 0.55778  | -0.02971 | 0.52188 | 0.095931 | 0.03824  |
| 0.02199  | -0.10651 | 0.02133  | 0.095744 | 0.03862  | -0.01473 | 0.75088 | 0.067607 | 0.14464  |
| 0.03488  | -0.10608 | 0.02187  | 0.039657 | 0.39254  | -0.02118 | 0.64805 | 0.035694 | 0.44158  |
| 4.90E-06 | -0.18935 | 3.82E-05 | 0.072146 | 0.11948  | 0.021857 | 0.63755 | -0.04539 | 0.32772  |

|          |          |          |          |          |          |         |          |          |
|----------|----------|----------|----------|----------|----------|---------|----------|----------|
| 0.94591  | -0.01611 | 0.72842  | 0.147705 | 0.00137  | -0.00843 | 0.85576 | 0.046332 | 0.31774  |
| 0.72677  | 0.002461 | 0.9577   | 0.192989 | 2.68E-05 | -0.00982 | 0.83233 | 0.113304 | 0.01429  |
| 0.00174  | -0.1667  | 0.0003   | 0.263791 | 7.12E-09 | -0.04642 | 0.31683 | 0.003526 | 0.93943  |
| 0.7745   | 0.02466  | 0.59504  | 0.084567 | 0.06787  | 0.031315 | 0.49963 | 0.152984 | 0.00091  |
| 8.35E-11 | -0.37528 | 4.58E-17 | -0.01214 | 0.79358  | -0.17601 | 0.00013 | -0.08251 | 0.07485  |
| 4.92E-05 | -0.23779 | 2.00E-07 | 0.045574 | 0.32574  | -0.05969 | 0.19787 | -0.00326 | 0.94407  |
| 0.32535  | 0.006409 | 0.89014  | 0.088501 | 0.05599  | 0.009206 | 0.84272 | 0.181123 | 8.28E-05 |
| 0.00296  | -0.16352 | 0.00039  | -0.02779 | 0.54918  | -0.04722 | 0.3086  | 0.063976 | 0.16751  |
| 0.0002   | -0.17097 | 0.00021  | 0.080582 | 0.08194  | 0.004388 | 0.92466 | 0.064533 | 0.16383  |
| 0.00531  | -0.16617 | 0.00031  | -0.03497 | 0.45091  | -0.06247 | 0.17775 | -0.03202 | 0.49008  |
| 2.52E-10 | -0.31124 | 6.00E-12 | 0.157451 | 0.00064  | -0.00533 | 0.9085  | 0.041829 | 0.3671   |
| 0.00012  | -0.21997 | 1.59E-06 | 0.29502  | 7.84E-11 | -0.03989 | 0.38972 | 0.069717 | 0.13248  |
| 0.90014  | -0.03105 | 0.50328  | 0.02234  | 0.63014  | 0.000881 | 0.98486 | 0.064709 | 0.16269  |
| 0.00214  | -0.02533 | 0.58509  | 0.047787 | 0.30277  | 0.097741 | 0.03472 | -0.11391 | 0.01378  |
| 0.00232  | -0.18543 | 5.54E-05 | 0.077358 | 0.09497  | -0.05125 | 0.26901 | -0.05678 | 0.22069  |
| 3.70E-06 | -0.19387 | 2.46E-05 | 0.112833 | 0.0147   | -0.10143 | 0.02841 | -0.01525 | 0.74245  |
| 8.38E-12 | -0.34788 | 9.88E-15 | 0.119008 | 0.01005  | -0.08574 | 0.06414 | -0.02052 | 0.6583   |
| 0.05568  | -0.1097  | 0.01772  | 0.041445 | 0.37153  | 0.029196 | 0.5291  | 0.105759 | 0.02227  |
| 0.63013  | 0.0225   | 0.62769  | 0.139588 | 0.0025   | -0.00043 | 0.99253 | 0.086674 | 0.06127  |
| 0.33901  | -0.08955 | 0.05312  | 0.002242 | 0.96146  | -0.03717 | 0.4229  | 0.040339 | 0.38444  |
| 0.02521  | -0.10634 | 0.02155  | 0.065244 | 0.15924  | 0.027357 | 0.55538 | 0.039804 | 0.39078  |
| 4.86E-16 | -0.41129 | 1.73E-20 | -0.03918 | 0.39831  | -0.06352 | 0.17058 | -0.00518 | 0.91103  |
| 1.14E-05 | -0.22327 | 1.10E-06 | -0.05833 | 0.20829  | -0.07104 | 0.12528 | 0.02623  | 0.57179  |
| 0.19067  | -0.07563 | 0.1026   | 0.553416 | 7.94E-39 | 0.04253  | 0.35912 | 0.109027 | 0.01843  |
| 0.87733  | 0.00781  | 0.86633  | 0.013191 | 0.77618  | -0.02012 | 0.66454 | 0.10761  | 0.02002  |
| 1.29E-14 | -0.36001 | 9.76E-16 | -0.02871 | 0.53595  | -0.11454 | 0.01326 | -0.01039 | 0.8228   |
| 2.30E-11 | -0.35422 | 2.98E-15 | -0.01031 | 0.82421  | -0.07537 | 0.10379 | -0.0674  | 0.14585  |
| 0.79563  | -0.03841 | 0.40763  | -0.0054  | 0.90741  | -0.02526 | 0.58608 | 0.046525 | 0.31573  |
| 0.31165  | 0.051561 | 0.26614  | -0.00942 | 0.83914  | -0.02938 | 0.52652 | 0.062143 | 0.18004  |
| 0.7045   | 0.037668 | 0.41672  | 0.154095 | 0.00083  | -0.01339 | 0.77283 | 0.079654 | 0.08553  |
| 7.98E-05 | -0.2159  | 2.49E-06 | -0.02433 | 0.59991  | -0.06886 | 0.1373  | 0.025375 | 0.58439  |
| 4.14E-05 | -0.22889 | 5.75E-07 | -0.02882 | 0.53442  | -0.04372 | 0.34588 | 0.004981 | 0.91451  |
| 0.00567  | -0.14549 | 0.00162  | -0.00054 | 0.99067  | -0.035   | 0.45048 | 0.046781 | 0.31308  |
| 0.10483  | -0.12091 | 0.00891  | 0.053828 | 0.24566  | -0.02163 | 0.64102 | 0.126516 | 0.00619  |
| 0.14495  | -0.08422 | 0.06901  | 0.015678 | 0.73543  | -0.02697 | 0.56096 | 0.043438 | 0.34894  |
| 0.25893  | -0.06675 | 0.1498   | 0.099037 | 0.03238  | -0.03986 | 0.39013 | 0.092376 | 0.04602  |
| 1.16E-08 | -0.25977 | 1.22E-08 | 0.067628 | 0.14451  | -0.04204 | 0.36474 | -0.03812 | 0.4111   |
| 0.00209  | -0.16089 | 0.00048  | -0.04132 | 0.37299  | -0.0622  | 0.17962 | 0.075178 | 0.10468  |
| 4.33E-14 | -0.30261 | 2.40E-11 | 0.069518 | 0.13359  | 0.013131 | 0.77717 | -0.05559 | 0.23051  |
| 0.38863  | -0.03628 | 0.43409  | 0.040646 | 0.38082  | 0.000191 | 0.99671 | 0.168522 | 0.00025  |
| 0.00498  | -0.15238 | 0.00095  | 0.172519 | 0.00018  | -0.06757 | 0.14484 | -0.02399 | 0.60509  |
| 0.00883  | 0.018157 | 0.69553  | 0.010747 | 0.81683  | -0.01851 | 0.68992 | -0.02544 | 0.58337  |
| 0.93152  | 0.010877 | 0.81465  | 0.145816 | 0.00158  | 0.000515 | 0.99114 | 0.124331 | 0.00714  |
| 1.92E-07 | -0.18173 | 7.83E-05 | -0.03505 | 0.44992  | -0.06539 | 0.15833 | 0.061038 | 0.18792  |
| 0.00393  | -0.18299 | 6.97E-05 | 0.012322 | 0.79056  | -0.00175 | 0.96998 | 0.052767 | 0.2551   |

|          |          |          |          |          |          |          |          |          |
|----------|----------|----------|----------|----------|----------|----------|----------|----------|
| 0.00728  | -0.07416 | 0.10947  | 0.065186 | 0.1596   | 0.064886 | 0.16154  | 0.059182 | 0.20173  |
| 0.00734  | -0.13244 | 0.00414  | 0.028294 | 0.54192  | -0.02831 | 0.54169  | -0.04308 | 0.35298  |
| 0.04564  | 0.056813 | 0.22041  | 0.056972 | 0.21912  | 0.023297 | 0.61555  | 0.121038 | 0.00884  |
| 0.46211  | -0.06501 | 0.16072  | -0.02584 | 0.57751  | -0.04442 | 0.33815  | 0.089824 | 0.0524   |
| 2.26E-09 | -0.23862 | 1.81E-07 | 0.059002 | 0.20311  | -0.07385 | 0.11096  | 0.015288 | 0.74178  |
| 0.15024  | -0.08201 | 0.07665  | 0.045997 | 0.32126  | -0.00782 | 0.86624  | 0.133537 | 0.00384  |
| 0.01104  | -0.17304 | 0.00017  | 0.010698 | 0.81765  | -0.02349 | 0.61263  | -0.01759 | 0.70451  |
| 1.91E-06 | -0.22342 | 1.08E-06 | 0.057782 | 0.21262  | 0.015263 | 0.74218  | 0.06431  | 0.1653   |
| 0.10072  | -0.10533 | 0.02282  | 0.028293 | 0.54193  | -0.01612 | 0.72831  | 0.07103  | 0.12533  |
| 0.04067  | -0.08254 | 0.07474  | 0.25085  | 3.92E-08 | -0.01227 | 0.7915   | -0.08469 | 0.06747  |
| 0.33443  | 0.062297 | 0.17896  | 0.010137 | 0.82706  | -0.02489 | 0.59163  | 0.25079  | 3.95E-08 |
| 2.67E-06 | -0.20678 | 6.63E-06 | -0.02115 | 0.6485   | -0.0782  | 0.09144  | -0.03275 | 0.48017  |
| 0.48617  | 0.00845  | 0.8555   | 0.020644 | 0.65635  | -0.02654 | 0.5672   | 0.147756 | 0.00136  |
| 0.12478  | 0.051211 | 0.2694   | 0.025473 | 0.58294  | -0.00468 | 0.91966  | 0.102706 | 0.02646  |
| 0.00054  | -0.04785 | 0.30216  | 0.213097 | 3.38E-06 | 0.007763 | 0.86712  | -0.07914 | 0.08758  |
| 0.69707  | -0.00028 | 0.99518  | 0.022265 | 0.63128  | 0.083841 | 0.07027  | 0.077719 | 0.09343  |
| 1.72E-05 | -0.22658 | 7.50E-07 | -0.02226 | 0.63131  | -0.07207 | 0.11988  | 0.009351 | 0.84028  |
| 5.86E-08 | -0.23933 | 1.66E-07 | 0.084375 | 0.0685   | -0.01947 | 0.67474  | 0.063403 | 0.17136  |
| 1.55E-09 | -0.29116 | 1.41E-10 | 0.079451 | 0.08634  | -0.08709 | 0.06002  | 0.02108  | 0.64956  |
| 0.0704   | -0.08456 | 0.0679   | 0.002878 | 0.95054  | -0.00934 | 0.84047  | 0.095182 | 0.03978  |
| 5.72E-12 | -0.32873 | 3.14E-13 | -0.02908 | 0.53072  | -0.01132 | 0.8073   | -0.02799 | 0.54632  |
| 0.01793  | -0.01786 | 0.70021  | -0.00688 | 0.88216  | -0.04582 | 0.32317  | 0.029877 | 0.51953  |
| 0.47987  | 0.004946 | 0.91511  | 0.038105 | 0.41134  | 0.074689 | 0.10697  | 0.092033 | 0.04684  |
| 0.1024   | 0.076071 | 0.10061  | 0.220474 | 1.50E-06 | 0.059551 | 0.19893  | 0.248892 | 5.03E-08 |
| 0.02808  | -0.06659 | 0.15077  | 0.07833  | 0.09088  | -0.00158 | 0.97283  | 0.154639 | 0.0008   |
| 2.37E-06 | -0.28917 | 1.91E-10 | -0.05436 | 0.24102  | -0.06557 | 0.15714  | -0.0332  | 0.47418  |
| 0.15296  | -0.08398 | 0.06982  | 0.01937  | 0.67631  | -0.02315 | 0.61771  | 0.041745 | 0.36807  |
| 0.9787   | 0.179425 | 9.67E-05 | 0.064954 | 0.1611   | 0.511738 | 1.57E-32 | 0.023408 | 0.61387  |
| 0.09372  | 0.105325 | 0.02283  | 0.269639 | 3.19E-09 | 0.440708 | 1.30E-23 | -0.03527 | 0.44708  |
| 0.19363  | 0.152261 | 0.00096  | 0.04688  | 0.31205  | 0.286233 | 2.95E-10 | -0.12464 | 0.007    |
| 0.7469   | 0.083873 | 0.07017  | 0.047154 | 0.30923  | 0.403358 | 1.07E-19 | -0.02345 | 0.61321  |
| 0.34355  | 0.082916 | 0.07344  | 0.010181 | 0.82632  | 0.32015  | 1.37E-12 | -0.07937 | 0.08665  |
| 0.49745  | 0.187446 | 4.58E-05 | 0.17246  | 0.00018  | 0.689249 | 4.50E-67 | 0.046663 | 0.3143   |
| 0.14404  | 0.158844 | 0.00057  | 0.15476  | 0.00079  | 0.428401 | 2.87E-22 | 0.156409 | 0.00069  |
| 0.00521  | 0.188041 | 4.33E-05 | 0.128743 | 0.00533  | 0.510587 | 2.28E-32 | 0.135247 | 0.00341  |
| 0.63408  | 0.104708 | 0.02364  | 0.056898 | 0.21972  | 0.412384 | 1.34E-20 | -0.03654 | 0.43078  |
| 4.40E-05 | 0.246317 | 6.97E-08 | 0.300841 | 3.18E-11 | 0.384321 | 6.93E-18 | 0.215992 | 2.47E-06 |
| 0.00257  | 0.218982 | 1.77E-06 | 0.174419 | 0.00015  | 0.709154 | 1.38E-72 | 0.232247 | 3.87E-07 |
| 0.20844  | 0.096075 | 0.03795  | 0.010351 | 0.82346  | 0.274118 | 1.71E-09 | 0.026732 | 0.56445  |
| 0.75537  | 0.013733 | 0.76723  | 0.127023 | 0.00598  | 0.262521 | 8.45E-09 | 0.029411 | 0.52607  |
| 0.00124  | 0.157052 | 0.00066  | 0.095664 | 0.03878  | 0.384651 | 6.46E-18 | 0.174347 | 0.00015  |
| 0.49753  | 0.142322 | 0.00205  | 0.044452 | 0.33781  | 0.824888 | #####    | 0.059954 | 0.19591  |
| 0.73039  | 0.116021 | 0.01211  | 0.04498  | 0.33209  | 0.584999 | 3.18E-44 | 0.083291 | 0.07214  |
| 0.45901  | 0.128767 | 0.00532  | 0.080703 | 0.08148  | 0.524329 | 2.43E-34 | 0.010914 | 0.81403  |
| 0.5344   | 0.007865 | 0.86539  | 0.121297 | 0.00869  | 0.413747 | 9.73E-21 | 0.057756 | 0.21284  |

|          |          |          |          |          |          |          |          |          |
|----------|----------|----------|----------|----------|----------|----------|----------|----------|
| 0.59937  | 0.077337 | 0.09506  | 0.122052 | 0.00828  | 0.755709 | 1.63E-87 | 0.076033 | 0.10079  |
| 0.9571   | 0.079553 | 0.08593  | 0.02334  | 0.6149   | 0.771786 | 1.78E-93 | 0.014207 | 0.75945  |
| 0.52889  | 0.109117 | 0.01834  | 0.014053 | 0.76198  | 0.711703 | 2.51E-73 | 0.032203 | 0.48754  |
| 0.32877  | 0.125182 | 0.00676  | 0.015184 | 0.74346  | 0.525288 | 1.76E-34 | 0.075781 | 0.10192  |
| 0.02764  | -0.0869  | 0.06059  | 0.114038 | 0.01367  | 0.297464 | 5.38E-11 | -0.02381 | 0.60777  |
| 0.32282  | 0.077656 | 0.0937   | 0.020466 | 0.65911  | 0.494796 | 3.29E-30 | 0.004042 | 0.93058  |
| 2.72E-05 | 0.328106 | 3.50E-13 | 0.077592 | 0.09397  | 0.389008 | 2.54E-18 | 0.185182 | 5.67E-05 |
| 0.2362   | 0.073109 | 0.11462  | 0.052238 | 0.25991  | 0.379199 | 2.03E-17 | -0.00204 | 0.96485  |
| 0.17     | 0.124133 | 0.00724  | 0.050999 | 0.27139  | 0.425483 | 5.88E-22 | 0.094559 | 0.0411   |
| 0.47579  | 0.116925 | 0.01145  | 0.027724 | 0.55008  | 0.738051 | 1.77E-81 | 0.003226 | 0.94456  |
| 0.48915  | 0.063958 | 0.16763  | 0.021958 | 0.63599  | 0.651708 | 8.39E-58 | 0.0107   | 0.81762  |
| 0.23749  | 0.172805 | 0.00018  | 0.072036 | 0.12005  | 0.673737 | 4.47E-63 | 0.122554 | 0.00802  |
| 0.77102  | 0.06869  | 0.13829  | 0.026811 | 0.5633   | 0.80904  | #####    | 0.015698 | 0.73511  |
| 0.46409  | 0.135452 | 0.00336  | 0.054953 | 0.23592  | 0.809199 | #####    | 0.074481 | 0.10795  |
| 0.69759  | 0.12106  | 0.00883  | 0.012366 | 0.78983  | 0.825273 | #####    | 0.008764 | 0.85018  |
| 0.86343  | 0.084715 | 0.06739  | 0.077799 | 0.0931   | 0.428177 | 3.04E-22 | 0.073464 | 0.11286  |
| 0.8966   | 0.124044 | 0.00728  | -0.00032 | 0.99448  | 0.783492 | 3.90E-98 | 0.012667 | 0.78484  |
| 0.56045  | 0.064016 | 0.16725  | 0.048994 | 0.29071  | 0.52066  | 8.34E-34 | 0.054318 | 0.24138  |
| 0.76943  | 0.1085   | 0.01901  | 0.002177 | 0.96258  | 0.786116 | 3.22E-99 | 0.000763 | 0.98689  |
| 0.51171  | 0.112518 | 0.01498  | 0.024258 | 0.60104  | 0.816721 | #####    | 0.003226 | 0.94458  |
| 0.70376  | 0.105087 | 0.02314  | 0.024898 | 0.59148  | 0.796036 | #####    | 0.029502 | 0.5248   |
| 0.30291  | 0.177469 | 0.00012  | 0.039505 | 0.39435  | 0.778162 | 5.60E-96 | 0.050732 | 0.27391  |
| 0.14647  | 0.112044 | 0.01542  | 0.038194 | 0.41024  | 0.624329 | 7.86E-52 | -0.00591 | 0.89866  |
| 0.70649  | 0.076195 | 0.10006  | 0.055978 | 0.22728  | 0.50689  | 7.48E-32 | -0.00483 | 0.91707  |
| 0.22988  | 0.140201 | 0.00239  | 0.064934 | 0.16122  | 0.467989 | 8.59E-27 | 0.03276  | 0.48004  |
| 0.16532  | 0.10642  | 0.02144  | 0.145763 | 0.00159  | 0.471331 | 3.34E-27 | 0.179148 | 9.92E-05 |
| 0.00169  | 0.268192 | 3.90E-09 | 0.023558 | 0.6116   | 0.415838 | 5.95E-21 | 0.137619 | 0.00288  |
| 0.84885  | 0.03425  | 0.46028  | 0.04449  | 0.33739  | 0.413907 | 9.37E-21 | -0.00167 | 0.9713   |
| 0.57181  | 0.113875 | 0.01381  | -0.00409 | 0.92968  | 0.750656 | 9.81E-86 | 0.003011 | 0.94827  |
| 0.71777  | 0.093485 | 0.04346  | 0.05305  | 0.25256  | 0.808795 | #####    | 0.026924 | 0.56166  |
| 0.44807  | 0.135073 | 0.00345  | 0.028605 | 0.53747  | 0.748319 | 6.31E-85 | 0.017466 | 0.70657  |
| 0.06228  | 0.127238 | 0.0059   | 0.068151 | 0.14142  | 0.649378 | 2.86E-57 | 0.077172 | 0.09577  |
| 0.10095  | 0.154273 | 0.00082  | 0.037939 | 0.41337  | 0.83221  | #####    | 0.035022 | 0.45023  |
| 0.65807  | 0.039898 | 0.38966  | 0.015719 | 0.73475  | 0.314643 | 3.43E-12 | -0.02853 | 0.53856  |
| 0.32058  | 0.199129 | 1.46E-05 | 0.042325 | 0.36145  | 0.718331 | 2.74E-75 | 0.033766 | 0.46665  |
| 0.78146  | 0.062978 | 0.17425  | 0.103507 | 0.0253   | 0.310429 | 6.85E-12 | -0.03943 | 0.39526  |
| 0.09062  | 0.139872 | 0.00245  | 0.199107 | 1.46E-05 | 0.623679 | 1.07E-51 | 0.139854 | 0.00245  |
| 0.03139  | 0.151482 | 0.00102  | 0.111206 | 0.01621  | 0.546077 | 1.18E-37 | 0.092514 | 0.0457   |
| 0.44943  | 0.01914  | 0.67993  | 0.084141 | 0.06927  | 0.072718 | 0.11658  | -0.02723 | 0.55716  |
| 0.84027  | 0.011732 | 0.80037  | 0.019348 | 0.67666  | -0.00619 | 0.8938   | 0.019506 | 0.67417  |
| 2.84E-05 | 0.234433 | 2.99E-07 | 0.006269 | 0.89252  | -0.00314 | 0.94606  | 0.268601 | 3.69E-09 |
| 0.00064  | 0.194501 | 2.31E-05 | 0.090142 | 0.05157  | 0.085126 | 0.06606  | 0.267725 | 4.16E-09 |
| 0.16764  | 0.071386 | 0.12344  | 0.005312 | 0.90885  | 0.016185 | 0.72721  | 0.154809 | 0.00079  |
| 0.00016  | 0.200149 | 1.31E-05 | 0.15771  | 0.00063  | 0.048507 | 0.29554  | 0.156046 | 0.00071  |
| 0.75928  | 0.034917 | 0.45159  | 0.291275 | 1.39E-10 | -0.00732 | 0.8747   | 0.147219 | 0.00142  |



|          |          |          |          |          |          |         |          |          |
|----------|----------|----------|----------|----------|----------|---------|----------|----------|
| 0.0355   | -0.08823 | 0.05674  | -0.00605 | 0.8962   | -0.06223 | 0.17945 | 0.076068 | 0.10063  |
| 0.00192  | -0.11757 | 0.011    | -0.02084 | 0.6533   | -0.06128 | 0.18621 | -0.14672 | 0.00148  |
| 0.12432  | 0.082151 | 0.07614  | 0.017342 | 0.70857  | -0.01476 | 0.7504  | 0.159477 | 0.00054  |
| 0.28463  | -0.00443 | 0.92386  | 0.100676 | 0.02961  | 0.003069 | 0.94726 | -0.00261 | 0.95509  |
| 0.07224  | -0.07854 | 0.09003  | 0.021439 | 0.644    | -0.05186 | 0.26334 | 0.093491 | 0.04345  |
| 0.1463   | 0.126467 | 0.00621  | 0.147665 | 0.00137  | -0.01295 | 0.78019 | 0.152757 | 0.00093  |
| 0.20946  | -0.04498 | 0.33204  | 0.088608 | 0.05569  | -0.03252 | 0.48321 | 0.205318 | 7.72E-06 |
| 0.09512  | 0.10718  | 0.02052  | -0.03047 | 0.51133  | -0.08801 | 0.05738 | 0.133034 | 0.00398  |
| 0.41768  | 0.046016 | 0.32107  | 0.036397 | 0.43263  | -0.00983 | 0.83221 | 0.145133 | 0.00166  |
| 0.04867  | 0.127086 | 0.00596  | 0.035697 | 0.44154  | -0.00636 | 0.891   | 0.195537 | 2.09E-05 |
| 0.98409  | 0.02021  | 0.66311  | 0.055102 | 0.23465  | -0.03663 | 0.4297  | 0.078969 | 0.08826  |
| 0.57199  | 0.112911 | 0.01463  | 0.045677 | 0.32464  | 0.014167 | 0.76011 | 0.13559  | 0.00333  |
| 5.95E-05 | 0.185273 | 5.63E-05 | 0.079006 | 0.08812  | 0.090091 | 0.0517  | 0.29129  | 1.38E-10 |
| 0.32397  | 0.21704  | 2.20E-06 | 0.092353 | 0.04608  | -0.01347 | 0.77159 | 0.117322 | 0.01117  |
| 0.14914  | -0.04778 | 0.30282  | -0.05676 | 0.22087  | -0.07439 | 0.10836 | 0.003737 | 0.93581  |
| 0.31059  | 0.040709 | 0.38009  | 0.000319 | 0.99452  | 0.000253 | 0.99565 | 0.151354 | 0.00103  |
| 0.12552  | 0.150716 | 0.00109  | 0.106007 | 0.02195  | 0.067792 | 0.14354 | 0.09265  | 0.04538  |
| 0.73338  | -0.0622  | 0.17963  | -0.0502  | 0.27896  | -0.04934 | 0.28731 | 0.004006 | 0.9312   |
| 0.00033  | 0.229685 | 5.24E-07 | -0.00999 | 0.82959  | 0.023098 | 0.61857 | 0.181744 | 7.82E-05 |
| 0.26321  | 0.014422 | 0.75592  | -0.00396 | 0.93197  | -0.03176 | 0.49358 | 0.145969 | 0.00156  |
| 0.02033  | 0.134537 | 0.00358  | 0.022309 | 0.63061  | 0.024358 | 0.59955 | 0.190243 | 3.50E-05 |
| 0.03125  | -0.10247 | 0.02681  | 0.029332 | 0.52719  | -0.03137 | 0.49893 | 0.069377 | 0.13439  |
| 0.00526  | 0.200422 | 1.28E-05 | 0.053423 | 0.24924  | 0.012648 | 0.78515 | 0.198038 | 1.63E-05 |
| 0.19022  | 0.061705 | 0.18314  | 0.380949 | 1.41E-17 | 0.043945 | 0.34335 | 0.172073 | 0.00019  |
| 0.83067  | -0.0614  | 0.18531  | -0.00829 | 0.85821  | -0.06652 | 0.15119 | 0.100534 | 0.02984  |
| 0.00205  | -0.12144 | 0.00862  | -0.03577 | 0.44055  | 0.011618 | 0.80228 | -0.00188 | 0.96761  |
| 9.47E-08 | 0.270804 | 2.72E-09 | 0.15792  | 0.00061  | 0.07029  | 0.12932 | 0.314184 | 3.70E-12 |
| 0.69145  | 0.030966 | 0.50443  | 0.033637 | 0.46835  | 0.015446 | 0.7392  | 0.04684  | 0.31246  |
| 0.00194  | 0.155802 | 0.00073  | 0.095162 | 0.03982  | 0.076106 | 0.10046 | 0.327229 | 4.07E-13 |
| 0.02829  | 0.144731 | 0.00171  | 0.285752 | 3.17E-10 | 0.066596 | 0.15075 | 0.085069 | 0.06625  |
| 0.0052   | -0.12436 | 0.00713  | 0.065839 | 0.15545  | -0.09473 | 0.04073 | 0.084112 | 0.06937  |
| 0.19753  | -0.0465  | 0.31604  | -0.00724 | 0.87602  | -0.06578 | 0.15585 | 0.109435 | 0.018    |
| 0.00034  | 0.119316 | 0.00986  | -0.03483 | 0.45278  | -0.08278 | 0.07392 | 0.075033 | 0.10536  |
| 4.02E-06 | 0.250463 | 4.12E-08 | 0.085415 | 0.06514  | 0.063507 | 0.17066 | 0.342689 | 2.58E-14 |
| 0.0072   | 0.148143 | 0.00132  | 0.059459 | 0.19963  | 0.019766 | 0.67008 | 0.298126 | 4.85E-11 |
| 0.22819  | 0.070356 | 0.12896  | -0.00063 | 0.98922  | 0.000255 | 0.99562 | 0.179983 | 9.19E-05 |
| 0.12356  | -0.09753 | 0.03511  | -0.09595 | 0.03821  | -0.12624 | 0.0063  | -0.08163 | 0.07803  |
| 0.26456  | 0.057388 | 0.21577  | 0.053892 | 0.2451   | 0.002165 | 0.96279 | 0.076319 | 0.09951  |
| 0.00241  | 0.193329 | 2.59E-05 | 0.168069 | 0.00026  | 0.141579 | 0.00216 | 0.292471 | 1.16E-10 |
| 0.01031  | 0.112713 | 0.01481  | 0.364564 | 3.99E-16 | -0.00699 | 0.88029 | 0.146369 | 0.00152  |
| 0.12244  | 0.051664 | 0.26518  | 0.024504 | 0.59737  | 0.030388 | 0.51241 | 0.286544 | 2.82E-10 |
| 0.00122  | 0.191307 | 3.16E-05 | -0.00978 | 0.83307  | 0.003596 | 0.93822 | 0.262871 | 8.06E-09 |
| 0.00027  | 0.161917 | 0.00044  | 0.075128 | 0.10492  | 0.06056  | 0.19141 | 0.264561 | 6.41E-09 |
| 3.51E-07 | 0.253    | 2.97E-08 | 0.093881 | 0.04258  | 0.001399 | 0.97595 | 0.238069 | 1.93E-07 |
| 0.52096  | -0.03561 | 0.44259  | 0.040431 | 0.38335  | -0.00516 | 0.91151 | 0.183235 | 6.81E-05 |

|          |          |          |          |          |          |         |          |          |
|----------|----------|----------|----------|----------|----------|---------|----------|----------|
| 0.01785  | -0.06626 | 0.15281  | 0.008078 | 0.86178  | -0.0158  | 0.73345 | -0.01851 | 0.68992  |
| 0.01102  | 0.152676 | 0.00093  | 0.057302 | 0.21646  | 0.014845 | 0.749   | 0.307236 | 1.15E-11 |
| 0.117    | -0.0802  | 0.08341  | 0.097371 | 0.03542  | -0.05898 | 0.20324 | 0.10061  | 0.02971  |
| 0.37226  | 0.024924 | 0.59109  | 0.040815 | 0.37885  | -0.03787 | 0.41422 | 0.131821 | 0.00432  |
| 0.00162  | 0.105552 | 0.02253  | 0.060934 | 0.18868  | -0.1356  | 0.00332 | 0.05805  | 0.21051  |
| 0.5954   | 0.104386 | 0.02408  | 0.028058 | 0.5453   | -0.00576 | 0.90121 | -0.09464 | 0.04091  |
| 0.64024  | -0.04074 | 0.37969  | -0.0704  | 0.12869  | -0.10976 | 0.01766 | 0.115571 | 0.01245  |
| 0.00718  | 0.168661 | 0.00025  | -0.06215 | 0.17996  | 0.006712 | 0.88498 | 0.103796 | 0.02489  |
| 0.0075   | 0.151129 | 0.00105  | -0.04876 | 0.29305  | 0.034176 | 0.46125 | 0.075925 | 0.10127  |
| 0.00263  | 0.176593 | 0.00012  | 0.036463 | 0.43179  | 0.032006 | 0.49021 | 0.199826 | 1.36E-05 |
| 0.00208  | 0.151313 | 0.00104  | 0.003621 | 0.9378   | -0.03897 | 0.40084 | 0.199893 | 1.35E-05 |
| 3.23E-07 | 0.216981 | 2.21E-06 | 0.032044 | 0.48969  | 0.043137 | 0.3523  | 0.076121 | 0.10039  |
| 0.00136  | 0.11364  | 0.014    | 0.071527 | 0.1227   | 0.045587 | 0.3256  | 0.166703 | 0.0003   |
| 0.00082  | 0.10773  | 0.01988  | 0.056184 | 0.22557  | -0.07117 | 0.12458 | 0.1938   | 2.48E-05 |
| 0.48888  | -0.0115  | 0.80424  | 0.218257 | 1.92E-06 | -0.0839  | 0.07008 | 0.152065 | 0.00098  |
| 0.52512  | 0.001283 | 0.97794  | 0.049195 | 0.28874  | 0.011356 | 0.80665 | 0.085295 | 0.06553  |
| 0.00058  | 0.244206 | 9.08E-08 | 0.065937 | 0.15484  | 0.053206 | 0.25116 | 0.186373 | 5.07E-05 |
| 0.51276  | 0.05838  | 0.20793  | 0.042444 | 0.3601   | -0.02751 | 0.5532  | 0.195262 | 2.14E-05 |
| 5.88E-06 | 0.260957 | 1.04E-08 | 0.037375 | 0.42036  | -0.01288 | 0.78124 | 0.218255 | 1.92E-06 |
| 0.04357  | -0.15608 | 0.00071  | -0.14058 | 0.00233  | -0.07033 | 0.12908 | 0.033723 | 0.46721  |
| 1.50E-05 | 0.175059 | 0.00014  | 0.034597 | 0.45575  | 0.02609  | 0.57384 | 0.07818  | 0.0915   |
| 0.08184  | 0.108279 | 0.01926  | 0.182654 | 7.19E-05 | 0.019575 | 0.67308 | 0.29073  | 1.51E-10 |
| 0.97606  | 0.020556 | 0.65772  | 0.097477 | 0.03522  | 0.102272 | 0.02711 | 0.338555 | 5.48E-14 |
| 0.00066  | 0.163927 | 0.00037  | 0.031733 | 0.49392  | 0.007086 | 0.87861 | 0.242744 | 1.09E-07 |
| 0.20146  | 0.063996 | 0.16738  | 0.004068 | 0.93013  | -0.01646 | 0.72269 | 0.129837 | 0.00495  |
| 2.36E-08 | 0.320774 | 1.23E-12 | 0.14651  | 0.0015   | 0.043051 | 0.35326 | 0.027612 | 0.5517   |
| 0.02288  | 0.143327 | 0.0019   | 0.108853 | 0.01862  | 0.117769 | 0.01086 | 0.377634 | 2.82E-17 |
| 0.08214  | 0.089047 | 0.05448  | 0.013482 | 0.77137  | -0.02701 | 0.56035 | 0.157219 | 0.00065  |
| 0.02173  | 0.12397  | 0.00731  | 0.016504 | 0.72205  | 0.010767 | 0.81649 | 0.133042 | 0.00397  |
| 0.09318  | 0.051405 | 0.26759  | 0.142126 | 0.00208  | -0.00617 | 0.8942  | 0.123615 | 0.00749  |
| 0.05166  | 0.102859 | 0.02623  | 0.016227 | 0.72652  | 0.133176 | 0.00394 | 0.024345 | 0.59975  |
| 0.00018  | -0.17639 | 0.00013  | 0.10873  | 0.01876  | -0.05358 | 0.24784 | -0.00718 | 0.87698  |
| 0.54194  | 0.089105 | 0.05432  | 0.144224 | 0.00178  | 0.056629 | 0.22191 | 0.084486 | 0.06813  |
| 0.02982  | 0.132105 | 0.00424  | 0.035325 | 0.44631  | -0.02058 | 0.65739 | 0.127698 | 0.00572  |
| 0.00589  | 0.141264 | 0.00221  | 0.063757 | 0.16898  | 0.075296 | 0.10414 | 0.401891 | 1.48E-19 |
| 2.17E-06 | 0.277152 | 1.11E-09 | -0.01042 | 0.82238  | 0.042046 | 0.36463 | 0.226759 | 7.35E-07 |
| 0.00045  | 0.163622 | 0.00038  | 0.162214 | 0.00043  | -0.0073  | 0.87493 | 0.226109 | 7.92E-07 |
| 0.3395   | 0.014993 | 0.74658  | 0.059225 | 0.2014   | -0.00776 | 0.86722 | 0.103606 | 0.02516  |
| 0.94438  | 0.019371 | 0.6763   | 0.003912 | 0.93282  | -0.03461 | 0.45557 | 0.066962 | 0.14852  |
| 2.87E-07 | 0.325168 | 5.81E-13 | -0.05872 | 0.20532  | 0.014276 | 0.75831 | 0.058449 | 0.20739  |
| 0.07958  | -0.10146 | 0.02836  | -0.07824 | 0.09123  | -0.11655 | 0.01172 | -0.08594 | 0.06351  |
| 0.53482  | 0.051833 | 0.26362  | -0.05424 | 0.24204  | -0.05713 | 0.21784 | -0.01934 | 0.67685  |
| 1.97E-07 | 0.300776 | 3.21E-11 | 0.187299 | 4.64E-05 | 0.091857 | 0.04726 | 0.214651 | 2.86E-06 |
| 6.36E-05 | 0.208948 | 5.27E-06 | 0.063841 | 0.16841  | -0.03318 | 0.47439 | 0.050795 | 0.27331  |
| 0.00099  | 0.180527 | 8.74E-05 | 0.011401 | 0.80589  | 0.01663  | 0.72002 | 0.211727 | 3.92E-06 |

|          |          |          |          |          |          |          |          |          |
|----------|----------|----------|----------|----------|----------|----------|----------|----------|
| 4.50E-05 | 0.224255 | 9.80E-07 | 0.046956 | 0.31127  | -0.01949 | 0.67436  | 0.176192 | 0.00013  |
| 0.14175  | 0.091092 | 0.04914  | 0.012984 | 0.77959  | -0.00097 | 0.98338  | 0.221325 | 1.36E-06 |
| 9.39E-07 | 0.13604  | 0.00322  | -0.0271  | 0.55906  | 0.015165 | 0.74377  | 0.304063 | 1.91E-11 |
| 0.90346  | 0.037695 | 0.41639  | 0.006861 | 0.88244  | 0.028002 | 0.54609  | 0.126422 | 0.00623  |
| 0.57323  | 0.106787 | 0.02099  | 0.082598 | 0.07455  | 0.074666 | 0.10707  | 0.087475 | 0.0589   |
| 0.8557   | -0.00854 | 0.85392  | 0.040479 | 0.38278  | 0.023541 | 0.61185  | -0.02369 | 0.60955  |
| 0.42239  | -0.05624 | 0.22514  | 0.059753 | 0.19741  | 0.025657 | 0.58023  | 0.221111 | 1.40E-06 |
| 0.32184  | 0.12393  | 0.00733  | -0.01249 | 0.78774  | -0.06015 | 0.19444  | 0.062023 | 0.18089  |
| 0.71578  | -0.01176 | 0.79986  | 0.014693 | 0.75148  | -0.03496 | 0.45097  | 0.117359 | 0.01114  |
| 0.12486  | -0.06104 | 0.18794  | 0.012062 | 0.79489  | -0.04363 | 0.34684  | 0.109644 | 0.01778  |
| 0.40686  | 0.073627 | 0.11207  | 0.061819 | 0.18233  | 0.056903 | 0.21968  | 0.113222 | 0.01436  |
| 0.00491  | 0.201057 | 1.20E-05 | 0.026694 | 0.56501  | 0.006811 | 0.88329  | 0.127926 | 0.00563  |
| 0.00259  | -0.15109 | 0.00106  | -0.04615 | 0.31962  | -0.07408 | 0.10988  | -0.1426  | 0.00201  |
| 0.24207  | 0.049393 | 0.28679  | -0.01405 | 0.76201  | -0.05886 | 0.2042   | 0.160377 | 0.0005   |
| 0.00226  | 0.131877 | 0.00431  | 0.051368 | 0.26794  | 0.107687 | 0.01993  | 0.175859 | 0.00013  |
| 0.42748  | 0.068067 | 0.14191  | 0.137243 | 0.00296  | 0.015189 | 0.74338  | 0.105038 | 0.0232   |
| 0.21844  | 0.026053 | 0.5744   | 0.053578 | 0.24786  | -0.03194 | 0.49114  | 0.183304 | 6.76E-05 |
| 9.88E-05 | -0.24141 | 1.28E-07 | -0.03325 | 0.47345  | -0.10966 | 0.01776  | 0.011257 | 0.8083   |
| 0.03032  | 0.081317 | 0.07918  | 0.003513 | 0.93965  | -0.0287  | 0.53608  | 0.173572 | 0.00016  |
| 8.22E-05 | -0.17167 | 0.00019  | 0.188741 | 4.05E-05 | -0.03388 | 0.46515  | -0.01457 | 0.75356  |
| 0.72989  | -0.00553 | 0.90511  | -0.02948 | 0.52505  | -0.06989 | 0.1315   | 0.006501 | 0.88858  |
| 0.00617  | 0.138962 | 0.00262  | 0.078126 | 0.09172  | 0.04968  | 0.284    | 0.254108 | 2.57E-08 |
| 0.01809  | -0.09266 | 0.04535  | -0.01151 | 0.80416  | -0.09825 | 0.03377  | 0.001272 | 0.97812  |
| 5.13E-16 | 0.426297 | 4.82E-22 | 0.190341 | 3.47E-05 | 0.416094 | 5.60E-21 | 0.294684 | 8.25E-11 |
| 0.36431  | -0.02964 | 0.5229   | 0.062489 | 0.17763  | 0.001698 | 0.97081  | 0.157512 | 0.00064  |
| 0.74566  | 0.053346 | 0.24992  | 0.061316 | 0.18592  | 0.088268 | 0.05664  | 0.167074 | 0.00029  |
| 0.02194  | -0.18303 | 6.94E-05 | 0.015584 | 0.73696  | -0.04216 | 0.36335  | 0.09545  | 0.03922  |
| 0.48127  | 0.052907 | 0.25384  | 0.062211 | 0.17957  | 0.040731 | 0.37984  | 0.133758 | 0.00378  |
| 0.00011  | 0.199414 | 1.42E-05 | 0.079068 | 0.08786  | 0.016376 | 0.72411  | 0.266866 | 4.68E-09 |
| 0.00018  | 0.170871 | 0.00021  | 0.100515 | 0.02987  | 0.065902 | 0.15506  | 0.228735 | 5.85E-07 |
| 2.76E-05 | 0.344605 | 1.82E-14 | 0.152799 | 0.00092  | 0.073419 | 0.11308  | 0.064014 | 0.16726  |
| 0.48981  | 0.034131 | 0.46184  | 0.042947 | 0.35443  | 0.00372  | 0.93611  | 0.072551 | 0.11742  |
| 0.38109  | -0.02166 | 0.6406   | 0.094155 | 0.04198  | -0.04517 | 0.3301   | 0.215593 | 2.58E-06 |
| 5.34E-10 | 0.201974 | 1.09E-05 | 0.22541  | 8.59E-07 | 0.009158 | 0.84354  | 0.117143 | 0.0113   |
| 0.56048  | 0.025784 | 0.57835  | -0.01994 | 0.6674   | -0.08749 | 0.05886  | 0.108123 | 0.01943  |
| 0.78013  | 0.000216 | 0.99629  | 0.126888 | 0.00604  | -0.0519  | 0.26304  | 0.136666 | 0.00308  |
| 0.96262  | -0.02002 | 0.66611  | 0.05933  | 0.20061  | 0.064195 | 0.16606  | 0.072478 | 0.11779  |
| 0.0893   | 0.120215 | 0.00931  | 0.059397 | 0.2001   | -0.11414 | 0.01358  | -0.01855 | 0.6893   |
| 0.50202  | 0.026776 | 0.56381  | 0.020512 | 0.6584   | -0.01184 | 0.79857  | 0.007374 | 0.87372  |
| 2.60E-16 | 0.185162 | 5.68E-05 | 0.07222  | 0.11911  | -0.14366 | 0.00186  | 0.244125 | 9.17E-08 |
| 0.00306  | 0.155601 | 0.00074  | 0.055064 | 0.23497  | -0.00808 | 0.8617   | -0.14903 | 0.00124  |
| 0.00756  | 0.084681 | 0.0675   | -0.06292 | 0.17463  | -0.04388 | 0.34401  | 0.114374 | 0.01339  |
| 0.00016  | 0.302443 | 2.47E-11 | 0.065641 | 0.15671  | 0.150088 | 0.00114  | 0.057698 | 0.2133   |
| 4.36E-16 | 0.442808 | 7.59E-24 | 0.104885 | 0.02341  | 0.102174 | 0.02725  | 0.456562 | 2.00E-25 |
| 0.00035  | 0.251043 | 3.82E-08 | 0.078654 | 0.08955  | 0.036795 | 0.42761  | 0.138155 | 0.00277  |

|          |          |          |          |          |          |         |          |          |
|----------|----------|----------|----------|----------|----------|---------|----------|----------|
| 0.76389  | 0.003879 | 0.93337  | 0.105794 | 0.02222  | 0.153055 | 0.00091 | 0.292085 | 1.23E-10 |
| 1.28E-06 | 0.219795 | 1.62E-06 | -0.01307 | 0.77825  | -0.00744 | 0.87256 | 0.248296 | 5.43E-08 |
| 0.00413  | 0.13416  | 0.00368  | -0.01025 | 0.82512  | -0.00456 | 0.92174 | 0.137504 | 0.0029   |
| 0.8333   | 0.012715 | 0.78404  | -0.01724 | 0.71023  | -0.03431 | 0.45953 | 0.124221 | 0.0072   |
| 0.64535  | 0.088155 | 0.05695  | 0.167162 | 0.00029  | 0.038409 | 0.40761 | -0.07752 | 0.09428  |
| 0.00335  | 0.131146 | 0.00453  | 0.046659 | 0.31435  | 0.0097   | 0.83441 | 0.06313  | 0.17321  |
| 0.58415  | 0.067488 | 0.14534  | 0.106581 | 0.02124  | 0.074227 | 0.10916 | 0.234475 | 2.97E-07 |
| 0.1274   | 0.083088 | 0.07284  | 0.042355 | 0.3611   | -0.00237 | 0.95929 | 0.107021 | 0.02071  |
| 0.69333  | -0.012   | 0.79599  | 0.011877 | 0.79796  | -0.03227 | 0.48661 | 0.108058 | 0.0195   |
| 0.00041  | 0.200986 | 1.21E-05 | 0.073218 | 0.11408  | 0.022855 | 0.62226 | 0.21034  | 4.55E-06 |
| 6.76E-07 | 0.282746 | 4.93E-10 | 0.060118 | 0.19468  | 0.027641 | 0.55128 | 0.261046 | 1.03E-08 |
| 0.14306  | 0.007086 | 0.87863  | -0.03049 | 0.51095  | -0.03554 | 0.44353 | 0.194428 | 2.33E-05 |
| 0.41887  | -0.03207 | 0.48938  | 0.038876 | 0.40193  | -0.03881 | 0.40267 | 0.153314 | 0.00089  |
| 5.53E-05 | 0.123666 | 0.00746  | 0.104047 | 0.02454  | -0.05069 | 0.27431 | 0.014648 | 0.75222  |
| 8.55E-07 | 0.328256 | 3.41E-13 | 0.122448 | 0.00807  | 0.053004 | 0.25297 | 0.29115  | 1.41E-10 |
| 0.93036  | 0.048164 | 0.29897  | 0.086441 | 0.06197  | -0.01946 | 0.67488 | 0.147223 | 0.00142  |
| 0.50254  | -0.12373 | 0.00743  | -0.04873 | 0.29335  | -0.04657 | 0.31524 | 0.089919 | 0.05215  |
| 0.00017  | 0.217095 | 2.19E-06 | 0.126497 | 0.00619  | 0.044966 | 0.33224 | 0.258906 | 1.37E-08 |
| 0.62253  | 0.138648 | 0.00268  | 0.192172 | 2.91E-05 | -0.05113 | 0.2702  | -0.10404 | 0.02455  |
| 0.02904  | 0.067218 | 0.14696  | 0.058178 | 0.2095   | -0.09812 | 0.03403 | -0.11432 | 0.01344  |
| 9.46E-07 | 0.254643 | 2.40E-08 | 0.023606 | 0.61086  | -0.0075  | 0.87162 | 0.224459 | 9.57E-07 |
| 0.30525  | 0.071573 | 0.12246  | 0.070664 | 0.12729  | 0.007612 | 0.86969 | -0.0293  | 0.52763  |
| 0.59138  | -0.03449 | 0.45711  | 0.023137 | 0.61798  | -0.04377 | 0.34532 | 0.068077 | 0.14186  |
| 1.73E-06 | 0.215562 | 2.59E-06 | 0.052333 | 0.25904  | 0.12203  | 0.00829 | 0.235885 | 2.51E-07 |
| 0.78102  | 0.022586 | 0.62637  | 0.05069  | 0.27431  | 0.027776 | 0.54934 | 0.208618 | 5.46E-06 |
| 0.001    | 0.171443 | 0.0002   | 0.338369 | 5.67E-14 | 0.024007 | 0.60483 | 0.088757 | 0.05527  |
| 0.05602  | 0.114093 | 0.01362  | 0.067696 | 0.14411  | 0.039445 | 0.39507 | 0.095946 | 0.03821  |
| 1.81E-06 | 0.307637 | 1.08E-11 | 0.032721 | 0.48056  | 0.013694 | 0.76788 | 0.242345 | 1.14E-07 |
| 0.01513  | 0.011092 | 0.81106  | 0.070705 | 0.12707  | -0.05079 | 0.2734  | 0.033316 | 0.47261  |
| 0.45899  | -0.01145 | 0.80513  | 0.475357 | 1.06E-27 | -0.00315 | 0.9459  | 0.137335 | 0.00294  |
| 0.00083  | 0.155308 | 0.00076  | 0.039235 | 0.39759  | -0.02246 | 0.62826 | 0.086231 | 0.06261  |
| 0.00661  | 0.130456 | 0.00475  | -0.01202 | 0.79563  | -0.02671 | 0.5647  | 0.183889 | 6.41E-05 |
| 7.04E-05 | 0.210109 | 4.66E-06 | 0.033946 | 0.46428  | -0.01523 | 0.74276 | 0.144903 | 0.00169  |
| 0.3686   | 0.176318 | 0.00013  | 0.164495 | 0.00036  | 0.063503 | 0.17068 | 0.099342 | 0.03184  |
| 0.16405  | -0.0335  | 0.47021  | 0.055829 | 0.22852  | 0.026335 | 0.57025 | 0.017034 | 0.71351  |
| 0.23761  | -0.04118 | 0.37456  | 0.009609 | 0.83592  | -0.02656 | 0.56703 | -0.0883  | 0.05654  |
| 0.02612  | 0.192409 | 2.84E-05 | 0.045908 | 0.3222   | -0.0066  | 0.88689 | 0.039834 | 0.39042  |
| 0.15141  | 0.03561  | 0.44266  | 0.034057 | 0.46282  | -0.03324 | 0.47368 | 0.128181 | 0.00554  |
| 0.00031  | 0.167622 | 0.00027  | 0.007007 | 0.87997  | -0.02397 | 0.6054  | 0.186415 | 5.05E-05 |
| 3.65E-09 | 0.214294 | 2.97E-06 | -0.03986 | 0.39014  | -0.04346 | 0.34871 | 0.092139 | 0.04659  |
| 1.98E-05 | 0.281362 | 6.04E-10 | 0.005683 | 0.90252  | 0.009371 | 0.83994 | 0.230496 | 4.76E-07 |
| 0.0002   | 0.217796 | 2.02E-06 | 0.047182 | 0.30894  | 0.078146 | 0.09164 | 0.168681 | 0.00025  |
| 0.52162  | -0.0254  | 0.58409  | 0.242415 | 1.13E-07 | -0.0806  | 0.08188 | 0.04979  | 0.28293  |
| 0.46208  | -0.03019 | 0.51514  | 0.058066 | 0.21039  | -0.04638 | 0.31724 | 0.006186 | 0.89394  |
| 6.97E-05 | 0.225036 | 8.96E-07 | 0.026915 | 0.56179  | 0.002696 | 0.95367 | 0.156561 | 0.00069  |

|          |          |          |          |          |          |         |          |          |
|----------|----------|----------|----------|----------|----------|---------|----------|----------|
| 4.09E-05 | 0.205652 | 7.46E-06 | 0.061674 | 0.18336  | 0.030225 | 0.51468 | 0.229517 | 5.34E-07 |
| 0.01905  | 0.139584 | 0.0025   | 0.056981 | 0.21904  | 0.019838 | 0.66895 | 0.13203  | 0.00426  |
| 4.73E-06 | 0.208571 | 5.49E-06 | 0.034711 | 0.45427  | -0.00089 | 0.98466 | 0.238874 | 1.75E-07 |
| 0.62831  | -0.01012 | 0.82742  | 0.03034  | 0.51308  | -0.0031  | 0.94675 | 0.164716 | 0.00035  |
| 8.62E-06 | 0.304999 | 1.64E-11 | 0.14887  | 0.00125  | 0.017957 | 0.69872 | 0.20253  | 1.03E-05 |
| 0.33436  | -0.03752 | 0.41852  | 0.032598 | 0.48222  | -0.0061  | 0.89536 | 0.145858 | 0.00158  |
| 0.43663  | 0.068877 | 0.13722  | 0.034157 | 0.46151  | -0.00267 | 0.95411 | 0.186834 | 4.85E-05 |
| 0.08722  | 0.080809 | 0.08108  | 0.097456 | 0.03525  | 0.076756 | 0.09758 | 0.253188 | 2.90E-08 |
| 0.98622  | 0.001382 | 0.97623  | 0.090996 | 0.04938  | -0.04041 | 0.3836  | 0.158988 | 0.00056  |
| 0.16589  | 0.079498 | 0.08615  | 0.122782 | 0.0079   | 0.049342 | 0.28729 | 0.053546 | 0.24815  |
| 0.32215  | 0.014592 | 0.75314  | 0.014846 | 0.74899  | -0.06971 | 0.13251 | 0.102029 | 0.02747  |
| 0.42193  | 0.032217 | 0.48735  | -0.01676 | 0.71797  | -0.03298 | 0.47705 | 0.013068 | 0.7782   |
| 0.70865  | 0.013608 | 0.7693   | 0.011145 | 0.81016  | -0.05625 | 0.22503 | 0.020279 | 0.66204  |
| 0.00405  | 0.189273 | 3.85E-05 | 0.074248 | 0.10906  | 0.061857 | 0.18206 | 0.300348 | 3.43E-11 |
| 0.11259  | -0.13814 | 0.00278  | 0.01983  | 0.66907  | -0.04016 | 0.38653 | -0.00608 | 0.89578  |
| 1.47E-09 | 0.367583 | 2.18E-16 | 0.150897 | 0.00107  | 0.043704 | 0.34601 | 0.146118 | 0.00154  |
| 0.04667  | 0.061591 | 0.18395  | -0.06103 | 0.188    | -0.06296 | 0.17435 | 0.138783 | 0.00265  |
| 0.00601  | 0.142787 | 0.00198  | -0.00877 | 0.85016  | -0.00932 | 0.84085 | 0.09364  | 0.04312  |
| 8.58E-06 | 0.320793 | 1.23E-12 | 0.022946 | 0.62088  | 0.037251 | 0.4219  | 0.142021 | 0.00209  |
| 0.01407  | 0.137208 | 0.00297  | 0.046705 | 0.31386  | -0.04702 | 0.3106  | 0.064391 | 0.16477  |
| 0.57984  | 0.001309 | 0.97749  | 0.080383 | 0.0827   | 0.066221 | 0.15307 | 0.103909 | 0.02473  |
| 0.02511  | -0.07325 | 0.11391  | 0.107875 | 0.01971  | 0.07885  | 0.08875 | 0.018846 | 0.68459  |
| 3.02E-17 | 0.418386 | 3.25E-21 | 0.131708 | 0.00436  | 0.027738 | 0.54988 | 0.250775 | 3.96E-08 |
| 0.91177  | 0.010858 | 0.81496  | 0.034684 | 0.45462  | -0.02128 | 0.64646 | 0.145915 | 0.00157  |
| 0.00037  | 0.18837  | 4.19E-05 | 0.309301 | 8.23E-12 | 0.028276 | 0.54218 | 0.204325 | 8.56E-06 |
| 2.07E-09 | 0.312302 | 5.05E-12 | 0.061871 | 0.18196  | 0.067244 | 0.14681 | 0.358017 | 1.44E-15 |
| 2.82E-06 | 0.254093 | 2.58E-08 | -0.01493 | 0.74758  | 0.006839 | 0.88283 | 0.220651 | 1.47E-06 |
| 0.49302  | -0.03533 | 0.4463   | 0.056032 | 0.22683  | 0.027182 | 0.55791 | 0.12643  | 0.00622  |
| 0.0078   | 0.142812 | 0.00198  | -0.01972 | 0.67085  | -0.00781 | 0.86632 | 0.212965 | 3.43E-06 |
| 2.10E-06 | 0.187079 | 4.74E-05 | 0.041902 | 0.36627  | 0.021571 | 0.64196 | 0.235601 | 2.60E-07 |
| 0.00033  | 0.206463 | 6.85E-06 | 0.05629  | 0.22469  | 0.019    | 0.68215 | 0.244137 | 9.15E-08 |
| 0.00029  | 0.186124 | 5.19E-05 | 0.062754 | 0.17579  | 0.039082 | 0.39943 | 0.286167 | 2.98E-10 |
| 4.03E-05 | 0.254047 | 2.59E-08 | 0.082961 | 0.07328  | -0.00946 | 0.83846 | 0.152879 | 0.00092  |
| 0.62951  | -0.00479 | 0.91785  | 0.046773 | 0.31316  | 0.010237 | 0.82537 | 0.064821 | 0.16196  |
| 0.07855  | 0.15568  | 0.00074  | -0.01377 | 0.76666  | -0.0303  | 0.5137  | -0.01519 | 0.74329  |
| 0.08953  | 0.030951 | 0.50463  | 0.095144 | 0.03986  | -0.02994 | 0.51871 | 0.182979 | 6.97E-05 |
| 4.48E-07 | 0.233346 | 3.40E-07 | 0.122103 | 0.00825  | -0.02149 | 0.64315 | 0.087835 | 0.05787  |
| 0.05632  | 0.108948 | 0.01852  | 0.036671 | 0.42917  | 0.039848 | 0.39026 | 0.192799 | 2.73E-05 |
| 0.66691  | -0.04512 | 0.33055  | 0.006169 | 0.89422  | -0.0425  | 0.35946 | 0.039485 | 0.39459  |
| 0.29859  | -0.03105 | 0.50328  | -0.00725 | 0.87591  | -0.0121  | 0.79433 | 0.181932 | 7.68E-05 |
| 0.02316  | 0.129824 | 0.00496  | 0.12063  | 0.00907  | 0.052155 | 0.26066 | -0.06729 | 0.14655  |
| 0.46439  | 0.017429 | 0.70716  | -0.00742 | 0.87287  | -0.04548 | 0.32671 | 0.251493 | 3.61E-08 |
| 0.99262  | 0.048775 | 0.29287  | 0.017016 | 0.7138   | -0.07011 | 0.1303  | 0.075587 | 0.1028   |
| 0.69797  | -0.00769 | 0.86835  | 0.006692 | 0.88531  | -0.03641 | 0.4325  | 0.141077 | 0.00224  |
| 0.4885   | 0.093456 | 0.04353  | 0.224755 | 9.25E-07 | 0.051171 | 0.26978 | -0.01452 | 0.75435  |

|         |          |          |          |          |          |         |          |          |
|---------|----------|----------|----------|----------|----------|---------|----------|----------|
| 0.09768 | -0.04112 | 0.37527  | 0.037821 | 0.41483  | 0.000159 | 0.99727 | -0.04489 | 0.33305  |
| 0.16595 | 0.08792  | 0.05762  | 0.075209 | 0.10454  | 0.024513 | 0.59722 | 0.168382 | 0.00026  |
| 0.24164 | 0.091691 | 0.04767  | 0.075555 | 0.10295  | 0.045709 | 0.32431 | 0.084595 | 0.06778  |
| 0.02704 | 0.099008 | 0.03243  | 0.15795  | 0.00061  | 0.039024 | 0.40013 | 0.158533 | 0.00058  |
| 0.23825 | -0.00037 | 0.99357  | 0.156009 | 0.00072  | 0.108333 | 0.0192  | 0.015627 | 0.73626  |
| 0.63445 | 0.023828 | 0.60751  | 0.037492 | 0.41891  | 0.024036 | 0.60439 | 0.009967 | 0.82991  |
| 0.7971  | 0.01767  | 0.7033   | 0.034552 | 0.45634  | 0.022069 | 0.6343  | -0.05178 | 0.26413  |
| 0.48019 | -0.032   | 0.49026  | 0.063878 | 0.16817  | 0.081771 | 0.07751 | 0.010877 | 0.81466  |
| 0.37713 | -0.00114 | 0.98033  | 0.069882 | 0.13157  | 0.077168 | 0.09579 | 0.027735 | 0.54993  |
| 0.66438 | 0.028045 | 0.54548  | 0.031836 | 0.49251  | 0.031493 | 0.49719 | 0.000626 | 0.98924  |
| 0.71292 | -0.0232  | 0.61705  | 0.04292  | 0.35473  | 0.051931 | 0.26272 | -0.02434 | 0.59987  |
| 0.70021 | -0.07442 | 0.10823  | 0.007514 | 0.87136  | -0.01393 | 0.76403 | -0.07333 | 0.11354  |
| 0.04633 | 0.076177 | 0.10014  | 0.073549 | 0.11245  | 0.061101 | 0.18747 | 0.124607 | 0.00702  |
| 0.11036 | -0.08121 | 0.07957  | 0.1368   | 0.00305  | -0.00376 | 0.9354  | 0.002782 | 0.95219  |
| 0.77222 | -0.00813 | 0.86088  | 0.061371 | 0.18552  | 0.041248 | 0.3738  | -0.00901 | 0.84596  |
| 0.12901 | -0.03726 | 0.42175  | 0.104879 | 0.02341  | 0.096546 | 0.03701 | 0.032623 | 0.48188  |
| 0.23314 | 0.102447 | 0.02684  | 0.062669 | 0.17638  | 0.035256 | 0.4472  | 0.027266 | 0.55669  |
| 0.06178 | 0.036635 | 0.42962  | 0.055789 | 0.22886  | 0.034787 | 0.45327 | 0.249893 | 4.43E-08 |
| 0.26708 | 0.072458 | 0.11789  | 0.102274 | 0.0271   | 0.058425 | 0.20757 | 0.155644 | 0.00074  |
| 0.74162 | 0.046173 | 0.31942  | 0.099763 | 0.03112  | 0.103835 | 0.02484 | 0.077143 | 0.09589  |
| 0.479   | -0.03843 | 0.40737  | 0.041071 | 0.37586  | 0.049573 | 0.28504 | 0.086457 | 0.06192  |
| 0.00101 | -0.12734 | 0.00586  | 0.056168 | 0.22571  | 0.03269  | 0.48097 | -0.00403 | 0.93083  |
| 0.18897 | 0.080392 | 0.08266  | 0.065803 | 0.15568  | 0.03575  | 0.44086 | 0.02863  | 0.53712  |
| 0.12271 | -0.06008 | 0.19497  | 0.011441 | 0.80524  | -0.00436 | 0.92522 | 0.017831 | 0.70073  |
| 0.09283 | -0.06794 | 0.14266  | -0.00389 | 0.93321  | -0.0182  | 0.6948  | 0.066539 | 0.1511   |
| 0.40525 | -0.00033 | 0.9944   | 0.049531 | 0.28545  | 0.033787 | 0.46638 | 0.022597 | 0.62621  |
| 0.26057 | 0.013778 | 0.76649  | 0.089137 | 0.05424  | 0.054384 | 0.24081 | 0.003607 | 0.93804  |
| 0.55064 | 0.051858 | 0.2634   | 0.082319 | 0.07554  | 0.028533 | 0.5385  | 0.071283 | 0.12398  |
| 0.64762 | 0.018451 | 0.69086  | 0.047551 | 0.30517  | 0.026069 | 0.57416 | 0.036427 | 0.43226  |
| 0.5343  | 0.078275 | 0.09111  | 0.206847 | 6.58E-06 | 0.042994 | 0.3539  | 0.043388 | 0.34951  |
| 0.94895 | 0.018088 | 0.69664  | 0.104407 | 0.02405  | 0.07476  | 0.10663 | 0.047586 | 0.30482  |
| 0.57074 | -0.00232 | 0.96009  | 0.069156 | 0.13563  | 0.031701 | 0.49435 | 0.054749 | 0.23766  |
| 0.25655 | 0.072362 | 0.11838  | 0.095771 | 0.03856  | 0.069746 | 0.13232 | 0.101897 | 0.02768  |
| 0.52773 | -0.04309 | 0.35287  | 0.042612 | 0.3582   | 0.033345 | 0.47222 | 0.012712 | 0.78409  |
| 0.00046 | -0.17794 | 0.00011  | 0.020582 | 0.65731  | 0.107767 | 0.01984 | -0.14258 | 0.00201  |
| 0.95674 | 0.041832 | 0.36707  | 0.056767 | 0.22079  | 0.032071 | 0.48933 | 0.127286 | 0.00588  |
| 0.01219 | 0.187652 | 4.49E-05 | 0.093227 | 0.04405  | 0.088613 | 0.05567 | 0.105681 | 0.02237  |
| 0.0251  | 0.134344 | 0.00363  | 0.041888 | 0.36643  | 0.076123 | 0.10038 | 0.112496 | 0.015    |
| 0.49589 | 0.005615 | 0.90368  | 0.030956 | 0.50456  | 0.004558 | 0.92174 | 0.035104 | 0.44916  |
| 0.68806 | -0.02471 | 0.59425  | 0.083912 | 0.07003  | 0.108966 | 0.0185  | 0.115515 | 0.01249  |
| 0.98999 | 0.037051 | 0.42441  | 0.087981 | 0.05745  | 0.045451 | 0.32705 | 0.020163 | 0.66385  |
| 0.48959 | -0.01684 | 0.71666  | 0.167133 | 0.00029  | 0.03626  | 0.43437 | 0.110355 | 0.01705  |
| 0.76572 | 0.042346 | 0.36121  | 0.042719 | 0.35699  | 0.035919 | 0.4387  | 0.04502  | 0.33166  |
| 0.45411 | 0.078593 | 0.08979  | 0.111133 | 0.01609  | 0.10815  | 0.0194  | 0.12404  | 0.00728  |
| 0.15066 | 0.077627 | 0.09382  | 0.128302 | 0.00549  | 0.125821 | 0.00648 | 0.178628 | 0.0001   |

|          |          |          |          |          |          |         |          |          |
|----------|----------|----------|----------|----------|----------|---------|----------|----------|
| 0.0052   | 0.154157 | 0.00083  | 0.134774 | 0.00352  | 0.14978  | 0.00117 | 0.149955 | 0.00115  |
| 0.00687  | 0.141219 | 0.00222  | 0.108693 | 0.0188   | 0.096782 | 0.03655 | 0.160738 | 0.00049  |
| 0.20241  | 0.056385 | 0.22391  | 0.098489 | 0.03335  | 0.071967 | 0.12041 | 0.017681 | 0.70313  |
| 0.64014  | -0.00408 | 0.92998  | 0.054113 | 0.24316  | 0.034179 | 0.46122 | 0.012334 | 0.79036  |
| 0.58285  | -0.03321 | 0.47405  | 0.103064 | 0.02593  | 0.010125 | 0.82726 | 0.030923 | 0.50501  |
| 0.53155  | 0.033636 | 0.46837  | 0.081726 | 0.07767  | 0.078615 | 0.0897  | 0.053375 | 0.24966  |
| 0.03678  | 0.134681 | 0.00355  | 0.105661 | 0.02239  | 0.093083 | 0.04438 | 0.176897 | 0.00012  |
| 0.98376  | 0.047905 | 0.30158  | 0.050405 | 0.27702  | 0.066399 | 0.15196 | 0.011696 | 0.80098  |
| 0.02807  | 0.131429 | 0.00444  | 0.123058 | 0.00776  | 0.125335 | 0.00669 | 0.281709 | 5.74E-10 |
| 0.77905  | -0.01269 | 0.78438  | 0.122508 | 0.00804  | 0.122109 | 0.00825 | 0.055989 | 0.22719  |
| 0.67963  | 0.0042   | 0.92787  | 0.051349 | 0.26811  | 0.048861 | 0.29203 | -0.0235  | 0.61253  |
| 0.28597  | 0.023501 | 0.61245  | 0.151273 | 0.00104  | -0.01249 | 0.78773 | 0.004716 | 0.91904  |
| 0.49534  | 0.006779 | 0.88383  | 0.351888 | 4.65E-15 | 0.016878 | 0.71603 | -0.01277 | 0.78312  |
| 0.66699  | -0.00742 | 0.8729   | 0.038419 | 0.40749  | 0.028887 | 0.53347 | -0.0198  | 0.66961  |
| 0.34231  | 0.008845 | 0.84882  | 0.020861 | 0.65296  | -0.00609 | 0.89557 | -0.02533 | 0.58512  |
| 0.41393  | 0.048605 | 0.29456  | 0.019452 | 0.67502  | 0.032914 | 0.47797 | 0.024984 | 0.5902   |
| 0.31815  | 0.074939 | 0.1058   | 0.047261 | 0.30814  | 0.123839 | 0.00738 | 0.077915 | 0.09261  |
| 0.98497  | 0.003066 | 0.94731  | 0.04469  | 0.33522  | 0.045452 | 0.32704 | 0.03215  | 0.48825  |
| 0.34486  | -0.01564 | 0.73607  | 0.043361 | 0.3498   | 0.046655 | 0.31438 | 0.039476 | 0.3947   |
| 0.33663  | 0.00815  | 0.86057  | 0.078332 | 0.09087  | 0.074273 | 0.10894 | -0.02595 | 0.57589  |
| 0.0041   | 0.172134 | 0.00019  | -0.01033 | 0.8239   | -0.03291 | 0.47808 | -0.16479 | 0.00035  |
| 1.95E-13 | 0.426008 | 5.17E-22 | 0.030388 | 0.51242  | 0.092878 | 0.04485 | -0.15246 | 0.00095  |
| 7.91E-05 | 0.144808 | 0.0017   | -0.01323 | 0.77556  | -0.00417 | 0.92833 | -0.00081 | 0.98605  |
| 0.00047  | 0.298173 | 4.82E-11 | 0.021552 | 0.64226  | 0.047732 | 0.30333 | 0.052829 | 0.25455  |
| 0.00012  | 0.214723 | 2.83E-06 | 0.064073 | 0.16687  | 0.035331 | 0.44624 | -0.0405  | 0.38254  |
| 1.28E-05 | 0.305309 | 1.57E-11 | 0.00129  | 0.97782  | -0.00355 | 0.93906 | -0.05176 | 0.26429  |
| 0.01921  | 0.13613  | 0.0032   | -0.06293 | 0.17458  | 0.033258 | 0.47338 | 0.012099 | 0.79428  |
| 9.01E-06 | 0.350814 | 5.70E-15 | -0.0578  | 0.2125   | 0.077847 | 0.09289 | 0.025181 | 0.58727  |
| 0.35183  | 0.17608  | 0.00013  | -0.00061 | 0.98949  | 0.046842 | 0.31244 | -0.26323 | 7.68E-09 |
| 0.00463  | 0.034303 | 0.45959  | 0.012608 | 0.78582  | 0.001548 | 0.97339 | -0.06775 | 0.14378  |
| 2.71E-12 | 0.352556 | 4.10E-15 | -0.03172 | 0.49409  | 0.007717 | 0.8679  | -0.01832 | 0.69294  |
| 1.50E-05 | 0.112132 | 0.01534  | 0.039664 | 0.39245  | 0.000684 | 0.98824 | 0.07737  | 0.09492  |
| 0.69917  | -0.0607  | 0.19036  | -0.12359 | 0.0075   | -0.07578 | 0.10192 | -0.1108  | 0.0166   |
| 2.14E-08 | -0.21398 | 3.07E-06 | 0.082343 | 0.07545  | 0.021429 | 0.64415 | 0.020514 | 0.65837  |
| 0.00158  | 0.129781 | 0.00497  | 0.070551 | 0.1279   | -0.05848 | 0.20717 | -0.22381 | 1.03E-06 |
| 1.59E-06 | 0.179196 | 9.87E-05 | -0.06118 | 0.1869   | -0.03114 | 0.502   | -0.16059 | 0.00049  |
| 1.45E-12 | 0.362371 | 6.15E-16 | 0.014591 | 0.75316  | 0.023998 | 0.60495 | -0.02024 | 0.66266  |
| 4.38E-13 | 0.38502  | 5.97E-18 | 0.053037 | 0.25267  | 0.023986 | 0.60513 | 0.053842 | 0.24554  |
| 0.00203  | 0.092368 | 0.04604  | -0.07755 | 0.09415  | 0.029122 | 0.53014 | -0.08832 | 0.0565   |
| 1.07E-06 | 0.239145 | 1.69E-07 | 0.041099 | 0.37553  | 0.067392 | 0.14592 | -0.04338 | 0.34956  |
| 2.79E-20 | 0.345751 | 1.47E-14 | 0.005563 | 0.90456  | 0.013014 | 0.7791  | 0.032645 | 0.48158  |
| 2.83E-06 | 0.195033 | 2.19E-05 | 0.027276 | 0.55656  | 0.01188  | 0.79791 | -0.02861 | 0.53734  |
| 0.00757  | 0.069768 | 0.1322   | -0.04832 | 0.29739  | -0.06089 | 0.18902 | -0.21819 | 1.94E-06 |
| 1.52E-09 | 0.335138 | 1.01E-13 | -0.05073 | 0.27397  | 0.09084  | 0.04978 | -0.05178 | 0.26411  |
| 0.95964  | -0.00739 | 0.87348  | -0.04947 | 0.28602  | 0.0443   | 0.33945 | -0.12608 | 0.00637  |

|          |          |          |          |         |          |         |          |          |
|----------|----------|----------|----------|---------|----------|---------|----------|----------|
| 1.72E-07 | 0.179405 | 9.69E-05 | -0.04718 | 0.309   | 0.003264 | 0.94391 | -0.05376 | 0.24627  |
| 2.48E-38 | 0.611998 | 2.49E-49 | 0.048428 | 0.29632 | 0.062355 | 0.17856 | 0.12142  | 0.00862  |
| 8.85E-10 | 0.374954 | 4.90E-17 | 0.147697 | 0.00137 | -0.00928 | 0.84152 | 0.111898 | 0.01555  |
| 6.14E-07 | 0.261757 | 9.36E-09 | -0.00878 | 0.84997 | -0.00803 | 0.86254 | -0.15753 | 0.00063  |
| 2.54E-34 | 0.360353 | 9.13E-16 | 0.008091 | 0.86157 | 0.033189 | 0.4743  | 0.073937 | 0.11056  |
| 0.51577  | -0.11361 | 0.01403  | 0.100622 | 0.02969 | 0.011519 | 0.80393 | -0.15412 | 0.00083  |
| 0.58453  | -0.06591 | 0.15499  | -0.07814 | 0.09165 | -0.08376 | 0.07056 | -0.03927 | 0.39717  |
| 1.26E-07 | 0.221344 | 1.36E-06 | -0.10079 | 0.02942 | 0.075412 | 0.10361 | -0.01767 | 0.70337  |
| 2.10E-13 | 0.364981 | 3.67E-16 | -0.01674 | 0.71823 | 0.065712 | 0.15625 | -0.09946 | 0.03164  |
| 2.56E-27 | 0.491029 | 1.04E-29 | 0.003589 | 0.93834 | 0.093342 | 0.04379 | 0.069644 | 0.13289  |
| 6.74E-20 | 0.408501 | 3.29E-20 | 0.042096 | 0.36406 | 0.03293  | 0.47776 | 0.127901 | 0.00564  |
| 0.24024  | 0.008117 | 0.86113  | -0.02521 | 0.58691 | -0.08582 | 0.06388 | -0.13628 | 0.00317  |
| 6.24E-14 | 0.397789 | 3.72E-19 | 0.022999 | 0.62007 | 0.058941 | 0.20358 | -0.09328 | 0.04392  |
| 0.69302  | 0.023687 | 0.60965  | -0.03426 | 0.46014 | 0.015122 | 0.74448 | -0.08198 | 0.07677  |
| 0.00368  | -0.01075 | 0.81683  | 0.033968 | 0.46398 | -0.0587  | 0.20546 | 0.036678 | 0.42909  |
| 2.63E-33 | 0.528447 | 5.98E-35 | 0.045849 | 0.32282 | 0.013289 | 0.77456 | 0.026927 | 0.56161  |
| 0.00051  | 0.088185 | 0.05687  | -0.06993 | 0.13129 | 0.020368 | 0.66064 | 0.078962 | 0.08829  |
| 2.40E-13 | 0.444847 | 4.47E-24 | -0.00885 | 0.84872 | 0.072981 | 0.11526 | 0.002001 | 0.9656   |
| 0.64639  | 0.048672 | 0.29389  | -0.05732 | 0.21627 | 0.052006 | 0.26203 | -0.12846 | 0.00543  |
| 2.03E-10 | 0.19844  | 1.56E-05 | -0.10665 | 0.02116 | -0.08416 | 0.0692  | 0.002156 | 0.96293  |
| 4.01E-12 | 0.493133 | 5.47E-30 | 0.097484 | 0.0352  | 0.153572 | 0.00087 | 0.039867 | 0.39003  |
| 0.00068  | -0.19708 | 1.79E-05 | 0.004643 | 0.92029 | -0.00755 | 0.87081 | -0.05147 | 0.26696  |
| 0.01252  | 0.024502 | 0.5974   | -0.04559 | 0.3256  | -0.05953 | 0.19908 | -0.07915 | 0.08752  |
| 1.52E-08 | 0.222194 | 1.24E-06 | 0.010743 | 0.8169  | -0.00542 | 0.90697 | -0.00621 | 0.89351  |
| 0.00553  | 0.105479 | 0.02263  | -0.05127 | 0.26889 | -0.11087 | 0.01653 | 0.001467 | 0.97478  |
| 0.58287  | 0.054434 | 0.24038  | -0.03512 | 0.44901 | 0.021265 | 0.64669 | -0.27156 | 2.44E-09 |
| 0.03894  | -0.0676  | 0.14469  | 0.061457 | 0.18491 | 0.083608 | 0.07106 | -0.23179 | 4.09E-07 |
| 2.15E-08 | 0.194892 | 2.22E-05 | 0.001406 | 0.97583 | 0.002992 | 0.94858 | -0.00161 | 0.9723   |
| 0.02207  | 0.066801 | 0.14949  | -0.07807 | 0.09194 | -0.0516  | 0.26577 | -0.04178 | 0.36772  |
| 9.48E-05 | 0.255789 | 2.07E-08 | -0.09454 | 0.04115 | -0.01555 | 0.73747 | -0.08171 | 0.07775  |
| 0.0201   | 0.116882 | 0.01148  | -0.08053 | 0.08213 | 0.008272 | 0.85851 | 0.001873 | 0.9678   |
| 0.12296  | 0.24925  | 4.81E-08 | -0.00515 | 0.91162 | 0.063568 | 0.17024 | 0.03363  | 0.46844  |
| 1.80E-36 | 0.599193 | 7.56E-47 | 0.110136 | 0.01727 | 0.095981 | 0.03813 | 0.024025 | 0.60454  |
| 2.19E-05 | -0.20761 | 6.07E-06 | -0.15159 | 0.00102 | -0.14239 | 0.00204 | -0.15814 | 0.0006   |
| 0.40212  | -0.01666 | 0.71951  | -0.07019 | 0.12985 | -0.10036 | 0.03012 | -0.05239 | 0.25853  |
| 0.0727   | -0.14472 | 0.00172  | -0.10444 | 0.02401 | -0.06081 | 0.18958 | -0.17861 | 0.0001   |
| 0.00194  | 0.250777 | 3.96E-08 | -0.07729 | 0.09526 | 0.094556 | 0.0411  | -0.1188  | 0.01018  |
| 0.13724  | 0.127221 | 0.0059   | 0.01566  | 0.73572 | 0.031351 | 0.49914 | -0.03519 | 0.44807  |
| 0.00189  | 0.155573 | 0.00074  | 0.038615 | 0.4051  | 0.00815  | 0.86056 | 0.029613 | 0.52323  |
| 4.81E-12 | 0.377553 | 2.86E-17 | 0.003182 | 0.94533 | 0.043373 | 0.34967 | 0.017416 | 0.70738  |
| 4.51E-17 | 0.453298 | 4.81E-25 | 0.027138 | 0.55856 | -0.00848 | 0.85492 | 0.100887 | 0.02926  |
| 0.08152  | 0.055091 | 0.23474  | -0.06536 | 0.15847 | -0.09599 | 0.03811 | -0.10106 | 0.02899  |
| 0.97166  | -0.06129 | 0.18612  | -0.03488 | 0.45203 | -0.0076  | 0.86984 | 0.053223 | 0.25102  |
| 8.33E-06 | 0.304513 | 1.78E-11 | 0.076028 | 0.10081 | 0.061948 | 0.18142 | -0.10899 | 0.01847  |
| 4.38E-13 | 0.191917 | 2.98E-05 | 0.035196 | 0.44798 | 0.024598 | 0.59596 | 0.113251 | 0.01434  |



|          |          |          |          |          |          |         |          |          |
|----------|----------|----------|----------|----------|----------|---------|----------|----------|
| 0.00312  | 0.095599 | 0.03891  | -0.08396 | 0.06987  | -0.07501 | 0.10547 | -0.14052 | 0.00234  |
| 0.13568  | 0.105502 | 0.0226   | -0.01879 | 0.68545  | 0.06525  | 0.15919 | 0.070095 | 0.13039  |
| 1.34E-10 | 0.278637 | 8.95E-10 | 0.005123 | 0.91207  | -0.06603 | 0.15426 | 0.001    | 0.98281  |
| 1.34E-06 | 0.260992 | 1.04E-08 | 0.028985 | 0.53209  | 0.02275  | 0.62386 | -0.18534 | 5.59E-05 |
| 0.00148  | 0.077321 | 0.09513  | -0.09465 | 0.0409   | -0.09986 | 0.03096 | -0.06176 | 0.18277  |
| 0.03125  | 0.212131 | 3.75E-06 | -0.11751 | 0.01104  | 0.074373 | 0.10846 | -0.0892  | 0.05406  |
| 2.89E-06 | 0.183353 | 6.73E-05 | 0.041323 | 0.37294  | 0.025335 | 0.58499 | -0.11191 | 0.01554  |
| 1.65E-13 | 0.385112 | 5.85E-18 | -0.02207 | 0.63431  | 0.016375 | 0.72414 | -0.06408 | 0.16679  |
| 8.76E-07 | 0.311391 | 5.86E-12 | 0.074101 | 0.10977  | 0.0471   | 0.30978 | 0.030355 | 0.51288  |
| 3.28E-06 | 0.320914 | 1.20E-12 | 0.045895 | 0.32234  | 0.102505 | 0.02676 | 0.06722  | 0.14695  |
| 2.63E-07 | 0.231275 | 4.35E-07 | -0.02289 | 0.62177  | 0.060045 | 0.19523 | 0.004481 | 0.92307  |
| 0.14585  | 0.091435 | 0.04829  | 0.018779 | 0.68565  | 0.025502 | 0.58251 | 0.018651 | 0.68768  |
| 2.57E-31 | 0.621605 | 2.87E-51 | 0.002832 | 0.95133  | 0.096946 | 0.03623 | 0.098425 | 0.03347  |
| 0.00036  | -0.20124 | 1.18E-05 | -0.08424 | 0.06895  | -0.00634 | 0.89135 | -0.22468 | 9.33E-07 |
| 4.02E-18 | 0.351533 | 4.97E-15 | 0.30323  | 2.18E-11 | -0.01877 | 0.68578 | 0.028799 | 0.53472  |
| 4.34E-07 | 0.307968 | 1.02E-11 | 0.004539 | 0.92207  | 0.030488 | 0.51103 | -0.14222 | 0.00206  |
| 0.22171  | -0.05991 | 0.19626  | -0.03628 | 0.43409  | -0.09499 | 0.04018 | -0.16771 | 0.00027  |
| 0.12388  | 0.167622 | 0.00027  | 0.013678 | 0.76814  | -0.03625 | 0.43446 | -0.06568 | 0.15648  |
| 1.08E-19 | 0.389902 | 2.10E-18 | 0.029525 | 0.52447  | 0.000743 | 0.98722 | -0.04949 | 0.28584  |
| 3.23E-05 | 0.219476 | 1.68E-06 | -0.02614 | 0.57317  | 0.008481 | 0.85496 | -0.09931 | 0.03191  |
| 4.17E-22 | 0.448334 | 1.80E-24 | -0.00951 | 0.8376   | 0.02837  | 0.54082 | -0.08981 | 0.05245  |
| 2.76E-09 | 0.180031 | 9.15E-05 | -0.06243 | 0.17801  | -0.06998 | 0.13101 | -0.02894 | 0.53275  |
| 2.08E-17 | 0.36031  | 9.20E-16 | 0.027152 | 0.55835  | 0.032639 | 0.48167 | 0.067769 | 0.14367  |
| 4.30E-05 | 0.208753 | 5.38E-06 | 0.026081 | 0.57398  | -0.0187  | 0.68692 | -0.2522  | 3.29E-08 |
| 4.59E-32 | 0.539588 | 1.22E-36 | 0.057102 | 0.21806  | 0.004574 | 0.92147 | 0.047264 | 0.3081   |
| 2.81E-08 | 0.31714  | 2.27E-12 | -0.07994 | 0.08441  | 0.028648 | 0.53687 | -0.068   | 0.14229  |
| 4.48E-13 | 0.33145  | 1.95E-13 | 0.027514 | 0.55311  | 0.056249 | 0.22504 | -0.05993 | 0.19609  |
| 0.00154  | 0.214807 | 2.81E-06 | -0.01262 | 0.78567  | -0.06885 | 0.13738 | 0.065905 | 0.15504  |
| 2.75E-22 | 0.545029 | 1.73E-37 | -0.02314 | 0.61795  | 0.035894 | 0.43902 | -0.00196 | 0.96635  |
| 0.00023  | 0.201087 | 1.19E-05 | 0.038946 | 0.40108  | -0.01961 | 0.67246 | -0.155   | 0.00078  |
| 6.31E-07 | 0.252893 | 3.01E-08 | 0.006878 | 0.88215  | -0.01777 | 0.70175 | -0.00758 | 0.87022  |
| 0.43487  | 0.161515 | 0.00046  | 0.02364  | 0.61036  | 0.002184 | 0.96246 | -0.19532 | 2.13E-05 |
| 2.22E-27 | 0.485293 | 5.79E-29 | 0.033485 | 0.47037  | 0.026839 | 0.56289 | -0.01208 | 0.79458  |
| 0.71448  | -0.02528 | 0.58585  | -0.00948 | 0.83804  | -0.07701 | 0.09647 | -0.11708 | 0.01134  |
| 0.60606  | 0.064146 | 0.16638  | 0.064608 | 0.16335  | -0.06903 | 0.13636 | -0.1497  | 0.00118  |
| 0.00216  | -0.04099 | 0.3768   | -0.06036 | 0.19289  | 0.023423 | 0.61364 | 0.051454 | 0.26714  |
| 1.29E-07 | 0.419992 | 2.21E-21 | 0.014999 | 0.74647  | 0.107223 | 0.02047 | 0.062802 | 0.17546  |
| 0.21264  | -0.04398 | 0.34297  | 0.029452 | 0.5255   | -0.015   | 0.74654 | -0.12272 | 0.00793  |
| 9.22E-24 | 0.41361  | 1.00E-20 | -0.01716 | 0.71149  | 0.017388 | 0.70783 | -0.0611  | 0.18746  |
| 2.11E-07 | 0.259118 | 1.33E-08 | -0.09113 | 0.04904  | 0.015904 | 0.73176 | -0.12321 | 0.00769  |
| 4.17E-16 | 0.356893 | 1.79E-15 | -0.00819 | 0.85986  | 0.013261 | 0.77501 | -0.07505 | 0.10526  |
| 2.67E-05 | 0.238482 | 1.84E-07 | -0.0085  | 0.85472  | -0.03428 | 0.45984 | -0.03123 | 0.50073  |
| 0.00103  | 0.161942 | 0.00044  | -0.02755 | 0.55253  | -0.05809 | 0.21022 | -0.14863 | 0.00128  |
| 0.23275  | -0.11774 | 0.01088  | 0.030126 | 0.51606  | -0.06017 | 0.19429 | -0.11219 | 0.01528  |
| 5.87E-08 | -0.29433 | 8.72E-11 | 0.038571 | 0.40563  | -0.0182  | 0.69487 | -0.06921 | 0.1353   |

|          |          |          |          |          |          |         |          |          |
|----------|----------|----------|----------|----------|----------|---------|----------|----------|
| 0.19626  | 0.046127 | 0.31989  | 0.034422 | 0.45803  | 0.005731 | 0.9017  | -0.04911 | 0.28956  |
| 3.97E-05 | -0.20649 | 6.83E-06 | -0.01201 | 0.79577  | -0.0142  | 0.75952 | -0.01398 | 0.76316  |
| 8.90E-12 | -0.36053 | 8.81E-16 | 0.029019 | 0.5316   | -0.00535 | 0.90819 | -0.01644 | 0.72314  |
| 0.00099  | -0.20928 | 5.09E-06 | -0.00861 | 0.85281  | -0.01802 | 0.69777 | -0.01869 | 0.68707  |
| 1.55E-05 | -0.22657 | 7.51E-07 | 0.018523 | 0.68971  | -0.04214 | 0.36358 | -0.06862 | 0.13872  |
| 0.0001   | -0.18475 | 5.91E-05 | -0.04833 | 0.29731  | 0.005073 | 0.91293 | -0.06409 | 0.16672  |
| 0.01363  | -0.14446 | 0.00175  | 0.032318 | 0.48599  | 0.010292 | 0.82446 | -0.10512 | 0.0231   |
| 0.00123  | -0.21021 | 4.61E-06 | 0.010557 | 0.82002  | 0.00599  | 0.89727 | -0.09629 | 0.03751  |
| 1.96E-05 | -0.21397 | 3.08E-06 | 0.016119 | 0.72828  | -0.00238 | 0.95901 | -0.0587  | 0.20544  |
| 9.71E-05 | -0.15369 | 0.00086  | -0.00478 | 0.91787  | -0.00169 | 0.97088 | -0.01236 | 0.78987  |
| 7.56E-05 | -0.16051 | 0.0005   | -0.00124 | 0.97861  | 0.002758 | 0.95261 | -0.03784 | 0.41458  |
| 2.82E-05 | -0.19986 | 1.35E-05 | -0.02877 | 0.53509  | -0.00064 | 0.98895 | -0.14161 | 0.00216  |
| 0.00022  | 0.261868 | 9.22E-09 | 0.027926 | 0.54718  | -0.044   | 0.34278 | -0.03243 | 0.48452  |
| 1.71E-07 | 0.215872 | 2.50E-06 | 0.038885 | 0.40182  | -0.09114 | 0.04904 | -0.03116 | 0.5018   |
| 0.00145  | 0.163867 | 0.00038  | 0.044766 | 0.33439  | -0.04366 | 0.3465  | 0.050308 | 0.27795  |
| 1.44E-24 | 0.50626  | 9.14E-32 | 0.020083 | 0.66511  | 0.037074 | 0.42411 | -0.15048 | 0.00111  |
| 3.38E-06 | 0.190462 | 3.43E-05 | -0.02379 | 0.60805  | 0.004723 | 0.91893 | -0.1634  | 0.00039  |
| 0.33684  | -0.09984 | 0.031    | -0.07739 | 0.09483  | -0.06068 | 0.19053 | -0.20457 | 8.34E-06 |
| 0.01102  | 0.114411 | 0.01336  | -0.01606 | 0.72925  | -0.02449 | 0.59755 | -0.02738 | 0.5551   |
| 8.88E-34 | 0.514824 | 5.75E-33 | -0.01348 | 0.77141  | 0.092902 | 0.04479 | 0.07465  | 0.10715  |
| 4.13E-16 | 0.301482 | 2.87E-11 | -0.0964  | 0.03729  | -0.03615 | 0.43582 | -0.0541  | 0.24324  |
| 0.89936  | -0.07327 | 0.11383  | -0.0397  | 0.39201  | -0.05011 | 0.27989 | -0.08829 | 0.05656  |
| 1.22E-21 | 0.434315 | 6.60E-23 | 0.034911 | 0.45167  | 0.039167 | 0.39841 | 0.041565 | 0.37015  |
| 0.00763  | 0.149734 | 0.00117  | 0.266512 | 4.91E-09 | 0.059172 | 0.20181 | 0.055048 | 0.2351   |
| 0.01978  | 0.109079 | 0.01838  | -0.06622 | 0.15305  | -0.0557  | 0.22956 | -0.23821 | 1.90E-07 |
| 1.34E-07 | 0.372509 | 8.08E-17 | -0.04757 | 0.30501  | -0.01767 | 0.70326 | -0.03772 | 0.41614  |
| 1.93E-08 | 0.330347 | 2.36E-13 | 0.011198 | 0.80928  | 0.126065 | 0.00637 | 0.111368 | 0.01605  |
| 0.02525  | 0.112239 | 0.01524  | -0.02922 | 0.52877  | -0.02881 | 0.53452 | -0.00212 | 0.96358  |
| 4.71E-23 | 0.458676 | 1.13E-25 | -0.0671  | 0.14765  | -0.00182 | 0.96871 | 0.03505  | 0.44986  |
| 0.03254  | 0.161623 | 0.00045  | 0.042107 | 0.36393  | -0.00024 | 0.99579 | -0.0426  | 0.3583   |
| 0.80522  | -0.00593 | 0.89823  | -0.10843 | 0.01908  | -0.04232 | 0.36149 | -0.06774 | 0.14386  |
| 0.00725  | 0.170219 | 0.00022  | 0.013626 | 0.76899  | -0.04548 | 0.32677 | -0.06236 | 0.17856  |
| 4.69E-17 | 0.315283 | 3.09E-12 | -0.00821 | 0.85951  | 0.098624 | 0.03311 | -0.00024 | 0.99581  |
| 1.32E-19 | 0.378111 | 2.55E-17 | 0.025297 | 0.58556  | 0.056796 | 0.22055 | 0.096248 | 0.0376   |
| 0.00486  | 0.11992  | 0.00949  | -0.09673 | 0.03666  | 0.038663 | 0.40451 | -0.04676 | 0.31326  |
| 0.31511  | -0.06285 | 0.17515  | -0.06033 | 0.19312  | -0.01647 | 0.72256 | -0.12368 | 0.00745  |
| 0.24068  | 0.028193 | 0.54336  | -0.12451 | 0.00706  | 0.022469 | 0.62815 | -0.10586 | 0.02214  |
| 0.00361  | 0.188121 | 4.29E-05 | -0.05072 | 0.27407  | -0.02277 | 0.62353 | -0.05081 | 0.27321  |
| 0.44652  | 0.005066 | 0.91305  | -0.06443 | 0.16448  | -0.08684 | 0.06078 | -0.11259 | 0.01492  |
| 1.58E-50 | 0.68133  | 5.30E-65 | 0.056153 | 0.22582  | 0.094953 | 0.04026 | 0.096821 | 0.03647  |
| 1.55E-09 | 0.36523  | 3.49E-16 | 0.089257 | 0.05391  | 0.115686 | 0.01236 | 0.142458 | 0.00203  |
| 8.48E-32 | 0.542658 | 4.07E-37 | 0.060168 | 0.19431  | 0.044648 | 0.33568 | 0.123193 | 0.00769  |
| 1.65E-09 | 0.350669 | 5.86E-15 | 0.046649 | 0.31444  | 0.071735 | 0.12161 | -0.05516 | 0.23416  |
| 1.57E-05 | 0.245335 | 7.88E-08 | 0.124761 | 0.00695  | 0.062261 | 0.17922 | 0.040872 | 0.37818  |
| 0.00614  | -0.04079 | 0.37913  | 0.026854 | 0.56267  | -0.08115 | 0.07981 | -0.08328 | 0.07217  |

|          |          |          |          |         |          |         |          |          |
|----------|----------|----------|----------|---------|----------|---------|----------|----------|
| 4.29E-12 | 0.293178 | 1.04E-10 | -0.03462 | 0.45548 | -0.02502 | 0.58962 | -0.06835 | 0.14024  |
| 0.23687  | -0.04795 | 0.30112  | -0.0466  | 0.31498 | -0.06529 | 0.15894 | -0.04964 | 0.28442  |
| 7.65E-20 | 0.460445 | 6.96E-26 | 0.085506 | 0.06486 | 0.074433 | 0.10818 | 0.085082 | 0.0662   |
| 0.329    | 0.194061 | 2.41E-05 | -0.02558 | 0.5814  | 0.044346 | 0.33896 | -0.00308 | 0.94713  |
| 2.39E-09 | 0.146204 | 0.00153  | -0.03189 | 0.49183 | -0.03853 | 0.4061  | 0.022565 | 0.62669  |
| 0.07674  | 0.004339 | 0.92549  | 0.167473 | 0.00028 | 0.006322 | 0.89162 | -0.06655 | 0.15103  |
| 0.10723  | -0.12681 | 0.00607  | -0.07608 | 0.10059 | -0.09341 | 0.04362 | -0.14938 | 0.00121  |
| 2.29E-14 | 0.374134 | 5.80E-17 | 0.061018 | 0.18807 | 0.068209 | 0.14108 | 0.026493 | 0.56794  |
| 1.01E-06 | 0.299888 | 3.69E-11 | -0.05281 | 0.25474 | 0.101641 | 0.02807 | -0.03827 | 0.40933  |
| 0.42221  | 0.125483 | 0.00662  | -0.05899 | 0.20324 | 0.066528 | 0.15117 | 0.019521 | 0.67392  |
| 1.95E-05 | 0.32424  | 6.82E-13 | 0.00314  | 0.94605 | 0.060077 | 0.19499 | -0.13157 | 0.0044   |
| 2.56E-21 | 0.436953 | 3.39E-23 | 0.058758 | 0.20499 | 0.04033  | 0.38454 | 0.116878 | 0.01148  |
| 4.28E-07 | 0.226174 | 7.86E-07 | -0.02905 | 0.53112 | 0.03104  | 0.5034  | 0.063814 | 0.16859  |
| 5.09E-05 | 0.205609 | 7.49E-06 | 0.007291 | 0.87514 | 0.049706 | 0.28375 | -0.09951 | 0.03156  |
| 0.86405  | -0.02104 | 0.65011  | -0.08231 | 0.07556 | 0.056223 | 0.22525 | 0.06213  | 0.18014  |
| 0.07985  | 0.075528 | 0.10308  | -0.07884 | 0.08879 | -0.05893 | 0.20363 | -0.03433 | 0.45918  |
| 3.97E-12 | 0.305664 | 1.48E-11 | 0.116139 | 0.01202 | 0.086836 | 0.06079 | 0.046698 | 0.31393  |
| 1.41E-06 | 0.162156 | 0.00043  | 0.026985 | 0.56078 | 0.054839 | 0.23689 | 0.0485   | 0.29561  |
| 0.96488  | -0.02585 | 0.57739  | -0.07607 | 0.10063 | -0.07603 | 0.10082 | -0.19403 | 2.42E-05 |
| 0.64363  | -0.05298 | 0.25319  | -0.01322 | 0.77565 | -0.02626 | 0.57136 | 0.022204 | 0.63221  |
| 3.32E-12 | 0.232141 | 3.92E-07 | 0.090476 | 0.0507  | -0.04548 | 0.32671 | 0.031894 | 0.49173  |
| 1.34E-09 | 0.293179 | 1.04E-10 | 0.032159 | 0.48814 | 0.04535  | 0.32812 | -0.11827 | 0.01053  |
| 4.75E-13 | 0.457844 | 1.41E-25 | 0.08845  | 0.05613 | 0.095463 | 0.03919 | -0.03136 | 0.49903  |
| 1.24E-12 | 0.324672 | 6.33E-13 | -0.0602  | 0.1941  | 0.029361 | 0.52678 | -0.09149 | 0.04816  |
| 1.02E-09 | 0.283965 | 4.13E-10 | 0.037298 | 0.42132 | 0.011899 | 0.7976  | -0.14512 | 0.00167  |
| 0.1409   | -0.01982 | 0.66917  | 0.006341 | 0.89129 | -0.05969 | 0.19786 | -0.11019 | 0.01721  |
| 8.36E-06 | 0.203629 | 9.20E-06 | 0.053363 | 0.24977 | -0.01871 | 0.68674 | -0.01692 | 0.71541  |
| 0.00375  | 0.241603 | 1.25E-07 | 0.095279 | 0.03957 | -0.02092 | 0.65199 | -0.18032 | 8.91E-05 |
| 0.00119  | 0.149348 | 0.00121  | -0.03155 | 0.49641 | -0.07981 | 0.08492 | -0.12456 | 0.00704  |
| 0.10842  | 0.014167 | 0.76009  | -0.08789 | 0.05771 | -0.04075 | 0.37959 | -0.0172  | 0.71085  |
| 0.00061  | 0.227376 | 6.85E-07 | 0.0289   | 0.5333  | -0.00324 | 0.94436 | -0.16663 | 0.0003   |
| 5.89E-05 | 0.323603 | 7.60E-13 | 0.001968 | 0.96616 | 0.058632 | 0.20596 | -0.0821  | 0.07631  |
| 0.9166   | 0.027573 | 0.55226  | -0.07829 | 0.09104 | -0.10266 | 0.02652 | -0.12031 | 0.00926  |
| 0.00444  | 0.153794 | 0.00085  | -0.11647 | 0.01177 | -0.08822 | 0.05677 | -0.03512 | 0.44899  |
| 0.15619  | 0.093724 | 0.04293  | 0.043019 | 0.35362 | -0.01472 | 0.75098 | 0.035125 | 0.4489   |
| 3.11E-21 | 0.479862 | 2.87E-28 | -0.00138 | 0.97623 | 0.053476 | 0.24876 | 0.040486 | 0.38271  |
| 0.00265  | 0.32872  | 3.14E-13 | 0.107721 | 0.01989 | 0.106469 | 0.02138 | 0.009114 | 0.84427  |
| 0.02463  | 0.114069 | 0.01364  | -0.03679 | 0.42774 | -0.06265 | 0.17649 | -0.15339 | 0.00088  |
| 5.78E-06 | 0.261871 | 9.22E-09 | -0.16215 | 0.00043 | 0.026466 | 0.56833 | -0.04706 | 0.31014  |
| 1.65E-08 | 0.255301 | 2.20E-08 | -0.01943 | 0.67544 | 0.017251 | 0.71003 | -0.02187 | 0.63733  |
| 3.45E-12 | 0.353966 | 3.13E-15 | 0.01157  | 0.80308 | 0.042223 | 0.3626  | -0.0884  | 0.05627  |
| 2.66E-31 | 0.617066 | 2.41E-50 | 0.132013 | 0.00427 | 0.091134 | 0.04904 | 0.12139  | 0.00864  |
| 1.60E-07 | 0.252951 | 2.99E-08 | 0.011913 | 0.79737 | -0.06396 | 0.1676  | -0.08966 | 0.05284  |
| 0.21636  | 0.060775 | 0.18984  | -0.00852 | 0.85439 | 0.085245 | 0.06568 | -0.08278 | 0.0739   |
| 0.7392   | -0.00883 | 0.84907  | -0.03861 | 0.40516 | -0.1069  | 0.02086 | -0.08034 | 0.08286  |

|          |          |          |          |          |          |         |          |          |
|----------|----------|----------|----------|----------|----------|---------|----------|----------|
| 0.00104  | 0.125361 | 0.00668  | -0.01617 | 0.72749  | -0.02719 | 0.55776 | -0.11969 | 0.00963  |
| 0.06664  | -0.09418 | 0.04193  | -0.06871 | 0.13816  | -0.00335 | 0.94242 | -0.20671 | 6.67E-06 |
| 0.07017  | 0.118529 | 0.01036  | -0.00865 | 0.85206  | -0.06768 | 0.14421 | -0.1601  | 0.00051  |
| 6.42E-05 | 0.167309 | 0.00028  | -0.03224 | 0.48699  | 0.018808 | 0.68519 | -0.12072 | 0.00902  |
| 2.37E-18 | 0.366247 | 2.85E-16 | 0.038176 | 0.41046  | 0.058116 | 0.20999 | -0.01048 | 0.82136  |
| 0.12415  | 0.001853 | 0.96814  | 0.078249 | 0.09121  | 0.003272 | 0.94378 | -0.13783 | 0.00284  |
| 9.51E-10 | 0.359913 | 9.95E-16 | 0.028006 | 0.54603  | 0.051896 | 0.26304 | -0.04985 | 0.28239  |
| 1.51E-13 | 0.373165 | 7.07E-17 | 0.026874 | 0.56239  | 0.038089 | 0.41153 | -0.01507 | 0.74537  |
| 1.85E-07 | 0.291728 | 1.30E-10 | -0.02473 | 0.59398  | 0.025583 | 0.58131 | 0.053317 | 0.25017  |
| 0.23059  | 0.105031 | 0.02321  | -0.06332 | 0.17191  | 0.058131 | 0.20987 | -0.21849 | 1.87E-06 |
| 3.37E-08 | 0.307522 | 1.10E-11 | 0.067928 | 0.14273  | 0.021567 | 0.64202 | 0.1022   | 0.02721  |
| 0.49007  | 0.029976 | 0.51816  | -0.01087 | 0.8148   | -0.02871 | 0.53605 | -0.08871 | 0.05541  |
| 0.3449   | 0.009876 | 0.83143  | 0.004301 | 0.92614  | 0.011006 | 0.8125  | -0.05492 | 0.2362   |
| 3.95E-07 | 0.266223 | 5.11E-09 | 0.070714 | 0.12702  | -0.01205 | 0.79502 | -0.0692  | 0.13537  |
| 1.71E-06 | 0.161781 | 0.00045  | -0.05155 | 0.26628  | -0.0416  | 0.36972 | 0.000255 | 0.99561  |
| 3.09E-07 | 0.154502 | 0.00081  | -0.0589  | 0.20392  | -0.04424 | 0.34007 | -0.05633 | 0.22435  |
| 0.00137  | 0.18991  | 3.62E-05 | -0.19127 | 3.17E-05 | 0.026783 | 0.56371 | -0.07264 | 0.11698  |
| 0.08743  | 0.079502 | 0.08613  | -0.10994 | 0.01747  | -0.04345 | 0.34886 | -0.10715 | 0.02056  |
| 2.22E-12 | 0.338923 | 5.13E-14 | 0.031338 | 0.49931  | 0.110077 | 0.01733 | -0.16607 | 0.00031  |
| 0.28447  | 0.068333 | 0.14036  | -0.04731 | 0.30763  | -0.04852 | 0.29541 | -0.08437 | 0.06851  |
| 0.05131  | 0.169083 | 0.00024  | 0.018332 | 0.69275  | 0.116484 | 0.01177 | 0.175665 | 0.00014  |
| 0.68103  | 0.070307 | 0.12923  | 0.005655 | 0.903    | 0.0007   | 0.98797 | -0.07141 | 0.12334  |
| 0.00012  | -0.05539 | 0.23223  | 0.067107 | 0.14763  | 0.045196 | 0.32977 | -0.15975 | 0.00053  |
| 1.12E-06 | 0.379798 | 1.80E-17 | 0.093717 | 0.04294  | 0.136518 | 0.00312 | 0.070325 | 0.12913  |
| 4.30E-14 | 0.480521 | 2.37E-28 | -0.01234 | 0.79027  | 0.129819 | 0.00496 | 0.07439  | 0.10838  |
| 1.45E-18 | 0.482596 | 1.29E-28 | -0.02057 | 0.65753  | 0.057531 | 0.21463 | 0.095776 | 0.03855  |
| 3.25E-08 | 0.315659 | 2.90E-12 | 0.014104 | 0.76114  | 0.105202 | 0.02299 | 0.195222 | 2.15E-05 |
| 2.05E-15 | 0.458395 | 1.22E-25 | -0.00291 | 0.95004  | 0.021458 | 0.64371 | 0.127468 | 0.00581  |
| 8.53E-39 | 0.760272 | 3.70E-89 | 0.05802  | 0.21074  | 0.129609 | 0.00503 | 0.172733 | 0.00018  |
| 0.0094   | 0.23596  | 2.49E-07 | -0.00829 | 0.85815  | 0.059729 | 0.19759 | 0.078458 | 0.09035  |
| 0.03987  | 0.157995 | 0.00061  | 0.029389 | 0.52639  | 0.014454 | 0.75539 | 0.013446 | 0.77197  |
| 0.03293  | 0.246404 | 6.89E-08 | 0.067703 | 0.14406  | 0.115555 | 0.01246 | 0.041194 | 0.37444  |
| 1.79E-09 | 0.443042 | 7.14E-24 | 0.103571 | 0.02521  | 0.125277 | 0.00671 | 0.057349 | 0.21608  |
| 2.94E-05 | 0.3014   | 2.91E-11 | -0.04008 | 0.38746  | 0.016165 | 0.72752 | 0.063599 | 0.17004  |
| 0.00906  | -0.06377 | 0.16888  | -0.07962 | 0.08568  | -0.01458 | 0.7534  | 0.076113 | 0.10042  |
| 0.00229  | 0.278519 | 9.11E-10 | 0.03094  | 0.50478  | 0.035922 | 0.43866 | -0.0837  | 0.07075  |
| 0.02271  | -0.06409 | 0.16676  | -0.09677 | 0.03657  | -0.03185 | 0.49237 | -0.02803 | 0.54563  |
| 3.72E-06 | 0.379024 | 2.11E-17 | -0.04043 | 0.3834   | 0.074963 | 0.10569 | 0.039995 | 0.38851  |
| 3.85E-06 | 0.385051 | 5.93E-18 | -0.01091 | 0.81404  | 0.103751 | 0.02495 | 0.091387 | 0.04841  |
| 0.4368   | 0.046457 | 0.31644  | -0.03014 | 0.51591  | 0.036176 | 0.43543 | 0.001645 | 0.97171  |
| 4.11E-12 | 0.404923 | 7.47E-20 | 0.022745 | 0.62394  | 0.025316 | 0.58527 | 0.008315 | 0.85778  |
| 4.36E-08 | 0.412381 | 1.34E-20 | -0.02436 | 0.59959  | 0.135121 | 0.00344 | 0.031576 | 0.49605  |
| 1.54E-09 | 0.423109 | 1.05E-21 | -0.00281 | 0.95165  | 0.11742  | 0.0111  | 0.048826 | 0.29237  |
| 5.62E-05 | 0.329436 | 2.77E-13 | -0.02461 | 0.59581  | 0.089161 | 0.05417 | 0.030891 | 0.50546  |
| 1.62E-16 | 0.504794 | 1.46E-31 | -0.04435 | 0.33888  | 0.15217  | 0.00097 | 0.020758 | 0.65456  |

|          |          |          |          |          |          |          |          |          |
|----------|----------|----------|----------|----------|----------|----------|----------|----------|
| 0.00325  | 0.230368 | 4.83E-07 | 0.039256 | 0.39734  | 0.214495 | 2.91E-06 | 0.125606 | 0.00657  |
| 0.00012  | -0.10379 | 0.0249   | -0.02811 | 0.54455  | 0.053834 | 0.2456   | 0.013997 | 0.76289  |
| 8.80E-05 | 0.3123   | 5.05E-12 | 0.045924 | 0.32203  | 0.065647 | 0.15667  | 0.11024  | 0.01716  |
| 0.00021  | -0.12293 | 0.00783  | -0.09576 | 0.03859  | 0.013353 | 0.7735   | 0.027683 | 0.55068  |
| 8.85E-06 | 0.363557 | 4.87E-16 | 0.12037  | 0.00922  | 0.113838 | 0.01384  | 0.103839 | 0.02483  |
| 4.06E-09 | 0.274054 | 1.72E-09 | -0.05565 | 0.23006  | 0.025771 | 0.57854  | 0.037349 | 0.42068  |
| 0.06767  | -0.00017 | 0.99713  | 0.010356 | 0.82338  | -0.01918 | 0.67937  | -0.09639 | 0.03732  |
| 0.09778  | 0.210949 | 4.26E-06 | -0.0303  | 0.51357  | 0.055943 | 0.22757  | 0.017872 | 0.70009  |
| 5.77E-05 | 0.41006  | 2.30E-20 | 0.187097 | 4.73E-05 | 0.152563 | 0.00094  | 0.129463 | 0.00508  |
| 1.14E-11 | 0.359351 | 1.11E-15 | -0.02327 | 0.61596  | -0.06312 | 0.17331  | 0.06453  | 0.16386  |
| 0.07419  | 0.208234 | 5.69E-06 | 0.057626 | 0.21386  | 0.058438 | 0.20747  | 0.034302 | 0.45961  |
| 0.09738  | 0.177673 | 0.00011  | -0.03431 | 0.45949  | 0.072576 | 0.11729  | 0.08466  | 0.06757  |
| 0.00018  | 0.316381 | 2.57E-12 | 0.03548  | 0.44432  | 0.058555 | 0.20656  | 0.074545 | 0.10765  |
| 0.28802  | 0.131363 | 0.00446  | -0.0388  | 0.40284  | 0.065892 | 0.15512  | 0.093501 | 0.04343  |
| 0.00189  | 0.220153 | 1.56E-06 | 0.09062  | 0.05034  | 0.035908 | 0.43884  | -0.06342 | 0.17124  |
| 0.06345  | 0.017959 | 0.69869  | 0.05867  | 0.20567  | 0.002797 | 0.95193  | 0.101047 | 0.02901  |
| 2.12E-11 | 0.446789 | 2.70E-24 | 0.004904 | 0.91582  | 0.046853 | 0.31233  | 0.252794 | 3.05E-08 |
| 1.25E-10 | 0.394707 | 7.35E-19 | -0.0072  | 0.87666  | 0.03368  | 0.46779  | 0.087676 | 0.05832  |
| 1.21E-19 | 0.548016 | 5.83E-38 | 0.102903 | 0.02617  | 0.076552 | 0.09848  | 0.132867 | 0.00402  |
| 0.00054  | 0.335479 | 9.53E-14 | -0.01651 | 0.72202  | 0.075854 | 0.10159  | 0.226645 | 7.45E-07 |
| 5.57E-06 | 0.364902 | 3.73E-16 | 0.01469  | 0.75153  | 0.136358 | 0.00315  | 0.07071  | 0.12704  |
| 0.81394  | 0.085134 | 0.06604  | 0.033053 | 0.47612  | -0.00924 | 0.84215  | 0.006539 | 0.88793  |
| 0.70049  | 0.100014 | 0.0307   | 0.083865 | 0.07019  | 0.157003 | 0.00066  | 0.085184 | 0.06588  |
| 6.71E-12 | 0.512193 | 1.36E-32 | 0.056872 | 0.21993  | 0.104725 | 0.02362  | 0.105526 | 0.02257  |
| 2.30E-05 | 0.328726 | 3.14E-13 | 0.013642 | 0.76874  | 0.071161 | 0.12463  | 0.084254 | 0.06889  |
| 0.02745  | 0.275586 | 1.39E-09 | 0.045329 | 0.32834  | 0.072457 | 0.1179   | 0.097829 | 0.03456  |
| 2.59E-11 | 0.379736 | 1.82E-17 | 0.007687 | 0.86841  | 0.02082  | 0.65359  | 0.012944 | 0.78026  |
| 0.00667  | 0.246414 | 6.88E-08 | 0.023636 | 0.61042  | 0.182319 | 7.41E-05 | 0.087555 | 0.05867  |
| 0.05934  | 0.181318 | 8.13E-05 | 0.093244 | 0.04401  | 0.044748 | 0.33459  | 0.057933 | 0.21143  |
| 2.23E-17 | 0.513907 | 7.76E-33 | 0.020164 | 0.66384  | 0.066199 | 0.15321  | 0.203492 | 9.33E-06 |
| 0.00011  | 0.352496 | 4.15E-15 | 0.147439 | 0.0014   | 0.150006 | 0.00115  | 0.139832 | 0.00246  |
| 0.0003   | 0.314319 | 3.62E-12 | -0.02442 | 0.59865  | 0.01112  | 0.81058  | 0.242024 | 1.19E-07 |
| 0.01236  | 0.185929 | 5.29E-05 | -0.13075 | 0.00465  | -0.0214  | 0.64454  | 0.017635 | 0.70387  |
| 0.14354  | 0.143844 | 0.00183  | 0.069483 | 0.13379  | -0.03049 | 0.51105  | 0.018418 | 0.69139  |
| 0.65793  | 0.036168 | 0.43553  | -0.07513 | 0.10491  | 0.010801 | 0.81592  | -0.21055 | 4.44E-06 |
| 8.21E-08 | 0.393814 | 8.94E-19 | 0.034382 | 0.45856  | -0.06505 | 0.16051  | 0.179652 | 9.47E-05 |
| 0.03158  | 0.185685 | 5.41E-05 | -0.09393 | 0.04247  | 0.068339 | 0.14032  | -0.0084  | 0.85625  |
| 0.24425  | 0.076612 | 0.09821  | 0.001302 | 0.97761  | 0.040102 | 0.38724  | -0.04747 | 0.30603  |
| 3.13E-06 | 0.331765 | 1.84E-13 | 0.048002 | 0.3006   | 0.003381 | 0.94191  | 0.045932 | 0.32195  |
| 0.00145  | 0.325454 | 5.53E-13 | 0.012667 | 0.78484  | 0.075274 | 0.10424  | 0.064123 | 0.16653  |
| 0.00615  | 0.263477 | 7.43E-09 | 0.052713 | 0.25559  | 0.084601 | 0.06776  | 0.113015 | 0.01454  |
| 3.00E-57 | 0.68229  | 3.00E-65 | 0.059976 | 0.19574  | 0.163401 | 0.00039  | 0.048133 | 0.29928  |
| 4.03E-16 | -0.4656  | 1.67E-26 | 0.024852 | 0.59217  | -0.05607 | 0.22655  | 0.078277 | 0.0911   |
| 9.46E-31 | 0.431856 | 1.22E-22 | -0.01637 | 0.7242   | 1.84E-05 | 0.99968  | 0.232813 | 3.62E-07 |
| 2.07E-87 | 0.741792 | 1.03E-82 | 0.048575 | 0.29486  | 0.097976 | 0.03428  | 0.206021 | 7.17E-06 |

|          |          |          |          |          |          |          |          |          |
|----------|----------|----------|----------|----------|----------|----------|----------|----------|
| 4.41E-44 | 0.634096 | 6.83E-54 | 0.015454 | 0.73907  | 0.079396 | 0.08655  | 0.141629 | 0.00216  |
| 7.60E-35 | -0.61668 | 2.89E-50 | -0.08446 | 0.06821  | -0.0691  | 0.13594  | -0.16214 | 0.00044  |
| 5.24E-13 | 0.224443 | 9.59E-07 | 0.060489 | 0.19194  | 0.013618 | 0.76912  | 0.182248 | 7.46E-05 |
| 1.25E-47 | 0.555753 | 3.31E-39 | 0.016475 | 0.72251  | -0.00596 | 0.89773  | 0.132258 | 0.0042   |
| 5.25E-47 | 0.625934 | 3.65E-52 | 0.073362 | 0.11336  | 0.062882 | 0.17491  | -0.0239  | 0.60644  |
| 2.21E-09 | 0.148319 | 0.00131  | 0.057155 | 0.21764  | 0.05159  | 0.26587  | -0.06911 | 0.13591  |
| 1.50E-30 | 0.405992 | 5.86E-20 | 0.030168 | 0.51547  | 0.004139 | 0.92892  | 0.121181 | 0.00876  |
| 2.21E-18 | 0.349281 | 7.61E-15 | 0.038682 | 0.40428  | -0.10508 | 0.02314  | 0.039739 | 0.39155  |
| 6.50E-42 | 0.486546 | 3.99E-29 | -0.01359 | 0.76955  | -0.01614 | 0.728    | 0.13376  | 0.00378  |
| 2.83E-77 | 0.751478 | 5.07E-86 | 0.05035  | 0.27755  | 0.046904 | 0.3118   | 0.140925 | 0.00227  |
| 1.59E-41 | 0.634762 | 4.91E-54 | 0.046311 | 0.31797  | 0.106157 | 0.02177  | 0.185114 | 5.71E-05 |
| 1.04E-49 | 0.530706 | 2.75E-35 | 0.097551 | 0.03508  | 0.051225 | 0.26928  | 0.079668 | 0.08548  |
| 6.26E-29 | 0.534082 | 8.51E-36 | -0.04429 | 0.33958  | 0.073704 | 0.11169  | 0.213419 | 3.27E-06 |
| 4.48E-09 | 0.139085 | 0.00259  | -0.13892 | 0.00262  | 0.009435 | 0.83887  | -0.0968  | 0.03652  |
| 4.96E-27 | 0.563072 | 2.05E-40 | 0.181501 | 7.99E-05 | 0.039213 | 0.39785  | 0.025065 | 0.589    |
| 5.46E-26 | 0.322454 | 9.25E-13 | 0.045894 | 0.32235  | 0.000985 | 0.98307  | 0.124645 | 0.007    |
| 2.51E-25 | 0.516167 | 3.70E-33 | 0.125757 | 0.00651  | 0.089841 | 0.05236  | -0.0112  | 0.80933  |
| 1.58E-11 | 0.348252 | 9.22E-15 | -0.01788 | 0.69998  | 0.043358 | 0.34984  | 0.173478 | 0.00016  |
| 5.80E-48 | 0.70146  | 2.11E-70 | 0.113118 | 0.01445  | 0.16827  | 0.00026  | 0.130071 | 0.00487  |
| 2.10E-43 | 0.6447   | 3.24E-56 | 0.047853 | 0.3021   | 0.079161 | 0.08749  | 0.120711 | 0.00902  |
| 3.24E-39 | 0.500664 | 5.35E-31 | 0.079106 | 0.08771  | -0.02361 | 0.61075  | 0.177345 | 0.00012  |
| 5.97E-43 | 0.59033  | 3.40E-45 | -0.0502  | 0.27899  | 0.092212 | 0.04641  | 0.031473 | 0.49746  |
| 1.75E-44 | 0.608389 | 1.28E-48 | -0.03713 | 0.42343  | 0.02578  | 0.57841  | 0.190815 | 3.31E-05 |
| 7.97E-28 | 0.427258 | 3.81E-22 | 0.033284 | 0.47304  | 0.026774 | 0.56384  | 0.188944 | 3.97E-05 |
| 3.92E-46 | 0.655384 | 1.19E-58 | 0.126669 | 0.00612  | 0.082357 | 0.0754   | 0.076315 | 0.09952  |
| 2.91E-14 | 0.33938  | 4.72E-14 | 0.096234 | 0.03763  | 0.051793 | 0.26399  | 0.038312 | 0.40879  |
| 1.75E-54 | 0.774875 | 1.12E-94 | 0.085427 | 0.06511  | 0.073437 | 0.11299  | 0.14331  | 0.0019   |
| 3.33E-21 | 0.554347 | 5.61E-39 | 0.026375 | 0.56967  | 0.099643 | 0.03133  | 0.018044 | 0.69733  |
| 3.69E-22 | 0.357008 | 1.75E-15 | -0.02415 | 0.6027   | 0.03322  | 0.47389  | -0.00226 | 0.96118  |
| 2.52E-13 | 0.399673 | 2.44E-19 | 0.103886 | 0.02476  | 0.022368 | 0.62971  | 0.061948 | 0.18142  |
| 4.39E-34 | 0.534125 | 8.38E-36 | 0.049196 | 0.28873  | 0.055937 | 0.22762  | 0.165482 | 0.00033  |
| 2.91E-34 | 0.605469 | 4.74E-48 | 0.071652 | 0.12205  | 0.093712 | 0.04295  | 0.061992 | 0.18111  |
| 2.41E-53 | 0.5572   | 1.92E-39 | -0.01952 | 0.67401  | 0.065583 | 0.15707  | 0.223049 | 1.12E-06 |
| 1.90E-33 | 0.503493 | 2.20E-31 | 0.112751 | 0.01478  | 0.045892 | 0.32238  | 0.319742 | 1.46E-12 |
| 4.10E-16 | 0.415001 | 7.25E-21 | -0.03321 | 0.47402  | 0.091266 | 0.04871  | -0.06866 | 0.13846  |
| 2.82E-20 | 0.482296 | 1.41E-28 | 0.036984 | 0.42524  | 0.039313 | 0.39666  | 0.198655 | 1.53E-05 |
| 1.45E-16 | -0.37751 | 2.89E-17 | -0.02585 | 0.57737  | 0.060124 | 0.19464  | 0.03506  | 0.44973  |
| 5.51E-27 | 0.531865 | 1.84E-35 | 0.093437 | 0.04357  | 0.262829 | 8.11E-09 | 0.204477 | 8.42E-06 |
| 5.12E-17 | 0.338401 | 5.64E-14 | 0.024665 | 0.59495  | -0.06394 | 0.16777  | -0.04231 | 0.36159  |
| 1.81E-57 | 0.586863 | 1.46E-44 | 0.032111 | 0.48878  | 0.044261 | 0.33989  | 0.123227 | 0.00768  |
| 9.40E-18 | 0.374116 | 5.82E-17 | -0.05212 | 0.26102  | 0.0566   | 0.22215  | 0.089369 | 0.05361  |
| 5.06E-07 | 0.20928  | 5.09E-06 | 0.027969 | 0.54656  | -0.04449 | 0.33743  | 0.157336 | 0.00064  |
| 3.10E-29 | 0.498798 | 9.56E-31 | -0.04371 | 0.34598  | 0.0337   | 0.46753  | 0.051711 | 0.26475  |
| 3.49E-44 | 0.59125  | 2.30E-45 | 0.058409 | 0.20769  | 0.064377 | 0.16486  | 0.089329 | 0.05372  |
| 5.09E-52 | 0.652271 | 6.23E-58 | 0.075577 | 0.10285  | 0.075018 | 0.10543  | 0.185031 | 5.76E-05 |

|          |          |          |          |         |          |         |          |          |
|----------|----------|----------|----------|---------|----------|---------|----------|----------|
| 2.01E-56 | 0.617308 | 2.15E-50 | 0.018649 | 0.68772 | 0.055701 | 0.22959 | 0.082563 | 0.07467  |
| 5.06E-27 | 0.434008 | 7.13E-23 | 0.000958 | 0.98352 | -0.00535 | 0.90827 | -0.02131 | 0.64599  |
| 3.52E-26 | 0.475707 | 9.57E-28 | 0.028511 | 0.53881 | 0.039268 | 0.3972  | 0.041547 | 0.37034  |
| 7.81E-30 | 0.407183 | 4.46E-20 | -0.03314 | 0.47502 | 0.077315 | 0.09515 | 0.06398  | 0.16748  |
| 4.23E-37 | 0.513918 | 7.73E-33 | 0.054681 | 0.23825 | -0.00801 | 0.86295 | 0.112607 | 0.0149   |
| 5.53E-24 | 0.45048  | 1.02E-24 | 0.062506 | 0.17751 | 0.166891 | 0.00029 | 0.069587 | 0.13321  |
| 6.43E-65 | 0.757754 | 3.02E-88 | 0.087071 | 0.06009 | 0.089564 | 0.05309 | 0.226899 | 7.23E-07 |
| 1.07E-70 | 0.729241 | 1.21E-78 | 0.04342  | 0.34915 | 0.141538 | 0.00217 | 0.30363  | 2.04E-11 |
| 3.48E-30 | 0.415707 | 6.13E-21 | 0.009437 | 0.83882 | -0.03831 | 0.40878 | 0.060344 | 0.193    |
| 4.15E-26 | 0.542594 | 4.17E-37 | 0.095683 | 0.03874 | 0.105363 | 0.02278 | 0.030316 | 0.51341  |
| 1.43E-26 | 0.47352  | 1.79E-27 | 0.122042 | 0.00829 | 0.002801 | 0.95185 | -0.05626 | 0.22496  |
| 5.29E-22 | 0.508089 | 5.10E-32 | -0.01211 | 0.79403 | 0.15815  | 0.0006  | -0.04452 | 0.33701  |
| 9.94E-14 | 0.27776  | 1.02E-09 | 0.042171 | 0.3632  | 0.010909 | 0.81412 | 0.058888 | 0.20398  |
| 5.58E-23 | 0.52155  | 6.19E-34 | 0.09137  | 0.04846 | 0.097155 | 0.03583 | 0.071335 | 0.12371  |
| 8.69E-55 | 0.669754 | 4.34E-62 | 0.037091 | 0.42391 | 0.053605 | 0.24762 | -0.01897 | 0.68265  |
| 9.62E-32 | 0.369787 | 1.40E-16 | 0.017571 | 0.70489 | 0.013333 | 0.77383 | 0.107676 | 0.01994  |
| 2.99E-49 | 0.650727 | 1.41E-57 | 0.09417  | 0.04194 | 0.120463 | 0.00917 | 0.104059 | 0.02452  |
| 7.08E-36 | 0.527799 | 7.47E-35 | -0.02184 | 0.63776 | 0.099191 | 0.03211 | 0.060127 | 0.19461  |
| 4.15E-49 | 0.713057 | 1.01E-73 | 0.055034 | 0.23522 | 0.078104 | 0.09182 | 0.079304 | 0.08692  |
| 3.83E-20 | 0.363949 | 4.50E-16 | 0.011012 | 0.8124  | 0.009991 | 0.82951 | 0.113228 | 0.01436  |
| 9.38E-44 | 0.593671 | 8.21E-46 | -0.019   | 0.68218 | 0.027703 | 0.55039 | 0.177413 | 0.00012  |
| 1.04E-28 | 0.448208 | 1.86E-24 | -0.02698 | 0.56087 | 0.025741 | 0.57898 | 0.098912 | 0.0326   |
| 7.61E-29 | 0.478291 | 4.53E-28 | 0.000754 | 0.98704 | -0.01776 | 0.70187 | 0.175414 | 0.00014  |
| 6.62E-36 | 0.527255 | 8.99E-35 | 0.047116 | 0.30962 | 0.058457 | 0.20732 | 0.021109 | 0.64912  |
| 5.04E-46 | 0.546203 | 1.13E-37 | 0.105371 | 0.02277 | 0.039595 | 0.39327 | 0.263083 | 7.83E-09 |
| 4.80E-17 | 0.261697 | 9.44E-09 | -0.0167  | 0.71887 | -0.03909 | 0.39936 | 0.089337 | 0.0537   |
| 1.11E-17 | 0.369519 | 1.48E-16 | 0.030193 | 0.51513 | -0.04698 | 0.31101 | 0.068816 | 0.13757  |
| 4.67E-46 | 0.5924   | 1.41E-45 | 0.080544 | 0.08208 | 0.029635 | 0.52293 | 0.272304 | 2.20E-09 |
| 2.33E-54 | 0.649739 | 2.37E-57 | 0.047847 | 0.30217 | 0.135364 | 0.00338 | 0.111588 | 0.01584  |
| 9.25E-18 | 0.483364 | 1.03E-28 | -0.00528 | 0.90932 | 0.145964 | 0.00156 | 0.121909 | 0.00836  |
| 2.09E-28 | 0.571835 | 6.65E-42 | 0.053899 | 0.24504 | 0.005333 | 0.9085  | 0.107844 | 0.01975  |
| 4.23E-20 | 0.283354 | 4.51E-10 | 0.008662 | 0.85191 | -0.00052 | 0.99112 | 0.246778 | 6.58E-08 |
| 1.55E-29 | 0.456169 | 2.23E-25 | 0.035253 | 0.44725 | 0.104788 | 0.02353 | 0.043326 | 0.3502   |
| 1.83E-64 | 0.652608 | 5.22E-58 | 0.0681   | 0.14172 | 0.038947 | 0.40106 | 0.093226 | 0.04405  |
| 6.41E-34 | 0.564209 | 1.32E-40 | -0.01199 | 0.79607 | 0.082414 | 0.0752  | 0.1026   | 0.02662  |
| 1.59E-29 | 0.475669 | 9.68E-28 | -0.0669  | 0.14887 | -0.0279  | 0.54762 | 0.167048 | 0.00029  |
| 1.53E-14 | 0.356423 | 1.96E-15 | -0.03751 | 0.41864 | -0.112   | 0.01545 | 0.02674  | 0.56433  |
| 1.12E-13 | 0.337732 | 6.36E-14 | 0.074008 | 0.11021 | 0.105027 | 0.02322 | 0.238788 | 1.77E-07 |
| 8.89E-14 | -0.34339 | 2.27E-14 | -0.15224 | 0.00097 | -0.15788 | 0.00062 | -0.01597 | 0.73075  |
| 6.36E-72 | 0.71181  | 2.34E-73 | 0.013998 | 0.76288 | 0.088864 | 0.05498 | 0.150652 | 0.00109  |
| 1.91E-14 | 0.330665 | 2.24E-13 | -0.08717 | 0.05978 | 0.05411  | 0.24319 | -0.05757 | 0.21433  |
| 4.52E-52 | 0.6715   | 1.61E-62 | 0.029328 | 0.52724 | 0.067016 | 0.14819 | 0.100351 | 0.03014  |
| 2.16E-39 | 0.686461 | 2.46E-66 | 0.020093 | 0.66494 | 0.1096   | 0.01782 | 0.113525 | 0.0141   |
| 6.35E-41 | 0.584763 | 3.51E-44 | 0.034759 | 0.45364 | 0.141678 | 0.00215 | 0.030909 | 0.50521  |
| 3.96E-28 | 0.4711   | 3.57E-27 | 0.00605  | 0.89626 | 0.000603 | 0.98964 | 0.082745 | 0.07403  |

|          |          |          |          |          |          |         |          |          |
|----------|----------|----------|----------|----------|----------|---------|----------|----------|
| 1.50E-13 | 0.448551 | 1.70E-24 | -0.02344 | 0.61334  | 0.044253 | 0.33997 | -0.09471 | 0.04077  |
| 6.83E-15 | 0.31366  | 4.04E-12 | 0.048691 | 0.2937   | -0.03373 | 0.46712 | 0.100114 | 0.03053  |
| 2.92E-37 | 0.491118 | 1.01E-29 | -0.03208 | 0.48924  | -0.02306 | 0.61915 | 0.143636 | 0.00186  |
| 4.23E-22 | 0.347231 | 1.12E-14 | 0.028075 | 0.54505  | 0.040619 | 0.38114 | 0.027722 | 0.55012  |
| 1.57E-59 | 0.715345 | 2.13E-74 | 0.164127 | 0.00037  | 0.120735 | 0.00901 | 0.024085 | 0.60364  |
| 3.30E-21 | 0.449035 | 1.49E-24 | -0.02566 | 0.58019  | -0.00893 | 0.84733 | -0.09543 | 0.03926  |
| 1.46E-38 | 0.529565 | 4.07E-35 | 0.051051 | 0.27091  | 0.011362 | 0.80654 | 0.093247 | 0.044    |
| 3.74E-23 | 0.460286 | 7.27E-26 | 0.01832  | 0.69293  | 0.060117 | 0.19469 | 0.076052 | 0.1007   |
| 7.74E-20 | 0.388751 | 2.69E-18 | 0.036377 | 0.43288  | 0.012648 | 0.78516 | 0.053885 | 0.24516  |
| 9.81E-16 | 0.375247 | 4.61E-17 | 0.014927 | 0.74765  | 0.043441 | 0.34891 | -0.07107 | 0.12511  |
| 7.90E-65 | 0.725746 | 1.49E-77 | 0.014518 | 0.75434  | 0.061943 | 0.18145 | 0.161177 | 0.00047  |
| 1.97E-07 | 0.122723 | 0.00793  | -0.04961 | 0.28472  | 0.003106 | 0.94662 | 0.081384 | 0.07893  |
| 6.07E-29 | 0.565836 | 7.02E-41 | 0.013924 | 0.76409  | 0.127128 | 0.00594 | 0.056624 | 0.22195  |
| 9.30E-48 | 0.648138 | 5.47E-57 | 0.046103 | 0.32015  | 0.12602  | 0.00639 | 0.03331  | 0.4727   |
| 2.09E-48 | 0.624783 | 6.33E-52 | -0.01469 | 0.75151  | 0.080932 | 0.08061 | 0.014255 | 0.75865  |
| 2.55E-29 | 0.539001 | 1.50E-36 | 0.203091 | 9.72E-06 | 0.136996 | 0.00301 | 0.216044 | 2.45E-06 |
| 4.27E-20 | 0.458125 | 1.31E-25 | 0.126749 | 0.00609  | 0.101007 | 0.02907 | 0.155571 | 0.00074  |
| 6.40E-21 | 0.537115 | 2.93E-36 | 0.014364 | 0.75686  | 0.022696 | 0.6247  | 0.078871 | 0.08866  |
| 3.22E-34 | 0.539709 | 1.17E-36 | -0.00087 | 0.98503  | 0.097272 | 0.0356  | 0.245894 | 7.35E-08 |
| 6.40E-45 | 0.524346 | 2.42E-34 | 0.024329 | 0.59998  | 0.102997 | 0.02603 | 0.161989 | 0.00044  |
| 1.84E-17 | 0.469936 | 4.97E-27 | 0.041053 | 0.37607  | 0.100246 | 0.03031 | -0.06491 | 0.16136  |
| 1.85E-08 | 0.197145 | 1.78E-05 | -0.01567 | 0.73548  | -0.00083 | 0.98572 | -0.12356 | 0.00751  |
| 1.93E-55 | 0.639069 | 5.70E-55 | 0.086853 | 0.06074  | 0.079514 | 0.08609 | 0.067876 | 0.14304  |
| 6.11E-33 | 0.558127 | 1.35E-39 | 0.029062 | 0.531    | 0.116425 | 0.01181 | 0.255804 | 2.06E-08 |
| 1.57E-22 | 0.333064 | 1.46E-13 | -0.04472 | 0.33489  | -0.08815 | 0.05697 | -0.04568 | 0.32465  |
| 2.84E-21 | 0.434516 | 6.28E-23 | 0.012081 | 0.79456  | 0.009534 | 0.83719 | 0.081139 | 0.07984  |
| 1.27E-11 | -0.33539 | 9.69E-14 | -0.0183  | 0.6932   | -0.11361 | 0.01403 | -0.1958  | 2.03E-05 |
| 1.11E-67 | 0.80158  | #####    | 0.050715 | 0.27408  | 0.124564 | 0.00704 | 0.128262 | 0.00551  |
| 1.22E-77 | 0.738668 | 1.11E-81 | 0.174177 | 0.00016  | 0.11966  | 0.00965 | 0.176027 | 0.00013  |
| 4.07E-15 | 0.429855 | 2.01E-22 | 0.085019 | 0.06641  | 0.04174  | 0.36813 | -0.04706 | 0.31015  |
| 5.35E-56 | 0.684995 | 5.95E-66 | 0.035259 | 0.44716  | 0.121092 | 0.00881 | 0.185837 | 5.33E-05 |
| 6.77E-12 | 0.216765 | 2.27E-06 | -0.00477 | 0.91806  | 0.032538 | 0.48302 | -0.10969 | 0.01773  |
| 6.88E-32 | 0.496322 | 2.06E-30 | -0.03484 | 0.45256  | 0.05182  | 0.26374 | 0.037782 | 0.41532  |
| 1.18E-66 | 0.755776 | 1.54E-87 | 0.074303 | 0.1088   | 0.103217 | 0.02571 | 0.18347  | 6.66E-05 |
| 2.26E-59 | 0.784605 | 1.36E-98 | 0.062119 | 0.18021  | 0.145032 | 0.00168 | 0.163639 | 0.00038  |
| 4.04E-39 | 0.462736 | 3.71E-26 | -0.05242 | 0.25826  | -0.01325 | 0.77521 | 0.130603 | 0.0047   |
| 2.31E-16 | 0.388761 | 2.68E-18 | 0.002845 | 0.95111  | -0.0053  | 0.90913 | 0.050552 | 0.27562  |
| 7.43E-34 | 0.476329 | 8.00E-28 | 0.096458 | 0.03718  | -0.01439 | 0.75648 | 0.14453  | 0.00174  |
| 1.48E-13 | 0.333124 | 1.45E-13 | 0.068109 | 0.14167  | 0.018633 | 0.68797 | -0.13028 | 0.00481  |
| 5.26E-34 | 0.591281 | 2.27E-45 | 0.030892 | 0.50545  | 0.006387 | 0.89051 | 0.090709 | 0.05011  |
| 4.44E-42 | 0.612049 | 2.43E-49 | 0.003714 | 0.9362   | 0.061495 | 0.18464 | 0.343723 | 2.14E-14 |
| 8.25E-37 | 0.60256  | 1.72E-47 | 0.071936 | 0.12057  | 0.09171  | 0.04762 | 0.027254 | 0.55688  |
| 9.33E-24 | 0.45341  | 4.67E-25 | -0.00667 | 0.88576  | 0.023498 | 0.61251 | 0.035915 | 0.43876  |
| 3.67E-17 | 0.411463 | 1.66E-20 | -0.00106 | 0.98173  | -0.01788 | 0.70002 | -0.0337  | 0.46754  |
| 1.81E-44 | 0.601201 | 3.14E-47 | 0.073307 | 0.11364  | 0.070548 | 0.12792 | 0.233968 | 3.16E-07 |



|          |          |          |          |          |          |          |          |          |
|----------|----------|----------|----------|----------|----------|----------|----------|----------|
| 2.83E-40 | 0.513164 | 9.89E-33 | 0.015808 | 0.73332  | -0.01617 | 0.72747  | 0.080395 | 0.08265  |
| 0.03968  | 0.213241 | 3.33E-06 | -0.05321 | 0.2511   | 0.072232 | 0.11905  | -0.16727 | 0.00028  |
| 7.46E-32 | 0.43277  | 9.72E-23 | 0.060504 | 0.19182  | 0.019172 | 0.67943  | 0.216071 | 2.45E-06 |
| 1.86E-23 | 0.500208 | 6.16E-31 | 0.050203 | 0.27895  | 0.024101 | 0.60341  | 0.182178 | 7.51E-05 |
| 2.12E-13 | 0.324797 | 6.19E-13 | 0.000829 | 0.98575  | -0.03954 | 0.3939   | -0.05002 | 0.28067  |
| 5.66E-32 | 0.413392 | 1.06E-20 | 0.0332   | 0.47416  | 0.033706 | 0.46744  | 0.158983 | 0.00056  |
| 6.29E-57 | 0.711547 | 2.79E-73 | 0.109291 | 0.01815  | 0.106406 | 0.02146  | 0.185937 | 5.28E-05 |
| 6.05E-24 | 0.506152 | 9.46E-32 | 0.264178 | 6.75E-09 | 0.133527 | 0.00384  | 0.271113 | 2.60E-09 |
| 7.08E-40 | 0.620684 | 4.43E-51 | 0.007185 | 0.87693  | 0.126015 | 0.0064   | -0.07772 | 0.09344  |
| 2.13E-13 | 0.298709 | 4.43E-11 | -0.12596 | 0.00642  | -0.00024 | 0.99586  | -0.00888 | 0.84814  |
| 1.19E-10 | 0.34542  | 1.56E-14 | 0.087943 | 0.05756  | 0.037482 | 0.41904  | -0.24838 | 5.37E-08 |
| 6.69E-42 | 0.519136 | 1.39E-33 | 0.097378 | 0.0354   | 0.007272 | 0.87545  | 0.123479 | 0.00755  |
| 2.88E-26 | 0.562535 | 2.51E-40 | 0.257635 | 1.62E-08 | 0.22218  | 1.24E-06 | 0.117203 | 0.01125  |
| 2.99E-45 | 0.573058 | 4.09E-42 | -0.08946 | 0.05336  | 0.030152 | 0.5157   | 0.081253 | 0.07941  |
| 6.50E-54 | 0.622201 | 2.16E-51 | -0.01557 | 0.73719  | 0.046774 | 0.31315  | 0.283586 | 4.36E-10 |
| 1.96E-17 | 0.340108 | 4.14E-14 | -0.08768 | 0.05832  | 0.018765 | 0.68586  | -0.12888 | 0.00528  |
| 8.91E-21 | 0.451829 | 7.13E-25 | -0.06445 | 0.16436  | 0.106806 | 0.02097  | 0.211359 | 4.08E-06 |
| 6.05E-54 | 0.65213  | 6.71E-58 | 0.044259 | 0.3399   | 0.056401 | 0.22378  | 0.03965  | 0.39262  |
| 5.55E-43 | 0.706562 | 7.65E-72 | 0.055969 | 0.22735  | 0.111817 | 0.01563  | 0.269894 | 3.08E-09 |
| 2.54E-30 | 0.507647 | 5.87E-32 | 0.029061 | 0.53101  | 0.014573 | 0.75344  | -0.04256 | 0.35876  |
| 2.15E-34 | 0.553106 | 8.91E-39 | 0.056121 | 0.22609  | 0.040571 | 0.38171  | 0.150637 | 0.00109  |
| 2.33E-35 | 0.572938 | 4.29E-42 | 0.062597 | 0.17688  | 0.101616 | 0.02811  | 0.268356 | 3.81E-09 |
| 3.10E-45 | 0.582039 | 1.08E-43 | -0.02005 | 0.66558  | 0.077084 | 0.09615  | 0.153515 | 0.00087  |
| 1.35E-40 | 0.555017 | 4.36E-39 | -0.00438 | 0.92479  | -0.01563 | 0.73615  | 0.239717 | 1.58E-07 |
| 5.32E-11 | 0.232597 | 3.72E-07 | -0.05451 | 0.23974  | 0.071676 | 0.12192  | -0.00389 | 0.93316  |
| 9.45E-49 | 0.680977 | 6.54E-65 | 0.049976 | 0.28114  | 0.148446 | 0.00129  | 0.148876 | 0.00125  |
| 2.79E-09 | -0.34685 | 1.20E-14 | -0.07445 | 0.10808  | -0.08679 | 0.06091  | -0.23469 | 2.90E-07 |
| 1.38E-76 | 0.796826 | #####    | 0.096725 | 0.03666  | 0.079403 | 0.08652  | 0.137276 | 0.00295  |
| 7.91E-25 | 0.585846 | 2.23E-44 | 0.127847 | 0.00566  | 0.072538 | 0.11748  | 0.064783 | 0.16221  |
| 9.67E-09 | 0.234228 | 3.06E-07 | -0.01511 | 0.74472  | 0.036323 | 0.43357  | -0.08789 | 0.0577   |
| 1.22E-22 | 0.526719 | 1.08E-34 | -0.03408 | 0.46249  | 0.06171  | 0.1831   | 0.158215 | 0.0006   |
| 1.42E-28 | -0.42397 | 8.49E-22 | -0.10698 | 0.02076  | -0.13228 | 0.00419  | -0.16851 | 0.00025  |
| 3.30E-18 | 0.429824 | 2.02E-22 | 0.07846  | 0.09034  | 0.093248 | 0.044    | -0.12272 | 0.00793  |
| 5.95E-45 | 0.601792 | 2.42E-47 | 0.013475 | 0.77149  | 0.059265 | 0.20111  | 0.11057  | 0.01683  |
| 2.58E-10 | 0.31471  | 3.39E-12 | 0.01961  | 0.67253  | 0.139558 | 0.00251  | 0.018428 | 0.69122  |
| 7.95E-62 | 0.759495 | 7.10E-89 | 0.062542 | 0.17726  | 0.089522 | 0.0532   | 0.181485 | 8.01E-05 |
| 5.53E-46 | 0.692994 | 4.47E-68 | 0.020961 | 0.65141  | 0.119529 | 0.00973  | 0.219051 | 1.76E-06 |
| 1.02E-63 | 0.778022 | 6.37E-96 | 0.057843 | 0.21214  | 0.078825 | 0.08885  | 0.061908 | 0.1817   |
| 3.84E-46 | 0.691914 | 8.73E-68 | 0.1689   | 0.00025  | 0.152929 | 0.00091  | 0.253362 | 2.83E-08 |
| 1.39E-11 | 0.293893 | 9.32E-11 | 0.04651  | 0.31589  | -0.05195 | 0.26255  | 0.189767 | 3.67E-05 |
| 2.68E-52 | 0.713148 | 9.47E-74 | 0.100608 | 0.02972  | 0.130338 | 0.00479  | 0.07765  | 0.09373  |
| 1.44E-36 | 0.605862 | 3.98E-48 | 0.073074 | 0.11479  | 0.083287 | 0.07215  | 0.029361 | 0.52678  |
| 1.45E-34 | 0.540522 | 8.76E-37 | 0.057835 | 0.21221  | 0.067191 | 0.14713  | 0.247897 | 5.71E-08 |
| 2.24E-43 | 0.722257 | 1.77E-76 | 0.072002 | 0.12023  | 0.15096  | 0.00107  | 0.306394 | 1.32E-11 |
| 4.04E-32 | 0.531114 | 2.39E-35 | 0.088162 | 0.05694  | 0.086408 | 0.06207  | 0.247465 | 6.03E-08 |

|          |          |          |          |         |          |         |          |          |
|----------|----------|----------|----------|---------|----------|---------|----------|----------|
| 2.97E-34 | 0.598163 | 1.18E-46 | 0.109633 | 0.01779 | 0.096068 | 0.03796 | 0.14549  | 0.00162  |
| 1.74E-10 | 0.239188 | 1.68E-07 | 0.033885 | 0.46508 | 0.049641 | 0.28438 | -0.01063 | 0.81875  |
| 4.42E-23 | 0.336564 | 7.85E-14 | 0.076349 | 0.09937 | 0.03013  | 0.51601 | 0.121709 | 0.00847  |
| 6.67E-45 | 0.663147 | 1.74E-60 | 0.065609 | 0.15691 | 0.143556 | 0.00187 | 0.207569 | 6.10E-06 |
| 4.70E-59 | 0.619381 | 8.17E-51 | 0.014853 | 0.74887 | 0.038545 | 0.40595 | 0.089835 | 0.05237  |
| 1.63E-26 | 0.409687 | 2.50E-20 | 0.043118 | 0.35252 | -0.10023 | 0.03034 | -0.08838 | 0.05632  |
| 4.70E-34 | 0.533427 | 1.07E-35 | 0.074292 | 0.10885 | 0.117836 | 0.01082 | -0.00051 | 0.99116  |
| 3.27E-16 | -0.2527  | 3.09E-08 | 0.018309 | 0.69311 | 0.014536 | 0.75406 | -0.13572 | 0.0033   |
| 3.61E-39 | 0.576707 | 9.47E-43 | 0.05919  | 0.20167 | 0.105879 | 0.02212 | 0.234082 | 3.12E-07 |
| 4.62E-26 | 0.435404 | 5.02E-23 | 0.0099   | 0.83103 | -0.03305 | 0.47615 | 0.072907 | 0.11563  |
| 9.26E-19 | -0.45256 | 5.86E-25 | 0.065944 | 0.15479 | -0.04877 | 0.29291 | -0.23565 | 2.58E-07 |
| 7.54E-30 | 0.558008 | 1.41E-39 | -0.01804 | 0.69733 | 0.031337 | 0.49932 | 0.153495 | 0.00087  |
| 2.46E-07 | 0.270404 | 2.87E-09 | -0.1098  | 0.01762 | 0.020965 | 0.65134 | -0.05654 | 0.22268  |
| 1.05E-24 | 0.483859 | 8.87E-29 | 0.014942 | 0.74742 | 0.087357 | 0.05925 | 0.011928 | 0.79711  |
| 4.97E-36 | 0.538702 | 1.67E-36 | 0.028967 | 0.53235 | 0.038715 | 0.40388 | 0.022672 | 0.62505  |
| 6.60E-29 | 0.496607 | 1.88E-30 | 0.165565 | 0.00033 | 0.02147  | 0.64352 | -0.10305 | 0.02596  |
| 1.45E-32 | 0.556281 | 2.71E-39 | 0.075413 | 0.1036  | 0.054928 | 0.23613 | -0.11261 | 0.0149   |
| 1.38E-21 | 0.344072 | 2.00E-14 | -0.03938 | 0.39586 | 0.131668 | 0.00437 | 0.164584 | 0.00035  |
| 3.25E-38 | 0.46408  | 2.56E-26 | 0.090365 | 0.05099 | 0.01423  | 0.75907 | -0.01457 | 0.75347  |
| 9.07E-19 | 0.308911 | 8.77E-12 | -0.06075 | 0.19003 | -0.09996 | 0.03079 | 0.203529 | 9.29E-06 |
| 4.40E-40 | 0.620688 | 4.42E-51 | 0.042176 | 0.36314 | 0.111184 | 0.01623 | 0.242705 | 1.09E-07 |
| 1.38E-31 | 0.537372 | 2.68E-36 | -0.05022 | 0.27882 | 0.024618 | 0.59566 | -0.00285 | 0.95096  |
| 2.17E-48 | 0.587974 | 9.18E-45 | 0.135829 | 0.00327 | 0.077168 | 0.09579 | 0.287258 | 2.53E-10 |
| 2.49E-33 | 0.64061  | 2.62E-55 | 0.019684 | 0.67137 | 0.103233 | 0.02569 | 0.102956 | 0.02609  |
| 0.02676  | 0.130318 | 0.00479  | -0.00807 | 0.862   | 0.065021 | 0.16067 | -0.03799 | 0.41276  |
| 3.54E-35 | 0.585361 | 2.73E-44 | -0.07212 | 0.11964 | 0.051145 | 0.27002 | 0.038669 | 0.40444  |
| 1.57E-39 | 0.455432 | 2.72E-25 | -0.03558 | 0.44308 | -0.02991 | 0.51901 | 0.125847 | 0.00647  |
| 3.51E-34 | 0.545236 | 1.61E-37 | -0.02474 | 0.59376 | 0.044701 | 0.3351  | 0.130375 | 0.00477  |
| 1.51E-24 | 0.500946 | 4.89E-31 | -0.02015 | 0.66408 | 0.0322   | 0.48758 | 0.228987 | 5.68E-07 |
| 1.52E-13 | 0.355    | 2.57E-15 | 0.034926 | 0.45147 | 0.006797 | 0.88353 | -0.0575  | 0.21488  |
| 3.87E-26 | 0.393967 | 8.64E-19 | -0.02177 | 0.63892 | 0.041571 | 0.37007 | -0.04935 | 0.28724  |
| 1.46E-46 | 0.630626 | 3.76E-53 | 0.087569 | 0.05863 | 0.164335 | 0.00036 | 0.044324 | 0.3392   |
| 8.82E-27 | 0.425993 | 5.19E-22 | 0.05808  | 0.21027 | 0.01831  | 0.6931  | 0.099425 | 0.0317   |
| 6.85E-07 | 0.209328 | 5.06E-06 | -0.03559 | 0.44294 | 0.000723 | 0.98756 | 0.079536 | 0.086    |
| 3.84E-31 | 0.524909 | 2.00E-34 | -0.05166 | 0.26519 | 0.079287 | 0.08699 | 0.00566  | 0.90292  |
| 1.40E-08 | 0.20029  | 1.29E-05 | -0.07722 | 0.09558 | 0.052939 | 0.25356 | 0.022014 | 0.63514  |
| 1.76E-27 | 0.527426 | 8.48E-35 | 0.048945 | 0.2912  | 0.160152 | 0.00051 | 0.148845 | 0.00126  |
| 1.02E-47 | 0.575067 | 1.83E-42 | 0.091177 | 0.04893 | -0.01973 | 0.67069 | 0.195305 | 2.14E-05 |
| 2.92E-28 | 0.460332 | 7.18E-26 | 0.089499 | 0.05326 | -0.0844  | 0.06841 | 0.037115 | 0.4236   |
| 3.52E-23 | 0.459025 | 1.03E-25 | 0.055887 | 0.22803 | 0.052791 | 0.25489 | 0.132919 | 0.00401  |
| 3.32E-32 | 0.589372 | 5.10E-45 | 0.056613 | 0.22204 | 0.14297  | 0.00195 | 0.186084 | 5.21E-05 |
| 1.35E-41 | 0.671446 | 1.66E-62 | 0.087295 | 0.05943 | 0.139458 | 0.00252 | 0.100888 | 0.02926  |
| 8.08E-48 | 0.734695 | 2.19E-80 | 0.088953 | 0.05474 | 0.114608 | 0.0132  | 0.1651   | 0.00034  |
| 3.84E-12 | 0.30852  | 9.34E-12 | 0.009276 | 0.84154 | 0.110628 | 0.01677 | 0.17931  | 9.77E-05 |
| 3.64E-39 | -0.60528 | 5.15E-48 | -0.13502 | 0.00346 | -0.17266 | 0.00018 | -0.19761 | 1.70E-05 |

|          |          |          |          |         |          |         |          |          |
|----------|----------|----------|----------|---------|----------|---------|----------|----------|
| 1.19E-15 | 0.387306 | 3.66E-18 | 0.033658 | 0.46807 | 0.013099 | 0.77769 | -0.11379 | 0.01388  |
| 1.20E-21 | 0.431199 | 1.44E-22 | 0.057622 | 0.2139  | 0.144053 | 0.0018  | 0.138012 | 0.0028   |
| 2.61E-24 | 0.393964 | 8.65E-19 | -0.0014  | 0.9759  | -0.0119  | 0.79757 | -0.05391 | 0.24494  |
| 1.77E-18 | 0.448982 | 1.51E-24 | -0.02739 | 0.55495 | 0.02793  | 0.54712 | 0.154291 | 0.00082  |
| 2.23E-31 | 0.509651 | 3.09E-32 | 0.029245 | 0.52841 | 0.07992  | 0.08449 | -0.05189 | 0.2631   |
| 9.62E-52 | 0.652814 | 4.68E-58 | 0.064371 | 0.1649  | 0.076298 | 0.0996  | 0.163405 | 0.00039  |
| 4.68E-39 | 0.57397  | 2.84E-42 | -0.01713 | 0.71197 | 0.03959  | 0.39333 | 0.099284 | 0.03195  |
| 1.23E-58 | 0.672251 | 1.05E-62 | 0.07464  | 0.1072  | 0.104551 | 0.02385 | 0.150875 | 0.00107  |
| 6.01E-67 | 0.763649 | 2.12E-90 | 0.041599 | 0.36976 | 0.075646 | 0.10254 | 0.026954 | 0.56122  |
| 2.19E-31 | 0.514384 | 6.64E-33 | 0.012339 | 0.79029 | 0.118021 | 0.01069 | -0.05152 | 0.26651  |
| 1.87E-16 | 0.334985 | 1.04E-13 | -0.02413 | 0.60291 | -0.04557 | 0.3258  | 0.192842 | 2.72E-05 |
| 4.38E-41 | 0.674175 | 3.47E-63 | 0.115947 | 0.01216 | 0.067152 | 0.14736 | 0.028092 | 0.54481  |
| 1.10E-24 | 0.403375 | 1.06E-19 | 0.036502 | 0.4313  | -0.03001 | 0.51761 | 0.164679 | 0.00035  |
| 7.89E-17 | -0.41007 | 2.29E-20 | -0.14987 | 0.00116 | -0.07931 | 0.08688 | -0.11877 | 0.0102   |
| 4.46E-52 | 0.579622 | 2.90E-43 | 0.001097 | 0.98114 | 0.041451 | 0.37146 | 0.173924 | 0.00016  |
| 1.79E-31 | 0.552414 | 1.15E-38 | 0.096669 | 0.03677 | 0.085954 | 0.06346 | 0.110726 | 0.01668  |
| 3.51E-75 | 0.707393 | 4.43E-72 | 0.107951 | 0.01963 | 0.055375 | 0.23234 | 0.111952 | 0.0155   |
| 2.27E-38 | 0.58661  | 1.62E-44 | 0.071033 | 0.12531 | 0.106629 | 0.02118 | 0.163587 | 0.00039  |
| 4.29E-29 | 0.545511 | 1.45E-37 | -0.0007  | 0.98803 | 0.055795 | 0.22881 | -0.03792 | 0.41356  |
| 1.65E-50 | 0.624415 | 7.55E-52 | 0.022814 | 0.62289 | 0.157695 | 0.00063 | 0.05125  | 0.26904  |
| 9.15E-72 | 0.809837 | #####    | 0.089282 | 0.05384 | 0.11551  | 0.01249 | 0.094867 | 0.04044  |
| 3.82E-15 | 0.377768 | 2.74E-17 | -0.0101  | 0.82774 | 0.126343 | 0.00626 | -0.01245 | 0.78838  |
| 9.52E-61 | 0.667028 | 2.02E-61 | 0.06153  | 0.18439 | 0.074049 | 0.11002 | 0.183505 | 6.64E-05 |
| 1.23E-57 | 0.67122  | 1.89E-62 | 0.029878 | 0.51953 | 0.030474 | 0.51122 | 0.109423 | 0.01801  |
| 3.96E-53 | 0.730861 | 3.70E-79 | 0.047841 | 0.30222 | 0.088673 | 0.05551 | 0.110171 | 0.01723  |
| 2.48E-28 | 0.512925 | 1.07E-32 | 0.05582  | 0.2286  | 0.053615 | 0.24754 | -0.05432 | 0.2414   |
| 1.26E-15 | 0.462424 | 4.04E-26 | -0.01101 | 0.81237 | 0.105497 | 0.0226  | 0.240649 | 1.41E-07 |
| 1.18E-70 | 0.80913  | #####    | 0.117802 | 0.01084 | 0.087111 | 0.05997 | 0.122128 | 0.00824  |
| 1.32E-19 | 0.391837 | 1.38E-18 | 0.118252 | 0.01054 | -0.10091 | 0.02922 | 0.084979 | 0.06653  |
| 0.002    | 0.104632 | 0.02374  | 0.014505 | 0.75456 | -0.00407 | 0.93018 | -0.05087 | 0.27264  |
| 5.42E-22 | 0.363179 | 5.24E-16 | 0.064973 | 0.16097 | 0.012631 | 0.78544 | 0.156503 | 0.00069  |
| 2.19E-36 | 0.52075  | 8.09E-34 | 0.007295 | 0.87507 | 0.072025 | 0.12011 | 0.044148 | 0.34112  |
| 2.15E-07 | 0.207196 | 6.34E-06 | -0.17419 | 0.00015 | -0.08278 | 0.07391 | 0.106759 | 0.02103  |
| 8.27E-42 | 0.629359 | 6.97E-53 | -0.02849 | 0.53913 | 0.145955 | 0.00156 | 0.167015 | 0.00029  |
| 8.76E-48 | 0.563012 | 2.09E-40 | 0.068806 | 0.13763 | 0.09808  | 0.03409 | 0.120333 | 0.00924  |
| 5.05E-41 | 0.530748 | 2.71E-35 | 0.086719 | 0.06114 | 0.05018  | 0.27917 | 0.071409 | 0.12332  |
| 2.50E-29 | 0.479753 | 2.96E-28 | -0.01664 | 0.7198  | -0.04274 | 0.35674 | 0.060656 | 0.19071  |
| 8.78E-29 | 0.490348 | 1.27E-29 | 0.105648 | 0.02241 | 0.146809 | 0.00147 | 0.080083 | 0.08386  |
| 6.14E-24 | 0.281437 | 5.97E-10 | -0.04368 | 0.34624 | 0.025236 | 0.58646 | 0.057406 | 0.21562  |
| 2.01E-58 | 0.682278 | 3.02E-65 | 0.06622  | 0.15307 | 0.056728 | 0.2211  | 0.108277 | 0.01926  |
| 2.70E-12 | 0.385517 | 5.37E-18 | 0.025646 | 0.58038 | 0.164433 | 0.00036 | 0.046616 | 0.31479  |
| 7.53E-46 | 0.7061   | 1.04E-71 | 0.138099 | 0.00278 | 0.166965 | 0.00029 | 0.232265 | 3.87E-07 |
| 2.69E-37 | 0.59389  | 7.48E-46 | 0.089931 | 0.05212 | 0.137125 | 0.00298 | 0.085089 | 0.06618  |
| 5.78E-71 | 0.748074 | 7.66E-85 | 0.093051 | 0.04445 | 0.105422 | 0.0227  | 0.114083 | 0.01363  |
| 5.21E-12 | 0.291629 | 1.31E-10 | 0.015833 | 0.73291 | 0.068214 | 0.14105 | 0.008109 | 0.86126  |

|          |          |          |          |          |          |         |          |          |
|----------|----------|----------|----------|----------|----------|---------|----------|----------|
| 7.23E-76 | 0.805576 | #####    | 0.080561 | 0.08202  | 0.135706 | 0.0033  | 0.137417 | 0.00292  |
| 1.69E-12 | -0.22394 | 1.01E-06 | 0.070877 | 0.12614  | 0.031458 | 0.49767 | 0.002651 | 0.95445  |
| 7.14E-10 | 0.301587 | 2.82E-11 | -0.00602 | 0.8967   | -0.07909 | 0.08776 | 0.102911 | 0.02616  |
| 1.54E-20 | 0.443025 | 7.17E-24 | -0.02474 | 0.59384  | 0.006515 | 0.88833 | 0.14155  | 0.00217  |
| 6.02E-40 | 0.452008 | 6.79E-25 | 0.016582 | 0.72079  | 0.008271 | 0.85852 | 0.05472  | 0.23791  |
| 1.55E-39 | 0.600924 | 3.54E-47 | 0.131845 | 0.00432  | 0.101392 | 0.02846 | 0.172859 | 0.00017  |
| 1.58E-22 | -0.47148 | 3.21E-27 | -0.00753 | 0.87111  | -0.10554 | 0.02254 | -0.17617 | 0.00013  |
| 2.63E-26 | 0.297831 | 5.08E-11 | 0.047298 | 0.30775  | 0.046321 | 0.31786 | 0.09969  | 0.03125  |
| 7.63E-29 | -0.48383 | 8.95E-29 | -0.03333 | 0.47241  | -0.03312 | 0.47524 | -0.0852  | 0.06583  |
| 7.25E-56 | 0.610937 | 4.03E-49 | 0.096295 | 0.03751  | 0.053625 | 0.24745 | 0.11976  | 0.00959  |
| 1.83E-39 | 0.5594   | 8.34E-40 | 0.068973 | 0.13667  | 0.065917 | 0.15497 | 0.132137 | 0.00423  |
| 1.05E-17 | 0.442077 | 9.16E-24 | 0.008475 | 0.85507  | -0.00579 | 0.90066 | 0.148689 | 0.00127  |
| 2.83E-16 | 0.327727 | 3.73E-13 | -0.01012 | 0.82734  | -0.01441 | 0.75607 | 0.08229  | 0.07564  |
| 5.39E-15 | 0.240547 | 1.43E-07 | 0.023302 | 0.61547  | 0.033704 | 0.46747 | -0.04656 | 0.31539  |
| 2.93E-44 | 0.622529 | 1.85E-51 | 0.025961 | 0.57575  | 0.026202 | 0.57221 | 0.274259 | 1.67E-09 |
| 4.32E-54 | 0.613473 | 1.27E-49 | 0.045623 | 0.32522  | 0.089146 | 0.05421 | 0.095079 | 0.03999  |
| 2.42E-21 | 0.413584 | 1.01E-20 | 0.0049   | 0.9159   | -0.00937 | 0.8399  | 0.014612 | 0.75281  |
| 1.08E-45 | 0.538737 | 1.65E-36 | -0.0748  | 0.10643  | 0.032354 | 0.48549 | 0.145022 | 0.00168  |
| 2.17E-47 | 0.473656 | 1.72E-27 | 0.038797 | 0.40289  | 0.101754 | 0.0279  | 0.180709 | 8.60E-05 |
| 7.53E-31 | 0.519491 | 1.23E-33 | 0.201525 | 1.14E-05 | 0.065436 | 0.15801 | 0.068264 | 0.14076  |
| 1.14E-38 | 0.579166 | 3.50E-43 | -0.01981 | 0.66941  | 0.06442  | 0.16458 | 0.049883 | 0.28204  |
| 2.00E-49 | 0.659702 | 1.15E-59 | 0.145603 | 0.00161  | 0.091307 | 0.04861 | 0.165162 | 0.00034  |
| 5.35E-10 | 0.25934  | 1.29E-08 | -0.04913 | 0.28938  | 0.022079 | 0.63415 | 0.026241 | 0.57163  |
| 6.27E-17 | 0.240741 | 1.39E-07 | 0.007766 | 0.86708  | 0.001285 | 0.9779  | 0.078798 | 0.08896  |
| 1.99E-10 | 0.242288 | 1.15E-07 | 0.095307 | 0.03952  | -0.05849 | 0.20705 | 0.183539 | 6.62E-05 |
| 6.01E-26 | 0.560033 | 6.56E-40 | 0.037666 | 0.41674  | 0.178997 | 0.0001  | 0.152553 | 0.00094  |
| 2.19E-51 | 0.58079  | 1.80E-43 | 0.079343 | 0.08677  | 0.066962 | 0.14851 | 0.169562 | 0.00023  |
| 3.75E-18 | 0.281454 | 5.96E-10 | -0.03449 | 0.45719  | 0.031882 | 0.49189 | 0.145433 | 0.00163  |
| 3.48E-37 | 0.528404 | 6.07E-35 | -0.0147  | 0.75131  | 0.110656 | 0.01675 | 0.223577 | 1.06E-06 |
| 9.44E-09 | 0.262495 | 8.48E-09 | -0.06409 | 0.16678  | 0.028878 | 0.53361 | -0.039   | 0.40047  |
| 1.28E-52 | 0.618541 | 1.21E-50 | 0.07635  | 0.09937  | 0.053596 | 0.2477  | 0.099278 | 0.03196  |
| 8.36E-19 | -0.35628 | 2.01E-15 | -0.03218 | 0.48785  | -0.02214 | 0.63326 | -0.1568  | 0.00067  |
| 6.14E-27 | 0.49361  | 4.73E-30 | 0.02249  | 0.62784  | -0.00414 | 0.92893 | -0.07875 | 0.08917  |
| 1.76E-21 | -0.46625 | 1.40E-26 | -0.08193 | 0.07695  | -0.08956 | 0.0531  | -0.10085 | 0.02932  |
| 6.68E-76 | 0.686251 | 2.79E-66 | 0.096014 | 0.03807  | 0.085046 | 0.06632 | 0.204501 | 8.40E-06 |
| 1.36E-25 | 0.384627 | 6.49E-18 | 0.057641 | 0.21375  | -0.01041 | 0.82251 | 0.185702 | 5.40E-05 |
| 1.26E-10 | 0.40983  | 2.42E-20 | -0.02035 | 0.66086  | 0.101994 | 0.02753 | -0.05536 | 0.23249  |
| 4.03E-33 | 0.621763 | 2.66E-51 | -0.07322 | 0.11408  | 0.084934 | 0.06668 | 0.043826 | 0.34466  |
| 2.07E-36 | 0.64926  | 3.04E-57 | -0.02733 | 0.5558   | 0.113765 | 0.0139  | 0.163134 | 0.0004   |
| 3.88E-22 | 0.442799 | 7.61E-24 | 0.028473 | 0.53936  | 0.074403 | 0.10832 | 0.094683 | 0.04083  |
| 3.74E-12 | 0.26514  | 5.93E-09 | 0.007848 | 0.86568  | -0.13925 | 0.00256 | -0.07611 | 0.10043  |
| 8.79E-10 | -0.21211 | 3.76E-06 | -0.0087  | 0.85121  | 0.094976 | 0.04021 | -0.29177 | 1.29E-10 |
| 1.05E-22 | 0.464705 | 2.15E-26 | 0.008767 | 0.85013  | 0.068351 | 0.14025 | 0.137519 | 0.0029   |
| 9.65E-35 | 0.457553 | 1.53E-25 | 0.044633 | 0.33584  | 0.060716 | 0.19027 | 0.233657 | 3.28E-07 |
| 4.53E-53 | 0.683527 | 1.43E-65 | -0.02761 | 0.55173  | 0.100821 | 0.02937 | 0.136538 | 0.00311  |

|          |          |          |          |         |          |          |          |          |
|----------|----------|----------|----------|---------|----------|----------|----------|----------|
| 9.34E-16 | 0.222316 | 1.22E-06 | 0.116042 | 0.01209 | -0.03818 | 0.41041  | 0.034094 | 0.46232  |
| 1.37E-27 | 0.418241 | 3.36E-21 | 0.093853 | 0.04264 | -0.00093 | 0.98399  | 0.160572 | 0.0005   |
| 2.39E-53 | 0.629737 | 5.80E-53 | 0.069484 | 0.13378 | 0.042507 | 0.35938  | 0.169597 | 0.00023  |
| 4.39E-14 | 0.414367 | 8.41E-21 | 0.047118 | 0.3096  | 0.070662 | 0.1273   | -0.05604 | 0.22675  |
| 1.11E-16 | 0.27306  | 1.98E-09 | -0.03983 | 0.39051 | 0.020468 | 0.65908  | 0.04411  | 0.34153  |
| 5.54E-25 | 0.385723 | 5.14E-18 | 0.081537 | 0.07837 | 0.046289 | 0.3182   | 0.103315 | 0.02557  |
| 5.99E-45 | 0.696499 | 4.98E-69 | 0.024631 | 0.59547 | 0.208138 | 5.74E-06 | 0.201734 | 1.12E-05 |
| 2.72E-11 | 0.277364 | 1.07E-09 | -0.0322  | 0.48763 | 0.01329  | 0.77453  | -0.00462 | 0.92071  |
| 2.34E-17 | 0.390797 | 1.73E-18 | 0.010631 | 0.81877 | 0.054783 | 0.23737  | 0.01556  | 0.73735  |
| 3.34E-46 | 0.615001 | 6.27E-50 | 0.086808 | 0.06087 | 0.122473 | 0.00806  | -0.01606 | 0.72916  |
| 1.50E-23 | 0.409223 | 2.79E-20 | -0.02879 | 0.5349  | 0.035598 | 0.4428   | 0.151265 | 0.00104  |
| 2.47E-29 | 0.353916 | 3.16E-15 | -0.01488 | 0.7484  | -0.0515  | 0.26673  | 0.016736 | 0.71831  |
| 1.13E-19 | 0.381944 | 1.14E-17 | -0.04859 | 0.2947  | 0.070241 | 0.12959  | 0.14312  | 0.00193  |
| 1.17E-78 | 0.705134 | 1.95E-71 | 0.115939 | 0.01217 | 0.067492 | 0.14532  | 0.287124 | 2.59E-10 |
| 9.76E-40 | 0.50085  | 5.04E-31 | 0.092143 | 0.04658 | -0.0152  | 0.74325  | 0.160156 | 0.00051  |
| 3.66E-09 | 0.209035 | 5.22E-06 | -0.06536 | 0.15851 | 0.080932 | 0.08061  | 0.005579 | 0.9043   |
| 9.22E-39 | 0.543912 | 2.59E-37 | -0.0398  | 0.39079 | 0.044669 | 0.33545  | 0.052857 | 0.25429  |
| 2.64E-37 | 0.612307 | 2.16E-49 | 0.069479 | 0.13381 | 0.128409 | 0.00545  | 0.175483 | 0.00014  |
| 4.83E-30 | 0.569327 | 1.79E-41 | 0.053939 | 0.24468 | 0.142373 | 0.00204  | 0.225674 | 8.33E-07 |
| 1.62E-14 | 0.32647  | 4.64E-13 | 0.148716 | 0.00127 | 0.109291 | 0.01815  | 0.250819 | 3.93E-08 |
| 3.25E-32 | 0.516133 | 3.74E-33 | 0.001676 | 0.97119 | 0.079488 | 0.08619  | 0.189949 | 3.60E-05 |
| 1.13E-25 | 0.512696 | 1.15E-32 | 0.009929 | 0.83055 | -0.02146 | 0.64374  | 0.113769 | 0.01389  |
| 7.30E-17 | 0.321367 | 1.11E-12 | 0.097401 | 0.03536 | 0.037289 | 0.42143  | 0.124017 | 0.00729  |
| 5.61E-18 | 0.295327 | 7.48E-11 | 0.007473 | 0.87204 | 0.039329 | 0.39646  | 0.019181 | 0.67929  |
| 6.41E-41 | 0.612747 | 1.77E-49 | 0.159265 | 0.00055 | 0.136475 | 0.00312  | 0.086262 | 0.06252  |
| 1.94E-16 | 0.450251 | 1.08E-24 | -0.0399  | 0.38968 | 0.021094 | 0.64935  | 0.133073 | 0.00397  |
| 1.03E-11 | -0.30201 | 2.64E-11 | 0.063631 | 0.16982 | 0.011173 | 0.80969  | 0.003444 | 0.94083  |
| 1.68E-38 | 0.572898 | 4.36E-42 | -0.07005 | 0.13065 | 0.054649 | 0.23852  | 0.190371 | 3.46E-05 |
| 9.40E-08 | 0.242034 | 1.19E-07 | -0.04413 | 0.34133 | -0.02977 | 0.52096  | 0.08499  | 0.0665   |
| 2.86E-22 | 0.366113 | 2.93E-16 | -0.02741 | 0.55462 | 0.036416 | 0.43239  | 0.25226  | 3.27E-08 |
| 2.25E-61 | 0.707654 | 3.73E-72 | 0.042656 | 0.35771 | 0.093045 | 0.04446  | 0.131435 | 0.00444  |
| 2.17E-50 | 0.607975 | 1.54E-48 | 0.031338 | 0.49932 | 0.071203 | 0.12441  | 0.112841 | 0.0147   |
| 2.86E-63 | 0.693089 | 4.21E-68 | 0.067275 | 0.14662 | 0.078899 | 0.08855  | 0.040661 | 0.38065  |
| 4.41E-34 | 0.604803 | 6.38E-48 | 0.028739 | 0.53557 | 0.115543 | 0.01247  | 0.154686 | 0.0008   |
| 3.87E-25 | 0.415997 | 5.73E-21 | -0.13276 | 0.00405 | 0.039984 | 0.38864  | 0.113287 | 0.01431  |
| 1.51E-46 | 0.676701 | 8.04E-64 | 0.071617 | 0.12223 | 0.134427 | 0.00361  | 0.144753 | 0.00171  |
| 8.90E-43 | 0.479325 | 3.36E-28 | 0.049629 | 0.28449 | 0.020757 | 0.65458  | 0.194076 | 2.41E-05 |
| 1.74E-17 | 0.285546 | 3.27E-10 | -0.05493 | 0.23612 | 0.039908 | 0.38955  | 0.004891 | 0.91604  |
| 2.01E-18 | 0.395304 | 6.44E-19 | 0.127189 | 0.00592 | -0.08414 | 0.06928  | 0.079369 | 0.08666  |
| 8.45E-24 | 0.345746 | 1.47E-14 | 0.062759 | 0.17576 | -0.01474 | 0.75068  | 0.219738 | 1.63E-06 |
| 4.13E-25 | 0.436729 | 3.59E-23 | 0.033071 | 0.47587 | 0.00168  | 0.97112  | 0.177783 | 0.00011  |
| 2.36E-11 | 0.294436 | 8.57E-11 | -0.10139 | 0.02846 | -0.03375 | 0.46692  | 0.047063 | 0.31016  |
| 5.37E-30 | 0.438389 | 2.36E-23 | -0.04034 | 0.38439 | -0.01174 | 0.80029  | 0.008638 | 0.85231  |
| 7.70E-16 | 0.423826 | 8.79E-22 | 0.178951 | 0.0001  | 0.104259 | 0.02425  | 0.109167 | 0.01828  |
| 2.60E-23 | 0.397831 | 3.68E-19 | -0.01393 | 0.76395 | 0.069715 | 0.13249  | 0.069185 | 0.13547  |

|          |          |          |          |          |          |          |          |          |
|----------|----------|----------|----------|----------|----------|----------|----------|----------|
| 5.50E-25 | 0.535971 | 4.39E-36 | 0.032123 | 0.48862  | 0.052627 | 0.25637  | 0.202325 | 1.05E-05 |
| 1.46E-15 | 0.314005 | 3.81E-12 | 0.007192 | 0.87682  | 0.037386 | 0.42022  | -0.00518 | 0.91107  |
| 6.48E-35 | 0.546269 | 1.10E-37 | -0.06438 | 0.16481  | 0.020302 | 0.66167  | -0.03293 | 0.47777  |
| 4.54E-09 | 0.224765 | 9.24E-07 | -0.00479 | 0.91785  | 0.038183 | 0.41038  | -0.06258 | 0.17702  |
| 7.56E-57 | 0.70896  | 1.57E-72 | 0.185893 | 5.31E-05 | 0.046003 | 0.3212   | 0.155503 | 0.00075  |
| 1.98E-85 | 0.757352 | 4.21E-88 | 0.085601 | 0.06456  | 0.102276 | 0.0271   | 0.242619 | 1.11E-07 |
| 2.28E-23 | 0.442072 | 9.18E-24 | 0.051926 | 0.26276  | -0.05898 | 0.20328  | -0.09582 | 0.03846  |
| 1.88E-21 | 0.30497  | 1.65E-11 | -0.03735 | 0.42067  | -0.0658  | 0.1557   | 0.164275 | 0.00036  |
| 2.21E-74 | 0.66832  | 9.75E-62 | 0.120715 | 0.00902  | 0.080579 | 0.08195  | 0.221025 | 1.41E-06 |
| 1.90E-50 | 0.552143 | 1.27E-38 | -0.00495 | 0.91509  | -0.07124 | 0.12419  | 0.066831 | 0.14931  |
| 3.29E-57 | 0.592402 | 1.41E-45 | 0.024229 | 0.60149  | 0.042881 | 0.35517  | 0.041147 | 0.37498  |
| 3.94E-45 | 0.568498 | 2.48E-41 | 0.045222 | 0.3295   | 0.011287 | 0.8078   | 0.109963 | 0.01745  |
| 1.74E-52 | 0.666748 | 2.36E-61 | 0.137214 | 0.00297  | 0.091931 | 0.04709  | 0.12578  | 0.0065   |
| 1.15E-42 | 0.66458  | 7.89E-61 | -0.01891 | 0.68353  | 0.042199 | 0.36288  | 0.106543 | 0.02129  |
| 2.44E-25 | 0.533836 | 9.27E-36 | 0.043376 | 0.34963  | 0.146397 | 0.00151  | 0.091155 | 0.04899  |
| 1.12E-35 | 0.576946 | 8.60E-43 | 0.075972 | 0.10106  | 0.059106 | 0.20232  | 0.204787 | 8.16E-06 |
| 8.50E-37 | 0.608362 | 1.29E-48 | 0.099487 | 0.03159  | 0.099493 | 0.03158  | 0.001423 | 0.97554  |
| 5.07E-44 | 0.627435 | 1.77E-52 | 0.08132  | 0.07917  | 0.130243 | 0.00482  | 0.328783 | 3.11E-13 |
| 1.31E-50 | 0.641978 | 1.31E-55 | -0.01727 | 0.70972  | 0.149781 | 0.00117  | 0.127383 | 0.00584  |
| 9.78E-57 | 0.526838 | 1.04E-34 | -0.04159 | 0.36985  | 0.060118 | 0.19468  | 0.143127 | 0.00193  |
| 3.51E-28 | 0.384543 | 6.61E-18 | -0.01529 | 0.74179  | -0.01561 | 0.73657  | 0.232756 | 3.65E-07 |
| 6.75E-43 | 0.525204 | 1.81E-34 | 0.016332 | 0.72483  | 0.035561 | 0.44329  | 0.174609 | 0.00015  |
| 5.59E-08 | 0.258708 | 1.41E-08 | 0.050508 | 0.27605  | 0.086951 | 0.06044  | -0.04818 | 0.29885  |
| 2.22E-66 | 0.726042 | 1.21E-77 | 0.054672 | 0.23833  | 0.091124 | 0.04907  | 0.134106 | 0.00369  |
| 2.47E-52 | 0.71019  | 6.92E-73 | 0.089796 | 0.05247  | 0.160638 | 0.00049  | 0.16276  | 0.00041  |
| 1.27E-40 | 0.580783 | 1.81E-43 | 0.043187 | 0.35174  | 0.094174 | 0.04193  | 0.114281 | 0.01347  |
| 1.31E-56 | 0.683247 | 1.70E-65 | 0.080159 | 0.08356  | 0.106721 | 0.02107  | 0.04811  | 0.29952  |
| 8.21E-46 | 0.635628 | 3.19E-54 | 0.10608  | 0.02186  | 0.02868  | 0.53642  | 0.067355 | 0.14614  |
| 1.94E-47 | 0.682951 | 2.02E-65 | 0.111474 | 0.01595  | 0.140922 | 0.00227  | 0.196235 | 1.95E-05 |
| 3.85E-15 | 0.332194 | 1.71E-13 | -0.04581 | 0.32321  | 0.066502 | 0.15133  | 0.136027 | 0.00323  |
| 5.27E-07 | 0.239517 | 1.62E-07 | 0.019318 | 0.67712  | -0.00132 | 0.97732  | -0.06339 | 0.17146  |
| 2.98E-12 | 0.20652  | 6.81E-06 | 0.0847   | 0.06744  | 0.010474 | 0.82139  | 0.126273 | 0.00629  |
| 1.41E-12 | 0.264761 | 6.24E-09 | -0.08865 | 0.05557  | 0.029457 | 0.52543  | -0.07036 | 0.12895  |
| 2.20E-63 | 0.719729 | 1.04E-75 | 0.111453 | 0.01597  | 0.072183 | 0.11929  | 0.108415 | 0.0191   |
| 1.86E-34 | 0.534946 | 6.29E-36 | 0.001823 | 0.96867  | 0.071052 | 0.12521  | 0.133463 | 0.00386  |
| 1.57E-14 | 0.231456 | 4.25E-07 | 0.032768 | 0.47992  | -0.0687  | 0.13824  | -0.12225 | 0.00818  |
| 1.29E-59 | 0.794448 | #####    | 0.1542   | 0.00083  | 0.231844 | 4.06E-07 | 0.202222 | 1.06E-05 |
| 3.78E-72 | 0.735535 | 1.17E-80 | 0.09443  | 0.04138  | 0.099425 | 0.0317   | 0.25163  | 3.54E-08 |
| 3.34E-56 | 0.707723 | 3.56E-72 | 0.015649 | 0.7359   | 0.079678 | 0.08544  | 0.085592 | 0.06459  |
| 2.86E-17 | 0.452692 | 5.66E-25 | 0.040728 | 0.37987  | 0.138341 | 0.00274  | 0.018799 | 0.68533  |
| 1.10E-13 | 0.2536   | 2.75E-08 | -0.06358 | 0.17019  | -0.00572 | 0.90193  | 0.135963 | 0.00324  |
| 6.59E-28 | 0.465914 | 1.54E-26 | 0.019259 | 0.67806  | 0.06213  | 0.18014  | 0.001275 | 0.97808  |
| 0.00021  | 0.051339 | 0.26821  | -0.15627 | 0.0007   | -0.13597 | 0.00324  | -0.13501 | 0.00346  |
| 2.16E-19 | -0.39885 | 2.94E-19 | -0.14469 | 0.00172  | -0.10703 | 0.0207   | -0.17388 | 0.00016  |
| 1.80E-58 | 0.706254 | 9.37E-72 | 0.004566 | 0.92161  | 0.038498 | 0.40653  | 0.05238  | 0.25861  |

|          |          |          |          |          |          |          |          |          |
|----------|----------|----------|----------|----------|----------|----------|----------|----------|
| 1.57E-14 | 0.301923 | 2.68E-11 | 0.07057  | 0.1278   | -0.00027 | 0.99533  | -0.022   | 0.63535  |
| 9.58E-28 | 0.424036 | 8.36E-22 | 0.002322 | 0.96009  | 0.084694 | 0.06746  | 0.232797 | 3.63E-07 |
| 1.31E-39 | 0.503311 | 2.33E-31 | 0.078047 | 0.09206  | 0.064329 | 0.16517  | 0.167238 | 0.00028  |
| 5.78E-36 | 0.401774 | 1.52E-19 | -0.03911 | 0.39908  | -0.02562 | 0.58083  | 0.064045 | 0.16705  |
| 4.86E-17 | -0.36805 | 1.99E-16 | -0.05228 | 0.25953  | 0.018012 | 0.69784  | -0.06588 | 0.15522  |
| 5.65E-07 | 0.199112 | 1.46E-05 | -0.09251 | 0.0457   | 0.059638 | 0.19828  | 0.174811 | 0.00015  |
| 6.23E-48 | 0.610277 | 5.45E-49 | 0.075323 | 0.10402  | 0.048201 | 0.2986   | 0.241337 | 1.29E-07 |
| 6.28E-50 | 0.633957 | 7.31E-54 | 0.048657 | 0.29404  | 0.058054 | 0.21048  | 0.054009 | 0.24407  |
| 5.63E-23 | 0.423005 | 1.07E-21 | -0.01667 | 0.71943  | 0.092653 | 0.04537  | -0.05587 | 0.22816  |
| 3.68E-46 | 0.58128  | 1.47E-43 | 0.030612 | 0.50931  | 0.059767 | 0.1973   | -0.02356 | 0.6115   |
| 8.60E-23 | 0.550084 | 2.73E-38 | 0.098157 | 0.03395  | 0.150819 | 0.00108  | -0.06122 | 0.18663  |
| 1.10E-62 | 0.739121 | 7.90E-82 | -0.09544 | 0.03925  | 0.133104 | 0.00396  | 0.201899 | 1.10E-05 |
| 7.49E-69 | 0.723644 | 6.65E-77 | 0.117803 | 0.01084  | 0.111982 | 0.01547  | 0.107108 | 0.02061  |
| 7.94E-73 | 0.73741  | 2.88E-81 | 0.071447 | 0.12312  | 0.09241  | 0.04594  | 0.166882 | 0.00029  |
| 8.75E-43 | 0.612122 | 2.35E-49 | 0.047856 | 0.30207  | 0.109377 | 0.01806  | 0.187468 | 4.57E-05 |
| 4.56E-32 | 0.505003 | 1.36E-31 | 0.027588 | 0.55204  | -0.00787 | 0.86523  | 0.347998 | 9.67E-15 |
| 2.27E-49 | 0.662014 | 3.25E-60 | -0.02992 | 0.51896  | 0.126203 | 0.00632  | 0.111768 | 0.01567  |
| 4.61E-26 | 0.430406 | 1.75E-22 | -0.0312  | 0.50114  | 0.031926 | 0.49129  | 0.064589 | 0.16347  |
| 4.67E-33 | 0.595666 | 3.49E-46 | 0.053038 | 0.25267  | 0.165313 | 0.00033  | -0.00458 | 0.92131  |
| 9.29E-26 | 0.350193 | 6.41E-15 | 0.089206 | 0.05405  | 0.043153 | 0.35212  | 0.149002 | 0.00124  |
| 3.89E-43 | 0.668745 | 7.68E-62 | 0.046541 | 0.31556  | 0.177342 | 0.00012  | 0.061    | 0.18821  |
| 6.29E-15 | 0.264715 | 6.28E-09 | 0.158946 | 0.00057  | 0.091283 | 0.04867  | 0.218625 | 1.85E-06 |
| 4.59E-47 | 0.521681 | 5.93E-34 | 0.074691 | 0.10696  | 0.07819  | 0.09146  | 0.268659 | 3.66E-09 |
| 2.56E-36 | 0.587848 | 9.68E-45 | 0.098446 | 0.03343  | 0.085357 | 0.06533  | -0.09437 | 0.0415   |
| 2.78E-32 | 0.502416 | 3.09E-31 | 0.109633 | 0.01779  | 0.081274 | 0.07934  | 0.299825 | 3.72E-11 |
| 1.54E-17 | 0.284099 | 4.05E-10 | -0.05236 | 0.25883  | -0.02007 | 0.66528  | 0.241939 | 1.20E-07 |
| 2.64E-45 | -0.63402 | 7.08E-54 | -0.05488 | 0.23656  | -0.11072 | 0.01668  | -0.12014 | 0.00936  |
| 8.29E-36 | 0.407094 | 4.55E-20 | 0.110614 | 0.01679  | -0.02586 | 0.57723  | 0.13746  | 0.00291  |
| 3.19E-35 | -0.50492 | 1.40E-31 | -0.12722 | 0.0059   | -0.17634 | 0.00013  | -0.20173 | 1.12E-05 |
| 1.48E-31 | 0.495174 | 2.93E-30 | 0.14423  | 0.00178  | 0.045669 | 0.32473  | 0.21579  | 2.52E-06 |
| 4.06E-10 | 0.306852 | 1.22E-11 | -0.0905  | 0.05065  | -0.04183 | 0.36708  | 0.02027  | 0.66218  |
| 8.16E-27 | 0.584846 | 3.39E-44 | 0.050428 | 0.2768   | 0.112255 | 0.01522  | 0.023209 | 0.61688  |
| 1.15E-28 | 0.577309 | 7.43E-43 | -0.00408 | 0.92992  | 0.135894 | 0.00326  | 0.092514 | 0.0457   |
| 1.05E-12 | 0.419626 | 2.42E-21 | 0.102965 | 0.02608  | 0.20137  | 1.16E-05 | -0.01525 | 0.74243  |
| 3.53E-22 | 0.419419 | 2.54E-21 | 0.305752 | 1.46E-11 | -0.04634 | 0.31762  | -0.01302 | 0.77897  |
| 3.96E-22 | 0.384386 | 6.83E-18 | 0.051006 | 0.27132  | -0.00678 | 0.8839   | 0.026821 | 0.56315  |
| 1.05E-37 | 0.591585 | 2.00E-45 | -0.01547 | 0.73874  | -0.0142  | 0.75964  | 0.036103 | 0.43636  |
| 7.50E-16 | 0.318346 | 1.85E-12 | -0.02753 | 0.55283  | 0.042936 | 0.35456  | 0.103911 | 0.02473  |
| 8.04E-08 | 0.089582 | 0.05304  | 0.079397 | 0.08655  | -0.02959 | 0.52354  | -0.00049 | 0.99158  |
| 2.97E-31 | 0.539733 | 1.16E-36 | 0.000531 | 0.99087  | 0.034309 | 0.45951  | -0.00147 | 0.97475  |
| 7.18E-29 | 0.403263 | 1.09E-19 | 0.032056 | 0.48952  | 0.03582  | 0.43997  | -0.032   | 0.49024  |
| 1.36E-12 | 0.423228 | 1.02E-21 | 0.06426  | 0.16563  | 0.087528 | 0.05875  | 0.122862 | 0.00786  |
| 4.69E-45 | 0.545375 | 1.53E-37 | 0.074289 | 0.10886  | 0.054846 | 0.23683  | 0.272053 | 2.28E-09 |
| 1.17E-28 | 0.496349 | 2.04E-30 | 0.00399  | 0.93147  | 0.088777 | 0.05522  | 0.20843  | 5.57E-06 |
| 1.61E-19 | 0.454007 | 3.98E-25 | -0.02147 | 0.64356  | 0.049796 | 0.28287  | 0.041594 | 0.36981  |

|          |          |          |          |         |          |          |          |          |
|----------|----------|----------|----------|---------|----------|----------|----------|----------|
| 8.95E-39 | 0.537574 | 2.49E-36 | 0.005568 | 0.90448 | 0.047251 | 0.30823  | 0.059368 | 0.20032  |
| 1.37E-39 | 0.620235 | 5.47E-51 | 0.112697 | 0.01482 | 0.076739 | 0.09765  | 0.059225 | 0.20141  |
| 4.89E-49 | 0.66904  | 6.50E-62 | 0.022882 | 0.62185 | 0.100644 | 0.02966  | 0.197796 | 1.67E-05 |
| 1.41E-39 | 0.49898  | 9.04E-31 | 0.000946 | 0.98374 | 0.032866 | 0.47862  | 0.091892 | 0.04718  |
| 9.31E-39 | 0.658184 | 2.63E-59 | 0.036375 | 0.43291 | 0.09137  | 0.04846  | 0.124674 | 0.00699  |
| 9.68E-26 | 0.398654 | 3.07E-19 | -0.01082 | 0.81557 | -0.01384 | 0.76549  | -0.00951 | 0.83763  |
| 3.01E-31 | 0.625224 | 5.13E-52 | 0.073387 | 0.11324 | 0.128498 | 0.00542  | 0.061913 | 0.18167  |
| 1.01E-36 | 0.599648 | 6.19E-47 | 0.043557 | 0.34763 | 0.096763 | 0.03658  | 0.045832 | 0.32301  |
| 2.54E-34 | 0.584103 | 4.61E-44 | 0.011344 | 0.80685 | 0.000633 | 0.98912  | 0.18683  | 4.86E-05 |
| 5.16E-13 | 0.414826 | 7.55E-21 | 0.014757 | 0.75044 | 0.228492 | 6.02E-07 | -0.0181  | 0.69643  |
| 2.41E-24 | 0.469846 | 5.09E-27 | 0.014749 | 0.75056 | 0.04644  | 0.31662  | -0.0873  | 0.05941  |
| 2.11E-42 | 0.639204 | 5.33E-55 | 0.036585 | 0.43026 | 0.09664  | 0.03682  | 0.026664 | 0.56544  |
| 1.61E-30 | 0.510084 | 2.68E-32 | 0.077387 | 0.09485 | 0.115882 | 0.01221  | 0.172184 | 0.00018  |
| 4.92E-44 | 0.562528 | 2.52E-40 | 0.066275 | 0.15273 | 0.114638 | 0.01318  | -0.02872 | 0.53591  |
| 1.41E-24 | 0.387721 | 3.35E-18 | -0.04623 | 0.31883 | -0.02669 | 0.56502  | -0.09406 | 0.04219  |
| 8.90E-40 | 0.504609 | 1.54E-31 | 0.06333  | 0.17185 | 0.023639 | 0.61037  | -0.00267 | 0.9541   |
| 6.96E-35 | 0.655348 | 1.21E-58 | 0.114766 | 0.01308 | 0.201375 | 1.16E-05 | 0.107115 | 0.0206   |
| 1.81E-20 | 0.344629 | 1.81E-14 | 0.003566 | 0.93874 | -0.02419 | 0.60204  | 0.203293 | 9.52E-06 |
| 3.68E-35 | 0.514211 | 7.03E-33 | 0.126769 | 0.00608 | 0.06635  | 0.15227  | 0.148538 | 0.00129  |
| 6.92E-42 | 0.504283 | 1.71E-31 | 0.018468 | 0.69058 | 0.023678 | 0.60977  | 0.107958 | 0.01962  |
| 9.15E-29 | 0.627225 | 1.96E-52 | 0.065277 | 0.15902 | 0.087992 | 0.05742  | 0.007189 | 0.87686  |
| 8.05E-35 | 0.556206 | 2.79E-39 | 0.118165 | 0.0106  | 0.097893 | 0.03444  | 0.08922  | 0.05401  |
| 1.19E-30 | 0.504712 | 1.49E-31 | 0.024945 | 0.59077 | 0.085352 | 0.06534  | 0.144901 | 0.00169  |
| 3.60E-52 | 0.625747 | 3.99E-52 | -0.02991 | 0.51905 | 0.063201 | 0.17273  | 0.158226 | 0.0006   |
| 4.22E-36 | 0.575661 | 1.44E-42 | 0.019244 | 0.67829 | 0.103983 | 0.02463  | 0.072451 | 0.11792  |
| 2.93E-54 | 0.724412 | 3.86E-77 | 0.102372 | 0.02695 | 0.125799 | 0.00649  | 0.205365 | 7.68E-06 |
| 1.68E-25 | 0.446022 | 3.29E-24 | 0.001724 | 0.97036 | -0.04806 | 0.30002  | -0.06267 | 0.1764   |
| 4.21E-59 | 0.734158 | 3.27E-80 | 0.139305 | 0.00255 | 0.121326 | 0.00868  | 0.105053 | 0.02318  |
| 7.64E-65 | 0.706379 | 8.63E-72 | 0.084164 | 0.06919 | 0.095485 | 0.03915  | 0.131677 | 0.00437  |
| 2.59E-33 | 0.446418 | 2.97E-24 | 0.032482 | 0.48378 | -0.01374 | 0.76713  | 0.074481 | 0.10795  |
| 1.70E-41 | 0.475449 | 1.03E-27 | 0.050893 | 0.27239 | 0.06443  | 0.16451  | 0.37815  | 2.53E-17 |
| 2.51E-21 | 0.437638 | 2.85E-23 | -0.12085 | 0.00894 | 0.067368 | 0.14606  | -0.03612 | 0.43613  |
| 3.21E-49 | 0.672395 | 9.65E-63 | 0.103646 | 0.0251  | 0.066596 | 0.15075  | 0.099526 | 0.03153  |
| 7.15E-11 | -0.28246 | 5.14E-10 | 0.030714 | 0.5079  | 0.080558 | 0.08203  | -0.03227 | 0.48663  |
| 2.02E-18 | 0.27664  | 1.19E-09 | -0.08579 | 0.06396 | -0.00507 | 0.91307  | 0.029944 | 0.5186   |
| 4.10E-11 | 0.326082 | 4.97E-13 | 0.004787 | 0.91783 | 0.066589 | 0.15079  | -0.07641 | 0.09909  |
| 1.66E-29 | 0.507997 | 5.25E-32 | -0.08905 | 0.05448 | 0.122917 | 0.00783  | 0.218075 | 1.96E-06 |
| 2.88E-10 | -0.31327 | 4.30E-12 | 0.004834 | 0.91702 | 0.019734 | 0.67058  | 0.121988 | 0.00832  |
| 8.83E-08 | -0.33859 | 5.45E-14 | -0.03511 | 0.44909 | -0.07189 | 0.12082  | -0.03208 | 0.48927  |
| 5.41E-28 | 0.576661 | 9.65E-43 | 0.121306 | 0.00869 | 0.150058 | 0.00114  | 0.023329 | 0.61506  |
| 2.13E-48 | 0.625229 | 5.11E-52 | 0.024271 | 0.60085 | 0.100658 | 0.02964  | 0.314426 | 3.56E-12 |
| 1.31E-39 | 0.566    | 6.59E-41 | 0.067208 | 0.14703 | 0.077043 | 0.09633  | 0.118611 | 0.01031  |
| 3.15E-30 | -0.61089 | 4.12E-49 | -0.06207 | 0.18056 | -0.08905 | 0.05446  | -0.19286 | 2.72E-05 |
| 6.06E-31 | 0.575237 | 1.71E-42 | 0.122469 | 0.00806 | 0.131369 | 0.00446  | 0.070077 | 0.13049  |
| 1.13E-59 | 0.727674 | 3.74E-78 | -0.00809 | 0.86151 | 0.146637 | 0.00149  | 0.151553 | 0.00102  |



|          |          |          |          |          |          |          |          |          |
|----------|----------|----------|----------|----------|----------|----------|----------|----------|
| 1.11E-76 | 0.754467 | 4.51E-87 | 0.048941 | 0.29123  | 0.115109 | 0.01281  | 0.146308 | 0.00152  |
| 5.11E-25 | 0.444856 | 4.46E-24 | -0.0025  | 0.95695  | 0.088871 | 0.05496  | 0.050582 | 0.27534  |
| 2.63E-12 | -0.35036 | 6.21E-15 | -0.02471 | 0.59422  | -0.10657 | 0.02126  | -0.15373 | 0.00086  |
| 2.26E-40 | 0.625808 | 3.87E-52 | 0.118837 | 0.01016  | 0.049761 | 0.28322  | 0.320491 | 1.29E-12 |
| 1.37E-66 | 0.578253 | 5.07E-43 | 0.016323 | 0.72497  | -0.0031  | 0.94672  | 0.062138 | 0.18008  |
| 9.73E-19 | -0.37381 | 6.20E-17 | -0.01436 | 0.75696  | -0.09631 | 0.03747  | -0.22783 | 6.50E-07 |
| 1.36E-08 | 0.353177 | 3.64E-15 | 0.019638 | 0.67209  | 0.059097 | 0.20238  | -0.11535 | 0.01262  |
| 3.35E-49 | 0.601075 | 3.31E-47 | 0.040698 | 0.38021  | 0.031477 | 0.49741  | 0.115214 | 0.01272  |
| 1.85E-55 | 0.616766 | 2.77E-50 | 0.180103 | 9.09E-05 | 0.081712 | 0.07773  | 0.097383 | 0.03539  |
| 5.28E-47 | 0.613856 | 1.06E-49 | 0.020966 | 0.65134  | 0.055836 | 0.22846  | 0.130471 | 0.00474  |
| 1.13E-13 | 0.275078 | 1.49E-09 | -0.02213 | 0.6334   | -0.13765 | 0.00287  | -0.01506 | 0.74542  |
| 1.40E-32 | 0.436385 | 3.92E-23 | 0.120061 | 0.0094   | 0.014951 | 0.74726  | 0.025692 | 0.57971  |
| 1.05E-32 | 0.564451 | 1.20E-40 | 0.021386 | 0.64482  | 0.090341 | 0.05105  | 0.133669 | 0.00381  |
| 7.83E-18 | 0.396921 | 4.51E-19 | 0.016    | 0.7302   | -0.03571 | 0.44138  | 0.013335 | 0.7738   |
| 1.45E-51 | 0.711867 | 2.25E-73 | 0.123436 | 0.00757  | 0.166633 | 0.0003   | 0.062986 | 0.1742   |
| 8.40E-47 | 0.527982 | 7.01E-35 | -0.0516  | 0.26578  | 0.044663 | 0.33551  | 0.125617 | 0.00657  |
| 7.15E-65 | 0.76063  | 2.74E-89 | 0.089124 | 0.05427  | 0.11775  | 0.01088  | 0.191645 | 3.06E-05 |
| 6.70E-18 | 0.4571   | 1.73E-25 | 0.033983 | 0.46379  | 0.084205 | 0.06906  | 0.030437 | 0.51174  |
| 4.35E-28 | 0.515168 | 5.14E-33 | 0.055057 | 0.23503  | -0.00225 | 0.96141  | -0.09695 | 0.03623  |
| 6.76E-06 | 0.255581 | 2.12E-08 | 0.09284  | 0.04494  | -0.01601 | 0.73009  | -0.23004 | 5.02E-07 |
| 1.67E-31 | 0.532246 | 1.61E-35 | 0.108443 | 0.01907  | 0.046249 | 0.31861  | 0.128467 | 0.00543  |
| 4.06E-41 | 0.608244 | 1.37E-48 | 0.045688 | 0.32453  | 0.06896  | 0.13675  | 0.033069 | 0.47591  |
| 4.68E-14 | -0.32687 | 4.33E-13 | 0.070071 | 0.13052  | 0.021676 | 0.64034  | 0.029557 | 0.52401  |
| 1.47E-40 | 0.654211 | 2.22E-58 | -0.0017  | 0.97084  | 0.139791 | 0.00246  | -0.04258 | 0.35854  |
| 1.58E-30 | 0.552734 | 1.02E-38 | 0.05123  | 0.26922  | 0.061866 | 0.18199  | 0.190992 | 3.26E-05 |
| 3.55E-12 | -0.29561 | 7.16E-11 | -0.0485  | 0.29556  | 0.015807 | 0.73332  | -0.12965 | 0.00501  |
| 8.25E-12 | 0.343559 | 2.20E-14 | 0.018102 | 0.6964   | 0.045824 | 0.32309  | 0.218756 | 1.82E-06 |
| 3.40E-29 | 0.449992 | 1.16E-24 | -0.00143 | 0.97533  | 0.069804 | 0.132    | 0.125165 | 0.00676  |
| 2.05E-49 | 0.679104 | 1.97E-64 | 0.050341 | 0.27764  | 0.109413 | 0.01802  | 0.069964 | 0.13111  |
| 9.29E-37 | 0.601728 | 2.49E-47 | 0.10563  | 0.02243  | 0.09618  | 0.03774  | 0.058368 | 0.20801  |
| 3.29E-07 | 0.152578 | 0.00094  | -0.08375 | 0.07057  | -0.01486 | 0.74874  | 0.00558  | 0.90428  |
| 6.67E-38 | 0.582742 | 8.08E-44 | 0.090646 | 0.05027  | 0.0922   | 0.04644  | 0.0086   | 0.85294  |
| 5.62E-31 | 0.510707 | 2.19E-32 | 0.033679 | 0.4678   | 0.112838 | 0.0147   | 0.155404 | 0.00075  |
| 7.93E-38 | 0.585262 | 2.85E-44 | 0.01134  | 0.80692  | 0.071933 | 0.12058  | -0.01774 | 0.70213  |
| 2.18E-34 | 0.594636 | 5.43E-46 | -0.01193 | 0.79701  | 0.080478 | 0.08233  | 0.215927 | 2.48E-06 |
| 1.00E-21 | 0.450961 | 8.97E-25 | -0.105   | 0.02325  | 0.069565 | 0.13333  | 0.130588 | 0.0047   |
| 1.39E-48 | 0.66981  | 4.20E-62 | 0.083547 | 0.07126  | 0.190748 | 3.34E-05 | 0.134494 | 0.00359  |
| 7.47E-37 | 0.662019 | 3.25E-60 | 0.14225  | 0.00206  | 0.183677 | 6.53E-05 | 0.196355 | 1.92E-05 |
| 2.41E-24 | 0.398391 | 3.25E-19 | -0.00955 | 0.83686  | 0.006643 | 0.88615  | 0.081864 | 0.07717  |
| 7.68E-19 | 0.368502 | 1.82E-16 | -0.09882 | 0.03276  | 0.039429 | 0.39527  | -0.06502 | 0.1607   |
| 1.32E-15 | 0.286114 | 3.00E-10 | -0.02415 | 0.60264  | 0.039335 | 0.3964   | 0.151829 | 0.001    |
| 4.36E-27 | 0.480787 | 2.19E-28 | 0.066088 | 0.1539   | 0.024468 | 0.5979   | 0.080701 | 0.08148  |
| 1.96E-08 | 0.304298 | 1.84E-11 | -0.04566 | 0.32485  | -0.01686 | 0.71626  | 0.023031 | 0.61959  |
| 9.63E-16 | -0.27964 | 7.75E-10 | -0.02293 | 0.62112  | -0.05888 | 0.20409  | -0.10899 | 0.01848  |
| 3.55E-12 | -0.41426 | 8.62E-21 | -0.03128 | 0.50016  | -0.16226 | 0.00043  | 0.017181 | 0.71115  |

|          |          |          |          |          |          |         |          |          |
|----------|----------|----------|----------|----------|----------|---------|----------|----------|
| 4.20E-08 | 0.230402 | 4.81E-07 | 0.039828 | 0.3905   | -0.004   | 0.9313  | -0.03243 | 0.48448  |
| 3.38E-29 | 0.57656  | 1.00E-42 | 0.02841  | 0.54025  | 0.105928 | 0.02205 | 0.15162  | 0.00101  |
| 3.31E-22 | 0.476035 | 8.71E-28 | -0.07852 | 0.09008  | 0.087075 | 0.06008 | 0.023682 | 0.60972  |
| 1.21E-25 | 0.490412 | 1.25E-29 | 0.054776 | 0.23743  | 0.01847  | 0.69056 | 0.169143 | 0.00024  |
| 2.15E-25 | 0.545243 | 1.60E-37 | 0.080837 | 0.08097  | 0.118241 | 0.01055 | 0.014665 | 0.75194  |
| 1.57E-36 | 0.557951 | 1.45E-39 | 0.052259 | 0.25971  | 0.115053 | 0.01285 | -0.01726 | 0.70996  |
| 1.55E-12 | 0.408723 | 3.13E-20 | 0.287596 | 2.41E-10 | 0.152535 | 0.00094 | 0.030636 | 0.50898  |
| 3.50E-54 | 0.649779 | 2.32E-57 | 0.024646 | 0.59524  | 0.016046 | 0.72945 | 0.043407 | 0.34929  |
| 2.56E-28 | 0.548024 | 5.82E-38 | 0.02269  | 0.62479  | 0.139416 | 0.00253 | 0.106954 | 0.02079  |
| 1.03E-48 | 0.700929 | 2.97E-70 | 0.030755 | 0.50733  | 0.026115 | 0.57348 | 0.169324 | 0.00024  |
| 1.85E-23 | 0.323887 | 7.24E-13 | 0.086021 | 0.06326  | 0.058477 | 0.20717 | 0.021674 | 0.64036  |
| 3.74E-34 | 0.60591  | 3.89E-48 | 0.18356  | 6.60E-05 | 0.172005 | 0.00019 | 0.341169 | 3.41E-14 |
| 3.96E-49 | 0.645452 | 2.20E-56 | 0.070502 | 0.12817  | 0.060343 | 0.19302 | 0.217897 | 2.00E-06 |
| 6.60E-13 | 0.209776 | 4.83E-06 | -0.15814 | 0.0006   | -0.04964 | 0.28436 | -0.22164 | 1.32E-06 |
| 2.02E-63 | 0.647602 | 7.23E-57 | 0.02883  | 0.53429  | 0.068124 | 0.14158 | 0.252158 | 3.31E-08 |
| 1.87E-26 | 0.435418 | 5.00E-23 | -0.02406 | 0.60407  | 0.009043 | 0.84547 | 0.103225 | 0.0257   |
| 1.96E-46 | 0.626499 | 2.78E-52 | 0.091195 | 0.04889  | 0.116591 | 0.01169 | 0.219716 | 1.63E-06 |
| 1.39E-17 | 0.422163 | 1.31E-21 | -0.08599 | 0.06335  | 0.113239 | 0.01435 | -0.03051 | 0.51068  |
| 1.26E-05 | 0.138838 | 0.00264  | -0.11466 | 0.01316  | -0.01276 | 0.78335 | -0.20087 | 1.22E-05 |
| 1.17E-29 | 0.549516 | 3.36E-38 | 0.040782 | 0.37923  | 0.152889 | 0.00092 | 0.279748 | 7.63E-10 |
| 4.39E-32 | 0.469939 | 4.96E-27 | 0.032342 | 0.48566  | 0.039041 | 0.39993 | 0.086534 | 0.06169  |
| 3.72E-51 | 0.705343 | 1.70E-71 | 0.12081  | 0.00897  | 0.097399 | 0.03536 | 0.281958 | 5.54E-10 |
| 5.85E-29 | 0.506432 | 8.66E-32 | 0.0129   | 0.78098  | 0.054359 | 0.24103 | 0.10772  | 0.01989  |
| 1.13E-33 | 0.690664 | 1.89E-67 | 0.106538 | 0.0213   | 0.102419 | 0.02688 | 0.066366 | 0.15217  |
| 2.81E-17 | 0.480758 | 2.21E-28 | -0.02917 | 0.52943  | 0.1459   | 0.00157 | -0.02249 | 0.62791  |
| 4.32E-26 | 0.500194 | 6.19E-31 | -0.00107 | 0.98162  | 0.033773 | 0.46655 | 0.133256 | 0.00392  |
| 1.57E-24 | 0.305255 | 1.58E-11 | 0.048472 | 0.29588  | 0.003415 | 0.94133 | 0.086187 | 0.06275  |
| 3.25E-48 | 0.690627 | 1.93E-67 | 0.133727 | 0.00379  | 0.133558 | 0.00383 | 0.137772 | 0.00285  |
| 1.52E-09 | 0.278455 | 9.19E-10 | 0.053978 | 0.24434  | -0.03621 | 0.43497 | -0.00851 | 0.85448  |
| 1.57E-31 | 0.437494 | 2.96E-23 | 0.110663 | 0.01674  | 0.055784 | 0.2289  | 0.347989 | 9.69E-15 |
| 2.70E-39 | 0.59966  | 6.16E-47 | 0.135006 | 0.00347  | 0.100553 | 0.02981 | 0.144795 | 0.00171  |
| 5.63E-32 | 0.519025 | 1.44E-33 | 0.035474 | 0.4444   | 0.059207 | 0.20154 | 0.092345 | 0.0461   |
| 1.76E-47 | 0.605036 | 5.75E-48 | 0.183827 | 6.44E-05 | 0.068298 | 0.14056 | 0.033632 | 0.46842  |
| 2.38E-26 | 0.510543 | 2.31E-32 | 0.060196 | 0.1941   | 0.147827 | 0.00136 | 0.239754 | 1.57E-07 |
| 1.70E-47 | 0.580987 | 1.66E-43 | 0.095188 | 0.03976  | 0.057583 | 0.21421 | 0.15477  | 0.00079  |
| 1.48E-29 | 0.4745   | 1.35E-27 | 0.060885 | 0.18904  | 0.035369 | 0.44575 | -0.01072 | 0.8173   |
| 6.24E-37 | 0.602179 | 2.04E-47 | 0.101683 | 0.02801  | 0.105811 | 0.0222  | 0.146807 | 0.00147  |
| 4.68E-16 | -0.32453 | 6.49E-13 | -0.10063 | 0.02968  | -0.02308 | 0.61888 | -0.02311 | 0.61842  |
| 4.22E-74 | 0.71913  | 1.57E-75 | 0.049646 | 0.28433  | 0.104348 | 0.02413 | 0.301549 | 2.84E-11 |
| 2.80E-56 | 0.711343 | 3.20E-73 | 0.105099 | 0.02312  | 0.085171 | 0.06592 | 0.123835 | 0.00738  |
| 1.08E-83 | 0.751971 | 3.41E-86 | 0.080285 | 0.08307  | 0.088007 | 0.05738 | 0.260408 | 1.12E-08 |
| 9.88E-43 | 0.678435 | 2.92E-64 | 0.072735 | 0.11649  | 0.128315 | 0.00549 | 0.084816 | 0.06706  |
| 1.72E-13 | -0.40762 | 4.04E-20 | -0.19219 | 2.90E-05 | -0.12846 | 0.00544 | 0.03061  | 0.50934  |
| 4.89E-41 | 0.524823 | 2.06E-34 | 0.025469 | 0.58301  | 0.092939 | 0.04471 | 0.128759 | 0.00533  |
| 1.53E-52 | 0.665117 | 5.85E-61 | 0.043433 | 0.34901  | 0.09986  | 0.03096 | 0.142364 | 0.00204  |

|          |          |          |          |          |          |         |          |          |
|----------|----------|----------|----------|----------|----------|---------|----------|----------|
| 8.61E-31 | 0.488701 | 2.09E-29 | 0.056786 | 0.22063  | 0.012628 | 0.78549 | 0.180716 | 8.59E-05 |
| 9.11E-31 | 0.474691 | 1.28E-27 | -0.01032 | 0.82406  | 0.068003 | 0.14229 | 0.13636  | 0.00315  |
| 4.48E-51 | 0.660146 | 9.05E-60 | 0.052898 | 0.25392  | 0.08912  | 0.05428 | 0.084013 | 0.0697   |
| 2.99E-38 | 0.597786 | 1.39E-46 | 0.038439 | 0.40724  | 0.032714 | 0.48066 | 0.113742 | 0.01392  |
| 2.58E-19 | 0.508394 | 4.62E-32 | 0.01708  | 0.71278  | 0.073953 | 0.11048 | -0.06874 | 0.13802  |
| 5.26E-33 | 0.530713 | 2.74E-35 | -0.04937 | 0.28705  | 0.046404 | 0.31699 | 0.174262 | 0.00015  |
| 1.02E-15 | 0.392544 | 1.18E-18 | 0.079462 | 0.08629  | 0.039827 | 0.3905  | -0.01812 | 0.69607  |
| 1.22E-25 | 0.443176 | 6.90E-24 | 0.165979 | 0.00032  | 0.049072 | 0.28994 | -0.02417 | 0.60232  |
| 8.73E-63 | 0.759741 | 5.77E-89 | 0.099625 | 0.03136  | 0.133911 | 0.00374 | 0.100991 | 0.0291   |
| 1.14E-09 | 0.211273 | 4.11E-06 | -0.04674 | 0.31352  | -0.10659 | 0.02123 | -0.07648 | 0.09881  |
| 1.68E-15 | 0.453387 | 4.70E-25 | 0.048575 | 0.29486  | 0.043614 | 0.347   | 0.027728 | 0.55003  |
| 2.91E-32 | 0.466922 | 1.16E-26 | 0.04057  | 0.38172  | 0.068554 | 0.13908 | 0.161691 | 0.00045  |
| 8.98E-22 | 0.4812   | 1.94E-28 | 0.000827 | 0.98578  | 0.050212 | 0.27886 | -0.02821 | 0.54309  |
| 1.55E-27 | -0.47593 | 8.99E-28 | -0.17362 | 0.00016  | -0.15722 | 0.00065 | -0.17473 | 0.00015  |
| 3.80E-28 | 0.433182 | 8.77E-23 | 0.043797 | 0.34498  | 0.082461 | 0.07503 | 0.096775 | 0.03656  |
| 6.48E-33 | 0.50721  | 6.75E-32 | 0.109503 | 0.01792  | 0.154299 | 0.00082 | 0.048768 | 0.29294  |
| 4.70E-42 | 0.588864 | 6.32E-45 | 0.131666 | 0.00437  | 0.107337 | 0.02034 | 0.173997 | 0.00016  |
| 3.42E-20 | 0.483867 | 8.85E-29 | 0.188158 | 4.28E-05 | 0.064297 | 0.16539 | 0.244763 | 8.47E-08 |
| 1.48E-26 | 0.467032 | 1.12E-26 | 0.001796 | 0.96912  | 0.047883 | 0.3018  | 0.030107 | 0.51632  |
| 7.60E-48 | 0.621815 | 2.60E-51 | 0.026434 | 0.56881  | 0.046257 | 0.31854 | 0.167138 | 0.00029  |
| 8.23E-10 | 0.173381 | 0.00017  | -0.05263 | 0.25632  | -0.08836 | 0.05638 | 0.001462 | 0.97487  |
| 3.84E-22 | 0.484341 | 7.69E-29 | 0.011949 | 0.79676  | 0.074029 | 0.11011 | 0.165023 | 0.00034  |
| 8.69E-55 | 0.716598 | 9.04E-75 | 0.026821 | 0.56316  | 0.149898 | 0.00116 | 0.152824 | 0.00092  |
| 4.21E-55 | 0.733402 | 5.72E-80 | -0.03571 | 0.44138  | 0.123278 | 0.00765 | 0.144658 | 0.00172  |
| 1.13E-42 | 0.650137 | 1.92E-57 | 0.00533  | 0.90855  | 0.063128 | 0.17322 | 0.118532 | 0.01036  |
| 2.01E-05 | -0.16605 | 0.00031  | -0.01364 | 0.76879  | -0.01954 | 0.67359 | 0.01094  | 0.8136   |
| 1.51E-12 | -0.30248 | 2.45E-11 | -0.01945 | 0.67507  | -0.01735 | 0.70847 | 0.020754 | 0.65463  |
| 1.17E-29 | -0.51975 | 1.13E-33 | -0.14312 | 0.00193  | -0.11576 | 0.0123  | -0.23726 | 2.13E-07 |
| 2.15E-69 | 0.774983 | 1.01E-94 | 0.081905 | 0.07703  | 0.050103 | 0.27991 | 0.296516 | 6.23E-11 |
| 4.29E-47 | 0.571285 | 8.28E-42 | 0.068524 | 0.13925  | 0.035787 | 0.44038 | 0.0909   | 0.04963  |
| 7.20E-31 | 0.492875 | 5.92E-30 | 0.043607 | 0.34708  | 0.0373   | 0.42129 | -0.00113 | 0.98057  |
| 3.53E-31 | 0.45587  | 2.41E-25 | -0.01954 | 0.67368  | 0.027504 | 0.55325 | 0.061521 | 0.18445  |
| 3.40E-54 | 0.62326  | 1.31E-51 | 0.018944 | 0.68303  | 0.094498 | 0.04123 | 0.113763 | 0.0139   |
| 1.11E-12 | 0.387434 | 3.57E-18 | 0.090026 | 0.05187  | 0.066572 | 0.15089 | 0.081483 | 0.07856  |
| 1.96E-35 | 0.616138 | 3.71E-50 | -0.07745 | 0.09457  | 0.074796 | 0.10646 | 0.066714 | 0.15002  |
| 1.19E-27 | 0.470805 | 3.88E-27 | 0.050584 | 0.27532  | 0.064236 | 0.16579 | 0.223865 | 1.02E-06 |
| 3.61E-76 | 0.725825 | 1.41E-77 | 0.031716 | 0.49414  | 0.062428 | 0.17805 | 0.095253 | 0.03963  |
| 1.58E-57 | 0.677934 | 3.92E-64 | 0.037112 | 0.42364  | 0.06052  | 0.19171 | 0.282779 | 4.91E-10 |
| 6.52E-71 | 0.68518  | 5.32E-66 | 0.040195 | 0.38614  | 0.092749 | 0.04515 | 0.171131 | 0.0002   |
| 2.55E-39 | 0.55079  | 2.10E-38 | 0.181996 | 7.64E-05 | 0.059332 | 0.20059 | 0.17986  | 9.29E-05 |
| 2.24E-09 | 0.170259 | 0.00022  | -0.04816 | 0.29896  | 0.088069 | 0.0572  | 0.021623 | 0.64115  |
| 1.95E-40 | 0.59435  | 6.14E-46 | 0.013359 | 0.7734   | 0.029423 | 0.52591 | 0.052294 | 0.25939  |
| 1.08E-34 | 0.519628 | 1.18E-33 | 0.075738 | 0.10212  | 0.002965 | 0.94906 | 0.119373 | 0.00982  |
| 8.89E-25 | 0.411015 | 1.84E-20 | 0.024403 | 0.59888  | -0.01816 | 0.69544 | 0.067758 | 0.14374  |
| 1.10E-10 | 0.387502 | 3.51E-18 | -0.01194 | 0.79695  | 0.080166 | 0.08353 | 0.180548 | 8.73E-05 |

|          |          |          |          |          |          |         |          |          |
|----------|----------|----------|----------|----------|----------|---------|----------|----------|
| 4.11E-17 | 0.32975  | 2.62E-13 | 0.033809 | 0.46609  | 0.040172 | 0.38641 | -0.0385  | 0.40649  |
| 1.57E-61 | 0.697091 | 3.43E-69 | 0.061883 | 0.18188  | 0.140779 | 0.00229 | 0.142374 | 0.00204  |
| 4.72E-16 | -0.49736 | 1.49E-30 | -0.10046 | 0.02996  | -0.17424 | 0.00015 | -0.03092 | 0.50505  |
| 3.07E-28 | 0.444112 | 5.41E-24 | -0.06191 | 0.18168  | 0.120364 | 0.00923 | 0.084722 | 0.06736  |
| 8.92E-32 | 0.545794 | 1.31E-37 | -0.04143 | 0.37172  | 0.068164 | 0.14135 | 0.211018 | 4.23E-06 |
| 2.32E-35 | 0.535025 | 6.12E-36 | 0.029388 | 0.5264   | 0.133819 | 0.00377 | 0.178975 | 0.0001   |
| 4.37E-74 | 0.75108  | 6.98E-86 | 0.0318   | 0.493    | 0.076155 | 0.10024 | 0.156751 | 0.00068  |
| 3.70E-34 | 0.493647 | 4.67E-30 | -0.03665 | 0.42939  | 0.023185 | 0.61724 | -0.09512 | 0.03991  |
| 1.18E-25 | 0.432325 | 1.09E-22 | -0.02109 | 0.64939  | 0.063018 | 0.17398 | 0.158823 | 0.00057  |
| 4.31E-76 | 0.77865  | 3.57E-96 | 0.110446 | 0.01696  | 0.122435 | 0.00808 | 0.250252 | 4.23E-08 |
| 7.12E-38 | 0.638175 | 8.94E-55 | 0.023289 | 0.61567  | 0.107555 | 0.02008 | 0.177796 | 0.00011  |
| 1.23E-29 | 0.355753 | 2.23E-15 | 0.018397 | 0.69172  | 0.04406  | 0.34209 | 0.211065 | 4.21E-06 |
| 4.01E-61 | 0.691572 | 1.08E-67 | 0.060812 | 0.18957  | 0.115554 | 0.01246 | 0.273718 | 1.80E-09 |
| 0.01049  | 0.126556 | 0.00617  | -0.01853 | 0.68953  | -0.02181 | 0.63833 | -0.1949  | 2.22E-05 |
| 3.51E-46 | 0.625868 | 3.76E-52 | 0.074464 | 0.10803  | 0.108529 | 0.01898 | 0.188898 | 3.99E-05 |
| 2.85E-41 | 0.528259 | 6.38E-35 | 0.041333 | 0.37283  | 0.119887 | 0.00951 | 0.099713 | 0.03121  |
| 2.11E-26 | 0.543425 | 3.09E-37 | -0.00578 | 0.9009   | 0.060364 | 0.19286 | 0.028124 | 0.54435  |
| 3.47E-37 | 0.52855  | 5.77E-35 | 0.00897  | 0.8467   | 0.07957  | 0.08586 | 0.047728 | 0.30337  |
| 1.87E-78 | 0.812021 | #####    | 0.102014 | 0.0275   | 0.142954 | 0.00196 | 0.18151  | 7.99E-05 |
| 9.60E-25 | 0.490887 | 1.08E-29 | 0.009335 | 0.84055  | 0.074831 | 0.1063  | -0.03673 | 0.42838  |
| 1.55E-31 | 0.512103 | 1.40E-32 | 0.037023 | 0.42475  | 0.147614 | 0.00138 | 0.172566 | 0.00018  |
| 1.11E-25 | 0.397359 | 4.09E-19 | -0.0029  | 0.95011  | 0.051082 | 0.27062 | 0.140937 | 0.00227  |
| 3.30E-53 | 0.574391 | 2.40E-42 | 0.022195 | 0.63235  | 0.070369 | 0.12889 | 0.137147 | 0.00298  |
| 1.56E-28 | 0.491101 | 1.01E-29 | 0.053345 | 0.24993  | 0.144218 | 0.00178 | 0.25723  | 1.71E-08 |
| 2.80E-55 | 0.613123 | 1.49E-49 | 0.030949 | 0.50466  | 0.073966 | 0.11042 | 0.189858 | 3.64E-05 |
| 3.23E-11 | 0.295749 | 7.01E-11 | -0.07014 | 0.13015  | -0.00706 | 0.87906 | 0.112822 | 0.01471  |
| 2.84E-17 | 0.271174 | 2.58E-09 | -0.04323 | 0.35129  | -0.0805  | 0.08225 | 0.180569 | 8.71E-05 |
| 1.45E-14 | 0.274161 | 1.70E-09 | -0.07805 | 0.09205  | -0.03505 | 0.44991 | 0.104478 | 0.02395  |
| 3.37E-52 | 0.594661 | 5.37E-46 | 0.016931 | 0.71516  | 0.022376 | 0.62958 | 0.283579 | 4.37E-10 |
| 1.88E-52 | 0.686205 | 2.87E-66 | 0.08398  | 0.06981  | 0.078878 | 0.08863 | 0.127252 | 0.00589  |
| 1.41E-19 | 0.485888 | 4.85E-29 | 0.12209  | 0.00826  | 0.101805 | 0.02782 | 0.098049 | 0.03415  |
| 7.35E-42 | 0.482569 | 1.30E-28 | 0.046134 | 0.31982  | 0.002052 | 0.96472 | 0.058229 | 0.2091   |
| 3.50E-19 | 0.379778 | 1.80E-17 | -0.07135 | 0.12365  | 0.065736 | 0.15611 | 0.301803 | 2.73E-11 |
| 1.91E-28 | 0.44759  | 2.18E-24 | 0.032362 | 0.48539  | -0.01546 | 0.73894 | -0.04384 | 0.34454  |
| 5.48E-23 | 0.273841 | 1.77E-09 | -0.06442 | 0.16457  | 0.033494 | 0.47025 | -0.00967 | 0.83484  |
| 1.62E-31 | 0.524483 | 2.31E-34 | -0.03589 | 0.43907  | 0.116066 | 0.01207 | -0.05702 | 0.21875  |
| 7.32E-55 | 0.697932 | 2.01E-69 | -0.00045 | 0.99228  | 0.12591  | 0.00644 | 0.108456 | 0.01906  |
| 4.67E-26 | 0.493741 | 4.54E-30 | 0.05852  | 0.20684  | 0.060528 | 0.19165 | 0.010137 | 0.82705  |
| 2.86E-21 | 0.43692  | 3.42E-23 | 0.130548 | 0.00472  | 0.113966 | 0.01373 | 0.194979 | 2.21E-05 |
| 1.20E-49 | 0.701155 | 2.57E-70 | 0.158078 | 0.00061  | 0.176284 | 0.00013 | 0.164093 | 0.00037  |
| 9.95E-34 | 0.574317 | 2.47E-42 | 0.049831 | 0.28254  | 0.042639 | 0.3579  | 0.220879 | 1.43E-06 |
| 1.36E-42 | 0.674021 | 3.79E-63 | 0.203445 | 9.37E-06 | 0.161316 | 0.00047 | 0.154616 | 0.0008   |
| 1.61E-33 | 0.419503 | 2.49E-21 | -0.05286 | 0.25428  | -0.02505 | 0.58917 | 0.116676 | 0.01163  |
| 2.73E-33 | 0.47562  | 9.81E-28 | 0.168618 | 0.00025  | 0.024245 | 0.60125 | 0.259957 | 1.19E-08 |
| 1.12E-35 | 0.555653 | 3.44E-39 | -0.04465 | 0.33569  | 0.090226 | 0.05135 | 0.190996 | 3.26E-05 |

|          |          |          |          |          |          |          |          |          |
|----------|----------|----------|----------|----------|----------|----------|----------|----------|
| 3.66E-53 | 0.680753 | 7.47E-65 | 0.044452 | 0.33781  | 0.079985 | 0.08424  | 0.046732 | 0.31358  |
| 1.74E-27 | 0.453826 | 4.18E-25 | -0.0402  | 0.38607  | 0.042024 | 0.36487  | 0.145154 | 0.00166  |
| 7.83E-32 | 0.574523 | 2.28E-42 | 0.048288 | 0.29773  | 0.122357 | 0.00812  | 0.272499 | 2.14E-09 |
| 7.55E-37 | 0.572032 | 6.15E-42 | 0.094647 | 0.04091  | 0.057032 | 0.21864  | 0.270353 | 2.89E-09 |
| 4.87E-22 | 0.458709 | 1.12E-25 | 0.039927 | 0.38932  | -0.0135  | 0.77111  | 0.11796  | 0.01073  |
| 1.06E-15 | 0.279446 | 7.97E-10 | 0.003912 | 0.93281  | 0.075006 | 0.10548  | 0.135939 | 0.00325  |
| 4.37E-46 | 0.613331 | 1.35E-49 | 0.11611  | 0.01204  | 0.083039 | 0.07301  | 0.095098 | 0.03995  |
| 1.73E-37 | 0.589059 | 5.82E-45 | 0.089665 | 0.05282  | 0.201293 | 1.17E-05 | 0.367086 | 2.41E-16 |
| 2.86E-18 | 0.354491 | 2.83E-15 | 0.052845 | 0.2544   | 0.046934 | 0.3115   | 0.13576  | 0.00329  |
| 5.56E-31 | 0.479568 | 3.13E-28 | 0.01728  | 0.70956  | 0.063272 | 0.17224  | 0.015638 | 0.73608  |
| 2.18E-17 | 0.327346 | 3.99E-13 | -0.05926 | 0.20118  | -0.10076 | 0.02947  | 0.259077 | 1.34E-08 |
| 2.64E-07 | 0.238422 | 1.85E-07 | -0.03384 | 0.46563  | 0.013329 | 0.7739   | -0.12428 | 0.00717  |
| 4.16E-27 | 0.466787 | 1.20E-26 | 0.041529 | 0.37055  | 0.047001 | 0.3108   | 0.307466 | 1.11E-11 |
| 1.40E-15 | 0.300501 | 3.35E-11 | 0.04521  | 0.32962  | -0.04898 | 0.29087  | -0.11313 | 0.01444  |
| 9.14E-33 | 0.51368  | 8.36E-33 | 0.058383 | 0.2079   | 0.04536  | 0.32802  | 0.029682 | 0.52226  |
| 9.98E-14 | -0.21169 | 3.93E-06 | -0.09224 | 0.04634  | -0.12741 | 0.00583  | -0.14451 | 0.00174  |
| 2.39E-22 | -0.44987 | 1.20E-24 | -0.06549 | 0.15768  | -0.0513  | 0.26859  | -0.12914 | 0.00519  |
| 7.45E-58 | 0.745464 | 5.97E-84 | 0.068275 | 0.1407   | 0.177845 | 0.00011  | 0.195243 | 2.15E-05 |
| 3.69E-41 | 0.542188 | 4.82E-37 | -0.01925 | 0.67826  | 0.082584 | 0.0746   | 0.053035 | 0.25269  |
| 1.88E-22 | 0.423921 | 8.59E-22 | 0.016484 | 0.72237  | -0.03448 | 0.45733  | -0.03376 | 0.4667   |
| 4.84E-15 | 0.31538  | 3.04E-12 | -0.05665 | 0.22177  | 0.051068 | 0.27075  | -0.02205 | 0.6346   |
| 4.12E-34 | 0.651069 | 1.18E-57 | 0.10855  | 0.01895  | 0.122197 | 0.0082   | 0.168874 | 0.00025  |
| 4.12E-16 | 0.359988 | 9.80E-16 | 0.387474 | 3.54E-18 | 0.117785 | 0.01085  | 0.077743 | 0.09333  |
| 1.04E-12 | 0.285843 | 3.13E-10 | 0.072501 | 0.11767  | -0.08403 | 0.06964  | -0.02927 | 0.528    |
| 7.63E-43 | 0.667777 | 1.32E-61 | 0.211791 | 3.89E-06 | 0.087622 | 0.05848  | -0.01768 | 0.70319  |
| 2.80E-11 | 0.230098 | 4.99E-07 | -0.05743 | 0.21543  | -0.07856 | 0.08994  | 0.020752 | 0.65467  |
| 1.07E-13 | 0.420058 | 2.18E-21 | 0.042339 | 0.36129  | 0.081442 | 0.07872  | 0.093651 | 0.04309  |
| 2.87E-68 | 0.732293 | 1.30E-79 | 0.092743 | 0.04516  | 0.151447 | 0.00103  | 0.233852 | 3.20E-07 |
| 1.03E-46 | 0.517657 | 2.26E-33 | -0.02547 | 0.58304  | 0.044921 | 0.33273  | 0.081933 | 0.07692  |
| 3.07E-67 | 0.747344 | 1.36E-84 | 0.072573 | 0.11731  | 0.125925 | 0.00643  | 0.110303 | 0.0171   |
| 2.80E-73 | 0.754255 | 5.36E-87 | 0.038836 | 0.40241  | 0.131704 | 0.00436  | 0.108691 | 0.0188   |
| 6.97E-30 | 0.583397 | 6.17E-44 | -0.01716 | 0.71141  | 0.10192  | 0.02764  | 0.140343 | 0.00237  |
| 1.45E-40 | 0.570906 | 9.61E-42 | -0.00822 | 0.85945  | 0.052929 | 0.25365  | 0.122234 | 0.00818  |
| 3.01E-40 | 0.553873 | 6.69E-39 | 0.066739 | 0.14987  | 0.026361 | 0.56987  | 0.069594 | 0.13317  |
| 7.71E-14 | 0.253504 | 2.78E-08 | 0.029723 | 0.5217   | 0.0099   | 0.83104  | 0.194176 | 2.39E-05 |
| 4.57E-41 | 0.534142 | 8.33E-36 | 0.158402 | 0.00059  | 0.004402 | 0.92442  | 0.08994  | 0.0521   |
| 5.10E-59 | 0.669171 | 6.03E-62 | 0.048398 | 0.29662  | 0.072045 | 0.12001  | 0.139438 | 0.00253  |
| 3.64E-61 | 0.708358 | 2.34E-72 | 0.104283 | 0.02422  | 0.049665 | 0.28415  | 0.03999  | 0.38856  |
| 3.58E-45 | 0.626466 | 2.82E-52 | 0.111293 | 0.01612  | 0.063625 | 0.16986  | 0.093874 | 0.04259  |
| 1.06E-13 | 0.318549 | 1.79E-12 | -0.07629 | 0.09962  | 0.048335 | 0.29726  | -0.19572 | 2.05E-05 |
| 1.48E-31 | 0.410415 | 2.12E-20 | -0.03675 | 0.42814  | 0.034222 | 0.46065  | 0.066909 | 0.14884  |
| 2.59E-26 | 0.445735 | 3.55E-24 | -0.01408 | 0.76158  | 0.11417  | 0.01356  | 0.168697 | 0.00025  |
| 1.39E-47 | 0.660382 | 7.96E-60 | 0.002219 | 0.96186  | 0.111531 | 0.0159   | 0.137435 | 0.00292  |
| 6.52E-19 | 0.574672 | 2.15E-42 | 0.062188 | 0.17973  | 0.10198  | 0.02755  | 0.000135 | 0.99767  |
| 1.12E-55 | 0.585761 | 2.32E-44 | 0.033567 | 0.46928  | 0.061227 | 0.18656  | 0.13362  | 0.00382  |

|          |          |          |          |         |          |         |          |          |
|----------|----------|----------|----------|---------|----------|---------|----------|----------|
| 7.57E-54 | 0.688032 | 9.46E-67 | 0.00982  | 0.83239 | 0.118275 | 0.01053 | 0.066955 | 0.14856  |
| 5.57E-83 | 0.852278 | #####    | 0.077346 | 0.09502 | 0.122798 | 0.00789 | 0.225012 | 8.98E-07 |
| 2.75E-15 | 0.288497 | 2.11E-10 | 0.017735 | 0.70227 | -0.03005 | 0.5171  | -0.05622 | 0.22528  |
| 1.94E-26 | 0.46932  | 5.91E-27 | 0.047047 | 0.31033 | 0.064081 | 0.16682 | 0.041642 | 0.36925  |
| 3.14E-27 | 0.498997 | 8.99E-31 | -0.03608 | 0.43667 | 0.007053 | 0.87918 | 0.238994 | 1.72E-07 |
| 3.54E-43 | 0.554133 | 6.08E-39 | 0.090617 | 0.05034 | 0.046996 | 0.31085 | 0.15361  | 0.00087  |
| 1.85E-38 | 0.554183 | 5.96E-39 | 0.04738  | 0.30691 | 0.047336 | 0.30736 | 0.027547 | 0.55263  |
| 8.17E-62 | 0.694405 | 1.86E-68 | -0.01189 | 0.7978  | 0.114544 | 0.01326 | 0.214576 | 2.88E-06 |
| 6.82E-35 | 0.583974 | 4.86E-44 | 0.042594 | 0.35841 | 0.066443 | 0.15169 | 0.295778 | 6.98E-11 |
| 5.89E-13 | -0.2904  | 1.58E-10 | 0.114314 | 0.01344 | 0.01383  | 0.76564 | 0.123735 | 0.00743  |
| 8.52E-26 | 0.38708  | 3.85E-18 | -0.02036 | 0.66084 | -0.12157 | 0.00854 | 0.142569 | 0.00201  |
| 2.45E-18 | 0.331166 | 2.05E-13 | 0.097255 | 0.03564 | 0.061934 | 0.18152 | 0.154382 | 0.00082  |
| 3.32E-34 | 0.512554 | 1.21E-32 | 0.071442 | 0.12315 | -0.07383 | 0.11109 | 0.239012 | 1.72E-07 |
| 3.30E-25 | 0.518081 | 1.97E-33 | -0.0016  | 0.97256 | 0.154534 | 0.00081 | -0.03017 | 0.51541  |
| 8.25E-27 | 0.371968 | 9.02E-17 | 0.02305  | 0.6193  | -0.05914 | 0.20207 | 0.164557 | 0.00036  |
| 5.24E-55 | 0.574455 | 2.34E-42 | 0.071117 | 0.12486 | 0.068408 | 0.13992 | 0.071998 | 0.12025  |
| 2.69E-32 | 0.494453 | 3.65E-30 | 0.087561 | 0.05866 | 0.089524 | 0.0532  | 0.257933 | 1.56E-08 |
| 5.80E-19 | 0.485064 | 6.20E-29 | 0.018906 | 0.68363 | -0.00685 | 0.88258 | 0.173851 | 0.00016  |
| 1.70E-61 | 0.655878 | 9.11E-59 | 0.050292 | 0.27811 | 0.043092 | 0.35281 | 0.20538  | 7.67E-06 |
| 6.60E-57 | 0.690773 | 1.77E-67 | 0.055451 | 0.23169 | 0.076834 | 0.09724 | 0.071002 | 0.12548  |
| 9.12E-15 | 0.406205 | 5.58E-20 | 0.071605 | 0.12229 | 0.12281  | 0.00789 | -0.06841 | 0.13992  |
| 4.66E-17 | 0.419474 | 2.51E-21 | 0.013621 | 0.76908 | 0.08226  | 0.07575 | 0.02299  | 0.62022  |
| 4.63E-31 | -0.50079 | 5.14E-31 | 0.013479 | 0.77143 | -0.10837 | 0.01915 | -0.09392 | 0.0425   |
| 1.22E-21 | 0.417688 | 3.84E-21 | -0.05627 | 0.22485 | 0.061772 | 0.18266 | 0.224106 | 9.96E-07 |
| 9.27E-31 | 0.52758  | 8.05E-35 | -0.02541 | 0.58385 | 0.086165 | 0.06281 | 0.21103  | 4.22E-06 |
| 1.30E-50 | 0.666176 | 3.24E-61 | -0.03777 | 0.41543 | 0.036567 | 0.43048 | 0.104056 | 0.02453  |
| 5.00E-38 | 0.597756 | 1.41E-46 | 0.173609 | 0.00016 | 0.12164  | 0.0085  | -0.04509 | 0.33092  |
| 4.94E-54 | 0.593523 | 8.75E-46 | 0.016151 | 0.72775 | 0.068444 | 0.13971 | 0.077883 | 0.09274  |
| 2.42E-49 | 0.587783 | 9.95E-45 | -0.01077 | 0.81641 | -0.00664 | 0.88621 | 0.042472 | 0.35978  |
| 2.75E-51 | 0.635287 | 3.78E-54 | 0.098232 | 0.03382 | 0.091541 | 0.04804 | 0.123346 | 0.00762  |
| 0.00924  | 0.168798 | 0.00025  | 0.02304  | 0.61945 | -0.07166 | 0.12199 | 0.016202 | 0.72693  |
| 1.37E-40 | 0.53474  | 6.76E-36 | 0.007208 | 0.87654 | 0.043257 | 0.35097 | 0.030426 | 0.51189  |
| 8.09E-07 | 0.294982 | 7.89E-11 | 0.024133 | 0.60293 | 0.045022 | 0.33164 | -0.01894 | 0.68305  |
| 9.67E-25 | 0.536389 | 3.79E-36 | 0.073508 | 0.11264 | 0.023769 | 0.60841 | 0.289111 | 1.92E-10 |
| 2.51E-17 | 0.464347 | 2.37E-26 | 0.076916 | 0.09688 | 0.076685 | 0.09789 | -0.15562 | 0.00074  |
| 2.53E-50 | 0.605078 | 5.64E-48 | 0.060103 | 0.19479 | 0.05855  | 0.2066  | 0.019689 | 0.67129  |
| 1.69E-19 | 0.419684 | 2.38E-21 | 0.053544 | 0.24816 | 0.010738 | 0.81698 | -0.06132 | 0.18586  |
| 3.25E-19 | 0.348959 | 8.08E-15 | -0.03519 | 0.44799 | -0.047   | 0.31086 | 0.055872 | 0.22816  |
| 1.47E-33 | 0.518941 | 1.48E-33 | 0.096503 | 0.03709 | 0.079596 | 0.08576 | 0.221599 | 1.32E-06 |
| 1.52E-43 | 0.562028 | 3.06E-40 | 0.041165 | 0.37477 | -0.00824 | 0.85901 | 0.041229 | 0.37403  |
| 1.14E-48 | 0.675248 | 1.87E-63 | 0.151098 | 0.00106 | 0.080535 | 0.08212 | 0.161609 | 0.00045  |
| 6.67E-18 | 0.470759 | 3.93E-27 | 0.037131 | 0.4234  | 0.143092 | 0.00194 | 0.024722 | 0.5941   |
| 8.45E-40 | 0.568092 | 2.91E-41 | 0.012958 | 0.78002 | 0.07018  | 0.12992 | 0.096602 | 0.0369   |
| 9.52E-15 | 0.369419 | 1.51E-16 | 0.027259 | 0.5568  | -0.02647 | 0.56822 | -0.04168 | 0.36886  |
| 1.42E-49 | 0.659312 | 1.43E-59 | 0.103662 | 0.02508 | 0.099818 | 0.03103 | 0.197456 | 1.72E-05 |

|          |          |          |          |         |          |         |          |          |
|----------|----------|----------|----------|---------|----------|---------|----------|----------|
| 5.40E-39 | 0.514791 | 5.81E-33 | 0.04415  | 0.3411  | 0.017522 | 0.70567 | -0.00037 | 0.99359  |
| 2.87E-26 | 0.314098 | 3.76E-12 | 0.0396   | 0.39322 | 0.014772 | 0.75019 | 0.083667 | 0.07086  |
| 1.06E-42 | 0.650911 | 1.28E-57 | 0.086628 | 0.06141 | 0.12791  | 0.00564 | 0.135102 | 0.00344  |
| 3.62E-43 | 0.592255 | 1.50E-45 | -0.01527 | 0.74207 | -0.00737 | 0.87375 | 0.133208 | 0.00393  |
| 5.17E-37 | 0.562733 | 2.33E-40 | 0.01178  | 0.79958 | 0.030176 | 0.51537 | 0.150498 | 0.00111  |
| 2.02E-27 | 0.512413 | 1.26E-32 | 0.008691 | 0.85142 | 0.034562 | 0.45621 | 0.086509 | 0.06177  |
| 1.91E-17 | 0.450884 | 9.16E-25 | 0.021143 | 0.64858 | 0.085011 | 0.06643 | -0.13701 | 0.00301  |
| 6.09E-61 | 0.725714 | 1.53E-77 | 0.006746 | 0.88441 | 0.105431 | 0.02269 | 0.075577 | 0.10285  |
| 3.35E-34 | 0.544882 | 1.83E-37 | 0.042184 | 0.36305 | 0.089384 | 0.05357 | 0.151111 | 0.00105  |
| 2.48E-40 | 0.597213 | 1.79E-46 | 0.120404 | 0.0092  | 0.10954  | 0.01789 | 0.116335 | 0.01188  |
| 5.00E-24 | 0.412293 | 1.37E-20 | -0.01488 | 0.74842 | 0.011713 | 0.8007  | 0.018377 | 0.69203  |
| 1.07E-38 | 0.649656 | 2.47E-57 | 0.10736  | 0.02031 | 0.122882 | 0.00785 | 0.011523 | 0.80386  |
| 4.84E-24 | 0.520243 | 9.58E-34 | 0.133133 | 0.00395 | 0.140025 | 0.00242 | 0.04655  | 0.31547  |
| 8.68E-41 | 0.588299 | 8.01E-45 | 0.000591 | 0.98984 | 0.051443 | 0.26724 | 0.031894 | 0.49173  |
| 6.39E-46 | 0.59034  | 3.39E-45 | 0.05305  | 0.25256 | 0.111511 | 0.01592 | 0.109777 | 0.01764  |
| 5.09E-35 | 0.467688 | 9.35E-27 | 0.055884 | 0.22806 | -0.01377 | 0.76662 | 0.120079 | 0.00939  |
| 1.54E-11 | 0.202443 | 1.04E-05 | 0.000532 | 0.99085 | -0.01106 | 0.81157 | -0.03535 | 0.44601  |
| 5.09E-19 | 0.33408  | 1.22E-13 | 0.031823 | 0.49269 | -0.03382 | 0.46597 | 0.035598 | 0.4428   |
| 2.41E-15 | 0.484401 | 7.55E-29 | 0.008239 | 0.85905 | 0.067217 | 0.14697 | 0.121994 | 0.00831  |
| 4.22E-22 | 0.500349 | 5.90E-31 | 0.034286 | 0.4598  | 0.067903 | 0.14288 | -0.0427  | 0.35725  |
| 2.21E-08 | 0.216406 | 2.36E-06 | -0.11347 | 0.01415 | 0.043569 | 0.3475  | -0.0485  | 0.29557  |
| 8.76E-37 | 0.467002 | 1.13E-26 | 0.113837 | 0.01384 | -0.01386 | 0.7651  | -0.03353 | 0.46977  |
| 1.33E-13 | 0.268226 | 3.88E-09 | -0.14418 | 0.00179 | 0.061701 | 0.18317 | -0.06933 | 0.13466  |
| 2.60E-32 | 0.564556 | 1.15E-40 | -0.01189 | 0.79769 | 0.132762 | 0.00405 | 0.091273 | 0.04869  |
| 8.62E-49 | 0.713271 | 8.72E-74 | 0.09945  | 0.03166 | 0.132025 | 0.00426 | 0.086914 | 0.06055  |
| 6.91E-40 | 0.58069  | 1.88E-43 | 0.032307 | 0.48614 | 0.027931 | 0.54711 | 0.190288 | 3.49E-05 |
| 4.02E-40 | 0.517816 | 2.15E-33 | 0.028991 | 0.532   | 0.029117 | 0.53022 | 0.146887 | 0.00146  |
| 2.35E-65 | 0.701434 | 2.15E-70 | 0.040214 | 0.38591 | 0.070917 | 0.12593 | 0.136867 | 0.00304  |
| 1.78E-16 | 0.353842 | 3.21E-15 | -0.04923 | 0.28841 | 0.017861 | 0.70026 | -0.05425 | 0.24199  |
| 1.12E-18 | 0.36553  | 3.29E-16 | 0.050536 | 0.27577 | -0.02119 | 0.64786 | 0.221743 | 1.30E-06 |
| 2.65E-14 | 0.322556 | 9.09E-13 | -0.05125 | 0.26899 | -0.0575  | 0.21486 | -0.06126 | 0.18636  |
| 1.15E-51 | 0.714585 | 3.57E-74 | 0.073921 | 0.11063 | 0.160179 | 0.00051 | 0.087972 | 0.05748  |
| 9.86E-23 | 0.400596 | 1.99E-19 | -0.0506  | 0.27515 | 0.011078 | 0.81128 | 0.11575  | 0.01231  |
| 1.27E-61 | 0.7423   | 6.95E-83 | 0.107531 | 0.02011 | 0.144661 | 0.00172 | 0.182762 | 7.11E-05 |
| 2.49E-22 | -0.45588 | 2.41E-25 | -0.058   | 0.21093 | -0.08369 | 0.07079 | -0.09229 | 0.04623  |
| 9.00E-11 | -0.25091 | 3.89E-08 | -0.01393 | 0.76397 | 0.066931 | 0.1487  | 0.039937 | 0.38919  |
| 4.19E-06 | 0.216689 | 2.29E-06 | -0.00901 | 0.84604 | 0.033528 | 0.46979 | -0.09727 | 0.03561  |
| 4.33E-72 | 0.760796 | 2.38E-89 | 0.122402 | 0.0081  | 0.102349 | 0.02699 | 0.14569  | 0.0016   |
| 7.80E-75 | 0.774954 | 1.04E-94 | 0.108158 | 0.01939 | 0.116358 | 0.01186 | 0.232265 | 3.87E-07 |
| 9.96E-47 | 0.654623 | 1.78E-58 | 0.054807 | 0.23717 | 0.051795 | 0.26397 | 0.075764 | 0.102    |
| 8.17E-49 | 0.66092  | 5.93E-60 | 0.005629 | 0.90344 | 0.115431 | 0.01255 | 0.145403 | 0.00163  |
| 4.45E-43 | 0.641985 | 1.30E-55 | -0.03968 | 0.3923  | 0.106477 | 0.02137 | 0.108688 | 0.0188   |
| 6.31E-32 | 0.587973 | 9.19E-45 | 0.070042 | 0.13068 | 0.091174 | 0.04894 | 0.11063  | 0.01677  |
| 6.29E-13 | -0.30867 | 9.12E-12 | -0.05279 | 0.2549  | -0.08418 | 0.06915 | -0.25109 | 3.80E-08 |
| 5.85E-40 | 0.592544 | 1.33E-45 | -0.05425 | 0.24199 | 0.138191 | 0.00277 | 0.187752 | 4.45E-05 |

|          |          |          |          |          |          |         |          |          |
|----------|----------|----------|----------|----------|----------|---------|----------|----------|
| 4.81E-84 | 0.556477 | 2.52E-39 | 0.053845 | 0.24551  | 0.030521 | 0.51056 | 0.162298 | 0.00043  |
| 8.75E-51 | 0.611627 | 2.95E-49 | 0.066003 | 0.15443  | 0.086766 | 0.06099 | -0.00273 | 0.95315  |
| 3.13E-31 | 0.638551 | 7.40E-55 | 0.061607 | 0.18384  | 0.131258 | 0.00449 | 0.022352 | 0.62995  |
| 8.19E-13 | 0.234376 | 3.01E-07 | -0.03731 | 0.42117  | -0.00475 | 0.91848 | -0.12954 | 0.00505  |
| 4.71E-37 | 0.479001 | 3.69E-28 | 0.000887 | 0.98475  | -0.0169  | 0.71565 | 0.232987 | 3.55E-07 |
| 2.28E-14 | 0.292618 | 1.13E-10 | -0.11249 | 0.01501  | 0.056168 | 0.22571 | -0.01919 | 0.67918  |
| 1.32E-31 | 0.501771 | 3.78E-31 | 0.082019 | 0.07662  | -0.0391  | 0.39927 | 0.047069 | 0.31011  |
| 1.84E-07 | 0.319265 | 1.59E-12 | -0.12685 | 0.00605  | 0.014815 | 0.74948 | -0.04444 | 0.33792  |
| 1.21E-36 | 0.550684 | 2.19E-38 | 0.045646 | 0.32498  | 0.031373 | 0.49884 | 0.077673 | 0.09363  |
| 8.81E-36 | 0.488859 | 2.00E-29 | 0.083109 | 0.07277  | 0.127043 | 0.00597 | 0.130348 | 0.00478  |
| 7.75E-35 | 0.531911 | 1.81E-35 | -0.03832 | 0.40867  | 0.010572 | 0.81976 | -0.00112 | 0.98073  |
| 4.37E-26 | 0.438838 | 2.10E-23 | 0.119097 | 0.01     | 0.001483 | 0.97451 | -0.12232 | 0.00814  |
| 1.25E-46 | 0.649888 | 2.19E-57 | 0.16487  | 0.00035  | 0.072385 | 0.11826 | 0.115895 | 0.0122   |
| 1.62E-19 | 0.359399 | 1.10E-15 | -0.07528 | 0.10419  | 0.002302 | 0.96043 | -0.08165 | 0.07795  |
| 3.41E-52 | 0.545036 | 1.73E-37 | 0.035328 | 0.44628  | 0.020841 | 0.65327 | 0.136991 | 0.00301  |
| 3.25E-18 | 0.329603 | 2.69E-13 | -0.00939 | 0.83966  | 0.057273 | 0.21669 | 0.119702 | 0.00962  |
| 1.73E-52 | 0.659139 | 1.57E-59 | 0.073706 | 0.11168  | 0.068122 | 0.14159 | 0.204382 | 8.51E-06 |
| 2.81E-61 | 0.497476 | 1.44E-30 | -0.03331 | 0.4727   | 0.009908 | 0.8309  | 0.106972 | 0.02077  |
| 8.75E-43 | 0.610473 | 4.98E-49 | 0.075723 | 0.10218  | 0.037078 | 0.42406 | 0.16101  | 0.00048  |
| 5.65E-30 | 0.484818 | 6.67E-29 | 0.1082   | 0.01934  | 0.142688 | 0.00199 | -0.01865 | 0.68772  |
| 3.86E-46 | 0.629339 | 7.04E-53 | -0.00926 | 0.84173  | 0.087993 | 0.05742 | 0.141014 | 0.00225  |
| 4.17E-16 | 0.45568  | 2.54E-25 | -0.03446 | 0.45759  | 0.07957  | 0.08586 | 0.051701 | 0.26484  |
| 6.03E-48 | 0.628481 | 1.07E-52 | 0.022633 | 0.62565  | 0.078918 | 0.08847 | 0.052951 | 0.25345  |
| 4.80E-62 | 0.709983 | 7.94E-73 | 0.042099 | 0.36402  | 0.12163  | 0.00851 | 0.179865 | 9.29E-05 |
| 1.59E-31 | -0.62012 | 5.78E-51 | -0.09484 | 0.04049  | -0.13743 | 0.00292 | -0.14367 | 0.00185  |
| 4.03E-41 | 0.51684  | 2.96E-33 | 0.142413 | 0.00204  | -0.00995 | 0.83027 | 0.119332 | 0.00985  |
| 9.31E-55 | 0.652994 | 4.25E-58 | 0.107832 | 0.01976  | 0.110497 | 0.0169  | -0.00484 | 0.91693  |
| 6.25E-54 | 0.642493 | 1.00E-55 | 0.010572 | 0.81976  | 0.055031 | 0.23525 | 0.079509 | 0.08611  |
| 5.09E-17 | 0.474121 | 1.51E-27 | 0.030438 | 0.51172  | 0.13898  | 0.00261 | -0.0337  | 0.46749  |
| 2.53E-15 | 0.285333 | 3.37E-10 | 0.038199 | 0.41018  | 0.003535 | 0.93927 | 0.209338 | 5.06E-06 |
| 2.56E-38 | 0.585076 | 3.08E-44 | 0.023302 | 0.61547  | 0.015882 | 0.73211 | 0.042576 | 0.3586   |
| 2.31E-31 | 0.434792 | 5.86E-23 | 0.123267 | 0.00766  | -0.09381 | 0.04274 | 0.006036 | 0.89649  |
| 2.00E-10 | 0.286292 | 2.93E-10 | -0.08816 | 0.05693  | -0.01537 | 0.74048 | 0.052619 | 0.25644  |
| 2.80E-16 | -0.39437 | 7.91E-19 | -0.09138 | 0.04844  | -0.17411 | 0.00016 | -0.09269 | 0.04529  |
| 2.40E-29 | 0.505282 | 1.25E-31 | -0.07229 | 0.11877  | 0.169446 | 0.00023 | 0.151701 | 0.00101  |
| 3.94E-22 | 0.409037 | 2.91E-20 | -0.06676 | 0.14977  | 0.063346 | 0.17175 | 0.285695 | 3.20E-10 |
| 4.30E-09 | 0.365347 | 3.41E-16 | 0.198541 | 1.55E-05 | 0.090515 | 0.0506  | 0.08963  | 0.05291  |
| 1.35E-48 | 0.617421 | 2.04E-50 | 0.071301 | 0.12389  | 0.052528 | 0.25727 | 0.0283   | 0.54183  |
| 6.79E-26 | 0.401811 | 1.51E-19 | -0.02659 | 0.56657  | -0.02053 | 0.65817 | 0.145798 | 0.00158  |
| 2.29E-32 | 0.556853 | 2.19E-39 | 0.073028 | 0.11502  | -0.03956 | 0.39369 | 0.170047 | 0.00022  |
| 3.31E-21 | 0.348402 | 8.97E-15 | 0.028496 | 0.53903  | 0.100519 | 0.02986 | 0.008678 | 0.85163  |
| 6.62E-51 | 0.648034 | 5.77E-57 | 0.000428 | 0.99264  | 0.006909 | 0.88162 | 0.151737 | 0.001    |
| 1.16E-41 | 0.546744 | 9.28E-38 | 0.134036 | 0.00371  | 0.012602 | 0.78593 | 0.036073 | 0.43674  |
| 2.13E-54 | 0.593704 | 8.10E-46 | -0.03575 | 0.44086  | 0.065525 | 0.15744 | 0.130933 | 0.0046   |
| 7.50E-28 | 0.517817 | 2.15E-33 | 0.009393 | 0.83957  | 0.017833 | 0.70071 | 0.211958 | 3.82E-06 |



|          |          |          |          |          |          |          |          |          |
|----------|----------|----------|----------|----------|----------|----------|----------|----------|
| 3.21E-36 | 0.582794 | 7.91E-44 | 0.019147 | 0.67983  | 0.049292 | 0.28778  | 0.045915 | 0.32213  |
| 3.59E-30 | 0.553017 | 9.21E-39 | -0.01801 | 0.69785  | 0.00141  | 0.97575  | 0.146419 | 0.00151  |
| 1.22E-18 | 0.390662 | 1.78E-18 | 0.013418 | 0.77243  | 0.045612 | 0.32534  | 0.003347 | 0.9425   |
| 4.64E-24 | 0.392865 | 1.10E-18 | -0.0197  | 0.67108  | 0.004602 | 0.92099  | 0.113606 | 0.01403  |
| 3.10E-55 | 0.715002 | 2.69E-74 | 0.03514  | 0.4487   | 0.104969 | 0.02329  | 0.041269 | 0.37356  |
| 2.28E-23 | -0.54538 | 1.52E-37 | -0.18176 | 7.81E-05 | -0.10835 | 0.01917  | -0.2108  | 4.33E-06 |
| 3.22E-65 | 0.699275 | 8.57E-70 | 0.118271 | 0.01053  | 0.125805 | 0.00648  | 0.236523 | 2.33E-07 |
| 1.28E-09 | 0.364592 | 3.96E-16 | -0.00062 | 0.98939  | 0.055501 | 0.23127  | 0.127862 | 0.00566  |
| 6.47E-19 | 0.524311 | 2.44E-34 | -0.10892 | 0.01855  | 0.113992 | 0.01371  | -0.00657 | 0.88735  |
| 5.16E-68 | 0.708864 | 1.67E-72 | -0.00656 | 0.88759  | 0.081086 | 0.08004  | 0.186577 | 4.97E-05 |
| 4.06E-09 | 0.287111 | 2.59E-10 | -0.07993 | 0.08447  | 0.059662 | 0.19809  | -0.09242 | 0.04592  |
| 1.28E-65 | 0.701397 | 2.20E-70 | 0.115212 | 0.01272  | 0.024157 | 0.60257  | 0.173401 | 0.00017  |
| 2.62E-73 | 0.760816 | 2.34E-89 | 0.059798 | 0.19707  | 0.047642 | 0.30424  | 0.158979 | 0.00056  |
| 2.58E-08 | -0.2412  | 1.32E-07 | -0.01845 | 0.69082  | -0.01576 | 0.73415  | -0.08534 | 0.06539  |
| 2.48E-66 | 0.729931 | 7.30E-79 | 0.106904 | 0.02085  | 0.152098 | 0.00098  | 0.081215 | 0.07956  |
| 3.45E-23 | 0.518756 | 1.57E-33 | 0.13059  | 0.0047   | 0.192194 | 2.90E-05 | 0.00866  | 0.85193  |
| 1.15E-27 | 0.478632 | 4.11E-28 | 0.173301 | 0.00017  | 0.132268 | 0.00419  | 0.155451 | 0.00075  |
| 4.13E-45 | 0.679518 | 1.55E-64 | 0.107706 | 0.01991  | 0.152309 | 0.00096  | 0.145452 | 0.00162  |
| 1.02E-32 | 0.467066 | 1.11E-26 | 0.004483 | 0.92304  | -0.01068 | 0.818    | 0.187287 | 4.65E-05 |
| 1.92E-40 | 0.624835 | 6.17E-52 | -0.018   | 0.698    | 0.083793 | 0.07043  | 0.052334 | 0.25903  |
| 2.86E-18 | 0.480126 | 2.66E-28 | 0.000684 | 0.98823  | 0.059749 | 0.19744  | 0.184538 | 6.03E-05 |
| 1.25E-17 | 0.306091 | 1.38E-11 | -0.02728 | 0.55654  | -0.00963 | 0.83556  | 0.079034 | 0.088    |
| 6.45E-30 | 0.44708  | 2.50E-24 | -0.00574 | 0.90155  | 0.050787 | 0.2734   | -0.04493 | 0.33265  |
| 1.93E-68 | 0.725822 | 1.41E-77 | 0.077468 | 0.0945   | 0.089552 | 0.05312  | 0.175834 | 0.00013  |
| 3.69E-47 | 0.633314 | 1.00E-53 | 0.065309 | 0.15882  | 0.067152 | 0.14736  | 0.253479 | 2.79E-08 |
| 1.80E-73 | 0.716275 | 1.13E-74 | 0.056499 | 0.22298  | 0.063104 | 0.17339  | 0.081882 | 0.07711  |
| 2.83E-11 | 0.33375  | 1.30E-13 | -0.15439 | 0.00082  | -0.01566 | 0.73573  | -0.06256 | 0.17712  |
| 1.18E-52 | 0.696697 | 4.40E-69 | 0.087255 | 0.05955  | 0.106235 | 0.02167  | 0.28439  | 3.88E-10 |
| 2.92E-08 | 0.280999 | 6.36E-10 | -0.0265  | 0.56788  | -0.03176 | 0.49356  | 0.227278 | 6.92E-07 |
| 5.98E-12 | 0.305917 | 1.42E-11 | -0.04428 | 0.33969  | -0.00266 | 0.95434  | 0.159304 | 0.00055  |
| 2.69E-17 | 0.261284 | 9.98E-09 | -0.1419  | 0.00211  | -0.05686 | 0.22006  | 0.086604 | 0.06148  |
| 4.77E-05 | 0.180353 | 8.88E-05 | -0.04935 | 0.28723  | 0.036671 | 0.42917  | 0.069985 | 0.131    |
| 5.32E-28 | 0.474847 | 1.23E-27 | 0.041486 | 0.37106  | -0.02087 | 0.65282  | 0.040152 | 0.38665  |
| 2.79E-22 | 0.506887 | 7.49E-32 | 0.194971 | 2.21E-05 | 0.143309 | 0.0019   | 0.122972 | 0.0078   |
| 1.45E-13 | 0.341846 | 3.02E-14 | -0.00986 | 0.83171  | 0.011821 | 0.7989   | -0.13937 | 0.00254  |
| 3.75E-14 | 0.416822 | 4.71E-21 | 0.060715 | 0.19028  | 0.127124 | 0.00594  | -0.12273 | 0.00792  |
| 1.00E-13 | 0.396969 | 4.46E-19 | -0.04606 | 0.32065  | 0.013051 | 0.77849  | 0.152062 | 0.00098  |
| 2.22E-32 | 0.376268 | 3.74E-17 | 0.026545 | 0.56719  | -0.02085 | 0.6532   | 0.035172 | 0.44829  |
| 4.08E-49 | 0.623753 | 1.03E-51 | 0.039817 | 0.39062  | 0.070458 | 0.1284   | 0.165036 | 0.00034  |
| 3.33E-32 | 0.610178 | 5.70E-49 | -0.03484 | 0.45256  | 0.123763 | 0.00741  | 0.150645 | 0.00109  |
| 3.92E-59 | 0.669699 | 4.48E-62 | 0.022869 | 0.62205  | 0.068656 | 0.13849  | 0.209243 | 5.11E-06 |
| 2.05E-07 | 0.239921 | 1.54E-07 | -0.05971 | 0.19777  | -0.01813 | 0.69602  | -0.13893 | 0.00262  |
| 1.21E-54 | 0.56134  | 3.98E-40 | 0.055381 | 0.23228  | -0.00149 | 0.9743   | 0.082913 | 0.07345  |
| 2.24E-46 | 0.563537 | 1.71E-40 | -0.00516 | 0.91148  | 0.08499  | 0.0665   | 0.125839 | 0.00647  |
| 3.93E-68 | 0.741968 | 8.97E-83 | 0.076549 | 0.09849  | 0.076838 | 0.09722  | 0.27292  | 2.02E-09 |

|          |          |          |          |          |          |         |          |          |
|----------|----------|----------|----------|----------|----------|---------|----------|----------|
| 1.40E-39 | 0.51998  | 1.05E-33 | 0.039051 | 0.39981  | 0.015486 | 0.73855 | 0.106833 | 0.02094  |
| 3.14E-44 | 0.620758 | 4.28E-51 | 0.028871 | 0.5337   | 0.03847  | 0.40686 | 0.058819 | 0.20452  |
| 5.48E-13 | 0.337132 | 7.09E-14 | 0.011951 | 0.79674  | 0.018403 | 0.69162 | -0.08053 | 0.08213  |
| 2.65E-31 | 0.522012 | 5.30E-34 | -0.06325 | 0.17241  | 0.088502 | 0.05598 | 0.161165 | 0.00047  |
| 1.00E-13 | 0.304286 | 1.84E-11 | -0.00679 | 0.88364  | 0.041811 | 0.36731 | 0.108967 | 0.0185   |
| 6.24E-31 | 0.543516 | 2.99E-37 | 0.160284 | 0.00051  | 0.118891 | 0.01013 | 0.293617 | 9.72E-11 |
| 7.90E-52 | 0.627567 | 1.66E-52 | 0.055311 | 0.23287  | 0.067936 | 0.14268 | 0.12927  | 0.00515  |
| 2.79E-41 | 0.560409 | 5.68E-40 | 0.053304 | 0.2503   | 0.01762  | 0.70411 | 0.093243 | 0.04401  |
| 1.34E-26 | 0.480793 | 2.19E-28 | 0.046058 | 0.32062  | 0.039243 | 0.3975  | 0.184902 | 5.83E-05 |
| 1.08E-35 | 0.621564 | 2.92E-51 | 0.103535 | 0.02526  | 0.110884 | 0.01652 | 0.141447 | 0.00218  |
| 6.67E-38 | 0.48177  | 1.64E-28 | 0.105772 | 0.02225  | 0.087139 | 0.05989 | 0.255008 | 2.29E-08 |
| 7.02E-38 | 0.608138 | 1.43E-48 | 0.061583 | 0.18401  | 0.088073 | 0.05719 | 0.071218 | 0.12433  |
| 4.92E-26 | 0.478027 | 4.89E-28 | 0.025955 | 0.57584  | 0.064828 | 0.16192 | 0.17332  | 0.00017  |
| 2.31E-41 | 0.604123 | 8.63E-48 | 0.093573 | 0.04327  | 0.051245 | 0.26908 | 0.073738 | 0.11152  |
| 1.58E-27 | 0.431656 | 1.28E-22 | 0.022806 | 0.62301  | 0.014707 | 0.75125 | 0.31651  | 2.52E-12 |
| 1.97E-49 | 0.568373 | 2.61E-41 | 0.014209 | 0.75942  | 0.055192 | 0.23388 | 0.061617 | 0.18377  |
| 1.17E-18 | 0.368864 | 1.69E-16 | -0.03829 | 0.40902  | -0.04054 | 0.38209 | 0.285871 | 3.11E-10 |
| 7.18E-62 | 0.699719 | 6.46E-70 | 0.125444 | 0.00664  | 0.014597 | 0.75305 | 0.10901  | 0.01845  |
| 2.97E-50 | 0.576256 | 1.14E-42 | 0.067859 | 0.14314  | 0.109875 | 0.01754 | 0.215468 | 2.61E-06 |
| 8.21E-35 | 0.485074 | 6.18E-29 | -0.0831  | 0.07278  | 0.0354   | 0.44535 | 0.081898 | 0.07705  |
| 8.36E-40 | 0.52455  | 2.25E-34 | 0.120576 | 0.0091   | 0.000452 | 0.99222 | 0.159395 | 0.00055  |
| 1.58E-25 | 0.556529 | 2.47E-39 | 0.105556 | 0.02253  | 0.148126 | 0.00133 | 0.129268 | 0.00515  |
| 1.02E-26 | 0.437697 | 2.81E-23 | -0.03232 | 0.48602  | 0.131232 | 0.0045  | 0.209691 | 4.87E-06 |
| 0.09469  | 0.170796 | 0.00021  | -0.08556 | 0.06468  | 0.046068 | 0.32051 | -0.22186 | 1.29E-06 |
| 1.03E-61 | 0.719061 | 1.65E-75 | 0.062982 | 0.17423  | 0.118519 | 0.01037 | 0.211489 | 4.02E-06 |
| 1.37E-90 | 0.779646 | 1.42E-96 | 0.008115 | 0.86116  | 0.096438 | 0.03722 | 0.184771 | 5.90E-05 |
| 5.70E-30 | 0.427839 | 3.30E-22 | 0.0738   | 0.11122  | -0.07459 | 0.10745 | -0.0947  | 0.04079  |
| 1.07E-33 | 0.411918 | 1.49E-20 | 0.015621 | 0.73635  | 0.065108 | 0.16011 | 0.283225 | 4.60E-10 |
| 1.53E-51 | 0.770397 | 6.08E-93 | 0.110236 | 0.01717  | 0.124022 | 0.00729 | 0.166436 | 0.0003   |
| 9.83E-31 | 0.509102 | 3.68E-32 | 0.099041 | 0.03237  | 0.105679 | 0.02237 | 0.230116 | 4.98E-07 |
| 4.27E-16 | 0.348987 | 8.04E-15 | 0.13869  | 0.00267  | 0.094116 | 0.04206 | -0.03238 | 0.48521  |
| 9.85E-16 | 0.363345 | 5.07E-16 | -0.00567 | 0.90269  | 0.045169 | 0.33006 | -0.16084 | 0.00048  |
| 2.20E-09 | -0.25284 | 3.03E-08 | 0.002914 | 0.94992  | -0.08557 | 0.06467 | 0.077355 | 0.09498  |
| 5.29E-36 | 0.484566 | 7.19E-29 | 0.179628 | 9.49E-05 | 0.063884 | 0.16812 | 0.106793 | 0.02099  |
| 4.25E-15 | -0.30735 | 1.13E-11 | -0.04779 | 0.30272  | -0.08968 | 0.05277 | -0.21637 | 2.37E-06 |
| 2.77E-62 | 0.670533 | 2.79E-62 | 0.075001 | 0.10551  | 0.041909 | 0.36619 | 0.117193 | 0.01126  |
| 3.46E-31 | 0.625038 | 5.60E-52 | 0.099798 | 0.03106  | 0.120605 | 0.00908 | 0.034716 | 0.4542   |
| 1.40E-50 | 0.689523 | 3.81E-67 | 0.060882 | 0.18906  | 0.138783 | 0.00265 | 0.094137 | 0.04201  |
| 8.65E-18 | 0.416493 | 5.10E-21 | 0.002615 | 0.95505  | 0.050755 | 0.27369 | -0.08613 | 0.06293  |
| 1.53E-45 | 0.577694 | 6.35E-43 | 0.008821 | 0.84922  | 0.065631 | 0.15677 | 0.145008 | 0.00168  |
| 3.00E-31 | -0.55273 | 1.02E-38 | -0.08321 | 0.07243  | -0.17014 | 0.00022 | -0.08323 | 0.07236  |
| 1.47E-42 | 0.53935  | 1.33E-36 | 0.01447  | 0.75513  | 0.098708 | 0.03296 | 0.13127  | 0.00449  |
| 8.73E-08 | 0.195108 | 2.18E-05 | -0.21372 | 3.16E-06 | 0.024857 | 0.5921  | -0.05982 | 0.19692  |
| 1.43E-36 | 0.535932 | 4.45E-36 | 0.06664  | 0.15048  | 0.071136 | 0.12476 | 0.244805 | 8.42E-08 |
| 3.91E-36 | 0.606874 | 2.53E-48 | 0.053555 | 0.24806  | 0.118709 | 0.01024 | 0.214668 | 2.85E-06 |

|          |          |          |          |          |          |         |           |          |
|----------|----------|----------|----------|----------|----------|---------|-----------|----------|
| 9.17E-85 | 0.671009 | 2.13E-62 | 0.135472 | 0.00335  | 0.049564 | 0.28513 | 0.058456  | 0.20733  |
| 1.92E-10 | 0.295071 | 7.78E-11 | 0.000856 | 0.98528  | 0.074212 | 0.10923 | -0.12561  | 0.00657  |
| 2.04E-08 | 0.279415 | 8.00E-10 | -0.03979 | 0.391    | -0.11616 | 0.01201 | 0.028315  | 0.54162  |
| 1.95E-24 | 0.577257 | 7.58E-43 | 0.07744  | 0.09462  | 0.044841 | 0.33358 | 0.13038   | 0.00477  |
| 5.05E-76 | 0.742997 | 4.06E-83 | 0.081356 | 0.07903  | 0.075419 | 0.10357 | 0.117176  | 0.01127  |
| 1.45E-10 | 0.380955 | 1.41E-17 | 0.028086 | 0.54489  | -0.02086 | 0.65301 | 0.043694  | 0.34611  |
| 7.99E-46 | 0.671809 | 1.35E-62 | -0.00487 | 0.91644  | 0.052378 | 0.25862 | 0.082124  | 0.07624  |
| 1.29E-79 | 0.65914  | 1.57E-59 | 0.024965 | 0.59048  | 0.044271 | 0.33978 | 0.055411  | 0.23202  |
| 7.38E-29 | 0.541892 | 5.36E-37 | 0.052818 | 0.25464  | 0.089124 | 0.05427 | 0.015389  | 0.74013  |
| 1.46E-36 | 0.539709 | 1.17E-36 | 0.099909 | 0.03088  | 0.088569 | 0.0558  | 0.054198  | 0.24243  |
| 1.01E-27 | 0.550708 | 2.17E-38 | -0.0239  | 0.60647  | 0.070222 | 0.12969 | 0.009917  | 0.83075  |
| 3.22E-40 | 0.501066 | 4.71E-31 | 0.021914 | 0.63668  | 0.107808 | 0.01979 | 0.153072  | 0.0009   |
| 2.57E-34 | 0.569881 | 1.44E-41 | 0.008773 | 0.85003  | 0.089433 | 0.05344 | 0.153603  | 0.00087  |
| 5.15E-18 | 0.310335 | 6.96E-12 | -0.10076 | 0.02948  | -0.01655 | 0.72124 | 0.093502  | 0.04342  |
| 2.19E-23 | 0.28348  | 4.43E-10 | 0.065274 | 0.15904  | 0.020414 | 0.65993 | 0.223265  | 1.10E-06 |
| 2.93E-10 | 0.275133 | 1.48E-09 | -0.0592  | 0.20162  | 0.047029 | 0.31051 | -0.02877  | 0.53518  |
| 1.98E-34 | 0.545226 | 1.61E-37 | 0.05138  | 0.26782  | 0.119144 | 0.00997 | -0.00631  | 0.89174  |
| 4.27E-64 | 0.728641 | 1.86E-78 | 0.067939 | 0.14266  | 0.086938 | 0.06048 | 0.188573  | 4.11E-05 |
| 1.79E-38 | 0.665541 | 4.62E-61 | -0.02875 | 0.53548  | 0.167645 | 0.00027 | 0.111122  | 0.01629  |
| 1.61E-45 | 0.687082 | 1.69E-66 | 0.083039 | 0.07301  | 0.082578 | 0.07462 | 0.096992  | 0.03614  |
| 7.56E-07 | 0.177324 | 0.00012  | -0.04328 | 0.35074  | -0.00798 | 0.86344 | -0.10223  | 0.02717  |
| 2.62E-15 | 0.345696 | 1.48E-14 | 0.076301 | 0.09958  | 0.001726 | 0.97033 | 0.06562   | 0.15684  |
| 3.39E-38 | 0.561269 | 4.09E-40 | -0.04338 | 0.34959  | -0.01252 | 0.78732 | 0.113384  | 0.01422  |
| 3.11E-38 | 0.446147 | 3.19E-24 | -0.05179 | 0.26405  | 0.008546 | 0.85387 | 0.065407  | 0.15819  |
| 2.57E-44 | 0.460701 | 6.49E-26 | -0.02361 | 0.61088  | 0.016279 | 0.72569 | 0.06916   | 0.13561  |
| 9.47E-52 | 0.572179 | 5.80E-42 | -0.00063 | 0.9891   | 0.008504 | 0.85458 | 0.245667  | 7.56E-08 |
| 6.06E-11 | 0.295847 | 6.90E-11 | 0.104632 | 0.02374  | 0.038526 | 0.40618 | 0.123673  | 0.00746  |
| 1.82E-43 | 0.552711 | 1.03E-38 | 0.016094 | 0.72868  | -0.02317 | 0.61751 | -0.0168   | 0.71722  |
| 1.38E-29 | 0.458224 | 1.28E-25 | 0.072746 | 0.11643  | 0.006054 | 0.89618 | 0.00631   | 0.89183  |
| 8.64E-26 | 0.454108 | 3.88E-25 | -0.10696 | 0.02079  | 0.037365 | 0.42049 | -0.14046  | 0.00235  |
| 2.59E-39 | 0.533681 | 9.79E-36 | 0.094804 | 0.04057  | 0.101224 | 0.02873 | 0.212271  | 3.70E-06 |
| 2.96E-35 | 0.573927 | 2.89E-42 | 0.099387 | 0.03177  | 0.080956 | 0.08052 | -0.01781  | 0.70114  |
| 2.44E-48 | 0.590331 | 3.40E-45 | 0.053876 | 0.24524  | 0.085138 | 0.06602 | 0.137512  | 0.0029   |
| 6.53E-29 | -0.49061 | 1.18E-29 | -0.10844 | 0.01908  | -0.11946 | 0.00977 | -0.16738  | 0.00028  |
| 2.31E-35 | 0.625855 | 3.79E-52 | 0.199202 | 1.45E-05 | 0.07878  | 0.08903 | 0.243632  | 9.75E-08 |
| 1.11E-42 | 0.642322 | 1.10E-55 | -0.04027 | 0.3852   | 0.074175 | 0.10941 | 0.138576  | 0.00269  |
| 4.13E-10 | 0.473467 | 1.82E-27 | 0.142861 | 0.00197  | 0.052536 | 0.2572  | 0.104918  | 0.02336  |
| 3.86E-09 | 0.245785 | 7.45E-08 | -0.00011 | 0.99817  | 0.020023 | 0.66605 | -0.11223  | 0.01525  |
| 3.82E-06 | 0.270449 | 2.85E-09 | -0.10025 | 0.03031  | -0.06984 | 0.13177 | -0.07919  | 0.08739  |
| 1.09E-22 | 0.3388   | 5.25E-14 | -0.01515 | 0.74397  | -0.04574 | 0.32397 | 0.106987  | 0.02075  |
| 2.34E-21 | 0.517657 | 2.26E-33 | 0.066959 | 0.14853  | 0.122798 | 0.00789 | 0.086003  | 0.06331  |
| 1.59E-53 | 0.599247 | 7.38E-47 | 0.041101 | 0.37551  | 0.064744 | 0.16246 | 0.245105  | 8.11E-08 |
| 1.87E-10 | 0.337581 | 6.54E-14 | 0.208905 | 5.30E-06 | 0.073505 | 0.11266 | -0.01822  | 0.6946   |
| 2.61E-20 | 0.503369 | 2.29E-31 | 0.053724 | 0.24657  | 0.025123 | 0.58813 | -4.29E-05 | 0.99926  |
| 1.06E-24 | 0.432237 | 1.11E-22 | 0.014516 | 0.75439  | 0.129779 | 0.00497 | -3.33E-05 | 0.99943  |

|          |          |          |          |          |          |         |          |          |
|----------|----------|----------|----------|----------|----------|---------|----------|----------|
| 2.71E-22 | 0.408089 | 3.62E-20 | 0.023717 | 0.60919  | 0.064143 | 0.1664  | 0.067617 | 0.14458  |
| 2.88E-33 | 0.556402 | 2.59E-39 | 0.102588 | 0.02663  | 0.078494 | 0.0902  | 0.075762 | 0.10201  |
| 1.33E-14 | 0.327852 | 3.65E-13 | -0.0942  | 0.04188  | -0.03183 | 0.49263 | 0.143234 | 0.00192  |
| 8.87E-44 | 0.622273 | 2.09E-51 | -0.00062 | 0.98936  | 0.140166 | 0.0024  | 0.253856 | 2.66E-08 |
| 2.36E-15 | 0.392435 | 1.21E-18 | -0.06436 | 0.16499  | -0.00955 | 0.83686 | 0.070846 | 0.12631  |
| 1.32E-59 | 0.608421 | 1.26E-48 | 0.048609 | 0.29452  | 0.048278 | 0.29782 | 0.083542 | 0.07128  |
| 4.56E-55 | 0.662557 | 2.41E-60 | 0.043292 | 0.35058  | 0.121517 | 0.00857 | 0.162424 | 0.00043  |
| 8.09E-51 | 0.63006  | 4.96E-53 | 0.114232 | 0.01351  | 0.116434 | 0.0118  | 0.133742 | 0.00379  |
| 1.96E-63 | 0.673455 | 5.25E-63 | 0.017453 | 0.70679  | 0.080975 | 0.08045 | 0.131407 | 0.00445  |
| 1.48E-68 | 0.742832 | 4.61E-83 | 0.035644 | 0.44222  | 0.090377 | 0.05096 | 0.137017 | 0.00301  |
| 4.15E-16 | 0.484119 | 8.21E-29 | -0.03647 | 0.43177  | 0.083173 | 0.07255 | -0.06939 | 0.13434  |
| 4.95E-65 | 0.534753 | 6.73E-36 | -0.0391  | 0.39922  | 0.007614 | 0.86965 | 0.175887 | 0.00013  |
| 7.71E-21 | -0.41319 | 1.11E-20 | -0.09135 | 0.04851  | -0.05432 | 0.2414  | -0.03355 | 0.46954  |
| 4.19E-31 | 0.489309 | 1.74E-29 | 0.006597 | 0.88693  | 0.036187 | 0.43529 | 0.05126  | 0.26894  |
| 5.13E-18 | 0.34352  | 2.22E-14 | 0.024371 | 0.59936  | 0.035781 | 0.44047 | 0.095325 | 0.03948  |
| 4.20E-34 | 0.426573 | 4.50E-22 | 0.102307 | 0.02705  | 0.009054 | 0.84528 | 0.065016 | 0.1607   |
| 4.71E-33 | 0.471239 | 3.43E-27 | 0.104729 | 0.02361  | 0.060743 | 0.19007 | 0.183644 | 6.55E-05 |
| 3.65E-17 | 0.253946 | 2.63E-08 | -0.02041 | 0.65997  | -0.03706 | 0.42435 | 0.088482 | 0.05604  |
| 7.36E-31 | 0.370089 | 1.32E-16 | -0.05223 | 0.25998  | -0.04057 | 0.38171 | 0.115254 | 0.01269  |
| 8.95E-29 | 0.537383 | 2.67E-36 | -0.00929 | 0.8413   | 0.092074 | 0.04674 | 0.061377 | 0.18548  |
| 2.59E-18 | 0.34042  | 3.91E-14 | 0.137586 | 0.00289  | -0.09896 | 0.03252 | 0.160091 | 0.00052  |
| 6.49E-39 | 0.674337 | 3.16E-63 | 0.186562 | 4.98E-05 | 0.12611  | 0.00636 | 0.129331 | 0.00512  |
| 1.73E-61 | 0.69477  | 1.48E-68 | 0.023169 | 0.6175   | 0.102062 | 0.02742 | 0.122741 | 0.00792  |
| 1.98E-14 | 0.345658 | 1.50E-14 | -0.04234 | 0.3613   | 0.016194 | 0.72705 | -0.05017 | 0.27925  |
| 3.52E-55 | 0.733628 | 4.84E-80 | 0.086233 | 0.0626   | 0.108913 | 0.01856 | 0.064253 | 0.16568  |
| 5.00E-12 | 0.333462 | 1.36E-13 | -0.00644 | 0.88953  | 0.022165 | 0.63282 | -0.1429  | 0.00196  |
| 9.10E-19 | 0.421479 | 1.55E-21 | 0.024578 | 0.59626  | 0.052596 | 0.25665 | 0.120022 | 0.00943  |
| 1.33E-09 | 0.170988 | 0.00021  | -0.09131 | 0.04861  | -0.08261 | 0.07449 | 0.020153 | 0.66401  |
| 4.89E-27 | 0.536152 | 4.12E-36 | -0.05891 | 0.20381  | 0.04267  | 0.35755 | 0.068183 | 0.14123  |
| 4.82E-24 | 0.490636 | 1.17E-29 | 0.119655 | 0.00965  | 0.059721 | 0.19765 | 0.094002 | 0.04231  |
| 1.54E-31 | 0.568196 | 2.79E-41 | 0.05327  | 0.25059  | 0.019057 | 0.68125 | 0.038335 | 0.40851  |
| 1.25E-26 | 0.589619 | 4.60E-45 | -0.04103 | 0.37629  | 0.120835 | 0.00895 | 0.025935 | 0.57612  |
| 7.52E-21 | 0.439407 | 1.82E-23 | -0.02301 | 0.61995  | 0.072045 | 0.12    | 0.160832 | 0.00048  |
| 1.37E-12 | 0.296634 | 6.11E-11 | -0.01986 | 0.66866  | -0.04029 | 0.38505 | 0.030696 | 0.50815  |
| 3.06E-32 | 0.552327 | 1.19E-38 | 0.084538 | 0.06796  | 0.148952 | 0.00125 | 0.08923  | 0.05399  |
| 3.86E-50 | 0.611125 | 3.70E-49 | 0.081969 | 0.07679  | 0.023991 | 0.60506 | 0.102081 | 0.0274   |
| 3.67E-45 | 0.619987 | 6.15E-51 | 0.073795 | 0.11124  | 0.0589   | 0.2039  | 0.162248 | 0.00043  |
| 3.46E-21 | 0.410638 | 2.01E-20 | 0.095154 | 0.03984  | 0.011235 | 0.80866 | 0.08574  | 0.06413  |
| 6.32E-27 | 0.555578 | 3.54E-39 | 0.059139 | 0.20206  | 0.035698 | 0.44152 | 0.02711  | 0.55896  |
| 5.23E-22 | 0.406992 | 4.66E-20 | -0.04116 | 0.3748   | -0.00705 | 0.87916 | -0.04564 | 0.32501  |
| 1.38E-40 | 0.574943 | 1.93E-42 | 0.103686 | 0.02504  | 0.13161  | 0.00439 | 0.238424 | 1.85E-07 |
| 3.22E-16 | 0.400051 | 2.24E-19 | 0.02354  | 0.61187  | 0.01435  | 0.7571  | -0.04266 | 0.35767  |
| 1.29E-29 | 0.445966 | 3.34E-24 | 0.069167 | 0.13557  | 0.008598 | 0.85298 | 0.133666 | 0.00381  |
| 6.13E-49 | 0.593094 | 1.05E-45 | 0.012606 | 0.78586  | 0.060021 | 0.19541 | 0.124523 | 0.00705  |
| 7.26E-53 | 0.537899 | 2.22E-36 | 0.002514 | 0.95679  | 0.070439 | 0.12851 | 0.13543  | 0.00336  |

|          |          |          |          |         |          |          |          |          |
|----------|----------|----------|----------|---------|----------|----------|----------|----------|
| 1.06E-67 | 0.680815 | 7.20E-65 | 0.014808 | 0.7496  | 0.078258 | 0.09118  | 0.08245  | 0.07507  |
| 3.75E-21 | 0.464275 | 2.42E-26 | -0.07969 | 0.08539 | 0.050487 | 0.27624  | 0.126249 | 0.0063   |
| 3.20E-44 | 0.569051 | 2.00E-41 | 0.032764 | 0.47999 | 0.098733 | 0.03291  | 0.114597 | 0.01321  |
| 1.10E-21 | 0.379209 | 2.03E-17 | -0.08288 | 0.07357 | -0.02354 | 0.6118   | 0.130878 | 0.00461  |
| 9.28E-48 | 0.530632 | 2.82E-35 | 0.041269 | 0.37356 | 0.033042 | 0.47627  | 0.210011 | 4.71E-06 |
| 9.74E-37 | 0.529183 | 4.64E-35 | 0.049845 | 0.2824  | 0.096931 | 0.03626  | 0.054565 | 0.23925  |
| 3.68E-38 | 0.482335 | 1.39E-28 | 0.093516 | 0.04339 | 0.015456 | 0.73904  | 0.052277 | 0.25955  |
| 1.64E-08 | 0.349936 | 6.73E-15 | 0.081913 | 0.077   | 0.168874 | 0.00025  | -0.11156 | 0.01587  |
| 1.81E-69 | 0.747771 | 9.74E-85 | 0.094891 | 0.04039 | 0.150785 | 0.00108  | 0.117085 | 0.01134  |
| 1.77E-25 | 0.420915 | 1.78E-21 | 0.079383 | 0.08661 | -0.03755 | 0.4182   | -0.0124  | 0.78935  |
| 5.95E-48 | 0.703545 | 5.49E-71 | -0.08712 | 0.05994 | 0.134081 | 0.0037   | 0.02919  | 0.52919  |
| 3.50E-44 | 0.696136 | 6.26E-69 | 0.038106 | 0.41132 | 0.10382  | 0.02486  | 0.098273 | 0.03374  |
| 5.96E-11 | 0.233757 | 3.24E-07 | -0.05809 | 0.21017 | 0.005329 | 0.90856  | -0.09983 | 0.031    |
| 1.17E-41 | 0.639907 | 3.74E-55 | -0.10308 | 0.02591 | -0.01775 | 0.70201  | -0.01835 | 0.6925   |
| 7.87E-54 | 0.653672 | 2.96E-58 | 0.078201 | 0.09141 | 0.083708 | 0.07072  | 0.15716  | 0.00065  |
| 2.59E-26 | 0.412308 | 1.36E-20 | 0.054264 | 0.24185 | 0.067892 | 0.14295  | 0.062108 | 0.18029  |
| 4.37E-73 | 0.79281  | #####    | 0.09227  | 0.04627 | 0.090718 | 0.05009  | 0.131924 | 0.00429  |
| 1.92E-57 | 0.689638 | 3.55E-67 | 0.068684 | 0.13833 | 0.128387 | 0.00546  | 0.227932 | 6.42E-07 |
| 7.73E-56 | 0.646171 | 1.52E-56 | 0.063821 | 0.16854 | 0.024913 | 0.59126  | 0.063984 | 0.16746  |
| 9.51E-39 | 0.633072 | 1.13E-53 | 0.163947 | 0.00037 | 0.106621 | 0.0212   | 0.200546 | 1.26E-05 |
| 4.46E-41 | 0.626012 | 3.51E-52 | 0.0133   | 0.77438 | 0.060452 | 0.19221  | 0.226997 | 7.15E-07 |
| 2.46E-42 | 0.569916 | 1.42E-41 | 0.003861 | 0.93369 | 0.093239 | 0.04402  | 0.187663 | 4.49E-05 |
| 5.10E-18 | 0.33466  | 1.10E-13 | -0.05833 | 0.20833 | 0.032998 | 0.47686  | 0.045771 | 0.32365  |
| 2.56E-39 | 0.575656 | 1.45E-42 | 0.011151 | 0.81007 | 0.138416 | 0.00272  | 0.132499 | 0.00413  |
| 3.24E-44 | 0.585176 | 2.95E-44 | 0.077093 | 0.09611 | 0.050772 | 0.27353  | 0.061229 | 0.18655  |
| 6.55E-15 | 0.337481 | 6.66E-14 | -0.04161 | 0.36967 | 0.002129 | 0.9634   | -0.08006 | 0.08394  |
| 2.64E-22 | 0.435349 | 5.09E-23 | 0.01188  | 0.79792 | 0.089477 | 0.05332  | 0.142008 | 0.0021   |
| 1.53E-22 | 0.468061 | 8.42E-27 | 0.001318 | 0.97734 | 0.038136 | 0.41095  | 0.088936 | 0.05478  |
| 5.86E-49 | 0.588073 | 8.81E-45 | 0.04955  | 0.28526 | 0.020654 | 0.65618  | 0.105137 | 0.02307  |
| 3.26E-33 | 0.568768 | 2.23E-41 | 0.173545 | 0.00016 | 0.106019 | 0.02194  | 0.161354 | 0.00046  |
| 1.05E-18 | 0.501356 | 4.30E-31 | 0.059734 | 0.19755 | 0.15621  | 0.00071  | 0.093489 | 0.04345  |
| 5.44E-20 | 0.381896 | 1.16E-17 | 0.032267 | 0.48667 | 0.042518 | 0.35927  | 0.000493 | 0.99152  |
| 1.51E-40 | 0.588756 | 6.61E-45 | 0.070989 | 0.12555 | 0.056202 | 0.22542  | 0.078268 | 0.09113  |
| 6.85E-15 | 0.422488 | 1.22E-21 | 0.014482 | 0.75494 | 0.080448 | 0.08245  | -0.04859 | 0.29467  |
| 3.41E-50 | 0.641866 | 1.38E-55 | 0.106946 | 0.0208  | 0.041072 | 0.37585  | 0.059683 | 0.19794  |
| 5.62E-43 | 0.618152 | 1.45E-50 | 0.131879 | 0.00431 | 0.170784 | 0.00021  | 0.25374  | 2.70E-08 |
| 1.70E-65 | 0.644029 | 4.58E-56 | 0.074148 | 0.10954 | 0.034229 | 0.46055  | 0.1149   | 0.01297  |
| 4.15E-40 | 0.477005 | 6.58E-28 | -0.07102 | 0.12539 | 0.051922 | 0.2628   | 0.146173 | 0.00154  |
| 1.68E-47 | 0.595297 | 4.09E-46 | 0.015188 | 0.74341 | 0.03512  | 0.44895  | 0.07581  | 0.10179  |
| 3.27E-15 | -0.46644 | 1.33E-26 | -0.09407 | 0.04217 | -0.08119 | 0.07966  | -0.01893 | 0.68329  |
| 5.21E-71 | 0.727245 | 5.10E-78 | 0.118817 | 0.01017 | 0.023309 | 0.61536  | 0.143044 | 0.00194  |
| 3.83E-72 | 0.79055  | #####    | 0.037317 | 0.42108 | 0.140934 | 0.00227  | 0.195753 | 2.04E-05 |
| 4.12E-33 | 0.559692 | 7.46E-40 | -0.01292 | 0.7807  | 0.092313 | 0.04617  | 0.311374 | 5.88E-12 |
| 7.93E-29 | 0.418975 | 2.82E-21 | -0.00072 | 0.98764 | -0.02983 | 0.52014  | -0.00108 | 0.9814   |
| 4.05E-10 | -0.36001 | 9.76E-16 | -0.09101 | 0.04935 | -0.1838  | 6.46E-05 | -0.07016 | 0.13004  |

|          |          |          |           |         |          |         |          |          |
|----------|----------|----------|-----------|---------|----------|---------|----------|----------|
| 1.79E-15 | 0.348979 | 8.05E-15 | -0.01806  | 0.69712 | -0.03041 | 0.51204 | 0.034607 | 0.45561  |
| 3.40E-56 | 0.682147 | 3.27E-65 | 0.024787  | 0.59313 | 0.033136 | 0.475   | 0.063483 | 0.17082  |
| 2.02E-43 | 0.607372 | 2.02E-48 | -0.02038  | 0.6604  | 0.099985 | 0.03075 | 0.252184 | 3.30E-08 |
| 1.12E-11 | 0.288207 | 2.20E-10 | -0.06508  | 0.1603  | -0.10817 | 0.01938 | 0.109572 | 0.01785  |
| 5.80E-23 | 0.390584 | 1.81E-18 | -0.04243  | 0.36025 | -0.00823 | 0.85915 | -0.02927 | 0.52802  |
| 1.08E-23 | 0.514111 | 7.26E-33 | 0.071806  | 0.12124 | 0.089814 | 0.05243 | -0.07028 | 0.12937  |
| 1.57E-45 | 0.62395  | 9.42E-52 | 0.06319   | 0.17281 | 0.079839 | 0.0848  | 0.193372 | 2.58E-05 |
| 3.43E-36 | -0.49734 | 1.50E-30 | -0.03233  | 0.48576 | -0.05016 | 0.27936 | -0.04704 | 0.31037  |
| 2.01E-33 | -0.5119  | 1.49E-32 | -0.01502  | 0.74618 | -0.0193  | 0.67736 | -0.07262 | 0.11707  |
| 1.49E-63 | 0.761772 | 1.05E-89 | 0.054794  | 0.23727 | 0.105777 | 0.02225 | 0.114523 | 0.01327  |
| 2.10E-10 | 0.346775 | 1.22E-14 | 0.035504  | 0.44401 | 0.133789 | 0.00377 | -0.00285 | 0.9511   |
| 3.56E-62 | 0.807551 | #####    | 0.03078   | 0.50698 | 0.135681 | 0.00331 | 0.18823  | 4.25E-05 |
| 2.08E-33 | 0.595863 | 3.20E-46 | 0.126065  | 0.00637 | -0.00836 | 0.85707 | 0.196523 | 1.89E-05 |
| 1.05E-39 | 0.445276 | 4.00E-24 | 0.149054  | 0.00124 | 0.028721 | 0.53583 | 0.046033 | 0.32088  |
| 9.84E-32 | 0.466844 | 1.18E-26 | 0.040287  | 0.38505 | 0.005291 | 0.90922 | 0.108696 | 0.01879  |
| 5.03E-09 | 0.198066 | 1.62E-05 | 0.063811  | 0.16861 | -0.002   | 0.96568 | 0.087667 | 0.05835  |
| 1.19E-44 | 0.655097 | 1.39E-58 | 0.077803  | 0.09308 | 0.13135  | 0.00447 | 0.195449 | 2.10E-05 |
| 3.81E-33 | -0.55065 | 2.21E-38 | -0.11681  | 0.01153 | -0.04272 | 0.35697 | -0.22092 | 1.43E-06 |
| 1.77E-06 | 0.106882 | 0.02088  | 0.009519  | 0.83744 | 0.009571 | 0.83657 | 0.059866 | 0.19656  |
| 1.41E-67 | 0.724773 | 2.99E-77 | 0.086086  | 0.06306 | 0.102276 | 0.0271  | 0.156755 | 0.00068  |
| 1.21E-33 | 0.579407 | 3.17E-43 | 0.002238  | 0.96154 | 0.079614 | 0.08569 | 0.081977 | 0.07677  |
| 2.93E-46 | 0.655479 | 1.13E-58 | -6.83E-05 | 0.99883 | 0.018652 | 0.68767 | 0.064677 | 0.16289  |
| 1.76E-51 | 0.614886 | 6.61E-50 | 0.038544  | 0.40596 | 0.045388 | 0.32772 | 0.01595  | 0.73101  |
| 1.21E-72 | 0.755633 | 1.74E-87 | -0.029    | 0.53186 | 0.07961  | 0.08571 | 0.23784  | 1.98E-07 |
| 1.20E-34 | 0.647197 | 8.92E-57 | 0.075732  | 0.10214 | 0.11563  | 0.0124  | 0.107116 | 0.0206   |
| 6.11E-44 | 0.621001 | 3.81E-51 | 0.005757  | 0.90126 | 0.087581 | 0.0586  | -0.02533 | 0.58511  |
| 2.05E-49 | 0.556153 | 2.85E-39 | 0.076051  | 0.1007  | 0.020602 | 0.657   | 0.155681 | 0.00074  |
| 1.10E-71 | 0.695921 | 7.17E-69 | 0.035226  | 0.44759 | 0.070532 | 0.12801 | 0.121251 | 0.00872  |
| 5.64E-16 | -0.28024 | 7.10E-10 | 0.0008    | 0.98624 | -0.05629 | 0.22471 | -0.11971 | 0.00962  |
| 3.36E-32 | 0.501814 | 3.73E-31 | -0.02506  | 0.58913 | 0.060482 | 0.19199 | 0.158309 | 0.0006   |
| 1.64E-47 | 0.661218 | 5.04E-60 | 0.081516  | 0.07844 | 0.079246 | 0.08715 | 0.131857 | 0.00431  |
| 1.52E-05 | 0.219335 | 1.71E-06 | -0.00075  | 0.98703 | -0.0379  | 0.41386 | -0.06078 | 0.18981  |
| 4.30E-42 | 0.657905 | 3.06E-59 | 0.034067  | 0.46268 | 0.057504 | 0.21484 | 0.090145 | 0.05156  |
| 7.95E-74 | 0.77201  | 1.46E-93 | 0.039131  | 0.39884 | 0.106186 | 0.02173 | 0.16423  | 0.00037  |
| 4.34E-48 | 0.594093 | 6.85E-46 | -0.02493  | 0.59093 | -0.008   | 0.86307 | 0.193661 | 2.51E-05 |
| 1.53E-15 | 0.29527  | 7.54E-11 | -0.05335  | 0.24985 | -0.02379 | 0.60813 | 0.048626 | 0.29435  |
| 5.24E-55 | 0.659251 | 1.47E-59 | 0.050342  | 0.27762 | 0.071861 | 0.12095 | 0.0611   | 0.18748  |
| 5.05E-23 | -0.44182 | 9.79E-24 | 0.030937  | 0.50482 | -0.03768 | 0.41654 | -0.13327 | 0.00391  |
| 2.41E-49 | 0.664199 | 9.74E-61 | 0.040799  | 0.37904 | 0.084501 | 0.06808 | 0.13324  | 0.00392  |
| 4.54E-06 | 0.269624 | 3.20E-09 | -0.05845  | 0.20736 | -0.06002 | 0.19543 | -0.23766 | 2.03E-07 |
| 1.17E-36 | 0.549911 | 2.91E-38 | 0.033491  | 0.47029 | 0.018249 | 0.69406 | 0.015515 | 0.73807  |
| 1.55E-10 | 0.312368 | 4.99E-12 | 0.152332  | 0.00096 | 0.111249 | 0.01617 | 0.187583 | 4.52E-05 |
| 1.77E-31 | 0.562081 | 2.99E-40 | 0.080616  | 0.08181 | 0.101066 | 0.02898 | 0.017917 | 0.69936  |
| 6.61E-07 | 0.182525 | 7.27E-05 | -0.04666  | 0.3143  | -0.00536 | 0.90798 | -0.19418 | 2.39E-05 |
| 2.08E-41 | 0.709466 | 1.12E-72 | 0.074216  | 0.10922 | 0.11126  | 0.01616 | 0.122306 | 0.00815  |

|          |          |          |          |         |          |         |          |          |
|----------|----------|----------|----------|---------|----------|---------|----------|----------|
| 1.70E-26 | 0.413467 | 1.04E-20 | 0.075585 | 0.10281 | 0.006404 | 0.89022 | 0.041478 | 0.37114  |
| 1.36E-23 | 0.590448 | 3.24E-45 | 0.022455 | 0.62838 | 0.061814 | 0.18236 | 0.155554 | 0.00074  |
| 2.12E-48 | 0.762735 | 4.63E-90 | 0.041543 | 0.3704  | 0.143486 | 0.00188 | 0.201436 | 1.15E-05 |
| 2.65E-15 | 0.337844 | 6.24E-14 | -0.00854 | 0.85401 | 0.016181 | 0.72727 | -0.06608 | 0.15392  |
| 3.66E-08 | -0.19857 | 1.54E-05 | 0.114371 | 0.0134  | 0.051396 | 0.26767 | 0.095289 | 0.03955  |
| 1.17E-17 | 0.469031 | 6.41E-27 | 0.093735 | 0.0429  | 0.175842 | 0.00013 | 0.22308  | 1.12E-06 |
| 9.21E-19 | 0.376352 | 3.67E-17 | -0.01073 | 0.81708 | 0.091611 | 0.04786 | 0.249384 | 4.73E-08 |
| 2.68E-09 | 0.174133 | 0.00016  | 0.012278 | 0.7913  | 0.038841 | 0.40236 | 0.16812  | 0.00026  |
| 6.56E-50 | 0.626523 | 2.75E-52 | 0.048525 | 0.29536 | 0.059622 | 0.19839 | 0.145446 | 0.00162  |
| 5.95E-52 | 0.727164 | 5.41E-78 | 0.094399 | 0.04144 | 0.142463 | 0.00203 | 0.289792 | 1.73E-10 |
| 4.44E-11 | 0.372984 | 7.33E-17 | -0.03351 | 0.47003 | 0.064247 | 0.16571 | -0.15188 | 0.00099  |
| 2.20E-15 | -0.33325 | 1.42E-13 | -0.14955 | 0.00119 | -0.10133 | 0.02856 | -0.13483 | 0.00351  |
| 1.11E-10 | 0.331539 | 1.92E-13 | 0.041221 | 0.37412 | 0.057279 | 0.21664 | 0.122412 | 0.00809  |
| 5.78E-53 | 0.774187 | 2.08E-94 | 0.081644 | 0.07797 | 0.152027 | 0.00098 | 0.057    | 0.21889  |
| 1.84E-39 | 0.490726 | 1.14E-29 | 0.111837 | 0.01561 | 0.047031 | 0.31049 | 0.215727 | 2.54E-06 |
| 7.85E-31 | 0.655939 | 8.82E-59 | 0.034228 | 0.46056 | 0.08131  | 0.0792  | 0.272145 | 2.25E-09 |
| 1.16E-54 | 0.657957 | 2.97E-59 | 0.064954 | 0.1611  | 0.130312 | 0.00479 | 0.287753 | 2.35E-10 |
| 4.96E-59 | 0.68316  | 1.79E-65 | 0.136882 | 0.00304 | 0.107754 | 0.01985 | 0.163126 | 0.0004   |
| 0.03867  | 0.008119 | 0.86109  | -0.07296 | 0.11535 | -0.03633 | 0.43348 | 0.079689 | 0.08539  |
| 4.14E-06 | 0.270516 | 2.83E-09 | -0.03868 | 0.40435 | 0.050113 | 0.27981 | 0.211289 | 4.11E-06 |
| 0.00011  | 0.132184 | 0.00422  | -0.04058 | 0.38158 | 0.021001 | 0.65079 | 0.056331 | 0.22435  |
| 0.00478  | 0.088432 | 0.05618  | -0.02243 | 0.62875 | -0.0528  | 0.25477 | -0.01082 | 0.81557  |
| 0.02925  | -0.06555 | 0.15726  | -0.04232 | 0.36147 | -0.10564 | 0.02242 | -0.22194 | 1.27E-06 |
| 0.00035  | 0.271884 | 2.34E-09 | 0.023984 | 0.60517 | 0.016462 | 0.72272 | 0.072503 | 0.11766  |
| 0.24159  | 0.061444 | 0.185    | -0.07274 | 0.11644 | 0.005383 | 0.90764 | 0.109665 | 0.01776  |
| 0.06679  | 0.138264 | 0.00275  | -0.10279 | 0.02634 | 0.010514 | 0.82073 | -0.2009  | 1.22E-05 |
| 4.65E-10 | 0.426468 | 4.62E-22 | 0.093126 | 0.04428 | 0.115993 | 0.01213 | 0.13434  | 0.00363  |
| 0.00748  | 0.090331 | 0.05108  | -0.10517 | 0.02303 | -0.08716 | 0.05984 | -0.16976 | 0.00023  |
| 0.05642  | -0.10452 | 0.02389  | -0.00419 | 0.92807 | -0.08354 | 0.07128 | -0.06521 | 0.15947  |
| 0.00012  | 0.306273 | 1.34E-11 | 0.090367 | 0.05098 | 0.05459  | 0.23903 | 0.067617 | 0.14457  |
| 0.50939  | -0.03624 | 0.43463  | -0.09551 | 0.03909 | 0.013349 | 0.77356 | -0.11864 | 0.01029  |
| 9.19E-07 | 0.319926 | 1.42E-12 | 0.001361 | 0.97659 | 0.081071 | 0.08009 | 0.020093 | 0.66494  |
| 0.73813  | 0.056689 | 0.22142  | -0.05276 | 0.25521 | 0.034202 | 0.46092 | 0.007639 | 0.86923  |
| 0.00086  | 0.299329 | 4.02E-11 | 0.108704 | 0.01878 | 0.053638 | 0.24733 | 0.076335 | 0.09944  |
| 0.00473  | -0.07775 | 0.09329  | -0.01791 | 0.69951 | -0.00722 | 0.87637 | -0.17956 | 9.56E-05 |
| 0.00485  | 0.145067 | 0.00167  | -0.01199 | 0.79609 | 0.042778 | 0.35633 | 0.010671 | 0.8181   |
| 1.68E-06 | 0.186837 | 4.85E-05 | -0.10805 | 0.01951 | -0.04687 | 0.31212 | -0.15547 | 0.00075  |
| 2.67E-10 | 0.399387 | 2.60E-19 | 0.133486 | 0.00385 | 0.113318 | 0.01428 | 0.019618 | 0.67241  |
| 4.38E-09 | 0.20973  | 4.85E-06 | -0.06303 | 0.17391 | -0.05039 | 0.2772  | -0.04289 | 0.35509  |
| 5.40E-12 | 0.362674 | 5.79E-16 | -0.01313 | 0.77721 | 0.053306 | 0.25027 | 0.044029 | 0.34242  |
| 1.23E-08 | -0.29141 | 1.36E-10 | 0.038887 | 0.4018  | 0.027075 | 0.55946 | -0.0189  | 0.6837   |
| 9.02E-09 | 0.320737 | 1.24E-12 | -0.05947 | 0.19953 | -0.04477 | 0.33441 | -0.15127 | 0.00104  |
| 0.02236  | 0.002858 | 0.95089  | -0.12742 | 0.00582 | -0.01451 | 0.75449 | -0.09268 | 0.0453   |
| 0.00493  | -0.01423 | 0.75899  | 0.009804 | 0.83265 | 0.004924 | 0.91548 | -0.25464 | 2.40E-08 |
| 0.15436  | 0.06823  | 0.14096  | -0.02369 | 0.60954 | -0.05242 | 0.25826 | 0.075853 | 0.1016   |

|          |          |          |          |          |          |         |          |          |
|----------|----------|----------|----------|----------|----------|---------|----------|----------|
| 1.04E-11 | 0.328987 | 3.00E-13 | -0.04018 | 0.38628  | 0.007099 | 0.8784  | 0.139468 | 0.00252  |
| 2.70E-06 | 0.325482 | 5.51E-13 | -0.02427 | 0.60083  | 0.004473 | 0.9232  | 0.048051 | 0.30011  |
| 5.45E-17 | 0.319817 | 1.45E-12 | -0.08901 | 0.05458  | -0.00504 | 0.91352 | -0.09274 | 0.04516  |
| 1.53E-12 | 0.405525 | 6.51E-20 | 0.003901 | 0.933    | 0.053701 | 0.24678 | 0.055391 | 0.2322   |
| 0.21918  | 0.18558  | 5.47E-05 | 0.082787 | 0.07388  | 0.067144 | 0.14741 | 0.207366 | 6.23E-06 |
| 0.00741  | 0.226559 | 7.52E-07 | -0.03424 | 0.46039  | 0.013996 | 0.76291 | 0.03279  | 0.47964  |
| 0.01916  | 0.255623 | 2.11E-08 | -0.0297  | 0.52207  | 0.065233 | 0.1593  | -0.06028 | 0.19345  |
| 0.04908  | -0.01537 | 0.7404   | 0.010374 | 0.82308  | 0.014216 | 0.7593  | 0.1087   | 0.01879  |
| 0.2773   | -0.01606 | 0.7292   | -0.01355 | 0.77031  | 0.161264 | 0.00047 | -0.10813 | 0.01942  |
| 7.07E-17 | 0.50841  | 4.60E-32 | 0.116685 | 0.01162  | 0.062178 | 0.1798  | 0.037746 | 0.41576  |
| 3.50E-07 | 0.2179   | 2.00E-06 | -0.03266 | 0.48143  | 0.035354 | 0.44595 | -0.10052 | 0.02986  |
| 7.45E-15 | 0.37447  | 5.41E-17 | 0.024056 | 0.60408  | 0.002082 | 0.9642  | -0.0871  | 0.05999  |
| 4.97E-05 | -0.20475 | 8.19E-06 | -0.02318 | 0.61739  | 0.015072 | 0.74528 | -0.06984 | 0.13177  |
| 0.00017  | 0.294082 | 9.05E-11 | 0.031345 | 0.49922  | 0.039665 | 0.39244 | -0.04768 | 0.30388  |
| 1.13E-10 | 0.301494 | 2.87E-11 | -0.06272 | 0.17605  | -0.04774 | 0.30323 | -0.00463 | 0.92045  |
| 1.20E-19 | 0.446282 | 3.08E-24 | 0.020359 | 0.66079  | 0.011251 | 0.8084  | -0.03624 | 0.43456  |
| 6.77E-06 | 0.336844 | 7.46E-14 | 0.031016 | 0.50373  | -0.00648 | 0.88888 | -0.06188 | 0.18192  |
| 2.20E-11 | 0.232636 | 3.70E-07 | 0.020304 | 0.66165  | 0.000455 | 0.99217 | -0.05934 | 0.20056  |
| 3.47E-08 | 0.314486 | 3.52E-12 | 0.072684 | 0.11675  | 0.085283 | 0.06556 | -0.03363 | 0.4685   |
| 1.32E-22 | 0.573072 | 4.07E-42 | 0.10927  | 0.01817  | 0.049196 | 0.28872 | 0.022818 | 0.62284  |
| 1.39E-08 | 0.399172 | 2.73E-19 | 0.013517 | 0.77079  | 0.020329 | 0.66125 | -0.0472  | 0.30878  |
| 0.05774  | 0.019826 | 0.66913  | -0.06936 | 0.13446  | -0.02496 | 0.59053 | 0.018999 | 0.68216  |
| 9.02E-06 | 0.269376 | 3.31E-09 | -0.04904 | 0.29022  | -0.01319 | 0.77617 | -0.12534 | 0.00669  |
| 5.09E-09 | 0.28354  | 4.39E-10 | -0.01701 | 0.7139   | 0.112502 | 0.015   | 0.085215 | 0.06578  |
| 7.56E-09 | 0.243498 | 9.91E-08 | -0.09544 | 0.03923  | -0.01167 | 0.80134 | -0.04352 | 0.34809  |
| 0.07819  | 0.304076 | 1.90E-11 | 0.039211 | 0.39788  | 0.113874 | 0.01381 | -0.0247  | 0.5944   |
| 0.00676  | 0.176038 | 0.00013  | -0.05674 | 0.22102  | 0.019985 | 0.66663 | -0.24115 | 1.33E-07 |
| 8.69E-05 | -0.13489 | 0.00349  | 0.054799 | 0.23723  | -0.02973 | 0.52157 | -0.26915 | 3.41E-09 |
| 0.02353  | 0.196588 | 1.88E-05 | -0.03537 | 0.44569  | 0.011636 | 0.80197 | -0.03677 | 0.42787  |
| 0.00048  | -0.11506 | 0.01284  | -0.21207 | 3.78E-06 | 0.004084 | 0.92985 | -0.20155 | 1.14E-05 |
| 1.34E-13 | 0.456903 | 1.83E-25 | 0.144559 | 0.00174  | 0.01972  | 0.67079 | 0.011791 | 0.7994   |
| 0.01346  | 0.231184 | 4.39E-07 | 0.007519 | 0.87126  | -0.00451 | 0.9225  | -0.02697 | 0.561    |
| 1.75E-12 | 0.386636 | 4.23E-18 | 0.0659   | 0.15507  | 0.038281 | 0.40918 | -0.0074  | 0.87327  |
| 0.75075  | 0.043527 | 0.34796  | -0.00107 | 0.98169  | -0.0932  | 0.0441  | -0.02354 | 0.61186  |
| 0.57557  | -0.06808 | 0.14183  | -0.07828 | 0.0911   | -0.01156 | 0.80321 | -0.14861 | 0.00128  |
| 1.13E-14 | 0.447371 | 2.31E-24 | 0.054314 | 0.24142  | 0.100172 | 0.03044 | 0.122067 | 0.00827  |
| 1.03E-06 | -0.26745 | 4.32E-09 | -0.00724 | 0.87602  | -0.02151 | 0.64287 | 0.018552 | 0.68926  |
| 7.22E-13 | 0.318684 | 1.75E-12 | 0.000446 | 0.99232  | -0.04159 | 0.36982 | -0.0945  | 0.04122  |
| 0.08074  | 0.266844 | 4.70E-09 | 0.024521 | 0.59711  | 0.065037 | 0.16056 | -0.16193 | 0.00044  |
| 0.06088  | -0.00148 | 0.97447  | -0.04028 | 0.38519  | -0.03213 | 0.48849 | -0.24436 | 8.90E-08 |
| 2.23E-07 | 0.25911  | 1.33E-08 | 0.058135 | 0.20984  | 0.106166 | 0.02176 | 0.054829 | 0.23697  |
| 0.00301  | -0.10772 | 0.01989  | -0.10754 | 0.0201   | -0.06235 | 0.1786  | -0.02035 | 0.66094  |
| 0.06337  | -0.19979 | 1.36E-05 | 0.19186  | 2.99E-05 | 0.004827 | 0.91714 | -0.02637 | 0.56976  |
| 0.00142  | 0.078551 | 0.08997  | 0.035773 | 0.44057  | -0.04917 | 0.28893 | 0.016335 | 0.72477  |
| 0.00065  | 0.264019 | 6.90E-09 | 0.117908 | 0.01077  | 0.142045 | 0.00209 | 0.170752 | 0.00021  |



|          |          |          |          |         |          |         |          |          |
|----------|----------|----------|----------|---------|----------|---------|----------|----------|
| 0.19217  | 0.065173 | 0.15969  | -0.03053 | 0.51038 | -0.08697 | 0.06039 | -0.12511 | 0.00679  |
| 0.22839  | 0.024602 | 0.59589  | -0.03493 | 0.45142 | 0.017278 | 0.70959 | -0.05924 | 0.20128  |
| 0.0013   | 0.250703 | 3.99E-08 | -0.02192 | 0.63663 | 0.069193 | 0.13542 | -0.0001  | 0.9982   |
| 9.03E-27 | 0.611925 | 2.57E-49 | 0.041974 | 0.36545 | 0.098982 | 0.03247 | 0.072548 | 0.11744  |
| 0.30546  | 0.045767 | 0.3237   | -0.06726 | 0.14669 | -0.05928 | 0.20098 | -0.12758 | 0.00576  |
| 0.02821  | -0.0751  | 0.10502  | -0.10636 | 0.02151 | -0.07071 | 0.12705 | -0.14951 | 0.00119  |
| 4.20E-07 | -0.19799 | 1.63E-05 | -0.13798 | 0.00281 | -0.05241 | 0.25837 | -0.16335 | 0.00039  |
| 8.55E-05 | 0.337987 | 6.08E-14 | 0.002466 | 0.95762 | 0.108216 | 0.01933 | 0.066578 | 0.15086  |
| 1.11E-10 | 0.491492 | 9.01E-30 | 0.093592 | 0.04322 | 0.078214 | 0.09136 | -0.11416 | 0.01357  |
| 1.72E-07 | 0.205768 | 7.37E-06 | -0.13478 | 0.00352 | -0.04688 | 0.31203 | -0.02353 | 0.61195  |
| 0.94251  | 0.190738 | 3.34E-05 | -0.10097 | 0.02914 | 0.04572  | 0.32419 | -0.00191 | 0.96722  |
| 0.76785  | -0.01445 | 0.75549  | 0.028591 | 0.53768 | -0.07387 | 0.11089 | -0.08111 | 0.07995  |
| 1.38E-05 | 0.20672  | 6.67E-06 | -0.04636 | 0.31742 | -0.0089  | 0.84783 | -0.01139 | 0.80609  |
| 0.01052  | 0.039509 | 0.3943   | -0.08853 | 0.0559  | -0.08761 | 0.05852 | 0.054917 | 0.23623  |
| 0.00546  | 0.143429 | 0.00189  | 0.035545 | 0.44348 | -0.04952 | 0.28553 | -0.0224  | 0.6292   |
| 4.59E-08 | 0.359384 | 1.10E-15 | -0.08182 | 0.07735 | 0.106566 | 0.02126 | 0.027256 | 0.55684  |
| 0.25257  | -0.02054 | 0.65793  | -0.15754 | 0.00063 | -0.00785 | 0.86564 | -0.09947 | 0.03162  |
| 4.64E-07 | 0.280449 | 6.89E-10 | 0.061894 | 0.1818  | 0.159885 | 0.00052 | 0.19518  | 2.16E-05 |
| 5.89E-07 | 0.338281 | 5.76E-14 | 0.027071 | 0.55952 | 0.099751 | 0.03114 | 0.007601 | 0.86986  |
| 4.53E-11 | 0.278262 | 9.45E-10 | 0.028326 | 0.54145 | -0.07412 | 0.10967 | -0.17305 | 0.00017  |
| 0.00992  | -0.08645 | 0.06195  | -0.13145 | 0.00443 | -0.10869 | 0.0188  | -0.19213 | 2.92E-05 |
| 0.00221  | -0.07359 | 0.11226  | -0.11648 | 0.01177 | 0.091071 | 0.0492  | -0.03938 | 0.39588  |
| 0.64788  | -0.0136  | 0.76937  | -0.05969 | 0.19787 | -0.01582 | 0.73305 | -0.10588 | 0.02212  |
| 0.00448  | 0.24532  | 7.90E-08 | -0.05685 | 0.22008 | 0.042513 | 0.35932 | 0.026582 | 0.56664  |
| 0.05456  | 0.145618 | 0.0016   | 0.080976 | 0.08045 | 0.045205 | 0.32968 | 0.068029 | 0.14214  |
| 0.00044  | 0.204623 | 8.30E-06 | -0.0117  | 0.80097 | 0.040301 | 0.38488 | -0.03215 | 0.48832  |
| 7.29E-13 | 0.29371  | 9.58E-11 | 0.004235 | 0.92728 | -0.01834 | 0.69264 | -0.08812 | 0.05705  |
| 0.00188  | 0.168938 | 0.00025  | -0.07089 | 0.12608 | -0.01768 | 0.70319 | -0.03202 | 0.48996  |
| 8.91E-08 | 0.245466 | 7.75E-08 | -0.01764 | 0.70385 | 0.00184  | 0.96836 | -0.00275 | 0.95269  |
| 0.04243  | 0.086454 | 0.06193  | 0.0578   | 0.21249 | -0.10824 | 0.0193  | -0.21137 | 4.07E-06 |
| 0.71957  | 0.10135  | 0.02853  | 0.046604 | 0.31491 | -0.0244  | 0.59893 | 0.085934 | 0.06352  |
| 0.04703  | 0.219189 | 1.73E-06 | -0.07092 | 0.12594 | 0.094113 | 0.04207 | -0.24368 | 9.69E-08 |
| 0.59847  | 0.026344 | 0.57012  | -0.04793 | 0.3013  | -0.0646  | 0.16338 | -0.19298 | 2.69E-05 |
| 0.04637  | -0.12409 | 0.00726  | -0.04809 | 0.29974 | -0.05263 | 0.25637 | -0.0503  | 0.27806  |
| 0.87154  | 0.048405 | 0.29656  | 0.068442 | 0.13973 | 0.016292 | 0.72547 | 0.130318 | 0.00479  |
| 1.30E-05 | 0.171302 | 0.0002   | -0.06566 | 0.15661 | 0.131405 | 0.00445 | 0.054545 | 0.23942  |
| 0.00152  | 0.179619 | 9.50E-05 | -0.02554 | 0.58194 | 0.016335 | 0.72478 | -0.0238  | 0.60788  |
| 0.01926  | 0.09463  | 0.04094  | -0.14834 | 0.0013  | -0.07511 | 0.10501 | -0.20263 | 1.02E-05 |
| 0.00026  | -0.24103 | 1.34E-07 | -0.01784 | 0.70056 | -0.06502 | 0.16065 | -0.06076 | 0.18992  |
| 0.00636  | 0.227561 | 6.70E-07 | -0.01939 | 0.67596 | 0.088441 | 0.05615 | 0.078068 | 0.09197  |
| 8.88E-05 | -0.1892  | 3.87E-05 | 0.112482 | 0.01502 | 0.027781 | 0.54926 | 0.0849   | 0.06679  |
| 1.92E-12 | 0.355455 | 2.36E-15 | -0.04384 | 0.34445 | 0.028672 | 0.53652 | -0.04696 | 0.31119  |
| 3.30E-07 | 0.259333 | 1.29E-08 | -0.05264 | 0.25621 | -0.04035 | 0.38427 | -0.12427 | 0.00717  |
| 9.74E-16 | 0.354883 | 2.63E-15 | -0.03634 | 0.43335 | 0.003711 | 0.93626 | -0.14703 | 0.00144  |
| 4.38E-10 | 0.396301 | 5.17E-19 | -0.02666 | 0.56544 | 0.034164 | 0.46141 | -0.01923 | 0.67848  |

|          |          |          |          |         |          |         |          |          |
|----------|----------|----------|----------|---------|----------|---------|----------|----------|
| 3.04E-24 | 0.460067 | 7.72E-26 | 0.026094 | 0.57379 | -0.03449 | 0.4571  | -0.0931  | 0.04433  |
| 0.01244  | 0.16459  | 0.00035  | 0.077303 | 0.09521 | 0.01232  | 0.79061 | -0.03307 | 0.47584  |
| 6.69E-17 | 0.490872 | 1.09E-29 | 0.016    | 0.7302  | 0.092199 | 0.04644 | 0.042971 | 0.35416  |
| 2.87E-11 | 0.359309 | 1.12E-15 | -0.02943 | 0.52581 | 0.074245 | 0.10908 | 0.120495 | 0.00915  |
| 0.00206  | 0.292275 | 1.19E-10 | 0.057751 | 0.21288 | 0.081683 | 0.07783 | 0.026387 | 0.56949  |
| 0.00673  | 0.287939 | 2.29E-10 | -0.06919 | 0.13545 | 0.063377 | 0.17153 | -0.10942 | 0.01801  |
| 0.04492  | 0.234677 | 2.90E-07 | -0.07147 | 0.12298 | 0.043702 | 0.34603 | -0.06983 | 0.13185  |
| 9.10E-19 | 0.564461 | 1.20E-40 | 0.091764 | 0.04749 | 0.108982 | 0.01848 | -0.02624 | 0.57164  |
| 1.81E-12 | 0.299526 | 3.90E-11 | 0.014074 | 0.76163 | -0.00252 | 0.95666 | -0.0509  | 0.27232  |
| 0.3964   | 0.170348 | 0.00022  | 0.015566 | 0.73724 | 0.049973 | 0.28116 | -0.1239  | 0.00735  |
| 0.01354  | 0.217532 | 2.08E-06 | 0.048328 | 0.29733 | -0.05772 | 0.2131  | -0.03359 | 0.46904  |
| 0.01104  | 0.265596 | 5.57E-09 | 0.121802 | 0.00842 | 0.088033 | 0.0573  | 0.222305 | 1.22E-06 |
| 7.36E-13 | 0.425607 | 5.70E-22 | -0.00037 | 0.9936  | 0.033046 | 0.47621 | -0.0627  | 0.17618  |
| 4.68E-07 | 0.408622 | 3.20E-20 | 0.000912 | 0.98432 | 0.074651 | 0.10715 | -0.06552 | 0.15747  |
| 1.39E-05 | 0.269858 | 3.10E-09 | 0.126096 | 0.00636 | 0.026333 | 0.57028 | -0.09095 | 0.04949  |
| 0.00033  | -0.12352 | 0.00753  | -0.09819 | 0.03388 | -0.09899 | 0.03245 | -0.07366 | 0.11191  |
| 0.00276  | -0.09598 | 0.03814  | 0.039872 | 0.38997 | 0.03271  | 0.48071 | -0.07945 | 0.08634  |
| 3.72E-07 | 0.365673 | 3.20E-16 | 0.129407 | 0.0051  | 0.088669 | 0.05552 | -0.02634 | 0.57011  |
| 0.86466  | 0.208516 | 5.52E-06 | -0.01255 | 0.78679 | 0.020782 | 0.65419 | -0.08954 | 0.05316  |
| 0.86277  | 0.126873 | 0.00604  | -0.00742 | 0.87292 | 0.016398 | 0.72375 | -0.09093 | 0.04956  |
| 0.00044  | 0.1671   | 0.00029  | -0.02638 | 0.5696  | 0.086105 | 0.063   | -0.06865 | 0.1385   |
| 0.53883  | 0.194535 | 2.30E-05 | 0.024798 | 0.59297 | 0.063699 | 0.16936 | 0.126101 | 0.00636  |
| 0.54167  | 0.029393 | 0.52633  | 0.143105 | 0.00193 | 0.077444 | 0.0946  | -0.08447 | 0.06819  |
| 0.97311  | 0.004471 | 0.92324  | -0.06264 | 0.1766  | -0.01536 | 0.74066 | -0.0007  | 0.98798  |
| 3.15E-13 | 0.353049 | 3.73E-15 | -0.01383 | 0.76562 | -0.04498 | 0.33207 | -0.07893 | 0.08842  |
| 0.00838  | 0.262167 | 8.86E-09 | 0.016221 | 0.72662 | 0.087703 | 0.05825 | 0.032852 | 0.4788   |
| 0.15043  | 0.089995 | 0.05195  | -0.08367 | 0.07083 | -0.0236  | 0.61091 | -0.10715 | 0.02056  |
| 0.00622  | -0.084   | 0.06974  | 0.05128  | 0.26876 | -0.01385 | 0.76535 | -0.13573 | 0.00329  |
| 3.24E-14 | 0.349614 | 7.14E-15 | -0.00431 | 0.92594 | -0.0011  | 0.98102 | 0.030974 | 0.50431  |
| 8.90E-08 | 0.234464 | 2.98E-07 | -0.04989 | 0.28198 | -0.05514 | 0.23433 | -0.12102 | 0.00885  |
| 0.1556   | -0.14493 | 0.00169  | -0.00527 | 0.9095  | -0.08531 | 0.06549 | -0.21339 | 3.28E-06 |
| 1.90E-05 | 0.262798 | 8.14E-09 | 0.026611 | 0.56622 | 0.024049 | 0.6042  | -0.17897 | 0.0001   |
| 8.39E-08 | 0.347689 | 1.02E-14 | 0.076861 | 0.09712 | 0.089753 | 0.05259 | 0.275325 | 1.44E-09 |
| 8.26E-05 | 0.250082 | 4.32E-08 | -0.05917 | 0.20185 | -0.02894 | 0.53268 | -0.04953 | 0.28545  |
| 3.93E-07 | 0.291729 | 1.29E-10 | 0.092664 | 0.04535 | 0.006509 | 0.88843 | 0.065426 | 0.15807  |
| 0.62118  | 0.126128 | 0.00635  | -0.01725 | 0.70997 | 0.097893 | 0.03444 | 0.095502 | 0.03911  |
| 0.00161  | 0.197949 | 1.64E-05 | 0.038235 | 0.40974 | 0.045303 | 0.32863 | 0.165436 | 0.00033  |
| 2.16E-07 | -0.25589 | 2.04E-08 | 0.089625 | 0.05293 | 0.025622 | 0.58074 | 0.034943 | 0.45125  |
| 0.14848  | 0.211978 | 3.81E-06 | 0.039168 | 0.3984  | 0.044342 | 0.339   | 0.00312  | 0.94639  |
| 2.03E-05 | 0.311091 | 6.15E-12 | 0.047958 | 0.30104 | 0.066315 | 0.15248 | 0.183205 | 6.83E-05 |
| 0.00718  | 0.221802 | 1.29E-06 | -0.0293  | 0.52761 | 0.034708 | 0.45431 | 0.094634 | 0.04094  |
| 0.05508  | 0.196068 | 1.98E-05 | -0.06028 | 0.19351 | -0.02673 | 0.5645  | -0.06358 | 0.17013  |
| 9.93E-11 | 0.456443 | 2.07E-25 | 0.113613 | 0.01403 | 0.125168 | 0.00676 | 0.088389 | 0.0563   |
| 2.18E-10 | 0.306221 | 1.35E-11 | 0.013029 | 0.77885 | -0.0473  | 0.30774 | -0.07427 | 0.10897  |
| 9.50E-16 | 0.500215 | 6.15E-31 | 0.092714 | 0.04523 | 0.083972 | 0.06983 | 0.220737 | 1.46E-06 |

|          |          |          |          |         |          |         |          |          |
|----------|----------|----------|----------|---------|----------|---------|----------|----------|
| 1.08E-09 | 0.367995 | 2.01E-16 | -0.01269 | 0.78444 | 0.032434 | 0.48442 | 0.149704 | 0.00118  |
| 5.12E-13 | 0.371148 | 1.07E-16 | 0.057628 | 0.21385 | -0.01852 | 0.68983 | -0.15342 | 0.00088  |
| 0.00381  | 0.162968 | 0.00041  | -0.03418 | 0.46121 | -0.02443 | 0.59846 | -0.2417  | 1.24E-07 |
| 1.37E-09 | 0.322013 | 9.97E-13 | -0.05078 | 0.27343 | -0.00094 | 0.9839  | 0.075526 | 0.10309  |
| 0.76262  | 0.111272 | 0.01614  | -0.08102 | 0.08028 | 0.115786 | 0.01228 | -0.13655 | 0.00311  |
| 2.89E-12 | 0.366617 | 2.65E-16 | 0.086397 | 0.06211 | -0.04156 | 0.37019 | 0.13377  | 0.00378  |
| 0.00037  | 0.135312 | 0.00339  | -0.01256 | 0.78669 | -0.07358 | 0.11229 | -0.09861 | 0.03313  |
| 3.07E-07 | 0.417897 | 3.65E-21 | -0.00974 | 0.8338  | 0.10821  | 0.01933 | -0.02665 | 0.56569  |
| 0.01035  | 0.176015 | 0.00013  | -0.04692 | 0.31164 | -0.06665 | 0.15039 | -0.15147 | 0.00103  |
| 0.00064  | 0.24515  | 8.07E-08 | 0.041348 | 0.37265 | 0.003603 | 0.93811 | -0.03866 | 0.40452  |
| 3.58E-10 | 0.294425 | 8.59E-11 | 0.023194 | 0.61711 | 0.065528 | 0.15742 | -0.02061 | 0.65691  |
| 0.00174  | 0.220644 | 1.47E-06 | -0.02749 | 0.55342 | -0.02748 | 0.55365 | 0.055617 | 0.2303   |
| 4.98E-16 | 0.43937  | 1.84E-23 | 0.034834 | 0.45266 | 0.007469 | 0.87211 | 0.01155  | 0.8034   |
| 0.0042   | -0.0339  | 0.46492  | -0.13108 | 0.00455 | 0.026454 | 0.56851 | -0.14777 | 0.00136  |
| 5.61E-09 | 0.404501 | 8.22E-20 | 0.051673 | 0.26511 | -0.0165  | 0.72206 | -0.05812 | 0.20999  |
| 2.93E-14 | 0.434759 | 5.91E-23 | 0.005844 | 0.89976 | -0.00186 | 0.968   | -0.0554  | 0.23211  |
| 0.95292  | 0.105936 | 0.02204  | 0.070955 | 0.12573 | 0.045197 | 0.32976 | -0.18804 | 4.33E-05 |
| 0.56106  | 0.008953 | 0.847    | 0.030849 | 0.50604 | -0.03061 | 0.50935 | 0.018612 | 0.6883   |
| 0.48986  | 0.225158 | 8.84E-07 | 0.097314 | 0.03553 | 0.103061 | 0.02594 | 0.019349 | 0.67665  |
| 6.04E-05 | 0.338349 | 5.69E-14 | 0.046154 | 0.31961 | 0.081248 | 0.07943 | 0.094895 | 0.04038  |
| 5.74E-14 | 0.327373 | 3.97E-13 | -0.08873 | 0.05535 | 0.120778 | 0.00899 | 0.083058 | 0.07294  |
| 0.00019  | 0.296759 | 6.00E-11 | -0.07955 | 0.08593 | 0.055192 | 0.23388 | -0.15042 | 0.00111  |
| 2.98E-07 | 0.317171 | 2.25E-12 | -0.00797 | 0.86353 | -0.00734 | 0.87427 | -0.136   | 0.00323  |
| 1.93E-10 | 0.364695 | 3.88E-16 | 0.004957 | 0.91492 | 0.081595 | 0.07816 | 0.09648  | 0.03714  |
| 0.00872  | 0.273301 | 1.91E-09 | 0.021105 | 0.64917 | 0.070035 | 0.13072 | -0.10489 | 0.02339  |
| 8.08E-11 | 0.341857 | 3.01E-14 | 0.068163 | 0.14135 | 0.004337 | 0.92554 | 0.046991 | 0.31091  |
| 0.12777  | 0.169796 | 0.00023  | 0.107619 | 0.02001 | -0.04091 | 0.37779 | -0.0501  | 0.27991  |
| 5.74E-06 | -0.06372 | 0.16922  | -0.05621 | 0.22533 | 0.016624 | 0.7201  | -0.17069 | 0.00021  |
| 0.01127  | -0.02959 | 0.52358  | 0.012589 | 0.78613 | 0.01357  | 0.76992 | -0.16632 | 0.00031  |
| 0.00015  | -0.1355  | 0.00335  | -0.07953 | 0.08602 | -0.05563 | 0.23015 | -0.16059 | 0.00049  |
| 0.001    | 0.080874 | 0.08083  | -0.07501 | 0.10547 | -0.07362 | 0.1121  | 0.103729 | 0.02498  |
| 3.74E-16 | 0.48227  | 1.42E-28 | 0.100106 | 0.03054 | 0.008618 | 0.85265 | 0.00073  | 0.98744  |
| 0.13195  | 0.010228 | 0.82553  | -0.15321 | 0.00089 | -0.02292 | 0.6213  | -0.09748 | 0.03522  |
| 3.22E-05 | 0.294233 | 8.84E-11 | 0.099272 | 0.03197 | 0.041221 | 0.37412 | -0.03689 | 0.4264   |
| 1.78E-05 | 0.288911 | 1.98E-10 | 0.031385 | 0.49867 | 0.026086 | 0.5739  | -0.03589 | 0.43907  |
| 0.02298  | -0.00865 | 0.85214  | -0.02238 | 0.6295  | 0.053577 | 0.24787 | -0.19703 | 1.80E-05 |
| 0.00132  | 0.197584 | 1.70E-05 | 0.002025 | 0.96518 | 0.017118 | 0.71217 | -0.01986 | 0.6686   |
| 3.95E-06 | 0.326901 | 4.31E-13 | -0.00893 | 0.84731 | 0.075061 | 0.10523 | -0.0346  | 0.45571  |
| 1.18E-06 | 0.184462 | 6.07E-05 | -0.09713 | 0.03588 | -0.04407 | 0.34194 | -0.06449 | 0.16412  |
| 1.52E-07 | 0.350308 | 6.27E-15 | 0.003886 | 0.93325 | 0.050074 | 0.28019 | 0.050024 | 0.28067  |
| 0.41477  | 0.206916 | 6.53E-06 | 0.06535  | 0.15855 | 0.07366  | 0.1119  | -0.03621 | 0.435    |
| 5.29E-08 | 0.280547 | 6.80E-10 | -0.01052 | 0.82056 | -0.06061 | 0.19104 | -0.14873 | 0.00127  |
| 2.79E-06 | 0.321752 | 1.04E-12 | 0.124066 | 0.00727 | 0.099832 | 0.03101 | 0.095654 | 0.0388   |
| 0.47985  | 0.047632 | 0.30435  | -0.0201  | 0.66484 | -0.07561 | 0.10269 | -0.16631 | 0.00031  |
| 0.00084  | 0.072019 | 0.12014  | -0.04399 | 0.34287 | -0.02617 | 0.57265 | -0.09016 | 0.05151  |

|          |          |          |          |         |          |         |          |          |
|----------|----------|----------|----------|---------|----------|---------|----------|----------|
| 0.32936  | -0.05407 | 0.24351  | -0.06834 | 0.14029 | -0.08714 | 0.05987 | 0.080256 | 0.08318  |
| 5.63E-34 | 0.550886 | 2.03E-38 | 0.080429 | 0.08252 | 0.03381  | 0.46607 | -0.0052  | 0.91083  |
| 0.0968   | 0.031512 | 0.49693  | 0.017865 | 0.70019 | 0.026062 | 0.57426 | -0.09469 | 0.04082  |
| 3.00E-06 | 0.207926 | 5.87E-06 | -0.07612 | 0.10038 | -0.07973 | 0.08525 | 0.059283 | 0.20096  |
| 3.74E-05 | 0.174755 | 0.00015  | -0.00726 | 0.87561 | -0.04626 | 0.31851 | -0.15977 | 0.00053  |
| 0.0004   | 0.132672 | 0.00408  | 0.012125 | 0.79383 | -0.00925 | 0.84194 | -0.04434 | 0.33906  |
| 0.0004   | 0.277428 | 1.07E-09 | 0.036199 | 0.43514 | 0.008515 | 0.85439 | -0.10405 | 0.02453  |
| 6.10E-05 | 0.170097 | 0.00022  | 0.022279 | 0.63106 | -0.06783 | 0.14332 | -0.03069 | 0.5082   |
| 0.83103  | 0.067157 | 0.14733  | -0.04367 | 0.34638 | 0.054223 | 0.24221 | -0.00745 | 0.8725   |
| 0.79961  | -0.08991 | 0.05217  | -0.01396 | 0.76342 | -0.12532 | 0.0067  | -0.12412 | 0.00724  |
| 0.00992  | 0.238451 | 1.84E-07 | 0.056148 | 0.22587 | 0.010929 | 0.81378 | -0.09324 | 0.04403  |
| 2.59E-08 | 0.382615 | 9.94E-18 | -0.02161 | 0.64129 | 0.065711 | 0.15626 | -0.10052 | 0.02985  |
| 0.59028  | 0.020619 | 0.65673  | -0.11206 | 0.01541 | 0.014068 | 0.76173 | -0.15454 | 0.00081  |
| 3.01E-06 | -0.12685 | 0.00605  | -0.01417 | 0.76012 | 0.058324 | 0.20836 | -0.13841 | 0.00272  |
| 0.25775  | 0.087577 | 0.05861  | -0.10106 | 0.02898 | -0.02758 | 0.55212 | -0.27996 | 7.40E-10 |
| 0.7001   | 0.130115 | 0.00486  | 0.119732 | 0.0096  | 0.024053 | 0.60413 | -0.03399 | 0.46373  |
| 1.27E-05 | -0.18118 | 8.24E-05 | -0.05438 | 0.24089 | 0.11197  | 0.01549 | -0.15604 | 0.00071  |
| 0.02925  | 0.191127 | 3.22E-05 | -0.00571 | 0.90211 | -0.01121 | 0.80909 | -0.11742 | 0.0111   |
| 2.16E-08 | 0.191204 | 3.19E-05 | -0.13511 | 0.00344 | -0.12295 | 0.00782 | -0.07401 | 0.1102   |
| 1.56E-14 | 0.41788  | 3.67E-21 | 0.018109 | 0.69631 | 0.046602 | 0.31493 | 0.080025 | 0.08408  |
| 1.85E-12 | 0.384519 | 6.64E-18 | 0.027679 | 0.55073 | 0.082041 | 0.07653 | 0.113441 | 0.01417  |
| 1.52E-12 | 0.364777 | 3.82E-16 | 0.058208 | 0.20927 | -0.00123 | 0.97879 | -0.05004 | 0.28048  |
| 0.14786  | 0.018381 | 0.69197  | 0.008273 | 0.85848 | 0.059358 | 0.20039 | -0.10343 | 0.02541  |
| 4.03E-08 | 0.207346 | 6.24E-06 | 0.069814 | 0.13194 | 0.018702 | 0.68688 | 0.068111 | 0.14165  |
| 0.01913  | 0.181075 | 8.31E-05 | -0.0825  | 0.07491 | -0.0361  | 0.43636 | -0.20235 | 1.05E-05 |
| 0.06155  | -0.04687 | 0.31214  | -0.00415 | 0.92874 | -0.02524 | 0.58637 | -0.04583 | 0.32308  |
| 0.00241  | 0.232627 | 3.70E-07 | 0.142705 | 0.00199 | 0.147531 | 0.00139 | -0.12013 | 0.00937  |
| 8.93E-09 | 0.340841 | 3.62E-14 | -0.02695 | 0.56129 | -0.07622 | 0.09996 | -0.01307 | 0.77809  |
| 3.29E-15 | 0.380271 | 1.63E-17 | 0.046355 | 0.3175  | 0.048053 | 0.30008 | 0.029606 | 0.52333  |
| 0.00011  | 0.21792  | 2.00E-06 | -0.01276 | 0.78326 | -0.05237 | 0.25868 | -0.15058 | 0.0011   |
| 0.4766   | 0.12011  | 0.00938  | 0.011363 | 0.80653 | -0.02757 | 0.5523  | -0.29966 | 3.82E-11 |
| 2.87E-05 | 0.203179 | 9.63E-06 | -0.02412 | 0.60312 | -0.01821 | 0.69465 | -0.06646 | 0.15161  |
| 3.94E-05 | 0.226427 | 7.64E-07 | 0.003593 | 0.93827 | -0.08594 | 0.06352 | 0.053361 | 0.24978  |
| 0.01455  | 0.089376 | 0.05359  | -0.00016 | 0.99731 | -0.07231 | 0.11866 | -0.17649 | 0.00013  |
| 5.52E-11 | 0.406684 | 5.00E-20 | 0.06828  | 0.14067 | 0.056103 | 0.22624 | -0.12912 | 0.0052   |
| 0.0004   | -0.136   | 0.00323  | -0.07494 | 0.10578 | -0.0539  | 0.24504 | -0.23775 | 2.01E-07 |
| 0.13971  | -0.00495 | 0.91495  | 0.056008 | 0.22703 | -0.05219 | 0.26032 | -0.07938 | 0.08662  |
| 0.93069  | 0.112924 | 0.01462  | -0.01917 | 0.67947 | 0.08767  | 0.05834 | 0.029608 | 0.52331  |
| 2.37E-11 | 0.323792 | 7.36E-13 | -0.05991 | 0.19626 | 0.001984 | 0.9659  | 0.023687 | 0.60964  |
| 0.00018  | 0.136719 | 0.00307  | -0.06913 | 0.13576 | -0.02063 | 0.65655 | -0.1699  | 0.00023  |
| 0.00041  | 0.199697 | 1.38E-05 | 0.011354 | 0.80668 | -0.0208  | 0.65387 | 0.010656 | 0.81834  |
| 8.41E-07 | 0.387748 | 3.33E-18 | 0.035344 | 0.44608 | 0.055823 | 0.22857 | 0.027558 | 0.55247  |
| 0.06315  | 0.195656 | 2.06E-05 | -0.01306 | 0.7783  | 0.032937 | 0.47766 | -0.073   | 0.11518  |
| 0.00143  | 0.234117 | 3.10E-07 | 0.010967 | 0.81314 | 0.088023 | 0.05733 | 0.085539 | 0.06475  |
| 1.41E-15 | 0.49134  | 9.43E-30 | 0.069508 | 0.13365 | 0.054842 | 0.23686 | -0.01534 | 0.74095  |

|          |          |          |          |         |           |         |          |         |
|----------|----------|----------|----------|---------|-----------|---------|----------|---------|
| 1.18E-05 | 0.316359 | 2.58E-12 | 0.06368  | 0.16949 | -4.83E-05 | 0.99917 | -0.05977 | 0.19726 |
| 0.95577  | 0.040118 | 0.38705  | -0.06579 | 0.15575 | -0.10026  | 0.03029 | 0.016678 | 0.71923 |
| 0.01439  | 0.138096 | 0.00278  | -0.00502 | 0.91376 | -0.04087  | 0.37821 | 0.005096 | 0.91254 |
| 3.74E-16 | 0.476005 | 8.78E-28 | -0.05035 | 0.27756 | 0.034913  | 0.45164 | 0.018296 | 0.69332 |
| 2.33E-21 | 0.446655 | 2.79E-24 | 0.019401 | 0.67582 | 0.035455  | 0.44465 | -0.02909 | 0.53064 |
| 0.92466  | 0.061681 | 0.18331  | -0.02164 | 0.64094 | 0.029013  | 0.53169 | -0.05338 | 0.24964 |
| 2.08E-18 | 0.467849 | 8.93E-27 | 0.167381 | 0.00028 | 0.120052  | 0.00941 | -0.11957 | 0.0097  |
| 0.52232  | 0.14528  | 0.00164  | -0.01845 | 0.69082 | 0.063237  | 0.17248 | -0.16145 | 0.00046 |
| 1.39E-09 | 0.414968 | 7.30E-21 | 0.013212 | 0.77582 | 0.005641  | 0.90324 | -0.028   | 0.5461  |
| 0.71053  | 0.0171   | 0.71245  | -0.0475  | 0.30568 | 0.010153  | 0.82678 | -0.13022 | 0.00482 |
| 1.50E-09 | 0.315106 | 3.18E-12 | -0.02037 | 0.66057 | 0.050296  | 0.27807 | 0.046287 | 0.31822 |
| 1.81E-05 | 0.17598  | 0.00013  | 0.004475 | 0.92317 | -0.00911  | 0.84438 | -0.13307 | 0.00397 |
| 0.00431  | -0.07684 | 0.09722  | -0.12344 | 0.00757 | 0.006728  | 0.88471 | -0.10269 | 0.02648 |
| 1.45E-10 | 0.274534 | 1.61E-09 | 0.027973 | 0.54651 | 0.037232  | 0.42214 | -0.07367 | 0.11186 |
| 1.17E-21 | 0.521205 | 6.95E-34 | -0.08533 | 0.0654  | 0.087528  | 0.05875 | 0.031278 | 0.50014 |
| 0.02676  | -0.09893 | 0.03256  | -0.00867 | 0.85179 | -0.09341  | 0.04364 | 0.073733 | 0.11155 |
| 0.30545  | 0.044048 | 0.34221  | 0.00012  | 0.99794 | -0.01164  | 0.80192 | -0.17672 | 0.00012 |
| 0.00035  | 0.240673 | 1.40E-07 | -0.05244 | 0.25806 | -0.07853  | 0.09005 | -0.03997 | 0.38877 |
| 0.02157  | 0.149708 | 0.00118  | -0.03332 | 0.47256 | -0.00317  | 0.94561 | -0.13197 | 0.00428 |
| 0.00057  | 0.23307  | 3.52E-07 | -0.00797 | 0.86364 | -0.00679  | 0.88371 | -0.07781 | 0.09304 |
| 0.48446  | -0.06414 | 0.16643  | -0.02234 | 0.63008 | -0.02536  | 0.58469 | -0.00993 | 0.83058 |
| 0.02107  | 0.218933 | 1.78E-06 | 0.027813 | 0.54881 | 0.01347   | 0.77158 | -0.09706 | 0.036   |
| 0.00211  | 0.262804 | 8.13E-09 | 0.020099 | 0.66485 | -0.00902  | 0.84579 | -0.09235 | 0.04609 |
| 1.61E-05 | 0.297003 | 5.77E-11 | 0.012632 | 0.78543 | 0.070257  | 0.1295  | 0.108652 | 0.01884 |
| 3.75E-08 | 0.248582 | 5.23E-08 | -0.0134  | 0.77279 | -0.05429  | 0.24158 | -0.06145 | 0.18494 |
| 7.81E-32 | 0.647797 | 6.53E-57 | 0.117283 | 0.0112  | 0.077703  | 0.0935  | 0.043551 | 0.3477  |
| 0.03186  | -0.03293 | 0.47775  | -0.03441 | 0.4582  | -0.11791  | 0.01077 | -0.08844 | 0.05617 |
| 1.78E-09 | 0.335758 | 9.07E-14 | -0.03359 | 0.46902 | -0.03065  | 0.50873 | 0.068716 | 0.13814 |
| 5.32E-07 | -0.06286 | 0.17509  | -0.02536 | 0.58468 | -0.02027  | 0.66222 | -0.13669 | 0.00308 |
| 2.45E-12 | 0.445572 | 3.70E-24 | 0.163476 | 0.00039 | 0.116937  | 0.01144 | -0.05751 | 0.21477 |
| 0.00623  | 0.189466 | 3.78E-05 | -0.08535 | 0.06537 | 0.09387   | 0.0426  | -0.01208 | 0.79452 |
| 0.00027  | 0.208934 | 5.28E-06 | 0.093506 | 0.04342 | -0.02381  | 0.60779 | 0.013633 | 0.76889 |
| 1.59E-06 | 0.368539 | 1.80E-16 | 0.085215 | 0.06578 | 0.059376  | 0.20026 | -0.0967  | 0.03671 |
| 3.64E-09 | 0.397952 | 3.58E-19 | 0.019248 | 0.67823 | 0.025109  | 0.58833 | -0.05203 | 0.26183 |
| 1.02E-10 | 0.369843 | 1.39E-16 | -0.02283 | 0.62265 | 0.035014  | 0.45033 | -0.00971 | 0.83422 |
| 7.08E-07 | 0.377698 | 2.78E-17 | 0.033253 | 0.47345 | 0.004062  | 0.93024 | -0.06094 | 0.18864 |
| 0.67569  | 0.053347 | 0.24991  | -0.16863 | 0.00025 | 0.05476   | 0.23757 | -0.09858 | 0.03319 |
| 0.67292  | 0.134079 | 0.0037   | -0.00035 | 0.99396 | 0.100234  | 0.03033 | -0.01175 | 0.80015 |
| 9.18E-05 | 0.340214 | 4.06E-14 | 0.011838 | 0.79861 | 0.054956  | 0.23589 | 0.022693 | 0.62474 |
| 0.00198  | -0.05614 | 0.22589  | 0.078542 | 0.09    | 0.01651   | 0.72195 | -0.0725  | 0.1177  |
| 1.40E-07 | -0.19448 | 2.32E-05 | -0.1566  | 0.00068 | 0.030725  | 0.50775 | -0.10952 | 0.01791 |
| 1.27E-16 | 0.516838 | 2.97E-33 | 0.088306 | 0.05653 | 0.106005  | 0.02196 | 0.075289 | 0.10417 |
| 0.02894  | 0.033298 | 0.47285  | -0.11505 | 0.01285 | 0.016452  | 0.72289 | 0.027978 | 0.54644 |
| 1.90E-11 | 0.373076 | 7.19E-17 | 0.0221   | 0.63381 | 0.009002  | 0.84616 | 0.029049 | 0.53119 |
| 0.02801  | 0.245743 | 7.49E-08 | -0.01015 | 0.82679 | -0.04098  | 0.37694 | -0.1696  | 0.00023 |

|          |          |          |          |         |          |          |          |          |
|----------|----------|----------|----------|---------|----------|----------|----------|----------|
| 1.14E-08 | 0.31536  | 3.05E-12 | 0.01801  | 0.69788 | 0.104532 | 0.02388  | 0.017841 | 0.70058  |
| 0.11569  | -0.06025 | 0.19371  | -0.15442 | 0.00081 | -0.03542 | 0.44504  | -0.09557 | 0.03897  |
| 6.16E-05 | -0.0215  | 0.64313  | -0.03981 | 0.39076 | 0.066221 | 0.15306  | -0.10562 | 0.02244  |
| 0.14593  | 0.150214 | 0.00113  | -0.01479 | 0.74984 | 0.063595 | 0.17006  | -0.121   | 0.00886  |
| 0.00018  | 0.269386 | 3.31E-09 | -0.07483 | 0.10631 | -0.03929 | 0.3969   | -0.13426 | 0.00365  |
| 1.23E-08 | 0.379834 | 1.78E-17 | -0.02348 | 0.61271 | -0.02818 | 0.54354  | -0.08785 | 0.05781  |
| 0.82697  | 0.072962 | 0.11535  | 0.001639 | 0.97182 | 0.00396  | 0.93199  | -0.27291 | 2.02E-09 |
| 0.01793  | 0.135831 | 0.00327  | -0.02624 | 0.57164 | -0.02815 | 0.54391  | -0.13528 | 0.0034   |
| 0.08506  | 0.000872 | 0.985    | -0.01833 | 0.69282 | -0.03857 | 0.40561  | 0.053335 | 0.25002  |
| 0.00013  | 0.112273 | 0.01521  | -0.09971 | 0.03121 | -0.1028  | 0.02632  | 0.034192 | 0.46104  |
| 3.46E-07 | 0.362963 | 5.47E-16 | 0.074793 | 0.10648 | 0.045576 | 0.32572  | -0.08987 | 0.05227  |
| 1.43E-05 | 0.268601 | 3.69E-09 | -0.00432 | 0.92575 | 0.038525 | 0.4062   | -0.0269  | 0.56205  |
| 0.00043  | 0.255896 | 2.04E-08 | 0.053646 | 0.24726 | 0.131412 | 0.00445  | -0.05214 | 0.2608   |
| 5.35E-06 | 0.408796 | 3.08E-20 | 0.023347 | 0.6148  | 0.05466  | 0.23842  | 0.044124 | 0.34138  |
| 9.20E-27 | 0.462849 | 3.59E-26 | 0.129898 | 0.00493 | 0.011506 | 0.80414  | -0.16783 | 0.00027  |
| 5.17E-11 | 0.478296 | 4.53E-28 | 0.078478 | 0.09027 | 0.111563 | 0.01587  | 0.027175 | 0.55801  |
| 2.89E-10 | 0.504214 | 1.75E-31 | 0.15269  | 0.00093 | 0.203814 | 9.02E-06 | 0.077461 | 0.09453  |
| 0.00173  | 0.212933 | 3.44E-06 | -0.01358 | 0.7698  | -0.05022 | 0.27875  | -0.17487 | 0.00015  |
| 1.79E-13 | 0.42831  | 2.94E-22 | 0.111844 | 0.0156  | 0.067147 | 0.14739  | 0.107275 | 0.02041  |
| 2.10E-05 | 0.308981 | 8.67E-12 | -0.00265 | 0.95443 | 0.049879 | 0.28207  | 0.080411 | 0.08259  |
| 0.94853  | 0.11488  | 0.01299  | 0.019853 | 0.66871 | -0.0633  | 0.17206  | -0.13664 | 0.00309  |
| 1.46E-14 | 0.382787 | 9.58E-18 | 0.010755 | 0.81669 | 0.013327 | 0.77393  | -0.02159 | 0.64174  |
| 0.01663  | 0.205337 | 7.70E-06 | -0.02244 | 0.62867 | 0.017786 | 0.70146  | 0.003415 | 0.94132  |
| 4.70E-06 | 0.352357 | 4.26E-15 | 0.037055 | 0.42436 | 0.046257 | 0.31854  | -0.00169 | 0.97091  |
| 0.00944  | -0.1279  | 0.00564  | 0.027035 | 0.56005 | 0.008794 | 0.84967  | -0.10503 | 0.02321  |
| 0.04157  | 0.059478 | 0.19948  | -0.03957 | 0.39357 | -0.13264 | 0.00409  | -0.25173 | 3.50E-08 |
| 3.00E-34 | 0.594975 | 4.70E-46 | 0.09006  | 0.05178 | 0.132254 | 0.0042   | -0.00199 | 0.96586  |
| 0.0057   | 0.120939 | 0.00889  | -0.02337 | 0.61446 | -0.11235 | 0.01513  | -0.0423  | 0.36172  |
| 0.58058  | 0.033046 | 0.47622  | 0.106697 | 0.0211  | 0.009085 | 0.84477  | -0.07814 | 0.09165  |
| 0.00011  | 0.280499 | 6.84E-10 | 0.010175 | 0.82642 | -0.04025 | 0.3855   | -0.14113 | 0.00224  |
| 0.00066  | -0.13856 | 0.00269  | -0.06161 | 0.18381 | 0.004771 | 0.9181   | -0.07832 | 0.09092  |
| 0.18875  | 0.02061  | 0.65687  | -0.14219 | 0.00207 | -0.04431 | 0.3393   | -0.19634 | 1.93E-05 |
| 8.51E-13 | 0.402458 | 1.31E-19 | -0.01547 | 0.73884 | -0.03661 | 0.42989  | 0.011388 | 0.80611  |
| 1.89E-07 | 0.239439 | 1.63E-07 | 0.049754 | 0.28328 | -0.03435 | 0.45891  | -0.13048 | 0.00474  |
| 0.0021   | 0.307918 | 1.03E-11 | 0.144538 | 0.00174 | 0.078878 | 0.08863  | 0.082084 | 0.07638  |
| 2.34E-09 | 0.257348 | 1.68E-08 | 0.028209 | 0.54312 | -0.08478 | 0.06718  | -0.17432 | 0.00015  |
| 0.00016  | 0.150712 | 0.00109  | -0.04394 | 0.34338 | -0.04655 | 0.31543  | -0.01112 | 0.81052  |
| 0.49917  | -0.02593 | 0.57616  | -0.04337 | 0.34974 | -0.06981 | 0.13194  | -0.30147 | 2.88E-11 |
| 0.18851  | 0.174511 | 0.00015  | -0.0169  | 0.71564 | -0.07126 | 0.12408  | -0.07046 | 0.1284   |
| 3.64E-07 | 0.215525 | 2.60E-06 | 0.111853 | 0.01559 | -0.06828 | 0.14067  | -0.08088 | 0.0808   |
| 0.91341  | -0.05425 | 0.24195  | -0.11073 | 0.01668 | -0.148   | 0.00134  | -0.12405 | 0.00728  |
| 0.62818  | 0.118062 | 0.01067  | -0.01998 | 0.66671 | 0.006307 | 0.89187  | -0.1226  | 0.008    |
| 0.00988  | 0.124392 | 0.00712  | -0.09784 | 0.03455 | 0.005527 | 0.90519  | 0.019073 | 0.681    |
| 1.03E-11 | 0.296487 | 6.25E-11 | -0.10135 | 0.02853 | -0.01489 | 0.74819  | 0.099672 | 0.03128  |
| 1.03E-18 | 0.408606 | 3.21E-20 | 0.066767 | 0.1497  | 0.074251 | 0.10905  | -0.03026 | 0.51421  |

|          |          |          |          |         |          |          |          |          |
|----------|----------|----------|----------|---------|----------|----------|----------|----------|
| 0.54451  | 0.033752 | 0.46683  | -0.02376 | 0.60848 | -0.02808 | 0.54496  | -0.05155 | 0.26628  |
| 0.00012  | 0.327867 | 3.64E-13 | 0.139459 | 0.00252 | 0.056113 | 0.22616  | 0.070304 | 0.12924  |
| 0.06121  | -0.03218 | 0.48788  | -0.05963 | 0.1983  | -0.02513 | 0.58798  | -0.04594 | 0.32185  |
| 3.26E-16 | 0.57751  | 6.85E-43 | 0.163738 | 0.00038 | 0.117515 | 0.01104  | -0.00129 | 0.97786  |
| 0.00442  | 0.052806 | 0.25476  | -0.06824 | 0.14088 | -0.02123 | 0.6473   | -0.07011 | 0.1303   |
| 0.34944  | -0.02122 | 0.64746  | -0.00327 | 0.94387 | 0.003301 | 0.94328  | -0.02483 | 0.59247  |
| 0.00013  | 0.227413 | 6.82E-07 | -0.01501 | 0.74635 | -0.01063 | 0.81878  | 0.003669 | 0.93698  |
| 0.00015  | -0.08866 | 0.05554  | 0.056422 | 0.22361 | 0.001916 | 0.96705  | -0.014   | 0.76286  |
| 2.63E-07 | 0.314707 | 3.40E-12 | 0.043341 | 0.35002 | 0.026789 | 0.56362  | 0.032167 | 0.48803  |
| 3.65E-19 | 0.443217 | 6.83E-24 | 0.033387 | 0.47167 | 0.055563 | 0.23075  | 0.1089   | 0.01857  |
| 0.06822  | 0.03608  | 0.43665  | 0.118639 | 0.01029 | 0.025301 | 0.58549  | -0.22486 | 9.14E-07 |
| 7.32E-05 | 0.285786 | 3.15E-10 | 0.083227 | 0.07236 | 0.072606 | 0.11714  | -0.06767 | 0.14423  |
| 2.67E-08 | 0.209698 | 4.87E-06 | -0.07086 | 0.12625 | 0.065212 | 0.15944  | -0.0538  | 0.24591  |
| 0.00589  | 0.168136 | 0.00026  | -0.01015 | 0.82687 | 0.056896 | 0.21974  | -0.00173 | 0.97029  |
| 0.43117  | 0.149212 | 0.00122  | -0.11609 | 0.01206 | 0.059632 | 0.19832  | -0.11823 | 0.01055  |
| 4.41E-06 | 0.315331 | 3.06E-12 | 0.029704 | 0.52196 | 0.053228 | 0.25097  | -0.05286 | 0.25423  |
| 3.80E-05 | -0.33735 | 6.82E-14 | -0.01992 | 0.66768 | -0.00304 | 0.94785  | -0.20798 | 5.84E-06 |
| 9.65E-21 | 0.485902 | 4.84E-29 | 0.022366 | 0.62974 | 0.113475 | 0.01414  | 0.114314 | 0.01344  |
| 0.09394  | 0.010025 | 0.82894  | -0.08217 | 0.07606 | -0.04825 | 0.29809  | -0.07394 | 0.11054  |
| 9.01E-06 | -0.16509 | 0.00034  | -0.16828 | 0.00026 | -0.1283  | 0.00549  | -0.29172 | 1.30E-10 |
| 3.85E-11 | 0.388127 | 3.07E-18 | 0.030981 | 0.50422 | -0.00222 | 0.96177  | -0.04993 | 0.28156  |
| 0.00014  | 0.289467 | 1.82E-10 | 0.058021 | 0.21073 | 0.009304 | 0.84107  | -0.09752 | 0.03514  |
| 9.20E-06 | -0.17763 | 0.00011  | 0.05234  | 0.25898 | 0.042708 | 0.35711  | -0.05805 | 0.21051  |
| 0.02707  | -0.14889 | 0.00125  | -0.1314  | 0.00445 | -0.08694 | 0.06049  | -0.17843 | 0.00011  |
| 0.5631   | 0.034435 | 0.45786  | -0.10778 | 0.01982 | -0.00664 | 0.88623  | -0.16889 | 0.00025  |
| 1.71E-05 | -0.14825 | 0.00131  | -0.06766 | 0.14432 | -0.01096 | 0.81327  | -0.23869 | 1.79E-07 |
| 0.70734  | 0.047307 | 0.30766  | 0.010407 | 0.82253 | -0.0738  | 0.11124  | -0.10699 | 0.02074  |
| 0.08239  | -0.13484 | 0.00351  | -0.07321 | 0.11412 | -0.07507 | 0.10518  | -0.0888  | 0.05516  |
| 2.53E-10 | 0.301019 | 3.09E-11 | -0.01975 | 0.67036 | 0.00718  | 0.87702  | -0.15529 | 0.00076  |
| 0.00553  | -0.06849 | 0.13944  | -0.04524 | 0.32928 | 0.070769 | 0.12672  | 0.092497 | 0.04574  |
| 1.01E-28 | 0.701935 | 1.56E-70 | 0.102843 | 0.02626 | 0.179128 | 9.94E-05 | 0.086454 | 0.06193  |
| 0.09188  | 0.165421 | 0.00033  | -0.01334 | 0.77376 | 0.035772 | 0.44057  | -0.07519 | 0.10461  |
| 0.05501  | 0.152148 | 0.00097  | -0.04652 | 0.31582 | 0.031412 | 0.4983   | -0.16241 | 0.00043  |
| 1.65E-06 | 0.273883 | 1.76E-09 | 0.045517 | 0.32635 | 0.059663 | 0.19808  | 0.005844 | 0.89977  |
| 0.00082  | -0.04019 | 0.38622  | -0.0945  | 0.04122 | -0.03547 | 0.44446  | -0.16578 | 0.00032  |
| 1.13E-10 | 0.397085 | 4.35E-19 | -0.0241  | 0.60342 | 0.018588 | 0.68867  | 0.034577 | 0.45601  |
| 1.51E-10 | 0.432464 | 1.05E-22 | 0.050428 | 0.2768  | 0.135383 | 0.00338  | 0.027357 | 0.55538  |
| 0.9911   | 0.024605 | 0.59585  | -0.0927  | 0.04527 | 0.006948 | 0.88097  | -0.18539 | 5.56E-05 |
| 1.84E-08 | 0.418643 | 3.06E-21 | 0.063091 | 0.17348 | 0.036091 | 0.43651  | -0.0806  | 0.08188  |
| 0.00641  | 0.277229 | 1.10E-09 | -0.01241 | 0.78911 | 0.025855 | 0.5773   | -0.04677 | 0.3132   |
| 0.00677  | -0.03805 | 0.41196  | -0.1071  | 0.02062 | 0.043953 | 0.34326  | -0.1586  | 0.00058  |
| 0.14198  | 0.14318  | 0.00192  | -0.0411  | 0.37547 | 0.015387 | 0.74016  | 0.015404 | 0.73988  |
| 0.00621  | 0.264608 | 6.37E-09 | -0.03634 | 0.43336 | 0.051812 | 0.26382  | 0.065239 | 0.15927  |
| 0.75204  | 0.049552 | 0.28525  | -0.0478  | 0.30267 | 0.007757 | 0.86722  | -0.05212 | 0.26103  |
| 0.26626  | 0.068376 | 0.14011  | 0.035305 | 0.44658 | -0.07634 | 0.09942  | 0.053794 | 0.24596  |

|          |          |          |          |          |          |          |          |          |
|----------|----------|----------|----------|----------|----------|----------|----------|----------|
| 0.24072  | 0.150548 | 0.0011   | 0.007292 | 0.87511  | 0.017326 | 0.70882  | -0.03159 | 0.49592  |
| 3.30E-19 | 0.581021 | 1.64E-43 | 0.025261 | 0.58609  | 0.059639 | 0.19827  | -0.00794 | 0.8641   |
| 0.01908  | -0.04663 | 0.31469  | -0.02623 | 0.57185  | -0.03194 | 0.49111  | -0.2207  | 1.46E-06 |
| 0.06231  | -0.02997 | 0.51818  | 0.028046 | 0.54546  | -0.00787 | 0.86526  | -0.1064  | 0.02147  |
| 0.51914  | 0.098971 | 0.03249  | 0.026711 | 0.56476  | 0.013185 | 0.77627  | 0.079538 | 0.08599  |
| 0.20332  | 0.053048 | 0.25258  | -0.01114 | 0.81022  | 0.00906  | 0.84518  | 0.151597 | 0.00102  |
| 0.00012  | 0.282886 | 4.83E-10 | 0.125176 | 0.00676  | 0.191325 | 3.15E-05 | 0.113116 | 0.01445  |
| 0.13909  | -0.06318 | 0.17289  | -0.00812 | 0.86106  | 0.018666 | 0.68745  | -0.03993 | 0.38933  |
| 2.56E-05 | -0.12528 | 0.00671  | -0.02703 | 0.56009  | 0.001355 | 0.9767   | -0.23856 | 1.82E-07 |
| 0.42638  | 0.134945 | 0.00348  | -0.05717 | 0.21753  | 0.044294 | 0.33953  | -0.15271 | 0.00093  |
| 5.00E-05 | 0.247504 | 6.00E-08 | -0.05318 | 0.25137  | -0.00329 | 0.94339  | -0.13727 | 0.00295  |
| 3.71E-07 | -0.24284 | 1.08E-07 | -0.01005 | 0.82846  | 0.010433 | 0.82209  | -0.19829 | 1.59E-05 |
| 0.0097   | 0.182564 | 7.25E-05 | 0.136034 | 0.00322  | 0.027512 | 0.55314  | 0.008463 | 0.85528  |
| 4.48E-08 | -0.21625 | 2.40E-06 | -0.03825 | 0.40953  | 0.011629 | 0.80209  | -0.23483 | 2.85E-07 |
| 0.43587  | 0.010657 | 0.81833  | -0.01565 | 0.73586  | -0.00446 | 0.92343  | -0.06549 | 0.15769  |
| 0.79094  | 0.123871 | 0.00736  | -0.00427 | 0.92662  | 0.019605 | 0.6726   | -0.04069 | 0.38027  |
| 0.00017  | 0.195229 | 2.15E-05 | 0.033462 | 0.47067  | 0.031012 | 0.50379  | 0.145157 | 0.00166  |
| 0.87768  | -0.0341  | 0.46223  | -0.03417 | 0.46133  | -0.04008 | 0.38749  | -0.07546 | 0.10338  |
| 0.00059  | -0.16147 | 0.00046  | -0.06188 | 0.18188  | -0.04915 | 0.2892   | -0.10982 | 0.0176   |
| 0.46668  | -0.04123 | 0.37407  | -0.06513 | 0.15998  | 0.005164 | 0.91137  | -0.1097  | 0.01772  |
| 0.37914  | 0.043699 | 0.34605  | -0.04015 | 0.38672  | 0.037876 | 0.41415  | -0.0494  | 0.28675  |
| 1.38E-07 | 0.284344 | 3.90E-10 | -0.03205 | 0.48955  | 0.062923 | 0.17463  | 0.124933 | 0.00687  |
| 0.26211  | 0.111225 | 0.01619  | -0.10341 | 0.02543  | 0.012478 | 0.78797  | -0.00795 | 0.86395  |
| 0.29927  | 0.005511 | 0.90545  | -0.01334 | 0.77375  | 0.013983 | 0.76313  | -0.14033 | 0.00237  |
| 0.00102  | 0.159378 | 0.00055  | -0.00817 | 0.86029  | 0.093709 | 0.04296  | 0.063811 | 0.16861  |
| 0.00074  | -0.15164 | 0.00101  | -0.06164 | 0.18362  | 0.047445 | 0.30624  | -0.19126 | 3.18E-05 |
| 8.13E-10 | -0.24459 | 8.65E-08 | -0.06183 | 0.18226  | 0.012264 | 0.79152  | -0.24182 | 1.22E-07 |
| 0.35197  | 0.070248 | 0.12955  | -0.00685 | 0.88269  | 0.024189 | 0.60208  | -0.09261 | 0.04548  |
| 0.00036  | 0.16342  | 0.00039  | 0.23096  | 4.51E-07 | 0.046853 | 0.31233  | -0.0136  | 0.76945  |
| 0.43854  | -0.11079 | 0.01661  | -0.08239 | 0.07527  | -0.08684 | 0.06077  | 0.077465 | 0.09451  |
| 0.80686  | 0.058291 | 0.20862  | -0.00253 | 0.9566   | 0.131124 | 0.00454  | -0.20419 | 8.68E-06 |
| 3.76E-09 | -0.28801 | 2.27E-10 | -0.06627 | 0.15275  | -0.12494 | 0.00686  | -0.13833 | 0.00274  |
| 0.00607  | 0.171763 | 0.00019  | 0.011358 | 0.80662  | 0.062841 | 0.17519  | -0.06674 | 0.14987  |
| 5.40E-06 | 0.249466 | 4.68E-08 | 0.010297 | 0.82437  | 0.081004 | 0.08035  | -0.05398 | 0.24435  |
| 0.00021  | 0.182165 | 7.52E-05 | 0.008145 | 0.86065  | -0.03204 | 0.48975  | -0.05396 | 0.24453  |
| 0.52511  | 0.079594 | 0.08577  | 0.010618 | 0.81898  | 0.144349 | 0.00176  | -0.09619 | 0.03772  |
| 0.19744  | 0.151433 | 0.00103  | 0.047352 | 0.3072   | 0.030381 | 0.51251  | -0.01656 | 0.72116  |
| 0.35344  | -0.01404 | 0.76226  | -0.04339 | 0.34949  | 0.001897 | 0.96739  | -0.01175 | 0.80006  |
| 0.00034  | 0.156291 | 0.0007   | -0.10427 | 0.02424  | -0.03392 | 0.46462  | -0.009   | 0.84623  |
| 0.03305  | 0.093154 | 0.04421  | 0.028931 | 0.53285  | 0.03174  | 0.49382  | 0.037502 | 0.41878  |
| 2.74E-12 | -0.32074 | 1.24E-12 | -0.13679 | 0.00306  | -0.10246 | 0.02683  | -0.24932 | 4.76E-08 |
| 0.26944  | 0.03122  | 0.50093  | -0.08342 | 0.07168  | -0.0433  | 0.35051  | -0.03952 | 0.39415  |
| 0.39976  | -0.07136 | 0.12359  | -0.04941 | 0.28667  | 0.078493 | 0.0902   | -0.03465 | 0.455    |
| 0.02762  | 0.065418 | 0.15812  | -0.0867  | 0.0612   | -0.03473 | 0.45406  | -0.13424 | 0.00366  |
| 0.00024  | -0.19044 | 3.44E-05 | -0.17508 | 0.00014  | -0.10913 | 0.01832  | -0.00229 | 0.96065  |



|          |          |          |          |          |          |         |          |          |
|----------|----------|----------|----------|----------|----------|---------|----------|----------|
| 0.43449  | 0.053567 | 0.24796  | -0.19006 | 3.57E-05 | 0.004691 | 0.91947 | -0.13007 | 0.00487  |
| 0.02719  | -0.11884 | 0.01016  | -0.13451 | 0.00359  | -0.0438  | 0.34493 | -0.21569 | 2.55E-06 |
| 0.17781  | 0.020111 | 0.66466  | -0.09372 | 0.04295  | -0.08204 | 0.07655 | -0.11228 | 0.0152   |
| 0.00264  | -0.11008 | 0.01733  | 0.000565 | 0.99029  | -0.06005 | 0.19517 | -0.13003 | 0.00489  |
| 0.408    | 0.04607  | 0.32049  | 0.01575  | 0.73426  | -0.00397 | 0.93183 | -0.09832 | 0.03365  |
| 0.62641  | 0.086523 | 0.06172  | 0.016152 | 0.72775  | 0.067763 | 0.14371 | -0.00361 | 0.93793  |
| 0.01465  | 0.043497 | 0.34829  | 0.046469 | 0.31632  | -0.01547 | 0.73881 | 0.004387 | 0.92467  |
| 0.00135  | -0.16607 | 0.00031  | -0.00859 | 0.85305  | -0.01515 | 0.74403 | -0.06267 | 0.17638  |
| 0.42184  | 0.058474 | 0.20719  | 0.066912 | 0.14882  | 0.006368 | 0.89084 | 3.30E-05 | 0.99943  |
| 0.00024  | -0.18251 | 7.29E-05 | -0.04498 | 0.33212  | -0.08389 | 0.07009 | -0.13659 | 0.0031   |
| 5.86E-05 | -0.16157 | 0.00046  | -0.05448 | 0.24     | 0.055137 | 0.23435 | -0.22802 | 6.35E-07 |
| 0.93273  | 0.060547 | 0.19151  | -0.0303  | 0.51364  | -0.0074  | 0.87327 | -0.08546 | 0.06502  |
| 0.0097   | -0.08809 | 0.05713  | -0.03681 | 0.42737  | 0.028224 | 0.54291 | -0.14371 | 0.00185  |
| 6.20E-06 | -0.20764 | 6.05E-06 | -0.02679 | 0.56354  | -0.03301 | 0.47671 | -0.15479 | 0.00079  |
| 0.17403  | 0.062317 | 0.17882  | -0.00663 | 0.88634  | -0.04949 | 0.28586 | 0.014962 | 0.74708  |
| 0.02079  | 0.27329  | 1.92E-09 | 0.06501  | 0.16074  | 0.086975 | 0.06037 | -0.02201 | 0.63517  |
| 0.70559  | 0.044092 | 0.34173  | -0.02403 | 0.60441  | 0.060916 | 0.18881 | -0.1024  | 0.02691  |
| 0.82379  | -0.01672 | 0.71851  | 0.14917  | 0.00122  | -0.04795 | 0.30111 | -0.16754 | 0.00028  |
| 1.35E-11 | -0.34013 | 4.12E-14 | -0.11148 | 0.01595  | -0.15263 | 0.00094 | -0.16599 | 0.00032  |
| 0.01924  | -0.11505 | 0.01286  | -0.06245 | 0.17788  | -0.06299 | 0.17415 | 0.010836 | 0.81534  |
| 0.00204  | 0.131438 | 0.00444  | -0.02302 | 0.61976  | 0.015964 | 0.73078 | 0.040219 | 0.38585  |
| 0.00104  | -0.0496  | 0.28478  | 0.020848 | 0.65316  | 0.113843 | 0.01383 | -0.29393 | 9.27E-11 |
| 0.18499  | -0.05385 | 0.2455   | -0.04306 | 0.35319  | -0.08051 | 0.0822  | -0.10387 | 0.02479  |
| 0.76337  | 0.072134 | 0.11955  | -0.03635 | 0.43318  | 0.048832 | 0.29231 | -0.06133 | 0.18585  |
| 0.58926  | -0.00704 | 0.87942  | 0.025601 | 0.58105  | -0.00109 | 0.98127 | -0.11345 | 0.01417  |
| 0.00138  | 0.00385  | 0.93386  | 0.021156 | 0.64838  | 0.032299 | 0.48624 | -0.10778 | 0.01982  |
| 0.95765  | -0.01356 | 0.77003  | -0.137   | 0.00301  | 0.011961 | 0.79657 | -0.08116 | 0.07975  |
| 0.00112  | 0.140898 | 0.00227  | -0.03622 | 0.43492  | 0.016691 | 0.71903 | 0.167003 | 0.00029  |
| 0.02147  | 0.099917 | 0.03086  | 0.005899 | 0.89884  | -0.00819 | 0.85984 | -0.03961 | 0.39313  |
| 0.03835  | -0.11353 | 0.0141   | -0.09268 | 0.04532  | -0.09555 | 0.03902 | -0.06145 | 0.18497  |
| 1.98E-06 | 0.209626 | 4.91E-06 | -0.05538 | 0.23228  | -0.03522 | 0.44762 | -0.01284 | 0.78191  |
| 0.05378  | -0.08275 | 0.07402  | -0.00892 | 0.84756  | -0.04132 | 0.37301 | -0.04041 | 0.38365  |
| 1.53E-18 | -0.39899 | 2.85E-19 | -0.07794 | 0.09249  | -0.12978 | 0.00497 | -0.13533 | 0.00339  |
| 2.75E-05 | -0.20886 | 5.32E-06 | 0.042748 | 0.35667  | -0.09481 | 0.04057 | 0.043902 | 0.34382  |
| 1.17E-05 | -0.10841 | 0.01911  | -0.04016 | 0.38656  | -0.07751 | 0.09433 | 0.117833 | 0.01082  |
| 0.73819  | 0.010634 | 0.81872  | 0.010097 | 0.82772  | -0.02027 | 0.66218 | 0.211345 | 4.08E-06 |
| 0.04652  | -0.05211 | 0.26105  | 0.05196  | 0.26245  | -0.04255 | 0.35892 | 0.06646  | 0.15159  |
| 0.16982  | -0.09858 | 0.0332   | -0.02296 | 0.62072  | -0.05173 | 0.26455 | 0.017717 | 0.70256  |
| 0.65324  | 0.12303  | 0.00777  | 0.100261 | 0.03029  | 0.072841 | 0.11595 | 0.111514 | 0.01591  |
| 0.78018  | 0.06665  | 0.15042  | 0.140678 | 0.00231  | -0.0887  | 0.05543 | 0.025523 | 0.5822   |
| 0.01036  | -0.13889 | 0.00263  | -0.04409 | 0.3418   | -0.11129 | 0.01613 | 0.042997 | 0.35387  |
| 0.00067  | -0.21134 | 4.08E-06 | -0.00325 | 0.94422  | -0.0538  | 0.24589 | 0.098645 | 0.03307  |
| 1.87E-11 | -0.37887 | 2.18E-17 | -0.03918 | 0.3983   | -0.05978 | 0.19718 | 0.005433 | 0.90679  |
| 0.3405   | -0.08548 | 0.06495  | 0.005389 | 0.90754  | -0.04153 | 0.3705  | 0.11724  | 0.01123  |
| 0.05288  | -0.09926 | 0.03199  | 0.145417 | 0.00163  | -0.00257 | 0.95591 | 0.077866 | 0.09281  |

|          |          |          |          |          |          |         |          |          |
|----------|----------|----------|----------|----------|----------|---------|----------|----------|
| 0.33025  | 0.025126 | 0.58809  | 0.178279 | 0.00011  | 0.082619 | 0.07447 | 0.141612 | 0.00216  |
| 4.28E-06 | -0.10905 | 0.01841  | 0.006355 | 0.89106  | -0.06513 | 0.15999 | 0.044841 | 0.33359  |
| 6.93E-05 | -0.04239 | 0.36066  | 0.19663  | 1.87E-05 | 0.093408 | 0.04364 | 0.068292 | 0.1406   |
| 0.00225  | -0.08083 | 0.08099  | 0.118623 | 0.0103   | 0.03099  | 0.5041  | -0.0346  | 0.45571  |
| 0.00682  | -0.14725 | 0.00142  | 0.0646   | 0.1634   | -0.08005 | 0.08397 | -0.07885 | 0.08876  |
| 0.05841  | -0.0724  | 0.11819  | 0.123769 | 0.00741  | 0.063721 | 0.16921 | 0.023068 | 0.61903  |
| 0.89074  | -0.03996 | 0.38888  | -0.02377 | 0.60838  | -0.01988 | 0.66827 | 0.260947 | 1.04E-08 |
| 0.09702  | 0.043585 | 0.34731  | -0.06069 | 0.19045  | -0.03665 | 0.42942 | 0.217287 | 2.14E-06 |
| 9.60E-10 | -0.23225 | 3.87E-07 | 0.048167 | 0.29894  | 0.002068 | 0.96445 | 0.06197  | 0.18126  |
| 0.01969  | -0.08087 | 0.08084  | 0.206712 | 6.67E-06 | 0.037306 | 0.42122 | 0.021924 | 0.63653  |
| 0.00425  | -0.11982 | 0.00955  | 0.028371 | 0.54081  | -0.00613 | 0.89484 | 0.062918 | 0.17466  |
| 0.00766  | -0.18328 | 6.78E-05 | -0.00197 | 0.96617  | -0.01158 | 0.80295 | -0.07577 | 0.10199  |
| 0.00033  | -0.16151 | 0.00046  | -0.00124 | 0.97866  | -0.07297 | 0.11533 | 0.018727 | 0.68648  |
| 4.24E-05 | -0.1673  | 0.00028  | 0.000681 | 0.98828  | -0.07838 | 0.09067 | 0.050876 | 0.27255  |
| 2.16E-05 | -0.1517  | 0.00101  | -0.01114 | 0.81027  | -0.07272 | 0.11656 | 0.027553 | 0.55254  |
| 0.00929  | -0.06984 | 0.13179  | 0.010319 | 0.824    | -0.04544 | 0.32714 | 0.057031 | 0.21864  |
| 1.05E-12 | -0.23662 | 2.30E-07 | -0.12014 | 0.00935  | -0.09609 | 0.03792 | -0.04154 | 0.37038  |
| 0.00467  | -0.09949 | 0.03159  | 0.033385 | 0.47169  | -0.00513 | 0.91194 | 0.196365 | 1.92E-05 |
| 0.00065  | -0.01994 | 0.66738  | 0.031121 | 0.50229  | -0.05305 | 0.25253 | 0.039774 | 0.39114  |
| 0.00953  | -0.05365 | 0.24721  | -0.07407 | 0.10992  | -0.09146 | 0.04824 | 0.003613 | 0.93793  |
| 0.26755  | 0.05914  | 0.20206  | 0.017506 | 0.70593  | -0.05288 | 0.25405 | -0.00173 | 0.9702   |
| 3.04E-09 | -0.26057 | 1.10E-08 | -0.05872 | 0.20528  | -0.00077 | 0.98678 | -0.02781 | 0.5488   |
| 3.54E-07 | -0.13907 | 0.0026   | 0.026508 | 0.56773  | -0.0241  | 0.60344 | -0.05501 | 0.2354   |
| 0.17533  | -0.02383 | 0.60748  | -0.06504 | 0.16053  | 0.004136 | 0.92898 | -0.0091  | 0.84451  |
| 2.65E-10 | -0.38419 | 7.12E-18 | -0.03717 | 0.42295  | -0.08148 | 0.07859 | 0.01478  | 0.75006  |
| 0.67604  | -0.0634  | 0.17141  | 0.033647 | 0.46822  | 0.045589 | 0.32558 | 0.052553 | 0.25704  |
| 0.05632  | 0.051126 | 0.2702   | 0.051398 | 0.26766  | -0.02108 | 0.64964 | 0.163848 | 0.00038  |
| 0.56188  | -0.01748 | 0.70634  | -0.0392  | 0.39796  | 0.065068 | 0.16036 | -0.06976 | 0.13224  |
| 0.25866  | -0.02615 | 0.57298  | 0.069146 | 0.13569  | 0.037908 | 0.41375 | 0.083905 | 0.07006  |
| 0.02625  | -0.12031 | 0.00926  | -0.04821 | 0.29852  | -0.07467 | 0.10707 | 0.081619 | 0.07807  |
| 0.00164  | -0.14863 | 0.00128  | 0.002632 | 0.95476  | -0.04341 | 0.34922 | 0.083775 | 0.0705   |
| 0.21018  | -0.07457 | 0.10754  | -0.04908 | 0.28986  | -0.06692 | 0.14876 | 0.055517 | 0.23113  |
| 0.22775  | -0.07016 | 0.13003  | -0.0227  | 0.62468  | -0.06864 | 0.1386  | 0.09852  | 0.0333   |
| 0.0294   | 0.148001 | 0.00134  | -0.00023 | 0.99612  | 0.127654 | 0.00574 | 0.101927 | 0.02763  |
| 0.01772  | 0.150578 | 0.0011   | -0.03492 | 0.45161  | 0.062716 | 0.17606 | 0.050268 | 0.27833  |
| 3.69E-12 | -0.28884 | 2.00E-10 | -0.00991 | 0.8308   | -0.10451 | 0.0239  | -0.01529 | 0.74168  |
| 0.67312  | -0.02737 | 0.55521  | -0.02876 | 0.53534  | -0.04811 | 0.29951 | 0.027262 | 0.55676  |
| 2.09E-05 | -0.21286 | 3.47E-06 | -0.05196 | 0.26245  | -0.07166 | 0.12198 | -0.08058 | 0.08194  |
| 0.3857   | -0.02808 | 0.54496  | -0.032   | 0.49022  | -0.05809 | 0.21018 | -0.03808 | 0.41159  |
| 0.00034  | -0.16804 | 0.00026  | -0.00798 | 0.86346  | -0.02443 | 0.59852 | 0.11213  | 0.01534  |
| 0.04509  | -0.07045 | 0.12842  | 0.002937 | 0.94953  | -0.00771 | 0.86808 | 0.073296 | 0.11369  |
| 0.04865  | 0.143445 | 0.00189  | 0.012528 | 0.78715  | 0.136339 | 0.00315 | 0.136021 | 0.00323  |
| 0.01288  | -0.09643 | 0.03723  | 0.07434  | 0.10862  | 0.065943 | 0.15481 | 0.142669 | 0.002    |
| 0.0105   | -0.15349 | 0.00088  | 0.051931 | 0.26272  | -0.03495 | 0.45111 | 0.158956 | 0.00057  |
| 0.16794  | -0.00942 | 0.83905  | 0.045908 | 0.3222   | 0.016264 | 0.72592 | 0.083749 | 0.07058  |

|          |          |          |          |          |          |          |          |          |
|----------|----------|----------|----------|----------|----------|----------|----------|----------|
| 0.58873  | 0.149083 | 0.00123  | 0.016617 | 0.72023  | 0.038091 | 0.4115   | -0.02931 | 0.52744  |
| 0.83529  | -0.0222  | 0.63233  | -0.00872 | 0.8509   | -0.05031 | 0.27791  | 0.036381 | 0.43283  |
| 1.15E-05 | -0.14319 | 0.00192  | 0.044339 | 0.33903  | -0.00261 | 0.95509  | 0.061585 | 0.184    |
| 1.52E-17 | -0.41048 | 2.09E-20 | -0.15656 | 0.00069  | -0.18942 | 3.79E-05 | -0.12751 | 0.00579  |
| 0.00504  | -0.15533 | 0.00076  | -0.01148 | 0.80466  | -0.02496 | 0.59062  | 0.161614 | 0.00045  |
| 2.99E-05 | -0.20147 | 1.15E-05 | 0.065654 | 0.15662  | 0.016645 | 0.71977  | 0.11535  | 0.01262  |
| 2.00E-18 | -0.42208 | 1.34E-21 | -0.02776 | 0.54957  | -0.11575 | 0.01231  | -0.14807 | 0.00133  |
| 0.83603  | -0.02352 | 0.61216  | -0.00605 | 0.89621  | -0.01636 | 0.72435  | 0.062324 | 0.17878  |
| 0.02457  | -0.04983 | 0.28254  | -0.03714 | 0.42323  | -0.09469 | 0.04082  | 0.062342 | 0.17865  |
| 0.0002   | -0.19933 | 1.43E-05 | -0.03164 | 0.49513  | -0.06012 | 0.19465  | -0.03134 | 0.49934  |
| 0.36721  | 0.034158 | 0.46148  | -0.00068 | 0.98833  | -0.01946 | 0.67482  | 0.188372 | 4.19E-05 |
| 0.71212  | -0.08599 | 0.06335  | 0.018307 | 0.69315  | -0.04253 | 0.35916  | 0.080473 | 0.08235  |
| 0.65035  | -0.08032 | 0.08293  | -0.04254 | 0.35901  | -0.0125  | 0.78764  | -0.02821 | 0.54311  |
| 0.0599   | -0.01286 | 0.78168  | -0.10277 | 0.02636  | -0.08752 | 0.05879  | -0.07929 | 0.08696  |
| 8.40E-06 | -0.16451 | 0.00036  | -0.06367 | 0.16953  | -0.07569 | 0.10233  | 0.009538 | 0.83713  |
| 0.14406  | -0.0552  | 0.23384  | 0.288558 | 2.09E-10 | 0.015618 | 0.7364   | 0.218189 | 1.94E-06 |
| 0.90157  | 0.00069  | 0.98814  | 0.070037 | 0.13071  | 0.114905 | 0.01297  | 0.102119 | 0.02734  |
| 9.70E-07 | -0.23975 | 1.57E-07 | 0.077011 | 0.09647  | 0.065672 | 0.15651  | 0.140835 | 0.00228  |
| 0.00508  | -0.20464 | 8.28E-06 | -0.14522 | 0.00165  | -0.1489  | 0.00125  | -0.02491 | 0.59128  |
| 1.60E-07 | -0.25269 | 3.09E-08 | -0.07617 | 0.10019  | -0.12816 | 0.00554  | -0.09514 | 0.03987  |
| 1.24E-06 | -0.29255 | 1.14E-10 | -0.08248 | 0.07497  | -0.0797  | 0.08536  | -0.06322 | 0.17262  |
| 0.07065  | 0.008028 | 0.86262  | -0.0584  | 0.20774  | -0.09203 | 0.04686  | 0.010461 | 0.82163  |
| 1.54E-07 | -0.2454  | 7.82E-08 | -0.01249 | 0.78773  | -0.07191 | 0.12071  | 0.084711 | 0.0674   |
| 0.00016  | -0.22528 | 8.72E-07 | -0.03634 | 0.43338  | -0.0068  | 0.88354  | 0.026042 | 0.57455  |
| 7.39E-08 | -0.22097 | 1.42E-06 | 0.057268 | 0.21673  | -0.01052 | 0.8207   | 0.078549 | 0.08997  |
| 2.35E-08 | -0.26277 | 8.18E-09 | 0.194561 | 2.30E-05 | -0.03804 | 0.41211  | 0.021074 | 0.64965  |
| 2.15E-08 | -0.19804 | 1.63E-05 | -0.0414  | 0.37206  | -0.06786 | 0.14315  | 0.044175 | 0.34083  |
| 2.28E-08 | -0.28756 | 2.42E-10 | 0.061693 | 0.18323  | -0.08328 | 0.07219  | -0.02655 | 0.56714  |
| 0.43047  | -0.01676 | 0.71793  | 0.05583  | 0.22851  | 0.042969 | 0.35418  | 0.083882 | 0.07013  |
| 0.265    | -0.02833 | 0.54141  | 0.002229 | 0.96169  | -0.01502 | 0.74609  | 0.074875 | 0.10609  |
| 1.10E-08 | -0.39451 | 7.68E-19 | -0.07601 | 0.10091  | -0.19163 | 3.06E-05 | -0.06872 | 0.13814  |
| 0.0101   | -0.09564 | 0.03884  | -0.03185 | 0.49227  | -0.0603  | 0.19334  | -0.1558  | 0.00073  |
| 0.00925  | -0.11682 | 0.01153  | -0.0222  | 0.63231  | -0.06019 | 0.19416  | 0.064478 | 0.1642   |
| 0.00489  | -0.13166 | 0.00437  | 0.006905 | 0.8817   | -0.01799 | 0.69821  | 0.146753 | 0.00147  |
| 0.06485  | -0.09486 | 0.04046  | 0.028206 | 0.54317  | -0.0098  | 0.8327   | 0.164036 | 0.00037  |
| 0.44027  | -0.01637 | 0.72414  | -0.01995 | 0.66714  | -0.02944 | 0.52565  | 0.11712  | 0.01131  |
| 0.19065  | -0.06521 | 0.15946  | -0.01584 | 0.73278  | 0.011062 | 0.81155  | 0.08358  | 0.07115  |
| 6.03E-10 | -0.29631 | 6.42E-11 | -0.03548 | 0.44435  | -0.09604 | 0.03802  | 0.033231 | 0.47374  |
| 0.02821  | -0.14093 | 0.00227  | 0.034078 | 0.46254  | -0.01541 | 0.73985  | 0.189243 | 3.86E-05 |
| 9.10E-09 | -0.26575 | 5.45E-09 | 0.161384 | 0.00046  | -0.08738 | 0.05918  | 0.036738 | 0.42832  |
| 0.00069  | -0.17919 | 9.88E-05 | 0.044379 | 0.3386   | -0.06196 | 0.18135  | -0.17781 | 0.00011  |
| 0.00042  | -0.15988 | 0.00052  | 0.045855 | 0.32277  | -0.05779 | 0.21256  | -0.11935 | 0.00984  |
| 0.17989  | -0.0481  | 0.29958  | -0.00954 | 0.8371   | -0.04087 | 0.37815  | 0.178562 | 0.0001   |
| 0.31962  | 0.029022 | 0.53156  | 0.06314  | 0.17314  | -0.03088 | 0.50567  | 0.038767 | 0.40325  |
| 1.11E-08 | -0.27231 | 2.20E-09 | -0.03636 | 0.43308  | -0.04643 | 0.31677  | 0.053153 | 0.25164  |

|          |          |          |          |          |          |          |          |          |
|----------|----------|----------|----------|----------|----------|----------|----------|----------|
| 9.95E-12 | -0.29984 | 3.71E-11 | 0.142621 | 0.002    | -0.11508 | 0.01283  | -0.13789 | 0.00283  |
| 0.17217  | -0.02987 | 0.51963  | 0.114138 | 0.01359  | 0.001212 | 0.97916  | -0.16482 | 0.00035  |
| 0.82741  | -0.01534 | 0.74096  | -0.09723 | 0.03568  | -0.04973 | 0.28348  | 0.136988 | 0.00301  |
| 0.59965  | -0.05054 | 0.27569  | 0.00902  | 0.84585  | 0.011799 | 0.79926  | -0.06195 | 0.18143  |
| 9.46E-09 | -0.34058 | 3.80E-14 | -0.09488 | 0.04041  | -0.13665 | 0.00309  | 0.030726 | 0.50773  |
| 0.00073  | -0.12818 | 0.00554  | -0.06831 | 0.14047  | -0.08713 | 0.05991  | 0.114264 | 0.01348  |
| 5.17E-15 | -0.35037 | 6.20E-15 | -0.04016 | 0.38657  | -0.07937 | 0.08667  | -0.02922 | 0.52874  |
| 0.80681  | -0.01243 | 0.78874  | -0.0114  | 0.80597  | -0.0418  | 0.36743  | 0.152117 | 0.00097  |
| 0.33218  | -0.04302 | 0.35366  | 0.183495 | 6.64E-05 | -0.04917 | 0.28902  | 0.144517 | 0.00174  |
| 0.0061   | -0.11681 | 0.01153  | -0.01451 | 0.75446  | -0.04013 | 0.38687  | 0.168919 | 0.00025  |
| 1.32E-10 | -0.3389  | 5.15E-14 | -0.14116 | 0.00223  | -0.16865 | 0.00025  | -0.0779  | 0.09266  |
| 0.19463  | -0.12376 | 0.00741  | -0.13997 | 0.00243  | -0.19164 | 3.06E-05 | -0.00683 | 0.88295  |
| 0.25743  | 0.065609 | 0.15691  | -0.0145  | 0.75458  | -0.07182 | 0.12116  | -0.02883 | 0.53425  |
| 0.00038  | -0.1654  | 0.00033  | -0.03808 | 0.41168  | -0.11131 | 0.01611  | -0.07498 | 0.10558  |
| 2.98E-09 | -0.28028 | 7.06E-10 | -0.03561 | 0.44262  | -0.13246 | 0.00414  | -0.09013 | 0.0516   |
| 0.00077  | -0.16118 | 0.00047  | -0.05922 | 0.20148  | -0.08933 | 0.05373  | -0.03881 | 0.40272  |
| 0.01811  | -0.08233 | 0.07552  | -0.0081  | 0.86138  | -0.05855 | 0.20656  | 0.010062 | 0.82832  |
| 1.27E-08 | -0.28118 | 6.20E-10 | -0.09009 | 0.0517   | -0.15009 | 0.00114  | -0.09473 | 0.04073  |
| 6.82E-05 | -0.16943 | 0.00023  | -0.01602 | 0.7298   | -0.09272 | 0.04522  | -0.03716 | 0.42303  |
| 0.00062  | -0.14855 | 0.00128  | -0.10432 | 0.02417  | -0.15515 | 0.00077  | -0.04295 | 0.35442  |
| 1.64E-09 | -0.27933 | 8.10E-10 | -0.11792 | 0.01076  | -0.13272 | 0.00407  | -0.09809 | 0.03407  |
| 5.16E-06 | -0.19943 | 1.41E-05 | -0.113   | 0.01456  | -0.13682 | 0.00305  | -0.10833 | 0.0192   |
| 1.35E-13 | -0.43828 | 2.42E-23 | 0.048087 | 0.29974  | -0.16177 | 0.00045  | -0.01165 | 0.80171  |
| 0.51885  | 0.009069 | 0.84502  | 0.115889 | 0.01221  | -0.02146 | 0.64372  | 0.116504 | 0.01175  |
| 0.72877  | -0.03163 | 0.49526  | 0.130441 | 0.00475  | 0.055532 | 0.23101  | 0.130887 | 0.00461  |
| 0.62172  | -0.00331 | 0.94315  | 0.105817 | 0.0222   | 0.033512 | 0.47001  | 0.204382 | 8.51E-06 |
| 1.12E-07 | -0.20593 | 7.24E-06 | 0.000998 | 0.98284  | 0.023052 | 0.61926  | 0.115309 | 0.01265  |
| 0.02533  | -0.13673 | 0.00307  | 0.001892 | 0.96748  | -0.02769 | 0.55054  | 0.254352 | 2.49E-08 |
| 0.0772   | -0.11166 | 0.01578  | -0.05431 | 0.24146  | -0.1041  | 0.02447  | 0.132369 | 0.00416  |
| 0.11728  | -0.11483 | 0.01302  | 0.047146 | 0.30932  | 0.038838 | 0.40238  | 0.12219  | 0.00821  |
| 1.22E-10 | -0.31109 | 6.15E-12 | -0.12825 | 0.00551  | -0.10679 | 0.02099  | 0.027531 | 0.55286  |
| 4.33E-06 | -0.11799 | 0.01072  | -0.08062 | 0.08179  | -0.0804  | 0.08265  | 0.08883  | 0.05507  |
| 0.06404  | 0.007266 | 0.87556  | 0.078901 | 0.08854  | 0.060134 | 0.19456  | 0.061323 | 0.18587  |
| 0.00975  | -0.11744 | 0.01109  | -0.04518 | 0.32998  | -0.10938 | 0.01805  | 0.043053 | 0.35324  |
| 0.76061  | 0.059917 | 0.19618  | 0.069759 | 0.13225  | -0.04648 | 0.31618  | 0.106455 | 0.0214   |
| 5.40E-07 | -0.1869  | 4.82E-05 | -0.01934 | 0.67679  | -0.04842 | 0.29637  | 0.08982  | 0.05241  |
| 0.00101  | -0.12081 | 0.00897  | -0.01272 | 0.78401  | -0.05502 | 0.23534  | 0.182209 | 7.49E-05 |
| 9.42E-06 | -0.18805 | 4.32E-05 | -0.04804 | 0.30019  | -0.08829 | 0.05656  | 0.056574 | 0.22236  |
| 0.00572  | -0.02069 | 0.65565  | 0.103792 | 0.0249   | 0.014116 | 0.76094  | 0.131127 | 0.00453  |
| 0.01851  | -0.08577 | 0.06403  | 0.323374 | 7.91E-13 | 0.001635 | 0.9719   | -0.01741 | 0.70753  |
| 0.4938   | 0.023072 | 0.61896  | 0.00505  | 0.91333  | -0.03075 | 0.50743  | 0.095402 | 0.03932  |
| 5.90E-05 | -0.101   | 0.02908  | -0.0232  | 0.61706  | 0.025902 | 0.57662  | 0.078707 | 0.08933  |
| 0.00152  | -0.12545 | 0.00664  | 0.003091 | 0.94688  | -0.05868 | 0.20557  | 0.123859 | 0.00737  |
| 3.53E-07 | -0.23364 | 3.29E-07 | 0.053564 | 0.24799  | -0.06934 | 0.13457  | 0.10729  | 0.02039  |
| 0.00011  | -0.18941 | 3.80E-05 | 0.035857 | 0.43949  | -0.0655  | 0.15759  | 0.08581  | 0.06391  |

|          |          |          |          |          |          |         |          |          |
|----------|----------|----------|----------|----------|----------|---------|----------|----------|
| 3.89E-07 | -0.2393  | 1.66E-07 | -0.01218 | 0.79287  | -0.0295  | 0.52479 | -0.00976 | 0.83334  |
| 0.00201  | -0.11681 | 0.01153  | 0.036857 | 0.42683  | -0.0014  | 0.9759  | 0.072053 | 0.11996  |
| 0.00012  | -0.17299 | 0.00017  | 0.067795 | 0.14352  | -0.00445 | 0.92354 | 0.0409   | 0.37785  |
| 0.04207  | -0.09308 | 0.04438  | 0.013216 | 0.77577  | 0.005905 | 0.89872 | 0.09407  | 0.04216  |
| 0.06131  | -0.08556 | 0.0647   | 0.009652 | 0.8352   | 0.067059 | 0.14792 | 0.143229 | 0.00192  |
| 0.30386  | 0.068669 | 0.13841  | 0.043902 | 0.34382  | 0.049702 | 0.28379 | 0.185385 | 5.57E-05 |
| 0.00517  | -0.115   | 0.01289  | 0.015422 | 0.73959  | -0.02614 | 0.57313 | 0.157926 | 0.00061  |
| 0.02027  | -0.08619 | 0.06274  | -0.0094  | 0.83939  | -0.01841 | 0.69148 | 0.140732 | 0.0023   |
| 0.23609  | -0.08498 | 0.06654  | 0.029515 | 0.52462  | 0.031526 | 0.49674 | 0.232612 | 3.71E-07 |
| 0.35979  | -0.03793 | 0.41354  | -0.02619 | 0.57242  | -0.0379  | 0.41387 | 0.13326  | 0.00392  |
| 5.93E-05 | -0.08165 | 0.07796  | 0.014041 | 0.76216  | 0.043295 | 0.35053 | 0.003804 | 0.93465  |
| 7.70E-05 | -0.11428 | 0.01347  | 0.221218 | 1.38E-06 | -0.06231 | 0.17891 | -0.06242 | 0.17812  |
| 3.42E-06 | -0.16822 | 0.00026  | -0.02611 | 0.57357  | -0.05564 | 0.23011 | 0.108274 | 0.01926  |
| 2.59E-09 | -0.31181 | 5.47E-12 | -0.08081 | 0.08108  | -0.09888 | 0.03265 | -0.07619 | 0.10009  |
| 2.38E-11 | -0.33894 | 5.12E-14 | -0.04026 | 0.38535  | -0.06854 | 0.13915 | 0.0418   | 0.36744  |
| 6.31E-09 | -0.24701 | 6.39E-08 | -0.08375 | 0.07057  | -0.04562 | 0.32523 | 0.095119 | 0.03991  |
| 0.07273  | -0.08046 | 0.08238  | 0.013324 | 0.77398  | -0.03706 | 0.4243  | 0.046345 | 0.31761  |
| 0.23537  | -0.03619 | 0.43521  | -0.00874 | 0.85055  | -0.03681 | 0.4274  | 0.031057 | 0.50317  |
| 2.37E-05 | -0.21302 | 3.41E-06 | 0.028589 | 0.53771  | -0.02626 | 0.57134 | 0.150538 | 0.0011   |
| 0.01009  | -0.11594 | 0.01217  | -0.00781 | 0.86633  | -0.02907 | 0.53085 | 0.149039 | 0.00124  |
| 0.0142   | -0.1543  | 0.00082  | -0.00077 | 0.9868   | -0.05977 | 0.19732 | 0.151711 | 0.00101  |
| 0.00795  | -0.15832 | 0.0006   | 0.002152 | 0.96301  | -0.06733 | 0.14631 | 0.111903 | 0.01555  |
| 3.11E-10 | -0.30294 | 2.28E-11 | -0.02961 | 0.52326  | -0.07718 | 0.09574 | 0.082126 | 0.07623  |
| 0.87494  | 0.039238 | 0.39756  | 0.095489 | 0.03914  | -0.03484 | 0.4526  | 0.071549 | 0.12259  |
| 2.54E-05 | -0.17943 | 9.67E-05 | -0.03053 | 0.51051  | -0.06913 | 0.13579 | 0.082642 | 0.07439  |
| 2.02E-12 | -0.33831 | 5.73E-14 | -0.00066 | 0.98871  | -0.12496 | 0.00685 | 0.012975 | 0.77974  |
| 0.00267  | -0.08501 | 0.06645  | -0.05624 | 0.22508  | -0.07321 | 0.11414 | 0.076098 | 0.10049  |
| 0.00118  | -0.19948 | 1.41E-05 | -0.00995 | 0.83012  | -0.12435 | 0.00713 | 0.024204 | 0.60186  |
| 0.00035  | -0.15203 | 0.00098  | -0.04541 | 0.32752  | -0.04019 | 0.38625 | 0.094351 | 0.04155  |
| 3.35E-10 | -0.26181 | 9.29E-09 | 0.015571 | 0.73716  | -0.06629 | 0.15264 | -0.0237  | 0.60945  |
| 0.00378  | -0.13673 | 0.00307  | -0.02329 | 0.61571  | -0.03551 | 0.4439  | 0.069115 | 0.13587  |
| 0.89872  | -0.01203 | 0.79546  | -0.05722 | 0.21709  | -0.04213 | 0.36368 | 0.11342  | 0.01419  |
| 0.00022  | -0.09507 | 0.04002  | -0.0179  | 0.69961  | -0.06129 | 0.18612 | 0.136922 | 0.00303  |
| 1.35E-06 | -0.27669 | 1.18E-09 | -0.11934 | 0.00985  | -0.13052 | 0.00473 | 0.015937 | 0.73122  |
| 6.26E-09 | -0.2245  | 9.53E-07 | 0.088223 | 0.05677  | -0.02209 | 0.63395 | 0.030183 | 0.51526  |
| 0.00074  | -0.01462 | 0.7526   | 0.0489   | 0.29164  | -0.00015 | 0.99739 | 0.069094 | 0.13598  |
| 0.15621  | -0.0392  | 0.39803  | 0.117015 | 0.01139  | 0.103903 | 0.02474 | 0.208765 | 5.38E-06 |
| 0.00234  | -0.1168  | 0.01154  | 0.160409 | 0.0005   | -0.06726 | 0.14671 | 0.072089 | 0.11978  |
| 1.17E-07 | -0.2101  | 4.66E-06 | 0.007952 | 0.86392  | -0.04765 | 0.30415 | -0.10322 | 0.02571  |
| 0.00024  | -0.15281 | 0.00092  | -0.09007 | 0.05175  | 0.022786 | 0.62332 | -0.09046 | 0.05076  |
| 1.42E-07 | -0.18609 | 5.21E-05 | 0.014787 | 0.74995  | -0.0789  | 0.08854 | -0.09811 | 0.03404  |
| 0.00222  | -0.10064 | 0.02966  | 0.144896 | 0.00169  | 0.05115  | 0.26998 | 0.124803 | 0.00693  |
| 1.01E-10 | -0.30759 | 1.09E-11 | -0.01469 | 0.7515   | -0.04597 | 0.3215  | -0.01085 | 0.81509  |
| 5.19E-21 | -0.50488 | 1.42E-31 | -0.11882 | 0.01017  | -0.17594 | 0.00013 | -0.1025  | 0.02676  |
| 0.23518  | -0.13074 | 0.00466  | -0.08682 | 0.06082  | -0.11266 | 0.01486 | -0.15472 | 0.00079  |

|          |          |          |          |          |          |          |          |          |
|----------|----------|----------|----------|----------|----------|----------|----------|----------|
| 0.00512  | -0.23044 | 4.79E-07 | -0.03844 | 0.40728  | -0.06437 | 0.16491  | 0.010992 | 0.81273  |
| 0.06397  | -0.05221 | 0.26017  | 0.035051 | 0.44986  | -0.06544 | 0.15799  | 0.131124 | 0.00454  |
| 0.00298  | -0.15156 | 0.00102  | 0.096926 | 0.03627  | 0.063286 | 0.17215  | 0.113443 | 0.01417  |
| 2.93E-06 | -0.25838 | 1.47E-08 | 0.063036 | 0.17385  | -0.12436 | 0.00713  | -0.11836 | 0.01047  |
| 0.01487  | 0.179418 | 9.68E-05 | 0.010749 | 0.81679  | 0.044361 | 0.3388   | 0.164611 | 0.00035  |
| 2.77E-09 | -0.28511 | 3.48E-10 | -0.12614 | 0.00634  | -0.1298  | 0.00496  | -0.04836 | 0.297    |
| 0.06089  | -0.02627 | 0.57126  | 0.079188 | 0.08738  | 0.012904 | 0.78091  | 0.066464 | 0.15156  |
| 0.16664  | -0.0637  | 0.16933  | 0.040674 | 0.3805   | -0.0692  | 0.13536  | 0.125266 | 0.00672  |
| 0.01174  | -0.02992 | 0.51892  | -0.04709 | 0.3099   | -0.12872 | 0.00534  | -0.0168  | 0.71734  |
| 0.03007  | -0.07544 | 0.1035   | 0.029008 | 0.53176  | -0.01488 | 0.74841  | 0.056746 | 0.22096  |
| 0.00011  | -0.19313 | 2.65E-05 | 0.059274 | 0.20103  | -0.0199  | 0.66792  | -0.01133 | 0.80705  |
| 0.41794  | 0.056188 | 0.22553  | 0.104219 | 0.0243   | 0.09987  | 0.03094  | 0.060082 | 0.19495  |
| 1.82E-12 | -0.27737 | 1.07E-09 | -0.0021  | 0.96396  | -0.11148 | 0.01594  | -0.10458 | 0.02382  |
| 0.06075  | -0.05434 | 0.24121  | 0.004614 | 0.92079  | -0.04745 | 0.30621  | 0.216844 | 2.25E-06 |
| 0.00463  | -0.18198 | 7.65E-05 | -0.05233 | 0.25904  | -0.05958 | 0.19875  | -0.00883 | 0.84904  |
| 2.20E-09 | -0.28507 | 3.51E-10 | -0.02229 | 0.63084  | -0.02244 | 0.6286   | -0.12505 | 0.00682  |
| 0.00013  | -0.12234 | 0.00813  | -0.02743 | 0.55431  | -0.00343 | 0.94102  | -0.03747 | 0.41918  |
| 0.81298  | -0.03772 | 0.41611  | -0.12028 | 0.00927  | 0.011826 | 0.7988   | 0.104023 | 0.02457  |
| 0.34846  | -0.00443 | 0.92387  | 0.079002 | 0.08813  | -0.0268  | 0.56345  | 0.22046  | 1.50E-06 |
| 0.2289   | 0.048587 | 0.29474  | 0.018881 | 0.68403  | 0.037488 | 0.41896  | 0.186472 | 5.02E-05 |
| 0.37004  | -0.03041 | 0.51213  | 0.022823 | 0.62276  | -0.04691 | 0.31174  | 0.134048 | 0.00371  |
| 0.00214  | -0.17572 | 0.00014  | -0.0219  | 0.63696  | -0.01158 | 0.80292  | 0.047456 | 0.30614  |
| 0.13161  | -0.00044 | 0.99249  | -0.01567 | 0.73556  | -0.01238 | 0.78965  | 0.071943 | 0.12053  |
| 0.13052  | -0.02591 | 0.57652  | 0.038903 | 0.4016   | 0.022559 | 0.62678  | 0.137356 | 0.00294  |
| 0.62412  | 0.026509 | 0.56771  | 0.004206 | 0.92777  | -0.02567 | 0.57996  | 0.122812 | 0.00789  |
| 0.04966  | -0.08936 | 0.05364  | 0.040453 | 0.38309  | -0.03533 | 0.44621  | 0.03209  | 0.48907  |
| 0.02814  | -0.06456 | 0.16364  | -0.00958 | 0.8365   | -0.0369  | 0.42629  | 0.166562 | 0.0003   |
| 0.47906  | 0.00314  | 0.94604  | 0.075902 | 0.10138  | -0.00228 | 0.9608   | 0.003996 | 0.93136  |
| 0.0035   | -0.13886 | 0.00264  | -0.03498 | 0.45074  | -0.06266 | 0.17641  | 0.093775 | 0.04281  |
| 0.00065  | -0.08063 | 0.08175  | 0.021883 | 0.63715  | 0.014662 | 0.752    | 0.252814 | 3.04E-08 |
| 4.82E-05 | -0.07973 | 0.08523  | -0.01096 | 0.81321  | 0.129035 | 0.00523  | -0.00047 | 0.99183  |
| 0.25325  | 0.037112 | 0.42364  | -0.00195 | 0.96655  | -0.03539 | 0.44549  | 0.081925 | 0.07695  |
| 0.06319  | -0.0777  | 0.0935   | 0.068881 | 0.1372   | -0.01683 | 0.71686  | 0.154277 | 0.00082  |
| 0.27187  | 0.005902 | 0.89877  | 0.059462 | 0.1996   | -0.04591 | 0.32221  | 0.123145 | 0.00772  |
| 0.95367  | -0.01141 | 0.80566  | 0.097709 | 0.03478  | 0.038749 | 0.40346  | -0.05257 | 0.25692  |
| 0.00013  | -0.20535 | 7.69E-06 | 0.12262  | 0.00798  | -0.02321 | 0.61688  | 0.04731  | 0.30763  |
| 0.00066  | -0.17627 | 0.00013  | 0.057313 | 0.21637  | 0.051225 | 0.26928  | 0.204639 | 8.28E-06 |
| 0.053    | -0.05827 | 0.20877  | 0.023811 | 0.60777  | 0.078    | 0.09225  | 0.021251 | 0.64691  |
| 9.25E-12 | -0.29263 | 1.13E-10 | -0.04723 | 0.30846  | -0.09012 | 0.05162  | 0.036006 | 0.43759  |
| 0.36896  | -0.0188  | 0.68539  | 0.401168 | 1.75E-19 | -0.01264 | 0.78524  | 0.088031 | 0.05731  |
| 2.79E-12 | -0.46745 | 1.00E-26 | -0.11105 | 0.01635  | -0.21802 | 1.97E-06 | -0.05893 | 0.20369  |
| 2.34E-18 | -0.32871 | 3.15E-13 | -0.0137  | 0.76779  | -0.06556 | 0.15722  | 0.06105  | 0.18784  |
| 2.95E-05 | -0.25346 | 2.80E-08 | 0.100526 | 0.02985  | -0.06238 | 0.17838  | 0.129597 | 0.00503  |
| 1.89E-07 | -0.16594 | 0.00032  | -0.01465 | 0.75224  | -0.11592 | 0.01218  | -0.13852 | 0.0027   |
| 0.35897  | -0.11298 | 0.01457  | -0.02093 | 0.65185  | -0.08779 | 0.058    | 0.091424 | 0.04832  |

|          |          |          |          |          |          |          |          |          |
|----------|----------|----------|----------|----------|----------|----------|----------|----------|
| 3.82E-12 | -0.27772 | 1.02E-09 | 0.014599 | 0.75302  | -0.06598 | 0.15457  | -0.17828 | 0.00011  |
| 0.04859  | -0.08159 | 0.07819  | 0.02663  | 0.56594  | 0.000648 | 0.98886  | 0.086372 | 0.06218  |
| 0.02858  | -0.04081 | 0.37887  | 0.032382 | 0.48512  | 0.02095  | 0.65158  | 0.129345 | 0.00512  |
| 0.30174  | -0.03385 | 0.4656   | 0.029212 | 0.52887  | 0.012362 | 0.78989  | 0.11379  | 0.01388  |
| 0.01217  | -0.03725 | 0.42189  | 0.012042 | 0.79522  | -0.02212 | 0.6335   | 0.029711 | 0.52186  |
| 0.10637  | -0.05031 | 0.27797  | -0.0104  | 0.82266  | -0.04539 | 0.32764  | 0.04854  | 0.2952   |
| 4.23E-10 | -0.30003 | 3.60E-11 | 0.158061 | 0.00061  | -0.06986 | 0.1317   | 0.060268 | 0.19357  |
| 5.06E-16 | -0.44912 | 1.46E-24 | 0.020428 | 0.6597   | -0.18593 | 5.29E-05 | -0.09647 | 0.03716  |
| 7.59E-05 | -0.21192 | 3.84E-06 | -0.01305 | 0.77845  | -0.09154 | 0.04803  | -0.04496 | 0.33226  |
| 7.65E-15 | -0.34861 | 8.63E-15 | -0.05572 | 0.22939  | 0.023355 | 0.61467  | -0.02297 | 0.62051  |
| 8.06E-16 | -0.36118 | 7.76E-16 | -0.02293 | 0.62117  | -0.0615  | 0.18459  | -0.00332 | 0.94304  |
| 2.99E-06 | -0.22016 | 1.55E-06 | -0.03345 | 0.47086  | -0.08544 | 0.06508  | 0.036192 | 0.43523  |
| 0.00307  | -0.11059 | 0.01681  | 0.132221 | 0.00421  | 0.012598 | 0.78599  | 0.121096 | 0.0088   |
| 2.86E-09 | -0.2913  | 1.38E-10 | 0.145188 | 0.00166  | -0.00348 | 0.94028  | -0.02394 | 0.60588  |
| 5.37E-10 | -0.28592 | 3.09E-10 | -0.0916  | 0.04789  | -0.06434 | 0.16511  | 0.073803 | 0.11121  |
| 5.11E-14 | -0.3271  | 4.17E-13 | -0.05357 | 0.24795  | -0.06693 | 0.1487   | -0.00881 | 0.84941  |
| 0.9183   | -0.01019 | 0.82624  | -0.05212 | 0.26103  | -0.08842 | 0.05622  | 0.056469 | 0.22322  |
| 0.08261  | 0.029575 | 0.52377  | 0.119778 | 0.00957  | 0.019518 | 0.67398  | 0.068256 | 0.14081  |
| 4.49E-24 | -0.48645 | 4.10E-29 | -0.02263 | 0.62568  | -0.11548 | 0.01251  | -0.24278 | 1.08E-07 |
| 0.14614  | -0.06839 | 0.14     | 0.194675 | 2.27E-05 | -0.03978 | 0.39103  | 0.090931 | 0.04955  |
| 1.17E-07 | -0.20451 | 8.40E-06 | 0.043463 | 0.34867  | 0.000591 | 0.98984  | -0.07975 | 0.08517  |
| 2.31E-10 | -0.26424 | 6.70E-09 | -0.00212 | 0.9635   | -0.04516 | 0.33017  | 0.013794 | 0.76623  |
| 0.17854  | -0.05784 | 0.2122   | 0.21938  | 1.70E-06 | 0.101959 | 0.02758  | 0.035739 | 0.44101  |
| 0.01294  | -0.0136  | 0.76938  | 0.009818 | 0.83242  | -0.02865 | 0.53688  | 0.032955 | 0.47742  |
| 1.66E-50 | 0.597607 | 1.51E-46 | 0.078801 | 0.08894  | 0.054974 | 0.23573  | -0.05719 | 0.21734  |
| 3.66E-27 | 0.353483 | 3.44E-15 | 0.003316 | 0.94303  | 0.025548 | 0.58183  | -0.00225 | 0.96131  |
| 1.98E-26 | 0.52657  | 1.14E-34 | 0.031565 | 0.49621  | 0.028169 | 0.54371  | -0.03126 | 0.50043  |
| 1.17E-07 | 0.076596 | 0.09828  | -0.11842 | 0.01043  | -0.09785 | 0.03452  | -0.02698 | 0.56086  |
| 6.28E-55 | 0.618205 | 1.42E-50 | 0.07485  | 0.10621  | 0.09336  | 0.04375  | 0.247318 | 6.14E-08 |
| 7.05E-19 | 0.367745 | 2.11E-16 | 0.010061 | 0.82833  | 0.092875 | 0.04486  | -0.09304 | 0.04447  |
| 4.62E-08 | 0.124927 | 0.00687  | 0.058635 | 0.20594  | -0.07812 | 0.09173  | -0.04388 | 0.34412  |
| 4.51E-35 | 0.489396 | 1.70E-29 | -0.00222 | 0.96192  | 0.056902 | 0.21969  | -0.08554 | 0.06476  |
| 1.77E-23 | 0.492743 | 6.16E-30 | -0.00807 | 0.86199  | 0.082337 | 0.07547  | -0.03766 | 0.41687  |
| 8.12E-41 | 0.55852  | 1.17E-39 | 0.036702 | 0.42878  | 0.115332 | 0.01263  | 0.089681 | 0.05278  |
| 4.59E-26 | 0.443561 | 6.25E-24 | 0.034597 | 0.45575  | 0.094599 | 0.04101  | 0.043644 | 0.34666  |
| 3.30E-45 | 0.655715 | 9.95E-59 | 0.109643 | 0.01778  | 0.104331 | 0.02415  | 0.017106 | 0.71236  |
| 2.43E-19 | 0.259659 | 1.24E-08 | 0.036122 | 0.43612  | -0.10648 | 0.02136  | -0.02331 | 0.61539  |
| 6.40E-11 | 0.22061  | 1.48E-06 | -0.07322 | 0.11405  | -0.00281 | 0.9517   | -0.08195 | 0.07688  |
| 2.34E-06 | 0.142771 | 0.00198  | -0.20257 | 1.03E-05 | -0.01148 | 0.80459  | -0.04522 | 0.32956  |
| 2.23E-23 | 0.360073 | 9.64E-16 | 0.024899 | 0.59147  | -0.00799 | 0.8632   | 0.036528 | 0.43098  |
| 9.28E-06 | 0.138476 | 0.00271  | -0.08321 | 0.07241  | -0.03959 | 0.39328  | -0.31567 | 2.89E-12 |
| 2.18E-33 | 0.394    | 8.58E-19 | 0.046379 | 0.31726  | 0.035545 | 0.44349  | 0.034475 | 0.45734  |
| 1.79E-45 | 0.598839 | 8.81E-47 | 0.076092 | 0.10052  | 0.115746 | 0.01231  | 0.12312  | 0.00773  |
| 2.80E-32 | 0.528853 | 5.20E-35 | 0.149005 | 0.00124  | 0.064447 | 0.1644   | 0.038221 | 0.40991  |
| 6.59E-09 | 0.265191 | 5.89E-09 | -0.03728 | 0.4215   | 0.02279  | 0.62326  | -0.25538 | 2.18E-08 |

|          |          |          |          |         |          |         |          |         |
|----------|----------|----------|----------|---------|----------|---------|----------|---------|
| 1.13E-17 | 0.320715 | 1.24E-12 | -0.06159 | 0.18394 | 0.017659 | 0.70348 | 0.130618 | 0.0047  |
| 1.35E-41 | 0.627591 | 1.64E-52 | 0.082041 | 0.07653 | 0.107249 | 0.02044 | -0.00321 | 0.94489 |
| 3.57E-28 | 0.505395 | 1.20E-31 | 0.038268 | 0.40933 | 0.07152  | 0.12274 | -0.02355 | 0.61177 |
| 3.21E-20 | 0.338184 | 5.86E-14 | 0.027221 | 0.55735 | 0.044434 | 0.338   | 0.115454 | 0.01254 |
| 4.99E-24 | 0.47257  | 2.35E-27 | 0.087623 | 0.05848 | 0.070329 | 0.12911 | 0.009599 | 0.8361  |
| 6.44E-45 | 0.519237 | 1.34E-33 | -0.0078  | 0.8665  | 0.060354 | 0.19293 | 0.131431 | 0.00444 |
| 2.22E-25 | 0.375217 | 4.64E-17 | 0.019367 | 0.67635 | 0.076665 | 0.09797 | -0.14515 | 0.00166 |
| 1.23E-23 | 0.473384 | 1.86E-27 | 0.003162 | 0.94567 | 0.049073 | 0.28993 | -0.06083 | 0.18947 |
| 1.49E-13 | 0.363958 | 4.49E-16 | 0.016808 | 0.71715 | 0.033724 | 0.46721 | -0.05332 | 0.25012 |
| 1.42E-38 | 0.475954 | 8.91E-28 | 0.005306 | 0.90896 | -0.00054 | 0.99067 | -0.01166 | 0.80165 |
| 2.07E-36 | 0.483647 | 9.44E-29 | -0.08146 | 0.07866 | 0.056265 | 0.2249  | 0.045177 | 0.32998 |
| 3.40E-08 | 0.258998 | 1.35E-08 | -0.02105 | 0.65003 | 0.04383  | 0.34461 | 0.013994 | 0.76294 |
| 3.03E-21 | 0.394367 | 7.92E-19 | 0.016145 | 0.72786 | 0.160651 | 0.00049 | -0.00287 | 0.95075 |
| 2.13E-37 | 0.551844 | 1.42E-38 | -0.03454 | 0.45654 | 0.049345 | 0.28727 | -0.00856 | 0.85355 |
| 2.03E-07 | 0.209687 | 4.87E-06 | -0.03374 | 0.46697 | 0.04228  | 0.36196 | 0.052361 | 0.25879 |
| 3.45E-14 | 0.272832 | 2.04E-09 | -0.02706 | 0.55974 | -0.01391 | 0.76435 | 0.043811 | 0.34482 |
| 1.47E-07 | 0.253159 | 2.91E-08 | -0.10686 | 0.02091 | 0.045312 | 0.32853 | -0.1435  | 0.00188 |
| 2.67E-44 | 0.628495 | 1.06E-52 | 0.064138 | 0.16644 | 0.028244 | 0.54263 | -0.02846 | 0.53957 |
| 1.97E-12 | 0.2527   | 3.09E-08 | -0.00553 | 0.90517 | -0.01407 | 0.76167 | -0.08811 | 0.05708 |
| 1.48E-20 | 0.365213 | 3.50E-16 | -0.02652 | 0.56754 | -0.02804 | 0.5456  | -0.17772 | 0.00011 |
| 4.29E-41 | 0.481035 | 2.04E-28 | 0.040552 | 0.38193 | 0.013341 | 0.77369 | -0.02906 | 0.53109 |
| 9.19E-43 | 0.630905 | 3.28E-53 | 0.141795 | 0.00213 | 0.14718  | 0.00143 | -0.0492  | 0.28868 |
| 1.18E-39 | 0.56621  | 6.07E-41 | 0.027985 | 0.54633 | -0.00358 | 0.93843 | 0.005406 | 0.90725 |
| 3.84E-50 | 0.42011  | 2.15E-21 | -0.01472 | 0.75107 | -0.03751 | 0.41864 | -0.04824 | 0.29824 |
| 5.46E-29 | 0.441406 | 1.09E-23 | -0.0538  | 0.24588 | 0.033822 | 0.46592 | 0.162411 | 0.00043 |
| 2.18E-21 | 0.378581 | 2.31E-17 | 0.034015 | 0.46336 | 0.04541  | 0.32748 | 0.000307 | 0.99472 |
| 3.05E-11 | 0.209643 | 4.90E-06 | -0.05399 | 0.24426 | -0.1368  | 0.00305 | -0.00527 | 0.90965 |
| 1.25E-11 | 0.309692 | 7.73E-12 | -0.04684 | 0.31243 | 0.003611 | 0.93797 | -0.13284 | 0.00403 |
| 1.10E-47 | 0.589972 | 3.96E-45 | 0.011181 | 0.80956 | 0.031061 | 0.50312 | 0.030481 | 0.51112 |
| 4.85E-14 | 0.269328 | 3.33E-09 | 0.003802 | 0.93469 | 0.095671 | 0.03877 | -0.01008 | 0.82805 |
| 1.25E-05 | 0.133516 | 0.00385  | 0.037608 | 0.41746 | -0.03668 | 0.42907 | -0.09736 | 0.03544 |
| 1.24E-10 | 0.309    | 8.64E-12 | 0.074311 | 0.10876 | 0.008928 | 0.84741 | -0.03401 | 0.46345 |
| 7.94E-40 | 0.607657 | 1.78E-48 | 0.015875 | 0.73224 | 0.112769 | 0.01476 | 0.039561 | 0.39368 |
| 1.37E-35 | 0.47851  | 4.25E-28 | -0.02266 | 0.6253  | 0.004153 | 0.92868 | 0.01621  | 0.7268  |
| 3.86E-30 | 0.360418 | 9.01E-16 | 0.011591 | 0.80273 | 0.037803 | 0.41505 | 0.086228 | 0.06262 |
| 4.00E-35 | 0.487066 | 3.42E-29 | 0.050853 | 0.27277 | 0.005324 | 0.90865 | 0.028942 | 0.5327  |
| 1.03E-39 | 0.511119 | 1.92E-32 | 0.001214 | 0.97913 | 0.052905 | 0.25386 | 0.016453 | 0.72287 |
| 1.63E-06 | 0.171634 | 0.00019  | -0.03276 | 0.48008 | 0.030834 | 0.50625 | -0.13592 | 0.00325 |
| 1.93E-28 | 0.445079 | 4.21E-24 | 0.067889 | 0.14296 | 0.031271 | 0.50023 | 0.021665 | 0.64052 |
| 9.44E-26 | 0.410123 | 2.26E-20 | -0.04182 | 0.36722 | -0.07974 | 0.08519 | 0.135015 | 0.00346 |
| 5.65E-40 | 0.575091 | 1.81E-42 | 0.093137 | 0.04425 | 0.042598 | 0.35835 | 0.058746 | 0.20508 |
| 3.12E-11 | 0.220356 | 1.52E-06 | -0.02293 | 0.62115 | -0.03126 | 0.50034 | 0.019436 | 0.67527 |
| 7.23E-08 | 0.283526 | 4.40E-10 | 0.011259 | 0.80827 | 0.071152 | 0.12468 | -0.03872 | 0.4038  |
| 1.10E-21 | 0.544027 | 2.49E-37 | -0.00208 | 0.96419 | 0.104992 | 0.02326 | 0.070338 | 0.12906 |
| 3.27E-39 | 0.537611 | 2.46E-36 | -0.04403 | 0.34243 | -0.03483 | 0.45269 | 0.07338  | 0.11328 |



|          |          |          |          |         |          |         |          |          |
|----------|----------|----------|----------|---------|----------|---------|----------|----------|
| 5.99E-59 | 0.611978 | 2.51E-49 | 0.072505 | 0.11765 | 0.03842  | 0.40748 | 0.031444 | 0.49786  |
| 5.40E-38 | 0.529817 | 3.73E-35 | 0.004046 | 0.93051 | 0.030882 | 0.50559 | -0.01317 | 0.77653  |
| 5.72E-46 | 0.605754 | 4.17E-48 | 0.036565 | 0.43051 | 0.069297 | 0.13483 | 0.033206 | 0.47408  |
| 7.21E-23 | 0.358536 | 1.30E-15 | 0.043428 | 0.34906 | -0.03562 | 0.44249 | -0.03401 | 0.46345  |
| 0.00015  | 0.024403 | 0.59888  | -0.0175  | 0.70609 | -0.03461 | 0.45556 | -0.07593 | 0.10123  |
| 2.19E-14 | 0.312997 | 4.50E-12 | 0.004189 | 0.92806 | -0.029   | 0.53185 | -0.00346 | 0.94057  |
| 4.78E-18 | 0.415564 | 6.35E-21 | 0.076279 | 0.09968 | 0.094635 | 0.04093 | -0.09721 | 0.03572  |
| 8.48E-29 | 0.380158 | 1.67E-17 | -0.02969 | 0.52221 | 0.006231 | 0.89317 | -0.10106 | 0.02898  |
| 7.07E-05 | 0.189257 | 3.85E-05 | -0.00669 | 0.88529 | 0.02609  | 0.57385 | -0.1153  | 0.01265  |
| 2.93E-31 | 0.396098 | 5.41E-19 | 0.093415 | 0.04362 | 0.00702  | 0.87974 | 0.017105 | 0.71237  |
| 0.00495  | -0.03755 | 0.41823  | -0.11258 | 0.01493 | -0.03637 | 0.43301 | -0.09706 | 0.03601  |
| 1.30E-07 | 0.165854 | 0.00032  | -0.06384 | 0.16844 | 0.026279 | 0.57108 | -0.17101 | 0.0002   |
| 1.80E-37 | 0.608977 | 9.81E-49 | 0.03549  | 0.4442  | 0.095995 | 0.03811 | -0.04863 | 0.29434  |
| 7.68E-23 | 0.455554 | 2.63E-25 | 0.092138 | 0.04659 | 0.119494 | 0.00975 | -0.10937 | 0.01807  |
| 6.16E-41 | 0.589763 | 4.33E-45 | 0.060264 | 0.1936  | -0.00329 | 0.94349 | 0.063067 | 0.17364  |
| 2.16E-27 | 0.41043  | 2.11E-20 | -0.01386 | 0.76507 | 0.035263 | 0.44712 | -0.13472 | 0.00354  |
| 2.18E-06 | 0.126093 | 0.00636  | -0.06898 | 0.13661 | -0.0088  | 0.84962 | -0.22508 | 8.91E-07 |
| 1.81E-27 | 0.447548 | 2.21E-24 | 0.177845 | 0.00011 | 0.074446 | 0.10812 | 0.082529 | 0.07479  |
| 1.22E-32 | 0.52026  | 9.53E-34 | 0.054987 | 0.23563 | 0.0577   | 0.21328 | -0.06362 | 0.16989  |
| 2.98E-41 | 0.476645 | 7.30E-28 | -0.03085 | 0.50606 | 0.031395 | 0.49853 | -0.03685 | 0.42688  |
| 3.47E-16 | 0.247067 | 6.34E-08 | -0.08426 | 0.06888 | 0.038506 | 0.40642 | 0.043969 | 0.34308  |
| 4.23E-77 | 0.744726 | 1.06E-83 | 0.06141  | 0.18525 | 0.079572 | 0.08586 | 0.076891 | 0.09699  |
| 2.16E-05 | 0.14865  | 0.00127  | -0.09451 | 0.04119 | 0.046156 | 0.31959 | -0.21717 | 2.17E-06 |
| 6.40E-13 | 0.280507 | 6.83E-10 | 0.027047 | 0.55987 | 0.002901 | 0.95015 | -0.08065 | 0.08169  |
| 0.73778  | -0.05692 | 0.21953  | 0.02154  | 0.64244 | -0.06625 | 0.15287 | -0.26251 | 8.47E-09 |
| 5.07E-47 | 0.704718 | 2.56E-71 | 0.097381 | 0.0354  | 0.149799 | 0.00117 | 0.135408 | 0.00337  |
| 1.31E-54 | 0.668746 | 7.67E-62 | 0.108001 | 0.01957 | 0.132983 | 0.00399 | 0.058825 | 0.20447  |
| 1.50E-28 | 0.477481 | 5.73E-28 | 0.003429 | 0.94109 | 0.082164 | 0.07609 | 0.017216 | 0.71058  |
| 1.60E-34 | 0.432591 | 1.02E-22 | 0.064942 | 0.16118 | 0.008767 | 0.85014 | 0.072312 | 0.11864  |
| 1.46E-67 | 0.653375 | 3.47E-58 | 0.050117 | 0.27978 | 0.141983 | 0.0021  | 0.188232 | 4.25E-05 |
| 1.44E-25 | 0.481323 | 1.87E-28 | 0.023526 | 0.61207 | 0.046523 | 0.31576 | -0.01947 | 0.67471  |
| 2.51E-41 | 0.667493 | 1.55E-61 | 0.173141 | 0.00017 | 0.174305 | 0.00015 | -0.00899 | 0.84643  |
| 5.16E-12 | 0.274862 | 1.54E-09 | 0.077655 | 0.09371 | 0.082459 | 0.07504 | 0.001721 | 0.97041  |
| 4.05E-54 | 0.556002 | 3.01E-39 | 0.059321 | 0.20068 | 0.066588 | 0.1508  | 0.146357 | 0.00152  |
| 3.72E-42 | 0.593455 | 9.01E-46 | 0.019268 | 0.67792 | 0.095174 | 0.03979 | -0.04755 | 0.30515  |
| 0.00016  | 0.259241 | 1.31E-08 | 0.161777 | 0.00045 | 0.093788 | 0.04279 | -0.04474 | 0.3347   |
| 3.69E-30 | 0.471328 | 3.35E-27 | 0.016    | 0.7302  | 0.110368 | 0.01703 | -0.08574 | 0.06412  |
| 3.28E-24 | 0.355058 | 2.54E-15 | 0.103798 | 0.02489 | -0.0448  | 0.33407 | -0.03098 | 0.50425  |
| 0.92068  | -0.20422 | 8.65E-06 | 0.065364 | 0.15846 | -0.05299 | 0.25307 | -0.10817 | 0.01938  |
| 3.36E-16 | 0.302988 | 2.26E-11 | -0.01843 | 0.69119 | 0.04794  | 0.30123 | -0.13178 | 0.00434  |
| 5.22E-18 | 0.310595 | 6.67E-12 | -0.08012 | 0.08372 | 0.014684 | 0.75162 | -0.0848  | 0.06711  |
| 1.33E-48 | 0.533425 | 1.07E-35 | 0.053375 | 0.24966 | 0.061659 | 0.18346 | 0.143525 | 0.00187  |
| 2.99E-43 | 0.499992 | 6.59E-31 | 0.043066 | 0.3531  | 0.019954 | 0.66713 | 0.132111 | 0.00424  |
| 4.89E-53 | 0.602248 | 1.98E-47 | 0.088543 | 0.05587 | 0.058328 | 0.20833 | -0.00927 | 0.84161  |
| 8.02E-07 | 0.061097 | 0.1875   | -0.1529  | 0.00092 | -0.04671 | 0.3138  | -0.08274 | 0.07403  |

|          |          |          |          |          |          |          |          |          |
|----------|----------|----------|----------|----------|----------|----------|----------|----------|
| 9.61E-47 | 0.553022 | 9.19E-39 | -0.04691 | 0.31174  | -0.00757 | 0.87046  | 0.006791 | 0.88364  |
| 1.01E-18 | 0.384334 | 6.91E-18 | 0.077253 | 0.09542  | 0.092823 | 0.04498  | -0.03266 | 0.48136  |
| 1.76E-28 | 0.49951  | 7.66E-31 | 0.03552  | 0.44381  | 0.112595 | 0.01492  | 0.097355 | 0.03545  |
| 1.11E-25 | 0.40599  | 5.86E-20 | 0.018436 | 0.6911   | 0.016536 | 0.72153  | -0.07167 | 0.12196  |
| 1.22E-33 | 0.554667 | 4.97E-39 | 0.018252 | 0.69402  | 0.091917 | 0.04712  | -0.07548 | 0.1033   |
| 4.87E-11 | 0.163415 | 0.00039  | -0.15414 | 0.00083  | -0.08443 | 0.06831  | -0.06856 | 0.13904  |
| 1.23E-20 | 0.36579  | 3.13E-16 | -0.02053 | 0.65817  | 0.046469 | 0.31632  | -0.0288  | 0.53468  |
| 2.87E-48 | 0.583975 | 4.86E-44 | 0.026586 | 0.56659  | 0.009232 | 0.84229  | -0.05455 | 0.23936  |
| 2.08E-18 | 0.261841 | 9.26E-09 | -0.13054 | 0.00472  | 0.005553 | 0.90473  | -0.02797 | 0.5465   |
| 0.01019  | 0.057686 | 0.21339  | -0.00829 | 0.85817  | 0.067373 | 0.14603  | 0.074197 | 0.1093   |
| 0.02562  | -0.02697 | 0.56099  | -0.18965 | 3.71E-05 | -0.03185 | 0.49228  | -0.09113 | 0.04905  |
| 1.32E-26 | 0.384997 | 6.00E-18 | -0.0415  | 0.37088  | 0.052548 | 0.25708  | -0.09641 | 0.03727  |
| 3.67E-16 | 0.282715 | 4.96E-10 | -0.01341 | 0.77255  | -0.0091  | 0.84453  | -0.12879 | 0.00532  |
| 1.52E-12 | 0.234145 | 3.09E-07 | -0.01223 | 0.79215  | 0.036758 | 0.42807  | -0.00818 | 0.86013  |
| 4.62E-13 | 0.215912 | 2.49E-06 | -0.02344 | 0.61343  | 0.014873 | 0.74854  | -0.06014 | 0.19451  |
| 4.66E-26 | 0.341967 | 2.95E-14 | -0.01221 | 0.79235  | 0.014064 | 0.76179  | 0.118284 | 0.01052  |
| 8.99E-40 | 0.501784 | 3.76E-31 | 0.004119 | 0.92926  | 0.075332 | 0.10397  | 0.062357 | 0.17854  |
| 4.28E-10 | 0.185724 | 5.39E-05 | -0.09824 | 0.0338   | -0.0577  | 0.21328  | -0.08157 | 0.07824  |
| 8.37E-27 | 0.503158 | 2.44E-31 | 0.066467 | 0.15155  | 0.071275 | 0.12402  | 0.038559 | 0.40578  |
| 1.91E-43 | 0.622271 | 2.09E-51 | 0.046839 | 0.31248  | 0.118445 | 0.01041  | -0.00581 | 0.90038  |
| 6.26E-55 | 0.680875 | 6.95E-65 | 0.088116 | 0.05707  | 0.147511 | 0.00139  | 0.160639 | 0.00049  |
| 1.89E-12 | 0.223257 | 1.10E-06 | -0.0824  | 0.07526  | -0.00691 | 0.88163  | -0.00628 | 0.8923   |
| 3.74E-48 | 0.530478 | 2.97E-35 | -0.00881 | 0.84936  | 0.078988 | 0.08819  | 0.09216  | 0.04654  |
| 2.43E-43 | 0.555714 | 3.36E-39 | 0.099724 | 0.03119  | 0.047705 | 0.30361  | -0.00295 | 0.94932  |
| 6.12E-45 | 0.595613 | 3.57E-46 | -0.0302  | 0.51499  | 0.057077 | 0.21827  | -0.07555 | 0.10298  |
| 8.02E-34 | 0.42459  | 7.30E-22 | -0.04431 | 0.3394   | -0.01552 | 0.73794  | 0.085244 | 0.06569  |
| 1.20E-42 | 0.517804 | 2.15E-33 | -0.00118 | 0.97974  | -0.0016  | 0.9725   | 0.065112 | 0.16008  |
| 4.96E-24 | 0.474792 | 1.25E-27 | 0.095503 | 0.03911  | 0.103101 | 0.02588  | 0.029524 | 0.52448  |
| 3.01E-48 | 0.578699 | 4.23E-43 | 0.040431 | 0.38336  | 0.064051 | 0.16701  | 0.118181 | 0.01059  |
| 1.06E-32 | 0.466204 | 1.42E-26 | 0.023662 | 0.61002  | 0.055749 | 0.22918  | -0.01583 | 0.73289  |
| 3.41E-06 | 0.183755 | 6.49E-05 | 0.017573 | 0.70486  | -0.01326 | 0.77511  | -0.08216 | 0.0761   |
| 3.18E-20 | 0.357131 | 1.71E-15 | 0.002259 | 0.96116  | 0.014612 | 0.7528   | -0.04584 | 0.32296  |
| 5.69E-35 | 0.602261 | 1.97E-47 | 0.112934 | 0.01461  | 0.18278  | 7.10E-05 | 0.040858 | 0.37834  |
| 2.65E-31 | 0.539747 | 1.15E-36 | 0.006174 | 0.89415  | 0.050667 | 0.27453  | -0.0347  | 0.45447  |
| 1.09E-23 | 0.399584 | 2.49E-19 | -0.00767 | 0.86876  | 0.019372 | 0.67627  | -0.05538 | 0.23232  |
| 7.49E-42 | 0.548196 | 5.46E-38 | 0.06271  | 0.1761   | 0.021345 | 0.64546  | 0.124604 | 0.00702  |
| 7.55E-26 | 0.495746 | 2.46E-30 | 0.056932 | 0.21944  | 0.077294 | 0.09525  | -0.0546  | 0.23894  |
| 0.21376  | 0.042268 | 0.36209  | 0.106453 | 0.0214   | 0.086883 | 0.06065  | 0.038006 | 0.41255  |
| 0.38805  | -0.07203 | 0.12006  | 0.0081   | 0.86142  | 0.130193 | 0.00483  | -0.00992 | 0.83074  |
| 0.7503   | 0.05437  | 0.24093  | 0.061541 | 0.18431  | 0.072373 | 0.11833  | 0.017483 | 0.70629  |
| 0.3776   | 0.039345 | 0.39627  | 0.180623 | 8.67E-05 | 0.030513 | 0.51068  | 0.184592 | 6.00E-05 |
| 0.4245   | -0.03817 | 0.41048  | 0.095273 | 0.03959  | 0.076835 | 0.09723  | 0.003079 | 0.94709  |
| 0.91112  | 0.029788 | 0.52078  | 0.048808 | 0.29255  | 0.076051 | 0.1007   | -0.03067 | 0.50844  |
| 0.15316  | 0.001164 | 0.97998  | 0.018755 | 0.68603  | 0.027363 | 0.5553   | -0.02021 | 0.66315  |
| 0.44148  | -0.04245 | 0.36002  | 0.033172 | 0.47453  | 0.007587 | 0.87012  | -0.04051 | 0.38245  |

|         |           |         |          |          |          |          |          |         |
|---------|-----------|---------|----------|----------|----------|----------|----------|---------|
| 0.97388 | -0.00525  | 0.90996 | 0.066578 | 0.15086  | 0.034166 | 0.46138  | 0.097506 | 0.03516 |
| 0.09427 | -0.08783  | 0.05789 | 0.033601 | 0.46883  | -0.01064 | 0.81869  | -0.05109 | 0.27054 |
| 0.66161 | -0.00799  | 0.86328 | 0.032037 | 0.48978  | -0.01509 | 0.74506  | -0.08207 | 0.07642 |
| 0.76674 | -0.01211  | 0.79408 | 0.043156 | 0.35209  | 0.006147 | 0.89461  | -0.01177 | 0.79981 |
| 0.82136 | 0.027963  | 0.54665 | 0.062277 | 0.17911  | 0.009574 | 0.83652  | 0.038949 | 0.40105 |
| 0.96946 | -2.46E-05 | 0.99958 | 0.036066 | 0.43683  | 0.01338  | 0.77305  | -0.00498 | 0.91449 |
| 0.91219 | -0.02311  | 0.61835 | 0.443927 | 5.68E-24 | -0.02835 | 0.54105  | -0.03353 | 0.46977 |
| 0.81209 | 0.020832  | 0.65341 | 0.02777  | 0.54943  | 0.011233 | 0.80869  | -0.03772 | 0.41611 |
| 0.30067 | -0.05149  | 0.2668  | 0.041981 | 0.36536  | -0.01787 | 0.70012  | -0.05356 | 0.24803 |
| 0.06284 | -0.06876  | 0.13791 | 0.09905  | 0.03235  | 0.068851 | 0.13737  | 0.013764 | 0.76673 |
| 0.03347 | -0.11095  | 0.01645 | 0.012925 | 0.78057  | -0.00874 | 0.85057  | -0.02268 | 0.62493 |
| 0.04865 | -0.09853  | 0.03327 | 0.030866 | 0.50579  | 0.018702 | 0.68688  | 0.014261 | 0.75855 |
| 0.16656 | -0.01908  | 0.68084 | 0.157048 | 0.00066  | 0.176709 | 0.00012  | 0.071781 | 0.12137 |
| 0.23121 | 0.101542  | 0.02823 | 0.040763 | 0.37946  | 0.31141  | 5.84E-12 | -0.00141 | 0.97568 |
| 0.85892 | 0.026646  | 0.56571 | 0.056774 | 0.22072  | 0.16546  | 0.00033  | 0.001774 | 0.9695  |
| 0.94515 | 0.023454  | 0.61317 | 0.163323 | 0.00039  | 0.140748 | 0.0023   | 0.113376 | 0.01423 |
| 0.67504 | -0.0024   | 0.95869 | 0.085513 | 0.06484  | 0.170667 | 0.00021  | 0.10433  | 0.02415 |
| 0.16967 | -0.08725  | 0.05957 | 0.023421 | 0.61366  | 0.003093 | 0.94684  | -0.03422 | 0.46072 |
| 0.18734 | -0.05107  | 0.2707  | 0.088635 | 0.05561  | 0.06891  | 0.13703  | -0.01024 | 0.82526 |
| 0.74301 | -0.01525  | 0.74237 | 0.035868 | 0.43936  | 0.012404 | 0.78921  | -0.01526 | 0.74222 |
| 0.15413 | -0.0518   | 0.26395 | 0.086754 | 0.06103  | 0.079687 | 0.0854   | 0.014172 | 0.76002 |
| 0.67989 | 0.024237  | 0.60136 | 0.034423 | 0.45802  | 0.058574 | 0.20641  | -0.03711 | 0.42362 |
| 0.36948 | 0.02287   | 0.62204 | 0.026501 | 0.56783  | 0.025835 | 0.5776   | -0.0131  | 0.77775 |
| 0.97459 | 0.006556  | 0.88763 | 0.062678 | 0.17632  | 0.055634 | 0.23015  | 0.032174 | 0.48794 |
| 0.54599 | -0.02216  | 0.63291 | 0.055129 | 0.23442  | 0.058574 | 0.20641  | -0.00713 | 0.8778  |
| 0.89145 | -0.00145  | 0.97514 | 0.034518 | 0.45678  | 0.026947 | 0.56133  | -0.00093 | 0.98398 |
| 0.3796  | -0.03673  | 0.42842 | 0.022171 | 0.63273  | 0.001922 | 0.96695  | -0.03029 | 0.51376 |
| 0.6187  | 0.000255  | 0.99561 | 0.033322 | 0.47254  | 0.018    | 0.69804  | 0.020066 | 0.66538 |
| 0.85592 | -0.009    | 0.84615 | 0.017733 | 0.70231  | 0.006358 | 0.89101  | -0.01928 | 0.67773 |
| 0.84548 | 0.012077  | 0.79463 | 0.02435  | 0.59968  | 0.010489 | 0.82115  | 0.003349 | 0.94247 |
| 0.78781 | 0.01174   | 0.80024 | 0.021064 | 0.64982  | 0.078851 | 0.08874  | -0.03206 | 0.48952 |
| 0.00549 | -0.14715  | 0.00143 | 0.07907  | 0.08786  | 0.068476 | 0.13953  | 0.034283 | 0.45985 |
| 0.32209 | -0.05997  | 0.19582 | 0.014036 | 0.76226  | 0.005385 | 0.90761  | -0.03389 | 0.46497 |
| 0.21639 | -0.08438  | 0.06849 | 0.008862 | 0.84852  | -0.01736 | 0.70833  | -0.05846 | 0.20728 |
| 0.1072  | -0.00847  | 0.85517 | 0.107448 | 0.02021  | -0.01127 | 0.80808  | 0.005122 | 0.9121  |
| 0.79009 | -0.01152  | 0.80399 | 0.038364 | 0.40816  | 0.033222 | 0.47386  | 0.036243 | 0.43458 |
| 0.32318 | -0.04538  | 0.32781 | 0.030894 | 0.50542  | 0.025519 | 0.58227  | -0.0137  | 0.76784 |
| 0.47773 | -0.03416  | 0.4614  | 0.009579 | 0.83643  | 0.001185 | 0.97962  | -0.03751 | 0.41868 |
| 0.7408  | -0.01773  | 0.7023  | 0.01273  | 0.7838   | 0.01701  | 0.71389  | -0.01118 | 0.80965 |
| 0.59682 | -0.03151  | 0.49701 | 0.022805 | 0.62303  | 0.005544 | 0.90489  | -0.03097 | 0.50431 |
| 0.6776  | -0.01977  | 0.67004 | 0.005203 | 0.91072  | 0.007835 | 0.86591  | -0.02064 | 0.65645 |
| 0.12216 | -0.07145  | 0.12312 | 0.020489 | 0.65875  | 0.006043 | 0.89638  | -0.03366 | 0.46802 |
| 0.30985 | -0.05196  | 0.26243 | -0.00753 | 0.87101  | 0.00111  | 0.98092  | -0.02096 | 0.65144 |
| 0.17356 | -0.06362  | 0.16989 | -0.01009 | 0.82779  | -0.00962 | 0.8357   | -0.01523 | 0.74273 |
| 0.41237 | -0.04218  | 0.36312 | -0.01393 | 0.76403  | 0.006444 | 0.88954  | -0.01037 | 0.82312 |

|          |          |          |          |          |          |          |          |          |
|----------|----------|----------|----------|----------|----------|----------|----------|----------|
| 0.10692  | 0.068649 | 0.13853  | 0.318757 | 1.73E-12 | 0.014108 | 0.76107  | 0.067448 | 0.14558  |
| 0.21509  | -0.04569 | 0.32451  | 0.086419 | 0.06204  | 0.071376 | 0.12349  | 0.01461  | 0.75284  |
| 0.2698   | 0.115722 | 0.01233  | 0.103782 | 0.02491  | 0.095752 | 0.0386   | 0.235307 | 2.69E-07 |
| 0.60721  | -0.02335 | 0.61477  | 0.013255 | 0.77512  | -0.00646 | 0.88935  | -0.03163 | 0.49531  |
| 0.52643  | -0.03454 | 0.45651  | 0.024165 | 0.60244  | 0.005109 | 0.91233  | -0.03125 | 0.50052  |
| 0.52335  | -0.04292 | 0.35471  | 0.023417 | 0.61372  | 0.002044 | 0.96486  | -0.04702 | 0.3106   |
| 0.12622  | -0.07037 | 0.12886  | 0.087609 | 0.05851  | 0.087593 | 0.05856  | 0.02079  | 0.65407  |
| 0.29416  | -0.05575 | 0.22917  | 0.020316 | 0.66147  | 0.009131 | 0.84399  | -0.0376  | 0.41761  |
| 0.22541  | -0.06246 | 0.1778   | 0.079726 | 0.08525  | 0.079904 | 0.08455  | -0.00016 | 0.99728  |
| 0.13001  | 0.032592 | 0.4823   | 0.018295 | 0.69333  | 0.104929 | 0.02335  | 0.007332 | 0.87445  |
| 0.92858  | -0.00736 | 0.87403  | 0.012815 | 0.7824   | -0.0044  | 0.92437  | 0.00046  | 0.99209  |
| 0.03634  | -0.10248 | 0.0268   | 0.078443 | 0.09041  | 0.060018 | 0.19543  | -0.00853 | 0.85416  |
| 0.28507  | -0.05428 | 0.24171  | 0.043849 | 0.34441  | 0.030517 | 0.51063  | -0.01801 | 0.69791  |
| 0.15705  | -0.03152 | 0.49688  | 0.075743 | 0.1021   | 0.113006 | 0.01455  | -0.04093 | 0.37752  |
| 0.43934  | -0.02985 | 0.51989  | 0.044129 | 0.34133  | 0.047609 | 0.30458  | 0.008432 | 0.85579  |
| 0.392    | -0.06479 | 0.16216  | 0.144038 | 0.0018   | 0.064152 | 0.16635  | -0.0015  | 0.97419  |
| 0.27982  | 0.006284 | 0.89228  | 0.069955 | 0.13116  | 0.042551 | 0.35888  | 0.057677 | 0.21346  |
| 0.1023   | -0.08106 | 0.08015  | 0.009422 | 0.83909  | -0.0138  | 0.76619  | -0.04782 | 0.3024   |
| 0.63803  | -0.01194 | 0.79683  | 0.068164 | 0.14135  | 0.046162 | 0.31953  | 0.121342 | 0.00867  |
| 5.24E-15 | -0.4177  | 3.83E-21 | 0.058686 | 0.20555  | -0.08145 | 0.07868  | -0.12423 | 0.00719  |
| 9.31E-31 | -0.60141 | 2.86E-47 | -0.07113 | 0.12479  | -0.12513 | 0.00678  | -0.19963 | 1.38E-05 |
| 5.79E-13 | -0.48926 | 1.77E-29 | -0.12079 | 0.00898  | -0.0515  | 0.26675  | -0.16507 | 0.00034  |
| 8.28E-07 | -0.2709  | 2.68E-09 | -0.02594 | 0.57604  | 0.026867 | 0.56249  | -0.26923 | 3.38E-09 |
| 8.57E-10 | -0.396   | 5.53E-19 | -0.03554 | 0.44356  | -0.05315 | 0.25168  | -0.01808 | 0.69684  |
| 1.45E-16 | -0.40762 | 4.03E-20 | -0.07224 | 0.11902  | -0.14303 | 0.00194  | -0.03442 | 0.45806  |
| 4.29E-12 | -0.29156 | 1.33E-10 | -0.01424 | 0.75884  | -0.01931 | 0.67722  | -0.11984 | 0.00954  |
| 1.11E-17 | -0.4676  | 9.58E-27 | -0.18044 | 8.81E-05 | -0.17788 | 0.00011  | -0.0989  | 0.03262  |
| 6.42E-17 | -0.5028  | 2.73E-31 | -0.10939 | 0.01805  | -0.12674 | 0.00609  | -0.2957  | 7.06E-11 |
| 1.14E-17 | -0.38602 | 4.82E-18 | -0.0387  | 0.40405  | -0.03494 | 0.45134  | -0.19119 | 3.20E-05 |
| 0.00606  | -0.21312 | 3.37E-06 | -0.08606 | 0.06314  | -0.08476 | 0.06724  | -0.03793 | 0.4135   |
| 1.42E-18 | -0.40814 | 3.58E-20 | -0.06813 | 0.14157  | -0.0626  | 0.17687  | -0.12715 | 0.00593  |
| 1.33E-11 | -0.50604 | 9.79E-32 | -0.11162 | 0.01582  | -0.09164 | 0.0478   | -0.12864 | 0.00537  |
| 3.60E-46 | -0.73888 | 9.45E-82 | -0.0985  | 0.03334  | -0.09372 | 0.04294  | -0.202   | 1.09E-05 |
| 8.16E-08 | -0.34039 | 3.93E-14 | -0.1314  | 0.00445  | -0.03525 | 0.44731  | 0.05892  | 0.20374  |
| 1.03E-12 | -0.48675 | 3.76E-29 | -0.14643 | 0.00151  | -0.11699 | 0.0114   | -0.17058 | 0.00021  |
| 1.70E-15 | -0.37833 | 2.44E-17 | -0.13152 | 0.00441  | -0.09875 | 0.03288  | -0.22076 | 1.45E-06 |
| 1.48E-17 | -0.5406  | 8.51E-37 | -0.05805 | 0.21048  | -0.14906 | 0.00123  | -0.18775 | 4.45E-05 |
| 1.14E-31 | -0.67433 | 3.18E-63 | -0.10367 | 0.02507  | -0.1191  | 0.00999  | -0.1429  | 0.00196  |
| 5.05E-12 | -0.44414 | 5.37E-24 | -0.08495 | 0.06662  | -0.05775 | 0.21289  | -0.11806 | 0.01067  |
| 1.55E-25 | -0.60701 | 2.38E-48 | -0.08589 | 0.06365  | -0.0589  | 0.20393  | -0.24716 | 6.27E-08 |
| 6.87E-08 | -0.26944 | 3.28E-09 | -0.04666 | 0.31438  | -0.088   | 0.0574   | -0.21254 | 3.59E-06 |
| 4.30E-07 | -0.26471 | 6.28E-09 | -0.04054 | 0.38202  | -0.19345 | 2.56E-05 | -0.15398 | 0.00084  |
| 1.99E-11 | -0.37133 | 1.03E-16 | -0.10495 | 0.02332  | -0.06545 | 0.15792  | -0.21295 | 3.44E-06 |
| 1.36E-28 | -0.59893 | 8.47E-47 | -0.12254 | 0.00803  | -0.14167 | 0.00215  | -0.25653 | 1.88E-08 |
| 5.71E-06 | -0.329   | 2.99E-13 | -0.07273 | 0.11649  | -0.01906 | 0.68118  | -0.2142  | 3.00E-06 |

|          |          |          |          |          |          |          |          |          |
|----------|----------|----------|----------|----------|----------|----------|----------|----------|
| 8.23E-09 | -0.35386 | 3.19E-15 | -0.04542 | 0.3274   | -0.00567 | 0.90268  | -0.09384 | 0.04268  |
| 6.84E-18 | -0.52511 | 1.87E-34 | -0.11438 | 0.01339  | -0.11592 | 0.01218  | -0.11623 | 0.01195  |
| 3.98E-16 | -0.4983  | 1.12E-30 | -0.09321 | 0.04408  | -0.11114 | 0.01628  | -0.2179  | 2.00E-06 |
| 9.65E-08 | -0.3151  | 3.18E-12 | -0.0978  | 0.03462  | -0.01281 | 0.78241  | 0.000595 | 0.98976  |
| 1.17E-30 | -0.66903 | 6.52E-62 | -0.08623 | 0.06262  | -0.10197 | 0.02756  | -0.13543 | 0.00336  |
| 1.08E-11 | -0.49807 | 1.20E-30 | -0.13178 | 0.00434  | -0.09205 | 0.0468   | -0.12581 | 0.00648  |
| 6.35E-08 | -0.2886  | 2.07E-10 | 0.110528 | 0.01687  | -0.06431 | 0.1653   | -0.06814 | 0.14146  |
| 0.01114  | -0.19143 | 3.12E-05 | -0.08705 | 0.06014  | -0.10921 | 0.01824  | -0.09579 | 0.03853  |
| 2.18E-16 | -0.38443 | 6.77E-18 | -0.08914 | 0.05424  | -0.06425 | 0.16571  | -0.31214 | 5.19E-12 |
| 5.32E-09 | -0.39804 | 3.52E-19 | -0.09465 | 0.0409   | -0.06279 | 0.17556  | -0.08623 | 0.06262  |
| 1.25E-08 | -0.33844 | 5.60E-14 | -0.18116 | 8.25E-05 | -0.1106  | 0.0168   | -0.13295 | 0.004    |
| 8.46E-19 | -0.50336 | 2.29E-31 | -0.14928 | 0.00121  | -0.09344 | 0.04357  | -0.23656 | 2.31E-07 |
| 0.18203  | 0.004966 | 0.91476  | -0.05895 | 0.2035   | 0.002508 | 0.9569   | -0.07246 | 0.11789  |
| 4.94E-13 | -0.5048  | 1.45E-31 | -0.12653 | 0.00618  | -0.07945 | 0.08633  | -0.15598 | 0.00072  |
| 9.54E-06 | -0.36773 | 2.12E-16 | -0.17385 | 0.00016  | -0.20898 | 5.25E-06 | -0.1621  | 0.00044  |
| 0.02558  | -0.13185 | 0.00432  | 0.00363  | 0.93764  | -0.04568 | 0.32463  | 0.089372 | 0.0536   |
| 0.16403  | -0.24528 | 7.93E-08 | 0.04144  | 0.37159  | 0.013887 | 0.7647   | -0.00565 | 0.90313  |
| 1.90E-13 | -0.42997 | 1.95E-22 | -0.08678 | 0.06096  | -0.19143 | 3.12E-05 | -0.14367 | 0.00186  |
| 0.003    | -0.13141 | 0.00445  | 0.067963 | 0.14252  | 0.01272  | 0.78397  | -0.15906 | 0.00056  |
| 7.67E-21 | -0.55162 | 1.54E-38 | -0.11784 | 0.01082  | -0.06043 | 0.19237  | -0.06436 | 0.16498  |
| 6.37E-28 | -0.56837 | 2.62E-41 | -0.02392 | 0.60617  | -0.10441 | 0.02404  | -0.12962 | 0.00502  |
| 5.88E-10 | -0.37808 | 2.57E-17 | -0.06453 | 0.16389  | 0.017618 | 0.70414  | -0.11735 | 0.01115  |
| 4.61E-08 | -0.38669 | 4.18E-18 | -0.11852 | 0.01036  | -0.08665 | 0.06133  | -0.0244  | 0.59895  |
| 7.78E-20 | -0.48425 | 7.90E-29 | -0.07177 | 0.12144  | -0.03767 | 0.41674  | -0.13444 | 0.00361  |
| 0.20836  | -0.17909 | 9.97E-05 | -0.0445  | 0.3373   | -0.07446 | 0.10805  | -0.02934 | 0.5271   |
| 1.18E-29 | -0.56697 | 4.51E-41 | -0.08886 | 0.05499  | -0.06309 | 0.1735   | -0.0717  | 0.12177  |
| 8.14E-10 | -0.3905  | 1.84E-18 | -0.11993 | 0.00948  | -0.0177  | 0.7028   | -0.0035  | 0.93981  |
| 6.90E-26 | -0.62006 | 5.95E-51 | -0.07584 | 0.10166  | -0.07663 | 0.09812  | -0.03046 | 0.51143  |
| 2.15E-17 | -0.43527 | 5.19E-23 | -0.16425 | 0.00037  | -0.07571 | 0.10225  | -0.30833 | 9.63E-12 |
| 6.13E-17 | -0.5569  | 2.15E-39 | -0.1499  | 0.00116  | -0.09948 | 0.0316   | -0.13365 | 0.00381  |
| 0.00022  | -0.41525 | 6.83E-21 | -0.23438 | 3.01E-07 | -0.2079  | 5.89E-06 | -0.02604 | 0.57465  |
| 0.00061  | -0.29767 | 5.20E-11 | -0.04194 | 0.36588  | -0.14264 | 0.002    | -0.09476 | 0.04067  |
| 7.47E-10 | -0.34601 | 1.40E-14 | -0.07084 | 0.12632  | -0.03641 | 0.43246  | 0.033511 | 0.47002  |
| 2.10E-08 | -0.35816 | 1.40E-15 | -0.13213 | 0.00423  | -0.03641 | 0.43246  | -0.03092 | 0.50509  |
| 6.15E-30 | -0.64569 | 1.94E-56 | -0.12178 | 0.00843  | -0.10913 | 0.01832  | -0.114   | 0.0137   |
| 4.05E-40 | -0.67411 | 3.60E-63 | -0.0993  | 0.03192  | -0.1309  | 0.00461  | -0.1778  | 0.00011  |
| 1.00E-16 | -0.48719 | 3.29E-29 | -0.05702 | 0.21875  | -0.06966 | 0.1328   | -0.18025 | 8.97E-05 |
| 1.68E-06 | -0.36745 | 2.25E-16 | -0.08956 | 0.0531   | -0.11379 | 0.01387  | 0.004047 | 0.93049  |
| 5.84E-25 | -0.52114 | 7.11E-34 | -0.16334 | 0.00039  | -0.04913 | 0.28937  | -0.20489 | 8.07E-06 |
| 3.55E-16 | -0.50889 | 3.95E-32 | -0.11785 | 0.01081  | -0.09894 | 0.03255  | 0.0429   | 0.35496  |
| 1.94E-18 | -0.46771 | 9.30E-27 | -0.03698 | 0.42527  | -0.04204 | 0.36469  | -0.26165 | 9.50E-09 |
| 3.09E-13 | -0.47597 | 8.86E-28 | -0.09142 | 0.04833  | -0.08979 | 0.05248  | -0.25279 | 3.05E-08 |
| 7.25E-17 | -0.57617 | 1.18E-42 | -0.12423 | 0.00719  | -0.13025 | 0.00481  | -0.13178 | 0.00434  |
| 6.10E-13 | -0.53728 | 2.76E-36 | -0.13626 | 0.00317  | -0.15719 | 0.00065  | -0.17711 | 0.00012  |
| 1.05E-15 | -0.54431 | 2.25E-37 | -0.08821 | 0.05679  | -0.103   | 0.02602  | -0.02633 | 0.57036  |

|          |          |          |          |          |          |          |          |          |
|----------|----------|----------|----------|----------|----------|----------|----------|----------|
| 9.83E-09 | -0.50577 | 1.07E-31 | -0.17305 | 0.00017  | -0.15921 | 0.00055  | -0.15031 | 0.00112  |
| 1.67E-17 | -0.50425 | 1.73E-31 | -0.12547 | 0.00663  | -0.05463 | 0.23866  | -0.10574 | 0.0223   |
| 3.16E-24 | -0.63316 | 1.08E-53 | -0.10691 | 0.02084  | -0.09675 | 0.03661  | -0.06788 | 0.14304  |
| 1.19E-25 | -0.62175 | 2.68E-51 | -0.03855 | 0.40588  | -0.0708  | 0.12654  | -0.16448 | 0.00036  |
| 2.71E-09 | -0.24092 | 1.36E-07 | -0.0525  | 0.25751  | -0.03993 | 0.38928  | -0.25704 | 1.75E-08 |
| 7.18E-08 | -0.38139 | 1.29E-17 | -0.14643 | 0.00151  | -0.03556 | 0.44323  | -0.11585 | 0.01224  |
| 3.20E-16 | -0.54757 | 6.86E-38 | -0.20672 | 6.67E-06 | -0.157   | 0.00066  | -0.10265 | 0.02654  |
| 3.39E-11 | -0.40971 | 2.49E-20 | -0.06219 | 0.17973  | -0.01174 | 0.80017  | 0.00727  | 0.87549  |
| 0.00029  | -0.3933  | 1.00E-18 | -0.07039 | 0.12879  | -0.13994 | 0.00244  | -0.05691 | 0.21962  |
| 8.04E-05 | -0.29679 | 5.97E-11 | 0.035299 | 0.44665  | -0.04306 | 0.35314  | -0.08885 | 0.05503  |
| 8.17E-07 | -0.29596 | 6.78E-11 | -0.12986 | 0.00494  | -0.05398 | 0.24435  | -0.15374 | 0.00086  |
| 5.23E-18 | -0.5511  | 1.88E-38 | -0.15605 | 0.00071  | -0.16664 | 0.0003   | -0.09265 | 0.04537  |
| 0.01447  | -0.21066 | 4.39E-06 | -0.06339 | 0.17147  | -0.07848 | 0.09027  | -0.12747 | 0.00581  |
| 4.27E-05 | -0.34897 | 8.06E-15 | -0.09365 | 0.0431   | -0.05601 | 0.22704  | -0.06664 | 0.15048  |
| 2.47E-07 | -0.39716 | 4.27E-19 | -0.08229 | 0.07564  | -0.03113 | 0.50223  | -0.1812  | 8.22E-05 |
| 5.19E-05 | -0.26039 | 1.12E-08 | -0.04455 | 0.33671  | -0.00141 | 0.97581  | -0.09055 | 0.05051  |
| 1.64E-26 | -0.49725 | 1.55E-30 | -0.07552 | 0.10313  | -0.00047 | 0.99184  | -0.15968 | 0.00053  |
| 3.01E-12 | -0.44414 | 5.38E-24 | -0.09352 | 0.04339  | -0.18212 | 7.55E-05 | -0.16176 | 0.00045  |
| 9.63E-08 | -0.30133 | 2.94E-11 | -0.0408  | 0.37901  | 0.004509 | 0.92258  | -0.16106 | 0.00048  |
| 5.58E-13 | -0.42417 | 8.09E-22 | -0.03996 | 0.3889   | -0.01209 | 0.79434  | -0.00655 | 0.8877   |
| 0.01073  | -0.26803 | 3.99E-09 | -0.08779 | 0.058    | -0.01696 | 0.71467  | -0.2006  | 1.25E-05 |
| 1.60E-11 | -0.49177 | 8.28E-30 | -0.12939 | 0.0051   | -0.07512 | 0.10498  | -0.11953 | 0.00973  |
| 3.34E-16 | -0.39652 | 4.92E-19 | -0.11151 | 0.01591  | -0.09273 | 0.0452   | -0.24504 | 8.17E-08 |
| 1.42E-10 | -0.37021 | 1.29E-16 | -0.09706 | 0.03601  | -0.12092 | 0.0089   | -0.20445 | 8.45E-06 |
| 7.00E-15 | -0.42508 | 6.49E-22 | -0.09591 | 0.03827  | -0.08456 | 0.0679   | -0.14094 | 0.00227  |
| 1.10E-34 | -0.67717 | 6.12E-64 | -0.11224 | 0.01523  | -0.1368  | 0.00305  | -0.24827 | 5.45E-08 |
| 1.27E-07 | -0.33983 | 4.35E-14 | -0.03993 | 0.38934  | -0.02416 | 0.6025   | -0.06027 | 0.19358  |
| 9.14E-32 | -0.62183 | 2.58E-51 | -0.06943 | 0.13409  | -0.11611 | 0.01204  | -0.0539  | 0.245    |
| 2.13E-15 | -0.40226 | 1.37E-19 | -0.08816 | 0.05693  | -0.06993 | 0.13132  | -0.29153 | 1.33E-10 |
| 1.31E-13 | -0.50142 | 4.22E-31 | -0.1609  | 0.00048  | -0.1764  | 0.00013  | -0.06362 | 0.16992  |
| 6.19E-10 | -0.44198 | 9.40E-24 | -0.08624 | 0.06258  | -0.06415 | 0.16635  | -0.17198 | 0.00019  |
| 6.92E-15 | -0.49906 | 8.82E-31 | -0.11513 | 0.01279  | -0.11768 | 0.01092  | -0.19237 | 2.85E-05 |
| 7.57E-37 | -0.67437 | 3.11E-63 | -0.12889 | 0.00528  | -0.10654 | 0.02129  | -0.15406 | 0.00084  |
| 4.39E-33 | -0.65745 | 3.92E-59 | -0.13531 | 0.00339  | -0.08796 | 0.05751  | -0.16316 | 0.0004   |
| 3.60E-08 | -0.26771 | 4.17E-09 | 0.009656 | 0.83515  | -0.10697 | 0.02077  | -0.11662 | 0.01167  |
| 2.39E-24 | -0.54318 | 3.38E-37 | -0.03432 | 0.45935  | -0.10761 | 0.02002  | -0.14253 | 0.00202  |
| 1.73E-15 | -0.53247 | 1.49E-35 | -0.13719 | 0.00297  | -0.12137 | 0.00865  | -0.08288 | 0.07356  |
| 2.42E-27 | -0.61043 | 5.07E-49 | -0.11391 | 0.01378  | -0.11648 | 0.01177  | -0.11012 | 0.01728  |
| 2.41E-10 | -0.34813 | 9.44E-15 | -0.08728 | 0.05948  | -0.07261 | 0.1171   | -0.20535 | 7.70E-06 |
| 4.22E-07 | -0.26364 | 7.27E-09 | -0.067   | 0.14827  | -0.0678  | 0.14351  | -0.00919 | 0.84292  |
| 1.16E-07 | -0.41842 | 3.23E-21 | -0.19501 | 2.20E-05 | -0.12568 | 0.00654  | -0.12363 | 0.00748  |
| 1.74E-19 | -0.638   | 9.75E-55 | -0.10553 | 0.02256  | -0.06953 | 0.13355  | -0.20394 | 8.90E-06 |
| 4.83E-12 | -0.42414 | 8.16E-22 | -0.09138 | 0.04844  | -0.09089 | 0.04965  | -0.03212 | 0.48864  |
| 3.00E-12 | -0.50207 | 3.44E-31 | -0.10347 | 0.02535  | -0.08759 | 0.05856  | -0.09297 | 0.04463  |
| 5.58E-05 | -0.38613 | 4.71E-18 | -0.12463 | 0.007    | -0.10345 | 0.02537  | -0.04642 | 0.31681  |

|          |          |          |          |          |          |          |          |          |
|----------|----------|----------|----------|----------|----------|----------|----------|----------|
| 1.84E-11 | -0.50298 | 2.58E-31 | -0.0976  | 0.03498  | -0.05583 | 0.2285   | -0.04356 | 0.34755  |
| 4.60E-17 | -0.44131 | 1.12E-23 | -0.09204 | 0.04682  | -0.09229 | 0.04622  | -0.20971 | 4.86E-06 |
| 9.47E-12 | -0.44861 | 1.67E-24 | -0.04642 | 0.31684  | -0.09585 | 0.0384   | -0.18851 | 4.14E-05 |
| 3.95E-20 | -0.41449 | 8.17E-21 | -0.15439 | 0.00082  | -0.06835 | 0.14024  | -0.19824 | 1.59E-05 |
| 2.46E-13 | -0.32095 | 1.19E-12 | -0.03858 | 0.40554  | -0.07126 | 0.12412  | -0.10975 | 0.01767  |
| 7.10E-25 | -0.61499 | 6.29E-50 | -0.11018 | 0.01723  | -0.056   | 0.22706  | -0.10598 | 0.02199  |
| 0.09981  | -0.15201 | 0.00098  | -0.05672 | 0.22118  | -0.00237 | 0.95932  | -0.06033 | 0.19314  |
| 2.99E-05 | -0.23943 | 1.64E-07 | -0.06324 | 0.17244  | -0.01347 | 0.7716   | -0.04216 | 0.36331  |
| 2.80E-13 | -0.31813 | 1.92E-12 | -0.14738 | 0.0014   | -0.05662 | 0.222    | -0.04768 | 0.30387  |
| 7.23E-14 | -0.47552 | 1.01E-27 | -0.10484 | 0.02347  | -0.10604 | 0.02192  | -0.23536 | 2.68E-07 |
| 2.49E-23 | -0.55438 | 5.55E-39 | -0.15657 | 0.00069  | -0.22555 | 8.45E-07 | -0.28207 | 5.45E-10 |
| 8.47E-12 | -0.53572 | 4.80E-36 | -0.08973 | 0.05265  | -0.10871 | 0.01878  | -0.13462 | 0.00356  |
| 5.39E-07 | -0.22635 | 7.70E-07 | -0.06671 | 0.15003  | 0.01125  | 0.80841  | 0.01022  | 0.82566  |
| 1.35E-05 | -0.31579 | 2.84E-12 | 0.051763 | 0.26427  | 0.02003  | 0.66594  | -0.05276 | 0.25514  |
| 3.02E-15 | -0.42735 | 3.72E-22 | -0.12011 | 0.00937  | -0.05032 | 0.27783  | -0.0924  | 0.04597  |
| 3.74E-29 | -0.54623 | 1.12E-37 | -0.13538 | 0.00338  | -0.09085 | 0.04976  | -0.25305 | 2.95E-08 |
| 1.17E-19 | -0.44164 | 1.03E-23 | -0.13225 | 0.0042   | -0.10747 | 0.02019  | -0.24632 | 6.97E-08 |
| 2.06E-29 | -0.66285 | 2.05E-60 | -0.09929 | 0.03193  | -0.21537 | 2.64E-06 | -0.21943 | 1.69E-06 |
| 5.52E-07 | -0.3617  | 7.01E-16 | -0.12567 | 0.00654  | -0.06031 | 0.19326  | -0.15118 | 0.00105  |
| 0.59533  | 0.030704 | 0.50804  | 0.188395 | 4.18E-05 | 0.187386 | 4.61E-05 | 0.229651 | 5.26E-07 |
| 0.24955  | 0.213025 | 3.41E-06 | 0.146064 | 0.00155  | 0.243859 | 9.48E-08 | 0.137527 | 0.0029   |
| 0.56914  | 0.045646 | 0.32498  | 0.196164 | 1.96E-05 | 0.151952 | 0.00099  | 0.25208  | 3.35E-08 |
| 0.77531  | 0.049345 | 0.28726  | 0.116964 | 0.01142  | 0.206372 | 6.92E-06 | 0.04262  | 0.35811  |
| 0.94635  | 0.013358 | 0.77343  | 0.133177 | 0.00394  | 0.151235 | 0.00104  | 0.123327 | 0.00763  |
| 0.31105  | -0.0225  | 0.62766  | 0.137786 | 0.00285  | 0.166339 | 0.00031  | 0.055775 | 0.22897  |
| 0.6313   | 0.03127  | 0.50024  | 0.215706 | 2.55E-06 | 0.129863 | 0.00494  | 0.060815 | 0.18955  |
| 0.45572  | 0.00451  | 0.92257  | 0.191516 | 3.10E-05 | 0.149612 | 0.00118  | 0.171993 | 0.00019  |
| 0.75488  | 0.050385 | 0.27721  | 0.170243 | 0.00022  | 0.172154 | 0.00019  | 0.141589 | 0.00216  |
| 0.77038  | 0.015805 | 0.73336  | 0.187901 | 4.39E-05 | 0.203289 | 9.53E-06 | 0.160172 | 0.00051  |
| 0.00057  | -0.15479 | 0.00079  | 0.13038  | 0.00477  | 0.123103 | 0.00774  | -0.04421 | 0.34043  |
| 0.00017  | 0.256669 | 1.84E-08 | 0.209929 | 4.75E-06 | 0.209572 | 4.93E-06 | 0.301447 | 2.89E-11 |
| 0.34269  | -0.00153 | 0.97376  | 0.17148  | 0.0002   | 0.141867 | 0.00212  | 0.058155 | 0.20968  |
| 0.66958  | 0.048445 | 0.29615  | 0.168644 | 0.00025  | 0.157537 | 0.00063  | 0.251067 | 3.81E-08 |
| 0.32033  | -0.01282 | 0.78224  | 0.193669 | 2.51E-05 | 0.239739 | 1.57E-07 | 0.156731 | 0.00068  |
| 0.63562  | -0.00564 | 0.90328  | 0.184904 | 5.82E-05 | 0.196235 | 1.95E-05 | 0.16951  | 0.00023  |
| 0.13962  | 0.046273 | 0.31836  | 0.155785 | 0.00073  | 0.165941 | 0.00032  | 0.113832 | 0.01384  |
| 0.56478  | 0.003757 | 0.93546  | 0.201467 | 1.15E-05 | 0.213621 | 3.19E-06 | 0.175122 | 0.00014  |
| 0.00755  | -0.08991 | 0.05217  | 0.119307 | 0.00986  | 0.249064 | 4.92E-08 | 0.234389 | 3.00E-07 |
| 0.01065  | -0.05642 | 0.22366  | 0.164838 | 0.00035  | 0.232851 | 3.61E-07 | 0.051715 | 0.26471  |
| 0.67741  | 0.012754 | 0.7834   | 0.197769 | 1.67E-05 | 0.191551 | 3.09E-05 | 0.168339 | 0.00026  |
| 0.65346  | 0.022324 | 0.63038  | 0.192248 | 2.88E-05 | 0.205341 | 7.70E-06 | 0.248225 | 5.48E-08 |
| 0.06719  | -0.04422 | 0.34037  | 0.101038 | 0.02902  | 0.095299 | 0.03953  | 0.125838 | 0.00647  |
| 0.07527  | -0.05777 | 0.21276  | 0.181647 | 7.89E-05 | 0.20345  | 9.37E-06 | 0.12233  | 0.00813  |
| 0.45661  | 0.011417 | 0.80563  | 0.169745 | 0.00023  | 0.105659 | 0.0224   | 0.118742 | 0.01022  |
| 0.18945  | 0.026475 | 0.56821  | 0.289017 | 1.95E-10 | 0.086376 | 0.06217  | 0.118316 | 0.0105   |

|          |          |          |          |          |          |          |          |          |
|----------|----------|----------|----------|----------|----------|----------|----------|----------|
| 0.02662  | 0.176824 | 0.00012  | 0.146602 | 0.00149  | 0.14448  | 0.00175  | 0.034    | 0.46357  |
| 0.44373  | -0.02324 | 0.61642  | 0.079443 | 0.08637  | 0.137253 | 0.00296  | 0.077325 | 0.09511  |
| 0.01616  | -0.13151 | 0.00442  | 0.088052 | 0.05725  | 0.113937 | 0.01375  | 0.046794 | 0.31294  |
| 0.78457  | 0.063601 | 0.17002  | 0.181195 | 8.22E-05 | 0.317819 | 2.02E-12 | 0.163492 | 0.00039  |
| 0.40884  | 0.05493  | 0.23611  | 0.18376  | 6.48E-05 | 0.251498 | 3.61E-08 | 0.209815 | 4.81E-06 |
| 0.08782  | -0.05013 | 0.27964  | 0.197675 | 1.69E-05 | 0.160597 | 0.00049  | 0.091489 | 0.04816  |
| 0.00035  | 0.236654 | 2.29E-07 | 0.225402 | 8.59E-07 | 0.243414 | 1.00E-07 | 0.352162 | 4.42E-15 |
| 0.11997  | 0.056187 | 0.22554  | 0.175623 | 0.00014  | 0.151299 | 0.00104  | 0.155404 | 0.00075  |
| 2.38E-07 | -0.22562 | 8.38E-07 | 0.091899 | 0.04716  | 0.081971 | 0.07679  | 0.030879 | 0.50561  |
| 0.51856  | 0.109325 | 0.01811  | 0.238516 | 1.83E-07 | 0.108282 | 0.01925  | 0.072421 | 0.11808  |
| 0.79113  | 0.014474 | 0.75507  | 0.098912 | 0.0326   | 0.106237 | 0.02167  | 0.163668 | 0.00038  |
| 0.08338  | -0.01435 | 0.75714  | 0.161356 | 0.00046  | 0.204217 | 8.65E-06 | 0.061327 | 0.18584  |
| 0.36592  | 0.107829 | 0.01977  | 0.161995 | 0.00044  | 0.115603 | 0.01242  | 0.172069 | 0.00019  |
| 0.85004  | 0.029495 | 0.52489  | 0.175775 | 0.00013  | 0.155101 | 0.00077  | 0.100481 | 0.02992  |
| 0.13962  | -0.04995 | 0.28142  | 0.17203  | 0.00019  | 0.175383 | 0.00014  | 0.121525 | 0.00857  |
| 0.22588  | -0.02295 | 0.62089  | 0.192481 | 2.82E-05 | 0.23739  | 2.10E-07 | 0.131822 | 0.00432  |
| 0.35088  | 0.109297 | 0.01814  | 0.349973 | 6.68E-15 | 0.185247 | 5.64E-05 | 0.169006 | 0.00024  |
| 0.20902  | 0.230277 | 4.89E-07 | 0.139575 | 0.0025   | 0.175495 | 0.00014  | 0.045092 | 0.33089  |
| 0.81287  | -0.01071 | 0.81748  | 0.180212 | 9.00E-05 | 0.170967 | 0.00021  | 0.150297 | 0.00112  |
| 0.7652   | 0.08936  | 0.05363  | 0.158417 | 0.00059  | 0.183642 | 6.55E-05 | 0.22833  | 6.13E-07 |
| 0.61562  | -0.00615 | 0.89451  | 0.181268 | 8.17E-05 | 0.173121 | 0.00017  | 0.154893 | 0.00078  |
| 0.58801  | 0.002322 | 0.96009  | 0.142349 | 0.00204  | 0.141722 | 0.00214  | 0.090077 | 0.05174  |
| 0.51732  | -0.04334 | 0.34999  | 0.10679  | 0.02099  | 0.11078  | 0.01662  | 0.109168 | 0.01828  |
| 0.3842   | 0.026691 | 0.56506  | 0.176751 | 0.00012  | 0.211606 | 3.97E-06 | 0.226966 | 7.18E-07 |
| 0.63339  | 0.007005 | 0.87999  | 0.19502  | 2.20E-05 | 0.185747 | 5.38E-05 | 0.203214 | 9.60E-06 |
| 0.87995  | 0.092872 | 0.04486  | 0.163395 | 0.00039  | 0.259099 | 1.34E-08 | 0.040055 | 0.3878   |
| 0.76322  | 0.034599 | 0.45572  | 0.198885 | 1.49E-05 | 0.263818 | 7.09E-09 | 0.172113 | 0.00019  |
| 0.78533  | 0.07465  | 0.10715  | 0.10334  | 0.02554  | 0.166719 | 0.0003   | 0.096838 | 0.03644  |
| 0.00063  | -0.1224  | 0.0081   | 0.135244 | 0.00341  | 0.135699 | 0.0033   | 0.077113 | 0.09603  |
| 0.07952  | -0.00146 | 0.97485  | 0.117183 | 0.01127  | 0.05955  | 0.19894  | 0.075119 | 0.10496  |
| 0.04957  | -0.01413 | 0.76078  | 0.228902 | 5.74E-07 | 0.108194 | 0.01935  | 0.231935 | 4.02E-07 |
| 0.59231  | 0.081641 | 0.07799  | 0.123969 | 0.00731  | 0.098237 | 0.03381  | 0.095742 | 0.03862  |
| 0.69774  | 0.025107 | 0.58837  | 0.182566 | 7.24E-05 | 0.204613 | 8.31E-06 | 0.183124 | 6.88E-05 |
| 0.0614   | 0.105964 | 0.02201  | 0.166938 | 0.00029  | 0.226471 | 7.60E-07 | 0.259995 | 1.19E-08 |
| 0.24767  | -0.04115 | 0.37496  | 0.175091 | 0.00014  | 0.134272 | 0.00365  | 0.12384  | 0.00738  |
| 0.17934  | 0.135905 | 0.00325  | 0.158977 | 0.00056  | 0.240878 | 1.37E-07 | 0.260048 | 1.18E-08 |
| 0.81846  | 0.011847 | 0.79846  | 0.115874 | 0.01222  | 0.097311 | 0.03553  | 0.156466 | 0.00069  |
| 0.35875  | 0.104835 | 0.02347  | 0.178819 | 0.0001   | 0.252328 | 3.24E-08 | 0.17609  | 0.00013  |
| 0.13019  | 0.154101 | 0.00083  | 0.185393 | 5.56E-05 | 0.211922 | 3.84E-06 | 0.196406 | 1.91E-05 |
| 0.08374  | 0.159287 | 0.00055  | 0.152996 | 0.00091  | 0.157775 | 0.00062  | 0.164369 | 0.00036  |
| 0.42804  | 0.101991 | 0.02753  | 0.183972 | 6.36E-05 | 0.175075 | 0.00014  | 0.311295 | 5.95E-12 |
| 0.85051  | -0.01563 | 0.73627  | 0.480093 | 2.68E-28 | 0.173279 | 0.00017  | 0.080814 | 0.08106  |
| 0.24668  | -0.02326 | 0.61612  | 0.112788 | 0.01474  | 0.14036  | 0.00236  | 0.117963 | 0.01073  |
| 0.95286  | 0.006019 | 0.89678  | 0.123929 | 0.00733  | 0.129434 | 0.00509  | 0.059332 | 0.20059  |
| 0.21999  | -0.04611 | 0.32007  | 0.171898 | 0.00019  | 0.151463 | 0.00103  | 0.160548 | 0.0005   |



|          |          |          |          |          |          |          |          |          |
|----------|----------|----------|----------|----------|----------|----------|----------|----------|
| 0.31765  | 0.060967 | 0.18844  | 0.580635 | 1.92E-43 | 0.117286 | 0.0112   | 0.092893 | 0.04481  |
| 0.13378  | -0.05444 | 0.24029  | 0.182647 | 7.19E-05 | 0.220954 | 1.42E-06 | 0.101633 | 0.02808  |
| 0.33619  | -0.02495 | 0.59065  | 0.156353 | 0.0007   | 0.149242 | 0.00122  | 0.106858 | 0.02091  |
| 0.9135   | 0.027826 | 0.54862  | 0.165204 | 0.00034  | 0.150164 | 0.00113  | 0.024789 | 0.5931   |
| 0.13401  | 0.087719 | 0.0582   | 0.191505 | 3.10E-05 | 0.164677 | 0.00035  | 0.151107 | 0.00105  |
| 9.51E-05 | -0.18521 | 5.66E-05 | 0.073901 | 0.11073  | 0.062145 | 0.18003  | 0.08334  | 0.07197  |
| 0.07414  | -0.04753 | 0.30537  | 0.166114 | 0.00031  | 0.197625 | 1.69E-05 | 0.132395 | 0.00416  |
| 0.98283  | -0.0072  | 0.87665  | 0.091771 | 0.04747  | 0.076091 | 0.10052  | 0.04659  | 0.31506  |
| 0.17393  | -0.03668 | 0.42901  | 0.18654  | 4.99E-05 | 0.166147 | 0.00031  | 0.101059 | 0.02899  |
| 0.03231  | 0.191425 | 3.12E-05 | 0.189125 | 3.90E-05 | 0.298304 | 4.72E-11 | 0.068991 | 0.13657  |
| 0.42725  | 0.027982 | 0.54639  | 0.339879 | 4.32E-14 | 0.187364 | 4.62E-05 | 0.092971 | 0.04463  |
| 0.0757   | 0.144798 | 0.00171  | 0.209009 | 5.24E-06 | 0.242146 | 1.17E-07 | 0.352587 | 4.07E-15 |
| 0.18265  | -0.00408 | 0.93001  | 0.144521 | 0.00174  | 0.146527 | 0.0015   | 0.010097 | 0.82773  |
| 0.3657   | -0.01131 | 0.80737  | 0.181162 | 8.25E-05 | 0.199788 | 1.36E-05 | 0.139764 | 0.00247  |
| 0.01011  | -0.14175 | 0.00214  | 0.091484 | 0.04817  | 0.108791 | 0.01869  | 0.060952 | 0.18855  |
| 0.18774  | -0.0381  | 0.41143  | 0.142301 | 0.00205  | 0.117944 | 0.01075  | 0.03854  | 0.40601  |
| 0.02822  | -0.10578 | 0.02224  | 0.089095 | 0.05435  | 0.083521 | 0.07135  | 0.108888 | 0.01858  |
| 0.2934   | -0.00846 | 0.85524  | 0.189089 | 3.91E-05 | 0.201568 | 1.14E-05 | 0.135699 | 0.0033   |
| 0.0031   | -0.09627 | 0.03756  | 0.097849 | 0.03452  | 0.301802 | 2.73E-11 | 0.042255 | 0.36225  |
| 0.12601  | -0.00772 | 0.86779  | 0.111487 | 0.01594  | 0.080585 | 0.08193  | 0.056222 | 0.22525  |
| 0.75764  | 0.091238 | 0.04878  | 0.16688  | 0.00029  | 0.152544 | 0.00094  | 0.132583 | 0.0041   |
| 0.10225  | -0.09754 | 0.0351   | 0.157059 | 0.00066  | 0.086413 | 0.06206  | 0.088805 | 0.05514  |
| 0.02706  | -0.10163 | 0.02809  | 0.136867 | 0.00304  | 0.123648 | 0.00747  | 0.086112 | 0.06298  |
| 0.72908  | 0.137732 | 0.00286  | 0.253393 | 2.82E-08 | 0.140335 | 0.00237  | 0.216477 | 2.34E-06 |
| 0.05607  | -0.07912 | 0.08766  | 0.093038 | 0.04448  | 0.071725 | 0.12167  | -0.05633 | 0.22432  |
| 0.74209  | 0.07464  | 0.1072   | 0.167858 | 0.00027  | 0.130469 | 0.00474  | -0.02313 | 0.61814  |
| 0.36427  | -0.0377  | 0.41628  | 0.666039 | 3.50E-61 | 0.138127 | 0.00278  | 0.081021 | 0.08028  |
| 0.8838   | 0.028185 | 0.54347  | 0.182634 | 7.20E-05 | 0.188693 | 4.07E-05 | 0.169965 | 0.00022  |
| 0.00096  | 0.200989 | 1.21E-05 | 0.169022 | 0.00024  | 0.122672 | 0.00796  | 0.212608 | 3.56E-06 |
| 0.51462  | 0.112311 | 0.01517  | 0.271578 | 2.44E-09 | 0.248453 | 5.32E-08 | 0.183361 | 6.73E-05 |
| 0.07253  | 0.152043 | 0.00098  | 0.163793 | 0.00038  | 0.154362 | 0.00082  | 0.14468  | 0.00172  |
| 0.0047   | 0.238625 | 1.80E-07 | 0.142346 | 0.00205  | 0.139645 | 0.00249  | 0.249134 | 4.88E-08 |
| 0.81558  | 0.024208 | 0.6018   | 0.136083 | 0.00321  | 0.229385 | 5.42E-07 | 0.085323 | 0.06544  |
| 0.95915  | 0.024051 | 0.60415  | 0.278141 | 9.62E-10 | 0.151234 | 0.00104  | 0.224392 | 9.64E-07 |
| 0.15818  | -0.0378  | 0.41512  | 0.181866 | 7.73E-05 | 0.209636 | 4.90E-06 | 0.117011 | 0.01139  |
| 0.20045  | -0.04171 | 0.36846  | 0.142165 | 0.00207  | 0.210018 | 4.71E-06 | 0.074149 | 0.10953  |
| 0.3849   | -0.00944 | 0.83881  | 0.19502  | 2.20E-05 | 0.093187 | 0.04414  | 0.053939 | 0.24468  |
| 0.01997  | -0.09268 | 0.04532  | 0.156562 | 0.00069  | 0.142894 | 0.00196  | 0.085354 | 0.06534  |
| 0.59111  | -0.00703 | 0.87954  | 0.255948 | 2.02E-08 | 0.105143 | 0.02306  | 0.124403 | 0.00711  |
| 0.83589  | 0.019047 | 0.68141  | 0.098931 | 0.03256  | 0.071981 | 0.12034  | 0.047987 | 0.30075  |
| 8.17E-05 | -0.11283 | 0.0147   | 0.094032 | 0.04224  | 0.073056 | 0.11488  | 0.188625 | 4.09E-05 |
| 0.21277  | 0.138045 | 0.00279  | 0.17796  | 0.00011  | 0.223419 | 1.08E-06 | 0.33726  | 6.93E-14 |
| 0.01108  | -0.07745 | 0.09458  | 0.165687 | 0.00032  | 0.168654 | 0.00025  | 0.137245 | 0.00296  |
| 0.40701  | 0.0069   | 0.88177  | 0.160938 | 0.00048  | 0.173341 | 0.00017  | 0.094322 | 0.04161  |
| 0.73019  | -0.00459 | 0.92119  | 0.134537 | 0.00358  | 0.154392 | 0.00082  | 0.138318 | 0.00274  |

|          |          |          |          |          |          |          |          |          |
|----------|----------|----------|----------|----------|----------|----------|----------|----------|
| 0.22448  | 0.054963 | 0.23583  | 0.166023 | 0.00031  | 0.175098 | 0.00014  | 0.220283 | 1.53E-06 |
| 0.18552  | 0.023834 | 0.60742  | 0.102827 | 0.02628  | 0.105367 | 0.02277  | 0.097395 | 0.03537  |
| 0.2827   | 0.054534 | 0.23951  | 0.072825 | 0.11604  | 0.049818 | 0.28267  | 0.08955  | 0.05313  |
| 0.73238  | 0.107736 | 0.01987  | 0.184087 | 6.29E-05 | 0.178729 | 0.0001   | 0.000781 | 0.98657  |
| 0.99718  | 0.071832 | 0.1211   | 0.102631 | 0.02657  | 0.196814 | 1.84E-05 | 0.008196 | 0.85978  |
| 0.5073   | 0.000886 | 0.98476  | 0.285362 | 3.36E-10 | 0.0779   | 0.09267  | 0.078316 | 0.09093  |
| 0.80136  | 0.023901 | 0.60641  | 0.098337 | 0.03363  | 0.090787 | 0.04991  | 0.055292 | 0.23304  |
| 0.377    | -0.02954 | 0.52422  | 0.11218  | 0.01529  | 0.048118 | 0.29943  | 0.072554 | 0.1174   |
| 2.29E-08 | -0.3144  | 3.57E-12 | 0.013004 | 0.77926  | -0.02556 | 0.58159  | -0.02511 | 0.58829  |
| 0.39181  | 0.140325 | 0.00237  | 0.164444 | 0.00036  | 0.215554 | 2.59E-06 | 0.175629 | 0.00014  |
| 0.45964  | -0.02435 | 0.59964  | 0.190692 | 3.35E-05 | 0.199645 | 1.38E-05 | 0.161608 | 0.00045  |
| 0.855    | 0.033975 | 0.4639   | 0.146251 | 0.00153  | 0.197211 | 1.77E-05 | 0.11468  | 0.01315  |
| 0.54912  | -0.0021  | 0.96386  | 0.170937 | 0.00021  | 0.211584 | 3.98E-06 | 0.117156 | 0.01129  |
| 0.73209  | 0.048825 | 0.29238  | 0.220361 | 1.52E-06 | 0.219512 | 1.67E-06 | 0.225362 | 8.63E-07 |
| 0.71905  | -0.05144 | 0.26726  | 0.11793  | 0.01076  | 0.112428 | 0.01507  | 0.055882 | 0.22808  |
| 0.26202  | 0.06731  | 0.14641  | 0.188512 | 4.14E-05 | 0.201284 | 1.17E-05 | 0.208856 | 5.32E-06 |
| 0.65005  | -0.01422 | 0.75931  | 0.129345 | 0.00512  | 0.156663 | 0.00068  | 0.119916 | 0.00949  |
| 0.00017  | 0.326401 | 4.70E-13 | 0.153737 | 0.00086  | 0.132771 | 0.00405  | 0.27556  | 1.39E-09 |
| 0.8241   | 0.083299 | 0.07211  | 0.262371 | 8.62E-09 | 0.214324 | 2.96E-06 | 0.139427 | 0.00253  |
| 0.31307  | 0.083621 | 0.07101  | 0.126383 | 0.00624  | 0.160261 | 0.00051  | 0.1305   | 0.00473  |
| 0.04714  | 0.057943 | 0.21136  | 0.137764 | 0.00285  | 0.05459  | 0.23903  | 0.037369 | 0.42044  |
| 0.0451   | -0.06717 | 0.14724  | 0.144686 | 0.00172  | 0.134529 | 0.00358  | 0.066617 | 0.15062  |
| 0.08734  | -0.05775 | 0.21292  | 0.055302 | 0.23295  | 0.101605 | 0.02813  | 0.051269 | 0.26886  |
| 0.37913  | 0.166901 | 0.00029  | 0.145535 | 0.00161  | 0.145348 | 0.00164  | 0.238475 | 1.84E-07 |
| 0.00085  | 0.210904 | 4.28E-06 | 0.176317 | 0.00013  | 0.17872  | 0.0001   | 0.318308 | 1.86E-12 |
| 0.2036   | 0.03353  | 0.46978  | 0.142907 | 0.00196  | 0.180944 | 8.42E-05 | 0.156785 | 0.00067  |
| 0.27987  | -0.03099 | 0.50406  | 0.16678  | 0.00029  | 0.145728 | 0.00159  | 0.061662 | 0.18344  |
| 0.55182  | 0.010615 | 0.81903  | 0.114504 | 0.01329  | 0.112128 | 0.01534  | 0.134703 | 0.00354  |
| 0.80656  | 0.101176 | 0.0288   | 0.225635 | 8.37E-07 | 0.138949 | 0.00262  | 0.152348 | 0.00096  |
| 0.01809  | -0.09898 | 0.03248  | 0.090236 | 0.05132  | 0.060537 | 0.19158  | 0.055174 | 0.23403  |
| 0.00567  | 0.178338 | 0.00011  | 0.200925 | 1.21E-05 | 0.226864 | 7.26E-07 | 0.326744 | 4.43E-13 |
| 0.01655  | -0.18318 | 6.85E-05 | 0.100907 | 0.02923  | 0.09105  | 0.04925  | 0.072806 | 0.11613  |
| 0.42593  | 0.051767 | 0.26423  | 0.203365 | 9.45E-06 | 0.216032 | 2.46E-06 | 0.206288 | 6.98E-06 |
| 0.81952  | 0.003126 | 0.94629  | 0.155876 | 0.00072  | 0.161802 | 0.00045  | 0.109316 | 0.01812  |
| 0.84862  | 0.032068 | 0.48937  | 0.185894 | 5.31E-05 | 0.201487 | 1.15E-05 | 0.251563 | 3.58E-08 |
| 0.01121  | 0.171377 | 0.0002   | 0.124954 | 0.00686  | 0.15713  | 0.00066  | 0.328639 | 3.19E-13 |
| 0.01193  | -0.06937 | 0.13442  | 0.077052 | 0.09629  | 0.046449 | 0.31652  | 0.018458 | 0.69075  |
| 0.02455  | -0.1391  | 0.00259  | 0.073577 | 0.11231  | 0.012898 | 0.78103  | 0.054098 | 0.24329  |
| 0.89347  | 0.014364 | 0.75688  | 0.188047 | 4.33E-05 | 0.268966 | 3.51E-09 | 0.176157 | 0.00013  |
| 0.48511  | 0.096021 | 0.03806  | 0.18627  | 5.12E-05 | 0.208216 | 5.70E-06 | 0.198964 | 1.48E-05 |
| 0.08394  | -0.07558 | 0.10283  | 0.166759 | 0.0003   | 0.159384 | 0.00055  | 0.069194 | 0.13542  |
| 0.10994  | 0.092802 | 0.04502  | 0.093771 | 0.04282  | 0.223835 | 1.03E-06 | 0.162301 | 0.00043  |
| 0.09966  | 0.137901 | 0.00282  | 0.194034 | 2.42E-05 | 0.195881 | 2.02E-05 | 0.342706 | 2.58E-14 |
| 0.63285  | -0.02093 | 0.65182  | 0.131514 | 0.00442  | 0.165559 | 0.00033  | 0.089174 | 0.05414  |
| 0.00861  | 0.125894 | 0.00645  | 0.14099  | 0.00226  | 0.173933 | 0.00016  | 0.095998 | 0.0381   |

|          |          |          |          |          |          |          |          |          |
|----------|----------|----------|----------|----------|----------|----------|----------|----------|
| 0.50696  | 0.104006 | 0.0246   | 0.11416  | 0.01357  | 0.224707 | 9.30E-07 | 0.10146  | 0.02835  |
| 0.91821  | 0.051807 | 0.26386  | 0.225593 | 8.41E-07 | 0.169728 | 0.00023  | 0.163882 | 0.00038  |
| 0.22264  | -0.04405 | 0.34217  | 0.148684 | 0.00127  | 0.165044 | 0.00034  | 0.125261 | 0.00672  |
| 0.00012  | -0.16164 | 0.00045  | 0.113898 | 0.01379  | 0.059868 | 0.19655  | 0.061828 | 0.18227  |
| 0.0023   | -0.14177 | 0.00213  | 0.062776 | 0.17564  | 0.06193  | 0.18154  | 0.012465 | 0.7882   |
| 0.12669  | 0.016527 | 0.72168  | 0.165704 | 0.00032  | 0.15737  | 0.00064  | 0.154773 | 0.00079  |
| 0.06756  | -0.05272 | 0.25554  | 0.240184 | 1.49E-07 | 0.202955 | 9.86E-06 | 0.115001 | 0.01289  |
| 0.22085  | 0.153375 | 0.00088  | 0.102941 | 0.02611  | 0.072164 | 0.11939  | 0.102891 | 0.02619  |
| 0.82836  | 0.021575 | 0.6419   | 0.11273  | 0.01479  | 0.127133 | 0.00594  | 0.077145 | 0.09589  |
| 0.15688  | -0.03378 | 0.46644  | 0.15696  | 0.00066  | 0.172882 | 0.00017  | 0.110721 | 0.01668  |
| 0.44026  | 0.125976 | 0.00641  | 0.143244 | 0.00191  | 0.183851 | 6.43E-05 | 0.09417  | 0.04194  |
| 0.43843  | 0.045004 | 0.33183  | 0.122055 | 0.00828  | 0.181162 | 8.25E-05 | 0.079893 | 0.08459  |
| 0.74948  | 0.052358 | 0.25881  | 0.145374 | 0.00163  | 0.167069 | 0.00029  | 0.126201 | 0.00632  |
| 0.03788  | -0.07696 | 0.09669  | 0.169859 | 0.00023  | 0.182353 | 7.39E-05 | 0.101242 | 0.0287   |
| 0.38207  | 0.052563 | 0.25694  | 0.076037 | 0.10077  | 0.126048 | 0.00638  | 0.053825 | 0.24568  |
| 0.32299  | -0.02119 | 0.64778  | 0.175011 | 0.00014  | 0.200311 | 1.29E-05 | 0.108843 | 0.01863  |
| 0.21313  | 0.07492  | 0.10588  | 0.157424 | 0.00064  | 0.163807 | 0.00038  | 0.189939 | 3.61E-05 |
| 0.04741  | -0.07432 | 0.10873  | 0.167702 | 0.00027  | 0.148261 | 0.00131  | 0.126081 | 0.00637  |
| 0.19785  | 0.142078 | 0.00209  | 0.235431 | 2.65E-07 | 0.197221 | 1.76E-05 | 0.202008 | 1.09E-05 |
| 0.01609  | -0.06628 | 0.15272  | 0.131837 | 0.00432  | 0.130432 | 0.00476  | 0.040205 | 0.38601  |
| 0.10531  | -0.03888 | 0.40185  | 0.178552 | 0.0001   | 0.192849 | 2.72E-05 | 0.143932 | 0.00182  |
| 0.0086   | -0.09375 | 0.04287  | 0.152222 | 0.00097  | 0.162405 | 0.00043  | 0.07434  | 0.10862  |
| 0.09545  | 0.06517  | 0.15971  | 0.091436 | 0.04829  | 0.085802 | 0.06393  | 0.167917 | 0.00027  |
| 0.91178  | -0.0066  | 0.88689  | 0.188481 | 4.15E-05 | 0.139665 | 0.00249  | 0.182765 | 7.11E-05 |
| 0.00037  | -0.12992 | 0.00492  | 0.129647 | 0.00502  | 0.120567 | 0.00911  | 0.064853 | 0.16175  |
| 0.35641  | 0.107399 | 0.02026  | 0.206533 | 6.80E-06 | 0.232582 | 3.72E-07 | 0.194676 | 2.27E-05 |
| 0.5166   | 0.035396 | 0.44541  | 0.196341 | 1.93E-05 | 0.203265 | 9.55E-06 | 0.160494 | 0.0005   |
| 0.02212  | 0.133246 | 0.00392  | 0.201145 | 1.19E-05 | 0.18605  | 5.23E-05 | 0.336101 | 8.53E-14 |
| 0.95178  | 0.112175 | 0.0153   | 0.138647 | 0.00268  | 0.11239  | 0.0151   | -0.01056 | 0.81998  |
| 8.29E-05 | 0.250971 | 3.86E-08 | 0.190412 | 3.45E-05 | 0.091594 | 0.0479   | 0.241209 | 1.32E-07 |
| 0.15858  | -0.10868 | 0.01881  | 0.077945 | 0.09248  | 0.09365  | 0.04309  | 0.143583 | 0.00187  |
| 0.00131  | -0.08436 | 0.06856  | 0.153845 | 0.00085  | 0.227016 | 7.14E-07 | -0.07874 | 0.08921  |
| 0.25982  | 0.004787 | 0.91783  | 0.16409  | 0.00037  | 0.2018   | 1.11E-05 | 0.152419 | 0.00095  |
| 0.08306  | -0.03603 | 0.43723  | 0.171923 | 0.00019  | 0.168072 | 0.00026  | 0.110295 | 0.01711  |
| 0.18151  | -0.06917 | 0.13554  | 0.137972 | 0.00281  | 0.093719 | 0.04294  | 0.034209 | 0.46083  |
| 0.03171  | 0.128959 | 0.00525  | 0.145211 | 0.00165  | 0.129991 | 0.0049   | 0.254128 | 2.57E-08 |
| 0.13628  | 0.106167 | 0.02175  | 0.088544 | 0.05587  | 0.149382 | 0.0012   | 0.263456 | 7.45E-09 |
| 0.64438  | 0.082987 | 0.07319  | 0.087325 | 0.05934  | 0.181502 | 7.99E-05 | 0.095735 | 0.03863  |
| 0.48702  | 0.037297 | 0.42133  | 0.121387 | 0.00864  | 0.147499 | 0.00139  | 0.106143 | 0.02178  |
| 0.51498  | 0.102852 | 0.02624  | 0.154128 | 0.00083  | 0.131039 | 0.00456  | 0.088232 | 0.05674  |
| 0.0164   | 0.19719  | 1.77E-05 | 0.156157 | 0.00071  | 0.327028 | 4.22E-13 | 0.205665 | 7.45E-06 |
| 0.50007  | -0.01889 | 0.68383  | 0.179795 | 9.35E-05 | 0.143581 | 0.00187  | 0.176892 | 0.00012  |
| 0.80486  | -0.00134 | 0.97689  | 0.163356 | 0.00039  | 0.290229 | 1.62E-10 | 0.147218 | 0.00142  |
| 0.07586  | 0.277175 | 1.10E-09 | 0.139029 | 0.0026   | 0.185078 | 5.73E-05 | 0.133896 | 0.00375  |
| 0.98216  | -0.0133  | 0.77433  | 0.073225 | 0.11404  | 0.179905 | 9.26E-05 | 0.039776 | 0.39111  |

|          |          |         |          |          |          |          |          |          |
|----------|----------|---------|----------|----------|----------|----------|----------|----------|
| 0.51986  | -0.0294  | 0.5262  | 0.152152 | 0.00097  | 0.203714 | 9.12E-06 | 0.135403 | 0.00337  |
| 0.35162  | -0.01825 | 0.69406 | 0.067705 | 0.14405  | 0.158667 | 0.00058  | 0.049634 | 0.28444  |
| 0.01894  | -0.09937 | 0.0318  | 0.13939  | 0.00254  | 0.172987 | 0.00017  | 0.10974  | 0.01768  |
| 0.02855  | 0.128346 | 0.00548 | 0.353703 | 3.29E-15 | 0.147142 | 0.00143  | 0.196848 | 1.83E-05 |
| 0.14574  | -0.03489 | 0.45196 | 0.184626 | 5.98E-05 | 0.179396 | 9.70E-05 | 0.072649 | 0.11692  |
| 0.36597  | -0.02371 | 0.6093  | 0.199796 | 1.36E-05 | 0.199469 | 1.41E-05 | 0.143433 | 0.00189  |
| 0.00018  | -0.11604 | 0.01209 | 0.185654 | 5.43E-05 | 0.12913  | 0.00519  | 0.065935 | 0.15485  |
| 3.51E-05 | 0.166082 | 0.00031 | 0.053463 | 0.24888  | 0.04473  | 0.33479  | 0.150677 | 0.00109  |
| 0.30884  | 0.106277 | 0.02162 | 0.144796 | 0.00171  | 0.12261  | 0.00799  | 0.183646 | 6.55E-05 |
| 0.35136  | -0.0065  | 0.88851 | 0.181262 | 8.17E-05 | 0.148704 | 0.00127  | 0.041099 | 0.37553  |
| 0.06455  | 0.162311 | 0.00043 | 0.285211 | 3.43E-10 | 0.239517 | 1.62E-07 | 0.181094 | 8.30E-05 |
| 0.79563  | 0.109282 | 0.01816 | 0.103847 | 0.02482  | 0.236278 | 2.40E-07 | 0.084453 | 0.06824  |
| 0.01663  | -0.09542 | 0.03929 | 0.151231 | 0.00104  | 0.146721 | 0.00148  | 0.060999 | 0.18821  |
| 0.80017  | 0.002908 | 0.95002 | 0.181578 | 7.94E-05 | 0.188051 | 4.32E-05 | 0.190848 | 3.30E-05 |
| 0.29656  | -0.04532 | 0.32841 | 0.165638 | 0.00032  | 0.17539  | 0.00014  | 0.110164 | 0.01724  |
| 0.32365  | 0.052675 | 0.25593 | 0.188375 | 4.19E-05 | 0.148326 | 0.00131  | 0.027445 | 0.55411  |
| 0.09932  | -0.06721 | 0.14703 | 0.142277 | 0.00206  | 0.124795 | 0.00693  | 0.004414 | 0.92422  |
| 0.02951  | -0.06686 | 0.14913 | 0.144526 | 0.00174  | 0.076966 | 0.09666  | 0.030406 | 0.51217  |
| 0.0117   | -0.11384 | 0.01383 | 0.15288  | 0.00092  | 0.124973 | 0.00685  | 0.044464 | 0.33768  |
| 0.02382  | -0.07954 | 0.08598 | 0.172414 | 0.00018  | 0.153431 | 0.00088  | 0.088006 | 0.05738  |
| 0.02636  | -0.072   | 0.12021 | 0.164414 | 0.00036  | 0.15119  | 0.00105  | 0.090985 | 0.04941  |
| 0.36213  | -0.02263 | 0.62565 | 0.154642 | 0.0008   | 0.223152 | 1.11E-06 | 0.111631 | 0.0158   |
| 0.17695  | -0.04968 | 0.28403 | 0.154749 | 0.00079  | 0.154742 | 0.00079  | 0.067392 | 0.14592  |
| 0.35217  | -0.03107 | 0.50298 | 0.178379 | 0.00011  | 0.144164 | 0.00179  | 0.131201 | 0.00451  |
| 0.06847  | -0.07777 | 0.09321 | 0.143854 | 0.00183  | 0.15077  | 0.00108  | 0.081443 | 0.07871  |
| 0.03504  | -0.09757 | 0.03504 | 0.132244 | 0.0042   | 0.150246 | 0.00113  | 0.048887 | 0.29176  |
| 0.99774  | 0.01814  | 0.69581 | 0.192487 | 2.82E-05 | 0.237186 | 2.15E-07 | 0.172483 | 0.00018  |
| 0.39336  | 0.001191 | 0.97952 | 0.104683 | 0.02367  | 0.091475 | 0.0482   | 0.094684 | 0.04083  |
| 0.23155  | -0.05767 | 0.2135  | 0.08012  | 0.08371  | 0.085752 | 0.06409  | 0.032857 | 0.47873  |
| 0.29931  | -0.02444 | 0.59825 | 0.193908 | 2.45E-05 | 0.198699 | 1.52E-05 | 0.139088 | 0.00259  |
| 0.75879  | 0.025598 | 0.5811  | 0.176342 | 0.00013  | 0.194766 | 2.25E-05 | 0.134709 | 0.00354  |
| 0.48039  | 0.046119 | 0.31998 | 0.161627 | 0.00045  | 0.152791 | 0.00092  | 0.161404 | 0.00046  |
| 0.201    | -0.02944 | 0.52568 | 0.168382 | 0.00026  | 0.115703 | 0.01235  | 0.014083 | 0.76148  |
| 0.03823  | -0.08421 | 0.06905 | 0.131742 | 0.00435  | 0.099144 | 0.03219  | 0.092605 | 0.04548  |
| 0.28777  | -0.04795 | 0.30115 | 0.16316  | 0.0004   | 0.161912 | 0.00044  | 0.082424 | 0.07517  |
| 0.26435  | -0.046   | 0.32126 | 0.173743 | 0.00016  | 0.159851 | 0.00053  | 0.123453 | 0.00756  |
| 0.0105   | -0.08879 | 0.05519 | 0.136826 | 0.00305  | 0.10885  | 0.01862  | 0.055035 | 0.23522  |
| 0.22432  | -0.00913 | 0.84406 | 0.182355 | 7.39E-05 | 0.178171 | 0.00011  | 0.22967  | 5.24E-07 |
| 0.24248  | 0.030278 | 0.51394 | 0.093701 | 0.04298  | 0.064957 | 0.16108  | 0.065558 | 0.15723  |
| 0.1241   | -0.08005 | 0.084   | 0.104453 | 0.02398  | 0.080185 | 0.08346  | 0.005076 | 0.91288  |
| 0.94903  | 0.003985 | 0.93156 | 0.059203 | 0.20157  | 0.084801 | 0.06711  | 0.017403 | 0.70758  |
| 0.77861  | 0.034132 | 0.46183 | 0.369132 | 1.60E-16 | 0.205827 | 7.32E-06 | 0.187394 | 4.60E-05 |
| 0.0241   | -0.06448 | 0.16415 | 0.073904 | 0.11072  | 0.069722 | 0.13246  | 0.019411 | 0.67566  |
| 0.92794  | 0.033162 | 0.47466 | 0.126098 | 0.00636  | 0.126748 | 0.00609  | 0.152521 | 0.00094  |
| 0.08777  | -0.06603 | 0.15428 | 0.098184 | 0.0339   | 0.076468 | 0.09885  | 0.101975 | 0.02756  |

|          |          |          |          |          |          |          |          |          |
|----------|----------|----------|----------|----------|----------|----------|----------|----------|
| 0.37295  | 0.030856 | 0.50594  | 0.163064 | 0.0004   | 0.044466 | 0.33765  | 0.06833  | 0.14037  |
| 0.99238  | 0.014586 | 0.75323  | 0.171036 | 0.0002   | 0.186515 | 5.00E-05 | 0.199757 | 1.37E-05 |
| 0.53341  | 0.017377 | 0.708    | 0.147046 | 0.00144  | 0.174882 | 0.00015  | 0.245816 | 7.42E-08 |
| 0.34976  | 0.137785 | 0.00285  | 0.202658 | 1.02E-05 | 0.113161 | 0.01442  | 0.217029 | 2.20E-06 |
| 0.33931  | -0.05521 | 0.23369  | 0.157742 | 0.00062  | 0.168571 | 0.00025  | 0.150818 | 0.00108  |
| 0.46277  | -0.02353 | 0.61199  | 0.186456 | 5.03E-05 | 0.185219 | 5.65E-05 | 0.116007 | 0.01212  |
| 0.12827  | 0.046204 | 0.31909  | 0.160771 | 0.00049  | 0.159978 | 0.00052  | 0.153073 | 0.0009   |
| 0.16332  | -0.01961 | 0.67249  | 0.18757  | 4.53E-05 | 0.138536 | 0.0027   | 0.07835  | 0.0908   |
| 0.0583   | -0.04699 | 0.31088  | 0.153083 | 0.0009   | 0.059437 | 0.1998   | 0.052747 | 0.25529  |
| 0.10254  | -0.05474 | 0.23774  | 0.153502 | 0.00087  | 0.191736 | 3.03E-05 | 0.094295 | 0.04167  |
| 0.31541  | -0.06488 | 0.16155  | 0.138295 | 0.00274  | 0.144206 | 0.00178  | 0.126626 | 0.00614  |
| 0.29599  | 0.081006 | 0.08034  | 0.197054 | 1.79E-05 | 0.19138  | 3.14E-05 | 0.209997 | 4.72E-06 |
| 0.0783   | 0.111417 | 0.01601  | 0.156459 | 0.00069  | 0.154116 | 0.00083  | 0.270353 | 2.89E-09 |
| 0.65911  | 0.034802 | 0.45308  | 0.200148 | 1.31E-05 | 0.204261 | 8.62E-06 | 0.155255 | 0.00076  |
| 0.19776  | 0.103966 | 0.02465  | 0.190527 | 3.41E-05 | 0.230002 | 5.05E-07 | 0.201891 | 1.10E-05 |
| 0.00046  | -0.13583 | 0.00327  | 0.186677 | 4.93E-05 | 0.138027 | 0.0028   | 0.11085  | 0.01655  |
| 0.21437  | -0.08001 | 0.08412  | 0.079016 | 0.08807  | 0.085644 | 0.06443  | 0.077507 | 0.09433  |
| 0.43103  | 0.060349 | 0.19297  | 0.205976 | 7.21E-06 | 0.12852  | 0.00541  | 0.062009 | 0.18098  |
| 0.80498  | 0.052524 | 0.2573   | 0.209208 | 5.13E-06 | 0.16138  | 0.00046  | 0.048857 | 0.29206  |
| 0.42016  | 0.006791 | 0.88363  | 0.158728 | 0.00058  | 0.149697 | 0.00118  | 0.073926 | 0.11061  |
| 0.07512  | -0.03215 | 0.48822  | 0.127023 | 0.00598  | 0.11191  | 0.01554  | 0.037809 | 0.41498  |
| 0.65022  | 0.130875 | 0.00461  | 0.144707 | 0.00172  | 0.060332 | 0.1931   | -0.02603 | 0.57467  |
| 0.03074  | 0.159065 | 0.00056  | 0.161599 | 0.00046  | 0.140765 | 0.0023   | 0.170687 | 0.00021  |
| 0.03441  | -0.05459 | 0.23902  | 0.160054 | 0.00052  | 0.154914 | 0.00078  | 0.05126  | 0.26895  |
| 0.58587  | 0.030896 | 0.50539  | 0.201661 | 1.13E-05 | 0.191869 | 2.99E-05 | 0.218481 | 1.87E-06 |
| 0.34403  | 0.022421 | 0.62889  | 0.117116 | 0.01131  | 0.079404 | 0.08652  | 0.081987 | 0.07673  |
| 0.26941  | -0.04429 | 0.33958  | 0.194556 | 2.30E-05 | 0.190487 | 3.42E-05 | 0.140082 | 0.00241  |
| 0.50319  | 0.073147 | 0.11443  | 0.159721 | 0.00053  | 0.0767   | 0.09783  | 0.100798 | 0.02941  |
| 0.56434  | 0.006829 | 0.883    | 0.147432 | 0.0014   | 0.181743 | 7.82E-05 | 0.111308 | 0.01611  |
| 0.83369  | 0.029414 | 0.52603  | 0.168676 | 0.00025  | 0.179771 | 9.37E-05 | 0.156678 | 0.00068  |
| 0.13782  | -0.01852 | 0.68978  | 0.1754   | 0.00014  | 0.211187 | 4.15E-06 | 0.090332 | 0.05107  |
| 0.03768  | -0.01088 | 0.81465  | 0.113919 | 0.01377  | 0.278557 | 9.06E-10 | 0.024505 | 0.59735  |
| 3.02E-06 | 0.252641 | 3.11E-08 | 0.083219 | 0.07239  | 0.167723 | 0.00027  | 0.219964 | 1.59E-06 |
| 0.92022  | -0.01336 | 0.77339  | 0.102409 | 0.0269   | 0.116101 | 0.01205  | 0.241147 | 1.33E-07 |
| 0.09009  | -0.03519 | 0.4481   | 0.174538 | 0.00015  | 0.193876 | 2.46E-05 | 0.130266 | 0.00481  |
| 0.43336  | 0.05401  | 0.24407  | 0.200148 | 1.31E-05 | 0.231338 | 4.31E-07 | 0.156946 | 0.00066  |
| 0.50303  | -0.02233 | 0.63023  | 0.139993 | 0.00243  | 0.153714 | 0.00086  | 0.06605  | 0.15413  |
| 0.99314  | -0.04027 | 0.38529  | 0.495711 | 2.48E-30 | 0.101798 | 0.02783  | 0.031863 | 0.49215  |
| 0.98063  | 0.056125 | 0.22606  | 0.172803 | 0.00018  | 0.19893  | 1.49E-05 | 0.141334 | 0.0022   |
| 0.10271  | -0.04397 | 0.34302  | 0.168294 | 0.00026  | 0.201843 | 1.11E-05 | 0.164423 | 0.00036  |
| 0.07201  | -0.0637  | 0.16933  | 0.162986 | 0.00041  | 0.187655 | 4.49E-05 | 0.118795 | 0.01019  |
| 0.82626  | 0.047242 | 0.30833  | 0.113841 | 0.01383  | 0.089449 | 0.0534   | 0.089218 | 0.05402  |
| 0.38624  | -0.01979 | 0.6697   | 0.182445 | 7.33E-05 | 0.197303 | 1.75E-05 | 0.156484 | 0.00069  |
| 0.20952  | -0.04165 | 0.36912  | 0.158905 | 0.00057  | 0.161627 | 0.00045  | 0.111807 | 0.01564  |
| 0.34606  | -0.01117 | 0.80978  | 0.138044 | 0.00279  | 0.110448 | 0.01695  | 0.022955 | 0.62074  |

|         |          |          |          |          |          |          |          |          |
|---------|----------|----------|----------|----------|----------|----------|----------|----------|
| 0.46055 | 0.055106 | 0.23462  | 0.217862 | 2.01E-06 | 0.157861 | 0.00062  | 0.154587 | 0.0008   |
| 0.2651  | 0.010333 | 0.82377  | 0.174251 | 0.00015  | 0.185511 | 5.50E-05 | 0.088059 | 0.05723  |
| 0.00135 | -0.10387 | 0.02479  | 0.126728 | 0.0061   | 0.083947 | 0.06992  | 0.045503 | 0.32649  |
| 0.19381 | 0.328323 | 3.37E-13 | 0.151941 | 0.00099  | 0.137141 | 0.00298  | 0.124947 | 0.00686  |
| 0.01439 | 0.167502 | 0.00028  | 0.300392 | 3.41E-11 | 0.201421 | 1.15E-05 | 0.140077 | 0.00241  |
| 0.70665 | 0.02768  | 0.55072  | 0.193414 | 2.57E-05 | 0.137478 | 0.00291  | 0.16867  | 0.00025  |
| 0.89916 | 0.056386 | 0.22391  | 0.178363 | 0.00011  | 0.266784 | 4.73E-09 | 0.208739 | 5.39E-06 |
| 0.00885 | -0.12326 | 0.00766  | 0.06069  | 0.19046  | 0.02438  | 0.59922  | -0.00473 | 0.91888  |
| 0.28701 | -0.00939 | 0.83967  | 0.111757 | 0.01568  | 0.12101  | 0.00885  | 0.086127 | 0.06293  |
| 0.27535 | -0.0639  | 0.16802  | 0.173292 | 0.00017  | 0.151926 | 0.00099  | 0.140243 | 0.00238  |
| 0.05442 | -0.05655 | 0.2226   | 0.118441 | 0.01042  | 0.125696 | 0.00653  | 0.075284 | 0.1042   |
| 0.0451  | 0.131922 | 0.00429  | 0.168833 | 0.00025  | 0.158159 | 0.0006   | 0.223222 | 1.10E-06 |
| 0.62811 | 0.101515 | 0.02827  | 0.137676 | 0.00287  | 0.0857   | 0.06425  | 0.104804 | 0.02351  |
| 0.17966 | -0.02832 | 0.54149  | 0.08451  | 0.06805  | 0.083987 | 0.06978  | 0.097673 | 0.03485  |
| 0.43711 | 0.031629 | 0.49534  | 0.236982 | 2.20E-07 | 0.102214 | 0.02719  | 0.082463 | 0.07503  |
| 0.14513 | 0.131407 | 0.00445  | 0.184244 | 6.20E-05 | 0.155065 | 0.00077  | 0.31491  | 3.28E-12 |
| 0.00594 | 0.16805  | 0.00026  | 0.220593 | 1.48E-06 | 0.191397 | 3.13E-05 | 0.413901 | 9.38E-21 |
| 0.47373 | -0.02922 | 0.52874  | 0.153499 | 0.00087  | 0.211968 | 3.82E-06 | 0.090858 | 0.04973  |
| 0.12427 | -0.07007 | 0.13051  | 0.157538 | 0.00063  | 0.164296 | 0.00036  | 0.07449  | 0.10791  |
| 0.19988 | -0.0417  | 0.36864  | 0.10784  | 0.01975  | 0.103925 | 0.02471  | 0.068833 | 0.13747  |
| 0.13672 | -0.05133 | 0.26826  | 0.118093 | 0.01065  | 0.118624 | 0.0103   | 0.072564 | 0.11735  |
| 0.04195 | 0.173023 | 0.00017  | 0.139251 | 0.00256  | 0.134294 | 0.00364  | 0.199266 | 1.44E-05 |
| 0.07927 | -0.06381 | 0.16861  | 0.165873 | 0.00032  | 0.186545 | 4.99E-05 | 0.09072  | 0.05008  |
| 0.39526 | -0.0348  | 0.45308  | 0.168941 | 0.00024  | 0.165099 | 0.00034  | 0.102839 | 0.02626  |
| 0.69787 | 0.029509 | 0.5247   | 0.202512 | 1.03E-05 | 0.205939 | 7.24E-06 | 0.196462 | 1.90E-05 |
| 0.37324 | -0.0416  | 0.36971  | 0.177964 | 0.00011  | 0.167978 | 0.00027  | 0.148323 | 0.00131  |
| 0.06335 | -0.0578  | 0.21249  | 0.163608 | 0.00039  | 0.204549 | 8.36E-06 | 0.057591 | 0.21414  |
| 0.61225 | 0.066882 | 0.149    | 0.13443  | 0.00361  | 0.161784 | 0.00045  | 0.125427 | 0.00665  |
| 0.13762 | -0.06713 | 0.14749  | 0.175231 | 0.00014  | 0.171405 | 0.0002   | 0.11297  | 0.01458  |
| 0.35394 | 0.002334 | 0.95987  | 0.190138 | 3.54E-05 | 0.199584 | 1.39E-05 | 0.168872 | 0.00025  |
| 0.29724 | -0.02796 | 0.54674  | 0.197656 | 1.69E-05 | 0.197795 | 1.67E-05 | 0.147399 | 0.0014   |
| 0.19826 | -0.03645 | 0.43201  | 0.186729 | 4.90E-05 | 0.193836 | 2.47E-05 | 0.107312 | 0.02037  |
| 0.21478 | -0.04178 | 0.36764  | 0.18617  | 5.17E-05 | 0.178998 | 0.0001   | 0.125903 | 0.00644  |
| 0.43397 | 0.057148 | 0.2177   | 0.189783 | 3.66E-05 | 0.198069 | 1.62E-05 | 0.209075 | 5.20E-06 |
| 0.62311 | 0.028069 | 0.54513  | 0.203806 | 9.03E-06 | 0.21385  | 3.12E-06 | 0.243599 | 9.79E-08 |
| 0.56931 | 0.014632 | 0.75248  | 0.165957 | 0.00032  | 0.149016 | 0.00124  | 0.214988 | 2.75E-06 |
| 0.57858 | -0.07486 | 0.10617  | 0.182325 | 7.41E-05 | 0.138415 | 0.00272  | 0.062193 | 0.17969  |
| 0.43077 | 0.024854 | 0.59214  | 0.147134 | 0.00143  | 0.14634  | 0.00152  | 0.126997 | 0.00599  |
| 0.42004 | 0.00143  | 0.97542  | 0.171747 | 0.00019  | 0.217172 | 2.17E-06 | 0.155851 | 0.00073  |
| 0.22049 | -0.03742 | 0.41986  | 0.142528 | 0.00202  | 0.138263 | 0.00275  | 0.076417 | 0.09907  |
| 0.02555 | -0.07212 | 0.11962  | 0.156933 | 0.00067  | 0.149126 | 0.00123  | 0.097288 | 0.03557  |
| 0.38295 | -0.02024 | 0.66269  | 0.185181 | 5.67E-05 | 0.205007 | 7.97E-06 | 0.133885 | 0.00375  |
| 0.38917 | -0.01859 | 0.68864  | 0.1141   | 0.01362  | 0.125691 | 0.00653  | 0.05095  | 0.27186  |
| 0.90736 | 0.000992 | 0.98295  | 0.145064 | 0.00167  | 0.138533 | 0.0027   | 0.128431 | 0.00544  |
| 0.01027 | -0.08729 | 0.05945  | 0.141574 | 0.00216  | 0.142242 | 0.00206  | 0.117541 | 0.01102  |

|         |          |         |          |          |          |          |          |          |
|---------|----------|---------|----------|----------|----------|----------|----------|----------|
| 0.71589 | -0.01729 | 0.70941 | 0.083574 | 0.07117  | 0.081963 | 0.07681  | 0.045449 | 0.32707  |
| 0.71945 | 0.048255 | 0.29806 | 0.162235 | 0.00043  | 0.15226  | 0.00096  | 0.171901 | 0.00019  |
| 0.10856 | -0.0679  | 0.14293 | 0.126841 | 0.00605  | 0.114657 | 0.01316  | 0.053828 | 0.24566  |
| 0.03366 | -0.09172 | 0.0476  | 0.13445  | 0.0036   | 0.139183 | 0.00257  | 0.043041 | 0.35337  |
| 0.26113 | -0.05239 | 0.25852 | 0.181012 | 8.36E-05 | 0.184033 | 6.32E-05 | 0.127796 | 0.00568  |
| 0.1316  | -0.07587 | 0.10153 | 0.154752 | 0.00079  | 0.156608 | 0.00068  | 0.125121 | 0.00678  |
| 0.44374 | -0.0115  | 0.80431 | 0.170779 | 0.00021  | 0.16057  | 0.0005   | 0.161513 | 0.00046  |
| 0.38093 | 0.171702 | 0.00019 | 0.160752 | 0.00049  | 0.227291 | 6.91E-07 | 0.166082 | 0.00031  |
| 0.06632 | 0.000288 | 0.99505 | 0.129251 | 0.00515  | 0.097798 | 0.03461  | 0.057697 | 0.2133   |
| 0.55138 | 0.065584 | 0.15706 | 0.132462 | 0.00414  | 0.12327  | 0.00766  | 0.193378 | 2.58E-05 |
| 0.60302 | 0.01609  | 0.72874 | 0.198434 | 1.56E-05 | 0.206086 | 7.13E-06 | 0.171884 | 0.00019  |
| 0.05167 | -0.03534 | 0.4461  | 0.142379 | 0.00204  | 0.113843 | 0.01383  | 0.07812  | 0.09175  |
| 0.37676 | -0.03605 | 0.43705 | 0.183678 | 6.53E-05 | 0.165623 | 0.00033  | 0.11792  | 0.01076  |
| 0.12868 | -0.06546 | 0.15789 | 0.122715 | 0.00794  | 0.106536 | 0.0213   | 0.060323 | 0.19316  |
| 0.05258 | -0.08852 | 0.05592 | 0.095617 | 0.03888  | 0.077329 | 0.09509  | 0.010178 | 0.82636  |
| 0.2928  | -0.04683 | 0.31256 | 0.075767 | 0.10199  | 0.055886 | 0.22804  | 0.08723  | 0.05962  |
| 0.00658 | -0.11366 | 0.01399 | 0.087725 | 0.05818  | 0.077347 | 0.09502  | 0.011169 | 0.80977  |
| 0.42409 | -0.04001 | 0.38831 | 0.122885 | 0.00785  | 0.103347 | 0.02553  | 0.096695 | 0.03672  |
| 0.03941 | -0.06877 | 0.13782 | 0.120682 | 0.00904  | 0.109519 | 0.01791  | 0.04176  | 0.36789  |
| 0.03995 | -0.0773  | 0.09522 | 0.150809 | 0.00108  | 0.149667 | 0.00118  | 0.064275 | 0.16553  |
| 0.63164 | 0.040141 | 0.38678 | 0.132256 | 0.0042   | 0.142491 | 0.00202  | 0.10255  | 0.02669  |
| 0.12544 | -0.03141 | 0.49832 | 0.09302  | 0.04452  | 0.11186  | 0.01559  | 0.014342 | 0.75723  |
| 0.93088 | 0.037845 | 0.41453 | 0.100724 | 0.02953  | 0.144087 | 0.0018   | 0.113562 | 0.01407  |
| 0.88079 | 0.032776 | 0.47982 | 0.193916 | 2.45E-05 | 0.205968 | 7.21E-06 | 0.21962  | 1.65E-06 |
| 0.34449 | -0.03094 | 0.50474 | 0.162128 | 0.00044  | 0.150723 | 0.00109  | 0.143661 | 0.00186  |
| 0.60121 | 0.006655 | 0.88594 | 0.190998 | 3.26E-05 | 0.190897 | 3.29E-05 | 0.1607   | 0.00049  |
| 0.57131 | 0.101032 | 0.02903 | 0.136358 | 0.00315  | 0.144748 | 0.00171  | 0.190605 | 3.38E-05 |
| 0.02214 | -0.08453 | 0.068   | 0.162146 | 0.00043  | 0.160986 | 0.00048  | 0.084244 | 0.06893  |
| 0.08245 | -0.05198 | 0.26227 | 0.175171 | 0.00014  | 0.189973 | 3.60E-05 | 0.113852 | 0.01382  |
| 0.73514 | 0.005713 | 0.902   | 0.196865 | 1.83E-05 | 0.20423  | 8.64E-06 | 0.152935 | 0.00091  |
| 0.04923 | -0.08913 | 0.05426 | 0.138009 | 0.0028   | 0.120443 | 0.00918  | 0.03104  | 0.5034   |
| 0.5872  | 0.072065 | 0.1199  | 0.204019 | 8.83E-06 | 0.226914 | 7.22E-07 | 0.234844 | 2.85E-07 |
| 0.4559  | -0.01603 | 0.72973 | 0.182058 | 7.59E-05 | 0.170762 | 0.00021  | 0.12842  | 0.00545  |
| 0.19875 | -0.02716 | 0.55819 | 0.188791 | 4.03E-05 | 0.188091 | 4.31E-05 | 0.156074 | 0.00071  |
| 0.44433 | 0.047782 | 0.30282 | 0.156338 | 0.0007   | 0.162678 | 0.00042  | 0.190258 | 3.50E-05 |
| 0.72128 | 0.01853  | 0.6896  | 0.212134 | 3.75E-06 | 0.212566 | 3.58E-06 | 0.202855 | 9.96E-06 |
| 0.33828 | -0.0433  | 0.35044 | 0.192818 | 2.73E-05 | 0.1775   | 0.00012  | 0.114657 | 0.01316  |
| 0.49509 | -0.01061 | 0.81912 | 0.107661 | 0.01996  | 0.114721 | 0.01311  | 0.160344 | 0.0005   |
| 0.14465 | -0.0604  | 0.19261 | 0.167654 | 0.00027  | 0.157266 | 0.00065  | 0.099961 | 0.03079  |
| 0.09445 | -0.06134 | 0.18576 | 0.184825 | 5.87E-05 | 0.175765 | 0.00013  | 0.120322 | 0.00925  |
| 0.96603 | 0.003002 | 0.94841 | 0.117661 | 0.01094  | 0.129966 | 0.00491  | 0.079274 | 0.08704  |
| 0.25302 | -0.04258 | 0.35852 | 0.176225 | 0.00013  | 0.158875 | 0.00057  | 0.08736  | 0.05924  |
| 0.08461 | -0.07285 | 0.1159  | 0.175132 | 0.00014  | 0.218751 | 1.82E-06 | 0.078842 | 0.08878  |
| 0.3098  | -0.0338  | 0.46615 | 0.183791 | 6.46E-05 | 0.201933 | 1.10E-05 | 0.145034 | 0.00168  |
| 0.63277 | 0.044164 | 0.34095 | 0.102855 | 0.02624  | 0.153737 | 0.00086  | 0.175199 | 0.00014  |

|          |          |          |          |          |          |          |          |          |
|----------|----------|----------|----------|----------|----------|----------|----------|----------|
| 0.52307  | 0.054627 | 0.23871  | 0.19948  | 1.41E-05 | 0.177223 | 0.00012  | 0.199056 | 1.47E-05 |
| 0.10396  | -0.07995 | 0.08439  | 0.160577 | 0.0005   | 0.161972 | 0.00044  | 0.111016 | 0.01639  |
| 0.2502   | 0.163251 | 0.0004   | 0.195517 | 2.09E-05 | 0.176882 | 0.00012  | 0.339228 | 4.86E-14 |
| 0.0182   | 0.185941 | 5.28E-05 | 0.18639  | 5.06E-05 | 0.168829 | 0.00025  | 0.200684 | 1.24E-05 |
| 0.40084  | 0.002672 | 0.95408  | 0.177714 | 0.00011  | 0.185523 | 5.49E-05 | 0.17591  | 0.00013  |
| 0.77585  | 0.001188 | 0.97957  | 0.187654 | 4.49E-05 | 0.231559 | 4.20E-07 | 0.112421 | 0.01507  |
| 0.90684  | 0.005167 | 0.91133  | 0.22408  | 9.99E-07 | 0.188499 | 4.14E-05 | 0.164657 | 0.00035  |
| 0.00254  | -0.1276  | 0.00575  | 0.135512 | 0.00334  | 0.140066 | 0.00242  | 0.092617 | 0.04546  |
| 0.67622  | 0.013535 | 0.7705   | 0.165141 | 0.00034  | 0.161915 | 0.00044  | 0.211643 | 3.95E-06 |
| 0.1507   | 0.098896 | 0.03262  | 0.127491 | 0.0058   | 0.123001 | 0.00779  | 0.18411  | 6.27E-05 |
| 0.91714  | 0.038362 | 0.40819  | 0.170262 | 0.00022  | 0.205502 | 7.57E-06 | 0.120452 | 0.00917  |
| 0.46173  | 0.018578 | 0.68883  | 0.174113 | 0.00016  | 0.230034 | 5.03E-07 | 0.135584 | 0.00333  |
| 0.91097  | 0.052135 | 0.26085  | 0.168241 | 0.00026  | 0.179212 | 9.86E-05 | 0.197123 | 1.78E-05 |
| 0.25178  | -0.00792 | 0.86446  | 0.184833 | 5.86E-05 | 0.185877 | 5.31E-05 | 0.146367 | 0.00152  |
| 0.26914  | -0.02965 | 0.52269  | 0.060172 | 0.19428  | 0.057967 | 0.21116  | -0.00388 | 0.93334  |
| 0.06138  | -0.04263 | 0.358    | 0.14454  | 0.00174  | 0.15372  | 0.00086  | 0.09523  | 0.03968  |
| 0.98144  | 0.036638 | 0.42959  | 0.121417 | 0.00863  | 0.134253 | 0.00365  | 0.065673 | 0.1565   |
| 0.09575  | -0.05506 | 0.23503  | 0.167324 | 0.00028  | 0.174398 | 0.00015  | 0.118105 | 0.01064  |
| 0.35074  | -0.03145 | 0.49773  | 0.156806 | 0.00067  | 0.135813 | 0.00327  | 0.118056 | 0.01067  |
| 0.64413  | 0.05211  | 0.26108  | 0.164474 | 0.00036  | 0.229378 | 5.43E-07 | 0.212129 | 3.75E-06 |
| 0.427    | -0.02736 | 0.55531  | 0.198991 | 1.48E-05 | 0.195183 | 2.16E-05 | 0.143013 | 0.00195  |
| 0.10351  | -0.03983 | 0.39052  | 0.09123  | 0.0488   | 0.084766 | 0.06722  | 0.06035  | 0.19296  |
| 0.70601  | 0.021568 | 0.642    | 0.226031 | 7.99E-07 | 0.204556 | 8.36E-06 | 0.155416 | 0.00075  |
| 0.64368  | 0.028269 | 0.54228  | 0.08351  | 0.07139  | 0.092222 | 0.04639  | 0.090668 | 0.05022  |
| 0.69775  | 0.027063 | 0.55965  | 0.133062 | 0.00397  | 0.148574 | 0.00128  | 0.11578  | 0.01229  |
| 0.3892   | -0.00606 | 0.89608  | 0.11062  | 0.01678  | 0.098945 | 0.03254  | 0.054857 | 0.23674  |
| 0.99076  | 0.036817 | 0.42733  | 0.102438 | 0.02686  | 0.111581 | 0.01585  | 0.116368 | 0.01185  |
| 0.34105  | -0.04523 | 0.32938  | 0.164394 | 0.00036  | 0.192141 | 2.91E-05 | 0.137866 | 0.00283  |
| 0.57651  | -0.0284  | 0.54045  | 0.169953 | 0.00022  | 0.158476 | 0.00059  | 0.11636  | 0.01186  |
| 0.35345  | -0.01008 | 0.82806  | 0.178765 | 0.0001   | 0.179824 | 9.32E-05 | 0.082096 | 0.07634  |
| 0.04317  | 0.121623 | 0.00851  | 0.209385 | 5.03E-06 | 0.178418 | 0.00011  | 0.270958 | 2.66E-09 |
| 0.06235  | -0.06604 | 0.1542   | 0.163444 | 0.00039  | 0.215019 | 2.74E-06 | 0.091795 | 0.04742  |
| 0.01756  | -0.09038 | 0.05096  | 0.124439 | 0.00709  | 0.133293 | 0.00391  | 0.071595 | 0.12234  |
| 0.51703  | 0.110068 | 0.01734  | 0.123727 | 0.00743  | 0.331658 | 1.88E-13 | 0.184719 | 5.93E-05 |
| 0.5898   | 0.036992 | 0.42514  | 0.202028 | 1.08E-05 | 0.148458 | 0.00129  | 0.145799 | 0.00158  |
| 0.24193  | -0.01766 | 0.70342  | 0.267096 | 4.54E-09 | 0.12789  | 0.00565  | 0.095417 | 0.03929  |
| 0.72538  | 0.013348 | 0.77358  | 0.397172 | 4.26E-19 | 0.204276 | 8.60E-06 | 0.149107 | 0.00123  |
| 0.65666  | 0.065498 | 0.15761  | 0.175358 | 0.00014  | 0.171096 | 0.0002   | 0.148311 | 0.00131  |
| 0.21916  | 0.025295 | 0.58558  | 0.112348 | 0.01514  | 0.089351 | 0.05366  | 0.04619  | 0.31924  |
| 0.00202  | 0.198967 | 1.48E-05 | 0.163228 | 0.0004   | 0.138469 | 0.00271  | 0.152896 | 0.00092  |
| 5.07E-05 | 0.159707 | 0.00053  | 0.104121 | 0.02444  | 0.203925 | 8.92E-06 | 0.105018 | 0.02323  |
| 0.66277  | 0.045643 | 0.325    | 0.135165 | 0.00343  | 0.126382 | 0.00624  | 0.244366 | 8.90E-08 |
| 0.00259  | -0.08479 | 0.06714  | 0.160525 | 0.0005   | 0.160028 | 0.00052  | 0.049027 | 0.29039  |
| 0.22939  | -0.00391 | 0.93286  | 0.182629 | 7.20E-05 | 0.207979 | 5.84E-06 | 0.143442 | 0.00189  |
| 0.24993  | -0.04662 | 0.3147   | 0.168604 | 0.00025  | 0.170712 | 0.00021  | 0.10668  | 0.02112  |



|         |          |          |          |          |          |          |          |          |
|---------|----------|----------|----------|----------|----------|----------|----------|----------|
| 0.11955 | -0.0862  | 0.0627   | 0.089836 | 0.05237  | 0.061034 | 0.18796  | 0.03479  | 0.45323  |
| 0.7681  | 0.038854 | 0.40219  | 0.208494 | 5.53E-06 | 0.240306 | 1.47E-07 | 0.156566 | 0.00069  |
| 0.20276 | 0.150282 | 0.00112  | 0.124406 | 0.00711  | 0.132778 | 0.00405  | 0.173708 | 0.00016  |
| 0.71715 | -0.00848 | 0.85495  | 0.19263  | 2.78E-05 | 0.218028 | 1.97E-06 | 0.151871 | 0.00099  |
| 0.88939 | 0.016582 | 0.72079  | 0.176203 | 0.00013  | 0.205578 | 7.51E-06 | 0.160922 | 0.00048  |
| 0.04183 | 0.137901 | 0.00282  | 0.194817 | 2.24E-05 | 0.223099 | 1.12E-06 | 0.208298 | 5.65E-06 |
| 0.97171 | 0.000408 | 0.99299  | 0.15206  | 0.00098  | 0.164349 | 0.00036  | 0.143235 | 0.00192  |
| 0.1047  | -0.05435 | 0.24111  | 0.164907 | 0.00035  | 0.224301 | 9.75E-07 | 0.102668 | 0.02651  |
| 0.92686 | 0.081364 | 0.079    | 0.106323 | 0.02156  | 0.436563 | 3.75E-23 | 0.061144 | 0.18716  |
| 0.34621 | 0.028647 | 0.53688  | 0.151078 | 0.00106  | 0.605067 | 5.67E-48 | 0.105886 | 0.02211  |
| 0.23256 | -0.02728 | 0.55644  | 0.183327 | 6.75E-05 | 0.191875 | 2.99E-05 | 0.119009 | 0.01005  |
| 0.01351 | -0.07436 | 0.10851  | 0.120964 | 0.00888  | 0.144758 | 0.00171  | 0.059871 | 0.19653  |
| 0.7315  | 0.044898 | 0.33297  | 0.084057 | 0.06955  | 0.062583 | 0.17697  | 0.043106 | 0.35265  |
| 0.90246 | 0.024915 | 0.59122  | 0.125967 | 0.00642  | 0.153299 | 0.00089  | 0.22384  | 1.03E-06 |
| 0.43179 | -0.02985 | 0.51995  | 0.184934 | 5.81E-05 | 0.179361 | 9.73E-05 | 0.155085 | 0.00077  |
| 0.10475 | -0.01972 | 0.67082  | 0.095694 | 0.03872  | 0.106171 | 0.02175  | 0.040824 | 0.37874  |
| 0.19876 | -0.02584 | 0.57747  | 0.171537 | 0.0002   | 0.214302 | 2.97E-06 | 0.129209 | 0.00517  |
| 0.04628 | -0.05162 | 0.26558  | 0.09018  | 0.05147  | 0.155775 | 0.00073  | 0.018792 | 0.68545  |
| 0.12946 | -0.04271 | 0.35707  | 0.118995 | 0.01006  | 0.151459 | 0.00103  | 0.08543  | 0.0651   |
| 0.24541 | 0.000129 | 0.99779  | 0.129624 | 0.00502  | 0.15391  | 0.00085  | 0.121498 | 0.00858  |
| 0.98529 | 0.047049 | 0.31031  | 0.153956 | 0.00084  | 0.162528 | 0.00042  | 0.161931 | 0.00044  |
| 0.12297 | -0.04244 | 0.3601   | 0.135064 | 0.00345  | 0.186126 | 5.19E-05 | 0.092306 | 0.04619  |
| 0.74367 | 0.068061 | 0.14195  | 0.092179 | 0.04649  | 0.059988 | 0.19565  | 0.087172 | 0.05979  |
| 0.26813 | -0.04273 | 0.35692  | 0.183726 | 6.50E-05 | 0.184507 | 6.05E-05 | 0.245254 | 7.96E-08 |
| 0.10651 | 0.049158 | 0.2891   | 0.189562 | 3.74E-05 | 0.179732 | 9.40E-05 | 0.213877 | 3.11E-06 |
| 0.33897 | 0.088303 | 0.05654  | 0.235686 | 2.57E-07 | 0.231947 | 4.01E-07 | 0.233189 | 3.47E-07 |
| 0.04079 | -0.08337 | 0.07188  | 0.158893 | 0.00057  | 0.155873 | 0.00072  | 0.089208 | 0.05404  |
| 0.81974 | 0.050606 | 0.27511  | 0.193516 | 2.55E-05 | 0.283024 | 4.74E-10 | 0.167883 | 0.00027  |
| 0.9426  | -0.03533 | 0.44628  | 0.062429 | 0.17805  | 0.311775 | 5.50E-12 | 0.033144 | 0.4749   |
| 0.09284 | 0.029495 | 0.5249   | 0.086257 | 0.06253  | 0.061084 | 0.1876   | 0.050323 | 0.27781  |
| 0.51625 | 0.193669 | 2.51E-05 | 0.156603 | 0.00068  | 0.198241 | 1.59E-05 | 0.076135 | 0.10033  |
| 0.43966 | 0.066071 | 0.154    | 0.144166 | 0.00179  | 0.184771 | 5.90E-05 | 0.201233 | 1.18E-05 |
| 0.24235 | -0.03514 | 0.44865  | 0.180913 | 8.44E-05 | 0.189878 | 3.63E-05 | 0.110076 | 0.01733  |
| 0.99173 | 0.052252 | 0.25978  | 0.179038 | 0.0001   | 0.163679 | 0.00038  | 0.171454 | 0.0002   |
| 0.54093 | 0.006448 | 0.88947  | 0.088855 | 0.05501  | 0.404642 | 7.97E-20 | 0.067959 | 0.14255  |
| 0.39395 | 0.042147 | 0.36348  | 0.096951 | 0.03622  | 0.388986 | 2.55E-18 | 0.047967 | 0.30095  |
| 0.70791 | 0.003515 | 0.93962  | 0.185641 | 5.43E-05 | 0.172515 | 0.00018  | 0.123054 | 0.00776  |
| 0.51894 | 0.044158 | 0.34101  | 0.123486 | 0.00755  | 0.116235 | 0.01195  | 0.158131 | 0.0006   |
| 0.55626 | 0.105168 | 0.02303  | 0.22733  | 6.88E-07 | 0.181819 | 7.76E-05 | 0.161604 | 0.00045  |
| 0.12071 | 0.157295 | 0.00065  | 0.158326 | 0.00059  | 0.207207 | 6.34E-06 | 0.24353  | 9.87E-08 |
| 0.30841 | 0.005808 | 0.90038  | 0.173428 | 0.00017  | 0.239724 | 1.58E-07 | 0.091281 | 0.04867  |
| 0.06264 | -0.07468 | 0.107    | 0.177893 | 0.00011  | 0.178106 | 0.00011  | 0.104202 | 0.02433  |
| 0.73398 | -0.00182 | 0.96869  | 0.115327 | 0.01264  | 0.05349  | 0.24864  | 0.149597 | 0.00119  |
| 0.05427 | -0.08197 | 0.0768   | 0.115785 | 0.01228  | 0.079503 | 0.08613  | 0.019888 | 0.66816  |
| 0.21589 | 0.044411 | 0.33825  | 0.086413 | 0.06206  | 0.099471 | 0.03162  | 0.012091 | 0.7944   |

|         |          |          |          |          |          |          |          |          |
|---------|----------|----------|----------|----------|----------|----------|----------|----------|
| 0.12725 | -0.06286 | 0.17505  | 0.075044 | 0.10531  | 0.077947 | 0.09247  | 0.017479 | 0.70637  |
| 0.81501 | 0.068033 | 0.14211  | 0.227304 | 6.90E-07 | 0.210801 | 4.33E-06 | 0.130351 | 0.00478  |
| 0.56767 | -0.03623 | 0.4348   | 0.214568 | 2.88E-06 | 0.13199  | 0.00427  | 0.085676 | 0.06432  |
| 0.01142 | -0.10092 | 0.02922  | 0.105802 | 0.02221  | 0.099479 | 0.03161  | 0.113536 | 0.01409  |
| 0.93729 | 0.040731 | 0.37983  | 0.178656 | 0.0001   | 0.191953 | 2.97E-05 | 0.13557  | 0.00333  |
| 0.35264 | -0.00363 | 0.93764  | 0.1104   | 0.017    | 0.119262 | 0.00989  | 0.101875 | 0.02771  |
| 0.11545 | -0.07731 | 0.09519  | 0.140969 | 0.00226  | 0.140927 | 0.00227  | 0.021078 | 0.64958  |
| 0.82297 | 0.051049 | 0.27092  | 0.131075 | 0.00455  | 0.235106 | 2.76E-07 | 0.064144 | 0.16639  |
| 0.5857  | 0.110067 | 0.01734  | 0.117112 | 0.01132  | 0.140464 | 0.00235  | 0.074204 | 0.10927  |
| 0.59769 | -0.00449 | 0.92284  | 0.209422 | 5.01E-06 | 0.219064 | 1.76E-06 | 0.159069 | 0.00056  |
| 0.0968  | -0.0873  | 0.05941  | 0.113942 | 0.01375  | 0.115677 | 0.01237  | 0.038756 | 0.40339  |
| 0.01717 | 0.224262 | 9.79E-07 | 0.180448 | 8.81E-05 | 0.183783 | 6.47E-05 | 0.282422 | 5.17E-10 |
| 0.91318 | 0.062847 | 0.17515  | 0.183031 | 6.94E-05 | 0.253421 | 2.81E-08 | 0.131212 | 0.00451  |
| 0.11463 | 0.185455 | 5.53E-05 | 0.167309 | 0.00028  | 0.127009 | 0.00599  | 0.169623 | 0.00023  |
| 0.48969 | 0.072276 | 0.11882  | 0.216448 | 2.35E-06 | 0.232516 | 3.75E-07 | 0.235202 | 2.73E-07 |
| 0.48306 | 0.066611 | 0.15066  | 0.169886 | 0.00023  | 0.1932   | 2.63E-05 | 0.136372 | 0.00315  |
| 0.00225 | -0.10215 | 0.02729  | 0.102851 | 0.02624  | 0.084017 | 0.06968  | 0.020874 | 0.65276  |
| 0.17214 | 0.044303 | 0.33943  | 0.096996 | 0.03613  | 0.095353 | 0.03942  | 0.115528 | 0.01248  |
| 0.27977 | 0.095357 | 0.03941  | 0.184457 | 6.07E-05 | 0.176083 | 0.00013  | 0.31176  | 5.52E-12 |
| 0.09969 | -0.05455 | 0.23939  | 0.166559 | 0.0003   | 0.18237  | 7.38E-05 | 0.098736 | 0.03291  |
| 0.30957 | 0.000159 | 0.99726  | 0.16602  | 0.00031  | 0.152738 | 0.00093  | 0.134817 | 0.00351  |
| 0.46176 | 0.053494 | 0.24861  | 0.142739 | 0.00199  | 0.102679 | 0.0265   | 0.082254 | 0.07577  |
| 0.80417 | 0.031503 | 0.49705  | 0.209302 | 5.08E-06 | 0.09272  | 0.04521  | 0.327114 | 4.15E-13 |
| 0.10143 | -0.10339 | 0.02546  | 0.070891 | 0.12607  | 0.049442 | 0.28632  | 0.082042 | 0.07653  |
| 0.81926 | 0.051693 | 0.26492  | 0.125628 | 0.00656  | 0.207299 | 6.27E-06 | 0.065901 | 0.15506  |
| 0.0651  | -0.05421 | 0.24234  | 0.125822 | 0.00648  | 0.185079 | 5.73E-05 | 0.092687 | 0.04529  |
| 0.13953 | 0.012839 | 0.78199  | 0.083455 | 0.07158  | 0.092453 | 0.04584  | 0.127201 | 0.00591  |
| 0.61937 | -0.00249 | 0.95713  | 0.304193 | 1.87E-11 | 0.219235 | 1.72E-06 | 0.18101  | 8.36E-05 |
| 0.02562 | -0.04505 | 0.33129  | 0.166184 | 0.00031  | 0.229397 | 5.41E-07 | 0.094791 | 0.0406   |
| 0.88195 | 0.075198 | 0.10459  | 0.213583 | 3.21E-06 | 0.243518 | 9.89E-08 | 0.198397 | 1.57E-05 |
| 0.29789 | 0.01925  | 0.6782   | 0.41266  | 1.25E-20 | 0.126598 | 0.00615  | 0.141338 | 0.0022   |
| 0.9503  | 0.049851 | 0.28234  | 0.171979 | 0.00019  | 0.099368 | 0.0318   | 0.152908 | 0.00092  |
| 0.17872 | 0.097656 | 0.03488  | 0.187244 | 4.67E-05 | 0.224022 | 1.01E-06 | 0.207765 | 5.97E-06 |
| 0.78206 | 0.046057 | 0.32064  | 0.095171 | 0.0398   | 0.16143  | 0.00046  | 0.036089 | 0.43654  |
| 0.90114 | 0.025286 | 0.58572  | 0.207607 | 6.07E-06 | 0.217108 | 2.18E-06 | 0.210673 | 4.39E-06 |
| 0.01058 | -0.06745 | 0.14555  | 0.609502 | 7.74E-49 | 0.120809 | 0.00897  | -0.02004 | 0.66585  |
| 0.00764 | -0.08271 | 0.07417  | 0.136893 | 0.00303  | 0.239251 | 1.67E-07 | 0.072807 | 0.11612  |
| 0.45156 | -0.05162 | 0.26558  | 0.087434 | 0.05902  | 0.14715  | 0.00143  | 0.131505 | 0.00442  |
| 0.18395 | -0.02959 | 0.52352  | 0.189811 | 3.65E-05 | 0.188259 | 4.24E-05 | 0.128228 | 0.00552  |
| 0.33527 | 0.072992 | 0.1152   | 0.204382 | 8.51E-06 | 0.171028 | 0.0002   | 0.174868 | 0.00015  |
| 0.04292 | -0.06327 | 0.17228  | 0.203421 | 9.40E-06 | 0.172894 | 0.00017  | 0.136491 | 0.00312  |
| 0.66344 | 0.046146 | 0.3197   | 0.179985 | 9.19E-05 | 0.199285 | 1.43E-05 | 0.15123  | 0.00104  |
| 0.98494 | 0.060903 | 0.18891  | 0.16056  | 0.0005   | 0.140896 | 0.00227  | 0.094991 | 0.04018  |
| 0.72149 | 0.061996 | 0.18108  | 0.14558  | 0.00161  | 0.16088  | 0.00048  | 0.057001 | 0.21888  |
| 0.03125 | -0.06184 | 0.18215  | 0.15457  | 0.0008   | 0.161427 | 0.00046  | 0.110349 | 0.01705  |

|         |          |          |          |          |          |          |          |          |
|---------|----------|----------|----------|----------|----------|----------|----------|----------|
| 0.07494 | -0.00731 | 0.87488  | 0.125863 | 0.00646  | 0.125285 | 0.00671  | 0.10146  | 0.02835  |
| 0.17226 | 0.171371 | 0.0002   | 0.113569 | 0.01406  | 0.122457 | 0.00807  | 0.116627 | 0.01166  |
| 0.22568 | -0.04422 | 0.34029  | 0.177483 | 0.00012  | 0.221897 | 1.28E-06 | 0.118452 | 0.01041  |
| 0.18465 | -0.02078 | 0.65415  | 0.173535 | 0.00016  | 0.308766 | 8.98E-12 | 0.107776 | 0.01983  |
| 0.04336 | -0.035   | 0.45052  | 0.174842 | 0.00015  | 0.190788 | 3.32E-05 | 0.16708  | 0.00029  |
| 0.76992 | 0.046933 | 0.3115   | 0.249783 | 4.49E-08 | 0.259458 | 1.27E-08 | 0.183183 | 6.84E-05 |
| 0.07244 | 0.170893 | 0.00021  | 0.171673 | 0.00019  | 0.14898  | 0.00124  | 0.119255 | 0.0099   |
| 0.20637 | -0.0217  | 0.63994  | 0.18413  | 6.26E-05 | 0.174058 | 0.00016  | 0.104777 | 0.02355  |
| 0.8057  | 0.012508 | 0.78749  | 0.147035 | 0.00144  | 0.133157 | 0.00394  | 0.209483 | 4.98E-06 |
| 0.15484 | -0.06974 | 0.13237  | 0.171279 | 0.0002   | 0.184245 | 6.20E-05 | 0.071898 | 0.12076  |
| 0.14274 | -0.039   | 0.40042  | 0.232456 | 3.78E-07 | 0.211049 | 4.21E-06 | 0.128869 | 0.00529  |
| 0.27537 | -0.00937 | 0.84002  | 0.118675 | 0.01026  | 0.088466 | 0.05608  | 0.090534 | 0.05055  |
| 0.42156 | 0.08621  | 0.06267  | 0.110104 | 0.0173   | 0.169501 | 0.00023  | 0.205394 | 7.66E-06 |
| 0.07485 | 0.136842 | 0.00304  | 0.23267  | 3.69E-07 | 0.216304 | 2.38E-06 | 0.142307 | 0.00205  |
| 0.90083 | 0.013307 | 0.77427  | 0.215477 | 2.61E-06 | 0.253706 | 2.71E-08 | 0.223023 | 1.13E-06 |
| 0.03318 | 0.194311 | 2.36E-05 | 0.170362 | 0.00022  | 0.227717 | 6.58E-07 | 0.359917 | 9.94E-16 |
| 0.00018 | 0.264239 | 6.70E-09 | 0.198723 | 1.52E-05 | 0.157415 | 0.00064  | 0.192779 | 2.74E-05 |
| 0.43677 | -0.00402 | 0.9309   | 0.144178 | 0.00179  | 0.101181 | 0.02879  | 0.166317 | 0.00031  |
| 0.57126 | 0.064241 | 0.16576  | 0.161002 | 0.00048  | 0.230955 | 4.51E-07 | 0.153165 | 0.0009   |
| 0.73807 | 0.043686 | 0.3462   | 0.15245  | 0.00095  | 0.207044 | 6.45E-06 | 0.088775 | 0.05523  |
| 0.0871  | -0.03905 | 0.39979  | 0.16463  | 0.00035  | 0.197426 | 1.73E-05 | 0.106821 | 0.02095  |
| 0.72969 | -0.01963 | 0.67214  | 0.177337 | 0.00012  | 0.192386 | 2.85E-05 | 0.226986 | 7.16E-07 |
| 0.05631 | 0.146983 | 0.00145  | 0.207401 | 6.21E-06 | 0.143863 | 0.00183  | 0.23298  | 3.55E-07 |
| 0.57505 | 0.101368 | 0.0285   | 0.118241 | 0.01055  | 0.341225 | 3.38E-14 | 0.070153 | 0.13007  |
| 0.06026 | -0.07937 | 0.08667  | 0.156132 | 0.00071  | 0.167096 | 0.00029  | 0.104405 | 0.02405  |
| 0.77948 | 0.007741 | 0.86749  | 0.167937 | 0.00027  | 0.168945 | 0.00024  | 0.209623 | 4.91E-06 |
| 0.31801 | 0.088333 | 0.05646  | 0.210846 | 4.31E-06 | 0.228221 | 6.21E-07 | 0.24651  | 6.80E-08 |
| 0.8054  | 0.067399 | 0.14587  | 0.2128   | 3.49E-06 | 0.186134 | 5.19E-05 | 0.141871 | 0.00212  |
| 0.1687  | -0.04258 | 0.3586   | 0.159559 | 0.00054  | 0.172241 | 0.00018  | 0.091006 | 0.04936  |
| 0.26522 | -0.05947 | 0.19957  | 0.215133 | 2.71E-06 | 0.183057 | 6.92E-05 | 0.117169 | 0.01128  |
| 0.76538 | 0.044344 | 0.33898  | 0.177398 | 0.00012  | 0.169719 | 0.00023  | 0.150059 | 0.00114  |
| 0.01249 | -0.11343 | 0.01418  | 0.077606 | 0.09391  | 0.120361 | 0.00923  | 0.087608 | 0.05852  |
| 0.16491 | 0.091975 | 0.04698  | 0.20237  | 1.05E-05 | 0.208697 | 5.41E-06 | 0.186001 | 5.25E-05 |
| 0.10928 | 0.145036 | 0.00168  | 0.231649 | 4.16E-07 | 0.20037  | 1.28E-05 | 0.303315 | 2.15E-11 |
| 0.26452 | -0.08409 | 0.06945  | 0.048606 | 0.29455  | 0.04104  | 0.37622  | -0.01129 | 0.80781  |
| 0.40895 | 0.069873 | 0.13162  | 0.225058 | 8.94E-07 | 0.164404 | 0.00036  | 0.088728 | 0.05536  |
| 0.04648 | -0.06389 | 0.16806  | 0.097976 | 0.03429  | 0.086448 | 0.06195  | -0.0099  | 0.83107  |
| 0.26154 | 0.024879 | 0.59177  | 0.170977 | 0.00021  | 0.146889 | 0.00146  | 0.118683 | 0.01026  |
| 0.29401 | -0.02728 | 0.55651  | 0.151476 | 0.00102  | 0.092728 | 0.0452   | -0.00062 | 0.98935  |
| 0.29972 | -0.03441 | 0.45822  | 0.090918 | 0.04958  | 0.061021 | 0.18805  | 0.038867 | 0.40204  |
| 0.08395 | -0.04609 | 0.32029  | 0.093672 | 0.04304  | 0.091    | 0.04937  | 0.019442 | 0.67517  |
| 0.03027 | -0.04164 | 0.36929  | 0.085402 | 0.06519  | 0.053495 | 0.2486   | 0.032335 | 0.48575  |
| 0.98779 | 0.050591 | 0.27525  | 0.196171 | 1.96E-05 | 0.153275 | 0.00089  | 0.194193 | 2.38E-05 |
| 0.54852 | 0.012734 | 0.78374  | 0.111001 | 0.01641  | 0.203152 | 9.66E-06 | 0.095976 | 0.03814  |
| 0.48898 | 0.032725 | 0.48051  | 0.102479 | 0.02679  | 0.08346  | 0.07156  | 0.038592 | 0.40537  |

|          |          |          |          |          |          |          |          |          |
|----------|----------|----------|----------|----------|----------|----------|----------|----------|
| 0.00536  | -0.13715 | 0.00298  | 0.094179 | 0.04192  | 0.084439 | 0.06829  | 0.087305 | 0.0594   |
| 0.61426  | 0.059014 | 0.20302  | 0.081139 | 0.07984  | 0.070516 | 0.12809  | 0.095089 | 0.03997  |
| 0.60047  | 0.022112 | 0.63364  | 0.070216 | 0.12972  | 0.093128 | 0.04427  | 0.083365 | 0.07188  |
| 0.45302  | 0.128873 | 0.00528  | 0.180366 | 8.87E-05 | 0.191282 | 3.17E-05 | 0.244918 | 8.30E-08 |
| 0.81691  | 0.030281 | 0.5139   | 0.131938 | 0.00429  | 0.158753 | 0.00057  | 0.087088 | 0.06004  |
| 0.6233   | 0.05355  | 0.24811  | 0.185004 | 5.77E-05 | 0.184792 | 5.89E-05 | 0.171136 | 0.0002   |
| 0.20629  | -0.03589 | 0.43903  | 0.046069 | 0.3205   | 0.038978 | 0.40069  | -0.01577 | 0.73391  |
| 0.69351  | 0.012603 | 0.7859   | 0.146498 | 0.0015   | 0.084541 | 0.06795  | -0.02028 | 0.66197  |
| 0.24765  | -0.03115 | 0.50185  | 0.168786 | 0.00025  | 0.188207 | 4.26E-05 | 0.136969 | 0.00302  |
| 0.19997  | -0.0407  | 0.3802   | 0.168953 | 0.00024  | 0.17244  | 0.00018  | 0.118315 | 0.0105   |
| 0.61413  | 0.025281 | 0.58579  | 0.143114 | 0.00193  | 0.120604 | 0.00909  | 0.165235 | 0.00034  |
| 0.04014  | 0.166454 | 0.0003   | 0.240963 | 1.36E-07 | 0.177464 | 0.00012  | 0.200527 | 1.26E-05 |
| 0.72819  | -0.00905 | 0.84531  | 0.188898 | 3.99E-05 | 0.192893 | 2.71E-05 | 0.147856 | 0.00135  |
| 0.25952  | 0.127463 | 0.00581  | 0.161009 | 0.00048  | 0.116708 | 0.0116   | 0.109962 | 0.01745  |
| 0.00029  | 0.234877 | 2.83E-07 | 0.202305 | 1.05E-05 | 0.241448 | 1.28E-07 | 0.309678 | 7.74E-12 |
| 0.05009  | -0.09334 | 0.04379  | 0.157871 | 0.00062  | 0.159742 | 0.00053  | 0.078945 | 0.08836  |
| 0.58642  | 0.052133 | 0.26086  | 0.145487 | 0.00162  | 0.147799 | 0.00136  | 0.140478 | 0.00234  |
| 0.85619  | 0.049611 | 0.28467  | 0.177688 | 0.00011  | 0.189209 | 3.87E-05 | 0.18674  | 4.90E-05 |
| 0.35923  | -0.00435 | 0.92535  | 0.141019 | 0.00225  | 0.250684 | 4.00E-08 | 0.151383 | 0.00103  |
| 5.06E-91 | 0.626835 | 2.36E-52 | 0.161013 | 0.00048  | 0.122108 | 0.00825  | 0.020252 | 0.66246  |
| #####    | 0.657935 | 3.01E-59 | 0.07571  | 0.10224  | 0.025102 | 0.58844  | 0.328238 | 3.42E-13 |
| #####    | 0.766044 | 2.72E-91 | 0.125934 | 0.00643  | 0.127336 | 0.00586  | 0.19532  | 2.13E-05 |
| #####    | 0.632069 | 1.85E-53 | 0.13688  | 0.00304  | 0.038862 | 0.4021   | 0.247855 | 5.74E-08 |
| 8.39E-50 | 0.359763 | 1.02E-15 | 0.004439 | 0.92378  | -0.0246  | 0.59596  | 0.124813 | 0.00692  |
| #####    | 0.596383 | 2.56E-46 | 0.083447 | 0.07161  | 0.038122 | 0.41113  | 0.203366 | 9.45E-06 |
| 1.83E-41 | 0.362182 | 6.38E-16 | 0.074411 | 0.10829  | 0.00315  | 0.94587  | 0.212496 | 3.61E-06 |
| 1.49E-40 | 0.549446 | 3.45E-38 | 0.072674 | 0.1168   | 0.142854 | 0.00197  | 0.376284 | 3.72E-17 |
| 2.73E-98 | 0.540841 | 7.81E-37 | 0.084169 | 0.06918  | 0.029155 | 0.52968  | 0.235431 | 2.65E-07 |
| #####    | 0.64031  | 3.05E-55 | 0.101188 | 0.02878  | 0.095753 | 0.0386   | 0.177921 | 0.00011  |
| #####    | 0.651666 | 8.59E-58 | 0.100958 | 0.02915  | 0.066782 | 0.14961  | 0.257873 | 1.57E-08 |
| 2.57E-81 | 0.604667 | 6.77E-48 | 0.159281 | 0.00055  | 0.007704 | 0.86813  | 0.158329 | 0.00059  |
| #####    | 0.739473 | 6.04E-82 | 0.119504 | 0.00974  | 0.062785 | 0.17558  | 0.167604 | 0.00027  |
| 1.50E-97 | 0.69343  | 3.41E-68 | -0.02549 | 0.58263  | 0.081079 | 0.08006  | 0.25246  | 3.19E-08 |
| 1.00E-63 | 0.428163 | 3.05E-22 | 0.026498 | 0.56788  | -0.00559 | 0.90402  | 0.124992 | 0.00684  |
| 7.59E-37 | 0.289197 | 1.90E-10 | -0.02813 | 0.54431  | -0.0503  | 0.27805  | -0.11312 | 0.01445  |
| #####    | 0.590702 | 2.91E-45 | 0.105072 | 0.02316  | 0.016925 | 0.71526  | 0.146855 | 0.00146  |
| 8.68E-61 | 0.419787 | 2.33E-21 | 0.06641  | 0.1519   | 0.060184 | 0.19419  | 0.132987 | 0.00399  |
| 3.91E-39 | 0.500406 | 5.79E-31 | 0.018802 | 0.68529  | 0.14788  | 0.00135  | 0.155294 | 0.00076  |
| 6.97E-43 | 0.519524 | 1.22E-33 | 0.030443 | 0.51165  | 0.032335 | 0.48576  | 0.19454  | 2.30E-05 |
| #####    | 0.769371 | 1.50E-92 | 0.166449 | 0.0003   | 0.076764 | 0.09754  | 0.277408 | 1.07E-09 |
| 2.66E-35 | 0.426552 | 4.53E-22 | 0.071423 | 0.12324  | 0.064417 | 0.16459  | 0.215982 | 2.47E-06 |
| 3.88E-90 | 0.617246 | 2.21E-50 | 0.177528 | 0.00011  | 0.052778 | 0.255    | 0.158496 | 0.00059  |
| #####    | 0.676973 | 6.87E-64 | 0.043117 | 0.35253  | 0.093138 | 0.04425  | 0.228337 | 6.13E-07 |
| #####    | 0.742352 | 6.68E-83 | 0.133236 | 0.00392  | 0.097423 | 0.03532  | 0.189391 | 3.80E-05 |
| 1.10E-58 | 0.518965 | 1.47E-33 | 0.086121 | 0.06295  | -0.00761 | 0.86974  | 0.197326 | 1.75E-05 |

|          |          |          |          |         |          |         |          |          |
|----------|----------|----------|----------|---------|----------|---------|----------|----------|
| 3.09E-96 | 0.563142 | 1.99E-40 | 0.109866 | 0.01755 | 0.018403 | 0.69161 | 0.298917 | 4.29E-11 |
| 9.53E-66 | 0.582608 | 8.54E-44 | 0.104031 | 0.02456 | -0.00663 | 0.88635 | 0.03496  | 0.45103  |
| 3.54E-62 | 0.417231 | 4.28E-21 | 0.081904 | 0.07703 | -0.00031 | 0.99465 | 0.19525  | 2.15E-05 |
| 2.64E-51 | 0.36813  | 1.96E-16 | 0.044675 | 0.33538 | -0.03593 | 0.43863 | 0.046234 | 0.31878  |
| 4.57E-97 | 0.579579 | 2.96E-43 | 0.0698   | 0.13202 | 0.002186 | 0.96242 | 0.182355 | 7.39E-05 |
| 7.79E-85 | 0.594044 | 7.00E-46 | 0.092655 | 0.04537 | 0.065442 | 0.15797 | 0.120522 | 0.00913  |
| 5.16E-90 | 0.54275  | 3.94E-37 | 0.067689 | 0.14415 | 0.05559  | 0.23052 | 0.256515 | 1.88E-08 |
| #####    | 0.658588 | 2.11E-59 | 0.076477 | 0.09881 | 0.063057 | 0.17371 | 0.226079 | 7.95E-07 |
| 7.27E-68 | 0.640119 | 3.36E-55 | 0.012769 | 0.78316 | 0.06518  | 0.15964 | 0.234502 | 2.96E-07 |
| 1.27E-69 | 0.524032 | 2.69E-34 | 0.164187 | 0.00037 | 0.041853 | 0.36683 | 0.255677 | 2.10E-08 |
| 7.14E-68 | 0.496172 | 2.15E-30 | 0.130463 | 0.00474 | 0.042601 | 0.35832 | 0.241796 | 1.22E-07 |
| 7.64E-85 | 0.594253 | 6.40E-46 | 0.079359 | 0.0867  | 0.096046 | 0.038   | 0.249815 | 4.47E-08 |
| 1.26E-59 | 0.514067 | 7.36E-33 | 0.031431 | 0.49803 | -0.01538 | 0.74027 | 0.145383 | 0.00163  |
| #####    | 0.778796 | 3.12E-96 | 0.176357 | 0.00013 | 0.130619 | 0.00469 | 0.299454 | 3.95E-11 |
| 3.52E-24 | 0.194453 | 2.32E-05 | 0.074828 | 0.10632 | -0.08057 | 0.08198 | -0.00494 | 0.91528  |
| 5.43E-82 | 0.523153 | 3.61E-34 | 0.020255 | 0.6624  | -0.01603 | 0.72976 | 0.06648  | 0.15146  |
| 1.02E-83 | 0.561994 | 3.10E-40 | 0.066344 | 0.15231 | -0.05727 | 0.21671 | 0.240644 | 1.41E-07 |
| 3.15E-96 | 0.563242 | 1.92E-40 | 0.134937 | 0.00348 | 0.027285 | 0.55643 | 0.196283 | 1.94E-05 |
| 7.10E-84 | 0.630648 | 3.72E-53 | 0.150058 | 0.00114 | 0.053275 | 0.25055 | 0.217117 | 2.18E-06 |
| 4.28E-92 | 0.524913 | 1.99E-34 | 0.023941 | 0.60581 | -0.00544 | 0.90667 | 0.192715 | 2.76E-05 |
| #####    | 0.792842 | #####    | 0.132415 | 0.00415 | 0.081746 | 0.0776  | 0.145773 | 0.00159  |
| #####    | 0.785396 | 6.40E-99 | 0.145942 | 0.00157 | 0.110668 | 0.01673 | 0.249863 | 4.45E-08 |
| 7.18E-62 | 0.421459 | 1.56E-21 | 0.012679 | 0.78464 | -0.00077 | 0.98684 | 0.140314 | 0.00237  |
| 3.23E-75 | 0.590623 | 3.01E-45 | 0.03991  | 0.38951 | 0.052621 | 0.25642 | 0.068427 | 0.13981  |
| #####    | 0.70785  | 3.27E-72 | 0.102073 | 0.02741 | 0.053696 | 0.24682 | 0.162481 | 0.00042  |
| 1.18E-57 | 0.491742 | 8.35E-30 | 0.072592 | 0.11721 | 0.007118 | 0.87808 | 0.201405 | 1.16E-05 |
| #####    | 0.728096 | 2.76E-78 | 0.094567 | 0.04108 | 0.0345   | 0.45701 | 0.286791 | 2.72E-10 |
| #####    | 0.633935 | 7.40E-54 | 0.108162 | 0.01939 | 0.054638 | 0.23862 | 0.234214 | 3.07E-07 |
| #####    | 0.764498 | 1.03E-90 | 0.132631 | 0.00409 | 0.08757  | 0.05863 | 0.216771 | 2.26E-06 |
| #####    | 0.702474 | 1.10E-70 | 0.030446 | 0.51161 | 0.044652 | 0.33564 | 0.115585 | 0.01244  |
| #####    | 0.697688 | 2.35E-69 | 0.09871  | 0.03296 | 0.042462 | 0.35989 | 0.165464 | 0.00033  |
| 1.22E-33 | 0.261367 | 9.87E-09 | 0.093902 | 0.04253 | 0.026866 | 0.56251 | 0.193478 | 2.56E-05 |
| 4.51E-99 | 0.712635 | 1.34E-73 | 0.157588 | 0.00063 | 0.110273 | 0.01713 | 0.288762 | 2.02E-10 |
| 1.73E-86 | 0.536584 | 3.54E-36 | 0.051961 | 0.26244 | 0.0308   | 0.50671 | 0.235933 | 2.50E-07 |
| 5.76E-60 | 0.40508  | 7.21E-20 | 0.099504 | 0.03157 | 0.003118 | 0.94643 | 0.012726 | 0.78386  |
| 5.29E-63 | 0.505355 | 1.22E-31 | 0.098286 | 0.03372 | -0.03397 | 0.46397 | 0.282309 | 5.26E-10 |
| 2.38E-27 | 0.344395 | 1.89E-14 | 0.05148  | 0.26689 | -0.02315 | 0.61773 | 0.10074  | 0.0295   |
| #####    | 0.629703 | 5.90E-53 | 0.078762 | 0.0891  | 0.06412  | 0.16655 | 0.163211 | 0.0004   |
| #####    | 0.745343 | 6.56E-84 | 0.129263 | 0.00515 | 0.091974 | 0.04698 | 0.295286 | 7.52E-11 |
| 1.31E-81 | 0.661982 | 3.31E-60 | 0.11855  | 0.01035 | 0.07394  | 0.11054 | 0.274069 | 1.72E-09 |
| #####    | 0.714591 | 3.56E-74 | 0.104478 | 0.02395 | 0.089615 | 0.05295 | 0.107697 | 0.01992  |
| #####    | 0.66463  | 7.67E-61 | 0.106543 | 0.02129 | 0.031477 | 0.49741 | 0.196585 | 1.88E-05 |
| 1.87E-81 | 0.661535 | 4.23E-60 | 0.062832 | 0.17526 | 0.106234 | 0.02167 | 0.266074 | 5.22E-09 |
| 7.40E-96 | 0.628595 | 1.01E-52 | 0.072947 | 0.11543 | -0.03315 | 0.47484 | 0.107361 | 0.02031  |
| 1.30E-23 | 0.362393 | 6.12E-16 | 0.012023 | 0.79553 | 0.036102 | 0.43637 | -0.01209 | 0.7944   |

|          |          |          |          |         |          |          |          |          |
|----------|----------|----------|----------|---------|----------|----------|----------|----------|
| 3.40E-33 | 0.500935 | 4.91E-31 | 0.041232 | 0.37399 | 0.085524 | 0.0648   | 0.172001 | 0.00019  |
| 3.51E-42 | 0.57964  | 2.88E-43 | 0.076782 | 0.09747 | 0.060141 | 0.19451  | 0.170147 | 0.00022  |
| 1.47E-69 | 0.676186 | 1.09E-63 | 0.068381 | 0.14008 | 0.095655 | 0.0388   | 0.129382 | 0.00511  |
| 1.10E-50 | 0.504866 | 1.42E-31 | 0.116847 | 0.0115  | 0.086197 | 0.06272  | 0.208307 | 5.64E-06 |
| 2.65E-79 | 0.448591 | 1.68E-24 | 0.158815 | 0.00057 | 0.012256 | 0.79165  | 0.155735 | 0.00073  |
| 0.00035  | -0.166   | 0.00031  | -0.13602 | 0.00323 | -0.1114  | 0.01603  | -0.0049  | 0.91587  |
| 7.34E-05 | -0.17917 | 9.90E-05 | -0.09685 | 0.03642 | -0.0485  | 0.29557  | 0.010732 | 0.81707  |
| 0.05884  | 0.115071 | 0.01283  | -0.01246 | 0.78822 | -0.06903 | 0.13636  | 0.109903 | 0.01751  |
| 0.02336  | 0.037574 | 0.41789  | -0.1451  | 0.00167 | -0.08159 | 0.07816  | -0.0322  | 0.48757  |
| 0.06366  | -0.0751  | 0.10502  | -0.0581  | 0.21013 | -0.0632  | 0.17273  | -0.02506 | 0.58909  |
| 0.13644  | 0.123021 | 0.00778  | -0.02073 | 0.65494 | -0.03939 | 0.39571  | -0.05053 | 0.27587  |
| 0.3738   | 0.125224 | 0.00674  | -0.04014 | 0.38683 | -0.02462 | 0.59564  | -0.05141 | 0.26753  |
| 0.0079   | -0.08958 | 0.05304  | -0.01997 | 0.66691 | -0.10401 | 0.0246   | -0.01986 | 0.66861  |
| 0.87228  | 0.089858 | 0.05231  | -0.08241 | 0.0752  | -0.03507 | 0.44956  | -0.09716 | 0.03583  |
| 0.00091  | -0.04549 | 0.32665  | -0.05309 | 0.25216 | -0.0267  | 0.56494  | 0.04132  | 0.37297  |
| 4.88E-09 | -0.21363 | 3.19E-06 | -0.04968 | 0.28405 | -0.0194  | 0.67576  | -0.11911 | 0.00999  |
| 0.02298  | -0.09841 | 0.0335   | 0.139426 | 0.00253 | -0.01    | 0.82941  | 0.020148 | 0.66408  |
| 0.01197  | 0.088325 | 0.05648  | -0.11302 | 0.01454 | -0.07395 | 0.1105   | 0.018719 | 0.68661  |
| 2.31E-12 | -0.31873 | 1.74E-12 | -0.08956 | 0.05309 | -0.12058 | 0.0091   | -0.10171 | 0.02797  |
| 4.48E-05 | -0.22393 | 1.02E-06 | -0.10099 | 0.0291  | -0.09588 | 0.03834  | -0.08751 | 0.05879  |
| 5.50E-05 | -0.23674 | 2.27E-07 | -0.09326 | 0.04397 | -0.16372 | 0.00038  | -0.13083 | 0.00463  |
| 2.90E-08 | -0.28943 | 1.83E-10 | -0.06837 | 0.14016 | -0.12386 | 0.00737  | -0.14181 | 0.00213  |
| 3.73E-07 | -0.19339 | 2.58E-05 | -0.04064 | 0.38084 | -0.05028 | 0.27819  | -0.09064 | 0.05029  |
| 1.20E-08 | -0.23389 | 3.19E-07 | -0.07147 | 0.12301 | -0.08125 | 0.07942  | -0.06515 | 0.15985  |
| 0.96612  | 0.007016 | 0.87981  | -0.11494 | 0.01294 | -0.06891 | 0.13704  | 0.067949 | 0.14261  |
| 8.19E-08 | -0.18366 | 6.54E-05 | -0.01697 | 0.71455 | 0.000438 | 0.99246  | -0.12046 | 0.00917  |
| 0.00021  | -0.11566 | 0.01238  | -0.16634 | 0.00031 | -0.04084 | 0.37859  | -0.14525 | 0.00165  |
| 1.56E-24 | -0.42193 | 1.39E-21 | -0.12165 | 0.0085  | -0.07038 | 0.12885  | -0.22442 | 9.61E-07 |
| 2.83E-11 | -0.2165  | 2.33E-06 | -0.13032 | 0.00479 | -0.03441 | 0.45817  | -0.16453 | 0.00036  |
| 0.00049  | -0.12495 | 0.00686  | -0.09465 | 0.04089 | -0.08379 | 0.07043  | -0.16985 | 0.00023  |
| 4.12E-16 | -0.32756 | 3.84E-13 | -0.09611 | 0.03787 | -0.12449 | 0.00707  | -0.07409 | 0.10982  |
| 4.27E-14 | -0.32103 | 1.18E-12 | -0.1553  | 0.00076 | -0.16602 | 0.00031  | -0.0866  | 0.06149  |
| 0.12275  | -0.08859 | 0.05575  | 0.002511 | 0.95684 | -0.03357 | 0.46927  | 0.085558 | 0.0647   |
| 1.52E-13 | -0.203   | 9.82E-06 | -0.02325 | 0.61627 | -0.04151 | 0.37082  | -0.14852 | 0.00129  |
| 1.60E-08 | -0.29038 | 1.59E-10 | -0.07339 | 0.11322 | -0.11886 | 0.01015  | -0.07761 | 0.0939   |
| 1.33E-07 | -0.23194 | 4.02E-07 | -0.05381 | 0.24582 | -0.05815 | 0.2097   | -0.06306 | 0.17371  |
| 0.00039  | -0.19586 | 2.02E-05 | -0.01836 | 0.69233 | -0.08387 | 0.07016  | -0.05862 | 0.20609  |
| 0.88846  | -0.00043 | 0.99263  | -0.05475 | 0.23769 | -0.05142 | 0.26747  | -0.02278 | 0.62348  |
| 0.40555  | 0.09024  | 0.05131  | 0.046567 | 0.3153  | 0.033884 | 0.4651   | 0.004766 | 0.91819  |
| 1.10E-12 | -0.29127 | 1.39E-10 | -0.08006 | 0.08394 | -0.18172 | 7.84E-05 | 0.024732 | 0.59395  |
| 6.63E-06 | -0.17447 | 0.00015  | 0.022821 | 0.62279 | -0.13944 | 0.00253  | -0.10545 | 0.02267  |
| 0.10261  | 0.11276  | 0.01477  | -0.07512 | 0.10495 | 0.013304 | 0.77431  | -0.02953 | 0.52434  |
| 4.14E-12 | -0.23873 | 1.78E-07 | -0.04228 | 0.36195 | -0.01955 | 0.67339  | -0.10601 | 0.02195  |
| 0.78472  | 0.035947 | 0.43835  | -0.04917 | 0.28895 | -0.05164 | 0.26537  | 0.076427 | 0.09903  |
| 0.00011  | -0.22226 | 1.23E-06 | -0.03632 | 0.43365 | -0.03151 | 0.49702  | 0.126211 | 0.00631  |

|          |          |          |          |         |          |         |          |          |
|----------|----------|----------|----------|---------|----------|---------|----------|----------|
| 2.52E-07 | -0.38247 | 1.02E-17 | -0.09259 | 0.04552 | -0.11139 | 0.01603 | -0.05787 | 0.21192  |
| 9.94E-08 | -0.29403 | 9.12E-11 | -0.02152 | 0.64273 | -0.08095 | 0.08053 | 0.03755  | 0.41818  |
| 0.46957  | -0.00918 | 0.8432   | 0.003974 | 0.93175 | -0.01579 | 0.73353 | -0.04219 | 0.36294  |
| 2.05E-06 | 0.403308 | 1.08E-19 | -0.08514 | 0.066   | 0.15287  | 0.00092 | -0.08187 | 0.07717  |
| 0.0004   | -0.22598 | 8.04E-07 | 0.114981 | 0.01291 | -0.05101 | 0.27128 | -0.0101  | 0.82767  |
| 0.05156  | -0.09391 | 0.04251  | 0.02983  | 0.5202  | -0.06577 | 0.15588 | -0.15171 | 0.00101  |
| 0.08963  | -0.05872 | 0.20529  | 0.03427  | 0.46001 | 0.012529 | 0.78714 | -0.11811 | 0.01063  |
| 0.22291  | -0.00608 | 0.89575  | 0.002649 | 0.95448 | 0.06264  | 0.17658 | -0.07662 | 0.09819  |
| 0.23492  | -0.14906 | 0.00124  | 0.050836 | 0.27293 | -0.13532 | 0.00339 | 0.085608 | 0.06454  |
| 0.42691  | -0.04042 | 0.38348  | 0.078951 | 0.08834 | 0.024023 | 0.60458 | 0.176335 | 0.00013  |
| 1.16E-20 | -0.44617 | 3.17E-24 | -0.0319  | 0.49158 | -0.00885 | 0.84879 | -0.06083 | 0.18942  |
| 0.05413  | -0.17184 | 0.00019  | -0.00744 | 0.87252 | 0.047795 | 0.30269 | 0.047385 | 0.30686  |
| 0.00033  | -0.27043 | 2.86E-09 | 0.001786 | 0.96929 | -0.03836 | 0.40822 | -0.09266 | 0.04535  |
| 0.14508  | -0.01069 | 0.81785  | -0.11546 | 0.01253 | 0.025953 | 0.57586 | -0.03237 | 0.4853   |
| 3.92E-06 | -0.3157  | 2.88E-12 | -0.03321 | 0.47406 | -0.04525 | 0.3292  | -0.05888 | 0.20406  |
| 0.02684  | -0.21573 | 2.54E-06 | 0.054007 | 0.24409 | -0.03845 | 0.40712 | 0.028269 | 0.54227  |
| 0.77331  | -0.10738 | 0.02028  | 0.053681 | 0.24695 | 0.012647 | 0.78518 | -0.0333  | 0.47283  |
| 0.97079  | -0.03781 | 0.41495  | -0.00861 | 0.85276 | 0.087559 | 0.05866 | -0.09916 | 0.03215  |
| 0.00411  | -0.32082 | 1.22E-12 | -0.05056 | 0.27554 | -0.06672 | 0.14999 | 0.080921 | 0.08066  |
| 1.23E-08 | -0.35533 | 2.41E-15 | -0.0503  | 0.27801 | -0.09096 | 0.04948 | -0.06973 | 0.13242  |
| 0.10589  | -0.01719 | 0.71105  | 0.031036 | 0.50346 | 0.030893 | 0.50543 | 0.044877 | 0.3332   |
| 0.00054  | -0.27449 | 1.62E-09 | -0.05437 | 0.24091 | -0.04791 | 0.30155 | -0.16332 | 0.00039  |
| 0.11958  | -0.19539 | 2.12E-05 | -0.04872 | 0.29346 | -0.06551 | 0.15755 | -0.08609 | 0.06304  |
| 0.00042  | -0.19199 | 2.96E-05 | 0.001791 | 0.96922 | -0.06918 | 0.1355  | -0.02198 | 0.63566  |
| 0.00631  | -0.08753 | 0.05873  | 0.060748 | 0.19004 | 0.022048 | 0.63462 | -0.10981 | 0.01761  |
| 0.02754  | -0.22369 | 1.04E-06 | -0.02555 | 0.58182 | -0.06207 | 0.18057 | -0.01819 | 0.69494  |
| 6.28E-10 | -0.31722 | 2.24E-12 | -0.03832 | 0.4087  | -0.09155 | 0.04801 | -0.23525 | 2.71E-07 |
| 0.0606   | -0.17492 | 0.00015  | 0.053823 | 0.2457  | -0.00331 | 0.94315 | -0.00505 | 0.91332  |
| 0.00154  | -0.18064 | 8.65E-05 | 0.029931 | 0.51879 | -0.03339 | 0.47163 | 0.026086 | 0.57391  |
| 4.55E-10 | -0.33422 | 1.19E-13 | -0.10982 | 0.01759 | -0.04707 | 0.31008 | -0.00466 | 0.92     |
| 0.00025  | -0.23312 | 3.50E-07 | 0.02101  | 0.65065 | -0.04745 | 0.3062  | -0.09498 | 0.04021  |
| 0.51778  | -0.04607 | 0.32047  | -0.01375 | 0.76697 | -0.04092 | 0.37762 | -0.05084 | 0.27286  |
| 0.39102  | -0.13358 | 0.00383  | -0.09694 | 0.03624 | -0.04859 | 0.29476 | 0.058511 | 0.2069   |
| 0.00828  | -0.22671 | 7.39E-07 | 0.036736 | 0.42835 | 0.022165 | 0.63282 | 0.092896 | 0.04481  |
| 3.31E-26 | -0.55849 | 1.18E-39 | -0.0702  | 0.12981 | -0.03395 | 0.46421 | -0.13199 | 0.00427  |
| 0.02595  | -0.188   | 4.34E-05 | 0.159019 | 0.00056 | 0.152977 | 0.00091 | -0.00366 | 0.9372   |
| 1.29E-06 | -0.26696 | 4.62E-09 | 0.013831 | 0.76562 | 0.080511 | 0.08221 | -0.00549 | 0.90586  |
| 3.14E-07 | -0.36609 | 2.94E-16 | -0.0049  | 0.91593 | -0.0999  | 0.03089 | -0.01163 | 0.80207  |
| 0.06554  | -0.13876 | 0.00265  | 0.012044 | 0.79518 | -0.02988 | 0.51954 | -0.04751 | 0.30563  |
| 0.39572  | -0.06079 | 0.18974  | 0.041066 | 0.37592 | -0.00612 | 0.89512 | -0.10964 | 0.01778  |
| 3.61E-06 | -0.23024 | 4.91E-07 | -0.01035 | 0.8234  | -0.04415 | 0.34111 | -0.01305 | 0.77844  |
| 0.00233  | -0.08006 | 0.08394  | 0.068116 | 0.14162 | -0.01992 | 0.66767 | 0.028435 | 0.53991  |
| 0.13828  | -0.04018 | 0.38636  | 0.013459 | 0.77175 | -0.01354 | 0.77045 | -0.19829 | 1.59E-05 |
| 0.00332  | -0.23274 | 3.65E-07 | -0.0571  | 0.21806 | -0.00854 | 0.85399 | -0.12149 | 0.00858  |
| 4.13E-11 | -0.43184 | 1.22E-22 | -0.0215  | 0.643   | -0.06391 | 0.16793 | -0.09968 | 0.03126  |

|          |          |          |          |          |          |         |          |          |
|----------|----------|----------|----------|----------|----------|---------|----------|----------|
| 2.37E-06 | -0.23677 | 2.26E-07 | 0.009342 | 0.84044  | -0.06556 | 0.15719 | -0.04869 | 0.29367  |
| 6.25E-10 | -0.37134 | 1.02E-16 | -0.06884 | 0.13744  | -0.04432 | 0.33922 | 0.06492  | 0.16132  |
| 9.77E-05 | -0.17864 | 0.0001   | 0.064466 | 0.16428  | -0.04244 | 0.36014 | -0.0468  | 0.31288  |
| 0.12402  | -0.05936 | 0.20037  | -0.01367 | 0.76824  | 0.046356 | 0.31749 | 0.006257 | 0.89273  |
| 0.16281  | -0.14339 | 0.00189  | -0.01533 | 0.74102  | 0.014016 | 0.76258 | 0.08626  | 0.06252  |
| 0.01939  | -0.07232 | 0.11862  | 0.075222 | 0.10448  | 0.020176 | 0.66365 | -0.02282 | 0.62278  |
| 0.02612  | -0.18481 | 5.87E-05 | 0.006877 | 0.88217  | -0.02716 | 0.55819 | -0.06923 | 0.13523  |
| 0.00256  | 0.077144 | 0.09589  | 0.115791 | 0.01228  | 0.040758 | 0.37951 | -0.06382 | 0.16855  |
| 0.84529  | -0.04879 | 0.29273  | 0.21287  | 3.47E-06 | 0.015741 | 0.7344  | 0.052151 | 0.2607   |
| 0.00304  | -0.18801 | 4.34E-05 | -0.00256 | 0.95602  | 0.020782 | 0.65418 | -0.06095 | 0.18856  |
| 0.95284  | -0.13172 | 0.00435  | 0.009854 | 0.83181  | -0.01732 | 0.70893 | 0.00161  | 0.97232  |
| 0.62927  | -0.04997 | 0.28121  | -0.05568 | 0.22979  | 0.034815 | 0.45291 | -0.06571 | 0.15629  |
| 7.25E-27 | -0.61468 | 7.27E-50 | -0.21482 | 2.80E-06 | -0.11819 | 0.01058 | -0.16574 | 0.00032  |
| 1.80E-10 | -0.37353 | 6.55E-17 | 0.027159 | 0.55825  | -0.04931 | 0.28762 | -0.10872 | 0.01877  |
| 0.00462  | -0.20204 | 1.08E-05 | -0.00394 | 0.9323   | -0.08621 | 0.06269 | -0.17985 | 9.30E-05 |
| 2.18E-10 | -0.53156 | 2.04E-35 | -0.21361 | 3.20E-06 | -0.13633 | 0.00316 | -0.0704  | 0.1287   |
| 2.44E-05 | -0.34101 | 3.52E-14 | -0.12455 | 0.00704  | -0.13649 | 0.00312 | -0.01305 | 0.77848  |
| 7.11E-11 | -0.38377 | 7.79E-18 | 0.024265 | 0.60095  | -0.11415 | 0.01358 | -0.02967 | 0.52245  |
| 0.00043  | -0.20439 | 8.50E-06 | 0.04625  | 0.31861  | 0.042679 | 0.35745 | -0.06493 | 0.16125  |
| 4.31E-12 | -0.34942 | 7.41E-15 | -0.13013 | 0.00485  | -0.05065 | 0.27469 | -0.03989 | 0.38972  |
| 0.72027  | -0.07149 | 0.12291  | -0.04899 | 0.29074  | -0.02722 | 0.55733 | -0.02179 | 0.63857  |
| 9.48E-08 | -0.34265 | 2.60E-14 | -0.11068 | 0.01672  | -0.15949 | 0.00054 | -0.07905 | 0.08793  |
| 0.57363  | -0.08266 | 0.07432  | -0.01181 | 0.79913  | -0.01029 | 0.82454 | -0.04317 | 0.35197  |
| 1.35E-12 | -0.42442 | 7.62E-22 | 0.027283 | 0.55645  | -0.06023 | 0.19386 | -0.05128 | 0.26876  |
| 5.87E-06 | 0.086735 | 0.06109  | -0.02936 | 0.52677  | -0.04569 | 0.32452 | 0.026357 | 0.56994  |
| 0.00422  | -0.16879 | 0.00025  | -0.13274 | 0.00406  | 0.034645 | 0.45512 | 0.059844 | 0.19672  |
| 0.10731  | -0.15379 | 0.00086  | -0.04869 | 0.2937   | 0.033264 | 0.4733  | -0.00877 | 0.85016  |
| 1.40E-05 | -0.30356 | 2.07E-11 | -0.01322 | 0.77562  | -0.09916 | 0.03216 | -0.08975 | 0.05259  |
| 2.04E-10 | -0.31707 | 2.29E-12 | -0.03373 | 0.46719  | -0.04188 | 0.36648 | -0.01514 | 0.74423  |
| 1.66E-07 | -0.36077 | 8.41E-16 | -0.01853 | 0.68962  | -0.02741 | 0.55457 | -0.09818 | 0.03391  |
| 6.80E-15 | -0.37654 | 3.53E-17 | 0.005077 | 0.91288  | -0.00743 | 0.87277 | 0.027091 | 0.55924  |
| 0.0598   | -0.04375 | 0.34548  | 0.002317 | 0.96017  | -0.01743 | 0.70713 | 0.021002 | 0.65077  |
| 0.00743  | -0.20541 | 7.64E-06 | 0.080946 | 0.08056  | 0.023225 | 0.61664 | 0.062677 | 0.17632  |
| 0.70369  | -0.16569 | 0.00032  | -0.07371 | 0.11168  | -0.03438 | 0.45862 | -0.15717 | 0.00065  |
| 7.98E-05 | -0.37123 | 1.05E-16 | -0.15166 | 0.00101  | -0.13877 | 0.00265 | 0.082764 | 0.07397  |
| 2.96E-08 | -0.3205  | 1.29E-12 | -0.01885 | 0.68456  | -0.12958 | 0.00504 | 0.047915 | 0.30148  |
| 0.02006  | -0.09983 | 0.03101  | 0.002171 | 0.96268  | 0.046888 | 0.31197 | -0.02035 | 0.66089  |
| 0.00011  | -0.24553 | 7.69E-08 | 0.075058 | 0.10524  | -0.05282 | 0.25464 | 0.03025  | 0.51433  |
| 0.0344   | -0.09129 | 0.04865  | 0.032285 | 0.48643  | 0.052946 | 0.25349 | -0.17394 | 0.00016  |
| 0.59302  | -0.09129 | 0.04865  | 0.047452 | 0.30617  | 0.03111  | 0.50244 | 0.070345 | 0.12902  |
| 0.48615  | 0.036116 | 0.43619  | -0.00033 | 0.99432  | 0.045264 | 0.32905 | -0.07079 | 0.1266   |
| 1.89E-06 | -0.16377 | 0.00038  | 0.036766 | 0.42797  | -0.00131 | 0.97755 | -0.0285  | 0.53902  |
| 3.62E-18 | -0.45224 | 6.39E-25 | -0.04402 | 0.34258  | -0.10232 | 0.02704 | -0.10055 | 0.02981  |
| 0.2567   | -0.02696 | 0.56116  | -0.01572 | 0.7347   | -0.01439 | 0.75649 | -0.04585 | 0.32278  |
| 0.00637  | -0.31124 | 6.00E-12 | -0.12572 | 0.00652  | -0.06752 | 0.14518 | 0.028646 | 0.5369   |



|          |          |          |          |         |          |          |          |          |
|----------|----------|----------|----------|---------|----------|----------|----------|----------|
| 6.13E-20 | -0.54627 | 1.10E-37 | -0.15953 | 0.00054 | -0.07184 | 0.12104  | -0.06777 | 0.14369  |
| 6.11E-29 | -0.61622 | 3.56E-50 | -0.06964 | 0.1329  | -0.08344 | 0.07162  | -0.21872 | 1.82E-06 |
| 4.73E-05 | -0.2402  | 1.49E-07 | -0.1488  | 0.00126 | -0.06274 | 0.17588  | -0.14657 | 0.00149  |
| 0.15012  | -0.13334 | 0.00389  | -0.09069 | 0.05016 | -0.04502 | 0.33171  | -0.05042 | 0.27687  |
| 0.00148  | -0.26747 | 4.31E-09 | -0.05098 | 0.27157 | -0.03457 | 0.45614  | -0.07068 | 0.12718  |
| 0.00124  | -0.21175 | 3.91E-06 | -0.10214 | 0.02731 | 0.059597 | 0.19859  | -0.04991 | 0.28174  |
| 7.53E-11 | -0.37925 | 2.01E-17 | -0.05073 | 0.27397 | -0.11145 | 0.01597  | -0.07884 | 0.08879  |
| 0.00101  | -0.1222  | 0.0082   | 0.09158  | 0.04794 | 0.013684 | 0.76805  | 0.012808 | 0.78251  |
| 0.00023  | -0.07186 | 0.12096  | 0.029671 | 0.52242 | 0.07868  | 0.08944  | -0.02013 | 0.66442  |
| 9.61E-29 | 0.678658 | 2.56E-64 | 0.07352  | 0.11259 | 0.101576 | 0.02817  | 0.083948 | 0.06991  |
| 0.20245  | -0.05013 | 0.27968  | 0.031998 | 0.49032 | -0.00097 | 0.98338  | -0.09941 | 0.03173  |
| 0.09394  | -0.15594 | 0.00072  | -0.00224 | 0.96146 | 0.056064 | 0.22656  | -0.02709 | 0.55929  |
| 1.98E-16 | -0.45684 | 1.86E-25 | -0.09568 | 0.03874 | -0.16628 | 0.00031  | -0.04398 | 0.34292  |
| 0.01613  | 0.030871 | 0.50573  | -0.03863 | 0.40492 | 0.082911 | 0.07345  | -0.03763 | 0.41717  |
| 1.07E-24 | -0.52822 | 6.46E-35 | -0.00683 | 0.88293 | -0.09283 | 0.04497  | -0.07852 | 0.09008  |
| 6.43E-14 | -0.45322 | 4.92E-25 | -0.06363 | 0.16983 | -0.02756 | 0.55244  | 0.032865 | 0.47863  |
| 2.48E-21 | -0.53701 | 3.04E-36 | -0.0265  | 0.56786 | -0.05445 | 0.24026  | -0.11128 | 0.01613  |
| 1.08E-06 | -0.17946 | 9.64E-05 | 0.034086 | 0.46243 | -0.0693  | 0.13479  | -0.06912 | 0.13582  |
| 0.01344  | -0.14395 | 0.00182  | 0.036602 | 0.43005 | 0.025246 | 0.58631  | 0.019639 | 0.67207  |
| 0.03378  | 0.114794 | 0.01305  | 0.021565 | 0.64205 | -0.01305 | 0.77853  | 0.052141 | 0.26079  |
| 0.18365  | -0.01256 | 0.78662  | 0.054987 | 0.23563 | 0.042806 | 0.35601  | 0.018193 | 0.69497  |
| 3.51E-14 | -0.38416 | 7.17E-18 | -0.02046 | 0.65915 | 0.018379 | 0.692    | -0.08884 | 0.05504  |
| 0.00012  | -0.24429 | 8.98E-08 | -0.06732 | 0.14635 | -0.04424 | 0.3401   | -0.03876 | 0.40334  |
| 0.12534  | 0.030924 | 0.505    | 0.093594 | 0.04322 | 0.020204 | 0.66321  | 0.110412 | 0.01699  |
| 1.31E-08 | -0.26347 | 7.43E-09 | -0.07863 | 0.08964 | -0.09056 | 0.05048  | -0.02011 | 0.66466  |
| 0.88274  | -0.02698 | 0.5609   | -0.0583  | 0.20858 | 0.009896 | 0.83111  | -0.08687 | 0.06068  |
| 1.27E-10 | -0.4252  | 6.29E-22 | -0.09296 | 0.04466 | -0.17646 | 0.00013  | -0.06174 | 0.18289  |
| 0.75273  | -0.06084 | 0.18937  | -0.0061  | 0.89547 | -0.04203 | 0.36486  | 0.083195 | 0.07247  |
| 0.0002   | -0.23243 | 3.79E-07 | -0.10085 | 0.02932 | -0.03221 | 0.48741  | -0.1833  | 6.77E-05 |
| 3.03E-13 | -0.47098 | 3.69E-27 | -0.09309 | 0.04437 | -0.21675 | 2.27E-06 | -0.01499 | 0.74663  |
| 0.35706  | -0.06856 | 0.13903  | -0.07734 | 0.09506 | -0.01987 | 0.66843  | 0.089155 | 0.05419  |
| 1.46E-09 | -0.36225 | 6.29E-16 | -0.07972 | 0.08526 | -0.09292 | 0.04476  | 0.044378 | 0.33861  |
| 2.62E-07 | 0.198546 | 1.54E-05 | -0.04098 | 0.37688 | 0.005857 | 0.89954  | 0.025716 | 0.57936  |
| 2.73E-08 | -0.33434 | 1.17E-13 | -0.04627 | 0.31836 | -0.05719 | 0.2174   | -0.1415  | 0.00218  |
| 0.00012  | -0.25716 | 1.73E-08 | 0.076703 | 0.09781 | 0.026078 | 0.57403  | -0.11402 | 0.01369  |
| 5.66E-05 | -0.21016 | 4.63E-06 | 0.00599  | 0.89728 | 0.002051 | 0.96474  | 0.002137 | 0.96326  |
| 0.92444  | -0.06829 | 0.14061  | -0.1568  | 0.00067 | -0.01789 | 0.69981  | -0.00523 | 0.91032  |
| 0.01067  | 0.158403 | 0.00059  | -0.04116 | 0.37487 | 0.047748 | 0.30316  | 0.014798 | 0.74977  |
| 0.0849   | -0.23677 | 2.26E-07 | 0.036546 | 0.43075 | -0.05621 | 0.22537  | -0.10509 | 0.02313  |
| 0.72778  | -0.01212 | 0.7939   | -0.0365  | 0.43134 | -0.00087 | 0.985    | 0.074372 | 0.10847  |
| 0.07448  | -0.17184 | 0.00019  | 0.110667 | 0.01673 | -0.03755 | 0.4182   | -0.07892 | 0.08845  |
| 0.0002   | -0.28589 | 3.10E-10 | -0.11802 | 0.01069 | -0.07275 | 0.1164   | 0.048937 | 0.29128  |
| 0.03442  | -0.06882 | 0.13757  | -0.02932 | 0.52734 | 0.051535 | 0.26638  | -0.11728 | 0.0112   |
| 4.75E-06 | 0.460326 | 7.19E-26 | 0.089456 | 0.05338 | 0.198569 | 1.54E-05 | -0.01997 | 0.66686  |
| 0.12061  | -0.1288  | 0.00531  | 0.105795 | 0.02222 | 0.031298 | 0.49986  | -0.02285 | 0.62228  |

|          |          |          |          |         |          |         |          |          |
|----------|----------|----------|----------|---------|----------|---------|----------|----------|
| 2.29E-13 | -0.45573 | 2.51E-25 | -0.07027 | 0.12944 | -0.01713 | 0.71194 | -0.04971 | 0.28369  |
| 0.57779  | 0.014932 | 0.74758  | 0.036341 | 0.43334 | 0.081748 | 0.0776  | -0.08583 | 0.06383  |
| 8.19E-07 | -0.2891  | 1.93E-10 | -0.0192  | 0.67892 | 0.006387 | 0.89051 | -0.08222 | 0.0759   |
| 5.09E-30 | 0.66802  | 1.15E-61 | 0.049787 | 0.28296 | 0.158035 | 0.00061 | 0.264508 | 6.46E-09 |
| 7.74E-06 | -0.16252 | 0.00042  | -0.10586 | 0.02214 | -0.04779 | 0.30273 | -0.07005 | 0.13066  |
| 0.09813  | -0.06519 | 0.15955  | 0.004401 | 0.92443 | -0.01666 | 0.71953 | -0.09036 | 0.051    |
| 2.05E-14 | -0.48353 | 9.77E-29 | -0.11945 | 0.00978 | -0.12956 | 0.00504 | -0.1592  | 0.00055  |
| 0.00943  | 0.077267 | 0.09536  | -0.00459 | 0.92123 | 0.023943 | 0.60578 | -0.02547 | 0.58292  |
| 3.12E-06 | -0.20075 | 1.24E-05 | -0.01502 | 0.74607 | -0.06286 | 0.17507 | -0.11788 | 0.01079  |
| 1.71E-17 | 0.438931 | 2.05E-23 | 0.01431  | 0.75776 | 0.018907 | 0.68362 | -0.00775 | 0.86733  |
| 0.01395  | -0.08635 | 0.06224  | 0.052488 | 0.25762 | -0.01218 | 0.79298 | 0.109024 | 0.01844  |
| 0.00031  | -0.28125 | 6.14E-10 | -0.01547 | 0.73878 | -0.02261 | 0.62607 | 0.083137 | 0.07267  |
| 0.02837  | -0.12724 | 0.0059   | -0.01084 | 0.81534 | 0.011732 | 0.80037 | -0.09335 | 0.04376  |
| 5.26E-06 | -0.29155 | 1.33E-10 | -0.00518 | 0.91114 | -0.11068 | 0.01673 | -0.13401 | 0.00372  |
| 5.36E-07 | -0.35103 | 5.47E-15 | -0.0916  | 0.0479  | -0.06737 | 0.14604 | -0.01495 | 0.74728  |
| 0.00036  | -0.16585 | 0.00032  | 0.050773 | 0.27353 | 0.013195 | 0.77611 | -0.05409 | 0.2434   |
| 9.67E-06 | -0.24741 | 6.07E-08 | -0.04158 | 0.36994 | -0.01501 | 0.74623 | -0.08686 | 0.0607   |
| 0.2829   | -0.14784 | 0.00136  | -0.0316  | 0.49571 | -0.06344 | 0.17114 | 0.014503 | 0.75459  |
| 0.20039  | -0.04635 | 0.31752  | -0.0282  | 0.54331 | 0.019349 | 0.67664 | -0.0839  | 0.07007  |
| 0.64017  | -0.08154 | 0.07835  | 0.006666 | 0.88576 | -0.06444 | 0.16442 | -0.01497 | 0.74694  |
| 0.00593  | -0.17385 | 0.00016  | 0.01687  | 0.71615 | 0.018263 | 0.69384 | -0.01234 | 0.79025  |
| 0.27016  | -0.09917 | 0.03214  | -0.06783 | 0.14332 | 0.043887 | 0.34398 | 0.029755 | 0.52125  |
| 4.24E-24 | -0.58464 | 3.70E-44 | -0.1077  | 0.01991 | -0.09289 | 0.04481 | -0.09721 | 0.03572  |
| 1.73E-06 | -0.34174 | 3.08E-14 | -0.1008  | 0.02941 | -0.02371 | 0.60929 | -0.12371 | 0.00744  |
| 3.74E-15 | -0.42596 | 5.23E-22 | -0.03995 | 0.38898 | -0.04927 | 0.288   | -0.02318 | 0.61737  |
| 0.01547  | 0.084992 | 0.06649  | 0.075777 | 0.10194 | -0.0403  | 0.38486 | -0.08026 | 0.08316  |
| 0.72752  | -0.01662 | 0.72013  | 0.063806 | 0.16865 | 0.01745  | 0.70683 | -0.02834 | 0.54129  |
| 1.18E-36 | -0.67221 | 1.07E-62 | -0.02522 | 0.58662 | -0.07106 | 0.12518 | -0.13939 | 0.00254  |
| 0.02951  | -0.23114 | 4.42E-07 | 0.009874 | 0.83148 | -0.02982 | 0.52033 | 0.014643 | 0.7523   |
| 0.47946  | 0.021705 | 0.6399   | 0.071904 | 0.12074 | 0.06785  | 0.14319 | 0.076047 | 0.10072  |
| 1.75E-08 | -0.39171 | 1.42E-18 | -0.14118 | 0.00223 | -0.10384 | 0.02483 | -0.05298 | 0.25316  |
| 0.8253   | -0.08448 | 0.06815  | 0.014178 | 0.75992 | -0.02157 | 0.642   | 0.051085 | 0.27058  |
| 0.19792  | -0.02548 | 0.58277  | 0.044416 | 0.33819 | 0.06779  | 0.14355 | 0.099146 | 0.03219  |
| 0.05176  | 0.145648 | 0.0016   | 0.067148 | 0.14739 | 0.033565 | 0.46931 | 0.095805 | 0.03849  |
| 8.91E-05 | 0.254787 | 2.36E-08 | 0.050485 | 0.27626 | -0.00034 | 0.99418 | -0.08802 | 0.05733  |
| 0.82401  | 0.045828 | 0.32305  | 0.078976 | 0.08824 | 0.084968 | 0.06657 | -0.01134 | 0.80696  |
| 0.11533  | -0.08964 | 0.05289  | -0.02628 | 0.57113 | -0.01083 | 0.81549 | 0.043543 | 0.34779  |
| 0.00071  | -0.06507 | 0.16033  | 0.071481 | 0.12294 | 0.015109 | 0.74469 | -0.02443 | 0.59847  |
| 0.01337  | -0.15323 | 0.00089  | 0.036086 | 0.43657 | -0.01051 | 0.82076 | -0.03532 | 0.4464   |
| 0.02056  | -0.21267 | 3.54E-06 | -0.08425 | 0.0689  | -0.0004  | 0.99313 | -0.0668  | 0.14952  |
| 0.00209  | -0.16079 | 0.00049  | -0.01605 | 0.72938 | 0.0411   | 0.37553 | -0.13422 | 0.00366  |
| 1.57E-21 | -0.46925 | 6.03E-27 | -0.0262  | 0.57218 | -0.01756 | 0.70514 | -0.03542 | 0.44507  |
| 1.26E-21 | -0.50183 | 3.71E-31 | -0.05262 | 0.25643 | -0.08756 | 0.05865 | -0.0753  | 0.1041   |
| 0.10691  | -0.04653 | 0.31573  | 0.090685 | 0.05017 | 0.019712 | 0.67092 | -0.16583 | 0.00032  |
| 2.10E-11 | -0.49735 | 1.50E-30 | -0.08787 | 0.05776 | -0.15743 | 0.00064 | 0.016177 | 0.72734  |

|          |          |          |          |         |          |          |          |          |
|----------|----------|----------|----------|---------|----------|----------|----------|----------|
| 0.00296  | -0.12449 | 0.00707  | -0.13291 | 0.00401 | -0.02812 | 0.54446  | -0.07617 | 0.10015  |
| 0.04807  | -0.20634 | 6.94E-06 | 0.067762 | 0.14371 | -0.02522 | 0.58675  | -0.04754 | 0.30524  |
| 0.34094  | -0.09567 | 0.03877  | 0.0546   | 0.23894 | 0.035269 | 0.44703  | -0.03892 | 0.40137  |
| 1.84E-21 | -0.52101 | 7.41E-34 | -0.0461  | 0.32013 | -0.02862 | 0.53721  | -0.04472 | 0.33495  |
| 7.45E-16 | -0.48569 | 5.14E-29 | -0.0753  | 0.1041  | -0.05905 | 0.20271  | -0.15294 | 0.00091  |
| 9.88E-30 | -0.57478 | 2.06E-42 | -0.02893 | 0.53281 | -0.03963 | 0.39285  | -0.05206 | 0.26151  |
| 0.00754  | -0.30602 | 1.40E-11 | -0.0452  | 0.3297  | -0.03756 | 0.41802  | 0.021304 | 0.64608  |
| 3.14E-06 | -0.29971 | 3.79E-11 | -0.024   | 0.60492 | -0.08288 | 0.07358  | -0.13439 | 0.00362  |
| 6.15E-05 | -0.18748 | 4.57E-05 | 0.08795  | 0.05754 | 0.028675 | 0.53648  | 0.087912 | 0.05765  |
| 0.00013  | -0.24646 | 6.85E-08 | -0.00086 | 0.9853  | -0.03462 | 0.45542  | 0.038212 | 0.41002  |
| 0.92322  | -0.12471 | 0.00697  | 0.082923 | 0.07341 | -0.03925 | 0.39736  | -0.06205 | 0.18071  |
| 0.00087  | 0.049218 | 0.28851  | -0.00755 | 0.87066 | -0.04203 | 0.36481  | 0.013433 | 0.77219  |
| 2.12E-20 | -0.42353 | 9.45E-22 | 0.010675 | 0.81803 | -0.03453 | 0.45658  | -0.12801 | 0.0056   |
| 8.73E-07 | 0.065856 | 0.15535  | 0.00781  | 0.86632 | -0.04026 | 0.38531  | 0.012207 | 0.79247  |
| 0.42769  | -0.12653 | 0.00618  | -0.04653 | 0.31573 | -0.02576 | 0.57867  | 0.005979 | 0.89746  |
| 4.45E-19 | -0.48222 | 1.44E-28 | -0.07592 | 0.10128 | -0.07549 | 0.10325  | -0.05433 | 0.24125  |
| 2.85E-07 | -0.26233 | 8.67E-09 | 0.024826 | 0.59255 | -0.0303  | 0.51367  | -0.01656 | 0.72112  |
| 5.34E-30 | -0.54799 | 5.89E-38 | -0.09214 | 0.04659 | -0.06207 | 0.18058  | -0.06576 | 0.15594  |
| 4.31E-08 | -0.328   | 3.56E-13 | -0.04098 | 0.3769  | -0.0298  | 0.52067  | -0.06963 | 0.13297  |
| 0.06479  | -0.06074 | 0.19006  | -0.0172  | 0.71077 | 0.006021 | 0.89675  | -0.08256 | 0.07467  |
| 0.05461  | -0.16031 | 0.00051  | -0.02121 | 0.64758 | 0.024394 | 0.599    | 0.039529 | 0.39407  |
| 0.00409  | -0.15492 | 0.00078  | 0.028662 | 0.53666 | -0.03339 | 0.4716   | 0.04715  | 0.30927  |
| 0.00343  | -0.30499 | 1.65E-11 | -0.1288  | 0.00531 | -0.05939 | 0.20011  | 0.027928 | 0.54715  |
| 0.1269   | -0.02773 | 0.54995  | -0.06151 | 0.18452 | 0.001544 | 0.97346  | 0.022117 | 0.63356  |
| 6.77E-09 | -0.34134 | 3.31E-14 | -0.10165 | 0.02806 | 0.056696 | 0.22136  | -0.10037 | 0.0301   |
| 0.01464  | -0.11377 | 0.01389  | 0.058258 | 0.20888 | -0.04991 | 0.28178  | -0.13288 | 0.00402  |
| 0.00034  | 0.242603 | 1.11E-07 | -0.05249 | 0.25762 | 0.034912 | 0.45165  | 0.029472 | 0.52521  |
| 0.0035   | -0.25503 | 2.28E-08 | -0.07171 | 0.12175 | -0.03065 | 0.50875  | -0.069   | 0.13653  |
| 0.05662  | -0.08473 | 0.06734  | 0.074465 | 0.10803 | 0.019224 | 0.67862  | 0.006952 | 0.88089  |
| 0.00417  | 0.201438 | 1.15E-05 | -0.03047 | 0.51128 | -0.0066  | 0.88693  | 0.062337 | 0.17868  |
| 0.95748  | -0.02733 | 0.55584  | 0.025513 | 0.58235 | -0.02464 | 0.59538  | 0.0271   | 0.55911  |
| 2.61E-08 | -0.26787 | 4.08E-09 | 0.004734 | 0.91873 | 0.048011 | 0.30051  | 0.04545  | 0.32705  |
| 0.41995  | -0.20409 | 8.77E-06 | -0.01388 | 0.76477 | -0.11549 | 0.01251  | -0.1229  | 0.00784  |
| 0.39403  | 0.001322 | 0.97726  | -0.03501 | 0.45037 | -0.06112 | 0.18734  | -0.14786 | 0.00135  |
| 0.23051  | -0.08137 | 0.07897  | -0.00094 | 0.98377 | 0.019573 | 0.67311  | -0.10841 | 0.01911  |
| 7.75E-08 | -0.21794 | 1.99E-06 | -0.00057 | 0.99016 | 0.063409 | 0.17132  | -0.18729 | 4.65E-05 |
| 0.66752  | -0.06157 | 0.18411  | -0.00532 | 0.90863 | 0.003022 | 0.94807  | 0.018752 | 0.68607  |
| 4.58E-29 | -0.61381 | 1.08E-49 | -0.10647 | 0.02138 | -0.08218 | 0.07604  | -0.16325 | 0.0004   |
| 4.97E-10 | -0.33879 | 5.26E-14 | -0.0792  | 0.08734 | -0.216   | 2.46E-06 | -0.00702 | 0.8798   |
| 1.32E-08 | -0.3104  | 6.89E-12 | -0.01884 | 0.68467 | 0.0458   | 0.32334  | -0.06284 | 0.17519  |
| 0.18528  | -0.04062 | 0.38114  | -0.03697 | 0.42542 | 0.039454 | 0.39496  | -0.02307 | 0.61894  |
| 0.05334  | 0.0488   | 0.29263  | 0.051795 | 0.26398 | 0.054179 | 0.24259  | 0.001597 | 0.97254  |
| 3.35E-05 | -0.17191 | 0.00019  | -0.01993 | 0.66754 | 0.027813 | 0.54881  | 0.003878 | 0.93339  |
| 8.26E-07 | -0.2785  | 9.14E-10 | -0.06646 | 0.1516  | 0.041085 | 0.3757   | -0.08603 | 0.06323  |
| 0.00046  | -0.33533 | 9.79E-14 | -0.04596 | 0.32171 | -0.04584 | 0.32287  | -0.18034 | 8.90E-05 |

|          |          |          |          |          |          |         |          |         |
|----------|----------|----------|----------|----------|----------|---------|----------|---------|
| 0.40371  | -0.06447 | 0.16425  | 0.140869 | 0.00228  | -0.04157 | 0.37014 | -0.02786 | 0.54814 |
| 0.02171  | 0.119419 | 0.00979  | 0.004694 | 0.91942  | 0.03506  | 0.44973 | 0.092747 | 0.04515 |
| 1.55E-12 | -0.41359 | 1.01E-20 | -0.00214 | 0.96315  | -0.07758 | 0.09403 | -0.09585 | 0.0384  |
| 1.67E-07 | -0.2854  | 3.34E-10 | 0.044328 | 0.33915  | 0.055087 | 0.23477 | -0.02612 | 0.57343 |
| 0.0314   | -0.17563 | 0.00014  | 0.014588 | 0.7532   | -0.05128 | 0.26873 | -0.07083 | 0.1264  |
| 0.98355  | -0.02288 | 0.62195  | 0.018074 | 0.69686  | 0.012702 | 0.78426 | -0.0088  | 0.84957 |
| 0.00191  | -0.27327 | 1.92E-09 | -0.01768 | 0.70321  | -0.07284 | 0.11595 | 0.130256 | 0.00481 |
| 0.13442  | -0.22133 | 1.36E-06 | 0.058857 | 0.20422  | 0.00315  | 0.94587 | -0.04909 | 0.28979 |
| 0.02124  | -0.07423 | 0.10917  | 0.040515 | 0.38237  | -0.01557 | 0.73719 | -0.01092 | 0.81388 |
| 0.46937  | -0.03785 | 0.41452  | 0.001437 | 0.9753   | 0.034038 | 0.46306 | 0.051932 | 0.26271 |
| 4.11E-10 | -0.3554  | 2.38E-15 | -0.01441 | 0.75613  | -0.13207 | 0.00425 | -0.13415 | 0.00368 |
| 7.75E-09 | -0.40359 | 1.01E-19 | -0.20109 | 1.19E-05 | -0.11036 | 0.01705 | -0.09375 | 0.04287 |
| 3.59E-06 | -0.30859 | 9.24E-12 | 0.05717  | 0.21752  | 0.021212 | 0.64752 | -0.03423 | 0.46048 |
| 0.22919  | 0.015772 | 0.7339   | 0.01083  | 0.81543  | 0.021203 | 0.64765 | -0.01907 | 0.681   |
| 0.19026  | -0.13552 | 0.00334  | -0.01093 | 0.8138   | -0.03314 | 0.47491 | -0.04185 | 0.36687 |
| 2.03E-17 | -0.3944  | 7.86E-19 | -0.07914 | 0.08756  | -0.0349  | 0.45183 | -0.03022 | 0.51474 |
| 2.25E-12 | -0.39694 | 4.49E-19 | -0.08815 | 0.05698  | -0.04211 | 0.36394 | -0.12176 | 0.00844 |
| 3.15E-10 | -0.32931 | 2.83E-13 | -0.05806 | 0.21041  | -0.08362 | 0.07103 | -0.06844 | 0.13974 |
| 0.08688  | -0.02195 | 0.63619  | 0.014693 | 0.75148  | -0.00822 | 0.85936 | 0.035307 | 0.44655 |
| 1.17E-07 | -0.25478 | 2.36E-08 | -0.16411 | 0.00037  | -0.04813 | 0.29928 | -0.15562 | 0.00074 |
| 0.91089  | -0.14109 | 0.00224  | -0.08196 | 0.07684  | -0.04818 | 0.29883 | -0.09998 | 0.03076 |
| 1.05E-09 | -0.40843 | 3.35E-20 | -0.03313 | 0.47506  | -0.08936 | 0.05365 | -0.01117 | 0.8097  |
| 0.87108  | -0.11724 | 0.01123  | -0.01707 | 0.71298  | -0.05066 | 0.27462 | -0.01957 | 0.67321 |
| 0.03697  | 0.084528 | 0.068    | -0.07903 | 0.08801  | 0.033257 | 0.47339 | 0.042247 | 0.36234 |
| 0.00012  | -0.21306 | 3.39E-06 | -0.02185 | 0.63772  | -0.02677 | 0.56396 | -0.03516 | 0.4484  |
| 0.00014  | -0.23885 | 1.76E-07 | 0.012958 | 0.78002  | -0.01929 | 0.6775  | 0.105362 | 0.02278 |
| 5.65E-13 | -0.37374 | 6.28E-17 | -0.06837 | 0.14016  | -0.143   | 0.00195 | 0.023564 | 0.61151 |
| 1.82E-11 | -0.35454 | 2.81E-15 | -0.02783 | 0.54854  | -0.08011 | 0.08374 | -0.09817 | 0.03392 |
| 0.01843  | -0.03109 | 0.50275  | 0.058685 | 0.20556  | 0.08915  | 0.0542  | 0.054392 | 0.24074 |
| 8.99E-17 | -0.40029 | 2.13E-19 | -0.10172 | 0.02796  | -0.10888 | 0.01859 | -0.01852 | 0.68982 |
| 0.00098  | 0.303299 | 2.15E-11 | -0.14287 | 0.00197  | 0.031656 | 0.49497 | 0.013008 | 0.7792  |
| 0.98471  | -0.13627 | 0.00317  | -0.06623 | 0.15299  | 0.021559 | 0.64214 | 0.034893 | 0.4519  |
| 0.00019  | -0.18964 | 3.71E-05 | -0.05087 | 0.2726   | -0.1057  | 0.02234 | -0.17182 | 0.00019 |
| 2.87E-06 | -0.26409 | 6.83E-09 | -0.0216  | 0.64155  | -0.0253  | 0.5855  | 0.02683  | 0.56302 |
| 1.22E-16 | -0.41015 | 2.25E-20 | -0.0774  | 0.09478  | -0.01402 | 0.76256 | -0.11285 | 0.01469 |
| 3.90E-15 | -0.39969 | 2.43E-19 | -0.08784 | 0.05784  | -0.05399 | 0.24427 | -0.05772 | 0.21313 |
| 0.00014  | -0.25303 | 2.96E-08 | -0.10609 | 0.02186  | -0.04845 | 0.29608 | -0.06056 | 0.19143 |
| 6.41E-23 | -0.48716 | 3.32E-29 | -0.01988 | 0.66834  | -0.01355 | 0.77025 | -0.05179 | 0.26406 |
| 0.88084  | -0.0473  | 0.30774  | 0.027602 | 0.55185  | -0.00996 | 0.83004 | 0.051996 | 0.26212 |
| 0.28025  | 0.062677 | 0.17633  | 0.141701 | 0.00214  | 0.074935 | 0.10581 | 0.036624 | 0.42976 |
| 0.07238  | -0.12821 | 0.00553  | -0.09254 | 0.04565  | 0.033508 | 0.47007 | -0.06027 | 0.19358 |
| 0.16989  | -0.08261 | 0.07452  | 0.033793 | 0.46629  | -0.02956 | 0.524   | -0.0674  | 0.14589 |
| 0.52796  | -0.08486 | 0.06691  | 0.092053 | 0.04679  | -0.04779 | 0.30279 | 0.016455 | 0.72283 |
| 1.97E-07 | -0.39496 | 6.95E-19 | -0.07803 | 0.09215  | -0.07923 | 0.0872  | -0.0675  | 0.14527 |
| 3.08E-07 | -0.28149 | 5.93E-10 | -0.15597 | 0.00072  | -0.00647 | 0.88913 | -0.10149 | 0.0283  |

|          |          |          |          |          |          |         |          |          |
|----------|----------|----------|----------|----------|----------|---------|----------|----------|
| 0.7182   | -0.13444 | 0.00361  | 0.046678 | 0.31414  | 0.037661 | 0.4168  | -0.03629 | 0.43398  |
| 0.84112  | -0.02151 | 0.64286  | -0.02793 | 0.54716  | -0.02473 | 0.59397 | -0.01063 | 0.81877  |
| 0.00567  | -0.04687 | 0.31218  | -0.18346 | 6.67E-05 | -0.10112 | 0.02889 | -0.06733 | 0.14627  |
| 0.18198  | -0.10129 | 0.02862  | 0.055493 | 0.23134  | -0.02243 | 0.62879 | -0.11641 | 0.01182  |
| 1.33E-17 | -0.41702 | 4.50E-21 | 0.021728 | 0.63954  | -0.01255 | 0.78677 | 0.081267 | 0.07937  |
| 2.41E-06 | -0.38992 | 2.09E-18 | -0.08374 | 0.07062  | -0.13464 | 0.00356 | -0.07475 | 0.10668  |
| 1.22E-25 | -0.62747 | 1.74E-52 | -0.13996 | 0.00243  | -0.08687 | 0.06069 | -0.07194 | 0.12054  |
| 0.1249   | -0.19942 | 1.41E-05 | 0.032442 | 0.48431  | -0.07216 | 0.11942 | -0.02193 | 0.63635  |
| 0.5259   | -0.12322 | 0.00768  | 0.00144  | 0.97524  | -0.01715 | 0.71163 | 0.060199 | 0.19408  |
| 0.01101  | 0.23851  | 1.83E-07 | -0.05908 | 0.20252  | 0.019088 | 0.68076 | 0.000798 | 0.98628  |
| 3.17E-08 | -0.34367 | 2.16E-14 | 0.032651 | 0.4815   | -0.09898 | 0.03248 | -0.00994 | 0.83037  |
| 0.07292  | -0.19324 | 2.62E-05 | 0.048557 | 0.29504  | 0.001473 | 0.97468 | 0.09269  | 0.04528  |
| 0.86431  | 0.078993 | 0.08817  | 0.046399 | 0.31705  | 0.042781 | 0.35629 | 0.032032 | 0.48985  |
| 1.98E-05 | -0.17672 | 0.00012  | -0.01741 | 0.70749  | 0.007948 | 0.86399 | 0.026913 | 0.56182  |
| 0.00026  | -0.19592 | 2.01E-05 | 0.003347 | 0.94249  | -0.00151 | 0.97404 | -0.09831 | 0.03367  |
| 0.01518  | -0.11609 | 0.01206  | -0.01748 | 0.70629  | 0.024592 | 0.59605 | -0.01153 | 0.80382  |
| 0.46793  | -0.07187 | 0.12089  | 0.048037 | 0.30024  | 0.066794 | 0.14953 | -0.10975 | 0.01766  |
| 6.83E-12 | -0.42168 | 1.48E-21 | -0.05592 | 0.22774  | -0.05102 | 0.27116 | -0.0584  | 0.20774  |
| 0.00186  | 0.069596 | 0.13315  | 0.030308 | 0.51352  | 0.084537 | 0.06797 | 0.100149 | 0.03047  |
| 1.00E-23 | -0.57771 | 6.32E-43 | -0.06434 | 0.16512  | -0.10284 | 0.02626 | -0.15801 | 0.00061  |
| 3.25E-05 | -0.23192 | 4.03E-07 | -0.13503 | 0.00346  | 0.03203  | 0.48988 | -0.12014 | 0.00936  |
| 1.18E-15 | -0.35181 | 4.72E-15 | -0.10052 | 0.02986  | 0.000551 | 0.99053 | -0.09942 | 0.03171  |
| 0.67886  | -0.07342 | 0.1131   | 0.029104 | 0.5304   | -0.0788  | 0.08895 | 0.049415 | 0.28658  |
| 1.59E-08 | -0.255   | 2.29E-08 | -0.02013 | 0.66442  | 0.029824 | 0.52028 | -0.04513 | 0.33049  |
| 0.03198  | -0.1882  | 4.26E-05 | -0.02114 | 0.64856  | -0.04344 | 0.34895 | 0.018295 | 0.69334  |
| 7.82E-10 | -0.37021 | 1.29E-16 | -0.13403 | 0.00371  | -0.15487 | 0.00078 | -0.19342 | 2.57E-05 |
| 8.94E-16 | -0.42682 | 4.24E-22 | -0.02566 | 0.58012  | -0.08868 | 0.05549 | -0.08337 | 0.07187  |
| 0.103    | -0.03095 | 0.50458  | -0.04295 | 0.35441  | -0.09716 | 0.03582 | -0.25378 | 2.68E-08 |
| 0.86005  | 0.007329 | 0.87448  | -0.12938 | 0.00511  | 0.052469 | 0.2578  | -0.07141 | 0.1233   |
| 1.52E-25 | -0.46641 | 1.34E-26 | -0.08106 | 0.08012  | -0.00942 | 0.83914 | -0.02899 | 0.53196  |
| 6.85E-39 | -0.62959 | 6.22E-53 | -0.05579 | 0.22881  | -0.02204 | 0.6348  | -0.13217 | 0.00422  |
| 1.94E-10 | -0.41005 | 2.30E-20 | -0.05977 | 0.19728  | -0.07169 | 0.12184 | -0.05943 | 0.19981  |
| 0.00676  | -0.15874 | 0.00058  | 0.035618 | 0.44255  | 0.013461 | 0.77171 | 0.06174  | 0.18289  |
| 0.30054  | -0.08131 | 0.07921  | -0.07597 | 0.10108  | 0.036442 | 0.43206 | -0.07922 | 0.08725  |
| 0.00312  | -0.22327 | 1.10E-06 | -0.06792 | 0.14278  | -0.00054 | 0.9907  | -0.08017 | 0.08352  |
| 0.36445  | 0.036091 | 0.43652  | 0.074658 | 0.10712  | 0.066791 | 0.14956 | 0.048151 | 0.2991   |
| 0.01686  | -0.22658 | 7.50E-07 | -0.02579 | 0.57825  | 0.011671 | 0.80139 | 0.03831  | 0.40882  |
| 8.96E-06 | -0.31716 | 2.26E-12 | -0.11301 | 0.01454  | -0.08379 | 0.07043 | -0.0629  | 0.17481  |
| 0.32696  | -0.04796 | 0.30098  | 0.021513 | 0.64285  | 0.03439  | 0.45846 | -0.0348  | 0.45305  |
| 9.87E-10 | -0.39006 | 2.03E-18 | -0.10774 | 0.01987  | -0.10871 | 0.01878 | -0.12732 | 0.00587  |
| 0.40583  | -0.15395 | 0.00084  | 0.108279 | 0.01926  | -0.02945 | 0.52558 | 0.046527 | 0.31571  |
| 0.16933  | 0.070432 | 0.12855  | 0.049596 | 0.28482  | -0.04077 | 0.37935 | -0.04234 | 0.36132  |
| 1.36E-11 | -0.3221  | 9.83E-13 | -0.03503 | 0.4501   | -0.146   | 0.00156 | -0.08313 | 0.0727   |
| 0.08859  | -0.16399 | 0.00037  | 0.068839 | 0.13744  | 0.009609 | 0.83594 | 0.141858 | 0.00212  |
| 0.29354  | 0.026548 | 0.56714  | -0.07321 | 0.11412  | 0.068376 | 0.14011 | 0.000587 | 0.9899   |

|          |          |          |          |          |          |          |          |          |
|----------|----------|----------|----------|----------|----------|----------|----------|----------|
| 1.16E-06 | -0.27031 | 2.91E-09 | -0.09231 | 0.04617  | -0.01668 | 0.71914  | -0.22394 | 1.01E-06 |
| 2.84E-11 | -0.37486 | 5.00E-17 | -0.05503 | 0.23523  | -0.06406 | 0.16693  | -0.01129 | 0.80772  |
| 0.03051  | -0.17309 | 0.00017  | -0.14886 | 0.00125  | 0.043848 | 0.34442  | 0.005873 | 0.89927  |
| 1.24E-09 | -0.30652 | 1.29E-11 | -0.00755 | 0.87076  | -0.00222 | 0.96188  | -0.14053 | 0.00234  |
| 0.16453  | -0.25273 | 3.08E-08 | -0.05823 | 0.20909  | -0.15539 | 0.00075  | -0.04538 | 0.32783  |
| 0.07754  | -0.211   | 4.23E-06 | -0.02463 | 0.59547  | -0.03946 | 0.39492  | 0.042215 | 0.3627   |
| 0.03197  | 0.055717 | 0.22945  | -0.0727  | 0.11667  | 0.035388 | 0.4455   | 0.11321  | 0.01437  |
| 0.66235  | 0.011938 | 0.79694  | 0.016532 | 0.72159  | -0.01371 | 0.76757  | 0.055799 | 0.22877  |
| 0.02758  | -0.19076 | 3.33E-05 | 0.025855 | 0.57731  | 0.008398 | 0.85637  | -0.02471 | 0.59423  |
| 9.04E-08 | -0.24349 | 9.92E-08 | -0.09128 | 0.04869  | -0.04267 | 0.35755  | -0.17082 | 0.00021  |
| 0.01304  | 0.001062 | 0.98173  | -0.05179 | 0.26404  | -0.05811 | 0.21002  | 0.180015 | 9.16E-05 |
| 7.97E-19 | -0.42189 | 1.40E-21 | -0.0444  | 0.33834  | -0.09596 | 0.03817  | -0.1909  | 3.29E-05 |
| 0.00502  | -0.10839 | 0.01914  | 0.003807 | 0.93461  | 0.043249 | 0.35106  | 0.042433 | 0.36023  |
| 1.49E-07 | -0.34577 | 1.47E-14 | 0.013156 | 0.77675  | -0.05971 | 0.19777  | -0.03734 | 0.42082  |
| 1.82E-11 | -0.4735  | 1.80E-27 | -0.093   | 0.04457  | -0.06386 | 0.16826  | -0.06743 | 0.14569  |
| 7.36E-12 | -0.37375 | 6.27E-17 | -0.12781 | 0.00567  | -0.13992 | 0.00244  | -0.18536 | 5.58E-05 |
| 0.07058  | -0.04649 | 0.31615  | -0.10648 | 0.02137  | -0.01038 | 0.82303  | 0.064197 | 0.16605  |
| 0.00024  | -0.11693 | 0.01144  | 0.00111  | 0.98092  | 0.070552 | 0.12789  | 0.007455 | 0.87235  |
| 0.03484  | -0.13717 | 0.00297  | -0.08642 | 0.06204  | -0.0159  | 0.73181  | -0.0458  | 0.32331  |
| 0.71642  | -0.05694 | 0.21934  | 0.017517 | 0.70576  | -0.05761 | 0.21401  | -0.01978 | 0.66981  |
| 7.63E-20 | -0.49775 | 1.32E-30 | -0.05712 | 0.2179   | -0.144   | 0.00181  | -0.07002 | 0.13082  |
| 0.14994  | 0.001863 | 0.96798  | -0.07127 | 0.12404  | 0.01949  | 0.67442  | -0.07643 | 0.09901  |
| 0.58686  | 0.046343 | 0.31763  | -0.00582 | 0.90016  | 0.043426 | 0.34908  | 0.000632 | 0.98913  |
| 0.24831  | -0.06537 | 0.15841  | -0.01404 | 0.76224  | -0.06063 | 0.19088  | -0.03542 | 0.44509  |
| 4.52E-07 | -0.22524 | 8.75E-07 | -0.03102 | 0.50366  | 0.017583 | 0.7047   | 0.016404 | 0.72367  |
| 1.59E-12 | 0.371627 | 9.67E-17 | 0.023971 | 0.60536  | -0.00239 | 0.95899  | 0.031555 | 0.49634  |
| 0.00926  | 0.055303 | 0.23294  | 0.151536 | 0.00102  | 0.021012 | 0.65061  | 0.158902 | 0.00057  |
| 1.14E-08 | -0.38493 | 6.08E-18 | -0.10625 | 0.02166  | -0.10522 | 0.02296  | -0.06699 | 0.14835  |
| 0.56141  | -0.05479 | 0.23729  | 0.029136 | 0.52996  | 0.029953 | 0.51847  | -0.0163  | 0.72531  |
| 0.00012  | -0.16974 | 0.00023  | 0.069567 | 0.13332  | 0.025433 | 0.58354  | 0.023515 | 0.61224  |
| 0.05966  | -0.08286 | 0.07363  | -0.00691 | 0.88166  | -0.03344 | 0.47101  | -0.16277 | 0.00041  |
| 8.95E-12 | -0.42294 | 1.09E-21 | -0.0664  | 0.15197  | -0.03922 | 0.39777  | -0.00203 | 0.96517  |
| 3.59E-11 | -0.43015 | 1.87E-22 | -0.03632 | 0.43362  | -0.09289 | 0.04481  | -0.08243 | 0.07516  |
| 0.00402  | 0.220435 | 1.51E-06 | 0.208325 | 5.63E-06 | 0.227723 | 6.58E-07 | 0.350548 | 5.99E-15 |
| 2.14E-08 | 0.29689  | 5.88E-11 | 0.279993 | 7.36E-10 | 0.104084 | 0.02449  | 0.499918 | 6.75E-31 |
| 0.09438  | 0.069722 | 0.13245  | 0.025644 | 0.58042  | -0.01512 | 0.74447  | 0.249024 | 4.95E-08 |
| 7.24E-06 | 0.266612 | 4.85E-09 | 0.076998 | 0.09652  | 0.006791 | 0.88364  | 0.32884  | 3.08E-13 |
| 0.03996  | 0.117127 | 0.01131  | 0.115449 | 0.01254  | 0.098646 | 0.03307  | 0.159062 | 0.00056  |
| 2.02E-08 | 0.31115  | 6.09E-12 | 0.143579 | 0.00187  | 0.116363 | 0.01185  | 0.5951   | 4.45E-46 |
| 3.04E-09 | 0.313658 | 4.04E-12 | 0.144532 | 0.00174  | 0.143163 | 0.00193  | 0.531832 | 1.86E-35 |
| 0.74606  | 0.061654 | 0.1835   | 0.146142 | 0.00154  | 0.22377  | 1.04E-06 | 0.299959 | 3.65E-11 |
| 0.09444  | 0.095868 | 0.03836  | 0.248427 | 5.34E-08 | 0.102868 | 0.02622  | 0.340449 | 3.89E-14 |
| 0.98792  | 0.085464 | 0.06499  | 0.176513 | 0.00013  | 0.207892 | 5.89E-06 | 0.324116 | 6.96E-13 |
| 1.76E-07 | 0.308932 | 8.74E-12 | 0.150084 | 0.00114  | 0.155591 | 0.00074  | 0.457166 | 1.70E-25 |
| 1.28E-09 | 0.330268 | 2.40E-13 | 0.127338 | 0.00586  | 0.140448 | 0.00235  | 0.48158  | 1.74E-28 |

|          |          |          |          |          |          |          |          |          |
|----------|----------|----------|----------|----------|----------|----------|----------|----------|
| 0.00429  | 0.201487 | 1.15E-05 | 0.058876 | 0.20408  | 0.035277 | 0.44693  | 0.215093 | 2.72E-06 |
| 4.04E-09 | 0.28903  | 1.95E-10 | 0.063676 | 0.16952  | 0.096641 | 0.03682  | 0.318646 | 1.76E-12 |
| 0.03162  | 0.143155 | 0.00193  | 0.021601 | 0.64151  | 0.000209 | 0.99641  | 0.198368 | 1.57E-05 |
| 2.21E-08 | 0.333303 | 1.40E-13 | 0.153732 | 0.00086  | 0.138025 | 0.0028   | 0.601741 | 2.47E-47 |
| 2.17E-10 | 0.430487 | 1.72E-22 | 0.199487 | 1.40E-05 | 0.199425 | 1.41E-05 | 0.467971 | 8.64E-27 |
| 5.97E-05 | 0.242092 | 1.18E-07 | 0.172301 | 0.00018  | 0.181981 | 7.65E-05 | 0.484623 | 7.07E-29 |
| 6.34E-09 | 0.314807 | 3.34E-12 | 0.120671 | 0.00905  | 0.088597 | 0.05572  | 0.368598 | 1.78E-16 |
| 2.30E-07 | 0.32087  | 1.21E-12 | 0.157142 | 0.00065  | 0.14379  | 0.00184  | 0.56472  | 1.08E-40 |
| 6.33E-11 | 0.35421  | 2.99E-15 | 0.14155  | 0.00217  | 0.132134 | 0.00423  | 0.587375 | 1.18E-44 |
| 1.43E-05 | 0.238383 | 1.86E-07 | 0.152356 | 0.00096  | 0.078815 | 0.08889  | 0.429423 | 2.23E-22 |
| 0.00053  | 0.199327 | 1.43E-05 | 0.080495 | 0.08227  | 0.075883 | 0.10146  | 0.284995 | 3.54E-10 |
| 0.03206  | 0.149741 | 0.00117  | 0.117769 | 0.01086  | 0.101059 | 0.02899  | 0.363983 | 4.47E-16 |
| 1.44E-05 | 0.234697 | 2.90E-07 | 0.061712 | 0.18309  | 0.10683  | 0.02094  | 0.421231 | 1.65E-21 |
| 1.39E-07 | 0.260657 | 1.09E-08 | 0.127294 | 0.00587  | 0.113881 | 0.0138   | 0.459395 | 9.27E-26 |
| 3.83E-10 | 0.347197 | 1.12E-14 | 0.129673 | 0.00501  | 0.13206  | 0.00425  | 0.552951 | 9.44E-39 |
| 1.21E-06 | 0.293286 | 1.02E-10 | 0.120731 | 0.00901  | 0.103219 | 0.02571  | 0.497365 | 1.49E-30 |
| 0.06138  | 0.142079 | 0.00209  | 0.040545 | 0.38201  | 0.028979 | 0.53218  | 0.278313 | 9.38E-10 |
| 2.94E-10 | 0.344562 | 1.83E-14 | 0.168273 | 0.00026  | 0.105556 | 0.02253  | 0.534044 | 8.62E-36 |
| 5.62E-10 | 0.351686 | 4.83E-15 | 0.135494 | 0.00335  | 0.127099 | 0.00595  | 0.566737 | 4.94E-41 |
| 1.74E-08 | 0.336531 | 7.89E-14 | 0.215372 | 2.64E-06 | 0.031629 | 0.49533  | 0.298218 | 4.78E-11 |
| 3.92E-12 | 0.382661 | 9.84E-18 | 0.108569 | 0.01893  | 0.073861 | 0.11092  | 0.388292 | 2.96E-18 |
| 3.37E-10 | 0.341578 | 3.17E-14 | 0.044408 | 0.33829  | 0.058358 | 0.2081   | 0.428965 | 2.50E-22 |
| 0.03526  | 0.171757 | 0.00019  | 0.145338 | 0.00164  | 0.196945 | 1.81E-05 | 0.301248 | 2.98E-11 |
| 3.21E-06 | 0.292402 | 1.17E-10 | 0.099203 | 0.03209  | 0.099336 | 0.03185  | 0.273315 | 1.91E-09 |
| 1.36E-17 | 0.556433 | 2.56E-39 | 0.126032 | 0.00639  | 0.197685 | 1.68E-05 | 0.48657  | 3.96E-29 |
| 4.35E-11 | 0.371997 | 8.96E-17 | 0.149491 | 0.00119  | 0.132978 | 0.00399  | 0.596884 | 2.06E-46 |
| 7.91E-08 | 0.288889 | 1.99E-10 | 0.128565 | 0.0054   | 0.11135  | 0.01607  | 0.447976 | 1.97E-24 |
| 0.00135  | 0.204914 | 8.05E-06 | 0.123545 | 0.00752  | 0.065767 | 0.15591  | 0.387063 | 3.86E-18 |
| 2.49E-21 | 0.442595 | 8.02E-24 | 0.149754 | 0.00117  | 0.120803 | 0.00897  | 0.562405 | 2.64E-40 |
| 0.00039  | 0.220199 | 1.55E-06 | 0.172806 | 0.00017  | 0.175464 | 0.00014  | 0.451532 | 7.71E-25 |
| 8.54E-09 | 0.310552 | 6.72E-12 | 0.113814 | 0.01386  | 0.178117 | 0.00011  | 0.319213 | 1.60E-12 |
| 5.64E-08 | 0.347302 | 1.10E-14 | 0.122928 | 0.00783  | 0.08061  | 0.08183  | 0.55111  | 1.87E-38 |
| 2.61E-05 | 0.257777 | 1.59E-08 | 0.130287 | 0.0048   | 0.15742  | 0.00064  | 0.332433 | 1.64E-13 |
| 1.32E-16 | 0.459482 | 9.06E-26 | 0.152864 | 0.00092  | 0.127296 | 0.00587  | 0.370379 | 1.24E-16 |
| 2.28E-18 | 0.443105 | 7.03E-24 | 0.113993 | 0.01371  | 0.118607 | 0.01031  | 0.411081 | 1.81E-20 |
| 0.00172  | 0.117005 | 0.01139  | -0.03612 | 0.43619  | -0.05508 | 0.23486  | 0.269532 | 3.24E-09 |
| 5.98E-05 | 0.224793 | 9.21E-07 | 0.107496 | 0.02015  | 0.099204 | 0.03208  | 0.372647 | 7.85E-17 |
| 0.05764  | 0.13466  | 0.00355  | 0.171564 | 0.0002   | 0.143959 | 0.00182  | 0.306628 | 1.27E-11 |
| 3.77E-10 | 0.400749 | 1.92E-19 | 0.262721 | 8.22E-09 | 0.286265 | 2.94E-10 | 0.375766 | 4.14E-17 |
| 2.58E-06 | 0.311486 | 5.77E-12 | 0.190541 | 3.40E-05 | 0.183518 | 6.63E-05 | 0.519231 | 1.34E-33 |
| 1.03E-08 | 0.213909 | 3.10E-06 | 0.066023 | 0.1543   | -0.00173 | 0.97027  | 0.345265 | 1.61E-14 |
| 1.92E-06 | 0.292909 | 1.08E-10 | 0.182342 | 7.40E-05 | 0.166531 | 0.0003   | 0.527886 | 7.25E-35 |
| 1.46E-08 | 0.260389 | 1.12E-08 | 0.050053 | 0.28039  | 0.090303 | 0.05115  | 0.393483 | 9.61E-19 |
| 0.00417  | 0.169736 | 0.00023  | 0.192475 | 2.82E-05 | 0.20262  | 1.02E-05 | 0.355514 | 2.33E-15 |
| 0.00281  | 0.174991 | 0.00014  | 0.129964 | 0.00491  | 0.0979   | 0.03443  | 0.304029 | 1.92E-11 |

|          |          |          |          |          |          |          |          |          |
|----------|----------|----------|----------|----------|----------|----------|----------|----------|
| 0.18828  | 0.025155 | 0.58766  | 0.035528 | 0.44371  | 0.015976 | 0.73059  | 0.271191 | 2.57E-09 |
| 0.0112   | 0.170534 | 0.00021  | 0.216824 | 2.25E-06 | 0.052344 | 0.25894  | 0.204292 | 8.59E-06 |
| 0.00063  | 0.204459 | 8.44E-06 | 0.064801 | 0.16209  | 0.060696 | 0.19042  | 0.216031 | 2.46E-06 |
| 2.93E-11 | 0.365604 | 3.24E-16 | 0.121678 | 0.00848  | 0.024972 | 0.59038  | 0.164872 | 0.00035  |
| 2.89E-08 | 0.381187 | 1.34E-17 | 0.188687 | 4.07E-05 | 0.164503 | 0.00036  | 0.381187 | 1.34E-17 |
| 4.78E-11 | 0.400438 | 2.06E-19 | 0.14549  | 0.00162  | 0.15372  | 0.00086  | 0.467344 | 1.03E-26 |
| 4.56E-05 | 0.242431 | 1.13E-07 | 0.192423 | 2.84E-05 | 0.189173 | 3.88E-05 | 0.497279 | 1.53E-30 |
| 1.25E-09 | 0.320883 | 1.21E-12 | 0.093078 | 0.04439  | 0.103046 | 0.02596  | 0.356679 | 1.86E-15 |
| 2.41E-08 | 0.315321 | 3.07E-12 | 0.113011 | 0.01455  | 0.150912 | 0.00107  | 0.352387 | 4.23E-15 |
| 1.61E-07 | 0.293575 | 9.78E-11 | 0.143148 | 0.00193  | 0.129241 | 0.00516  | 0.518111 | 1.95E-33 |
| 1.03E-12 | 0.367742 | 2.12E-16 | 0.05434  | 0.24119  | 0.085352 | 0.06535  | 0.385069 | 5.91E-18 |
| 1.63E-05 | 0.236777 | 2.26E-07 | 0.106512 | 0.02133  | 0.085222 | 0.06576  | 0.396601 | 4.84E-19 |
| 7.03E-07 | 0.294704 | 8.23E-11 | 0.132822 | 0.00404  | 0.093438 | 0.04357  | 0.544839 | 1.85E-37 |
| 0.00362  | 0.154818 | 0.00079  | 0.048309 | 0.29752  | 0.028426 | 0.54003  | 0.188604 | 4.10E-05 |
| 2.91E-05 | 0.253673 | 2.72E-08 | 0.080298 | 0.08302  | 0.164004 | 0.00037  | 0.303677 | 2.03E-11 |
| 1.17E-07 | 0.324236 | 6.82E-13 | 0.129508 | 0.00506  | 0.137084 | 0.00299  | 0.592971 | 1.11E-45 |
| 5.02E-06 | 0.271096 | 2.61E-09 | 0.088626 | 0.05564  | 0.103361 | 0.02551  | 0.411315 | 1.72E-20 |
| 1.69E-08 | 0.307488 | 1.10E-11 | 0.13565  | 0.00331  | 0.119249 | 0.0099   | 0.474411 | 1.39E-27 |
| 0.0299   | 0.136487 | 0.00312  | 0.112113 | 0.01535  | 0.070188 | 0.12988  | 0.198005 | 1.63E-05 |
| 1.61E-11 | 0.375689 | 4.21E-17 | 0.154761 | 0.00079  | 0.164972 | 0.00034  | 0.565981 | 6.63E-41 |
| 0.05981  | 0.149473 | 0.0012   | 0.132396 | 0.00416  | 0.121775 | 0.00843  | 0.195584 | 2.08E-05 |
| 1.32E-12 | 0.440226 | 1.47E-23 | 0.166568 | 0.0003   | 0.136292 | 0.00317  | 0.415133 | 7.02E-21 |
| 1.67E-08 | 0.256471 | 1.89E-08 | 0.140889 | 0.00228  | 0.124146 | 0.00723  | 0.4064   | 5.33E-20 |
| 0.64247  | -0.10318 | 0.02576  | -0.00804 | 0.86248  | -0.02237 | 0.62975  | 0.142538 | 0.00202  |
| 1.96E-08 | 0.309044 | 8.58E-12 | 0.109217 | 0.01823  | 0.126814 | 0.00607  | 0.357966 | 1.45E-15 |
| 0.1451   | 0.190599 | 3.38E-05 | 0.115726 | 0.01233  | 0.130945 | 0.00459  | 0.190479 | 3.42E-05 |
| 6.19E-17 | 0.479061 | 3.62E-28 | 0.196907 | 1.82E-05 | 0.177885 | 0.00011  | 0.564353 | 1.25E-40 |
| 7.36E-18 | 0.482234 | 1.43E-28 | 0.188242 | 4.25E-05 | 0.134218 | 0.00366  | 0.575667 | 1.44E-42 |
| 6.06E-15 | 0.432153 | 1.13E-22 | 0.193865 | 2.46E-05 | 0.138695 | 0.00267  | 0.613793 | 1.09E-49 |
| 0.02849  | 0.099471 | 0.03162  | 0.555502 | 3.64E-39 | 0.076508 | 0.09867  | 0.184153 | 6.25E-05 |
| 5.93E-10 | 0.389889 | 2.10E-18 | 0.167518 | 0.00028  | 0.174326 | 0.00015  | 0.463713 | 2.83E-26 |
| 3.82E-09 | 0.40703  | 4.62E-20 | 0.181417 | 8.06E-05 | 0.233979 | 3.16E-07 | 0.519348 | 1.29E-33 |
| 0.02677  | 0.151094 | 0.00106  | 0.097936 | 0.03436  | 0.047961 | 0.30102  | 0.236547 | 2.32E-07 |
| 1.14E-14 | 0.446175 | 3.16E-24 | 0.156392 | 0.0007   | 0.155409 | 0.00075  | 0.40546  | 6.61E-20 |
| 7.01E-33 | 0.644873 | 2.97E-56 | 0.055134 | 0.23438  | 0.114057 | 0.01365  | 0.320645 | 1.26E-12 |
| 0.00017  | 0.257119 | 1.73E-08 | 0.153796 | 0.00085  | 0.397964 | 3.58E-19 | 0.301892 | 2.69E-11 |
| 6.12E-07 | 0.271835 | 2.35E-09 | 0.1293   | 0.00513  | 0.112466 | 0.01503  | 0.311453 | 5.80E-12 |
| 0.00053  | 0.246055 | 7.20E-08 | 0.104885 | 0.0234   | 0.104058 | 0.02453  | 0.217017 | 2.20E-06 |
| 0.04392  | 0.095658 | 0.03879  | 0.034413 | 0.45815  | -0.03674 | 0.42828  | 0.330318 | 2.38E-13 |
| 4.00E-08 | -0.27756 | 1.05E-09 | -0.11441 | 0.01336  | -0.08286 | 0.07363  | -0.33338 | 1.39E-13 |
| 1.47E-12 | 0.408396 | 3.37E-20 | 0.139513 | 0.00251  | 0.148784 | 0.00126  | 0.431477 | 1.34E-22 |
| 4.56E-16 | 0.410262 | 2.19E-20 | 0.179004 | 0.0001   | 0.217467 | 2.10E-06 | 0.297506 | 5.34E-11 |
| 0.43451  | 0.131425 | 0.00444  | 0.060988 | 0.18829  | 0.068337 | 0.14034  | 0.05312  | 0.25193  |
| 0.0001   | 0.193247 | 2.62E-05 | 0.103577 | 0.0252   | 0.153527 | 0.00087  | 0.42693  | 4.13E-22 |
| 0.00642  | 0.238681 | 1.79E-07 | 0.168191 | 0.00026  | 0.096722 | 0.03666  | 0.255496 | 2.15E-08 |



|          |          |          |          |          |          |          |          |          |
|----------|----------|----------|----------|----------|----------|----------|----------|----------|
| 0.00026  | 0.242758 | 1.09E-07 | 0.185057 | 5.74E-05 | 0.21311  | 3.38E-06 | 0.381692 | 1.21E-17 |
| 0.8255   | 0.069312 | 0.13475  | 0.137573 | 0.00289  | 0.187968 | 4.36E-05 | 0.303302 | 2.15E-11 |
| 0.00445  | 0.216559 | 2.32E-06 | 0.122122 | 0.00824  | 0.164357 | 0.00036  | 0.417985 | 3.58E-21 |
| 6.84E-15 | 0.484508 | 7.31E-29 | 0.109022 | 0.01844  | 0.2483   | 5.42E-08 | 0.323009 | 8.41E-13 |
| 6.51E-07 | 0.251029 | 3.83E-08 | 0.118113 | 0.01063  | 0.109154 | 0.0183   | 0.312467 | 4.91E-12 |
| 4.72E-13 | 0.457277 | 1.65E-25 | 0.157108 | 0.00066  | 0.131553 | 0.0044   | 0.272759 | 2.07E-09 |
| 2.47E-06 | 0.309134 | 8.46E-12 | 0.076327 | 0.09947  | 0.109018 | 0.01844  | 0.245286 | 7.93E-08 |
| 0.00224  | -0.12071 | 0.00903  | 0.094436 | 0.04136  | -0.13621 | 0.00318  | -0.23148 | 4.24E-07 |
| 4.18E-07 | 0.31819  | 1.90E-12 | 0.121777 | 0.00843  | 0.095002 | 0.04016  | 0.47706  | 6.48E-28 |
| 0.04379  | 0.18767  | 4.48E-05 | 0.107927 | 0.01965  | 0.122724 | 0.00793  | 0.419627 | 2.42E-21 |
| 2.94E-10 | 0.350307 | 6.27E-15 | 0.196356 | 1.92E-05 | 0.198158 | 1.61E-05 | 0.512711 | 1.15E-32 |
| 2.76E-09 | 0.344777 | 1.76E-14 | 0.171139 | 0.0002   | 0.158081 | 0.00061  | 0.563004 | 2.10E-40 |
| 1.29E-05 | 0.300896 | 3.15E-11 | 0.130478 | 0.00474  | 0.093454 | 0.04353  | 0.326592 | 4.55E-13 |
| 1.15E-07 | 0.294238 | 8.84E-11 | 0.222142 | 1.24E-06 | 0.230957 | 4.51E-07 | 0.528526 | 5.82E-35 |
| 4.74E-12 | 0.34814  | 9.42E-15 | 0.109329 | 0.01811  | 0.153435 | 0.00088  | 0.337443 | 6.70E-14 |
| 0.00971  | 0.195558 | 2.08E-05 | 0.159234 | 0.00055  | 0.160181 | 0.00051  | 0.29373  | 9.55E-11 |
| 9.50E-15 | 0.393597 | 9.37E-19 | 0.102829 | 0.02628  | 0.145699 | 0.00159  | 0.442019 | 9.30E-24 |
| 1.24E-14 | -0.3163  | 2.61E-12 | -0.10669 | 0.02111  | -0.07927 | 0.08707  | -0.41614 | 5.54E-21 |
| 1.54E-09 | 0.321634 | 1.06E-12 | 0.164583 | 0.00035  | 0.16184  | 0.00045  | 0.480391 | 2.46E-28 |
| 3.71E-11 | 0.346325 | 1.32E-14 | 0.117307 | 0.01118  | 0.149524 | 0.00119  | 0.385473 | 5.42E-18 |
| 0.00062  | 0.137712 | 0.00286  | 0.269405 | 3.30E-09 | 0.110161 | 0.01724  | 0.304775 | 1.70E-11 |
| 9.42E-06 | 0.285716 | 3.19E-10 | 0.121779 | 0.00843  | 0.111337 | 0.01608  | 0.413701 | 9.83E-21 |
| 6.10E-05 | 0.289332 | 1.86E-10 | 0.122045 | 0.00829  | 0.166861 | 0.00029  | 0.217974 | 1.98E-06 |
| 1.41E-07 | 0.324293 | 6.75E-13 | 0.208806 | 5.35E-06 | 0.205327 | 7.71E-06 | 0.49875  | 9.71E-31 |
| 2.68E-07 | 0.243545 | 9.85E-08 | 0.165525 | 0.00033  | 0.171735 | 0.00019  | 0.389627 | 2.22E-18 |
| 0.57232  | 0.030877 | 0.50565  | 0.081588 | 0.07818  | 0.218512 | 1.87E-06 | 0.259862 | 1.21E-08 |
| 3.00E-05 | 0.189801 | 3.66E-05 | 0.188759 | 4.04E-05 | 0.11615  | 0.01201  | 0.379212 | 2.03E-17 |
| 1.18E-05 | 0.259357 | 1.29E-08 | 0.203833 | 9.01E-06 | 0.274759 | 1.56E-09 | 0.377555 | 2.86E-17 |
| 4.17E-10 | 0.364723 | 3.86E-16 | 0.113849 | 0.01383  | 0.122876 | 0.00785  | 0.48793  | 2.64E-29 |
| 0.00044  | 0.210459 | 4.49E-06 | 0.228764 | 5.83E-07 | 0.072765 | 0.11634  | 0.28396  | 4.13E-10 |
| 1.05E-09 | 0.35449  | 2.83E-15 | 0.146579 | 0.00149  | 0.122229 | 0.00819  | 0.595897 | 3.16E-46 |
| 2.33E-10 | 0.347329 | 1.10E-14 | 0.115663 | 0.01238  | 0.092602 | 0.04549  | 0.336685 | 7.68E-14 |
| 8.54E-07 | 0.317381 | 2.18E-12 | 0.143271 | 0.00191  | 0.186399 | 5.06E-05 | 0.440939 | 1.23E-23 |
| 3.05E-06 | 0.307539 | 1.09E-11 | 0.060603 | 0.1911   | 0.079408 | 0.0865   | 0.366024 | 2.98E-16 |
| 6.21E-10 | 0.375617 | 4.27E-17 | 0.110289 | 0.01711  | 0.151556 | 0.00102  | 0.419205 | 2.67E-21 |
| 2.10E-09 | 0.347113 | 1.14E-14 | 0.249509 | 4.65E-08 | 0.178206 | 0.00011  | 0.467504 | 9.84E-27 |
| 1.47E-05 | 0.242927 | 1.06E-07 | 0.122506 | 0.00804  | 0.11399  | 0.01371  | 0.337276 | 6.91E-14 |
| 1.12E-05 | 0.287486 | 2.45E-10 | 0.098416 | 0.03348  | 0.074779 | 0.10655  | 0.3989   | 2.90E-19 |
| 0.08476  | 0.092147 | 0.04657  | 0.059302 | 0.20082  | 0.067519 | 0.14516  | 0.359283 | 1.12E-15 |
| 2.39E-24 | 0.501494 | 4.12E-31 | 0.224513 | 9.51E-07 | 0.213237 | 3.33E-06 | 0.28006  | 7.29E-10 |
| 2.04E-13 | 0.377312 | 3.01E-17 | 0.135036 | 0.00346  | 0.107063 | 0.02066  | 0.403939 | 9.34E-20 |
| 1.10E-06 | 0.297319 | 5.50E-11 | 0.193556 | 2.54E-05 | 0.200305 | 1.29E-05 | 0.544617 | 2.01E-37 |
| 1.51E-09 | 0.356851 | 1.80E-15 | 0.165774 | 0.00032  | 0.141038 | 0.00225  | 0.447744 | 2.10E-24 |
| 3.07E-07 | 0.302126 | 2.59E-11 | 0.118907 | 0.01012  | 0.105441 | 0.02268  | 0.315173 | 3.14E-12 |
| 9.24E-06 | 0.273252 | 1.93E-09 | 0.128505 | 0.00542  | 0.106654 | 0.02115  | 0.496639 | 1.87E-30 |

|          |          |          |          |          |          |          |          |          |
|----------|----------|----------|----------|----------|----------|----------|----------|----------|
| 1.09E-09 | 0.349261 | 7.63E-15 | 0.128708 | 0.00534  | 0.104681 | 0.02368  | 0.5356   | 5.00E-36 |
| 4.82E-07 | 0.266108 | 5.19E-09 | 0.094309 | 0.04164  | 0.072007 | 0.1202   | 0.321521 | 1.08E-12 |
| 0.00189  | 0.172123 | 0.00019  | 0.057873 | 0.2119   | 0.041988 | 0.36529  | 0.199622 | 1.39E-05 |
| 0.86475  | -0.12961 | 0.00503  | -0.01627 | 0.72589  | -0.12782 | 0.00567  | -0.1551  | 0.00077  |
| 0.00015  | 0.170428 | 0.00022  | 0.080584 | 0.08193  | 0.076934 | 0.0968   | 0.356554 | 1.91E-15 |
| 1.65E-07 | 0.327126 | 4.15E-13 | 0.179395 | 9.70E-05 | 0.199394 | 1.42E-05 | 0.416117 | 5.57E-21 |
| 1.08E-18 | 0.465005 | 1.98E-26 | 0.199773 | 1.36E-05 | 0.157929 | 0.00061  | 0.377538 | 2.87E-17 |
| 7.38E-09 | 0.333764 | 1.29E-13 | 0.137593 | 0.00289  | 0.114502 | 0.01329  | 0.400373 | 2.09E-19 |
| 1.22E-05 | 0.247859 | 5.74E-08 | 0.096964 | 0.03619  | 0.126399 | 0.00624  | 0.372035 | 8.90E-17 |
| 2.88E-06 | 0.356333 | 1.99E-15 | 0.113617 | 0.01402  | 0.068187 | 0.14121  | 0.182834 | 7.07E-05 |
| 1.08E-06 | 0.310006 | 7.34E-12 | 0.100389 | 0.03008  | 0.175604 | 0.00014  | 0.408682 | 3.16E-20 |
| 2.02E-09 | 0.324117 | 6.96E-13 | 0.133244 | 0.00392  | 0.116564 | 0.01171  | 0.463468 | 3.03E-26 |
| 8.37E-10 | 0.43107  | 1.49E-22 | 0.223998 | 1.01E-06 | 0.200462 | 1.27E-05 | 0.44293  | 7.35E-24 |
| 1.47E-08 | 0.373432 | 6.69E-17 | 0.048855 | 0.29208  | 0.220324 | 1.53E-06 | 0.280027 | 7.33E-10 |
| 1.78E-09 | 0.372187 | 8.63E-17 | 0.210352 | 4.54E-06 | 0.200658 | 1.25E-05 | 0.409047 | 2.90E-20 |
| 6.96E-10 | 0.239011 | 1.72E-07 | 0.123583 | 0.0075   | 0.086753 | 0.06103  | 0.434132 | 6.91E-23 |
| 2.19E-05 | 0.242707 | 1.09E-07 | 0.170781 | 0.00021  | 0.105806 | 0.02221  | 0.392975 | 1.07E-18 |
| 1.79E-06 | 0.291533 | 1.33E-10 | 0.397099 | 4.33E-19 | 0.377319 | 3.01E-17 | 0.430057 | 1.91E-22 |
| 0.28973  | -0.05924 | 0.20127  | 0.01972  | 0.6708   | -0.05069 | 0.27427  | -0.1072  | 0.0205   |
| 0.00144  | 0.199433 | 1.41E-05 | 0.109517 | 0.01791  | 0.088734 | 0.05534  | 0.261214 | 1.01E-08 |
| 1.85E-20 | 0.481549 | 1.75E-28 | 0.171885 | 0.00019  | 0.110443 | 0.01696  | 0.466711 | 1.23E-26 |
| 1.85E-10 | 0.381189 | 1.34E-17 | 0.144956 | 0.00169  | 0.143718 | 0.00185  | 0.451489 | 7.80E-25 |
| 6.58E-11 | 0.317048 | 2.30E-12 | 0.191492 | 3.10E-05 | 0.15062  | 0.0011   | 0.506534 | 8.38E-32 |
| 9.24E-09 | -0.24418 | 9.11E-08 | -0.0234  | 0.61405  | -0.0713  | 0.12387  | -0.20157 | 1.14E-05 |
| 0.00015  | 0.225089 | 8.91E-07 | 0.124302 | 0.00716  | 0.136499 | 0.00312  | 0.389681 | 2.20E-18 |
| 4.03E-08 | 0.306301 | 1.34E-11 | 0.100869 | 0.02929  | 0.098141 | 0.03398  | 0.245375 | 7.84E-08 |
| 4.34E-07 | 0.290413 | 1.58E-10 | 0.252354 | 3.23E-08 | 0.115055 | 0.01285  | 0.34125  | 3.36E-14 |
| 3.44E-05 | 0.269394 | 3.30E-09 | 0.125148 | 0.00677  | 0.142919 | 0.00196  | 0.348642 | 8.57E-15 |
| 0.00245  | 0.22119  | 1.39E-06 | 0.07275  | 0.11642  | 0.048738 | 0.29325  | 0.314609 | 3.45E-12 |
| 0.30716  | 0.077572 | 0.09406  | 0.050374 | 0.27732  | 0.040346 | 0.38436  | 0.251157 | 3.77E-08 |
| 0.04254  | 0.11272  | 0.0148   | 0.199381 | 1.42E-05 | 0.166924 | 0.00029  | 0.300961 | 3.12E-11 |
| 0.00128  | 0.240737 | 1.39E-07 | 0.117016 | 0.01139  | 0.088702 | 0.05543  | 0.137944 | 0.00281  |
| 2.04E-05 | 0.282478 | 5.13E-10 | 0.329273 | 2.85E-13 | 0.162319 | 0.00043  | 0.295222 | 7.60E-11 |
| 0.8057   | 0.048707 | 0.29355  | 0.107269 | 0.02042  | 0.102011 | 0.0275   | 0.097403 | 0.03536  |
| 3.47E-11 | 0.356478 | 1.94E-15 | 0.191466 | 3.11E-05 | 0.160082 | 0.00052  | 0.529764 | 3.80E-35 |
| 0.00073  | 0.207097 | 6.41E-06 | 0.15169  | 0.00101  | 0.173739 | 0.00016  | 0.326132 | 4.92E-13 |
| 0.6365   | 0.013573 | 0.76988  | 0.111296 | 0.01612  | 0.072972 | 0.1153   | 0.289621 | 1.78E-10 |
| 0.01476  | 0.102479 | 0.0268   | 0.054505 | 0.23976  | 0.04355  | 0.34771  | 0.131042 | 0.00456  |
| 0.02092  | 0.168685 | 0.00025  | 0.083559 | 0.07122  | 0.091832 | 0.04732  | 0.299476 | 3.93E-11 |
| 4.44E-07 | 0.31248  | 4.90E-12 | 0.142669 | 0.002    | 0.148988 | 0.00124  | 0.467883 | 8.85E-27 |
| 0.01826  | -0.17734 | 0.00012  | -0.05004 | 0.28051  | -0.06739 | 0.14592  | -0.27162 | 2.42E-09 |
| 1.53E-07 | 0.338989 | 5.07E-14 | 0.09657  | 0.03696  | 0.167593 | 0.00028  | 0.259523 | 1.26E-08 |
| 1.62E-05 | 0.294122 | 8.99E-11 | 0.285785 | 3.15E-10 | 0.106987 | 0.02075  | 0.172017 | 0.00019  |
| 0.19614  | -0.0938  | 0.04277  | 0.009651 | 0.83522  | -0.14209 | 0.00208  | -0.19799 | 1.63E-05 |
| 0.01561  | 0.171682 | 0.00019  | 0.094123 | 0.04204  | 0.051165 | 0.26983  | 0.209174 | 5.15E-06 |

|          |          |          |          |          |          |          |          |          |
|----------|----------|----------|----------|----------|----------|----------|----------|----------|
| 7.92E-06 | -0.27373 | 1.80E-09 | 0.021167 | 0.64821  | 0.016579 | 0.72084  | -0.24728 | 6.17E-08 |
| 1.25E-07 | 0.303647 | 2.04E-11 | 0.153778 | 0.00086  | 0.132991 | 0.00399  | 0.489714 | 1.54E-29 |
| 0.45577  | 0.083835 | 0.07029  | 0.238762 | 1.77E-07 | 0.07133  | 0.12373  | 0.190098 | 3.55E-05 |
| 5.22E-05 | 0.26264  | 8.32E-09 | 0.122106 | 0.00825  | 0.125485 | 0.00662  | 0.352345 | 4.26E-15 |
| 0.38586  | 0.136996 | 0.00301  | 0.085706 | 0.06423  | 0.167118 | 0.00029  | 0.270318 | 2.91E-09 |
| 0.00037  | 0.24257  | 1.11E-07 | 0.144596 | 0.00173  | 0.104738 | 0.0236   | 0.396782 | 4.65E-19 |
| 3.34E-12 | 0.404979 | 7.38E-20 | 0.089219 | 0.05402  | 0.141852 | 0.00212  | 0.254362 | 2.49E-08 |
| 1.04E-08 | 0.313187 | 4.36E-12 | 0.164641 | 0.00035  | 0.128441 | 0.00544  | 0.609577 | 7.48E-49 |
| 6.41E-15 | 0.459451 | 9.13E-26 | 0.124465 | 0.00708  | 0.120178 | 0.00934  | 0.350033 | 6.60E-15 |
| 4.79E-10 | 0.357105 | 1.71E-15 | 0.119416 | 0.0098   | 0.090452 | 0.05077  | 0.514925 | 5.56E-33 |
| 0.51384  | 0.060086 | 0.19492  | 0.06897  | 0.13669  | 0.102337 | 0.02701  | 0.224697 | 9.31E-07 |
| 8.04E-09 | 0.315362 | 3.05E-12 | 0.137453 | 0.00291  | 0.125806 | 0.00648  | 0.449242 | 1.41E-24 |
| 8.56E-07 | -0.18786 | 4.40E-05 | -0.09508 | 0.03999  | -0.08786 | 0.0578   | -0.35721 | 1.68E-15 |
| 0.69889  | 0.069686 | 0.13265  | 0.09263  | 0.04543  | 0.129012 | 0.00524  | 0.290725 | 1.51E-10 |
| 3.96E-08 | 0.28093  | 6.43E-10 | 0.14973  | 0.00117  | 0.145414 | 0.00163  | 0.386414 | 4.43E-18 |
| 0.08408  | 0.088978 | 0.05467  | 0.170281 | 0.00022  | 0.163349 | 0.00039  | 0.23566  | 2.58E-07 |
| 0.00025  | 0.21358  | 3.21E-06 | 0.088412 | 0.05623  | 0.082602 | 0.07454  | 0.328559 | 3.23E-13 |
| 6.57E-06 | 0.258166 | 1.51E-08 | 0.140388 | 0.00236  | 0.092329 | 0.04613  | 0.329404 | 2.79E-13 |
| 2.49E-10 | 0.342073 | 2.89E-14 | 0.069096 | 0.13597  | 0.129596 | 0.00503  | 0.212322 | 3.68E-06 |
| 2.15E-06 | 0.248102 | 5.56E-08 | 0.073956 | 0.11047  | 0.060169 | 0.19431  | 0.410428 | 2.11E-20 |
| 5.44E-09 | 0.308151 | 9.92E-12 | 0.218107 | 1.95E-06 | 0.088666 | 0.05553  | 0.317549 | 2.12E-12 |
| 0.01519  | 0.199304 | 1.43E-05 | 0.206539 | 6.80E-06 | 0.208708 | 5.41E-06 | 0.308262 | 9.74E-12 |
| 1.22E-11 | 0.346736 | 1.22E-14 | 0.114931 | 0.01295  | 0.07168  | 0.1219   | 0.32962  | 2.69E-13 |
| 1.46E-06 | 0.289084 | 1.93E-10 | 0.098862 | 0.03269  | 0.081796 | 0.07742  | 0.510736 | 2.17E-32 |
| 0.00127  | 0.2219   | 1.28E-06 | 0.132456 | 0.00414  | 0.121013 | 0.00885  | 0.434638 | 6.09E-23 |
| 0.28238  | 0.074421 | 0.10824  | 0.035566 | 0.44322  | 0.02026  | 0.66233  | 0.150832 | 0.00108  |
| 0.00641  | 0.117441 | 0.01109  | 0.157742 | 0.00062  | 0.120155 | 0.00935  | 0.291645 | 1.31E-10 |
| 0.00265  | 0.171614 | 0.00019  | 0.041287 | 0.37336  | 0.017057 | 0.71314  | 0.231261 | 4.35E-07 |
| 4.67E-11 | 0.292372 | 1.17E-10 | 0.022075 | 0.6342   | 0.089075 | 0.05441  | 0.294408 | 8.61E-11 |
| 0.00055  | 0.209901 | 4.76E-06 | 0.096495 | 0.03711  | 0.081398 | 0.07888  | 0.239254 | 1.67E-07 |
| 0.51779  | 0.120873 | 0.00893  | 0.171189 | 0.0002   | 0.141395 | 0.00219  | 0.311659 | 5.61E-12 |
| 1.93E-23 | 0.461047 | 5.90E-26 | 0.137417 | 0.00292  | 0.165164 | 0.00034  | 0.478656 | 4.08E-28 |
| 5.92E-14 | 0.435219 | 5.26E-23 | 0.098694 | 0.03298  | 0.10323  | 0.02569  | 0.504429 | 1.63E-31 |
| 2.00E-06 | 0.265043 | 6.00E-09 | 0.211439 | 4.04E-06 | 0.210268 | 4.58E-06 | 0.465122 | 1.91E-26 |
| 1.06E-14 | 0.430596 | 1.67E-22 | 0.198193 | 1.60E-05 | 0.12759  | 0.00576  | 0.507812 | 5.57E-32 |
| 4.34E-12 | 0.429863 | 2.00E-22 | 0.140774 | 0.00229  | 0.215458 | 2.62E-06 | 0.459384 | 9.30E-26 |
| 0.13194  | 0.099791 | 0.03107  | 0.130312 | 0.00479  | 0.128104 | 0.00557  | 0.149097 | 0.00123  |
| 3.86E-09 | 0.356632 | 1.88E-15 | 0.081455 | 0.07867  | 0.143136 | 0.00193  | 0.27196  | 2.31E-09 |
| 0.00072  | 0.170309 | 0.00022  | 0.11699  | 0.0114   | 0.101804 | 0.02782  | 0.437781 | 2.75E-23 |
| 0.00512  | 0.176175 | 0.00013  | 0.180128 | 9.07E-05 | 0.185124 | 5.71E-05 | 0.39791  | 3.62E-19 |
| 1.14E-13 | 0.423041 | 1.06E-21 | 0.11502  | 0.01288  | 0.163571 | 0.00039  | 0.452128 | 6.58E-25 |
| 0.01038  | 0.186422 | 5.05E-05 | 0.103734 | 0.02498  | 0.090773 | 0.04995  | 0.231363 | 4.30E-07 |
| 3.54E-17 | 0.468318 | 7.83E-27 | 0.149956 | 0.00115  | 0.166672 | 0.0003   | 0.398124 | 3.45E-19 |
| 8.08E-05 | 0.186012 | 5.25E-05 | 0.089472 | 0.05334  | 0.032019 | 0.49004  | 0.385902 | 4.95E-18 |
| 0.04318  | -0.12161 | 0.00852  | 0.012885 | 0.78122  | -0.00288 | 0.95056  | -0.29761 | 5.26E-11 |

|          |          |          |          |          |          |          |          |          |
|----------|----------|----------|----------|----------|----------|----------|----------|----------|
| 0.00023  | 0.18994  | 3.61E-05 | 0.124892 | 0.00689  | 0.152101 | 0.00098  | 0.274098 | 1.71E-09 |
| 0.00092  | 0.194941 | 2.21E-05 | 0.111055 | 0.01635  | 0.07561  | 0.1027   | 0.205689 | 7.43E-06 |
| 0.00795  | 0.156435 | 0.00069  | 0.205182 | 7.83E-06 | 0.23713  | 2.16E-07 | 0.351347 | 5.15E-15 |
| 6.26E-06 | 0.223883 | 1.02E-06 | 0.081837 | 0.07727  | 0.073193 | 0.1142   | 0.333527 | 1.35E-13 |
| 0.00047  | 0.149233 | 0.00122  | 0.094206 | 0.04186  | 0.073366 | 0.11334  | 0.302826 | 2.32E-11 |
| 0.00065  | 0.283179 | 4.63E-10 | 0.120942 | 0.00889  | 0.338692 | 5.35E-14 | 0.26041  | 1.12E-08 |
| 4.40E-14 | 0.413551 | 1.02E-20 | 0.123525 | 0.00753  | 0.167743 | 0.00027  | 0.295651 | 7.11E-11 |
| 2.00E-08 | 0.292974 | 1.07E-10 | 0.10306  | 0.02594  | 0.095658 | 0.03879  | 0.222907 | 1.14E-06 |
| 8.38E-06 | 0.293131 | 1.05E-10 | 0.287291 | 2.52E-10 | 0.201131 | 1.19E-05 | 0.481181 | 1.95E-28 |
| 1.30E-06 | 0.213675 | 3.18E-06 | 0.061827 | 0.18228  | 0.041925 | 0.36601  | 0.39764  | 3.84E-19 |
| 0.00017  | 0.174282 | 0.00015  | 0.056763 | 0.22081  | 0.052774 | 0.25504  | 0.19983  | 1.36E-05 |
| 0.06717  | 0.121394 | 0.00864  | 0.06668  | 0.15024  | 0.038217 | 0.40996  | 0.367728 | 2.12E-16 |
| 2.05E-13 | 0.446804 | 2.68E-24 | 0.184666 | 5.96E-05 | 0.155583 | 0.00074  | 0.250721 | 3.98E-08 |
| 7.12E-13 | 0.395379 | 6.34E-19 | 0.215524 | 2.60E-06 | 0.167496 | 0.00028  | 0.499621 | 7.40E-31 |
| 1.03E-06 | 0.260471 | 1.11E-08 | 0.058171 | 0.20956  | 0.047131 | 0.30947  | 0.263094 | 7.82E-09 |
| 3.96E-08 | 0.319881 | 1.43E-12 | 0.129889 | 0.00493  | 0.117384 | 0.01113  | 0.419363 | 2.57E-21 |
| 3.92E-08 | -0.21257 | 3.58E-06 | 0.039431 | 0.39523  | 0.029739 | 0.52147  | -0.23977 | 1.57E-07 |
| 2.39E-06 | 0.325695 | 5.31E-13 | 0.189382 | 3.81E-05 | 0.180614 | 8.67E-05 | 0.206364 | 6.92E-06 |
| 0.00049  | 0.268277 | 3.85E-09 | 0.152405 | 0.00095  | 0.212366 | 3.66E-06 | 0.419133 | 2.72E-21 |
| 1.01E-09 | 0.316992 | 2.32E-12 | 0.174026 | 0.00016  | 0.167925 | 0.00027  | 0.523706 | 3.00E-34 |
| 0.00024  | 0.170059 | 0.00022  | 0.079331 | 0.08681  | 0.094614 | 0.04098  | 0.398802 | 2.97E-19 |
| 1.28E-06 | 0.254983 | 2.30E-08 | 0.154354 | 0.00082  | 0.163167 | 0.0004   | 0.389763 | 2.16E-18 |
| 3.10E-09 | 0.349346 | 7.51E-15 | 0.115511 | 0.01249  | 0.10541  | 0.02272  | 0.302319 | 2.52E-11 |
| 1.44E-06 | 0.226276 | 7.77E-07 | 0.173314 | 0.00017  | 0.168884 | 0.00025  | 0.456038 | 2.31E-25 |
| 1.21E-05 | 0.316895 | 2.36E-12 | 0.441954 | 9.46E-24 | 0.163178 | 0.0004   | 0.251098 | 3.80E-08 |
| 0.00586  | 0.190091 | 3.55E-05 | 0.204945 | 8.03E-06 | 0.21085  | 4.31E-06 | 0.29123  | 1.40E-10 |
| 5.56E-05 | 0.157714 | 0.00063  | 0.101018 | 0.02905  | -0.00189 | 0.96751  | 0.264821 | 6.19E-09 |
| 7.10E-07 | 0.273211 | 1.94E-09 | 0.131084 | 0.00455  | 0.120627 | 0.00907  | 0.404492 | 8.24E-20 |
| 0.00498  | 0.190723 | 3.34E-05 | 0.04373  | 0.34571  | 0.025017 | 0.58971  | 0.227195 | 6.99E-07 |
| 0.00252  | 0.23195  | 4.01E-07 | 0.085591 | 0.06459  | 0.083691 | 0.07078  | 0.241487 | 1.27E-07 |
| 6.61E-07 | 0.295195 | 7.63E-11 | 0.184155 | 6.25E-05 | 0.193395 | 2.58E-05 | 0.507828 | 5.54E-32 |
| 0.05028  | 0.113603 | 0.01404  | 0.082234 | 0.07584  | 0.091916 | 0.04712  | 0.227072 | 7.09E-07 |
| 0.0562   | 0.140363 | 0.00236  | 0.064773 | 0.16227  | 0.044167 | 0.34091  | 0.452433 | 6.07E-25 |
| 1.83E-05 | 0.232232 | 3.88E-07 | 0.094991 | 0.04018  | 0.080117 | 0.08372  | 0.500327 | 5.94E-31 |
| 4.80E-05 | 0.238678 | 1.79E-07 | 0.116639 | 0.01165  | 0.12296  | 0.00781  | 0.135085 | 0.00345  |
| 1.12E-08 | 0.312074 | 5.24E-12 | 0.116121 | 0.01203  | 0.1393   | 0.00255  | 0.471031 | 3.64E-27 |
| 6.71E-13 | 0.389396 | 2.34E-18 | 0.13699  | 0.00301  | 0.157948 | 0.00061  | 0.583709 | 5.42E-44 |
| 0.00012  | 0.223292 | 1.09E-06 | 0.038299 | 0.40896  | 0.238703 | 1.79E-07 | 0.226839 | 7.28E-07 |
| 8.07E-05 | 0.263706 | 7.20E-09 | 0.399796 | 2.38E-19 | 0.212877 | 3.46E-06 | 0.186652 | 4.94E-05 |
| 5.21E-06 | 0.375099 | 4.75E-17 | 0.157376 | 0.00064  | 0.120435 | 0.00918  | 0.282706 | 4.96E-10 |
| 0.00014  | 0.204846 | 8.11E-06 | 0.136291 | 0.00317  | 0.116402 | 0.01183  | 0.415161 | 6.98E-21 |
| 5.40E-05 | 0.263333 | 7.57E-09 | 0.326812 | 4.38E-13 | 0.098549 | 0.03324  | 0.396801 | 4.63E-19 |
| 2.07E-15 | 0.379474 | 1.92E-17 | 0.078266 | 0.09114  | 0.082594 | 0.07456  | 0.459681 | 8.58E-26 |
| 2.84E-06 | 0.321666 | 1.06E-12 | 0.199732 | 1.37E-05 | 0.195279 | 2.14E-05 | 0.470082 | 4.77E-27 |
| 2.01E-12 | 0.398075 | 3.49E-19 | 0.157509 | 0.00064  | 0.156043 | 0.00071  | 0.569144 | 1.93E-41 |

|          |          |          |          |          |          |          |          |          |
|----------|----------|----------|----------|----------|----------|----------|----------|----------|
| 6.65E-06 | 0.272266 | 2.21E-09 | 0.117897 | 0.01078  | 0.035102 | 0.44919  | 0.404263 | 8.68E-20 |
| 7.95E-07 | -0.25068 | 4.01E-08 | 0.094316 | 0.04162  | 0.085771 | 0.06403  | -0.2013  | 1.17E-05 |
| 0.00059  | 0.194789 | 2.25E-05 | 0.135095 | 0.00344  | 0.079496 | 0.08615  | 0.294983 | 7.88E-11 |
| 0.6254   | 0.053362 | 0.24978  | 0.089045 | 0.05449  | 0.108164 | 0.01939  | 0.260977 | 1.04E-08 |
| 0.47245  | 0.133152 | 0.00394  | 0.133743 | 0.00379  | 0.138936 | 0.00262  | 0.337359 | 6.80E-14 |
| 0.00085  | 0.206148 | 7.08E-06 | 0.222069 | 1.26E-06 | 0.207538 | 6.12E-06 | 0.413767 | 9.68E-21 |
| 2.10E-09 | 0.335597 | 9.33E-14 | 0.130963 | 0.00459  | 0.127389 | 0.00584  | 0.441511 | 1.06E-23 |
| 0.00013  | 0.240711 | 1.40E-07 | 0.177034 | 0.00012  | 0.174113 | 0.00016  | 0.475497 | 1.02E-27 |
| 9.85E-08 | 0.32375  | 7.41E-13 | 0.136687 | 0.00308  | 0.13212  | 0.00424  | 0.383136 | 8.90E-18 |
| 3.86E-11 | -0.35924 | 1.13E-15 | -0.06535 | 0.15855  | -0.1506  | 0.0011   | -0.19853 | 1.55E-05 |
| 3.79E-10 | 0.357497 | 1.59E-15 | 0.131406 | 0.00445  | 0.138128 | 0.00278  | 0.563736 | 1.58E-40 |
| 0.00433  | 0.183816 | 6.45E-05 | 0.030965 | 0.50443  | -0.00853 | 0.85421  | 0.297411 | 5.42E-11 |
| 1.58E-08 | 0.352573 | 4.08E-15 | 0.096353 | 0.03739  | 0.075698 | 0.1023   | 0.388286 | 2.97E-18 |
| 0.00893  | 0.310839 | 6.41E-12 | 0.09753  | 0.03512  | 0.164413 | 0.00036  | 0.252264 | 3.27E-08 |
| 0.00019  | 0.17267  | 0.00018  | 0.286873 | 2.68E-10 | 0.059608 | 0.1985   | 0.463317 | 3.16E-26 |
| 1.20E-05 | 0.263437 | 7.47E-09 | 0.128023 | 0.0056   | 0.072325 | 0.11857  | 0.426601 | 4.47E-22 |
| 7.47E-05 | 0.220478 | 1.50E-06 | 0.097872 | 0.03448  | 0.130269 | 0.00481  | 0.243336 | 1.01E-07 |
| 2.36E-10 | 0.343349 | 2.29E-14 | 0.140202 | 0.00239  | 0.116503 | 0.01175  | 0.53661  | 3.50E-36 |
| 0.01018  | 0.2685   | 3.74E-09 | 0.139686 | 0.00248  | 0.144205 | 0.00178  | 0.278709 | 8.86E-10 |
| 2.54E-06 | 0.284398 | 3.87E-10 | 0.101575 | 0.02817  | 0.071627 | 0.12218  | 0.499991 | 6.59E-31 |
| 3.16E-10 | 0.217442 | 2.10E-06 | 0.037474 | 0.41914  | 0.061823 | 0.1823   | 0.249664 | 4.56E-08 |
| 2.57E-05 | 0.241042 | 1.34E-07 | 0.104898 | 0.02339  | 0.123491 | 0.00755  | 0.302104 | 2.60E-11 |
| 6.84E-07 | 0.209348 | 5.05E-06 | 0.477019 | 6.56E-28 | 0.069238 | 0.13517  | 0.229123 | 5.59E-07 |
| 2.82E-07 | 0.336208 | 8.37E-14 | 0.082803 | 0.07383  | 0.200367 | 1.28E-05 | 0.285843 | 3.13E-10 |
| 0.11021  | 0.105497 | 0.0226   | 0.032212 | 0.48741  | 0.014475 | 0.75505  | 0.412506 | 1.30E-20 |
| 2.26E-08 | 0.320269 | 1.34E-12 | 0.136539 | 0.00311  | 0.112336 | 0.01515  | 0.454426 | 3.56E-25 |
| 0.21144  | 0.07204  | 0.12003  | 0.010422 | 0.82228  | 0.015091 | 0.74497  | -0.12502 | 0.00683  |
| 7.08E-05 | 0.313423 | 4.20E-12 | 0.128684 | 0.00535  | 0.153882 | 0.00085  | 0.313465 | 4.17E-12 |
| 0.01014  | 0.208548 | 5.50E-06 | 0.101364 | 0.0285   | 0.089751 | 0.05259  | 0.319152 | 1.62E-12 |
| 1.86E-05 | 0.286011 | 3.05E-10 | 0.116012 | 0.01211  | 0.10594  | 0.02204  | 0.389472 | 2.30E-18 |
| 1.94E-05 | 0.298321 | 4.71E-11 | 0.080169 | 0.08352  | 0.059206 | 0.20155  | 0.29756  | 5.30E-11 |
| 0.0014   | -0.0945  | 0.04122  | 0.019359 | 0.67648  | 0.036055 | 0.43696  | -0.16986 | 0.00023  |
| 0.00045  | 0.220965 | 1.42E-06 | 0.157264 | 0.00065  | 0.138226 | 0.00276  | 0.357618 | 1.55E-15 |
| 2.47E-06 | 0.324942 | 6.04E-13 | 0.095799 | 0.0385   | 0.075051 | 0.10528  | 0.316803 | 2.40E-12 |
| 2.18E-07 | 0.296586 | 6.16E-11 | 0.125894 | 0.00645  | 0.15472  | 0.00079  | 0.434802 | 5.84E-23 |
| 0.00341  | 0.162601 | 0.00042  | 0.086577 | 0.06156  | 0.077959 | 0.09242  | 0.5859   | 2.19E-44 |
| 3.76E-07 | 0.276376 | 1.24E-09 | 0.154914 | 0.00078  | 0.141876 | 0.00212  | 0.702929 | 8.19E-71 |
| 0.1494   | 0.13935  | 0.00254  | 0.132323 | 0.00418  | 0.102823 | 0.02629  | 0.272495 | 2.14E-09 |
| 1.97E-11 | 0.40509  | 7.19E-20 | 0.193771 | 2.48E-05 | 0.106658 | 0.02115  | 0.724677 | 3.20E-77 |
| 1.48E-07 | 0.30973  | 7.68E-12 | 0.190018 | 3.58E-05 | 0.182169 | 7.52E-05 | 0.440195 | 1.49E-23 |
| 4.36E-06 | 0.30365  | 2.04E-11 | 0.181192 | 8.23E-05 | 0.18267  | 7.18E-05 | 0.290899 | 1.47E-10 |
| 0.00073  | 0.287873 | 2.31E-10 | 0.10483  | 0.02348  | 0.121363 | 0.00866  | 0.282921 | 4.81E-10 |
| 0.00181  | 0.182148 | 7.53E-05 | 0.035667 | 0.44192  | 0.008458 | 0.85535  | 0.131618 | 0.00438  |
| 1.88E-05 | 0.295546 | 7.23E-11 | 0.056802 | 0.2205   | 0.07336  | 0.11337  | 0.194176 | 2.39E-05 |
| 4.61E-05 | 0.256301 | 1.93E-08 | 0.150333 | 0.00112  | 0.169658 | 0.00023  | 0.415612 | 6.27E-21 |

|          |          |          |          |          |          |          |          |          |
|----------|----------|----------|----------|----------|----------|----------|----------|----------|
| 5.42E-08 | 0.348594 | 8.65E-15 | 0.147743 | 0.00137  | 0.176789 | 0.00012  | 0.464942 | 2.01E-26 |
| 0.00383  | 0.22877  | 5.83E-07 | 0.104418 | 0.02403  | 0.094518 | 0.04119  | 0.290255 | 1.62E-10 |
| 7.43E-09 | 0.331895 | 1.80E-13 | 0.16421  | 0.00037  | 0.15874  | 0.00058  | 0.560551 | 5.38E-40 |
| 2.83E-05 | 0.275673 | 1.37E-09 | 0.169655 | 0.00023  | 0.224799 | 9.21E-07 | 0.331163 | 2.05E-13 |
| 1.63E-08 | 0.379311 | 1.99E-17 | 0.105079 | 0.02315  | 0.159467 | 0.00054  | 0.338089 | 5.97E-14 |
| 0.00827  | 0.125338 | 0.00669  | 0.042785 | 0.35625  | 0.024825 | 0.59257  | 0.202758 | 1.01E-05 |
| 6.68E-08 | 0.311525 | 5.73E-12 | 0.176787 | 0.00012  | 0.171766 | 0.00019  | 0.44487  | 4.45E-24 |
| 3.88E-15 | 0.392752 | 1.13E-18 | 0.152497 | 0.00095  | 0.074443 | 0.10813  | 0.489577 | 1.61E-29 |
| 5.11E-06 | 0.269995 | 3.04E-09 | 0.099626 | 0.03136  | 0.322035 | 9.93E-13 | 0.353619 | 3.35E-15 |
| 0.00122  | -0.10455 | 0.02385  | -0.01497 | 0.747    | -0.05858 | 0.20633  | -0.25768 | 1.61E-08 |
| 0.00711  | 0.222407 | 1.21E-06 | 0.121067 | 0.00882  | 0.112748 | 0.01478  | 0.237093 | 2.17E-07 |
| 1.37E-16 | 0.444923 | 4.39E-24 | 0.068776 | 0.1378   | 0.094126 | 0.04204  | 0.336299 | 8.23E-14 |
| 3.64E-08 | 0.29185  | 1.27E-10 | 0.136603 | 0.0031   | 0.155676 | 0.00074  | 0.372916 | 7.43E-17 |
| 0.00066  | 0.233394 | 3.38E-07 | 0.327927 | 3.61E-13 | 0.144921 | 0.00169  | 0.334138 | 1.21E-13 |
| 3.67E-11 | 0.352424 | 4.20E-15 | 0.102538 | 0.02671  | 0.106527 | 0.02131  | 0.329358 | 2.81E-13 |
| 0.00021  | 0.291452 | 1.35E-10 | 0.156392 | 0.0007   | 0.086815 | 0.06085  | 0.151472 | 0.00103  |
| 8.80E-08 | 0.376573 | 3.51E-17 | 0.10928  | 0.01816  | 0.088532 | 0.0559   | 0.425949 | 5.24E-22 |
| 6.74E-12 | 0.45859  | 1.15E-25 | 0.085581 | 0.06462  | 0.181192 | 8.23E-05 | 0.282818 | 4.88E-10 |
| 0.00023  | 0.245481 | 7.74E-08 | 0.101503 | 0.02829  | 0.108893 | 0.01858  | 0.288834 | 2.00E-10 |
| 0.00139  | 0.286492 | 2.84E-10 | 0.164369 | 0.00036  | 0.188355 | 4.20E-05 | 0.457698 | 1.47E-25 |
| 8.93E-10 | 0.349625 | 7.13E-15 | 0.167477 | 0.00028  | 0.148356 | 0.0013   | 0.584903 | 3.31E-44 |
| 0.94993  | -0.12293 | 0.00782  | -0.09393 | 0.04248  | -0.06715 | 0.14737  | -0.16287 | 0.00041  |
| 3.74E-08 | 0.314414 | 3.56E-12 | 0.142279 | 0.00206  | 0.124513 | 0.00706  | 0.349156 | 7.79E-15 |
| 1.28E-08 | 0.382413 | 1.04E-17 | 0.13693  | 0.00303  | 0.16822  | 0.00026  | 0.555528 | 3.60E-39 |
| 3.30E-16 | 0.466513 | 1.30E-26 | 0.007142 | 0.87766  | 0.116977 | 0.01141  | 0.484465 | 7.41E-29 |
| 0.11533  | -0.02186 | 0.63744  | 0.153328 | 0.00089  | 0.072603 | 0.11716  | 0.131627 | 0.00438  |
| 0.00715  | 0.190465 | 3.43E-05 | 0.109361 | 0.01808  | 0.100236 | 0.03033  | 0.197168 | 1.77E-05 |
| 0.88813  | 0.038576 | 0.40557  | 0.097057 | 0.03602  | 0.090035 | 0.05185  | 0.416828 | 4.71E-21 |
| 5.51E-12 | 0.486005 | 4.69E-29 | 0.208225 | 5.69E-06 | 0.325687 | 5.31E-13 | 0.256981 | 1.77E-08 |
| 8.83E-09 | 0.31006  | 7.28E-12 | 0.157267 | 0.00065  | 0.15638  | 0.0007   | 0.430654 | 1.65E-22 |
| 2.05E-08 | 0.306287 | 1.34E-11 | 0.134275 | 0.00365  | 0.091441 | 0.04828  | 0.531107 | 2.39E-35 |
| 0.00047  | 0.260978 | 1.04E-08 | 0.155578 | 0.00074  | 0.133914 | 0.00374  | 0.336137 | 8.47E-14 |
| 1.69E-08 | 0.276629 | 1.19E-09 | 0.065653 | 0.15663  | 0.109687 | 0.01773  | 0.362961 | 5.47E-16 |
| 0.00415  | 0.241599 | 1.25E-07 | 0.144338 | 0.00176  | 0.136429 | 0.00314  | 0.230089 | 4.99E-07 |
| 3.09E-13 | 0.436756 | 3.57E-23 | 0.14477  | 0.00171  | 0.092073 | 0.04674  | 0.343486 | 2.23E-14 |
| 4.08E-11 | 0.434763 | 5.90E-23 | 0.140349 | 0.00237  | 0.185005 | 5.77E-05 | 0.354975 | 2.58E-15 |
| 2.11E-05 | 0.217864 | 2.01E-06 | 0.117919 | 0.01076  | 0.062777 | 0.17564  | 0.424688 | 7.13E-22 |
| 0.00031  | 0.160242 | 0.00051  | 0.046269 | 0.31841  | 0.04609  | 0.32029  | 0.131129 | 0.00453  |
| 7.09E-11 | 0.330788 | 2.19E-13 | 0.115978 | 0.01214  | 0.123299 | 0.00764  | 0.413845 | 9.51E-21 |
| 0.00714  | 0.179719 | 9.41E-05 | 0.099371 | 0.0318   | 0.085554 | 0.06471  | 0.369512 | 1.48E-16 |
| 1.23E-05 | 0.279595 | 7.80E-10 | 0.134441 | 0.00361  | 0.100332 | 0.03017  | 0.301414 | 2.90E-11 |
| 2.79E-14 | 0.39445  | 7.77E-19 | 0.163992 | 0.00037  | 0.156064 | 0.00071  | 0.11315  | 0.01443  |
| 9.36E-09 | 0.262585 | 8.38E-09 | 0.167641 | 0.00027  | 0.090291 | 0.05118  | 0.463001 | 3.45E-26 |
| 7.38E-08 | 0.35288  | 3.85E-15 | 0.11894  | 0.01009  | 0.132979 | 0.00399  | 0.268693 | 3.64E-09 |
| 0.00312  | 0.389367 | 2.35E-18 | 0.221841 | 1.29E-06 | 0.081141 | 0.07983  | 0.127165 | 0.00593  |

|          |          |          |          |          |          |          |          |          |
|----------|----------|----------|----------|----------|----------|----------|----------|----------|
| 1.85E-07 | 0.343895 | 2.07E-14 | 0.18615  | 5.18E-05 | 0.153694 | 0.00086  | 0.275321 | 1.44E-09 |
| 0.00039  | 0.233401 | 3.38E-07 | 0.175162 | 0.00014  | 0.161035 | 0.00048  | 0.281417 | 5.99E-10 |
| 1.18E-07 | 0.266828 | 4.71E-09 | 0.096023 | 0.03805  | 0.159101 | 0.00056  | 0.227554 | 6.71E-07 |
| 7.15E-10 | 0.358245 | 1.38E-15 | 0.145201 | 0.00165  | 0.121939 | 0.00834  | 0.528136 | 6.65E-35 |
| 1.79E-07 | 0.294995 | 7.87E-11 | 0.38817  | 3.04E-18 | 0.112276 | 0.0152   | 0.364376 | 4.14E-16 |
| 3.47E-08 | 0.239145 | 1.69E-07 | 0.084462 | 0.06821  | 0.029194 | 0.52913  | 0.300405 | 3.40E-11 |
| 0.00016  | 0.202331 | 1.05E-05 | 0.097214 | 0.03571  | 0.065455 | 0.15789  | 0.303967 | 1.94E-11 |
| 8.22E-05 | -0.12983 | 0.00495  | -0.08369 | 0.07077  | -0.02693 | 0.56151  | -0.27054 | 2.82E-09 |
| 2.03E-05 | 0.286155 | 2.99E-10 | 0.121826 | 0.0084   | 0.086668 | 0.06129  | 0.180498 | 8.77E-05 |
| 1.56E-08 | 0.334006 | 1.24E-13 | 0.136985 | 0.00301  | 0.122405 | 0.0081   | 0.576528 | 1.02E-42 |
| 4.18E-07 | 0.240473 | 1.44E-07 | 0.212746 | 3.51E-06 | 0.011667 | 0.80146  | 0.353067 | 3.72E-15 |
| 0.01974  | 0.341312 | 3.32E-14 | 0.175817 | 0.00013  | 0.360153 | 9.49E-16 | 0.167199 | 0.00028  |
| 1.98E-05 | 0.309353 | 8.16E-12 | 0.147017 | 0.00144  | 0.11228  | 0.0152   | 0.235214 | 2.72E-07 |
| 9.54E-28 | 0.580926 | 1.70E-43 | 0.114868 | 0.013    | 0.1842   | 6.22E-05 | 0.390916 | 1.68E-18 |
| 0.00011  | 0.261383 | 9.85E-09 | 0.31182  | 5.46E-12 | 0.186704 | 4.91E-05 | 0.307881 | 1.04E-11 |
| 1.28E-20 | 0.351301 | 5.20E-15 | 0.16675  | 0.0003   | 0.11033  | 0.01707  | 0.296785 | 5.97E-11 |
| 0.00122  | 0.178924 | 0.0001   | 0.034744 | 0.45384  | 0.014399 | 0.7563   | 0.144814 | 0.0017   |
| 0.00015  | 0.23164  | 4.16E-07 | 0.17031  | 0.00022  | 0.200148 | 1.31E-05 | 0.315247 | 3.11E-12 |
| 1.76E-19 | 0.488904 | 1.97E-29 | 0.143617 | 0.00186  | 0.187849 | 4.41E-05 | 0.405518 | 6.52E-20 |
| 0.0016   | 0.176834 | 0.00012  | 0.171952 | 0.00019  | 0.094914 | 0.04034  | 0.37392  | 6.06E-17 |
| 0.00288  | 0.201196 | 1.18E-05 | 0.082429 | 0.07515  | 0.060044 | 0.19523  | 0.163307 | 0.00039  |
| 1.49E-05 | 0.24412  | 9.17E-08 | 0.087234 | 0.05961  | 0.095641 | 0.03883  | 0.410724 | 1.97E-20 |
| 0.00019  | 0.156388 | 0.0007   | 0.015358 | 0.74062  | -0.02486 | 0.59207  | 0.220763 | 1.45E-06 |
| 6.24E-08 | 0.308752 | 9.00E-12 | 0.127064 | 0.00597  | 0.091931 | 0.04709  | 0.427055 | 4.00E-22 |
| 0.8144   | -0.02693 | 0.56151  | -0.00642 | 0.88994  | -0.03354 | 0.46965  | -0.18076 | 8.56E-05 |
| 0.00275  | 0.272292 | 2.21E-09 | 0.122966 | 0.00781  | 0.356363 | 1.98E-15 | 0.260089 | 1.17E-08 |
| 0.00016  | 0.249819 | 4.47E-08 | 0.135422 | 0.00337  | 0.154106 | 0.00083  | 0.26952  | 3.25E-09 |
| 6.31E-06 | -0.20875 | 5.38E-06 | -0.01927 | 0.67785  | -0.06519 | 0.15959  | -0.21676 | 2.27E-06 |
| 2.41E-11 | -0.43949 | 1.78E-23 | -0.22791 | 6.44E-07 | -0.17949 | 9.61E-05 | -0.30933 | 8.20E-12 |
| 3.06E-08 | 0.332716 | 1.56E-13 | 0.12714  | 0.00594  | 0.151289 | 0.00104  | 0.438174 | 2.49E-23 |
| 0.00014  | 0.216419 | 2.35E-06 | 0.088285 | 0.05659  | 0.141068 | 0.00225  | 0.180015 | 9.16E-05 |
| 0.00508  | -0.05004 | 0.28055  | -0.13259 | 0.0041   | 0.013732 | 0.76725  | -0.24734 | 6.13E-08 |
| 0.00039  | 0.170401 | 0.00022  | 0.116149 | 0.01201  | 0.098395 | 0.03352  | 0.336167 | 8.43E-14 |
| 7.77E-05 | 0.287427 | 2.47E-10 | 0.142573 | 0.00201  | 0.17297  | 0.00017  | 0.407479 | 4.17E-20 |
| 0.0436   | 0.132947 | 0.004    | 0.1145   | 0.01329  | 0.054192 | 0.24248  | 0.316424 | 2.55E-12 |
| 0.03739  | 0.139962 | 0.00243  | 0.166281 | 0.00031  | 0.154363 | 0.00082  | 0.379647 | 1.85E-17 |
| 0.1072   | 0.154092 | 0.00083  | 0.089069 | 0.05442  | 0.116436 | 0.0118   | 0.281611 | 5.82E-10 |
| 5.16E-20 | 0.462939 | 3.51E-26 | 0.27916  | 8.30E-10 | 0.168643 | 0.00025  | 0.33655  | 7.87E-14 |
| 0.14561  | 0.154341 | 0.00082  | 0.111951 | 0.0155   | 0.047466 | 0.30603  | 0.232218 | 3.89E-07 |
| 0.22572  | -0.0264  | 0.56923  | 0.049077 | 0.28989  | 0.112044 | 0.01542  | 0.298011 | 4.94E-11 |
| 0.00113  | 0.228774 | 5.82E-07 | 0.154111 | 0.00083  | 0.267626 | 4.22E-09 | 0.307608 | 1.08E-11 |
| 0.00036  | 0.240538 | 1.43E-07 | 0.20587  | 7.29E-06 | 0.199844 | 1.35E-05 | 0.419476 | 2.51E-21 |
| 0.0113   | 0.192133 | 2.92E-05 | 0.173496 | 0.00016  | 0.365324 | 3.43E-16 | 0.30607  | 1.39E-11 |
| 0.00695  | 0.183358 | 6.73E-05 | 0.212967 | 3.43E-06 | 0.219478 | 1.68E-06 | 0.303566 | 2.07E-11 |
| 0.23635  | 0.10375  | 0.02495  | 0.086852 | 0.06074  | 0.188922 | 3.98E-05 | 0.077668 | 0.09365  |

|          |          |          |          |          |          |          |          |          |
|----------|----------|----------|----------|----------|----------|----------|----------|----------|
| 1.98E-05 | 0.2654   | 5.72E-09 | 0.146526 | 0.0015   | 0.256613 | 1.85E-08 | 0.33771  | 6.39E-14 |
| 0.06848  | 0.073338 | 0.11348  | 0.109359 | 0.01808  | 0.10261  | 0.0266   | 0.296016 | 6.73E-11 |
| 0.00164  | 0.25024  | 4.24E-08 | 0.126378 | 0.00624  | 0.291541 | 1.33E-10 | 0.335766 | 9.06E-14 |
| 5.32E-10 | 0.391967 | 1.34E-18 | 0.076086 | 0.10055  | 0.080194 | 0.08343  | 0.283622 | 4.34E-10 |
| 0.0003   | 0.225992 | 8.03E-07 | 0.141819 | 0.00213  | 0.123756 | 0.00742  | 0.331376 | 1.97E-13 |
| 4.89E-17 | 0.424964 | 6.67E-22 | 0.104529 | 0.02388  | 0.100119 | 0.03052  | 0.613889 | 1.05E-49 |
| 1.69E-12 | 0.389077 | 2.50E-18 | 0.205493 | 7.58E-06 | 0.229087 | 5.61E-07 | 0.369872 | 1.38E-16 |
| 8.57E-12 | 0.379136 | 2.06E-17 | 0.296348 | 6.39E-11 | 0.125744 | 0.00651  | 0.428921 | 2.53E-22 |
| 0.13185  | 0.014124 | 0.76081  | -0.05882 | 0.20454  | -0.07775 | 0.09331  | -0.22231 | 1.22E-06 |
| 1.11E-12 | 0.378486 | 2.36E-17 | 0.148827 | 0.00126  | 0.140439 | 0.00235  | 0.47403  | 1.55E-27 |
| 0.00533  | 0.261087 | 1.02E-08 | 0.139526 | 0.00251  | 0.135689 | 0.0033   | 0.227561 | 6.70E-07 |
| 0.00075  | 0.251059 | 3.82E-08 | 0.184227 | 6.21E-05 | 0.291962 | 1.25E-10 | 0.34735  | 1.09E-14 |
| 2.56E-07 | 0.337203 | 7.00E-14 | 0.099182 | 0.03212  | 0.115904 | 0.01219  | 0.381901 | 1.16E-17 |
| 1.32E-09 | 0.363135 | 5.29E-16 | 0.114167 | 0.01356  | 0.136884 | 0.00304  | 0.395146 | 6.67E-19 |
| 0.0001   | 0.259858 | 1.21E-08 | 0.080069 | 0.08391  | 0.120559 | 0.00911  | 0.307356 | 1.13E-11 |
| 1.69E-07 | 0.287712 | 2.37E-10 | 0.139437 | 0.00253  | 0.169073 | 0.00024  | 0.452082 | 6.66E-25 |
| 6.67E-07 | 0.320139 | 1.37E-12 | 0.141418 | 0.00219  | 0.151558 | 0.00102  | 0.373774 | 6.24E-17 |
| 5.45E-15 | -0.41068 | 1.99E-20 | -0.11433 | 0.01343  | -0.15107 | 0.00106  | -0.25537 | 2.18E-08 |
| 8.72E-08 | 0.21671  | 2.28E-06 | 0.077872 | 0.09279  | 0.041941 | 0.36582  | 0.266897 | 4.66E-09 |
| 0.00147  | 0.245922 | 7.32E-08 | 0.194007 | 2.43E-05 | 0.20819  | 5.71E-06 | 0.381288 | 1.31E-17 |
| 1.07E-08 | 0.298208 | 4.79E-11 | 0.058047 | 0.21053  | 0.058337 | 0.20826  | 0.275859 | 1.33E-09 |
| 0.01802  | 0.15335  | 0.00089  | 0.12062  | 0.00908  | 0.070887 | 0.12609  | 0.460887 | 6.16E-26 |
| 0.00169  | 0.278691 | 8.89E-10 | 0.078556 | 0.08995  | 0.111825 | 0.01562  | 0.286165 | 2.98E-10 |
| 0.63682  | 0.076398 | 0.09916  | 0.099704 | 0.03122  | 0.100184 | 0.03041  | 0.074511 | 0.10781  |
| 6.73E-07 | 0.281085 | 6.29E-10 | 0.182565 | 7.24E-05 | 0.182357 | 7.39E-05 | 0.46408  | 2.56E-26 |
| 0.13201  | 0.03105  | 0.50326  | 0.066081 | 0.15394  | 0.019024 | 0.68177  | 0.193622 | 2.52E-05 |
| 7.40E-13 | 0.411041 | 1.83E-20 | 0.126752 | 0.00609  | 0.185773 | 5.37E-05 | 0.44316  | 6.93E-24 |
| 5.37E-08 | 0.326905 | 4.31E-13 | 0.13414  | 0.00368  | 0.11685  | 0.0115   | 0.486702 | 3.81E-29 |
| 1.09E-06 | 0.225254 | 8.74E-07 | 0.133296 | 0.00391  | 0.069636 | 0.13293  | 0.270476 | 2.84E-09 |
| 0.08725  | 0.164448 | 0.00036  | 0.105288 | 0.02287  | 0.068161 | 0.14136  | 0.222449 | 1.20E-06 |
| 0.0004   | 0.215152 | 2.70E-06 | 0.188706 | 4.06E-05 | 0.198555 | 1.54E-05 | 0.43294  | 9.32E-23 |
| 0.04365  | 0.178141 | 0.00011  | 0.187669 | 4.48E-05 | 0.174913 | 0.00015  | 0.322427 | 9.29E-13 |
| 4.66E-07 | 0.284465 | 3.83E-10 | 0.149968 | 0.00115  | 0.153266 | 0.00089  | 0.476206 | 8.29E-28 |
| 1.09E-06 | 0.305186 | 1.60E-11 | 0.127524 | 0.00579  | 0.130207 | 0.00483  | 0.450337 | 1.06E-24 |
| 0.0006   | 0.224575 | 9.44E-07 | 0.212211 | 3.72E-06 | 0.214704 | 2.84E-06 | 0.423441 | 9.65E-22 |
| 1.23E-09 | 0.333031 | 1.47E-13 | 0.154375 | 0.00082  | 0.145959 | 0.00156  | 0.517699 | 2.23E-33 |
| 0.00039  | 0.239211 | 1.68E-07 | 0.10467  | 0.02369  | 0.10356  | 0.02522  | 0.438662 | 2.20E-23 |
| 0.0001   | 0.225766 | 8.24E-07 | 0.205264 | 7.76E-06 | 0.203466 | 9.35E-06 | 0.405171 | 7.06E-20 |
| 1.56E-09 | 0.320416 | 1.31E-12 | 0.154457 | 0.00081  | 0.156047 | 0.00071  | 0.45492  | 3.12E-25 |
| 0.01595  | 0.123079 | 0.00775  | 0.054328 | 0.24129  | 0.031545 | 0.49648  | 0.146379 | 0.00151  |
| 0.01144  | 0.159617 | 0.00054  | 0.140682 | 0.00231  | 0.134515 | 0.00359  | 0.275151 | 1.47E-09 |
| 0.27411  | 0.176197 | 0.00013  | 0.144557 | 0.00174  | 0.116462 | 0.01178  | 0.275421 | 1.42E-09 |
| 7.13E-05 | 0.278135 | 9.62E-10 | 0.165247 | 0.00034  | 0.152945 | 0.00091  | 0.354739 | 2.70E-15 |
| 0.00824  | 0.218638 | 1.84E-06 | 0.12772  | 0.00571  | 0.144075 | 0.0018   | 0.475461 | 1.03E-27 |
| 5.20E-06 | 0.2795   | 7.91E-10 | 0.130154 | 0.00485  | 0.099736 | 0.03117  | 0.398326 | 3.30E-19 |



|          |          |          |          |          |          |          |          |          |
|----------|----------|----------|----------|----------|----------|----------|----------|----------|
| 9.62E-05 | 0.264016 | 6.90E-09 | 0.135386 | 0.00337  | 0.101935 | 0.02762  | 0.468489 | 7.47E-27 |
| 0.14017  | 0.12872  | 0.00534  | 0.104864 | 0.02343  | 0.061027 | 0.188    | 0.17187  | 0.00019  |
| 0.04461  | 0.143641 | 0.00186  | 0.03871  | 0.40395  | 0.015641 | 0.73602  | 0.239526 | 1.62E-07 |
| 0.01061  | 0.146059 | 0.00155  | 0.07167  | 0.12195  | 0.071803 | 0.12126  | 0.261844 | 9.26E-09 |
| 0.00049  | 0.17553  | 0.00014  | 0.104513 | 0.0239   | 0.115082 | 0.01283  | 0.307795 | 1.05E-11 |
| 0.09755  | 0.103633 | 0.02512  | 0.082144 | 0.07616  | 0.061665 | 0.18343  | 0.199036 | 1.47E-05 |
| 0.00114  | 0.236845 | 2.24E-07 | 0.082736 | 0.07406  | 0.102404 | 0.02691  | 0.177064 | 0.00012  |
| 1.56E-06 | 0.296013 | 6.73E-11 | 0.143102 | 0.00193  | 0.136527 | 0.00311  | 0.416927 | 4.60E-21 |
| 0.04064  | 0.181428 | 8.05E-05 | 0.113684 | 0.01397  | 0.10954  | 0.01789  | 0.327359 | 3.98E-13 |
| 0.00219  | 0.190619 | 3.38E-05 | 0.168934 | 0.00025  | 0.141957 | 0.0021   | 0.369773 | 1.41E-16 |
| 0.00014  | 0.245042 | 8.18E-08 | 0.116741 | 0.01158  | 0.115155 | 0.01277  | 0.366537 | 2.69E-16 |
| 3.42E-05 | 0.272959 | 2.01E-09 | 0.101048 | 0.02901  | 0.132255 | 0.0042   | 0.37627  | 3.74E-17 |
| 0.19002  | 0.133799 | 0.00377  | 0.178956 | 0.0001   | 0.159191 | 0.00055  | 0.302673 | 2.38E-11 |
| 0.00873  | 0.190804 | 3.32E-05 | 0.20294  | 9.88E-06 | 0.188247 | 4.24E-05 | 0.401385 | 1.66E-19 |
| 1.56E-06 | 0.303607 | 2.05E-11 | 0.124607 | 0.00702  | 0.098934 | 0.03256  | 0.421488 | 1.55E-21 |
| 2.69E-05 | 0.257474 | 1.66E-08 | 0.136018 | 0.00323  | 0.123904 | 0.00735  | 0.388855 | 2.63E-18 |
| 2.55E-06 | 0.268058 | 3.97E-09 | 0.173179 | 0.00017  | 0.179724 | 9.41E-05 | 0.399586 | 2.49E-19 |
| 4.50E-07 | 0.296176 | 6.56E-11 | 0.156271 | 0.0007   | 0.153124 | 0.0009   | 0.381643 | 1.22E-17 |
| 0.0088   | 0.169539 | 0.00023  | 0.11574  | 0.01232  | 0.103814 | 0.02486  | 0.274957 | 1.51E-09 |
| 5.34E-06 | 0.284999 | 3.54E-10 | 0.188817 | 4.02E-05 | 0.198673 | 1.53E-05 | 0.466418 | 1.33E-26 |
| 5.73E-05 | 0.242147 | 1.17E-07 | 0.095868 | 0.03836  | 0.079365 | 0.08667  | 0.40733  | 4.31E-20 |
| 2.69E-06 | 0.283197 | 4.62E-10 | 0.156122 | 0.00071  | 0.147036 | 0.00144  | 0.398489 | 3.18E-19 |
| 0.10504  | 0.112579 | 0.01493  | 0.072025 | 0.12011  | 0.050443 | 0.27666  | 0.091532 | 0.04806  |
| 3.77E-06 | 0.260539 | 1.10E-08 | 0.145602 | 0.00161  | 0.145271 | 0.00165  | 0.337665 | 6.44E-14 |
| 0.00131  | 0.226097 | 7.93E-07 | 0.113319 | 0.01428  | 0.163731 | 0.00038  | 0.215885 | 2.50E-06 |
| 1.16E-05 | 0.248811 | 5.08E-08 | 0.167697 | 0.00027  | 0.164553 | 0.00036  | 0.351866 | 4.67E-15 |
| 4.00E-05 | 0.253656 | 2.73E-08 | 0.130651 | 0.00468  | 0.114985 | 0.0129   | 0.367913 | 2.04E-16 |
| 0.00524  | 0.165813 | 0.00032  | 0.084553 | 0.06791  | 0.091375 | 0.04844  | 0.246393 | 6.90E-08 |
| 0.04392  | 0.184872 | 5.84E-05 | 0.162453 | 0.00042  | 0.168455 | 0.00026  | 0.292736 | 1.11E-10 |
| 8.53E-07 | 0.309896 | 7.48E-12 | 0.17392  | 0.00016  | 0.148616 | 0.00128  | 0.490971 | 1.05E-29 |
| 5.07E-06 | 0.215374 | 2.64E-06 | 0.400819 | 1.89E-19 | 0.110415 | 0.01699  | 0.333074 | 1.46E-13 |
| 0.10187  | 0.106303 | 0.02159  | 0.09965  | 0.03131  | 0.084626 | 0.06767  | 0.289759 | 1.74E-10 |
| 0.00017  | 0.29247  | 1.16E-10 | 0.182746 | 7.12E-05 | 0.177086 | 0.00012  | 0.290677 | 1.52E-10 |
| 0.22094  | 0.137394 | 0.00293  | 0.140605 | 0.00232  | 0.164605 | 0.00035  | 0.224677 | 9.34E-07 |
| 2.78E-09 | 0.304828 | 1.69E-11 | 0.202391 | 1.04E-05 | 0.055159 | 0.23416  | 0.270298 | 2.91E-09 |
| 1.42E-06 | 0.282282 | 5.28E-10 | 0.166992 | 0.00029  | 0.159282 | 0.00055  | 0.406681 | 5.00E-20 |
| 0.00014  | 0.286693 | 2.76E-10 | 0.138658 | 0.00267  | 0.136983 | 0.00301  | 0.391362 | 1.53E-18 |
| 2.70E-06 | 0.294478 | 8.52E-11 | 0.136247 | 0.00318  | 0.12758  | 0.00576  | 0.422779 | 1.13E-21 |
| 2.70E-07 | 0.330441 | 2.33E-13 | 0.28173  | 5.72E-10 | 0.149929 | 0.00116  | 0.396685 | 4.75E-19 |
| 8.04E-05 | 0.265704 | 5.49E-09 | 0.18762  | 4.51E-05 | 0.180328 | 8.90E-05 | 0.438128 | 2.52E-23 |
| 1.37E-06 | 0.298098 | 4.87E-11 | 0.164902 | 0.00035  | 0.145743 | 0.00159  | 0.440828 | 1.26E-23 |
| 3.71E-08 | 0.305596 | 1.49E-11 | 0.138767 | 0.00265  | 0.134347 | 0.00363  | 0.518973 | 1.46E-33 |
| 3.56E-08 | 0.324869 | 6.12E-13 | 0.097141 | 0.03585  | 0.263687 | 7.22E-09 | 0.253528 | 2.77E-08 |
| 0.00102  | 0.255652 | 2.10E-08 | 0.074308 | 0.10878  | 0.066462 | 0.15158  | 0.170153 | 0.00022  |
| 0.12512  | 0.188793 | 4.03E-05 | 0.069294 | 0.13485  | 0.129158 | 0.00518  | 0.186968 | 4.79E-05 |

|          |          |          |          |          |          |          |          |          |
|----------|----------|----------|----------|----------|----------|----------|----------|----------|
| 0.10338  | 0.216822 | 2.25E-06 | 0.089411 | 0.0535   | 0.126062 | 0.00638  | 0.200109 | 1.32E-05 |
| 1.06E-08 | 0.328319 | 3.37E-13 | 0.170072 | 0.00022  | 0.176378 | 0.00013  | 0.503039 | 2.54E-31 |
| 1.79E-05 | 0.312465 | 4.91E-12 | 0.114332 | 0.01343  | 0.152937 | 0.00091  | 0.306743 | 1.24E-11 |
| 8.36E-07 | 0.287218 | 2.55E-10 | 0.176677 | 0.00012  | 0.188837 | 4.01E-05 | 0.488421 | 2.28E-29 |
| 0.0091   | 0.241098 | 1.33E-07 | 0.073419 | 0.11308  | 0.141435 | 0.00219  | 0.215131 | 2.71E-06 |
| 3.13E-10 | 0.345263 | 1.61E-14 | 0.181117 | 8.28E-05 | 0.148138 | 0.00133  | 0.501095 | 4.67E-31 |
| 1.13E-05 | 0.265168 | 5.90E-09 | 0.105133 | 0.02308  | 0.153361 | 0.00088  | 0.303068 | 2.24E-11 |
| 8.07E-07 | 0.279048 | 8.44E-10 | 0.180161 | 9.04E-05 | 0.171979 | 0.00019  | 0.376897 | 3.28E-17 |
| 0.00019  | -0.1499  | 0.00116  | -0.06367 | 0.16954  | -0.07332 | 0.11359  | -0.20802 | 5.82E-06 |
| 0.86115  | -0.02388 | 0.60675  | 0.087271 | 0.0595   | 0.095282 | 0.03957  | 0.247648 | 5.89E-08 |
| 9.14E-09 | 0.299228 | 4.09E-11 | 0.123107 | 0.00774  | 0.062563 | 0.17711  | 0.368098 | 1.97E-16 |
| 0.28301  | -0.0558  | 0.22873  | 0.138097 | 0.00278  | 0.091935 | 0.04708  | 0.280722 | 6.63E-10 |
| 1.11E-09 | 0.364807 | 3.80E-16 | 0.23952  | 1.62E-07 | 0.173004 | 0.00017  | 0.465409 | 1.77E-26 |
| 0.00249  | 0.214722 | 2.83E-06 | 0.057346 | 0.2161   | 0.017586 | 0.70465  | 0.388287 | 2.97E-18 |
| 2.00E-07 | 0.313024 | 4.48E-12 | 0.15624  | 0.0007   | 0.153809 | 0.00085  | 0.480711 | 2.24E-28 |
| 3.05E-10 | 0.377375 | 2.97E-17 | 0.401857 | 1.50E-19 | 0.072265 | 0.11888  | 0.423869 | 8.70E-22 |
| 8.61E-07 | 0.311736 | 5.54E-12 | 0.114328 | 0.01343  | 0.111591 | 0.01584  | 0.528866 | 5.18E-35 |
| 2.25E-05 | 0.289664 | 1.77E-10 | 0.138598 | 0.00269  | 0.141196 | 0.00223  | 0.552083 | 1.30E-38 |
| 0.1884   | 0.103478 | 0.02534  | 0.154722 | 0.00079  | 0.115915 | 0.01219  | 0.201989 | 1.09E-05 |
| 2.51E-05 | 0.247201 | 6.23E-08 | 0.123271 | 0.00765  | 0.132645 | 0.00409  | 0.304064 | 1.91E-11 |
| 4.16E-07 | 0.297899 | 5.03E-11 | 0.180585 | 8.70E-05 | 0.179023 | 0.0001   | 0.534477 | 7.41E-36 |
| 5.83E-07 | 0.372094 | 8.79E-17 | 0.265763 | 5.44E-09 | 0.210754 | 4.35E-06 | 0.233511 | 3.34E-07 |
| 2.98E-14 | 0.407905 | 3.78E-20 | 0.160556 | 0.0005   | 0.145442 | 0.00163  | 0.519514 | 1.22E-33 |
| 3.37E-06 | 0.278044 | 9.75E-10 | 0.137455 | 0.00291  | 0.143228 | 0.00192  | 0.402511 | 1.29E-19 |
| 0.08902  | 0.123543 | 0.00752  | 0.09157  | 0.04796  | 0.07052  | 0.12807  | 0.215185 | 2.69E-06 |
| 7.35E-05 | 0.216177 | 2.42E-06 | 0.230569 | 4.72E-07 | 0.059593 | 0.19862  | 0.232498 | 3.76E-07 |
| 0.01381  | 0.154541 | 0.00081  | 0.120486 | 0.00915  | 0.103659 | 0.02508  | 0.277259 | 1.09E-09 |
| 4.08E-09 | 0.319994 | 1.40E-12 | 0.123142 | 0.00772  | 0.119566 | 0.0097   | 0.380592 | 1.52E-17 |
| 0.03568  | -0.06099 | 0.1883   | -0.03625 | 0.43453  | -0.01013 | 0.82722  | -0.19357 | 2.53E-05 |
| 3.51E-07 | 0.331106 | 2.07E-13 | 0.180649 | 8.65E-05 | 0.134649 | 0.00355  | 0.418208 | 3.39E-21 |
| 5.19E-08 | 0.267504 | 4.29E-09 | 0.149682 | 0.00118  | 0.098603 | 0.03315  | 0.513655 | 8.42E-33 |
| 1.32E-07 | 0.337449 | 6.70E-14 | 0.140747 | 0.0023   | 0.119503 | 0.00974  | 0.364584 | 3.97E-16 |
| 0.38382  | -0.00183 | 0.96855  | 0.061597 | 0.18391  | 0.019361 | 0.67645  | 0.254792 | 2.35E-08 |
| 0.1292   | 0.104123 | 0.02444  | 0.144045 | 0.0018   | 0.007728 | 0.86771  | 0.194775 | 2.25E-05 |
| 1.98E-11 | 0.391573 | 1.46E-18 | 0.197887 | 1.65E-05 | 0.116517 | 0.01174  | 0.479664 | 3.04E-28 |
| 0.00027  | 0.242404 | 1.14E-07 | 0.061879 | 0.18191  | 0.015179 | 0.74354  | 0.376295 | 3.72E-17 |
| 1.62E-08 | 0.307666 | 1.07E-11 | 0.162521 | 0.00042  | 0.157011 | 0.00066  | 0.46597  | 1.51E-26 |
| 0.00073  | 0.284832 | 3.63E-10 | 0.127574 | 0.00577  | 0.211638 | 3.96E-06 | 0.354236 | 2.98E-15 |
| 9.30E-06 | 0.263617 | 7.29E-09 | 0.139492 | 0.00252  | 0.112615 | 0.0149   | 0.229921 | 5.09E-07 |
| 1.46E-07 | 0.319645 | 1.49E-12 | 0.168022 | 0.00027  | 0.139617 | 0.0025   | 0.554573 | 5.15E-39 |
| 0.13981  | 0.145854 | 0.00158  | 0.215112 | 2.72E-06 | 0.27175  | 2.38E-09 | 0.316319 | 2.60E-12 |
| 0.0102   | 0.192237 | 2.89E-05 | 0.196596 | 1.88E-05 | 0.206414 | 6.89E-06 | 0.362568 | 5.91E-16 |
| 0.0293   | 0.171356 | 0.0002   | 0.211553 | 3.99E-06 | 0.218843 | 1.80E-06 | 0.349878 | 6.80E-15 |
| 4.73E-05 | 0.260153 | 1.16E-08 | 0.383998 | 7.42E-18 | 0.201524 | 1.14E-05 | 0.409281 | 2.75E-20 |
| 0.03269  | 0.174788 | 0.00015  | 0.269737 | 3.15E-09 | 0.260351 | 1.13E-08 | 0.337011 | 7.24E-14 |

|          |          |          |          |          |          |          |          |          |
|----------|----------|----------|----------|----------|----------|----------|----------|----------|
| 0.00113  | 0.218893 | 1.79E-06 | 0.158297 | 0.0006   | 0.158862 | 0.00057  | 0.355095 | 2.52E-15 |
| 0.00133  | -0.13189 | 0.0043   | 0.003065 | 0.94734  | 0.000422 | 0.99274  | -0.3049  | 1.67E-11 |
| 0.88865  | -0.03352 | 0.46988  | 0.065128 | 0.15998  | 0.050137 | 0.27959  | 0.160201 | 0.00051  |
| 1.82E-08 | 0.37337  | 6.78E-17 | 0.126942 | 0.00601  | 0.095265 | 0.0396   | 0.426776 | 4.28E-22 |
| 0.00254  | 0.230788 | 4.60E-07 | 0.126244 | 0.0063   | 0.091139 | 0.04903  | 0.366827 | 2.54E-16 |
| 2.65E-05 | -0.33438 | 1.16E-13 | -0.12004 | 0.00942  | -0.15747 | 0.00064  | -0.25114 | 3.78E-08 |
| 4.34E-13 | 0.420521 | 1.95E-21 | 0.182664 | 7.18E-05 | 0.099058 | 0.03234  | 0.428326 | 2.93E-22 |
| 8.73E-06 | 0.391779 | 1.39E-18 | 0.069012 | 0.13645  | 0.127828 | 0.00567  | 0.231404 | 4.28E-07 |
| 1.92E-12 | 0.385662 | 5.21E-18 | 0.143453 | 0.00188  | 0.125548 | 0.0066   | 0.549631 | 3.23E-38 |
| 3.78E-07 | 0.304142 | 1.89E-11 | 0.194819 | 2.24E-05 | 0.152616 | 0.00094  | 0.333133 | 1.45E-13 |
| 1.82E-09 | 0.33573  | 9.11E-14 | 0.121588 | 0.00853  | 0.114202 | 0.01353  | 0.128119 | 0.00556  |
| 3.47E-11 | 0.350049 | 6.58E-15 | 0.04391  | 0.34374  | 0.059119 | 0.20222  | 0.466069 | 1.47E-26 |
| 3.50E-20 | 0.487255 | 3.23E-29 | 0.151813 | 0.001    | 0.138065 | 0.00279  | 0.396498 | 4.95E-19 |
| 1.66E-11 | 0.375964 | 3.98E-17 | 0.101736 | 0.02792  | 0.096397 | 0.0373   | 0.355656 | 2.27E-15 |
| 0.00012  | 0.214785 | 2.82E-06 | 0.092168 | 0.04652  | 0.089936 | 0.05211  | 0.330548 | 2.28E-13 |
| 6.02E-08 | 0.300771 | 3.21E-11 | 0.177331 | 0.00012  | 0.158712 | 0.00058  | 0.545375 | 1.53E-37 |
| 0.0007   | 0.258479 | 1.45E-08 | 0.126637 | 0.00614  | 0.198312 | 1.58E-05 | 0.243067 | 1.05E-07 |
| 0.0105   | 0.19429  | 2.36E-05 | 0.117255 | 0.01122  | 0.132367 | 0.00416  | 0.177819 | 0.00011  |
| 0.33705  | 0.09563  | 0.03885  | 0.083401 | 0.07176  | 0.029725 | 0.52167  | 0.356374 | 1.97E-15 |
| 0.00026  | 0.198319 | 1.58E-05 | 0.150394 | 0.00111  | 0.050698 | 0.27423  | 0.366674 | 2.62E-16 |
| 7.87E-05 | 0.226917 | 7.22E-07 | 0.085222 | 0.06576  | 0.08661  | 0.06146  | 0.26164  | 9.51E-09 |
| 0.00311  | 0.20384  | 9.00E-06 | 0.164664 | 0.00035  | 0.05269  | 0.2558   | 0.227074 | 7.09E-07 |
| 4.04E-21 | 0.523217 | 3.54E-34 | 0.233767 | 3.24E-07 | 0.139797 | 0.00246  | 0.248158 | 5.52E-08 |
| 6.54E-08 | 0.295406 | 7.39E-11 | 0.1231   | 0.00774  | 0.195958 | 2.00E-05 | 0.268601 | 3.69E-09 |
| 0.09922  | 0.14092  | 0.00227  | 0.11239  | 0.0151   | 0.007127 | 0.87791  | 0.167119 | 0.00029  |
| 0.03114  | -0.05475 | 0.23768  | 0.020887 | 0.65257  | -0.03374 | 0.46702  | 0.273722 | 1.80E-09 |
| 2.83E-08 | 0.310606 | 6.66E-12 | 0.133448 | 0.00386  | 0.112287 | 0.01519  | 0.550933 | 2.00E-38 |
| 1.48E-08 | 0.273513 | 1.86E-09 | 0.277685 | 1.03E-09 | 0.099328 | 0.03187  | 0.430645 | 1.65E-22 |
| 0.00877  | 0.130896 | 0.00461  | 0.27298  | 2.00E-09 | 0.088584 | 0.05576  | 0.429513 | 2.18E-22 |
| 0.29537  | -0.00476 | 0.91829  | -0.004   | 0.93123  | -0.08177 | 0.07752  | -0.25004 | 4.35E-08 |
| 8.53E-07 | 0.282637 | 5.01E-10 | 0.14481  | 0.0017   | 0.114911 | 0.01296  | 0.35975  | 1.03E-15 |
| 6.29E-09 | -0.32081 | 1.22E-12 | -0.14363 | 0.00186  | -0.11261 | 0.0149   | -0.31343 | 4.19E-12 |
| 3.00E-29 | 0.574683 | 2.14E-42 | 0.113783 | 0.01388  | 0.086493 | 0.06181  | 0.397777 | 3.73E-19 |
| 4.91E-11 | 0.387484 | 3.53E-18 | 0.11895  | 0.01009  | 0.125745 | 0.00651  | 0.358944 | 1.20E-15 |
| 3.85E-05 | 0.212993 | 3.42E-06 | 0.04714  | 0.30937  | 0.071803 | 0.12126  | 0.295548 | 7.23E-11 |
| 0.90756  | 0.027566 | 0.55236  | 0.029268 | 0.52808  | 0.032756 | 0.48008  | 0.226068 | 7.96E-07 |
| 4.31E-08 | 0.33021  | 2.42E-13 | 0.136908 | 0.00303  | 0.113303 | 0.01429  | 0.47417  | 1.49E-27 |
| 3.46E-05 | 0.22042  | 1.51E-06 | 0.074568 | 0.10754  | 0.082034 | 0.07656  | 0.19289  | 2.71E-05 |
| 3.93E-11 | 0.398277 | 3.34E-19 | 0.210202 | 4.61E-06 | 0.219224 | 1.73E-06 | 0.532735 | 1.36E-35 |
| 5.33E-06 | 0.345098 | 1.66E-14 | 0.143538 | 0.00187  | 0.103398 | 0.02545  | 0.299987 | 3.63E-11 |
| 0.02762  | 0.173928 | 0.00016  | 0.020252 | 0.66247  | -0.00667 | 0.88568  | 0.123949 | 0.00732  |
| 6.34E-09 | 0.331783 | 1.84E-13 | 0.120607 | 0.00908  | 0.117246 | 0.01122  | 0.314648 | 3.43E-12 |
| 8.21E-09 | 0.29237  | 1.17E-10 | 0.104472 | 0.02396  | 0.058731 | 0.2052   | 0.379036 | 2.10E-17 |
| 7.75E-11 | 0.324138 | 6.94E-13 | 0.081703 | 0.07776  | 0.056886 | 0.21982  | 0.39149  | 1.48E-18 |
| 4.58E-12 | 0.37828  | 2.46E-17 | 0.100516 | 0.02987  | 0.127194 | 0.00591  | 0.268602 | 3.69E-09 |

|          |          |          |          |          |          |          |          |          |
|----------|----------|----------|----------|----------|----------|----------|----------|----------|
| 1.32E-15 | 0.410594 | 2.03E-20 | 0.126223 | 0.00631  | 0.125518 | 0.00661  | 0.402688 | 1.24E-19 |
| 0.00211  | 0.172687 | 0.00018  | 0.018438 | 0.69106  | 0.028506 | 0.53889  | 0.224187 | 9.87E-07 |
| 1.84E-09 | 0.337972 | 6.09E-14 | 0.100117 | 0.03053  | 0.090489 | 0.05067  | 0.273834 | 1.78E-09 |
| 1.71E-11 | 0.366102 | 2.94E-16 | 0.184154 | 6.25E-05 | 0.16124  | 0.00047  | 0.624161 | 8.52E-52 |
| 7.14E-10 | 0.309966 | 7.39E-12 | 0.11201  | 0.01545  | 0.114505 | 0.01329  | 0.362906 | 5.53E-16 |
| 3.16E-13 | 0.359477 | 1.08E-15 | 0.104654 | 0.02371  | 0.147107 | 0.00143  | 0.332725 | 1.56E-13 |
| 0.22359  | 0.072578 | 0.11728  | 0.004503 | 0.92269  | -0.00265 | 0.9544   | 0.329528 | 2.73E-13 |
| 4.74E-06 | 0.240053 | 1.52E-07 | 0.103395 | 0.02546  | 0.131751 | 0.00434  | 0.24264  | 1.10E-07 |
| 0.00014  | 0.254602 | 2.41E-08 | 0.048076 | 0.29986  | 0.005733 | 0.90166  | 0.272308 | 2.20E-09 |
| 2.80E-18 | 0.482124 | 1.48E-28 | 0.240372 | 1.46E-07 | 0.120529 | 0.00913  | 0.353501 | 3.42E-15 |
| 0.01033  | 0.186779 | 4.88E-05 | 0.060793 | 0.18971  | 0.034133 | 0.46182  | 0.256972 | 1.77E-08 |
| 0.0284   | 0.130854 | 0.00462  | 0.037093 | 0.42388  | 0.024318 | 0.60015  | 0.157154 | 0.00065  |
| 6.91E-06 | 0.297408 | 5.42E-11 | 0.167909 | 0.00027  | 0.13318  | 0.00394  | 0.469595 | 5.47E-27 |
| 1.82E-10 | 0.346174 | 1.36E-14 | 0.108385 | 0.01914  | 0.098858 | 0.03269  | 0.408964 | 2.96E-20 |
| 3.18E-08 | 0.329592 | 2.70E-13 | 0.130967 | 0.00458  | 0.095926 | 0.03825  | 0.402485 | 1.30E-19 |
| 7.24E-12 | 0.37445  | 5.43E-17 | 0.085786 | 0.06398  | 0.069912 | 0.1314   | 0.431856 | 1.22E-22 |
| 3.65E-07 | 0.354728 | 2.71E-15 | 0.110426 | 0.01698  | 0.155764 | 0.00073  | 0.328021 | 3.55E-13 |
| 3.59E-14 | 0.464536 | 2.25E-26 | 0.181754 | 7.81E-05 | 0.141317 | 0.00221  | 0.364587 | 3.97E-16 |
| 0.0002   | 0.230779 | 4.61E-07 | 0.094449 | 0.04134  | 0.234508 | 2.96E-07 | 0.100123 | 0.03052  |
| 2.72E-06 | 0.337821 | 6.26E-14 | 0.194495 | 2.31E-05 | 0.144573 | 0.00173  | 0.404136 | 8.94E-20 |
| 2.66E-05 | 0.270903 | 2.68E-09 | 0.097396 | 0.03537  | 0.152279 | 0.00096  | 0.288447 | 2.12E-10 |
| 3.95E-12 | 0.371727 | 9.47E-17 | 0.113152 | 0.01442  | 0.074398 | 0.10834  | 0.383606 | 8.06E-18 |
| 2.46E-07 | 0.246579 | 6.74E-08 | 0.086261 | 0.06252  | 0.070118 | 0.13026  | 0.318905 | 1.69E-12 |
| 9.03E-09 | 0.321407 | 1.11E-12 | 0.152125 | 0.00097  | 0.131793 | 0.00433  | 0.435797 | 4.55E-23 |
| 1.25E-10 | 0.368262 | 1.91E-16 | 0.140109 | 0.00241  | 0.106113 | 0.02182  | 0.480272 | 2.55E-28 |
| 2.88E-09 | 0.38941  | 2.33E-18 | 0.233319 | 3.41E-07 | 0.222764 | 1.16E-06 | 0.454057 | 3.93E-25 |
| 0.01463  | 0.176006 | 0.00013  | 0.083872 | 0.07017  | 0.088462 | 0.05609  | 0.132753 | 0.00405  |
| 1.45E-05 | 0.315552 | 2.95E-12 | 0.176222 | 0.00013  | 0.228317 | 6.14E-07 | 0.408429 | 3.35E-20 |
| 1.48E-09 | 0.291881 | 1.27E-10 | 0.079507 | 0.08611  | 0.067582 | 0.14478  | 0.273269 | 1.92E-09 |
| 0.02659  | 0.087572 | 0.05862  | 0.048032 | 0.30029  | 0.042929 | 0.35463  | 0.184608 | 5.99E-05 |
| 2.69E-05 | 0.313618 | 4.07E-12 | 0.202016 | 1.09E-05 | 0.254574 | 2.42E-08 | 0.422072 | 1.34E-21 |
| 6.60E-07 | 0.207572 | 6.10E-06 | 0.189442 | 3.78E-05 | 0.111479 | 0.01595  | 0.266121 | 5.18E-09 |
| 1.31E-06 | -0.16908 | 0.00024  | -0.06854 | 0.13915  | -0.01247 | 0.78818  | -0.20581 | 7.33E-06 |
| 0.00466  | 0.288211 | 2.20E-10 | 0.161255 | 0.00047  | 0.170033 | 0.00022  | 0.275572 | 1.39E-09 |
| 1.18E-09 | 0.347436 | 1.07E-14 | 0.100581 | 0.02976  | 0.179859 | 9.29E-05 | 0.304253 | 1.85E-11 |
| 0.00342  | 0.211387 | 4.06E-06 | 0.100963 | 0.02914  | 0.244407 | 8.85E-08 | 0.28971  | 1.76E-10 |
| 0.00284  | 0.307304 | 1.14E-11 | 0.113949 | 0.01374  | 0.134173 | 0.00367  | 0.188538 | 4.13E-05 |
| 3.60E-07 | 0.288266 | 2.18E-10 | 0.187115 | 4.73E-05 | 0.192763 | 2.74E-05 | 0.348003 | 9.66E-15 |
| 2.19E-06 | 0.245011 | 8.21E-08 | 0.345986 | 1.41E-14 | 0.086988 | 0.06033  | 0.285234 | 3.42E-10 |
| 0.00033  | -0.22302 | 1.13E-06 | -0.1632  | 0.0004   | -0.15531 | 0.00076  | -0.16765 | 0.00027  |
| 0.00542  | 0.206196 | 7.04E-06 | 0.137489 | 0.00291  | 0.056315 | 0.22448  | 0.373632 | 6.42E-17 |
| 0.51183  | -0.00061 | 0.98947  | 0.05151  | 0.26661  | 0.039047 | 0.39986  | 0.103825 | 0.02485  |
| 1.24E-06 | 0.256272 | 1.94E-08 | 0.19529  | 2.14E-05 | 0.196778 | 1.84E-05 | 0.341998 | 2.93E-14 |
| 2.45E-05 | 0.294708 | 8.22E-11 | 0.15648  | 0.00069  | 0.119089 | 0.01     | 0.345229 | 1.62E-14 |
| 1.98E-05 | 0.28583  | 3.13E-10 | 0.201281 | 1.17E-05 | 0.170414 | 0.00022  | 0.453869 | 4.13E-25 |

|          |          |          |          |          |          |          |          |          |
|----------|----------|----------|----------|----------|----------|----------|----------|----------|
| 0.01041  | -0.11346 | 0.01416  | 0.037438 | 0.41957  | -0.08213 | 0.07621  | -0.25196 | 3.40E-08 |
| 1.54E-22 | 0.353212 | 3.62E-15 | 0.168687 | 0.00025  | 0.081506 | 0.07848  | 0.357159 | 1.70E-15 |
| 0.00013  | 0.260323 | 1.13E-08 | 0.198887 | 1.49E-05 | 0.193273 | 2.61E-05 | 0.354447 | 2.86E-15 |
| 0.00355  | 0.14656  | 0.00149  | 0.075571 | 0.10288  | 0.055702 | 0.22958  | 0.315525 | 2.97E-12 |
| 0.0087   | 0.075862 | 0.10156  | 0.025056 | 0.58914  | 0.015107 | 0.74472  | 0.132988 | 0.00399  |
| 3.17E-12 | 0.433341 | 8.43E-23 | 0.269508 | 3.25E-09 | 0.119366 | 0.00983  | 0.277271 | 1.09E-09 |
| 2.69E-07 | 0.368207 | 1.93E-16 | 0.18561  | 5.45E-05 | 0.121592 | 0.00853  | 0.466448 | 1.32E-26 |
| 0.00382  | 0.145022 | 0.00168  | 0.162038 | 0.00044  | 0.080199 | 0.08341  | 0.403256 | 1.09E-19 |
| 2.59E-06 | 0.279702 | 7.68E-10 | 0.123235 | 0.00767  | 0.137066 | 0.003    | 0.341882 | 3.00E-14 |
| 0.00729  | 0.175303 | 0.00014  | 0.19069  | 3.35E-05 | 0.121245 | 0.00872  | 0.247355 | 6.11E-08 |
| 0.25453  | 0.076247 | 0.09983  | 0.434754 | 5.91E-23 | 0.135139 | 0.00343  | 0.279989 | 7.37E-10 |
| 4.89E-15 | -0.38224 | 1.07E-17 | -0.065   | 0.16079  | -0.07437 | 0.10848  | -0.28094 | 6.41E-10 |
| 2.74E-07 | 0.299906 | 3.68E-11 | 0.227892 | 6.45E-07 | 0.146327 | 0.00152  | 0.304601 | 1.75E-11 |
| 1.82E-06 | 0.288701 | 2.04E-10 | 0.08459  | 0.06779  | 0.235103 | 2.76E-07 | 0.183368 | 6.72E-05 |
| 4.54E-11 | 0.287783 | 2.34E-10 | 0.16197  | 0.00044  | 0.094434 | 0.04137  | 0.343383 | 2.28E-14 |
| 0.00021  | 0.305697 | 1.47E-11 | 0.110576 | 0.01683  | 0.075961 | 0.10111  | 0.150877 | 0.00107  |
| 8.77E-05 | 0.222126 | 1.25E-06 | 0.09618  | 0.03774  | 0.180309 | 8.92E-05 | 0.311692 | 5.58E-12 |
| 0.39301  | 0.131677 | 0.00437  | 0.077072 | 0.0962   | 0.104476 | 0.02395  | 0.189233 | 3.86E-05 |
| 0.4131   | 0.010357 | 0.82336  | 0.06137  | 0.18553  | 0.016791 | 0.71742  | 0.089437 | 0.05343  |
| 0.6996   | 0.074179 | 0.10939  | 0.160937 | 0.00048  | 0.124983 | 0.00685  | 0.198525 | 1.55E-05 |
| 2.40E-06 | 0.297032 | 5.75E-11 | 0.132137 | 0.00423  | 0.09315  | 0.04422  | 0.497465 | 1.45E-30 |
| 0.00013  | 0.31144  | 5.81E-12 | 0.146402 | 0.00151  | 0.125565 | 0.00659  | 0.304154 | 1.88E-11 |
| 0.02648  | 0.138187 | 0.00277  | 0.044567 | 0.33655  | 0.077408 | 0.09475  | 0.222954 | 1.14E-06 |
| 0.00582  | 0.238322 | 1.87E-07 | 0.061228 | 0.18655  | 0.056172 | 0.22567  | 0.338124 | 5.93E-14 |
| 1.96E-13 | 0.438021 | 2.59E-23 | 0.16416  | 0.00037  | 0.183879 | 6.41E-05 | 0.416744 | 4.80E-21 |
| 0.18019  | 0.146566 | 0.00149  | 0.089366 | 0.05362  | 0.059282 | 0.20097  | 0.332034 | 1.76E-13 |
| 0.01241  | 0.232249 | 3.87E-07 | 0.125169 | 0.00676  | 0.14626  | 0.00153  | 0.178604 | 0.0001   |
| 5.30E-11 | 0.346384 | 1.31E-14 | 0.155408 | 0.00075  | 0.153876 | 0.00085  | 0.570246 | 1.25E-41 |
| 7.65E-06 | -0.36738 | 2.27E-16 | -0.13505 | 0.00345  | -0.10568 | 0.02237  | -0.37168 | 9.56E-17 |
| 9.26E-16 | 0.455224 | 2.87E-25 | 0.261678 | 9.46E-09 | 0.159375 | 0.00055  | 0.384158 | 7.17E-18 |
| 0.06433  | -0.01966 | 0.6717   | -0.19481 | 2.24E-05 | -0.00612 | 0.895    | -0.26557 | 5.59E-09 |
| 1.46E-09 | 0.407846 | 3.83E-20 | 0.123912 | 0.00734  | 0.155838 | 0.00073  | 0.298076 | 4.89E-11 |
| 0.00017  | 0.242706 | 1.09E-07 | 0.180098 | 9.09E-05 | 0.175218 | 0.00014  | 0.389572 | 2.25E-18 |
| 0.00808  | 0.16511  | 0.00034  | 0.075217 | 0.1045   | 0.076375 | 0.09926  | 0.420092 | 2.16E-21 |
| 0.01137  | 0.242929 | 1.06E-07 | 0.092639 | 0.04541  | 0.133378 | 0.00388  | 0.265536 | 5.61E-09 |
| 1.84E-10 | 0.376324 | 3.69E-17 | 0.163862 | 0.00038  | 0.173053 | 0.00017  | 0.442479 | 8.26E-24 |
| 6.93E-12 | 0.39284  | 1.11E-18 | 0.163567 | 0.00039  | 0.156003 | 0.00072  | 0.534234 | 8.07E-36 |
| 1.38E-11 | 0.394994 | 6.90E-19 | 0.132332 | 0.00417  | 0.084271 | 0.06884  | 0.469277 | 5.98E-27 |
| 0.00103  | 0.205488 | 7.58E-06 | 0.007735 | 0.8676   | -0.02696 | 0.5612   | 0.234269 | 3.05E-07 |
| 2.10E-06 | 0.306829 | 1.23E-11 | 0.153156 | 0.0009   | 0.130905 | 0.0046   | 0.525769 | 1.49E-34 |
| 0.0537   | 0.165543 | 0.00033  | 0.105163 | 0.02304  | 0.032349 | 0.48557  | 0.31617  | 2.66E-12 |
| 9.50E-06 | 0.280491 | 6.85E-10 | 0.108941 | 0.01853  | 0.058096 | 0.21015  | 0.171386 | 0.0002   |
| 6.32E-08 | 0.359084 | 1.17E-15 | 0.181453 | 8.03E-05 | 0.120702 | 0.00903  | 0.435098 | 5.42E-23 |
| 0.14201  | 0.028392 | 0.54051  | 0.073749 | 0.11147  | 0.069489 | 0.13376  | 0.267277 | 4.42E-09 |
| 1.34E-05 | 0.263261 | 7.65E-09 | 0.195387 | 2.12E-05 | 0.196167 | 1.96E-05 | 0.453778 | 4.23E-25 |

|          |          |          |          |          |          |          |          |          |
|----------|----------|----------|----------|----------|----------|----------|----------|----------|
| 0.00047  | 0.248132 | 5.54E-08 | 0.188431 | 4.17E-05 | 0.186289 | 5.11E-05 | 0.444442 | 4.97E-24 |
| 3.38E-06 | 0.25963  | 1.24E-08 | 0.102706 | 0.02646  | 0.071257 | 0.12412  | 0.390774 | 1.73E-18 |
| 5.63E-07 | 0.298956 | 4.26E-11 | 0.149898 | 0.00116  | 0.0776   | 0.09394  | 0.339821 | 4.36E-14 |
| 1.19E-09 | 0.360702 | 8.53E-16 | 0.153267 | 0.00089  | 0.132253 | 0.0042   | 0.488665 | 2.12E-29 |
| 0.00022  | -0.23727 | 2.13E-07 | -0.12288 | 0.00785  | -0.08107 | 0.0801   | -0.28624 | 2.95E-10 |
| 9.41E-10 | 0.33761  | 6.50E-14 | 0.177144 | 0.00012  | 0.158883 | 0.00057  | 0.546328 | 1.08E-37 |
| 6.49E-14 | 0.401519 | 1.61E-19 | 0.132202 | 0.00421  | 0.166923 | 0.00029  | 0.619965 | 6.21E-51 |
| 6.05E-09 | 0.378999 | 2.12E-17 | 0.382508 | 1.02E-17 | 0.115164 | 0.01276  | 0.274239 | 1.68E-09 |
| 4.73E-07 | 0.375305 | 4.56E-17 | 0.254366 | 2.49E-08 | 0.106793 | 0.02099  | 0.23109  | 4.44E-07 |
| 6.24E-07 | 0.304429 | 1.80E-11 | 0.193629 | 2.52E-05 | 0.164637 | 0.00035  | 0.471648 | 3.06E-27 |
| 0.19273  | 0.211197 | 4.15E-06 | 0.258374 | 1.47E-08 | 0.225357 | 8.64E-07 | 0.225499 | 8.50E-07 |
| 0.0004   | 0.270571 | 2.81E-09 | 0.108344 | 0.01918  | 0.063706 | 0.16932  | 0.181441 | 8.04E-05 |
| 2.21E-13 | 0.412304 | 1.36E-20 | 0.063941 | 0.16775  | 0.081697 | 0.07778  | 0.248544 | 5.26E-08 |
| 0.09226  | 0.136283 | 0.00317  | 0.159065 | 0.00056  | 0.191646 | 3.06E-05 | 0.213402 | 3.27E-06 |
| 0.00476  | 0.225309 | 8.69E-07 | 0.127722 | 0.00571  | 0.116575 | 0.0117   | 0.257998 | 1.55E-08 |
| 0.0001   | -0.23141 | 4.28E-07 | -0.11962 | 0.00967  | -0.06244 | 0.17797  | -0.25917 | 1.32E-08 |
| 0.03694  | 0.177769 | 0.00011  | 0.181224 | 8.20E-05 | 0.096645 | 0.03682  | 0.3365   | 7.94E-14 |
| 2.26E-05 | 0.232368 | 3.82E-07 | 0.069413 | 0.13418  | 0.099591 | 0.03142  | 0.179701 | 9.43E-05 |
| 2.18E-06 | 0.32967  | 2.66E-13 | 0.153297 | 0.00089  | 0.103911 | 0.02473  | 0.362807 | 5.64E-16 |
| 7.75E-11 | 0.36157  | 7.19E-16 | 0.153992 | 0.00084  | 0.145511 | 0.00162  | 0.605671 | 4.33E-48 |
| 1.17E-23 | 0.513818 | 7.99E-33 | 0.18277  | 7.11E-05 | 0.086039 | 0.0632   | 0.348493 | 8.82E-15 |
| 1.28E-14 | 0.453921 | 4.08E-25 | 0.183281 | 6.78E-05 | 0.22079  | 1.45E-06 | 0.508197 | 4.92E-32 |
| 1.38E-22 | 0.54672  | 9.37E-38 | 0.162245 | 0.00043  | 0.162193 | 0.00043  | 0.415705 | 6.14E-21 |
| 1.51E-09 | 0.348831 | 8.28E-15 | 0.138872 | 0.00263  | 0.128866 | 0.00529  | 0.560689 | 5.10E-40 |
| 9.38E-11 | 0.361455 | 7.36E-16 | 0.143315 | 0.0019   | 0.123765 | 0.00741  | 0.61876  | 1.09E-50 |
| 3.94E-16 | 0.493146 | 5.45E-30 | 0.127842 | 0.00566  | 0.217747 | 2.03E-06 | 0.531872 | 1.84E-35 |
| 8.17E-08 | 0.332708 | 1.56E-13 | 0.135554 | 0.00333  | 0.125637 | 0.00656  | 0.38247  | 1.02E-17 |
| 2.05E-08 | 0.279224 | 8.23E-10 | 0.187227 | 4.68E-05 | 0.182342 | 7.40E-05 | 0.493983 | 4.22E-30 |
| 1.32E-06 | 0.296141 | 6.60E-11 | 0.081759 | 0.07756  | 0.04582  | 0.32314  | 0.514067 | 7.37E-33 |
| 9.12E-06 | 0.275548 | 1.39E-09 | 0.181593 | 7.93E-05 | 0.171136 | 0.0002   | 0.410461 | 2.09E-20 |
| 1.07E-09 | 0.352596 | 4.07E-15 | 0.110882 | 0.01652  | 0.139787 | 0.00247  | 0.489702 | 1.55E-29 |
| 2.79E-11 | 0.365575 | 3.26E-16 | 0.146627 | 0.00149  | 0.123816 | 0.00739  | 0.60759  | 1.83E-48 |
| 8.62E-12 | 0.387644 | 3.41E-18 | 0.14216  | 0.00207  | 0.132015 | 0.00427  | 0.592185 | 1.55E-45 |
| 0.00423  | 0.182048 | 7.60E-05 | 0.290222 | 1.63E-10 | 0.122486 | 0.00805  | 0.364596 | 3.96E-16 |
| 2.40E-06 | 0.281784 | 5.68E-10 | 0.120548 | 0.00912  | 0.100461 | 0.02996  | 0.330711 | 2.22E-13 |
| 2.11E-05 | 0.261787 | 9.33E-09 | 0.133373 | 0.00388  | 0.134726 | 0.00353  | 0.340151 | 4.11E-14 |
| 1.11E-05 | 0.311174 | 6.07E-12 | 0.141145 | 0.00223  | 0.133359 | 0.00389  | 0.433453 | 8.20E-23 |
| 0.04641  | 0.122352 | 0.00812  | 0.016127 | 0.72814  | 0.003923 | 0.93262  | 0.284779 | 3.66E-10 |
| 3.68E-06 | 0.240936 | 1.36E-07 | 0.103326 | 0.02556  | 0.092414 | 0.04593  | 0.388976 | 2.56E-18 |
| 3.58E-05 | 0.259693 | 1.23E-08 | 0.115532 | 0.01248  | 0.041737 | 0.36816  | 0.170049 | 0.00022  |
| 0.00042  | 0.253104 | 2.93E-08 | 0.167846 | 0.00027  | 0.158938 | 0.00057  | 0.351512 | 4.99E-15 |
| 3.68E-09 | 0.307744 | 1.06E-11 | 0.221864 | 1.28E-06 | 0.184887 | 5.83E-05 | 0.373682 | 6.36E-17 |
| 0.25209  | 0.008758 | 0.85027  | 0.094871 | 0.04043  | 0.057016 | 0.21876  | 0.179689 | 9.44E-05 |
| 2.37E-09 | 0.303156 | 2.20E-11 | 0.09239  | 0.04599  | 0.038042 | 0.4121   | 0.180345 | 8.89E-05 |
| 0.00918  | 0.176194 | 0.00013  | 0.146688 | 0.00148  | 0.045375 | 0.32786  | 0.222934 | 1.14E-06 |

|          |          |          |          |          |          |          |          |          |
|----------|----------|----------|----------|----------|----------|----------|----------|----------|
| 0.00062  | 0.297867 | 5.05E-11 | 0.183748 | 6.49E-05 | 0.285225 | 3.43E-10 | 0.165316 | 0.00033  |
| 5.55E-06 | -0.22083 | 1.44E-06 | -0.22099 | 1.42E-06 | 0.00377  | 0.93525  | -0.25811 | 1.52E-08 |
| 1.00E-11 | 0.365457 | 3.34E-16 | 0.129312 | 0.00513  | 0.109761 | 0.01766  | 0.631922 | 1.99E-53 |
| 0.23455  | -0.0205  | 0.65865  | -0.07307 | 0.1148   | -0.15281 | 0.00092  | -0.20978 | 4.82E-06 |
| 2.80E-11 | -0.35358 | 3.37E-15 | -0.18389 | 6.40E-05 | -0.10405 | 0.02454  | -0.21987 | 1.61E-06 |
| 3.61E-06 | 0.306901 | 1.21E-11 | 0.210461 | 4.49E-06 | 0.203916 | 8.93E-06 | 0.453368 | 4.73E-25 |
| 0.00165  | 0.256645 | 1.85E-08 | 0.114784 | 0.01306  | 0.095473 | 0.03917  | 0.155677 | 0.00074  |
| 0.00041  | 0.238592 | 1.81E-07 | 0.100925 | 0.0292   | 0.119799 | 0.00956  | 0.332694 | 1.56E-13 |
| 0.00057  | 0.179863 | 9.29E-05 | 0.067842 | 0.14324  | 0.041452 | 0.37145  | 0.36289  | 5.55E-16 |
| 8.22E-06 | 0.27249  | 2.14E-09 | 0.110664 | 0.01674  | 0.069072 | 0.13611  | 0.434441 | 6.40E-23 |
| 0.01839  | 0.117735 | 0.01089  | 0.07561  | 0.1027   | 0.049548 | 0.28528  | 0.303359 | 2.13E-11 |
| 0.00407  | 0.215157 | 2.70E-06 | 0.195485 | 2.10E-05 | 0.187157 | 4.71E-05 | 0.383647 | 7.99E-18 |
| 1.45E-06 | 0.283696 | 4.29E-10 | 0.208393 | 5.59E-06 | 0.206176 | 7.06E-06 | 0.36078  | 8.40E-16 |
| 0.00119  | 0.240987 | 1.35E-07 | 0.147756 | 0.00136  | 0.090308 | 0.05114  | 0.336409 | 8.07E-14 |
| 0.01139  | 0.152214 | 0.00097  | 0.145691 | 0.00159  | 0.197367 | 1.74E-05 | 0.303393 | 2.12E-11 |
| 6.04E-13 | -0.35427 | 2.96E-15 | -0.05387 | 0.24531  | -0.09045 | 0.05077  | -0.24364 | 9.74E-08 |
| 3.46E-05 | 0.20312  | 9.69E-06 | 0.03541  | 0.44523  | 0.049072 | 0.28994  | 0.200299 | 1.29E-05 |
| 4.81E-25 | 0.563565 | 1.69E-40 | 0.114219 | 0.01352  | 0.086952 | 0.06044  | 0.335925 | 8.80E-14 |
| 1.14E-09 | 0.419118 | 2.73E-21 | 0.1768   | 0.00012  | 0.154202 | 0.00083  | 0.432039 | 1.17E-22 |
| 7.95E-06 | 0.264646 | 6.34E-09 | 0.160561 | 0.0005   | 0.159406 | 0.00054  | 0.391792 | 1.39E-18 |
| 1.56E-08 | 0.30974  | 7.67E-12 | 0.203609 | 9.22E-06 | 0.216479 | 2.34E-06 | 0.476555 | 7.49E-28 |
| 0.5023   | 0.105234 | 0.02295  | 0.069519 | 0.13359  | 0.07288  | 0.11576  | 0.108396 | 0.01912  |
| 0.35102  | 0.151426 | 0.00103  | 0.148889 | 0.00125  | 0.13486  | 0.0035   | 0.112229 | 0.01525  |
| 1.49E-06 | 0.326457 | 4.65E-13 | 0.129924 | 0.00492  | 0.2419   | 1.21E-07 | 0.28117  | 6.21E-10 |
| 0.00047  | 0.239742 | 1.57E-07 | 0.103913 | 0.02473  | 0.092557 | 0.0456   | 0.336291 | 8.24E-14 |
| 0.00031  | 0.182342 | 7.40E-05 | 0.213168 | 3.36E-06 | 0.09399  | 0.04234  | 0.21134  | 4.09E-06 |
| 3.83E-05 | 0.270155 | 2.97E-09 | 0.160932 | 0.00048  | 0.337031 | 7.22E-14 | 0.412291 | 1.37E-20 |
| 0.00023  | 0.281932 | 5.56E-10 | 0.185251 | 5.64E-05 | 0.186659 | 4.94E-05 | 0.325478 | 5.51E-13 |
| 0.09695  | 0.026602 | 0.56636  | -0.01669 | 0.71902  | 0.019114 | 0.68035  | -0.16685 | 0.00029  |
| 4.87E-06 | 0.219781 | 1.62E-06 | 0.059502 | 0.1993   | 0.013854 | 0.76524  | 0.243506 | 9.90E-08 |
| 0.01214  | 0.205396 | 7.66E-06 | 0.096882 | 0.03635  | 0.108999 | 0.01846  | 0.347095 | 1.14E-14 |
| 4.21E-07 | 0.306048 | 1.39E-11 | 0.188465 | 4.16E-05 | 0.149439 | 0.0012   | 0.501663 | 3.91E-31 |
| 0.10853  | 0.075707 | 0.10226  | 0.051517 | 0.26654  | 0.110314 | 0.01709  | 0.22822  | 6.21E-07 |
| 2.37E-10 | 0.38896  | 2.57E-18 | 0.129296 | 0.00514  | 0.065479 | 0.15774  | 0.219026 | 1.76E-06 |
| 6.69E-09 | 0.342936 | 2.47E-14 | 0.118823 | 0.01017  | 0.072967 | 0.11533  | 0.291925 | 1.26E-10 |
| 9.23E-11 | 0.407326 | 4.31E-20 | 0.1376   | 0.00288  | 0.131499 | 0.00442  | 0.499813 | 6.97E-31 |
| 0.03276  | 0.243613 | 9.77E-08 | 0.154869 | 0.00078  | 0.051379 | 0.26783  | 0.210419 | 4.51E-06 |
| 3.06E-07 | 0.251041 | 3.82E-08 | 0.222387 | 1.21E-06 | 0.087119 | 0.05995  | 0.395641 | 5.98E-19 |
| 0.02032  | 0.093963 | 0.0424   | 0.07388  | 0.11083  | 0.095408 | 0.03931  | 0.403454 | 1.04E-19 |
| 2.78E-06 | 0.261738 | 9.39E-09 | 0.184243 | 6.20E-05 | 0.18267  | 7.18E-05 | 0.476287 | 8.10E-28 |
| 0.06588  | 0.129554 | 0.00505  | 0.05525  | 0.23339  | 0.036128 | 0.43604  | 0.293696 | 9.60E-11 |
| 1.83E-15 | 0.473398 | 1.86E-27 | 0.134231 | 0.00366  | 0.087655 | 0.05838  | 0.390431 | 1.87E-18 |
| 5.23E-08 | 0.327608 | 3.81E-13 | 0.116076 | 0.01207  | 0.095906 | 0.03829  | 0.513488 | 8.90E-33 |
| 0.87033  | 0.04786  | 0.30203  | 0.059107 | 0.20231  | 0.027022 | 0.56023  | 0.124419 | 0.0071   |
| 4.21E-06 | 0.290185 | 1.64E-10 | 0.123045 | 0.00777  | 0.104346 | 0.02413  | 0.432611 | 1.01E-22 |

|          |          |          |          |          |          |          |          |          |
|----------|----------|----------|----------|----------|----------|----------|----------|----------|
| 5.43E-06 | 0.255877 | 2.04E-08 | 0.104437 | 0.02401  | 0.112959 | 0.01459  | 0.412979 | 1.16E-20 |
| 6.45E-09 | -0.27982 | 7.54E-10 | -0.0701  | 0.13037  | -0.05496 | 0.23585  | -0.26814 | 3.93E-09 |
| 3.95E-07 | 0.221715 | 1.31E-06 | 0.132384 | 0.00416  | 0.121754 | 0.00844  | 0.449635 | 1.27E-24 |
| 0.01092  | 0.175782 | 0.00013  | 0.051539 | 0.26634  | 0.018044 | 0.69734  | 0.271702 | 2.40E-09 |
| 9.85E-05 | 0.23401  | 3.14E-07 | 0.178906 | 0.0001   | 0.232554 | 3.74E-07 | 0.359936 | 9.90E-16 |
| 0.03804  | 0.205036 | 7.95E-06 | 0.050187 | 0.27911  | 0.053301 | 0.25032  | 0.350981 | 5.52E-15 |
| 0.01063  | 0.169618 | 0.00023  | 0.151477 | 0.00102  | 0.156006 | 0.00072  | 0.372613 | 7.91E-17 |
| 5.52E-05 | 0.273962 | 1.74E-09 | 0.142662 | 0.002    | 0.236032 | 2.47E-07 | 0.196538 | 1.89E-05 |
| 0.01946  | 0.143157 | 0.00193  | 0.049844 | 0.28241  | 0.056523 | 0.22278  | 0.191561 | 3.08E-05 |
| 4.26E-11 | 0.414057 | 9.05E-21 | 0.196284 | 1.94E-05 | 0.173696 | 0.00016  | 0.304174 | 1.88E-11 |
| 1.14E-05 | 0.291226 | 1.40E-10 | 0.201002 | 1.20E-05 | 0.177894 | 0.00011  | 0.426449 | 4.64E-22 |
| 3.93E-05 | -0.21023 | 4.60E-06 | -0.10428 | 0.02423  | -0.08143 | 0.07877  | -0.22236 | 1.21E-06 |
| 6.70E-06 | 0.242648 | 1.10E-07 | 0.106128 | 0.0218   | 0.122195 | 0.00821  | 0.284584 | 3.77E-10 |
| 1.77E-24 | 0.526713 | 1.08E-34 | 0.117672 | 0.01093  | 0.1134   | 0.01421  | 0.466165 | 1.43E-26 |
| 0.01525  | 0.158969 | 0.00056  | 0.196349 | 1.92E-05 | 0.191961 | 2.97E-05 | 0.304562 | 1.76E-11 |
| 0.00092  | 0.269084 | 3.45E-09 | 0.390371 | 1.89E-18 | 0.100007 | 0.03071  | 0.228892 | 5.74E-07 |
| 3.20E-08 | 0.314658 | 3.42E-12 | 0.138972 | 0.00261  | 0.137155 | 0.00298  | 0.36666  | 2.63E-16 |
| 0.00063  | 0.228995 | 5.67E-07 | 0.13483  | 0.00351  | 0.133484 | 0.00385  | 0.384054 | 7.33E-18 |
| 4.34E-20 | 0.606418 | 3.10E-48 | 0.239797 | 1.56E-07 | 0.269487 | 3.26E-09 | 0.372808 | 7.60E-17 |
| 1.47E-06 | 0.350119 | 6.50E-15 | 0.213744 | 3.15E-06 | 0.134017 | 0.00371  | 0.261792 | 9.32E-09 |
| 0.88915  | 0.038123 | 0.41111  | 0.005185 | 0.91102  | -0.03119 | 0.50137  | -0.15945 | 0.00054  |
| 0.28323  | 0.114009 | 0.01369  | 0.039557 | 0.39373  | 0.051398 | 0.26766  | 0.262169 | 8.86E-09 |
| 0.00026  | -0.15668 | 0.00068  | -0.11459 | 0.01321  | -0.11188 | 0.01557  | -0.18344 | 6.68E-05 |
| 0.79998  | 0.043748 | 0.34551  | 0.055403 | 0.23209  | 0.102774 | 0.02636  | 0.255657 | 2.10E-08 |
| 0.00073  | 0.244575 | 8.67E-08 | 0.157153 | 0.00065  | 0.089974 | 0.052    | 0.589861 | 4.15E-45 |
| 0.00204  | 0.184579 | 6.00E-05 | 0.129746 | 0.00498  | 0.128995 | 0.00524  | 0.393941 | 8.69E-19 |
| 0.0003   | 0.262822 | 8.11E-09 | 0.104537 | 0.02387  | 0.285702 | 3.19E-10 | 0.175331 | 0.00014  |
| 1.65E-05 | 0.288798 | 2.01E-10 | 0.179043 | 0.0001   | 0.112703 | 0.01482  | 0.364483 | 4.05E-16 |
| 0.23012  | 0.144142 | 0.00179  | 0.052668 | 0.256    | 0.041927 | 0.36599  | 0.138101 | 0.00278  |
| 1.32E-07 | 0.261714 | 9.42E-09 | 0.142174 | 0.00207  | 0.073268 | 0.11383  | 0.226116 | 7.92E-07 |
| 3.47E-16 | 0.504959 | 1.38E-31 | 0.24264  | 1.10E-07 | 0.167072 | 0.00029  | 0.34212  | 2.87E-14 |
| 8.44E-29 | 0.576035 | 1.24E-42 | 0.16407  | 0.00037  | 0.140345 | 0.00237  | 0.433372 | 8.36E-23 |
| 3.92E-05 | 0.305165 | 1.60E-11 | 0.117913 | 0.01077  | 0.125197 | 0.00675  | 0.265385 | 5.73E-09 |
| 3.49E-05 | 0.247093 | 6.32E-08 | 0.12831  | 0.00549  | 0.081803 | 0.0774   | 0.130139 | 0.00485  |
| 1.72E-13 | 0.439033 | 2.00E-23 | 0.177412 | 0.00012  | 0.148268 | 0.00131  | 0.317767 | 2.04E-12 |
| 7.51E-16 | 0.467988 | 8.59E-27 | 0.141679 | 0.00215  | 0.199467 | 1.41E-05 | 0.433222 | 8.68E-23 |
| 1.45E-14 | 0.49384  | 4.41E-30 | 0.149477 | 0.0012   | 0.181037 | 8.34E-05 | 0.482568 | 1.30E-28 |
| 1.21E-05 | 0.367818 | 2.08E-16 | 0.183695 | 6.52E-05 | 0.189453 | 3.78E-05 | 0.220523 | 1.49E-06 |
| 9.62E-09 | 0.269377 | 3.31E-09 | 0.060252 | 0.19369  | 0.033659 | 0.46807  | 0.345179 | 1.63E-14 |
| 0.00017  | 0.330295 | 2.39E-13 | 0.112409 | 0.01508  | 0.205136 | 7.87E-06 | 0.312902 | 4.57E-12 |
| 1.41E-05 | 0.286073 | 3.02E-10 | 0.162127 | 0.00044  | 0.17337  | 0.00017  | 0.199034 | 1.47E-05 |
| 2.88E-22 | 0.562685 | 2.37E-40 | 0.136376 | 0.00315  | 0.173246 | 0.00017  | 0.474531 | 1.34E-27 |
| 8.66E-21 | 0.510346 | 2.47E-32 | 0.100574 | 0.02977  | 0.140587 | 0.00233  | 0.464224 | 2.46E-26 |
| 4.51E-24 | 0.500759 | 5.19E-31 | 0.172455 | 0.00018  | 0.124349 | 0.00714  | 0.435108 | 5.41E-23 |
| 3.27E-18 | 0.549835 | 2.99E-38 | 0.141272 | 0.00221  | 0.222503 | 1.20E-06 | 0.310507 | 6.77E-12 |



|          |          |          |          |          |          |          |          |          |
|----------|----------|----------|----------|----------|----------|----------|----------|----------|
| 5.26E-08 | 0.401608 | 1.58E-19 | 0.149753 | 0.00117  | 0.235915 | 2.50E-07 | 0.347967 | 9.73E-15 |
| 4.02E-06 | 0.324922 | 6.06E-13 | 0.160186 | 0.00051  | 0.229877 | 5.12E-07 | 0.369667 | 1.44E-16 |
| 0.00013  | 0.283492 | 4.42E-10 | 0.149421 | 0.0012   | 0.136063 | 0.00322  | 0.181925 | 7.69E-05 |
| 0.00153  | 0.193069 | 2.66E-05 | 0.12759  | 0.00576  | 0.098577 | 0.03319  | 0.320627 | 1.26E-12 |
| 2.09E-17 | 0.499674 | 7.28E-31 | 0.117527 | 0.01103  | 0.087598 | 0.05855  | 0.341024 | 3.50E-14 |
| 0.06826  | 0.132774 | 0.00405  | 0.05896  | 0.20344  | 0.238563 | 1.82E-07 | 0.312454 | 4.92E-12 |
| 9.10E-22 | -0.53714 | 2.90E-36 | -0.04534 | 0.32827  | -0.08326 | 0.07226  | -0.29692 | 5.85E-11 |
| 1.07E-17 | -0.46363 | 2.90E-26 | -0.07256 | 0.11736  | -0.14244 | 0.00203  | -0.019   | 0.68217  |
| 7.79E-36 | -0.64065 | 2.57E-55 | -0.09727 | 0.03561  | -0.14081 | 0.00229  | -0.35839 | 1.34E-15 |
| 8.62E-51 | 0.764519 | 1.01E-90 | 0.130665 | 0.00468  | 0.205633 | 7.47E-06 | 0.345133 | 1.65E-14 |
| 4.76E-10 | 0.462955 | 3.49E-26 | 0.110154 | 0.01725  | 0.058356 | 0.20811  | 0.125182 | 0.00676  |
| 2.37E-21 | 0.614406 | 8.25E-50 | 0.107365 | 0.0203   | 0.116343 | 0.01187  | 0.166489 | 0.0003   |
| 2.14E-30 | 0.52153  | 6.23E-34 | 0.082776 | 0.07392  | 0.075178 | 0.10469  | 0.106784 | 0.021    |
| 1.97E-21 | 0.607166 | 2.22E-48 | 0.021071 | 0.6497   | 0.120515 | 0.00914  | 0.202655 | 1.02E-05 |
| 7.19E-53 | 0.777031 | 1.58E-95 | 0.131391 | 0.00445  | 0.117993 | 0.01071  | 0.029376 | 0.52657  |
| 1.93E-58 | 0.825098 | #####    | 0.17321  | 0.00017  | 0.16615  | 0.00031  | 0.255684 | 2.09E-08 |
| 5.50E-19 | -0.5419  | 5.35E-37 | -0.1106  | 0.0168   | -0.19249 | 2.82E-05 | -0.15834 | 0.00059  |
| 1.04E-25 | 0.626603 | 2.64E-52 | 0.121243 | 0.00872  | 0.151402 | 0.00103  | 0.069623 | 0.13301  |
| 9.92E-53 | 0.758226 | 2.04E-88 | 0.084047 | 0.06958  | 0.078034 | 0.09211  | 0.164758 | 0.00035  |
| 1.05E-67 | 0.782249 | 1.26E-97 | 0.134093 | 0.00369  | 0.098899 | 0.03262  | 0.299573 | 3.87E-11 |
| 9.78E-32 | 0.647909 | 6.16E-57 | 0.089734 | 0.05264  | 0.138883 | 0.00263  | 0.2795   | 7.91E-10 |
| 3.02E-12 | -0.4315  | 1.33E-22 | -0.16248 | 0.00042  | -0.19159 | 3.07E-05 | -0.18734 | 4.63E-05 |
| 4.19E-13 | 0.460862 | 6.21E-26 | 0.076859 | 0.09713  | 0.133246 | 0.00392  | 0.123688 | 0.00745  |
| 6.15E-10 | 0.465828 | 1.57E-26 | 0.399806 | 2.37E-19 | 0.116403 | 0.01183  | 0.216151 | 2.42E-06 |
| 7.85E-22 | 0.612507 | 1.97E-49 | 0.026789 | 0.56363  | 0.222955 | 1.14E-06 | 0.040424 | 0.38344  |
| 1.45E-67 | 0.83128  | #####    | 0.080524 | 0.08216  | 0.127894 | 0.00564  | 0.122372 | 0.00811  |
| 3.87E-27 | 0.581918 | 1.13E-43 | 0.011869 | 0.7981   | 0.092264 | 0.04629  | 0.086926 | 0.06052  |
| 3.11E-49 | 0.71295  | 1.08E-73 | 0.064524 | 0.16389  | 0.082749 | 0.07402  | 0.146127 | 0.00154  |
| 1.51E-11 | 0.422038 | 1.35E-21 | 0.153521 | 0.00087  | 0.10949  | 0.01794  | 0.161857 | 0.00045  |
| 5.71E-19 | 0.501028 | 4.77E-31 | -0.02853 | 0.53849  | 0.049092 | 0.28974  | 0.144587 | 0.00173  |
| 8.89E-19 | 0.556981 | 2.09E-39 | 0.094968 | 0.04023  | 0.134    | 0.00372  | 0.195648 | 2.06E-05 |
| 3.14E-31 | 0.638469 | 7.71E-55 | 0.088553 | 0.05584  | 0.079779 | 0.08504  | 0.317587 | 2.10E-12 |
| 1.22E-30 | 0.590338 | 3.39E-45 | 0.108885 | 0.01859  | 0.06093  | 0.18871  | 0.212807 | 3.49E-06 |
| 3.50E-09 | 0.459546 | 8.90E-26 | 0.024556 | 0.59658  | 0.132866 | 0.00402  | -0.0402  | 0.38607  |
| 1.90E-21 | 0.607001 | 2.39E-48 | 0.053117 | 0.25196  | 0.098928 | 0.03257  | 0.041839 | 0.36699  |
| 7.51E-73 | 0.836224 | #####    | 0.049738 | 0.28344  | 0.134428 | 0.00361  | 0.125164 | 0.00676  |
| 3.99E-87 | 0.88746  | #####    | 0.157137 | 0.00065  | 0.117206 | 0.01125  | 0.27275  | 2.07E-09 |
| 2.08E-28 | 0.5313   | 2.24E-35 | 0.111447 | 0.01598  | 0.156769 | 0.00067  | 0.07103  | 0.12533  |
| 4.90E-12 | 0.419878 | 2.28E-21 | 0.148486 | 0.00129  | 0.077608 | 0.0939   | 0.004316 | 0.92589  |
| 7.13E-21 | 0.521314 | 6.70E-34 | 0.149607 | 0.00118  | 0.134595 | 0.00357  | 0.234125 | 3.10E-07 |
| 1.19E-65 | 0.856407 | #####    | 0.09402  | 0.04227  | 0.145569 | 0.00161  | 0.199192 | 1.45E-05 |
| 4.20E-30 | 0.678963 | 2.14E-64 | -0.0017  | 0.9708   | 0.171825 | 0.00019  | 0.165392 | 0.00033  |
| 5.66E-36 | 0.586765 | 1.52E-44 | 0.019049 | 0.68137  | 0.0533   | 0.25033  | 0.26556  | 5.60E-09 |
| 1.59E-52 | 0.745511 | 5.75E-84 | 0.123819 | 0.00739  | 0.129089 | 0.00521  | 0.267139 | 4.51E-09 |
| 6.74E-14 | 0.474155 | 1.49E-27 | 0.313613 | 4.07E-12 | 0.113195 | 0.01439  | 0.199358 | 1.42E-05 |

|          |          |          |          |          |          |          |          |          |
|----------|----------|----------|----------|----------|----------|----------|----------|----------|
| 0.00264  | 0.335587 | 9.35E-14 | 0.053492 | 0.24863  | 0.058821 | 0.2045   | -0.05849 | 0.2071   |
| 4.07E-35 | 0.712951 | 1.08E-73 | 0.114333 | 0.01343  | 0.151789 | 0.001    | 0.316328 | 2.59E-12 |
| 4.41E-29 | 0.646074 | 1.60E-56 | 0.101937 | 0.02761  | 0.090162 | 0.05152  | 0.069962 | 0.13112  |
| 2.77E-22 | 0.518929 | 1.48E-33 | 0.174341 | 0.00015  | 0.120322 | 0.00925  | 0.230842 | 4.57E-07 |
| 1.82E-15 | 0.526293 | 1.25E-34 | 0.196473 | 1.90E-05 | -0.0132  | 0.77601  | 0.002439 | 0.95808  |
| 2.46E-27 | 0.518603 | 1.65E-33 | 0.180819 | 8.51E-05 | 0.082931 | 0.07338  | 0.184372 | 6.12E-05 |
| 9.71E-14 | 0.434591 | 6.16E-23 | -0.01242 | 0.78889  | 0.107701 | 0.01991  | 0.299521 | 3.90E-11 |
| 1.04E-85 | 0.79089  | #####    | 0.051219 | 0.26933  | 0.127972 | 0.00561  | 0.294763 | 8.15E-11 |
| 2.37E-12 | 0.499591 | 7.47E-31 | 0.109748 | 0.01767  | 0.12556  | 0.00659  | 0.062376 | 0.17841  |
| 1.75E-12 | 0.446699 | 2.76E-24 | 0.06502  | 0.16067  | 0.090251 | 0.05128  | -0.03337 | 0.47184  |
| 2.50E-17 | 0.462167 | 4.34E-26 | 0.143362 | 0.0019   | 0.230553 | 4.73E-07 | -0.00799 | 0.86327  |
| 6.18E-66 | 0.788048 | #####    | 0.037062 | 0.42427  | 0.096111 | 0.03787  | 0.104228 | 0.02429  |
| 8.17E-59 | 0.77796  | 6.74E-96 | 0.167939 | 0.00027  | 0.195657 | 2.06E-05 | 0.348706 | 8.47E-15 |
| 4.06E-18 | 0.454137 | 3.85E-25 | 0.163606 | 0.00039  | 0.063344 | 0.17176  | 0.205121 | 7.88E-06 |
| 1.53E-55 | 0.749337 | 2.81E-85 | 0.076332 | 0.09945  | 0.102542 | 0.0267   | 0.178168 | 0.00011  |
| 2.67E-16 | -0.53094 | 2.54E-35 | -0.10635 | 0.02153  | -0.1749  | 0.00015  | -0.06137 | 0.18556  |
| 7.01E-21 | -0.51195 | 1.47E-32 | -0.14365 | 0.00186  | -0.10106 | 0.02899  | -0.16521 | 0.00034  |
| 6.27E-17 | 0.564641 | 1.12E-40 | 0.24398  | 9.34E-08 | 0.059695 | 0.19785  | 0.243781 | 9.57E-08 |
| 2.11E-58 | 0.754368 | 4.89E-87 | 0.094265 | 0.04173  | 0.161641 | 0.00045  | 0.242604 | 1.11E-07 |
| 8.12E-20 | 0.533756 | 9.53E-36 | 0.109003 | 0.01846  | 0.091359 | 0.04848  | 0.110219 | 0.01718  |
| 3.09E-44 | 0.728166 | 2.63E-78 | 0.117643 | 0.01095  | 0.154744 | 0.00079  | 0.138904 | 0.00263  |
| 6.03E-56 | 0.765073 | 6.28E-91 | 0.13035  | 0.00478  | 0.205542 | 7.54E-06 | 0.142753 | 0.00198  |
| 2.53E-91 | 0.816324 | #####    | 0.146281 | 0.00153  | 0.140972 | 0.00226  | 0.291573 | 1.33E-10 |
| 7.64E-62 | 0.755198 | 2.48E-87 | 0.12168  | 0.00848  | 0.099839 | 0.03099  | 0.209727 | 4.85E-06 |
| 6.95E-19 | -0.43945 | 1.80E-23 | -0.18694 | 4.81E-05 | -0.12927 | 0.00515  | -0.30602 | 1.40E-11 |
| 6.95E-16 | 0.56598  | 6.64E-41 | 0.124534 | 0.00705  | 0.129143 | 0.00519  | 0.096342 | 0.03741  |
| 2.93E-67 | 0.778154 | 5.64E-96 | 0.060785 | 0.18977  | 0.020989 | 0.65097  | 0.185712 | 5.40E-05 |
| 1.96E-20 | -0.51554 | 4.55E-33 | -0.15143 | 0.00103  | -0.20177 | 1.11E-05 | -0.24965 | 4.57E-08 |
| 4.62E-25 | 0.549777 | 3.06E-38 | 0.087256 | 0.05954  | 0.164704 | 0.00035  | 0.266557 | 4.88E-09 |
| 5.80E-63 | 0.744115 | 1.71E-83 | 0.119135 | 0.00997  | 0.171322 | 0.0002   | 0.221372 | 1.36E-06 |
| 1.47E-48 | 0.751871 | 3.70E-86 | 0.123092 | 0.00774  | 0.227749 | 6.56E-07 | 0.166814 | 0.00029  |
| 3.62E-58 | 0.778019 | 6.38E-96 | 0.159282 | 0.00055  | 0.14372  | 0.00185  | 0.195795 | 2.03E-05 |
| 4.72E-47 | 0.752276 | 2.67E-86 | 0.058264 | 0.20883  | 0.064065 | 0.16692  | 0.167405 | 0.00028  |
| 4.52E-16 | 0.409595 | 2.56E-20 | 0.164284 | 0.00036  | 0.065618 | 0.15685  | 0.08327  | 0.07221  |
| 2.45E-55 | 0.821369 | #####    | 0.118741 | 0.01022  | 0.165148 | 0.00034  | 0.172382 | 0.00018  |
| 4.67E-18 | -0.45234 | 6.22E-25 | -0.06218 | 0.17977  | -0.13272 | 0.00406  | -0.09256 | 0.04558  |
| 5.28E-20 | -0.51589 | 4.05E-33 | -0.06087 | 0.18912  | -0.06983 | 0.13187  | -0.07815 | 0.0916   |
| 1.38E-52 | 0.744082 | 1.75E-83 | 0.092883 | 0.04484  | 0.099755 | 0.03114  | 0.252061 | 3.35E-08 |
| 3.39E-07 | 0.422203 | 1.30E-21 | 0.135647 | 0.00331  | 0.12801  | 0.0056   | 0.121122 | 0.00879  |
| 2.93E-52 | 0.784075 | 2.25E-98 | 0.075221 | 0.10449  | 0.090192 | 0.05144  | 0.254714 | 2.38E-08 |
| 2.31E-59 | 0.765203 | 5.62E-91 | 0.159613 | 0.00054  | 0.133467 | 0.00386  | 0.304481 | 1.79E-11 |
| 1.67E-88 | 0.843249 | #####    | 0.068377 | 0.1401   | 0.09833  | 0.03364  | 0.256342 | 1.92E-08 |
| 3.25E-44 | 0.745207 | 7.29E-84 | 0.030611 | 0.50932  | 0.196758 | 1.85E-05 | 0.308389 | 9.54E-12 |
| 9.79E-13 | -0.50864 | 4.27E-32 | -0.03875 | 0.40346  | -0.14259 | 0.00201  | -0.08102 | 0.08028  |
| 1.95E-18 | -0.51951 | 1.22E-33 | -0.19995 | 1.34E-05 | -0.08062 | 0.08178  | -0.20238 | 1.05E-05 |

|          |          |          |          |          |          |          |          |          |
|----------|----------|----------|----------|----------|----------|----------|----------|----------|
| 8.64E-14 | 0.418098 | 3.48E-21 | 0.048859 | 0.29204  | 0.053551 | 0.2481   | 0.265314 | 5.79E-09 |
| 1.74E-25 | -0.54101 | 7.35E-37 | -0.06073 | 0.19019  | -0.12514 | 0.00677  | -0.263   | 7.92E-09 |
| 1.32E-16 | 0.505592 | 1.13E-31 | -0.04023 | 0.38575  | 0.121272 | 0.00871  | 0.098186 | 0.0339   |
| 1.32E-64 | 0.730586 | 4.53E-79 | 0.133453 | 0.00386  | 0.127439 | 0.00582  | 0.199711 | 1.37E-05 |
| 1.33E-35 | 0.675634 | 1.50E-63 | 0.137332 | 0.00294  | 0.118502 | 0.01038  | 0.093592 | 0.04322  |
| 1.22E-07 | 0.43384  | 7.44E-23 | 0.057767 | 0.21274  | 0.123561 | 0.00751  | 0.064142 | 0.16641  |
| 6.23E-17 | 0.497819 | 1.30E-30 | 0.195394 | 2.12E-05 | 0.007598 | 0.86993  | 0.083939 | 0.06994  |
| 5.47E-42 | 0.673022 | 6.74E-63 | 0.109103 | 0.01835  | 0.123629 | 0.00748  | 0.234294 | 3.04E-07 |
| 8.07E-17 | -0.47532 | 1.07E-27 | -0.08459 | 0.06778  | -0.11292 | 0.01463  | -0.1844  | 6.10E-05 |
| 5.66E-11 | 0.384344 | 6.89E-18 | -0.00424 | 0.92727  | -0.0307  | 0.50815  | 0.215982 | 2.47E-06 |
| 3.23E-08 | 0.46742  | 1.01E-26 | 0.135864 | 0.00326  | 0.168376 | 0.00026  | 0.025692 | 0.5797   |
| 1.19E-15 | 0.531355 | 2.20E-35 | 0.106518 | 0.02132  | 0.123798 | 0.0074   | 0.006673 | 0.88564  |
| 3.68E-57 | 0.794349 | #####    | 0.050314 | 0.2779   | 0.128199 | 0.00553  | 0.152382 | 0.00095  |
| 3.19E-27 | 0.557946 | 1.45E-39 | 0.051417 | 0.26748  | 0.017192 | 0.71097  | 0.184221 | 6.21E-05 |
| 2.04E-38 | 0.693078 | 4.24E-68 | 0.108212 | 0.01933  | 0.133141 | 0.00395  | 0.145476 | 0.00162  |
| 3.84E-51 | 0.729044 | 1.39E-78 | 0.156661 | 0.00068  | 0.100781 | 0.02944  | 0.242603 | 1.11E-07 |
| 1.00E-57 | 0.793029 | #####    | 0.055941 | 0.22758  | 0.168561 | 0.00025  | 0.263409 | 7.50E-09 |
| 1.69E-17 | 0.526988 | 9.85E-35 | 0.091682 | 0.04769  | 0.092464 | 0.04582  | 0.23614  | 2.44E-07 |
| 5.68E-75 | 0.836002 | #####    | 0.157609 | 0.00063  | 0.08952  | 0.05321  | 0.214454 | 2.92E-06 |
| 7.12E-19 | 0.544992 | 1.75E-37 | 0.050595 | 0.27522  | 0.031152 | 0.50187  | 0.209778 | 4.83E-06 |
| 2.19E-29 | 0.622122 | 2.24E-51 | 0.19548  | 2.10E-05 | 0.206171 | 7.06E-06 | 0.217683 | 2.05E-06 |
| 1.13E-43 | 0.738994 | 8.69E-82 | 0.154547 | 0.00081  | 0.157729 | 0.00062  | 0.146865 | 0.00146  |
| 1.06E-16 | 0.409701 | 2.50E-20 | 0.065167 | 0.15972  | 0.053341 | 0.24997  | 0.144587 | 0.00173  |
| 1.01E-68 | 0.748508 | 5.43E-85 | 0.077542 | 0.09419  | 0.106963 | 0.02078  | 0.170903 | 0.00021  |
| 9.48E-19 | 0.560244 | 6.05E-40 | 0.049581 | 0.28496  | 0.129643 | 0.00502  | 0.145344 | 0.00164  |
| 9.30E-42 | 0.730875 | 3.67E-79 | 0.04783  | 0.30234  | 0.230577 | 4.72E-07 | 0.162116 | 0.00044  |
| 1.00E-67 | 0.811348 | #####    | 0.138178 | 0.00277  | 0.154027 | 0.00084  | 0.272798 | 2.05E-09 |
| 5.70E-18 | 0.566334 | 5.78E-41 | 0.021356 | 0.64529  | 0.182127 | 7.55E-05 | 0.15797  | 0.00061  |
| 7.15E-12 | 0.493393 | 5.05E-30 | 0.012201 | 0.79258  | 0.126588 | 0.00616  | 0.056927 | 0.21948  |
| 9.06E-18 | 0.543451 | 3.06E-37 | 0.006841 | 0.88279  | 0.152908 | 0.00092  | 0.03475  | 0.45375  |
| 2.35E-65 | 0.720495 | 6.09E-76 | 0.114181 | 0.01355  | 0.127003 | 0.00599  | 0.171837 | 0.00019  |
| 7.60E-88 | 0.859982 | #####    | 0.147391 | 0.0014   | 0.131396 | 0.00445  | 0.230549 | 4.73E-07 |
| 7.74E-64 | 0.777965 | 6.71E-96 | 0.082879 | 0.07356  | 0.094234 | 0.0418   | 0.191112 | 3.22E-05 |
| 3.99E-66 | 0.807176 | #####    | 0.048929 | 0.29135  | 0.140032 | 0.00242  | 0.290594 | 1.54E-10 |
| 4.36E-36 | 0.725558 | 1.71E-77 | 0.044997 | 0.33191  | 0.170052 | 0.00022  | 0.277641 | 1.03E-09 |
| 2.09E-23 | 0.507115 | 6.96E-32 | 0.036607 | 0.42998  | 0.045664 | 0.32478  | 0.008898 | 0.84792  |
| 7.12E-68 | 0.790784 | #####    | 0.123256 | 0.00766  | 0.173799 | 0.00016  | 0.206588 | 6.76E-06 |
| 1.61E-30 | 0.639886 | 3.78E-55 | 0.127686 | 0.00572  | 0.135493 | 0.00335  | 0.269755 | 3.14E-09 |
| 4.92E-13 | 0.531208 | 2.31E-35 | 0.209848 | 4.79E-06 | 0.156575 | 0.00068  | 0.109052 | 0.01841  |
| 2.49E-19 | 0.55093  | 2.00E-38 | 0.080834 | 0.08098  | 0.125329 | 0.00669  | 0.351118 | 5.38E-15 |
| 2.67E-21 | 0.58996  | 3.98E-45 | 0.039722 | 0.39175  | 0.076606 | 0.09824  | -0.03024 | 0.51448  |
| 2.11E-30 | 0.571183 | 8.62E-42 | 0.067861 | 0.14312  | 0.115946 | 0.01216  | 0.116711 | 0.0116   |
| 4.37E-18 | -0.4695  | 5.62E-27 | -0.08046 | 0.08242  | -0.15253 | 0.00094  | -0.15867 | 0.00058  |
| 1.08E-14 | 0.540424 | 9.07E-37 | 0.139351 | 0.00254  | 0.160729 | 0.00049  | -0.0139  | 0.76446  |
| 2.80E-65 | 0.757725 | 3.09E-88 | 0.098223 | 0.03383  | 0.160798 | 0.00049  | 0.160422 | 0.0005   |

|          |          |          |          |          |          |          |          |          |
|----------|----------|----------|----------|----------|----------|----------|----------|----------|
| 2.22E-52 | 0.807709 | #####    | 0.085937 | 0.06352  | 0.194952 | 2.21E-05 | 0.237656 | 2.03E-07 |
| 1.12E-18 | 0.519749 | 1.13E-33 | 0.105967 | 0.022    | 0.194058 | 2.42E-05 | 0.184782 | 5.89E-05 |
| 5.30E-13 | -0.51177 | 1.56E-32 | -0.06893 | 0.13693  | -0.14438 | 0.00176  | -0.13541 | 0.00337  |
| 1.75E-22 | 0.579246 | 3.38E-43 | 0.038553 | 0.40586  | 0.083155 | 0.07261  | 0.004158 | 0.92859  |
| 3.01E-12 | 0.415626 | 6.25E-21 | 0.016506 | 0.72202  | 0.132674 | 0.00408  | 0.223565 | 1.06E-06 |
| 1.30E-40 | 0.760546 | 2.94E-89 | 0.074744 | 0.10671  | 0.148748 | 0.00126  | 0.287846 | 2.32E-10 |
| 8.19E-46 | 0.648889 | 3.69E-57 | 0.051307 | 0.2685   | 0.0322   | 0.48758  | 0.108028 | 0.01954  |
| 2.36E-19 | 0.467412 | 1.01E-26 | 0.004716 | 0.91904  | 0.143061 | 0.00194  | 0.036322 | 0.43358  |
| 1.31E-20 | 0.50538  | 1.21E-31 | 0.076433 | 0.099    | 0.127615 | 0.00575  | 0.232955 | 3.56E-07 |
| 5.72E-38 | 0.681236 | 5.61E-65 | 0.049221 | 0.28848  | 0.133877 | 0.00375  | 0.26362  | 7.28E-09 |
| 2.81E-62 | 0.745862 | 4.37E-84 | 0.101537 | 0.02823  | 0.144925 | 0.00169  | 0.264297 | 6.65E-09 |
| 3.98E-21 | 0.51217  | 1.37E-32 | -0.01686 | 0.71635  | 0.079325 | 0.08684  | 0.215273 | 2.67E-06 |
| 1.54E-65 | 0.818613 | #####    | 0.052678 | 0.2559   | 0.129442 | 0.00509  | 0.171085 | 0.0002   |
| 2.09E-69 | 0.781355 | 2.91E-97 | 0.136199 | 0.00319  | 0.161354 | 0.00046  | 0.256174 | 1.96E-08 |
| 4.76E-12 | 0.519327 | 1.30E-33 | 0.097383 | 0.03539  | 0.145583 | 0.00161  | 0.057143 | 0.21774  |
| 3.07E-52 | 0.793259 | #####    | 0.144127 | 0.00179  | 0.166339 | 0.00031  | 0.266419 | 4.98E-09 |
| 1.07E-09 | -0.468   | 8.58E-27 | -0.058   | 0.21089  | -0.11646 | 0.01178  | -0.14041 | 0.00236  |
| 1.46E-62 | 0.776623 | 2.29E-95 | 0.019103 | 0.68053  | 0.133901 | 0.00374  | 0.273159 | 1.95E-09 |
| 2.89E-15 | -0.4318  | 1.24E-22 | -0.04062 | 0.38116  | -0.02523 | 0.58653  | -0.19332 | 2.60E-05 |
| 4.30E-18 | 0.488006 | 2.58E-29 | 0.077541 | 0.09419  | 0.052863 | 0.25424  | 0.121816 | 0.00841  |
| 3.96E-24 | 0.590076 | 3.79E-45 | 0.145592 | 0.00161  | 0.165618 | 0.00033  | 0.214805 | 2.81E-06 |
| 1.36E-28 | 0.600472 | 4.32E-47 | 0.0978   | 0.03461  | 0.039049 | 0.39984  | 0.126507 | 0.00619  |
| 7.81E-15 | 0.521833 | 5.63E-34 | 0.285125 | 3.48E-10 | 0.248333 | 5.40E-08 | 0.007954 | 0.86388  |
| 1.64E-31 | 0.55961  | 7.70E-40 | 0.12892  | 0.00527  | 0.198004 | 1.63E-05 | 0.148727 | 0.00127  |
| 4.65E-52 | 0.828627 | #####    | 0.193347 | 2.59E-05 | 0.141346 | 0.0022   | 0.081845 | 0.07724  |
| 1.20E-31 | 0.731743 | 1.94E-79 | 0.140091 | 0.00241  | 0.224528 | 9.50E-07 | 0.361284 | 7.61E-16 |
| 4.83E-70 | 0.849179 | #####    | 0.12199  | 0.00831  | 0.18275  | 7.12E-05 | 0.232619 | 3.71E-07 |
| 7.98E-20 | 0.597073 | 1.90E-46 | 0.080915 | 0.08068  | 0.117381 | 0.01113  | 0.093453 | 0.04354  |
| 5.32E-23 | 0.52361  | 3.10E-34 | 0.097348 | 0.03546  | 0.154279 | 0.00082  | -0.02911 | 0.53026  |
| 7.55E-14 | 0.428166 | 3.05E-22 | 0.156027 | 0.00072  | -0.02409 | 0.60351  | -0.00548 | 0.90592  |
| 3.79E-12 | 0.446374 | 3.00E-24 | 0.074685 | 0.10699  | 0.148446 | 0.00129  | 0.151977 | 0.00099  |
| 5.24E-52 | 0.830442 | #####    | 0.028888 | 0.53347  | 0.153436 | 0.00088  | 0.225698 | 8.31E-07 |
| 1.33E-33 | 0.694806 | 1.44E-68 | 0.070585 | 0.12772  | 0.113829 | 0.01384  | 0.230772 | 4.61E-07 |
| 1.64E-20 | 0.500756 | 5.19E-31 | 0.119256 | 0.0099   | 0.066615 | 0.15063  | 0.260338 | 1.13E-08 |
| 5.69E-55 | 0.7149   | 2.88E-74 | 0.071349 | 0.12364  | 0.162389 | 0.00043  | 0.128919 | 0.00527  |
| 7.43E-52 | 0.75887  | 1.19E-88 | 0.140901 | 0.00227  | 0.248583 | 5.23E-08 | 0.195425 | 2.11E-05 |
| 5.37E-34 | 0.639284 | 5.12E-55 | 0.08699  | 0.06033  | 0.095483 | 0.03915  | 0.047459 | 0.3061   |
| 2.96E-69 | 0.789804 | #####    | 0.022668 | 0.62512  | 0.167602 | 0.00027  | 0.163339 | 0.00039  |
| 2.51E-20 | 0.600402 | 4.45E-47 | 0.031869 | 0.49207  | 0.205578 | 7.51E-06 | 0.272625 | 2.10E-09 |
| 1.31E-57 | 0.749888 | 1.81E-85 | 0.071893 | 0.12079  | 0.11605  | 0.01209  | 0.211649 | 3.95E-06 |
| 7.55E-21 | 0.521657 | 5.97E-34 | 0.218883 | 1.79E-06 | 0.04204  | 0.3647   | 0.174228 | 0.00015  |
| 9.84E-12 | -0.43016 | 1.86E-22 | -0.0358  | 0.44018  | -0.10678 | 0.021    | -0.14235 | 0.00204  |
| 5.70E-61 | 0.801596 | #####    | 0.063843 | 0.1684   | 0.108802 | 0.01868  | 0.285612 | 3.24E-10 |
| 1.61E-32 | 0.645499 | 2.15E-56 | 0.153706 | 0.00086  | 0.11251  | 0.01499  | 0.102804 | 0.02631  |
| 4.73E-14 | 0.446985 | 2.56E-24 | 0.082113 | 0.07628  | 0.015943 | 0.73112  | 0.200364 | 1.29E-05 |

|          |          |          |          |         |          |          |          |          |
|----------|----------|----------|----------|---------|----------|----------|----------|----------|
| 3.78E-44 | 0.714565 | 3.63E-74 | 0.101014 | 0.02906 | 0.122878 | 0.00785  | 0.095687 | 0.03873  |
| 1.01E-52 | 0.797171 | #####    | 0.089009 | 0.05458 | 0.179746 | 9.39E-05 | 0.319792 | 1.45E-12 |
| 3.25E-21 | 0.495689 | 2.50E-30 | 0.149114 | 0.00123 | 0.136953 | 0.00302  | 0.020447 | 0.6594   |
| 3.40E-16 | 0.588386 | 7.72E-45 | 0.004213 | 0.92765 | 0.108453 | 0.01906  | 0.156968 | 0.00066  |
| 1.12E-09 | -0.30552 | 1.51E-11 | -0.08446 | 0.06821 | -0.08588 | 0.06369  | -0.2484  | 5.36E-08 |
| 1.73E-12 | 0.527625 | 7.92E-35 | 0.124964 | 0.00685 | 0.183688 | 6.53E-05 | -0.04332 | 0.35032  |
| 7.93E-30 | 0.621182 | 3.50E-51 | 0.108346 | 0.01918 | 0.055993 | 0.22715  | 0.235813 | 2.53E-07 |
| 4.27E-46 | 0.783464 | 4.01E-98 | 0.089892 | 0.05222 | 0.157427 | 0.00064  | 0.107483 | 0.02017  |
| 1.80E-14 | 0.490019 | 1.41E-29 | 0.128656 | 0.00536 | 0.179461 | 9.64E-05 | 0.104828 | 0.02348  |
| 3.44E-27 | -0.64141 | 1.75E-55 | -0.1496  | 0.00118 | -0.19202 | 2.95E-05 | -0.08581 | 0.06391  |
| 1.70E-14 | -0.51126 | 1.83E-32 | -0.14544 | 0.00162 | -0.17934 | 9.75E-05 | -0.14175 | 0.00214  |
| 8.33E-12 | 0.480311 | 2.52E-28 | 0.056176 | 0.22563 | 0.102863 | 0.02623  | -0.05119 | 0.26957  |
| 1.24E-22 | 0.532822 | 1.32E-35 | 0.059708 | 0.19775 | 0.081505 | 0.07849  | 0.067428 | 0.1457   |
| 1.24E-28 | 0.641115 | 2.03E-55 | 0.092825 | 0.04497 | 0.145422 | 0.00163  | 0.178909 | 0.0001   |
| 1.73E-60 | 0.773049 | 5.77E-94 | 0.142401 | 0.00204 | 0.134686 | 0.00354  | 0.14277  | 0.00198  |
| 1.05E-17 | 0.471375 | 3.30E-27 | 0.12925  | 0.00515 | 0.106567 | 0.02126  | -0.01406 | 0.76188  |
| 2.20E-53 | 0.723227 | 8.94E-77 | 0.172272 | 0.00018 | 0.165624 | 0.00033  | 0.377233 | 3.06E-17 |
| 5.45E-67 | 0.85124  | #####    | 0.105985 | 0.02198 | 0.188368 | 4.19E-05 | 0.227912 | 6.44E-07 |
| 7.98E-22 | 0.602906 | 1.48E-47 | 0.129465 | 0.00508 | 0.081775 | 0.0775   | 0.130841 | 0.00462  |
| 7.99E-18 | 0.559475 | 8.11E-40 | 0.018854 | 0.68446 | 0.188288 | 4.23E-05 | 0.065202 | 0.1595   |
| 2.92E-52 | 0.756859 | 6.33E-88 | 0.092372 | 0.04603 | 0.07336  | 0.11337  | 0.240257 | 1.48E-07 |
| 1.62E-10 | 0.502468 | 3.04E-31 | 0.108653 | 0.01884 | 0.092517 | 0.04569  | 0.138096 | 0.00278  |
| 1.93E-78 | 0.856033 | #####    | 0.102295 | 0.02707 | 0.152866 | 0.00092  | 0.192918 | 2.70E-05 |
| 3.73E-41 | 0.753656 | 8.73E-87 | 0.102028 | 0.02748 | 0.152708 | 0.00093  | 0.199104 | 1.46E-05 |
| 6.55E-33 | 0.667269 | 1.76E-61 | 0.172402 | 0.00018 | 0.119249 | 0.0099   | 0.135822 | 0.00327  |
| 7.38E-18 | 0.584459 | 3.98E-44 | 0.088138 | 0.057   | 0.076874 | 0.09706  | 0.100784 | 0.02943  |
| 3.30E-65 | 0.78566  | 4.97E-99 | 0.096172 | 0.03775 | 0.099942 | 0.03082  | 0.204009 | 8.84E-06 |
| 1.19E-37 | 0.687759 | 1.12E-66 | 0.1644   | 0.00036 | 0.142045 | 0.00209  | 0.077174 | 0.09576  |
| 5.02E-11 | 0.447104 | 2.48E-24 | 0.042137 | 0.36359 | 0.142092 | 0.00208  | -0.0294  | 0.5262   |
| 5.63E-37 | 0.62894  | 8.54E-53 | 0.038991 | 0.40053 | 0.045645 | 0.32498  | 0.208823 | 5.34E-06 |
| 2.37E-22 | 0.580603 | 1.95E-43 | 0.05114  | 0.27007 | 0.093745 | 0.04288  | 0.288443 | 2.12E-10 |
| 3.61E-18 | 0.58542  | 2.67E-44 | 0.130674 | 0.00468 | 0.163486 | 0.00039  | 0.084026 | 0.06965  |
| 2.14E-29 | 0.674238 | 3.35E-63 | 0.01569  | 0.73524 | 0.110981 | 0.01643  | 0.011274 | 0.80801  |
| 1.68E-08 | 0.439396 | 1.82E-23 | 0.0967   | 0.03671 | 0.172515 | 0.00018  | 0.051571 | 0.26604  |
| 1.07E-84 | 0.844193 | #####    | 0.115402 | 0.01258 | 0.118278 | 0.01052  | 0.172873 | 0.00017  |
| 5.12E-14 | 0.501548 | 4.05E-31 | 0.062476 | 0.17772 | 0.11443  | 0.01335  | 0.079654 | 0.08553  |
| 3.95E-16 | 0.552075 | 1.31E-38 | 0.096865 | 0.03639 | 0.162197 | 0.00043  | 0.056474 | 0.22318  |
| 9.59E-20 | 0.450525 | 1.01E-24 | 0.057204 | 0.21724 | 0.102628 | 0.02657  | 0.086207 | 0.06269  |
| 3.04E-09 | 0.480415 | 2.44E-28 | 0.039764 | 0.39125 | 0.117047 | 0.01136  | -0.05438 | 0.24082  |
| 2.05E-42 | 0.709036 | 1.49E-72 | 0.072016 | 0.12015 | 0.202917 | 9.90E-06 | 0.078089 | 0.09188  |
| 5.35E-20 | 0.529776 | 3.79E-35 | 0.016948 | 0.71489 | 0.159296 | 0.00055  | 0.327192 | 4.10E-13 |
| 0.02755  | -0.17671 | 0.00012  | 0.055738 | 0.22928 | -0.089   | 0.05462  | -0.01565 | 0.73582  |
| 0.00197  | -0.21748 | 2.09E-06 | -0.03556 | 0.44325 | -0.0151  | 0.74486  | 0.218429 | 1.89E-06 |
| 6.30E-05 | 0.364208 | 4.28E-16 | 0.119449 | 0.00978 | 0.135925 | 0.00325  | -0.00132 | 0.97729  |
| 0.0064   | -0.26367 | 7.23E-09 | -0.15009 | 0.00114 | -0.19061 | 3.38E-05 | -0.13741 | 0.00292  |

|          |          |          |          |          |          |          |          |         |
|----------|----------|----------|----------|----------|----------|----------|----------|---------|
| 0.11182  | -0.17154 | 0.0002   | -0.11828 | 0.01052  | -0.1693  | 0.00024  | -0.05221 | 0.26018 |
| 0.00053  | -0.27081 | 2.71E-09 | -0.0979  | 0.03443  | -0.13687 | 0.00304  | -0.06615 | 0.1535  |
| 0.00129  | -0.23968 | 1.59E-07 | -0.13245 | 0.00414  | -0.05141 | 0.26756  | 0.066032 | 0.15425 |
| 1.04E-06 | -0.33075 | 2.20E-13 | -0.04404 | 0.34234  | -0.11771 | 0.01091  | -0.05141 | 0.26757 |
| 7.52E-06 | -0.31599 | 2.75E-12 | -0.18972 | 3.68E-05 | -0.11569 | 0.01236  | -0.09844 | 0.03344 |
| 0.00326  | -0.24194 | 1.20E-07 | -0.15456 | 0.0008   | -0.22406 | 1.00E-06 | -0.08019 | 0.08343 |
| 0.00346  | -0.32228 | 9.53E-13 | -0.02946 | 0.52541  | -0.14732 | 0.00141  | 0.04741  | 0.3066  |
| 0.00011  | -0.36766 | 2.15E-16 | -0.12999 | 0.0049   | -0.13598 | 0.00324  | 0.00474  | 0.91863 |
| 0.04963  | -0.22805 | 6.33E-07 | -0.09647 | 0.03715  | -0.09455 | 0.04112  | -0.00693 | 0.8812  |
| 0.22126  | -0.13836 | 0.00273  | -0.13787 | 0.00283  | -0.20158 | 1.14E-05 | -0.09979 | 0.03108 |
| 0.71106  | 0.151084 | 0.00106  | 0.057266 | 0.21674  | 0.15261  | 0.00094  | 0.036157 | 0.43567 |
| 8.94E-05 | -0.34293 | 2.47E-14 | -0.08709 | 0.06004  | -0.08777 | 0.05806  | -0.0518  | 0.26394 |
| 0.00237  | -0.23562 | 2.59E-07 | -0.08104 | 0.08022  | -0.11783 | 0.01082  | -0.02381 | 0.60774 |
| 1.01E-05 | -0.34956 | 7.22E-15 | 0.015845 | 0.73272  | -0.07246 | 0.11787  | 0.003344 | 0.94255 |
| 0.00435  | -0.27996 | 7.40E-10 | -0.14164 | 0.00215  | -0.17133 | 0.0002   | -0.01825 | 0.69411 |
| 0.0039   | -0.04332 | 0.35023  | -0.11563 | 0.0124   | -0.07669 | 0.09787  | 0.027511 | 0.55315 |
| 0.00074  | -0.21206 | 3.78E-06 | -0.10913 | 0.01832  | 0.010388 | 0.82285  | -0.09365 | 0.04309 |
| 0.53816  | -0.13312 | 0.00395  | 0.116297 | 0.0119   | -0.05267 | 0.25601  | 0.007301 | 0.87496 |
| 0.29301  | -0.25412 | 2.57E-08 | -0.00872 | 0.85093  | -0.14132 | 0.0022   | 0.002436 | 0.95813 |
| 0.02231  | -0.24187 | 1.21E-07 | -0.06373 | 0.16914  | -0.04681 | 0.31283  | -0.07498 | 0.10563 |
| 0.37945  | -0.22864 | 5.92E-07 | 0.013901 | 0.76447  | -0.13053 | 0.00472  | -0.0747  | 0.1069  |
| 1.72E-06 | -0.32686 | 4.34E-13 | -0.20197 | 1.09E-05 | -0.07999 | 0.08421  | -0.04546 | 0.32699 |
| 2.19E-05 | 0.416413 | 5.19E-21 | 0.031088 | 0.50274  | 0.143824 | 0.00183  | 0.127209 | 0.00591 |
| 5.12E-06 | 0.372348 | 8.35E-17 | 0.170531 | 0.00021  | 0.11194  | 0.01551  | 0.026583 | 0.56663 |
| 8.87E-12 | -0.41918 | 2.69E-21 | -0.11527 | 0.01268  | -0.14528 | 0.00164  | -0.14334 | 0.0019  |
| 0.00144  | -0.26014 | 1.16E-08 | -0.08194 | 0.07691  | -0.05788 | 0.21185  | -0.03345 | 0.47081 |
| 0.00136  | -0.34345 | 2.25E-14 | -0.22638 | 7.68E-07 | -0.25199 | 3.39E-08 | -0.16056 | 0.0005  |
| 0.00225  | -0.29861 | 4.50E-11 | 0.04774  | 0.30325  | -0.15529 | 0.00076  | -0.0761  | 0.10048 |
| 0.16426  | -0.23139 | 4.29E-07 | -0.19482 | 2.24E-05 | -0.11677 | 0.01156  | -0.03517 | 0.44836 |
| 0.0071   | -0.29801 | 4.94E-11 | -0.06427 | 0.16557  | -0.15011 | 0.00114  | -0.13864 | 0.00268 |
| 0.94018  | -0.10474 | 0.02359  | -0.05658 | 0.2223   | -0.09253 | 0.04566  | 0.011691 | 0.80106 |
| 0.31759  | -0.01161 | 0.80241  | -0.07722 | 0.09555  | -0.07713 | 0.09595  | 0.009524 | 0.83737 |
| 2.08E-05 | -0.2235  | 1.07E-06 | -0.14355 | 0.00187  | -0.19389 | 2.46E-05 | -0.08774 | 0.05813 |
| 1.19E-05 | -0.06536 | 0.15846  | -0.10755 | 0.02009  | -0.13403 | 0.00371  | 0.079344 | 0.08676 |
| 0.99029  | -0.08007 | 0.0839   | -0.13558 | 0.00333  | -0.12662 | 0.00614  | -0.00016 | 0.9973  |
| 0.02208  | -0.22927 | 5.49E-07 | -0.06108 | 0.1876   | -0.10134 | 0.02854  | 0.029447 | 0.52556 |
| 0.82769  | -0.19847 | 1.56E-05 | -0.13684 | 0.00304  | -0.15173 | 0.001    | -0.068   | 0.14229 |
| 0.00017  | 0.365762 | 3.14E-16 | 0.136954 | 0.00302  | 0.170016 | 0.00022  | 0.126325 | 0.00627 |
| 0.09126  | -0.28448 | 3.83E-10 | -0.15395 | 0.00084  | -0.17976 | 9.38E-05 | -0.09637 | 0.03736 |
| 0.05694  | -0.15687 | 0.00067  | -0.17989 | 9.27E-05 | -0.11162 | 0.01581  | -0.10296 | 0.02609 |
| 0.15315  | -0.15634 | 0.0007   | -0.09342 | 0.04361  | -0.08416 | 0.06921  | 0.028071 | 0.54511 |
| 0.97364  | -0.13517 | 0.00343  | -0.17995 | 9.21E-05 | -0.13141 | 0.00445  | -0.0483  | 0.29761 |
| 0.00033  | -0.27268 | 2.09E-09 | -0.12684 | 0.00605  | -0.07627 | 0.09972  | 0.024996 | 0.59002 |
| 0.00142  | -0.28798 | 2.27E-10 | -0.10191 | 0.02766  | -0.10083 | 0.02935  | -0.12497 | 0.00685 |
| 0.66706  | -0.1764  | 0.00013  | -0.04155 | 0.37027  | -0.08271 | 0.07417  | 0.008271 | 0.85852 |

|          |          |          |          |          |          |          |          |          |
|----------|----------|----------|----------|----------|----------|----------|----------|----------|
| 2.99E-05 | -0.34665 | 1.24E-14 | -0.1528  | 0.00092  | -0.11943 | 0.00979  | -0.15097 | 0.00107  |
| 0.67565  | 0.187372 | 4.61E-05 | 0.125554 | 0.00659  | 0.035681 | 0.44174  | 0.053818 | 0.24575  |
| 0.63893  | -0.08252 | 0.07481  | -0.11165 | 0.01578  | -0.08727 | 0.0595   | -0.00719 | 0.87684  |
| 8.47E-05 | -0.34595 | 1.42E-14 | -0.11957 | 0.0097   | -0.12241 | 0.0081   | -0.09723 | 0.03569  |
| 0.11412  | -0.2435  | 9.91E-08 | -0.14608 | 0.00155  | -0.06065 | 0.19072  | -0.09342 | 0.0436   |
| 0.22984  | -0.05825 | 0.20891  | -0.10072 | 0.02953  | -0.15154 | 0.00102  | -0.00972 | 0.83399  |
| 0.00657  | -0.01443 | 0.75571  | -0.06169 | 0.18328  | -0.07129 | 0.12393  | 0.06335  | 0.17172  |
| 0.00189  | -0.00894 | 0.84723  | -0.12113 | 0.00878  | -0.02145 | 0.64385  | 0.227978 | 6.39E-07 |
| 0.00076  | -0.23959 | 1.60E-07 | -0.09009 | 0.05171  | -0.1091  | 0.01836  | 0.064927 | 0.16127  |
| 0.15521  | -0.18812 | 4.29E-05 | -0.09751 | 0.03515  | -0.0337  | 0.46755  | 0.035094 | 0.4493   |
| 0.07999  | 0.304135 | 1.89E-11 | -0.03476 | 0.45367  | 0.092029 | 0.04685  | -0.13472 | 0.00354  |
| 0.31113  | -0.25213 | 3.32E-08 | -0.10623 | 0.02168  | -0.10285 | 0.02624  | 0.010207 | 0.82588  |
| 0.00098  | -0.29586 | 6.89E-11 | -0.1095  | 0.01793  | -0.04633 | 0.31772  | -0.06177 | 0.18265  |
| 0.41791  | -0.09374 | 0.04289  | -0.11778 | 0.01086  | -0.11683 | 0.01152  | -0.13161 | 0.00439  |
| 0.00413  | -0.31919 | 1.61E-12 | -0.01849 | 0.69028  | -0.03905 | 0.3998   | 0.007866 | 0.86537  |
| 0.32846  | -0.14025 | 0.00238  | -0.01464 | 0.75229  | -0.08652 | 0.06173  | -0.12207 | 0.00827  |
| 0.0376   | -0.28185 | 5.62E-10 | -0.15617 | 0.00071  | -0.12782 | 0.00567  | 0.126784 | 0.00608  |
| 4.11E-05 | -0.30959 | 7.86E-12 | -0.21551 | 2.60E-06 | -0.18206 | 7.59E-05 | -0.01749 | 0.70617  |
| 0.00014  | 0.407341 | 4.30E-20 | 0.079854 | 0.08475  | 0.141275 | 0.00221  | 0.000627 | 0.98921  |
| 3.68E-10 | 0.473804 | 1.65E-27 | 0.012522 | 0.78724  | 0.161069 | 0.00048  | 0.141657 | 0.00215  |
| 0.0284   | 0.2765   | 1.22E-09 | 0.155837 | 0.00073  | 0.147277 | 0.00141  | -0.05347 | 0.24881  |
| 5.75E-06 | -0.27021 | 2.95E-09 | -0.0299  | 0.51928  | 0.008726 | 0.85082  | -0.01577 | 0.73391  |
| 2.73E-06 | 0.424815 | 6.92E-22 | -0.00355 | 0.93902  | 0.127665 | 0.00573  | 0.052073 | 0.26142  |
| 1.16E-07 | -0.39374 | 9.09E-19 | -0.12986 | 0.00494  | -0.13331 | 0.0039   | -0.11225 | 0.01523  |
| 7.62E-05 | -0.36217 | 6.40E-16 | -0.12237 | 0.00811  | -0.17013 | 0.00022  | -0.10522 | 0.02296  |
| 4.40E-06 | 0.337658 | 6.45E-14 | 0.100543 | 0.02982  | 0.175186 | 0.00014  | 0.002321 | 0.96011  |
| 0.00946  | 0.301396 | 2.91E-11 | 0.057658 | 0.21361  | 0.095267 | 0.0396   | -0.00184 | 0.96831  |
| 1.12E-06 | -0.3608  | 8.36E-16 | -0.15433 | 0.00082  | -0.10828 | 0.01925  | -0.08415 | 0.06923  |
| 0.00013  | -0.38995 | 2.07E-18 | -0.13373 | 0.00379  | -0.1519  | 0.00099  | -0.03704 | 0.4245   |
| 0.00025  | 0.399641 | 2.46E-19 | 0.067471 | 0.14545  | 0.10247  | 0.02681  | 0.144694 | 0.00172  |
| 2.56E-10 | -0.31845 | 1.82E-12 | -0.07699 | 0.09657  | -0.08168 | 0.07784  | 0.077331 | 0.09509  |
| 3.65E-09 | -0.43516 | 5.34E-23 | -0.08508 | 0.06621  | -0.11016 | 0.01724  | -0.05517 | 0.23407  |
| 0.00897  | 0.247252 | 6.19E-08 | 0.120593 | 0.00909  | 0.224799 | 9.21E-07 | -0.09639 | 0.03732  |
| 0.0123   | 0.220475 | 1.50E-06 | -0.02821 | 0.54317  | 0.05762  | 0.21392  | 0.1673   | 0.00028  |
| 0.03198  | -0.0769  | 0.09694  | -0.18194 | 7.68E-05 | -0.20777 | 5.97E-06 | -0.09877 | 0.03285  |
| 0.00277  | 0.018913 | 0.68353  | -0.13029 | 0.0048   | -0.03145 | 0.4978   | 0.153954 | 0.00084  |
| 0.58457  | -0.14154 | 0.00217  | -0.06352 | 0.1706   | -0.10518 | 0.02302  | -0.02648 | 0.56809  |
| 1.08E-12 | -0.47162 | 3.08E-27 | -0.1556  | 0.00074  | -0.19247 | 2.82E-05 | -0.01947 | 0.67476  |
| 0.28643  | -0.13974 | 0.00247  | -0.06718 | 0.14719  | -0.05326 | 0.2507   | -0.05402 | 0.24394  |
| 9.25E-09 | -0.24984 | 4.46E-08 | -0.05813 | 0.20985  | -0.06801 | 0.14226  | 0.032371 | 0.48527  |
| 2.64E-13 | -0.39548 | 6.20E-19 | -0.08194 | 0.0769   | -0.14087 | 0.00228  | -0.03223 | 0.48715  |
| 0.24371  | -0.1463  | 0.00152  | -0.0861  | 0.063    | -0.00043 | 0.99254  | -0.01055 | 0.82012  |
| 0.11725  | -0.22439 | 9.65E-07 | -0.02834 | 0.54126  | -0.12807 | 0.00558  | 0.039833 | 0.39043  |
| 0.82489  | -0.14901 | 0.00124  | -0.13555 | 0.00334  | -0.08085 | 0.08092  | -0.09343 | 0.04359  |
| 3.53E-06 | -0.39135 | 1.53E-18 | -0.13597 | 0.00324  | -0.15124 | 0.00104  | -0.0006  | 0.9897   |

|          |          |          |          |          |          |          |          |          |
|----------|----------|----------|----------|----------|----------|----------|----------|----------|
| 0.10267  | -0.04861 | 0.29448  | -0.09571 | 0.03869  | -0.04944 | 0.28631  | 0.083588 | 0.07113  |
| 0.00094  | -0.28945 | 1.83E-10 | -0.18005 | 9.14E-05 | -0.08596 | 0.06344  | 0.069135 | 0.13575  |
| 0.43305  | -0.05372 | 0.2466   | -0.08373 | 0.07066  | -0.06132 | 0.18592  | 0.221822 | 1.29E-06 |
| 0.00069  | -0.22444 | 9.60E-07 | -0.0541  | 0.24324  | -0.05222 | 0.26006  | 0.042781 | 0.3563   |
| 1.07E-06 | -0.45196 | 6.89E-25 | -0.09284 | 0.04493  | -0.20679 | 6.62E-06 | -0.05778 | 0.21268  |
| 0.04802  | -0.04967 | 0.28408  | -0.06493 | 0.16124  | -0.10962 | 0.01781  | 0.029856 | 0.51984  |
| 0.00856  | -0.28794 | 2.29E-10 | -0.08798 | 0.05745  | -0.14538 | 0.00163  | 0.095762 | 0.03858  |
| 0.00316  | 0.347107 | 1.14E-14 | 0.220212 | 1.55E-06 | 0.094321 | 0.04161  | 0.076414 | 0.09908  |
| 0.00045  | -0.32506 | 5.92E-13 | -0.07924 | 0.08719  | -0.10686 | 0.0209   | -0.00084 | 0.98552  |
| 0.00025  | -0.223   | 1.13E-06 | -0.19105 | 3.24E-05 | -0.1332  | 0.00393  | -0.15097 | 0.00107  |
| 1.84E-11 | -0.45841 | 1.21E-25 | -0.17776 | 0.00011  | -0.15152 | 0.00102  | 0.00484  | 0.91692  |
| 0.51351  | -0.10682 | 0.02096  | -0.11676 | 0.01157  | -0.22123 | 1.38E-06 | 0.032814 | 0.47932  |
| 2.26E-12 | -0.46058 | 6.71E-26 | -0.0207  | 0.65545  | -0.12914 | 0.00519  | -0.07058 | 0.12772  |
| 2.18E-06 | -0.39964 | 2.46E-19 | -0.07978 | 0.08502  | -0.07246 | 0.1179   | -0.03349 | 0.47029  |
| 0.61608  | -0.03938 | 0.39591  | -0.13775 | 0.00285  | -0.19011 | 3.55E-05 | 0.036126 | 0.43607  |
| 3.79E-05 | -0.3423  | 2.78E-14 | -0.12821 | 0.00553  | -0.13973 | 0.00247  | -0.12131 | 0.00869  |
| 0.00092  | -0.31489 | 3.29E-12 | -0.061   | 0.18823  | -0.12097 | 0.00888  | -0.05099 | 0.27152  |
| 0.20223  | 0.221754 | 1.30E-06 | 0.017546 | 0.70529  | -0.00246 | 0.95779  | 0.111159 | 0.01625  |
| 0.07185  | 0.295343 | 7.46E-11 | 0.201392 | 1.16E-05 | 0.018139 | 0.69583  | 0.065147 | 0.15985  |
| 1.27E-08 | -0.44992 | 1.18E-24 | -0.16839 | 0.00026  | -0.17276 | 0.00018  | -0.0255  | 0.5825   |
| 1.47E-05 | -0.35721 | 1.68E-15 | -0.05189 | 0.26312  | -0.0556  | 0.23044  | -0.02209 | 0.63398  |
| 0.0331   | -0.28937 | 1.85E-10 | -0.08278 | 0.07393  | -0.11066 | 0.01674  | 0.034232 | 0.46052  |
| 0.04456  | -0.17147 | 0.0002   | -0.101   | 0.02908  | -0.15995 | 0.00052  | 0.051946 | 0.26259  |
| 0.50794  | -0.09963 | 0.03134  | -0.129   | 0.00524  | -0.11043 | 0.01697  | -0.05963 | 0.19834  |
| 0.30176  | -0.03839 | 0.40783  | -0.1106  | 0.0168   | -0.12076 | 0.009    | 0.194615 | 2.29E-05 |
| 3.73E-07 | 0.10707  | 0.02065  | -0.12286 | 0.00786  | -0.04936 | 0.28712  | 0.080675 | 0.08158  |
| 0.84887  | -0.08231 | 0.07556  | -0.13164 | 0.00438  | -0.09569 | 0.03872  | 0.073378 | 0.11328  |
| 4.61E-12 | -0.48919 | 1.81E-29 | -0.07865 | 0.08956  | -0.14158 | 0.00216  | -0.03337 | 0.47183  |
| 0.01026  | -0.22882 | 5.79E-07 | -0.0986  | 0.03315  | -0.16383 | 0.00038  | 0.097166 | 0.03581  |
| 0.00158  | -0.30646 | 1.30E-11 | -0.04417 | 0.34088  | -0.04    | 0.38842  | 0.030467 | 0.51132  |
| 1.07E-05 | -0.3336  | 1.33E-13 | -0.09197 | 0.04699  | -0.12168 | 0.00848  | -0.08019 | 0.08344  |
| 0.82704  | -0.19849 | 1.55E-05 | -0.13597 | 0.00324  | -0.18    | 9.18E-05 | 0.082927 | 0.0734   |
| 0.00044  | -0.27194 | 2.32E-09 | -0.10445 | 0.02399  | -0.12993 | 0.00492  | 0.166106 | 0.00031  |
| 0.24531  | -0.25058 | 4.06E-08 | -0.00529 | 0.90928  | -0.16406 | 0.00037  | 0.049462 | 0.28612  |
| 0.0001   | 0.239596 | 1.60E-07 | 0.049848 | 0.28238  | 0.029718 | 0.52176  | 0.099668 | 0.03128  |
| 8.73E-14 | -0.36212 | 6.46E-16 | -0.08211 | 0.07628  | -0.02298 | 0.62033  | -0.11015 | 0.01725  |
| 1.54E-09 | -0.45602 | 2.32E-25 | -0.12989 | 0.00493  | -0.15858 | 0.00058  | -0.01864 | 0.68786  |
| 1.07E-06 | -0.3255  | 5.49E-13 | -0.17764 | 0.00011  | -0.12493 | 0.00687  | -0.14561 | 0.0016   |
| 0.00079  | -0.23908 | 1.71E-07 | -0.07898 | 0.08823  | -0.07747 | 0.09451  | -0.1057  | 0.02234  |
| 3.71E-06 | -0.28461 | 3.75E-10 | -0.04509 | 0.33091  | -0.06743 | 0.1457   | -0.09382 | 0.04272  |
| 2.76E-06 | 0.393521 | 9.53E-19 | 0.125819 | 0.00648  | 0.160557 | 0.0005   | 0.030328 | 0.51324  |
| 0.01619  | -0.28633 | 2.91E-10 | -0.19446 | 2.32E-05 | -0.07045 | 0.12846  | -0.15996 | 0.00052  |
| 2.31E-06 | -0.38992 | 2.09E-18 | -0.09325 | 0.04401  | -0.11614 | 0.01202  | 0.014587 | 0.75322  |
| 5.78E-07 | -0.35658 | 1.90E-15 | -0.03689 | 0.42636  | -0.11429 | 0.01347  | -0.09459 | 0.04103  |
| 0.73754  | -0.1026  | 0.02661  | -0.08556 | 0.06469  | -0.08586 | 0.06376  | -0.11765 | 0.01094  |



|          |          |          |          |          |          |          |          |          |
|----------|----------|----------|----------|----------|----------|----------|----------|----------|
| 0.00042  | -0.0711  | 0.12495  | -0.02741 | 0.55462  | 0.030428 | 0.51186  | -0.13587 | 0.00326  |
| 1.76E-12 | 0.536111 | 4.18E-36 | 0.115829 | 0.01225  | 0.175098 | 0.00014  | 0.272785 | 2.06E-09 |
| 1.86E-10 | 0.382338 | 1.05E-17 | -0.02132 | 0.64586  | 0.07219  | 0.11926  | 0.351781 | 4.75E-15 |
| 4.54E-06 | 0.304681 | 1.73E-11 | 0.01887  | 0.68421  | 0.08901  | 0.05458  | 0.15211  | 0.00098  |
| 0.00011  | 0.252365 | 3.22E-08 | 0.046361 | 0.31744  | 0.085714 | 0.06421  | 0.194232 | 2.37E-05 |
| 4.57E-30 | 0.567248 | 4.05E-41 | 0.123426 | 0.00758  | 0.114149 | 0.01358  | 0.31469  | 3.41E-12 |
| 8.35E-09 | 0.332916 | 1.50E-13 | 0.160669 | 0.00049  | 0.146881 | 0.00146  | 0.182255 | 7.46E-05 |
| 1.17E-14 | 0.526616 | 1.12E-34 | 0.179249 | 9.83E-05 | 0.11889  | 0.01013  | 0.229533 | 5.33E-07 |
| 2.82E-48 | 0.619202 | 8.89E-51 | 0.159057 | 0.00056  | 0.128371 | 0.00547  | 0.348816 | 8.30E-15 |
| 2.37E-33 | 0.707272 | 4.79E-72 | 0.205002 | 7.98E-06 | 0.202263 | 1.06E-05 | 0.332258 | 1.69E-13 |
| 5.00E-13 | -0.33817 | 5.88E-14 | -0.03569 | 0.44162  | -0.03991 | 0.38954  | -0.1489  | 0.00125  |
| 0.00134  | 0.174918 | 0.00015  | -0.02546 | 0.58308  | -0.01233 | 0.79046  | 0.029084 | 0.53068  |
| 0.00028  | -0.17282 | 0.00017  | -0.01548 | 0.73864  | -0.0558  | 0.22879  | -0.2522  | 3.29E-08 |
| 4.31E-07 | 0.359498 | 1.08E-15 | 0.07272  | 0.11656  | 0.109262 | 0.01818  | 0.127259 | 0.00589  |
| 2.91E-09 | -0.37868 | 2.27E-17 | -0.07781 | 0.09305  | -0.12627 | 0.00629  | -0.23883 | 1.76E-07 |
| 6.26E-40 | 0.633447 | 9.41E-54 | 0.121553 | 0.00855  | 0.098677 | 0.03301  | 0.282961 | 4.78E-10 |
| 2.78E-06 | 0.1728   | 0.00018  | 0.098318 | 0.03366  | 0.009432 | 0.83891  | 0.11234  | 0.01515  |
| 0.01313  | -0.2664  | 4.99E-09 | -0.03485 | 0.45245  | -0.02679 | 0.56358  | -0.05669 | 0.22142  |
| 1.37E-07 | 0.501326 | 4.34E-31 | 0.128935 | 0.00526  | 0.205979 | 7.21E-06 | 0.108109 | 0.01945  |
| 2.33E-40 | 0.678763 | 2.41E-64 | 0.04644  | 0.31662  | 0.049914 | 0.28174  | 0.231388 | 4.29E-07 |
| 3.68E-13 | -0.42898 | 2.49E-22 | -0.10801 | 0.01956  | -0.08804 | 0.05727  | -0.25161 | 3.55E-08 |
| 4.80E-06 | -0.30024 | 3.49E-11 | 0.011122 | 0.81055  | -0.09732 | 0.03551  | -0.1843  | 6.16E-05 |
| 0.0444   | -0.02776 | 0.5495   | 0.012019 | 0.7956   | -0.0027  | 0.95363  | 0.09087  | 0.0497   |
| 0.03024  | -0.10429 | 0.02421  | -0.14385 | 0.00183  | -0.03542 | 0.44503  | -0.22782 | 6.51E-07 |
| 4.56E-23 | 0.511819 | 1.53E-32 | 0.053722 | 0.24659  | 0.05905  | 0.20274  | 0.246647 | 6.68E-08 |
| 0.01083  | -0.10928 | 0.01816  | -0.03887 | 0.40205  | -0.04865 | 0.29411  | -0.04632 | 0.31786  |
| 0.99636  | -0.08671 | 0.06116  | -0.05548 | 0.23144  | -0.0362  | 0.43519  | -0.18456 | 6.02E-05 |
| 2.64E-33 | 0.653775 | 2.81E-58 | 0.056075 | 0.22648  | 0.119723 | 0.00961  | 0.3468   | 1.21E-14 |
| 1.17E-18 | 0.446416 | 2.97E-24 | 0.076524 | 0.0986   | 0.089705 | 0.05271  | 0.442135 | 9.03E-24 |
| 1.43E-28 | 0.575341 | 1.64E-42 | 0.006943 | 0.88105  | 0.081072 | 0.08009  | 0.116895 | 0.01147  |
| 5.51E-29 | 0.568541 | 2.44E-41 | 0.079201 | 0.08733  | 0.167626 | 0.00027  | 0.506927 | 7.39E-32 |
| 1.52E-24 | -0.38924 | 2.42E-18 | -0.14408 | 0.0018   | -0.03102 | 0.50371  | -0.25047 | 4.12E-08 |
| 0.14339  | -0.01245 | 0.7884   | 0.011766 | 0.79981  | -0.02795 | 0.54681  | -0.1363  | 0.00316  |
| 1.56E-10 | -0.2969  | 5.87E-11 | -0.01432 | 0.75755  | 0.020244 | 0.66259  | -0.06538 | 0.15838  |
| 3.55E-11 | 0.295787 | 6.97E-11 | 0.073231 | 0.11401  | 0.066049 | 0.15414  | 0.225714 | 8.29E-07 |
| 3.62E-17 | 0.54167  | 5.81E-37 | 0.118592 | 0.01032  | 0.151291 | 0.00104  | 0.296627 | 6.12E-11 |
| 1.10E-30 | 0.654507 | 1.90E-58 | 0.118916 | 0.01011  | 0.156635 | 0.00068  | 0.395735 | 5.86E-19 |
| 0.00979  | -0.28649 | 2.84E-10 | 0.061543 | 0.18429  | -0.09031 | 0.05114  | -0.10283 | 0.02628  |
| 3.08E-26 | 0.639465 | 4.67E-55 | 0.14397  | 0.00181  | 0.146454 | 0.00151  | 0.150755 | 0.00108  |
| 4.76E-05 | -0.28076 | 6.59E-10 | 0.047492 | 0.30577  | -0.09608 | 0.03793  | -0.2925  | 1.15E-10 |
| 1.14E-05 | 0.152636 | 0.00094  | -0.0093  | 0.84106  | 0.023567 | 0.61145  | 0.271555 | 2.45E-09 |
| 7.17E-14 | -0.48169 | 1.68E-28 | -0.12368 | 0.00745  | -0.16774 | 0.00027  | -0.30244 | 2.47E-11 |
| 5.75E-06 | -0.20356 | 9.27E-06 | -0.03548 | 0.44437  | -0.04638 | 0.31728  | -0.10155 | 0.02822  |
| 4.38E-08 | 0.41197  | 1.47E-20 | 0.219247 | 1.72E-06 | 0.130981 | 0.00458  | 0.078996 | 0.08816  |
| 4.23E-12 | 0.426219 | 4.91E-22 | 0.09802  | 0.0342   | 0.065167 | 0.15973  | 0.284469 | 3.83E-10 |

|          |          |          |          |          |          |          |          |          |
|----------|----------|----------|----------|----------|----------|----------|----------|----------|
| 4.51E-16 | 0.542795 | 3.88E-37 | 0.198877 | 1.49E-05 | 0.151627 | 0.00101  | 0.147468 | 0.00139  |
| 1.89E-13 | -0.45464 | 3.36E-25 | -0.10556 | 0.02252  | -0.09593 | 0.03824  | -0.23704 | 2.19E-07 |
| 1.56E-06 | 0.300802 | 3.19E-11 | 0.101599 | 0.02814  | 0.039667 | 0.39242  | 0.198123 | 1.61E-05 |
| 2.04E-12 | 0.504977 | 1.37E-31 | 0.065713 | 0.15625  | 0.15385  | 0.00085  | 0.15445  | 0.00081  |
| 6.57E-10 | -0.25343 | 2.81E-08 | -0.04939 | 0.28682  | -0.09425 | 0.04176  | -0.14561 | 0.0016   |
| 1.70E-11 | 0.237127 | 2.16E-07 | 0.081156 | 0.07978  | 0.002291 | 0.96062  | 0.246239 | 7.04E-08 |
| 2.00E-10 | -0.29496 | 7.92E-11 | 0.027843 | 0.54838  | -0.05323 | 0.25096  | -0.24462 | 8.62E-08 |
| 6.38E-13 | 0.42852  | 2.79E-22 | 0.052312 | 0.25923  | 0.050484 | 0.27627  | 0.246786 | 6.57E-08 |
| 2.91E-08 | 0.341198 | 3.39E-14 | 0.014563 | 0.75362  | 0.067602 | 0.14466  | 0.194913 | 2.22E-05 |
| 3.73E-11 | 0.435353 | 5.08E-23 | 0.022587 | 0.62636  | 0.09778  | 0.03465  | 0.116711 | 0.0116   |
| 4.40E-07 | -0.20826 | 5.67E-06 | -0.05772 | 0.2131   | -0.05728 | 0.21666  | -0.10579 | 0.02223  |
| 6.37E-09 | -0.3563  | 2.00E-15 | -0.07257 | 0.11734  | -0.17156 | 0.0002   | -0.22905 | 5.64E-07 |
| 3.41E-09 | -0.39082 | 1.72E-18 | 0.060146 | 0.19447  | -0.14324 | 0.00192  | -0.14695 | 0.00145  |
| 6.74E-15 | -0.44203 | 9.27E-24 | -0.12896 | 0.00526  | -0.05123 | 0.26921  | -0.0966  | 0.03689  |
| 2.34E-10 | 0.379342 | 1.97E-17 | 0.203523 | 9.30E-06 | 0.143051 | 0.00194  | 0.237673 | 2.02E-07 |
| 0.00021  | -0.24109 | 1.33E-07 | -0.00453 | 0.92228  | -0.01897 | 0.68268  | -0.11892 | 0.01011  |
| 2.29E-12 | 0.427522 | 3.57E-22 | 0.054603 | 0.23892  | 0.039809 | 0.39072  | 0.204575 | 8.34E-06 |
| 1.45E-22 | -0.4795  | 3.19E-28 | -0.04434 | 0.33907  | -0.0463  | 0.3181   | -0.14109 | 0.00224  |
| 2.42E-09 | -0.34077 | 3.67E-14 | -0.09104 | 0.04928  | -0.05186 | 0.26337  | -0.15895 | 0.00057  |
| 4.98E-15 | 0.478152 | 4.72E-28 | -0.02334 | 0.61483  | 0.022189 | 0.63245  | 0.195011 | 2.20E-05 |
| 2.79E-24 | 0.564411 | 1.22E-40 | 0.069739 | 0.13236  | 0.15015  | 0.00114  | 0.191891 | 2.99E-05 |
| 1.09E-08 | 0.408595 | 3.22E-20 | 0.09709  | 0.03595  | 0.194137 | 2.40E-05 | 0.181768 | 7.80E-05 |
| 0.00595  | -0.16293 | 0.00041  | -0.00885 | 0.84878  | 0.002478 | 0.9574   | -0.08485 | 0.06696  |
| 0.12012  | -0.1968  | 1.84E-05 | -0.10991 | 0.0175   | -0.11883 | 0.01016  | -0.15319 | 0.0009   |
| 4.88E-11 | 0.36972  | 1.42E-16 | -0.00852 | 0.85425  | 0.031266 | 0.50029  | 0.351349 | 5.15E-15 |
| 8.67E-16 | 0.492654 | 6.33E-30 | 0.017358 | 0.70831  | 0.063336 | 0.17181  | 0.172613 | 0.00018  |
| 3.40E-11 | 0.310932 | 6.31E-12 | -0.01922 | 0.67872  | -0.0164  | 0.72381  | 0.321823 | 1.03E-12 |
| 0.00011  | -0.23713 | 2.16E-07 | -0.08836 | 0.05638  | -0.04414 | 0.34122  | -0.16892 | 0.00025  |
| 9.68E-30 | -0.55506 | 4.29E-39 | -0.12352 | 0.00753  | -0.0516  | 0.26576  | -0.29201 | 1.24E-10 |
| 2.27E-16 | 0.439291 | 1.87E-23 | -0.04051 | 0.38237  | 0.052431 | 0.25815  | 0.396048 | 5.47E-19 |
| 4.76E-10 | 0.276566 | 1.20E-09 | 0.069245 | 0.13513  | 0.006929 | 0.88129  | 0.10548  | 0.02263  |
| 2.31E-18 | 0.428651 | 2.70E-22 | 0.090204 | 0.05141  | 0.122756 | 0.00791  | 0.354345 | 2.91E-15 |
| 1.70E-14 | 0.47182  | 2.91E-27 | 0.173902 | 0.00016  | 0.122256 | 0.00817  | 0.17101  | 0.0002   |
| 0.00014  | 0.191342 | 3.15E-05 | -0.11464 | 0.01318  | 0.089928 | 0.05213  | 0.220201 | 1.55E-06 |
| 3.58E-17 | -0.48657 | 3.96E-29 | -0.1897  | 3.69E-05 | -0.09955 | 0.03149  | -0.21159 | 3.98E-06 |
| 0.24739  | 0.026418 | 0.56904  | 0.057353 | 0.21605  | 0.076262 | 0.09976  | 0.040524 | 0.38226  |
| 1.78E-37 | 0.671631 | 1.49E-62 | 0.09042  | 0.05085  | 0.182838 | 7.06E-05 | 0.282087 | 5.43E-10 |
| 0.00079  | 0.379912 | 1.75E-17 | 0.119351 | 0.00984  | 0.085359 | 0.06532  | 0.061933 | 0.18152  |
| 1.77E-11 | 0.444312 | 5.14E-24 | 0.133332 | 0.0039   | 0.15977  | 0.00053  | 0.28032  | 7.02E-10 |
| 3.78E-07 | -0.42067 | 1.88E-21 | -0.14276 | 0.00198  | -0.1901  | 3.55E-05 | -0.14782 | 0.00136  |
| 1.34E-05 | 0.289954 | 1.69E-10 | 0.138429 | 0.00272  | 0.116673 | 0.01163  | 0.148109 | 0.00133  |
| 2.01E-17 | 0.578493 | 4.60E-43 | 0.136702 | 0.00308  | 0.167079 | 0.00029  | 0.374039 | 5.91E-17 |
| 4.58E-05 | 0.288371 | 2.15E-10 | 0.110899 | 0.01651  | 0.054183 | 0.24256  | 0.143724 | 0.00185  |
| 2.08E-06 | -0.31562 | 2.92E-12 | 0.023792 | 0.60807  | -0.0886  | 0.05571  | -0.09322 | 0.04407  |
| 1.05E-13 | 0.379447 | 1.93E-17 | 0.05082  | 0.27308  | 0.036071 | 0.43677  | 0.199564 | 1.39E-05 |

|          |          |          |          |          |          |         |          |          |
|----------|----------|----------|----------|----------|----------|---------|----------|----------|
| 7.93E-17 | 0.456735 | 1.91E-25 | 0.050049 | 0.28043  | 0.00989  | 0.8312  | 0.28586  | 3.12E-10 |
| 5.09E-10 | 0.453102 | 5.07E-25 | 0.068758 | 0.1379   | 0.084329 | 0.06865 | 0.245641 | 7.59E-08 |
| 0.00133  | 0.222354 | 1.22E-06 | 0.001184 | 0.97964  | -0.01012 | 0.82727 | 0.068407 | 0.13993  |
| 0.00023  | -0.31107 | 6.17E-12 | 0.034692 | 0.45452  | -0.15388 | 0.00085 | -0.04927 | 0.28796  |
| 2.54E-06 | -0.19874 | 1.51E-05 | 0.043951 | 0.34328  | -0.06045 | 0.19222 | -0.23388 | 3.19E-07 |
| 1.08E-08 | 0.412162 | 1.41E-20 | 0.100864 | 0.0293   | 0.061153 | 0.18709 | 0.113818 | 0.01385  |
| 2.69E-13 | 0.489165 | 1.82E-29 | 0.120565 | 0.00911  | 0.172462 | 0.00018 | 0.254942 | 2.31E-08 |
| 3.96E-20 | 0.612717 | 1.79E-49 | 0.164042 | 0.00037  | 0.143947 | 0.00182 | 0.187591 | 4.52E-05 |
| 3.67E-06 | 0.240218 | 1.49E-07 | 0.02442  | 0.59861  | -0.00316 | 0.94565 | 0.239314 | 1.66E-07 |
| 0.8144   | -0.07267 | 0.11681  | -0.08017 | 0.08351  | -0.03115 | 0.50192 | -0.14022 | 0.00239  |
| 6.20E-07 | 0.304205 | 1.87E-11 | 0.110304 | 0.0171   | 0.151939 | 0.00099 | 0.091871 | 0.04723  |
| 5.40E-10 | 0.444786 | 4.54E-24 | 0.113971 | 0.01373  | 0.140341 | 0.00237 | 0.233622 | 3.29E-07 |
| 3.83E-19 | 0.43336  | 8.39E-23 | 0.023519 | 0.61218  | 0.083788 | 0.07045 | 0.188824 | 4.02E-05 |
| 7.30E-31 | 0.62858  | 1.02E-52 | 0.173827 | 0.00016  | 0.149771 | 0.00117 | 0.277081 | 1.12E-09 |
| 0.00035  | 0.330544 | 2.28E-13 | 0.052957 | 0.25339  | 0.05532  | 0.2328  | 0.037629 | 0.41721  |
| 7.18E-27 | 0.518765 | 1.57E-33 | 0.053858 | 0.24539  | 0.073529 | 0.11254 | 0.261216 | 1.01E-08 |
| 0.00335  | 0.238285 | 1.88E-07 | -0.01741 | 0.70744  | 0.121683 | 0.00848 | 0.215043 | 2.74E-06 |
| 2.42E-09 | 0.378161 | 2.53E-17 | 0.033211 | 0.47401  | 0.123274 | 0.00765 | 0.302551 | 2.43E-11 |
| 2.61E-17 | 0.483042 | 1.13E-28 | 0.122736 | 0.00792  | 0.137742 | 0.00286 | 0.164757 | 0.00035  |
| 0.01056  | 0.188957 | 3.96E-05 | 0.066508 | 0.15129  | 0.134319 | 0.00364 | 0.12056  | 0.00911  |
| 7.97E-21 | -0.47441 | 1.39E-27 | -0.01105 | 0.81171  | -0.10355 | 0.02524 | -0.17777 | 0.00011  |
| 4.49E-11 | 0.287074 | 2.61E-10 | -0.00888 | 0.84827  | -0.02745 | 0.55403 | 0.319494 | 1.53E-12 |
| 1.86E-05 | -0.26309 | 7.82E-09 | -0.00138 | 0.97635  | -0.02114 | 0.6487  | -0.18771 | 4.47E-05 |
| 2.29E-07 | 0.214911 | 2.78E-06 | 0.032323 | 0.48592  | -0.0369  | 0.42624 | 0.268707 | 3.63E-09 |
| 2.11E-06 | 0.27117  | 2.58E-09 | 0.203889 | 8.95E-06 | 0.091472 | 0.0482  | 0.208805 | 5.35E-06 |
| 2.25E-08 | 0.419417 | 2.54E-21 | 0.062967 | 0.17432  | 0.172495 | 0.00018 | 0.142721 | 0.00199  |
| 6.86E-07 | 0.418964 | 2.83E-21 | 0.087691 | 0.05828  | 0.041765 | 0.36785 | 0.347171 | 1.13E-14 |
| 2.13E-13 | 0.418024 | 3.54E-21 | 0.058485 | 0.20711  | 0.047358 | 0.30714 | 0.120953 | 0.00889  |
| 3.43E-06 | 0.295994 | 6.75E-11 | 0.10478  | 0.02354  | 0.048835 | 0.29228 | 0.262158 | 8.87E-09 |
| 1.24E-08 | 0.397967 | 3.57E-19 | 0.070809 | 0.12651  | 0.03722  | 0.4223  | 0.131652 | 0.00437  |
| 0.00229  | 0.137    | 0.00301  | 0.068828 | 0.1375   | 0.041334 | 0.37281 | 0.201298 | 1.17E-05 |
| 1.62E-06 | 0.266674 | 4.81E-09 | 0.143777 | 0.00184  | 0.043259 | 0.35094 | 0.00827  | 0.85853  |
| 0.00496  | -0.08664 | 0.06137  | 0.008093 | 0.86153  | -0.01932 | 0.67711 | -0.01519 | 0.74339  |
| 1.08E-14 | 0.4401   | 1.52E-23 | 0.018724 | 0.68652  | 0.07417  | 0.10943 | 0.104047 | 0.02454  |
| 3.17E-06 | -0.31212 | 5.20E-12 | -0.07264 | 0.11699  | -0.02366 | 0.61009 | -0.10585 | 0.02215  |
| 6.86E-06 | -0.14022 | 0.00239  | 0.000613 | 0.98947  | 0.018688 | 0.68709 | -0.14586 | 0.00157  |
| 2.12E-20 | 0.537996 | 2.15E-36 | 0.023883 | 0.60669  | 0.099375 | 0.03179 | 0.188898 | 3.99E-05 |
| 4.24E-05 | -0.25907 | 1.34E-08 | -0.0026  | 0.95526  | 0.014294 | 0.75802 | -0.23721 | 2.14E-07 |
| 6.83E-09 | 0.355739 | 2.23E-15 | 0.107794 | 0.01981  | 0.165038 | 0.00034 | 0.166499 | 0.0003   |
| 1.45E-14 | -0.36272 | 5.74E-16 | -0.03005 | 0.5171   | -0.03427 | 0.46005 | -0.17667 | 0.00012  |
| 1.55E-15 | -0.44459 | 4.78E-24 | -0.05468 | 0.23825  | -0.07326 | 0.11388 | -0.24574 | 7.49E-08 |
| 7.05E-12 | 0.415333 | 6.70E-21 | 0.095424 | 0.03927  | 0.128857 | 0.00529 | 0.234672 | 2.90E-07 |
| 0.04478  | -0.17982 | 9.33E-05 | 0.024752 | 0.59366  | 0.001151 | 0.98021 | -0.06222 | 0.17953  |
| 7.97E-19 | 0.430662 | 1.64E-22 | 0.0442   | 0.34055  | 0.078982 | 0.08821 | 0.266722 | 4.77E-09 |
| 0.06223  | -0.07925 | 0.08712  | -0.05745 | 0.2153   | 0.029339 | 0.52709 | -0.24457 | 8.68E-08 |

|          |          |          |          |          |          |          |          |          |
|----------|----------|----------|----------|----------|----------|----------|----------|----------|
| 0.00167  | 0.198613 | 1.53E-05 | 0.050559 | 0.27556  | 0.121869 | 0.00838  | 0.152683 | 0.00093  |
| 0.00752  | 0.169966 | 0.00022  | 0.090464 | 0.05074  | 0.018594 | 0.68858  | -0.0071  | 0.87846  |
| 0.00307  | 0.23923  | 1.68E-07 | 0.036685 | 0.42899  | 0.123552 | 0.00752  | 0.25089  | 3.90E-08 |
| 6.46E-09 | -0.31949 | 1.53E-12 | -0.1107  | 0.0167   | -0.15625 | 0.0007   | -0.08094 | 0.08057  |
| 0.00777  | -0.20322 | 9.59E-06 | -0.12368 | 0.00746  | -0.0648  | 0.16207  | -0.11729 | 0.01119  |
| 7.93E-11 | -0.33902 | 5.04E-14 | -0.11713 | 0.0113   | -0.04859 | 0.2947   | -0.16776 | 0.00027  |
| 2.16E-19 | 0.48286  | 1.19E-28 | 0.196687 | 1.86E-05 | 0.189155 | 3.89E-05 | 0.394049 | 8.49E-19 |
| 3.68E-06 | 0.309614 | 7.82E-12 | 0.052266 | 0.25964  | 0.085326 | 0.06543  | 0.296924 | 5.85E-11 |
| 4.29E-05 | 0.319773 | 1.46E-12 | 0.11756  | 0.01101  | 0.091051 | 0.04925  | 0.196913 | 1.82E-05 |
| 0.09241  | 0.188481 | 4.15E-05 | 0.072547 | 0.11744  | 0.108441 | 0.01907  | 0.155694 | 0.00074  |
| 0.00699  | 0.235614 | 2.60E-07 | 0.07878  | 0.08903  | 0.191093 | 3.23E-05 | 0.20738  | 6.22E-06 |
| 1.10E-07 | 0.322995 | 8.43E-13 | 0.11238  | 0.01511  | 0.099375 | 0.03179  | 0.142012 | 0.0021   |
| 3.18E-25 | 0.55349  | 7.72E-39 | 0.058178 | 0.2095   | 0.124419 | 0.0071   | 0.160239 | 0.00051  |
| 0.2302   | 0.006003 | 0.89706  | 0.02091  | 0.65221  | 0.024522 | 0.59709  | -0.0067  | 0.8852   |
| 6.09E-06 | 0.060333 | 0.19309  | -0.16859 | 0.00025  | -0.06529 | 0.15891  | -0.00119 | 0.97956  |
| 4.71E-05 | 0.293212 | 1.03E-10 | 0.139832 | 0.00246  | 0.062379 | 0.17839  | 0.01818  | 0.69516  |
| 5.80E-06 | 0.324049 | 7.04E-13 | 0.026199 | 0.57225  | 0.199102 | 1.46E-05 | 0.084102 | 0.0694   |
| 0.00114  | -0.27495 | 1.52E-09 | -0.10304 | 0.02596  | -0.06803 | 0.14212  | -0.1592  | 0.00055  |
| 0.46783  | 0.078996 | 0.08816  | -0.01288 | 0.78137  | -0.04144 | 0.37164  | -0.00788 | 0.86517  |
| 8.75E-07 | -0.28938 | 1.85E-10 | -0.05585 | 0.22837  | 0.00038  | 0.99346  | -0.07647 | 0.09882  |
| 5.85E-13 | -0.36294 | 5.49E-16 | -0.05302 | 0.25283  | -0.09709 | 0.03594  | -0.04772 | 0.3034   |
| 1.18E-23 | 0.641977 | 1.31E-55 | 0.094637 | 0.04093  | 0.207158 | 6.37E-06 | 0.341279 | 3.34E-14 |
| 4.31E-19 | 0.476968 | 6.65E-28 | 0.13217  | 0.00422  | 0.213058 | 3.40E-06 | 0.194366 | 2.34E-05 |
| 3.30E-17 | 0.528613 | 5.65E-35 | 0.131778 | 0.00434  | 0.182093 | 7.57E-05 | 0.460726 | 6.44E-26 |
| 0.97306  | 0.032165 | 0.48806  | 0.035164 | 0.44839  | 0.049334 | 0.28737  | -0.07989 | 0.0846   |
| 1.43E-09 | 0.312857 | 4.61E-12 | 0.048604 | 0.29457  | 0.111516 | 0.01591  | 0.384305 | 6.95E-18 |
| 1.28E-06 | 0.302792 | 2.34E-11 | 0.020174 | 0.66368  | 0.010905 | 0.81419  | 0.004858 | 0.91661  |
| 0.00204  | -0.32589 | 5.14E-13 | -0.15421 | 0.00083  | -0.11047 | 0.01693  | -0.15376 | 0.00086  |
| 2.70E-13 | -0.39189 | 1.36E-18 | -0.06065 | 0.19072  | -0.06363 | 0.16981  | -0.18355 | 6.61E-05 |
| 9.31E-15 | 0.491171 | 9.93E-30 | 0.090441 | 0.05079  | 0.251237 | 3.73E-08 | 0.214748 | 2.83E-06 |
| 0.01411  | -0.14985 | 0.00116  | -0.01713 | 0.71198  | -0.06178 | 0.1826   | -0.05189 | 0.26305  |
| 5.24E-20 | 0.484015 | 8.47E-29 | 0.048173 | 0.29888  | 0.08031  | 0.08298  | 0.278509 | 9.12E-10 |
| 0.10773  | -0.10323 | 0.02569  | -0.04627 | 0.31844  | -0.00635 | 0.8911   | -0.01932 | 0.67706  |
| 0.00071  | -0.16657 | 0.0003   | -0.00941 | 0.83926  | 0.005066 | 0.91306  | -0.00423 | 0.92743  |
| 1.07E-10 | 0.452645 | 5.73E-25 | 0.020154 | 0.664    | 0.197623 | 1.69E-05 | 0.252173 | 3.31E-08 |
| 7.16E-05 | -0.14068 | 0.00231  | -0.03785 | 0.41445  | -0.08983 | 0.05238  | -0.08745 | 0.05896  |
| 0.60484  | -0.12482 | 0.00692  | -0.00236 | 0.95949  | -0.02034 | 0.66108  | -0.15151 | 0.00102  |
| 4.43E-05 | -0.17425 | 0.00015  | 0.054848 | 0.23681  | 0.018673 | 0.68734  | -0.21995 | 1.59E-06 |
| 4.77E-12 | 0.412059 | 1.44E-20 | 0.13855  | 0.00269  | 0.194029 | 2.42E-05 | 0.259517 | 1.26E-08 |
| 0.00067  | 0.181303 | 8.14E-05 | 0.045802 | 0.32332  | -0.08161 | 0.0781   | 0.207207 | 6.34E-06 |
| 6.66E-13 | 0.501443 | 4.19E-31 | 0.187436 | 4.58E-05 | 0.133662 | 0.00381  | 0.258203 | 1.50E-08 |
| 6.97E-16 | 0.4193   | 2.61E-21 | 0.065616 | 0.15687  | 0.048496 | 0.29565  | 0.459784 | 8.34E-26 |
| 0.00024  | 0.178555 | 0.0001   | 0.074086 | 0.10984  | -0.01099 | 0.81271  | 0.149623 | 0.00118  |
| 4.49E-08 | -0.39814 | 3.44E-19 | -0.10969 | 0.01773  | -0.08868 | 0.0555   | -0.18948 | 3.77E-05 |
| 0.01202  | -0.06662 | 0.15058  | 0.038546 | 0.40594  | -0.04186 | 0.36676  | -0.16324 | 0.0004   |

|          |          |          |          |          |          |          |          |          |
|----------|----------|----------|----------|----------|----------|----------|----------|----------|
| 3.07E-07 | 0.323542 | 7.68E-13 | 0.042535 | 0.35907  | 0.135844 | 0.00327  | 0.10505  | 0.02319  |
| 3.17E-28 | 0.581524 | 1.33E-43 | 0.009149 | 0.84368  | 0.134736 | 0.00353  | 0.254803 | 2.35E-08 |
| 2.83E-08 | -0.19506 | 2.19E-05 | -0.07126 | 0.1241   | 0.014154 | 0.76032  | -0.14823 | 0.00132  |
| 7.53E-06 | 0.211793 | 3.89E-06 | 0.095671 | 0.03876  | 0.065664 | 0.15656  | 0.24256  | 1.11E-07 |
| 2.47E-12 | 0.341116 | 3.45E-14 | 0.052897 | 0.25394  | 0.033721 | 0.46724  | 0.15711  | 0.00066  |
| 2.57E-10 | 0.35325  | 3.59E-15 | 0.038999 | 0.40044  | 0.182515 | 7.28E-05 | 0.263334 | 7.57E-09 |
| 2.83E-07 | -0.29293 | 1.08E-10 | 0.033648 | 0.4682   | 0.012302 | 0.7909   | -0.24123 | 1.31E-07 |
| 2.15E-14 | -0.36336 | 5.06E-16 | -0.0281  | 0.54463  | -0.09132 | 0.04857  | -0.2531  | 2.93E-08 |
| 2.65E-14 | 0.476162 | 8.40E-28 | 0.080079 | 0.08387  | 0.130243 | 0.00482  | 0.25342  | 2.81E-08 |
| 2.79E-30 | 0.541292 | 6.65E-37 | 0.180307 | 8.92E-05 | 0.018385 | 0.69191  | 0.273308 | 1.91E-09 |
| 8.28E-08 | -0.40607 | 5.75E-20 | -0.12828 | 0.0055   | -0.06199 | 0.18112  | -0.20465 | 8.27E-06 |
| 0.78787  | 0.029899 | 0.51923  | -0.00079 | 0.98645  | 0.078541 | 0.09001  | 0.063185 | 0.17284  |
| 2.78E-21 | -0.4611  | 5.81E-26 | -0.14307 | 0.00194  | -0.09642 | 0.03726  | -0.26349 | 7.41E-09 |
| 0.00405  | -0.33529 | 9.86E-14 | -0.01268 | 0.78463  | -0.07169 | 0.12183  | -0.119   | 0.01006  |
| 3.41E-15 | -0.44505 | 4.24E-24 | -0.06917 | 0.13555  | -0.0481  | 0.29963  | -0.09013 | 0.05161  |
| 3.43E-27 | 0.59167  | 1.93E-45 | 0.100713 | 0.02955  | 0.145303 | 0.00164  | 0.418619 | 3.07E-21 |
| 3.17E-09 | 0.394498 | 7.69E-19 | 0.104411 | 0.02404  | 0.09303  | 0.0445   | 0.081444 | 0.07871  |
| 9.27E-11 | 0.331821 | 1.82E-13 | 0.044109 | 0.34155  | 0.057503 | 0.21484  | 0.043675 | 0.34632  |
| 0.00182  | 0.229271 | 5.50E-07 | -0.03102 | 0.50365  | 0.086377 | 0.06217  | 0.128971 | 0.00525  |
| 0.01596  | 0.246554 | 6.76E-08 | 0.004724 | 0.9189   | 0.018077 | 0.69682  | 0.156952 | 0.00066  |
| 0.00302  | 0.281014 | 6.35E-10 | -0.02003 | 0.66594  | 0.242687 | 1.10E-07 | 0.060481 | 0.192    |
| 2.34E-08 | 0.332356 | 1.66E-13 | -0.00977 | 0.8332   | 0.222702 | 1.17E-06 | 0.331342 | 1.99E-13 |
| 3.87E-07 | -0.30218 | 2.57E-11 | -0.02885 | 0.53398  | -0.10754 | 0.0201   | -0.2481  | 5.56E-08 |
| 4.69E-19 | 0.482512 | 1.32E-28 | 0.079982 | 0.08425  | 0.10501  | 0.02324  | 0.140938 | 0.00227  |
| 5.66E-08 | 0.364486 | 4.05E-16 | 0.147928 | 0.00135  | 0.109987 | 0.01742  | 0.248829 | 5.07E-08 |
| 2.72E-22 | 0.543539 | 2.97E-37 | 0.177645 | 0.00011  | 0.15751  | 0.00064  | 0.235986 | 2.48E-07 |
| 0.00017  | -0.16059 | 0.00049  | 0.032442 | 0.48431  | -0.06442 | 0.16455  | -0.17308 | 0.00017  |
| 6.73E-05 | -0.31234 | 5.02E-12 | -0.04098 | 0.37692  | -0.05071 | 0.27409  | -0.10717 | 0.02053  |
| 0.00539  | -0.09525 | 0.03964  | 0.102793 | 0.02633  | -0.08856 | 0.05581  | -0.0341  | 0.46228  |
| 2.25E-19 | 0.559983 | 6.68E-40 | 0.146753 | 0.00147  | 0.125211 | 0.00674  | 0.337759 | 6.33E-14 |
| 3.55E-10 | 0.311992 | 5.31E-12 | 0.000919 | 0.9842   | -0.04344 | 0.34898  | 0.258354 | 1.47E-08 |
| 0.00494  | 0.296033 | 6.71E-11 | 0.085325 | 0.06543  | 0.109275 | 0.01817  | -0.01133 | 0.80701  |
| 2.84E-09 | 0.278454 | 9.19E-10 | 0.090232 | 0.05133  | -0.03834 | 0.40849  | 0.087252 | 0.05955  |
| 0.37819  | 0.149965 | 0.00115  | 0.024632 | 0.59545  | 0.034246 | 0.46033  | 0.044508 | 0.3372   |
| 5.86E-05 | -0.25882 | 1.38E-08 | -0.20283 | 9.98E-06 | -0.02516 | 0.58764  | -0.24491 | 8.31E-08 |
| 4.69E-15 | 0.448261 | 1.83E-24 | 0.010469 | 0.82149  | 0.099554 | 0.03148  | 0.128803 | 0.00531  |
| 1.38E-12 | 0.532987 | 1.25E-35 | 0.097802 | 0.03461  | 0.156776 | 0.00067  | 0.133388 | 0.00388  |
| 6.28E-11 | 0.32766  | 3.78E-13 | 0.029545 | 0.52419  | 0.060544 | 0.19154  | 0.23662  | 2.30E-07 |
| 3.44E-05 | 0.321224 | 1.14E-12 | 0.24299  | 1.06E-07 | 0.170079 | 0.00022  | 0.084242 | 0.06893  |
| 1.18E-07 | 0.365716 | 3.17E-16 | 0.019629 | 0.67223  | 0.058908 | 0.20383  | 0.250694 | 4.00E-08 |
| 0.14983  | 0.041721 | 0.36835  | 0.008237 | 0.8591   | -0.04216 | 0.36332  | 0.067211 | 0.147    |
| 3.71E-22 | 0.569339 | 1.78E-41 | 0.103961 | 0.02466  | 0.289144 | 1.91E-10 | 0.366569 | 2.68E-16 |
| 0.00078  | -0.24649 | 6.82E-08 | -0.00027 | 0.9953   | -0.03918 | 0.39827  | -0.14408 | 0.0018   |
| 8.41E-15 | -0.42052 | 1.95E-21 | -0.02771 | 0.55031  | -0.10577 | 0.02225  | -0.26713 | 4.52E-09 |
| 1.28E-08 | -0.40339 | 1.06E-19 | -0.00498 | 0.91448  | -0.08016 | 0.08356  | -0.14708 | 0.00144  |

|          |          |          |          |         |          |          |          |          |
|----------|----------|----------|----------|---------|----------|----------|----------|----------|
| 0.03314  | -0.2523  | 3.25E-08 | 0.001963 | 0.96625 | -0.01199 | 0.79601  | -0.11809 | 0.01065  |
| 6.33E-11 | 0.352052 | 4.51E-15 | 0.10612  | 0.02181 | 0.130445 | 0.00475  | 0.523071 | 3.72E-34 |
| 2.95E-20 | 0.543175 | 3.38E-37 | 0.069301 | 0.13481 | 0.134383 | 0.00362  | 0.352114 | 4.46E-15 |
| 8.05E-33 | -0.56176 | 3.38E-40 | -0.11508 | 0.01282 | -0.09335 | 0.04378  | -0.25139 | 3.65E-08 |
| 6.18E-08 | -0.37057 | 1.20E-16 | -0.13184 | 0.00432 | -0.16707 | 0.00029  | -0.17599 | 0.00013  |
| 5.34E-17 | 0.527967 | 7.05E-35 | 0.076421 | 0.09905 | 0.140545 | 0.00233  | 0.217873 | 2.01E-06 |
| 0.49451  | -0.09398 | 0.04237  | 0.003771 | 0.93522 | 0.043694 | 0.34611  | -0.11275 | 0.01478  |
| 0.45232  | 0.120631 | 0.00907  | -0.06541 | 0.15818 | 0.101836 | 0.02777  | -0.00062 | 0.98933  |
| 2.01E-21 | 0.449763 | 1.23E-24 | 0.081582 | 0.0782  | 0.063207 | 0.17269  | 0.30417  | 1.88E-11 |
| 5.59E-14 | -0.37424 | 5.67E-17 | -0.12432 | 0.00715 | -0.06284 | 0.17517  | -0.34598 | 1.41E-14 |
| 0.00236  | -0.11237 | 0.01511  | 0.044529 | 0.33697 | -0.03871 | 0.40397  | -0.07496 | 0.10572  |
| 2.27E-32 | 0.635645 | 3.17E-54 | 0.063594 | 0.17007 | 0.080567 | 0.08199  | 0.3402   | 4.07E-14 |
| 2.90E-14 | 0.459648 | 8.65E-26 | 0.125119 | 0.00678 | 0.182315 | 7.42E-05 | 0.234604 | 2.93E-07 |
| 1.24E-29 | 0.628562 | 1.03E-52 | 0.065176 | 0.15967 | 0.097134 | 0.03587  | 0.241467 | 1.27E-07 |
| 5.96E-37 | 0.635786 | 2.95E-54 | 0.135955 | 0.00324 | 0.134334 | 0.00363  | 0.37261  | 7.91E-17 |
| 1.62E-42 | 0.548253 | 5.35E-38 | 0.125686 | 0.00654 | 0.096894 | 0.03633  | 0.302181 | 2.57E-11 |
| 3.62E-13 | 0.384281 | 6.99E-18 | 0.057654 | 0.21364 | 0.073873 | 0.11087  | 0.233634 | 3.29E-07 |
| 8.42E-15 | 0.440429 | 1.40E-23 | 0.050185 | 0.27913 | 0.115009 | 0.01288  | 0.370165 | 1.30E-16 |
| 7.51E-12 | 0.430333 | 1.78E-22 | 0.089952 | 0.05206 | 0.102128 | 0.02732  | 0.247379 | 6.10E-08 |
| 3.14E-22 | 0.625465 | 4.57E-52 | 0.070488 | 0.12824 | 0.13803  | 0.0028   | 0.206193 | 7.05E-06 |
| 8.54E-11 | 0.230939 | 4.52E-07 | -0.02128 | 0.64641 | 0.006912 | 0.88157  | 0.152277 | 0.00096  |
| 6.60E-08 | 0.385733 | 5.13E-18 | 0.019015 | 0.68191 | 0.107727 | 0.01988  | 0.126677 | 0.00612  |
| 0.0002   | 0.277727 | 1.02E-09 | 0.057375 | 0.21587 | 0.105261 | 0.02291  | 0.026244 | 0.57159  |
| 6.64E-05 | -0.26808 | 3.96E-09 | -0.0204  | 0.66012 | -0.09203 | 0.04685  | -0.14058 | 0.00233  |
| 2.31E-09 | 0.327438 | 3.93E-13 | 0.136795 | 0.00305 | 0.123265 | 0.00766  | 0.341673 | 3.11E-14 |
| 5.56E-11 | 0.417324 | 4.18E-21 | 0.041361 | 0.3725  | 0.108385 | 0.01914  | 0.141615 | 0.00216  |
| 8.11E-06 | 0.290096 | 1.66E-10 | 0.027413 | 0.55457 | 0.084042 | 0.0696   | 0.106162 | 0.02176  |
| 2.01E-06 | 0.277733 | 1.02E-09 | 0.10035  | 0.03014 | 0.066605 | 0.15069  | -0.02291 | 0.62144  |
| 2.36E-12 | 0.453253 | 4.87E-25 | 0.091956 | 0.04703 | 0.079641 | 0.08558  | 0.224129 | 9.94E-07 |
| 1.34E-05 | 0.299596 | 3.86E-11 | 0.124923 | 0.00687 | 0.128519 | 0.00541  | 0.266219 | 5.11E-09 |
| 1.90E-13 | 0.442799 | 7.61E-24 | 0.109516 | 0.01791 | 0.140864 | 0.00228  | 0.604292 | 8.00E-48 |
| 1.47E-12 | 0.376824 | 3.33E-17 | 0.055386 | 0.23224 | 0.003354 | 0.94237  | 0.070717 | 0.127    |
| 2.79E-14 | 0.456817 | 1.87E-25 | 0.110042 | 0.01737 | 0.142064 | 0.00209  | 0.452031 | 6.75E-25 |
| 7.19E-20 | 0.547988 | 5.89E-38 | 0.076358 | 0.09934 | 0.160655 | 0.00049  | 0.193141 | 2.64E-05 |
| 2.81E-37 | 0.678229 | 3.30E-64 | 0.11688  | 0.01148 | 0.139431 | 0.00253  | 0.226502 | 7.57E-07 |
| 2.54E-08 | 0.295648 | 7.12E-11 | 0.009835 | 0.83213 | 0.119999 | 0.00944  | 0.159085 | 0.00056  |
| 1.54E-11 | 0.394192 | 8.23E-19 | 0.015268 | 0.74209 | 0.073868 | 0.11089  | 0.269837 | 3.11E-09 |
| 1.88E-14 | 0.448012 | 1.96E-24 | 0.070851 | 0.12628 | 0.11338  | 0.01423  | 0.307574 | 1.09E-11 |
| 1.82E-20 | 0.537468 | 2.59E-36 | 0.078638 | 0.08961 | 0.128607 | 0.00538  | 0.238135 | 1.91E-07 |
| 2.58E-17 | 0.459942 | 7.99E-26 | 0.077611 | 0.09389 | 0.185425 | 5.55E-05 | 0.168279 | 0.00026  |
| 0.04619  | 0.23152  | 4.22E-07 | 0.071145 | 0.12471 | 0.115908 | 0.01219  | -0.00289 | 0.95038  |
| 4.17E-25 | 0.615004 | 6.26E-50 | 0.123237 | 0.00767 | 0.167176 | 0.00028  | 0.472905 | 2.14E-27 |
| 2.03E-08 | 0.425715 | 5.55E-22 | 0.103413 | 0.02543 | 0.128176 | 0.00554  | 0.138451 | 0.00271  |
| 2.58E-10 | 0.357376 | 1.63E-15 | 0.04944  | 0.28633 | 0.099135 | 0.0322   | 0.227757 | 6.55E-07 |
| 2.90E-29 | 0.58996  | 3.98E-45 | 0.053631 | 0.2474  | 0.113499 | 0.01412  | 0.310918 | 6.33E-12 |

|          |          |          |          |          |          |          |          |          |
|----------|----------|----------|----------|----------|----------|----------|----------|----------|
| 2.54E-05 | 0.237682 | 2.02E-07 | 0.09452  | 0.04118  | 0.161179 | 0.00047  | 0.263263 | 7.64E-09 |
| 4.21E-12 | 0.5037   | 2.06E-31 | 0.024461 | 0.59801  | 0.170366 | 0.00022  | 0.164505 | 0.00036  |
| 5.89E-17 | 0.503684 | 2.07E-31 | 0.112802 | 0.01473  | 0.163441 | 0.00039  | 0.393161 | 1.03E-18 |
| 2.00E-15 | 0.449768 | 1.23E-24 | 0.123514 | 0.00753  | 0.115036 | 0.01286  | 0.424055 | 8.32E-22 |
| 3.44E-18 | 0.463875 | 2.71E-26 | 0.072964 | 0.11534  | 0.088449 | 0.05613  | 0.192997 | 2.68E-05 |
| 1.65E-09 | 0.351818 | 4.71E-15 | 0.010934 | 0.8137   | 0.034336 | 0.45916  | 0.068218 | 0.14103  |
| 8.59E-37 | 0.628975 | 8.40E-53 | 0.057991 | 0.21097  | 0.106722 | 0.02107  | 0.234294 | 3.04E-07 |
| 0.00024  | -0.15659 | 0.00068  | -0.00772 | 0.86783  | 0.007152 | 0.87749  | -0.07059 | 0.12771  |
| 0.00102  | 0.231946 | 4.01E-07 | 0.052488 | 0.25763  | -0.00135 | 0.97679  | 0.172206 | 0.00018  |
| 2.91E-26 | 0.623288 | 1.29E-51 | 0.16038  | 0.0005   | 0.205953 | 7.23E-06 | 0.285329 | 3.37E-10 |
| 0.12169  | 0.10668  | 0.02112  | 0.747346 | 1.36E-84 | 0.146549 | 0.0015   | 0.115943 | 0.01217  |
| 0.02573  | 0.14051  | 0.00234  | 0.529815 | 3.74E-35 | 0.011953 | 0.7967   | 0.102065 | 0.02742  |
| 0.13836  | 0.083536 | 0.0713   | 0.639031 | 5.81E-55 | 0.017779 | 0.70157  | -0.07366 | 0.11189  |
| 0.02091  | 0.064641 | 0.16313  | 0.681039 | 6.30E-65 | 0.088775 | 0.05523  | 0.04261  | 0.35822  |
| 0.95491  | 0.035243 | 0.44738  | 0.449986 | 1.16E-24 | 0.013554 | 0.77018  | -0.02816 | 0.54378  |
| 0.04029  | 0.112907 | 0.01464  | 0.466676 | 1.24E-26 | 0.085548 | 0.06473  | 0.233274 | 3.43E-07 |
| 0.9459   | -0.00693 | 0.88119  | 0.494439 | 3.67E-30 | 0.029422 | 0.52592  | 0.026729 | 0.5645   |
| 0.06827  | 0.101585 | 0.02816  | 0.853305 | #####    | 0.089871 | 0.05228  | 0.092378 | 0.04602  |
| 0.15251  | -0.03454 | 0.45653  | 0.618411 | 1.29E-50 | 0.117836 | 0.01082  | 0.07337  | 0.11333  |
| 0.03917  | 0.241807 | 1.22E-07 | 0.468121 | 8.28E-27 | 0.012377 | 0.78965  | 0.009823 | 0.83233  |
| 0.00202  | 0.223781 | 1.03E-06 | 0.630042 | 5.00E-53 | 0.031276 | 0.50017  | 0.122385 | 0.00811  |
| 0.09234  | 0.017359 | 0.70829  | 0.395705 | 5.90E-19 | -0.00376 | 0.93535  | 0.00735  | 0.87413  |
| 0.22546  | 0.122102 | 0.00825  | 0.716181 | 1.20E-74 | 0.067496 | 0.14529  | 0.049614 | 0.28464  |
| 0.37351  | -0.0399  | 0.38963  | 0.646978 | 9.99E-57 | -0.00502 | 0.91381  | -0.02577 | 0.57857  |
| 0.25838  | 0.041531 | 0.37053  | 0.689185 | 4.68E-67 | 0.019997 | 0.66645  | -0.0314  | 0.4984   |
| 0.2062   | 0.039235 | 0.3976   | 0.711871 | 2.24E-73 | 0.123507 | 0.00754  | 0.044207 | 0.34047  |
| 1.57E-06 | 0.269884 | 3.09E-09 | 0.765898 | 3.09E-91 | 0.061632 | 0.18366  | 0.248107 | 5.56E-08 |
| 0.78703  | 0.024802 | 0.59291  | 0.846119 | #####    | 0.048034 | 0.30028  | 0.045563 | 0.32585  |
| 0.38752  | 0.187132 | 4.72E-05 | 0.514702 | 5.98E-33 | 0.15938  | 0.00055  | -0.0153  | 0.74163  |
| 0.00568  | 0.093399 | 0.04366  | 0.085807 | 0.06392  | 0.138203 | 0.00276  | 0.009386 | 0.83969  |
| 0.00701  | 0.102025 | 0.02748  | 0.082663 | 0.07432  | 0.109763 | 0.01765  | 0.05368  | 0.24696  |
| 0.00119  | 0.160339 | 0.0005   | 0.806731 | #####    | 0.045091 | 0.3309   | 0.117701 | 0.01091  |
| 0.97439  | 0.005131 | 0.91195  | 0.212744 | 3.51E-06 | 0.139672 | 0.00249  | 0.037214 | 0.42237  |
| 0.94108  | -0.00471 | 0.91916  | 0.446062 | 3.26E-24 | 0.065695 | 0.15636  | -0.07403 | 0.11011  |
| 0.2446   | 0.045776 | 0.3236   | 0.835242 | #####    | 0.022966 | 0.62058  | 0.042905 | 0.3549   |
| 0.00044  | 0.217861 | 2.01E-06 | 0.868394 | #####    | 0.061026 | 0.18802  | 0.107528 | 0.02011  |
| 0.10822  | 0.101367 | 0.0285   | 0.451712 | 7.35E-25 | 0.043242 | 0.35113  | 0.040541 | 0.38206  |
| 0.14408  | 0.020569 | 0.6575   | 0.559191 | 9.03E-40 | -0.01277 | 0.78318  | 0.019262 | 0.67802  |
| 0.00016  | 0.179785 | 9.36E-05 | 0.724693 | 3.16E-77 | 0.110206 | 0.0172   | 0.09029  | 0.05118  |
| 0.00482  | 0.098288 | 0.03371  | 0.539277 | 1.36E-36 | 0.030197 | 0.51507  | -0.09793 | 0.03437  |
| 0.00201  | 0.125597 | 0.00657  | 0.746875 | 1.97E-84 | 0.055945 | 0.22755  | 0.058335 | 0.20828  |
| 0.07473  | 0.060981 | 0.18834  | 0.553851 | 6.75E-39 | -0.01448 | 0.75505  | -0.05729 | 0.21652  |
| 1.49E-05 | 0.133053 | 0.00397  | 0.439548 | 1.75E-23 | 0.052161 | 0.26061  | 0.074726 | 0.10679  |
| 0.09831  | 0.05824  | 0.20902  | 0.555522 | 3.61E-39 | 0.037184 | 0.42274  | 0.06028  | 0.19348  |
| 0.79613  | -0.0045  | 0.92266  | 0.835428 | #####    | 0.038699 | 0.40408  | 0.012285 | 0.79118  |

|          |          |          |          |          |          |         |          |          |
|----------|----------|----------|----------|----------|----------|---------|----------|----------|
| 0.14774  | 0.17067  | 0.00021  | 0.544883 | 1.83E-37 | 0.076071 | 0.10062 | 0.002012 | 0.96542  |
| 0.56926  | 0.033307 | 0.47274  | 0.654973 | 1.48E-58 | 0.050258 | 0.27843 | 0.105561 | 0.02252  |
| 0.16758  | 0.072719 | 0.11657  | 0.67532  | 1.79E-63 | 0.021669 | 0.64045 | 0.004596 | 0.9211   |
| 0.00033  | 0.229304 | 5.47E-07 | 0.690467 | 2.13E-67 | 0.048959 | 0.29106 | 0.080474 | 0.08235  |
| 0.08184  | 0.075784 | 0.10191  | 0.798096 | #####    | 0.048463 | 0.29598 | -0.00833 | 0.85753  |
| 0.06079  | 0.07659  | 0.09831  | 0.565041 | 9.56E-41 | 0.04698  | 0.31102 | 0.049967 | 0.28123  |
| 0.48726  | 0.104314 | 0.02417  | 0.492002 | 7.72E-30 | -0.00086 | 0.98521 | -0.04312 | 0.35247  |
| 0.811    | 0.129924 | 0.00492  | 0.450742 | 9.51E-25 | 0.055526 | 0.23106 | -0.10769 | 0.01992  |
| 0.51499  | -0.01151 | 0.80405  | 0.863227 | #####    | 0.085904 | 0.06362 | 0.042993 | 0.35391  |
| 0.82337  | 0.011196 | 0.80931  | 0.839366 | #####    | 0.116112 | 0.01204 | 0.095687 | 0.03873  |
| 0.20294  | -0.04621 | 0.31908  | 0.604693 | 6.69E-48 | -0.00014 | 0.99759 | -0.07177 | 0.12143  |
| 0.00149  | 0.164174 | 0.00037  | 0.806647 | #####    | 0.111631 | 0.0158  | 0.284627 | 3.74E-10 |
| 0.43747  | 0.030652 | 0.50875  | 0.884334 | #####    | 0.032669 | 0.48127 | -0.00667 | 0.88562  |
| 0.05577  | 0.090762 | 0.04997  | 0.441023 | 1.20E-23 | 0.049972 | 0.28117 | 0.127271 | 0.00588  |
| 0.05439  | 0.071493 | 0.12288  | 0.613238 | 1.41E-49 | 0.034972 | 0.45087 | 0.029081 | 0.53074  |
| 0.19544  | 0.102451 | 0.02684  | 0.770105 | 7.87E-93 | 0.083926 | 0.06999 | -0.00273 | 0.95301  |
| 0.00642  | 0.161983 | 0.00044  | 0.515925 | 4.00E-33 | 0.050423 | 0.27685 | 0.039262 | 0.39726  |
| 0.0331   | 0.207085 | 6.42E-06 | 0.437484 | 2.97E-23 | 0.132681 | 0.00408 | -0.02621 | 0.57202  |
| 0.44686  | -0.04948 | 0.28597  | 0.586225 | 1.91E-44 | 0.013007 | 0.77921 | -0.01927 | 0.67782  |
| 0.00326  | 0.138658 | 0.00267  | 0.627348 | 1.85E-52 | 0.050684 | 0.27437 | 0.098238 | 0.0338   |
| 1.85E-05 | 0.224746 | 9.26E-07 | 0.704157 | 3.69E-71 | 0.094373 | 0.0415  | 0.157032 | 0.00066  |
| 0.19982  | 0.049896 | 0.2819   | 0.710194 | 6.90E-73 | 0.013458 | 0.77177 | 0.113173 | 0.0144   |
| 0.00237  | 0.102303 | 0.02706  | 0.176231 | 0.00013  | 0.024627 | 0.59553 | -0.01804 | 0.69732  |
| 0.0212   | 0.069762 | 0.13223  | 0.524709 | 2.14E-34 | 0.006899 | 0.88179 | -0.02839 | 0.5406   |
| 0.00768  | 0.135656 | 0.00331  | 0.598938 | 8.44E-47 | 0.142185 | 0.00207 | 0.167878 | 0.00027  |
| 0.0973   | 0.090624 | 0.05033  | 0.838268 | #####    | 0.089857 | 0.05231 | 0.051669 | 0.26514  |
| 0.17839  | 0.112846 | 0.01469  | 0.559752 | 7.29E-40 | 0.00664  | 0.88621 | -0.0173  | 0.70925  |
| 7.99E-07 | 0.237226 | 2.14E-07 | 0.506284 | 9.07E-32 | 0.059251 | 0.20121 | 0.116076 | 0.01207  |
| 0.21912  | -0.03117 | 0.50156  | 0.427776 | 3.35E-22 | 0.040516 | 0.38235 | 0.010925 | 0.81386  |
| 0.00028  | 0.182498 | 7.29E-05 | 0.596462 | 2.47E-46 | 0.021094 | 0.64934 | 0.224207 | 9.85E-07 |
| 0.81919  | 0.01845  | 0.69087  | 0.598106 | 1.21E-46 | 0.168805 | 0.00025 | 0.090268 | 0.05124  |
| 0.00999  | 0.120277 | 0.00928  | 0.425281 | 6.17E-22 | 0.083397 | 0.07178 | -0.00418 | 0.92816  |
| 0.89468  | 0.057858 | 0.21203  | 0.721366 | 3.31E-76 | 0.066278 | 0.15271 | 0.154549 | 0.00081  |
| 0.00572  | 0.217577 | 2.07E-06 | 0.608083 | 1.47E-48 | 0.005516 | 0.90537 | 0.031987 | 0.49046  |
| 0.93392  | 0.022981 | 0.62035  | 0.275494 | 1.40E-09 | 0.140972 | 0.00226 | 0.00486  | 0.91658  |
| 0.01683  | 0.089742 | 0.05262  | 0.448228 | 1.85E-24 | 0.092686 | 0.04529 | 0.056549 | 0.22257  |
| 0.18093  | 0.086323 | 0.06233  | 0.549577 | 3.29E-38 | 0.054655 | 0.23847 | 0.030365 | 0.51273  |
| 0.0003   | 0.174682 | 0.00015  | 0.616293 | 3.45E-50 | 0.145819 | 0.00158 | 0.22472  | 9.29E-07 |
| 0.04502  | 0.078065 | 0.09198  | 0.931328 | #####    | 0.057197 | 0.2173  | 0.021036 | 0.65025  |
| 0.52944  | 0.041263 | 0.37363  | 0.583663 | 5.53E-44 | 0.137028 | 0.003   | 0.042253 | 0.36226  |
| 0.00044  | 0.14975  | 0.00117  | 0.894091 | #####    | 0.059012 | 0.20304 | 0.112477 | 0.01502  |
| 0.01191  | 0.106021 | 0.02194  | 0.934907 | #####    | 0.055519 | 0.23112 | 0.091893 | 0.04718  |
| 0.08705  | 0.139107 | 0.00259  | 0.539141 | 1.43E-36 | 0.111823 | 0.01562 | 0.090119 | 0.05163  |
| 0.8466   | 0.023272 | 0.61593  | 0.746258 | 3.21E-84 | 0.056049 | 0.22669 | 0.046965 | 0.31117  |
| 0.00605  | 0.179537 | 9.57E-05 | 0.910251 | #####    | 0.096706 | 0.0367  | 0.04533  | 0.32834  |



|          |          |          |          |          |          |          |          |          |
|----------|----------|----------|----------|----------|----------|----------|----------|----------|
| 0.42396  | 0.008842 | 0.84886  | 0.409152 | 2.83E-20 | 0.092415 | 0.04593  | 0.074284 | 0.10889  |
| 0.06091  | 0.092727 | 0.0452   | 0.719381 | 1.32E-75 | 0.159046 | 0.00056  | 0.154576 | 0.0008   |
| 0.03918  | 0.104513 | 0.0239   | 0.62768  | 1.57E-52 | 0.083248 | 0.07229  | 0.094509 | 0.04121  |
| 0.55548  | 0.075726 | 0.10217  | 0.444592 | 4.78E-24 | 0.034893 | 0.4519   | -0.01647 | 0.72261  |
| 0.91656  | 0.00235  | 0.95961  | 0.040057 | 0.38777  | 0.037394 | 0.42013  | 0.050836 | 0.27293  |
| 0.67293  | 0.031683 | 0.4946   | 0.047108 | 0.3097   | 0.068066 | 0.14192  | 0.069994 | 0.13095  |
| 0.23697  | 0.240122 | 1.50E-07 | 0.592105 | 1.60E-45 | 0.073464 | 0.11286  | 0.067454 | 0.14554  |
| 0.19649  | 0.076275 | 0.0997   | 0.416379 | 5.23E-21 | 0.026338 | 0.57021  | 0.033055 | 0.47608  |
| 0.00061  | 0.193195 | 2.63E-05 | 0.739495 | 5.94E-82 | 0.077906 | 0.09264  | 0.22936  | 5.44E-07 |
| 0.22373  | 0.057308 | 0.21641  | 0.424589 | 7.30E-22 | 0.048617 | 0.29444  | 0.066887 | 0.14897  |
| 0.00756  | 0.126726 | 0.0061   | 0.632867 | 1.25E-53 | 0.089854 | 0.05232  | 0.15006  | 0.00114  |
| 0.34899  | 0.000235 | 0.99596  | 0.489089 | 1.86E-29 | -0.03429 | 0.45972  | -0.01785 | 0.70041  |
| 0.48907  | 0.030405 | 0.51218  | 0.40915  | 2.84E-20 | 0.017175 | 0.71125  | -0.03404 | 0.46305  |
| 0.25546  | 0.031916 | 0.49143  | 0.822336 | #####    | 0.069868 | 0.13164  | 0.082406 | 0.07523  |
| 0.35136  | 0.116192 | 0.01198  | 0.456562 | 2.00E-25 | 0.022062 | 0.6344   | 0.035789 | 0.44036  |
| 0.01385  | 0.118545 | 0.01035  | 0.548842 | 4.31E-38 | 0.104593 | 0.0238   | 0.073352 | 0.11341  |
| 0.14122  | 0.045482 | 0.32672  | 0.06064  | 0.19082  | 0.076041 | 0.10075  | 0.037364 | 0.42049  |
| 0.00092  | 0.261363 | 9.87E-09 | 0.423777 | 8.90E-22 | 0.200287 | 1.30E-05 | 0.098774 | 0.03284  |
| 0.00668  | 0.211339 | 4.09E-06 | 0.478148 | 4.73E-28 | 0.106357 | 0.02152  | 0.024801 | 0.59292  |
| 0.00159  | 0.153196 | 0.0009   | 0.548588 | 4.73E-38 | 0.092864 | 0.04488  | 0.037872 | 0.4142   |
| 0.14366  | 0.062457 | 0.17785  | 0.651803 | 7.98E-58 | 0.31384  | 3.92E-12 | 0.096035 | 0.03803  |
| 1.62E-06 | -0.24251 | 1.12E-07 | -0.03028 | 0.51394  | 0.028822 | 0.53439  | -0.19141 | 3.13E-05 |
| 0.00014  | -0.10953 | 0.0179   | -0.01137 | 0.80649  | -0.00265 | 0.9545   | 0.004059 | 0.9303   |
| 0.45516  | -0.03378 | 0.46642  | -0.03836 | 0.40818  | -0.00804 | 0.8625   | -0.16602 | 0.00031  |
| 0.23869  | 0.016552 | 0.72127  | 0.004814 | 0.91736  | 0.09334  | 0.04379  | -0.19484 | 2.24E-05 |
| 0.38098  | -0.04264 | 0.35793  | -0.06321 | 0.17264  | 0.012593 | 0.78607  | -0.18758 | 4.52E-05 |
| 8.09E-10 | 0.302939 | 2.28E-11 | 0.073395 | 0.1132   | 0.004522 | 0.92235  | 0.220193 | 1.55E-06 |
| 0.51843  | 0.028171 | 0.54368  | 0.014637 | 0.75239  | -0.01851 | 0.68997  | -0.23815 | 1.91E-07 |
| 5.03E-07 | 0.232583 | 3.72E-07 | 0.019198 | 0.67903  | 0.008052 | 0.86223  | -0.0762  | 0.10005  |
| 0.94271  | 0.116441 | 0.0118   | 0.045808 | 0.32326  | 0.041155 | 0.37488  | 0.175765 | 0.00013  |
| 0.35923  | -0.04333 | 0.35015  | -0.10968 | 0.01774  | 0.015244 | 0.74249  | -0.20432 | 8.56E-06 |
| 0.87048  | -0.09948 | 0.03161  | -0.10652 | 0.02132  | -0.01643 | 0.72317  | -0.24492 | 8.30E-08 |
| 7.13E-05 | 0.162258 | 0.00043  | 0.048608 | 0.29453  | 0.00394  | 0.93233  | -0.20099 | 1.21E-05 |
| 0.34242  | 0.099712 | 0.03121  | 0.096195 | 0.03771  | 0.098049 | 0.03415  | 0.037228 | 0.42219  |
| 0.01479  | -0.16114 | 0.00047  | 0.088633 | 0.05562  | -0.01724 | 0.71021  | -0.16982 | 0.00023  |
| 0.47251  | -0.07471 | 0.10686  | -0.11734 | 0.01116  | -0.08096 | 0.08052  | -0.26781 | 4.11E-09 |
| 1.71E-11 | 0.156154 | 0.00071  | 0.029194 | 0.52914  | -0.03623 | 0.43476  | -0.12044 | 0.00918  |
| 0.03734  | -0.14114 | 0.00223  | -0.04493 | 0.33263  | -0.02425 | 0.60116  | -0.23061 | 4.70E-07 |
| 0.00013  | -0.19466 | 2.28E-05 | -0.08187 | 0.07714  | -0.14677 | 0.00147  | -0.18324 | 6.80E-05 |
| 3.67E-06 | -0.21137 | 4.07E-06 | -0.15241 | 0.00095  | -0.03698 | 0.42525  | -0.27938 | 8.04E-10 |
| 2.73E-15 | -0.45491 | 3.13E-25 | -0.12698 | 0.006    | -0.17392 | 0.00016  | -0.35277 | 3.93E-15 |
| 6.49E-29 | -0.51815 | 1.92E-33 | -0.14933 | 0.00121  | -0.11552 | 0.01248  | -0.25983 | 1.21E-08 |
| 0.00166  | 0.138569 | 0.00269  | -0.06449 | 0.16415  | 0.013095 | 0.77776  | -0.19184 | 3.00E-05 |
| 0.03912  | -0.199   | 1.48E-05 | -0.11157 | 0.01586  | -0.10636 | 0.02151  | -0.07978 | 0.08503  |
| 0.08206  | -0.07846 | 0.09033  | -0.06129 | 0.18608  | -0.04216 | 0.36337  | -0.30624 | 1.35E-11 |

|          |          |          |          |         |          |         |          |          |
|----------|----------|----------|----------|---------|----------|---------|----------|----------|
| 0.017    | -0.16029 | 0.00051  | -0.10935 | 0.01809 | 0.048408 | 0.29653 | -0.207   | 6.47E-06 |
| 0.63994  | 0.115478 | 0.01252  | -0.03478 | 0.45342 | 0.116633 | 0.01166 | -0.04483 | 0.33375  |
| 0.0132   | -0.10571 | 0.02233  | -0.05291 | 0.25378 | -0.07661 | 0.09822 | -0.0674  | 0.14589  |
| 0.12364  | -0.10964 | 0.01778  | 0.064738 | 0.1625  | 0.051037 | 0.27103 | 0.089228 | 0.05399  |
| 0.43588  | -0.11625 | 0.01194  | -0.08423 | 0.06897 | -0.12623 | 0.00631 | -0.12381 | 0.00739  |
| 0.35714  | -0.0363  | 0.43384  | -0.09397 | 0.04238 | -0.0372  | 0.42258 | -0.26751 | 4.28E-09 |
| 0.0015   | 0.01315  | 0.77684  | -0.00264 | 0.95466 | 0.030956 | 0.50456 | -0.16737 | 0.00028  |
| 0.02011  | 0.020632 | 0.65653  | -0.03665 | 0.42945 | -0.08263 | 0.07445 | 0.124574 | 0.00703  |
| 1.09E-09 | 0.275571 | 1.39E-09 | 0.043749 | 0.3455  | 0.003749 | 0.9356  | 0.226532 | 7.55E-07 |
| 0.02957  | -0.23473 | 2.89E-07 | 0.029328 | 0.52725 | -0.00364 | 0.93745 | -0.18625 | 5.13E-05 |
| 3.02E-20 | -0.42553 | 5.81E-22 | -0.08852 | 0.05593 | -0.03822 | 0.40996 | -0.23515 | 2.74E-07 |
| 0.86775  | 0.029124 | 0.53012  | 0.011453 | 0.80503 | 0.005551 | 0.90477 | -0.23585 | 2.52E-07 |
| 0.07323  | -0.02604 | 0.57462  | -0.04734 | 0.3073  | 0.032552 | 0.48283 | -0.16913 | 0.00024  |
| 0.54485  | 0.181736 | 7.82E-05 | 0.053864 | 0.24534 | 0.17718  | 0.00012 | 0.054185 | 0.24254  |
| 2.06E-08 | -0.25095 | 3.87E-08 | -0.1198  | 0.00956 | -0.00341 | 0.94138 | -0.14996 | 0.00115  |
| 0.00011  | 0.061457 | 0.18491  | -0.13029 | 0.0048  | -0.08341 | 0.07172 | -0.08745 | 0.05897  |
| 0.0152   | 0.139849 | 0.00245  | -0.00497 | 0.91473 | 0.107405 | 0.02026 | -0.24759 | 5.93E-08 |
| 0.00123  | -0.10882 | 0.01866  | -0.05997 | 0.19579 | 0.024324 | 0.60006 | -0.1071  | 0.02062  |
| 1.41E-10 | -0.30994 | 7.42E-12 | 0.055201 | 0.23381 | -0.02454 | 0.5968  | -0.02788 | 0.54785  |
| 1.02E-07 | -0.19012 | 3.54E-05 | 0.014017 | 0.76256 | 0.028718 | 0.53587 | -0.12869 | 0.00535  |
| 0.00949  | 0.307538 | 1.09E-11 | 0.083071 | 0.0729  | 0.167853 | 0.00027 | -0.05753 | 0.21466  |
| 0.0138   | 0.052428 | 0.25817  | -0.09124 | 0.04879 | 0.017082 | 0.71274 | -0.01942 | 0.67548  |
| 2.98E-07 | -0.27597 | 1.31E-09 | 0.013682 | 0.76808 | -0.08403 | 0.06964 | -0.19859 | 1.54E-05 |
| 2.40E-07 | -0.3238  | 7.35E-13 | -0.08841 | 0.05623 | -0.0887  | 0.05544 | -0.35041 | 6.15E-15 |
| 0.94461  | -0.06475 | 0.1624   | -0.10433 | 0.02415 | -0.08677 | 0.06097 | -0.25691 | 1.78E-08 |
| 0.01369  | -0.20799 | 5.84E-06 | -0.10744 | 0.02022 | -0.05258 | 0.25679 | -0.20145 | 1.15E-05 |
| 1.78E-12 | -0.4002  | 2.17E-19 | -0.09625 | 0.0376  | -0.10978 | 0.01764 | -0.17661 | 0.00012  |
| 1.75E-35 | -0.65267 | 5.04E-58 | -0.11855 | 0.01035 | -0.1195  | 0.00975 | -0.24412 | 9.17E-08 |
| 6.02E-07 | -0.31883 | 1.71E-12 | -0.10546 | 0.02266 | -0.06918 | 0.13547 | -0.23439 | 3.00E-07 |
| 0.22309  | -0.20384 | 9.00E-06 | -0.07531 | 0.10409 | -0.03373 | 0.46713 | -0.18611 | 5.20E-05 |
| 0.16     | -0.16965 | 0.00023  | -0.08632 | 0.06235 | -0.0727  | 0.11666 | -0.31947 | 1.53E-12 |
| 3.33E-06 | 0.200085 | 1.32E-05 | -0.03958 | 0.39351 | 0.000274 | 0.99529 | -0.04003 | 0.38807  |
| 3.12E-28 | -0.59205 | 1.64E-45 | -0.10067 | 0.02961 | -0.15016 | 0.00113 | -0.19563 | 2.07E-05 |
| 1.26E-11 | -0.3056  | 1.49E-11 | -0.0513  | 0.26861 | -0.07545 | 0.10341 | -0.15435 | 0.00082  |
| 1.90E-12 | -0.34009 | 4.15E-14 | -0.11624 | 0.01195 | -0.05988 | 0.19647 | -0.22572 | 8.28E-07 |
| 0.00469  | 0.086376 | 0.06217  | -0.05112 | 0.27023 | -0.03856 | 0.40583 | -0.11328 | 0.01431  |
| 5.77E-11 | 0.210983 | 4.24E-06 | 0.031973 | 0.49065 | -0.04543 | 0.32731 | -0.12075 | 0.009    |
| 0.13099  | -0.01638 | 0.72399  | -0.06651 | 0.15125 | 0.084233 | 0.06896 | -0.06048 | 0.192    |
| 0.00039  | -0.18681 | 4.87E-05 | -0.07607 | 0.10061 | -0.02992 | 0.51897 | -0.21028 | 4.58E-06 |
| 8.54E-05 | -0.2221  | 1.25E-06 | -0.12591 | 0.00644 | -0.09765 | 0.03489 | -0.22246 | 1.20E-06 |
| 0.2253   | -0.03856 | 0.40573  | -0.03806 | 0.41185 | -0.06491 | 0.16136 | -0.14327 | 0.00191  |
| 0.22248  | -0.05323 | 0.25097  | -0.05721 | 0.21723 | -0.05603 | 0.22681 | -0.16362 | 0.00038  |
| 5.41E-08 | -0.311   | 6.25E-12 | -0.09217 | 0.04652 | -0.05223 | 0.26    | -0.26145 | 9.76E-09 |
| 4.12E-07 | -0.31724 | 2.23E-12 | -0.08558 | 0.06462 | -0.03788 | 0.41411 | -0.16928 | 0.00024  |
| 6.89E-41 | -0.62522 | 5.14E-52 | -0.07942 | 0.08645 | -0.09733 | 0.0355  | -0.12548 | 0.00663  |

|          |          |          |          |          |          |          |          |          |
|----------|----------|----------|----------|----------|----------|----------|----------|----------|
| 6.61E-14 | -0.47592 | 9.00E-28 | -0.13651 | 0.00312  | -0.05143 | 0.26739  | -0.25348 | 2.79E-08 |
| 1.43E-14 | -0.46315 | 3.31E-26 | -0.1878  | 4.43E-05 | -0.15784 | 0.00062  | -0.30839 | 9.54E-12 |
| 6.78E-10 | 0.03978  | 0.39106  | -0.00123 | 0.97881  | -0.06147 | 0.18482  | -0.1194  | 0.0098   |
| 0.00292  | -0.17738 | 0.00012  | -0.04453 | 0.33692  | -0.09037 | 0.05099  | -0.16557 | 0.00033  |
| 1.11E-05 | -0.3075  | 1.10E-11 | -0.06052 | 0.19174  | -0.04699 | 0.31089  | -0.19889 | 1.49E-05 |
| 1.44E-07 | -0.36131 | 7.57E-16 | -0.12973 | 0.00499  | -0.0674  | 0.14589  | -0.20123 | 1.18E-05 |
| 5.92E-12 | -0.40298 | 1.16E-19 | -0.05031 | 0.27792  | -0.11967 | 0.00964  | -0.17826 | 0.00011  |
| 0.02041  | 0.138829 | 0.00264  | -0.03576 | 0.44075  | 0.081819 | 0.07734  | -0.09369 | 0.043    |
| 1.39E-23 | -0.57188 | 6.54E-42 | -0.11374 | 0.01392  | -0.09295 | 0.04467  | -0.2236  | 1.06E-06 |
| 0.26666  | -0.12902 | 0.00523  | 0.03589  | 0.43907  | -0.00579 | 0.9007   | -0.06357 | 0.17021  |
| 0.3543   | -0.05939 | 0.20012  | -0.02722 | 0.55736  | 0.003482 | 0.94018  | -0.10961 | 0.01781  |
| 6.78E-07 | -0.39619 | 5.29E-19 | -0.05338 | 0.24964  | -0.13107 | 0.00455  | -0.25048 | 4.11E-08 |
| 8.64E-11 | -0.29315 | 1.04E-10 | -0.06265 | 0.17651  | -0.07266 | 0.11687  | -0.14364 | 0.00186  |
| 0.00883  | -0.17642 | 0.00013  | -0.04302 | 0.35366  | -0.06957 | 0.13332  | -0.1866  | 4.96E-05 |
| 1.78E-07 | -0.25563 | 2.11E-08 | -0.10427 | 0.02424  | -0.03041 | 0.51214  | -0.14996 | 0.00115  |
| 0.00053  | 0.08678  | 0.06095  | 0.036133 | 0.43598  | 0.008415 | 0.85608  | -0.03813 | 0.41097  |
| 0.10576  | -0.19292 | 2.70E-05 | -0.05977 | 0.19726  | -0.05427 | 0.24184  | -0.20609 | 7.12E-06 |
| 0.03111  | 0.061002 | 0.18819  | 0.01577  | 0.73393  | 0.000339 | 0.99417  | -0.19261 | 2.78E-05 |
| 0.74272  | -0.02537 | 0.58449  | -0.10248 | 0.02679  | -0.05475 | 0.23768  | -0.24766 | 5.88E-08 |
| 0.00158  | 0.068231 | 0.14096  | -0.0442  | 0.34059  | -0.03016 | 0.51558  | -0.18481 | 5.88E-05 |
| 4.42E-21 | 0.215861 | 2.50E-06 | -0.04997 | 0.28116  | -0.0798  | 0.08494  | -0.09487 | 0.04043  |
| 1.57E-17 | -0.48741 | 3.08E-29 | -0.13525 | 0.00341  | -0.18427 | 6.18E-05 | -0.30291 | 2.29E-11 |
| 0.12354  | -0.04281 | 0.35597  | -0.03775 | 0.41571  | -0.03154 | 0.49651  | -0.16799 | 0.00027  |
| 5.90E-15 | -0.42415 | 8.13E-22 | -0.08518 | 0.06591  | -0.10537 | 0.02277  | -0.22274 | 1.16E-06 |
| 9.87E-39 | -0.64963 | 2.50E-57 | -0.05245 | 0.25798  | -0.137   | 0.00301  | -0.28052 | 6.82E-10 |
| 9.08E-33 | -0.56811 | 2.88E-41 | -0.12338 | 0.0076   | -0.07595 | 0.10115  | -0.21478 | 2.82E-06 |
| 0.18662  | -0.1149  | 0.01297  | -0.00666 | 0.88586  | -0.06559 | 0.15705  | -0.08246 | 0.07505  |
| 1.82E-21 | -0.48554 | 5.39E-29 | -0.1302  | 0.00483  | -0.06185 | 0.18211  | -0.21032 | 4.56E-06 |
| 0.53901  | -0.03932 | 0.39657  | -0.05083 | 0.273    | -0.06368 | 0.16952  | -0.19198 | 2.96E-05 |
| 0.00282  | -0.22556 | 8.44E-07 | -0.08909 | 0.05436  | -0.05832 | 0.20842  | -0.25257 | 3.14E-08 |
| 2.50E-25 | -0.51826 | 1.85E-33 | -0.15878 | 0.00057  | -0.11014 | 0.01726  | -0.32729 | 4.03E-13 |
| 0.35212  | -0.0138  | 0.76619  | -0.0455  | 0.32652  | -0.02463 | 0.59552  | -0.14393 | 0.00182  |
| 0.06871  | -0.18556 | 5.48E-05 | -0.04345 | 0.3488   | -0.10044 | 0.02999  | -0.14939 | 0.0012   |
| 1.99E-10 | -0.29173 | 1.30E-10 | -0.08566 | 0.06437  | -0.06825 | 0.14087  | -0.20092 | 1.21E-05 |
| 9.35E-06 | -0.27672 | 1.18E-09 | 0.001353 | 0.97674  | -0.03506 | 0.44968  | -0.10978 | 0.01763  |
| 1.08E-31 | -0.58538 | 2.71E-44 | -0.11088 | 0.01652  | -0.06645 | 0.15163  | -0.20308 | 9.74E-06 |
| 8.57E-06 | 0.012788 | 0.78284  | 0.021253 | 0.64688  | -0.01536 | 0.74055  | -0.04754 | 0.30524  |
| 0.27308  | -0.01827 | 0.69375  | -0.0645  | 0.16402  | -0.0247  | 0.59439  | -0.28074 | 6.61E-10 |
| 0.91159  | -0.05909 | 0.20242  | -0.02018 | 0.66356  | -0.03537 | 0.44576  | -0.11722 | 0.01124  |
| 4.22E-08 | 0.170203 | 0.00022  | -0.02214 | 0.63326  | -0.01035 | 0.82352  | -0.12164 | 0.0085   |
| 5.24E-07 | -0.27375 | 1.80E-09 | -0.0308  | 0.50669  | -0.01571 | 0.73492  | -0.13338 | 0.00388  |
| 0.0716   | 0.04281  | 0.35597  | 0.017124 | 0.71207  | 0.03289  | 0.4783   | -0.09714 | 0.03585  |
| 0.6865   | 0.027233 | 0.55717  | -0.01111 | 0.81073  | -0.0442  | 0.34055  | -0.19027 | 3.49E-05 |
| 2.19E-36 | -0.65649 | 6.55E-59 | -0.1091  | 0.01836  | -0.08827 | 0.05664  | -0.22529 | 8.70E-07 |
| 0.31687  | -0.11261 | 0.0149   | -0.01422 | 0.75928  | -0.07333 | 0.1135   | -0.1331  | 0.00396  |

|          |          |          |          |          |          |         |          |          |
|----------|----------|----------|----------|----------|----------|---------|----------|----------|
| 3.16E-12 | -0.37675 | 3.39E-17 | -0.08004 | 0.08401  | -0.12242 | 0.00808 | -0.27914 | 8.33E-10 |
| 1.32E-06 | 0.13501  | 0.00346  | -0.05297 | 0.25326  | -0.04406 | 0.3421  | -0.16253 | 0.00042  |
| 2.51E-06 | -0.33031 | 2.38E-13 | -0.0872  | 0.05971  | -0.1718  | 0.00019 | -0.28591 | 3.10E-10 |
| 2.73E-16 | -0.41603 | 5.68E-21 | -0.13056 | 0.00471  | -0.04623 | 0.31885 | -0.23899 | 1.73E-07 |
| 0.00102  | -0.22462 | 9.40E-07 | -0.04718 | 0.309    | -0.06028 | 0.19345 | -0.25033 | 4.19E-08 |
| 1.93E-05 | 0.126249 | 0.0063   | -0.0623  | 0.17896  | -0.03931 | 0.39672 | -0.07382 | 0.11112  |
| 2.07E-05 | -0.2642  | 6.73E-09 | -0.12053 | 0.00913  | -0.09514 | 0.03987 | -0.25529 | 2.20E-08 |
| 8.79E-18 | -0.50111 | 4.65E-31 | -0.13932 | 0.00255  | -0.09382 | 0.04272 | -0.2781  | 9.67E-10 |
| 1.17E-10 | -0.40265 | 1.25E-19 | -0.0198  | 0.66947  | -0.04177 | 0.36773 | -0.15415 | 0.00083  |
| 0.89801  | -0.04636 | 0.31749  | 0.009578 | 0.83645  | -0.00565 | 0.90311 | -0.22003 | 1.58E-06 |
| 0.12728  | -0.02408 | 0.60372  | 0.011535 | 0.80367  | -0.03462 | 0.45539 | 0.193419 | 2.57E-05 |
| 0.00075  | -0.2514  | 3.65E-08 | -0.0858  | 0.06394  | -0.11    | 0.0174  | -0.03524 | 0.44746  |
| 2.59E-05 | -0.1242  | 0.0072   | -0.12696 | 0.00601  | -0.03737 | 0.42045 | -0.28233 | 5.24E-10 |
| 0.89577  | -0.06673 | 0.1499   | -0.04033 | 0.38456  | 0.060725 | 0.1902  | -0.21107 | 4.20E-06 |
| 0.9497   | -0.05183 | 0.26364  | -0.08618 | 0.06276  | -0.11593 | 0.01218 | -0.22748 | 6.77E-07 |
| 0.4147   | -0.02009 | 0.66502  | -0.10047 | 0.02994  | -0.06726 | 0.1467  | -0.01677 | 0.71784  |
| 0.03381  | -0.21445 | 2.92E-06 | 0.021805 | 0.63835  | -0.07009 | 0.13043 | -0.28192 | 5.56E-10 |
| 0.00118  | -0.25501 | 2.29E-08 | -0.18537 | 5.57E-05 | -0.15176 | 0.001   | -0.17443 | 0.00015  |
| 7.64E-21 | -0.42211 | 1.33E-21 | -0.03563 | 0.44238  | -0.04226 | 0.36214 | -0.16972 | 0.00023  |
| 0.00227  | -0.23667 | 2.29E-07 | 0.044881 | 0.33316  | -0.06539 | 0.15828 | -0.04318 | 0.3518   |
| 0.05585  | -0.05678 | 0.22066  | 0.032703 | 0.4808   | -0.01387 | 0.76504 | 0.036344 | 0.43331  |
| 3.84E-08 | -0.3772  | 3.08E-17 | -0.07137 | 0.12353  | -0.10567 | 0.02238 | -0.13316 | 0.00394  |
| 0.86358  | -0.01611 | 0.72849  | 0.007013 | 0.87986  | 0.003886 | 0.93326 | -0.17972 | 9.42E-05 |
| 4.98E-09 | -0.26988 | 3.09E-09 | -0.1361  | 0.00321  | -0.02561 | 0.58098 | -0.17459 | 0.00015  |
| 0.59718  | 0.152303 | 0.00096  | 0.040207 | 0.38599  | 0.005703 | 0.90217 | -0.15726 | 0.00065  |
| 0.00295  | 0.209122 | 5.18E-06 | 0.00203  | 0.9651   | -0.00637 | 0.89086 | 0.013605 | 0.76935  |
| 0.00077  | -0.31339 | 4.22E-12 | 0.017613 | 0.70422  | -0.05358 | 0.24784 | 0.054952 | 0.23592  |
| 0.00076  | -0.07574 | 0.10211  | 0.019331 | 0.67692  | -0.01562 | 0.73631 | 0.023824 | 0.60758  |
| 0.17233  | -0.01916 | 0.67962  | 0.034157 | 0.4615   | -0.02598 | 0.57551 | -0.12199 | 0.00832  |
| 0.00056  | 0.095238 | 0.03966  | -0.00077 | 0.98672  | -0.01556 | 0.7374  | 0.132756 | 0.00405  |
| 3.49E-07 | -0.27832 | 9.37E-10 | -0.03813 | 0.41107  | -0.0751  | 0.10504 | 0.064657 | 0.16303  |
| 0.36458  | -0.17825 | 0.00011  | 0.002492 | 0.95717  | -0.00385 | 0.9339  | 0.019551 | 0.67346  |
| 0.19563  | -0.12058 | 0.0091   | 0.097405 | 0.03535  | -0.04756 | 0.30503 | -0.10046 | 0.02995  |
| 0.01462  | 0.078579 | 0.08985  | 0.077896 | 0.09269  | 0.005124 | 0.91206 | -0.01351 | 0.77088  |
| 0.00412  | -0.16722 | 0.00028  | -0.02244 | 0.62856  | -0.03861 | 0.40518 | -0.01148 | 0.80459  |
| 0.33652  | -0.19436 | 2.34E-05 | -0.04821 | 0.29855  | -0.10994 | 0.01747 | -0.00274 | 0.95299  |
| 0.12541  | -0.18749 | 4.56E-05 | 0.002708 | 0.95345  | -0.04576 | 0.32376 | 0.01006  | 0.82835  |
| 0.31229  | -0.12364 | 0.00747  | -0.00468 | 0.91965  | -0.05765 | 0.21366 | -0.00076 | 0.98687  |
| 0.25925  | -0.21561 | 2.57E-06 | 0.011613 | 0.80236  | -0.04872 | 0.2934  | -0.03103 | 0.50353  |
| 0.00179  | -0.32067 | 1.25E-12 | 0.04884  | 0.29223  | -0.05217 | 0.26051 | -0.01697 | 0.71446  |
| 3.00E-05 | -0.1453  | 0.00164  | -0.11329 | 0.0143   | -0.02202 | 0.63508 | -0.18186 | 7.74E-05 |
| 0.40941  | 0.074165 | 0.10946  | 0.051197 | 0.26953  | 0.048416 | 0.29644 | 0.131073 | 0.00455  |
| 0.00071  | 0.131555 | 0.0044   | 0.101616 | 0.02811  | -0.05525 | 0.23342 | 0.069499 | 0.1337   |
| 0.68834  | -0.04147 | 0.3712   | 0.031301 | 0.49981  | -0.00614 | 0.89472 | 0.016025 | 0.7298   |
| 0.6792   | -0.10082 | 0.02938  | -0.08038 | 0.0827   | -0.15148 | 0.00102 | -0.10313 | 0.02584  |

|          |          |          |          |         |          |         |          |         |
|----------|----------|----------|----------|---------|----------|---------|----------|---------|
| 7.61E-08 | -0.43015 | 1.87E-22 | -0.03242 | 0.48456 | -0.06343 | 0.17118 | -0.03584 | 0.43976 |
| 0.00044  | -0.1779  | 0.00011  | 0.061204 | 0.18673 | -0.0372  | 0.42252 | -0.05545 | 0.23167 |
| 0.6308   | 0.064428 | 0.16452  | 0.042771 | 0.3564  | 0.008308 | 0.85788 | -0.12518 | 0.00676 |
| 0.03689  | -0.27811 | 9.66E-10 | -0.05276 | 0.25513 | -0.03279 | 0.47962 | 0.054907 | 0.23631 |
| 0.01473  | -0.22379 | 1.03E-06 | 0.01162  | 0.80225 | -0.05123 | 0.26923 | -0.04971 | 0.28367 |
| 0.05898  | -0.22395 | 1.01E-06 | 0.037545 | 0.41825 | -0.09711 | 0.03592 | -0.09374 | 0.04289 |
| 8.04E-19 | -0.33411 | 1.22E-13 | -0.0153  | 0.74159 | 0.009974 | 0.82979 | -0.09951 | 0.03155 |
| 0.02224  | -0.11601 | 0.01211  | 0.00226  | 0.96115 | -0.03264 | 0.48161 | 0.007151 | 0.87751 |
| 0.114    | -0.23022 | 4.92E-07 | -0.09809 | 0.03408 | -0.06221 | 0.17955 | -0.04911 | 0.28958 |
| 0.99677  | -0.01841 | 0.69152  | -0.07834 | 0.09085 | 0.01125  | 0.80842 | 0.000445 | 0.99235 |
| 0.97423  | -0.22327 | 1.10E-06 | -0.00429 | 0.92633 | -0.03411 | 0.46218 | -0.03118 | 0.50144 |
| 0.01208  | -0.04311 | 0.35264  | -0.03557 | 0.44312 | -0.08006 | 0.08394 | -0.01275 | 0.78343 |
| 0.1434   | 0.029033 | 0.5314   | -0.00031 | 0.99461 | 0.032881 | 0.47842 | -0.04171 | 0.36844 |
| 2.78E-08 | -0.25718 | 1.72E-08 | 0.032335 | 0.48576 | -0.00842 | 0.85604 | -0.09311 | 0.04432 |
| 1.38E-08 | -0.19231 | 2.87E-05 | -0.00747 | 0.87214 | -0.02647 | 0.56834 | -0.08267 | 0.0743  |
| 0.01689  | -0.06807 | 0.14188  | -0.03812 | 0.41113 | -0.01068 | 0.81803 | -0.08285 | 0.07366 |
| 1.85E-06 | 0.092507 | 0.04571  | 0.028703 | 0.53609 | -0.03022 | 0.51475 | 0.014445 | 0.75554 |
| 0.01315  | -0.06874 | 0.13802  | -0.03631 | 0.43376 | 0.018899 | 0.68375 | -0.03061 | 0.50929 |
| 0.00023  | 0.024543 | 0.59679  | 0.056252 | 0.22501 | -0.0073  | 0.87494 | -0.03757 | 0.4179  |
| 0.92963  | -0.16011 | 0.00051  | -0.02201 | 0.63514 | -0.10999 | 0.01742 | -0.14684 | 0.00146 |
| 5.30E-12 | -0.31487 | 3.31E-12 | -0.05838 | 0.20793 | -0.13349 | 0.00385 | -0.10308 | 0.02591 |
| 0.85279  | 0.091953 | 0.04703  | -0.16572 | 0.00032 | 0.014886 | 0.74834 | -0.14743 | 0.0014  |
| 0.05703  | -0.24696 | 6.43E-08 | -0.03084 | 0.50618 | -0.05628 | 0.22479 | -0.00505 | 0.91335 |
| 0.97947  | -0.14825 | 0.00131  | 0.00745  | 0.87244 | -0.09128 | 0.04867 | 0.178352 | 0.00011 |
| 0.31881  | 0.090406 | 0.05088  | -0.05082 | 0.2731  | 0.030436 | 0.51174 | -0.107   | 0.02074 |
| 4.16E-05 | -0.30339 | 2.13E-11 | 0.016831 | 0.71677 | -0.03725 | 0.42191 | -0.005   | 0.91416 |
| 0.46494  | 0.144735 | 0.00171  | 0.003291 | 0.94346 | 0.078588 | 0.08982 | 0.101972 | 0.02756 |
| 8.65E-12 | -0.30062 | 3.29E-11 | -0.04246 | 0.35993 | -0.02011 | 0.66466 | -0.08264 | 0.07439 |
| 0.20164  | -0.0701  | 0.13034  | -0.05055 | 0.27566 | -0.09998 | 0.03075 | 0.045772 | 0.32364 |
| 6.96E-07 | -0.19763 | 1.69E-05 | -0.08795 | 0.05755 | -0.03898 | 0.40072 | -0.08409 | 0.06943 |
| 0.3992   | -0.06252 | 0.17745  | 0.028225 | 0.5429  | -0.02044 | 0.65949 | -0.04911 | 0.28957 |
| 0.10486  | -0.0487  | 0.2936   | 0.016975 | 0.71446 | -0.0293  | 0.52762 | 0.060505 | 0.19182 |
| 7.69E-05 | -0.30031 | 3.45E-11 | -0.0463  | 0.31806 | -0.1092  | 0.01825 | 0.006207 | 0.89358 |
| 0.01159  | -0.08379 | 0.07045  | -0.05249 | 0.25761 | -0.0015  | 0.97415 | -0.16635 | 0.00031 |
| 0.30334  | -0.04903 | 0.29039  | -0.01024 | 0.82535 | -0.01892 | 0.68338 | -0.02744 | 0.55418 |
| 0.01929  | -0.27091 | 2.68E-09 | 0.001968 | 0.96617 | -0.06918 | 0.13551 | 0.027354 | 0.55543 |
| 0.04108  | -0.13719 | 0.00297  | 0.00983  | 0.83221 | -0.02614 | 0.57306 | 0.063666 | 0.16958 |
| 0.60185  | 0.138359 | 0.00273  | 0.154982 | 0.00078 | 0.116523 | 0.01174 | 0.032603 | 0.48215 |
| 0.00488  | -0.22245 | 1.20E-06 | 0.019484 | 0.67451 | -0.10628 | 0.02162 | 0.081477 | 0.07859 |
| 0.11317  | -0.00544 | 0.90666  | 0.007535 | 0.871   | -0.06015 | 0.19446 | -0.17831 | 0.00011 |
| 1.90E-05 | 0.127005 | 0.00599  | 0.02211  | 0.63367 | -0.00538 | 0.90773 | -0.0136  | 0.76948 |
| 2.22E-09 | -0.25605 | 2.00E-08 | -0.15465 | 0.0008  | -0.04749 | 0.30583 | -0.12981 | 0.00496 |
| 2.57E-08 | -0.44392 | 5.70E-24 | -0.03876 | 0.40328 | -0.10316 | 0.0258  | -0.1063  | 0.02158 |
| 0.35716  | 0.122384 | 0.00811  | 0.014346 | 0.75717 | 0.073552 | 0.11243 | 0.077578 | 0.09403 |
| 0.02249  | -0.08794 | 0.05758  | -0.0457  | 0.32437 | 0.018649 | 0.68771 | 0.007869 | 0.86533 |

|          |          |          |          |         |          |         |          |          |
|----------|----------|----------|----------|---------|----------|---------|----------|----------|
| 0.003    | -0.25353 | 2.77E-08 | -0.0069  | 0.8817  | -0.08408 | 0.06947 | 0.00573  | 0.90171  |
| 0.00087  | 0.128611 | 0.00538  | 0.098922 | 0.03258 | -0.03343 | 0.47107 | 0.229571 | 5.31E-07 |
| 0.11647  | -0.24152 | 1.27E-07 | -0.04823 | 0.29834 | -0.07608 | 0.10059 | 0.044943 | 0.33249  |
| 0.32626  | 0.150161 | 0.00113  | -0.01508 | 0.74514 | 0.007127 | 0.87792 | -0.15673 | 0.00068  |
| 0.45328  | -0.01441 | 0.75606  | 0.051182 | 0.26967 | 0.021235 | 0.64716 | 0.071288 | 0.12396  |
| 0.19172  | -0.11991 | 0.00949  | -0.01924 | 0.67835 | -0.13307 | 0.00397 | -0.04353 | 0.34792  |
| 0.24934  | -0.06561 | 0.15691  | 0.010155 | 0.82675 | -0.06008 | 0.19497 | -0.1046  | 0.02379  |
| 0.00131  | 0.041246 | 0.37383  | 0.06217  | 0.17985 | 0.139869 | 0.00245 | 0.119668 | 0.00964  |
| 0.00025  | 0.056886 | 0.21981  | 0.01752  | 0.70571 | -0.00335 | 0.94242 | 0.140728 | 0.0023   |
| 0.00379  | 0.046436 | 0.31666  | 0.095589 | 0.03893 | -0.04463 | 0.33587 | -0.01532 | 0.74122  |
| 0.00171  | -0.33306 | 1.47E-13 | -0.04698 | 0.31106 | -0.08535 | 0.06535 | 0.061577 | 0.18405  |
| 0.99622  | -0.10212 | 0.02734  | -0.02363 | 0.61054 | -0.05693 | 0.21946 | -0.06125 | 0.18637  |
| 0.00204  | -0.09297 | 0.04464  | -0.0805  | 0.08225 | 0.014274 | 0.75834 | -0.01622 | 0.72662  |
| 7.55E-14 | -0.55891 | 1.01E-39 | -0.07303 | 0.11499 | -0.10519 | 0.023   | -0.19231 | 2.87E-05 |
| 0.91466  | -0.0262  | 0.57224  | 0.053444 | 0.24905 | -0.00466 | 0.91994 | 0.15842  | 0.00059  |
| 0.78783  | -0.06689 | 0.14898  | -0.01341 | 0.77263 | -0.02914 | 0.52994 | 0.013892 | 0.76462  |
| 0.47331  | -0.00256 | 0.95607  | -0.01487 | 0.74857 | 0.066442 | 0.1517  | -0.04515 | 0.33025  |
| 0.03705  | 0.040969 | 0.37704  | 0.023875 | 0.60681 | -0.04184 | 0.36699 | -0.13688 | 0.00304  |
| 1.70E-30 | 0.411191 | 1.77E-20 | 0.068333 | 0.14036 | 0.051268 | 0.26887 | -0.03984 | 0.3903   |
| 6.93E-22 | 0.374417 | 5.47E-17 | 0.0639   | 0.16802 | 0.000909 | 0.98437 | 0.087172 | 0.05979  |
| 5.60E-07 | -0.25834 | 1.48E-08 | -0.09752 | 0.03513 | -0.00729 | 0.87523 | -0.10601 | 0.02195  |
| 6.29E-10 | -0.26655 | 4.89E-09 | -0.09421 | 0.04186 | -0.12377 | 0.00741 | -0.09034 | 0.05104  |
| 1.40E-23 | -0.50193 | 3.60E-31 | -0.07538 | 0.10376 | -0.05825 | 0.20891 | -0.07372 | 0.11162  |
| 0.45592  | -0.10519 | 0.02301  | -0.0904  | 0.0509  | -0.04157 | 0.37008 | -0.08282 | 0.07375  |
| 3.43E-11 | -0.41018 | 2.24E-20 | 0.0161   | 0.72857 | -0.04724 | 0.30834 | 0.044145 | 0.34115  |
| 0.00178  | -0.09216 | 0.04655  | 0.003659 | 0.93714 | 0.037422 | 0.41978 | -0.0407  | 0.38021  |
| 2.29E-13 | -0.33831 | 5.74E-14 | -0.00087 | 0.98509 | -0.12899 | 0.00524 | -0.01307 | 0.7781   |
| 8.69E-10 | -0.26492 | 6.10E-09 | 0.013508 | 0.77094 | -0.03933 | 0.39649 | -0.02919 | 0.52917  |
| 1.45E-06 | -0.28972 | 1.75E-10 | -0.10654 | 0.02129 | -0.08754 | 0.05871 | -0.05047 | 0.27643  |
| 1.54E-10 | -0.40006 | 2.24E-19 | -0.07578 | 0.10192 | -0.07872 | 0.08926 | -0.11405 | 0.01366  |
| 0.00081  | -0.187   | 4.78E-05 | -0.07732 | 0.09513 | 0.010558 | 0.82    | -0.17108 | 0.0002   |
| 4.93E-05 | -0.21892 | 1.79E-06 | -0.06081 | 0.18956 | -0.02414 | 0.60287 | -0.10343 | 0.02541  |
| 1.29E-05 | -0.22808 | 6.31E-07 | 0.000423 | 0.99272 | -0.03172 | 0.49404 | 0.063484 | 0.17081  |
| 2.98E-18 | -0.36738 | 2.27E-16 | -0.10589 | 0.0221  | -0.04122 | 0.37414 | -0.01081 | 0.81575  |
| 3.27E-11 | -0.24855 | 5.25E-08 | -0.12041 | 0.0092  | 0.02374  | 0.60885 | -0.1111  | 0.01631  |
| 6.97E-06 | -0.20509 | 7.91E-06 | 0.008979 | 0.84654 | 0.009402 | 0.83941 | -0.01544 | 0.73922  |
| 2.97E-12 | -0.38147 | 1.26E-17 | 0.045544 | 0.32605 | -0.08848 | 0.05605 | -0.12245 | 0.00807  |
| 7.79E-10 | -0.37925 | 2.01E-17 | -0.06087 | 0.18917 | -0.0617  | 0.18317 | -0.08273 | 0.07409  |
| 4.48E-07 | -0.26997 | 3.05E-09 | -0.15451 | 0.00081 | -0.00084 | 0.98564 | -0.10223 | 0.02717  |
| 0.00307  | -0.24857 | 5.24E-08 | -0.02331 | 0.61528 | -0.02536 | 0.58464 | 0.167102 | 0.00029  |
| 0.00024  | -0.12974 | 0.00498  | -0.04033 | 0.38454 | 0.038392 | 0.40782 | -0.042   | 0.36512  |
| 0.01462  | -0.15742 | 0.00064  | -0.09728 | 0.03559 | -0.03536 | 0.44589 | -0.10072 | 0.02953  |
| 8.01E-11 | -0.33928 | 4.81E-14 | 0.01643  | 0.72325 | -0.04493 | 0.33258 | -0.00977 | 0.8332   |
| 0.00027  | -0.07731 | 0.09516  | 0.031016 | 0.50374 | 0.073782 | 0.11131 | 0.075409 | 0.10362  |
| 1.17E-10 | -0.36598 | 3.01E-16 | -0.00911 | 0.84432 | -0.0752  | 0.10458 | -0.03564 | 0.44225  |

|          |          |          |          |         |          |         |          |          |
|----------|----------|----------|----------|---------|----------|---------|----------|----------|
| 9.76E-08 | -0.35022 | 6.37E-15 | 0.008407 | 0.85621 | -0.04043 | 0.38334 | -0.04966 | 0.28419  |
| 4.38E-10 | -0.23577 | 2.55E-07 | 0.014405 | 0.7562  | 0.006016 | 0.89683 | -0.05911 | 0.20227  |
| 1.03E-13 | -0.43673 | 3.59E-23 | -0.02662 | 0.56611 | -0.04227 | 0.36204 | -0.11427 | 0.01348  |
| 0.04322  | -0.04561 | 0.32531  | 0.076447 | 0.09894 | 0.053122 | 0.25192 | 0.084358 | 0.06855  |
| 0.0223   | -0.0451  | 0.3308   | 0.08304  | 0.073   | 0.032106 | 0.48886 | 0.103024 | 0.02599  |
| 3.82E-12 | -0.38217 | 1.09E-17 | -0.04225 | 0.36235 | -0.135   | 0.00347 | -0.10848 | 0.01903  |
| 4.81E-07 | -0.31339 | 4.22E-12 | -0.06301 | 0.17402 | -0.1137  | 0.01395 | -0.00785 | 0.8657   |
| 6.66E-05 | -0.296   | 6.75E-11 | 0.003874 | 0.93347 | -0.04357 | 0.34748 | 0.020891 | 0.65249  |
| 7.39E-14 | -0.40523 | 6.97E-20 | 0.016295 | 0.72542 | -0.02342 | 0.61361 | 0.017745 | 0.70212  |
| 0.99838  | 0.056962 | 0.2192   | -0.03401 | 0.46339 | 0.003155 | 0.94578 | 0.003338 | 0.94264  |
| 1.77E-09 | -0.28067 | 6.67E-10 | -0.0652  | 0.15954 | -0.0069  | 0.88179 | -0.15807 | 0.00061  |
| 9.10E-07 | -0.2252  | 8.80E-07 | -0.1166  | 0.01168 | -0.03423 | 0.46052 | -0.0989  | 0.03261  |
| 2.30E-09 | -0.35913 | 1.16E-15 | -0.08928 | 0.05384 | -0.00659 | 0.88701 | -0.09866 | 0.03305  |
| 0.27617  | -0.02414 | 0.60282  | 0.079712 | 0.0853  | 0.067314 | 0.14639 | -0.00889 | 0.84807  |
| 1.92E-11 | -0.35336 | 3.51E-15 | -0.08725 | 0.05955 | -0.02193 | 0.63645 | -0.12683 | 0.00606  |
| 1.26E-12 | -0.46614 | 1.44E-26 | -0.11128 | 0.01614 | -0.04967 | 0.2841  | -0.11585 | 0.01223  |
| 3.36E-12 | -0.24865 | 5.19E-08 | -0.07895 | 0.08835 | 0.005351 | 0.90818 | -0.06755 | 0.14495  |
| 1.64E-16 | -0.49146 | 9.10E-30 | -0.09891 | 0.03259 | -0.07633 | 0.09944 | -0.03915 | 0.39863  |
| 0.00068  | -0.17058 | 0.00021  | -0.06628 | 0.15268 | -0.01929 | 0.67754 | 0.005565 | 0.90452  |
| 2.35E-15 | -0.53574 | 4.77E-36 | -0.11282 | 0.01471 | -0.08997 | 0.052   | -0.08875 | 0.05531  |
| 4.76E-19 | -0.49259 | 6.45E-30 | -0.0028  | 0.95193 | 0.009137 | 0.84389 | -0.07216 | 0.11941  |
| 2.79E-18 | -0.43493 | 5.66E-23 | -0.11963 | 0.00967 | -0.05443 | 0.24043 | -0.05688 | 0.21984  |
| 0.0005   | -0.17714 | 0.00012  | -0.00383 | 0.93424 | -0.00698 | 0.88037 | -0.03776 | 0.41561  |
| 6.31E-09 | -0.34066 | 3.74E-14 | -0.03044 | 0.51169 | -0.0019  | 0.96735 | -0.05538 | 0.23227  |
| 0.81098  | -0.03275 | 0.48018  | -0.0758  | 0.10182 | -0.00487 | 0.91635 | 0.029544 | 0.52421  |
| 0.00086  | -0.15045 | 0.00111  | 0.089152 | 0.0542  | 0.105709 | 0.02233 | 0.044468 | 0.33762  |
| 3.52E-07 | -0.33923 | 4.85E-14 | -0.15985 | 0.00053 | -0.05463 | 0.23868 | -0.17003 | 0.00022  |
| 1.00E-08 | -0.33664 | 7.74E-14 | -0.06655 | 0.15105 | -0.09073 | 0.05005 | -0.05763 | 0.21385  |
| 1.41E-11 | -0.36173 | 6.97E-16 | 0.020577 | 0.65738 | -0.06875 | 0.13793 | -0.18193 | 7.68E-05 |
| 4.61E-13 | -0.35674 | 1.84E-15 | -0.09953 | 0.03153 | -0.02741 | 0.55462 | -0.16243 | 0.00042  |
| 1.77E-06 | -0.29231 | 1.19E-10 | -0.07618 | 0.10014 | -0.02321 | 0.61694 | -0.08604 | 0.06319  |
| 2.85E-18 | -0.45306 | 5.13E-25 | -0.08445 | 0.06824 | -0.00018 | 0.99687 | -0.13005 | 0.00488  |
| 0.63009  | -0.1117  | 0.01574  | -0.03471 | 0.45426 | -0.04999 | 0.28097 | 0.028313 | 0.54164  |
| 0.00055  | -0.14447 | 0.00175  | 0.030083 | 0.51665 | -0.00628 | 0.8923  | -0.02981 | 0.52048  |
| 1.84E-11 | -0.34174 | 3.07E-14 | -0.0573  | 0.21649 | -0.01726 | 0.70995 | -0.06131 | 0.18598  |
| 2.18E-17 | -0.5028  | 2.73E-31 | -0.08191 | 0.077   | -0.08212 | 0.07626 | -0.10677 | 0.02102  |
| 0.00294  | -0.12989 | 0.00493  | 0.109763 | 0.01765 | 0.012662 | 0.78492 | 0.032362 | 0.48539  |
| 0.00039  | -0.18591 | 5.30E-05 | -0.08088 | 0.08082 | 0.037101 | 0.42378 | 0.060935 | 0.18867  |
| 3.84E-11 | -0.37323 | 6.98E-17 | -0.00291 | 0.95007 | -0.04858 | 0.2948  | -0.0704  | 0.12871  |
| 0.00564  | -0.18425 | 6.19E-05 | -0.08576 | 0.06408 | -0.0173  | 0.7092  | -0.04407 | 0.34192  |
| 1.40E-08 | -0.29437 | 8.66E-11 | -0.00166 | 0.9715  | -0.02769 | 0.55053 | -0.14721 | 0.00142  |
| 6.01E-28 | -0.59004 | 3.85E-45 | -0.12375 | 0.00742 | -0.06299 | 0.17414 | -0.16663 | 0.0003   |
| 1.42E-05 | -0.25267 | 3.10E-08 | 0.048987 | 0.29078 | 0.019942 | 0.66732 | -0.06552 | 0.15747  |
| 3.32E-30 | -0.56285 | 2.23E-40 | -0.05492 | 0.23622 | -0.06069 | 0.19047 | -0.14085 | 0.00228  |
| 4.12E-17 | -0.37645 | 3.60E-17 | -0.06258 | 0.177   | -0.00948 | 0.83817 | -0.16248 | 0.00042  |

|          |          |          |          |         |          |         |          |          |
|----------|----------|----------|----------|---------|----------|---------|----------|----------|
| 7.58E-29 | -0.4917  | 8.45E-30 | -0.06546 | 0.15787 | -0.03837 | 0.40813 | -0.09013 | 0.05161  |
| 1.24E-15 | -0.42135 | 1.60E-21 | -0.07571 | 0.10226 | -0.00094 | 0.98387 | -0.12463 | 0.00701  |
| 2.92E-16 | -0.44828 | 1.82E-24 | -0.1233  | 0.00764 | -0.07005 | 0.13062 | -0.17363 | 0.00016  |
| 0.00018  | -0.23046 | 4.78E-07 | -0.07992 | 0.0845  | -0.00396 | 0.93203 | -0.07465 | 0.10714  |
| 9.75E-18 | -0.38886 | 2.63E-18 | -0.08207 | 0.07643 | -0.03593 | 0.43859 | -0.08731 | 0.05937  |
| 1.69E-07 | -0.27148 | 2.47E-09 | -0.00841 | 0.85624 | -0.00486 | 0.91656 | 0.001264 | 0.97827  |
| 3.37E-16 | 0.4771   | 6.40E-28 | -0.0165  | 0.72208 | 0.040774 | 0.37933 | 0.037117 | 0.42358  |
| 1.06E-06 | -0.28525 | 3.42E-10 | -0.09675 | 0.03662 | -0.10784 | 0.01976 | -0.0285  | 0.53893  |
| 7.13E-15 | -0.36484 | 3.78E-16 | -0.07916 | 0.08748 | -0.02736 | 0.55528 | -0.05472 | 0.23793  |
| 5.34E-08 | -0.28985 | 1.72E-10 | 0.00235  | 0.95961 | -0.03584 | 0.4397  | 0.046462 | 0.31639  |
| 0.04052  | -0.18406 | 6.30E-05 | -0.11138 | 0.01604 | -0.02738 | 0.55503 | -0.04578 | 0.32354  |
| 5.00E-10 | -0.31174 | 5.54E-12 | -0.03968 | 0.3922  | -0.02917 | 0.52946 | 0.062247 | 0.17932  |
| 0.00216  | -0.20973 | 4.85E-06 | -0.03232 | 0.48596 | -0.03498 | 0.4508  | -0.09817 | 0.03393  |
| 1.25E-32 | -0.5432  | 3.35E-37 | -0.02387 | 0.60695 | -0.05257 | 0.25691 | -0.01699 | 0.71425  |
| 8.41E-19 | -0.45885 | 1.08E-25 | -0.04808 | 0.29983 | -0.03259 | 0.48237 | -0.09565 | 0.0388   |
| 0.05231  | -0.18818 | 4.27E-05 | 0.015727 | 0.73464 | -0.00699 | 0.88024 | -0.04037 | 0.38412  |
| 0.01427  | -0.16838 | 0.00026  | -0.08445 | 0.06826 | -0.04981 | 0.28275 | 0.011168 | 0.80978  |
| 8.59E-14 | -0.35646 | 1.94E-15 | -0.10844 | 0.01908 | -0.05142 | 0.26748 | 0.065957 | 0.15472  |
| 6.64E-13 | -0.39621 | 5.28E-19 | -0.03501 | 0.45033 | -0.10807 | 0.01949 | -0.00544 | 0.90664  |
| 8.01E-09 | -0.312   | 5.31E-12 | -0.06072 | 0.19028 | 0.000421 | 0.99275 | -0.09444 | 0.04135  |
| 3.41E-11 | -0.34782 | 1.00E-14 | 0.035933 | 0.43853 | -0.03407 | 0.46265 | -0.10414 | 0.02441  |
| 0.32651  | 0.044056 | 0.34213  | 0.017922 | 0.69928 | 0.008232 | 0.85919 | 0.063987 | 0.16744  |
| 8.04E-17 | -0.40725 | 4.39E-20 | -0.08838 | 0.05633 | -0.06849 | 0.13945 | -0.08054 | 0.08209  |
| 5.66E-19 | -0.4248  | 6.94E-22 | -0.12697 | 0.006   | -0.03127 | 0.5002  | -0.08202 | 0.07661  |
| 5.58E-10 | -0.37048 | 1.22E-16 | -0.10487 | 0.02343 | -0.0683  | 0.14052 | -0.11609 | 0.01205  |
| 6.95E-09 | -0.26231 | 8.70E-09 | -0.13024 | 0.00482 | -0.05056 | 0.27558 | -0.21122 | 4.14E-06 |
| 2.46E-10 | -0.39852 | 3.16E-19 | -0.11052 | 0.01689 | -0.11595 | 0.01216 | -0.03284 | 0.47903  |
| 0.04165  | -0.14365 | 0.00186  | -0.08134 | 0.07911 | 0.020776 | 0.65428 | 0.044077 | 0.3419   |
| 4.54E-13 | -0.32396 | 7.16E-13 | -0.04755 | 0.30517 | -0.00667 | 0.88568 | -0.07267 | 0.1168   |
| 1.32E-15 | -0.43321 | 8.72E-23 | -0.06733 | 0.14628 | -0.04542 | 0.32735 | 0.014071 | 0.76168  |
| 3.47E-10 | -0.29562 | 7.15E-11 | -0.06506 | 0.1604  | -0.01129 | 0.80768 | -0.04628 | 0.31828  |
| 0.26278  | -0.01449 | 0.75478  | -0.00367 | 0.93692 | 0.064825 | 0.16194 | 0.032275 | 0.48656  |
| 2.05E-27 | -0.52223 | 4.93E-34 | -0.09573 | 0.03865 | -0.09552 | 0.03908 | -0.1659  | 0.00032  |
| 0.00651  | -0.21305 | 3.40E-06 | -0.04612 | 0.31997 | -0.0007  | 0.98789 | 0.058848 | 0.2043   |
| 9.02E-18 | -0.46498 | 1.99E-26 | -0.11279 | 0.01474 | -0.06913 | 0.13577 | -0.13479 | 0.00352  |
| 0.00046  | -0.14508 | 0.00167  | -0.0605  | 0.19185 | -0.01553 | 0.73788 | 0.129006 | 0.00524  |
| 5.35E-17 | -0.36633 | 2.80E-16 | 0.031405 | 0.4984  | -0.05386 | 0.24533 | -0.10902 | 0.01844  |
| 7.13E-08 | -0.33801 | 6.05E-14 | -0.05641 | 0.22367 | -0.05391 | 0.24496 | 0.085036 | 0.06635  |
| 4.34E-09 | -0.28605 | 3.03E-10 | -0.03794 | 0.41341 | -0.00332 | 0.94304 | -0.02741 | 0.55455  |
| 2.04E-08 | -0.29358 | 9.77E-11 | -0.07705 | 0.09629 | -0.05391 | 0.24496 | -0.04043 | 0.38337  |
| 0.29207  | -0.04858 | 0.29485  | 0.023023 | 0.61971 | -0.01118 | 0.80959 | -0.02205 | 0.63455  |
| 5.18E-09 | -0.37763 | 2.82E-17 | -0.01857 | 0.6889  | -0.02591 | 0.57647 | -0.06108 | 0.18761  |
| 2.74E-06 | -0.25637 | 1.91E-08 | -0.03962 | 0.39298 | -0.07403 | 0.11009 | -0.07694 | 0.09678  |
| 4.34E-08 | -0.28544 | 3.32E-10 | -0.02972 | 0.52173 | -0.028   | 0.54612 | -0.12988 | 0.00494  |
| 1.89E-11 | -0.34915 | 7.80E-15 | 0.000728 | 0.98749 | -0.03691 | 0.42623 | -0.10924 | 0.0182   |



|          |          |          |          |         |          |         |          |         |
|----------|----------|----------|----------|---------|----------|---------|----------|---------|
| 1.07E-09 | -0.38085 | 1.44E-17 | -0.05343 | 0.24918 | -0.10327 | 0.02564 | -0.09288 | 0.04485 |
| 0.92719  | 0.043664 | 0.34644  | 0.069777 | 0.13215 | 0.06041  | 0.19252 | 0.059209 | 0.20153 |
| 3.23E-24 | -0.46254 | 3.92E-26 | -0.09066 | 0.05024 | -0.00708 | 0.87878 | -0.16259 | 0.00042 |
| 4.53E-10 | -0.36268 | 5.78E-16 | -0.10247 | 0.02681 | -0.06073 | 0.19016 | -0.14624 | 0.00153 |
| 7.71E-10 | -0.30545 | 1.53E-11 | -0.08718 | 0.05976 | 0.005129 | 0.91198 | -0.05355 | 0.24812 |
| 0.00313  | -0.21304 | 3.40E-06 | 0.00723  | 0.87618 | -0.02656 | 0.56698 | -0.07745 | 0.09456 |
| 3.90E-15 | -0.45483 | 3.19E-25 | -0.06978 | 0.13213 | -0.11714 | 0.0113  | -0.06151 | 0.18456 |
| 1.76E-10 | -0.27792 | 9.92E-10 | -0.0256  | 0.58111 | -0.03297 | 0.47725 | -0.05646 | 0.22328 |
| 6.15E-22 | -0.43816 | 2.50E-23 | 0.000925 | 0.9841  | -0.03316 | 0.47466 | -0.06365 | 0.1697  |
| 0.00376  | -0.1707  | 0.00021  | 0.052986 | 0.25313 | -0.01203 | 0.79549 | 0.112419 | 0.01507 |
| 4.17E-07 | -0.27298 | 2.00E-09 | -0.11536 | 0.01261 | -0.03662 | 0.42985 | -0.12631 | 0.00627 |
| 2.74E-07 | -0.29307 | 1.06E-10 | -0.15555 | 0.00074 | -0.03398 | 0.46378 | -0.09801 | 0.03421 |
| 1.74E-15 | -0.4829  | 1.18E-28 | 0.003217 | 0.94473 | -0.11088 | 0.01653 | 0.018844 | 0.68462 |
| 0.00388  | -0.16766 | 0.00027  | -0.04741 | 0.30663 | -0.03616 | 0.43569 | -0.12861 | 0.00538 |
| 1.82E-06 | -0.19592 | 2.01E-05 | -0.01389 | 0.76468 | -0.06233 | 0.17877 | -0.06632 | 0.15246 |
| 3.79E-24 | -0.51799 | 2.02E-33 | -0.14235 | 0.00205 | -0.07814 | 0.09166 | -0.16434 | 0.00036 |
| 6.66E-08 | -0.27226 | 2.21E-09 | -0.00589 | 0.899   | 0.005123 | 0.91209 | 0.033818 | 0.46596 |
| 7.28E-08 | -0.30404 | 1.92E-11 | 0.003637 | 0.93752 | -0.0159  | 0.73175 | -0.17826 | 0.00011 |
| 4.36E-09 | -0.30129 | 2.96E-11 | -0.05437 | 0.24092 | -0.02997 | 0.51826 | -0.11109 | 0.01632 |
| 0.08613  | -0.02788 | 0.5478   | -0.03087 | 0.50573 | -0.00743 | 0.87285 | -0.15569 | 0.00074 |
| 1.49E-07 | -0.21903 | 1.76E-06 | -0.0134  | 0.77277 | -0.06601 | 0.15435 | -0.1255  | 0.00662 |
| 2.86E-05 | -0.18123 | 8.20E-05 | -0.09154 | 0.04804 | -0.05738 | 0.21581 | -0.08617 | 0.06279 |
| 7.39E-20 | -0.44765 | 2.15E-24 | -0.10755 | 0.02009 | -0.08492 | 0.06673 | -0.08577 | 0.06404 |
| 0.02266  | 0.139311 | 0.00255  | 0.039599 | 0.39323 | 0.110561 | 0.01684 | 0.01146  | 0.80491 |
| 1.35E-06 | 0.184324 | 6.15E-05 | 0.057736 | 0.21299 | 0.012641 | 0.78528 | 0.11139  | 0.01603 |
| 3.59E-14 | 0.301942 | 2.67E-11 | 0.072489 | 0.11773 | 0.028154 | 0.54392 | 0.05742  | 0.21551 |
| 6.76E-07 | -0.24727 | 6.18E-08 | -0.0673  | 0.14645 | -0.05985 | 0.19667 | -0.09464 | 0.04093 |
| 1.18E-15 | 0.335803 | 8.99E-14 | 0.037121 | 0.42353 | 0.096818 | 0.03648 | 0.045814 | 0.3232  |
| 9.81E-10 | 0.188532 | 4.13E-05 | 0.10312  | 0.02585 | -0.00244 | 0.95807 | 0.100357 | 0.03013 |
| 6.33E-05 | 0.104872 | 0.02342  | 0.109577 | 0.01785 | -0.02274 | 0.62394 | 0.095155 | 0.03983 |
| 4.64E-06 | 0.06687  | 0.14907  | -0.00859 | 0.85316 | -0.06991 | 0.13139 | 0.048905 | 0.29159 |
| 2.15E-15 | 0.242818 | 1.08E-07 | 0.024637 | 0.59537 | -0.00507 | 0.91305 | -0.06236 | 0.17854 |
| 3.36E-19 | -0.43521 | 5.28E-23 | -0.07896 | 0.08831 | -0.05395 | 0.24455 | -0.16869 | 0.00025 |
| 8.43E-28 | 0.457971 | 1.37E-25 | -0.06122 | 0.18659 | 0.110055 | 0.01735 | 0.107597 | 0.02003 |
| 3.23E-25 | 0.375168 | 4.69E-17 | 0.056125 | 0.22606 | 0.093543 | 0.04333 | 0.101866 | 0.02772 |
| 9.43E-06 | 0.21929  | 1.71E-06 | -0.07472 | 0.1068  | -0.03202 | 0.49003 | -0.11275 | 0.01478 |
| 2.33E-53 | 0.660532 | 7.33E-60 | 0.085873 | 0.06371 | 0.09802  | 0.0342  | 0.16748  | 0.00028 |
| 2.18E-06 | 0.067167 | 0.14727  | 0.048765 | 0.29297 | 0.000606 | 0.98959 | -0.11431 | 0.01345 |
| 6.43E-71 | 0.704349 | 3.26E-71 | 0.041442 | 0.37156 | 0.088735 | 0.05534 | 0.130909 | 0.0046  |
| 3.71E-15 | 0.267868 | 4.08E-09 | 0.065191 | 0.15957 | -0.02553 | 0.58216 | -0.02466 | 0.59499 |
| 2.10E-14 | 0.377212 | 3.07E-17 | 0.095429 | 0.03926 | 0.102588 | 0.02663 | 0.021442 | 0.64396 |
| 0.01115  | 0.043038 | 0.35341  | 0.062126 | 0.18017 | 0.002178 | 0.96257 | -0.051   | 0.27139 |
| 2.45E-06 | 0.110145 | 0.01726  | -0.04572 | 0.32415 | -0.01981 | 0.66941 | -0.02038 | 0.66041 |
| 8.36E-13 | 0.298061 | 4.90E-11 | 0.002166 | 0.96277 | 0.111001 | 0.01641 | 0.013323 | 0.77399 |
| 1.79E-13 | 0.275026 | 1.50E-09 | -0.00241 | 0.9585  | 0.062677 | 0.17632 | -0.11388 | 0.0138  |

|          |          |          |          |          |          |          |          |          |
|----------|----------|----------|----------|----------|----------|----------|----------|----------|
| 1.04E-07 | 0.195144 | 2.17E-05 | 0.027082 | 0.55937  | 0.007515 | 0.87133  | -0.06435 | 0.16506  |
| 5.55E-22 | 0.360871 | 8.25E-16 | 0.056365 | 0.22407  | 0.036135 | 0.43595  | 0.11218  | 0.01529  |
| 1.21E-34 | 0.324233 | 6.82E-13 | 0.025525 | 0.58218  | 0.027493 | 0.55342  | 0.045532 | 0.32619  |
| 9.19E-15 | 0.381234 | 1.33E-17 | 0.196578 | 1.88E-05 | 0.037596 | 0.41761  | 0.153732 | 0.00086  |
| 9.02E-20 | 0.447403 | 2.29E-24 | 0.170028 | 0.00022  | 0.187525 | 4.55E-05 | 0.247873 | 5.73E-08 |
| 1.08E-55 | 0.655479 | 1.13E-58 | 0.145951 | 0.00156  | 0.099071 | 0.03232  | 0.110365 | 0.01704  |
| 1.01E-11 | 0.391171 | 1.59E-18 | 0.068892 | 0.13713  | 0.040365 | 0.38413  | -0.07433 | 0.10866  |
| 5.26E-31 | 0.496882 | 1.73E-30 | 0.020712 | 0.65527  | 0.13021  | 0.00483  | 0.121158 | 0.00877  |
| 7.31E-24 | 0.433216 | 8.70E-23 | 0.034292 | 0.45973  | 0.109414 | 0.01802  | 0.168252 | 0.00026  |
| 5.70E-37 | 0.586664 | 1.59E-44 | 0.034954 | 0.45111  | 0.12072  | 0.00902  | 0.049824 | 0.2826   |
| 9.43E-40 | 0.474011 | 1.56E-27 | 0.007803 | 0.86645  | 0.08594  | 0.06351  | -0.00505 | 0.91337  |
| 2.94E-09 | 0.204379 | 8.51E-06 | -0.05082 | 0.2731   | -0.09079 | 0.04989  | -0.07276 | 0.11635  |
| 1.11E-57 | 0.749436 | 2.60E-85 | 0.117748 | 0.01088  | 0.149215 | 0.00122  | 0.138578 | 0.00269  |
| 4.29E-05 | 0.073594 | 0.11222  | -0.00342 | 0.9413   | 0.035964 | 0.43812  | -0.10365 | 0.0251   |
| 2.39E-12 | 0.209468 | 4.99E-06 | 0.058956 | 0.20346  | 0.022543 | 0.62702  | -0.07184 | 0.12108  |
| 2.23E-27 | 0.414472 | 8.21E-21 | 0.103637 | 0.02511  | 0.111642 | 0.01579  | 0.140888 | 0.00228  |
| 2.98E-15 | 0.250735 | 3.98E-08 | 0.050303 | 0.27799  | 0.016927 | 0.71524  | 0.048905 | 0.29159  |
| 8.00E-17 | 0.237543 | 2.06E-07 | 0.028305 | 0.54176  | -0.02084 | 0.65326  | 0.092127 | 0.04661  |
| 0.02733  | -0.02181 | 0.63822  | 0.14817  | 0.00132  | 0.016044 | 0.72949  | 0.118655 | 0.01028  |
| 2.79E-26 | 0.398571 | 3.12E-19 | 0.049292 | 0.28779  | 0.066963 | 0.14851  | 0.147126 | 0.00143  |
| 5.53E-38 | 0.609323 | 8.39E-49 | 0.128192 | 0.00553  | 0.125647 | 0.00655  | 0.094418 | 0.0414   |
| 1.72E-23 | 0.527822 | 7.41E-35 | 0.074162 | 0.10947  | 0.066104 | 0.15379  | 0.108015 | 0.01955  |
| 1.10E-08 | 0.180153 | 9.05E-05 | 0.061055 | 0.1878   | 0.005892 | 0.89896  | 0.090199 | 0.05142  |
| 2.77E-09 | 0.185661 | 5.42E-05 | 0.025371 | 0.58446  | 0.024606 | 0.59584  | 0.011233 | 0.8087   |
| 8.39E-11 | 0.119502 | 0.00974  | -0.02898 | 0.53216  | -0.04289 | 0.35512  | -0.08207 | 0.07642  |
| 2.24E-05 | 0.074035 | 0.11008  | 0.095379 | 0.03937  | -0.03824 | 0.40969  | 0.072089 | 0.11978  |
| 2.20E-07 | -0.05517 | 0.23407  | 0.100962 | 0.02914  | -0.00849 | 0.85478  | 0.021631 | 0.64103  |
| 3.83E-23 | 0.446907 | 2.61E-24 | -0.04159 | 0.36986  | 0.022784 | 0.62335  | -0.03718 | 0.42274  |
| 7.50E-22 | -0.37615 | 3.83E-17 | -0.04333 | 0.35013  | 0.025747 | 0.5789   | -0.00547 | 0.90619  |
| 8.77E-38 | 0.598406 | 1.06E-46 | 0.078479 | 0.09026  | 0.141631 | 0.00216  | 0.12514  | 0.00678  |
| 7.75E-12 | 0.32799  | 3.57E-13 | 0.015536 | 0.73773  | 0.072114 | 0.11965  | 0.167102 | 0.00029  |
| 2.15E-37 | 0.5355   | 5.18E-36 | 0.119749 | 0.00959  | 0.11938  | 0.00982  | 0.193893 | 2.45E-05 |
| 0.00074  | 0.239655 | 1.59E-07 | 0.061989 | 0.18113  | 0.168628 | 0.00025  | -0.04023 | 0.38576  |
| 1.09E-06 | 0.17893  | 0.0001   | -0.01144 | 0.80525  | 0.042346 | 0.36121  | -0.09372 | 0.04292  |
| 1.26E-11 | 0.250821 | 3.93E-08 | -0.01377 | 0.76657  | 0.075881 | 0.10147  | 0.000668 | 0.98851  |
| 1.49E-31 | 0.455147 | 2.93E-25 | 0.18631  | 5.10E-05 | 0.092956 | 0.04467  | 0.150445 | 0.00111  |
| 2.04E-06 | 0.042078 | 0.36426  | -0.03266 | 0.48132  | -0.04111 | 0.37536  | -0.12211 | 0.00825  |
| 0.08883  | 0.0091   | 0.8445   | 0.034206 | 0.46086  | -0.07092 | 0.12589  | -0.06956 | 0.13335  |
| 2.15E-21 | 0.116268 | 0.01192  | -0.03941 | 0.39555  | 0.004109 | 0.92943  | 0.025246 | 0.58631  |
| 5.25E-53 | 0.654038 | 2.44E-58 | 0.067283 | 0.14657  | 0.103641 | 0.02511  | 0.147819 | 0.00136  |
| 0.00125  | 0.104063 | 0.02452  | -0.01803 | 0.69762  | -0.01153 | 0.80369  | -0.04182 | 0.3672   |
| 4.19E-45 | 0.615944 | 4.05E-50 | 0.092037 | 0.04683  | 0.082666 | 0.07431  | 0.113671 | 0.01398  |
| 1.85E-15 | 0.302686 | 2.37E-11 | -0.03199 | 0.4904   | 0.041513 | 0.37074  | 0.104132 | 0.02442  |
| 1.85E-07 | 0.197107 | 1.78E-05 | -0.06596 | 0.15472  | 0.095137 | 0.03987  | -0.07891 | 0.0885   |
| 2.15E-48 | 0.606475 | 3.02E-48 | -0.0008  | 0.98628  | 0.061441 | 0.18502  | 0.094603 | 0.041    |

|          |          |          |          |         |          |         |          |          |
|----------|----------|----------|----------|---------|----------|---------|----------|----------|
| 3.04E-15 | 0.32283  | 8.67E-13 | 0.003752 | 0.93554 | 0.046989 | 0.31093 | 0.14001  | 0.00243  |
| 9.83E-14 | 0.327159 | 4.12E-13 | -0.02128 | 0.64653 | 0.013673 | 0.76822 | 0.012047 | 0.79514  |
| 1.13E-09 | 0.128449 | 0.00544  | -0.13821 | 0.00276 | 0.02174  | 0.63935 | 0.010162 | 0.82663  |
| 6.22E-25 | 0.429512 | 2.18E-22 | 0.033301 | 0.47282 | 0.074392 | 0.10837 | 0.261361 | 9.87E-09 |
| 1.03E-13 | -0.4135  | 1.03E-20 | -0.13972 | 0.00248 | -0.13394 | 0.00373 | -0.25165 | 3.54E-08 |
| 3.74E-13 | 0.368823 | 1.70E-16 | 0.11581  | 0.01227 | 0.093454 | 0.04353 | 0.004602 | 0.921    |
| 9.92E-14 | 0.372914 | 7.44E-17 | 0.003629 | 0.93766 | 0.061763 | 0.18272 | -0.04678 | 0.31314  |
| 5.92E-16 | 0.341888 | 2.99E-14 | 0.071745 | 0.12156 | 0.031561 | 0.49627 | 0.075662 | 0.10246  |
| 0.04522  | -0.07793 | 0.09253  | -0.00845 | 0.85546 | -0.03102 | 0.5037  | 0.035663 | 0.44198  |
| 5.19E-10 | 0.250997 | 3.85E-08 | 0.000117 | 0.99799 | -0.00241 | 0.95863 | 0.131255 | 0.0045   |
| 3.25E-20 | 0.414684 | 7.81E-21 | 0.062034 | 0.18081 | 0.124799 | 0.00693 | 0.063925 | 0.16785  |
| 4.67E-23 | 0.325642 | 5.36E-13 | -0.04861 | 0.2945  | -0.0737  | 0.11169 | 0.110476 | 0.01693  |
| 3.10E-05 | 0.226903 | 7.23E-07 | -0.00768 | 0.86846 | 0.032439 | 0.48435 | 0.055791 | 0.22884  |
| 6.85E-27 | 0.411715 | 1.56E-20 | 0.027418 | 0.55451 | 0.033356 | 0.47208 | -0.00202 | 0.96519  |
| 2.50E-10 | 0.203743 | 9.09E-06 | -0.01222 | 0.79231 | 0.031679 | 0.49466 | -0.07017 | 0.13     |
| 3.29E-20 | 0.42302  | 1.07E-21 | 0.072038 | 0.12004 | 0.054584 | 0.23908 | -0.09294 | 0.0447   |
| 6.88E-10 | 0.254911 | 2.32E-08 | -0.1296  | 0.00503 | -0.05117 | 0.26977 | 0.110959 | 0.01645  |
| 1.08E-23 | 0.402992 | 1.16E-19 | -0.00946 | 0.8384  | 0.008295 | 0.85811 | 0.019914 | 0.66776  |
| 1.09E-09 | 0.281762 | 5.70E-10 | 0.091588 | 0.04792 | 0.046793 | 0.31295 | -0.09743 | 0.03531  |
| 1.28E-06 | 0.107679 | 0.01994  | -0.03114 | 0.50209 | -0.04688 | 0.3121  | -0.20076 | 1.23E-05 |
| 1.01E-10 | 0.165045 | 0.00034  | -0.06832 | 0.14045 | 0.039934 | 0.38923 | 0.021621 | 0.64119  |
| 1.59E-13 | 0.267625 | 4.22E-09 | -0.03521 | 0.4478  | 0.039936 | 0.38921 | 0.018345 | 0.69255  |
| 0.00025  | 0.229303 | 5.47E-07 | -0.0034  | 0.94162 | 0.086212 | 0.06267 | -0.02935 | 0.52697  |
| 1.45E-12 | 0.149772 | 0.00117  | 0.033607 | 0.46875 | -0.02801 | 0.54601 | 0.101238 | 0.0287   |
| 3.77E-50 | 0.664594 | 7.83E-61 | 0.090776 | 0.04994 | 0.08614  | 0.06289 | 0.086515 | 0.06175  |
| 3.36E-32 | 0.452513 | 5.94E-25 | 0.008312 | 0.85783 | 0.061081 | 0.18762 | 0.184302 | 6.16E-05 |
| 2.36E-17 | 0.350805 | 5.71E-15 | 0.099075 | 0.03231 | -0.01037 | 0.8232  | 0.056203 | 0.22542  |
| 1.06E-12 | 0.31073  | 6.53E-12 | -0.07966 | 0.08551 | 0.004151 | 0.92871 | 0.101654 | 0.02805  |
| 1.65E-17 | 0.40114  | 1.76E-19 | 0.051384 | 0.26779 | 0.063329 | 0.17186 | 0.101107 | 0.02891  |
| 2.29E-42 | 0.525323 | 1.74E-34 | -0.02018 | 0.66358 | 0.106343 | 0.02154 | 0.083357 | 0.07191  |
| 0.01339  | 0.161038 | 0.00048  | 0.07232  | 0.11859 | 0.073163 | 0.11435 | -0.1434  | 0.00189  |
| 3.25E-09 | 0.110483 | 0.01692  | -0.11759 | 0.01099 | 0.020499 | 0.6586  | -0.02544 | 0.5835   |
| 6.81E-13 | 0.188869 | 4.00E-05 | -0.05844 | 0.20744 | 0.009727 | 0.83395 | 0.036334 | 0.43343  |
| 1.45E-24 | 0.35766  | 1.54E-15 | -0.06641 | 0.15192 | 0.019421 | 0.67551 | 0.08453  | 0.06799  |
| 3.01E-12 | 0.372415 | 8.23E-17 | 0.099358 | 0.03182 | 0.089346 | 0.05367 | 0.049914 | 0.28173  |
| 4.51E-06 | 0.061631 | 0.18366  | -0.01009 | 0.82785 | 0.069108 | 0.1359  | 0.022339 | 0.63015  |
| 8.95E-06 | 0.095853 | 0.03839  | -0.04605 | 0.32073 | -0.01408 | 0.76154 | 0.085298 | 0.06552  |
| 1.41E-39 | 0.507262 | 6.64E-32 | 0.078738 | 0.0892  | 0.025171 | 0.58742 | 0.105055 | 0.02318  |
| 3.30E-11 | 0.295346 | 7.46E-11 | -0.10626 | 0.02164 | 0.08392  | 0.07001 | -0.06823 | 0.14096  |
| 3.35E-10 | 0.299166 | 4.13E-11 | -0.03241 | 0.4847  | 0.053846 | 0.2455  | -0.13254 | 0.00412  |
| 8.83E-18 | 0.372198 | 8.61E-17 | 0.049153 | 0.28914 | 0.087168 | 0.0598  | -0.01017 | 0.82655  |
| 5.58E-08 | 0.171726 | 0.00019  | -0.13757 | 0.00289 | 0.003817 | 0.93444 | 0.049038 | 0.29028  |
| 1.84E-16 | 0.468656 | 7.12E-27 | 0.118849 | 0.01015 | 0.123995 | 0.0073  | 0.161668 | 0.00045  |
| 9.08E-47 | 0.565914 | 6.81E-41 | 0.010546 | 0.8202  | 0.032929 | 0.47778 | 0.030507 | 0.51076  |
| 1.25E-27 | 0.491214 | 9.80E-30 | 0.041465 | 0.3713  | 0.052519 | 0.25735 | 0.138768 | 0.00265  |

|          |          |          |          |         |          |          |          |          |
|----------|----------|----------|----------|---------|----------|----------|----------|----------|
| 1.14E-13 | 0.33473  | 1.09E-13 | 0.029473 | 0.5252  | 0.096721 | 0.03667  | 0.070259 | 0.12949  |
| 9.10E-46 | 0.579458 | 3.10E-43 | 0.097818 | 0.03458 | 0.114208 | 0.01353  | 0.085996 | 0.06333  |
| 2.60E-46 | 0.567989 | 3.03E-41 | 0.028335 | 0.54133 | 0.079084 | 0.0878   | 0.019418 | 0.67555  |
| 9.61E-25 | 0.429369 | 2.26E-22 | 0.007263 | 0.87561 | 0.078403 | 0.09058  | -0.03398 | 0.46378  |
| 1.46E-47 | 0.62712  | 2.06E-52 | 0.093186 | 0.04414 | 0.075605 | 0.10272  | 0.096936 | 0.03625  |
| 1.68E-08 | 0.248311 | 5.42E-08 | 0.095388 | 0.03935 | 0.052083 | 0.26132  | -0.02836 | 0.54097  |
| 5.47E-39 | 0.306206 | 1.36E-11 | 0.031746 | 0.49374 | 0.003127 | 0.94627  | 0.184823 | 5.87E-05 |
| 2.03E-22 | 0.381578 | 1.24E-17 | 0.004611 | 0.92084 | 0.056969 | 0.21914  | 0.021745 | 0.63928  |
| 1.33E-25 | 0.399722 | 2.42E-19 | -0.02795 | 0.54677 | 0.067625 | 0.14453  | 0.141027 | 0.00225  |
| 4.96E-18 | 0.374906 | 4.95E-17 | 0.062823 | 0.17531 | 0.029307 | 0.52754  | 0.09695  | 0.03622  |
| 1.64E-11 | 0.191462 | 3.11E-05 | 0.018108 | 0.69632 | 0.042871 | 0.35528  | 0.116051 | 0.01209  |
| 2.36E-13 | 0.287768 | 2.35E-10 | 0.064274 | 0.16554 | 0.017853 | 0.70039  | -0.02487 | 0.59183  |
| 9.83E-16 | 0.31082  | 6.43E-12 | 0.102671 | 0.02651 | 0.066008 | 0.1544   | 0.204111 | 8.75E-06 |
| 1.56E-05 | 0.227284 | 6.92E-07 | 0.077952 | 0.09245 | 0.036597 | 0.43011  | 0.065238 | 0.15927  |
| 3.97E-15 | 0.30583  | 1.44E-11 | 0.048555 | 0.29506 | 0.054497 | 0.23983  | -0.02378 | 0.60826  |
| 4.56E-08 | 0.301901 | 2.69E-11 | 0.078432 | 0.09045 | 0.095832 | 0.03844  | -0.05789 | 0.21175  |
| 1.39E-23 | 0.447442 | 2.27E-24 | 0.028684 | 0.53636 | 0.113475 | 0.01414  | 0.226667 | 7.43E-07 |
| 0.00197  | 0.094211 | 0.04185  | -0.01052 | 0.82065 | -0.02677 | 0.56395  | -0.01357 | 0.76996  |
| 4.09E-20 | 0.476324 | 8.01E-28 | -0.05762 | 0.21392 | 0.124093 | 0.00726  | 0.054642 | 0.23859  |
| 8.69E-34 | 0.5183   | 1.83E-33 | -0.00022 | 0.99614 | 0.081495 | 0.07852  | 0.094277 | 0.04171  |
| 5.39E-22 | 0.334209 | 1.20E-13 | 0.044612 | 0.33607 | 0.066876 | 0.14903  | 0.066533 | 0.15114  |
| 9.36E-24 | 0.431592 | 1.30E-22 | 0.112555 | 0.01495 | 0.111837 | 0.01561  | 0.144799 | 0.00171  |
| 9.06E-38 | 0.537367 | 2.68E-36 | 0.049004 | 0.29061 | 0.074417 | 0.10825  | 0.112363 | 0.01512  |
| 5.59E-45 | 0.616136 | 3.71E-50 | -0.00204 | 0.96492 | 0.097733 | 0.03473  | 0.027908 | 0.54744  |
| 8.58E-31 | 0.495345 | 2.78E-30 | -0.01473 | 0.75091 | 0.062288 | 0.17903  | 0.015326 | 0.74115  |
| 1.07E-18 | 0.397868 | 3.65E-19 | 0.17491  | 0.00015 | 0.113675 | 0.01397  | 0.220059 | 1.57E-06 |
| 2.26E-09 | 0.202715 | 1.01E-05 | 0.021052 | 0.65    | 0.010315 | 0.82406  | 0.078703 | 0.08935  |
| 1.11E-12 | -0.33133 | 1.99E-13 | -0.12379 | 0.0074  | -0.19423 | 2.37E-05 | -0.05606 | 0.22662  |
| 2.37E-32 | 0.49151  | 8.96E-30 | -0.05487 | 0.23664 | 0.030627 | 0.5091   | 0.042196 | 0.36292  |
| 4.88E-42 | 0.626928 | 2.26E-52 | 0.084853 | 0.06694 | 0.134706 | 0.00354  | 0.094318 | 0.04162  |
| 0.00376  | 0.145541 | 0.00161  | -0.07296 | 0.11536 | 0.001751 | 0.96989  | -0.08152 | 0.07843  |
| 3.38E-18 | 0.380103 | 1.68E-17 | -0.00557 | 0.9044  | 0.022202 | 0.63225  | 0.060747 | 0.19005  |
| 1.31E-14 | -0.30352 | 2.08E-11 | -0.08783 | 0.05788 | -0.05747 | 0.21508  | -0.11272 | 0.01481  |
| 1.14E-18 | 0.387942 | 3.20E-18 | 0.068917 | 0.13699 | 0.022515 | 0.62746  | -0.01029 | 0.82445  |
| 1.40E-13 | -0.26837 | 3.81E-09 | -0.08439 | 0.06844 | 0.023991 | 0.60506  | -0.06312 | 0.17329  |
| 1.78E-45 | 0.458929 | 1.05E-25 | 0.039849 | 0.39024 | 0.001111 | 0.9809   | 0.24591  | 7.33E-08 |
| 1.83E-43 | 0.55745  | 1.75E-39 | 0.046117 | 0.32    | 0.061345 | 0.18571  | -0.0045  | 0.92272  |
| 2.47E-36 | 0.540646 | 8.38E-37 | 0.149243 | 0.00122 | 0.093258 | 0.04398  | 0.141685 | 0.00215  |
| 2.02E-22 | 0.302462 | 2.46E-11 | -0.05554 | 0.23091 | 0.045115 | 0.33064  | 0.015605 | 0.73662  |
| 7.95E-06 | 0.084521 | 0.06802  | -0.0071  | 0.87834 | -0.00089 | 0.98464  | -0.01383 | 0.7656   |
| 2.17E-33 | 0.426772 | 4.29E-22 | 0.05482  | 0.23705 | 0.027213 | 0.55747  | 0.043991 | 0.34284  |
| 2.70E-23 | 0.388605 | 2.77E-18 | 0.012391 | 0.78941 | 0.003933 | 0.93245  | 0.062683 | 0.17628  |
| 2.06E-39 | 0.533368 | 1.09E-35 | 0.044389 | 0.33849 | 0.030685 | 0.5083   | 0.082494 | 0.07492  |
| 2.79E-30 | 0.376155 | 3.82E-17 | -0.06929 | 0.13485 | -0.0277  | 0.55044  | 0.075606 | 0.10272  |
| 6.43E-05 | 0.179864 | 9.29E-05 | 0.022796 | 0.62317 | 0.074565 | 0.10755  | 0.10018  | 0.03042  |

|          |          |          |          |         |          |         |          |          |
|----------|----------|----------|----------|---------|----------|---------|----------|----------|
| 1.13E-05 | 0.147528 | 0.00139  | 0.067086 | 0.14776 | 0.012549 | 0.78679 | -0.02943 | 0.52575  |
| 1.16E-42 | 0.566683 | 5.05E-41 | 0.021506 | 0.64296 | 0.040801 | 0.37901 | 0.122393 | 0.0081   |
| 6.24E-11 | 0.225353 | 8.64E-07 | 0.102189 | 0.02723 | 0.081594 | 0.07816 | 0.114134 | 0.01359  |
| 2.57E-20 | 0.354049 | 3.08E-15 | 0.041062 | 0.37597 | 0.07593  | 0.10125 | 0.132534 | 0.00412  |
| 1.22E-40 | 0.623374 | 1.24E-51 | 0.067154 | 0.14735 | 0.108904 | 0.01857 | 0.141235 | 0.00222  |
| 5.56E-12 | 0.305679 | 1.48E-11 | -0.02933 | 0.52724 | 0.040606 | 0.3813  | 0.06418  | 0.16616  |
| 2.34E-06 | 0.131004 | 0.00457  | 0.0825   | 0.07489 | -0.04906 | 0.29008 | -0.04685 | 0.31241  |
| 1.94E-25 | 0.431543 | 1.32E-22 | 0.08755  | 0.05869 | 0.168814 | 0.00025 | 0.056644 | 0.22179  |
| 1.90E-08 | 0.265548 | 5.61E-09 | 0.022417 | 0.62896 | 0.000979 | 0.98317 | -0.00939 | 0.8397   |
| 1.42E-51 | 0.59636  | 2.58E-46 | 0.046967 | 0.31116 | 0.094123 | 0.04204 | 0.13875  | 0.00266  |
| 1.77E-25 | 0.405637 | 6.35E-20 | 0.065806 | 0.15567 | 0.01664  | 0.71985 | 0.088324 | 0.05648  |
| 6.04E-08 | -0.11357 | 0.01407  | -0.05822 | 0.20918 | -0.00225 | 0.9614  | -0.13946 | 0.00252  |
| 7.87E-08 | 0.135352 | 0.00338  | 0.091062 | 0.04922 | 0.034916 | 0.4516  | -0.06818 | 0.14125  |
| 1.97E-05 | 0.096753 | 0.0366   | 0.006528 | 0.88811 | 0.054182 | 0.24256 | 0.019743 | 0.67044  |
| 4.78E-22 | 0.413316 | 1.08E-20 | 0.033702 | 0.46749 | 0.089507 | 0.05324 | 0.041578 | 0.37     |
| 5.68E-16 | 0.292569 | 1.14E-10 | 0.075025 | 0.10539 | -0.00093 | 0.98401 | 0.061639 | 0.18361  |
| 9.76E-10 | 0.203027 | 9.79E-06 | 0.09937  | 0.0318  | 0.093129 | 0.04427 | -0.09508 | 0.04     |
| 0.00014  | 0.064366 | 0.16493  | -0.02165 | 0.64069 | 0.008808 | 0.84943 | -0.0137  | 0.76771  |
| 2.52E-05 | 0.13328  | 0.00391  | -0.08555 | 0.06474 | -0.07311 | 0.11461 | -0.13752 | 0.0029   |
| 1.75E-19 | 0.428451 | 2.84E-22 | 0.078861 | 0.0887  | 0.076608 | 0.09823 | -0.00077 | 0.98681  |
| 7.46E-45 | 0.617288 | 2.17E-50 | 0.027383 | 0.55501 | 0.114189 | 0.01354 | 0.050239 | 0.27861  |
| 1.58E-13 | 0.353002 | 3.76E-15 | 0.117295 | 0.01119 | 0.047114 | 0.30964 | 0.13859  | 0.00269  |
| 6.87E-37 | 0.599706 | 6.04E-47 | 0.049137 | 0.28931 | 0.105285 | 0.02288 | 0.210076 | 4.68E-06 |
| 1.65E-20 | 0.398049 | 3.51E-19 | 0.060421 | 0.19244 | 0.045254 | 0.32915 | 0.002733 | 0.95303  |
| 2.73E-45 | 0.590574 | 3.07E-45 | 0.113549 | 0.01408 | 0.108839 | 0.01864 | 0.11569  | 0.01236  |
| 0.02947  | 0.01301  | 0.77917  | 0.028147 | 0.54402 | 0.038719 | 0.40384 | -0.00442 | 0.92406  |
| 7.87E-18 | 0.365617 | 3.23E-16 | 0.016141 | 0.72792 | 0.058645 | 0.20587 | 0.055082 | 0.23482  |
| 1.14E-17 | 0.404508 | 8.21E-20 | 0.042087 | 0.36416 | 0.021848 | 0.63769 | -0.0175  | 0.7061   |
| 3.12E-07 | 0.080121 | 0.08371  | -0.06465 | 0.1631  | -0.0154  | 0.74    | -0.08324 | 0.07231  |
| 2.98E-16 | 0.455147 | 2.93E-25 | 0.022747 | 0.62391 | 0.032714 | 0.48065 | 0.00581  | 0.90036  |
| 3.21E-25 | 0.500784 | 5.15E-31 | -0.01046 | 0.82168 | 0.053261 | 0.25067 | 0.123668 | 0.00746  |
| 2.55E-11 | 0.225533 | 8.46E-07 | -0.02382 | 0.60766 | -0.05483 | 0.23699 | -0.02462 | 0.59565  |
| 8.86E-10 | 0.207742 | 5.99E-06 | -0.06116 | 0.18706 | 0.097597 | 0.03499 | -0.01315 | 0.77691  |
| 1.02E-07 | 0.184489 | 6.06E-05 | -0.00686 | 0.88254 | 0.014475 | 0.75505 | 0.094963 | 0.04024  |
| 3.55E-19 | 0.433812 | 7.49E-23 | 0.077295 | 0.09524 | 0.143136 | 0.00193 | 0.084344 | 0.0686   |
| 0.00113  | -0.03672 | 0.42851  | 0.001148 | 0.98027 | 0.030914 | 0.50514 | -0.00531 | 0.90893  |
| 4.08E-17 | -0.41662 | 4.95E-21 | -0.08329 | 0.07213 | -0.0933  | 0.04388 | -0.29022 | 1.63E-10 |
| 2.48E-16 | 0.286186 | 2.97E-10 | 0.047792 | 0.30272 | 0.002665 | 0.95419 | 0.001754 | 0.96985  |
| 0.00012  | -0.18973 | 3.68E-05 | 0.00112  | 0.98074 | -0.03629 | 0.43399 | -0.04438 | 0.33862  |
| 1.21E-17 | 0.363882 | 4.56E-16 | 0.001373 | 0.97639 | 0.062041 | 0.18076 | 0.009668 | 0.83494  |
| 8.70E-13 | -0.32183 | 1.03E-12 | -0.1739  | 0.00016 | -0.09832 | 0.03365 | -0.07751 | 0.09433  |
| 1.45E-42 | 0.46474  | 2.13E-26 | 0.101345 | 0.02853 | 0.091388 | 0.04841 | 0.237467 | 2.08E-07 |
| 7.16E-08 | 0.123165 | 0.00771  | -0.09735 | 0.03545 | -0.0501  | 0.27996 | 0.043245 | 0.3511   |
| 6.07E-12 | 0.1197   | 0.00962  | -0.0276  | 0.55187 | -0.00435 | 0.92525 | 0.100812 | 0.02939  |
| 1.15E-19 | 0.340158 | 4.10E-14 | -0.04857 | 0.29493 | -0.08925 | 0.05394 | -0.01892 | 0.68345  |

|          |          |          |          |         |          |         |          |          |
|----------|----------|----------|----------|---------|----------|---------|----------|----------|
| 2.16E-12 | 0.430344 | 1.78E-22 | 0.092385 | 0.046   | 0.083276 | 0.07219 | -0.05854 | 0.20665  |
| 9.76E-12 | 0.171938 | 0.00019  | -0.07066 | 0.12733 | -0.04451 | 0.33719 | 0.032412 | 0.48472  |
| 1.02E-09 | 0.28991  | 1.70E-10 | -0.03093 | 0.50488 | 0.04733  | 0.30742 | -0.03146 | 0.49759  |
| 3.94E-19 | 0.346352 | 1.31E-14 | -0.00348 | 0.94019 | 0.038023 | 0.41235 | 0.076161 | 0.10021  |
| 4.41E-17 | 0.289694 | 1.76E-10 | 0.08555  | 0.06472 | 0.075516 | 0.10313 | 0.131163 | 0.00452  |
| 5.57E-19 | 0.267476 | 4.30E-09 | 0.02265  | 0.62539 | -0.03215 | 0.48828 | 0.130929 | 0.0046   |
| 4.77E-11 | 0.19926  | 1.44E-05 | -0.01261 | 0.78571 | 0.012247 | 0.79182 | 0.044001 | 0.34273  |
| 8.65E-69 | 0.605924 | 3.87E-48 | 0.066823 | 0.14936 | 0.01418  | 0.75989 | 0.143801 | 0.00184  |
| 1.16E-30 | 0.416524 | 5.06E-21 | 0.022671 | 0.62508 | 0.133864 | 0.00375 | 0.145096 | 0.00167  |
| 7.46E-17 | 0.286011 | 3.05E-10 | 0.014719 | 0.75106 | 0.057205 | 0.21724 | 0.041858 | 0.36677  |
| 9.63E-17 | 0.344473 | 1.86E-14 | -0.06534 | 0.15859 | -0.00019 | 0.99671 | 0.045478 | 0.32676  |
| 1.36E-14 | 0.201063 | 1.20E-05 | 0.099416 | 0.03172 | -0.02319 | 0.61723 | 0.152952 | 0.00091  |
| 2.95E-09 | 0.168096 | 0.00026  | 0.055041 | 0.23516 | 0.062313 | 0.17886 | -0.00972 | 0.83406  |
| 5.42E-26 | 0.447137 | 2.46E-24 | -0.03329 | 0.473   | 0.065601 | 0.15696 | 0.112961 | 0.01459  |
| 1.15E-26 | 0.514149 | 7.17E-33 | 0.074588 | 0.10744 | 0.097597 | 0.03499 | 0.048355 | 0.29705  |
| 3.61E-14 | 0.334336 | 1.17E-13 | 0.016787 | 0.71749 | 0.05771  | 0.2132  | 0.041844 | 0.36694  |
| 9.64E-06 | 0.162666 | 0.00042  | 0.062088 | 0.18043 | 0.043791 | 0.34504 | -0.06196 | 0.18136  |
| 2.41E-29 | 0.502006 | 3.51E-31 | -0.06403 | 0.16717 | 0.006711 | 0.885   | -0.0741  | 0.10977  |
| 5.77E-12 | 0.279047 | 8.44E-10 | -0.03868 | 0.40433 | 0.051569 | 0.26607 | 0.079428 | 0.08643  |
| 3.36E-12 | 0.362403 | 6.11E-16 | -0.02667 | 0.56541 | 0.013851 | 0.76529 | 0.059741 | 0.1975   |
| 4.53E-06 | 0.308566 | 9.27E-12 | 0.017038 | 0.71344 | 0.020795 | 0.65399 | -0.16912 | 0.00024  |
| 0.00051  | 0.161186 | 0.00047  | 0.017417 | 0.70735 | 0.010863 | 0.81488 | 0.014418 | 0.75598  |
| 2.13E-15 | 0.38502  | 5.97E-18 | 0.110356 | 0.01705 | 0.049788 | 0.28296 | -0.08719 | 0.05974  |
| 3.43E-36 | 0.565272 | 8.74E-41 | -0.00717 | 0.87718 | 0.02688  | 0.56229 | 0.026359 | 0.56991  |
| 4.64E-21 | 0.398539 | 3.15E-19 | 0.003069 | 0.94725 | 0.094685 | 0.04083 | 0.083398 | 0.07177  |
| 2.45E-14 | 0.345498 | 1.54E-14 | 0.014294 | 0.75802 | 0.099324 | 0.03188 | 0.081174 | 0.07971  |
| 4.52E-10 | 0.276603 | 1.20E-09 | 0.013831 | 0.76562 | 0.122803 | 0.00789 | 0.088562 | 0.05581  |
| 2.32E-13 | 0.428516 | 2.79E-22 | 0.089916 | 0.05216 | 0.100045 | 0.03065 | -0.08524 | 0.0657   |
| 5.18E-06 | 0.144433 | 0.00175  | -0.03633 | 0.43345 | 0.024143 | 0.60277 | -0.10459 | 0.0238   |
| 2.60E-08 | 0.271768 | 2.37E-09 | -0.0104  | 0.82272 | 0.092757 | 0.04513 | 0.036979 | 0.4253   |
| 0.0002   | -0.00256 | 0.95596  | 0.016714 | 0.71866 | -0.01613 | 0.72807 | 0.113573 | 0.01406  |
| 8.98E-23 | 0.438027 | 2.58E-23 | -0.02933 | 0.52725 | 0.051522 | 0.2665  | 0.020733 | 0.65495  |
| 1.37E-30 | 0.60623  | 3.37E-48 | 0.089583 | 0.05304 | 0.123667 | 0.00746 | 0.21856  | 1.86E-06 |
| 2.57E-21 | 0.348065 | 9.55E-15 | 0.00683  | 0.88297 | -0.00226 | 0.96119 | 0.140715 | 0.0023   |
| 4.04E-30 | 0.554079 | 6.20E-39 | 0.03931  | 0.39669 | 0.122423 | 0.00809 | 0.083536 | 0.0713   |
| 5.75E-07 | 0.174886 | 0.00015  | 0.066968 | 0.14848 | 0.013131 | 0.77717 | -0.0035  | 0.93983  |
| 4.60E-16 | 0.344238 | 1.94E-14 | 0.013078 | 0.77805 | 0.094845 | 0.04049 | -0.01695 | 0.71486  |
| 2.14E-10 | 0.128497 | 0.00542  | 0.020406 | 0.66006 | -0.03109 | 0.50277 | 0.091361 | 0.04848  |
| 1.90E-67 | 0.693987 | 2.41E-68 | 0.174499 | 0.00015 | 0.086364 | 0.06221 | 0.043164 | 0.352    |
| 2.41E-27 | 0.509298 | 3.46E-32 | 0.084077 | 0.06948 | 0.121226 | 0.00873 | 0.042951 | 0.35439  |
| 4.29E-13 | 0.265722 | 5.47E-09 | 0.061611 | 0.18381 | 0.059711 | 0.19773 | 0.024607 | 0.59582  |
| 2.54E-13 | 0.254814 | 2.35E-08 | 0.053895 | 0.24507 | -0.00892 | 0.84751 | 0.104194 | 0.02434  |
| 8.33E-10 | 0.159007 | 0.00056  | 0.131601 | 0.00439 | -0.03978 | 0.39105 | -0.02815 | 0.54395  |
| 2.23E-16 | 0.217558 | 2.08E-06 | -0.06691 | 0.1488  | 0.038825 | 0.40254 | -0.07716 | 0.09581  |
| 1.71E-11 | 0.204612 | 8.31E-06 | 0.024068 | 0.6039  | 0.042107 | 0.36393 | 0.093348 | 0.04377  |

|          |          |          |          |         |          |         |          |          |
|----------|----------|----------|----------|---------|----------|---------|----------|----------|
| 1.08E-56 | 0.669596 | 4.74E-62 | 0.000232 | 0.99601 | 0.138299 | 0.00274 | 0.195662 | 2.06E-05 |
| 4.58E-44 | 0.64909  | 3.32E-57 | 0.023383 | 0.61424 | 0.093038 | 0.04448 | 0.104562 | 0.02384  |
| 1.57E-50 | 0.644277 | 4.03E-56 | 0.069358 | 0.13449 | 0.100051 | 0.03064 | 0.085933 | 0.06353  |
| 2.82E-18 | 0.497411 | 1.47E-30 | 0.013115 | 0.77742 | 0.09169  | 0.04767 | 0.064063 | 0.16693  |
| 4.19E-64 | 0.676553 | 8.77E-64 | 0.024692 | 0.59456 | 0.07539  | 0.10371 | 0.058297 | 0.20857  |
| 7.63E-09 | 0.157495 | 0.00064  | 0.002367 | 0.95932 | -0.0173  | 0.70929 | 0.045963 | 0.32162  |
| 8.42E-37 | 0.480915 | 2.11E-28 | 0.062931 | 0.17458 | 0.085526 | 0.0648  | 0.138741 | 0.00266  |
| 1.19E-06 | 0.193253 | 2.61E-05 | 0.001672 | 0.97125 | 0.003084 | 0.947   | -0.01477 | 0.75015  |
| 6.05E-51 | 0.626369 | 2.96E-52 | 0.060322 | 0.19317 | 0.071516 | 0.12276 | 0.103098 | 0.02589  |
| 8.37E-30 | 0.540416 | 9.09E-37 | -0.01482 | 0.74944 | 0.108931 | 0.01854 | 0.02039  | 0.6603   |
| 1.04E-14 | 0.3531   | 3.69E-15 | 0.126798 | 0.00607 | 0.087084 | 0.06005 | 0.128259 | 0.00551  |
| 1.09E-31 | 0.537924 | 2.20E-36 | 0.103908 | 0.02473 | 0.103505 | 0.0253  | 0.039057 | 0.39974  |
| 5.20E-21 | 0.318226 | 1.89E-12 | -0.00049 | 0.99158 | 0.027733 | 0.54996 | -0.12214 | 0.00823  |
| 1.71E-34 | 0.52831  | 6.27E-35 | 0.062862 | 0.17505 | 0.070318 | 0.12917 | 0.13432  | 0.00364  |
| 9.39E-06 | -0.11383 | 0.01385  | -0.01029 | 0.82452 | -0.00359 | 0.93828 | -0.12069 | 0.00904  |
| 1.27E-25 | 0.480676 | 2.26E-28 | 0.154922 | 0.00078 | 0.105833 | 0.02217 | 0.142707 | 0.00199  |
| 4.79E-19 | 0.233421 | 3.37E-07 | -0.03266 | 0.4814  | 0.040043 | 0.38793 | 0.004692 | 0.91945  |
| 2.31E-15 | 0.25241  | 3.21E-08 | 0.017857 | 0.70032 | -0.00454 | 0.92207 | -0.08557 | 0.06465  |
| 3.25E-29 | 0.482585 | 1.29E-28 | 0.010471 | 0.82145 | 0.047105 | 0.30973 | 0.055339 | 0.23263  |
| 1.27E-05 | 0.052608 | 0.25654  | -0.02923 | 0.52859 | 0.045563 | 0.32586 | -0.00121 | 0.9792   |
| 0.00052  | 0.115609 | 0.01242  | 0.034696 | 0.45446 | 0.087788 | 0.058   | -0.00111 | 0.98084  |
| 1.75E-28 | 0.519078 | 1.41E-33 | 0.026812 | 0.56329 | 0.022467 | 0.62819 | 0.103716 | 0.025    |
| 1.02E-08 | 0.310799 | 6.45E-12 | 0.005952 | 0.89792 | 0.015157 | 0.74391 | -0.13696 | 0.00302  |
| 2.55E-12 | 0.383432 | 8.36E-18 | -0.02123 | 0.6473  | 0.054246 | 0.242   | 0.111676 | 0.01576  |
| 3.95E-21 | 0.318429 | 1.83E-12 | -0.03756 | 0.41804 | 0.013847 | 0.76536 | -0.01728 | 0.70956  |
| 2.63E-06 | 0.219122 | 1.75E-06 | 0.000339 | 0.99418 | -0.01449 | 0.75486 | -0.09523 | 0.03969  |
| 6.47E-05 | 0.167424 | 0.00028  | -0.01075 | 0.81683 | 0.015475 | 0.73873 | 0.027582 | 0.55213  |
| 3.55E-13 | 0.380821 | 1.45E-17 | 0.002436 | 0.95813 | 0.131353 | 0.00446 | 0.152483 | 0.00095  |
| 1.99E-19 | 0.417492 | 4.02E-21 | 0.050885 | 0.27246 | 0.032194 | 0.48766 | -0.00985 | 0.83191  |
| 3.23E-15 | 0.308598 | 9.23E-12 | 0.009791 | 0.83287 | 0.114263 | 0.01348 | -0.00385 | 0.93393  |
| 2.55E-38 | 0.669274 | 5.69E-62 | 0.037449 | 0.41944 | 0.040184 | 0.38627 | 0.125238 | 0.00673  |
| 1.97E-55 | 0.658345 | 2.41E-59 | 0.033102 | 0.47547 | 0.10111  | 0.02891 | 0.101531 | 0.02824  |
| 5.18E-10 | -0.21732 | 2.13E-06 | -0.12693 | 0.00602 | -0.00398 | 0.93164 | -0.03661 | 0.42993  |
| 5.45E-07 | 0.196446 | 1.91E-05 | 0.042676 | 0.35748 | 0.03653  | 0.43095 | -0.01002 | 0.82894  |
| 0.05804  | 0.069128 | 0.13579  | -0.08413 | 0.06931 | -0.01936 | 0.67646 | -0.18708 | 4.74E-05 |
| 9.60E-10 | 0.386968 | 3.94E-18 | 0.036323 | 0.43357 | 0.133572 | 0.00383 | 0.049762 | 0.28321  |
| 4.91E-13 | 0.311257 | 5.99E-12 | -0.08745 | 0.05898 | -0.0216  | 0.6415  | 0.041534 | 0.3705   |
| 6.03E-53 | 0.638951 | 6.05E-55 | 0.048927 | 0.29137 | 0.021202 | 0.64767 | 0.217003 | 2.21E-06 |
| 1.10E-32 | 0.608788 | 1.07E-48 | 0.169096 | 0.00024 | 0.099603 | 0.03139 | 0.122534 | 0.00803  |
| 1.32E-16 | 0.078486 | 0.09023  | 0.046334 | 0.31772 | -0.02442 | 0.59861 | -0.0617  | 0.18319  |
| 1.10E-33 | 0.495273 | 2.84E-30 | 0.092159 | 0.04654 | 0.063174 | 0.17291 | 0.032942 | 0.4776   |
| 2.78E-24 | 0.449791 | 1.22E-24 | 0.039947 | 0.38908 | 0.03924  | 0.39753 | -0.01158 | 0.80298  |
| 6.55E-69 | 0.671819 | 1.34E-62 | 0.074624 | 0.10727 | 0.100975 | 0.02912 | 0.1123   | 0.01518  |
| 1.18E-23 | 0.43889  | 2.07E-23 | 0.07924  | 0.08718 | 0.027304 | 0.55615 | 0.064095 | 0.16672  |
| 1.54E-10 | 0.324699 | 6.30E-13 | -0.03333 | 0.47248 | 0.070377 | 0.12885 | 0.023739 | 0.60885  |

|          |          |          |          |         |          |          |          |          |
|----------|----------|----------|----------|---------|----------|----------|----------|----------|
| 2.42E-15 | 0.369117 | 1.61E-16 | 0.023322 | 0.61517 | 0.05808  | 0.21027  | 0.02793  | 0.54712  |
| 3.40E-25 | -0.44895 | 1.53E-24 | -0.11887 | 0.01014 | -0.04032 | 0.38462  | -0.1031  | 0.02588  |
| 0.00457  | 0.194699 | 2.27E-05 | 0.020523 | 0.65823 | 0.107422 | 0.02024  | -0.12038 | 0.00921  |
| 0.65869  | -0.00515 | 0.91161  | 0.037293 | 0.42138 | 0.030139 | 0.51588  | -0.00884 | 0.84891  |
| 0.57967  | 0.048275 | 0.29785  | 0.055748 | 0.22919 | 0.031506 | 0.49701  | -0.02067 | 0.656    |
| 0.57542  | 0.016862 | 0.71628  | 0.016197 | 0.72701 | 0.000131 | 0.99775  | -0.20919 | 5.14E-06 |
| 0.66391  | -0.02468 | 0.59475  | 0.012438 | 0.78864 | -0.01404 | 0.76215  | -0.16303 | 0.0004   |
| 0.00856  | 0.201766 | 1.11E-05 | -0.13324 | 0.00392 | 0.018534 | 0.68954  | 0.099923 | 0.03085  |
| 0.33425  | 0.056095 | 0.22631  | 0.039098 | 0.39925 | 0.011016 | 0.81233  | -0.13186 | 0.00431  |
| 0.63803  | 0.045414 | 0.32744  | 0.043383 | 0.34956 | -0.00809 | 0.86156  | -0.1065  | 0.02134  |
| 0.0304   | -0.15237 | 0.00096  | -0.04997 | 0.2812  | -0.09626 | 0.03757  | 0.08639  | 0.06213  |
| 0.00425  | 6.43E-05 | 0.99889  | -0.00949 | 0.83787 | -0.1006  | 0.02973  | 0.128195 | 0.00553  |
| 0.60691  | 0.102215 | 0.02719  | 0.028635 | 0.53706 | 0.048266 | 0.29795  | -0.15344 | 0.00088  |
| 0.40113  | -0.0108  | 0.81596  | 0.120655 | 0.00906 | -0.01613 | 0.72809  | -0.17247 | 0.00018  |
| 3.08E-12 | 0.203451 | 9.37E-06 | -0.06041 | 0.19249 | -0.16642 | 0.0003   | 0.145666 | 0.0016   |
| 0.91262  | 0.153155 | 0.0009   | 0.149259 | 0.00122 | 0.094619 | 0.04097  | -0.20763 | 6.06E-06 |
| 0.04577  | 0.140461 | 0.00235  | 0.049212 | 0.28857 | 0.048197 | 0.29863  | 0.101803 | 0.02782  |
| 0.00205  | -0.12037 | 0.00922  | -0.04322 | 0.35142 | -0.00665 | 0.88603  | -0.25277 | 3.06E-08 |
| 0.01399  | 0.222226 | 1.23E-06 | 0.115214 | 0.01272 | -0.0047  | 0.91926  | -0.14106 | 0.00225  |
| 2.22E-05 | -0.2128  | 3.49E-06 | -0.02284 | 0.62256 | -0.02136 | 0.6452   | -0.29391 | 9.29E-11 |
| 0.25841  | 0.020968 | 0.65129  | 0.034678 | 0.4547  | 0.028878 | 0.5336   | -0.13936 | 0.00254  |
| 6.42E-05 | -0.19324 | 2.62E-05 | -0.00848 | 0.85496 | -0.00167 | 0.97127  | -0.26793 | 4.04E-09 |
| 0.4308   | 0.071117 | 0.12486  | 0.00832  | 0.85768 | -0.01202 | 0.79555  | -0.23985 | 1.55E-07 |
| 9.34E-06 | 0.168475 | 0.00025  | 0.045776 | 0.3236  | 0.01827  | 0.69373  | 0.057339 | 0.21616  |
| 0.07076  | -0.14453 | 0.00174  | 0.05669  | 0.22141 | -0.02906 | 0.53108  | -0.0119  | 0.79754  |
| 0.31317  | 0.067731 | 0.14389  | 0.131857 | 0.00431 | 0.216342 | 2.37E-06 | -0.1525  | 0.00095  |
| 0.00029  | 0.240266 | 1.48E-07 | 0.112202 | 0.01527 | 0.105764 | 0.02226  | -0.10402 | 0.02458  |
| 0.05547  | 0.057103 | 0.21806  | 0.024363 | 0.59948 | 0.049319 | 0.28751  | -0.12824 | 0.00551  |
| 5.35E-05 | 0.301387 | 2.91E-11 | -0.08172 | 0.0777  | 0.075193 | 0.10461  | -0.02296 | 0.62067  |
| 0.00016  | -0.08705 | 0.06016  | -0.00321 | 0.94481 | 0.074502 | 0.10785  | -0.20581 | 7.34E-06 |
| 0.00298  | 0.203279 | 9.54E-06 | 0.007149 | 0.87754 | 0.116319 | 0.01189  | -0.0813  | 0.07924  |
| 0.02066  | -0.11853 | 0.01036  | -0.01509 | 0.74492 | -0.05063 | 0.27488  | -0.10557 | 0.02251  |
| 0.72134  | 0.050171 | 0.27926  | -0.01745 | 0.70678 | 0.114721 | 0.01311  | -0.06746 | 0.1455   |
| 0.08438  | 0.209902 | 4.76E-06 | 0.080114 | 0.08373 | 0.103298 | 0.0256   | -0.0704  | 0.12873  |
| 0.00073  | -0.15356 | 0.00087  | -0.01366 | 0.76842 | -0.05561 | 0.23037  | -0.2015  | 1.14E-05 |
| 0.12074  | 0.18793  | 4.37E-05 | 0.151716 | 0.00101 | 0.17997  | 9.20E-05 | -0.14213 | 0.00208  |
| 0.46011  | 0.037243 | 0.42201  | 0.080376 | 0.08272 | 0.080276 | 0.08311  | -0.18581 | 5.35E-05 |
| 0.07827  | 0.23825  | 1.89E-07 | 0.086321 | 0.06234 | 0.07941  | 0.0865   | -0.13062 | 0.00469  |
| 0.40993  | 0.165469 | 0.00033  | -0.00402 | 0.931   | 0.007765 | 0.86708  | -0.0113  | 0.80751  |
| 0.05202  | 0.162791 | 0.00041  | 0.093103 | 0.04433 | 0.022272 | 0.63117  | -0.07207 | 0.1199   |
| 0.07357  | 0.108906 | 0.01856  | 0.105903 | 0.02209 | 0.050706 | 0.27416  | -0.09578 | 0.03854  |
| 0.08927  | -0.07295 | 0.11541  | 0.016631 | 0.71999 | -0.03274 | 0.48026  | -0.28802 | 2.26E-10 |
| 0.11451  | 0.086854 | 0.06073  | 0.068496 | 0.13942 | 0.012952 | 0.78012  | -0.08655 | 0.06165  |
| 0.45514  | -0.11067 | 0.01673  | 0.016845 | 0.71655 | -0.08226 | 0.07575  | 0.065273 | 0.15905  |
| 0.93632  | 0.09691  | 0.0363   | 0.079406 | 0.08651 | 0.095601 | 0.03891  | -0.18353 | 6.63E-05 |



|          |          |          |          |          |          |         |          |          |
|----------|----------|----------|----------|----------|----------|---------|----------|----------|
| 0.00217  | -0.24756 | 5.95E-08 | -0.0171  | 0.71242  | -0.06881 | 0.13763 | -0.16547 | 0.00033  |
| 2.35E-09 | -0.16944 | 0.00023  | -0.01764 | 0.70383  | -0.03182 | 0.49273 | -0.17116 | 0.0002   |
| 0.7931   | 0.046098 | 0.3202   | 0.065456 | 0.15788  | 0.012563 | 0.78657 | -0.15216 | 0.00097  |
| 0.69667  | 0.12556  | 0.00659  | 0.012256 | 0.79166  | 0.004235 | 0.92727 | -0.18092 | 8.44E-05 |
| 0.947    | -0.04864 | 0.29421  | -0.04041 | 0.38365  | -0.02669 | 0.565   | -0.10133 | 0.02855  |
| 0.14675  | 0.035893 | 0.43904  | 0.048136 | 0.29925  | -0.07713 | 0.09595 | 0.125525 | 0.00661  |
| 0.25367  | 0.043824 | 0.34468  | -0.10178 | 0.02786  | 0.006097 | 0.89546 | 0.070033 | 0.13073  |
| 0.93899  | 0.022464 | 0.62824  | -0.03634 | 0.43336  | 0.017565 | 0.70499 | 0.014995 | 0.74655  |
| 2.98E-05 | 0.263836 | 7.07E-09 | -0.00528 | 0.90938  | 0.02379  | 0.60809 | -0.0251  | 0.58854  |
| 0.00453  | 0.084597 | 0.06777  | -0.04852 | 0.29538  | 0.005608 | 0.9038  | 0.115291 | 0.01266  |
| 4.78E-05 | 0.256673 | 1.84E-08 | 0.094293 | 0.04167  | 0.063922 | 0.16787 | 0.117312 | 0.01118  |
| 0.01861  | 0.158518 | 0.00059  | 0.152624 | 0.00094  | 0.119094 | 0.01    | 0.053907 | 0.24496  |
| 0.24585  | 0.101449 | 0.02837  | 0.072184 | 0.11929  | 0.044207 | 0.34048 | -0.1298  | 0.00496  |
| 0.00254  | 0.019587 | 0.67288  | -0.11992 | 0.00949  | -0.01629 | 0.72557 | 0.133773 | 0.00378  |
| 0.27132  | 0.124013 | 0.00729  | 0.111867 | 0.01558  | -0.13797 | 0.00281 | -0.1348  | 0.00352  |
| 0.67553  | 0.059851 | 0.19668  | 0.077099 | 0.09608  | -0.00861 | 0.85273 | -0.13569 | 0.0033   |
| 0.13627  | -0.10869 | 0.0188   | 0.031507 | 0.49701  | -0.03057 | 0.50991 | -0.08091 | 0.08071  |
| 0.01798  | 0.17085  | 0.00021  | -0.04925 | 0.28822  | 0.08115  | 0.0798  | -0.27895 | 8.56E-10 |
| 0.00071  | -0.20453 | 8.38E-06 | -0.08823 | 0.05673  | -0.03645 | 0.43191 | -0.01659 | 0.72071  |
| 0.09216  | 0.196225 | 1.95E-05 | 0.005137 | 0.91185  | 0.074367 | 0.10849 | -0.23582 | 2.53E-07 |
| 0.22581  | 0.009633 | 0.83552  | 0.019157 | 0.67967  | 0.015266 | 0.74214 | -0.09928 | 0.03195  |
| 3.81E-07 | -0.39165 | 1.44E-18 | 0.007942 | 0.86409  | -0.09335 | 0.04376 | -0.22534 | 8.65E-07 |
| 4.23E-10 | 0.291112 | 1.42E-10 | 0.092258 | 0.0463   | 0.044738 | 0.3347  | 0.099795 | 0.03107  |
| 0.13912  | 0.109296 | 0.01814  | 0.031442 | 0.49789  | 0.032096 | 0.48899 | -0.18633 | 5.09E-05 |
| 0.0001   | 0.162292 | 0.00043  | 0.005231 | 0.91024  | 0.135975 | 0.00324 | 0.026299 | 0.57078  |
| 0.08407  | 0.196619 | 1.87E-05 | 0.212811 | 3.49E-06 | 0.112022 | 0.01544 | -0.0737  | 0.11168  |
| 0.36879  | 0.011756 | 0.79998  | 0.110073 | 0.01733  | 0.02602  | 0.57488 | -0.18875 | 4.04E-05 |
| 0.00016  | 0.352464 | 4.17E-15 | 0.185411 | 5.55E-05 | 0.139286 | 0.00256 | -0.04339 | 0.34952  |
| 0.13008  | -0.03711 | 0.42364  | 0.066073 | 0.15399  | 0.014035 | 0.76227 | -0.10381 | 0.02487  |
| 0.94196  | 0.00547  | 0.90616  | -0.05316 | 0.2516   | -0.01638 | 0.72399 | 0.007808 | 0.86636  |
| 0.82837  | 0.020091 | 0.66498  | 0.0546   | 0.23894  | 0.104875 | 0.02342 | -0.04655 | 0.31551  |
| 6.94E-05 | 0.344402 | 1.89E-14 | 0.123634 | 0.00748  | 0.169618 | 0.00023 | -0.00088 | 0.9848   |
| 0.04383  | -0.09481 | 0.04057  | -0.01509 | 0.74495  | -0.14904 | 0.00124 | 0.104566 | 0.02383  |
| 0.42485  | -0.00322 | 0.94467  | -0.05127 | 0.26881  | -0.05973 | 0.19756 | -0.21559 | 2.58E-06 |
| 0.04515  | -0.02897 | 0.53231  | 0.029588 | 0.52359  | 0.091572 | 0.04796 | -0.23204 | 3.97E-07 |
| 0.01892  | -0.09931 | 0.0319   | 0.021431 | 0.64412  | -0.02087 | 0.65282 | -0.25401 | 2.60E-08 |
| 0.8454   | 0.074115 | 0.1097   | 0.054548 | 0.2394   | 0.051224 | 0.26928 | -0.22561 | 8.39E-07 |
| 0.85753  | -0.08852 | 0.05592  | 0.038179 | 0.41042  | -0.08603 | 0.06323 | -0.06269 | 0.17622  |
| 5.33E-07 | 0.300027 | 3.61E-11 | 0.162103 | 0.00044  | 0.025219 | 0.5867  | -0.01014 | 0.82704  |
| 0.36207  | 0.079088 | 0.08779  | 0.132615 | 0.00409  | 0.058747 | 0.20508 | -0.06174 | 0.18287  |
| 0.21226  | 0.096946 | 0.03623  | 0.036119 | 0.43615  | 0.121672 | 0.00849 | -0.25679 | 1.81E-08 |
| 0.00665  | -0.16853 | 0.00025  | -0.14036 | 0.00236  | 0.042021 | 0.36491 | -0.05492 | 0.23617  |
| 0.30655  | 0.008859 | 0.84857  | 0.026564 | 0.5669   | 0.005211 | 0.91057 | 0.018057 | 0.69713  |
| 2.60E-07 | -0.26884 | 3.56E-09 | -0.04679 | 0.31293  | -0.08385 | 0.07025 | -0.24606 | 7.20E-08 |
| 0.00106  | 0.221701 | 1.31E-06 | 0.0945   | 0.04122  | 0.031302 | 0.49981 | -0.08122 | 0.07953  |

|          |          |          |          |         |          |          |          |          |
|----------|----------|----------|----------|---------|----------|----------|----------|----------|
| 0.03148  | -0.07411 | 0.10972  | 0.058074 | 0.21032 | 0.073258 | 0.11388  | -0.07064 | 0.1274   |
| 0.02717  | 0.066104 | 0.1538   | -0.01845 | 0.69087 | -0.0522  | 0.26026  | -0.10132 | 0.02857  |
| 0.63398  | -0.01791 | 0.69945  | 0.003994 | 0.9314  | -0.0483  | 0.29765  | 0.008345 | 0.85727  |
| 0.61876  | 0.058873 | 0.2041   | 0.134203 | 0.00367 | -0.01579 | 0.73357  | -0.14705 | 0.00144  |
| 0.6363   | 0.208489 | 5.53E-06 | 0.016861 | 0.71629 | 0.102681 | 0.0265   | -0.12151 | 0.00858  |
| 0.00011  | 0.238316 | 1.87E-07 | 0.035985 | 0.43786 | 0.064202 | 0.16601  | 0.046379 | 0.31726  |
| 0.20043  | 0.111313 | 0.0161   | 0.069463 | 0.1339  | 0.131814 | 0.00433  | -0.20448 | 8.42E-06 |
| 0.2837   | 0.126426 | 0.00622  | 0.015559 | 0.73735 | 0.109046 | 0.01841  | -0.12417 | 0.00722  |
| 0.39354  | 0.230416 | 4.81E-07 | -0.03162 | 0.49544 | 0.119531 | 0.00973  | -0.13616 | 0.00319  |
| 0.56697  | 0.011253 | 0.80837  | -0.00659 | 0.88698 | -0.09337 | 0.04372  | -0.00473 | 0.9188   |
| 0.35707  | 0.103964 | 0.02466  | -0.00995 | 0.83012 | 0.094363 | 0.04152  | -0.26363 | 7.27E-09 |
| 0.00015  | 0.273859 | 1.77E-09 | 0.039319 | 0.39658 | 0.09671  | 0.03669  | -0.05942 | 0.19992  |
| 0.61056  | 0.119261 | 0.00989  | 0.071574 | 0.12245 | 0.161977 | 0.00044  | -0.18808 | 4.31E-05 |
| 0.00023  | 0.133357 | 0.00389  | 0.010027 | 0.82889 | -0.05945 | 0.19971  | 0.061488 | 0.18469  |
| 1.44E-08 | 0.446624 | 2.81E-24 | 0.130057 | 0.00488 | 0.263577 | 7.33E-09 | -0.03521 | 0.44774  |
| 0.02363  | 0.197151 | 1.78E-05 | -0.08807 | 0.0572  | 0.030901 | 0.50531  | -0.00573 | 0.90171  |
| 1.07E-06 | 0.401079 | 1.78E-19 | 0.161482 | 0.00046 | 0.099352 | 0.03183  | -0.13932 | 0.00255  |
| 0.0012   | 0.340122 | 4.13E-14 | 0.097976 | 0.03428 | 0.167462 | 0.00028  | -0.06597 | 0.15465  |
| 0.28386  | -0.01111 | 0.8107   | 0.149039 | 0.00124 | -0.03418 | 0.46124  | -0.03482 | 0.4528   |
| 0.04465  | -0.026   | 0.57523  | 0.042019 | 0.36494 | 0.018687 | 0.6871   | -0.12892 | 0.00527  |
| 0.00805  | 0.164252 | 0.00036  | 0.098498 | 0.03334 | 0.083531 | 0.07132  | 0.121775 | 0.00843  |
| 0.55992  | -0.12376 | 0.00742  | -0.00023 | 0.99601 | 0.001122 | 0.98071  | 0.035509 | 0.44395  |
| 0.0514   | -0.10701 | 0.02073  | -0.13964 | 0.00249 | -0.0991  | 0.03227  | -0.01715 | 0.71169  |
| 0.02891  | 0.290492 | 1.56E-10 | 0.027155 | 0.5583  | 0.211163 | 4.16E-06 | -0.05994 | 0.19601  |
| 2.92E-08 | -0.25172 | 3.51E-08 | -0.03496 | 0.451   | -0.08446 | 0.06821  | -0.23377 | 3.23E-07 |
| 0.6928   | 0.05957  | 0.19879  | 0.106498 | 0.02135 | 0.095728 | 0.03865  | -0.06621 | 0.15312  |
| 0.41013  | -0.00217 | 0.96269  | 0.035606 | 0.4427  | -0.00525 | 0.90993  | -0.26664 | 4.83E-09 |
| 0.59333  | -0.06713 | 0.14747  | -0.00589 | 0.89891 | -0.02355 | 0.61169  | -0.15107 | 0.00106  |
| 0.79443  | 0.030782 | 0.50695  | -0.0031  | 0.94667 | -0.00067 | 0.9885   | -0.03373 | 0.46718  |
| 0.00044  | 0.234876 | 2.83E-07 | 0.075816 | 0.10177 | -0.04614 | 0.31976  | -0.18137 | 8.10E-05 |
| 0.00274  | -0.01947 | 0.67479  | 0.031247 | 0.50056 | 0.056399 | 0.2238   | -0.25749 | 1.65E-08 |
| 2.31E-10 | -0.29478 | 8.13E-11 | -0.06456 | 0.16366 | -0.00792 | 0.86446  | -0.03655 | 0.43068  |
| 1.27E-05 | -0.26244 | 8.55E-09 | 0.003491 | 0.94003 | -0.12168 | 0.00848  | -0.07063 | 0.1275   |
| 0.07966  | 0.012124 | 0.79385  | 0.048375 | 0.29685 | 0.078061 | 0.092    | -0.241   | 1.35E-07 |
| 0.6441   | -0.13678 | 0.00306  | -0.06566 | 0.15658 | -0.10773 | 0.01988  | -0.08456 | 0.06788  |
| 4.01E-06 | -0.31934 | 1.57E-12 | -0.02439 | 0.59906 | -0.07717 | 0.09579  | 0.061167 | 0.18699  |
| 0.00057  | 0.30766  | 1.07E-11 | 0.044268 | 0.33981 | 0.271703 | 2.39E-09 | -0.15344 | 0.00088  |
| 0.00406  | 0.331515 | 1.93E-13 | 0.018069 | 0.69694 | 0.129301 | 0.00513  | -0.09174 | 0.04755  |
| 0.01848  | 0.124203 | 0.0072   | 0.073992 | 0.11029 | 0.015861 | 0.73245  | 0.059509 | 0.19925  |
| 0.01346  | 0.213521 | 3.23E-06 | 0.049249 | 0.2882  | 0.036173 | 0.43546  | -0.05849 | 0.2071   |
| 0.0716   | 0.134131 | 0.00368  | 0.032373 | 0.48524 | 0.020225 | 0.66288  | -0.02884 | 0.53408  |
| 0.03633  | 0.044021 | 0.34252  | 0.088837 | 0.05506 | 0.1001   | 0.03056  | -0.09153 | 0.04807  |
| 0.00164  | -0.16064 | 0.00049  | -0.08215 | 0.07613 | -0.08123 | 0.07948  | -0.09885 | 0.03271  |
| 0.01187  | -0.00506 | 0.91317  | -0.02206 | 0.63441 | 0.062614 | 0.17676  | -0.10949 | 0.01794  |
| 3.60E-08 | 0.226188 | 7.85E-07 | -0.00134 | 0.97691 | 0.017493 | 0.70614  | -0.06522 | 0.15939  |

|          |          |          |          |         |           |          |          |          |
|----------|----------|----------|----------|---------|-----------|----------|----------|----------|
| 0.45403  | -0.0058  | 0.90057  | 0.038871 | 0.40199 | 0.06673   | 0.14993  | 0.096532 | 0.03704  |
| 0.58153  | 0.051437 | 0.26729  | -0.1054  | 0.02273 | 0.101059  | 0.02899  | -0.37681 | 3.34E-17 |
| 2.78E-05 | 0.365668 | 3.20E-16 | 0.072432 | 0.11802 | 0.136604  | 0.0031   | -0.06439 | 0.16479  |
| 8.00E-13 | 0.303418 | 2.11E-11 | -0.04288 | 0.35517 | 0.061282  | 0.18616  | -0.1384  | 0.00272  |
| 0.08693  | 0.175785 | 0.00013  | 0.04978  | 0.28303 | 0.041525  | 0.3706   | -0.14751 | 0.00139  |
| 0.73052  | -0.07335 | 0.11342  | 0.061913 | 0.18166 | -0.09491  | 0.04036  | 0.127218 | 0.0059   |
| 0.01896  | -0.09813 | 0.034    | 0.034675 | 0.45473 | 0.005662  | 0.90288  | -0.13702 | 0.00301  |
| 0.32222  | 0.111484 | 0.01594  | 0.034689 | 0.45454 | 0.001298  | 0.97768  | -0.22015 | 1.56E-06 |
| 5.60E-05 | 0.16064  | 0.00049  | 0.032545 | 0.48293 | -0.01706  | 0.71303  | -0.1801  | 9.09E-05 |
| 0.47228  | 0.000412 | 0.99292  | 0.013539 | 0.77043 | -4.42E-05 | 0.99924  | 0.104656 | 0.02371  |
| 0.17675  | 0.024844 | 0.59229  | 0.125911 | 0.00644 | 0.071931  | 0.12059  | -0.12471 | 0.00697  |
| 1.35E-07 | 0.373654 | 6.39E-17 | 0.082703 | 0.07418 | 0.101828  | 0.02778  | -0.01417 | 0.75997  |
| 0.805    | 0.067894 | 0.14293  | 0.061072 | 0.18768 | 0.040595  | 0.38142  | -0.00936 | 0.84017  |
| 0.77619  | 0.142092 | 0.00208  | -0.00025 | 0.99575 | -0.04448  | 0.33749  | -0.03172 | 0.49411  |
| 3.37E-07 | 0.291035 | 1.44E-10 | 0.041638 | 0.3693  | 0.059961  | 0.19585  | 0.07698  | 0.0966   |
| 0.00595  | -0.23142 | 4.27E-07 | 0.09155  | 0.04801 | -0.17924  | 9.83E-05 | 0.088572 | 0.05579  |
| 0.39387  | 0.090766 | 0.04996  | 0.045436 | 0.3272  | 0.112615  | 0.0149   | -0.08201 | 0.07664  |
| 0.89329  | 0.106021 | 0.02194  | 0.045457 | 0.32698 | 0.086187  | 0.06275  | -0.20778 | 5.96E-06 |
| 0.00197  | 0.266432 | 4.97E-09 | 0.057094 | 0.21813 | 0.106891  | 0.02087  | -0.09755 | 0.03507  |
| 0.04148  | -0.06565 | 0.15662  | 0.122738 | 0.00792 | 0.04374   | 0.34561  | -0.0913  | 0.04862  |
| 0.05578  | 0.095769 | 0.03856  | 0.022435 | 0.62868 | 0.015113  | 0.74463  | -0.05658 | 0.22229  |
| 0.18332  | 0.214671 | 2.85E-06 | 0.05     | 0.2809  | 0.060955  | 0.18853  | -0.00652 | 0.88827  |
| 2.26E-07 | 0.163985 | 0.00037  | 0.086697 | 0.0612  | -0.00632  | 0.89173  | -0.13822 | 0.00276  |
| 0.01075  | 0.26435  | 6.60E-09 | 0.03414  | 0.46173 | 0.198775  | 1.51E-05 | -0.12034 | 0.00924  |
| 2.00E-06 | 0.399237 | 2.69E-19 | 0.033202 | 0.47413 | 0.142119  | 0.00208  | -0.12858 | 0.00539  |
| 3.77E-09 | -0.28571 | 3.19E-10 | -0.0123  | 0.79085 | -0.05426  | 0.24187  | -0.23347 | 3.35E-07 |
| 0.00075  | 0.093311 | 0.04386  | 0.002068 | 0.96445 | -0.01947  | 0.67473  | -0.19377 | 2.48E-05 |
| 0.44709  | 0.086526 | 0.06172  | -0.00267 | 0.95414 | -0.03141  | 0.49833  | -0.1764  | 0.00013  |
| 0.00013  | -0.07312 | 0.11457  | 0.019041 | 0.6815  | 0.031552  | 0.49638  | -0.23199 | 3.99E-07 |
| 0.00141  | -0.16985 | 0.00023  | 0.009234 | 0.84225 | -0.0271   | 0.55917  | -0.21245 | 3.63E-06 |
| 0.00066  | 0.300354 | 3.43E-11 | 0.096509 | 0.03708 | 0.245275  | 7.94E-08 | -0.08344 | 0.07163  |
| 0.27264  | 0.049706 | 0.28374  | 0.008543 | 0.85392 | 0.02687   | 0.56244  | -0.18126 | 8.17E-05 |
| 4.05E-08 | -0.22944 | 5.39E-07 | -0.00705 | 0.87922 | -0.05579  | 0.22881  | -0.0569  | 0.2197   |
| 0.01046  | -0.12757 | 0.00577  | -0.01665 | 0.71972 | -0.05395  | 0.24462  | 0.09971  | 0.03121  |
| 0.57799  | 0.002328 | 0.95998  | 0.002452 | 0.95785 | -0.04834  | 0.29722  | -0.18577 | 5.37E-05 |
| 0.03181  | -0.00619 | 0.8938   | 0.0567   | 0.22133 | -0.05685  | 0.22015  | 0.07993  | 0.08445  |
| 1.78E-07 | -0.20637 | 6.92E-06 | 0.022366 | 0.62973 | -0.02406  | 0.604    | -0.24443 | 8.83E-08 |
| 0.00192  | -0.12017 | 0.00934  | 0.121063 | 0.00882 | 0.010933  | 0.81371  | -0.24652 | 6.79E-08 |
| 6.71E-12 | -0.2258  | 8.21E-07 | -0.00266 | 0.95429 | 0.012851  | 0.78179  | -0.25751 | 1.65E-08 |
| 0.50051  | 0.059776 | 0.19724  | 0.015964 | 0.73079 | 0.002743  | 0.95286  | -0.13962 | 0.0025   |
| 3.97E-05 | -0.08987 | 0.05229  | -0.04107 | 0.37591 | 0.002329  | 0.95997  | -0.23818 | 1.90E-07 |
| 0.36483  | 0.042069 | 0.36436  | -0.07844 | 0.09042 | 0.020387  | 0.66034  | -0.09535 | 0.03942  |
| 0.05765  | -0.07296 | 0.11534  | 0.0852   | 0.06583 | -0.01725  | 0.71007  | -0.13821 | 0.00276  |
| 1.07E-10 | 0.427613 | 3.49E-22 | 0.068368 | 0.14015 | 0.032438  | 0.48437  | 0.224486 | 9.54E-07 |
| 0.34036  | 0.178939 | 0.0001   | 0.004312 | 0.92596 | 0.018424  | 0.69129  | -0.12518 | 0.00676  |

|          |          |          |          |          |          |          |          |          |
|----------|----------|----------|----------|----------|----------|----------|----------|----------|
| 0.10917  | 0.169537 | 0.00023  | 0.097833 | 0.03455  | 0.007319 | 0.87466  | -0.0964  | 0.03731  |
| 0.40332  | 0.111809 | 0.01564  | -0.03366 | 0.46803  | 0.239043 | 1.71E-07 | -0.20639 | 6.90E-06 |
| 0.90643  | 0.043013 | 0.35369  | 0.159182 | 0.00055  | 0.003305 | 0.94321  | -0.20117 | 1.18E-05 |
| 0.01809  | 0.014483 | 0.75492  | 0.012248 | 0.7918   | -0.02763 | 0.55147  | -0.17712 | 0.00012  |
| 0.23517  | -0.03544 | 0.44489  | 0.032947 | 0.47754  | 0.00271  | 0.95343  | -0.27351 | 1.86E-09 |
| 0.00224  | 0.368087 | 1.97E-16 | 0.096315 | 0.03747  | 0.066021 | 0.15431  | -0.14105 | 0.00225  |
| 0.09257  | 0.117378 | 0.01113  | 0.124242 | 0.00719  | 0.10652  | 0.02132  | -0.0469  | 0.31186  |
| 0.00039  | 0.262955 | 7.97E-09 | 0.132813 | 0.00404  | 0.015288 | 0.74177  | -0.15844 | 0.00059  |
| 0.8937   | 0.083348 | 0.07195  | 0.128818 | 0.0053   | 0.002775 | 0.95232  | -0.04831 | 0.29749  |
| 0.96357  | -0.03364 | 0.46834  | 0.006807 | 0.88336  | -0.03755 | 0.41819  | -0.181   | 8.37E-05 |
| 0.00723  | 0.163407 | 0.00039  | 0.051409 | 0.26756  | 0.017941 | 0.69898  | -0.09117 | 0.04894  |
| 0.00643  | 0.084817 | 0.06705  | -0.03212 | 0.48868  | -0.04713 | 0.30945  | -0.09055 | 0.05052  |
| 0.00105  | -0.09196 | 0.04701  | 0.093059 | 0.04443  | 0.203309 | 9.51E-06 | -0.17209 | 0.00019  |
| 0.39055  | -0.02577 | 0.57863  | 0.130468 | 0.00474  | 0.018359 | 0.69232  | -0.18259 | 7.23E-05 |
| 0.15497  | 0.004082 | 0.92989  | 0.030735 | 0.5076   | 0.021426 | 0.6442   | -0.13635 | 0.00315  |
| 5.84E-05 | -0.1792  | 9.87E-05 | 0.005923 | 0.89842  | -0.04581 | 0.32329  | -0.24999 | 4.38E-08 |
| 0.00091  | 0.213404 | 3.27E-06 | 0.317776 | 2.04E-12 | 0.05161  | 0.26569  | -0.14781 | 0.00136  |
| 0.45335  | 0.09946  | 0.03164  | 0.075754 | 0.10204  | 0.090008 | 0.05192  | -0.0941  | 0.0421   |
| 0.05175  | -0.01344 | 0.77214  | 0.066201 | 0.15319  | 0.035733 | 0.44107  | -0.1522  | 0.00097  |
| 0.17485  | 0.213709 | 3.16E-06 | -0.03819 | 0.41034  | 0.00132  | 0.9773   | -0.24808 | 5.57E-08 |
| 0.00177  | 0.167958 | 0.00027  | -0.02457 | 0.59639  | 0.035583 | 0.443    | -0.22246 | 1.20E-06 |
| 0.11706  | -0.05858 | 0.20637  | 0.111805 | 0.01564  | -0.01822 | 0.69454  | -0.28696 | 2.65E-10 |
| 0.70069  | -0.04298 | 0.35408  | -0.05537 | 0.23238  | 0.014197 | 0.75962  | 0.014305 | 0.75784  |
| 0.20718  | -0.02719 | 0.55783  | 0.038787 | 0.40301  | 0.002369 | 0.95927  | -0.2454  | 7.82E-08 |
| 2.17E-06 | 0.317081 | 2.29E-12 | 0.128735 | 0.00533  | 0.035721 | 0.44123  | -0.1425  | 0.00202  |
| 4.49E-10 | 0.285095 | 3.49E-10 | -0.10578 | 0.02224  | 0.118656 | 0.01028  | 0.235934 | 2.50E-07 |
| 7.17E-06 | 0.34308  | 2.41E-14 | 0.137872 | 0.00283  | 0.119495 | 0.00975  | -0.1125  | 0.015    |
| 4.15E-10 | -0.22551 | 8.49E-07 | -0.05881 | 0.20457  | -0.03173 | 0.49401  | -0.02476 | 0.59349  |
| 0.07409  | 0.114783 | 0.01306  | -0.08745 | 0.05899  | 0.090577 | 0.05045  | -0.23187 | 4.05E-07 |
| 1.07E-06 | 0.106937 | 0.02081  | -0.04018 | 0.38626  | -0.0177  | 0.70279  | 0.131386 | 0.00446  |
| 0.78084  | 0.014987 | 0.74668  | 0.014479 | 0.75498  | -0.00908 | 0.84489  | -0.21377 | 3.14E-06 |
| 0.44421  | 0.06558  | 0.15709  | 0.062102 | 0.18033  | 0.042202 | 0.36285  | -0.16746 | 0.00028  |
| 0.34562  | 0.076535 | 0.09855  | 0.139208 | 0.00257  | -0.02581 | 0.578    | -0.13458 | 0.00357  |
| 0.43147  | -0.04308 | 0.35295  | 0.173047 | 0.00017  | 0.03259  | 0.48233  | -0.14838 | 0.0013   |
| 0.46021  | 0.003653 | 0.93725  | 0.024473 | 0.59782  | -0.02612 | 0.57346  | -0.17471 | 0.00015  |
| 0.6444   | 0.15421  | 0.00083  | 0.134216 | 0.00366  | 0.017675 | 0.70323  | -0.15383 | 0.00085  |
| 0.0253   | -0.06187 | 0.18196  | 0.066054 | 0.15411  | -0.07001 | 0.13083  | -0.29082 | 1.48E-10 |
| 0.22076  | 0.045595 | 0.32551  | -0.03854 | 0.40599  | 0.027323 | 0.55588  | 0.066905 | 0.14886  |
| 0.05426  | -0.02094 | 0.65167  | 0.052344 | 0.25894  | -0.0149  | 0.74814  | -0.22748 | 6.76E-07 |
| 0.01578  | -0.00335 | 0.94241  | -0.02627 | 0.57125  | 0.007829 | 0.86601  | 0.267762 | 4.14E-09 |
| 0.7449   | 0.076425 | 0.09904  | 0.19172  | 3.04E-05 | 0.09915  | 0.03218  | -0.16686 | 0.00029  |
| 0.0213   | 0.139425 | 0.00253  | 0.132644 | 0.00409  | 0.152395 | 0.00095  | 0.136559 | 0.00311  |
| 0.03482  | 0.030209 | 0.51491  | -0.05217 | 0.26054  | -0.13125 | 0.0045   | -0.11964 | 0.00966  |
| 0.0019   | 0.25372  | 2.71E-08 | 0.0923   | 0.0462   | 0.076002 | 0.10093  | 0.063866 | 0.16825  |
| 0.04056  | 0.252236 | 3.28E-08 | 0.07136  | 0.12358  | 0.108314 | 0.01922  | -0.05971 | 0.19772  |

|          |          |          |          |          |          |          |          |          |
|----------|----------|----------|----------|----------|----------|----------|----------|----------|
| 0.00509  | -0.06314 | 0.17315  | -0.01931 | 0.67728  | -0.03651 | 0.43117  | -0.21912 | 1.75E-06 |
| 0.3559   | 0.103933 | 0.0247   | 0.186604 | 4.96E-05 | 0.093325 | 0.04382  | -0.15387 | 0.00085  |
| 0.00132  | 0.210271 | 4.58E-06 | 0.345647 | 1.50E-14 | 0.228928 | 5.72E-07 | 0.133341 | 0.00389  |
| 0.00063  | -0.16597 | 0.00032  | 0.111083 | 0.01633  | -0.06041 | 0.19252  | 0.08324  | 0.07231  |
| 0.74653  | 0.027914 | 0.54736  | -0.02101 | 0.65066  | 0.005041 | 0.91349  | -0.17841 | 0.00011  |
| 0.11682  | 0.057205 | 0.21724  | 0.02255  | 0.62692  | 0.041124 | 0.37525  | -0.203   | 9.81E-06 |
| 0.95729  | 0.142985 | 0.00195  | 0.132592 | 0.0041   | 0.18075  | 8.57E-05 | -0.04219 | 0.36295  |
| 0.3393   | -0.04519 | 0.32982  | 0.011418 | 0.80561  | -0.03173 | 0.49402  | -0.26832 | 3.83E-09 |
| 0.15341  | -0.0333  | 0.47285  | 0.070336 | 0.12907  | 0.058418 | 0.20763  | -0.13587 | 0.00326  |
| 8.97E-09 | -0.27997 | 7.39E-10 | -0.04188 | 0.36657  | -0.06136 | 0.18559  | -0.20364 | 9.18E-06 |
| 0.03674  | -0.09179 | 0.04742  | -0.00622 | 0.8933   | -0.04475 | 0.33459  | -0.19095 | 3.27E-05 |
| 0.28592  | 0.041698 | 0.36861  | 0.007312 | 0.87477  | 0.067148 | 0.14739  | -0.10564 | 0.02242  |
| 0.69666  | 0.06031  | 0.19326  | -0.09125 | 0.04876  | -0.00773 | 0.86769  | -0.02798 | 0.54646  |
| 0.40051  | -0.03043 | 0.51187  | 0.061164 | 0.18702  | 0.026394 | 0.5694   | -0.19299 | 2.68E-05 |
| 2.60E-09 | 0.29717  | 5.63E-11 | 0.089362 | 0.05363  | -0.01623 | 0.72652  | 0.031992 | 0.4904   |
| 0.20314  | 0.048167 | 0.29894  | 0.071746 | 0.12156  | 0.058148 | 0.20974  | -0.27738 | 1.07E-09 |
| 2.76E-05 | 0.224867 | 9.14E-07 | 0.004723 | 0.91892  | -0.00857 | 0.85354  | -0.19481 | 2.24E-05 |
| 4.76E-06 | -0.20038 | 1.28E-05 | 0.014392 | 0.75641  | -0.0291  | 0.53047  | -0.18458 | 6.00E-05 |
| 0.18285  | -0.06729 | 0.14654  | 0.028584 | 0.53778  | -0.00546 | 0.90628  | -0.20932 | 5.07E-06 |
| 0.45578  | 0.04272  | 0.35698  | 0.232479 | 3.77E-07 | 0.206233 | 7.02E-06 | -0.06062 | 0.19097  |
| 0.49609  | 0.066496 | 0.15137  | 0.12488  | 0.00689  | 0.160482 | 0.0005   | -0.19014 | 3.54E-05 |
| 0.31443  | 0.081194 | 0.07963  | 0.1535   | 0.00087  | -0.00738 | 0.87355  | -0.18879 | 4.03E-05 |
| 2.04E-07 | 0.393959 | 8.66E-19 | 0.142688 | 0.00199  | 0.212061 | 3.78E-06 | -0.1214  | 0.00863  |
| 0.13972  | 0.027648 | 0.55119  | 0.075101 | 0.10504  | -0.06515 | 0.15986  | -0.1331  | 0.00396  |
| 3.54E-06 | 0.36602  | 2.99E-16 | 0.018903 | 0.68368  | 0.087351 | 0.05927  | -0.02556 | 0.58163  |
| 0.63252  | 0.001389 | 0.97612  | 0.004911 | 0.9157   | -0.04329 | 0.35063  | -0.2077  | 6.02E-06 |
| 2.44E-11 | 0.299276 | 4.06E-11 | 0.058438 | 0.20747  | 0.071343 | 0.12367  | -0.1391  | 0.00259  |
| 0.01949  | -0.10191 | 0.02765  | -0.06489 | 0.16153  | -0.08401 | 0.06969  | -0.15177 | 0.001    |
| 0.07512  | 0.082137 | 0.07619  | -0.00727 | 0.87555  | 0.048105 | 0.29956  | 0.206263 | 6.99E-06 |
| 0.00739  | -0.1624  | 0.00043  | -0.04657 | 0.31527  | -0.10961 | 0.01781  | -0.08449 | 0.06814  |
| 4.10E-07 | 0.266932 | 4.64E-09 | 0.229643 | 5.26E-07 | 0.055106 | 0.23461  | -0.09436 | 0.04153  |
| 0.00107  | -0.09933 | 0.03186  | -0.01461 | 0.75279  | -0.02316 | 0.61765  | -0.12095 | 0.00889  |
| 0.12658  | 0.086667 | 0.06129  | 0.114056 | 0.01365  | 0.036633 | 0.42965  | -0.26934 | 3.33E-09 |
| 0.03094  | -0.08502 | 0.06639  | -0.00854 | 0.85392  | -0.01369 | 0.76796  | -0.24395 | 9.38E-08 |
| 5.36E-05 | 0.248789 | 5.10E-08 | 0.054863 | 0.23669  | 0.035585 | 0.44298  | -0.03432 | 0.45939  |
| 0.0043   | 0.146316 | 0.00152  | 0.261626 | 9.53E-09 | -0.02862 | 0.53726  | -0.12832 | 0.00549  |
| 0.0012   | -0.02202 | 0.63497  | 0.022298 | 0.63078  | 0.026704 | 0.56487  | -0.14883 | 0.00126  |
| 0.65617  | 0.174275 | 0.00015  | 0.064701 | 0.16274  | 0.081475 | 0.0786   | -0.15811 | 0.00061  |
| 0.01114  | -0.09889 | 0.03264  | 0.074781 | 0.10654  | 0.028039 | 0.54556  | -0.12353 | 0.00753  |
| 0.18699  | -0.02747 | 0.55369  | 0.063591 | 0.17009  | 0.020549 | 0.65782  | -0.16569 | 0.00032  |
| 0.01789  | 0.043329 | 0.35016  | 0.130822 | 0.00463  | 0.091855 | 0.04727  | -0.11567 | 0.01237  |
| 0.00173  | 0.001206 | 0.97926  | 0.011624 | 0.80217  | 0.087791 | 0.05799  | -0.19927 | 1.44E-05 |
| 0.56208  | 0.050746 | 0.27378  | -0.00778 | 0.86679  | -0.01974 | 0.67046  | -0.18702 | 4.77E-05 |
| 0.00024  | 0.26826  | 3.86E-09 | 0.085609 | 0.06454  | 0.068999 | 0.13652  | -0.00795 | 0.86395  |
| 0.13439  | 0.055803 | 0.22874  | 0.034409 | 0.4582   | 0.037244 | 0.42199  | -0.08446 | 0.06822  |

|          |          |          |          |          |          |         |          |          |
|----------|----------|----------|----------|----------|----------|---------|----------|----------|
| 0.65125  | 0.043862 | 0.34425  | 0.046156 | 0.31959  | 0.020768 | 0.6544  | -0.08801 | 0.05737  |
| 0.99983  | 0.037388 | 0.42019  | 0.043603 | 0.34712  | 0.054764 | 0.23754 | -0.13287 | 0.00402  |
| 0.12226  | 0.044108 | 0.34156  | 0.071747 | 0.12155  | 0.06522  | 0.15938 | -0.14794 | 0.00135  |
| 9.01E-05 | 0.24012  | 1.50E-07 | 0.129258 | 0.00515  | 0.132346 | 0.00417 | 0.026201 | 0.57222  |
| 0.00046  | -0.14272 | 0.00199  | 8.38E-05 | 0.99856  | -0.00638 | 0.89063 | -0.25169 | 3.52E-08 |
| 0.64563  | 0.132635 | 0.00409  | 0.274735 | 1.56E-09 | 0.030159 | 0.51559 | -0.08835 | 0.05642  |
| 0.64125  | 0.010717 | 0.81732  | 0.059286 | 0.20094  | 0.052738 | 0.25537 | -0.2589  | 1.37E-08 |
| 0.01081  | -0.10663 | 0.02119  | 0.00695  | 0.88093  | -0.01306 | 0.77836 | -0.22774 | 6.56E-07 |
| 0.00103  | 0.104449 | 0.02399  | -0.03285 | 0.47883  | -0.04001 | 0.38834 | -0.06396 | 0.16765  |
| 0.89687  | 0.041745 | 0.36807  | 0.04847  | 0.29591  | 0.01485  | 0.74892 | -0.17428 | 0.00015  |
| 0.35314  | 0.066681 | 0.15023  | 0.036987 | 0.42521  | 0.166678 | 0.0003  | -0.16575 | 0.00032  |
| 0.0051   | 0.083621 | 0.07101  | -0.1124  | 0.01509  | 0.031935 | 0.49118 | 0.01072  | 0.81729  |
| 0.01793  | 0.006902 | 0.88174  | -0.04157 | 0.37014  | -0.00343 | 0.94109 | -0.11609 | 0.01205  |
| 0.3124   | 0.018567 | 0.68901  | 0.000951 | 0.98365  | 0.009337 | 0.84051 | -0.16842 | 0.00026  |
| 0.59323  | 0.061343 | 0.18573  | 0.035202 | 0.4479   | 0.123871 | 0.00736 | -0.24755 | 5.97E-08 |
| 0.05129  | 0.153407 | 0.00088  | 0.01022  | 0.82566  | 0.071359 | 0.12358 | -0.21606 | 2.45E-06 |
| 0.4722   | -0.05883 | 0.20442  | -0.08195 | 0.07687  | -0.0611  | 0.18747 | 0.05541  | 0.23203  |
| 0.20441  | -0.04603 | 0.32095  | -0.12633 | 0.00627  | -0.03244 | 0.48436 | 0.001486 | 0.97446  |
| 0.03023  | -0.08808 | 0.05716  | -0.00171 | 0.97052  | -0.02425 | 0.60116 | -0.17531 | 0.00014  |
| 0.00111  | -0.25787 | 1.57E-08 | -0.12971 | 0.00499  | -0.01305 | 0.77856 | 0.058384 | 0.20789  |
| 0.2811   | 0.025856 | 0.57729  | 0.353449 | 3.46E-15 | 0.103782 | 0.02491 | -0.19105 | 3.24E-05 |
| 0.01413  | -0.0137  | 0.76786  | 0.09851  | 0.03331  | 0.067805 | 0.14346 | -0.17986 | 9.29E-05 |
| 0.91702  | -0.13696 | 0.00302  | -0.01175 | 0.80015  | -0.04797 | 0.30093 | 0.066193 | 0.15324  |
| 7.34E-16 | -0.38753 | 3.49E-18 | -0.01745 | 0.7068   | -0.05465 | 0.23853 | -0.1757  | 0.00014  |
| 0.05635  | 0.038475 | 0.4068   | 0.332818 | 1.53E-13 | -0.01657 | 0.721   | -0.06793 | 0.14275  |
| 0.00017  | 0.273545 | 1.85E-09 | 0.061603 | 0.18387  | 0.088732 | 0.05535 | -0.17517 | 0.00014  |
| 0.67407  | 0.115677 | 0.01237  | 0.153115 | 0.0009   | 0.044862 | 0.33337 | -0.13701 | 0.00301  |
| 0.7242   | 0.034736 | 0.45393  | 0.018105 | 0.69637  | -0.02457 | 0.59632 | -0.14066 | 0.00231  |
| 0.00132  | 0.08927  | 0.05388  | 0.085822 | 0.06387  | -0.04559 | 0.32556 | -0.18333 | 6.75E-05 |
| 2.89E-05 | -0.08389 | 0.0701   | -0.04013 | 0.38693  | 0.033202 | 0.47413 | -0.12514 | 0.00678  |
| 2.00E-05 | -0.1505  | 0.00111  | -0.01898 | 0.68241  | -0.05304 | 0.25263 | -0.14813 | 0.00133  |
| 9.67E-11 | 0.386066 | 4.78E-18 | 0.049194 | 0.28875  | 0.053851 | 0.24546 | 0.010672 | 0.81808  |
| 0.33745  | 0.109625 | 0.0178   | 0.053604 | 0.24763  | 0.057966 | 0.21117 | -0.15752 | 0.00063  |
| 1.71E-07 | 0.337647 | 6.46E-14 | -0.02672 | 0.56469  | 0.082751 | 0.07401 | -0.06199 | 0.18111  |
| 0.9688   | 0.041303 | 0.37317  | 0.052633 | 0.25632  | -0.01059 | 0.81952 | -0.14187 | 0.00212  |
| 0.20788  | 0.081816 | 0.07735  | 0.066469 | 0.15153  | 0.16195  | 0.00044 | -0.18219 | 7.50E-05 |
| 0.26209  | 0.031522 | 0.4968   | -0.09897 | 0.0325   | -0.05984 | 0.19675 | -0.30177 | 2.74E-11 |
| 0.00039  | -0.07863 | 0.08966  | 0.007802 | 0.86647  | 0.03529  | 0.44676 | -0.24392 | 9.41E-08 |
| 0.7245   | -0.02287 | 0.62204  | 0.026949 | 0.5613   | -0.06209 | 0.18043 | -0.03116 | 0.50174  |
| 0.63953  | -0.06407 | 0.16688  | -0.06498 | 0.16094  | -0.05796 | 0.21121 | -0.07763 | 0.09381  |
| 0.02273  | -0.12204 | 0.00829  | 0.025576 | 0.58141  | -0.09826 | 0.03377 | -0.32007 | 1.39E-12 |
| 0.00039  | -0.27553 | 1.40E-09 | -0.09619 | 0.03772  | -0.12413 | 0.00724 | 0.01213  | 0.79375  |
| 0.65578  | 0.034999 | 0.45053  | 0.052415 | 0.25829  | 0.032331 | 0.48581 | -0.08136 | 0.07902  |
| 0.35658  | -0.04165 | 0.36913  | -0.01305 | 0.77856  | -0.03312 | 0.47528 | -0.23449 | 2.97E-07 |
| 1.27E-07 | -0.18251 | 7.28E-05 | -0.15066 | 0.00109  | -0.07114 | 0.12476 | -0.22614 | 7.90E-07 |

|          |          |          |          |          |          |          |          |          |
|----------|----------|----------|----------|----------|----------|----------|----------|----------|
| 0.55875  | 0.034689 | 0.45455  | -0.08563 | 0.06448  | 0.031791 | 0.49312  | -0.1211  | 0.0088   |
| 7.85E-05 | -0.1491  | 0.00123  | 0.06596  | 0.1547   | 0.061787 | 0.18256  | -0.28073 | 6.62E-10 |
| 0.45746  | 0.115797 | 0.01228  | 0.067604 | 0.14465  | 0.069347 | 0.13455  | -0.18802 | 4.33E-05 |
| 0.53583  | 0.09414  | 0.04201  | 0.011065 | 0.81151  | 0.034009 | 0.46344  | -0.24254 | 1.12E-07 |
| 0.17088  | -0.0627  | 0.17613  | 0.153294 | 0.00089  | 0.003978 | 0.93168  | -0.1935  | 2.55E-05 |
| 0.82205  | -0.02218 | 0.63257  | 0.102779 | 0.02635  | -0.03602 | 0.43741  | -0.17672 | 0.00012  |
| 0.0001   | 0.187298 | 4.65E-05 | -0.12555 | 0.00659  | -0.10988 | 0.01754  | -0.2109  | 4.28E-06 |
| 0.20371  | 0.104409 | 0.02404  | -0.02125 | 0.64685  | -0.05458 | 0.23912  | -0.08435 | 0.06859  |
| 0.44366  | -0.00151 | 0.97399  | 0.141964 | 0.0021   | 0.005537 | 0.905    | -0.19938 | 1.42E-05 |
| 0.12613  | 0.126309 | 0.00627  | 0.212349 | 3.67E-06 | 0.096635 | 0.03683  | -0.13029 | 0.0048   |
| 0.00351  | 0.28854  | 2.09E-10 | -0.01272 | 0.78404  | 0.055659 | 0.22994  | -0.14417 | 0.00179  |
| 0.56597  | 0.099868 | 0.03095  | 0.07178  | 0.12138  | -0.01663 | 0.72     | -0.10903 | 0.01843  |
| 0.00021  | 0.210019 | 4.70E-06 | 0.051591 | 0.26586  | 0.103409 | 0.02544  | -0.17751 | 0.00012  |
| 0.24695  | 0.070142 | 0.13013  | -0.10479 | 0.02353  | 0.060195 | 0.19411  | -0.16725 | 0.00028  |
| 0.90325  | 0.054155 | 0.2428   | 0.003724 | 0.93603  | -0.0482  | 0.29863  | -0.00377 | 0.93528  |
| 0.49441  | 0.153649 | 0.00086  | 0.040285 | 0.38508  | 0.072408 | 0.11814  | -0.15811 | 0.00061  |
| 0.00227  | 0.229441 | 5.39E-07 | 0.021261 | 0.64675  | 0.106545 | 0.02129  | -0.19784 | 1.66E-05 |
| 0.13897  | 0.063991 | 0.16741  | 0.03856  | 0.40577  | 0.008353 | 0.85712  | 0.017968 | 0.69854  |
| 0.93586  | 0.001655 | 0.97155  | 0.038321 | 0.40869  | -0.04967 | 0.28407  | -0.13357 | 0.00383  |
| 0.41182  | -0.00129 | 0.97775  | 0.06615  | 0.15351  | 0.061342 | 0.18573  | -0.30318 | 2.20E-11 |
| 0.24778  | -0.03513 | 0.44878  | 0.01179  | 0.79941  | -0.0312  | 0.50117  | 0.101424 | 0.02841  |
| 0.00039  | 0.026701 | 0.56491  | 0.056334 | 0.22433  | -0.08367 | 0.07084  | 0.073198 | 0.11418  |
| 0.39629  | -0.0639  | 0.16799  | -0.08924 | 0.05397  | -0.05111 | 0.27037  | 0.122718 | 0.00793  |
| 3.57E-05 | 0.263972 | 6.95E-09 | 0.112078 | 0.01539  | -0.0954  | 0.03932  | -0.11392 | 0.01377  |
| 0.99018  | 0.113735 | 0.01392  | 0.024421 | 0.5986   | 0.095496 | 0.03913  | -0.18713 | 4.72E-05 |
| 0.5434   | 0.117374 | 0.01113  | 0.049557 | 0.2852   | 0.099066 | 0.03233  | -0.18159 | 7.93E-05 |
| 2.72E-07 | 0.238601 | 1.81E-07 | 0.192872 | 2.71E-05 | 0.077164 | 0.0958   | -0.01598 | 0.73056  |
| 0.00019  | 0.34218  | 2.84E-14 | 0.304281 | 1.84E-11 | 0.208125 | 5.75E-06 | -0.04898 | 0.29083  |
| 0.61076  | -0.03143 | 0.49812  | -0.00891 | 0.84768  | -0.017   | 0.71413  | -0.23867 | 1.80E-07 |
| 0.06489  | 0.204787 | 8.16E-06 | 0.005811 | 0.90034  | -0.0113  | 0.80759  | -0.25033 | 4.19E-08 |
| 0.01272  | 0.195048 | 2.19E-05 | 0.037706 | 0.41625  | 0.135447 | 0.00336  | -0.11773 | 0.01089  |
| 0.00231  | -0.17063 | 0.00021  | -0.10088 | 0.02928  | -0.0965  | 0.0371   | -0.1885  | 4.14E-05 |
| 0.01645  | -0.05262 | 0.25645  | 0.057333 | 0.21621  | 0.017232 | 0.71032  | -0.06738 | 0.14597  |
| 0.34953  | -0.01191 | 0.7974   | 0.166577 | 0.0003   | 0.00829  | 0.85819  | -0.14648 | 0.0015   |
| 0.72057  | 0.039965 | 0.38886  | -0.00278 | 0.95231  | -0.10211 | 0.02735  | 0.227796 | 6.52E-07 |
| 0.00185  | -0.1124  | 0.01509  | 0.012127 | 0.79381  | 0.015174 | 0.74363  | -0.25146 | 3.62E-08 |
| 0.01244  | 0.191328 | 3.15E-05 | -0.05486 | 0.23668  | 0.017487 | 0.70623  | -0.15833 | 0.00059  |
| 0.11859  | 0.218874 | 1.79E-06 | 0.024321 | 0.60011  | 0.026598 | 0.5664   | -0.11041 | 0.017    |
| 0.96386  | 0.043848 | 0.34442  | 0.07826  | 0.09117  | 0.036469 | 0.43172  | -0.17878 | 0.0001   |
| 2.09E-05 | -0.22045 | 1.51E-06 | -0.02631 | 0.57066  | 0.048854 | 0.29209  | -0.24865 | 5.19E-08 |
| 1.30E-06 | 0.294582 | 8.38E-11 | -0.01    | 0.82939  | 0.060388 | 0.19268  | -0.09346 | 0.04352  |
| 0.20797  | -0.09603 | 0.03803  | 0.047912 | 0.30151  | -0.00352 | 0.93954  | -0.26104 | 1.03E-08 |
| 0.00011  | 0.237238 | 2.13E-07 | 0.077918 | 0.09259  | 0.074607 | 0.10735  | -0.13288 | 0.00402  |
| 0.01627  | 0.05381  | 0.24582  | 0.088662 | 0.05554  | 0.00757  | 0.87039  | -0.04168 | 0.36876  |
| 0.34411  | 0.046089 | 0.3203   | 0.016874 | 0.71608  | 0.040742 | 0.3797   | -0.19245 | 2.83E-05 |

|          |          |          |          |          |          |          |          |          |
|----------|----------|----------|----------|----------|----------|----------|----------|----------|
| 0.04288  | -0.01394 | 0.76388  | 0.10925  | 0.01819  | -0.09606 | 0.03798  | -0.21388 | 3.11E-06 |
| 5.28E-05 | 0.234007 | 3.14E-07 | 0.037525 | 0.41849  | 0.077763 | 0.09325  | 0.007632 | 0.86934  |
| 4.35E-05 | -0.14253 | 0.00202  | 0.065524 | 0.15745  | -0.03663 | 0.42975  | -0.18007 | 9.11E-05 |
| 0.09301  | 0.160809 | 0.00049  | 0.096614 | 0.03688  | 0.115866 | 0.01222  | -0.11152 | 0.0159   |
| 2.44E-05 | 0.332741 | 1.55E-13 | 0.016398 | 0.72376  | 0.162019 | 0.00044  | -0.23157 | 4.20E-07 |
| 0.02084  | -0.09715 | 0.03584  | 0.055714 | 0.22948  | 0.242035 | 1.19E-07 | -0.13214 | 0.00423  |
| 0.00065  | 0.16777  | 0.00027  | 0.057538 | 0.21456  | 0.028098 | 0.54471  | 0.106951 | 0.0208   |
| 0.22594  | 0.051806 | 0.26387  | -0.11991 | 0.00949  | -0.07215 | 0.11946  | 0.10876  | 0.01872  |
| 0.00271  | -0.11471 | 0.01312  | 0.015227 | 0.74277  | -0.03404 | 0.46306  | -0.20922 | 5.12E-06 |
| 0.02372  | -0.101   | 0.02909  | 0.027746 | 0.54976  | -0.01651 | 0.72196  | -0.28549 | 3.30E-10 |
| 0.1612   | 0.118509 | 0.01037  | 0.017117 | 0.71218  | -0.0355  | 0.44409  | -0.08636 | 0.06223  |
| 0.04264  | 0.140494 | 0.00234  | 0.113902 | 0.01378  | 0.149459 | 0.0012   | -0.12321 | 0.00768  |
| 0.20814  | -0.07209 | 0.11979  | 0.154196 | 0.00083  | -0.03895 | 0.40099  | -0.24171 | 1.24E-07 |
| 0.90597  | 0.042124 | 0.36374  | 0.056919 | 0.21955  | 0.071948 | 0.1205   | -0.0922  | 0.04645  |
| 0.00313  | 0.270473 | 2.84E-09 | 0.15028  | 0.00112  | 0.111505 | 0.01592  | 0.011613 | 0.80236  |
| 0.54328  | 0.119648 | 0.00965  | 0.274609 | 1.59E-09 | 0.035652 | 0.44212  | -0.04365 | 0.34656  |
| 1.07E-07 | 0.281642 | 5.80E-10 | 0.07811  | 0.09179  | 0.122249 | 0.00818  | 0.0455   | 0.32652  |
| 3.82E-15 | 0.374546 | 5.33E-17 | -0.13567 | 0.00331  | -0.08814 | 0.05699  | 0.288899 | 1.98E-10 |
| 0.00016  | 0.129612 | 0.00503  | 0.002781 | 0.95221  | -0.04781 | 0.30256  | -0.15261 | 0.00094  |
| 0.00299  | 0.352594 | 4.07E-15 | 0.164284 | 0.00036  | 0.217404 | 2.11E-06 | -0.01822 | 0.69445  |
| 6.62E-09 | -0.33281 | 1.53E-13 | -0.06124 | 0.18645  | -0.05569 | 0.22971  | 0.104008 | 0.02459  |
| 0.12761  | -0.04425 | 0.34     | -0.03039 | 0.51234  | -0.00762 | 0.86952  | -0.16251 | 0.00042  |
| 0.0007   | 0.201006 | 1.20E-05 | -0.01461 | 0.75285  | 0.035646 | 0.44219  | 0.001765 | 0.96965  |
| 4.32E-05 | 0.350016 | 6.62E-15 | 0.063749 | 0.16903  | 0.223265 | 1.10E-06 | 0.007198 | 0.87671  |
| 0.70069  | 0.01477  | 0.75023  | 0.010576 | 0.8197   | 0.084615 | 0.06771  | -0.10672 | 0.02107  |
| 0.33069  | 0.089454 | 0.05338  | 0.151198 | 0.00105  | 0.145489 | 0.00162  | -0.00211 | 0.9638   |
| 0.0299   | 0.163524 | 0.00039  | 0.158642 | 0.00058  | 0.045324 | 0.3284   | -0.01237 | 0.78982  |
| 0.12916  | 0.069879 | 0.13158  | 0.033515 | 0.46997  | 0.007089 | 0.87857  | -0.15707 | 0.00066  |
| 0.58013  | 0.03113  | 0.50217  | 0.033987 | 0.46374  | 0.029992 | 0.51792  | -0.14959 | 0.00119  |
| 0.01915  | 0.111951 | 0.0155   | -0.02502 | 0.58962  | 0.13111  | 0.00454  | -0.16427 | 0.00036  |
| 0.01283  | -0.09552 | 0.03908  | -0.10702 | 0.02072  | -0.0806  | 0.08187  | 0.024689 | 0.5946   |
| 0.23793  | 0.058336 | 0.20827  | 0.03005  | 0.51712  | -0.00028 | 0.99523  | -0.1403  | 0.00237  |
| 0.22789  | 0.076887 | 0.09701  | 0.004755 | 0.91838  | 0.006965 | 0.88067  | -0.14361 | 0.00186  |
| 0.43849  | 0.051581 | 0.26595  | 0.084901 | 0.06678  | 0.008596 | 0.85302  | -0.10685 | 0.02092  |
| 1.03E-07 | -0.2203  | 1.53E-06 | -0.01145 | 0.80499  | -0.05719 | 0.21736  | -0.23099 | 4.49E-07 |
| 0.53564  | 0.095736 | 0.03863  | 0.030961 | 0.50449  | 0.092085 | 0.04672  | -0.13911 | 0.00259  |
| 4.73E-05 | -0.03902 | 0.40016  | -0.07851 | 0.09013  | 0.108618 | 0.01888  | -0.19898 | 1.48E-05 |
| 0.28556  | -0.00463 | 0.92048  | 0.08901  | 0.05458  | 0.001909 | 0.96718  | -0.19035 | 3.47E-05 |
| 0.27782  | 0.065298 | 0.15889  | 0.071833 | 0.1211   | 0.043198 | 0.35162  | 0.048532 | 0.29529  |
| 0.03472  | 0.070162 | 0.13002  | -0.12362 | 0.00748  | 0.002633 | 0.95474  | 0.008895 | 0.84797  |
| 0.0039   | 0.203675 | 9.15E-06 | 0.129594 | 0.00503  | 0.158289 | 0.0006   | -0.1098  | 0.01761  |
| 0.4903   | 0.07879  | 0.08899  | -0.05347 | 0.24881  | -0.00608 | 0.89581  | -0.20075 | 1.24E-05 |
| 0.66085  | 0.099011 | 0.03242  | 0.006598 | 0.88692  | 0.004675 | 0.91974  | -0.10492 | 0.02336  |
| 0.18541  | -0.03559 | 0.4429   | -0.0279  | 0.5476   | -0.05028 | 0.27817  | -0.17703 | 0.00012  |
| 3.32E-08 | -0.24838 | 5.37E-08 | -0.04021 | 0.38595  | 0.03983  | 0.39046  | -0.26682 | 4.71E-09 |



|          |          |          |          |          |          |         |          |          |
|----------|----------|----------|----------|----------|----------|---------|----------|----------|
| 4.76E-08 | 0.397969 | 3.57E-19 | 0.219124 | 1.75E-06 | 0.176006 | 0.00013 | 0.132883 | 0.00402  |
| 2.46E-07 | 0.313093 | 4.43E-12 | 0.014086 | 0.76144  | 0.024229 | 0.60148 | -0.08228 | 0.07566  |
| 0.06685  | 0.01034  | 0.82366  | 0.075294 | 0.10415  | 0.060135 | 0.19455 | -0.17671 | 0.00012  |
| 0.0005   | -0.1584  | 0.00059  | -0.04989 | 0.282    | 0.036836 | 0.4271  | -0.3073  | 1.14E-11 |
| 0.57206  | 0.058556 | 0.20655  | 0.129454 | 0.00508  | 0.158089 | 0.00061 | -0.19255 | 2.80E-05 |
| 0.00385  | 0.279192 | 8.27E-10 | 0.071157 | 0.12465  | 0.004903 | 0.91584 | -0.01833 | 0.69273  |
| 8.63E-19 | -0.3884  | 2.90E-18 | -0.01026 | 0.82501  | 0.006483 | 0.88888 | -0.25316 | 2.91E-08 |
| 0.03276  | 0.064897 | 0.16147  | -0.06447 | 0.16426  | -0.01011 | 0.8275  | 0.074703 | 0.1069   |
| 0.10175  | 0.189582 | 3.73E-05 | 0.182965 | 6.98E-05 | 0.041847 | 0.3669  | -0.1541  | 0.00083  |
| 0.00071  | 0.17201  | 0.00019  | 0.066274 | 0.15274  | 0.03085  | 0.50602 | -0.06433 | 0.1652   |
| 0.01197  | 0.138081 | 0.00279  | 0.024839 | 0.59236  | 0.055416 | 0.23198 | -0.1053  | 0.02286  |
| 0.00433  | -0.1847  | 5.94E-05 | -0.02699 | 0.56074  | -0.04311 | 0.35262 | 0.036209 | 0.43501  |
| 0.07513  | 0.101896 | 0.02768  | 0.224723 | 9.29E-07 | 0.041627 | 0.36943 | -0.06577 | 0.15592  |
| 0.21777  | 0.053766 | 0.2462   | 0.075798 | 0.10185  | 0.035725 | 0.44118 | -0.10527 | 0.02289  |
| 0.35692  | 0.004426 | 0.924    | 0.02068  | 0.65577  | 0.016935 | 0.71511 | -0.05568 | 0.22976  |
| 0.67936  | 0.060932 | 0.18869  | 0.052613 | 0.25649  | 0.09993  | 0.03084 | -0.06305 | 0.17373  |
| 0.00935  | 0.059913 | 0.19621  | 0.042581 | 0.35855  | 0.062612 | 0.17677 | -0.17944 | 9.66E-05 |
| 1.85E-08 | 0.397511 | 3.95E-19 | 0.154287 | 0.00082  | 0.000517 | 0.9911  | -0.0611  | 0.18746  |
| 0.21076  | -0.12128 | 0.0087   | 0.039696 | 0.39207  | -0.00669 | 0.88538 | -0.12803 | 0.00559  |
| 0.00093  | -0.18197 | 7.66E-05 | 0.003605 | 0.93808  | -0.09135 | 0.0485  | 0.123879 | 0.00736  |
| 0.66998  | -0.07811 | 0.09177  | 0.085496 | 0.06489  | -0.08325 | 0.07227 | -0.03389 | 0.46503  |
| 0.04993  | 0.283593 | 4.36E-10 | 0.015735 | 0.7345   | 0.102963 | 0.02608 | -0.1068  | 0.02097  |
| 0.82033  | 0.095538 | 0.03904  | 0.06118  | 0.1869   | 0.120267 | 0.00928 | -0.12578 | 0.00649  |
| 0.51964  | 0.071185 | 0.1245   | 0.033114 | 0.4753   | 0.041609 | 0.36964 | -0.16073 | 0.00049  |
| 0.27169  | 0.079909 | 0.08453  | -0.06156 | 0.18415  | -0.02209 | 0.634   | 0.24035  | 1.46E-07 |
| 2.57E-07 | -0.16826 | 0.00026  | 0.011508 | 0.80411  | 0.046093 | 0.32025 | -0.237   | 2.20E-07 |
| 0.00459  | -0.17427 | 0.00015  | 0.102276 | 0.0271   | -0.07375 | 0.11146 | -0.06139 | 0.18539  |
| 0.20785  | 0.067948 | 0.14261  | -0.03284 | 0.47891  | -0.05599 | 0.22715 | 0.034742 | 0.45386  |
| 9.20E-05 | 0.254755 | 2.36E-08 | 0.105667 | 0.02239  | 0.026919 | 0.56173 | -0.15889 | 0.00057  |
| 0.00015  | 0.150016 | 0.00115  | 0.012104 | 0.79418  | -0.07645 | 0.09892 | 0.188323 | 4.21E-05 |
| 0.67594  | 0.0764   | 0.09915  | 0.087337 | 0.05931  | 0.117782 | 0.01086 | -0.12609 | 0.00636  |
| 0.04882  | -0.20859 | 5.48E-06 | 0.038037 | 0.41217  | -0.13414 | 0.00368 | 0.089662 | 0.05283  |
| 3.44E-09 | 0.410488 | 2.08E-20 | 0.071605 | 0.12229  | 0.128273 | 0.0055  | -0.00287 | 0.95061  |
| 0.67728  | -0.05028 | 0.27819  | -0.09632 | 0.03745  | -0.01862 | 0.68813 | -0.09772 | 0.03475  |
| 9.29E-06 | 0.30033  | 3.44E-11 | 0.20531  | 7.73E-06 | 0.077138 | 0.09592 | -0.22983 | 5.15E-07 |
| 0.40297  | -0.02711 | 0.55897  | -0.00234 | 0.95983  | -0.08923 | 0.05399 | -0.07027 | 0.12941  |
| 0.20872  | -0.01885 | 0.68445  | 0.012057 | 0.79497  | -0.0207  | 0.65549 | -0.20021 | 1.31E-05 |
| 0.41513  | -0.0101  | 0.82775  | -0.03382 | 0.4659   | -0.02449 | 0.59756 | -0.1046  | 0.02379  |
| 0.10562  | 0.15638  | 0.0007   | 0.004215 | 0.92762  | 0.046255 | 0.31856 | -0.08576 | 0.06406  |
| 0.80667  | 0.008782 | 0.84988  | 0.013704 | 0.76771  | 0.037174 | 0.42287 | -0.17287 | 0.00017  |
| 0.20277  | -0.01308 | 0.77804  | 0.106059 | 0.02189  | 0.071403 | 0.12335 | -0.05993 | 0.1961   |
| 0.18454  | 0.068322 | 0.14042  | 0.017697 | 0.70287  | 0.068706 | 0.1382  | -0.07832 | 0.09091  |
| 0.06357  | -0.00194 | 0.96663  | -0.03922 | 0.39774  | -0.04444 | 0.33789 | -0.07591 | 0.10136  |
| 0.14848  | -0.05721 | 0.2172   | 0.064287 | 0.16545  | 0.027018 | 0.5603  | -0.16616 | 0.00031  |
| 0.17105  | -0.05771 | 0.21317  | 0.170521 | 0.00021  | 0.102737 | 0.02641 | -0.18527 | 5.63E-05 |

|          |          |          |          |          |          |          |          |          |
|----------|----------|----------|----------|----------|----------|----------|----------|----------|
| 3.79E-05 | 0.302544 | 2.43E-11 | 0.232476 | 3.77E-07 | 0.150499 | 0.00111  | -0.13609 | 0.00321  |
| 0.06317  | 0.110221 | 0.01718  | 0.022261 | 0.63135  | 0.089586 | 0.05303  | -0.06309 | 0.1735   |
| 0.19051  | 0.096385 | 0.03733  | 0.046987 | 0.31095  | 0.012775 | 0.78306  | -0.1052  | 0.02298  |
| 0.04532  | 0.017492 | 0.70616  | 0.038553 | 0.40585  | 0.025405 | 0.58395  | -0.21189 | 3.85E-06 |
| 5.21E-06 | 0.245825 | 7.41E-08 | 0.226365 | 7.69E-07 | 0.067667 | 0.14427  | -0.03532 | 0.44642  |
| 0.23718  | -0.08821 | 0.05679  | -0.08364 | 0.07095  | 0.020906 | 0.65227  | -0.21191 | 3.84E-06 |
| 0.47834  | 0.047846 | 0.30217  | 0.030205 | 0.51496  | 0.026371 | 0.56972  | -0.0355  | 0.44406  |
| 0.95457  | 0.134747 | 0.00353  | 0.069044 | 0.13627  | 0.103872 | 0.02478  | -0.10566 | 0.02239  |
| 0.0016   | 0.299154 | 4.13E-11 | 0.076557 | 0.09845  | 0.068781 | 0.13777  | -0.11703 | 0.01138  |
| 0.02014  | -0.01525 | 0.74239  | 0.067039 | 0.14805  | 0.050942 | 0.27193  | 0.008563 | 0.85358  |
| 0.00992  | -0.11161 | 0.01582  | 0.051981 | 0.26226  | 0.077284 | 0.09529  | -0.15588 | 0.00072  |
| 0.37653  | 0.023041 | 0.61943  | -0.04755 | 0.30522  | -0.04094 | 0.37737  | 0.077083 | 0.09615  |
| 0.18184  | 0.130449 | 0.00475  | 0.069079 | 0.13607  | 0.054173 | 0.24264  | -0.15827 | 0.0006   |
| 0.00019  | 0.195562 | 2.08E-05 | 0.024568 | 0.5964   | 0.234497 | 2.97E-07 | 0.010753 | 0.81673  |
| 0.5946   | 0.105353 | 0.02279  | 0.068716 | 0.13814  | 0.038093 | 0.41148  | -0.20014 | 1.31E-05 |
| 0.00354  | -0.02984 | 0.52006  | 0.029463 | 0.52534  | 0.061288 | 0.18612  | -0.20613 | 7.09E-06 |
| 0.15323  | -0.07324 | 0.11396  | 0.063576 | 0.17019  | -0.00357 | 0.93866  | -0.26193 | 9.15E-09 |
| 0.0488   | -0.10277 | 0.02637  | -0.02096 | 0.65137  | 0.067752 | 0.14377  | -0.19984 | 1.36E-05 |
| 0.06142  | 0.263775 | 7.13E-09 | 0.128599 | 0.00538  | 0.116896 | 0.01147  | -0.06467 | 0.16291  |
| 0.07059  | 0.069478 | 0.13382  | 0.116869 | 0.01149  | 0.008668 | 0.85181  | -0.18719 | 4.69E-05 |
| 9.85E-12 | 0.361015 | 8.02E-16 | -0.04935 | 0.28717  | 0.108149 | 0.0194   | -0.08537 | 0.06529  |
| 0.00032  | -0.08419 | 0.06911  | 0.068425 | 0.13983  | -0.03274 | 0.48037  | -0.19688 | 1.83E-05 |
| 0.15739  | -0.05688 | 0.21983  | -0.00035 | 0.99404  | 0.11962  | 0.00967  | -0.23452 | 2.96E-07 |
| 0.31395  | 0.091915 | 0.04713  | -0.03311 | 0.47539  | -0.01731 | 0.70911  | 0.068019 | 0.1422   |
| 0.85994  | 0.030823 | 0.50639  | 0.020413 | 0.65994  | 0.023921 | 0.60611  | -0.17272 | 0.00018  |
| 3.70E-06 | 0.174096 | 0.00016  | 0.206436 | 6.87E-06 | 0.064309 | 0.16531  | -0.12905 | 0.00522  |
| 0.03602  | 0.12116  | 0.00877  | 0.068106 | 0.14168  | 0.071006 | 0.12546  | -0.14206 | 0.00209  |
| 0.87581  | -0.00231 | 0.96031  | 0.008976 | 0.8466   | -0.02565 | 0.5804   | -0.18618 | 5.17E-05 |
| 0.20122  | 0.032327 | 0.48587  | 0.038337 | 0.40849  | 0.041488 | 0.37103  | -0.23754 | 2.06E-07 |
| 0.00253  | -0.09167 | 0.04773  | -0.03534 | 0.44607  | -0.02231 | 0.63058  | -0.28555 | 3.27E-10 |
| 0.49682  | -0.03434 | 0.45907  | 0.022011 | 0.63519  | -0.00968 | 0.8347   | -0.21625 | 2.40E-06 |
| 0.35491  | -0.00925 | 0.842    | 0.018734 | 0.68636  | 0.114073 | 0.01364  | -0.17833 | 0.00011  |
| 0.74295  | -0.00039 | 0.99322  | 0.137832 | 0.00284  | -0.00646 | 0.88921  | -0.19529 | 2.14E-05 |
| 0.15638  | 0.110099 | 0.01731  | -0.01836 | 0.69237  | -0.00077 | 0.98668  | -0.09037 | 0.05098  |
| 0.1722   | 0.112783 | 0.01475  | 0.007592 | 0.87002  | 0.030595 | 0.50954  | -0.14274 | 0.00199  |
| 2.38E-06 | 0.279023 | 8.47E-10 | 0.025732 | 0.57911  | 0.054466 | 0.2401   | -0.25266 | 3.10E-08 |
| 0.07846  | -0.07734 | 0.09504  | -0.03344 | 0.47101  | -0.0009  | 0.98456  | 0.086776 | 0.06096  |
| 0.97146  | 0.11799  | 0.01071  | -0.0406  | 0.38138  | 0.068241 | 0.14089  | -0.18881 | 4.02E-05 |
| 0.13718  | 0.00415  | 0.92873  | 0.047464 | 0.30606  | 0.101371 | 0.02849  | -0.22048 | 1.50E-06 |
| 0.91157  | 0.051798 | 0.26394  | 0.026636 | 0.56585  | 0.059286 | 0.20094  | -0.15438 | 0.00082  |
| 0.00971  | 0.310965 | 6.28E-12 | 0.101111 | 0.02891  | 0.184957 | 5.80E-05 | 0.006967 | 0.88065  |
| 0.62289  | 0.046075 | 0.32045  | 0.355555 | 2.31E-15 | 0.223212 | 1.10E-06 | -0.07943 | 0.0864   |
| 2.15E-05 | -0.07066 | 0.12732  | -0.04211 | 0.36385  | -0.03478 | 0.45343  | -0.2317  | 4.14E-07 |
| 0.00016  | 0.276195 | 1.27E-09 | 0.041257 | 0.3737   | 0.071989 | 0.12029  | -0.01744 | 0.70702  |
| 0.0892   | 0.212625 | 3.56E-06 | 0.113936 | 0.01375  | 0.22336  | 1.08E-06 | -0.16373 | 0.00038  |

|          |          |          |          |          |          |          |          |          |
|----------|----------|----------|----------|----------|----------|----------|----------|----------|
| 0.80202  | -0.01685 | 0.71651  | -0.04362 | 0.34688  | -0.03135 | 0.49918  | -0.14487 | 0.0017   |
| 0.80562  | 0.026229 | 0.57181  | 0.013776 | 0.76654  | -0.00538 | 0.90761  | -0.1182  | 0.01058  |
| 0.13232  | 0.152041 | 0.00098  | -0.11406 | 0.01365  | 0.009673 | 0.83486  | -0.00123 | 0.97888  |
| 0.00025  | -0.10024 | 0.03032  | 0.089294 | 0.05381  | 0.031203 | 0.50117  | -0.10787 | 0.01972  |
| 0.12852  | 0.088301 | 0.05655  | 0.088866 | 0.05498  | -0.04363 | 0.34684  | -0.25536 | 2.18E-08 |
| 0.00046  | -0.15945 | 0.00054  | -0.02698 | 0.5608   | -0.06219 | 0.17972  | -0.21582 | 2.51E-06 |
| 0.56246  | 0.012266 | 0.79149  | -0.00221 | 0.96196  | -0.03176 | 0.49359  | -0.14983 | 0.00116  |
| 3.17E-09 | 0.290561 | 1.55E-10 | 0.054493 | 0.23987  | 0.072841 | 0.11595  | -0.04689 | 0.31199  |
| 0.00106  | 0.178286 | 0.00011  | -0.10034 | 0.03016  | -0.02678 | 0.56378  | -0.01629 | 0.72558  |
| 0.00447  | 0.189618 | 3.72E-05 | 0.143925 | 0.00182  | -0.00414 | 0.92894  | -0.23982 | 1.56E-07 |
| 0.59557  | -0.07711 | 0.09603  | 0.00504  | 0.91349  | 0.017981 | 0.69835  | -0.02063 | 0.65656  |
| 0.9611   | 0.012687 | 0.78451  | 0.08783  | 0.05788  | -0.00644 | 0.88953  | -0.19973 | 1.37E-05 |
| 1.31E-08 | 0.16961  | 0.00023  | -0.03741 | 0.41989  | 0.004735 | 0.91871  | 0.118494 | 0.01038  |
| 0.00236  | 0.161672 | 0.00045  | 0.152548 | 0.00094  | -0.02959 | 0.52361  | 0.040392 | 0.38381  |
| 4.37E-05 | 0.217126 | 2.18E-06 | 0.064263 | 0.16561  | 0.007567 | 0.87045  | 0.024252 | 0.60114  |
| 0.00035  | 0.170404 | 0.00022  | 0.031583 | 0.49596  | 0.052725 | 0.25548  | -0.1896  | 3.73E-05 |
| 0.67725  | 0.035148 | 0.4486   | 0.050652 | 0.27467  | 0.031863 | 0.49215  | -0.17978 | 9.36E-05 |
| 0.3242   | 0.127698 | 0.00572  | 0.120522 | 0.00913  | 0.000783 | 0.98654  | -0.01783 | 0.70068  |
| 4.90E-08 | 0.337478 | 6.66E-14 | -0.09115 | 0.04901  | 0.150847 | 0.00108  | -0.05775 | 0.2129   |
| 4.52E-05 | -0.13188 | 0.00431  | 0.023766 | 0.60845  | 0.03724  | 0.42204  | -0.16387 | 0.00038  |
| 0.01113  | -0.01994 | 0.66729  | 0.053187 | 0.25133  | 0.027374 | 0.55513  | -0.20758 | 6.09E-06 |
| 0.86883  | 0.123824 | 0.00738  | 0.116575 | 0.0117   | 0.027185 | 0.55788  | -0.24876 | 5.12E-08 |
| 0.05365  | 0.112513 | 0.01499  | -0.0638  | 0.16871  | -0.01476 | 0.75032  | -0.18525 | 5.64E-05 |
| 0.00382  | 0.238905 | 1.74E-07 | 0.10127  | 0.02865  | 0.031924 | 0.49132  | -0.17937 | 9.72E-05 |
| 0.01539  | 0.217579 | 2.07E-06 | 0.055975 | 0.2273   | 0.202579 | 1.02E-05 | -0.06178 | 0.18261  |
| 1.70E-05 | 0.347498 | 1.06E-14 | 0.16665  | 0.0003   | 0.052372 | 0.25868  | -0.1696  | 0.00023  |
| 0.00268  | 0.287708 | 2.37E-10 | 0.116665 | 0.01164  | -0.00634 | 0.89128  | -0.15152 | 0.00102  |
| 0.07262  | 0.122361 | 0.00812  | 0.035846 | 0.43963  | -0.04146 | 0.37136  | -0.0511  | 0.27042  |
| 0.65289  | 0.2172   | 2.16E-06 | 0.061111 | 0.1874   | 0.133206 | 0.00393  | -0.13593 | 0.00325  |
| 0.00876  | 0.189763 | 3.67E-05 | 0.094652 | 0.0409   | 0.019633 | 0.67217  | -0.04604 | 0.32081  |
| 0.006    | -0.25778 | 1.59E-08 | -0.13908 | 0.00259  | -0.12199 | 0.00831  | 0.063038 | 0.17384  |
| 0.35552  | -0.0284  | 0.54038  | 0.025235 | 0.58647  | 0.012377 | 0.78965  | -0.19682 | 1.84E-05 |
| 0.59638  | 0.090746 | 0.05002  | 0.086904 | 0.06058  | 0.016365 | 0.72429  | -0.11747 | 0.01107  |
| 0.00017  | -0.18175 | 7.81E-05 | -0.00743 | 0.8727   | -0.14617 | 0.00154  | 0.032064 | 0.48943  |
| 2.73E-05 | -0.22624 | 7.81E-07 | -0.04259 | 0.3585   | -0.05003 | 0.28063  | -0.05187 | 0.26326  |
| 0.04396  | 0.19657  | 1.88E-05 | 0.075198 | 0.10459  | 0.029451 | 0.52551  | -0.18053 | 8.74E-05 |
| 0.41953  | 0.134694 | 0.00354  | 0.046628 | 0.31466  | 0.080908 | 0.0807   | -0.22037 | 1.52E-06 |
| 2.83E-05 | -0.0952  | 0.03975  | -0.02193 | 0.6364   | 0.053706 | 0.24673  | -0.23084 | 4.57E-07 |
| 0.02445  | 0.109161 | 0.01829  | 0.079867 | 0.0847   | 0.024379 | 0.59923  | -0.05692 | 0.21956  |
| 0.56221  | 0.066197 | 0.15322  | 0.068099 | 0.14173  | -0.03021 | 0.5149   | -0.2279  | 6.44E-07 |
| 0.01085  | 0.153037 | 0.00091  | 0.256283 | 1.94E-08 | 0.098884 | 0.03265  | 0.04432  | 0.33924  |
| 0.00079  | 0.174747 | 0.00015  | 0.120751 | 0.009    | 0.098564 | 0.03322  | 0.055533 | 0.231    |
| 0.11804  | 0.063014 | 0.17401  | 0.164356 | 0.00036  | 0.210424 | 4.51E-06 | 0.023197 | 0.61707  |
| 0.68726  | 0.042957 | 0.35431  | 0.044899 | 0.33296  | 0.042613 | 0.35818  | -0.17338 | 0.00017  |
| 0.0034   | -0.25305 | 2.95E-08 | -0.18863 | 4.09E-05 | -0.09521 | 0.03972  | 0.071636 | 0.12213  |

|          |          |          |          |          |          |          |          |          |
|----------|----------|----------|----------|----------|----------|----------|----------|----------|
| 0.29707  | -0.0061  | 0.89535  | -0.02134 | 0.64552  | 0.091873 | 0.04723  | -0.07362 | 0.11212  |
| 0.13488  | 0.042972 | 0.35415  | 0.010077 | 0.82805  | 0.015349 | 0.74078  | -0.07708 | 0.09615  |
| 0.19814  | 0.033425 | 0.47116  | 0.043769 | 0.34529  | 0.032101 | 0.48892  | -0.15133 | 0.00104  |
| 0.28914  | 0.165466 | 0.00033  | 0.033872 | 0.46525  | -0.00764 | 0.8692   | -0.15388 | 0.00085  |
| 7.54E-15 | -0.39122 | 1.57E-18 | -0.02916 | 0.52966  | -0.08223 | 0.07585  | -0.20834 | 5.62E-06 |
| 0.00395  | 0.190756 | 3.33E-05 | 0.049524 | 0.28552  | 0.068545 | 0.13913  | -0.12297 | 0.00781  |
| 5.03E-07 | -0.17705 | 0.00012  | -0.05267 | 0.25598  | -0.05384 | 0.24552  | 0.035516 | 0.44386  |
| 0.09413  | 0.134431 | 0.00361  | 0.051078 | 0.27065  | 0.129939 | 0.00492  | -0.10197 | 0.02757  |
| 1.98E-05 | -0.13022 | 0.00482  | -0.01874 | 0.68632  | -0.04188 | 0.36648  | -0.19937 | 1.42E-05 |
| 1.26E-05 | -0.17464 | 0.00015  | -0.03083 | 0.50626  | -0.05178 | 0.26413  | -0.14978 | 0.00117  |
| 0.00408  | 0.022397 | 0.62926  | 0.042704 | 0.35716  | 0.055958 | 0.22744  | -0.21798 | 1.98E-06 |
| 0.00904  | 0.26423  | 6.71E-09 | 0.065317 | 0.15876  | 0.158074 | 0.00061  | -0.15145 | 0.00103  |
| 0.00118  | 0.202075 | 1.08E-05 | 0.017057 | 0.71313  | -0.00792 | 0.86452  | -0.05822 | 0.20916  |
| 0.95538  | 0.053456 | 0.24894  | 0.016893 | 0.71577  | 0.019825 | 0.66915  | -0.19932 | 1.43E-05 |
| 0.13034  | -0.06469 | 0.16283  | 0.021874 | 0.63729  | 0.085209 | 0.0658   | -0.13445 | 0.0036   |
| 0.0071   | 0.000277 | 0.99524  | 0.060744 | 0.19007  | 0.011723 | 0.80052  | -0.12711 | 0.00595  |
| 0.62956  | 0.024628 | 0.5955   | 0.116495 | 0.01176  | 0.310419 | 6.86E-12 | -0.08951 | 0.05323  |
| 0.60743  | 0.002182 | 0.96249  | 0.026786 | 0.56366  | 0.03712  | 0.42354  | -0.14508 | 0.00167  |
| 0.29171  | 0.050337 | 0.27767  | 0.187387 | 4.61E-05 | -0.00516 | 0.91146  | -0.13451 | 0.00359  |
| 0.03481  | 0.163502 | 0.00039  | 0.001848 | 0.96824  | 0.082593 | 0.07457  | -0.16926 | 0.00024  |
| 0.22967  | -0.24121 | 1.32E-07 | -0.08712 | 0.05995  | -0.09672 | 0.03666  | 0.080843 | 0.08095  |
| 0.02421  | -0.12768 | 0.00573  | 0.029451 | 0.52551  | -0.05073 | 0.2739   | 0.045218 | 0.32954  |
| 0.04192  | -0.13948 | 0.00252  | -0.01795 | 0.69876  | -0.04183 | 0.36711  | -0.17841 | 0.00011  |
| 0.47349  | 0.104143 | 0.02441  | 0.115619 | 0.01241  | -0.00312 | 0.94642  | -0.1584  | 0.00059  |
| 0.2196   | 0.015944 | 0.73111  | 0.073247 | 0.11393  | 0.043927 | 0.34354  | -0.1625  | 0.00042  |
| 0.08009  | 0.206181 | 7.06E-06 | 0.210391 | 4.52E-06 | 0.108427 | 0.01909  | -0.1575  | 0.00064  |
| 0.7279   | -0.04069 | 0.38035  | -0.05017 | 0.27925  | -0.06219 | 0.17972  | -0.15043 | 0.00111  |
| 0.01663  | 0.118518 | 0.01037  | 0.061144 | 0.18716  | -0.01157 | 0.80311  | -0.05559 | 0.23055  |
| 0.47594  | -0.04396 | 0.34319  | 0.0822   | 0.07596  | 0.087643 | 0.05842  | -0.26836 | 3.81E-09 |
| 0.1622   | -0.19686 | 1.83E-05 | 0.040176 | 0.38636  | -0.11816 | 0.0106   | -0.01306 | 0.77842  |
| 0.47057  | -0.0374  | 0.4201   | 0.026757 | 0.5641   | 0.034036 | 0.46309  | 0.020333 | 0.6612   |
| 0.94677  | 0.030713 | 0.50792  | 0.007172 | 0.87715  | 0.005528 | 0.90515  | 0.049868 | 0.28218  |
| 0.00614  | -0.10746 | 0.0202   | 0.038358 | 0.40823  | 0.001219 | 0.97904  | -0.24971 | 4.53E-08 |
| 0.40626  | 0.038831 | 0.40247  | 0.225885 | 8.13E-07 | 0.013441 | 0.77205  | -0.24736 | 6.11E-08 |
| 0.03757  | 0.172821 | 0.00017  | 0.125308 | 0.0067   | 0.12609  | 0.00636  | 0.055092 | 0.23473  |
| 0.05451  | -0.05999 | 0.19564  | 0.007023 | 0.8797   | 0.004271 | 0.92666  | -0.25554 | 2.13E-08 |
| 0.09822  | 0.009052 | 0.84532  | 0.141455 | 0.00218  | 0.016736 | 0.7183   | -0.1993  | 1.43E-05 |
| 0.00118  | 0.2218   | 1.29E-06 | 0.237636 | 2.03E-07 | -0.07436 | 0.10851  | 0.087289 | 0.05945  |
| 0.00027  | -0.11788 | 0.01079  | 0.001909 | 0.96718  | -0.01837 | 0.6922   | -0.13304 | 0.00397  |
| 0.17209  | 0.086633 | 0.06139  | 0.23492  | 2.82E-07 | 0.00702  | 0.87973  | -0.13574 | 0.00329  |
| 0.00032  | 0.326768 | 4.41E-13 | 0.03433  | 0.45923  | 0.090464 | 0.05074  | -0.17811 | 0.00011  |
| 0.30743  | 0.177785 | 0.00011  | 0.080722 | 0.08141  | 0.040221 | 0.38583  | 0.022572 | 0.62658  |
| 2.49E-06 | 0.465213 | 1.87E-26 | 0.058013 | 0.2108   | 0.094437 | 0.04136  | 0.006286 | 0.89223  |
| 0.72046  | 0.130499 | 0.00473  | 0.058666 | 0.2057   | 0.04334  | 0.35003  | -0.0496  | 0.28481  |
| 0.76268  | 0.022292 | 0.63087  | 0.059747 | 0.19746  | 0.027398 | 0.55479  | -0.05008 | 0.28011  |

|          |          |          |          |          |          |          |          |          |
|----------|----------|----------|----------|----------|----------|----------|----------|----------|
| 0.97366  | 0.100002 | 0.03072  | 0.032734 | 0.48038  | 0.061309 | 0.18597  | -0.06803 | 0.14213  |
| 0.3382   | 0.033345 | 0.47223  | 0.045956 | 0.32169  | 0.003607 | 0.93803  | 0.086189 | 0.06274  |
| 0.31668  | 0.10992  | 0.01749  | 0.041023 | 0.37642  | 0.025113 | 0.58828  | -0.1824  | 7.36E-05 |
| 1.23E-06 | 0.341489 | 3.22E-14 | 0.109079 | 0.01838  | 0.10078  | 0.02944  | -0.2008  | 1.23E-05 |
| 0.50667  | -0.11243 | 0.01506  | -0.11495 | 0.01293  | 1.51E-05 | 0.99974  | 0.103225 | 0.0257   |
| 0.54765  | 0.060537 | 0.19158  | 0.226025 | 8.00E-07 | 0.028068 | 0.54515  | -0.15037 | 0.00112  |
| 0.01772  | 0.139417 | 0.00253  | 0.043225 | 0.35132  | 0.028853 | 0.53396  | -0.01563 | 0.73619  |
| 0.00021  | 0.238243 | 1.89E-07 | 0.104397 | 0.02406  | 0.241411 | 1.28E-07 | 0.041204 | 0.37432  |
| 0.00043  | -0.08543 | 0.06509  | 0.03243  | 0.48448  | 0.037166 | 0.42297  | -0.21989 | 1.60E-06 |
| 0.92431  | 0.000479 | 0.99177  | 0.314631 | 3.44E-12 | 0.074663 | 0.10709  | -0.20948 | 4.98E-06 |
| 0.7622   | 0.061807 | 0.18241  | 0.065173 | 0.15969  | 0.099644 | 0.03133  | 0.029485 | 0.52503  |
| 0.02255  | 0.1122   | 0.01527  | 0.004739 | 0.91866  | -0.01926 | 0.67809  | -0.178   | 0.00011  |
| 4.03E-07 | -0.26959 | 3.21E-09 | 0.012693 | 0.78442  | -0.14057 | 0.00233  | -0.27092 | 2.67E-09 |
| 0.00038  | 0.253072 | 2.94E-08 | 0.179689 | 9.44E-05 | 0.114946 | 0.01293  | -0.01718 | 0.7112   |
| 1.84E-05 | -0.28211 | 5.42E-10 | 0.011108 | 0.81078  | -0.00527 | 0.9096   | -0.04905 | 0.29012  |
| 0.00237  | 0.272485 | 2.15E-09 | 0.027633 | 0.55139  | 0.108391 | 0.01913  | -0.14648 | 0.0015   |
| 0.01579  | -0.08528 | 0.06557  | 0.017973 | 0.69846  | -0.02696 | 0.56108  | -0.27198 | 2.30E-09 |
| 0.03445  | 0.123949 | 0.00732  | -0.02605 | 0.57437  | -0.04819 | 0.29873  | -0.13189 | 0.0043   |
| 0.06245  | 0.12536  | 0.00668  | 0.033368 | 0.47192  | 0.019357 | 0.67651  | -0.00273 | 0.95314  |
| 0.01197  | 0.174168 | 0.00016  | -0.0124  | 0.78924  | 0.023467 | 0.61297  | -0.00107 | 0.98164  |
| 0.57491  | -0.10143 | 0.0284   | -0.06484 | 0.16186  | 0.03508  | 0.44948  | 0.01523  | 0.74271  |
| 0.67145  | 0.082584 | 0.0746   | -0.06307 | 0.17359  | -0.13126 | 0.00449  | -0.21003 | 4.70E-06 |
| 1.47E-06 | -0.15909 | 0.00056  | 0.044677 | 0.33536  | -0.03904 | 0.39988  | -0.17173 | 0.00019  |
| 1.49E-05 | 0.168015 | 0.00027  | 0.060938 | 0.18865  | 0.000356 | 0.99387  | -0.16956 | 0.00023  |
| 0.1829   | -0.05424 | 0.24204  | -0.01648 | 0.72247  | -0.03098 | 0.50421  | -0.26676 | 4.75E-09 |
| 0.0098   | -0.10634 | 0.02154  | 0.081607 | 0.07811  | 0.045159 | 0.33017  | -0.18737 | 4.62E-05 |
| 0.20879  | -0.00433 | 0.92567  | 0.08354  | 0.07129  | 0.04943  | 0.28643  | -0.0925  | 0.04572  |
| 0.51749  | -0.00813 | 0.8609   | 0.029445 | 0.52559  | 0.024547 | 0.59671  | -0.10679 | 0.02099  |
| 0.00195  | -0.03965 | 0.39262  | 0.026259 | 0.57137  | -0.00142 | 0.97554  | -0.24416 | 9.13E-08 |
| 0.53502  | 0.008224 | 0.85931  | -0.02982 | 0.52033  | -0.0024  | 0.95875  | -0.17039 | 0.00022  |
| 0.05547  | -0.24373 | 9.63E-08 | -0.02154 | 0.64245  | -0.05923 | 0.20136  | 0.021676 | 0.64034  |
| 0.00173  | 0.173113 | 0.00017  | 0.052985 | 0.25315  | 0.016433 | 0.72319  | 0.047015 | 0.31066  |
| 0.1203   | 0.054071 | 0.24353  | 0.103731 | 0.02498  | -0.00184 | 0.96841  | -0.11052 | 0.01688  |
| 1.85E-12 | -0.29485 | 8.04E-11 | -0.02905 | 0.53111  | -0.05058 | 0.27536  | -0.24073 | 1.40E-07 |
| 1.01E-05 | 0.082204 | 0.07595  | 0.004064 | 0.93021  | -0.01035 | 0.82355  | 0.053158 | 0.2516   |
| 0.02048  | -0.17364 | 0.00016  | 0.085639 | 0.06444  | -0.13343 | 0.00387  | 0.08348  | 0.07149  |
| 2.20E-08 | 0.230383 | 4.83E-07 | -0.03824 | 0.40963  | 0.041348 | 0.37264  | 0.201698 | 1.12E-05 |
| 0.67261  | 0.073164 | 0.11434  | 0.014295 | 0.758    | 0.038895 | 0.4017   | -0.22064 | 1.47E-06 |
| 0.01418  | -0.04868 | 0.29379  | 0.023133 | 0.61803  | 0.006235 | 0.8931   | -0.18311 | 6.89E-05 |
| 1.52E-06 | 0.084982 | 0.06653  | -0.0786  | 0.08977  | -0.02412 | 0.60317  | 0.172808 | 0.00017  |
| 0.6926   | -0.05069 | 0.27434  | -0.056   | 0.22709  | -0.12717 | 0.00592  | -0.07861 | 0.08972  |
| 0.96942  | 0.04423  | 0.34023  | -0.00219 | 0.96236  | -0.05687 | 0.21994  | 0.037296 | 0.42134  |
| 0.62393  | 0.000871 | 0.98502  | -0.03092 | 0.50505  | -0.01367 | 0.76831  | -0.14475 | 0.00171  |
| 0.17831  | 0.035462 | 0.44455  | -0.02074 | 0.65478  | -0.06113 | 0.18725  | -0.0709  | 0.12602  |
| 0.03187  | -0.15244 | 0.00095  | -0.07874 | 0.0892   | -0.09784 | 0.03453  | -0.13431 | 0.00364  |

|          |          |          |          |          |          |          |          |          |
|----------|----------|----------|----------|----------|----------|----------|----------|----------|
| 0.65562  | 0.072487 | 0.11774  | 0.129745 | 0.00498  | -0.00816 | 0.86039  | -0.07338 | 0.11327  |
| 0.42917  | 0.015733 | 0.73453  | 0.427133 | 3.92E-22 | -0.02689 | 0.56221  | -0.05568 | 0.22977  |
| 0.28037  | 0.078233 | 0.09128  | 0.029208 | 0.52894  | 0.017449 | 0.70685  | -0.13681 | 0.00305  |
| 0.00015  | -0.13526 | 0.0034   | 0.053262 | 0.25066  | 0.015856 | 0.73253  | -0.10554 | 0.02255  |
| 1.48E-06 | -0.19755 | 1.71E-05 | -0.0019  | 0.96739  | 0.133525 | 0.00384  | -0.19389 | 2.46E-05 |
| 0.14759  | 0.120221 | 0.00931  | -0.0742  | 0.1093   | 0.08297  | 0.07325  | 0.046825 | 0.31262  |
| 0.00103  | 0.096698 | 0.03671  | 0.075987 | 0.10099  | 0.021813 | 0.63823  | 0.029005 | 0.53181  |
| 4.08E-06 | 0.292959 | 1.07E-10 | 0.072885 | 0.11574  | -0.01394 | 0.76375  | -0.12156 | 0.00854  |
| 0.49942  | 0.076015 | 0.10087  | 0.056102 | 0.22625  | 0.011307 | 0.80747  | -0.17619 | 0.00013  |
| 0.13295  | 0.108649 | 0.01884  | 0.166237 | 0.00031  | 0.005943 | 0.89808  | -0.21827 | 1.92E-06 |
| 9.67E-06 | -0.11817 | 0.01059  | 0.020021 | 0.66607  | 0.084061 | 0.06954  | -0.25948 | 1.27E-08 |
| 0.00176  | -0.037   | 0.42503  | 0.025215 | 0.58677  | 0.056728 | 0.2211   | -0.22163 | 1.32E-06 |
| 0.89363  | 0.003039 | 0.94777  | 0.018903 | 0.68368  | 0.067016 | 0.14818  | -0.17129 | 0.0002   |
| 0.20287  | -0.02498 | 0.59022  | 0.011309 | 0.80742  | 0.027041 | 0.55996  | -0.21758 | 2.07E-06 |
| 0.30859  | -0.02094 | 0.65181  | 0.048713 | 0.29349  | 0.066735 | 0.14989  | -0.25178 | 3.48E-08 |
| 0.03363  | -0.06209 | 0.18038  | 0.004942 | 0.91517  | 0.000555 | 0.99046  | -0.27749 | 1.06E-09 |
| 0.18017  | -0.09506 | 0.04003  | 0.055978 | 0.22728  | -0.00679 | 0.88373  | -0.15487 | 0.00078  |
| 0.96327  | 0.047029 | 0.31051  | 0.054774 | 0.23745  | 0.081523 | 0.07842  | -0.06794 | 0.14268  |
| 0.7035   | 0.013887 | 0.7647   | 0.07431  | 0.10876  | 0.027062 | 0.55966  | -0.09345 | 0.04354  |
| 0.36955  | 0.070029 | 0.13076  | -0.00816 | 0.86046  | -0.015   | 0.74646  | -0.05722 | 0.21713  |
| 0.02238  | -0.17569 | 0.00014  | -0.13107 | 0.00455  | -0.02145 | 0.64386  | -0.27448 | 1.62E-09 |
| 3.84E-10 | -0.31371 | 4.00E-12 | -0.07504 | 0.10533  | -0.03399 | 0.46375  | -0.23325 | 3.44E-07 |
| 0.01106  | -0.24091 | 1.37E-07 | -0.04972 | 0.28366  | -0.06568 | 0.15644  | 0.13714  | 0.00298  |
| 0.03142  | 0.205059 | 7.93E-06 | 0.068651 | 0.13852  | 0.229403 | 5.41E-07 | -0.02632 | 0.57041  |
| 0.09869  | 0.067055 | 0.14795  | -0.00111 | 0.98098  | 0.073836 | 0.11104  | -0.02245 | 0.62839  |
| 0.57585  | 0.06953  | 0.13353  | -0.03767 | 0.41673  | 0.002739 | 0.95292  | -0.16632 | 0.00031  |
| 9.41E-08 | -0.14028 | 0.00238  | 0.004174 | 0.92831  | 0.005356 | 0.9081   | -0.23485 | 2.84E-07 |
| 0.07728  | -0.00394 | 0.93234  | 0.036776 | 0.42785  | 0.175315 | 0.00014  | -0.08505 | 0.06631  |
| 0.02458  | 0.076953 | 0.09672  | 0.03285  | 0.47884  | -0.01541 | 0.73975  | -0.14701 | 0.00144  |
| 6.23E-05 | -0.19219 | 2.90E-05 | -0.06903 | 0.13637  | -0.07613 | 0.10033  | -0.13921 | 0.00257  |
| 0.04306  | 0.211551 | 3.99E-06 | 0.015368 | 0.74047  | 0.024648 | 0.59522  | 0.053285 | 0.25046  |
| 0.42739  | 0.111906 | 0.01554  | 0.176399 | 0.00013  | 0.075446 | 0.10345  | -0.16271 | 0.00042  |
| 0.00154  | -0.15895 | 0.00057  | 0.001061 | 0.98175  | -0.09084 | 0.04978  | 0.140211 | 0.00239  |
| 0.26884  | 0.149854 | 0.00116  | 0.095212 | 0.03971  | 0.20561  | 7.49E-06 | -0.18557 | 5.47E-05 |
| 0.02149  | 0.182547 | 7.26E-05 | -0.03758 | 0.4178   | -0.01254 | 0.78687  | -0.1706  | 0.00021  |
| 3.91E-07 | -0.26083 | 1.06E-08 | 0.083913 | 0.07003  | 0.032549 | 0.48288  | -0.24426 | 9.02E-08 |
| 0.16596  | 0.068021 | 0.14219  | 0.11534  | 0.01263  | 0.048679 | 0.29383  | -0.08194 | 0.0769   |
| 9.49E-10 | 0.323424 | 7.84E-13 | 0.019659 | 0.67176  | 0.063392 | 0.17143  | -0.121   | 0.00886  |
| 0.27776  | -0.01293 | 0.7805   | 0.04814  | 0.29921  | 0.023221 | 0.61671  | -0.14407 | 0.0018   |
| 0.53442  | 0.196707 | 1.86E-05 | 0.098004 | 0.03423  | 0.08102  | 0.08028  | -0.13317 | 0.00394  |
| 0.1366   | 0.148772 | 0.00126  | -0.07328 | 0.11378  | 0.021672 | 0.64041  | -0.1608  | 0.00049  |
| 0.00143  | 0.321689 | 1.05E-12 | 0.055942 | 0.22757  | 0.15777  | 0.00062  | -0.0723  | 0.11867  |
| 0.75431  | 0.026866 | 0.5625   | 0.031912 | 0.49148  | 0.023024 | 0.6197   | -0.19801 | 1.63E-05 |
| 0.00248  | 0.203531 | 9.29E-06 | 0.052719 | 0.25553  | 0.021861 | 0.63749  | -0.19425 | 2.37E-05 |
| 0.00048  | -0.18059 | 8.69E-05 | -0.00871 | 0.85117  | -0.00253 | 0.95654  | -0.24067 | 1.41E-07 |

|          |          |          |          |          |           |         |          |          |
|----------|----------|----------|----------|----------|-----------|---------|----------|----------|
| 0.93676  | 0.134596 | 0.00357  | 0.083672 | 0.07084  | 0.019317  | 0.67715 | -0.16371 | 0.00038  |
| 0.73531  | 0.01787  | 0.70011  | 0.0324   | 0.48488  | 0.000529  | 0.9909  | -0.1946  | 2.29E-05 |
| 0.02368  | 0.02192  | 0.63658  | -0.00377 | 0.93525  | 0.038723  | 0.40378 | -0.01303 | 0.77887  |
| 0.62591  | -0.01142 | 0.80557  | 0.084715 | 0.06739  | 0.034313  | 0.45946 | -0.12301 | 0.00778  |
| 0.26963  | -0.06045 | 0.19219  | 0.014254 | 0.75867  | 0.106206  | 0.02171 | -0.12154 | 0.00856  |
| 0.27842  | 0.059681 | 0.19795  | 0.006401 | 0.89027  | -0.02356  | 0.61152 | -0.16796 | 0.00027  |
| 0.41396  | -0.04216 | 0.36337  | 0.045286 | 0.32881  | -0.08696  | 0.06042 | -0.22502 | 8.97E-07 |
| 0.00377  | 0.117292 | 0.01119  | 0.029236 | 0.52853  | 0.065314  | 0.15878 | -0.09562 | 0.03887  |
| 0.79841  | 0.000923 | 0.98413  | -0.03279 | 0.47961  | -0.02435  | 0.59972 | -0.11692 | 0.01145  |
| 0.33362  | -0.00069 | 0.98809  | 0.118877 | 0.01013  | -0.0584   | 0.20776 | -0.14471 | 0.00172  |
| 0.34786  | 0.023108 | 0.61842  | -0.02083 | 0.65341  | -0.02244  | 0.62854 | -0.22248 | 1.20E-06 |
| 0.43568  | 0.037902 | 0.41383  | 0.162484 | 0.00042  | 0.170314  | 0.00022 | -0.23197 | 4.00E-07 |
| 0.00221  | 0.095157 | 0.03983  | -0.01585 | 0.7326   | -0.04735  | 0.30717 | -0.11977 | 0.00958  |
| 0.04365  | -0.03406 | 0.46277  | 0.017711 | 0.70266  | -0.00504  | 0.91344 | -0.26869 | 3.64E-09 |
| 0.07239  | -0.01576 | 0.73415  | 0.071754 | 0.12151  | 0.022045  | 0.63466 | -0.27825 | 9.47E-10 |
| 0.26933  | 0.052787 | 0.25492  | 0.017867 | 0.70016  | -0.00972  | 0.83413 | -0.26586 | 5.37E-09 |
| 1.10E-05 | 0.299733 | 3.78E-11 | 0.069985 | 0.13099  | 0.098278  | 0.03373 | -0.05655 | 0.22256  |
| 0.02538  | -0.05432 | 0.24133  | 0.070798 | 0.12657  | 0.041429  | 0.37171 | -0.08827 | 0.05664  |
| 0.10844  | 0.175146 | 0.00014  | 0.261672 | 9.47E-09 | 0.152692  | 0.00093 | 0.097949 | 0.03433  |
| 0.55447  | 0.01934  | 0.67678  | 0.112065 | 0.0154   | 0.160092  | 0.00052 | -0.10748 | 0.02017  |
| 0.5156   | 0.081955 | 0.07684  | 0.081298 | 0.07925  | 0.062107  | 0.1803  | -0.05535 | 0.23251  |
| 5.03E-05 | 0.198424 | 1.56E-05 | 0.068523 | 0.13926  | 0.068675  | 0.13838 | 0.093657 | 0.04308  |
| 0.26156  | -0.00584 | 0.89982  | 0.034488 | 0.45717  | 0.022755  | 0.62379 | -0.17184 | 0.00019  |
| 0.14881  | -0.05033 | 0.27774  | 0.057091 | 0.21815  | 0.01744   | 0.70699 | -0.19734 | 1.74E-05 |
| 0.01743  | 0.169628 | 0.00023  | 0.033688 | 0.46768  | -0.00073  | 0.98752 | 0.021149 | 0.64849  |
| 0.0014   | -0.13719 | 0.00297  | 0.168646 | 0.00025  | 0.020987  | 0.65101 | -0.19885 | 1.50E-05 |
| 0.2654   | -0.09157 | 0.04797  | 0.004342 | 0.92544  | -0.04618  | 0.31935 | -0.2387  | 1.79E-07 |
| 0.01641  | 0.191232 | 3.18E-05 | 0.148923 | 0.00125  | 0.071279  | 0.124   | -0.11203 | 0.01543  |
| 0.67967  | -0.00177 | 0.9695   | 0.032303 | 0.48619  | 0.065798  | 0.15572 | -0.22025 | 1.54E-06 |
| 0.09665  | -0.01491 | 0.74799  | 0.060783 | 0.18978  | 0.002905  | 0.95007 | -0.15197 | 0.00099  |
| 0.00384  | -0.07299 | 0.11519  | 0.038852 | 0.40222  | -0.01447  | 0.75507 | -0.23263 | 3.70E-07 |
| 0.00179  | -0.13233 | 0.00417  | 0.096812 | 0.03649  | -0.02932  | 0.52736 | -0.26036 | 1.13E-08 |
| 0.64319  | -0.05302 | 0.25284  | -0.03112 | 0.50228  | -0.02904  | 0.53124 | -0.18557 | 5.47E-05 |
| 2.33E-06 | 0.331199 | 2.04E-13 | 0.08477  | 0.06721  | 0.102516  | 0.02674 | -0.11166 | 0.01577  |
| 1.43E-05 | 0.339478 | 4.64E-14 | 0.062746 | 0.17584  | 0.048607  | 0.29454 | -0.08912 | 0.05427  |
| 0.03394  | 0.17374  | 0.00016  | 0.102637 | 0.02656  | 0.035612  | 0.44263 | -0.15565 | 0.00074  |
| 0.7781   | 0.056793 | 0.22057  | -0.00227 | 0.96102  | 0.041489  | 0.37101 | -0.17659 | 0.00012  |
| 1.03E-05 | 0.302033 | 2.63E-11 | 0.186638 | 4.95E-05 | 0.116583  | 0.01169 | -0.13783 | 0.00284  |
| 0.78075  | 0.060609 | 0.19105  | 0.027266 | 0.5567   | 0.090613  | 0.05036 | -0.09278 | 0.04508  |
| 0.90013  | 0.087258 | 0.05954  | 0.085167 | 0.06593  | -0.01078  | 0.81624 | -0.10732 | 0.02035  |
| 0.87919  | 0.03255  | 0.48286  | 0.026249 | 0.57151  | -0.02372  | 0.60921 | -0.2579  | 1.56E-08 |
| 0.5353   | -0.00275 | 0.95272  | -0.00738 | 0.87367  | -1.69E-05 | 0.99971 | -0.05638 | 0.22393  |
| 0.36927  | -0.04297 | 0.35421  | -0.00425 | 0.92699  | -0.03563  | 0.44239 | -0.21851 | 1.87E-06 |
| 8.79E-07 | -0.22285 | 1.15E-06 | 0.004733 | 0.91875  | -0.04382  | 0.34472 | -0.2069  | 6.54E-06 |
| 0.90581  | 0.039196 | 0.39807  | 0.252698 | 3.09E-08 | 0.01254   | 0.78695 | -0.23936 | 1.65E-07 |

|          |          |          |          |          |          |         |          |          |
|----------|----------|----------|----------|----------|----------|---------|----------|----------|
| 0.00448  | 0.175863 | 0.00013  | 0.25197  | 3.39E-08 | -0.00804 | 0.86245 | -0.09956 | 0.03146  |
| 0.26862  | -0.03829 | 0.40908  | 0.101634 | 0.02808  | 0.074358 | 0.10854 | -0.14867 | 0.00127  |
| 8.51E-12 | -0.31748 | 2.14E-12 | 0.016806 | 0.71718  | -0.06137 | 0.18552 | -0.27003 | 3.02E-09 |
| 0.27816  | 0.026282 | 0.57103  | 0.070622 | 0.12751  | -0.11575 | 0.01231 | -0.14068 | 0.00231  |
| 6.64E-07 | 0.313236 | 4.33E-12 | 0.110474 | 0.01693  | 0.123094 | 0.00774 | -0.03824 | 0.40972  |
| 0.00028  | 0.185398 | 5.56E-05 | -0.00629 | 0.89218  | -0.04407 | 0.34197 | -0.13127 | 0.00449  |
| 0.00245  | 0.185167 | 5.68E-05 | 0.045506 | 0.32646  | 0.016649 | 0.71971 | -0.14597 | 0.00156  |
| 0.01475  | 0.118832 | 0.01016  | -0.04482 | 0.33385  | -0.04052 | 0.3823  | 0.007749 | 0.86737  |
| 0.02788  | 0.096628 | 0.03685  | 0.094646 | 0.04091  | -0.0018  | 0.969   | -0.06309 | 0.17351  |
| 0.03269  | -0.07035 | 0.129    | 0.081195 | 0.07963  | 0.067922 | 0.14277 | -0.20681 | 6.61E-06 |
| 0.4287   | -0.02266 | 0.6253   | 0.066614 | 0.15064  | -0.02304 | 0.61944 | -0.22125 | 1.38E-06 |
| 0.76068  | 0.018957 | 0.68283  | 0.022148 | 0.63308  | 0.012003 | 0.79586 | -0.2653  | 5.80E-09 |
| 0.87916  | 0.006995 | 0.88017  | 0.032649 | 0.48153  | -0.00138 | 0.97633 | -0.13345 | 0.00386  |
| 0.97488  | 0.065089 | 0.16023  | 0.028631 | 0.53711  | -0.01298 | 0.77966 | 0.115483 | 0.01252  |
| 0.98704  | 0.181874 | 7.72E-05 | 0.075843 | 0.10164  | 0.099297 | 0.03192 | 0.019205 | 0.6789   |
| 0.7673   | 0.068328 | 0.14039  | 0.051183 | 0.26967  | 0.050263 | 0.27838 | -0.09233 | 0.04613  |
| 0.16451  | 0.124844 | 0.00691  | 0.106613 | 0.0212   | 0.021999 | 0.63536 | -0.08515 | 0.066    |
| 0.90426  | 0.001714 | 0.97053  | 0.01312  | 0.77735  | -0.00059 | 0.98982 | -0.10408 | 0.02449  |
| 0.22363  | -0.07812 | 0.09177  | -0.01957 | 0.67313  | -0.0488  | 0.29258 | 0.09826  | 0.03376  |
| 1.44E-06 | 0.338896 | 5.16E-14 | -0.03853 | 0.40619  | 0.151566 | 0.00102 | -0.01065 | 0.81853  |
| 0.71225  | 0.098645 | 0.03307  | 0.097311 | 0.03553  | 0.030525 | 0.51052 | -0.18294 | 7.00E-05 |
| 0.15666  | 0.088445 | 0.05614  | -0.09541 | 0.0393   | 0.137839 | 0.00284 | -0.16639 | 0.0003   |
| 0.40192  | 0.064594 | 0.16344  | 0.02392  | 0.60613  | -0.01131 | 0.80737 | -0.19341 | 2.57E-05 |
| 0.48348  | -0.01634 | 0.72476  | -0.00165 | 0.97161  | -0.02318 | 0.61727 | -0.21199 | 3.81E-06 |
| 0.89211  | 0.020028 | 0.66596  | 0.005242 | 0.91004  | 0.012494 | 0.7877  | -0.16113 | 0.00047  |
| 0.19713  | -0.03547 | 0.44441  | 0.002789 | 0.95207  | 0.049325 | 0.28746 | -0.14543 | 0.00163  |
| 6.09E-05 | -0.09924 | 0.03202  | -0.04132 | 0.37291  | -0.00255 | 0.95619 | -0.16846 | 0.00026  |
| 0.86282  | 0.065905 | 0.15504  | 0.046448 | 0.31653  | -0.00034 | 0.99416 | -0.06363 | 0.16981  |
| 0.06004  | -0.07451 | 0.10783  | -0.02179 | 0.63861  | 0.012658 | 0.78499 | -0.18535 | 5.59E-05 |
| 0.003    | 0.197461 | 1.72E-05 | -0.00058 | 0.98998  | -0.01512 | 0.74448 | -0.1405  | 0.00234  |
| 0.03066  | 0.20729  | 6.28E-06 | 0.058901 | 0.20389  | 0.010217 | 0.82572 | -0.17518 | 0.00014  |
| 0.15427  | -0.04842 | 0.29637  | 0.101053 | 0.029    | 0.093181 | 0.04415 | -0.14277 | 0.00198  |
| 0.00025  | -0.14303 | 0.00194  | 0.054343 | 0.24116  | 0.017058 | 0.71313 | -0.23657 | 2.31E-07 |
| 0.37813  | 0.086943 | 0.06047  | 0.043058 | 0.35319  | 0.024108 | 0.6033  | -0.22216 | 1.24E-06 |
| 9.42E-07 | 0.339524 | 4.60E-14 | 0.057016 | 0.21876  | 0.097122 | 0.03589 | -0.02496 | 0.59055  |
| 2.37E-11 | -0.27148 | 2.47E-09 | -0.04601 | 0.32114  | -0.04495 | 0.33241 | -0.29294 | 1.08E-10 |
| 0.06848  | 0.087144 | 0.05987  | 0.089711 | 0.0527   | 0.038538 | 0.40604 | -0.08444 | 0.0683   |
| 0.05432  | 0.153271 | 0.00089  | 0.295665 | 7.10E-11 | 0.121687 | 0.00848 | -0.16368 | 0.00038  |
| 0.25527  | 0.04434  | 0.33902  | 0.065539 | 0.15735  | 0.124092 | 0.00726 | -0.21387 | 3.11E-06 |
| 0.91789  | 0.047288 | 0.30786  | 0.107171 | 0.02053  | 0.066637 | 0.1505  | -0.13045 | 0.00475  |
| 0.00098  | -0.1269  | 0.00603  | -0.0086  | 0.85288  | -0.01615 | 0.72773 | -0.28979 | 1.73E-10 |
| 2.72E-07 | 0.347624 | 1.04E-14 | 0.14038  | 0.00236  | 0.105174 | 0.02302 | -0.02153 | 0.64266  |
| 0.00222  | 0.210073 | 4.68E-06 | -0.00222 | 0.96186  | 0.030952 | 0.50462 | -0.07086 | 0.12625  |
| 0.55274  | 0.076954 | 0.09672  | -0.00972 | 0.83406  | 0.047925 | 0.30138 | -0.14582 | 0.00158  |
| 0.74837  | -0.03955 | 0.39383  | -0.1033  | 0.02559  | -0.12703 | 0.00598 | -0.14431 | 0.00177  |



|          |          |          |          |          |          |          |          |          |
|----------|----------|----------|----------|----------|----------|----------|----------|----------|
| 6.67E-09 | -0.23168 | 4.14E-07 | -0.02162 | 0.64117  | 0.010953 | 0.81338  | 0.011854 | 0.79835  |
| 0.02315  | 0.248095 | 5.57E-08 | 0.11034  | 0.01706  | 0.233703 | 3.26E-07 | -0.03221 | 0.48744  |
| 0.09718  | 0.04697  | 0.31112  | -0.02371 | 0.60935  | -0.04562 | 0.32529  | -0.03612 | 0.43619  |
| 2.11E-09 | 0.326954 | 4.27E-13 | 0.017243 | 0.71015  | 0.032931 | 0.47774  | 0.011636 | 0.80198  |
| 5.36E-07 | 0.381026 | 1.39E-17 | 0.066055 | 0.1541   | 0.075839 | 0.10166  | 0.040346 | 0.38435  |
| 0.01402  | 0.237896 | 1.97E-07 | 0.048157 | 0.29904  | 0.047678 | 0.30387  | 0.011685 | 0.80117  |
| 0.13092  | 0.051937 | 0.26266  | -0.00086 | 0.98524  | 0.105051 | 0.02318  | -0.14214 | 0.00208  |
| 0.1269   | -0.08381 | 0.07038  | -0.01844 | 0.69097  | -0.04668 | 0.31409  | -0.25022 | 4.25E-08 |
| 0.00062  | -0.07432 | 0.1087   | 0.024054 | 0.60411  | 0.071517 | 0.12275  | -0.24602 | 7.23E-08 |
| 3.44E-09 | -0.20307 | 9.74E-06 | -0.00976 | 0.83336  | 0.027084 | 0.55934  | -0.2073  | 6.27E-06 |
| 3.09E-06 | 0.252533 | 3.16E-08 | 0.048614 | 0.29447  | 0.046598 | 0.31497  | 0.086117 | 0.06296  |
| 1.58E-06 | 0.315308 | 3.07E-12 | 0.119865 | 0.00952  | 0.107938 | 0.01964  | -0.03743 | 0.41966  |
| 0.00123  | 0.20208  | 1.08E-05 | 0.078147 | 0.09164  | 0.02282  | 0.6228   | 0.16019  | 0.00051  |
| 0.00414  | -0.14575 | 0.00159  | -0.04428 | 0.33965  | -0.06374 | 0.1691   | -0.29242 | 1.17E-10 |
| 0.76144  | 0.114196 | 0.01354  | 0.29176  | 1.29E-10 | 0.05594  | 0.22759  | -0.09238 | 0.04602  |
| 0.92471  | 0.072285 | 0.11877  | 0.047755 | 0.30309  | 0.082794 | 0.07386  | -0.00997 | 0.82985  |
| 0.48571  | 0.076194 | 0.10006  | 0.024538 | 0.59686  | 0.029019 | 0.5316   | -0.17917 | 9.90E-05 |
| 1.90E-07 | -0.14575 | 0.00159  | 0.024922 | 0.59113  | -0.04504 | 0.33148  | -0.2593  | 1.30E-08 |
| 0.02577  | -0.07435 | 0.10857  | 0.037952 | 0.41322  | -0.03839 | 0.40778  | -0.21222 | 3.72E-06 |
| 0.08015  | 0.196653 | 1.87E-05 | 0.026063 | 0.57425  | 0.122845 | 0.00787  | -0.04295 | 0.35438  |
| 0.09552  | -0.14955 | 0.00119  | -0.12492 | 0.00687  | -0.0648  | 0.16209  | 0.043753 | 0.34546  |
| 0.08947  | 0.060022 | 0.1954   | -0.00475 | 0.91845  | -0.0357  | 0.44149  | -0.02753 | 0.55283  |
| 0.05702  | 0.205512 | 7.57E-06 | 0.077707 | 0.09348  | 0.0752   | 0.10458  | -0.1018  | 0.02783  |
| 0.36857  | 0.060695 | 0.19042  | 0.076624 | 0.09816  | 0.020106 | 0.66475  | -0.09239 | 0.046    |
| 0.41734  | 0.051944 | 0.2626   | 0.05744  | 0.21535  | 0.055078 | 0.23485  | -0.15531 | 0.00076  |
| 1.07E-05 | 0.370801 | 1.14E-16 | 0.057781 | 0.21263  | 0.170905 | 0.00021  | -0.18542 | 5.55E-05 |
| 0.00308  | 0.276796 | 1.17E-09 | 0.12734  | 0.00586  | 0.08478  | 0.06718  | 0.086801 | 0.06089  |
| 4.96E-05 | 0.319625 | 1.49E-12 | 0.15601  | 0.00072  | 0.08818  | 0.05689  | -0.09269 | 0.04528  |
| 0.3943   | 0.201666 | 1.13E-05 | 0.057362 | 0.21598  | 0.123504 | 0.00754  | -0.08372 | 0.07069  |
| 8.72E-07 | 0.343944 | 2.05E-14 | 0.095316 | 0.0395   | 0.067382 | 0.14598  | -0.0481  | 0.29965  |
| 0.7696   | 0.069739 | 0.13236  | 0.04433  | 0.33914  | 0.022595 | 0.62623  | -0.21505 | 2.73E-06 |
| 0.00547  | 0.254079 | 2.58E-08 | 0.015608 | 0.73657  | 0.076173 | 0.10016  | -0.03841 | 0.40757  |
| 3.36E-06 | 0.18095  | 8.41E-05 | 0.073501 | 0.11268  | -0.03103 | 0.50348  | 0.010542 | 0.82027  |
| 0.1491   | -0.11079 | 0.01662  | 0.227658 | 6.63E-07 | -0.02391 | 0.60627  | -0.23098 | 4.50E-07 |
| 0.07526  | -0.08142 | 0.07879  | -0.05638 | 0.22398  | 0.04555  | 0.32599  | 0.026166 | 0.57273  |
| 0.03961  | -0.10069 | 0.02959  | -0.06212 | 0.18024  | -0.03984 | 0.39034  | -0.27842 | 9.23E-10 |
| 0.04113  | 0.255979 | 2.02E-08 | 0.153386 | 0.00088  | 0.102922 | 0.02614  | -0.03005 | 0.51717  |
| 0.00818  | 0.101718 | 0.02795  | 0.004817 | 0.91732  | 0.105179 | 0.02302  | -0.01752 | 0.70563  |
| 0.70562  | -0.14146 | 0.00218  | -0.09907 | 0.03232  | -0.10416 | 0.02438  | 0.043947 | 0.34333  |
| 0.09752  | 0.269337 | 3.33E-09 | 0.045244 | 0.32925  | 0.157761 | 0.00062  | -0.04819 | 0.29872  |
| 0.0278   | 0.254329 | 2.50E-08 | -0.02046 | 0.65928  | 0.057043 | 0.21855  | -0.16878 | 0.00025  |
| 0.39365  | -0.00578 | 0.90084  | 0.1384   | 0.00272  | 0.060148 | 0.19446  | -0.07248 | 0.11776  |
| 1.18E-09 | 0.431732 | 1.26E-22 | 0.185675 | 5.42E-05 | 0.1555   | 0.00075  | -0.08402 | 0.06968  |
| 0.00483  | 0.188724 | 4.05E-05 | 0.071946 | 0.12052  | 0.06707  | 0.14786  | 0.035025 | 0.45019  |
| 1.07E-05 | -0.15167 | 0.00101  | 0.005176 | 0.91118  | -0.04781 | 0.30249  | -0.238   | 1.95E-07 |

|          |           |          |          |          |          |          |          |          |
|----------|-----------|----------|----------|----------|----------|----------|----------|----------|
| 0.20058  | -0.04712  | 0.30957  | -0.20864 | 5.44E-06 | 0.085301 | 0.06551  | -0.02705 | 0.55978  |
| 0.48417  | 0.034355  | 0.45891  | -0.03015 | 0.51568  | 0.090551 | 0.05051  | -0.05522 | 0.23361  |
| 0.35919  | 0.103781  | 0.02491  | 0.116442 | 0.0118   | 0.058791 | 0.20473  | -0.17532 | 0.00014  |
| 0.42958  | 0.001926  | 0.96688  | -0.04494 | 0.33256  | 0.024867 | 0.59195  | -0.04949 | 0.28587  |
| 0.44459  | 0.070078  | 0.13049  | -0.01516 | 0.74386  | 0.066773 | 0.14967  | -0.24768 | 5.87E-08 |
| 0.72807  | 0.022773  | 0.62352  | 0.148779 | 0.00126  | 0.166138 | 0.00031  | -0.05689 | 0.2198   |
| 0.39995  | 0.064458  | 0.16433  | 0.075646 | 0.10253  | 0.06541  | 0.15817  | -0.07765 | 0.09371  |
| 0.10033  | -0.06891  | 0.13704  | 0.021528 | 0.64262  | -0.03282 | 0.47918  | -0.27085 | 2.70E-09 |
| 0.82915  | -0.07974  | 0.0852   | -0.05499 | 0.23563  | -0.06838 | 0.1401   | -0.07806 | 0.09198  |
| 0.37477  | 0.003667  | 0.93701  | 0.020509 | 0.65844  | -0.05605 | 0.22665  | -0.16182 | 0.00045  |
| 0.2816   | -0.08222  | 0.07589  | -0.09253 | 0.04567  | -0.03167 | 0.49481  | -0.00896 | 0.84695  |
| 0.87368  | 0.025864  | 0.57717  | 0.049772 | 0.28311  | 0.11568  | 0.01236  | -0.10669 | 0.02111  |
| 0.06093  | 0.070715  | 0.12701  | -0.00022 | 0.99627  | -0.05879 | 0.20474  | -0.11116 | 0.01625  |
| 0.32232  | 0.092859  | 0.04489  | 0.066638 | 0.15049  | 0.118862 | 0.01014  | -0.14057 | 0.00233  |
| 7.23E-07 | 0.351771  | 4.76E-15 | 0.168771 | 0.00025  | 0.080499 | 0.08225  | -0.05399 | 0.24421  |
| 0.99788  | 0.024807  | 0.59284  | 0.071619 | 0.12221  | -0.0419  | 0.36632  | -0.16835 | 0.00026  |
| 0.48937  | 0.060166  | 0.19433  | 0.039372 | 0.39595  | 0.007268 | 0.87552  | -0.13076 | 0.00465  |
| 0.18554  | 0.000445  | 0.99235  | 0.063214 | 0.17264  | -0.01445 | 0.75546  | -0.19105 | 3.24E-05 |
| 0.77674  | -0.04339  | 0.34953  | -0.01403 | 0.76235  | 0.012028 | 0.79545  | -0.08749 | 0.05887  |
| 1.01E-05 | -0.19222  | 2.89E-05 | 0.015347 | 0.7408   | 0.015809 | 0.7333   | -0.2406  | 1.42E-07 |
| 0.32249  | 0.247847  | 5.75E-08 | 0.017993 | 0.69815  | 0.182544 | 7.26E-05 | -0.05747 | 0.21509  |
| 0.83331  | 0.053151  | 0.25166  | 0.041719 | 0.36838  | -0.00361 | 0.93795  | -0.21287 | 3.46E-06 |
| 0.2133   | 0.043896  | 0.34388  | -0.07299 | 0.11522  | -0.12086 | 0.00894  | -0.1644  | 0.00036  |
| 0.03745  | 0.137677  | 0.00287  | 0.048725 | 0.29337  | 0.10824  | 0.0193   | -0.11915 | 0.00996  |
| 0.02043  | -9.97E-05 | 0.99829  | -0.01481 | 0.7495   | 0.01652  | 0.72179  | -0.2651  | 5.95E-09 |
| 0.77187  | 0.094199  | 0.04188  | -0.02207 | 0.63431  | 0.063809 | 0.16862  | -0.03262 | 0.48189  |
| 0.55622  | 0.004703  | 0.91926  | -0.023   | 0.62002  | -0.01973 | 0.67069  | -0.18418 | 6.23E-05 |
| 0.30738  | 0.084053  | 0.06956  | -0.05733 | 0.21625  | -0.08411 | 0.06937  | 0.006345 | 0.89123  |
| 0.02683  | -0.10944  | 0.01799  | -0.00651 | 0.88835  | -0.01067 | 0.81804  | -0.20022 | 1.30E-05 |
| 0.28892  | 0.01255   | 0.78678  | 0.053631 | 0.2474   | -0.02027 | 0.6622   | -0.04088 | 0.37808  |
| 0.00111  | 0.184578  | 6.01E-05 | 0.045037 | 0.33147  | 0.026968 | 0.56102  | -0.0185  | 0.69008  |
| 0.02434  | 0.109263  | 0.01818  | -0.04953 | 0.2855   | -0.02181 | 0.63833  | -0.03959 | 0.39328  |
| 0.18665  | 0.142431  | 0.00203  | 0.026416 | 0.56908  | 0.057292 | 0.21654  | 0.004791 | 0.91776  |
| 0.00046  | -0.1845   | 6.05E-05 | -0.11349 | 0.01413  | -0.0186  | 0.68856  | 0.07588  | 0.10147  |
| 5.07E-06 | 0.25535   | 2.19E-08 | 0.176664 | 0.00012  | 0.25846  | 1.45E-08 | 0.04645  | 0.31652  |
| 0.95374  | 0.045113  | 0.33066  | 0.012362 | 0.7899   | -0.00797 | 0.86355  | -0.0074  | 0.8733   |
| 0.70204  | 0.15627   | 0.0007   | 0.063558 | 0.17031  | 0.012651 | 0.7851   | 0.001365 | 0.97654  |
| 4.50E-05 | -0.1662   | 0.00031  | 0.037353 | 0.42063  | -0.00445 | 0.92352  | -0.26482 | 6.19E-09 |
| 0.40351  | 0.136855  | 0.00304  | 0.035837 | 0.43975  | 0.20535  | 7.69E-06 | -0.17488 | 0.00015  |
| 0.21099  | 0.113599  | 0.01404  | 0.048297 | 0.29763  | -0.03645 | 0.43196  | -0.12706 | 0.00597  |
| 0.01672  | -0.09668  | 0.03675  | -0.08022 | 0.08331  | -0.11947 | 0.00976  | -0.03653 | 0.43098  |
| 0.00295  | -0.02408  | 0.60366  | -0.02006 | 0.66553  | 0.022496 | 0.62775  | 0.099687 | 0.03125  |
| 0.24501  | 0.137297  | 0.00295  | 0.081634 | 0.07801  | 0.025558 | 0.58169  | -0.13453 | 0.00358  |
| 0.00427  | 0.263495  | 7.41E-09 | -0.02138 | 0.64489  | 0.149658 | 0.00118  | -0.04903 | 0.29035  |
| 0.16254  | 0.002612  | 0.9551   | 0.014567 | 0.75354  | 0.102062 | 0.02742  | -0.22761 | 6.66E-07 |

|          |          |          |          |          |          |          |          |          |
|----------|----------|----------|----------|----------|----------|----------|----------|----------|
| 9.96E-11 | 0.253233 | 2.88E-08 | -0.06332 | 0.1719   | -0.12158 | 0.00854  | 0.253752 | 2.69E-08 |
| 0.56552  | 0.03456  | 0.45624  | 0.039137 | 0.39878  | 0.007081 | 0.8787   | -0.1359  | 0.00325  |
| 0.00015  | -0.14358 | 0.00187  | -0.03345 | 0.47078  | -0.02439 | 0.5991   | -0.28108 | 6.29E-10 |
| 0.0762   | -0.09003 | 0.05187  | 0.013297 | 0.77442  | -0.03897 | 0.40083  | -0.19589 | 2.01E-05 |
| 0.15717  | 0.064233 | 0.16581  | 0.069521 | 0.13357  | 0.042505 | 0.35941  | -0.06458 | 0.16351  |
| 9.72E-07 | -0.27393 | 1.75E-09 | 0.010858 | 0.81497  | -0.03565 | 0.44216  | -0.12524 | 0.00673  |
| 0.52429  | 0.066365 | 0.15217  | 0.008984 | 0.84647  | 0.030616 | 0.50926  | -0.23924 | 1.67E-07 |
| 0.01602  | -0.14322 | 0.00192  | 0.04786  | 0.30204  | 0.059691 | 0.19788  | 0.002014 | 0.96538  |
| 0.00044  | -0.22483 | 9.17E-07 | -0.05405 | 0.24373  | -0.026   | 0.57513  | 0.038452 | 0.40708  |
| 0.01425  | -0.238   | 1.95E-07 | -0.06859 | 0.13889  | -0.07841 | 0.09053  | 0.092871 | 0.04486  |
| 9.66E-11 | 0.3406   | 3.79E-14 | 0.045751 | 0.32386  | -0.03167 | 0.49474  | 0.141259 | 0.00221  |
| 0.01662  | 0.207651 | 6.05E-06 | 0.016655 | 0.71961  | 0.061355 | 0.18564  | -0.10293 | 0.02612  |
| 0.88646  | 0.064189 | 0.1661   | 0.109163 | 0.01829  | 0.041568 | 0.37011  | -0.08386 | 0.07021  |
| 0.00977  | 0.124738 | 0.00696  | -0.04775 | 0.30315  | 0.004294 | 0.92627  | 0.028298 | 0.54186  |
| 0.03154  | -0.21924 | 1.72E-06 | 0.018565 | 0.68904  | -0.00081 | 0.98606  | -0.19001 | 3.58E-05 |
| 0.10969  | 0.158631 | 0.00058  | 0.079262 | 0.08709  | -0.00213 | 0.96332  | -0.06529 | 0.15895  |
| 0.40132  | -0.00396 | 0.93201  | 0.03057  | 0.5099   | 0.02169  | 0.64012  | -0.09027 | 0.05123  |
| 0.87559  | 0.123559 | 0.00751  | 0.063612 | 0.16995  | 0.016679 | 0.71923  | -0.17827 | 0.00011  |
| 0.00438  | 0.187925 | 4.38E-05 | -0.09039 | 0.05093  | 0.090995 | 0.04939  | -0.24546 | 7.76E-08 |
| 0.24289  | 0.007799 | 0.86652  | -0.05919 | 0.20165  | 0.044666 | 0.33548  | -0.21319 | 3.35E-06 |
| 0.00126  | -0.14955 | 0.00119  | -0.00102 | 0.98245  | -0.02353 | 0.61194  | -0.26991 | 3.08E-09 |
| 0.00284  | -0.13843 | 0.00272  | -0.00351 | 0.93963  | 0.000159 | 0.99727  | -0.05129 | 0.26867  |
| 3.34E-07 | -0.16196 | 0.00044  | -0.03255 | 0.4829   | 0.014923 | 0.74772  | -0.26792 | 4.05E-09 |
| 0.78085  | 0.040945 | 0.37732  | 0.020633 | 0.65651  | 0.064792 | 0.16215  | -0.21444 | 2.92E-06 |
| 2.73E-07 | 0.262151 | 8.88E-09 | -0.02626 | 0.57133  | 0.003447 | 0.94077  | 0.288477 | 2.11E-10 |
| 0.17251  | -0.05278 | 0.255    | 0.005309 | 0.9089   | -0.00875 | 0.85049  | -0.27554 | 1.39E-09 |
| 0.84905  | 0.044177 | 0.34081  | 0.052922 | 0.25371  | 0.057363 | 0.21597  | -0.19663 | 1.87E-05 |
| 0.00044  | -0.19512 | 2.17E-05 | 0.3285   | 3.26E-13 | 0.015933 | 0.73129  | -0.221   | 1.42E-06 |
| 0.88544  | 0.002797 | 0.95192  | 0.031926 | 0.4913   | 0.015815 | 0.73321  | -0.14919 | 0.00122  |
| 0.0769   | 0.234619 | 2.92E-07 | 0.204923 | 8.04E-06 | 0.142025 | 0.00209  | -0.1105  | 0.01691  |
| 0.76134  | -0.03275 | 0.48016  | 0.150219 | 0.00113  | -0.02932 | 0.52737  | -0.21776 | 2.03E-06 |
| 0.00392  | 0.184092 | 6.28E-05 | 0.062015 | 0.18094  | -0.03503 | 0.45012  | -0.07025 | 0.12957  |
| 8.01E-05 | 0.328851 | 3.07E-13 | 0.13773  | 0.00286  | 0.060205 | 0.19403  | -0.00767 | 0.86871  |
| 0.03259  | -0.03451 | 0.45687  | 0.016966 | 0.71461  | 0.053274 | 0.25056  | -0.16621 | 0.00031  |
| 0.98325  | 0.143003 | 0.00195  | 0.024641 | 0.59531  | 0.21456  | 2.88E-06 | -0.23082 | 4.58E-07 |
| 0.45038  | 0.074696 | 0.10694  | 0.00265  | 0.95446  | 0.05746  | 0.21519  | 0.075099 | 0.10505  |
| 4.79E-08 | -0.17374 | 0.00016  | -0.09013 | 0.0516   | -0.06032 | 0.19321  | -0.19111 | 3.22E-05 |
| 0.00118  | 0.231606 | 4.18E-07 | 0.037553 | 0.41814  | 0.075198 | 0.10459  | -0.22335 | 1.09E-06 |
| 0.00132  | 0.271581 | 2.44E-09 | 0.032924 | 0.47784  | 0.187179 | 4.70E-05 | -0.21718 | 2.16E-06 |
| 1.48E-05 | 0.190744 | 3.34E-05 | 0.173651 | 0.00016  | 0.137908 | 0.00282  | -0.10443 | 0.02402  |
| 0.01598  | 0.163163 | 0.0004   | 0.030688 | 0.50826  | 0.031979 | 0.49058  | -0.07567 | 0.10243  |
| 0.00435  | 0.204303 | 8.58E-06 | 0.074207 | 0.10926  | 0.044622 | 0.33596  | 0.005723 | 0.90183  |
| 7.24E-07 | 0.329103 | 2.94E-13 | 0.093064 | 0.04442  | 0.172846 | 0.00017  | 0.063105 | 0.17339  |
| 0.0078   | -0.15642 | 0.00069  | -0.05198 | 0.26224  | -0.039   | 0.40044  | 0.144031 | 0.00181  |
| 1.75E-13 | -0.33201 | 1.76E-13 | 0.022583 | 0.62642  | -0.10139 | 0.02847  | -0.20634 | 6.94E-06 |

|          |          |          |          |          |          |          |          |          |
|----------|----------|----------|----------|----------|----------|----------|----------|----------|
| 0.99204  | 0.127749 | 0.0057   | 0.236573 | 2.31E-07 | 0.076247 | 0.09983  | -0.24659 | 6.73E-08 |
| 0.42647  | 0.162027 | 0.00044  | 0.031691 | 0.49449  | 0.074867 | 0.10613  | -0.13278 | 0.00405  |
| 0.00023  | -0.17471 | 0.00015  | -0.04667 | 0.31422  | -0.07821 | 0.09138  | -0.26205 | 9.00E-09 |
| 0.06981  | 0.125007 | 0.00683  | 0.005132 | 0.91193  | -0.00904 | 0.84549  | -0.08447 | 0.06819  |
| 0.33817  | -0.10367 | 0.02507  | -0.10493 | 0.02335  | -0.1032  | 0.02573  | -0.15469 | 0.0008   |
| 4.35E-06 | 0.284237 | 3.96E-10 | 0.087124 | 0.05993  | 0.094368 | 0.04151  | -0.04661 | 0.31481  |
| 0.02606  | 0.182636 | 7.20E-05 | 0.097455 | 0.03526  | 0.022415 | 0.62898  | -0.15634 | 0.0007   |
| 0.16051  | 0.04035  | 0.3843   | 0.038293 | 0.40903  | 0.078133 | 0.09169  | 0.075139 | 0.10486  |
| 7.93E-07 | 0.265803 | 5.41E-09 | 0.037575 | 0.41787  | 0.062313 | 0.17885  | 0.023476 | 0.61283  |
| 0.81356  | 0.027861 | 0.54812  | 0.009478 | 0.83815  | -0.02716 | 0.55816  | -0.16953 | 0.00023  |
| 0.05503  | -0.08411 | 0.06938  | 0.02667  | 0.56536  | 0.045131 | 0.33047  | -0.21145 | 4.04E-06 |
| 0.60775  | -0.04992 | 0.28166  | -0.09667 | 0.03676  | -0.05497 | 0.23575  | 0.128089 | 0.00557  |
| 0.66886  | 0.034544 | 0.45644  | 0.100783 | 0.02943  | 0.090349 | 0.05103  | -0.20255 | 1.03E-05 |
| 0.54875  | -0.01357 | 0.76984  | -0.15439 | 0.00082  | -0.05185 | 0.26348  | 0.023677 | 0.60979  |
| 0.72779  | 0.106702 | 0.0211   | 0.2579   | 1.57E-08 | 0.156818 | 0.00067  | -0.10908 | 0.01838  |
| 0.17412  | 0.101652 | 0.02806  | 0.178861 | 0.0001   | -0.07711 | 0.09605  | -0.21765 | 2.06E-06 |
| 0.04422  | 0.136322 | 0.00316  | 0.01841  | 0.69151  | 0.100298 | 0.03023  | -0.1812  | 8.22E-05 |
| 0.03512  | -0.12615 | 0.00634  | 0.170644 | 0.00021  | 0.017031 | 0.71356  | -0.15508 | 0.00077  |
| 0.002    | 0.228465 | 6.03E-07 | 0.042115 | 0.36384  | -0.05751 | 0.21483  | 0.016012 | 0.73001  |
| 0.06438  | -0.07075 | 0.12682  | -0.05794 | 0.21136  | -0.00978 | 0.83304  | -0.18616 | 5.18E-05 |
| 0.00497  | -0.06523 | 0.15933  | 0.02985  | 0.51991  | 0.115443 | 0.01255  | -0.19642 | 1.91E-05 |
| 0.18238  | -0.06202 | 0.1809   | 0.246461 | 6.84E-08 | 0.055394 | 0.23217  | -0.18598 | 5.26E-05 |
| 4.13E-07 | 0.116496 | 0.01176  | 0.011772 | 0.79971  | -0.12477 | 0.00694  | -0.0154  | 0.73999  |
| 0.34469  | -0.04267 | 0.35756  | 0.027597 | 0.55192  | -0.00892 | 0.84753  | -0.21161 | 3.97E-06 |
| 0.00121  | 0.294721 | 8.21E-11 | 0.124245 | 0.00718  | 0.275053 | 1.49E-09 | 0.032107 | 0.48884  |
| 0.24439  | 0.139488 | 0.00252  | 0.037396 | 0.4201   | 0.122231 | 0.00819  | -0.19586 | 2.02E-05 |
| 0.04824  | 0.021304 | 0.64609  | 0.100725 | 0.02953  | 0.074246 | 0.10907  | -0.24088 | 1.37E-07 |
| 0.35032  | 0.152138 | 0.00097  | 0.137012 | 0.00301  | 0.03425  | 0.46028  | -0.17925 | 9.83E-05 |
| 1.12E-20 | 0.498127 | 1.18E-30 | 0.124744 | 0.00695  | 0.151226 | 0.00104  | -0.06911 | 0.13589  |
| 0.00014  | -0.06435 | 0.16503  | 0.235827 | 2.53E-07 | -0.02985 | 0.51992  | -0.16252 | 0.00042  |
| 0.78212  | 0.104316 | 0.02417  | 0.101307 | 0.0286   | 0.090204 | 0.05141  | 0.09121  | 0.04885  |
| 0.8058   | -0.01359 | 0.76953  | 0.003695 | 0.93653  | -0.03454 | 0.4565   | -0.1275  | 0.00579  |
| 0.00984  | 0.231646 | 4.16E-07 | 0.329269 | 2.86E-13 | 0.137549 | 0.0029   | -0.0751  | 0.10504  |
| 0.04368  | -0.05854 | 0.20665  | 0.069109 | 0.1359   | 0.049258 | 0.28811  | -0.19689 | 1.82E-05 |
| 0.9953   | 0.18837  | 4.19E-05 | 0.037935 | 0.41343  | 0.064193 | 0.16607  | -0.02412 | 0.60311  |
| 0.93835  | 0.126436 | 0.00622  | 0.017059 | 0.71311  | 0.195287 | 2.14E-05 | -0.21941 | 1.69E-06 |
| 0.00318  | 0.158936 | 0.00057  | 0.081581 | 0.07821  | 0.206103 | 7.11E-06 | -0.00971 | 0.8343   |
| 0.10905  | 0.144403 | 0.00176  | 0.027327 | 0.55581  | 0.08909  | 0.05437  | -0.11712 | 0.01131  |
| 0.44565  | 0.13384  | 0.00376  | 0.040887 | 0.378    | 0.032915 | 0.47796  | -0.05816 | 0.20968  |
| 0.02021  | 0.0131   | 0.77768  | -0.00202 | 0.96521  | 0.169445 | 0.00023  | -0.19874 | 1.51E-05 |
| 0.90593  | 0.005292 | 0.9092   | -0.05201 | 0.26201  | 0.009145 | 0.84374  | -0.17043 | 0.00022  |
| 0.30716  | 0.049101 | 0.28966  | -0.03739 | 0.42015  | -0.03006 | 0.51703  | 0.153429 | 0.00088  |
| 2.91E-05 | 0.339467 | 4.65E-14 | 0.201233 | 1.18E-05 | 0.160425 | 0.0005   | -0.06538 | 0.15833  |
| 5.25E-05 | 0.262947 | 7.98E-09 | 0.033336 | 0.47235  | 0.032111 | 0.48879  | 0.058077 | 0.2103   |
| 0.45198  | 0.012566 | 0.78651  | 0.009846 | 0.83195  | -0.00615 | 0.89455  | -0.12596 | 0.00642  |

|          |          |          |          |          |          |         |          |          |
|----------|----------|----------|----------|----------|----------|---------|----------|----------|
| 0.38625  | 6.16E-05 | 0.99894  | 0.090209 | 0.05139  | -0.02433 | 0.59994 | -0.03514 | 0.44873  |
| 0.01414  | 0.119126 | 0.00998  | 0.043055 | 0.35322  | 0.033341 | 0.47228 | 0.028899 | 0.53331  |
| 0.00071  | -0.1243  | 0.00716  | -0.00571 | 0.90204  | 0.006709 | 0.88502 | -0.14365 | 0.00186  |
| 0.00518  | 0.14362  | 0.00186  | -0.03653 | 0.43099  | -0.04481 | 0.33389 | -0.11234 | 0.01515  |
| 0.00666  | -0.0687  | 0.13826  | 0.005542 | 0.90492  | -0.01383 | 0.76569 | -0.16302 | 0.0004   |
| 9.00E-05 | 0.176838 | 0.00012  | 0.07662  | 0.09818  | 0.016205 | 0.72688 | -0.00564 | 0.90321  |
| 0.13977  | -0.18146 | 8.03E-05 | -0.09236 | 0.04605  | -0.1232  | 0.00769 | -0.17796 | 0.00011  |
| 0.00059  | 0.168816 | 0.00025  | 0.036134 | 0.43596  | 0.053656 | 0.24718 | -0.09662 | 0.03686  |
| 0.38093  | 0.093332 | 0.04381  | 0.102264 | 0.02712  | 0.09849  | 0.03335 | -0.1106  | 0.0168   |
| 0.00024  | 0.347236 | 1.12E-14 | 0.014748 | 0.75058  | 0.162796 | 0.00041 | -0.11395 | 0.01374  |
| 0.04701  | 0.276497 | 1.22E-09 | -0.08156 | 0.07827  | 0.057031 | 0.21864 | 0.155596 | 0.00074  |
| 0.3258   | 0.17225  | 0.00018  | 0.091168 | 0.04896  | 0.15384  | 0.00085 | -0.18654 | 4.99E-05 |
| 0.00027  | 0.314953 | 3.26E-12 | 0.153205 | 0.0009   | 0.138174 | 0.00277 | -0.12669 | 0.00611  |
| 0.15365  | 0.024876 | 0.5918   | -0.00601 | 0.89695  | -0.03868 | 0.40436 | -0.153   | 0.00091  |
| 0.02275  | -0.00032 | 0.99449  | 0.125979 | 0.00641  | 0.072609 | 0.11712 | -0.20362 | 9.21E-06 |
| 1.40E-05 | 0.372117 | 8.75E-17 | 0.312205 | 5.13E-12 | 0.13698  | 0.00301 | -0.11319 | 0.01439  |
| 0.01229  | -0.09395 | 0.04242  | 0.048156 | 0.29905  | -0.01545 | 0.73905 | -0.24787 | 5.73E-08 |
| 0.01182  | 0.316514 | 2.52E-12 | 0.07985  | 0.08476  | 0.174043 | 0.00016 | -0.14102 | 0.00225  |
| 0.00384  | -0.10148 | 0.02832  | -0.14811 | 0.00133  | -0.05213 | 0.26087 | -0.26252 | 8.45E-09 |
| 0.6165   | -0.15482 | 0.00079  | -0.1024  | 0.02691  | -0.12327 | 0.00765 | 0.012997 | 0.77938  |
| 0.56763  | -0.0304  | 0.51221  | 0.022589 | 0.62632  | -0.0028  | 0.95191 | -0.19493 | 2.22E-05 |
| 0.14274  | -0.05623 | 0.22517  | 0.106742 | 0.02105  | -0.04546 | 0.32699 | -0.22336 | 1.08E-06 |
| 0.18103  | 0.02568  | 0.57988  | 0.016553 | 0.72125  | 0.110366 | 0.01704 | -0.21197 | 3.82E-06 |
| 0.12281  | -0.03763 | 0.41717  | 0.038167 | 0.41058  | -0.01897 | 0.68267 | -0.20407 | 8.79E-06 |
| 2.38E-05 | -0.20582 | 7.33E-06 | -0.0863  | 0.06239  | -0.04068 | 0.38048 | -0.27819 | 9.55E-10 |
| 0.23481  | 0.049631 | 0.28447  | 0.061667 | 0.18341  | 0.023163 | 0.61758 | -0.09963 | 0.03135  |
| 0.49108  | -0.0307  | 0.50815  | 0.068596 | 0.13883  | -0.00796 | 0.86376 | -0.1859  | 5.30E-05 |
| 7.01E-10 | 0.326498 | 4.62E-13 | 0.110923 | 0.01648  | 0.15578  | 0.00073 | -0.04131 | 0.37304  |
| 0.08279  | 0.126972 | 0.006    | 0.071514 | 0.12277  | 0.017634 | 0.70388 | -0.06521 | 0.15944  |
| 4.52E-06 | -0.2778  | 1.01E-09 | 0.048532 | 0.29529  | -0.04872 | 0.29339 | 0.011935 | 0.79699  |
| 1.50E-16 | 0.42639  | 4.71E-22 | 0.099642 | 0.03133  | 0.103526 | 0.02527 | -0.11126 | 0.01615  |
| 2.19E-06 | -0.21294 | 3.44E-06 | 0.027107 | 0.559    | -0.07634 | 0.09939 | -0.34815 | 9.41E-15 |
| 0.07019  | -0.0841  | 0.06939  | -0.00938 | 0.83987  | 0.095013 | 0.04013 | -0.22201 | 1.26E-06 |
| 0.61321  | -0.00689 | 0.88187  | -0.01894 | 0.68304  | -0.01914 | 0.68    | -0.20466 | 8.27E-06 |
| 0.87602  | 0.050435 | 0.27674  | 0.03772  | 0.41609  | 0.022077 | 0.63417 | -0.12981 | 0.00496  |
| 0.20233  | -0.01514 | 0.74417  | 0.103131 | 0.02584  | 0.066507 | 0.1513  | -0.09233 | 0.04613  |
| 0.62033  | 0.104132 | 0.02442  | 0.20707  | 6.43E-06 | 0.107584 | 0.02005 | -0.14059 | 0.00233  |
| 2.24E-08 | 0.25724  | 1.71E-08 | -0.00123 | 0.97889  | -0.05464 | 0.23857 | 0.136778 | 0.00306  |
| 2.34E-05 | -0.0658  | 0.15568  | 0.055621 | 0.23026  | 0.028979 | 0.53217 | -0.13163 | 0.00438  |
| 0.00267  | 0.037807 | 0.415    | 0.020987 | 0.651    | 0.036307 | 0.43377 | 0.012863 | 0.78159  |
| 0.04683  | 0.068772 | 0.13782  | -0.01117 | 0.80976  | -0.04994 | 0.28145 | -0.06289 | 0.17488  |
| 0.99358  | -0.04243 | 0.36024  | -0.00995 | 0.83024  | -0.02444 | 0.59827 | 0.013932 | 0.76396  |
| 0.00072  | 0.310053 | 7.29E-12 | -0.00819 | 0.85991  | 0.109102 | 0.01835 | -0.0751  | 0.10504  |
| 0.00271  | -0.04313 | 0.35241  | -0.01581 | 0.73331  | 0.083181 | 0.07252 | -0.22226 | 1.23E-06 |
| 0.3393   | 0.09768  | 0.03483  | 0.036054 | 0.43699  | -0.00524 | 0.91011 | -0.19185 | 3.00E-05 |

|          |          |          |          |          |          |         |          |          |
|----------|----------|----------|----------|----------|----------|---------|----------|----------|
| 0.00017  | 0.107994 | 0.01958  | 0.06664  | 0.15048  | -0.09137 | 0.04846 | 0.073305 | 0.11365  |
| 0.19562  | 0.012571 | 0.78643  | 0.020075 | 0.66523  | -0.01121 | 0.80913 | -0.156   | 0.00072  |
| 0.00193  | 0.230625 | 4.69E-07 | 0.262326 | 8.67E-09 | 0.106218 | 0.02169 | -0.12196 | 0.00833  |
| 0.00543  | 0.050357 | 0.27748  | -0.13813 | 0.00278  | -0.07903 | 0.08802 | -0.16735 | 0.00028  |
| 0.60861  | 0.077145 | 0.09589  | 0.003562 | 0.93881  | 0.095504 | 0.03911 | -0.10398 | 0.02464  |
| 0.00059  | 0.204943 | 8.03E-06 | 0.029576 | 0.52375  | 0.088986 | 0.05465 | -0.07771 | 0.09348  |
| 0.48404  | 0.194882 | 2.23E-05 | 0.010756 | 0.81668  | 0.006461 | 0.88925 | 0.017624 | 0.70404  |
| 0.18628  | 0.09304  | 0.04448  | 0.072775 | 0.11629  | 0.062913 | 0.1747  | -0.06312 | 0.1733   |
| 0.36917  | -0.10767 | 0.01995  | 0.040119 | 0.38704  | -0.03192 | 0.49142 | 0.073585 | 0.11227  |
| 0.41628  | 0.035815 | 0.44003  | -0.00946 | 0.83838  | -0.01988 | 0.66832 | -0.06956 | 0.13335  |
| 0.94462  | -0.07308 | 0.11477  | 0.017703 | 0.70278  | 0.001756 | 0.96981 | -0.12799 | 0.00561  |
| 0.95243  | 0.018247 | 0.6941   | -0.08241 | 0.07522  | -0.03128 | 0.50006 | -0.13975 | 0.00247  |
| 0.83133  | 0.058726 | 0.20523  | -0.18629 | 5.11E-05 | -0.02845 | 0.53969 | 0.15196  | 0.00099  |
| 0.00052  | 0.235487 | 2.63E-07 | 0.060796 | 0.18968  | 0.148065 | 0.00133 | -0.09534 | 0.03945  |
| 0.59635  | -0.13862 | 0.00268  | -0.04857 | 0.29491  | -0.11235 | 0.01514 | -0.02313 | 0.61811  |
| 0.0013   | -0.08453 | 0.068    | 0.057347 | 0.21609  | -0.00327 | 0.94385 | -0.19587 | 2.02E-05 |
| 0.16433  | 0.089117 | 0.05429  | -0.02597 | 0.57567  | 0.061242 | 0.18645 | -0.08764 | 0.05841  |
| 0.04522  | 0.091631 | 0.04781  | -0.00174 | 0.97015  | 0.027001 | 0.56055 | -0.15123 | 0.00105  |
| 0.10418  | 0.177168 | 0.00012  | 0.01307  | 0.77818  | 0.050127 | 0.27969 | -0.03849 | 0.40665  |
| 0.13886  | 0.17187  | 0.00019  | 0.02318  | 0.61733  | 0.06288  | 0.17493 | 0.044934 | 0.33258  |
| 0.01662  | 0.268044 | 3.98E-09 | 0.050456 | 0.27654  | 0.120612 | 0.00908 | 0.029853 | 0.51987  |
| 0.14317  | 0.168448 | 0.00026  | 0.059346 | 0.20049  | 0.04156  | 0.3702  | -0.01577 | 0.73397  |
| 0.8413   | 0.106513 | 0.02133  | 0.058914 | 0.20378  | 0.06265  | 0.17651 | -0.14219 | 0.00207  |
| 0.34104  | 0.17552  | 0.00014  | 0.037412 | 0.4199   | 0.052166 | 0.26056 | -0.14871 | 0.00127  |
| 0.612    | 0.100322 | 0.03019  | 0.010594 | 0.81939  | 0.010786 | 0.81617 | -0.06123 | 0.18656  |
| 0.91777  | 0.058912 | 0.2038   | 0.003632 | 0.9376   | 0.008664 | 0.85188 | -0.07804 | 0.09208  |
| 0.07796  | 0.054786 | 0.23734  | 0.030494 | 0.51095  | 0.107518 | 0.02013 | 0.012649 | 0.78514  |
| 0.91745  | 0.069817 | 0.13192  | 0.033546 | 0.46956  | 0.039571 | 0.39356 | -0.06368 | 0.16948  |
| 0.36737  | 0.137893 | 0.00282  | 0.067464 | 0.14549  | 0.14953  | 0.00119 | -0.13704 | 0.003    |
| 0.50007  | 0.128599 | 0.00538  | 0.042044 | 0.36465  | 0.107081 | 0.02064 | -0.08415 | 0.06924  |
| 0.66082  | 0.147695 | 0.00137  | 0.078361 | 0.09075  | 0.08964  | 0.05289 | 0.02068  | 0.65578  |
| 0.10037  | 0.174625 | 0.00015  | 0.095847 | 0.03841  | 0.08462  | 0.0677  | 0.081531 | 0.07839  |
| 0.09754  | 0.161176 | 0.00047  | 0.117043 | 0.01137  | 0.056415 | 0.22366 | 0.109833 | 0.01758  |
| 0.00195  | 0.137954 | 0.00281  | -0.0036  | 0.93813  | -0.03767 | 0.41665 | -0.00621 | 0.89352  |
| 0.77975  | 0.1293   | 0.00513  | 0.088151 | 0.05697  | 0.014994 | 0.74657 | -0.05468 | 0.23826  |
| 0.49049  | 0.06625  | 0.15289  | -0.0221  | 0.63378  | 0.1375   | 0.00291 | -0.09465 | 0.0409   |
| 0.63864  | 0.047325 | 0.30747  | 0.056709 | 0.22126  | -0.02162 | 0.64128 | 0.136461 | 0.00313  |
| 3.96E-05 | 0.174083 | 0.00016  | 0.066984 | 0.14838  | 0.169114 | 0.00024 | 0.135129 | 0.00344  |
| 0.41079  | 0.092963 | 0.04465  | 0.031527 | 0.49672  | 0.088851 | 0.05502 | -0.12264 | 0.00797  |
| 0.2164   | 0.007968 | 0.86365  | 0.067446 | 0.14559  | 0.034472 | 0.45738 | -0.16022 | 0.00051  |
| 0.8411   | 0.031008 | 0.50384  | 0.297046 | 5.74E-11 | 0.040495 | 0.3826  | -0.18169 | 7.86E-05 |
| 0.02531  | -0.09131 | 0.04861  | 0.072919 | 0.11556  | -0.01805 | 0.69716 | -0.29456 | 8.41E-11 |
| 0.00076  | 0.186189 | 5.16E-05 | 0.061739 | 0.1829   | 0.035215 | 0.44773 | -0.01001 | 0.82919  |
| 0.01155  | 0.192829 | 2.72E-05 | 0.017366 | 0.70818  | 0.167704 | 0.00027 | -0.08973 | 0.05265  |
| 0.43501  | 0.067062 | 0.14791  | 0.025562 | 0.58163  | -0.00413 | 0.92907 | -0.21468 | 2.85E-06 |

|          |          |          |          |          |          |          |          |          |
|----------|----------|----------|----------|----------|----------|----------|----------|----------|
| 0.00569  | 0.175987 | 0.00013  | -0.02867 | 0.53653  | 0.059946 | 0.19597  | -0.06556 | 0.1572   |
| 0.19264  | 0.037415 | 0.41987  | -0.02868 | 0.53636  | 0.043316 | 0.35031  | -0.13739 | 0.00293  |
| 0.08469  | 0.1567   | 0.00068  | -0.0164  | 0.7238   | -0.03374 | 0.46702  | -0.16333 | 0.00039  |
| 4.35E-05 | 0.141443 | 0.00219  | -0.09243 | 0.04589  | -0.05559 | 0.23052  | 0.040821 | 0.37878  |
| 0.00017  | 0.201171 | 1.18E-05 | 0.104642 | 0.02373  | -0.00613 | 0.89484  | -0.05572 | 0.22942  |
| 0.00025  | -0.24715 | 6.27E-08 | -0.06605 | 0.15411  | 0.087647 | 0.05841  | -0.1967  | 1.86E-05 |
| 0.31382  | -0.01607 | 0.72904  | 0.040988 | 0.37683  | 0.00017  | 0.99707  | -0.24681 | 6.55E-08 |
| 7.76E-08 | -0.13943 | 0.00253  | -0.02618 | 0.57256  | 0.027398 | 0.5548   | -0.2878  | 2.34E-10 |
| 0.07424  | 0.17974  | 9.40E-05 | -0.03427 | 0.46     | 0.175546 | 0.00014  | -0.09957 | 0.03145  |
| 0.00983  | -0.0518  | 0.26391  | 0.124033 | 0.00728  | 0.082282 | 0.07567  | -0.20537 | 7.68E-06 |
| 0.93706  | -0.02004 | 0.66575  | -0.00149 | 0.97442  | -0.06317 | 0.17294  | -0.26672 | 4.78E-09 |
| 0.30407  | 0.006135 | 0.8948   | 0.049906 | 0.28181  | 0.073671 | 0.11185  | -0.22999 | 5.05E-07 |
| 0.01474  | -0.09581 | 0.03848  | 0.08105  | 0.08017  | -0.02228 | 0.63111  | -0.22979 | 5.17E-07 |
| 1.64E-06 | 0.351186 | 5.31E-15 | -0.00677 | 0.88404  | 0.068833 | 0.13747  | 0.025407 | 0.58392  |
| 0.42036  | 0.074778 | 0.10655  | 0.046152 | 0.31964  | -0.0205  | 0.65859  | -0.1684  | 0.00026  |
| 0.05271  | -0.09749 | 0.03519  | -0.02049 | 0.6588   | -0.01051 | 0.82072  | -0.2541  | 2.57E-08 |
| 0.22702  | 0.073044 | 0.11494  | 0.02532  | 0.58521  | 0.015699 | 0.73509  | -0.09898 | 0.03247  |
| 0.3895   | 0.003693 | 0.93656  | 0.102631 | 0.02657  | 0.047027 | 0.31053  | -0.17429 | 0.00015  |
| 0.01277  | 0.259811 | 1.21E-08 | 0.165943 | 0.00032  | 0.012435 | 0.7887   | -0.09422 | 0.04183  |
| 0.00067  | 0.119141 | 0.00997  | -0.07766 | 0.09368  | 0.146559 | 0.00149  | 0.139101 | 0.00259  |
| 0.04679  | -0.12062 | 0.00908  | -0.05225 | 0.25976  | -0.03479 | 0.45322  | -0.06271 | 0.17606  |
| 0.21038  | 0.024056 | 0.60408  | -0.05409 | 0.24333  | -0.06428 | 0.16552  | 0.072494 | 0.11771  |
| 0.27068  | -0.00627 | 0.89254  | -0.01701 | 0.71389  | 0.032583 | 0.48241  | -0.26196 | 9.11E-09 |
| 0.61097  | 0.047594 | 0.30473  | -0.01098 | 0.81289  | 0.00558  | 0.90428  | -0.28175 | 5.70E-10 |
| 0.00338  | -0.04997 | 0.2812   | 0.049753 | 0.28329  | 0.129869 | 0.00494  | -0.06698 | 0.14842  |
| 0.05545  | -0.18761 | 4.51E-05 | -0.02535 | 0.5848   | -0.16251 | 0.00042  | 0.030327 | 0.51326  |
| 0.01167  | 0.165107 | 0.00034  | 0.015884 | 0.73208  | -0.00701 | 0.87997  | -0.04205 | 0.36459  |
| 5.35E-06 | -0.16823 | 0.00026  | 0.0235   | 0.61247  | 0.00738  | 0.87363  | -0.27678 | 1.17E-09 |
| 0.00033  | 0.203806 | 9.03E-06 | 0.040263 | 0.38534  | 0.300865 | 3.16E-11 | -0.04228 | 0.362    |
| 0.23848  | -0.0368  | 0.42754  | 0.039779 | 0.39107  | 0.025677 | 0.57992  | -0.21176 | 3.91E-06 |
| 0.03292  | -0.02696 | 0.56112  | 0.034848 | 0.45248  | 0.134118 | 0.00369  | -0.20077 | 1.23E-05 |
| 0.7023   | 0.046333 | 0.31774  | 0.023244 | 0.61635  | 0.03922  | 0.39778  | -0.26988 | 3.09E-09 |
| 0.12346  | 0.146848 | 0.00146  | 0.124606 | 0.00702  | 0.028    | 0.54612  | 0.06145  | 0.18496  |
| 0.42194  | 0.048562 | 0.29499  | -0.10056 | 0.02979  | -0.17399 | 0.00016  | -0.20792 | 5.88E-06 |
| 0.00014  | -0.09322 | 0.04407  | 0.06391  | 0.16795  | 0.031827 | 0.49264  | -0.0929  | 0.04479  |
| 0.39482  | -0.08842 | 0.05621  | -0.02437 | 0.59931  | -0.01379 | 0.76628  | 0.082833 | 0.07372  |
| 0.75707  | -0.00262 | 0.95499  | 0.120712 | 0.00902  | 0.132001 | 0.00427  | -0.03093 | 0.5049   |
| 3.35E-07 | 0.263269 | 7.64E-09 | 0.019581 | 0.67298  | 0.044497 | 0.33731  | -0.15331 | 0.00089  |
| 3.58E-09 | -0.17412 | 0.00016  | 0.029253 | 0.5283   | 0.072716 | 0.11658  | -0.18732 | 4.64E-05 |
| 5.48E-09 | 0.310005 | 7.34E-12 | -0.01264 | 0.7853   | 0.051258 | 0.26896  | -0.09197 | 0.047    |
| 0.00865  | -0.15097 | 0.00107  | -0.01878 | 0.68561  | -0.0765  | 0.09871  | -0.20343 | 9.39E-06 |
| 0.00897  | -0.10056 | 0.0298   | -0.1077  | 0.01991  | -0.02139 | 0.64483  | 0.030969 | 0.50438  |
| 0.66813  | 0.081011 | 0.08032  | 0.291511 | 1.34E-10 | 0.108177 | 0.01937  | -0.17545 | 0.00014  |
| 0.03716  | 0.092569 | 0.04557  | 0.007352 | 0.8741   | 0.00559  | 0.90411  | 0.005468 | 0.90618  |
| 0.00077  | -0.10382 | 0.02486  | 0.069981 | 0.13102  | -0.02037 | 0.66059  | -0.15159 | 0.00102  |

|          |          |          |          |          |           |         |          |          |
|----------|----------|----------|----------|----------|-----------|---------|----------|----------|
| 0.0145   | -0.04713 | 0.30949  | -0.01937 | 0.67624  | -0.06626  | 0.1528  | -0.21776 | 2.03E-06 |
| 0.19516  | 0.125437 | 0.00664  | 0.159384 | 0.00055  | 0.128935  | 0.00526 | -0.17175 | 0.00019  |
| 0.00071  | 0.217987 | 1.98E-06 | 0.160406 | 0.0005   | -0.08199  | 0.07671 | 0.133962 | 0.00373  |
| 0.00154  | 0.232659 | 3.69E-07 | 0.019203 | 0.67894  | 0.045024  | 0.33162 | -0.07294 | 0.11546  |
| 0.01764  | -0.10447 | 0.02396  | 0.011278 | 0.80795  | -0.01599  | 0.73031 | -0.17878 | 0.0001   |
| 0.0043   | -0.1458  | 0.00158  | 0.038456 | 0.40704  | -8.78E-05 | 0.99849 | -0.1803  | 8.93E-05 |
| 0.90831  | 0.00859  | 0.85313  | 0.0313   | 0.49983  | 0.013946  | 0.76373 | -0.20401 | 8.84E-06 |
| 0.15348  | -0.14963 | 0.00118  | -0.16041 | 0.0005   | -0.01371  | 0.76755 | -0.06475 | 0.1624   |
| 0.99907  | 0.048463 | 0.29598  | 0.033297 | 0.47287  | 0.116143  | 0.01202 | -0.15452 | 0.00081  |
| 0.01135  | 0.219417 | 1.69E-06 | 0.107945 | 0.01963  | 0.053781  | 0.24608 | -0.18491 | 5.82E-05 |
| 0.00954  | -0.08654 | 0.06168  | 0.051302 | 0.26855  | 0.028004  | 0.54607 | -0.148   | 0.00134  |
| 0.03545  | 0.202959 | 9.86E-06 | 0.006312 | 0.8918   | 0.129034  | 0.00523 | 0.064386 | 0.1648   |
| 0.15894  | -0.06045 | 0.19219  | 0.033346 | 0.47222  | 0.102169  | 0.02726 | -0.25118 | 3.76E-08 |
| 0.00017  | -0.13249 | 0.00413  | -0.05878 | 0.20484  | -0.08586  | 0.06374 | 0.064236 | 0.16579  |
| 0.05823  | 0.081823 | 0.07732  | 0.0645   | 0.16406  | 0.159877  | 0.00052 | -0.18028 | 8.95E-05 |
| 0.00509  | -0.05907 | 0.20258  | 0.000445 | 0.99235  | -0.02436  | 0.59958 | -0.2933  | 1.02E-10 |
| 0.32088  | 0.049679 | 0.28401  | 0.008588 | 0.85316  | -0.00262  | 0.95494 | -0.00934 | 0.84039  |
| 0.46999  | 0.009987 | 0.82957  | -0.139   | 0.00261  | -0.0044   | 0.92449 | -0.02886 | 0.53382  |
| 0.95626  | 0.058121 | 0.20995  | 0.053634 | 0.24737  | 0.08246   | 0.07504 | -0.21471 | 2.84E-06 |
| 0.04662  | -0.0696  | 0.13312  | 0.053261 | 0.25068  | 0.015744  | 0.73436 | -0.17675 | 0.00012  |
| 2.12E-06 | -0.21019 | 4.62E-06 | -0.04738 | 0.30695  | -0.11215  | 0.01532 | -0.01716 | 0.71152  |
| 2.61E-06 | 0.215521 | 2.60E-06 | 0.092789 | 0.04506  | 0.024423  | 0.59857 | -0.0744  | 0.10835  |
| 0.23616  | 0.007488 | 0.87179  | 0.107588 | 0.02004  | -0.00067  | 0.98849 | -0.24228 | 1.15E-07 |
| 0.00144  | -0.07312 | 0.11455  | 0.043909 | 0.34375  | 0.093475  | 0.04349 | -0.19417 | 2.39E-05 |
| 0.01881  | 0.16069  | 0.00049  | 0.016811 | 0.7171   | 0.09009   | 0.0517  | 0.105548 | 0.02254  |
| 0.03127  | -0.02815 | 0.54398  | 0.048026 | 0.30036  | 0.007485  | 0.87185 | -0.20429 | 8.59E-06 |
| 0.01106  | 0.13007  | 0.00487  | 0.053801 | 0.24589  | 0.071898  | 0.12077 | -0.10417 | 0.02438  |
| 0.27455  | 0.059157 | 0.20193  | 0.037864 | 0.4143   | 0.014595  | 0.75309 | -0.18263 | 7.20E-05 |
| 0.52855  | -0.02267 | 0.6251   | -0.00756 | 0.87059  | -0.00487  | 0.9164  | -0.20357 | 9.25E-06 |
| 0.00014  | -0.18568 | 5.41E-05 | 0.011906 | 0.79748  | -0.01699  | 0.71425 | -0.12172 | 0.00846  |
| 0.80365  | 0.068244 | 0.14088  | 0.085309 | 0.06548  | 0.037086  | 0.42397 | -0.17729 | 0.00012  |
| 0.32409  | 0.124359 | 0.00713  | 0.047779 | 0.30285  | 0.06282   | 0.17534 | -0.17747 | 0.00012  |
| 0.06873  | 0.08749  | 0.05886  | -0.03672 | 0.42849  | 0.024612  | 0.59575 | 0.155251 | 0.00076  |
| 0.00725  | 0.364071 | 4.40E-16 | 0.086305 | 0.06239  | 0.152807  | 0.00092 | -0.05059 | 0.27525  |
| 0.00099  | 0.297585 | 5.28E-11 | 0.030631 | 0.50905  | 0.109805  | 0.01761 | -0.07289 | 0.11571  |
| 0.2663   | -0.04119 | 0.37444  | 0.011587 | 0.8028   | 0.011543  | 0.80352 | -0.2382  | 1.90E-07 |
| 0.00107  | -0.10323 | 0.0257   | 0.016062 | 0.72919  | 0.033897  | 0.46492 | -0.26478 | 6.22E-09 |
| 0.05884  | 0.201104 | 1.19E-05 | -0.01925 | 0.67816  | 0.168432  | 0.00026 | -0.11448 | 0.0133   |
| 0.09624  | 0.092906 | 0.04478  | -0.02096 | 0.6515   | 0.020389  | 0.66032 | -0.1143  | 0.01345  |
| 0.00356  | 0.256815 | 1.81E-08 | 0.029065 | 0.53096  | 0.10102   | 0.02905 | -0.13431 | 0.00364  |
| 1.91E-07 | 0.324145 | 6.93E-13 | 0.181552 | 7.96E-05 | 0.084658  | 0.06757 | -0.07863 | 0.08966  |
| 0.79424  | 0.077468 | 0.0945   | 0.018323 | 0.69289  | -0.0392   | 0.39796 | -0.12655 | 0.00617  |
| 0.88852  | -0.02887 | 0.53377  | -0.0617  | 0.18319  | -0.04625  | 0.31858 | 0.064257 | 0.16565  |
| 1.61E-09 | -0.2167  | 2.28E-06 | -0.03285 | 0.47881  | -0.01221  | 0.79235 | -0.23648 | 2.34E-07 |
| 0.0168   | 0.044899 | 0.33296  | -0.00711 | 0.87821  | -0.03278  | 0.47971 | 0.113037 | 0.01452  |



|          |          |          |          |          |          |          |          |          |
|----------|----------|----------|----------|----------|----------|----------|----------|----------|
| 6.04E-06 | 0.301289 | 2.96E-11 | 0.049944 | 0.28144  | 0.117284 | 0.0112   | -0.0901  | 0.05167  |
| 0.18258  | 0.082393 | 0.07527  | 0.041143 | 0.37502  | 0.057886 | 0.21181  | -0.18674 | 4.90E-05 |
| 0.03074  | -0.09305 | 0.04444  | -0.00213 | 0.96337  | -0.0173  | 0.70928  | -0.20461 | 8.31E-06 |
| 8.75E-05 | 0.103275 | 0.02563  | -0.02205 | 0.63462  | 0.038747 | 0.40349  | 0.082707 | 0.07417  |
| 0.88386  | 0.035018 | 0.45028  | 0.051921 | 0.26281  | 0.152641 | 0.00094  | -0.13568 | 0.0033   |
| 1.40E-08 | 0.328153 | 3.47E-13 | 0.040878 | 0.37811  | 0.096829 | 0.03646  | -0.16307 | 0.0004   |
| 0.02009  | 0.022267 | 0.63125  | 0.003312 | 0.94309  | 0.089677 | 0.05279  | -0.08543 | 0.0651   |
| 0.01063  | -0.078   | 0.09226  | 0.040068 | 0.38764  | 0.02647  | 0.56828  | -0.23978 | 1.57E-07 |
| 0.00066  | 0.256645 | 1.85E-08 | 0.037302 | 0.42127  | 0.02435  | 0.59967  | -0.12283 | 0.00788  |
| 0.16201  | -0.05894 | 0.20361  | -0.16192 | 0.00044  | -0.09819 | 0.03389  | 0.112248 | 0.01523  |
| 0.72146  | 0.118733 | 0.01023  | 0.088822 | 0.0551   | 0.120282 | 0.00927  | 0.000741 | 0.98726  |
| 0.38857  | -0.01617 | 0.72749  | -0.03093 | 0.50486  | 0.02119  | 0.64785  | -0.0764  | 0.09913  |
| 0.06945  | -0.17135 | 0.0002   | -0.10089 | 0.02927  | -0.08613 | 0.06292  | 0.000265 | 0.99544  |
| 5.71E-05 | -0.23107 | 4.45E-07 | 0.002424 | 0.95834  | -0.00681 | 0.8834   | -0.01146 | 0.80483  |
| 0.15367  | 0.244894 | 8.33E-08 | 0.082369 | 0.07536  | 0.11047  | 0.01693  | -0.08635 | 0.06226  |
| 0.00659  | -0.06617 | 0.15341  | -0.02166 | 0.64062  | 0.024738 | 0.59386  | -0.20332 | 9.50E-06 |
| 0.70469  | 0.001728 | 0.9703   | 0.043078 | 0.35296  | 0.137743 | 0.00286  | -0.09926 | 0.03198  |
| 0.03907  | 0.034589 | 0.45586  | -0.0349  | 0.45179  | 0.019096 | 0.68063  | -0.18033 | 8.90E-05 |
| 0.10835  | 0.117685 | 0.01092  | -0.04366 | 0.34653  | 0.078349 | 0.0908   | -0.16908 | 0.00024  |
| 0.06778  | 0.173683 | 0.00016  | 0.054252 | 0.24196  | 0.056603 | 0.22212  | -0.09323 | 0.04404  |
| 0.33511  | 0.131343 | 0.00447  | 0.030888 | 0.5055   | -0.00374 | 0.93569  | -0.09468 | 0.04083  |
| 0.57442  | 0.072394 | 0.11821  | 0.049036 | 0.2903   | 0.169259 | 0.00024  | -0.24611 | 7.15E-08 |
| 0.00105  | -0.07412 | 0.10969  | 0.004954 | 0.91497  | 0.087508 | 0.05881  | -0.25714 | 1.73E-08 |
| 0.36087  | -0.03214 | 0.48843  | -0.00859 | 0.85315  | -0.02969 | 0.52219  | -0.09083 | 0.04979  |
| 1.36E-07 | -0.18503 | 5.75E-05 | -0.01991 | 0.66778  | -0.0368  | 0.42751  | -0.13585 | 0.00327  |
| 0.58123  | 0.089663 | 0.05283  | 0.05035  | 0.27755  | 0.008718 | 0.85096  | -0.1152  | 0.01273  |
| 0.68787  | -0.00149 | 0.97444  | 0.06455  | 0.16372  | 0.006938 | 0.88113  | -0.01379 | 0.76626  |
| 0.00504  | -0.06953 | 0.13354  | 0.10819  | 0.01936  | 0.027866 | 0.54805  | -0.10052 | 0.02985  |
| 3.45E-07 | -0.25933 | 1.29E-08 | -0.07745 | 0.09457  | -0.0201  | 0.6649   | -0.0906  | 0.05039  |
| 0.19424  | -0.07356 | 0.1124   | -0.04192 | 0.3661   | -0.08539 | 0.06523  | -0.04716 | 0.30922  |
| 0.79377  | 0.020087 | 0.66505  | 0.131004 | 0.00457  | -0.00398 | 0.93159  | -0.23203 | 3.97E-07 |
| 0.58914  | 0.080958 | 0.08052  | 0.269733 | 3.15E-09 | 0.183731 | 6.50E-05 | -0.08417 | 0.06916  |
| 0.89625  | 0.005351 | 0.90819  | 0.010969 | 0.81312  | -0.00469 | 0.91957  | -0.2655  | 5.64E-09 |
| 0.17882  | 0.014769 | 0.75024  | 0.024073 | 0.60382  | 0.059873 | 0.19651  | -0.27366 | 1.82E-09 |
| 6.90E-06 | -0.19215 | 2.91E-05 | 0.004117 | 0.92929  | 0.021242 | 0.64705  | -0.06342 | 0.17126  |
| 0.0494   | 0.066809 | 0.14945  | 0.035069 | 0.44962  | 0.048689 | 0.29372  | -0.14328 | 0.00191  |
| 7.00E-07 | 0.30409  | 1.90E-11 | -0.04643 | 0.31674  | 0.030879 | 0.50563  | -0.06658 | 0.15086  |
| 7.43E-11 | -0.31869 | 1.75E-12 | 0.111988 | 0.01547  | -0.1836  | 6.58E-05 | 0.041113 | 0.37537  |
| 0.00175  | 0.192955 | 2.69E-05 | 0.02856  | 0.53812  | 0.116856 | 0.0115   | -0.01337 | 0.77321  |
| 0.05692  | -0.07666 | 0.09799  | 0.197252 | 1.76E-05 | -0.02646 | 0.56845  | -0.26871 | 3.63E-09 |
| 0.56179  | 0.175691 | 0.00014  | 0.054215 | 0.24228  | 0.041997 | 0.36518  | -0.03851 | 0.40632  |
| 0.49225  | -0.01707 | 0.71296  | -0.02102 | 0.65045  | -0.00296 | 0.94918  | -0.09258 | 0.04554  |
| 0.00017  | -0.12507 | 0.00681  | -0.03985 | 0.39028  | 0.081532 | 0.07838  | -0.29912 | 4.16E-11 |
| 0.22806  | 0.202106 | 1.08E-05 | 0.071446 | 0.12312  | 0.278494 | 9.14E-10 | -0.07997 | 0.08429  |
| 0.1884   | -0.05401 | 0.24403  | -0.04313 | 0.35234  | 0.001487 | 0.97443  | -0.00917 | 0.84335  |

|          |          |          |          |          |          |          |          |          |
|----------|----------|----------|----------|----------|----------|----------|----------|----------|
| 0.55779  | 0.029707 | 0.52192  | 0.039461 | 0.39487  | -0.00179 | 0.9692   | -0.15928 | 0.00055  |
| 0.00075  | 0.284861 | 3.62E-10 | -0.05971 | 0.1977   | 0.120344 | 0.00924  | 0.208711 | 5.41E-06 |
| 0.05345  | 0.159567 | 0.00054  | 0.016577 | 0.72086  | -0.00125 | 0.97846  | -0.18949 | 3.77E-05 |
| 0.00058  | -0.23715 | 2.16E-07 | -0.0277  | 0.55038  | -0.14613 | 0.00154  | 0.062372 | 0.17844  |
| 0.00228  | -0.20993 | 4.75E-06 | -0.13746 | 0.00291  | -0.14933 | 0.00121  | 0.051085 | 0.27059  |
| 2.77E-17 | 0.437722 | 2.79E-23 | 0.029976 | 0.51815  | 0.05233  | 0.25906  | -0.09048 | 0.05069  |
| 0.00753  | 0.195027 | 2.19E-05 | 0.06505  | 0.16048  | -0.06003 | 0.19533  | -0.05943 | 0.19982  |
| 0.78487  | 0.017226 | 0.71042  | 0.043314 | 0.35033  | 0.093533 | 0.04336  | -0.05941 | 0.19999  |
| 2.82E-06 | -0.15097 | 0.00107  | -0.03002 | 0.51747  | -0.04991 | 0.28178  | -0.25345 | 2.80E-08 |
| 1.03E-06 | 0.260286 | 1.14E-08 | 0.160431 | 0.0005   | 0.167884 | 0.00027  | 0.061808 | 0.18241  |
| 0.13257  | 0.105435 | 0.02268  | 0.0562   | 0.22544  | 0.0006   | 0.98969  | -0.02816 | 0.54377  |
| 3.99E-06 | 0.319494 | 1.53E-12 | 0.098435 | 0.03345  | 0.083022 | 0.07307  | -0.11347 | 0.01415  |
| 0.542    | 0.068241 | 0.14089  | 0.224996 | 9.00E-07 | -0.0135  | 0.77112  | -0.23998 | 1.53E-07 |
| 2.67E-12 | -0.32205 | 9.91E-13 | -0.10142 | 0.02842  | -0.06688 | 0.14903  | -0.2892  | 1.90E-10 |
| 0.00034  | 0.202241 | 1.06E-05 | 0.065598 | 0.15698  | 0.03215  | 0.48826  | -0.10521 | 0.02297  |
| 6.09E-10 | -0.23955 | 1.61E-07 | -0.08985 | 0.05233  | -0.11559 | 0.01243  | -0.23867 | 1.79E-07 |
| 0.7782   | 0.024664 | 0.59497  | 0.011846 | 0.79848  | -0.02161 | 0.6413   | -0.11491 | 0.01296  |
| 0.41694  | 0.112207 | 0.01527  | 0.145613 | 0.0016   | 0.086112 | 0.06298  | -0.12365 | 0.00747  |
| 0.90131  | 0.02064  | 0.65641  | 0.09287  | 0.04487  | 0.012509 | 0.78746  | -0.14947 | 0.0012   |
| 1.13E-05 | -0.19266 | 2.77E-05 | 0.151136 | 0.00105  | -0.06112 | 0.18732  | -0.22997 | 5.06E-07 |
| 0.84674  | 0.011309 | 0.80743  | 0.047097 | 0.30981  | 0.065469 | 0.1578   | -0.07066 | 0.12732  |
| 0.00197  | -0.12378 | 0.00741  | 0.011119 | 0.8106   | -0.05818 | 0.2095   | -0.21067 | 4.39E-06 |
| 6.16E-05 | -0.14464 | 0.00173  | -0.01414 | 0.76051  | -0.03162 | 0.4954   | -0.21013 | 4.65E-06 |
| 0.03811  | 0.069978 | 0.13104  | 0.123814 | 0.00739  | -0.03508 | 0.44951  | -0.05291 | 0.25384  |
| 3.28E-07 | 0.351042 | 5.46E-15 | 0.042493 | 0.35955  | 0.093746 | 0.04288  | -0.06763 | 0.14449  |
| 3.09E-06 | 0.34516  | 1.64E-14 | 0.023587 | 0.61116  | 0.087421 | 0.05906  | -0.11641 | 0.01182  |
| 0.3736   | 0.049816 | 0.28268  | 0.050668 | 0.27452  | -0.02098 | 0.65104  | -0.18036 | 8.88E-05 |
| 0.74276  | 0.003326 | 0.94286  | 0.112319 | 0.01516  | 0.001826 | 0.96861  | -0.06504 | 0.16052  |
| 0.77131  | -0.01767 | 0.70325  | -0.01108 | 0.81123  | -0.03767 | 0.41667  | -0.08458 | 0.06781  |
| 0.03573  | 0.002782 | 0.95219  | -0.02115 | 0.6484   | -0.1231  | 0.00774  | 0.263157 | 7.75E-09 |
| 0.00229  | 0.212784 | 3.50E-06 | 0.042323 | 0.36147  | 0.214857 | 2.79E-06 | -0.00064 | 0.98897  |
| 0.15146  | 0.015712 | 0.73488  | 0.122056 | 0.00828  | -0.0135  | 0.77107  | -0.11656 | 0.01171  |
| 0.88585  | -0.02751 | 0.55311  | -0.10859 | 0.01891  | -0.01447 | 0.75506  | -0.15123 | 0.00104  |
| 0.12392  | 0.158611 | 0.00058  | 0.257001 | 1.76E-08 | 0.032172 | 0.48796  | -0.14726 | 0.00142  |
| 0.00206  | 0.322396 | 9.34E-13 | 0.024423 | 0.59857  | 0.089642 | 0.05288  | -0.09491 | 0.04035  |
| 0.00159  | 0.243548 | 9.85E-08 | 0.108211 | 0.01933  | 0.242644 | 1.10E-07 | -0.20499 | 7.99E-06 |
| 0.21625  | 0.074412 | 0.10828  | 0.107055 | 0.02067  | -0.02524 | 0.58644  | -0.20081 | 1.23E-05 |
| 7.84E-06 | -0.13479 | 0.00352  | 0.033037 | 0.47633  | 0.00458  | 0.92136  | -0.2312  | 4.39E-07 |
| 0.84069  | -0.03209 | 0.48901  | 0.047669 | 0.30397  | -0.08989 | 0.05224  | 0.087081 | 0.06006  |
| 0.76152  | 0.09512  | 0.03991  | 0.048096 | 0.29965  | 0.027862 | 0.5481   | -0.20001 | 1.33E-05 |
| 0.65105  | -0.0096  | 0.8361   | 0.014938 | 0.74747  | -0.00173 | 0.97026  | -0.25316 | 2.91E-08 |
| 0.01099  | 0.153582 | 0.00087  | 0.137398 | 0.00293  | 0.06306  | 0.17369  | -0.03522 | 0.44767  |
| 0.09206  | 0.232009 | 3.99E-07 | 0.065047 | 0.1605   | 0.096378 | 0.03734  | -0.14782 | 0.00136  |
| 0.10454  | 0.040573 | 0.38168  | 0.129542 | 0.00505  | -0.04995 | 0.28135  | -0.12721 | 0.00591  |
| 0.48741  | 0.060252 | 0.19369  | -0.00928 | 0.84149  | 0.059592 | 0.19862  | -0.1889  | 3.99E-05 |

|          |          |          |          |          |          |         |          |          |
|----------|----------|----------|----------|----------|----------|---------|----------|----------|
| 2.86E-05 | 0.273429 | 1.88E-09 | 0.111207 | 0.01621  | 0.09099  | 0.0494  | 0.040298 | 0.38492  |
| 0.92559  | -0.00247 | 0.95748  | 0.132617 | 0.00409  | 0.033405 | 0.47143 | -0.14209 | 0.00208  |
| 0.0002   | 0.252842 | 3.03E-08 | 0.183324 | 6.75E-05 | 0.046508 | 0.31591 | 0.026452 | 0.56854  |
| 0.91058  | 0.128833 | 0.0053   | 0.152867 | 0.00092  | 0.068537 | 0.13918 | -0.07331 | 0.11362  |
| 0.10261  | -0.10591 | 0.02208  | -0.06888 | 0.13722  | -0.04715 | 0.30925 | -0.12718 | 0.00592  |
| 0.73506  | 0.005092 | 0.91262  | -0.01219 | 0.79282  | 0.057118 | 0.21794 | -0.26237 | 8.63E-09 |
| 0.03215  | -0.22257 | 1.19E-06 | -0.04486 | 0.33333  | -0.07921 | 0.08729 | 0.114615 | 0.0132   |
| 2.68E-08 | 0.278442 | 9.21E-10 | -0.07901 | 0.08812  | -0.09209 | 0.04671 | 0.224032 | 1.00E-06 |
| 0.05688  | 0.19828  | 1.59E-05 | 0.167191 | 0.00028  | 0.021056 | 0.64994 | -0.06525 | 0.15921  |
| 0.04141  | -0.00835 | 0.85717  | -0.04133 | 0.37288  | 0.064893 | 0.16149 | -0.27219 | 2.24E-09 |
| 0.03012  | 0.272471 | 2.15E-09 | 0.09759  | 0.035    | 0.122861 | 0.00786 | -0.13224 | 0.0042   |
| 0.58662  | -0.00517 | 0.91127  | 0.018059 | 0.6971   | 0.016047 | 0.72944 | 0.011987 | 0.79614  |
| 0.04812  | -0.21976 | 1.63E-06 | -0.00362 | 0.93775  | -0.07422 | 0.10917 | -0.24639 | 6.91E-08 |
| 0.32948  | 0.14984  | 0.00116  | 0.104081 | 0.02449  | 0.008976 | 0.8466  | -0.06834 | 0.14034  |
| 4.08E-11 | 0.429188 | 2.37E-22 | 0.060355 | 0.19292  | 0.075814 | 0.10177 | -0.11463 | 0.01318  |
| 0.2976   | 0.111898 | 0.01555  | 0.007521 | 0.87123  | -0.03057 | 0.50994 | 0.011164 | 0.80986  |
| 3.23E-05 | 0.215073 | 2.73E-06 | 0.044056 | 0.34213  | 0.070064 | 0.13056 | 0.006692 | 0.88532  |
| 0.06082  | 0.187142 | 4.71E-05 | 0.096149 | 0.0378   | 0.030775 | 0.50705 | -0.08169 | 0.0778   |
| 0.96662  | 0.004258 | 0.92689  | 0.003436 | 0.94096  | -0.02143 | 0.64408 | -0.15585 | 0.00073  |
| 0.00159  | 0.182843 | 7.06E-05 | 0.038175 | 0.41048  | 0.020352 | 0.6609  | 0.038945 | 0.40109  |
| 0.15027  | 0.012033 | 0.79536  | 0.024988 | 0.59015  | -0.05249 | 0.25765 | -0.19071 | 3.35E-05 |
| 0.64909  | 0.047857 | 0.30207  | 0.012938 | 0.78036  | -0.01565 | 0.73589 | -0.19391 | 2.45E-05 |
| 0.46034  | 0.043266 | 0.35086  | -0.05381 | 0.2458   | -0.04229 | 0.3619  | 0.104894 | 0.02339  |
| 0.80122  | 0.026463 | 0.56839  | 0.247873 | 5.73E-08 | -0.01614 | 0.72791 | -0.21043 | 4.50E-06 |
| 0.00781  | -0.25575 | 2.08E-08 | -0.09963 | 0.03134  | -0.10657 | 0.02125 | 0.118485 | 0.01039  |
| 0.63576  | 0.041696 | 0.36863  | -0.0659  | 0.1551   | -0.07389 | 0.11079 | -0.14668 | 0.00148  |
| 0.01208  | 0.294194 | 8.90E-11 | 0.075169 | 0.10473  | 0.140625 | 0.00232 | -0.07106 | 0.12518  |
| 0.00055  | -0.11696 | 0.01143  | 0.018968 | 0.68266  | 0.002318 | 0.96016 | -0.26752 | 4.28E-09 |
| 0.00457  | 0.19967  | 1.38E-05 | 0.014171 | 0.76004  | 0.005408 | 0.90722 | -0.17601 | 0.00013  |
| 0.20229  | -0.01807 | 0.69699  | 0.008943 | 0.84716  | -0.04507 | 0.33112 | 0.100572 | 0.02978  |
| 0.26737  | -0.00435 | 0.9253   | -0.05265 | 0.25613  | 0.019064 | 0.68114 | 0.155655 | 0.00074  |
| 0.00928  | 0.029301 | 0.52763  | -0.00793 | 0.86437  | -0.02599 | 0.57531 | -0.06408 | 0.16679  |
| 0.80368  | 0.022501 | 0.62767  | 0.043687 | 0.3462   | 0.091186 | 0.04891 | -0.12221 | 0.0082   |
| 0.40158  | 0.083018 | 0.07308  | 0.147623 | 0.00138  | 0.137834 | 0.00284 | -0.24817 | 5.51E-08 |
| 0.00537  | 0.183002 | 6.96E-05 | 0.376473 | 3.58E-17 | 0.091619 | 0.04784 | 0.13208  | 0.00425  |
| 0.13246  | 0.098366 | 0.03357  | 0.072593 | 0.1172   | 0.069911 | 0.13141 | -0.12131 | 0.00869  |
| 8.21E-08 | -0.366   | 3.00E-16 | -0.079   | 0.08815  | -0.14671 | 0.00148 | 0.049697 | 0.28384  |
| 0.78743  | 0.0638   | 0.16868  | 0.03394  | 0.46435  | -0.03269 | 0.48094 | -0.14038 | 0.00236  |
| 0.0001   | -0.20033 | 1.29E-05 | -0.00113 | 0.98059  | -0.00948 | 0.83811 | 0.033073 | 0.47584  |
| 0.00044  | 0.25755  | 1.64E-08 | 0.048605 | 0.29456  | 0.031724 | 0.49404 | 0.017275 | 0.70964  |
| 0.00227  | 0.255791 | 2.07E-08 | 0.066889 | 0.14896  | 0.108943 | 0.01852 | 0.080316 | 0.08295  |
| 3.98E-07 | 0.302687 | 2.37E-11 | -0.01869 | 0.68707  | 0.003416 | 0.94131 | -0.21673 | 2.28E-06 |
| 0.94604  | 0.035299 | 0.44664  | 0.040712 | 0.38005  | -0.02484 | 0.59231 | -0.02354 | 0.61181  |
| 0.06937  | 0.138157 | 0.00277  | -0.07274 | 0.11648  | 0.046614 | 0.31481 | 0.068075 | 0.14187  |
| 0.00047  | -0.09547 | 0.03917  | -0.09586 | 0.03838  | -0.03379 | 0.46627 | -0.20974 | 4.85E-06 |

|          |          |          |          |          |          |         |          |          |
|----------|----------|----------|----------|----------|----------|---------|----------|----------|
| 0.30599  | -0.04183 | 0.36707  | 0.026013 | 0.57498  | 0.011948 | 0.79679 | -0.16849 | 0.00025  |
| 0.00053  | -0.03867 | 0.40448  | -0.00822 | 0.8593   | 0.098678 | 0.03301 | -0.21599 | 2.47E-06 |
| 1.76E-06 | -0.15484 | 0.00079  | 0.051843 | 0.26353  | -0.03586 | 0.43946 | -0.12273 | 0.00793  |
| 0.59191  | 0.139402 | 0.00253  | 0.072083 | 0.11981  | 0.124706 | 0.00697 | -0.18137 | 8.09E-05 |
| 0.59936  | 0.111997 | 0.01546  | 0.157516 | 0.00064  | 0.112429 | 0.01506 | -0.11856 | 0.01034  |
| 0.67408  | 0.008247 | 0.85892  | 0.193906 | 2.45E-05 | -0.01094 | 0.81356 | -0.16099 | 0.00048  |
| 0.94673  | 0.016799 | 0.71729  | 0.000277 | 0.99524  | -0.00403 | 0.93071 | -0.20376 | 9.07E-06 |
| 0.0306   | 0.153867 | 0.00085  | 0.13325  | 0.00392  | 0.170046 | 0.00022 | 0.114425 | 0.01335  |
| 0.35177  | -0.10069 | 0.02958  | -0.05189 | 0.26306  | -0.02787 | 0.54795 | 0.079281 | 0.08701  |
| 0.72918  | 0.101721 | 0.02795  | 0.047175 | 0.30901  | 0.046887 | 0.31197 | -0.18448 | 6.06E-05 |
| 0.00668  | -0.16825 | 0.00026  | -0.10766 | 0.01996  | -0.03147 | 0.49745 | 0.074094 | 0.1098   |
| 0.49664  | -0.01788 | 0.70003  | 0.037053 | 0.42438  | 0.026996 | 0.56061 | -0.17686 | 0.00012  |
| 0.20313  | 0.026507 | 0.56773  | 0.034171 | 0.46132  | -0.01678 | 0.71756 | 0.018288 | 0.69345  |
| 1.06E-05 | -0.25892 | 1.37E-08 | 0.036178 | 0.4354   | -0.08956 | 0.0531  | -0.24492 | 8.31E-08 |
| 0.39513  | -0.02361 | 0.61075  | 0.037287 | 0.42146  | -0.09707 | 0.03599 | 0.118072 | 0.01066  |
| 0.05921  | 0.139117 | 0.00259  | 0.002927 | 0.9497   | -0.01477 | 0.75016 | -0.01556 | 0.73728  |
| 0.00098  | 0.051578 | 0.26598  | -0.02573 | 0.57922  | -0.0455  | 0.32654 | 0.175219 | 0.00014  |
| 0.08219  | -0.14126 | 0.00222  | 0.046334 | 0.31773  | 0.070433 | 0.12854 | -0.16716 | 0.00029  |
| 0.23495  | 0.118748 | 0.01022  | 0.000421 | 0.99277  | -0.01669 | 0.71907 | -0.12804 | 0.00559  |
| 0.01025  | -0.14637 | 0.00151  | -0.03133 | 0.49943  | 0.076357 | 0.09934 | -0.20138 | 1.16E-05 |
| 5.53E-05 | -0.05822 | 0.20916  | -0.10503 | 0.02322  | -0.05642 | 0.22365 | -0.20618 | 7.05E-06 |
| 1.01E-05 | 0.092947 | 0.04469  | 0.132447 | 0.00414  | 0.012782 | 0.78293 | -0.07593 | 0.10123  |
| 0.67816  | -0.00427 | 0.92676  | -0.02945 | 0.52548  | -0.05299 | 0.25306 | -0.24836 | 5.39E-08 |
| 0.00038  | 0.269516 | 3.25E-09 | 0.088006 | 0.05738  | 0.153319 | 0.00089 | 0.031604 | 0.49567  |
| 2.47E-05 | 0.15306  | 0.00091  | 0.067586 | 0.14476  | -0.09141 | 0.04836 | -0.0876  | 0.05853  |
| 2.32E-07 | -0.40372 | 9.81E-20 | -0.06445 | 0.16437  | -0.13779 | 0.00285 | 0.07936  | 0.0867   |
| 0.04708  | 0.117125 | 0.01131  | 0.040393 | 0.3838   | 0.069869 | 0.13164 | -0.10022 | 0.03035  |
| 0.00017  | -0.20943 | 5.01E-06 | -0.04114 | 0.375    | -0.08225 | 0.07578 | -0.13924 | 0.00256  |
| 0.00081  | -0.14554 | 0.00161  | 0.004    | 0.93131  | 0.032413 | 0.4847  | -0.25228 | 3.26E-08 |
| 2.19E-06 | 0.361612 | 7.13E-16 | -0.00342 | 0.94118  | 0.024933 | 0.59095 | -0.12485 | 0.0069   |
| 0.00603  | 0.181931 | 7.68E-05 | 0.073641 | 0.112    | 0.031404 | 0.49842 | 0.122257 | 0.00817  |
| 2.99E-10 | 0.254793 | 2.35E-08 | 0.078547 | 0.08998  | 0.02809  | 0.54484 | -0.14415 | 0.00179  |
| 0.00111  | 0.170276 | 0.00022  | 0.039118 | 0.399    | 0.031807 | 0.49291 | -0.19822 | 1.60E-05 |
| 0.03102  | 0.196758 | 1.85E-05 | 0.077405 | 0.09477  | 0.116484 | 0.01177 | -0.11272 | 0.0148   |
| 8.13E-12 | -0.30641 | 1.31E-11 | 0.006657 | 0.88591  | -0.08625 | 0.06257 | -0.24368 | 9.69E-08 |
| 0.34759  | 0.061725 | 0.183    | -0.0474  | 0.30669  | 0.017585 | 0.70468 | -0.1905  | 3.42E-05 |
| 0.03699  | 0.104732 | 0.02361  | -0.00889 | 0.84811  | -0.06252 | 0.17744 | 0.077981 | 0.09233  |
| 0.00012  | -0.10146 | 0.02836  | -0.07935 | 0.08672  | 0.037042 | 0.42452 | -0.15077 | 0.00108  |
| 0.83641  | 0.081359 | 0.07902  | 0.120929 | 0.0089   | 0.112402 | 0.01509 | 0.053005 | 0.25296  |
| 0.09313  | 0.08062  | 0.08179  | 0.065703 | 0.15631  | 0.133609 | 0.00382 | 0.049286 | 0.28784  |
| 0.0055   | -0.08489 | 0.06683  | -0.03062 | 0.50917  | 0.037735 | 0.41589 | -0.16151 | 0.00046  |
| 0.00416  | 0.11341  | 0.0142   | -0.00361 | 0.93791  | -0.02788 | 0.54785 | 0.182352 | 7.39E-05 |
| 0.06705  | 0.167869 | 0.00027  | 0.158091 | 0.00061  | 0.084923 | 0.06671 | -0.28267 | 4.99E-10 |
| 0.07222  | -0.09071 | 0.05012  | -0.12121 | 0.00874  | -0.02495 | 0.5907  | 0.100172 | 0.03044  |
| 0.00331  | 0.17608  | 0.00013  | 0.097139 | 0.03586  | 0.040543 | 0.38204 | -0.00264 | 0.95465  |

|          |          |          |          |          |          |         |          |          |
|----------|----------|----------|----------|----------|----------|---------|----------|----------|
| 0.2611   | 0.010008 | 0.82922  | 0.041972 | 0.36547  | 0.129435 | 0.00509 | -0.22732 | 6.89E-07 |
| 0.45538  | 0.080003 | 0.08416  | 0.087875 | 0.05775  | 0.06748  | 0.14539 | -0.20498 | 8.00E-06 |
| 0.18537  | -0.00725 | 0.87586  | 0.017142 | 0.71177  | -0.01176 | 0.79985 | -0.23978 | 1.57E-07 |
| 0.20352  | 0.225182 | 8.81E-07 | 0.163027 | 0.0004   | 0.068124 | 0.14158 | -0.11569 | 0.01236  |
| 0.06567  | -0.07361 | 0.11214  | 0.024696 | 0.59449  | -0.05348 | 0.24873 | -0.26358 | 7.33E-09 |
| 0.02306  | -0.15346 | 0.00088  | -0.06011 | 0.19475  | -0.00112 | 0.9807  | -0.02684 | 0.56285  |
| 0.46728  | 0.052139 | 0.26081  | 0.115613 | 0.01242  | 0.120871 | 0.00893 | -0.2157  | 2.55E-06 |
| 0.03031  | 0.184835 | 5.86E-05 | 0.030585 | 0.50968  | 0.152118 | 0.00097 | -0.06871 | 0.13818  |
| 0.00477  | -0.19601 | 1.99E-05 | -0.07768 | 0.09361  | 0.027439 | 0.55419 | 0.047352 | 0.3072   |
| 0.97418  | 0.103205 | 0.02573  | 0.091014 | 0.04934  | 0.105829 | 0.02218 | -0.20631 | 6.96E-06 |
| 0.00083  | -0.17458 | 0.00015  | -0.04474 | 0.33463  | -0.05143 | 0.26737 | 0.008033 | 0.86254  |
| 0.00376  | 0.199925 | 1.34E-05 | 0.06203  | 0.18084  | 0.036461 | 0.43182 | -0.11495 | 0.01293  |
| 3.42E-05 | 0.297413 | 5.42E-11 | 0.138757 | 0.00266  | 0.142287 | 0.00205 | 0.034801 | 0.45309  |
| 9.98E-05 | -0.2201  | 1.57E-06 | -0.13504 | 0.00346  | 0.036115 | 0.4362  | 0.084688 | 0.06747  |
| 0.0064   | 0.043649 | 0.34661  | -0.0486  | 0.29458  | -0.08856 | 0.05583 | 0.099064 | 0.03233  |
| 3.20E-05 | -0.12767 | 0.00573  | 0.065474 | 0.15776  | -0.02375 | 0.60874 | -0.28544 | 3.32E-10 |
| 0.25997  | -0.03459 | 0.45586  | -0.03218 | 0.48779  | -0.05532 | 0.23276 | 0.059695 | 0.19785  |
| 0.05383  | -0.13056 | 0.00471  | -0.02045 | 0.65936  | -0.03056 | 0.51002 | -0.06713 | 0.14751  |
| 0.93006  | 0.01762  | 0.70411  | 0.060305 | 0.1933   | 0.029557 | 0.52402 | -0.03203 | 0.48993  |
| 0.18714  | 0.017402 | 0.7076   | 0.012755 | 0.78339  | 0.068955 | 0.13677 | -0.19875 | 1.51E-05 |
| 0.40234  | -0.17461 | 0.00015  | -0.00641 | 0.89011  | -0.09333 | 0.04381 | 0.108846 | 0.01863  |
| 1.85E-06 | 0.36519  | 3.52E-16 | 0.048631 | 0.2943   | 0.100568 | 0.02978 | -0.00109 | 0.98134  |
| 0.11118  | -0.0455  | 0.32654  | 0.33861  | 5.43E-14 | -0.00167 | 0.97135 | -0.22145 | 1.35E-06 |
| 1.93E-05 | 0.209872 | 4.78E-06 | 0.0599   | 0.19631  | 0.061752 | 0.1828  | -0.18547 | 5.52E-05 |
| 0.14548  | 0.081555 | 0.0783   | 0.035807 | 0.44013  | 0.08412  | 0.06934 | -0.21943 | 1.69E-06 |
| 0.31451  | -0.01639 | 0.72384  | 0.041321 | 0.37296  | -0.00636 | 0.89104 | -0.22174 | 1.30E-06 |
| 0.13288  | -0.00281 | 0.95163  | 0.042365 | 0.36099  | -0.02926 | 0.52821 | -0.08542 | 0.06514  |
| 0.67259  | 0.068537 | 0.13917  | 0.00788  | 0.86515  | 0.007075 | 0.8788  | 0.081997 | 0.07669  |
| 0.01295  | 0.205931 | 7.24E-06 | 0.127163 | 0.00593  | 0.160484 | 0.0005  | -0.25776 | 1.60E-08 |
| 0.11203  | -0.06547 | 0.1578   | -0.03104 | 0.50338  | -0.06466 | 0.16303 | -0.23522 | 2.72E-07 |
| 0.00666  | 0.105213 | 0.02297  | 0.024746 | 0.59374  | -0.04228 | 0.36196 | -0.03265 | 0.48147  |
| 1.40E-05 | -0.16474 | 0.00035  | 0.071798 | 0.12129  | -0.03346 | 0.47067 | -0.26361 | 7.29E-09 |
| 0.08049  | 0.08426  | 0.06887  | 0.006985 | 0.88033  | 0.111124 | 0.01629 | -0.18254 | 7.26E-05 |
| 0.00885  | 0.276784 | 1.17E-09 | 0.107744 | 0.01986  | 0.107514 | 0.02013 | -0.10709 | 0.02063  |
| 0.01212  | 0.210552 | 4.44E-06 | 0.24812  | 5.55E-08 | 0.023462 | 0.61305 | -0.21503 | 2.74E-06 |
| 0.83703  | 0.011032 | 0.81207  | -0.00389 | 0.93319  | 0.017029 | 0.71359 | -0.14916 | 0.00123  |
| 0.01792  | -0.00328 | 0.94371  | 0.004014 | 0.93106  | -0.01435 | 0.75709 | -0.22183 | 1.29E-06 |
| 0.0349   | 0.011499 | 0.80425  | 0.003047 | 0.94764  | 0.049012 | 0.29053 | -0.15956 | 0.00054  |
| 0.65126  | 0.007463 | 0.87222  | 0.181761 | 7.81E-05 | 0.060545 | 0.19152 | -0.10741 | 0.02025  |
| 0.17843  | -0.06351 | 0.17065  | 0.04897  | 0.29095  | 0.020557 | 0.65769 | -0.27156 | 2.44E-09 |
| 1.35E-06 | -0.19154 | 3.09E-05 | -0.04672 | 0.31375  | -0.08469 | 0.06748 | -0.17763 | 0.00011  |
| 0.94447  | 0.087968 | 0.05749  | 0.09761  | 0.03497  | 0.087632 | 0.05845 | -0.11977 | 0.00958  |
| 0.63586  | 0.098775 | 0.03284  | -0.01547 | 0.7388   | 0.040754 | 0.37956 | -0.19979 | 1.36E-05 |
| 0.10559  | 0.080665 | 0.08162  | 0.026254 | 0.57143  | 0.014491 | 0.7548  | -0.22116 | 1.39E-06 |
| 7.49E-06 | -0.22912 | 5.59E-07 | -0.11886 | 0.01015  | 0.056222 | 0.22526 | -0.23859 | 1.81E-07 |

|          |          |          |          |          |          |          |          |          |
|----------|----------|----------|----------|----------|----------|----------|----------|----------|
| 0.95087  | 0.025168 | 0.58747  | 0.05947  | 0.19955  | 0.066674 | 0.15027  | -0.09713 | 0.03588  |
| 0.01405  | -0.02234 | 0.63012  | 0.014024 | 0.76245  | -0.02237 | 0.62965  | -0.23564 | 2.59E-07 |
| 0.07955  | 0.033986 | 0.46374  | 0.075147 | 0.10483  | -0.06422 | 0.16586  | -0.20367 | 9.16E-06 |
| 0.00088  | -0.28369 | 4.29E-10 | -0.11262 | 0.01489  | -0.02905 | 0.53118  | 0.082524 | 0.07481  |
| 0.09133  | 0.08372  | 0.07068  | -0.02276 | 0.62377  | 0.021993 | 0.63546  | -0.19426 | 2.37E-05 |
| 0.65679  | 0.15669  | 0.00068  | 0.059956 | 0.19589  | 0.046053 | 0.32067  | -0.21017 | 4.63E-06 |
| 0.00041  | 0.144169 | 0.00179  | -0.05077 | 0.27354  | -0.02813 | 0.54426  | 0.2405   | 1.43E-07 |
| 0.42917  | -0.03004 | 0.51728  | -0.0384  | 0.40767  | -0.11398 | 0.01372  | -0.05365 | 0.24724  |
| 0.60789  | 0.094107 | 0.04208  | -0.06739 | 0.14592  | -0.00859 | 0.85308  | 0.09793  | 0.03437  |
| 0.14802  | 0.053605 | 0.24762  | 0.197072 | 1.79E-05 | 0.200346 | 1.29E-05 | -0.10048 | 0.02993  |
| 2.86E-08 | -0.36312 | 5.30E-16 | -0.14903 | 0.00124  | -0.16653 | 0.0003   | -0.01092 | 0.81396  |
| 0.27662  | 0.035704 | 0.44145  | 0.085161 | 0.06595  | 0.01339  | 0.77289  | -0.25065 | 4.02E-08 |
| 0.16095  | 0.038046 | 0.41206  | 0.041845 | 0.36692  | 0.061803 | 0.18244  | -0.19146 | 3.11E-05 |
| 0.03579  | -0.03624 | 0.4346   | -0.01458 | 0.75327  | -0.00506 | 0.91322  | 0.091443 | 0.04827  |
| 0.82582  | 0.123054 | 0.00776  | 0.046872 | 0.31213  | 0.106877 | 0.02088  | -0.24813 | 5.55E-08 |
| 0.00412  | 0.224738 | 9.27E-07 | 0.131292 | 0.00448  | 0.058002 | 0.21089  | -0.07022 | 0.1297   |
| 1.00E-06 | -0.1689  | 0.00025  | -0.00704 | 0.87944  | -0.02921 | 0.52889  | -0.24894 | 5.00E-08 |
| 0.39874  | 0.190712 | 3.35E-05 | 0.017978 | 0.69839  | -0.02794 | 0.54704  | -0.17552 | 0.00014  |
| 0.00418  | 0.209847 | 4.79E-06 | 0.007255 | 0.87575  | -0.02549 | 0.58267  | -0.09207 | 0.04675  |
| 0.75175  | 0.095959 | 0.03818  | 0.032843 | 0.47893  | 0.027451 | 0.55402  | -0.11946 | 0.00977  |
| 0.08233  | 0.168038 | 0.00026  | 0.069055 | 0.13621  | 0.146931 | 0.00145  | -0.11442 | 0.01335  |
| 0.00066  | -0.1045  | 0.02392  | 0.053214 | 0.2511   | 0.091125 | 0.04906  | -0.20692 | 6.53E-06 |
| 0.11682  | 0.022988 | 0.62024  | 0.144586 | 0.00173  | 0.029175 | 0.52941  | -0.16158 | 0.00046  |
| 0.09945  | 0.149706 | 0.00118  | -0.02472 | 0.59415  | -0.04218 | 0.36311  | -0.27295 | 2.01E-09 |
| 0.00441  | 0.238648 | 1.80E-07 | 0.159054 | 0.00056  | 0.000992 | 0.98294  | -0.04012 | 0.38705  |
| 0.0375   | 0.165306 | 0.00033  | 0.26906  | 3.46E-09 | 0.058782 | 0.2048   | -0.13181 | 0.00433  |
| 0.00054  | -0.09507 | 0.04001  | -0.05693 | 0.21942  | -0.07095 | 0.12574  | -0.26768 | 4.18E-09 |
| 0.01942  | 0.160616 | 0.00049  | 0.04178  | 0.36767  | 0.015066 | 0.74539  | -0.08997 | 0.05202  |
| 0.53137  | -0.02026 | 0.66227  | 0.123055 | 0.00776  | 0.079089 | 0.08778  | -0.03619 | 0.43525  |
| 0.03437  | 0.075133 | 0.10489  | -0.04587 | 0.32259  | -0.03165 | 0.49511  | -0.00869 | 0.85141  |
| 0.04412  | -0.09976 | 0.03112  | 0.067787 | 0.14356  | -0.04677 | 0.31318  | -0.20286 | 9.96E-06 |
| 0.40285  | 0.110805 | 0.0166   | 0.093174 | 0.04417  | 0.165822 | 0.00032  | -0.09245 | 0.04585  |
| 0.6572   | 0.091836 | 0.04731  | -0.01464 | 0.75231  | -0.00765 | 0.86903  | -0.24326 | 1.02E-07 |
| 0.00346  | 0.064748 | 0.16243  | -0.08141 | 0.07882  | -0.03148 | 0.49735  | 0.039766 | 0.39123  |
| 0.41822  | 0.046447 | 0.31655  | 0.07245  | 0.11793  | 0.109272 | 0.01817  | -0.06232 | 0.1788   |
| 0.52002  | 0.002432 | 0.95819  | 0.13726  | 0.00296  | 0.030451 | 0.51154  | -0.21171 | 3.93E-06 |
| 0.00072  | 0.319232 | 1.60E-12 | 0.056657 | 0.22168  | 0.036509 | 0.43122  | -0.16545 | 0.00033  |
| 0.81363  | 0.040559 | 0.38184  | 0.036421 | 0.43233  | 0.008875 | 0.84831  | -0.09708 | 0.03596  |
| 0.00318  | -0.0003  | 0.99483  | 0.092106 | 0.04667  | 0.153138 | 0.0009   | -0.04142 | 0.37177  |
| 0.19794  | 0.124822 | 0.00692  | 0.084617 | 0.06771  | 0.129749 | 0.00498  | -0.0254  | 0.584    |
| 0.10267  | 0.196404 | 1.91E-05 | 0.218879 | 1.79E-06 | 0.058092 | 0.21018  | -0.19827 | 1.59E-05 |
| 0.02475  | -0.12868 | 0.00535  | -0.05836 | 0.20805  | -0.03728 | 0.42151  | -0.17877 | 0.0001   |
| 3.61E-05 | 0.285151 | 3.46E-10 | 0.025331 | 0.58504  | 0.106894 | 0.02086  | -0.08791 | 0.05765  |
| 0.2595   | -0.04846 | 0.29597  | -0.00703 | 0.87959  | -0.018   | 0.69807  | -0.08923 | 0.05399  |
| 2.31E-07 | 0.281536 | 5.89E-10 | -0.00172 | 0.97038  | 0.046497 | 0.31602  | -0.11587 | 0.01222  |

|          |          |          |          |          |          |          |          |          |
|----------|----------|----------|----------|----------|----------|----------|----------|----------|
| 0.79828  | -0.00998 | 0.82961  | 0.01804  | 0.69739  | -0.10934 | 0.0181   | 0.122336 | 0.00813  |
| 0.32483  | 0.106898 | 0.02086  | 0.021133 | 0.64874  | 0.088781 | 0.05521  | -0.19569 | 2.05E-05 |
| 0.04996  | 0.151565 | 0.00102  | 0.072246 | 0.11897  | 0.014449 | 0.75548  | 0.095634 | 0.03884  |
| 0.94881  | 0.008592 | 0.85308  | 0.215491 | 2.61E-06 | 0.097821 | 0.03457  | -0.13809 | 0.00279  |
| 0.31659  | 0.06064  | 0.19083  | 0.138742 | 0.00266  | 0.040893 | 0.37793  | -0.2043  | 8.59E-06 |
| 4.59E-05 | -0.05007 | 0.28023  | -0.0068  | 0.88355  | 0.062261 | 0.17921  | -0.29402 | 9.14E-11 |
| 0.68347  | -0.01845 | 0.69083  | -0.00555 | 0.90485  | -0.0172  | 0.71077  | -0.20477 | 8.18E-06 |
| 0.56184  | -0.00673 | 0.88466  | 0.052779 | 0.255    | 0.070588 | 0.1277   | -0.09075 | 0.05001  |
| 0.37808  | 0.072535 | 0.1175   | 0.07776  | 0.09326  | 0.016574 | 0.72092  | -0.02718 | 0.55793  |
| 0.3728   | 0.006736 | 0.88458  | 0.074513 | 0.1078   | 0.032304 | 0.48617  | -0.20152 | 1.14E-05 |
| 0.14345  | 0.157565 | 0.00063  | 0.05865  | 0.20582  | 0.200298 | 1.29E-05 | -0.11293 | 0.01462  |
| 0.29283  | 0.009847 | 0.83193  | -0.02369 | 0.60954  | -0.04859 | 0.29471  | -0.13982 | 0.00246  |
| 0.85758  | 0.048284 | 0.29776  | 0.08636  | 0.06222  | -0.02787 | 0.54803  | -0.09784 | 0.03453  |
| 0.00102  | 0.123459 | 0.00756  | 0.072432 | 0.11802  | -0.02553 | 0.58214  | -0.08929 | 0.05383  |
| 0.03263  | -0.07005 | 0.13065  | 0.101128 | 0.02888  | -0.01876 | 0.68598  | -0.21412 | 3.03E-06 |
| 0.00206  | -0.14127 | 0.00221  | -0.0311  | 0.50255  | 0.00505  | 0.91332  | -0.29487 | 8.02E-11 |
| 0.30835  | -0.01699 | 0.7142   | 0.038638 | 0.40481  | -0.00652 | 0.88826  | -0.19335 | 2.59E-05 |
| 0.21092  | -0.23042 | 4.80E-07 | -0.11048 | 0.01692  | -0.12652 | 0.00619  | -0.02249 | 0.62788  |
| 3.10E-05 | -0.07913 | 0.08763  | -0.022   | 0.63531  | 0.013938 | 0.76387  | 0.018929 | 0.68328  |
| 0.10587  | 0.004583 | 0.92131  | -0.02355 | 0.61167  | -0.06406 | 0.16693  | -0.12949 | 0.00507  |
| 0.01372  | 0.172306 | 0.00018  | 0.168245 | 0.00026  | 0.028623 | 0.53722  | -0.16262 | 0.00042  |
| 0.17373  | 0.065414 | 0.15814  | -0.01374 | 0.76714  | 0.009022 | 0.84583  | 0.192976 | 2.69E-05 |
| 0.0007   | 0.248019 | 5.62E-08 | -0.08258 | 0.07461  | 0.045039 | 0.33145  | -0.11738 | 0.01113  |
| 2.34E-05 | -0.07579 | 0.10188  | 0.158426 | 0.00059  | 0.089148 | 0.05421  | -0.10623 | 0.02168  |
| 0.39079  | 0.034997 | 0.45056  | 0.043147 | 0.35219  | -0.05853 | 0.20679  | -0.1464  | 0.00151  |
| 0.0438   | 0.007384 | 0.87356  | -0.01279 | 0.78288  | 0.046715 | 0.31376  | -0.13854 | 0.0027   |
| 1.61E-09 | 0.274184 | 1.69E-09 | 0.068852 | 0.13736  | -0.01654 | 0.72148  | -0.25632 | 1.93E-08 |
| 0.2266   | 0.153634 | 0.00087  | 0.059041 | 0.20281  | 0.059769 | 0.19729  | -0.22322 | 1.10E-06 |
| 0.68919  | 0.003356 | 0.94234  | 0.039653 | 0.39258  | 0.008382 | 0.85664  | -0.29314 | 1.05E-10 |
| 0.00371  | 0.102584 | 0.02664  | 0.035438 | 0.44486  | 0.022627 | 0.62574  | -0.34951 | 7.28E-15 |
| 0.03647  | 0.306119 | 1.37E-11 | 0.040118 | 0.38705  | 0.131061 | 0.00456  | -0.11003 | 0.01738  |
| 0.7003   | 0.002381 | 0.95907  | 0.014956 | 0.74718  | 0.000926 | 0.98407  | -0.26268 | 8.28E-09 |
| 0.56347  | 0.054753 | 0.23763  | 0.000299 | 0.99487  | -0.02089 | 0.65249  | -0.2027  | 1.01E-05 |
| 0.04209  | -0.08634 | 0.06229  | 0.002094 | 0.964    | -0.01717 | 0.71127  | -0.22437 | 9.67E-07 |
| 0.04844  | -0.05578 | 0.22897  | 0.022719 | 0.62434  | 0.00545  | 0.90649  | -0.28536 | 3.36E-10 |
| 0.00254  | 0.16349  | 0.00039  | 0.038103 | 0.41136  | 0.071513 | 0.12277  | 0.014578 | 0.75336  |
| 0.01074  | 0.19031  | 3.48E-05 | -0.06    | 0.19558  | -0.01476 | 0.75045  | -0.04237 | 0.36099  |
| 0.26787  | 0.037695 | 0.41639  | 0.186361 | 5.08E-05 | 0.0515   | 0.2667   | -0.13747 | 0.00291  |
| 0.09458  | 0.214078 | 3.04E-06 | 0.038764 | 0.40329  | -0.03241 | 0.48474  | -0.15978 | 0.00053  |
| 0.23607  | -0.00833 | 0.85757  | 0.023128 | 0.61811  | 0.016452 | 0.72289  | -0.2951  | 7.74E-11 |
| 0.00011  | 0.2445   | 8.75E-08 | 0.094909 | 0.04035  | 0.172498 | 0.00018  | 0.029902 | 0.51918  |
| 0.0027   | 0.072714 | 0.1166   | -0.08422 | 0.06902  | -0.04635 | 0.3176   | 0.10374  | 0.02497  |
| 0.63609  | 0.022785 | 0.62334  | 0.034248 | 0.46031  | 0.00268  | 0.95394  | 0.028994 | 0.53196  |
| 2.51E-07 | -0.19323 | 2.62E-05 | -0.02547 | 0.58303  | 0.007641 | 0.86919  | -0.32659 | 4.55E-13 |
| 0.23587  | -0.00273 | 0.95313  | -0.03437 | 0.45867  | 0.060368 | 0.19283  | -0.15549 | 0.00075  |

|          |          |          |          |          |          |         |          |          |
|----------|----------|----------|----------|----------|----------|---------|----------|----------|
| 0.00064  | 0.203225 | 9.59E-06 | 0.087328 | 0.05933  | 0.051778 | 0.26413 | -0.07843 | 0.09048  |
| 3.92E-05 | -0.14625 | 0.00153  | -0.07241 | 0.11812  | -0.10257 | 0.02666 | -0.16313 | 0.0004   |
| 0.29499  | 0.065177 | 0.15966  | -0.03764 | 0.41708  | 0.012638 | 0.78533 | -0.18071 | 8.60E-05 |
| 0.54545  | 0.081848 | 0.07723  | 0.03085  | 0.50603  | 0.034964 | 0.45098 | -0.01125 | 0.80839  |
| 0.00324  | 0.030769 | 0.50714  | 0.020403 | 0.6601   | 0.024702 | 0.59441 | -0.23986 | 1.55E-07 |
| 2.10E-09 | 0.371802 | 9.33E-17 | 0.015757 | 0.73414  | 0.062955 | 0.17441 | 0.018364 | 0.69224  |
| 0.00034  | 0.29121  | 1.40E-10 | 0.149279 | 0.00121  | 0.176572 | 0.00013 | -0.02677 | 0.56393  |
| 0.17087  | 0.165222 | 0.00034  | -0.02931 | 0.52749  | 0.085522 | 0.06481 | -0.20227 | 1.06E-05 |
| 0.22128  | 0.066603 | 0.15071  | 0.02895  | 0.53258  | 0.108123 | 0.01943 | -0.25465 | 2.40E-08 |
| 0.79944  | -0.09136 | 0.04848  | -0.09461 | 0.04099  | 0.034259 | 0.46017 | -0.08562 | 0.06451  |
| 0.52757  | -0.146   | 0.00156  | -0.12714 | 0.00593  | -0.04014 | 0.38681 | 0.010871 | 0.81475  |
| 0.00025  | -0.19131 | 3.16E-05 | -0.05444 | 0.24032  | -0.03093 | 0.50491 | 0.145508 | 0.00162  |
| 0.09489  | 0.191722 | 3.04E-05 | 0.191673 | 3.05E-05 | 0.000132 | 0.99772 | -0.021   | 0.65074  |
| 0.00017  | 0.206365 | 6.92E-06 | 0.060596 | 0.19115  | 0.008006 | 0.86301 | -0.05164 | 0.26544  |
| 0.72317  | 0.110876 | 0.01653  | 0.066592 | 0.15077  | 0.040702 | 0.38016 | -0.19449 | 2.32E-05 |
| 0.00568  | -0.14977 | 0.00117  | -0.12171 | 0.00846  | -0.00129 | 0.97788 | 0.037606 | 0.41749  |
| 0.0004   | -0.0775  | 0.09436  | -0.01545 | 0.73912  | -0.09551 | 0.03909 | 0.070554 | 0.12788  |
| 0.00084  | -0.12958 | 0.00504  | 0.012376 | 0.78967  | 0.020316 | 0.66146 | -0.17298 | 0.00017  |
| 0.0003   | -0.29349 | 9.90E-11 | -0.14111 | 0.00224  | -0.05768 | 0.21346 | 0.064068 | 0.1669   |
| 0.31101  | -0.00061 | 0.98955  | 0.04328  | 0.3507   | -0.02441 | 0.59873 | -0.20185 | 1.10E-05 |
| 0.12922  | -0.15083 | 0.00108  | 0.035747 | 0.44091  | -0.02732 | 0.55598 | -0.15438 | 0.00082  |
| 0.0579   | 0.159354 | 0.00055  | -0.0536  | 0.24763  | 0.003696 | 0.93651 | -0.04271 | 0.35711  |
| 0.7621   | 0.064955 | 0.16109  | 0.035085 | 0.44942  | -0.00512 | 0.9122  | -0.04858 | 0.2948   |
| 0.05308  | 0.12973  | 0.00499  | -0.03271 | 0.48077  | 0.017493 | 0.70615 | -0.07434 | 0.10863  |
| 0.87631  | -0.02476 | 0.5935   | -0.02038 | 0.66049  | 0.040389 | 0.38385 | -0.23113 | 4.42E-07 |
| 0.01683  | 0.120069 | 0.0094   | 0.050003 | 0.28087  | -0.02369 | 0.6096  | 0.013689 | 0.76796  |
| 0.02059  | -0.18065 | 8.65E-05 | 0.037204 | 0.4225   | -0.10086 | 0.0293  | -0.13773 | 0.00286  |
| 6.83E-10 | -0.34305 | 2.42E-14 | -0.04907 | 0.28995  | -0.17242 | 0.00018 | 0.032481 | 0.48378  |
| 0.001    | -0.1335  | 0.00385  | 0.024407 | 0.59881  | 0.00958  | 0.83641 | -0.23458 | 2.94E-07 |
| 0.25068  | 0.184602 | 5.99E-05 | 0.032917 | 0.47793  | 0.043157 | 0.35207 | -0.12839 | 0.00546  |
| 0.66209  | 0.082305 | 0.07559  | 0.059106 | 0.20231  | 0.023431 | 0.61352 | -0.12679 | 0.00608  |
| 0.00065  | 0.175807 | 0.00013  | -0.03941 | 0.39546  | -0.0086  | 0.85302 | -0.17427 | 0.00015  |
| 4.82E-10 | 0.330793 | 2.19E-13 | -0.02711 | 0.55901  | 0.039189 | 0.39815 | -0.22614 | 7.89E-07 |
| 0.00302  | 0.19743  | 1.73E-05 | -0.05339 | 0.24951  | 0.10962  | 0.0178  | -0.06228 | 0.1791   |
| 1.77E-12 | 0.338663 | 5.38E-14 | 0.147542 | 0.00139  | 0.09068  | 0.05018 | -0.03413 | 0.46182  |
| 0.03388  | -0.13401 | 0.00372  | -0.04791 | 0.30151  | -0.06292 | 0.17465 | 0.06578  | 0.15583  |
| 1.24E-07 | -0.22223 | 1.23E-06 | 0.018819 | 0.68502  | 0.118319 | 0.0105  | -0.21357 | 3.21E-06 |
| 8.32E-08 | -0.29512 | 7.72E-11 | -0.13183 | 0.00432  | -0.10775 | 0.01985 | 0.033435 | 0.47103  |
| 1.78E-05 | -0.10649 | 0.02136  | 0.013183 | 0.7763   | 0.087887 | 0.05772 | -0.29591 | 6.83E-11 |
| 0.1402   | 0.115684 | 0.01236  | -0.03673 | 0.42845  | -0.0338  | 0.46618 | -0.1327  | 0.00407  |
| 0.00046  | 0.25608  | 1.99E-08 | 0.120774 | 0.00899  | 0.173597 | 0.00016 | -0.09068 | 0.05017  |
| 0.03894  | 0.054625 | 0.23873  | -0.09548 | 0.03917  | -0.10142 | 0.02842 | 0.196877 | 1.83E-05 |
| 0.45224  | -0.05934 | 0.20055  | 0.025691 | 0.57972  | -0.00998 | 0.82967 | -0.2414  | 1.28E-07 |
| 0.79816  | 0.152485 | 0.00095  | 0.155369 | 0.00075  | 0.118937 | 0.0101  | -0.06279 | 0.17553  |
| 0.74278  | 0.104697 | 0.02366  | 0.087036 | 0.06019  | 0.012941 | 0.7803  | -0.22519 | 8.80E-07 |



|          |          |          |          |          |          |          |          |          |
|----------|----------|----------|----------|----------|----------|----------|----------|----------|
| 4.36E-09 | -0.22185 | 1.29E-06 | 0.012685 | 0.78455  | -0.01488 | 0.74846  | -0.31606 | 2.71E-12 |
| 0.01083  | -0.09004 | 0.05184  | 0.001232 | 0.97882  | -0.03689 | 0.42641  | -0.22464 | 9.38E-07 |
| 0.08998  | -0.1467  | 0.00148  | -0.05702 | 0.21875  | -0.02425 | 0.60111  | 0.017299 | 0.70926  |
| 0.09348  | 0.118347 | 0.01048  | 0.089406 | 0.05351  | -0.00583 | 0.90003  | -0.16565 | 0.00032  |
| 5.99E-05 | -0.18796 | 4.36E-05 | 0.05046  | 0.2765   | -0.00506 | 0.91315  | -0.32381 | 7.34E-13 |
| 0.48229  | 0.087203 | 0.0597   | 0.058159 | 0.20965  | 0.173656 | 0.00016  | -0.0139  | 0.76452  |
| 4.70E-05 | -0.21849 | 1.87E-06 | -0.04055 | 0.38197  | -0.01656 | 0.72109  | -0.07878 | 0.08904  |
| 5.58E-08 | -0.2845  | 3.81E-10 | -0.02823 | 0.54284  | -0.07369 | 0.11178  | -0.1552  | 0.00076  |
| 1.37E-05 | -0.22221 | 1.23E-06 | -0.01881 | 0.68514  | -0.06361 | 0.16995  | -0.17073 | 0.00021  |
| 0.00283  | -0.11779 | 0.01085  | 0.016154 | 0.72771  | -0.02227 | 0.63117  | -0.09619 | 0.03771  |
| 0.35504  | -0.03222 | 0.48737  | 0.020839 | 0.65331  | -0.00696 | 0.88075  | -0.17955 | 9.56E-05 |
| 0.10589  | -0.04832 | 0.29738  | -0.06659 | 0.1508   | -0.0368  | 0.4275   | 0.150424 | 0.00111  |
| 0.53546  | 0.092639 | 0.0454   | 0.009614 | 0.83585  | -0.01813 | 0.69593  | -0.05643 | 0.22351  |
| 0.97533  | 0.036778 | 0.42783  | 0.069197 | 0.1354   | 0.03315  | 0.47482  | -0.09701 | 0.03611  |
| 1.09E-05 | 0.365031 | 3.63E-16 | 0.229552 | 5.32E-07 | 0.123344 | 0.00762  | -0.06531 | 0.15879  |
| 0.10458  | -0.09306 | 0.04442  | -0.01127 | 0.80814  | -0.04351 | 0.34811  | -0.1265  | 0.0062   |
| 0.00146  | 0.247619 | 5.91E-08 | 0.090777 | 0.04994  | 0.012782 | 0.78294  | -0.15548 | 0.00075  |
| 0.00182  | 0.196317 | 1.93E-05 | 0.094929 | 0.04031  | -0.08717 | 0.0598   | -0.09554 | 0.03903  |
| 0.36132  | 0.006848 | 0.88267  | 0.063904 | 0.16799  | 0.070739 | 0.12689  | -0.07263 | 0.117    |
| 0.01011  | 0.202898 | 9.92E-06 | 0.131228 | 0.0045   | 0.101479 | 0.02832  | -0.13057 | 0.00471  |
| 2.60E-07 | -0.19657 | 1.88E-05 | -0.01482 | 0.74933  | -0.08581 | 0.06391  | -0.13691 | 0.00303  |
| 0.02828  | 0.382498 | 1.02E-17 | 0.0457   | 0.3244   | 0.187819 | 4.42E-05 | -0.09526 | 0.03962  |
| 8.99E-05 | 0.278344 | 9.34E-10 | 0.128882 | 0.00528  | 0.070178 | 0.12993  | -0.1026  | 0.02661  |
| 0.84269  | 0.008628 | 0.85248  | -0.00071 | 0.98774  | -0.04131 | 0.37311  | -0.15107 | 0.00106  |
| 1.86E-06 | -0.33299 | 1.48E-13 | -0.01499 | 0.74667  | -0.08113 | 0.07987  | 0.100488 | 0.02991  |
| 0.38173  | 0.102758 | 0.02638  | 0.142905 | 0.00196  | 0.078371 | 0.09071  | 0.015597 | 0.73675  |
| 0.57428  | -0.0761  | 0.10047  | -0.0844  | 0.06841  | -0.05498 | 0.23565  | -0.04209 | 0.36416  |
| 0.00272  | 0.161521 | 0.00046  | 0.054563 | 0.23926  | 0.100476 | 0.02993  | 0.271427 | 2.49E-09 |
| 0.62374  | 0.142368 | 0.00204  | 0.128654 | 0.00536  | 0.03942  | 0.39537  | -0.18124 | 8.19E-05 |
| 0.08243  | 0.099153 | 0.03217  | 0.072753 | 0.1164   | 0.07053  | 0.12802  | -0.094   | 0.04231  |
| 0.01761  | 0.210822 | 4.32E-06 | 0.054612 | 0.23884  | 0.048547 | 0.29514  | 0.039222 | 0.39774  |
| 0.09047  | -0.0321  | 0.48891  | 0.042938 | 0.35453  | -0.00646 | 0.88928  | -0.17788 | 0.00011  |
| 0.00098  | 0.119394 | 0.00981  | 0.044271 | 0.33977  | -0.00298 | 0.94871  | -0.11193 | 0.01552  |
| 0.46433  | 0.079674 | 0.08545  | -0.15954 | 0.00054  | -0.03583 | 0.43988  | 0.036911 | 0.42615  |
| 0.83702  | 0.115744 | 0.01232  | 0.15962  | 0.00054  | 0.143734 | 0.00185  | -0.20695 | 6.51E-06 |
| 0.02828  | 0.198759 | 1.51E-05 | 0.051789 | 0.26403  | 0.066592 | 0.15077  | -0.20673 | 6.66E-06 |
| 0.00586  | -0.09594 | 0.03823  | 0.091817 | 0.04736  | -0.03277 | 0.47995  | 0.073737 | 0.11153  |
| 3.32E-09 | -0.16293 | 0.00041  | -0.0558  | 0.22878  | 0.079434 | 0.0864   | -0.15964 | 0.00053  |
| 0.92362  | -0.10072 | 0.02954  | 0.086071 | 0.0631   | -0.05613 | 0.22599  | -0.17255 | 0.00018  |
| 0.57729  | 0.139796 | 0.00246  | -0.01956 | 0.67324  | 0.041186 | 0.37452  | -0.18189 | 7.71E-05 |
| 0.0003   | -0.17564 | 0.00014  | -0.03977 | 0.39118  | 0.024144 | 0.60276  | -0.24048 | 1.44E-07 |
| 2.97E-05 | -0.08727 | 0.0595   | 0.087614 | 0.0585   | 0.065244 | 0.15923  | -0.17988 | 9.28E-05 |
| 0.06964  | 0.197349 | 1.74E-05 | 0.179758 | 9.38E-05 | 0.060185 | 0.19418  | -0.01794 | 0.69903  |
| 0.12955  | -0.01636 | 0.72432  | -0.04197 | 0.36552  | 0.004093 | 0.92971  | 0.110284 | 0.01712  |
| 0.12281  | 0.220023 | 1.58E-06 | 0.095835 | 0.03843  | 0.207266 | 6.30E-06 | -0.20614 | 7.09E-06 |

|          |          |          |          |          |          |          |          |          |
|----------|----------|----------|----------|----------|----------|----------|----------|----------|
| 0.02334  | 0.234079 | 3.12E-07 | 0.08065  | 0.08168  | 0.149098 | 0.00123  | -0.15536 | 0.00075  |
| 0.23679  | 0.076667 | 0.09797  | 0.045815 | 0.32318  | 0.099181 | 0.03212  | -0.11732 | 0.01117  |
| 1.53E-05 | -0.08627 | 0.06251  | 0.104712 | 0.02364  | 0.073233 | 0.114    | -0.22027 | 1.54E-06 |
| 0.06308  | 0.137978 | 0.00281  | 0.124699 | 0.00697  | 0.064167 | 0.16624  | -0.1518  | 0.001    |
| 0.39898  | 0.023875 | 0.60681  | 0.066547 | 0.15105  | 0.1586   | 0.00058  | 0.057936 | 0.21141  |
| 0.3232   | 0.071504 | 0.12282  | 0.074384 | 0.10841  | 0.13167  | 0.00437  | -0.09032 | 0.05111  |
| 0.00816  | -0.08768 | 0.0583   | -0.03672 | 0.42856  | 0.054983 | 0.23566  | -0.2414  | 1.29E-07 |
| 0.01197  | 0.151785 | 0.001    | 0.159226 | 0.00055  | -0.00248 | 0.95737  | -0.05692 | 0.21955  |
| 0.02077  | 0.101609 | 0.02812  | -0.00265 | 0.95447  | 0.041326 | 0.3729   | -0.26894 | 3.52E-09 |
| 0.9775   | 0.003063 | 0.94736  | -0.05605 | 0.22665  | -0.03542 | 0.44507  | -0.16015 | 0.00051  |
| 0.96427  | -0.08372 | 0.07068  | -0.00858 | 0.85327  | 0.058431 | 0.20753  | 0.083533 | 0.07131  |
| 0.05055  | -0.14067 | 0.00231  | 0.043184 | 0.35178  | -0.02024 | 0.66257  | -0.0981  | 0.03405  |
| 0.12949  | -0.04773 | 0.30333  | 0.16092  | 0.00048  | 0.046604 | 0.31491  | -0.15849 | 0.00059  |
| 2.82E-09 | -0.28922 | 1.89E-10 | -0.05451 | 0.2397   | -0.14406 | 0.0018   | 0.037556 | 0.41811  |
| 9.92E-08 | -0.2123  | 3.68E-06 | -0.09343 | 0.04359  | -0.09641 | 0.03728  | -0.01616 | 0.72765  |
| 6.26E-09 | -0.26648 | 4.93E-09 | -0.03162 | 0.49544  | 0.020287 | 0.66191  | -0.02783 | 0.54862  |
| 2.61E-08 | 0.385693 | 5.17E-18 | 0.032855 | 0.47876  | 0.11222  | 0.01526  | -0.05904 | 0.20285  |
| 7.00E-09 | 0.452404 | 6.11E-25 | 0.133911 | 0.00374  | 0.098787 | 0.03282  | -0.08025 | 0.08323  |
| 6.15E-05 | 0.341055 | 3.48E-14 | 0.034144 | 0.46167  | 0.071262 | 0.1241   | -0.14061 | 0.00232  |
| 2.08E-06 | -0.24687 | 6.50E-08 | 0.042787 | 0.35623  | -0.00782 | 0.86619  | -0.28444 | 3.85E-10 |
| 0.02283  | 0.041738 | 0.36815  | 0.054625 | 0.23872  | 0.098394 | 0.03352  | -0.11098 | 0.01642  |
| 0.60867  | 0.042427 | 0.36029  | 0.056156 | 0.2258   | 0.070801 | 0.12655  | -0.1377  | 0.00286  |
| 1.22E-09 | 0.184009 | 6.33E-05 | -0.1579  | 0.00062  | -0.07531 | 0.10409  | 0.197667 | 1.69E-05 |
| 0.0622   | 0.116485 | 0.01177  | 0.055621 | 0.23026  | 0.02262  | 0.62586  | -0.08038 | 0.08271  |
| 0.78244  | 0.000854 | 0.98531  | 0.045811 | 0.32322  | 0.029676 | 0.52235  | -0.16932 | 0.00024  |
| 1.23E-06 | -0.20215 | 1.07E-05 | -0.0197  | 0.67109  | -0.05353 | 0.24826  | -0.17339 | 0.00017  |
| 2.28E-06 | -0.3046  | 1.75E-11 | -0.02801 | 0.546    | -0.10236 | 0.02698  | 0.028558 | 0.53815  |
| 0.22936  | -0.05662 | 0.22201  | -0.01049 | 0.82107  | -0.02249 | 0.62785  | -0.21785 | 2.01E-06 |
| 0.65222  | 0.018529 | 0.68962  | 0.011891 | 0.79773  | 0.004814 | 0.91737  | -0.18149 | 8.00E-05 |
| 0.74824  | 0.122132 | 0.00824  | 0.152822 | 0.00092  | 0.099669 | 0.03128  | -0.17993 | 9.23E-05 |
| 1.29E-06 | 0.39106  | 1.63E-18 | 0.195953 | 2.00E-05 | 0.155805 | 0.00073  | 0.034218 | 0.4607   |
| 0.00012  | 0.089703 | 0.05272  | -0.07797 | 0.09239  | -0.02582 | 0.57777  | 0.036555 | 0.43064  |
| 0.32284  | 0.183358 | 6.73E-05 | 0.141209 | 0.00222  | 0.041032 | 0.37631  | -0.14673 | 0.00148  |
| 0.03737  | -0.10542 | 0.02271  | -0.00778 | 0.86679  | -0.02315 | 0.61781  | -0.17717 | 0.00012  |
| 0.04694  | 0.192791 | 2.73E-05 | 0.098183 | 0.03391  | 0.203255 | 9.56E-06 | 0.034977 | 0.45081  |
| 6.97E-05 | -0.10723 | 0.02047  | 0.053452 | 0.24898  | -0.0243  | 0.60049  | -0.13276 | 0.00405  |
| 0.04924  | 0.158233 | 0.0006   | 0.055582 | 0.23059  | 0.053755 | 0.2463   | 0.096849 | 0.03642  |
| 0.16511  | 0.059142 | 0.20204  | 0.06335  | 0.17172  | 0.041686 | 0.36875  | -0.19247 | 2.82E-05 |
| 0.84081  | 0.178715 | 0.0001   | 0.086568 | 0.06159  | 0.014313 | 0.75771  | -0.16833 | 0.00026  |
| 0.02877  | 0.210911 | 4.28E-06 | 0.21672  | 2.28E-06 | 0.051808 | 0.26385  | -0.1365  | 0.00312  |
| 7.18E-13 | 0.365449 | 3.34E-16 | -0.01685 | 0.71652  | 0.058967 | 0.20338  | 0.056862 | 0.22001  |
| 0.03927  | 0.184961 | 5.79E-05 | 0.015589 | 0.73687  | -0.01957 | 0.67316  | -0.02825 | 0.54255  |
| 0.07166  | -0.04816 | 0.29899  | 0.047843 | 0.3022   | 0.029955 | 0.51845  | -0.12341 | 0.00758  |
| 0.69328  | 0.097137 | 0.03586  | 0.20111  | 1.19E-05 | 0.12138  | 0.00865  | -0.1289  | 0.00528  |
| 0.82472  | -0.0587  | 0.20545  | -0.19301 | 2.68E-05 | -0.10201 | 0.02751  | 0.072551 | 0.11742  |

|          |          |          |          |          |          |          |          |          |
|----------|----------|----------|----------|----------|----------|----------|----------|----------|
| 0.11011  | 0.188269 | 4.23E-05 | 0.065399 | 0.15824  | 0.106568 | 0.02126  | 0.051463 | 0.26705  |
| 0.37483  | -0.01591 | 0.73163  | -0.07148 | 0.12293  | 0.022819 | 0.62282  | -0.04451 | 0.33721  |
| 0.20666  | -0.03458 | 0.45599  | 0.049351 | 0.2872   | 0.017802 | 0.70119  | -0.21995 | 1.59E-06 |
| 0.82568  | 0.022131 | 0.63334  | -0.03313 | 0.47508  | -0.02357 | 0.61145  | -0.2725  | 2.14E-09 |
| 0.18205  | 0.108422 | 0.0191   | 0.107383 | 0.02028  | 0.108048 | 0.01952  | -0.07762 | 0.09385  |
| 0.80831  | 0.070831 | 0.12639  | -0.00205 | 0.96484  | 0.057617 | 0.21394  | -0.24768 | 5.87E-08 |
| 2.54E-05 | 0.348393 | 8.98E-15 | 0.094177 | 0.04193  | 0.228281 | 6.17E-07 | -0.00335 | 0.94241  |
| 0.8977   | 0.002356 | 0.9595   | 0.03315  | 0.47483  | -0.03441 | 0.45818  | -0.24298 | 1.06E-07 |
| 9.94E-07 | 0.340988 | 3.53E-14 | -0.00065 | 0.98889  | 0.127804 | 0.00568  | -0.09201 | 0.04689  |
| 0.32577  | 0.019486 | 0.67448  | 0.001488 | 0.97441  | 0.079287 | 0.08699  | -0.28142 | 5.99E-10 |
| 0.88374  | 0.013171 | 0.7765   | 0.058292 | 0.20861  | 0.046793 | 0.31295  | -0.13848 | 0.00271  |
| 9.27E-11 | 0.403164 | 1.11E-19 | 0.161061 | 0.00048  | 0.202549 | 1.03E-05 | 0.190374 | 3.46E-05 |
| 0.76883  | 0.06601  | 0.15438  | 0.065459 | 0.15786  | 0.028313 | 0.54164  | -0.09345 | 0.04354  |
| 4.36E-05 | 0.343823 | 2.10E-14 | 0.197887 | 1.65E-05 | 0.101211 | 0.02875  | -0.0733  | 0.11367  |
| 0.02227  | -0.13412 | 0.00369  | -0.11941 | 0.0098   | 0.016898 | 0.7157   | 0.093693 | 0.043    |
| 0.14935  | 0.100374 | 0.0301   | 0.021091 | 0.64939  | 0.08124  | 0.07946  | -0.11513 | 0.01279  |
| 0.01004  | 0.162297 | 0.00043  | 0.07604  | 0.10075  | 0.032036 | 0.4898   | 0.024957 | 0.5906   |
| 0.00012  | 0.237954 | 1.96E-07 | 0.105366 | 0.02277  | 0.111597 | 0.01583  | -0.06056 | 0.19145  |
| 0.00297  | -0.21218 | 3.73E-06 | -0.02015 | 0.66409  | -0.07946 | 0.08631  | -0.22474 | 9.27E-07 |
| 7.20E-12 | 0.324122 | 6.96E-13 | 0.073529 | 0.11255  | -0.00801 | 0.86289  | 0.302276 | 2.53E-11 |
| 0.04585  | 0.168976 | 0.00024  | 0.277371 | 1.07E-09 | 0.132215 | 0.00421  | -0.04292 | 0.35477  |
| 6.04E-06 | 0.381232 | 1.33E-17 | 0.163825 | 0.00038  | 0.121409 | 0.00863  | 0.037927 | 0.41352  |
| 1.97E-12 | 0.358114 | 1.41E-15 | 0.004282 | 0.92647  | 0.115243 | 0.0127   | -0.08112 | 0.07991  |
| 7.17E-09 | 0.206512 | 6.81E-06 | 0.053947 | 0.24461  | 0.068054 | 0.14199  | -0.12312 | 0.00773  |
| 0.01216  | 0.13435  | 0.00363  | 0.072357 | 0.1184   | 0.186765 | 4.89E-05 | 0.073707 | 0.11167  |
| 0.36535  | 0.082366 | 0.07537  | -0.02018 | 0.66363  | -0.10045 | 0.02998  | -0.2144  | 2.94E-06 |
| 0.00052  | 0.274522 | 1.61E-09 | 0.19055  | 3.40E-05 | 0.151887 | 0.00099  | 0.131781 | 0.00434  |
| 2.61E-12 | 0.406665 | 5.02E-20 | 0.080965 | 0.08049  | 0.156922 | 0.00067  | -0.02654 | 0.5672   |
| 2.39E-07 | 0.272169 | 2.24E-09 | 0.142806 | 0.00198  | 0.016093 | 0.72869  | -0.024   | 0.60495  |
| 0.22146  | 0.098542 | 0.03325  | 0.020867 | 0.65287  | 0.215462 | 2.61E-06 | -0.0795  | 0.08615  |
| 0.88423  | 0.046097 | 0.32021  | 0.146009 | 0.00156  | 0.090359 | 0.05101  | -0.07539 | 0.1037   |
| 2.48E-10 | 0.363622 | 4.80E-16 | 0.138461 | 0.00271  | 0.128417 | 0.00545  | 0.037419 | 0.41981  |
| 2.03E-06 | -0.18279 | 7.09E-05 | 0.225422 | 8.57E-07 | -0.0306  | 0.50946  | -0.15462 | 0.0008   |
| 0.08267  | 0.168464 | 0.00026  | 0.059423 | 0.1999   | 0.031501 | 0.49708  | -0.07407 | 0.10989  |
| 4.12E-06 | 0.316889 | 2.36E-12 | 0.186824 | 4.86E-05 | 0.152021 | 0.00098  | 0.080562 | 0.08201  |
| 7.10E-06 | -0.24893 | 5.01E-08 | -0.02621 | 0.57213  | -0.08415 | 0.06924  | -0.03383 | 0.46582  |
| 0.33919  | 0.145778 | 0.00158  | 0.111201 | 0.01621  | 0.069487 | 0.13377  | -0.05485 | 0.23677  |
| 1.97E-06 | 0.353048 | 3.73E-15 | 0.135017 | 0.00346  | 0.176427 | 0.00013  | 0.003229 | 0.94452  |
| 0.0001   | 0.257986 | 1.55E-08 | 0.210596 | 4.42E-06 | 0.164058 | 0.00037  | -0.05346 | 0.24894  |
| 0.44817  | 0.08896  | 0.05472  | 0.164707 | 0.00035  | 0.058962 | 0.20342  | -0.16636 | 0.00031  |
| 0.49943  | 0.110005 | 0.0174   | 0.033265 | 0.47329  | 0.090285 | 0.0512   | -0.16721 | 0.00028  |
| 4.07E-13 | -0.29269 | 1.12E-10 | -0.14898 | 0.00124  | -0.06543 | 0.15802  | -0.35589 | 2.17E-15 |
| 0.12113  | 0.176676 | 0.00012  | 0.240435 | 1.45E-07 | 0.193866 | 2.46E-05 | 0.244632 | 8.61E-08 |
| 0.0165   | 0.114724 | 0.01311  | 0.168752 | 0.00025  | 0.206768 | 6.63E-06 | 0.300826 | 3.18E-11 |
| 7.01E-05 | 0.231647 | 4.16E-07 | 0.206291 | 6.97E-06 | 0.202389 | 1.05E-05 | 0.39932  | 2.64E-19 |

|          |          |          |          |          |          |          |          |          |
|----------|----------|----------|----------|----------|----------|----------|----------|----------|
| 0.03516  | 0.141266 | 0.00221  | 0.236876 | 2.23E-07 | 0.253744 | 2.70E-08 | 0.316061 | 2.71E-12 |
| 0.00746  | 0.187694 | 4.47E-05 | 0.105125 | 0.02309  | 0.110709 | 0.01669  | 0.169592 | 0.00023  |
| 0.1985   | 0.101582 | 0.02816  | 0.17099  | 0.00021  | 0.167457 | 0.00028  | 0.23134  | 4.31E-07 |
| 0.52521  | 0.107968 | 0.01961  | 0.256947 | 1.77E-08 | 0.265496 | 5.65E-09 | 0.263795 | 7.11E-09 |
| 0.01671  | 0.162485 | 0.00042  | 0.155612 | 0.00074  | 0.173808 | 0.00016  | 0.256686 | 1.84E-08 |
| 0.00318  | 0.169607 | 0.00023  | 0.197429 | 1.73E-05 | 0.218633 | 1.84E-06 | 0.312093 | 5.22E-12 |
| 0.00428  | 0.1947   | 2.27E-05 | 0.133339 | 0.00389  | 0.122554 | 0.00802  | 0.18212  | 7.55E-05 |
| 0.076    | 0.051852 | 0.26345  | 0.089887 | 0.05223  | 0.068036 | 0.1421   | -0.02835 | 0.54117  |
| 0.03749  | 0.148491 | 0.00129  | 0.199925 | 1.34E-05 | 0.221728 | 1.30E-06 | 0.267717 | 4.16E-09 |
| 0.01494  | 0.112211 | 0.01526  | 0.406837 | 4.83E-20 | 0.167585 | 0.00028  | 0.143464 | 0.00188  |
| 0.83291  | 0.097214 | 0.03572  | 0.131332 | 0.00447  | 0.149763 | 0.00117  | 0.157512 | 0.00064  |
| 0.0016   | 0.190555 | 3.40E-05 | 0.2467   | 6.64E-08 | 0.26462  | 6.36E-09 | 0.359777 | 1.02E-15 |
| 0.00304  | 0.187586 | 4.52E-05 | 0.150492 | 0.00111  | 0.149398 | 0.0012   | 0.265265 | 5.83E-09 |
| 2.75E-05 | 0.225522 | 8.48E-07 | 0.222752 | 1.16E-06 | 0.336159 | 8.44E-14 | 0.300302 | 3.46E-11 |
| 0.28956  | 0.130286 | 0.0048   | 0.128088 | 0.00557  | 0.117368 | 0.01114  | 0.082919 | 0.07343  |
| 0.68813  | 0.038607 | 0.40519  | 0.08785  | 0.05782  | 0.11015  | 0.01725  | 0.049494 | 0.28581  |
| 0.07127  | 0.121978 | 0.00832  | 0.190356 | 3.47E-05 | 0.243604 | 9.78E-08 | 0.239295 | 1.66E-07 |
| 0.04391  | 0.084177 | 0.06915  | 0.107136 | 0.02058  | 0.109648 | 0.01777  | 0.096178 | 0.03774  |
| 0.1233   | 0.101241 | 0.0287   | 0.221088 | 1.40E-06 | 0.263258 | 7.65E-09 | 0.25059  | 4.05E-08 |
| 0.48187  | 0.003321 | 0.94295  | 0.104632 | 0.02374  | 0.108313 | 0.01922  | 0.110647 | 0.01676  |
| 0.0013   | 0.139506 | 0.00252  | 0.10304  | 0.02597  | 0.108983 | 0.01848  | 0.235839 | 2.53E-07 |
| 0.20626  | 0.107323 | 0.02035  | 0.190477 | 3.42E-05 | 0.220246 | 1.54E-06 | 0.193904 | 2.45E-05 |
| 0.15444  | 0.108434 | 0.01908  | 0.188693 | 4.07E-05 | 0.214856 | 2.79E-06 | 0.235138 | 2.75E-07 |
| 0.0043   | 0.212702 | 3.53E-06 | 0.169884 | 0.00023  | 0.143728 | 0.00185  | 0.25119  | 3.75E-08 |
| 0.02679  | 0.169083 | 0.00024  | 0.219433 | 1.69E-06 | 0.259799 | 1.22E-08 | 0.311353 | 5.89E-12 |
| 0.03887  | 0.138224 | 0.00276  | 0.15306  | 0.00091  | 0.144923 | 0.00169  | 0.19011  | 3.55E-05 |
| 0.00829  | 0.17092  | 0.00021  | 0.189153 | 3.89E-05 | 0.199481 | 1.41E-05 | 0.247174 | 6.26E-08 |
| 0.02633  | 0.1209   | 0.00892  | 0.209259 | 5.10E-06 | 0.208188 | 5.71E-06 | 0.24524  | 7.98E-08 |
| 0.01462  | 0.16146  | 0.00046  | 0.182114 | 7.55E-05 | 0.240827 | 1.38E-07 | 0.2669   | 4.66E-09 |
| 0.14114  | 0.103622 | 0.02513  | 0.161894 | 0.00044  | 0.1904   | 3.45E-05 | 0.253775 | 2.69E-08 |
| 0.36163  | 0.03258  | 0.48245  | 0.156359 | 0.0007   | 0.132504 | 0.00413  | 0.054924 | 0.23617  |
| 0.00035  | 0.128016 | 0.0056   | 0.024408 | 0.59881  | 0.009914 | 0.8308   | 0.329944 | 2.54E-13 |
| 0.40405  | 0.069901 | 0.13146  | 0.198511 | 1.55E-05 | 0.236899 | 2.22E-07 | 0.179826 | 9.32E-05 |
| 0.04781  | 0.136333 | 0.00316  | 0.169648 | 0.00023  | 0.181884 | 7.72E-05 | 0.188688 | 4.07E-05 |
| 0.25733  | 0.066724 | 0.14996  | 0.14418  | 0.00179  | 0.182691 | 7.16E-05 | 0.258167 | 1.51E-08 |
| 0.00335  | 0.183761 | 6.48E-05 | 0.12007  | 0.0094   | 0.65385  | 2.69E-58 | 0.124031 | 0.00729  |
| 0.0183   | 0.16449  | 0.00036  | 0.276881 | 1.15E-09 | 0.150331 | 0.00112  | 0.237245 | 2.13E-07 |
| 0.02642  | 0.162577 | 0.00042  | 0.185212 | 5.66E-05 | 0.222216 | 1.23E-06 | 0.228351 | 6.12E-07 |
| 0.54811  | 0.017401 | 0.70762  | 0.111033 | 0.01637  | 0.096377 | 0.03734  | 0.063465 | 0.17094  |
| 0.00165  | 0.177195 | 0.00012  | 0.151261 | 0.00104  | 0.165541 | 0.00033  | 0.216595 | 2.31E-06 |
| 0.00053  | 0.191959 | 2.97E-05 | 0.183768 | 6.48E-05 | 0.202254 | 1.06E-05 | 0.290972 | 1.45E-10 |
| 0.74419  | -0.0206  | 0.65702  | 0.080027 | 0.08407  | 0.085206 | 0.06581  | 0.092998 | 0.04457  |
| 0.00935  | 0.112547 | 0.01496  | 0.123207 | 0.00769  | 0.098813 | 0.03277  | 0.244012 | 9.30E-08 |
| 0.00123  | 0.172836 | 0.00017  | 0.174535 | 0.00015  | 0.184188 | 6.23E-05 | 0.320525 | 1.28E-12 |
| 0.5722   | 0.07036  | 0.12894  | 0.151745 | 0.001    | 0.236484 | 2.34E-07 | 0.22295  | 1.14E-06 |

|          |          |          |          |          |          |          |          |          |
|----------|----------|----------|----------|----------|----------|----------|----------|----------|
| 0.00019  | 0.209408 | 5.02E-06 | 0.199499 | 1.40E-05 | 0.21317  | 3.35E-06 | 0.336256 | 8.29E-14 |
| 0.05568  | 0.123201 | 0.00769  | 0.180807 | 8.52E-05 | 0.202314 | 1.05E-05 | 0.221378 | 1.36E-06 |
| 0.01384  | 0.157804 | 0.00062  | 0.18908  | 3.92E-05 | 0.196707 | 1.86E-05 | 0.287196 | 2.56E-10 |
| 0.00458  | 0.158808 | 0.00057  | 0.207503 | 6.14E-06 | 0.216863 | 2.24E-06 | 0.276463 | 1.22E-09 |
| 0.00061  | 0.182299 | 7.43E-05 | 0.117382 | 0.01113  | 0.107396 | 0.02027  | 0.194809 | 2.24E-05 |
| 0.02979  | 0.125359 | 0.00668  | 0.201417 | 1.15E-05 | 0.226038 | 7.99E-07 | 0.231948 | 4.01E-07 |
| 0.00023  | 0.305183 | 1.60E-11 | 0.198479 | 1.56E-05 | 0.259599 | 1.25E-08 | 0.119694 | 0.00963  |
| 0.88722  | -0.03954 | 0.39395  | 0.112413 | 0.01508  | 0.052498 | 0.25754  | 0.251872 | 3.44E-08 |
| 0.4982   | 0.053255 | 0.25073  | 0.284831 | 3.63E-10 | 0.161672 | 0.00045  | 0.209304 | 5.08E-06 |
| 0.03988  | 0.177203 | 0.00012  | 0.170331 | 0.00022  | 0.154446 | 0.00081  | 0.250294 | 4.21E-08 |
| 0.45923  | 0.049222 | 0.28847  | 0.183613 | 6.57E-05 | 0.211391 | 4.06E-06 | 0.292397 | 1.17E-10 |
| 0.5806   | 0.06421  | 0.16596  | 0.168827 | 0.00025  | 0.23024  | 4.91E-07 | 0.257832 | 1.58E-08 |
| 0.00135  | 0.222717 | 1.17E-06 | 0.192565 | 2.80E-05 | 0.199938 | 1.34E-05 | 0.325089 | 5.89E-13 |
| 0.00523  | 0.169316 | 0.00024  | 0.178495 | 0.00011  | 0.160832 | 0.00048  | 0.291527 | 1.34E-10 |
| 0.11611  | 0.085946 | 0.06349  | 0.170551 | 0.00021  | 0.177361 | 0.00012  | 0.286473 | 2.85E-10 |
| 0.35601  | 0.062058 | 0.18064  | 0.162128 | 0.00044  | 0.147364 | 0.00141  | 0.159023 | 0.00056  |
| 0.05451  | 0.113381 | 0.01423  | 0.155875 | 0.00072  | 0.16983  | 0.00023  | 0.192884 | 2.71E-05 |
| 0.00083  | 0.206205 | 7.04E-06 | 0.193473 | 2.56E-05 | 0.196483 | 1.90E-05 | 0.36874  | 1.73E-16 |
| 0.18388  | 0.141174 | 0.00223  | 0.177751 | 0.00011  | 0.22034  | 1.52E-06 | 0.183775 | 6.47E-05 |
| 0.01339  | 0.119242 | 0.0099   | 0.191684 | 3.05E-05 | 0.18904  | 3.93E-05 | 0.312209 | 5.12E-12 |
| 0.19169  | 0.122828 | 0.00788  | 0.151243 | 0.00104  | 0.164539 | 0.00036  | 0.213159 | 3.36E-06 |
| 0.00023  | 0.258725 | 1.40E-08 | 0.251744 | 3.49E-08 | 0.228304 | 6.15E-07 | 0.354775 | 2.68E-15 |
| 0.21741  | 0.108988 | 0.01848  | 0.190949 | 3.27E-05 | 0.220973 | 1.42E-06 | 0.226653 | 7.44E-07 |
| 0.74574  | 0.056493 | 0.22302  | 0.189151 | 3.89E-05 | 0.213849 | 3.12E-06 | 0.195605 | 2.07E-05 |
| 0.06727  | 0.105236 | 0.02294  | 0.202249 | 1.06E-05 | 0.213458 | 3.25E-06 | 0.222872 | 1.15E-06 |
| 0.04886  | 0.119553 | 0.00971  | 0.197196 | 1.77E-05 | 0.208903 | 5.30E-06 | 0.243142 | 1.04E-07 |
| 0.09988  | 0.063856 | 0.16831  | 0.125431 | 0.00665  | 0.113142 | 0.01443  | 0.174747 | 0.00015  |
| 0.28739  | 0.080987 | 0.08041  | 0.247538 | 5.97E-08 | 0.199257 | 1.44E-05 | 0.202026 | 1.08E-05 |
| 0.22498  | 0.077185 | 0.09571  | 0.207992 | 5.83E-06 | 0.22153  | 1.33E-06 | 0.249275 | 4.79E-08 |
| 0.01007  | 0.123981 | 0.00731  | 0.205668 | 7.44E-06 | 0.218098 | 1.96E-06 | 0.285723 | 3.18E-10 |
| 0.00136  | 0.145203 | 0.00165  | 0.189566 | 3.74E-05 | 0.218172 | 1.94E-06 | 0.359613 | 1.05E-15 |
| 0.00463  | 0.114433 | 0.01335  | 0.173888 | 0.00016  | 0.189754 | 3.67E-05 | 0.304119 | 1.89E-11 |
| 0.00471  | 0.151328 | 0.00104  | 0.182381 | 7.37E-05 | 0.216522 | 2.33E-06 | 0.288772 | 2.02E-10 |
| 0.00091  | 0.187461 | 4.57E-05 | 0.216395 | 2.36E-06 | 0.214251 | 2.98E-06 | 0.354057 | 3.08E-15 |
| 2.28E-05 | 0.276718 | 1.18E-09 | 0.132663 | 0.00408  | 0.197408 | 1.73E-05 | 0.216019 | 2.46E-06 |
| 0.01168  | 0.104162 | 0.02438  | 0.111353 | 0.01607  | 0.117359 | 0.01114  | 0.110199 | 0.01721  |
| 0.00121  | 0.12551  | 0.00661  | 0.133256 | 0.00392  | 0.101153 | 0.02884  | 0.185846 | 5.33E-05 |
| 0.23131  | 0.088459 | 0.0561   | 0.124373 | 0.00712  | 0.122386 | 0.0081   | 0.176946 | 0.00012  |
| 0.07925  | 0.128878 | 0.00528  | 0.141455 | 0.00218  | 0.141661 | 0.00215  | 0.242419 | 1.13E-07 |
| 0.00641  | 0.137564 | 0.00289  | 0.097554 | 0.03507  | 0.141985 | 0.0021   | 0.145214 | 0.00165  |
| 0.00172  | 0.120934 | 0.0089   | 0.081485 | 0.07856  | 0.115261 | 0.01269  | 0.227217 | 6.97E-07 |
| 0.64555  | 0.064714 | 0.16266  | 0.09189  | 0.04718  | 0.101178 | 0.0288   | 0.153246 | 0.00089  |
| 0.01405  | 0.090048 | 0.05181  | 0.13861  | 0.00268  | 0.176511 | 0.00013  | 0.235644 | 2.59E-07 |
| 0.00958  | 0.190045 | 3.57E-05 | 0.199035 | 1.47E-05 | 0.199088 | 1.46E-05 | 0.325416 | 5.57E-13 |
| 0.04924  | 0.172563 | 0.00018  | 0.155473 | 0.00075  | 0.223735 | 1.04E-06 | 0.078684 | 0.08942  |

|          |          |          |          |          |          |          |          |          |
|----------|----------|----------|----------|----------|----------|----------|----------|----------|
| 0.52862  | 0.084344 | 0.0686   | 0.11364  | 0.014    | 0.141011 | 0.00226  | 0.126904 | 0.00603  |
| 0.23014  | 0.097504 | 0.03517  | 0.20079  | 1.23E-05 | 0.224698 | 9.31E-07 | 0.233552 | 3.32E-07 |
| 0.00343  | 0.172642 | 0.00018  | 0.175998 | 0.00013  | 0.185856 | 5.33E-05 | 0.308483 | 9.40E-12 |
| 0.20327  | 0.134453 | 0.0036   | 0.207232 | 6.32E-06 | 0.198416 | 1.56E-05 | 0.258028 | 1.54E-08 |
| 0.04823  | 0.145134 | 0.00166  | 0.166367 | 0.00031  | 0.243331 | 1.01E-07 | 0.291313 | 1.38E-10 |
| 0.01619  | 0.113099 | 0.01447  | 0.138184 | 0.00277  | 0.158359 | 0.00059  | 0.212961 | 3.43E-06 |
| 0.21088  | 0.100774 | 0.02945  | 0.110491 | 0.01691  | 0.13781  | 0.00284  | 0.036446 | 0.43201  |
| 0.29248  | 0.167675 | 0.00027  | 0.204786 | 8.16E-06 | 0.212241 | 3.71E-06 | 0.265948 | 5.31E-09 |
| 0.0182   | 0.128672 | 0.00536  | 0.162095 | 0.00044  | 0.147554 | 0.00139  | 0.192948 | 2.69E-05 |
| 0.00352  | 0.194775 | 2.25E-05 | 0.219349 | 1.70E-06 | 0.214105 | 3.03E-06 | 0.287961 | 2.28E-10 |
| 0.4627   | 0.117975 | 0.01072  | 0.101272 | 0.02865  | 0.106361 | 0.02151  | 0.134864 | 0.0035   |
| 0.0058   | 0.156063 | 0.00071  | 0.208296 | 5.65E-06 | 0.23249  | 3.77E-07 | 0.3179   | 2.00E-12 |
| 0.0047   | 0.151529 | 0.00102  | 0.169249 | 0.00024  | 0.199132 | 1.46E-05 | 0.245313 | 7.90E-08 |
| 0.03684  | 0.121217 | 0.00874  | 0.215169 | 2.70E-06 | 0.2293   | 5.48E-07 | 0.298668 | 4.46E-11 |
| 0.1348   | 0.101242 | 0.0287   | 0.16032  | 0.00051  | 0.21527  | 2.67E-06 | 0.174042 | 0.00016  |
| 0.001    | 0.233418 | 3.37E-07 | 0.193781 | 2.48E-05 | 0.284986 | 3.55E-10 | 0.293153 | 1.04E-10 |
| 0.13898  | 0.100723 | 0.02953  | 0.199877 | 1.35E-05 | 0.231722 | 4.12E-07 | 0.238333 | 1.87E-07 |
| 0.00305  | 0.192391 | 2.84E-05 | 0.173717 | 0.00016  | 0.150846 | 0.00108  | 0.163102 | 0.0004   |
| 9.08E-05 | 0.220996 | 1.42E-06 | 0.220223 | 1.54E-06 | 0.219183 | 1.73E-06 | 0.353348 | 3.52E-15 |
| 0.0075   | 0.129953 | 0.00491  | 0.193347 | 2.59E-05 | 0.14739  | 0.0014   | 0.15303  | 0.00091  |
| 0.00812  | 0.174203 | 0.00015  | 0.198931 | 1.49E-05 | 0.239501 | 1.62E-07 | 0.24237  | 1.14E-07 |
| 0.00351  | 0.16132  | 0.00047  | 0.229333 | 5.46E-07 | 0.227582 | 6.69E-07 | 0.37894  | 2.15E-17 |
| 0.00166  | 0.192998 | 2.68E-05 | 0.169938 | 0.00022  | 0.164456 | 0.00036  | 0.419467 | 2.51E-21 |
| 0.02398  | 0.205508 | 7.57E-06 | 0.182781 | 7.10E-05 | 0.154367 | 0.00082  | 0.184375 | 6.12E-05 |
| 0.19028  | 0.14117  | 0.00223  | 0.168978 | 0.00024  | 0.177357 | 0.00012  | 0.306268 | 1.34E-11 |
| 0.03546  | 0.172725 | 0.00018  | 0.130072 | 0.00487  | 0.304796 | 1.70E-11 | 0.178407 | 0.00011  |
| 0.00146  | 0.235546 | 2.62E-07 | 0.132161 | 0.00422  | 0.197484 | 1.72E-05 | 0.155826 | 0.00073  |
| 0.00045  | 0.188595 | 4.10E-05 | 0.224672 | 9.34E-07 | 0.193197 | 2.63E-05 | 0.300455 | 3.37E-11 |
| 0.92605  | 0.111025 | 0.01638  | 0.211131 | 4.18E-06 | 0.357252 | 1.67E-15 | 0.194591 | 2.29E-05 |
| 0.09797  | 0.100837 | 0.02934  | 0.212257 | 3.70E-06 | 0.249699 | 4.54E-08 | 0.26911  | 3.44E-09 |
| 0.00011  | 0.210524 | 4.46E-06 | 0.195337 | 2.13E-05 | 0.268394 | 3.79E-09 | 0.333801 | 1.29E-13 |
| 0.07934  | 0.121131 | 0.00879  | 0.211533 | 4.00E-06 | 0.232004 | 3.99E-07 | 0.267646 | 4.20E-09 |
| 0.03369  | 0.166599 | 0.0003   | 0.175617 | 0.00014  | 0.173715 | 0.00016  | 0.282348 | 5.23E-10 |
| 0.7773   | 0.03782  | 0.41484  | 0.115803 | 0.01227  | 0.140175 | 0.0024   | 0.105765 | 0.02226  |
| 0.00202  | 0.124561 | 0.00704  | 0.115217 | 0.01272  | 0.166116 | 0.00031  | 0.172177 | 0.00018  |
| 0.62115  | 0.00363  | 0.93765  | 0.117189 | 0.01126  | 0.132613 | 0.00409  | 0.144011 | 0.00181  |
| 0.99752  | 0.027795 | 0.54906  | 0.094229 | 0.04181  | 0.063527 | 0.17052  | 0.180059 | 9.13E-05 |
| 3.42E-10 | 0.465714 | 1.62E-26 | 0.222471 | 1.20E-06 | 0.210354 | 4.54E-06 | 0.238304 | 1.88E-07 |
| 0.00118  | 0.217333 | 2.13E-06 | 0.184838 | 5.86E-05 | 0.309918 | 7.45E-12 | 0.247668 | 5.88E-08 |
| 0.94687  | 0.014341 | 0.75725  | 0.131319 | 0.00448  | 0.1078   | 0.0198   | 0.12782  | 0.00567  |
| 0.20079  | 0.111539 | 0.01589  | 0.114939 | 0.01294  | 0.042169 | 0.36322  | 0.031858 | 0.49221  |
| 0.01999  | 0.131641 | 0.00438  | 0.134116 | 0.00369  | 0.11334  | 0.01426  | 0.183604 | 6.58E-05 |
| 0.8178   | 0.045112 | 0.33068  | 0.079177 | 0.08743  | 0.170474 | 0.00021  | -0.03936 | 0.39606  |
| 0.59109  | 0.034065 | 0.46271  | 0.139417 | 0.00253  | 0.110669 | 0.01673  | 0.217878 | 2.00E-06 |
| 0.47043  | 0.07758  | 0.09402  | 0.123417 | 0.00758  | 0.169839 | 0.00023  | 0.268116 | 3.94E-09 |

|          |          |          |          |          |          |          |          |          |
|----------|----------|----------|----------|----------|----------|----------|----------|----------|
| 0.99427  | 0.024775 | 0.59332  | 0.159166 | 0.00056  | 0.153326 | 0.00089  | 0.114964 | 0.01292  |
| 0.78197  | 0.042612 | 0.3582   | 0.146948 | 0.00145  | 0.145518 | 0.00162  | 0.183981 | 6.35E-05 |
| 0.781    | 0.034272 | 0.46     | 0.169634 | 0.00023  | 0.169231 | 0.00024  | 0.189902 | 3.62E-05 |
| 0.77205  | 0.020167 | 0.66378  | 0.10179  | 0.02784  | 0.098605 | 0.03314  | 0.031953 | 0.49092  |
| 0.07098  | -0.07145 | 0.12308  | 0.087658 | 0.05837  | 0.221282 | 1.37E-06 | 0.107708 | 0.01991  |
| 0.36228  | 0.026122 | 0.57338  | 0.100023 | 0.03068  | 0.048333 | 0.29728  | 0.087755 | 0.05809  |
| 0.45077  | 0.029435 | 0.52574  | 0.12584  | 0.00647  | 0.153931 | 0.00085  | 0.105631 | 0.02243  |
| 0.25565  | -0.04125 | 0.37379  | 0.108682 | 0.01881  | 0.169413 | 0.00024  | 0.010648 | 0.81848  |
| 0.11985  | 0.100012 | 0.0307   | 0.218179 | 1.94E-06 | 0.23628  | 2.40E-07 | 0.274838 | 1.54E-09 |
| 0.54974  | 0.049641 | 0.28438  | 0.223573 | 1.06E-06 | 0.244731 | 8.50E-08 | 0.233075 | 3.51E-07 |
| 0.2342   | 0.101294 | 0.02861  | 0.145184 | 0.00166  | 0.175907 | 0.00013  | 0.197863 | 1.65E-05 |
| 0.71213  | 0.023589 | 0.61112  | 0.178941 | 0.0001   | 0.180204 | 9.01E-05 | 0.136412 | 0.00314  |
| 1.30E-06 | 0.271481 | 2.47E-09 | 0.166257 | 0.00031  | 0.303906 | 1.96E-11 | 0.285888 | 3.11E-10 |
| 0.10969  | 0.110232 | 0.01717  | 0.171076 | 0.0002   | 0.15309  | 0.0009   | 0.248723 | 5.14E-08 |
| 0.11165  | 0.190374 | 3.46E-05 | 0.222998 | 1.13E-06 | 0.265243 | 5.84E-09 | 0.253573 | 2.76E-08 |
| 0.30355  | 0.083041 | 0.073    | 0.208523 | 5.51E-06 | 0.196879 | 1.83E-05 | 0.289331 | 1.86E-10 |
| 0.59871  | 0.057559 | 0.2144   | 0.190345 | 3.47E-05 | 0.240654 | 1.41E-07 | 0.19647  | 1.90E-05 |
| 0.61647  | 0.069678 | 0.1327   | 0.124237 | 0.00719  | 0.123054 | 0.00776  | 0.126762 | 0.00609  |
| 0.05829  | 0.096118 | 0.03786  | 0.260193 | 1.15E-08 | 0.218168 | 1.94E-06 | 0.221646 | 1.32E-06 |
| 0.17829  | 0.161749 | 0.00045  | 0.424335 | 7.77E-22 | 0.145032 | 0.00168  | 0.163855 | 0.00038  |
| 0.00031  | 0.238717 | 1.78E-07 | 0.125162 | 0.00677  | 0.130074 | 0.00487  | 0.10086  | 0.02931  |
| 0.06819  | 0.058302 | 0.20853  | 0.14095  | 0.00227  | 0.156464 | 0.00069  | 0.235272 | 2.70E-07 |
| 0.5293   | 0.070089 | 0.13042  | 0.030435 | 0.51176  | 0.032826 | 0.47915  | 0.074897 | 0.10599  |
| 0.1276   | 0.088361 | 0.05638  | 0.202207 | 1.06E-05 | 0.206342 | 6.94E-06 | 0.242635 | 1.10E-07 |
| 0.36845  | 0.077992 | 0.09228  | 0.133958 | 0.00373  | 0.098914 | 0.03259  | 0.125943 | 0.00643  |
| 0.11467  | 0.06586  | 0.15532  | 0.207303 | 6.27E-06 | 0.194867 | 2.23E-05 | 0.244073 | 9.23E-08 |
| 0.31524  | -0.01715 | 0.71159  | 0.17653  | 0.00013  | 0.175014 | 0.00014  | 0.140904 | 0.00227  |
| 0.28287  | 0.056368 | 0.22405  | 0.225568 | 8.43E-07 | 0.323642 | 7.55E-13 | 0.146649 | 0.00148  |
| 0.84998  | 0.028943 | 0.53269  | 0.131585 | 0.00439  | 0.131546 | 0.00441  | 0.1217   | 0.00847  |
| 0.05664  | -0.0401  | 0.3873   | 0.139935 | 0.00244  | 0.112013 | 0.01545  | 0.27571  | 1.36E-09 |
| 0.07105  | -0.04361 | 0.34709  | 0.163441 | 0.00039  | 0.128315 | 0.00549  | 0.151853 | 0.001    |
| 0.32884  | -0.02344 | 0.61345  | 0.109951 | 0.01746  | 0.107722 | 0.01989  | 0.107846 | 0.01975  |
| 0.73742  | 0.01914  | 0.67994  | 0.127439 | 0.00582  | 0.124601 | 0.00702  | 0.223194 | 1.11E-06 |
| 0.36063  | 0.088521 | 0.05593  | 0.152371 | 0.00096  | 0.175813 | 0.00013  | 0.180095 | 9.10E-05 |
| 0.01807  | 0.20713  | 6.39E-06 | 0.170842 | 0.00021  | 0.214351 | 2.95E-06 | 0.196099 | 1.97E-05 |
| 0.82582  | 0.050093 | 0.28001  | 0.169561 | 0.00023  | 0.153366 | 0.00088  | 0.209392 | 5.03E-06 |
| 0.10527  | 0.136151 | 0.0032   | 0.33063  | 2.25E-13 | 0.38601  | 4.84E-18 | 0.210917 | 4.27E-06 |
| 0.40806  | 0.043417 | 0.34919  | 0.200961 | 1.21E-05 | 0.213936 | 3.09E-06 | 0.168057 | 0.00026  |
| 0.34322  | 0.059843 | 0.19674  | 0.177002 | 0.00012  | 0.179622 | 9.50E-05 | 0.182828 | 7.07E-05 |
| 0.33481  | 0.053067 | 0.25241  | 0.154363 | 0.00082  | 0.17807  | 0.00011  | 0.138185 | 0.00277  |
| 0.48516  | 0.076487 | 0.09876  | 0.114623 | 0.01319  | 0.131437 | 0.00444  | 0.076796 | 0.0974   |
| 0.08326  | 0.10472  | 0.02363  | 0.254896 | 2.32E-08 | 0.208553 | 5.50E-06 | 0.220314 | 1.53E-06 |
| 0.55409  | 0.043465 | 0.34865  | 0.121302 | 0.00869  | 0.117206 | 0.01125  | 0.109144 | 0.01831  |
| 0.52639  | 0.058725 | 0.20524  | 0.181498 | 8.00E-05 | 0.153175 | 0.0009   | 0.176895 | 0.00012  |
| 0.95532  | 0.032755 | 0.48011  | 0.426724 | 4.34E-22 | 0.161336 | 0.00047  | 0.077278 | 0.09531  |

|         |          |          |          |          |          |          |          |          |
|---------|----------|----------|----------|----------|----------|----------|----------|----------|
| 0.79665 | 0.096707 | 0.03669  | 0.153334 | 0.00089  | 0.122168 | 0.00822  | 0.070319 | 0.12916  |
| 0.46608 | 0.109128 | 0.01832  | 0.115611 | 0.01242  | 0.117847 | 0.01081  | 0.124749 | 0.00695  |
| 0.00806 | -0.06992 | 0.13135  | 0.100653 | 0.02964  | 0.092319 | 0.04616  | 0.061473 | 0.18479  |
| 0.00062 | -0.07908 | 0.0878   | 0.15513  | 0.00077  | 0.250075 | 4.33E-08 | 0.083745 | 0.0706   |
| 0.88042 | 0.039262 | 0.39727  | 0.097646 | 0.0349   | 0.093167 | 0.04418  | 0.078581 | 0.08985  |
| 0.11054 | 0.127507 | 0.00579  | 0.107439 | 0.02022  | 0.301776 | 2.74E-11 | 0.088631 | 0.05563  |
| 0.69694 | 0.089201 | 0.05406  | 0.102642 | 0.02655  | 0.13332  | 0.0039   | 0.126283 | 0.00628  |
| 0.52892 | 0.038864 | 0.40207  | 0.151861 | 0.00099  | 0.146199 | 0.00154  | 0.152748 | 0.00093  |
| 0.82171 | 0.023635 | 0.61042  | 0.134049 | 0.00371  | 0.134891 | 0.00349  | 0.115992 | 0.01213  |
| 0.64939 | -0.04288 | 0.35522  | 0.074194 | 0.10932  | 0.06013  | 0.19459  | 0.059384 | 0.2002   |
| 0.00031 | 0.248434 | 5.33E-08 | 0.2453   | 7.92E-08 | 0.15356  | 0.00087  | 0.247931 | 5.68E-08 |
| 0.19624 | -0.02285 | 0.62235  | 0.167776 | 0.00027  | 0.191954 | 2.97E-05 | 0.140646 | 0.00232  |
| 0.40445 | 0.1116   | 0.01583  | 0.117994 | 0.01071  | 0.327539 | 3.86E-13 | 0.12924  | 0.00516  |
| 0.03252 | -0.10554 | 0.02255  | 0.086173 | 0.06279  | 0.075359 | 0.10385  | 0.006624 | 0.88647  |
| 0.37314 | 0.140748 | 0.0023   | 0.149727 | 0.00117  | 0.349546 | 7.24E-15 | 0.079104 | 0.08772  |
| 0.64298 | 0.034105 | 0.46219  | 0.083197 | 0.07246  | 0.063113 | 0.17333  | 0.055974 | 0.22731  |
| 0.98517 | 0.026497 | 0.56788  | 0.167227 | 0.00028  | 0.176112 | 0.00013  | 0.140368 | 0.00236  |
| 0.47891 | 0.036019 | 0.43743  | 0.168255 | 0.00026  | 0.16803  | 0.00026  | 0.182276 | 7.44E-05 |
| 0.00017 | 0.222463 | 1.20E-06 | 0.209533 | 4.95E-06 | 0.252749 | 3.07E-08 | 0.327928 | 3.61E-13 |
| 0.23531 | 0.067576 | 0.14482  | 0.169951 | 0.00022  | 0.195566 | 2.08E-05 | 0.19406  | 2.41E-05 |
| 0.49168 | -0.0166  | 0.72044  | 0.096814 | 0.03648  | 0.203323 | 9.49E-06 | 0.115264 | 0.01268  |
| 0.07305 | 0.132659 | 0.00408  | 0.121448 | 0.00861  | 0.136596 | 0.0031   | 0.175526 | 0.00014  |
| 0.09484 | 0.02921  | 0.52891  | 0.105642 | 0.02242  | 0.112289 | 0.01519  | 0.148861 | 0.00125  |
| 0.93597 | 0.143971 | 0.00181  | 0.142343 | 0.00205  | 0.214165 | 3.01E-06 | 0.148569 | 0.00128  |
| 0.53058 | -0.07106 | 0.12515  | 0.120254 | 0.00929  | 0.137251 | 0.00296  | 0.110794 | 0.01661  |
| 0.692   | 0.003998 | 0.93134  | 0.198519 | 1.55E-05 | 0.246338 | 6.95E-08 | 0.177078 | 0.00012  |
| 0.75592 | 0.033867 | 0.46532  | 0.137558 | 0.00289  | 0.136956 | 0.00302  | 0.115564 | 0.01245  |
| 0.57354 | 0.072297 | 0.11871  | 0.153682 | 0.00086  | 0.147225 | 0.00142  | 0.220078 | 1.57E-06 |
| 0.76322 | -0.01347 | 0.77163  | 0.11611  | 0.01204  | 0.120966 | 0.00888  | 0.079079 | 0.08782  |
| 0.48216 | 0.075825 | 0.10172  | 0.199493 | 1.40E-05 | 0.25987  | 1.21E-08 | 0.220272 | 1.54E-06 |
| 0.69408 | 0.038399 | 0.40774  | 0.15672  | 0.00068  | 0.182662 | 7.18E-05 | 0.215095 | 2.72E-06 |
| 0.52348 | 0.072527 | 0.11754  | 0.213533 | 3.23E-06 | 0.227948 | 6.41E-07 | 0.195507 | 2.09E-05 |
| 0.64868 | 0.00702  | 0.87974  | 0.125501 | 0.00662  | 0.098657 | 0.03305  | 0.101801 | 0.02782  |
| 0.18579 | 0.119948 | 0.00947  | 0.172364 | 0.00018  | 0.118881 | 0.01013  | 0.180704 | 8.60E-05 |
| 0.28855 | 0.0654   | 0.15824  | 0.184756 | 5.91E-05 | 0.201535 | 1.14E-05 | 0.242833 | 1.08E-07 |
| 0.88628 | 0.011053 | 0.81171  | 0.134717 | 0.00354  | 0.120146 | 0.00935  | 0.207604 | 6.08E-06 |
| 0.24869 | 0.073726 | 0.11158  | 0.194137 | 2.40E-05 | 0.204739 | 8.20E-06 | 0.267507 | 4.29E-09 |
| 0.6024  | 0.028251 | 0.54253  | 0.170094 | 0.00022  | 0.167027 | 0.00029  | 0.145829 | 0.00158  |
| 0.4491  | -0.01831 | 0.69307  | 0.178705 | 0.0001   | 0.178936 | 0.0001   | 0.125608 | 0.00657  |
| 0.37329 | 0.065464 | 0.15783  | 0.19405  | 2.42E-05 | 0.205168 | 7.84E-06 | 0.247142 | 6.28E-08 |
| 0.87014 | 0.042061 | 0.36445  | 0.120847 | 0.00895  | 0.231061 | 4.46E-07 | 0.120001 | 0.00944  |
| 0.68185 | 0.067991 | 0.14236  | 0.13915  | 0.00258  | 0.146335 | 0.00152  | 0.201101 | 1.19E-05 |
| 0.13217 | 0.069892 | 0.13151  | 0.173213 | 0.00017  | 0.21916  | 1.74E-06 | 0.209461 | 4.99E-06 |
| 0.27622 | 0.074711 | 0.10687  | 0.192841 | 2.72E-05 | 0.185633 | 5.44E-05 | 0.255022 | 2.28E-08 |
| 0.55612 | 0.068584 | 0.1389   | 0.290112 | 1.65E-10 | 0.225155 | 8.84E-07 | 0.225665 | 8.34E-07 |



|          |          |          |          |          |          |          |          |          |
|----------|----------|----------|----------|----------|----------|----------|----------|----------|
| 0.4851   | -0.01959 | 0.67277  | 0.115049 | 0.01285  | 0.118257 | 0.01054  | 0.132778 | 0.00405  |
| 0.52134  | 0.013292 | 0.77451  | 0.170038 | 0.00022  | 0.18097  | 8.39E-05 | 0.17078  | 0.00021  |
| 0.14613  | 0.078867 | 0.08868  | 0.189939 | 3.61E-05 | 0.198341 | 1.58E-05 | 0.21292  | 3.45E-06 |
| 0.05364  | 0.129413 | 0.0051   | 0.192925 | 2.70E-05 | 0.164484 | 0.00036  | 0.348392 | 8.98E-15 |
| 0.30645  | 0.063494 | 0.17074  | 0.190444 | 3.44E-05 | 0.196644 | 1.87E-05 | 0.207105 | 6.40E-06 |
| 0.78694  | 0.018321 | 0.69292  | 0.172189 | 0.00018  | 0.183024 | 6.94E-05 | 0.171701 | 0.00019  |
| 0.76021  | 0.038367 | 0.40812  | 0.099116 | 0.03224  | 0.079623 | 0.08565  | 0.049677 | 0.28403  |
| 0.68183  | 0.061064 | 0.18774  | 0.164678 | 0.00035  | 0.041923 | 0.36604  | 0.104439 | 0.024    |
| 0.73675  | 0.076437 | 0.09898  | 0.16456  | 0.00036  | 0.160478 | 0.0005   | 0.149296 | 0.00121  |
| 0.55747  | 0.034731 | 0.45401  | 0.149307 | 0.00121  | 0.12363  | 0.00748  | 0.13859  | 0.00269  |
| 0.61743  | -0.02168 | 0.64031  | 0.132729 | 0.00406  | 0.125487 | 0.00662  | 0.145547 | 0.00161  |
| 0.92621  | 0.021844 | 0.63775  | 0.394067 | 8.46E-19 | 0.132216 | 0.00421  | 0.252964 | 2.98E-08 |
| 0.94595  | 0.050031 | 0.28061  | 0.169954 | 0.00022  | 0.119904 | 0.0095   | 0.047092 | 0.30986  |
| 0.98262  | 0.025766 | 0.57862  | 0.189101 | 3.91E-05 | 0.197861 | 1.65E-05 | 0.169863 | 0.00023  |
| 0.63778  | 0.032773 | 0.47987  | 0.152567 | 0.00094  | 0.122432 | 0.00808  | 0.190764 | 3.33E-05 |
| 0.83636  | 0.003698 | 0.93647  | 0.20221  | 1.06E-05 | 0.204357 | 8.53E-06 | 0.09257  | 0.04557  |
| 0.68566  | 0.028552 | 0.53823  | 0.054889 | 0.23646  | 0.022261 | 0.63134  | -0.0857  | 0.06426  |
| 0.30514  | 0.055297 | 0.23299  | 0.180429 | 8.82E-05 | 0.178035 | 0.00011  | 0.189163 | 3.89E-05 |
| 0.41615  | 0.022752 | 0.62384  | 0.097642 | 0.03491  | 0.082994 | 0.07316  | 0.126692 | 0.00611  |
| 0.6991   | 0.018732 | 0.6864   | -0.02105 | 0.64995  | -0.02642 | 0.56901  | 0.011271 | 0.80807  |
| 0.04786  | 0.06531  | 0.15881  | 0.512892 | 1.08E-32 | 0.122616 | 0.00799  | 0.106659 | 0.02115  |
| 0.84597  | 0.041254 | 0.37373  | 0.187112 | 4.73E-05 | 0.036112 | 0.43625  | 0.006837 | 0.88285  |
| 0.1608   | -0.05    | 0.28088  | 0.159598 | 0.00054  | 0.178707 | 0.0001   | 0.086835 | 0.06079  |
| 0.16305  | 0.068044 | 0.14205  | 0.275352 | 1.43E-09 | 0.146438 | 0.00151  | 0.117344 | 0.01116  |
| 0.02383  | 0.136661 | 0.00308  | 0.173495 | 0.00016  | 0.169775 | 0.00023  | 0.223954 | 1.01E-06 |
| 0.00013  | -0.15571 | 0.00073  | 0.104713 | 0.02363  | 0.126908 | 0.00603  | 0.113869 | 0.01381  |
| 0.58633  | 0.044751 | 0.33456  | 0.073339 | 0.11348  | 0.076483 | 0.09878  | 0.134603 | 0.00357  |
| 0.32451  | 0.058076 | 0.2103   | 0.155499 | 0.00075  | 0.132771 | 0.00405  | 0.21964  | 1.65E-06 |
| 0.55539  | 0.023123 | 0.61819  | 0.139643 | 0.00249  | 0.119179 | 0.00994  | 0.05545  | 0.2317   |
| 0.42199  | 0.062354 | 0.17856  | 0.177153 | 0.00012  | 0.17416  | 0.00016  | 0.22886  | 5.76E-07 |
| 0.52813  | 0.08401  | 0.06971  | 0.157594 | 0.00063  | 0.161176 | 0.00047  | 0.061583 | 0.18401  |
| 0.32623  | 0.081682 | 0.07784  | 0.156457 | 0.00069  | 0.195675 | 2.06E-05 | 0.261408 | 9.81E-09 |
| 0.18503  | 0.172837 | 0.00017  | 0.224524 | 9.50E-07 | 0.301506 | 2.86E-11 | 0.203431 | 9.39E-06 |
| 0.01131  | 0.199835 | 1.36E-05 | 0.184425 | 6.09E-05 | 0.201158 | 1.19E-05 | 0.193944 | 2.44E-05 |
| 0.56555  | -0.0276  | 0.55191  | 0.111976 | 0.01548  | 0.086488 | 0.06183  | 0.036888 | 0.42644  |
| 0.31856  | -0.00309 | 0.94682  | 0.078129 | 0.09171  | 0.120062 | 0.0094   | 0.015779 | 0.73378  |
| 0.2247   | -0.0901  | 0.05169  | 0.114706 | 0.01312  | 0.019259 | 0.67806  | 0.201728 | 1.12E-05 |
| 0.75371  | 0.00105  | 0.98195  | 0.199393 | 1.42E-05 | 0.194627 | 2.28E-05 | 0.154073 | 0.00084  |
| 0.12672  | -0.04888 | 0.29188  | 0.177905 | 0.00011  | 0.135835 | 0.00327  | 0.062413 | 0.17816  |
| 0.94921  | 0.009221 | 0.84246  | 0.216956 | 2.22E-06 | 0.221081 | 1.40E-06 | 0.201019 | 1.20E-05 |
| 9.52E-05 | 0.197192 | 1.77E-05 | 0.222534 | 1.19E-06 | 0.193682 | 2.51E-05 | 0.066895 | 0.14892  |
| 0.0795   | 0.143932 | 0.00182  | 0.178212 | 0.00011  | 0.188512 | 4.14E-05 | 0.306774 | 1.24E-11 |
| 0.65354  | 0.040248 | 0.38551  | 0.160984 | 0.00048  | 0.17721  | 0.00012  | 0.186403 | 5.06E-05 |
| 0.73655  | 0.028899 | 0.5333   | 0.201244 | 1.18E-05 | 0.29882  | 4.36E-11 | 0.180841 | 8.49E-05 |
| 0.44204  | 0.010066 | 0.82824  | 0.146371 | 0.00152  | 0.119147 | 0.00996  | 0.190066 | 3.56E-05 |

|          |          |          |          |          |          |          |          |          |
|----------|----------|----------|----------|----------|----------|----------|----------|----------|
| 0.7393   | 0.040692 | 0.38029  | 0.186274 | 5.12E-05 | 0.203524 | 9.30E-06 | 0.17723  | 0.00012  |
| 0.02495  | 0.195237 | 2.15E-05 | 0.136375 | 0.00315  | 0.1868   | 4.87E-05 | 0.177765 | 0.00011  |
| 0.9564   | 0.008375 | 0.85677  | 0.191823 | 3.01E-05 | 0.191259 | 3.18E-05 | 0.126389 | 0.00624  |
| 1.71E-46 | 0.582224 | 1.00E-43 | 0.108529 | 0.01898  | -0.03385 | 0.46549  | 0.082692 | 0.07422  |
| 1.69E-70 | 0.741766 | 1.05E-82 | 0.147997 | 0.00134  | 0.105727 | 0.02231  | 0.260578 | 1.10E-08 |
| 6.82E-39 | 0.54388  | 2.62E-37 | 0.138511 | 0.0027   | 0.09314  | 0.04425  | 0.122764 | 0.00791  |
| 2.20E-21 | 0.423673 | 9.12E-22 | 0.114643 | 0.01318  | -0.00856 | 0.85369  | 0.026291 | 0.5709   |
| 0.00014  | 0.200701 | 1.24E-05 | 0.029031 | 0.53144  | 0.004242 | 0.92715  | 0.000256 | 0.99559  |
| 0.00235  | 0.107076 | 0.02065  | -0.00452 | 0.92243  | -0.00792 | 0.86451  | -0.04686 | 0.31228  |
| 8.05E-12 | 0.241769 | 1.23E-07 | 0.021174 | 0.6481   | -0.06797 | 0.14247  | 0.112856 | 0.01468  |
| 1.45E-29 | 0.492202 | 7.26E-30 | 0.002843 | 0.95115  | 0.031373 | 0.49883  | 0.097383 | 0.03539  |
| 2.68E-15 | 0.246942 | 6.44E-08 | -0.02386 | 0.60703  | -0.03344 | 0.47101  | 0.051287 | 0.26869  |
| 3.94E-20 | 0.475185 | 1.11E-27 | 0.069127 | 0.13579  | 0.09765  | 0.03489  | 0.153361 | 0.00088  |
| 5.07E-30 | 0.359964 | 9.85E-16 | 0.052489 | 0.25762  | 0.025392 | 0.58414  | 0.087919 | 0.05763  |
| 5.66E-42 | 0.636858 | 1.73E-54 | 0.213139 | 3.37E-06 | 0.132956 | 0.004    | 0.264044 | 6.88E-09 |
| 1.89E-16 | 0.415034 | 7.19E-21 | 0.075377 | 0.10376  | 0.04262  | 0.35811  | 0.058585 | 0.20633  |
| 1.38E-11 | 0.401603 | 1.58E-19 | 0.021858 | 0.63754  | 0.123165 | 0.00771  | 0.133161 | 0.00394  |
| 0.01157  | 0.115296 | 0.01266  | 0.067045 | 0.14801  | 0.040094 | 0.38734  | 0.084369 | 0.06852  |
| 1.97E-20 | 0.424032 | 8.36E-22 | -0.0181  | 0.69641  | -0.01762 | 0.70412  | 0.136493 | 0.00312  |
| 7.55E-19 | 0.343463 | 2.24E-14 | 0.228478 | 6.03E-07 | 0.025219 | 0.58671  | 0.079953 | 0.08436  |
| 3.54E-18 | 0.456029 | 2.31E-25 | 0.122349 | 0.00812  | -0.00379 | 0.93497  | 0.039615 | 0.39303  |
| 9.47E-18 | 0.33804  | 6.02E-14 | 0.019435 | 0.67528  | 0.003583 | 0.93844  | 0.02973  | 0.52159  |
| 0.00053  | 0.144594 | 0.00173  | -0.00465 | 0.92022  | 0.029027 | 0.5315   | -0.06472 | 0.16263  |
| 1.77E-06 | 0.333194 | 1.43E-13 | 0.038652 | 0.40465  | 0.108637 | 0.01886  | -0.01354 | 0.77039  |
| 1.90E-11 | 0.227472 | 6.77E-07 | 0.163848 | 0.00038  | 0.014222 | 0.75921  | 0.05864  | 0.2059   |
| 8.77E-52 | 0.581017 | 1.64E-43 | 0.074623 | 0.10728  | 0.036518 | 0.43111  | 0.14313  | 0.00193  |
| 0.03355  | 0.231931 | 4.02E-07 | 0.054241 | 0.24205  | 0.080179 | 0.08348  | -0.11335 | 0.01426  |
| 0.01656  | 0.017776 | 0.70161  | -0.00073 | 0.98746  | -0.04693 | 0.31155  | 0.013394 | 0.77282  |
| 7.51E-11 | 0.328148 | 3.47E-13 | 0.113462 | 0.01416  | 0.05699  | 0.21897  | 0.27549  | 1.40E-09 |
| 8.65E-05 | 0.245028 | 8.19E-08 | 0.00178  | 0.9694   | -0.01169 | 0.80111  | -0.05519 | 0.23392  |
| 0.00208  | 0.14099  | 0.00226  | -0.01722 | 0.7105   | -0.05504 | 0.23515  | -0.00809 | 0.86154  |
| 4.94E-18 | 0.308833 | 8.88E-12 | 0.012461 | 0.78826  | -0.02528 | 0.58586  | 0.072892 | 0.1157   |
| 4.17E-08 | 0.356484 | 1.93E-15 | 0.01396  | 0.76351  | 0.097767 | 0.03467  | 0.000393 | 0.99325  |
| 1.13E-08 | 0.113839 | 0.01384  | 0.110482 | 0.01692  | -0.00241 | 0.95861  | 0.053645 | 0.24727  |
| 5.74E-15 | 0.293334 | 1.01E-10 | -0.00655 | 0.88774  | -0.0325  | 0.48355  | 0.087193 | 0.05973  |
| 0.11911  | 0.021058 | 0.64991  | 0.054961 | 0.23584  | 0.043919 | 0.34364  | -0.04457 | 0.33648  |
| 0.00018  | 0.08233  | 0.0755   | 0.080791 | 0.08115  | -0.03714 | 0.42329  | 0.158285 | 0.0006   |
| 7.53E-44 | 0.512764 | 1.13E-32 | 0.02794  | 0.54698  | 0.029454 | 0.52546  | 0.073944 | 0.11052  |
| 1.55E-23 | 0.446814 | 2.68E-24 | 0.138333 | 0.00274  | 0.013033 | 0.77878  | 0.255322 | 2.20E-08 |
| 1.30E-22 | 0.490933 | 1.07E-29 | 0.084563 | 0.06788  | 0.130768 | 0.00465  | 0.053766 | 0.2462   |
| 0.36406  | -0.04812 | 0.29939  | -0.02187 | 0.63743  | -0.04979 | 0.28291  | 0.037324 | 0.421    |
| 0.99127  | 0.056488 | 0.22307  | 0.034924 | 0.4515   | 0.04264  | 0.35789  | -0.03076 | 0.50727  |
| 6.02E-59 | 0.769854 | 9.82E-93 | 0.142645 | 0.002    | 0.116781 | 0.01155  | 0.207571 | 6.10E-06 |
| 6.49E-06 | 0.25077  | 3.96E-08 | -0.02372 | 0.60919  | -0.04367 | 0.3464   | 0.11252  | 0.01498  |
| 0.01607  | 0.197961 | 1.64E-05 | -0.07401 | 0.11022  | -0.01691 | 0.71545  | -0.00125 | 0.97843  |

|          |          |          |          |          |          |         |          |          |
|----------|----------|----------|----------|----------|----------|---------|----------|----------|
| 2.81E-21 | 0.417971 | 3.59E-21 | 0.026223 | 0.57189  | -0.00904 | 0.84558 | -0.03202 | 0.48998  |
| 2.53E-08 | 0.096971 | 0.03618  | 0.016625 | 0.72009  | -0.06186 | 0.18202 | 0.143955 | 0.00182  |
| 2.91E-16 | 0.431636 | 1.29E-22 | 0.010109 | 0.82753  | 0.067615 | 0.14458 | 0.046929 | 0.31154  |
| 3.98E-10 | 0.263637 | 7.27E-09 | 0.047864 | 0.30199  | -0.00382 | 0.93436 | -0.01635 | 0.72455  |
| 0.77869  | -0.01953 | 0.67384  | -0.05192 | 0.26279  | -0.03157 | 0.49616 | -0.0979  | 0.03442  |
| 3.92E-44 | 0.624953 | 5.84E-52 | 0.091229 | 0.0488   | 0.109792 | 0.01762 | 0.082473 | 0.07499  |
| 0.05714  | 0.020177 | 0.66362  | -0.05036 | 0.27745  | -0.04221 | 0.36277 | 0.027597 | 0.55192  |
| 7.32E-48 | 0.643796 | 5.16E-56 | 0.078556 | 0.08995  | 0.071715 | 0.12172 | 0.140326 | 0.00237  |
| 2.95E-25 | 0.464339 | 2.38E-26 | 0.142419 | 0.00203  | 0.055349 | 0.23255 | 0.185954 | 5.28E-05 |
| 5.97E-34 | 0.445799 | 3.49E-24 | -0.01665 | 0.71965  | 0.043264 | 0.35088 | 0.136635 | 0.00309  |
| 1.01E-22 | 0.457379 | 1.60E-25 | 0.067325 | 0.14632  | 0.021986 | 0.63556 | 0.087269 | 0.0595   |
| 2.28E-08 | 0.21557  | 2.58E-06 | -0.06469 | 0.16282  | -0.0198  | 0.66953 | -0.12007 | 0.0094   |
| 1.96E-31 | 0.551727 | 1.49E-38 | 0.033454 | 0.47078  | 0.154304 | 0.00082 | 0.015888 | 0.73201  |
| 8.20E-05 | 0.280026 | 7.33E-10 | -0.03312 | 0.4752   | 0.047644 | 0.30423 | 0.043978 | 0.34298  |
| 8.47E-16 | 0.396466 | 4.98E-19 | 0.01417  | 0.76006  | 0.074305 | 0.10879 | 0.10102  | 0.02905  |
| 7.21E-10 | 0.379896 | 1.76E-17 | -0.01379 | 0.76624  | 0.056343 | 0.22426 | 0.101733 | 0.02793  |
| 1.17E-06 | 0.279036 | 8.45E-10 | 0.015344 | 0.74087  | 0.064878 | 0.16159 | -0.02286 | 0.62223  |
| 5.23E-13 | 0.42656  | 4.52E-22 | 0.197972 | 1.64E-05 | 0.091361 | 0.04848 | 0.146686 | 0.00148  |
| 5.97E-05 | 0.23698  | 2.20E-07 | 0.064612 | 0.16332  | 0.023387 | 0.61418 | -0.08952 | 0.05319  |
| 8.42E-24 | 0.372784 | 7.64E-17 | 0.042577 | 0.35859  | -0.00257 | 0.95584 | 0.118466 | 0.0104   |
| 0.01552  | 0.054563 | 0.23926  | 0.060428 | 0.19239  | -0.07694 | 0.09676 | 0.073595 | 0.11222  |
| 0.00015  | 0.147324 | 0.00141  | 0.10661  | 0.02121  | 0.085368 | 0.06529 | 0.210362 | 4.54E-06 |
| 7.68E-26 | 0.512113 | 1.39E-32 | 0.0709   | 0.12602  | 0.026676 | 0.56528 | 0.198988 | 1.48E-05 |
| 0.76268  | -0.00499 | 0.91428  | -0.05791 | 0.21161  | -0.13622 | 0.00318 | -0.00443 | 0.92395  |
| 3.60E-58 | 0.64841  | 4.74E-57 | 0.075835 | 0.10168  | 0.103652 | 0.02509 | 0.125243 | 0.00673  |
| 0.47543  | -0.06049 | 0.19189  | -0.00857 | 0.85354  | -0.01777 | 0.7017  | -0.08953 | 0.05318  |
| 2.90E-09 | 0.20313  | 9.68E-06 | -0.04797 | 0.30094  | -0.06446 | 0.16434 | -0.01692 | 0.7153   |
| 1.96E-37 | 0.536414 | 3.76E-36 | 0.028689 | 0.53629  | 0.110399 | 0.017   | 0.078142 | 0.09166  |
| 0.85739  | 0.034747 | 0.4538   | 0.00026  | 0.99553  | -0.04482 | 0.33379 | -0.02769 | 0.55057  |
| 9.75E-07 | 0.304297 | 1.84E-11 | 0.081171 | 0.07972  | 0.135074 | 0.00345 | 0.107234 | 0.02046  |
| 1.35E-09 | 0.177921 | 0.00011  | 0.051566 | 0.26609  | -0.02183 | 0.63803 | 0.085481 | 0.06494  |
| 0.00988  | 0.184552 | 6.02E-05 | 0.071685 | 0.12187  | 0.072375 | 0.11831 | -0.04252 | 0.35926  |
| 3.64E-11 | 0.297002 | 5.78E-11 | -0.00824 | 0.85896  | 0.024251 | 0.60116 | -0.0132  | 0.77605  |
| 9.23E-39 | 0.469846 | 5.09E-27 | 0.069795 | 0.13205  | 0.035238 | 0.44744 | 0.149896 | 0.00116  |
| 8.18E-12 | 0.172049 | 0.00019  | -0.03463 | 0.45528  | -0.04803 | 0.30036 | 0.164781 | 0.00035  |
| 4.90E-08 | 0.314305 | 3.63E-12 | 0.043673 | 0.34634  | 0.090051 | 0.0518  | 0.063866 | 0.16825  |
| 2.21E-13 | 0.264377 | 6.57E-09 | 0.071493 | 0.12288  | 0.074802 | 0.10644 | 0.070136 | 0.13017  |
| 2.38E-41 | 0.55221  | 1.24E-38 | 0.070788 | 0.12662  | 0.046243 | 0.31868 | 0.1616   | 0.00046  |
| 9.04E-46 | 0.576653 | 9.68E-43 | 0.028359 | 0.54099  | 0.023868 | 0.60692 | 0.108087 | 0.01947  |
| 2.24E-23 | 0.386528 | 4.33E-18 | 0.05428  | 0.24171  | 0.049821 | 0.28263 | 0.127605 | 0.00575  |
| 6.86E-42 | 0.56607  | 6.41E-41 | 0.046132 | 0.31985  | 0.022353 | 0.62993 | 0.084689 | 0.06747  |
| 6.16E-22 | 0.345591 | 1.51E-14 | 0.036814 | 0.42737  | -0.02599 | 0.57529 | 0.097013 | 0.0361   |
| 2.11E-20 | 0.368952 | 1.66E-16 | 0.008836 | 0.84896  | -0.00694 | 0.88108 | -0.00279 | 0.95203  |
| 0.00242  | 0.026556 | 0.56702  | 0.032855 | 0.47877  | -0.07865 | 0.08956 | -0.01771 | 0.70261  |
| 8.50E-26 | 0.405747 | 6.19E-20 | -0.00258 | 0.95571  | 0.017012 | 0.71387 | 0.161075 | 0.00048  |

|          |          |          |          |         |          |         |          |          |
|----------|----------|----------|----------|---------|----------|---------|----------|----------|
| 3.04E-31 | 0.489911 | 1.45E-29 | 0.045548 | 0.32601 | -0.00053 | 0.99081 | 0.111046 | 0.01636  |
| 4.80E-37 | 0.540728 | 8.13E-37 | 0.119791 | 0.00957 | 0.074146 | 0.10955 | 0.098752 | 0.03288  |
| 3.74E-25 | 0.500363 | 5.87E-31 | 0.076802 | 0.09738 | 0.061316 | 0.18592 | 0.217992 | 1.98E-06 |
| 4.71E-15 | 0.377949 | 2.64E-17 | 0.033833 | 0.46577 | 0.05817  | 0.20957 | -0.01907 | 0.68097  |
| 2.21E-13 | 0.44922  | 1.42E-24 | 0.02594  | 0.57605 | 0.127767 | 0.00569 | -0.0015  | 0.97421  |
| 1.09E-56 | 0.603591 | 1.09E-47 | 0.105601 | 0.02247 | 0.043892 | 0.34393 | 0.185526 | 5.49E-05 |
| 0.01468  | 0.226144 | 7.89E-07 | -0.00157 | 0.97303 | 0.050949 | 0.27187 | -0.10303 | 0.02598  |
| 1.30E-12 | 0.353662 | 3.32E-15 | 0.050732 | 0.27392 | 0.064502 | 0.16404 | 0.136884 | 0.00304  |
| 3.69E-07 | 0.296512 | 6.23E-11 | -0.00249 | 0.95719 | 0.052721 | 0.25552 | -0.00923 | 0.84237  |

| MMpink   | p.MMpink | MMviolet | p.MMviolet | MMwhite  | p.MMwhite | MMcyan   | p.MMcyan | MMred    |
|----------|----------|----------|------------|----------|-----------|----------|----------|----------|
| 0.144215 | 0.00178  | 0.290218 | 1.63E-10   | 0.207056 | 6.44E-06  | 0.258706 | 1.41E-08 | 0.332552 |
| 0.085951 | 0.06347  | 0.093695 | 0.04299    | 0.096944 | 0.03623   | 0.048705 | 0.29357  | 0.050925 |
| 0.310958 | 6.29E-12 | 0.201898 | 1.10E-05   | 0.270666 | 2.77E-09  | 0.076812 | 0.09733  | 0.073013 |
| 0.067969 | 0.14249  | 0.124693 | 0.00698    | 0.082212 | 0.07592   | 0.106272 | 0.02162  | 0.146649 |
| 0.269302 | 3.35E-09 | 0.236901 | 2.22E-07   | 0.278883 | 8.64E-10  | 0.124753 | 0.00695  | 0.252349 |
| 0.104897 | 0.02339  | 0.13984  | 0.00246    | 0.0899   | 0.0522    | 0.141462 | 0.00218  | 0.225491 |
| 0.183782 | 6.47E-05 | 0.324811 | 6.18E-13   | 0.254022 | 2.60E-08  | 0.282979 | 4.77E-10 | 0.21272  |
| 0.13545  | 0.00336  | 0.142184 | 0.00207    | 0.109097 | 0.01836   | 0.128873 | 0.00528  | 0.164774 |
| 0.080144 | 0.08362  | 0.070845 | 0.12632    | 0.039348 | 0.39624   | 0.080683 | 0.08155  | 0.083249 |
| 0.081113 | 0.07994  | 0.052442 | 0.25805    | 0.030335 | 0.51315   | 0.069188 | 0.13545  | 0.052209 |
| 0.387042 | 3.88E-18 | 0.514085 | 7.32E-33   | 0.455651 | 2.56E-25  | 0.396978 | 4.45E-19 | 0.277781 |
| 0.183423 | 6.69E-05 | 0.161063 | 0.00048    | 0.170633 | 0.00021   | 0.086831 | 0.0608   | 0.09456  |
| 0.172124 | 0.00019  | 0.043885 | 0.34401    | 0.082025 | 0.07659   | 0.004912 | 0.91569  | -0.00272 |
| 0.152546 | 0.00094  | 0.229089 | 5.61E-07   | 0.173083 | 0.00017   | 0.192161 | 2.91E-05 | 0.284505 |
| 0.054764 | 0.23753  | 0.103274 | 0.02563    | 0.054624 | 0.23873   | 0.105505 | 0.02259  | 0.082452 |
| 0.091108 | 0.04911  | 0.092046 | 0.04681    | 0.101289 | 0.02862   | 0.050636 | 0.27483  | 0.063976 |
| 0.224223 | 9.83E-07 | 0.166336 | 0.00031    | 0.198123 | 1.61E-05  | 0.085831 | 0.06384  | 0.064915 |
| 0.339341 | 4.76E-14 | 0.560804 | 4.88E-40   | 0.427312 | 3.76E-22  | 0.493863 | 4.38E-30 | 0.392911 |
| 0.016086 | 0.7288   | 0.009168 | 0.84336    | 0.02049  | 0.65874   | -0.00664 | 0.88618  | -0.01793 |
| 0.015852 | 0.73261  | 0.070888 | 0.12609    | 0.031937 | 0.49114   | 0.076961 | 0.09668  | 0.043556 |
| 0.108944 | 0.01852  | 0.125804 | 0.00649    | 0.127818 | 0.00567   | 0.077793 | 0.09312  | 0.124092 |
| 0.228336 | 6.13E-07 | 0.113337 | 0.01426    | 0.125894 | 0.00645   | 0.079985 | 0.08424  | 0.14277  |
| 0.084655 | 0.06758  | 0.239254 | 1.67E-07   | 0.120106 | 0.00938   | 0.272465 | 2.15E-09 | 0.271991 |
| 0.111744 | 0.0157   | 0.167775 | 0.00027    | 0.134773 | 0.00352   | 0.14694  | 0.00145  | 0.117345 |
| 0.017898 | 0.69967  | 0.020143 | 0.66416    | 0.025521 | 0.58224   | 0.01243  | 0.78877  | 4.77E-05 |
| 0.035005 | 0.45045  | 0.085884 | 0.06368    | 0.057666 | 0.21354   | 0.077133 | 0.09594  | 0.220053 |
| 0.321421 | 1.10E-12 | 0.382652 | 9.86E-18   | 0.37257  | 7.98E-17  | 0.270984 | 2.65E-09 | 0.175687 |
| 0.133827 | 0.00376  | 0.103105 | 0.02587    | 0.11304  | 0.01452   | 0.065194 | 0.15955  | 0.09115  |
| 0.151752 | 0.001    | 0.102279 | 0.0271     | 0.101695 | 0.02799   | 0.080408 | 0.0826   | 0.047028 |
| 0.230589 | 4.71E-07 | 0.147049 | 0.00144    | 0.188372 | 4.19E-05  | 0.067161 | 0.14731  | 0.018449 |
| 0.108232 | 0.01931  | 0.115403 | 0.01258    | 0.100445 | 0.02998   | 0.092439 | 0.04588  | 0.048129 |
| 0.011052 | 0.81172  | 0.049579 | 0.28498    | 0.032766 | 0.47995   | 0.027209 | 0.55753  | 0.062097 |
| 0.092856 | 0.0449   | 0.158883 | 0.00057    | 0.12612  | 0.00635   | 0.13271  | 0.00407  | 0.155124 |
| 0.012514 | 0.78738  | 0.004002 | 0.93126    | 0.004847 | 0.9168    | -0.00284 | 0.95113  | 0.00101  |
| 0.163625 | 0.00038  | 0.200526 | 1.26E-05   | 0.146117 | 0.00154   | 0.201237 | 1.18E-05 | 0.153587 |
| 0.088177 | 0.05689  | 0.057875 | 0.21189    | 0.072729 | 0.11652   | 0.029392 | 0.52635  | 0.010722 |
| 0.196709 | 1.86E-05 | 0.329983 | 2.52E-13   | 0.261725 | 9.40E-09  | 0.292506 | 1.15E-10 | 0.20815  |
| 0.066671 | 0.15029  | 0.052323 | 0.25913    | 0.059896 | 0.19634   | 0.019871 | 0.66843  | -0.00029 |
| 0.143609 | 0.00186  | 0.103707 | 0.02502    | 0.126869 | 0.00604   | 0.03802  | 0.41238  | 0.091849 |
| 0.07798  | 0.09234  | 0.234249 | 3.06E-07   | 0.126146 | 0.00634   | 0.247841 | 5.75E-08 | 0.321705 |
| 0.081703 | 0.07776  | 0.06491  | 0.16138    | 0.039479 | 0.39466   | 0.07527  | 0.10426  | 0.040778 |
| 0.009494 | 0.83787  | 0.020792 | 0.65403    | 0.015339 | 0.74093   | 0.017582 | 0.70472  | 0.007412 |
| 0.003676 | 0.93686  | 0.102544 | 0.0267     | 0.013625 | 0.76901   | 0.12732  | 0.00586  | 0.271741 |
| -0.0617  | 0.18316  | -0.02342 | 0.61374    | -0.03081 | 0.50654   | -0.04107 | 0.3759   | 0.115457 |

|          |         |          |         |          |         |          |         |          |
|----------|---------|----------|---------|----------|---------|----------|---------|----------|
| -0.07436 | 0.10852 | 0.006411 | 0.89011 | -0.03278 | 0.47976 | 0.010537 | 0.82034 | 0.103451 |
| 0.04398  | 0.34296 | -0.08692 | 0.06054 | -0.03019 | 0.51524 | -0.11255 | 0.01495 | -0.0641  |
| -0.00545 | 0.90641 | -0.02132 | 0.64586 | -0.0237  | 0.60952 | -0.0339  | 0.46494 | 0.04201  |
| -0.02971 | 0.52194 | 0.080335 | 0.08288 | -0.00234 | 0.95975 | 0.113079 | 0.01449 | 0.21194  |
| 0.093395 | 0.04367 | 0.11252  | 0.01498 | 0.103967 | 0.02465 | 0.070919 | 0.12592 | 0.174295 |
| -0.11391 | 0.01378 | -0.02649 | 0.56798 | -0.07238 | 0.1183  | -0.00328 | 0.94369 | 0.025364 |
| -0.00188 | 0.96765 | 0.048917 | 0.29147 | -0.00431 | 0.92598 | 0.062185 | 0.17975 | 0.118171 |
| -0.02967 | 0.52245 | 0.052136 | 0.26084 | -0.01533 | 0.74117 | 0.070406 | 0.12869 | 0.189277 |
| -0.07011 | 0.1303  | -0.00865 | 0.85211 | -0.06121 | 0.18669 | 0.035474 | 0.44439 | 0.068189 |
| 0.03305  | 0.47616 | 0.133456 | 0.00386 | 0.066065 | 0.15404 | 0.140454 | 0.00235 | 0.196315 |
| -0.06299 | 0.17414 | 0.076191 | 0.10008 | -0.01765 | 0.7037  | 0.110377 | 0.01703 | 0.195823 |
| -0.07066 | 0.12732 | 0.008954 | 0.84697 | -0.04043 | 0.38333 | 0.01646  | 0.72276 | 0.099747 |
| -0.02943 | 0.52574 | 0.098764 | 0.03286 | -0.00712 | 0.87807 | 0.134971 | 0.00347 | 0.289042 |
| -0.11398 | 0.01371 | 0.066396 | 0.15198 | -0.05874 | 0.20513 | 0.130499 | 0.00473 | 0.194475 |
| 0.005665 | 0.90283 | 0.04273  | 0.35687 | -0.01678 | 0.71761 | 0.069615 | 0.13305 | 0.122445 |
| 0.017872 | 0.70007 | 0.089523 | 0.0532  | 0.033325 | 0.47249 | 0.11057  | 0.01683 | 0.175693 |
| 0.00953  | 0.83727 | -0.02633 | 0.57026 | -0.02088 | 0.65266 | -0.02522 | 0.58671 | 0.118407 |
| 0.027433 | 0.55429 | 0.127553 | 0.00577 | 0.047909 | 0.30153 | 0.134472 | 0.0036  | 0.354301 |
| -0.01585 | 0.73259 | 0.006239 | 0.89303 | -0.00904 | 0.84557 | 0.014413 | 0.75607 | 0.097885 |
| 0.125214 | 0.00674 | 0.037172 | 0.42289 | 0.132346 | 0.00417 | -0.04385 | 0.34435 | 0.015302 |
| -0.01268 | 0.78467 | 0.155531 | 0.00074 | 0.034874 | 0.45214 | 0.177216 | 0.00012 | 0.43545  |
| -0.04272 | 0.35697 | -0.0179  | 0.69967 | -0.06769 | 0.14413 | 0.010479 | 0.82131 | 0.05799  |
| -0.00662 | 0.88658 | 0.08516  | 0.06595 | 0.026579 | 0.56668 | 0.090469 | 0.05072 | 0.253068 |
| 0.08048  | 0.08233 | 0.031622 | 0.49542 | 0.062789 | 0.17555 | 0.008381 | 0.85666 | -0.02988 |
| 0.0298   | 0.52062 | 0.006111 | 0.89522 | -0.01338 | 0.77309 | 0.019665 | 0.67167 | 0.14652  |
| -0.03473 | 0.45402 | 0.061292 | 0.18609 | 0.005348 | 0.90824 | 0.083147 | 0.07263 | 0.165777 |
| -0.0708  | 0.12658 | -0.09644 | 0.03721 | -0.09138 | 0.04843 | -0.08746 | 0.05896 | -0.15062 |
| -0.00461 | 0.92086 | 0.045031 | 0.33154 | -0.00553 | 0.90521 | 0.057645 | 0.21371 | 0.187685 |
| -0.00984 | 0.83207 | 0.037868 | 0.41425 | -0.01243 | 0.78885 | 0.065753 | 0.156   | 0.269816 |
| -0.03502 | 0.4503  | 0.00532  | 0.90871 | -0.02849 | 0.53907 | 0.021808 | 0.63831 | 0.154019 |
| 0.084057 | 0.06955 | 0.05555  | 0.23086 | 0.052836 | 0.25448 | 0.036274 | 0.43419 | 0.145974 |
| 0.001736 | 0.97016 | 0.113218 | 0.01437 | 0.030245 | 0.5144  | 0.129056 | 0.00522 | 0.321189 |
| 0.028015 | 0.54591 | 0.034884 | 0.45202 | -0.00443 | 0.92392 | 0.030538 | 0.51033 | 0.218702 |
| 0.139075 | 0.0026  | 0.027568 | 0.55233 | 0.125792 | 0.00649 | -0.05084 | 0.27288 | -0.00893 |
| -0.0632  | 0.17271 | 0.058104 | 0.21008 | -0.02565 | 0.58039 | 0.099028 | 0.03239 | 0.227664 |
| 0.010626 | 0.81885 | 0.131411 | 0.00445 | 0.044852 | 0.33347 | 0.147372 | 0.0014  | 0.335035 |
| -0.13651 | 0.00312 | -0.07269 | 0.11669 | -0.11294 | 0.01461 | -0.02585 | 0.5774  | -0.06774 |
| 0.043362 | 0.34979 | 0.008594 | 0.85305 | 0.07301  | 0.11511 | -0.0485  | 0.29559 | -0.12025 |
| 0.0413   | 0.3732  | 0.076051 | 0.1007  | 0.031853 | 0.49229 | 0.075186 | 0.10465 | 0.196815 |
| 0.026399 | 0.56932 | 0.044489 | 0.3374  | 0.03234  | 0.48569 | 0.032615 | 0.48199 | 0.147165 |
| -0.02281 | 0.62296 | 0.07733  | 0.09509 | -0.00622 | 0.89332 | 0.095714 | 0.03868 | 0.275856 |
| 0.071459 | 0.12306 | 0.089852 | 0.05233 | 0.058522 | 0.20682 | 0.076703 | 0.09781 | 0.19167  |
| -0.14923 | 0.00122 | -0.05032 | 0.27781 | -0.10535 | 0.02279 | -0.00334 | 0.9426  | 0.075619 |
| 0.03371  | 0.46739 | 0.125419 | 0.00665 | 0.068259 | 0.14079 | 0.138512 | 0.0027  | 0.282447 |
| -0.00292 | 0.94987 | -0.02376 | 0.60849 | -0.03484 | 0.4526  | -0.01116 | 0.80997 | 0.070514 |

|          |          |          |          |          |          |          |          |          |
|----------|----------|----------|----------|----------|----------|----------|----------|----------|
| -0.03773 | 0.4159   | -0.00556 | 0.90457  | -0.05288 | 0.25407  | 0.008529 | 0.85414  | 0.276771 |
| -0.08495 | 0.06663  | 0.02077  | 0.65438  | -0.02942 | 0.52593  | 0.062753 | 0.1758   | 0.079608 |
| -0.00519 | 0.91094  | 0.136552 | 0.00311  | 0.039721 | 0.39177  | 0.153423 | 0.00088  | 0.350396 |
| -0.00368 | 0.93679  | 0.07829  | 0.09104  | -0.01154 | 0.80349  | 0.117223 | 0.01124  | 0.249973 |
| -0.07864 | 0.08962  | 0.126412 | 0.00623  | -0.01153 | 0.80377  | 0.177899 | 0.00011  | 0.35792  |
| 0.056095 | 0.2263   | 0.17873  | 0.0001   | 0.074178 | 0.1094   | 0.201326 | 1.17E-05 | 0.440426 |
| -0.0333  | 0.47279  | -0.02212 | 0.63349  | -0.03217 | 0.48804  | -0.01137 | 0.80639  | 0.114348 |
| -0.06107 | 0.1877   | 0.114007 | 0.0137   | 0.012333 | 0.79038  | 0.15043  | 0.00111  | 0.327595 |
| 0.004251 | 0.927    | 0.10167  | 0.02803  | 0.003091 | 0.94688  | 0.137103 | 0.00299  | 0.244266 |
| 0.021046 | 0.65009  | 0.039257 | 0.39733  | -0.00652 | 0.88818  | 0.067336 | 0.14625  | 0.134445 |
| -0.07868 | 0.08946  | -0.08538 | 0.06526  | -0.08547 | 0.06497  | -0.07227 | 0.11884  | -0.09384 |
| -0.04643 | 0.31673  | -0.00909 | 0.84464  | -0.06572 | 0.1562   | 0.027797 | 0.54903  | 0.083012 |
| -0.04575 | 0.32382  | 0.03714  | 0.42329  | -0.03581 | 0.44009  | 0.090045 | 0.05182  | 0.145175 |
| 0.040617 | 0.38116  | 0.112046 | 0.01542  | 0.014905 | 0.74802  | 0.145106 | 0.00167  | 0.217787 |
| -0.04562 | 0.32522  | -0.22536 | 8.63E-07 | -0.11357 | 0.01406  | -0.25869 | 1.41E-08 | -0.32164 |
| -0.08653 | 0.0617   | -0.12843 | 0.00544  | -0.09418 | 0.04191  | -0.12629 | 0.00628  | -0.13168 |
| -0.014   | 0.7629   | 0.128706 | 0.00534  | 0.028693 | 0.53623  | 0.154438 | 0.00081  | 0.264309 |
| -0.03901 | 0.40026  | -0.01209 | 0.79447  | -0.08922 | 0.05401  | 0.048883 | 0.29181  | 0.13846  |
| -0.01525 | 0.74234  | -0.01814 | 0.69579  | -0.01047 | 0.82148  | -0.03815 | 0.41078  | 0.076651 |
| 0.042127 | 0.3637   | 0.000293 | 0.99496  | 0.00946  | 0.83844  | -0.00755 | 0.87072  | 0.029246 |
| 0.188976 | 3.96E-05 | 0.060735 | 0.19013  | 0.174597 | 0.00015  | -0.02818 | 0.54355  | 0.031464 |
| -0.00594 | 0.89816  | 0.012904 | 0.78092  | -0.00894 | 0.84727  | 0.025958 | 0.57579  | 0.107721 |
| 0.081852 | 0.07722  | -0.0726  | 0.11716  | 0.052746 | 0.25529  | -0.13648 | 0.00312  | -0.30658 |
| -0.0369  | 0.42627  | 0.123474 | 0.00755  | 0.026931 | 0.56155  | 0.141162 | 0.00223  | 0.3876   |
| -0.05659 | 0.22226  | -0.08425 | 0.06892  | -0.06149 | 0.18466  | -0.10032 | 0.03019  | 0.018137 |
| 0.102618 | 0.02659  | -0.00759 | 0.87014  | 0.020748 | 0.65472  | -0.02446 | 0.59804  | 0.024728 |
| -0.088   | 0.0574   | 0.014318 | 0.75762  | -0.06183 | 0.18225  | 0.059402 | 0.20006  | -0.01184 |
| -0.01963 | 0.6722   | 0.031383 | 0.49869  | -0.01666 | 0.71952  | 0.06032  | 0.19318  | 0.207388 |
| -0.01149 | 0.80446  | 0.0823   | 0.07561  | -0.0032  | 0.945    | 0.119507 | 0.00974  | 0.175252 |
| 0.040159 | 0.38657  | -0.12868 | 0.00535  | 0.014507 | 0.75452  | -0.18826 | 4.24E-05 | -0.38923 |
| 0.000317 | 0.99455  | -0.01649 | 0.72222  | -0.07723 | 0.09552  | 0.049471 | 0.28604  | 0.125484 |
| 0.010037 | 0.82874  | -0.00361 | 0.93798  | 0.060194 | 0.19411  | -0.04565 | 0.3249   | -0.09411 |
| 0.092097 | 0.04669  | -0.00323 | 0.94458  | 0.041452 | 0.37145  | -0.01255 | 0.78675  | -0.11328 |
| -0.03698 | 0.42532  | -0.12067 | 0.00905  | -0.01363 | 0.76886  | -0.16258 | 0.00042  | -0.25439 |
| 0.107376 | 0.02029  | 0.138169 | 0.00277  | 0.061802 | 0.18245  | 0.148391 | 0.0013   | 0.322821 |
| 0.126301 | 0.00628  | 0.075032 | 0.10536  | 0.140714 | 0.0023   | -0.00074 | 0.98735  | 0.000477 |
| -0.06997 | 0.13106  | -0.01668 | 0.71918  | -0.04651 | 0.31589  | 0.001556 | 0.97324  | 0.042366 |
| 0.235737 | 2.56E-07 | 0.10471  | 0.02364  | 0.190171 | 3.53E-05 | 0.023652 | 0.61017  | 0.003589 |
| 0.132602 | 0.0041   | 0.070557 | 0.12787  | 0.118558 | 0.01034  | 0.039501 | 0.39439  | -0.02457 |
| 0.086576 | 0.06156  | -0.09172 | 0.0476   | 0.041222 | 0.3741   | -0.16322 | 0.0004   | -0.34416 |
| 0.034861 | 0.45231  | 0.078279 | 0.09109  | 0.038561 | 0.40576  | 0.054602 | 0.23893  | 0.205471 |
| -0.05706 | 0.21843  | -0.07554 | 0.10304  | -0.053   | 0.25298  | -0.07959 | 0.08576  | -0.05776 |
| -0.01864 | 0.68781  | 0.069401 | 0.13425  | -0.00157 | 0.97299  | 0.088756 | 0.05528  | 0.238878 |
| 0.05126  | 0.26894  | 0.058627 | 0.206    | 0.027792 | 0.5491   | 0.064203 | 0.16601  | 0.097377 |
| -0.03147 | 0.49756  | 0.117748 | 0.01088  | -0.00939 | 0.83959  | 0.170778 | 0.00021  | 0.269519 |

|          |          |          |         |          |         |          |          |          |
|----------|----------|----------|---------|----------|---------|----------|----------|----------|
| 0.011927 | 0.79713  | -0.14985 | 0.00116 | -0.01365 | 0.7686  | -0.20411 | 8.75E-06 | -0.32834 |
| -0.06503 | 0.16062  | 0.058383 | 0.2079  | -0.03269 | 0.481   | 0.093424 | 0.0436   | 0.266225 |
| 0.027282 | 0.55646  | -0.11393 | 0.01376 | 0.002214 | 0.96194 | -0.17713 | 0.00012  | -0.31986 |
| 0.138838 | 0.00264  | -0.00956 | 0.8367  | 0.111664 | 0.01577 | -0.10099 | 0.0291   | -0.10683 |
| 0.103094 | 0.02589  | 0.007839 | 0.86583 | 0.095967 | 0.03816 | -0.05797 | 0.21114  | -0.13101 |
| 0.028365 | 0.5409   | 0.002387 | 0.95897 | 0.032236 | 0.4871  | -0.01836 | 0.69235  | -0.00311 |
| 0.039613 | 0.39306  | -0.08831 | 0.05653 | 0.034468 | 0.45743 | -0.17353 | 0.00016  | -0.21329 |
| 0.004677 | 0.9197   | 0.138601 | 0.00269 | 0.03874  | 0.40358 | 0.168985 | 0.00024  | 0.364527 |
| 0.226857 | 7.27E-07 | 0.086517 | 0.06174 | 0.169742 | 0.00023 | 0.016481 | 0.72242  | -0.02596 |
| -0.09155 | 0.04801  | 0.028128 | 0.54429 | -0.06332 | 0.17192 | 0.074932 | 0.10583  | 0.10672  |
| -0.05701 | 0.2188   | 0.083948 | 0.06991 | -0.01755 | 0.7052  | 0.120421 | 0.00919  | 0.29593  |
| 0.031688 | 0.49453  | -0.07018 | 0.1299  | 0.0256   | 0.58107 | -0.12165 | 0.0085   | -0.26859 |
| 0.116762 | 0.01157  | -0.02748 | 0.55366 | 0.087524 | 0.05876 | -0.1059  | 0.02208  | -0.12677 |
| -0.02215 | 0.6331   | 0.091234 | 0.04879 | 0.034505 | 0.45695 | 0.08228  | 0.07568  | 0.295411 |
| -0.02288 | 0.62185  | 0.006953 | 0.88089 | 0.038971 | 0.40078 | -0.03465 | 0.45505  | 0.034974 |
| -0.03484 | 0.45254  | -0.0645  | 0.16405 | -0.04137 | 0.37237 | -0.0616  | 0.1839   | 0.00215  |
| -0.11174 | 0.0157   | -0.0936  | 0.04321 | -0.11364 | 0.01401 | -0.05306 | 0.25246  | -0.02426 |
| 0.060682 | 0.19052  | -0.02943 | 0.5258  | 0.049762 | 0.28321 | -0.08556 | 0.0647   | -0.17312 |
| -0.07683 | 0.09724  | -0.01605 | 0.72943 | -0.07373 | 0.11155 | 0.020441 | 0.6595   | 0.017375 |
| 0.064364 | 0.16494  | 0.075978 | 0.10103 | 0.134683 | 0.00355 | 0.001796 | 0.96911  | 0.070939 |
| -0.01156 | 0.80327  | 0.064284 | 0.16547 | -0.01023 | 0.82555 | 0.08327  | 0.07221  | 0.173619 |
| -0.13249 | 0.00413  | -0.0818  | 0.07741 | -0.10217 | 0.02726 | -0.04837 | 0.29687  | -0.0313  |
| -0.00506 | 0.91312  | 0.006391 | 0.89044 | -0.03324 | 0.47359 | 0.028036 | 0.54561  | 0.084039 |
| 0.060291 | 0.1934   | -0.13559 | 0.00333 | 0.016317 | 0.72506 | -0.21717 | 2.17E-06 | -0.25523 |
| 0.04588  | 0.3225   | 0.09412  | 0.04205 | 0.034735 | 0.45395 | 0.12087  | 0.00893  | 0.248643 |
| -0.0526  | 0.25662  | -0.02205 | 0.63456 | -0.05916 | 0.20188 | -0.00912 | 0.84413  | 0.072409 |
| -0.01767 | 0.70328  | -0.0059  | 0.89875 | -0.02322 | 0.61678 | -0.00196 | 0.96623  | 0.084767 |
| -0.09613 | 0.03784  | 0.042657 | 0.35769 | -0.05743 | 0.21539 | 0.093334 | 0.0438   | 0.213902 |
| -0.06818 | 0.14124  | -0.05409 | 0.24335 | -0.02598 | 0.57553 | -0.06729 | 0.14655  | -0.10819 |
| -0.13895 | 0.00262  | -0.04245 | 0.36008 | -0.08792 | 0.05761 | -0.0011  | 0.98113  | 0.061003 |
| 0.112482 | 0.01502  | 0.004613 | 0.9208  | 0.105379 | 0.02276 | -0.07191 | 0.12072  | -0.14788 |
| 0.075179 | 0.10468  | 0.013375 | 0.77313 | 0.020965 | 0.65134 | -0.00578 | 0.90092  | 0.089481 |
| -0.08394 | 0.06994  | -0.00121 | 0.97919 | -0.06196 | 0.18131 | 0.043494 | 0.34833  | 0.072231 |
| -0.05085 | 0.27276  | 0.040844 | 0.37851 | -0.01198 | 0.79618 | 0.064359 | 0.16498  | 0.161945 |
| -0.05024 | 0.27859  | 0.043071 | 0.35304 | -0.01441 | 0.7562  | 0.060058 | 0.19513  | 0.135049 |
| -0.00352 | 0.93947  | 0.018288 | 0.69345 | -0.02033 | 0.66119 | 0.027883 | 0.5478   | 0.100194 |
| 0.110467 | 0.01693  | 0.022069 | 0.6343  | 0.065534 | 0.15738 | -0.00367 | 0.93689  | 0.106413 |
| -0.07955 | 0.08594  | 0.05685  | 0.22011 | -0.03998 | 0.38868 | 0.103269 | 0.02564  | 0.189469 |
| -0.08726 | 0.05954  | 0.040734 | 0.3798  | -0.03136 | 0.49895 | 0.062335 | 0.1787   | 0.187263 |
| -0.04778 | 0.30285  | 0.102888 | 0.02619 | -0.00222 | 0.96179 | 0.13797  | 0.00281  | 0.289751 |
| 0.037804 | 0.41505  | 0.08879  | 0.05519 | 0.053466 | 0.24885 | 0.070305 | 0.12924  | 0.214135 |
| 0.009628 | 0.83561  | -0.02459 | 0.59615 | 0.021161 | 0.64831 | -0.0512  | 0.26952  | -0.10179 |
| -0.00403 | 0.93086  | 0.043571 | 0.34748 | 0.015437 | 0.73935 | 0.022824 | 0.62274  | 0.187362 |
| -0.09091 | 0.0496   | -0.00067 | 0.98845 | -0.06133 | 0.18582 | 0.023373 | 0.6144   | 0.091953 |
| -0.08148 | 0.07859  | 0.001089 | 0.98127 | -0.05081 | 0.27321 | 0.02547  | 0.58299  | 0.16072  |



|          |         |          |          |          |          |          |          |          |
|----------|---------|----------|----------|----------|----------|----------|----------|----------|
| 0.030819 | 0.50645 | 0.094105 | 0.04208  | 0.033333 | 0.47239  | 0.125004 | 0.00684  | 0.172671 |
| 0.030397 | 0.51229 | 0.01431  | 0.75776  | 0.013276 | 0.77478  | 0.0148   | 0.74973  | 0.050213 |
| -0.06972 | 0.13246 | -0.03863 | 0.40487  | -0.07109 | 0.125    | -0.02104 | 0.65025  | -0.10624 |
| -0.00443 | 0.92393 | 0.131925 | 0.00429  | 0.059009 | 0.20306  | 0.125782 | 0.00649  | 0.306121 |
| -0.15129 | 0.00104 | -0.20913 | 5.17E-06 | -0.18545 | 5.53E-05 | -0.18864 | 4.09E-05 | -0.20317 |
| -0.10888 | 0.01859 | -0.03906 | 0.3997   | -0.03696 | 0.42556  | -0.05584 | 0.22842  | 0.08537  |
| -0.00283 | 0.95134 | 0.057153 | 0.21766  | 0.007986 | 0.86334  | 0.058216 | 0.2092   | 0.151326 |
| 0.101014 | 0.02906 | 0.104849 | 0.02345  | 0.094787 | 0.04061  | 0.057714 | 0.21317  | 0.188695 |
| 0.111142 | 0.01627 | 0.010069 | 0.8282   | 0.030197 | 0.51508  | -0.00145 | 0.97499  | 0.129754 |
| 0.139327 | 0.00255 | 0.119765 | 0.00958  | 0.069918 | 0.13137  | 0.124534 | 0.00705  | 0.262558 |
| -0.0463  | 0.31812 | -0.02993 | 0.51883  | -0.07639 | 0.09921  | 0.00411  | 0.92941  | 0.006137 |
| 0.025679 | 0.5799  | 0.063192 | 0.17279  | -0.00365 | 0.93736  | 0.086442 | 0.06197  | 0.269193 |
| 0.018349 | 0.69247 | 0.144306 | 0.00177  | 0.04085  | 0.37844  | 0.168759 | 0.00025  | 0.315621 |
| 0.105675 | 0.02238 | 0.043994 | 0.3428   | 0.101024 | 0.02904  | -0.00811 | 0.86127  | -0.04103 |
| 0.005301 | 0.90904 | 0.057122 | 0.21791  | 0.017636 | 0.70385  | 0.060522 | 0.1917   | 0.283629 |
| -0.06597 | 0.1546  | 0.123562 | 0.00751  | -0.00599 | 0.89733  | 0.172007 | 0.00019  | 0.355325 |
| 0.021174 | 0.6481  | 0.083984 | 0.06979  | -0.00065 | 0.98888  | 0.115134 | 0.01279  | 0.264305 |
| 0.055106 | 0.23461 | 0.068541 | 0.13915  | 0.031524 | 0.49677  | 0.061434 | 0.18507  | 0.184793 |
| -0.13613 | 0.0032  | -0.16842 | 0.00026  | -0.13607 | 0.00321  | -0.15338 | 0.00088  | -0.21722 |
| -0.05046 | 0.27646 | 0.012265 | 0.79151  | -0.02047 | 0.65901  | 0.009359 | 0.84013  | 0.147709 |
| -0.09062 | 0.05035 | -0.09761 | 0.03496  | -0.10251 | 0.02675  | -0.05997 | 0.1958   | -0.08255 |
| -0.03632 | 0.43358 | -0.13217 | 0.00422  | -0.08597 | 0.06342  | -0.14593 | 0.00157  | -0.14673 |
| -0.05766 | 0.21358 | 0.049957 | 0.28132  | -0.01445 | 0.75548  | 0.07711  | 0.09604  | 0.13884  |
| -0.16238 | 0.00043 | -0.03933 | 0.39641  | -0.11105 | 0.01636  | 0.00742  | 0.87294  | 0.11384  |
| -0.10211 | 0.02736 | 0.059639 | 0.19827  | -0.04146 | 0.37137  | 0.105777 | 0.02225  | 0.28591  |
| -0.0464  | 0.31709 | 0.120937 | 0.00889  | 0.00836  | 0.85701  | 0.149202 | 0.00122  | 0.286068 |
| 0.046633 | 0.31461 | 0.107413 | 0.02025  | 0.040298 | 0.38492  | 0.118489 | 0.01038  | 0.132903 |
| -0.07973 | 0.08523 | -0.0217  | 0.6399   | -0.03569 | 0.44165  | -0.01607 | 0.72914  | 0.186219 |
| -0.01813 | 0.69601 | 0.059429 | 0.19985  | -0.00125 | 0.97859  | 0.065446 | 0.15794  | 0.204172 |
| 0.033994 | 0.46365 | -0.04635 | 0.3176   | -0.04229 | 0.36187  | -0.04018 | 0.38632  | 0.023862 |
| 0.024214 | 0.6017  | -0.01504 | 0.74579  | -0.01428 | 0.75821  | -0.00569 | 0.90246  | 0.005867 |
| -0.09804 | 0.03416 | 0.024847 | 0.59224  | -0.05508 | 0.23484  | 0.062032 | 0.18083  | 0.217901 |
| -0.00315 | 0.94588 | 0.053401 | 0.24943  | -0.01724 | 0.71022  | 0.106774 | 0.02101  | 0.042618 |
| 0.015869 | 0.73233 | 0.01198  | 0.79624  | -0.02098 | 0.65105  | 0.030165 | 0.51552  | 0.137182 |
| 0.033597 | 0.46888 | -0.01932 | 0.67709  | 0.017911 | 0.69946  | -0.03313 | 0.47512  | -0.04657 |
| -0.03098 | 0.50428 | 0.025075 | 0.58885  | -0.01776 | 0.70194  | 0.045402 | 0.32757  | 0.114922 |
| -0.12994 | 0.00492 | -0.02398 | 0.60518  | -0.10221 | 0.0272   | 0.03807  | 0.41176  | 0.046792 |
| -0.06681 | 0.14942 | 0.050766 | 0.27359  | -0.04287 | 0.35526  | 0.09642  | 0.03726  | 0.212603 |
| 0.00792  | 0.86446 | 0.118936 | 0.0101   | 0.052735 | 0.25539  | 0.118024 | 0.01069  | 0.274607 |
| 0.074438 | 0.10816 | 0.079603 | 0.08573  | 0.043962 | 0.34317  | 0.078195 | 0.09144  | 0.122775 |
| 0.054587 | 0.23905 | -0.00388 | 0.93334  | 0.017836 | 0.70066  | -0.03744 | 0.41957  | 0.104363 |
| -0.12978 | 0.00497 | -0.00266 | 0.95429  | -0.08163 | 0.07802  | 0.036218 | 0.4349   | 0.127155 |
| 0.010946 | 0.8135  | 0.040566 | 0.38176  | -0.0112  | 0.80929  | 0.051363 | 0.26798  | 0.206913 |
| -0.03535 | 0.44598 | -0.05345 | 0.24903  | -0.05825 | 0.20898  | -0.04793 | 0.30131  | 0.050451 |
| -0.00427 | 0.92672 | 0.019017 | 0.68188  | 0.073479 | 0.11279  | -0.02191 | 0.6367   | 0.024349 |

|          |          |          |         |          |          |          |          |          |
|----------|----------|----------|---------|----------|----------|----------|----------|----------|
| -0.15758 | 0.00063  | -0.07406 | 0.10997 | -0.0989  | 0.03261  | -0.05123 | 0.26922  | 0.044355 |
| -0.02746 | 0.55392  | 0.088232 | 0.05674 | -0.00307 | 0.94719  | 0.123366 | 0.00761  | 0.219402 |
| -0.05617 | 0.22566  | 0.055571 | 0.23068 | -0.03854 | 0.40596  | 0.103832 | 0.02484  | 0.225639 |
| 0.03522  | 0.44768  | -0.04652 | 0.3158  | 0.055857 | 0.22829  | -0.1014  | 0.02844  | -0.18008 |
| 0.020283 | 0.66198  | 0.073478 | 0.11279 | 0.016623 | 0.72013  | 0.091493 | 0.04815  | 0.265668 |
| 0.014168 | 0.76008  | -0.00185 | 0.96827 | 0.002071 | 0.9644   | -0.02094 | 0.65177  | 0.156495 |
| -0.04891 | 0.29152  | 0.06928  | 0.13493 | -0.02154 | 0.64244  | 0.10668  | 0.02112  | 0.199997 |
| -0.05629 | 0.22472  | -0.002   | 0.96567 | -0.06809 | 0.14177  | 0.033309 | 0.47271  | 0.125628 |
| 0.012317 | 0.79064  | 0.149656 | 0.00118 | 0.034674 | 0.45475  | 0.190105 | 3.55E-05 | 0.384193 |
| 0.002284 | 0.96074  | -0.02677 | 0.56391 | 0.035121 | 0.44895  | -0.05623 | 0.22521  | -0.12214 |
| 0.031598 | 0.49576  | 0.136776 | 0.00306 | 0.048044 | 0.30018  | 0.139118 | 0.00259  | 0.362324 |
| 0.022245 | 0.63159  | 0.044961 | 0.33229 | -0.00691 | 0.88168  | 0.067604 | 0.14465  | 0.13791  |
| 0.114011 | 0.01369  | 0.027965 | 0.54663 | 0.042057 | 0.3645   | 0.000217 | 0.99626  | 0.076964 |
| 0.159479 | 0.00054  | 0.025569 | 0.58152 | 0.141119 | 0.00224  | -0.06342 | 0.17121  | -0.02372 |
| -0.00089 | 0.98476  | -0.03901 | 0.40025 | -0.0141  | 0.76119  | -0.0539  | 0.24501  | -0.04268 |
| -0.06332 | 0.17189  | 0.056502 | 0.22295 | 0.000667 | 0.98853  | 0.054764 | 0.23753  | 0.302245 |
| 0.018616 | 0.68824  | 0.111731 | 0.01571 | 0.030845 | 0.50609  | 0.135216 | 0.00342  | 0.305078 |
| -0.00101 | 0.98259  | 0.099929 | 0.03084 | 0.013882 | 0.76478  | 0.130517 | 0.00473  | 0.355439 |
| -0.02798 | 0.54635  | 0.037409 | 0.41993 | 0.010454 | 0.82174  | 0.055694 | 0.22965  | 0.179898 |
| 0.194915 | 2.22E-05 | 0.086776 | 0.06096 | 0.189657 | 3.71E-05 | -0.01577 | 0.73401  | -0.00515 |
| 0.09017  | 0.0515   | 0.108544 | 0.01896 | 0.079509 | 0.08611  | 0.091493 | 0.04815  | 0.233326 |
| -0.02478 | 0.59324  | 0.145437 | 0.00163 | 0.036659 | 0.42932  | 0.170153 | 0.00022  | 0.393311 |
| 0.077839 | 0.09293  | 0.03405  | 0.46291 | 0.016745 | 0.71816  | 0.028259 | 0.54242  | 0.065111 |
| -0.15065 | 0.00109  | -0.07493 | 0.10583 | -0.1304  | 0.00476  | -0.03281 | 0.47942  | 0.03022  |
| -0.0218  | 0.63835  | 0.099266 | 0.03198 | 0.003576 | 0.93857  | 0.131423 | 0.00444  | 0.270833 |
| -0.0792  | 0.08735  | -0.00518 | 0.91109 | -0.06793 | 0.14273  | 0.03995  | 0.38904  | 0.088212 |
| -0.06773 | 0.14388  | -0.12634 | 0.00626 | -0.01437 | 0.75678  | -0.18914 | 3.89E-05 | -0.28832 |
| -0.0822  | 0.07595  | -0.01935 | 0.67664 | -0.08324 | 0.07232  | 0.038283 | 0.40915  | 0.002247 |
| -0.00776 | 0.86717  | 0.052032 | 0.26179 | 0.031682 | 0.49461  | 0.025225 | 0.58661  | 0.178178 |
| -0.00303 | 0.94795  | 0.018008 | 0.69791 | -0.00054 | 0.9907   | 0.02245  | 0.62844  | 0.100225 |
| -0.11205 | 0.01541  | 0.021351 | 0.64537 | -0.03362 | 0.46853  | 0.031207 | 0.50112  | 0.190504 |
| -0.00775 | 0.86733  | 0.095877 | 0.03835 | -0.01584 | 0.73273  | 0.151681 | 0.00101  | 0.295993 |
| -0.05623 | 0.22522  | 0.039868 | 0.39001 | -0.01415 | 0.76045  | 0.053671 | 0.24704  | 0.183637 |
| -0.05498 | 0.23572  | 0.004558 | 0.92174 | -0.01406 | 0.76186  | -0.00413 | 0.9291   | 0.14512  |
| -0.02676 | 0.56408  | 0.067402 | 0.14586 | 0.001955 | 0.9664   | 0.086902 | 0.06059  | 0.193441 |
| -0.10961 | 0.01782  | -0.10145 | 0.02836 | -0.09873 | 0.03292  | -0.07801 | 0.09222  | -0.05825 |
| 0.014729 | 0.7509   | 0.083678 | 0.07082 | -0.01484 | 0.74907  | 0.128234 | 0.00552  | 0.195439 |
| -0.07635 | 0.09939  | 0.094774 | 0.04064 | -0.00168 | 0.97109  | 0.119513 | 0.00974  | 0.268839 |
| -0.07955 | 0.08596  | -0.06667 | 0.15028 | -0.05359 | 0.24775  | -0.07882 | 0.08885  | -0.02697 |
| 0.092748 | 0.04515  | 0.091185 | 0.04891 | 0.064356 | 0.165    | 0.087968 | 0.05749  | 0.214813 |
| -0.09598 | 0.03814  | 0.028484 | 0.5392  | -0.06011 | 0.19471  | 0.079003 | 0.08813  | 0.177201 |
| -0.06781 | 0.14341  | -0.02752 | 0.55297 | -0.07414 | 0.1096   | 0.002454 | 0.95782  | 0.066015 |
| -0.05486 | 0.23674  | 0.041672 | 0.36891 | -0.00439 | 0.92461  | 0.039003 | 0.40039  | 0.26312  |
| -0.04973 | 0.2835   | 0.077701 | 0.09351 | 0.006899 | 0.88181  | 0.103786 | 0.0249   | 0.19973  |
| 0.010501 | 0.82094  | 0.085499 | 0.06488 | 0.019294 | 0.6775   | 0.101782 | 0.02785  | 0.26479  |

|          |         |          |         |          |         |          |          |          |
|----------|---------|----------|---------|----------|---------|----------|----------|----------|
| -0.00249 | 0.95717 | 0.088402 | 0.05626 | 0.034318 | 0.45939 | 0.101559 | 0.0282   | 0.201655 |
| 0.052398 | 0.25844 | 0.023881 | 0.60672 | 0.0147   | 0.75136 | 0.00026  | 0.99552  | 0.102998 |
| -0.10314 | 0.02583 | -0.04862 | 0.29438 | -0.10578 | 0.02225 | 0.00412  | 0.92925  | -0.08295 |
| -0.06875 | 0.13793 | 0.013391 | 0.77287 | -0.04369 | 0.34621 | 0.048069 | 0.29993  | 0.109914 |
| -0.08809 | 0.05714 | 0.095828 | 0.03845 | -0.01975 | 0.6703  | 0.137625 | 0.00288  | 0.164094 |
| -0.05864 | 0.20589 | -0.11958 | 0.0097  | -0.07891 | 0.08851 | -0.12913 | 0.00519  | -0.09901 |
| 0.036176 | 0.43544 | 0.10472  | 0.02363 | 0.043225 | 0.35132 | 0.119158 | 0.00996  | 0.293158 |
| -0.11999 | 0.00945 | -0.03231 | 0.4861  | -0.07763 | 0.09382 | 0.012044 | 0.79518  | 0.097566 |
| -0.00508 | 0.91281 | 0.090501 | 0.05064 | 0.021582 | 0.64179 | 0.124573 | 0.00703  | 0.213028 |
| -0.12958 | 0.00504 | -0.12444 | 0.0071  | -0.03342 | 0.47125 | -0.16733 | 0.00028  | -0.24357 |
| -0.0876  | 0.05855 | 0.019086 | 0.68078 | -0.05606 | 0.22662 | 0.04916  | 0.28908  | 0.226507 |
| -0.01963 | 0.67226 | -0.11275 | 0.01478 | -0.0745  | 0.10784 | -0.12041 | 0.0092   | -0.08098 |
| 0.107656 | 0.01997 | 0.003786 | 0.93497 | 0.064074 | 0.16686 | -0.03286 | 0.4787   | -0.08996 |
| -0.08368 | 0.0708  | 0.051894 | 0.26306 | -0.05115 | 0.26994 | 0.098282 | 0.03373  | 0.238227 |
| 0.096379 | 0.03734 | -0.11669 | 0.01162 | 0.058825 | 0.20447 | -0.21395 | 3.08E-06 | -0.35108 |
| 0.035447 | 0.44474 | -0.06276 | 0.17577 | 0.030193 | 0.51513 | -0.10427 | 0.02424  | -0.14368 |
| 0.02103  | 0.65034 | 0.033906 | 0.4648  | 0.022458 | 0.62833 | 0.027916 | 0.54733  | 0.187708 |
| -0.07097 | 0.12564 | -0.00555 | 0.9048  | -0.08501 | 0.06644 | 0.048298 | 0.29762  | 0.163396 |
| -0.01545 | 0.73909 | 0.110002 | 0.01741 | 0.01922  | 0.67867 | 0.147172 | 0.00143  | 0.31658  |
| -0.05577 | 0.229   | 0.113808 | 0.01386 | 0.001167 | 0.97993 | 0.149946 | 0.00115  | 0.343066 |
| 0.070961 | 0.1257  | 0.097822 | 0.03457 | 0.044841 | 0.33359 | 0.115543 | 0.01247  | 0.308377 |
| 0.012895 | 0.78107 | -0.01081 | 0.81583 | -0.02817 | 0.54373 | 0.000283 | 0.99513  | 0.023401 |
| 0.026051 | 0.57442 | 0.132447 | 0.00414 | 0.046804 | 0.31283 | 0.140838 | 0.00228  | 0.288092 |
| 0.121877 | 0.00837 | 0.11655  | 0.01172 | 0.159296 | 0.00055 | 0.047772 | 0.30292  | 0.121829 |
| -0.09205 | 0.04681 | 0.023587 | 0.61115 | -0.06457 | 0.16362 | 0.072279 | 0.1188   | 0.229603 |
| 0.125005 | 0.00684 | 0.004515 | 0.92248 | 0.079991 | 0.08421 | -0.04361 | 0.34701  | -0.11276 |
| 0.008328 | 0.85755 | -0.05817 | 0.20957 | 0.017452 | 0.7068  | -0.07692 | 0.09687  | -0.14813 |
| -0.04114 | 0.37502 | -0.03759 | 0.4177  | -0.05837 | 0.20803 | -0.01746 | 0.70662  | 0.079526 |
| -0.16411 | 0.00037 | -0.11617 | 0.012   | -0.15075 | 0.00108 | -0.07874 | 0.08919  | -0.06623 |
| -0.16186 | 0.00045 | -0.07269 | 0.11669 | -0.13563 | 0.00332 | -0.01323 | 0.77548  | -0.03632 |
| 0.018558 | 0.68915 | 0.053393 | 0.2495  | 0.020014 | 0.66619 | 0.063059 | 0.1737   | 0.154517 |
| 0.052544 | 0.25712 | -0.09754 | 0.0351  | 0.053226 | 0.25098 | -0.18103 | 8.35E-05 | -0.31931 |
| 0.017687 | 0.70304 | -0.0398  | 0.39088 | 0.036589 | 0.43021 | -0.08476 | 0.06723  | -0.12443 |
| -0.00121 | 0.97913 | 0.047666 | 0.304   | 0.015358 | 0.74064 | 0.045646 | 0.32497  | 0.169577 |
| -0.02157 | 0.64204 | 0.015238 | 0.74258 | -0.02324 | 0.61639 | 0.035883 | 0.43916  | 0.126281 |
| 0.086383 | 0.06215 | 0.161253 | 0.00047 | 0.069186 | 0.13546 | 0.19014  | 3.54E-05 | 0.269984 |
| -0.11188 | 0.01557 | 0.037692 | 0.41642 | -0.06593 | 0.15488 | 0.098086 | 0.03408  | 0.207853 |
| 0.035531 | 0.44366 | -0.00469 | 0.91956 | 0.053895 | 0.24507 | -0.04541 | 0.32751  | -0.1436  |
| -0.07669 | 0.09786 | 0.004752 | 0.91842 | -0.03197 | 0.49063 | 0.020531 | 0.65811  | 0.216095 |
| -0.08671 | 0.06117 | -0.00899 | 0.84637 | -0.05515 | 0.23425 | 0.022522 | 0.62735  | 0.086553 |
| -0.16502 | 0.00034 | -0.01693 | 0.71517 | -0.09536 | 0.0394  | 0.026674 | 0.5653   | 0.138842 |
| -0.04999 | 0.28098 | -0.05311 | 0.25202 | -0.07609 | 0.10052 | -0.03176 | 0.49356  | 0.032704 |
| -0.04563 | 0.32512 | 0.053481 | 0.24872 | -0.03703 | 0.42468 | 0.097096 | 0.03594  | 0.217775 |
| 0.008034 | 0.86253 | 0.018406 | 0.69156 | -0.00033 | 0.99427 | 0.016646 | 0.71976  | 0.144661 |
| -0.0805  | 0.08224 | 0.031867 | 0.4921  | -0.05163 | 0.2655  | 0.066224 | 0.15305  | 0.183367 |

|          |         |          |          |          |         |          |          |          |
|----------|---------|----------|----------|----------|---------|----------|----------|----------|
| 0.016121 | 0.72824 | 0.084076 | 0.06949  | 0.037455 | 0.41936 | 0.075372 | 0.10379  | 0.209454 |
| -0.13564 | 0.00331 | -0.07839 | 0.09063  | -0.11403 | 0.01368 | -0.03778 | 0.41529  | 0.022046 |
| 0.061604 | 0.18386 | -0.08032 | 0.08295  | 0.047546 | 0.30522 | -0.1527  | 0.00093  | -0.21484 |
| -0.01978 | 0.66992 | 0.006645 | 0.88612  | -0.02402 | 0.60465 | 0.021255 | 0.64685  | 0.10772  |
| 0.097084 | 0.03596 | 0.173428 | 0.00017  | 0.095368 | 0.03939 | 0.188812 | 4.02E-05 | 0.357303 |
| 0.022356 | 0.6299  | 0.118276 | 0.01052  | 0.048847 | 0.29216 | 0.118836 | 0.01016  | 0.279724 |
| 0.010586 | 0.81952 | 0.09914  | 0.0322   | 0.041518 | 0.37069 | 0.117139 | 0.0113   | 0.21451  |
| -0.02095 | 0.65152 | 0.054418 | 0.24051  | 0.011573 | 0.80302 | 0.058033 | 0.21064  | 0.151015 |
| -0.06396 | 0.16759 | 0.080619 | 0.0818   | -0.01889 | 0.68383 | 0.130592 | 0.0047   | 0.265499 |
| 0.031514 | 0.49691 | 0.025607 | 0.58096  | -0.01365 | 0.76863 | 0.031955 | 0.4909   | 0.153603 |
| 0.049665 | 0.28414 | 0.009876 | 0.83144  | 0.017532 | 0.70552 | -0.02216 | 0.63292  | 0.010177 |
| -0.08086 | 0.08089 | 0.00026  | 0.99553  | -0.05075 | 0.2737  | 0.02198  | 0.63566  | 0.092597 |
| -0.03763 | 0.41724 | 0.11139  | 0.01603  | -0.00113 | 0.98054 | 0.13942  | 0.00253  | 0.324837 |
| 0.063958 | 0.16763 | -0.06518 | 0.15967  | -0.01572 | 0.73474 | -0.10049 | 0.02992  | -0.01967 |
| -0.12283 | 0.00788 | -0.02011 | 0.66474  | -0.07462 | 0.10729 | 0.015075 | 0.74525  | 0.117732 |
| -0.04698 | 0.31099 | 0.091021 | 0.04932  | 0.013951 | 0.76365 | 0.109578 | 0.01785  | 0.174808 |
| 0.040001 | 0.38844 | 0.127825 | 0.00567  | 0.030114 | 0.51623 | 0.145577 | 0.00161  | 0.287384 |
| -0.001   | 0.98275 | 0.089344 | 0.05368  | 0.034021 | 0.46329 | 0.104187 | 0.02435  | 0.196567 |
| -0.01017 | 0.82654 | 0.042524 | 0.35919  | 0.024113 | 0.60322 | 0.027599 | 0.55189  | 0.136761 |
| 0.020045 | 0.6657  | 0.057977 | 0.21108  | 0.029381 | 0.52649 | 0.053236 | 0.2509   | 0.066424 |
| 0.034596 | 0.45576 | 0.088894 | 0.0549   | 0.026835 | 0.56295 | 0.095126 | 0.03989  | 0.219643 |
| -0.00014 | 0.99755 | 0.060881 | 0.18907  | 0.007961 | 0.86377 | 0.055074 | 0.23488  | 0.230055 |
| 0.030697 | 0.50813 | 0.135293 | 0.0034   | 0.045116 | 0.33063 | 0.148084 | 0.00133  | 0.364351 |
| -0.05586 | 0.22829 | 0.096845 | 0.03643  | 0.013923 | 0.76411 | 0.116719 | 0.0116   | 0.280425 |
| 0.015622 | 0.73634 | 0.130621 | 0.00469  | 0.054888 | 0.23647 | 0.129365 | 0.00511  | 0.269788 |
| -0.09429 | 0.04168 | -0.07093 | 0.12584  | -0.08319 | 0.07248 | -0.06118 | 0.18688  | 0.05059  |
| 0.048054 | 0.30008 | 0.197893 | 1.65E-05 | 0.08804  | 0.05728 | 0.216456 | 2.34E-06 | 0.380738 |
| 0.00024  | 0.99587 | -0.00658 | 0.8873   | -0.0111  | 0.81095 | -0.0084  | 0.85635  | 0.040213 |
| -0.07441 | 0.10827 | 0.006439 | 0.88963  | -0.04708 | 0.31    | 0.030835 | 0.50623  | 0.13582  |
| -0.0567  | 0.22129 | 0.036165 | 0.43557  | -0.03288 | 0.4785  | 0.073515 | 0.11261  | 0.173951 |
| 0.080642 | 0.08171 | 0.125428 | 0.00665  | 0.08698  | 0.06036 | 0.105101 | 0.02312  | 0.230631 |
| -0.02138 | 0.64489 | 0.066714 | 0.15003  | 0.011807 | 0.79913 | 0.078196 | 0.09143  | 0.213464 |
| 0.07272  | 0.11656 | 0.149808 | 0.00117  | 0.086852 | 0.06074 | 0.142173 | 0.00207  | 0.322641 |
| 0.023741 | 0.60883 | -0.05655 | 0.22258  | 0.022813 | 0.6229  | -0.08445 | 0.06824  | -0.17126 |
| -0.02578 | 0.57841 | 0.013403 | 0.77268  | -0.02458 | 0.59621 | 0.043696 | 0.34609  | 0.091934 |
| -0.04971 | 0.28372 | 0.088406 | 0.05625  | -0.00447 | 0.92327 | 0.131743 | 0.00435  | 0.284157 |
| -0.04835 | 0.29712 | -0.02273 | 0.62421  | -0.04639 | 0.31715 | -0.01312 | 0.77736  | 0.112022 |
| -0.12552 | 0.00661 | -0.14048 | 0.00234  | -0.12642 | 0.00623 | -0.12124 | 0.00872  | -0.11223 |
| 0.003606 | 0.93805 | -0.01376 | 0.76671  | -0.0329  | 0.47811 | -0.00143 | 0.97535  | 0.028425 |
| 0.09894  | 0.03255 | 0.001239 | 0.97869  | 0.018227 | 0.69442 | -0.01613 | 0.72816  | 0.122497 |
| 0.070654 | 0.12734 | 0.135434 | 0.00336  | 0.06133  | 0.18582 | 0.144541 | 0.00174  | 0.226184 |
| -0.0201  | 0.66488 | -0.06841 | 0.1399   | -0.00491 | 0.91571 | -0.08814 | 0.057    | -0.1825  |
| 0.048682 | 0.29379 | 0.070636 | 0.12744  | 0.035236 | 0.44746 | 0.088261 | 0.05666  | 0.194792 |
| 0.008886 | 0.84811 | 0.104018 | 0.02458  | 0.018974 | 0.68256 | 0.134593 | 0.00357  | 0.255493 |
| -0.05411 | 0.2432  | 0.10671  | 0.02109  | -0.01244 | 0.7886  | 0.159264 | 0.00055  | 0.283925 |

|          |         |          |         |          |         |          |          |          |
|----------|---------|----------|---------|----------|---------|----------|----------|----------|
| 0.022823 | 0.62275 | 0.112837 | 0.0147  | 0.020953 | 0.65153 | 0.133109 | 0.00396  | 0.23988  |
| 0.021796 | 0.63849 | 0.155948 | 0.00072 | 0.04364  | 0.34671 | 0.190186 | 3.52E-05 | 0.345078 |
| 0.01536  | 0.74059 | 0.07592  | 0.10129 | -0.00198 | 0.96597 | 0.112331 | 0.01515  | 0.180652 |
| -0.05059 | 0.27522 | -0.17163 | 0.00019 | -0.12115 | 0.00877 | -0.18165 | 7.89E-05 | -0.25769 |
| -0.02193 | 0.63644 | 0.056562 | 0.22246 | 0.011111 | 0.81074 | 0.051321 | 0.26837  | 0.182167 |
| -0.03226 | 0.48672 | -0.12235 | 0.00812 | -0.10287 | 0.02622 | -0.10015 | 0.03047  | -0.16915 |
| 0.133735 | 0.00379 | 0.069263 | 0.13503 | 0.104267 | 0.02424 | -0.00412 | 0.92922  | 0.013227 |
| -0.03472 | 0.45413 | 0.028614 | 0.53735 | -0.014   | 0.76282 | 0.050706 | 0.27416  | 0.053004 |
| 0.130831 | 0.00463 | 0.123343 | 0.00762 | 0.174172 | 0.00016 | 0.048439 | 0.29622  | 0.177958 |
| -0.02973 | 0.52163 | 0.06714  | 0.14744 | -0.0005  | 0.99132 | 0.096556 | 0.03699  | 0.289061 |
| 0.06922  | 0.13527 | 0.045148 | 0.33028 | 0.052687 | 0.25583 | 0.03118  | 0.50148  | 0.059413 |
| -0.03519 | 0.44811 | -0.05957 | 0.19877 | -0.06549 | 0.15768 | -0.0353  | 0.44667  | -0.01338 |
| 0.092887 | 0.04483 | 0.038018 | 0.4124  | 0.082593 | 0.07457 | 0.003896 | 0.93308  | -0.08998 |
| 0.004539 | 0.92208 | 0.111423 | 0.016   | 0.012477 | 0.78799 | 0.142434 | 0.00203  | 0.300711 |
| 0.015871 | 0.73229 | 0.004472 | 0.92322 | 0.006781 | 0.88381 | -0.01225 | 0.79179  | 0.099437 |
| 0.052719 | 0.25553 | -0.08477 | 0.06722 | 0.026457 | 0.56847 | -0.13427 | 0.00365  | -0.24044 |
| -0.01259 | 0.78609 | 0.087004 | 0.06029 | 0.017149 | 0.71166 | 0.118594 | 0.01032  | 0.168257 |
| -0.09418 | 0.04192 | -0.01896 | 0.68284 | -0.07251 | 0.11761 | 0.014824 | 0.74934  | 0.024573 |
| -0.0306  | 0.50953 | -0.04537 | 0.3279  | -0.04879 | 0.29276 | -0.04543 | 0.32723  | -0.00457 |
| -0.00534 | 0.90833 | 0.084937 | 0.06667 | 0.052286 | 0.25946 | 0.071511 | 0.12278  | 0.155475 |
| -0.05374 | 0.24646 | 0.054733 | 0.2378  | -0.03846 | 0.40701 | 0.09766  | 0.03487  | 0.22809  |
| -0.04448 | 0.33746 | 0.032982 | 0.47706 | 0.000145 | 0.9975  | 0.042073 | 0.36432  | 0.076974 |
| 0.105579 | 0.0225  | 0.008911 | 0.8477  | 0.031572 | 0.49612 | -0.021   | 0.65077  | -0.00916 |
| 0.077853 | 0.09287 | -0.004   | 0.93132 | 0.017583 | 0.7047  | -0.02197 | 0.63575  | 0.099845 |
| 0.140087 | 0.00241 | -0.02481 | 0.59277 | 0.076791 | 0.09743 | -0.08583 | 0.06386  | -0.18219 |
| 0.027164 | 0.55817 | 0.061297 | 0.18606 | 0.024189 | 0.60209 | 0.043607 | 0.34708  | 0.154475 |
| -0.02754 | 0.55273 | 0.046965 | 0.31117 | -0.02118 | 0.64804 | 0.068614 | 0.13873  | 0.138762 |
| -0.0902  | 0.05141 | -0.00267 | 0.95416 | -0.03803 | 0.41231 | 0.001987 | 0.96584  | 0.165409 |
| -0.00157 | 0.973   | 0.13392  | 0.00374 | 0.026117 | 0.57345 | 0.17509  | 0.00014  | 0.270893 |
| 0.019472 | 0.67469 | 0.086349 | 0.06225 | 0.016748 | 0.71811 | 0.103093 | 0.02589  | 0.174725 |
| 0.026129 | 0.57328 | -0.00223 | 0.96164 | -0.04055 | 0.38191 | 0.026254 | 0.57144  | 0.134478 |
| -0.08533 | 0.06541 | 0.080102 | 0.08378 | -0.03328 | 0.47314 | 0.132132 | 0.00423  | 0.309833 |
| -0.08795 | 0.05755 | -0.09521 | 0.03972 | -0.13047 | 0.00474 | -0.0475  | 0.30571  | -0.07676 |
| 0.053514 | 0.24843 | 0.069378 | 0.13438 | 0.039603 | 0.39317 | 0.082267 | 0.07572  | 0.087072 |
| -0.06488 | 0.16155 | 0.07337  | 0.11332 | -0.0308  | 0.50668 | 0.1206   | 0.00909  | 0.169826 |
| -0.0132  | 0.776   | -0.10697 | 0.02077 | -0.0195  | 0.67425 | -0.1479  | 0.00135  | -0.20116 |
| 0.020848 | 0.65316 | -0.12412 | 0.00724 | 0.025078 | 0.58881 | -0.20766 | 6.04E-06 | -0.35857 |
| -0.05579 | 0.22887 | 0.035209 | 0.44781 | 0.019346 | 0.67669 | 0.030737 | 0.50758  | -0.01421 |
| -0.01282 | 0.78239 | -0.04955 | 0.28527 | -0.04233 | 0.36139 | -0.03431 | 0.45953  | 0.01739  |
| 0.018022 | 0.69768 | -0.01492 | 0.74784 | -0.05246 | 0.25792 | 0.011477 | 0.80463  | -0.06183 |
| -0.02568 | 0.57994 | -0.08929 | 0.05382 | -0.00632 | 0.89159 | -0.11868 | 0.01026  | -0.1863  |
| -0.00795 | 0.86402 | -0.0961  | 0.0379  | -0.02895 | 0.53252 | -0.11312 | 0.01445  | -0.29337 |
| -0.01611 | 0.72842 | 0.005398 | 0.90739 | -0.00955 | 0.83691 | 0.006279 | 0.89236  | 0.142709 |
| 0.02382  | 0.60763 | 0.12605  | 0.00638 | 0.037276 | 0.4216  | 0.130937 | 0.00459  | 0.303391 |
| 0.015969 | 0.7307  | 0.014019 | 0.76254 | 0.016995 | 0.71414 | 0.008732 | 0.85072  | 0.136908 |

|          |          |          |         |          |         |          |          |          |
|----------|----------|----------|---------|----------|---------|----------|----------|----------|
| 0.026437 | 0.56876  | 0.090303 | 0.05115 | 0.021402 | 0.64458 | 0.109095 | 0.01836  | 0.213704 |
| 0.006387 | 0.89051  | 0.120306 | 0.00926 | 0.026137 | 0.57316 | 0.14095  | 0.00227  | 0.27194  |
| -0.0389  | 0.40165  | 0.03646  | 0.43183 | -0.02827 | 0.54229 | 0.057789 | 0.21257  | 0.18061  |
| -0.09964 | 0.03133  | -0.09311 | 0.04431 | -0.08298 | 0.07322 | -0.08243 | 0.07513  | -0.04589 |
| 0.006433 | 0.88972  | 0.006721 | 0.88482 | -0.01952 | 0.67398 | 0.020344 | 0.66101  | 0.144279 |
| -0.07565 | 0.10251  | -0.13461 | 0.00356 | -0.10451 | 0.0239  | -0.12761 | 0.00575  | -0.13038 |
| 0.027837 | 0.54846  | 0.000358 | 0.99385 | 0.047413 | 0.30658 | -0.02563 | 0.58059  | 0.010136 |
| -0.06652 | 0.1512   | 0.008357 | 0.85706 | -0.01746 | 0.70669 | 0.004448 | 0.92363  | 0.168907 |
| -0.08731 | 0.05937  | 0.003154 | 0.94581 | -0.04922 | 0.28853 | 0.035741 | 0.44098  | 0.13071  |
| -0.03305 | 0.47615  | -0.06826 | 0.14078 | -0.05649 | 0.22305 | -0.06033 | 0.19311  | -0.04991 |
| -0.00825 | 0.85879  | 0.042171 | 0.3632  | 0.00063  | 0.98918 | 0.035168 | 0.44833  | 0.08518  |
| -0.06145 | 0.18496  | 0.090298 | 0.05116 | -0.01797 | 0.69851 | 0.143804 | 0.00184  | 0.263085 |
| -0.12797 | 0.00562  | -0.00689 | 0.88192 | -0.0816  | 0.07814 | 0.02711  | 0.55896  | 0.2528   |
| -0.00019 | 0.99669  | 0.099606 | 0.03139 | 0.039877 | 0.38991 | 0.104386 | 0.02408  | 0.257483 |
| -0.15242 | 0.00095  | 0.016251 | 0.72614 | -0.06237 | 0.17848 | 0.062442 | 0.17796  | 0.116765 |
| 0.063765 | 0.16892  | 0.038933 | 0.40124 | -0.00947 | 0.83827 | 0.057824 | 0.21229  | 0.141381 |
| -0.04136 | 0.37253  | 0.103335 | 0.02554 | 0.039698 | 0.39204 | 0.089261 | 0.0539   | 0.297019 |
| -0.02183 | 0.63799  | 0.027206 | 0.55756 | -0.03042 | 0.51196 | 0.047761 | 0.30303  | 0.206269 |
| 0.047968 | 0.30094  | 0.008926 | 0.84744 | 0.054094 | 0.24333 | -0.01904 | 0.68155  | -0.11474 |
| 0.015943 | 0.73112  | -0.02389 | 0.60664 | 0.04208  | 0.36423 | -0.06229 | 0.17898  | -0.18728 |
| -0.00184 | 0.96843  | -0.0904  | 0.05091 | 0.02192  | 0.63658 | -0.14163 | 0.00216  | -0.23521 |
| 0.004331 | 0.92563  | 0.136525 | 0.00311 | 0.125398 | 0.00666 | 0.09513  | 0.03989  | 0.157799 |
| 0.028323 | 0.5415   | 0.051281 | 0.26875 | 0.036314 | 0.43368 | 0.035405 | 0.44528  | 0.154913 |
| -0.04467 | 0.33544  | -0.10994 | 0.01747 | -0.02801 | 0.54601 | -0.13358 | 0.00383  | -0.27827 |
| 0.029206 | 0.52896  | 0.022041 | 0.63472 | -0.01173 | 0.80045 | 0.022204 | 0.63222  | 0.075651 |
| -0.02966 | 0.52256  | 0.075413 | 0.1036  | -0.00965 | 0.83527 | 0.108484 | 0.01903  | 0.209903 |
| -0.10715 | 0.02055  | -0.03621 | 0.43494 | -0.109   | 0.01846 | 0.00594  | 0.89814  | 0.088897 |
| -0.01216 | 0.79319  | -0.00073 | 0.98748 | -0.01201 | 0.79582 | -0.01547 | 0.73876  | 0.097827 |
| 0.019984 | 0.66665  | 0.056768 | 0.22078 | 0.025367 | 0.58452 | 0.047606 | 0.30461  | 0.142372 |
| 0.046667 | 0.31426  | 0.142324 | 0.00205 | 0.064559 | 0.16367 | 0.135544 | 0.00334  | 0.361398 |
| 0.010661 | 0.81827  | 0.05767  | 0.21351 | 0.008403 | 0.85629 | 0.073242 | 0.11395  | 0.159224 |
| -0.04773 | 0.30337  | -0.15506 | 0.00077 | -0.01878 | 0.68562 | -0.21955 | 1.67E-06 | -0.35827 |
| -0.02444 | 0.59831  | -0.09837 | 0.03357 | -0.05569 | 0.2297  | -0.11713 | 0.01131  | -0.13587 |
| 0.063591 | 0.17009  | 0.098624 | 0.03311 | 0.050969 | 0.27168 | 0.10133  | 0.02856  | 0.22793  |
| 0.000727 | 0.9875   | 0.09577  | 0.03856 | -0.00014 | 0.99751 | 0.130199 | 0.00483  | 0.252002 |
| 0.073619 | 0.1121   | -0.02855 | 0.53824 | -0.00123 | 0.97891 | -0.04067 | 0.38059  | -0.01038 |
| 0.214541 | 2.89E-06 | 0.054914 | 0.23625 | 0.159819 | 0.00053 | -0.04548 | 0.32669  | -0.07399 |
| -0.09578 | 0.03855  | -0.03014 | 0.51586 | -0.08236 | 0.07538 | 0.008921 | 0.84752  | 0.055582 |
| 0.068579 | 0.13893  | 0.145287 | 0.00164 | 0.077536 | 0.09421 | 0.151311 | 0.00104  | 0.364297 |
| -0.06842 | 0.13983  | 0.071186 | 0.1245  | -0.03708 | 0.42405 | 0.122332 | 0.00813  | 0.307956 |
| 0.008486 | 0.85488  | 0.082259 | 0.07575 | 0.04597  | 0.32155 | 0.072829 | 0.11602  | 0.25836  |
| 0.004922 | 0.91552  | 0.117826 | 0.01082 | 0.039708 | 0.39192 | 0.114938 | 0.01294  | 0.31992  |
| -0.03538 | 0.44561  | 0.070549 | 0.12791 | 0.011604 | 0.8025  | 0.073864 | 0.11091  | 0.291589 |
| 0.017577 | 0.7048   | -0.06433 | 0.16516 | -0.0457  | 0.32443 | -0.05758 | 0.2142   | -0.07206 |
| 0.121211 | 0.00874  | 0.034206 | 0.46086 | 0.043733 | 0.34569 | 0.009482 | 0.83807  | 0.073724 |

|          |         |          |          |          |         |          |          |          |
|----------|---------|----------|----------|----------|---------|----------|----------|----------|
| -0.04845 | 0.29615 | 0.046955 | 0.31128  | -0.03322 | 0.47384 | 0.079043 | 0.08797  | 0.195166 |
| 0.009316 | 0.84087 | -0.05856 | 0.20653  | 0.015295 | 0.74166 | -0.08574 | 0.06412  | -0.19892 |
| 0.01841  | 0.69151 | -0.07757 | 0.09407  | 0.021403 | 0.64455 | -0.12723 | 0.0059   | -0.20436 |
| -0.06316 | 0.17298 | 0.014567 | 0.75355  | -0.0348  | 0.45312 | 0.031699 | 0.49438  | 0.166569 |
| -0.00411 | 0.92942 | -0.14077 | 0.0023   | -0.03074 | 0.50753 | -0.19681 | 1.84E-05 | -0.25994 |
| 0.172566 | 0.00018 | 0.033701 | 0.46751  | 0.120241 | 0.0093  | -0.02733 | 0.55584  | -0.07489 |
| -0.02278 | 0.62342 | 0.12424  | 0.00719  | -0.00473 | 0.91886 | 0.192475 | 2.82E-05 | 0.19728  |
| 0.117052 | 0.01136 | -0.00883 | 0.84904  | 0.11354  | 0.01409 | -0.08676 | 0.06102  | -0.16022 |
| 0.129339 | 0.00512 | 0.043253 | 0.35101  | 0.138245 | 0.00275 | -0.04881 | 0.29252  | -0.02578 |
| -0.11236 | 0.01513 | -0.01584 | 0.73278  | -0.05381 | 0.24583 | -0.00357 | 0.93859  | 0.113175 |
| -0.11193 | 0.01552 | 0.032207 | 0.48749  | -0.05836 | 0.20805 | 0.083765 | 0.07053  | 0.186345 |
| -0.00191 | 0.96715 | 0.035515 | 0.44387  | -0.0136  | 0.76938 | 0.048491 | 0.2957   | 0.109278 |
| -0.0447  | 0.3351  | 0.008873 | 0.84834  | -0.03481 | 0.45304 | 0.024512 | 0.59725  | 0.088687 |
| 0.067772 | 0.14365 | 0.110646 | 0.01676  | 0.049955 | 0.28134 | 0.137767 | 0.00285  | 0.162011 |
| -0.00874 | 0.85052 | 0.089915 | 0.05216  | 0.020198 | 0.6633  | 0.129075 | 0.00521  | 0.165862 |
| -0.04512 | 0.33056 | -0.02632 | 0.57049  | -0.04932 | 0.28747 | -0.0043  | 0.92612  | 0.050799 |
| 0.112178 | 0.01529 | 0.091737 | 0.04756  | 0.070201 | 0.12981 | 0.082201 | 0.07596  | 0.210697 |
| 0.072824 | 0.11604 | -0.00485 | 0.9167   | 0.056358 | 0.22413 | -0.04955 | 0.28528  | -0.06955 |
| -0.09745 | 0.03526 | -0.15185 | 0.001    | -0.13856 | 0.00269 | -0.11008 | 0.01733  | -0.16763 |
| 0.004344 | 0.92541 | 0.124595 | 0.00702  | 0.036487 | 0.4315  | 0.157224 | 0.00065  | 0.213293 |
| 0.07385  | 0.11098 | 0.039735 | 0.3916   | 0.106494 | 0.02135 | -0.00503 | 0.91368  | -0.02536 |
| -0.07055 | 0.12791 | -0.07914 | 0.08758  | -0.00453 | 0.92223 | -0.11407 | 0.01364  | -0.21882 |
| 0.069018 | 0.13642 | 0.047326 | 0.30747  | 0.013002 | 0.7793  | 0.044579 | 0.33643  | 0.149309 |
| -0.0952  | 0.03974 | -0.15174 | 0.001    | -0.13837 | 0.00273 | -0.13688 | 0.00304  | -0.11948 |
| 0.034903 | 0.45177 | -0.03756 | 0.41807  | -0.0172  | 0.71091 | -0.06193 | 0.18154  | 0.005386 |
| 0.002275 | 0.96089 | -0.02337 | 0.61438  | -0.04026 | 0.38539 | -0.00932 | 0.84082  | 0.036006 |
| 0.143748 | 0.00184 | 0.090638 | 0.05029  | 0.056354 | 0.22417 | 0.089357 | 0.05364  | 0.22371  |
| 0.052106 | 0.26111 | 0.061078 | 0.18764  | 0.03833  | 0.40858 | 0.041459 | 0.37137  | 0.128639 |
| 0.007296 | 0.87505 | 0.006133 | 0.89485  | 0.009591 | 0.83624 | -0.02095 | 0.65163  | 0.175025 |
| 0.008184 | 0.85999 | -0.02081 | 0.65383  | -0.01119 | 0.80946 | -0.03312 | 0.47526  | 0.054459 |
| 0.018766 | 0.68585 | -0.03914 | 0.39875  | -0.02872 | 0.53585 | -0.04758 | 0.30486  | -0.00115 |
| 0.034612 | 0.45555 | 0.073208 | 0.11413  | 0.001572 | 0.97297 | 0.110788 | 0.01662  | 0.131521 |
| -0.00756 | 0.87065 | 0.075542 | 0.10301  | -0.00081 | 0.98607 | 0.098292 | 0.03371  | 0.139707 |
| 0.117483 | 0.01106 | 0.026874 | 0.56239  | 0.109068 | 0.01839 | -0.03584 | 0.43972  | 0.007672 |
| -0.02023 | 0.66286 | 0.014897 | 0.74816  | -0.00978 | 0.83305 | 0.024362 | 0.5995   | 0.168907 |
| -0.11464 | 0.01318 | -0.2208  | 1.45E-06 | -0.16195 | 0.00044 | -0.21395 | 3.08E-06 | -0.1842  |
| 0.00727  | 0.8755  | -0.05305 | 0.25258  | -0.03336 | 0.47196 | -0.04977 | 0.28311  | -0.04538 |
| -0.00756 | 0.87053 | 0.006763 | 0.88411  | 0.004933 | 0.91532 | -0.00746 | 0.87218  | 0.033176 |
| 0.041437 | 0.37162 | 0.060943 | 0.18861  | 0.024148 | 0.6027  | 0.054897 | 0.23639  | 0.175385 |
| -0.06693 | 0.14869 | -0.13543 | 0.00336  | -0.128   | 0.0056  | -0.12687 | 0.00604  | -0.13435 |
| 0.015098 | 0.74487 | -0.00779 | 0.86671  | -0.01934 | 0.6768  | -0.00916 | 0.84356  | 0.069086 |
| 0.125019 | 0.00683 | 0.09072  | 0.05008  | 0.154728 | 0.00079 | 0.037663 | 0.41678  | -0.0332  |
| -0.02572 | 0.5793  | 0.102927 | 0.02613  | -0.0011  | 0.98104 | 0.14117  | 0.00223  | 0.289944 |
| -0.04609 | 0.32033 | -0.00646 | 0.88922  | -0.05983 | 0.19686 | 0.036142 | 0.43587  | 0.01145  |
| -0.03195 | 0.49091 | -0.00818 | 0.86006  | -0.02279 | 0.62324 | -0.01927 | 0.67781  | 0.061336 |

|          |         |          |          |          |         |          |          |          |
|----------|---------|----------|----------|----------|---------|----------|----------|----------|
| -0.01191 | 0.79749 | -0.10611 | 0.02182  | -0.10841 | 0.0191  | -0.08096 | 0.08052  | -0.08357 |
| 0.046275 | 0.31835 | 0.003157 | 0.94575  | -0.02094 | 0.65172 | 0.010313 | 0.8241   | 0.048954 |
| -0.02794 | 0.54694 | 0.022424 | 0.62885  | -0.02064 | 0.65641 | 0.03883  | 0.40248  | 0.109035 |
| 0.025063 | 0.58902 | 0.019192 | 0.67912  | -0.02118 | 0.64804 | 0.044183 | 0.34074  | 0.105797 |
| 0.024363 | 0.59947 | -0.02652 | 0.56754  | 0.001524 | 0.97379 | -0.04956 | 0.28521  | 0.020851 |
| -0.01463 | 0.75252 | 0.014998 | 0.7465   | -0.02998 | 0.51809 | 0.024506 | 0.59734  | 0.161906 |
| -0.06088 | 0.18907 | 0.049198 | 0.28871  | -0.05329 | 0.25046 | 0.108959 | 0.01851  | 0.182213 |
| -0.05854 | 0.20669 | -0.02958 | 0.52367  | -0.0159  | 0.73181 | -0.04494 | 0.3325   | 0.050043 |
| -0.01947 | 0.67478 | -0.04177 | 0.36778  | -0.05542 | 0.23195 | -0.04574 | 0.32401  | 0.007286 |
| -0.0196  | 0.67262 | -0.0029  | 0.9502   | -0.04174 | 0.36812 | 0.031746 | 0.49374  | 0.047217 |
| -0.02766 | 0.55104 | -0.12473 | 0.00696  | -0.05446 | 0.24016 | -0.15105 | 0.00106  | -0.138   |
| -0.05215 | 0.26073 | 0.038317 | 0.40874  | -0.01643 | 0.72317 | 0.046116 | 0.32001  | 0.192823 |
| -0.01006 | 0.82831 | 0.052425 | 0.2582   | -0.01421 | 0.75943 | 0.079549 | 0.08595  | 0.133056 |
| 0.088786 | 0.0552  | 0.165862 | 0.00032  | 0.072098 | 0.11973 | 0.183665 | 6.54E-05 | 0.366431 |
| -0.00856 | 0.85369 | -0.10822 | 0.01932  | -0.061   | 0.18821 | -0.12083 | 0.00896  | -0.03498 |
| 0.062296 | 0.17897 | 0.201526 | 1.14E-05 | 0.112697 | 0.01482 | 0.18396  | 6.36E-05 | 0.413767 |
| -0.14848 | 0.00129 | -0.1096  | 0.01782  | -0.12396 | 0.00732 | -0.07587 | 0.10151  | -0.08758 |
| 0.06972  | 0.13246 | 0.098907 | 0.0326   | 0.050134 | 0.27962 | 0.102975 | 0.02606  | 0.164967 |
| 0.110219 | 0.01718 | 0.008209 | 0.85957  | 0.033304 | 0.47278 | -0.02963 | 0.52304  | 0.122179 |
| 0.023276 | 0.61586 | 0.004412 | 0.92424  | -0.01642 | 0.72344 | 0.007602 | 0.86985  | 0.11991  |
| 0.00134  | 0.97696 | 0.128954 | 0.00526  | 0.031537 | 0.4966  | 0.1566   | 0.00068  | 0.324594 |
| 0.115192 | 0.01274 | 0.011571 | 0.80307  | 0.106483 | 0.02136 | -0.05958 | 0.19874  | -0.11631 |
| 0.018237 | 0.69426 | -0.0589  | 0.20392  | 0.047543 | 0.30525 | -0.13062 | 0.0047   | -0.15121 |
| 0.02176  | 0.63905 | -0.11696 | 0.01143  | -0.03504 | 0.45002 | -0.15559 | 0.00074  | -0.13044 |
| 0.031794 | 0.49309 | 0.024768 | 0.59342  | 0.010473 | 0.82143 | 0.035791 | 0.44034  | 0.050963 |
| -0.09623 | 0.03763 | -0.01941 | 0.67563  | -0.09414 | 0.042   | 0.035259 | 0.44716  | 0.102756 |
| 0.014245 | 0.75882 | 0.027439 | 0.5542   | -0.03057 | 0.50985 | 0.060573 | 0.19132  | 0.152104 |
| -0.00845 | 0.85555 | -0.03303 | 0.47644  | -0.06141 | 0.18525 | -0.01322 | 0.77563  | 0.065156 |
| 0.012545 | 0.78687 | 0.090857 | 0.04974  | 0.029201 | 0.52903 | 0.099736 | 0.03117  | 0.238544 |
| -0.04711 | 0.30963 | 0.097635 | 0.03492  | 0.004535 | 0.92213 | 0.122055 | 0.00828  | 0.278215 |
| 0.110518 | 0.01688 | 0.141219 | 0.00222  | 0.074566 | 0.10755 | 0.139444 | 0.00253  | 0.308642 |
| -0.01568 | 0.73543 | 0.080558 | 0.08203  | 0.011257 | 0.8083  | 0.094547 | 0.04112  | 0.208374 |
| 0.125763 | 0.0065  | -0.00973 | 0.83386  | 0.097495 | 0.03518 | -0.08287 | 0.07361  | -0.16679 |
| 0.011795 | 0.79932 | 0.043291 | 0.35059  | 0.003654 | 0.93723 | 0.044235 | 0.34017  | 0.15887  |
| -0.03687 | 0.4267  | -0.05078 | 0.27342  | 0.021907 | 0.63678 | -0.1095  | 0.01793  | -0.19499 |
| 0.004038 | 0.93065 | 0.09216  | 0.04654  | 0.007329 | 0.8745  | 0.118815 | 0.01017  | 0.186529 |
| -0.07239 | 0.11821 | 0.093122 | 0.04429  | -0.0235  | 0.61253 | 0.139226 | 0.00257  | 0.324958 |
| -0.03192 | 0.49136 | 0.087721 | 0.05819  | -0.00947 | 0.83819 | 0.129477 | 0.00507  | 0.277496 |
| 0.018675 | 0.68729 | 0.104172 | 0.02437  | 0.030378 | 0.51255 | 0.119242 | 0.0099   | 0.214356 |
| -0.02122 | 0.64747 | 0.17214  | 0.00019  | 0.023043 | 0.61941 | 0.223344 | 1.09E-06 | 0.429591 |
| -0.03892 | 0.4014  | -0.07018 | 0.12993  | 0.018272 | 0.6937  | -0.11743 | 0.0111   | -0.18154 |
| 0.037062 | 0.42426 | 0.134657 | 0.00355  | 0.041032 | 0.37631 | 0.164821 | 0.00035  | 0.270039 |
| -0.03293 | 0.47781 | 0.12859  | 0.00539  | 0.012453 | 0.78839 | 0.16019  | 0.00051  | 0.341398 |
| 0.077    | 0.09651 | 0.0418   | 0.36744  | 0.025649 | 0.58034 | 0.033622 | 0.46855  | 0.129553 |
| -0.07397 | 0.1104  | -0.02744 | 0.55421  | -0.05572 | 0.22944 | -0.01427 | 0.75839  | 0.144248 |



|          |         |          |         |           |         |          |         |          |
|----------|---------|----------|---------|-----------|---------|----------|---------|----------|
| 0.010397 | 0.8227  | -0.07681 | 0.09733 | -0.01695  | 0.71488 | -0.09215 | 0.04656 | -0.20935 |
| 0.027524 | 0.55296 | 0.079554 | 0.08593 | 0.014562  | 0.75363 | 0.099677 | 0.03127 | 0.227674 |
| -0.04669 | 0.31398 | 0.014668 | 0.7519  | -3.15E-05 | 0.99946 | 0.014493 | 0.75476 | 0.122419 |
| -0.01504 | 0.74583 | -0.10812 | 0.01943 | -0.02467  | 0.59491 | -0.13631 | 0.00316 | -0.25616 |
| 0.021372 | 0.64504 | 0.044339 | 0.33903 | 0.071296  | 0.12391 | 0.002771 | 0.95238 | -0.0028  |
| 0.023598 | 0.61099 | 0.126997 | 0.00599 | 0.030276  | 0.51397 | 0.149958 | 0.00115 | 0.33023  |
| -0.08514 | 0.06601 | -0.0666  | 0.15069 | -0.08977  | 0.05253 | -0.04879 | 0.29269 | 0.084192 |
| 0.00364  | 0.93746 | 0.096702 | 0.0367  | 0.003176  | 0.94543 | 0.129948 | 0.00491 | 0.277953 |
| -0.05195 | 0.26251 | 0.070736 | 0.1269  | -0.02354  | 0.61188 | 0.116449 | 0.01179 | 0.265265 |
| -0.01444 | 0.75557 | 0.068259 | 0.14079 | 0.010949  | 0.81344 | 0.0802   | 0.0834  | 0.19769  |
| -0.02863 | 0.53706 | -0.01641 | 0.72353 | 0.031101  | 0.50256 | -0.06277 | 0.17567 | -0.0704  |
| -0.04909 | 0.28972 | -0.07631 | 0.09956 | -0.07874  | 0.08918 | -0.05541 | 0.23202 | 0.059224 |
| -0.07181 | 0.12123 | -0.033   | 0.47676 | -0.04743  | 0.30645 | -0.00987 | 0.83161 | 0.054965 |
| 0.035243 | 0.44737 | 0.05589  | 0.22801 | 0.025592  | 0.58119 | 0.066855 | 0.14917 | 0.153926 |
| 0.067843 | 0.14323 | 0.12035  | 0.00923 | 0.078545  | 0.08999 | 0.104358 | 0.02411 | 0.237405 |
| 0.064758 | 0.16237 | -0.01792 | 0.69931 | -0.00153  | 0.97362 | -0.01217 | 0.79303 | -0.0482  |
| -0.01326 | 0.77497 | -0.0817  | 0.07776 | -0.01834  | 0.69264 | -0.0989  | 0.03261 | -0.18709 |
| -0.06365 | 0.16971 | 0.027287 | 0.55639 | -0.01074  | 0.81693 | 0.042364 | 0.36101 | 0.092065 |
| -0.01488 | 0.74841 | -0.05952 | 0.19919 | -0.06097  | 0.18843 | -0.053   | 0.25301 | -0.03828 |
| 0.158335 | 0.00059 | 0.082818 | 0.07378 | 0.158106  | 0.00061 | 0.006975 | 0.88051 | 0.021754 |
| 0.035929 | 0.43858 | 0.069235 | 0.13518 | 0.016086  | 0.7288  | 0.092931 | 0.04473 | 0.165202 |
| 0.074424 | 0.10822 | 0.006718 | 0.88488 | 0.091527  | 0.04807 | -0.05036 | 0.27745 | -0.08594 |
| 0.006413 | 0.89006 | 0.120896 | 0.00892 | 0.02991   | 0.51908 | 0.144332 | 0.00177 | 0.342195 |
| 0.006191 | 0.89385 | -0.01779 | 0.70137 | -0.02343  | 0.61349 | -0.03088 | 0.5056  | 0.061993 |
| -0.08207 | 0.07645 | -0.03316 | 0.47463 | -0.07946  | 0.0863  | 0.014491 | 0.75479 | -0.0384  |
| 0.120735 | 0.00901 | 0.060835 | 0.1894  | 0.116714  | 0.0116  | 0.026385 | 0.56952 | 0.041876 |
| 0.018681 | 0.6872  | -0.03895 | 0.40109 | -0.02088  | 0.65268 | -0.04691 | 0.31177 | -0.00734 |
| -0.09199 | 0.04694 | -0.04036 | 0.38421 | -0.09541  | 0.0393  | 0.004852 | 0.91672 | -0.00116 |
| -0.02633 | 0.57036 | 0.106668 | 0.02114 | 0.007162  | 0.87732 | 0.135194 | 0.00342 | 0.307043 |
| -0.05821 | 0.20927 | 0.067427 | 0.14571 | -0.01965  | 0.67188 | 0.101775 | 0.02786 | 0.169934 |
| 0.016194 | 0.72705 | -0.00506 | 0.91313 | 0.047553  | 0.30515 | -0.04236 | 0.36103 | -0.12632 |
| -0.01526 | 0.74216 | -0.04892 | 0.29145 | -0.00401  | 0.93105 | -0.06493 | 0.16123 | -0.07997 |
| 0.032437 | 0.48438 | 0.158101 | 0.00061 | 0.052237  | 0.25991 | 0.173341 | 0.00017 | 0.399706 |
| 0.038058 | 0.41191 | 0.125337 | 0.00669 | 0.049555  | 0.28521 | 0.130066 | 0.00488 | 0.324742 |
| 0.021219 | 0.64741 | 0.021978 | 0.63568 | 0.004313  | 0.92594 | 0.029496 | 0.52488 | 0.162734 |
| 0.059842 | 0.19674 | -0.025   | 0.58992 | -0.03939  | 0.39576 | 0.006029 | 0.89661 | -0.01003 |
| -0.11653 | 0.01174 | -0.10318 | 0.02576 | -0.11598  | 0.01214 | -0.07072 | 0.12699 | -0.0846  |
| -0.0583  | 0.20857 | -0.08252 | 0.07483 | -0.01583  | 0.73302 | -0.10649 | 0.02136 | -0.12596 |
| 0.025851 | 0.57737 | 0.05829  | 0.20863 | 0.022409  | 0.62908 | 0.053023 | 0.2528  | 0.099701 |
| -0.00244 | 0.95809 | -0.07505 | 0.10526 | -0.04675  | 0.31335 | -0.08651 | 0.06177 | -0.02811 |
| -0.01879 | 0.68542 | -0.04242 | 0.36039 | -0.02033  | 0.66125 | -0.05659 | 0.22226 | 0.002807 |
| 0.033632 | 0.46842 | 0.103637 | 0.02511 | -0.00014  | 0.99763 | 0.13868  | 0.00267 | 0.254396 |
| 0.032688 | 0.481   | 0.084599 | 0.06776 | 0.015416  | 0.73968 | 0.106485 | 0.02136 | 0.184268 |
| -0.00256 | 0.956   | 0.020694 | 0.65555 | -0.02254  | 0.62706 | 0.028289 | 0.54198 | 0.153038 |
| 0.118153 | 0.01061 | 0.015994 | 0.73031 | 0.055315  | 0.23284 | -0.00858 | 0.85322 | 0.096724 |

|           |         |          |         |          |         |          |          |          |
|-----------|---------|----------|---------|----------|---------|----------|----------|----------|
| 0.037704  | 0.41627 | -0.01676 | 0.71787 | -0.00328 | 0.94362 | -0.02659 | 0.56653  | 0.060444 |
| -0.00092  | 0.98416 | -0.0179  | 0.6997  | -0.02015 | 0.66403 | -0.0178  | 0.70129  | 0.087438 |
| -0.0276   | 0.55188 | 0.05963  | 0.19833 | -0.00923 | 0.84235 | 0.091703 | 0.04764  | 0.185803 |
| 0.006155  | 0.89446 | 0.109725 | 0.01769 | 0.03765  | 0.41694 | 0.124399 | 0.00711  | 0.263763 |
| 0.000927  | 0.98407 | 0.02171  | 0.63982 | -0.01862 | 0.68814 | 0.030931 | 0.5049   | 0.13579  |
| -0.03407  | 0.46266 | 0.030129 | 0.51602 | -0.0269  | 0.56198 | 0.055061 | 0.23499  | 0.12872  |
| 0.042804  | 0.35604 | -0.08761 | 0.0585  | 0.047948 | 0.30114 | -0.15986 | 0.00052  | -0.25183 |
| 0.025274  | 0.5859  | 0.080535 | 0.08212 | 0.015218 | 0.74291 | 0.106632 | 0.02118  | 0.173006 |
| -0.03888  | 0.40185 | 0.020043 | 0.66574 | -0.02701 | 0.56034 | 0.051879 | 0.2632   | 0.051961 |
| 0.085301  | 0.06551 | -0.06538 | 0.15835 | 0.01113  | 0.81041 | -0.10442 | 0.02403  | -0.16609 |
| -0.03187  | 0.49205 | 0.011962 | 0.79654 | -0.04966 | 0.28419 | 0.053291 | 0.25041  | 0.064115 |
| -0.05521  | 0.23376 | -0.01536 | 0.74057 | -0.02459 | 0.59609 | -0.02103 | 0.65034  | 0.116165 |
| 0.039843  | 0.39032 | 0.150812 | 0.00108 | 0.050129 | 0.27967 | 0.188899 | 3.99E-05 | 0.256985 |
| -0.11989  | 0.00951 | -0.17629 | 0.00013 | -0.15066 | 0.00109 | -0.15098 | 0.00107  | -0.19479 |
| -0.02361  | 0.61075 | 0.048414 | 0.29646 | -0.01456 | 0.75362 | 0.081118 | 0.07992  | 0.116007 |
| -0.08793  | 0.05758 | -0.0385  | 0.40649 | -0.07003 | 0.13075 | -0.0186  | 0.68842  | 0.030344 |
| -0.03542  | 0.44511 | -0.01619 | 0.7272  | -0.0456  | 0.32549 | -0.00154 | 0.97354  | 0.044995 |
| 5.54E-05  | 0.99905 | 0.030045 | 0.51718 | -0.00082 | 0.98589 | 0.033944 | 0.46431  | 0.056016 |
| -0.12395  | 0.00732 | 0.031863 | 0.49215 | -0.03782 | 0.41487 | 0.048291 | 0.2977   | 0.18031  |
| -0.0859   | 0.06363 | 0.008326 | 0.85759 | -0.0679  | 0.14289 | 0.042623 | 0.35808  | 0.191897 |
| 0.031269  | 0.50026 | -0.01099 | 0.81281 | -0.01661 | 0.72033 | -0.01254 | 0.78702  | 0.060988 |
| -0.00644  | 0.88959 | 0.060875 | 0.18911 | 0.00336  | 0.94227 | 0.062412 | 0.17817  | 0.180326 |
| -0.07819  | 0.09144 | 0.023519 | 0.61219 | -0.06659 | 0.15081 | 0.063704 | 0.16933  | 0.173805 |
| -0.07339  | 0.11322 | -0.13326 | 0.00391 | -0.07068 | 0.1272  | -0.14242 | 0.00203  | -0.27226 |
| 0.040936  | 0.37743 | -0.02208 | 0.63411 | 0.043868 | 0.34419 | -0.06908 | 0.13607  | -0.13779 |
| -0.03249  | 0.48364 | 0.059131 | 0.20212 | -0.01138 | 0.8062  | 0.079538 | 0.08599  | 0.232803 |
| -0.04769  | 0.30378 | -0.03653 | 0.43097 | -0.05696 | 0.21919 | -0.01706 | 0.71317  | -0.00125 |
| -0.03513  | 0.44885 | -0.11327 | 0.01432 | -0.00309 | 0.94682 | -0.16821 | 0.00026  | -0.26014 |
| -0.09349  | 0.04345 | -0.03596 | 0.43816 | -0.07684 | 0.09723 | -0.01101 | 0.81236  | 0.058529 |
| -0.08896  | 0.05471 | 0.054782 | 0.23738 | -0.0296  | 0.52344 | 0.096243 | 0.03761  | 0.173415 |
| -0.09542  | 0.03928 | 0.045715 | 0.32424 | -0.04446 | 0.33771 | 0.090881 | 0.04968  | 0.201307 |
| 0.056313  | 0.22451 | 0.013852 | 0.76529 | 0.054852 | 0.23678 | -0.02074 | 0.65485  | -0.03422 |
| 0.093438  | 0.04357 | 0.146963 | 0.00145 | 0.077023 | 0.09641 | 0.161576 | 0.00046  | 0.301369 |
| 0.057994  | 0.21095 | 0.11365  | 0.01399 | 0.073524 | 0.11257 | 0.102129 | 0.02732  | 0.237645 |
| -4.98E-05 | 0.99914 | 0.113592 | 0.01404 | 0.022158 | 0.63292 | 0.162577 | 0.00042  | 0.280543 |
| -0.03436  | 0.45881 | 0.115035 | 0.01286 | 0.046623 | 0.31472 | 0.1045   | 0.02392  | 0.334213 |
| -0.02642  | 0.56901 | 0.0991   | 0.03227 | 0.015768 | 0.73396 | 0.10999  | 0.01742  | 0.157106 |
| 0.002991  | 0.9486  | 0.051085 | 0.27058 | 0.002328 | 0.95999 | 0.066955 | 0.14856  | 0.081704 |
| 0.019764  | 0.6701  | 0.127578 | 0.00576 | 0.047931 | 0.30132 | 0.141025 | 0.00225  | 0.302806 |
| 0.110553  | 0.01685 | -0.01591 | 0.73174 | 0.067426 | 0.14571 | -0.07702 | 0.09643  | -0.08914 |
| -0.01249  | 0.78778 | 0.093636 | 0.04312 | 0.002529 | 0.95653 | 0.112912 | 0.01463  | 0.255948 |
| 0.008326  | 0.85759 | 0.062263 | 0.1792  | 0.01543  | 0.73946 | 0.075894 | 0.10141  | 0.177605 |
| 0.079076  | 0.08783 | 0.048413 | 0.29648 | 0.116017 | 0.01211 | -0.01607 | 0.72905  | 0.046334 |
| -0.00612  | 0.89515 | 0.02335  | 0.61475 | 0.013952 | 0.76363 | 0.010524 | 0.82056  | 0.076683 |
| -0.0096   | 0.83609 | -0.05218 | 0.26042 | -0.03915 | 0.39866 | -0.04905 | 0.29014  | -0.02487 |

|          |          |          |          |          |          |          |          |          |
|----------|----------|----------|----------|----------|----------|----------|----------|----------|
| 0.003209 | 0.94486  | -0.10938 | 0.01806  | -0.029   | 0.53183  | -0.13481 | 0.00351  | -0.17572 |
| -0.09933 | 0.03186  | -0.0116  | 0.80257  | -0.05495 | 0.23592  | 0.012977 | 0.77971  | 0.141459 |
| 0.124988 | 0.00684  | 0.034188 | 0.4611   | 0.058146 | 0.20976  | 0.002396 | 0.95882  | 0.131237 |
| -0.05268 | 0.25592  | -0.10655 | 0.02128  | -0.08684 | 0.06076  | -0.0907  | 0.05012  | -0.12747 |
| -0.09336 | 0.04374  | -0.14012 | 0.00241  | -0.11993 | 0.00948  | -0.1285  | 0.00542  | -0.21836 |
| 0.038397 | 0.40776  | 0.062998 | 0.17411  | 0.014565 | 0.75358  | 0.070914 | 0.12594  | 0.199551 |
| 0.141101 | 0.00224  | 0.226821 | 7.30E-07 | 0.212111 | 3.76E-06 | 0.180291 | 8.94E-05 | 0.268741 |
| -0.04683 | 0.31252  | 0.096605 | 0.03689  | -0.00664 | 0.88625  | 0.124328 | 0.00715  | 0.331692 |
| -0.03927 | 0.39719  | -0.00691 | 0.88161  | -0.0429  | 0.35497  | 0.004195 | 0.92796  | 0.05224  |
| -0.08456 | 0.06789  | -0.13158 | 0.0044   | -0.11201 | 0.01545  | -0.11916 | 0.00995  | -0.15159 |
| 0.101943 | 0.02761  | 0.061661 | 0.18345  | 0.02985  | 0.51991  | 0.067144 | 0.14741  | 0.151813 |
| -0.01963 | 0.67219  | -0.1161  | 0.01205  | -0.09146 | 0.04823  | -0.10812 | 0.01943  | -0.13599 |
| 0.026787 | 0.56365  | 0.127611 | 0.00575  | 0.054243 | 0.24203  | 0.140018 | 0.00242  | 0.36875  |
| -0.21021 | 4.61E-06 | -0.1225  | 0.00805  | -0.15276 | 0.00093  | -0.08568 | 0.06432  | -0.10089 |
| 0.027202 | 0.55763  | -0.0583  | 0.20852  | 0.00571  | 0.90206  | -0.08704 | 0.06018  | -0.05433 |
| -0.17616 | 0.00013  | -0.14546 | 0.00162  | -0.16652 | 0.0003   | -0.09106 | 0.04924  | -0.15565 |
| -0.07825 | 0.0912   | -0.10512 | 0.0231   | -0.07161 | 0.12229  | -0.11245 | 0.01504  | -0.11189 |
| -0.04993 | 0.28158  | 0.08194  | 0.0769   | -0.00682 | 0.88312  | 0.106402 | 0.02146  | 0.217782 |
| 0.02543  | 0.58358  | 0.094158 | 0.04197  | 0.057753 | 0.21285  | 0.070212 | 0.12975  | 0.260162 |
| 0.016197 | 0.727    | 0.077392 | 0.09482  | 0.020745 | 0.65476  | 0.082427 | 0.07515  | 0.162888 |
| -0.02515 | 0.58769  | 0.010396 | 0.8227   | 0.010263 | 0.82493  | -0.01294 | 0.78026  | 0.125464 |
| 0.038314 | 0.40878  | 0.099235 | 0.03203  | 0.017982 | 0.69833  | 0.120386 | 0.00921  | 0.331281 |
| 0.005778 | 0.90089  | -0.01194 | 0.79695  | -0.04736 | 0.30707  | 0.012223 | 0.79221  | 0.088604 |
| -0.10208 | 0.0274   | -0.03095 | 0.5046   | -0.05657 | 0.22238  | -0.01242 | 0.7889   | 0.006423 |
| -0.01409 | 0.76144  | 0.0236   | 0.61096  | 0.045239 | 0.32931  | -0.00957 | 0.8366   | -0.03973 |
| 0.130928 | 0.0046   | 0.008063 | 0.86204  | 0.105501 | 0.0226   | -0.05239 | 0.2585   | -0.1439  |
| -0.05725 | 0.2169   | 0.012542 | 0.78691  | -0.06287 | 0.17497  | 0.050739 | 0.27384  | 0.197822 |
| 0.072804 | 0.11614  | 0.171604 | 0.00019  | 0.074791 | 0.10649  | 0.194274 | 2.36E-05 | 0.328426 |
| 0.112832 | 0.0147   | 0.02484  | 0.59235  | 0.067254 | 0.14675  | 0.000607 | 0.98957  | -0.04712 |
| -0.02937 | 0.52663  | 0.055898 | 0.22795  | 0.006532 | 0.88804  | 0.048921 | 0.29143  | 0.240392 |
| -0.03803 | 0.4123   | -0.03488 | 0.45212  | -0.02692 | 0.56178  | -0.04233 | 0.36136  | 0.073028 |
| 0.031381 | 0.49872  | 0.127962 | 0.00562  | 0.048612 | 0.29449  | 0.140497 | 0.00234  | 0.313246 |
| -0.07751 | 0.09433  | 0.02986  | 0.51977  | -0.05254 | 0.25714  | 0.072439 | 0.11799  | 0.123582 |
| -0.08146 | 0.07864  | -0.06619 | 0.15328  | -0.09863 | 0.0331   | -0.0318  | 0.493    | -0.11755 |
| -0.00685 | 0.88267  | 0.005288 | 0.90926  | -0.03753 | 0.41841  | 0.042736 | 0.3568   | -0.03071 |
| -0.02981 | 0.52053  | 0.003348 | 0.94248  | -0.01745 | 0.70677  | 0.013374 | 0.77315  | 0.063613 |
| -0.03228 | 0.48651  | 0.065483 | 0.1577   | -0.02528 | 0.58584  | 0.116214 | 0.01196  | 0.174977 |
| -0.11081 | 0.0166   | 0.039478 | 0.39468  | -0.07548 | 0.10331  | 0.104789 | 0.02353  | 0.175535 |
| -0.01858 | 0.68876  | 0.16558  | 0.00033  | 0.06994  | 0.13125  | 0.171101 | 0.0002   | 0.372899 |
| 0.047804 | 0.3026   | 0.003166 | 0.9456   | 0.077077 | 0.09618  | -0.04867 | 0.29393  | -0.20771 |
| -0.08769 | 0.0583   | -0.01539 | 0.74018  | -0.06203 | 0.18083  | 0.016279 | 0.72568  | 0.054338 |
| -0.01701 | 0.71386  | 0.018459 | 0.69073  | 0.007334 | 0.87441  | -0.00239 | 0.95893  | 0.210546 |
| -0.09579 | 0.03852  | -0.04491 | 0.33286  | -0.06265 | 0.1765   | -0.04279 | 0.35618  | 0.048679 |
| -0.00554 | 0.90499  | -0.08284 | 0.0737   | -0.08801 | 0.05737  | -0.0437  | 0.34601  | -0.05005 |
| -0.10122 | 0.02872  | -0.03812 | 0.41116  | -0.08944 | 0.05343  | -0.00645 | 0.88952  | 0.085887 |

|          |         |          |         |          |         |          |         |          |
|----------|---------|----------|---------|----------|---------|----------|---------|----------|
| 0.004147 | 0.92878 | 0.058949 | 0.20352 | -0.04617 | 0.31945 | 0.127864 | 0.00566 | 0.052343 |
| -0.03681 | 0.42737 | -0.03827 | 0.40936 | -0.04519 | 0.32983 | -0.02678 | 0.56382 | 0.026736 |
| -0.07286 | 0.11587 | 0.086074 | 0.06309 | -0.01765 | 0.7037  | 0.126539 | 0.00618 | 0.232872 |
| -0.06481 | 0.16203 | -0.01465 | 0.75216 | -0.07554 | 0.10301 | 0.022772 | 0.62352 | 0.020844 |
| -0.04945 | 0.28619 | -0.04326 | 0.35096 | -0.09148 | 0.04818 | 0.0067   | 0.88518 | 0.037898 |
| 0.022104 | 0.63376 | -0.06843 | 0.13979 | 0.031213 | 0.50103 | -0.12001 | 0.00943 | -0.28522 |
| 0.051529 | 0.26644 | 0.105553 | 0.02253 | 0.069146 | 0.13569 | 0.081085 | 0.08004 | 0.191889 |
| -0.04559 | 0.32555 | 0.037907 | 0.41378 | -0.04738 | 0.30694 | 0.095701 | 0.0387  | 0.131717 |
| 0.171612 | 0.00019 | 0.055787 | 0.22887 | 0.177092 | 0.00012 | -0.04423 | 0.3402  | -0.09306 |
| 0.131477 | 0.00443 | 0.031834 | 0.49255 | 0.137691 | 0.00287 | -0.06556 | 0.15723 | -0.04088 |
| -0.0587  | 0.20543 | -0.07676 | 0.09757 | -0.00373 | 0.93595 | -0.12277 | 0.00791 | -0.28409 |
| -0.10187 | 0.02771 | -0.09513 | 0.03989 | -0.07536 | 0.10383 | -0.09668 | 0.03675 | -0.06119 |
| -0.0961  | 0.03789 | -0.07559 | 0.1028  | -0.1003  | 0.03022 | -0.0484  | 0.29658 | 0.006596 |
| 0.032209 | 0.48746 | 0.012297 | 0.79097 | 0.059049 | 0.20275 | -0.01897 | 0.68256 | -0.05308 |
| -0.05762 | 0.21388 | -0.11035 | 0.01705 | -0.06434 | 0.16508 | -0.12853 | 0.00541 | -0.07888 |
| -0.07187 | 0.12094 | 0.026114 | 0.5735  | -0.04357 | 0.34749 | 0.048184 | 0.29877 | 0.266792 |
| -0.07273 | 0.11653 | -0.09191 | 0.04713 | -0.09688 | 0.03636 | -0.06391 | 0.16792 | -0.14569 |
| -0.0365  | 0.43129 | 0.02398  | 0.60523 | -0.03152 | 0.49689 | 0.048395 | 0.29665 | 0.244565 |
| 0.084333 | 0.06863 | 0.087552 | 0.05868 | 0.045641 | 0.32503 | 0.088874 | 0.05495 | 0.186238 |
| 0.021118 | 0.64898 | 0.108373 | 0.01915 | 0.012374 | 0.7897  | 0.140343 | 0.00237 | 0.320878 |
| -0.03622 | 0.43491 | -0.00826 | 0.85866 | 0.037757 | 0.41563 | -0.04367 | 0.34634 | -0.10278 |
| -0.01337 | 0.77323 | -0.03739 | 0.4202  | -0.06624 | 0.15292 | -0.01512 | 0.74443 | 0.05142  |
| -0.0665  | 0.15135 | -0.04049 | 0.38263 | -0.05661 | 0.22204 | -0.02406 | 0.60396 | -0.0407  |
| -0.08787 | 0.05777 | 0.074853 | 0.1062  | -0.00991 | 0.83095 | 0.091124 | 0.04906 | 0.328485 |
| 0.027576 | 0.55223 | 0.065013 | 0.16072 | -0.00796 | 0.86381 | 0.0949   | 0.04037 | 0.243379 |
| -0.06248 | 0.17766 | -0.0269  | 0.56206 | -0.04998 | 0.28115 | -0.01798 | 0.69828 | 0.068291 |
| 0.031271 | 0.50023 | -0.00413 | 0.92902 | -0.00943 | 0.83889 | 0.023115 | 0.61832 | 0.023337 |
| -0.05516 | 0.23418 | 0.037775 | 0.4154  | -0.03481 | 0.45293 | 0.056534 | 0.22269 | 0.135315 |
| -0.03163 | 0.49537 | 0.043195 | 0.35166 | -0.05449 | 0.23988 | 0.096017 | 0.03806 | 0.26556  |
| -0.01215 | 0.79334 | 0.044825 | 0.33376 | -0.00214 | 0.96321 | 0.041931 | 0.36594 | 0.227901 |
| 0.122523 | 0.00803 | 0.067822 | 0.14336 | 0.062428 | 0.17805 | 0.056672 | 0.22156 | 0.089095 |
| 0.006072 | 0.89588 | 0.072787 | 0.11623 | 0.025957 | 0.5758  | 0.081153 | 0.07979 | 0.190652 |
| 0.054627 | 0.23871 | -0.03248 | 0.48378 | -0.00908 | 0.84491 | -0.05164 | 0.26538 | 0.011233 |
| -0.00279 | 0.95201 | -0.00294 | 0.94948 | -0.01011 | 0.8275  | 0.000614 | 0.98944 | 0.020212 |
| 0.123686 | 0.00745 | -0.00667 | 0.88573 | 0.104895 | 0.02339 | -0.07937 | 0.08665 | -0.07698 |
| 0.041169 | 0.37472 | 0.057687 | 0.21338 | 0.012941 | 0.7803  | 0.059558 | 0.19888 | 0.153299 |
| -0.09772 | 0.03477 | 0.017766 | 0.70177 | -0.0468  | 0.31286 | 0.047737 | 0.30328 | 0.192338 |
| -0.06745 | 0.14559 | 0.021422 | 0.64426 | -0.03835 | 0.40828 | 0.049394 | 0.28678 | 0.125601 |
| -0.03719 | 0.42261 | 0.082936 | 0.07336 | -0.02584 | 0.57759 | 0.131784 | 0.00434 | 0.340357 |
| 0.088465 | 0.05609 | 0.010991 | 0.81274 | 0.088068 | 0.0572  | -0.02986 | 0.51976 | -0.07835 |
| -0.08417 | 0.06919 | 0.060673 | 0.19059 | -0.01372 | 0.76748 | 0.091547 | 0.04802 | 0.196027 |
| -0.01331 | 0.77414 | 0.129858 | 0.00494 | 0.022577 | 0.62651 | 0.158986 | 0.00056 | 0.316742 |
| -0.04955 | 0.28528 | -0.04994 | 0.28144 | -0.04952 | 0.28554 | -0.05792 | 0.21155 | -0.00661 |
| -0.07174 | 0.12158 | -0.04864 | 0.29417 | -0.05478 | 0.23741 | -0.05074 | 0.27384 | 0.016373 |
| -0.0243  | 0.60045 | -0.04205 | 0.36459 | -0.04118 | 0.37464 | -0.03433 | 0.45925 | -0.0445  |

|          |          |           |         |          |          |          |          |          |
|----------|----------|-----------|---------|----------|----------|----------|----------|----------|
| 0.037414 | 0.41988  | 0.015333  | 0.74103 | -0.01717 | 0.71139  | 0.032754 | 0.48012  | 0.086746 |
| -0.00931 | 0.84089  | -0.1465   | 0.0015  | -0.09441 | 0.04141  | -0.14413 | 0.00179  | -0.17733 |
| 0.011166 | 0.80981  | 0.078569  | 0.08989 | 0.002648 | 0.95449  | 0.10926  | 0.01818  | 0.178965 |
| -0.03283 | 0.47915  | 0.024606  | 0.59584 | 0.034693 | 0.45449  | 0.016446 | 0.72299  | -0.05723 |
| -0.06919 | 0.13545  | -2.38E-05 | 0.99959 | -0.06477 | 0.16228  | 0.029923 | 0.51889  | 0.113518 |
| 0.001561 | 0.97316  | 0.025343  | 0.58487 | -0.01277 | 0.7831   | 0.038396 | 0.40777  | 0.103239 |
| 0.072832 | 0.116    | -0.01616  | 0.72761 | 0.002311 | 0.96027  | -0.02691 | 0.56192  | 0.114807 |
| 0.063774 | 0.16886  | 0.093463  | 0.04351 | 0.048797 | 0.29266  | 0.091363 | 0.04847  | 0.186978 |
| -0.01264 | 0.78536  | 0.091669  | 0.04772 | 0.025096 | 0.58853  | 0.094735 | 0.04072  | 0.258299 |
| -0.06199 | 0.18115  | 0.135349  | 0.00338 | -0.00049 | 0.99153  | 0.190486 | 3.42E-05 | 0.315777 |
| -0.08202 | 0.07661  | 0.070392  | 0.12876 | -0.01432 | 0.75759  | 0.099549 | 0.03149  | 0.246578 |
| 0.002349 | 0.95962  | 0.083092  | 0.07282 | 0.010236 | 0.8254   | 0.096892 | 0.03633  | 0.14047  |
| -0.04139 | 0.37214  | 0.046628  | 0.31466 | -0.02013 | 0.66436  | 0.077799 | 0.0931   | 0.181252 |
| -0.05724 | 0.21692  | 0.066982  | 0.14839 | -0.00124 | 0.97872  | 0.081884 | 0.0771   | 0.211634 |
| -0.05068 | 0.27444  | 0.028802  | 0.53468 | -0.05394 | 0.24464  | 0.062724 | 0.176    | 0.145294 |
| -0.02016 | 0.66384  | 0.056769  | 0.22077 | -0.04103 | 0.37634  | 0.100617 | 0.0297   | 0.177619 |
| -0.06275 | 0.17581  | -0.12864  | 0.00537 | -0.08704 | 0.06018  | -0.12306 | 0.00776  | -0.15202 |
| 0.065512 | 0.15752  | 0.119671  | 0.00964 | 0.040033 | 0.38805  | 0.142118 | 0.00208  | 0.283806 |
| -0.05747 | 0.21508  | -0.00911  | 0.84428 | -0.04335 | 0.34995  | -0.00617 | 0.89415  | 0.012177 |
| 0.001504 | 0.97415  | -0.00021  | 0.99639 | -0.01535 | 0.74071  | -0.00121 | 0.97913  | 0.055845 |
| 0.075141 | 0.10486  | -0.0703   | 0.12926 | 0.03958  | 0.39346  | -0.12934 | 0.00512  | -0.22161 |
| 0.039837 | 0.39039  | 0.038806  | 0.40278 | 0.057262 | 0.21678  | -0.01142 | 0.80562  | 0.042114 |
| 0.007535 | 0.87099  | 0.017241  | 0.71018 | -0.02023 | 0.66281  | 0.034406 | 0.45824  | 0.022548 |
| 0.037486 | 0.41898  | 0.135676  | 0.00331 | 0.062706 | 0.17613  | 0.149859 | 0.00116  | 0.274044 |
| -0.03908 | 0.39941  | 0.048134  | 0.29927 | -0.0188  | 0.68537  | 0.066463 | 0.15157  | 0.222083 |
| -0.02146 | 0.64363  | 0.005868  | 0.89937 | -0.00823 | 0.85918  | -0.00908 | 0.84479  | 0.023634 |
| -0.00938 | 0.83986  | -0.02912  | 0.53018 | -0.0316  | 0.49571  | -0.03797 | 0.41305  | 0.109523 |
| 0.031171 | 0.50161  | 0.066814  | 0.14942 | 0.025414 | 0.58381  | 0.068692 | 0.13828  | 0.252147 |
| 0.103875 | 0.02478  | -0.03257  | 0.48262 | 0.099178 | 0.03213  | -0.12791 | 0.00564  | -0.15703 |
| -0.00803 | 0.86253  | 0.042434  | 0.36022 | -0.01919 | 0.67915  | 0.072019 | 0.12014  | 0.149374 |
| 0.156464 | 0.00069  | 0.129176  | 0.00518 | 0.252616 | 3.12E-08 | -0.03532 | 0.4464   | -0.03112 |
| 0.005826 | 0.90008  | 0.049881  | 0.28205 | -0.03783 | 0.41471  | 0.100463 | 0.02995  | 0.236317 |
| 0.050479 | 0.27631  | 0.170833  | 0.00021 | 0.050178 | 0.2792   | 0.202859 | 9.96E-06 | 0.346276 |
| -0.01936 | 0.67652  | 0.01902   | 0.68184 | -0.04648 | 0.31621  | 0.054965 | 0.23582  | 0.134335 |
| -0.06022 | 0.19395  | -0.06402  | 0.16721 | -0.05863 | 0.20595  | -0.06573 | 0.15616  | -0.06205 |
| -0.04133 | 0.37286  | -0.03376  | 0.46672 | -0.05395 | 0.24462  | 0.001565 | 0.97309  | -0.0171  |
| 0.054128 | 0.24303  | 0.071958  | 0.12045 | 0.005537 | 0.90501  | 0.086846 | 0.06075  | 0.198968 |
| -0.02126 | 0.64678  | 0.001934  | 0.96675 | -0.02243 | 0.62873  | 0.005466 | 0.90623  | 0.078327 |
| 0.000597 | 0.98973  | 0.144017  | 0.00181 | 0.030854 | 0.50596  | 0.180352 | 8.88E-05 | 0.316673 |
| -0.04468 | 0.33532  | -0.07297  | 0.11531 | -0.05578 | 0.2289   | -0.07365 | 0.11193  | -0.08555 |
| -0.026   | 0.5752   | 0.094861  | 0.04045 | 0.002875 | 0.95059  | 0.119338 | 0.00984  | 0.299733 |
| 0.209265 | 5.10E-06 | 0.121795  | 0.00842 | 0.230112 | 4.98E-07 | 0.007776 | 0.86691  | -0.01395 |
| 0.087002 | 0.06029  | 0.076648  | 0.09805 | 0.087466 | 0.05893  | 0.056808 | 0.22045  | 0.111315 |
| 0.00498  | 0.91453  | -0.04402  | 0.34258 | -0.03792 | 0.41366  | -0.04414 | 0.34117  | 0.04786  |
| 0.037354 | 0.42062  | -0.00732  | 0.87466 | -0.00305 | 0.94765  | -0.01563 | 0.73618  | 0.0546   |

|          |         |          |          |          |         |          |          |          |
|----------|---------|----------|----------|----------|---------|----------|----------|----------|
| 0.021571 | 0.64196 | -0.07205 | 0.12     | -0.03692 | 0.42601 | -0.08403 | 0.06965  | -0.02579 |
| 0.079238 | 0.08718 | -0.06136 | 0.18563  | -0.02602 | 0.57482 | -0.06009 | 0.19491  | 0.007139 |
| 0.018455 | 0.69078 | 0.066926 | 0.14873  | 0.011991 | 0.79607 | 0.060262 | 0.19361  | 0.197091 |
| -0.04011 | 0.38718 | 0.120115 | 0.00937  | 0.003849 | 0.93389 | 0.162435 | 0.00042  | 0.280205 |
| 0.098795 | 0.0328  | 0.055842 | 0.22841  | 0.071176 | 0.12455 | 0.024699 | 0.59445  | 0.109958 |
| 0.012259 | 0.79161 | 0.098737 | 0.03291  | 0.02184  | 0.63782 | 0.121022 | 0.00885  | 0.280859 |
| -0.02228 | 0.63106 | 0.065083 | 0.16027  | -0.01058 | 0.81968 | 0.100322 | 0.03019  | 0.169509 |
| 0.085405 | 0.06518 | 0.031797 | 0.49304  | 0.030989 | 0.50411 | 0.028629 | 0.53714  | -0.00949 |
| -0.01267 | 0.78482 | 0.109642 | 0.01778  | 0.024451 | 0.59816 | 0.130263 | 0.00481  | 0.222023 |
| -0.07099 | 0.12552 | -0.18196 | 7.66E-05 | -0.06023 | 0.19386 | -0.21805 | 1.97E-06 | -0.33293 |
| 0.035004 | 0.45047 | -0.07548 | 0.1033   | -0.06431 | 0.16531 | -0.06626 | 0.15285  | -0.02409 |
| 0.020952 | 0.65155 | 0.081064 | 0.08012  | 0.039541 | 0.39392 | 0.075338 | 0.10395  | 0.274926 |
| 0.029849 | 0.51993 | 0.11543  | 0.01256  | 0.039844 | 0.3903  | 0.124378 | 0.00712  | 0.261132 |
| 0.028109 | 0.54455 | 0.063506 | 0.17066  | 0.010862 | 0.81489 | 0.071519 | 0.12274  | 0.227116 |
| 0.095395 | 0.03933 | 0.054561 | 0.23928  | 0.061806 | 0.18242 | 0.019315 | 0.67717  | 0.168742 |
| 0.083962 | 0.06987 | 0.166263 | 0.00031  | 0.07869  | 0.0894  | 0.173903 | 0.00016  | 0.30027  |
| 0.032161 | 0.4881  | -0.0529  | 0.25387  | -0.03967 | 0.39242 | -0.04995 | 0.28135  | -0.03954 |
| 0.034904 | 0.45176 | -0.05003 | 0.2806   | 0.059475 | 0.19951 | -0.11813 | 0.01062  | -0.15507 |
| 0.04893  | 0.29134 | 0.065472 | 0.15778  | 0.042494 | 0.35954 | 0.070313 | 0.1292   | 0.134398 |
| 0.171598 | 0.00019 | 0.001601 | 0.97247  | 0.129747 | 0.00498 | -0.091   | 0.04938  | -0.07985 |
| 0.069542 | 0.13346 | 0.078517 | 0.09011  | 0.022804 | 0.62304 | 0.092289 | 0.04623  | 0.127061 |
| -0.02439 | 0.59904 | 0.120781 | 0.00898  | 0.003605 | 0.93807 | 0.166087 | 0.00031  | 0.348519 |
| 0.031097 | 0.50262 | -0.0811  | 0.07999  | 0.039134 | 0.39881 | -0.14544 | 0.00162  | -0.21329 |
| -0.00084 | 0.98557 | -0.04504 | 0.33142  | -0.05176 | 0.2643  | -0.04395 | 0.34333  | -0.01993 |
| -0.02424 | 0.60135 | -0.00446 | 0.92336  | -0.01276 | 0.78333 | -0.00056 | 0.99035  | 0.071093 |
| 0.048493 | 0.29567 | 0.125258 | 0.00672  | 0.083653 | 0.07091 | 0.114403 | 0.01337  | 0.271086 |
| -0.03197 | 0.49071 | -0.01735 | 0.70849  | -0.02358 | 0.61119 | -0.01389 | 0.76458  | 0.030633 |
| 0.003545 | 0.9391  | 0.17032  | 0.00022  | 0.042446 | 0.36008 | 0.22998  | 5.06E-07 | 0.259479 |
| -0.04955 | 0.28531 | 0.048926 | 0.29138  | -0.02697 | 0.561   | 0.07681  | 0.09734  | 0.298112 |
| -0.02835 | 0.54118 | -0.03854 | 0.40607  | 0.034883 | 0.45203 | -0.08788 | 0.05775  | -0.12896 |
| 0.027252 | 0.55689 | 0.01499  | 0.74663  | 0.030765 | 0.50719 | -0.01918 | 0.67935  | 0.029452 |
| -0.01174 | 0.80028 | 0.001389 | 0.97611  | -0.05505 | 0.23506 | 0.049112 | 0.28955  | 0.18635  |
| 0.062208 | 0.17959 | 0.100095 | 0.03056  | 0.023919 | 0.60614 | 0.12296  | 0.00781  | 0.3039   |
| 0.018749 | 0.68613 | 0.096739 | 0.03663  | 0.04778  | 0.30285 | 0.095528 | 0.03906  | 0.131879 |
| -0.03418 | 0.46114 | 0.144596 | 0.00173  | 0.03956  | 0.39369 | 0.169036 | 0.00024  | 0.358193 |
| 0.079681 | 0.08543 | 0.197011 | 1.80E-05 | 0.12173  | 0.00845 | 0.189195 | 3.88E-05 | 0.358372 |
| 0.015942 | 0.73114 | 0.13032  | 0.00479  | 0.038601 | 0.40527 | 0.146815 | 0.00147  | 0.385471 |
| 0.057081 | 0.21823 | 0.211547 | 4.00E-06 | 0.079885 | 0.08463 | 0.256169 | 1.97E-08 | 0.448094 |
| 0.039081 | 0.39944 | 0.258753 | 1.40E-08 | 0.088935 | 0.05479 | 0.324753 | 6.24E-13 | 0.595861 |
| -0.02231 | 0.63055 | 0.06836  | 0.1402   | 0.025562 | 0.58162 | 0.0868   | 0.06089  | 0.174923 |
| 0.030763 | 0.50722 | 0.231829 | 4.07E-07 | 0.097198 | 0.03575 | 0.260417 | 1.12E-08 | 0.445331 |
| 0.085148 | 0.06599 | 0.197821 | 1.66E-05 | 0.145522 | 0.00162 | 0.159731 | 0.00053  | 0.301243 |
| 0.000911 | 0.98434 | -0.06634 | 0.15235  | -0.06715 | 0.1474  | -0.03833 | 0.40861  | -0.16784 |
| -0.04623 | 0.31886 | -0.14851 | 0.00129  | -0.08644 | 0.06198 | -0.17286 | 0.00017  | -0.29127 |
| 0.014474 | 0.75507 | 0.122376 | 0.00811  | 0.050777 | 0.27349 | 0.156043 | 0.00071  | 0.179482 |

|          |          |          |          |          |          |          |          |          |
|----------|----------|----------|----------|----------|----------|----------|----------|----------|
| 0.007646 | 0.8691   | 0.093495 | 0.04344  | 0.040074 | 0.38757  | 0.090957 | 0.04948  | 0.18143  |
| 0.050395 | 0.27712  | 0.045685 | 0.32456  | 0.059527 | 0.19912  | 0.029719 | 0.52175  | -0.02762 |
| 0.013186 | 0.77626  | 0.162554 | 0.00042  | 0.088532 | 0.0559   | 0.153008 | 0.00091  | 0.372758 |
| 0.109436 | 0.018    | 0.199556 | 1.39E-05 | 0.126854 | 0.00605  | 0.180283 | 8.94E-05 | 0.469076 |
| 0.041987 | 0.3653   | 0.114445 | 0.01334  | 0.078683 | 0.08943  | 0.106632 | 0.02118  | 0.34234  |
| 0.117293 | 0.01119  | -0.03714 | 0.42328  | 0.009103 | 0.84446  | -0.06648 | 0.15147  | -0.1891  |
| -0.05579 | 0.22883  | 0.105667 | 0.02239  | 0.028304 | 0.54177  | 0.11335  | 0.01425  | 0.218475 |
| 0.041368 | 0.37241  | 0.129453 | 0.00508  | 0.091212 | 0.04885  | 0.101986 | 0.02754  | 0.286065 |
| -0.09405 | 0.0422   | -0.24571 | 7.52E-08 | -0.14791 | 0.00135  | -0.24793 | 5.68E-08 | -0.44235 |
| -0.01219 | 0.7928   | 0.146476 | 0.0015   | 0.050155 | 0.27941  | 0.171684 | 0.00019  | 0.326941 |
| 0.008751 | 0.8504   | 0.185502 | 5.51E-05 | 0.073226 | 0.11404  | 0.20894  | 5.28E-06 | 0.406733 |
| 0.065306 | 0.15884  | -0.1554  | 0.00075  | -0.05364 | 0.24736  | -0.17682 | 0.00012  | -0.30156 |
| 0.075358 | 0.10385  | 0.136839 | 0.00305  | 0.058311 | 0.20846  | 0.154116 | 0.00083  | 0.27061  |
| 0.088511 | 0.05596  | 0.192377 | 2.85E-05 | 0.106949 | 0.0208   | 0.191719 | 3.04E-05 | 0.403083 |
| 0.066611 | 0.15066  | -0.14124 | 0.00222  | -0.00335 | 0.94243  | -0.20681 | 6.60E-06 | -0.32083 |
| 0.037755 | 0.41565  | 0.164739 | 0.00035  | 0.065239 | 0.15926  | 0.19096  | 3.27E-05 | 0.393935 |
| 0.03111  | 0.50244  | -0.09148 | 0.04817  | -0.01679 | 0.71741  | -0.12757 | 0.00577  | -0.26867 |
| -0.00945 | 0.83856  | 0.144848 | 0.0017   | 0.043651 | 0.34659  | 0.16522  | 0.00034  | 0.271292 |
| 0.028554 | 0.53821  | -0.21928 | 1.72E-06 | -0.08193 | 0.07694  | -0.2538  | 2.68E-08 | -0.46958 |
| -0.02608 | 0.57398  | 0.120699 | 0.00903  | 0.026745 | 0.56427  | 0.128323 | 0.00548  | 0.362631 |
| 0.018254 | 0.69399  | 0.203325 | 9.49E-06 | 0.083111 | 0.07276  | 0.223737 | 1.04E-06 | 0.478886 |
| 0.061332 | 0.18581  | 0.229291 | 5.48E-07 | 0.141074 | 0.00224  | 0.227379 | 6.84E-07 | 0.40664  |
| -0.0073  | 0.87504  | 0.176523 | 0.00013  | 0.079918 | 0.0845   | 0.175121 | 0.00014  | 0.491829 |
| 0.231445 | 4.26E-07 | 0.190527 | 3.41E-05 | 0.177028 | 0.00012  | 0.127715 | 0.00571  | 0.381601 |
| 0.032259 | 0.48678  | 0.233877 | 3.19E-07 | 0.098747 | 0.03289  | 0.271725 | 2.39E-09 | 0.454409 |
| 0.027688 | 0.55061  | 0.22137  | 1.36E-06 | 0.082529 | 0.07479  | 0.261444 | 9.76E-09 | 0.536287 |
| -0.01808 | 0.69682  | 0.128604 | 0.00538  | 0.050039 | 0.28053  | 0.146383 | 0.00151  | 0.300766 |
| -0.08543 | 0.06511  | 0.067754 | 0.14376  | -0.00364 | 0.93743  | 0.090236 | 0.05132  | 0.234351 |
| 0.026888 | 0.56218  | 0.224011 | 1.01E-06 | 0.087683 | 0.0583   | 0.246986 | 6.41E-08 | 0.548974 |
| 0.048601 | 0.2946   | 0.223161 | 1.11E-06 | 0.105941 | 0.02204  | 0.239447 | 1.63E-07 | 0.433684 |
| 0.04763  | 0.30437  | -0.08044 | 0.08249  | -0.01124 | 0.80866  | -0.12732 | 0.00586  | -0.21285 |
| 0.001585 | 0.97275  | 0.089632 | 0.05291  | 0.014117 | 0.76092  | 0.106757 | 0.02103  | 0.088139 |
| -0.04244 | 0.36011  | 0.071314 | 0.12382  | 0.014069 | 0.76171  | 0.079895 | 0.08459  | 0.252322 |
| -0.04557 | 0.32579  | 0.092656 | 0.04537  | 0.016159 | 0.72762  | 0.099463 | 0.03164  | 0.299008 |
| -0.07468 | 0.107    | 0.049986 | 0.28104  | -0.01929 | 0.6776   | 0.084223 | 0.069    | 0.129475 |
| 0.001406 | 0.97583  | 0.198423 | 1.56E-05 | 0.084612 | 0.06772  | 0.207281 | 6.29E-06 | 0.462194 |
| 0.037832 | 0.4147   | 0.143339 | 0.0019   | 0.08486  | 0.06692  | 0.144512 | 0.00174  | 0.323229 |
| 0.016877 | 0.71604  | 0.18938  | 3.81E-05 | 0.093437 | 0.04357  | 0.202202 | 1.07E-05 | 0.403262 |
| 0.055949 | 0.22752  | 0.242334 | 1.14E-07 | 0.100159 | 0.03046  | 0.257092 | 1.74E-08 | 0.485196 |
| -0.06476 | 0.16236  | 0.014699 | 0.75138  | -0.02077 | 0.65436  | 0.030294 | 0.51372  | 0.133025 |
| -0.04342 | 0.34911  | 0.13919  | 0.00257  | 0.026377 | 0.56964  | 0.172621 | 0.00018  | 0.355852 |
| 0.154136 | 0.00083  | 0.236718 | 2.27E-07 | 0.199408 | 1.42E-05 | 0.165301 | 0.00033  | 0.390652 |
| 0.054516 | 0.23967  | 0.228937 | 5.71E-07 | 0.091394 | 0.0484   | 0.269937 | 3.06E-09 | 0.399361 |
| 0.008001 | 0.86309  | -0.0953  | 0.03954  | -0.01597 | 0.73066  | -0.12505 | 0.00681  | -0.28436 |
| 0.053487 | 0.24867  | 0.147903 | 0.00135  | 0.106175 | 0.02174  | 0.142464 | 0.00203  | 0.308653 |

|          |         |          |          |          |         |          |          |          |
|----------|---------|----------|----------|----------|---------|----------|----------|----------|
| -0.00037 | 0.99366 | 0.200713 | 1.24E-05 | 0.093868 | 0.04261 | 0.216205 | 2.41E-06 | 0.414524 |
| 0.070551 | 0.1279  | 0.122472 | 0.00806  | 0.086992 | 0.06032 | 0.113269 | 0.01432  | 0.229002 |
| 0.028797 | 0.53476 | 0.189817 | 3.65E-05 | 0.065948 | 0.15477 | 0.224719 | 9.29E-07 | 0.35086  |
| -0.06576 | 0.15595 | 0.101667 | 0.02803  | 0.013493 | 0.77118 | 0.132736 | 0.00406  | 0.294796 |
| -0.06693 | 0.14874 | 0.144365 | 0.00176  | 0.020894 | 0.65245 | 0.182507 | 7.28E-05 | 0.334133 |
| -0.0553  | 0.23296 | 0.030747 | 0.50745  | -0.03    | 0.51783 | 0.054108 | 0.24321  | 0.231005 |
| -0.03958 | 0.39349 | 0.077285 | 0.09528  | 0.009411 | 0.83927 | 0.08994  | 0.0521   | 0.273534 |
| 0.070346 | 0.12901 | 0.257859 | 1.57E-08 | 0.128193 | 0.00553 | 0.273313 | 1.91E-09 | 0.456196 |
| 0.114968 | 0.01292 | -0.0655  | 0.1576   | 0.056742 | 0.22099 | -0.13908 | 0.0026   | -0.17709 |
| 0.075117 | 0.10497 | -0.03344 | 0.47103  | 0.016189 | 0.72713 | -0.07308 | 0.11477  | -0.07956 |
| -0.04375 | 0.34548 | 0.143659 | 0.00186  | 0.069468 | 0.13387 | 0.134247 | 0.00366  | 0.378841 |
| -0.03633 | 0.4335  | 0.144937 | 0.00169  | 0.060797 | 0.18968 | 0.151007 | 0.00106  | 0.345866 |
| 0.0941   | 0.04209 | 0.246405 | 6.89E-08 | 0.146052 | 0.00155 | 0.260116 | 1.17E-08 | 0.355314 |
| 0.005667 | 0.90279 | 0.171352 | 0.0002   | 0.054695 | 0.23813 | 0.202365 | 1.05E-05 | 0.435992 |
| 0.007578 | 0.87026 | 0.172846 | 0.00017  | 0.073472 | 0.11282 | 0.189046 | 3.93E-05 | 0.464789 |
| -0.01744 | 0.70695 | 0.15243  | 0.00095  | 0.04834  | 0.29721 | 0.173937 | 0.00016  | 0.362448 |
| 0.08744  | 0.05901 | 0.126703 | 0.00611  | 0.089079 | 0.05439 | 0.133077 | 0.00396  | 0.332021 |
| 0.018298 | 0.69328 | 0.067445 | 0.1456   | 0.053351 | 0.24987 | 0.072045 | 0.12     | 0.112693 |
| 0.087489 | 0.05886 | 0.256994 | 1.76E-08 | 0.15362  | 0.00087 | 0.249996 | 4.37E-08 | 0.522892 |
| 0.028956 | 0.5325  | 0.159058 | 0.00056  | 0.113385 | 0.01422 | 0.125996 | 0.0064   | 0.338465 |
| -0.00149 | 0.97431 | 0.113487 | 0.01413  | 0.055104 | 0.23462 | 0.116624 | 0.01166  | 0.276359 |
| 0.016102 | 0.72854 | 0.193734 | 2.49E-05 | 0.073767 | 0.11138 | 0.219381 | 1.70E-06 | 0.454384 |
| 0.015173 | 0.74365 | 0.131786 | 0.00433  | 0.051563 | 0.26613 | 0.149039 | 0.00124  | 0.335382 |
| -0.02753 | 0.55281 | -0.19826 | 1.59E-05 | -0.06622 | 0.15305 | -0.23299 | 3.55E-07 | -0.41612 |
| -0.0043  | 0.92617 | 0.191864 | 2.99E-05 | 0.078186 | 0.09147 | 0.213557 | 3.22E-06 | 0.300146 |
| 0.02625  | 0.5715  | -0.08505 | 0.06632  | 0.02786  | 0.54813 | -0.14053 | 0.00234  | -0.23312 |
| -0.07037 | 0.12887 | 0.065255 | 0.15916  | -0.01547 | 0.73882 | 0.090889 | 0.04965  | 0.173304 |
| 0.059377 | 0.20025 | 0.147661 | 0.00137  | 0.05287  | 0.25417 | 0.182077 | 7.58E-05 | 0.308126 |
| -0.0745  | 0.10786 | -0.12879 | 0.00531  | -0.10448 | 0.02395 | -0.11048 | 0.01692  | -0.28521 |
| 0.016319 | 0.72504 | 0.043416 | 0.34919  | -0.0074  | 0.8733  | 0.07087  | 0.12618  | 0.103047 |
| -0.04093 | 0.37754 | 0.100464 | 0.02995  | 0.013901 | 0.76448 | 0.130712 | 0.00467  | 0.267501 |
| 0.105146 | 0.02306 | -0.09645 | 0.03719  | 0.011778 | 0.7996  | -0.1491  | 0.00123  | -0.26252 |
| -0.05168 | 0.265   | 0.080113 | 0.08374  | 0.013973 | 0.76329 | 0.095117 | 0.03991  | 0.194171 |
| 0.012468 | 0.78815 | 0.130023 | 0.00489  | 0.03947  | 0.39477 | 0.147467 | 0.00139  | 0.350054 |
| -0.05581 | 0.22866 | 0.041044 | 0.37617  | 0.020823 | 0.65356 | 0.021455 | 0.64376  | 0.046213 |
| 0.058633 | 0.20595 | 0.271059 | 2.62E-09 | 0.136685 | 0.00308 | 0.285025 | 3.53E-10 | 0.587345 |
| -0.01682 | 0.71688 | 0.126289 | 0.00628  | 0.049596 | 0.28481 | 0.139493 | 0.00252  | 0.359116 |
| 0.012816 | 0.78238 | 0.130126 | 0.00485  | 0.037311 | 0.42116 | 0.156608 | 0.00068  | 0.326723 |
| -0.00131 | 0.97748 | 0.046249 | 0.31862  | -0.00718 | 0.87698 | 0.079599 | 0.08575  | 0.130105 |
| 0.12099  | 0.00886 | 0.258304 | 1.48E-08 | 0.178603 | 0.0001  | 0.243734 | 9.62E-08 | 0.42344  |
| 0.117001 | 0.0114  | 0.264573 | 6.40E-09 | 0.137004 | 0.00301 | 0.287727 | 2.36E-10 | 0.516044 |
| 0.080893 | 0.08076 | -0.11413 | 0.01359  | -0.01435 | 0.75711 | -0.15912 | 0.00056  | -0.12683 |
| 0.033518 | 0.46993 | 0.178704 | 0.0001   | 0.074273 | 0.10894 | 0.214337 | 2.96E-06 | 0.271325 |
| 0.065871 | 0.15526 | 0.26039  | 1.12E-08 | 0.147196 | 0.00142 | 0.264643 | 6.34E-09 | 0.551564 |
| -0.00172 | 0.97044 | 0.129642 | 0.00502  | 0.024145 | 0.60275 | 0.177166 | 0.00012  | 0.332502 |



|          |         |          |          |          |         |          |          |          |
|----------|---------|----------|----------|----------|---------|----------|----------|----------|
| -0.05775 | 0.21286 | 0.145499 | 0.00162  | 0.016012 | 0.73    | 0.195329 | 2.13E-05 | 0.365606 |
| 0.005629 | 0.90344 | 0.117255 | 0.01122  | 0.036357 | 0.43314 | 0.133896 | 0.00375  | 0.334195 |
| 0.041872 | 0.36662 | 0.077121 | 0.09599  | 0.028987 | 0.53206 | 0.094258 | 0.04175  | 0.143752 |
| 0.066951 | 0.14858 | 0.260767 | 1.07E-08 | 0.135347 | 0.00338 | 0.281588 | 5.84E-10 | 0.41688  |
| 0.039237 | 0.39756 | 0.178604 | 0.0001   | 0.061341 | 0.18574 | 0.22059  | 1.48E-06 | 0.274253 |
| 0.071238 | 0.12422 | 0.248903 | 5.02E-08 | 0.101447 | 0.02837 | 0.285117 | 3.48E-10 | 0.534863 |
| 0.05359  | 0.24776 | 0.253608 | 2.75E-08 | 0.153277 | 0.00089 | 0.24253  | 1.12E-07 | 0.501766 |
| 0.052139 | 0.26081 | 0.190961 | 3.27E-05 | 0.087601 | 0.05854 | 0.203078 | 9.74E-06 | 0.448535 |
| 0.085137 | 0.06603 | 0.236269 | 2.40E-07 | 0.125205 | 0.00675 | 0.229576 | 5.30E-07 | 0.493057 |
| 0.04467  | 0.33543 | 0.166148 | 0.00031  | 0.103382 | 0.02548 | 0.145014 | 0.00168  | 0.352017 |
| 0.076887 | 0.09701 | 0.194197 | 2.38E-05 | 0.111016 | 0.01639 | 0.21734  | 2.13E-06 | 0.369721 |
| 0.035972 | 0.43803 | -0.13124 | 0.0045   | -0.03154 | 0.49659 | -0.17974 | 9.39E-05 | -0.32118 |
| 0.013166 | 0.77659 | 0.196367 | 1.92E-05 | 0.082468 | 0.07501 | 0.216981 | 2.21E-06 | 0.464265 |
| 0.101735 | 0.02793 | 0.270865 | 2.69E-09 | 0.168492 | 0.00025 | 0.259524 | 1.26E-08 | 0.600531 |
| 0.065587 | 0.15704 | 0.216933 | 2.22E-06 | 0.124766 | 0.00694 | 0.221535 | 1.33E-06 | 0.473884 |
| 0.012625 | 0.78554 | 0.124269 | 0.00717  | 0.057051 | 0.21848 | 0.135101 | 0.00344  | 0.263259 |
| 0.006862 | 0.88242 | 0.160686 | 0.00049  | 0.068582 | 0.13892 | 0.179455 | 9.64E-05 | 0.334722 |
| -0.01029 | 0.82441 | 0.151026 | 0.00106  | 0.040248 | 0.38551 | 0.176578 | 0.00013  | 0.3837   |
| -0.07025 | 0.12955 | 0.065901 | 0.15507  | 0.015259 | 0.74223 | 0.084966 | 0.06658  | 0.149518 |
| -0.09618 | 0.03774 | -0.24375 | 9.61E-08 | -0.14601 | 0.00156 | -0.24259 | 1.11E-07 | -0.51228 |
| 0.028856 | 0.53391 | 0.211529 | 4.00E-06 | 0.101192 | 0.02878 | 0.222642 | 1.18E-06 | 0.529624 |
| 0.057794 | 0.21254 | 0.114721 | 0.01311  | 0.064748 | 0.16244 | 0.110727 | 0.01668  | 0.245659 |
| 0.041065 | 0.37593 | 0.189097 | 3.91E-05 | 0.102902 | 0.02617 | 0.195773 | 2.04E-05 | 0.323943 |
| 0.050199 | 0.27899 | 0.15049  | 0.00111  | 0.098358 | 0.03359 | 0.138743 | 0.00266  | 0.31001  |
| 0.011804 | 0.79917 | 0.111485 | 0.01594  | 0.085861 | 0.06375 | 0.104062 | 0.02452  | 0.249273 |
| -0.102   | 0.02752 | 0.073591 | 0.11224  | -0.01597 | 0.73069 | 0.109142 | 0.01831  | 0.256561 |
| -0.10217 | 0.02727 | -0.15858 | 0.00058  | -0.11657 | 0.0117  | -0.12604 | 0.00639  | -0.35637 |
| -0.00041 | 0.993   | 0.095162 | 0.03982  | 0.048301 | 0.29759 | 0.089517 | 0.05321  | 0.24705  |
| -0.02464 | 0.5953  | 0.149816 | 0.00117  | 0.042339 | 0.36129 | 0.181871 | 7.73E-05 | 0.379254 |
| -0.00257 | 0.95581 | 0.141028 | 0.00225  | 0.072022 | 0.12013 | 0.139781 | 0.00247  | 0.345649 |
| -0.03897 | 0.40079 | -0.05408 | 0.24342  | 0.002356 | 0.95951 | -0.06525 | 0.15918  | -0.19934 |
| 0.072493 | 0.11771 | 0.274051 | 1.72E-09 | 0.126358 | 0.00625 | 0.293711 | 9.58E-11 | 0.535609 |
| -0.12424 | 0.00719 | -0.14289 | 0.00196  | -0.13114 | 0.00453 | -0.11607 | 0.01207  | -0.29886 |
| 0.046202 | 0.31911 | 0.257703 | 1.61E-08 | 0.103128 | 0.02584 | 0.295753 | 7.00E-11 | 0.529792 |
| 0.071791 | 0.12132 | 0.189999 | 3.59E-05 | 0.114771 | 0.01307 | 0.184168 | 6.24E-05 | 0.472391 |
| 0.055223 | 0.23362 | 0.16253  | 0.00042  | 0.083982 | 0.0698  | 0.159999 | 0.00052  | 0.328737 |
| 0.082125 | 0.07623 | 0.183405 | 6.70E-05 | 0.101872 | 0.02771 | 0.188551 | 4.12E-05 | 0.417757 |
| 0.044367 | 0.33873 | 0.121689 | 0.00848  | 0.059523 | 0.19914 | 0.127967 | 0.00562  | 0.229308 |
| -0.01383 | 0.76559 | -0.03493 | 0.45137  | -0.02034 | 0.6611  | -0.04112 | 0.37529  | -0.01277 |
| -0.029   | 0.53182 | -0.19386 | 2.46E-05 | -0.10327 | 0.02564 | -0.19467 | 2.27E-05 | -0.34949 |
| 0.028674 | 0.53649 | 0.153891 | 0.00085  | 0.050693 | 0.27429 | 0.17835  | 0.00011  | 0.381668 |
| -0.02891 | 0.53311 | 0.102885 | 0.02619  | 0.05267  | 0.25598 | 0.102829 | 0.02628  | 0.237214 |
| -0.07817 | 0.09154 | -0.21677 | 2.27E-06 | -0.07818 | 0.09148 | -0.26487 | 6.15E-09 | -0.44218 |
| -0.02223 | 0.6318  | 0.073872 | 0.11087  | 0.021579 | 0.64184 | 0.078033 | 0.09211  | 0.217153 |
| 0.024576 | 0.59628 | 0.165178 | 0.00034  | 0.084876 | 0.06687 | 0.17271  | 0.00018  | 0.309503 |

|          |         |          |          |          |         |          |          |          |
|----------|---------|----------|----------|----------|---------|----------|----------|----------|
| 0.06627  | 0.15277 | 0.142707 | 0.00199  | 0.110432 | 0.01697 | 0.118085 | 0.01065  | 0.16175  |
| -0.06202 | 0.18093 | -0.00012 | 0.99797  | -0.03249 | 0.48362 | 0.016727 | 0.71844  | 0.184888 |
| 0.045573 | 0.32575 | 0.090312 | 0.05113  | 0.050368 | 0.27737 | 0.0828   | 0.07384  | 0.296836 |
| 0.130504 | 0.00473 | 0.226953 | 7.19E-07 | 0.109595 | 0.01783 | 0.245662 | 7.57E-08 | 0.427935 |
| 0.126436 | 0.00622 | 0.187889 | 4.39E-05 | 0.153296 | 0.00089 | 0.148899 | 0.00125  | 0.409009 |
| -0.02435 | 0.59962 | 0.13828  | 0.00275  | 0.031121 | 0.50229 | 0.168163 | 0.00026  | 0.345775 |
| 0.04     | 0.38845 | 0.133495 | 0.00385  | 0.120483 | 0.00916 | 0.078442 | 0.09042  | 0.226254 |
| -0.03356 | 0.46936 | 0.112428 | 0.01507  | 0.035362 | 0.44585 | 0.121466 | 0.0086   | 0.1714   |
| 0.071852 | 0.121   | 0.230842 | 4.57E-07 | 0.135485 | 0.00335 | 0.233767 | 3.24E-07 | 0.413724 |
| 0.092138 | 0.04659 | -0.04965 | 0.28427  | 0.043665 | 0.34643 | -0.11613 | 0.01202  | -0.25259 |
| -0.05265 | 0.25614 | 0.099239 | 0.03202  | 0.018705 | 0.68682 | 0.130736 | 0.00466  | 0.269933 |
| -0.00554 | 0.90489 | -0.16041 | 0.0005   | -0.03247 | 0.48394 | -0.20525 | 7.77E-06 | -0.39593 |
| -0.03872 | 0.40385 | 0.136416 | 0.00314  | 0.023946 | 0.60575 | 0.175903 | 0.00013  | 0.314202 |
| 0.002462 | 0.95768 | 0.171428 | 0.0002   | 0.082942 | 0.07335 | 0.177712 | 0.00011  | 0.33301  |
| 0.057387 | 0.21577 | 0.132069 | 0.00425  | 0.077114 | 0.09602 | 0.13321  | 0.00393  | 0.257308 |
| 0.086616 | 0.06144 | 0.201073 | 1.20E-05 | 0.109376 | 0.01806 | 0.19639  | 1.92E-05 | 0.379872 |
| 0.022522 | 0.62736 | -0.10428 | 0.02421  | -0.0367  | 0.42882 | -0.11297 | 0.01458  | -0.2494  |
| 0.080081 | 0.08386 | 0.190597 | 3.39E-05 | 0.107161 | 0.02055 | 0.191125 | 3.22E-05 | 0.435249 |
| 0.061631 | 0.18366 | -0.14937 | 0.00121  | -0.05805 | 0.2105  | -0.16754 | 0.00028  | -0.33954 |
| -0.12104 | 0.00884 | -0.01677 | 0.71779  | -0.04217 | 0.36318 | 0.004955 | 0.91495  | 0.031463 |
| -0.05719 | 0.21735 | 0.077678 | 0.09361  | 0.016651 | 0.71968 | 0.10909  | 0.01836  | 0.20935  |
| -0.00546 | 0.90633 | 0.053491 | 0.24863  | 0.019018 | 0.68187 | 0.04803  | 0.30032  | 0.134848 |
| -0.02468 | 0.59466 | 0.030034 | 0.51734  | 0.023774 | 0.60834 | 0.015854 | 0.73257  | 0.104379 |
| -0.00763 | 0.86945 | 0.19102  | 3.25E-05 | 0.056713 | 0.22123 | 0.224803 | 9.20E-07 | 0.418576 |
| 0.009654 | 0.83517 | -0.24691 | 6.46E-08 | -0.0818  | 0.07741 | -0.294   | 9.16E-11 | -0.49008 |
| 0.064258 | 0.16565 | 0.257505 | 1.65E-08 | 0.119702 | 0.00962 | 0.286583 | 2.80E-10 | 0.486789 |
| -0.02589 | 0.57685 | 0.087378 | 0.05919  | 0.038974 | 0.40074 | 0.080055 | 0.08396  | 0.279707 |
| 0.07341  | 0.11313 | 0.238335 | 1.87E-07 | 0.124939 | 0.00687 | 0.245654 | 7.57E-08 | 0.499942 |
| 0.062117 | 0.18023 | 0.187823 | 4.42E-05 | 0.118471 | 0.0104  | 0.171421 | 0.0002   | 0.38323  |
| -0.0514  | 0.26763 | 0.047806 | 0.30258  | -0.00476 | 0.91821 | 0.056939 | 0.21939  | 0.189157 |
| 0.061526 | 0.18442 | 0.246538 | 6.78E-08 | 0.144372 | 0.00176 | 0.235364 | 2.67E-07 | 0.467947 |
| -0.03317 | 0.47453 | -0.26356 | 7.34E-09 | -0.1027  | 0.02647 | -0.30479 | 1.70E-11 | -0.51332 |
| -0.05233 | 0.25907 | 0.132721 | 0.00406  | 0.033337 | 0.47233 | 0.142563 | 0.00201  | 0.3679   |
| 0.091255 | 0.04874 | 0.325213 | 5.77E-13 | 0.151222 | 0.00105 | 0.362547 | 5.94E-16 | 0.47795  |
| 0.109473 | 0.01796 | 0.222587 | 1.18E-06 | 0.152613 | 0.00094 | 0.195501 | 2.09E-05 | 0.442134 |
| -0.01527 | 0.74212 | 0.167706 | 0.00027  | 0.060287 | 0.19343 | 0.192369 | 2.85E-05 | 0.419393 |
| 0.014345 | 0.75718 | 0.134967 | 0.00348  | 0.076095 | 0.10051 | 0.131742 | 0.00435  | 0.297963 |
| -0.04808 | 0.29979 | 0.014708 | 0.75124  | -0.00932 | 0.84088 | 0.020563 | 0.65761  | 0.161634 |
| -0.04774 | 0.30322 | 0.076    | 0.10093  | 0.012929 | 0.7805  | 0.086032 | 0.06322  | 0.192218 |
| 0.02247  | 0.62814 | 0.170488 | 0.00021  | 0.09185  | 0.04728 | 0.166214 | 0.00031  | 0.396318 |
| -0.03276 | 0.47999 | -0.13269 | 0.00407  | -0.0219  | 0.63685 | -0.17813 | 0.00011  | -0.30443 |
| 0.025798 | 0.57815 | 0.224692 | 9.32E-07 | 0.107921 | 0.01966 | 0.244252 | 9.02E-08 | 0.380415 |
| 9.78E-05 | 0.99832 | 0.152434 | 0.00095  | 0.066394 | 0.152   | 0.161976 | 0.00044  | 0.325678 |
| 0.015068 | 0.74535 | -0.0545  | 0.2398   | -0.00558 | 0.90423 | -0.07109 | 0.125    | -0.22072 |
| 0.018546 | 0.68934 | 0.174169 | 0.00016  | 0.077854 | 0.09287 | 0.192133 | 2.92E-05 | 0.32391  |

|          |         |          |          |          |          |          |          |          |
|----------|---------|----------|----------|----------|----------|----------|----------|----------|
| 0.011293 | 0.8077  | 0.184913 | 5.82E-05 | 0.067314 | 0.14639  | 0.215332 | 2.65E-06 | 0.425744 |
| 0.035924 | 0.43864 | 0.135157 | 0.00343  | 0.072062 | 0.11992  | 0.116254 | 0.01193  | 0.362254 |
| -0.00457 | 0.92155 | 0.118261 | 0.01053  | 0.061561 | 0.18417  | 0.115625 | 0.01241  | 0.281241 |
| 0.003372 | 0.94207 | 0.078292 | 0.09103  | 0.045143 | 0.33034  | 0.059178 | 0.20176  | 0.151494 |
| -0.08007 | 0.08392 | -0.23041 | 4.81E-07 | -0.13611 | 0.00321  | -0.24532 | 7.90E-08 | -0.44009 |
| 0.034484 | 0.45722 | 0.118794 | 0.01019  | 0.070617 | 0.12755  | 0.094029 | 0.04225  | 0.282676 |
| 0.018867 | 0.68425 | 0.163761 | 0.00038  | 0.070238 | 0.1296   | 0.175486 | 0.00014  | 0.327324 |
| 0.071793 | 0.12131 | 0.215867 | 2.50E-06 | 0.112959 | 0.01459  | 0.232526 | 3.75E-07 | 0.43662  |
| 0.006681 | 0.8855  | 0.060727 | 0.19019  | 0.036648 | 0.42946  | 0.052806 | 0.25476  | 0.142212 |
| 0.021533 | 0.64255 | 0.169429 | 0.00023  | 0.088224 | 0.05676  | 0.170374 | 0.00022  | 0.421037 |
| 0.022271 | 0.6312  | 0.184891 | 5.83E-05 | 0.084052 | 0.06957  | 0.201923 | 1.10E-05 | 0.348642 |
| 0.006198 | 0.89373 | -0.16939 | 0.00024  | -0.0413  | 0.37318  | -0.2159  | 2.49E-06 | -0.39363 |
| 0.04919  | 0.28879 | 0.116406 | 0.01182  | 0.044075 | 0.34192  | 0.140112 | 0.00241  | 0.309739 |
| 0.020869 | 0.65284 | -0.19263 | 2.78E-05 | -0.05553 | 0.23103  | -0.22613 | 7.90E-07 | -0.42323 |
| 0.051129 | 0.27017 | 0.19377  | 2.48E-05 | 0.103323 | 0.02556  | 0.199317 | 1.43E-05 | 0.446765 |
| -0.06223 | 0.1794  | 0.094    | 0.04232  | 0.039013 | 0.40027  | 0.090272 | 0.05123  | 0.273222 |
| 0.102152 | 0.02729 | 0.284694 | 3.71E-10 | 0.163014 | 0.0004   | 0.280973 | 6.39E-10 | 0.509681 |
| 0.071333 | 0.12372 | 0.233348 | 3.40E-07 | 0.150396 | 0.00111  | 0.215486 | 2.61E-06 | 0.490635 |
| 0.050835 | 0.27294 | 0.184545 | 6.02E-05 | 0.124036 | 0.00728  | 0.179147 | 9.92E-05 | 0.327055 |
| 0.037552 | 0.41816 | 0.234976 | 2.80E-07 | 0.109317 | 0.01812  | 0.248334 | 5.40E-08 | 0.511546 |
| 0.040372 | 0.38405 | 0.28217  | 5.37E-10 | 0.12229  | 0.00816  | 0.322063 | 9.89E-13 | 0.565118 |
| 0.132456 | 0.00414 | 0.199351 | 1.42E-05 | 0.139307 | 0.00255  | 0.209341 | 5.06E-06 | 0.314432 |
| -0.01739 | 0.70786 | 0.068695 | 0.13826  | 0.003612 | 0.93795  | 0.08282  | 0.07377  | 0.235117 |
| 0.061951 | 0.1814  | 0.252467 | 3.18E-08 | 0.128985 | 0.00525  | 0.259356 | 1.29E-08 | 0.480399 |
| 0.105337 | 0.02281 | 0.227109 | 7.06E-07 | 0.135455 | 0.00336  | 0.215573 | 2.58E-06 | 0.456832 |
| -0.0255  | 0.58256 | 0.206859 | 6.57E-06 | 0.053737 | 0.24646  | 0.248728 | 5.14E-08 | 0.45301  |
| -0.03218 | 0.48785 | 0.123754 | 0.00742  | 0.032454 | 0.48415  | 0.150424 | 0.00111  | 0.284049 |
| 0.095116 | 0.03992 | 0.22548  | 8.52E-07 | 0.127521 | 0.00579  | 0.226202 | 7.84E-07 | 0.4556   |
| -0.01529 | 0.74178 | 0.141916 | 0.00211  | 0.049756 | 0.28326  | 0.159714 | 0.00053  | 0.302869 |
| 0.027078 | 0.55943 | 0.186353 | 5.08E-05 | 0.124479 | 0.00707  | 0.173323 | 0.00017  | 0.437199 |
| 0.077767 | 0.09323 | 0.167391 | 0.00028  | 0.093343 | 0.04378  | 0.161206 | 0.00047  | 0.461507 |
| 0.066741 | 0.14986 | 0.139309 | 0.00255  | 0.081588 | 0.07818  | 0.137889 | 0.00283  | 0.381134 |
| 0.036231 | 0.43474 | 0.24255  | 1.11E-07 | 0.132709 | 0.00407  | 0.248268 | 5.45E-08 | 0.510748 |
| 0.067898 | 0.14291 | 0.246488 | 6.82E-08 | 0.108062 | 0.0195   | 0.277857 | 1.00E-09 | 0.488585 |
| -0.08857 | 0.0558  | -0.22729 | 6.92E-07 | -0.13632 | 0.00316  | -0.24692 | 6.46E-08 | -0.42007 |
| -0.01096 | 0.81326 | 0.172246 | 0.00018  | 0.05765  | 0.21368  | 0.201267 | 1.17E-05 | 0.412334 |
| -0.16369 | 0.00038 | -0.26178 | 9.33E-09 | -0.19705 | 1.80E-05 | -0.23305 | 3.52E-07 | -0.41002 |
| 0.041031 | 0.37633 | 0.224558 | 9.46E-07 | 0.11267  | 0.01485  | 0.240552 | 1.43E-07 | 0.454462 |
| -0.02089 | 0.65246 | -0.19727 | 1.76E-05 | -0.0752  | 0.10456  | -0.23674 | 2.27E-07 | -0.36041 |
| -0.00197 | 0.96608 | 0.08703  | 0.06021  | 0.036252 | 0.43447  | 0.086833 | 0.06079  | 0.237137 |
| -0.11051 | 0.01689 | 0.069283 | 0.13492  | -0.03541 | 0.44527  | 0.122096 | 0.00826  | 0.209703 |
| -0.05436 | 0.24099 | -0.14799 | 0.00134  | -0.07983 | 0.08485  | -0.16765 | 0.00027  | -0.35867 |
| 0.073913 | 0.11067 | 0.261942 | 9.13E-09 | 0.145508 | 0.00162  | 0.262602 | 8.36E-09 | 0.51222  |
| 0.044632 | 0.33585 | 0.231746 | 4.11E-07 | 0.112631 | 0.01488  | 0.273897 | 1.76E-09 | 0.46548  |
| 0.073454 | 0.11291 | 0.072851 | 0.11591  | 0.062439 | 0.17797  | 0.045137 | 0.33041  | 0.21811  |

|          |         |          |          |          |         |          |          |          |
|----------|---------|----------|----------|----------|---------|----------|----------|----------|
| -0.07152 | 0.12272 | 0.0558   | 0.22876  | -0.01301 | 0.7792  | 0.072068 | 0.11988  | 0.209595 |
| -0.00734 | 0.87427 | 0.090443 | 0.05079  | 0.035382 | 0.44558 | 0.1022   | 0.02721  | 0.248462 |
| -0.05385 | 0.24544 | 0.101274 | 0.02865  | 0.02337  | 0.61443 | 0.120712 | 0.00902  | 0.247279 |
| 0.026962 | 0.56111 | 0.151534 | 0.00102  | 0.085086 | 0.06619 | 0.139431 | 0.00253  | 0.323199 |
| 0.040706 | 0.38013 | 0.168926 | 0.00025  | 0.077352 | 0.095   | 0.184746 | 5.91E-05 | 0.301211 |
| 0.021786 | 0.63864 | 0.258164 | 1.51E-08 | 0.080034 | 0.08405 | 0.311492 | 5.76E-12 | 0.533701 |
| -0.03507 | 0.44958 | -0.22084 | 1.44E-06 | -0.06738 | 0.14596 | -0.26893 | 3.52E-09 | -0.50652 |
| -0.03002 | 0.51761 | 0.149055 | 0.00124  | 0.081432 | 0.07875 | 0.137614 | 0.00288  | 0.329056 |
| 0.019042 | 0.68148 | -0.04615 | 0.31962  | 0.000386 | 0.99337 | -0.04408 | 0.34186  | -0.17091 |
| 0.029739 | 0.52146 | 0.126768 | 0.00608  | 0.080545 | 0.08208 | 0.105235 | 0.02294  | 0.329635 |
| 0.037288 | 0.42144 | 0.245844 | 7.39E-08 | 0.14194  | 0.00211 | 0.225763 | 8.24E-07 | 0.48816  |
| 0.043609 | 0.34705 | 0.200061 | 1.33E-05 | 0.10997  | 0.01744 | 0.195586 | 2.08E-05 | 0.404539 |
| -0.01451 | 0.75446 | 0.180395 | 8.85E-05 | 0.056342 | 0.22426 | 0.211265 | 4.12E-06 | 0.373852 |
| 0.010798 | 0.81598 | 0.115665 | 0.01238  | 0.053591 | 0.24775 | 0.115923 | 0.01218  | 0.274338 |
| -0.06816 | 0.14137 | 0.037989 | 0.41276  | -0.02216 | 0.63295 | 0.051079 | 0.27064  | 0.226657 |
| -0.06888 | 0.13718 | 0.134919 | 0.00349  | 0.005552 | 0.90475 | 0.183848 | 6.43E-05 | 0.349894 |
| -0.06465 | 0.16309 | 0.051938 | 0.26265  | -0.01804 | 0.69735 | 0.07387  | 0.11088  | 0.177408 |
| 0.020299 | 0.66173 | 0.076825 | 0.09727  | 0.069814 | 0.13194 | 0.064867 | 0.16166  | 0.149463 |
| -0.09106 | 0.04923 | -0.22829 | 6.16E-07 | -0.13647 | 0.00313 | -0.24388 | 9.45E-08 | -0.37963 |
| 0.003953 | 0.93211 | -0.21768 | 2.05E-06 | -0.07325 | 0.11394 | -0.25839 | 1.47E-08 | -0.47727 |
| -0.01994 | 0.66728 | -0.21492 | 2.77E-06 | -0.11529 | 0.01266 | -0.22386 | 1.02E-06 | -0.41464 |
| 0.092545 | 0.04563 | 0.238476 | 1.84E-07 | 0.142832 | 0.00197 | 0.241029 | 1.34E-07 | 0.431259 |
| 0.148889 | 0.00125 | 0.24736  | 6.11E-08 | 0.133191 | 0.00393 | 0.265459 | 5.67E-09 | 0.340104 |
| 0.067673 | 0.14424 | 0.205995 | 7.19E-06 | 0.108376 | 0.01915 | 0.230778 | 4.61E-07 | 0.404982 |
| 0.026078 | 0.57402 | 0.152479 | 0.00095  | 0.084909 | 0.06676 | 0.157645 | 0.00063  | 0.272898 |
| 0.021868 | 0.63738 | -0.14756 | 0.00139  | -0.02759 | 0.55205 | -0.19018 | 3.52E-05 | -0.32378 |
| -0.0022  | 0.9622  | -0.13726 | 0.00296  | -0.02989 | 0.51932 | -0.166   | 0.00031  | -0.37925 |
| 0.052433 | 0.25813 | 0.058217 | 0.2092   | 0.059898 | 0.19632 | 0.025742 | 0.57897  | 0.209119 |
| 0.037241 | 0.42203 | 0.206059 | 7.15E-06 | 0.107474 | 0.02018 | 0.218837 | 1.80E-06 | 0.410617 |
| -0.0198  | 0.66949 | 0.204634 | 8.29E-06 | 0.068383 | 0.14007 | 0.231937 | 4.02E-07 | 0.475604 |
| 0.07776  | 0.09326 | 0.191994 | 2.96E-05 | 0.112424 | 0.01507 | 0.18908  | 3.92E-05 | 0.332561 |
| -0.06507 | 0.16038 | 0.070315 | 0.12919  | -0.01728 | 0.70959 | 0.104131 | 0.02442  | 0.162721 |
| -0.00258 | 0.95565 | 0.149087 | 0.00123  | 0.04054  | 0.38207 | 0.181278 | 8.16E-05 | 0.389228 |
| 0.063281 | 0.17218 | -0.14926 | 0.00122  | -0.06232 | 0.17878 | -0.1714  | 0.0002   | -0.32811 |
| 0.101242 | 0.0287  | 0.126588 | 0.00616  | 0.145596 | 0.00161 | 0.041694 | 0.36866  | 0.180349 |
| 0.028059 | 0.54528 | 0.180282 | 8.94E-05 | 0.080673 | 0.08159 | 0.205055 | 7.93E-06 | 0.431766 |
| -0.07522 | 0.10448 | 0.008527 | 0.85418  | -0.02917 | 0.52941 | 0.026127 | 0.57331  | 0.112857 |
| -0.0628  | 0.17545 | 0.094233 | 0.0418   | 0.021881 | 0.63718 | 0.107859 | 0.01973  | 0.269106 |
| -0.04492 | 0.33274 | 0.114707 | 0.01312  | 0.045827 | 0.32305 | 0.122357 | 0.00812  | 0.312833 |
| 0.071953 | 0.12048 | 0.127156 | 0.00593  | 0.090714 | 0.0501  | 0.110802 | 0.0166   | 0.249269 |
| 0.067599 | 0.14468 | 0.19177  | 3.02E-05 | 0.118013 | 0.0107  | 0.19464  | 2.28E-05 | 0.430915 |
| -0.03582 | 0.44    | 0.107701 | 0.01991  | 0.026478 | 0.56816 | 0.115449 | 0.01254  | 0.248125 |
| 0.129731 | 0.00499 | 0.264625 | 6.36E-09 | 0.114047 | 0.01366 | 0.325572 | 5.42E-13 | 0.344553 |
| -0.00405 | 0.93044 | 0.166155 | 0.00031  | 0.067044 | 0.14802 | 0.184798 | 5.88E-05 | 0.39323  |
| 0.006787 | 0.88371 | 0.137073 | 0.003    | 0.051373 | 0.26789 | 0.156033 | 0.00072  | 0.34894  |

|          |         |          |          |          |          |          |          |          |
|----------|---------|----------|----------|----------|----------|----------|----------|----------|
| -0.03568 | 0.44177 | 0.153164 | 0.0009   | 0.058508 | 0.20693  | 0.179685 | 9.44E-05 | 0.292439 |
| -0.10725 | 0.02045 | -0.23129 | 4.34E-07 | -0.14904 | 0.00124  | -0.22244 | 1.20E-06 | -0.45145 |
| -0.10381 | 0.02487 | 0.084745 | 0.06729  | 0.009052 | 0.84532  | 0.098721 | 0.03293  | 0.275955 |
| 0.0353   | 0.44664 | -0.2205  | 1.50E-06 | -0.07116 | 0.12464  | -0.27193 | 2.32E-09 | -0.4166  |
| -0.06081 | 0.1896  | -0.14437 | 0.00176  | -0.10871 | 0.01878  | -0.14189 | 0.00212  | -0.29763 |
| -0.01836 | 0.69234 | -0.14055 | 0.00233  | -0.05252 | 0.2573   | -0.17465 | 0.00015  | -0.3311  |
| 0.126089 | 0.00636 | 0.191573 | 3.08E-05 | 0.164686 | 0.00035  | 0.148275 | 0.00131  | 0.289012 |
| -0.02175 | 0.63913 | 0.045312 | 0.32853  | 0.031655 | 0.49499  | 0.033051 | 0.47614  | 0.083894 |
| 0.044883 | 0.33314 | 0.158357 | 0.00059  | 0.117774 | 0.01086  | 0.123136 | 0.00772  | 0.289565 |
| 0.080595 | 0.08189 | 0.113232 | 0.01435  | 0.076964 | 0.09667  | 0.09619  | 0.03771  | 0.21846  |
| 0.006467 | 0.88915 | 0.149862 | 0.00116  | 0.03446  | 0.45754  | 0.192348 | 2.86E-05 | 0.353606 |
| 0.061226 | 0.18657 | 0.131246 | 0.0045   | 0.067423 | 0.14573  | 0.130763 | 0.00465  | 0.262836 |
| 0.028252 | 0.54251 | 0.21012  | 4.65E-06 | 0.074409 | 0.10829  | 0.252521 | 3.16E-08 | 0.448008 |
| -0.04506 | 0.33122 | 0.047119 | 0.30959  | 0.018951 | 0.68292  | 0.031845 | 0.4924   | 0.183756 |
| -0.00776 | 0.86719 | 0.113107 | 0.01446  | 0.04883  | 0.29233  | 0.105285 | 0.02288  | 0.215894 |
| 0.031141 | 0.50202 | 0.241512 | 1.27E-07 | 0.121879 | 0.00837  | 0.252518 | 3.16E-08 | 0.462276 |
| -0.00691 | 0.88156 | 0.132108 | 0.00424  | 0.051614 | 0.26565  | 0.147291 | 0.00141  | 0.245025 |
| 0.166316 | 0.00031 | 0.178142 | 0.00011  | 0.169556 | 0.00023  | 0.135474 | 0.00335  | 0.361762 |
| 0.069998 | 0.13092 | 0.238471 | 1.84E-07 | 0.125442 | 0.00664  | 0.249556 | 4.62E-08 | 0.418496 |
| -0.01303 | 0.77883 | -0.19267 | 2.77E-05 | -0.04947 | 0.28599  | -0.2587  | 1.41E-08 | -0.33708 |
| 0.056413 | 0.22368 | 0.263688 | 7.22E-09 | 0.132809 | 0.00404  | 0.281488 | 5.93E-10 | 0.513563 |
| -0.02295 | 0.62075 | 0.175348 | 0.00014  | 0.049061 | 0.29005  | 0.214026 | 3.06E-06 | 0.381375 |
| -0.15419 | 0.00083 | -0.24267 | 1.10E-07 | -0.19846 | 1.56E-05 | -0.21876 | 1.82E-06 | -0.39173 |
| -0.02399 | 0.605   | -0.24902 | 4.95E-08 | -0.11255 | 0.01496  | -0.27938 | 8.05E-10 | -0.44856 |
| -0.00701 | 0.87993 | -0.16574 | 0.00032  | -0.05523 | 0.23352  | -0.19468 | 2.27E-05 | -0.36764 |
| -0.07557 | 0.1029  | 0.008409 | 0.85619  | -0.00707 | 0.87882  | -0.01053 | 0.8204   | 0.130052 |
| -0.03958 | 0.39349 | 0.131384 | 0.00446  | 0.041491 | 0.37099  | 0.150468 | 0.00111  | 0.348264 |
| 0.029293 | 0.52773 | -0.13716 | 0.00298  | -0.05812 | 0.20995  | -0.16045 | 0.0005   | -0.27788 |
| 0.044496 | 0.33732 | -0.08705 | 0.06014  | 0.03225  | 0.48691  | -0.15413 | 0.00083  | -0.26219 |
| 0.109171 | 0.01828 | 0.246749 | 6.60E-08 | 0.155415 | 0.00075  | 0.245281 | 7.94E-08 | 0.383904 |
| 0.048438 | 0.29622 | 0.211067 | 4.21E-06 | 0.128272 | 0.0055   | 0.190078 | 3.56E-05 | 0.452887 |
| -0.0142  | 0.75955 | 0.174685 | 0.00015  | 0.07562  | 0.10266  | 0.169428 | 0.00023  | 0.385982 |
| 0.063622 | 0.16988 | 0.209723 | 4.86E-06 | 0.12326  | 0.00766  | 0.201308 | 1.17E-05 | 0.332754 |
| 0.015104 | 0.74476 | 0.158037 | 0.00061  | 0.068243 | 0.14088  | 0.170614 | 0.00021  | 0.341624 |
| 0.080378 | 0.08272 | 0.203805 | 9.03E-06 | 0.130001 | 0.0049   | 0.193228 | 2.62E-05 | 0.304155 |
| 0.028942 | 0.5327  | -0.12991 | 0.00493  | -0.05268 | 0.25589  | -0.1453  | 0.00164  | -0.24877 |
| -0.07791 | 0.09264 | -0.01787 | 0.70015  | -0.03756 | 0.41812  | -0.00705 | 0.87926  | 0.072213 |
| 0.00062  | 0.98934 | -0.19976 | 1.37E-05 | -0.09956 | 0.03146  | -0.20676 | 6.64E-06 | -0.3461  |
| 0.046761 | 0.31328 | -0.10413 | 0.02442  | -0.04411 | 0.34152  | -0.12452 | 0.00706  | -0.22239 |
| -0.13048 | 0.00474 | -0.21447 | 2.91E-06 | -0.14596 | 0.00156  | -0.22225 | 1.23E-06 | -0.34488 |
| -0.00678 | 0.88389 | 0.073296 | 0.11369  | 0.064788 | 0.16217  | 0.047909 | 0.30153  | 0.128456 |
| 0.00938  | 0.83978 | 0.131734 | 0.00435  | 0.054261 | 0.24187  | 0.15331  | 0.00089  | 0.313478 |
| 0.062215 | 0.17954 | 0.256633 | 1.85E-08 | 0.132466 | 0.00414  | 0.267066 | 4.55E-09 | 0.510659 |
| -0.04316 | 0.35201 | -0.01764 | 0.70377  | -0.0401  | 0.3873   | -0.0026  | 0.95539  | 0.038975 |
| 0.068883 | 0.13719 | 0.281769 | 5.69E-10 | 0.156384 | 0.0007   | 0.283609 | 4.35E-10 | 0.534521 |

|          |         |          |          |          |         |          |          |          |
|----------|---------|----------|----------|----------|---------|----------|----------|----------|
| 0.004106 | 0.92948 | 0.249404 | 4.71E-08 | 0.081226 | 0.07951 | 0.311953 | 5.34E-12 | 0.536472 |
| -0.03707 | 0.42415 | -0.20003 | 1.33E-05 | -0.0699  | 0.13149 | -0.25201 | 3.37E-08 | -0.34723 |
| -0.00151 | 0.97411 | 0.096121 | 0.03785  | 0.058836 | 0.20438 | 0.097595 | 0.03499  | 0.235515 |
| -0.00714 | 0.87766 | 0.082999 | 0.07315  | 0.008994 | 0.8463  | 0.109664 | 0.01776  | 0.24702  |
| 0.016552 | 0.72128 | 0.214814 | 2.81E-06 | 0.087968 | 0.05749 | 0.234708 | 2.89E-07 | 0.450862 |
| -0.02281 | 0.62296 | 0.137242 | 0.00296  | 0.049286 | 0.28784 | 0.138494 | 0.00271  | 0.315015 |
| 0.074962 | 0.10569 | 0.240512 | 1.43E-07 | 0.137095 | 0.00299 | 0.22763  | 6.65E-07 | 0.515729 |
| -0.00572 | 0.90187 | 0.151436 | 0.00103  | 0.050402 | 0.27705 | 0.179695 | 9.44E-05 | 0.432673 |
| 0.023501 | 0.61245 | -0.14574 | 0.00159  | -0.00274 | 0.95296 | -0.20649 | 6.83E-06 | -0.36292 |
| 0.048309 | 0.29752 | -0.03303 | 0.47636  | 0.022025 | 0.63497 | -0.06025 | 0.19374  | -0.07432 |
| -0.01621 | 0.72683 | 0.11865  | 0.01028  | 0.035798 | 0.44025 | 0.140972 | 0.00226  | 0.253048 |
| 0.011146 | 0.81015 | 0.176313 | 0.00013  | 0.063044 | 0.1738  | 0.206424 | 6.88E-06 | 0.502544 |
| 0.070796 | 0.12658 | 0.238253 | 1.89E-07 | 0.123241 | 0.00767 | 0.253782 | 2.68E-08 | 0.410925 |
| 0.074684 | 0.10699 | -0.15689 | 0.00067  | -0.01331 | 0.77416 | -0.20431 | 8.58E-06 | -0.42827 |
| 0.018594 | 0.68858 | -0.14228 | 0.00206  | -0.04169 | 0.36868 | -0.16691 | 0.00029  | -0.32129 |
| 0.031116 | 0.50237 | 0.200627 | 1.25E-05 | 0.089968 | 0.05202 | 0.2231   | 1.12E-06 | 0.417036 |
| -0.00901 | 0.84599 | 0.122255 | 0.00817  | 0.043395 | 0.34942 | 0.128367 | 0.00547  | 0.305051 |
| 0.086157 | 0.06284 | 0.152534 | 0.00094  | 0.097073 | 0.03599 | 0.150938 | 0.00107  | 0.301134 |
| -0.04751 | 0.30554 | 0.088998 | 0.05461  | 0.03219  | 0.48772 | 0.104549 | 0.02385  | 0.257008 |
| -0.00637 | 0.89088 | 0.157664 | 0.00063  | 0.03639  | 0.43272 | 0.20307  | 9.74E-06 | 0.314007 |
| -0.00912 | 0.84416 | -0.11701 | 0.01139  | -0.06169 | 0.18327 | -0.12848 | 0.00543  | -0.22477 |
| -0.01836 | 0.69231 | -0.1788  | 0.0001   | -0.08527 | 0.06559 | -0.19015 | 3.53E-05 | -0.29807 |
| 0.04276  | 0.35653 | 0.135171 | 0.00343  | 0.046261 | 0.3185  | 0.143435 | 0.00189  | 0.357783 |
| -0.03607 | 0.43682 | -0.20995 | 4.74E-06 | -0.09722 | 0.0357  | -0.22986 | 5.13E-07 | -0.37557 |
| 0.053765 | 0.24621 | 0.154262 | 0.00082  | 0.100714 | 0.02954 | 0.143475 | 0.00188  | 0.339057 |
| 0.011984 | 0.79618 | 0.209879 | 4.78E-06 | 0.082461 | 0.07503 | 0.246978 | 6.41E-08 | 0.44681  |
| 0.000241 | 0.99585 | -0.18665 | 4.94E-05 | -0.10583 | 0.02218 | -0.18327 | 6.79E-05 | -0.38462 |
| -0.05486 | 0.23675 | 0.089301 | 0.05379  | -0.01704 | 0.71344 | 0.137757 | 0.00285  | 0.239328 |
| 0.016301 | 0.72533 | 0.20013  | 1.32E-05 | 0.087153 | 0.05985 | 0.213199 | 3.34E-06 | 0.392386 |
| -0.03912 | 0.39893 | 0.119075 | 0.01001  | 0.017926 | 0.69922 | 0.156139 | 0.00071  | 0.296938 |
| -0.09722 | 0.0357  | 0.047206 | 0.30869  | -0.02225 | 0.63153 | 0.073628 | 0.11206  | 0.226887 |
| -0.1334  | 0.00388 | -0.02184 | 0.63785  | -0.04813 | 0.29928 | -0.00196 | 0.96627  | 0.037011 |
| -0.02386 | 0.60696 | 0.077214 | 0.09559  | 0.015361 | 0.74057 | 0.082771 | 0.07394  | 0.210632 |
| -0.04532 | 0.32842 | -0.21325 | 3.33E-06 | -0.09184 | 0.0473  | -0.24672 | 6.63E-08 | -0.35642 |
| -0.01453 | 0.75415 | -0.20036 | 1.29E-05 | -0.09844 | 0.03344 | -0.20095 | 1.21E-05 | -0.41079 |
| -0.09235 | 0.04607 | -0.18585 | 5.33E-05 | -0.09472 | 0.04075 | -0.19589 | 2.01E-05 | -0.37399 |
| 0.023035 | 0.61953 | 0.128549 | 0.0054   | 0.030261 | 0.51418 | 0.156795 | 0.00067  | 0.443589 |
| -0.03618 | 0.43542 | 0.008169 | 0.86024  | -0.0097  | 0.83443 | 0.007067 | 0.87894  | 0.134163 |
| 0.029053 | 0.53112 | 0.155146 | 0.00077  | 0.091072 | 0.0492  | 0.137186 | 0.00297  | 0.25347  |
| 0.011317 | 0.80729 | 0.176454 | 0.00013  | 0.107259 | 0.02043 | 0.152054 | 0.00098  | 0.376676 |
| -0.1123  | 0.01518 | -0.24293 | 1.06E-07 | -0.15315 | 0.0009  | -0.24086 | 1.37E-07 | -0.4324  |
| 0.003824 | 0.93432 | 0.163814 | 0.00038  | 0.067187 | 0.14715 | 0.174144 | 0.00016  | 0.442905 |
| 0.096767 | 0.03658 | 0.263473 | 7.43E-09 | 0.152244 | 0.00097 | 0.271845 | 2.35E-09 | 0.508668 |
| 0.13639  | 0.00314 | -0.11647 | 0.01178  | 0.033994 | 0.46364 | -0.18075 | 8.57E-05 | -0.35385 |
| 0.01998  | 0.66672 | 0.062681 | 0.17629  | 0.05294  | 0.25355 | 0.03344  | 0.47097  | 0.193341 |

|          |          |          |          |          |          |          |          |          |
|----------|----------|----------|----------|----------|----------|----------|----------|----------|
| -0.07447 | 0.10798  | -0.22434 | 9.70E-07 | -0.11678 | 0.01155  | -0.25153 | 3.59E-08 | -0.37645 |
| 0.001601 | 0.97248  | 0.165014 | 0.00034  | 0.070541 | 0.12795  | 0.180026 | 9.15E-05 | 0.363227 |
| 0.018793 | 0.68543  | 0.09959  | 0.03142  | 0.042678 | 0.35745  | 0.107413 | 0.02025  | 0.20543  |
| -0.02941 | 0.52614  | 0.09422  | 0.04183  | 0.040844 | 0.37851  | 0.090927 | 0.04956  | 0.195979 |
| -0.02364 | 0.61038  | 0.103059 | 0.02594  | 0.035826 | 0.43989  | 0.093109 | 0.04432  | 0.15415  |
| 0.051359 | 0.26802  | 0.18768  | 4.48E-05 | 0.083715 | 0.0707   | 0.205909 | 7.26E-06 | 0.457038 |
| -0.01619 | 0.72713  | 0.160898 | 0.00048  | 0.083859 | 0.07021  | 0.158273 | 0.0006   | 0.398782 |
| 0.073942 | 0.11053  | 0.152546 | 0.00094  | 0.103511 | 0.02529  | 0.137871 | 0.00283  | 0.243515 |
| 0.047532 | 0.30536  | -0.14738 | 0.0014   | -0.03133 | 0.49939  | -0.19985 | 1.35E-05 | -0.34466 |
| 0.014079 | 0.76155  | 0.193559 | 2.54E-05 | 0.086077 | 0.06308  | 0.2104   | 4.52E-06 | 0.397355 |
| -0.04726 | 0.30813  | 0.042434 | 0.36021  | -0.00306 | 0.94748  | 0.047939 | 0.30124  | 0.196315 |
| -0.04544 | 0.32719  | -0.14496 | 0.00168  | -0.06127 | 0.18625  | -0.16857 | 0.00025  | -0.25149 |
| -0.01469 | 0.7515   | 0.133029 | 0.00398  | 0.044701 | 0.3351   | 0.151506 | 0.00102  | 0.307654 |
| 0.062874 | 0.17496  | 0.349051 | 7.94E-15 | 0.157836 | 0.00062  | 0.394063 | 8.46E-19 | 0.524605 |
| 0.017112 | 0.71226  | 0.201414 | 1.15E-05 | 0.080298 | 0.08302  | 0.226789 | 7.33E-07 | 0.51794  |
| -0.01237 | 0.78976  | -0.20572 | 7.40E-06 | -0.13074 | 0.00466  | -0.20244 | 1.04E-05 | -0.36334 |
| -0.02857 | 0.53804  | 0.027951 | 0.54682  | -0.01297 | 0.77976  | 0.040708 | 0.3801   | 0.136948 |
| 0.008063 | 0.86204  | 0.077811 | 0.09304  | 0.04998  | 0.2811   | 0.059151 | 0.20197  | 0.217737 |
| -0.02547 | 0.58305  | 0.062523 | 0.17739  | 0.020442 | 0.65949  | 0.064888 | 0.16153  | 0.172301 |
| 0.030997 | 0.504    | 0.121349 | 0.00866  | 0.046072 | 0.32047  | 0.150799 | 0.00108  | 0.280386 |
| -0.02167 | 0.64047  | 0.160177 | 0.00051  | 0.065674 | 0.1565   | 0.18766  | 4.49E-05 | 0.299753 |
| -0.10906 | 0.0184   | -0.16785 | 0.00027  | -0.08738 | 0.05919  | -0.17983 | 9.32E-05 | -0.35464 |
| 0.057917 | 0.21156  | 0.24842  | 5.34E-08 | 0.1283   | 0.00549  | 0.249843 | 4.46E-08 | 0.523327 |
| -0.03337 | 0.47193  | 0.136596 | 0.0031   | 0.060087 | 0.19492  | 0.147203 | 0.00142  | 0.28187  |
| 0.046704 | 0.31387  | 0.172847 | 0.00017  | 0.106709 | 0.02109  | 0.157087 | 0.00066  | 0.338339 |
| -0.01161 | 0.80244  | 0.090905 | 0.04962  | 0.069214 | 0.1353   | 0.059501 | 0.19931  | 0.186838 |
| -0.01201 | 0.79582  | 0.11591  | 0.01219  | 0.037103 | 0.42375  | 0.125862 | 0.00646  | 0.294746 |
| -0.04404 | 0.34231  | 0.087029 | 0.06021  | 0.012293 | 0.79104  | 0.104254 | 0.02426  | 0.294995 |
| 0.177755 | 0.00011  | 0.360689 | 8.55E-16 | 0.196671 | 1.86E-05 | 0.4006   | 1.98E-19 | 0.423815 |
| -0.09392 | 0.0425   | -0.01943 | 0.67536  | -0.06038 | 0.19276  | 0.008723 | 0.85087  | 0.096657 |
| 0.094198 | 0.04188  | 0.181136 | 8.27E-05 | 0.097226 | 0.03569  | 0.187311 | 4.64E-05 | 0.284705 |
| 0.181801 | 7.78E-05 | 0.228958 | 5.70E-07 | 0.196395 | 1.92E-05 | 0.164859 | 0.00035  | 0.249887 |
| 0.026732 | 0.56445  | 0.222826 | 1.15E-06 | 0.117047 | 0.01136  | 0.251399 | 3.65E-08 | 0.438148 |
| 0.070379 | 0.12884  | 0.288961 | 1.97E-10 | 0.165978 | 0.00032  | 0.291346 | 1.37E-10 | 0.573255 |
| -0.01959 | 0.6729   | 0.08958  | 0.05305  | 0.022103 | 0.63377  | 0.113172 | 0.01441  | 0.203392 |
| 0.000925 | 0.9841   | 0.178743 | 0.0001   | 0.085229 | 0.06573  | 0.182779 | 7.10E-05 | 0.361208 |
| 0.046621 | 0.31473  | 0.178694 | 0.0001   | 0.117339 | 0.01116  | 0.172061 | 0.00019  | 0.375932 |
| 0.024216 | 0.60168  | 0.099335 | 0.03186  | 0.071625 | 0.12219  | 0.06375  | 0.16902  | 0.263356 |
| -0.01181 | 0.79907  | 0.081567 | 0.07826  | 0.025506 | 0.58246  | 0.091888 | 0.04719  | 0.193114 |
| -0.02259 | 0.62627  | 0.090682 | 0.05018  | 0.020867 | 0.65287  | 0.117274 | 0.0112   | 0.210881 |
| -0.02361 | 0.61079  | 0.119653 | 0.00965  | 0.046682 | 0.31411  | 0.130975 | 0.00458  | 0.280534 |
| 0.029641 | 0.52283  | 0.171989 | 0.00019  | 0.086625 | 0.06142  | 0.189588 | 3.73E-05 | 0.410858 |
| 0.081417 | 0.07881  | 0.214484 | 2.91E-06 | 0.120399 | 0.0092   | 0.21932  | 1.71E-06 | 0.362371 |
| -0.0784  | 0.09057  | 0.077174 | 0.09576  | 0.019604 | 0.67262  | 0.087569 | 0.05863  | 0.242091 |
| 0.10507  | 0.02316  | 0.239262 | 1.67E-07 | 0.18065  | 8.65E-05 | 0.195845 | 2.02E-05 | 0.384958 |

|          |         |          |          |          |          |          |          |          |
|----------|---------|----------|----------|----------|----------|----------|----------|----------|
| -0.09254 | 0.04563 | -0.19144 | 3.12E-05 | -0.11634 | 0.01187  | -0.19563 | 2.07E-05 | -0.33958 |
| 0.027865 | 0.54806 | 0.200557 | 1.26E-05 | 0.086622 | 0.06143  | 0.217494 | 2.09E-06 | 0.440586 |
| 0.019704 | 0.67106 | 0.185674 | 5.42E-05 | 0.079123 | 0.08765  | 0.190208 | 3.51E-05 | 0.433863 |
| 0.032112 | 0.48877 | 0.159975 | 0.00052  | 0.087216 | 0.05966  | 0.154861 | 0.00079  | 0.324572 |
| 0.018102 | 0.6964  | 0.192281 | 2.87E-05 | 0.103256 | 0.02566  | 0.208167 | 5.73E-06 | 0.3162   |
| 0.018693 | 0.68701 | 0.120032 | 0.00942  | 0.036569 | 0.43046  | 0.14876  | 0.00126  | 0.299798 |
| 0.018042 | 0.69736 | -0.13179 | 0.00433  | -0.03485 | 0.45247  | -0.16205 | 0.00044  | -0.34641 |
| -0.01681 | 0.71713 | -0.1357  | 0.0033   | -0.07559 | 0.10279  | -0.12942 | 0.00509  | -0.36035 |
| 0.03703  | 0.42467 | 0.197918 | 1.65E-05 | 0.100851 | 0.02932  | 0.215416 | 2.63E-06 | 0.439849 |
| 0.099753 | 0.03114 | 0.282279 | 5.28E-10 | 0.167504 | 0.00028  | 0.281448 | 5.96E-10 | 0.480791 |
| 0.081477 | 0.07859 | 0.174448 | 0.00015  | 0.110484 | 0.01692  | 0.159766 | 0.00053  | 0.301038 |
| -0.04467 | 0.33549 | 0.08182  | 0.07733  | 0.012172 | 0.79306  | 0.10804  | 0.01953  | 0.261903 |
| -0.08411 | 0.06937 | 0.035816 | 0.44002  | -0.02551 | 0.58242  | 0.05424  | 0.24206  | 0.118155 |
| -0.06928 | 0.13496 | -0.18065 | 8.65E-05 | -0.09364 | 0.04311  | -0.18753 | 4.55E-05 | -0.3347  |
| -0.03342 | 0.47123 | -0.18862 | 4.09E-05 | -0.09109 | 0.04914  | -0.20178 | 1.11E-05 | -0.39525 |
| 0.002917 | 0.94987 | 0.149707 | 0.00118  | 0.063412 | 0.17129  | 0.172029 | 0.00019  | 0.292205 |
| -0.01961 | 0.67252 | 0.106975 | 0.02077  | 0.024462 | 0.59799  | 0.124524 | 0.00705  | 0.289484 |
| 0.00287  | 0.95067 | 0.1762   | 0.00013  | 0.051536 | 0.26637  | 0.19752  | 1.71E-05 | 0.4363   |
| -0.07203 | 0.12009 | 0.099358 | 0.03182  | 0.007756 | 0.86724  | 0.122246 | 0.00818  | 0.202184 |
| -0.00013 | 0.99769 | 0.14226  | 0.00206  | 0.056191 | 0.22551  | 0.15256  | 0.00094  | 0.336877 |
| 0.00225  | 0.96132 | 0.202151 | 1.07E-05 | 0.072975 | 0.11528  | 0.239162 | 1.69E-07 | 0.446397 |
| -0.04308 | 0.35291 | 0.103489 | 0.02532  | 0.020554 | 0.65775  | 0.119792 | 0.00957  | 0.302007 |
| 0.011488 | 0.80444 | 0.11002  | 0.01739  | 0.057849 | 0.2121   | 0.093487 | 0.04346  | 0.220481 |
| 0.063742 | 0.16908 | -0.06114 | 0.18722  | 0.023313 | 0.61531  | -0.1118  | 0.01564  | -0.18085 |
| 0.073022 | 0.11505 | 0.203156 | 9.66E-06 | 0.093412 | 0.04363  | 0.233391 | 3.38E-07 | 0.279023 |
| -0.00294 | 0.94948 | 0.064706 | 0.16271  | 0.012391 | 0.78941  | 0.095977 | 0.03814  | 0.106436 |
| 0.000548 | 0.99057 | 0.123984 | 0.00731  | 0.055109 | 0.23459  | 0.14124  | 0.00222  | 0.26175  |
| -0.02458 | 0.59616 | -0.19004 | 3.57E-05 | -0.12502 | 0.00683  | -0.17497 | 0.00014  | -0.39968 |
| -0.01596 | 0.73089 | 0.128251 | 0.00551  | 0.050917 | 0.27217  | 0.135281 | 0.0034   | 0.292036 |
| 0.020166 | 0.66381 | 0.117439 | 0.01109  | 0.048439 | 0.29621  | 0.112181 | 0.01529  | 0.214047 |
| 0.015017 | 0.74618 | 0.153746 | 0.00086  | 0.054867 | 0.23665  | 0.185921 | 5.29E-05 | 0.343713 |
| -0.02875 | 0.53547 | 0.178865 | 0.0001   | 0.057962 | 0.21121  | 0.209786 | 4.82E-06 | 0.351397 |
| 0.016322 | 0.725   | 0.192017 | 2.95E-05 | 0.075586 | 0.10281  | 0.224679 | 9.33E-07 | 0.477369 |
| -0.05323 | 0.25096 | 0.141569 | 0.00217  | 0.033749 | 0.46687  | 0.167091 | 0.00029  | 0.333357 |
| 0.099452 | 0.03166 | 0.22288  | 1.15E-06 | 0.122955 | 0.00781  | 0.225015 | 8.98E-07 | 0.424924 |
| 0.028086 | 0.54488 | 0.192494 | 2.82E-05 | 0.10617  | 0.02175  | 0.185757 | 5.38E-05 | 0.446547 |
| -0.12024 | 0.0093  | -0.28054 | 6.81E-10 | -0.19986 | 1.35E-05 | -0.26369 | 7.21E-09 | -0.4599  |
| 0.110892 | 0.01651 | -0.06748 | 0.14536  | 0.042634 | 0.35795  | -0.12904 | 0.00523  | -0.22033 |
| -0.00416 | 0.92855 | 0.181677 | 7.87E-05 | 0.10492  | 0.02336  | 0.190111 | 3.55E-05 | 0.304843 |
| 0.039424 | 0.39532 | -0.24993 | 4.41E-08 | -0.06918 | 0.13547  | -0.3019  | 2.69E-11 | -0.53701 |
| 0.020506 | 0.65849 | 0.21642  | 2.35E-06 | 0.083524 | 0.07134  | 0.25713  | 1.73E-08 | 0.381034 |
| -0.02005 | 0.66559 | -0.2282  | 6.23E-07 | -0.10499 | 0.02327  | -0.26316 | 7.75E-09 | -0.41519 |
| 0.035639 | 0.44228 | -0.14179 | 0.00213  | -0.04277 | 0.35646  | -0.17916 | 9.91E-05 | -0.35333 |
| 0.077053 | 0.09629 | 0.154131 | 0.00083  | 0.10074  | 0.0295   | 0.126788 | 0.00608  | 0.315683 |
| -0.02658 | 0.56665 | 0.096219 | 0.03766  | 0.046739 | 0.31351  | 0.089089 | 0.05437  | 0.273804 |



|          |         |          |          |          |         |          |          |          |
|----------|---------|----------|----------|----------|---------|----------|----------|----------|
| -0.01555 | 0.73747 | 0.158609 | 0.00058  | 0.060135 | 0.19456 | 0.162951 | 0.00041  | 0.34168  |
| 0.053548 | 0.24812 | 0.268457 | 3.76E-09 | 0.131987 | 0.00428 | 0.286039 | 3.04E-10 | 0.501301 |
| 0.031652 | 0.49503 | 0.19933  | 1.43E-05 | 0.097807 | 0.0346  | 0.214744 | 2.83E-06 | 0.395189 |
| 0.003942 | 0.9323  | 0.217394 | 2.11E-06 | 0.08383  | 0.07031 | 0.25654  | 1.87E-08 | 0.44236  |
| -0.01405 | 0.76201 | 0.119475 | 0.00976  | 0.032899 | 0.47818 | 0.132048 | 0.00426  | 0.287386 |
| 0.049504 | 0.28571 | -0.16465 | 0.00035  | -0.04133 | 0.3729  | -0.2336  | 3.30E-07 | -0.37289 |
| 0.076332 | 0.09945 | 0.141301 | 0.00221  | 0.088212 | 0.0568  | 0.122143 | 0.00823  | 0.297709 |
| 0.030689 | 0.50825 | 0.199499 | 1.40E-05 | 0.086519 | 0.06174 | 0.211462 | 4.03E-06 | 0.418786 |
| 0.023281 | 0.6158  | 0.218071 | 1.96E-06 | 0.111583 | 0.01585 | 0.218949 | 1.78E-06 | 0.453864 |
| 0.00523  | 0.91025 | 0.06404  | 0.16709  | 0.019988 | 0.6666  | 0.073305 | 0.11364  | 0.091723 |
| -0.0102  | 0.82597 | 0.077144 | 0.09589  | 0.00385  | 0.93387 | 0.089159 | 0.05418  | 0.216596 |
| 0.05456  | 0.23929 | -0.16225 | 0.00043  | -0.02882 | 0.53448 | -0.21193 | 3.83E-06 | -0.41578 |
| 0.023938 | 0.60586 | 0.152108 | 0.00098  | 0.065739 | 0.15609 | 0.159554 | 0.00054  | 0.417098 |
| 0.177684 | 0.00011 | 0.177056 | 0.00012  | 0.142257 | 0.00206 | 0.171263 | 0.0002   | 0.329365 |
| 0.025356 | 0.58467 | 0.065352 | 0.15854  | 0.010023 | 0.82897 | 0.093696 | 0.04299  | 0.19125  |
| 0.071961 | 0.12044 | 0.161403 | 0.00046  | 0.093502 | 0.04342 | 0.157291 | 0.00065  | 0.320707 |
| 0.05295  | 0.25345 | 0.187609 | 4.51E-05 | 0.079766 | 0.08509 | 0.201114 | 1.19E-05 | 0.401713 |
| 0.045423 | 0.32735 | 0.129364 | 0.00511  | 0.068978 | 0.13664 | 0.154231 | 0.00083  | 0.261714 |
| -0.00027 | 0.99544 | 0.048939 | 0.29126  | 0.04317  | 0.35194 | 0.024328 | 0.60001  | 0.16905  |
| -0.00123 | 0.97883 | 0.203464 | 9.36E-06 | 0.084142 | 0.06927 | 0.216262 | 2.40E-06 | 0.487074 |
| -0.08026 | 0.08319 | 0.044197 | 0.34058  | -0.00325 | 0.94418 | 0.044209 | 0.34046  | 0.122195 |
| 0.025875 | 0.57701 | 0.087441 | 0.059    | 0.034975 | 0.45083 | 0.099912 | 0.03087  | 0.234362 |
| 0.109119 | 0.01833 | 0.359963 | 9.85E-16 | 0.160411 | 0.0005  | 0.408067 | 3.64E-20 | 0.625667 |
| 0.105969 | 0.022   | 0.230627 | 4.69E-07 | 0.115036 | 0.01286 | 0.264576 | 6.40E-09 | 0.412516 |
| 0.101625 | 0.0281  | 0.22998  | 5.06E-07 | 0.132163 | 0.00422 | 0.221735 | 1.30E-06 | 0.306713 |
| 0.014829 | 0.74926 | 0.14874  | 0.00127  | 0.073976 | 0.11037 | 0.165479 | 0.00033  | 0.382077 |
| -0.03502 | 0.45025 | 0.141939 | 0.00211  | 0.049906 | 0.28181 | 0.162245 | 0.00043  | 0.340819 |
| -0.0427  | 0.35726 | -0.00114 | 0.98041  | -0.01303 | 0.77882 | 0.009614 | 0.83584  | 0.108914 |
| -0.00709 | 0.87861 | 0.091625 | 0.04783  | 0.049803 | 0.2828  | 0.082906 | 0.07347  | 0.24537  |
| 0.092364 | 0.04605 | -0.04727 | 0.30802  | -0.00548 | 0.90605 | -0.05636 | 0.22409  | -0.1593  |
| -0.0351  | 0.44921 | 0.084807 | 0.06709  | 0.028775 | 0.53506 | 0.100947 | 0.02917  | 0.219963 |
| 0.006594 | 0.88699 | 0.150022 | 0.00115  | 0.059957 | 0.19588 | 0.171403 | 0.0002   | 0.290288 |
| -0.03477 | 0.45349 | 0.102089 | 0.02738  | 0.040326 | 0.38459 | 0.097854 | 0.03451  | 0.193419 |
| -0.03795 | 0.41324 | 0.008426 | 0.85589  | -0.01589 | 0.73191 | 0.024003 | 0.60488  | 0.079995 |
| 0.030333 | 0.51318 | 0.168661 | 0.00025  | 0.077224 | 0.09555 | 0.196006 | 1.99E-05 | 0.382252 |
| -0.06554 | 0.15736 | -0.04557 | 0.32578  | -0.04806 | 0.29999 | -0.04307 | 0.35301  | 0.194074 |
| -0.00668 | 0.88548 | 0.153927 | 0.00085  | 0.069983 | 0.131   | 0.157742 | 0.00062  | 0.39054  |
| -0.03262 | 0.48186 | 0.049059 | 0.29007  | 0.026808 | 0.56334 | 0.028242 | 0.54265  | 0.102718 |
| -0.08244 | 0.07513 | 0.067444 | 0.14561  | -0.01859 | 0.68865 | 0.109067 | 0.01839  | 0.266642 |
| -0.04355 | 0.34769 | 0.108916 | 0.01855  | 0.029402 | 0.5262  | 0.140397 | 0.00236  | 0.220209 |
| -0.01974 | 0.67052 | 0.029685 | 0.52222  | 0.010925 | 0.81385 | 0.026731 | 0.56447  | 0.182732 |
| -0.03809 | 0.41147 | 0.092572 | 0.04556  | -0.00894 | 0.84726 | 0.147728 | 0.00137  | 0.082447 |
| 0.033417 | 0.47128 | 0.121944 | 0.00834  | 0.060528 | 0.19165 | 0.12159  | 0.00853  | 0.195636 |
| 0.042596 | 0.35838 | 0.123367 | 0.00761  | 0.07213  | 0.11957 | 0.120259 | 0.00929  | 0.278353 |
| -0.01429 | 0.75815 | 0.145429 | 0.00163  | 0.04176  | 0.3679  | 0.177831 | 0.00011  | 0.378361 |

|          |         |          |          |          |          |          |          |          |
|----------|---------|----------|----------|----------|----------|----------|----------|----------|
| -0.00465 | 0.92011 | -0.11313 | 0.01444  | -0.05076 | 0.27366  | -0.1295  | 0.00507  | -0.3517  |
| -0.03506 | 0.4497  | 0.020588 | 0.65721  | 0.001254 | 0.97844  | 0.030681 | 0.50835  | 0.130962 |
| 0.043297 | 0.35052 | 0.121027 | 0.00884  | 0.062525 | 0.17738  | 0.107563 | 0.02007  | 0.302878 |
| -0.1045  | 0.02392 | -0.1942  | 2.38E-05 | -0.16631 | 0.00031  | -0.15366 | 0.00086  | -0.35484 |
| -0.07183 | 0.1211  | -0.18912 | 3.90E-05 | -0.0814  | 0.07887  | -0.23164 | 4.16E-07 | -0.36493 |
| -0.00741 | 0.87313 | -0.17107 | 0.0002   | -0.06936 | 0.13447  | -0.20029 | 1.29E-05 | -0.36043 |
| 0.003639 | 0.93749 | 0.160044 | 0.00052  | 0.07467  | 0.10706  | 0.158758 | 0.00057  | 0.334321 |
| 0.017384 | 0.70788 | -0.17651 | 0.00013  | -0.07252 | 0.11755  | -0.21292 | 3.45E-06 | -0.31005 |
| -0.06099 | 0.18825 | -0.24054 | 1.43E-07 | -0.15873 | 0.00058  | -0.22676 | 7.35E-07 | -0.42454 |
| -0.01965 | 0.67184 | -0.20037 | 1.28E-05 | -0.07958 | 0.08582  | -0.22428 | 9.77E-07 | -0.45532 |
| -0.04087 | 0.37822 | 0.089934 | 0.05211  | 0.017112 | 0.71226  | 0.108847 | 0.01863  | 0.292065 |
| 0.071962 | 0.12044 | 0.107264 | 0.02042  | 0.028867 | 0.53376  | 0.143901 | 0.00182  | 0.266966 |
| 0.059724 | 0.19763 | 0.199311 | 1.43E-05 | 0.103445 | 0.02539  | 0.203839 | 9.00E-06 | 0.306262 |
| 0.01868  | 0.68722 | 0.138749 | 0.00266  | 0.04718  | 0.30896  | 0.162042 | 0.00044  | 0.284425 |
| 0.086381 | 0.06216 | 0.262053 | 9.00E-09 | 0.130456 | 0.00475  | 0.279285 | 8.16E-10 | 0.550882 |
| 0.034439 | 0.45781 | 0.175959 | 0.00013  | 0.086963 | 0.06041  | 0.184852 | 5.85E-05 | 0.381366 |
| -0.00291 | 0.95003 | 0.158806 | 0.00057  | 0.053119 | 0.25194  | 0.18111  | 8.29E-05 | 0.265911 |
| 0.030828 | 0.50632 | 0.105875 | 0.02212  | 0.057889 | 0.21178  | 0.104025 | 0.02457  | 0.318683 |
| -0.04727 | 0.30803 | 0.140658 | 0.00231  | 0.034653 | 0.45501  | 0.159289 | 0.00055  | 0.312135 |
| -0.01965 | 0.67196 | 0.101522 | 0.02826  | 0.02084  | 0.6533   | 0.12123  | 0.00873  | 0.302997 |
| -0.02648 | 0.56814 | 0.018689 | 0.68708  | 0.002511 | 0.95684  | 0.026946 | 0.56134  | 0.121602 |
| 0.023446 | 0.6133  | 0.168676 | 0.00025  | 0.060755 | 0.18999  | 0.193939 | 2.44E-05 | 0.342482 |
| 0.068663 | 0.13845 | 0.196519 | 1.89E-05 | 0.115532 | 0.01248  | 0.199905 | 1.35E-05 | 0.485779 |
| 0.028822 | 0.5344  | 0.217574 | 2.07E-06 | 0.099872 | 0.03094  | 0.238742 | 1.78E-07 | 0.511466 |
| -0.04242 | 0.36035 | 0.09264  | 0.0454   | -0.00066 | 0.98867  | 0.129901 | 0.00493  | 0.225891 |
| 0.019259 | 0.67806 | 0.247738 | 5.82E-08 | 0.133024 | 0.00398  | 0.254223 | 2.53E-08 | 0.513016 |
| -0.0136  | 0.76939 | 0.127601 | 0.00576  | 0.057439 | 0.21536  | 0.143528 | 0.00187  | 0.207883 |
| 0.153847 | 0.00085 | 0.266324 | 5.04E-09 | 0.222897 | 1.14E-06 | 0.195178 | 2.16E-05 | 0.451932 |
| -0.01459 | 0.75314 | 0.125535 | 0.0066   | 0.022653 | 0.62534  | 0.159525 | 0.00054  | 0.374058 |
| 0.050373 | 0.27732 | 0.188306 | 4.22E-05 | 0.097781 | 0.03465  | 0.195038 | 2.19E-05 | 0.418904 |
| -0.00356 | 0.93876 | -0.0987  | 0.03298  | -0.04085 | 0.37845  | -0.11543 | 0.01256  | -0.25372 |
| 0.127858 | 0.00566 | 0.26109  | 1.02E-08 | 0.197824 | 1.66E-05 | 0.229064 | 5.63E-07 | 0.497644 |
| -0.03125 | 0.50049 | 0.11734  | 0.01116  | 0.038856 | 0.40217  | 0.131074 | 0.00455  | 0.314289 |
| -0.02817 | 0.54375 | 0.114453 | 0.01333  | 0.050805 | 0.27323  | 0.111214 | 0.0162   | 0.293124 |
| -0.06256 | 0.17711 | 0.014918 | 0.74781  | -0.01974 | 0.67056  | 0.032199 | 0.48759  | 0.138602 |
| -0.05053 | 0.27579 | -0.1645  | 0.00036  | -0.09631 | 0.03747  | -0.17231 | 0.00018  | -0.26471 |
| -0.03852 | 0.4062  | -0.1843  | 6.16E-05 | -0.04939 | 0.28678  | -0.24962 | 4.58E-08 | -0.44653 |
| -0.02039 | 0.66026 | -0.19866 | 1.53E-05 | -0.10073 | 0.02953  | -0.22349 | 1.07E-06 | -0.35262 |
| 0.009637 | 0.83545 | 0.21361  | 3.20E-06 | 0.113464 | 0.01415  | 0.218012 | 1.97E-06 | 0.412189 |
| -0.02904 | 0.53127 | 0.13675  | 0.00306  | 0.055003 | 0.23549  | 0.145726 | 0.00159  | 0.341218 |
| -0.06286 | 0.17506 | 0.07082  | 0.12645  | -0.00237 | 0.95927  | 0.100329 | 0.03018  | 0.237193 |
| 0.056102 | 0.22625 | 0.155193 | 0.00076  | 0.086684 | 0.06124  | 0.149031 | 0.00124  | 0.367528 |
| -0.03418 | 0.46123 | 0.126826 | 0.00606  | 0.038062 | 0.41186  | 0.133725 | 0.00379  | 0.24993  |
| -0.07317 | 0.1143  | 0.058229 | 0.20911  | 0.001172 | 0.97984  | 0.062829 | 0.17528  | 0.141449 |
| 0.078249 | 0.09121 | 0.285696 | 3.20E-10 | 0.115477 | 0.01252  | 0.339559 | 4.57E-14 | 0.546456 |

|          |         |          |          |          |          |          |          |          |
|----------|---------|----------|----------|----------|----------|----------|----------|----------|
| 0.088027 | 0.05732 | 0.07735  | 0.09501  | 0.078222 | 0.09132  | 0.045372 | 0.32789  | 0.176364 |
| 0.011706 | 0.8008  | 0.155171 | 0.00077  | 0.100035 | 0.03066  | 0.137785 | 0.00285  | 0.3493   |
| 0.012458 | 0.78831 | 0.07119  | 0.12447  | 0.035057 | 0.44978  | 0.062418 | 0.17812  | 0.162833 |
| 0.034264 | 0.4601  | 0.197732 | 1.68E-05 | 0.065238 | 0.15927  | 0.241136 | 1.33E-07 | 0.33358  |
| 0.000517 | 0.9911  | 0.11968  | 0.00963  | 0.0641   | 0.16669  | 0.119639 | 0.00966  | 0.285462 |
| -0.05109 | 0.27054 | -0.15513 | 0.00077  | -0.09368 | 0.04302  | -0.1592  | 0.00055  | -0.28808 |
| 0.05508  | 0.23484 | 0.171143 | 0.0002   | 0.08127  | 0.07935  | 0.186202 | 5.15E-05 | 0.36763  |
| -0.06846 | 0.13961 | 0.044441 | 0.33792  | -0.02269 | 0.62471  | 0.066418 | 0.15185  | 0.241222 |
| 0.114945 | 0.01293 | 0.325545 | 5.45E-13 | 0.170051 | 0.00022  | 0.347929 | 9.80E-15 | 0.679882 |
| 0.056972 | 0.21912 | 0.263012 | 7.91E-09 | 0.115752 | 0.01231  | 0.311094 | 6.15E-12 | 0.434471 |
| -0.07674 | 0.09764 | 0.045477 | 0.32677  | 0.005319 | 0.90874  | 0.051664 | 0.26518  | 0.242842 |
| 0.099942 | 0.03082 | 0.368702 | 1.75E-16 | 0.206672 | 6.70E-06 | 0.382991 | 9.18E-18 | 0.675566 |
| 0.047552 | 0.30515 | 0.211569 | 3.99E-06 | 0.111123 | 0.01629  | 0.215536 | 2.59E-06 | 0.449553 |
| 0.054189 | 0.2425  | 0.201752 | 1.12E-05 | 0.086737 | 0.06108  | 0.228378 | 6.10E-07 | 0.392963 |
| 0.043945 | 0.34335 | 0.167493 | 0.00028  | 0.119492 | 0.00975  | 0.146592 | 0.00149  | 0.224953 |
| -0.03216 | 0.48811 | 0.157492 | 0.00064  | 0.033057 | 0.47606  | 0.198988 | 1.48E-05 | 0.409828 |
| 0.054874 | 0.23659 | -0.14172 | 0.00214  | -0.00645 | 0.88937  | -0.20226 | 1.06E-05 | -0.39209 |
| -0.07708 | 0.09617 | 0.108958 | 0.01851  | 0.002203 | 0.96213  | 0.148126 | 0.00133  | 0.354525 |
| 0.077555 | 0.09413 | 0.233593 | 3.30E-07 | 0.103571 | 0.02521  | 0.271579 | 2.44E-09 | 0.437772 |
| 0.033375 | 0.47182 | 0.176025 | 0.00013  | 0.090222 | 0.05136  | 0.193853 | 2.46E-05 | 0.337803 |
| 0.067858 | 0.14314 | 0.170291 | 0.00022  | 0.111183 | 0.01623  | 0.16054  | 0.0005   | 0.347748 |
| 0.015748 | 0.73429 | 0.187707 | 4.47E-05 | 0.078746 | 0.08917  | 0.207939 | 5.87E-06 | 0.350919 |
| 0.012861 | 0.78164 | 0.225061 | 8.94E-07 | 0.100138 | 0.03049  | 0.24333  | 1.01E-07 | 0.382368 |
| 0.000341 | 0.99413 | 0.169446 | 0.00023  | 0.089113 | 0.0543   | 0.167375 | 0.00028  | 0.426347 |
| 0.062279 | 0.17909 | 0.038876 | 0.40193  | 0.032413 | 0.4847   | 0.031283 | 0.50007  | 0.247098 |
| -0.06297 | 0.17433 | -0.23342 | 3.37E-07 | -0.1421  | 0.00208  | -0.2386  | 1.81E-07 | -0.37542 |
| 0.03096  | 0.5045  | 0.167217 | 0.00028  | 0.097472 | 0.03523  | 0.162421 | 0.00043  | 0.364993 |
| -0.03362 | 0.46864 | -0.15253 | 0.00094  | -0.04963 | 0.28451  | -0.18671 | 4.91E-05 | -0.37598 |
| -0.0769  | 0.09697 | 0.025566 | 0.58157  | -0.02674 | 0.56435  | 0.042288 | 0.36186  | 0.19421  |
| 0.051122 | 0.27024 | 0.251578 | 3.57E-08 | 0.123592 | 0.0075   | 0.273158 | 1.95E-09 | 0.626517 |
| 0.116548 | 0.01172 | 0.166377 | 0.00031  | 0.119253 | 0.0099   | 0.156848 | 0.00067  | 0.352363 |
| 0.024044 | 0.60427 | 0.18372  | 6.51E-05 | 0.07964  | 0.08559  | 0.199348 | 1.42E-05 | 0.24839  |
| 0.034731 | 0.45401 | 0.191649 | 3.06E-05 | 0.09014  | 0.05157  | 0.224467 | 9.56E-07 | 0.360493 |
| -0.01134 | 0.80686 | 0.189558 | 3.74E-05 | 0.076434 | 0.099    | 0.221115 | 1.40E-06 | 0.285251 |
| 0.14715  | 0.00143 | 0.209442 | 5.00E-06 | 0.20328  | 9.54E-06 | 0.145002 | 0.00168  | 0.165493 |
| 0.005671 | 0.90273 | 0.13909  | 0.00259  | 0.053277 | 0.25053  | 0.158525 | 0.00059  | 0.201565 |
| 0.061386 | 0.18542 | 0.222234 | 1.23E-06 | 0.096356 | 0.03738  | 0.262067 | 8.98E-09 | 0.482914 |
| 0.103401 | 0.02545 | 0.199788 | 1.36E-05 | 0.142253 | 0.00206  | 0.175087 | 0.00014  | 0.440649 |
| 0.054522 | 0.23962 | 0.174175 | 0.00016  | 0.091646 | 0.04778  | 0.17573  | 0.00014  | 0.244873 |
| -0.10598 | 0.02199 | 0.031458 | 0.49767  | -0.01741 | 0.70754  | 0.045909 | 0.32219  | 0.112634 |
| -0.03285 | 0.47883 | 0.102252 | 0.02714  | 0.015343 | 0.74087  | 0.127243 | 0.00589  | 0.287951 |
| 0.057565 | 0.21435 | 0.199491 | 1.40E-05 | 0.082859 | 0.07363  | 0.228164 | 6.25E-07 | 0.383588 |
| 0.021215 | 0.64747 | 0.165697 | 0.00032  | 0.058259 | 0.20887  | 0.200712 | 1.24E-05 | 0.287638 |
| -0.02805 | 0.54545 | 0.093871 | 0.0426   | -0.00353 | 0.9394   | 0.129029 | 0.00523  | 0.286658 |
| 0.005205 | 0.91068 | 0.16193  | 0.00044  | 0.072343 | 0.11847  | 0.175872 | 0.00013  | 0.410894 |

|          |         |          |          |          |          |          |          |          |
|----------|---------|----------|----------|----------|----------|----------|----------|----------|
| 0.006408 | 0.89016 | 0.090835 | 0.04979  | 0.044052 | 0.34218  | 0.085672 | 0.06434  | 0.240992 |
| 0.015925 | 0.73142 | 0.166616 | 0.0003   | 0.09525  | 0.03963  | 0.163424 | 0.00039  | 0.362459 |
| 0.020668 | 0.65596 | 0.078823 | 0.08886  | 0.044739 | 0.33469  | 0.057033 | 0.21862  | 0.300426 |
| 0.09297  | 0.04464 | 0.224274 | 9.77E-07 | 0.136696 | 0.00308  | 0.216387 | 2.36E-06 | 0.354315 |
| 0.10727  | 0.02042 | 0.280855 | 6.50E-10 | 0.140768 | 0.0023   | 0.327834 | 3.67E-13 | 0.395961 |
| 0.015021 | 0.74613 | 0.210946 | 4.26E-06 | 0.110853 | 0.01655  | 0.217202 | 2.16E-06 | 0.475995 |
| 0.026797 | 0.56351 | 0.226281 | 7.77E-07 | 0.08727  | 0.0595   | 0.256966 | 1.77E-08 | 0.495441 |
| 0.007869 | 0.86533 | 0.071988 | 0.1203   | 0.039006 | 0.40035  | 0.072138 | 0.11953  | 0.253876 |
| 0.145465 | 0.00162 | 0.23194  | 4.02E-07 | 0.176776 | 0.00012  | 0.192405 | 2.84E-05 | 0.420546 |
| 0.06559  | 0.15703 | 0.218732 | 1.82E-06 | 0.095806 | 0.03849  | 0.248096 | 5.57E-08 | 0.410621 |
| 0.018185 | 0.69509 | 0.168006 | 0.00027  | 0.076393 | 0.09918  | 0.164612 | 0.00035  | 0.307543 |
| -0.11266 | 0.01486 | -0.22424 | 9.82E-07 | -0.1661  | 0.00031  | -0.206   | 7.19E-06 | -0.46465 |
| 0.052622 | 0.25641 | 0.182017 | 7.62E-05 | 0.081298 | 0.07925  | 0.195192 | 2.16E-05 | 0.457661 |
| 0.059599 | 0.19857 | 0.150305 | 0.00112  | 0.066775 | 0.14965  | 0.169307 | 0.00024  | 0.351217 |
| -0.02433 | 0.59992 | 0.09343  | 0.04359  | 0.023517 | 0.61222  | 0.104042 | 0.02455  | 0.264448 |
| 0.087463 | 0.05894 | 0.167499 | 0.00028  | 0.11448  | 0.01331  | 0.14472  | 0.00172  | 0.329802 |
| -0.02307 | 0.61896 | 0.115945 | 0.01216  | 0.03538  | 0.44561  | 0.138568 | 0.00269  | 0.293336 |
| 0.074264 | 0.10899 | 0.180174 | 9.03E-05 | 0.107045 | 0.02068  | 0.175352 | 0.00014  | 0.409495 |
| -0.03589 | 0.43912 | 0.070396 | 0.12874  | 0.000367 | 0.99369  | 0.085046 | 0.06632  | 0.224044 |
| -0.07465 | 0.10717 | 0.033049 | 0.47618  | -0.00519 | 0.91093  | 0.034155 | 0.46152  | 0.192106 |
| 0.064033 | 0.16714 | 0.218677 | 1.83E-06 | 0.107326 | 0.02035  | 0.260579 | 1.10E-08 | 0.390052 |
| 0.023426 | 0.61359 | 0.089117 | 0.05429  | 0.053436 | 0.24912  | 0.090199 | 0.05142  | 0.237997 |
| 0.016571 | 0.72097 | -0.16765 | 0.00027  | -0.06273 | 0.17597  | -0.20647 | 6.85E-06 | -0.33731 |
| 0.048982 | 0.29082 | 0.198735 | 1.52E-05 | 0.09887  | 0.03267  | 0.215944 | 2.48E-06 | 0.378806 |
| -0.00454 | 0.92202 | 0.166694 | 0.0003   | 0.054362 | 0.241    | 0.186896 | 4.83E-05 | 0.450722 |
| 0.014179 | 0.75991 | 0.122768 | 0.00791  | 0.055951 | 0.2275   | 0.136737 | 0.00307  | 0.276599 |
| 0.011604 | 0.80251 | 0.163615 | 0.00038  | 0.041848 | 0.36689  | 0.206103 | 7.11E-06 | 0.322713 |
| -0.03173 | 0.49395 | 0.068566 | 0.13901  | -0.00021 | 0.99644  | 0.083987 | 0.06978  | 0.221629 |
| 0.063411 | 0.17131 | 0.221765 | 1.30E-06 | 0.098314 | 0.03367  | 0.231642 | 4.16E-07 | 0.478989 |
| 0.060476 | 0.19203 | 0.20951  | 4.97E-06 | 0.149738 | 0.00117  | 0.179781 | 9.36E-05 | 0.45652  |
| 0.082404 | 0.07524 | 0.275641 | 1.37E-09 | 0.140905 | 0.00227  | 0.315967 | 2.76E-12 | 0.421082 |
| -0.0334  | 0.47148 | 0.089172 | 0.05414  | 0.006914 | 0.88154  | 0.109094 | 0.01836  | 0.347603 |
| -0.04003 | 0.38803 | 0.049586 | 0.28491  | 0.030558 | 0.51005  | 0.034763 | 0.45358  | 0.163961 |
| 0.034659 | 0.45494 | 0.04303  | 0.3535   | 0.037428 | 0.4197   | 0.018824 | 0.68493  | 0.17096  |
| 0.117402 | 0.01111 | 0.333724 | 1.30E-13 | 0.195999 | 1.99E-05 | 0.354708 | 2.72E-15 | 0.543188 |
| -0.1604  | 0.0005  | -0.13087 | 0.00462  | -0.1106  | 0.0168   | -0.12669 | 0.00612  | -0.13476 |
| 0.031378 | 0.49876 | 0.262584 | 8.38E-09 | 0.114215 | 0.01352  | 0.291759 | 1.29E-10 | 0.477658 |
| 0.031026 | 0.50359 | 0.181185 | 8.23E-05 | 0.091565 | 0.04798  | 0.17898  | 0.0001   | 0.422879 |
| -0.00599 | 0.89733 | -0.0933  | 0.04387  | -0.03508 | 0.44946  | -0.10783 | 0.01977  | -0.18324 |
| 0.074966 | 0.10567 | 0.281538 | 5.88E-10 | 0.139105 | 0.00259  | 0.302269 | 2.54E-11 | 0.596481 |
| 0.030461 | 0.5114  | 0.070796 | 0.12658  | 0.034134 | 0.46181  | 0.088716 | 0.05539  | 0.127792 |
| 0.008558 | 0.85366 | 0.154558 | 0.0008   | 0.096284 | 0.03753  | 0.133013 | 0.00398  | 0.33975  |
| -0.06524 | 0.15923 | 0.073369 | 0.11333  | -0.01019 | 0.82611  | 0.11038  | 0.01702  | 0.200363 |
| -0.12812 | 0.00556 | 0.072866 | 0.11583  | -0.05037 | 0.27737  | 0.126478 | 0.0062   | 0.245425 |
| 0.035893 | 0.43903 | 0.184594 | 6.00E-05 | 0.102075 | 0.0274   | 0.190993 | 3.26E-05 | 0.36202  |

|          |          |          |          |          |          |          |          |          |
|----------|----------|----------|----------|----------|----------|----------|----------|----------|
| -0.12645 | 0.00621  | 0.022609 | 0.62601  | -0.03407 | 0.46258  | 0.037639 | 0.41708  | 0.171916 |
| 0.032955 | 0.47743  | 0.11887  | 0.01014  | 0.041228 | 0.37404  | 0.132649 | 0.00408  | 0.239807 |
| -0.00777 | 0.86701  | 0.124976 | 0.00685  | 0.043275 | 0.35077  | 0.139068 | 0.0026   | 0.255084 |
| 0.033718 | 0.46728  | 0.162929 | 0.00041  | 0.085844 | 0.0638   | 0.164602 | 0.00035  | 0.37547  |
| -0.1145  | 0.01329  | -0.2654  | 5.72E-09 | -0.16543 | 0.00033  | -0.27219 | 2.24E-09 | -0.45297 |
| 0.036617 | 0.42985  | 0.317356 | 2.19E-12 | 0.120954 | 0.00888  | 0.394782 | 7.23E-19 | 0.430408 |
| 0.039263 | 0.39726  | 0.208093 | 5.77E-06 | 0.092915 | 0.04476  | 0.237706 | 2.02E-07 | 0.450647 |
| -0.00755 | 0.87073  | 0.097901 | 0.03442  | -0.00379 | 0.93496  | 0.14882  | 0.00126  | 0.261339 |
| -0.0168  | 0.7173   | 0.123549 | 0.00752  | 0.056872 | 0.21993  | 0.147195 | 0.00142  | 0.228656 |
| -0.02555 | 0.58178  | 0.07392  | 0.11064  | 0.006264 | 0.8926   | 0.094365 | 0.04152  | 0.266829 |
| 0.116251 | 0.01194  | 0.199485 | 1.40E-05 | 0.143768 | 0.00184  | 0.171018 | 0.0002   | 0.390357 |
| 0.206534 | 6.80E-06 | 0.337884 | 6.19E-14 | 0.217643 | 2.06E-06 | 0.337506 | 6.63E-14 | 0.548252 |
| 0.038186 | 0.41034  | 0.150393 | 0.00111  | 0.08054  | 0.0821   | 0.156758 | 0.00068  | 0.370793 |
| 0.028903 | 0.53325  | 0.17953  | 9.58E-05 | 0.081879 | 0.07712  | 0.185325 | 5.60E-05 | 0.408076 |
| 0.059293 | 0.20089  | 0.151509 | 0.00102  | 0.120609 | 0.00908  | 0.126422 | 0.00623  | 0.307554 |
| -0.04593 | 0.32197  | 0.072956 | 0.11538  | 0.01887  | 0.68421  | 0.06787  | 0.14307  | 0.249279 |
| -0.01796 | 0.69865  | 0.134645 | 0.00355  | 0.038966 | 0.40084  | 0.159383 | 0.00055  | 0.304499 |
| -0.02596 | 0.57571  | 0.086716 | 0.06114  | 0.038657 | 0.40458  | 0.092742 | 0.04516  | 0.207405 |
| 0.044689 | 0.33523  | 0.233411 | 3.38E-07 | 0.122106 | 0.00825  | 0.238054 | 1.93E-07 | 0.497897 |
| 0.035008 | 0.45041  | 0.166416 | 0.0003   | 0.111244 | 0.01617  | 0.158157 | 0.0006   | 0.248439 |
| -0.06132 | 0.1859   | 0.134496 | 0.00359  | 0.023905 | 0.60636  | 0.173982 | 0.00016  | 0.297299 |
| 0.065696 | 0.15636  | 0.26871  | 3.63E-09 | 0.122879 | 0.00785  | 0.310313 | 6.99E-12 | 0.513025 |
| 0.018804 | 0.68525  | -0.10977 | 0.01764  | -0.00352 | 0.93952  | -0.15783 | 0.00062  | -0.26998 |
| -0.00772 | 0.86782  | -0.07181 | 0.12124  | -0.02823 | 0.54287  | -0.07512 | 0.10496  | -0.19579 |
| 0.006831 | 0.88295  | 0.226238 | 7.81E-07 | 0.074018 | 0.11017  | 0.277896 | 9.96E-10 | 0.435452 |
| 0.023664 | 0.60999  | 0.112408 | 0.01508  | 0.060578 | 0.19128  | 0.114655 | 0.01317  | 0.29082  |
| -0.0425  | 0.35948  | 0.169668 | 0.00023  | 0.028456 | 0.5396   | 0.223037 | 1.13E-06 | 0.403007 |
| -0.07558 | 0.10285  | -0.18008 | 9.11E-05 | -0.0898  | 0.05246  | -0.20387 | 8.97E-06 | -0.34127 |
| -0.06508 | 0.16027  | 0.080647 | 0.08169  | -0.00193 | 0.96688  | 0.110105 | 0.0173   | 0.232986 |
| -0.06048 | 0.19197  | 0.140313 | 0.00237  | 0.023454 | 0.61316  | 0.179882 | 9.28E-05 | 0.337415 |
| 0.021492 | 0.64319  | -0.18388 | 6.41E-05 | -0.08622 | 0.06266  | -0.19611 | 1.97E-05 | -0.29147 |
| -0.01834 | 0.69269  | 0.12536  | 0.00668  | 0.04688  | 0.31205  | 0.129352 | 0.00512  | 0.343586 |
| 0.014876 | 0.7485   | 0.12579  | 0.00649  | 0.074089 | 0.10982  | 0.112579 | 0.01493  | 0.34887  |
| 0.030078 | 0.51673  | 0.26424  | 6.70E-09 | 0.114712 | 0.01312  | 0.292095 | 1.22E-10 | 0.559302 |
| 0.01666  | 0.71954  | 0.138283 | 0.00275  | 0.041329 | 0.37286  | 0.170596 | 0.00021  | 0.313919 |
| -0.01787 | 0.70017  | 0.067984 | 0.1424   | 0.02007  | 0.66531  | 0.071992 | 0.12028  | 0.155947 |
| 0.037979 | 0.41288  | 0.192085 | 2.93E-05 | 0.09141  | 0.04836  | 0.207395 | 6.21E-06 | 0.433154 |
| 0.016042 | 0.72953  | 0.174654 | 0.00015  | 0.090717 | 0.05009  | 0.174399 | 0.00015  | 0.410117 |
| -0.04016 | 0.38659  | 0.122329 | 0.00813  | 0.064987 | 0.16089  | 0.120534 | 0.00913  | 0.361479 |
| 0.051679 | 0.26505  | 0.221499 | 1.34E-06 | 0.119794 | 0.00956  | 0.223326 | 1.09E-06 | 0.448788 |
| -0.00238 | 0.95909  | 0.137051 | 0.003    | 0.040553 | 0.38191  | 0.160579 | 0.00049  | 0.327029 |
| -0.05507 | 0.23488  | 0.125673 | 0.00654  | 0.031828 | 0.49262  | 0.156052 | 0.00071  | 0.321008 |
| -0.03018 | 0.51532  | 0.111315 | 0.0161   | 0.00665  | 0.88603  | 0.1689   | 0.00025  | 0.214423 |
| -0.01756 | 0.70507  | 0.158989 | 0.00056  | 0.062696 | 0.17619  | 0.176318 | 0.00013  | 0.35057  |
| 0.034586 | 0.45589  | 0.137779 | 0.00285  | 0.075408 | 0.10362  | 0.144773 | 0.00171  | 0.345084 |

|          |          |          |          |          |          |          |          |          |
|----------|----------|----------|----------|----------|----------|----------|----------|----------|
| 0.038784 | 0.40304  | 0.182792 | 7.09E-05 | 0.073935 | 0.11057  | 0.207516 | 6.13E-06 | 0.392145 |
| -0.03361 | 0.46877  | 0.107636 | 0.01999  | -0.00118 | 0.97976  | 0.154051 | 0.00084  | 0.285089 |
| 0.037277 | 0.42158  | 0.07549  | 0.10325  | 0.050453 | 0.27657  | 0.069559 | 0.13336  | 0.182867 |
| 0.047054 | 0.31026  | 0.224972 | 9.03E-07 | 0.114952 | 0.01293  | 0.218481 | 1.87E-06 | 0.482937 |
| 0.007675 | 0.86862  | -0.14931 | 0.00121  | -0.06044 | 0.19226  | -0.19009 | 3.55E-05 | -0.3144  |
| 0.074158 | 0.10949  | 0.214299 | 2.97E-06 | 0.118371 | 0.01046  | 0.213182 | 3.35E-06 | 0.518949 |
| 0.04662  | 0.31474  | 0.114962 | 0.01292  | 0.067041 | 0.14804  | 0.088636 | 0.05561  | 0.179513 |
| -0.02223 | 0.63186  | 0.184822 | 5.87E-05 | 0.068941 | 0.13685  | 0.212571 | 3.58E-06 | 0.43757  |
| 0.047504 | 0.30565  | 0.14572  | 0.00159  | 0.068928 | 0.13693  | 0.143768 | 0.00184  | 0.346505 |
| 0.035799 | 0.44024  | 0.211539 | 4.00E-06 | 0.12562  | 0.00656  | 0.195961 | 2.00E-05 | 0.400188 |
| 0.027532 | 0.55285  | 0.113426 | 0.01419  | 0.029009 | 0.53174  | 0.141687 | 0.00215  | 0.253041 |
| 0.02143  | 0.64413  | 0.155984 | 0.00072  | 0.070626 | 0.12749  | 0.146045 | 0.00155  | 0.250908 |
| -0.03436 | 0.45885  | 0.164035 | 0.00037  | 0.062478 | 0.1777   | 0.183279 | 6.78E-05 | 0.392007 |
| -0.06496 | 0.16108  | -0.01822 | 0.6945   | -0.05736 | 0.21598  | 0.011407 | 0.80579  | 0.039338 |
| -0.01384 | 0.76541  | 0.149564 | 0.00119  | 0.066275 | 0.15273  | 0.138772 | 0.00265  | 0.371972 |
| 0.00333  | 0.94278  | 0.080131 | 0.08367  | 0.020225 | 0.66288  | 0.093982 | 0.04235  | 0.279994 |
| 0.048611 | 0.2945   | -0.19254 | 2.80E-05 | -0.0564  | 0.22377  | -0.24774 | 5.82E-08 | -0.40937 |
| -0.06899 | 0.13656  | -0.17859 | 0.0001   | -0.09207 | 0.04675  | -0.18315 | 6.86E-05 | -0.41474 |
| 0.044781 | 0.33423  | 0.24618  | 7.09E-08 | 0.131387 | 0.00445  | 0.256065 | 1.99E-08 | 0.416586 |
| 0.057929 | 0.21146  | 0.24696  | 6.43E-08 | 0.121199 | 0.00875  | 0.256555 | 1.87E-08 | 0.543442 |
| 0.085259 | 0.06564  | 0.159898 | 0.00052  | 0.136178 | 0.00319  | 0.128367 | 0.00547  | 0.327097 |
| -0.01837 | 0.69209  | 0.169238 | 0.00024  | 0.055147 | 0.23426  | 0.190387 | 3.45E-05 | 0.408262 |
| 0.041593 | 0.36982  | 0.110903 | 0.0165   | 0.048803 | 0.2926   | 0.117868 | 0.0108   | 0.276938 |
| 0.016836 | 0.7167   | 0.15001  | 0.00115  | 0.054268 | 0.24182  | 0.164994 | 0.00034  | 0.365977 |
| -0.03494 | 0.45133  | 0.115783 | 0.01229  | 0.030614 | 0.50928  | 0.133307 | 0.0039   | 0.368535 |
| -0.1937  | 2.50E-05 | -0.2947  | 8.23E-11 | -0.22316 | 1.11E-06 | -0.26205 | 9.00E-09 | -0.45539 |
| -0.02487 | 0.59197  | 0.225101 | 8.89E-07 | 0.069575 | 0.13327  | 0.254785 | 2.36E-08 | 0.563168 |
| 0.081956 | 0.07684  | 0.214333 | 2.96E-06 | 0.113803 | 0.01387  | 0.22938  | 5.43E-07 | 0.513505 |
| -0.00336 | 0.94234  | 0.117325 | 0.01117  | 0.022827 | 0.62269  | 0.152475 | 0.00095  | 0.359924 |
| 0.072057 | 0.11995  | 0.1287   | 0.00535  | 0.076946 | 0.09675  | 0.123347 | 0.00762  | 0.333504 |
| 0.036195 | 0.43519  | 0.191389 | 3.14E-05 | 0.09578  | 0.03854  | 0.205642 | 7.46E-06 | 0.437922 |
| -0.12848 | 0.00543  | -0.24583 | 7.40E-08 | -0.1476  | 0.00138  | -0.25528 | 2.21E-08 | -0.36252 |
| -0.00884 | 0.84892  | 0.056113 | 0.22616  | 0.008976 | 0.8466   | 0.058347 | 0.20818  | 0.123579 |
| -0.11243 | 0.01507  | -0.17344 | 0.00017  | -0.09861 | 0.03313  | -0.19848 | 1.56E-05 | -0.34621 |
| 0.093882 | 0.04258  | 0.294655 | 8.29E-11 | 0.181688 | 7.86E-05 | 0.286252 | 2.94E-10 | 0.567414 |
| 0.033385 | 0.4717   | 0.172764 | 0.00018  | 0.093017 | 0.04453  | 0.168464 | 0.00026  | 0.412032 |
| 0.003746 | 0.93566  | 0.137468 | 0.00291  | 0.072018 | 0.12014  | 0.145493 | 0.00162  | 0.24785  |
| -0.02713 | 0.55871  | 0.125648 | 0.00655  | 0.031777 | 0.49331  | 0.144583 | 0.00173  | 0.270852 |
| 0.027667 | 0.55091  | 0.138596 | 0.00269  | 0.070971 | 0.12564  | 0.135898 | 0.00325  | 0.328574 |
| -0.09495 | 0.04027  | -0.03359 | 0.46892  | -0.06077 | 0.18985  | -0.01219 | 0.79278  | 0.084083 |
| -0.04923 | 0.28836  | -0.02471 | 0.59424  | -0.03301 | 0.47663  | -0.02745 | 0.554    | 0.107286 |
| -0.00785 | 0.86572  | -0.1177  | 0.01091  | 0.012376 | 0.78967  | -0.19307 | 2.66E-05 | -0.31667 |
| -0.04466 | 0.33553  | -0.19359 | 2.53E-05 | -0.106   | 0.02196  | -0.20286 | 9.95E-06 | -0.36396 |
| -0.04957 | 0.28505  | -0.22919 | 5.55E-07 | -0.11725 | 0.01122  | -0.24363 | 9.75E-08 | -0.42068 |
| 0.0787   | 0.08936  | -0.13913 | 0.00258  | -0.01146 | 0.80487  | -0.176   | 0.00013  | -0.39971 |

|          |         |          |          |          |         |          |          |          |
|----------|---------|----------|----------|----------|---------|----------|----------|----------|
| -0.02437 | 0.59937 | -0.24587 | 7.37E-08 | -0.13932 | 0.00255 | -0.25132 | 3.69E-08 | -0.45884 |
| -0.04125 | 0.37377 | 0.172726 | 0.00018  | 0.023951 | 0.60566 | 0.26159  | 9.58E-09 | 0.187459 |
| -0.00557 | 0.90445 | 0.120657 | 0.00905  | 0.048703 | 0.29359 | 0.139917 | 0.00244  | 0.261031 |
| 0.022903 | 0.62154 | 0.131704 | 0.00436  | 0.061811 | 0.18239 | 0.137282 | 0.00295  | 0.324023 |
| 0.007227 | 0.87622 | 0.132045 | 0.00426  | 0.054461 | 0.24015 | 0.127369 | 0.00585  | 0.333753 |
| -0.01124 | 0.80863 | -0.09941 | 0.03173  | -0.00144 | 0.97525 | -0.14132 | 0.00221  | -0.3092  |
| -0.10629 | 0.0216  | -0.10064 | 0.02966  | -0.076   | 0.10092 | -0.09168 | 0.04769  | -0.20471 |
| -0.08565 | 0.0644  | -0.13307 | 0.00397  | -0.07478 | 0.10655 | -0.14422 | 0.00178  | -0.30391 |
| 0.011794 | 0.79934 | 0.14905  | 0.00124  | 0.043892 | 0.34393 | 0.188041 | 4.33E-05 | 0.340078 |
| -0.0705  | 0.12817 | 0.076114 | 0.10042  | -0.03949 | 0.39456 | 0.119274 | 0.00988  | 0.260232 |
| 0.032717 | 0.48062 | 0.092581 | 0.04554  | 0.069774 | 0.13217 | 0.065454 | 0.15789  | 0.272544 |
| 0.034842 | 0.45256 | 0.097385 | 0.03539  | 0.063999 | 0.16736 | 0.073751 | 0.11146  | 0.339801 |
| -0.07864 | 0.08958 | 0.073217 | 0.11408  | -0.0008  | 0.98631 | 0.09993  | 0.03084  | 0.254663 |
| 0.057716 | 0.21315 | 0.128371 | 0.00547  | 0.063654 | 0.16967 | 0.149402 | 0.0012   | 0.313328 |
| 0.029068 | 0.53091 | 0.197652 | 1.69E-05 | 0.108533 | 0.01897 | 0.202667 | 1.02E-05 | 0.381833 |
| 0.089502 | 0.05326 | 0.129237 | 0.00516  | 0.066679 | 0.15024 | 0.142501 | 0.00202  | 0.205895 |
| -0.07415 | 0.10952 | 0.011499 | 0.80426  | -0.04541 | 0.32746 | 0.036135 | 0.43596  | 0.143155 |
| 0.02292  | 0.62128 | 0.169768 | 0.00023  | 0.092099 | 0.04668 | 0.172248 | 0.00018  | 0.383491 |
| -0.01151 | 0.80415 | 0.157372 | 0.00064  | 0.050984 | 0.27154 | 0.201214 | 1.18E-05 | 0.306126 |
| 0.005078 | 0.91285 | 0.035749 | 0.44088  | 0.021618 | 0.64123 | 0.030241 | 0.51446  | 0.093318 |
| 0.074559 | 0.10758 | 0.160332 | 0.00051  | 0.105639 | 0.02242 | 0.138939 | 0.00262  | 0.364292 |
| -0.05442 | 0.24054 | 0.006826 | 0.88303  | -0.03338 | 0.47181 | 0.014105 | 0.76111  | 0.130258 |
| 0.041008 | 0.37659 | 0.166659 | 0.0003   | 0.095084 | 0.03998 | 0.151979 | 0.00099  | 0.369884 |
| 0.060468 | 0.19209 | 0.27623  | 1.26E-09 | 0.143694 | 0.00185 | 0.294435 | 8.58E-11 | 0.562713 |
| 0.027399 | 0.55478 | 0.103757 | 0.02494  | 0.050766 | 0.27359 | 0.106371 | 0.0215   | 0.13566  |
| 0.01751  | 0.70587 | 0.209581 | 4.93E-06 | 0.099313 | 0.0319  | 0.215647 | 2.56E-06 | 0.48157  |
| -0.0468  | 0.31285 | 0.005338 | 0.90841  | -0.01477 | 0.75018 | 0.021314 | 0.64594  | 0.168741 |
| -0.00929 | 0.84124 | -0.15428 | 0.00082  | -0.04744 | 0.30632 | -0.19051 | 3.41E-05 | -0.29591 |
| 0.034045 | 0.46297 | 0.162941 | 0.00041  | 0.098584 | 0.03318 | 0.14948  | 0.0012   | 0.392439 |
| 0.045982 | 0.32142 | 0.1354   | 0.00337  | 0.054362 | 0.241   | 0.158531 | 0.00059  | 0.356268 |
| -0.09121 | 0.04885 | -0.15686 | 0.00067  | -0.08624 | 0.06258 | -0.17237 | 0.00018  | -0.36142 |
| -0.00146 | 0.97494 | -0.1279  | 0.00564  | -0.06868 | 0.13833 | -0.1242  | 0.0072   | -0.25089 |
| -0.00773 | 0.86773 | 0.145816 | 0.00158  | 0.054821 | 0.23705 | 0.151933 | 0.00099  | 0.32242  |
| 0.007784 | 0.86677 | 0.203439 | 9.38E-06 | 0.085909 | 0.0636  | 0.233747 | 3.24E-07 | 0.395361 |
| -0.04308 | 0.35289 | 0.16873  | 0.00025  | 0.035889 | 0.43908 | 0.208416 | 5.58E-06 | 0.401948 |
| -0.06821 | 0.14108 | 0.05636  | 0.22412  | -0.05959 | 0.19866 | 0.129453 | 0.00508  | 0.2456   |
| 0.126307 | 0.00627 | 0.198299 | 1.58E-05 | 0.158503 | 0.00059 | 0.178525 | 0.0001   | 0.315813 |
| 0.105495 | 0.02261 | 0.256643 | 1.85E-08 | 0.135826 | 0.00327 | 0.284148 | 4.02E-10 | 0.476344 |
| -0.04715 | 0.30927 | 0.042591 | 0.35844  | -0.03597 | 0.4381  | 0.087582 | 0.05859  | 0.171744 |
| -0.02173 | 0.63954 | 0.036842 | 0.42702  | 0.003481 | 0.9402  | 0.049575 | 0.28502  | 0.173781 |
| 0.04198  | 0.36538 | 0.221725 | 1.30E-06 | 0.085001 | 0.06646 | 0.258334 | 1.48E-08 | 0.472477 |
| 0.095158 | 0.03983 | 0.189046 | 3.93E-05 | 0.099054 | 0.03235 | 0.220847 | 1.44E-06 | 0.454823 |
| -0.11123 | 0.01619 | -0.03211 | 0.48878  | -0.06484 | 0.16181 | 6.01E-05 | 0.99897  | 0.05672  |
| -0.03791 | 0.41375 | 0.123566 | 0.00751  | 0.003737 | 0.9358  | 0.176269 | 0.00013  | 0.333165 |
| 0.04523  | 0.32941 | 0.178969 | 0.0001   | 0.081736 | 0.07764 | 0.203097 | 9.72E-06 | 0.324066 |

|          |         |          |          |          |          |          |          |          |
|----------|---------|----------|----------|----------|----------|----------|----------|----------|
| -0.01512 | 0.74446 | 0.147241 | 0.00142  | 0.046475 | 0.31626  | 0.167167 | 0.00029  | 0.353961 |
| 0.020019 | 0.6661  | 0.079853 | 0.08475  | 0.033343 | 0.47225  | 0.084662 | 0.06756  | 0.242341 |
| 0.032117 | 0.4887  | -0.16712 | 0.00029  | -0.04794 | 0.30126  | -0.19932 | 1.43E-05 | -0.38479 |
| -0.00991 | 0.83091 | 0.142751 | 0.00199  | 0.054843 | 0.23686  | 0.149985 | 0.00115  | 0.350583 |
| 0.054583 | 0.23909 | 0.166343 | 0.00031  | 0.093532 | 0.04336  | 0.171549 | 0.0002   | 0.334465 |
| 0.008272 | 0.85849 | 0.045423 | 0.32735  | 0.026727 | 0.56453  | 0.041272 | 0.37353  | 0.131992 |
| -0.04572 | 0.32417 | 0.129256 | 0.00515  | 0.022331 | 0.63027  | 0.158368 | 0.00059  | 0.401631 |
| 0.069041 | 0.13629 | 0.158816 | 0.00057  | 0.114695 | 0.01313  | 0.143021 | 0.00195  | 0.276965 |
| 0.038767 | 0.40324 | 0.181502 | 7.99E-05 | 0.087878 | 0.05774  | 0.187442 | 4.58E-05 | 0.482883 |
| -0.09637 | 0.03736 | 0.015801 | 0.73343  | -0.04726 | 0.30815  | 0.03302  | 0.47656  | 0.185138 |
| 0.068833 | 0.13747 | 0.135586 | 0.00333  | 0.104499 | 0.02392  | 0.105964 | 0.02201  | 0.174702 |
| 0.045345 | 0.32818 | -0.11693 | 0.01144  | -0.01443 | 0.75577  | -0.16148 | 0.00046  | -0.21243 |
| -0.04643 | 0.31668 | -0.14989 | 0.00116  | -0.03495 | 0.45115  | -0.19161 | 3.07E-05 | -0.41824 |
| -0.00483 | 0.91717 | 0.152649 | 0.00094  | 0.04689  | 0.31194  | 0.176413 | 0.00013  | 0.341328 |
| 0.059288 | 0.20093 | 0.197225 | 1.76E-05 | 0.103535 | 0.02526  | 0.210553 | 4.44E-06 | 0.477489 |
| 0.043051 | 0.35326 | 0.238163 | 1.91E-07 | 0.118483 | 0.01039  | 0.249949 | 4.40E-08 | 0.44453  |
| -0.00609 | 0.89551 | 0.056919 | 0.21955  | 0.051194 | 0.26957  | 0.021131 | 0.64877  | 0.211154 |
| -0.03042 | 0.51197 | 0.135722 | 0.0033   | 0.05003  | 0.28062  | 0.157165 | 0.00065  | 0.356784 |
| 0.044884 | 0.33313 | 0.183507 | 6.64E-05 | 0.074243 | 0.10908  | 0.217647 | 2.06E-06 | 0.363002 |
| 0.025081 | 0.58875 | 0.229604 | 5.29E-07 | 0.099138 | 0.0322   | 0.249141 | 4.87E-08 | 0.492949 |
| -0.04606 | 0.32061 | -0.18222 | 7.48E-05 | -0.06082 | 0.18951  | -0.23047 | 4.78E-07 | -0.35295 |
| -0.00767 | 0.86872 | 0.219638 | 1.65E-06 | 0.089725 | 0.05266  | 0.241105 | 1.33E-07 | 0.490923 |
| -0.12066 | 0.00906 | -0.21598 | 2.47E-06 | -0.13694 | 0.00302  | -0.20399 | 8.86E-06 | -0.34571 |
| 0.008041 | 0.8624  | -0.16726 | 0.00028  | -0.06897 | 0.1367   | -0.19836 | 1.57E-05 | -0.32994 |
| -0.01087 | 0.81481 | 0.089658 | 0.05284  | 0.032342 | 0.48566  | 0.087485 | 0.05888  | 0.232653 |
| 0.072203 | 0.11919 | 0.177195 | 0.00012  | 0.068448 | 0.13969  | 0.21219  | 3.73E-06 | 0.462119 |
| 0.114892 | 0.01298 | 0.17031  | 0.00022  | 0.102927 | 0.02613  | 0.155512 | 0.00075  | 0.380458 |
| -0.02368 | 0.60969 | 0.135125 | 0.00344  | 0.030119 | 0.51616  | 0.162933 | 0.00041  | 0.368092 |
| -0.1467  | 0.00148 | -0.22315 | 1.11E-06 | -0.18042 | 8.83E-05 | -0.19198 | 2.96E-05 | -0.39438 |
| 0.009032 | 0.84566 | 0.119456 | 0.00977  | 0.032306 | 0.48615  | 0.135706 | 0.0033   | 0.284039 |
| -0.00245 | 0.95783 | -0.16349 | 0.00039  | -0.04837 | 0.29689  | -0.19144 | 3.12E-05 | -0.3776  |
| 0.02359  | 0.61111 | 0.244063 | 9.24E-08 | 0.095234 | 0.03967  | 0.27281  | 2.05E-09 | 0.492738 |
| -0.04629 | 0.31816 | 0.104597 | 0.02379  | 0.001353 | 0.97673  | 0.15058  | 0.0011   | 0.266901 |
| 0.045691 | 0.3245  | -0.11989 | 0.00951  | -0.01986 | 0.66864  | -0.15585 | 0.00073  | -0.28825 |
| -0.12598 | 0.00641 | -0.25927 | 1.31E-08 | -0.18582 | 5.34E-05 | -0.2406  | 1.42E-07 | -0.39592 |
| 0.020829 | 0.65346 | -0.0757  | 0.1023   | -0.00294 | 0.94946  | -0.11335 | 0.01426  | -0.26915 |
| -0.01748 | 0.70643 | 0.208452 | 5.56E-06 | 0.080397 | 0.08265  | 0.240344 | 1.46E-07 | 0.470235 |
| 0.00499  | 0.91435 | 0.042759 | 0.35654  | 0.011498 | 0.80427  | 0.068954 | 0.13678  | 0.089231 |
| -0.05058 | 0.27533 | 0.05972  | 0.19766  | -0.02072 | 0.65509  | 0.104798 | 0.02352  | 0.206121 |
| -0.03542 | 0.44508 | -0.20515 | 7.86E-06 | -0.11735 | 0.01115  | -0.22122 | 1.38E-06 | -0.36858 |
| 0.028442 | 0.5398  | 0.220407 | 1.51E-06 | 0.119829 | 0.00954  | 0.227623 | 6.65E-07 | 0.454761 |
| 0.037969 | 0.41301 | 0.124836 | 0.00691  | 0.060142 | 0.19451  | 0.133321 | 0.0039   | 0.359535 |
| 0.016781 | 0.71759 | 0.068197 | 0.14115  | 0.023847 | 0.60724  | 0.057472 | 0.21509  | 0.354883 |
| -0.01472 | 0.75111 | 0.197238 | 1.76E-05 | 0.078574 | 0.08987  | 0.221335 | 1.36E-06 | 0.427044 |
| -0.04439 | 0.33844 | 0.113764 | 0.0139   | 0.008504 | 0.85457  | 0.146623 | 0.00149  | 0.293466 |



|          |          |          |          |          |          |          |          |          |
|----------|----------|----------|----------|----------|----------|----------|----------|----------|
| -0.14439 | 0.00176  | -0.23793 | 1.96E-07 | -0.18069 | 8.62E-05 | -0.20259 | 1.02E-05 | -0.40308 |
| -0.04297 | 0.35419  | 0.125405 | 0.00666  | 0.039616 | 0.39303  | 0.152522 | 0.00094  | 0.231895 |
| 0.023757 | 0.60859  | 0.082147 | 0.07615  | 0.041282 | 0.37342  | 0.088947 | 0.05475  | 0.222962 |
| 0.145971 | 0.00156  | 0.323363 | 7.92E-13 | 0.188304 | 4.22E-05 | 0.343966 | 2.04E-14 | 0.476243 |
| 0.016691 | 0.71903  | 0.172007 | 0.00019  | 0.059756 | 0.19739  | 0.197153 | 1.78E-05 | 0.477665 |
| -0.0243  | 0.60047  | 0.119712 | 0.00961  | 0.049919 | 0.28169  | 0.117943 | 0.01075  | 0.299629 |
| -0.1606  | 0.00049  | -0.22963 | 5.27E-07 | -0.14375 | 0.00184  | -0.24286 | 1.07E-07 | -0.38683 |
| -0.03201 | 0.49012  | 0.053169 | 0.2515   | 0.007066 | 0.87896  | 0.061064 | 0.18774  | 0.273298 |
| -0.01009 | 0.82789  | 0.078151 | 0.09162  | 0.005972 | 0.89759  | 0.109069 | 0.01839  | 0.20448  |
| 0.017713 | 0.70262  | 0.173953 | 0.00016  | 0.115384 | 0.01259  | 0.147803 | 0.00136  | 0.385292 |
| 0.003597 | 0.93821  | 0.213936 | 3.09E-06 | 0.092777 | 0.04508  | 0.231327 | 4.32E-07 | 0.443228 |
| 0.029754 | 0.52126  | 0.24934  | 4.75E-08 | 0.114627 | 0.01319  | 0.284896 | 3.60E-10 | 0.432884 |
| 0.003272 | 0.94378  | 0.037272 | 0.42164  | 0.005727 | 0.90177  | 0.037538 | 0.41833  | 0.10831  |
| 0.001432 | 0.97539  | -0.14179 | 0.00213  | -0.05651 | 0.22287  | -0.17606 | 0.00013  | -0.26836 |
| -0.01349 | 0.77127  | 0.069559 | 0.13336  | 0.025786 | 0.57833  | 0.071146 | 0.12471  | 0.27277  |
| 0.017496 | 0.7061   | 0.132439 | 0.00414  | 0.070129 | 0.1302   | 0.11433  | 0.01343  | 0.271774 |
| 0.027734 | 0.54994  | 0.160241 | 0.00051  | 0.07559  | 0.10279  | 0.171099 | 0.0002   | 0.389995 |
| 0.010244 | 0.82526  | 0.087606 | 0.05852  | 0.031425 | 0.49812  | 0.097738 | 0.03473  | 0.211127 |
| 0.187572 | 4.53E-05 | 0.296038 | 6.70E-11 | 0.232423 | 3.80E-07 | 0.260884 | 1.05E-08 | 0.395772 |
| 0.066901 | 0.14889  | -0.04208 | 0.36419  | 0.006838 | 0.88283  | -0.06917 | 0.13558  | -0.19297 |
| -0.02522 | 0.58674  | 0.148353 | 0.0013   | 0.034112 | 0.4621   | 0.188228 | 4.25E-05 | 0.294284 |
| 0.02142  | 0.6443   | 0.145463 | 0.00162  | 0.08809  | 0.05714  | 0.125466 | 0.00663  | 0.399216 |
| -0.11663 | 0.01166  | 0.045845 | 0.32286  | -0.05916 | 0.20187  | 0.106437 | 0.02142  | 0.165909 |
| -0.07438 | 0.10843  | 0.010391 | 0.8228   | -0.0015  | 0.97426  | 0.000568 | 0.99023  | 0.099607 |
| -0.03752 | 0.41861  | 0.120258 | 0.00929  | 0.007698 | 0.86823  | 0.154791 | 0.00079  | 0.261804 |
| 0.022833 | 0.62261  | 0.082236 | 0.07583  | 0.061642 | 0.18358  | 0.06993  | 0.1313   | 0.195597 |
| 0.009966 | 0.82993  | 0.095605 | 0.0389   | 0.046654 | 0.3144   | 0.099691 | 0.03124  | 0.266835 |
| 0.030417 | 0.51201  | 0.140775 | 0.00229  | 0.091309 | 0.0486   | 0.119888 | 0.00951  | 0.331737 |
| -0.0055  | 0.90562  | 0.09731  | 0.03553  | 0.009983 | 0.82965  | 0.129941 | 0.00492  | 0.212604 |
| 0.012914 | 0.78076  | 0.096504 | 0.03709  | 0.066374 | 0.15212  | 0.085385 | 0.06524  | 0.190446 |
| -0.01433 | 0.7574   | 0.114466 | 0.01332  | 0.043458 | 0.34872  | 0.118708 | 0.01024  | 0.256756 |
| -0.06345 | 0.17103  | 0.03604  | 0.43716  | -0.0283  | 0.54179  | 0.064458 | 0.16433  | 0.235729 |
| 0.122523 | 0.00803  | 0.204322 | 8.56E-06 | 0.160886 | 0.00048  | 0.193335 | 2.59E-05 | 0.283164 |
| -0.01655 | 0.72129  | 0.158314 | 0.0006   | 0.062153 | 0.17998  | 0.171009 | 0.0002   | 0.411483 |
| 0.062004 | 0.18102  | -0.00256 | 0.95604  | 0.013309 | 0.77423  | -0.00735 | 0.87418  | -0.05021 |
| 0.022373 | 0.62962  | 0.116419 | 0.01181  | 0.052999 | 0.25301  | 0.139735 | 0.00247  | 0.291494 |
| 0.048309 | 0.29752  | 0.132758 | 0.00405  | 0.059974 | 0.19576  | 0.155592 | 0.00074  | 0.293379 |
| -0.0942  | 0.04188  | 0.048037 | 0.30025  | -0.02926 | 0.52824  | 0.070411 | 0.12866  | 0.261479 |
| -0.0373  | 0.42131  | -0.02211 | 0.63373  | 0.002298 | 0.96049  | -0.05891 | 0.20383  | 0.019552 |
| 0.020617 | 0.65676  | -0.16525 | 0.00034  | -0.05963 | 0.19834  | -0.20538 | 7.67E-06 | -0.3678  |
| 0.015064 | 0.74543  | -0.17868 | 0.0001   | -0.0492  | 0.28868  | -0.22651 | 7.57E-07 | -0.42335 |
| -0.00228 | 0.96074  | -0.19977 | 1.36E-05 | -0.1098  | 0.01762  | -0.21536 | 2.64E-06 | -0.34604 |
| -0.08791 | 0.05765  | -0.28254 | 5.08E-10 | -0.1699  | 0.00023  | -0.28301 | 4.75E-10 | -0.56529 |
| 0.08549  | 0.06491  | 0.222693 | 1.17E-06 | 0.122821 | 0.00788  | 0.234322 | 3.03E-07 | 0.452026 |
| 0.069246 | 0.13513  | 0.15564  | 0.00074  | 0.153276 | 0.00089  | 0.097398 | 0.03536  | 0.20943  |

|          |         |          |          |          |          |          |          |          |
|----------|---------|----------|----------|----------|----------|----------|----------|----------|
| 0.03997  | 0.3888  | 0.188276 | 4.23E-05 | 0.093957 | 0.04241  | 0.190533 | 3.41E-05 | 0.288852 |
| 0.035307 | 0.44654 | 0.231821 | 4.07E-07 | 0.114702 | 0.01313  | 0.241368 | 1.29E-07 | 0.485776 |
| 0.032079 | 0.48922 | 0.284602 | 3.76E-10 | 0.137295 | 0.00295  | 0.300544 | 3.33E-11 | 0.557697 |
| 0.102012 | 0.0275  | 0.105912 | 0.02207  | 0.098936 | 0.03255  | 0.072308 | 0.11865  | 0.212602 |
| -0.05656 | 0.22248 | 0.136519 | 0.00312  | 0.020163 | 0.66385  | 0.173992 | 0.00016  | 0.38676  |
| 0.077121 | 0.09599 | 0.276491 | 1.22E-09 | 0.160839 | 0.00048  | 0.277025 | 1.13E-09 | 0.557036 |
| -0.02575 | 0.57887 | 0.117596 | 0.01098  | 0.045376 | 0.32785  | 0.135873 | 0.00326  | 0.232484 |
| 0.020576 | 0.65739 | 0.178301 | 0.00011  | 0.07176  | 0.12148  | 0.203679 | 9.15E-06 | 0.378138 |
| -0.0789  | 0.08856 | 0.116781 | 0.01155  | 0.014383 | 0.75656  | 0.151962 | 0.00099  | 0.345105 |
| 0.031221 | 0.50092 | -0.14626 | 0.00153  | -0.01995 | 0.66722  | -0.20976 | 4.84E-06 | -0.3145  |
| 0.004402 | 0.92441 | 0.184875 | 5.84E-05 | 0.082025 | 0.07659  | 0.195201 | 2.16E-05 | 0.443004 |
| 0.023948 | 0.60571 | 0.14598  | 0.00156  | 0.069156 | 0.13563  | 0.145215 | 0.00165  | 0.402227 |
| 0.067382 | 0.14598 | 0.249889 | 4.43E-08 | 0.135521 | 0.00334  | 0.261879 | 9.21E-09 | 0.530763 |
| -0.05161 | 0.26567 | -0.12973 | 0.00499  | -0.07189 | 0.12079  | -0.12733 | 0.00586  | -0.26303 |
| -0.06448 | 0.16419 | 0.074671 | 0.10705  | -0.00137 | 0.97636  | 0.097955 | 0.03432  | 0.223961 |
| -0.02252 | 0.62741 | 0.165403 | 0.00033  | 0.064155 | 0.16632  | 0.181021 | 8.36E-05 | 0.390173 |
| 0.133295 | 0.00391 | 0.068491 | 0.13944  | 0.076526 | 0.09859  | 0.045459 | 0.32696  | 0.254758 |
| 0.076302 | 0.09958 | 0.185222 | 5.65E-05 | 0.122954 | 0.00781  | 0.17859  | 0.0001   | 0.438882 |
| 0.002571 | 0.95582 | 0.117187 | 0.01126  | 0.05806  | 0.21043  | 0.114108 | 0.01361  | 0.291809 |
| -0.00449 | 0.92297 | 0.099196 | 0.0321   | 0.054054 | 0.24368  | 0.083754 | 0.07057  | 0.209063 |
| 0.006654 | 0.88596 | 0.061961 | 0.18132  | 0.030188 | 0.5152   | 0.061378 | 0.18548  | 0.165187 |
| 0.004927 | 0.91544 | 0.062792 | 0.17553  | 0.025721 | 0.57928  | 0.073439 | 0.11298  | 0.172409 |
| 0.063238 | 0.17247 | 0.219764 | 1.63E-06 | 0.122356 | 0.00812  | 0.225031 | 8.97E-07 | 0.337961 |
| -0.02192 | 0.63658 | 0.109099 | 0.01836  | 0.037493 | 0.41889  | 0.11727  | 0.01121  | 0.329512 |
| 0.125531 | 0.0066  | 0.328525 | 3.25E-13 | 0.182882 | 7.03E-05 | 0.333124 | 1.45E-13 | 0.568515 |
| 0.004858 | 0.91662 | 0.080506 | 0.08223  | 0.04719  | 0.30886  | 0.059944 | 0.19598  | 0.234193 |
| -0.0083  | 0.858   | -0.04551 | 0.32645  | 0.001879 | 0.9677   | -0.08329 | 0.07213  | -0.18159 |
| 0.043216 | 0.35142 | 0.146767 | 0.00147  | 0.071587 | 0.12238  | 0.135003 | 0.00347  | 0.271332 |
| -0.0782  | 0.0914  | -0.23375 | 3.24E-07 | -0.14238 | 0.00204  | -0.23472 | 2.89E-07 | -0.39226 |
| -0.03396 | 0.46407 | 0.119145 | 0.00997  | 0.050418 | 0.27689  | 0.115238 | 0.0127   | 0.293976 |
| -0.01082 | 0.81553 | 0.105066 | 0.02317  | 0.045123 | 0.33055  | 0.107668 | 0.01995  | 0.265894 |
| -0.00311 | 0.94648 | 0.097367 | 0.03542  | 0.058042 | 0.21057  | 0.091335 | 0.04854  | 0.225102 |
| -0.00766 | 0.86889 | 0.164274 | 0.00036  | 0.068687 | 0.13831  | 0.179554 | 9.56E-05 | 0.401108 |
| -0.05196 | 0.2625  | 0.097777 | 0.03465  | 0.027255 | 0.55686  | 0.131887 | 0.0043   | 0.225406 |
| 0.102015 | 0.0275  | 0.303665 | 2.03E-11 | 0.172978 | 0.00017  | 0.313781 | 3.96E-12 | 0.575288 |
| 0.037295 | 0.42136 | -0.18566 | 5.42E-05 | -0.0431  | 0.35269  | -0.22644 | 7.63E-07 | -0.43164 |
| 0.043029 | 0.35351 | 0.127274 | 0.00588  | 0.081223 | 0.07953  | 0.121387 | 0.00864  | 0.355153 |
| 0.017129 | 0.71197 | 0.212471 | 3.62E-06 | 0.109465 | 0.01797  | 0.220489 | 1.50E-06 | 0.448361 |
| -0.00989 | 0.83128 | 0.139574 | 0.0025   | 0.04059  | 0.38148  | 0.154517 | 0.00081  | 0.380635 |
| -0.1145  | 0.01329 | -0.01201 | 0.79581  | -0.05147 | 0.26699  | 0.014326 | 0.75749  | 0.114407 |
| 0.015778 | 0.73381 | 0.131654 | 0.00437  | 0.067557 | 0.14493  | 0.143204 | 0.00192  | 0.266855 |
| -0.02707 | 0.55949 | 0.132168 | 0.00422  | 0.038444 | 0.40718  | 0.15086  | 0.00108  | 0.357119 |
| -0.05823 | 0.20909 | 0.06308  | 0.17355  | -0.011   | 0.81253  | 0.088361 | 0.05638  | 0.242148 |
| -0.04394 | 0.34336 | -0.00627 | 0.89247  | -0.01397 | 0.76329  | 0.003627 | 0.9377   | 0.037654 |
| -0.00917 | 0.84326 | 0.141635 | 0.00215  | 0.011868 | 0.79812  | 0.211096 | 4.19E-06 | 0.230121 |

|          |         |          |          |          |         |          |          |          |
|----------|---------|----------|----------|----------|---------|----------|----------|----------|
| 0.022739 | 0.62403 | 0.136262 | 0.00317  | 0.075847 | 0.10162 | 0.116843 | 0.01151  | 0.394597 |
| -0.05125 | 0.269   | -0.26262 | 8.34E-09 | -0.12485 | 0.0069  | -0.2952  | 7.62E-11 | -0.46843 |
| 0.082078 | 0.0764  | 0.209834 | 4.80E-06 | 0.130332 | 0.00479 | 0.199024 | 1.47E-05 | 0.461977 |
| 0.123993 | 0.0073  | -0.00848 | 0.85503  | 0.04748  | 0.30589 | -0.03636 | 0.43314  | -0.12325 |
| 0.001388 | 0.97613 | 0.125647 | 0.00655  | 0.046534 | 0.31564 | 0.142416 | 0.00203  | 0.256122 |
| -0.02527 | 0.58602 | 0.154019 | 0.00084  | 0.063723 | 0.1692  | 0.163259 | 0.0004   | 0.272777 |
| -0.09003 | 0.05187 | 0.047446 | 0.30624  | -0.02376 | 0.60857 | 0.064155 | 0.16632  | 0.25499  |
| 0.102525 | 0.02673 | 0.224817 | 9.19E-07 | 0.129973 | 0.00491 | 0.225513 | 8.48E-07 | 0.469585 |
| -0.04691 | 0.3117  | 0.021721 | 0.63964  | -0.0246  | 0.59594 | 0.042212 | 0.36273  | 0.057378 |
| 0.00269  | 0.95377 | 0.167443 | 0.00028  | 0.083436 | 0.07164 | 0.15545  | 0.00075  | 0.390501 |
| -0.05256 | 0.25693 | 0.107476 | 0.02017  | 0.015776 | 0.73384 | 0.14637  | 0.00152  | 0.29479  |
| 0.050741 | 0.27383 | 0.173681 | 0.00016  | 0.118335 | 0.01049 | 0.148258 | 0.00131  | 0.288364 |
| -0.03474 | 0.45391 | 0.172422 | 0.00018  | 0.053931 | 0.24476 | 0.204323 | 8.56E-06 | 0.362146 |
| 0.010911 | 0.81409 | 0.184423 | 6.09E-05 | 0.071393 | 0.1234  | 0.212803 | 3.49E-06 | 0.444084 |
| -0.00615 | 0.89449 | 0.148848 | 0.00126  | 0.061913 | 0.18166 | 0.181558 | 7.95E-05 | 0.307966 |
| -0.06593 | 0.15489 | 0.073508 | 0.11265  | -0.01008 | 0.82796 | 0.10614  | 0.02179  | 0.212723 |
| -0.04649 | 0.31612 | 0.072883 | 0.11575  | -0.00748 | 0.87191 | 0.109211 | 0.01824  | 0.242086 |
| -0.01044 | 0.82201 | -0.25935 | 1.29E-08 | -0.09529 | 0.03954 | -0.30633 | 1.33E-11 | -0.46166 |
| -0.02044 | 0.65955 | -0.15068 | 0.00109  | -0.06287 | 0.17502 | -0.18255 | 7.26E-05 | -0.26882 |
| -0.03197 | 0.49074 | 0.139954 | 0.00244  | 0.035108 | 0.44912 | 0.17285  | 0.00017  | 0.369543 |
| -0.06635 | 0.15229 | 0.067307 | 0.14643  | -0.00764 | 0.86916 | 0.098341 | 0.03362  | 0.215006 |
| -0.08693 | 0.06049 | -0.26742 | 4.34E-09 | -0.16477 | 0.00035 | -0.27914 | 8.33E-10 | -0.4078  |
| -0.03616 | 0.43569 | 0.115288 | 0.01267  | 0.036319 | 0.43362 | 0.134902 | 0.00349  | 0.302034 |
| 0.048484 | 0.29577 | 0.181127 | 8.27E-05 | 0.090615 | 0.05035 | 0.18493  | 5.81E-05 | 0.437584 |
| -0.02975 | 0.52136 | -0.22218 | 1.24E-06 | -0.13287 | 0.00402 | -0.22138 | 1.36E-06 | -0.35618 |
| 0.037774 | 0.41541 | 0.178656 | 0.0001   | 0.066071 | 0.154   | 0.218981 | 1.77E-06 | 0.389162 |
| 0.098766 | 0.03285 | 0.220423 | 1.51E-06 | 0.15554  | 0.00074 | 0.186416 | 5.05E-05 | 0.520314 |
| -0.02358 | 0.61132 | 0.060741 | 0.19009  | 0.019122 | 0.68023 | 0.054545 | 0.23942  | 0.267852 |
| 0.037755 | 0.41564 | 0.227761 | 6.55E-07 | 0.114357 | 0.01341 | 0.246937 | 6.45E-08 | 0.510862 |
| 0.033967 | 0.464   | -0.0862  | 0.06269  | -0.019   | 0.68211 | -0.10205 | 0.02744  | -0.19961 |
| 0.076831 | 0.09725 | -0.13443 | 0.00361  | -0.0317  | 0.49433 | -0.18544 | 5.54E-05 | -0.3016  |
| 0.017423 | 0.70727 | 0.167366 | 0.00028  | 0.088074 | 0.05719 | 0.178929 | 0.0001   | 0.330361 |
| 0.071735 | 0.12161 | 0.225352 | 8.64E-07 | 0.099676 | 0.03127 | 0.280439 | 6.90E-10 | 0.446677 |
| -0.01967 | 0.67162 | 0.107576 | 0.02006  | 0.03754  | 0.41831 | 0.101725 | 0.02794  | 0.277784 |
| 0.031813 | 0.49283 | 0.125806 | 0.00648  | 0.070196 | 0.12984 | 0.121669 | 0.00849  | 0.330223 |
| 0.056117 | 0.22613 | 0.269349 | 3.32E-09 | 0.125224 | 0.00674 | 0.295397 | 7.40E-11 | 0.542652 |
| 0.03459  | 0.45584 | 0.169168 | 0.00024  | 0.071705 | 0.12177 | 0.186933 | 4.81E-05 | 0.364527 |
| -0.02296 | 0.62064 | 0.140098 | 0.00241  | 0.051168 | 0.2698  | 0.153603 | 0.00087  | 0.374264 |
| 0.072858 | 0.11587 | 0.263652 | 7.25E-09 | 0.125535 | 0.0066  | 0.298528 | 4.56E-11 | 0.480499 |
| 0.08262  | 0.07447 | -0.10973 | 0.01769  | -0.00312 | 0.94638 | -0.16127 | 0.00047  | -0.26022 |
| 0.059883 | 0.19644 | 0.318551 | 1.79E-12 | 0.135789 | 0.00328 | 0.375017 | 4.83E-17 | 0.582367 |
| -0.00469 | 0.91943 | -0.11459 | 0.01322  | -0.03732 | 0.42108 | -0.1264  | 0.00623  | -0.26368 |
| 0.004434 | 0.92387 | -0.1475  | 0.00139  | -0.06391 | 0.16794 | -0.17457 | 0.00015  | -0.21903 |
| 0.021697 | 0.64001 | 0.188142 | 4.29E-05 | 0.119166 | 0.00995 | 0.177649 | 0.00011  | 0.351994 |
| -0.07335 | 0.11343 | -0.18076 | 8.56E-05 | -0.10773 | 0.01988 | -0.18513 | 5.70E-05 | -0.27917 |

|          |          |          |          |          |          |          |          |          |
|----------|----------|----------|----------|----------|----------|----------|----------|----------|
| -0.01382 | 0.76577  | 0.099439 | 0.03168  | 0.00944  | 0.83878  | 0.137974 | 0.00281  | 0.250969 |
| 0.045405 | 0.32753  | 0.193686 | 2.51E-05 | 0.105246 | 0.02293  | 0.195633 | 2.07E-05 | 0.380684 |
| -0.01946 | 0.67484  | -0.18101 | 8.37E-05 | -0.06027 | 0.19358  | -0.2304  | 4.82E-07 | -0.33537 |
| 0.02697  | 0.56099  | 0.208365 | 5.61E-06 | 0.100371 | 0.03011  | 0.220827 | 1.44E-06 | 0.426475 |
| 0.044584 | 0.33636  | 0.207261 | 6.30E-06 | 0.096876 | 0.03637  | 0.211942 | 3.83E-06 | 0.467595 |
| 0.147833 | 0.00136  | -0.08565 | 0.06441  | 0.044686 | 0.33527  | -0.1423  | 0.00205  | -0.25192 |
| 0.135895 | 0.00326  | 0.160263 | 0.00051  | 0.137764 | 0.00285  | 0.127475 | 0.0058   | 0.277566 |
| 0.007014 | 0.87985  | 0.07515  | 0.10481  | 0.029908 | 0.51911  | 0.083371 | 0.07187  | 0.293766 |
| 0.113367 | 0.01424  | 0.104017 | 0.02458  | 0.083406 | 0.07175  | 0.094821 | 0.04054  | 0.197798 |
| 0.018443 | 0.69099  | 0.160815 | 0.00049  | 0.078971 | 0.08826  | 0.165511 | 0.00033  | 0.288819 |
| 0.051572 | 0.26604  | 0.179315 | 9.77E-05 | 0.130199 | 0.00483  | 0.151219 | 0.00105  | 0.375545 |
| -0.08856 | 0.05583  | 0.064466 | 0.16427  | -0.0111  | 0.81099  | 0.0881   | 0.05711  | 0.2506   |
| -0.0149  | 0.7481   | 0.163303 | 0.0004   | 0.066613 | 0.15065  | 0.19433  | 2.35E-05 | 0.341041 |
| -0.06056 | 0.19139  | -0.21825 | 1.92E-06 | -0.09972 | 0.0312   | -0.24725 | 6.19E-08 | -0.4487  |
| -0.05913 | 0.20213  | 0.049029 | 0.29037  | -0.01282 | 0.78231  | 0.065275 | 0.15903  | 0.257779 |
| 0.014495 | 0.75473  | 0.065741 | 0.15607  | 0.028028 | 0.54572  | 0.07256  | 0.11737  | 0.245458 |
| 0.086544 | 0.06166  | -0.20026 | 1.30E-05 | -0.05194 | 0.26267  | -0.25029 | 4.21E-08 | -0.4153  |
| -0.05542 | 0.23195  | 0.075239 | 0.1044   | -0.00728 | 0.87532  | 0.10315  | 0.02581  | 0.230169 |
| 0.089097 | 0.05434  | 0.23337  | 3.39E-07 | 0.140879 | 0.00228  | 0.224832 | 9.17E-07 | 0.423262 |
| 0.281897 | 5.58E-10 | 0.380243 | 1.64E-17 | 0.312754 | 4.69E-12 | 0.312783 | 4.66E-12 | 0.357927 |
| 0.102194 | 0.02722  | 0.257625 | 1.62E-08 | 0.166389 | 0.0003   | 0.237885 | 1.97E-07 | 0.408178 |
| -0.0109  | 0.81427  | 0.130156 | 0.00485  | 0.054086 | 0.2434   | 0.145178 | 0.00166  | 0.21741  |
| 0.052552 | 0.25705  | 0.265994 | 5.27E-09 | 0.140468 | 0.00235  | 0.268262 | 3.86E-09 | 0.620673 |
| -0.01932 | 0.67714  | 0.10907  | 0.01839  | 0.027875 | 0.54791  | 0.156369 | 0.0007   | 0.252243 |
| 0.002877 | 0.95056  | -0.18672 | 4.91E-05 | -0.07186 | 0.12097  | -0.22283 | 1.15E-06 | -0.36407 |
| -0.03633 | 0.43352  | 0.137366 | 0.00293  | 0.048797 | 0.29266  | 0.155949 | 0.00072  | 0.358534 |
| -0.02623 | 0.57177  | 0.110092 | 0.01731  | 0.034353 | 0.45894  | 0.121136 | 0.00878  | 0.34451  |
| -0.0105  | 0.82098  | 0.25403  | 2.60E-08 | 0.128341 | 0.00548  | 0.256879 | 1.79E-08 | 0.439712 |
| -0.00082 | 0.98581  | 0.163524 | 0.00039  | 0.072499 | 0.11768  | 0.180086 | 9.10E-05 | 0.291121 |
| 0.050709 | 0.27413  | 0.178594 | 0.0001   | 0.091828 | 0.04734  | 0.175187 | 0.00014  | 0.463585 |
| 0.002986 | 0.94869  | 0.126381 | 0.00624  | 0.033601 | 0.46883  | 0.162301 | 0.00043  | 0.324775 |
| 0.045211 | 0.32961  | 0.225651 | 8.35E-07 | 0.106217 | 0.02169  | 0.256594 | 1.86E-08 | 0.445255 |
| 0.024896 | 0.59151  | 0.147853 | 0.00135  | 0.078686 | 0.08941  | 0.139446 | 0.00253  | 0.246887 |
| -0.06997 | 0.13109  | 0.039097 | 0.39925  | -0.01415 | 0.76042  | 0.052543 | 0.25713  | 0.119874 |
| 0.016068 | 0.7291   | 0.095568 | 0.03898  | 0.032833 | 0.47905  | 0.102864 | 0.02623  | 0.226584 |
| -0.03285 | 0.47877  | 0.04032  | 0.38466  | 0.00874  | 0.85059  | 0.050715 | 0.27408  | 0.19388  |
| 0.006337 | 0.89137  | 0.210358 | 4.54E-06 | 0.084616 | 0.06771  | 0.243353 | 1.01E-07 | 0.418553 |
| 0.08638  | 0.06216  | -0.11566 | 0.01238  | -0.01711 | 0.71222  | -0.15018 | 0.00113  | -0.27254 |
| -0.00779 | 0.86672  | -0.17211 | 0.00019  | -0.06048 | 0.19202  | -0.20788 | 5.91E-06 | -0.39283 |
| 0.070077 | 0.13049  | 0.256088 | 1.99E-08 | 0.141389 | 0.00219  | 0.260801 | 1.06E-08 | 0.555693 |
| 0.172781 | 0.00018  | 0.248789 | 5.10E-08 | 0.241269 | 1.31E-07 | 0.165803 | 0.00032  | 0.413009 |
| 0.064029 | 0.16716  | 0.243533 | 9.87E-08 | 0.155052 | 0.00077  | 0.214967 | 2.76E-06 | 0.559463 |
| -0.02518 | 0.58729  | -0.23251 | 3.76E-07 | -0.08507 | 0.06625  | -0.2662  | 5.13E-09 | -0.4392  |
| -0.02627 | 0.57126  | 0.070171 | 0.12997  | 0.020982 | 0.65108  | 0.08154  | 0.07836  | 0.153277 |
| -0.05549 | 0.23134  | 0.031078 | 0.50288  | -0.01097 | 0.81303  | 0.043929 | 0.34352  | 0.194521 |

|          |         |          |          |          |         |          |          |          |
|----------|---------|----------|----------|----------|---------|----------|----------|----------|
| 0.034981 | 0.45076 | 0.156279 | 0.0007   | 0.090922 | 0.04957 | 0.151133 | 0.00105  | 0.376965 |
| -0.02626 | 0.57136 | 0.113411 | 0.0142   | 0.011353 | 0.80669 | 0.142641 | 0.002    | 0.278498 |
| 0.041409 | 0.37195 | 0.2146   | 2.87E-06 | 0.160145 | 0.00051 | 0.181624 | 7.90E-05 | 0.27828  |
| 0.030693 | 0.50819 | 0.098424 | 0.03347  | 0.045386 | 0.32774 | 0.106879 | 0.02088  | 0.192437 |
| 0.027369 | 0.55521 | 0.177751 | 0.00011  | 0.064905 | 0.16141 | 0.205389 | 7.66E-06 | 0.333725 |
| -0.02707 | 0.55948 | 0.160288 | 0.00051  | 0.0331   | 0.47549 | 0.197845 | 1.66E-05 | 0.428971 |
| -0.02265 | 0.62532 | 0.137899 | 0.00282  | 0.042379 | 0.36084 | 0.149741 | 0.00117  | 0.393909 |
| 0.005736 | 0.90162 | 0.17587  | 0.00013  | 0.072853 | 0.1159  | 0.189902 | 3.62E-05 | 0.410785 |
| 0.021721 | 0.63964 | -0.13513 | 0.00344  | -0.04055 | 0.38189 | -0.16992 | 0.00023  | -0.31087 |
| 0.047602 | 0.30465 | -0.13527 | 0.0034   | -0.0344  | 0.45832 | -0.17592 | 0.00013  | -0.36594 |
| -0.06965 | 0.13288 | 0.046172 | 0.31942  | 0.016729 | 0.71842 | 0.02855  | 0.53826  | 0.130878 |
| -0.00654 | 0.88791 | 0.076223 | 0.09993  | 0.03947  | 0.39477 | 0.089352 | 0.05366  | 0.232519 |
| -0.02904 | 0.53127 | -0.2318  | 4.08E-07 | -0.11129 | 0.01613 | -0.25958 | 1.25E-08 | -0.50413 |
| -0.09268 | 0.04531 | 0.109846 | 0.01757  | 0.004351 | 0.92529 | 0.143101 | 0.00193  | 0.288611 |
| -0.01916 | 0.67961 | 0.070628 | 0.12748  | 0.020756 | 0.6546  | 0.083949 | 0.06991  | 0.126904 |
| 0.029898 | 0.51924 | 0.242389 | 1.14E-07 | 0.101001 | 0.02908 | 0.268908 | 3.53E-09 | 0.554194 |
| 0.087864 | 0.05778 | 0.18513  | 5.70E-05 | 0.130412 | 0.00476 | 0.167755 | 0.00027  | 0.387096 |
| 0.066498 | 0.15135 | 0.29258  | 1.14E-10 | 0.134934 | 0.00348 | 0.33365  | 1.32E-13 | 0.566562 |
| 0.027508 | 0.5532  | 0.251393 | 3.65E-08 | 0.111071 | 0.01634 | 0.276473 | 1.22E-09 | 0.553964 |
| -0.01319 | 0.77623 | 0.118299 | 0.01051  | 0.05643  | 0.22354 | 0.120757 | 0.009    | 0.268317 |
| -0.0222  | 0.63231 | 0.159873 | 0.00052  | 0.032037 | 0.48978 | 0.200219 | 1.30E-05 | 0.400512 |
| 0.045288 | 0.32879 | 0.240205 | 1.49E-07 | 0.095337 | 0.03945 | 0.279707 | 7.67E-10 | 0.468902 |
| 0.003261 | 0.94398 | 0.172667 | 0.00018  | 0.087023 | 0.06023 | 0.194713 | 2.26E-05 | 0.402899 |
| 0.016918 | 0.71537 | 0.123882 | 0.00736  | 0.028215 | 0.54305 | 0.163123 | 0.0004   | 0.3025   |
| -0.07487 | 0.10611 | 0.036051 | 0.43702  | -0.01671 | 0.71869 | 0.073255 | 0.11389  | 0.159712 |
| -0.01798 | 0.69832 | 0.060208 | 0.19401  | 0.028871 | 0.5337  | 0.05891  | 0.20382  | 0.216053 |
| 0.009929 | 0.83055 | 0.118226 | 0.01056  | 0.061166 | 0.187   | 0.119805 | 0.00956  | 0.279043 |
| -0.05333 | 0.25004 | 0.103964 | 0.02466  | 0.016915 | 0.71543 | 0.133345 | 0.00389  | 0.233137 |
| -0.04926 | 0.28811 | 0.038421 | 0.40746  | -0.01315 | 0.77692 | 0.06184  | 0.18218  | 0.11137  |
| -0.0466  | 0.31496 | 0.140793 | 0.00229  | 0.034453 | 0.45763 | 0.170533 | 0.00021  | 0.262189 |
| -0.00745 | 0.8724  | 0.157869 | 0.00062  | 0.027363 | 0.5553  | 0.210551 | 4.45E-06 | 0.273083 |
| -0.00323 | 0.94459 | 0.083871 | 0.07017  | 0.019038 | 0.68155 | 0.102006 | 0.02751  | 0.250715 |
| 0.044931 | 0.33262 | 0.112639 | 0.01488  | 0.065025 | 0.16064 | 0.102312 | 0.02705  | 0.246248 |
| 0.015887 | 0.73203 | 0.130617 | 0.0047   | 0.043334 | 0.3501  | 0.157075 | 0.00066  | 0.35862  |
| 0.014808 | 0.74961 | 0.096399 | 0.0373   | 0.046303 | 0.31805 | 0.091083 | 0.04917  | 0.216924 |
| -0.00248 | 0.95731 | -0.17927 | 9.81E-05 | -0.09948 | 0.0316  | -0.17035 | 0.00022  | -0.39913 |
| 0.059323 | 0.20066 | 0.148157 | 0.00132  | 0.062772 | 0.17567 | 0.169693 | 0.00023  | 0.352793 |
| 0.100574 | 0.02977 | -0.13163 | 0.00438  | -0.01262 | 0.7857  | -0.16936 | 0.00024  | -0.33301 |
| 0.074267 | 0.10897 | 0.238549 | 1.82E-07 | 0.132188 | 0.00422 | 0.232306 | 3.85E-07 | 0.480097 |
| 0.019762 | 0.67015 | -0.15294 | 0.00091  | -0.04748 | 0.30592 | -0.17983 | 9.32E-05 | -0.34596 |
| -0.07354 | 0.11249 | 0.112663 | 0.01486  | 0.018703 | 0.68685 | 0.131165 | 0.00452  | 0.3419   |
| -0.01677 | 0.71775 | 0.153048 | 0.00091  | 0.053382 | 0.2496  | 0.182963 | 6.98E-05 | 0.399879 |
| 0.016013 | 0.73    | 0.087308 | 0.05939  | 0.071695 | 0.12182 | 0.039247 | 0.39745  | 0.142817 |
| 0.076084 | 0.10055 | 0.265093 | 5.96E-09 | 0.141045 | 0.00225 | 0.277457 | 1.06E-09 | 0.443541 |
| 0.122646 | 0.00797 | 0.148347 | 0.0013   | 0.114357 | 0.01341 | 0.123094 | 0.00774  | 0.275394 |

|          |         |          |          |          |          |          |          |          |
|----------|---------|----------|----------|----------|----------|----------|----------|----------|
| 0.029606 | 0.52333 | 0.21079  | 4.33E-06 | 0.068655 | 0.13849  | 0.26363  | 7.27E-09 | 0.383327 |
| 0.062883 | 0.1749  | 0.274878 | 1.53E-09 | 0.115743 | 0.01232  | 0.31089  | 6.36E-12 | 0.553602 |
| -0.11153 | 0.0159  | -0.26728 | 4.42E-09 | -0.12238 | 0.00811  | -0.29892 | 4.29E-11 | -0.48222 |
| 0.103132 | 0.02584 | 0.243204 | 1.03E-07 | 0.129351 | 0.00512  | 0.246932 | 6.45E-08 | 0.42418  |
| 0.027556 | 0.55251 | 0.095545 | 0.03902  | 0.043717 | 0.34586  | 0.089872 | 0.05227  | 0.247562 |
| -0.04233 | 0.36139 | -0.1669  | 0.00029  | -0.09953 | 0.03153  | -0.16983 | 0.00023  | -0.33448 |
| -0.04174 | 0.36817 | 0.118315 | 0.0105   | -0.00324 | 0.94424  | 0.171325 | 0.0002   | 0.309041 |
| -0.10448 | 0.02394 | -0.18719 | 4.69E-05 | -0.1223  | 0.00815  | -0.17363 | 0.00016  | -0.31163 |
| 0.081625 | 0.07804 | 0.167141 | 0.00029  | 0.106529 | 0.02131  | 0.153171 | 0.0009   | 0.269294 |
| 0.004698 | 0.91935 | 0.029809 | 0.52048  | -0.00542 | 0.90701  | 0.047897 | 0.30165  | 0.195699 |
| -0.06381 | 0.16865 | -0.20451 | 8.40E-06 | -0.10756 | 0.02008  | -0.2151  | 2.72E-06 | -0.40361 |
| -0.00148 | 0.97455 | 0.177345 | 0.00012  | 0.062604 | 0.17683  | 0.19976  | 1.37E-05 | 0.374985 |
| -0.02609 | 0.57391 | 0.097648 | 0.0349   | 0.020013 | 0.66619  | 0.105498 | 0.0226   | 0.270592 |
| -0.01348 | 0.77142 | 0.13125  | 0.0045   | 0.039453 | 0.39497  | 0.153051 | 0.00091  | 0.354741 |
| -0.04401 | 0.34265 | 0.114504 | 0.01329  | 0.033627 | 0.46849  | 0.136587 | 0.0031   | 0.268699 |
| -0.13176 | 0.00434 | 0.035496 | 0.44412  | -0.01595 | 0.73101  | 0.060357 | 0.19291  | 0.159655 |
| 0.054207 | 0.24235 | 0.209927 | 4.75E-06 | 0.106035 | 0.02192  | 0.218743 | 1.82E-06 | 0.431648 |
| 0.093276 | 0.04394 | 0.291328 | 1.38E-10 | 0.195787 | 2.04E-05 | 0.263136 | 7.78E-09 | 0.548608 |
| 0.039247 | 0.39745 | 0.198483 | 1.55E-05 | 0.097138 | 0.03586  | 0.204796 | 8.15E-06 | 0.496649 |
| -0.0192  | 0.67896 | 0.123159 | 0.00771  | 0.043677 | 0.3463   | 0.133662 | 0.00381  | 0.279381 |
| -0.03343 | 0.47107 | 0.129679 | 0.005    | 0.029185 | 0.52925  | 0.141508 | 0.00217  | 0.342926 |
| 0.105288 | 0.02287 | 0.239787 | 1.57E-07 | 0.135286 | 0.0034   | 0.248105 | 5.56E-08 | 0.497334 |
| 0.015526 | 0.73789 | 0.214276 | 2.98E-06 | 0.10273  | 0.02642  | 0.220965 | 1.42E-06 | 0.426174 |
| 0.028279 | 0.54212 | 0.204108 | 8.75E-06 | 0.094026 | 0.04226  | 0.225255 | 8.74E-07 | 0.438677 |
| 0.032803 | 0.47946 | 0.188758 | 4.04E-05 | 0.088928 | 0.05481  | 0.199502 | 1.40E-05 | 0.38769  |
| -0.0615  | 0.1846  | -0.27814 | 9.62E-10 | -0.11022 | 0.01718  | -0.32672 | 4.45E-13 | -0.50072 |
| -0.01327 | 0.77489 | 0.106027 | 0.02193  | 0.02959  | 0.52355  | 0.129489 | 0.00507  | 0.285211 |
| -0.00043 | 0.99269 | 0.166095 | 0.00031  | 0.055414 | 0.232    | 0.184154 | 6.25E-05 | 0.421089 |
| -0.0156  | 0.73667 | 0.193513 | 2.55E-05 | 0.067933 | 0.1427   | 0.221402 | 1.35E-06 | 0.441981 |
| 0.025523 | 0.5822  | 0.179791 | 9.35E-05 | 0.087609 | 0.05852  | 0.181159 | 8.25E-05 | 0.46984  |
| 0.101819 | 0.0278  | 0.294638 | 8.31E-11 | 0.158164 | 0.0006   | 0.314488 | 3.52E-12 | 0.570648 |
| -0.06474 | 0.16248 | 0.056379 | 0.22396  | 0.023768 | 0.60842  | 0.044082 | 0.34184  | 0.189351 |
| 0.00189  | 0.96751 | 0.18873  | 4.05E-05 | 0.077714 | 0.09346  | 0.20362  | 9.21E-06 | 0.409284 |
| -0.01741 | 0.70742 | -0.16979 | 0.00023  | -0.04539 | 0.32773  | -0.21914 | 1.74E-06 | -0.31339 |
| -0.06121 | 0.18671 | 0.078862 | 0.0887   | -0.01064 | 0.81862  | 0.122824 | 0.00788  | 0.21269  |
| -0.05362 | 0.24746 | 0.033737 | 0.46703  | 0.011699 | 0.80092  | 0.038758 | 0.40336  | 0.065254 |
| -0.02752 | 0.55306 | -0.11754 | 0.01102  | -0.04109 | 0.37562  | -0.14071 | 0.00231  | -0.2656  |
| -0.0316  | 0.49574 | 0.093325 | 0.04382  | 0.027916 | 0.54732  | 0.105784 | 0.02224  | 0.242854 |
| -0.00468 | 0.91963 | 0.191571 | 3.08E-05 | 0.076003 | 0.10092  | 0.216491 | 2.34E-06 | 0.349066 |
| 0.030359 | 0.51282 | 0.103189 | 0.02575  | 0.046661 | 0.31432  | 0.108758 | 0.01872  | 0.184547 |
| 0.021233 | 0.64719 | 0.111824 | 0.01562  | 0.042332 | 0.36137  | 0.110606 | 0.0168   | 0.317374 |
| -0.02198 | 0.63566 | 0.109184 | 0.01826  | 0.051371 | 0.26791  | 0.109309 | 0.01813  | 0.322028 |
| -0.05316 | 0.25154 | 0.142078 | 0.00209  | 0.020244 | 0.66258  | 0.187735 | 4.46E-05 | 0.321098 |
| -0.04484 | 0.33365 | 0.029646 | 0.52277  | 0.012093 | 0.79436  | 0.011769 | 0.79976  | 0.106542 |
| 0.061861 | 0.18203 | 0.208645 | 5.44E-06 | 0.117896 | 0.01078  | 0.203869 | 8.97E-06 | 0.345307 |

|          |          |          |          |          |          |          |          |          |
|----------|----------|----------|----------|----------|----------|----------|----------|----------|
| -0.0475  | 0.30565  | 0.113442 | 0.01417  | 0.006048 | 0.89629  | 0.167878 | 0.00027  | 0.200941 |
| -0.10025 | 0.0303   | 0.057256 | 0.21682  | -0.02321 | 0.6168   | 0.092027 | 0.04685  | 0.219155 |
| 0.005247 | 0.90996  | 0.125417 | 0.00665  | 0.025502 | 0.58252  | 0.17041  | 0.00022  | 0.305542 |
| -0.06211 | 0.18024  | 0.050867 | 0.27264  | -0.02448 | 0.59771  | 0.090783 | 0.04992  | 0.213165 |
| -0.01587 | 0.73238  | 0.195855 | 2.02E-05 | 0.048564 | 0.29497  | 0.248947 | 5.00E-08 | 0.370039 |
| -0.07593 | 0.10126  | 0.023623 | 0.61061  | -0.03093 | 0.50497  | 0.039936 | 0.38921  | 0.14179  |
| -0.03672 | 0.42855  | 0.045537 | 0.32613  | -0.01851 | 0.68989  | 0.079612 | 0.0857   | 0.124771 |
| -0.10846 | 0.01905  | -0.12418 | 0.00721  | -0.05519 | 0.23394  | -0.13617 | 0.00319  | -0.27142 |
| -0.02136 | 0.64528  | 0.10085  | 0.02932  | 0.011488 | 0.80444  | 0.141566 | 0.00217  | 0.1881   |
| -0.05559 | 0.2305   | 0.031548 | 0.49644  | 0.01461  | 0.75284  | 0.017185 | 0.71107  | 0.139119 |
| -0.02692 | 0.56167  | 0.100609 | 0.02972  | 0.039504 | 0.39436  | 0.108693 | 0.0188   | 0.245758 |
| -0.02952 | 0.52454  | 0.122308 | 0.00815  | 0.010819 | 0.81563  | 0.159696 | 0.00053  | 0.290841 |
| 0.002182 | 0.96249  | 0.151829 | 0.001    | 0.084292 | 0.06877  | 0.164526 | 0.00036  | 0.329843 |
| -0.05623 | 0.22518  | 0.041044 | 0.37617  | 0.032498 | 0.48356  | 0.019551 | 0.67345  | 0.109769 |
| 0.049228 | 0.28841  | 0.184865 | 5.85E-05 | 0.074684 | 0.10699  | 0.201234 | 1.18E-05 | 0.462681 |
| -0.00229 | 0.96064  | 0.109589 | 0.01783  | 0.046731 | 0.3136   | 0.10997  | 0.01744  | 0.336694 |
| 0.046043 | 0.32078  | 0.209476 | 4.98E-06 | 0.078901 | 0.08854  | 0.24443  | 8.83E-08 | 0.354127 |
| 0.187205 | 4.69E-05 | 0.227814 | 6.51E-07 | 0.213473 | 3.25E-06 | 0.165189 | 0.00034  | 0.409515 |
| -0.05232 | 0.25919  | 0.096924 | 0.03627  | 0.017262 | 0.70985  | 0.11339  | 0.01422  | 0.25097  |
| -0.02801 | 0.54594  | 0.123696 | 0.00745  | 0.02262  | 0.62585  | 0.161895 | 0.00044  | 0.312972 |
| 0.013695 | 0.76787  | 0.127453 | 0.00581  | 0.066995 | 0.14831  | 0.134727 | 0.00353  | 0.212822 |
| -0.00216 | 0.96289  | 0.160752 | 0.00049  | 0.070535 | 0.12799  | 0.180265 | 8.96E-05 | 0.296069 |
| 0.06124  | 0.18647  | -0.06595 | 0.15473  | -0.01187 | 0.79809  | -0.08292 | 0.07341  | -0.1666  |
| 0.006761 | 0.88414  | 0.088776 | 0.05522  | 0.036576 | 0.43037  | 0.102577 | 0.02665  | 0.230739 |
| -0.05551 | 0.23118  | 0.057926 | 0.21149  | 0.00638  | 0.89064  | 0.058598 | 0.20623  | 0.275688 |
| 0.002254 | 0.96126  | -0.11303 | 0.01453  | -0.01275 | 0.7834   | -0.15288 | 0.00092  | -0.25985 |
| -0.01481 | 0.7495   | -0.15408 | 0.00084  | -0.11265 | 0.01486  | -0.15273 | 0.00093  | -0.32469 |
| 0.009788 | 0.83292  | -0.10239 | 0.02693  | -0.03366 | 0.46806  | -0.1109  | 0.01651  | -0.29239 |
| -0.00531 | 0.90894  | 0.143883 | 0.00183  | 0.076258 | 0.09978  | 0.147487 | 0.00139  | 0.335157 |
| 0.004442 | 0.92374  | -0.12432 | 0.00715  | -0.00804 | 0.86248  | -0.19034 | 3.47E-05 | -0.29296 |
| 0.077657 | 0.0937   | 0.05386  | 0.24538  | 0.045753 | 0.32383  | 0.046142 | 0.31974  | 0.140189 |
| -0.0015  | 0.97417  | -0.13427 | 0.00365  | -0.03847 | 0.40681  | -0.16367 | 0.00038  | -0.30817 |
| -0.0674  | 0.14588  | 0.086889 | 0.06063  | 0.013635 | 0.76884  | 0.104728 | 0.02361  | 0.269739 |
| 0.090451 | 0.05077  | 0.237416 | 2.09E-07 | 0.153955 | 0.00084  | 0.23091  | 4.54E-07 | 0.447202 |
| -0.04361 | 0.34701  | 0.079694 | 0.08537  | 0.002147 | 0.9631   | 0.095651 | 0.03881  | 0.22618  |
| 0.028162 | 0.5438   | 0.242334 | 1.14E-07 | 0.106694 | 0.02111  | 0.274343 | 1.65E-09 | 0.445499 |
| -0.06198 | 0.18118  | -0.00342 | 0.9413   | -0.04591 | 0.32222  | 0.023744 | 0.60878  | 0.079894 |
| 0.032722 | 0.48055  | 0.148083 | 0.00133  | 0.07364  | 0.112    | 0.162887 | 0.00041  | 0.347844 |
| -0.02617 | 0.5727   | 0.135025 | 0.00346  | 0.025062 | 0.58904  | 0.185798 | 5.35E-05 | 0.379981 |
| -0.02838 | 0.54066  | -0.20677 | 6.63E-06 | -0.10569 | 0.02235  | -0.21535 | 2.65E-06 | -0.36187 |
| -0.04983 | 0.28258  | -0.25723 | 1.71E-08 | -0.14867 | 0.00127  | -0.26981 | 3.12E-09 | -0.46891 |
| 0.080315 | 0.08296  | 0.163242 | 0.0004   | 0.109844 | 0.01757  | 0.157059 | 0.00066  | 0.27786  |
| 0.107838 | 0.01976  | 0.260441 | 1.12E-08 | 0.172957 | 0.00017  | 0.251866 | 3.44E-08 | 0.397428 |
| 0.02095  | 0.65158  | 0.138744 | 0.00266  | 0.044029 | 0.34242  | 0.16955  | 0.00023  | 0.278508 |
| -0.00092 | 0.98419  | 0.158443 | 0.00059  | 0.065461 | 0.15785  | 0.181257 | 8.18E-05 | 0.317773 |

|          |         |          |          |          |          |          |          |          |
|----------|---------|----------|----------|----------|----------|----------|----------|----------|
| -0.06078 | 0.18981 | -0.25482 | 2.34E-08 | -0.16484 | 0.00035  | -0.25068 | 4.00E-08 | -0.44053 |
| 0.051574 | 0.26602 | -0.02821 | 0.54314  | 0.018639 | 0.68787  | -0.05604 | 0.22679  | -0.1524  |
| 0.040569 | 0.38173 | 0.232394 | 3.81E-07 | 0.115376 | 0.0126   | 0.257614 | 1.63E-08 | 0.506711 |
| 0.080648 | 0.08169 | -0.12634 | 0.00626  | -0.0129  | 0.78104  | -0.14977 | 0.00117  | -0.27996 |
| 0.077306 | 0.09519 | 0.265276 | 5.82E-09 | 0.138143 | 0.00277  | 0.283961 | 4.13E-10 | 0.486077 |
| 0.022389 | 0.62939 | 0.232586 | 3.72E-07 | 0.101588 | 0.02815  | 0.254181 | 2.55E-08 | 0.477668 |
| 0.062078 | 0.1805  | 0.131853 | 0.00431  | 0.068622 | 0.13869  | 0.142971 | 0.00195  | 0.284843 |
| -0.0297  | 0.52202 | 0.127802 | 0.00568  | 0.012591 | 0.78609  | 0.180569 | 8.71E-05 | 0.341846 |
| 0.027395 | 0.55483 | 0.17327  | 0.00017  | 0.072244 | 0.11898  | 0.19486  | 2.23E-05 | 0.389428 |
| 0.039107 | 0.39913 | 0.164692 | 0.00035  | 0.076986 | 0.09658  | 0.190599 | 3.38E-05 | 0.38791  |
| -0.02236 | 0.62976 | 0.086169 | 0.0628   | 0.011557 | 0.80329  | 0.121272 | 0.00871  | 0.204898 |
| 0.019791 | 0.66969 | 0.151144 | 0.00105  | 0.081399 | 0.07888  | 0.163898 | 0.00038  | 0.294638 |
| 0.046877 | 0.31208 | 0.232143 | 3.92E-07 | 0.136382 | 0.00315  | 0.23507  | 2.77E-07 | 0.48717  |
| 0.021006 | 0.6507  | 0.142232 | 0.00206  | 0.063137 | 0.17317  | 0.164812 | 0.00035  | 0.325185 |
| 0.053351 | 0.24987 | 0.268649 | 3.66E-09 | 0.125032 | 0.00682  | 0.291623 | 1.32E-10 | 0.517648 |
| 0.02253  | 0.62722 | 0.199081 | 1.46E-05 | 0.079314 | 0.08688  | 0.223437 | 1.08E-06 | 0.437642 |
| 0.039393 | 0.39569 | 0.161403 | 0.00046  | 0.061109 | 0.18741  | 0.186295 | 5.11E-05 | 0.256391 |
| 0.151533 | 0.00102 | 0.308267 | 9.73E-12 | 0.200098 | 1.32E-05 | 0.320656 | 1.26E-12 | 0.390809 |
| 0.007667 | 0.86876 | 0.137324 | 0.00294  | 0.081747 | 0.0776   | 0.113212 | 0.01437  | 0.301524 |
| -0.10142 | 0.02842 | 0.043008 | 0.35374  | -0.02309 | 0.61864  | 0.072955 | 0.11539  | 0.241444 |
| -0.02848 | 0.53929 | 0.128624 | 0.00537  | 0.027126 | 0.55872  | 0.157001 | 0.00066  | 0.336613 |
| -0.03843 | 0.40733 | 0.079906 | 0.08454  | 0.026527 | 0.56744  | 0.076671 | 0.09795  | 0.24244  |
| 0.049397 | 0.28675 | 0.213833 | 3.12E-06 | 0.098412 | 0.03349  | 0.22774  | 6.56E-07 | 0.470115 |
| 0.017822 | 0.70087 | 0.132525 | 0.00412  | 0.042789 | 0.35621  | 0.153891 | 0.00085  | 0.337443 |
| -0.02222 | 0.63196 | 0.114233 | 0.01351  | 0.042134 | 0.36363  | 0.128875 | 0.00528  | 0.278011 |
| -0.03355 | 0.46951 | 0.023988 | 0.6051   | -0.01205 | 0.79502  | 0.030745 | 0.50747  | 0.082142 |
| -0.00853 | 0.85415 | 0.130962 | 0.00459  | 0.053029 | 0.25275  | 0.14131  | 0.00221  | 0.334265 |
| -0.006   | 0.89717 | 0.146286 | 0.00153  | 0.058772 | 0.20488  | 0.160244 | 0.00051  | 0.405483 |
| 0.010876 | 0.81467 | 0.223806 | 1.03E-06 | 0.097497 | 0.03518  | 0.240041 | 1.52E-07 | 0.49939  |
| 0.057605 | 0.21404 | 0.237803 | 1.99E-07 | 0.11837  | 0.01046  | 0.244057 | 9.25E-08 | 0.554578 |
| 0.047189 | 0.30887 | 0.19162  | 3.07E-05 | 0.073761 | 0.11141  | 0.24047  | 1.44E-07 | 0.402302 |
| -0.06221 | 0.17958 | 0.104747 | 0.02359  | 0.02475  | 0.59369  | 0.11692  | 0.01145  | 0.301074 |
| 0.024631 | 0.59546 | 0.175395 | 0.00014  | 0.091612 | 0.04786  | 0.183738 | 6.50E-05 | 0.374253 |
| 0.00471  | 0.91914 | 0.163123 | 0.0004   | 0.068287 | 0.14063  | 0.176226 | 0.00013  | 0.339397 |
| 0.032405 | 0.48481 | 0.27278  | 2.06E-09 | 0.120616 | 0.00908  | 0.312317 | 5.03E-12 | 0.533339 |
| -0.0002  | 0.99654 | 0.105042 | 0.0232   | 0.034505 | 0.45694  | 0.12009  | 0.00939  | 0.334096 |
| -0.04492 | 0.33272 | -0.093   | 0.04458  | -0.06427 | 0.16556  | -0.07733 | 0.09509  | -0.19451 |
| -0.02922 | 0.52883 | 0.03651  | 0.4312   | -0.00455 | 0.9219   | 0.047173 | 0.30903  | 0.151156 |
| -0.00706 | 0.87904 | 0.161552 | 0.00046  | 0.057462 | 0.21518  | 0.176747 | 0.00012  | 0.376463 |
| -0.00413 | 0.92912 | 0.118824 | 0.01017  | 0.037086 | 0.42397  | 0.130696 | 0.00467  | 0.295163 |
| 0.057383 | 0.21581 | 0.167139 | 0.00029  | 0.074528 | 0.10773  | 0.18148  | 8.01E-05 | 0.421609 |
| -0.0407  | 0.38025 | 0.121433 | 0.00862  | 0.022416 | 0.62897  | 0.151679 | 0.00101  | 0.36841  |
| -0.04004 | 0.388   | 0.0637   | 0.16936  | 0.000952 | 0.98363  | 0.086696 | 0.0612   | 0.217329 |
| 0.106226 | 0.02168 | 0.200469 | 1.27E-05 | 0.131139 | 0.00453  | 0.177017 | 0.00012  | 0.333045 |
| -0.01099 | 0.8127  | 0.121117 | 0.00879  | 0.040839 | 0.37857  | 0.144519 | 0.00174  | 0.321354 |



|          |         |          |          |          |         |          |          |          |
|----------|---------|----------|----------|----------|---------|----------|----------|----------|
| -0.03958 | 0.39351 | 0.129039 | 0.00523  | 0.017081 | 0.71275 | 0.167133 | 0.00029  | 0.380443 |
| 0.045247 | 0.32923 | 0.227234 | 6.96E-07 | 0.105073 | 0.02316 | 0.245389 | 7.83E-08 | 0.405673 |
| -0.07477 | 0.10657 | 0.118759 | 0.01021  | 0.028663 | 0.53666 | 0.138081 | 0.00279  | 0.329788 |
| 0.031876 | 0.49197 | 0.110638 | 0.01676  | 0.068455 | 0.13965 | 0.093613 | 0.04317  | 0.266047 |
| 0.022129 | 0.63337 | 0.24789  | 5.71E-08 | 0.094581 | 0.04105 | 0.289465 | 1.82E-10 | 0.463688 |
| -0.02247 | 0.62812 | 0.093016 | 0.04453  | 0.037677 | 0.41661 | 0.092691 | 0.04528  | 0.216004 |
| 0.061005 | 0.18817 | 0.223509 | 1.07E-06 | 0.106795 | 0.02098 | 0.237344 | 2.11E-07 | 0.48681  |
| 0.047689 | 0.30377 | 0.085355 | 0.06534  | 0.051367 | 0.26795 | 0.071574 | 0.12245  | 0.212365 |
| 0.060198 | 0.19409 | 0.127371 | 0.00584  | 0.07961  | 0.08571 | 0.114753 | 0.01309  | 0.237832 |
| -0.06686 | 0.14916 | 0.162641 | 0.00042  | -0.00261 | 0.95518 | 0.231503 | 4.23E-07 | 0.433076 |
| 0.002101 | 0.96388 | 0.142638 | 0.002    | 0.067213 | 0.14699 | 0.144711 | 0.00172  | 0.338274 |
| 0.053808 | 0.24583 | 0.175068 | 0.00014  | 0.08121  | 0.07958 | 0.184335 | 6.14E-05 | 0.306744 |
| 0.008227 | 0.85927 | 0.157819 | 0.00062  | 0.041244 | 0.37386 | 0.200442 | 1.27E-05 | 0.35063  |
| 0.037043 | 0.4245  | 0.060645 | 0.19079  | 0.098708 | 0.03296 | -0.01175 | 0.80001  | -0.01664 |
| 0.083319 | 0.07205 | 0.153799 | 0.00085  | 0.064325 | 0.1652  | 0.180766 | 8.55E-05 | 0.30845  |
| 0.130172 | 0.00484 | 0.185375 | 5.57E-05 | 0.110203 | 0.0172  | 0.188188 | 4.27E-05 | 0.355789 |
| -0.03871 | 0.40397 | 0.094531 | 0.04116  | 0.033201 | 0.47415 | 0.085752 | 0.06409  | 0.192772 |
| 0.006707 | 0.88507 | 0.14377  | 0.00184  | 0.053815 | 0.24578 | 0.16573  | 0.00032  | 0.358264 |
| 0.005153 | 0.91157 | 0.143048 | 0.00194  | 0.058044 | 0.21056 | 0.15069  | 0.00109  | 0.318303 |
| -0.01001 | 0.82914 | -0.08619 | 0.06275  | -0.02397 | 0.60537 | -0.11467 | 0.01315  | -0.23666 |
| -0.06189 | 0.18186 | -0.15639 | 0.0007   | -0.08916 | 0.05418 | -0.15987 | 0.00052  | -0.30454 |
| 0.008385 | 0.85659 | 0.050445 | 0.27664  | 0.018856 | 0.68443 | 0.044714 | 0.33496  | 0.099412 |
| -0.03899 | 0.40056 | 0.076474 | 0.09882  | 0.008327 | 0.85757 | 0.111797 | 0.01565  | 0.185495 |
| 0.053013 | 0.25289 | 0.21885  | 1.80E-06 | 0.108344 | 0.01918 | 0.227467 | 6.78E-07 | 0.425466 |
| 0.144528 | 0.00174 | 0.263524 | 7.38E-09 | 0.153995 | 0.00084 | 0.28173  | 5.72E-10 | 0.399445 |
| -0.01844 | 0.69107 | 0.173526 | 0.00016  | 0.038006 | 0.41255 | 0.22473  | 9.28E-07 | 0.418461 |
| -0.00301 | 0.94828 | 0.171025 | 0.0002   | 0.092076 | 0.04674 | 0.156192 | 0.00071  | 0.369669 |
| -0.00384 | 0.93411 | 0.163012 | 0.0004   | 0.061822 | 0.18231 | 0.174266 | 0.00015  | 0.408473 |
| 0.077188 | 0.0957  | -0.06551 | 0.1575   | 0.026135 | 0.57319 | -0.11234 | 0.01514  | -0.15894 |
| -0.04326 | 0.35097 | -0.18847 | 4.15E-05 | -0.09792 | 0.03439 | -0.21157 | 3.99E-06 | -0.331   |
| -0.027   | 0.56058 | 0.144866 | 0.0017   | 0.041405 | 0.37199 | 0.177235 | 0.00012  | 0.34548  |
| 0.028083 | 0.54494 | 0.190199 | 3.52E-05 | 0.112296 | 0.01519 | 0.186052 | 5.23E-05 | 0.494528 |
| 0.002538 | 0.95639 | 0.194046 | 2.42E-05 | 0.081554 | 0.0783  | 0.223096 | 1.12E-06 | 0.435541 |
| 0.034118 | 0.46201 | -0.17391 | 0.00016  | -0.03495 | 0.45119 | -0.22495 | 9.05E-07 | -0.29875 |
| -0.01542 | 0.73963 | 0.029693 | 0.52211  | 0.0086   | 0.85294 | 0.026195 | 0.5723   | 0.161161 |
| -0.01021 | 0.82586 | 0.09341  | 0.04363  | 0.038919 | 0.40141 | 0.093141 | 0.04424  | 0.216459 |
| 0.06164  | 0.1836  | 0.15351  | 0.00087  | 0.089452 | 0.05339 | 0.14928  | 0.00121  | 0.323973 |
| -0.04146 | 0.37141 | 0.036394 | 0.43266  | -0.00576 | 0.90115 | 0.043869 | 0.34418  | 0.114935 |
| 0.000737 | 0.98733 | -0.14141 | 0.00219  | -0.07335 | 0.11341 | -0.16266 | 0.00042  | -0.31234 |
| 0.043726 | 0.34576 | -0.08045 | 0.08246  | 0.022693 | 0.62474 | -0.15356 | 0.00087  | -0.1757  |
| 0.07161  | 0.12226 | 0.220117 | 1.56E-06 | 0.124154 | 0.00723 | 0.225665 | 8.34E-07 | 0.43169  |
| -0.02599 | 0.57533 | 0.145823 | 0.00158  | 0.057994 | 0.21095 | 0.151348 | 0.00104  | 0.349735 |
| 0.019826 | 0.66913 | 0.146401 | 0.00151  | 0.071635 | 0.12214 | 0.160858 | 0.00048  | 0.369619 |
| -0.03425 | 0.46028 | 0.101847 | 0.02775  | 0.003605 | 0.93808 | 0.132171 | 0.00422  | 0.288996 |
| 0.018397 | 0.69172 | 0.16541  | 0.00033  | 0.072685 | 0.11674 | 0.175627 | 0.00014  | 0.42843  |

|          |         |          |          |          |          |          |          |          |
|----------|---------|----------|----------|----------|----------|----------|----------|----------|
| 0.077212 | 0.0956  | 0.118474 | 0.01039  | 0.060365 | 0.19285  | 0.11443  | 0.01335  | 0.271083 |
| 0.006051 | 0.89625 | 0.135831 | 0.00327  | 0.04293  | 0.35462  | 0.176288 | 0.00013  | 0.265166 |
| 0.011573 | 0.80303 | 0.211468 | 4.03E-06 | 0.096368 | 0.03736  | 0.230611 | 4.70E-07 | 0.493254 |
| -0.03829 | 0.40902 | 0.068067 | 0.14191  | 0.007646 | 0.8691   | 0.088193 | 0.05685  | 0.200705 |
| -0.01625 | 0.7261  | 0.097813 | 0.03459  | 0.052357 | 0.25882  | 0.084486 | 0.06813  | 0.14564  |
| -0.0378  | 0.41511 | 0.051386 | 0.26777  | 0.027773 | 0.54938  | 0.051167 | 0.26981  | 0.186388 |
| 0.088507 | 0.05597 | 0.210783 | 4.34E-06 | 0.102258 | 0.02713  | 0.236661 | 2.29E-07 | 0.474705 |
| 0.101951 | 0.02759 | 0.227077 | 7.09E-07 | 0.120225 | 0.00931  | 0.219877 | 1.61E-06 | 0.483587 |
| 0.063135 | 0.17318 | 0.206866 | 6.57E-06 | 0.105752 | 0.02228  | 0.210039 | 4.70E-06 | 0.402223 |
| -0.02152 | 0.64273 | 0.153875 | 0.00085  | 0.046653 | 0.3144   | 0.16855  | 0.00025  | 0.333201 |
| 0.0445   | 0.33728 | 0.248177 | 5.51E-08 | 0.122221 | 0.00819  | 0.25855  | 1.44E-08 | 0.487905 |
| -0.01849 | 0.69027 | 0.145805 | 0.00158  | 0.071693 | 0.12183  | 0.145326 | 0.00164  | 0.352841 |
| 0.023121 | 0.61822 | 0.077328 | 0.0951   | 0.059262 | 0.20112  | 0.065251 | 0.15919  | 0.212593 |
| 0.069124 | 0.13582 | 0.229426 | 5.40E-07 | 0.130925 | 0.0046   | 0.252741 | 3.07E-08 | 0.366355 |
| -0.00563 | 0.90343 | -0.19369 | 2.50E-05 | -0.07204 | 0.12002  | -0.21947 | 1.68E-06 | -0.35526 |
| 0.009608 | 0.83594 | 0.215755 | 2.53E-06 | 0.093295 | 0.04389  | 0.233101 | 3.50E-07 | 0.47342  |
| 0.022712 | 0.62444 | 0.193417 | 2.57E-05 | 0.083736 | 0.07063  | 0.225762 | 8.25E-07 | 0.421887 |
| -0.08928 | 0.05385 | -0.02128 | 0.64639  | -0.04896 | 0.29104  | -0.01317 | 0.77651  | 0.116871 |
| 0.033976 | 0.46389 | 0.138404 | 0.00272  | 0.087168 | 0.0598   | 0.141824 | 0.00213  | 0.107288 |
| -0.01465 | 0.75219 | 0.061903 | 0.18174  | 0.005732 | 0.90168  | 0.07725  | 0.09543  | 0.172311 |
| -0.03851 | 0.4064  | 0.054713 | 0.23797  | -0.0044  | 0.92453  | 0.072238 | 0.11901  | 0.208277 |
| 0.045897 | 0.32232 | 0.15977  | 0.00053  | 0.129447 | 0.00508  | 0.127578 | 0.00576  | 0.2947   |
| -0.07388 | 0.11083 | 0.009758 | 0.83342  | -0.04728 | 0.30791  | 0.033768 | 0.46663  | 0.09117  |
| -0.00619 | 0.89385 | 0.118914 | 0.01011  | 0.018787 | 0.68552  | 0.155914 | 0.00072  | 0.326457 |
| 0.018492 | 0.6902  | -0.17402 | 0.00016  | -0.04445 | 0.33781  | -0.2087  | 5.41E-06 | -0.39141 |
| 0.051094 | 0.2705  | 0.22378  | 1.03E-06 | 0.110677 | 0.01672  | 0.238977 | 1.73E-07 | 0.506752 |
| 0.04946  | 0.28614 | 0.198609 | 1.53E-05 | 0.116884 | 0.01148  | 0.200705 | 1.24E-05 | 0.375031 |
| 0.051965 | 0.26241 | 0.191556 | 3.08E-05 | 0.106887 | 0.02087  | 0.207359 | 6.24E-06 | 0.29978  |
| -0.10126 | 0.02867 | -0.31337 | 4.24E-12 | -0.18751 | 4.55E-05 | -0.31717 | 2.26E-12 | -0.43488 |
| 0.051944 | 0.2626  | 0.248437 | 5.33E-08 | 0.121319 | 0.00868  | 0.275349 | 1.43E-09 | 0.473719 |
| 0.021675 | 0.64035 | -0.10059 | 0.02975  | -0.03585 | 0.43954  | -0.10143 | 0.0284   | -0.16577 |
| 0.025475 | 0.58291 | 0.119736 | 0.0096   | 0.050065 | 0.28028  | 0.147906 | 0.00135  | 0.31608  |
| -0.03016 | 0.51556 | 0.106694 | 0.02111  | 0.048469 | 0.29591  | 0.108655 | 0.01884  | 0.245211 |
| 0.092645 | 0.04539 | 0.243936 | 9.39E-08 | 0.163193 | 0.0004   | 0.233888 | 3.19E-07 | 0.356688 |
| -0.00961 | 0.83593 | 0.13357  | 0.00383  | 0.05622  | 0.22527  | 0.151616 | 0.00101  | 0.290723 |
| 0.04923  | 0.28839 | 0.177478 | 0.00012  | 0.076038 | 0.10076  | 0.185246 | 5.64E-05 | 0.308236 |
| 0.047572 | 0.30496 | 0.061853 | 0.18209  | 0.024691 | 0.59457  | 0.064171 | 0.16622  | 0.205377 |
| 0.050078 | 0.28015 | 0.186011 | 5.25E-05 | 0.078152 | 0.09162  | 0.213031 | 3.41E-06 | 0.365835 |
| -0.1486  | 0.00128 | -0.24865 | 5.19E-08 | -0.15596 | 0.00072  | -0.26117 | 1.01E-08 | -0.43161 |
| -0.01811 | 0.69628 | 0.176152 | 0.00013  | 0.058296 | 0.20858  | 0.213999 | 3.07E-06 | 0.363615 |
| -0.07993 | 0.08445 | -0.24665 | 6.68E-08 | -0.13116 | 0.00453  | -0.26763 | 4.22E-09 | -0.46931 |
| -0.05921 | 0.2015  | 0.056174 | 0.22566  | -0.01193 | 0.79705  | 0.081185 | 0.07967  | 0.221406 |
| -0.04437 | 0.33868 | -0.24441 | 8.85E-08 | -0.12087 | 0.00894  | -0.26155 | 9.63E-09 | -0.44032 |
| 0.034214 | 0.46075 | 0.263819 | 7.09E-09 | 0.106501 | 0.02134  | 0.308232 | 9.79E-12 | 0.536648 |
| -0.01605 | 0.72932 | 0.153782 | 0.00086  | 0.068492 | 0.13944  | 0.163977 | 0.00037  | 0.354978 |

|          |         |          |          |          |         |          |          |          |
|----------|---------|----------|----------|----------|---------|----------|----------|----------|
| 0.065895 | 0.15511 | 0.222704 | 1.17E-06 | 0.093825 | 0.0427  | 0.258894 | 1.37E-08 | 0.452343 |
| -0.02948 | 0.52517 | 0.179172 | 9.90E-05 | 0.064534 | 0.16383 | 0.213719 | 3.16E-06 | 0.296995 |
| -0.03216 | 0.4881  | -0.13889 | 0.00263  | -0.11802 | 0.0107  | -0.10949 | 0.01794  | -0.31718 |
| 0.025224 | 0.58663 | 0.101951 | 0.02759  | 0.031314 | 0.49964 | 0.126024 | 0.00639  | 0.14356  |
| -0.00926 | 0.84188 | -0.1907  | 3.35E-05 | -0.09233 | 0.04614 | -0.2011  | 1.19E-05 | -0.38445 |
| 0.061516 | 0.18448 | -0.14012 | 0.00241  | -0.01542 | 0.7396  | -0.20839 | 5.59E-06 | -0.35702 |
| 0.00694  | 0.8811  | 0.126371 | 0.00625  | 0.035472 | 0.44442 | 0.15271  | 0.00093  | 0.295489 |
| -0.07942 | 0.08644 | 0.105797 | 0.02222  | 0.011324 | 0.80718 | 0.127599 | 0.00576  | 0.248046 |
| 0.047789 | 0.30275 | 0.143992 | 0.00181  | 0.072086 | 0.11979 | 0.145757 | 0.00159  | 0.286897 |
| -0.0861  | 0.06302 | 0.001207 | 0.97924  | -0.02593 | 0.57625 | 0.012333 | 0.79039  | 0.05377  |
| -0.02447 | 0.59784 | -0.12739 | 0.00584  | -0.09259 | 0.04551 | -0.1299  | 0.00493  | -0.23596 |
| -0.03866 | 0.40456 | -0.10212 | 0.02733  | -0.04724 | 0.30832 | -0.09752 | 0.03513  | -0.21241 |
| 0.050421 | 0.27687 | 0.156062 | 0.00071  | 0.074348 | 0.10858 | 0.173291 | 0.00017  | 0.282166 |
| 0.004288 | 0.92637 | 0.202732 | 1.01E-05 | 0.059008 | 0.20307 | 0.25234  | 3.24E-08 | 0.518497 |
| -0.02586 | 0.57722 | 0.126896 | 0.00603  | 0.019195 | 0.67907 | 0.179417 | 9.68E-05 | 0.261882 |
| -0.0027  | 0.95357 | -0.17247 | 0.00018  | -0.09231 | 0.04617 | -0.18384 | 6.44E-05 | -0.36879 |
| 0.021661 | 0.64057 | 0.162279 | 0.00043  | 0.072125 | 0.11959 | 0.16283  | 0.00041  | 0.350452 |
| 0.042703 | 0.35718 | 0.131196 | 0.00451  | 0.061201 | 0.18675 | 0.155119 | 0.00077  | 0.197766 |
| 0.007704 | 0.86813 | 0.068567 | 0.139    | 0.013741 | 0.7671  | 0.061247 | 0.18641  | 0.227561 |
| -0.01714 | 0.71185 | 0.143142 | 0.00193  | 0.066562 | 0.15096 | 0.157494 | 0.00064  | 0.332577 |
| -0.01568 | 0.73547 | -0.1794  | 9.69E-05 | -0.0785  | 0.09017 | -0.2166  | 2.31E-06 | -0.34176 |
| 0.01124  | 0.80858 | 0.140183 | 0.0024   | 0.06005  | 0.19519 | 0.14806  | 0.00133  | 0.323997 |
| 0.163909 | 0.00038 | 0.218705 | 1.83E-06 | 0.178336 | 0.00011 | 0.183662 | 6.54E-05 | 0.472056 |
| -0.08382 | 0.07033 | -0.1398  | 0.00246  | -0.07609 | 0.10051 | -0.15503 | 0.00077  | -0.22604 |
| -0.05589 | 0.22801 | 0.038744 | 0.40353  | -0.00545 | 0.90654 | 0.03885  | 0.40224  | 0.189165 |
| 0.007857 | 0.86553 | -0.17227 | 0.00018  | -0.09514 | 0.03987 | -0.19046 | 3.43E-05 | -0.35903 |
| 0.076686 | 0.09789 | 0.174774 | 0.00015  | 0.10804  | 0.01953 | 0.180547 | 8.73E-05 | 0.334179 |
| -0.00678 | 0.88386 | 0.144115 | 0.00179  | 0.066118 | 0.15371 | 0.153386 | 0.00088  | 0.382339 |
| 0.050714 | 0.27409 | -0.16013 | 0.00051  | -0.04503 | 0.33151 | -0.1974  | 1.73E-05 | -0.38148 |
| -0.05009 | 0.27999 | 0.026099 | 0.57371  | -0.00724 | 0.87608 | 0.034187 | 0.4611   | 0.17643  |
| -0.05283 | 0.25451 | -0.23718 | 2.15E-07 | -0.11784 | 0.01081 | -0.25851 | 1.44E-08 | -0.38117 |
| 0.052337 | 0.259   | -0.09415 | 0.04198  | -0.00197 | 0.96611 | -0.14341 | 0.00189  | -0.25814 |
| -0.01702 | 0.71376 | 0.177277 | 0.00012  | 0.061639 | 0.18361 | 0.201062 | 1.20E-05 | 0.444854 |
| -0.03333 | 0.47237 | 0.112554 | 0.01495  | 0.036487 | 0.4315  | 0.142657 | 0.002    | 0.274196 |
| -0.04026 | 0.38535 | 0.146362 | 0.00152  | 0.031891 | 0.49176 | 0.175963 | 0.00013  | 0.346976 |
| 0.001792 | 0.96919 | 0.15838  | 0.00059  | 0.066919 | 0.14878 | 0.168811 | 0.00025  | 0.382687 |
| 0.022155 | 0.63297 | 0.215906 | 2.49E-06 | 0.091749 | 0.04753 | 0.228628 | 5.92E-07 | 0.398144 |
| 0.071816 | 0.12119 | 0.232738 | 3.66E-07 | 0.170401 | 0.00022 | 0.195467 | 2.10E-05 | 0.420542 |
| 0.021931 | 0.63641 | 0.150484 | 0.00111  | 0.076606 | 0.09823 | 0.153123 | 0.0009   | 0.32535  |
| -0.08675 | 0.06106 | -0.25654 | 1.87E-08 | -0.14988 | 0.00116 | -0.26929 | 3.35E-09 | -0.40283 |
| 0.03063  | 0.50906 | 0.244868 | 8.36E-08 | 0.114188 | 0.01355 | 0.263259 | 7.65E-09 | 0.475261 |
| -0.01623 | 0.72654 | 0.133557 | 0.00384  | 0.026329 | 0.57034 | 0.170603 | 0.00021  | 0.338789 |
| -0.04706 | 0.31019 | 0.059096 | 0.20239  | 0.019493 | 0.67437 | 0.04219  | 0.36299  | 0.128918 |
| 0.020685 | 0.65571 | 0.089778 | 0.05252  | 0.042415 | 0.36043 | 0.105295 | 0.02286  | 0.219984 |
| 0.109926 | 0.01748 | 0.163229 | 0.0004   | 0.085309 | 0.06548 | 0.189166 | 3.89E-05 | 0.321009 |

|          |         |          |          |          |          |          |          |          |
|----------|---------|----------|----------|----------|----------|----------|----------|----------|
| -0.01236 | 0.78995 | 0.195572 | 2.08E-05 | 0.060854 | 0.18927  | 0.232837 | 3.61E-07 | 0.429013 |
| 0.000107 | 0.99816 | 0.072296 | 0.11872  | 0.048916 | 0.29148  | 0.070716 | 0.12701  | 0.274929 |
| 0.12688  | 0.00604 | -0.07146 | 0.12303  | 0.045851 | 0.32281  | -0.13086 | 0.00462  | -0.18494 |
| 0.001297 | 0.9777  | 0.123745 | 0.00742  | 0.052327 | 0.25909  | 0.119023 | 0.01004  | 0.326749 |
| 0.035943 | 0.4384  | -0.14785 | 0.00135  | -0.066   | 0.15446  | -0.16146 | 0.00046  | -0.31931 |
| -0.00934 | 0.84051 | 0.190065 | 3.56E-05 | 0.064055 | 0.16699  | 0.22493  | 9.07E-07 | 0.453213 |
| 0.007275 | 0.8754  | 0.127804 | 0.00568  | 0.070318 | 0.12917  | 0.117634 | 0.01096  | 0.283889 |
| 0.052524 | 0.2573  | -0.15744 | 0.00064  | -0.02191 | 0.63669  | -0.20572 | 7.40E-06 | -0.35331 |
| 0.152611 | 0.00094 | 0.135226 | 0.00341  | 0.116612 | 0.01167  | 0.118234 | 0.01055  | 0.344121 |
| 0.094217 | 0.04184 | 0.240372 | 1.46E-07 | 0.127891 | 0.00565  | 0.255124 | 2.25E-08 | 0.477369 |
| -0.1153  | 0.01266 | -0.25095 | 3.87E-08 | -0.13738 | 0.00293  | -0.26358 | 7.33E-09 | -0.50198 |
| 0.018827 | 0.6849  | 0.067944 | 0.14264  | 0.023855 | 0.60711  | 0.075738 | 0.10212  | 0.201381 |
| 0.014399 | 0.7563  | -0.22261 | 1.18E-06 | -0.07958 | 0.08583  | -0.26548 | 5.66E-09 | -0.45119 |
| -0.05491 | 0.23627 | -0.14519 | 0.00166  | -0.04709 | 0.30985  | -0.18484 | 5.86E-05 | -0.33561 |
| 0.107494 | 0.02015 | 0.228905 | 5.73E-07 | 0.14288  | 0.00197  | 0.224258 | 9.79E-07 | 0.451608 |
| 0.090499 | 0.05064 | 0.140526 | 0.00234  | 0.10539  | 0.02274  | 0.117572 | 0.011    | 0.370917 |
| 0.010469 | 0.82149 | 0.162995 | 0.00041  | 0.068824 | 0.13752  | 0.179894 | 9.27E-05 | 0.43539  |
| -0.01179 | 0.79944 | 0.146094 | 0.00155  | 0.079793 | 0.08499  | 0.13614  | 0.0032   | 0.355726 |
| -0.03218 | 0.4878  | 0.130797 | 0.00464  | 0.038285 | 0.40912  | 0.158207 | 0.0006   | 0.291078 |
| -0.0249  | 0.5915  | 0.125269 | 0.00672  | 0.034722 | 0.45412  | 0.14791  | 0.00135  | 0.303385 |
| 0.087104 | 0.05999 | 0.204628 | 8.29E-06 | 0.154925 | 0.00078  | 0.162797 | 0.00041  | 0.327025 |
| 0.014467 | 0.75518 | 0.088992 | 0.05463  | 0.040233 | 0.38568  | 0.088884 | 0.05493  | 0.259222 |
| -0.1462  | 0.00154 | -0.25686 | 1.80E-08 | -0.15539 | 0.00075  | -0.27725 | 1.09E-09 | -0.44125 |
| -0.04325 | 0.35105 | 0.072477 | 0.11779  | 0.004092 | 0.92973  | 0.088842 | 0.05504  | 0.187193 |
| 0.0976   | 0.03498 | -0.07867 | 0.08947  | 0.019704 | 0.67104  | -0.13829 | 0.00275  | -0.21294 |
| 0.027691 | 0.55056 | 0.111016 | 0.01639  | 0.071789 | 0.12133  | 0.115321 | 0.01264  | 0.279314 |
| 0.028433 | 0.53992 | 0.242746 | 1.09E-07 | 0.1312   | 0.00451  | 0.24717  | 6.26E-08 | 0.494749 |
| 0.079325 | 0.08683 | -0.17    | 0.00022  | 0.006778 | 0.88386  | -0.26097 | 1.04E-08 | -0.3646  |
| 0.035529 | 0.44369 | -0.13641 | 0.00314  | -0.03849 | 0.40659  | -0.16811 | 0.00026  | -0.32664 |
| 0.138567 | 0.00269 | 0.336337 | 8.17E-14 | 0.23592  | 2.50E-07 | 0.307846 | 1.04E-11 | 0.38287  |
| -0.07177 | 0.12141 | 0.080997 | 0.08037  | 0.018497 | 0.69013  | 0.07918  | 0.08742  | 0.335899 |
| -0.00052 | 0.99107 | 0.223368 | 1.08E-06 | 0.117982 | 0.01072  | 0.230692 | 4.65E-07 | 0.437389 |
| -0.01852 | 0.68973 | 0.103224 | 0.0257   | 0.039972 | 0.38878  | 0.115726 | 0.01233  | 0.256239 |
| -0.04369 | 0.34621 | 0.114911 | 0.01296  | 0.016368 | 0.72424  | 0.148082 | 0.00133  | 0.372463 |
| 0.051889 | 0.26311 | 0.204425 | 8.47E-06 | 0.105629 | 0.02243  | 0.20846  | 5.55E-06 | 0.486519 |
| 0.007877 | 0.86518 | 0.227286 | 6.92E-07 | 0.094308 | 0.04164  | 0.259399 | 1.28E-08 | 0.447549 |
| 0.06137  | 0.18553 | -0.09904 | 0.03236  | -0.0386  | 0.40534  | -0.10046 | 0.02995  | -0.30086 |
| -0.02125 | 0.64696 | 0.148511 | 0.00129  | 0.048499 | 0.29562  | 0.158771 | 0.00057  | 0.279681 |
| 0.011624 | 0.80217 | -0.0867  | 0.06119  | -0.01536 | 0.74061  | -0.11824 | 0.01055  | -0.21664 |
| 0.077092 | 0.09612 | 0.260744 | 1.07E-08 | 0.153738 | 0.00086  | 0.270234 | 2.94E-09 | 0.528141 |
| -0.0456  | 0.32543 | 0.130809 | 0.00463  | 0.023234 | 0.61651  | 0.158909 | 0.00057  | 0.359207 |
| 0.036637 | 0.4296  | 0.212855 | 3.47E-06 | 0.102613 | 0.0266   | 0.222994 | 1.13E-06 | 0.472108 |
| 0.109666 | 0.01775 | 0.10572  | 0.02232  | 0.085986 | 0.06336  | 0.075627 | 0.10262  | 0.200371 |
| -0.04858 | 0.29476 | -0.23278 | 3.64E-07 | -0.12185 | 0.00839  | -0.25342 | 2.81E-08 | -0.46585 |
| -0.02682 | 0.56321 | -0.22469 | 9.32E-07 | -0.11877 | 0.0102   | -0.2345  | 2.96E-07 | -0.43676 |

|          |          |          |          |          |         |          |          |          |
|----------|----------|----------|----------|----------|---------|----------|----------|----------|
| 0.00865  | 0.8521   | -0.16193 | 0.00044  | -0.05003 | 0.28059 | -0.20412 | 8.74E-06 | -0.29825 |
| 0.003427 | 0.94113  | 0.181867 | 7.73E-05 | 0.078805 | 0.08893 | 0.20393  | 8.92E-06 | 0.428497 |
| -0.01102 | 0.81233  | 0.08866  | 0.05554  | 0.033187 | 0.47433 | 0.074061 | 0.10996  | 0.201806 |
| 0.000904 | 0.98446  | 0.239098 | 1.70E-07 | 0.109836 | 0.01758 | 0.25037  | 4.17E-08 | 0.48358  |
| 0.004322 | 0.92579  | 0.142843 | 0.00197  | 0.050047 | 0.28046 | 0.160681 | 0.00049  | 0.396509 |
| 0.004349 | 0.92532  | 0.145109 | 0.00167  | 0.069518 | 0.13359 | 0.144378 | 0.00176  | 0.366575 |
| 0.02855  | 0.53826  | 0.21368  | 3.17E-06 | 0.101304 | 0.0286  | 0.225853 | 8.16E-07 | 0.393087 |
| 0.091194 | 0.04889  | 0.114178 | 0.01355  | 0.091434 | 0.0483  | 0.083843 | 0.07027  | 0.206101 |
| -0.00915 | 0.84366  | 0.167868 | 0.00027  | 0.045498 | 0.32655 | 0.19866  | 1.53E-05 | 0.350413 |
| -0.05624 | 0.22514  | 0.075194 | 0.10461  | 0.007464 | 0.87219 | 0.09249  | 0.04576  | 0.289541 |
| 0.08766  | 0.05837  | 0.214698 | 2.84E-06 | 0.137052 | 0.003   | 0.195355 | 2.12E-05 | 0.475345 |
| 0.022779 | 0.62343  | 0.143079 | 0.00194  | 0.074187 | 0.10935 | 0.142327 | 0.00205  | 0.314075 |
| -0.01689 | 0.71581  | 0.142062 | 0.00209  | 0.075123 | 0.10494 | 0.122018 | 0.0083   | 0.337604 |
| -0.05062 | 0.27499  | 0.072531 | 0.11752  | -0.0039  | 0.93293 | 0.089095 | 0.05435  | 0.248053 |
| 0.03705  | 0.42442  | 0.182369 | 7.38E-05 | 0.092249 | 0.04632 | 0.18126  | 8.17E-05 | 0.408762 |
| 0.077192 | 0.09569  | 0.130601 | 0.0047   | 0.0637   | 0.16936 | 0.151191 | 0.00105  | 0.256532 |
| 0.171919 | 0.00019  | 0.227916 | 6.43E-07 | 0.160271 | 0.00051 | 0.215692 | 2.55E-06 | 0.350235 |
| -0.17913 | 9.94E-05 | 0.000686 | 0.9882   | -0.0956  | 0.03892 | 0.074377 | 0.10845  | 0.122662 |
| 0.072565 | 0.11735  | -0.00112 | 0.98082  | 0.059961 | 0.19585 | -0.04338 | 0.34965  | -0.11688 |
| 0.085298 | 0.06551  | 0.297793 | 5.11E-11 | 0.161348 | 0.00046 | 0.302105 | 2.60E-11 | 0.546917 |
| -0.02168 | 0.64022  | -0.14187 | 0.00212  | -0.08041 | 0.08261 | -0.13891 | 0.00263  | -0.3141  |
| 0.044066 | 0.34202  | 0.190548 | 3.40E-05 | 0.144246 | 0.00178 | 0.168993 | 0.00024  | 0.387137 |
| 0.062497 | 0.17757  | 0.249987 | 4.38E-08 | 0.12584  | 0.00647 | 0.271056 | 2.62E-09 | 0.570764 |
| 0.021228 | 0.64727  | 0.228928 | 5.72E-07 | 0.107181 | 0.02052 | 0.24042  | 1.45E-07 | 0.484516 |
| 0.044877 | 0.3332   | 0.211464 | 4.03E-06 | 0.076115 | 0.10042 | 0.242129 | 1.17E-07 | 0.459649 |
| 0.035161 | 0.44844  | -0.09501 | 0.04013  | -0.01577 | 0.73397 | -0.12474 | 0.00695  | -0.22794 |
| -0.01946 | 0.67496  | 0.101788 | 0.02784  | 0.037923 | 0.41358 | 0.121203 | 0.00874  | 0.30346  |
| -0.01759 | 0.70465  | 0.182741 | 7.13E-05 | 0.055477 | 0.23147 | 0.242595 | 1.11E-07 | 0.346743 |
| -0.08409 | 0.06943  | 0.126949 | 0.00601  | 0.012965 | 0.77991 | 0.162072 | 0.00044  | 0.345432 |
| 0.073458 | 0.11289  | 0.254276 | 2.52E-08 | 0.146148 | 0.00154 | 0.262629 | 8.33E-09 | 0.448039 |
| 0.009831 | 0.8322   | 0.117353 | 0.01115  | 0.067269 | 0.14666 | 0.112035 | 0.01543  | 0.252307 |
| 0.02998  | 0.5181   | 0.17419  | 0.00015  | 0.069067 | 0.13614 | 0.221429 | 1.35E-06 | 0.322772 |
| 0.060141 | 0.19451  | 0.10263  | 0.02657  | 0.070701 | 0.12709 | 0.103338 | 0.02554  | 0.209939 |
| -0.06013 | 0.19462  | 0.067187 | 0.14715  | -0.01197 | 0.79647 | 0.093955 | 0.04241  | 0.242509 |
| -0.04135 | 0.37268  | 0.093718 | 0.04294  | 0.004309 | 0.926   | 0.115295 | 0.01266  | 0.307472 |
| 0.105187 | 0.02301  | 0.221464 | 1.34E-06 | 0.141448 | 0.00218 | 0.22109  | 1.40E-06 | 0.405429 |
| 0.06546  | 0.15785  | 0.222219 | 1.23E-06 | 0.103042 | 0.02597 | 0.246594 | 6.73E-08 | 0.485264 |
| -0.01678 | 0.71766  | 0.111764 | 0.01568  | 0.029487 | 0.52501 | 0.126094 | 0.00636  | 0.346934 |
| 0.058975 | 0.20332  | 0.167277 | 0.00028  | 0.067278 | 0.1466  | 0.182263 | 7.45E-05 | 0.372495 |
| -0.00703 | 0.87961  | 0.073965 | 0.11042  | 0.039422 | 0.39535 | 0.059284 | 0.20096  | 0.297176 |
| -0.05021 | 0.2789   | 0.140206 | 0.00239  | 0.039549 | 0.39382 | 0.166812 | 0.00029  | 0.349239 |
| -0.04358 | 0.34733  | 0.104892 | 0.02339  | 0.014519 | 0.75434 | 0.124935 | 0.00687  | 0.298406 |
| 0.010344 | 0.82358  | 0.116896 | 0.01147  | 0.048704 | 0.29358 | 0.110217 | 0.01719  | 0.272633 |
| 0.043468 | 0.34862  | 0.152142 | 0.00097  | 0.102272 | 0.02711 | 0.118848 | 0.01015  | 0.3043   |
| -0.00775 | 0.8674   | 0.058301 | 0.20854  | -0.0054  | 0.90727 | 0.070866 | 0.1262   | 0.429467 |

|          |          |          |          |          |          |          |          |          |
|----------|----------|----------|----------|----------|----------|----------|----------|----------|
| -0.02264 | 0.62552  | -0.17027 | 0.00022  | -0.10544 | 0.02268  | -0.15131 | 0.00104  | -0.36426 |
| 0.019527 | 0.67383  | -0.00955 | 0.83697  | -0.01715 | 0.71168  | -0.00323 | 0.94448  | 0.127263 |
| -0.00927 | 0.84164  | 0.165    | 0.00034  | 0.076375 | 0.09926  | 0.156553 | 0.00069  | 0.418974 |
| 0.024895 | 0.59152  | 0.13911  | 0.00259  | 0.059994 | 0.19561  | 0.14517  | 0.00166  | 0.358294 |
| -0.07693 | 0.0968   | 0.051091 | 0.27052  | -0.0271  | 0.55908  | 0.080347 | 0.08284  | 0.270874 |
| 0.106495 | 0.02135  | 0.233779 | 3.23E-07 | 0.143902 | 0.00182  | 0.224303 | 9.74E-07 | 0.358244 |
| 0.01635  | 0.72454  | 0.240182 | 1.49E-07 | 0.096463 | 0.03717  | 0.268004 | 4.00E-09 | 0.5293   |
| 0.080248 | 0.08322  | 0.290796 | 1.49E-10 | 0.154941 | 0.00078  | 0.29342  | 1.00E-10 | 0.557901 |
| -0.04549 | 0.32667  | 0.07617  | 0.10017  | -0.01387 | 0.76495  | 0.106773 | 0.02101  | 0.272781 |
| 0.041765 | 0.36784  | 0.121038 | 0.00884  | 0.073309 | 0.11363  | 0.116474 | 0.01177  | 0.287515 |
| -0.03972 | 0.39175  | 0.046867 | 0.31218  | -0.01838 | 0.69203  | 0.079694 | 0.08537  | 0.166053 |
| -0.00933 | 0.84057  | 0.05178  | 0.26411  | 0.017039 | 0.71343  | 0.048617 | 0.29444  | 0.225566 |
| -0.02107 | 0.6497   | 0.122934 | 0.00782  | 0.058106 | 0.21007  | 0.129287 | 0.00514  | 0.283529 |
| 0.025361 | 0.58461  | 0.204912 | 8.05E-06 | 0.08271  | 0.07415  | 0.234215 | 3.07E-07 | 0.43713  |
| 0.310763 | 6.49E-12 | 0.241028 | 1.34E-07 | 0.231417 | 4.27E-07 | 0.17244  | 0.00018  | 0.322547 |
| -0.04583 | 0.32298  | 0.117935 | 0.01075  | 0.03676  | 0.42805  | 0.124909 | 0.00688  | 0.346257 |
| 0.046645 | 0.31449  | 0.207814 | 5.94E-06 | 0.117727 | 0.01089  | 0.202566 | 1.03E-05 | 0.430925 |
| -0.08772 | 0.05819  | 0.019768 | 0.67004  | -0.03722 | 0.42223  | 0.040846 | 0.37848  | 0.14524  |
| -0.06434 | 0.16511  | -0.1981  | 1.62E-05 | -0.10818 | 0.01937  | -0.22323 | 1.10E-06 | -0.33014 |
| 0.033964 | 0.46404  | 0.177956 | 0.00011  | 0.087909 | 0.05766  | 0.173674 | 0.00016  | 0.395311 |
| 0.013686 | 0.76802  | 0.142054 | 0.00209  | 0.068669 | 0.13841  | 0.136759 | 0.00306  | 0.320577 |
| 0.098165 | 0.03394  | 0.20728  | 6.29E-06 | 0.113773 | 0.01389  | 0.222377 | 1.21E-06 | 0.439403 |
| 0.150369 | 0.00112  | 0.22787  | 6.47E-07 | 0.135814 | 0.00327  | 0.22945  | 5.38E-07 | 0.437217 |
| -0.00217 | 0.96264  | 0.186261 | 5.13E-05 | 0.075007 | 0.10548  | 0.20192  | 1.10E-05 | 0.45275  |
| -0.09287 | 0.04487  | -0.25306 | 2.95E-08 | -0.1547  | 0.0008   | -0.26345 | 7.45E-09 | -0.4071  |
| 0.140615 | 0.00232  | 0.203278 | 9.54E-06 | 0.190495 | 3.42E-05 | 0.136216 | 0.00318  | 0.303934 |
| 0.009536 | 0.83716  | 0.120597 | 0.00909  | 0.062835 | 0.17523  | 0.121713 | 0.00846  | 0.316129 |
| 0.057626 | 0.21387  | 0.252578 | 3.14E-08 | 0.126923 | 0.00602  | 0.271873 | 2.34E-09 | 0.475229 |
| 0.014919 | 0.74778  | 0.086568 | 0.06159  | 0.047222 | 0.30854  | 0.080426 | 0.08253  | 0.230828 |
| 0.117617 | 0.01097  | 0.305473 | 1.52E-11 | 0.155938 | 0.00072  | 0.337898 | 6.18E-14 | 0.49969  |
| -0.01699 | 0.71417  | 0.09314  | 0.04425  | 0.014011 | 0.76266  | 0.121477 | 0.00859  | 0.279458 |
| 0.003913 | 0.93279  | 0.139298 | 0.00255  | 0.056166 | 0.22572  | 0.149982 | 0.00115  | 0.273116 |
| 0.062984 | 0.17421  | 0.200017 | 1.33E-05 | 0.116008 | 0.01212  | 0.192896 | 2.71E-05 | 0.32937  |
| 0.023569 | 0.61143  | 0.176773 | 0.00012  | 0.097918 | 0.03439  | 0.180414 | 8.83E-05 | 0.339072 |
| 0.118675 | 0.01026  | 0.329569 | 2.71E-13 | 0.192839 | 2.72E-05 | 0.339582 | 4.55E-14 | 0.408229 |
| 0.02792  | 0.54727  | -0.17778 | 0.00011  | -0.06372 | 0.16925  | -0.21086 | 4.30E-06 | -0.44149 |
| -0.01175 | 0.80002  | 0.0747   | 0.10692  | 0.02517  | 0.58743  | 0.075673 | 0.10241  | 0.179099 |
| 0.083294 | 0.07213  | 0.290781 | 1.49E-10 | 0.148093 | 0.00133  | 0.304392 | 1.81E-11 | 0.580231 |
| 0.143406 | 0.00189  | -0.03909 | 0.39939  | 0.04252  | 0.35924  | -0.08286 | 0.07363  | -0.23428 |
| -0.02189 | 0.637    | -0.19408 | 2.41E-05 | -0.07411 | 0.10975  | -0.22912 | 5.59E-07 | -0.32829 |
| 0.019373 | 0.67626  | 0.1675   | 0.00028  | 0.102791 | 0.02633  | 0.141376 | 0.0022   | 0.30317  |
| 0.028658 | 0.53672  | 0.094927 | 0.04031  | 0.082254 | 0.07577  | 0.065843 | 0.15543  | 0.268392 |
| 0.016844 | 0.71656  | 0.172233 | 0.00018  | 0.108832 | 0.01864  | 0.163238 | 0.0004   | 0.275148 |
| 0.132357 | 0.00417  | 0.133842 | 0.00376  | 0.147104 | 0.00143  | 0.091635 | 0.0478   | 0.232424 |
| 0.081825 | 0.07731  | 0.129042 | 0.00522  | 0.083417 | 0.07171  | 0.122949 | 0.00782  | 0.202088 |

|          |          |          |          |          |          |          |          |          |
|----------|----------|----------|----------|----------|----------|----------|----------|----------|
| 0.020493 | 0.6587   | 0.055104 | 0.23463  | 0.041851 | 0.36685  | 0.028937 | 0.53277  | 0.133297 |
| -0.04831 | 0.29746  | 0.058213 | 0.20923  | 0.006336 | 0.89137  | 0.089467 | 0.05335  | 0.184332 |
| 0.001513 | 0.97399  | 0.076792 | 0.09742  | 0.067148 | 0.14739  | 0.046209 | 0.31904  | 0.205055 |
| 0.051562 | 0.26613  | 0.198895 | 1.49E-05 | 0.093127 | 0.04427  | 0.209613 | 4.91E-06 | 0.423701 |
| 0.022875 | 0.62197  | 0.202132 | 1.07E-05 | 0.118024 | 0.01069  | 0.195534 | 2.09E-05 | 0.465803 |
| 0.001676 | 0.97118  | 0.156324 | 0.0007   | 0.067108 | 0.14763  | 0.169709 | 0.00023  | 0.306374 |
| 0.091097 | 0.04913  | 0.185203 | 5.66E-05 | 0.127998 | 0.0056   | 0.175475 | 0.00014  | 0.335367 |
| 0.083342 | 0.07197  | 0.130848 | 0.00462  | 0.11646  | 0.01178  | 0.090253 | 0.05128  | 0.239622 |
| 0.055389 | 0.23222  | 0.132141 | 0.00423  | 0.108333 | 0.01919  | 0.096166 | 0.03776  | 0.233858 |
| 0.042801 | 0.35607  | 0.141485 | 0.00218  | 0.075284 | 0.1042   | 0.139568 | 0.0025   | 0.369823 |
| 0.054941 | 0.23602  | 0.209394 | 5.03E-06 | 0.11704  | 0.01137  | 0.215915 | 2.49E-06 | 0.385188 |
| 0.063306 | 0.17202  | 0.184974 | 5.79E-05 | 0.096658 | 0.03679  | 0.194737 | 2.26E-05 | 0.435695 |
| 0.048049 | 0.30013  | 0.223005 | 1.13E-06 | 0.131867 | 0.00431  | 0.213747 | 3.15E-06 | 0.457414 |
| 0.002056 | 0.96465  | 0.151211 | 0.00105  | 0.073955 | 0.11047  | 0.140874 | 0.00228  | 0.361676 |
| -0.02966 | 0.52251  | 0.118321 | 0.0105   | 0.025276 | 0.58586  | 0.137818 | 0.00284  | 0.322852 |
| 0.064396 | 0.16474  | 0.246801 | 6.56E-08 | 0.152236 | 0.00097  | 0.247122 | 6.30E-08 | 0.436051 |
| 0.144643 | 0.00173  | 0.250797 | 3.95E-08 | 0.190348 | 3.47E-05 | 0.242133 | 1.17E-07 | 0.371955 |
| 0.014112 | 0.76101  | 0.189901 | 3.62E-05 | 0.060089 | 0.1949   | 0.240549 | 1.43E-07 | 0.41069  |
| 0.166011 | 0.00031  | 0.238341 | 1.87E-07 | 0.182176 | 7.51E-05 | 0.225656 | 8.35E-07 | 0.378412 |
| 0.030005 | 0.51775  | 0.229588 | 5.30E-07 | 0.107618 | 0.02001  | 0.25788  | 1.57E-08 | 0.388219 |
| 0.070439 | 0.12851  | 0.182474 | 7.31E-05 | 0.08288  | 0.07356  | 0.207244 | 6.31E-06 | 0.3614   |
| 0.022504 | 0.62763  | 0.223631 | 1.05E-06 | 0.068101 | 0.14172  | 0.269403 | 3.30E-09 | 0.470721 |
| 0.087864 | 0.05778  | 0.164696 | 0.00035  | 0.117391 | 0.01112  | 0.136344 | 0.00315  | 0.37803  |
| 0.366705 | 2.60E-16 | 0.272802 | 2.05E-09 | 0.252596 | 3.13E-08 | 0.211998 | 3.81E-06 | 0.401386 |
| -0.01979 | 0.66964  | 0.026639 | 0.56581  | 0.017447 | 0.70689  | 0.009378 | 0.83981  | 0.218316 |
| 0.063863 | 0.16827  | 0.251708 | 3.51E-08 | 0.123177 | 0.0077   | 0.294586 | 8.38E-11 | 0.383369 |
| 0.018862 | 0.68433  | 0.092445 | 0.04586  | 0.068515 | 0.13931  | 0.070421 | 0.12861  | 0.225385 |
| -0.00785 | 0.86569  | 0.131864 | 0.00431  | 0.058563 | 0.2065   | 0.142392 | 0.00204  | 0.309123 |
| 0.060117 | 0.19469  | 0.111466 | 0.01596  | 0.09266  | 0.04536  | 0.088565 | 0.05581  | 0.13687  |
| 0.034877 | 0.45211  | 0.184471 | 6.07E-05 | 0.115472 | 0.01252  | 0.169592 | 0.00023  | 0.329871 |
| -0.01533 | 0.74109  | -0.19561 | 2.07E-05 | -0.05392 | 0.24486  | -0.24771 | 5.84E-08 | -0.40073 |
| 0.051173 | 0.26976  | 0.059232 | 0.20136  | 0.081771 | 0.07751  | 0.000748 | 0.98714  | 0.148389 |
| 0.024489 | 0.59758  | 0.102244 | 0.02715  | 0.040421 | 0.38347  | 0.104662 | 0.0237   | 0.26246  |
| 0.104212 | 0.02431  | 0.27288  | 2.03E-09 | 0.173432 | 0.00017  | 0.257067 | 1.75E-08 | 0.50465  |
| 0.02296  | 0.62067  | 0.156136 | 0.00071  | 0.085069 | 0.06625  | 0.160076 | 0.00052  | 0.347291 |
| 0.093543 | 0.04333  | 0.156039 | 0.00072  | 0.131241 | 0.0045   | 0.132556 | 0.00411  | 0.382983 |
| 0.045123 | 0.33056  | 0.239085 | 1.71E-07 | 0.127369 | 0.00585  | 0.244592 | 8.65E-08 | 0.522445 |
| 0.046976 | 0.31106  | 0.087877 | 0.05775  | 0.063898 | 0.16803  | 0.073013 | 0.11509  | 0.229081 |
| 0.048032 | 0.30029  | 0.235942 | 2.49E-07 | 0.126555 | 0.00617  | 0.242113 | 1.18E-07 | 0.397694 |
| 0.042527 | 0.35916  | 0.216185 | 2.42E-06 | 0.128584 | 0.00539  | 0.208397 | 5.59E-06 | 0.436591 |
| -0.02378 | 0.60819  | 0.13683  | 0.00305  | 0.068398 | 0.13998  | 0.131227 | 0.0045   | 0.351172 |
| 0.069409 | 0.13421  | 0.183682 | 6.53E-05 | 0.160249 | 0.00051  | 0.130446 | 0.00475  | 0.326146 |
| -0.06545 | 0.15795  | 0.011316 | 0.80731  | -0.03156 | 0.49624  | 0.02838  | 0.54069  | 0.161028 |
| 0.065853 | 0.15537  | 0.263351 | 7.55E-09 | 0.139666 | 0.00249  | 0.273171 | 1.95E-09 | 0.550943 |
| 0.090255 | 0.05127  | 0.15676  | 0.00067  | 0.164108 | 0.00037  | 0.084429 | 0.06832  | 0.269306 |

|          |          |          |          |          |          |          |          |          |
|----------|----------|----------|----------|----------|----------|----------|----------|----------|
| 0.19558  | 2.08E-05 | 0.196312 | 1.93E-05 | 0.184579 | 6.00E-05 | 0.143728 | 0.00185  | 0.317914 |
| 0.138233 | 0.00276  | 0.128572 | 0.00539  | 0.078111 | 0.09179  | 0.143289 | 0.00191  | 0.367302 |
| -0.02168 | 0.64029  | 0.173128 | 0.00017  | 0.075617 | 0.10267  | 0.178738 | 0.0001   | 0.397113 |
| -0.02144 | 0.64405  | 0.122603 | 0.00799  | 0.056951 | 0.21929  | 0.122701 | 0.00794  | 0.287277 |
| 0.021485 | 0.64329  | 0.133641 | 0.00381  | 0.059024 | 0.20294  | 0.157769 | 0.00062  | 0.312269 |
| -0.00562 | 0.90353  | 0.161311 | 0.00047  | 0.06167  | 0.18339  | 0.184649 | 5.97E-05 | 0.404169 |
| 0.095894 | 0.03831  | 0.165712 | 0.00032  | 0.125404 | 0.00666  | 0.143406 | 0.00189  | 0.324579 |
| 0.062207 | 0.17959  | -0.15636 | 0.0007   | -0.03453 | 0.45665  | -0.18544 | 5.54E-05 | -0.38012 |
| 0.077427 | 0.09468  | 0.290878 | 1.47E-10 | 0.135398 | 0.00337  | 0.33552  | 9.46E-14 | 0.448053 |
| 0.037462 | 0.41928  | 0.162447 | 0.00042  | 0.069468 | 0.13387  | 0.195302 | 2.14E-05 | 0.313274 |
| -0.02469 | 0.59452  | 0.046504 | 0.31595  | -0.00315 | 0.94586  | 0.067306 | 0.14643  | 0.150164 |
| 0.055071 | 0.23491  | 0.160155 | 0.00051  | 0.078346 | 0.09081  | 0.188669 | 4.08E-05 | 0.366513 |
| 0.262866 | 8.07E-09 | 0.34041  | 3.92E-14 | 0.282391 | 5.20E-10 | 0.293639 | 9.68E-11 | 0.395761 |
| 0.061394 | 0.18536  | 0.145044 | 0.00167  | 0.086903 | 0.06059  | 0.131434 | 0.00444  | 0.355722 |
| 0.148201 | 0.00132  | 0.404479 | 8.27E-20 | 0.227257 | 6.94E-07 | 0.423407 | 9.73E-22 | 0.715227 |
| 0.088598 | 0.05572  | 0.265649 | 5.53E-09 | 0.145028 | 0.00168  | 0.276468 | 1.22E-09 | 0.535753 |
| 0.007383 | 0.87358  | 0.147237 | 0.00142  | 0.061938 | 0.18149  | 0.18527  | 5.63E-05 | 0.264533 |
| -0.00267 | 0.95415  | 0.148702 | 0.00127  | 0.056578 | 0.22233  | 0.171091 | 0.0002   | 0.363195 |
| 0.101856 | 0.02774  | 0.249219 | 4.83E-08 | 0.169457 | 0.00023  | 0.229203 | 5.54E-07 | 0.538198 |
| 0.046643 | 0.3145   | 0.201185 | 1.18E-05 | 0.09844  | 0.03344  | 0.214872 | 2.79E-06 | 0.368557 |
| 0.131391 | 0.00445  | 0.340097 | 4.15E-14 | 0.203492 | 9.33E-06 | 0.350503 | 6.04E-15 | 0.611781 |
| -0.01249 | 0.78781  | 0.132071 | 0.00425  | 0.013958 | 0.76354  | 0.197994 | 1.63E-05 | 0.315746 |
| 0.010009 | 0.8292   | 0.197435 | 1.73E-05 | 0.057156 | 0.21763  | 0.260915 | 1.05E-08 | 0.373681 |
| 0.038248 | 0.40958  | 0.074634 | 0.10723  | 0.056327 | 0.22439  | 0.062642 | 0.17657  | 0.203352 |
| 0.001024 | 0.98239  | 0.065286 | 0.15897  | 0.045028 | 0.33158  | 0.056828 | 0.22029  | 0.156787 |
| 0.132178 | 0.00422  | 0.257797 | 1.59E-08 | 0.162955 | 0.00041  | 0.262212 | 8.81E-09 | 0.4035   |
| 0.1018   | 0.02783  | -0.06748 | 0.14541  | 0.06324  | 0.17246  | -0.1408  | 0.00229  | -0.28547 |
| 0.066362 | 0.15219  | -0.12782 | 0.00567  | 0.003534 | 0.93929  | -0.19443 | 2.33E-05 | -0.31597 |
| 0.030621 | 0.50918  | 0.098246 | 0.03379  | 0.05969  | 0.19788  | 0.092421 | 0.04592  | 0.30188  |
| 0.075523 | 0.10309  | 0.168491 | 0.00025  | 0.116258 | 0.01193  | 0.164233 | 0.00037  | 0.301832 |
| 0.055701 | 0.22959  | 0.144762 | 0.00171  | 0.077234 | 0.0955   | 0.143087 | 0.00194  | 0.232412 |
| 0.089252 | 0.05393  | 0.172326 | 0.00018  | 0.115015 | 0.01288  | 0.154501 | 0.00081  | 0.376087 |
| 0.037086 | 0.42396  | 0.114279 | 0.01347  | 0.103472 | 0.02535  | 0.068258 | 0.1408   | 0.314344 |
| 0.056858 | 0.22004  | 0.108582 | 0.01892  | 0.064555 | 0.16369  | 0.103658 | 0.02508  | 0.260008 |
| 0.050765 | 0.2736   | -0.13344 | 0.00387  | -0.04477 | 0.33437  | -0.16612 | 0.00031  | -0.30604 |
| 0.23723  | 2.14E-07 | 0.368019 | 2.00E-16 | 0.262856 | 8.08E-09 | 0.360695 | 8.54E-16 | 0.373375 |
| 0.03616  | 0.43564  | 0.169059 | 0.00024  | 0.103503 | 0.0253   | 0.154675 | 0.0008   | 0.340648 |
| 0.016484 | 0.72236  | 0.201599 | 1.13E-05 | 0.081675 | 0.07786  | 0.220058 | 1.57E-06 | 0.475439 |
| 0.065553 | 0.15726  | 0.179879 | 9.28E-05 | 0.099995 | 0.03073  | 0.20191  | 1.10E-05 | 0.282503 |
| 0.055662 | 0.22991  | -0.13093 | 0.0046   | -0.03671 | 0.42864  | -0.15392 | 0.00085  | -0.24543 |
| -0.00749 | 0.87174  | 0.197912 | 1.65E-05 | 0.071119 | 0.12485  | 0.225736 | 8.27E-07 | 0.406487 |
| 0.016186 | 0.72719  | 0.077781 | 0.09317  | 0.04581  | 0.32324  | 0.047639 | 0.30427  | 0.309184 |
| -0.08509 | 0.06619  | -0.01608 | 0.72897  | -0.04951 | 0.28569  | 0.015792 | 0.73358  | 0.126856 |
| 0.101701 | 0.02798  | 0.208615 | 5.46E-06 | 0.153376 | 0.00088  | 0.177787 | 0.00011  | 0.368759 |
| 0.247763 | 5.81E-08 | 0.444606 | 4.76E-24 | 0.279979 | 7.38E-10 | 0.463592 | 2.93E-26 | 0.636839 |



|           |          |          |          |          |          |          |          |          |
|-----------|----------|----------|----------|----------|----------|----------|----------|----------|
| 0.002958  | 0.94917  | 0.158749 | 0.00057  | 0.062159 | 0.17993  | 0.189542 | 3.75E-05 | 0.413679 |
| 0.080269  | 0.08314  | 0.237029 | 2.19E-07 | 0.119565 | 0.0097   | 0.265312 | 5.79E-09 | 0.467951 |
| 0.004729  | 0.91882  | 0.07842  | 0.09051  | 0.042067 | 0.36438  | 0.071676 | 0.12192  | 0.204053 |
| 0.059301  | 0.20083  | 0.123914 | 0.00734  | 0.120542 | 0.00912  | 0.072951 | 0.11541  | 0.299878 |
| 0.118572  | 0.01033  | 0.218097 | 1.96E-06 | 0.180097 | 9.10E-05 | 0.163201 | 0.0004   | 0.373451 |
| 0.100905  | 0.02924  | 0.160633 | 0.00049  | 0.096827 | 0.03646  | 0.15383  | 0.00085  | 0.400609 |
| 0.049903  | 0.28184  | 0.21233  | 3.67E-06 | 0.091157 | 0.04898  | 0.241652 | 1.25E-07 | 0.4738   |
| 0.057751  | 0.21287  | 0.276481 | 1.22E-09 | 0.139654 | 0.00249  | 0.296688 | 6.06E-11 | 0.57958  |
| 0.151095  | 0.00106  | 0.198125 | 1.61E-05 | 0.170187 | 0.00022  | 0.161112 | 0.00047  | 0.431539 |
| 0.077168  | 0.09579  | 0.203993 | 8.86E-06 | 0.107229 | 0.02047  | 0.224342 | 9.70E-07 | 0.314234 |
| 0.014389  | 0.75646  | 0.170447 | 0.00022  | 0.056797 | 0.22054  | 0.192955 | 2.69E-05 | 0.307209 |
| 0.06526   | 0.15913  | 0.181672 | 7.87E-05 | 0.116211 | 0.01197  | 0.172831 | 0.00017  | 0.287458 |
| 0.009687  | 0.83463  | 0.154743 | 0.00079  | 0.052232 | 0.25996  | 0.183456 | 6.67E-05 | 0.291385 |
| 0.125613  | 0.00657  | 0.23748  | 2.07E-07 | 0.171735 | 0.00019  | 0.21642  | 2.35E-06 | 0.281585 |
| 0.156992  | 0.00066  | 0.218801 | 1.81E-06 | 0.154812 | 0.00079  | 0.210924 | 4.27E-06 | 0.354279 |
| -0.0025   | 0.95696  | 0.198008 | 1.63E-05 | 0.074199 | 0.1093   | 0.220846 | 1.44E-06 | 0.490501 |
| -0.02526  | 0.58604  | 0.072854 | 0.11589  | 0.041456 | 0.3714   | 0.064652 | 0.16306  | 0.181669 |
| 0.020486  | 0.6588   | 0.051566 | 0.26609  | 0.010876 | 0.81467  | 0.063695 | 0.16939  | 0.145947 |
| 0.172646  | 0.00018  | 0.23272  | 3.66E-07 | 0.172641 | 0.00018  | 0.223685 | 1.05E-06 | 0.42648  |
| 0.062445  | 0.17793  | 0.104131 | 0.02442  | 0.046862 | 0.31224  | 0.124997 | 0.00684  | 0.207867 |
| 0.149195  | 0.00122  | 0.254951 | 2.31E-08 | 0.19567  | 2.06E-05 | 0.241359 | 1.29E-07 | 0.416992 |
| 0.035187  | 0.44809  | -0.1541  | 0.00083  | -0.0285  | 0.53903  | -0.19525 | 2.15E-05 | -0.36672 |
| 0.174955  | 0.00014  | 0.329637 | 2.68E-13 | 0.212933 | 3.44E-06 | 0.323696 | 7.48E-13 | 0.647414 |
| 0.004284  | 0.92644  | -0.07151 | 0.12277  | -0.05317 | 0.25148  | -0.05462 | 0.23876  | -0.1533  |
| 0.013207  | 0.77591  | 0.112567 | 0.01494  | 0.056668 | 0.22159  | 0.117367 | 0.01114  | 0.321149 |
| -8.68E-05 | 0.99851  | -0.02223 | 0.63178  | 0.005715 | 0.90197  | -0.0448  | 0.33407  | 0.058964 |
| -0.01524  | 0.74249  | 0.021334 | 0.64562  | 0.033868 | 0.46531  | -0.00632 | 0.8916   | 0.130819 |
| -0.00895  | 0.84705  | 0.061706 | 0.18313  | -0.00228 | 0.96073  | 0.089859 | 0.05231  | 0.220234 |
| -0.0563   | 0.22464  | 0.113413 | 0.0142   | 0.041191 | 0.37447  | 0.111878 | 0.01557  | 0.365619 |
| 0.066179  | 0.15333  | 0.144784 | 0.00171  | 0.089849 | 0.05233  | 0.124044 | 0.00728  | 0.335051 |
| -0.04454  | 0.33687  | 0.091905 | 0.04715  | -0.02377 | 0.60842  | 0.154488 | 0.00081  | 0.308206 |
| 0.031642  | 0.49516  | 0.228709 | 5.87E-07 | 0.074339 | 0.10863  | 0.284376 | 3.88E-10 | 0.382402 |
| 0.010328  | 0.82384  | 0.193787 | 2.48E-05 | 0.073985 | 0.11032  | 0.227886 | 6.45E-07 | 0.412795 |
| 0.042774  | 0.35638  | 0.220326 | 1.53E-06 | 0.105274 | 0.02289  | 0.232584 | 3.72E-07 | 0.46704  |
| 0.065811  | 0.15563  | 0.049637 | 0.28442  | 0.056552 | 0.22254  | 0.021912 | 0.6367   | 0.088259 |
| 0.249448  | 4.69E-08 | 0.352429 | 4.20E-15 | 0.343307 | 2.31E-14 | 0.231258 | 4.35E-07 | 0.368728 |
| 0.15391   | 0.00085  | 0.17719  | 0.00012  | 0.160099 | 0.00051  | 0.131105 | 0.00454  | 0.122979 |
| 0.205526  | 7.55E-06 | 0.134735 | 0.00353  | 0.143172 | 0.00192  | 0.096688 | 0.03673  | 0.093233 |
| 0.078328  | 0.09088  | -0.04858 | 0.29483  | -0.00592 | 0.8984   | -0.04626 | 0.31848  | -0.15008 |
| -0.00498  | 0.91452  | 0.012488 | 0.78781  | 0.019425 | 0.67544  | -0.01615 | 0.72781  | 0.016781 |
| 0.088239  | 0.05672  | 0.027132 | 0.55864  | 0.044936 | 0.33256  | -0.00509 | 0.91266  | 0.030589 |
| -0.11852  | 0.01037  | -0.07416 | 0.10946  | -0.07531 | 0.10408  | -0.05146 | 0.26706  | -0.06604 |
| 0.076006  | 0.10091  | 0.049102 | 0.28964  | 0.091396 | 0.04839  | -0.02764 | 0.55125  | 0.000869 |
| 0.056022  | 0.22691  | 0.086311 | 0.06237  | 0.044034 | 0.34238  | 0.111802 | 0.01564  | 0.168384 |
| -0.03432  | 0.45942  | -0.02603 | 0.57467  | -0.02192 | 0.63658  | -0.02135 | 0.64545  | 0.060111 |

|          |         |          |          |          |         |          |          |          |
|----------|---------|----------|----------|----------|---------|----------|----------|----------|
| 0.040003 | 0.38841 | 0.153464 | 0.00088  | 0.061548 | 0.18426 | 0.185347 | 5.59E-05 | 0.325812 |
| -0.12076 | 0.009   | -0.10465 | 0.02372  | -0.10844 | 0.01907 | -0.08459 | 0.0678   | -0.13158 |
| 0.055334 | 0.23268 | 0.03199  | 0.49042  | 0.068426 | 0.13982 | -0.03313 | 0.47506  | 0.031097 |
| 0.005324 | 0.90864 | 0.026335 | 0.57025  | 0.00879  | 0.84975 | 0.018388 | 0.69186  | 0.070824 |
| 0.098222 | 0.03384 | -0.04308 | 0.35298  | 0.020271 | 0.66217 | -0.07254 | 0.11749  | -0.10349 |
| 0.176486 | 0.00013 | 0.075434 | 0.10351  | 0.14198  | 0.0021  | -0.01735 | 0.7085   | 0.042219 |
| 0.09262  | 0.04545 | 0.146982 | 0.00145  | 0.089509 | 0.05324 | 0.162442 | 0.00042  | 0.252521 |
| 0.15595  | 0.00072 | 0.08969  | 0.05276  | 0.123013 | 0.00778 | 0.041452 | 0.37144  | 0.143479 |
| -0.06498 | 0.1609  | -0.13635 | 0.00315  | -0.09262 | 0.04544 | -0.11762 | 0.01097  | -0.23282 |
| 0.136596 | 0.0031  | 0.136562 | 0.00311  | 0.145196 | 0.00166 | 0.070159 | 0.13004  | 0.112917 |
| 0.115842 | 0.01224 | 0.151684 | 0.00101  | 0.126608 | 0.00615 | 0.120712 | 0.00902  | 0.22507  |
| 0.01532  | 0.74124 | -0.00035 | 0.99398  | -0.03456 | 0.4562  | 0.030392 | 0.51236  | -0.01441 |
| 0.035015 | 0.45032 | 0.111639 | 0.01579  | 0.075028 | 0.10538 | 0.104745 | 0.02359  | 0.181586 |
| 0.050052 | 0.28041 | 0.074501 | 0.10786  | 0.099559 | 0.03147 | 0.002999 | 0.94847  | 0.134067 |
| -0.02265 | 0.62534 | -0.03105 | 0.50326  | -0.00088 | 0.98484 | -0.06527 | 0.15905  | -0.0398  |
| -0.02652 | 0.56755 | 0.038414 | 0.40754  | 0.003539 | 0.93921 | 0.031449 | 0.49779  | 0.031413 |
| 0.058218 | 0.20919 | 0.088965 | 0.05471  | 0.091302 | 0.04862 | 0.031465 | 0.49757  | 0.16989  |
| -0.05558 | 0.23059 | -0.05093 | 0.27205  | -0.05115 | 0.27001 | -0.04218 | 0.36314  | -0.03205 |
| 0.098883 | 0.03265 | 0.123989 | 0.00731  | 0.128072 | 0.00558 | 0.069794 | 0.13205  | 0.143755 |
| 0.019992 | 0.66654 | 0.066118 | 0.15371  | 0.058092 | 0.21018 | 0.049208 | 0.28861  | 0.019397 |
| 0.042098 | 0.36403 | -0.05081 | 0.27316  | -0.00656 | 0.8876  | -0.06345 | 0.17105  | -0.06935 |
| 0.154319 | 0.00082 | 0.093257 | 0.04398  | 0.13032  | 0.00479 | 0.016178 | 0.72732  | 0.132161 |
| 0.0729   | 0.11566 | 0.11433  | 0.01343  | 0.079301 | 0.08693 | 0.090852 | 0.04975  | 0.227382 |
| -0.07309 | 0.11471 | -0.06965 | 0.13283  | -0.05675 | 0.22096 | -0.06666 | 0.15038  | 0.004807 |
| -0.08296 | 0.07329 | -0.0584  | 0.20775  | -0.0641  | 0.1667  | -0.04795 | 0.30113  | -0.08074 |
| -0.00312 | 0.94632 | 0.011356 | 0.80664  | 0.019016 | 0.6819  | -0.0201  | 0.66476  | 0.022153 |
| 0.050676 | 0.27445 | 0.03232  | 0.48595  | 0.039506 | 0.39434 | -0.00588 | 0.89909  | 0.060043 |
| 0.075222 | 0.10448 | 0.003896 | 0.93308  | 0.034428 | 0.45796 | -0.03087 | 0.50572  | -0.03195 |
| 0.063321 | 0.17191 | 0.140267 | 0.00238  | 0.090691 | 0.05016 | 0.123382 | 0.0076   | 0.273474 |
| 0.033169 | 0.47457 | 0.016269 | 0.72584  | 0.03145  | 0.49778 | -0.02096 | 0.65146  | 0.014342 |
| 0.030794 | 0.50679 | -0.01596 | 0.73083  | 0.005742 | 0.90151 | -0.04344 | 0.3489   | 0.014145 |
| -0.02671 | 0.5648  | 0.047218 | 0.30857  | 0.031237 | 0.50069 | 0.039773 | 0.39115  | -0.01248 |
| 0.069087 | 0.13603 | 0.151368 | 0.00103  | 0.109888 | 0.01752 | 0.133156 | 0.00394  | 0.137972 |
| -0.00957 | 0.83663 | -0.03164 | 0.49513  | -0.00356 | 0.93891 | -0.0613  | 0.18603  | -0.12143 |
| 0.052362 | 0.25877 | -0.00806 | 0.86206  | 0.013025 | 0.77892 | -0.01924 | 0.67837  | -0.04632 |
| -0.06857 | 0.13899 | -0.08145 | 0.07871  | -0.06616 | 0.15343 | -0.06471 | 0.16271  | -0.14542 |
| 0.038182 | 0.41039 | 0.049394 | 0.28678  | 0.058258 | 0.20888 | -0.00595 | 0.89792  | 0.024583 |
| -0.00656 | 0.88749 | -0.04453 | 0.33695  | -0.02318 | 0.61727 | -0.05095 | 0.27187  | -0.08897 |
| 0.034516 | 0.45681 | 0.008288 | 0.85823  | 0.014215 | 0.75931 | -0.00445 | 0.92362  | -0.01377 |
| 0.112393 | 0.0151  | 0.229459 | 5.38E-07 | 0.142826 | 0.00197 | 0.221804 | 1.29E-06 | 0.344061 |
| -0.03022 | 0.5148  | -0.02942 | 0.52601  | -0.02335 | 0.61474 | -0.05163 | 0.26552  | -0.0765  |
| 0.11597  | 0.01215 | 0.165946 | 0.00032  | 0.129284 | 0.00514 | 0.131553 | 0.0044   | 0.288162 |
| 0.052874 | 0.25414 | 0.142658 | 0.002    | 0.079943 | 0.0844  | 0.13025  | 0.00481  | 0.257583 |
| 0.063897 | 0.16804 | 0.047257 | 0.30817  | 0.064256 | 0.16566 | 0.025184 | 0.58723  | 0.060403 |
| 0.047865 | 0.30199 | 0.082468 | 0.07501  | 0.091133 | 0.04904 | 0.040192 | 0.38618  | 0.168625 |

|          |          |          |          |          |          |           |          |          |
|----------|----------|----------|----------|----------|----------|-----------|----------|----------|
| 0.109676 | 0.01774  | 0.109502 | 0.01793  | 0.105919 | 0.02207  | 0.069961  | 0.13113  | 0.267494 |
| 0.051964 | 0.26242  | 0.038038 | 0.41216  | 0.053783 | 0.24606  | 0.014229  | 0.75908  | 0.071284 |
| 0.098201 | 0.03387  | 0.050731 | 0.27393  | 0.101511 | 0.02827  | -0.01445  | 0.75553  | 0.040898 |
| 0.083896 | 0.07009  | 0.037552 | 0.41816  | 0.050027 | 0.28064  | 0.000396  | 0.99319  | 0.10966  |
| 0.115895 | 0.0122   | 0.279576 | 7.82E-10 | 0.173304 | 0.00017  | 0.282138  | 5.39E-10 | 0.415365 |
| 0.008426 | 0.8559   | -0.00358 | 0.93847  | 0.020833 | 0.65339  | -0.01805  | 0.69719  | -0.03939 |
| -0.03874 | 0.40361  | -0.01508 | 0.74512  | -0.03003 | 0.51735  | -0.01037  | 0.82322  | -0.02523 |
| 0.03461  | 0.45558  | 0.096219 | 0.03766  | 0.058692 | 0.2055   | 0.079026  | 0.08804  | 0.215411 |
| 0.062113 | 0.18026  | 0.111124 | 0.01629  | 0.078273 | 0.09112  | 0.09258   | 0.04554  | 0.204261 |
| 0.158466 | 0.00059  | 0.069308 | 0.13477  | 0.102123 | 0.02733  | 0.022662  | 0.62521  | 0.060049 |
| 0.018592 | 0.68861  | -0.10318 | 0.02577  | -0.0129  | 0.78105  | -0.14694  | 0.00145  | -0.2287  |
| 0.07521  | 0.10454  | 0.045788 | 0.32347  | 0.061895 | 0.18179  | -9.82E-05 | 0.99831  | -0.03626 |
| 0.043204 | 0.35155  | 0.032322 | 0.48594  | 0.053747 | 0.24637  | -0.01522  | 0.74288  | 0.0166   |
| 0.049103 | 0.28964  | 0.046475 | 0.31625  | 0.049272 | 0.28798  | 0.037468  | 0.4192   | 0.067132 |
| 0.083577 | 0.07116  | 0.156857 | 0.00067  | 0.084765 | 0.06722  | 0.167151  | 0.00029  | 0.229524 |
| 0.057088 | 0.21818  | 0.041802 | 0.36742  | 0.035731 | 0.44111  | 0.038319  | 0.40871  | 0.081063 |
| -0.01021 | 0.82586  | -0.0265  | 0.56787  | -0.02295 | 0.62078  | -0.02858  | 0.53777  | -0.0315  |
| 0.030259 | 0.51421  | 0.047346 | 0.30726  | 0.043582 | 0.34735  | 0.022944  | 0.62091  | 0.047626 |
| -0.05917 | 0.20183  | -0.01918 | 0.67923  | -0.0392  | 0.398    | 0.013563  | 0.77003  | -0.06861 |
| 0.065426 | 0.15807  | 0.05449  | 0.23989  | 0.064087 | 0.16677  | 0.014139  | 0.76056  | 0.079889 |
| -0.0634  | 0.17135  | -0.05866 | 0.20577  | -0.02967 | 0.52248  | -0.07208  | 0.1198   | -0.16134 |
| 0.119259 | 0.00989  | 0.129797 | 0.00496  | 0.131689 | 0.00436  | 0.078942  | 0.08837  | 0.158206 |
| -0.00701 | 0.87992  | -0.04706 | 0.31022  | -0.01683 | 0.71687  | -0.05653  | 0.2227   | -0.09943 |
| 0.107959 | 0.01962  | 0.059144 | 0.20203  | 0.092608 | 0.04548  | 0.001156  | 0.98012  | 0.036004 |
| -0.03298 | 0.47716  | 0.111118 | 0.01629  | 0.05609  | 0.22635  | 0.107365  | 0.0203   | 0.255445 |
| 0.010915 | 0.81402  | 0.050446 | 0.27663  | 0.026538 | 0.56729  | 0.031474  | 0.49746  | 0.103348 |
| 0.088865 | 0.05498  | 0.095156 | 0.03983  | 0.094637 | 0.04093  | 0.056636  | 0.22185  | 0.154178 |
| 0.172277 | 0.00018  | 0.217874 | 2.01E-06 | 0.197236 | 1.76E-05 | 0.152768  | 0.00093  | 0.400922 |
| 0.064525 | 0.16389  | 0.19091  | 3.28E-05 | 0.116621 | 0.01167  | 0.181308  | 8.14E-05 | 0.265976 |
| -0.10666 | 0.02114  | -0.12314 | 0.00772  | -0.09747 | 0.03522  | -0.12275  | 0.00792  | -0.16425 |
| 0.024978 | 0.59029  | 0.143485 | 0.00188  | 0.082848 | 0.07367  | 0.127757  | 0.0057   | 0.351278 |
| 0.071636 | 0.12213  | 0.124609 | 0.00702  | 0.090073 | 0.05175  | 0.093072  | 0.0444   | 0.28958  |
| 0.04398  | 0.34297  | 0.062722 | 0.17601  | 0.054046 | 0.24375  | 0.028618  | 0.53729  | 0.090151 |
| -0.01155 | 0.80335  | -0.00096 | 0.98357  | -0.00048 | 0.9917   | -0.02197  | 0.63585  | 0.061469 |
| -0.0022  | 0.96221  | 0.007518 | 0.87129  | 0.002837 | 0.95124  | 0.000548  | 0.99057  | 0.009107 |
| 0.080004 | 0.08416  | 0.020304 | 0.66164  | 0.057173 | 0.21749  | -0.01416  | 0.76015  | -0.0341  |
| -0.05233 | 0.25911  | -0.03531 | 0.44651  | -0.02915 | 0.52978  | -0.04092  | 0.37762  | -0.07882 |
| 0.011643 | 0.80185  | 0.004269 | 0.92669  | 0.007216 | 0.87641  | 0.012715  | 0.78405  | 0.063577 |
| 0.098943 | 0.03254  | 0.164133 | 0.00037  | 0.11906  | 0.01002  | 0.160107  | 0.00051  | 0.276273 |
| 0.040992 | 0.37678  | 0.041879 | 0.36653  | 0.073926 | 0.11061  | -0.00309  | 0.94689  | -0.0125  |
| 0.106152 | 0.02177  | 0.081187 | 0.07966  | 0.102179 | 0.02725  | 0.030007  | 0.51771  | 0.010889 |
| 0.03003  | 0.5174   | 0.064096 | 0.16671  | 0.033892 | 0.46499  | 0.057093  | 0.21814  | 0.119617 |
| 0.012562 | 0.78658  | 0.066898 | 0.1489   | 0.016622 | 0.72015  | 0.081767  | 0.07753  | 0.259203 |
| 0.200312 | 1.29E-05 | 0.182325 | 7.41E-05 | 0.188335 | 4.21E-05 | 0.126113  | 0.00635  | 0.199972 |
| 0.047559 | 0.30508  | 0.12251  | 0.00804  | 0.080996 | 0.08037  | 0.095516  | 0.03908  | 0.252904 |

|          |          |          |          |          |          |          |          |          |
|----------|----------|----------|----------|----------|----------|----------|----------|----------|
| -0.03458 | 0.45591  | -0.09323 | 0.04405  | -0.06027 | 0.19357  | -0.08137 | 0.07897  | -0.1713  |
| 0.257717 | 1.60E-08 | 0.299499 | 3.92E-11 | 0.286991 | 2.64E-10 | 0.21605  | 2.45E-06 | 0.249826 |
| 0.049421 | 0.28652  | 0.033772 | 0.46657  | 0.065812 | 0.15562  | -0.02834 | 0.5412   | -0.03738 |
| 0.016217 | 0.72669  | 0.021558 | 0.64216  | 0.030061 | 0.51696  | -0.00482 | 0.91729  | 0.109379 |
| 0.087962 | 0.0575   | 0.066504 | 0.15131  | 0.052888 | 0.25401  | 0.065823 | 0.15556  | 0.153109 |
| 0.039064 | 0.39966  | -0.04438 | 0.33855  | 0.016508 | 0.72198  | -0.10802 | 0.01955  | -0.08946 |
| -0.0344  | 0.4583   | -0.16275 | 0.00041  | -0.0777  | 0.09353  | -0.19616 | 1.96E-05 | -0.24778 |
| 0.027565 | 0.55237  | -0.02437 | 0.59942  | 0.006371 | 0.89078  | -0.05878 | 0.2048   | -0.02681 |
| 0.008324 | 0.85762  | 0.002619 | 0.95499  | 0.014465 | 0.75522  | 0.019186 | 0.67921  | -0.03912 |
| 0.125623 | 0.00656  | 0.132494 | 0.00413  | 0.092567 | 0.04557  | 0.106206 | 0.02171  | 0.179588 |
| -0.04977 | 0.28309  | 0.011296 | 0.80765  | -0.03098 | 0.50417  | 0.024705 | 0.59437  | 0.136694 |
| 0.000934 | 0.98393  | 0.055392 | 0.23219  | 0.043277 | 0.35074  | 0.032655 | 0.48145  | 0.145665 |
| 0.051111 | 0.27034  | 0.014747 | 0.7506   | 0.014667 | 0.75191  | -0.00157 | 0.97304  | 0.067911 |
| 0.02747  | 0.55374  | 0.011798 | 0.79927  | 0.010853 | 0.81505  | 0.018082 | 0.69673  | 0.049712 |
| 0.018451 | 0.69085  | 0.05809  | 0.2102   | 0.029588 | 0.52359  | 0.058953 | 0.20349  | 0.136649 |
| 0.154231 | 0.00083  | 0.210074 | 4.68E-06 | 0.173604 | 0.00016  | 0.159518 | 0.00054  | 0.371762 |
| 0.127296 | 0.00587  | 0.060035 | 0.1953   | 0.104685 | 0.02367  | -0.00957 | 0.83653  | 0.015011 |
| 0.107997 | 0.01957  | 0.031555 | 0.49635  | 0.048624 | 0.29437  | 0.014855 | 0.74884  | 0.050305 |
| 0.015076 | 0.74522  | 0.156038 | 0.00072  | 0.037697 | 0.41637  | 0.205545 | 7.54E-06 | 0.200107 |
| -0.08153 | 0.07841  | -0.03436 | 0.45888  | -0.03868 | 0.40432  | -0.01945 | 0.67512  | -0.00099 |
| 0.063931 | 0.16781  | 0.101106 | 0.02891  | 0.066432 | 0.15176  | 0.089744 | 0.05261  | 0.146053 |
| 0.083186 | 0.0725   | 0.099374 | 0.03179  | 0.027439 | 0.55419  | 0.118199 | 0.01058  | 0.299623 |
| 0.085922 | 0.06356  | 0.063485 | 0.1708   | 0.055307 | 0.23291  | 0.050243 | 0.27857  | 0.080472 |
| 0.020023 | 0.66604  | 0.020758 | 0.65456  | 0.052196 | 0.26028  | -0.022   | 0.63536  | 0.027977 |
| 0.517833 | 2.13E-33 | 0.40733  | 4.31E-20 | 0.516904 | 2.90E-33 | 0.176785 | 0.00012  | 0.167781 |
| 0.199218 | 1.44E-05 | 0.190079 | 3.56E-05 | 0.191067 | 3.23E-05 | 0.117814 | 0.01083  | 0.237177 |
| 0.055103 | 0.23464  | 0.038587 | 0.40544  | 0.059219 | 0.20145  | -0.01108 | 0.81121  | 0.042701 |
| 0.057344 | 0.21612  | -0.02895 | 0.53259  | 0.003679 | 0.9368   | -0.05446 | 0.24018  | -0.03811 |
| -0.00906 | 0.84515  | 0.019793 | 0.66965  | 0.012954 | 0.78008  | 0.0038   | 0.93473  | 0.039142 |
| -0.02188 | 0.63722  | -0.03386 | 0.46546  | -0.00849 | 0.85481  | -0.05705 | 0.21847  | 0.049935 |
| 0.041131 | 0.37517  | 0.049184 | 0.28884  | 0.053824 | 0.2457   | 0.006377 | 0.89068  | 0.080229 |
| -0.04575 | 0.32384  | -0.01025 | 0.82508  | 0.000738 | 0.98731  | -0.02506 | 0.58905  | -0.00518 |
| 0.087456 | 0.05896  | 0.059129 | 0.20214  | 0.07722  | 0.09557  | 0.019619 | 0.67239  | 0.052987 |
| 0.245915 | 7.33E-08 | 0.189701 | 3.69E-05 | 0.275063 | 1.49E-09 | 0.007891 | 0.86496  | 0.073813 |
| 0.078237 | 0.09126  | 0.166857 | 0.00029  | 0.111282 | 0.01613  | 0.158    | 0.00061  | 0.22383  |
| 0.073858 | 0.11094  | 0.217038 | 2.20E-06 | 0.136495 | 0.00312  | 0.194354 | 2.35E-05 | 0.419153 |
| 0.117779 | 0.01086  | 0.120053 | 0.00941  | 0.092378 | 0.04602  | 0.09128  | 0.04868  | 0.252058 |
| 0.062646 | 0.17654  | 0.091096 | 0.04914  | 0.072918 | 0.11557  | 0.07866  | 0.08952  | 0.235222 |
| -0.02725 | 0.55699  | 0.05584  | 0.22843  | 0.007235 | 0.87608  | 0.06554  | 0.15735  | 0.063231 |
| 0.024012 | 0.60475  | -0.02018 | 0.66364  | -0.00579 | 0.90068  | -0.0433  | 0.35043  | -0.0423  |
| 0.135811 | 0.00328  | 0.016785 | 0.71751  | 0.087586 | 0.05858  | -0.04101 | 0.37654  | -0.01522 |
| 0.163476 | 0.00039  | 0.038159 | 0.41067  | 0.121613 | 0.00852  | -0.04132 | 0.37302  | -0.04834 |
| 0.052073 | 0.26141  | 0.046587 | 0.31509  | 0.053275 | 0.25055  | 0.006002 | 0.89708  | 0.075168 |
| -0.01233 | 0.79047  | -0.0153  | 0.74152  | 0.01844  | 0.69103  | -0.05015 | 0.27945  | -0.01806 |
| -0.0316  | 0.49571  | 0.022358 | 0.62987  | -0.00481 | 0.9174   | 0.020157 | 0.66394  | 0.114541 |

|          |          |          |          |          |          |          |          |          |
|----------|----------|----------|----------|----------|----------|----------|----------|----------|
| 0.09793  | 0.03437  | 0.03544  | 0.44483  | 0.075349 | 0.10389  | -0.0189  | 0.68381  | 0.008088 |
| 0.021637 | 0.64094  | -0.07313 | 0.11454  | -0.04022 | 0.38579  | -0.0773  | 0.09521  | -0.07114 |
| 0.122679 | 0.00795  | 0.060144 | 0.19449  | 0.123062 | 0.00776  | -0.01994 | 0.66739  | -0.01138 |
| 0.080441 | 0.08248  | -0.01451 | 0.75449  | 0.050917 | 0.27216  | -0.07265 | 0.11693  | -0.08165 |
| 0.084528 | 0.068    | 0.063094 | 0.17346  | 0.077107 | 0.09605  | 0.03037  | 0.51266  | 0.058534 |
| 0.144415 | 0.00175  | 0.100506 | 0.02988  | 0.171767 | 0.00019  | 0.011571 | 0.80305  | 0.065738 |
| 0.005125 | 0.91205  | -0.03752 | 0.41851  | -0.01197 | 0.79641  | -0.03248 | 0.48379  | -0.07401 |
| 0.114611 | 0.0132   | 0.023738 | 0.60887  | 0.081121 | 0.07991  | -0.0242  | 0.60199  | 0.011719 |
| 0.207749 | 5.98E-06 | 0.316423 | 2.55E-12 | 0.171159 | 0.0002   | 0.350637 | 5.89E-15 | 0.552448 |
| 0.093505 | 0.04342  | 0.085694 | 0.06427  | 0.105698 | 0.02235  | 0.025608 | 0.58094  | 0.075077 |
| 0.455327 | 2.79E-25 | 0.266205 | 5.12E-09 | 0.399636 | 2.46E-19 | 0.059905 | 0.19627  | 0.1035   |
| 0.076669 | 0.09796  | 0.037726 | 0.41601  | 0.07239  | 0.11824  | -0.01764 | 0.70385  | -0.0049  |
| 0.022201 | 0.63226  | 0.089316 | 0.05375  | 0.039033 | 0.40002  | 0.093032 | 0.04449  | 0.188258 |
| 0.084695 | 0.06745  | 0.105561 | 0.02252  | 0.090604 | 0.05038  | 0.087248 | 0.05957  | 0.0971   |
| 0.049113 | 0.28954  | 0.037991 | 0.41274  | 0.053427 | 0.2492   | -0.00199 | 0.96571  | 0.001553 |
| 0.064359 | 0.16498  | 0.042654 | 0.35772  | 0.067843 | 0.14323  | -0.00091 | 0.98427  | -0.0007  |
| 0.15469  | 0.0008   | 0.078122 | 0.09174  | 0.124238 | 0.00719  | 0.00407  | 0.93011  | 0.023462 |
| 0.02358  | 0.61127  | 0.044876 | 0.33321  | 0.050341 | 0.27764  | 0.001497 | 0.97426  | 0.062208 |
| 0.047249 | 0.30825  | 0.010637 | 0.81867  | 0.030497 | 0.5109   | 0.007441 | 0.87259  | -0.05764 |
| -0.0089  | 0.84781  | -0.00611 | 0.89529  | 0.0067   | 0.88518  | -0.01738 | 0.70794  | -0.00741 |
| 0.170709 | 0.00021  | 0.033088 | 0.47565  | 0.0353   | 0.44663  | 0.028037 | 0.54559  | 0.054134 |
| 0.042989 | 0.35396  | 0.009031 | 0.84567  | 0.04453  | 0.33696  | -0.03771 | 0.41626  | -0.03513 |
| 0.038664 | 0.4045   | -0.03172 | 0.49412  | 0.026604 | 0.56632  | -0.0845  | 0.06809  | -0.05929 |
| 0.106113 | 0.02182  | 0.024688 | 0.59461  | 0.065489 | 0.15767  | -0.02787 | 0.54794  | -0.0089  |
| 0.026735 | 0.56441  | -0.01488 | 0.74842  | 0.063377 | 0.17154  | -0.08551 | 0.06485  | -0.04879 |
| 0.100963 | 0.02914  | 0.049538 | 0.28538  | 0.096155 | 0.03779  | -0.02133 | 0.64562  | 0.030469 |
| -0.04617 | 0.31947  | -0.04623 | 0.31885  | -0.0623  | 0.17898  | -0.02782 | 0.5487   | 0.047489 |
| 0.005306 | 0.90896  | 0.070941 | 0.1258   | 0.016269 | 0.72584  | 0.095454 | 0.03921  | 0.036696 |
| 0.045394 | 0.32765  | -0.03692 | 0.42608  | -0.01231 | 0.79077  | -0.05345 | 0.24898  | -0.08905 |
| 0.013163 | 0.77663  | 0.01884  | 0.68468  | 0.019281 | 0.67772  | -0.00348 | 0.9402   | 0.03987  |
| 0.116913 | 0.01146  | 0.050715 | 0.27407  | 0.080439 | 0.08248  | 0.003796 | 0.93479  | 0.019336 |
| 0.062273 | 0.17914  | 0.067385 | 0.14596  | 0.075988 | 0.10099  | 0.02043  | 0.65968  | 0.065115 |
| 0.098911 | 0.0326   | -0.03466 | 0.45496  | 0.037984 | 0.41282  | -0.08785 | 0.05784  | -0.11295 |
| -0.0356  | 0.44282  | 0.0928   | 0.04503  | 0.039066 | 0.39964  | 0.09176  | 0.0475   | 0.110028 |
| 0.062027 | 0.18086  | 0.075132 | 0.1049   | 0.066656 | 0.15038  | 0.043425 | 0.3491   | 0.127716 |
| -0.02063 | 0.65659  | 0.117623 | 0.01096  | 0.039287 | 0.39697  | 0.134341 | 0.00363  | 0.181333 |
| 0.073647 | 0.11196  | 0.059668 | 0.19805  | 0.081088 | 0.08003  | 0.007788 | 0.8667   | 0.104978 |
| 0.051777 | 0.26414  | 0.026134 | 0.5732   | 0.051932 | 0.26271  | -0.01713 | 0.712    | 0.018697 |
| 0.123655 | 0.00747  | 0.217166 | 2.17E-06 | 0.104343 | 0.02413  | 0.268237 | 3.88E-09 | 0.177119 |
| 0.07192  | 0.12065  | 0.058528 | 0.20677  | 0.065237 | 0.15928  | 0.026819 | 0.56319  | 0.074612 |
| 0.045167 | 0.33009  | 0.030135 | 0.51593  | 0.040138 | 0.38681  | -0.00395 | 0.93219  | 0.051087 |
| 0.131985 | 0.00428  | 0.212024 | 3.80E-06 | 0.129207 | 0.00517  | 0.20336  | 9.46E-06 | 0.437186 |
| 0.157856 | 0.00062  | 0.286456 | 2.86E-10 | 0.179891 | 9.27E-05 | 0.275017 | 1.50E-09 | 0.425276 |
| -0.04855 | 0.29508  | -0.05605 | 0.22669  | -0.06611 | 0.15376  | -0.0213  | 0.64622  | -0.07753 |
| 0.048234 | 0.29827  | 0.156248 | 0.0007   | 0.053486 | 0.24868  | 0.190551 | 3.40E-05 | 0.121876 |

|          |          |          |          |          |          |          |          |          |
|----------|----------|----------|----------|----------|----------|----------|----------|----------|
| 0.013842 | 0.76545  | 0.017916 | 0.69937  | 0.00597  | 0.89763  | 0.021345 | 0.64546  | -0.02516 |
| 0.004212 | 0.92766  | -0.02406 | 0.604    | -0.00508 | 0.91283  | -0.02389 | 0.60658  | -0.09341 |
| 0.070835 | 0.12637  | 0.060259 | 0.19364  | 0.071929 | 0.1206   | 0.013041 | 0.77866  | 0.074399 |
| 0.045572 | 0.32576  | 0.077038 | 0.09635  | 0.058365 | 0.20804  | 0.070358 | 0.12895  | 0.044567 |
| 0.089179 | 0.05412  | 0.255516 | 2.14E-08 | 0.132216 | 0.00421  | 0.280663 | 6.68E-10 | 0.34328  |
| 0.002028 | 0.96513  | 0.050693 | 0.27428  | 0.061278 | 0.18619  | 0.00687  | 0.88229  | 0.052841 |
| 0.046324 | 0.31784  | -0.04103 | 0.3763   | 0.017037 | 0.71346  | -0.08879 | 0.05519  | -0.1105  |
| 0.093596 | 0.04321  | 0.020827 | 0.65349  | 0.054809 | 0.23714  | -0.02761 | 0.55169  | 0.028624 |
| -0.00866 | 0.85193  | 0.008343 | 0.85729  | -0.00211 | 0.96377  | 0.003281 | 0.94362  | 0.031654 |
| 0.062217 | 0.17953  | 0.020235 | 0.66272  | 0.049921 | 0.28167  | -0.02588 | 0.57693  | -0.0174  |
| 0.05212  | 0.26099  | 0.00796  | 0.86378  | 0.037226 | 0.42221  | -0.03278 | 0.47979  | -0.03742 |
| 0.191383 | 3.14E-05 | 0.209048 | 5.22E-06 | 0.223582 | 1.06E-06 | 0.107368 | 0.0203   | 0.160993 |
| 0.157701 | 0.00063  | 0.08658  | 0.06155  | 0.103919 | 0.02472  | 0.039219 | 0.39779  | 0.076096 |
| 0.061348 | 0.18569  | -0.04309 | 0.35284  | 0.007459 | 0.87229  | -0.07443 | 0.10821  | -0.10911 |
| 0.050536 | 0.27578  | 0.095053 | 0.04005  | 0.073884 | 0.11081  | 0.070083 | 0.13045  | 0.089764 |
| 0.107896 | 0.01969  | 0.058156 | 0.20968  | 0.055949 | 0.22752  | 0.057031 | 0.21864  | 0.080253 |
| 0.043746 | 0.34554  | 0.042073 | 0.36432  | 0.059792 | 0.19712  | 0.00832  | 0.85768  | 0.079297 |
| 0.03824  | 0.40968  | 0.079242 | 0.08717  | 0.02209  | 0.63397  | 0.102114 | 0.02734  | 0.045758 |
| -0.06166 | 0.18347  | -0.05177 | 0.26422  | -0.06254 | 0.17729  | -0.03822 | 0.40993  | -0.03305 |
| 0.025484 | 0.58277  | 0.053551 | 0.2481   | 0.038884 | 0.40183  | 0.034914 | 0.45162  | 0.016627 |
| 0.003486 | 0.94011  | -0.00485 | 0.91668  | 0.000994 | 0.98292  | -0.01575 | 0.73426  | -0.01289 |
| 0.010332 | 0.82377  | -0.03275 | 0.4802   | 0.017462 | 0.70663  | -0.07904 | 0.08796  | -0.15873 |
| 0.086958 | 0.06042  | 0.184431 | 6.09E-05 | 0.12691  | 0.00603  | 0.157511 | 0.00064  | 0.370272 |
| 0.04073  | 0.37984  | 0.032153 | 0.48821  | 0.050758 | 0.27366  | -0.00973 | 0.83382  | 0.016777 |
| 0.056999 | 0.2189   | -0.06699 | 0.14832  | 0.002985 | 0.9487   | -0.09996 | 0.03078  | -0.07096 |
| 0.089272 | 0.05387  | 0.101951 | 0.02759  | 0.083389 | 0.0718   | 0.074667 | 0.10707  | 0.114307 |
| 0.218295 | 1.91E-06 | 0.250197 | 4.26E-08 | 0.282919 | 4.81E-10 | 0.123323 | 0.00763  | 0.341968 |
| 0.06503  | 0.16061  | 0.030096 | 0.51648  | 0.05378  | 0.24608  | -0.01487 | 0.74865  | 0.005308 |
| 0.14234  | 0.00205  | 0.084778 | 0.06718  | 0.126055 | 0.00638  | 0.009715 | 0.83414  | 0.035117 |
| -0.0629  | 0.17479  | -0.11971 | 0.00961  | -0.02493 | 0.59104  | -0.17579 | 0.00013  | -0.21419 |
| 0.013655 | 0.76852  | 0.124251 | 0.00718  | 0.060843 | 0.18935  | 0.126566 | 0.00617  | 0.259216 |
| -0.09057 | 0.05047  | -0.04003 | 0.38808  | -0.053   | 0.25303  | -0.02551 | 0.58235  | 0.025926 |
| 0.086349 | 0.06225  | 0.034419 | 0.45807  | 0.066239 | 0.15295  | -0.01363 | 0.76893  | 0.051189 |
| 0.030019 | 0.51756  | 0.045583 | 0.32564  | 0.034854 | 0.45241  | 0.027417 | 0.55451  | 0.065758 |
| 0.0676   | 0.14468  | 0.010068 | 0.82821  | 0.048495 | 0.29565  | -0.03454 | 0.45652  | -0.0211  |
| -0.02035 | 0.66092  | 0.028501 | 0.53897  | 0.021777 | 0.63879  | 0.011472 | 0.80471  | 0.073265 |
| 0.147676 | 0.00137  | 0.071748 | 0.12154  | 0.100482 | 0.02992  | 0.014947 | 0.74733  | 0.083593 |
| 0.016305 | 0.72526  | 0.132199 | 0.00421  | 0.063867 | 0.16824  | 0.130563 | 0.00471  | 0.29374  |
| 0.026354 | 0.56997  | 0.032069 | 0.48936  | 0.032154 | 0.4882   | 0.001464 | 0.97484  | 0.075206 |
| 0.028862 | 0.53383  | 0.134456 | 0.0036   | 0.062105 | 0.18031  | 0.138368 | 0.00273  | 0.422662 |
| 0.127968 | 0.00562  | 0.041716 | 0.36841  | 0.092756 | 0.04513  | -0.01181 | 0.79914  | -0.00398 |
| 0.079104 | 0.08772  | 0.038114 | 0.41122  | 0.090189 | 0.05145  | -0.0258  | 0.57811  | -0.02392 |
| 0.076347 | 0.09938  | 0.012083 | 0.79454  | 0.06265  | 0.17651  | -0.05437 | 0.24092  | 0.012865 |
| 0.025277 | 0.58584  | 0.076375 | 0.09926  | 0.054691 | 0.23816  | 0.054879 | 0.23655  | 0.038364 |
| 0.095296 | 0.03954  | 0.039533 | 0.39402  | 0.079376 | 0.08663  | -0.01499 | 0.74662  | 0.058509 |

|          |          |          |          |          |          |          |         |          |
|----------|----------|----------|----------|----------|----------|----------|---------|----------|
| 0.036095 | 0.43646  | 0.049929 | 0.28159  | 0.071198 | 0.12443  | -0.01014 | 0.82704 | 0.054294 |
| 0.042772 | 0.35639  | 0.047302 | 0.30771  | 0.03946  | 0.39489  | 0.015661 | 0.7357  | 0.143644 |
| 0.025511 | 0.58239  | 0.055634 | 0.23015  | 0.062828 | 0.17528  | 0.007564 | 0.8705  | 0.147171 |
| 0.160979 | 0.00048  | 0.149959 | 0.00115  | 0.136386 | 0.00314  | 0.105996 | 0.02197 | 0.350752 |
| 0.145209 | 0.00165  | 0.00477  | 0.91812  | 0.092779 | 0.04508  | -0.06139 | 0.18541 | -0.09752 |
| -0.03729 | 0.42145  | -0.01811 | 0.69628  | -0.02234 | 0.63021  | -0.03044 | 0.51169 | -0.03583 |
| 0.162351 | 0.00043  | 0.229804 | 5.16E-07 | 0.184461 | 6.07E-05 | 0.178218 | 0.00011 | 0.464875 |
| 0.085699 | 0.06425  | 0.048332 | 0.29728  | 0.055676 | 0.2298   | 0.017441 | 0.70697 | 0.031201 |
| 0.088983 | 0.05466  | 0.071587 | 0.12239  | 0.094012 | 0.04229  | 0.015554 | 0.73744 | 0.087559 |
| 0.114047 | 0.01366  | 0.198395 | 1.57E-05 | 0.135903 | 0.00325  | 0.1772   | 0.00012 | 0.344244 |
| 0.093845 | 0.04266  | 0.013729 | 0.7673   | 0.049142 | 0.28926  | -0.02856 | 0.53808 | 0.033409 |
| 0.036325 | 0.43354  | 0.009907 | 0.83093  | 0.043093 | 0.35279  | -0.03992 | 0.38937 | -0.03047 |
| 0.163823 | 0.00038  | 0.080416 | 0.08257  | 0.171924 | 0.00019  | -0.01694 | 0.71508 | 0.134815 |
| 0.07618  | 0.10013  | 0.074582 | 0.10747  | 0.063041 | 0.17382  | 0.048051 | 0.30011 | 0.105004 |
| 0.11433  | 0.01343  | 0.138318 | 0.00274  | 0.121086 | 0.00881  | 0.098759 | 0.03287 | 0.184136 |
| 0.062242 | 0.17935  | 0.164534 | 0.00036  | 0.106244 | 0.02166  | 0.152945 | 0.00091 | 0.171373 |
| 0.044001 | 0.34274  | -0.0255  | 0.58249  | 0.028457 | 0.53959  | -0.06489 | 0.1615  | -0.0427  |
| -0.04237 | 0.36094  | -0.05479 | 0.23727  | -0.02878 | 0.53502  | -0.06963 | 0.13295 | -0.03726 |
| 0.091877 | 0.04722  | 0.034271 | 0.46001  | 0.092978 | 0.04462  | -0.03669 | 0.42897 | -0.01269 |
| 0.061147 | 0.18714  | 0.068466 | 0.13959  | 0.057445 | 0.21531  | 0.049936 | 0.28152 | 0.110921 |
| 0.091719 | 0.0476   | 0.072764 | 0.11634  | 0.068489 | 0.13945  | 0.04143  | 0.3717  | 0.043999 |
| 0.03711  | 0.42367  | 0.002848 | 0.95105  | -0.00038 | 0.99349  | -0.01527 | 0.74205 | 0.017758 |
| -0.03175 | 0.49365  | -0.01395 | 0.76368  | -0.0387  | 0.40406  | -0.00018 | 0.99685 | 0.042049 |
| 0.008602 | 0.85292  | -0.01918 | 0.67934  | 0.016404 | 0.72366  | -0.05884 | 0.20433 | -0.06667 |
| 0.072789 | 0.11622  | 0.099869 | 0.03094  | 0.115971 | 0.01214  | 0.03735  | 0.42067 | 0.074509 |
| -0.03196 | 0.4908   | -0.02658 | 0.56666  | -0.03159 | 0.49583  | -0.02539 | 0.58414 | -0.01086 |
| 0.007129 | 0.87789  | 0.012707 | 0.78418  | 0.00947  | 0.83827  | 0.007038 | 0.87943 | 0.01676  |
| 0.037758 | 0.41561  | 0.050492 | 0.27619  | 0.032275 | 0.48656  | 0.029543 | 0.52421 | -0.00561 |
| 0.024646 | 0.59525  | -0.06097 | 0.18839  | -0.00519 | 0.91102  | -0.10227 | 0.0271  | -0.16248 |
| 0.044769 | 0.33437  | 0.061663 | 0.18344  | 0.093619 | 0.04316  | 0.002041 | 0.96492 | 0.038213 |
| 0.073464 | 0.11286  | 0.015106 | 0.74473  | 0.062516 | 0.17744  | -0.0453  | 0.32863 | -0.04154 |
| 0.014316 | 0.75765  | 0.003021 | 0.94808  | 0.02226  | 0.63137  | -0.03388 | 0.46513 | -0.00571 |
| 0.031464 | 0.49759  | -0.01314 | 0.77702  | -0.01927 | 0.67788  | 0.006115 | 0.89515 | -0.04301 |
| 0.121408 | 0.00863  | 0.069935 | 0.13127  | 0.090021 | 0.05188  | 0.033212 | 0.474   | 0.096736 |
| 0.05585  | 0.22835  | 0.048572 | 0.29489  | 0.061778 | 0.18262  | 0.004145 | 0.92881 | 0.065593 |
| 0.068045 | 0.14204  | 0.026187 | 0.57242  | 0.058439 | 0.20746  | -0.02452 | 0.59712 | 0.000772 |
| 0.061928 | 0.18156  | -0.0347  | 0.45447  | 0.010851 | 0.81508  | -0.08542 | 0.06514 | -0.02948 |
| 0.068479 | 0.13951  | 0.080942 | 0.08057  | 0.068704 | 0.13821  | 0.056862 | 0.22001 | 0.251543 |
| -0.0774  | 0.09477  | -0.09952 | 0.03154  | -0.05737 | 0.21595  | -0.11167 | 0.01577 | -0.14298 |
| 0.02413  | 0.60297  | 0.03005  | 0.51713  | 0.011864 | 0.79817  | 0.031853 | 0.49229 | 0.08902  |
| 0.191194 | 3.20E-05 | 0.154664 | 0.0008   | 0.147259 | 0.00142  | 0.114658 | 0.01316 | 0.129894 |
| 0.007105 | 0.8783   | 0.062524 | 0.17738  | 0.010746 | 0.81685  | 0.073284 | 0.11375 | 0.162271 |
| -0.02015 | 0.66401  | 0.002638 | 0.95466  | 0.047416 | 0.30655  | -0.04935 | 0.28725 | -0.03393 |
| 0.041842 | 0.36696  | 0.008731 | 0.85074  | 0.031531 | 0.49668  | -0.01988 | 0.6683  | -0.02056 |
| 0.130074 | 0.00487  | 0.087241 | 0.05959  | 0.12267  | 0.00796  | 0.044275 | 0.33973 | 0.037901 |

|          |          |          |          |          |          |          |          |          |
|----------|----------|----------|----------|----------|----------|----------|----------|----------|
| 0.079335 | 0.08679  | 0.048917 | 0.29147  | 0.073465 | 0.11286  | 0.004769 | 0.91813  | 0.156639 |
| 0.010283 | 0.82461  | 0.020594 | 0.65712  | 0.012581 | 0.78626  | 0.009296 | 0.84121  | 0.113334 |
| 0.016403 | 0.72368  | 0.052302 | 0.25932  | 0.048307 | 0.29754  | 0.006334 | 0.89142  | 0.129413 |
| 0.068708 | 0.13819  | 0.146482 | 0.0015   | 0.116075 | 0.01207  | 0.108941 | 0.01853  | 0.346152 |
| -0.00308 | 0.94713  | -0.08054 | 0.08208  | -0.02435 | 0.59971  | -0.10626 | 0.02164  | -0.15079 |
| -0.03542 | 0.44504  | 0.056968 | 0.21915  | 0.008871 | 0.84837  | 0.067671 | 0.14425  | 0.16169  |
| 0.13192  | 0.00429  | 0.07126  | 0.12411  | 0.103027 | 0.02599  | 0.015574 | 0.73711  | 0.11712  |
| -0.02199 | 0.63544  | -0.05254 | 0.2572   | -0.01439 | 0.75636  | -0.07992 | 0.08448  | -0.07574 |
| 0.07657  | 0.0984   | 0.072171 | 0.11936  | 0.076321 | 0.0995   | 0.027565 | 0.55238  | 0.18098  |
| -0.12609 | 0.00636  | -0.05432 | 0.24134  | -0.05477 | 0.23751  | -0.05601 | 0.22705  | -0.01945 |
| 0.091688 | 0.04767  | 0.097531 | 0.03511  | 0.1042   | 0.02433  | 0.042213 | 0.36272  | 0.175534 |
| 0.027026 | 0.56017  | -0.00408 | 0.92995  | 0.020143 | 0.66416  | -0.03587 | 0.43929  | -0.03857 |
| 0.051267 | 0.26888  | 0.024857 | 0.59209  | 0.044551 | 0.33673  | -0.0218  | 0.63845  | 0.063522 |
| 0.062311 | 0.17887  | 0.036552 | 0.43067  | 0.047844 | 0.30219  | -0.00412 | 0.92918  | 0.028996 |
| 0.039003 | 0.40039  | 0.015151 | 0.744    | 0.034893 | 0.45191  | -0.02212 | 0.63354  | -0.00563 |
| 0.131377 | 0.00446  | 0.200766 | 1.23E-05 | 0.147375 | 0.0014   | 0.163271 | 0.0004   | 0.468576 |
| 0.08892  | 0.05483  | 0.052019 | 0.26191  | 0.081743 | 0.07761  | -0.0103  | 0.82424  | 0.053806 |
| 0.043677 | 0.3463   | 0.03766  | 0.41682  | 0.055444 | 0.23175  | -0.00195 | 0.96646  | 0.072975 |
| 0.08654  | 0.06167  | 0.073705 | 0.11168  | 0.066891 | 0.14894  | 0.041206 | 0.37429  | 0.147616 |
| 0.099919 | 0.03086  | 0.128055 | 0.00558  | 0.121234 | 0.00873  | 0.068138 | 0.1415   | 0.343766 |
| 0.138697 | 0.00267  | 0.178241 | 0.00011  | 0.137661 | 0.00287  | 0.147198 | 0.00142  | 0.293633 |
| 0.092897 | 0.04481  | 0.058499 | 0.207    | 0.094587 | 0.04104  | -0.00109 | 0.98131  | 0.036361 |
| 0.114755 | 0.01309  | 0.05135  | 0.2681   | 0.095186 | 0.03977  | -0.02078 | 0.6543   | -0.00645 |
| -0.01319 | 0.7762   | -0.01448 | 0.75504  | -0.01405 | 0.76197  | -0.03473 | 0.45398  | 0.036919 |
| 0.096644 | 0.03682  | 0.091462 | 0.04823  | 0.104531 | 0.02388  | 0.05264  | 0.25625  | 0.044598 |
| 0.008921 | 0.84753  | 0.014935 | 0.74753  | 0.014958 | 0.74714  | -0.00626 | 0.89271  | 0.00253  |
| -0.03468 | 0.45467  | -0.02926 | 0.52823  | -0.02756 | 0.5525   | -0.0388  | 0.40281  | -0.09527 |
| 0.01722  | 0.71052  | 0.023153 | 0.61773  | 0.043947 | 0.34333  | -0.01214 | 0.79351  | -0.01062 |
| 0.057232 | 0.21702  | 0.130462 | 0.00475  | 0.093412 | 0.04363  | 0.127777 | 0.00569  | 0.158998 |
| 0.004042 | 0.93059  | 0.004767 | 0.91816  | 0.015361 | 0.74057  | -0.02799 | 0.54624  | -0.03481 |
| -0.00817 | 0.86031  | 0.033208 | 0.47405  | -0.00313 | 0.94623  | 0.034783 | 0.45333  | 0.079246 |
| 0.348814 | 8.30E-15 | 0.242975 | 1.06E-07 | 0.358662 | 1.27E-15 | 0.040935 | 0.37745  | 0.156008 |
| 0.01756  | 0.70507  | 0.016745 | 0.71815  | 0.00213  | 0.96339  | 0.024072 | 0.60385  | -0.05144 |
| 0.08123  | 0.0795   | 0.054191 | 0.24248  | 0.04911  | 0.28957  | 0.05059  | 0.27526  | 0.08542  |
| 0.297974 | 4.97E-11 | 0.395024 | 6.85E-19 | 0.322543 | 9.11E-13 | 0.313778 | 3.96E-12 | 0.513684 |
| -0.02296 | 0.62072  | 0.006843 | 0.88276  | -0.00924 | 0.84211  | 0.006137 | 0.89477  | 0.014863 |
| 0.157668 | 0.00063  | 0.279243 | 8.21E-10 | 0.196448 | 1.91E-05 | 0.253769 | 2.69E-08 | 0.497613 |
| 0.013295 | 0.77446  | 0.025133 | 0.58798  | 0.045437 | 0.3272   | -0.03269 | 0.48103  | -0.02943 |
| 0.040954 | 0.37722  | 0.095502 | 0.03911  | 0.039509 | 0.3943   | 0.089508 | 0.05324  | 0.275281 |
| -0.0867  | 0.06118  | -0.05433 | 0.24125  | -0.04747 | 0.30597  | -0.06366 | 0.16963  | 0.051969 |
| 0.039215 | 0.39783  | 0.012042 | 0.79522  | 0.028525 | 0.53861  | -0.02053 | 0.65809  | 0.005962 |
| 0.067721 | 0.14395  | 0.006326 | 0.89155  | 0.045671 | 0.32471  | -0.03801 | 0.41246  | 0.002561 |
| 0.174936 | 0.00014  | 0.150398 | 0.00111  | 0.155421 | 0.00075  | 0.09464  | 0.04093  | 0.219429 |
| 0.059582 | 0.1987   | 0.243685 | 9.68E-08 | 0.098606 | 0.03314  | 0.292483 | 1.15E-10 | 0.477415 |
| 0.053188 | 0.25133  | 0.127302 | 0.00587  | 0.078126 | 0.09172  | 0.108857 | 0.01862  | 0.17796  |



|          |          |          |          |          |          |          |          |          |
|----------|----------|----------|----------|----------|----------|----------|----------|----------|
| 0.064858 | 0.16172  | 0.196745 | 1.85E-05 | 0.112738 | 0.01479  | 0.196307 | 1.93E-05 | 0.202854 |
| 0.043029 | 0.35351  | 0.130227 | 0.00482  | 0.083415 | 0.07172  | 0.118443 | 0.01042  | 0.185364 |
| -0.01019 | 0.82612  | 0.000808 | 0.9861   | -0.00165 | 0.97156  | 0.008222 | 0.85935  | 0.063855 |
| -0.02976 | 0.52123  | 0.009033 | 0.84564  | -0.0353  | 0.4466   | 0.023336 | 0.61496  | 0.089119 |
| 0.042359 | 0.36106  | -0.04731 | 0.3076   | -0.00876 | 0.85026  | -0.06776 | 0.14372  | -0.03175 |
| 0.033372 | 0.47187  | 0.113461 | 0.01416  | 0.055543 | 0.23091  | 0.116135 | 0.01202  | 0.164314 |
| 0.111907 | 0.01554  | 0.120044 | 0.00941  | 0.109696 | 0.01772  | 0.095668 | 0.03877  | 0.214058 |
| 0.030306 | 0.51355  | -0.01996 | 0.66705  | 0.029257 | 0.52825  | -0.06393 | 0.16784  | -0.02993 |
| 0.22283  | 1.15E-06 | 0.155555 | 0.00074  | 0.170833 | 0.00021  | 0.104565 | 0.02383  | 0.20952  |
| 0.005873 | 0.89928  | -0.01857 | 0.68901  | 0.045958 | 0.32168  | -0.07586 | 0.10157  | -0.03278 |
| 0.086747 | 0.06105  | -0.0727  | 0.11668  | 0.021029 | 0.65035  | -0.13175 | 0.00435  | -0.19842 |
| 0.056448 | 0.22339  | 0.051373 | 0.26789  | 0.090482 | 0.05069  | 0.016174 | 0.72738  | 0.042578 |
| -0.0179  | 0.69968  | 0.03449  | 0.45714  | 0.028904 | 0.53324  | 0.01696  | 0.71471  | 0.061785 |
| -0.0076  | 0.8699   | -0.05383 | 0.24564  | -0.0397  | 0.39199  | -0.05672 | 0.2212   | -0.14226 |
| 0.057971 | 0.21113  | 0.097431 | 0.0353   | 0.082754 | 0.074    | 0.061138 | 0.1872   | 0.123268 |
| 0.103605 | 0.02516  | 0.164024 | 0.00037  | 0.115197 | 0.01274  | 0.144013 | 0.00181  | 0.154855 |
| 0.029842 | 0.52003  | 0.081148 | 0.07981  | 0.036093 | 0.43649  | 0.095559 | 0.03899  | 0.105309 |
| -0.00541 | 0.90723  | 0.046942 | 0.31141  | 0.008851 | 0.84872  | 0.066734 | 0.1499   | 0.09427  |
| 0.135401 | 0.00337  | 0.075807 | 0.1018   | 0.106145 | 0.02178  | 0.029097 | 0.5305   | 0.053691 |
| -0.01267 | 0.78486  | -0.08169 | 0.0778   | -0.00078 | 0.98659  | -0.13557 | 0.00333  | -0.09492 |
| 0.066271 | 0.15276  | 0.191709 | 3.04E-05 | 0.109522 | 0.01791  | 0.169583 | 0.00023  | 0.439907 |
| 0.108279 | 0.01926  | 0.115046 | 0.01286  | 0.108734 | 0.01875  | 0.084507 | 0.06806  | 0.111708 |
| 0.112766 | 0.01476  | 0.133181 | 0.00394  | 0.075603 | 0.10273  | 0.161203 | 0.00047  | 0.119431 |
| -0.0079  | 0.86485  | 0.018807 | 0.68521  | 0.03032  | 0.51336  | -0.01688 | 0.71593  | -0.01742 |
| 0.02147  | 0.64353  | -0.17174 | 0.00019  | -0.06606 | 0.15407  | -0.20288 | 9.94E-06 | -0.32928 |
| 0.149536 | 0.00119  | 0.249871 | 4.44E-08 | 0.200623 | 1.25E-05 | 0.201376 | 1.16E-05 | 0.334813 |
| -0.06    | 0.19553  | -0.10979 | 0.01762  | -0.06857 | 0.13899  | -0.1172  | 0.01126  | -0.16797 |
| -0.03462 | 0.45547  | -0.01147 | 0.80482  | -0.01532 | 0.74127  | -0.01214 | 0.79357  | 0.055067 |
| 0.00525  | 0.90991  | 0.089289 | 0.05383  | 0.039286 | 0.39698  | 0.090697 | 0.05014  | 0.078325 |
| 0.026154 | 0.5729   | 0.029616 | 0.52319  | 0.026242 | 0.57162  | -0.00133 | 0.97712  | -0.05352 |
| 0.068155 | 0.1414   | 0.07858  | 0.08985  | 0.074905 | 0.10595  | 0.040137 | 0.38682  | 0.103458 |
| 0.006361 | 0.89095  | 0.045345 | 0.32818  | 0.042228 | 0.36255  | 0.01759  | 0.7046   | 0.059611 |
| -0.00255 | 0.95626  | 0.069144 | 0.1357   | 0.015862 | 0.73244  | 0.084215 | 0.06902  | 0.137263 |
| 0.133897 | 0.00375  | 0.18801  | 4.34E-05 | 0.125213 | 0.00674  | 0.176716 | 0.00012  | 0.219889 |
| 0.07239  | 0.11823  | 0.246124 | 7.14E-08 | 0.122431 | 0.00808  | 0.263095 | 7.82E-09 | 0.410324 |
| 0.241047 | 1.34E-07 | 0.452958 | 5.27E-25 | 0.264209 | 6.73E-09 | 0.484143 | 8.15E-29 | 0.502984 |
| 0.066624 | 0.15058  | 0.129191 | 0.00517  | 0.086744 | 0.06106  | 0.12143  | 0.00862  | 0.139217 |
| 0.124047 | 0.00728  | 0.128898 | 0.00528  | 0.145513 | 0.00162  | 0.080209 | 0.08337  | 0.149364 |
| 0.043544 | 0.34777  | 0.030944 | 0.50473  | 0.00587  | 0.89933  | 0.03183  | 0.4926   | 0.022481 |
| -0.02096 | 0.65144  | -0.05503 | 0.2353   | -0.04285 | 0.35551  | -0.06019 | 0.19413  | -0.18826 |
| 0.053989 | 0.24425  | 0.074018 | 0.11017  | 0.055478 | 0.23146  | 0.04512  | 0.33059  | 0.160785 |
| 0.070864 | 0.12621  | 0.090098 | 0.05168  | 0.078957 | 0.08831  | 0.06818  | 0.14125  | 0.056465 |
| 0.053301 | 0.25032  | -0.06842 | 0.13985  | -0.00822 | 0.85935  | -0.09458 | 0.04106  | -0.18441 |
| 0.090044 | 0.05182  | 0.150491 | 0.00111  | 0.105907 | 0.02208  | 0.112906 | 0.01464  | 0.461325 |
| 0.047101 | 0.30978  | 0.086697 | 0.0612   | 0.062601 | 0.17685  | 0.070524 | 0.12805  | 0.190411 |

|          |          |          |          |          |          |          |          |          |
|----------|----------|----------|----------|----------|----------|----------|----------|----------|
| 0.086006 | 0.0633   | 0.150642 | 0.00109  | 0.100711 | 0.02955  | 0.124818 | 0.00692  | 0.336472 |
| -0.03146 | 0.49764  | -0.00065 | 0.98879  | -0.03644 | 0.43211  | 0.017072 | 0.71291  | 0.004719 |
| 0.085697 | 0.06426  | -0.03681 | 0.42742  | 0.064569 | 0.1636   | -0.11638 | 0.01185  | -0.12228 |
| 0.031053 | 0.50322  | -0.0797  | 0.08535  | -0.01928 | 0.67768  | -0.10624 | 0.02166  | -0.00927 |
| 0.001682 | 0.97108  | -0.05421 | 0.24236  | -0.01595 | 0.73096  | -0.07813 | 0.09172  | -0.14578 |
| -0.00415 | 0.9287   | -0.08563 | 0.06447  | -0.02416 | 0.60245  | -0.12242 | 0.00808  | -0.20545 |
| 0.151838 | 0.001    | 0.242148 | 1.17E-07 | 0.169342 | 0.00024  | 0.224408 | 9.63E-07 | 0.272598 |
| 0.137408 | 0.00292  | 0.053615 | 0.24753  | 0.100438 | 0.02999  | -0.01759 | 0.70456  | 0.096358 |
| 0.085528 | 0.06479  | 0.05376  | 0.24626  | 0.085126 | 0.06606  | -0.00452 | 0.92245  | 0.040303 |
| -0.02663 | 0.56588  | -0.05051 | 0.27598  | -0.05149 | 0.26684  | -0.04719 | 0.30884  | -0.0438  |
| 0.102006 | 0.02751  | 0.057075 | 0.21829  | 0.093866 | 0.04261  | -0.00479 | 0.91773  | 0.043826 |
| 0.02478  | 0.59325  | -0.0015  | 0.97416  | 0.054954 | 0.23591  | -0.06662 | 0.1506   | -0.03448 |
| 0.05916  | 0.2019   | 0.057017 | 0.21875  | 0.061331 | 0.18581  | 0.020236 | 0.66271  | 0.144306 |
| 0.084223 | 0.069    | 0.243979 | 9.34E-08 | 0.127136 | 0.00594  | 0.263149 | 7.76E-09 | 0.353764 |
| 0.095377 | 0.03937  | 0.092969 | 0.04464  | 0.100338 | 0.03016  | 0.040597 | 0.38141  | 0.15812  |
| 0.164545 | 0.00036  | 0.131431 | 0.00444  | 0.13267  | 0.00408  | 0.081488 | 0.07855  | 0.126556 |
| 0.101203 | 0.02876  | 0.068193 | 0.14118  | 0.08144  | 0.07872  | 0.021101 | 0.64924  | 0.127649 |
| 0.067645 | 0.14441  | 0.119096 | 0.01     | 0.084342 | 0.06861  | 0.100526 | 0.02985  | 0.257835 |
| 0.089973 | 0.05201  | 0.1385   | 0.0027   | 0.114712 | 0.01312  | 0.09229  | 0.04623  | 0.29034  |
| 0.105113 | 0.0231   | 0.195313 | 2.13E-05 | 0.132189 | 0.00422  | 0.160188 | 0.00051  | 0.495531 |
| 0.066897 | 0.14891  | 0.045346 | 0.32817  | 0.062601 | 0.17685  | -0.00427 | 0.92659  | 0.083595 |
| 0.06672  | 0.14999  | 0.032885 | 0.47836  | 0.068673 | 0.13839  | -0.02719 | 0.55776  | 0.045981 |
| 0.089234 | 0.05398  | 0.052614 | 0.25649  | 0.082981 | 0.07321  | -0.003   | 0.94852  | 0.041773 |
| 0.010935 | 0.81368  | 0.018616 | 0.68824  | 0.002337 | 0.95984  | 0.013318 | 0.77407  | 0.107064 |
| 0.018109 | 0.6963   | 0.041549 | 0.37033  | 0.01645  | 0.72293  | 0.044493 | 0.33736  | 0.073862 |
| -0.02108 | 0.64955  | 0.081437 | 0.07873  | 0.053231 | 0.25095  | 0.049655 | 0.28424  | 0.159746 |
| 0.031765 | 0.49348  | 0.115605 | 0.01242  | 0.054844 | 0.23684  | 0.108786 | 0.01869  | 0.284048 |
| -0.02443 | 0.59847  | -0.13532 | 0.00339  | -0.06188 | 0.18191  | -0.1658  | 0.00032  | -0.24367 |
| 0.040725 | 0.37989  | 0.005718 | 0.90193  | 0.025639 | 0.5805   | -0.03119 | 0.50134  | -0.00038 |
| 0.088471 | 0.05607  | 0.071967 | 0.1204   | 0.111546 | 0.01588  | 0.002518 | 0.95672  | 0.091399 |
| -0.0298  | 0.52067  | -0.12053 | 0.00913  | -0.04819 | 0.29875  | -0.15057 | 0.0011   | -0.23349 |
| 0.042111 | 0.36388  | 0.07502  | 0.10542  | 0.05093  | 0.27204  | 0.04217  | 0.36322  | 0.079466 |
| 0.049787 | 0.28296  | 0.021154 | 0.64841  | 0.043434 | 0.349    | -0.01828 | 0.69356  | 0.015759 |
| 0.075675 | 0.1024   | 0.022565 | 0.62669  | 0.051929 | 0.26274  | -0.01945 | 0.67501  | -0.00351 |
| 0.209124 | 5.17E-06 | 0.168741 | 0.00025  | 0.221688 | 1.31E-06 | 0.060439 | 0.1923   | 0.217386 |
| 0.077799 | 0.09309  | 0.097939 | 0.03435  | 0.095655 | 0.0388   | 0.048163 | 0.29898  | 0.179549 |
| 0.056154 | 0.22582  | 0.031097 | 0.50262  | 0.04669  | 0.31402  | -0.00277 | 0.95243  | 0.033989 |
| 0.071178 | 0.12454  | 0.055548 | 0.23087  | 0.066168 | 0.15339  | 0.039594 | 0.39328  | 0.029768 |
| 0.001211 | 0.97917  | 0.000243 | 0.99583  | 0.007724 | 0.86779  | -0.00464 | 0.92031  | 0.018245 |
| 0.020617 | 0.65677  | 0.038802 | 0.40282  | 0.030937 | 0.50482  | 0.035079 | 0.4495   | 0.01706  |
| -0.03871 | 0.40393  | -0.10731 | 0.02037  | -0.05634 | 0.22425  | -0.1258  | 0.00649  | -0.09033 |
| 0.119898 | 0.0095   | 0.142207 | 0.00207  | 0.163411 | 0.00039  | 0.051296 | 0.2686   | 0.241461 |
| 0.079533 | 0.08601  | 0.121581 | 0.00854  | 0.095097 | 0.03996  | 0.086053 | 0.06316  | 0.192407 |
| -0.02572 | 0.57931  | 0.003762 | 0.93538  | 0.001704 | 0.97071  | 0.002637 | 0.95468  | 0.068717 |
| 0.071082 | 0.12505  | 0.080809 | 0.08108  | 0.07824  | 0.09125  | 0.040658 | 0.38069  | 0.087975 |

|          |          |           |          |          |          |          |          |          |
|----------|----------|-----------|----------|----------|----------|----------|----------|----------|
| 0.086759 | 0.06101  | 0.051334  | 0.26825  | 0.068472 | 0.13955  | 0.00886  | 0.84855  | 0.020542 |
| 0.067084 | 0.14777  | 0.167481  | 0.00028  | 0.107698 | 0.01992  | 0.145443 | 0.00162  | 0.42838  |
| -0.07587 | 0.10154  | 0.041194  | 0.37443  | -0.00785 | 0.86562  | 0.051725 | 0.26462  | 0.204152 |
| -0.13209 | 0.00424  | -0.13441  | 0.00361  | -0.11504 | 0.01286  | -0.12148 | 0.00859  | -0.23831 |
| 0.055425 | 0.23191  | 0.020621  | 0.6567   | 0.052599 | 0.25663  | -0.02809 | 0.54477  | 0.002007 |
| -0.04831 | 0.29755  | -0.07474  | 0.10672  | -0.06362 | 0.1699   | -0.07759 | 0.09398  | -0.18389 |
| 0.103819 | 0.02486  | 0.137736  | 0.00286  | 0.124189 | 0.00721  | 0.102702 | 0.02646  | 0.232206 |
| 0.030214 | 0.51483  | 0.029699  | 0.52203  | 0.04512  | 0.33058  | -0.01018 | 0.8264   | 0.078316 |
| 0.159151 | 0.00056  | 0.16142   | 0.00046  | 0.148272 | 0.00131  | 0.112501 | 0.015    | 0.312614 |
| 0.085618 | 0.06451  | 0.065015  | 0.16071  | 0.069576 | 0.13327  | 0.025466 | 0.58305  | 0.180797 |
| 0.011878 | 0.79794  | 0.060501  | 0.19185  | 0.040053 | 0.38782  | 0.040318 | 0.38469  | 0.217203 |
| -0.06212 | 0.18024  | -0.07153  | 0.12267  | -0.0522  | 0.26027  | -0.09858 | 0.0332   | -0.13913 |
| 0.080303 | 0.08301  | 0.091429  | 0.04831  | 0.099453 | 0.03165  | 0.0702   | 0.12981  | 0.115366 |
| -0.08392 | 0.07002  | -0.05586  | 0.22829  | -0.05895 | 0.20353  | -0.04346 | 0.34868  | -0.08555 |
| 0.14952  | 0.00119  | 0.210705  | 4.37E-06 | 0.163871 | 0.00038  | 0.173779 | 0.00016  | 0.325551 |
| -0.02822 | 0.54296  | -0.03058  | 0.50971  | -0.02722 | 0.55733  | -0.0414  | 0.37205  | -0.09456 |
| 0.053115 | 0.25197  | 0.037159  | 0.42305  | 0.050121 | 0.27974  | -0.00088 | 0.98494  | 0.050861 |
| 0.084472 | 0.06818  | 0.11148   | 0.01594  | 0.0913   | 0.04863  | 0.080746 | 0.08132  | 0.182492 |
| 0.098496 | 0.03334  | 0.138314  | 0.00274  | 0.095186 | 0.03977  | 0.13361  | 0.00382  | 0.189029 |
| 0.107286 | 0.0204   | 0.049041  | 0.29025  | 0.073817 | 0.11114  | -0.00059 | 0.98992  | 0.059794 |
| 0.153646 | 0.00086  | 0.097009  | 0.03611  | 0.109831 | 0.01758  | 0.047167 | 0.3091   | 0.197705 |
| 0.113201 | 0.01438  | 0.093831  | 0.04269  | 0.115937 | 0.01217  | 0.013421 | 0.77238  | 0.284272 |
| 0.085952 | 0.06347  | 0.093426  | 0.0436   | 0.091906 | 0.04715  | 0.051795 | 0.26397  | 0.129584 |
| 0.078338 | 0.09084  | 0.11515   | 0.01277  | 0.112641 | 0.01487  | 0.063594 | 0.17007  | 0.217574 |
| 0.066737 | 0.14989  | 0.119668  | 0.00964  | 0.076684 | 0.09789  | 0.109219 | 0.01823  | 0.194307 |
| -0.04151 | 0.37074  | 0.019098  | 0.6806   | -0.01511 | 0.74472  | 0.018133 | 0.69592  | -0.02996 |
| 0.008663 | 0.8519   | -0.0921   | 0.04668  | -0.02814 | 0.54409  | -0.12483 | 0.00691  | -0.20033 |
| 0.152546 | 0.00094  | 0.092442  | 0.04587  | 0.147891 | 0.00135  | 0.000173 | 0.99702  | 0.003337 |
| 0.08879  | 0.05519  | 0.190208  | 3.51E-05 | 0.151349 | 0.00103  | 0.151842 | 0.001    | 0.180043 |
| -0.06266 | 0.17645  | -0.03375  | 0.46682  | -0.01515 | 0.74395  | -0.06226 | 0.17924  | -0.03529 |
| 0.028496 | 0.53903  | -0.08438  | 0.06847  | 0.040808 | 0.37893  | -0.15673 | 0.00068  | -0.22884 |
| 0.043635 | 0.34677  | 0.035001  | 0.4505   | 0.047423 | 0.30647  | -0.00412 | 0.9292   | 0.044017 |
| 0.086149 | 0.06286  | 0.098169  | 0.03393  | 0.072679 | 0.11677  | 0.071018 | 0.12539  | 0.178065 |
| -0.01556 | 0.73731  | 0.098374  | 0.03356  | 0.031278 | 0.50014  | 0.102393 | 0.02692  | 0.127759 |
| 0.157224 | 0.00065  | 0.257112  | 1.74E-08 | 0.147755 | 0.00136  | 0.276005 | 1.31E-09 | 0.336075 |
| 0.295254 | 7.56E-11 | 0.205876  | 7.28E-06 | 0.244428 | 8.83E-08 | 0.09642  | 0.03726  | 0.206408 |
| -0.04567 | 0.32475  | 0.000983  | 0.9831   | 0.01276  | 0.78331  | -0.02921 | 0.52892  | -0.03245 |
| 0.004586 | 0.92127  | -0.00282  | 0.95153  | 0.00695  | 0.88093  | -0.02943 | 0.52574  | 0.039504 |
| 0.016437 | 0.72312  | -7.24E-05 | 0.99875  | 0.014046 | 0.76209  | -0.02341 | 0.61377  | -0.0006  |
| 0.237242 | 2.13E-07 | 0.166123  | 0.00031  | 0.178421 | 0.00011  | 0.122996 | 0.00779  | 0.210631 |
| 0.077611 | 0.09389  | 0.083285  | 0.07216  | 0.060839 | 0.18937  | 0.077989 | 0.0923   | 0.122599 |
| 0.004871 | 0.91639  | -0.06364  | 0.16975  | -0.02297 | 0.62049  | -0.07452 | 0.10777  | -0.11381 |
| 0.003646 | 0.93736  | 0.003429  | 0.94109  | -0.00141 | 0.97569  | 0.006131 | 0.89488  | 0.013293 |
| -0.03894 | 0.40115  | -0.0229   | 0.62157  | -0.02383 | 0.60746  | -0.03678 | 0.4278   | -0.11375 |
| 0.086641 | 0.06137  | 0.049886  | 0.282    | 0.048406 | 0.29654  | 0.046999 | 0.31082  | 0.044613 |

|          |          |          |          |          |          |          |          |          |
|----------|----------|----------|----------|----------|----------|----------|----------|----------|
| 0.064255 | 0.16566  | 0.038946 | 0.40109  | 0.073088 | 0.11472  | 0.004393 | 0.92457  | -0.03655 |
| -0.0546  | 0.23892  | 0.024289 | 0.60058  | -0.00484 | 0.91696  | 0.013888 | 0.76469  | 0.124641 |
| 0.018512 | 0.68989  | 0.006923 | 0.8814   | 0.020443 | 0.65947  | -0.01162 | 0.80231  | 0.004496 |
| -0.03831 | 0.40877  | -0.10231 | 0.02705  | -0.09521 | 0.03972  | -0.08396 | 0.06988  | -0.10882 |
| -0.00902 | 0.84593  | 0.066555 | 0.151    | 0.050265 | 0.27836  | 0.07452  | 0.10776  | 0.023202 |
| 0.052166 | 0.26056  | 0.121081 | 0.00881  | 0.07849  | 0.09022  | 0.113542 | 0.01409  | 0.151414 |
| 0.009214 | 0.84259  | 0.020778 | 0.65425  | 0.051104 | 0.2704   | -0.01625 | 0.72618  | 0.011927 |
| -0.03004 | 0.51719  | 0.008323 | 0.85763  | 0.00254  | 0.95634  | -0.01656 | 0.72111  | 0.039531 |
| 0.195704 | 2.05E-05 | 0.265144 | 5.92E-09 | 0.224158 | 9.90E-07 | 0.212357 | 3.66E-06 | 0.402038 |
| 0.380724 | 1.48E-17 | 0.343774 | 2.12E-14 | 0.301736 | 2.76E-11 | 0.302116 | 2.60E-11 | 0.194096 |
| 0.048884 | 0.2918   | 0.048006 | 0.30056  | 0.049418 | 0.28655  | 0.016873 | 0.7161   | 0.115774 |
| 0.032174 | 0.48793  | -0.04743 | 0.30638  | 0.012602 | 0.78592  | -0.09989 | 0.03091  | -0.04091 |
| -0.03095 | 0.50468  | -0.03211 | 0.48875  | -0.02935 | 0.52695  | -0.03638 | 0.43279  | 0.025974 |
| 0.073175 | 0.11429  | 0.041901 | 0.36628  | 0.028092 | 0.5448   | 0.035286 | 0.44682  | 0.068309 |
| 0.064533 | 0.16384  | 0.006742 | 0.88447  | 0.045106 | 0.33073  | -0.04224 | 0.36242  | -0.02245 |
| 0.297893 | 5.03E-11 | 0.192225 | 2.89E-05 | 0.260579 | 1.10E-08 | 0.072274 | 0.11883  | 0.052791 |
| -0.10145 | 0.02837  | -0.08054 | 0.08209  | -0.10599 | 0.02197  | -0.04917 | 0.28896  | -0.11909 |
| 0.091965 | 0.047    | 0.058225 | 0.20913  | 0.072189 | 0.11926  | 0.025039 | 0.58938  | 0.062878 |
| 0.050793 | 0.27333  | 0.174156 | 0.00016  | 0.094569 | 0.04108  | 0.168271 | 0.00026  | 0.406814 |
| 0.089459 | 0.05337  | -0.01232 | 0.79061  | 0.007284 | 0.87525  | -0.03599 | 0.43779  | -0.07088 |
| 0.020775 | 0.65431  | -0.00937 | 0.83996  | 0.026153 | 0.57292  | -0.03482 | 0.4528   | -0.03302 |
| 0.087948 | 0.05754  | 0.073599 | 0.1122   | 0.045309 | 0.32856  | 0.071184 | 0.12451  | 0.238517 |
| 0.057645 | 0.21372  | 0.028426 | 0.54003  | 0.067206 | 0.14704  | -0.02387 | 0.60683  | -0.01057 |
| 0.141249 | 0.00222  | 0.188149 | 4.28E-05 | 0.147822 | 0.00136  | 0.169056 | 0.00024  | 0.255669 |
| 0.006602 | 0.88686  | 0.054558 | 0.23931  | 0.046218 | 0.31894  | 0.018848 | 0.68456  | 0.141933 |
| 0.036263 | 0.43433  | 0.028103 | 0.54464  | 0.042375 | 0.36088  | -0.01013 | 0.8271   | 0.047881 |
| 0.214284 | 2.97E-06 | 0.282366 | 5.21E-10 | 0.197276 | 1.75E-05 | 0.261496 | 9.70E-09 | 0.3772   |
| 0.015488 | 0.73852  | -0.00594 | 0.89819  | 0.008282 | 0.85833  | -0.00143 | 0.97543  | -0.03645 |
| 0.198533 | 1.55E-05 | 0.208462 | 5.55E-06 | 0.200809 | 1.23E-05 | 0.126629 | 0.00614  | 0.425814 |
| -0.00545 | 0.9065   | -0.00678 | 0.88381  | 0.028336 | 0.54131  | -0.04594 | 0.3219   | 0.001039 |
| -0.08262 | 0.07449  | -0.08023 | 0.0833   | -0.06561 | 0.15688  | -0.07632 | 0.09951  | -0.09534 |
| 0.061854 | 0.18208  | 0.100396 | 0.03006  | 0.044216 | 0.34037  | 0.106614 | 0.0212   | 0.223294 |
| 0.007176 | 0.87709  | 0.011818 | 0.79895  | 0.02204  | 0.63474  | -0.01072 | 0.81732  | 0.054537 |
| 0.061045 | 0.18787  | 0.053109 | 0.25203  | 0.061821 | 0.18231  | 0.01879  | 0.68547  | 0.047693 |
| 0.099833 | 0.031    | 0.094147 | 0.04199  | 0.122061 | 0.00828  | 0.063225 | 0.17256  | 0.052799 |
| 0.001144 | 0.98032  | -0.03314 | 0.47491  | 0.00962  | 0.83574  | -0.07018 | 0.12994  | -0.06963 |
| -0.05529 | 0.23304  | -0.07472 | 0.1068   | -0.07003 | 0.13077  | -0.05944 | 0.19977  | 0.015483 |
| 0.036004 | 0.43761  | 0.01785  | 0.70043  | 0.041613 | 0.36959  | -0.02198 | 0.6357   | -0.0105  |
| 0.005558 | 0.90465  | 0.042147 | 0.36347  | 0.057287 | 0.21658  | 0.001733 | 0.97021  | 0.061735 |
| 0.068468 | 0.13958  | 0.064471 | 0.16424  | 0.074199 | 0.1093   | 0.020956 | 0.65149  | 0.108574 |
| 0.102685 | 0.02649  | 0.322339 | 9.43E-13 | 0.17491  | 0.00015  | 0.31503  | 3.22E-12 | 0.608494 |
| 0.132953 | 0.004    | 0.209551 | 4.94E-06 | 0.15791  | 0.00062  | 0.172107 | 0.00019  | 0.410323 |
| 0.06852  | 0.13928  | 0.028095 | 0.54476  | 0.024297 | 0.60046  | 0.023257 | 0.61616  | 0.08434  |
| -0.0058  | 0.90054  | -0.00059 | 0.98984  | 0.015913 | 0.73161  | -0.03395 | 0.46426  | -0.00159 |
| 0.054258 | 0.24191  | 0.037611 | 0.41743  | 0.039155 | 0.39855  | 0.005115 | 0.91221  | 0.106085 |

|          |          |          |          |          |          |          |          |          |
|----------|----------|----------|----------|----------|----------|----------|----------|----------|
| 0.156208 | 0.00071  | 0.094311 | 0.04163  | 0.118256 | 0.01054  | 0.035192 | 0.44802  | 0.067479 |
| -0.01662 | 0.72015  | -0.13424 | 0.00366  | -0.08948 | 0.05331  | -0.14106 | 0.00225  | -0.21419 |
| 0.05558  | 0.23061  | -0.01332 | 0.77397  | 0.012019 | 0.7956   | -0.02706 | 0.55975  | -0.06788 |
| 0.113936 | 0.01375  | 0.157818 | 0.00062  | 0.085727 | 0.06417  | 0.17419  | 0.00015  | 0.180947 |
| 0.198078 | 1.62E-05 | 0.086599 | 0.06149  | 0.108817 | 0.01866  | 0.044459 | 0.33773  | 0.011087 |
| 0.062565 | 0.1771   | 0.073591 | 0.11224  | 0.06328  | 0.17219  | 0.063193 | 0.17278  | 0.063815 |
| 0.109974 | 0.01743  | 0.231117 | 4.43E-07 | 0.172595 | 0.00018  | 0.190191 | 3.52E-05 | 0.424818 |
| -0.02162 | 0.64123  | 0.050798 | 0.27329  | 0.005078 | 0.91285  | 0.071373 | 0.12351  | 0.101954 |
| 0.074798 | 0.10646  | 0.080758 | 0.08127  | 0.078511 | 0.09013  | 0.035102 | 0.44919  | 0.184958 |
| 0.111658 | 0.01578  | 0.160672 | 0.00049  | 0.130121 | 0.00486  | 0.144447 | 0.00175  | 0.186081 |
| -0.00677 | 0.88401  | 0.010578 | 0.81966  | 0.001517 | 0.97393  | 0.002201 | 0.96217  | 0.149221 |
| 0.225121 | 8.87E-07 | 0.152641 | 0.00094  | 0.132869 | 0.00402  | 0.131798 | 0.00433  | 0.106729 |
| 0.036443 | 0.43205  | 0.158312 | 0.0006   | 0.075113 | 0.10499  | 0.161153 | 0.00047  | 0.365156 |
| 0.074651 | 0.10715  | 0.171569 | 0.0002   | 0.098854 | 0.0327   | 0.17614  | 0.00013  | 0.186536 |
| 0.059831 | 0.19683  | 0.160494 | 0.0005   | 0.093825 | 0.0427   | 0.165825 | 0.00032  | 0.217585 |
| 0.060708 | 0.19033  | 0.16364  | 0.00038  | 0.094513 | 0.0412   | 0.153729 | 0.00086  | 0.144712 |
| -0.01849 | 0.69023  | -0.03812 | 0.41117  | 0.012102 | 0.79422  | -0.07501 | 0.10546  | -0.06148 |
| -0.0627  | 0.17615  | -0.0338  | 0.46618  | -0.04558 | 0.32573  | -0.02519 | 0.58711  | -0.00291 |
| 0.01393  | 0.76399  | 0.014274 | 0.75834  | 0.029507 | 0.52472  | -0.01951 | 0.67402  | -0.04708 |
| 0.295786 | 6.97E-11 | 0.197788 | 1.67E-05 | 0.308067 | 1.01E-11 | 0.02596  | 0.57576  | 0.080325 |
| 0.062463 | 0.17781  | 0.0699   | 0.13147  | 0.038012 | 0.41248  | 0.091431 | 0.04831  | 0.188067 |
| 0.028372 | 0.5408   | -0.02919 | 0.52912  | 0.009548 | 0.83696  | -0.06462 | 0.16326  | -0.08286 |
| 0.079263 | 0.08708  | 0.025416 | 0.58379  | 0.064745 | 0.16245  | -0.03049 | 0.51097  | -0.01476 |
| -0.00145 | 0.97506  | -0.07975 | 0.08517  | -0.06483 | 0.16189  | -0.05877 | 0.20492  | -0.154   |
| 0.000195 | 0.99665  | 0.019928 | 0.66754  | 0.002897 | 0.95022  | 0.013409 | 0.77258  | 0.156383 |
| 0.131321 | 0.00447  | 0.22667  | 7.43E-07 | 0.148223 | 0.00132  | 0.210647 | 4.40E-06 | 0.410856 |
| 0.032231 | 0.48716  | 0.108656 | 0.01884  | 0.049759 | 0.28323  | 0.111725 | 0.01571  | 0.282301 |
| 0.04021  | 0.38596  | 0.046091 | 0.32028  | 0.069714 | 0.1325   | 0.023056 | 0.61921  | -0.00588 |
| -0.13392 | 0.00374  | -0.06334 | 0.17181  | -0.11018 | 0.01722  | -0.01992 | 0.66763  | -0.10545 |
| -0.01689 | 0.71584  | -0.10388 | 0.02477  | -0.05154 | 0.26635  | -0.13527 | 0.0034   | -0.14195 |
| -0.04992 | 0.28167  | -0.04727 | 0.30801  | -0.03175 | 0.49375  | -0.05268 | 0.25589  | 0.001444 |
| 0.025038 | 0.5894   | 0.084538 | 0.06796  | 0.03712  | 0.42354  | 0.08039  | 0.08267  | 0.225509 |
| -0.0328  | 0.47953  | -0.06398 | 0.16747  | -0.05428 | 0.24174  | -0.06422 | 0.16592  | -0.07432 |
| 0.050289 | 0.27813  | 0.023644 | 0.6103   | 0.046224 | 0.31888  | -0.00203 | 0.9651   | -0.06787 |
| 0.044553 | 0.33671  | 0.011877 | 0.79795  | 0.043642 | 0.34669  | -0.03586 | 0.43946  | -0.01312 |
| 0.055119 | 0.2345   | -0.05907 | 0.20259  | -0.00451 | 0.92258  | -0.09506 | 0.04002  | -0.06619 |
| 0.108353 | 0.01917  | 0.071198 | 0.12443  | 0.086652 | 0.06133  | 0.034355 | 0.45891  | 0.168936 |
| 0.017726 | 0.70241  | -0.01819 | 0.69497  | 0.00045  | 0.99227  | -0.01138 | 0.8062   | -0.07538 |
| -0.04395 | 0.34333  | -0.05254 | 0.25718  | -0.05716 | 0.21762  | -0.03698 | 0.4253   | -0.02418 |
| 0.124251 | 0.00718  | 0.071787 | 0.12134  | 0.109154 | 0.0183   | 0.007731 | 0.86766  | 0.055761 |
| 0.068364 | 0.14018  | 0.127175 | 0.00592  | 0.088024 | 0.05733  | 0.11394  | 0.01375  | 0.219032 |
| 0.067561 | 0.14491  | 0.235801 | 2.54E-07 | 0.109296 | 0.01814  | 0.254086 | 2.58E-08 | 0.447577 |
| 0.089697 | 0.05273  | 0.009208 | 0.84269  | 0.077423 | 0.09469  | -0.05807 | 0.21033  | 0.028488 |
| -0.01915 | 0.6798   | -0.05799 | 0.21102  | -0.01595 | 0.73106  | -0.07158 | 0.12242  | -0.06781 |
| 0.099824 | 0.03102  | 0.211067 | 4.21E-06 | 0.129673 | 0.00501  | 0.223045 | 1.12E-06 | 0.299568 |

|          |          |          |          |          |          |          |          |          |
|----------|----------|----------|----------|----------|----------|----------|----------|----------|
| -0.06554 | 0.15732  | -0.0056  | 0.90387  | -0.04115 | 0.37492  | 0.004633 | 0.92046  | 0.048284 |
| -0.05016 | 0.27935  | 0.0132   | 0.77602  | -0.00874 | 0.85051  | 0.002783 | 0.95216  | 0.041227 |
| 0.012756 | 0.78337  | 0.002407 | 0.95863  | -0.0042  | 0.9279   | 0.016989 | 0.71422  | 0.069794 |
| 0.01492  | 0.74778  | -0.01921 | 0.67876  | 0.010137 | 0.82705  | -0.03801 | 0.41246  | -0.0156  |
| 0.024904 | 0.59139  | 0.13466  | 0.00355  | 0.066829 | 0.14932  | 0.142699 | 0.00199  | 0.113483 |
| 0.017029 | 0.71359  | -0.10161 | 0.02812  | -0.0554  | 0.23215  | -0.11527 | 0.01268  | -0.21837 |
| -0.10559 | 0.02249  | -0.11652 | 0.01174  | -0.06477 | 0.16226  | -0.13231 | 0.00418  | -0.16172 |
| 0.159483 | 0.00054  | 0.080458 | 0.08241  | 0.11208  | 0.01538  | 0.03452  | 0.45675  | 0.044702 |
| 0.017392 | 0.70776  | 0.076961 | 0.09668  | 0.041541 | 0.37041  | 0.075954 | 0.10114  | 0.274556 |
| 0.094945 | 0.04028  | 0.156945 | 0.00066  | 0.074089 | 0.10983  | 0.196248 | 1.94E-05 | 0.252131 |
| 0.116028 | 0.0121   | 0.120335 | 0.00924  | 0.17863  | 0.0001   | 0.019903 | 0.66793  | 0.244759 |
| 0.044933 | 0.3326   | 0.034623 | 0.45541  | 0.002654 | 0.95439  | 0.060354 | 0.19293  | 0.163472 |
| -0.0072  | 0.87663  | 0.014139 | 0.76057  | 0.00125  | 0.97851  | 0.035544 | 0.4435   | 0.111119 |
| -0.07519 | 0.10462  | -0.06234 | 0.17866  | -0.0522  | 0.26022  | -0.07239 | 0.11822  | -0.06466 |
| 0.016305 | 0.72526  | -0.02527 | 0.5859   | -0.02273 | 0.62413  | -0.04089 | 0.37798  | -0.03427 |
| -0.00386 | 0.93378  | -0.00407 | 0.93004  | -0.01207 | 0.79473  | -0.00699 | 0.8802   | -0.02123 |
| 0.293495 | 9.90E-11 | 0.307166 | 1.16E-11 | 0.274151 | 1.70E-09 | 0.240535 | 1.43E-07 | 0.228415 |
| 0.000237 | 0.99592  | -0.09208 | 0.04672  | -0.01976 | 0.67024  | -0.11653 | 0.01173  | -0.13955 |
| 0.025016 | 0.58972  | 0.060825 | 0.18947  | 0.049936 | 0.28152  | 0.051973 | 0.26233  | 0.031724 |
| 0.070477 | 0.1283   | 0.142356 | 0.00204  | 0.099279 | 0.03195  | 0.118715 | 0.01024  | 0.267198 |
| 0.079554 | 0.08593  | 0.008112 | 0.86122  | 0.055141 | 0.23431  | -0.03648 | 0.43161  | 0.027773 |
| 0.125994 | 0.0064   | 0.025498 | 0.58257  | 0.067028 | 0.14811  | -0.00136 | 0.97659  | -0.00457 |
| 0.128357 | 0.00547  | 0.11454  | 0.01326  | 0.137872 | 0.00283  | 0.046744 | 0.31346  | 0.061231 |
| 0.075851 | 0.1016   | 0.103328 | 0.02555  | 0.088171 | 0.05691  | 0.084621 | 0.06769  | 0.248929 |
| 0.116258 | 0.01193  | 0.059582 | 0.1987   | 0.068588 | 0.13888  | 0.028144 | 0.54406  | 0.086058 |
| 0.100382 | 0.03009  | 0.162467 | 0.00042  | 0.141294 | 0.00221  | 0.113674 | 0.01397  | 0.165225 |
| 0.11404  | 0.01367  | 0.12871  | 0.00534  | 0.143372 | 0.0019   | 0.059043 | 0.20279  | 0.031676 |
| 0.030542 | 0.51028  | 0.011478 | 0.8046   | 0.024372 | 0.59933  | -0.00558 | 0.90424  | 0.015195 |
| 0.099049 | 0.03236  | 0.12229  | 0.00816  | 0.11153  | 0.0159   | 0.087175 | 0.05978  | 0.137082 |
| 0.115816 | 0.01226  | 0.163992 | 0.00037  | 0.130793 | 0.00464  | 0.131718 | 0.00435  | 0.244571 |
| -0.03052 | 0.51053  | 0.034896 | 0.45187  | -0.00121 | 0.97926  | 0.054584 | 0.23908  | 0.025436 |
| 0.027486 | 0.55352  | 0.024951 | 0.5907   | 0.033225 | 0.47383  | -0.00626 | 0.89261  | 0.029724 |
| 0.107079 | 0.02064  | 0.098912 | 0.0326   | 0.158279 | 0.0006   | 0.002021 | 0.96525  | 0.139269 |
| 0.182607 | 7.22E-05 | 0.233482 | 3.35E-07 | 0.18353  | 6.62E-05 | 0.202169 | 1.07E-05 | 0.460567 |
| 0.259031 | 1.35E-08 | 0.302047 | 2.63E-11 | 0.381301 | 1.31E-17 | 0.106141 | 0.02179  | 0.074081 |
| -0.03214 | 0.48845  | -0.02466 | 0.59498  | -0.02289 | 0.62169  | -0.02158 | 0.64185  | 0.018128 |
| 0.16589  | 0.00032  | 0.096618 | 0.03687  | 0.113955 | 0.01374  | 0.047497 | 0.30572  | 0.163685 |
| 0.34109  | 3.46E-14 | 0.317076 | 2.29E-12 | 0.334405 | 1.15E-13 | 0.178483 | 0.00011  | 0.392423 |
| 0.049572 | 0.28505  | -0.02396 | 0.60559  | 0.021343 | 0.64549  | -0.03987 | 0.38994  | -0.02919 |
| 0.071308 | 0.12385  | 0.038649 | 0.40468  | 0.056566 | 0.22242  | -0.00856 | 0.85358  | 0.075448 |
| 0.02342  | 0.61369  | 0.096102 | 0.03789  | 0.042886 | 0.35511  | 0.107175 | 0.02053  | 0.166185 |
| 0.122117 | 0.00825  | 0.094297 | 0.04167  | 0.134426 | 0.00361  | 0.024125 | 0.60305  | 0.041159 |
| 0.046144 | 0.31972  | 0.083911 | 0.07004  | 0.043878 | 0.34408  | 0.091305 | 0.04861  | 0.12471  |
| 0.001647 | 0.97168  | 0.025746 | 0.57891  | 0.021631 | 0.64104  | 0.020707 | 0.65537  | 0.135158 |
| 0.077215 | 0.09558  | 0.005779 | 0.90087  | 0.068345 | 0.14029  | -0.04717 | 0.3091   | 0.014022 |

|          |          |          |          |          |          |          |          |          |
|----------|----------|----------|----------|----------|----------|----------|----------|----------|
| -0.03441 | 0.45821  | -0.05024 | 0.27864  | -0.03238 | 0.48519  | -0.05364 | 0.24735  | -0.04791 |
| 0.01761  | 0.70427  | 0.027939 | 0.54699  | 0.008484 | 0.85492  | 0.005559 | 0.90463  | 0.071453 |
| 0.326015 | 5.02E-13 | 0.228113 | 6.29E-07 | 0.280842 | 6.51E-10 | 0.098105 | 0.03405  | 0.147694 |
| 0.022559 | 0.62679  | 0.019974 | 0.66681  | 0.010725 | 0.8172   | 0.009797 | 0.83277  | -0.01185 |
| 0.105308 | 0.02285  | 0.110204 | 0.0172   | 0.117317 | 0.01117  | 0.066518 | 0.15123  | 0.140916 |
| 0.058083 | 0.21025  | 0.062311 | 0.17887  | 0.055925 | 0.22772  | 0.036085 | 0.43658  | 0.093499 |
| 0.061429 | 0.18511  | 0.028488 | 0.53915  | 0.063775 | 0.16885  | -0.01448 | 0.75495  | -0.02304 |
| 0.03307  | 0.47589  | -0.00294 | 0.94943  | 0.019657 | 0.67179  | -0.02399 | 0.60511  | -0.02248 |
| 0.067309 | 0.14642  | 0.002426 | 0.95829  | 0.007257 | 0.87572  | -0.01725 | 0.70996  | 0.006646 |
| 0.06371  | 0.16929  | -0.00631 | 0.89189  | 0.018461 | 0.6907   | -0.02288 | 0.62193  | -0.03871 |
| -0.08087 | 0.08085  | -0.03208 | 0.48924  | -0.04326 | 0.35093  | -0.00676 | 0.88418  | -0.11774 |
| 0.197068 | 1.79E-05 | 0.183916 | 6.39E-05 | 0.206305 | 6.96E-06 | 0.106418 | 0.02144  | 0.092816 |
| 0.038119 | 0.41117  | -0.02459 | 0.59614  | 0.008536 | 0.85403  | -0.0564  | 0.22378  | -0.02518 |
| 0.049672 | 0.28408  | 0.062586 | 0.17695  | 0.059851 | 0.19668  | 0.0207   | 0.65546  | 0.215647 |
| 0.145403 | 0.00163  | 0.223866 | 1.02E-06 | 0.181807 | 7.77E-05 | 0.173458 | 0.00017  | 0.364695 |
| 0.058684 | 0.20556  | 0.028076 | 0.54503  | 0.050441 | 0.27668  | -0.00745 | 0.87246  | 0.024662 |
| 0.123912 | 0.00734  | 0.055742 | 0.22924  | 0.071358 | 0.12358  | 0.015746 | 0.73431  | 0.067292 |
| 0.063374 | 0.17155  | -0.05154 | 0.26634  | 0.008937 | 0.84726  | -0.09426 | 0.04174  | -0.02928 |
| 0.112415 | 0.01508  | 0.030044 | 0.51721  | 0.065197 | 0.15954  | -0.01146 | 0.80485  | 0.06204  |
| -0.03358 | 0.46904  | -0.11433 | 0.01343  | -0.06422 | 0.16592  | -0.13523 | 0.00341  | -0.14986 |
| 0.072568 | 0.11733  | 0.033952 | 0.4642   | 0.084088 | 0.06945  | -0.01229 | 0.79106  | 0.061273 |
| 0.071112 | 0.12489  | -0.06784 | 0.14325  | 0.024746 | 0.59374  | -0.13636 | 0.00315  | -0.15346 |
| -0.03041 | 0.51213  | -0.05367 | 0.24707  | -0.00879 | 0.84969  | -0.09082 | 0.04982  | -0.01725 |
| -0.07459 | 0.10743  | -0.03714 | 0.42325  | -0.04379 | 0.34502  | -0.04764 | 0.30424  | 0.061908 |
| 0.004256 | 0.92692  | 0.037844 | 0.41455  | 0.044408 | 0.33828  | -0.00295 | 0.94929  | 0.122858 |
| 0.010634 | 0.81872  | 0.097353 | 0.03545  | 0.059452 | 0.19968  | 0.083323 | 0.07203  | 0.268271 |
| 0.061446 | 0.18499  | 0.044324 | 0.3392   | 0.055272 | 0.2332   | 0.021496 | 0.64311  | 0.109869 |
| -0.14031 | 0.00237  | -0.20362 | 9.21E-06 | -0.12289 | 0.00785  | -0.22892 | 5.72E-07 | -0.28408 |
| 0.02799  | 0.54626  | 0.053958 | 0.24452  | 0.050231 | 0.27868  | 0.029862 | 0.51975  | 0.056244 |
| -0.02988 | 0.51944  | 0.066087 | 0.1539   | 0.004647 | 0.92023  | 0.075625 | 0.10263  | 0.15095  |
| 0.059216 | 0.20147  | 0.054387 | 0.24079  | 0.042692 | 0.3573   | 0.034013 | 0.4634   | -0.00364 |
| 0.080499 | 0.08225  | 0.099012 | 0.03242  | 0.127168 | 0.00592  | 0.029222 | 0.52874  | 0.010654 |
| 0.199838 | 1.36E-05 | 0.182891 | 7.03E-05 | 0.153522 | 0.00087  | 0.152029 | 0.00098  | 0.294626 |
| 0.051193 | 0.26957  | 0.045959 | 0.32167  | 0.052414 | 0.2583   | 0.008703 | 0.85122  | 0.08826  |
| 0.02129  | 0.64631  | 0.122578 | 0.00801  | 0.052203 | 0.26023  | 0.119629 | 0.00967  | 0.372968 |
| 0.113645 | 0.014    | -0.07354 | 0.1125   | 0.013774 | 0.76655  | -0.11438 | 0.01339  | -0.10022 |
| 0.080183 | 0.08347  | 0.038296 | 0.409    | 0.03453  | 0.45662  | 0.042181 | 0.36309  | 0.090674 |
| 0.077891 | 0.09271  | 0.236656 | 2.29E-07 | 0.124501 | 0.00706  | 0.248714 | 5.15E-08 | 0.485358 |
| 0.073525 | 0.11257  | 0.166914 | 0.00029  | 0.148333 | 0.00131  | 0.099107 | 0.03225  | 0.211646 |
| 0.030793 | 0.5068   | 0.03497  | 0.45091  | 0.025369 | 0.58448  | 0.013836 | 0.76554  | 0.148134 |
| 0.077235 | 0.0955   | 0.039717 | 0.39182  | 0.051031 | 0.27109  | -0.00089 | 0.9847   | 0.019029 |
| 0.027515 | 0.5531   | 0.010113 | 0.82746  | 0.031809 | 0.49289  | -0.01675 | 0.71814  | 0.04195  |
| 0.062953 | 0.17442  | 0.061044 | 0.18788  | 0.058694 | 0.20549  | 0.016324 | 0.72496  | 0.096881 |
| 0.055875 | 0.22814  | 0.139993 | 0.00243  | 0.073713 | 0.11164  | 0.14991  | 0.00116  | 0.287739 |
| 0.01238  | 0.7896   | 0.002661 | 0.95426  | 0.005931 | 0.89828  | -0.02095 | 0.6516   | 0.105711 |

|           |          |          |          |          |          |          |          |          |
|-----------|----------|----------|----------|----------|----------|----------|----------|----------|
| -0.01549  | 0.73849  | 0.049596 | 0.28481  | 0.013543 | 0.77036  | 0.052556 | 0.25701  | 0.123947 |
| 0.031749  | 0.4937   | 0.069912 | 0.1314   | 0.052347 | 0.25891  | 0.034801 | 0.4531   | 0.194388 |
| 0.051871  | 0.26327  | 0.003071 | 0.94722  | 0.010978 | 0.81296  | -0.00703 | 0.87955  | -0.06436 |
| 0.003308  | 0.94316  | 0.036007 | 0.43758  | 0.003511 | 0.93968  | 0.035976 | 0.43797  | 0.041545 |
| 0.19995   | 1.34E-05 | 0.139017 | 0.00261  | 0.179447 | 9.65E-05 | 0.055762 | 0.22908  | 0.22465  |
| 0.099033  | 0.03238  | 0.121578 | 0.00854  | 0.078683 | 0.08943  | 0.118772 | 0.0102   | 0.19844  |
| -0.08089  | 0.08079  | -0.1739  | 0.00016  | -0.12001 | 0.00943  | -0.1614  | 0.00046  | -0.23869 |
| 0.023027  | 0.61965  | 0.03386  | 0.46541  | 0.061579 | 0.18404  | -0.02264 | 0.62548  | 0.074375 |
| 0.094414  | 0.04141  | 0.0821   | 0.07632  | 0.088038 | 0.05729  | 0.025584 | 0.5813   | 0.168363 |
| 0.073622  | 0.11209  | -0.018   | 0.69804  | 0.016877 | 0.71604  | -0.0513  | 0.26853  | -0.08146 |
| 0.206564  | 6.78E-06 | 0.177763 | 0.00011  | 0.238846 | 1.76E-07 | 0.069374 | 0.1344   | 0.068784 |
| 0.083561  | 0.07122  | 0.166068 | 0.00031  | 0.096684 | 0.03674  | 0.162796 | 0.00041  | 0.363871 |
| 0.075555  | 0.10295  | 0.073756 | 0.11144  | 0.058218 | 0.20919  | 0.063681 | 0.16948  | 0.122794 |
| 0.081164  | 0.07975  | 0.092521 | 0.04568  | 0.08138  | 0.07894  | 0.054843 | 0.23685  | 0.166053 |
| -0.06747  | 0.14543  | -0.0758  | 0.10185  | -0.06197 | 0.18127  | -0.06012 | 0.19465  | -0.12484 |
| 0.047352  | 0.3072   | 0.108803 | 0.01868  | 0.101098 | 0.02893  | 0.050586 | 0.27529  | 0.146932 |
| 0.158713  | 0.00058  | 0.135462 | 0.00336  | 0.125528 | 0.0066   | 0.10685  | 0.02092  | 0.155402 |
| 0.089283  | 0.05384  | 0.045213 | 0.32959  | 0.04885  | 0.29213  | 0.013063 | 0.77828  | 0.178683 |
| 0.133351  | 0.00389  | 0.309425 | 8.07E-12 | 0.179479 | 9.62E-05 | 0.315562 | 2.95E-12 | 0.597752 |
| 0.013104  | 0.77762  | 0.01962  | 0.67237  | 0.006559 | 0.88759  | 0.009733 | 0.83384  | 0.000663 |
| 0.154995  | 0.00078  | 0.158661 | 0.00058  | 0.167575 | 0.00028  | 0.093815 | 0.04272  | 0.149912 |
| 0.051187  | 0.26963  | 0.107649 | 0.01997  | 0.076661 | 0.098    | 0.082335 | 0.07548  | 0.220545 |
| 0.059068  | 0.20261  | 0.098676 | 0.03301  | 0.101603 | 0.02813  | 0.040309 | 0.38479  | 0.215451 |
| 0.038237  | 0.40972  | 0.079566 | 0.08588  | 0.075924 | 0.10128  | 0.051724 | 0.26463  | 0.306107 |
| 0.049107  | 0.28959  | 0.177845 | 0.00011  | 0.103044 | 0.02596  | 0.17443  | 0.00015  | 0.324869 |
| 0.129169  | 0.00518  | 0.091535 | 0.04805  | 0.143088 | 0.00194  | 0.005386 | 0.90759  | 0.03313  |
| 0.105871  | 0.02213  | 0.123333 | 0.00762  | 0.125616 | 0.00657  | 0.059323 | 0.20066  | 0.161241 |
| 0.147782  | 0.00136  | 0.082307 | 0.07558  | 0.103316 | 0.02557  | 0.032924 | 0.47785  | 0.067529 |
| -4.07E-05 | 0.9993   | 0.008543 | 0.85391  | 0.028764 | 0.53523  | -0.03914 | 0.39875  | -0.01809 |
| 0.084396  | 0.06843  | 0.086088 | 0.06305  | 0.06613  | 0.15363  | 0.057656 | 0.21363  | 0.186715 |
| 0.038147  | 0.41082  | 0.143836 | 0.00183  | 0.084892 | 0.06682  | 0.121215 | 0.00874  | 0.408314 |
| 0.177749  | 0.00011  | 0.119801 | 0.00956  | 0.147843 | 0.00136  | 0.051516 | 0.26656  | 0.150127 |
| -0.0167   | 0.71883  | -0.02541 | 0.58387  | -0.01599 | 0.73035  | -0.04639 | 0.3171   | 0.004299 |
| 0.13327   | 0.00391  | 0.236046 | 2.46E-07 | 0.152688 | 0.00093  | 0.217516 | 2.09E-06 | 0.337457 |
| 0.078006  | 0.09222  | -0.05852 | 0.20684  | 0.006976 | 0.88048  | -0.09653 | 0.03705  | -0.15021 |
| 0.138865  | 0.00263  | 0.13795  | 0.00281  | 0.140442 | 0.00235  | 0.085406 | 0.06517  | 0.242229 |
| 0.05912   | 0.20221  | 0.079847 | 0.08477  | 0.052625 | 0.25638  | 0.055669 | 0.22986  | 0.169903 |
| 0.102597  | 0.02662  | 0.193932 | 2.45E-05 | 0.139784 | 0.00247  | 0.16359  | 0.00039  | 0.280914 |
| 0.095298  | 0.03954  | 0.141708 | 0.00214  | 0.083952 | 0.0699   | 0.130629 | 0.00469  | 0.22005  |
| 0.037152  | 0.42314  | -0.0528  | 0.25478  | -0.02784 | 0.54848  | -0.04843 | 0.29632  | -0.08183 |
| 0.049722  | 0.28359  | 0.058326 | 0.20835  | 0.024071 | 0.60387  | 0.072883 | 0.11575  | 0.120137 |
| 0.07063   | 0.12747  | 0.069465 | 0.13389  | 0.068689 | 0.1383   | 0.034714 | 0.45422  | 0.030409 |
| 0.05832   | 0.20839  | 0.03307  | 0.47589  | 0.062755 | 0.17578  | 0.008029 | 0.86262  | 0.024156 |
| 0.262503  | 8.47E-09 | 0.263861 | 7.05E-09 | 0.249092 | 4.91E-08 | 0.180137 | 9.06E-05 | 0.168551 |
| 0.168514  | 0.00025  | 0.2141   | 3.03E-06 | 0.172322 | 0.00018  | 0.172836 | 0.00017  | 0.257498 |



|          |          |          |          |          |         |          |          |          |
|----------|----------|----------|----------|----------|---------|----------|----------|----------|
| 0.073736 | 0.11153  | 0.069121 | 0.13583  | 0.094113 | 0.04207 | 0.035149 | 0.44859  | 0.125187 |
| 0.056572 | 0.22238  | 0.127196 | 0.00591  | 0.096018 | 0.03806 | 0.101622 | 0.0281   | 0.293661 |
| 0.081835 | 0.07728  | 0.1502   | 0.00113  | 0.113385 | 0.01422 | 0.111801 | 0.01564  | 0.279577 |
| 0.032128 | 0.48855  | 0.00147  | 0.97472  | 0.016675 | 0.71928 | -0.02822 | 0.543    | 0.001589 |
| 0.124901 | 0.00688  | 0.245929 | 7.32E-08 | 0.11508  | 0.01283 | 0.274181 | 1.69E-09 | 0.471642 |
| 0.102425 | 0.02688  | 0.06836  | 0.1402   | 0.019563 | 0.67327 | 0.087023 | 0.06023  | 0.037195 |
| 0.079141 | 0.08757  | 0.041821 | 0.3672   | 0.076587 | 0.09832 | 0.006651 | 0.88601  | -0.00242 |
| 0.106127 | 0.0218   | 0.147891 | 0.00135  | 0.100324 | 0.03018 | 0.129739 | 0.00498  | 0.259976 |
| 0.097122 | 0.03589  | 0.113599 | 0.01404  | 0.103707 | 0.02502 | 0.07088  | 0.12613  | 0.208523 |
| 0.077058 | 0.09626  | 0.093294 | 0.0439   | 0.074325 | 0.10869 | 0.093404 | 0.04365  | 0.020111 |
| 0.022665 | 0.62516  | 0.094944 | 0.04028  | 0.036199 | 0.43514 | 0.121669 | 0.00849  | 0.079083 |
| 0.046483 | 0.31617  | 0.055323 | 0.23277  | 0.028579 | 0.53785 | 0.033824 | 0.46588  | 0.056458 |
| -0.00112 | 0.98072  | -0.00938 | 0.83983  | 0.013573 | 0.76987 | -0.04627 | 0.31844  | -0.05149 |
| 0.070751 | 0.12682  | 0.088419 | 0.05621  | 0.067449 | 0.14558 | 0.064055 | 0.16699  | 0.242862 |
| 0.068466 | 0.13959  | 0.078995 | 0.08816  | 0.053941 | 0.24466 | 0.053797 | 0.24593  | 0.061617 |
| -0.01977 | 0.67001  | 0.032086 | 0.48912  | 0.00549  | 0.90582 | 0.026726 | 0.56455  | 0.103456 |
| 0.097441 | 0.03528  | 0.198116 | 1.61E-05 | 0.11796  | 0.01073 | 0.200445 | 1.27E-05 | 0.337216 |
| 0.046589 | 0.31506  | 0.018364 | 0.69224  | 0.053462 | 0.24889 | -0.02849 | 0.53916  | -0.01753 |
| -0.03513 | 0.44877  | 0.016587 | 0.72071  | -0.00851 | 0.85448 | 0.010463 | 0.82159  | -0.00161 |
| 0.029695 | 0.52209  | 0.044825 | 0.33376  | 0.031858 | 0.49221 | 0.026888 | 0.56218  | 0.059576 |
| 0.03823  | 0.40981  | -0.02247 | 0.62815  | 0.032765 | 0.47997 | -0.08128 | 0.07931  | -0.07422 |
| 0.070544 | 0.12794  | 0.030958 | 0.50453  | 0.070861 | 0.12623 | -0.01922 | 0.67865  | 0.06582  |
| 0.067221 | 0.14695  | 0.147122 | 0.00143  | 0.07202  | 0.12013 | 0.148328 | 0.00131  | 0.317206 |
| 0.077246 | 0.09545  | 0.051145 | 0.27002  | 0.07291  | 0.11561 | 0.018661 | 0.68752  | 0.045923 |
| -0.00588 | 0.89914  | 0.005466 | 0.90622  | 0.016249 | 0.72617 | -0.02113 | 0.64881  | -0.00745 |
| 0.063795 | 0.16872  | 0.017536 | 0.70545  | 0.037813 | 0.41493 | -0.02085 | 0.65321  | 0.015185 |
| 0.071321 | 0.12378  | 0.02912  | 0.53018  | 0.075232 | 0.10444 | -0.0321  | 0.48891  | -0.02904 |
| 0.092329 | 0.04614  | 0.036925 | 0.42598  | 0.074528 | 0.10773 | -0.02156 | 0.64212  | 0.065043 |
| 0.04692  | 0.31163  | 0.078035 | 0.09211  | 0.074657 | 0.10712 | 0.032404 | 0.48482  | 0.21064  |
| 0.049722 | 0.28359  | -0.01575 | 0.73425  | 0.019828 | 0.6691  | -0.03674 | 0.42835  | -0.04682 |
| 0.040793 | 0.3791   | 0.065918 | 0.15496  | 0.049282 | 0.28788 | 0.044506 | 0.33722  | 0.174223 |
| 0.061452 | 0.18495  | 0.122829 | 0.00788  | 0.066572 | 0.1509  | 0.128198 | 0.00553  | 0.205245 |
| 0.087615 | 0.0585   | 0.040615 | 0.38119  | 0.079809 | 0.08492 | -0.01874 | 0.68631  | 0.001448 |
| 0.057622 | 0.2139   | -0.02454 | 0.59677  | 0.014906 | 0.74801 | -0.07    | 0.13094  | -0.07472 |
| 0.184193 | 6.23E-05 | 0.11178  | 0.01566  | 0.1646   | 0.00035 | 0.012492 | 0.78775  | 0.070108 |
| 0.039772 | 0.39116  | 0.119815 | 0.00955  | 0.098305 | 0.03368 | 0.067555 | 0.14494  | 0.329955 |
| 0.032129 | 0.48854  | 0.139414 | 0.00253  | 0.042129 | 0.36368 | 0.177116 | 0.00012  | 0.239249 |
| 0.070869 | 0.12619  | 0.015119 | 0.74453  | 0.024385 | 0.59914 | -0.0055  | 0.90562  | 0.026868 |
| -0.0529  | 0.25393  | -0.16278 | 0.00041  | -0.08997 | 0.05203 | -0.18911 | 3.91E-05 | -0.24308 |
| 0.079714 | 0.08529  | 0.063868 | 0.16823  | 0.053058 | 0.25249 | 0.043699 | 0.34606  | -0.00112 |
| 0.111745 | 0.0157   | 0.020171 | 0.66372  | 0.100228 | 0.03034 | -0.0617  | 0.18317  | -0.1113  |
| -0.00802 | 0.86272  | 0.065849 | 0.15539  | 0.005125 | 0.91205 | 0.08787  | 0.05777  | 0.07275  |
| -0.0021  | 0.9639   | 0.089224 | 0.054    | 0.045651 | 0.32493 | 0.070195 | 0.12984  | 0.247746 |
| 0.089905 | 0.05219  | 0.096629 | 0.03685  | 0.091833 | 0.04732 | 0.055166 | 0.23411  | 0.240816 |
| 0.063486 | 0.17079  | 0.118434 | 0.01042  | 0.109082 | 0.01837 | 0.068067 | 0.14191  | 0.225014 |

|          |          |          |          |          |          |          |          |          |
|----------|----------|----------|----------|----------|----------|----------|----------|----------|
| 0.12743  | 0.00582  | 0.225637 | 8.36E-07 | 0.138864 | 0.00263  | 0.203516 | 9.31E-06 | 0.435179 |
| 0.036989 | 0.42518  | 0.032875 | 0.4785   | 0.060299 | 0.19334  | -0.01218 | 0.79295  | 0.071976 |
| 0.039456 | 0.39494  | 0.048404 | 0.29656  | 0.040428 | 0.38339  | 0.022485 | 0.62792  | 0.104679 |
| 0.073949 | 0.1105   | 0.047494 | 0.30575  | 0.068615 | 0.13872  | 0.008013 | 0.86288  | 0.031075 |
| -0.03889 | 0.40176  | -0.05665 | 0.22173  | -0.02309 | 0.61861  | -0.05692 | 0.21956  | -0.06525 |
| 0.14498  | 0.00168  | 0.0175   | 0.70602  | 0.066761 | 0.14973  | -0.0414  | 0.37209  | 0.014222 |
| 0.030095 | 0.51649  | -0.04773 | 0.30333  | -0.02293 | 0.62116  | -0.06509 | 0.1602   | -0.08559 |
| 0.032357 | 0.48545  | -0.02835 | 0.54109  | 0.008275 | 0.85845  | -0.05659 | 0.22225  | -0.02747 |
| 0.11137  | 0.01605  | 0.077288 | 0.09527  | 0.110916 | 0.01649  | 0.009879 | 0.83138  | 0.032975 |
| 0.041888 | 0.36643  | 0.037368 | 0.42044  | 0.040628 | 0.38104  | 0.016763 | 0.71787  | 0.033976 |
| 0.02766  | 0.55101  | -0.07646 | 0.09889  | 0.017982 | 0.69833  | -0.13003 | 0.00489  | -0.1472  |
| 0.098332 | 0.03363  | 0.001571 | 0.97299  | 0.048137 | 0.29924  | -0.01662 | 0.72014  | 0.033682 |
| 0.037165 | 0.42298  | -0.00403 | 0.93079  | 0.026816 | 0.56323  | -0.03569 | 0.44157  | -0.06177 |
| 0.148345 | 0.0013   | 0.167385 | 0.00028  | 0.180397 | 8.85E-05 | 0.089799 | 0.05247  | 0.060014 |
| 0.108618 | 0.01888  | 0.167483 | 0.00028  | 0.068751 | 0.13794  | 0.223709 | 1.04E-06 | 0.280656 |
| 0.030989 | 0.5041   | 0.020543 | 0.65791  | 0.040528 | 0.38221  | -0.02465 | 0.59523  | 0.008292 |
| 0.08329  | 0.07214  | 0.04608  | 0.32039  | 0.058822 | 0.20449  | 0.002995 | 0.94853  | 0.123283 |
| 0.01969  | 0.67128  | 0.106327 | 0.02156  | 0.076772 | 0.09751  | 0.072975 | 0.11528  | 0.195434 |
| 0.026943 | 0.56138  | 0.120948 | 0.00889  | 0.075164 | 0.10475  | 0.098013 | 0.03422  | 0.223422 |
| 0.02596  | 0.57575  | -0.12122 | 0.00874  | -0.0375  | 0.41884  | -0.15982 | 0.00053  | -0.1983  |
| 0.089737 | 0.05263  | 0.117417 | 0.0111   | 0.10654  | 0.02129  | 0.078919 | 0.08847  | 0.111538 |
| 0.048686 | 0.29375  | 0.093083 | 0.04438  | 0.05797  | 0.21114  | 0.079217 | 0.08727  | 0.133658 |
| 0.227464 | 6.78E-07 | 0.287143 | 2.58E-10 | 0.23647  | 2.34E-07 | 0.242273 | 1.15E-07 | 0.273007 |
| 0.007068 | 0.87893  | 0.122323 | 0.00814  | 0.05021  | 0.27889  | 0.135373 | 0.00338  | 0.185716 |
| 0.039016 | 0.40023  | 0.012789 | 0.78282  | 0.022905 | 0.6215   | -0.01005 | 0.82856  | 0.080415 |
| -0.07601 | 0.10089  | -0.07288 | 0.11574  | -0.03736 | 0.42059  | -0.08675 | 0.06104  | -0.15261 |
| -0.04189 | 0.36637  | -0.14188 | 0.00212  | -0.12664 | 0.00614  | -0.1275  | 0.0058   | -0.20045 |
| -0.0629  | 0.17476  | -0.04623 | 0.31881  | -0.05038 | 0.2773   | -0.05037 | 0.27737  | 0.001179 |
| -0.03011 | 0.51628  | -0.06721 | 0.147    | -0.01367 | 0.7683   | -0.09439 | 0.04147  | -0.10323 |
| 0.009785 | 0.83297  | 0.021833 | 0.63792  | 0.012748 | 0.7835   | 0.013166 | 0.77659  | 0.08328  |
| 0.012639 | 0.7853   | 0.065058 | 0.16043  | 0.03375  | 0.46686  | 0.087828 | 0.05789  | 0.059901 |
| -0.02343 | 0.61358  | 0.020724 | 0.6551   | 0.00553  | 0.90512  | 0.000927 | 0.98406  | 0.144726 |
| 0.354803 | 2.67E-15 | 0.349134 | 7.82E-15 | 0.309863 | 7.51E-12 | 0.279975 | 7.38E-10 | 0.229638 |
| 0.106436 | 0.02142  | 0.088982 | 0.05466  | 0.087077 | 0.06007  | 0.047166 | 0.3091   | 0.210959 |
| 0.184092 | 6.28E-05 | 0.081509 | 0.07847  | 0.13257  | 0.00411  | 0.004421 | 0.92409  | 0.110997 |
| -0.00222 | 0.96181  | 0.016518 | 0.72182  | 0.033369 | 0.47191  | -0.01618 | 0.72724  | -0.01893 |
| 0.086528 | 0.06171  | 0.042794 | 0.35615  | 0.081511 | 0.07846  | -0.01777 | 0.70168  | -0.0298  |
| 0.043412 | 0.34923  | -0.01096 | 0.8133   | 0.024306 | 0.60033  | -0.032   | 0.49031  | -0.00344 |
| 0.076885 | 0.09701  | 0.024506 | 0.59734  | 0.070364 | 0.12892  | -0.03859 | 0.40536  | -0.01216 |
| 0.03623  | 0.43475  | 0.074249 | 0.10905  | 0.039095 | 0.39928  | 0.067119 | 0.14756  | 0.083538 |
| -0.04891 | 0.29158  | -0.04992 | 0.2817   | -0.01215 | 0.79348  | -0.08509 | 0.06618  | -0.0664  |
| 0.101046 | 0.02901  | 0.150476 | 0.00111  | 0.115484 | 0.01251  | 0.117695 | 0.01091  | 0.228668 |
| 0.012351 | 0.79008  | -0.0095  | 0.83778  | 0.007119 | 0.87806  | -0.03664 | 0.42954  | 0.031491 |
| -0.01815 | 0.69568  | -0.0035  | 0.93994  | 0.004146 | 0.92879  | -0.01373 | 0.76721  | 0.058126 |
| -0.0152  | 0.74327  | -0.01225 | 0.79172  | -0.00156 | 0.97318  | -0.02419 | 0.60206  | -0.06231 |

|          |          |          |          |          |          |          |          |          |
|----------|----------|----------|----------|----------|----------|----------|----------|----------|
| 0.012209 | 0.79245  | -0.02565 | 0.58038  | 0.038215 | 0.40998  | -0.05888 | 0.20402  | -0.08364 |
| 0.111255 | 0.01616  | 0.059297 | 0.20086  | 0.107407 | 0.02026  | 0.010639 | 0.81863  | 0.052396 |
| 0.089988 | 0.05197  | 0.16427  | 0.00036  | 0.115084 | 0.01282  | 0.136895 | 0.00303  | 0.26684  |
| 0.01327  | 0.77487  | -0.0267  | 0.56487  | -0.01462 | 0.75275  | -0.03285 | 0.47885  | -0.00145 |
| 0.081933 | 0.07693  | 0.037883 | 0.41407  | 0.029312 | 0.52746  | 0.028378 | 0.54071  | 0.097609 |
| 0.009427 | 0.83899  | 0.020795 | 0.65399  | 0.016385 | 0.72397  | 0.004    | 0.9313   | 0.0309   |
| -0.05406 | 0.24363  | 0.045748 | 0.32389  | -0.02416 | 0.60253  | 0.071732 | 0.12162  | 0.117979 |
| 0.071202 | 0.12441  | 0.064166 | 0.16625  | 0.085041 | 0.06634  | 0.009882 | 0.83134  | 0.04657  |
| 0.089614 | 0.05295  | 0.151665 | 0.00101  | 0.10052  | 0.02986  | 0.135769 | 0.00328  | 0.129719 |
| 0.038853 | 0.4022   | -0.02864 | 0.53695  | -0.01734 | 0.70854  | -0.01318 | 0.77632  | -0.05229 |
| -0.01029 | 0.82448  | -0.04158 | 0.36996  | 0.00335  | 0.94244  | -0.06516 | 0.15977  | -0.10026 |
| 0.093892 | 0.04255  | 0.090877 | 0.04969  | 0.039361 | 0.39608  | 0.103055 | 0.02595  | 0.072603 |
| 0.090578 | 0.05044  | -0.02321 | 0.61684  | 0.049002 | 0.29063  | -0.08741 | 0.05908  | -0.07667 |
| -0.05848 | 0.20714  | 0.008123 | 0.86102  | -0.05014 | 0.27954  | 0.056839 | 0.2202   | 0.01772  |
| 0.10232  | 0.02703  | 0.030915 | 0.50513  | 0.089738 | 0.05263  | -0.01821 | 0.69476  | 0.008644 |
| 0.129417 | 0.00509  | 0.190049 | 3.57E-05 | 0.152112 | 0.00098  | 0.14783  | 0.00136  | 0.336275 |
| 0.081552 | 0.07831  | 0.135377 | 0.00338  | 0.075527 | 0.10308  | 0.131033 | 0.00456  | 0.24001  |
| 0.166195 | 0.00031  | 0.181871 | 7.73E-05 | 0.171137 | 0.0002   | 0.125252 | 0.00673  | 0.265867 |
| 0.024966 | 0.59046  | 0.014828 | 0.74928  | 0.016492 | 0.72223  | 0.00219  | 0.96236  | 0.004893 |
| 0.024849 | 0.59221  | -0.03657 | 0.43045  | -0.00055 | 0.9905   | -0.06876 | 0.13791  | -0.07418 |
| 0.113617 | 0.01402  | 0.009112 | 0.8443   | 0.044839 | 0.33361  | -0.02649 | 0.56794  | -0.06303 |
| 0.071081 | 0.12506  | 0.235301 | 2.69E-07 | 0.08927  | 0.05388  | 0.296253 | 6.48E-11 | 0.273314 |
| 0.034004 | 0.46352  | 0.034508 | 0.4569   | 0.038952 | 0.40101  | 0.00474  | 0.91862  | 0.054018 |
| -0.09625 | 0.0376   | -0.0062  | 0.89363  | -0.03753 | 0.41849  | -0.00362 | 0.93783  | 0.141682 |
| 0.117524 | 0.01103  | 0.115259 | 0.01269  | 0.109737 | 0.01768  | 0.066691 | 0.15017  | 0.187778 |
| 0.1353   | 0.00339  | 0.081209 | 0.07958  | 0.107345 | 0.02033  | 0.050202 | 0.27897  | 0.054317 |
| 0.222663 | 1.17E-06 | 0.283254 | 4.58E-10 | 0.222405 | 1.21E-06 | 0.222731 | 1.16E-06 | 0.48226  |
| 0.082816 | 0.07378  | 0.069155 | 0.13564  | 0.061915 | 0.18165  | 0.038671 | 0.40442  | 0.048476 |
| 0.078178 | 0.09151  | 0.116981 | 0.01141  | 0.0908   | 0.04988  | 0.091461 | 0.04823  | 0.266365 |
| 0.004691 | 0.91947  | -0.0234  | 0.61392  | -0.03672 | 0.42862  | -0.01959 | 0.67278  | 0.126189 |
| -0.02695 | 0.56126  | 0.007931 | 0.86427  | 0.004845 | 0.91683  | 0.007994 | 0.86321  | -0.06831 |
| 0.185001 | 5.77E-05 | 0.255212 | 2.23E-08 | 0.223068 | 1.12E-06 | 0.199491 | 1.40E-05 | 0.18642  |
| 0.056101 | 0.22626  | 0.005022 | 0.91382  | 0.022631 | 0.62569  | -0.02622 | 0.57197  | 0.093515 |
| 0.093555 | 0.0433   | 0.232008 | 3.99E-07 | 0.137162 | 0.00298  | 0.236614 | 2.30E-07 | 0.274176 |
| -0.03014 | 0.51587  | -0.14923 | 0.00122  | -0.04222 | 0.36265  | -0.1892  | 3.87E-05 | -0.28536 |
| -0.01182 | 0.79884  | -0.02177 | 0.63897  | -0.00142 | 0.97565  | -0.04095 | 0.37727  | -0.11896 |
| 0.074845 | 0.10624  | 0.123607 | 0.00749  | 0.074666 | 0.10708  | 0.109668 | 0.01775  | 0.196037 |
| -0.02533 | 0.58505  | -0.02048 | 0.65891  | -0.02646 | 0.56847  | -0.02958 | 0.52373  | -0.05136 |
| -0.04798 | 0.30082  | -0.03516 | 0.44844  | 0.003872 | 0.93349  | -0.07363 | 0.11205  | -0.06621 |
| 0.029088 | 0.53064  | 0.067078 | 0.14781  | 0.040967 | 0.37708  | 0.049841 | 0.28244  | 0.199235 |
| 0.105572 | 0.02251  | 0.090079 | 0.05173  | 0.078285 | 0.09106  | 0.068301 | 0.14055  | 0.090283 |
| 0.059317 | 0.20071  | 0.036235 | 0.43468  | 0.05299  | 0.2531   | 0.006931 | 0.88126  | 0.065875 |
| 0.039773 | 0.39114  | 0.036386 | 0.43278  | 0.018046 | 0.69731  | 0.030771 | 0.50712  | 0.018926 |
| -0.00939 | 0.83966  | -0.06844 | 0.13972  | -0.03454 | 0.45651  | -0.08838 | 0.05634  | -0.0617  |
| 0.074886 | 0.10604  | 0.20222  | 1.06E-05 | 0.141726 | 0.00214  | 0.172691 | 0.00018  | 0.373568 |

|          |          |          |          |          |          |          |          |          |
|----------|----------|----------|----------|----------|----------|----------|----------|----------|
| 0.058218 | 0.20919  | -0.0173  | 0.70924  | 0.060243 | 0.19376  | -0.09653 | 0.03704  | -0.11851 |
| 0.20044  | 1.28E-05 | 0.10583  | 0.02218  | 0.142342 | 0.00205  | 0.049273 | 0.28797  | 0.089281 |
| 0.029166 | 0.52952  | 0.036938 | 0.42581  | 0.06907  | 0.13612  | -0.02852 | 0.53875  | -0.04895 |
| 0.069181 | 0.13549  | 0.096904 | 0.03631  | 0.072486 | 0.11775  | 0.071014 | 0.12541  | 0.19976  |
| 0.412456 | 1.32E-20 | 0.253737 | 2.70E-08 | 0.292496 | 1.15E-10 | 0.135729 | 0.00329  | 0.224105 |
| 0.181088 | 8.30E-05 | 0.050787 | 0.27339  | 0.078668 | 0.08949  | 0.037112 | 0.42364  | 0.087951 |
| 0.022042 | 0.63471  | -0.02243 | 0.62875  | 0.010643 | 0.81857  | -0.06164 | 0.18359  | -0.03328 |
| -0.01508 | 0.74522  | 0.010307 | 0.82421  | -0.0101  | 0.82765  | 0.008514 | 0.8544   | 0.032259 |
| 0.019291 | 0.67756  | 0.014616 | 0.75274  | 0.034816 | 0.4529   | -0.0298  | 0.52061  | 0.003562 |
| 0.055089 | 0.23476  | 0.064131 | 0.16648  | 0.044032 | 0.34239  | 0.060156 | 0.1944   | 0.171742 |
| 0.081146 | 0.07981  | 0.05642  | 0.22363  | 0.092266 | 0.04628  | 0.01203  | 0.79542  | 0.036086 |
| 0.047452 | 0.30617  | -0.08296 | 0.07328  | -0.02514 | 0.58793  | -0.1117  | 0.01573  | -0.11642 |
| 0.038555 | 0.40583  | 0.024227 | 0.60152  | 0.042693 | 0.35728  | -0.01019 | 0.82612  | 0.053099 |
| -0.00532 | 0.90864  | 0.020425 | 0.65975  | 0.012271 | 0.79141  | 0.010686 | 0.81786  | 0.046368 |
| -0.02323 | 0.61656  | 0.016487 | 0.72232  | 0.017775 | 0.70162  | -0.00853 | 0.85421  | 0.036337 |
| -0.0118  | 0.79926  | -0.00497 | 0.91476  | 0.003947 | 0.93221  | -0.02746 | 0.55385  | 0.06437  |
| -0.05498 | 0.23568  | -0.05775 | 0.21291  | -0.05528 | 0.23317  | -0.05081 | 0.2732   | -0.05331 |
| -0.0051  | 0.91254  | 0.075103 | 0.10503  | 0.048781 | 0.29281  | 0.059719 | 0.19767  | 0.179395 |
| 0.26801  | 4.00E-09 | 0.33762  | 6.49E-14 | 0.282936 | 4.80E-10 | 0.295668 | 7.10E-11 | 0.29129  |
| 0.103804 | 0.02488  | -0.00523 | 0.91033  | 0.063495 | 0.17074  | -0.04686 | 0.31229  | -0.0934  |
| -0.00566 | 0.90292  | -0.00759 | 0.8701   | 0.009748 | 0.83359  | -0.02427 | 0.6008   | -0.07417 |
| 0.022799 | 0.62312  | 0.023192 | 0.61714  | 0.02833  | 0.5414   | -0.0013  | 0.97768  | 0.071792 |
| -0.10424 | 0.02428  | -0.10925 | 0.0182   | -0.08612 | 0.06296  | -0.10502 | 0.02323  | -0.19926 |
| -0.04692 | 0.3116   | -0.02246 | 0.6283   | -0.0346  | 0.45576  | -0.01864 | 0.68778  | 0.00768  |
| 0.017788 | 0.70143  | -0.069   | 0.1365   | -0.00125 | 0.97846  | -0.10672 | 0.02108  | -0.17655 |
| 0.072211 | 0.11915  | 0.084688 | 0.06747  | 0.034803 | 0.45307  | 0.104613 | 0.02377  | 0.034646 |
| 0.120818 | 0.00896  | 0.120359 | 0.00923  | 0.149523 | 0.00119  | 0.055341 | 0.23262  | 0.173971 |
| -0.01019 | 0.82619  | -0.08924 | 0.05395  | -0.05947 | 0.19957  | -0.08525 | 0.06566  | -0.1146  |
| 0.153391 | 0.00088  | 0.09283  | 0.04496  | 0.124548 | 0.00704  | 0.020944 | 0.65168  | 0.036158 |
| 0.014913 | 0.74789  | 0.150272 | 0.00113  | 0.061252 | 0.18638  | 0.152011 | 0.00098  | 0.269529 |
| 0.019213 | 0.67878  | 0.03638  | 0.43285  | 0.041532 | 0.37052  | 0.009547 | 0.83697  | 0.043648 |
| 0.041666 | 0.36898  | 0.023615 | 0.61073  | 0.046849 | 0.31237  | -0.01987 | 0.66847  | 0.019003 |
| 0.080421 | 0.08255  | 0.086908 | 0.06057  | 0.097012 | 0.0361   | 0.033182 | 0.4744   | 0.143165 |
| 0.068334 | 0.14035  | 0.038527 | 0.40617  | 0.061765 | 0.18271  | -0.01152 | 0.80383  | 0.039467 |
| 0.009749 | 0.83357  | 0.085005 | 0.06645  | 0.051993 | 0.26215  | 0.063967 | 0.16757  | 0.108383 |
| -0.0519  | 0.26301  | 0.049812 | 0.28272  | -0.00114 | 0.98039  | 0.05518  | 0.23398  | 0.08427  |
| -0.00175 | 0.96989  | -0.08057 | 0.08198  | -0.05361 | 0.24755  | -0.09294 | 0.0447   | -0.07099 |
| 0.042137 | 0.36359  | 0.143406 | 0.00189  | 0.084679 | 0.0675   | 0.134305 | 0.00364  | 0.128409 |
| -0.05523 | 0.23353  | 0.009288 | 0.84135  | -0.0095  | 0.83775  | 0.00868  | 0.8516   | 0.132615 |
| 0.064567 | 0.16362  | 0.011787 | 0.79946  | 0.071674 | 0.12193  | -0.04317 | 0.35191  | -0.05871 |
| 0.062372 | 0.17844  | 0.061976 | 0.18122  | 0.06367  | 0.16956  | 0.03232  | 0.48595  | 0.104132 |
| -0.08073 | 0.08139  | -0.17372 | 0.00016  | -0.08425 | 0.0689   | -0.18547 | 5.52E-05 | -0.25237 |
| 0.042746 | 0.35669  | 0.070448 | 0.12846  | 0.048649 | 0.29412  | 0.041325 | 0.37291  | 0.169699 |
| 0.055938 | 0.22761  | -0.01356 | 0.77004  | 0.013242 | 0.77534  | -0.03207 | 0.48936  | -0.14124 |
| 0.137442 | 0.00292  | 0.177308 | 0.00012  | 0.191228 | 3.18E-05 | 0.094826 | 0.04053  | 0.211381 |

|          |          |          |          |          |          |           |          |          |
|----------|----------|----------|----------|----------|----------|-----------|----------|----------|
| 0.041021 | 0.37644  | 0.062167 | 0.17988  | 0.045863 | 0.32268  | 0.040425  | 0.38343  | 0.195785 |
| 0.058326 | 0.20835  | 0.048185 | 0.29876  | 0.052258 | 0.25972  | 0.015612  | 0.73649  | 0.002665 |
| 0.016577 | 0.72087  | 0.030795 | 0.50678  | 0.024587 | 0.59612  | 0.013698  | 0.76782  | 0.049436 |
| -0.05294 | 0.25359  | 0.029526 | 0.52446  | -0.0247  | 0.59449  | 0.069956  | 0.13116  | 0.024526 |
| 0.167406 | 0.00028  | 0.017479 | 0.70637  | 0.103946 | 0.02468  | -0.07101  | 0.12542  | 0.051008 |
| 0.184598 | 5.99E-05 | 0.256931 | 1.78E-08 | 0.203352 | 9.46E-06 | 0.231643  | 4.16E-07 | 0.162234 |
| -0.03421 | 0.46082  | -0.0042  | 0.92783  | -0.02943 | 0.52576  | -0.02361  | 0.61082  | 0.00418  |
| 0.078586 | 0.08982  | -0.05827 | 0.20876  | 0.011325 | 0.80716  | -0.10651  | 0.02134  | 0.003822 |
| 0.013122 | 0.77732  | 0.06817  | 0.14131  | 0.047939 | 0.30123  | 0.05359   | 0.24776  | 0.120002 |
| 0.063146 | 0.17311  | 0.071183 | 0.12451  | 0.06233  | 0.17873  | 0.038037  | 0.41217  | 0.104664 |
| 0.091351 | 0.0485   | 0.130155 | 0.00485  | 0.121009 | 0.00885  | 0.0752    | 0.10458  | 0.188184 |
| 0.11274  | 0.01479  | -0.02137 | 0.64511  | 0.07972  | 0.08527  | -0.09229  | 0.04622  | -0.10198 |
| 0.086314 | 0.06236  | 0.021277 | 0.6465   | 0.02223  | 0.63182  | 0.008195  | 0.8598   | 0.066507 |
| 0.036464 | 0.43178  | 0.020323 | 0.66135  | 0.019315 | 0.67717  | -0.00142  | 0.97566  | 0.065039 |
| 0.070215 | 0.12973  | 0.01183  | 0.79875  | 0.054897 | 0.23639  | -0.03874  | 0.40356  | -0.01626 |
| 0.08649  | 0.06182  | 0.087735 | 0.05815  | 0.096411 | 0.03728  | 0.049739  | 0.28343  | 0.063206 |
| 0.088451 | 0.05612  | 0.105176 | 0.02302  | 0.097142 | 0.03585  | 0.059605  | 0.19853  | 0.149778 |
| 0.202657 | 1.02E-05 | 0.236195 | 2.42E-07 | 0.254316 | 2.50E-08 | 0.134882  | 0.0035   | 0.148771 |
| 0.081861 | 0.07718  | 0.057852 | 0.21207  | 0.056642 | 0.2218   | 0.042024  | 0.36487  | 0.03612  |
| 0.009278 | 0.84151  | 0.016721 | 0.71855  | 0.046097 | 0.32021  | -0.01204  | 0.79532  | -0.02248 |
| 0.047456 | 0.30613  | 0.051236 | 0.26917  | 0.068646 | 0.13855  | 0.001528  | 0.97373  | 0.027638 |
| 0.053439 | 0.24909  | 0.009749 | 0.83358  | 0.036866 | 0.42671  | -0.03319  | 0.47433  | -0.00292 |
| 0.026637 | 0.56584  | 0.008834 | 0.84899  | -0.01189 | 0.79777  | 0.011508  | 0.80412  | 0.003767 |
| 0.056233 | 0.22517  | -0.00994 | 0.83042  | 0.035807 | 0.44013  | -0.0167   | 0.71882  | -0.10063 |
| 0.019161 | 0.67961  | 0.064802 | 0.16208  | 0.021187 | 0.64791  | 0.075346  | 0.10391  | 0.107821 |
| 0.032101 | 0.48891  | -0.04297 | 0.35415  | 0.050344 | 0.27761  | -0.10386  | 0.0248   | -0.15346 |
| 0.103717 | 0.025    | 0.116866 | 0.01149  | 0.114077 | 0.01364  | 0.082548  | 0.07473  | 0.127627 |
| 0.017525 | 0.70563  | 0.163656 | 0.00038  | 0.070689 | 0.12715  | 0.166026  | 0.00031  | 0.299962 |
| 0.145095 | 0.00167  | 0.301038 | 3.08E-11 | 0.181541 | 7.96E-05 | 0.320466  | 1.30E-12 | 0.32165  |
| 0.171777 | 0.00019  | 0.090029 | 0.05186  | 0.082652 | 0.07436  | 0.071535  | 0.12266  | 0.185328 |
| 0.049349 | 0.28723  | 0.009846 | 0.83194  | 0.050863 | 0.27267  | -0.02431  | 0.60034  | -0.07114 |
| 0.038812 | 0.4027   | 0.083919 | 0.07001  | 0.06761  | 0.14462  | 0.055686  | 0.22971  | 0.144413 |
| 0.240754 | 1.39E-07 | 0.126807 | 0.00607  | 0.167596 | 0.00027  | 0.063267  | 0.17228  | 0.121203 |
| 0.083814 | 0.07036  | -0.01399 | 0.76307  | 0.028705 | 0.53606  | -0.06091  | 0.18885  | -0.00054 |
| 0.364217 | 4.27E-16 | 0.202061 | 1.08E-05 | 0.247646 | 5.89E-08 | 0.095888  | 0.03832  | 0.209631 |
| 0.203899 | 8.94E-06 | 0.190455 | 3.43E-05 | 0.144457 | 0.00175  | 0.173382  | 0.00017  | 0.254723 |
| 0.038742 | 0.40356  | -0.04804 | 0.30026  | 0.006056 | 0.89616  | -0.10293  | 0.02613  | -0.02561 |
| 0.128121 | 0.00556  | 0.175106 | 0.00014  | 0.136903 | 0.00303  | 0.14792   | 0.00135  | 0.175233 |
| 0.115294 | 0.01266  | 0.130345 | 0.00478  | 0.077272 | 0.09534  | 0.121347  | 0.00866  | 0.300688 |
| -0.00542 | 0.90699  | 0.018513 | 0.68987  | 0.011337 | 0.80696  | 0.02784   | 0.54842  | 0.012923 |
| -0.00792 | 0.86443  | 0.006988 | 0.88029  | -0.00042 | 0.99275  | -6.29E-05 | 0.99892  | 0.032258 |
| 0.025134 | 0.58797  | 0.101368 | 0.0285   | 0.050635 | 0.27483  | 0.095765  | 0.03857  | 0.207345 |
| 0.095331 | 0.03947  | 0.055792 | 0.22883  | 0.06302  | 0.17397  | 0.031535  | 0.49662  | 0.006276 |
| 0.088812 | 0.05513  | 0.022979 | 0.62038  | 0.069478 | 0.13381  | -0.03117  | 0.50164  | -0.00274 |
| 0.072421 | 0.11808  | 0.016665 | 0.71945  | 0.055693 | 0.22965  | -0.03514  | 0.44864  | 0.039476 |

|          |          |          |          |          |          |          |          |          |
|----------|----------|----------|----------|----------|----------|----------|----------|----------|
| 0.036171 | 0.4355   | 0.116559 | 0.01171  | 0.052193 | 0.26031  | 0.107971 | 0.0196   | 0.339245 |
| 0.030217 | 0.51479  | -0.00925 | 0.84194  | 0.017006 | 0.71395  | -0.03909 | 0.39934  | 0.063127 |
| 0.08096  | 0.08051  | 0.155866 | 0.00073  | 0.123507 | 0.00754  | 0.112332 | 0.01515  | 0.197868 |
| 0.11374  | 0.01392  | 0.142276 | 0.00206  | 0.124269 | 0.00717  | 0.109503 | 0.01793  | 0.172959 |
| -0.03247 | 0.48389  | 0.051424 | 0.26742  | 0.002677 | 0.95399  | 0.05937  | 0.2003   | 0.145613 |
| 0.084435 | 0.0683   | 0.011583 | 0.80286  | 0.074314 | 0.10875  | -0.05176 | 0.26433  | -0.06081 |
| 0.052686 | 0.25584  | 0.006802 | 0.88345  | 0.032792 | 0.47961  | -0.03015 | 0.51569  | -0.03127 |
| 0.023571 | 0.6114   | -0.00435 | 0.9253   | 0.029255 | 0.52827  | -0.05912 | 0.20224  | -0.02089 |
| 0.077637 | 0.09378  | 0.058798 | 0.20468  | 0.103766 | 0.02493  | -0.01068 | 0.81789  | 0.019776 |
| -0.07874 | 0.08919  | -0.08605 | 0.06318  | -0.06167 | 0.18337  | -0.10262 | 0.02659  | -0.16815 |
| -0.03273 | 0.48051  | -0.13247 | 0.00414  | -0.0561  | 0.22628  | -0.18575 | 5.38E-05 | -0.20358 |
| 0.015187 | 0.74342  | -0.01128 | 0.80792  | 0.018491 | 0.69022  | -0.02616 | 0.57289  | -0.12679 |
| 0.105616 | 0.02245  | 0.252435 | 3.20E-08 | 0.127704 | 0.00572  | 0.275539 | 1.39E-09 | 0.387177 |
| 0.007575 | 0.87032  | 0.089992 | 0.05196  | 0.064231 | 0.16582  | 0.062124 | 0.18018  | 0.166025 |
| 0.050074 | 0.2802   | 0.092221 | 0.04639  | 0.079755 | 0.08514  | 0.059983 | 0.19569  | 0.114817 |
| 0.044483 | 0.33746  | 0.018774 | 0.68573  | 0.04749  | 0.30579  | -0.02954 | 0.52423  | -0.00995 |
| 0.134353 | 0.00363  | 0.201932 | 1.10E-05 | 0.163426 | 0.00039  | 0.147209 | 0.00142  | 0.396347 |
| 0.039457 | 0.39492  | -0.00943 | 0.83891  | -0.00349 | 0.94012  | -0.00656 | 0.8875   | -0.00082 |
| 0.071337 | 0.1237   | 0.105516 | 0.02258  | 0.144128 | 0.00179  | 0.007957 | 0.86383  | 0.170813 |
| 0.337012 | 7.24E-14 | 0.320434 | 1.30E-12 | 0.315545 | 2.96E-12 | 0.200123 | 1.32E-05 | 0.442112 |
| 0.11213  | 0.01534  | 0.107597 | 0.02003  | 0.097821 | 0.03457  | 0.083447 | 0.07161  | 0.261425 |
| 0.144191 | 0.00178  | 0.121439 | 0.00861  | 0.093094 | 0.04435  | 0.120631 | 0.00907  | 0.202129 |
| 0.070909 | 0.12597  | 0.145208 | 0.00165  | 0.163355 | 0.00039  | 0.049401 | 0.28672  | 0.248732 |
| 0.217704 | 2.04E-06 | 0.156915 | 0.00067  | 0.197012 | 1.80E-05 | 0.047044 | 0.31036  | 0.214732 |
| 0.027021 | 0.56025  | 0.059701 | 0.1978   | 0.034533 | 0.45658  | 0.048753 | 0.2931   | 0.10156  |
| 0.014939 | 0.74746  | 0.200528 | 1.26E-05 | 0.063349 | 0.17172  | 0.258344 | 1.48E-08 | 0.268349 |
| -0.00555 | 0.90471  | -0.04769 | 0.30374  | -0.05511 | 0.23456  | -0.03433 | 0.4592   | 0.024296 |
| 0.145991 | 0.00156  | 0.051241 | 0.26913  | 0.089061 | 0.05444  | 0.004724 | 0.9189   | 0.100581 |
| 0.080869 | 0.08085  | 0.119298 | 0.00987  | 0.08492  | 0.06672  | 0.08218  | 0.07604  | 0.30392  |
| 0.089085 | 0.05438  | 0.185942 | 5.28E-05 | 0.125811 | 0.00648  | 0.164706 | 0.00035  | 0.40286  |
| 0.056503 | 0.22294  | -0.01247 | 0.78804  | 0.034491 | 0.45713  | -0.04674 | 0.31353  | -0.05372 |
| 0.02175  | 0.63919  | -0.02124 | 0.64701  | 0.006232 | 0.89315  | -0.05798 | 0.21109  | -0.03652 |
| 0.05134  | 0.2682   | 0.032325 | 0.48589  | 0.019116 | 0.68032  | 0.023099 | 0.61855  | 0.122554 |
| 0.033436 | 0.47102  | 0.048073 | 0.29988  | 0.032455 | 0.48414  | 0.03158  | 0.496    | 0.149342 |
| 0.137684 | 0.00287  | 0.058197 | 0.20935  | 0.107144 | 0.02057  | -0.01166 | 0.80153  | -0.00042 |
| 0.050875 | 0.27256  | 0.148749 | 0.00126  | 0.072212 | 0.11915  | 0.152782 | 0.00093  | 0.289331 |
| 0.054292 | 0.24161  | 0.05916  | 0.2019   | 0.068662 | 0.13845  | 0.01063  | 0.81878  | 0.096703 |
| 0.069214 | 0.1353   | 0.068041 | 0.14207  | 0.093655 | 0.04308  | 0.000473 | 0.99187  | 0.065081 |
| 0.016988 | 0.71425  | 0.034158 | 0.46149  | 0.019237 | 0.67841  | 0.019062 | 0.68117  | 0.015063 |
| -0.09086 | 0.04974  | -0.16119 | 0.00047  | -0.10238 | 0.02694  | -0.16436 | 0.00036  | -0.17578 |
| -0.03912 | 0.39901  | -0.02664 | 0.56585  | -0.0241  | 0.60344  | -0.03647 | 0.43176  | -0.0291  |
| 0.045974 | 0.32151  | 0.051043 | 0.27098  | 0.043185 | 0.35176  | 0.016247 | 0.72619  | 0.159932 |
| -0.05481 | 0.23715  | -0.04196 | 0.36555  | -0.01545 | 0.73905  | -0.06216 | 0.17993  | -0.07298 |
| 0.009525 | 0.83735  | -0.13431 | 0.00364  | -0.06204 | 0.18074  | -0.1555  | 0.00075  | -0.28879 |
| 0.020183 | 0.66353  | -0.01313 | 0.77719  | 0.008536 | 0.85403  | -0.04897 | 0.29094  | -0.07715 |

|          |          |          |          |          |          |          |          |          |
|----------|----------|----------|----------|----------|----------|----------|----------|----------|
| -0.0366  | 0.43001  | -0.04506 | 0.3312   | -0.00636 | 0.89101  | -0.07481 | 0.1064   | -0.10491 |
| -0.02398 | 0.60528  | -0.03249 | 0.48371  | -0.00862 | 0.85259  | -0.0443  | 0.33942  | -0.04822 |
| -0.05427 | 0.24182  | -0.06895 | 0.1368   | -0.03597 | 0.43801  | -0.0845  | 0.06809  | -0.14092 |
| 0.091588 | 0.04792  | 0.023466 | 0.61299  | 0.090469 | 0.05072  | -0.01942 | 0.67551  | -0.06828 |
| 0.093072 | 0.0444   | 0.149852 | 0.00116  | 0.116851 | 0.0115   | 0.121861 | 0.00838  | 0.218743 |
| 0.048489 | 0.29571  | 0.047617 | 0.3045   | 0.054581 | 0.23911  | 0.018846 | 0.68458  | -0.07718 |
| 0.065655 | 0.15661  | 0.075898 | 0.10139  | 0.084561 | 0.06789  | 0.036985 | 0.42522  | -0.02242 |
| 0.030853 | 0.50598  | -0.01522 | 0.74286  | 0.010776 | 0.81635  | -0.03045 | 0.51158  | -0.0329  |
| 0.2053   | 7.73E-06 | 0.06936  | 0.13448  | 0.133283 | 0.00391  | -0.00075 | 0.98716  | 0.053505 |
| 0.197658 | 1.69E-05 | 0.233765 | 3.24E-07 | 0.197062 | 1.79E-05 | 0.188848 | 4.01E-05 | 0.146262 |
| 0.115876 | 0.01222  | 0.056706 | 0.22128  | 0.07862  | 0.08968  | 0.01784  | 0.70059  | 0.050537 |
| -0.04711 | 0.30968  | 0.059486 | 0.19942  | -0.00496 | 0.91483  | 0.083361 | 0.0719   | 0.151549 |
| -0.01228 | 0.79122  | -0.00669 | 0.88542  | -0.00558 | 0.90435  | -0.02625 | 0.57151  | 0.047987 |
| -0.00618 | 0.8941   | -0.01201 | 0.79572  | -0.00714 | 0.87765  | -0.01606 | 0.7292   | -0.03412 |
| 0.017185 | 0.71108  | 0.018198 | 0.69488  | 0.060201 | 0.19407  | -0.03688 | 0.42653  | -0.06852 |
| 0.031153 | 0.50185  | 0.001549 | 0.97337  | 0.029602 | 0.52338  | -0.03842 | 0.4075   | -0.01171 |
| 0.013913 | 0.76428  | 0.019716 | 0.67086  | 0.026934 | 0.56151  | -0.02654 | 0.56725  | -0.0207  |
| -0.05591 | 0.22786  | -0.14408 | 0.0018   | -0.06755 | 0.14495  | -0.15729 | 0.00065  | -0.21184 |
| 0.154454 | 0.00081  | 0.158737 | 0.00058  | 0.177417 | 0.00012  | 0.078032 | 0.09212  | 0.229442 |
| 0.116482 | 0.01177  | 0.072426 | 0.11805  | 0.086744 | 0.06106  | 0.040221 | 0.38583  | 0.127579 |
| 0.031646 | 0.49511  | 0.136029 | 0.00323  | 0.091644 | 0.04778  | 0.107322 | 0.02035  | 0.219234 |
| 0.085784 | 0.06399  | 0.108458 | 0.01906  | 0.160601 | 0.00049  | 0.015436 | 0.73936  | 0.109172 |
| -0.01819 | 0.69508  | -0.02062 | 0.65677  | 0.00842  | 0.85599  | -0.04022 | 0.38582  | -0.09108 |
| -0.04931 | 0.28761  | -0.09843 | 0.03346  | -0.04329 | 0.35062  | -0.12134 | 0.00867  | -0.13906 |
| 0.069661 | 0.13279  | 0.070241 | 0.12959  | 0.095183 | 0.03978  | 0.006275 | 0.89242  | 0.041539 |
| 0.000595 | 0.98977  | 0.063279 | 0.1722   | 0.038667 | 0.40447  | 0.048421 | 0.29639  | 0.008845 |
| 0.054359 | 0.24103  | 0.029378 | 0.52654  | 0.064713 | 0.16266  | -0.01321 | 0.77587  | 0.044873 |
| -0.03657 | 0.43043  | 0.052299 | 0.25935  | 0.008552 | 0.85377  | 0.061682 | 0.1833   | 0.162466 |
| 0.093555 | 0.0433   | 0.116262 | 0.01193  | 0.091449 | 0.04826  | 0.084229 | 0.06898  | 0.252576 |
| 0.009803 | 0.83267  | -0.02944 | 0.52568  | 0.006132 | 0.89486  | -0.05836 | 0.20812  | -0.1005  |
| 0.048287 | 0.29773  | 0.026174 | 0.57262  | 0.021157 | 0.64837  | 0.020637 | 0.65645  | 0.130728 |
| 0.013376 | 0.77313  | 0.048426 | 0.29634  | 0.042454 | 0.35998  | 0.01349  | 0.77124  | 0.011686 |
| 0.021096 | 0.64931  | 0.083017 | 0.07309  | 0.061154 | 0.18709  | 0.042934 | 0.35457  | 0.133585 |
| 0.029186 | 0.52924  | 0.081654 | 0.07794  | 0.042138 | 0.36358  | 0.069212 | 0.13531  | 0.150807 |
| 0.016753 | 0.71803  | 0.055929 | 0.22769  | 0.03226  | 0.48676  | 0.043694 | 0.34611  | 0.069066 |
| 0.127849 | 0.00566  | 0.108659 | 0.01883  | 0.12004  | 0.00942  | 0.071156 | 0.12466  | 0.063748 |
| 0.124835 | 0.00691  | 0.032829 | 0.47912  | 0.033844 | 0.46562  | 0.012963 | 0.77994  | 0.093837 |
| 0.066267 | 0.15278  | 0.097633 | 0.03492  | 0.075754 | 0.10205  | 0.071783 | 0.12136  | 0.172294 |
| 0.00097  | 0.98331  | 0.030691 | 0.50822  | 0.01623  | 0.72648  | 0.019541 | 0.67362  | 0.118915 |
| 0.039833 | 0.39044  | 0.047065 | 0.31014  | 0.035335 | 0.44619  | 0.032419 | 0.48463  | 0.073762 |
| 0.016462 | 0.72272  | 0.079846 | 0.08478  | 0.068627 | 0.13865  | 0.041773 | 0.36775  | 0.117966 |
| -0.08573 | 0.06415  | -0.0692  | 0.13537  | -0.05119 | 0.26957  | -0.07646 | 0.09887  | -0.04049 |
| -0.02466 | 0.59507  | 0.014516 | 0.75439  | -0.01898 | 0.68239  | 0.022797 | 0.62315  | 0.052642 |
| 0.078364 | 0.09074  | 0.145302 | 0.00164  | 0.091678 | 0.0477   | 0.146932 | 0.00145  | 0.152639 |
| 0.057815 | 0.21237  | 0.046311 | 0.31796  | 0.072592 | 0.11721  | 0.007215 | 0.87643  | 0.008526 |

|          |          |          |          |          |          |          |          |          |
|----------|----------|----------|----------|----------|----------|----------|----------|----------|
| 0.026413 | 0.56911  | 0.065806 | 0.15567  | 0.049261 | 0.28808  | 0.061155 | 0.18708  | 0.077871 |
| 0.11421  | 0.01353  | 0.060538 | 0.19157  | 0.069882 | 0.13157  | 0.032611 | 0.48204  | 0.011539 |
| -0.07268 | 0.11677  | -0.13869 | 0.00267  | -0.09376 | 0.04284  | -0.13087 | 0.00461  | -0.26093 |
| 0.006809 | 0.88332  | 0.063318 | 0.17193  | 0.031423 | 0.49815  | 0.05437  | 0.24093  | 0.064961 |
| 0.019339 | 0.67679  | -0.02453 | 0.59705  | -0.0114  | 0.80599  | -0.04114 | 0.3751   | -0.02741 |
| 0.06509  | 0.16022  | 0.063189 | 0.17281  | 0.049638 | 0.2844   | 0.053231 | 0.25094  | 0.084433 |
| -0.00392 | 0.93261  | -0.02638 | 0.56954  | -0.01351 | 0.77098  | -0.0306  | 0.50952  | -0.02808 |
| 0.120517 | 0.00914  | 0.094764 | 0.04066  | 0.13015  | 0.00485  | 0.021365 | 0.64514  | 0.05545  |
| 0.103023 | 0.02599  | -0.02041 | 0.66001  | -0.00831 | 0.85786  | -0.0067  | 0.88523  | -0.07813 |
| 0.000887 | 0.98475  | 0.039675 | 0.39232  | 0.014276 | 0.75831  | 0.033037 | 0.47634  | 0.127377 |
| 0.179912 | 9.25E-05 | 0.213586 | 3.21E-06 | 0.154897 | 0.00078  | 0.193072 | 2.66E-05 | 0.276309 |
| 0.043523 | 0.34801  | 0.079206 | 0.08731  | 0.041438 | 0.37161  | 0.066829 | 0.14932  | 0.071652 |
| 0.148818 | 0.00126  | 0.066729 | 0.14993  | 0.12413  | 0.00724  | -0.01011 | 0.8275   | -0.02301 |
| 0.275977 | 1.31E-09 | 0.172497 | 0.00018  | 0.225244 | 8.75E-07 | 0.07306  | 0.11486  | 0.246405 |
| -0.0141  | 0.76113  | -0.07596 | 0.1011   | -0.05354 | 0.24816  | -0.08247 | 0.07502  | -0.18257 |
| 0.269112 | 3.44E-09 | 0.34592  | 1.42E-14 | 0.253686 | 2.72E-08 | 0.33378  | 1.29E-13 | 0.478595 |
| -0.02982 | 0.5204   | -0.0396  | 0.39326  | -0.02693 | 0.56159  | -0.03469 | 0.45451  | -0.01174 |
| 0.108818 | 0.01866  | 0.265424 | 5.70E-09 | 0.156079 | 0.00071  | 0.285835 | 3.13E-10 | 0.275954 |
| 0.091868 | 0.04724  | 0.029094 | 0.53055  | 0.047589 | 0.30478  | 0.010956 | 0.81333  | 0.109531 |
| 0.039751 | 0.39141  | 0.019649 | 0.67191  | 0.062795 | 0.17551  | -0.03608 | 0.43666  | 0.000986 |
| 0.017025 | 0.71365  | -0.0296  | 0.52341  | -0.01873 | 0.68639  | -0.03817 | 0.4105   | -0.05186 |
| -0.02611 | 0.57354  | -0.01531 | 0.74136  | -0.00979 | 0.83286  | -0.02397 | 0.60542  | -0.04194 |
| 0.05792  | 0.21154  | -0.04525 | 0.32917  | 0.000348 | 0.99402  | -0.06777 | 0.14365  | -0.12771 |
| 0.052007 | 0.26202  | -0.05975 | 0.19746  | 0.026502 | 0.56781  | -0.1227  | 0.00794  | -0.17984 |
| -0.00689 | 0.88201  | -0.0183  | 0.6933   | 0.000834 | 0.98566  | -0.03759 | 0.41764  | -0.05017 |
| 0.072372 | 0.11833  | -0.12156 | 0.00855  | 3.55E-05 | 0.99939  | -0.18885 | 4.01E-05 | -0.1721  |
| 0.045701 | 0.3244   | 0.031274 | 0.50019  | 0.050577 | 0.27538  | -0.01087 | 0.81481  | 0.050913 |
| 0.141869 | 0.00212  | 0.167167 | 0.00029  | 0.125118 | 0.00678  | 0.14989  | 0.00116  | 0.145831 |
| -0.02579 | 0.57827  | 0.060602 | 0.19111  | 0.032365 | 0.48536  | 0.051214 | 0.26938  | 0.116866 |
| 0.061221 | 0.18661  | 0.05261  | 0.25653  | 0.023641 | 0.61034  | 0.059427 | 0.19987  | 0.070699 |
| 0.016467 | 0.72265  | 0.004064 | 0.9302   | 0.008568 | 0.85349  | -0.01151 | 0.80401  | -0.08891 |
| 0.007849 | 0.86567  | 0.041649 | 0.36917  | 0.010494 | 0.82107  | 0.04648  | 0.3162   | 0.02472  |
| 0.196763 | 1.85E-05 | 0.225275 | 8.72E-07 | 0.208696 | 5.41E-06 | 0.149219 | 0.00122  | 0.204903 |
| -0.02399 | 0.60508  | -0.0059  | 0.89875  | 0.00832  | 0.85769  | -0.03768 | 0.4166   | -0.01618 |
| 0.043979 | 0.34297  | 0.148342 | 0.0013   | 0.082254 | 0.07577  | 0.146246 | 0.00153  | 0.287562 |
| 0.060715 | 0.19028  | 0.057565 | 0.21435  | 0.059799 | 0.19707  | 0.014486 | 0.75488  | 0.233284 |
| 0.049327 | 0.28744  | 0.12228  | 0.00816  | 0.075331 | 0.10398  | 0.114938 | 0.01294  | 0.30066  |
| 0.006377 | 0.89068  | 0.034934 | 0.45137  | 0.022149 | 0.63306  | 0.028834 | 0.53423  | 0.091859 |
| 0.091608 | 0.04787  | 0.041401 | 0.37203  | 0.075014 | 0.10545  | -0.0192  | 0.67896  | 0.037458 |
| 0.077911 | 0.09262  | 0.079389 | 0.08658  | 0.084074 | 0.06949  | 0.038699 | 0.40407  | 0.117563 |
| 0.043191 | 0.3517   | 0.064094 | 0.16673  | 0.054165 | 0.24271  | 0.035734 | 0.44107  | 0.041193 |
| 0.004905 | 0.91581  | -0.00045 | 0.99221  | 0.00948  | 0.8381   | -0.01288 | 0.7813   | 0.013198 |
| 0.08546  | 0.065    | 0.01167  | 0.8014   | 0.067625 | 0.14452  | -0.04511 | 0.33072  | -0.04479 |
| 0.088984 | 0.05465  | 0.089285 | 0.05384  | 0.073677 | 0.11182  | 0.063286 | 0.17215  | 0.128151 |
| 0.038098 | 0.41142  | 0.146019 | 0.00156  | 0.065918 | 0.15496  | 0.154523 | 0.00081  | 0.30628  |



|          |          |          |          |          |          |          |          |          |
|----------|----------|----------|----------|----------|----------|----------|----------|----------|
| 0.111346 | 0.01607  | 0.170145 | 0.00022  | 0.168395 | 0.00026  | 0.09509  | 0.03997  | 0.458093 |
| 0.083451 | 0.07159  | 0.183009 | 6.95E-05 | 0.141691 | 0.00215  | 0.141557 | 0.00217  | 0.311837 |
| 0.068591 | 0.13887  | 0.039509 | 0.3943   | 0.057105 | 0.21804  | -0.00448 | 0.92307  | 0.023853 |
| -0.00656 | 0.88756  | 0.049434 | 0.2864   | 0.025614 | 0.58087  | 0.020597 | 0.65707  | 0.099102 |
| 0.095672 | 0.03876  | 0.017792 | 0.70137  | 0.055178 | 0.234    | -0.02909 | 0.53054  | -0.03546 |
| 0.093346 | 0.04378  | 0.127231 | 0.0059   | 0.118796 | 0.01019  | 0.07917  | 0.08745  | 0.240725 |
| 0.175744 | 0.00013  | 0.028463 | 0.5395   | 0.106248 | 0.02165  | -0.03614 | 0.43586  | -0.02481 |
| 0.301741 | 2.76E-11 | 0.13877  | 0.00265  | 0.230202 | 4.93E-07 | 0.030823 | 0.5064   | -0.01521 |
| 0.087702 | 0.05825  | -0.07888 | 0.0886   | 0.041178 | 0.37462  | -0.14922 | 0.00122  | -0.21706 |
| 0.090491 | 0.05067  | 0.250969 | 3.86E-08 | 0.133386 | 0.00388  | 0.257789 | 1.59E-08 | 0.336847 |
| 0.173778 | 0.00016  | 0.046739 | 0.31351  | 0.094917 | 0.04033  | 0.000787 | 0.98647  | 0.032092 |
| 0.067226 | 0.14691  | 0.037126 | 0.42346  | 0.05273  | 0.25544  | 0.000965 | 0.9834   | 0.078471 |
| 0.160663 | 0.00049  | 0.156488 | 0.00069  | 0.116221 | 0.01196  | 0.126365 | 0.00625  | 0.254456 |
| 0.293412 | 1.00E-10 | 0.194437 | 2.33E-05 | 0.187519 | 4.55E-05 | 0.140637 | 0.00232  | 0.258767 |
| 0.085048 | 0.06631  | 0.184519 | 6.04E-05 | 0.101428 | 0.0284   | 0.191691 | 3.04E-05 | 0.265307 |
| 0.019209 | 0.67885  | -0.03715 | 0.42313  | -0.00149 | 0.97442  | -0.07169 | 0.12185  | -0.08711 |
| 0.177711 | 0.00011  | 0.184122 | 6.27E-05 | 0.150512 | 0.0011   | 0.150231 | 0.00113  | 0.370585 |
| 0.055436 | 0.23181  | 0.116448 | 0.01179  | 0.071515 | 0.12276  | 0.102455 | 0.02683  | 0.235891 |
| 0.136735 | 0.00307  | 0.06308  | 0.17355  | 0.099581 | 0.03143  | 0.012182 | 0.79288  | 0.195051 |
| 0.046726 | 0.31365  | 0.027059 | 0.5597   | 0.039387 | 0.39577  | -0.00633 | 0.8915   | 0.02327  |
| 0.0619   | 0.18176  | 0.036147 | 0.4358   | 0.052666 | 0.25602  | -0.00876 | 0.85026  | 0.015105 |
| 0.046377 | 0.31728  | 0.104804 | 0.02351  | 0.082009 | 0.07665  | 0.062127 | 0.18016  | 0.133381 |
| 0.01703  | 0.71358  | -0.01523 | 0.74265  | -0.00938 | 0.83987  | -0.02895 | 0.53255  | 0.005767 |
| -0.01541 | 0.73974  | -0.03983 | 0.39052  | -0.00016 | 0.99729  | -0.0646  | 0.16338  | -0.04645 |
| 0.025732 | 0.57911  | 0.044067 | 0.34201  | 0.042249 | 0.36231  | 0.029124 | 0.53012  | 0.097124 |
| 0.018562 | 0.68909  | 0.000818 | 0.98594  | 0.041689 | 0.36871  | -0.03305 | 0.47615  | -0.06678 |
| -0.03487 | 0.45217  | -0.11269 | 0.01483  | -0.03816 | 0.4107   | -0.14963 | 0.00118  | -0.21799 |
| 0.216112 | 2.43E-06 | 0.204864 | 8.09E-06 | 0.18794  | 4.37E-05 | 0.153031 | 0.00091  | 0.218437 |
| 0.014012 | 0.76265  | 0.08185  | 0.07722  | 0.047073 | 0.31006  | 0.069246 | 0.13512  | 0.108621 |
| -0.03238 | 0.48513  | -0.00313 | 0.94623  | -0.0442  | 0.3405   | 0.014208 | 0.75943  | 0.062824 |
| 0.062325 | 0.17877  | 0.068015 | 0.14222  | 0.100962 | 0.02914  | 0.016802 | 0.71724  | 0.027092 |
| 0.033073 | 0.47585  | -0.01166 | 0.80156  | 0.01413  | 0.76072  | -0.01396 | 0.76346  | -0.04489 |
| 0.007609 | 0.86974  | 0.073567 | 0.11235  | 0.014185 | 0.75981  | 0.089934 | 0.05211  | 0.076259 |
| -0.0125  | 0.78755  | 0.04918  | 0.28888  | 0.010224 | 0.8256   | 0.067408 | 0.14582  | 0.117605 |
| 0.046052 | 0.32068  | 0.109565 | 0.01786  | 0.06775  | 0.14378  | 0.116777 | 0.01155  | 0.16174  |
| 0.086597 | 0.0615   | 0.198566 | 1.54E-05 | 0.084784 | 0.06716  | 0.239405 | 1.64E-07 | 0.168428 |
| 0.002059 | 0.9646   | 0.044653 | 0.33562  | -0.00277 | 0.95243  | 0.056972 | 0.21912  | 0.168553 |
| 0.010593 | 0.81941  | 0.0152   | 0.74321  | 0.015879 | 0.73216  | -0.01009 | 0.82782  | 0.017121 |
| 0.116543 | 0.01172  | 0.120279 | 0.00928  | 0.14379  | 0.00184  | 0.052311 | 0.25924  | 0.101041 |
| 0.087359 | 0.05924  | 0.025339 | 0.58493  | 0.046447 | 0.31655  | -0.01148 | 0.80456  | 0.017118 |
| 0.033961 | 0.46408  | 0.113585 | 0.01405  | 0.071621 | 0.1222   | 0.115572 | 0.01245  | 0.173389 |
| -0.02504 | 0.58943  | -0.01715 | 0.71166  | -0.00102 | 0.98249  | -0.03625 | 0.43452  | -0.00705 |
| 0.045053 | 0.33131  | 0.026674 | 0.5653   | 0.046598 | 0.31498  | -0.02138 | 0.64498  | 0.027188 |
| 0.069359 | 0.13448  | 0.031665 | 0.49485  | 0.061053 | 0.18782  | -0.01011 | 0.82757  | 0.102478 |
| 0.065327 | 0.1587   | -0.0031  | 0.94669  | 0.030955 | 0.50458  | -0.04824 | 0.29817  | 0.021226 |

|          |          |          |          |          |          |          |          |          |
|----------|----------|----------|----------|----------|----------|----------|----------|----------|
| 0.114124 | 0.0136   | 0.150442 | 0.00111  | 0.12884  | 0.0053   | 0.104412 | 0.02404  | 0.251582 |
| 0.003056 | 0.94748  | 0.012379 | 0.78961  | 0.03111  | 0.50244  | -0.03642 | 0.4323   | 0.00395  |
| 0.066653 | 0.1504   | -0.01825 | 0.69406  | 0.027067 | 0.55959  | -0.06721 | 0.14701  | -0.06336 |
| 0.12972  | 0.00499  | 0.085496 | 0.06489  | 0.12054  | 0.00912  | 0.01449  | 0.75481  | 0.063002 |
| 0.038153 | 0.41074  | 0.005044 | 0.91344  | 0.038362 | 0.40818  | -0.04502 | 0.33169  | -0.03775 |
| 0.086481 | 0.06185  | 0.098816 | 0.03277  | 0.093721 | 0.04293  | 0.050909 | 0.27224  | 0.046374 |
| 0.049369 | 0.28703  | 0.152194 | 0.00097  | 0.083423 | 0.07169  | 0.144935 | 0.00169  | 0.393447 |
| -0.01835 | 0.6925   | -0.02307 | 0.61902  | -0.00318 | 0.94537  | -0.02943 | 0.52581  | -0.09604 |
| 0.045038 | 0.33147  | -0.02146 | 0.64375  | 0.008739 | 0.8506   | -0.0396  | 0.3932   | -0.06889 |
| 0.04704  | 0.3104   | 0.093137 | 0.04425  | 0.06241  | 0.17817  | 0.083912 | 0.07003  | 0.096193 |
| 0.014026 | 0.76242  | 0.106037 | 0.02192  | 0.027968 | 0.54658  | 0.127796 | 0.00568  | 0.256519 |
| 0.128033 | 0.00559  | 0.174303 | 0.00015  | 0.138956 | 0.00262  | 0.137195 | 0.00297  | 0.1246   |
| 0.131739 | 0.00435  | 0.172625 | 0.00018  | 0.15229  | 0.00096  | 0.129964 | 0.00491  | 0.277321 |
| 0.210388 | 4.52E-06 | 0.369675 | 1.43E-16 | 0.293966 | 9.21E-11 | 0.320492 | 1.29E-12 | 0.240478 |
| 0.020278 | 0.66205  | 0.035672 | 0.44185  | 0.045718 | 0.32422  | 0.005236 | 0.91016  | 0.076051 |
| -0.01546 | 0.73898  | -0.02025 | 0.66256  | 0.028594 | 0.53764  | -0.06192 | 0.18161  | -0.05981 |
| 0.050351 | 0.27754  | 0.043894 | 0.34391  | 0.02932  | 0.52736  | 0.016705 | 0.7188   | 0.096098 |
| -0.01584 | 0.73285  | -0.0109  | 0.81423  | -0.00418 | 0.9282   | -0.03304 | 0.47626  | -0.03865 |
| 0.08549  | 0.06491  | 0.064873 | 0.16163  | 0.043991 | 0.34285  | 0.064352 | 0.16502  | 0.234449 |
| 0.153986 | 0.00084  | 0.060894 | 0.18897  | 0.140665 | 0.00231  | -0.02847 | 0.53935  | 0.009359 |
| -0.00554 | 0.90502  | -0.04738 | 0.30688  | -0.03804 | 0.41217  | -0.04079 | 0.37917  | -0.018   |
| 0.046866 | 0.3122   | 0.185072 | 5.73E-05 | 0.080811 | 0.08107  | 0.224268 | 9.78E-07 | 0.258363 |
| -0.02104 | 0.65023  | 0.050891 | 0.27241  | 0.022781 | 0.6234   | 0.035005 | 0.45045  | 0.123606 |
| 0.021899 | 0.6369   | 0.012237 | 0.79197  | 0.041456 | 0.37139  | -0.00351 | 0.93977  | -0.03215 |
| 0.060728 | 0.19019  | 0.062353 | 0.17857  | 0.075931 | 0.10124  | 0.019169 | 0.67948  | 0.025978 |
| 0.12352  | 0.00753  | 0.066148 | 0.15352  | 0.107214 | 0.02048  | -0.0022  | 0.96226  | 0.024244 |
| 0.023893 | 0.60654  | 0.006379 | 0.89065  | 0.006359 | 0.89099  | -0.00131 | 0.97746  | 0.081692 |
| 0.01554  | 0.73767  | 0.020836 | 0.65335  | 0.016542 | 0.72144  | 0.004129 | 0.92909  | 0.057793 |
| 0.032131 | 0.48851  | 0.019559 | 0.67333  | 0.021172 | 0.64814  | -0.00475 | 0.91839  | 0.010897 |
| 0.095922 | 0.03825  | 0.098626 | 0.03311  | 0.100158 | 0.03046  | 0.05366  | 0.24714  | 0.194605 |
| 0.122366 | 0.00812  | 0.008358 | 0.85705  | 0.083751 | 0.07057  | -0.06305 | 0.17375  | 0.025257 |
| -0.01509 | 0.74507  | -0.00355 | 0.93907  | -0.01327 | 0.77491  | -0.00325 | 0.94422  | -0.00876 |
| 0.084324 | 0.06867  | 0.039004 | 0.40038  | 0.112717 | 0.01481  | -0.0557  | 0.2296   | 0.062538 |
| 0.09526  | 0.03961  | 0.069616 | 0.13304  | 0.085403 | 0.06518  | 0.018065 | 0.697    | 0.012414 |
| 0.041647 | 0.3692   | 0.043716 | 0.34588  | 0.045003 | 0.33184  | 0.01769  | 0.70298  | 0.03608  |
| -0.02695 | 0.56123  | -0.00538 | 0.90763  | -0.02734 | 0.55564  | 0.013294 | 0.77448  | -0.00602 |
| 0.098772 | 0.03284  | 0.19571  | 2.05E-05 | 0.138586 | 0.00269  | 0.156778 | 0.00067  | 0.42233  |
| -0.02736 | 0.55537  | -0.02024 | 0.66266  | -0.02666 | 0.56547  | -0.02217 | 0.63279  | -0.0293  |
| 0.073356 | 0.11339  | 0.013607 | 0.76931  | -0.00234 | 0.95981  | 0.012627 | 0.7855   | -0.03069 |
| 0.152011 | 0.00098  | 0.194507 | 2.31E-05 | 0.13052  | 0.00473  | 0.208766 | 5.37E-06 | 0.167869 |
| 0.005897 | 0.89887  | -0.03162 | 0.4954   | -0.0098  | 0.83273  | -0.05917 | 0.20181  | -0.0787  |
| 0.086526 | 0.06172  | 0.018051 | 0.69722  | 0.062049 | 0.1807   | -0.02877 | 0.53519  | -0.03384 |
| 0.125079 | 0.0068   | 0.069752 | 0.13229  | 0.099277 | 0.03196  | 0.058621 | 0.20605  | -0.03911 |
| 0.029906 | 0.51913  | 0.052575 | 0.25684  | 0.037138 | 0.42331  | 0.041362 | 0.37248  | 0.03608  |
| -0.0038  | 0.93472  | -0.03962 | 0.393    | -0.00243 | 0.95826  | -0.06326 | 0.17233  | -0.04975 |

|          |          |          |          |          |          |          |          |          |
|----------|----------|----------|----------|----------|----------|----------|----------|----------|
| 0.110118 | 0.01729  | 0.04785  | 0.30214  | 0.080396 | 0.08265  | 0.005846 | 0.89974  | 0.170358 |
| 0.077521 | 0.09427  | 0.080539 | 0.0821   | 0.060237 | 0.1938   | 0.063325 | 0.17189  | 0.135575 |
| 0.048674 | 0.29388  | -0.02465 | 0.59522  | 0.023649 | 0.61022  | -0.06712 | 0.14754  | -0.07744 |
| 0.09884  | 0.03272  | 0.107141 | 0.02057  | 0.08486  | 0.06692  | 0.07276  | 0.11636  | 0.126034 |
| 0.005928 | 0.89833  | 0.061192 | 0.18681  | 0.012516 | 0.78735  | 0.059962 | 0.19584  | 0.183287 |
| 0.09309  | 0.04436  | 0.074172 | 0.10943  | 0.074588 | 0.10744  | 0.039319 | 0.39658  | 0.163494 |
| 0.019479 | 0.67459  | -0.01608 | 0.7289   | 0.002936 | 0.94954  | -0.00783 | 0.86594  | -0.0598  |
| 0.17997  | 9.20E-05 | 0.130002 | 0.0049   | 0.152565 | 0.00094  | 0.065275 | 0.15904  | 0.095051 |
| 0.015529 | 0.73784  | 0.01522  | 0.74287  | 0.022316 | 0.63051  | 0.00862  | 0.85261  | -0.02099 |
| -0.00229 | 0.96065  | -0.01218 | 0.793    | -0.00179 | 0.96919  | -0.02264 | 0.6255   | -0.00185 |
| 0.15643  | 0.00069  | -0.00941 | 0.83924  | 0.091457 | 0.04824  | -0.08473 | 0.06735  | -0.03005 |
| 0.07011  | 0.13031  | 0.035232 | 0.44751  | 0.035827 | 0.43987  | 0.010695 | 0.8177   | 0.146301 |
| 0.119421 | 0.00979  | -0.00319 | 0.94522  | 0.010806 | 0.81583  | 0.003694 | 0.93654  | 0.006707 |
| 0.051411 | 0.26754  | -0.02249 | 0.62791  | -0.00626 | 0.89275  | -0.03052 | 0.51061  | -0.00095 |
| 0.043732 | 0.34569  | 0.145936 | 0.00157  | 0.093377 | 0.04371  | 0.120266 | 0.00928  | 0.347586 |
| 0.060651 | 0.19075  | 0.016327 | 0.72491  | 0.077092 | 0.09611  | -0.05101 | 0.27131  | -0.01569 |
| -0.00853 | 0.85414  | -0.06844 | 0.13977  | -0.04433 | 0.33909  | -0.07648 | 0.09878  | -0.12974 |
| 0.020153 | 0.66401  | 0.07737  | 0.09492  | 0.046205 | 0.31908  | 0.05932  | 0.20068  | 0.250088 |
| -0.00454 | 0.92198  | -0.01119 | 0.80937  | -0.02145 | 0.64381  | -0.0203  | 0.6617   | -0.02072 |
| -0.04961 | 0.28471  | -0.02673 | 0.56446  | -0.03462 | 0.45542  | -0.03985 | 0.39019  | 0.066558 |
| 0.107327 | 0.02035  | 0.059791 | 0.19712  | 0.080316 | 0.08295  | 0.009332 | 0.8406   | 0.025069 |
| 0.151242 | 0.00104  | 0.116311 | 0.01189  | 0.148316 | 0.00131  | 0.035869 | 0.43934  | 0.150456 |
| 0.111675 | 0.01576  | 0.180264 | 8.96E-05 | 0.1343   | 0.00364  | 0.144148 | 0.00179  | 0.255819 |
| 0.057551 | 0.21447  | 0.020658 | 0.65612  | 0.062345 | 0.17863  | -0.03724 | 0.42206  | 0.00122  |
| -0.0014  | 0.97596  | 0.07246  | 0.11788  | 0.030378 | 0.51255  | 0.058771 | 0.20489  | 0.190086 |
| 0.042509 | 0.35936  | 0.032884 | 0.47838  | 0.041897 | 0.36633  | -0.00111 | 0.98093  | 0.077823 |
| 0.027964 | 0.54663  | 0.093371 | 0.04372  | 0.033073 | 0.47586  | 0.109379 | 0.01806  | 0.196185 |
| 0.012487 | 0.78783  | 0.063491 | 0.17076  | 0.023062 | 0.61912  | 0.063604 | 0.17     | 0.129072 |
| 0.110128 | 0.01728  | 0.087039 | 0.06018  | 0.092531 | 0.04566  | 0.059986 | 0.19566  | 0.22969  |
| 0.085408 | 0.06517  | 0.182334 | 7.40E-05 | 0.113081 | 0.01449  | 0.172242 | 0.00018  | 0.276638 |
| 0.087469 | 0.05892  | 0.134425 | 0.00361  | 0.112174 | 0.0153   | 0.103904 | 0.02474  | 0.179603 |
| 0.060383 | 0.19272  | 0.057717 | 0.21314  | 0.053955 | 0.24454  | 0.029935 | 0.51873  | 0.1152   |
| -0.04377 | 0.34524  | -0.15611 | 0.00071  | -0.10176 | 0.02788  | -0.15775 | 0.00062  | -0.23946 |
| 0.078669 | 0.08948  | 0.04749  | 0.30579  | 0.057981 | 0.21105  | 0.009713 | 0.83418  | 0.067807 |
| 0.049197 | 0.28872  | 0.079569 | 0.08587  | 0.038205 | 0.41011  | 0.064355 | 0.165    | 0.241665 |
| 0.208867 | 5.32E-06 | 0.164489 | 0.00036  | 0.206204 | 7.04E-06 | 0.0759   | 0.10139  | 0.128474 |
| 0.041445 | 0.37153  | 0.186848 | 4.85E-05 | 0.096217 | 0.03766  | 0.195528 | 2.09E-05 | 0.263299 |
| 0.15315  | 0.0009   | 0.104849 | 0.02345  | 0.114135 | 0.01359  | 0.049565 | 0.28512  | 0.188088 |
| -0.04539 | 0.32768  | -0.12269 | 0.00795  | -0.07239 | 0.11823  | -0.11582 | 0.01226  | -0.2056  |
| 0.068762 | 0.13788  | 0.24572  | 7.51E-08 | 0.183324 | 6.75E-05 | 0.192051 | 2.94E-05 | 0.498023 |
| -0.01856 | 0.68905  | 0.007227 | 0.87622  | -0.0061  | 0.89544  | -0.01011 | 0.82746  | 0.03142  |
| 0.134271 | 0.00365  | -0.00966 | 0.83512  | 0.077295 | 0.09524  | -0.09048 | 0.05069  | -0.0674  |
| 0.039316 | 0.39662  | 0.031578 | 0.49603  | 0.027405 | 0.55468  | 0.021384 | 0.64486  | -0.00173 |
| -0.07889 | 0.0886   | -0.12761 | 0.00575  | -0.06232 | 0.17878  | -0.13938 | 0.00254  | -0.20581 |
| 0.008884 | 0.84815  | 0.066644 | 0.15046  | 0.063744 | 0.16906  | 0.04117  | 0.37471  | 0.107015 |

|          |          |          |          |          |          |          |          |          |
|----------|----------|----------|----------|----------|----------|----------|----------|----------|
| 0.018685 | 0.68714  | -0.00573 | 0.90167  | 0.002    | 0.96562  | 0.004431 | 0.92393  | -0.04829 |
| 0.157554 | 0.00063  | 0.245745 | 7.49E-08 | 0.152083 | 0.00098  | 0.239615 | 1.60E-07 | 0.469385 |
| 0.104875 | 0.02342  | 0.065777 | 0.15584  | 0.082764 | 0.07397  | 0.012607 | 0.78584  | 0.064813 |
| 0.257604 | 1.63E-08 | 0.257063 | 1.75E-08 | 0.184041 | 6.32E-05 | 0.23314  | 3.49E-07 | 0.321375 |
| -0.01475 | 0.75061  | 0.015888 | 0.73201  | -0.00177 | 0.96962  | -0.00246 | 0.95764  | -0.00992 |
| 0.138993 | 0.00261  | 0.131962 | 0.00428  | 0.072699 | 0.11667  | 0.151178 | 0.00105  | 0.092111 |
| -0.01064 | 0.81857  | 0.000805 | 0.98616  | 0.011842 | 0.79855  | 0.003048 | 0.94762  | 0.054991 |
| -0.00304 | 0.94774  | -0.02875 | 0.53548  | -0.03363 | 0.46841  | -0.01115 | 0.81008  | -0.02666 |
| 0.048318 | 0.29742  | 0.035136 | 0.44876  | 0.043277 | 0.35074  | 0.01774  | 0.70218  | 0.060862 |
| 0.103798 | 0.02489  | 0.029902 | 0.51919  | 0.05202  | 0.2619   | 0.001929 | 0.96684  | 0.113329 |
| 0.074008 | 0.11021  | 0.154039 | 0.00084  | 0.085823 | 0.06387  | 0.184317 | 6.15E-05 | 0.255278 |
| -0.03615 | 0.43572  | -0.01991 | 0.66786  | -0.00338 | 0.94199  | -0.01892 | 0.6834   | -0.02007 |
| 0.099706 | 0.03122  | 0.150513 | 0.0011   | 0.102273 | 0.0271   | 0.147284 | 0.00141  | 0.171476 |
| -0.08171 | 0.07775  | -0.07529 | 0.10418  | -0.06905 | 0.13625  | -0.09705 | 0.03604  | -0.04036 |
| -0.00353 | 0.93936  | -0.01489 | 0.7483   | 0.002263 | 0.9611   | -0.01506 | 0.74543  | -0.02185 |
| 0.085429 | 0.0651   | 0.042484 | 0.35965  | 0.078446 | 0.0904   | -0.0061  | 0.89535  | 0.054446 |
| 0.090405 | 0.05089  | 0.049366 | 0.28706  | 0.05688  | 0.21987  | 0.017373 | 0.70806  | 0.038692 |
| 0.160189 | 0.00051  | 0.193635 | 2.52E-05 | 0.171135 | 0.0002   | 0.146068 | 0.00155  | 0.269875 |
| 0.052883 | 0.25406  | 0.015422 | 0.73958  | 0.053111 | 0.25202  | -0.02546 | 0.5832   | -0.02063 |
| 0.104698 | 0.02365  | 0.030487 | 0.51104  | 0.056063 | 0.22657  | -0.0184  | 0.69171  | 0.068388 |
| 0.013605 | 0.76935  | -0.03665 | 0.42938  | 0.010668 | 0.81814  | -0.06347 | 0.17087  | -0.10623 |
| 0.153432 | 0.00088  | 0.060933 | 0.18869  | 0.126905 | 0.00603  | -0.01204 | 0.79522  | -0.03574 |
| 0.047152 | 0.30925  | 0.098531 | 0.03327  | 0.038828 | 0.40251  | 0.100924 | 0.0292   | 0.271828 |
| 0.041588 | 0.36988  | 0.025179 | 0.58731  | 0.014578 | 0.75337  | 0.014402 | 0.75625  | 0.052587 |
| 0.076591 | 0.0983   | 0.02881  | 0.53457  | 0.061408 | 0.18526  | -0.02167 | 0.64036  | -0.01092 |
| 0.053134 | 0.25181  | 0.074434 | 0.10818  | 0.063605 | 0.16999  | 0.038554 | 0.40584  | 0.188924 |
| 0.048222 | 0.29839  | -0.06908 | 0.13604  | 0.001174 | 0.97981  | -0.11938 | 0.00982  | -0.1502  |
| 0.056859 | 0.22004  | 0.105725 | 0.02231  | 0.071466 | 0.12302  | 0.089506 | 0.05324  | 0.168042 |
| 0.098259 | 0.03377  | 0.117261 | 0.01121  | 0.09728  | 0.03559  | 0.075673 | 0.10241  | 0.315349 |
| 0.04623  | 0.31882  | 0.066545 | 0.15106  | 0.073059 | 0.11486  | 0.011922 | 0.79722  | 0.110845 |
| 0.068206 | 0.1411   | 0.063264 | 0.1723   | 0.085749 | 0.0641   | 0.00264  | 0.95463  | 0.111048 |
| 0.023691 | 0.60958  | -0.01301 | 0.77924  | -0.00294 | 0.94955  | -0.03726 | 0.42175  | -0.03851 |
| 0.072507 | 0.11764  | 0.11485  | 0.01301  | 0.091334 | 0.04854  | 0.079294 | 0.08696  | 0.199058 |
| 0.151532 | 0.00102  | -0.0157  | 0.73499  | 0.059317 | 0.2007   | -0.07981 | 0.08493  | -0.02199 |
| 0.121206 | 0.00874  | 0.250835 | 3.93E-08 | 0.194862 | 2.23E-05 | 0.206714 | 6.67E-06 | 0.375993 |
| 0.163613 | 0.00038  | 0.176225 | 0.00013  | 0.174404 | 0.00015  | 0.11003  | 0.01738  | 0.152632 |
| 0.145271 | 0.00165  | 0.120671 | 0.00905  | 0.139047 | 0.0026   | 0.059075 | 0.20255  | 0.013791 |
| 0.119703 | 0.00962  | 0.105281 | 0.02288  | 0.095908 | 0.03828  | 0.077976 | 0.09235  | 0.130618 |
| 0.080025 | 0.08408  | -0.01151 | 0.80416  | -0.01447 | 0.7551   | -0.01273 | 0.78378  | 0.021594 |
| -0.02539 | 0.58421  | 0.00705  | 0.87923  | -0.00147 | 0.97474  | -0.00692 | 0.88147  | 0.060795 |
| 0.035776 | 0.44052  | 0.036683 | 0.42902  | 0.069107 | 0.13591  | -0.01488 | 0.74847  | -0.02909 |
| 0.073717 | 0.11163  | 0.141907 | 0.00211  | 0.104147 | 0.0244   | 0.122393 | 0.0081   | 0.267782 |
| 0.085359 | 0.06532  | 0.092347 | 0.04609  | 0.098622 | 0.03311  | 0.044648 | 0.33568  | 0.17198  |
| 0.081494 | 0.07852  | 0.084307 | 0.06872  | 0.070437 | 0.12852  | 0.064113 | 0.1666   | 0.11795  |
| 0.063743 | 0.16907  | 0.059235 | 0.20133  | 0.083633 | 0.07097  | 0.00326  | 0.94399  | 0.045478 |

|          |          |          |          |          |          |          |          |          |
|----------|----------|----------|----------|----------|----------|----------|----------|----------|
| 0.100198 | 0.03039  | 0.070465 | 0.12837  | 0.075059 | 0.10524  | 0.044571 | 0.33652  | 0.128344 |
| 0.012165 | 0.79318  | -0.08003 | 0.08407  | -0.01696 | 0.71463  | -0.1111  | 0.01631  | -0.14908 |
| 0.056048 | 0.2267   | 0.072224 | 0.11908  | 0.065283 | 0.15898  | 0.078594 | 0.08979  | 0.12151  |
| 0.040683 | 0.3804   | 0.039798 | 0.39085  | 0.036416 | 0.43239  | 0.035103 | 0.44918  | 0.119958 |
| 0.031421 | 0.49817  | -0.06734 | 0.14622  | -0.01962 | 0.67239  | -0.08266 | 0.07434  | -0.14935 |
| 0.245926 | 7.32E-08 | 0.111444 | 0.01598  | 0.17312  | 0.00017  | 0.025254 | 0.58619  | 0.124412 |
| 0.055118 | 0.23451  | -0.0227  | 0.62468  | 0.000183 | 0.99685  | -0.03129 | 0.49991  | 0.050753 |
| 0.094145 | 0.042    | 0.056946 | 0.21933  | 0.056451 | 0.22337  | 0.035328 | 0.44628  | 0.044887 |
| 0.049075 | 0.28991  | 0.004852 | 0.91671  | 0.043201 | 0.35159  | -0.0477  | 0.30366  | -0.05068 |
| 0.069051 | 0.13623  | 0.057658 | 0.21361  | 0.053078 | 0.25231  | 0.033071 | 0.47588  | 0.039853 |
| 0.049389 | 0.28684  | 0.076807 | 0.09735  | 0.072531 | 0.11752  | 0.036645 | 0.4295   | 0.276313 |
| 0.068289 | 0.14062  | 0.118535 | 0.01036  | 0.128761 | 0.00532  | 0.058105 | 0.21008  | 0.185481 |
| 0.23086  | 4.56E-07 | 0.347459 | 1.07E-14 | 0.292382 | 1.17E-10 | 0.273987 | 1.74E-09 | 0.39869  |
| 0.07726  | 0.09539  | 0.024092 | 0.60354  | 0.058503 | 0.20697  | -0.02891 | 0.5332   | 0.119149 |
| 0.001121 | 0.98072  | 0.084844 | 0.06697  | 0.031733 | 0.49391  | 0.100348 | 0.03014  | 0.154235 |
| 0.021296 | 0.64621  | 0.05288  | 0.25408  | 0.03732  | 0.42105  | 0.036651 | 0.42942  | 0.141709 |
| 0.051292 | 0.26864  | 0.111569 | 0.01586  | 0.053256 | 0.25072  | 0.125154 | 0.00677  | 0.295532 |
| 0.036188 | 0.43528  | -0.1018  | 0.02782  | 0.010695 | 0.8177   | -0.17113 | 0.0002   | -0.22402 |
| 0.006891 | 0.88193  | 0.050099 | 0.27995  | 0.044892 | 0.33304  | 0.008427 | 0.85588  | 0.167016 |
| 0.037406 | 0.41998  | 0.039266 | 0.39721  | 0.044089 | 0.34177  | 0.00693  | 0.88127  | 0.069528 |
| 0.083572 | 0.07118  | 0.115696 | 0.01235  | 0.109319 | 0.01812  | 0.081796 | 0.07742  | 0.198035 |
| 0.063706 | 0.16931  | -0.04468 | 0.3353   | -0.01009 | 0.8279   | -0.06061 | 0.19103  | -0.05242 |
| 0.062266 | 0.17919  | -0.00848 | 0.85503  | 0.024398 | 0.59895  | -0.05311 | 0.25201  | 0.030572 |
| 0.087074 | 0.06008  | 0.080654 | 0.08166  | 0.059696 | 0.19784  | 0.078313 | 0.09095  | 0.223841 |
| 0.085723 | 0.06418  | 0.10148  | 0.02832  | 0.105247 | 0.02293  | 0.056192 | 0.2255   | 0.152669 |
| 0.05276  | 0.25516  | 0.141273 | 0.00221  | 0.079252 | 0.08713  | 0.165677 | 0.00032  | 0.243326 |
| 0.119265 | 0.00989  | 0.185294 | 5.61E-05 | 0.110868 | 0.01654  | 0.200998 | 1.20E-05 | 0.082511 |
| 0.215158 | 2.70E-06 | 0.189147 | 3.89E-05 | 0.204347 | 8.54E-06 | 0.122976 | 0.0078   | 0.121215 |
| 0.129325 | 0.00513  | 0.141192 | 0.00223  | 0.136724 | 0.00307  | 0.077202 | 0.09564  | 0.258883 |
| -0.09602 | 0.03806  | -0.002   | 0.96557  | -0.03967 | 0.39238  | 0.000453 | 0.99221  | 0.167863 |
| -0.10804 | 0.01952  | 0.009514 | 0.83754  | -0.07062 | 0.12753  | 0.051577 | 0.26599  | 0.064916 |
| -0.06792 | 0.14277  | 0.032544 | 0.48295  | -0.03916 | 0.39845  | 0.066531 | 0.15115  | 0.111    |
| -0.11184 | 0.01561  | -0.00651 | 0.88838  | -0.04434 | 0.33897  | 0.000802 | 0.98621  | 0.043536 |
| 0.055504 | 0.23124  | 0.221295 | 1.37E-06 | 0.089233 | 0.05398  | 0.251886 | 3.43E-08 | 0.364826 |
| -0.09802 | 0.0342   | -0.09862 | 0.03312  | -0.1091  | 0.01835  | -0.09404 | 0.04224  | 0.02048  |
| -0.08999 | 0.05197  | 0.027724 | 0.55009  | -0.02749 | 0.55341  | 0.04462  | 0.33598  | 0.107121 |
| -0.10126 | 0.02867  | -0.18338 | 6.72E-05 | -0.11178 | 0.01567  | -0.20683 | 6.59E-06 | -0.21182 |
| -0.13835 | 0.00273  | -0.05522 | 0.23366  | -0.07803 | 0.09211  | -0.05274 | 0.25536  | -0.01286 |
| -0.18389 | 6.40E-05 | -0.14494 | 0.00169  | -0.10853 | 0.01897  | -0.16174 | 0.00045  | -0.15072 |
| 0.02501  | 0.58981  | 0.088487 | 0.05602  | 0.045773 | 0.32363  | 0.087412 | 0.05909  | 0.258695 |
| -0.09615 | 0.03779  | 0.048329 | 0.29731  | -0.02209 | 0.63395  | 0.060964 | 0.18847  | 0.22773  |
| -0.09652 | 0.03707  | -0.03238 | 0.48509  | -0.04612 | 0.31995  | -0.03911 | 0.39909  | 0.001531 |
| 0.021954 | 0.63606  | 0.165325 | 0.00033  | 0.067992 | 0.14235  | 0.188976 | 3.96E-05 | 0.321615 |
| -0.03037 | 0.51268  | 0.077965 | 0.0924   | 0.02974  | 0.52146  | 0.065346 | 0.15858  | 0.245926 |
| -0.06304 | 0.17385  | 0.034273 | 0.45999  | -0.02331 | 0.61541  | 0.047731 | 0.30334  | 0.236246 |

|          |          |          |          |          |          |          |          |          |
|----------|----------|----------|----------|----------|----------|----------|----------|----------|
| -0.04623 | 0.31882  | 0.02523  | 0.58654  | -0.04013 | 0.38689  | 0.06298  | 0.17424  | 0.098331 |
| -0.04727 | 0.30801  | 0.073721 | 0.11161  | 0.018898 | 0.68377  | 0.076802 | 0.09738  | 0.221424 |
| -0.12823 | 0.00552  | -0.13008 | 0.00487  | -0.11284 | 0.0147   | -0.12769 | 0.00572  | -0.16941 |
| -0.00082 | 0.98586  | 0.118788 | 0.01019  | 0.078469 | 0.0903   | 0.081375 | 0.07896  | 0.26616  |
| -0.1538  | 0.00085  | -0.07964 | 0.08557  | -0.08213 | 0.07621  | -0.07631 | 0.09955  | -0.09748 |
| 0.094027 | 0.04226  | 0.193427 | 2.57E-05 | 0.136926 | 0.00303  | 0.161214 | 0.00047  | 0.456842 |
| -0.05734 | 0.21614  | 0.004678 | 0.9197   | 0.023567 | 0.61146  | -0.03931 | 0.39663  | 0.059735 |
| -0.12657 | 0.00617  | -0.13703 | 0.00301  | -0.10407 | 0.02451  | -0.14851 | 0.00129  | -0.14375 |
| -0.08097 | 0.08048  | 0.101351 | 0.02853  | 0.008664 | 0.85188  | 0.12877  | 0.00532  | 0.293739 |
| -0.13458 | 0.00357  | -0.02062 | 0.65666  | -0.04558 | 0.32569  | -0.01517 | 0.74373  | 0.042037 |
| -0.049   | 0.2907   | 0.042858 | 0.35543  | -0.00471 | 0.91914  | 0.050219 | 0.2788   | 0.227371 |
| -0.17218 | 0.00018  | -0.0931  | 0.04433  | -0.13364 | 0.00381  | -0.04539 | 0.3277   | -0.07243 |
| -0.04559 | 0.3256   | 0.081877 | 0.07713  | 0.025883 | 0.57689  | 0.082936 | 0.07337  | 0.219931 |
| -0.06941 | 0.13419  | 0.065208 | 0.15946  | 0.006617 | 0.88659  | 0.074111 | 0.10972  | 0.214001 |
| 0.0064   | 0.89029  | 0.16235  | 0.00043  | 0.0859   | 0.06363  | 0.159441 | 0.00054  | 0.444557 |
| -0.12001 | 0.00944  | -0.1579  | 0.00062  | -0.11386 | 0.01382  | -0.16937 | 0.00024  | -0.2238  |
| -0.0851  | 0.06613  | 0.044229 | 0.34023  | -0.00283 | 0.95131  | 0.029125 | 0.53011  | 0.247059 |
| -0.00481 | 0.91738  | 0.131035 | 0.00456  | 0.034422 | 0.45803  | 0.151705 | 0.00101  | 0.213204 |
| -0.07928 | 0.087    | -0.08694 | 0.06047  | -0.09404 | 0.04223  | -0.07514 | 0.10484  | -0.03601 |
| -0.08112 | 0.0799   | -0.02085 | 0.6531   | -0.05668 | 0.22148  | -0.01187 | 0.79803  | 0.063982 |
| -0.0703  | 0.12925  | 0.054594 | 0.239    | -0.00922 | 0.84252  | 0.062217 | 0.17953  | 0.216635 |
| -0.0372  | 0.42253  | 0.020885 | 0.6526   | 0.010722 | 0.81724  | 0.01952  | 0.67394  | 0.10254  |
| -0.08515 | 0.066    | 0.027024 | 0.56021  | -0.02532 | 0.58515  | 0.043985 | 0.34291  | 0.093407 |
| -0.12796 | 0.00562  | -0.06204 | 0.18079  | -0.07143 | 0.12319  | -0.06756 | 0.14493  | -0.01761 |
| -0.12631 | 0.00627  | -0.00755 | 0.87071  | -0.07959 | 0.08579  | 0.036073 | 0.43674  | -0.02558 |
| -0.01714 | 0.71175  | -0.02656 | 0.56703  | 0.003055 | 0.94751  | -0.06777 | 0.14369  | 0.047838 |
| 0.004539 | 0.92208  | 0.106285 | 0.02161  | 0.043463 | 0.34868  | 0.108238 | 0.0193   | 0.298979 |
| -0.16633 | 0.00031  | -0.12714 | 0.00594  | -0.12873 | 0.00534  | -0.11313 | 0.01445  | -0.11382 |
| -0.0726  | 0.11719  | -0.01078 | 0.81633  | -0.02667 | 0.56537  | -0.0304  | 0.51218  | 0.06209  |
| -0.0457  | 0.32445  | 0.098989 | 0.03246  | 0.02198  | 0.63566  | 0.110566 | 0.01684  | 0.267444 |
| 0.034381 | 0.45856  | 0.20256  | 1.03E-05 | 0.083247 | 0.07229  | 0.232125 | 3.93E-07 | 0.439441 |
| -0.05347 | 0.24878  | -0.01837 | 0.69215  | -0.0417  | 0.36857  | -0.01329 | 0.77446  | 0.088282 |
| -0.04156 | 0.37024  | -0.05034 | 0.27763  | -0.03626 | 0.43435  | -0.07726 | 0.09538  | -0.04108 |
| 0.244965 | 8.26E-08 | 0.723889 | 5.60E-77 | 0.302877 | 2.30E-11 | 0.899831 | #####    | 0.625075 |
| 0.177543 | 0.00011  | 0.555731 | 3.34E-39 | 0.224036 | 1.00E-06 | 0.710692 | 4.95E-73 | 0.386007 |
| 0.077234 | 0.0955   | 0.356268 | 2.02E-15 | 0.130159 | 0.00484  | 0.46435  | 2.37E-26 | 0.360222 |
| 0.072889 | 0.11572  | 0.398931 | 2.88E-19 | 0.143106 | 0.00193  | 0.537002 | 3.05E-36 | 0.284053 |
| 0.144803 | 0.0017   | 0.408521 | 3.28E-20 | 0.193864 | 2.46E-05 | 0.501991 | 3.53E-31 | 0.31423  |
| 0.150181 | 0.00113  | 0.43938  | 1.83E-23 | 0.217311 | 2.13E-06 | 0.521023 | 7.39E-34 | 0.388208 |
| 0.264858 | 6.16E-09 | 0.592125 | 1.59E-45 | 0.315534 | 2.96E-12 | 0.690579 | 1.99E-67 | 0.469136 |
| 0.167014 | 0.00029  | 0.494755 | 3.33E-30 | 0.223919 | 1.02E-06 | 0.632992 | 1.18E-53 | 0.425778 |
| 0.170844 | 0.00021  | 0.651229 | 1.08E-57 | 0.250225 | 4.25E-08 | 0.840992 | #####    | 0.461004 |
| 0.21544  | 2.62E-06 | 0.735456 | 1.24E-80 | 0.306793 | 1.23E-11 | 0.938867 | #####    | 0.489322 |
| 0.062845 | 0.17516  | 0.122108 | 0.00825  | 0.060517 | 0.19173  | 0.156023 | 0.00072  | 0.088539 |
| 0.108458 | 0.01906  | 0.46981  | 5.14E-27 | 0.175792 | 0.00013  | 0.618636 | 1.16E-50 | 0.34809  |

|          |          |          |          |          |          |          |          |          |
|----------|----------|----------|----------|----------|----------|----------|----------|----------|
| 0.432689 | 9.92E-23 | 0.863907 | #####    | 0.550533 | 2.31E-38 | 0.905827 | #####    | 0.547854 |
| 0.164127 | 0.00037  | 0.581804 | 1.19E-43 | 0.241954 | 1.20E-07 | 0.756733 | 7.03E-88 | 0.372377 |
| 0.198141 | 1.61E-05 | 0.682582 | 2.52E-65 | 0.283543 | 4.39E-10 | 0.859568 | #####    | 0.602714 |
| 0.08467  | 0.06753  | 0.328479 | 3.28E-13 | 0.139288 | 0.00256  | 0.410459 | 2.09E-20 | 0.310244 |
| 0.105868 | 0.02213  | 0.436806 | 3.52E-23 | 0.208348 | 5.62E-06 | 0.511998 | 1.44E-32 | 0.422999 |
| 0.283855 | 4.19E-10 | 0.673023 | 6.73E-63 | 0.374832 | 5.02E-17 | 0.754195 | 5.63E-87 | 0.608933 |
| 0.115606 | 0.01242  | 0.340537 | 3.83E-14 | 0.162411 | 0.00043  | 0.4236   | 9.29E-22 | 0.291532 |
| 0.140335 | 0.00237  | 0.465959 | 1.52E-26 | 0.200582 | 1.26E-05 | 0.594654 | 5.39E-46 | 0.316564 |
| 0.510012 | 2.75E-32 | 0.685275 | 5.02E-66 | 0.516398 | 3.43E-33 | 0.668926 | 6.93E-62 | 0.360286 |
| 0.505736 | 1.08E-31 | 0.607735 | 1.72E-48 | 0.301209 | 3.00E-11 | 0.748001 | 8.12E-85 | 0.534942 |
| 0.348785 | 8.35E-15 | 0.530787 | 2.67E-35 | 0.365746 | 3.15E-16 | 0.551523 | 1.60E-38 | 0.387947 |
| 0.371316 | 1.03E-16 | 0.644971 | 2.82E-56 | 0.321242 | 1.14E-12 | 0.803294 | #####    | 0.464083 |
| 0.348851 | 8.24E-15 | 0.383104 | 8.96E-18 | 0.206519 | 6.81E-06 | 0.449121 | 1.46E-24 | 0.392292 |
| 0.247073 | 6.34E-08 | 0.592553 | 1.32E-45 | 0.273946 | 1.75E-09 | 0.722048 | 2.05E-76 | 0.631913 |
| 0.211428 | 4.05E-06 | 0.700709 | 3.42E-70 | 0.288773 | 2.02E-10 | 0.900941 | #####    | 0.495586 |
| 0.103013 | 0.02601  | 0.37365  | 6.40E-17 | 0.174596 | 0.00015  | 0.458123 | 1.31E-25 | 0.408186 |
| 0.273996 | 1.74E-09 | 0.664311 | 9.16E-61 | 0.305005 | 1.64E-11 | 0.841488 | #####    | 0.547391 |
| 0.266987 | 4.60E-09 | 0.499106 | 8.69E-31 | 0.235214 | 2.72E-07 | 0.636951 | 1.65E-54 | 0.346616 |
| 0.135649 | 0.00331  | 0.281236 | 6.15E-10 | 0.133514 | 0.00385  | 0.342804 | 2.53E-14 | 0.260999 |
| 0.097446 | 0.03527  | 0.438298 | 2.41E-23 | 0.16319  | 0.0004   | 0.564352 | 1.25E-40 | 0.411823 |
| 0.331226 | 2.03E-13 | 0.377966 | 2.63E-17 | 0.201959 | 1.09E-05 | 0.465156 | 1.90E-26 | 0.28463  |
| 0.256959 | 1.77E-08 | 0.748703 | 4.66E-85 | 0.358285 | 1.36E-15 | 0.896842 | #####    | 0.602538 |
| 0.122139 | 0.00824  | 0.374886 | 4.97E-17 | 0.159155 | 0.00056  | 0.460499 | 6.86E-26 | 0.413578 |
| 0.079255 | 0.08712  | 0.323846 | 7.29E-13 | 0.123823 | 0.00738  | 0.419792 | 2.32E-21 | 0.238676 |
| 0.1674   | 0.00028  | 0.435289 | 5.17E-23 | 0.19205  | 2.94E-05 | 0.551382 | 1.69E-38 | 0.456985 |
| 0.077465 | 0.09451  | 0.409118 | 2.86E-20 | 0.148324 | 0.00131  | 0.538923 | 1.55E-36 | 0.404262 |
| 0.129115 | 0.0052   | 0.449933 | 1.18E-24 | 0.189185 | 3.88E-05 | 0.571976 | 6.29E-42 | 0.454588 |
| 0.130227 | 0.00482  | 0.376653 | 3.45E-17 | 0.1518   | 0.001    | 0.494641 | 3.45E-30 | 0.329996 |
| 0.206608 | 6.75E-06 | 0.72738  | 4.62E-78 | 0.298022 | 4.93E-11 | 0.929656 | #####    | 0.571076 |
| 0.211098 | 4.19E-06 | 0.738552 | 1.21E-81 | 0.298587 | 4.52E-11 | 0.947965 | #####    | 0.513714 |
| 0.141816 | 0.00213  | 0.4814   | 1.83E-28 | 0.200124 | 1.32E-05 | 0.62453  | 7.14E-52 | 0.29574  |
| 0.19791  | 1.65E-05 | 0.716115 | 1.26E-74 | 0.28851  | 2.10E-10 | 0.922958 | #####    | 0.492544 |
| 0.466706 | 1.23E-26 | 0.613566 | 1.21E-49 | 0.32016  | 1.36E-12 | 0.742171 | 7.68E-83 | 0.542767 |
| 0.540897 | 7.66E-37 | 0.638158 | 9.02E-55 | 0.487648 | 2.87E-29 | 0.587416 | 1.16E-44 | 0.420935 |
| 0.240875 | 1.37E-07 | 0.569954 | 1.40E-41 | 0.263298 | 7.61E-09 | 0.701155 | 2.57E-70 | 0.373618 |
| 0.614511 | 7.86E-50 | 0.774353 | 1.79E-94 | 0.557732 | 1.57E-39 | 0.779395 | 1.80E-96 | 0.507524 |
| 0.124439 | 0.00709  | 0.318174 | 1.91E-12 | 0.146455 | 0.00151  | 0.416191 | 5.47E-21 | 0.250144 |
| 0.136203 | 0.00319  | 0.239693 | 1.58E-07 | 0.148454 | 0.00129  | 0.285678 | 3.20E-10 | 0.151533 |
| 0.580669 | 1.89E-43 | 0.732994 | 7.74E-80 | 0.607429 | 1.97E-48 | 0.641045 | 2.10E-55 | 0.437852 |
| 0.460016 | 7.82E-26 | 0.651208 | 1.09E-57 | 0.549889 | 2.93E-38 | 0.553927 | 6.56E-39 | 0.43073  |
| 0.382951 | 9.26E-18 | 0.606585 | 2.88E-48 | 0.441891 | 9.61E-24 | 0.600073 | 5.14E-47 | 0.392981 |
| 0.304643 | 1.74E-11 | 0.620233 | 5.48E-51 | 0.290116 | 1.65E-10 | 0.761006 | 2.00E-89 | 0.628716 |
| 0.228159 | 6.25E-07 | 0.290166 | 1.64E-10 | 0.171217 | 0.0002   | 0.368938 | 1.66E-16 | 0.181477 |
| 0.2388   | 1.77E-07 | 0.473329 | 1.89E-27 | 0.234311 | 3.03E-07 | 0.588288 | 8.05E-45 | 0.325002 |
| 0.751622 | 4.52E-86 | 0.799485 | #####    | 0.624428 | 7.50E-52 | 0.755583 | 1.81E-87 | 0.439161 |

|          |          |          |          |          |          |          |          |          |
|----------|----------|----------|----------|----------|----------|----------|----------|----------|
| 0.383042 | 9.08E-18 | 0.825874 | #####    | 0.497971 | 1.24E-30 | 0.878566 | #####    | 0.747918 |
| 0.560798 | 4.89E-40 | 0.862691 | #####    | 0.621931 | 2.46E-51 | 0.853248 | #####    | 0.572778 |
| 0.131053 | 0.00456  | 0.35661  | 1.89E-15 | 0.178843 | 0.0001   | 0.423495 | 9.53E-22 | 0.286679 |
| 0.059016 | 0.203    | 0.15856  | 0.00058  | 0.101442 | 0.02838  | 0.168711 | 0.00025  | 0.099609 |
| -0.06114 | 0.18715  | -0.04645 | 0.31653  | -0.04963 | 0.28445  | -0.03638 | 0.43285  | -0.0537  |
| 0.184796 | 5.88E-05 | 0.601313 | 2.99E-47 | 0.259464 | 1.27E-08 | 0.771685 | 1.95E-93 | 0.461722 |
| 0.452159 | 6.53E-25 | 0.862161 | #####    | 0.504773 | 1.47E-31 | 0.939863 | #####    | 0.705344 |
| 0.319194 | 1.61E-12 | 0.638216 | 8.76E-55 | 0.440571 | 1.35E-23 | 0.627254 | 1.93E-52 | 0.425469 |
| 0.278973 | 8.53E-10 | 0.315041 | 3.21E-12 | 0.146213 | 0.00153  | 0.390805 | 1.72E-18 | 0.203674 |
| 0.263096 | 7.82E-09 | 0.354462 | 2.85E-15 | 0.269936 | 3.06E-09 | 0.360503 | 8.86E-16 | 0.25669  |
| 0.407859 | 3.82E-20 | 0.741475 | 1.31E-82 | 0.468963 | 6.53E-27 | 0.777915 | 7.02E-96 | 0.594922 |
| 0.282483 | 5.13E-10 | 0.333321 | 1.40E-13 | 0.219765 | 1.63E-06 | 0.397899 | 3.63E-19 | 0.215116 |
| 0.174388 | 0.00015  | 0.529272 | 4.50E-35 | 0.209684 | 4.88E-06 | 0.687258 | 1.51E-66 | 0.356911 |
| 0.10882  | 0.01866  | 0.319073 | 1.64E-12 | 0.139161 | 0.00258  | 0.417387 | 4.12E-21 | 0.197775 |
| 0.265551 | 5.60E-09 | 0.741112 | 1.73E-82 | 0.322462 | 9.24E-13 | 0.936741 | #####    | 0.591495 |
| 0.495341 | 2.78E-30 | 0.571693 | 7.04E-42 | 0.457282 | 1.65E-25 | 0.532011 | 1.75E-35 | 0.317848 |
| 0.215141 | 2.71E-06 | 0.416983 | 4.54E-21 | 0.203154 | 9.66E-06 | 0.522005 | 5.32E-34 | 0.322585 |
| 0.203423 | 9.40E-06 | 0.66619  | 3.22E-61 | 0.268797 | 3.59E-09 | 0.851302 | #####    | 0.480259 |
| 0.226588 | 7.50E-07 | 0.643168 | 7.12E-56 | 0.273641 | 1.82E-09 | 0.799141 | #####    | 0.645898 |
| 0.200003 | 1.33E-05 | 0.721571 | 2.87E-76 | 0.287607 | 2.41E-10 | 0.911758 | #####    | 0.628682 |
| 0.176376 | 0.00013  | 0.390891 | 1.69E-18 | 0.199858 | 1.35E-05 | 0.481637 | 1.71E-28 | 0.241715 |
| 0.247957 | 5.67E-08 | 0.67709  | 6.41E-64 | 0.310125 | 7.20E-12 | 0.855871 | #####    | 0.428552 |
| 0.154606 | 0.0008   | 0.404693 | 7.87E-20 | 0.191616 | 3.07E-05 | 0.526591 | 1.13E-34 | 0.380783 |
| 0.225424 | 8.57E-07 | 0.506238 | 9.21E-32 | 0.258989 | 1.36E-08 | 0.641898 | 1.36E-55 | 0.350623 |
| 0.189243 | 3.86E-05 | 0.480531 | 2.36E-28 | 0.20511  | 7.89E-06 | 0.608372 | 1.29E-48 | 0.320969 |
| 0.341968 | 2.95E-14 | 0.588071 | 8.81E-45 | 0.494674 | 3.41E-30 | 0.491185 | 9.89E-30 | 0.41427  |
| 0.305036 | 1.63E-11 | 0.610934 | 4.04E-49 | 0.262099 | 8.94E-09 | 0.786661 | 1.91E-99 | 0.439977 |
| 0.159063 | 0.00056  | 0.432854 | 9.52E-23 | 0.234231 | 3.06E-07 | 0.494714 | 3.37E-30 | 0.43054  |
| 0.145833 | 0.00158  | 0.39468  | 7.39E-19 | 0.198041 | 1.63E-05 | 0.45788  | 1.40E-25 | 0.383393 |
| 0.118434 | 0.01042  | 0.353788 | 3.24E-15 | 0.153922 | 0.00085  | 0.445745 | 3.54E-24 | 0.319154 |
| 0.330805 | 2.18E-13 | 0.595482 | 3.78E-46 | 0.267372 | 4.37E-09 | 0.774695 | 1.31E-94 | 0.403533 |
| 0.086794 | 0.06091  | 0.177438 | 0.00012  | 0.123095 | 0.00774  | 0.219503 | 1.67E-06 | 0.07488  |
| 0.136117 | 0.0032   | 0.43117  | 1.45E-22 | 0.172357 | 0.00018  | 0.558865 | 1.02E-39 | 0.29085  |
| 0.180867 | 8.47E-05 | 0.46644  | 1.33E-26 | 0.232669 | 3.69E-07 | 0.579446 | 3.12E-43 | 0.467439 |
| 0.187847 | 4.41E-05 | 0.643421 | 6.25E-56 | 0.267177 | 4.49E-09 | 0.843827 | #####    | 0.460801 |
| 0.226674 | 7.42E-07 | 0.503247 | 2.38E-31 | 0.240487 | 1.44E-07 | 0.61422  | 8.98E-50 | 0.491196 |
| 0.095319 | 0.03949  | 0.345727 | 1.48E-14 | 0.146156 | 0.00154  | 0.465144 | 1.90E-26 | 0.206527 |
| 0.054697 | 0.23811  | 0.020047 | 0.66566  | 0.011555 | 0.80333  | 0.025847 | 0.57743  | 0.049561 |
| 0.176593 | 0.00012  | 0.640643 | 2.57E-55 | 0.264609 | 6.37E-09 | 0.832244 | #####    | 0.431248 |
| 0.382272 | 1.07E-17 | 0.603902 | 9.52E-48 | 0.424873 | 6.82E-22 | 0.601177 | 3.17E-47 | 0.396107 |
| 0.274742 | 1.56E-09 | 0.550185 | 2.63E-38 | 0.252148 | 3.32E-08 | 0.686061 | 3.13E-66 | 0.353    |
| 0.159652 | 0.00053  | 0.485941 | 4.78E-29 | 0.230925 | 4.53E-07 | 0.638018 | 9.67E-55 | 0.295551 |
| 0.390702 | 1.76E-18 | 0.527769 | 7.54E-35 | 0.261263 | 1.00E-08 | 0.660935 | 5.88E-60 | 0.336995 |
| 0.204578 | 8.34E-06 | 0.337511 | 6.62E-14 | 0.185029 | 5.76E-05 | 0.414368 | 8.41E-21 | 0.294038 |
| 0.270624 | 2.78E-09 | 0.503269 | 2.36E-31 | 0.246755 | 6.59E-08 | 0.621052 | 3.72E-51 | 0.386563 |



|          |          |          |          |          |          |          |          |          |
|----------|----------|----------|----------|----------|----------|----------|----------|----------|
| 0.628375 | 1.12E-52 | 0.740517 | 2.73E-82 | 0.519904 | 1.07E-33 | 0.76279  | 4.42E-90 | 0.555721 |
| 0.510683 | 2.21E-32 | 0.549933 | 2.89E-38 | 0.494585 | 3.51E-30 | 0.45627  | 2.17E-25 | 0.385142 |
| 0.30479  | 1.70E-11 | 0.732774 | 9.10E-80 | 0.463193 | 3.27E-26 | 0.769142 | 1.84E-92 | 0.542624 |
| 0.136697 | 0.00308  | 0.546412 | 1.05E-37 | 0.206226 | 7.02E-06 | 0.706052 | 1.07E-71 | 0.390422 |
| 0.445939 | 3.37E-24 | 0.584358 | 4.15E-44 | 0.342674 | 2.59E-14 | 0.701509 | 2.05E-70 | 0.403043 |
| 0.122836 | 0.00787  | 0.293874 | 9.34E-11 | 0.12463  | 0.00701  | 0.369674 | 1.44E-16 | 0.344632 |
| 0.20194  | 1.09E-05 | 0.487914 | 2.65E-29 | 0.286307 | 2.92E-10 | 0.555341 | 3.87E-39 | 0.460443 |
| 0.242866 | 1.07E-07 | 0.425295 | 6.15E-22 | 0.200372 | 1.28E-05 | 0.547887 | 6.12E-38 | 0.38184  |
| 0.238588 | 1.81E-07 | 0.296756 | 6.00E-11 | 0.183447 | 6.67E-05 | 0.361383 | 7.46E-16 | 0.213938 |
| 0.303435 | 2.11E-11 | 0.711967 | 2.10E-73 | 0.341222 | 3.38E-14 | 0.889471 | #####    | 0.568078 |
| 0.17617  | 0.00013  | 0.636258 | 2.33E-54 | 0.254857 | 2.33E-08 | 0.822493 | #####    | 0.447694 |
| 0.125886 | 0.00645  | 0.293737 | 9.54E-11 | 0.119176 | 0.00995  | 0.384412 | 6.79E-18 | 0.195073 |
| 0.248688 | 5.16E-08 | 0.603873 | 9.64E-48 | 0.249144 | 4.87E-08 | 0.785976 | 3.68E-99 | 0.399012 |
| 0.317914 | 1.99E-12 | 0.65602  | 8.44E-59 | 0.294665 | 8.28E-11 | 0.835606 | #####    | 0.448157 |
| 0.201345 | 1.16E-05 | 0.734629 | 2.30E-80 | 0.290158 | 1.64E-10 | 0.945951 | #####    | 0.520079 |
| 0.08059  | 0.08191  | 0.116383 | 0.01184  | 0.104398 | 0.02406  | 0.161851 | 0.00045  | 0.021404 |
| 0.215272 | 2.67E-06 | 0.741017 | 1.86E-82 | 0.309322 | 8.21E-12 | 0.953406 | #####    | 0.498185 |
| 0.583534 | 5.83E-44 | 0.613316 | 1.36E-49 | 0.33987  | 4.32E-14 | 0.749543 | 2.39E-85 | 0.421983 |
| 0.353213 | 3.62E-15 | 0.644178 | 4.24E-56 | 0.33593  | 8.79E-14 | 0.811269 | #####    | 0.418797 |
| 0.197145 | 1.78E-05 | 0.541695 | 5.76E-37 | 0.24609  | 7.17E-08 | 0.702926 | 8.21E-71 | 0.371783 |
| 0.490337 | 1.28E-29 | 0.605067 | 5.67E-48 | 0.348594 | 8.65E-15 | 0.724265 | 4.29E-77 | 0.372952 |
| 0.28706  | 2.61E-10 | 0.665492 | 4.75E-61 | 0.297867 | 5.05E-11 | 0.83957  | #####    | 0.460241 |
| 0.308878 | 8.82E-12 | 0.761405 | 1.43E-89 | 0.462662 | 3.78E-26 | 0.819591 | #####    | 0.678626 |
| 0.054916 | 0.23623  | 0.308259 | 9.75E-12 | 0.121415 | 0.00863  | 0.404239 | 8.73E-20 | 0.285881 |
| 0.171621 | 0.00019  | 0.535654 | 4.91E-36 | 0.236509 | 2.33E-07 | 0.669035 | 6.52E-62 | 0.573868 |
| 0.290891 | 1.47E-10 | 0.680541 | 8.46E-65 | 0.305589 | 1.50E-11 | 0.861065 | #####    | 0.499219 |
| 0.19201  | 2.95E-05 | 0.308695 | 9.08E-12 | 0.146134 | 0.00154  | 0.401353 | 1.68E-19 | 0.197346 |
| 0.311174 | 6.07E-12 | 0.679487 | 1.58E-64 | 0.371171 | 1.06E-16 | 0.77174  | 1.85E-93 | 0.595856 |
| 0.30785  | 1.04E-11 | 0.567604 | 3.52E-41 | 0.258803 | 1.39E-08 | 0.718547 | 2.36E-75 | 0.447949 |
| 0.19959  | 1.39E-05 | 0.339497 | 4.62E-14 | 0.148077 | 0.00133  | 0.447254 | 2.39E-24 | 0.250028 |
| 0.212264 | 3.70E-06 | 0.287854 | 2.32E-10 | 0.173581 | 0.00016  | 0.341193 | 3.40E-14 | 0.252259 |
| 0.411805 | 1.53E-20 | 0.572782 | 4.57E-42 | 0.439582 | 1.74E-23 | 0.545148 | 1.66E-37 | 0.451556 |
| 0.364464 | 4.07E-16 | 0.517776 | 2.18E-33 | 0.307144 | 1.17E-11 | 0.637593 | 1.20E-54 | 0.334148 |
| 0.306644 | 1.26E-11 | 0.684001 | 1.08E-65 | 0.465868 | 1.56E-26 | 0.660292 | 8.36E-60 | 0.622254 |
| 0.450718 | 9.57E-25 | 0.554651 | 5.00E-39 | 0.291318 | 1.38E-10 | 0.669369 | 5.40E-62 | 0.448139 |
| 0.100986 | 0.02911  | 0.227002 | 7.15E-07 | 0.144961 | 0.00168  | 0.243297 | 1.02E-07 | 0.188212 |
| 0.206353 | 6.93E-06 | 0.7194   | 1.30E-75 | 0.291039 | 1.44E-10 | 0.91871  | #####    | 0.549946 |
| 0.252381 | 3.22E-08 | 0.400885 | 1.86E-19 | 0.180677 | 8.62E-05 | 0.488948 | 1.94E-29 | 0.407225 |
| 0.359697 | 1.04E-15 | 0.473952 | 1.58E-27 | 0.266105 | 5.19E-09 | 0.585464 | 2.62E-44 | 0.275331 |
| 0.309155 | 8.43E-12 | 0.540325 | 9.39E-37 | 0.376574 | 3.51E-17 | 0.544101 | 2.42E-37 | 0.316405 |
| 0.231156 | 4.41E-07 | 0.457536 | 1.54E-25 | 0.227483 | 6.76E-07 | 0.579217 | 3.42E-43 | 0.48596  |
| 0.397385 | 4.07E-19 | 0.517077 | 2.74E-33 | 0.271405 | 2.50E-09 | 0.649211 | 3.12E-57 | 0.338789 |
| 0.576424 | 1.06E-42 | 0.569312 | 1.80E-41 | 0.321208 | 1.14E-12 | 0.694298 | 1.98E-68 | 0.379    |
| 0.2479   | 5.71E-08 | 0.575332 | 1.65E-42 | 0.257526 | 1.64E-08 | 0.719699 | 1.06E-75 | 0.604836 |
| 0.26971  | 3.16E-09 | 0.489162 | 1.82E-29 | 0.262487 | 8.49E-09 | 0.61637  | 3.33E-50 | 0.306026 |

|          |          |          |          |          |          |          |          |          |
|----------|----------|----------|----------|----------|----------|----------|----------|----------|
| 0.290894 | 1.47E-10 | 0.500938 | 4.91E-31 | 0.213697 | 3.17E-06 | 0.63997  | 3.62E-55 | 0.347002 |
| 0.554672 | 4.97E-39 | 0.387295 | 3.67E-18 | 0.252789 | 3.05E-08 | 0.460624 | 6.63E-26 | 0.239373 |
| 0.19128  | 3.17E-05 | 0.490008 | 1.41E-29 | 0.251655 | 3.53E-08 | 0.59952  | 6.55E-47 | 0.43758  |
| 0.200379 | 1.28E-05 | 0.6371   | 1.53E-54 | 0.28045  | 6.89E-10 | 0.818616 | #####    | 0.412812 |
| 0.192361 | 2.85E-05 | 0.644031 | 4.57E-56 | 0.278946 | 8.56E-10 | 0.826222 | #####    | 0.42111  |
| 0.172639 | 0.00018  | 0.627813 | 1.47E-52 | 0.257768 | 1.59E-08 | 0.812345 | #####    | 0.470418 |
| 0.190175 | 3.53E-05 | 0.689543 | 3.76E-67 | 0.274555 | 1.60E-09 | 0.871661 | #####    | 0.596459 |
| 0.635239 | 3.88E-54 | 0.577463 | 6.98E-43 | 0.338871 | 5.18E-14 | 0.693679 | 2.92E-68 | 0.37882  |
| 0.394548 | 7.61E-19 | 0.747072 | 1.69E-84 | 0.352621 | 4.05E-15 | 0.936998 | #####    | 0.539405 |
| 0.517178 | 2.65E-33 | 0.673836 | 4.22E-63 | 0.345688 | 1.49E-14 | 0.833761 | #####    | 0.454326 |
| 0.136229 | 0.00318  | 0.407872 | 3.81E-20 | 0.175861 | 0.00013  | 0.528069 | 6.81E-35 | 0.285014 |
| 0.216421 | 2.35E-06 | 0.739445 | 6.17E-82 | 0.306288 | 1.34E-11 | 0.948493 | #####    | 0.505559 |
| 0.188204 | 4.26E-05 | 0.511596 | 1.65E-32 | 0.220204 | 1.55E-06 | 0.641195 | 1.94E-55 | 0.360742 |
| 0.166533 | 0.0003   | 0.63572  | 3.05E-54 | 0.245951 | 7.30E-08 | 0.823599 | #####    | 0.452899 |
| 0.089055 | 0.05446  | 0.170406 | 0.00022  | 0.116585 | 0.01169  | 0.201142 | 1.19E-05 | 0.048856 |
| 0.208217 | 5.70E-06 | 0.721432 | 3.16E-76 | 0.302579 | 2.41E-11 | 0.915439 | #####    | 0.581293 |
| 0.45209  | 6.65E-25 | 0.561562 | 3.65E-40 | 0.299953 | 3.65E-11 | 0.721484 | 3.05E-76 | 0.375097 |
| 0.315386 | 3.03E-12 | 0.682271 | 3.03E-65 | 0.285436 | 3.32E-10 | 0.876491 | #####    | 0.510758 |
| 0.201283 | 1.17E-05 | 0.665719 | 4.19E-61 | 0.269779 | 3.13E-09 | 0.854444 | #####    | 0.47191  |
| 0.202577 | 1.03E-05 | 0.734573 | 2.40E-80 | 0.292746 | 1.11E-10 | 0.945089 | #####    | 0.514745 |
| 0.29109  | 1.43E-10 | 0.604485 | 7.34E-48 | 0.250599 | 4.05E-08 | 0.785825 | 4.25E-99 | 0.411087 |
| 0.203657 | 9.17E-06 | 0.670585 | 2.71E-62 | 0.276646 | 1.19E-09 | 0.830261 | #####    | 0.692173 |
| 0.420403 | 2.01E-21 | 0.540371 | 9.24E-37 | 0.316001 | 2.74E-12 | 0.635767 | 2.98E-54 | 0.321291 |
| 0.333789 | 1.29E-13 | 0.665597 | 4.48E-61 | 0.331873 | 1.81E-13 | 0.807679 | #####    | 0.57919  |
| 0.187521 | 4.55E-05 | 0.566781 | 4.86E-41 | 0.246276 | 7.00E-08 | 0.727669 | 3.76E-78 | 0.383951 |
| 0.455183 | 2.90E-25 | 0.461593 | 5.08E-26 | 0.316392 | 2.57E-12 | 0.529819 | 3.73E-35 | 0.354602 |
| 0.568917 | 2.11E-41 | 0.833039 | #####    | 0.554159 | 6.02E-39 | 0.868384 | #####    | 0.60879  |
| 0.621074 | 3.68E-51 | 0.566114 | 6.30E-41 | 0.336496 | 7.94E-14 | 0.661034 | 5.57E-60 | 0.522597 |
| 0.375835 | 4.09E-17 | 0.520234 | 9.61E-34 | 0.331968 | 1.78E-13 | 0.540284 | 9.53E-37 | 0.502488 |
| 0.343479 | 2.24E-14 | 0.523842 | 2.86E-34 | 0.292444 | 1.16E-10 | 0.621743 | 2.69E-51 | 0.540147 |
| 0.205529 | 7.55E-06 | 0.712832 | 1.17E-73 | 0.296279 | 6.46E-11 | 0.919849 | #####    | 0.479741 |
| 0.481148 | 1.97E-28 | 0.498097 | 1.19E-30 | 0.324385 | 6.65E-13 | 0.567375 | 3.85E-41 | 0.338951 |
| 0.564077 | 1.39E-40 | 0.569223 | 1.87E-41 | 0.340118 | 4.13E-14 | 0.687304 | 1.47E-66 | 0.371393 |
| 0.206839 | 6.59E-06 | 0.714061 | 5.11E-74 | 0.289659 | 1.77E-10 | 0.905154 | #####    | 0.559189 |
| 0.246742 | 6.61E-08 | 0.621694 | 2.75E-51 | 0.274747 | 1.56E-09 | 0.799043 | #####    | 0.424837 |
| 0.217591 | 2.07E-06 | 0.735596 | 1.12E-80 | 0.314326 | 3.62E-12 | 0.940174 | #####    | 0.555474 |
| 0.29598  | 6.76E-11 | 0.68065  | 7.93E-65 | 0.305886 | 1.43E-11 | 0.868774 | #####    | 0.45485  |
| 0.34964  | 7.11E-15 | 0.604144 | 8.54E-48 | 0.319835 | 1.44E-12 | 0.733309 | 6.13E-80 | 0.563702 |
| 0.18304  | 6.93E-05 | 0.666829 | 2.25E-61 | 0.271595 | 2.43E-09 | 0.867329 | #####    | 0.460939 |
| 0.186422 | 5.05E-05 | 0.673348 | 5.59E-63 | 0.270388 | 2.88E-09 | 0.847767 | #####    | 0.698092 |
| 0.110759 | 0.01664  | 0.419839 | 2.30E-21 | 0.17956  | 9.55E-05 | 0.54815  | 5.55E-38 | 0.283818 |
| 0.219798 | 1.62E-06 | 0.667446 | 1.59E-61 | 0.284848 | 3.62E-10 | 0.858727 | #####    | 0.444482 |
| 0.299912 | 3.67E-11 | 0.525943 | 1.41E-34 | 0.280016 | 7.34E-10 | 0.66555  | 4.60E-61 | 0.343642 |
| 0.269195 | 3.40E-09 | 0.351127 | 5.37E-15 | 0.144493 | 0.00174  | 0.461003 | 5.97E-26 | 0.22547  |
| 0.182815 | 7.08E-05 | 0.602541 | 1.74E-47 | 0.265469 | 5.67E-09 | 0.784981 | 9.51E-99 | 0.387447 |

|          |          |          |          |          |          |          |          |          |
|----------|----------|----------|----------|----------|----------|----------|----------|----------|
| 0.190905 | 3.29E-05 | 0.687746 | 1.13E-66 | 0.284666 | 3.72E-10 | 0.886259 | #####    | 0.539587 |
| 0.203892 | 8.95E-06 | 0.687725 | 1.14E-66 | 0.285214 | 3.43E-10 | 0.861029 | #####    | 0.612473 |
| 0.320684 | 1.25E-12 | 0.476268 | 8.14E-28 | 0.247622 | 5.91E-08 | 0.563068 | 2.05E-40 | 0.314249 |
| 0.128965 | 0.00525  | 0.400035 | 2.25E-19 | 0.180749 | 8.57E-05 | 0.540794 | 7.95E-37 | 0.294497 |
| 0.361461 | 7.35E-16 | 0.510494 | 2.35E-32 | 0.311028 | 6.22E-12 | 0.609419 | 8.03E-49 | 0.407647 |
| 0.305067 | 1.63E-11 | 0.481317 | 1.87E-28 | 0.267221 | 4.46E-09 | 0.609429 | 8.00E-49 | 0.309033 |
| 0.257307 | 1.69E-08 | 0.558275 | 1.28E-39 | 0.267153 | 4.50E-09 | 0.70263  | 9.94E-71 | 0.374945 |
| 0.240677 | 1.40E-07 | 0.732197 | 1.39E-79 | 0.302442 | 2.47E-11 | 0.932503 | #####    | 0.497212 |
| 0.195688 | 2.06E-05 | 0.598635 | 9.63E-47 | 0.247642 | 5.90E-08 | 0.766445 | 1.92E-91 | 0.488468 |
| 0.31722  | 2.24E-12 | 0.723757 | 6.14E-77 | 0.481076 | 2.01E-28 | 0.73973  | 4.97E-82 | 0.422138 |
| 0.192917 | 2.70E-05 | 0.710609 | 5.23E-73 | 0.276281 | 1.25E-09 | 0.916069 | #####    | 0.501228 |
| 0.447311 | 2.35E-24 | 0.549689 | 3.16E-38 | 0.334682 | 1.10E-13 | 0.614284 | 8.72E-50 | 0.356795 |
| 0.353715 | 3.29E-15 | 0.819167 | #####    | 0.462536 | 3.92E-26 | 0.906912 | #####    | 0.546563 |
| 0.289371 | 1.85E-10 | 0.793893 | #####    | 0.427376 | 3.70E-22 | 0.908377 | #####    | 0.520954 |
| 0.201164 | 1.18E-05 | 0.734438 | 2.66E-80 | 0.290569 | 1.54E-10 | 0.947383 | #####    | 0.520928 |
| 0.267992 | 4.01E-09 | 0.549176 | 3.81E-38 | 0.32653  | 4.60E-13 | 0.580917 | 1.71E-43 | 0.332359 |
| 0.207111 | 6.40E-06 | 0.714172 | 4.74E-74 | 0.297926 | 5.01E-11 | 0.921317 | #####    | 0.481435 |
| 0.128134 | 0.00555  | 0.257934 | 1.56E-08 | 0.129904 | 0.00493  | 0.319917 | 1.42E-12 | 0.199468 |
| 0.202557 | 1.03E-05 | 0.661671 | 3.93E-60 | 0.283873 | 4.18E-10 | 0.842198 | #####    | 0.540468 |
| 0.221101 | 1.40E-06 | 0.69074  | 1.80E-67 | 0.29524  | 7.58E-11 | 0.89386  | #####    | 0.480825 |
| 0.216541 | 2.32E-06 | 0.638964 | 6.01E-55 | 0.290209 | 1.63E-10 | 0.823353 | #####    | 0.404903 |
| 0.463608 | 2.91E-26 | 0.599938 | 5.45E-47 | 0.325535 | 5.46E-13 | 0.73906  | 8.27E-82 | 0.371598 |
| 0.143745 | 0.00184  | 0.435965 | 4.36E-23 | 0.203964 | 8.88E-06 | 0.575505 | 1.54E-42 | 0.256922 |
| 0.620556 | 4.70E-51 | 0.65276  | 4.81E-58 | 0.360891 | 8.22E-16 | 0.798035 | #####    | 0.461899 |
| 0.214853 | 2.79E-06 | 0.506683 | 7.99E-32 | 0.223914 | 1.02E-06 | 0.62277  | 1.65E-51 | 0.426613 |
| 0.281016 | 6.35E-10 | 0.618572 | 1.19E-50 | 0.267618 | 4.22E-09 | 0.790969 | #####    | 0.429971 |
| 0.314269 | 3.65E-12 | 0.714187 | 4.69E-74 | 0.399517 | 2.53E-19 | 0.801587 | #####    | 0.534086 |
| 0.310088 | 7.24E-12 | 0.366783 | 2.56E-16 | 0.225537 | 8.46E-07 | 0.411267 | 1.74E-20 | 0.312734 |
| 0.212542 | 3.59E-06 | 0.71903  | 1.69E-75 | 0.291062 | 1.43E-10 | 0.92252  | #####    | 0.488994 |
| 0.160002 | 0.00052  | 0.345309 | 1.60E-14 | 0.172711 | 0.00018  | 0.443159 | 6.93E-24 | 0.237278 |
| 0.208045 | 5.80E-06 | 0.478971 | 3.72E-28 | 0.18713  | 4.72E-05 | 0.622496 | 1.88E-51 | 0.316612 |
| 0.333054 | 1.47E-13 | 0.70631  | 9.03E-72 | 0.339908 | 4.29E-14 | 0.878324 | #####    | 0.501397 |
| 0.30257  | 2.42E-11 | 0.536373 | 3.81E-36 | 0.281197 | 6.18E-10 | 0.657353 | 4.12E-59 | 0.411555 |
| 0.289597 | 1.79E-10 | 0.542216 | 4.77E-37 | 0.27862  | 8.98E-10 | 0.648672 | 4.14E-57 | 0.559352 |
| 0.144276 | 0.00177  | 0.506898 | 7.46E-32 | 0.216782 | 2.26E-06 | 0.657669 | 3.47E-59 | 0.321624 |
| 0.178246 | 0.00011  | 0.639255 | 5.19E-55 | 0.257427 | 1.67E-08 | 0.828945 | #####    | 0.458349 |
| 0.552246 | 1.23E-38 | 0.40461  | 8.02E-20 | 0.23601  | 2.47E-07 | 0.487495 | 3.00E-29 | 0.389579 |
| 0.435818 | 4.52E-23 | 0.796254 | #####    | 0.542909 | 3.72E-37 | 0.797306 | #####    | 0.55158  |
| 0.129344 | 0.00512  | 0.390352 | 1.90E-18 | 0.177976 | 0.00011  | 0.520617 | 8.46E-34 | 0.249646 |
| 0.144541 | 0.00174  | 0.561798 | 3.34E-40 | 0.217346 | 2.13E-06 | 0.719872 | 9.40E-76 | 0.44368  |
| 0.45419  | 3.79E-25 | 0.39691  | 4.52E-19 | 0.269249 | 3.37E-09 | 0.465944 | 1.52E-26 | 0.238628 |
| 0.166933 | 0.00029  | 0.340066 | 4.17E-14 | 0.146946 | 0.00145  | 0.43292  | 9.37E-23 | 0.348684 |
| 0.209564 | 4.94E-06 | 0.716021 | 1.34E-74 | 0.30271  | 2.37E-11 | 0.902944 | #####    | 0.585074 |
| 0.062336 | 0.17869  | 0.137469 | 0.00291  | 0.086175 | 0.06278  | 0.147248 | 0.00142  | 0.081801 |
| 0.090715 | 0.0501   | 0.292032 | 1.24E-10 | 0.118842 | 0.01016  | 0.372198 | 8.61E-17 | 0.20176  |

|          |          |          |          |          |          |          |          |          |
|----------|----------|----------|----------|----------|----------|----------|----------|----------|
| 0.557566 | 1.67E-39 | 0.680043 | 1.14E-64 | 0.516091 | 3.79E-33 | 0.661764 | 3.73E-60 | 0.409136 |
| 0.274442 | 1.63E-09 | 0.606169 | 3.47E-48 | 0.289395 | 1.84E-10 | 0.754514 | 4.34E-87 | 0.409708 |
| 0.464812 | 2.09E-26 | 0.536631 | 3.48E-36 | 0.272837 | 2.04E-09 | 0.654791 | 1.63E-58 | 0.439552 |
| 0.251327 | 3.69E-08 | 0.5241   | 2.63E-34 | 0.25583  | 2.06E-08 | 0.650402 | 1.67E-57 | 0.35679  |
| 0.393865 | 8.84E-19 | 0.417486 | 4.03E-21 | 0.21369  | 3.17E-06 | 0.52077  | 8.04E-34 | 0.300135 |
| 0.271103 | 2.60E-09 | 0.513292 | 9.49E-33 | 0.249773 | 4.50E-08 | 0.627138 | 2.04E-52 | 0.442702 |
| 0.12798  | 0.00561  | 0.3967   | 4.73E-19 | 0.181724 | 7.83E-05 | 0.486801 | 3.70E-29 | 0.308824 |
| 0.322044 | 9.92E-13 | 0.621302 | 3.31E-51 | 0.323271 | 8.05E-13 | 0.769703 | 1.12E-92 | 0.50165  |
| 0.182603 | 7.22E-05 | 0.603163 | 1.32E-47 | 0.254935 | 2.31E-08 | 0.776261 | 3.18E-95 | 0.398424 |
| 0.18222  | 7.48E-05 | 0.512949 | 1.06E-32 | 0.258492 | 1.45E-08 | 0.608592 | 1.17E-48 | 0.352953 |
| 0.431501 | 1.33E-22 | 0.670485 | 2.87E-62 | 0.338367 | 5.67E-14 | 0.83334  | #####    | 0.473487 |
| 0.270229 | 2.94E-09 | 0.323477 | 7.77E-13 | 0.195594 | 2.07E-05 | 0.408155 | 3.57E-20 | 0.173352 |
| 0.588037 | 8.94E-45 | 0.503402 | 2.26E-31 | 0.320608 | 1.27E-12 | 0.586979 | 1.39E-44 | 0.408479 |
| 0.127324 | 0.00586  | 0.31997  | 1.41E-12 | 0.146501 | 0.0015   | 0.392233 | 1.26E-18 | 0.322026 |
| 0.25416  | 2.56E-08 | 0.207508 | 6.14E-06 | 0.278486 | 9.15E-10 | 0.071817 | 0.12119  | 0.093449 |
| 0.089055 | 0.05446  | 0.170406 | 0.00022  | 0.116585 | 0.01169  | 0.201142 | 1.19E-05 | 0.048856 |
| 0.251063 | 3.81E-08 | 0.684932 | 6.17E-66 | 0.291198 | 1.40E-10 | 0.870262 | #####    | 0.483223 |
| 0.227194 | 6.99E-07 | 0.531763 | 1.91E-35 | 0.235843 | 2.52E-07 | 0.66451  | 8.20E-61 | 0.374684 |
| 0.17284  | 0.00017  | 0.590321 | 3.42E-45 | 0.241528 | 1.26E-07 | 0.753586 | 9.23E-87 | 0.447185 |
| 0.242371 | 1.14E-07 | 0.588279 | 8.08E-45 | 0.329451 | 2.77E-13 | 0.666205 | 3.19E-61 | 0.441352 |
| 0.260589 | 1.09E-08 | 0.572237 | 5.67E-42 | 0.264088 | 6.84E-09 | 0.725852 | 1.38E-77 | 0.419205 |
| 0.185737 | 5.39E-05 | 0.616731 | 2.81E-50 | 0.252693 | 3.09E-08 | 0.786529 | 2.16E-99 | 0.423406 |
| 0.141819 | 0.00213  | 0.479838 | 2.89E-28 | 0.203879 | 8.96E-06 | 0.606421 | 3.10E-48 | 0.385071 |
| 0.138563 | 0.00269  | 0.27766  | 1.03E-09 | 0.129887 | 0.00493  | 0.348069 | 9.54E-15 | 0.185908 |
| 0.441455 | 1.08E-23 | 0.545813 | 1.30E-37 | 0.317128 | 2.27E-12 | 0.650431 | 1.65E-57 | 0.459163 |
| 0.119845 | 0.00953  | 0.486194 | 4.43E-29 | 0.181771 | 7.80E-05 | 0.638381 | 8.06E-55 | 0.364065 |
| 0.208275 | 5.66E-06 | 0.7139   | 5.69E-74 | 0.292529 | 1.15E-10 | 0.919204 | #####    | 0.488519 |
| -0.07264 | 0.11698  | -0.04112 | 0.37529  | -0.03519 | 0.44803  | -0.04637 | 0.31734  | -0.02504 |
| 0.02194  | 0.63628  | 0.033608 | 0.46874  | 0.034228 | 0.46057  | 0.014039 | 0.76221  | 0.064873 |
| -0.00246 | 0.95769  | 0.020558 | 0.65768  | 0.017284 | 0.70949  | 0.02186  | 0.63751  | 0.065778 |
| -0.00243 | 0.95832  | 0.010906 | 0.81417  | 0.006235 | 0.8931   | 0.010423 | 0.82225  | 0.1981   |
| 0.045019 | 0.33168  | -0.03204 | 0.48972  | 0.01448  | 0.75497  | -0.05268 | 0.25589  | -0.09484 |
| -0.01614 | 0.72792  | -0.0372  | 0.42252  | 0.004808 | 0.91746  | -0.05949 | 0.19941  | -0.09155 |
| 0.102273 | 0.0271   | 0.075777 | 0.10194  | 0.091603 | 0.04788  | 0.045075 | 0.33107  | 0.046334 |
| 0.069844 | 0.13178  | 0.018904 | 0.68367  | 0.072175 | 0.11934  | -0.03367 | 0.46785  | 0.004442 |
| 0.017717 | 0.70256  | 0.092718 | 0.04522  | 0.039298 | 0.39684  | 0.107165 | 0.02054  | 0.080281 |
| 0.000939 | 0.98385  | 0.040353 | 0.38427  | 0.027916 | 0.54732  | 0.01693  | 0.71518  | 0.026804 |
| -0.07375 | 0.11146  | -0.03849 | 0.40657  | -0.03106 | 0.5031   | -0.02631 | 0.57057  | -0.08207 |
| -0.00611 | 0.89525  | -0.0272  | 0.55767  | 0.010079 | 0.82803  | -0.04097 | 0.37702  | -0.05702 |
| 0.036495 | 0.43139  | 0.110409 | 0.01699  | 0.070684 | 0.12718  | 0.105734 | 0.0223   | 0.205875 |
| -0.02065 | 0.65618  | -0.03509 | 0.44938  | -0.00119 | 0.97961  | -0.04887 | 0.29192  | -0.00979 |
| -0.02104 | 0.65012  | 0.078632 | 0.08964  | 0.018781 | 0.68562  | 0.093551 | 0.04331  | 0.164331 |
| 0.046411 | 0.31693  | -0.023   | 0.62007  | 0.051113 | 0.27033  | -0.07942 | 0.08647  | -0.11774 |
| -0.05101 | 0.27131  | 0.052605 | 0.25656  | 0.023673 | 0.60985  | 0.058787 | 0.20477  | 0.139007 |
| -0.05144 | 0.26723  | -0.00025 | 0.99573  | 0.00646  | 0.88927  | -0.00163 | 0.97198  | 0.025055 |

|          |          |          |          |          |          |          |          |          |
|----------|----------|----------|----------|----------|----------|----------|----------|----------|
| 0.002446 | 0.95796  | 0.027689 | 0.55059  | 0.001242 | 0.97865  | 0.045079 | 0.33103  | 0.09505  |
| 0.041045 | 0.37617  | -0.00568 | 0.90259  | 0.000766 | 0.98683  | -0.00511 | 0.91232  | 0.037193 |
| -0.00513 | 0.91193  | -0.0065  | 0.88858  | 0.005335 | 0.90846  | -0.02001 | 0.66627  | -0.04126 |
| -0.0172  | 0.71084  | 0.032596 | 0.48224  | 0.008432 | 0.85579  | 0.056901 | 0.21969  | 0.020359 |
| -0.02892 | 0.53299  | -0.0554  | 0.23209  | -0.03785 | 0.41443  | -0.05824 | 0.20899  | -0.12919 |
| -0.01032 | 0.82391  | 0.082904 | 0.07348  | 0.034687 | 0.45458  | 0.098358 | 0.03359  | 0.2063   |
| 0.437963 | 2.63E-23 | 0.284782 | 3.66E-10 | 0.376014 | 3.94E-17 | 0.133109 | 0.00396  | 0.099908 |
| -0.00721 | 0.87655  | -0.0156  | 0.73664  | -0.00677 | 0.88397  | -0.00417 | 0.92831  | -0.01131 |
| 0.017178 | 0.7112   | 0.014904 | 0.74803  | 0.03918  | 0.39825  | -0.01898 | 0.68248  | -0.01795 |
| -0.0019  | 0.96731  | -0.04435 | 0.33895  | 0.007802 | 0.86647  | -0.05865 | 0.20579  | -0.06617 |
| -0.04833 | 0.29732  | -0.03448 | 0.45733  | -0.00205 | 0.96472  | -0.05584 | 0.2284   | -0.07257 |
| -0.04009 | 0.38733  | 0.047256 | 0.30818  | 0.001541 | 0.9735   | 0.070268 | 0.12944  | 0.136121 |
| -0.05102 | 0.27119  | -0.09809 | 0.03407  | -0.09124 | 0.04877  | -0.08142 | 0.07879  | -0.13441 |
| -0.02774 | 0.54985  | -0.03292 | 0.47791  | -0.03283 | 0.4791   | -0.02182 | 0.63815  | -0.03298 |
| 0.046536 | 0.31562  | -0.0428  | 0.35608  | 0.019814 | 0.66932  | -0.06257 | 0.17709  | -0.04503 |
| 0.059857 | 0.19663  | -0.0205  | 0.65866  | 0.042897 | 0.35499  | -0.05677 | 0.22075  | -0.14175 |
| -0.08416 | 0.06921  | -0.08018 | 0.08348  | -0.05319 | 0.25134  | -0.0789  | 0.08856  | -0.10506 |
| 0.044452 | 0.3378   | 0.037087 | 0.42395  | 0.05399  | 0.24424  | 0.014641 | 0.75234  | 0.04504  |
| -0.06227 | 0.17917  | 0.033741 | 0.46698  | 0.004317 | 0.92586  | 0.038138 | 0.41093  | 0.061334 |
| -0.04194 | 0.3658   | -0.05244 | 0.25809  | -0.02425 | 0.60114  | -0.0456  | 0.32545  | -0.06736 |
| 0.066004 | 0.15442  | 0.186934 | 4.81E-05 | 0.123302 | 0.00764  | 0.183933 | 6.38E-05 | 0.147817 |
| 0.007924 | 0.86439  | 0.095766 | 0.03857  | 0.070268 | 0.12944  | 0.082115 | 0.07627  | 0.141465 |
| 0.060523 | 0.19169  | 0.058722 | 0.20527  | 0.064836 | 0.16186  | 0.056697 | 0.22136  | 0.067523 |
| 0.003381 | 0.94191  | -0.0132  | 0.77606  | -0.00104 | 0.98214  | -0.00493 | 0.91537  | -0.01609 |
| -0.03071 | 0.50799  | -0.01972 | 0.67084  | -0.00899 | 0.84639  | -0.01333 | 0.77382  | 0.005335 |
| -0.00378 | 0.93503  | -0.05891 | 0.20379  | 0.008454 | 0.85542  | -0.08313 | 0.07268  | -0.14004 |
| -0.01142 | 0.80556  | 0.033326 | 0.47248  | 0.021852 | 0.63762  | 0.027305 | 0.55613  | 0.098329 |
| 0.037621 | 0.4173   | 0.026769 | 0.56392  | 0.059053 | 0.20272  | -0.00542 | 0.90693  | -0.03308 |
| 0.063591 | 0.17009  | -0.01433 | 0.75744  | 0.027374 | 0.55513  | -0.03913 | 0.39884  | -0.08706 |
| -0.01268 | 0.78463  | 0.032108 | 0.48882  | 0.003477 | 0.94026  | 0.058531 | 0.20675  | 0.028484 |
| -0.07848 | 0.09027  | -0.0546  | 0.23894  | -0.02526 | 0.58605  | -0.05891 | 0.20379  | -0.09973 |
| 0.016806 | 0.71718  | 0.0336   | 0.46884  | 0.052873 | 0.25415  | -0.00188 | 0.96772  | 0.074452 |
| 0.046687 | 0.31406  | -0.03747 | 0.41912  | 0.033058 | 0.47605  | -0.06675 | 0.14981  | -0.1253  |
| -0.01347 | 0.77157  | -0.01976 | 0.67014  | 0.013431 | 0.77221  | -0.01102 | 0.8123   | -0.06284 |
| 0.041386 | 0.37221  | 0.127572 | 0.00577  | 0.052724 | 0.25549  | 0.17212  | 0.00019  | 0.109967 |
| -0.04417 | 0.34086  | 0.057373 | 0.21589  | 0.032786 | 0.47969  | 0.057994 | 0.21095  | 0.119888 |
| 0.012726 | 0.78387  | 0.051214 | 0.26938  | 0.057701 | 0.21327  | 0.030607 | 0.50938  | 0.089639 |
| -0.03483 | 0.45267  | -0.10223 | 0.02718  | -0.02549 | 0.58267  | -0.13604 | 0.00322  | -0.19244 |
| -0.01517 | 0.74368  | 0.019473 | 0.67468  | 0.002502 | 0.957    | 0.02184  | 0.63782  | 0.07928  |
| -0.03133 | 0.49948  | 0.085555 | 0.0647   | 0.036165 | 0.43557  | 0.097795 | 0.03462  | 0.211276 |
| -0.05606 | 0.22656  | 0.00181  | 0.96888  | -0.03438 | 0.4586   | 0.026952 | 0.56125  | 0.044392 |
| 0.009867 | 0.83159  | 0.020279 | 0.66204  | 0.033565 | 0.46931  | 0.00535  | 0.9082   | 0.079234 |
| -0.07845 | 0.09039  | -0.10973 | 0.01768  | -0.06177 | 0.18268  | -0.10597 | 0.022    | -0.17318 |
| -0.07162 | 0.12223  | 0.045103 | 0.33076  | -0.0028  | 0.95188  | 0.057981 | 0.21105  | 0.196359 |
| -0.07498 | 0.10561  | -0.1204  | 0.0092   | -0.06944 | 0.13403  | -0.11018 | 0.01722  | -0.20908 |

|          |         |          |          |          |          |          |          |          |
|----------|---------|----------|----------|----------|----------|----------|----------|----------|
| 0.00277  | 0.95239 | -0.06989 | 0.13155  | 0.011138 | 0.81028  | -0.09901 | 0.03242  | -0.15031 |
| -0.0371  | 0.42375 | -0.05451 | 0.23973  | -0.01676 | 0.71788  | -0.06504 | 0.16052  | -0.08997 |
| -0.00372 | 0.93606 | 0.043621 | 0.34692  | 0.03184  | 0.49246  | 0.036333 | 0.43344  | 0.049272 |
| -0.02692 | 0.56169 | -0.09278 | 0.04508  | 0.012259 | 0.79161  | -0.144   | 0.00181  | -0.2378  |
| 0.013329 | 0.77389 | -0.03139 | 0.4986   | 0.054769 | 0.23749  | -0.08164 | 0.07801  | -0.13499 |
| 0.034279 | 0.4599  | 0.055806 | 0.22871  | 0.035084 | 0.44942  | 0.049618 | 0.2846   | 0.07329  |
| -0.03308 | 0.47571 | 0.040793 | 0.37911  | 0.007334 | 0.8744   | 0.055529 | 0.23104  | 0.092534 |
| -0.05567 | 0.22983 | 0.070301 | 0.12926  | 0.000808 | 0.9861   | 0.104897 | 0.02339  | 0.191735 |
| 0.046352 | 0.31754 | -0.03021 | 0.51487  | 0.01427  | 0.75841  | -0.03391 | 0.46473  | -0.04609 |
| 0.021551 | 0.64228 | 0.037892 | 0.41395  | 0.074471 | 0.108    | -0.00372 | 0.93615  | -0.01608 |
| 0.079093 | 0.08777 | -0.01246 | 0.78823  | 0.072754 | 0.11639  | -0.05113 | 0.27019  | -0.13859 |
| -0.04069 | 0.38029 | -0.02007 | 0.66526  | -0.01381 | 0.76595  | -0.02241 | 0.62904  | -0.05042 |
| -0.02565 | 0.58037 | 0.018383 | 0.69194  | 0.002618 | 0.95501  | 0.007874 | 0.86525  | 0.029478 |
| -0.07477 | 0.1066  | 0.000987 | 0.98302  | -0.02011 | 0.66466  | 0.008764 | 0.85017  | 0.004666 |
| 0.026986 | 0.56076 | 0.163144 | 0.0004   | 0.054689 | 0.23818  | 0.198131 | 1.61E-05 | 0.348185 |
| -0.04586 | 0.32275 | 0.007304 | 0.87491  | -0.01685 | 0.71647  | 0.018149 | 0.69566  | 0.052352 |
| -0.05617 | 0.22565 | -0.03288 | 0.47845  | -0.03202 | 0.49002  | -0.02931 | 0.52745  | -0.03961 |
| -0.04115 | 0.37496 | 0.009845 | 0.83197  | -0.00192 | 0.96701  | 0.00737  | 0.87379  | 0.045211 |
| 0.048484 | 0.29576 | 0.029343 | 0.52702  | 0.113899 | 0.01379  | -0.03598 | 0.43789  | -0.04069 |
| -0.01936 | 0.67643 | -0.08955 | 0.05311  | -0.05826 | 0.20888  | -0.08825 | 0.05668  | -0.13174 |
| -0.0083  | 0.85801 | -0.01457 | 0.75349  | 0.004864 | 0.91651  | -0.01056 | 0.81998  | -0.03917 |
| -0.06119 | 0.18683 | -0.18152 | 7.98E-05 | -0.1083  | 0.01923  | -0.20315 | 9.66E-06 | -0.38401 |
| -0.04087 | 0.37825 | 0.084104 | 0.06939  | 0.009171 | 0.84331  | 0.121631 | 0.00851  | 0.200333 |
| 0.044886 | 0.3331  | -0.01355 | 0.77027  | 0.050301 | 0.27802  | -0.05157 | 0.26604  | -0.14368 |
| 0.165322 | 0.00033 | 0.315115 | 3.17E-12 | 0.211964 | 3.82E-06 | 0.314581 | 3.47E-12 | 0.287753 |
| -0.15918 | 0.00055 | -0.10764 | 0.01998  | -0.11001 | 0.0174   | -0.09269 | 0.04528  | -0.07619 |
| -0.01587 | 0.7323  | 0.059461 | 0.19961  | 0.02622  | 0.57193  | 0.073345 | 0.11345  | 0.228793 |
| -0.04653 | 0.31566 | -0.05428 | 0.24167  | -0.0254  | 0.58396  | -0.06124 | 0.18643  | -0.10072 |
| 0.005887 | 0.89903 | 0.067522 | 0.14514  | 0.02249  | 0.62784  | 0.079202 | 0.08733  | 0.189666 |
| -0.08656 | 0.0616  | -0.08172 | 0.07771  | -0.05922 | 0.20144  | -0.06404 | 0.16708  | -0.03973 |
| -0.01887 | 0.68416 | 0.05451  | 0.23972  | 0.03721  | 0.42241  | 0.05211  | 0.26108  | 0.046306 |
| 0.103459 | 0.02537 | 0.03769  | 0.41645  | 0.082924 | 0.07341  | 0.005671 | 0.90272  | -0.00078 |
| -0.00889 | 0.84813 | -0.00167 | 0.97123  | -0.01077 | 0.81638  | 0.01394  | 0.76383  | 0.042185 |
| 0.003795 | 0.93481 | 0.030207 | 0.51493  | 0.040329 | 0.38455  | 0.022641 | 0.62553  | 0.156657 |
| 0.026711 | 0.56477 | 0.041905 | 0.36623  | 0.0613   | 0.18604  | 0.029129 | 0.53005  | 0.128037 |
| 0.052149 | 0.26072 | 0.099742 | 0.03116  | 0.06075  | 0.19003  | 0.097613 | 0.03496  | 0.325991 |
| 0.05955  | 0.19894 | 0.06514  | 0.1599   | 0.073442 | 0.11297  | 0.029828 | 0.52023  | 0.154792 |
| 0.027675 | 0.55079 | 0.035005 | 0.45045  | 0.039283 | 0.39702  | 0.029317 | 0.5274   | 0.094962 |
| 0.051762 | 0.26428 | 0.001374 | 0.97638  | 0.063776 | 0.16884  | -0.03556 | 0.44329  | -0.01949 |
| -0.0399  | 0.38966 | -0.1405  | 0.00234  | -0.08315 | 0.07261  | -0.12874 | 0.00533  | -0.22286 |
| 0.040503 | 0.3825  | 0.028763 | 0.53524  | 0.044679 | 0.33534  | -0.00118 | 0.97968  | 0.025748 |
| 0.081821 | 0.07733 | 0.039234 | 0.39761  | 0.067733 | 0.14388  | 0.01207  | 0.79475  | 0.016734 |
| -0.0862  | 0.0627  | -0.08239 | 0.0753   | -0.07616 | 0.1002   | -0.06052 | 0.19168  | -0.09758 |
| 0.004678 | 0.9197  | -0.00014 | 0.99767  | 0.02922  | 0.52877  | -0.02934 | 0.52713  | -0.02694 |
| -0.03094 | 0.50478 | -0.01864 | 0.68779  | 0.007185 | 0.87694  | -0.02994 | 0.51863  | 0.010127 |

|          |         |           |          |          |         |           |          |          |
|----------|---------|-----------|----------|----------|---------|-----------|----------|----------|
| -0.02021 | 0.66304 | 0.033224  | 0.47384  | 0.008284 | 0.85829 | 0.041985  | 0.36533  | 0.141007 |
| 0.07615  | 0.10026 | 0.008299  | 0.85804  | 0.036243 | 0.43458 | -0.00291  | 0.94993  | -0.08109 |
| 0.01052  | 0.82063 | -0.04011  | 0.38719  | 0.035553 | 0.44338 | -0.08005  | 0.08399  | -0.09274 |
| 0.114692 | 0.01314 | 0.109362  | 0.01807  | 0.104672 | 0.02369 | 0.077176  | 0.09575  | 0.178245 |
| 0.056002 | 0.22708 | 0.246683  | 6.65E-08 | 0.103318 | 0.02557 | 0.286079  | 3.02E-10 | 0.407725 |
| -0.01078 | 0.81624 | 0.135406  | 0.00337  | 0.088017 | 0.05735 | 0.131724  | 0.00435  | 0.281036 |
| -0.02625 | 0.57155 | 0.010799  | 0.81595  | 0.010336 | 0.82371 | 0.008257  | 0.85876  | 0.027833 |
| 6.82E-05 | 0.99883 | -0.05604  | 0.22679  | -0.01948 | 0.67452 | -0.05983  | 0.19683  | -0.09763 |
| -0.0859  | 0.06364 | -0.01103  | 0.81202  | -0.03989 | 0.38976 | 0.015109  | 0.74469  | 0.06285  |
| 0.04945  | 0.28624 | 0.080829  | 0.081    | 0.06381  | 0.16862 | 0.072356  | 0.11841  | 0.199468 |
| 0.062771 | 0.17567 | -8.89E-05 | 0.99847  | -0.00194 | 0.96671 | 0.020601  | 0.65702  | 0.029641 |
| 0.029268 | 0.52809 | -0.00696  | 0.88074  | 0.054213 | 0.2423  | -0.05691  | 0.21963  | -0.11239 |
| -0.01778 | 0.70157 | -0.08593  | 0.06353  | -0.02832 | 0.54152 | -0.09165  | 0.04776  | -0.13186 |
| -0.0595  | 0.19929 | -0.03854  | 0.40606  | -0.04446 | 0.3377  | -0.00997  | 0.82982  | -0.02812 |
| -0.02606 | 0.57427 | -0.04087  | 0.37825  | -0.00752 | 0.87123 | -0.05137  | 0.26795  | -0.09535 |
| -0.03703 | 0.42462 | 0.020669  | 0.65596  | -0.00809 | 0.86164 | 0.033211  | 0.47401  | 0.117896 |
| -0.04668 | 0.3141  | -0.05035  | 0.27753  | -0.04275 | 0.35659 | -0.03176  | 0.49353  | -0.0468  |
| -0.03225 | 0.48688 | 0.038629  | 0.40493  | 0.028778 | 0.53503 | 0.034032  | 0.46314  | 0.097941 |
| -0.0207  | 0.65548 | -0.02173  | 0.63951  | -0.01941 | 0.67574 | -0.02127  | 0.64667  | -0.04424 |
| 0.063834 | 0.16846 | 0.021806  | 0.63834  | 0.05597  | 0.22735 | -0.00807  | 0.86192  | 0.009859 |
| 0.145242 | 0.00165 | 0.099858  | 0.03096  | 0.160513 | 0.0005  | 0.025663  | 0.58013  | 0.088072 |
| -0.06083 | 0.18946 | 0.053817  | 0.24576  | 0.000515 | 0.99114 | 0.058943  | 0.20356  | 0.164432 |
| 0.008364 | 0.85694 | 0.09521   | 0.03972  | 0.078775 | 0.08905 | 0.090683  | 0.05018  | 0.034325 |
| -0.01028 | 0.82467 | 0.019854  | 0.6687   | 0.013455 | 0.77181 | 0.022756  | 0.62377  | 0.003244 |
| 0.1459   | 0.00157 | 0.165113  | 0.00034  | 0.137709 | 0.00286 | 0.125448  | 0.00664  | 0.157222 |
| -0.07151 | 0.12281 | -0.00945  | 0.83865  | -0.01773 | 0.70229 | 0.008224  | 0.85931  | 0.030061 |
| -0.02374 | 0.60877 | 0.105088  | 0.02314  | 0.024247 | 0.60122 | 0.140116  | 0.00241  | 0.23782  |
| -0.05216 | 0.26058 | 0.00122   | 0.97902  | -0.01675 | 0.71815 | 0.015708  | 0.73493  | 0.004106 |
| 0.056519 | 0.22281 | 0.059458  | 0.19963  | 0.078389 | 0.09063 | 0.024383  | 0.59917  | 0.078216 |
| 0.024441 | 0.5983  | -0.10157  | 0.02819  | -0.01741 | 0.70751 | -0.1232   | 0.00769  | -0.24749 |
| -0.06959 | 0.13318 | -0.05     | 0.28094  | -0.0485  | 0.29557 | -0.02992  | 0.5189   | -0.04512 |
| -0.10016 | 0.03046 | -0.08154  | 0.07836  | -0.06899 | 0.13656 | -0.07727  | 0.09534  | -0.00023 |
| -0.04001 | 0.38834 | -0.11088  | 0.01652  | -0.04271 | 0.35708 | -0.13783  | 0.00284  | -0.15851 |
| 0.0478   | 0.30264 | 0.018323  | 0.69289  | 0.017953 | 0.69878 | 0.009674  | 0.83484  | 0.043626 |
| -0.08431 | 0.06872 | 0.000895  | 0.98461  | -0.05669 | 0.22139 | 0.036722  | 0.42854  | 0.082537 |
| 0.137104 | 0.00299 | 0.098033  | 0.03418  | 0.155958 | 0.00072 | 0.016347  | 0.72458  | -0.03977 |
| 0.000545 | 0.99063 | 0.076592  | 0.0983   | 0.042087 | 0.36416 | 0.080162  | 0.08355  | 0.193719 |
| 0.002628 | 0.95482 | -0.06982  | 0.13192  | 0.000754 | 0.98704 | -0.09091  | 0.04959  | -0.16202 |
| -0.05509 | 0.23478 | -0.0912   | 0.04886  | -0.03952 | 0.39414 | -0.10838  | 0.01915  | -0.19515 |
| 0.141161 | 0.00223 | 0.051207  | 0.26944  | 0.106018 | 0.02194 | -0.00517  | 0.91134  | 7.06E-05 |
| -0.02887 | 0.53376 | -0.04951  | 0.28561  | -0.02983 | 0.52014 | -0.02492  | 0.59117  | -0.12039 |
| 0.082174 | 0.07606 | 0.070519  | 0.12807  | 0.096276 | 0.03754 | 0.022341  | 0.63012  | 0.104313 |
| -0.01612 | 0.72826 | 0.019288  | 0.6776   | 0.005288 | 0.90926 | 0.030112  | 0.51625  | 0.068275 |
| -0.04502 | 0.33163 | -0.00495  | 0.9151   | 0.00075  | 0.9871  | -1.39E-05 | 0.99976  | 0.026801 |
| -0.01103 | 0.81211 | 0.071235  | 0.12424  | 0.052568 | 0.2569  | 0.070027  | 0.13077  | 0.190697 |

|          |         |          |          |          |         |          |          |          |
|----------|---------|----------|----------|----------|---------|----------|----------|----------|
| 0.027724 | 0.55009 | 0.056479 | 0.22314  | 0.046997 | 0.31084 | 0.045805 | 0.32329  | 0.098423 |
| -0.05336 | 0.24976 | -0.05822 | 0.20919  | -0.02687 | 0.5625  | -0.05686 | 0.22007  | -0.07699 |
| 0.014012 | 0.76265 | 0.037373 | 0.42038  | 0.032316 | 0.48602 | 0.026352 | 0.57     | 0.046889 |
| -0.02813 | 0.54422 | -0.03536 | 0.44587  | -0.03706 | 0.42434 | -0.01832 | 0.69295  | -0.03377 |
| -0.02257 | 0.62654 | -0.01417 | 0.76007  | -0.01729 | 0.70944 | -0.00622 | 0.89338  | 0.018287 |
| -0.03531 | 0.44645 | -0.04993 | 0.28162  | -0.01297 | 0.77979 | -0.06545 | 0.15791  | -0.0919  |
| -0.00045 | 0.99228 | -0.04254 | 0.35906  | -0.00279 | 0.95206 | -0.05695 | 0.21932  | -0.09074 |
| 0.02946  | 0.52538 | 0.025166 | 0.58749  | 0.031078 | 0.50288 | 0.013669 | 0.76829  | 0.072666 |
| 0.000582 | 0.99    | 0.126208 | 0.00631  | 0.04872  | 0.29342 | 0.142426 | 0.00203  | 0.290726 |
| -0.00574 | 0.90162 | 0.068154 | 0.1414   | -0.00648 | 0.88893 | 0.100729 | 0.02952  | 0.227371 |
| 0.022779 | 0.62342 | -0.05709 | 0.2182   | -0.00025 | 0.99571 | -0.0758  | 0.10186  | -0.11864 |
| 0.03142  | 0.49819 | 0.063338 | 0.1718   | 0.044212 | 0.34042 | 0.060497 | 0.19188  | 0.11591  |
| -0.01688 | 0.71599 | 0.054612 | 0.23884  | 0.025046 | 0.58927 | 0.061254 | 0.18637  | 0.144268 |
| -0.00606 | 0.89612 | -0.01072 | 0.81729  | -0.04778 | 0.30284 | 0.020521 | 0.65826  | -0.05301 |
| -0.00128 | 0.978   | 0.101923 | 0.02764  | 0.03232  | 0.48596 | 0.123576 | 0.0075   | 0.163319 |
| 0.053376 | 0.24965 | -0.03484 | 0.45256  | 0.032516 | 0.48331 | -0.06391 | 0.16795  | -0.14339 |
| 0.017359 | 0.7083  | 0.01651  | 0.72195  | 0.025904 | 0.57658 | 0.011727 | 0.80046  | 0.054631 |
| -0.01111 | 0.81079 | 0.056078 | 0.22645  | 0.028688 | 0.53631 | 0.064416 | 0.1646   | 0.117104 |
| 0.041404 | 0.372   | 0.239923 | 1.54E-07 | 0.090872 | 0.0497  | 0.312967 | 4.52E-12 | 0.356865 |
| 0.027529 | 0.5529  | 0.087263 | 0.05952  | 0.040588 | 0.38151 | 0.084897 | 0.0668   | 0.144331 |
| 0.040895 | 0.37792 | -0.001   | 0.98285  | 0.060533 | 0.19161 | -0.03943 | 0.39531  | -0.11723 |
| -0.01807 | 0.69696 | -0.00876 | 0.85032  | -0.02128 | 0.64651 | 0.001308 | 0.97752  | 0.069051 |
| -0.08294 | 0.07336 | -0.12142 | 0.00862  | -0.08157 | 0.07826 | -0.1191  | 0.00999  | -0.1614  |
| -0.07864 | 0.08959 | 0.040314 | 0.38473  | -0.04542 | 0.3274  | 0.083577 | 0.07116  | 0.183751 |
| -0.04173 | 0.36826 | 0.009862 | 0.83168  | -0.00582 | 0.90016 | 0.022568 | 0.62665  | 0.040793 |
| 0.032223 | 0.48727 | 0.010469 | 0.82149  | 0.047328 | 0.30744 | -0.01223 | 0.79211  | 0.049869 |
| -0.00149 | 0.97436 | -0.04318 | 0.35186  | -0.01442 | 0.75595 | -0.04052 | 0.38229  | -0.04332 |
| -0.06463 | 0.16317 | 0.062718 | 0.17604  | -0.00325 | 0.94409 | 0.099423 | 0.0317   | 0.168121 |
| -0.06985 | 0.13172 | 0.036745 | 0.42824  | -0.01671 | 0.71875 | 0.085247 | 0.06568  | 0.100776 |
| -0.01269 | 0.78454 | -0.05197 | 0.26239  | -0.01782 | 0.70097 | -0.05994 | 0.19599  | -0.08389 |
| 0.018537 | 0.68948 | -0.01924 | 0.67841  | 0.016883 | 0.71594 | -0.02689 | 0.5622   | -0.03758 |
| 0.010551 | 0.8201  | 0.035392 | 0.44545  | 0.017545 | 0.70531 | 0.034787 | 0.45328  | 0.071077 |
| 0.108921 | 0.01855 | 0.052479 | 0.25771  | 0.106602 | 0.02122 | -0.01218 | 0.7929   | 0.003366 |
| -0.07488 | 0.10607 | -0.04737 | 0.30702  | -0.03272 | 0.48058 | -0.05547 | 0.23154  | 0.046478 |
| -0.06022 | 0.19394 | -0.06827 | 0.14075  | -0.07434 | 0.10862 | -0.04155 | 0.37028  | -0.05878 |
| 0.055653 | 0.23    | 0.034863 | 0.45229  | 0.083321 | 0.07204 | -0.00123 | 0.97883  | -0.03003 |
| 0.050814 | 0.27314 | 0.062497 | 0.17757  | 0.030232 | 0.51458 | 0.068344 | 0.14029  | 0.113779 |
| -0.11791 | 0.01077 | -0.00113 | 0.98054  | -0.09535 | 0.03943 | 0.059083 | 0.20249  | 0.117192 |
| -0.07084 | 0.12634 | 0.020341 | 0.66106  | -0.03917 | 0.39841 | 0.049528 | 0.28548  | 0.157002 |
| -0.02288 | 0.62187 | 0.084334 | 0.06863  | 0.002472 | 0.95751 | 0.109581 | 0.01784  | 0.248623 |
| -0.0261  | 0.57371 | 0.222633 | 1.18E-06 | 0.053123 | 0.25191 | 0.285249 | 3.41E-10 | 0.503922 |
| -0.13066 | 0.00468 | -0.05356 | 0.24805  | -0.09408 | 0.04214 | -0.02299 | 0.62021  | 0.094823 |
| 0.011089 | 0.81111 | -0.08077 | 0.08124  | -0.0352  | 0.44791 | -0.09775 | 0.0347   | -0.07322 |
| -0.03627 | 0.43424 | -0.00513 | 0.91193  | -0.04838 | 0.29681 | 0.018232 | 0.69434  | 0.117529 |
| -0.01112 | 0.81057 | -0.00871 | 0.85108  | -0.02042 | 0.65984 | -0.00533 | 0.9086   | 0.070148 |



|          |         |          |          |          |         |          |          |           |
|----------|---------|----------|----------|----------|---------|----------|----------|-----------|
| 0.003573 | 0.93861 | -0.01878 | 0.68568  | -0.01546 | 0.73895 | -0.02713 | 0.5586   | 0.042076  |
| -0.06636 | 0.15223 | -0.01413 | 0.76063  | -0.05502 | 0.23533 | 0.009242 | 0.84211  | 0.053944  |
| -0.00496 | 0.9149  | 0.00355  | 0.93902  | -0.00927 | 0.84172 | -0.01323 | 0.77549  | 0.154381  |
| -0.04538 | 0.3278  | 0.111214 | 0.0162   | 0.00043  | 0.99261 | 0.14246  | 0.00203  | 0.291656  |
| -0.11004 | 0.01737 | 0.030693 | 0.50818  | -0.05182 | 0.26372 | 0.058277 | 0.20873  | 0.21654   |
| -0.1275  | 0.0058  | -0.22471 | 9.30E-07 | -0.14763 | 0.00138 | -0.23791 | 1.97E-07 | -0.27812  |
| -0.05744 | 0.21534 | 0.054287 | 0.24165  | -0.00869 | 0.8514  | 0.085358 | 0.06533  | 0.118956  |
| -0.08825 | 0.05668 | 0.123267 | 0.00766  | 0.001746 | 0.96999 | 0.16079  | 0.00049  | 0.322001  |
| -0.0095  | 0.83785 | 0.023209 | 0.61689  | -0.00451 | 0.92255 | 0.02796  | 0.5467   | 0.117287  |
| -0.06284 | 0.17521 | 0.013421 | 0.77239  | -0.02252 | 0.62736 | 0.022893 | 0.62169  | 0.119113  |
| -0.04115 | 0.37493 | -0.04399 | 0.34283  | -0.04312 | 0.35252 | -0.04153 | 0.37052  | 0.04032   |
| -0.05925 | 0.20119 | -0.11231 | 0.01517  | -0.10035 | 0.03015 | -0.09788 | 0.03446  | -0.11194  |
| -0.15952 | 0.00054 | 0.016499 | 0.72212  | -0.08058 | 0.08194 | 0.075396 | 0.10368  | 0.150292  |
| -0.02924 | 0.52854 | 0.146679 | 0.00148  | 0.011423 | 0.80553 | 0.189121 | 3.90E-05 | 0.406994  |
| -0.1096  | 0.01783 | -0.10585 | 0.02216  | -0.10649 | 0.02135 | -0.07784 | 0.09293  | -0.09201  |
| -0.07603 | 0.1008  | -0.00818 | 0.86013  | -0.03791 | 0.41374 | 0.000242 | 0.99584  | 0.069735  |
| -0.10185 | 0.02774 | 0.014347 | 0.75715  | -0.05482 | 0.23706 | 0.034335 | 0.45917  | 0.247964  |
| -0.01394 | 0.76388 | 0.027677 | 0.55076  | -0.01818 | 0.69517 | 0.037851 | 0.41446  | 0.07933   |
| -0.0652  | 0.1595  | -0.02443 | 0.59853  | -0.04468 | 0.33537 | -0.0129  | 0.78106  | 0.045048  |
| 0.02694  | 0.56142 | 0.028559 | 0.53813  | 0.01798  | 0.69835 | 0.020683 | 0.65573  | 0.112367  |
| -0.05697 | 0.21911 | 0.073606 | 0.11217  | -0.02133 | 0.64569 | 0.109549 | 0.01788  | 0.267735  |
| 0.010553 | 0.82007 | 0.046152 | 0.31963  | 0.020109 | 0.66469 | 0.035808 | 0.44012  | 0.154514  |
| -0.11385 | 0.01383 | -0.0534  | 0.24944  | -0.11855 | 0.01035 | -0.00021 | 0.9964   | 0.095936  |
| -0.09472 | 0.04074 | 0.024958 | 0.59059  | -0.0671  | 0.14766 | 0.077079 | 0.09617  | 0.156336  |
| -0.14468 | 0.00172 | -0.09313 | 0.04426  | -0.12924 | 0.00515 | -0.05804 | 0.21056  | 0.037652  |
| -0.11185 | 0.0156  | -0.07958 | 0.08583  | -0.10302 | 0.02599 | -0.06332 | 0.17195  | -7.67E-05 |
| -0.11961 | 0.00968 | 0.021423 | 0.64425  | -0.06162 | 0.18371 | 0.061615 | 0.18378  | 0.166279  |
| -0.13295 | 0.004   | -0.05298 | 0.2532   | -0.10312 | 0.02585 | -0.02085 | 0.65319  | 0.109822  |
| -0.06219 | 0.1797  | 0.053104 | 0.25207  | -0.01872 | 0.68655 | 0.076005 | 0.10091  | 0.217797  |
| 0.009856 | 0.83177 | -0.00496 | 0.91483  | -0.0104  | 0.82269 | 0.002774 | 0.95232  | 0.039478  |
| -0.07865 | 0.08955 | 0.056095 | 0.22631  | -0.02707 | 0.55959 | 0.093623 | 0.04315  | 0.202795  |
| -0.06128 | 0.18617 | -0.00547 | 0.90622  | -0.01288 | 0.78132 | -0.01628 | 0.72562  | 0.060525  |
| -0.04265 | 0.35775 | 0.068631 | 0.13863  | -0.03758 | 0.41783 | 0.116313 | 0.01189  | 0.260824  |
| -0.06865 | 0.13855 | -0.01639 | 0.7239   | -0.07344 | 0.11296 | 0.016344 | 0.72463  | 0.062951  |
| -0.13675 | 0.00307 | -0.02615 | 0.57303  | -0.09853 | 0.03329 | 0.024754 | 0.59363  | 0.113343  |
| -0.00741 | 0.87304 | 0.102251 | 0.02714  | 0.012863 | 0.7816  | 0.127219 | 0.0059   | 0.317969  |
| -0.03787 | 0.41425 | 0.037975 | 0.41293  | -0.00847 | 0.85507 | 0.039618 | 0.393    | 0.179078  |
| -0.10288 | 0.0262  | -0.14355 | 0.00187  | -0.11791 | 0.01077 | -0.14154 | 0.00217  | -0.10417  |
| -0.08217 | 0.07605 | -0.00967 | 0.83489  | -0.04474 | 0.33466 | 0.01294  | 0.78032  | 0.06175   |
| 0.000566 | 0.99027 | -0.04619 | 0.31927  | -0.03127 | 0.50023 | -0.05168 | 0.26502  | -0.09912  |
| -0.13884 | 0.00264 | -0.10945 | 0.01799  | -0.11487 | 0.01299 | -0.09789 | 0.03444  | -0.09923  |
| -0.04958 | 0.28499 | 0.102548 | 0.02669  | 0.000796 | 0.98631 | 0.139284 | 0.00256  | 0.263357  |
| -0.00649 | 0.88876 | 0.029429 | 0.52582  | -0.02249 | 0.6279  | 0.045276 | 0.32892  | 0.128524  |
| -0.09593 | 0.03824 | -0.0821  | 0.0763   | -0.11171 | 0.01573 | -0.03426 | 0.46014  | -0.09104  |
| -0.03743 | 0.41974 | 0.104531 | 0.02388  | 0.011436 | 0.80531 | 0.142714 | 0.00199  | 0.28848   |

|          |          |          |         |          |         |          |          |          |
|----------|----------|----------|---------|----------|---------|----------|----------|----------|
| -0.12965 | 0.00501  | -0.01582 | 0.73318 | -0.07403 | 0.11009 | 0.017278 | 0.70959  | 0.150472 |
| -0.04084 | 0.37854  | 0.039784 | 0.39102 | -0.04207 | 0.36434 | 0.076025 | 0.10082  | 0.213887 |
| -0.12027 | 0.00928  | -0.03151 | 0.49702 | -0.08848 | 0.05605 | 0.000959 | 0.98351  | 0.077668 |
| -0.02303 | 0.61966  | 0.109787 | 0.01763 | 0.027217 | 0.5574  | 0.123913 | 0.00734  | 0.251351 |
| -0.13618 | 0.00319  | -0.14578 | 0.00158 | -0.12802 | 0.0056  | -0.12745 | 0.00581  | -0.17565 |
| -0.19725 | 1.76E-05 | -0.16028 | 0.00051 | -0.15365 | 0.00086 | -0.13773 | 0.00286  | -0.18251 |
| -0.1267  | 0.00611  | -0.07803 | 0.09211 | -0.08213 | 0.0762  | -0.07276 | 0.11636  | -0.02255 |
| -0.08169 | 0.07782  | -0.17072 | 0.00021 | -0.09583 | 0.03844 | -0.1874  | 4.60E-05 | -0.1752  |
| -0.10159 | 0.02816  | 0.000939 | 0.98385 | -0.07025 | 0.12951 | 0.04553  | 0.3262   | 0.139115 |
| -0.09427 | 0.04173  | -0.00676 | 0.88412 | -0.08201 | 0.07663 | 0.03574  | 0.44099  | 0.132682 |
| -0.0512  | 0.26952  | 0.063036 | 0.17385 | 0.003247 | 0.9442  | 0.076709 | 0.09778  | 0.224387 |
| -0.04494 | 0.33254  | 0.06141  | 0.18525 | -0.00565 | 0.90306 | 0.085662 | 0.06437  | 0.147606 |
| 0.008153 | 0.86051  | 0.130469 | 0.00474 | 0.046907 | 0.31177 | 0.150433 | 0.00111  | 0.274542 |
| -0.00673 | 0.88461  | 0.109769 | 0.01765 | 0.037646 | 0.417   | 0.101109 | 0.02891  | 0.255358 |
| -0.08156 | 0.0783   | -0.02176 | 0.63901 | -0.06958 | 0.13323 | 0.012616 | 0.78569  | 0.12742  |
| 0.080959 | 0.08051  | 0.040917 | 0.37766 | 0.023047 | 0.61934 | 0.031816 | 0.49279  | 0.021495 |
| -0.1302  | 0.00483  | -0.1608  | 0.00049 | -0.11871 | 0.01024 | -0.15762 | 0.00063  | -0.21824 |
| -0.08894 | 0.05477  | 0.057365 | 0.21595 | -0.04269 | 0.35736 | 0.100323 | 0.03018  | 0.20142  |
| -0.06234 | 0.17868  | 0.03016  | 0.51558 | -0.02918 | 0.52934 | 0.046225 | 0.31887  | 0.164621 |
| -0.07978 | 0.08502  | 0.065122 | 0.16002 | -0.02134 | 0.64546 | 0.091382 | 0.04842  | 0.248846 |
| -0.09057 | 0.05047  | 0.021292 | 0.64628 | -0.06884 | 0.13743 | 0.072827 | 0.11603  | 0.182635 |
| -0.06013 | 0.19457  | -0.07445 | 0.10808 | -0.08883 | 0.05508 | -0.05593 | 0.22768  | -0.00215 |
| -0.03436 | 0.4589   | -0.07534 | 0.10395 | -0.09534 | 0.03945 | -0.05249 | 0.25759  | -0.04231 |
| -0.03849 | 0.40664  | -0.04354 | 0.34781 | -0.05577 | 0.22902 | -0.03166 | 0.49484  | 0.068023 |
| -0.06037 | 0.19279  | -0.0692  | 0.13536 | -0.1093  | 0.01814 | -0.02306 | 0.61911  | -0.04345 |
| -0.05191 | 0.26287  | 0.045963 | 0.32162 | -0.03865 | 0.40466 | 0.087887 | 0.05772  | 0.155521 |
| -0.09732 | 0.03551  | -0.02205 | 0.63452 | -0.10093 | 0.02919 | 0.035297 | 0.44667  | 0.163784 |
| -0.09184 | 0.0473   | -0.00624 | 0.89305 | -0.06634 | 0.15234 | 0.03008  | 0.5167   | 0.118314 |
| -0.07027 | 0.12942  | -0.02105 | 0.64997 | -0.07108 | 0.12506 | 0.015453 | 0.73909  | 0.038558 |
| -0.08452 | 0.06803  | 0.010227 | 0.82554 | -0.03303 | 0.47647 | 0.039658 | 0.39252  | 0.120094 |
| -0.03484 | 0.45253  | 0.092168 | 0.04652 | 0.016059 | 0.72925 | 0.099909 | 0.03088  | 0.244226 |
| -0.07308 | 0.11474  | 0.059938 | 0.19603 | -0.02308 | 0.61879 | 0.092048 | 0.0468   | 0.219269 |
| -0.07305 | 0.11489  | -0.07387 | 0.11089 | -0.09123 | 0.0488  | -0.03952 | 0.39416  | -0.03388 |
| -0.02242 | 0.6289   | 0.098098 | 0.03406 | 0.001613 | 0.97226 | 0.145965 | 0.00156  | 0.243037 |
| -0.04013 | 0.38692  | 0.078138 | 0.09168 | -0.00753 | 0.87104 | 0.091464 | 0.04822  | 0.277038 |
| -0.05392 | 0.24488  | 0.042432 | 0.36024 | -0.02102 | 0.65053 | 0.065599 | 0.15697  | 0.234977 |
| -0.13046 | 0.00475  | -0.00141 | 0.97574 | -0.08872 | 0.05538 | 0.047253 | 0.30821  | 0.128516 |
| 0.051105 | 0.2704   | 0.118953 | 0.01009 | 0.036824 | 0.42725 | 0.143798 | 0.00184  | 0.28781  |
| -0.08672 | 0.06114  | -0.15552 | 0.00075 | -0.13412 | 0.00369 | -0.14302 | 0.00195  | -0.1541  |
| -0.05817 | 0.20959  | 0.057324 | 0.21628 | -0.03011 | 0.51632 | 0.095157 | 0.03983  | 0.212606 |
| 0.00769  | 0.86836  | 0.092797 | 0.04504 | 0.036713 | 0.42864 | 0.097311 | 0.03553  | 0.247467 |
| -0.11866 | 0.01027  | 0.0524   | 0.25843 | -0.04394 | 0.34345 | 0.096534 | 0.03703  | 0.190447 |
| 0.011395 | 0.806    | 0.080163 | 0.08354 | 0.001402 | 0.9759  | 0.109379 | 0.01806  | 0.23378  |
| -0.05317 | 0.25145  | 0.032456 | 0.48412 | -0.03115 | 0.50191 | 0.068622 | 0.13869  | 0.093358 |
| -0.0247  | 0.5944   | 0.105979 | 0.02199 | 0.007951 | 0.86393 | 0.145058 | 0.00167  | 0.236944 |

|          |         |          |         |          |         |          |         |          |
|----------|---------|----------|---------|----------|---------|----------|---------|----------|
| -0.02353 | 0.61206 | 0.070348 | 0.129   | -0.01284 | 0.78196 | 0.11005  | 0.01736 | 0.22835  |
| -0.13184 | 0.00432 | -0.01392 | 0.76421 | -0.10482 | 0.02349 | 0.043869 | 0.34418 | 0.152369 |
| -0.06373 | 0.16918 | -0.00783 | 0.86605 | -0.04273 | 0.35687 | 0.003931 | 0.93248 | 0.101896 |
| -0.10896 | 0.0185  | -0.06323 | 0.17251 | -0.10568 | 0.02237 | -0.02111 | 0.64904 | 0.017684 |
| -0.10579 | 0.02223 | -0.01444 | 0.75555 | -0.06243 | 0.17803 | 0.018485 | 0.69032 | 0.040631 |
| -0.00508 | 0.91284 | 0.129807 | 0.00496 | 0.014601 | 0.75298 | 0.175079 | 0.00014 | 0.31424  |
| -0.15294 | 0.00091 | -0.06972 | 0.13249 | -0.13193 | 0.00429 | -0.02131 | 0.64593 | 0.013538 |
| -0.07887 | 0.08867 | 0.021684 | 0.64022 | -0.02362 | 0.61059 | 0.037683 | 0.41653 | 0.129455 |
| -0.1093  | 0.01814 | 0.037147 | 0.42321 | -0.05852 | 0.20685 | 0.086888 | 0.06063 | 0.155112 |
| -0.09528 | 0.03957 | -0.00052 | 0.99114 | -0.07022 | 0.12972 | 0.03616  | 0.43563 | 0.073789 |
| -0.14098 | 0.00226 | -0.06367 | 0.16955 | -0.11579 | 0.01228 | -0.02155 | 0.64222 | -0.00398 |
| -0.07105 | 0.12523 | 0.019094 | 0.68066 | -0.05681 | 0.22041 | 0.066391 | 0.15201 | 0.170923 |
| -0.07749 | 0.09441 | 0.096488 | 0.03712 | -0.02342 | 0.61366 | 0.137848 | 0.00283 | 0.346925 |
| -0.09909 | 0.03228 | -0.00449 | 0.92293 | -0.07532 | 0.10402 | 0.04589  | 0.3224  | 0.112185 |
| -0.06969 | 0.13261 | 0.08883  | 0.05507 | -0.01181 | 0.79908 | 0.130804 | 0.00464 | 0.203917 |
| -0.14582 | 0.00158 | -0.08387 | 0.07018 | -0.1044  | 0.02406 | -0.06207 | 0.18055 | -0.04132 |
| -0.03937 | 0.39593 | 0.012896 | 0.78105 | -0.04535 | 0.32813 | 0.034021 | 0.46329 | 0.057934 |
| -0.03553 | 0.44367 | -0.0419  | 0.36634 | -0.0688  | 0.13764 | -0.01905 | 0.6814  | 0.010388 |
| -0.10884 | 0.01864 | -0.12044 | 0.00918 | -0.12397 | 0.00731 | -0.10578 | 0.02224 | -0.1243  |
| -0.07017 | 0.12996 | -0.04523 | 0.32938 | -0.08112 | 0.07992 | -0.02052 | 0.65821 | 0.08306  |
| -0.15312 | 0.0009  | 0.022409 | 0.62908 | -0.07511 | 0.105   | 0.073974 | 0.11038 | 0.190777 |
| -0.04413 | 0.34136 | -0.13048 | 0.00474 | -0.10297 | 0.02607 | -0.12636 | 0.00625 | -0.10537 |
| -0.11023 | 0.01717 | 0.010724 | 0.81721 | -0.07528 | 0.1042  | 0.061018 | 0.18807 | 0.047258 |
| -0.01974 | 0.67048 | 0.089778 | 0.05252 | -0.01202 | 0.79552 | 0.145659 | 0.0016  | 0.13624  |
| -0.09915 | 0.03217 | -0.00747 | 0.87212 | -0.05151 | 0.26661 | 0.014816 | 0.74947 | 0.132712 |
| -0.1429  | 0.00196 | -0.04637 | 0.31737 | -0.08578 | 0.06401 | -0.01515 | 0.74408 | 0.032973 |
| -0.11063 | 0.01677 | -0.00756 | 0.87055 | -0.0765  | 0.09872 | 0.037039 | 0.42456 | 0.129798 |
| -0.1008  | 0.0294  | 0.044743 | 0.33464 | -0.05428 | 0.24173 | 0.101996 | 0.02752 | 0.153731 |
| -0.10944 | 0.01799 | -0.04472 | 0.3349  | -0.10099 | 0.0291  | -0.00252 | 0.95669 | 0.100979 |
| -0.07499 | 0.10558 | -0.05701 | 0.21884 | -0.08483 | 0.067   | -0.02664 | 0.56573 | 0.015326 |
| -0.03554 | 0.44351 | 0.054957 | 0.23588 | -0.00721 | 0.87656 | 0.067814 | 0.14341 | 0.233316 |
| -0.16307 | 0.0004  | -0.09911 | 0.03224 | -0.11505 | 0.01286 | -0.08724 | 0.0596  | 0.019566 |
| 0.00696  | 0.88076 | -0.03204 | 0.48969 | -0.06769 | 0.14413 | 0.00646  | 0.88926 | 0.00952  |
| -0.02797 | 0.54661 | 0.050563 | 0.27552 | -0.01333 | 0.77395 | 0.071464 | 0.12303 | 0.149035 |
| -0.12608 | 0.00637 | -0.06215 | 0.18    | -0.11692 | 0.01145 | -0.02023 | 0.66282 | 0.089702 |
| -0.05419 | 0.24246 | -0.12251 | 0.00804 | -0.10383 | 0.02484 | -0.11497 | 0.01292 | -0.19036 |
| -0.04702 | 0.31066 | -0.03718 | 0.42282 | -0.06313 | 0.17321 | -0.0109  | 0.81427 | -0.05449 |
| -0.06127 | 0.18625 | -0.04002 | 0.38825 | -0.0688  | 0.13768 | -0.01991 | 0.66779 | 0.064124 |
| -0.07408 | 0.10989 | 0.059499 | 0.19933 | -0.00693 | 0.88122 | 0.072663 | 0.11685 | 0.154028 |
| -0.11498 | 0.01291 | 0.006269 | 0.89252 | -0.06089 | 0.18899 | 0.033573 | 0.4692  | 0.134069 |
| -0.09157 | 0.04795 | -0.08448 | 0.06815 | -0.11063 | 0.01677 | -0.06119 | 0.18679 | 0.002159 |
| -0.07736 | 0.09496 | 0.028202 | 0.54323 | -0.07481 | 0.10641 | 0.092171 | 0.04651 | 0.207252 |
| -0.06426 | 0.16563 | 0.025706 | 0.57951 | -0.03879 | 0.40296 | 0.066852 | 0.14918 | 0.123281 |
| -0.09977 | 0.03111 | 0.04511  | 0.3307  | -0.05586 | 0.22824 | 0.102106 | 0.02736 | 0.201832 |
| -0.03706 | 0.42431 | 0.126002 | 0.0064  | 0.007192 | 0.87681 | 0.17105  | 0.0002  | 0.340636 |

|          |          |          |         |          |         |          |         |          |
|----------|----------|----------|---------|----------|---------|----------|---------|----------|
| -0.06775 | 0.14376  | 0.117045 | 0.01136 | 0.015383 | 0.74023 | 0.150837 | 0.00108 | 0.311295 |
| 0.029573 | 0.52379  | 0.170999 | 0.0002  | 0.07518  | 0.10468 | 0.172218 | 0.00018 | 0.345815 |
| -0.10125 | 0.02869  | -0.06783 | 0.1433  | -0.11041 | 0.017   | -0.02619 | 0.57237 | 0.013971 |
| -0.00668 | 0.88547  | -0.11818 | 0.01059 | -0.0429  | 0.35491 | -0.14689 | 0.00146 | -0.16415 |
| -0.09792 | 0.03438  | 0.031719 | 0.49411 | -0.05848 | 0.20714 | 0.075903 | 0.10137 | 0.220194 |
| -0.13845 | 0.00271  | -0.02907 | 0.53088 | -0.07921 | 0.08729 | 0.010088 | 0.82788 | 0.075364 |
| -0.15337 | 0.00088  | 7.44E-05 | 0.99872 | -0.09727 | 0.0356  | 0.062077 | 0.18051 | 0.088879 |
| -0.00747 | 0.87215  | 0.026255 | 0.57143 | -0.02424 | 0.60133 | 0.040291 | 0.38501 | 0.182881 |
| -0.02986 | 0.51977  | 0.140077 | 0.00241 | 0.044725 | 0.33484 | 0.160637 | 0.00049 | 0.298509 |
| -0.10186 | 0.02774  | -0.15674 | 0.00068 | -0.1113  | 0.01611 | -0.15565 | 0.00074 | -0.22594 |
| -0.00475 | 0.91852  | 0.093197 | 0.04412 | 0.001709 | 0.97062 | 0.126662 | 0.00613 | 0.378202 |
| 0.049057 | 0.29009  | 0.04931  | 0.28761 | 0.0401   | 0.38726 | 0.035941 | 0.43843 | 0.040042 |
| 0.002088 | 0.9641   | -0.04243 | 0.36021 | -0.04    | 0.38848 | -0.02395 | 0.60564 | 0.010841 |
| 0.020595 | 0.6571   | 0.016868 | 0.71617 | 0.023236 | 0.61647 | 0.014427 | 0.75584 | 0.056549 |
| 0.146898 | 0.00146  | 0.074503 | 0.10785 | 0.048018 | 0.30044 | 0.090722 | 0.05008 | 0.058044 |
| -0.01941 | 0.67562  | -0.04664 | 0.31457 | -0.03577 | 0.4406  | -0.03138 | 0.49868 | -0.06544 |
| 0.040644 | 0.38085  | -0.03283 | 0.47912 | -0.01655 | 0.72128 | -0.02647 | 0.56831 | -0.06003 |
| 0.150744 | 0.00108  | 0.069362 | 0.13447 | 0.10788  | 0.01971 | 0.014001 | 0.76282 | -0.0325  |
| 0.12805  | 0.00559  | 0.169521 | 0.00023 | 0.14731  | 0.00141 | 0.130309 | 0.00479 | 0.151595 |
| -0.01748 | 0.70632  | 7.41E-05 | 0.99873 | -0.01066 | 0.81821 | 0.009869 | 0.83156 | 0.038797 |
| -0.01444 | 0.75568  | 0.027431 | 0.55431 | 0.006075 | 0.89583 | 0.050288 | 0.27814 | -0.02739 |
| 0.19059  | 3.39E-05 | 0.091205 | 0.04886 | 0.132336 | 0.00417 | 0.032537 | 0.48303 | -0.01842 |
| 0.00257  | 0.95583  | 0.039115 | 0.39904 | 0.01775  | 0.70202 | 0.058651 | 0.20582 | 0.026036 |
| -0.03596 | 0.43822  | 0.010924 | 0.81387 | -0.0127  | 0.7843  | 0.027609 | 0.55175 | -0.01035 |
| -0.01507 | 0.74536  | 0.004803 | 0.91756 | 0.000827 | 0.98578 | 0.010211 | 0.82582 | 0.007123 |
| 0.028661 | 0.53668  | 0.037782 | 0.41531 | 0.028491 | 0.53911 | 0.033821 | 0.46592 | 0.029426 |
| -0.05356 | 0.24807  | -0.01482 | 0.74949 | 0.001222 | 0.97899 | -0.03294 | 0.47761 | -0.03702 |
| 0.007682 | 0.8685   | 0.085646 | 0.06442 | 0.033098 | 0.47551 | 0.099772 | 0.03111 | 0.276243 |
| -0.06388 | 0.16813  | -0.05735 | 0.21607 | -0.04622 | 0.31888 | -0.04256 | 0.35879 | -0.07197 |
| -0.09565 | 0.0388   | -0.06221 | 0.1796  | -0.07072 | 0.12701 | -0.04444 | 0.33789 | -0.09954 |
| -0.05256 | 0.25695  | 0.001488 | 0.97441 | -0.01498 | 0.74675 | 0.012657 | 0.78502 | -0.01279 |
| -0.07484 | 0.10624  | -0.03822 | 0.40996 | -0.04214 | 0.3636  | -0.0201  | 0.66483 | -0.03727 |
| 0.106291 | 0.0216   | 0.10885  | 0.01862 | 0.121226 | 0.00873 | 0.056846 | 0.22014 | 0.119233 |
| 0.028538 | 0.53844  | -0.01169 | 0.80113 | -0.0039  | 0.93305 | 0.00291  | 0.94999 | 0.035652 |
| -0.02956 | 0.52401  | 0.040752 | 0.37958 | 0.012978 | 0.7797  | 0.027503 | 0.55328 | 0.002153 |
| -0.01833 | 0.69278  | 0.023745 | 0.60877 | -0.01012 | 0.8273  | 0.055671 | 0.22984 | 0.009489 |
| -0.02017 | 0.66368  | -0.0258  | 0.57809 | -0.01707 | 0.71288 | -0.02246 | 0.62832 | -0.0443  |
| 0.05303  | 0.25274  | 0.165251 | 0.00034 | 0.09711  | 0.03591 | 0.178006 | 0.00011 | 0.095741 |
| 0.076669 | 0.09796  | 0.060074 | 0.19501 | 0.079754 | 0.08514 | 0.033949 | 0.46424 | 0.009627 |
| -0.03098 | 0.5043   | -0.03955 | 0.39384 | -0.0274  | 0.55474 | -0.02764 | 0.55133 | -0.06381 |
| 0.015515 | 0.73807  | -0.02638 | 0.56958 | -0.01005 | 0.82849 | -0.03186 | 0.49215 | -0.07633 |
| -0.0222  | 0.63227  | -0.0531  | 0.25207 | -0.02127 | 0.64655 | -0.06139 | 0.18536 | -0.12163 |
| 0.038203 | 0.41014  | -0.01972 | 0.67085 | 0.025422 | 0.5837  | -0.04679 | 0.31296 | -0.09322 |
| 0.057406 | 0.21563  | 0.047091 | 0.30987 | 0.084218 | 0.06901 | 0.004176 | 0.92828 | 0.006671 |
| -0.01156 | 0.80318  | -0.00208 | 0.96419 | 0.01215  | 0.79342 | -0.01729 | 0.70944 | -0.02732 |

|          |          |          |          |          |          |          |          |          |
|----------|----------|----------|----------|----------|----------|----------|----------|----------|
| -0.00571 | 0.90208  | -0.00555 | 0.90481  | 0.007058 | 0.87909  | -0.01356 | 0.77013  | -0.01664 |
| 0.016606 | 0.7204   | -0.01217 | 0.79308  | -0.00094 | 0.98385  | -0.01943 | 0.67539  | -0.05449 |
| -0.01476 | 0.75042  | -0.04799 | 0.30077  | -0.04517 | 0.33001  | -0.03263 | 0.48172  | -0.08225 |
| -0.01127 | 0.80802  | -0.04954 | 0.28535  | -0.04047 | 0.38287  | -0.03463 | 0.45526  | -0.06991 |
| -0.03754 | 0.41832  | -0.03132 | 0.49952  | -0.0289  | 0.53328  | -0.02125 | 0.64699  | -0.0514  |
| 0.010192 | 0.82614  | 0.010127 | 0.82722  | 0.010399 | 0.82265  | 0.012845 | 0.78189  | 0.007672 |
| 0.200618 | 1.25E-05 | 0.222511 | 1.19E-06 | 0.188092 | 4.31E-05 | 0.194175 | 2.39E-05 | 0.09763  |
| 0.151024 | 0.00106  | 0.089012 | 0.05458  | 0.126922 | 0.00602  | 0.032877 | 0.47847  | -0.03119 |
| 0.174887 | 0.00015  | 0.059789 | 0.19714  | 0.106384 | 0.02149  | 0.015598 | 0.73672  | -0.00055 |
| 0.010732 | 0.81707  | -0.01457 | 0.75345  | -0.007   | 0.88001  | -0.01035 | 0.82349  | -0.02953 |
| 0.009474 | 0.8382   | -0.00666 | 0.88584  | -0.00844 | 0.8557   | -0.00326 | 0.94394  | -0.01592 |
| 0.098989 | 0.03246  | 0.271527 | 2.45E-09 | 0.116252 | 0.01194  | 0.352321 | 4.28E-15 | 0.178763 |
| -0.02984 | 0.52003  | -0.01474 | 0.75064  | -0.02143 | 0.64417  | -0.0047  | 0.91928  | -0.02608 |
| -0.02713 | 0.55861  | -0.00335 | 0.9424   | -0.01636 | 0.72432  | 0.009762 | 0.83336  | -0.02176 |
| 0.015828 | 0.73299  | 0.07529  | 0.10417  | 0.013833 | 0.7656   | 0.118973 | 0.01007  | 0.039541 |
| -0.04405 | 0.34217  | -0.03065 | 0.50878  | -0.02932 | 0.52738  | -0.01426 | 0.75858  | -0.02489 |
| -0.07922 | 0.08724  | -0.08106 | 0.08012  | -0.05552 | 0.23114  | -0.07692 | 0.09686  | -0.11739 |
| 0.03883  | 0.40248  | 0.104151 | 0.0244   | 0.059435 | 0.19981  | 0.113802 | 0.01387  | 0.107142 |
| -0.05989 | 0.1964   | -0.04632 | 0.31793  | -0.04856 | 0.29504  | -0.03139 | 0.49865  | -0.05061 |
| 0.041855 | 0.36681  | 0.050366 | 0.27739  | 0.056177 | 0.22563  | 0.052406 | 0.25837  | 0.004763 |
| 0.079584 | 0.08581  | 0.070425 | 0.12858  | 0.063678 | 0.1695   | 0.063537 | 0.17045  | 0.030247 |
| 0.250425 | 4.14E-08 | 0.116728 | 0.01159  | 0.146001 | 0.00156  | 0.070068 | 0.13054  | 0.072777 |
| 0.031836 | 0.49252  | 0.00482  | 0.91726  | 0.004179 | 0.92824  | 0.010536 | 0.82036  | -0.08247 |
| -0.05951 | 0.19926  | -0.05053 | 0.27581  | -0.04208 | 0.36427  | -0.03454 | 0.45655  | -0.03472 |
| 0.148332 | 0.00131  | 0.113349 | 0.01425  | 0.105535 | 0.02256  | 0.095568 | 0.03898  | 0.058354 |
| 0.062605 | 0.17682  | 0.011273 | 0.80804  | 0.060053 | 0.19517  | -0.02963 | 0.52306  | -0.04177 |
| -0.02501 | 0.5898   | -0.03241 | 0.4847   | -0.02373 | 0.60896  | -0.02416 | 0.60246  | -0.03644 |
| -0.01784 | 0.70054  | 0.005594 | 0.90404  | -0.01147 | 0.80478  | 0.014504 | 0.75458  | 0.012376 |
| -0.00467 | 0.91978  | 0.010497 | 0.82102  | 0.00892  | 0.84755  | 0.015569 | 0.7372   | -0.02769 |
| 0.098675 | 0.03302  | 0.058476 | 0.20717  | 0.067231 | 0.14688  | 0.044957 | 0.33234  | 0.009832 |
| -0.05331 | 0.25022  | -0.03728 | 0.42157  | -0.04095 | 0.37723  | -0.02116 | 0.64836  | -0.04233 |
| 0.020579 | 0.65736  | 0.10015  | 0.03047  | 0.075086 | 0.10511  | 0.086415 | 0.06205  | 0.098935 |
| 0.01443  | 0.75579  | -0.03283 | 0.47908  | 0.002309 | 0.9603   | -0.04965 | 0.28434  | -0.12871 |
| 0.009973 | 0.82981  | -0.02455 | 0.59667  | 0.025379 | 0.58434  | -0.05924 | 0.2013   | -0.10166 |
| -0.01403 | 0.76234  | -0.03625 | 0.43455  | -0.01103 | 0.81216  | -0.04052 | 0.38235  | -0.04226 |
| 0.024741 | 0.59383  | 0.024987 | 0.59016  | 0.022452 | 0.62841  | 0.022227 | 0.63187  | 0.024221 |
| -0.00739 | 0.87341  | 0.025146 | 0.5878   | 0.029734 | 0.52154  | 0.011786 | 0.79947  | -0.0059  |
| -0.00873 | 0.85075  | -0.00504 | 0.91342  | -0.01361 | 0.76923  | 0.009066 | 0.84508  | -0.01688 |
| -0.07378 | 0.1113   | -0.07375 | 0.11145  | -0.05944 | 0.19977  | -0.06826 | 0.14081  | -0.11342 |
| 0.051509 | 0.26663  | -0.00122 | 0.97911  | 0.031689 | 0.49452  | -0.02299 | 0.62015  | -0.04466 |
| 0.031356 | 0.49907  | 0.071967 | 0.1204   | 0.050536 | 0.27578  | 0.074201 | 0.10928  | 0.027037 |
| 0.048721 | 0.29341  | 0.02666  | 0.5655   | 0.014042 | 0.76216  | 0.037675 | 0.41664  | 0.081878 |
| 0.151718 | 0.00101  | 0.116929 | 0.01145  | 0.136854 | 0.00304  | 0.063407 | 0.17133  | 0.068188 |
| 0.035319 | 0.4464   | 0.034699 | 0.45442  | 0.013512 | 0.77088  | 0.052947 | 0.25348  | 0.105587 |
| -0.04019 | 0.38617  | -0.02464 | 0.5954   | -0.02478 | 0.59319  | -0.0066  | 0.88689  | 0.029382 |

|          |          |          |          |           |          |          |          |          |
|----------|----------|----------|----------|-----------|----------|----------|----------|----------|
| -0.03963 | 0.39283  | -0.00554 | 0.9049   | -0.02152  | 0.64269  | 0.006659 | 0.88588  | 0.01088  |
| -0.0017  | 0.97074  | 0.000162 | 0.99721  | 0.010492  | 0.8211   | -0.00641 | 0.8902   | -0.02988 |
| -0.0017  | 0.97084  | 0.019667 | 0.67163  | 0.0133    | 0.77438  | 0.014593 | 0.75311  | 0.063325 |
| -0.042   | 0.36518  | 0.005398 | 0.90739  | -0.0147   | 0.75138  | 0.031873 | 0.49201  | 0.035604 |
| -0.037   | 0.42508  | 0.013561 | 0.77008  | -0.01128  | 0.80799  | 0.027011 | 0.56039  | 0.034443 |
| -0.05327 | 0.25061  | -0.02122 | 0.64743  | -0.0359   | 0.43895  | -0.00283 | 0.95135  | 0.003945 |
| -0.02452 | 0.59715  | 0.031686 | 0.49456  | 0.00499   | 0.91436  | 0.042157 | 0.36335  | 0.052809 |
| -0.03053 | 0.51038  | -0.04724 | 0.30836  | -0.04432  | 0.33925  | -0.02821 | 0.54315  | -0.08314 |
| -0.03893 | 0.40133  | -0.04999 | 0.28101  | -0.04779  | 0.30271  | -0.03017 | 0.51539  | -0.08216 |
| -0.053   | 0.25305  | -0.03788 | 0.41412  | -0.03721  | 0.42241  | -0.02038 | 0.66051  | -0.05116 |
| -0.01044 | 0.82196  | -0.01817 | 0.6954   | -0.01277  | 0.78322  | -0.01537 | 0.74039  | -0.02188 |
| -0.07321 | 0.11414  | -0.04899 | 0.29078  | -0.05068  | 0.27436  | -0.02958 | 0.52369  | -0.07369 |
| -0.00708 | 0.87873  | -0.01078 | 0.81634  | -0.00165  | 0.97162  | -0.01101 | 0.81243  | -0.04993 |
| 0.020735 | 0.65493  | 0.003527 | 0.9394   | 0.003359  | 0.94228  | 0.006354 | 0.89108  | -0.03075 |
| 0.086137 | 0.0629   | 0.034929 | 0.45144  | 0.02761   | 0.55173  | 0.054335 | 0.24123  | 0.004081 |
| -0.045   | 0.33188  | -0.03883 | 0.4025   | -0.03318  | 0.47447  | -0.02828 | 0.54212  | -0.06349 |
| 0.008998 | 0.84622  | 0.034737 | 0.45393  | 0.031673  | 0.49473  | 0.0142   | 0.75956  | -0.00949 |
| 0.030182 | 0.51527  | 0.027881 | 0.54783  | 0.050645  | 0.27473  | 0.00711  | 0.87821  | -0.00048 |
| 0.032156 | 0.48818  | 0.031039 | 0.50341  | 0.045944  | 0.32182  | 0.012905 | 0.7809   | 0.008358 |
| 0.280856 | 6.50E-10 | 0.095305 | 0.03952  | 0.129009  | 0.00524  | 0.048264 | 0.29797  | 0.019852 |
| 0.001376 | 0.97635  | 0.03303  | 0.47643  | 0.025969  | 0.57562  | 0.033867 | 0.46532  | 0.052313 |
| 0.036287 | 0.43402  | -0.00171 | 0.97059  | 0.017174  | 0.71125  | -0.00857 | 0.85352  | -0.06857 |
| -0.01694 | 0.71506  | -0.03781 | 0.41496  | -0.03218  | 0.48786  | -0.03218 | 0.48788  | -0.05539 |
| -0.01367 | 0.76824  | -0.00698 | 0.88037  | -5.88E-05 | 0.99899  | -0.01858 | 0.68874  | -0.01238 |
| 0.17996  | 9.21E-05 | 0.147697 | 0.00137  | 0.184654  | 5.96E-05 | 0.060814 | 0.18956  | 0.132778 |
| 0.036489 | 0.43147  | 0.047095 | 0.30983  | 0.018721  | 0.68657  | 0.044917 | 0.33277  | 0.104086 |
| 0.012081 | 0.79457  | 0.145866 | 0.00157  | 0.063684  | 0.16947  | 0.159731 | 0.00053  | 0.251215 |
| 0.158427 | 0.00059  | 0.255102 | 2.26E-08 | 0.175951  | 0.00013  | 0.247302 | 6.15E-08 | 0.533557 |
| -0.03355 | 0.46944  | 0.134545 | 0.00358  | 0.024857  | 0.59209  | 0.181497 | 8.00E-05 | 0.247086 |
| -0.01131 | 0.80748  | -0.00761 | 0.86965  | -0.02777  | 0.54941  | 0.011605 | 0.80249  | -0.04964 |
| -0.12829 | 0.00549  | -0.05029 | 0.27815  | -0.07616  | 0.10024  | -0.01105 | 0.8117   | -0.05367 |
| 0.071293 | 0.12393  | 0.207608 | 6.07E-06 | 0.118459  | 0.0104   | 0.218469 | 1.88E-06 | 0.381076 |
| 0.059985 | 0.19567  | 0.009892 | 0.83117  | 0.000979  | 0.98317  | 0.014734 | 0.75081  | 0.116259 |
| 0.048826 | 0.29237  | -0.03489 | 0.45194  | -0.0194   | 0.67577  | -0.0323  | 0.4862   | 0.03437  |
| 0.116667 | 0.01163  | 0.216109 | 2.44E-06 | 0.155577  | 0.00074  | 0.194404 | 2.33E-05 | 0.390743 |
| -0.09007 | 0.05175  | 0.051846 | 0.2635   | -0.04508  | 0.33102  | 0.110429 | 0.01697  | 0.209383 |
| -0.03255 | 0.48291  | -0.00623 | 0.89323  | -0.01249  | 0.78774  | -0.00892 | 0.84751  | 0.0601   |
| -0.03974 | 0.39149  | 0.121762 | 0.00844  | 0.045166  | 0.33009  | 0.147634 | 0.00138  | 0.299455 |
| 0.031877 | 0.49196  | 0.171598 | 0.00019  | 0.080437  | 0.08249  | 0.193765 | 2.49E-05 | 0.274751 |
| 0.051966 | 0.26239  | 0.05671  | 0.22124  | 0.051025  | 0.27114  | 0.055424 | 0.23192  | 0.055544 |
| -0.0064  | 0.89034  | 0.105182 | 0.02301  | 0.044043  | 0.34227  | 0.130117 | 0.00486  | 0.275845 |
| 0.028027 | 0.54573  | 0.168197 | 0.00026  | 0.106398  | 0.02147  | 0.170307 | 0.00022  | 0.367222 |
| -0.0161  | 0.72859  | 0.124754 | 0.00695  | 0.035649  | 0.44215  | 0.150582 | 0.0011   | 0.287355 |
| 0.048032 | 0.30029  | 0.1293   | 0.00513  | 0.066218  | 0.15309  | 0.156132 | 0.00071  | 0.300498 |
| -0.01207 | 0.79477  | 0.101121 | 0.02889  | 0.022957  | 0.62071  | 0.132802 | 0.00404  | 0.22155  |

|           |          |          |          |           |          |          |          |          |
|-----------|----------|----------|----------|-----------|----------|----------|----------|----------|
| -0.05562  | 0.23024  | 0.086383 | 0.06215  | -8.52E-05 | 0.99853  | 0.12023  | 0.0093   | 0.262234 |
| -0.01496  | 0.74719  | 0.138493 | 0.00271  | 0.050896  | 0.27236  | 0.161605 | 0.00045  | 0.373273 |
| 0.05737   | 0.21591  | 0.243509 | 9.90E-08 | 0.12966   | 0.00501  | 0.260282 | 1.14E-08 | 0.526721 |
| 0.028823  | 0.53438  | 0.116885 | 0.01148  | 0.039277  | 0.39709  | 0.145181 | 0.00166  | 0.313313 |
| -0.02446  | 0.59801  | -0.01752 | 0.70576  | -0.02865  | 0.53683  | -0.00341 | 0.94141  | 0.052015 |
| -0.06144  | 0.18502  | 0.100503 | 0.02989  | 0.030631  | 0.50905  | 0.106358 | 0.02152  | 0.253372 |
| 0.163946  | 0.00037  | 0.159503 | 0.00054  | 0.153274  | 0.00089  | 0.135046 | 0.00346  | 0.277217 |
| -0.02302  | 0.61976  | 0.037914 | 0.41369  | 0.004641  | 0.92032  | 0.044703 | 0.33508  | 0.173822 |
| 0.077571  | 0.09406  | 0.245231 | 7.99E-08 | 0.125545  | 0.0066   | 0.277086 | 1.12E-09 | 0.435502 |
| -0.02473  | 0.59398  | 0.106322 | 0.02156  | 0.012302  | 0.79089  | 0.15353  | 0.00087  | 0.242864 |
| 0.0006    | 0.98968  | 0.089098 | 0.05434  | 0.01347   | 0.77157  | 0.113381 | 0.01423  | 0.222276 |
| 0.021583  | 0.64177  | 0.110995 | 0.01641  | 0.038974  | 0.40074  | 0.132253 | 0.0042   | 0.212868 |
| -0.02473  | 0.594    | -0.00233 | 0.95997  | -0.0213   | 0.64611  | 0.031147 | 0.50194  | 0.103719 |
| -0.0029   | 0.95021  | 0.148412 | 0.0013   | 0.05794   | 0.21137  | 0.174834 | 0.00015  | 0.33733  |
| -0.03717  | 0.42297  | 0.092106 | 0.04667  | -0.0087   | 0.85134  | 0.140195 | 0.00239  | 0.208358 |
| 0.033006  | 0.47674  | 0.151291 | 0.00104  | 0.070062  | 0.13057  | 0.169001 | 0.00024  | 0.275267 |
| 0.100943  | 0.02917  | 0.188956 | 3.96E-05 | 0.105536  | 0.02255  | 0.194914 | 2.22E-05 | 0.433612 |
| 0.093833  | 0.04268  | 0.101932 | 0.02762  | 0.093315  | 0.04385  | 0.066229 | 0.15301  | 0.158389 |
| -0.00123  | 0.97882  | 0.229798 | 5.17E-07 | 0.056524  | 0.22277  | 0.306249 | 1.35E-11 | 0.466687 |
| -0.01911  | 0.68048  | 0.052165 | 0.26057  | -0.00089  | 0.98463  | 0.077569 | 0.09407  | 0.177146 |
| -0.01692  | 0.7153   | 0.161908 | 0.00044  | 0.057538  | 0.21457  | 0.196951 | 1.81E-05 | 0.300507 |
| 0.083532  | 0.07131  | 0.152177 | 0.00097  | 0.095045  | 0.04006  | 0.17206  | 0.00019  | 0.220878 |
| 0.00308   | 0.94708  | 0.031868 | 0.49208  | 0.001342  | 0.97693  | 0.042199 | 0.36288  | 0.033269 |
| 0.007669  | 0.86872  | 0.085525 | 0.0648   | 0.04972   | 0.28361  | 0.096427 | 0.03724  | 0.159924 |
| 0.046974  | 0.31108  | 0.133318 | 0.0039   | 0.083578  | 0.07116  | 0.119849 | 0.00953  | 0.357339 |
| -0.01606  | 0.72926  | 0.089648 | 0.05286  | 0.038178  | 0.41044  | 0.094581 | 0.04105  | 0.210806 |
| 0.112156  | 0.01531  | 0.261426 | 9.79E-09 | 0.157898  | 0.00062  | 0.261211 | 1.01E-08 | 0.505408 |
| 0.111903  | 0.01555  | 0.059342 | 0.20051  | 0.035825  | 0.4399   | 0.068468 | 0.13957  | 0.224634 |
| 0.022246  | 0.63158  | 0.100186 | 0.03041  | 0.042553  | 0.35887  | 0.107153 | 0.02055  | 0.161383 |
| -0.01718  | 0.71124  | 0.034615 | 0.45552  | 0.015056  | 0.74555  | 0.031015 | 0.50374  | 0.170713 |
| 0.033758  | 0.46676  | 0.111624 | 0.01581  | 0.040848  | 0.37847  | 0.141548 | 0.00217  | 0.177714 |
| -0.00886  | 0.84863  | 0.074371 | 0.10848  | 0.026646  | 0.56571  | 0.072496 | 0.1177   | 0.202006 |
| -0.03085  | 0.50599  | 0.014585 | 0.75326  | 0.001479  | 0.97457  | 0.021598 | 0.64155  | 0.080239 |
| -0.01513  | 0.74437  | 0.018776 | 0.6857   | -0.03408  | 0.46246  | 0.056904 | 0.21967  | 0.057409 |
| 0.050395  | 0.27712  | 0.112839 | 0.0147   | 0.064094  | 0.16673  | 0.126764 | 0.00609  | 0.207745 |
| -0.03365  | 0.46814  | 0.132231 | 0.0042   | 0.037506  | 0.41873  | 0.163467 | 0.00039  | 0.272546 |
| 0.03164   | 0.49519  | 0.074376 | 0.10845  | 0.059623  | 0.19839  | 0.068062 | 0.14194  | 0.198356 |
| 0.24882   | 5.08E-08 | 0.301228 | 2.99E-11 | 0.231221  | 4.37E-07 | 0.277883 | 9.98E-10 | 0.511809 |
| -0.07185  | 0.12099  | 0.079681 | 0.08542  | 0.004589  | 0.92121  | 0.111262 | 0.01615  | 0.197321 |
| -0.10888  | 0.01859  | -0.02876 | 0.53527  | -0.06842  | 0.13982  | 0.015411 | 0.73977  | 0.047856 |
| -0.01271  | 0.78417  | 0.068715 | 0.13815  | 0.025655  | 0.58026  | 0.071986 | 0.12031  | 0.116619 |
| 0.071749  | 0.12154  | 0.152255 | 0.00096  | 0.090503  | 0.05063  | 0.143939 | 0.00182  | 0.208165 |
| -0.01083  | 0.81551  | 0.082998 | 0.07315  | 0.016804  | 0.71721  | 0.109449 | 0.01798  | 0.279264 |
| -5.15E-06 | 0.99991  | -0.07246 | 0.11788  | -0.03913  | 0.39888  | -0.07377 | 0.11138  | -0.09832 |
| 0.030638  | 0.50895  | 0.119688 | 0.00963  | 0.056742  | 0.22099  | 0.140656 | 0.00231  | 0.224142 |

|          |          |          |          |          |          |          |          |          |
|----------|----------|----------|----------|----------|----------|----------|----------|----------|
| 0.086821 | 0.06083  | 0.1668   | 0.00029  | 0.112582 | 0.01493  | 0.159155 | 0.00056  | 0.236111 |
| 0.182322 | 7.41E-05 | 0.244729 | 8.50E-08 | 0.18529  | 5.62E-05 | 0.231969 | 4.00E-07 | 0.370557 |
| 0.006144 | 0.89466  | 0.077727 | 0.0934   | 0.035477 | 0.44436  | 0.097267 | 0.03561  | 0.115228 |
| 0.082773 | 0.07394  | 0.133226 | 0.00392  | 0.081003 | 0.08035  | 0.143729 | 0.00185  | 0.23414  |
| 0.160362 | 0.0005   | 0.1221   | 0.00826  | 0.099414 | 0.03172  | 0.105033 | 0.02321  | 0.163946 |
| 0.058218 | 0.20919  | 0.093522 | 0.04338  | 0.052514 | 0.25739  | 0.103481 | 0.02534  | 0.282567 |
| -0.05939 | 0.20017  | 0.055276 | 0.23317  | 0.017168 | 0.71135  | 0.064474 | 0.16422  | 0.185647 |
| 0.138674 | 0.00267  | 0.127115 | 0.00595  | 0.118763 | 0.01021  | 0.099384 | 0.03177  | 0.301319 |
| -0.00644 | 0.88959  | 0.126679 | 0.00612  | 0.017051 | 0.71324  | 0.167211 | 0.00028  | 0.333639 |
| -0.06315 | 0.17308  | 0.064421 | 0.16457  | -0.00455 | 0.9219   | 0.107984 | 0.01959  | 0.136671 |
| -0.0284  | 0.54042  | 0.08479  | 0.06714  | 0.010414 | 0.8224   | 0.118716 | 0.01024  | 0.143058 |
| 0.003985 | 0.93155  | 0.169451 | 0.00023  | 0.069563 | 0.13334  | 0.191974 | 2.96E-05 | 0.392552 |
| 0.04632  | 0.31788  | 0.149324 | 0.00121  | 0.085459 | 0.06501  | 0.151767 | 0.001    | 0.319699 |
| 0.03167  | 0.49477  | 0.165462 | 0.00033  | 0.076118 | 0.1004   | 0.180383 | 8.86E-05 | 0.434818 |
| 0.055119 | 0.2345   | 0.16381  | 0.00038  | 0.10853  | 0.01898  | 0.160659 | 0.00049  | 0.250154 |
| 0.102913 | 0.02615  | 0.301122 | 3.04E-11 | 0.179431 | 9.67E-05 | 0.296749 | 6.01E-11 | 0.610551 |
| 0.114415 | 0.01336  | 0.225355 | 8.64E-07 | 0.136648 | 0.00309  | 0.234354 | 3.02E-07 | 0.395251 |
| 0.049925 | 0.28163  | 0.152174 | 0.00097  | 0.081807 | 0.07738  | 0.158417 | 0.00059  | 0.269057 |
| 0.020172 | 0.66371  | 0.131801 | 0.00433  | 0.051104 | 0.27041  | 0.163474 | 0.00039  | 0.273564 |
| 0.016587 | 0.72071  | 0.146746 | 0.00147  | 0.064997 | 0.16082  | 0.162118 | 0.00044  | 0.317971 |
| -0.01344 | 0.77201  | 0.158854 | 0.00057  | 0.061554 | 0.18422  | 0.169977 | 0.00022  | 0.324256 |
| 0.063529 | 0.1705   | 0.152245 | 0.00097  | 0.105708 | 0.02233  | 0.139936 | 0.00244  | 0.305134 |
| 0.023137 | 0.61798  | 0.057597 | 0.2141   | 0.000105 | 0.9982   | 0.094119 | 0.04205  | 0.243748 |
| 0.026861 | 0.56258  | 0.152824 | 0.00092  | 0.06302  | 0.17396  | 0.178521 | 0.00011  | 0.258804 |
| -0.05283 | 0.25454  | -0.04726 | 0.3081   | -0.03803 | 0.41227  | -0.0201  | 0.66481  | 0.006576 |
| 0.002067 | 0.96446  | 0.053277 | 0.25053  | 0.043567 | 0.34752  | 0.033747 | 0.46691  | 0.146033 |
| -0.04823 | 0.2983   | 0.111378 | 0.01604  | 0.016457 | 0.72281  | 0.143157 | 0.00193  | 0.232097 |
| 0.026018 | 0.57491  | 0.042559 | 0.3588   | 0.000232 | 0.996    | 0.075874 | 0.1015   | 0.144371 |
| 0.036894 | 0.42637  | 0.212433 | 3.63E-06 | 0.107077 | 0.02065  | 0.22796  | 6.40E-07 | 0.366073 |
| 0.101623 | 0.0281   | 0.073069 | 0.11482  | 0.046368 | 0.31737  | 0.084374 | 0.0685   | 0.168371 |
| 0.015322 | 0.74121  | 0.13538  | 0.00338  | 0.070929 | 0.12587  | 0.145046 | 0.00167  | 0.317086 |
| 0.027887 | 0.54774  | 0.172258 | 0.00018  | 0.094886 | 0.0404   | 0.171947 | 0.00019  | 0.383722 |
| -0.02925 | 0.5284   | 0.116567 | 0.01171  | 0.040729 | 0.37986  | 0.138348 | 0.00273  | 0.253193 |
| -0.02092 | 0.65202  | 0.022891 | 0.62172  | -0.05006 | 0.28028  | 0.071866 | 0.12093  | 0.120444 |
| -0.0406  | 0.38132  | 0.059505 | 0.19928  | 0.020062 | 0.66543  | 0.068913 | 0.13701  | 0.17994  |
| 0.160837 | 0.00048  | 0.260749 | 1.07E-08 | 0.181359 | 8.10E-05 | 0.258336 | 1.48E-08 | 0.414436 |
| 0.000309 | 0.99469  | 0.080606 | 0.08184  | 0.022856 | 0.62225  | 0.089624 | 0.05293  | 0.258107 |
| 0.057342 | 0.21613  | 0.104571 | 0.02382  | 0.10633  | 0.02155  | 0.069836 | 0.13182  | 0.177044 |
| 0.064659 | 0.16301  | 0.22571  | 8.29E-07 | 0.114323 | 0.01343  | 0.246265 | 7.01E-08 | 0.470987 |
| -0.00484 | 0.91692  | 0.006373 | 0.89074  | -0.01867 | 0.6873   | 0.037779 | 0.41535  | 0.105725 |
| -0.01152 | 0.80394  | 0.040829 | 0.37868  | 0.031551 | 0.49639  | 0.027416 | 0.55454  | 0.060853 |
| 0.069119 | 0.13584  | -0.02716 | 0.55822  | -0.00977 | 0.83327  | -0.024   | 0.6049   | 0.001193 |
| 0.020582 | 0.65731  | 0.181013 | 8.36E-05 | 0.087333 | 0.05932  | 0.205763 | 7.37E-06 | 0.33094  |
| 0.032131 | 0.48851  | 0.181967 | 7.66E-05 | 0.091408 | 0.04836  | 0.207906 | 5.89E-06 | 0.331693 |
| 0.055436 | 0.23181  | 0.203085 | 9.73E-06 | 0.082067 | 0.07644  | 0.239997 | 1.53E-07 | 0.386285 |



|          |          |          |          |          |          |          |          |          |
|----------|----------|----------|----------|----------|----------|----------|----------|----------|
| 0.006518 | 0.88828  | 0.090638 | 0.05029  | 0.033432 | 0.47108  | 0.100346 | 0.03015  | 0.165078 |
| 0.050857 | 0.27273  | 0.190804 | 3.32E-05 | 0.09331  | 0.04386  | 0.215534 | 2.59E-06 | 0.429256 |
| -0.06425 | 0.16571  | -0.03825 | 0.40959  | -0.04461 | 0.33605  | -0.02793 | 0.54708  | 0.060711 |
| 0.181299 | 8.14E-05 | 0.368949 | 1.66E-16 | 0.2228   | 1.16E-06 | 0.38062  | 1.51E-17 | 0.662467 |
| 0.025245 | 0.58633  | 0.201846 | 1.10E-05 | 0.075318 | 0.10404  | 0.245971 | 7.28E-08 | 0.396407 |
| 0.033449 | 0.47085  | 0.180847 | 8.49E-05 | 0.088467 | 0.05608  | 0.195155 | 2.17E-05 | 0.384624 |
| 0.116571 | 0.0117   | 0.282794 | 4.90E-10 | 0.164101 | 0.00037  | 0.289433 | 1.83E-10 | 0.631441 |
| -0.02228 | 0.63107  | 0.150659 | 0.00109  | 0.047795 | 0.30269  | 0.175432 | 0.00014  | 0.387559 |
| -0.02379 | 0.60805  | 0.040074 | 0.38757  | -0.02955 | 0.52405  | 0.08092  | 0.08066  | 0.153505 |
| 0.119839 | 0.00954  | 0.338148 | 5.90E-14 | 0.189395 | 3.80E-05 | 0.364686 | 3.89E-16 | 0.586795 |
| 0.014605 | 0.75292  | -0.02314 | 0.61799  | -0.03284 | 0.4789   | -0.01382 | 0.76587  | -0.0922  |
| 0.041905 | 0.36624  | -0.05674 | 0.22102  | -0.01769 | 0.70305  | -0.05928 | 0.20101  | -0.15637 |
| 0.027089 | 0.55926  | -0.02534 | 0.58495  | 0.013525 | 0.77066  | -0.04454 | 0.33686  | -0.04558 |
| -0.06661 | 0.15066  | -0.11351 | 0.01411  | -0.0617  | 0.18319  | -0.11466 | 0.01316  | -0.129   |
| -0.01524 | 0.74261  | -0.11835 | 0.01048  | -0.08223 | 0.07584  | -0.12662 | 0.00615  | -0.15083 |
| -0.05053 | 0.2758   | -0.07211 | 0.11965  | -0.07743 | 0.09467  | -0.04795 | 0.30117  | -0.14935 |
| 0.022464 | 0.62824  | -0.00963 | 0.83552  | -0.01536 | 0.74064  | 0.001556 | 0.97324  | 0.068822 |
| -0.0517  | 0.26487  | -0.0854  | 0.06519  | -0.07611 | 0.10045  | -0.06689 | 0.14897  | -0.17016 |
| 0.017443 | 0.70695  | -0.02335 | 0.61478  | -0.02378 | 0.60831  | -0.02866 | 0.53663  | 0.008637 |
| 0.017504 | 0.70596  | -0.1024  | 0.02692  | -0.03382 | 0.46598  | -0.12976 | 0.00498  | -0.21083 |
| -0.04115 | 0.37498  | -0.20717 | 6.36E-06 | -0.16032 | 0.00051  | -0.18636 | 5.08E-05 | -0.29139 |
| 0.015541 | 0.73765  | -0.04675 | 0.31339  | 0.010863 | 0.81489  | -0.08094 | 0.08058  | -0.1233  |
| 0.012496 | 0.78768  | -0.04273 | 0.35682  | 0.005193 | 0.91088  | -0.07218 | 0.11929  | -0.07122 |
| -0.05344 | 0.24907  | 0.036422 | 0.43231  | 0.012866 | 0.78154  | 0.039383 | 0.39582  | 0.102292 |
| -0.00047 | 0.99193  | -0.07476 | 0.10662  | -0.05979 | 0.19717  | -0.07437 | 0.10846  | -0.14709 |
| -0.063   | 0.17411  | -0.0856  | 0.06458  | -0.10022 | 0.03036  | -0.04653 | 0.3157   | -0.11118 |
| 0.00349  | 0.94005  | -0.08705 | 0.06014  | -0.05514 | 0.23436  | -0.08849 | 0.05603  | -0.08565 |
| -0.06533 | 0.15871  | -0.00538 | 0.90776  | -0.04007 | 0.38765  | 0.008535 | 0.85405  | 0.013815 |
| -0.06289 | 0.17486  | -0.02469 | 0.59453  | -0.05073 | 0.27393  | -0.00529 | 0.90917  | -0.00464 |
| -0.00722 | 0.87629  | -0.04099 | 0.37676  | -0.05557 | 0.23067  | -0.02915 | 0.5298   | 0.040329 |
| 0.074209 | 0.10925  | -0.01704 | 0.71343  | -0.02253 | 0.62724  | -0.01648 | 0.7224   | 0.035004 |
| 0.03224  | 0.48704  | 0.023215 | 0.61679  | 0.008801 | 0.84955  | 0.02471  | 0.59428  | 0.097433 |
| -0.09207 | 0.04675  | -0.04095 | 0.37725  | -0.06476 | 0.16237  | -0.00833 | 0.8575   | -0.01145 |
| 0.022541 | 0.62706  | -0.10686 | 0.0209   | -0.04903 | 0.29038  | -0.1234  | 0.00759  | -0.21181 |
| -0.01787 | 0.70005  | -0.08213 | 0.07622  | -0.07154 | 0.1226   | -0.0739  | 0.11074  | -0.08919 |
| -0.03674 | 0.4283   | -0.1002  | 0.03039  | -0.08128 | 0.07932  | -0.09069 | 0.05016  | -0.1402  |
| -0.07937 | 0.08667  | -0.10476 | 0.02357  | -0.09272 | 0.04522  | -0.09714 | 0.03586  | -0.15021 |
| 0.072046 | 0.12     | -0.04571 | 0.32435  | 0.024159 | 0.60254  | -0.07742 | 0.0947   | -0.12129 |
| -0.02059 | 0.65718  | -0.014   | 0.76277  | -0.02152 | 0.64273  | -0.01887 | 0.68427  | -0.03805 |
| -0.03391 | 0.46469  | -0.09322 | 0.04407  | -0.04801 | 0.30053  | -0.10087 | 0.0293   | -0.21207 |
| 0.001201 | 0.97936  | -0.08094 | 0.08059  | -0.07223 | 0.11907  | -0.07672 | 0.09772  | -0.06896 |
| 0.080631 | 0.08175  | -0.0316  | 0.49572  | 0.007219 | 0.87635  | -0.03182 | 0.49279  | -0.09467 |
| 0.027474 | 0.55369  | -0.0323  | 0.48627  | -0.0014  | 0.97597  | -0.05112 | 0.27023  | -0.06112 |
| 0.032274 | 0.48658  | -0.05371 | 0.24671  | 0.007998 | 0.86314  | -0.08265 | 0.07436  | -0.15403 |
| -0.0563  | 0.22462  | -0.02139 | 0.64481  | -0.02875 | 0.53545  | -0.01512 | 0.74449  | -0.03222 |

|           |         |          |         |          |         |          |         |          |
|-----------|---------|----------|---------|----------|---------|----------|---------|----------|
| 0.055692  | 0.22966 | -0.07475 | 0.10666 | -0.0336  | 0.4688  | -0.08956 | 0.05309 | -0.10639 |
| -0.01522  | 0.74285 | -0.08439 | 0.06845 | -0.06481 | 0.16204 | -0.0766  | 0.09827 | -0.17903 |
| 0.069087  | 0.13602 | -0.0326  | 0.48216 | 0.030901 | 0.50532 | -0.07537 | 0.10379 | -0.0773  |
| -0.00946  | 0.83836 | -0.12192 | 0.00835 | -0.05188 | 0.26315 | -0.13942 | 0.00253 | -0.19277 |
| 0.043758  | 0.34541 | 0.044625 | 0.33593 | 0.073976 | 0.11037 | 0.00603  | 0.89659 | 0.030584 |
| 0.007827  | 0.86604 | 0.05647  | 0.22321 | 0.021401 | 0.64459 | 0.067944 | 0.14264 | 0.083118 |
| 0.022317  | 0.63048 | -0.00291 | 0.94999 | 0.002223 | 0.96179 | -0.00752 | 0.87117 | -0.00956 |
| -0.00148  | 0.97462 | -0.09538 | 0.03936 | -0.04136 | 0.37252 | -0.10338 | 0.02549 | -0.17655 |
| 0.008671  | 0.85176 | -0.00268 | 0.9539  | -0.00398 | 0.93158 | -0.00257 | 0.95579 | -0.01866 |
| -0.03269  | 0.48103 | -0.02764 | 0.55131 | -0.03126 | 0.50039 | -0.02697 | 0.56095 | -0.0003  |
| -0.0863   | 0.0624  | -0.17072 | 0.00021 | -0.1557  | 0.00073 | -0.13013 | 0.00486 | -0.23732 |
| 0.024498  | 0.59745 | -0.04435 | 0.33886 | -0.02028 | 0.66201 | -0.05353 | 0.24832 | -0.09888 |
| 0.061873  | 0.18195 | -0.03986 | 0.39017 | 0.000273 | 0.9953  | -0.05839 | 0.20788 | -0.10344 |
| -0.01984  | 0.66898 | -0.03067 | 0.50845 | -0.04176 | 0.36795 | -0.01935 | 0.67668 | -0.07546 |
| -0.02173  | 0.63953 | -0.04138 | 0.37229 | -0.02101 | 0.6507  | -0.04438 | 0.33864 | -0.10272 |
| 0.054729  | 0.23784 | -0.03669 | 0.42891 | -0.00125 | 0.97856 | -0.05261 | 0.25652 | -0.08728 |
| -0.05444  | 0.24031 | -0.03428 | 0.45995 | -0.03474 | 0.45384 | -0.03266 | 0.48139 | -0.02066 |
| -3.19E-05 | 0.99945 | -0.0322  | 0.48753 | -0.03805 | 0.41201 | -0.01111 | 0.81073 | -0.09348 |
| 0.02205   | 0.63458 | 0.046792 | 0.31296 | 0.030953 | 0.5046  | 0.029049 | 0.53119 | 0.078214 |
| 0.028346  | 0.54117 | -0.07529 | 0.10415 | -0.01778 | 0.70148 | -0.10464 | 0.02374 | -0.13734 |
| 0.017578  | 0.70478 | 0.033821 | 0.46592 | 0.04708  | 0.30999 | 0.013254 | 0.77514 | 0.018914 |
| -0.05774  | 0.21293 | -0.04685 | 0.31233 | -0.05984 | 0.19672 | -0.03685 | 0.42697 | -0.09666 |
| 0.03304   | 0.47629 | 0.017223 | 0.71047 | 0.013043 | 0.77863 | 0.003069 | 0.94727 | 0.038457 |
| -0.0127   | 0.78432 | -0.06162 | 0.18372 | -0.03332 | 0.47259 | -0.05889 | 0.20396 | -0.07617 |
| -0.01823  | 0.69431 | -0.14971 | 0.00117 | -0.08636 | 0.06222 | -0.14724 | 0.00142 | -0.26922 |
| 0.009262  | 0.84177 | -0.08657 | 0.06158 | -0.06134 | 0.18577 | -0.08468 | 0.06749 | -0.16277 |
| 0.054199  | 0.24241 | -0.0185  | 0.69008 | -0.01291 | 0.78083 | -0.0196  | 0.67261 | -0.06273 |
| 0.024362  | 0.59949 | 0.06629  | 0.15264 | 0.036838 | 0.42707 | 0.05872  | 0.20528 | 0.13617  |
| 0.011055  | 0.81167 | -0.08939 | 0.05354 | -0.01237 | 0.78979 | -0.116   | 0.01213 | -0.23724 |
| -0.04363  | 0.34688 | -0.10501 | 0.02324 | -0.05948 | 0.1995  | -0.10813 | 0.01942 | -0.18984 |
| 0.000735  | 0.98737 | -0.09494 | 0.04028 | -0.03232 | 0.48602 | -0.1134  | 0.01421 | -0.22663 |
| 0.009423  | 0.83906 | -0.01698 | 0.7143  | -0.01329 | 0.77452 | -0.00711 | 0.87817 | -0.03614 |
| -0.02859  | 0.5377  | -0.11203 | 0.01543 | -0.05475 | 0.23767 | -0.12082 | 0.00896 | -0.22031 |
| -0.03105  | 0.5033  | -0.10162 | 0.02811 | -0.04114 | 0.37509 | -0.11598 | 0.01214 | -0.16203 |
| 0.002671  | 0.95409 | -0.03129 | 0.49994 | -0.02694 | 0.56147 | -0.02546 | 0.58318 | -0.05481 |
| -0.08926  | 0.05391 | -0.06858 | 0.13893 | -0.06361 | 0.16998 | -0.06516 | 0.15974 | -0.06418 |
| 0.019522  | 0.67392 | -0.03773 | 0.41591 | -0.02073 | 0.65505 | -0.04361 | 0.34704 | -0.10178 |
| 0.056603  | 0.22213 | -0.068   | 0.14232 | -0.00161 | 0.97227 | -0.09908 | 0.03229 | -0.13256 |
| -0.00744  | 0.87253 | 0.000533 | 0.99084 | -0.00476 | 0.91835 | -0.00074 | 0.9873  | -0.07786 |
| -0.02488  | 0.59179 | -0.15975 | 0.00053 | -0.09151 | 0.0481  | -0.16769 | 0.00027 | -0.27792 |
| 0.058782  | 0.2048  | -0.01346 | 0.77168 | 0.005509 | 0.90548 | -0.0337  | 0.46746 | -0.02804 |
| -0.00177  | 0.96962 | 0.062592 | 0.17691 | 0.016952 | 0.71482 | 0.076549 | 0.09849 | 0.138366 |
| -0.05575  | 0.22916 | 0.052713 | 0.25559 | -0.01103 | 0.81209 | 0.080234 | 0.08327 | 0.163812 |
| -0.08818  | 0.05688 | -0.0672  | 0.1471  | -0.0801  | 0.0838  | -0.04638 | 0.31724 | -0.05863 |
| 0.00156   | 0.97318 | 0.041521 | 0.37065 | 0.037595 | 0.41762 | 0.013916 | 0.76423 | 0.055574 |

|          |         |          |          |          |         |          |          |          |
|----------|---------|----------|----------|----------|---------|----------|----------|----------|
| -0.05069 | 0.27432 | -0.00292 | 0.94978  | -0.01997 | 0.6668  | 0.002851 | 0.95101  | -0.02139 |
| 0.041464 | 0.37131 | -0.03227 | 0.48669  | -0.01087 | 0.8147  | -0.03791 | 0.41368  | -0.11058 |
| 0.017523 | 0.70567 | 0.114824 | 0.01303  | 0.05616  | 0.22577 | 0.124475 | 0.00708  | 0.223394 |
| 0.030921 | 0.50504 | -0.01697 | 0.7145   | -0.00231 | 0.9603  | -0.0305  | 0.51083  | -0.08899 |
| 0.03535  | 0.446   | 0.008178 | 0.86009  | 0.006785 | 0.88374 | 0.004861 | 0.91657  | -0.01795 |
| -0.01776 | 0.70192 | -0.04691 | 0.31177  | -0.04996 | 0.2813  | -0.04029 | 0.38506  | -0.08605 |
| 0.007454 | 0.87237 | 0.03554  | 0.44356  | -0.01019 | 0.82614 | 0.048565 | 0.29495  | 0.142918 |
| -0.01945 | 0.6751  | -0.03432 | 0.45933  | -0.02224 | 0.6316  | -0.04517 | 0.3301   | -0.12833 |
| 0.020731 | 0.65498 | -0.03144 | 0.4979   | -0.01066 | 0.81827 | -0.03286 | 0.47875  | -0.11332 |
| -0.0894  | 0.05353 | -0.03914 | 0.39868  | -0.05683 | 0.22024 | -0.02053 | 0.65815  | -0.03477 |
| -0.07647 | 0.09886 | -0.13093 | 0.0046   | -0.08481 | 0.06709 | -0.13666 | 0.00308  | -0.21058 |
| -0.02349 | 0.6126  | -0.04721 | 0.30861  | -0.05321 | 0.25117 | -0.03592 | 0.43875  | -0.00781 |
| 0.005709 | 0.90208 | -0.06392 | 0.1679   | -0.01637 | 0.72424 | -0.06562 | 0.15686  | -0.13119 |
| -0.0007  | 0.98799 | -0.03345 | 0.47081  | -0.02828 | 0.54212 | -0.02555 | 0.58185  | -0.04345 |
| -0.08063 | 0.08174 | -0.05119 | 0.26959  | -0.0491  | 0.28969 | -0.0539  | 0.24507  | -0.1357  |
| -0.01524 | 0.7426  | -0.03296 | 0.47737  | -0.0304  | 0.51228 | -0.01947 | 0.67466  | -0.1022  |
| -0.011   | 0.8126  | -0.06726 | 0.1467   | -0.01875 | 0.68614 | -0.10021 | 0.03038  | -0.16661 |
| 0.006436 | 0.88968 | -0.0002  | 0.99656  | 0.016864 | 0.71625 | -0.0279  | 0.54756  | -0.02079 |
| -0.0154  | 0.73987 | -0.07819 | 0.09146  | -0.05252 | 0.25731 | -0.08006 | 0.08396  | -0.1418  |
| 0.038539 | 0.40602 | 0.00438  | 0.92479  | 0.009998 | 0.82939 | -0.01877 | 0.6858   | -0.06096 |
| -0.04014 | 0.38681 | -0.00307 | 0.94719  | -0.03627 | 0.43419 | 0.013781 | 0.76645  | 0.048527 |
| -0.04305 | 0.35325 | -0.08185 | 0.07722  | -0.10004 | 0.03066 | -0.0542  | 0.24244  | -0.06501 |
| 0.029866 | 0.51968 | -0.00364 | 0.9375   | -0.0014  | 0.97599 | -0.00294 | 0.94945  | -0.00809 |
| -0.03872 | 0.40381 | -0.08973 | 0.05265  | -0.0506  | 0.27514 | -0.09188 | 0.04721  | -0.14932 |
| 0.061941 | 0.18146 | 0.023411 | 0.61383  | -0.00709 | 0.87861 | 0.050831 | 0.27297  | 0.018698 |
| 0.043931 | 0.3435  | -0.03838 | 0.408    | 0.005787 | 0.90074 | -0.05426 | 0.24185  | -0.09489 |
| 0.04216  | 0.36333 | -0.03006 | 0.51696  | 0.044463 | 0.33769 | -0.08286 | 0.07364  | -0.14664 |
| 0.004071 | 0.93009 | -0.08281 | 0.0738   | -0.07103 | 0.12532 | -0.07213 | 0.11955  | -0.06159 |
| 0.040278 | 0.38515 | -0.02342 | 0.6137   | -0.02293 | 0.6212  | -0.0193  | 0.67743  | -0.05671 |
| -0.09511 | 0.03992 | -0.01696 | 0.71474  | -0.07994 | 0.08439 | 0.025921 | 0.57633  | -0.00394 |
| -0.05472 | 0.23788 | -0.10971 | 0.01771  | -0.0845  | 0.06809 | -0.10723 | 0.02046  | -0.17981 |
| 0.005555 | 0.90469 | -0.01548 | 0.73865  | -0.05015 | 0.27947 | 0.004272 | 0.92665  | 0.058109 |
| -0.01075 | 0.81685 | -0.05914 | 0.20206  | -0.01517 | 0.74362 | -0.06704 | 0.14803  | -0.11125 |
| 0.044098 | 0.34167 | 0.027675 | 0.5508   | 0.00184  | 0.96838 | 0.037572 | 0.41792  | -0.04465 |
| -0.05688 | 0.21988 | -0.07743 | 0.09467  | -0.06333 | 0.17182 | -0.07957 | 0.08586  | -0.07859 |
| 0.048365 | 0.29695 | 0.012797 | 0.78268  | 0.009163 | 0.84345 | 0.009231 | 0.8423   | 0.013576 |
| 0.024498 | 0.59746 | -0.01384 | 0.76545  | -0.01677 | 0.71768 | -0.00567 | 0.90266  | -0.12981 |
| -0.06698 | 0.1484  | -0.10447 | 0.02397  | -0.06783 | 0.14334 | -0.11877 | 0.0102   | -0.19969 |
| 0.176777 | 0.00012 | 0.092422 | 0.04591  | 0.125488 | 0.00662 | 0.050051 | 0.28042  | 0.052487 |
| -0.06874 | 0.13802 | -0.12749 | 0.0058   | -0.09655 | 0.037   | -0.11786 | 0.0108   | -0.19661 |
| -0.078   | 0.09223 | -0.11602 | 0.01211  | -0.09425 | 0.04178 | -0.10467 | 0.02369  | -0.1722  |
| -0.05918 | 0.20173 | -0.08943 | 0.05346  | -0.06858 | 0.13891 | -0.09453 | 0.04117  | -0.15823 |
| -0.01338 | 0.77299 | -0.13341 | 0.00387  | -0.0639  | 0.168   | -0.14955 | 0.00119  | -0.2918  |
| -0.00201 | 0.96537 | -0.08732 | 0.05935  | -0.0172  | 0.71081 | -0.10476 | 0.02357  | -0.14463 |
| -0.03818 | 0.41038 | -0.19385 | 2.47E-05 | -0.10247 | 0.02681 | -0.2121  | 3.77E-06 | -0.34703 |

|          |         |          |          |          |         |          |          |          |
|----------|---------|----------|----------|----------|---------|----------|----------|----------|
| -0.01181 | 0.79903 | -0.08731 | 0.05938  | -0.0023  | 0.96038 | -0.14069 | 0.00231  | -0.19691 |
| 0.005579 | 0.90429 | 0.008404 | 0.85626  | 0.001961 | 0.96629 | -0.00192 | 0.96701  | -0.03258 |
| -0.10675 | 0.02103 | -0.20558 | 7.51E-06 | -0.13046 | 0.00475 | -0.20512 | 7.88E-06 | -0.38477 |
| -0.01035 | 0.82355 | -0.07295 | 0.11541  | -0.04757 | 0.30496 | -0.08339 | 0.0718   | -0.17589 |
| -0.02641 | 0.56919 | -0.09999 | 0.03074  | -0.02426 | 0.60106 | -0.13883 | 0.00264  | -0.18779 |
| -0.1065  | 0.02134 | -0.18953 | 3.75E-05 | -0.14453 | 0.00174 | -0.18357 | 6.60E-05 | -0.27163 |
| -0.00327 | 0.94387 | -0.06472 | 0.16263  | -0.04965 | 0.28433 | -0.05835 | 0.20817  | -0.13207 |
| 0.008751 | 0.85041 | -0.05715 | 0.21766  | -0.02413 | 0.60294 | -0.06865 | 0.1385   | -0.1158  |
| 0.041905 | 0.36624 | 0.012969 | 0.77985  | 0.025514 | 0.58234 | 0.012685 | 0.78455  | -0.0213  |
| 0.006647 | 0.88609 | 0.013541 | 0.7704   | -0.01477 | 0.75019 | 0.013995 | 0.76292  | 0.017933 |
| -0.03846 | 0.40699 | -0.10929 | 0.01815  | -0.07028 | 0.12938 | -0.12659 | 0.00616  | -0.15652 |
| -0.08699 | 0.06031 | -0.09545 | 0.03922  | -0.08578 | 0.06401 | -0.08669 | 0.06121  | -0.163   |
| -0.01216 | 0.79326 | -0.09122 | 0.04883  | -0.03381 | 0.46603 | -0.10942 | 0.01802  | -0.20866 |
| 0.047868 | 0.30195 | -0.00468 | 0.91958  | 0.027473 | 0.5537  | -0.05111 | 0.27037  | 0.012228 |
| -0.07062 | 0.12751 | -0.1018  | 0.02783  | -0.0668  | 0.1495  | -0.10014 | 0.03049  | -0.25203 |
| 0.007218 | 0.87637 | 0.076097 | 0.1005   | 0.026631 | 0.56593 | 0.072893 | 0.11569  | 0.096475 |
| 0.058736 | 0.20516 | 0.000388 | 0.99333  | 0.010452 | 0.82177 | -0.02442 | 0.59868  | -0.07882 |
| 0.016537 | 0.72152 | -0.03751 | 0.41862  | -0.02203 | 0.63486 | -0.04537 | 0.32789  | -0.01555 |
| 0.021226 | 0.64729 | -0.15206 | 0.00098  | -0.09626 | 0.03758 | -0.14441 | 0.00176  | -0.30612 |
| 0.069435 | 0.13406 | -0.05506 | 0.23502  | -0.0507  | 0.2742  | -0.03611 | 0.43632  | -0.11713 |
| 0.035708 | 0.4414  | -0.07504 | 0.10532  | -0.03799 | 0.41276 | -0.07805 | 0.09204  | -0.12205 |
| 0.035792 | 0.44032 | 0.133456 | 0.00386  | 0.083795 | 0.07043 | 0.135595 | 0.00333  | 0.310813 |
| -0.07452 | 0.10778 | 0.018713 | 0.68669  | -0.0361  | 0.43646 | 0.052563 | 0.25695  | 0.230978 |
| 0.003562 | 0.93881 | 0.0782   | 0.09142  | 0.031895 | 0.49171 | 0.092123 | 0.04663  | 0.201902 |
| -0.04857 | 0.29493 | 0.062339 | 0.17867  | -0.01294 | 0.78031 | 0.106725 | 0.02107  | 0.273614 |
| 0.065804 | 0.15568 | 0.176157 | 0.00013  | 0.117401 | 0.01112 | 0.15511  | 0.00077  | 0.381841 |
| -0.04408 | 0.34188 | 0.095382 | 0.03936  | 0.03899  | 0.40055 | 0.098565 | 0.03321  | 0.286953 |
| 0.127583 | 0.00576 | 0.127285 | 0.00588  | 0.139755 | 0.00247 | 0.086894 | 0.06061  | 0.204203 |
| -0.10375 | 0.02495 | 0.009611 | 0.8359   | -0.01961 | 0.67248 | 0.032015 | 0.49009  | 0.114789 |
| -0.01206 | 0.79492 | 0.097289 | 0.03557  | 0.054403 | 0.24065 | 0.10091  | 0.02923  | 0.209071 |
| -0.02004 | 0.66577 | 0.130584 | 0.00471  | 0.056498 | 0.22298 | 0.144901 | 0.00169  | 0.290306 |
| 0.011877 | 0.79796 | 0.115488 | 0.01251  | 0.080721 | 0.08141 | 0.102803 | 0.02632  | 0.281822 |
| -0.06564 | 0.15671 | 0.088961 | 0.05472  | 0.023151 | 0.61776 | 0.098157 | 0.03395  | 0.242032 |
| -0.00995 | 0.83025 | 0.073472 | 0.11282  | 0.059074 | 0.20256 | 0.046037 | 0.32084  | 0.183243 |
| 0.020701 | 0.65545 | 0.148927 | 0.00125  | 0.10575  | 0.02228 | 0.117123 | 0.01131  | 0.324038 |
| -0.00478 | 0.91802 | 0.208586 | 5.48E-06 | 0.078706 | 0.08933 | 0.247953 | 5.67E-08 | 0.525993 |
| 0.025975 | 0.57554 | 0.090554 | 0.0505   | 0.074095 | 0.1098  | 0.076458 | 0.09889  | 0.190909 |
| 0.018997 | 0.6822  | 0.236334 | 2.38E-07 | 0.115799 | 0.01227 | 0.257394 | 1.67E-08 | 0.498413 |
| 0.057195 | 0.21732 | 0.073334 | 0.1135   | 0.086683 | 0.06124 | 0.044076 | 0.34191  | 0.096803 |
| 0.037017 | 0.42482 | 0.083282 | 0.07217  | 0.039908 | 0.38954 | 0.086659 | 0.06131  | 0.19101  |
| -0.06606 | 0.15407 | -0.01555 | 0.73745  | -0.03048 | 0.51113 | -0.00852 | 0.85437  | 0.051471 |
| 0.047833 | 0.30231 | 0.185102 | 5.72E-05 | 0.095513 | 0.03909 | 0.193605 | 2.53E-05 | 0.396955 |
| 0.098394 | 0.03352 | 0.172604 | 0.00018  | 0.131449 | 0.00444 | 0.154788 | 0.00079  | 0.281312 |
| 0.041847 | 0.3669  | 0.089752 | 0.05259  | 0.065429 | 0.15805 | 0.082593 | 0.07457  | 0.16107  |
| -0.12104 | 0.00884 | -0.05524 | 0.23343  | -0.08165 | 0.07797 | -0.01775 | 0.702    | 0.062903 |

|          |          |          |          |          |          |          |          |          |
|----------|----------|----------|----------|----------|----------|----------|----------|----------|
| 0.102319 | 0.02704  | 0.157467 | 0.00064  | 0.126642 | 0.00614  | 0.157053 | 0.00066  | 0.284483 |
| -0.09187 | 0.04723  | 0.040161 | 0.38654  | -0.00916 | 0.84348  | 0.052302 | 0.25932  | 0.204257 |
| 0.032353 | 0.48551  | 0.153209 | 0.00089  | 0.098253 | 0.03378  | 0.144897 | 0.00169  | 0.292858 |
| 0.142391 | 0.00204  | 0.158212 | 0.0006   | 0.158453 | 0.00059  | 0.108139 | 0.01941  | 0.287178 |
| 0.142369 | 0.00204  | 0.150319 | 0.00112  | 0.121459 | 0.0086   | 0.146804 | 0.00147  | 0.273148 |
| 0.084354 | 0.06857  | 0.085801 | 0.06394  | 0.113516 | 0.01411  | 0.04895  | 0.29114  | 0.119017 |
| 0.063778 | 0.16883  | 0.144984 | 0.00168  | 0.104567 | 0.02383  | 0.12925  | 0.00515  | 0.288601 |
| 0.032451 | 0.48419  | 0.10867  | 0.01882  | 0.058369 | 0.20801  | 0.125303 | 0.0067   | 0.228803 |
| -0.03488 | 0.4521   | 0.079671 | 0.08546  | -0.00672 | 0.88485  | 0.128126 | 0.00556  | 0.268923 |
| 0.028036 | 0.5456   | 0.138262 | 0.00275  | 0.109548 | 0.01788  | 0.109423 | 0.01801  | 0.242535 |
| 0.068543 | 0.13914  | 0.12123  | 0.00873  | 0.104124 | 0.02443  | 0.093045 | 0.04446  | 0.264762 |
| 0.07357  | 0.11234  | 0.114068 | 0.01365  | 0.074469 | 0.10801  | 0.118896 | 0.01012  | 0.167932 |
| 0.076666 | 0.09797  | 0.165581 | 0.00033  | 0.094465 | 0.0413   | 0.186641 | 4.94E-05 | 0.313254 |
| 0.057541 | 0.21454  | 0.163543 | 0.00039  | 0.120135 | 0.00936  | 0.135043 | 0.00346  | 0.320801 |
| 0.037524 | 0.41851  | 0.135117 | 0.00344  | 0.092744 | 0.04516  | 0.1247   | 0.00697  | 0.283921 |
| -0.04229 | 0.3619   | 0.073038 | 0.11497  | 0.022894 | 0.62167  | 0.07713  | 0.09595  | 0.195118 |
| -0.04568 | 0.32464  | 0.028831 | 0.53426  | -0.03395 | 0.46417  | 0.063142 | 0.17313  | 0.207852 |
| 0.138248 | 0.00275  | 0.186156 | 5.18E-05 | 0.144005 | 0.00181  | 0.157062 | 0.00066  | 0.287255 |
| -0.06054 | 0.19154  | 0.035558 | 0.44332  | 0.001166 | 0.97994  | 0.028226 | 0.54289  | 0.136777 |
| 0.035491 | 0.44418  | 0.135321 | 0.00339  | 0.092978 | 0.04462  | 0.133605 | 0.00382  | 0.206299 |
| 0.022415 | 0.62898  | 0.106117 | 0.02182  | 0.042129 | 0.36367  | 0.118428 | 0.01042  | 0.272611 |
| 0.216012 | 2.46E-06 | 0.229855 | 5.13E-07 | 0.236597 | 2.31E-07 | 0.166982 | 0.00029  | 0.342036 |
| 0.037965 | 0.41305  | 0.154765 | 0.00079  | 0.119785 | 0.00957  | 0.130544 | 0.00472  | 0.214217 |
| 0.029106 | 0.53037  | 0.105665 | 0.02239  | 0.04637  | 0.31735  | 0.126837 | 0.00606  | 0.232449 |
| 0.019644 | 0.67199  | -0.02519 | 0.58721  | 0.028123 | 0.54435  | -0.0677  | 0.14411  | 0.007633 |
| 0.000726 | 0.98751  | 0.113875 | 0.01381  | 0.060862 | 0.1892   | 0.11697  | 0.01142  | 0.142001 |
| -0.09313 | 0.04427  | -0.04885 | 0.29209  | -0.0464  | 0.31703  | -0.05691 | 0.21964  | -0.06827 |
| -0.02763 | 0.55148  | 0.026815 | 0.56325  | -0.00863 | 0.8525   | 0.038301 | 0.40893  | 0.051764 |
| -0.05673 | 0.22112  | 0.010668 | 0.81815  | -0.00668 | 0.88557  | 0.007653 | 0.86898  | 0.037085 |
| -0.01745 | 0.70688  | 0.014975 | 0.74688  | 0.003152 | 0.94584  | 0.000296 | 0.99491  | 0.102967 |
| -0.12691 | 0.00603  | -0.07968 | 0.08544  | -0.08055 | 0.08207  | -0.06135 | 0.18566  | -0.08849 |
| -0.08951 | 0.05324  | 0.09444  | 0.04136  | 0.000384 | 0.99339  | 0.133371 | 0.00389  | 0.256231 |
| -0.05037 | 0.27734  | 0.02438  | 0.59922  | 0.015716 | 0.73481  | -0.00358 | 0.93849  | 0.03812  |
| -0.05812 | 0.20993  | 0.079157 | 0.08751  | 0.002625 | 0.95489  | 0.105103 | 0.02312  | 0.184258 |
| -0.03865 | 0.40464  | 0.031765 | 0.49348  | 0.017171 | 0.7113   | 0.005911 | 0.89863  | 0.049352 |
| -0.08393 | 0.06998  | 0.018236 | 0.69428  | -0.03032 | 0.51339  | 0.040148 | 0.38669  | 0.087422 |
| -0.08064 | 0.08172  | 0.006751 | 0.88432  | -0.04062 | 0.38116  | 0.020039 | 0.6658   | -0.00974 |
| -0.01017 | 0.82644  | 0.067449 | 0.14558  | 0.025733 | 0.57911  | 0.081208 | 0.07958  | 0.132154 |
| -0.07049 | 0.12824  | 0.051937 | 0.26266  | 0.013108 | 0.77755  | 0.051844 | 0.26353  | 0.049245 |
| -0.03435 | 0.45904  | 0.023666 | 0.60997  | -0.03382 | 0.46596  | 0.048954 | 0.29111  | 0.111013 |
| 0.010298 | 0.82436  | 0.11052  | 0.01688  | 0.03209  | 0.48907  | 0.134204 | 0.00367  | 0.179484 |
| -0.00828 | 0.85843  | -0.00962 | 0.83582  | -0.01682 | 0.71697  | -0.00888 | 0.84816  | 0.010562 |
| -0.05966 | 0.19811  | 0.009318 | 0.84083  | 0.009167 | 0.84339  | -0.01133 | 0.80715  | 0.10534  |
| 0.00117  | 0.97987  | 0.104189 | 0.02435  | 0.040507 | 0.38246  | 0.104844 | 0.02346  | 0.221426 |
| -0.01398 | 0.76318  | -0.14613 | 0.00154  | -0.0873  | 0.05941  | -0.12599 | 0.00641  | -0.28078 |

|          |         |          |         |          |         |          |          |          |
|----------|---------|----------|---------|----------|---------|----------|----------|----------|
| -0.03451 | 0.45694 | -0.02959 | 0.52363 | -0.03117 | 0.50168 | -0.04376 | 0.34534  | 0.012233 |
| 0.003228 | 0.94454 | 0.044536 | 0.33689 | 0.008692 | 0.8514  | 0.054461 | 0.24015  | 0.142667 |
| -0.03917 | 0.39836 | 0.083725 | 0.07066 | 0.01544  | 0.7393  | 0.101412 | 0.02843  | 0.224802 |
| -0.1219  | 0.00836 | -0.01553 | 0.73788 | -0.09172 | 0.0476  | 0.047314 | 0.30759  | 0.038135 |
| -0.12574 | 0.00651 | -0.03857 | 0.40564 | -0.07532 | 0.10404 | -0.02262 | 0.62587  | -0.01155 |
| -0.09337 | 0.04373 | -0.0088  | 0.84954 | -0.03747 | 0.41922 | -0.0039  | 0.93296  | 0.012428 |
| 0.024345 | 0.59974 | 0.141173 | 0.00223 | 0.092447 | 0.04585 | 0.134347 | 0.00363  | 0.202107 |
| -0.03991 | 0.38949 | 0.057738 | 0.21298 | 0.00122  | 0.97903 | 0.070957 | 0.12572  | 0.158576 |
| -0.09267 | 0.04534 | -0.045   | 0.3319  | -0.02677 | 0.56392 | -0.06463 | 0.1632   | -0.01715 |
| -0.00769 | 0.86841 | 0.086639 | 0.06137 | 0.035682 | 0.44173 | 0.106577 | 0.02125  | 0.123121 |
| -0.04908 | 0.28986 | -0.01491 | 0.74787 | -0.02411 | 0.60332 | -0.00111 | 0.98084  | -0.04813 |
| -0.04651 | 0.31592 | 0.072618 | 0.11708 | 0.00235  | 0.9596  | 0.091581 | 0.04793  | 0.197832 |
| -0.09691 | 0.0363  | 0.08013  | 0.08367 | -0.01281 | 0.78242 | 0.12682  | 0.00606  | 0.172637 |
| -0.00278 | 0.95226 | 0.09723  | 0.03568 | 0.023697 | 0.6095  | 0.102536 | 0.02671  | 0.164039 |
| 0.082758 | 0.07399 | 0.175786 | 0.00013 | 0.110337 | 0.01706 | 0.168949 | 0.00024  | 0.331719 |
| -0.01612 | 0.7283  | 0.155909 | 0.00072 | 0.057873 | 0.21191 | 0.180483 | 8.78E-05 | 0.308979 |
| 0.021627 | 0.64109 | 0.075249 | 0.10436 | 0.030852 | 0.506   | 0.093379 | 0.0437   | 0.055247 |
| -0.06569 | 0.1564  | 0.060118 | 0.19468 | -0.03192 | 0.49144 | 0.114337 | 0.01342  | 0.173968 |
| 0.087121 | 0.05994 | -0.08342 | 0.0717  | -0.01134 | 0.80692 | -0.10763 | 0.02     | -0.1717  |
| -0.05654 | 0.22262 | 0.040422 | 0.38346 | 0.027795 | 0.54906 | 0.017657 | 0.70352  | 0.122356 |
| 0.055537 | 0.23097 | 0.149494 | 0.00119 | 0.12336  | 0.00761 | 0.10195  | 0.02759  | 0.235929 |
| 0.03401  | 0.46343 | 0.156664 | 0.00068 | 0.082757 | 0.07399 | 0.177769 | 0.00011  | 0.186572 |
| 0.001541 | 0.9735  | 0.05784  | 0.21217 | 0.012368 | 0.7898  | 0.075392 | 0.1037   | 0.121737 |
| -0.05217 | 0.26051 | 0.040236 | 0.38565 | 0.011563 | 0.8032  | 0.036981 | 0.42528  | 0.119172 |
| -0.13731 | 0.00295 | 0.013562 | 0.77006 | -0.06969 | 0.13265 | 0.065587 | 0.15705  | 0.124294 |
| -0.08859 | 0.05573 | 0.0759   | 0.10138 | -0.00952 | 0.83743 | 0.105709 | 0.02233  | 0.206926 |
| -0.054   | 0.2442  | 0.06368  | 0.16949 | 0.023988 | 0.6051  | 0.058993 | 0.20318  | 0.099626 |
| -0.04766 | 0.30406 | 0.091894 | 0.04717 | 0.017078 | 0.71279 | 0.115853 | 0.01223  | 0.181725 |
| 0.026278 | 0.57109 | -0.14535 | 0.00164 | -0.06239 | 0.17829 | -0.16897 | 0.00024  | -0.26249 |
| -0.00975 | 0.83358 | 0.128377 | 0.00546 | 0.043756 | 0.34543 | 0.165308 | 0.00033  | 0.255153 |
| -0.1122  | 0.01527 | 0.031707 | 0.49427 | -0.03653 | 0.43091 | 0.055519 | 0.23111  | 0.091046 |
| -0.03645 | 0.43201 | 0.11555  | 0.01246 | 0.016231 | 0.72646 | 0.157115 | 0.00066  | 0.181063 |
| 0.006313 | 0.89177 | 0.141402 | 0.00219 | 0.073243 | 0.11395 | 0.138282 | 0.00275  | 0.33743  |
| -0.14    | 0.00243 | 0.033036 | 0.47635 | -0.04586 | 0.32267 | 0.070739 | 0.12688  | 0.105599 |
| -0.06161 | 0.18379 | 0.048505 | 0.29555 | 0.005396 | 0.90742 | 0.068337 | 0.14033  | 0.089824 |
| -0.07363 | 0.11207 | 0.033118 | 0.47524 | -0.0132  | 0.77598 | 0.050194 | 0.27904  | 0.078209 |
| -0.01089 | 0.81445 | 0.079753 | 0.08514 | 0.039008 | 0.40033 | 0.079433 | 0.0864   | 0.182536 |
| -0.10797 | 0.0196  | 0.021259 | 0.64678 | -0.03317 | 0.47452 | 0.054923 | 0.23617  | 0.130059 |
| -0.08301 | 0.07312 | -0.02944 | 0.52561 | -0.07061 | 0.12758 | 0.001089 | 0.98127  | 0.047076 |
| -0.0624  | 0.17822 | 0.048829 | 0.29234 | -0.01032 | 0.82402 | 0.074676 | 0.10703  | 0.036699 |
| -0.03744 | 0.41954 | 0.148967 | 0.00124 | 0.036296 | 0.43391 | 0.188591 | 4.11E-05 | 0.262559 |
| -0.08306 | 0.07294 | -0.04315 | 0.35211 | -0.06566 | 0.15658 | -0.01202 | 0.79557  | -0.08526 |
| -0.0481  | 0.29965 | 0.03836  | 0.4082  | -0.01053 | 0.82045 | 0.056478 | 0.22315  | 0.153979 |
| -0.04527 | 0.32896 | 0.064476 | 0.16421 | -0.00403 | 0.93074 | 0.093668 | 0.04305  | 0.14709  |
| -0.02723 | 0.55726 | 0.127807 | 0.00568 | 0.021934 | 0.63637 | 0.174753 | 0.00015  | 0.272374 |

|          |         |          |         |          |         |          |          |          |
|----------|---------|----------|---------|----------|---------|----------|----------|----------|
| -0.0798  | 0.08497 | 0.001395 | 0.97602 | -0.02856 | 0.53812 | 0.010326 | 0.82388  | 0.085472 |
| -0.08076 | 0.08126 | -0.00759 | 0.87006 | -0.02077 | 0.65435 | -0.01491 | 0.74788  | -0.01877 |
| 0.028953 | 0.53254 | 0.086183 | 0.06276 | 0.051432 | 0.26734 | 0.083602 | 0.07108  | 0.128194 |
| -0.01147 | 0.80478 | 0.08307  | 0.0729  | 0.029045 | 0.53124 | 0.082755 | 0.074    | 0.149469 |
| -0.03387 | 0.46525 | 0.075295 | 0.10414 | 0.015279 | 0.74191 | 0.081846 | 0.07724  | 0.191988 |
| -0.04355 | 0.3477  | 0.006978 | 0.88046 | -0.00083 | 0.9857  | 0.002083 | 0.96419  | 0.193774 |
| -0.13243 | 0.00415 | -0.02623 | 0.57183 | -0.07664 | 0.0981  | -0.00019 | 0.99667  | 0.010255 |
| -0.05465 | 0.23855 | 0.02894  | 0.53272 | 0.013667 | 0.76832 | 0.0122   | 0.79259  | 0.042698 |
| -0.06029 | 0.19342 | 0.040686 | 0.38036 | -0.041   | 0.37668 | 0.101513 | 0.02827  | 0.0158   |
| 0.019322 | 0.67706 | -0.11815 | 0.01061 | -0.06762 | 0.14455 | -0.11362 | 0.01402  | -0.21202 |
| -0.0977  | 0.0348  | -0.02934 | 0.5271  | -0.07237 | 0.11832 | -0.00481 | 0.91737  | -0.02899 |
| -0.11561 | 0.01241 | -0.05844 | 0.20744 | -0.04867 | 0.29388 | -0.05697 | 0.21913  | -0.02302 |
| 0.001379 | 0.97629 | -0.12751 | 0.00579 | -0.04796 | 0.30098 | -0.15177 | 0.001    | -0.25691 |
| -0.0029  | 0.95015 | 0.054334 | 0.24124 | 0.037502 | 0.41878 | 0.048525 | 0.29536  | 0.087339 |
| -0.0803  | 0.08302 | 0.11787  | 0.0108  | -0.0018  | 0.96911 | 0.187309 | 4.64E-05 | 0.089266 |
| -0.08214 | 0.07616 | -0.07672 | 0.09774 | -0.077   | 0.0965  | -0.06502 | 0.16068  | -0.0413  |
| -0.00099 | 0.98293 | 0.103947 | 0.02468 | 0.031705 | 0.49431 | 0.116466 | 0.01178  | 0.176533 |
| 0.048126 | 0.29935 | 0.115024 | 0.01287 | 0.051901 | 0.263   | 0.11642  | 0.01181  | 0.200996 |
| -0.05829 | 0.20862 | 0.112189 | 0.01528 | -0.00497 | 0.91468 | 0.165531 | 0.00033  | 0.282435 |
| -0.05293 | 0.25361 | 0.073989 | 0.1103  | -0.00778 | 0.86678 | 0.112444 | 0.01505  | 0.137422 |
| 0.004646 | 0.92024 | 0.178454 | 0.00011 | 0.067641 | 0.14443 | 0.199364 | 1.42E-05 | 0.380279 |
| -0.14444 | 0.00175 | 0.032182 | 0.48783 | -0.04763 | 0.30436 | 0.073907 | 0.1107   | 0.126009 |
| -0.0513  | 0.26858 | 0.068991 | 0.13657 | -0.00569 | 0.90246 | 0.085339 | 0.06538  | 0.195393 |
| -0.08118 | 0.07968 | 0.047199 | 0.30877 | -0.0117  | 0.80094 | 0.054526 | 0.23958  | 0.148838 |
| -0.07008 | 0.13047 | -0.0224  | 0.62924 | -0.05274 | 0.25537 | -0.003   | 0.94844  | 0.037241 |
| -0.03957 | 0.39358 | 0.040904 | 0.37781 | 0.005298 | 0.90908 | 0.051949 | 0.26256  | 0.083817 |
| -0.07937 | 0.08667 | 0.014719 | 0.75107 | -0.01565 | 0.73596 | 0.042888 | 0.35509  | 0.024248 |
| -0.03593 | 0.43852 | 0.089424 | 0.05346 | 0.019869 | 0.66846 | 0.110312 | 0.01709  | 0.243822 |
| -0.04331 | 0.35041 | -0.00246 | 0.95767 | -0.02175 | 0.63919 | 0.001641 | 0.97179  | -0.0353  |
| -0.07138 | 0.12346 | 0.055148 | 0.23426 | 0.039183 | 0.39822 | 0.041811 | 0.36731  | 0.115041 |
| -0.04228 | 0.362   | 0.035857 | 0.4395  | -0.00945 | 0.83857 | 0.051839 | 0.26357  | 0.123539 |
| -0.02144 | 0.64391 | 0.015474 | 0.73874 | -0.01253 | 0.78706 | 0.023721 | 0.60914  | 0.075213 |
| -0.05068 | 0.2744  | -0.00183 | 0.96861 | -0.06829 | 0.14061 | 0.041622 | 0.36948  | 0.074827 |
| -0.03477 | 0.45354 | 9.82E-06 | 0.99983 | -0.05117 | 0.2698  | 0.051405 | 0.26759  | -0.03047 |
| 0.006076 | 0.89581 | 0.132055 | 0.00426 | 0.062162 | 0.17991 | 0.142197 | 0.00207  | 0.299939 |
| -0.09883 | 0.03273 | -0.05222 | 0.26003 | -0.03662 | 0.42987 | -0.05047 | 0.27637  | -0.0187  |
| -0.07077 | 0.12669 | 0.024739 | 0.59385 | -0.00533 | 0.9085  | 0.025201 | 0.58698  | 0.054231 |
| 0.064542 | 0.16378 | 0.053698 | 0.2468  | 0.055614 | 0.23032 | 0.045866 | 0.32264  | 0.140428 |
| 0.173904 | 0.00016 | 0.070603 | 0.12762 | 0.129106 | 0.0052  | 0.029644 | 0.5228   | -0.00992 |
| -0.02464 | 0.5953  | 0.023832 | 0.60745 | -0.0057  | 0.90228 | 0.026895 | 0.56208  | 0.110774 |
| 0.030407 | 0.51215 | -0.02861 | 0.53735 | -0.03175 | 0.49365 | -0.01026 | 0.82506  | -0.00702 |
| -0.08931 | 0.05377 | -0.0346  | 0.45566 | -0.0655  | 0.15763 | -0.00236 | 0.95937  | -0.01696 |
| 0.024634 | 0.59543 | 0.111808 | 0.01564 | 0.083416 | 0.07171 | 0.098908 | 0.0326   | 0.139042 |
| -0.11312 | 0.01445 | -0.05032 | 0.27779 | -0.06957 | 0.1333  | -0.03598 | 0.43789  | -0.10279 |
| -0.0615  | 0.1846  | 0.066377 | 0.1521  | 0.011229 | 0.80877 | 0.078678 | 0.08945  | 0.213883 |

|          |          |          |         |          |         |          |          |          |
|----------|----------|----------|---------|----------|---------|----------|----------|----------|
| 0.165429 | 0.00033  | -0.03261 | 0.48205 | 0.031794 | 0.49309 | -0.06146 | 0.18492  | -0.11486 |
| -0.05693 | 0.21942  | 0.011603 | 0.80253 | -0.03441 | 0.4582  | 0.036807 | 0.42746  | 0.050494 |
| 0.182617 | 7.21E-05 | -0.01874 | 0.68623 | 0.069995 | 0.13094 | -0.06461 | 0.16336  | -0.08372 |
| -0.09574 | 0.03863  | 0.001222 | 0.97899 | -0.05597 | 0.22732 | 0.034967 | 0.45094  | 0.024503 |
| -0.04337 | 0.34975  | 0.169551 | 0.00023 | 0.042492 | 0.35955 | 0.213257 | 3.32E-06 | 0.376739 |
| -0.02728 | 0.55652  | 0.113396 | 0.01421 | 0.05333  | 0.25006 | 0.113255 | 0.01433  | 0.318384 |
| -0.00756 | 0.87057  | 0.141859 | 0.00212 | 0.041918 | 0.36609 | 0.173572 | 0.00016  | 0.30015  |
| -0.05959 | 0.19867  | -0.08181 | 0.07738 | -0.08702 | 0.06024 | -0.0587  | 0.20541  | -0.07651 |
| -0.03911 | 0.39909  | -0.1764  | 0.00013 | -0.09624 | 0.03761 | -0.17676 | 0.00012  | -0.27975 |
| -0.002   | 0.96561  | 0.126915 | 0.00603 | 0.038282 | 0.40917 | 0.146081 | 0.00155  | 0.287476 |
| -0.08291 | 0.07345  | 0.064312 | 0.16528 | -0.00329 | 0.94344 | 0.079847 | 0.08477  | 0.177055 |
| -0.00897 | 0.84669  | -0.00615 | 0.89447 | -0.00353 | 0.93939 | 0.002918 | 0.94986  | 0.044926 |
| -0.01842 | 0.69132  | 0.036381 | 0.43284 | 0.005957 | 0.89784 | 0.043924 | 0.34358  | 0.124796 |
| 0.003689 | 0.93663  | 0.048062 | 0.29999 | 0.00994  | 0.83036 | 0.060149 | 0.19445  | 0.134663 |
| -0.08045 | 0.08243  | 0.093892 | 0.04255 | -0.0148  | 0.74974 | 0.143675 | 0.00185  | 0.241924 |
| 0.016198 | 0.72699  | 0.075478 | 0.1033  | 0.031523 | 0.49678 | 0.074387 | 0.1084   | 0.105545 |
| -0.00235 | 0.95961  | 0.150714 | 0.00109 | 0.07022  | 0.1297  | 0.16441  | 0.00036  | 0.263719 |
| -0.11915 | 0.00996  | -0.03629 | 0.43397 | -0.06635 | 0.15227 | -0.01393 | 0.76406  | 0.009353 |
| 0.011627 | 0.80212  | 0.110959 | 0.01645 | 0.036773 | 0.42788 | 0.128408 | 0.00545  | 0.23827  |
| 0.028886 | 0.53349  | 0.092906 | 0.04478 | 0.05262  | 0.25643 | 0.104064 | 0.02452  | 0.116814 |
| -0.04512 | 0.33061  | 0.112569 | 0.01494 | 0.020724 | 0.65509 | 0.139199 | 0.00257  | 0.249514 |
| -0.09616 | 0.03777  | -0.03362 | 0.46854 | -0.03311 | 0.47534 | -0.03506 | 0.44969  | -0.10623 |
| -0.01443 | 0.75578  | 0.116855 | 0.0115  | 0.021705 | 0.63989 | 0.157189 | 0.00065  | 0.170898 |
| -0.15955 | 0.00054  | -0.1136  | 0.01404 | -0.11312 | 0.01445 | -0.0978  | 0.03461  | -0.13466 |
| 0.016855 | 0.71639  | 0.114387 | 0.01338 | 0.050962 | 0.27174 | 0.120253 | 0.00929  | 0.261265 |
| 0.040467 | 0.38293  | 0.140259 | 0.00238 | 0.060479 | 0.19201 | 0.164064 | 0.00037  | 0.176172 |
| -0.09344 | 0.04356  | 0.037987 | 0.41278 | -0.03146 | 0.49765 | 0.077692 | 0.09355  | 0.083799 |
| -0.01428 | 0.75824  | 0.044113 | 0.34151 | 0.009258 | 0.84184 | 0.041008 | 0.37659  | 0.124547 |
| -0.07317 | 0.11429  | 0.027811 | 0.54884 | -0.02664 | 0.56577 | 0.054362 | 0.241    | 0.065753 |
| -0.07172 | 0.12171  | 0.089978 | 0.052   | -0.01222 | 0.79218 | 0.134114 | 0.00369  | 0.215892 |
| -0.05271 | 0.25561  | -0.01142 | 0.80557 | -0.02525 | 0.58631 | -0.01516 | 0.7439   | 0.004719 |
| 0.029817 | 0.52038  | 0.09957  | 0.03145 | 0.033867 | 0.46531 | 0.102865 | 0.02622  | 0.17406  |
| 0.015752 | 0.73423  | 0.094977 | 0.04021 | 0.06219  | 0.17972 | 0.074249 | 0.10906  | 0.158662 |
| 0.018779 | 0.68565  | 0.086515 | 0.06175 | 0.047566 | 0.30501 | 0.085452 | 0.06503  | 0.082737 |
| -0.12856 | 0.0054   | 0.020455 | 0.65928 | -0.04474 | 0.33468 | 0.043558 | 0.34761  | 0.133484 |
| -0.00202 | 0.96528  | 0.149266 | 0.00122 | 0.030457 | 0.51146 | 0.185481 | 5.52E-05 | 0.30081  |
| -0.01444 | 0.75568  | 0.125124 | 0.00678 | 0.046357 | 0.31749 | 0.138546 | 0.0027   | 0.238225 |
| -0.0493  | 0.28766  | 0.069791 | 0.13207 | 0.009015 | 0.84594 | 0.091643 | 0.04778  | 0.149074 |
| -0.06105 | 0.18783  | 0.062158 | 0.17994 | -0.00388 | 0.93339 | 0.076425 | 0.09903  | 0.151711 |
| -0.00441 | 0.9243   | 0.051298 | 0.26859 | 0.004733 | 0.91874 | 0.063709 | 0.1693   | 0.106378 |
| -0.11218 | 0.01529  | 0.006487 | 0.88881 | -0.02642 | 0.56899 | 0.021123 | 0.6489   | 0.079271 |
| -0.06011 | 0.19476  | 0.055554 | 0.23082 | 0.014094 | 0.7613  | 0.051064 | 0.27078  | 0.161973 |
| -0.04022 | 0.38584  | 0.067407 | 0.14583 | 0.014049 | 0.76204 | 0.086427 | 0.06201  | 0.18079  |
| -0.04877 | 0.29289  | 0.126676 | 0.00612 | 0.03845  | 0.40712 | 0.152178 | 0.00097  | 0.288207 |
| -0.03661 | 0.42997  | 0.106693 | 0.02111 | 0.020427 | 0.65972 | 0.122057 | 0.00828  | 0.252718 |



|          |         |          |         |          |         |          |          |          |
|----------|---------|----------|---------|----------|---------|----------|----------|----------|
| -0.03394 | 0.4644  | 0.038751 | 0.40345 | 0.018886 | 0.68396 | 0.047354 | 0.30718  | 0.016455 |
| -0.01139 | 0.8061  | 0.162106 | 0.00044 | 0.07542  | 0.10357 | 0.159611 | 0.00054  | 0.365761 |
| -0.01373 | 0.76737 | 0.024753 | 0.59364 | 0.005433 | 0.90679 | 0.017016 | 0.71379  | 0.150259 |
| -0.03576 | 0.44073 | 0.064079 | 0.16683 | -0.00198 | 0.96598 | 0.097721 | 0.03476  | 0.089028 |
| -0.08163 | 0.07803 | 0.069687 | 0.13265 | -0.0061  | 0.89541 | 0.101587 | 0.02816  | 0.196784 |
| -0.12114 | 0.00878 | 0.013724 | 0.76739 | -0.04601 | 0.32109 | 0.046703 | 0.31389  | 0.043671 |
| -0.07994 | 0.08442 | 0.008811 | 0.84938 | -0.02876 | 0.53522 | 0.02634  | 0.57019  | 0.102434 |
| -0.06424 | 0.16576 | 0.024394 | 0.59901 | -0.01416 | 0.76028 | 0.055342 | 0.23261  | 0.042175 |
| -0.02284 | 0.62248 | -0.04682 | 0.31264 | -0.04    | 0.38844 | -0.05137 | 0.26792  | -0.08009 |
| 0.031958 | 0.49085 | 0.143557 | 0.00187 | 0.09808  | 0.03409 | 0.116496 | 0.01176  | 0.308649 |
| 0.008065 | 0.86201 | 0.126424 | 0.00622 | 0.037943 | 0.41333 | 0.149717 | 0.00117  | 0.206266 |
| 0.106554 | 0.02128 | -0.08098 | 0.08042 | 0.021131 | 0.64876 | -0.11934 | 0.00984  | -0.22058 |
| -0.08387 | 0.07017 | -0.10042 | 0.03003 | -0.05691 | 0.21959 | -0.10581 | 0.0222   | -0.15069 |
| -0.01799 | 0.69824 | 0.030096 | 0.51648 | 0.000103 | 0.99822 | 0.039378 | 0.39587  | 0.080738 |
| -0.05764 | 0.21376 | -0.01657 | 0.72093 | -0.03587 | 0.43927 | -0.01905 | 0.68133  | -0.07836 |
| -0.0726  | 0.11718 | 0.003579 | 0.93852 | -0.05816 | 0.20966 | 0.038234 | 0.40975  | 0.0515   |
| -0.05165 | 0.26532 | 0.111707 | 0.01573 | 0.024272 | 0.60084 | 0.137361 | 0.00293  | 0.221018 |
| -0.00764 | 0.8692  | 0.102408 | 0.0269  | 0.028429 | 0.53999 | 0.12321  | 0.00768  | 0.190385 |
| -0.00692 | 0.88146 | 0.115615 | 0.01241 | 0.045385 | 0.32775 | 0.133354 | 0.00389  | 0.241741 |
| -0.01818 | 0.69512 | 0.106283 | 0.02161 | 0.048297 | 0.29764 | 0.110307 | 0.0171   | 0.189464 |
| -0.10201 | 0.0275  | 0.066695 | 0.15014 | -0.01231 | 0.7907  | 0.094706 | 0.04078  | 0.132656 |
| 0.004096 | 0.92965 | 0.133178 | 0.00394 | 0.046514 | 0.31585 | 0.154055 | 0.00084  | 0.240564 |
| -0.03938 | 0.39579 | 0.016621 | 0.72017 | 0.00902  | 0.84585 | 0.013104 | 0.77762  | 0.131604 |
| 0.021713 | 0.63978 | -0.17663 | 0.00012 | -0.06737 | 0.14606 | -0.21802 | 1.97E-06 | -0.319   |
| 0.052524 | 0.2573  | 0.160951 | 0.00048 | 0.115001 | 0.01289 | 0.14362  | 0.00186  | 0.224122 |
| -0.06396 | 0.16761 | -0.02247 | 0.6281  | -0.04297 | 0.35419 | -0.01598 | 0.73052  | -0.05001 |
| -0.11807 | 0.01066 | -0.04379 | 0.34502 | -0.09192 | 0.04711 | -0.0036  | 0.93811  | -0.04624 |
| -0.124   | 0.0073  | -0.01759 | 0.7046  | -0.05734 | 0.21613 | 0.006426 | 0.88985  | 0.066391 |
| -0.01693 | 0.71525 | 0.164765 | 0.00035 | 0.058312 | 0.20846 | 0.187452 | 4.58E-05 | 0.331486 |
| -0.11702 | 0.01138 | -0.04064 | 0.38094 | -0.07783 | 0.09297 | -0.00709 | 0.8786   | -0.08403 |
| -0.06657 | 0.15089 | 0.048621 | 0.2944  | -0.00614 | 0.89469 | 0.059235 | 0.20133  | 0.174355 |
| -0.04323 | 0.35124 | 0.011167 | 0.80981 | -0.01199 | 0.7961  | 0.022095 | 0.63389  | 0.128147 |
| -0.02146 | 0.6437  | 0.015385 | 0.74019 | -0.01839 | 0.69187 | 0.049492 | 0.28583  | 0.025553 |
| -0.00652 | 0.88825 | 0.127475 | 0.0058  | 0.04597  | 0.32155 | 0.151393 | 0.00103  | 0.255751 |
| -0.04709 | 0.30993 | 0.045517 | 0.32634 | 0.013637 | 0.76882 | 0.050245 | 0.27855  | 0.020333 |
| -0.10799 | 0.01958 | 0.027283 | 0.55646 | -0.05444 | 0.24028 | 0.065355 | 0.15852  | 0.172287 |
| -0.09743 | 0.0353  | 0.088277 | 0.05661 | -0.00266 | 0.95428 | 0.123095 | 0.00774  | 0.205585 |
| -0.09053 | 0.05058 | 0.092132 | 0.0466  | 0.01194  | 0.79691 | 0.107414 | 0.02025  | 0.240289 |
| -0.05702 | 0.21874 | 0.111434 | 0.01599 | 0.028403 | 0.54036 | 0.125033 | 0.00682  | 0.275361 |
| 0.047424 | 0.30647 | -0.1092  | 0.01824 | -0.05099 | 0.27148 | -0.12783 | 0.00567  | -0.17001 |
| -0.03497 | 0.45095 | 0.12178  | 0.00843 | 0.042698 | 0.35723 | 0.132175 | 0.00422  | 0.270488 |
| 0.027208 | 0.55754 | 0.143854 | 0.00183 | 0.093156 | 0.04421 | 0.128743 | 0.00533  | 0.267443 |
| -0.04006 | 0.3877  | 0.024977 | 0.5903  | -0.01789 | 0.69973 | 0.040337 | 0.38446  | 0.108517 |
| -0.0868  | 0.06089 | 0.074506 | 0.10783 | -0.01923 | 0.6785  | 0.113966 | 0.01373  | 0.235571 |
| 0.163596 | 0.00039 | 0.00823  | 0.85921 | 0.079374 | 0.08664 | -0.05017 | 0.27928  | -0.10291 |

|          |          |          |          |          |          |          |          |          |
|----------|----------|----------|----------|----------|----------|----------|----------|----------|
| 0.107364 | 0.02031  | 0.198277 | 1.59E-05 | 0.125889 | 0.00645  | 0.204457 | 8.44E-06 | 0.42791  |
| 0.061062 | 0.18775  | 0.053351 | 0.24987  | 0.101176 | 0.0288   | 0.012229 | 0.79211  | 0.016628 |
| 0.138807 | 0.00265  | 0.151162 | 0.00105  | 0.151903 | 0.00099  | 0.116013 | 0.01211  | 0.312672 |
| 0.068139 | 0.14149  | 0.164939 | 0.00034  | 0.101404 | 0.02844  | 0.155557 | 0.00074  | 0.413197 |
| 0.064528 | 0.16387  | 0.20653  | 6.80E-06 | 0.122793 | 0.00789  | 0.213783 | 3.14E-06 | 0.422528 |
| 0.100907 | 0.02923  | 0.165429 | 0.00033  | 0.137948 | 0.00281  | 0.139649 | 0.00249  | 0.278595 |
| -0.00839 | 0.85643  | 0.11452  | 0.01327  | 0.034535 | 0.45655  | 0.145991 | 0.00156  | 0.356478 |
| 0.054214 | 0.24228  | 0.199488 | 1.40E-05 | 0.115932 | 0.01217  | 0.200684 | 1.24E-05 | 0.392176 |
| 0.016857 | 0.71636  | 0.056264 | 0.2249   | 0.062807 | 0.17543  | 0.031273 | 0.50021  | 0.110932 |
| 0.059634 | 0.19831  | 0.125378 | 0.00667  | 0.108834 | 0.01864  | 0.097003 | 0.03612  | 0.28161  |
| 0.119144 | 0.00997  | 0.092596 | 0.04551  | 0.078127 | 0.09172  | 0.085121 | 0.06608  | 0.243978 |
| 0.071948 | 0.1205   | 0.118276 | 0.01052  | 0.100387 | 0.03008  | 0.099999 | 0.03073  | 0.316238 |
| 0.28738  | 2.49E-10 | 0.258533 | 1.44E-08 | 0.2139   | 3.10E-06 | 0.228766 | 5.83E-07 | 0.477396 |
| 0.169917 | 0.00023  | 0.208436 | 5.57E-06 | 0.166101 | 0.00031  | 0.189061 | 3.93E-05 | 0.392444 |
| 0.114486 | 0.0133   | 0.170156 | 0.00022  | 0.127266 | 0.00589  | 0.166664 | 0.0003   | 0.323042 |
| 0.100331 | 0.03017  | 0.141425 | 0.00219  | 0.111116 | 0.01629  | 0.152557 | 0.00094  | 0.22815  |
| -0.02708 | 0.55942  | 0.115876 | 0.01222  | 0.059093 | 0.20242  | 0.11948  | 0.00976  | 0.289162 |
| 0.101073 | 0.02897  | 0.155895 | 0.00072  | 0.136628 | 0.00309  | 0.12541  | 0.00666  | 0.41005  |
| 0.126598 | 0.00615  | 0.245654 | 7.57E-08 | 0.148082 | 0.00133  | 0.255578 | 2.12E-08 | 0.529696 |
| 0.155231 | 0.00076  | 0.259079 | 1.34E-08 | 0.22255  | 1.19E-06 | 0.211479 | 4.02E-06 | 0.439128 |
| 0.193845 | 2.47E-05 | 0.234759 | 2.87E-07 | 0.207607 | 6.07E-06 | 0.193408 | 2.57E-05 | 0.47807  |
| 0.243104 | 1.04E-07 | 0.320861 | 1.21E-12 | 0.276965 | 1.14E-09 | 0.268976 | 3.50E-09 | 0.510917 |
| 0.224334 | 9.71E-07 | 0.182483 | 7.30E-05 | 0.168778 | 0.00025  | 0.138966 | 0.00262  | 0.36097  |
| 0.128693 | 0.00535  | 0.246791 | 6.56E-08 | 0.187843 | 4.41E-05 | 0.214668 | 2.85E-06 | 0.47888  |
| 0.066428 | 0.15178  | 0.164644 | 0.00035  | 0.099808 | 0.03105  | 0.16295  | 0.00041  | 0.443217 |
| 0.230419 | 4.80E-07 | 0.239615 | 1.60E-07 | 0.223006 | 1.13E-06 | 0.188893 | 3.99E-05 | 0.369096 |
| 0.021174 | 0.6481   | 0.140135 | 0.0024   | 0.075372 | 0.10379  | 0.163109 | 0.0004   | 0.272278 |
| 0.104827 | 0.02348  | 0.193204 | 2.63E-05 | 0.143555 | 0.00187  | 0.182032 | 7.61E-05 | 0.350779 |
| 0.18933  | 3.83E-05 | 0.332153 | 1.72E-13 | 0.241856 | 1.21E-07 | 0.311119 | 6.12E-12 | 0.578249 |
| 0.090016 | 0.0519   | 0.247593 | 5.93E-08 | 0.13753  | 0.0029   | 0.263643 | 7.26E-09 | 0.516497 |
| 0.10914  | 0.01831  | 0.18127  | 8.17E-05 | 0.116378 | 0.01184  | 0.186828 | 4.86E-05 | 0.337751 |
| 0.121999 | 0.00831  | 0.120141 | 0.00936  | 0.097746 | 0.03471  | 0.110897 | 0.01651  | 0.287338 |
| 0.110107 | 0.0173   | 0.070594 | 0.12767  | 0.099698 | 0.03123  | 0.022512 | 0.6275   | 0.16575  |
| 0.074515 | 0.10779  | 0.25849  | 1.45E-08 | 0.166478 | 0.0003   | 0.25804  | 1.54E-08 | 0.440847 |
| 0.117835 | 0.01082  | 0.270541 | 2.82E-09 | 0.168842 | 0.00025  | 0.278524 | 9.10E-10 | 0.49731  |
| 0.202195 | 1.07E-05 | 0.277216 | 1.10E-09 | 0.181158 | 8.25E-05 | 0.283025 | 4.74E-10 | 0.565371 |
| 0.130494 | 0.00473  | 0.236653 | 2.29E-07 | 0.186004 | 5.25E-05 | 0.204037 | 8.82E-06 | 0.520514 |
| 0.155657 | 0.00074  | 0.215343 | 2.65E-06 | 0.144287 | 0.00177  | 0.218121 | 1.95E-06 | 0.392275 |
| 0.233528 | 3.33E-07 | 0.273387 | 1.89E-09 | 0.219019 | 1.77E-06 | 0.246398 | 6.90E-08 | 0.436532 |
| 0.05067  | 0.2745   | 0.127198 | 0.00591  | 0.082663 | 0.07432  | 0.135584 | 0.00333  | 0.275578 |
| 0.062391 | 0.17831  | 0.15888  | 0.00057  | 0.122254 | 0.00817  | 0.131075 | 0.00455  | 0.223952 |
| -0.01176 | 0.79999  | 0.005986 | 0.89735  | 0.016982 | 0.71435  | -0.00296 | 0.9491   | 0.037823 |
| -0.07767 | 0.09363  | -0.04096 | 0.37721  | -0.04168 | 0.36881  | -0.03347 | 0.47055  | 0.007471 |
| 0.051808 | 0.26385  | 0.056189 | 0.22553  | 0.055778 | 0.22895  | 0.039881 | 0.38986  | 0.048933 |
| -0.04519 | 0.3298   | -0.0182  | 0.69483  | -0.00039 | 0.99336  | -0.03539 | 0.44544  | -0.00022 |

|          |          |          |          |          |          |          |          |          |
|----------|----------|----------|----------|----------|----------|----------|----------|----------|
| -0.00781 | 0.86635  | -0.04606 | 0.3206   | 0.000185 | 0.99682  | -0.0655  | 0.1576   | -0.10089 |
| 0.001037 | 0.98216  | 0.008366 | 0.85691  | 0.009116 | 0.84423  | 0.01051  | 0.8208   | 0.003086 |
| 0.002048 | 0.96479  | 0.019806 | 0.66945  | -0.00471 | 0.91916  | 0.029776 | 0.52095  | 0.052595 |
| 0.183405 | 6.70E-05 | 0.188181 | 4.27E-05 | 0.187512 | 4.55E-05 | 0.141356 | 0.0022   | 0.092502 |
| -0.04706 | 0.31023  | -0.05177 | 0.26419  | -0.01662 | 0.72024  | -0.0714  | 0.12338  | -0.05838 |
| 0.028333 | 0.54136  | 0.015307 | 0.74146  | 0.049568 | 0.28509  | -0.0204  | 0.66019  | -0.03342 |
| -0.06975 | 0.13232  | -0.06741 | 0.14579  | -0.03802 | 0.41235  | -0.08782 | 0.05791  | -0.03966 |
| -0.07347 | 0.11281  | -0.09528 | 0.03958  | -0.06136 | 0.18558  | -0.10018 | 0.03043  | -0.12488 |
| 0.043683 | 0.34623  | 0.065584 | 0.15706  | 0.067516 | 0.14518  | 0.046512 | 0.31587  | 0.033383 |
| -0.04249 | 0.35959  | -0.0337  | 0.46755  | -0.00164 | 0.97181  | -0.05143 | 0.26733  | -0.06675 |
| 0.038128 | 0.41105  | 0.021541 | 0.64242  | 0.044009 | 0.34264  | 3.07E-05 | 0.99947  | -0.01066 |
| 0.026787 | 0.56365  | 0.071972 | 0.12038  | 0.023549 | 0.61172  | 0.099943 | 0.03082  | 0.0942   |
| 0.014907 | 0.74798  | 0.013192 | 0.77616  | 0.03844  | 0.40723  | -0.01253 | 0.78718  | 0.009847 |
| 0.004504 | 0.92267  | 0.006268 | 0.89255  | 8.19E-05 | 0.99859  | 0.012389 | 0.78945  | -0.02494 |
| 0.158877 | 0.00057  | 0.071422 | 0.12325  | 0.066131 | 0.15363  | 0.068895 | 0.13712  | 0.056764 |
| 0.062701 | 0.17616  | 0.026061 | 0.57427  | 0.041105 | 0.37547  | 0.015618 | 0.7364   | -0.00164 |
| -0.01776 | 0.70188  | -0.01816 | 0.69548  | 0.007565 | 0.87048  | -0.03605 | 0.43705  | -0.05141 |
| -0.00769 | 0.86837  | 0.127984 | 0.00561  | 0.037554 | 0.41813  | 0.18163  | 7.90E-05 | 0.122129 |
| -0.02369 | 0.60957  | -0.00752 | 0.87132  | 0.014262 | 0.75854  | -0.01421 | 0.75932  | -0.04915 |
| -0.03586 | 0.43939  | -0.02415 | 0.60274  | -0.03177 | 0.4934   | -0.018   | 0.69801  | 0.061147 |
| 0.036499 | 0.43134  | 0.026438 | 0.56875  | 0.034101 | 0.46224  | 0.013005 | 0.77925  | 0.019087 |
| 0.050354 | 0.27751  | 0.13601  | 0.00323  | 0.111989 | 0.01547  | 0.114163 | 0.01357  | 0.124718 |
| 0.262986 | 7.94E-09 | 0.214216 | 2.99E-06 | 0.257599 | 1.63E-08 | 0.109428 | 0.018    | 0.132597 |
| 0.082906 | 0.07347  | 0.052415 | 0.25829  | 0.106487 | 0.02136  | -0.01626 | 0.72599  | -0.03719 |
| 0.071453 | 0.12309  | 0.011952 | 0.79672  | 0.055602 | 0.23042  | -0.03566 | 0.44198  | -0.074   |
| 0.026025 | 0.5748   | -0.0028  | 0.95189  | 0.030983 | 0.50418  | -0.0264  | 0.56926  | -0.07299 |
| 0.051546 | 0.26628  | 0.028677 | 0.53645  | 0.060208 | 0.19401  | -0.00838 | 0.8567   | -0.05712 |
| 0.091082 | 0.04917  | 0.02264  | 0.62554  | 0.065227 | 0.15934  | -0.01734 | 0.70853  | -0.03725 |
| 0.057485 | 0.21499  | 0.005961 | 0.89778  | 0.019444 | 0.67514  | 0.005603 | 0.90387  | -0.03392 |
| 0.276349 | 1.24E-09 | 0.114692 | 0.01314  | 0.190385 | 3.46E-05 | 0.015895 | 0.7319   | 0.028108 |
| 0.028418 | 0.54015  | 0.036162 | 0.43561  | 0.079374 | 0.08664  | -0.01906 | 0.68114  | -0.08817 |
| 0.005547 | 0.90483  | 0.001119 | 0.98077  | 0.028038 | 0.54557  | -0.02501 | 0.58985  | -0.02938 |
| 0.094706 | 0.04078  | 0.150135 | 0.00114  | 0.12633  | 0.00626  | 0.118576 | 0.01033  | 0.146195 |
| 0.048919 | 0.29145  | 0.044434 | 0.338    | 0.084237 | 0.06895  | -0.00763 | 0.86946  | -0.00921 |
| 0.018444 | 0.69097  | 0.015289 | 0.74176  | 0.041647 | 0.3692   | -0.01289 | 0.78117  | -0.0147  |
| 0.008349 | 0.85719  | 0.032229 | 0.48719  | 0.01232  | 0.7906   | 0.019248 | 0.67824  | 0.190292 |
| -0.00711 | 0.87827  | 0.059767 | 0.19731  | 0.052089 | 0.26127  | 0.049757 | 0.28326  | 0.067821 |
| -0.05833 | 0.20831  | -0.03453 | 0.45664  | -0.0236  | 0.61089  | -0.03143 | 0.49807  | -0.00751 |
| -0.01856 | 0.68912  | -0.02306 | 0.61917  | 0.005097 | 0.91253  | -0.04624 | 0.31874  | -0.05625 |
| -0.01854 | 0.6895   | -0.01786 | 0.70023  | 0.005752 | 0.90134  | -0.01168 | 0.80118  | -0.03863 |
| 0.035128 | 0.44886  | 0.007537 | 0.87096  | 0.047401 | 0.3067   | -0.03045 | 0.5115   | -0.05223 |
| 0.083054 | 0.07296  | 0.070508 | 0.12814  | 0.095569 | 0.03897  | 0.024092 | 0.60354  | 0.016917 |
| -0.09236 | 0.04606  | -0.07142 | 0.12327  | -0.05916 | 0.20191  | -0.05918 | 0.20175  | -0.02429 |
| -0.02483 | 0.59249  | 0.007508 | 0.87145  | -0.00253 | 0.9566   | 0.013977 | 0.76322  | 0.095809 |
| -0.01776 | 0.70185  | -0.00599 | 0.89722  | 0.023669 | 0.60992  | -0.04231 | 0.36157  | -0.05622 |

|          |         |          |         |          |         |          |          |          |
|----------|---------|----------|---------|----------|---------|----------|----------|----------|
| -0.04698 | 0.31102 | -0.01309 | 0.77785 | -0.01875 | 0.68608 | -0.00435 | 0.92527  | 0.061119 |
| -0.03596 | 0.43822 | 0.017377 | 0.708   | 0.007023 | 0.87969 | 0.02607  | 0.57414  | 0.020539 |
| 0.001422 | 0.97555 | 0.030905 | 0.50526 | 0.020346 | 0.66098 | 0.039209 | 0.39791  | 0.012029 |
| -0.03309 | 0.47566 | -0.02884 | 0.53411 | -0.02428 | 0.60067 | -0.01907 | 0.681    | -0.05548 |
| -0.02105 | 0.65001 | 0.004971 | 0.91467 | -0.00263 | 0.9548  | 0.019593 | 0.6728   | -0.02546 |
| 0.153923 | 0.00085 | 0.052401 | 0.25842 | 0.090228 | 0.05134 | 0.01263  | 0.78546  | -0.02809 |
| -0.05003 | 0.28062 | -0.05843 | 0.20757 | -0.05077 | 0.27351 | -0.04393 | 0.34349  | -0.03256 |
| 0.05235  | 0.25888 | -0.0072  | 0.87675 | 0.015284 | 0.74183 | -0.02862 | 0.53726  | -0.0466  |
| 0.006846 | 0.8827  | 0.033107 | 0.4754  | 0.07255  | 0.11742 | -0.02528 | 0.58583  | -0.03389 |
| 0.113031 | 0.01453 | 0.026332 | 0.5703  | 0.067282 | 0.14658 | -0.02053 | 0.65816  | -0.03585 |
| 0.004693 | 0.91944 | 0.003256 | 0.94405 | 0.019617 | 0.67242 | -0.00893 | 0.84736  | -0.03184 |
| 0.029452 | 0.5255  | 0.004188 | 0.92808 | 0.039563 | 0.39366 | -0.02715 | 0.55835  | -0.04373 |
| -0.00773 | 0.86764 | 0.024918 | 0.59118 | 0.052584 | 0.25675 | -0.00698 | 0.88047  | -0.04334 |
| 0.083504 | 0.07141 | 0.023213 | 0.61682 | 0.034222 | 0.46064 | 0.01734  | 0.70859  | 0.025774 |
| 0.070709 | 0.12705 | 0.040037 | 0.38801 | 0.051322 | 0.26837 | 0.014169 | 0.76007  | -0.01478 |
| 0.023622 | 0.61062 | -0.05718 | 0.21743 | -0.02735 | 0.55551 | -0.06641 | 0.15188  | -0.10697 |
| 0.028299 | 0.54184 | 0.04351  | 0.34815 | 0.060185 | 0.19418 | 0.01507  | 0.74533  | 0.003543 |
| 0.060228 | 0.19386 | 0.040121 | 0.38702 | 0.066903 | 0.14887 | 0.00753  | 0.87107  | -0.00034 |
| 0.008697 | 0.85131 | 0.036366 | 0.43302 | 0.016979 | 0.71439 | 0.060819 | 0.18952  | 0.027773 |
| 0.041403 | 0.37202 | 0.053429 | 0.24918 | 0.04826  | 0.29801 | 0.056728 | 0.2211   | 0.041522 |
| -0.01096 | 0.81324 | -0.00428 | 0.92643 | -0.00136 | 0.97661 | -0.00083 | 0.98579  | 0.023582 |
| 0.060654 | 0.19073 | 0.12755  | 0.00578 | 0.110657 | 0.01675 | 0.088844 | 0.05504  | 0.170686 |
| 0.071168 | 0.12459 | 0.165722 | 0.00032 | 0.114802 | 0.01305 | 0.161761 | 0.00045  | 0.241098 |
| 0.114753 | 0.01309 | 0.083018 | 0.07308 | 0.080996 | 0.08038 | 0.063738 | 0.1691   | 0.050913 |
| -0.03371 | 0.46742 | -0.0256  | 0.58102 | -0.0052  | 0.9108  | -0.03528 | 0.44694  | -0.01748 |
| -0.03527 | 0.44697 | -0.0368  | 0.42756 | -0.00713 | 0.87784 | -0.06446 | 0.16432  | -0.04931 |
| 0.108032 | 0.01953 | 0.121851 | 0.00839 | 0.131862 | 0.00431 | 0.063232 | 0.17252  | 0.154724 |
| 0.006937 | 0.88115 | 0.046701 | 0.3139  | 0.045146 | 0.3303  | 0.042857 | 0.35544  | 0.053679 |
| 0.102376 | 0.02695 | 0.110719 | 0.01668 | 0.117366 | 0.01114 | 0.081844 | 0.07725  | 0.070319 |
| 0.042525 | 0.35918 | 0.152669 | 0.00093 | 0.060824 | 0.18948 | 0.200671 | 1.25E-05 | 0.173222 |
| 0.012949 | 0.78018 | 0.018479 | 0.69041 | 0.016644 | 0.71979 | 0.000321 | 0.99448  | 0.118749 |
| 0.037604 | 0.41752 | 0.043898 | 0.34387 | 0.060214 | 0.19397 | 0.020952 | 0.65155  | 0.087939 |
| -0.00331 | 0.94313 | -0.00423 | 0.92739 | -0.00332 | 0.94302 | -0.01601 | 0.73004  | 0.037288 |
| -0.01709 | 0.71268 | 0.008583 | 0.85324 | -0.00823 | 0.85923 | 0.007536 | 0.87098  | 0.031995 |
| 0.070629 | 0.12748 | 0.087868 | 0.05777 | 0.09669  | 0.03673 | 0.061994 | 0.18109  | 0.103796 |
| 0.019129 | 0.68012 | 0.069877 | 0.13159 | 0.042054 | 0.36454 | 0.0653   | 0.15887  | 0.160659 |
| -0.04852 | 0.29545 | -0.01145 | 0.80507 | -0.02925 | 0.52838 | -0.00718 | 0.87696  | 0.033026 |
| 0.028308 | 0.54172 | 0.016131 | 0.72808 | 0.041137 | 0.37509 | -0.01747 | 0.70646  | -0.00879 |
| 0.10988  | 0.01753 | 0.160849 | 0.00048 | 0.152852 | 0.00092 | 0.113761 | 0.0139   | 0.215242 |
| 0.058103 | 0.21009 | 0.105443 | 0.02267 | 0.127777 | 0.00569 | 0.033322 | 0.47254  | 0.114858 |
| 0.112179 | 0.01529 | 0.12643  | 0.00622 | 0.108661 | 0.01883 | 0.106292 | 0.0216   | 0.169134 |
| 0.03182  | 0.49273 | 0.038179 | 0.41042 | 0.042014 | 0.36499 | 0.023708 | 0.60932  | 0.094082 |
| -0.02929 | 0.5278  | -0.00965 | 0.83523 | 0.020879 | 0.65268 | -0.04566 | 0.32486  | -0.0116  |
| 0.038154 | 0.41073 | 0.005063 | 0.91311 | 0.048209 | 0.29852 | -0.03103 | 0.50356  | -0.02734 |
| -0.02882 | 0.53447 | -0.02521 | 0.5869  | -0.02043 | 0.65975 | -0.0248  | 0.59298  | -0.03853 |

|          |          |          |          |          |          |          |         |          |
|----------|----------|----------|----------|----------|----------|----------|---------|----------|
| 0.122347 | 0.00813  | 0.055637 | 0.23012  | 0.055379 | 0.23229  | 0.056012 | 0.22699 | 0.030797 |
| 0.013825 | 0.76573  | -0.00813 | 0.86084  | 0.033955 | 0.46416  | -0.04913 | 0.28933 | -0.06617 |
| -0.01236 | 0.78987  | 0.00603  | 0.8966   | 0.026558 | 0.56699  | -0.02875 | 0.53545 | -0.01141 |
| -0.01808 | 0.6967   | -0.02588 | 0.57689  | -0.01308 | 0.77793  | -0.03681 | 0.42738 | 0.010203 |
| 0.046873 | 0.31213  | 0.080794 | 0.08113  | 0.074547 | 0.10764  | 0.070389 | 0.12878 | 0.038403 |
| 0.032163 | 0.48808  | -0.01567 | 0.73561  | -0.00153 | 0.97362  | -0.0215  | 0.64298 | -0.03237 |
| 0.043008 | 0.35375  | 0.049209 | 0.28859  | 0.08035  | 0.08283  | 0.001068 | 0.98164 | -0.01065 |
| -0.10792 | 0.01966  | -0.07795 | 0.09245  | -0.05502 | 0.23533  | -0.08428 | 0.06881 | -0.07109 |
| -0.02003 | 0.66591  | -0.01059 | 0.81952  | 0.012056 | 0.79498  | -0.03314 | 0.47491 | -0.04224 |
| 0.090094 | 0.05169  | 0.04867  | 0.29392  | 0.09811  | 0.03404  | -0.00707 | 0.87881 | 0.028727 |
| 0.196746 | 1.85E-05 | 0.208935 | 5.28E-06 | 0.253678 | 2.72E-08 | 0.099131 | 0.03221 | 0.098923 |
| -0.01233 | 0.79039  | 0.012798 | 0.78267  | 0.039346 | 0.39625  | -0.02052 | 0.6582  | 0.037368 |
| 0.05599  | 0.22718  | 0.004983 | 0.91447  | 0.053016 | 0.25287  | -0.01775 | 0.70206 | -0.02669 |
| 0.073326 | 0.11354  | 0.107232 | 0.02046  | 0.112902 | 0.01464  | 0.071296 | 0.12391 | 0.144897 |
| -0.03099 | 0.50412  | -0.02905 | 0.53113  | 0.003509 | 0.93972  | -0.06276 | 0.17574 | -0.07318 |
| 0.06737  | 0.14605  | 0.115611 | 0.01242  | 0.052029 | 0.26182  | 0.158594 | 0.00058 | 0.087989 |
| 0.075883 | 0.10146  | 0.10519  | 0.023    | 0.103694 | 0.02503  | 0.073455 | 0.11291 | 0.230856 |
| 0.071821 | 0.12116  | 0.061516 | 0.18449  | 0.095235 | 0.03967  | 0.01003  | 0.82884 | 0.009479 |
| 0.05513  | 0.23441  | 0.096702 | 0.0367   | 0.102297 | 0.02707  | 0.056214 | 0.22532 | 0.074513 |
| -0.03043 | 0.51186  | 0.027159 | 0.55824  | 0.013476 | 0.77147  | 0.018529 | 0.68962 | 0.044945 |
| 0.00155  | 0.97336  | 0.00068  | 0.98831  | 0.013259 | 0.77505  | -0.0018  | 0.96902 | -0.01619 |
| -0.03882 | 0.40255  | -0.02668 | 0.56519  | -0.02822 | 0.543    | -0.01259 | 0.78615 | -0.03081 |
| 0.011555 | 0.80333  | 0.035892 | 0.43905  | 0.038362 | 0.40819  | 0.023482 | 0.61275 | 0.071475 |
| -0.05511 | 0.2346   | -0.04364 | 0.34672  | -0.04074 | 0.3797   | -0.03064 | 0.50886 | -0.03093 |
| -0.00619 | 0.89391  | 0.06928  | 0.13493  | 0.022767 | 0.62361  | 0.076024 | 0.10083 | 0.216527 |
| 0.00878  | 0.84991  | 0.00901  | 0.84603  | 0.046297 | 0.31811  | -0.03944 | 0.39511 | -0.02087 |
| -0.04141 | 0.37196  | -0.02585 | 0.57742  | -0.01321 | 0.77586  | -0.03182 | 0.49268 | -0.01137 |
| -0.03618 | 0.43536  | -0.01132 | 0.80723  | -0.01914 | 0.67988  | -0.00778 | 0.86685 | 0.009092 |
| 0.027764 | 0.54951  | 0.010633 | 0.81873  | 0.008961 | 0.84686  | 0.023997 | 0.60497 | -0.00812 |
| 0.038458 | 0.40701  | 0.105999 | 0.02196  | 0.096199 | 0.0377   | 0.078362 | 0.09074 | 0.196035 |
| 0.072811 | 0.11611  | 0.134808 | 0.00351  | 0.127107 | 0.00595  | 0.08145  | 0.07869 | 0.2158   |
| -0.0061  | 0.89546  | 0.002762 | 0.95253  | 0.009692 | 0.83454  | -0.00577 | 0.90099 | -0.01365 |
| 0.030952 | 0.50462  | 0.022445 | 0.62852  | 0.048031 | 0.30031  | -0.00944 | 0.83876 | 0.052634 |
| 0.098158 | 0.03395  | 0.134751 | 0.00353  | 0.128439 | 0.00544  | 0.114346 | 0.01342 | 0.066648 |
| -0.00467 | 0.91976  | 0.011134 | 0.81035  | 0.006548 | 0.88777  | 0.015932 | 0.7313  | -0.01387 |
| -0.02495 | 0.59073  | -0.03959 | 0.39339  | -0.02642 | 0.56908  | -0.0304  | 0.51222 | -0.04141 |
| 0.096803 | 0.03651  | 0.101665 | 0.02803  | 0.10675  | 0.02104  | 0.076306 | 0.09956 | 0.069218 |
| -0.00794 | 0.8642   | -0.03571 | 0.44141  | -0.00073 | 0.98752  | -0.05881 | 0.20462 | -0.02845 |
| 0.02408  | 0.60373  | 0.079503 | 0.08613  | 0.074986 | 0.10557  | 0.044219 | 0.34034 | 0.05824  |
| 0.02168  | 0.64028  | 0.078147 | 0.09164  | 0.015276 | 0.74197  | 0.124664 | 0.00699 | 0.082493 |
| -0.00517 | 0.91125  | -0.00611 | 0.89524  | 0.004214 | 0.92764  | -0.0167  | 0.71895 | -0.02951 |
| -0.0139  | 0.76445  | -0.03652 | 0.43106  | -0.01891 | 0.68359  | -0.03401 | 0.46345 | -0.08436 |
| -0.0015  | 0.97428  | 0.006448 | 0.88947  | 0.020294 | 0.66181  | 0.001415 | 0.97567 | -0.02121 |
| 0.01184  | 0.79857  | 0.008153 | 0.86051  | 0.029739 | 0.52146  | -0.0104  | 0.82262 | -0.00603 |
| 0.064263 | 0.16561  | 0.077729 | 0.09339  | 0.08143  | 0.07876  | 0.046721 | 0.3137  | 0.064851 |

|          |          |          |          |          |          |          |          |          |
|----------|----------|----------|----------|----------|----------|----------|----------|----------|
| 0.040737 | 0.37976  | 0.080304 | 0.083    | 0.065155 | 0.1598   | 0.060716 | 0.19027  | 0.125327 |
| 0.042328 | 0.36142  | 0.087708 | 0.05823  | 0.070684 | 0.12718  | 0.083548 | 0.07126  | 0.040283 |
| -0.0106  | 0.8193   | 0.002619 | 0.95499  | 0.008804 | 0.84951  | -0.0154  | 0.73994  | -0.04918 |
| 0.109381 | 0.01805  | 0.130809 | 0.00463  | 0.111912 | 0.01554  | 0.11374  | 0.01392  | 0.121084 |
| 0.218133 | 1.95E-06 | 0.161761 | 0.00045  | 0.212804 | 3.49E-06 | 0.064387 | 0.1648   | 0.093004 |
| -0.01153 | 0.80371  | 0.012082 | 0.79456  | 0.008391 | 0.85649  | -0.00964 | 0.83534  | 0.083743 |
| 0.024254 | 0.60111  | 0.036552 | 0.43067  | 0.053242 | 0.25084  | 0.008964 | 0.84681  | 0.033765 |
| -0.04443 | 0.33808  | -0.07248 | 0.11777  | -0.04355 | 0.34773  | -0.08382 | 0.07034  | -0.0945  |
| -0.0862  | 0.0627   | -0.08206 | 0.07647  | -0.05431 | 0.24146  | -0.09582 | 0.03846  | -0.06431 |
| 0.015458 | 0.73901  | 0.009025 | 0.84577  | 0.022649 | 0.62541  | -0.00491 | 0.91566  | 0.001772 |
| -0.10283 | 0.02627  | -0.10133 | 0.02856  | -0.08612 | 0.06295  | -0.09879 | 0.03281  | -0.11135 |
| -0.00226 | 0.96123  | 0.016687 | 0.7191   | 0.026122 | 0.57338  | 0.000796 | 0.98632  | -0.02042 |
| -0.02918 | 0.52928  | -0.02292 | 0.62133  | -0.04072 | 0.37992  | -0.00341 | 0.94145  | 0.000963 |
| -0.0183  | 0.69322  | -0.0162  | 0.727    | 0.006088 | 0.8956   | -0.03089 | 0.50552  | -0.0664  |
| 0.056425 | 0.22358  | 0.101272 | 0.02865  | 0.082797 | 0.07385  | 0.106953 | 0.02079  | 0.110837 |
| 0.08576  | 0.06406  | 0.006553 | 0.88768  | 0.042963 | 0.35425  | -0.02178 | 0.63877  | -0.01051 |
| -0.011   | 0.81258  | -0.02399 | 0.60505  | -0.02086 | 0.65301  | -0.01598 | 0.73056  | -0.041   |
| 0.186645 | 4.94E-05 | 0.358221 | 1.38E-15 | 0.285651 | 3.22E-10 | 0.300534 | 3.33E-11 | 0.545216 |
| 0.014162 | 0.76018  | 0.054703 | 0.23806  | 0.062134 | 0.18011  | 0.038441 | 0.40721  | 0.07584  |
| 0.184598 | 5.99E-05 | 0.386124 | 4.72E-18 | 0.276777 | 1.17E-09 | 0.351972 | 4.58E-15 | 0.627602 |
| 0.173499 | 0.00016  | 0.307891 | 1.03E-11 | 0.253191 | 2.90E-08 | 0.255671 | 2.10E-08 | 0.530056 |
| 0.162457 | 0.00042  | 0.237607 | 2.04E-07 | 0.121154 | 0.00877  | 0.276077 | 1.29E-09 | 0.3787   |
| 0.163466 | 0.00039  | 0.31512  | 3.17E-12 | 0.197924 | 1.64E-05 | 0.327152 | 4.13E-13 | 0.595679 |
| -0.0502  | 0.27895  | 0.0405   | 0.38254  | -0.00986 | 0.83166  | 0.074924 | 0.10586  | 0.082725 |
| 0.075279 | 0.10422  | 0.195047 | 2.19E-05 | 0.134904 | 0.00349  | 0.178983 | 0.0001   | 0.368427 |
| 0.093338 | 0.04379  | 0.097774 | 0.03466  | 0.098648 | 0.03307  | 0.07211  | 0.11967  | 0.155667 |
| 0.056998 | 0.21891  | 0.20395  | 8.90E-06 | 0.090938 | 0.04953  | 0.235057 | 2.77E-07 | 0.370484 |
| 0.235808 | 2.54E-07 | 0.365715 | 3.17E-16 | 0.28528  | 3.40E-10 | 0.311405 | 5.84E-12 | 0.535171 |
| 0.069423 | 0.13412  | 0.243739 | 9.62E-08 | 0.136021 | 0.00323  | 0.255571 | 2.13E-08 | 0.492669 |
| 0.071593 | 0.12235  | 0.200368 | 1.28E-05 | 0.122975 | 0.0078   | 0.193736 | 2.49E-05 | 0.396252 |
| 0.150048 | 0.00114  | 0.22843  | 6.06E-07 | 0.17974  | 9.40E-05 | 0.18368  | 6.53E-05 | 0.338618 |
| 0.09427  | 0.04172  | 0.232513 | 3.76E-07 | 0.151107 | 0.00105  | 0.23283  | 3.62E-07 | 0.430576 |
| 0.054999 | 0.23552  | 0.148408 | 0.0013   | 0.086542 | 0.06167  | 0.147363 | 0.00141  | 0.263466 |
| 0.039732 | 0.39163  | 0.058634 | 0.20595  | 0.042747 | 0.35668  | 0.059806 | 0.19702  | 0.122064 |
| 0.177476 | 0.00012  | 0.226664 | 7.43E-07 | 0.209442 | 5.00E-06 | 0.16504  | 0.00034  | 0.286121 |
| 0.163806 | 0.00038  | 0.254691 | 2.38E-08 | 0.185333 | 5.59E-05 | 0.240365 | 1.46E-07 | 0.484756 |
| 0.093266 | 0.04396  | 0.160215 | 0.00051  | 0.098453 | 0.03342  | 0.161503 | 0.00046  | 0.288624 |
| 0.113899 | 0.01379  | 0.120915 | 0.00891  | 0.08576  | 0.06407  | 0.10755  | 0.02009  | 0.163908 |
| 0.260639 | 1.09E-08 | 0.406557 | 5.15E-20 | 0.304827 | 1.69E-11 | 0.360824 | 8.32E-16 | 0.623407 |
| 0.021507 | 0.64295  | 0.126012 | 0.0064   | 0.049066 | 0.29     | 0.142545 | 0.00202  | 0.206454 |
| -0.06155 | 0.18425  | -0.03832 | 0.40868  | -0.06074 | 0.19007  | -0.00817 | 0.86029  | -0.02786 |
| 0.136751 | 0.00306  | 0.236037 | 2.47E-07 | 0.150975 | 0.00107  | 0.229783 | 5.18E-07 | 0.502955 |
| 0.206419 | 6.88E-06 | 0.243404 | 1.00E-07 | 0.237573 | 2.05E-07 | 0.164879 | 0.00035  | 0.487079 |
| 0.088761 | 0.05527  | 0.257532 | 1.64E-08 | 0.135354 | 0.00338  | 0.279806 | 7.57E-10 | 0.446821 |
| 0.148378 | 0.0013   | 0.247188 | 6.24E-08 | 0.186474 | 5.02E-05 | 0.222023 | 1.26E-06 | 0.430822 |

|          |          |          |          |          |          |          |          |          |
|----------|----------|----------|----------|----------|----------|----------|----------|----------|
| 0.121049 | 0.00883  | 0.283083 | 4.70E-10 | 0.186939 | 4.81E-05 | 0.274891 | 1.53E-09 | 0.479027 |
| 0.167389 | 0.00028  | 0.335767 | 9.05E-14 | 0.25796  | 1.55E-08 | 0.292175 | 1.21E-10 | 0.546864 |
| 0.220863 | 1.44E-06 | 0.362468 | 6.03E-16 | 0.279912 | 7.45E-10 | 0.314662 | 3.42E-12 | 0.356173 |
| 0.10548  | 0.02263  | 0.133717 | 0.00379  | 0.115122 | 0.01279  | 0.11384  | 0.01384  | 0.238323 |
| 0.203615 | 9.21E-06 | 0.318375 | 1.84E-12 | 0.249526 | 4.64E-08 | 0.274615 | 1.59E-09 | 0.448027 |
| 0.100254 | 0.0303   | 0.239425 | 1.64E-07 | 0.136562 | 0.00311  | 0.254017 | 2.60E-08 | 0.304224 |
| 0.03158  | 0.496    | 0.072945 | 0.11543  | 0.047324 | 0.30749  | 0.07477  | 0.10659  | 0.138653 |
| 0.168162 | 0.00026  | 0.307501 | 1.10E-11 | 0.1873   | 4.64E-05 | 0.330403 | 2.34E-13 | 0.413248 |
| 0.249534 | 4.64E-08 | 0.385768 | 5.09E-18 | 0.259509 | 1.26E-08 | 0.392236 | 1.26E-18 | 0.416952 |
| 0.203892 | 8.95E-06 | 0.325047 | 5.93E-13 | 0.2576   | 1.63E-08 | 0.272283 | 2.21E-09 | 0.544043 |
| 0.215288 | 2.66E-06 | 0.350416 | 6.14E-15 | 0.267016 | 4.59E-09 | 0.314826 | 3.33E-12 | 0.604412 |
| 0.201087 | 1.19E-05 | 0.359839 | 1.01E-15 | 0.245624 | 7.60E-08 | 0.346342 | 1.32E-14 | 0.666535 |
| 0.18101  | 8.36E-05 | 0.327707 | 3.75E-13 | 0.238714 | 1.78E-07 | 0.294728 | 8.20E-11 | 0.583501 |
| 0.179358 | 9.73E-05 | 0.279065 | 8.42E-10 | 0.213083 | 3.39E-06 | 0.248649 | 5.19E-08 | 0.497877 |
| 0.383071 | 9.02E-18 | 0.353392 | 3.50E-15 | 0.214965 | 2.76E-06 | 0.416611 | 4.95E-21 | 0.575137 |
| 0.052409 | 0.25834  | 0.161287 | 0.00047  | 0.088948 | 0.05475  | 0.160391 | 0.0005   | 0.278422 |
| -0.0295  | 0.5248   | 0.011378 | 0.80628  | -0.02709 | 0.55922  | 0.052849 | 0.25436  | -0.01721 |
| 0.012727 | 0.78384  | 0.135804 | 0.00328  | 0.071342 | 0.12367  | 0.147582 | 0.00138  | 0.303332 |
| 0.285797 | 3.15E-10 | 0.467271 | 1.05E-26 | 0.326573 | 4.56E-13 | 0.456675 | 1.94E-25 | 0.557187 |
| 0.164241 | 0.00037  | 0.344871 | 1.73E-14 | 0.213941 | 3.09E-06 | 0.359449 | 1.09E-15 | 0.63574  |
| 0.132517 | 0.00412  | 0.201507 | 1.14E-05 | 0.153436 | 0.00088  | 0.184411 | 6.10E-05 | 0.304699 |
| 0.040286 | 0.38506  | 0.083744 | 0.0706   | 0.047727 | 0.30338  | 0.104021 | 0.02458  | 0.124138 |
| 0.125337 | 0.00669  | 0.271294 | 2.54E-09 | 0.162971 | 0.00041  | 0.292171 | 1.21E-10 | 0.502896 |
| 0.076614 | 0.0982   | 0.217867 | 2.01E-06 | 0.08699  | 0.06033  | 0.262434 | 8.55E-09 | 0.537822 |
| 0.147793 | 0.00136  | 0.188124 | 4.29E-05 | 0.146781 | 0.00147  | 0.167842 | 0.00027  | 0.228821 |
| 0.055199 | 0.23382  | 0.118493 | 0.01038  | 0.069693 | 0.13261  | 0.14565  | 0.0016   | 0.129257 |
| -0.06513 | 0.15998  | 0.010997 | 0.81265  | -0.04066 | 0.38063  | 0.037426 | 0.41972  | 0.067922 |
| -0.00759 | 0.87004  | -0.07271 | 0.11659  | -0.03197 | 0.49067  | -0.08883 | 0.05509  | -0.03097 |
| -0.04166 | 0.36908  | 0.082898 | 0.0735   | 0.01294  | 0.78032  | 0.101234 | 0.02871  | 0.152238 |
| 0.041898 | 0.36632  | -0.08023 | 0.08328  | -0.00999 | 0.82956  | -0.11473 | 0.01311  | -0.14438 |
| 0.049478 | 0.28596  | 0.055549 | 0.23087  | 0.054725 | 0.23787  | 0.038329 | 0.40859  | 0.046034 |
| -0.01983 | 0.66907  | -0.08627 | 0.06248  | -0.0712  | 0.1244   | -0.08305 | 0.07297  | -0.12424 |
| -0.16206 | 0.00044  | -0.1     | 0.03072  | -0.14197 | 0.0021   | -0.04061 | 0.38123  | -0.13515 |
| 0.104413 | 0.02404  | 0.197918 | 1.65E-05 | 0.137264 | 0.00295  | 0.191621 | 3.07E-05 | 0.250956 |
| -0.11298 | 0.01458  | -0.01509 | 0.745    | -0.07611 | 0.10043  | 0.027492 | 0.55343  | 0.070454 |
| -0.07613 | 0.10036  | -0.00886 | 0.84854  | -0.03232 | 0.48602  | -0.00552 | 0.90525  | 0.015319 |
| 0.005228 | 0.91029  | 0.007118 | 0.87807  | -0.00094 | 0.98376  | 0.013359 | 0.7734   | -0.04484 |
| 0.061833 | 0.18223  | 0.05659  | 0.22223  | 0.044477 | 0.33753  | 0.054871 | 0.23662  | 0.105583 |
| 0.005613 | 0.90372  | -0.02117 | 0.64811  | -0.01783 | 0.7008   | -0.023   | 0.62011  | -0.06461 |
| -0.02714 | 0.55859  | 0.031518 | 0.49685  | -0.03334 | 0.47234  | 0.073616 | 0.11212  | 0.032298 |
| 0.029587 | 0.5236   | 0.068356 | 0.14023  | 0.053953 | 0.24456  | 0.058043 | 0.21057  | 0.066039 |
| -0.17194 | 0.00019  | -0.20501 | 7.97E-06 | -0.19028 | 3.49E-05 | -0.15724 | 0.00065  | -0.269   |
| 0.013143 | 0.77697  | 0.035695 | 0.44156  | 0.018142 | 0.69578  | 0.034609 | 0.45559  | 0.079203 |
| 0.10817  | 0.01938  | 0.061452 | 0.18495  | 0.073158 | 0.11437  | 0.035687 | 0.44166  | 0.104507 |
| 0.208045 | 5.80E-06 | 0.106246 | 0.02166  | 0.190282 | 3.49E-05 | 0.020125 | 0.66444  | -0.00174 |

|          |          |          |          |          |          |          |          |          |
|----------|----------|----------|----------|----------|----------|----------|----------|----------|
| 0.074768 | 0.1066   | -0.03086 | 0.50589  | -0.01421 | 0.75943  | -0.01748 | 0.70634  | -0.11648 |
| -0.03346 | 0.47074  | 0.100685 | 0.02959  | 0.008196 | 0.85978  | 0.150349 | 0.00112  | 0.180529 |
| -0.05786 | 0.21203  | -0.0426  | 0.35836  | -0.08417 | 0.06917  | -0.00309 | 0.94697  | -0.02294 |
| -0.0942  | 0.04188  | -0.1451  | 0.00167  | -0.1387  | 0.00267  | -0.10659 | 0.02123  | -0.21614 |
| 0.133725 | 0.00379  | 0.057641 | 0.21375  | 0.067527 | 0.14511  | 0.056779 | 0.22069  | 0.020063 |
| -0.05333 | 0.2501   | -0.05542 | 0.23192  | -0.05101 | 0.27128  | -0.04753 | 0.30539  | -0.1129  |
| -0.03764 | 0.41708  | 0.10439  | 0.02407  | 0.024409 | 0.59878  | 0.129643 | 0.00502  | 0.181202 |
| 0.087401 | 0.05912  | 0.16518  | 0.00034  | 0.097135 | 0.03587  | 0.169437 | 0.00023  | 0.315986 |
| 0.184474 | 6.06E-05 | 0.039534 | 0.394    | 0.10781  | 0.01979  | -0.00538 | 0.90764  | 0.02275  |
| 0.047552 | 0.30516  | 0.081072 | 0.08009  | 0.048611 | 0.2945   | 0.065663 | 0.15656  | 0.052535 |
| 0.045089 | 0.33092  | -0.0382  | 0.41018  | -0.0027  | 0.95368  | -0.04685 | 0.31231  | -0.06875 |
| 0.101609 | 0.02812  | 0.044804 | 0.33399  | 0.056827 | 0.2203   | 0.028478 | 0.53929  | 0.120766 |
| -0.00442 | 0.92403  | 0.0066   | 0.88689  | -0.01613 | 0.72815  | 0.010693 | 0.81774  | 0.065238 |
| 0.017135 | 0.71189  | 0.087157 | 0.05983  | 0.023453 | 0.61319  | 0.114281 | 0.01347  | 0.130977 |
| -0.01456 | 0.75367  | 0.11089  | 0.01651  | 0.02478  | 0.59324  | 0.118704 | 0.01025  | 0.268071 |
| 0.032582 | 0.48243  | -0.00998 | 0.82961  | -0.00694 | 0.88118  | -0.00147 | 0.9747   | -0.0811  |
| -0.09786 | 0.03451  | -0.26424 | 6.70E-09 | -0.18752 | 4.55E-05 | -0.24228 | 1.15E-07 | -0.44973 |
| -0.03457 | 0.45611  | -0.0199  | 0.66793  | -0.00263 | 0.95485  | -0.0249  | 0.5915   | -0.02739 |
| 0.004373 | 0.92491  | 0.149266 | 0.00122  | 0.050498 | 0.27614  | 0.186748 | 4.89E-05 | 0.326466 |
| 0.008114 | 0.86118  | 0.101428 | 0.0284   | 0.037998 | 0.41264  | 0.121707 | 0.00847  | 0.209786 |
| 0.067138 | 0.14745  | 0.268845 | 3.56E-09 | 0.140384 | 0.00236  | 0.286023 | 3.05E-10 | 0.520474 |
| 0.098209 | 0.03386  | 0.023218 | 0.61675  | 0.059426 | 0.19988  | -0.01907 | 0.68108  | 0.073494 |
| 0.016151 | 0.72776  | -0.05282 | 0.25465  | -0.0152  | 0.74323  | -0.06993 | 0.13129  | -0.22328 |
| 0.101856 | 0.02774  | -0.08342 | 0.0717   | -0.03687 | 0.42662  | -0.06808 | 0.14183  | -0.21978 |
| -0.09294 | 0.04471  | -0.05072 | 0.27402  | -0.06223 | 0.17946  | -0.04875 | 0.29311  | -0.01433 |
| -0.1759  | 0.00013  | -0.13615 | 0.0032   | -0.12456 | 0.00704  | -0.10779 | 0.01982  | -0.23601 |
| 0.087088 | 0.06004  | 0.058503 | 0.20697  | 0.040585 | 0.38154  | 0.063064 | 0.17366  | 0.005703 |
| -0.01604 | 0.72948  | 0.023579 | 0.61128  | -0.00561 | 0.90375  | 0.036715 | 0.42862  | 0.045505 |
| -0.0067  | 0.88512  | 0.037364 | 0.4205   | 0.005445 | 0.90659  | 0.055204 | 0.23378  | 0.046367 |
| 0.01831  | 0.69309  | -0.0663  | 0.15259  | -0.03054 | 0.51029  | -0.07429 | 0.10888  | -0.15211 |
| -0.08984 | 0.05236  | -0.10267 | 0.02651  | -0.09913 | 0.03222  | -0.08103 | 0.08024  | -0.14267 |
| 0.006229 | 0.8932   | 0.131712 | 0.00436  | 0.039809 | 0.39072  | 0.161684 | 0.00045  | 0.336218 |
| -0.11443 | 0.01334  | -0.19228 | 2.87E-05 | -0.10807 | 0.01949  | -0.20543 | 7.63E-06 | -0.32715 |
| 0.088582 | 0.05576  | 0.083739 | 0.07062  | 0.076889 | 0.097    | 0.051768 | 0.26422  | 0.142788 |
| 0.065698 | 0.15635  | 0.069668 | 0.13275  | 0.044836 | 0.33365  | 0.062925 | 0.17462  | 0.166121 |
| -0.03819 | 0.41023  | -0.02751 | 0.55323  | -0.03481 | 0.45293  | -0.00931 | 0.84091  | -0.06542 |
| 0.009991 | 0.8295   | 0.090761 | 0.04998  | 0.052079 | 0.26136  | 0.086489 | 0.06183  | 0.18527  |
| -0.07514 | 0.10488  | 0.013989 | 0.76302  | -0.03332 | 0.47253  | 0.05051  | 0.27602  | 0.028752 |
| -0.0502  | 0.27895  | -0.0105  | 0.82101  | 0.002714 | 0.95336  | -0.01059 | 0.81951  | -0.12064 |
| -0.02963 | 0.52304  | 0.104184 | 0.02435  | -0.00282 | 0.9515   | 0.162958 | 0.00041  | 0.243009 |
| -0.00502 | 0.91385  | 0.105341 | 0.02281  | 0.045377 | 0.32783  | 0.112671 | 0.01485  | 0.221451 |
| 0.069752 | 0.13229  | 0.285081 | 3.50E-10 | 0.12654  | 0.00618  | 0.331494 | 1.93E-13 | 0.528026 |
| -0.02666 | 0.56546  | 0.020214 | 0.66305  | -0.02354 | 0.61194  | 0.054473 | 0.24004  | 0.025695 |
| 0.011673 | 0.80135  | 0.153101 | 0.0009   | 0.079464 | 0.08628  | 0.16494  | 0.00034  | 0.252461 |
| -0.03167 | 0.49471  | 0.087934 | 0.05758  | 0.00622  | 0.89336  | 0.123519 | 0.00753  | 0.160442 |



|          |          |          |          |          |          |          |          |          |
|----------|----------|----------|----------|----------|----------|----------|----------|----------|
| -0.04473 | 0.33477  | 0.035346 | 0.44605  | -0.01584 | 0.73282  | 0.062407 | 0.1782   | 0.12366  |
| -0.06196 | 0.18134  | 0.011219 | 0.80894  | -0.03668 | 0.42905  | 0.047608 | 0.30459  | 0.059654 |
| -0.11922 | 0.00992  | -0.21406 | 3.05E-06 | -0.14688 | 0.00146  | -0.21127 | 4.11E-06 | -0.26944 |
| -0.1145  | 0.01329  | -0.00273 | 0.95312  | -0.06887 | 0.13729  | 0.050093 | 0.28001  | 0.048119 |
| -0.08038 | 0.0827   | -0.09973 | 0.03118  | -0.07067 | 0.12728  | -0.09638 | 0.03733  | -0.23217 |
| 0.002578 | 0.9557   | -0.12714 | 0.00594  | -0.07054 | 0.12798  | -0.12927 | 0.00515  | -0.24432 |
| 0.07952  | 0.08606  | 0.077889 | 0.09272  | 0.085044 | 0.06633  | 0.054505 | 0.23976  | 0.0696   |
| -0.02854 | 0.53843  | -0.10095 | 0.02916  | -0.04356 | 0.34759  | -0.12083 | 0.00896  | -0.19115 |
| -0.0125  | 0.78756  | -0.0221  | 0.63387  | -0.01733 | 0.7087   | -0.02955 | 0.52414  | -0.04796 |
| 0.049184 | 0.28884  | 0.03185  | 0.49233  | 0.040657 | 0.3807   | 0.02347  | 0.61292  | -0.02982 |
| -0.02969 | 0.52219  | -0.04074 | 0.37967  | -0.0032  | 0.94497  | -0.06683 | 0.14934  | -0.10009 |
| -0.02812 | 0.54433  | 0.103337 | 0.02554  | 0.049776 | 0.28307  | 0.103344 | 0.02553  | 0.319517 |
| 0.034924 | 0.4515   | -0.00159 | 0.97265  | 0.004201 | 0.92787  | 0.006647 | 0.88608  | -0.03388 |
| 0.098135 | 0.03399  | -0.01623 | 0.72644  | 0.019632 | 0.67219  | -0.01988 | 0.66827  | -0.14571 |
| 0.084004 | 0.06973  | 0.028648 | 0.53687  | 0.044963 | 0.33227  | 0.018718 | 0.68662  | 0.028659 |
| -0.01695 | 0.71491  | 0.125353 | 0.00668  | 0.009274 | 0.84157  | 0.17913  | 9.93E-05 | 0.325764 |
| -0.02041 | 0.65998  | -0.05813 | 0.20991  | -0.02101 | 0.65069  | -0.04993 | 0.2816   | -0.05725 |
| -0.18757 | 4.53E-05 | -0.09053 | 0.05058  | -0.14866 | 0.00127  | -0.02484 | 0.59233  | -0.07201 |
| 0.116714 | 0.0116   | 0.072802 | 0.11615  | 0.081765 | 0.07753  | 0.043416 | 0.3492   | 0.052007 |
| -0.05023 | 0.27872  | 0.089289 | 0.05383  | 0.002251 | 0.96131  | 0.126147 | 0.00634  | 0.206668 |
| 0.07392  | 0.11064  | 0.247791 | 5.79E-08 | 0.114694 | 0.01313  | 0.295288 | 7.52E-11 | 0.32799  |
| -0.10641 | 0.02145  | -0.06496 | 0.16108  | -0.08686 | 0.06071  | -0.02313 | 0.61813  | -0.05435 |
| 0.083623 | 0.07101  | 0.022532 | 0.62719  | 0.023176 | 0.61738  | 0.015662 | 0.73569  | 0.029192 |
| -0.06054 | 0.19156  | -0.10533 | 0.02282  | -0.05118 | 0.26967  | -0.13335 | 0.00389  | -0.17781 |
| 0.007372 | 0.87376  | 0.031407 | 0.49837  | 0.029713 | 0.52183  | 0.030751 | 0.50739  | 0.060969 |
| -0.08828 | 0.05659  | -0.07085 | 0.12628  | -0.04778 | 0.30285  | -0.09213 | 0.04662  | -0.05193 |
| 0.01424  | 0.75891  | 0.171685 | 0.00019  | 0.069735 | 0.13238  | 0.199166 | 1.45E-05 | 0.302775 |
| -0.03679 | 0.42773  | -0.04499 | 0.33202  | -0.04606 | 0.32057  | -0.03612 | 0.43616  | -0.01693 |
| 0.008225 | 0.85929  | -0.01657 | 0.72103  | -0.00455 | 0.92189  | -0.02074 | 0.65483  | -0.0511  |
| 0.047069 | 0.3101   | 0.151968 | 0.00099  | 0.059444 | 0.19974  | 0.180889 | 8.46E-05 | 0.331254 |
| 0.136262 | 0.00317  | 0.130512 | 0.00473  | 0.09216  | 0.04654  | 0.150155 | 0.00114  | 0.104256 |
| -0.00729 | 0.87509  | 0.011035 | 0.812    | 0.000796 | 0.98632  | 0.003061 | 0.94741  | 0.156501 |
| 0.130404 | 0.00476  | 0.26928  | 3.36E-09 | 0.183716 | 6.51E-05 | 0.260665 | 1.08E-08 | 0.405446 |
| 0.047122 | 0.30956  | 0.221238 | 1.38E-06 | 0.115494 | 0.01251  | 0.228925 | 5.72E-07 | 0.464363 |
| -0.07134 | 0.12368  | -0.04438 | 0.33854  | -0.00963 | 0.8356   | -0.08582 | 0.06388  | -0.04024 |
| -0.02617 | 0.57265  | 0.02086  | 0.65298  | 0.015968 | 0.73072  | 0.005473 | 0.9061   | 0.062149 |
| -0.05013 | 0.27966  | 0.028694 | 0.53622  | -0.03674 | 0.42826  | 0.078621 | 0.08968  | 0.058288 |
| -0.07429 | 0.10887  | -0.05812 | 0.20996  | -0.06662 | 0.15063  | -0.04044 | 0.38325  | -0.08856 |
| -0.03547 | 0.44441  | -0.01629 | 0.72549  | -0.04663 | 0.31462  | 0.011119 | 0.8106   | -0.02629 |
| 0.048865 | 0.29198  | 0.045854 | 0.32277  | 0.031617 | 0.49549  | 0.048921 | 0.29143  | -0.00199 |
| 0.005008 | 0.91405  | 0.133864 | 0.00375  | 0.060324 | 0.19315  | 0.144289 | 0.00177  | 0.266393 |
| 0.007171 | 0.87717  | -0.02221 | 0.63215  | -0.02444 | 0.59832  | -0.0097  | 0.83435  | -0.0263  |
| -0.15155 | 0.00102  | -0.18357 | 6.60E-05 | -0.13835 | 0.00273  | -0.15989 | 0.00052  | -0.2219  |
| -0.13306 | 0.00397  | -0.00949 | 0.83785  | -0.07934 | 0.08676  | 0.050277 | 0.27824  | 0.051422 |
| 0.003654 | 0.93723  | -0.05121 | 0.26944  | 0.005624 | 0.90353  | -0.07965 | 0.08555  | -0.1134  |

|          |         |          |          |          |         |          |          |          |
|----------|---------|----------|----------|----------|---------|----------|----------|----------|
| -0.05314 | 0.25175 | -0.03475 | 0.45369  | -0.05634 | 0.22426 | -0.04581 | 0.32324  | -0.04299 |
| -0.02174 | 0.63933 | -0.21695 | 2.22E-06 | -0.13562 | 0.00332 | -0.21449 | 2.91E-06 | -0.35065 |
| -0.13072 | 0.00466 | -0.09982 | 0.03103  | -0.10695 | 0.0208  | -0.06984 | 0.13182  | -0.13722 |
| 0.004491 | 0.92289 | -0.05057 | 0.27541  | -0.02391 | 0.60622 | -0.05285 | 0.25433  | -0.13454 |
| 0.040156 | 0.3866  | 0.100069 | 0.03061  | 0.048033 | 0.30028 | 0.111274 | 0.01614  | 0.085842 |
| -0.00257 | 0.95591 | 0.014741 | 0.75069  | 0.011916 | 0.79731 | 0.022338 | 0.63017  | -0.03016 |
| -0.01038 | 0.82302 | -0.02545 | 0.58325  | -0.03084 | 0.50609 | -0.01641 | 0.72364  | -0.05734 |
| -0.03868 | 0.40431 | -0.02111 | 0.64904  | -0.01485 | 0.74895 | -0.03178 | 0.49332  | -0.05501 |
| -0.01059 | 0.81949 | 0.078688 | 0.08941  | 0.024574 | 0.59632 | 0.093557 | 0.0433   | 0.157829 |
| -0.04481 | 0.33392 | 0.057003 | 0.21887  | 0.013609 | 0.76928 | 0.062001 | 0.18104  | 0.124199 |
| -0.00108 | 0.98151 | -0.05662 | 0.22202  | -0.02473 | 0.59404 | -0.0631  | 0.17342  | -0.11328 |
| 0.068559 | 0.13905 | -0.00607 | 0.89589  | 0.00416  | 0.92857 | -0.00692 | 0.88139  | -0.08376 |
| -0.02163 | 0.64103 | -0.01991 | 0.66778  | -0.02938 | 0.52644 | -0.01098 | 0.81287  | -0.07209 |
| -0.05321 | 0.25115 | -0.01933 | 0.677    | -0.02281 | 0.623   | -0.01449 | 0.75486  | 0.039066 |
| -0.02364 | 0.61042 | -0.04002 | 0.3882   | -0.06005 | 0.19521 | -0.01086 | 0.81488  | -0.06311 |
| -0.00884 | 0.84892 | -0.07307 | 0.11483  | -0.00748 | 0.872   | -0.09831 | 0.03367  | -0.09204 |
| -0.05856 | 0.20654 | 0.052493 | 0.25759  | 0.011507 | 0.80413 | 0.066319 | 0.15246  | 0.068103 |
| 0.041378 | 0.3723  | 0.02348  | 0.61277  | -0.0055  | 0.90561 | 0.063364 | 0.17162  | -0.06335 |
| -0.04534 | 0.32822 | 0.00825  | 0.85887  | -0.01604 | 0.72961 | 0.022481 | 0.62798  | 0.072173 |
| 0.035717 | 0.44128 | -0.006   | 0.89717  | -0.00112 | 0.98076 | 0.003123 | 0.94634  | -0.00154 |
| 0.029419 | 0.52596 | -0.0077  | 0.86823  | -0.00341 | 0.94149 | 0.000709 | 0.98781  | -0.00693 |
| -0.05818 | 0.20949 | -0.00819 | 0.85995  | -0.03041 | 0.51206 | 0.011908 | 0.79745  | -0.02586 |
| -0.03243 | 0.48449 | -0.08066 | 0.08166  | -0.0586  | 0.20619 | -0.07451 | 0.10781  | -0.09793 |
| -0.00621 | 0.89358 | -0.10181 | 0.02782  | -0.04699 | 0.31092 | -0.11137 | 0.01605  | -0.23586 |
| 0.048477 | 0.29583 | 0.049363 | 0.28709  | 0.046734 | 0.31357 | 0.039718 | 0.3918   | 0.118697 |
| -0.0261  | 0.57367 | 0.032081 | 0.48918  | -0.00962 | 0.83582 | 0.058998 | 0.20315  | 0.025433 |
| -0.01604 | 0.72959 | 0.151651 | 0.00101  | 0.048522 | 0.29539 | 0.192312 | 2.87E-05 | 0.302153 |
| 0.00682  | 0.88314 | 0.095147 | 0.03985  | 0.028318 | 0.54158 | 0.121999 | 0.00831  | 0.199482 |
| 0.015172 | 0.74365 | -0.00752 | 0.87127  | 0.000985 | 0.98306 | -0.01315 | 0.77679  | -0.05433 |
| 0.097883 | 0.03446 | 0.254026 | 2.60E-08 | 0.139254 | 0.00256 | 0.265469 | 5.67E-09 | 0.327529 |
| -0.00664 | 0.88623 | 0.088809 | 0.05513  | 0.036108 | 0.4363  | 0.0901   | 0.05168  | 0.223395 |
| 0.071093 | 0.12499 | 0.177981 | 0.00011  | 0.114623 | 0.01319 | 0.174353 | 0.00015  | 0.22249  |
| -0.07319 | 0.1142  | 0.032896 | 0.47822  | -0.04538 | 0.3278  | 0.092421 | 0.04592  | 0.058679 |
| -0.03073 | 0.50773 | 0.012264 | 0.79152  | -0.02367 | 0.60993 | 0.036621 | 0.4298   | 0.056637 |
| 0.06412  | 0.16655 | 0.215991 | 2.47E-06 | 0.133749 | 0.00378 | 0.199152 | 1.45E-05 | 0.389979 |
| -0.00715 | 0.87749 | 0.055272 | 0.2332   | 0.021736 | 0.63941 | 0.064102 | 0.16668  | 0.059901 |
| -0.08119 | 0.07966 | -0.04742 | 0.30646  | -0.04606 | 0.32064 | -0.04384 | 0.34454  | -0.13795 |
| -0.01669 | 0.71898 | 0.049481 | 0.28594  | 0.006971 | 0.88058 | 0.067366 | 0.14608  | 0.06008  |
| 3.01E-05 | 0.99948 | 0.113889 | 0.01379  | 0.002295 | 0.96056 | 0.170375 | 0.00022  | 0.214624 |
| 0.002338 | 0.95981 | 0.068525 | 0.13925  | 0.018806 | 0.68522 | 0.079297 | 0.08695  | 0.131926 |
| 0.06674  | 0.14987 | -0.01793 | 0.69916  | 0.019263 | 0.67799 | -0.04284 | 0.35558  | 0.043578 |
| 0.000526 | 0.99095 | -0.04237 | 0.36095  | -0.01419 | 0.7598  | -0.04524 | 0.32934  | -0.08507 |
| 0.041897 | 0.36633 | 0.037987 | 0.41279  | 0.029339 | 0.52709 | 0.029576 | 0.52375  | 0.006312 |
| -0.09365 | 0.04309 | 0.064544 | 0.16376  | -0.02162 | 0.64125 | 0.101708 | 0.02797  | 0.200567 |
| -0.02816 | 0.54382 | -0.06241 | 0.17817  | -0.05968 | 0.19795 | -0.04632 | 0.3179   | -0.11212 |

|          |          |          |          |          |          |          |          |          |
|----------|----------|----------|----------|----------|----------|----------|----------|----------|
| 0.014899 | 0.74811  | -0.0138  | 0.76606  | 0.017682 | 0.70312  | -0.04472 | 0.33491  | -0.12093 |
| -0.07403 | 0.1101   | 0.047827 | 0.30237  | -0.01762 | 0.70407  | 0.081391 | 0.07891  | 0.138237 |
| -0.02339 | 0.61415  | 0.02564  | 0.58047  | 0.016462 | 0.72273  | 0.009541 | 0.83707  | 0.046323 |
| -0.00069 | 0.9881   | -0.07275 | 0.11642  | -0.02149 | 0.64317  | -0.09307 | 0.0444   | -0.05184 |
| -0.05392 | 0.24482  | -0.015   | 0.74647  | -0.03003 | 0.5174   | 0.016188 | 0.72715  | 0.032602 |
| -0.06986 | 0.13166  | 0.004721 | 0.91896  | -0.07588 | 0.10147  | 0.069653 | 0.13284  | 0.083783 |
| -0.0134  | 0.7728   | -0.02589 | 0.57683  | -0.02387 | 0.60694  | -0.0207  | 0.65553  | -0.04898 |
| -0.00905 | 0.84541  | -0.09692 | 0.03627  | -0.00474 | 0.91862  | -0.15074 | 0.00109  | -0.16472 |
| 0.120065 | 0.0094   | 0.092376 | 0.04602  | 0.074398 | 0.10835  | 0.080436 | 0.08249  | 0.105054 |
| -0.03249 | 0.48369  | 0.076585 | 0.09833  | 0.018125 | 0.69604  | 0.096766 | 0.03658  | 0.164839 |
| -0.0149  | 0.74802  | 0.105686 | 0.02236  | 0.019685 | 0.67135  | 0.142213 | 0.00207  | 0.159923 |
| -0.02504 | 0.58937  | 0.009182 | 0.84313  | -0.03566 | 0.44196  | 0.031945 | 0.49103  | 0.106956 |
| -0.10576 | 0.02227  | -0.06929 | 0.13486  | -0.10027 | 0.03026  | -0.02467 | 0.59487  | -0.08821 |
| -0.0732  | 0.11419  | -0.0387  | 0.40408  | -0.05466 | 0.23843  | -0.01375 | 0.76698  | -0.09807 |
| 0.068205 | 0.14111  | -0.02845 | 0.53975  | 0.015375 | 0.74035  | -0.04898 | 0.29084  | -0.02632 |
| -0.21314 | 3.37E-06 | -0.22744 | 6.80E-07 | -0.17307 | 0.00017  | -0.21058 | 4.43E-06 | -0.30595 |
| 0.066036 | 0.15422  | 0.006082 | 0.89572  | -0.01146 | 0.80494  | 0.00814  | 0.86073  | -0.02614 |
| -0.01629 | 0.72543  | -0.04441 | 0.33821  | -0.06125 | 0.1864   | -0.01041 | 0.8225   | -0.11967 |
| 0.00174  | 0.97009  | 0.090384 | 0.05094  | 0.024373 | 0.59932  | 0.101026 | 0.02904  | 0.167437 |
| 0.04664  | 0.31454  | -0.03325 | 0.47349  | 0.002338 | 0.95981  | -0.06729 | 0.14653  | -0.10752 |
| -0.00632 | 0.8916   | 0.124693 | 0.00698  | 0.045635 | 0.32509  | 0.153449 | 0.00088  | 0.163329 |
| -0.01792 | 0.69935  | 0.088682 | 0.05548  | 0.061008 | 0.18814  | 0.056881 | 0.21986  | 0.166305 |
| -0.02654 | 0.56732  | -0.09623 | 0.03764  | -0.07752 | 0.09427  | -0.08254 | 0.07475  | -0.126   |
| -0.20915 | 5.16E-06 | -0.11848 | 0.01039  | -0.14529 | 0.00164  | -0.07895 | 0.08835  | -0.11172 |
| 0.02835  | 0.54111  | -0.11149 | 0.01593  | -0.04846 | 0.29596  | -0.123   | 0.00779  | -0.12123 |
| -0.1225  | 0.00805  | 0.019669 | 0.67159  | -0.03536 | 0.44582  | 0.044408 | 0.33829  | 0.043793 |
| -0.04777 | 0.30294  | 0.001024 | 0.9824   | 0.0094   | 0.83945  | -0.01329 | 0.77456  | -0.09568 |
| -0.09565 | 0.03881  | -0.04161 | 0.36958  | -0.05867 | 0.2057   | -0.01658 | 0.72076  | -0.05075 |
| -0.0667  | 0.1501   | -0.11265 | 0.01487  | -0.07765 | 0.09373  | -0.12389 | 0.00735  | -0.17414 |
| 0.014684 | 0.75164  | -0.04112 | 0.37532  | -0.03745 | 0.41938  | -0.04092 | 0.37757  | 0.021513 |
| -0.06289 | 0.17483  | 0.043953 | 0.34326  | -0.02887 | 0.53373  | 0.081591 | 0.07817  | 0.125414 |
| 0.003089 | 0.94693  | -0.00625 | 0.89283  | 0.011981 | 0.79623  | -0.02268 | 0.62501  | -0.0206  |
| 0.015382 | 0.74023  | 0.03755  | 0.41819  | 0.007541 | 0.87089  | 0.039415 | 0.39543  | -0.02693 |
| -0.15129 | 0.00104  | -0.09559 | 0.03893  | -0.12473 | 0.00696  | -0.05107 | 0.27071  | -0.08962 |
| -0.06538 | 0.15838  | 0.022739 | 0.62403  | -0.0378  | 0.41513  | 0.059296 | 0.20086  | 0.100506 |
| -0.08299 | 0.07319  | -0.02237 | 0.62969  | -0.07542 | 0.10356  | 0.012209 | 0.79244  | 0.02485  |
| 0.016347 | 0.72458  | 0.025638 | 0.5805   | 0.013943 | 0.76379  | 0.040466 | 0.38295  | 0.099051 |
| 0.009275 | 0.84156  | 0.053399 | 0.24944  | 0.005098 | 0.9125   | 0.068449 | 0.13968  | 0.059382 |
| -0.02925 | 0.52835  | -0.1221  | 0.00826  | -0.06597 | 0.15461  | -0.13307 | 0.00397  | -0.18761 |
| 0.025504 | 0.58249  | -0.01164 | 0.80187  | 0.011627 | 0.80212  | -0.04037 | 0.38409  | -0.11385 |
| -0.05186 | 0.26336  | 0.012522 | 0.78724  | -0.0366  | 0.43003  | 0.044467 | 0.33764  | 0.109041 |
| -0.18285 | 7.06E-05 | -0.29759 | 5.28E-11 | -0.18752 | 4.55E-05 | -0.30444 | 1.80E-11 | -0.42925 |
| -0.03337 | 0.47187  | -0.05576 | 0.22908  | -0.00647 | 0.88904  | -0.0735  | 0.11266  | -0.10171 |
| -0.07138 | 0.12345  | 0.077929 | 0.09255  | 0.018101 | 0.69643  | 0.079507 | 0.08611  | 0.158736 |
| 0.213726 | 3.16E-06 | 0.082134 | 0.0762   | 0.123763 | 0.00741  | 0.039218 | 0.3978   | 0.053264 |

|          |         |          |          |          |          |          |          |          |
|----------|---------|----------|----------|----------|----------|----------|----------|----------|
| -0.06972 | 0.13244 | -0.19041 | 3.45E-05 | -0.08878 | 0.05522  | -0.22921 | 5.53E-07 | -0.29441 |
| 0.091945 | 0.04705 | -0.11573 | 0.01232  | -0.03192 | 0.49144  | -0.13463 | 0.00356  | -0.23431 |
| -0.0398  | 0.39077 | -0.01462 | 0.75275  | -0.0512  | 0.26954  | 0.001406 | 0.97582  | 0.009734 |
| -0.16669 | 0.0003  | -0.02286 | 0.62214  | -0.05723 | 0.21702  | -0.01817 | 0.69526  | 0.024064 |
| -0.01807 | 0.69685 | 0.131574 | 0.0044   | 0.039021 | 0.40018  | 0.162639 | 0.00042  | 0.220178 |
| 0.028853 | 0.53395 | -0.02409 | 0.60358  | 0.010746 | 0.81684  | -0.04182 | 0.36721  | -0.03645 |
| -0.0759  | 0.10138 | -0.10042 | 0.03002  | -0.07606 | 0.10066  | -0.10305 | 0.02595  | -0.09545 |
| -0.0255  | 0.58247 | 0.142071 | 0.00209  | 0.030188 | 0.51519  | 0.190319 | 3.48E-05 | 0.248233 |
| -0.04209 | 0.36417 | 0.040637 | 0.38093  | -0.00476 | 0.91821  | 0.064161 | 0.16629  | 0.152311 |
| -0.06969 | 0.13261 | -0.02991 | 0.51909  | -0.04665 | 0.31444  | -0.02451 | 0.59724  | -0.01377 |
| 0.039644 | 0.39269 | 0.025645 | 0.58039  | 0.017094 | 0.71255  | 0.030273 | 0.51401  | 0.066099 |
| 0.007904 | 0.86474 | -0.01101 | 0.81241  | -0.04091 | 0.37776  | 0.026142 | 0.57308  | -0.08159 |
| -0.00118 | 0.97971 | -0.11516 | 0.01277  | -0.07291 | 0.11561  | -0.11162 | 0.01581  | -0.25291 |
| -0.07648 | 0.09881 | -0.01597 | 0.73076  | -0.04447 | 0.33764  | -0.0009  | 0.98457  | 0.043508 |
| 0.024948 | 0.59074 | -0.0133  | 0.77445  | 0.052953 | 0.25343  | -0.05409 | 0.24332  | -0.0494  |
| -0.01711 | 0.71229 | -0.15512 | 0.00077  | -0.08047 | 0.08237  | -0.18264 | 7.20E-05 | -0.2588  |
| -0.01858 | 0.68875 | 0.116912 | 0.01146  | 0.030061 | 0.51697  | 0.145387 | 0.00163  | 0.26428  |
| -0.07704 | 0.09633 | 0.010391 | 0.82279  | -0.03418 | 0.46121  | 0.033077 | 0.4758   | 0.073181 |
| 0.02528  | 0.5858  | 0.184769 | 5.90E-05 | 0.094525 | 0.04117  | 0.194091 | 2.41E-05 | 0.333134 |
| -0.06646 | 0.15158 | -0.00198 | 0.96603  | 0.005321 | 0.90869  | -0.01768 | 0.70312  | -0.02875 |
| 0.004963 | 0.91481 | 0.075608 | 0.10271  | 0.032047 | 0.48965  | 0.088259 | 0.05666  | 0.091433 |
| -0.13531 | 0.00339 | -0.05892 | 0.20372  | -0.12122 | 0.00873  | -0.00364 | 0.93747  | 0.024354 |
| -0.10114 | 0.02886 | -0.14223 | 0.00206  | -0.09709 | 0.03595  | -0.14505 | 0.00167  | -0.34874 |
| -0.00092 | 0.9841  | -0.01687 | 0.71621  | -0.04834 | 0.2972   | 0.012349 | 0.79012  | -0.02186 |
| 0.050448 | 0.27661 | 0.070547 | 0.12792  | 0.065074 | 0.16033  | 0.045134 | 0.33043  | 0.199434 |
| 0.031479 | 0.49738 | 0.062004 | 0.18102  | 0.035867 | 0.43937  | 0.068612 | 0.13874  | 0.119569 |
| 0.021501 | 0.64304 | 0.075499 | 0.10321  | 0.057258 | 0.21681  | 0.064852 | 0.16176  | 0.135474 |
| 0.16506  | 0.00034 | 0.145601 | 0.00161  | 0.18432  | 6.15E-05 | 0.063836 | 0.16845  | 0.083655 |
| -0.04166 | 0.36905 | -0.05947 | 0.19953  | -0.08702 | 0.06023  | -0.0164  | 0.72372  | -0.10354 |
| -0.11319 | 0.01439 | -0.1338  | 0.00377  | -0.07207 | 0.11989  | -0.14484 | 0.0017   | -0.2552  |
| 0.017061 | 0.71307 | 0.13784  | 0.00284  | 0.060015 | 0.19545  | 0.160731 | 0.00049  | 0.22192  |
| -0.03674 | 0.4283  | 0.057979 | 0.21107  | 0.013325 | 0.77396  | 0.070121 | 0.13025  | 0.103673 |
| -0.01098 | 0.81285 | 0.053628 | 0.24742  | 0.02687  | 0.56245  | 0.062843 | 0.17518  | 0.068078 |
| -0.11228 | 0.0152  | -0.12464 | 0.007    | -0.12053 | 0.00913  | -0.08159 | 0.07819  | -0.16488 |
| -0.04376 | 0.34535 | 0.060393 | 0.19264  | -0.00318 | 0.9454   | 0.100295 | 0.03023  | 0.096282 |
| -0.07927 | 0.08706 | -0.10248 | 0.0268   | -0.06234 | 0.17866  | -0.10272 | 0.02644  | -0.19161 |
| 0.060932 | 0.1887  | 0.060853 | 0.18927  | 0.061513 | 0.18451  | 0.058669 | 0.20568  | 0.072073 |
| 0.03666  | 0.42931 | -0.01973 | 0.67068  | -0.02574 | 0.57902  | 0.001476 | 0.97462  | -0.09016 |
| 0.051071 | 0.27072 | 0.039259 | 0.39731  | 0.022574 | 0.62656  | 0.043742 | 0.34558  | 0.023822 |
| 0.040148 | 0.3867  | 0.121614 | 0.00852  | 0.059021 | 0.20297  | 0.123802 | 0.00739  | 0.23664  |
| 0.018258 | 0.69393 | 0.078313 | 0.09095  | 0.044406 | 0.3383   | 0.062361 | 0.17852  | 0.138615 |
| -0.05675 | 0.22091 | 0.02101  | 0.65064  | -0.04424 | 0.34011  | 0.046721 | 0.31369  | 0.102004 |
| 0.029133 | 0.52999 | -0.03658 | 0.43034  | 0.00278  | 0.95223  | -0.04784 | 0.30221  | -0.19037 |
| -0.03744 | 0.41949 | 0.099009 | 0.03243  | 0.00933  | 0.84064  | 0.135141 | 0.00343  | 0.210085 |
| 0.082236 | 0.07583 | -0.02842 | 0.54012  | 0.017105 | 0.71236  | -0.0415  | 0.37093  | -0.12093 |

|           |          |          |          |           |         |          |          |          |
|-----------|----------|----------|----------|-----------|---------|----------|----------|----------|
| -0.0355   | 0.44412  | -0.02822 | 0.54301  | -0.01746  | 0.70668 | -0.01449 | 0.75473  | -0.12686 |
| -0.13542  | 0.00337  | -0.07315 | 0.1144   | -0.10945  | 0.01798 | -0.0312  | 0.50123  | -0.02846 |
| -0.07739  | 0.09484  | -0.04189 | 0.36638  | -0.07724  | 0.09547 | -0.00298 | 0.94881  | -0.06765 |
| 0.039381  | 0.39583  | 0.090337 | 0.05106  | 0.042444  | 0.3601  | 0.115383 | 0.01259  | 0.142859 |
| -0.12086  | 0.00894  | 0.000487 | 0.99162  | -0.06769  | 0.14415 | 0.035836 | 0.43976  | 0.054306 |
| -0.0217   | 0.64     | -0.01707 | 0.7129   | -0.02497  | 0.59039 | 0.008716 | 0.85099  | -0.0099  |
| 0.100873  | 0.02929  | -0.04328 | 0.35075  | 0.018825  | 0.68493 | -0.06984 | 0.13181  | -0.14894 |
| -0.01392  | 0.76422  | -0.05586 | 0.22827  | -0.03865  | 0.40473 | -0.06471 | 0.16271  | -0.00394 |
| -0.03498  | 0.45079  | 0.116578 | 0.0117   | 0.003293  | 0.94343 | 0.172634 | 0.00018  | 0.326988 |
| -0.10958  | 0.01784  | -0.24926 | 4.80E-08 | -0.17087  | 0.00021 | -0.23316 | 3.48E-07 | -0.40447 |
| -7.29E-05 | 0.99875  | 0.114729 | 0.01311  | 0.044132  | 0.3413  | 0.120765 | 0.00899  | 0.204762 |
| -0.08949  | 0.05328  | -0.09396 | 0.04241  | -0.06924  | 0.13516 | -0.0886  | 0.0557   | -0.16907 |
| -0.04075  | 0.37966  | 0.095641 | 0.03883  | 0.014783  | 0.75002 | 0.114805 | 0.01305  | 0.218417 |
| -0.01523  | 0.74274  | 0.061163 | 0.18702  | 0.01476   | 0.75039 | 0.089082 | 0.05439  | 0.070668 |
| 0.046626  | 0.31468  | 0.020049 | 0.66564  | 0.007218  | 0.87638 | 0.031312 | 0.49967  | 0.040269 |
| 0.061098  | 0.18749  | 0.014615 | 0.75276  | 0.036444  | 0.43204 | -0.0084  | 0.85638  | 0.015695 |
| -0.11199  | 0.01547  | -0.03708 | 0.42409  | -0.06133  | 0.18584 | -0.03343 | 0.47112  | 0.088859 |
| -0.02608  | 0.57399  | 0.04001  | 0.38832  | -0.00197  | 0.96621 | 0.059204 | 0.20157  | 0.091248 |
| -0.19747  | 1.72E-05 | -0.13591 | 0.00325  | -0.13768  | 0.00287 | -0.11348 | 0.01414  | -0.07023 |
| 0.007435  | 0.87269  | -0.06076 | 0.18995  | -0.03266  | 0.48132 | -0.06723 | 0.14688  | -0.02527 |
| -0.05296  | 0.25336  | 0.043285 | 0.35065  | -0.01953  | 0.67381 | 0.063843 | 0.1684   | 0.11478  |
| -0.00762  | 0.86949  | 0.042666 | 0.35759  | 0.016685  | 0.71914 | 0.040253 | 0.38545  | 0.093526 |
| -0.07832  | 0.09093  | -0.05377 | 0.24613  | -0.03736  | 0.42061 | -0.05657 | 0.2224   | -0.07031 |
| -0.02226  | 0.63143  | 0.048749 | 0.29313  | 0.000524  | 0.99099 | 0.074913 | 0.10592  | 0.071264 |
| -0.05747  | 0.21509  | -0.0736  | 0.11219  | -0.05709  | 0.21816 | -0.07352 | 0.11257  | -0.13108 |
| -0.07723  | 0.09552  | 0.023266 | 0.61601  | -0.02968  | 0.52229 | 0.069654 | 0.13283  | 0.059745 |
| 0.000154  | 0.99736  | 0.053582 | 0.24782  | 0.023791  | 0.60808 | 0.05408  | 0.24345  | 0.089103 |
| 0.040591  | 0.38147  | 0.025665 | 0.58011  | 0.011766  | 0.79981 | 0.023772 | 0.60836  | 0.022848 |
| -0.07613  | 0.10034  | -0.01693 | 0.71513  | -0.03631  | 0.43372 | -0.00658 | 0.88716  | -0.05418 |
| -0.0944   | 0.04144  | -0.10717 | 0.02054  | -0.07978  | 0.08505 | -0.09476 | 0.04066  | -0.16957 |
| -0.05037  | 0.27739  | -0.07635 | 0.09936  | -0.05798  | 0.21105 | -0.06887 | 0.13725  | -0.03377 |
| -0.06257  | 0.17703  | -0.0706  | 0.12762  | -0.06078  | 0.18977 | -0.05872 | 0.20526  | -0.09894 |
| -0.00681  | 0.88323  | 0.128195 | 0.00553  | 0.011701  | 0.80089 | 0.200889 | 1.22E-05 | 0.202971 |
| -0.02022  | 0.66304  | 0.136888 | 0.00303  | 0.008798  | 0.8496  | 0.204599 | 8.32E-06 | 0.189007 |
| 0.084904  | 0.06678  | 0.2316   | 4.18E-07 | 0.094873  | 0.04043 | 0.311276 | 5.97E-12 | 0.188239 |
| 0.041917  | 0.3661   | 0.189864 | 3.63E-05 | 0.084257  | 0.06889 | 0.242603 | 1.11E-07 | 0.261313 |
| -0.02     | 0.66643  | 0.015774 | 0.73386  | -0.04055  | 0.38193 | 0.058594 | 0.20626  | 0.032959 |
| 0.081613  | 0.07809  | 0.050617 | 0.27501  | 0.038568  | 0.40568 | 0.039052 | 0.3998   | 0.096025 |
| 0.066805  | 0.14947  | 0.269593 | 3.21E-09 | 0.136477  | 0.00312 | 0.285301 | 3.39E-10 | 0.482158 |
| -0.01198  | 0.7962   | 0.031955 | 0.49089  | -1.76E-05 | 0.9997  | 0.038966 | 0.40084  | 0.169842 |
| 0.04174   | 0.36813  | 0.126214 | 0.00631  | 0.063251  | 0.17239 | 0.13509  | 0.00345  | 0.192758 |
| 0.002664  | 0.95421  | -0.04233 | 0.3614   | -0.01731  | 0.70908 | -0.05503 | 0.2353   | -0.07841 |
| -0.01239  | 0.78948  | -0.09958 | 0.03144  | -0.04717  | 0.30906 | -0.11638 | 0.01184  | -0.16741 |
| -0.03713  | 0.42344  | 0.052273 | 0.25958  | 0.008064  | 0.86201 | 0.058575 | 0.20641  | 0.139343 |
| -0.07067  | 0.12724  | -0.22768 | 6.61E-07 | -0.14034  | 0.00237 | -0.22227 | 1.23E-06 | -0.3965  |

|          |          |          |          |          |         |          |          |          |
|----------|----------|----------|----------|----------|---------|----------|----------|----------|
| -0.11988 | 0.00951  | -0.13718 | 0.00297  | -0.08869 | 0.05546 | -0.13726 | 0.00296  | -0.14575 |
| -0.00555 | 0.90481  | -0.1004  | 0.03006  | -0.07091 | 0.12599 | -0.09372 | 0.04293  | -0.10391 |
| -0.00486 | 0.9166   | 0.136881 | 0.00304  | 0.092481 | 0.04578 | 0.125916 | 0.00644  | 0.259225 |
| -0.02431 | 0.60034  | 0.030535 | 0.51038  | -0.00672 | 0.8849  | 0.035184 | 0.44814  | 0.049456 |
| 0.030846 | 0.50608  | -0.08872 | 0.05537  | -0.03755 | 0.41823 | -0.10184 | 0.02776  | -0.04664 |
| -0.01903 | 0.68161  | -0.11386 | 0.01382  | -0.05844 | 0.20742 | -0.12954 | 0.00505  | -0.11857 |
| 0.070384 | 0.12881  | 0.036598 | 0.43009  | 0.018884 | 0.68399 | 0.040675 | 0.38048  | 0.129823 |
| 0.049343 | 0.28728  | 0.138413 | 0.00272  | 0.053143 | 0.25172 | 0.186099 | 5.20E-05 | 0.107244 |
| -0.02628 | 0.57104  | 0.096274 | 0.03755  | 0.026522 | 0.56752 | 0.113339 | 0.01426  | 0.169602 |
| -0.10239 | 0.02693  | 0.052451 | 0.25796  | -0.03559 | 0.44297 | 0.087343 | 0.05929  | 0.186238 |
| -0.10488 | 0.02341  | -0.11861 | 0.01031  | -0.10862 | 0.01887 | -0.0959  | 0.0383   | -0.19528 |
| -0.05646 | 0.22333  | 0.156484 | 0.00069  | 0.032262 | 0.48675 | 0.207357 | 6.24E-06 | 0.324032 |
| -0.10377 | 0.02492  | -0.15064 | 0.00109  | -0.10469 | 0.02366 | -0.15068 | 0.00109  | -0.22619 |
| 0.036842 | 0.42702  | -0.02413 | 0.60292  | -0.01044 | 0.8219  | -0.02045 | 0.65935  | -0.00748 |
| -0.01507 | 0.74535  | -0.04315 | 0.35217  | -0.06206 | 0.18066 | -0.01994 | 0.66734  | -0.03512 |
| 0.006874 | 0.88222  | -0.03398 | 0.46379  | -0.04411 | 0.34155 | -0.00515 | 0.91157  | -0.0885  |
| -0.0366  | 0.43004  | 0.068271 | 0.14072  | -0.02856 | 0.53808 | 0.142334 | 0.00205  | -0.01575 |
| -0.03009 | 0.51661  | -0.07766 | 0.09368  | -0.08596 | 0.06344 | -0.05589 | 0.22798  | 0.09503  |
| -0.00305 | 0.94755  | -0.0602  | 0.19409  | -0.00024 | 0.99582 | -0.09252 | 0.04569  | -0.16569 |
| -0.00569 | 0.90246  | -0.08302 | 0.07307  | 0.003381 | 0.94191 | -0.1311  | 0.00454  | -0.22156 |
| -0.11408 | 0.01363  | -0.04135 | 0.37264  | -0.07398 | 0.11037 | 0.004435 | 0.92386  | -0.04732 |
| 0.018997 | 0.68219  | 0.182408 | 7.35E-05 | 0.087361 | 0.05924 | 0.203121 | 9.69E-06 | 0.312076 |
| -0.01597 | 0.73071  | -0.06299 | 0.17417  | -0.05196 | 0.26242 | -0.06148 | 0.18473  | -0.03586 |
| -0.00786 | 0.86549  | -0.03339 | 0.47164  | -0.03975 | 0.39142 | -0.00621 | 0.89358  | -0.03948 |
| -0.01043 | 0.82205  | 0.066245 | 0.15292  | 0.039967 | 0.38884 | 0.065292 | 0.15893  | 0.120179 |
| -0.00357 | 0.93868  | -0.07777 | 0.0932   | -0.04004 | 0.38796 | -0.07225 | 0.11895  | -0.20561 |
| -0.05077 | 0.27358  | 0.017762 | 0.70184  | -0.01216 | 0.79332 | 0.018733 | 0.68637  | 0.058478 |
| 0.075388 | 0.10372  | 0.250609 | 4.04E-08 | 0.147158 | 0.00143 | 0.259719 | 1.23E-08 | 0.433099 |
| -0.07571 | 0.10223  | 0.005104 | 0.91241  | -0.03913 | 0.39884 | 0.036963 | 0.42551  | 0.025181 |
| 0.0032   | 0.94502  | -0.02412 | 0.6031   | -0.06269 | 0.17621 | 0.013397 | 0.77277  | -0.00684 |
| 0.031475 | 0.49743  | 0.072235 | 0.11903  | 0.022422 | 0.62887 | 0.094009 | 0.04229  | 0.114927 |
| -0.08622 | 0.06263  | -0.08241 | 0.07523  | -0.07214 | 0.1195  | -0.05715 | 0.21766  | -0.15282 |
| -0.03382 | 0.46588  | 0.017456 | 0.70673  | 0.00154  | 0.97352 | 0.028947 | 0.53263  | 0.03489  |
| 0.002875 | 0.9506   | 0.023914 | 0.60622  | -0.00578 | 0.90094 | 0.030416 | 0.51202  | 0.129513 |
| -0.10193 | 0.02762  | -0.04385 | 0.34442  | -0.03342 | 0.47126 | -0.04838 | 0.29685  | -0.15387 |
| 0.046823 | 0.31265  | 0.035206 | 0.44785  | 0.015714 | 0.73484 | 0.042429 | 0.36027  | 0.06529  |
| 0.081609 | 0.0781   | -0.06077 | 0.18985  | -0.01677 | 0.71771 | -0.07488 | 0.10608  | -0.11584 |
| -0.1179  | 0.01077  | -0.03595 | 0.43827  | -0.07275 | 0.11639 | -0.00708 | 0.87875  | -0.01096 |
| -0.04102 | 0.3764   | 0.098077 | 0.0341   | -0.00236 | 0.95937 | 0.143755 | 0.00184  | 0.21627  |
| -0.08127 | 0.07935  | -0.08646 | 0.06192  | -0.08767 | 0.05835 | -0.05677 | 0.22078  | -0.14651 |
| 0.097578 | 0.03503  | 0.044795 | 0.33409  | 0.093024 | 0.04451 | -0.01122 | 0.80886  | 0.062184 |
| 0.028367 | 0.54087  | -0.00482 | 0.91733  | 0.014591 | 0.75316 | -0.00736 | 0.87403  | 0.003539 |
| 0.273585 | 1.84E-09 | 0.161269 | 0.00047  | 0.139833 | 0.00246 | 0.15496  | 0.00078  | 0.15074  |
| -0.03967 | 0.39237  | -0.05066 | 0.27457  | -0.03185 | 0.49229 | -0.04599 | 0.32133  | -0.0257  |
| -0.03423 | 0.46055  | 0.113319 | 0.01428  | 0.01914  | 0.67993 | 0.155009 | 0.00078  | 0.248385 |

|          |         |          |          |          |         |          |          |          |
|----------|---------|----------|----------|----------|---------|----------|----------|----------|
| -0.058   | 0.21093 | -0.22728 | 6.92E-07 | -0.12695 | 0.00601 | -0.22868 | 5.89E-07 | -0.33526 |
| -0.05401 | 0.24408 | -0.0136  | 0.76947  | -0.07632 | 0.09952 | 0.032593 | 0.48228  | 0.044632 |
| -0.02488 | 0.59173 | -0.11524 | 0.0127   | -0.07732 | 0.09512 | -0.11483 | 0.01303  | -0.10975 |
| -0.00365 | 0.93735 | -0.04175 | 0.36807  | -0.04274 | 0.35671 | -0.03217 | 0.48798  | -0.01084 |
| -0.00845 | 0.85544 | -0.07911 | 0.08771  | -0.06482 | 0.16196 | -0.07875 | 0.08917  | -0.05689 |
| 0.079175 | 0.08743 | -0.05457 | 0.2392   | 0.011565 | 0.80316 | -0.07831 | 0.09097  | -0.10811 |
| -0.1165  | 0.01176 | -0.03946 | 0.39491  | -0.08153 | 0.0784  | -0.01023 | 0.82558  | 0.030554 |
| -0.03541 | 0.44528 | -0.04433 | 0.33909  | -0.03772 | 0.4161  | -0.04364 | 0.34672  | -0.04403 |
| -0.09183 | 0.04732 | 0.01834  | 0.69262  | -0.07171 | 0.12173 | 0.093005 | 0.04455  | 0.053105 |
| -0.03128 | 0.5001  | -0.09405 | 0.04221  | -0.02754 | 0.55279 | -0.10923 | 0.01821  | -0.23937 |
| -0.051   | 0.2714  | -0.01327 | 0.7749   | -0.06825 | 0.14084 | 0.029552 | 0.52409  | 0.008542 |
| -0.14124 | 0.00222 | -0.07587 | 0.10152  | -0.13024 | 0.00482 | -0.00759 | 0.87014  | -0.13613 |
| -0.00249 | 0.95714 | 0.091658 | 0.04775  | 0.055796 | 0.2288  | 0.087425 | 0.05905  | 0.086262 |
| 0.044228 | 0.34025 | -0.05133 | 0.26832  | 0.008837 | 0.84895 | -0.06446 | 0.16429  | -0.06197 |
| -0.01599 | 0.73038 | -0.04464 | 0.3358   | -0.00619 | 0.89383 | -0.06642 | 0.15185  | -0.09117 |
| -0.12987 | 0.00494 | -0.13953 | 0.00251  | -0.11225 | 0.01523 | -0.13395 | 0.00373  | -0.16758 |
| 0.056902 | 0.21969 | 0.154509 | 0.00081  | 0.093955 | 0.04242 | 0.164196 | 0.00037  | 0.206668 |
| -0.03823 | 0.40984 | -0.06388 | 0.16817  | -0.05241 | 0.25836 | -0.05485 | 0.23677  | -0.07686 |
| 0.090526 | 0.05058 | 0.18869  | 4.07E-05 | 0.122453 | 0.00807 | 0.185857 | 5.32E-05 | 0.378517 |
| 0.041239 | 0.37391 | 0.039845 | 0.39029  | 0.020428 | 0.65971 | 0.03224  | 0.48703  | 0.066982 |
| 0.042579 | 0.35857 | 0.002388 | 0.95896  | 0.020929 | 0.6519  | -0.02046 | 0.65921  | 0.064597 |
| 0.016093 | 0.72869 | -0.00481 | 0.91745  | 0.004876 | 0.9163  | -0.0074  | 0.87324  | 0.003989 |
| -0.1083  | 0.01923 | -0.16095 | 0.00048  | -0.12044 | 0.00918 | -0.14543 | 0.00163  | -0.29004 |
| -0.05536 | 0.23243 | -0.08061 | 0.08184  | -0.07673 | 0.0977  | -0.06059 | 0.19118  | -0.13556 |
| -0.0802  | 0.0834  | -0.09322 | 0.04405  | -0.08606 | 0.06313 | -0.07195 | 0.1205   | -0.11115 |
| -0.04545 | 0.32701 | -0.01978 | 0.66981  | -0.02105 | 0.64998 | -0.02    | 0.66639  | -0.07955 |
| -0.06974 | 0.13234 | 0.018035 | 0.69748  | -0.03595 | 0.43826 | 0.067557 | 0.14493  | 0.065682 |
| -0.04263 | 0.35803 | -0.06817 | 0.14131  | -0.02069 | 0.65555 | -0.08558 | 0.06463  | -0.16592 |
| -0.11023 | 0.01717 | -0.13788 | 0.00283  | -0.11014 | 0.01727 | -0.11927 | 0.00989  | -0.21055 |
| 0.079635 | 0.08561 | -0.00292 | 0.94974  | 0.011995 | 0.796   | -0.00407 | 0.93014  | -0.02334 |
| 0.008378 | 0.85671 | 0.081146 | 0.07981  | 0.040659 | 0.38068 | 0.080486 | 0.0823   | 0.102338 |
| 0.057351 | 0.21607 | 0.095684 | 0.03874  | 0.04695  | 0.31133 | 0.112652 | 0.01486  | 0.142426 |
| -0.08497 | 0.06656 | 0.056424 | 0.22359  | -0.027   | 0.56054 | 0.09045  | 0.05077  | 0.17994  |
| -0.13845 | 0.00271 | -0.07993 | 0.08443  | -0.10523 | 0.02295 | -0.03249 | 0.48369  | -0.07921 |
| -0.14652 | 0.0015  | -0.07542 | 0.10355  | -0.0955  | 0.03913 | -0.04112 | 0.37524  | -0.0254  |
| 0.042142 | 0.36353 | 0.0841   | 0.06941  | 0.012198 | 0.79262 | 0.111011 | 0.0164   | 0.215157 |
| -0.06096 | 0.18849 | -0.14556 | 0.00161  | -0.13164 | 0.00438 | -0.10856 | 0.01894  | -0.2525  |
| -0.03125 | 0.50053 | -0.08525 | 0.06567  | -0.0148  | 0.7497  | -0.11738 | 0.01113  | -0.12834 |
| -0.12206 | 0.00828 | -0.10309 | 0.0259   | -0.11563 | 0.0124  | -0.05921 | 0.20155  | -0.11836 |
| 0.073741 | 0.11151 | 0.002955 | 0.94922  | 0.031737 | 0.49387 | -0.01868 | 0.6872   | 0.078332 |
| 0.009572 | 0.83656 | 0.006902 | 0.88174  | 0.000114 | 0.99804 | 0.013106 | 0.77758  | 0.053346 |
| -0.05936 | 0.20038 | -0.00174 | 0.97012  | -0.03965 | 0.39259 | 0.028454 | 0.53963  | -0.07154 |
| 0.028124 | 0.54434 | 0.065505 | 0.15757  | 0.031643 | 0.49514 | 0.075072 | 0.10518  | 0.095779 |
| -0.03084 | 0.50611 | -0.03211 | 0.48877  | -0.06853 | 0.13921 | -0.00254 | 0.95632  | -0.00522 |
| -0.01278 | 0.78296 | 0.11906  | 0.01002  | 0.05224  | 0.25989 | 0.128924 | 0.00527  | 0.275225 |

|          |          |          |          |          |         |          |          |          |
|----------|----------|----------|----------|----------|---------|----------|----------|----------|
| 0.069431 | 0.13408  | 0.024335 | 0.59989  | 0.026757 | 0.5641  | 0.02863  | 0.53712  | 0.082324 |
| -0.10522 | 0.02296  | -0.08093 | 0.08062  | -0.11553 | 0.01248 | -0.03302 | 0.47649  | -0.15361 |
| 0.08957  | 0.05307  | 0.058432 | 0.20752  | 0.058389 | 0.20785 | 0.038179 | 0.41043  | 0.157797 |
| 0.057133 | 0.21782  | 0.037932 | 0.41346  | 0.11268  | 0.01484 | -0.04183 | 0.36706  | -0.0502  |
| 0.047827 | 0.30237  | 0.066734 | 0.14991  | 0.03491  | 0.45168 | 0.070427 | 0.12857  | 0.107871 |
| -0.10023 | 0.03034  | -0.07556 | 0.10294  | -0.09194 | 0.04707 | -0.06326 | 0.17231  | -0.00026 |
| -0.02195 | 0.63606  | 0.00578  | 0.90086  | 0.009655 | 0.83516 | -0.00216 | 0.96286  | -0.04495 |
| -0.06149 | 0.1847   | 0.067597 | 0.14469  | -0.00876 | 0.85019 | 0.098582 | 0.03318  | 0.239755 |
| 0.196237 | 1.95E-05 | 0.104654 | 0.02371  | 0.16145  | 0.00046 | 0.043973 | 0.34304  | 0.100134 |
| -0.04356 | 0.3476   | 0.035748 | 0.44088  | -0.00731 | 0.87488 | 0.056827 | 0.22029  | 0.093314 |
| 0.035461 | 0.44457  | 0.157031 | 0.00066  | 0.072608 | 0.11713 | 0.177117 | 0.00012  | 0.29228  |
| -0.03112 | 0.50231  | 0.072177 | 0.11933  | 0.002277 | 0.96086 | 0.09498  | 0.0402   | 0.146711 |
| -0.0359  | 0.43895  | 0.087798 | 0.05797  | 0.014137 | 0.7606  | 0.106646 | 0.02116  | 0.213382 |
| 0.049047 | 0.29019  | -0.01066 | 0.81829  | -0.00259 | 0.95552 | -0.00966 | 0.835    | -0.05647 |
| 0.078956 | 0.08832  | 0.038118 | 0.41117  | 0.024699 | 0.59444 | 0.040848 | 0.37846  | 0.04864  |
| -0.01091 | 0.81402  | -0.02109 | 0.64933  | -0.02544 | 0.58344 | -0.00777 | 0.86698  | -0.03042 |
| -0.02008 | 0.66516  | 0.135012 | 0.00346  | 0.050847 | 0.27282 | 0.156043 | 0.00071  | 0.293437 |
| -0.03907 | 0.3996   | -0.08968 | 0.05279  | -0.04091 | 0.37773 | -0.09817 | 0.03393  | -0.12845 |
| -0.02174 | 0.63943  | 0.039626 | 0.39291  | -0.0095  | 0.83769 | 0.064675 | 0.16291  | 0.133373 |
| 0.004276 | 0.92657  | 0.008436 | 0.85573  | -0.00536 | 0.90795 | 0.020312 | 0.66153  | -0.02919 |
| -0.04802 | 0.30044  | -0.00749 | 0.87181  | -0.03754 | 0.41834 | 0.009681 | 0.83472  | 0.023056 |
| 0.197771 | 1.67E-05 | 0.158815 | 0.00057  | 0.118248 | 0.01054 | 0.160305 | 0.00051  | 0.137931 |
| -0.01688 | 0.71604  | -0.06747 | 0.14545  | -0.04702 | 0.31059 | -0.06636 | 0.1522   | -0.11663 |
| 0.067015 | 0.14819  | 0.04433  | 0.33913  | 0.049416 | 0.28657 | 0.05135  | 0.26811  | 0.003713 |
| 0.026951 | 0.56127  | 0.097122 | 0.03589  | 0.032685 | 0.48105 | 0.114523 | 0.01327  | 0.161562 |
| 0.158682 | 0.00058  | 0.102156 | 0.02728  | 0.08496  | 0.0666  | 0.104048 | 0.02454  | 0.099752 |
| -0.02775 | 0.54967  | -0.02071 | 0.65527  | -0.00791 | 0.86462 | -0.04158 | 0.36999  | 0.008189 |
| -0.0233  | 0.61556  | 0.029663 | 0.52253  | -0.00739 | 0.87347 | 0.060951 | 0.18856  | 0.040128 |
| 0.09432  | 0.04161  | 0.174233 | 0.00015  | 0.119937 | 0.00948 | 0.168521 | 0.00025  | 0.331065 |
| -0.11039 | 0.01701  | -0.0218  | 0.63849  | -0.0765  | 0.0987  | 0.023931 | 0.60596  | -0.01757 |
| -0.0125  | 0.78757  | -0.12526 | 0.00672  | -0.03637 | 0.43296 | -0.14119 | 0.00223  | -0.24127 |
| -0.13206 | 0.00425  | -0.20354 | 9.28E-06 | -0.1165  | 0.01175 | -0.2102  | 4.61E-06 | -0.34008 |
| -0.03269 | 0.48104  | 0.113112 | 0.01446  | 0.029213 | 0.52887 | 0.133494 | 0.00385  | 0.228041 |
| -0.05128 | 0.26874  | -0.0211  | 0.64928  | -0.05131 | 0.26846 | -0.02441 | 0.59882  | -0.00921 |
| -0.11052 | 0.01688  | -0.06513 | 0.15999  | -0.08735 | 0.05926 | -0.03965 | 0.3926   | -0.11593 |
| -0.00012 | 0.998    | -0.05308 | 0.25231  | -0.01578 | 0.73369 | -0.07626 | 0.09976  | -0.08185 |
| 0.089891 | 0.05222  | -0.00952 | 0.83745  | 0.011887 | 0.7978  | -0.01732 | 0.70895  | -0.07496 |
| -0.06129 | 0.1861   | -0.1052  | 0.02298  | -0.06925 | 0.13507 | -0.10188 | 0.0277   | -0.14578 |
| 0.001252 | 0.97848  | -0.08594 | 0.06351  | -0.04655 | 0.31546 | -0.09239 | 0.04598  | -0.1218  |
| 0.059833 | 0.19681  | 0.152512 | 0.00095  | 0.067146 | 0.1474  | 0.186639 | 4.95E-05 | 0.212589 |
| -0.05665 | 0.22174  | -0.03383 | 0.46586  | -0.05394 | 0.24472 | -0.01697 | 0.71446  | -0.037   |
| -0.09383 | 0.04268  | -0.14739 | 0.0014   | -0.12419 | 0.00721 | -0.12613 | 0.00635  | -0.20145 |
| -0.00788 | 0.86517  | 0.016175 | 0.72737  | 0.007298 | 0.87501 | 0.023354 | 0.61468  | -0.01007 |
| 0.004595 | 0.92112  | 0.089682 | 0.05278  | 0.018037 | 0.69744 | 0.12367  | 0.00746  | 0.136505 |
| -0.08883 | 0.05509  | 0.063522 | 0.17055  | 0.019203 | 0.67895 | 0.066804 | 0.14948  | 0.061514 |



|          |          |          |          |          |         |          |          |          |
|----------|----------|----------|----------|----------|---------|----------|----------|----------|
| 0.011059 | 0.8116   | 0.117583 | 0.01099  | 0.056007 | 0.22704 | 0.110941 | 0.01647  | 0.21587  |
| 0.034886 | 0.45199  | 0.05852  | 0.20683  | 0.029626 | 0.52305 | 0.058745 | 0.20509  | 0.066115 |
| -0.08652 | 0.06173  | -0.10759 | 0.02004  | -0.08297 | 0.07325 | -0.0916  | 0.04789  | -0.21461 |
| 0.208831 | 5.34E-06 | 0.061997 | 0.18107  | 0.153766 | 0.00086 | -0.02    | 0.66644  | -0.08183 |
| -0.01803 | 0.69753  | 0.070727 | 0.12695  | -0.00467 | 0.91978 | 0.096366 | 0.03736  | 0.144248 |
| -0.03298 | 0.47706  | -0.01114 | 0.81023  | -0.0445  | 0.33734 | 0.007936 | 0.86418  | 0.059068 |
| -0.15304 | 0.00091  | -0.20566 | 7.45E-06 | -0.14465 | 0.00172 | -0.20394 | 8.91E-06 | -0.36747 |
| -0.03424 | 0.46045  | -0.09354 | 0.04335  | -0.03876 | 0.40336 | -0.10246 | 0.02682  | -0.23955 |
| -0.08661 | 0.06146  | 0.019505 | 0.67418  | -0.02149 | 0.64325 | 0.031404 | 0.49841  | 0.145705 |
| 0.00899  | 0.84637  | -0.09781 | 0.0346   | -0.06669 | 0.1502  | -0.09119 | 0.04891  | -0.10051 |
| 0.007816 | 0.86622  | -0.03924 | 0.39754  | -0.01484 | 0.74915 | -0.04364 | 0.34673  | -0.06379 |
| 0.052977 | 0.25321  | -0.01922 | 0.67866  | 0.042241 | 0.3624  | -0.06465 | 0.16307  | -0.06905 |
| -0.07315 | 0.11443  | 0.037095 | 0.42386  | -0.04488 | 0.33316 | 0.087416 | 0.05907  | 0.061356 |
| -0.06063 | 0.1909   | -0.10462 | 0.02376  | -0.04602 | 0.32105 | -0.11967 | 0.00964  | -0.25856 |
| -0.05354 | 0.24821  | -0.10759 | 0.02005  | -0.07091 | 0.12596 | -0.11364 | 0.014    | -0.17151 |
| -0.10549 | 0.02261  | -0.11352 | 0.01411  | -0.08737 | 0.0592  | -0.10438 | 0.02408  | -0.20135 |
| 0.088123 | 0.05705  | -0.0142  | 0.75955  | 0.02517  | 0.58744 | -0.01914 | 0.67999  | -0.06865 |
| 0.028127 | 0.5443   | 0.020083 | 0.6651   | 0.045629 | 0.32515 | -0.00713 | 0.87786  | -0.01985 |
| 0.090071 | 0.05175  | 0.130893 | 0.00461  | 0.076253 | 0.0998  | 0.141576 | 0.00216  | 0.122148 |
| -0.0875  | 0.05883  | -0.0968  | 0.03652  | -0.08702 | 0.06023 | -0.0843  | 0.06874  | -0.08888 |
| 0.127113 | 0.00595  | 0.059908 | 0.19625  | 0.083102 | 0.07279 | 0.034806 | 0.45303  | 0.022208 |
| -0.03264 | 0.48162  | 0.113555 | 0.01408  | 0.042835 | 0.35569 | 0.126565 | 0.00617  | 0.215349 |
| -0.06277 | 0.17569  | 0.017431 | 0.70714  | -0.03459 | 0.45588 | 0.052861 | 0.25426  | 0.087798 |
| -0.02763 | 0.5515   | -0.07285 | 0.11592  | -0.073   | 0.11518 | -0.05786 | 0.21199  | -0.09742 |
| -0.0689  | 0.13711  | -0.09366 | 0.04308  | -0.10591 | 0.02208 | -0.05594 | 0.22756  | -0.13615 |
| -0.01825 | 0.69408  | 0.00519  | 0.91094  | -0.03675 | 0.4282  | 0.035669 | 0.4419   | 0.026621 |
| -0.03685 | 0.42691  | -0.11777 | 0.01086  | -0.08235 | 0.07543 | -0.11087 | 0.01654  | -0.2002  |
| -0.10537 | 0.02277  | -0.04788 | 0.30185  | -0.08798 | 0.05744 | -0.00435 | 0.92524  | -0.01314 |
| -0.03954 | 0.39387  | -0.14434 | 0.00176  | -0.09312 | 0.04428 | -0.14881 | 0.00126  | -0.21527 |
| 0.059481 | 0.19946  | 0.198475 | 1.56E-05 | 0.099355 | 0.03182 | 0.211461 | 4.03E-06 | 0.335626 |
| -0.00022 | 0.99619  | 0.106894 | 0.02086  | 0.029632 | 0.52297 | 0.139613 | 0.0025   | 0.175555 |
| -0.02948 | 0.52507  | -0.04427 | 0.33978  | -0.04148 | 0.37107 | -0.04152 | 0.37064  | -0.00805 |
| -0.02315 | 0.61777  | -0.04939 | 0.28683  | -0.05924 | 0.20131 | -0.03358 | 0.46912  | 0.002665 |
| -0.09085 | 0.04975  | -0.0809  | 0.08073  | -0.09818 | 0.03391 | -0.03912 | 0.39903  | -0.20571 |
| -0.02265 | 0.62538  | 0.026618 | 0.56612  | -0.00426 | 0.9269  | 0.037239 | 0.42205  | 0.0438   |
| -0.03593 | 0.43855  | -0.02614 | 0.57305  | -0.01464 | 0.75234 | -0.03388 | 0.46512  | 0.044563 |
| 0.016203 | 0.72692  | -0.06011 | 0.19477  | -0.02421 | 0.60176 | -0.07667 | 0.09795  | 0.002392 |
| 0.017188 | 0.71103  | -0.00735 | 0.87419  | 0.033443 | 0.47093 | -0.05778 | 0.21264  | 0.023841 |
| 0.055448 | 0.23171  | 0.022847 | 0.62239  | 0.034353 | 0.45893 | -0.00081 | 0.98601  | 0.035866 |
| -0.11099 | 0.01641  | -0.09284 | 0.04494  | -0.09983 | 0.03101 | -0.06658 | 0.15086  | -0.12922 |
| -0.04993 | 0.28163  | -0.04413 | 0.3413   | -0.0539  | 0.24507 | -0.02119 | 0.6478   | 0.010009 |
| 0.054973 | 0.23574  | 0.099403 | 0.03174  | 0.064    | 0.16735 | 0.094484 | 0.04126  | 0.145039 |
| 0.007787 | 0.86672  | 0.054066 | 0.24358  | 0.022249 | 0.63153 | 0.057042 | 0.21855  | 0.003315 |
| -0.06676 | 0.14974  | -0.00487 | 0.91645  | -0.04891 | 0.29153 | 0.023275 | 0.61587  | -0.0033  |
| 0.007088 | 0.87859  | 0.028955 | 0.53251  | 0.0041   | 0.92958 | 0.039765 | 0.39124  | 0.104742 |

|          |         |          |          |          |         |          |          |          |
|----------|---------|----------|----------|----------|---------|----------|----------|----------|
| 0.119425 | 0.00979 | 0.081959 | 0.07683  | 0.063269 | 0.17226 | 0.084339 | 0.06862  | 0.109322 |
| 0.069819 | 0.13191 | 0.235473 | 2.64E-07 | 0.126132 | 0.00635 | 0.245501 | 7.72E-08 | 0.539366 |
| -0.03927 | 0.39718 | 0.010883 | 0.81455  | -0.00919 | 0.84298 | 0.031724 | 0.49404  | 0.010086 |
| -0.09151 | 0.04811 | -0.06363 | 0.16983  | -0.06595 | 0.15475 | -0.03734 | 0.42082  | 0.032184 |
| -0.00662 | 0.88658 | -0.07295 | 0.11539  | -0.03784 | 0.41463 | -0.08279 | 0.07387  | -0.09814 |
| -0.10021 | 0.03038 | -0.16447 | 0.00036  | -0.12973 | 0.00499 | -0.13726 | 0.00295  | -0.26848 |
| -0.06493 | 0.16125 | -0.06943 | 0.1341   | -0.06041 | 0.19253 | -0.06241 | 0.17815  | -0.12363 |
| -0.06185 | 0.18212 | 0.020784 | 0.65416  | -0.04671 | 0.3138  | 0.060662 | 0.19067  | 0.083633 |
| -0.14725 | 0.00142 | -0.16509 | 0.00034  | -0.14974 | 0.00117 | -0.13006 | 0.00488  | -0.29648 |
| -0.03909 | 0.39937 | 0.014047 | 0.76207  | 0.028302 | 0.54181 | -0.00244 | 0.95805  | -0.04104 |
| -0.04698 | 0.31106 | -0.05451 | 0.23976  | -0.03372 | 0.4673  | -0.05049 | 0.27622  | -0.17212 |
| -0.08869 | 0.05547 | -0.03575 | 0.44082  | -0.07627 | 0.09973 | 0.008792 | 0.84971  | -0.10585 |
| -0.10034 | 0.03015 | -0.17933 | 9.76E-05 | -0.13523 | 0.00341 | -0.17367 | 0.00016  | -0.29436 |
| -0.08775 | 0.05812 | -0.13655 | 0.00311  | -0.06715 | 0.14735 | -0.16487 | 0.00035  | -0.28962 |
| -0.08732 | 0.05934 | 0.025331 | 0.58505  | -0.05019 | 0.27903 | 0.061185 | 0.18687  | 0.144285 |
| 0.062682 | 0.17629 | 0.014332 | 0.75739  | 0.040564 | 0.38179 | -0.0253  | 0.58549  | -0.04798 |
| -0.10153 | 0.02824 | -0.15358 | 0.00087  | -0.1077  | 0.01991 | -0.15415 | 0.00083  | -0.24933 |
| 0.043683 | 0.34623 | 0.216813 | 2.25E-06 | 0.089418 | 0.05348 | 0.25766  | 1.62E-08 | 0.442298 |
| -0.11864 | 0.01029 | -0.06731 | 0.14642  | -0.12217 | 0.00822 | -0.00674 | 0.88448  | -0.05068 |
| 0.0139   | 0.76448 | 0.082812 | 0.0738   | 0.030663 | 0.5086  | 0.102395 | 0.02692  | 0.060255 |
| -0.14369 | 0.00185 | -0.12016 | 0.00935  | -0.12018 | 0.00934 | -0.09071 | 0.05012  | -0.11468 |
| -0.05413 | 0.243   | 0.019918 | 0.66769  | -0.01093 | 0.81382 | 0.020508 | 0.65846  | 0.091413 |
| -0.05086 | 0.27271 | -0.00254 | 0.95632  | -0.05508 | 0.23483 | 0.041145 | 0.375    | 0.046533 |
| -0.05958 | 0.1987  | 0.04372  | 0.34582  | -0.00055 | 0.99047 | 0.057898 | 0.21171  | 0.070308 |
| 0.096441 | 0.03722 | 0.27999  | 7.37E-10 | 0.151977 | 0.00099 | 0.303501 | 2.09E-11 | 0.30221  |
| 0.020538 | 0.65798 | -0.03751 | 0.41862  | -0.01764 | 0.70384 | -0.04    | 0.38847  | -0.11473 |
| 0.03793  | 0.41348 | -0.01365 | 0.76866  | -0.02237 | 0.62962 | -0.01296 | 0.77999  | -0.01997 |
| 0.04941  | 0.28663 | 0.02104  | 0.65018  | 0.045845 | 0.32287 | -0.00336 | 0.9422   | 0.178897 |
| 0.082011 | 0.07664 | 0.028692 | 0.53624  | 0.056936 | 0.21941 | -0.00938 | 0.83987  | 0.062516 |
| 0.070173 | 0.12996 | 0.01879  | 0.68547  | 0.025782 | 0.57837 | -0.00266 | 0.95421  | 0.095845 |
| -0.00915 | 0.8437  | 0.139131 | 0.00258  | 0.011493 | 0.80437 | 0.197177 | 1.77E-05 | 0.290894 |
| -0.02784 | 0.54841 | -0.06977 | 0.13217  | -0.01555 | 0.73751 | -0.10497 | 0.02329  | -0.09003 |
| 0.021393 | 0.64472 | 0.031945 | 0.49104  | 0.032327 | 0.48587 | 0.025867 | 0.57713  | 0.041576 |
| -0.06944 | 0.13404 | -0.12217 | 0.00822  | -0.08721 | 0.05968 | -0.13586 | 0.00326  | -0.11486 |
| -0.07037 | 0.12887 | -0.07613 | 0.10034  | -0.09056 | 0.0505  | -0.04218 | 0.36315  | -0.04553 |
| -0.05256 | 0.25699 | 0.03234  | 0.48569  | -0.04139 | 0.37218 | 0.071459 | 0.12306  | 0.109919 |
| -0.04459 | 0.33626 | 0.048992 | 0.29073  | -0.00375 | 0.93562 | 0.074982 | 0.10559  | 0.07953  |
| -0.01688 | 0.71603 | 0.077758 | 0.09327  | 0.003944 | 0.93226 | 0.109873 | 0.01754  | 0.176476 |
| -0.03484 | 0.45257 | 0.000678 | 0.98834  | -0.03637 | 0.43296 | 0.024618 | 0.59565  | 0.014093 |
| -0.05068 | 0.27443 | -0.00116 | 0.98003  | -0.00773 | 0.86762 | -0.01033 | 0.82375  | 0.04401  |
| -0.05214 | 0.26082 | 0.106737 | 0.02105  | -0.00041 | 0.99293 | 0.153108 | 0.0009   | 0.216589 |
| -0.04388 | 0.34405 | 0.039197 | 0.39804  | 0.011206 | 0.80914 | 0.045283 | 0.32884  | 0.073087 |
| 0.100882 | 0.02927 | -0.11185 | 0.0156   | -0.02511 | 0.58839 | -0.14013 | 0.00241  | -0.19155 |
| 0.010124 | 0.82726 | -0.04151 | 0.37079  | -0.01056 | 0.81989 | -0.06343 | 0.17115  | -0.06425 |
| 0.114614 | 0.0132  | 0.218897 | 1.79E-06 | 0.160539 | 0.0005  | 0.214298 | 2.97E-06 | 0.348278 |

|          |         |          |          |          |         |          |          |          |
|----------|---------|----------|----------|----------|---------|----------|----------|----------|
| -0.09129 | 0.04865 | 0.023321 | 0.61518  | -0.00469 | 0.91947 | 0.027807 | 0.54889  | 0.031809 |
| 0.012738 | 0.78367 | 0.120127 | 0.00937  | 0.03172  | 0.4941  | 0.154073 | 0.00084  | 0.214785 |
| -0.02484 | 0.5924  | 0.042579 | 0.35857  | -0.00172 | 0.97039 | 0.055841 | 0.22842  | 0.048081 |
| 0.025038 | 0.5894  | -0.03502 | 0.45027  | -0.01812 | 0.69618 | -0.04881 | 0.29255  | -0.05816 |
| -0.00056 | 0.99043 | 0.078563 | 0.08992  | 0.037698 | 0.41636 | 0.083164 | 0.07258  | 0.11727  |
| 0.125859 | 0.00646 | 0.061294 | 0.18608  | 0.118574 | 0.01033 | -0.01445 | 0.75546  | -0.07568 |
| 0.054557 | 0.23931 | 0.039121 | 0.39896  | 0.031683 | 0.49459 | 0.031862 | 0.49216  | 0.134927 |
| -0.10776 | 0.01984 | -0.0714  | 0.12338  | -0.13499 | 0.00347 | 0.002795 | 0.95197  | -0.00485 |
| -0.12024 | 0.0093  | -0.10388 | 0.02478  | -0.11028 | 0.01712 | -0.08513 | 0.06605  | -0.0969  |
| 0.006538 | 0.88793 | -0.09423 | 0.0418   | -0.02058 | 0.65735 | -0.10882 | 0.01866  | -0.23022 |
| 0.02895  | 0.53258 | 0.027148 | 0.55841  | 0.008688 | 0.85146 | 0.047591 | 0.30476  | -0.00974 |
| -0.10571 | 0.02233 | -0.07485 | 0.1062   | -0.1006  | 0.02972 | -0.02069 | 0.65556  | -0.14335 |
| 0.015433 | 0.73941 | -0.10067 | 0.02961  | -0.00596 | 0.89783 | -0.13458 | 0.00357  | -0.17932 |
| -0.1097  | 0.01772 | -0.1298  | 0.00496  | -0.1016  | 0.02814 | -0.12239 | 0.0081   | -0.1067  |
| 0.052036 | 0.26175 | -0.07393 | 0.11057  | 0.016844 | 0.71657 | -0.10964 | 0.01778  | -0.20138 |
| 0.128708 | 0.00534 | 0.079502 | 0.08613  | 0.062446 | 0.17793 | 0.074131 | 0.10962  | 0.132741 |
| -0.00625 | 0.89286 | -0.12419 | 0.00721  | -0.06708 | 0.14782 | -0.11629 | 0.01191  | -0.18258 |
| -0.03555 | 0.44338 | -0.10767 | 0.01995  | -0.01984 | 0.66892 | -0.1376  | 0.00288  | -0.24344 |
| 0.153396 | 0.00088 | 0.178366 | 0.00011  | 0.12272  | 0.00793 | 0.168162 | 0.00026  | 0.346358 |
| -0.00085 | 0.98547 | 0.169428 | 0.00023  | 0.068694 | 0.13827 | 0.209062 | 5.21E-06 | 0.236292 |
| -0.06799 | 0.14239 | 0.063088 | 0.1735   | -0.02562 | 0.58072 | 0.110863 | 0.01654  | 0.170783 |
| 0.083686 | 0.0708  | 0.130674 | 0.00468  | 0.050461 | 0.27649 | 0.153537 | 0.00087  | 0.190224 |
| -0.01012 | 0.82742 | -0.10406 | 0.02452  | -0.04854 | 0.29526 | -0.10776 | 0.01985  | -0.17708 |
| -0.04593 | 0.32194 | 0.006976 | 0.88048  | -0.02412 | 0.60316 | 0.036038 | 0.43719  | 0.055392 |
| 0.07986  | 0.08472 | 0.093457 | 0.04353  | 0.061338 | 0.18577 | 0.105805 | 0.02221  | 0.091208 |
| 0.059067 | 0.20261 | 0.168257 | 0.00026  | 0.109919 | 0.01749 | 0.164676 | 0.00035  | 0.211144 |
| -0.05739 | 0.21577 | -0.01562 | 0.73639  | -0.02627 | 0.57118 | 0.001765 | 0.96966  | -0.03327 |
| -0.02154 | 0.64245 | 0.041254 | 0.37374  | 0.010564 | 0.81989 | 0.056858 | 0.22005  | 0.081287 |
| -0.02359 | 0.61104 | 0.056362 | 0.2241   | 0.007169 | 0.8772  | 0.065601 | 0.15696  | 0.166966 |
| 0.016241 | 0.72629 | 0.19178  | 3.02E-05 | 0.056475 | 0.22318 | 0.242165 | 1.17E-07 | 0.325501 |
| 0.029259 | 0.52822 | -0.00336 | 0.94235  | -0.01121 | 0.80904 | 0.001715 | 0.97051  | -0.01881 |
| 0.062414 | 0.17815 | 0.148586 | 0.00128  | 0.074554 | 0.1076  | 0.173291 | 0.00017  | 0.230678 |
| -0.071   | 0.12551 | -0.16596 | 0.00032  | -0.11457 | 0.01324 | -0.18107 | 8.32E-05 | -0.22431 |
| -0.03265 | 0.48149 | -0.05029 | 0.2781   | -0.03243 | 0.48452 | -0.05103 | 0.27107  | -0.00947 |
| -0.06396 | 0.16762 | -0.08681 | 0.06086  | -0.07921 | 0.0873  | -0.09178 | 0.04746  | -0.01147 |
| -0.07034 | 0.12904 | -0.07669 | 0.09788  | -0.08059 | 0.08189 | -0.04998 | 0.28112  | -0.08785 |
| -0.02003 | 0.66587 | 0.030908 | 0.50522  | -0.00019 | 0.99668 | 0.046701 | 0.31391  | 0.054566 |
| 0.072513 | 0.11761 | 0.015289 | 0.74176  | 0.017488 | 0.70622 | 0.013678 | 0.76814  | -0.03421 |
| -0.04739 | 0.3068  | -0.1314  | 0.00445  | -0.08629 | 0.06243 | -0.10811 | 0.01944  | -0.25158 |
| -0.07977 | 0.08507 | -0.04712 | 0.3096   | -0.08366 | 0.07089 | -0.00598 | 0.89748  | 0.028667 |
| -0.10899 | 0.01847 | -0.04082 | 0.37878  | -0.08887 | 0.05498 | 0.010788 | 0.81614  | -0.01007 |
| -0.04235 | 0.36111 | -0.00556 | 0.90462  | -0.03015 | 0.51578 | 0.013131 | 0.77717  | -0.0066  |
| 0.04226  | 0.36218 | 0.092666 | 0.04534  | 0.052705 | 0.25567 | 0.098935 | 0.03256  | 0.09089  |
| -0.01092 | 0.81394 | -0.02822 | 0.54297  | -0.03175 | 0.49362 | -0.01288 | 0.78125  | -0.06718 |
| 0.091863 | 0.04725 | 0.261269 | 1.00E-08 | 0.134225 | 0.00366 | 0.278933 | 8.58E-10 | 0.430185 |

|          |          |          |          |          |          |          |          |          |
|----------|----------|----------|----------|----------|----------|----------|----------|----------|
| -0.0666  | 0.15074  | -0.13605 | 0.00322  | -0.04207 | 0.36431  | -0.1637  | 0.00038  | -0.2898  |
| -0.09545 | 0.03921  | -0.0402  | 0.38603  | -0.06182 | 0.18229  | -0.01007 | 0.82825  | -0.03783 |
| -0.03525 | 0.44735  | -0.04068 | 0.38041  | -0.01106 | 0.81154  | -0.05781 | 0.21242  | -0.10571 |
| -0.02227 | 0.63124  | -0.05645 | 0.22341  | -0.0388  | 0.4029   | -0.05965 | 0.19819  | -0.02343 |
| -0.05881 | 0.20459  | 0.098728 | 0.03292  | 0.004909 | 0.91574  | 0.13565  | 0.00331  | 0.225202 |
| 0.159087 | 0.00056  | 0.088167 | 0.05692  | 0.104116 | 0.02445  | 0.046398 | 0.31706  | 0.179326 |
| -0.05917 | 0.20186  | 0.01529  | 0.74173  | -0.01496 | 0.74714  | 0.021925 | 0.63651  | 0.000591 |
| -0.06267 | 0.17637  | -0.12487 | 0.0069   | -0.05152 | 0.26654  | -0.1495  | 0.00119  | -0.18523 |
| -0.11857 | 0.01033  | -0.14173 | 0.00214  | -0.14569 | 0.0016   | -0.11111 | 0.0163   | -0.19792 |
| -0.05547 | 0.23156  | -0.14683 | 0.00146  | -0.09905 | 0.03236  | -0.13469 | 0.00354  | -0.20648 |
| -0.09219 | 0.04646  | -0.09295 | 0.04467  | -0.11411 | 0.01361  | -0.05515 | 0.23425  | -0.12684 |
| 0.05765  | 0.21367  | 0.039845 | 0.39029  | 0.029859 | 0.51978  | 0.028747 | 0.53547  | 0.186845 |
| 0.059894 | 0.19635  | -0.0795  | 0.08614  | -0.03797 | 0.41303  | -0.08702 | 0.06025  | -0.108   |
| -0.07287 | 0.11582  | -0.1153  | 0.01265  | -0.0675  | 0.14527  | -0.11608 | 0.01207  | -0.21142 |
| 0.020257 | 0.66237  | 0.027379 | 0.55506  | 0.045646 | 0.32498  | 0.02119  | 0.64785  | 0.012453 |
| 0.119199 | 0.00993  | 0.190449 | 3.43E-05 | 0.125953 | 0.00642  | 0.175328 | 0.00014  | 0.292162 |
| 0.006291 | 0.89214  | -0.03782 | 0.41479  | -0.02992 | 0.51899  | -0.02196 | 0.63598  | -0.10474 |
| -0.04018 | 0.38636  | 0.013969 | 0.76336  | -0.01362 | 0.76903  | 0.028555 | 0.5382   | 0.045693 |
| 0.039262 | 0.39726  | -0.04394 | 0.34335  | 0.000617 | 0.98939  | -0.0647  | 0.16273  | -0.10925 |
| -0.07462 | 0.10728  | -0.15939 | 0.00055  | -0.11946 | 0.00977  | -0.13237 | 0.00416  | -0.25803 |
| -0.08696 | 0.06043  | -0.01183 | 0.79873  | -0.03326 | 0.47337  | 0.003674 | 0.93688  | 0.079305 |
| -0.04227 | 0.3621   | -0.13727 | 0.00295  | -0.10787 | 0.01972  | -0.11623 | 0.01195  | -0.252   |
| -0.1841  | 6.28E-05 | -0.20278 | 1.00E-05 | -0.18287 | 7.04E-05 | -0.16412 | 0.00037  | -0.21475 |
| 0.003008 | 0.94832  | -0.06293 | 0.17459  | -0.04704 | 0.31041  | -0.05766 | 0.21361  | -0.13613 |
| 0.085225 | 0.06575  | 0.04512  | 0.33059  | 0.06516  | 0.15977  | 0.021499 | 0.64307  | 0.012882 |
| 0.038105 | 0.41133  | 0.09681  | 0.03649  | 0.088834 | 0.05506  | 0.068718 | 0.13813  | 0.144121 |
| -0.023   | 0.62002  | -0.10218 | 0.02725  | -0.07737 | 0.09491  | -0.09036 | 0.05102  | -0.17707 |
| -0.02198 | 0.63574  | -0.13177 | 0.00434  | -0.04584 | 0.32289  | -0.16154 | 0.00046  | -0.26445 |
| -0.04472 | 0.33486  | -0.03958 | 0.39348  | -0.02726 | 0.55679  | -0.04772 | 0.30344  | -0.10704 |
| -0.01722 | 0.71055  | -0.11687 | 0.01149  | -0.04814 | 0.29925  | -0.14377 | 0.00184  | -0.1844  |
| 0.053556 | 0.24806  | -0.0045  | 0.92267  | 0.009696 | 0.83447  | 0.003332 | 0.94275  | -0.06074 |
| 0.014564 | 0.75359  | -0.06438 | 0.16483  | -0.04452 | 0.3371   | -0.0574  | 0.21568  | -0.12863 |
| -0.00645 | 0.88942  | 0.107566 | 0.02007  | 0.051645 | 0.26536  | 0.103882 | 0.02477  | 0.174815 |
| -0.0637  | 0.16934  | -0.07717 | 0.09579  | -0.0845  | 0.0681   | -0.06061 | 0.19105  | -0.09865 |
| 0.147228 | 0.00142  | 0.036284 | 0.43406  | 0.103194 | 0.02575  | -0.0066  | 0.88692  | 0.016172 |
| -0.01523 | 0.74271  | -0.02604 | 0.57465  | -0.03909 | 0.39939  | -0.01014 | 0.82704  | -0.11057 |
| -0.02925 | 0.52837  | 0.07825  | 0.09121  | 0.009804 | 0.83266  | 0.093735 | 0.0429   | 0.240563 |
| -0.02982 | 0.52033  | -0.04611 | 0.32004  | -0.05804 | 0.21061  | -0.02392 | 0.6061   | -0.09595 |
| -0.01012 | 0.82733  | -0.13009 | 0.00487  | -0.06934 | 0.13459  | -0.15022 | 0.00113  | -0.23081 |
| -0.02359 | 0.61114  | 0.083053 | 0.07296  | 0.006089 | 0.89559  | 0.097633 | 0.03492  | 0.219788 |
| 0.091847 | 0.04729  | -0.00358 | 0.9385   | 0.038754 | 0.4034   | -0.03309 | 0.47557  | 0.01221  |
| 0.025858 | 0.57725  | 0.165387 | 0.00033  | 0.110008 | 0.0174   | 0.154936 | 0.00078  | 0.282616 |
| 0.11096  | 0.01645  | 0.241141 | 1.33E-07 | 0.147951 | 0.00134  | 0.236659 | 2.29E-07 | 0.404168 |
| -0.04048 | 0.38277  | 0.031891 | 0.49177  | 0.013036 | 0.77874  | 0.022411 | 0.62905  | 0.084295 |
| 0.078304 | 0.09099  | 0.00854  | 0.85397  | 0.021268 | 0.64665  | -0.00953 | 0.83724  | 0.029874 |

|          |          |          |          |          |          |          |          |          |
|----------|----------|----------|----------|----------|----------|----------|----------|----------|
| 0.004577 | 0.92142  | 0.069697 | 0.13259  | 0.062961 | 0.17437  | 0.041367 | 0.37242  | 0.153683 |
| 0.011205 | 0.80917  | 0.026742 | 0.56431  | 0.011159 | 0.80994  | 0.04576  | 0.32377  | 0.000616 |
| -0.14575 | 0.00159  | -0.1465  | 0.0015   | -0.14507 | 0.00167  | -0.08461 | 0.06773  | -0.30505 |
| -0.06545 | 0.1579   | -0.10168 | 0.02802  | -0.11504 | 0.01286  | -0.06433 | 0.16515  | -0.17203 |
| -0.12944 | 0.00509  | -0.14325 | 0.00191  | -0.10659 | 0.02124  | -0.12032 | 0.00925  | -0.23863 |
| -0.12094 | 0.00889  | -0.25872 | 1.40E-08 | -0.17131 | 0.0002   | -0.25242 | 3.20E-08 | -0.43492 |
| -0.03649 | 0.43147  | -0.01685 | 0.71648  | -0.04463 | 0.33582  | 0.009949 | 0.83022  | 0.022481 |
| -0.1476  | 0.00138  | -0.20075 | 1.24E-05 | -0.17059 | 0.00021  | -0.16761 | 0.00027  | -0.34329 |
| -0.20194 | 1.09E-05 | -0.28052 | 6.83E-10 | -0.2438  | 9.54E-08 | -0.21138 | 4.07E-06 | -0.38319 |
| 0.04612  | 0.31997  | 0.015321 | 0.74124  | -0.00501 | 0.91406  | 0.04055  | 0.38196  | -0.08939 |
| -0.11732 | 0.01117  | -0.02383 | 0.60754  | -0.0769  | 0.09696  | 0.014869 | 0.7486   | 0.035318 |
| -0.05394 | 0.24468  | 0.071092 | 0.125    | -0.01451 | 0.75444  | 0.108528 | 0.01898  | 0.193667 |
| -0.0482  | 0.2986   | -0.01382 | 0.76575  | -0.07363 | 0.11206  | 0.040523 | 0.38226  | -0.02698 |
| -0.02562 | 0.58082  | -0.00424 | 0.92712  | -0.02765 | 0.55117  | 0.002551 | 0.95616  | 0.04066  |
| -0.01111 | 0.81075  | 0.068632 | 0.13863  | 0.035249 | 0.44729  | 0.077548 | 0.09416  | 0.059805 |
| 0.063109 | 0.17336  | -0.03152 | 0.49681  | 0.022807 | 0.623    | -0.04685 | 0.31241  | -0.15086 |
| 0.006335 | 0.8914   | -0.04385 | 0.34438  | -0.0316  | 0.49571  | -0.02846 | 0.53959  | -0.01605 |
| -0.17652 | 0.00013  | -0.10767 | 0.01995  | -0.13923 | 0.00257  | -0.07129 | 0.12395  | -0.17495 |
| -0.13733 | 0.00294  | -0.13867 | 0.00267  | -0.16794 | 0.00027  | -0.08351 | 0.0714   | -0.23716 |
| -0.06732 | 0.14637  | -0.05779 | 0.21254  | -0.09104 | 0.04929  | -0.00976 | 0.83331  | -0.18426 |
| -0.20339 | 9.43E-06 | -0.12372 | 0.00743  | -0.15391 | 0.00085  | -0.07647 | 0.09883  | -0.18177 |
| -0.07873 | 0.08925  | -0.06637 | 0.15213  | -0.04999 | 0.281    | -0.07527 | 0.10428  | -0.05849 |
| -0.1329  | 0.00401  | -0.06613 | 0.15361  | -0.06482 | 0.16196  | -0.06368 | 0.1695   | -0.04727 |
| -0.11591 | 0.01219  | 0.009523 | 0.83737  | -0.0775  | 0.09437  | 0.07087  | 0.12618  | 0.072373 |
| -0.10325 | 0.02567  | -0.1196  | 0.00969  | -0.1306  | 0.0047   | -0.0862  | 0.0627   | -0.17733 |
| -0.01503 | 0.74595  | -0.05894 | 0.20361  | -0.04052 | 0.38225  | -0.06025 | 0.19374  | -0.09442 |
| -0.02276 | 0.62371  | -0.14801 | 0.00134  | -0.06004 | 0.19526  | -0.17004 | 0.00022  | -0.28434 |
| -0.08863 | 0.05561  | -0.06118 | 0.18691  | -0.09264 | 0.04541  | -0.02471 | 0.5943   | -0.05316 |
| -0.14658 | 0.00149  | -0.23342 | 3.37E-07 | -0.1468  | 0.00147  | -0.25118 | 3.76E-08 | -0.31278 |
| -0.01646 | 0.72269  | -0.02467 | 0.59485  | -0.0019  | 0.96727  | -0.02814 | 0.54412  | -0.13172 |
| -0.03369 | 0.46771  | 0.075167 | 0.10473  | 0.036022 | 0.43739  | 0.060663 | 0.19066  | 0.181904 |
| -0.12876 | 0.00532  | -0.08863 | 0.05562  | -0.06704 | 0.14804  | -0.087   | 0.06029  | -0.03359 |
| -0.04843 | 0.29627  | -0.09078 | 0.04992  | -0.06477 | 0.1623   | -0.08308 | 0.07287  | -0.13007 |
| -0.10657 | 0.02125  | -0.07765 | 0.09371  | -0.07493 | 0.10586  | -0.06811 | 0.14169  | -0.14348 |
| -0.03062 | 0.50916  | 0.107208 | 0.02049  | 0.017623 | 0.70405  | 0.136358 | 0.00315  | 0.232226 |
| -0.00948 | 0.83804  | -0.0105  | 0.82091  | -0.0077  | 0.86823  | -0.00321 | 0.94488  | 0.007806 |
| -0.10429 | 0.02421  | -0.05288 | 0.25413  | -0.07295 | 0.11543  | -0.0321  | 0.48888  | -0.06703 |
| -0.03263 | 0.48174  | -0.1165  | 0.01175  | -0.06597 | 0.15462  | -0.11588 | 0.01221  | -0.17921 |
| -0.02397 | 0.60538  | 0.029193 | 0.52915  | -0.02608 | 0.57396  | 0.059697 | 0.19783  | 0.059188 |
| -0.00019 | 0.99669  | 0.173923 | 0.00016  | 0.037076 | 0.4241   | 0.229174 | 5.56E-07 | 0.380813 |
| -0.14646 | 0.00151  | -0.22634 | 7.71E-07 | -0.19772 | 1.68E-05 | -0.17238 | 0.00018  | -0.2989  |
| -0.0316  | 0.49574  | -0.03015 | 0.51577  | -0.02564 | 0.58041  | -0.03271 | 0.48073  | -0.06227 |
| -0.01516 | 0.74387  | 0.103053 | 0.02595  | 0.028934 | 0.53281  | 0.126617 | 0.00615  | 0.188886 |
| 0.089435 | 0.05343  | 0.214743 | 2.83E-06 | 0.152089 | 0.00098  | 0.198815 | 1.50E-05 | 0.392333 |
| 0.039314 | 0.39664  | 0.078379 | 0.09067  | 0.029202 | 0.52903  | 0.094258 | 0.04175  | 0.109963 |

|          |         |          |          |          |         |          |          |          |
|----------|---------|----------|----------|----------|---------|----------|----------|----------|
| -0.08441 | 0.06839 | -0.08865 | 0.05557  | -0.10602 | 0.02194 | -0.05307 | 0.25242  | -0.02147 |
| -0.10913 | 0.01832 | -0.1132  | 0.01438  | -0.10802 | 0.01955 | -0.08898 | 0.05468  | -0.1375  |
| 0.03158  | 0.496   | -0.12614 | 0.00634  | -0.02559 | 0.58125 | -0.18804 | 4.33E-05 | -0.26594 |
| 0.023103 | 0.61849 | -0.01337 | 0.77321  | 0.026637 | 0.56584 | -0.04435 | 0.33888  | -0.07098 |
| 0.063096 | 0.17344 | 0.217612 | 2.06E-06 | 0.113505 | 0.01412 | 0.237389 | 2.10E-07 | 0.372706 |
| 0.089742 | 0.05262 | 0.261961 | 9.11E-09 | 0.161938 | 0.00044 | 0.252455 | 3.19E-08 | 0.545574 |
| -0.01887 | 0.68425 | 0.057423 | 0.21548  | 0.008878 | 0.84825 | 0.058953 | 0.20349  | 0.240377 |
| 0.018621 | 0.68815 | 0.017722 | 0.70247  | 0.031286 | 0.50003 | -0.00293 | 0.94965  | 0.078845 |
| -0.08734 | 0.05931 | -0.10659 | 0.02123  | -0.09052 | 0.0506  | -0.10373 | 0.02498  | -0.13454 |
| -0.0534  | 0.24948 | -0.05641 | 0.22374  | -0.06244 | 0.17796 | -0.04163 | 0.36943  | -0.07534 |
| 0.014068 | 0.76173 | -0.03196 | 0.4908   | -0.00901 | 0.84611 | -0.03235 | 0.48554  | -0.11444 |
| -0.02511 | 0.5883  | -0.14899 | 0.00124  | -0.10869 | 0.0188  | -0.13433 | 0.00363  | -0.22666 |
| -0.00082 | 0.98586 | -0.04271 | 0.35708  | -0.02157 | 0.64194 | -0.05223 | 0.26002  | -0.07306 |
| 0.094369 | 0.04151 | 0.051068 | 0.27074  | 0.089183 | 0.05411 | 0.013307 | 0.77425  | 0.0101   |
| 0.046556 | 0.31541 | -0.05765 | 0.2137   | -0.00609 | 0.89562 | -0.07062 | 0.12753  | -0.12572 |
| -0.04437 | 0.33871 | -0.16546 | 0.00033  | -0.08989 | 0.05224 | -0.18176 | 7.80E-05 | -0.33498 |
| 0.039188 | 0.39816 | 0.003311 | 0.94312  | -0.02298 | 0.62029 | 0.016992 | 0.71418  | 0.043787 |
| -0.09412 | 0.04206 | -0.16117 | 0.00047  | -0.09734 | 0.03547 | -0.16848 | 0.00025  | -0.28337 |
| -0.05675 | 0.22089 | 0.060374 | 0.19278  | -0.0331  | 0.47548 | 0.113468 | 0.01415  | 0.150254 |
| -0.0257  | 0.57956 | -0.01026 | 0.82505  | -0.00459 | 0.92126 | -0.01513 | 0.74435  | -0.01116 |
| -0.03864 | 0.40479 | 0.020164 | 0.66384  | 0.00065  | 0.98883 | 0.020032 | 0.6659   | 0.078724 |
| -0.04153 | 0.37059 | -0.02859 | 0.53768  | -0.0378  | 0.41504 | -0.01113 | 0.81039  | -0.03032 |
| -0.0003  | 0.99492 | 0.057632 | 0.21382  | -0.00106 | 0.98182 | 0.085636 | 0.06445  | 0.10314  |
| 0.007528 | 0.87111 | -0.04029 | 0.38498  | -0.03257 | 0.48254 | -0.02464 | 0.59529  | -0.08499 |
| -0.01607 | 0.729   | 0.010474 | 0.8214   | -0.00832 | 0.8577  | 0.036495 | 0.43139  | -0.02134 |
| -0.09003 | 0.05186 | 0.016246 | 0.72622  | -0.04203 | 0.36476 | 0.052896 | 0.25394  | 0.091775 |
| -0.00525 | 0.90991 | -0.11582 | 0.01226  | -0.06085 | 0.18928 | -0.11512 | 0.0128   | -0.24821 |
| 0.013832 | 0.76561 | -0.00192 | 0.96697  | -0.02789 | 0.54764 | 0.011131 | 0.8104   | 0.036806 |
| -0.05125 | 0.26901 | -0.00823 | 0.85919  | -0.01432 | 0.75763 | -0.0202  | 0.66324  | 0.041505 |
| 0.175053 | 0.00014 | 0.052661 | 0.25606  | 0.093733 | 0.04291 | 0.014754 | 0.75049  | -0.00568 |
| -0.05439 | 0.24073 | -0.15296 | 0.00091  | -0.09959 | 0.03141 | -0.15256 | 0.00094  | -0.20986 |
| -0.11586 | 0.01223 | -0.07303 | 0.11503  | -0.08074 | 0.08135 | -0.0371  | 0.42382  | -0.08574 |
| -0.04084 | 0.37859 | 0.083083 | 0.07286  | 0.015888 | 0.73201 | 0.119002 | 0.01006  | 0.019325 |
| -0.05937 | 0.20032 | -0.05024 | 0.27863  | -0.07534 | 0.10393 | -0.03859 | 0.40545  | 0.092586 |
| -0.02756 | 0.55243 | -0.06178 | 0.1826   | -0.04798 | 0.30079 | -0.07038 | 0.12884  | -0.11199 |
| -0.03149 | 0.49724 | -0.02047 | 0.65911  | -0.02964 | 0.52284 | -0.00211 | 0.96376  | -0.09278 |
| -0.12409 | 0.00726 | -0.12455 | 0.00704  | -0.08799 | 0.05743 | -0.13353 | 0.00384  | -0.1559  |
| -0.04817 | 0.29888 | -0.02443 | 0.59843  | -0.03348 | 0.47048 | -0.00461 | 0.92082  | -0.04217 |
| 0.059619 | 0.19842 | 0.059058 | 0.20269  | 0.042571 | 0.35867 | 0.04814  | 0.29921  | 0.130264 |
| -0.15052 | 0.0011  | -0.07876 | 0.08911  | -0.12023 | 0.00931 | -0.03476 | 0.45356  | -0.06223 |
| -0.0901  | 0.05168 | -0.0039  | 0.93301  | -0.04758 | 0.30484 | 0.035187 | 0.44809  | 0.016041 |
| -0.13876 | 0.00266 | -0.08185 | 0.07724  | -0.09256 | 0.04558 | -0.05491 | 0.23631  | -0.12461 |
| -0.0977  | 0.0348  | -0.1427  | 0.00199  | -0.11468 | 0.01315 | -0.12968 | 0.00501  | -0.20044 |
| -0.02119 | 0.64789 | 0.147426 | 0.0014   | 0.053766 | 0.2462  | 0.171855 | 0.00019  | 0.282244 |
| -0.02783 | 0.54859 | -0.10715 | 0.02056  | -0.07826 | 0.09115 | -0.111   | 0.01641  | -0.17127 |

|          |         |          |          |          |         |          |          |          |
|----------|---------|----------|----------|----------|---------|----------|----------|----------|
| -0.0187  | 0.68685 | -0.06704 | 0.14806  | -0.03703 | 0.4247  | -0.05913 | 0.20215  | -0.14287 |
| -0.00332 | 0.94304 | 0.160858 | 0.00048  | 0.06377  | 0.16888 | 0.173869 | 0.00016  | 0.313621 |
| -0.02918 | 0.52929 | 0.003069 | 0.94726  | -0.01984 | 0.66888 | 0.019541 | 0.67361  | -0.03113 |
| 0.039806 | 0.39076 | -0.08049 | 0.0823   | 0.003779 | 0.93509 | -0.12177 | 0.00843  | -0.16862 |
| 0.110762 | 0.01664 | 0.168358 | 0.00026  | 0.117986 | 0.01072 | 0.158167 | 0.0006   | 0.318014 |
| 0.030233 | 0.51458 | 0.00279  | 0.95205  | -0.01341 | 0.77254 | 0.001522 | 0.97384  | 0.081935 |
| -0.00035 | 0.99394 | 0.132225 | 0.00421  | 0.044643 | 0.33573 | 0.149063 | 0.00123  | 0.299511 |
| -0.03051 | 0.51075 | -0.00963 | 0.83551  | -0.00756 | 0.87058 | -0.02292 | 0.62125  | -0.04513 |
| 0.069159 | 0.13562 | 0.095977 | 0.03814  | 0.061334 | 0.18579 | 0.10062  | 0.0297   | 0.078613 |
| -0.04647 | 0.31634 | -0.05435 | 0.24109  | -0.02364 | 0.61031 | -0.0681  | 0.14171  | -0.13783 |
| -0.02419 | 0.60203 | -0.03145 | 0.49784  | -0.02067 | 0.6559  | -0.02912 | 0.53014  | -0.0348  |
| 0.051352 | 0.26808 | 0.15059  | 0.0011   | 0.064417 | 0.1646  | 0.164049 | 0.00037  | 0.243486 |
| -0.02446 | 0.59807 | 0.053398 | 0.24946  | 0.018232 | 0.69434 | 0.060689 | 0.19047  | 0.080746 |
| 0.015819 | 0.73314 | -0.01873 | 0.6865   | 0.014918 | 0.74781 | -0.04082 | 0.37879  | -0.01472 |
| 0.073517 | 0.1126  | 0.113525 | 0.0141   | 0.063978 | 0.1675  | 0.11874  | 0.01022  | 0.117521 |
| 0.023274 | 0.6159  | 0.163901 | 0.00038  | 0.070883 | 0.12611 | 0.187294 | 4.65E-05 | 0.214039 |
| -0.05781 | 0.21243 | 0.112955 | 0.0146   | 0.016647 | 0.71975 | 0.146943 | 0.00145  | 0.239687 |
| -0.01149 | 0.80443 | 0.084113 | 0.06936  | 0.029153 | 0.52971 | 0.109161 | 0.01829  | 0.088895 |
| -0.09474 | 0.04072 | -0.16531 | 0.00033  | -0.11364 | 0.01401 | -0.16464 | 0.00035  | -0.28068 |
| -0.03373 | 0.46707 | -0.1949  | 2.22E-05 | -0.11332 | 0.01428 | -0.19124 | 3.18E-05 | -0.32648 |
| 0.017219 | 0.71053 | 0.050719 | 0.27404  | 0.03401  | 0.46344 | 0.048332 | 0.29728  | 0.018501 |
| -0.01778 | 0.70148 | 0.027671 | 0.55085  | 0.009022 | 0.84583 | 0.03104  | 0.50341  | 0.054714 |
| -0.00195 | 0.96648 | 0.137782 | 0.00285  | 0.0522   | 0.26026 | 0.159849 | 0.00053  | 0.193823 |
| -0.05919 | 0.20169 | -0.01565 | 0.73594  | -0.03522 | 0.4477  | -0.00281 | 0.9517   | -0.00577 |
| 0.097626 | 0.03493 | 0.231997 | 3.99E-07 | 0.131824 | 0.00432 | 0.231121 | 4.43E-07 | 0.336393 |
| 0.079636 | 0.0856  | 0.018308 | 0.69313  | 0.050556 | 0.27558 | -0.01421 | 0.75938  | -0.01549 |
| 0.066016 | 0.15435 | 0.170438 | 0.00022  | 0.121081 | 0.00881 | 0.15176  | 0.001    | 0.272291 |
| -0.05571 | 0.22949 | -0.04696 | 0.3112   | -0.0561  | 0.22625 | -0.02164 | 0.64093  | -0.02705 |
| -0.0399  | 0.38963 | 0.078947 | 0.08835  | 0.015672 | 0.73552 | 0.104331 | 0.02415  | 0.052612 |
| 0.115098 | 0.01281 | -0.0089  | 0.84796  | 0.04909  | 0.28976 | -0.04938 | 0.28691  | -0.05186 |
| 0.070735 | 0.12691 | -0.03066 | 0.5086   | -0.01179 | 0.79943 | -0.03288 | 0.47839  | -0.06727 |
| -0.00838 | 0.85668 | 0.016421 | 0.72339  | -0.05275 | 0.25523 | 0.07264  | 0.11697  | -0.02524 |
| 0.072534 | 0.11751 | -0.0548  | 0.23721  | -0.02176 | 0.63904 | -0.04116 | 0.37481  | -0.09586 |
| -0.0409  | 0.3779  | -0.1109  | 0.01651  | -0.06396 | 0.16761 | -0.11509 | 0.01282  | -0.10695 |
| 0.081246 | 0.07944 | 0.054805 | 0.23718  | 0.086823 | 0.06082 | 0.020298 | 0.66175  | 0.081698 |
| 0.050994 | 0.27144 | -0.01278 | 0.78294  | 0.025936 | 0.57612 | -0.04269 | 0.35735  | 0.047375 |
| 0.015657 | 0.73576 | -0.05232 | 0.25914  | -0.03018 | 0.51529 | -0.0578  | 0.21248  | -0.0196  |
| 0.126067 | 0.00637 | 0.119478 | 0.00976  | 0.093211 | 0.04408 | 0.105671 | 0.02238  | 0.173131 |
| -0.10042 | 0.03002 | 0.026739 | 0.56436  | -0.0556  | 0.23041 | 0.073815 | 0.11115  | 0.141255 |
| -0.0415  | 0.37092 | 0.104954 | 0.02331  | 0.028487 | 0.53915 | 0.120173 | 0.00934  | 0.266135 |
| 0.039837 | 0.39039 | -0.02027 | 0.66218  | -0.01578 | 0.73379 | -0.01762 | 0.70404  | -0.0031  |
| -0.08071 | 0.08144 | -0.12623 | 0.0063   | -0.11685 | 0.0115  | -0.09362 | 0.04315  | -0.06639 |
| -0.10209 | 0.02739 | -0.05293 | 0.25366  | -0.07208 | 0.11985 | -0.03593 | 0.43852  | -0.02388 |
| -0.04822 | 0.29845 | -0.20271 | 1.01E-05 | -0.0965  | 0.03709 | -0.21644 | 2.35E-06 | -0.40579 |
| -0.15122 | 0.00105 | -0.23561 | 2.60E-07 | -0.16629 | 0.00031 | -0.22468 | 9.34E-07 | -0.39779 |

|          |         |          |          |          |         |          |          |          |
|----------|---------|----------|----------|----------|---------|----------|----------|----------|
| -0.12412 | 0.00724 | -0.07861 | 0.08974  | -0.07379 | 0.11127 | -0.0688  | 0.13767  | -0.14608 |
| -0.09489 | 0.04039 | -0.16996 | 0.00022  | -0.1189  | 0.01012 | -0.1605  | 0.0005   | -0.25061 |
| 0.004148 | 0.92877 | -0.07317 | 0.11432  | -0.01807 | 0.69688 | -0.09049 | 0.05068  | -0.17952 |
| 0.058383 | 0.2079  | -0.0553  | 0.23297  | 0.000591 | 0.98983 | -0.09116 | 0.04897  | -0.14792 |
| -0.04204 | 0.3647  | -0.00809 | 0.86166  | -0.01259 | 0.78617 | -0.0036  | 0.9382   | 0.006103 |
| 0.115088 | 0.01282 | 0.047223 | 0.30852  | 0.069456 | 0.13394 | 0.030264 | 0.51413  | -0.04836 |
| -0.05321 | 0.25109 | 0.010825 | 0.81551  | -0.0231  | 0.61858 | 0.033335 | 0.47236  | 0.026114 |
| -0.04578 | 0.32351 | 0.063952 | 0.16767  | 0.024694 | 0.59452 | 0.076773 | 0.0975   | 0.10712  |
| -0.00132 | 0.97722 | -0.1367  | 0.00308  | -0.08326 | 0.07226 | -0.14674 | 0.00147  | -0.28133 |
| -0.01318 | 0.77641 | 0.093909 | 0.04252  | -0.01446 | 0.75528 | 0.169695 | 0.00023  | 0.207619 |
| -0.10358 | 0.02519 | -0.28054 | 6.80E-10 | -0.13779 | 0.00285 | -0.31582 | 2.82E-12 | -0.4021  |
| 0.03214  | 0.48839 | 0.151547 | 0.00102  | 0.06557  | 0.15716 | 0.170343 | 0.00022  | 0.275513 |
| -0.15125 | 0.00104 | -0.20135 | 1.16E-05 | -0.15924 | 0.00055 | -0.18232 | 7.41E-05 | -0.27552 |
| -0.07462 | 0.10728 | -0.0209  | 0.65235  | -0.0248  | 0.59288 | -0.01414 | 0.76048  | -0.02351 |
| -0.04216 | 0.36334 | -0.08364 | 0.07094  | -0.08721 | 0.05969 | -0.06384 | 0.16841  | -0.10744 |
| 0.039175 | 0.39832 | 0.007006 | 0.87998  | -0.02537 | 0.58443 | 0.054862 | 0.23669  | -0.08297 |
| -0.05717 | 0.21751 | 0.108361 | 0.01916  | 0.001026 | 0.98235 | 0.14906  | 0.00124  | 0.262171 |
| 0.153733 | 0.00086 | 0.09397  | 0.04238  | 0.091075 | 0.04919 | 0.083762 | 0.07054  | 0.051785 |
| 0.01559  | 0.73686 | -0.02669 | 0.56509  | -0.01626 | 0.72593 | -0.02234 | 0.63013  | -0.06166 |
| 0.014554 | 0.75376 | 0.045191 | 0.32983  | 0.023183 | 0.61727 | 0.047405 | 0.30666  | 0.114262 |
| -0.00895 | 0.84697 | -0.04973 | 0.28353  | -0.02215 | 0.63303 | -0.05242 | 0.25821  | -0.11729 |
| -0.08057 | 0.08196 | -0.01293 | 0.78046  | -0.02372 | 0.6091  | -0.00857 | 0.85352  | -0.00168 |
| -0.01866 | 0.68759 | 0.093598 | 0.04321  | 0.048031 | 0.30031 | 0.098651 | 0.03306  | 0.175539 |
| -0.12965 | 0.00501 | 0.018298 | 0.6933   | -0.06101 | 0.18812 | 0.067787 | 0.14357  | 0.083841 |
| 0.062779 | 0.17562 | 0.009498 | 0.83779  | 0.038421 | 0.40747 | -0.02196 | 0.6359   | -0.05368 |
| 0.017631 | 0.70393 | 0.18306  | 6.92E-05 | 0.066694 | 0.15015 | 0.223563 | 1.06E-06 | 0.329248 |
| -0.04947 | 0.28608 | -0.03215 | 0.4882   | -0.04685 | 0.31238 | -0.01186 | 0.79821  | -0.07061 |
| -0.04232 | 0.36145 | -0.09635 | 0.0374   | -0.0547  | 0.23807 | -0.09737 | 0.03542  | -0.21272 |
| -0.03491 | 0.45167 | -0.12724 | 0.0059   | -0.04317 | 0.35195 | -0.1585  | 0.00059  | -0.22296 |
| -0.00873 | 0.85083 | 0.06385  | 0.16835  | -0.02473 | 0.59395 | 0.108657 | 0.01884  | 0.14569  |
| -0.00313 | 0.94619 | 0.01386  | 0.76514  | -0.00729 | 0.87524 | 0.036223 | 0.43484  | 0.061622 |
| -0.08825 | 0.0567  | -0.09386 | 0.04263  | -0.06653 | 0.15116 | -0.10768 | 0.01994  | -0.07932 |
| -0.02715 | 0.55832 | -0.11002 | 0.01739  | -0.05285 | 0.25437 | -0.12661 | 0.00615  | -0.16388 |
| 0.062143 | 0.18004 | 0.002342 | 0.95975  | 0.032925 | 0.47783 | -0.02138 | 0.64498  | -0.02022 |
| -0.01479 | 0.74996 | -0.09083 | 0.04981  | -0.03436 | 0.45886 | -0.11405 | 0.01366  | -0.15806 |
| -0.01762 | 0.7041  | 0.027532 | 0.55285  | -0.0179  | 0.69968 | 0.03628  | 0.43411  | 0.086144 |
| -0.05536 | 0.23248 | 0.083058 | 0.07294  | -0.0034  | 0.94161 | 0.114009 | 0.01369  | 0.132601 |
| -0.10344 | 0.02539 | -0.10588 | 0.02211  | -0.0916  | 0.04789 | -0.09219 | 0.04648  | -0.14232 |
| -0.05186 | 0.2634  | -0.03329 | 0.47292  | -0.03447 | 0.45741 | -0.03943 | 0.39526  | 0.046536 |
| 0.061699 | 0.18318 | 0.107922 | 0.01966  | 0.053844 | 0.24552 | 0.1188   | 0.01018  | 0.178473 |
| 0.046942 | 0.31141 | -0.01222 | 0.79226  | 0.033488 | 0.47032 | -0.04245 | 0.35999  | -0.11632 |
| -0.05898 | 0.20332 | -0.04143 | 0.37172  | -0.05803 | 0.21063 | -0.02273 | 0.62417  | -0.01135 |
| -0.08945 | 0.05339 | -0.033   | 0.47688  | -0.01376 | 0.76686 | -0.03582 | 0.44     | -0.17555 |
| -0.12454 | 0.00704 | 0.032195 | 0.48765  | -0.06635 | 0.15225 | 0.09863  | 0.0331   | 0.084865 |
| -0.01951 | 0.67406 | -0.01217 | 0.79303  | -0.0023  | 0.9605  | -0.01059 | 0.81948  | -0.04545 |



|          |         |          |         |          |         |          |         |          |
|----------|---------|----------|---------|----------|---------|----------|---------|----------|
| 0.00852  | 0.8543  | -0.08237 | 0.07536 | -0.03181 | 0.49287 | -0.08746 | 0.05894 | -0.20232 |
| -0.00327 | 0.94379 | -0.09031 | 0.05113 | -0.05328 | 0.25054 | -0.09855 | 0.03325 | -0.15206 |
| -0.06703 | 0.14809 | -0.09052 | 0.0506  | -0.09094 | 0.04953 | -0.06621 | 0.15316 | -0.11883 |
| -0.01143 | 0.8054  | -0.07681 | 0.09734 | -0.01307 | 0.77816 | -0.11272 | 0.0148  | -0.15029 |
| -0.01084 | 0.81527 | -0.07737 | 0.09492 | -0.0514  | 0.26765 | -0.04991 | 0.28176 | -0.10024 |
| 0.068609 | 0.13876 | 0.003082 | 0.94704 | 0.058685 | 0.20556 | -0.03845 | 0.4071  | -0.06458 |
| 0.001016 | 0.98253 | 0.130002 | 0.0049  | 0.04793  | 0.30132 | 0.14981  | 0.00117 | 0.29059  |
| 0.052104 | 0.26113 | -0.07381 | 0.11117 | -0.00237 | 0.95929 | -0.11911 | 0.00999 | -0.1755  |
| -0.01042 | 0.82235 | 0.039729 | 0.39167 | -0.00108 | 0.98145 | 0.057397 | 0.21569 | 0.057282 |
| 0.053316 | 0.25019 | 0.028076 | 0.54503 | 0.012266 | 0.7915  | 0.036611 | 0.42993 | -0.03454 |
| 0.022639 | 0.62557 | 0.073269 | 0.11383 | 0.03182  | 0.49274 | 0.082776 | 0.07393 | 0.066718 |
| -0.13482 | 0.00351 | -0.09115 | 0.04901 | -0.08862 | 0.05564 | -0.07192 | 0.12064 | -0.07576 |
| -0.00096 | 0.98345 | 0.140263 | 0.00238 | 0.040198 | 0.38611 | 0.168997 | 0.00024 | 0.229944 |
| 0.039586 | 0.39338 | 0.075377 | 0.10377 | 0.060111 | 0.19473 | 0.064009 | 0.1673  | 0.099596 |
| 0.023784 | 0.60818 | -0.09817 | 0.03393 | 0.004206 | 0.92777 | -0.14805 | 0.00133 | -0.26132 |
| 0.106057 | 0.02189 | 0.01306  | 0.77833 | 0.040645 | 0.38084 | -0.01706 | 0.71308 | 0.01783  |
| 0.065067 | 0.16037 | -0.00669 | 0.88538 | 0.031123 | 0.50226 | -0.03169 | 0.49456 | 0.015186 |
| -0.0851  | 0.06614 | -0.13961 | 0.0025  | -0.13222 | 0.00421 | -0.11405 | 0.01366 | -0.1691  |
| -0.04668 | 0.31416 | -0.14151 | 0.00217 | -0.06972 | 0.13248 | -0.15245 | 0.00095 | -0.27036 |
| -0.17109 | 0.0002  | -0.1062  | 0.02172 | -0.12514 | 0.00677 | -0.06585 | 0.15537 | -0.08613 |
| -0.00266 | 0.95428 | -0.07421 | 0.10924 | -0.03263 | 0.4818  | -0.08754 | 0.05873 | -0.10393 |
| -0.01832 | 0.69294 | 0.036392 | 0.43269 | -0.00045 | 0.99228 | 0.04864  | 0.29422 | 0.097526 |
| -0.04357 | 0.3475  | -0.00506 | 0.91308 | -0.01996 | 0.66696 | -0.00115 | 0.98019 | 0.077613 |
| -0.01094 | 0.81362 | 0.113988 | 0.01371 | 0.035448 | 0.44474 | 0.128129 | 0.00556 | 0.282054 |
| 0.166236 | 0.00031 | 0.060386 | 0.1927  | 0.068478 | 0.13952 | 0.04937  | 0.28702 | 0.094164 |
| -0.08452 | 0.06803 | -0.0338  | 0.46615 | -0.05628 | 0.2248  | -0.02308 | 0.6189  | -0.04314 |
| -0.03544 | 0.44482 | 0.017351 | 0.70841 | -0.02401 | 0.60481 | 0.041829 | 0.36711 | 0.012423 |
| -0.11983 | 0.00954 | -0.11681 | 0.01153 | -0.1384  | 0.00272 | -0.06869 | 0.13829 | -0.18388 |
| -0.01581 | 0.73324 | 0.00227  | 0.96099 | -0.01283 | 0.78211 | 0.016846 | 0.71653 | 0.006248 |
| -0.04023 | 0.38576 | 0.136987 | 0.00301 | 0.031831 | 0.49259 | 0.1631   | 0.0004  | 0.335382 |
| 0.04429  | 0.33957 | 0.01936  | 0.67646 | 0.018009 | 0.69789 | 0.01581  | 0.73329 | -0.02912 |
| 0.032845 | 0.4789  | 0.143182 | 0.00192 | 0.093039 | 0.04448 | 0.156403 | 0.00069 | 0.209746 |
| -0.01167 | 0.80145 | 0.046648 | 0.31446 | 0.004184 | 0.92816 | 0.068848 | 0.13739 | 0.05174  |
| 0.060577 | 0.19129 | -0.00881 | 0.84939 | 0.024836 | 0.59241 | -0.02765 | 0.5511  | -0.05839 |
| -0.01095 | 0.81342 | -0.10072 | 0.02953 | -0.09066 | 0.05024 | -0.08343 | 0.07166 | -0.12212 |
| 0.008868 | 0.84842 | -0.02075 | 0.65466 | -0.01347 | 0.77152 | -0.01964 | 0.67207 | 0.014038 |
| 0.004998 | 0.91422 | 0.115924 | 0.01218 | 0.014088 | 0.76141 | 0.154993 | 0.00078 | 0.249333 |
| 0.069324 | 0.13468 | 0.047411 | 0.3066  | -0.0046  | 0.92101 | 0.085143 | 0.06601 | 0.159484 |
| -0.00468 | 0.9196  | 0.10686  | 0.02091 | 0.035362 | 0.44584 | 0.130706 | 0.00467 | 0.192755 |
| -0.00227 | 0.96093 | 0.114682 | 0.01314 | 0.047553 | 0.30514 | 0.133852 | 0.00376 | 0.209448 |
| 0.017371 | 0.7081  | 0.024532 | 0.59695 | 0.025378 | 0.58435 | 0.00707  | 0.87889 | 0.164359 |
| 0.005225 | 0.91034 | -0.04724 | 0.30837 | -0.03348 | 0.47045 | -0.04431 | 0.33937 | -0.09266 |
| -0.14163 | 0.00216 | -0.12365 | 0.00747 | -0.15036 | 0.00112 | -0.07345 | 0.11295 | -0.16935 |
| -0.09378 | 0.0428  | -0.14019 | 0.00239 | -0.099   | 0.03244 | -0.13682 | 0.00305 | -0.26127 |
| -0.03278 | 0.47976 | -0.04139 | 0.37219 | -0.02195 | 0.63606 | -0.05214 | 0.26084 | 0.001248 |

|          |         |          |          |          |          |          |          |          |
|----------|---------|----------|----------|----------|----------|----------|----------|----------|
| -0.08292 | 0.07341 | -0.0347  | 0.45446  | -0.04908 | 0.28989  | -0.02973 | 0.52158  | -0.01787 |
| -0.12831 | 0.00549 | -0.28702 | 2.63E-10 | -0.18411 | 6.28E-05 | -0.29072 | 1.51E-10 | -0.38293 |
| 0.039604 | 0.39317 | -0.0072  | 0.8766   | -0.0282  | 0.54326  | 0.030446 | 0.51161  | -0.11092 |
| 0.027905 | 0.54749 | 0.00575  | 0.90138  | 0.015133 | 0.7443   | 0.003429 | 0.94108  | -0.04979 |
| 0.001953 | 0.96642 | -0.13835 | 0.00273  | -0.07458 | 0.10751  | -0.16006 | 0.00052  | -0.20414 |
| -0.11263 | 0.01489 | -0.1246  | 0.00702  | -0.09595 | 0.0382   | -0.10383 | 0.02484  | -0.19836 |
| -0.02827 | 0.54219 | -0.03585 | 0.43965  | -0.04371 | 0.34597  | -0.0128  | 0.7827   | -0.09638 |
| -0.06559 | 0.15701 | -0.12882 | 0.0053   | -0.09753 | 0.03512  | -0.10872 | 0.01877  | -0.29327 |
| 0.039468 | 0.3948  | 0.078432 | 0.09046  | 0.035829 | 0.43985  | 0.093679 | 0.04303  | 0.079473 |
| -0.06918 | 0.13549 | -0.06804 | 0.14207  | -0.05224 | 0.25992  | -0.05474 | 0.23778  | -0.04976 |
| -0.05859 | 0.20626 | -0.02951 | 0.52472  | -0.02956 | 0.52403  | -0.03232 | 0.48597  | -0.05275 |
| -0.01453 | 0.75413 | -0.00681 | 0.88335  | -0.02121 | 0.64748  | -0.0003  | 0.99485  | -0.04033 |
| 0.039883 | 0.38984 | 0.071298 | 0.12391  | 0.06082  | 0.18951  | 0.070377 | 0.12885  | 0.118334 |
| -0.121   | 0.00886 | -0.06355 | 0.1704   | -0.1008  | 0.0294   | -0.02999 | 0.51795  | 0.011458 |
| -0.01545 | 0.73915 | -0.04442 | 0.3381   | -0.00985 | 0.83181  | -0.05645 | 0.2234   | -0.12078 |
| -0.05827 | 0.20882 | -0.0935  | 0.04343  | -0.05955 | 0.19894  | -0.10082 | 0.02938  | -0.11664 |
| -0.05627 | 0.22483 | -0.04856 | 0.29501  | -0.06958 | 0.13323  | -0.0107  | 0.81762  | -0.06876 |
| -0.15472 | 0.00079 | -0.06304 | 0.17385  | -0.12472 | 0.00697  | 0.007775 | 0.86693  | -0.10392 |
| -0.07647 | 0.09884 | -0.10427 | 0.02423  | -0.09104 | 0.04928  | -0.09826 | 0.03376  | -0.09333 |
| -0.03832 | 0.40872 | 0.084019 | 0.06968  | -0.00552 | 0.90535  | 0.11602  | 0.01211  | 0.175512 |
| -0.00997 | 0.82986 | -0.01726 | 0.7099   | -0.00992 | 0.83068  | -0.00516 | 0.91144  | 0.027379 |
| 0.001747 | 0.96996 | -0.02851 | 0.5389   | 0.013077 | 0.77805  | -0.06682 | 0.14939  | -0.07277 |
| -0.06152 | 0.18443 | 0.058269 | 0.20879  | 0.008307 | 0.85791  | 0.06875  | 0.13795  | 0.164337 |
| -0.0127  | 0.7843  | -0.00432 | 0.92584  | 0.015075 | 0.74525  | -0.02111 | 0.64906  | -0.02442 |
| 0.111041 | 0.01637 | 0.030331 | 0.5132   | 0.060169 | 0.1943   | 0.004887 | 0.91612  | 0.003719 |
| -0.06297 | 0.17427 | 0.103568 | 0.02521  | 0.029632 | 0.52297  | 0.117313 | 0.01118  | 0.147414 |
| -0.0417  | 0.3686  | 0.021315 | 0.64592  | -0.00984 | 0.83204  | 0.03328  | 0.47309  | 0.053402 |
| -0.05696 | 0.21921 | -0.15011 | 0.00114  | -0.105   | 0.02325  | -0.14876 | 0.00126  | -0.24435 |
| 0.044417 | 0.33818 | 0.087846 | 0.05784  | 0.022603 | 0.62611  | 0.109013 | 0.01845  | 0.186777 |
| -0.10855 | 0.01895 | -0.18837 | 4.20E-05 | -0.15444 | 0.00081  | -0.15531 | 0.00076  | -0.24712 |
| -0.01355 | 0.7702  | -0.07855 | 0.08998  | -0.06679 | 0.14954  | -0.07642 | 0.09904  | -0.10147 |
| -0.03635 | 0.43328 | 0.023514 | 0.61226  | -0.02264 | 0.62556  | 0.040221 | 0.38584  | 0.130826 |
| 0.02264  | 0.62554 | 0.151742 | 0.001    | 0.044955 | 0.33236  | 0.194748 | 2.26E-05 | 0.276299 |
| 0.0968   | 0.03651 | -0.01006 | 0.8284   | 0.013052 | 0.77846  | -0.01738 | 0.70789  | 0.005606 |
| -0.00533 | 0.9085  | -0.02259 | 0.62631  | -0.01181 | 0.79915  | -0.026   | 0.57515  | -0.03072 |
| 0.042304 | 0.36169 | 0.13892  | 0.00262  | 0.066242 | 0.15294  | 0.161473 | 0.00046  | 0.211049 |
| -0.11458 | 0.01322 | -0.09555 | 0.03902  | -0.09273 | 0.04519  | -0.07346 | 0.11287  | -0.11454 |
| -0.15545 | 0.00075 | -0.08684 | 0.06077  | -0.13561 | 0.00332  | -0.02303 | 0.61956  | -0.05283 |
| -0.17734 | 0.00012 | -0.15228 | 0.00096  | -0.17435 | 0.00015  | -0.08559 | 0.06461  | -0.14447 |
| 0.079819 | 0.08488 | 0.059424 | 0.19989  | 0.059383 | 0.20021  | 0.063919 | 0.16789  | 0.100762 |
| -0.07317 | 0.11429 | -0.07587 | 0.10153  | -0.08308 | 0.07287  | -0.03469 | 0.4545   | -0.17444 |
| -0.0179  | 0.6997  | -0.03403 | 0.46319  | -0.04907 | 0.28996  | -0.01997 | 0.66693  | -0.03626 |
| 0.025212 | 0.58681 | 0.00828  | 0.85836  | -0.01274 | 0.78367  | 0.023869 | 0.6069   | 0.023842 |
| 0.086135 | 0.0629  | 0.242309 | 1.15E-07 | 0.143572 | 0.00187  | 0.241327 | 1.30E-07 | 0.414438 |
| 0.031994 | 0.49038 | -0.0422  | 0.3629   | 0.025746 | 0.57891  | -0.09406 | 0.04217  | -0.14903 |

|          |          |          |          |          |          |          |          |          |
|----------|----------|----------|----------|----------|----------|----------|----------|----------|
| -0.06938 | 0.13436  | -0.10288 | 0.0262   | -0.04404 | 0.34236  | -0.12788 | 0.00565  | -0.14982 |
| -0.08191 | 0.07701  | -0.10052 | 0.02986  | -0.09739 | 0.03538  | -0.08616 | 0.06282  | -0.20316 |
| 0.079386 | 0.08659  | -0.13437 | 0.00362  | -0.0063  | 0.89198  | -0.19696 | 1.81E-05 | -0.29167 |
| 0.002783 | 0.95217  | 0.133322 | 0.0039   | 0.075719 | 0.1022   | 0.128309 | 0.00549  | 0.313218 |
| 0.153809 | 0.00085  | 0.338118 | 5.93E-14 | 0.21258  | 3.58E-06 | 0.33796  | 6.11E-14 | 0.551879 |
| -0.04304 | 0.35344  | 0.079375 | 0.08664  | 0.013885 | 0.76474  | 0.100974 | 0.02912  | 0.161484 |
| 0.003021 | 0.94809  | -0.0826  | 0.07455  | -0.0122  | 0.79251  | -0.11547 | 0.01253  | -0.12566 |
| 0.200849 | 1.22E-05 | 0.24663  | 6.70E-08 | 0.173309 | 0.00017  | 0.239971 | 1.53E-07 | 0.339333 |
| 0.056349 | 0.22421  | 0.157652 | 0.00063  | 0.103358 | 0.02551  | 0.16837  | 0.00026  | 0.184219 |
| 0.060216 | 0.19395  | 0.103772 | 0.02492  | 0.078971 | 0.08826  | 0.069143 | 0.13571  | 0.250927 |
| -0.03294 | 0.47764  | -0.0629  | 0.17476  | -0.02188 | 0.63723  | -0.08567 | 0.06435  | 0.02111  |
| 0.090299 | 0.05116  | 0.22996  | 5.07E-07 | 0.112278 | 0.0152   | 0.270368 | 2.89E-09 | 0.367188 |
| 0.172593 | 0.00018  | 0.120084 | 0.00939  | 0.147866 | 0.00135  | 0.06567  | 0.15652  | 0.265121 |
| 0.144232 | 0.00178  | 0.058791 | 0.20473  | 0.077503 | 0.09435  | 0.047604 | 0.30463  | 0.086832 |
| -0.1177  | 0.01091  | -0.03484 | 0.45255  | -0.07003 | 0.13076  | -0.00775 | 0.86741  | -0.02356 |
| -0.0383  | 0.40889  | -0.00546 | 0.90633  | 0.01352  | 0.77075  | -0.0309  | 0.50539  | 0.033019 |
| -0.00208 | 0.96422  | 0.097636 | 0.03492  | 0.052048 | 0.26164  | 0.095944 | 0.03821  | 0.178632 |
| -0.07339 | 0.11324  | -0.02665 | 0.56562  | -0.03562 | 0.44253  | -0.00688 | 0.88207  | -0.08762 |
| 0.137566 | 0.00289  | 0.21998  | 1.59E-06 | 0.138184 | 0.00277  | 0.233947 | 3.17E-07 | 0.237603 |
| 0.092381 | 0.04601  | 0.124522 | 0.00706  | 0.090225 | 0.05135  | 0.118617 | 0.0103   | 0.27801  |
| 0.004369 | 0.92497  | -0.07792 | 0.09258  | -0.00337 | 0.94213  | -0.12645 | 0.00621  | 0.007053 |
| -0.04224 | 0.36241  | -0.18504 | 5.75E-05 | -0.1139  | 0.01379  | -0.18108 | 8.31E-05 | -0.34826 |
| 0.08623  | 0.06261  | 0.197307 | 1.75E-05 | 0.149628 | 0.00118  | 0.179486 | 9.62E-05 | 0.371791 |
| 0.067485 | 0.14536  | 0.043452 | 0.34879  | 0.068019 | 0.1422   | 0.018605 | 0.68841  | 0.137167 |
| -0.04774 | 0.30329  | 0.040888 | 0.37799  | 0.005214 | 0.91052  | 0.056092 | 0.22633  | 0.247069 |
| 0.132872 | 0.00402  | 0.125279 | 0.00671  | 0.16047  | 0.0005   | 0.064318 | 0.16525  | 0.179437 |
| 0.101015 | 0.02906  | 0.259316 | 1.30E-08 | 0.201231 | 1.18E-05 | 0.197939 | 1.64E-05 | 0.527925 |
| 0.146336 | 0.00152  | 0.169017 | 0.00024  | 0.172142 | 0.00019  | 0.119187 | 0.00994  | 0.304815 |
| 0.08535  | 0.06535  | 0.226513 | 7.56E-07 | 0.169157 | 0.00024  | 0.196283 | 1.94E-05 | 0.394327 |
| 0.194777 | 2.25E-05 | 0.222229 | 1.23E-06 | 0.218164 | 1.94E-06 | 0.163909 | 0.00038  | 0.387006 |
| 0.057873 | 0.21191  | 0.241483 | 1.27E-07 | 0.139815 | 0.00246  | 0.233877 | 3.19E-07 | 0.524064 |
| 0.114368 | 0.0134   | 0.180428 | 8.82E-05 | 0.135978 | 0.00324  | 0.162107 | 0.00044  | 0.281629 |
| 0.06637  | 0.15214  | 0.110748 | 0.01666  | 0.12017  | 0.00934  | 0.05639  | 0.22387  | 0.244919 |
| -0.10987 | 0.01754  | -0.19702 | 1.80E-05 | -0.17737 | 0.00012  | -0.17318 | 0.00017  | -0.32188 |
| 0.05777  | 0.21272  | 0.153018 | 0.00091  | 0.122303 | 0.00815  | 0.126668 | 0.00612  | 0.306217 |
| 0.182939 | 7.00E-05 | 0.11762  | 0.01096  | 0.144684 | 0.00172  | 0.064201 | 0.16602  | 0.168892 |
| -0.05501 | 0.23543  | -0.25702 | 1.76E-08 | -0.16473 | 0.00035  | -0.25798 | 1.55E-08 | -0.35188 |
| -0.07768 | 0.09362  | -0.12949 | 0.00507  | -0.11253 | 0.01497  | -0.11539 | 0.01258  | -0.25021 |
| 0.276426 | 1.23E-09 | 0.38642  | 4.43E-18 | 0.299171 | 4.12E-11 | 0.340854 | 3.61E-14 | 0.596268 |
| 0.108758 | 0.01873  | 0.302172 | 2.58E-11 | 0.184073 | 6.30E-05 | 0.292489 | 1.15E-10 | 0.595896 |
| 0.013324 | 0.77397  | 0.160909 | 0.00048  | 0.089481 | 0.05331  | 0.1583   | 0.0006   | 0.345846 |
| 0.055124 | 0.23446  | 0.207965 | 5.85E-06 | 0.133292 | 0.00391  | 0.197739 | 1.68E-05 | 0.447165 |
| 0.113768 | 0.0139   | 0.195212 | 2.15E-05 | 0.180221 | 8.99E-05 | 0.135048 | 0.00346  | 0.252072 |
| 0.012417 | 0.78899  | 0.145893 | 0.00157  | 0.085514 | 0.06483  | 0.136543 | 0.00311  | 0.328888 |
| 0.069966 | 0.1311   | 0.239688 | 1.58E-07 | 0.149889 | 0.00116  | 0.246939 | 6.44E-08 | 0.312945 |

|          |          |          |          |          |          |          |          |          |
|----------|----------|----------|----------|----------|----------|----------|----------|----------|
| 0.061168 | 0.18699  | 0.016304 | 0.72528  | 0.010958 | 0.8133   | 0.017199 | 0.71086  | 0.18062  |
| 0.113741 | 0.01392  | 0.174111 | 0.00016  | 0.143355 | 0.0019   | 0.143518 | 0.00188  | 0.261278 |
| 0.098082 | 0.03409  | 0.236207 | 2.42E-07 | 0.16033  | 0.00051  | 0.214257 | 2.98E-06 | 0.353212 |
| 0.164221 | 0.00037  | 0.244921 | 8.30E-08 | 0.187666 | 4.49E-05 | 0.222424 | 1.21E-06 | 0.442182 |
| 0.113531 | 0.0141   | 0.137973 | 0.00281  | 0.115068 | 0.01284  | 0.107376 | 0.02029  | 0.330293 |
| 0.122696 | 0.00794  | 0.196626 | 1.87E-05 | 0.155324 | 0.00076  | 0.164919 | 0.00035  | 0.399371 |
| 0.064325 | 0.1652   | 0.200109 | 1.32E-05 | 0.155419 | 0.00075  | 0.172882 | 0.00017  | 0.389569 |
| 0.2708   | 2.72E-09 | 0.246498 | 6.81E-08 | 0.251579 | 3.57E-08 | 0.173982 | 0.00016  | 0.439371 |
| 0.150512 | 0.0011   | 0.191403 | 3.13E-05 | 0.164492 | 0.00036  | 0.155478 | 0.00075  | 0.398359 |
| -0.03109 | 0.50277  | 0.095663 | 0.03878  | 0.076973 | 0.09663  | 0.062284 | 0.17906  | 0.22673  |
| 0.108397 | 0.01912  | 0.202598 | 1.02E-05 | 0.159719 | 0.00053  | 0.172827 | 0.00017  | 0.418979 |
| 0.11584  | 0.01224  | 0.246485 | 6.82E-08 | 0.165321 | 0.00033  | 0.225058 | 8.94E-07 | 0.506725 |
| 0.176371 | 0.00013  | 0.193964 | 2.44E-05 | 0.202794 | 1.00E-05 | 0.131848 | 0.00432  | 0.3119   |
| 0.111693 | 0.01574  | 0.226414 | 7.65E-07 | 0.154417 | 0.00081  | 0.203209 | 9.61E-06 | 0.449737 |
| 0.123944 | 0.00733  | 0.121372 | 0.00865  | 0.154809 | 0.00079  | 0.063758 | 0.16897  | 0.190357 |
| 0.102045 | 0.02745  | 0.240946 | 1.36E-07 | 0.159168 | 0.00056  | 0.227976 | 6.39E-07 | 0.510881 |
| 0.075557 | 0.10294  | 0.052129 | 0.2609   | 0.097977 | 0.03428  | 0.001239 | 0.9787   | 0.136304 |
| 0.131989 | 0.00427  | 0.216966 | 2.22E-06 | 0.237445 | 2.08E-07 | 0.128045 | 0.00559  | 0.192421 |
| 0.058907 | 0.20384  | 0.156186 | 0.00071  | 0.113982 | 0.01372  | 0.129504 | 0.00506  | 0.275437 |
| 0.043598 | 0.34717  | 0.157652 | 0.00063  | 0.108733 | 0.01875  | 0.140095 | 0.00241  | 0.366351 |
| 0.019579 | 0.67301  | 0.142302 | 0.00205  | 0.090525 | 0.05058  | 0.129741 | 0.00498  | 0.385002 |
| 0.03081  | 0.50657  | 0.277276 | 1.09E-09 | 0.14436  | 0.00176  | 0.29811  | 4.86E-11 | 0.453323 |
| 0.031625 | 0.49539  | 0.120385 | 0.00921  | 0.106233 | 0.02167  | 0.089247 | 0.05394  | 0.335724 |
| 0.129084 | 0.00521  | 0.197917 | 1.65E-05 | 0.162055 | 0.00044  | 0.155337 | 0.00076  | 0.396331 |
| 0.112944 | 0.01461  | 0.169447 | 0.00023  | 0.159107 | 0.00056  | 0.127073 | 0.00596  | 0.304988 |
| 0.13533  | 0.00339  | 0.241995 | 1.19E-07 | 0.197639 | 1.69E-05 | 0.202666 | 1.02E-05 | 0.43165  |
| 0.212527 | 3.60E-06 | 0.142685 | 0.00199  | 0.185742 | 5.38E-05 | 0.072287 | 0.11876  | 0.16532  |
| 0.107021 | 0.02071  | 0.260289 | 1.14E-08 | 0.15749  | 0.00064  | 0.260988 | 1.04E-08 | 0.449206 |
| -0.0581  | 0.21015  | -0.06039 | 0.19268  | -0.07894 | 0.0884   | -0.02999 | 0.51799  | -0.15606 |
| 0.054779 | 0.23741  | 0.14708  | 0.00144  | 0.091812 | 0.04737  | 0.138391 | 0.00273  | 0.392506 |
| -0.05095 | 0.27182  | 0.097014 | 0.0361   | 0.019482 | 0.67454  | 0.116492 | 0.01176  | 0.274628 |
| 0.098754 | 0.03288  | 0.2081   | 5.77E-06 | 0.148538 | 0.00129  | 0.186164 | 5.17E-05 | 0.410614 |
| 0.07     | 0.13091  | 0.076539 | 0.09853  | 0.046209 | 0.31904  | 0.074329 | 0.10867  | 0.255468 |
| 0.109709 | 0.01771  | 0.20975  | 4.84E-06 | 0.116981 | 0.01141  | 0.21355  | 3.22E-06 | 0.618855 |
| 0.19054  | 3.40E-05 | 0.154132 | 0.00083  | 0.185709 | 5.40E-05 | 0.084651 | 0.0676   | 0.19365  |
| 0.082354 | 0.07542  | 0.171562 | 0.0002   | 0.112762 | 0.01477  | 0.154592 | 0.0008   | 0.442027 |
| 0.07712  | 0.09599  | 0.2873   | 2.52E-10 | 0.141725 | 0.00214  | 0.313351 | 4.25E-12 | 0.591887 |
| 0.076537 | 0.09854  | 0.113613 | 0.01403  | 0.092747 | 0.04515  | 0.094724 | 0.04074  | 0.32141  |
| -0.00159 | 0.97271  | -0.03117 | 0.50156  | 0.018432 | 0.69116  | -0.06972 | 0.13247  | 0.128052 |
| 0.038399 | 0.40774  | -0.12958 | 0.00504  | -0.05899 | 0.20319  | -0.14173 | 0.00214  | -0.21644 |
| 0.05318  | 0.25139  | 0.130162 | 0.00484  | 0.109919 | 0.01749  | 0.100066 | 0.03061  | 0.2742   |
| 0.159504 | 0.00054  | 0.145425 | 0.00163  | 0.1267   | 0.00611  | 0.126597 | 0.00615  | 0.272522 |
| -0.0657  | 0.15633  | 0.077237 | 0.09549  | 0.002444 | 0.958    | 0.093966 | 0.04239  | 0.258355 |
| -0.13475 | 0.00353  | -0.21616 | 2.42E-06 | -0.17946 | 9.64E-05 | -0.1831  | 6.89E-05 | -0.32783 |
| 0.025617 | 0.58081  | 0.188287 | 4.23E-05 | 0.109954 | 0.01746  | 0.176561 | 0.00013  | 0.440578 |

|          |          |          |          |          |          |          |          |          |
|----------|----------|----------|----------|----------|----------|----------|----------|----------|
| 0.066935 | 0.14868  | 0.192709 | 2.76E-05 | 0.124749 | 0.00695  | 0.185249 | 5.64E-05 | 0.417789 |
| 0.123508 | 0.00754  | 0.194413 | 2.33E-05 | 0.160903 | 0.00048  | 0.159875 | 0.00052  | 0.307606 |
| 0.102266 | 0.02711  | 0.362428 | 6.08E-16 | 0.191543 | 3.09E-05 | 0.392345 | 1.23E-18 | 0.677926 |
| -0.02621 | 0.57206  | 0.135955 | 0.00324  | 0.072234 | 0.11904  | 0.122751 | 0.00792  | 0.37195  |
| 0.046452 | 0.31649  | 0.176595 | 0.00012  | 0.094633 | 0.04094  | 0.177843 | 0.00011  | 0.407102 |
| 0.037604 | 0.41751  | 0.197443 | 1.73E-05 | 0.123021 | 0.00778  | 0.18006  | 9.13E-05 | 0.353021 |
| -0.04423 | 0.34022  | 0.104147 | 0.0244   | 0.053846 | 0.2455   | 0.106003 | 0.02196  | 0.262834 |
| 0.005022 | 0.91381  | 0.180077 | 9.11E-05 | 0.087696 | 0.05827  | 0.195194 | 2.16E-05 | 0.314851 |
| 0.098644 | 0.03307  | 0.252454 | 3.19E-08 | 0.174153 | 0.00016  | 0.227961 | 6.40E-07 | 0.515398 |
| 0.131374 | 0.00446  | 0.190248 | 3.50E-05 | 0.155581 | 0.00074  | 0.152752 | 0.00093  | 0.421353 |
| 0.004253 | 0.92697  | 0.189782 | 3.66E-05 | 0.112364 | 0.01512  | 0.18649  | 5.02E-05 | 0.391604 |
| -0.03959 | 0.39335  | 0.122224 | 0.00819  | 0.057311 | 0.21639  | 0.11619  | 0.01198  | 0.239076 |
| 0.025832 | 0.57765  | 0.162809 | 0.00041  | 0.114913 | 0.01296  | 0.142002 | 0.0021   | 0.30239  |
| 0.093333 | 0.04381  | 0.192749 | 2.75E-05 | 0.12662  | 0.00614  | 0.201983 | 1.09E-05 | 0.382449 |
| 0.154977 | 0.00078  | 0.278135 | 9.62E-10 | 0.234303 | 3.04E-07 | 0.21202  | 3.80E-06 | 0.418321 |
| 0.165241 | 0.00034  | 0.176045 | 0.00013  | 0.16247  | 0.00042  | 0.140186 | 0.00239  | 0.289355 |
| 0.141676 | 0.00215  | 0.113957 | 0.01374  | 0.150807 | 0.00108  | 0.058748 | 0.20507  | 0.203957 |
| -0.03197 | 0.49074  | 0.127203 | 0.00591  | 0.056814 | 0.2204   | 0.135782 | 0.00328  | 0.351634 |
| 0.13177  | 0.00434  | 0.289157 | 1.91E-10 | 0.246578 | 6.74E-08 | 0.217119 | 2.18E-06 | 0.48213  |
| 0.045244 | 0.32926  | 0.199115 | 1.46E-05 | 0.118827 | 0.01017  | 0.193479 | 2.56E-05 | 0.385834 |
| 0.001901 | 0.96732  | 0.216238 | 2.40E-06 | 0.086303 | 0.06239  | 0.245889 | 7.35E-08 | 0.381106 |
| -0.01239 | 0.78949  | 0.003182 | 0.94532  | 0.009592 | 0.83622  | 0.005288 | 0.90926  | 0.099218 |
| 0.019738 | 0.67052  | 0.127994 | 0.00561  | 0.067841 | 0.14324  | 0.117639 | 0.01095  | 0.352749 |
| 0.145364 | 0.00163  | 0.227269 | 6.93E-07 | 0.184829 | 5.87E-05 | 0.187676 | 4.48E-05 | 0.382188 |
| 0.127924 | 0.00563  | 0.225966 | 8.05E-07 | 0.183836 | 6.44E-05 | 0.182289 | 7.43E-05 | 0.401903 |
| 0.00357  | 0.93867  | 0.125151 | 0.00677  | 0.060164 | 0.19434  | 0.113623 | 0.01402  | 0.269318 |
| 0.024483 | 0.59767  | 0.174897 | 0.00015  | 0.121062 | 0.00882  | 0.149855 | 0.00116  | 0.363853 |
| 0.137677 | 0.00287  | 0.158995 | 0.00056  | 0.134721 | 0.00354  | 0.142187 | 0.00207  | 0.330053 |
| 0.075685 | 0.10236  | 0.160569 | 0.0005   | 0.084227 | 0.06899  | 0.177646 | 0.00011  | 0.352521 |
| -0.01397 | 0.76326  | 0.136132 | 0.0032   | 0.083255 | 0.07226  | 0.119038 | 0.01003  | 0.256085 |
| 0.134405 | 0.00361  | 0.20427  | 8.61E-06 | 0.172467 | 0.00018  | 0.16178  | 0.00045  | 0.270366 |
| 0.0757   | 0.10229  | 0.124514 | 0.00706  | 0.102178 | 0.02725  | 0.092389 | 0.04599  | 0.272853 |
| 0.236214 | 2.41E-07 | 0.228254 | 6.18E-07 | 0.200391 | 1.28E-05 | 0.184334 | 6.14E-05 | 0.438274 |
| 0.068043 | 0.14205  | 0.320089 | 1.38E-12 | 0.142103 | 0.00208  | 0.367789 | 2.10E-16 | 0.560419 |
| 0.028274 | 0.5422   | 0.14154  | 0.00217  | 0.102807 | 0.02631  | 0.116713 | 0.0116   | 0.214408 |
| 0.189219 | 3.87E-05 | 0.24471  | 8.52E-08 | 0.21794  | 1.99E-06 | 0.189508 | 3.76E-05 | 0.364534 |
| 0.029416 | 0.52601  | 0.104024 | 0.02457  | 0.124592 | 0.00702  | 0.048071 | 0.29991  | 0.215318 |
| 0.11716  | 0.01128  | 0.258607 | 1.43E-08 | 0.156968 | 0.00066  | 0.259827 | 1.21E-08 | 0.454468 |
| 0.230236 | 4.91E-07 | 0.254582 | 2.42E-08 | 0.213304 | 3.31E-06 | 0.189155 | 3.89E-05 | 0.3654   |
| 0.024707 | 0.59433  | 0.046868 | 0.31218  | 0.074633 | 0.10723  | 0.007358 | 0.874    | 0.109233 |
| 0.079734 | 0.08521  | 0.23411  | 3.11E-07 | 0.142792 | 0.00198  | 0.229535 | 5.33E-07 | 0.535963 |
| -0.00496 | 0.91479  | 0.146584 | 0.00149  | 0.062009 | 0.18099  | 0.176613 | 0.00012  | 0.249762 |
| 0.10653  | 0.02131  | 0.191246 | 3.18E-05 | 0.177994 | 0.00011  | 0.145798 | 0.00158  | 0.35695  |
| 0.208029 | 5.81E-06 | 0.155847 | 0.00073  | 0.149847 | 0.00116  | 0.116275 | 0.01192  | 0.341765 |
| 0.191528 | 3.09E-05 | 0.256021 | 2.00E-08 | 0.237257 | 2.13E-07 | 0.187361 | 4.62E-05 | 0.363679 |

|          |          |          |          |          |          |          |          |          |
|----------|----------|----------|----------|----------|----------|----------|----------|----------|
| 0.030377 | 0.51257  | 0.160754 | 0.00049  | 0.095932 | 0.03824  | 0.155856 | 0.00073  | 0.334247 |
| 0.049771 | 0.28312  | 0.087848 | 0.05783  | 0.096898 | 0.03632  | 0.057273 | 0.21669  | 0.159483 |
| 0.078665 | 0.0895   | 0.239636 | 1.59E-07 | 0.135634 | 0.00332  | 0.238332 | 1.87E-07 | 0.484604 |
| 0.193502 | 2.55E-05 | 0.20952  | 4.96E-06 | 0.18252  | 7.28E-05 | 0.171727 | 0.00019  | 0.307837 |
| 0.091059 | 0.04923  | 0.288887 | 1.99E-10 | 0.154756 | 0.00079  | 0.306759 | 1.24E-11 | 0.604398 |
| 0.108532 | 0.01897  | 0.283726 | 4.27E-10 | 0.190054 | 3.57E-05 | 0.269445 | 3.28E-09 | 0.560225 |
| 0.127213 | 0.00591  | 0.234076 | 3.12E-07 | 0.17923  | 9.84E-05 | 0.201496 | 1.15E-05 | 0.439301 |
| 0.189166 | 3.89E-05 | 0.322479 | 9.21E-13 | 0.191893 | 2.99E-05 | 0.338064 | 5.99E-14 | 0.577034 |
| 0.027038 | 0.56     | 0.078471 | 0.0903   | 0.07828  | 0.09108  | 0.063331 | 0.17184  | 0.20746  |
| 0.072707 | 0.11663  | 0.111943 | 0.01551  | 0.099588 | 0.03142  | 0.080527 | 0.08215  | 0.299844 |
| 0.001007 | 0.98269  | 0.058459 | 0.20731  | 0.033984 | 0.46377  | 0.055224 | 0.23361  | 0.182163 |
| 0.145274 | 0.00165  | 0.273139 | 1.96E-09 | 0.191786 | 3.02E-05 | 0.255203 | 2.23E-08 | 0.555384 |
| 0.168131 | 0.00026  | 0.227744 | 6.56E-07 | 0.206646 | 6.72E-06 | 0.168006 | 0.00027  | 0.401645 |
| 0.059071 | 0.20258  | 0.142895 | 0.00196  | 0.133034 | 0.00398  | 0.094364 | 0.04152  | 0.295406 |
| -0.02845 | 0.53964  | 0.067366 | 0.14607  | 0.039422 | 0.39534  | 0.062345 | 0.17863  | 0.208981 |
| 0.033195 | 0.47422  | 0.167944 | 0.00027  | 0.113242 | 0.01435  | 0.163877 | 0.00038  | 0.255652 |
| 0.054597 | 0.23897  | 0.11     | 0.01741  | 0.106857 | 0.02091  | 0.087008 | 0.06027  | 0.202242 |
| 0.114299 | 0.01345  | 0.194046 | 2.42E-05 | 0.137222 | 0.00296  | 0.182599 | 7.22E-05 | 0.429042 |
| -0.12381 | 0.00739  | -0.22921 | 5.53E-07 | -0.18122 | 8.20E-05 | -0.21007 | 4.68E-06 | -0.42081 |
| -0.02067 | 0.65598  | 0.123482 | 0.00755  | 0.052829 | 0.25455  | 0.134362 | 0.00363  | 0.2411   |
| 0.064241 | 0.16576  | 0.157173 | 0.00065  | 0.116835 | 0.01151  | 0.135229 | 0.00341  | 0.295605 |
| 0.022331 | 0.63028  | 0.127911 | 0.00564  | 0.073679 | 0.11181  | 0.130533 | 0.00472  | 0.25062  |
| 0.121789 | 0.00842  | 0.21182  | 3.88E-06 | 0.164277 | 0.00036  | 0.180613 | 8.67E-05 | 0.43415  |
| 0.12061  | 0.00908  | 0.259012 | 1.35E-08 | 0.200348 | 1.29E-05 | 0.220472 | 1.50E-06 | 0.471772 |
| 0.029721 | 0.52172  | 0.142265 | 0.00206  | 0.079267 | 0.08707  | 0.138933 | 0.00262  | 0.377329 |
| 0.053348 | 0.2499   | 0.212306 | 3.68E-06 | 0.134462 | 0.0036   | 0.203268 | 9.55E-06 | 0.397143 |
| 0.081619 | 0.07807  | 0.181373 | 8.09E-05 | 0.124433 | 0.0071   | 0.166314 | 0.00031  | 0.354209 |
| 0.205832 | 7.32E-06 | 0.190112 | 3.55E-05 | 0.192911 | 2.70E-05 | 0.126855 | 0.00605  | 0.347448 |
| 0.174138 | 0.00016  | 0.316723 | 2.43E-12 | 0.205101 | 7.90E-06 | 0.304656 | 1.74E-11 | 0.507072 |
| 0.192439 | 2.83E-05 | 0.226571 | 7.51E-07 | 0.211049 | 4.21E-06 | 0.148315 | 0.00131  | 0.407173 |
| 0.007547 | 0.87078  | 0.157265 | 0.00065  | 0.089829 | 0.05239  | 0.148755 | 0.00126  | 0.357722 |
| 0.092183 | 0.04648  | 0.193762 | 2.49E-05 | 0.126605 | 0.00615  | 0.181329 | 8.12E-05 | 0.416276 |
| -0.04438 | 0.33862  | 0.045796 | 0.32339  | 0.026128 | 0.57329  | 0.023181 | 0.61731  | 0.156554 |
| 0.026756 | 0.5641   | 0.125148 | 0.00677  | 0.090532 | 0.05056  | 0.099877 | 0.03093  | 0.255242 |
| 0.069425 | 0.13412  | 0.116812 | 0.01153  | 0.110825 | 0.01658  | 0.07828  | 0.09108  | 0.263725 |
| -0.06356 | 0.1703   | 0.059749 | 0.19744  | 0.022891 | 0.62171  | 0.045184 | 0.3299   | 0.232657 |
| 0.007731 | 0.86766  | 0.10219  | 0.02723  | 0.06544  | 0.15798  | 0.084211 | 0.06904  | 0.257403 |
| 0.059952 | 0.19592  | 0.139295 | 0.00255  | 0.143063 | 0.00194  | 0.080647 | 0.08169  | 0.288729 |
| 0.120598 | 0.00909  | 0.188098 | 4.30E-05 | 0.165728 | 0.00032  | 0.131851 | 0.00432  | 0.385556 |
| 0.137836 | 0.00284  | 0.388275 | 2.98E-18 | 0.219798 | 1.62E-06 | 0.40582  | 6.09E-20 | 0.631843 |
| 0.20501  | 7.97E-06 | 0.15694  | 0.00067  | 0.199192 | 1.45E-05 | 0.071572 | 0.12246  | 0.293258 |
| 0.140153 | 0.0024   | 0.205719 | 7.40E-06 | 0.176366 | 0.00013  | 0.168517 | 0.00025  | 0.338125 |
| 0.075645 | 0.10254  | 0.229723 | 5.21E-07 | 0.147105 | 0.00143  | 0.207795 | 5.96E-06 | 0.515794 |
| -0.01506 | 0.74549  | 0.104537 | 0.02387  | 0.04906  | 0.29006  | 0.105488 | 0.02262  | 0.340256 |
| 0.049669 | 0.28411  | 0.14385  | 0.00183  | 0.124912 | 0.00688  | 0.097541 | 0.0351   | 0.345552 |

|          |          |          |          |          |          |          |          |          |
|----------|----------|----------|----------|----------|----------|----------|----------|----------|
| 0.088272 | 0.05663  | 0.199357 | 1.42E-05 | 0.134208 | 0.00366  | 0.192309 | 2.87E-05 | 0.439883 |
| 0.108094 | 0.01946  | 0.131509 | 0.00442  | 0.123022 | 0.00778  | 0.088969 | 0.05469  | 0.282682 |
| 0.068852 | 0.13736  | 0.107572 | 0.02006  | 0.133385 | 0.00388  | 0.033587 | 0.46902  | 0.200357 |
| 0.125418 | 0.00665  | 0.164051 | 0.00037  | 0.157183 | 0.00065  | 0.11931  | 0.00986  | 0.28099  |
| 0.070435 | 0.12853  | 0.257673 | 1.61E-08 | 0.139906 | 0.00244  | 0.264748 | 6.25E-09 | 0.52099  |
| 0.254843 | 2.34E-08 | 0.244349 | 8.92E-08 | 0.209364 | 5.04E-06 | 0.19589  | 2.01E-05 | 0.326884 |
| -0.04022 | 0.38583  | 0.078695 | 0.08938  | 0.027949 | 0.54685  | 0.080808 | 0.08108  | 0.261105 |
| 0.168248 | 0.00026  | 0.187042 | 4.76E-05 | 0.163139 | 0.0004   | 0.152262 | 0.00096  | 0.281659 |
| 0.032979 | 0.47711  | 0.285016 | 3.53E-10 | 0.134315 | 0.00364  | 0.309834 | 7.55E-12 | 0.529012 |
| 0.012167 | 0.79314  | 0.190913 | 3.28E-05 | 0.099008 | 0.03243  | 0.181228 | 8.20E-05 | 0.460713 |
| 0.066129 | 0.15364  | 0.175288 | 0.00014  | 0.116127 | 0.01203  | 0.155494 | 0.00075  | 0.382936 |
| 0.049386 | 0.28686  | 0.189328 | 3.83E-05 | 0.113892 | 0.01379  | 0.186715 | 4.91E-05 | 0.292845 |
| 0.216743 | 2.27E-06 | 0.180823 | 8.51E-05 | 0.199104 | 1.46E-05 | 0.105646 | 0.02241  | 0.318673 |
| 0.139717 | 0.00248  | 0.12868  | 0.00535  | 0.146243 | 0.00153  | 0.075545 | 0.103    | 0.247321 |
| 0.080505 | 0.08223  | 0.220126 | 1.56E-06 | 0.148735 | 0.00127  | 0.190459 | 3.43E-05 | 0.400345 |
| -0.04042 | 0.38349  | 0.076882 | 0.09703  | 0.031151 | 0.50187  | 0.096994 | 0.03614  | 0.181262 |
| 0.180664 | 8.63E-05 | 0.308971 | 8.68E-12 | 0.215506 | 2.60E-06 | 0.308488 | 9.39E-12 | 0.481328 |
| 0.092143 | 0.04658  | 0.235087 | 2.76E-07 | 0.144612 | 0.00173  | 0.237532 | 2.06E-07 | 0.435677 |
| 0.255572 | 2.13E-08 | 0.320968 | 1.19E-12 | 0.336003 | 8.68E-14 | 0.178997 | 0.0001   | 0.439893 |
| 0.075773 | 0.10196  | 0.217885 | 2.00E-06 | 0.161967 | 0.00044  | 0.186982 | 4.79E-05 | 0.433722 |
| 0.123701 | 0.00744  | 0.083114 | 0.07275  | 0.108061 | 0.0195   | 0.047467 | 0.30603  | 0.248605 |
| 0.006053 | 0.8962   | 0.180756 | 8.56E-05 | 0.072817 | 0.11608  | 0.195446 | 2.11E-05 | 0.420833 |
| 0.071381 | 0.12347  | 0.18263  | 7.20E-05 | 0.132765 | 0.00405  | 0.156413 | 0.00069  | 0.39105  |
| -0.05243 | 0.25813  | -0.07368 | 0.1118   | -0.02663 | 0.56597  | -0.11185 | 0.01559  | 0.015215 |
| 0.076851 | 0.09716  | 0.120036 | 0.00942  | 0.114438 | 0.01334  | 0.083259 | 0.07225  | 0.260779 |
| 0.165823 | 0.00032  | 0.194345 | 2.35E-05 | 0.175873 | 0.00013  | 0.15289  | 0.00092  | 0.327219 |
| 0.090514 | 0.05061  | 0.189208 | 3.87E-05 | 0.106352 | 0.02152  | 0.199722 | 1.37E-05 | 0.380372 |
| 0.038093 | 0.41148  | 0.081395 | 0.07889  | 0.058152 | 0.20971  | 0.068553 | 0.13908  | 0.196874 |
| 0.12912  | 0.0052   | 0.185586 | 5.46E-05 | 0.149002 | 0.00124  | 0.16487  | 0.00035  | 0.304417 |
| 0.141175 | 0.00223  | 0.350395 | 6.17E-15 | 0.205016 | 7.97E-06 | 0.348063 | 9.56E-15 | 0.64307  |
| 0.044289 | 0.33958  | 0.135827 | 0.00327  | 0.123901 | 0.00735  | 0.095809 | 0.03848  | 0.284877 |
| 0.086718 | 0.06114  | 0.164342 | 0.00036  | 0.12818  | 0.00554  | 0.133521 | 0.00384  | 0.347576 |
| 0.12421  | 0.0072   | 0.261247 | 1.00E-08 | 0.18531  | 5.61E-05 | 0.243658 | 9.72E-08 | 0.464416 |
| 0.042484 | 0.35965  | 0.214096 | 3.03E-06 | 0.12664  | 0.00614  | 0.217434 | 2.11E-06 | 0.38809  |
| 0.036744 | 0.42826  | 0.164458 | 0.00036  | 0.122361 | 0.00812  | 0.148465 | 0.00129  | 0.33855  |
| -0.01604 | 0.72948  | 0.173691 | 0.00016  | 0.086938 | 0.06048  | 0.165903 | 0.00032  | 0.387702 |
| 0.044067 | 0.34201  | 0.15533  | 0.00076  | 0.11599  | 0.01213  | 0.143328 | 0.0019   | 0.287235 |
| 0.106192 | 0.02172  | 0.228981 | 5.68E-07 | 0.187718 | 4.46E-05 | 0.18252  | 7.28E-05 | 0.405254 |
| 0.143492 | 0.00188  | 0.292914 | 1.08E-10 | 0.195943 | 2.00E-05 | 0.274277 | 1.67E-09 | 0.504351 |
| 0.070479 | 0.12829  | 0.031491 | 0.49722  | 0.09847  | 0.03339  | -0.01793 | 0.69915  | 0.052534 |
| 0.039867 | 0.39003  | 0.211429 | 4.05E-06 | 0.137175 | 0.00297  | 0.198015 | 1.63E-05 | 0.344368 |
| 0.051362 | 0.268    | 0.099903 | 0.03089  | 0.130459 | 0.00475  | 0.041565 | 0.37014  | 0.16738  |
| 0.082609 | 0.07451  | 0.064405 | 0.16467  | 0.083358 | 0.07191  | 0.031652 | 0.49503  | 0.149988 |
| 0.091648 | 0.04777  | 0.182489 | 7.30E-05 | 0.160424 | 0.0005   | 0.142899 | 0.00196  | 0.405994 |
| 0.160314 | 0.00051  | 0.156489 | 0.00069  | 0.156845 | 0.00067  | 0.101158 | 0.02883  | 0.26031  |

|          |          |          |          |          |          |          |          |          |
|----------|----------|----------|----------|----------|----------|----------|----------|----------|
| 0.078923 | 0.08845  | 0.199063 | 1.47E-05 | 0.134685 | 0.00354  | 0.184903 | 5.82E-05 | 0.402059 |
| 0.181251 | 8.18E-05 | 0.239571 | 1.61E-07 | 0.175142 | 0.00014  | 0.213229 | 3.33E-06 | 0.425153 |
| 0.046564 | 0.31533  | 0.173907 | 0.00016  | 0.113898 | 0.01379  | 0.173462 | 0.00017  | 0.382988 |
| 0.176775 | 0.00012  | 0.120326 | 0.00925  | 0.142733 | 0.00199  | 0.071185 | 0.1245   | 0.284373 |
| 0.011146 | 0.81015  | 0.169561 | 0.00023  | 0.087061 | 0.06012  | 0.177492 | 0.00012  | 0.440152 |
| 0.094208 | 0.04186  | 0.232539 | 3.74E-07 | 0.155098 | 0.00077  | 0.212568 | 3.58E-06 | 0.311753 |
| 0.115115 | 0.0128   | 0.40507  | 7.23E-20 | 0.222103 | 1.25E-06 | 0.415498 | 6.45E-21 | 0.743061 |
| 0.000979 | 0.98316  | 0.155453 | 0.00075  | 0.087593 | 0.05856  | 0.154831 | 0.00079  | 0.361646 |
| 0.142546 | 0.00202  | 0.325049 | 5.93E-13 | 0.192621 | 2.78E-05 | 0.330161 | 2.44E-13 | 0.589211 |
| -0.00764 | 0.86928  | 0.071511 | 0.12278  | 0.052141 | 0.26079  | 0.05885  | 0.20428  | 0.216582 |
| 0.106635 | 0.02118  | 0.361732 | 6.97E-16 | 0.199492 | 1.40E-05 | 0.37417  | 5.75E-17 | 0.696708 |
| 0.012712 | 0.7841   | 0.14908  | 0.00123  | 0.123565 | 0.00751  | 0.1123   | 0.01518  | 0.313562 |
| 0.072341 | 0.11848  | 0.179522 | 9.59E-05 | 0.159685 | 0.00053  | 0.130939 | 0.00459  | 0.315463 |
| -0.10736 | 0.02031  | -0.19516 | 2.17E-05 | -0.14699 | 0.00145  | -0.18667 | 4.93E-05 | -0.29279 |
| 0.183197 | 6.83E-05 | 0.214693 | 2.84E-06 | 0.172022 | 0.00019  | 0.188765 | 4.04E-05 | 0.469406 |
| -0.02186 | 0.63749  | 0.098623 | 0.03311  | 0.072556 | 0.11739  | 0.076625 | 0.09815  | 0.192533 |
| 0.094158 | 0.04197  | 0.181519 | 7.98E-05 | 0.149865 | 0.00116  | 0.13632  | 0.00316  | 0.390109 |
| 0.09157  | 0.04796  | 0.330655 | 2.24E-13 | 0.181918 | 7.69E-05 | 0.338856 | 5.19E-14 | 0.609778 |
| 0.018263 | 0.69384  | 0.109975 | 0.01743  | 0.091556 | 0.048    | 0.077525 | 0.09426  | 0.241827 |
| -0.0002  | 0.9966   | 0.066359 | 0.15221  | 0.053715 | 0.24666  | 0.053126 | 0.25188  | 0.146243 |
| 0.192433 | 2.83E-05 | 0.301505 | 2.86E-11 | 0.218877 | 1.79E-06 | 0.273976 | 1.74E-09 | 0.502335 |
| 0.048188 | 0.29873  | 0.115046 | 0.01285  | 0.091317 | 0.04859  | 0.091039 | 0.04928  | 0.2599   |
| 0.103974 | 0.02464  | 0.250222 | 4.25E-08 | 0.168999 | 0.00024  | 0.22751  | 6.74E-07 | 0.49171  |
| 0.062787 | 0.17556  | 0.24093  | 1.36E-07 | 0.125735 | 0.00651  | 0.25537  | 2.18E-08 | 0.518896 |
| 0.010798 | 0.81597  | 0.113144 | 0.01443  | 0.067097 | 0.14769  | 0.109745 | 0.01767  | 0.287543 |
| 0.122109 | 0.00825  | 0.202859 | 9.96E-06 | 0.154438 | 0.00081  | 0.186146 | 5.18E-05 | 0.299329 |
| 0.053976 | 0.24436  | 0.178981 | 0.0001   | 0.1122   | 0.01527  | 0.169986 | 0.00022  | 0.393909 |
| 0.098338 | 0.03362  | 0.270871 | 2.69E-09 | 0.181405 | 8.07E-05 | 0.256402 | 1.91E-08 | 0.483758 |
| 0.113349 | 0.01425  | 0.184085 | 6.29E-05 | 0.158675 | 0.00058  | 0.153444 | 0.00088  | 0.310889 |
| 0.112307 | 0.01518  | 0.276427 | 1.23E-09 | 0.174797 | 0.00015  | 0.26399  | 6.93E-09 | 0.497894 |
| 0.019024 | 0.68177  | 0.19334  | 2.59E-05 | 0.113375 | 0.01423  | 0.194167 | 2.39E-05 | 0.328832 |
| -0.03158 | 0.49598  | 0.087746 | 0.05812  | 0.017807 | 0.70112  | 0.104724 | 0.02362  | 0.288001 |
| 0.222719 | 1.17E-06 | 0.331672 | 1.87E-13 | 0.247113 | 6.30E-08 | 0.32168  | 1.05E-12 | 0.537583 |
| 0.000122 | 0.99791  | 0.071128 | 0.12481  | 0.105133 | 0.02308  | 0.017305 | 0.70916  | 0.080501 |
| 0.053697 | 0.24681  | 0.196963 | 1.81E-05 | 0.145604 | 0.00161  | 0.163346 | 0.00039  | 0.371153 |
| 0.020272 | 0.66215  | 0.118467 | 0.0104   | 0.110272 | 0.01713  | 0.069015 | 0.13643  | 0.253828 |
| 0.088826 | 0.05509  | 0.151935 | 0.00099  | 0.162334 | 0.00043  | 0.094035 | 0.04224  | 0.245432 |
| 0.051863 | 0.26335  | 0.069115 | 0.13587  | 0.078613 | 0.08971  | 0.032757 | 0.48008  | 0.199119 |
| 0.097013 | 0.0361   | 0.267171 | 4.49E-09 | 0.163029 | 0.0004   | 0.262884 | 8.05E-09 | 0.5444   |
| 0.273742 | 1.80E-09 | 0.389776 | 2.15E-18 | 0.316695 | 2.44E-12 | 0.338411 | 5.63E-14 | 0.587975 |
| 0.109759 | 0.01766  | 0.13441  | 0.00361  | 0.148878 | 0.00125  | 0.08517  | 0.06592  | 0.222315 |
| 0.095746 | 0.03861  | 0.188506 | 4.14E-05 | 0.155086 | 0.00077  | 0.146227 | 0.00153  | 0.276207 |
| 0.095342 | 0.03944  | 0.268084 | 3.96E-09 | 0.143555 | 0.00187  | 0.292553 | 1.14E-10 | 0.411025 |
| 0.004547 | 0.92193  | 0.198358 | 1.57E-05 | 0.088547 | 0.05586  | 0.200243 | 1.30E-05 | 0.457517 |
| 0.166321 | 0.00031  | 0.171378 | 0.0002   | 0.151657 | 0.00101  | 0.145445 | 0.00162  | 0.249462 |



|          |          |          |          |          |          |          |          |          |
|----------|----------|----------|----------|----------|----------|----------|----------|----------|
| 0.041178 | 0.37462  | 0.116422 | 0.01181  | 0.101488 | 0.02831  | 0.103679 | 0.02506  | 0.237636 |
| 0.145798 | 0.00158  | 0.261374 | 9.86E-09 | 0.203412 | 9.41E-06 | 0.232809 | 3.63E-07 | 0.473857 |
| 0.164722 | 0.00035  | 0.287335 | 2.51E-10 | 0.225991 | 8.03E-07 | 0.244834 | 8.39E-08 | 0.398931 |
| 0.171426 | 0.0002   | 0.250983 | 3.85E-08 | 0.176145 | 0.00013  | 0.232589 | 3.72E-07 | 0.424861 |
| 0.044945 | 0.33246  | 0.215035 | 2.74E-06 | 0.093832 | 0.04269  | 0.237759 | 2.00E-07 | 0.476623 |
| 0.127768 | 0.00569  | 0.294396 | 8.63E-11 | 0.181971 | 7.65E-05 | 0.301597 | 2.82E-11 | 0.543054 |
| 0.162933 | 0.00041  | 0.167017 | 0.00029  | 0.172975 | 0.00017  | 0.119732 | 0.0096   | 0.260251 |
| 0.097118 | 0.0359   | 0.213424 | 3.26E-06 | 0.125479 | 0.00663  | 0.241387 | 1.29E-07 | 0.371274 |
| 0.096208 | 0.03768  | 0.183655 | 6.55E-05 | 0.122031 | 0.00829  | 0.189361 | 3.81E-05 | 0.34471  |
| 0.159596 | 0.00054  | 0.248851 | 5.06E-08 | 0.198453 | 1.56E-05 | 0.214914 | 2.78E-06 | 0.427592 |
| 0.116791 | 0.01155  | 0.223481 | 1.07E-06 | 0.150663 | 0.00109  | 0.225525 | 8.47E-07 | 0.357829 |
| 0.058374 | 0.20797  | 0.257711 | 1.60E-08 | 0.137012 | 0.00301  | 0.279751 | 7.63E-10 | 0.444316 |
| 0.193264 | 2.61E-05 | 0.359523 | 1.07E-15 | 0.240421 | 1.45E-07 | 0.353445 | 3.46E-15 | 0.614607 |
| 0.068113 | 0.14165  | 0.170606 | 0.00021  | 0.10141  | 0.02843  | 0.181123 | 8.28E-05 | 0.4138   |
| 0.133868 | 0.00375  | 0.160719 | 0.00049  | 0.158764 | 0.00057  | 0.124116 | 0.00724  | 0.307753 |
| 0.016071 | 0.72905  | 0.067572 | 0.14484  | 0.073562 | 0.11238  | 0.043845 | 0.34445  | 0.188142 |
| 0.090375 | 0.05097  | 0.16641  | 0.0003   | 0.155175 | 0.00077  | 0.115702 | 0.01235  | 0.291708 |
| 0.12262  | 0.00798  | 0.191802 | 3.01E-05 | 0.140358 | 0.00237  | 0.180051 | 9.13E-05 | 0.332765 |
| -0.02388 | 0.60678  | 0.174883 | 0.00015  | 0.085638 | 0.06445  | 0.184461 | 6.07E-05 | 0.458749 |
| 0.275902 | 1.32E-09 | 0.425069 | 6.50E-22 | 0.304178 | 1.87E-11 | 0.394324 | 7.99E-19 | 0.639959 |
| 0.081809 | 0.07737  | 0.258693 | 1.41E-08 | 0.133707 | 0.0038   | 0.28314  | 4.66E-10 | 0.478096 |
| 0.022393 | 0.62932  | 0.251736 | 3.50E-08 | 0.115473 | 0.01252  | 0.2753   | 1.44E-09 | 0.448213 |
| 0.11838  | 0.01046  | 0.283471 | 4.44E-10 | 0.178334 | 0.00011  | 0.288044 | 2.25E-10 | 0.476783 |
| 0.153413 | 0.00088  | 0.226772 | 7.34E-07 | 0.184264 | 6.18E-05 | 0.202012 | 1.09E-05 | 0.307877 |
| 0.199986 | 1.34E-05 | 0.234008 | 3.14E-07 | 0.214873 | 2.79E-06 | 0.169727 | 0.00023  | 0.308943 |
| 0.063849 | 0.16836  | 0.195287 | 2.14E-05 | 0.114754 | 0.01309  | 0.212281 | 3.69E-06 | 0.401704 |
| 0.118973 | 0.01007  | 0.285153 | 3.46E-10 | 0.174323 | 0.00015  | 0.272583 | 2.12E-09 | 0.529736 |
| 0.269983 | 3.04E-09 | 0.304236 | 1.86E-11 | 0.209845 | 4.79E-06 | 0.318613 | 1.77E-12 | 0.356341 |
| 0.045837 | 0.32295  | 0.175597 | 0.00014  | 0.081104 | 0.07997  | 0.200656 | 1.25E-05 | 0.405719 |
| 0.132743 | 0.00406  | 0.284444 | 3.85E-10 | 0.166139 | 0.00031  | 0.296382 | 6.36E-11 | 0.542552 |
| 0.114474 | 0.01331  | 0.17621  | 0.00013  | 0.128409 | 0.00545  | 0.160537 | 0.0005   | 0.291437 |
| 0.145387 | 0.00163  | 0.236536 | 2.32E-07 | 0.213173 | 3.35E-06 | 0.181964 | 7.66E-05 | 0.334441 |
| 0.107165 | 0.02054  | 0.106524 | 0.02131  | 0.115155 | 0.01277  | 0.080261 | 0.08317  | 0.138151 |
| 0.155014 | 0.00078  | 0.308316 | 9.66E-12 | 0.208635 | 5.45E-06 | 0.292121 | 1.22E-10 | 0.623801 |
| 0.195417 | 2.11E-05 | 0.266466 | 4.94E-09 | 0.216643 | 2.30E-06 | 0.245361 | 7.86E-08 | 0.449684 |
| 0.138892 | 0.00263  | 0.249076 | 4.92E-08 | 0.18642  | 5.05E-05 | 0.226289 | 7.76E-07 | 0.381264 |
| 0.051273 | 0.26882  | 0.136986 | 0.00301  | 0.096415 | 0.03727  | 0.132398 | 0.00416  | 0.332625 |
| 0.171341 | 0.0002   | 0.181853 | 7.74E-05 | 0.191499 | 3.10E-05 | 0.116234 | 0.01195  | 0.303442 |
| 0.079924 | 0.08447  | 0.177797 | 0.00011  | 0.141447 | 0.00218  | 0.14591  | 0.00157  | 0.342211 |
| 0.081378 | 0.07895  | 0.222849 | 1.15E-06 | 0.150689 | 0.00109  | 0.218435 | 1.88E-06 | 0.331609 |
| -0.04145 | 0.3715   | 0.143255 | 0.00191  | 0.043428 | 0.34906  | 0.175265 | 0.00014  | 0.333287 |
| 0.055986 | 0.22721  | 0.131787 | 0.00433  | 0.081334 | 0.07912  | 0.140962 | 0.00226  | 0.215122 |
| 0.055429 | 0.23187  | 0.198517 | 1.55E-05 | 0.123305 | 0.00764  | 0.191536 | 3.09E-05 | 0.390459 |
| 0.109997 | 0.01741  | 0.157959 | 0.00061  | 0.112434 | 0.01506  | 0.146429 | 0.00151  | 0.386814 |
| 0.057101 | 0.21808  | 0.106832 | 0.02094  | 0.13746  | 0.00291  | 0.035972 | 0.43803  | 0.215666 |

|          |          |           |          |          |          |          |          |          |
|----------|----------|-----------|----------|----------|----------|----------|----------|----------|
| 0.284039 | 4.08E-10 | 0.292822  | 1.10E-10 | 0.369201 | 1.58E-16 | 0.134364 | 0.00363  | 0.193591 |
| -0.06266 | 0.17645  | -0.10775  | 0.01985  | -0.06524 | 0.15928  | -0.12377 | 0.00741  | -0.19618 |
| 0.051074 | 0.27069  | 0.148618  | 0.00128  | 0.070755 | 0.1268   | 0.179388 | 9.70E-05 | 0.142196 |
| 0.331775 | 1.84E-13 | 0.209096  | 5.19E-06 | 0.268887 | 3.54E-09 | 0.118787 | 0.01019  | 0.109895 |
| -0.01692 | 0.7153   | 0.063991  | 0.16741  | 0.057113 | 0.21798  | 0.038443 | 0.4072   | 0.121979 |
| 0.231046 | 4.46E-07 | 0.220864  | 1.44E-06 | 0.280247 | 7.10E-10 | 0.094723 | 0.04075  | 0.15753  |
| 0.025973 | 0.57557  | 0.101423  | 0.02841  | 0.043949 | 0.34331  | 0.127502 | 0.00579  | 0.108669 |
| -0.0566  | 0.22216  | -0.13325  | 0.00392  | -0.06002 | 0.19538  | -0.15171 | 0.00101  | -0.1061  |
| 0.090373 | 0.05097  | 0.04393   | 0.34351  | 0.054916 | 0.23623  | 0.030533 | 0.5104   | 0.079689 |
| 0.148056 | 0.00133  | -0.02279  | 0.62331  | 0.015651 | 0.73586  | -0.02917 | 0.52949  | -0.05741 |
| 0.059671 | 0.19803  | -0.00405  | 0.93047  | 0.031618 | 0.49549  | -0.02231 | 0.63059  | -0.01545 |
| 0.187562 | 4.53E-05 | 0.087347  | 0.05928  | 0.08702  | 0.06024  | 0.065905 | 0.15504  | 0.111042 |
| 0.171323 | 0.0002   | 0.328498  | 3.27E-13 | 0.216501 | 2.33E-06 | 0.323299 | 8.01E-13 | 0.235161 |
| 0.024206 | 0.60183  | -0.10177  | 0.02787  | -0.08133 | 0.07913  | -0.08156 | 0.07829  | -0.10412 |
| 0.104337 | 0.02414  | 0.022018  | 0.63507  | 0.068658 | 0.13848  | -0.04459 | 0.33632  | -0.07841 |
| 0.231399 | 4.28E-07 | 0.367077  | 2.42E-16 | 0.286486 | 2.84E-10 | 0.336867 | 7.43E-14 | 0.210737 |
| 0.062466 | 0.17779  | 0.078145  | 0.09164  | 0.067381 | 0.14598  | 0.057801 | 0.21248  | 0.102496 |
| -0.01396 | 0.76349  | -0.00868  | 0.85152  | 0.019801 | 0.66953  | -0.02446 | 0.59807  | -0.06107 |
| 0.209913 | 4.76E-06 | 0.114725  | 0.01311  | 0.167644 | 0.00027  | 0.048788 | 0.29274  | 0.046677 |
| 0.027125 | 0.55874  | -0.03163  | 0.49528  | 0.02343  | 0.61354  | -0.08997 | 0.05201  | 0.009627 |
| 0.018331 | 0.69276  | -0.02893  | 0.53285  | -0.03183 | 0.49264  | -0.0306  | 0.50944  | -0.07518 |
| 0.316722 | 2.43E-12 | 0.239333  | 1.65E-07 | 0.273468 | 1.87E-09 | 0.158465 | 0.00059  | 0.151016 |
| 0.191089 | 3.23E-05 | 0.184333  | 6.14E-05 | 0.160285 | 0.00051  | 0.161978 | 0.00044  | 0.280784 |
| -0.01675 | 0.71807  | 0.044694  | 0.33518  | 0.052493 | 0.25758  | 0.019785 | 0.66978  | 0.002032 |
| 0.060327 | 0.19313  | 0.034402  | 0.4583   | 0.050422 | 0.27686  | -0.00436 | 0.92511  | 0.112926 |
| -0.09455 | 0.04111  | -0.07243  | 0.11804  | -0.06947 | 0.13386  | -0.05399 | 0.24422  | -0.07886 |
| -0.00617 | 0.89416  | -0.1304   | 0.00476  | -0.09075 | 0.05002  | -0.10674 | 0.02105  | -0.16642 |
| 0.055066 | 0.23496  | -0.11605  | 0.01208  | -0.03173 | 0.49399  | -0.14613 | 0.00154  | -0.2095  |
| 0.040282 | 0.38511  | 0.080105  | 0.08377  | 0.022581 | 0.62645  | 0.098934 | 0.03256  | 0.155558 |
| 0.116954 | 0.01143  | 0.011893  | 0.7977   | 0.025373 | 0.58442  | 0.011526 | 0.80381  | 0.042019 |
| -0.03694 | 0.42582  | -0.08968  | 0.05278  | -0.06955 | 0.13343  | -0.09169 | 0.04768  | -0.07275 |
| -0.01208 | 0.79453  | -0.00318  | 0.94539  | -0.00725 | 0.87589  | 0.001019 | 0.98247  | 0.056756 |
| 0.027961 | 0.54667  | -0.0258   | 0.57819  | -0.01288 | 0.78129  | -0.01197 | 0.79634  | -0.04728 |
| -0.04284 | 0.35567  | -0.02957  | 0.52386  | -0.03872 | 0.40382  | -0.02424 | 0.6013   | -0.02934 |
| 0.020492 | 0.65871  | 0.01305   | 0.7785   | -0.00308 | 0.947    | 0.009738 | 0.83376  | 0.199056 |
| 0.08653  | 0.0617   | 0.196847  | 1.83E-05 | 0.080398 | 0.08264  | 0.233148 | 3.48E-07 | 0.303915 |
| -0.00855 | 0.85384  | -1.67E-05 | 0.99971  | -0.01803 | 0.6976   | -0.00704 | 0.87937  | 0.262059 |
| 0.075027 | 0.10539  | 0.082758  | 0.07399  | 0.047588 | 0.3048   | 0.086944 | 0.06046  | 0.284797 |
| 0.135813 | 0.00327  | 0.031011  | 0.5038   | 0.082807 | 0.07382  | 0.002659 | 0.9543   | -0.00243 |
| 0.119104 | 0.00999  | 0.118095  | 0.01064  | 0.169876 | 0.00023  | 0.005988 | 0.89731  | 0.09553  |
| 0.113472 | 0.01415  | 0.24264   | 1.10E-07 | 0.113909 | 0.01378  | 0.277655 | 1.03E-09 | 0.26592  |
| -0.07967 | 0.08545  | -0.03153  | 0.49673  | -0.04583 | 0.32304  | -0.03576 | 0.44072  | -0.00273 |
| -0.04226 | 0.36222  | -0.02673  | 0.56452  | -0.02464 | 0.5953   | -0.01645 | 0.72295  | -0.01657 |
| -0.00429 | 0.92626  | -0.00719  | 0.87682  | -0.0031  | 0.94669  | 0.004622 | 0.92065  | 0.022619 |
| -0.01674 | 0.71829  | -0.01477  | 0.75018  | -0.0177  | 0.70288  | -0.02145 | 0.6438   | 0.007186 |

|          |          |          |          |          |          |          |          |          |
|----------|----------|----------|----------|----------|----------|----------|----------|----------|
| -0.03752 | 0.41852  | -0.02553 | 0.58209  | -0.01913 | 0.68008  | -0.02142 | 0.64431  | 0.036103 |
| 0.35413  | 3.04E-15 | 0.228303 | 6.15E-07 | 0.263454 | 7.45E-09 | 0.124877 | 0.00689  | 0.201212 |
| 0.234755 | 2.88E-07 | 0.13824  | 0.00276  | 0.219689 | 1.64E-06 | 0.017648 | 0.70366  | 0.155073 |
| 0.14008  | 0.00241  | 0.177734 | 0.00011  | 0.280631 | 6.71E-10 | -0.00651 | 0.88847  | 0.093137 |
| 0.294627 | 8.33E-11 | 0.22433  | 9.71E-07 | 0.146276 | 0.00153  | 0.247826 | 5.76E-08 | 0.137449 |
| 0.046447 | 0.31654  | 0.022787 | 0.6233   | 0.032942 | 0.4776   | 0.014396 | 0.75634  | 0.214736 |
| -0.02695 | 0.56131  | -0.01822 | 0.69447  | -0.01823 | 0.69437  | -0.01776 | 0.70192  | 0.03492  |
| -0.01939 | 0.676    | -0.01529 | 0.74173  | -0.01581 | 0.7333   | -0.00487 | 0.91639  | -0.0043  |
| 0.007773 | 0.86695  | 0.030684 | 0.50831  | 0.00811  | 0.86125  | 0.051347 | 0.26813  | -0.00475 |
| 0.083631 | 0.07098  | 0.087924 | 0.05761  | 0.082565 | 0.07467  | 0.105686 | 0.02236  | 0.027035 |
| 0.010864 | 0.81487  | -0.00675 | 0.88434  | 0.004874 | 0.91634  | -0.01129 | 0.80778  | -0.0021  |
| -0.03306 | 0.476    | -0.01359 | 0.76952  | -0.01551 | 0.73813  | -0.00749 | 0.87181  | 0.020904 |
| -0.02589 | 0.57674  | -0.02751 | 0.55315  | -0.03167 | 0.49482  | -0.02206 | 0.63441  | -0.03078 |
| 0.201079 | 1.19E-05 | 0.117165 | 0.01128  | 0.088947 | 0.05475  | 0.147761 | 0.00136  | 0.056204 |
| 0.015383 | 0.74023  | -0.00552 | 0.90535  | -0.00068 | 0.98833  | -0.01397 | 0.76338  | -0.02927 |
| -0.03371 | 0.46736  | -0.02498 | 0.59028  | -0.01572 | 0.73479  | -0.01016 | 0.82673  | -0.0233  |
| -0.04076 | 0.37953  | -0.02522 | 0.58663  | -0.03148 | 0.49733  | -0.02045 | 0.65929  | -0.03132 |
| 0.225933 | 8.08E-07 | 0.195234 | 2.15E-05 | 0.310195 | 7.12E-12 | 0.004444 | 0.9237   | 0.12399  |
| 0.162355 | 0.00043  | 0.127425 | 0.00582  | 0.110201 | 0.0172   | 0.102188 | 0.02723  | 0.216885 |
| 0.132949 | 0.004    | 0.147022 | 0.00144  | 0.146905 | 0.00146  | 0.103996 | 0.02461  | 0.143603 |
| -0.0234  | 0.61394  | -0.02523 | 0.58656  | -0.02816 | 0.54383  | -0.01944 | 0.67521  | 0.074909 |
| 0.192182 | 2.90E-05 | 0.131209 | 0.00451  | 0.089642 | 0.05288  | 0.148692 | 0.00127  | 0.122121 |
| -0.026   | 0.57512  | -0.01441 | 0.75608  | -0.01801 | 0.69788  | -0.0097  | 0.83447  | -0.00021 |
| -0.06976 | 0.13227  | -0.06598 | 0.15455  | -0.05365 | 0.24719  | -0.05562 | 0.23026  | 0.008085 |
| 0.050491 | 0.2762   | 0.142707 | 0.00199  | 0.066062 | 0.15406  | 0.183953 | 6.37E-05 | 0.20225  |
| 0.022966 | 0.62058  | 0.032873 | 0.47852  | -0.01284 | 0.78197  | 0.064973 | 0.16097  | 0.096609 |
| 0.047088 | 0.3099   | 0.100938 | 0.02918  | 0.063325 | 0.17188  | 0.131368 | 0.00446  | 0.015496 |
| -0.05271 | 0.25565  | 0.08183  | 0.0773   | -0.01763 | 0.70401  | 0.144717 | 0.00172  | 0.145764 |
| 0.320941 | 1.20E-12 | 0.103767 | 0.02493  | 0.127671 | 0.00573  | 0.085937 | 0.06351  | 0.040008 |
| -0.02766 | 0.55099  | -0.02074 | 0.65486  | -0.01636 | 0.72439  | -0.01623 | 0.72655  | -0.01459 |
| -0.04482 | 0.33381  | -0.02697 | 0.56105  | -0.03024 | 0.51445  | -0.01994 | 0.66738  | -0.01639 |
| -0.03601 | 0.43757  | -0.02815 | 0.54403  | -0.02593 | 0.57624  | -0.02218 | 0.63254  | -0.03487 |
| 0.000605 | 0.9896   | -0.01691 | 0.71544  | -0.00899 | 0.84637  | -0.00569 | 0.9024   | -0.02366 |
| -0.06852 | 0.13926  | -0.05821 | 0.20926  | -0.0426  | 0.35839  | -0.05595 | 0.2275   | 0.053657 |
| -0.04662 | 0.31473  | -0.0418  | 0.36741  | -0.0376  | 0.41754  | -0.03376 | 0.46679  | -0.02661 |
| 0.061432 | 0.18509  | 0.040701 | 0.38018  | 0.049541 | 0.28535  | 0.063313 | 0.17197  | 0.003234 |
| 0.093637 | 0.04312  | 0.155613 | 0.00074  | 0.076867 | 0.09709  | 0.212958 | 3.43E-06 | 0.106936 |
| -0.03239 | 0.48504  | -0.02114 | 0.64868  | -0.02477 | 0.59334  | -0.01697 | 0.71449  | -0.01542 |
| 0.018541 | 0.68942  | 0.005019 | 0.91386  | 0.006333 | 0.89144  | 0.007019 | 0.87976  | 0.008296 |
| -0.02303 | 0.61962  | -0.0098  | 0.83277  | -0.01725 | 0.71009  | -0.00774 | 0.86743  | -0.01773 |
| -0.01159 | 0.80268  | -0.00788 | 0.86519  | -0.0091  | 0.84455  | -0.0071  | 0.87835  | -0.01    |
| -0.06986 | 0.1317   | -0.05397 | 0.24439  | -0.05394 | 0.24466  | -0.04045 | 0.38309  | -0.05037 |
| 0.17633  | 0.00013  | 0.137462 | 0.00291  | 0.202246 | 1.06E-05 | 0.013825 | 0.76572  | 0.269051 |
| -0.0027  | 0.95352  | -0.00486 | 0.91652  | -0.00185 | 0.96815  | -0.00765 | 0.86897  | 0.018035 |
| 0.109119 | 0.01833  | 0.097141 | 0.03586  | 0.068937 | 0.13688  | 0.121542 | 0.00856  | 0.141145 |

|          |          |          |          |          |          |          |          |          |
|----------|----------|----------|----------|----------|----------|----------|----------|----------|
| 0.122517 | 0.00804  | 0.203788 | 9.05E-06 | 0.174665 | 0.00015  | 0.178745 | 0.0001   | 0.226651 |
| -0.00495 | 0.91506  | 0.017908 | 0.6995   | -0.00528 | 0.90935  | 0.033494 | 0.47025  | 0.279293 |
| 0.166341 | 0.00031  | 0.036901 | 0.42628  | 0.055698 | 0.22962  | 0.028048 | 0.54544  | 0.118303 |
| -0.04011 | 0.38716  | -0.07627 | 0.09973  | -0.08588 | 0.06369  | -0.05943 | 0.19981  | -0.07486 |
| -0.01209 | 0.79444  | -0.0267  | 0.56497  | -0.02083 | 0.6535   | -0.02551 | 0.58235  | -0.02975 |
| -0.00071 | 0.98785  | 0.01884  | 0.68469  | -0.02441 | 0.59872  | 0.0579   | 0.21169  | -0.0196  |
| 0.012661 | 0.78494  | -0.09417 | 0.04194  | -0.08289 | 0.07351  | -0.06064 | 0.19083  | -0.11329 |
| 0.041959 | 0.36562  | 0.104825 | 0.02348  | 0.044309 | 0.33936  | 0.123356 | 0.00761  | 0.214855 |
| 0.070376 | 0.12885  | 0.044724 | 0.33485  | 0.044613 | 0.33605  | 0.047453 | 0.30617  | 0.024345 |
| 0.107542 | 0.0201   | 0.122195 | 0.00821  | 0.072028 | 0.12009  | 0.118551 | 0.01034  | 0.170026 |
| -0.06329 | 0.17214  | -0.13609 | 0.00321  | -0.10952 | 0.01791  | -0.12638 | 0.00624  | -0.20553 |
| 0.018445 | 0.69095  | 0.069556 | 0.13338  | 0.055394 | 0.23217  | 0.077675 | 0.09362  | 0.041832 |
| 0.047917 | 0.30146  | -0.0183  | 0.69326  | 0.042518 | 0.35926  | -0.03972 | 0.39174  | -0.01898 |
| 0.007018 | 0.87978  | -0.06397 | 0.16757  | 0.028848 | 0.53403  | -0.11816 | 0.0106   | -0.20134 |
| 0.00946  | 0.83843  | -0.03221 | 0.48746  | 0.012999 | 0.77935  | -0.05984 | 0.19672  | -0.11486 |
| 0.00042  | 0.99278  | 0.092429 | 0.0459   | 0.028804 | 0.53465  | 0.115115 | 0.0128   | 0.077907 |
| 0.1106   | 0.0168   | 0.058641 | 0.20589  | 0.113467 | 0.01415  | 3.61E-05 | 0.99938  | 0.001306 |
| 0.051931 | 0.26272  | 0.006529 | 0.88809  | -0.01188 | 0.79789  | 0.026636 | 0.56586  | -0.00919 |
| -0.08461 | 0.06771  | -0.08193 | 0.07694  | -0.079   | 0.08812  | -0.05629 | 0.22466  | -0.13874 |
| 0.104924 | 0.02335  | 0.148769 | 0.00126  | 0.087396 | 0.05913  | 0.165317 | 0.00033  | 0.210784 |
| -0.12075 | 0.009    | -0.07138 | 0.12347  | -0.05532 | 0.23277  | -0.06252 | 0.1774   | -0.21181 |
| 0.013359 | 0.7734   | 0.023573 | 0.61137  | 0.028595 | 0.53763  | 0.008193 | 0.85983  | -0.06366 |
| -0.00962 | 0.83583  | 0.040998 | 0.37672  | 0.034782 | 0.45334  | 0.038372 | 0.40807  | 0.058738 |
| 0.007918 | 0.86449  | -0.00624 | 0.89306  | -0.01302 | 0.77899  | -0.00148 | 0.97452  | -0.00346 |
| 0.074149 | 0.10954  | 0.160181 | 0.00051  | 0.098441 | 0.03344  | 0.169985 | 0.00022  | 0.156375 |
| 0.022841 | 0.62248  | 0.107654 | 0.01997  | 0.053989 | 0.24424  | 0.110491 | 0.01691  | 0.155602 |
| 0.206569 | 6.77E-06 | 0.071826 | 0.12114  | 0.093584 | 0.04324  | 0.048508 | 0.29553  | 0.059793 |
| -0.00242 | 0.95838  | -0.03904 | 0.39994  | 0.002721 | 0.95324  | -0.06163 | 0.18368  | -0.08597 |
| 0.252874 | 3.02E-08 | 0.279177 | 8.28E-10 | 0.276727 | 1.18E-09 | 0.205786 | 7.35E-06 | 0.401857 |
| -0.01517 | 0.74368  | -0.01235 | 0.79004  | -0.0013  | 0.97771  | -0.0166  | 0.72048  | -0.09776 |
| 0.022867 | 0.62209  | 0.06992  | 0.13135  | 0.025016 | 0.58972  | 0.072534 | 0.1175   | 0.154337 |
| 0.303002 | 2.26E-11 | 0.314549 | 3.49E-12 | 0.284041 | 4.08E-10 | 0.257723 | 1.60E-08 | 0.299124 |
| 0.079468 | 0.08627  | -0.02317 | 0.61745  | 0.003713 | 0.93621  | -0.01438 | 0.75664  | -0.09966 |
| 0.085319 | 0.06545  | -0.00129 | 0.97789  | 0.033263 | 0.47331  | -0.00675 | 0.88427  | -0.08313 |
| 0.011669 | 0.80143  | 0.045492 | 0.32661  | 0.004963 | 0.91482  | 0.07875  | 0.08915  | 0.015733 |
| -0.06835 | 0.14026  | -0.22166 | 1.31E-06 | -0.15543 | 0.00075  | -0.20747 | 6.17E-06 | -0.30952 |
| 0.082378 | 0.07533  | 0.044554 | 0.33669  | 0.062461 | 0.17782  | 0.024984 | 0.5902   | 0.039711 |
| 0.360161 | 9.48E-16 | 0.206369 | 6.92E-06 | 0.252112 | 3.33E-08 | 0.114433 | 0.01335  | 0.116734 |
| -0.0998  | 0.03106  | -0.17348 | 0.00016  | -0.10661 | 0.02121  | -0.18324 | 6.80E-05 | -0.22757 |
| -0.06442 | 0.16456  | -0.16263 | 0.00042  | -0.07465 | 0.10715  | -0.18003 | 9.15E-05 | -0.31234 |
| 0.017617 | 0.70415  | -0.01692 | 0.71537  | 0.023139 | 0.61794  | -0.02806 | 0.54533  | -0.06132 |
| 0.182156 | 7.52E-05 | 0.267225 | 4.46E-09 | 0.24547  | 7.75E-08 | 0.210986 | 4.24E-06 | 0.131834 |
| 0.026425 | 0.56893  | 0.044817 | 0.33384  | 0.022356 | 0.6299   | 0.041135 | 0.37512  | 0.068766 |
| 0.095229 | 0.03968  | 0.097014 | 0.0361   | 0.090318 | 0.05111  | 0.077612 | 0.09388  | 0.129148 |
| -0.04637 | 0.31739  | -0.05098 | 0.27161  | -0.03826 | 0.40938  | -0.03652 | 0.43111  | -0.01595 |

|          |          |          |          |          |          |          |          |          |
|----------|----------|----------|----------|----------|----------|----------|----------|----------|
| 0.03042  | 0.51197  | 0.023744 | 0.60878  | 0.049199 | 0.28869  | -0.00454 | 0.92211  | -0.01971 |
| 0.021223 | 0.64734  | 0.120361 | 0.00923  | 0.064117 | 0.16658  | 0.120638 | 0.00907  | 0.13657  |
| 0.024765 | 0.59346  | -0.12159 | 0.00853  | -0.05387 | 0.24527  | -0.13075 | 0.00465  | -0.25084 |
| 0.030047 | 0.51716  | 0.061408 | 0.18526  | 0.02235  | 0.62999  | 0.068206 | 0.1411   | 0.263577 |
| 0.275845 | 1.34E-09 | 0.065376 | 0.15839  | 0.155981 | 0.00072  | -0.01264 | 0.78534  | 0.022637 |
| 0.101186 | 0.02879  | 0.132035 | 0.00426  | 0.168501 | 0.00025  | 0.05086  | 0.2727   | 0.116275 |
| 0.086271 | 0.06249  | 0.021035 | 0.65026  | 0.02048  | 0.6589   | 0.017361 | 0.70827  | 0.067188 |
| 0.056504 | 0.22294  | 0.090878 | 0.04968  | 0.067385 | 0.14596  | 0.095492 | 0.03913  | 0.195258 |
| 0.04269  | 0.35731  | 0.029626 | 0.52305  | 0.031683 | 0.4946   | 0.020074 | 0.66525  | 0.097312 |
| 0.312865 | 4.60E-12 | 0.375354 | 4.51E-17 | 0.343717 | 2.14E-14 | 0.283675 | 4.31E-10 | 0.288893 |
| -0.05065 | 0.27466  | -0.04727 | 0.30807  | -0.0285  | 0.53903  | -0.05381 | 0.24585  | -0.03771 |
| 0.07542  | 0.10357  | 0.117153 | 0.01129  | 0.093719 | 0.04294  | 0.092011 | 0.04689  | 0.288775 |
| 0.130019 | 0.00489  | 0.116805 | 0.01153  | 0.113259 | 0.01433  | 0.100181 | 0.03042  | 0.095429 |
| -0.06572 | 0.15621  | -0.1973  | 1.75E-05 | -0.15867 | 0.00058  | -0.16398 | 0.00037  | -0.29107 |
| -0.0294  | 0.52627  | -0.07686 | 0.09714  | -0.02723 | 0.55727  | -0.09803 | 0.03419  | -0.14859 |
| -0.02824 | 0.54264  | -0.14121 | 0.00222  | -0.05249 | 0.25764  | -0.17332 | 0.00017  | -0.18793 |
| 0.017405 | 0.70755  | 0.020418 | 0.65987  | 0.015046 | 0.74571  | 0.003484 | 0.94015  | 0.019255 |
| 0.035288 | 0.44679  | 0.040558 | 0.38185  | 0.034312 | 0.45948  | 0.041385 | 0.37222  | 0.034882 |
| -0.10355 | 0.02523  | -0.01648 | 0.72249  | -0.06461 | 0.16331  | 0.032688 | 0.48101  | -0.08605 |
| 0.168876 | 0.00025  | 0.266081 | 5.21E-09 | 0.13558  | 0.00333  | 0.289869 | 1.71E-10 | 0.309404 |
| 0.127841 | 0.00566  | 0.140629 | 0.00232  | 0.158163 | 0.0006   | 0.076152 | 0.10025  | 0.051994 |
| -0.02169 | 0.64013  | -0.01352 | 0.77067  | -0.01807 | 0.69691  | -0.01342 | 0.77232  | -0.01788 |
| 0.021183 | 0.64796  | 0.001939 | 0.96667  | 0.003518 | 0.93955  | -0.00659 | 0.88698  | -0.04793 |
| 0.096728 | 0.03665  | -0.00522 | 0.91035  | 0.078859 | 0.08871  | -0.04806 | 0.30003  | -0.03742 |
| 0.006938 | 0.88114  | -0.02211 | 0.63373  | -0.01728 | 0.70954  | -0.00642 | 0.88994  | -0.0312  |
| -0.05593 | 0.22766  | -0.04141 | 0.37197  | -0.04082 | 0.37882  | -0.04362 | 0.34689  | -0.01559 |
| 0.038256 | 0.40949  | 0.018597 | 0.68854  | 0.023525 | 0.6121   | 0.024922 | 0.59112  | 0.024818 |
| 0.06275  | 0.17582  | 0.023469 | 0.61294  | 0.017228 | 0.71039  | 0.039597 | 0.39324  | -0.01132 |
| 0.026162 | 0.5728   | 0.045915 | 0.32213  | 0.06019  | 0.19415  | 0.0106   | 0.81929  | 0.01392  |
| 0.049588 | 0.28489  | -0.00238 | 0.95902  | 0.01715  | 0.71164  | -0.01675 | 0.71814  | -0.03557 |
| -0.0238  | 0.6079   | -0.05613 | 0.22599  | -0.03193 | 0.49123  | -0.06685 | 0.1492   | -0.072   |
| 0.169686 | 0.00023  | 0.152418 | 0.00095  | 0.237283 | 2.12E-07 | 0.017715 | 0.70258  | 0.045789 |
| 0.109353 | 0.01808  | -0.00639 | 0.89043  | 0.007496 | 0.87165  | 0.012174 | 0.79303  | -0.01427 |
| -0.03799 | 0.41277  | 0.040268 | 0.38528  | 0.002614 | 0.95507  | 0.049085 | 0.28982  | 0.116392 |
| 0.04412  | 0.34143  | 0.219187 | 1.73E-06 | 0.08084  | 0.08096  | 0.293269 | 1.02E-10 | 0.1575   |
| 0.043294 | 0.35055  | -0.04083 | 0.37865  | 0.033571 | 0.46923  | -0.09225 | 0.04632  | -0.08649 |
| -0.00396 | 0.93192  | 0.036934 | 0.42587  | -0.00341 | 0.94145  | 0.048603 | 0.29458  | 0.024672 |
| 0.061482 | 0.18473  | 0.115891 | 0.0122   | 0.080643 | 0.08171  | 0.112439 | 0.01506  | 0.138197 |
| 0.013946 | 0.76374  | -0.06987 | 0.13164  | -0.05676 | 0.22088  | -0.06637 | 0.15216  | -0.07317 |
| -0.0363  | 0.43382  | 0.029876 | 0.51955  | 0.000456 | 0.99215  | 0.040736 | 0.37977  | 0.068627 |
| 0.042206 | 0.36281  | 0.063533 | 0.17048  | 0.070361 | 0.12893  | 0.046047 | 0.32074  | 0.065192 |
| -0.01085 | 0.81516  | 0.017936 | 0.69906  | 0.028583 | 0.53779  | 0.001312 | 0.97744  | 0.037756 |
| 0.090832 | 0.0498   | -0.06405 | 0.16702  | -0.01096 | 0.81318  | -0.08135 | 0.07906  | -0.07323 |
| -0.03776 | 0.4156   | -0.02303 | 0.61964  | -0.03449 | 0.45717  | -0.00698 | 0.88049  | 0.062372 |
| 0.11616  | 0.012    | 0.139472 | 0.00252  | 0.119977 | 0.00945  | 0.125588 | 0.00658  | 0.200622 |

|          |          |          |          |          |          |          |          |          |
|----------|----------|----------|----------|----------|----------|----------|----------|----------|
| 0.070009 | 0.13086  | -0.0144  | 0.75631  | 0.009975 | 0.82977  | -0.02414 | 0.60289  | -0.01217 |
| -0.05563 | 0.23015  | -0.07185 | 0.12101  | -0.05178 | 0.26411  | -0.08012 | 0.08371  | -0.17444 |
| 0.02975  | 0.52132  | 0.071629 | 0.12216  | 0.051393 | 0.2677   | 0.067573 | 0.14484  | 0.120594 |
| -0.01563 | 0.73614  | 0.047354 | 0.30718  | 0.007417 | 0.87299  | 0.072981 | 0.11526  | 0.161301 |
| 0.055382 | 0.23227  | 0.014125 | 0.7608   | 0.042159 | 0.36333  | -0.00601 | 0.89699  | -0.00407 |
| 0.234866 | 2.84E-07 | 0.271759 | 2.38E-09 | 0.360527 | 8.82E-16 | 0.087004 | 0.06029  | 0.217955 |
| 0.057259 | 0.2168   | 0.120687 | 0.00904  | 0.084087 | 0.06945  | 0.14558  | 0.00161  | 0.082122 |
| 0.113803 | 0.01387  | 0.066719 | 0.14999  | 0.074305 | 0.10879  | 0.0474   | 0.30671  | 0.088786 |
| 0.063473 | 0.17088  | 0.08879  | 0.05518  | 0.064889 | 0.16152  | 0.078476 | 0.09028  | 0.07414  |
| -0.01673 | 0.71842  | -0.11085 | 0.01656  | -0.03861 | 0.40517  | -0.14379 | 0.00184  | -0.16744 |
| 0.0564   | 0.22379  | 0.018168 | 0.69536  | 0.001884 | 0.96762  | 0.02182  | 0.63813  | 0.04375  |
| 0.061853 | 0.18209  | 0.122196 | 0.00821  | 0.039619 | 0.39299  | 0.150293 | 0.00112  | 0.201493 |
| 0.071161 | 0.12463  | 0.013893 | 0.7646   | 0.0589   | 0.2039   | -0.04166 | 0.36902  | 0.131733 |
| 0.046582 | 0.31514  | -0.04969 | 0.28391  | 0.023651 | 0.61019  | -0.08989 | 0.05222  | -0.03736 |
| -0.07607 | 0.1006   | -0.10711 | 0.02061  | -0.06895 | 0.13683  | -0.10236 | 0.02698  | -0.18604 |
| -0.01495 | 0.74723  | -0.01809 | 0.69653  | -0.0438  | 0.34497  | -0.00138 | 0.97628  | -0.04103 |
| 0.012178 | 0.79295  | 0.031857 | 0.49222  | 0.032483 | 0.48376  | 0.008018 | 0.86281  | -0.00765 |
| 0.018827 | 0.6849   | 0.136373 | 0.00315  | 0.045542 | 0.32608  | 0.163306 | 0.00039  | 0.07896  |
| 0.008114 | 0.86117  | 0.062265 | 0.17919  | 0.047734 | 0.30331  | 0.049188 | 0.2888   | 0.037687 |
| 0.035936 | 0.43849  | 0.09746  | 0.03525  | 0.100898 | 0.02925  | 0.052374 | 0.25866  | 0.025931 |
| 0.012557 | 0.78666  | 0.121116 | 0.00879  | 0.057685 | 0.2134   | 0.13345  | 0.00386  | 0.227835 |
| -0.17278 | 0.00018  | -0.19929 | 1.43E-05 | -0.18067 | 8.63E-05 | -0.16751 | 0.00028  | -0.29882 |
| 0.159785 | 0.00053  | 0.084821 | 0.06704  | 0.150884 | 0.00107  | 0.005878 | 0.89918  | 0.031626 |
| 0.043859 | 0.34429  | -0.04184 | 0.36696  | -0.01588 | 0.73217  | -0.03889 | 0.40175  | -0.04991 |
| 0.02777  | 0.54942  | 0.007498 | 0.87162  | 0.016534 | 0.72157  | 0.005446 | 0.90657  | -0.01508 |
| -0.03811 | 0.41125  | -0.0409  | 0.37782  | -0.05766 | 0.21359  | -0.02508 | 0.58881  | -0.02411 |
| 0.011015 | 0.81234  | 0.062253 | 0.17927  | 0.112765 | 0.01476  | -0.02788 | 0.54785  | 0.098134 |
| 0.201936 | 1.09E-05 | 0.205699 | 7.42E-06 | 0.123704 | 0.00744  | 0.233397 | 3.38E-07 | 0.265396 |
| 0.058747 | 0.20508  | 0.006496 | 0.88865  | 0.031321 | 0.49955  | 0.011587 | 0.80279  | 0.088532 |
| 0.024024 | 0.60456  | 0.056996 | 0.21893  | 0.05566  | 0.22993  | 0.049274 | 0.28796  | 0.012192 |
| 0.02448  | 0.59772  | 0.042146 | 0.36348  | 0.024785 | 0.59317  | 0.045183 | 0.32991  | 0.016079 |
| 0.208686 | 5.42E-06 | 0.077718 | 0.09344  | 0.106878 | 0.02088  | 0.057531 | 0.21462  | 0.164552 |
| 0.296771 | 5.99E-11 | 0.225996 | 8.03E-07 | 0.279857 | 7.51E-10 | 0.110059 | 0.01735  | 0.069354 |
| 0.004097 | 0.92964  | -0.00537 | 0.90779  | 0.008487 | 0.85486  | 0.002111 | 0.96371  | 0.01442  |
| -0.07256 | 0.11736  | -0.12575 | 0.00651  | -0.12132 | 0.00868  | -0.09725 | 0.03564  | -0.18192 |
| 0.12574  | 0.00651  | 0.142089 | 0.00208  | 0.069563 | 0.13334  | 0.16493  | 0.00034  | 0.130308 |
| -0.04166 | 0.3691   | 0.00914  | 0.84384  | 0.000802 | 0.9862   | -0.0012  | 0.97943  | 0.081786 |
| -0.02849 | 0.53916  | -0.02895 | 0.53259  | -0.03596 | 0.43823  | -0.02511 | 0.5883   | -0.03292 |
| 0.058138 | 0.20982  | 0.128845 | 0.00529  | 0.06235  | 0.17859  | 0.146053 | 0.00155  | 0.250723 |
| 0.001667 | 0.97134  | -0.0378  | 0.41507  | 0.022362 | 0.62979  | -0.08531 | 0.06549  | -0.16486 |
| 0.012775 | 0.78306  | -0.07234 | 0.1185   | -0.02257 | 0.62657  | -0.09503 | 0.04009  | -0.22386 |
| -0.12047 | 0.00916  | -0.13534 | 0.00339  | -0.09002 | 0.05187  | -0.13732 | 0.00294  | -0.23882 |
| 0.128505 | 0.00542  | 0.098532 | 0.03327  | 0.12109  | 0.00881  | 0.067535 | 0.14506  | 0.095094 |
| 0.130504 | 0.00473  | 0.137241 | 0.00296  | 0.174659 | 0.00015  | 0.044443 | 0.3379   | 0.16004  |
| 0.174433 | 0.00015  | 0.156171 | 0.00071  | 0.122087 | 0.00826  | 0.139962 | 0.00243  | 0.191079 |

|          |          |          |          |          |          |          |          |          |
|----------|----------|----------|----------|----------|----------|----------|----------|----------|
| -0.02791 | 0.54735  | -0.04111 | 0.3754   | -0.01532 | 0.7413   | -0.06736 | 0.14613  | 0.011119 |
| 0.0886   | 0.05571  | 0.115888 | 0.01221  | 0.148772 | 0.00126  | 0.063853 | 0.16833  | 0.251741 |
| 0.177673 | 0.00011  | 0.253995 | 2.61E-08 | 0.204623 | 8.30E-06 | 0.224061 | 1.00E-06 | 0.149593 |
| 0.105403 | 0.02273  | 0.157004 | 0.00066  | 0.092375 | 0.04603  | 0.174201 | 0.00015  | 0.317139 |
| 0.221817 | 1.29E-06 | 0.130952 | 0.00459  | 0.153165 | 0.0009   | 0.08319  | 0.07249  | 0.061352 |
| 0.070546 | 0.12793  | 0.045476 | 0.32678  | 0.045647 | 0.32496  | 0.041121 | 0.37528  | -0.00595 |
| 0.109191 | 0.01826  | 0.140425 | 0.00235  | 0.114213 | 0.01353  | 0.131574 | 0.0044   | 0.252708 |
| -0.04053 | 0.38219  | 0.024925 | 0.59107  | -0.01475 | 0.75062  | 0.041554 | 0.37026  | 0.065919 |
| 0.001951 | 0.96646  | -0.03796 | 0.41311  | -0.00047 | 0.99186  | -0.0809  | 0.08074  | -0.09384 |
| -0.05873 | 0.20522  | -0.05097 | 0.27169  | -0.04931 | 0.28757  | -0.05905 | 0.20277  | -0.07526 |
| 0.132802 | 0.00404  | 0.070725 | 0.12696  | 0.08436  | 0.06855  | 0.048104 | 0.29957  | 0.082378 |
| 0.151312 | 0.00104  | 0.240685 | 1.40E-07 | 0.176612 | 0.00012  | 0.210541 | 4.45E-06 | 0.342448 |
| 0.012756 | 0.78337  | 0.040439 | 0.38326  | 0.014068 | 0.76174  | 0.042135 | 0.36361  | 0.14616  |
| 0.014316 | 0.75766  | 0.02948  | 0.52511  | 0.003954 | 0.93209  | 0.041011 | 0.37656  | 0.045286 |
| 0.020186 | 0.66349  | 0.019364 | 0.6764   | 0.029778 | 0.52092  | 0.015094 | 0.74493  | 0.027655 |
| -0.0706  | 0.12766  | 0.049563 | 0.28514  | 0.001778 | 0.96943  | 0.073885 | 0.11081  | 0.047838 |
| 0.017821 | 0.7009   | -0.0005  | 0.99146  | 0.02206  | 0.63444  | -0.01556 | 0.73727  | -0.05575 |
| 0.068146 | 0.14145  | 0.062758 | 0.17576  | 0.053393 | 0.24951  | 0.05056  | 0.27554  | 0.051213 |
| 0.083461 | 0.07156  | 0.112312 | 0.01517  | 0.07701  | 0.09647  | 0.109342 | 0.0181   | 0.193167 |
| -0.01259 | 0.7862   | 0.008351 | 0.85716  | -0.00227 | 0.96106  | 0.024829 | 0.59251  | -0.0132  |
| 0.05023  | 0.27869  | 0.096599 | 0.03691  | 0.067634 | 0.14447  | 0.09032  | 0.05111  | 0.114921 |
| 0.254882 | 2.33E-08 | 0.162061 | 0.00044  | 0.227966 | 6.40E-07 | 0.067005 | 0.14825  | 0.048295 |
| -0.02013 | 0.66434  | -0.05135 | 0.26812  | -0.0159  | 0.73179  | -0.05612 | 0.2261   | -0.07236 |
| 0.137612 | 0.00288  | 0.191945 | 2.97E-05 | 0.216962 | 2.22E-06 | 0.092076 | 0.04674  | 0.248443 |
| 0.052077 | 0.26137  | 0.008664 | 0.85187  | 0.028785 | 0.53493  | 0.005014 | 0.91395  | -0.04216 |
| 0.038155 | 0.41071  | -0.07336 | 0.11338  | -0.02282 | 0.62283  | -0.0942  | 0.04188  | -0.05891 |
| 0.017001 | 0.71403  | 0.029609 | 0.52329  | 0.012755 | 0.78339  | 0.034839 | 0.4526   | 0.010209 |
| 0.038989 | 0.40056  | 0.230078 | 5.00E-07 | 0.072177 | 0.11932  | 0.308878 | 8.82E-12 | 0.163017 |
| 0.021712 | 0.63978  | 0.207809 | 5.95E-06 | 0.053718 | 0.24663  | 0.287867 | 2.31E-10 | 0.146734 |
| 0.054267 | 0.24182  | 0.21862  | 1.85E-06 | 0.077144 | 0.09589  | 0.298405 | 4.65E-11 | 0.152803 |
| 0.177529 | 0.00011  | 0.164768 | 0.00035  | 0.187247 | 4.67E-05 | 0.1023   | 0.02706  | 0.18338  |
| 0.137297 | 0.00295  | 0.039365 | 0.39602  | 0.099757 | 0.03113  | -0.0177  | 0.7028   | 0.03793  |
| 0.044974 | 0.33215  | 0.15297  | 0.00091  | 0.105562 | 0.02252  | 0.142161 | 0.00207  | 0.238277 |
| 0.136983 | 0.00301  | 0.102328 | 0.02702  | 0.076435 | 0.09899  | 0.09167  | 0.04772  | 0.060656 |
| 0.001364 | 0.97655  | -0.02947 | 0.52528  | -0.00561 | 0.90385  | -0.03607 | 0.43684  | -0.10232 |
| 0.296008 | 6.73E-11 | 0.209475 | 4.99E-06 | 0.291592 | 1.32E-10 | 0.067892 | 0.14294  | 0.066581 |
| 0.070636 | 0.12744  | 0.032612 | 0.48202  | 0.046494 | 0.31606  | 0.014365 | 0.75685  | -0.04546 |
| 0.071331 | 0.12373  | 0.112924 | 0.01462  | 0.06183  | 0.18225  | 0.114291 | 0.01346  | 0.154946 |
| -0.02345 | 0.61324  | 0.025105 | 0.5884   | 0.006244 | 0.89294  | 0.02779  | 0.54914  | 0.086163 |
| -0.01843 | 0.69112  | -0.09362 | 0.04317  | -0.02292 | 0.6212   | -0.1054  | 0.02273  | -0.11311 |
| -0.02493 | 0.59096  | -0.14144 | 0.00219  | -0.06033 | 0.1931   | -0.18046 | 8.80E-05 | -0.19028 |
| 0.069325 | 0.13467  | 0.139756 | 0.00247  | 0.09792  | 0.03439  | 0.144919 | 0.00169  | 0.282294 |
| 0.175653 | 0.00014  | 0.11662  | 0.01167  | 0.148054 | 0.00133  | 0.08096  | 0.08051  | 0.049771 |
| 0.10499  | 0.02327  | 0.022832 | 0.62262  | 0.045927 | 0.322    | 0.02158  | 0.64182  | 0.092463 |
| 0.050443 | 0.27666  | 0.039806 | 0.39075  | 0.033132 | 0.47507  | 0.030266 | 0.51411  | 0.161274 |

|          |          |          |          |          |          |          |          |          |
|----------|----------|----------|----------|----------|----------|----------|----------|----------|
| -0.00295 | 0.94933  | 0.052325 | 0.25911  | 0.014379 | 0.75663  | 0.060322 | 0.19317  | 0.272707 |
| 0.226678 | 7.42E-07 | 0.175268 | 0.00014  | 0.209356 | 5.05E-06 | 0.09076  | 0.04998  | 0.138511 |
| 0.016061 | 0.72922  | 0.0508   | 0.27327  | 0.024371 | 0.59935  | 0.04653  | 0.31568  | 0.201337 |
| 0.006428 | 0.88981  | 0.006507 | 0.88847  | 0.00906  | 0.84519  | 0.019137 | 0.67999  | 0.011849 |
| 0.196504 | 1.90E-05 | 0.209672 | 4.88E-06 | 0.202983 | 9.83E-06 | 0.149553 | 0.00119  | 0.305194 |
| 0.022285 | 0.63097  | -0.0371  | 0.42379  | -0.00911 | 0.84438  | -0.03915 | 0.39861  | 0.004663 |
| -0.01162 | 0.80228  | -0.00253 | 0.95645  | -0.01878 | 0.68564  | 0.017661 | 0.70345  | -0.03399 |
| 0.253773 | 2.69E-08 | 0.205369 | 7.68E-06 | 0.159818 | 0.00053  | 0.198398 | 1.57E-05 | 0.295373 |
| 0.117081 | 0.01134  | 0.319473 | 1.53E-12 | 0.204138 | 8.73E-06 | 0.321925 | 1.01E-12 | 0.316404 |
| 0.095122 | 0.0399   | 0.098931 | 0.03256  | 0.087902 | 0.05767  | 0.094751 | 0.04069  | 0.090391 |
| 0.091638 | 0.0478   | -0.00487 | 0.91636  | 0.040042 | 0.38794  | -0.03547 | 0.44442  | 0.034036 |
| 0.072215 | 0.11913  | 0.151781 | 0.001    | 0.030149 | 0.51574  | 0.217414 | 2.11E-06 | 0.14932  |
| -0.01168 | 0.80119  | 0.038702 | 0.40404  | 0.006102 | 0.89537  | 0.044013 | 0.3426   | -0.02064 |
| 0.337648 | 6.46E-14 | 0.173786 | 0.00016  | 0.18937  | 3.81E-05 | 0.111699 | 0.01574  | 0.064204 |
| -0.09818 | 0.03392  | -0.0696  | 0.13312  | -0.08067 | 0.08161  | -0.05073 | 0.27392  | -0.04724 |
| -0.02818 | 0.54354  | -0.10927 | 0.01817  | -0.05796 | 0.21125  | -0.12821 | 0.00553  | -0.12811 |
| -0.09264 | 0.04541  | -0.1069  | 0.02086  | -0.08641 | 0.06207  | -0.09412 | 0.04204  | -0.15735 |
| 0.097415 | 0.03533  | 0.102871 | 0.02622  | 0.094306 | 0.04164  | 0.110831 | 0.01657  | 0.066847 |
| -0.0395  | 0.39436  | -0.00339 | 0.94172  | -0.03008 | 0.5167   | 0.005772 | 0.90099  | 0.01373  |
| -0.06303 | 0.17387  | -0.02157 | 0.64192  | -0.03246 | 0.48401  | 0.001363 | 0.97656  | 0.018958 |
| 0.037905 | 0.4138   | 0.021805 | 0.63836  | -0.00132 | 0.97738  | 0.039098 | 0.39925  | 0.06052  |
| 0.039024 | 0.40014  | 0.017617 | 0.70416  | 0.015652 | 0.73584  | 0.027607 | 0.55177  | 0.020427 |
| 0.175009 | 0.00014  | 0.159219 | 0.00055  | 0.184208 | 6.22E-05 | 0.095509 | 0.0391   | 0.171098 |
| -0.00705 | 0.87931  | 0.015847 | 0.73267  | 0.03938  | 0.39585  | -0.02627 | 0.57117  | -0.02834 |
| -0.09792 | 0.03438  | -0.05523 | 0.2336   | -0.05874 | 0.20513  | -0.04381 | 0.34482  | 0.020693 |
| -0.05501 | 0.23547  | -0.03525 | 0.44728  | -0.03853 | 0.40619  | -0.02999 | 0.51803  | 0.009586 |
| -0.02626 | 0.57135  | -0.00409 | 0.92971  | -0.01603 | 0.72977  | -0.0073  | 0.87502  | 0.000256 |
| 0.054859 | 0.23672  | -0.04825 | 0.2981   | -0.03979 | 0.39091  | -0.02966 | 0.52255  | -0.07016 |
| 0.023784 | 0.60818  | -0.05612 | 0.22613  | -0.04186 | 0.3668   | -0.05669 | 0.22143  | -0.10591 |
| -0.06996 | 0.13112  | -0.05757 | 0.21434  | -0.05802 | 0.21078  | -0.04163 | 0.36943  | -0.05833 |
| 0.166101 | 0.00031  | 0.131943 | 0.00429  | 0.186057 | 5.23E-05 | 0.046793 | 0.31295  | 0.148402 |
| -0.06147 | 0.18479  | -0.14837 | 0.0013   | -0.10704 | 0.02069  | -0.14084 | 0.00228  | -0.26986 |
| 0.048501 | 0.2956   | -0.07534 | 0.10395  | -0.02457 | 0.59632  | -0.08967 | 0.0528   | -0.04724 |
| 0.037537 | 0.41834  | -0.11608 | 0.01206  | -0.03134 | 0.49931  | -0.1402  | 0.00239  | -0.2476  |
| -0.01273 | 0.78376  | -0.13262 | 0.00409  | -0.06436 | 0.16499  | -0.13734 | 0.00294  | -0.17921 |
| 0.182651 | 7.19E-05 | 0.110352 | 0.01705  | 0.145835 | 0.00158  | 0.057059 | 0.21841  | 0.101634 |
| 0.053699 | 0.24679  | 0.08857  | 0.05579  | 0.045875 | 0.32255  | 0.108247 | 0.01929  | 0.105136 |
| 0.078573 | 0.08988  | 0.068758 | 0.1379   | 0.114529 | 0.01327  | -0.00459 | 0.9212   | 0.001713 |
| 0.173168 | 0.00017  | 0.102282 | 0.02709  | 0.076683 | 0.0979   | 0.096255 | 0.03759  | 0.060826 |
| 0.013938 | 0.76386  | -0.04627 | 0.31837  | 0.003926 | 0.93256  | -0.07754 | 0.09421  | -0.08231 |
| 0.211096 | 4.19E-06 | 0.047208 | 0.30867  | 0.129336 | 0.00512  | -0.02414 | 0.60285  | 0.013273 |
| 0.134898 | 0.00349  | 0.15236  | 0.00096  | 0.160937 | 0.00048  | 0.09412  | 0.04205  | 0.120958 |
| 0.112555 | 0.01495  | 0.106882 | 0.02088  | 0.098193 | 0.03389  | 0.077389 | 0.09484  | 0.105702 |
| 0.123792 | 0.0074   | 0.162089 | 0.00044  | 0.153956 | 0.00084  | 0.149213 | 0.00122  | 0.048637 |
| 0.049042 | 0.29024  | 0.092813 | 0.045    | 0.087264 | 0.05952  | 0.07835  | 0.09079  | 0.070181 |



|          |          |          |          |          |          |          |          |          |
|----------|----------|----------|----------|----------|----------|----------|----------|----------|
| 0.134959 | 0.00348  | 0.053861 | 0.24537  | 0.05503  | 0.23525  | 0.043392 | 0.34946  | -0.00861 |
| 0.199577 | 1.39E-05 | 0.179439 | 9.66E-05 | 0.210544 | 4.45E-06 | 0.107953 | 0.01962  | 0.04181  |
| -0.00097 | 0.98333  | -0.03255 | 0.48281  | 0.032755 | 0.4801   | -0.09532 | 0.0395   | -0.11457 |
| -0.01967 | 0.67152  | 0.027965 | 0.54663  | 0.005533 | 0.90508  | 0.015452 | 0.7391   | 0.011454 |
| 0.121226 | 0.00873  | 0.088812 | 0.05512  | 0.108093 | 0.01947  | 0.047587 | 0.3048   | 0.067211 |
| 0.004656 | 0.92007  | -0.00398 | 0.93157  | 0.037242 | 0.42201  | -0.03814 | 0.41089  | -0.06247 |
| 0.027527 | 0.55293  | 0.178178 | 0.00011  | 0.033142 | 0.47492  | 0.236184 | 2.42E-07 | 0.363853 |
| 0.023244 | 0.61635  | 0.009599 | 0.8361   | 0.011729 | 0.80043  | 0.013929 | 0.76402  | 0.026724 |
| 0.002838 | 0.95123  | -0.01336 | 0.77343  | -0.00899 | 0.84636  | -0.01055 | 0.82015  | -0.00798 |
| 0.160392 | 0.0005   | 0.14089  | 0.00228  | 0.128145 | 0.00555  | 0.108671 | 0.01882  | 0.089388 |
| 0.025081 | 0.58875  | 0.055085 | 0.23479  | 0.033251 | 0.47348  | 0.054317 | 0.24139  | 0.054803 |
| 0.152098 | 0.00098  | 0.180567 | 8.71E-05 | 0.172165 | 0.00019  | 0.131087 | 0.00455  | 0.062643 |
| -0.01994 | 0.66731  | -0.00092 | 0.98416  | -0.02835 | 0.54115  | 0.027448 | 0.55407  | -0.1125  |
| -0.05527 | 0.23325  | -0.14934 | 0.00121  | -0.12362 | 0.00748  | -0.13473 | 0.00353  | -0.11189 |
| -0.00799 | 0.86331  | -0.04269 | 0.3573   | -0.01749 | 0.70614  | -0.03783 | 0.41475  | -0.02139 |
| -0.01685 | 0.7164   | -0.02945 | 0.52547  | -0.01456 | 0.7536   | -0.01951 | 0.67417  | 0.000248 |
| -0.0507  | 0.27425  | -0.00864 | 0.85222  | -0.00636 | 0.89095  | -0.01104 | 0.81185  | 0.054799 |
| 0.032456 | 0.48413  | -0.01175 | 0.8001   | -0.03543 | 0.44502  | 0.015914 | 0.73159  | -0.07633 |
| -0.01801 | 0.69792  | -0.18106 | 8.32E-05 | -0.07359 | 0.11226  | -0.224   | 1.01E-06 | -0.26526 |
| -0.03326 | 0.47332  | -0.00896 | 0.84695  | -0.01444 | 0.75567  | -0.01344 | 0.77203  | 0.002293 |
| -0.03511 | 0.44904  | -0.15472 | 0.00079  | -0.10323 | 0.0257   | -0.14109 | 0.00224  | -0.22144 |
| 0.012997 | 0.77937  | 0.044454 | 0.33778  | 0.055068 | 0.23493  | 0.020218 | 0.663    | -0.01076 |
| 0.149504 | 0.00119  | 0.163234 | 0.0004   | 0.168367 | 0.00026  | 0.111767 | 0.01567  | 0.071563 |
| 0.052705 | 0.25566  | 0.058256 | 0.20889  | 0.059595 | 0.1986   | 0.057405 | 0.21563  | 0.092767 |
| 0.036813 | 0.42739  | 0.019738 | 0.67052  | 0.070081 | 0.13047  | -0.02247 | 0.62814  | -0.04059 |
| 0.044528 | 0.33697  | -0.02278 | 0.62336  | 0.020558 | 0.65768  | -0.05284 | 0.25444  | -0.05061 |
| -0.01148 | 0.80458  | 0.048672 | 0.2939   | 0.012978 | 0.77969  | 0.051825 | 0.2637   | 0.263465 |
| -0.08801 | 0.05737  | 0.008881 | 0.84821  | -0.05658 | 0.2223   | 0.052275 | 0.25957  | -0.00827 |
| 0.028091 | 0.54482  | -0.02276 | 0.62366  | 0.014177 | 0.75993  | -0.0417  | 0.36854  | 0.036398 |
| 0.056878 | 0.21988  | 0.101327 | 0.02856  | 0.092202 | 0.04644  | 0.091273 | 0.04869  | 0.169369 |
| 0.28969  | 1.76E-10 | 0.172806 | 0.00017  | 0.238955 | 1.73E-07 | 0.054283 | 0.24169  | 0.057384 |
| 0.072727 | 0.11653  | -0.02407 | 0.60394  | 0.0663   | 0.15258  | -0.08416 | 0.06919  | -0.12875 |
| 0.004005 | 0.93121  | 0.046141 | 0.31975  | 0.042165 | 0.36327  | 0.030158 | 0.51561  | 0.11331  |
| 0.012968 | 0.77987  | 0.060527 | 0.19166  | 0.049582 | 0.28495  | 0.027754 | 0.54966  | 0.175564 |
| 0.078515 | 0.09012  | -0.01714 | 0.71187  | -0.00113 | 0.9806   | -0.00303 | 0.94796  | 0.066306 |
| -0.13864 | 0.00268  | -0.00042 | 0.9928   | -0.0291  | 0.53046  | 0.018871 | 0.6842   | 0.032352 |
| -0.04281 | 0.35592  | -0.0764  | 0.09913  | -0.02393 | 0.606    | -0.09672 | 0.03667  | -0.22587 |
| 0.05293  | 0.25364  | -0.14436 | 0.00176  | -0.08248 | 0.07498  | -0.13871 | 0.00266  | -0.31675 |
| -0.03556 | 0.4433   | 0.014168 | 0.76009  | 0.027402 | 0.55473  | -0.01094 | 0.81367  | -0.02708 |
| 0.20618  | 7.06E-06 | 0.133018 | 0.00398  | 0.192499 | 2.81E-05 | 0.067497 | 0.14529  | 0.041934 |
| -0.09318 | 0.04415  | -0.17083 | 0.00021  | -0.11214 | 0.01533  | -0.16565 | 0.00032  | -0.21035 |
| 0.01861  | 0.68833  | 0.079494 | 0.08616  | 0.046818 | 0.31269  | 0.064023 | 0.1672   | 0.137383 |
| 0.19406  | 2.41E-05 | 0.143264 | 0.00191  | 0.233102 | 3.50E-07 | 0.006538 | 0.88795  | 0.058973 |
| -0.10821 | 0.01934  | -0.13706 | 0.003    | -0.13197 | 0.00428  | -0.09694 | 0.03624  | -0.25169 |
| -0.0499  | 0.28191  | -0.03373 | 0.46711  | -0.00182 | 0.96863  | -0.0564  | 0.22375  | -0.07982 |

|          |          |          |          |          |          |          |          |          |
|----------|----------|----------|----------|----------|----------|----------|----------|----------|
| 0.025672 | 0.58     | 0.042271 | 0.36206  | 0.036324 | 0.43356  | 0.051351 | 0.2681   | 0.012981 |
| 0.066319 | 0.15246  | 0.119737 | 0.0096   | 0.075311 | 0.10407  | 0.107583 | 0.02005  | 0.190437 |
| 0.080539 | 0.0821   | 0.036971 | 0.42541  | 0.035838 | 0.43974  | 0.017821 | 0.7009   | -0.02449 |
| 0.002057 | 0.96464  | 0.041683 | 0.36878  | 0.034803 | 0.45307  | 0.020811 | 0.65373  | 0.166882 |
| -0.00254 | 0.95633  | -0.00466 | 0.92007  | -0.00513 | 0.912    | 0.006094 | 0.8955   | -0.03406 |
| -0.02101 | 0.65068  | -0.01716 | 0.71145  | -0.02921 | 0.52896  | -0.01189 | 0.79772  | -0.02013 |
| -0.07839 | 0.09061  | -0.10636 | 0.02152  | -0.11673 | 0.01159  | -0.07857 | 0.08988  | -0.10242 |
| 0.07113  | 0.12479  | 0.055131 | 0.2344   | 0.042929 | 0.35463  | 0.058667 | 0.20569  | 0.105115 |
| 0.141874 | 0.00212  | 0.209006 | 5.24E-06 | 0.193952 | 2.44E-05 | 0.169001 | 0.00024  | 0.104616 |
| -0.0515  | 0.26668  | -0.09832 | 0.03365  | -0.05537 | 0.23236  | -0.10283 | 0.02628  | -0.19456 |
| 0.162695 | 0.00042  | 0.088573 | 0.05578  | 0.130127 | 0.00485  | 0.031068 | 0.50302  | 0.139866 |
| 0.019942 | 0.66731  | 0.083138 | 0.07267  | 0.034597 | 0.45575  | 0.100079 | 0.03059  | 0.060359 |
| 0.163737 | 0.00038  | -0.07077 | 0.12672  | 0.005926 | 0.89838  | -0.11151 | 0.01592  | -0.20918 |
| -0.02938 | 0.52655  | 0.015898 | 0.73185  | -0.026   | 0.5752   | 0.056994 | 0.21894  | -0.0012  |
| 0.001979 | 0.96597  | 0.014548 | 0.75386  | 0.026203 | 0.57219  | 0.003618 | 0.93786  | -0.00575 |
| 0.023744 | 0.60878  | -0.03204 | 0.48973  | 0.032106 | 0.48886  | -0.06475 | 0.16241  | -0.13668 |
| 0.297481 | 5.36E-11 | 0.172219 | 0.00018  | 0.153359 | 0.00088  | 0.170823 | 0.00021  | 0.239313 |
| 0.047994 | 0.30068  | 0.147371 | 0.0014   | 0.058171 | 0.20956  | 0.202739 | 1.01E-05 | 0.100383 |
| 0.202823 | 9.99E-06 | 0.126607 | 0.00615  | 0.206477 | 6.84E-06 | 0.028627 | 0.53716  | -0.00057 |
| 0.034694 | 0.45449  | 0.001391 | 0.97608  | 0.039747 | 0.39146  | -0.02489 | 0.59154  | -0.03161 |
| -0.05988 | 0.19648  | -0.0531  | 0.25213  | -0.05172 | 0.26464  | -0.0453  | 0.32865  | -0.06753 |
| 0.08515  | 0.06599  | 0.006803 | 0.88343  | 0.045876 | 0.32254  | -0.00151 | 0.97409  | -0.01194 |
| -0.12758 | 0.00576  | -0.14052 | 0.00234  | -0.10684 | 0.02093  | -0.12727 | 0.00589  | -0.19113 |
| -0.08337 | 0.07186  | -0.19964 | 1.38E-05 | -0.1223  | 0.00815  | -0.2087  | 5.41E-06 | -0.32309 |
| 0.189087 | 3.92E-05 | 0.133889 | 0.00375  | 0.162892 | 0.00041  | 0.073528 | 0.11255  | 0.090378 |
| 0.033829 | 0.46582  | -0.0031  | 0.94665  | 0.032872 | 0.47854  | -0.0169  | 0.71562  | -0.03239 |
| -0.03249 | 0.4836   | -0.05776 | 0.21283  | -0.04861 | 0.29453  | -0.05983 | 0.19684  | -0.0287  |
| 0.023291 | 0.61563  | -0.00094 | 0.98391  | -0.0158  | 0.7335   | 0.014617 | 0.75273  | 0.062862 |
| 0.051365 | 0.26797  | -0.02043 | 0.65962  | -0.01879 | 0.68549  | -0.00864 | 0.85221  | -0.0863  |
| 0.05228  | 0.25952  | 0.023294 | 0.61559  | 0.015757 | 0.73414  | 0.037295 | 0.42135  | 0.050596 |
| 0.028111 | 0.54453  | 0.028184 | 0.54349  | 0.029084 | 0.53069  | 0.001645 | 0.97173  | 0.04262  |
| 0.111165 | 0.01625  | 0.134325 | 0.00364  | 0.124843 | 0.00691  | 0.103601 | 0.02517  | 0.230904 |
| 0.11446  | 0.01332  | 0.114462 | 0.01332  | 0.113929 | 0.01376  | 0.103627 | 0.02513  | 0.054635 |
| 0.227739 | 6.57E-07 | 0.144966 | 0.00168  | 0.197849 | 1.66E-05 | 0.062393 | 0.17829  | 0.039263 |
| -0.00867 | 0.85169  | 0.011801 | 0.79922  | 0.010644 | 0.81855  | 0.004189 | 0.92807  | 0.086964 |
| -0.12644 | 0.00622  | -0.20801 | 5.82E-06 | -0.07997 | 0.0843   | -0.25696 | 1.77E-08 | -0.32773 |
| 0.012649 | 0.78515  | 0.064709 | 0.16269  | 0.040958 | 0.37718  | 0.059048 | 0.20276  | 0.107267 |
| 0.053828 | 0.24566  | -0.01638 | 0.72411  | 0.013392 | 0.77285  | -0.03567 | 0.44186  | -0.04959 |
| -0.02121 | 0.64757  | 0.151882 | 0.00099  | 0.045158 | 0.33017  | 0.172149 | 0.00019  | 0.19193  |
| 0.146619 | 0.00149  | 0.061354 | 0.18565  | 0.132635 | 0.00409  | -0.02807 | 0.54508  | 0.023147 |
| 0.026037 | 0.57462  | 0.066458 | 0.1516   | 0.035836 | 0.43976  | 0.097051 | 0.03603  | 0.046468 |
| 0.09308  | 0.04438  | 0.118024 | 0.01069  | 0.125352 | 0.00668  | 0.091409 | 0.04836  | 0.034911 |
| 0.049172 | 0.28896  | 0.007273 | 0.87544  | 0.036321 | 0.43359  | -0.02609 | 0.57378  | -0.00401 |
| 0.086141 | 0.06289  | 0.182492 | 7.29E-05 | 0.088971 | 0.05469  | 0.235666 | 2.58E-07 | 0.208509 |
| 0.078425 | 0.09049  | 0.0536   | 0.24766  | 0.072989 | 0.11521  | 0.025696 | 0.57965  | -0.00101 |

|          |          |          |          |          |          |          |          |          |
|----------|----------|----------|----------|----------|----------|----------|----------|----------|
| 0.217808 | 2.02E-06 | 0.161818 | 0.00045  | 0.171385 | 0.0002   | 0.109432 | 0.018    | 0.270452 |
| 0.04728  | 0.30794  | 0.115098 | 0.01281  | 0.072802 | 0.11615  | 0.117677 | 0.01093  | 0.111179 |
| -0.0779  | 0.09268  | -0.09211 | 0.04666  | -0.10561 | 0.02246  | -0.05438 | 0.24082  | -0.10044 |
| 0.069698 | 0.13258  | 0.013595 | 0.76951  | 0.029797 | 0.52065  | -0.01197 | 0.79645  | 0.005666 |
| 0.246321 | 6.96E-08 | 0.131698 | 0.00436  | 0.213222 | 3.34E-06 | 0.036651 | 0.42943  | 0.00053  |
| 0.152263 | 0.00096  | 0.083141 | 0.07265  | 0.096866 | 0.03638  | 0.042048 | 0.3646   | 0.019646 |
| 0.106168 | 0.02175  | 0.136652 | 0.00309  | 0.054211 | 0.24231  | 0.181991 | 7.64E-05 | 0.14191  |
| 0.22517  | 8.82E-07 | 0.194292 | 2.36E-05 | 0.233604 | 3.30E-07 | 0.088302 | 0.05654  | 0.115133 |
| 0.186933 | 4.81E-05 | 0.051181 | 0.26968  | 0.133816 | 0.00377  | -0.01887 | 0.6842   | -0.1586  |
| 0.298544 | 4.55E-11 | 0.115681 | 0.01236  | 0.154225 | 0.00083  | 0.064583 | 0.16351  | 0.093462 |
| -0.02638 | 0.56961  | -0.21233 | 3.67E-06 | -0.11829 | 0.01052  | -0.2072  | 6.34E-06 | -0.33287 |
| -0.00075 | 0.98719  | -0.01421 | 0.75933  | 0.008531 | 0.85412  | -0.02344 | 0.61344  | 0.006739 |
| 0.024283 | 0.60067  | 0.012144 | 0.79351  | 0.024881 | 0.59174  | -0.00431 | 0.92606  | 0.008417 |
| -0.16811 | 0.00026  | -0.13083 | 0.00463  | -0.13045 | 0.00475  | -0.09692 | 0.03628  | -0.29441 |
| -0.03445 | 0.45767  | -0.09543 | 0.03927  | -0.0682  | 0.14111  | -0.08429 | 0.06876  | -0.19683 |
| 0.12425  | 0.00718  | 0.034157 | 0.4615   | 0.066645 | 0.15045  | 0.015642 | 0.736    | 0.003344 |
| -0.02793 | 0.54719  | -0.0297  | 0.52198  | -0.01368 | 0.76817  | -0.03381 | 0.46607  | -0.00801 |
| -0.13342 | 0.00387  | -0.15659 | 0.00068  | -0.15879 | 0.00057  | -0.10168 | 0.02801  | -0.22828 |
| 0.059844 | 0.19673  | 0.07738  | 0.09488  | 0.05358  | 0.24785  | 0.070647 | 0.12738  | 0.080537 |
| 0.058898 | 0.20391  | -0.00096 | 0.98345  | 0.007997 | 0.86316  | -0.00233 | 0.95999  | 0.110001 |
| 0.048846 | 0.29217  | 0.184222 | 6.21E-05 | 0.068706 | 0.1382   | 0.249429 | 4.70E-08 | 0.115347 |
| 0.020063 | 0.66542  | 0.011305 | 0.8075   | -0.03397 | 0.4639   | 0.046046 | 0.32074  | 0.089426 |
| 0.043715 | 0.34588  | 0.023161 | 0.6176   | 0.067765 | 0.1437   | -0.0186  | 0.6885   | -0.04257 |
| 0.085953 | 0.06346  | -0.00159 | 0.97266  | 0.058224 | 0.20914  | -0.03818 | 0.41038  | 0.044419 |
| 0.034921 | 0.45154  | 0.062468 | 0.17778  | 0.050738 | 0.27385  | 0.040336 | 0.38447  | 0.070953 |
| -0.12151 | 0.00858  | -0.05812 | 0.20993  | -0.05559 | 0.23055  | -0.05181 | 0.26383  | -0.12992 |
| 0.018884 | 0.68399  | 0.010446 | 0.82187  | 0.021283 | 0.64642  | 0.020542 | 0.65793  | 0.006728 |
| 0.184046 | 6.31E-05 | 0.232712 | 3.67E-07 | 0.127105 | 0.00595  | 0.273715 | 1.81E-09 | 0.205929 |
| 0.33303  | 1.47E-13 | 0.334964 | 1.05E-13 | 0.366501 | 2.71E-16 | 0.200494 | 1.27E-05 | 0.175861 |
| 0.081021 | 0.08028  | 0.015728 | 0.73461  | 0.033704 | 0.46747  | 0.018027 | 0.69761  | 0.000271 |
| 0.160533 | 0.0005   | 0.096895 | 0.03633  | 0.089928 | 0.05213  | 0.068555 | 0.13907  | 0.119094 |
| 0.106654 | 0.02115  | 0.118462 | 0.0104   | 0.100111 | 0.03054  | 0.094976 | 0.04021  | 0.10785  |
| -0.02444 | 0.59838  | -0.04372 | 0.34584  | -0.0378  | 0.4151   | -0.04823 | 0.29831  | -0.11403 |
| 0.025774 | 0.57849  | 0.017465 | 0.70659  | 0.015811 | 0.73327  | 0.029602 | 0.52338  | 0.065264 |
| 0.027119 | 0.55883  | -0.00481 | 0.91752  | -0.00345 | 0.94081  | 0.006553 | 0.88768  | -0.00018 |
| 0.308414 | 9.50E-12 | 0.222869 | 1.15E-06 | 0.321257 | 1.13E-12 | 0.054729 | 0.23783  | 0.065032 |
| 0.018029 | 0.69757  | -0.00974 | 0.8338   | -0.03289 | 0.47824  | -0.00915 | 0.84362  | -0.02303 |
| 0.046437 | 0.31665  | -0.04082 | 0.37881  | -0.01618 | 0.72721  | -0.03267 | 0.48129  | -0.05574 |
| 0.019219 | 0.6787   | 0.043222 | 0.35135  | 0.046662 | 0.31431  | 0.03124  | 0.50066  | 0.010534 |
| -0.02092 | 0.65208  | -0.06263 | 0.17667  | -0.02154 | 0.64237  | -0.09022 | 0.05137  | -0.08265 |
| -0.06339 | 0.17144  | 0.003514 | 0.93964  | -0.04543 | 0.32727  | 0.017868 | 0.70014  | 0.039913 |
| 0.042551 | 0.35889  | 0.071328 | 0.12375  | 0.025251 | 0.58623  | 0.070171 | 0.12997  | 0.131285 |
| 0.023579 | 0.61127  | 0.046996 | 0.31086  | 0.031941 | 0.49109  | 0.046916 | 0.31168  | 0.032277 |
| -0.1477  | 0.00137  | -0.16327 | 0.0004   | -0.12547 | 0.00663  | -0.16731 | 0.00028  | -0.25728 |
| -0.06847 | 0.13958  | -0.11967 | 0.00964  | -0.07861 | 0.08974  | -0.11162 | 0.01581  | -0.1648  |

|          |          |          |          |          |          |          |          |          |
|----------|----------|----------|----------|----------|----------|----------|----------|----------|
| -0.00037 | 0.99369  | -0.03507 | 0.44961  | 0.002255 | 0.96123  | -0.03681 | 0.42742  | 0.026092 |
| -0.01353 | 0.77055  | -0.01919 | 0.67914  | 0.001234 | 0.97879  | -0.01699 | 0.71427  | -0.02145 |
| 0.100616 | 0.0297   | 0.035239 | 0.44743  | 0.063649 | 0.1697   | 0.01122  | 0.80892  | -0.00389 |
| 0.032796 | 0.47956  | -0.06905 | 0.13621  | -0.03162 | 0.49539  | -0.07641 | 0.09909  | -0.08226 |
| 0.010261 | 0.82498  | -0.03952 | 0.3942   | 0.002805 | 0.9518   | -0.03963 | 0.39287  | -0.06217 |
| 0.060928 | 0.18872  | 0.111468 | 0.01596  | 0.108547 | 0.01896  | 0.079309 | 0.0869   | 0.103956 |
| 0.170203 | 0.00022  | 0.201054 | 1.20E-05 | 0.188583 | 4.11E-05 | 0.148283 | 0.00131  | 0.089275 |
| 0.07568  | 0.10238  | 0.075532 | 0.10306  | 0.063854 | 0.16832  | 0.081359 | 0.07902  | 0.079221 |
| -0.032   | 0.4903   | 0.017857 | 0.70032  | 0.005758 | 0.90124  | 0.014218 | 0.75926  | 0.0255   |
| 0.000851 | 0.98537  | 0.000206 | 0.99646  | 0.022661 | 0.62522  | -0.00289 | 0.95026  | 0.035965 |
| -0.11343 | 0.01418  | -0.14192 | 0.00211  | -0.08453 | 0.06798  | -0.15152 | 0.00102  | -0.21187 |
| 0.078045 | 0.09206  | -0.06564 | 0.15673  | -0.02111 | 0.64917  | -0.06831 | 0.14051  | -0.1007  |
| -0.03812 | 0.41119  | -0.04163 | 0.36939  | -0.05474 | 0.23778  | -0.05086 | 0.27267  | -0.03495 |
| 0.060957 | 0.18851  | 0.101929 | 0.02763  | 0.062534 | 0.17731  | 0.097798 | 0.03462  | 0.123503 |
| 0.026029 | 0.57475  | 0.028301 | 0.54182  | 0.039469 | 0.39478  | 0.004779 | 0.91797  | 0.098471 |
| 0.066237 | 0.15297  | -0.12731 | 0.00587  | -0.04989 | 0.28196  | -0.13053 | 0.00472  | -0.25322 |
| 0.009795 | 0.83281  | 0.013857 | 0.7652   | 0.06026  | 0.19363  | -0.03442 | 0.45807  | -0.05225 |
| 0.007659 | 0.86889  | 0.051297 | 0.2686   | 0.035959 | 0.43819  | 0.038265 | 0.40937  | 0.049283 |
| 0.05942  | 0.19992  | 0.031401 | 0.49845  | 0.064036 | 0.16711  | -0.00477 | 0.91811  | 0.016607 |
| 0.108384 | 0.01914  | 0.135087 | 0.00345  | 0.128001 | 0.0056   | 0.111059 | 0.01635  | 0.11581  |
| 0.005963 | 0.89774  | 0.08408  | 0.06947  | 0.04636  | 0.31745  | 0.081504 | 0.07849  | 0.109577 |
| 0.197049 | 1.80E-05 | 0.184592 | 6.00E-05 | 0.184696 | 5.94E-05 | 0.125808 | 0.00648  | 0.245421 |
| 0.169683 | 0.00023  | 0.16593  | 0.00032  | 0.161097 | 0.00047  | 0.115756 | 0.01231  | 0.114195 |
| -0.04807 | 0.29987  | -0.03044 | 0.51169  | -0.00217 | 0.96262  | -0.06216 | 0.17992  | -0.05514 |
| -0.06948 | 0.13383  | -0.19235 | 2.85E-05 | -0.12165 | 0.0085   | -0.19651 | 1.90E-05 | -0.31558 |
| 0.008784 | 0.84985  | -0.00914 | 0.84385  | 0.005884 | 0.89909  | -0.01974 | 0.6705   | -0.00392 |
| 0.026847 | 0.56279  | 0.035852 | 0.43956  | 0.009301 | 0.84112  | 0.045628 | 0.32516  | 0.037452 |
| 0.045196 | 0.32977  | 0.064256 | 0.16566  | 0.055039 | 0.23519  | 0.04772  | 0.30345  | 0.070388 |
| -0.06638 | 0.15209  | -0.05323 | 0.25099  | -0.04899 | 0.2907   | -0.04213 | 0.36371  | -0.09811 |
| -0.04744 | 0.30632  | 0.020907 | 0.65225  | 0.0208   | 0.65392  | 0.000417 | 0.99282  | -0.07529 |
| -0.06562 | 0.15683  | -0.05252 | 0.25732  | -0.06922 | 0.13526  | -0.03275 | 0.48023  | -0.06406 |
| 0.275896 | 1.33E-09 | 0.117326 | 0.01117  | 0.179519 | 9.59E-05 | 0.029463 | 0.52534  | 0.021019 |
| -0.01712 | 0.71216  | 0.074736 | 0.10675  | 0.025814 | 0.57791  | 0.091449 | 0.04826  | 0.061622 |
| 0.050491 | 0.2762   | 0.034835 | 0.45265  | 0.058315 | 0.20843  | -0.00098 | 0.9832   | 0.007189 |
| 0.16587  | 0.00032  | 0.223763 | 1.04E-06 | 0.184438 | 6.08E-05 | 0.193551 | 2.54E-05 | 0.311787 |
| 0.024388 | 0.5991   | 0.093046 | 0.04446  | 0.062943 | 0.1745   | 0.082987 | 0.07319  | 0.252932 |
| -0.01815 | 0.69569  | -0.03932 | 0.39659  | -0.05456 | 0.23929  | -0.02004 | 0.6658   | -0.05407 |
| 0.004491 | 0.9229   | -0.09221 | 0.04642  | -0.03495 | 0.45113  | -0.0996  | 0.0314   | -0.1237  |
| 0.096504 | 0.03709  | 0.082306 | 0.07558  | 0.121957 | 0.00833  | 0.032638 | 0.48167  | 0.029293 |
| -0.05119 | 0.26964  | -0.00702 | 0.87967  | -0.02068 | 0.65574  | -0.00786 | 0.86553  | 0.118705 |
| 0.216742 | 2.27E-06 | 0.226979 | 7.17E-07 | 0.219007 | 1.77E-06 | 0.188365 | 4.20E-05 | 0.105911 |
| -0.10973 | 0.01768  | -0.05823 | 0.20913  | -0.06656 | 0.15096  | -0.04074 | 0.37977  | -0.0907  |
| -0.00714 | 0.87777  | 0.012818 | 0.78235  | 0.024303 | 0.60038  | -0.01353 | 0.7706   | 0.077835 |
| -0.00039 | 0.99333  | -0.08185 | 0.07724  | -0.00331 | 0.9432   | -0.11424 | 0.0135   | -0.25033 |
| -0.06488 | 0.16157  | -0.17513 | 0.00014  | -0.16244 | 0.00042  | -0.13195 | 0.00429  | -0.31553 |

|          |          |          |          |          |          |          |          |          |
|----------|----------|----------|----------|----------|----------|----------|----------|----------|
| 0.008302 | 0.85799  | -0.01163 | 0.80213  | 0.016283 | 0.72562  | -0.02779 | 0.5492   | -0.01262 |
| -0.0919  | 0.04717  | -0.08938 | 0.05357  | -0.06999 | 0.13097  | -0.08474 | 0.06732  | -0.24881 |
| 0.034745 | 0.45382  | 0.025493 | 0.58265  | 0.027306 | 0.55611  | 0.010951 | 0.81342  | 0.098888 |
| -0.01101 | 0.81245  | -0.0845  | 0.06809  | -0.00717 | 0.87726  | -0.12066 | 0.00905  | -0.08764 |
| -0.00062 | 0.98937  | 0.022808 | 0.62299  | 0.030633 | 0.50902  | 0.004933 | 0.91534  | 0.142145 |
| 0.019666 | 0.67165  | 0.050794 | 0.27332  | 0.053168 | 0.25151  | 0.024298 | 0.60045  | 0.002441 |
| 0.075444 | 0.10346  | 0.006    | 0.89711  | 0.025037 | 0.58942  | -0.00671 | 0.885    | -0.00249 |
| 0.009785 | 0.83297  | 0.042949 | 0.35441  | 0.003813 | 0.93451  | 0.077963 | 0.09241  | 0.096934 |
| -0.037   | 0.42508  | -0.01129 | 0.80776  | -0.02709 | 0.55926  | 0.018046 | 0.6973   | 0.015942 |
| 0.067787 | 0.14357  | 0.100455 | 0.02997  | 0.069623 | 0.13301  | 0.101523 | 0.02826  | 0.171905 |
| 0.09521  | 0.03972  | 0.09233  | 0.04613  | 0.099888 | 0.03091  | 0.063026 | 0.17392  | 0.067343 |
| 0.026864 | 0.56253  | -0.09291 | 0.04478  | -0.02275 | 0.6239   | -0.10024 | 0.03032  | -0.23174 |
| 0.066376 | 0.15211  | 0.024796 | 0.593    | 0.038186 | 0.41034  | 0.006513 | 0.88836  | -0.01937 |
| 0.163027 | 0.0004   | 0.061955 | 0.18137  | 0.063261 | 0.17232  | 0.043121 | 0.35248  | 0.013707 |
| 0.044773 | 0.33433  | 0.013218 | 0.77572  | 0.011588 | 0.80277  | -0.00128 | 0.97797  | -0.03892 |
| 0.007242 | 0.87596  | -0.02902 | 0.53157  | -0.01485 | 0.74892  | -0.02035 | 0.66087  | -0.05013 |
| 0.025766 | 0.57861  | 0.00425  | 0.92702  | 0.000767 | 0.98681  | 0.01327  | 0.77486  | 0.009011 |
| 0.103531 | 0.02526  | 0.140835 | 0.00228  | 0.102318 | 0.02704  | 0.159644 | 0.00053  | 0.040838 |
| 0.270229 | 2.94E-09 | 0.150784 | 0.00108  | 0.146358 | 0.00152  | 0.137057 | 0.003    | 0.07058  |
| 0.056088 | 0.22637  | 0.018629 | 0.68803  | 0.011495 | 0.80432  | 0.018309 | 0.69312  | 0.094267 |
| 0.216845 | 2.25E-06 | 0.195601 | 2.07E-05 | 0.227093 | 7.07E-07 | 0.105458 | 0.02265  | 0.255044 |
| 0.050134 | 0.27962  | 0.073796 | 0.11124  | 0.085453 | 0.06503  | 0.057931 | 0.21145  | 0.073361 |
| 0.022833 | 0.6226   | 0.018405 | 0.69158  | 0.054083 | 0.24342  | -0.04286 | 0.35543  | -0.02536 |
| 0.019753 | 0.67027  | 0.068662 | 0.13846  | 0.044689 | 0.33523  | 0.079135 | 0.0876   | 0.093288 |
| 0.047003 | 0.31079  | 0.006083 | 0.89569  | 0.052764 | 0.25513  | -0.03979 | 0.39093  | 0.008905 |
| -0.01493 | 0.74762  | 0.000292 | 0.99498  | 0.006788 | 0.88368  | 0.000716 | 0.98768  | 0.016717 |
| -0.03325 | 0.47344  | -0.08846 | 0.05611  | -0.06074 | 0.19011  | -0.09819 | 0.03389  | -0.11785 |
| 0.200965 | 1.21E-05 | 0.121627 | 0.00851  | 0.119604 | 0.00968  | 0.090361 | 0.051    | 0.215669 |
| 0.169579 | 0.00023  | 0.248611 | 5.21E-08 | 0.151183 | 0.00105  | 0.296495 | 6.25E-11 | 0.199237 |
| 0.046317 | 0.3179   | 0.103777 | 0.02492  | 0.070647 | 0.12738  | 0.098014 | 0.03422  | 0.013521 |
| 0.176895 | 0.00012  | 0.122863 | 0.00786  | 0.173667 | 0.00016  | 0.032088 | 0.4891   | 0.106837 |
| 0.070803 | 0.12654  | 0.05798  | 0.21106  | 0.058065 | 0.21039  | 0.055518 | 0.23113  | 0.025391 |
| 0.245857 | 7.38E-08 | 0.339155 | 4.92E-14 | 0.300159 | 3.53E-11 | 0.277193 | 1.10E-09 | 0.171455 |
| 0.106062 | 0.02189  | 0.037136 | 0.42334  | 0.035289 | 0.44679  | 0.038677 | 0.40435  | 0.024734 |
| 0.051908 | 0.26293  | -0.00035 | 0.994    | 0.051534 | 0.26639  | -0.04649 | 0.31609  | 0.055595 |
| 0.113307 | 0.01429  | 0.147077 | 0.00144  | 0.091672 | 0.04771  | 0.160998 | 0.00048  | 0.145145 |
| 0.006283 | 0.89228  | -0.00315 | 0.9458   | -0.00471 | 0.91915  | -0.00516 | 0.91143  | -0.00051 |
| 0.050969 | 0.27168  | 0.088507 | 0.05597  | 0.060657 | 0.1907   | 0.082245 | 0.0758   | 0.134459 |
| 0.007415 | 0.87302  | 0.027912 | 0.54739  | 0.000962 | 0.98346  | 0.035359 | 0.44588  | 0.02169  |
| 0.03721  | 0.42241  | 0.04102  | 0.37646  | 0.078881 | 0.08862  | -0.00495 | 0.91504  | 0.064156 |
| 0.262771 | 8.17E-09 | 0.233652 | 3.28E-07 | 0.211499 | 4.02E-06 | 0.191568 | 3.08E-05 | 0.161817 |
| 0.034761 | 0.45362  | 0.047868 | 0.30195  | 0.023298 | 0.61554  | 0.090118 | 0.05163  | -0.00406 |
| 0.056699 | 0.22134  | 0.082068 | 0.07644  | 0.066383 | 0.15207  | 0.067084 | 0.14777  | 0.083816 |
| 0.019142 | 0.67991  | 0.087624 | 0.05847  | 0.052801 | 0.2548   | 0.095616 | 0.03888  | 0.065722 |
| 0.02771  | 0.55029  | 0.066946 | 0.14861  | 0.027988 | 0.5463   | 0.084648 | 0.0676   | 0.200549 |

|          |          |          |          |          |          |           |          |          |
|----------|----------|----------|----------|----------|----------|-----------|----------|----------|
| 0.137006 | 0.00301  | 0.141837 | 0.00212  | 0.132321 | 0.00418  | 0.104376  | 0.02409  | 0.101443 |
| 0.162503 | 0.00042  | 0.07905  | 0.08794  | 0.102294 | 0.02707  | 0.045317  | 0.32848  | 0.004858 |
| 0.021853 | 0.63761  | -0.02663 | 0.56599  | -0.01562 | 0.7364   | 0.005794  | 0.90063  | 0.028026 |
| 0.028872 | 0.53369  | -0.07078 | 0.12666  | 0.033054 | 0.4761   | -0.14031  | 0.00237  | -0.23091 |
| 0.169859 | 0.00023  | 0.209998 | 4.72E-06 | 0.217787 | 2.02E-06 | 0.159593  | 0.00054  | 0.191199 |
| 0.081433 | 0.07875  | 0.116808 | 0.01153  | 0.075057 | 0.10525  | 0.12241   | 0.00809  | 0.143125 |
| 0.040954 | 0.37722  | -0.02766 | 0.55094  | 0.045969 | 0.32156  | -0.08303  | 0.07303  | -0.11853 |
| -0.01817 | 0.69532  | 0.025818 | 0.57785  | -0.00612 | 0.89512  | 0.044998  | 0.33189  | 0.069912 |
| -0.12982 | 0.00496  | -0.18487 | 5.84E-05 | -0.15476 | 0.00079  | -0.15581  | 0.00073  | -0.2685  |
| -0.04765 | 0.30414  | -0.04701 | 0.31071  | -0.02826 | 0.54236  | -0.05681  | 0.22047  | -0.11285 |
| 0.134456 | 0.0036   | 0.068064 | 0.14193  | 0.0602   | 0.19408  | 0.066793  | 0.14954  | 0.135842 |
| 0.048767 | 0.29295  | 0.105832 | 0.02218  | 0.052302 | 0.25932  | 0.143268  | 0.00191  | 0.065625 |
| 0.250136 | 4.29E-08 | 0.276419 | 1.23E-09 | 0.278402 | 9.26E-10 | 0.181084  | 8.31E-05 | 0.247903 |
| -0.14971 | 0.00118  | -0.10177 | 0.02787  | -0.11937 | 0.00982  | -0.07938  | 0.08662  | -0.02134 |
| 0.047862 | 0.30201  | 0.064259 | 0.16564  | 0.052327 | 0.2591   | 0.041934  | 0.3659   | 0.161591 |
| 0.063703 | 0.16933  | 0.033359 | 0.47204  | 0.067134 | 0.14747  | 0.010645  | 0.81853  | -0.00486 |
| 0.054237 | 0.24209  | 0.001095 | 0.98116  | 0.00382  | 0.93439  | -0.00307  | 0.94719  | -0.15859 |
| -0.03383 | 0.46577  | -0.03847 | 0.40682  | -0.04364 | 0.34671  | -0.02086  | 0.65293  | 0.047618 |
| 0.046996 | 0.31085  | 0.019838 | 0.66894  | 0.049925 | 0.28163  | 0.004869  | 0.91643  | -0.06119 |
| 0.243285 | 1.02E-07 | 0.304668 | 1.73E-11 | 0.314027 | 3.80E-12 | 0.194919  | 2.22E-05 | 0.173113 |
| -0.00589 | 0.89899  | -0.04578 | 0.32358  | -0.02601 | 0.57503  | -0.05283  | 0.25454  | 0.010834 |
| -0.04907 | 0.28997  | -0.06343 | 0.17116  | -0.02517 | 0.58737  | -0.08977  | 0.05254  | -0.04723 |
| -0.04857 | 0.29486  | -0.00309 | 0.94695  | -0.00756 | 0.87051  | -0.00596  | 0.89782  | -0.04948 |
| 0.28225  | 5.30E-10 | 0.157181 | 0.00065  | 0.139051 | 0.0026   | 0.162725  | 0.00041  | 0.079665 |
| 0.100159 | 0.03046  | 0.066591 | 0.15078  | 0.055649 | 0.23002  | 0.067627  | 0.14452  | 0.039262 |
| 0.089167 | 0.05415  | 0.120669 | 0.00905  | 0.119337 | 0.00985  | 0.089998  | 0.05194  | 0.112698 |
| -0.015   | 0.74651  | -0.0364  | 0.43255  | 0.000387 | 0.99334  | -0.04819  | 0.29868  | -0.07326 |
| -0.00361 | 0.93798  | -0.0365  | 0.43134  | 0.020609 | 0.65688  | -0.0698   | 0.132    | -0.11322 |
| 0.068886 | 0.13717  | -0.05181 | 0.26379  | 0.030022 | 0.51751  | -0.0817   | 0.07778  | -0.23768 |
| -0.11108 | 0.01633  | -0.17588 | 0.00013  | -0.13025 | 0.00482  | -0.17158  | 0.00019  | -0.22676 |
| 0.080139 | 0.08364  | 0.054549 | 0.23938  | 0.128866 | 0.00529  | -0.03355  | 0.46953  | -0.04092 |
| 0.056779 | 0.22069  | 2.62E-05 | 0.99955  | 0.034492 | 0.45711  | -0.01204  | 0.79519  | -0.01036 |
| 0.144337 | 0.00176  | 0.092772 | 0.0451   | 0.132008 | 0.00427  | 0.060455  | 0.19219  | 0.006209 |
| -0.04459 | 0.33629  | -0.02637 | 0.5698   | -0.03135 | 0.49915  | -0.00468  | 0.91968  | 0.015218 |
| 0.229158 | 5.57E-07 | 0.159731 | 0.00053  | 0.221608 | 1.32E-06 | 0.064174  | 0.1662   | 0.051572 |
| 0.167025 | 0.00029  | 0.130032 | 0.00489  | 0.133164 | 0.00394  | 0.105604  | 0.02247  | 0.172351 |
| -0.08691 | 0.06055  | -0.07562 | 0.10265  | -0.08339 | 0.07179  | -0.0491   | 0.28967  | -0.08819 |
| 0.061089 | 0.18756  | -0.01174 | 0.80018  | 0.004842 | 0.91689  | -0.01319  | 0.77618  | 0.00475  |
| 0.264789 | 6.22E-09 | 0.183167 | 6.85E-05 | 0.139462 | 0.00252  | 0.211813  | 3.88E-06 | 0.171946 |
| 0.10903  | 0.01843  | 0.049489 | 0.28586  | 0.03693  | 0.42591  | 0.066509  | 0.15128  | 0.016438 |
| 0.293369 | 1.01E-10 | 0.309882 | 7.49E-12 | 0.322421 | 9.30E-13 | 0.195099  | 2.18E-05 | 0.226265 |
| 0.18372  | 6.51E-05 | 0.133276 | 0.00391  | 0.132984 | 0.00399  | 0.085943  | 0.0635   | 0.052895 |
| 0.03769  | 0.41645  | 0.059937 | 0.19603  | 0.036528 | 0.43098  | 0.052659  | 0.25607  | 0.163341 |
| 0.030964 | 0.50444  | 0.037983 | 0.41283  | 0.024035 | 0.6044   | 0.041338  | 0.37276  | -0.00841 |
| 0.013768 | 0.76666  | -0.00017 | 0.99703  | 0.016136 | 0.728    | -7.73E-05 | 0.99867  | -0.05544 |

|          |          |          |          |          |          |          |          |           |
|----------|----------|----------|----------|----------|----------|----------|----------|-----------|
| 0.151522 | 0.00102  | 0.27515  | 1.47E-09 | 0.196276 | 1.94E-05 | 0.262565 | 8.40E-09 | 0.312469  |
| -0.04064 | 0.38094  | -0.0408  | 0.37901  | 0.016474 | 0.72253  | -0.0863  | 0.0624   | -0.11502  |
| 0.084291 | 0.06877  | 0.027357 | 0.55538  | 0.009935 | 0.83045  | 0.041349 | 0.37264  | 0.025998  |
| 0.04936  | 0.28711  | 0.042254 | 0.36225  | 0.039492 | 0.39451  | 0.040138 | 0.38682  | 0.048402  |
| 0.049244 | 0.28825  | 0.003179 | 0.94537  | 0.030175 | 0.51537  | -0.0391  | 0.39923  | -0.00116  |
| 0.256339 | 1.92E-08 | 0.144051 | 0.0018   | 0.197478 | 1.72E-05 | 0.069387 | 0.13433  | 0.047202  |
| -0.09856 | 0.03322  | -0.04998 | 0.28108  | -0.06257 | 0.17705  | -0.02868 | 0.53642  | -0.10531  |
| -0.00151 | 0.97398  | 0.099478 | 0.03161  | 0.02259  | 0.62631  | 0.135519 | 0.00334  | 0.123961  |
| -0.02075 | 0.65474  | -0.00923 | 0.84225  | -0.01636 | 0.72431  | -0.00522 | 0.91037  | -0.01717  |
| -0.01373 | 0.7672   | -0.02302 | 0.61972  | 0.009134 | 0.84393  | -0.03768 | 0.4166   | -0.07447  |
| 0.037088 | 0.42394  | -0.00199 | 0.96574  | 0.002846 | 0.9511   | -0.02253 | 0.62728  | 0.046316  |
| -0.00199 | 0.96571  | -0.05974 | 0.19751  | -0.03001 | 0.51764  | -0.07217 | 0.11936  | -0.05839  |
| 0.064084 | 0.16679  | -0.04465 | 0.33567  | 0.057924 | 0.21151  | -0.12036 | 0.00923  | -0.14373  |
| 0.038908 | 0.40155  | 0.108178 | 0.01937  | 0.077764 | 0.09324  | 0.087934 | 0.05758  | 0.191402  |
| -0.02329 | 0.61562  | -0.00477 | 0.91819  | -0.01149 | 0.80433  | -0.00401 | 0.93113  | -0.00834  |
| 0.095858 | 0.03839  | 0.063962 | 0.16761  | 0.090096 | 0.05169  | 0.02049  | 0.65874  | -0.02384  |
| 0.080062 | 0.08394  | 0.005079 | 0.91284  | 0.060834 | 0.18941  | -0.02345 | 0.61327  | -0.01901  |
| -0.02616 | 0.57276  | 0.005617 | 0.90365  | -0.01137 | 0.80639  | 0.010347 | 0.82353  | 0.11541   |
| -0.0163  | 0.72534  | -0.03273 | 0.48048  | -0.00652 | 0.88817  | -0.04878 | 0.29286  | -0.06282  |
| 0.079496 | 0.08616  | 0.155175 | 0.00077  | 0.089621 | 0.05294  | 0.152481 | 0.00095  | 0.241861  |
| 0.035157 | 0.44848  | 0.043059 | 0.35317  | 0.061833 | 0.18223  | 0.018651 | 0.68769  | 0.01022   |
| 0.104313 | 0.02417  | 0.180037 | 9.15E-05 | 0.088031 | 0.05731  | 0.236304 | 2.39E-07 | 0.158898  |
| 0.066783 | 0.14961  | 0.020151 | 0.66404  | 0.09101  | 0.04935  | -0.03328 | 0.47314  | -0.03823  |
| 0.162627 | 0.00042  | 0.308468 | 9.42E-12 | 0.208737 | 5.39E-06 | 0.318389 | 1.84E-12 | 0.258227  |
| 0.019923 | 0.66761  | 0.104342 | 0.02414  | 0.068433 | 0.13978  | 0.092756 | 0.04513  | 0.115279  |
| -0.0293  | 0.52768  | 0.094057 | 0.04219  | 0.036433 | 0.43218  | 0.082487 | 0.07494  | 0.249054  |
| 0.08755  | 0.05869  | 0.165625 | 0.00033  | 0.092137 | 0.04659  | 0.199208 | 1.44E-05 | 0.097807  |
| 0.098682 | 0.033    | 0.147617 | 0.00138  | 0.105311 | 0.02284  | 0.124974 | 0.00685  | 0.273099  |
| -0.02574 | 0.57904  | -0.064   | 0.16733  | -0.05993 | 0.19609  | -0.0536  | 0.24762  | -0.03519  |
| -0.03267 | 0.48119  | -0.0715  | 0.12285  | -0.05593 | 0.22765  | -0.07565 | 0.10253  | -0.07637  |
| 0.046825 | 0.31262  | 0.0336   | 0.46885  | 0.024682 | 0.59471  | 0.027529 | 0.5529   | 0.010675  |
| 0.005794 | 0.90063  | 0.116689 | 0.01162  | 0.042409 | 0.3605   | 0.140254 | 0.00238  | 0.178522  |
| 0.150373 | 0.00112  | 0.232704 | 3.67E-07 | 0.214143 | 3.02E-06 | 0.175323 | 0.00014  | 0.255381  |
| 0.037114 | 0.42362  | 0.092102 | 0.04668  | 0.070015 | 0.13083  | 0.083431 | 0.07166  | 0.151947  |
| 0.046448 | 0.31653  | 0.045698 | 0.32442  | 0.080736 | 0.08135  | 0.004417 | 0.92416  | -0.0076   |
| 0.050411 | 0.27696  | 0.069336 | 0.13462  | 0.058824 | 0.20448  | 0.067597 | 0.14469  | 0.017441  |
| 0.029161 | 0.52959  | 0.00269  | 0.95377  | 0.042284 | 0.36191  | -0.04218 | 0.36305  | -5.53E-05 |
| 0.218493 | 1.87E-06 | 0.307818 | 1.05E-11 | 0.312998 | 4.50E-12 | 0.199193 | 1.45E-05 | 0.285936  |
| 0.137233 | 0.00296  | 0.113135 | 0.01444  | 0.132311 | 0.00418  | 0.074499 | 0.10787  | 0.100957  |
| 0.254423 | 2.47E-08 | 0.194424 | 2.33E-05 | 0.176313 | 0.00013  | 0.144611 | 0.00173  | 0.318259  |
| -0.01991 | 0.6678   | 0.035499 | 0.44407  | -0.01335 | 0.77363  | 0.052868 | 0.2542   | 0.126037  |
| 0.131955 | 0.00428  | -0.07358 | 0.11229  | 0.017164 | 0.71142  | -0.1193  | 0.00987  | -0.17094  |
| 0.117178 | 0.01127  | 0.166766 | 0.0003   | 0.167354 | 0.00028  | 0.10683  | 0.02094  | 0.070986  |
| -0.02246 | 0.62825  | 0.008287 | 0.85824  | 0.009384 | 0.83973  | -0.00386 | 0.93373  | 0.067802  |
| 0.015565 | 0.73727  | -0.06441 | 0.16465  | 0.024102 | 0.60339  | -0.12172 | 0.00846  | -0.11926  |

|          |          |          |          |          |          |          |          |          |
|----------|----------|----------|----------|----------|----------|----------|----------|----------|
| 0.311565 | 5.69E-12 | 0.252007 | 3.38E-08 | 0.268757 | 3.61E-09 | 0.161841 | 0.00045  | 0.148713 |
| 0.018776 | 0.6857   | 0.014196 | 0.75963  | 0.008047 | 0.8623   | 0.031922 | 0.49135  | 0.062926 |
| 0.116745 | 0.01158  | 0.248235 | 5.47E-08 | 0.18312  | 6.88E-05 | 0.236721 | 2.27E-07 | 0.176565 |
| 0.19971  | 1.37E-05 | 0.117968 | 0.01073  | 0.185774 | 5.37E-05 | 0.008969 | 0.84671  | 0.089887 |
| -0.02711 | 0.55901  | -0.06748 | 0.14542  | -0.04075 | 0.37962  | -0.04787 | 0.30194  | -0.11825 |
| 0.231942 | 4.02E-07 | 0.107325 | 0.02035  | 0.155443 | 0.00075  | 0.04272  | 0.35698  | 0.038517 |
| 0.116785 | 0.01155  | 0.174773 | 0.00015  | 0.131057 | 0.00456  | 0.171616 | 0.00019  | 0.198943 |
| -0.02945 | 0.52556  | -0.08007 | 0.08392  | -0.01154 | 0.80359  | -0.11631 | 0.0119   | -0.24799 |
| -0.03497 | 0.45084  | -0.0217  | 0.63996  | -0.01507 | 0.74526  | -0.0258  | 0.57813  | -0.00679 |
| 0.200329 | 1.29E-05 | 0.251883 | 3.43E-08 | 0.185068 | 5.74E-05 | 0.228586 | 5.95E-07 | 0.212959 |
| 0.011242 | 0.80854  | -0.0032  | 0.94499  | 0.009344 | 0.84039  | -0.01881 | 0.68516  | -0.03439 |
| -0.04029 | 0.38506  | -0.02191 | 0.63678  | -0.01704 | 0.71342  | -0.02459 | 0.59614  | -0.03949 |
| 0.17948  | 9.62E-05 | 0.139956 | 0.00243  | 0.12889  | 0.00528  | 0.116764 | 0.01156  | 0.153831 |
| -0.00351 | 0.93966  | -0.00317 | 0.94551  | -0.00111 | 0.981    | -0.00517 | 0.91135  | 0.033462 |
| 0.04015  | 0.38668  | 0.080321 | 0.08294  | 0.074005 | 0.11023  | 0.072894 | 0.11569  | 0.042776 |
| -0.02266 | 0.6252   | -0.04659 | 0.31506  | -0.0218  | 0.63846  | -0.06778 | 0.14358  | -0.12867 |
| 0.065278 | 0.15901  | -0.03921 | 0.39788  | -0.00822 | 0.85941  | -0.06269 | 0.17625  | 0.017901 |
| -0.03591 | 0.43885  | -0.02167 | 0.64039  | -0.01182 | 0.79883  | -0.04934 | 0.28733  | 0.037318 |
| 0.0763   | 0.09959  | 0.055223 | 0.23362  | 0.066319 | 0.15246  | 0.037184 | 0.42274  | 0.036885 |
| 0.078081 | 0.09191  | 0.041195 | 0.37442  | 0.078739 | 0.0892   | -0.00877 | 0.85005  | -0.00521 |
| 0.244793 | 8.43E-08 | 0.143213 | 0.00192  | 0.195174 | 2.16E-05 | 0.058707 | 0.20539  | 0.067418 |
| 0.231764 | 4.10E-07 | 0.144224 | 0.00178  | 0.171555 | 0.0002   | 0.093917 | 0.0425   | 0.152635 |
| 0.10451  | 0.02391  | 0.129214 | 0.00516  | 0.09555  | 0.03901  | 0.132305 | 0.00418  | 0.301832 |
| 0.253251 | 2.88E-08 | 0.226486 | 7.59E-07 | 0.268313 | 3.84E-09 | 0.120197 | 0.00932  | 0.10075  |
| 0.161925 | 0.00044  | 0.161857 | 0.00045  | 0.246052 | 7.20E-08 | 0.011297 | 0.80763  | 0.04248  |
| 0.231277 | 4.34E-07 | 0.138275 | 0.00275  | 0.113748 | 0.01391  | 0.116689 | 0.01162  | 0.175932 |
| 0.198286 | 1.59E-05 | 0.049468 | 0.28606  | 0.131219 | 0.00451  | -0.02044 | 0.65959  | -0.00367 |
| -0.00817 | 0.86027  | -0.08432 | 0.06867  | -0.00902 | 0.84592  | -0.12396 | 0.00732  | -0.08997 |
| 0.213213 | 3.34E-06 | 0.154702 | 0.0008   | 0.169011 | 0.00024  | 0.07991  | 0.08453  | 0.120432 |
| 0.165819 | 0.00032  | 0.125389 | 0.00666  | 0.153985 | 0.00084  | 0.056762 | 0.22083  | 0.053955 |
| 0.041854 | 0.36682  | 0.009654 | 0.83517  | 0.020234 | 0.66275  | -0.00051 | 0.99129  | -0.03428 |
| -0.01611 | 0.72847  | -0.00616 | 0.89431  | -0.01258 | 0.78625  | -0.0014  | 0.9759   | -0.01745 |
| 0.293901 | 9.30E-11 | 0.189802 | 3.66E-05 | 0.260571 | 1.10E-08 | 0.070032 | 0.13074  | 0.06958  |
| 0.144883 | 0.00169  | 0.124487 | 0.00707  | 0.1426   | 0.00201  | 0.080911 | 0.08069  | 0.149247 |
| -0.00609 | 0.89563  | 0.045441 | 0.32715  | 0.011221 | 0.8089   | 0.035263 | 0.44712  | 0.065073 |
| 0.096604 | 0.0369   | 0.153536 | 0.00087  | 0.141708 | 0.00214  | 0.113385 | 0.01422  | 0.086003 |
| 0.146661 | 0.00148  | 0.209958 | 4.74E-06 | 0.206225 | 7.02E-06 | 0.134158 | 0.00368  | 0.299039 |
| 0.174353 | 0.00015  | 0.310326 | 6.97E-12 | 0.181791 | 7.78E-05 | 0.332819 | 1.53E-13 | 0.281617 |
| 0.105355 | 0.02279  | 0.129651 | 0.00501  | 0.135798 | 0.00328  | 0.083439 | 0.07163  | 0.159403 |
| 0.06246  | 0.17783  | 0.034336 | 0.45915  | 0.063281 | 0.17219  | 0.007518 | 0.87128  | -0.01579 |
| 0.031076 | 0.50291  | 0.032033 | 0.48984  | 0.022141 | 0.63318  | 0.018527 | 0.68965  | 0.003696 |
| 0.018928 | 0.6833   | 0.029821 | 0.52032  | 0.023711 | 0.60929  | 0.013826 | 0.7657   | 0.042915 |
| 0.107808 | 0.01979  | 0.023807 | 0.60784  | 0.028958 | 0.53246  | 0.029972 | 0.5182   | 0.001961 |
| 0.163078 | 0.0004   | 0.112119 | 0.01535  | 0.22482  | 9.18E-07 | -0.00826 | 0.85875  | 0.007948 |
| 0.105614 | 0.02245  | 0.082256 | 0.07576  | 0.117396 | 0.01112  | 0.049084 | 0.28983  | 0.008107 |



|          |          |          |          |          |          |          |          |          |
|----------|----------|----------|----------|----------|----------|----------|----------|----------|
| 0.037531 | 0.41842  | 0.015866 | 0.73238  | 0.021021 | 0.65048  | -0.00135 | 0.97683  | 0.03455  |
| 0.094483 | 0.04126  | 0.048791 | 0.29271  | 0.034632 | 0.4553   | 0.051965 | 0.26241  | 0.034103 |
| 0.139373 | 0.00254  | 0.057673 | 0.21349  | 0.107455 | 0.0202   | -0.00133 | 0.97719  | -0.02066 |
| 0.028916 | 0.53306  | -0.01937 | 0.67626  | -0.00126 | 0.97834  | -0.01191 | 0.79739  | -0.05747 |
| 0.021258 | 0.6468   | 0.1153   | 0.01266  | 0.057555 | 0.21443  | 0.134694 | 0.00354  | 0.260445 |
| 0.084616 | 0.06771  | -0.00334 | 0.94263  | 0.026475 | 0.5682   | -0.02513 | 0.588    | 0.016684 |
| 0.150961 | 0.00107  | 0.080278 | 0.0831   | 0.106414 | 0.02145  | 0.054981 | 0.23568  | 0.056778 |
| 0.052954 | 0.25342  | 0.024549 | 0.5967   | 0.046958 | 0.31125  | -0.00986 | 0.83167  | -0.05732 |
| -0.07982 | 0.08488  | -0.12264 | 0.00797  | -0.11136 | 0.01606  | -0.0937  | 0.04299  | -0.12635 |
| 0.113533 | 0.01409  | -0.01003 | 0.82889  | 0.065931 | 0.15488  | -0.06416 | 0.1663   | 0.011665 |
| 0.116386 | 0.01184  | 0.062196 | 0.17967  | 0.120102 | 0.00938  | -0.02105 | 0.65008  | 0.060006 |
| 0.019878 | 0.66832  | 0.047491 | 0.30579  | 0.018363 | 0.69225  | 0.051634 | 0.26547  | -0.00668 |
| 0.068428 | 0.13981  | 0.078489 | 0.09022  | 0.076259 | 0.09977  | 0.060393 | 0.19264  | 0.128167 |
| 0.062243 | 0.17934  | -0.02437 | 0.59933  | -0.0106  | 0.81921  | -0.01914 | 0.68     | -0.0169  |
| 0.041188 | 0.3745   | 0.027527 | 0.55292  | 0.044432 | 0.33803  | 0.003567 | 0.93872  | -0.01413 |
| 0.01515  | 0.74402  | 0.05998  | 0.19571  | 0.022893 | 0.62169  | 0.094724 | 0.04074  | 0.165162 |
| 0.052663 | 0.25605  | 0.024    | 0.60492  | 0.03564  | 0.44227  | 0.017966 | 0.69858  | 0.047591 |
| -0.04361 | 0.34707  | -0.09257 | 0.04557  | -0.07092 | 0.1259   | -0.09936 | 0.03181  | -0.16699 |
| 0.197653 | 1.69E-05 | 0.088198 | 0.05684  | 0.118755 | 0.01021  | 0.063136 | 0.17317  | 0.100763 |
| -0.02395 | 0.60565  | 0.040835 | 0.37861  | 0.025368 | 0.5845   | 0.02647  | 0.56828  | 0.08828  |
| 0.263543 | 7.36E-09 | 0.166998 | 0.00029  | 0.190917 | 3.28E-05 | 0.102317 | 0.02704  | 0.138998 |
| 0.103681 | 0.02505  | 0.074088 | 0.10983  | 0.092038 | 0.04683  | 0.028316 | 0.5416   | 0.002855 |
| 0.05198  | 0.26227  | 0.047428 | 0.30643  | 0.066379 | 0.15209  | 0.03526  | 0.44715  | 0.045861 |
| -0.00047 | 0.99186  | -0.02301 | 0.61993  | -0.00241 | 0.95862  | -0.0383  | 0.40898  | 0.00915  |
| 0.10798  | 0.01959  | 0.107263 | 0.02042  | 0.100464 | 0.02995  | 0.087281 | 0.05947  | 0.037934 |
| -0.01134 | 0.80696  | -0.03652 | 0.43111  | -0.03627 | 0.43422  | -0.04055 | 0.38193  | -0.01079 |
| 0.029481 | 0.52509  | 0.010035 | 0.82877  | 0.010716 | 0.81735  | 0.000638 | 0.98904  | 0.016793 |
| 0.109732 | 0.01769  | 0.143458 | 0.00188  | 0.126172 | 0.00633  | 0.134281 | 0.00365  | 0.119409 |
| 0.092497 | 0.04574  | 0.003573 | 0.93861  | 0.015052 | 0.74562  | -0.00983 | 0.83219  | 0.110378 |
| 0.107967 | 0.01961  | 0.107623 | 0.02     | 0.113667 | 0.01398  | 0.086018 | 0.06327  | 0.0824   |
| 0.167586 | 0.00028  | 0.236364 | 2.37E-07 | 0.197831 | 1.66E-05 | 0.208346 | 5.62E-06 | 0.258908 |
| 0.266719 | 4.78E-09 | 0.224567 | 9.45E-07 | 0.258867 | 1.38E-08 | 0.128195 | 0.00553  | 0.328525 |
| 0.003484 | 0.94014  | 0.030827 | 0.50634  | 0.025044 | 0.58931  | 0.030251 | 0.51432  | 0.0153   |
| 0.062348 | 0.17861  | -0.02045 | 0.65936  | 0.007191 | 0.87683  | -0.02551 | 0.58238  | -0.05815 |
| -0.08516 | 0.06594  | -0.06109 | 0.18755  | -0.09093 | 0.04954  | -0.02472 | 0.59406  | -0.13016 |
| -0.05966 | 0.19811  | -0.02799 | 0.54629  | -0.01712 | 0.71217  | -0.0434  | 0.34941  | -0.05978 |
| 0.0253   | 0.5855   | -0.05051 | 0.27606  | -0.00963 | 0.83561  | -0.05494 | 0.23602  | -0.14144 |
| 0.238428 | 1.85E-07 | 0.131512 | 0.00442  | 0.094071 | 0.04216  | 0.131591 | 0.00439  | 0.144393 |
| 0.046604 | 0.31491  | -0.04194 | 0.36586  | 0.015981 | 0.73051  | -0.07277 | 0.11632  | -0.08582 |
| 0.161266 | 0.00047  | 0.027775 | 0.54935  | 0.069128 | 0.13579  | -0.00149 | 0.97432  | -0.04867 |
| -0.07085 | 0.1263   | -0.143   | 0.00195  | -0.06781 | 0.14343  | -0.15621 | 0.00071  | -0.23424 |
| -0.05876 | 0.205    | 0.015762 | 0.73407  | -0.025   | 0.58992  | 0.026853 | 0.56269  | 0.058099 |
| -0.01197 | 0.79642  | 0.117267 | 0.01121  | 0.020314 | 0.66149  | 0.162319 | 0.00043  | 0.231805 |
| 0.290649 | 1.52E-10 | 0.145249 | 0.00165  | 0.267542 | 4.27E-09 | -0.00393 | 0.93241  | 0.040623 |
| -0.07435 | 0.10859  | -0.02027 | 0.66216  | -0.05462 | 0.23876  | 0.02388  | 0.60673  | 0.039266 |

|          |          |          |          |          |          |          |          |          |
|----------|----------|----------|----------|----------|----------|----------|----------|----------|
| 0.044954 | 0.33237  | 0.106323 | 0.02156  | 0.063281 | 0.17219  | 0.126399 | 0.00623  | 0.089429 |
| 0.019718 | 0.67083  | -0.00344 | 0.94089  | 0.045709 | 0.3243   | -0.03146 | 0.49771  | -0.02603 |
| 0.259316 | 1.30E-08 | 0.202884 | 9.93E-06 | 0.259211 | 1.32E-08 | 0.105008 | 0.02324  | 0.053512 |
| 0.15042  | 0.00111  | 0.05005  | 0.28043  | 0.087807 | 0.05795  | 0.001147 | 0.98028  | -0.0582  |
| 0.155943 | 0.00072  | 0.066851 | 0.14919  | 0.115956 | 0.01216  | 0.013887 | 0.7647   | 0.022269 |
| -0.00807 | 0.86194  | 0.048621 | 0.29441  | 0.006019 | 0.89678  | 0.057913 | 0.21159  | 0.319331 |
| -0.02377 | 0.60838  | 0.023161 | 0.6176   | 0.026382 | 0.56957  | 0.018646 | 0.68775  | 0.082592 |
| 0.017489 | 0.7062   | 0.066869 | 0.14908  | 0.042607 | 0.35825  | 0.067444 | 0.14561  | 0.093245 |
| 0.011418 | 0.80561  | -0.00894 | 0.84714  | 0.025921 | 0.57633  | -0.01313 | 0.7772   | -0.04056 |
| 0.05868  | 0.20559  | 0.054426 | 0.24045  | 0.067652 | 0.14437  | 0.021397 | 0.64466  | 0.01071  |
| 0.297306 | 5.51E-11 | 0.200832 | 1.23E-05 | 0.269133 | 3.43E-09 | 0.08052  | 0.08217  | 0.047673 |
| -0.03638 | 0.43286  | 0.011678 | 0.80127  | 0.015805 | 0.73336  | 0.005451 | 0.90648  | -0.02376 |
| -0.05428 | 0.24167  | -0.08106 | 0.08014  | -0.06888 | 0.13722  | -0.07986 | 0.08471  | -0.04073 |
| 0.030944 | 0.50472  | -0.12121 | 0.00874  | -0.02693 | 0.56151  | -0.16432 | 0.00036  | -0.16899 |
| 0.070191 | 0.12986  | 0.1013   | 0.02861  | 0.088819 | 0.05511  | 0.101041 | 0.02902  | 0.039461 |
| 0.043465 | 0.34865  | 0.02345  | 0.61323  | 0.039372 | 0.39594  | 0.001441 | 0.97522  | -0.00431 |
| 0.01312  | 0.77735  | 0.034876 | 0.45212  | 0.056021 | 0.22692  | -0.00057 | 0.99021  | 0.039674 |
| 0.013971 | 0.76332  | -0.01269 | 0.78445  | 0.022374 | 0.62961  | -0.04024 | 0.38557  | -0.10412 |
| 0.151355 | 0.00103  | 0.115507 | 0.0125   | 0.156583 | 0.00068  | 0.042746 | 0.35669  | 0.004763 |
| -0.01537 | 0.74046  | -0.00973 | 0.83397  | -0.01127 | 0.80801  | -0.01457 | 0.75355  | -0.01684 |
| 0.082867 | 0.07361  | 0.153902 | 0.00085  | 0.075255 | 0.10433  | 0.190428 | 3.44E-05 | 0.188495 |
| 0.222329 | 1.22E-06 | 0.248116 | 5.55E-08 | 0.188883 | 3.99E-05 | 0.236307 | 2.39E-07 | 0.303525 |
| -0.02055 | 0.65785  | -0.03068 | 0.50831  | -0.00511 | 0.91228  | -0.0321  | 0.48887  | -0.03514 |
| 0.009314 | 0.8409   | -0.08427 | 0.06883  | -0.03136 | 0.49904  | -0.09548 | 0.03916  | -0.16641 |
| 0.114729 | 0.01311  | 0.096971 | 0.03618  | 0.111193 | 0.01622  | 0.061083 | 0.1876   | 0.115295 |
| 0.01535  | 0.74076  | 0.009283 | 0.84141  | 0.002237 | 0.96155  | 0.015503 | 0.73827  | -0.03291 |
| -0.02494 | 0.59085  | -0.01579 | 0.73353  | -0.00348 | 0.94017  | -0.0216  | 0.64154  | -0.04983 |
| 0.164495 | 0.00036  | 0.261144 | 1.02E-08 | 0.200215 | 1.30E-05 | 0.218654 | 1.84E-06 | 0.200553 |
| 0.013033 | 0.77879  | 0.016303 | 0.7253   | 0.030968 | 0.50439  | -0.0104  | 0.8226   | -0.01298 |
| 0.132361 | 0.00417  | 0.072567 | 0.11734  | 0.075515 | 0.10313  | 0.038045 | 0.41208  | -0.03444 |
| 0.054778 | 0.23741  | 0.033837 | 0.46571  | 0.037614 | 0.41739  | 0.011894 | 0.79769  | 0.0059   |
| 0.097017 | 0.03609  | 0.046865 | 0.31221  | 0.055876 | 0.22813  | 0.030034 | 0.51734  | 0.088199 |
| -0.04753 | 0.30541  | -0.12775 | 0.0057   | -0.08818 | 0.05689  | -0.13737 | 0.00293  | -0.20532 |
| -0.0977  | 0.0348   | -0.14166 | 0.00215  | -0.06202 | 0.18092  | -0.16571 | 0.00032  | -0.21432 |
| -0.07762 | 0.09383  | 0.015989 | 0.73037  | -0.00785 | 0.86559  | 0.023173 | 0.61743  | 0.041702 |
| -0.06367 | 0.16956  | 0.018995 | 0.68223  | -0.02867 | 0.53659  | 0.037959 | 0.41313  | 0.075762 |
| -0.0405  | 0.38258  | 0.092774 | 0.04509  | 0.057392 | 0.21573  | 0.080445 | 0.08246  | 0.129233 |
| 0.110992 | 0.01641  | 0.094125 | 0.04204  | 0.049956 | 0.28133  | 0.107172 | 0.02053  | 0.051671 |
| 0.027011 | 0.56039  | 0.051271 | 0.26884  | 0.020984 | 0.65105  | 0.065151 | 0.15983  | 0.071589 |
| -0.08108 | 0.08005  | -0.11899 | 0.01006  | -0.04904 | 0.29024  | -0.15266 | 0.00093  | -0.22389 |
| 0.020617 | 0.65676  | -0.03449 | 0.45718  | 0.029585 | 0.52362  | -0.0525  | 0.25752  | -0.13989 |
| 0.06019  | 0.19415  | -0.02257 | 0.62666  | 0.038812 | 0.4027   | -0.06236 | 0.17851  | -0.05893 |
| -0.03276 | 0.48009  | -0.1652  | 0.00034  | -0.08791 | 0.05766  | -0.16971 | 0.00023  | -0.25983 |
| 0.015571 | 0.73716  | -0.03568 | 0.44181  | -0.05225 | 0.25978  | -0.01857 | 0.68892  | -0.07852 |
| 0.056017 | 0.22696  | 0.145133 | 0.00166  | 0.095964 | 0.03817  | 0.141864 | 0.00212  | 0.192576 |

|          |          |          |          |          |          |          |          |          |
|----------|----------|----------|----------|----------|----------|----------|----------|----------|
| 0.093561 | 0.04329  | 0.158604 | 0.00058  | 0.082074 | 0.07642  | 0.188039 | 4.33E-05 | 0.151051 |
| 0.067777 | 0.14362  | 0.064336 | 0.16513  | 0.070029 | 0.13075  | 0.051241 | 0.26912  | 0.012609 |
| 0.009147 | 0.84372  | 0.0077   | 0.8682   | 0.025283 | 0.58575  | 0.003002 | 0.94841  | 0.013289 |
| 0.051292 | 0.26864  | 0.102297 | 0.02707  | 0.075771 | 0.10197  | 0.108945 | 0.01852  | 0.148884 |
| 0.096804 | 0.0365   | 0.146471 | 0.0015   | 0.078281 | 0.09108  | 0.169839 | 0.00023  | 0.124668 |
| 0.083888 | 0.07012  | 0.168449 | 0.00026  | 0.133196 | 0.00393  | 0.123123 | 0.00773  | 0.213813 |
| 0.012752 | 0.78343  | -0.01417 | 0.76012  | -0.01029 | 0.82446  | -0.00521 | 0.91063  | 0.063968 |
| 0.284287 | 3.93E-10 | 0.117864 | 0.0108   | 0.12446  | 0.00708  | 0.085739 | 0.06413  | 0.086084 |
| 0.09042  | 0.05085  | 0.022652 | 0.62537  | 0.041537 | 0.37047  | 0.007847 | 0.8657   | -0.02041 |
| 0.144346 | 0.00176  | 0.295665 | 7.10E-11 | 0.165124 | 0.00034  | 0.336676 | 7.69E-14 | 0.266532 |
| 0.010023 | 0.82898  | 0.002822 | 0.95149  | -0.00304 | 0.94771  | -0.00273 | 0.95313  | -0.06702 |
| 0.066786 | 0.14959  | 0.067361 | 0.1461   | 0.065472 | 0.15777  | 0.040672 | 0.38052  | 0.084545 |
| 0.054077 | 0.24348  | 0.071196 | 0.12444  | 0.041755 | 0.36795  | 0.079226 | 0.08723  | 0.135613 |
| 0.078172 | 0.09153  | 0.010581 | 0.8196   | 0.06255  | 0.1772   | -0.00953 | 0.83734  | -0.01223 |
| 0.070451 | 0.12844  | 0.12062  | 0.00908  | 0.11504  | 0.01286  | 0.096097 | 0.0379   | 0.188364 |
| 0.017339 | 0.70862  | -0.18593 | 5.29E-05 | -0.0926  | 0.04549  | -0.18912 | 3.90E-05 | -0.29654 |
| -0.02335 | 0.61473  | -0.05774 | 0.213    | -0.02382 | 0.60763  | -0.06595 | 0.15475  | -0.02992 |
| -0.19294 | 2.70E-05 | -0.23913 | 1.70E-07 | -0.20411 | 8.75E-06 | -0.19499 | 2.20E-05 | -0.30083 |
| 0.108765 | 0.01872  | -0.02688 | 0.56226  | 0.006025 | 0.89668  | -0.03895 | 0.401    | -0.10287 |
| 0.03814  | 0.4109   | -0.00073 | 0.98744  | 0.044314 | 0.33931  | -0.03528 | 0.44694  | 0.10171  |
| 0.083146 | 0.07264  | 0.064917 | 0.16134  | 0.086459 | 0.06192  | 0.046312 | 0.31795  | 0.036936 |
| 0.05526  | 0.2333   | -0.0127  | 0.78427  | 0.050732 | 0.27392  | -0.06609 | 0.15388  | -0.09532 |
| 0.02747  | 0.55374  | 0.123304 | 0.00764  | 0.064369 | 0.16492  | 0.140365 | 0.00236  | 0.232021 |
| -0.04248 | 0.35968  | -0.01959 | 0.67281  | -0.02993 | 0.51883  | 0.002422 | 0.95837  | -0.08303 |
| 0.103727 | 0.02499  | 0.024282 | 0.60069  | 0.022036 | 0.6348   | 0.024122 | 0.6031   | 0.153112 |
| 0.05488  | 0.23654  | 0.102325 | 0.02703  | 0.114075 | 0.01364  | 0.082548 | 0.07473  | 0.07459  |
| 0.032745 | 0.48025  | 0.062136 | 0.18009  | 0.03334  | 0.47229  | 0.079897 | 0.08458  | 0.04909  |
| -0.02603 | 0.57475  | -0.01304 | 0.77869  | -0.01644 | 0.72315  | -0.01629 | 0.72547  | -0.00657 |
| 0.089842 | 0.05235  | 0.031193 | 0.50131  | 0.082776 | 0.07392  | -0.02755 | 0.55252  | 0.019115 |
| 0.192921 | 2.70E-05 | 0.158239 | 0.0006   | 0.154063 | 0.00084  | 0.109669 | 0.01775  | 0.047003 |
| -0.0712  | 0.12442  | -0.03273 | 0.48046  | -0.04487 | 0.33326  | -0.01422 | 0.7593   | -0.05372 |
| -0.05801 | 0.21085  | 0.0242   | 0.60192  | -0.01561 | 0.73657  | 0.039007 | 0.40035  | 0.028597 |
| -0.02377 | 0.60847  | 0.032559 | 0.48273  | 0.010677 | 0.81799  | 0.039035 | 0.4      | 0.018406 |
| -0.01984 | 0.66894  | 0.012608 | 0.78582  | 0.002248 | 0.96136  | 0.030019 | 0.51756  | -0.00857 |
| 0.065056 | 0.16044  | 0.026387 | 0.56949  | 0.024072 | 0.60384  | 0.034464 | 0.45748  | -0.0393  |
| 0.027975 | 0.54648  | 0.02329  | 0.61566  | 0.031029 | 0.50355  | 0.014753 | 0.7505   | -0.00737 |
| 0.067824 | 0.14335  | 0.02722  | 0.55737  | 0.050941 | 0.27194  | -0.00629 | 0.89224  | -0.01608 |
| 0.282957 | 4.78E-10 | 0.149256 | 0.00122  | 0.223248 | 1.10E-06 | 0.050805 | 0.27322  | 0.029497 |
| 0.381198 | 1.34E-17 | 0.244474 | 8.78E-08 | 0.347853 | 9.94E-15 | 0.086345 | 0.06226  | 0.045383 |
| 0.127693 | 0.00572  | 0.137212 | 0.00297  | 0.142048 | 0.00209  | 0.096917 | 0.03629  | 0.141571 |
| 0.211999 | 3.81E-06 | 0.144478 | 0.00175  | 0.187695 | 4.47E-05 | 0.062587 | 0.17695  | 0.051989 |
| 0.031768 | 0.49344  | 0.035071 | 0.4496   | 0.04979  | 0.28294  | 0.021226 | 0.6473   | 0.031985 |
| 0.013451 | 0.77188  | -0.03329 | 0.47292  | 0.005461 | 0.9063   | -0.06319 | 0.17281  | -0.02448 |
| 0.026168 | 0.5727   | -0.02825 | 0.54258  | -0.00874 | 0.85061  | -0.03713 | 0.42338  | -0.03371 |
| 0.055845 | 0.22839  | 0.150014 | 0.00115  | 0.07471  | 0.10687  | 0.176959 | 0.00012  | 0.239658 |

|          |          |          |          |          |          |          |          |          |
|----------|----------|----------|----------|----------|----------|----------|----------|----------|
| 0.075698 | 0.1023   | 0.01525  | 0.74238  | 0.034676 | 0.45471  | -0.00178 | 0.96947  | -0.07626 |
| 0.126978 | 0.006    | 0.11171  | 0.01573  | 0.119501 | 0.00974  | 0.074661 | 0.1071   | 0.148604 |
| 0.023019 | 0.61977  | 0.060441 | 0.19229  | 0.082786 | 0.07389  | 0.022489 | 0.62785  | -0.00991 |
| 0.009515 | 0.83752  | 0.049465 | 0.28609  | 0.025026 | 0.58957  | 0.065435 | 0.15801  | 0.011292 |
| 0.038126 | 0.41107  | 0.03587  | 0.43933  | 0.038397 | 0.40775  | 0.036495 | 0.43139  | 0.025667 |
| -0.03896 | 0.40094  | 0.017798 | 0.70125  | 0.000756 | 0.987    | 0.009234 | 0.84226  | 0.028059 |
| 0.058891 | 0.20396  | 0.106237 | 0.02167  | 0.048128 | 0.29933  | 0.138058 | 0.00279  | 0.093165 |
| 0.024225 | 0.60154  | 0.004746 | 0.91852  | 0.003616 | 0.93788  | 0.00367  | 0.93696  | 0.003957 |
| 0.023528 | 0.61205  | 0.1665   | 0.0003   | 0.069187 | 0.13546  | 0.200238 | 1.30E-05 | 0.313456 |
| 0.119529 | 0.00973  | 0.288531 | 2.10E-10 | 0.202683 | 1.01E-05 | 0.283073 | 4.70E-10 | 0.186715 |
| 0.100205 | 0.03038  | 0.10764  | 0.01998  | 0.101298 | 0.02861  | 0.080331 | 0.0829   | 0.104608 |
| 0.063799 | 0.16869  | 0.029528 | 0.52443  | 0.026482 | 0.56811  | 0.018848 | 0.68456  | 0.004509 |
| 0.0912   | 0.04888  | 0.079266 | 0.08707  | 0.132292 | 0.00419  | 0.003091 | 0.94689  | -0.0017  |
| 0.099797 | 0.03106  | 0.034924 | 0.45149  | 0.060023 | 0.19539  | 0.030965 | 0.50443  | 0.009086 |
| 0.048507 | 0.29554  | 0.025406 | 0.58393  | 0.030956 | 0.50456  | 0.042853 | 0.35548  | -0.00785 |
| 0.038085 | 0.41158  | 0.03023  | 0.51461  | 0.047683 | 0.30383  | 0.008728 | 0.85078  | -0.00462 |
| 0.059832 | 0.19682  | -0.00162 | 0.9721   | 0.012119 | 0.79393  | -0.00408 | 0.93001  | -0.01567 |
| -0.04309 | 0.35287  | -0.04461 | 0.33611  | -0.03228 | 0.48654  | -0.0352  | 0.44787  | -0.05894 |
| -0.05291 | 0.25384  | -0.02348 | 0.61283  | -0.03058 | 0.50979  | -0.02006 | 0.66544  | 0.081906 |
| -0.00692 | 0.88151  | -0.02764 | 0.55135  | -0.02324 | 0.61648  | -0.02297 | 0.62044  | -0.01068 |
| 0.046677 | 0.31415  | 0.037811 | 0.41495  | 0.04474  | 0.33468  | 0.050959 | 0.27177  | 0.006785 |
| 0.028098 | 0.54472  | 0.030694 | 0.50818  | 0.024899 | 0.59147  | 0.031673 | 0.49474  | 0.074243 |
| -0.02902 | 0.53164  | -0.01581 | 0.73332  | -0.01557 | 0.73725  | -0.0149  | 0.74809  | -0.01609 |
| -0.06952 | 0.1336   | -0.10699 | 0.02075  | -0.10283 | 0.02628  | -0.091   | 0.04938  | -0.10041 |
| -0.05728 | 0.21664  | -0.04746 | 0.30607  | -0.0497  | 0.28376  | -0.04152 | 0.37064  | -0.04915 |
| -0.09231 | 0.04618  | -0.10349 | 0.02532  | -0.09635 | 0.03739  | -0.0967  | 0.0367   | -0.03612 |
| 0.026653 | 0.5656   | 0.062037 | 0.18079  | 0.063944 | 0.16773  | 0.034584 | 0.45592  | 0.132918 |
| 0.05381  | 0.24582  | -0.06272 | 0.17605  | -0.01176 | 0.79989  | -0.07059 | 0.1277   | -0.14142 |
| 0.13157  | 0.0044   | 0.153008 | 0.00091  | 0.115118 | 0.0128   | 0.134423 | 0.00361  | 0.235005 |
| 0.039185 | 0.3982   | 0.059564 | 0.19883  | 0.071972 | 0.12038  | 0.034499 | 0.45702  | 0.022292 |
| 0.060279 | 0.19349  | -0.04905 | 0.29021  | 0.001307 | 0.97753  | -0.07635 | 0.09937  | -0.1393  |
| 0.01541  | 0.73979  | -0.07978 | 0.08505  | -0.01829 | 0.69341  | -0.12746 | 0.00581  | -0.05366 |
| 0.283833 | 4.21E-10 | 0.252318 | 3.24E-08 | 0.332755 | 1.55E-13 | 0.107865 | 0.01973  | 0.173055 |
| 0.140031 | 0.00242  | 0.080712 | 0.08144  | 0.091646 | 0.04778  | 0.045443 | 0.32713  | 0.09185  |
| 0.045806 | 0.32328  | 0.04986  | 0.28226  | 0.060589 | 0.1912   | 0.030459 | 0.51143  | 0.00354  |
| 0.06793  | 0.14272  | 0.038754 | 0.40341  | 0.019554 | 0.67341  | 0.037012 | 0.42489  | -0.01339 |
| 0.095545 | 0.03902  | 0.116295 | 0.0119   | 0.117533 | 0.01102  | 0.068143 | 0.14147  | 0.070727 |
| -0.03    | 0.51785  | -0.06568 | 0.15648  | -0.04565 | 0.32489  | -0.06397 | 0.16755  | 0.045138 |
| 0.044539 | 0.33685  | 0.100974 | 0.02912  | 0.068993 | 0.13656  | 0.077609 | 0.0939   | 0.183933 |
| -0.09702 | 0.03608  | -0.22211 | 1.25E-06 | -0.16635 | 0.00031  | -0.19999 | 1.34E-05 | -0.35786 |
| 0.06928  | 0.13493  | 0.108064 | 0.0195   | 0.071212 | 0.12436  | 0.109481 | 0.01795  | 0.095358 |
| 0.15629  | 0.0007   | 0.097215 | 0.03571  | 0.119895 | 0.0095   | 0.052928 | 0.25365  | 0.012602 |
| 0.047428 | 0.30642  | 0.072027 | 0.1201   | 0.0451   | 0.3308   | 0.069034 | 0.13633  | 0.202229 |
| 0.23861  | 1.81E-07 | 0.124926 | 0.00687  | 0.146457 | 0.00151  | 0.098964 | 0.0325   | 0.04992  |
| 0.06509  | 0.16022  | 0.083134 | 0.07268  | 0.075085 | 0.10512  | 0.061833 | 0.18223  | 0.121799 |

|          |          |          |          |          |          |           |          |          |
|----------|----------|----------|----------|----------|----------|-----------|----------|----------|
| 0.014597 | 0.75305  | 0.07918  | 0.08741  | 0.035694 | 0.44158  | 0.108677  | 0.01881  | 0.117088 |
| 0.083614 | 0.07104  | 0.096082 | 0.03793  | 0.074802 | 0.10644  | 0.084981  | 0.06653  | 0.008058 |
| 0.169537 | 0.00023  | 0.08967  | 0.05281  | 0.145844 | 0.00158  | 0.036336  | 0.43341  | 0.054193 |
| 0.072006 | 0.12021  | 0.082284 | 0.07567  | 0.076329 | 0.09946  | 0.082066  | 0.07645  | 0.054613 |
| 0.047312 | 0.30761  | 0.036368 | 0.43299  | 0.032029 | 0.4899   | 0.032247  | 0.48694  | 0.039554 |
| 0.240448 | 1.44E-07 | 0.229013 | 5.66E-07 | 0.241439 | 1.28E-07 | 0.155426  | 0.00075  | 0.236257 |
| 0.047155 | 0.30922  | 0.101802 | 0.02782  | 0.062626 | 0.17667  | 0.093987  | 0.04234  | 0.169015 |
| 0.031773 | 0.49338  | 0.075433 | 0.10351  | 0.048782 | 0.29281  | 0.077979  | 0.09234  | 0.029866 |
| 0.096974 | 0.03618  | 0.044938 | 0.33255  | 0.076242 | 0.09985  | -9.42E-05 | 0.99838  | -0.02465 |
| 0.047385 | 0.30686  | 0.107069 | 0.02065  | 0.063598 | 0.17004  | 0.11218   | 0.01529  | 0.210522 |
| 0.096168 | 0.03776  | 0.081292 | 0.07927  | 0.087288 | 0.05945  | 0.052953  | 0.25343  | 0.018912 |
| 0.32474  | 6.26E-13 | 0.203714 | 9.12E-06 | 0.276672 | 1.19E-09 | 0.066531  | 0.15115  | 0.123277 |
| 0.059883 | 0.19643  | 0.00478  | 0.91795  | 0.037943 | 0.41333  | -0.01389  | 0.76461  | -0.02056 |
| 0.082889 | 0.07353  | -0.02576 | 0.57863  | -0.00579 | 0.90065  | -0.04178  | 0.36771  | -0.09799 |
| -0.00648 | 0.88892  | -0.01774 | 0.70222  | 0.03167  | 0.49478  | -0.0638   | 0.16869  | -0.08719 |
| 0.090182 | 0.05146  | 0.061154 | 0.18708  | 0.075601 | 0.10274  | 0.048036  | 0.30026  | 0.011338 |
| -0.07306 | 0.11485  | -0.17447 | 0.00015  | -0.09746 | 0.03524  | -0.18119  | 8.22E-05 | -0.29315 |
| 0.01648  | 0.72244  | 0.05875  | 0.20505  | 0.008235 | 0.85913  | 0.083977  | 0.06982  | 0.154688 |
| -0.00834 | 0.85735  | -0.00972 | 0.83407  | -0.01339 | 0.77282  | 0.011606  | 0.80248  | -0.08207 |
| -0.0045  | 0.92276  | -0.04206 | 0.36449  | -0.02209 | 0.63391  | -0.02529  | 0.58566  | -0.01351 |
| -0.06442 | 0.16458  | -0.00314 | 0.94601  | -0.04354 | 0.34785  | 0.027486  | 0.55352  | -0.06327 |
| 0.084809 | 0.06708  | 0.050762 | 0.27363  | 0.086743 | 0.06106  | 0.020265  | 0.66225  | -0.00508 |
| -0.08776 | 0.05809  | 0.011252 | 0.80838  | -0.03912 | 0.39899  | 0.041713  | 0.36844  | 0.102305 |
| 0.002704 | 0.95352  | -0.02383 | 0.6075   | -0.01325 | 0.7752   | -0.01308  | 0.77796  | -0.08966 |
| -0.02453 | 0.59699  | -0.08149 | 0.07855  | -0.05025 | 0.2785   | -0.07599  | 0.10097  | -0.13913 |
| 0.239957 | 1.53E-07 | 0.12732  | 0.00586  | 0.183465 | 6.66E-05 | 0.055481  | 0.23144  | 0.03053  |
| 0.029336 | 0.52712  | 0.006673 | 0.88565  | 0.00639  | 0.89045  | 0.010653  | 0.81841  | -0.0363  |
| -0.0632  | 0.17271  | -0.06313 | 0.17319  | -0.0039  | 0.93297  | -0.11958  | 0.0097   | -0.1704  |
| -0.00819 | 0.85984  | -0.09166 | 0.04775  | -0.0507  | 0.27419  | -0.11297  | 0.01458  | -0.1885  |
| 0.227919 | 6.43E-07 | 0.111298 | 0.01612  | 0.151484 | 0.00102  | 0.050914  | 0.27219  | 0.011171 |
| -0.02327 | 0.61601  | -0.03539 | 0.44546  | -0.0067  | 0.88511  | -0.03555  | 0.44346  | -0.10005 |
| -0.0463  | 0.31803  | -0.03075 | 0.50742  | -0.03109 | 0.50277  | -0.0061   | 0.89539  | -0.07377 |
| -0.01992 | 0.66762  | 0.055054 | 0.23505  | 0.000747 | 0.98715  | 0.076062  | 0.10066  | 0.175888 |
| 0.05043  | 0.27679  | 0.137675 | 0.00287  | 0.081437 | 0.07873  | 0.169103  | 0.00024  | 0.110464 |
| -0.03212 | 0.4886   | 0.046453 | 0.31648  | -0.01327 | 0.77485  | 0.083105  | 0.07278  | 0.092355 |
| 0.085231 | 0.06573  | -0.02001 | 0.66618  | 0.015175 | 0.74361  | -0.03728  | 0.42156  | 0.077003 |
| 0.065638 | 0.15673  | 0.143812 | 0.00184  | 0.063583 | 0.17014  | 0.175048  | 0.00014  | 0.195481 |
| 0.085102 | 0.06614  | 0.10615  | 0.02178  | 0.104718 | 0.02363  | 0.079019  | 0.08806  | 0.12036  |
| 0.029797 | 0.52066  | 0.021031 | 0.65032  | 0.033715 | 0.46732  | 0.003032  | 0.94791  | 0.052331 |
| 0.02361  | 0.61081  | 0.063818 | 0.16857  | 0.022    | 0.63536  | 0.078284  | 0.09107  | 0.121156 |
| -0.05855 | 0.20659  | -0.04476 | 0.33444  | -0.04225 | 0.36225  | -0.0463   | 0.31811  | -0.05334 |
| 0.051355 | 0.26806  | 0.053413 | 0.24933  | 0.044656 | 0.33559  | 0.060004  | 0.19553  | 0.024542 |
| 0.096621 | 0.03686  | 0.113689 | 0.01396  | 0.04373  | 0.34571  | 0.144742  | 0.00171  | 0.1259   |
| 0.024297 | 0.60047  | 0.023522 | 0.61214  | 0.015514 | 0.73808  | 0.01825   | 0.69405  | -0.00849 |
| 0.122207 | 0.0082   | 0.101217 | 0.02874  | 0.119743 | 0.0096   | 0.063725  | 0.16919  | 0.145388 |

|          |          |          |          |          |          |          |          |          |
|----------|----------|----------|----------|----------|----------|----------|----------|----------|
| 0.085818 | 0.06389  | 0.114215 | 0.01352  | 0.157948 | 0.00061  | 0.025996 | 0.57523  | 0.018675 |
| -0.02754 | 0.55271  | -0.02385 | 0.6072   | -0.01639 | 0.72393  | -0.02947 | 0.52528  | 0.003318 |
| 0.107435 | 0.02022  | 0.175668 | 0.00014  | 0.098508 | 0.03332  | 0.200903 | 1.22E-05 | 0.276536 |
| 0.124578 | 0.00703  | 0.093176 | 0.04416  | 0.080104 | 0.08377  | 0.087503 | 0.05882  | 0.195815 |
| 0.118996 | 0.01006  | 0.040899 | 0.37786  | 0.053229 | 0.25096  | 0.023545 | 0.6118   | -0.00932 |
| 0.239501 | 1.62E-07 | 0.21294  | 3.44E-06 | 0.296746 | 6.01E-11 | 0.079231 | 0.08721  | 0.120957 |
| 0.137989 | 0.00281  | 0.123841 | 0.00738  | 0.137212 | 0.00297  | 0.074729 | 0.10678  | 0.067375 |
| 0.204204 | 8.67E-06 | 0.113302 | 0.01429  | 0.149867 | 0.00116  | 0.056703 | 0.22131  | 0.044642 |
| 0.019807 | 0.66943  | 0.061795 | 0.1825   | 0.030611 | 0.50932  | 0.091345 | 0.04852  | 0.057339 |
| 0.184136 | 6.26E-05 | 0.121239 | 0.00872  | 0.1091   | 0.01835  | 0.110613 | 0.01679  | 0.087526 |
| 0.027946 | 0.5469   | 0.033957 | 0.46413  | 0.036087 | 0.43656  | 0.03268  | 0.48112  | 0.016847 |
| 0.129617 | 0.00503  | 0.078943 | 0.08837  | 0.127788 | 0.00568  | 0.02019  | 0.66343  | 0.101545 |
| 0.012036 | 0.79531  | -0.07464 | 0.1072   | -0.02769 | 0.55058  | -0.08237 | 0.07536  | -0.18186 |
| 0.038854 | 0.4022   | 0.021376 | 0.64497  | 0.009839 | 0.83207  | 0.02978  | 0.52089  | 0.065094 |
| 0.126372 | 0.00625  | 0.007966 | 0.86368  | 0.07804  | 0.09209  | -0.04359 | 0.34729  | 0.000214 |
| 0.072152 | 0.11945  | 0.000585 | 0.98994  | 0.016377 | 0.7241   | -0.00169 | 0.97099  | 0.071198 |
| 0.243176 | 1.03E-07 | 0.269934 | 3.06E-09 | 0.24349  | 9.92E-08 | 0.200252 | 1.30E-05 | 0.217522 |
| 0.379658 | 1.85E-17 | 0.209084 | 5.20E-06 | 0.24102  | 1.35E-07 | 0.148268 | 0.00131  | 0.102018 |
| 0.10805  | 0.01951  | 0.064612 | 0.16332  | 0.096533 | 0.03703  | 0.029897 | 0.51926  | -0.02753 |
| 0.074934 | 0.10582  | 0.052378 | 0.25863  | 0.07422  | 0.10919  | 0.03162  | 0.49546  | -0.01943 |
| -0.07553 | 0.10307  | -0.23056 | 4.73E-07 | -0.15016 | 0.00113  | -0.2321  | 3.94E-07 | -0.3667  |
| -0.02037 | 0.66069  | -0.01281 | 0.78243  | -0.00147 | 0.97476  | -0.00997 | 0.82992  | -0.01351 |
| -0.06904 | 0.13631  | -0.15666 | 0.00068  | -0.11411 | 0.01361  | -0.1531  | 0.0009   | -0.16603 |
| 0.000885 | 0.98478  | -0.08088 | 0.08081  | -0.02179 | 0.63857  | -0.11588 | 0.01221  | -0.0885  |
| 0.142764 | 0.00198  | 0.106753 | 0.02103  | 0.109838 | 0.01758  | 0.081633 | 0.07802  | 0.162015 |
| 0.006278 | 0.89237  | 0.02964  | 0.52285  | 0.026039 | 0.5746   | 0.006764 | 0.8841   | -0.0106  |
| 0.012802 | 0.78261  | -0.00313 | 0.9463   | 0.007767 | 0.86706  | 0.003548 | 0.93905  | -0.03307 |
| -0.05735 | 0.21605  | -0.00665 | 0.88609  | -0.02287 | 0.62202  | 0.008419 | 0.85602  | -0.06434 |
| -0.02052 | 0.65832  | -0.00917 | 0.8433   | -0.00706 | 0.879    | 0.016934 | 0.71512  | -0.03368 |
| 0.169655 | 0.00023  | 0.173599 | 0.00016  | 0.174382 | 0.00015  | 0.121854 | 0.00839  | 0.182486 |
| 0.036139 | 0.4359   | -0.00448 | 0.92304  | 0.038395 | 0.40778  | -0.05332 | 0.25017  | -0.107   |
| -0.07684 | 0.09722  | -0.06576 | 0.15597  | -0.07772 | 0.09342  | -0.05111 | 0.27036  | -0.11683 |
| 0.133879 | 0.00375  | 0.180224 | 8.99E-05 | 0.118163 | 0.0106   | 0.204773 | 8.17E-06 | 0.235721 |
| 0.029654 | 0.52266  | 0.042057 | 0.3645   | 0.025625 | 0.5807   | 0.039443 | 0.3951   | 0.01332  |
| 0.274698 | 1.57E-09 | 0.204404 | 8.49E-06 | 0.217879 | 2.00E-06 | 0.14744  | 0.0014   | 0.129095 |
| 0.147062 | 0.00144  | 0.255796 | 2.06E-08 | 0.161663 | 0.00045  | 0.249589 | 4.60E-08 | 0.253882 |
| -0.02366 | 0.61006  | -0.05808 | 0.21026  | -0.03375 | 0.46682  | -0.04539 | 0.32771  | -0.09621 |
| -0.00147 | 0.97479  | 0.044717 | 0.33493  | 0.029613 | 0.52323  | 0.045462 | 0.32693  | 0.176994 |
| 0.081037 | 0.08022  | 0.100976 | 0.02912  | 0.091672 | 0.04771  | 0.086641 | 0.06137  | 0.057451 |
| 0.038054 | 0.41196  | 0.091109 | 0.0491   | 0.038662 | 0.40453  | 0.101961 | 0.02758  | 0.177218 |
| 0.035697 | 0.44154  | 0.037669 | 0.41671  | 0.038379 | 0.40798  | 0.05608  | 0.22643  | -0.01456 |
| 0.096201 | 0.03769  | 0.021109 | 0.64911  | 0.034679 | 0.45468  | 0.009855 | 0.83179  | 0.005629 |
| 0.139913 | 0.00244  | 0.22932  | 5.46E-07 | 0.166506 | 0.0003   | 0.23306  | 3.52E-07 | 0.223442 |
| 0.028892 | 0.5334   | 0.070275 | 0.1294   | 0.05475  | 0.23766  | 0.060712 | 0.1903   | 0.059346 |
| 0.093914 | 0.0425   | 0.182859 | 7.05E-05 | 0.122052 | 0.00828  | 0.185566 | 5.47E-05 | 0.273622 |

|          |          |          |          |          |          |          |          |          |
|----------|----------|----------|----------|----------|----------|----------|----------|----------|
| -0.00985 | 0.83195  | -0.15432 | 0.00082  | -0.05222 | 0.26009  | -0.19966 | 1.38E-05 | -0.21515 |
| 0.012688 | 0.78449  | 0.058928 | 0.20368  | 0.070623 | 0.12751  | 0.007073 | 0.87884  | 0.019727 |
| -0.08663 | 0.06141  | -0.10898 | 0.01848  | -0.08779 | 0.05799  | -0.09081 | 0.04985  | -0.08651 |
| 0.019208 | 0.67886  | 0.097051 | 0.03603  | 0.051133 | 0.27014  | 0.130039 | 0.00488  | 0.115807 |
| 0.109811 | 0.0176   | 0.083397 | 0.07178  | 0.095945 | 0.03821  | 0.054879 | 0.23655  | 0.119768 |
| 0.016224 | 0.72658  | 0.025099 | 0.5885   | 0.017923 | 0.69927  | 0.029285 | 0.52785  | -0.0078  |
| -0.0467  | 0.31389  | -0.03764 | 0.41703  | -0.02575 | 0.5789   | -0.02555 | 0.58178  | -0.06218 |
| 0.031535 | 0.49662  | -0.08589 | 0.06365  | -0.01482 | 0.74943  | -0.12338 | 0.0076   | -0.11986 |
| 0.236534 | 2.32E-07 | 0.385824 | 5.03E-18 | 0.285894 | 3.10E-10 | 0.361051 | 7.96E-16 | 0.301517 |
| 0.073041 | 0.11496  | 0.067253 | 0.14675  | 0.076509 | 0.09866  | 0.047944 | 0.30119  | 0.190317 |
| 0.05058  | 0.27535  | 0.059078 | 0.20253  | 0.051041 | 0.271    | 0.058678 | 0.20561  | 0.032099 |
| 0.089597 | 0.053    | 0.094424 | 0.04139  | 0.07645  | 0.09892  | 0.075071 | 0.10518  | 0.143282 |
| 0.062063 | 0.18061  | 0.001258 | 0.97837  | 0.034498 | 0.45704  | -0.02888 | 0.53357  | -0.03376 |
| 0.13617  | 0.00319  | 0.069792 | 0.13206  | 0.144965 | 0.00168  | -0.01214 | 0.79355  | 0.139158 |
| -0.02239 | 0.62941  | -0.01318 | 0.77643  | -0.01025 | 0.82523  | -0.01384 | 0.7654   | -0.03909 |
| 0.078538 | 0.09002  | 0.15365  | 0.00086  | 0.109372 | 0.01806  | 0.136265 | 0.00317  | 0.354261 |
| 0.052941 | 0.25354  | 0.094669 | 0.04086  | 0.076662 | 0.09799  | 0.073231 | 0.11401  | 0.242408 |
| 0.122954 | 0.00781  | 0.058765 | 0.20493  | 0.09758  | 0.03502  | 0.000737 | 0.98733  | 0.185563 |
| 0.068653 | 0.13851  | 0.05626  | 0.22494  | 0.069723 | 0.13245  | 0.038692 | 0.40416  | 0.053985 |
| 0.041477 | 0.37116  | 0.054408 | 0.2406   | 0.044758 | 0.33449  | 0.056579 | 0.22232  | 0.128056 |
| 0.115814 | 0.01226  | 0.038131 | 0.41102  | 0.053905 | 0.24498  | 0.015712 | 0.73487  | -0.02482 |
| 0.049391 | 0.28682  | 0.038687 | 0.40422  | 0.034524 | 0.4567   | 0.034246 | 0.46033  | 0.038286 |
| 0.06148  | 0.18474  | 0.093275 | 0.04394  | 0.076738 | 0.09766  | 0.065497 | 0.15762  | 0.168941 |
| -0.0099  | 0.83102  | -0.02021 | 0.66304  | -0.01013 | 0.82714  | -0.01466 | 0.75204  | -0.0272  |
| 0.04451  | 0.33717  | 0.015118 | 0.74454  | 0.026727 | 0.56452  | 0.008753 | 0.85037  | -0.01939 |
| -0.0493  | 0.28775  | -0.02969 | 0.5221   | -0.03353 | 0.46972  | -0.01923 | 0.67849  | 0.016403 |
| 0.074059 | 0.10997  | 0.039703 | 0.39198  | 0.080678 | 0.08157  | 0.017481 | 0.70633  | -0.01289 |
| -0.03774 | 0.41587  | -0.08901 | 0.05458  | -0.05357 | 0.24789  | -0.08064 | 0.08173  | -0.19512 |
| 0.041026 | 0.37638  | 0.010967 | 0.81315  | 0.040386 | 0.38389  | -0.01616 | 0.72754  | 0.016606 |
| 0.048762 | 0.293    | 0.015423 | 0.73957  | 0.047147 | 0.3093   | 0.004472 | 0.92322  | 0.045451 |
| -0.07294 | 0.11545  | -0.09569 | 0.03873  | -0.07438 | 0.10842  | -0.07111 | 0.12492  | -0.11469 |
| 0.226101 | 7.93E-07 | 0.075094 | 0.10508  | 0.124775 | 0.00694  | 0.038108 | 0.4113   | 0.060682 |
| 0.064095 | 0.16672  | 0.009138 | 0.84387  | 0.022211 | 0.63211  | 0.016824 | 0.71689  | 0.012438 |
| 0.106548 | 0.02128  | 0.118463 | 0.0104   | 0.128888 | 0.00528  | 0.067765 | 0.14369  | 0.098618 |
| 0.030523 | 0.51054  | 0.124788 | 0.00693  | 0.040902 | 0.37783  | 0.168131 | 0.00026  | 0.097943 |
| 0.083908 | 0.07005  | 0.077666 | 0.09366  | 0.045246 | 0.32924  | 0.092472 | 0.0458   | 0.094473 |
| 0.019514 | 0.67404  | 0.077885 | 0.09273  | 0.007046 | 0.8793   | 0.101496 | 0.0283   | 0.083009 |
| 0.284075 | 4.06E-10 | 0.135013 | 0.00346  | 0.165663 | 0.00032  | 0.09878  | 0.03283  | 0.061922 |
| 0.169848 | 0.00023  | 0.180934 | 8.42E-05 | 0.136117 | 0.0032   | 0.181497 | 8.00E-05 | 0.100192 |
| 0.037798 | 0.41511  | 0.075051 | 0.10527  | 0.039907 | 0.38955  | 0.090995 | 0.04939  | 0.01961  |
| 0.057114 | 0.21797  | 0.081303 | 0.07923  | 0.066734 | 0.14991  | 0.07025  | 0.12954  | 0.009844 |
| 0.013653 | 0.76856  | 0.055216 | 0.23368  | 0.034766 | 0.45355  | 0.03794  | 0.41337  | 0.036097 |
| 0.134486 | 0.00359  | 0.101471 | 0.02834  | 0.109502 | 0.01793  | 0.062082 | 0.18047  | 0.108444 |
| 0.212446 | 3.63E-06 | 0.32593  | 5.10E-13 | 0.276403 | 1.23E-09 | 0.260795 | 1.07E-08 | 0.30775  |
| 0.015178 | 0.74356  | -0.04764 | 0.30426  | 0.025741 | 0.57898  | -0.08412 | 0.06934  | -0.11616 |

|          |          |          |          |          |          |          |          |          |
|----------|----------|----------|----------|----------|----------|----------|----------|----------|
| 0.048714 | 0.29348  | 0.044619 | 0.33598  | 0.062956 | 0.1744   | 0.004932 | 0.91535  | 0.041488 |
| 0.002078 | 0.96428  | -0.01221 | 0.79251  | 0.008358 | 0.85704  | -0.006   | 0.89708  | -0.01326 |
| 0.082242 | 0.07581  | 0.073011 | 0.1151   | 0.078052 | 0.09203  | 0.070622 | 0.12751  | 0.042522 |
| 0.15748  | 0.00064  | 0.183354 | 6.73E-05 | 0.108642 | 0.01885  | 0.213581 | 3.21E-06 | 0.160174 |
| 0.092119 | 0.04663  | -0.003   | 0.94845  | 0.067176 | 0.14722  | -0.0451  | 0.33077  | -0.06876 |
| 0.221926 | 1.28E-06 | 0.235252 | 2.71E-07 | 0.181055 | 8.33E-05 | 0.221567 | 1.33E-06 | 0.192145 |
| 0.005771 | 0.90102  | 0.05335  | 0.24988  | 0.0058   | 0.90053  | 0.092858 | 0.0449   | 0.0792   |
| 0.045147 | 0.33029  | 0.101868 | 0.02772  | 0.074235 | 0.10913  | 0.109334 | 0.0181   | 0.139562 |
| 0.112167 | 0.0153   | 0.160822 | 0.00049  | 0.070333 | 0.12909  | 0.212029 | 3.79E-06 | 0.242922 |
| 0.007094 | 0.87848  | 0.027048 | 0.55986  | -0.00679 | 0.88366  | 0.0509   | 0.27232  | 0.035644 |
| 0.094984 | 0.04019  | 0.029991 | 0.51795  | 0.116803 | 0.01154  | -0.05423 | 0.24213  | 0.031104 |
| 0.039264 | 0.39724  | 0.035736 | 0.44104  | 0.069915 | 0.13138  | 0.006524 | 0.88819  | 0.018664 |
| -0.00508 | 0.91274  | -0.00724 | 0.87595  | 0.001447 | 0.97512  | -0.0174  | 0.70769  | 0.013439 |
| 0.01024  | 0.82533  | 0.067986 | 0.14239  | 0.024087 | 0.60362  | 0.0748   | 0.10645  | 0.103485 |
| 0.069195 | 0.13541  | 0.061802 | 0.18245  | 0.078037 | 0.09209  | 0.03321  | 0.47403  | -0.02654 |
| 0.024584 | 0.59617  | -0.05821 | 0.20923  | -0.02024 | 0.66261  | -0.06473 | 0.16255  | -0.10092 |
| 0.186905 | 4.82E-05 | 0.151143 | 0.00105  | 0.170141 | 0.00022  | 0.08091  | 0.0807   | 0.155086 |
| -0.05941 | 0.20002  | -0.13523 | 0.00341  | -0.09669 | 0.03673  | -0.12975 | 0.00498  | -0.2602  |
| 0.213866 | 3.11E-06 | 0.086396 | 0.06211  | 0.091028 | 0.0493   | 0.078325 | 0.0909   | 0.092067 |
| 0.024271 | 0.60085  | 0.108372 | 0.01915  | 0.075091 | 0.10509  | 0.109587 | 0.01784  | 0.098701 |
| -0.05725 | 0.21685  | -0.15652 | 0.00069  | -0.09099 | 0.0494   | -0.17588 | 0.00013  | -0.2389  |
| -0.01506 | 0.74554  | 0.009418 | 0.83914  | -0.00946 | 0.8385   | 0.005945 | 0.89805  | 0.023454 |
| 0.113944 | 0.01375  | 0.028676 | 0.53647  | 0.031653 | 0.49501  | 0.02791  | 0.54741  | 0.009257 |
| 0.175115 | 0.00014  | 0.084867 | 0.06689  | 0.115838 | 0.01224  | 0.037831 | 0.41471  | 0.063737 |
| 0.183504 | 6.64E-05 | 0.149875 | 0.00116  | 0.133462 | 0.00386  | 0.140203 | 0.00239  | 0.100553 |
| 0.231178 | 4.40E-07 | 0.0751   | 0.10505  | 0.092903 | 0.04479  | 0.046182 | 0.31932  | 0.025097 |
| 0.09341  | 0.04363  | 0.084446 | 0.06826  | 0.083642 | 0.07094  | 0.073477 | 0.1128   | 0.034822 |
| 0.125266 | 0.00672  | 0.046161 | 0.31954  | 0.047119 | 0.30958  | 0.055777 | 0.22895  | 0.058078 |
| 0.13944  | 0.00253  | -0.04157 | 0.37003  | 0.03632  | 0.43361  | -0.08289 | 0.07353  | -0.06659 |
| 0.033542 | 0.46961  | -0.19563 | 2.07E-05 | -0.06306 | 0.17369  | -0.23655 | 2.32E-07 | -0.28838 |
| 0.039532 | 0.39402  | -0.00664 | 0.88621  | 0.014775 | 0.75014  | -0.00949 | 0.8379   | -0.04307 |
| 0.070855 | 0.12626  | 0.074539 | 0.10768  | 0.113705 | 0.01395  | 0.031622 | 0.49543  | 0.017351 |
| 0.113975 | 0.01372  | 0.048585 | 0.29476  | 0.099091 | 0.03228  | -0.00045 | 0.99234  | -0.01592 |
| 0.172155 | 0.00019  | 0.065626 | 0.1568   | 0.0822   | 0.07597  | 0.036238 | 0.43465  | 0.029647 |
| 0.105637 | 0.02242  | 0.068394 | 0.14001  | 0.06661  | 0.15066  | 0.052162 | 0.2606   | 0.019442 |
| 0.092575 | 0.04556  | 0.09887  | 0.03267  | 0.104251 | 0.02426  | 0.062387 | 0.17833  | 0.141714 |
| 0.153195 | 0.0009   | 0.113185 | 0.01439  | 0.184329 | 6.15E-05 | 0.0302   | 0.51504  | 0.107121 |
| -0.01109 | 0.81117  | -0.01385 | 0.76534  | 0.005598 | 0.90398  | -0.01102 | 0.81233  | -0.03887 |
| 0.009214 | 0.84258  | 0.023982 | 0.60519  | 0.007422 | 0.87292  | 0.024721 | 0.59412  | 0.003637 |
| -0.02447 | 0.59792  | -0.01225 | 0.79179  | 0.007128 | 0.8779   | -0.03883 | 0.40243  | -0.01052 |
| -0.01042 | 0.82227  | -0.01584 | 0.73275  | 0.002802 | 0.95184  | -0.03835 | 0.40835  | -0.03121 |
| 0.023751 | 0.60868  | 0.011425 | 0.8055   | 0.011977 | 0.79629  | 0.022611 | 0.626    | -0.00593 |
| 0.072972 | 0.1153   | 0.006442 | 0.88958  | 0.018436 | 0.6911   | 0.010481 | 0.82128  | 0.0013   |
| 0.234999 | 2.79E-07 | 0.123005 | 0.00779  | 0.126294 | 0.00628  | 0.149816 | 0.00117  | 0.040483 |
| -0.00337 | 0.94213  | 0.036483 | 0.43154  | 0.031449 | 0.49779  | 0.032604 | 0.48213  | 0.009042 |



|          |          |          |          |           |          |          |          |          |
|----------|----------|----------|----------|-----------|----------|----------|----------|----------|
| 0.079293 | 0.08696  | 0.133034 | 0.00398  | 0.097387  | 0.03539  | 0.12798  | 0.00561  | 0.085537 |
| -0.04458 | 0.33643  | 0.006194 | 0.89381  | -0.02314  | 0.61789  | 0.027348 | 0.55551  | 0.021095 |
| -0.05835 | 0.20818  | -0.02928 | 0.52798  | -0.04547  | 0.3268   | -0.02188 | 0.63715  | -0.03348 |
| 0.080737 | 0.08135  | 0.143467 | 0.00188  | 0.101951  | 0.02759  | 0.133544 | 0.00384  | 0.331495 |
| -0.00352 | 0.93945  | -0.05411 | 0.24316  | -0.03717  | 0.42291  | -0.04904 | 0.29025  | -0.08297 |
| 0.160498 | 0.0005   | 0.204361 | 8.53E-06 | 0.119624  | 0.00967  | 0.248306 | 5.42E-08 | 0.11729  |
| 0.045423 | 0.32735  | 0.090086 | 0.05171  | 0.049162  | 0.28906  | 0.103627 | 0.02513  | 0.095575 |
| 0.071116 | 0.12487  | 0.032524 | 0.4832   | 0.043324  | 0.35022  | 0.008095 | 0.86149  | 0.007417 |
| 0.01454  | 0.75398  | 0.057143 | 0.21773  | 0.010967  | 0.81314  | 0.078508 | 0.09014  | 0.020546 |
| 0.020803 | 0.65387  | 0.080718 | 0.08142  | 0.030878  | 0.50563  | 0.106504 | 0.02134  | 0.051938 |
| 0.014841 | 0.74906  | 0.036599 | 0.43007  | 0.004384  | 0.92473  | 0.034856 | 0.45238  | 0.012685 |
| -0.00556 | 0.90466  | -0.00341 | 0.94148  | -0.00243  | 0.95829  | -0.00494 | 0.91524  | -0.01393 |
| 0.008332 | 0.85748  | 0.002736 | 0.95297  | 0.000958  | 0.98352  | 0.001202 | 0.97934  | 0.001409 |
| 0.298872 | 4.32E-11 | 0.189799 | 3.66E-05 | 0.199871  | 1.35E-05 | 0.127046 | 0.00597  | 0.140463 |
| -0.01789 | 0.69979  | -0.00316 | 0.9457   | -0.01086  | 0.81489  | 0.00711  | 0.87821  | -0.01418 |
| 0.030962 | 0.50448  | 0.019815 | 0.6693   | 0.015357  | 0.74065  | 0.00683  | 0.88297  | 0.011221 |
| -0.00777 | 0.86699  | -0.00893 | 0.84735  | -0.00781  | 0.86638  | 0.000858 | 0.98524  | -0.00052 |
| 0.00079  | 0.98642  | 0.003728 | 0.93597  | -1.35E-05 | 0.99977  | -0.00067 | 0.98849  | -0.0014  |
| -0.0588  | 0.20469  | -0.04714 | 0.30935  | -0.04262  | 0.35806  | -0.0421  | 0.36405  | -0.00784 |
| 0.111442 | 0.01598  | 0.08262  | 0.07447  | 0.123276  | 0.00765  | 0.039289 | 0.39695  | 0.013077 |
| -0.1028  | 0.02633  | -0.05244 | 0.25804  | -0.05791  | 0.21164  | -0.03582 | 0.43998  | -0.0169  |
| 0.130475 | 0.00474  | 0.204498 | 8.41E-06 | 0.130906  | 0.0046   | 0.207186 | 6.35E-06 | 0.268221 |
| -0.05682 | 0.22033  | -0.06745 | 0.14559  | -0.05741  | 0.2156   | -0.05898 | 0.20327  | -0.06929 |
| -0.00273 | 0.95302  | 0.000487 | 0.99162  | -0.00027  | 0.99528  | -0.00114 | 0.9804   | 0.005678 |
| -0.01144 | 0.80527  | -0.00308 | 0.94704  | -0.00904  | 0.84553  | -0.00363 | 0.93766  | -0.01537 |
| 5.11E-05 | 0.99912  | -0.02629 | 0.57086  | -0.02233  | 0.63024  | -0.0043  | 0.9262   | 0.012849 |
| -0.04883 | 0.29231  | -0.03358 | 0.46914  | -0.03616  | 0.43568  | -0.02534 | 0.58495  | -0.01397 |
| -0.01544 | 0.73936  | -0.00821 | 0.85954  | -0.00904  | 0.84553  | -0.0098  | 0.8327   | -0.01182 |
| 0.070627 | 0.12749  | 0.057931 | 0.21145  | 0.063166  | 0.17297  | 0.051322 | 0.26837  | 0.071493 |
| -0.07383 | 0.1111   | -0.04115 | 0.37496  | -0.04476  | 0.33451  | -0.03322 | 0.47383  | -0.02385 |
| 0.160702 | 0.00049  | 0.264389 | 6.56E-09 | 0.245696  | 7.53E-08 | 0.186815 | 4.86E-05 | 0.119583 |
| 0.027695 | 0.55051  | 0.132694 | 0.00407  | 0.037673  | 0.41666  | 0.190773 | 3.33E-05 | 0.107507 |
| -0.0204  | 0.66021  | -0.01547 | 0.7388   | -0.01963  | 0.67229  | -0.01585 | 0.73269  | -0.02839 |
| -0.02137 | 0.64511  | -0.00862 | 0.85264  | -0.01587  | 0.73231  | -0.00952 | 0.83746  | -0.01127 |
| 0.055362 | 0.23244  | -0.01512 | 0.74455  | 0.050791  | 0.27336  | -0.08622 | 0.06266  | 0.04673  |
| 0.070891 | 0.12607  | 0.06148  | 0.18475  | 0.054707  | 0.23802  | 0.054532 | 0.23953  | 0.094701 |
| 0.267771 | 4.13E-09 | 0.21536  | 2.64E-06 | 0.306879  | 1.22E-11 | 0.073444 | 0.11296  | 0.036966 |
| 0.138195 | 0.00276  | 0.225092 | 8.90E-07 | 0.109483  | 0.01795  | 0.279696 | 7.69E-10 | 0.362128 |
| 0.033043 | 0.47625  | 0.008798 | 0.8496   | 0.020478  | 0.65892  | 0.003421 | 0.94122  | 0.0454   |
| 0.015029 | 0.746    | -0.01028 | 0.82469  | 0.007346  | 0.87421  | -0.00405 | 0.93041  | -0.04211 |
| -0.042   | 0.36513  | -0.01925 | 0.67819  | -0.03353  | 0.46975  | -0.02005 | 0.66567  | 0.103546 |
| -0.01805 | 0.69728  | -0.01422 | 0.75923  | -0.01427  | 0.75838  | -0.00729 | 0.87521  | -0.02061 |
| 0.054967 | 0.2358   | -0.02085 | 0.65307  | 0.015338  | 0.74096  | -0.04706 | 0.31024  | -0.1121  |
| -0.03821 | 0.41005  | -0.0437  | 0.34602  | -0.03964  | 0.39271  | -0.03366 | 0.46801  | -0.05608 |
| -0.03666 | 0.42926  | -0.02283 | 0.62266  | -0.02084  | 0.65335  | -0.01353 | 0.77059  | -0.04335 |

|          |          |          |          |          |          |          |          |          |
|----------|----------|----------|----------|----------|----------|----------|----------|----------|
| -0.03647 | 0.43166  | 0.026362 | 0.56985  | -0.01715 | 0.71172  | 0.058829 | 0.20444  | -0.01239 |
| -0.02126 | 0.64679  | -0.01252 | 0.78732  | -0.00923 | 0.84232  | -0.01242 | 0.78897  | 0.000137 |
| 0.274868 | 1.53E-09 | 0.232055 | 3.96E-07 | 0.343694 | 2.15E-14 | 0.019425 | 0.67544  | 0.086036 |
| -0.00648 | 0.8889   | -0.04414 | 0.34121  | -0.0242  | 0.60186  | -0.03532 | 0.44638  | -0.03824 |
| 0.087723 | 0.05819  | 0.055249 | 0.2334   | 0.111392 | 0.01603  | 0.00347  | 0.94038  | -0.03952 |
| -0.0874  | 0.05913  | -0.0715  | 0.12282  | -0.05954 | 0.19904  | -0.05251 | 0.25743  | -0.05035 |
| -0.01938 | 0.67609  | -0.01316 | 0.7767   | -0.01493 | 0.74764  | -0.01027 | 0.8248   | -0.00626 |
| -0.01542 | 0.73965  | -0.03067 | 0.50849  | -0.02507 | 0.58886  | -0.02696 | 0.56116  | -0.02505 |
| -0.00748 | 0.87193  | -0.01479 | 0.74987  | -0.0051  | 0.9125   | -0.00904 | 0.84545  | 0.000298 |
| -0.06176 | 0.18272  | 0.077721 | 0.09343  | -0.02006 | 0.66543  | 0.135423 | 0.00337  | 0.09881  |
| -0.10311 | 0.02587  | -0.07996 | 0.08434  | -0.07331 | 0.11363  | -0.06306 | 0.17369  | -0.08989 |
| -0.03967 | 0.39234  | -0.0306  | 0.50947  | -0.02289 | 0.62173  | -0.02149 | 0.64328  | -0.04056 |
| -0.13067 | 0.00468  | -0.08749 | 0.05887  | -0.09037 | 0.05098  | -0.05318 | 0.25144  | -0.09405 |
| -0.05594 | 0.22758  | -0.01896 | 0.68282  | -0.02304 | 0.61942  | -0.02156 | 0.64215  | 0.060122 |
| -0.0047  | 0.91926  | -0.01898 | 0.68248  | -0.01386 | 0.76512  | -0.01403 | 0.76229  | -0.01999 |
| -0.02019 | 0.66341  | -0.02288 | 0.62194  | -0.02102 | 0.65043  | -0.01755 | 0.70523  | -0.02531 |
| 0.034757 | 0.45367  | 0.194032 | 2.42E-05 | 0.065178 | 0.15966  | 0.266793 | 4.73E-09 | 0.237155 |
| -0.01615 | 0.72779  | -0.11975 | 0.00959  | -0.06771 | 0.14402  | -0.14155 | 0.00217  | -0.17682 |
| 0.008872 | 0.84836  | 0.039951 | 0.38902  | 0.015158 | 0.74388  | 0.052627 | 0.25637  | 0.084333 |
| -0.04903 | 0.29038  | -0.02798 | 0.54645  | -0.0257  | 0.57962  | -0.01518 | 0.74352  | -0.00548 |
| -0.03539 | 0.44552  | 0.03839  | 0.40784  | -0.00612 | 0.89502  | 0.043323 | 0.35023  | 0.076265 |
| 0.043404 | 0.34933  | 0.017536 | 0.70545  | 0.012785 | 0.78288  | 0.020909 | 0.65221  | 0.027101 |
| 0.005096 | 0.91254  | -0.02822 | 0.54303  | -0.03483 | 0.45273  | -0.03764 | 0.41708  | -0.00141 |
| 0.080726 | 0.08139  | 0.018104 | 0.69637  | 0.040145 | 0.38673  | 0.013436 | 0.77214  | 0.041774 |
| 0.372257 | 8.50E-17 | 0.268693 | 3.64E-09 | 0.375197 | 4.66E-17 | 0.100856 | 0.02931  | 0.103235 |
| -0.08847 | 0.05607  | -0.12064 | 0.00906  | -0.11361 | 0.01403  | -0.09926 | 0.03199  | -0.21    |
| -0.02733 | 0.55574  | -0.0119  | 0.7975   | -0.02625 | 0.57154  | -0.00709 | 0.87861  | -0.02315 |
| -0.03614 | 0.43595  | -0.06048 | 0.19201  | -0.01738 | 0.70796  | -0.08402 | 0.06967  | -0.14009 |
| -0.06609 | 0.15386  | -0.01948 | 0.6745   | -0.04037 | 0.38408  | -0.00947 | 0.83828  | -0.07869 |
| 0.071898 | 0.12077  | -0.05242 | 0.25822  | -0.01387 | 0.76504  | -0.07245 | 0.11794  | -0.07523 |
| 0.036207 | 0.43504  | 0.039947 | 0.38908  | 0.032254 | 0.48684  | 0.028244 | 0.54263  | 0.165941 |
| 0.074184 | 0.10937  | 0.127627 | 0.00575  | 0.104058 | 0.02453  | 0.104356 | 0.02412  | 0.096897 |
| 0.135264 | 0.0034   | 0.035641 | 0.44225  | 0.079247 | 0.08715  | -0.02369 | 0.60966  | 0.051875 |
| 0.190803 | 3.32E-05 | 0.098658 | 0.03305  | 0.134894 | 0.00349  | 0.0591   | 0.20236  | 0.09338  |
| 0.124564 | 0.00704  | 0.103647 | 0.0251   | 0.104561 | 0.02384  | 0.096855 | 0.0364   | 0.199379 |
| 0.009941 | 0.83035  | 0.005958 | 0.89783  | 0.051316 | 0.26842  | -0.05673 | 0.22112  | 0.089056 |
| -0.04612 | 0.31993  | -0.09628 | 0.03753  | -0.05149 | 0.2668   | -0.11646 | 0.01178  | -0.14278 |
| 0.010408 | 0.82251  | 0.081617 | 0.07807  | 0.03714  | 0.42329  | 0.091682 | 0.04769  | 0.150732 |
| 0.006342 | 0.89128  | 0.129279 | 0.00514  | 0.049408 | 0.28665  | 0.149852 | 0.00116  | 0.177604 |
| 0.007763 | 0.86712  | 0.083777 | 0.07049  | 0.048629 | 0.29433  | 0.067498 | 0.14528  | 0.091954 |
| 0.001523 | 0.97381  | -0.00042 | 0.99286  | -0.01867 | 0.68739  | -0.00754 | 0.87094  | -0.07686 |
| 0.066474 | 0.1515   | 0.096799 | 0.03652  | 0.045119 | 0.33059  | 0.114719 | 0.01311  | 0.082125 |
| -0.03558 | 0.44305  | -0.02029 | 0.66181  | -0.02875 | 0.53536  | -0.02115 | 0.64851  | -0.02864 |
| -0.03766 | 0.4168   | -0.0192  | 0.67895  | -0.02419 | 0.60202  | -0.02414 | 0.60278  | -0.03311 |
| 0.048036 | 0.30026  | 0.039816 | 0.39064  | 0.022802 | 0.62308  | 0.039294 | 0.39688  | 0.024115 |

|          |          |          |          |          |          |          |          |          |
|----------|----------|----------|----------|----------|----------|----------|----------|----------|
| 0.098639 | 0.03308  | 0.031625 | 0.49538  | 0.041719 | 0.36837  | 0.037445 | 0.41948  | 0.004865 |
| 0.068357 | 0.14022  | 0.04077  | 0.37937  | 0.034157 | 0.4615   | 0.036898 | 0.42632  | 0.067607 |
| -0.08224 | 0.07584  | -0.05965 | 0.19815  | -0.08662 | 0.06142  | -0.02531 | 0.58535  | -0.01891 |
| -0.0676  | 0.14466  | 0.012735 | 0.78372  | 0.015702 | 0.73504  | 0.004298 | 0.9262   | 0.027424 |
| -0.03393 | 0.4645   | -0.02217 | 0.63271  | -0.02179 | 0.63864  | -0.03334 | 0.47223  | -0.09606 |
| -0.07452 | 0.10777  | -0.20416 | 8.70E-06 | -0.1453  | 0.00164  | -0.19095 | 3.27E-05 | -0.34029 |
| 0.037063 | 0.42425  | 0.03016  | 0.51558  | 0.008225 | 0.85929  | 0.037653 | 0.4169   | 0.041403 |
| 0.083579 | 0.07116  | 0.039225 | 0.39772  | 0.055246 | 0.23342  | 0.011223 | 0.80886  | -0.00297 |
| 0.094286 | 0.04169  | 0.058402 | 0.20775  | 0.065966 | 0.15466  | 0.039176 | 0.3983   | 0.010351 |
| 0.30981  | 7.58E-12 | 0.181922 | 7.69E-05 | 0.23501  | 2.79E-07 | 0.076027 | 0.10081  | 0.073171 |
| 0.112148 | 0.01532  | 0.019923 | 0.66761  | 0.057561 | 0.21438  | 0.004995 | 0.91428  | -0.00451 |
| -0.02426 | 0.601    | -0.00102 | 0.98239  | -0.00773 | 0.86774  | -0.0026  | 0.95529  | 0.066691 |
| 0.01605  | 0.7294   | 0.003113 | 0.94652  | 0.005321 | 0.9087   | -0.0119  | 0.79761  | -0.02583 |
| -0.01516 | 0.74382  | 0.014587 | 0.75321  | 0.000834 | 0.98566  | 0.027371 | 0.55517  | 0.019381 |
| 0.066658 | 0.15037  | 0.038062 | 0.41186  | 0.035256 | 0.4472   | 0.037541 | 0.4183   | 0.054851 |
| 0.013089 | 0.77787  | 0.037075 | 0.4241   | 0.034463 | 0.4575   | 0.031373 | 0.49884  | 0.025171 |
| 0.005346 | 0.90827  | 0.035809 | 0.44011  | 0.031942 | 0.49108  | 0.026878 | 0.56233  | 0.133736 |
| 0.074471 | 0.108    | 0.114196 | 0.01354  | 0.054538 | 0.23948  | 0.126931 | 0.00602  | 0.165445 |
| 0.064274 | 0.16554  | 0.053178 | 0.25141  | 0.078902 | 0.08853  | 0.023974 | 0.60531  | 0.03265  |
| 0.084194 | 0.06909  | 0.082976 | 0.07323  | 0.084053 | 0.06956  | 0.06189  | 0.18183  | 0.104126 |
| 0.087362 | 0.05923  | 0.058289 | 0.20864  | 0.062186 | 0.17974  | 0.057632 | 0.21382  | 0.072576 |
| 0.072809 | 0.11612  | 0.007177 | 0.87707  | 0.044438 | 0.33796  | -0.03879 | 0.40302  | -0.04549 |
| 0.189327 | 3.83E-05 | 0.138205 | 0.00276  | 0.140473 | 0.00235  | 0.116256 | 0.01193  | 0.178832 |
| 0.024578 | 0.59626  | 0.105766 | 0.02226  | 0.075154 | 0.10479  | 0.101459 | 0.02836  | 0.179638 |
| 0.07155  | 0.12258  | 0.016913 | 0.71546  | 0.035404 | 0.44529  | 0.006582 | 0.88718  | -0.04176 |
| 0.069786 | 0.1321   | 0.073319 | 0.11358  | 0.081942 | 0.07689  | 0.084556 | 0.06791  | 0.050366 |
| 0.074938 | 0.1058   | 0.122696 | 0.00794  | 0.113578 | 0.01406  | 0.095665 | 0.03878  | 0.185429 |
| 0.055829 | 0.22852  | 0.153146 | 0.0009   | 0.092884 | 0.04484  | 0.154437 | 0.00081  | 0.312678 |
| 0.175537 | 0.00014  | 0.123328 | 0.00763  | 0.112626 | 0.01489  | 0.102044 | 0.02745  | 0.089936 |
| -0.01298 | 0.7796   | -0.01944 | 0.67515  | -0.00483 | 0.91717  | -0.03166 | 0.49487  | -0.06413 |
| 0.014747 | 0.7506   | 0.022102 | 0.63379  | 0.021437 | 0.64403  | 0.016205 | 0.72688  | 0.042877 |
| -0.00196 | 0.96639  | -0.00116 | 0.98009  | -0.00595 | 0.89789  | 0.001428 | 0.97545  | 0.015146 |
| 0.129073 | 0.00521  | 0.101004 | 0.02908  | 0.066184 | 0.1533   | 0.103018 | 0.026    | 0.140592 |
| 0.098089 | 0.03408  | 0.169257 | 0.00024  | 0.117442 | 0.01109  | 0.153089 | 0.0009   | 0.159868 |
| 0.157751 | 0.00062  | 0.177772 | 0.00011  | 0.219704 | 1.64E-06 | 0.058082 | 0.21026  | 0.123963 |
| 0.114374 | 0.01339  | -0.01153 | 0.80382  | 0.043412 | 0.34924  | -0.02908 | 0.53074  | -0.11451 |
| 0.018396 | 0.69172  | -0.0618  | 0.18245  | 0.050135 | 0.27961  | -0.13171 | 0.00436  | -0.05314 |
| 0.008735 | 0.85066  | -0.03011 | 0.51631  | -0.02944 | 0.5257   | -0.02396 | 0.60545  | -0.0196  |
| 0.032322 | 0.48594  | 0.078111 | 0.09179  | 0.053283 | 0.25048  | 0.087397 | 0.05913  | 0.139208 |
| 0.020841 | 0.65327  | -0.11224 | 0.01524  | -0.04595 | 0.3218   | -0.13825 | 0.00275  | -0.13051 |
| 0.055593 | 0.2305   | 0.079598 | 0.08575  | 0.074577 | 0.1075   | 0.055751 | 0.22917  | 0.058846 |
| -0.07804 | 0.09207  | -0.04878 | 0.29281  | -0.08891 | 0.05485  | 0.00182  | 0.96871  | -0.12468 |
| 0.081192 | 0.07964  | 0.07201  | 0.12019  | 0.063937 | 0.16777  | 0.062825 | 0.1753   | 0.135941 |
| 0.048215 | 0.29846  | 0.072236 | 0.11903  | 0.05782  | 0.21233  | 0.073773 | 0.11135  | 0.031585 |
| 0.00059  | 0.98985  | -0.01811 | 0.69635  | -0.0131  | 0.77765  | -0.01084 | 0.81528  | -0.06372 |

|          |          |          |          |          |          |          |          |          |
|----------|----------|----------|----------|----------|----------|----------|----------|----------|
| -0.00852 | 0.85427  | 0.001118 | 0.98077  | -0.00375 | 0.93565  | 0.018162 | 0.69546  | -0.00079 |
| -0.00376 | 0.93537  | 0.005049 | 0.91335  | -0.00105 | 0.98187  | 0.021864 | 0.63744  | -0.00019 |
| -0.02054 | 0.65797  | -0.0926  | 0.04551  | -0.04355 | 0.34771  | -0.09496 | 0.04025  | -0.19174 |
| 0.094942 | 0.04028  | 0.085197 | 0.06584  | 0.098073 | 0.03411  | 0.053525 | 0.24833  | 0.03344  |
| 0.119041 | 0.01003  | 0.289358 | 1.85E-10 | 0.168304 | 0.00026  | 0.297154 | 5.64E-11 | 0.171221 |
| 0.042879 | 0.35519  | 0.021022 | 0.65047  | 0.019474 | 0.67468  | 0.004663 | 0.91995  | 0.091979 |
| -0.02373 | 0.60907  | -0.02028 | 0.66196  | 0.001157 | 0.98011  | -0.04936 | 0.28713  | -0.01054 |
| 0.07841  | 0.09055  | 0.151039 | 0.00106  | 0.066347 | 0.15229  | 0.188142 | 4.29E-05 | 0.086229 |
| 0.151447 | 0.00103  | 0.103077 | 0.02592  | 0.085786 | 0.06398  | 0.096766 | 0.03658  | 0.180199 |
| 0.050741 | 0.27383  | 0.014989 | 0.74664  | 0.009968 | 0.82989  | 0.008918 | 0.84758  | -0.00291 |
| -0.04034 | 0.38437  | 0.058364 | 0.20805  | 0.027821 | 0.54869  | 0.0444   | 0.33837  | 0.144952 |
| 0.223123 | 1.11E-06 | 0.262283 | 8.72E-09 | 0.230929 | 4.53E-07 | 0.217826 | 2.02E-06 | 0.170763 |
| 0.275924 | 1.32E-09 | 0.20122  | 1.18E-05 | 0.287726 | 2.36E-10 | 0.059627 | 0.19836  | 0.062146 |
| 0.114978 | 0.01291  | 0.167868 | 0.00027  | 0.134656 | 0.00355  | 0.145196 | 0.00166  | 0.118472 |
| -0.05811 | 0.21005  | -0.14082 | 0.00229  | -0.08912 | 0.05428  | -0.13658 | 0.0031   | -0.27944 |
| 0.151876 | 0.00099  | 0.20432  | 8.56E-06 | 0.200332 | 1.29E-05 | 0.147036 | 0.00144  | 0.164593 |
| -0.05811 | 0.21008  | -0.12894 | 0.00526  | -0.12427 | 0.00717  | -0.10248 | 0.0268   | -0.1395  |
| 0.23523  | 2.72E-07 | 0.165172 | 0.00034  | 0.175232 | 0.00014  | 0.11877  | 0.0102   | 0.26754  |
| 0.006247 | 0.8929   | 0.034204 | 0.46088  | 0.031639 | 0.4952   | 0.031628 | 0.49535  | 0.036376 |
| 0.072364 | 0.11837  | -0.08672 | 0.06113  | 0.005215 | 0.91052  | -0.12452 | 0.00706  | -0.18651 |
| 0.000416 | 0.99285  | -0.05795 | 0.21128  | -0.00871 | 0.8511   | -0.09009 | 0.0517   | -0.15303 |
| 0.044873 | 0.33324  | 0.075077 | 0.10515  | 0.04984  | 0.28245  | 0.091919 | 0.04711  | 0.073762 |
| -0.06676 | 0.14977  | -0.07877 | 0.08907  | -0.03403 | 0.46315  | -0.08057 | 0.08199  | -0.16802 |
| -0.07372 | 0.11159  | -0.08808 | 0.05716  | -0.0843  | 0.06873  | -0.06676 | 0.14971  | -0.18929 |
| -0.05443 | 0.24038  | 0.065414 | 0.15815  | -0.0064  | 0.89022  | 0.102518 | 0.02674  | 0.042818 |
| -0.01959 | 0.67286  | -0.00816 | 0.86041  | -0.00349 | 0.94001  | -0.00766 | 0.86896  | -0.03313 |
| 0.103688 | 0.02504  | 0.035863 | 0.43942  | 0.061101 | 0.18747  | 0.009772 | 0.8332   | 0.163423 |
| -0.04387 | 0.34418  | -0.02838 | 0.54071  | 0.019492 | 0.67438  | -0.05713 | 0.21782  | -0.13576 |
| 0.062933 | 0.17456  | 0.096125 | 0.03785  | 0.084048 | 0.06958  | 0.078411 | 0.09054  | 0.192264 |
| 0.034412 | 0.45816  | 0.136537 | 0.00311  | 0.069282 | 0.13492  | 0.16587  | 0.00032  | 0.20416  |
| 0.281229 | 6.16E-10 | 0.280027 | 7.33E-10 | 0.206562 | 6.78E-06 | 0.288783 | 2.02E-10 | 0.247498 |
| -0.04099 | 0.37685  | -0.16135 | 0.00046  | -0.05822 | 0.20918  | -0.19479 | 2.25E-05 | -0.29659 |
| 0.046326 | 0.31781  | -0.06059 | 0.19122  | -0.00049 | 0.99161  | -0.0645  | 0.16408  | -0.08514 |
| -0.01172 | 0.80051  | 0.025042 | 0.58934  | 0.006645 | 0.88613  | 0.044571 | 0.33651  | 0.019537 |
| -0.0072  | 0.87663  | 0.030423 | 0.51193  | 0.002978 | 0.94883  | 0.046164 | 0.31951  | 0.038452 |
| -0.00595 | 0.89793  | -0.05439 | 0.24074  | -0.01842 | 0.69132  | -0.06241 | 0.17814  | -0.10828 |
| -0.00627 | 0.8925   | 0.002976 | 0.94886  | 0.001533 | 0.97364  | 0.020735 | 0.65492  | 0.022035 |
| -0.02493 | 0.59095  | -0.01109 | 0.81103  | -0.01198 | 0.79623  | -0.01163 | 0.80214  | 0.017613 |
| -0.02717 | 0.55806  | -0.01258 | 0.78632  | -0.01876 | 0.68594  | -0.01309 | 0.77789  | -0.0062  |
| 0.005404 | 0.90728  | -0.00617 | 0.89424  | 0.010552 | 0.82009  | -0.00706 | 0.87907  | -0.00039 |
| -0.01323 | 0.77554  | -0.00852 | 0.85438  | -0.01143 | 0.80544  | -0.00561 | 0.90383  | -0.00289 |
| -0.00519 | 0.91091  | 0.002013 | 0.96539  | 0.004462 | 0.92338  | 0.006112 | 0.8952   | 0.003396 |
| -0.01837 | 0.69217  | -0.01024 | 0.82538  | -0.01531 | 0.74141  | -0.00655 | 0.88778  | 0.000847 |
| -0.02645 | 0.56863  | -0.01738 | 0.708    | -0.01825 | 0.69408  | -0.00674 | 0.88452  | -0.01652 |
| 0.096716 | 0.03668  | 0.037264 | 0.42174  | 0.062643 | 0.17656  | 0.01539  | 0.7401   | 0.060169 |

|          |          |          |          |          |          |          |          |          |
|----------|----------|----------|----------|----------|----------|----------|----------|----------|
| 0.108633 | 0.01886  | 0.172566 | 0.00018  | 0.085151 | 0.06598  | 0.214042 | 3.05E-06 | 0.156109 |
| 0.144211 | 0.00178  | 0.085551 | 0.06472  | 0.070447 | 0.12847  | 0.05108  | 0.27063  | 0.198185 |
| -0.06623 | 0.15299  | -0.06269 | 0.17624  | -0.04431 | 0.33936  | -0.05779 | 0.21258  | -0.1008  |
| 0.017407 | 0.70752  | 0.057007 | 0.21884  | 0.029137 | 0.52993  | 0.081388 | 0.07892  | 0.024952 |
| 0.044433 | 0.33801  | -0.06302 | 0.17399  | -0.01823 | 0.69435  | -0.07501 | 0.10548  | -0.14877 |
| 0.079436 | 0.08639  | 0.026839 | 0.5629   | 0.006    | 0.89711  | 0.036118 | 0.43617  | 0.012757 |
| 0.109938 | 0.01747  | -0.0156  | 0.7367   | 0.037694 | 0.4164   | -0.04648 | 0.31616  | 0.043685 |
| -0.00453 | 0.92214  | -0.02604 | 0.57455  | 0.006585 | 0.88714  | -0.03674 | 0.42832  | -0.01997 |
| -0.07516 | 0.10476  | -0.06967 | 0.13277  | -0.05577 | 0.22905  | -0.05421 | 0.24228  | -0.09045 |
| 0.054086 | 0.2434   | -0.04659 | 0.31509  | 0.012676 | 0.7847   | -0.08989 | 0.05222  | 0.072913 |
| 0.016308 | 0.72522  | -0.02607 | 0.57412  | 0.023922 | 0.6061   | -0.04842 | 0.29643  | -0.02309 |
| 0.241179 | 1.32E-07 | 0.210542 | 4.45E-06 | 0.197802 | 1.66E-05 | 0.163918 | 0.00038  | 0.13407  |
| 0.097415 | 0.03533  | 0.122163 | 0.00822  | 0.116301 | 0.0119   | 0.09668  | 0.03675  | 0.18117  |
| 0.076216 | 0.09997  | -0.05555 | 0.23086  | -0.0234  | 0.61397  | -0.05055 | 0.27562  | -0.13817 |
| -0.02897 | 0.53226  | -0.00369 | 0.93662  | -0.03556 | 0.44335  | 0.002506 | 0.95693  | 0.012346 |
| 0.102652 | 0.02654  | 0.053201 | 0.25121  | 0.103323 | 0.02556  | 0.013238 | 0.7754   | -0.0633  |
| -0.02946 | 0.5254   | -0.02051 | 0.65846  | 0.00862  | 0.85262  | -0.03631 | 0.43372  | -0.10055 |
| 0.104217 | 0.02431  | -0.02369 | 0.60967  | 0.035256 | 0.44721  | -0.06438 | 0.16481  | -0.09718 |
| -0.01436 | 0.75688  | -0.01563 | 0.73628  | -0.00262 | 0.95496  | -0.00929 | 0.84134  | -0.04344 |
| -0.22624 | 7.81E-07 | -0.18239 | 7.37E-05 | -0.17011 | 0.00022  | -0.15306 | 0.00091  | -0.19945 |
| -0.05394 | 0.24469  | -0.00089 | 0.98472  | -0.04012 | 0.38704  | 0.022991 | 0.6202   | 0.026064 |
| -0.05658 | 0.22229  | -0.09936 | 0.03182  | -0.07929 | 0.08697  | -0.09137 | 0.04845  | -0.16176 |
| 0.086037 | 0.06321  | 0.129682 | 0.005    | 0.051321 | 0.26837  | 0.155633 | 0.00074  | 0.201633 |
| 0.031592 | 0.49584  | 0.027925 | 0.54719  | 0.020322 | 0.66137  | 0.016047 | 0.72944  | 0.008966 |
| 0.132743 | 0.00406  | 0.208954 | 5.27E-06 | 0.115767 | 0.0123   | 0.229591 | 5.29E-07 | 0.318262 |
| 0.165035 | 0.00034  | 0.124032 | 0.00728  | 0.185892 | 5.31E-05 | 0.040004 | 0.3884   | 0.022535 |
| 0.148798 | 0.00126  | 0.168352 | 0.00026  | 0.085993 | 0.06334  | 0.189752 | 3.67E-05 | 0.330979 |
| 0.033153 | 0.47478  | 0.077878 | 0.09276  | 0.050249 | 0.27852  | 0.086088 | 0.06305  | 0.079434 |
| 0.182343 | 7.40E-05 | 0.084654 | 0.06758  | 0.173994 | 0.00016  | -0.02074 | 0.65487  | -0.00315 |
| -0.05156 | 0.26614  | -0.07628 | 0.0997   | -0.06965 | 0.13287  | -0.07997 | 0.08429  | -0.11252 |
| 0.097097 | 0.03594  | 0.059942 | 0.196    | 0.056159 | 0.22578  | 0.056486 | 0.22309  | 0.143054 |
| 0.214953 | 2.76E-06 | 0.215859 | 2.50E-06 | 0.258038 | 1.54E-08 | 0.111207 | 0.01621  | 0.107147 |
| 0.185512 | 5.50E-05 | 0.091906 | 0.04715  | 0.092732 | 0.04519  | 0.071996 | 0.12026  | 0.106082 |
| 0.120293 | 0.00927  | -0.01036 | 0.82325  | 0.079032 | 0.08801  | -0.08069 | 0.08154  | -0.09935 |
| 0.045741 | 0.32397  | 0.059183 | 0.20173  | 0.051568 | 0.26607  | 0.053077 | 0.25232  | 0.003812 |
| 0.049763 | 0.2832   | 0.022736 | 0.62408  | 0.028881 | 0.53356  | 0.009929 | 0.83055  | 0.020112 |
| 0.063455 | 0.171    | 0.054005 | 0.2441   | 0.070304 | 0.12924  | 0.045626 | 0.32518  | -0.00778 |
| -0.02343 | 0.61354  | -0.00818 | 0.86004  | -0.01074 | 0.81691  | 0.004168 | 0.92843  | -0.00741 |
| -0.00483 | 0.91707  | 0.012978 | 0.7797   | 0.010963 | 0.81321  | 0.012776 | 0.78304  | 0.006215 |
| 0.041981 | 0.36537  | 0.032565 | 0.48265  | 0.066294 | 0.15262  | 0.013181 | 0.77634  | -0.00544 |
| -0.08876 | 0.05527  | -0.10641 | 0.02145  | -0.0624  | 0.17828  | -0.11843 | 0.01042  | -0.12678 |
| -0.08817 | 0.05692  | -0.08919 | 0.0541   | -0.06032 | 0.19321  | -0.1014  | 0.02846  | -0.09152 |
| 0.096531 | 0.03704  | 0.033239 | 0.47364  | 0.020457 | 0.65926  | 0.048774 | 0.29289  | 0.00403  |
| 0.039245 | 0.39747  | 0.058959 | 0.20344  | 0.06231  | 0.17887  | 0.040477 | 0.38281  | 0.079276 |
| 0.102478 | 0.0268   | 0.188419 | 4.17E-05 | 0.131086 | 0.00455  | 0.178637 | 0.0001   | 0.275479 |

|          |          |          |          |          |          |          |          |          |
|----------|----------|----------|----------|----------|----------|----------|----------|----------|
| 0.022178 | 0.63262  | -0.02291 | 0.62139  | 0.030763 | 0.50723  | -0.07121 | 0.12435  | -0.0444  |
| 0.105311 | 0.02284  | 0.131954 | 0.00428  | 0.090825 | 0.04982  | 0.131554 | 0.0044   | 0.143242 |
| 0.084877 | 0.06686  | 0.039228 | 0.39768  | 0.054734 | 0.23779  | 0.01657  | 0.72099  | 0.000345 |
| 0.034319 | 0.45938  | 0.061901 | 0.18175  | 0.027555 | 0.55253  | 0.079306 | 0.08691  | 0.023644 |
| -0.00487 | 0.91634  | 0.014917 | 0.74782  | 0.011733 | 0.80036  | 0.005469 | 0.90616  | 0.103582 |
| -0.00708 | 0.87866  | 0.012614 | 0.78572  | 0.023304 | 0.61544  | -0.0063  | 0.89204  | -0.06212 |
| 0.114635 | 0.01318  | 0.119057 | 0.01002  | 0.125155 | 0.00677  | 0.066569 | 0.15092  | 0.044851 |
| 0.272099 | 2.27E-09 | 0.072672 | 0.1168   | 0.10217  | 0.02726  | 0.069865 | 0.13166  | 0.046019 |
| -0.01845 | 0.69095  | 0.013381 | 0.77304  | 0.004633 | 0.92046  | 0.026163 | 0.57277  | 0.006042 |
| -0.02239 | 0.62934  | -0.11941 | 0.0098   | -0.03069 | 0.50829  | -0.16771 | 0.00027  | -0.17199 |
| 0.053933 | 0.24474  | -0.03913 | 0.39881  | 0.022134 | 0.63329  | -0.08557 | 0.06465  | -0.03075 |
| 0.219052 | 1.76E-06 | 0.156956 | 0.00066  | 0.166428 | 0.0003   | 0.107684 | 0.01993  | 0.280476 |
| 0.071123 | 0.12483  | 0.023772 | 0.60837  | 0.012589 | 0.78614  | 0.026701 | 0.56491  | 0.101472 |
| -0.02108 | 0.64961  | -0.05826 | 0.20888  | -0.01667 | 0.71932  | -0.07053 | 0.128    | -0.13343 |
| -0.00962 | 0.83566  | -0.05367 | 0.24706  | -0.03749 | 0.41892  | -0.04896 | 0.29103  | -0.17458 |
| -0.22459 | 9.43E-07 | -0.11348 | 0.01414  | -0.1343  | 0.00364  | -0.07792 | 0.09259  | -0.13381 |
| -0.01867 | 0.68732  | 0.026764 | 0.56399  | 0.038058 | 0.41191  | 0.007853 | 0.8656   | 0.039953 |
| -0.0231  | 0.61847  | -0.00308 | 0.94701  | 0.005215 | 0.91051  | 0.003958 | 0.93202  | -0.03774 |
| -0.02857 | 0.53796  | 0.008035 | 0.86252  | 0.000467 | 0.99197  | 0.018546 | 0.68935  | 0.00546  |
| -0.0104  | 0.82272  | -0.07993 | 0.08445  | 0.00684  | 0.8828   | -0.13928 | 0.00256  | -0.22353 |
| 0.213877 | 3.11E-06 | 0.140648 | 0.00232  | 0.190617 | 3.38E-05 | 0.069378 | 0.13438  | 0.193605 |
| 0.073941 | 0.11054  | 0.071579 | 0.12243  | 0.078335 | 0.09086  | 0.032845 | 0.47889  | 0.120379 |
| 0.129344 | 0.00512  | 0.028528 | 0.53858  | 0.035938 | 0.43846  | 0.027142 | 0.55849  | 0.143219 |
| 0.121157 | 0.00877  | 0.038088 | 0.41154  | 0.062494 | 0.17759  | 0.016764 | 0.71786  | 0.130022 |
| -0.02184 | 0.63781  | -0.01412 | 0.76083  | 0.005906 | 0.89872  | -0.03496 | 0.45109  | 0.071672 |
| 0.064136 | 0.16645  | 0.016914 | 0.71544  | -0.00179 | 0.96929  | 0.02452  | 0.59712  | 0.044844 |
| 0.189154 | 3.89E-05 | 0.183553 | 6.61E-05 | 0.158088 | 0.00061  | 0.153711 | 0.00086  | 0.248719 |
| 0.113194 | 0.01439  | -0.00375 | 0.93566  | 0.051223 | 0.26929  | -0.02574 | 0.57893  | 0.061208 |
| -0.09942 | 0.03171  | -0.09853 | 0.03328  | -0.07693 | 0.09682  | -0.09219 | 0.04646  | -0.11403 |
| 0.091206 | 0.04886  | 0.056535 | 0.22268  | 0.054896 | 0.2364   | 0.040569 | 0.38173  | 0.088196 |
| 0.059862 | 0.19659  | -0.02294 | 0.62099  | -0.00684 | 0.8828   | -0.02995 | 0.51851  | -0.04807 |
| 0.204515 | 8.39E-06 | 0.27974  | 7.64E-10 | 0.247958 | 5.66E-08 | 0.210703 | 4.37E-06 | 0.227772 |
| 0.009761 | 0.83338  | 0.023682 | 0.60972  | 0.015773 | 0.73389  | 0.014506 | 0.75454  | 0.011534 |
| -0.07772 | 0.09342  | -0.00555 | 0.90475  | -0.03321 | 0.47399  | 0.00324  | 0.94433  | 0.091293 |
| 0.064976 | 0.16096  | 0.034176 | 0.46125  | 0.072187 | 0.11927  | 0.001419 | 0.9756   | -0.01074 |
| 0.291141 | 1.42E-10 | 0.24529  | 7.93E-08 | 0.265267 | 5.82E-09 | 0.167822 | 0.00027  | 0.102922 |
| 0.299932 | 3.66E-11 | 0.244436 | 8.82E-08 | 0.273582 | 1.84E-09 | 0.140907 | 0.00227  | 0.126825 |
| 0.243413 | 1.00E-07 | 0.203789 | 9.05E-06 | 0.267632 | 4.21E-09 | 0.071652 | 0.12204  | 0.076392 |
| 0.299247 | 4.08E-11 | 0.190789 | 3.32E-05 | 0.177083 | 0.00012  | 0.202181 | 1.07E-05 | 0.103881 |
| 0.144548 | 0.00174  | 0.227174 | 7.01E-07 | 0.19264  | 2.78E-05 | 0.187495 | 4.56E-05 | 0.196842 |
| 0.16187  | 0.00045  | 0.112716 | 0.01481  | 0.135159 | 0.00343  | 0.076296 | 0.09961  | 0.094653 |
| 0.011021 | 0.81224  | 0.031147 | 0.50194  | 0.020428 | 0.65971  | 0.030168 | 0.51548  | 0.028164 |
| 0.075832 | 0.10169  | 0.15172  | 0.00101  | 0.11799  | 0.01071  | 0.143428 | 0.00189  | 0.112657 |
| 0.032328 | 0.48585  | -0.00522 | 0.91038  | 0.002863 | 0.95079  | 0.017053 | 0.71321  | 0.013391 |
| 0.177988 | 0.00011  | 0.125257 | 0.00672  | 0.139437 | 0.00253  | 0.087443 | 0.059    | 0.055609 |

|          |          |          |          |          |          |          |          |          |
|----------|----------|----------|----------|----------|----------|----------|----------|----------|
| 0.134062 | 0.0037   | 0.056792 | 0.22058  | 0.033563 | 0.46933  | 0.073757 | 0.11143  | 0.043623 |
| 0.142532 | 0.00202  | 0.231855 | 4.06E-07 | 0.180408 | 8.84E-05 | 0.220682 | 1.47E-06 | 0.157665 |
| 0.0577   | 0.21327  | 0.072696 | 0.11668  | 0.070621 | 0.12752  | 0.059054 | 0.20272  | 0.039674 |
| 0.13942  | 0.00253  | 0.159123 | 0.00056  | 0.159579 | 0.00054  | 0.095374 | 0.03938  | 0.311191 |
| 0.029155 | 0.52968  | 0.040516 | 0.38235  | 0.041085 | 0.37569  | 0.024668 | 0.5949   | 0.081439 |
| -0.13599 | 0.00323  | -0.08244 | 0.0751   | -0.09661 | 0.03688  | -0.06138 | 0.18549  | -0.09247 |
| 0.054939 | 0.23604  | -0.00993 | 0.83055  | 0.042491 | 0.35957  | -0.04414 | 0.34118  | -0.0306  |
| 0.120227 | 0.00931  | -0.03315 | 0.47478  | 0.06409  | 0.16675  | -0.10216 | 0.02728  | -0.06154 |
| 0.041348 | 0.37265  | -0.00506 | 0.91323  | -0.02869 | 0.53631  | 0.023448 | 0.61326  | 0.082582 |
| 0.21856  | 1.86E-06 | 0.192231 | 2.89E-05 | 0.247294 | 6.16E-08 | 0.071673 | 0.12194  | 0.041513 |
| -0.02357 | 0.61138  | 0.072938 | 0.11547  | 0.021693 | 0.64008  | 0.07748  | 0.09445  | 0.076536 |
| 0.042326 | 0.36144  | 0.07376  | 0.11142  | 0.060837 | 0.18939  | 0.05367  | 0.24705  | 0.047322 |
| 0.100072 | 0.0306   | 0.042789 | 0.35621  | 0.069766 | 0.13221  | 0.024329 | 0.59998  | -0.00696 |
| -0.0412  | 0.37435  | -0.0523  | 0.25931  | -0.03245 | 0.48417  | -0.05628 | 0.22478  | -0.05727 |
| 0.052152 | 0.26069  | 0.038514 | 0.40632  | 0.0372   | 0.42254  | 0.03309  | 0.47563  | 0.17741  |
| 0.056352 | 0.22419  | 0.002915 | 0.94991  | 0.023654 | 0.61014  | 0.004711 | 0.91912  | -0.01056 |
| 0.111671 | 0.01576  | 0.094835 | 0.04051  | 0.070597 | 0.12765  | 0.108953 | 0.01851  | 0.222325 |
| -0.02203 | 0.63494  | -0.05916 | 0.20188  | -0.04797 | 0.30091  | -0.05137 | 0.26796  | -0.04051 |
| -0.04525 | 0.32922  | -0.01848 | 0.69034  | -0.02523 | 0.58651  | -0.01955 | 0.67342  | 0.000355 |
| 0.000812 | 0.98603  | -0.08081 | 0.08106  | -0.01131 | 0.80747  | -0.11456 | 0.01324  | -0.11382 |
| 0.012279 | 0.79128  | 0.085759 | 0.06407  | 0.027014 | 0.56036  | 0.104095 | 0.02448  | 0.245648 |
| -0.09397 | 0.04238  | -0.07622 | 0.09997  | -0.07704 | 0.09636  | -0.05529 | 0.23304  | -0.12149 |
| 0.099072 | 0.03232  | -0.05729 | 0.21655  | 0.058037 | 0.21061  | -0.12606 | 0.00638  | -0.1951  |
| -0.04253 | 0.35911  | -0.15288 | 0.00092  | -0.07558 | 0.10283  | -0.16414 | 0.00037  | -0.24426 |
| -0.01334 | 0.77372  | -0.07638 | 0.09925  | -0.04184 | 0.36694  | -0.09094 | 0.04952  | -0.15796 |
| 0.036093 | 0.43649  | -0.02814 | 0.54408  | -0.01799 | 0.69826  | -0.03403 | 0.46323  | -0.07468 |
| 0.02995  | 0.51851  | 0.081275 | 0.07934  | 0.041373 | 0.37236  | 0.08381  | 0.07038  | 0.048932 |
| 0.067073 | 0.14784  | 0.040337 | 0.38446  | 0.042302 | 0.36171  | 0.028759 | 0.53529  | 0.000817 |
| 0.095411 | 0.0393   | -0.01715 | 0.71166  | 0.062219 | 0.17951  | -0.07593 | 0.10126  | -0.04212 |
| 0.271651 | 2.41E-09 | 0.309114 | 8.49E-12 | 0.257965 | 1.55E-08 | 0.23524  | 2.71E-07 | 0.284286 |
| 0.075955 | 0.10113  | -0.00852 | 0.85427  | 0.017906 | 0.69954  | -0.02174 | 0.63941  | -0.07544 |
| 0.088423 | 0.0562   | 0.028743 | 0.53552  | 0.049365 | 0.28706  | 0.020818 | 0.65363  | 0.025273 |
| 0.000724 | 0.98755  | -0.01203 | 0.79534  | 0.004188 | 0.92808  | -0.00577 | 0.90102  | 0.012989 |
| 0.099359 | 0.03182  | 0.127412 | 0.00583  | 0.1507   | 0.00109  | 0.083779 | 0.07048  | 0.042949 |
| 0.064391 | 0.16477  | 0.083414 | 0.07172  | 0.072707 | 0.11663  | 0.072842 | 0.11595  | 0.105959 |
| 0.083309 | 0.07208  | -0.04283 | 0.35578  | 0.008407 | 0.85621  | -0.04703 | 0.31049  | -0.06875 |
| 0.08357  | 0.07119  | 0.102545 | 0.0267   | 0.062209 | 0.17958  | 0.093981 | 0.04236  | 0.200732 |
| -0.00582 | 0.90026  | -0.02958 | 0.52364  | -0.02858 | 0.53789  | -0.02507 | 0.58887  | -0.00934 |
| 0.158128 | 0.0006   | 0.075662 | 0.10246  | 0.099565 | 0.03146  | 0.04514  | 0.33038  | 0.093925 |
| 0.047708 | 0.30357  | 0.175993 | 0.00013  | 0.073298 | 0.11368  | 0.219523 | 1.67E-06 | 0.201076 |
| 0.022705 | 0.62455  | 0.074161 | 0.10948  | 0.025707 | 0.57948  | 0.103888 | 0.02476  | 0.104236 |
| 0.013326 | 0.77394  | 0.091818 | 0.04736  | 0.043487 | 0.34841  | 0.108245 | 0.01929  | 0.159441 |
| -0.03097 | 0.50436  | 0.011723 | 0.80052  | 0.001005 | 0.98272  | -0.00141 | 0.97569  | 0.072257 |
| 0.02768  | 0.55072  | 0.007087 | 0.8786   | 0.041066 | 0.37592  | -0.01142 | 0.80565  | 0.014838 |
| 0.038183 | 0.41038  | 0.02122  | 0.6474   | 0.021905 | 0.63681  | 0.01499  | 0.74664  | 0.067379 |

|          |          |           |          |          |          |          |          |          |
|----------|----------|-----------|----------|----------|----------|----------|----------|----------|
| -0.10038 | 0.03008  | -0.09357  | 0.04326  | -0.07638 | 0.09924  | -0.10245 | 0.02684  | -0.12783 |
| 0.193113 | 2.65E-05 | 0.25102   | 3.83E-08 | 0.326125 | 4.93E-13 | 0.078032 | 0.09212  | 0.265416 |
| -0.02014 | 0.66415  | -0.03334  | 0.47236  | -0.02992 | 0.51899  | -0.01459 | 0.75317  | -0.01663 |
| -0.05101 | 0.27131  | -0.01872  | 0.68659  | -0.02914 | 0.52985  | -0.00604 | 0.89636  | -0.00013 |
| 0.030632 | 0.50904  | 0.115089  | 0.01282  | 0.086884 | 0.06064  | 0.099872 | 0.03094  | 0.212164 |
| 0.055718 | 0.22945  | 0.001485  | 0.97448  | 0.080436 | 0.08249  | -0.06598 | 0.15458  | -0.11563 |
| -0.07743 | 0.09467  | -0.13828  | 0.00275  | -0.0759  | 0.10136  | -0.16392 | 0.00038  | -0.18991 |
| 0.324531 | 6.48E-13 | 0.148717  | 0.00127  | 0.259541 | 1.26E-08 | 0.012539 | 0.78697  | 0.017271 |
| 0.174449 | 0.00015  | 0.113307  | 0.01429  | 0.137929 | 0.00282  | 0.068867 | 0.13728  | 0.133197 |
| 0.333592 | 1.33E-13 | 0.203364  | 9.45E-06 | 0.289056 | 1.94E-10 | 0.077782 | 0.09317  | 0.089391 |
| 0.082761 | 0.07398  | 0.145298  | 0.00164  | 0.104883 | 0.02341  | 0.140453 | 0.00235  | 0.134667 |
| 0.071649 | 0.12206  | 0.010314  | 0.82409  | 0.001643 | 0.97176  | 0.015216 | 0.74294  | 0.002732 |
| -0.00636 | 0.89104  | 0.06334   | 0.17178  | 0.034747 | 0.45379  | 0.055837 | 0.22846  | 0.027616 |
| -0.00835 | 0.85724  | -5.89E-05 | 0.99899  | 0.009047 | 0.8454   | 0.00817  | 0.86022  | 0.00694  |
| 0.049254 | 0.28816  | 0.09456   | 0.0411   | 0.075836 | 0.10167  | 0.081559 | 0.07829  | 0.201251 |
| 0.073482 | 0.11277  | 0.135776  | 0.00328  | 0.102265 | 0.02712  | 0.12674  | 0.0061   | 0.252746 |
| 0.095441 | 0.03924  | 0.091005  | 0.04936  | 0.101026 | 0.02904  | 0.073011 | 0.11511  | 0.040246 |
| 0.029974 | 0.51819  | 0.098579  | 0.03319  | 0.078016 | 0.09219  | 0.093507 | 0.04341  | 0.190158 |
| 0.214197 | 3.00E-06 | 0.1755    | 0.00014  | 0.215582 | 2.58E-06 | 0.094325 | 0.0416   | 0.14376  |
| -0.15645 | 0.00069  | -0.18744  | 4.58E-05 | -0.16075 | 0.00049  | -0.16285 | 0.00041  | -0.24971 |
| -0.17067 | 0.00021  | -0.13924  | 0.00256  | -0.11178 | 0.01566  | -0.12661 | 0.00615  | -0.24756 |
| 0.129112 | 0.0052   | 0.034076  | 0.46256  | 0.116086 | 0.01206  | -0.03676 | 0.42802  | 0.063612 |
| -0.01935 | 0.67659  | -0.04119  | 0.37445  | -0.00934 | 0.84039  | -0.08139 | 0.07891  | -0.08476 |
| -0.06342 | 0.17121  | -0.00218  | 0.96255  | -0.00455 | 0.92191  | -0.02981 | 0.52045  | -0.01266 |
| -0.03156 | 0.49634  | -0.12876  | 0.00533  | -0.07133 | 0.12374  | -0.12973 | 0.00499  | -0.20414 |
| -0.01091 | 0.81415  | -0.155    | 0.00078  | -0.03154 | 0.49656  | -0.20399 | 8.86E-06 | -0.24988 |
| 0.054194 | 0.24246  | 0.024764  | 0.59348  | 0.039587 | 0.39337  | 0.014377 | 0.75666  | -0.02349 |
| 0.203393 | 9.42E-06 | 0.035561  | 0.44329  | 0.04882  | 0.29243  | 0.034139 | 0.46173  | 0.051431 |
| 0.057441 | 0.21534  | -0.03375  | 0.46685  | 0.036007 | 0.43758  | -0.08544 | 0.06506  | -0.04043 |
| 0.091965 | 0.047    | 0.019532  | 0.67375  | 0.019225 | 0.67859  | 0.028563 | 0.53808  | -0.00719 |
| -0.00918 | 0.84311  | -0.02894  | 0.53266  | -0.01962 | 0.67231  | -0.01805 | 0.69726  | -0.00506 |
| -0.03825 | 0.40956  | 0.007666  | 0.86877  | -0.00504 | 0.91348  | -0.00091 | 0.98442  | 0.061545 |
| 0.152224 | 0.00097  | 0.066957  | 0.14854  | 0.102186 | 0.02724  | 0.04403  | 0.34241  | 0.049409 |
| 0.058252 | 0.20892  | -0.01612  | 0.72826  | 0.060998 | 0.18822  | -0.06588 | 0.15522  | -0.00614 |
| 0.025774 | 0.57849  | -0.00111  | 0.98096  | -0.00665 | 0.88604  | 0.00258  | 0.95565  | -0.02824 |
| -0.00957 | 0.83655  | -0.05714  | 0.21777  | -0.02414 | 0.60286  | -0.07829 | 0.09106  | -0.11624 |
| 0.016992 | 0.71418  | 0.065464  | 0.15783  | 0.051517 | 0.26655  | 0.060436 | 0.19233  | 0.04381  |
| 0.277002 | 1.13E-09 | 0.265257  | 5.83E-09 | 0.200171 | 1.31E-05 | 0.275643 | 1.37E-09 | 0.244398 |
| 0.357464 | 1.60E-15 | 0.31529   | 3.08E-12 | 0.372897 | 7.46E-17 | 0.170047 | 0.00022  | 0.165256 |
| 0.043947 | 0.34332  | -0.03911  | 0.39907  | -0.01324 | 0.77539  | -0.04126 | 0.37367  | -0.08531 |
| 0.018839 | 0.68469  | 0.003161  | 0.94568  | -0.00169 | 0.97093  | 0.022388 | 0.6294   | 0.063788 |
| 0.214319 | 2.96E-06 | 0.108124  | 0.01943  | 0.141208 | 0.00222  | 0.053376 | 0.24965  | 0.080684 |
| -0.01287 | 0.78145  | -0.09385  | 0.04265  | -0.06888 | 0.1372   | -0.09323 | 0.04404  | -0.0488  |
| 0.030497 | 0.5109   | 0.029655  | 0.52264  | 0.044007 | 0.34266  | 0.003703 | 0.93638  | -0.01187 |
| 0.055991 | 0.22717  | 0.080062  | 0.08394  | 0.057021 | 0.21872  | 0.080873 | 0.08084  | 0.120056 |



|          |          |          |          |          |          |          |          |          |
|----------|----------|----------|----------|----------|----------|----------|----------|----------|
| 0.029347 | 0.52697  | -0.07883 | 0.08882  | -0.02661 | 0.5662   | -0.07275 | 0.11642  | -0.13899 |
| -0.16002 | 0.00052  | -0.19509 | 2.18E-05 | -0.14067 | 0.00231  | -0.19214 | 2.91E-05 | -0.19171 |
| 0.028541 | 0.5384   | 0.019516 | 0.67401  | 0.035768 | 0.44063  | -0.00022 | 0.99622  | 0.011815 |
| 0.042796 | 0.35612  | 0.113653 | 0.01399  | 0.053566 | 0.24797  | 0.128607 | 0.00538  | 0.108249 |
| 0.197319 | 1.75E-05 | 0.077326 | 0.09511  | 0.129881 | 0.00494  | 0.031241 | 0.50065  | 0.087066 |
| 0.17358  | 0.00016  | 0.106178 | 0.02174  | 0.075547 | 0.10299  | 0.107896 | 0.01969  | 0.218645 |
| -0.02    | 0.6664   | -0.02637 | 0.5698   | -0.00334 | 0.94267  | -0.02975 | 0.52127  | -0.04183 |
| -0.01477 | 0.75021  | 0.056244 | 0.22508  | 0.024581 | 0.59622  | 0.074643 | 0.10719  | 0.101022 |
| 0.09408  | 0.04214  | 0.132246 | 0.0042   | 0.137472 | 0.00291  | 0.086577 | 0.06156  | 0.091522 |
| 0.094837 | 0.0405   | 0.074931 | 0.10583  | 0.070404 | 0.1287   | 0.069286 | 0.1349   | 0.053416 |
| 0.030922 | 0.50502  | -0.05752 | 0.21471  | -0.02091 | 0.65218  | -0.07623 | 0.0999   | -0.03851 |
| 0.023445 | 0.61331  | 0.073675 | 0.11183  | 0.067478 | 0.14541  | 0.057536 | 0.21458  | 0.149426 |
| 0.298768 | 4.39E-11 | 0.172732 | 0.00018  | 0.234843 | 2.85E-07 | 0.090456 | 0.05075  | 0.083586 |
| 0.012159 | 0.79327  | -0.00531 | 0.90893  | 0.007716 | 0.86792  | -0.01857 | 0.68891  | -0.04695 |
| 0.019943 | 0.6673   | 0.13972  | 0.00248  | 0.068293 | 0.14059  | 0.159502 | 0.00054  | 0.285707 |
| 0.226806 | 7.31E-07 | 0.263854 | 7.06E-09 | 0.26661  | 4.85E-09 | 0.175901 | 0.00013  | 0.193942 |
| 0.016314 | 0.72512  | 0.042253 | 0.36227  | 0.039483 | 0.39462  | 0.053252 | 0.25076  | 0.048001 |
| 0.148316 | 0.00131  | 0.111753 | 0.01569  | 0.110914 | 0.01649  | 0.075189 | 0.10463  | 0.078376 |
| 0.15368  | 0.00086  | 0.152344 | 0.00096  | 0.142976 | 0.00195  | 0.132657 | 0.00408  | 0.092221 |
| 0.011065 | 0.81151  | -0.00084 | 0.9856   | 0.00616  | 0.89438  | -0.01079 | 0.81607  | -0.05426 |
| 0.055056 | 0.23503  | 0.102326 | 0.02702  | 0.077301 | 0.09522  | 0.103823 | 0.02485  | 0.043772 |
| -0.06246 | 0.17783  | -0.06525 | 0.15918  | -0.0334  | 0.47147  | -0.08604 | 0.0632   | -0.04859 |
| -0.01239 | 0.7895   | 0.037996 | 0.41267  | 0.011012 | 0.81239  | 0.0317   | 0.49437  | 0.087393 |
| -0.04675 | 0.31341  | -0.1436  | 0.00186  | -0.08218 | 0.07605  | -0.14191 | 0.00211  | -0.251   |
| 0.035411 | 0.4452   | -0.00792 | 0.8644   | 0.014839 | 0.7491   | -0.03304 | 0.47625  | 0.016396 |
| 0.106661 | 0.02115  | 0.054537 | 0.23949  | 0.052769 | 0.25508  | 0.067804 | 0.14346  | 0.056793 |
| -0.01797 | 0.69854  | -0.07596 | 0.10113  | -0.06455 | 0.16371  | -0.06284 | 0.17517  | -0.13683 |
| 0.04126  | 0.37366  | 0.022234 | 0.63177  | 0.041354 | 0.37258  | -0.00092 | 0.98426  | -0.01754 |
| 0.050988 | 0.27149  | 0.128281 | 0.0055   | 0.1183   | 0.01051  | 0.110184 | 0.01722  | 0.101861 |
| -0.03731 | 0.42112  | -0.06982 | 0.13193  | -0.0339  | 0.46487  | -0.09798 | 0.03427  | -0.07565 |
| 0.059094 | 0.20241  | 0.090728 | 0.05006  | 0.073869 | 0.11089  | 0.068947 | 0.13682  | 0.043973 |
| 0.132684 | 0.00407  | 0.121324 | 0.00868  | 0.08942  | 0.05347  | 0.12312  | 0.00773  | 0.135615 |
| 0.013574 | 0.76986  | 0.072158 | 0.11942  | 0.045293 | 0.32873  | 0.081352 | 0.07905  | 0.119667 |
| 0.069227 | 0.13523  | 0.036521 | 0.43106  | 0.073915 | 0.11066  | -0.01369 | 0.76794  | -0.06516 |
| 0.007901 | 0.86479  | 0.054433 | 0.24039  | 0.008021 | 0.86274  | 0.057624 | 0.21388  | 0.099607 |
| 0.015957 | 0.7309   | 0.047466 | 0.30604  | 0.032477 | 0.48384  | 0.043567 | 0.34752  | 0.071134 |
| 0.015908 | 0.73169  | -0.0463  | 0.31813  | -0.00852 | 0.85426  | -0.04801 | 0.30053  | -0.18672 |
| -0.03128 | 0.5001   | -0.02204 | 0.63475  | -0.02696 | 0.56115  | -0.01561 | 0.73646  | -0.0368  |
| -0.03974 | 0.3915   | 0.019438 | 0.67524  | -0.01956 | 0.67333  | 0.052871 | 0.25417  | 0.019116 |
| 0.018871 | 0.68419  | -0.05762 | 0.21388  | -0.01626 | 0.72592  | -0.06988 | 0.13155  | -0.14051 |
| 0.074125 | 0.10965  | 0.161227 | 0.00047  | 0.105613 | 0.02245  | 0.181714 | 7.84E-05 | 0.066971 |
| 0.04721  | 0.30865  | 0.162601 | 0.00042  | 0.060576 | 0.1913   | 0.181152 | 8.26E-05 | 0.192409 |
| 0.01066  | 0.81828  | 0.034099 | 0.46227  | 0.024223 | 0.60158  | 0.031756 | 0.4936   | 0.042281 |
| 0.049003 | 0.29062  | 0.055148 | 0.23425  | 0.057862 | 0.21199  | 0.037836 | 0.41465  | 0.003552 |
| 0.053    | 0.25301  | -0.05387 | 0.24526  | -0.00251 | 0.95682  | -0.06997 | 0.13107  | -0.13909 |

|          |          |           |          |          |          |          |          |          |
|----------|----------|-----------|----------|----------|----------|----------|----------|----------|
| 0.070842 | 0.12633  | 0.059662  | 0.1981   | 0.057171 | 0.21751  | 0.046276 | 0.31834  | 0.008184 |
| -0.02913 | 0.53     | -0.07975  | 0.08515  | -0.05234 | 0.25901  | -0.08538 | 0.06524  | -0.16833 |
| -0.14816 | 0.00132  | -0.13278  | 0.00405  | -0.15109 | 0.00106  | -0.07066 | 0.1273   | -0.16268 |
| -0.05393 | 0.24478  | -0.04437  | 0.33865  | -0.03183 | 0.49261  | -0.04966 | 0.28424  | -0.04966 |
| -0.09268 | 0.04532  | -0.04693  | 0.31158  | -0.05917 | 0.2018   | -0.01057 | 0.81972  | -0.06496 |
| 0.031982 | 0.49054  | -0.02604  | 0.57455  | 0.007828 | 0.86603  | -0.04443 | 0.33805  | -0.0764  |
| 0.06872  | 0.13812  | 0.070497  | 0.1282   | 0.02916  | 0.52961  | 0.075086 | 0.10511  | 0.035223 |
| 0.040817 | 0.37882  | -0.06874  | 0.13799  | 0.014908 | 0.74796  | -0.10991 | 0.0175   | -0.24696 |
| -0.09443 | 0.04138  | -0.09075  | 0.05     | -0.03839 | 0.40781  | -0.10239 | 0.02693  | -0.11351 |
| 0.009659 | 0.83509  | 0.01908   | 0.68088  | 0.041463 | 0.37132  | -0.01809 | 0.69667  | 0.121216 |
| 0.105874 | 0.02212  | 0.056952  | 0.21928  | 0.067426 | 0.14572  | 0.038149 | 0.41079  | 0.069386 |
| 0.024013 | 0.60473  | 0.002374  | 0.9592   | -0.00707 | 0.87896  | 0.01287  | 0.78148  | -0.09664 |
| 0.044787 | 0.33417  | 0.040799  | 0.37904  | 0.065657 | 0.15661  | 0.00736  | 0.87396  | -0.00851 |
| 0.009037 | 0.84558  | -0.02325  | 0.61618  | -0.00551 | 0.90544  | -0.01512 | 0.74449  | -0.03817 |
| 0.094978 | 0.04021  | 0.1756    | 0.00014  | 0.122605 | 0.00799  | 0.158261 | 0.0006   | 0.222603 |
| -0.06051 | 0.19175  | -0.23469  | 2.90E-07 | -0.17359 | 0.00016  | -0.22    | 1.58E-06 | -0.31439 |
| 0.025729 | 0.57916  | 0.141217  | 0.00222  | 0.066624 | 0.15058  | 0.151021 | 0.00106  | 0.258945 |
| -0.07133 | 0.12372  | -0.06265  | 0.17651  | -0.01007 | 0.82815  | -0.09107 | 0.04919  | -0.16776 |
| 0.277253 | 1.09E-09 | 0.339481  | 4.64E-14 | 0.289995 | 1.68E-10 | 0.283407 | 4.48E-10 | 0.258923 |
| 0.156661 | 0.00068  | 0.130615  | 0.0047   | 0.134779 | 0.00352  | 0.104211 | 0.02431  | 0.113214 |
| 0.282328 | 5.24E-10 | 0.30934   | 8.18E-12 | 0.289584 | 1.79E-10 | 0.246341 | 6.95E-08 | 0.191787 |
| -0.00075 | 0.98708  | -0.01209  | 0.79446  | 0.011828 | 0.79877  | -0.02671 | 0.56472  | 0.043926 |
| -0.01852 | 0.68973  | -0.04675  | 0.31341  | -0.01755 | 0.7053   | -0.04184 | 0.36701  | -0.07227 |
| -0.00529 | 0.90927  | 0.061391  | 0.18538  | 0.015996 | 0.73026  | 0.108099 | 0.01946  | 0.08061  |
| 0.040699 | 0.38021  | -0.10926  | 0.01818  | 0.002036 | 0.96501  | -0.17833 | 0.00011  | -0.16338 |
| 0.284503 | 3.81E-10 | 0.236612  | 2.30E-07 | 0.289281 | 1.87E-10 | 0.136386 | 0.00314  | 0.113798 |
| 0.035368 | 0.44576  | -0.00193  | 0.96684  | -0.00451 | 0.92265  | 0.005372 | 0.90783  | 0.049847 |
| 0.129221 | 0.00516  | 0.227596  | 6.67E-07 | 0.12107  | 0.00882  | 0.300011 | 3.62E-11 | 0.1318   |
| 0.038045 | 0.41207  | -0.01964  | 0.67198  | -0.00173 | 0.97023  | -0.03791 | 0.41377  | 0.003993 |
| 0.017308 | 0.7091   | -0.09063  | 0.05032  | -0.05216 | 0.26063  | -0.0788  | 0.08897  | -0.15186 |
| 0.128111 | 0.00556  | 0.139897  | 0.00245  | 0.121728 | 0.00846  | 0.127433 | 0.00582  | 0.082761 |
| 0.081044 | 0.08019  | 0.108235  | 0.0193   | 0.073223 | 0.11405  | 0.131599 | 0.00439  | 0.082275 |
| 0.088368 | 0.05636  | -4.17E-05 | 0.99928  | 0.029002 | 0.53184  | -0.0094  | 0.83937  | -0.05494 |
| -0.05645 | 0.22335  | -0.0252   | 0.58699  | -0.00265 | 0.95439  | -0.02534 | 0.58497  | -0.04732 |
| 0.149492 | 0.00119  | 0.198762  | 1.51E-05 | 0.171031 | 0.0002   | 0.171046 | 0.0002   | 0.145016 |
| 0.358888 | 1.21E-15 | 0.177748  | 0.00011  | 0.247374 | 6.10E-08 | 0.099804 | 0.03105  | 0.069098 |
| 0.051798 | 0.26394  | 0.069521  | 0.13358  | 0.04554  | 0.3261   | 0.083544 | 0.07128  | 0.060054 |
| 0.286474 | 2.85E-10 | 0.139512  | 0.00251  | 0.228389 | 6.09E-07 | 0.044855 | 0.33344  | 0.084603 |
| 0.282369 | 5.21E-10 | 0.235824  | 2.53E-07 | 0.28106  | 6.31E-10 | 0.13543  | 0.00336  | 0.083114 |
| 0.097604 | 0.03498  | 0.08725   | 0.05956  | 0.0734   | 0.11318  | 0.068996 | 0.13654  | 0.109103 |
| 0.073337 | 0.11349  | -0.02133  | 0.64573  | 0.03052  | 0.51059  | -0.05896 | 0.20346  | -0.07673 |
| -0.02205 | 0.63458  | -0.00583  | 0.90006  | 0.006889 | 0.88197  | -0.02206 | 0.63441  | -0.04296 |
| -0.03981 | 0.39076  | 0.000864  | 0.98514  | -0.00571 | 0.90204  | 0.004726 | 0.91887  | 0.028052 |
| -0.10054 | 0.02983  | -0.16492  | 0.00035  | -0.09952 | 0.03154  | -0.17547 | 0.00014  | -0.23561 |
| 0.099743 | 0.03116  | 0.016405  | 0.72365  | 0.096737 | 0.03664  | -0.0578  | 0.2125   | -0.1005  |

|          |          |          |          |          |          |          |          |          |
|----------|----------|----------|----------|----------|----------|----------|----------|----------|
| 0.292432 | 1.16E-10 | 0.192889 | 2.71E-05 | 0.295706 | 7.05E-11 | 0.027821 | 0.54869  | 0.043876 |
| 0.218123 | 1.95E-06 | 0.223837 | 1.03E-06 | 0.208521 | 5.52E-06 | 0.170206 | 0.00022  | 0.380411 |
| 0.107626 | 0.02     | 0.239214 | 1.68E-07 | 0.13123  | 0.0045   | 0.269344 | 3.33E-09 | 0.250105 |
| -0.03352 | 0.46989  | -0.02345 | 0.61328  | -0.01156 | 0.80326  | -0.01488 | 0.74844  | 0.020845 |
| 0.004518 | 0.92243  | 0.011902 | 0.79754  | 0.006212 | 0.89349  | 0.016577 | 0.72087  | 0.026138 |
| 0.155431 | 0.00075  | 0.044376 | 0.33863  | 0.079885 | 0.08463  | 0.038658 | 0.40457  | 0.120827 |
| 0.03919  | 0.39814  | 0.017027 | 0.71362  | 0.009633 | 0.83553  | 0.032318 | 0.48598  | 0.115757 |
| 0.027647 | 0.55119  | 0.008612 | 0.85274  | 0.010797 | 0.81598  | 0.012041 | 0.79524  | 0.001499 |
| -0.00758 | 0.87016  | 0.037937 | 0.41341  | 0.003705 | 0.93635  | 0.053076 | 0.25232  | 0.000226 |
| 0.003257 | 0.94404  | -0.01783 | 0.70075  | -0.01257 | 0.78644  | -0.00026 | 0.99549  | -0.06627 |
| -0.02495 | 0.59069  | -0.03072 | 0.50777  | -0.02012 | 0.66447  | -0.02207 | 0.63433  | -0.05839 |
| 0.01732  | 0.70891  | 0.120394 | 0.00921  | 0.055152 | 0.23422  | 0.116657 | 0.01164  | 0.304048 |
| 0.042831 | 0.35573  | 0.033593 | 0.46894  | 0.035031 | 0.45011  | 0.012321 | 0.79058  | -0.03974 |
| -0.02704 | 0.55998  | -0.02107 | 0.64964  | -0.00295 | 0.94924  | -0.03253 | 0.48306  | -0.04239 |
| -0.03044 | 0.51163  | -0.05533 | 0.23273  | -0.04322 | 0.3514   | -0.062   | 0.18106  | -0.10465 |
| 0.131689 | 0.00436  | 0.027977 | 0.54645  | 0.051293 | 0.26863  | 0.02155  | 0.64228  | 0.043657 |
| 0.002994 | 0.94855  | -0.04185 | 0.36687  | -0.00478 | 0.918    | -0.06089 | 0.18903  | -0.02359 |
| -0.07987 | 0.08468  | -0.09909 | 0.03229  | -0.09484 | 0.04049  | -0.09798 | 0.03427  | -0.13475 |
| 0.272142 | 2.25E-09 | 0.141987 | 0.0021   | 0.168539 | 0.00025  | 0.099822 | 0.03102  | 0.07756  |
| 0.110279 | 0.01712  | -0.0687  | 0.13822  | 0.01349  | 0.77123  | -0.10508 | 0.02314  | -0.14189 |
| 0.134238 | 0.00366  | 0.047016 | 0.31065  | 0.057471 | 0.2151   | 0.039177 | 0.39829  | -0.01531 |
| 0.222798 | 1.16E-06 | 0.231924 | 4.03E-07 | 0.269231 | 3.38E-09 | 0.122156 | 0.00823  | 0.160687 |
| 0.333102 | 1.45E-13 | 0.304769 | 1.71E-11 | 0.308172 | 9.88E-12 | 0.226354 | 7.70E-07 | 0.179138 |
| 0.165636 | 0.00032  | 0.237269 | 2.13E-07 | 0.21647  | 2.34E-06 | 0.196831 | 1.83E-05 | 0.268041 |
| 0.098452 | 0.03342  | 0.017696 | 0.70289  | 0.021592 | 0.64164  | 0.00793  | 0.8643   | -0.05257 |
| 0.020438 | 0.65956  | 0.050998 | 0.2714   | 0.037008 | 0.42494  | 0.029404 | 0.52617  | 0.061792 |
| 0.026928 | 0.56161  | -0.06235 | 0.17859  | -0.00835 | 0.85719  | -0.09869 | 0.03298  | -0.14936 |
| 0.08578  | 0.064    | 0.035019 | 0.45027  | 0.069868 | 0.13164  | -0.00735 | 0.87421  | 0.00559  |
| 0.077244 | 0.09546  | 0.220251 | 1.54E-06 | 0.092679 | 0.04531  | 0.279064 | 8.42E-10 | 0.193407 |
| -0.04168 | 0.36879  | -0.10367 | 0.02507  | -0.04873 | 0.2933   | -0.09605 | 0.038    | -0.17492 |
| 0.054625 | 0.23872  | 0.081848 | 0.07723  | 0.089759 | 0.05257  | 0.050316 | 0.27787  | 0.022892 |
| 0.021536 | 0.64251  | 0.090222 | 0.05136  | 0.003651 | 0.93729  | 0.137291 | 0.00295  | 0.131993 |
| 0.148535 | 0.00129  | 0.158499 | 0.00059  | 0.233308 | 3.42E-07 | 0.04274  | 0.35676  | 0.000924 |
| 0.048151 | 0.2991   | 0.140502 | 0.00234  | 0.07771  | 0.09347  | 0.149406 | 0.0012   | 0.152426 |
| -0.03374 | 0.46695  | -0.06833 | 0.14038  | -0.01382 | 0.76584  | -0.09931 | 0.0319   | -0.09792 |
| 0.099748 | 0.03115  | 0.031074 | 0.50294  | 0.076028 | 0.10081  | -0.01625 | 0.72622  | -0.07024 |
| 0.019708 | 0.67098  | -0.02644 | 0.56869  | -0.00594 | 0.89813  | -0.02336 | 0.61466  | -0.0324  |
| 0.066578 | 0.15086  | 0.019671 | 0.67158  | 0.018377 | 0.69202  | 0.01779  | 0.70139  | 0.007046 |
| 0.163997 | 0.00037  | 0.071556 | 0.12255  | 0.092255 | 0.04631  | 0.04361  | 0.34704  | 0.089635 |
| 0.103691 | 0.02504  | 0.179517 | 9.59E-05 | 0.132776 | 0.00405  | 0.171554 | 0.0002   | 0.197654 |
| 0.089434 | 0.05344  | -0.0262  | 0.57228  | 0.052791 | 0.25489  | -0.07034 | 0.12903  | 0.022611 |
| 0.127741 | 0.0057   | 0.012384 | 0.78954  | 0.017495 | 0.70611  | 0.019336 | 0.67684  | -0.00605 |
| 0.1352   | 0.00342  | 0.021495 | 0.64314  | 0.089537 | 0.05316  | -0.03263 | 0.4818   | -0.05527 |
| 0.083141 | 0.07266  | 0.058445 | 0.20741  | 0.07134  | 0.12368  | 0.032621 | 0.4819   | -0.03078 |
| 0.296093 | 6.65E-11 | 0.164083 | 0.00037  | 0.247958 | 5.66E-08 | 0.04615  | 0.31965  | 0.140541 |

|          |          |          |          |          |          |          |          |          |
|----------|----------|----------|----------|----------|----------|----------|----------|----------|
| 0.071631 | 0.12215  | 0.07235  | 0.11844  | 0.053436 | 0.24912  | 0.078892 | 0.08858  | 0.026669 |
| -0.00154 | 0.97356  | -0.12704 | 0.00598  | -0.04711 | 0.3097   | -0.15285 | 0.00092  | -0.18391 |
| 0.030826 | 0.50635  | 0.209998 | 4.72E-06 | 0.098935 | 0.03256  | 0.223781 | 1.03E-06 | 0.26812  |
| -0.12842 | 0.00545  | -0.1714  | 0.0002   | -0.10784 | 0.01975  | -0.19063 | 3.37E-05 | -0.25987 |
| 0.07441  | 0.10829  | 0.01275  | 0.78346  | 0.060028 | 0.19536  | -0.03513 | 0.44889  | 0.047136 |
| 0.118616 | 0.0103   | 0.077395 | 0.09481  | 0.073142 | 0.11445  | 0.059985 | 0.19567  | 0.041715 |
| 0.052845 | 0.2544   | -0.01483 | 0.74923  | 0.051329 | 0.2683   | -0.05093 | 0.27203  | -0.11438 |
| 0.070891 | 0.12607  | 0.057716 | 0.21315  | 0.062082 | 0.18048  | 0.019408 | 0.6757   | 0.049656 |
| 0.133452 | 0.00386  | 0.108321 | 0.01921  | 0.117462 | 0.01107  | 0.083604 | 0.07107  | 0.071531 |
| -0.02408 | 0.60365  | 0.003088 | 0.94694  | -0.01251 | 0.78745  | 0.013784 | 0.76639  | 0.069102 |
| -0.02794 | 0.54692  | 0.01415  | 0.76038  | 0.030369 | 0.51268  | -0.0219  | 0.63684  | -0.01663 |
| 0.224861 | 9.14E-07 | 0.127619 | 0.00575  | 0.199456 | 1.41E-05 | 0.027285 | 0.55642  | 0.018082 |
| 0.326929 | 4.29E-13 | 0.248885 | 5.04E-08 | 0.260332 | 1.13E-08 | 0.169742 | 0.00023  | 0.333728 |
| 0.002929 | 0.94967  | 0.010812 | 0.81575  | 0.003176 | 0.94542  | -0.00427 | 0.92662  | -0.0068  |
| -0.05032 | 0.27786  | 0.02747  | 0.55374  | 0.008503 | 0.85459  | 0.018994 | 0.68225  | 0.08048  |
| 0.22474  | 9.27E-07 | 0.331501 | 1.93E-13 | 0.231172 | 4.40E-07 | 0.328976 | 3.00E-13 | 0.256691 |
| 0.108945 | 0.01852  | 0.118966 | 0.01008  | 0.135654 | 0.00331  | 0.083288 | 0.07215  | 0.037368 |
| -0.03574 | 0.44104  | -0.02662 | 0.56609  | -0.02999 | 0.51799  | -0.02108 | 0.6495   | -0.02523 |
| 0.096548 | 0.03701  | 0.118129 | 0.01062  | 0.129783 | 0.00497  | 0.073245 | 0.11394  | 0.233432 |
| 0.185681 | 5.41E-05 | 0.230261 | 4.89E-07 | 0.209968 | 4.73E-06 | 0.19291  | 2.70E-05 | 0.18704  |
| 0.042627 | 0.35803  | 0.043659 | 0.3465   | 0.030463 | 0.51137  | 0.047272 | 0.30802  | 0.007497 |
| 0.026213 | 0.57204  | 0.048379 | 0.29681  | 0.062616 | 0.17674  | 0.022218 | 0.632    | 0.118412 |
| 0.065038 | 0.16056  | 0.10993  | 0.01748  | 0.083106 | 0.07278  | 0.101992 | 0.02753  | 0.17356  |
| 0.131713 | 0.00436  | 0.032281 | 0.48649  | 0.047749 | 0.30316  | 0.022883 | 0.62183  | 0.006776 |
| 0.101365 | 0.0285   | 0.077451 | 0.09457  | 0.107238 | 0.02045  | 0.019138 | 0.67997  | 0.021484 |
| 0.079193 | 0.08736  | -0.01085 | 0.81511  | 0.020886 | 0.65258  | -0.01729 | 0.7094   | -0.07529 |
| 0.276225 | 1.26E-09 | 0.244326 | 8.94E-08 | 0.34657  | 1.26E-14 | 0.065185 | 0.15961  | 0.064758 |
| -0.00391 | 0.9328   | -0.01416 | 0.76024  | 0.01038  | 0.82298  | -0.03529 | 0.44682  | -0.00641 |
| 0.209064 | 5.21E-06 | 0.170856 | 0.00021  | 0.208317 | 5.64E-06 | 0.090318 | 0.05111  | 0.070505 |
| 0.111203 | 0.01621  | 0.236384 | 2.37E-07 | 0.131845 | 0.00432  | 0.259796 | 1.22E-08 | 0.171511 |
| -0.02256 | 0.62676  | 0.037149 | 0.42317  | -0.00096 | 0.98342  | 0.05103  | 0.2711   | 0.112627 |
| 0.043962 | 0.34316  | 0.037469 | 0.41919  | 0.036317 | 0.43364  | 0.047608 | 0.30459  | -0.01098 |
| 0.043047 | 0.35331  | 0.038038 | 0.41216  | 0.092268 | 0.04628  | -0.02294 | 0.62104  | -0.02064 |
| 0.068521 | 0.13927  | 0.038342 | 0.40843  | 0.015066 | 0.74539  | 0.036133 | 0.43598  | 0.035362 |
| -0.0054  | 0.90728  | -0.00481 | 0.91746  | 0.021366 | 0.64513  | -0.03641 | 0.43252  | 0.096275 |
| 0.089968 | 0.05202  | 0.004058 | 0.9303   | 0.03375  | 0.46686  | 0.010353 | 0.82343  | 0.088097 |
| 0.006035 | 0.89652  | -0.02101 | 0.65058  | 0.027813 | 0.54881  | -0.04611 | 0.32002  | -0.04702 |
| 0.124701 | 0.00697  | 0.032805 | 0.47944  | 0.003074 | 0.94717  | 0.043029 | 0.35351  | -0.02903 |
| -0.04914 | 0.28929  | -0.00953 | 0.83729  | -0.02377 | 0.60839  | -0.01256 | 0.78666  | 0.022872 |
| 0.07959  | 0.08578  | 0.088726 | 0.05536  | 0.059083 | 0.20249  | 0.083529 | 0.07133  | 0.109349 |
| -0.04338 | 0.34965  | -0.00485 | 0.9168   | -0.02575 | 0.57881  | -0.00125 | 0.97848  | -0.02751 |
| -0.00327 | 0.94374  | -0.11001 | 0.0174   | -0.01736 | 0.70831  | -0.13223 | 0.0042   | -0.15502 |
| 0.048716 | 0.29346  | 0.007276 | 0.87539  | 0.056946 | 0.21933  | -0.02996 | 0.51837  | -0.05741 |
| 0.003375 | 0.94202  | -0.01492 | 0.7478   | -0.01023 | 0.82548  | -0.01791 | 0.6995   | -0.00184 |
| 0.030762 | 0.50723  | 0.062384 | 0.17836  | 0.068708 | 0.13819  | 0.04513  | 0.33048  | 0.068394 |

|          |          |          |          |          |          |          |          |          |
|----------|----------|----------|----------|----------|----------|----------|----------|----------|
| 0.00997  | 0.82986  | -0.01725 | 0.71009  | -0.00054 | 0.99071  | -0.02535 | 0.58482  | 0.006095 |
| -0.06095 | 0.18858  | -0.08736 | 0.05924  | -0.04135 | 0.37264  | -0.10517 | 0.02303  | -0.11988 |
| -0.02539 | 0.58413  | -0.00715 | 0.87748  | 0.024984 | 0.5902   | -0.03688 | 0.42653  | -0.01313 |
| 0.00405  | 0.93045  | -0.01869 | 0.68698  | 0.005884 | 0.89908  | -0.03649 | 0.4314   | -0.05208 |
| 0.013436 | 0.77214  | 0.035246 | 0.44734  | -0.00822 | 0.85941  | 0.044324 | 0.3392   | -0.04042 |
| -0.00594 | 0.89817  | 0.051989 | 0.26219  | 0.006812 | 0.88327  | 0.076146 | 0.10028  | 0.100601 |
| 0.023378 | 0.61432  | -0.05031 | 0.27791  | 0.019969 | 0.66689  | -0.10818 | 0.01937  | -0.02987 |
| 0.103498 | 0.02531  | 0.082899 | 0.0735   | 0.053154 | 0.25163  | 0.106559 | 0.02127  | 0.09034  |
| 0.11427  | 0.01348  | 0.156062 | 0.00071  | 0.076331 | 0.09945  | 0.182453 | 7.32E-05 | 0.245703 |
| 0.061828 | 0.18226  | 0.114399 | 0.01337  | 0.071619 | 0.12222  | 0.135218 | 0.00341  | 0.18513  |
| 0.239169 | 1.69E-07 | 0.261201 | 1.01E-08 | 0.269239 | 3.38E-09 | 0.15641  | 0.00069  | 0.344514 |
| 0.030136 | 0.51592  | 0.008101 | 0.86139  | 0.00805  | 0.86225  | -0.005   | 0.91412  | 0.114052 |
| 0.156865 | 0.00067  | 0.178922 | 0.0001   | 0.111004 | 0.0164   | 0.188156 | 4.28E-05 | 0.216023 |
| -0.05239 | 0.25856  | -0.0075  | 0.87161  | -0.00919 | 0.84303  | -0.00016 | 0.9972   | 0.15607  |
| 0.004776 | 0.91802  | 0.179236 | 9.84E-05 | 0.057598 | 0.21409  | 0.223946 | 1.01E-06 | 0.295135 |
| 0.061537 | 0.18433  | 0.03881  | 0.40273  | 0.017682 | 0.70311  | 0.038245 | 0.40962  | 0.148424 |
| -0.03372 | 0.46732  | -0.005   | 0.91418  | -0.01964 | 0.67203  | 0.006201 | 0.89369  | 0.095166 |
| -0.00315 | 0.94584  | 0.104741 | 0.0236   | 0.040168 | 0.38646  | 0.124293 | 0.00716  | 0.252265 |
| 0.086364 | 0.06221  | -0.04672 | 0.31369  | 0.032764 | 0.47999  | -0.08111 | 0.07995  | -0.16019 |
| 0.07345  | 0.11293  | 0.045743 | 0.32394  | 0.064564 | 0.16364  | 0.01373  | 0.76728  | 0.061434 |
| 0.093136 | 0.04425  | 0.159016 | 0.00056  | 0.129917 | 0.00492  | 0.127785 | 0.00569  | 0.10862  |
| 0.324527 | 6.49E-13 | 0.195273 | 2.14E-05 | 0.184627 | 5.98E-05 | 0.176979 | 0.00012  | 0.14725  |
| -0.03622 | 0.43489  | -0.16425 | 0.00037  | -0.09777 | 0.03468  | -0.16008 | 0.00052  | -0.28483 |
| 0.042613 | 0.35819  | 0.02352  | 0.61218  | 0.046038 | 0.32083  | 0.007923 | 0.86441  | 0.020779 |
| 0.02555  | 0.5818   | 0.022515 | 0.62746  | -0.00388 | 0.9333   | 0.043518 | 0.34806  | 0.068662 |
| -0.03126 | 0.50032  | -0.11207 | 0.01539  | -0.02399 | 0.60509  | -0.1439  | 0.00182  | -0.17854 |
| 0.002175 | 0.96261  | 0.018423 | 0.69129  | 0.0145   | 0.75465  | 0.012426 | 0.78884  | 0.153722 |
| 0.09851  | 0.03331  | 0.017589 | 0.7046   | 0.01417  | 0.76005  | 0.018412 | 0.69148  | 0.011573 |
| 0.100291 | 0.03024  | 0.012634 | 0.78539  | 0.025896 | 0.57671  | 0.00324  | 0.94434  | -0.0566  |
| 0.062651 | 0.1765   | 0.03548  | 0.44432  | 0.059954 | 0.19591  | 0.019663 | 0.6717   | 0.002388 |
| -0.03777 | 0.41541  | -0.02493 | 0.59104  | -0.01302 | 0.77895  | -0.02156 | 0.64219  | -0.03577 |
| 0.024973 | 0.59036  | 0.089076 | 0.0544   | 0.042348 | 0.36119  | 0.072566 | 0.11734  | 0.054632 |
| -0.07456 | 0.1076   | -0.04553 | 0.32618  | -0.05278 | 0.25501  | -0.01837 | 0.69208  | -0.05224 |
| -0.0046  | 0.92109  | 0.00538  | 0.90769  | 0.006898 | 0.88181  | 0.016546 | 0.72137  | -0.0272  |
| 0.001939 | 0.96667  | 0.000791 | 0.9864   | 0.004811 | 0.91741  | 0.009559 | 0.83678  | -0.00695 |
| -0.0169  | 0.71566  | -0.0134  | 0.77274  | -0.01335 | 0.77352  | -0.00704 | 0.87945  | -0.0366  |
| 0.010163 | 0.82663  | -0.02092 | 0.65198  | 0.013522 | 0.77072  | -0.03155 | 0.49648  | -0.0411  |
| 0.163206 | 0.0004   | 0.102299 | 0.02706  | 0.194449 | 2.32E-05 | 0.008177 | 0.86011  | 0.062324 |
| 0.070728 | 0.12694  | 0.042223 | 0.36261  | 0.095384 | 0.03936  | -0.01478 | 0.75005  | -0.00896 |
| 0.003445 | 0.94081  | -0.03078 | 0.50699  | -0.02021 | 0.66306  | -0.02699 | 0.56074  | 0.055219 |
| 0.023759 | 0.60856  | 0.054256 | 0.24192  | 0.036622 | 0.42979  | 0.066499 | 0.15134  | 0.117344 |
| -0.00533 | 0.90851  | -0.00061 | 0.98953  | 0.018441 | 0.69102  | -0.01776 | 0.70181  | -0.04093 |
| 0.018928 | 0.68329  | 0.090496 | 0.05065  | 0.042017 | 0.36496  | 0.105811 | 0.0222   | 0.051875 |
| 0.10508  | 0.02315  | 0.080475 | 0.08235  | 0.143577 | 0.00187  | 0.001285 | 0.97791  | 0.034287 |
| 0.010603 | 0.81924  | -0.00754 | 0.87084  | 0.008663 | 0.85188  | -0.00758 | 0.87029  | -0.04278 |

|          |          |          |          |          |          |          |          |          |
|----------|----------|----------|----------|----------|----------|----------|----------|----------|
| 0.16514  | 0.00034  | 0.123858 | 0.00737  | 0.186319 | 5.10E-05 | 0.022351 | 0.62997  | 0.019073 |
| 0.094575 | 0.04106  | 0.072415 | 0.11811  | 0.097484 | 0.0352   | 0.050713 | 0.27409  | 0.01107  |
| 0.090602 | 0.05038  | -0.00434 | 0.92539  | 0.00282  | 0.95154  | 0.012387 | 0.78949  | -0.0521  |
| -0.03475 | 0.45376  | -0.05056 | 0.27557  | -0.04868 | 0.29377  | -0.04123 | 0.37406  | -0.05007 |
| 0.028829 | 0.5343   | 0.025126 | 0.58808  | 0.01691  | 0.71551  | 0.032128 | 0.48856  | 0.012307 |
| 0.027176 | 0.558    | 0.12454  | 0.00705  | 0.049731 | 0.2835   | 0.146202 | 0.00153  | 0.190561 |
| 0.088576 | 0.05578  | 0.080508 | 0.08222  | 0.106331 | 0.02155  | 0.020486 | 0.6588   | 0.057718 |
| 0.120292 | 0.00927  | 0.118157 | 0.0106   | 0.180932 | 8.42E-05 | 0.010898 | 0.8143   | 0.058363 |
| 0.107067 | 0.02066  | 0.130703 | 0.00467  | 0.093544 | 0.04333  | 0.157595 | 0.00063  | 0.106663 |
| 0.108225 | 0.01932  | 0.137992 | 0.0028   | 0.124932 | 0.00687  | 0.113351 | 0.01425  | 0.255808 |
| 0.137705 | 0.00286  | 0.143954 | 0.00182  | 0.107571 | 0.02006  | 0.133079 | 0.00396  | 0.182988 |
| 0.153114 | 0.0009   | 0.269486 | 3.26E-09 | 0.158782 | 0.00057  | 0.29163  | 1.31E-10 | 0.183815 |
| 0.007444 | 0.87254  | 0.051622 | 0.26557  | 0.006636 | 0.88628  | 0.048964 | 0.29101  | 0.136707 |
| 0.09105  | 0.04925  | -0.07187 | 0.12092  | 0.003528 | 0.93939  | -0.1172  | 0.01126  | -0.19297 |
| -0.01538 | 0.74034  | -0.01148 | 0.8046   | 0.003874 | 0.93346  | -0.02069 | 0.65565  | -0.02387 |
| -0.03338 | 0.47173  | -0.09183 | 0.04733  | -0.05408 | 0.24341  | -0.08645 | 0.06194  | -0.16469 |
| 0.073572 | 0.11233  | -0.00827 | 0.8586   | 0.019891 | 0.66811  | -0.01862 | 0.68812  | -0.0162  |
| 0.14818  | 0.00132  | 0.155283 | 0.00076  | 0.161239 | 0.00047  | 0.096189 | 0.03772  | 0.226659 |
| 0.136315 | 0.00316  | 0.083307 | 0.07209  | 0.119239 | 0.00991  | 0.038454 | 0.40706  | 0.02937  |
| 0.089153 | 0.0542   | 0.19481  | 2.24E-05 | 0.115835 | 0.01225  | 0.202578 | 1.02E-05 | 0.307454 |
| 0.228474 | 6.03E-07 | 0.154299 | 0.00082  | 0.216591 | 2.31E-06 | 0.083126 | 0.07271  | 0.08748  |
| 0.043005 | 0.35378  | 0.141144 | 0.00223  | 0.06553  | 0.15741  | 0.166034 | 0.00031  | 0.177733 |
| 0.138169 | 0.00277  | 0.05332  | 0.25015  | 0.036    | 0.43766  | 0.062066 | 0.18059  | 0.012791 |
| 0.079246 | 0.08715  | 0.108438 | 0.01908  | 0.068953 | 0.13678  | 0.134968 | 0.00348  | 0.068518 |
| 0.027542 | 0.5527   | -0.10069 | 0.02959  | -0.0435  | 0.34821  | -0.12084 | 0.00895  | -0.20562 |
| 0.011788 | 0.79945  | -0.01078 | 0.81629  | -0.00627 | 0.89259  | -0.00681 | 0.88329  | -0.02905 |
| 0.028274 | 0.54221  | 0.003602 | 0.93812  | 0.002126 | 0.96346  | 0.007413 | 0.87306  | -0.06366 |
| -0.08689 | 0.06062  | 0.019373 | 0.67626  | -0.04886 | 0.29203  | 0.065741 | 0.15607  | 0.167098 |
| 0.265774 | 5.43E-09 | 0.181856 | 7.74E-05 | 0.183243 | 6.80E-05 | 0.120488 | 0.00915  | 0.039069 |
| -0.00652 | 0.88833  | -0.02506 | 0.58908  | -0.01321 | 0.7758   | -0.0215  | 0.64299  | -0.03855 |
| 0.012167 | 0.79314  | 0.029231 | 0.52861  | 0.027687 | 0.55063  | 0.037431 | 0.41966  | 0.062842 |
| 0.058499 | 0.207    | 0.040806 | 0.37895  | 0.038199 | 0.41018  | 0.040397 | 0.38375  | -0.01061 |
| 0.211098 | 4.19E-06 | 0.129207 | 0.00517  | 0.136155 | 0.0032   | 0.119632 | 0.00966  | 0.095149 |
| 0.038332 | 0.40855  | -0.06833 | 0.14036  | 0.0155   | 0.73832  | -0.10496 | 0.0233   | -0.21618 |
| -0.08763 | 0.05844  | -0.07925 | 0.08713  | -0.07976 | 0.08511  | -0.06408 | 0.1668   | -0.0966  |
| 0.009448 | 0.83864  | -0.03575 | 0.44081  | -0.01458 | 0.75341  | -0.02921 | 0.52891  | -0.08421 |
| -0.00292 | 0.94985  | 0.005541 | 0.90494  | 0.01148  | 0.80457  | 1.62E-05 | 0.99972  | -0.06215 |
| -0.03352 | 0.46987  | -0.1263  | 0.00628  | -0.07073 | 0.12692  | -0.1337  | 0.0038   | -0.27222 |
| -0.02825 | 0.5426   | -0.10573 | 0.0223   | -0.05494 | 0.23601  | -0.09911 | 0.03225  | -0.20819 |
| 0.075947 | 0.10117  | 0.032111 | 0.48879  | 0.023765 | 0.60847  | 0.022741 | 0.624    | 0.001333 |
| 0.032467 | 0.48398  | 0.072333 | 0.11853  | 0.043755 | 0.34544  | 0.078487 | 0.09023  | 0.061649 |
| 0.033145 | 0.47489  | 0.121762 | 0.00844  | 0.055171 | 0.23406  | 0.148694 | 0.00127  | 0.090452 |
| 0.221863 | 1.28E-06 | 0.203869 | 8.97E-06 | 0.22483  | 9.17E-07 | 0.139739 | 0.00247  | 0.104711 |
| -0.04635 | 0.31759  | -0.06211 | 0.18028  | -0.0154  | 0.73989  | -0.06498 | 0.16095  | -0.13515 |
| 0.077154 | 0.09585  | 0.080296 | 0.08303  | 0.094585 | 0.04104  | 0.053959 | 0.24451  | 0.212592 |

|          |          |          |          |          |          |          |          |          |
|----------|----------|----------|----------|----------|----------|----------|----------|----------|
| 0.04996  | 0.2813   | 0.135008 | 0.00347  | 0.053036 | 0.25269  | 0.165944 | 0.00032  | 0.099019 |
| 0.149267 | 0.00122  | 0.201649 | 1.13E-05 | 0.179053 | 0.0001   | 0.182241 | 7.47E-05 | 0.141586 |
| 0.112276 | 0.0152   | 0.06438  | 0.16484  | 0.070499 | 0.12818  | 0.04008  | 0.3875   | 0.069028 |
| 0.058559 | 0.20653  | 0.156679 | 0.00068  | 0.075884 | 0.10146  | 0.197438 | 1.73E-05 | 0.203527 |
| 0.293448 | 9.97E-11 | 0.30829  | 9.70E-12 | 0.288434 | 2.13E-10 | 0.246645 | 6.69E-08 | 0.272614 |
| 0.025312 | 0.58534  | 0.058326 | 0.20835  | 0.040603 | 0.38133  | 0.064207 | 0.16598  | 0.034989 |
| -0.08501 | 0.06642  | -0.0998  | 0.03106  | -0.07339 | 0.11323  | -0.09606 | 0.03797  | -0.09702 |
| 0.137086 | 0.00299  | 0.228681 | 5.89E-07 | 0.175671 | 0.00014  | 0.237215 | 2.14E-07 | 0.164671 |
| 0.105649 | 0.02241  | 0.131329 | 0.00447  | 0.118685 | 0.01026  | 0.098257 | 0.03377  | 0.307302 |
| -0.01938 | 0.6762   | -0.00441 | 0.92427  | -0.01303 | 0.77878  | -0.00952 | 0.83743  | -0.00468 |
| -0.01726 | 0.70984  | -0.00962 | 0.83576  | -0.01962 | 0.67239  | -0.01362 | 0.76917  | -0.02736 |
| 0.015276 | 0.74196  | 0.053633 | 0.24738  | 0.025411 | 0.58387  | 0.059626 | 0.19836  | 0.061075 |
| 0.000418 | 0.99282  | -0.09444 | 0.04135  | -0.06598 | 0.1546   | -0.0964  | 0.0373   | -0.14008 |
| 0.002778 | 0.95225  | -0.02727 | 0.55669  | -0.00388 | 0.93332  | -0.02844 | 0.53984  | -0.04763 |
| 0.005479 | 0.90599  | -0.01697 | 0.71453  | 0.013163 | 0.77663  | -0.02384 | 0.60728  | -0.03726 |
| 0.046622 | 0.31472  | -0.03622 | 0.43483  | -0.04301 | 0.35372  | -0.01769 | 0.70301  | -0.00895 |
| 0.106271 | 0.02162  | 0.050362 | 0.27743  | 0.056919 | 0.21955  | 0.048475 | 0.29585  | 0.068926 |
| 0.132703 | 0.00407  | 0.156129 | 0.00071  | 0.101693 | 0.02799  | 0.161051 | 0.00048  | 0.174791 |
| 0.006143 | 0.89467  | 0.025368 | 0.58449  | 0.001491 | 0.97436  | 0.044185 | 0.34071  | -0.01702 |
| 0.049726 | 0.28355  | 0.027145 | 0.55845  | 0.076741 | 0.09764  | -0.0382  | 0.41017  | -0.05094 |
| -0.03776 | 0.41554  | 0.055258 | 0.23332  | -0.00501 | 0.9141   | 0.071849 | 0.12102  | 0.099359 |
| 0.161522 | 0.00046  | 0.135799 | 0.00328  | 0.148489 | 0.00129  | 0.101536 | 0.02823  | 0.162857 |
| 0.191748 | 3.03E-05 | 0.041599 | 0.36975  | 0.069155 | 0.13564  | 0.031797 | 0.49305  | 0.013014 |
| 0.104204 | 0.02433  | 0.119944 | 0.00947  | 0.077623 | 0.09384  | 0.124838 | 0.00691  | 0.03719  |
| 0.195746 | 2.04E-05 | 0.194875 | 2.23E-05 | 0.136708 | 0.00307  | 0.189271 | 3.85E-05 | 0.162573 |
| 0.255215 | 2.23E-08 | 0.122353 | 0.00812  | 0.216634 | 2.30E-06 | 0.002475 | 0.95746  | -0.0094  |
| -0.00381 | 0.9346   | -0.14942 | 0.0012   | -0.09529 | 0.03956  | -0.13488 | 0.0035   | -0.18934 |
| -0.01359 | 0.76958  | -0.06224 | 0.1794   | 0.00343  | 0.94107  | -0.07205 | 0.11996  | -0.16191 |
| 0.08854  | 0.05588  | 0.096111 | 0.03787  | 0.089133 | 0.05425  | 0.08407  | 0.06951  | 0.093442 |
| -0.02376 | 0.60861  | -0.0294  | 0.52621  | -0.00784 | 0.86582  | -0.0388  | 0.40288  | -0.034   |
| -0.00392 | 0.93275  | 0.039415 | 0.39543  | 0.019449 | 0.67506  | 0.037651 | 0.41693  | 0.138013 |
| 0.026364 | 0.56983  | -0.12873 | 0.00534  | -0.04609 | 0.32032  | -0.1536  | 0.00087  | -0.3051  |
| 0.11023  | 0.01717  | 0.024012 | 0.60475  | 0.065322 | 0.15874  | 0.001042 | 0.98209  | -0.02261 |
| 0.027473 | 0.5537   | -0.03936 | 0.39611  | -0.00817 | 0.86017  | -0.05388 | 0.24517  | -0.0404  |
| 0.094307 | 0.04164  | 0.064414 | 0.16461  | 0.067678 | 0.14421  | 0.047138 | 0.30939  | 0.096712 |
| 0.022253 | 0.63147  | 0.005536 | 0.90503  | 0.025944 | 0.576    | -0.0224  | 0.62926  | -0.05016 |
| -0.01235 | 0.79002  | 0.051775 | 0.26416  | 0.030739 | 0.50755  | 0.033405 | 0.47143  | 0.095029 |
| 0.047579 | 0.30489  | -0.0018  | 0.96913  | 0.056015 | 0.22697  | -0.04272 | 0.35699  | -0.04952 |
| 0.117024 | 0.01138  | 0.051258 | 0.26896  | 0.064447 | 0.1644   | 0.036565 | 0.43051  | 0.06728  |
| 0.112881 | 0.01466  | 0.177374 | 0.00012  | 0.164197 | 0.00037  | 0.11152  | 0.01591  | 0.199391 |
| 0.106757 | 0.02103  | 0.108086 | 0.01947  | 0.102419 | 0.02688  | 0.07858  | 0.08985  | 0.100893 |
| 0.076295 | 0.09961  | 0.220971 | 1.42E-06 | 0.109223 | 0.01822  | 0.254626 | 2.41E-08 | 0.131901 |
| 0.070988 | 0.12555  | 0.070174 | 0.12996  | 0.071642 | 0.12209  | 0.054587 | 0.23906  | 0.089272 |
| 0.108823 | 0.01865  | 0.084838 | 0.06699  | 0.078121 | 0.09174  | 0.077506 | 0.09434  | 0.060387 |
| 0.365347 | 3.41E-16 | 0.253422 | 2.81E-08 | 0.267364 | 4.37E-09 | 0.173928 | 0.00016  | 0.139171 |

|           |          |          |          |          |          |          |          |          |
|-----------|----------|----------|----------|----------|----------|----------|----------|----------|
| 0.05034   | 0.27764  | 0.118613 | 0.0103   | 0.086929 | 0.06051  | 0.096129 | 0.03784  | 0.250946 |
| 0.00105   | 0.98194  | 0.024967 | 0.59046  | -0.00458 | 0.92132  | 0.049052 | 0.29014  | 0.093592 |
| 0.026242  | 0.57162  | 0.095769 | 0.03857  | 0.05895  | 0.20351  | 0.072213 | 0.11914  | 0.093099 |
| 0.173955  | 0.00016  | 0.108155 | 0.01939  | 0.159925 | 0.00052  | 0.037002 | 0.42502  | 0.008637 |
| 0.217395  | 2.11E-06 | 0.179887 | 9.27E-05 | 0.229797 | 5.17E-07 | 0.067838 | 0.14326  | 0.049867 |
| 0.046193  | 0.3192   | 0.070636 | 0.12744  | 0.062391 | 0.17831  | 0.068918 | 0.13699  | 0.040665 |
| 0.191805  | 3.01E-05 | 0.160249 | 0.00051  | 0.118995 | 0.01006  | 0.180858 | 8.48E-05 | 0.128391 |
| 0.173075  | 0.00017  | 0.09476  | 0.04067  | 0.094484 | 0.04126  | 0.075824 | 0.10173  | 0.051619 |
| 0.057884  | 0.21182  | 0.003748 | 0.93562  | 0.063871 | 0.16821  | -0.02998 | 0.51813  | -0.01551 |
| 0.111163  | 0.01625  | 0.001182 | 0.97967  | 0.022923 | 0.62123  | 0.003743 | 0.9357   | 0.002237 |
| 0.177885  | 0.00011  | 0.056491 | 0.22304  | 0.135638 | 0.00332  | -0.0342  | 0.46096  | -0.05818 |
| 0.050823  | 0.27305  | 0.067357 | 0.14613  | 0.051301 | 0.26856  | 0.072011 | 0.12018  | 0.02233  |
| 0.178426  | 0.00011  | 0.18703  | 4.76E-05 | 0.139974 | 0.00243  | 0.165219 | 0.00034  | 0.170066 |
| 0.050632  | 0.27486  | 0.021211 | 0.64753  | 0.04539  | 0.32769  | 0.002333 | 0.9599   | -0.00781 |
| 0.037467  | 0.41922  | 0.022187 | 0.63247  | 0.042754 | 0.35659  | -0.01188 | 0.79789  | -0.06601 |
| 0.105494  | 0.02261  | 0.051308 | 0.26849  | 0.043244 | 0.35111  | 0.039637 | 0.39277  | 0.015495 |
| -0.02641  | 0.56914  | -0.01923 | 0.6785   | -0.01829 | 0.69335  | -0.00577 | 0.90108  | -0.043   |
| 0.039754  | 0.39137  | 0.006413 | 0.89007  | -0.00904 | 0.84545  | 0.020649 | 0.65627  | 0.072748 |
| 0.077167  | 0.09579  | -0.0262  | 0.57221  | -0.00231 | 0.96025  | -0.03932 | 0.39654  | 0.037651 |
| -0.12714  | 0.00594  | -0.10187 | 0.02771  | -0.10349 | 0.02532  | -0.07092 | 0.12593  | -0.07982 |
| 0.102618  | 0.02659  | 0.053108 | 0.25204  | 0.091562 | 0.04798  | 0.010023 | 0.82897  | 0.082197 |
| 0.043487  | 0.3484   | -0.02845 | 0.53969  | 0.01417  | 0.76006  | -0.04687 | 0.31217  | -0.07937 |
| 0.138703  | 0.00267  | 0.091045 | 0.04926  | 0.147937 | 0.00135  | 0.013204 | 0.77595  | 0.026488 |
| -0.04637  | 0.3174   | -0.09851 | 0.03331  | -0.07316 | 0.11435  | -0.09028 | 0.05122  | -0.08398 |
| 0.092427  | 0.0459   | 0.007271 | 0.87548  | 0.031609 | 0.4956   | 0.013562 | 0.77006  | -0.01397 |
| 0.183798  | 6.46E-05 | 0.085275 | 0.06559  | 0.085186 | 0.06587  | 0.089955 | 0.05206  | 0.046359 |
| 0.041387  | 0.3722   | 0.077832 | 0.09296  | 0.072288 | 0.11876  | 0.057955 | 0.21126  | 0.046074 |
| 0.318418  | 1.83E-12 | 0.173318 | 0.00017  | 0.214143 | 3.02E-06 | 0.099615 | 0.03137  | 0.08728  |
| 0.302558  | 2.42E-11 | 0.208079 | 5.78E-06 | 0.129726 | 0.00499  | 0.250356 | 4.17E-08 | 0.14684  |
| 0.125894  | 0.00645  | -0.02674 | 0.56436  | 0.082135 | 0.0762   | -0.10334 | 0.02553  | 0.007288 |
| -0.0245   | 0.59746  | -0.02479 | 0.59307  | -0.02623 | 0.57179  | -0.0213  | 0.64612  | -0.02073 |
| 0.010912  | 0.81407  | 0.104508 | 0.02391  | 0.053669 | 0.24706  | 0.108416 | 0.0191   | 0.167486 |
| 0.013488  | 0.77128  | -0.18028 | 8.95E-05 | -0.04415 | 0.34113  | -0.22718 | 7.01E-07 | -0.30588 |
| 0.110491  | 0.01691  | 0.113308 | 0.01429  | 0.100723 | 0.02953  | 0.090601 | 0.05038  | 0.078721 |
| -6.39E-07 | 0.99999  | -0.06173 | 0.18295  | -0.03159 | 0.49592  | -0.0626  | 0.17685  | -0.12032 |
| -0.01775  | 0.70203  | -0.0507  | 0.27419  | -0.04094 | 0.37741  | -0.0376  | 0.41761  | -0.06723 |
| 0.019505  | 0.67419  | -0.00346 | 0.94063  | 0.000924 | 0.98411  | -0.00959 | 0.83619  | -0.031   |
| -0.03106  | 0.50308  | -0.00812 | 0.86114  | -0.01319 | 0.77614  | -0.00683 | 0.88299  | -0.058   |
| 0.117639  | 0.01095  | 0.152073 | 0.00098  | 0.13925  | 0.00256  | 0.131863 | 0.00431  | 0.081133 |
| -0.14249  | 0.00202  | -0.12239 | 0.0081   | -0.15032 | 0.00112  | -0.08887 | 0.05495  | -0.10952 |
| 0.024781  | 0.59322  | 0.063852 | 0.16834  | 0.041532 | 0.37052  | 0.047093 | 0.30986  | 0.093597 |
| 0.209238  | 5.11E-06 | 0.1639   | 0.00038  | 0.18797  | 4.36E-05 | 0.094172 | 0.04194  | 0.065398 |
| 0.029742  | 0.52142  | 0.05135  | 0.26811  | 0.027993 | 0.54623  | 0.057534 | 0.2146   | 0.112326 |
| 0.017751  | 0.70201  | 0.0661   | 0.15382  | 0.040609 | 0.38126  | 0.067332 | 0.14628  | 0.059151 |
| 0.089934  | 0.05211  | 0.163379 | 0.00039  | 0.129801 | 0.00496  | 0.124406 | 0.00711  | 0.235447 |



|          |          |          |          |          |          |          |          |          |
|----------|----------|----------|----------|----------|----------|----------|----------|----------|
| -0.08534 | 0.0654   | -0.07356 | 0.11237  | -0.05774 | 0.21299  | -0.0667  | 0.15012  | -0.13878 |
| -0.04176 | 0.36795  | -0.0591  | 0.2024   | -0.04989 | 0.28194  | -0.0359  | 0.43891  | -0.04887 |
| 0.02985  | 0.51991  | -0.00888 | 0.84821  | -0.00742 | 0.87301  | 0.003116 | 0.94645  | -0.02057 |
| 0.171879 | 0.00019  | 0.111529 | 0.0159   | 0.084761 | 0.06724  | 0.133174 | 0.00394  | 0.18211  |
| 0.046025 | 0.32097  | -0.04617 | 0.31942  | 0.023096 | 0.6186   | -0.08621 | 0.06269  | -0.16449 |
| -0.02962 | 0.52307  | -0.01448 | 0.75504  | -0.02069 | 0.65559  | -0.01641 | 0.72349  | -0.01665 |
| 0.14947  | 0.0012   | 0.096959 | 0.0362   | 0.142556 | 0.00201  | 0.038219 | 0.40994  | 0.148541 |
| 0.206611 | 6.74E-06 | 0.146696 | 0.00148  | 0.118346 | 0.01048  | 0.147994 | 0.00134  | 0.314886 |
| -0.02653 | 0.56744  | -0.02323 | 0.6166   | -0.01422 | 0.75923  | -0.02174 | 0.6394   | 0.001274 |
| 0.068711 | 0.13817  | 0.016542 | 0.72144  | 0.08156  | 0.07828  | -0.02217 | 0.63272  | -0.06353 |
| 0.053967 | 0.24444  | 0.077501 | 0.09436  | 0.064008 | 0.1673   | 0.063943 | 0.16773  | 0.189932 |
| 0.216214 | 2.41E-06 | 0.128203 | 0.00553  | 0.12937  | 0.00511  | 0.127319 | 0.00586  | 0.151422 |
| 0.328751 | 3.12E-13 | 0.0723   | 0.11869  | 0.113015 | 0.01454  | 0.058629 | 0.20599  | 0.049855 |
| 0.043591 | 0.34725  | 0.013312 | 0.77418  | 0.028767 | 0.53518  | -0.00261 | 0.9551   | -0.01381 |
| 0.198511 | 1.55E-05 | 0.142909 | 0.00196  | 0.139816 | 0.00246  | 0.09597  | 0.03816  | 0.207887 |
| 0.033685 | 0.46771  | 0.056747 | 0.22095  | 0.024316 | 0.60019  | 0.068136 | 0.14151  | 0.010627 |
| -0.00843 | 0.85575  | 0.11905  | 0.01002  | 0.012343 | 0.79022  | 0.179161 | 9.91E-05 | 0.100142 |
| 0.005517 | 0.90536  | 0.018693 | 0.68701  | 0.005371 | 0.90784  | 0.031504 | 0.49705  | 0.091229 |
| 0.032177 | 0.48789  | 0.116697 | 0.01161  | 0.045277 | 0.3289   | 0.155638 | 0.00074  | 0.155043 |
| -0.05348 | 0.24873  | -0.07241 | 0.11814  | -0.04372 | 0.34579  | -0.05923 | 0.20134  | -0.2089  |
| 0.040622 | 0.38111  | 0.10194  | 0.02761  | 0.041649 | 0.36917  | 0.1295   | 0.00507  | 0.14641  |
| 0.068403 | 0.13995  | 0.076505 | 0.09868  | 0.075822 | 0.10173  | 0.040616 | 0.38117  | 0.01786  |
| 0.166495 | 0.0003   | 0.126797 | 0.00607  | 0.149209 | 0.00122  | 0.08289  | 0.07353  | 0.012681 |
| 0.051512 | 0.26659  | 0.028457 | 0.53959  | 0.058961 | 0.20343  | -0.01512 | 0.74454  | -0.00877 |
| 0.067019 | 0.14817  | 0.032216 | 0.48737  | 0.081711 | 0.07773  | -0.01917 | 0.67946  | -0.00409 |
| 0.000927 | 0.98406  | 0.022096 | 0.63388  | 0.001755 | 0.96983  | 0.028464 | 0.53949  | 0.04459  |
| -0.02113 | 0.64873  | 0.018305 | 0.69318  | -0.02739 | 0.55484  | 0.043433 | 0.349    | -0.07331 |
| 0.204176 | 8.69E-06 | 0.146567 | 0.00149  | 0.173333 | 0.00017  | 0.08909  | 0.05436  | 0.051178 |
| 0.108421 | 0.0191   | 0.024183 | 0.60218  | 0.045017 | 0.33169  | 0.016285 | 0.72559  | -0.00287 |
| 0.262663 | 8.29E-09 | 0.134643 | 0.00356  | 0.185734 | 5.39E-05 | 0.054036 | 0.24384  | 0.03092  |
| 0.032968 | 0.47726  | -0.06034 | 0.19304  | -0.09022 | 0.05135  | -0.01682 | 0.71695  | -0.08501 |
| 0.023869 | 0.6069   | 0.072205 | 0.11918  | 0.041559 | 0.37021  | 0.065001 | 0.1608   | 0.190556 |
| 0.037496 | 0.41886  | 0.086017 | 0.06327  | 0.073076 | 0.11478  | 0.07211  | 0.11967  | 0.152216 |
| -0.01441 | 0.75611  | 0.042385 | 0.36077  | 0.020772 | 0.65434  | 0.052459 | 0.25789  | 0.111577 |
| 0.118478 | 0.01039  | 0.086076 | 0.06309  | 0.080224 | 0.08331  | 0.057449 | 0.21527  | 0.160563 |
| 0.204111 | 8.75E-06 | 0.286842 | 2.70E-10 | 0.217291 | 2.14E-06 | 0.278589 | 9.02E-10 | 0.199538 |
| 0.30434  | 1.83E-11 | 0.278282 | 9.42E-10 | 0.363637 | 4.79E-16 | 0.1145   | 0.01329  | 0.135987 |
| 0.040445 | 0.38319  | 0.027782 | 0.54926  | 0.021943 | 0.63622  | 0.036558 | 0.4306   | 0.01413  |
| 0.053625 | 0.24745  | 0.137932 | 0.00282  | 0.055297 | 0.23299  | 0.178341 | 0.00011  | 0.285598 |
| 0.250091 | 4.32E-08 | 0.318745 | 1.73E-12 | 0.252573 | 3.14E-08 | 0.277262 | 1.09E-09 | 0.240751 |
| 0.080933 | 0.08061  | 0.155683 | 0.00074  | 0.083038 | 0.07301  | 0.168969 | 0.00024  | 0.220519 |
| -0.04283 | 0.35579  | -0.01047 | 0.82142  | -0.05366 | 0.24717  | 0.010508 | 0.82082  | -0.05562 |
| 0.094999 | 0.04016  | 0.190695 | 3.35E-05 | 0.129467 | 0.00508  | 0.186781 | 4.88E-05 | 0.232088 |
| -0.00553 | 0.9051   | 0.093709 | 0.04296  | 0.026589 | 0.56653  | 0.115208 | 0.01273  | 0.210519 |
| 0.013315 | 0.77412  | 0.049825 | 0.28259  | 0.026413 | 0.56911  | 0.039527 | 0.39409  | 0.075553 |

|          |          |          |          |          |          |          |          |          |
|----------|----------|----------|----------|----------|----------|----------|----------|----------|
| 0.044568 | 0.33654  | 0.080201 | 0.0834   | 0.018894 | 0.68383  | 0.106902 | 0.02085  | 0.094213 |
| 0.052512 | 0.25741  | -0.00291 | 0.95008  | 0.044625 | 0.33592  | -0.0263  | 0.57081  | -0.0274  |
| -0.0379  | 0.41382  | -0.03715 | 0.42321  | -0.02979 | 0.5207   | -0.02832 | 0.54153  | -0.05004 |
| 0.366501 | 2.71E-16 | 0.177721 | 0.00011  | 0.222622 | 1.18E-06 | 0.116549 | 0.01172  | 0.089793 |
| 0.146851 | 0.00146  | 0.190403 | 3.45E-05 | 0.150647 | 0.00109  | 0.182591 | 7.23E-05 | 0.153722 |
| -0.00039 | 0.99327  | -0.00136 | 0.9766   | -0.01158 | 0.80285  | 0.0093   | 0.84113  | -0.01945 |
| 0.061567 | 0.18413  | 0.023864 | 0.60698  | 0.01545  | 0.73913  | 0.011339 | 0.80693  | -0.00848 |
| -0.00863 | 0.85241  | -0.002   | 0.96562  | -0.00055 | 0.99047  | 0.003921 | 0.93266  | -0.01    |
| 0.043385 | 0.34954  | 0.068298 | 0.14056  | 0.053994 | 0.24421  | 0.062066 | 0.18059  | 0.055289 |
| 0.043322 | 0.35024  | 0.057947 | 0.21132  | 0.031627 | 0.49536  | 0.056443 | 0.22344  | 0.179884 |
| 0.036257 | 0.4344   | 0.092665 | 0.04534  | 0.056655 | 0.2217   | 0.098251 | 0.03378  | 0.161935 |
| 0.128878 | 0.00528  | 0.2486   | 5.22E-08 | 0.173463 | 0.00017  | 0.259929 | 1.20E-08 | 0.316126 |
| 0.13793  | 0.00282  | 0.251796 | 3.47E-08 | 0.170142 | 0.00022  | 0.268198 | 3.90E-09 | 0.376514 |
| 0.067843 | 0.14323  | 0.187705 | 4.47E-05 | 0.106741 | 0.02105  | 0.201426 | 1.15E-05 | 0.276257 |
| 0.001623 | 0.97209  | -0.00701 | 0.87984  | -0.00938 | 0.83981  | -0.00891 | 0.84772  | 0.009191 |
| 0.010622 | 0.81893  | -0.01292 | 0.78064  | -0.01838 | 0.69194  | -0.02085 | 0.65316  | 0.019683 |
| 0.041283 | 0.3734   | -0.03804 | 0.41219  | -0.02146 | 0.6437   | -0.03757 | 0.41793  | -0.06406 |
| 0.103851 | 0.02481  | 0.042445 | 0.36009  | 0.041405 | 0.37199  | 0.044846 | 0.33353  | 0.049996 |
| 0.108224 | 0.01932  | -0.00505 | 0.91326  | 0.065984 | 0.15455  | -0.0548  | 0.2372   | 0.02697  |
| 0.038087 | 0.41156  | -0.07392 | 0.11062  | -0.01007 | 0.82823  | -0.07588 | 0.10147  | -0.0688  |
| 0.089826 | 0.05239  | -0.00599 | 0.89725  | 0.010265 | 0.8249   | 0.004591 | 0.92118  | -0.06246 |
| 0.008668 | 0.8518   | -0.01712 | 0.71212  | -0.00067 | 0.98855  | -0.0349  | 0.45175  | -0.04914 |
| 0.078759 | 0.08911  | -0.11269 | 0.01483  | 0.003496 | 0.93994  | -0.16855 | 0.00025  | -0.20766 |
| 0.076052 | 0.1007   | 0.083522 | 0.07135  | 0.06259  | 0.17693  | 0.079966 | 0.08431  | 0.153038 |
| -0.06714 | 0.14745  | -0.09279 | 0.04505  | -0.07413 | 0.1096   | -0.09309 | 0.04437  | -0.04107 |
| -0.08801 | 0.05738  | -0.00669 | 0.88531  | -0.05344 | 0.24908  | 0.027566 | 0.55237  | -0.00859 |
| 0.017115 | 0.71221  | 0.056082 | 0.22642  | 0.070928 | 0.12587  | 0.008959 | 0.84689  | 0.059339 |
| 0.075304 | 0.1041   | -0.03785 | 0.41452  | -0.0087  | 0.85125  | -0.04475 | 0.33458  | -0.00636 |
| -0.00304 | 0.94777  | 0.108829 | 0.01865  | 0.027593 | 0.55198  | 0.147931 | 0.00135  | 0.212963 |
| 0.111674 | 0.01576  | 0.133707 | 0.0038   | 0.125984 | 0.00641  | 0.104955 | 0.02331  | 0.060621 |
| 0.085822 | 0.06387  | 0.283005 | 4.75E-10 | 0.131245 | 0.0045   | 0.35023  | 6.36E-15 | 0.259197 |
| 0.273133 | 1.96E-09 | 0.21727  | 2.14E-06 | 0.243789 | 9.56E-08 | 0.120236 | 0.0093   | 0.24156  |
| 0.009405 | 0.83937  | 0.053022 | 0.25281  | 0.03199  | 0.49042  | 0.027293 | 0.5563   | 0.10277  |
| 0.096163 | 0.03777  | 0.031393 | 0.49857  | 0.027707 | 0.55034  | 0.03026  | 0.51419  | 0.011322 |
| 0.067488 | 0.14534  | 0.041512 | 0.37076  | 0.051664 | 0.26518  | 0.025457 | 0.58319  | 0.120235 |
| 0.134884 | 0.0035   | 0.136493 | 0.00312  | 0.147175 | 0.00143  | 0.080453 | 0.08243  | 0.14994  |
| 0.050673 | 0.27447  | 0.051376 | 0.26786  | 0.051341 | 0.26819  | 0.033473 | 0.47053  | 0.067998 |
| 0.002283 | 0.96076  | -0.01046 | 0.82155  | 0.016802 | 0.71725  | -0.02131 | 0.64602  | -0.09226 |
| 0.067538 | 0.14505  | 0.147652 | 0.00138  | 0.100303 | 0.03022  | 0.133738 | 0.00379  | 0.188663 |
| 0.026119 | 0.57343  | 0.070674 | 0.12724  | 0.014837 | 0.74913  | 0.094093 | 0.04211  | 0.070322 |
| 0.220975 | 1.42E-06 | 0.174177 | 0.00016  | 0.19592  | 2.01E-05 | 0.107393 | 0.02027  | 0.126067 |
| 0.166817 | 0.00029  | 0.247424 | 6.06E-08 | 0.219934 | 1.59E-06 | 0.191033 | 3.25E-05 | 0.252841 |
| 0.292522 | 1.15E-10 | 0.302337 | 2.51E-11 | 0.258421 | 1.46E-08 | 0.24973  | 4.52E-08 | 0.175581 |
| 0.201898 | 1.10E-05 | 0.172554 | 0.00018  | 0.237108 | 2.17E-07 | 0.063114 | 0.17332  | 0.039858 |
| 0.144029 | 0.00181  | 0.106338 | 0.02154  | 0.127221 | 0.0059   | 0.067341 | 0.14622  | 0.099343 |

|          |          |          |          |          |          |          |          |          |
|----------|----------|----------|----------|----------|----------|----------|----------|----------|
| 0.358121 | 1.41E-15 | 0.336504 | 7.93E-14 | 0.3428   | 2.53E-14 | 0.252489 | 3.17E-08 | 0.281381 |
| 0.043543 | 0.34778  | 0.057388 | 0.21577  | 0.095443 | 0.03923  | 0.014544 | 0.75392  | -0.01176 |
| 0.027588 | 0.55205  | 0.122997 | 0.00779  | 0.016507 | 0.722    | 0.187645 | 4.49E-05 | 0.135855 |
| -0.04804 | 0.30022  | -0.02594 | 0.57608  | -0.03009 | 0.51651  | -0.00967 | 0.83484  | 0.012389 |
| 0.086138 | 0.06289  | 0.01954  | 0.67364  | 0.07067  | 0.12726  | -0.03886 | 0.40217  | -0.10183 |
| 0.124091 | 0.00726  | 0.087603 | 0.05853  | 0.115481 | 0.01252  | 0.044808 | 0.33395  | 0.178185 |
| 0.121862 | 0.00838  | 0.17134  | 0.0002   | 0.104258 | 0.02425  | 0.181217 | 8.21E-05 | 0.135853 |
| 0.098666 | 0.03303  | 0.079594 | 0.08577  | 0.080794 | 0.08113  | 0.066609 | 0.15067  | 0.017231 |
| -0.07728 | 0.0953   | -0.06641 | 0.15189  | -0.07442 | 0.10822  | -0.05893 | 0.20365  | -0.08335 |
| 0.00517  | 0.91127  | 0.070944 | 0.12578  | 0.015513 | 0.73811  | 0.104631 | 0.02374  | 0.045185 |
| -0.06463 | 0.16323  | -0.04436 | 0.33876  | -0.03256 | 0.48267  | -0.03594 | 0.4384   | -0.06354 |
| -0.0486  | 0.29465  | -0.0503  | 0.27801  | -0.04693 | 0.31154  | -0.04189 | 0.36641  | -0.07752 |
| 0.065959 | 0.1547   | -0.00251 | 0.95685  | 0.009509 | 0.83762  | -0.00493 | 0.91533  | -0.09058 |
| 0.046329 | 0.31778  | 0.048204 | 0.29856  | 0.060645 | 0.19079  | 0.034367 | 0.45875  | 0.099691 |
| -0.07021 | 0.12978  | -0.0788  | 0.08895  | -0.05205 | 0.26163  | -0.06937 | 0.13442  | -0.11212 |
| -0.0056  | 0.90398  | 0.003089 | 0.94692  | -0.00081 | 0.98616  | 0.015114 | 0.74461  | 0.000851 |
| 0.272988 | 2.00E-09 | 0.098654 | 0.03306  | 0.088705 | 0.05542  | 0.116964 | 0.01142  | 0.043615 |
| 0.232232 | 3.88E-07 | 0.331449 | 1.95E-13 | 0.329415 | 2.78E-13 | 0.21151  | 4.01E-06 | 0.312031 |
| -0.05521 | 0.23375  | -0.04157 | 0.37014  | -0.00205 | 0.96473  | -0.07318 | 0.11428  | -0.02322 |
| 0.044312 | 0.33933  | 0.059584 | 0.19868  | 0.055794 | 0.22881  | 0.046588 | 0.31508  | 0.027078 |
| 0.160431 | 0.0005   | 0.131469 | 0.00443  | 0.173208 | 0.00017  | 0.076826 | 0.09727  | 0.057577 |
| 0.207519 | 6.13E-06 | 0.104044 | 0.02454  | 0.137648 | 0.00287  | 0.04284  | 0.35563  | 0.114715 |
| 0.115702 | 0.01235  | 0.123802 | 0.00739  | 0.161092 | 0.00047  | 0.063566 | 0.17026  | 0.042388 |
| 0.088859 | 0.055    | 0.1437   | 0.00185  | 0.090724 | 0.05007  | 0.17643  | 0.00013  | 0.054854 |
| 0.062962 | 0.17436  | 0.020635 | 0.65649  | 0.037892 | 0.41395  | 0.026547 | 0.56716  | -0.00995 |
| 0.029721 | 0.52171  | -0.13151 | 0.00442  | -0.10575 | 0.02228  | -0.11169 | 0.01575  | -0.17278 |
| 0.283114 | 4.67E-10 | 0.198561 | 1.54E-05 | 0.284264 | 3.95E-10 | 0.062342 | 0.17865  | 0.05259  |
| -0.09511 | 0.03992  | -0.16653 | 0.0003   | -0.11939 | 0.00981  | -0.15071 | 0.00109  | -0.27658 |
| 0.001721 | 0.97041  | 0.003547 | 0.93906  | 0.003049 | 0.94761  | 0.000282 | 0.99516  | 0.004024 |
| 0.146804 | 0.00147  | 0.256874 | 1.79E-08 | 0.18902  | 3.94E-05 | 0.242191 | 1.17E-07 | 0.293478 |
| -0.07115 | 0.12467  | -0.07635 | 0.09939  | -0.02858 | 0.53788  | -0.09708 | 0.03597  | -0.14747 |
| 0.086404 | 0.06208  | 0.01332  | 0.77404  | 0.03715  | 0.42316  | 0.011293 | 0.80769  | 0.003245 |
| -0.00962 | 0.83576  | -0.0112  | 0.80932  | -0.00885 | 0.84873  | -0.00908 | 0.8448   | -0.01099 |
| -0.02096 | 0.65146  | -0.01734 | 0.70856  | -0.01899 | 0.68227  | -0.01052 | 0.82061  | -0.02519 |
| -0.02426 | 0.60102  | -0.04597 | 0.32155  | 0.009316 | 0.84086  | -0.08476 | 0.06724  | -0.13809 |
| -0.02557 | 0.58155  | -0.05789 | 0.21175  | -0.00932 | 0.84085  | -0.08896 | 0.05472  | -0.10079 |
| 0.086533 | 0.06169  | 0.188366 | 4.20E-05 | 0.100502 | 0.02989  | 0.245101 | 8.12E-08 | 0.175231 |
| 0.026873 | 0.56241  | -0.00766 | 0.86888  | -0.00282 | 0.95156  | -0.00376 | 0.93546  | -0.0248  |
| 0.027887 | 0.54775  | 0.010027 | 0.8289   | 0.030399 | 0.51227  | 0.021066 | 0.64979  | 0.037884 |
| 0.222859 | 1.15E-06 | 0.132649 | 0.00408  | 0.144983 | 0.00168  | 0.090636 | 0.0503   | -0.01013 |
| -0.22708 | 7.08E-07 | -0.22756 | 6.70E-07 | -0.17689 | 0.00012  | -0.20434 | 8.54E-06 | -0.29795 |
| 0.083346 | 0.07195  | 0.086437 | 0.06199  | 0.0605   | 0.19186  | 0.088292 | 0.05657  | 0.15451  |
| 0.012927 | 0.78055  | 0.007487 | 0.87181  | 0.002015 | 0.96537  | 0.009495 | 0.83786  | -0.00708 |
| 0.065156 | 0.15979  | 0.082887 | 0.07354  | 0.044347 | 0.33894  | 0.107846 | 0.01975  | 0.083207 |
| 0.173191 | 0.00017  | 0.084316 | 0.06869  | 0.145715 | 0.00159  | 0.023647 | 0.61026  | 0.053367 |

|          |          |          |          |          |          |          |          |          |
|----------|----------|----------|----------|----------|----------|----------|----------|----------|
| 0.005849 | 0.89969  | -0.03814 | 0.4109   | -0.01362 | 0.7691   | -0.06767 | 0.14428  | -0.11142 |
| -0.01585 | 0.73261  | 0.002599 | 0.95533  | -0.00312 | 0.94643  | 0.014831 | 0.74923  | 0.027472 |
| -0.16901 | 0.00024  | -0.22549 | 8.50E-07 | -0.1768  | 0.00012  | -0.18691 | 4.82E-05 | -0.29551 |
| 0.04405  | 0.3422   | 0.087492 | 0.05886  | 0.085332 | 0.06541  | 0.056655 | 0.2217   | 0.153121 |
| -0.07367 | 0.11185  | -0.05281 | 0.25475  | -0.03483 | 0.45269  | -0.05523 | 0.23354  | -0.03668 |
| 0.120118 | 0.00937  | 0.140419 | 0.00235  | 0.132764 | 0.00405  | 0.10332  | 0.02556  | 0.150758 |
| 0.168008 | 0.00027  | 0.047055 | 0.31024  | 0.093563 | 0.04329  | 0.000674 | 0.98842  | -0.04988 |
| 0.075229 | 0.10445  | -0.00473 | 0.91884  | 0.054629 | 0.23869  | -0.04722 | 0.30853  | -0.11863 |
| 0.031285 | 0.50003  | 0.021618 | 0.64123  | 0.028766 | 0.5352   | 0.003933 | 0.93244  | -0.01293 |
| -0.00743 | 0.87279  | 0.016799 | 0.71729  | -0.00032 | 0.99446  | 0.031787 | 0.49318  | 0.015022 |
| 0.116038 | 0.01209  | 0.079038 | 0.08799  | 0.105279 | 0.02289  | 0.045037 | 0.33148  | 0.038268 |
| 0.007599 | 0.86991  | 0.040777 | 0.37929  | 0.010059 | 0.82836  | 0.063917 | 0.16791  | 0.033323 |
| -0.00879 | 0.84976  | -0.01831 | 0.69302  | 0.004641 | 0.92033  | -0.01959 | 0.67277  | -0.07646 |
| 0.161811 | 0.00045  | 0.095291 | 0.03955  | 0.155912 | 0.00072  | 0.021485 | 0.64329  | 0.023484 |
| 0.186504 | 5.01E-05 | 0.121767 | 0.00843  | 0.109125 | 0.01833  | 0.10775  | 0.01986  | 0.099901 |
| 0.067652 | 0.14436  | 0.06604  | 0.1542   | 0.033007 | 0.47673  | 0.071947 | 0.12051  | 0.056608 |
| 0.186391 | 5.06E-05 | 0.207783 | 5.96E-06 | 0.113471 | 0.01415  | 0.234324 | 3.03E-07 | 0.155699 |
| 0.214904 | 2.78E-06 | 0.239585 | 1.60E-07 | 0.224232 | 9.82E-07 | 0.189259 | 3.85E-05 | 0.22879  |
| 0.026386 | 0.56951  | 0.097196 | 0.03575  | 0.075648 | 0.10253  | 0.084274 | 0.06883  | 0.08269  |
| -0.0016  | 0.97244  | -0.0265  | 0.56777  | -0.01929 | 0.67753  | -0.00837 | 0.85686  | -0.03038 |
| 0.150571 | 0.0011   | 0.03772  | 0.41608  | 0.118893 | 0.01012  | -0.0174  | 0.7076   | -0.00165 |
| 0.15583  | 0.00073  | 0.259875 | 1.20E-08 | 0.211923 | 3.84E-06 | 0.220657 | 1.47E-06 | 0.149725 |
| 0.000168 | 0.99711  | -0.08133 | 0.07914  | -0.0585  | 0.20703  | -0.07325 | 0.1139   | -0.13686 |
| 0.131375 | 0.00446  | 0.113557 | 0.01407  | 0.097725 | 0.03475  | 0.102886 | 0.02619  | 0.164713 |
| 0.072998 | 0.11517  | -0.06385 | 0.16837  | -0.00286 | 0.95085  | -0.08589 | 0.06366  | -0.0486  |
| 0.040447 | 0.38317  | 0.087532 | 0.05874  | 0.067474 | 0.14543  | 0.058698 | 0.20546  | 0.152166 |
| -0.12447 | 0.00708  | -0.14487 | 0.0017   | -0.10218 | 0.02724  | -0.13352 | 0.00385  | -0.24737 |
| 0.001703 | 0.97072  | -0.01144 | 0.80531  | -0.00899 | 0.84645  | -0.00333 | 0.9427   | 0.035944 |
| -0.07024 | 0.1296   | -0.03337 | 0.47183  | -0.09023 | 0.05133  | 0.027198 | 0.55768  | -0.09915 |
| -0.08931 | 0.05377  | -0.13169 | 0.00436  | -0.10739 | 0.02027  | -0.11837 | 0.01046  | -0.12692 |
| -0.1053  | 0.02286  | -0.10445 | 0.02399  | -0.11048 | 0.01692  | -0.07928 | 0.08701  | -0.1295  |
| -0.00312 | 0.94641  | -0.17545 | 0.00014  | -0.11967 | 0.00964  | -0.16227 | 0.00043  | -0.32253 |
| 0.147366 | 0.00141  | 0.164856 | 0.00035  | 0.093035 | 0.04449  | 0.177047 | 0.00012  | 0.251001 |
| 0.15751  | 0.00064  | 0.168764 | 0.00025  | 0.156928 | 0.00067  | 0.142541 | 0.00202  | 0.113577 |
| 0.122793 | 0.00789  | 0.053137 | 0.25178  | 0.085932 | 0.06353  | 0.018759 | 0.68597  | 0.096715 |
| 0.03902  | 0.40018  | -0.05988 | 0.19646  | -0.00979 | 0.83283  | -0.0847  | 0.06742  | -0.11582 |
| 0.027031 | 0.5601   | -0.00171 | 0.97055  | -0.00617 | 0.89429  | -0.01502 | 0.74613  | -0.05687 |
| 0.055034 | 0.23522  | 0.104398 | 0.02406  | 0.109444 | 0.01799  | 0.078444 | 0.0904   | 0.049365 |
| -0.0925  | 0.04574  | -0.05819 | 0.20944  | -0.04057 | 0.3817   | -0.07712 | 0.09601  | -0.09766 |
| -0.14092 | 0.00227  | -0.06828 | 0.14065  | -0.08531 | 0.06549  | -0.03309 | 0.47557  | -0.09423 |
| -0.00309 | 0.94687  | -0.03065 | 0.50872  | 0.025599 | 0.58107  | -0.06457 | 0.16358  | -0.04959 |
| 0.022969 | 0.62053  | 0.007035 | 0.87949  | 0.009523 | 0.83739  | -0.0042  | 0.92786  | -0.07324 |
| 0.161799 | 0.00045  | 0.056914 | 0.21959  | 0.115556 | 0.01246  | 0.007422 | 0.8729   | 0.021668 |
| 0.043908 | 0.34376  | 0.124319 | 0.00715  | 0.098569 | 0.03321  | 0.100236 | 0.03033  | 0.171846 |
| -0.08656 | 0.06162  | -0.16924 | 0.00024  | -0.1036  | 0.02516  | -0.16641 | 0.0003   | -0.27092 |

|          |          |          |          |          |          |          |          |          |
|----------|----------|----------|----------|----------|----------|----------|----------|----------|
| 0.024813 | 0.59275  | 0.068342 | 0.14031  | 0.037628 | 0.41722  | 0.065201 | 0.15951  | 0.140237 |
| -0.01886 | 0.68444  | -0.04551 | 0.32643  | -0.01776 | 0.70182  | -0.027   | 0.56053  | -0.05265 |
| -0.02587 | 0.57707  | 0.013203 | 0.77597  | -0.00413 | 0.92911  | 0.000911 | 0.98433  | 0.171327 |
| -0.04007 | 0.38762  | -0.02672 | 0.5646   | -0.01151 | 0.80404  | -0.01541 | 0.73971  | 0.036661 |
| -0.01681 | 0.71705  | -0.01694 | 0.71495  | -0.01947 | 0.6748   | -0.01699 | 0.71419  | -0.0045  |
| -0.02387 | 0.60685  | 0.039629 | 0.39287  | -0.01402 | 0.76258  | 0.082664 | 0.07432  | 0.031888 |
| -0.03231 | 0.48604  | 0.001731 | 0.97025  | -0.00942 | 0.83914  | -0.00551 | 0.9054   | 0.152195 |
| 0.046882 | 0.31203  | -0.00563 | 0.90341  | 0.020957 | 0.65146  | -0.0091  | 0.84455  | -0.09542 |
| -0.1359  | 0.00325  | -0.1401  | 0.00241  | -0.12106 | 0.00883  | -0.13264 | 0.00409  | -0.20118 |
| -0.00972 | 0.83407  | -0.02398 | 0.60516  | -0.0239  | 0.60639  | -0.01283 | 0.78215  | 0.027246 |
| 0.019176 | 0.67937  | 0.080769 | 0.08123  | 0.04028  | 0.38513  | 0.082685 | 0.07425  | 0.137884 |
| 0.167238 | 0.00028  | 0.350323 | 6.25E-15 | 0.215099 | 2.72E-06 | 0.354177 | 3.01E-15 | 0.217982 |
| 0.064529 | 0.16386  | 0.085687 | 0.06429  | 0.077945 | 0.09248  | 0.06863  | 0.13864  | 0.001257 |
| -0.05625 | 0.22506  | -0.01115 | 0.81015  | 0.000869 | 0.98506  | -0.02187 | 0.63728  | -0.00568 |
| 0.205971 | 7.21E-06 | 0.208548 | 5.50E-06 | 0.142022 | 0.00209  | 0.229313 | 5.47E-07 | 0.183661 |
| 0.107749 | 0.01986  | 0.09275  | 0.04515  | 0.093164 | 0.04419  | 0.081694 | 0.07779  | 0.051838 |
| 0.123117 | 0.00773  | 0.118112 | 0.01063  | 0.143444 | 0.00189  | 0.072263 | 0.11889  | 0.051312 |
| 0.022517 | 0.62743  | 0.004909 | 0.91574  | 0.013853 | 0.76526  | 0.01723  | 0.71036  | -0.01761 |
| -0.04259 | 0.35843  | -0.03402 | 0.46328  | -0.03365 | 0.4682   | -0.01719 | 0.71102  | -0.06322 |
| -0.03363 | 0.46842  | -0.02486 | 0.59202  | -0.02925 | 0.52838  | -0.01174 | 0.80018  | -0.04403 |
| -0.005   | 0.91416  | -0.02348 | 0.61273  | 0.01732  | 0.70891  | -0.04221 | 0.36279  | 0.033464 |
| 0.046165 | 0.3195   | 0.042233 | 0.36249  | 0.046612 | 0.31483  | 0.045255 | 0.32914  | 0.040754 |
| 0.021837 | 0.63785  | 0.011565 | 0.80316  | 0.018295 | 0.69333  | 0.010175 | 0.82642  | 0.078048 |
| -0.0526  | 0.25665  | -0.03118 | 0.50154  | -0.03671 | 0.42867  | -0.02161 | 0.64133  | -0.03063 |
| 0.081962 | 0.07682  | 0.07592  | 0.10129  | 0.091583 | 0.04793  | 0.062431 | 0.17803  | 0.131807 |
| -0.05062 | 0.27501  | -0.10408 | 0.0245   | -0.04732 | 0.30748  | -0.10925 | 0.0182   | -0.1681  |
| 0.019382 | 0.67612  | -0.00098 | 0.9832   | -0.02335 | 0.61474  | 0.008497 | 0.85469  | -0.0238  |
| 0.108825 | 0.01865  | 0.280513 | 6.83E-10 | 0.142328 | 0.00205  | 0.331028 | 2.10E-13 | 0.259117 |
| -0.00771 | 0.86801  | 0.033502 | 0.47014  | 0.024443 | 0.59828  | 0.053842 | 0.24553  | 0.118053 |
| -0.07168 | 0.1219   | -0.0348  | 0.45305  | -0.04393 | 0.34356  | -0.03137 | 0.49889  | 0.081593 |
| 0.05956  | 0.19887  | 0.037411 | 0.41992  | 0.061316 | 0.18592  | 0.032205 | 0.48751  | 0.141532 |
| -0.0013  | 0.97766  | -0.00793 | 0.86424  | 0.015992 | 0.73034  | -0.0055  | 0.90558  | 0.090898 |
| -0.00815 | 0.86061  | -0.02513 | 0.58799  | 0.005025 | 0.91376  | -0.02272 | 0.62437  | 0.069705 |
| -0.03003 | 0.5174   | -0.03326 | 0.47335  | -0.02307 | 0.61897  | -0.01883 | 0.6849   | 0.112019 |
| -0.00663 | 0.88632  | -0.02727 | 0.5566   | -0.01013 | 0.82725  | -0.01747 | 0.70659  | -0.01109 |
| -0.00494 | 0.91529  | -0.01471 | 0.75114  | -0.00014 | 0.99751  | -0.0074  | 0.87335  | 0.055887 |
| 0.055205 | 0.23377  | 0.037065 | 0.42423  | 0.054215 | 0.24227  | 0.038667 | 0.40447  | -0.02256 |
| 0.049771 | 0.28312  | 0.014203 | 0.75951  | 0.060656 | 0.19071  | -0.02805 | 0.54546  | -0.07917 |
| 0.037535 | 0.41838  | -0.01359 | 0.76954  | 0.017457 | 0.70671  | -0.03815 | 0.41084  | -0.05234 |
| 0.038256 | 0.40948  | 0.018111 | 0.69627  | 0.00712  | 0.87804  | 0.029952 | 0.51848  | 0.001185 |
| -0.0629  | 0.1748   | -0.05118 | 0.26973  | -0.04    | 0.38844  | -0.03256 | 0.48267  | -0.0731  |
| -0.0322  | 0.48754  | -0.0249  | 0.59152  | -0.002   | 0.96555  | -0.01918 | 0.67923  | -0.05758 |
| -0.0015  | 0.97426  | 0.004835 | 0.91701  | 0.01715  | 0.71164  | 0.019208 | 0.67886  | 0.005679 |
| -0.01686 | 0.71635  | -0.01513 | 0.74433  | 0.003362 | 0.94223  | -0.00263 | 0.95486  | -0.03499 |
| -0.00549 | 0.90587  | -0.04039 | 0.38381  | -0.02468 | 0.5948   | -0.04239 | 0.36069  | -0.01799 |

|          |          |          |          |          |          |          |          |          |
|----------|----------|----------|----------|----------|----------|----------|----------|----------|
| -0.03599 | 0.43777  | -0.02726 | 0.55682  | -0.01322 | 0.77571  | -0.01337 | 0.77326  | -0.03978 |
| -0.01359 | 0.76962  | -0.01713 | 0.71199  | 0.00662  | 0.88654  | -0.01542 | 0.7396   | -0.02962 |
| -0.04094 | 0.37743  | -0.0319  | 0.49169  | -0.00853 | 0.85416  | -0.02709 | 0.55923  | -0.05959 |
| 0.017479 | 0.70636  | 0.051725 | 0.26462  | 0.034248 | 0.4603   | 0.067234 | 0.14687  | 0.048636 |
| 0.006994 | 0.88018  | 0.051636 | 0.26544  | 0.03999  | 0.38857  | 0.063967 | 0.16757  | 0.07978  |
| 0.029685 | 0.52222  | -0.01997 | 0.66692  | -0.00022 | 0.99625  | -0.0237  | 0.60942  | -0.07549 |
| 0.201582 | 1.14E-05 | 0.099271 | 0.03197  | 0.145417 | 0.00163  | 0.040802 | 0.379    | 0.002223 |
| 0.010998 | 0.81263  | 0.05615  | 0.22585  | 0.068158 | 0.14138  | 0.000749 | 0.98712  | 0.044487 |
| 0.020234 | 0.66274  | -0.00415 | 0.92879  | 0.028135 | 0.54419  | -0.01985 | 0.6687   | -0.00372 |
| 0.12383  | 0.00738  | 0.202383 | 1.05E-05 | 0.208596 | 5.47E-06 | 0.113592 | 0.01404  | 0.160817 |
| -0.05728 | 0.21663  | -0.15621 | 0.00071  | -0.06964 | 0.1329   | -0.176   | 0.00013  | -0.30029 |
| -0.0971  | 0.03592  | -0.23467 | 2.91E-07 | -0.14155 | 0.00217  | -0.23554 | 2.62E-07 | -0.36093 |
| -0.01976 | 0.67017  | 0.06307  | 0.17362  | 0.011369 | 0.80643  | 0.081302 | 0.07923  | 0.105992 |
| 0.055299 | 0.23297  | -0.02461 | 0.59575  | -0.01053 | 0.82046  | -0.02589 | 0.57677  | -0.01878 |
| 0.039855 | 0.39017  | 0.031125 | 0.50223  | 0.043739 | 0.34562  | 0.006342 | 0.89128  | 0.028557 |
| 0.098054 | 0.03414  | 0.065802 | 0.15569  | 0.076936 | 0.09679  | 0.030734 | 0.50763  | 0.065267 |
| -0.00929 | 0.84139  | 0.033928 | 0.46451  | 0.031871 | 0.49204  | 0.009574 | 0.83652  | 0.108161 |
| 0.013273 | 0.77482  | 0.033601 | 0.46884  | 0.043205 | 0.35155  | 0.0204   | 0.66014  | 0.002086 |
| 0.278198 | 9.54E-10 | 0.217263 | 2.15E-06 | 0.236642 | 2.29E-07 | 0.126642 | 0.00614  | 0.20106  |
| -0.06267 | 0.17637  | -0.10312 | 0.02585  | -0.06622 | 0.15306  | -0.08389 | 0.07011  | -0.2012  |
| -0.04439 | 0.33843  | -0.00543 | 0.90687  | -0.01376 | 0.76674  | -0.03195 | 0.49093  | -0.00222 |
| -0.0275  | 0.55331  | 0.026075 | 0.57407  | -0.01329 | 0.77457  | 0.031935 | 0.49118  | -0.01379 |
| -0.00922 | 0.84252  | 0.019595 | 0.67276  | 0.000674 | 0.98841  | 0.008347 | 0.85724  | 0.04674  |
| 0.190243 | 3.50E-05 | 0.209496 | 4.97E-06 | 0.264358 | 6.59E-09 | 0.089255 | 0.05392  | 0.069012 |
| 0.021467 | 0.64357  | 0.068573 | 0.13897  | 0.046917 | 0.31167  | 0.073798 | 0.11123  | 0.170387 |
| -0.0016  | 0.97245  | 0.023021 | 0.61974  | 0.05103  | 0.2711   | -0.00714 | 0.87774  | 0.015493 |
| -0.01956 | 0.67339  | -0.09792 | 0.03439  | -0.03733 | 0.42092  | -0.10798 | 0.0196   | -0.20341 |
| -0.01324 | 0.77536  | -0.01347 | 0.77162  | -0.00998 | 0.82973  | -0.00254 | 0.95632  | -0.06723 |
| 0.012266 | 0.7915   | -0.02746 | 0.55392  | 0.026775 | 0.56383  | -0.05555 | 0.23085  | -0.07257 |
| 0.006779 | 0.88384  | 0.024889 | 0.59162  | 0.037982 | 0.41285  | 0.012712 | 0.7841   | -0.01748 |
| 0.209411 | 5.02E-06 | 0.226682 | 7.42E-07 | 0.154043 | 0.00084  | 0.243264 | 1.02E-07 | 0.171543 |
| 0.008041 | 0.86241  | 0.079059 | 0.0879   | 0.037501 | 0.4188   | 0.088386 | 0.05631  | 0.071045 |
| 0.094977 | 0.04021  | 0.01797  | 0.69852  | 0.106872 | 0.02089  | -0.05331 | 0.25026  | -0.0392  |
| 0.086222 | 0.06264  | 0.016021 | 0.72986  | 0.012632 | 0.78543  | 0.01591  | 0.73166  | 0.069923 |
| 0.021826 | 0.63804  | -0.01816 | 0.69552  | -0.01663 | 0.71996  | -0.01558 | 0.73702  | -0.02218 |
| -0.03064 | 0.50895  | -0.01539 | 0.74016  | -0.0138  | 0.76616  | -0.00818 | 0.86009  | 6.05E-05 |
| -0.01812 | 0.69606  | -0.00933 | 0.84056  | -0.01739 | 0.70785  | -0.00709 | 0.87856  | -0.00743 |
| -0.02159 | 0.64169  | 0.00806  | 0.8621   | 0.014298 | 0.75795  | -0.00796 | 0.86387  | -0.04468 |
| 0.001216 | 0.9791   | -0.02865 | 0.53678  | -0.03068 | 0.50832  | -0.02008 | 0.66516  | -0.04028 |
| -0.07216 | 0.11943  | -0.06104 | 0.1879   | -0.03946 | 0.39494  | -0.05525 | 0.23341  | -0.05592 |
| 0.02747  | 0.55374  | -0.01175 | 0.80014  | 0.015229 | 0.74274  | -0.02433 | 0.59995  | -0.03441 |
| 0.337171 | 7.04E-14 | 0.225602 | 8.40E-07 | 0.327625 | 3.80E-13 | 0.077302 | 0.09521  | 0.048101 |
| -0.13816 | 0.00277  | -0.04374 | 0.34564  | -0.0991  | 0.03227  | 0.003198 | 0.94505  | -0.07173 |
| 0.028874 | 0.53366  | 0.076199 | 0.10004  | 0.049333 | 0.28738  | 0.074542 | 0.10766  | 0.040295 |
| 0.044905 | 0.3329   | 0.160247 | 0.00051  | 0.070974 | 0.12562  | 0.214157 | 3.01E-06 | 0.133752 |

|          |          |           |          |          |          |          |          |          |
|----------|----------|-----------|----------|----------|----------|----------|----------|----------|
| 0.116604 | 0.01168  | 0.069275  | 0.13496  | 0.112976 | 0.01458  | 0.009407 | 0.83934  | -0.01098 |
| 0.125201 | 0.00675  | 0.186552  | 4.99E-05 | 0.16989  | 0.00023  | 0.136734 | 0.00307  | 0.254717 |
| 0.018787 | 0.68552  | 0.004587  | 0.92124  | -0.02012 | 0.66449  | 0.021594 | 0.6416   | -0.01936 |
| 0.354804 | 2.67E-15 | 0.325099  | 5.88E-13 | 0.347087 | 1.15E-14 | 0.197392 | 1.73E-05 | 0.151307 |
| 0.151217 | 0.00105  | 0.129097  | 0.00521  | 0.122104 | 0.00825  | 0.107584 | 0.02005  | 0.06012  |
| 0.055963 | 0.22741  | 0.059578  | 0.19873  | 0.045637 | 0.32507  | 0.067476 | 0.14541  | 0.015543 |
| 0.067717 | 0.14398  | 0.151623  | 0.00101  | 0.08276  | 0.07398  | 0.167427 | 0.00028  | 0.16761  |
| 0.254351 | 2.49E-08 | 0.13788   | 0.00283  | 0.141992 | 0.0021   | 0.110726 | 0.01668  | 0.227133 |
| -0.02424 | 0.60133  | -0.08878  | 0.05522  | -0.06234 | 0.1787   | -0.06916 | 0.13563  | -0.15736 |
| 0.242169 | 1.17E-07 | 0.22889   | 5.74E-07 | 0.158541 | 0.00058  | 0.231022 | 4.48E-07 | 0.135745 |
| -0.0981  | 0.03405  | -0.14396  | 0.00182  | -0.1049  | 0.02338  | -0.12337 | 0.00761  | -0.14931 |
| 0.065098 | 0.16017  | 0.136601  | 0.0031   | 0.156744 | 0.00068  | 0.069677 | 0.13271  | 0.090554 |
| 0.226439 | 7.63E-07 | 0.233879  | 3.19E-07 | 0.272323 | 2.20E-09 | 0.119213 | 0.00992  | 0.363583 |
| 0.019652 | 0.67187  | 0.084721  | 0.06737  | 0.045157 | 0.33019  | 0.123739 | 0.00743  | 0.055836 |
| -0.05582 | 0.22856  | -0.01975  | 0.67025  | -0.05803 | 0.21067  | 0.00738  | 0.87362  | -0.02245 |
| 0.05753  | 0.21463  | 0.15035   | 0.00112  | 0.082116 | 0.07626  | 0.158793 | 0.00057  | 0.271966 |
| 0.055186 | 0.23394  | 0.143519  | 0.00188  | 0.051731 | 0.26457  | 0.201233 | 1.18E-05 | 0.112947 |
| 0.114699 | 0.01313  | 0.042152  | 0.36342  | 0.069644 | 0.13289  | 0.014529 | 0.75417  | 0.024602 |
| 0.034363 | 0.4588   | 0.000848  | 0.98541  | 0.002741 | 0.9529   | -0.00784 | 0.86583  | 0.034279 |
| -0.08509 | 0.06616  | -0.09703  | 0.03606  | -0.05159 | 0.26584  | -0.1106  | 0.0168   | -0.1872  |
| -0.11061 | 0.01679  | -0.04637  | 0.31734  | -0.03835 | 0.40839  | -0.0384  | 0.4077   | -0.03532 |
| -0.13918 | 0.00257  | -0.15292  | 0.00092  | -0.102   | 0.02751  | -0.15485 | 0.00079  | -0.19615 |
| -0.03823 | 0.40979  | 0.005522  | 0.90526  | 0.008986 | 0.84642  | -0.01746 | 0.7067   | 0.025283 |
| 0.089816 | 0.05242  | 0.0892    | 0.05407  | 0.095078 | 0.03999  | 0.062414 | 0.17815  | 0.114634 |
| -0.03828 | 0.4092   | -0.09182  | 0.04736  | -0.0351  | 0.44916  | -0.11583 | 0.01225  | -0.15074 |
| -0.04816 | 0.29904  | -0.10865  | 0.01884  | -0.06053 | 0.19162  | -0.11615 | 0.01201  | -0.14648 |
| -0.0622  | 0.17965  | -0.07545  | 0.10345  | -0.05484 | 0.23684  | -0.07377 | 0.11137  | -0.10094 |
| 0.005748 | 0.9014   | -0.07426  | 0.10899  | -0.01809 | 0.69653  | -0.1053  | 0.02285  | -0.20588 |
| 0.065851 | 0.15538  | 0.044143  | 0.34117  | 0.053241 | 0.25085  | 0.011778 | 0.79961  | 0.050315 |
| 0.108006 | 0.01956  | 0.015338  | 0.74095  | 0.07445  | 0.1081   | -0.01846 | 0.69078  | -0.10172 |
| 0.099813 | 0.03104  | 0.12777   | 0.00569  | 0.133031 | 0.00398  | 0.081868 | 0.07716  | 0.231088 |
| 0.284705 | 3.70E-10 | 0.224301  | 9.74E-07 | 0.223336 | 1.09E-06 | 0.167127 | 0.00029  | 0.254785 |
| 0.037072 | 0.42414  | 0.053646  | 0.24726  | 0.043864 | 0.34424  | 0.04703  | 0.31051  | 0.198491 |
| -0.03454 | 0.4565   | -0.01798  | 0.69839  | -0.0109  | 0.81419  | -0.04101 | 0.37657  | -0.05598 |
| 0.095036 | 0.04008  | 0.047394  | 0.30677  | 0.07314  | 0.11446  | 0.00472  | 0.91897  | 0.10434  |
| 0.137382 | 0.00293  | 0.129836  | 0.00495  | 0.148048 | 0.00133  | 0.083067 | 0.07291  | 0.149757 |
| -0.00797 | 0.8636   | -7.19E-05 | 0.99876  | 0.029917 | 0.51897  | -0.04544 | 0.32721  | -0.01819 |
| 0.088632 | 0.05562  | 0.104506  | 0.02391  | 0.111303 | 0.01611  | 0.077415 | 0.09472  | 0.181283 |
| 0.119219 | 0.00992  | 0.029512  | 0.52465  | 0.046631 | 0.31463  | 0.022675 | 0.62501  | 0.005341 |
| 0.025575 | 0.58143  | 0.045252  | 0.32918  | 0.055388 | 0.23222  | 0.027055 | 0.55976  | 0.013343 |
| -0.01996 | 0.66709  | -0.06092  | 0.1888   | -0.05202 | 0.26187  | -0.06304 | 0.17385  | -0.10011 |
| -0.01776 | 0.70186  | 0.001473  | 0.97467  | 0.014385 | 0.75653  | -0.0149  | 0.74808  | -0.04669 |
| 0.062849 | 0.17514  | 0.038762  | 0.40331  | 0.074307 | 0.10878  | -0.00713 | 0.87779  | -0.00178 |
| 0.114911 | 0.01296  | 0.084972  | 0.06656  | 0.114642 | 0.01318  | 0.030924 | 0.505    | -0.01493 |
| 0.016531 | 0.72161  | 0.051105  | 0.27039  | 0.055558 | 0.23079  | 0.039891 | 0.38975  | 0.003406 |

|          |          |          |          |          |          |          |          |          |
|----------|----------|----------|----------|----------|----------|----------|----------|----------|
| 0.068732 | 0.13805  | -0.02523 | 0.58648  | 0.028761 | 0.53527  | -0.0656  | 0.15697  | -0.03238 |
| 0.092885 | 0.04483  | 0.055276 | 0.23317  | 0.065769 | 0.15589  | 0.047817 | 0.30247  | 0.086983 |
| 0.016907 | 0.71555  | 0.062939 | 0.17452  | 0.023641 | 0.61034  | 0.076821 | 0.09729  | 0.138303 |
| 0.092238 | 0.04635  | 0.15319  | 0.0009   | 0.111256 | 0.01616  | 0.123603 | 0.00749  | 0.242746 |
| 0.177223 | 0.00012  | 0.155562 | 0.00074  | 0.122251 | 0.00818  | 0.138866 | 0.00263  | 0.204947 |
| 0.097111 | 0.03591  | 0.083722 | 0.07067  | 0.058587 | 0.20631  | 0.087718 | 0.0582   | 0.109148 |
| 0.186395 | 5.06E-05 | 0.113524 | 0.0141   | 0.131948 | 0.00429  | 0.079419 | 0.08646  | 0.065258 |
| 0.137955 | 0.00281  | 0.113659 | 0.01399  | 0.100676 | 0.02961  | 0.077712 | 0.09346  | 0.274295 |
| -0.04967 | 0.28413  | -0.08693 | 0.06051  | -0.04841 | 0.29655  | -0.09777 | 0.03466  | -0.19325 |
| 0.045249 | 0.32921  | 0.045035 | 0.3315   | 0.06569  | 0.15639  | 0.013031 | 0.77881  | 0.136115 |
| 0.072016 | 0.12015  | 0.083726 | 0.07066  | 0.075653 | 0.10251  | 0.060026 | 0.19537  | 0.152348 |
| 0.001689 | 0.97096  | 0.071186 | 0.1245   | 0.0345   | 0.45701  | 0.081233 | 0.07949  | 0.042138 |
| 0.049794 | 0.28289  | 0.194838 | 2.24E-05 | 0.068079 | 0.14184  | 0.252637 | 3.11E-08 | 0.113328 |
| 0.079742 | 0.08518  | 0.062165 | 0.17989  | 0.087281 | 0.05947  | 0.024239 | 0.60134  | -0.02817 |
| 0.002378 | 0.95912  | -0.0131  | 0.77766  | 0.000173 | 0.99702  | -0.01962 | 0.67243  | -0.04142 |
| 0.023698 | 0.60947  | -0.01798 | 0.6983   | -0.00902 | 0.84581  | -0.02804 | 0.54556  | -0.04297 |
| 0.039023 | 0.40015  | 0.060207 | 0.19402  | 0.058312 | 0.20846  | 0.04708  | 0.30999  | 0.11603  |
| 0.009803 | 0.83267  | -0.09969 | 0.03124  | -0.02046 | 0.65914  | -0.12838 | 0.00546  | -0.22725 |
| 0.01503  | 0.74598  | -0.01917 | 0.67941  | 0.009477 | 0.83816  | -0.02322 | 0.61675  | -0.09723 |
| 0.165045 | 0.00034  | 0.194156 | 2.39E-05 | 0.217564 | 2.08E-06 | 0.079693 | 0.08538  | 0.24771  |
| -0.03365 | 0.46823  | -0.01711 | 0.71227  | -0.01784 | 0.70051  | -0.01453 | 0.7542   | -0.03415 |
| 0.00521  | 0.9106   | 0.154258 | 0.00082  | 0.048179 | 0.29882  | 0.206303 | 6.97E-06 | 0.183254 |
| 0.041927 | 0.36598  | 0.072393 | 0.11822  | 0.03537  | 0.44574  | 0.077722 | 0.09342  | 0.071588 |
| 0.260582 | 1.10E-08 | 0.230236 | 4.91E-07 | 0.237444 | 2.08E-07 | 0.156474 | 0.00069  | 0.149752 |
| 0.14779  | 0.00136  | 0.118719 | 0.01024  | 0.137198 | 0.00297  | 0.090778 | 0.04993  | 0.089019 |
| 0.007197 | 0.87673  | 0.016582 | 0.72078  | 0.007174 | 0.87713  | 0.031764 | 0.4935   | 0.000462 |
| 0.06216  | 0.17992  | 0.172129 | 0.00019  | 0.061575 | 0.18407  | 0.23229  | 3.86E-07 | 0.090067 |
| -0.03295 | 0.47753  | -0.04781 | 0.30258  | -0.00673 | 0.88465  | -0.06232 | 0.17881  | -0.11118 |
| 0.188541 | 4.13E-05 | 0.176281 | 0.00013  | 0.189709 | 3.69E-05 | 0.111444 | 0.01598  | 0.060871 |
| 0.019221 | 0.67866  | 0.043547 | 0.34774  | 0.021462 | 0.64365  | 0.068843 | 0.13742  | 0.03709  |
| 0.021888 | 0.63708  | 0.058034 | 0.21064  | 0.032892 | 0.47827  | 0.052354 | 0.25885  | 0.122638 |
| 0.019428 | 0.6754   | 0.067129 | 0.1475   | 0.018093 | 0.69656  | 0.088228 | 0.05675  | 0.157266 |
| 0.065382 | 0.15835  | 0.114615 | 0.0132   | 0.081032 | 0.08024  | 0.11447  | 0.01332  | 0.222465 |
| 0.124151 | 0.00723  | 0.15754  | 0.00063  | 0.101239 | 0.0287   | 0.170363 | 0.00022  | 0.193256 |
| 0.035439 | 0.44485  | -0.00606 | 0.89609  | 0.008324 | 0.85762  | -0.00653 | 0.888    | 0.094394 |
| 0.082746 | 0.07403  | -0.07562 | 0.10265  | -0.02195 | 0.63609  | -0.07588 | 0.10145  | -0.17186 |
| 0.026659 | 0.56552  | 0.013336 | 0.77378  | 0.01023  | 0.82548  | 0.005482 | 0.90596  | 0.031186 |
| -0.03899 | 0.40058  | -0.1244  | 0.00711  | -0.07466 | 0.1071   | -0.13852 | 0.0027   | -0.17003 |
| 0.087668 | 0.05834  | -0.02067 | 0.65599  | 0.04022  | 0.38584  | -0.05985 | 0.19667  | 0.067062 |
| 0.03541  | 0.44522  | 0.003912 | 0.9328   | 0.02539  | 0.58417  | -0.02898 | 0.53212  | -0.05901 |
| 0.013087 | 0.77789  | 0.01554  | 0.73767  | 0.019582 | 0.67296  | 0.014197 | 0.75961  | 0.016773 |
| -0.11041 | 0.01699  | -0.08427 | 0.06885  | -0.07456 | 0.10757  | -0.06196 | 0.1813   | -0.10179 |
| 0.041732 | 0.36822  | -0.11162 | 0.01582  | -0.02226 | 0.63142  | -0.12588 | 0.00645  | -0.16333 |
| -0.08002 | 0.08408  | -0.02814 | 0.5441   | -0.04287 | 0.3553   | -0.02039 | 0.66037  | 0.059404 |
| 0.053332 | 0.25004  | -0.02531 | 0.58533  | 0.01547  | 0.7388   | -0.05056 | 0.27557  | -0.0878  |



|          |          |          |          |          |          |          |          |          |
|----------|----------|----------|----------|----------|----------|----------|----------|----------|
| 0.002431 | 0.95822  | -0.13982 | 0.00246  | -0.04213 | 0.36362  | -0.183   | 6.96E-05 | -0.27185 |
| 0.134175 | 0.00367  | -0.05478 | 0.23744  | 0.025744 | 0.57893  | -0.10205 | 0.02744  | -0.0774  |
| 0.025525 | 0.58218  | 0.070615 | 0.12756  | 0.043474 | 0.34855  | 0.092777 | 0.04508  | 0.027413 |
| 0.040447 | 0.38317  | 0.084319 | 0.06868  | 0.060967 | 0.18844  | 0.105676 | 0.02237  | 0.027857 |
| 0.00444  | 0.92377  | 0.039707 | 0.39194  | 0.032096 | 0.48899  | 0.014385 | 0.75653  | -0.01519 |
| -0.01385 | 0.76523  | -0.00187 | 0.96793  | -0.01237 | 0.78978  | 0.002308 | 0.96033  | -0.01823 |
| 0.021031 | 0.65033  | 0.031595 | 0.4958   | 0.032256 | 0.48683  | 0.033593 | 0.46894  | 0.009713 |
| 0.032826 | 0.47916  | 0.131554 | 0.0044   | 0.060514 | 0.19175  | 0.176044 | 0.00013  | 0.125505 |
| 0.338054 | 6.00E-14 | 0.170549 | 0.00021  | 0.225802 | 8.21E-07 | 0.090005 | 0.05192  | 0.142885 |
| -0.05924 | 0.20132  | -0.19607 | 1.98E-05 | -0.10587 | 0.02212  | -0.21719 | 2.16E-06 | -0.37407 |
| 0.051783 | 0.26408  | -0.02789 | 0.54766  | 0.017897 | 0.69968  | -0.06274 | 0.17587  | -0.03365 |
| 0.114482 | 0.01331  | 0.124582 | 0.00703  | 0.113842 | 0.01383  | 0.109048 | 0.01841  | 0.092455 |
| 0.055942 | 0.22758  | 0.033439 | 0.47098  | 0.027219 | 0.55737  | 0.033072 | 0.47587  | 0.127517 |
| 0.182402 | 7.36E-05 | 0.078911 | 0.0885   | 0.069779 | 0.13214  | 0.083853 | 0.07023  | 0.123964 |
| 0.098901 | 0.03262  | 0.011554 | 0.80334  | 0.042333 | 0.36136  | -0.01357 | 0.76999  | -0.11779 |
| 0.052327 | 0.2591   | 0.054589 | 0.23904  | 0.030288 | 0.5138   | 0.049365 | 0.28707  | 0.099603 |
| 0.066841 | 0.14925  | 0.098925 | 0.03257  | 0.055969 | 0.22735  | 0.107808 | 0.01979  | 0.221013 |
| 0.014653 | 0.75214  | 0.031696 | 0.49442  | 0.042309 | 0.36163  | 0.014609 | 0.75286  | 0.033868 |
| 0.026878 | 0.56233  | 0.043289 | 0.35061  | 0.041846 | 0.36691  | 0.053393 | 0.2495   | 0.015079 |
| 0.049915 | 0.28172  | 0.021818 | 0.63816  | 0.049712 | 0.28369  | -0.00401 | 0.93108  | -0.02691 |
| 0.055012 | 0.23541  | 0.032418 | 0.48464  | 0.051234 | 0.26919  | 0.009878 | 0.8314   | -0.03468 |
| -0.00669 | 0.88533  | -0.01093 | 0.81376  | -0.00184 | 0.96841  | -0.0025  | 0.95701  | -0.00525 |
| 0.072975 | 0.11529  | 0.023444 | 0.61332  | 0.02427  | 0.60087  | 0.028577 | 0.53787  | 0.003325 |
| -0.02449 | 0.59754  | -0.0335  | 0.47014  | -0.01766 | 0.70348  | -0.05943 | 0.19985  | -0.05392 |
| 0.012853 | 0.78176  | 0.03309  | 0.47563  | 0.033851 | 0.46552  | 0.016942 | 0.71499  | 0.091846 |
| 0.064624 | 0.16324  | 0.041009 | 0.37658  | 0.042508 | 0.35938  | 0.034078 | 0.46254  | -0.02196 |
| -0.08774 | 0.05814  | -0.05846 | 0.20729  | -0.06061 | 0.19103  | -0.03873 | 0.4037   | -0.04087 |
| 0.019508 | 0.67413  | -0.03795 | 0.4132   | -0.01075 | 0.81674  | -0.05516 | 0.23418  | 0.00234  |
| 0.240163 | 1.50E-07 | 0.144902 | 0.00169  | 0.19774  | 1.68E-05 | 0.064361 | 0.16496  | 0.124496 |
| 0.147689 | 0.00137  | 0.051451 | 0.26717  | 0.127946 | 0.00562  | -0.01756 | 0.70499  | -0.01629 |
| 0.194632 | 2.28E-05 | 0.177925 | 0.00011  | 0.185033 | 5.75E-05 | 0.107705 | 0.01991  | 0.125039 |
| 0.004719 | 0.91899  | 0.069637 | 0.13293  | 0.022981 | 0.62035  | 0.08692  | 0.06053  | 0.137963 |
| 0.042015 | 0.36498  | -0.07479 | 0.10647  | -0.03347 | 0.47055  | -0.08488 | 0.06686  | -0.16221 |
| 0.031227 | 0.50084  | -0.09986 | 0.03096  | -0.09016 | 0.05152  | -0.09229 | 0.04622  | -0.14669 |
| 0.024432 | 0.59845  | 0.072281 | 0.1188   | 0.039462 | 0.39487  | 0.063986 | 0.16744  | 0.183169 |
| -0.02422 | 0.60164  | 0.000472 | 0.99188  | -0.0132  | 0.776    | -0.0077  | 0.86815  | 0.008077 |
| 0.152309 | 0.00096  | 0.13852  | 0.0027   | 0.136697 | 0.00308  | 0.11146  | 0.01596  | 0.01934  |
| 0.102243 | 0.02715  | 0.039576 | 0.3935   | 0.064126 | 0.16652  | 0.006447 | 0.88949  | -0.01595 |
| 0.01528  | 0.74191  | -0.02609 | 0.5738   | 0.004691 | 0.91946  | -0.02704 | 0.55997  | -0.09687 |
| -0.02969 | 0.52219  | -0.11124 | 0.01617  | -0.0305  | 0.51081  | -0.13668 | 0.00308  | -0.09827 |
| 0.099092 | 0.03228  | 0.086296 | 0.06241  | 0.100522 | 0.02986  | 0.04476  | 0.33446  | 0.079622 |
| -0.07397 | 0.1104   | -0.17976 | 9.38E-05 | -0.09885 | 0.0327   | -0.19764 | 1.69E-05 | -0.25806 |
| 0.047811 | 0.30252  | 0.066931 | 0.1487   | 0.041464 | 0.3713   | 0.061336 | 0.18578  | 0.087539 |
| 0.344539 | 1.84E-14 | 0.23636  | 2.37E-07 | 0.336667 | 7.70E-14 | 0.092574 | 0.04556  | 0.09136  |
| 0.163974 | 0.00037  | 0.182935 | 7.00E-05 | 0.162453 | 0.00042  | 0.157474 | 0.00064  | 0.269496 |

|          |          |          |          |          |          |          |          |          |
|----------|----------|----------|----------|----------|----------|----------|----------|----------|
| 0.018137 | 0.69585  | -0.10226 | 0.02712  | -0.04556 | 0.32593  | -0.0955  | 0.03911  | -0.1626  |
| 0.075753 | 0.10205  | 0.147648 | 0.00138  | 0.113512 | 0.01411  | 0.144065 | 0.0018   | 0.163432 |
| 0.029828 | 0.52023  | 0.140137 | 0.0024   | 0.053074 | 0.25235  | 0.188074 | 4.31E-05 | 0.156825 |
| -0.06465 | 0.16308  | -0.06972 | 0.13248  | -0.07254 | 0.11747  | -0.0682  | 0.14114  | -0.07726 |
| -0.05928 | 0.20097  | -0.10644 | 0.02141  | -0.06312 | 0.17328  | -0.11144 | 0.01598  | -0.20509 |
| 0.017978 | 0.69838  | 0.095253 | 0.03963  | 0.022578 | 0.62649  | 0.141546 | 0.00217  | 0.180834 |
| 0.111594 | 0.01584  | 0.042722 | 0.35696  | 0.045754 | 0.32382  | 0.044358 | 0.33883  | 0.142554 |
| -0.00681 | 0.88328  | -0.05519 | 0.23391  | -0.03337 | 0.47185  | -0.06583 | 0.15549  | -0.07037 |
| -0.01803 | 0.69752  | -0.0937  | 0.04298  | -0.05269 | 0.25582  | -0.10356 | 0.02523  | -0.16609 |
| 0.06121  | 0.18669  | 0.054085 | 0.24341  | 0.068213 | 0.14106  | 0.031289 | 0.49998  | 0.118326 |
| 0.070092 | 0.13041  | 0.153857 | 0.00085  | 0.07218  | 0.11931  | 0.17326  | 0.00017  | 0.182157 |
| 0.017455 | 0.70675  | 0.06107  | 0.1877   | 0.018295 | 0.69334  | 0.071918 | 0.12066  | 0.011687 |
| -0.12874 | 0.00533  | -0.16401 | 0.00037  | -0.11062 | 0.01678  | -0.16153 | 0.00046  | -0.29932 |
| 0.126294 | 0.00628  | 0.002294 | 0.96057  | 0.062773 | 0.17566  | -0.03336 | 0.47204  | 0.036252 |
| 0.005265 | 0.90965  | -0.02073 | 0.65497  | 0.025215 | 0.58676  | -0.05362 | 0.24748  | -0.11858 |
| -0.00825 | 0.85888  | 0.030062 | 0.51695  | -0.02485 | 0.59221  | 0.055187 | 0.23393  | 0.086697 |
| -0.06278 | 0.17558  | -0.02699 | 0.5607   | -0.02406 | 0.60402  | -0.0096  | 0.83607  | 0.058644 |
| 0.085769 | 0.06404  | 0.079917 | 0.0845   | 0.060996 | 0.18823  | 0.062567 | 0.17709  | 0.095006 |
| 0.197299 | 1.75E-05 | 0.170132 | 0.00022  | 0.194123 | 2.40E-05 | 0.105651 | 0.02241  | 0.135721 |
| 0.069183 | 0.13548  | 0.121711 | 0.00846  | 0.118194 | 0.01058  | 0.090244 | 0.0513   | 0.112653 |
| 0.109169 | 0.01828  | 0.106397 | 0.02147  | 0.122431 | 0.00808  | 0.06835  | 0.14026  | 0.072801 |
| 0.110869 | 0.01654  | 0.082912 | 0.07345  | 0.10839  | 0.01913  | 0.048258 | 0.29803  | 0.053059 |
| -0.00227 | 0.96097  | 0.085783 | 0.06399  | 0.014307 | 0.7578   | 0.107326 | 0.02035  | 0.051388 |
| 0.037424 | 0.41975  | 0.006053 | 0.8962   | 0.033289 | 0.47297  | -0.01993 | 0.66747  | 0.017845 |
| 0.04157  | 0.37008  | 0.027668 | 0.55089  | 0.051713 | 0.26473  | 0.004107 | 0.92946  | -0.03869 |
| 0.034363 | 0.4588   | -0.01745 | 0.70679  | 0.000691 | 0.98812  | -0.02604 | 0.57462  | -0.03239 |
| 0.052094 | 0.26122  | 0.074453 | 0.10809  | 0.035425 | 0.44503  | 0.105337 | 0.02281  | 0.162253 |
| 0.140335 | 0.00237  | 0.076712 | 0.09777  | 0.108033 | 0.01953  | 0.04287  | 0.35529  | 0.086018 |
| 0.22415  | 9.91E-07 | 0.186373 | 5.07E-05 | 0.162623 | 0.00042  | 0.177702 | 0.00011  | 0.340527 |
| 0.093535 | 0.04335  | 0.041987 | 0.3653   | 0.061162 | 0.18703  | 0.036551 | 0.43069  | 0.025593 |
| 0.032045 | 0.48969  | 0.130347 | 0.00478  | 0.051418 | 0.26747  | 0.159477 | 0.00054  | 0.116987 |
| 0.006499 | 0.88861  | -0.08029 | 0.08304  | -0.03741 | 0.41998  | -0.09072 | 0.05008  | -0.14958 |
| 0.082385 | 0.0753   | 0.018966 | 0.68269  | 0.022373 | 0.62962  | 0.007118 | 0.87807  | -0.01596 |
| 0.208683 | 5.42E-06 | 0.189117 | 3.90E-05 | 0.262093 | 8.95E-09 | 0.083843 | 0.07027  | 0.120576 |
| 0.089497 | 0.05327  | 0.130104 | 0.00486  | 0.141725 | 0.00214  | 0.065129 | 0.15997  | 0.116791 |
| 0.066381 | 0.15208  | 0.090573 | 0.05046  | 0.065884 | 0.15517  | 0.070572 | 0.12779  | 0.217826 |
| 0.13704  | 0.003    | 0.107389 | 0.02028  | 0.151709 | 0.00101  | 0.025164 | 0.58752  | 0.002587 |
| 0.066009 | 0.15439  | 0.150324 | 0.00112  | 0.105102 | 0.02312  | 0.130536 | 0.00472  | 0.251482 |
| 0.066437 | 0.15173  | 0.080805 | 0.08109  | 0.088912 | 0.05485  | 0.05918  | 0.20175  | 0.069418 |
| 0.118063 | 0.01067  | 0.070228 | 0.12966  | 0.091139 | 0.04903  | 0.036268 | 0.43427  | 0.067996 |
| -0.04526 | 0.32905  | 0.003862 | 0.93367  | -0.03263 | 0.48177  | 0.036553 | 0.43066  | -0.00517 |
| 0.003408 | 0.94144  | 0.028433 | 0.53993  | -0.01039 | 0.82286  | 0.042201 | 0.36285  | 0.055154 |
| 0.068581 | 0.13892  | 0.200624 | 1.25E-05 | 0.089001 | 0.05461  | 0.229858 | 5.13E-07 | 0.271804 |
| 0.04756  | 0.30507  | -0.0056  | 0.90398  | -0.01497 | 0.74688  | 0.002187 | 0.96241  | -0.0904  |
| 0.033818 | 0.46596  | 0.081582 | 0.0782   | 0.06511  | 0.16009  | 0.070243 | 0.12958  | 0.044334 |

|          |          |          |          |          |          |          |          |          |
|----------|----------|----------|----------|----------|----------|----------|----------|----------|
| 0.084552 | 0.06792  | 0.074598 | 0.1074   | 0.115258 | 0.01269  | 0.021473 | 0.64348  | 0.010597 |
| 0.055717 | 0.22946  | 0.156543 | 0.00069  | 0.076072 | 0.10061  | 0.191428 | 3.12E-05 | 0.314075 |
| 0.007473 | 0.87204  | 0.030157 | 0.51563  | 0.019271 | 0.67787  | 0.032594 | 0.48227  | 0.069582 |
| 0.008655 | 0.85202  | -0.03904 | 0.39995  | -0.03068 | 0.50838  | -0.03887 | 0.40195  | -0.0756  |
| 0.124948 | 0.00686  | 0.022898 | 0.62161  | 0.088899 | 0.05488  | -0.03087 | 0.5058   | -0.05059 |
| 0.043817 | 0.34475  | 0.022321 | 0.63043  | 0.026975 | 0.56092  | 0.023045 | 0.61937  | 0.024058 |
| 0.021058 | 0.6499   | 0.032017 | 0.49006  | 0.029037 | 0.53135  | 0.020235 | 0.66273  | 0.01414  |
| 0.129279 | 0.00514  | 0.05025  | 0.2785   | 0.076332 | 0.09945  | 0.004719 | 0.91899  | 0.0476   |
| -0.002   | 0.96569  | -0.06277 | 0.17566  | -0.0062  | 0.89376  | -0.09524 | 0.03965  | -0.14266 |
| 0.03282  | 0.47923  | -0.06313 | 0.1732   | -0.03453 | 0.4566   | -0.06758 | 0.1448   | -0.11445 |
| 0.061143 | 0.18717  | 0.027917 | 0.54731  | 0.0389   | 0.40164  | 0.015192 | 0.74334  | 0.020877 |
| 0.113262 | 0.01433  | 0.175753 | 0.00013  | 0.122865 | 0.00786  | 0.175854 | 0.00013  | 0.300318 |
| 0.038527 | 0.40618  | -0.02486 | 0.59208  | 0.006284 | 0.89227  | -0.03148 | 0.49734  | -0.04194 |
| 0.003661 | 0.93711  | 0.020609 | 0.65688  | -0.0021  | 0.96382  | 0.035371 | 0.44572  | 0.036356 |
| -0.03922 | 0.39772  | -0.00833 | 0.85756  | -0.00355 | 0.93897  | -0.00684 | 0.88284  | -0.01717 |
| 0.218339 | 1.90E-06 | 0.109714 | 0.0177   | 0.137893 | 0.00282  | 0.0591   | 0.20236  | 0.074414 |
| 0.195343 | 2.13E-05 | 0.250863 | 3.91E-08 | 0.251123 | 3.78E-08 | 0.174538 | 0.00015  | 0.133629 |
| 0.134701 | 0.00354  | 0.268022 | 3.99E-09 | 0.168792 | 0.00025  | 0.29471  | 8.22E-11 | 0.242945 |
| 0.053193 | 0.25128  | 0.012349 | 0.79011  | 0.034452 | 0.45763  | -0.0126  | 0.78591  | 0.089206 |
| -0.11833 | 0.01049  | -0.20565 | 7.46E-06 | -0.16274 | 0.00041  | -0.19381 | 2.47E-05 | -0.23973 |
| 0.110418 | 0.01698  | 0.015571 | 0.73717  | 0.042959 | 0.3543   | 7.39E-06 | 0.99987  | 0.020425 |
| -0.1172  | 0.01125  | -0.10354 | 0.02525  | -0.09273 | 0.04519  | -0.10856 | 0.01894  | -0.14909 |
| 0.321959 | 1.01E-12 | 0.364005 | 4.45E-16 | 0.343046 | 2.42E-14 | 0.265588 | 5.57E-09 | 0.261499 |
| -0.0342  | 0.46096  | -0.09612 | 0.03785  | -0.06122 | 0.18662  | -0.09229 | 0.04624  | -0.05959 |
| -0.03514 | 0.44864  | -0.04758 | 0.30485  | -0.05027 | 0.27831  | -0.0374  | 0.41999  | -0.06653 |
| -0.03216 | 0.48811  | 0.038619 | 0.40505  | 0.031107 | 0.50248  | 0.037288 | 0.42144  | 0.042009 |
| 0.108672 | 0.01882  | 0.162806 | 0.00041  | 0.191419 | 3.13E-05 | 0.076153 | 0.10025  | 0.206003 |
| 0.104022 | 0.02457  | 0.01733  | 0.70875  | 0.100109 | 0.03054  | -0.04767 | 0.30396  | -0.05005 |
| -0.00724 | 0.87608  | -0.17279 | 0.00018  | -0.09423 | 0.04181  | -0.16498 | 0.00034  | -0.32375 |
| 0.234784 | 2.87E-07 | 0.166218 | 0.00031  | 0.110799 | 0.0166   | 0.192563 | 2.80E-05 | 0.15103  |
| -0.00611 | 0.89518  | 0.02009  | 0.66499  | 0.004076 | 0.93     | 0.032452 | 0.48418  | 0.082778 |
| 0.083927 | 0.06998  | 0.06839  | 0.14003  | 0.071606 | 0.12228  | 0.060931 | 0.1887   | 0.114227 |
| 0.013572 | 0.76989  | 0.034765 | 0.45357  | 0.03768  | 0.41657  | -0.00892 | 0.8476   | 0.196348 |
| 0.004628 | 0.92055  | 0.064611 | 0.16333  | 0.016157 | 0.72766  | 0.090079 | 0.05173  | 0.138104 |
| -0.03393 | 0.46445  | -0.05871 | 0.20537  | -0.03815 | 0.4108   | -0.06545 | 0.15791  | -0.01847 |
| -0.03282 | 0.47928  | 0.00061  | 0.98951  | -0.03662 | 0.42982  | 0.010746 | 0.81684  | 0.035713 |
| 0.061508 | 0.18454  | -0.01866 | 0.68752  | 0.056444 | 0.22343  | -0.06884 | 0.13744  | -0.00508 |
| -0.06992 | 0.13138  | -0.11273 | 0.0148   | -0.03801 | 0.41245  | -0.14811 | 0.00133  | -0.16538 |
| 0.020421 | 0.65983  | 0.017521 | 0.70569  | 0.014695 | 0.75145  | 0.021813 | 0.63823  | 0.013909 |
| -0.02935 | 0.52695  | -0.0286  | 0.53761  | -0.04884 | 0.29219  | -0.00332 | 0.94289  | -0.04104 |
| 0.081977 | 0.07677  | 0.0789   | 0.08854  | 0.062051 | 0.18069  | 0.057436 | 0.21538  | 0.100863 |
| 0.032686 | 0.48103  | 0.143298 | 0.00191  | 0.046308 | 0.318    | 0.182865 | 7.05E-05 | 0.183482 |
| 0.060975 | 0.18839  | -0.03788 | 0.41405  | 0.026722 | 0.56459  | -0.0705  | 0.12817  | -0.04067 |
| -0.10545 | 0.02266  | -0.17745 | 0.00012  | -0.14573 | 0.00159  | -0.16279 | 0.00041  | -0.17727 |
| 0.165364 | 0.00033  | 0.169854 | 0.00023  | 0.218931 | 1.78E-06 | 0.104668 | 0.02369  | 0.088073 |

|          |          |          |          |          |          |          |          |          |
|----------|----------|----------|----------|----------|----------|----------|----------|----------|
| 0.097611 | 0.03496  | 0.100135 | 0.0305   | 0.111133 | 0.01628  | 0.053872 | 0.24527  | 0.199187 |
| 0.038731 | 0.40368  | 0.073084 | 0.11474  | 0.048712 | 0.2935   | 0.063706 | 0.16931  | 0.174432 |
| 0.035614 | 0.4426   | 0.011776 | 0.79965  | 0.036488 | 0.43149  | -0.01168 | 0.8013   | 0.033551 |
| -0.01382 | 0.76573  | 0.014074 | 0.76164  | 0.009956 | 0.8301   | 0.017801 | 0.70122  | 0.053765 |
| -0.01433 | 0.75746  | 0.006747 | 0.88439  | -0.0083  | 0.85797  | 0.009237 | 0.84219  | -0.00997 |
| 0.086455 | 0.06193  | 0.085214 | 0.06578  | 0.105675 | 0.02238  | 0.026314 | 0.57056  | 0.019374 |
| -0.01373 | 0.76736  | 0.002974 | 0.94889  | -0.00591 | 0.89857  | 0.003089 | 0.94692  | -0.0177  |
| 0.245011 | 8.21E-08 | 0.08451  | 0.06805  | 0.137218 | 0.00296  | 0.037942 | 0.41335  | -0.00095 |
| 0.210712 | 4.37E-06 | 0.192934 | 2.70E-05 | 0.233089 | 3.51E-07 | 0.117887 | 0.01078  | 0.128394 |
| 0.062732 | 0.17594  | 0.054543 | 0.23943  | 0.067183 | 0.14717  | 0.031394 | 0.49855  | 0.034213 |
| 0.034967 | 0.45094  | 0.028745 | 0.53549  | 0.072835 | 0.11598  | -0.01275 | 0.78347  | -0.07447 |
| -0.04614 | 0.31973  | -0.04488 | 0.33318  | -0.0258  | 0.57812  | -0.04501 | 0.33177  | -0.10478 |
| 0.016021 | 0.72985  | -0.20233 | 1.05E-05 | -0.11784 | 0.01081  | -0.20106 | 1.20E-05 | -0.24139 |
| -0.02499 | 0.59014  | -0.13091 | 0.0046   | -0.0677  | 0.14408  | -0.16009 | 0.00052  | -0.19821 |
| 0.090644 | 0.05028  | 0.04237  | 0.36094  | 0.044003 | 0.34272  | 0.046864 | 0.31221  | -0.0473  |
| 0.104242 | 0.02427  | 0.096233 | 0.03763  | 0.134482 | 0.0036   | 0.035552 | 0.44339  | 0.030258 |
| 0.05912  | 0.20221  | 0.009496 | 0.83784  | 0.025039 | 0.58939  | -0.00159 | 0.97261  | -0.0386  |
| -0.04681 | 0.31276  | -0.07405 | 0.11003  | -0.06008 | 0.19499  | -0.07669 | 0.09787  | -0.11277 |
| 0.120548 | 0.00912  | 0.02066  | 0.65609  | 0.026349 | 0.57004  | 0.018965 | 0.68271  | 0.005025 |
| 0.001208 | 0.97922  | -0.02492 | 0.5911   | -0.01192 | 0.79723  | -0.03907 | 0.39956  | -0.09334 |
| 0.033535 | 0.46971  | 0.046085 | 0.32034  | 0.035854 | 0.43953  | 0.054386 | 0.24079  | 0.04542  |
| 0.070509 | 0.12813  | -0.0437  | 0.34603  | 0.040162 | 0.38652  | -0.08104 | 0.08022  | -0.0857  |
| 0.010906 | 0.81416  | -0.09064 | 0.05029  | -0.07631 | 0.09957  | -0.08261 | 0.07449  | -0.10338 |
| 0.004438 | 0.9238   | -0.06748 | 0.14537  | -0.03845 | 0.40712  | -0.08541 | 0.06515  | -0.1131  |
| 0.036927 | 0.42596  | 0.085402 | 0.06519  | 0.035415 | 0.44516  | 0.10471  | 0.02364  | 0.188289 |
| 0.004758 | 0.91832  | 0.015699 | 0.73509  | -0.00429 | 0.9263   | 0.034721 | 0.45414  | 0.070278 |
| 0.319829 | 1.44E-12 | 0.164635 | 0.00035  | 0.1651   | 0.00034  | 0.127953 | 0.00562  | 0.091187 |
| 0.116597 | 0.01168  | 0.054895 | 0.23641  | 0.042998 | 0.35386  | 0.055554 | 0.23082  | 0.051756 |
| 0.044492 | 0.33737  | 0.063121 | 0.17328  | 0.038974 | 0.40074  | 0.076707 | 0.09779  | 0.043573 |
| 0.017047 | 0.7133   | -0.005   | 0.91421  | 0.02156  | 0.64213  | -0.01638 | 0.72401  | -0.01861 |
| 0.021834 | 0.6379   | -0.06104 | 0.18792  | -0.03443 | 0.4579   | -0.05915 | 0.20199  | -0.08192 |
| 0.096905 | 0.03631  | 0.022912 | 0.6214   | 0.055392 | 0.23219  | 0.001115 | 0.98082  | -0.02835 |
| 0.070339 | 0.12905  | 0.005056 | 0.91322  | 0.022688 | 0.62481  | -0.00215 | 0.96301  | -0.00134 |
| 0.132154 | 0.00423  | 0.007568 | 0.87043  | 0.055763 | 0.22907  | -0.01861 | 0.68828  | -0.0518  |
| 0.283224 | 4.60E-10 | 0.23316  | 3.48E-07 | 0.323466 | 7.78E-13 | 0.073604 | 0.11218  | 0.13834  |
| 0.096692 | 0.03672  | 0.069382 | 0.13436  | 0.112598 | 0.01491  | 0.016335 | 0.72479  | 0.028626 |
| 0.183721 | 6.51E-05 | 0.1185   | 0.01038  | 0.179066 | 9.99E-05 | 0.049087 | 0.2898   | 0.063371 |
| 0.094419 | 0.0414   | 0.037307 | 0.4212   | 0.044144 | 0.34116  | 0.034852 | 0.45243  | 0.03393  |
| 0.077524 | 0.09426  | 0.005959 | 0.89782  | 0.019096 | 0.68064  | 0.009514 | 0.83753  | 0.008171 |
| 0.073102 | 0.11465  | 0.004888 | 0.9161   | 0.011138 | 0.81029  | 0.00617  | 0.8942   | 0.004321 |
| 0.10427  | 0.02423  | 0.029745 | 0.52139  | 0.046374 | 0.31731  | 0.014724 | 0.75097  | 0.010269 |
| 0.326552 | 4.58E-13 | 0.126332 | 0.00626  | 0.195948 | 2.00E-05 | 0.044818 | 0.33384  | 0.01363  |
| 0.174338 | 0.00015  | 0.14519  | 0.00166  | 0.184383 | 6.12E-05 | 0.093574 | 0.04326  | 0.099301 |
| 0.121471 | 0.0086   | 0.200994 | 1.21E-05 | 0.146067 | 0.00155  | 0.185036 | 5.75E-05 | 0.186003 |
| 0.016169 | 0.72747  | 0.057296 | 0.2165   | 0.033833 | 0.46576  | 0.060652 | 0.19074  | 0.163428 |

|          |          |          |          |          |          |          |          |          |
|----------|----------|----------|----------|----------|----------|----------|----------|----------|
| 0.059988 | 0.19565  | -0.0361  | 0.43641  | 0.006894 | 0.88188  | -0.06312 | 0.1733   | -0.07387 |
| 0.132268 | 0.00419  | 0.00876  | 0.85024  | 0.046818 | 0.31269  | -0.01086 | 0.81488  | -0.03889 |
| -0.02736 | 0.55537  | -0.03461 | 0.45558  | 0.027475 | 0.55368  | -0.07076 | 0.12677  | -0.11823 |
| -0.02564 | 0.58046  | -0.04078 | 0.37924  | -0.02538 | 0.58425  | -0.0348  | 0.45311  | -0.05753 |
| 0.02932  | 0.52735  | 0.039823 | 0.39055  | 0.052878 | 0.2541   | 0.015608 | 0.73657  | 0.051717 |
| -0.00194 | 0.96671  | 0.003052 | 0.94756  | -0.01694 | 0.71494  | 0.02055  | 0.6578   | -0.02778 |
| -0.02924 | 0.52846  | -0.01885 | 0.68458  | -0.02002 | 0.66605  | -0.00917 | 0.84328  | -0.02521 |
| 0.026487 | 0.56803  | 0.083018 | 0.07308  | 0.035315 | 0.44644  | 0.105983 | 0.02199  | 0.077244 |
| 0.146469 | 0.0015   | 0.124951 | 0.00686  | 0.095913 | 0.03827  | 0.124666 | 0.00699  | 0.06763  |
| 0.007406 | 0.87318  | 0.006475 | 0.88902  | 0.006271 | 0.89249  | 0.013391 | 0.77287  | -0.01366 |
| 0.014871 | 0.74858  | 0.061782 | 0.1826   | 0.025527 | 0.58214  | 0.091156 | 0.04899  | 0.07725  |
| 0.131229 | 0.0045   | 0.036059 | 0.43692  | 0.033418 | 0.47126  | 0.045887 | 0.32243  | 0.028047 |
| 0.064613 | 0.16331  | 0.063223 | 0.17258  | 0.036999 | 0.42506  | 0.08637  | 0.06219  | 0.053507 |
| 0.046592 | 0.31504  | 0.001437 | 0.97529  | 0.01915  | 0.67978  | -0.01576 | 0.73417  | -0.04457 |
| 0.109061 | 0.0184   | 0.135366 | 0.00338  | 0.098821 | 0.03276  | 0.139327 | 0.00255  | 0.074533 |
| 0.08846  | 0.0561   | 0.033392 | 0.47161  | 0.05624  | 0.22511  | 0.000964 | 0.98343  | -0.02294 |
| -0.02165 | 0.64079  | -0.01464 | 0.75232  | 0.00074  | 0.98728  | -0.00644 | 0.88957  | -0.05832 |
| 0.042972 | 0.35415  | -0.00264 | 0.95459  | 0.009089 | 0.8447   | -0.00598 | 0.8974   | -0.07567 |
| 0.158693 | 0.00058  | 0.102198 | 0.02722  | 0.063226 | 0.17256  | 0.11769  | 0.01092  | 0.16664  |
| 0.052767 | 0.2551   | 0.039541 | 0.39392  | 0.065855 | 0.15535  | 0.008208 | 0.85958  | 0.0633   |
| 0.000883 | 0.98481  | -0.0145  | 0.75469  | -0.00851 | 0.85445  | -0.01064 | 0.81857  | -0.0074  |
| 0.292942 | 1.08E-10 | 0.135364 | 0.00338  | 0.147928 | 0.00135  | 0.111257 | 0.01616  | 0.059585 |
| 0.180991 | 8.38E-05 | 0.213973 | 3.08E-06 | 0.127252 | 0.00589  | 0.251517 | 3.60E-08 | 0.219084 |
| 0.041327 | 0.37289  | 0.215086 | 2.72E-06 | 0.072965 | 0.11534  | 0.289321 | 1.86E-10 | 0.127994 |
| 0.248142 | 5.53E-08 | 0.077873 | 0.09278  | 0.163037 | 0.0004   | -0.007   | 0.88005  | 0.035788 |
| 0.358869 | 1.22E-15 | 0.145136 | 0.00166  | 0.175242 | 0.00014  | 0.109903 | 0.01751  | 0.052744 |
| 0.109066 | 0.01839  | 0.029369 | 0.52667  | 0.041618 | 0.36953  | 0.041588 | 0.36987  | 0.014866 |
| 0.28477  | 3.66E-10 | 0.113301 | 0.01429  | 0.17656  | 0.00013  | 0.045578 | 0.3257   | 0.055026 |
| 0.226713 | 7.39E-07 | 0.142878 | 0.00197  | 0.218965 | 1.78E-06 | 0.034471 | 0.4574   | 0.05707  |
| 0.274269 | 1.67E-09 | 0.294697 | 8.24E-11 | 0.236907 | 2.22E-07 | 0.271366 | 2.51E-09 | 0.32922  |
| 0.154536 | 0.00081  | 0.149254 | 0.00122  | 0.182724 | 7.14E-05 | 0.075734 | 0.10213  | 0.071373 |
| 0.035383 | 0.44558  | -0.0264  | 0.56937  | -0.0294  | 0.52625  | -0.01514 | 0.74426  | -0.0156  |
| -0.10671 | 0.02108  | -0.16852 | 0.00025  | -0.11651 | 0.01175  | -0.17185 | 0.00019  | -0.2486  |
| -0.07257 | 0.11732  | -0.008   | 0.86314  | -0.04013 | 0.38696  | 0.013252 | 0.77517  | 0.031843 |
| 0.047278 | 0.30796  | 0.048828 | 0.29234  | 0.040672 | 0.38052  | 0.031655 | 0.49498  | 0.160117 |
| -0.05933 | 0.20063  | -0.01877 | 0.68581  | -0.04649 | 0.31609  | -0.00028 | 0.99515  | 0.081623 |
| 0.048049 | 0.30013  | -0.04538 | 0.32782  | -0.02877 | 0.53508  | -0.04863 | 0.29434  | -0.00525 |
| -0.02125 | 0.64689  | -0.10661 | 0.02121  | -0.07439 | 0.10837  | -0.1009  | 0.02924  | -0.14242 |
| 0.047686 | 0.30379  | -0.01182 | 0.79887  | 0.031245 | 0.50059  | -0.03187 | 0.49211  | 0.012277 |
| -0.13898 | 0.00261  | -0.16234 | 0.00043  | -0.16464 | 0.00035  | -0.12372 | 0.00744  | -0.23767 |
| -0.03799 | 0.41271  | -0.00172 | 0.97044  | -0.02146 | 0.64361  | 0.017579 | 0.70477  | 0.085784 |
| -0.00367 | 0.93697  | -0.05993 | 0.19611  | -0.03899 | 0.40058  | -0.06476 | 0.16238  | -0.12435 |
| 0.022364 | 0.62977  | 0.00619  | 0.89387  | 0.015075 | 0.74525  | -0.00176 | 0.96966  | -0.00411 |
| -0.00943 | 0.83888  | -0.0114  | 0.8059   | -0.01102 | 0.81218  | -0.00715 | 0.87747  | -0.03128 |
| -0.0226  | 0.62611  | -0.02077 | 0.6544   | -0.01094 | 0.81361  | -0.01478 | 0.75002  | -0.02995 |

|          |          |          |          |          |          |          |          |          |
|----------|----------|----------|----------|----------|----------|----------|----------|----------|
| 0.080174 | 0.0835   | 0.252037 | 3.36E-08 | 0.104367 | 0.0241   | 0.321357 | 1.11E-12 | 0.224111 |
| 6.85E-05 | 0.99882  | 0.028198 | 0.54329  | 0.020307 | 0.66159  | 0.055085 | 0.23479  | 0.025999 |
| 0.053817 | 0.24576  | 0.141096 | 0.00224  | 0.047737 | 0.30327  | 0.204092 | 8.77E-06 | 0.097359 |
| 0.005043 | 0.91346  | 0.139323 | 0.00255  | 0.032415 | 0.48467  | 0.190595 | 3.39E-05 | 0.077711 |
| 0.063827 | 0.16851  | 0.243997 | 9.32E-08 | 0.106923 | 0.02083  | 0.315078 | 3.19E-12 | 0.206901 |
| 0.084143 | 0.06926  | 0.205087 | 7.91E-06 | 0.095049 | 0.04006  | 0.261558 | 9.62E-09 | 0.126979 |
| 0.067759 | 0.14373  | 0.098164 | 0.03394  | 0.075961 | 0.10111  | 0.133274 | 0.00391  | 0.035736 |
| 0.22007  | 1.57E-06 | 0.245578 | 7.65E-08 | 0.143478 | 0.00188  | 0.299835 | 3.72E-11 | 0.167547 |
| -0.02837 | 0.5409   | 0.005833 | 0.89995  | -0.03242 | 0.48458  | 0.025205 | 0.58691  | -0.01222 |
| 0.08776  | 0.05808  | 0.067023 | 0.14814  | 0.080512 | 0.0822   | 0.040012 | 0.3883   | 0.013758 |
| 0.142264 | 0.00206  | 0.029524 | 0.52448  | 0.077084 | 0.09615  | -0.01534 | 0.74089  | -0.02322 |
| 0.006605 | 0.8868   | 0.018038 | 0.69744  | 0.02804  | 0.54555  | 0.015443 | 0.73924  | -0.0473  |
| 0.199357 | 1.42E-05 | 0.098129 | 0.034    | 0.135381 | 0.00338  | 0.03125  | 0.50052  | -0.00519 |
| 0.257612 | 1.63E-08 | 0.184466 | 6.07E-05 | 0.259359 | 1.29E-08 | 0.072259 | 0.1189   | 0.073275 |
| 0.12143  | 0.00862  | 0.072764 | 0.11634  | 0.063314 | 0.17196  | 0.07739  | 0.09483  | 0.128857 |
| 0.155818 | 0.00073  | 0.138355 | 0.00273  | 0.161408 | 0.00046  | 0.05757  | 0.21431  | 0.04985  |
| -0.04817 | 0.29892  | -0.07081 | 0.12651  | -0.0478  | 0.30261  | -0.07414 | 0.10959  | -0.16888 |
| -0.02842 | 0.54009  | -0.08722 | 0.05966  | -0.06306 | 0.1737   | -0.08707 | 0.0601   | -0.15282 |
| 0.006738 | 0.88454  | -0.00144 | 0.97522  | 0.022723 | 0.62428  | -0.012   | 0.7959   | -0.05829 |
| 0.145497 | 0.00162  | 0.126148 | 0.00634  | 0.116265 | 0.01193  | 0.114908 | 0.01296  | 0.247206 |
| 0.15178  | 0.001    | 0.13418  | 0.00367  | 0.135766 | 0.00329  | 0.104156 | 0.02439  | 0.100592 |
| 0.022958 | 0.62069  | -0.00948 | 0.8381   | 0.001292 | 0.97779  | -0.00848 | 0.85494  | -0.04153 |
| 0.060793 | 0.18971  | 0.058318 | 0.20841  | 0.014482 | 0.75493  | 0.074639 | 0.1072   | 0.019285 |
| 0.1093   | 0.01814  | 0.246438 | 6.86E-08 | 0.144278 | 0.00177  | 0.262902 | 8.03E-09 | 0.320432 |
| 0.065629 | 0.15678  | 0.039719 | 0.39179  | 0.029516 | 0.5246   | 0.034084 | 0.46246  | 0.100268 |
| 0.02762  | 0.55159  | -0.0513  | 0.2686   | -0.00117 | 0.97985  | -0.05298 | 0.25315  | -0.11565 |
| 0.099172 | 0.03214  | 0.052813 | 0.25469  | 0.069821 | 0.1319   | 0.034747 | 0.4538   | -0.00456 |
| 0.090173 | 0.05149  | 0.158857 | 0.00057  | 0.103795 | 0.02489  | 0.188004 | 4.34E-05 | 0.069149 |
| -0.13465 | 0.00355  | -0.09114 | 0.04901  | -0.08406 | 0.06955  | -0.07536 | 0.10386  | -0.14304 |
| 0.091108 | 0.04911  | 0.084267 | 0.06885  | 0.10065  | 0.02965  | 0.06185  | 0.18211  | 0.041111 |
| -0.00084 | 0.98557  | 0.002475 | 0.95746  | 0.028919 | 0.53303  | -0.02772 | 0.55007  | -0.04747 |
| -0.05343 | 0.24919  | -0.04823 | 0.29829  | -0.03722 | 0.42227  | -0.03616 | 0.43564  | -0.0729  |
| -0.0214  | 0.64456  | -0.02438 | 0.59919  | -0.02316 | 0.61756  | -0.01226 | 0.79167  | -0.02704 |
| 0.045781 | 0.32354  | 0.054069 | 0.24355  | 0.062985 | 0.17421  | 0.034587 | 0.45588  | 0.019427 |
| 0.225687 | 8.32E-07 | 0.223005 | 1.13E-06 | 0.22117  | 1.39E-06 | 0.152609 | 0.00094  | 0.139058 |
| 0.054455 | 0.2402   | 0.094454 | 0.04132  | 0.058471 | 0.20721  | 0.085232 | 0.06573  | 0.113257 |
| 0.078814 | 0.08889  | 0.009297 | 0.84119  | 0.02329  | 0.61566  | -0.00702 | 0.87973  | -0.03973 |
| 0.115109 | 0.0128   | 0.094014 | 0.04228  | 0.09803  | 0.03419  | 0.065202 | 0.1595   | 0.011111 |
| 0.051027 | 0.27113  | 0.138096 | 0.00278  | 0.078805 | 0.08893  | 0.148877 | 0.00125  | 0.223539 |
| 0.22143  | 1.35E-06 | 0.179626 | 9.50E-05 | 0.215778 | 2.53E-06 | 0.093019 | 0.04452  | 0.103402 |
| 0.194731 | 2.26E-05 | 0.093156 | 0.04421  | 0.09678  | 0.03655  | 0.075856 | 0.10158  | 0.195832 |
| 0.05332  | 0.25015  | 0.037101 | 0.42378  | 0.062766 | 0.17571  | 0.006453 | 0.88939  | -0.01984 |
| 0.015432 | 0.73943  | 0.017407 | 0.70752  | 0.030061 | 0.51697  | 0.006024 | 0.89669  | -0.00358 |
| 0.044822 | 0.33379  | 0.043741 | 0.34559  | 0.055396 | 0.23216  | 0.046891 | 0.31194  | -0.00169 |
| 0.152464 | 0.00095  | 0.164141 | 0.00037  | 0.165467 | 0.00033  | 0.121794 | 0.00842  | 0.089315 |

|          |          |          |          |          |          |          |          |          |
|----------|----------|----------|----------|----------|----------|----------|----------|----------|
| 0.038193 | 0.41026  | 0.047549 | 0.30519  | 0.039325 | 0.39651  | 0.049572 | 0.28505  | 0.037902 |
| -0.02857 | 0.53802  | -0.03658 | 0.4303   | -0.02772 | 0.5501   | -0.04238 | 0.36085  | 0.07683  |
| 0.232054 | 3.96E-07 | 0.217403 | 2.11E-06 | 0.232528 | 3.75E-07 | 0.156124 | 0.00071  | 0.073402 |
| 0.093707 | 0.04296  | -0.01693 | 0.71525  | 0.05344  | 0.24909  | -0.04924 | 0.28833  | -0.0307  |
| 0.052382 | 0.25859  | 0.011637 | 0.80196  | 0.014225 | 0.75916  | 0.001795 | 0.96914  | 0.014149 |
| -0.03514 | 0.44865  | -0.03477 | 0.45344  | -0.02348 | 0.61274  | -0.03263 | 0.48184  | -0.03089 |
| -0.04165 | 0.36913  | -0.02472 | 0.59418  | -0.02805 | 0.54537  | -0.03075 | 0.50735  | -0.03583 |
| 0.198356 | 1.57E-05 | 0.166577 | 0.0003   | 0.181423 | 8.05E-05 | 0.112904 | 0.01464  | 0.131854 |
| 0.020789 | 0.65408  | 0.010681 | 0.81793  | 0.080472 | 0.08236  | -0.04914 | 0.28925  | 0.033506 |
| 0.079432 | 0.08641  | -0.01306 | 0.77828  | 0.053635 | 0.24736  | -0.05609 | 0.22633  | -0.0942  |
| -0.00253 | 0.95659  | -0.04152 | 0.37071  | -0.00989 | 0.83124  | -0.03758 | 0.41783  | -0.08563 |
| -0.01815 | 0.69557  | -0.03903 | 0.40005  | -0.02554 | 0.58202  | -0.02773 | 0.54998  | -0.04157 |
| 0.149697 | 0.00118  | 0.041937 | 0.36587  | 0.104967 | 0.0233   | -0.00975 | 0.83353  | 0.004833 |
| 0.108981 | 0.01848  | 0.150742 | 0.00108  | 0.115617 | 0.01241  | 0.157738 | 0.00062  | 0.072276 |
| 0.060613 | 0.19103  | 0.007997 | 0.86316  | 0.029993 | 0.51792  | -0.0062  | 0.8937   | -0.01199 |
| 0.098297 | 0.0337   | 0.162442 | 0.00042  | 0.123813 | 0.00739  | 0.166693 | 0.0003   | 0.115744 |
| 0.059521 | 0.19916  | 0.066872 | 0.14906  | 0.056306 | 0.22456  | 0.056199 | 0.22544  | 0.02558  |
| -0.05186 | 0.26339  | -0.03737 | 0.42044  | -0.04899 | 0.29075  | -0.01471 | 0.75123  | -0.05306 |
| 0.03478  | 0.45337  | 0.036787 | 0.42771  | 0.032472 | 0.48391  | 0.04631  | 0.31798  | 0.108835 |
| -0.02402 | 0.60463  | -0.02076 | 0.6546   | -0.02349 | 0.61268  | -0.01753 | 0.70558  | -0.02278 |
| 0.254377 | 2.48E-08 | 0.15682  | 0.00067  | 0.21796  | 1.99E-06 | 0.060197 | 0.1941   | 0.071946 |
| -0.1225  | 0.00805  | -0.05168 | 0.265    | -0.0656  | 0.15699  | -0.03531 | 0.44645  | -0.02451 |
| 0.1569   | 0.00067  | 0.016671 | 0.71935  | 0.107565 | 0.02007  | -0.06875 | 0.13795  | 0.046659 |
| -0.03464 | 0.45521  | -0.16333 | 0.00039  | -0.06903 | 0.13637  | -0.17985 | 9.30E-05 | -0.26427 |
| 0.044117 | 0.34146  | -0.04883 | 0.29229  | 0.015086 | 0.74506  | -0.07262 | 0.11708  | -0.10169 |
| 0.022601 | 0.62615  | 0.014591 | 0.75315  | 0.00366  | 0.93714  | 0.005327 | 0.9086   | -0.03497 |
| -0.0571  | 0.21805  | -0.04031 | 0.38482  | -0.01638 | 0.72399  | -0.06211 | 0.18029  | -0.0846  |
| 0.072096 | 0.11974  | 0.109354 | 0.01808  | 0.065103 | 0.16014  | 0.130915 | 0.0046   | 0.145665 |
| 0.029717 | 0.52178  | 0.049973 | 0.28117  | 0.034391 | 0.45844  | 0.032574 | 0.48254  | -0.02271 |
| 0.341808 | 3.04E-14 | 0.218057 | 1.97E-06 | 0.293842 | 9.39E-11 | 0.097427 | 0.03531  | 0.135509 |
| 0.019126 | 0.68016  | -0.02728 | 0.55645  | 0.04126  | 0.37367  | -0.07047 | 0.12837  | -0.10896 |
| 0.158433 | 0.00059  | 0.033191 | 0.47428  | 0.043931 | 0.3435   | 0.041529 | 0.37056  | -0.00828 |
| -0.01882 | 0.68499  | 0.06799  | 0.14237  | 0.002134 | 0.96332  | 0.084499 | 0.06809  | 0.127124 |
| -0.0445  | 0.33726  | 0.070377 | 0.12885  | 0.0143   | 0.75791  | 0.090647 | 0.05027  | 0.13643  |
| 0.108271 | 0.01927  | -0.00222 | 0.96185  | 0.044764 | 0.33442  | -0.03079 | 0.50687  | -0.08221 |
| -0.00588 | 0.8991   | -0.01411 | 0.76103  | -0.03457 | 0.45606  | 0.01262  | 0.78562  | 0.073869 |
| -0.09024 | 0.05131  | -0.17696 | 0.00012  | -0.1191  | 0.00999  | -0.17716 | 0.00012  | -0.24503 |
| 0.108715 | 0.01877  | 0.038347 | 0.40836  | 0.079201 | 0.08733  | 0.009457 | 0.83849  | 0.002285 |
| 0.057998 | 0.21092  | 0.081832 | 0.07729  | 0.064851 | 0.16176  | 0.059228 | 0.20139  | 0.18532  |
| 0.073003 | 0.11514  | -0.01601 | 0.73007  | 0.01185  | 0.79841  | -0.02373 | 0.60907  | 0.022696 |
| 0.033645 | 0.46826  | 0.086722 | 0.06113  | 0.070168 | 0.12999  | 0.064597 | 0.16342  | 0.099797 |
| 0.110705 | 0.0167   | 0.088539 | 0.05588  | 0.111274 | 0.01614  | 0.049941 | 0.28148  | 0.045672 |
| 0.06786  | 0.14313  | -0.06871 | 0.13818  | 0.024136 | 0.60288  | -0.10473 | 0.02361  | -0.17058 |
| -0.02513 | 0.58803  | 0.063937 | 0.16777  | 0.013762 | 0.76677  | 0.084388 | 0.06846  | 0.192674 |
| 0.04758  | 0.30487  | 0.094255 | 0.04176  | 0.069901 | 0.13146  | 0.099649 | 0.03132  | 0.105557 |

|          |          |          |          |          |          |          |          |          |
|----------|----------|----------|----------|----------|----------|----------|----------|----------|
| 0.114971 | 0.01291  | 0.238248 | 1.89E-07 | 0.126925 | 0.00602  | 0.274847 | 1.54E-09 | 0.187086 |
| 0.167832 | 0.00027  | 0.068957 | 0.13677  | 0.11133  | 0.01609  | 5.95E-05 | 0.99898  | 0.004299 |
| 0.062355 | 0.17856  | 0.030487 | 0.51104  | 0.060281 | 0.19347  | 0.018447 | 0.69091  | -0.03995 |
| 0.154955 | 0.00078  | 0.101357 | 0.02852  | 0.114498 | 0.01329  | 0.075559 | 0.10293  | 0.022743 |
| 0.080843 | 0.08095  | 0.055462 | 0.2316   | 0.045797 | 0.32337  | 0.082023 | 0.0766   | 0.042152 |
| 0.114381 | 0.01339  | 0.099704 | 0.03122  | 0.053757 | 0.24629  | 0.099379 | 0.03178  | 0.131636 |
| -0.14238 | 0.00204  | -0.20038 | 1.28E-05 | -0.20517 | 7.84E-06 | -0.14914 | 0.00123  | -0.22127 |
| 0.080113 | 0.08374  | 0.101312 | 0.02859  | 0.098428 | 0.03346  | 0.090406 | 0.05088  | 0.168028 |
| -0.03424 | 0.46037  | -0.0524  | 0.25843  | -0.04992 | 0.28172  | -0.0403  | 0.38486  | -0.05595 |
| -0.01781 | 0.70111  | 0.053668 | 0.24707  | 0.036099 | 0.43641  | 0.036247 | 0.43453  | 0.139629 |
| 0.008381 | 0.85666  | 0.027746 | 0.54977  | -0.00615 | 0.89454  | 0.035422 | 0.44507  | 0.114992 |
| 0.091275 | 0.04869  | 0.154422 | 0.00081  | 0.130184 | 0.00484  | 0.142381 | 0.00204  | 0.209832 |
| 0.147129 | 0.00143  | 0.115234 | 0.01271  | 0.130307 | 0.0048   | 0.073743 | 0.1115   | 0.042608 |
| -0.01841 | 0.69155  | 0.000141 | 0.99757  | -0.02957 | 0.52378  | 0.001894 | 0.96744  | 0.077996 |
| 0.047331 | 0.30742  | 0.075864 | 0.10155  | 0.040377 | 0.38399  | 0.088722 | 0.05537  | 0.118477 |
| 0.057148 | 0.2177   | 0.068543 | 0.13914  | 0.079617 | 0.08568  | 0.017885 | 0.69987  | 0.10687  |
| 0.111645 | 0.01579  | 0.075632 | 0.1026   | 0.088284 | 0.05659  | 0.052347 | 0.25891  | 0.031518 |
| 0.171508 | 0.0002   | 0.27155  | 2.45E-09 | 0.231319 | 4.32E-07 | 0.224118 | 9.95E-07 | 0.148434 |
| 0.055713 | 0.22949  | 0.016325 | 0.72494  | 0.003535 | 0.93927  | 0.032517 | 0.4833   | -0.01196 |
| -0.07968 | 0.08542  | -0.10313 | 0.02584  | -0.06725 | 0.14675  | -0.11697 | 0.01142  | -0.2027  |
| 0.119858 | 0.00953  | 0.098795 | 0.0328   | 0.120793 | 0.00898  | 0.052733 | 0.25541  | 0.09477  |
| 0.256363 | 1.92E-08 | 0.262708 | 8.24E-09 | 0.24621  | 7.06E-08 | 0.187268 | 4.66E-05 | 0.271118 |
| 0.08361  | 0.07105  | 0.026631 | 0.56592  | 0.02387  | 0.60689  | 0.015557 | 0.7374   | 0.118224 |
| 0.025522 | 0.58222  | 0.046898 | 0.31187  | 0.033782 | 0.46644  | 0.041871 | 0.36663  | 0.177908 |
| 0.076797 | 0.0974   | -0.00057 | 0.99013  | -0.00237 | 0.95921  | -0.00131 | 0.97741  | -0.01559 |
| 0.078179 | 0.0915   | 0.030963 | 0.50447  | 0.034822 | 0.45283  | 0.026646 | 0.56571  | 0.02014  |
| 0.003376 | 0.942    | -0.02613 | 0.5733   | -0.02059 | 0.65725  | -0.03195 | 0.49096  | -0.03016 |
| 0.187511 | 4.55E-05 | 0.160739 | 0.00049  | 0.166904 | 0.00029  | 0.088982 | 0.05466  | 0.318268 |
| 0.030166 | 0.5155   | -0.0055  | 0.90572  | 0.011934 | 0.79702  | -0.00834 | 0.85731  | -0.02847 |
| 0.199677 | 1.38E-05 | 0.111965 | 0.01549  | 0.154797 | 0.00079  | 0.074655 | 0.10713  | 0.07609  |
| 0.02314  | 0.61792  | -0.09947 | 0.03163  | -0.05724 | 0.21695  | -0.10588 | 0.02211  | -0.09421 |
| -0.04124 | 0.37395  | -0.11873 | 0.01023  | -0.03401 | 0.46346  | -0.15376 | 0.00086  | -0.2181  |
| 0.005975 | 0.89753  | -0.01221 | 0.79236  | 0.009096 | 0.84457  | -0.01582 | 0.73311  | -0.03659 |
| -0.08207 | 0.07643  | -0.06599 | 0.15448  | -0.06725 | 0.1468   | -0.04892 | 0.29148  | -0.00799 |
| 0.069221 | 0.13527  | 0.059115 | 0.20225  | 0.034932 | 0.4514   | 0.055735 | 0.2293   | 0.071095 |
| 0.113015 | 0.01454  | 0.151309 | 0.00104  | 0.168112 | 0.00026  | 0.074681 | 0.10701  | 0.092297 |
| 0.023041 | 0.61944  | 0.057366 | 0.21594  | 0.039152 | 0.39859  | 0.052069 | 0.26145  | 0.154632 |
| 0.11958  | 0.0097   | 0.072308 | 0.11866  | 0.09894  | 0.03255  | 0.045311 | 0.32855  | 0.035011 |
| -0.03246 | 0.48406  | -0.06783 | 0.14328  | -0.05794 | 0.21135  | -0.05095 | 0.27184  | -0.06434 |
| -0.08596 | 0.06343  | -0.03603 | 0.4373   | -0.05757 | 0.21428  | -0.03204 | 0.48974  | 0.042218 |
| 0.139518 | 0.00251  | 0.114048 | 0.01366  | 0.110872 | 0.01653  | 0.111011 | 0.0164   | 0.13859  |
| 0.041649 | 0.36917  | 0.003611 | 0.93797  | 0.035471 | 0.44443  | -0.036   | 0.4377   | -0.03956 |
| 0.089581 | 0.05304  | 0.037145 | 0.42323  | 0.040019 | 0.38823  | 0.047451 | 0.30619  | 0.032972 |
| 0.01849  | 0.69024  | 0.000766 | 0.98682  | 0.035769 | 0.44062  | -0.03298 | 0.47704  | -0.07017 |
| 0.038486 | 0.40667  | 0.019332 | 0.67691  | 0.00606  | 0.89609  | 0.020485 | 0.65881  | 0.047436 |



|          |          |          |          |          |          |          |          |          |
|----------|----------|----------|----------|----------|----------|----------|----------|----------|
| 0.127721 | 0.00571  | 0.170753 | 0.00021  | 0.102781 | 0.02635  | 0.189202 | 3.87E-05 | 0.100159 |
| 0.000217 | 0.99628  | 0.051338 | 0.26821  | 0.057938 | 0.2114   | 0.030744 | 0.50748  | 0.088349 |
| 0.185473 | 5.52E-05 | 0.141957 | 0.0021   | 0.190041 | 3.57E-05 | 0.049073 | 0.28993  | 0.024453 |
| 0.081094 | 0.08001  | -0.09599 | 0.03811  | 0.016532 | 0.7216   | -0.15323 | 0.00089  | -0.10556 |
| 0.000668 | 0.98851  | -0.01643 | 0.7232   | 0.005403 | 0.9073   | -0.0185  | 0.69006  | -0.04871 |
| 0.053415 | 0.2493   | -0.00916 | 0.84344  | 1.03E-05 | 0.99982  | -0.00578 | 0.90088  | 0.01363  |
| 0.055619 | 0.23028  | 0.163116 | 0.0004   | 0.073345 | 0.11345  | 0.209197 | 5.13E-06 | 0.277978 |
| 0.190843 | 3.31E-05 | 0.125019 | 0.00683  | 0.200686 | 1.24E-05 | 0.041392 | 0.37213  | 0.026645 |
| -0.02651 | 0.56769  | -0.0452  | 0.32971  | -0.03527 | 0.44709  | -0.05163 | 0.26549  | 0.009942 |
| 0.053704 | 0.24675  | 0.0451   | 0.3308   | 0.044729 | 0.33479  | 0.049008 | 0.29058  | 0.044876 |
| 0.130622 | 0.00469  | 0.036889 | 0.42644  | 0.055972 | 0.22732  | 0.025437 | 0.58347  | -0.00105 |
| -0.00445 | 0.9236   | -0.05679 | 0.22062  | -0.01815 | 0.69559  | -0.07463 | 0.10726  | -0.02089 |
| 0.10612  | 0.02181  | 0.052759 | 0.25518  | 0.066724 | 0.14996  | 0.029237 | 0.52853  | 0.061571 |
| 0.039107 | 0.39914  | 0.043224 | 0.35134  | 0.034346 | 0.45903  | 0.026873 | 0.56241  | 0.116105 |
| 0.055599 | 0.23044  | 0.090161 | 0.05152  | 0.068198 | 0.14114  | 0.073054 | 0.11489  | 0.090304 |
| 0.044489 | 0.3374   | 0.131491 | 0.00442  | 0.072706 | 0.11664  | 0.158046 | 0.00061  | 0.173469 |
| 0.008788 | 0.84977  | 0.013733 | 0.76724  | 0.006048 | 0.89628  | 0.010688 | 0.81782  | 0.005224 |
| 0.03713  | 0.42342  | 0.138121 | 0.00278  | 0.050216 | 0.27883  | 0.177857 | 0.00011  | 0.078054 |
| 0.013088 | 0.77788  | 0.007133 | 0.87781  | 0.014613 | 0.75279  | -0.0061  | 0.89534  | 0.003036 |
| 0.025239 | 0.58641  | 0.113382 | 0.01422  | 0.043396 | 0.34942  | 0.138313 | 0.00274  | 0.061466 |
| 0.035502 | 0.44405  | 0.03699  | 0.42517  | 0.037362 | 0.42052  | 0.029601 | 0.52341  | 0.032488 |
| 0.025182 | 0.58726  | 0.136766 | 0.00306  | 0.057839 | 0.21218  | 0.189189 | 3.88E-05 | 0.124243 |
| -0.03365 | 0.46817  | -0.02128 | 0.64652  | -0.02245 | 0.6284   | -0.01438 | 0.7566   | -0.02324 |
| 0.135837 | 0.00327  | 0.126597 | 0.00615  | 0.095808 | 0.03849  | 0.145663 | 0.0016   | 0.176226 |
| 0.023577 | 0.61131  | 0.049632 | 0.28447  | 0.028529 | 0.53856  | 0.055512 | 0.23118  | 0.058696 |
| 0.015069 | 0.74534  | 0.068242 | 0.14089  | 0.010859 | 0.81495  | 0.109677 | 0.01774  | 0.089744 |
| 0.287035 | 2.62E-10 | 0.354909 | 2.62E-15 | 0.307414 | 1.12E-11 | 0.299781 | 3.75E-11 | 0.18945  |
| 0.044687 | 0.33525  | 0.061458 | 0.1849   | 0.054827 | 0.23699  | 0.059271 | 0.20106  | 0.061916 |
| 0.188492 | 4.15E-05 | 0.127049 | 0.00597  | 0.105134 | 0.02308  | 0.112869 | 0.01467  | 0.057908 |
| 0.03376  | 0.46673  | 0.144283 | 0.00177  | 0.047487 | 0.30583  | 0.195539 | 2.09E-05 | 0.100541 |
| 0.011275 | 0.80801  | 0.026425 | 0.56893  | 0.014991 | 0.74661  | 0.021807 | 0.63832  | 0.030011 |
| 0.006808 | 0.88335  | 0.028941 | 0.53271  | 0.006455 | 0.88935  | 0.024336 | 0.59988  | 0.017813 |
| 0.126468 | 0.00621  | 0.154091 | 0.00083  | 0.161985 | 0.00044  | 0.102936 | 0.02612  | 0.125706 |
| -0.04883 | 0.29235  | -0.02174 | 0.63938  | -0.05128 | 0.2688   | 0.014382 | 0.75657  | -0.06448 |
| -0.05345 | 0.24897  | -0.03502 | 0.4503   | -0.0364  | 0.43254  | -0.01298 | 0.77972  | -0.12177 |
| -0.00933 | 0.8407   | -0.02878 | 0.53503  | -0.02481 | 0.59272  | -0.00856 | 0.85368  | 0.008316 |
| -0.01479 | 0.74987  | -0.02757 | 0.55224  | -0.01998 | 0.66679  | -0.02003 | 0.66595  | 0.00293  |
| -0.05606 | 0.22658  | -0.03    | 0.51785  | -0.07443 | 0.10819  | 0.01852  | 0.68977  | -0.08876 |
| 0.162365 | 0.00043  | 0.040907 | 0.37778  | 0.095274 | 0.03959  | -0.00341 | 0.94144  | 0.027169 |
| 0.071826 | 0.12114  | 0.024073 | 0.60383  | 0.076165 | 0.10019  | -0.01857 | 0.68896  | -0.04029 |
| -0.08726 | 0.05952  | -0.12453 | 0.00705  | -0.11954 | 0.00972  | -0.08907 | 0.05443  | -0.16439 |
| -0.06556 | 0.15721  | -0.06924 | 0.13513  | -0.08115 | 0.07978  | -0.05549 | 0.23136  | -0.12332 |
| 0.023345 | 0.61483  | -0.08718 | 0.05977  | -0.05468 | 0.23829  | -0.09535 | 0.03944  | -0.00847 |
| -0.00931 | 0.84097  | -0.16245 | 0.00042  | -0.08877 | 0.05524  | -0.1673  | 0.00028  | -0.3191  |
| -0.05348 | 0.24872  | -0.05639 | 0.22391  | -0.06053 | 0.19165  | -0.02966 | 0.52264  | -0.05252 |

|          |          |          |          |          |         |          |          |          |
|----------|----------|----------|----------|----------|---------|----------|----------|----------|
| -0.03126 | 0.50034  | 0.044562 | 0.33661  | -0.00425 | 0.92703 | 0.069903 | 0.13145  | 0.060304 |
| 0.063616 | 0.16992  | 0.174555 | 0.00015  | 0.140041 | 0.00242 | 0.143403 | 0.00189  | 0.119816 |
| 0.148179 | 0.00132  | 0.130456 | 0.00475  | 0.11738  | 0.01113 | 0.101085 | 0.02895  | 0.092388 |
| 0.029014 | 0.53168  | -0.11624 | 0.01194  | 0.025258 | 0.58613 | -0.20366 | 9.17E-06 | -0.25771 |
| 0.099866 | 0.03095  | 0.006054 | 0.89619  | 0.067129 | 0.1475  | -0.02521 | 0.5869   | -0.10608 |
| 0.016551 | 0.7213   | -0.02178 | 0.63879  | -0.0106  | 0.81925 | -0.02867 | 0.53651  | 0.020576 |
| 0.193771 | 2.48E-05 | 0.166697 | 0.0003   | 0.170223 | 0.00022 | 0.116766 | 0.01156  | 0.218258 |
| -0.05868 | 0.20559  | -0.11365 | 0.014    | -0.04198 | 0.36543 | -0.13812 | 0.00278  | -0.19155 |
| 0.030949 | 0.50466  | 0.111915 | 0.01554  | 0.071772 | 0.12142 | 0.089746 | 0.0526   | 0.250709 |
| 0.078364 | 0.09074  | 0.064171 | 0.16622  | 0.049151 | 0.28917 | 0.069454 | 0.13395  | 0.069187 |
| 0.013013 | 0.77912  | -0.02006 | 0.66547  | 0.016387 | 0.72394 | -0.04069 | 0.38025  | -0.08774 |
| 0.156356 | 0.0007   | 0.013551 | 0.77023  | 0.098538 | 0.03326 | -0.03812 | 0.41113  | 0.028283 |
| 0.086545 | 0.06166  | -0.04208 | 0.36419  | 0.013098 | 0.77772 | -0.06541 | 0.15817  | -0.10048 |
| 0.168269 | 0.00026  | 0.100977 | 0.02912  | 0.129046 | 0.00522 | 0.067954 | 0.14258  | 0.10914  |
| -0.02658 | 0.56674  | 0.004981 | 0.91451  | -0.00862 | 0.85253 | 0.01779  | 0.70138  | 0.022374 |
| 0.14743  | 0.0014   | 0.121897 | 0.00836  | 0.099909 | 0.03088 | 0.122278 | 0.00816  | 0.06642  |
| 0.009468 | 0.83831  | 0.04136  | 0.37251  | 0.022113 | 0.63362 | 0.048593 | 0.29468  | 0.048745 |
| 0.053282 | 0.25049  | -0.00694 | 0.88111  | 0.023681 | 0.60973 | -0.01927 | 0.67795  | 0.062    |
| 0.069949 | 0.1312   | 0.041217 | 0.37416  | 0.044422 | 0.33813 | 0.031845 | 0.49239  | 0.038042 |
| 0.101347 | 0.02853  | 0.025641 | 0.58046  | 0.040423 | 0.38345 | 0.022249 | 0.63153  | -0.00143 |
| 0.034432 | 0.4579   | 0.077511 | 0.09432  | 0.072903 | 0.11565 | 0.062491 | 0.17761  | 0.044163 |
| 0.194676 | 2.27E-05 | 0.095451 | 0.03922  | 0.115471 | 0.01252 | 0.063344 | 0.17176  | -0.00476 |
| 0.223293 | 1.09E-06 | 0.166186 | 0.00031  | 0.165778 | 0.00032 | 0.1225   | 0.00805  | 0.238267 |
| 0.130184 | 0.00484  | -0.03899 | 0.4006   | 0.068876 | 0.13723 | -0.11204 | 0.01542  | -0.13402 |
| 0.133521 | 0.00384  | 0.077289 | 0.09527  | 0.092038 | 0.04683 | 0.04632  | 0.31787  | 0.017748 |
| 0.217772 | 2.03E-06 | 0.163441 | 0.00039  | 0.134189 | 0.00367 | 0.185333 | 5.59E-05 | 0.165595 |
| 0.066407 | 0.15191  | 0.056655 | 0.2217   | 0.045843 | 0.32289 | 0.06761  | 0.14461  | 0.055854 |
| 0.095271 | 0.03959  | 0.149764 | 0.00117  | 0.106678 | 0.02113 | 0.132241 | 0.0042   | 0.323279 |
| 0.05926  | 0.20114  | 0.105923 | 0.02206  | 0.094021 | 0.04227 | 0.096411 | 0.03728  | 0.261274 |
| -0.00988 | 0.83136  | -0.04154 | 0.3704   | 0.008927 | 0.84743 | -0.06134 | 0.18575  | -0.09565 |
| -0.07139 | 0.12341  | -0.11264 | 0.01487  | -0.07781 | 0.09305 | -0.11315 | 0.01443  | -0.18152 |
| -0.01528 | 0.74197  | 0.115143 | 0.01278  | 0.038675 | 0.40437 | 0.141944 | 0.00211  | 0.148388 |
| 0.081858 | 0.0772   | 0.022247 | 0.63155  | 0.045239 | 0.32931 | 0.014546 | 0.75389  | 0.053203 |
| -0.02704 | 0.55999  | -0.08936 | 0.05364  | -0.046   | 0.32127 | -0.09535 | 0.03943  | -0.17052 |
| -0.02951 | 0.52474  | -0.03102 | 0.50363  | -0.05378 | 0.24611 | 0.002852 | 0.95098  | -0.1096  |
| 0.109535 | 0.01789  | 0.18472  | 5.93E-05 | 0.117497 | 0.01105 | 0.180707 | 8.60E-05 | 0.232347 |
| 0.102679 | 0.0265   | -0.08324 | 0.07231  | 0.027373 | 0.55515 | -0.143   | 0.00195  | -0.24261 |
| 0.037354 | 0.42062  | -0.03859 | 0.40541  | 0.032146 | 0.4883  | -0.06862 | 0.1387   | -0.21281 |
| -0.05219 | 0.26031  | -0.09243 | 0.0459   | -0.05845 | 0.20739 | -0.10135 | 0.02853  | -0.11318 |
| 0.090733 | 0.05005  | -0.01503 | 0.746    | 0.013763 | 0.76674 | -0.01124 | 0.80866  | -0.01001 |
| -0.08089 | 0.08076  | 0.012184 | 0.79286  | -0.0195  | 0.6742  | 0.019256 | 0.6781   | 0.074647 |
| 0.038218 | 0.40995  | 0.088853 | 0.05501  | 0.043343 | 0.35    | 0.116609 | 0.01168  | 0.102977 |
| 0.054203 | 0.24238  | 0.073919 | 0.11064  | 0.038664 | 0.4045  | 0.07731  | 0.09517  | 0.146525 |
| 0.068044 | 0.14205  | -0.02421 | 0.60178  | -0.0059  | 0.89888 | -0.02729 | 0.55638  | -0.01506 |
| -0.05839 | 0.20783  | -0.11393 | 0.01376  | -0.07157 | 0.12246 | -0.12182 | 0.00841  | -0.03413 |

|          |          |          |          |           |          |          |          |          |
|----------|----------|----------|----------|-----------|----------|----------|----------|----------|
| 0.095425 | 0.03927  | 0.235676 | 2.58E-07 | 0.117571  | 0.011    | 0.264318 | 6.63E-09 | 0.35899  |
| -0.02221 | 0.63215  | -0.1928  | 2.73E-05 | -0.09688  | 0.03636  | -0.21055 | 4.44E-06 | -0.27464 |
| 0.014059 | 0.76188  | -0.02788 | 0.54786  | -0.01678  | 0.71763  | -0.02778 | 0.54932  | -0.07724 |
| 0.090278 | 0.05121  | 0.056324 | 0.22441  | 0.054991  | 0.23559  | 0.050833 | 0.27296  | -0.01695 |
| -0.05341 | 0.24936  | 0.028269 | 0.54227  | 0.002229  | 0.96168  | 0.029938 | 0.51868  | 0.138376 |
| 0.146382 | 0.00151  | -0.00817 | 0.86029  | 0.039738  | 0.39156  | -0.02341 | 0.61382  | -0.0954  |
| 0.068418 | 0.13987  | -0.0301  | 0.51642  | -0.01791  | 0.69941  | -0.02669 | 0.565    | -0.05782 |
| 0.113429 | 0.01418  | 0.074287 | 0.10888  | 0.122582  | 0.008    | -0.00757 | 0.87046  | 0.055584 |
| 0.139204 | 0.00257  | 0.104226 | 0.02429  | 0.136126  | 0.0032   | 0.043036 | 0.35343  | 0.167253 |
| 0.040605 | 0.38131  | -0.02306 | 0.6192   | -1.41E-05 | 0.99976  | -0.02301 | 0.61991  | -0.07498 |
| -0.06093 | 0.18873  | -0.10827 | 0.01927  | -0.06915  | 0.13569  | -0.11972 | 0.00961  | -0.14391 |
| -0.05122 | 0.26934  | -0.0984  | 0.03351  | -0.07533  | 0.104    | -0.10374 | 0.02497  | -0.10932 |
| 0.069809 | 0.13197  | -0.01181 | 0.79913  | 0.014704  | 0.7513   | -0.02032 | 0.66134  | -0.06337 |
| -0.02041 | 0.66     | 0.006994 | 0.88019  | 0.054781  | 0.23739  | -0.04732 | 0.3075   | -0.05016 |
| 0.072332 | 0.11853  | -0.00823 | 0.85918  | 0.003846  | 0.93393  | -0.01367 | 0.76833  | -0.03115 |
| 0.025259 | 0.58612  | 0.03863  | 0.40491  | 0.012398  | 0.7893   | 0.055846 | 0.22837  | 0.133389 |
| 0.015213 | 0.743    | -0.01851 | 0.68999  | -0.00063  | 0.98918  | -0.03271 | 0.48074  | -0.02569 |
| -0.0193  | 0.67741  | -0.02433 | 0.59996  | -0.0048   | 0.91754  | -0.0498  | 0.28281  | -0.05605 |
| -0.06243 | 0.17807  | -0.13071 | 0.00466  | -0.08022  | 0.08334  | -0.14545 | 0.00162  | -0.29655 |
| 0.027704 | 0.55038  | 0.030973 | 0.50433  | 0.010002  | 0.82931  | 0.021998 | 0.63539  | 0.064534 |
| 0.029359 | 0.5268   | 0.026372 | 0.56971  | 0.029636  | 0.52292  | 0.022328 | 0.63032  | 0.01518  |
| -0.08883 | 0.05508  | -0.0018  | 0.96908  | -0.03131  | 0.49967  | 0.015607 | 0.73658  | -0.02601 |
| -0.07084 | 0.12634  | -0.06975 | 0.13228  | -0.04326  | 0.35098  | -0.06335 | 0.17172  | -0.11213 |
| 0.028464 | 0.53949  | 0.006851 | 0.88261  | 0.048421  | 0.2964   | -0.01999 | 0.66659  | -0.029   |
| -0.05473 | 0.23784  | -0.05341 | 0.24934  | -0.03607  | 0.43674  | -0.03815 | 0.41078  | -0.05082 |
| -0.05987 | 0.1965   | -0.08375 | 0.07057  | -0.0302   | 0.51509  | -0.10552 | 0.02257  | -0.12791 |
| -0.03637 | 0.43296  | -0.11021 | 0.01719  | -0.06818  | 0.14128  | -0.12579 | 0.00649  | -0.12275 |
| 0.041287 | 0.37335  | -0.02423 | 0.60149  | 0.024163  | 0.60248  | -0.06922 | 0.13527  | -0.0913  |
| -0.0055  | 0.90556  | -0.12081 | 0.00897  | -0.07255  | 0.11741  | -0.13905 | 0.0026   | -0.14717 |
| -0.1208  | 0.00897  | -0.18801 | 4.34E-05 | -0.15485  | 0.00079  | -0.15022 | 0.00113  | -0.28513 |
| 0.153179 | 0.0009   | 0.166661 | 0.0003   | 0.100181  | 0.03042  | 0.192196 | 2.90E-05 | 0.180943 |
| 0.231183 | 4.39E-07 | 0.114484 | 0.0133   | 0.194376  | 2.34E-05 | 0.026053 | 0.57439  | 0.036971 |
| 0.108569 | 0.01893  | 0.094347 | 0.04156  | 0.123405  | 0.00759  | 0.043392 | 0.34946  | 0.010295 |
| 0.130414 | 0.00476  | 0.124124 | 0.00724  | 0.078332  | 0.09087  | 0.126622 | 0.00614  | 0.169681 |
| -0.00523 | 0.91021  | -0.07302 | 0.11509  | -0.04787  | 0.30195  | -0.07246 | 0.11787  | -0.20151 |
| 0.04945  | 0.28624  | 0.063449 | 0.17105  | 0.026646  | 0.56571  | 0.084099 | 0.06941  | 0.125942 |
| 0.083376 | 0.07185  | 0.094334 | 0.04158  | 0.054436  | 0.24036  | 0.081699 | 0.07777  | 0.269464 |
| 0.278799 | 8.75E-10 | 0.118748 | 0.01022  | 0.146417  | 0.00151  | 0.067122 | 0.14754  | 0.032452 |
| -0.05109 | 0.27051  | -0.02712 | 0.55879  | -0.01333  | 0.7738   | -0.03712 | 0.4236   | -0.01221 |
| 0.048228 | 0.29832  | 0.095866 | 0.03837  | 0.071626  | 0.12218  | 0.081027 | 0.08026  | 0.127899 |
| -0.00457 | 0.92158  | 0.055475 | 0.23149  | 0.012586  | 0.78619  | 0.057036 | 0.2186   | 0.103201 |
| -0.04018 | 0.38628  | -0.14797 | 0.00134  | -0.07935  | 0.08672  | -0.15758 | 0.00063  | -0.26297 |
| -0.04421 | 0.34049  | 0.036028 | 0.43731  | 0.010239  | 0.82534  | 0.013608 | 0.7693   | 0.134209 |
| 0.072937 | 0.11548  | -0.05848 | 0.20711  | 0.020484  | 0.65883  | -0.1253  | 0.0067   | -0.00207 |
| 0.178217 | 0.00011  | 0.205469 | 7.60E-06 | 0.245734  | 7.50E-08 | 0.071661 | 0.122    | 0.067633 |

|          |          |          |          |          |          |          |          |          |
|----------|----------|----------|----------|----------|----------|----------|----------|----------|
| 0.050687 | 0.27434  | -0.02224 | 0.63167  | 0.018726 | 0.68649  | -0.06583 | 0.15551  | 0.034342 |
| 0.110982 | 0.01643  | 0.03059  | 0.50962  | 0.077489 | 0.09441  | -0.01566 | 0.73579  | 0.009436 |
| -0.0278  | 0.54896  | -0.06611 | 0.15377  | -0.04296 | 0.35425  | -0.07011 | 0.13029  | -0.12604 |
| -0.0287  | 0.5362   | -0.01534 | 0.74093  | -0.01529 | 0.74177  | -0.00803 | 0.86267  | -0.01135 |
| 0.046538 | 0.3156   | 0.131207 | 0.00451  | 0.086521 | 0.06173  | 0.122615 | 0.00799  | 0.318216 |
| -0.02823 | 0.54285  | -0.05038 | 0.27728  | -0.02004 | 0.66577  | -0.0607  | 0.1904   | -0.09938 |
| 0.123955 | 0.00732  | 0.139736 | 0.00247  | 0.148691 | 0.00127  | 0.070108 | 0.13032  | 0.27429  |
| -0.05243 | 0.25817  | -0.06204 | 0.1808   | -0.0435  | 0.34821  | -0.04922 | 0.28853  | -0.04984 |
| 0.064532 | 0.16384  | 0.103111 | 0.02587  | 0.085743 | 0.06412  | 0.075378 | 0.10376  | 0.095449 |
| 0.05194  | 0.26264  | 0.026604 | 0.56631  | 0.014939 | 0.74747  | 0.022617 | 0.62589  | 0.072122 |
| -0.04111 | 0.37535  | -0.01831 | 0.69306  | -0.00944 | 0.83876  | -0.04115 | 0.3749   | 0.027912 |
| 0.111723 | 0.01572  | 0.282937 | 4.80E-10 | 0.150842 | 0.00108  | 0.322051 | 9.91E-13 | 0.191401 |
| -0.02444 | 0.59826  | -0.00764 | 0.8692   | 0.014272 | 0.75837  | -0.01122 | 0.80887  | -0.05261 |
| -0.04566 | 0.32481  | -0.03975 | 0.39146  | -0.04461 | 0.33605  | -0.04116 | 0.37481  | -0.05018 |
| -0.0467  | 0.31395  | -0.08848 | 0.05605  | -0.07953 | 0.08603  | -0.07961 | 0.08572  | -0.10956 |
| 0.07504  | 0.10533  | 0.187537 | 4.54E-05 | 0.126696 | 0.00611  | 0.16937  | 0.00024  | 0.277135 |
| 0.058413 | 0.20767  | 0.045237 | 0.32933  | 0.05405  | 0.24371  | 0.028171 | 0.54367  | -0.00083 |
| 0.005054 | 0.91326  | 0.000223 | 0.99616  | 0.031587 | 0.49591  | -0.03873 | 0.40364  | -0.06181 |
| -0.12026 | 0.00929  | -0.03648 | 0.43164  | -0.06043 | 0.1924   | -0.01933 | 0.67688  | 0.003926 |
| 0.073207 | 0.11413  | 0.124345 | 0.00714  | 0.106811 | 0.02096  | 0.117173 | 0.01127  | 0.056604 |
| 0.19897  | 1.48E-05 | 0.126722 | 0.0061   | 0.174127 | 0.00016  | 0.059156 | 0.20193  | 0.150556 |
| -0.04929 | 0.28779  | 0.037717 | 0.41611  | -0.00854 | 0.85397  | 0.071203 | 0.12441  | 0.056415 |
| -0.06751 | 0.14519  | -0.13829 | 0.00274  | -0.09619 | 0.03771  | -0.13644 | 0.00313  | -0.22655 |
| 0.186127 | 5.19E-05 | 0.167813 | 0.00027  | 0.168685 | 0.00025  | 0.12719  | 0.00592  | 0.070842 |
| 0.039151 | 0.39861  | 0.029096 | 0.53052  | 0.028248 | 0.54257  | 0.036882 | 0.42653  | 0.02747  |
| 0.191498 | 3.10E-05 | 0.127022 | 0.00598  | 0.129072 | 0.00521  | 0.109356 | 0.01808  | 0.20348  |
| 0.106922 | 0.02083  | 0.113951 | 0.01374  | 0.116919 | 0.01145  | 0.084684 | 0.06749  | 0.117749 |
| 0.045031 | 0.33154  | -0.07969 | 0.08539  | -0.04216 | 0.36333  | -0.06997 | 0.13109  | -0.16812 |
| 0.112934 | 0.01461  | 0.110042 | 0.01737  | 0.08909  | 0.05437  | 0.105145 | 0.02306  | 0.084949 |
| 0.205493 | 7.58E-06 | 0.128794 | 0.00531  | 0.155838 | 0.00073  | 0.087414 | 0.05908  | 0.070276 |
| -0.0397  | 0.39206  | -0.03677 | 0.42789  | -0.04029 | 0.38507  | -0.02874 | 0.53558  | -0.07641 |
| 0.151249 | 0.00104  | 0.022179 | 0.63261  | 0.012182 | 0.79289  | 0.032882 | 0.4784   | 0.002112 |
| 0.03038  | 0.51252  | -0.03196 | 0.49085  | -0.03333 | 0.47238  | -0.01889 | 0.68383  | -0.01122 |
| -0.05181 | 0.26387  | -0.13342 | 0.00387  | -0.05393 | 0.2448   | -0.1761  | 0.00013  | -0.20566 |
| 0.192111 | 2.92E-05 | 0.326411 | 4.69E-13 | 0.232161 | 3.91E-07 | 0.3051   | 1.62E-11 | 0.275604 |
| 0.097828 | 0.03456  | 0.091737 | 0.04755  | 0.09759  | 0.035    | 0.072969 | 0.11532  | 0.082442 |
| 0.033655 | 0.46812  | -0.04376 | 0.34543  | -0.00444 | 0.92378  | -0.04477 | 0.33433  | -0.09612 |
| 0.095125 | 0.0399   | 0.134839 | 0.00351  | 0.080483 | 0.08232  | 0.174303 | 0.00015  | 0.207352 |
| 0.20489  | 8.07E-06 | 0.142551 | 0.00201  | 0.168655 | 0.00025  | 0.072054 | 0.11996  | 0.13169  |
| -0.04767 | 0.30399  | -0.10679 | 0.02099  | -0.03605 | 0.437    | -0.13729 | 0.00295  | -0.11396 |
| 0.094149 | 0.04199  | 0.109245 | 0.0182   | 0.097362 | 0.03543  | 0.078827 | 0.08884  | 0.041417 |
| 0.146038 | 0.00155  | 0.290673 | 1.52E-10 | 0.188398 | 4.18E-05 | 0.291762 | 1.29E-10 | 0.309651 |
| 0.234943 | 2.81E-07 | 0.136856 | 0.00304  | 0.149108 | 0.00123  | 0.086832 | 0.0608   | 0.070945 |
| 0.296209 | 6.53E-11 | 0.221211 | 1.38E-06 | 0.225902 | 8.11E-07 | 0.167246 | 0.00028  | 0.220576 |
| 0.089513 | 0.05322  | 0.028289 | 0.54199  | 0.04081  | 0.37891  | 0.00779  | 0.86667  | -0.0279  |

|          |          |          |          |          |          |          |          |          |
|----------|----------|----------|----------|----------|----------|----------|----------|----------|
| 0.19006  | 3.57E-05 | 0.093738 | 0.04289  | 0.092802 | 0.04502  | 0.07668  | 0.09791  | 0.068916 |
| -0.06658 | 0.15082  | -0.08833 | 0.05645  | -0.03616 | 0.43564  | -0.11171 | 0.01573  | -0.10256 |
| 0.143483 | 0.00188  | 0.035299 | 0.44665  | 0.094595 | 0.04102  | -0.00997 | 0.82994  | 0.036773 |
| -0.01647 | 0.72266  | -0.04476 | 0.33451  | -0.0213  | 0.64619  | -0.0483  | 0.29758  | -0.0812  |
| 0.044243 | 0.34008  | 0.061923 | 0.18159  | 0.037581 | 0.41781  | 0.07203  | 0.12008  | 0.105541 |
| -0.01613 | 0.72817  | -0.00768 | 0.86853  | 0.001939 | 0.96666  | -0.01376 | 0.76681  | -0.06471 |
| 0.038397 | 0.40776  | 0.050631 | 0.27487  | 0.008783 | 0.84986  | 0.068773 | 0.13781  | -0.01596 |
| -0.03059 | 0.50967  | -0.02804 | 0.54559  | -0.00764 | 0.86924  | -0.03306 | 0.47599  | -0.10245 |
| -0.02459 | 0.59605  | -0.04904 | 0.29024  | -0.03094 | 0.50485  | -0.04794 | 0.30123  | -0.13491 |
| -0.01941 | 0.67562  | -0.038   | 0.41267  | -0.04038 | 0.38399  | -0.0256  | 0.58107  | -0.07058 |
| 0.255031 | 2.28E-08 | 0.163852 | 0.00038  | 0.101344 | 0.02854  | 0.204958 | 8.01E-06 | 0.068638 |
| -0.04757 | 0.30501  | -0.05606 | 0.2266   | -0.04445 | 0.33779  | -0.04989 | 0.28197  | -0.12229 |
| -0.04843 | 0.29632  | -0.05333 | 0.2501   | -0.03701 | 0.42497  | -0.06962 | 0.133    | -0.11727 |
| 0.110605 | 0.0168   | -0.11471 | 0.01312  | -0.02773 | 0.55     | -0.13612 | 0.0032   | -0.15972 |
| -0.01207 | 0.79479  | 0.00672  | 0.88485  | 0.028555 | 0.53819  | -0.02472 | 0.59412  | 0.072552 |
| 0.025706 | 0.5795   | -0.05157 | 0.26607  | 0.022453 | 0.6284   | -0.09862 | 0.03311  | -0.10226 |
| 0.088892 | 0.05491  | 0.056142 | 0.22592  | 0.066714 | 0.15002  | 0.030398 | 0.51228  | 0.077274 |
| 0.003131 | 0.94621  | 0.084348 | 0.06859  | 0.031264 | 0.50033  | 0.111125 | 0.01629  | 0.092288 |
| 0.080413 | 0.08258  | 0.133982 | 0.00372  | 0.132208 | 0.00421  | 0.121379 | 0.00865  | 0.100839 |
| 0.254837 | 2.34E-08 | 0.260151 | 1.16E-08 | 0.249582 | 4.61E-08 | 0.241676 | 1.24E-07 | 0.135884 |
| 0.077217 | 0.09557  | 0.057507 | 0.21481  | 0.106811 | 0.02096  | 0.018977 | 0.68251  | 0.017121 |
| -0.01319 | 0.77623  | -0.00614 | 0.89474  | 0.011504 | 0.80417  | 0.003505 | 0.93978  | 0.045904 |
| 0.147875 | 0.00135  | 0.246819 | 6.54E-08 | 0.150288 | 0.00112  | 0.298922 | 4.29E-11 | 0.197335 |
| 0.126651 | 0.00613  | 0.071158 | 0.12464  | 0.090441 | 0.05079  | 0.074845 | 0.10623  | 0.055158 |
| -0.02422 | 0.60166  | 0.033458 | 0.47072  | 0.004073 | 0.93005  | 0.056047 | 0.22671  | 0.10698  |
| -0.00028 | 0.99514  | 0.067381 | 0.14598  | 0.024307 | 0.60031  | 0.082908 | 0.07347  | 0.213291 |
| -0.06277 | 0.17571  | -0.10222 | 0.02718  | -0.04804 | 0.30018  | -0.1236  | 0.00749  | -0.14291 |
| 0.073814 | 0.11115  | 0.06542  | 0.15811  | 0.098181 | 0.03391  | 0.021186 | 0.64792  | 0.016815 |
| 0.035612 | 0.44262  | 0.168565 | 0.00025  | 0.06686  | 0.14914  | 0.223604 | 1.05E-06 | 0.208893 |
| 0.132779 | 0.00405  | 0.171074 | 0.0002   | 0.075331 | 0.10398  | 0.212352 | 3.66E-06 | 0.216967 |
| 0.023316 | 0.61526  | 0.024349 | 0.59968  | 0.008776 | 0.84998  | 0.030179 | 0.51533  | -0.0057  |
| 0.296351 | 6.39E-11 | 0.18996  | 3.60E-05 | 0.230458 | 4.78E-07 | 0.111956 | 0.0155   | 0.067741 |
| 0.106703 | 0.02109  | 0.022448 | 0.62849  | 0.05412  | 0.2431   | 0.001593 | 0.97261  | -0.02514 |
| 0.031518 | 0.49685  | 0.022541 | 0.62705  | 0.035771 | 0.44059  | 0.00257  | 0.95582  | -0.02019 |
| -0.00541 | 0.90718  | -0.16541 | 0.00033  | -0.07416 | 0.10946  | -0.1967  | 1.86E-05 | -0.17825 |
| -0.01922 | 0.67863  | -0.12252 | 0.00804  | -0.05434 | 0.24122  | -0.13317 | 0.00394  | -0.22802 |
| 0.055301 | 0.23295  | 0.141447 | 0.00218  | 0.082445 | 0.07509  | 0.139863 | 0.00245  | 0.169255 |
| 0.04941  | 0.28663  | 0.016236 | 0.72638  | 0.046122 | 0.31995  | 0.024167 | 0.60241  | -0.00931 |
| 0.210155 | 4.64E-06 | 0.257107 | 1.74E-08 | 0.226902 | 7.23E-07 | 0.203211 | 9.60E-06 | 0.132576 |
| 0.131677 | 0.00437  | 0.09312  | 0.04429  | 0.119086 | 0.01     | 0.038123 | 0.41111  | 0.023601 |
| 0.145545 | 0.00161  | 0.141944 | 0.00211  | 0.139818 | 0.00246  | 0.114418 | 0.01336  | 0.084398 |
| 0.085522 | 0.06481  | 0.096268 | 0.03756  | 0.096775 | 0.03656  | 0.069136 | 0.13575  | 0.096422 |
| 0.18988  | 3.63E-05 | 0.155315 | 0.00076  | 0.099887 | 0.03091  | 0.170934 | 0.00021  | 0.26297  |
| 0.017552 | 0.7052   | 0.058075 | 0.21032  | 0.03474  | 0.45389  | 0.050514 | 0.27598  | -0.02285 |
| -0.03587 | 0.43937  | -0.05148 | 0.26687  | -0.03734 | 0.42083  | -0.04764 | 0.30425  | -0.09973 |

|          |          |          |          |          |          |           |          |          |
|----------|----------|----------|----------|----------|----------|-----------|----------|----------|
| 0.095871 | 0.03836  | 0.095919 | 0.03826  | 0.105594 | 0.02248  | 0.059209  | 0.20153  | 0.036845 |
| 0.149459 | 0.0012   | 0.219571 | 1.66E-06 | 0.197007 | 1.80E-05 | 0.166206  | 0.00031  | 0.205026 |
| 0.191545 | 3.09E-05 | 0.130501 | 0.00473  | 0.20029  | 1.29E-05 | 0.023144  | 0.61787  | 0.142613 |
| 0.047908 | 0.30154  | 0.052852 | 0.25434  | 0.05373  | 0.24652  | 0.070391  | 0.12877  | 0.037621 |
| 0.054826 | 0.237    | 0.077048 | 0.0963   | 0.073959 | 0.11045  | 0.068925  | 0.13694  | 0.043686 |
| 0.119583 | 0.00969  | 0.260177 | 1.16E-08 | 0.166527 | 0.0003   | 0.264087  | 6.84E-09 | 0.311312 |
| 0.173475 | 0.00016  | 0.188563 | 4.12E-05 | 0.216997 | 2.21E-06 | 0.102268  | 0.02711  | 0.119987 |
| 0.27191  | 2.33E-09 | 0.202734 | 1.01E-05 | 0.294782 | 8.13E-11 | 0.059341  | 0.20052  | 0.037135 |
| -0.18368 | 6.53E-05 | -0.12347 | 0.00755  | -0.13007 | 0.00487  | -0.08957  | 0.05308  | -0.17477 |
| -0.12926 | 0.00515  | -0.08826 | 0.05665  | -0.06366 | 0.16966  | -0.08681  | 0.06087  | -0.19456 |
| 0.217256 | 2.15E-06 | 0.158059 | 0.00061  | 0.17524  | 0.00014  | 0.121193  | 0.00875  | 0.063313 |
| 0.029919 | 0.51895  | 0.018655 | 0.68761  | 0.040936 | 0.37744  | 0.015554  | 0.73745  | -0.03559 |
| 0.144348 | 0.00176  | 0.065474 | 0.15777  | 0.120337 | 0.00924  | 0.03005   | 0.51712  | 0.002383 |
| 0.115496 | 0.01251  | 0.190418 | 3.44E-05 | 0.130475 | 0.00474  | 0.183629  | 6.56E-05 | 0.245441 |
| 0.287235 | 2.54E-10 | 0.196716 | 1.86E-05 | 0.243032 | 1.05E-07 | 0.106387  | 0.02148  | 0.16188  |
| 0.241187 | 1.32E-07 | 0.180623 | 8.67E-05 | 0.186517 | 5.00E-05 | 0.135853  | 0.00327  | 0.076767 |
| 0.182196 | 7.50E-05 | 0.149406 | 0.0012   | 0.156313 | 0.0007   | 0.112713  | 0.01481  | 0.087098 |
| -0.02066 | 0.65614  | -0.13422 | 0.00366  | -0.06749 | 0.14532  | -0.15135  | 0.00104  | -0.16629 |
| 0.12957  | 0.00504  | 0.110439 | 0.01696  | 0.120869 | 0.00893  | 0.072698  | 0.11667  | 0.085289 |
| 0.062659 | 0.17645  | 0.085473 | 0.06496  | 0.059522 | 0.19915  | 0.081141  | 0.07983  | 0.228476 |
| 0.162713 | 0.00041  | 0.077504 | 0.09435  | 0.092827 | 0.04497  | 0.059461  | 0.19962  | 0.099397 |
| 0.096009 | 0.03808  | 0.091115 | 0.04909  | 0.080133 | 0.08366  | 0.069746  | 0.13232  | 0.068753 |
| 0.009473 | 0.83822  | 0.009704 | 0.83434  | 0.021362 | 0.64519  | 0.005747  | 0.90143  | 0.004006 |
| 0.269419 | 3.29E-09 | 0.214364 | 2.95E-06 | 0.211177 | 4.16E-06 | 0.168199  | 0.00026  | 0.150084 |
| 0.067352 | 0.14616  | 0.091023 | 0.04932  | 0.092359 | 0.04606  | 0.071357  | 0.12359  | 0.155003 |
| 0.194111 | 2.40E-05 | 0.214468 | 2.91E-06 | 0.20948  | 4.98E-06 | 0.143865  | 0.00183  | 0.310589 |
| 0.098938 | 0.03255  | 0.059399 | 0.20008  | 0.079028 | 0.08803  | 0.036501  | 0.43132  | 0.025271 |
| -0.00984 | 0.83202  | -0.11534 | 0.01263  | -0.04585 | 0.32282  | -0.12483  | 0.00691  | -0.24344 |
| 0.048086 | 0.29976  | -0.01218 | 0.79285  | 0.00876  | 0.85024  | -0.01374  | 0.76704  | 0.012483 |
| 0.334481 | 1.14E-13 | 0.299185 | 4.11E-11 | 0.317005 | 2.32E-12 | 0.194488  | 2.31E-05 | 0.296842 |
| 0.126359 | 0.00625  | 0.078289 | 0.09105  | 0.079931 | 0.08444  | 0.073418  | 0.11309  | 0.149305 |
| 0.257549 | 1.64E-08 | 0.273569 | 1.84E-09 | 0.267458 | 4.32E-09 | 0.203258  | 9.56E-06 | 0.161145 |
| -0.0224  | 0.62927  | -0.12131 | 0.00868  | -0.06024 | 0.1938   | -0.13773  | 0.00286  | -0.09849 |
| 0.133901 | 0.00374  | 0.010485 | 0.82121  | 0.073186 | 0.11424  | -0.03469  | 0.45454  | -0.09009 |
| -0.12043 | 0.00919  | -0.13842 | 0.00272  | -0.12611 | 0.00635  | -0.10801  | 0.01956  | -0.19209 |
| -0.0444  | 0.33842  | -0.01873 | 0.68647  | -0.02659 | 0.56658  | -0.00137  | 0.97647  | 0.002049 |
| -0.02696 | 0.56108  | -0.13064 | 0.00469  | -0.08783 | 0.05787  | -0.13261  | 0.0041   | -0.28616 |
| 0.155316 | 0.00076  | 0.183553 | 6.61E-05 | 0.142386 | 0.00204  | 0.175201  | 0.00014  | 0.134906 |
| 0.042537 | 0.35904  | 0.110857 | 0.01655  | 0.067762 | 0.14371  | 0.108463  | 0.01905  | 0.138369 |
| 0.078215 | 0.09135  | 0.004605 | 0.92094  | 0.087576 | 0.05861  | -0.05876  | 0.20498  | -0.08219 |
| 0.127867 | 0.00565  | 0.147161 | 0.00143  | 0.141201 | 0.00222  | 0.120253  | 0.00929  | 0.088952 |
| 0.029914 | 0.51902  | 0.024802 | 0.5929   | 0.042396 | 0.36064  | 0.004595  | 0.92111  | 0.100667 |
| -0.01661 | 0.72033  | -0.0059  | 0.89882  | -0.01094 | 0.81365  | -0.01234  | 0.79031  | 0.021809 |
| 0.030014 | 0.51762  | -0.13096 | 0.00459  | -0.05075 | 0.27371  | -0.15125  | 0.00104  | -0.25089 |
| 0.027597 | 0.55192  | 0.007443 | 0.87256  | 0.016012 | 0.73001  | -7.38E-05 | 0.99873  | 0.03744  |

|          |          |          |          |           |          |          |          |          |
|----------|----------|----------|----------|-----------|----------|----------|----------|----------|
| 0.004627 | 0.92057  | 0.003532 | 0.93932  | 0.003063  | 0.94736  | -0.00514 | 0.91179  | 0.060304 |
| 0.012548 | 0.78681  | 0.059741 | 0.1975   | 0.019689  | 0.67128  | 0.058066 | 0.21038  | 0.044683 |
| 0.061732 | 0.18295  | 0.092458 | 0.04583  | 0.077821  | 0.093    | 0.099448 | 0.03166  | 0.160405 |
| 0.196381 | 1.92E-05 | 0.165764 | 0.00032  | 0.201762  | 1.11E-05 | 0.090939 | 0.04953  | 0.082304 |
| 0.008379 | 0.85669  | -0.055   | 0.23548  | -0.06318  | 0.17284  | -0.04046 | 0.38307  | -0.14415 |
| -0.00208 | 0.96426  | 0.061119 | 0.18734  | 0.011096  | 0.81099  | 0.068288 | 0.14062  | 0.141698 |
| -0.04739 | 0.30676  | -0.17764 | 0.00011  | -0.1125   | 0.015    | -0.19279 | 2.74E-05 | -0.30715 |
| 0.162839 | 0.00041  | 0.221523 | 1.33E-06 | 0.260819  | 1.06E-08 | 0.089086 | 0.05438  | 0.054584 |
| -0.00639 | 0.89047  | 0.001362 | 0.97658  | -0.03272  | 0.48056  | 0.035002 | 0.45049  | -0.05464 |
| 0.237105 | 2.17E-07 | 0.344191 | 1.96E-14 | 0.300553  | 3.32E-11 | 0.285014 | 3.54E-10 | 0.208739 |
| -0.06426 | 0.1656   | -0.05634 | 0.2243   | -0.07279  | 0.11623  | -0.02558 | 0.58133  | -0.01141 |
| 0.039516 | 0.39421  | -0.01819 | 0.69505  | 0.014023  | 0.76247  | -0.03619 | 0.43525  | -0.13278 |
| 0.049821 | 0.28263  | 0.155021 | 0.00078  | 0.079172  | 0.08745  | 0.172646 | 0.00018  | 0.23234  |
| 0.194908 | 2.22E-05 | 0.134489 | 0.00359  | 0.164272  | 0.00036  | 0.086288 | 0.06244  | 0.045269 |
| 0.066733 | 0.14991  | 0.107537 | 0.0201   | 0.077535  | 0.09422  | 0.098275 | 0.03374  | 0.212952 |
| -0.06108 | 0.18762  | -0.02764 | 0.55129  | 0.014958  | 0.74715  | -0.06734 | 0.14622  | -0.10887 |
| 0.052142 | 0.26078  | 0.041634 | 0.36935  | 0.046388  | 0.31717  | 0.017018 | 0.71376  | 0.037893 |
| 0.114561 | 0.01324  | 0.080039 | 0.08403  | 0.098357  | 0.03359  | 0.052181 | 0.26043  | 0.061298 |
| 0.100033 | 0.03067  | -0.01446 | 0.75531  | 0.088422  | 0.05621  | -0.09115 | 0.04901  | -0.10358 |
| 0.085742 | 0.06412  | 0.026127 | 0.57331  | 0.029196  | 0.5291   | 0.01366  | 0.76843  | 0.00503  |
| -0.04048 | 0.38279  | 0.019063 | 0.68116  | -0.0176   | 0.70446  | 0.036746 | 0.42823  | 0.057655 |
| 0.065895 | 0.15511  | 0.14108  | 0.00224  | 0.102287  | 0.02708  | 0.150575 | 0.0011   | 0.153079 |
| 0.102088 | 0.02738  | 0.009657 | 0.83513  | 0.024655  | 0.5951   | 0.018145 | 0.69573  | -0.00071 |
| 0.08704  | 0.06018  | 0.083506 | 0.07141  | 0.093352  | 0.04376  | 0.0529   | 0.2539   | 0.041609 |
| 0.043926 | 0.34355  | 0.127457 | 0.00581  | 0.083225  | 0.07237  | 0.134639 | 0.00356  | 0.074635 |
| 0.044058 | 0.34211  | 0.054184 | 0.24255  | 0.063658  | 0.16964  | 0.020594 | 0.65712  | -0.00752 |
| 0.054872 | 0.23661  | 0.063597 | 0.17005  | 0.048798  | 0.29265  | 0.056871 | 0.21994  | 0.013605 |
| 0.00326  | 0.94399  | 0.01802  | 0.69772  | 0.01374   | 0.76712  | 0.018789 | 0.68549  | -0.00011 |
| 0.054558 | 0.23931  | 0.016242 | 0.72627  | 0.043753  | 0.34546  | -0.01753 | 0.70558  | 0.035523 |
| 0.018425 | 0.69127  | -0.0704  | 0.12871  | -0.04448  | 0.33747  | -0.06815 | 0.14143  | -0.04558 |
| 0.120236 | 0.0093   | 0.061714 | 0.18308  | 0.093799  | 0.04276  | 0.00729  | 0.87515  | -0.04195 |
| -0.02723 | 0.55725  | 0.056906 | 0.21966  | 0.00556   | 0.90462  | 0.07424  | 0.1091   | 0.152212 |
| 0.078468 | 0.09031  | 0.127317 | 0.00587  | 0.084019  | 0.06968  | 0.118611 | 0.01031  | 0.129634 |
| 0.066325 | 0.15242  | 0.00058  | 0.99003  | 0.021312  | 0.64597  | -0.02267 | 0.6251   | -0.02417 |
| 0.011758 | 0.79994  | -0.0116  | 0.80259  | -0.01734  | 0.70862  | -0.01894 | 0.68314  | -0.01585 |
| 0.1676   | 0.00027  | 0.067032 | 0.14809  | 0.124976  | 0.00685  | -0.00066 | 0.98867  | 0.167065 |
| 0.042671 | 0.35754  | 0.095382 | 0.03936  | 0.074953  | 0.10573  | 0.076746 | 0.09762  | 0.255617 |
| 0.032431 | 0.48446  | 0.015326 | 0.74115  | 0.007679  | 0.86856  | 0.027013 | 0.56037  | -0.04427 |
| 0.02131  | 0.646    | -0.0815  | 0.0785   | -0.05973  | 0.19756  | -0.05792 | 0.21152  | -0.12385 |
| -0.04431 | 0.33935  | -0.05372 | 0.24658  | -0.06161  | 0.18382  | -0.03611 | 0.43625  | -0.0979  |
| 0.253977 | 2.62E-08 | 0.170168 | 0.00022  | 0.251751  | 3.49E-08 | 0.054575 | 0.23916  | 0.085324 |
| 0.068001 | 0.1423   | 0.16102  | 0.00048  | 0.098723  | 0.03293  | 0.182273 | 7.44E-05 | 0.064539 |
| 0.034967 | 0.45093  | 0.015422 | 0.73959  | 0.006082  | 0.89571  | 0.016333 | 0.72481  | -0.01422 |
| 0.27688  | 1.15E-09 | 0.202401 | 1.04E-05 | 0.223935  | 1.02E-06 | 0.125743 | 0.00651  | 0.083813 |
| 0.039722 | 0.39176  | -0.01724 | 0.71022  | -1.50E-05 | 0.99974  | -0.03162 | 0.49545  | -0.09076 |

|          |          |          |          |          |          |          |          |          |
|----------|----------|----------|----------|----------|----------|----------|----------|----------|
| -0.0352  | 0.44795  | 0.035046 | 0.44992  | -0.02111 | 0.64909  | 0.082353 | 0.07542  | 0.059373 |
| 0.057982 | 0.21104  | 0.163853 | 0.00038  | 0.095034 | 0.04009  | 0.180629 | 8.66E-05 | 0.278129 |
| 0.051684 | 0.265    | -0.12311 | 0.00774  | -0.03064 | 0.5089   | -0.1434  | 0.00189  | -0.20978 |
| 0.038792 | 0.40295  | 0.038478 | 0.40677  | 0.059634 | 0.1983   | 0.009689 | 0.83459  | -0.01148 |
| 0.06345  | 0.17104  | 0.084145 | 0.06926  | 0.07807  | 0.09196  | 0.0716   | 0.12231  | 0.078166 |
| 0.07179  | 0.12132  | 0.09935  | 0.03183  | 0.100135 | 0.0305   | 0.052311 | 0.25924  | 0.048331 |
| 0.141823 | 0.00213  | 0.091542 | 0.04803  | 0.11084  | 0.01656  | 0.060424 | 0.19242  | 0.086247 |
| 0.071561 | 0.12252  | 0.03563  | 0.4424   | 0.063182 | 0.17286  | 0.019892 | 0.66809  | 0.02898  |
| 0.210868 | 4.30E-06 | 0.281958 | 5.53E-10 | 0.345323 | 1.59E-14 | 0.12597  | 0.00641  | 0.084556 |
| 0.064938 | 0.1612   | 0.146936 | 0.00145  | 0.111419 | 0.016    | 0.137107 | 0.00299  | 0.067725 |
| -0.03529 | 0.44672  | -0.02054 | 0.658    | -0.02324 | 0.61648  | -0.0149  | 0.74802  | -0.02092 |
| -0.02972 | 0.52176  | -0.02856 | 0.53809  | -0.0231  | 0.61851  | -0.01893 | 0.68325  | -0.03674 |
| 0.00287  | 0.95068  | 0.028245 | 0.54262  | 0.013093 | 0.7778   | 0.052199 | 0.26026  | 0.020058 |
| 0.085029 | 0.06637  | 0.0587   | 0.20544  | 0.064511 | 0.16398  | 0.061346 | 0.1857   | 0.041385 |
| 0.063073 | 0.1736   | 0.028484 | 0.53921  | 0.050178 | 0.27919  | 0.006648 | 0.88607  | -0.01714 |
| 0.031984 | 0.49051  | 0.033723 | 0.46722  | 0.060541 | 0.19156  | -0.00192 | 0.96702  | -0.05404 |
| 0.013041 | 0.77866  | 0.035486 | 0.44425  | 0.014535 | 0.75406  | 0.04264  | 0.35788  | 0.064299 |
| 0.025717 | 0.57934  | 0.037643 | 0.41703  | 0.053286 | 0.25045  | 0.024549 | 0.59669  | 0.012647 |
| 0.057638 | 0.21377  | 0.001154 | 0.98017  | -0.00424 | 0.92723  | 0.00605  | 0.89626  | -0.01766 |
| 0.05446  | 0.24015  | 0.080914 | 0.08068  | 0.082558 | 0.07469  | 0.058223 | 0.20915  | 0.056724 |
| 0.053192 | 0.25129  | 0.062275 | 0.17912  | 0.040032 | 0.38806  | 0.067008 | 0.14824  | 0.040509 |
| -0.10269 | 0.02648  | -0.19103 | 3.25E-05 | -0.11385 | 0.01383  | -0.19757 | 1.70E-05 | -0.24747 |
| 0.010669 | 0.81813  | 0.067606 | 0.14464  | 0.019839 | 0.66892  | 0.080737 | 0.08135  | 0.123311 |
| 0.150469 | 0.00111  | 0.177451 | 0.00012  | 0.263041 | 7.88E-09 | 0.030925 | 0.50498  | 0.039218 |
| 0.22729  | 6.92E-07 | 0.167642 | 0.00027  | 0.207335 | 6.25E-06 | 0.090837 | 0.04979  | 0.105281 |
| -0.00037 | 0.99369  | 0.018611 | 0.68832  | 0.009011 | 0.84601  | 0.00975  | 0.83357  | 0.00746  |
| 0.072643 | 0.11695  | 0.063061 | 0.17368  | 0.074282 | 0.1089   | 0.033801 | 0.46619  | 0.040625 |
| 0.232374 | 3.82E-07 | 0.157767 | 0.00062  | 0.175881 | 0.00013  | 0.085436 | 0.06508  | 0.049    |
| -0.0474  | 0.3067   | -0.1505  | 0.00111  | -0.10034 | 0.03015  | -0.14928 | 0.00121  | -0.23328 |
| -0.09928 | 0.03195  | -0.09057 | 0.05047  | -0.06472 | 0.16259  | -0.09511 | 0.03993  | -0.18311 |
| -0.15602 | 0.00072  | -0.1293  | 0.00514  | -0.1327  | 0.00407  | -0.09209 | 0.0467   | -0.1815  |
| 0.048953 | 0.29111  | 0.192645 | 2.77E-05 | 0.063173 | 0.17292  | 0.240315 | 1.47E-07 | 0.224009 |
| 0.163006 | 0.0004   | 0.061145 | 0.18715  | 0.063826 | 0.16851  | 0.047596 | 0.30471  | 0.062855 |
| 0.022649 | 0.62541  | 0.019438 | 0.67524  | 0.018089 | 0.69661  | 0.014404 | 0.75622  | 0.055919 |
| 0.00478  | 0.91795  | -0.00073 | 0.98742  | 0.042869 | 0.35531  | -0.05816 | 0.20965  | -0.07356 |
| 0.063863 | 0.16827  | 0.120714 | 0.00902  | 0.07927  | 0.08706  | 0.12486  | 0.0069   | 0.073306 |
| 0.020319 | 0.66141  | 0.016127 | 0.72814  | 0.059619 | 0.19842  | -0.01656 | 0.72108  | -0.06931 |
| 0.005488 | 0.90585  | 0.007582 | 0.8702   | 0.017966 | 0.69857  | 0.003053 | 0.94753  | -0.05794 |
| -0.04242 | 0.36035  | -0.06554 | 0.15737  | 0.00643  | 0.88978  | -0.09493 | 0.04031  | -0.13386 |
| 0.104106 | 0.02446  | 0.133945 | 0.00373  | 0.110295 | 0.01711  | 0.121991 | 0.00831  | 0.138603 |
| 0.137448 | 0.00292  | 0.078528 | 0.09006  | 0.069253 | 0.13508  | 0.069483 | 0.13379  | 0.163068 |
| 0.268916 | 3.53E-09 | 0.148249 | 0.00131  | 0.201793 | 1.11E-05 | 0.066753 | 0.14979  | 0.078505 |
| 0.081233 | 0.07949  | 0.047811 | 0.30253  | 0.066575 | 0.15088  | 0.017313 | 0.70903  | -0.00592 |
| -0.01496 | 0.74718  | 0.021625 | 0.64112  | -0.01591 | 0.73173  | 0.039551 | 0.3938   | 0.038223 |
| 0.025877 | 0.57698  | 0.12111  | 0.0088   | 0.070839 | 0.12635  | 0.123519 | 0.00753  | 0.240968 |



|          |          |          |          |          |          |          |          |          |
|----------|----------|----------|----------|----------|----------|----------|----------|----------|
| -0.04654 | 0.31554  | -0.04    | 0.38847  | -0.04575 | 0.32384  | -0.03517 | 0.44826  | -0.05869 |
| 0.145752 | 0.00159  | 0.091299 | 0.04863  | 0.152328 | 0.00096  | 0.012241 | 0.79192  | -0.02493 |
| -0.02767 | 0.55087  | -0.03145 | 0.4978   | -0.01547 | 0.73883  | -0.02885 | 0.53394  | 0.001323 |
| 0.020295 | 0.66179  | 0.026746 | 0.56425  | 0.009109 | 0.84435  | 0.045784 | 0.32351  | 0.012394 |
| 0.14399  | 0.00181  | 0.106842 | 0.02093  | 0.133745 | 0.00379  | 0.065871 | 0.15525  | 0.065586 |
| 0.101711 | 0.02796  | 0.051043 | 0.27098  | 0.037798 | 0.41511  | 0.056531 | 0.22271  | 0.031697 |
| 0.072522 | 0.11757  | 0.042707 | 0.35712  | 0.107273 | 0.02041  | -0.03202 | 0.48997  | 0.051681 |
| -0.01252 | 0.7872   | -0.0095  | 0.83784  | -0.00629 | 0.89221  | -0.00699 | 0.88018  | -0.00627 |
| 0.193615 | 2.52E-05 | 0.057658 | 0.21361  | 0.121929 | 0.00835  | -0.00086 | 0.98522  | -0.03429 |
| 0.071892 | 0.12079  | -0.03325 | 0.47349  | 0.016176 | 0.72734  | -0.04559 | 0.32556  | -0.0376  |
| -0.01966 | 0.67175  | -0.00737 | 0.87386  | -0.01066 | 0.81832  | -0.01357 | 0.76984  | 0.001573 |
| 0.121439 | 0.00861  | 0.017948 | 0.69886  | 0.04036  | 0.38419  | 0.025469 | 0.58301  | 0.015243 |
| 0.200555 | 1.26E-05 | 0.095435 | 0.03925  | 0.15073  | 0.00109  | 0.055723 | 0.22941  | 0.116841 |
| 0.075906 | 0.10136  | 0.011491 | 0.8044   | 0.038668 | 0.40445  | 0.011082 | 0.81122  | 0.03554  |
| 0.263726 | 7.18E-09 | 0.115266 | 0.01268  | 0.207606 | 6.07E-06 | 0.024541 | 0.59681  | 0.078704 |
| 0.231551 | 4.21E-07 | 0.131445 | 0.00444  | 0.203652 | 9.18E-06 | 0.032133 | 0.48849  | 0.065281 |
| 0.086232 | 0.06261  | 0.150381 | 0.00112  | 0.186703 | 4.92E-05 | 0.042021 | 0.36491  | 0.1684   |
| 0.030707 | 0.508    | -0.045   | 0.33183  | 0.018031 | 0.69754  | -0.07846 | 0.09034  | -0.08394 |
| -0.0524  | 0.25841  | -0.02129 | 0.64632  | -0.03472 | 0.45411  | -0.00933 | 0.8407   | 0.057344 |
| 0.133138 | 0.00395  | 0.130581 | 0.00471  | 0.164533 | 0.00036  | 0.060308 | 0.19327  | 0.142919 |
| 0.102488 | 0.02678  | 0.131259 | 0.00449  | 0.165055 | 0.00034  | 0.0587   | 0.20544  | 0.018307 |
| -0.02387 | 0.60687  | -0.03395 | 0.46429  | -0.03137 | 0.49886  | -0.02763 | 0.55141  | -0.06687 |
| 0.038744 | 0.40354  | 0.197681 | 1.68E-05 | 0.075168 | 0.10473  | 0.265273 | 5.82E-09 | 0.140549 |
| 0.208095 | 5.77E-06 | 0.182742 | 7.13E-05 | 0.181121 | 8.28E-05 | 0.139527 | 0.00251  | 0.102986 |
| -0.01422 | 0.75921  | -0.00507 | 0.91305  | -0.00342 | 0.94128  | 0.005022 | 0.91382  | 0.01682  |
| 0.057568 | 0.21433  | 0.03544  | 0.44483  | 0.030225 | 0.51469  | 0.041418 | 0.37184  | 0.000468 |
| 0.084291 | 0.06878  | 0.036416 | 0.43239  | 0.022576 | 0.62652  | 0.057409 | 0.2156   | 0.046317 |
| 0.129751 | 0.00498  | 0.124767 | 0.00694  | 0.075461 | 0.10338  | 0.129267 | 0.00515  | 0.071807 |
| 0.046322 | 0.31786  | 0.00317  | 0.94554  | 0.039511 | 0.39428  | -0.01671 | 0.7188   | -0.07374 |
| 0.088385 | 0.05631  | 0.071548 | 0.12259  | 0.069445 | 0.134    | 0.084568 | 0.06786  | 0.075396 |
| 0.065128 | 0.15998  | 0.067537 | 0.14505  | 0.070545 | 0.12793  | 0.071545 | 0.12261  | -0.04141 |
| 0.096467 | 0.03716  | 0.021599 | 0.64153  | 0.017009 | 0.71391  | 0.030361 | 0.5128   | 0.048256 |
| 0.086779 | 0.06096  | 0.047741 | 0.30324  | 0.05616  | 0.22577  | 0.023879 | 0.60676  | 0.013595 |
| 0.063376 | 0.17154  | 0.082298 | 0.07562  | 0.075348 | 0.1039   | 0.068731 | 0.13806  | 0.034533 |
| 0.285231 | 3.42E-10 | 0.29565  | 7.11E-11 | 0.322213 | 9.64E-13 | 0.187597 | 4.51E-05 | 0.134191 |
| 0.002331 | 0.95993  | 0.036632 | 0.42967  | 0.027292 | 0.55633  | 0.018408 | 0.69154  | 0.090576 |
| 0.055939 | 0.22761  | 0.045701 | 0.32439  | 0.036455 | 0.43189  | 0.053721 | 0.2466   | 0.025237 |
| 0.029693 | 0.52211  | -0.05063 | 0.27489  | -0.03432 | 0.45932  | -0.03919 | 0.39811  | -0.05367 |
| -0.15353 | 0.00087  | -0.21301 | 3.41E-06 | -0.16209 | 0.00044  | -0.20722 | 6.33E-06 | -0.28307 |
| 0.121846 | 0.00839  | 0.055843 | 0.2284   | 0.046935 | 0.31149  | 0.047625 | 0.30442  | 0.126014 |
| 0.012176 | 0.79299  | 0.074027 | 0.11012  | 0.008379 | 0.85669  | 0.09093  | 0.04955  | 0.152293 |
| 0.063634 | 0.1698   | 0.091888 | 0.04719  | 0.094826 | 0.04053  | 0.047486 | 0.30583  | 0.277935 |
| 0.032274 | 0.48658  | 0.041727 | 0.36828  | 0.034522 | 0.45673  | 0.031013 | 0.50378  | 0.018678 |
| 0.092674 | 0.04532  | 0.070069 | 0.13053  | 0.0513   | 0.26857  | 0.080584 | 0.08193  | 0.080545 |
| 0.060771 | 0.18987  | -0.07661 | 0.09821  | 0.012024 | 0.79551  | -0.10265 | 0.02655  | -0.18291 |

|          |          |          |          |          |          |          |          |          |
|----------|----------|----------|----------|----------|----------|----------|----------|----------|
| 0.04793  | 0.30132  | 0.170471 | 0.00021  | 0.089442 | 0.05341  | 0.186703 | 4.92E-05 | 0.240674 |
| 0.130245 | 0.00482  | 0.116344 | 0.01187  | 0.109536 | 0.01789  | 0.092794 | 0.04504  | 0.070691 |
| 0.008959 | 0.84688  | -0.02987 | 0.5197   | -0.04016 | 0.3866   | 0.006954 | 0.88086  | -0.0887  |
| 0.094699 | 0.0408   | -0.10797 | 0.01961  | 0.005343 | 0.90832  | -0.16933 | 0.00024  | -0.25907 |
| 0.081304 | 0.07923  | 0.112793 | 0.01474  | 0.116438 | 0.0118   | 0.080194 | 0.08342  | 0.078178 |
| 0.09114  | 0.04903  | 0.184059 | 6.30E-05 | 0.145828 | 0.00158  | 0.153367 | 0.00088  | 0.136283 |
| -0.01484 | 0.74913  | -0.06003 | 0.19535  | -0.06011 | 0.19475  | -0.05534 | 0.23265  | -0.10846 |
| 0.134601 | 0.00357  | -0.02223 | 0.63182  | 0.076083 | 0.10056  | -0.09065 | 0.05027  | -0.11241 |
| -0.0259  | 0.57661  | -0.02488 | 0.59181  | -0.0248  | 0.593    | -0.0155  | 0.73839  | -0.01855 |
| -0.04006 | 0.38774  | -0.12931 | 0.00513  | -0.02981 | 0.52042  | -0.15803 | 0.00061  | -0.26572 |
| 0.092081 | 0.04673  | -0.02233 | 0.63035  | 0.040726 | 0.37989  | -0.04834 | 0.29723  | -0.10433 |
| 0.150815 | 0.00108  | 0.065228 | 0.15934  | 0.086027 | 0.06324  | 0.046538 | 0.3156   | 0.065286 |
| 0.060296 | 0.19336  | 0.059537 | 0.19904  | 0.081787 | 0.07745  | 0.030998 | 0.50398  | 0.091093 |
| 0.068888 | 0.13716  | 0.046154 | 0.31961  | 0.045775 | 0.32361  | 0.025711 | 0.57943  | 0.224678 |
| 0.153382 | 0.00088  | 0.072042 | 0.12002  | 0.144879 | 0.00169  | 0.003357 | 0.94233  | 0.023451 |
| 0.091872 | 0.04723  | 0.123654 | 0.00747  | 0.090886 | 0.04966  | 0.117027 | 0.01138  | 0.249691 |
| 0.180089 | 9.10E-05 | 0.122921 | 0.00783  | 0.153341 | 0.00089  | 0.076036 | 0.10077  | 0.10083  |
| 0.006929 | 0.88129  | 0.016665 | 0.71945  | 0.012437 | 0.78866  | 0.019227 | 0.67856  | 0.068945 |
| -0.01295 | 0.78009  | -0.00092 | 0.98414  | 0.005023 | 0.91379  | 0.010303 | 0.82426  | -0.00468 |
| 0.110316 | 0.01709  | 0.08001  | 0.08414  | 0.089351 | 0.05366  | 0.058068 | 0.21037  | 0.110296 |
| -0.18352 | 6.63E-05 | -0.23521 | 2.72E-07 | -0.2154  | 2.63E-06 | -0.19525 | 2.15E-05 | -0.27453 |
| -0.01628 | 0.72561  | -0.04056 | 0.38183  | -0.0399  | 0.38967  | -0.0204  | 0.66008  | -0.12146 |
| -0.00761 | 0.8697   | 0.040644 | 0.38085  | -0.03234 | 0.48565  | 0.090684 | 0.05017  | -0.02359 |
| 0.034822 | 0.45282  | 0.024649 | 0.59519  | 0.030242 | 0.51445  | 0.017761 | 0.70186  | 0.094969 |
| 0.07535  | 0.10389  | 0.176685 | 0.00012  | 0.124193 | 0.00721  | 0.160272 | 0.00051  | 0.286326 |
| 0.057618 | 0.21393  | 0.092998 | 0.04457  | 0.061772 | 0.18267  | 0.089392 | 0.05355  | 0.097822 |
| -0.03975 | 0.3914   | 0.016914 | 0.71544  | -0.02599 | 0.57531  | 0.033928 | 0.46451  | 0.216898 |
| 0.101317 | 0.02858  | 0.109141 | 0.01831  | 0.036131 | 0.436    | 0.13316  | 0.00394  | 0.30356  |
| 0.068643 | 0.13856  | 0.028114 | 0.54448  | 0.02262  | 0.62585  | 0.027871 | 0.54798  | 0.058978 |
| 0.189671 | 3.70E-05 | 0.131074 | 0.00455  | 0.110946 | 0.01646  | 0.157042 | 0.00066  | 0.069022 |
| 0.014303 | 0.75786  | 0.073594 | 0.11223  | 0.038524 | 0.40621  | 0.084967 | 0.06657  | 0.123243 |
| -0.03198 | 0.49062  | -0.14377 | 0.00184  | -0.05379 | 0.24595  | -0.18525 | 5.64E-05 | -0.13449 |
| -0.00912 | 0.8442   | 0.006648 | 0.88606  | -0.00051 | 0.99126  | 0.001341 | 0.97694  | 0.101703 |
| -0.03915 | 0.39858  | -0.08558 | 0.06464  | -0.04786 | 0.30205  | -0.09215 | 0.04657  | -0.08867 |
| 0.039482 | 0.39463  | 0.060043 | 0.19524  | 0.059459 | 0.19963  | 0.039735 | 0.3916   | 0.069564 |
| 0.13508  | 0.00345  | 0.182804 | 7.09E-05 | 0.151822 | 0.001    | 0.16831  | 0.00026  | 0.114174 |
| 0.144828 | 0.0017   | 0.156149 | 0.00071  | 0.138194 | 0.00276  | 0.113112 | 0.01446  | 0.239123 |
| -0.00559 | 0.90407  | -0.01322 | 0.77566  | -0.01201 | 0.79568  | -0.02161 | 0.64139  | 0.03313  |
| 0.247438 | 6.05E-08 | 0.192311 | 2.87E-05 | 0.264242 | 6.70E-09 | 0.059249 | 0.20123  | 0.054454 |
| -0.03272 | 0.4806   | -0.03956 | 0.39366  | -0.02203 | 0.63485  | -0.05718 | 0.21741  | -0.08604 |
| 0.119882 | 0.00951  | 0.058571 | 0.20643  | 0.119864 | 0.00952  | 0.001222 | 0.97898  | 0.004564 |
| -0.18006 | 9.12E-05 | -0.1636  | 0.00039  | -0.12549 | 0.00662  | -0.14719 | 0.00142  | -0.22369 |
| 0.141804 | 0.00213  | 0.009652 | 0.83521  | 0.03805  | 0.41201  | 0.004938 | 0.91524  | -0.02476 |
| 0.072994 | 0.11519  | -0.00748 | 0.87199  | 0.026915 | 0.56178  | -0.01503 | 0.74591  | -0.03276 |
| 0.119191 | 0.00994  | 0.079838 | 0.08481  | 0.068023 | 0.14217  | 0.085787 | 0.06398  | 0.184106 |

|          |          |          |          |          |          |          |          |          |
|----------|----------|----------|----------|----------|----------|----------|----------|----------|
| 0.102686 | 0.02649  | -0.07111 | 0.12488  | 0.005468 | 0.90619  | -0.11063 | 0.01677  | -0.08939 |
| 0.052672 | 0.25596  | 0.077894 | 0.09269  | 0.059398 | 0.20009  | 0.062352 | 0.17858  | 0.143336 |
| 0.078696 | 0.08937  | 0.032141 | 0.48838  | 0.02158  | 0.64183  | 0.031757 | 0.49359  | 0.087302 |
| 0.0152   | 0.7432   | 0.024393 | 0.59902  | 0.027048 | 0.55985  | 0.015887 | 0.73203  | -0.01807 |
| 0.209297 | 5.08E-06 | 0.13524  | 0.00341  | 0.208809 | 5.35E-06 | 0.048126 | 0.29935  | 0.028169 |
| 0.050139 | 0.27957  | 0.00479  | 0.91777  | 0.033109 | 0.47537  | -0.02471 | 0.59432  | -0.05647 |
| -0.00442 | 0.92413  | -0.0114  | 0.80584  | -0.00174 | 0.97003  | -0.0009  | 0.98455  | 0.002929 |
| 0.039117 | 0.39902  | 0.071298 | 0.1239   | 0.055668 | 0.22987  | 0.081507 | 0.07848  | 0.067456 |
| 0.043197 | 0.35163  | 0.018999 | 0.68217  | 0.019673 | 0.67154  | 0.027224 | 0.55731  | -0.0107  |
| 0.038466 | 0.40692  | 0.043675 | 0.34633  | 0.041303 | 0.37316  | 0.031133 | 0.50213  | -0.00195 |
| 0.088933 | 0.05479  | -0.00164 | 0.97178  | -0.00519 | 0.91095  | 0.002491 | 0.95718  | 0.102156 |
| 0.076936 | 0.09679  | 0.09765  | 0.03489  | 0.100275 | 0.03026  | 0.063563 | 0.17028  | 0.049181 |
| 0.070883 | 0.12611  | 0.089497 | 0.05327  | 0.056879 | 0.21987  | 0.094208 | 0.04186  | 0.217789 |
| 0.104104 | 0.02446  | 0.060479 | 0.19201  | 0.107569 | 0.02007  | -0.00073 | 0.9874   | -0.03231 |
| 0.045784 | 0.32351  | 0.061691 | 0.18324  | 0.052922 | 0.25371  | 0.065081 | 0.16028  | 0.047138 |
| 0.009993 | 0.82947  | -0.04576 | 0.32374  | 0.016844 | 0.71656  | -0.08497 | 0.06657  | -0.11281 |
| 0.273203 | 1.94E-09 | 0.199868 | 1.35E-05 | 0.233986 | 3.15E-07 | 0.127427 | 0.00582  | 0.098426 |
| 0.017448 | 0.70686  | 0.05925  | 0.20122  | 0.028638 | 0.53701  | 0.066484 | 0.15144  | 0.151941 |
| -0.02119 | 0.64793  | 0.030585 | 0.50969  | 0.005647 | 0.90313  | 0.044116 | 0.34148  | 0.045135 |
| 0.04881  | 0.29253  | 0.013153 | 0.77681  | 0.017142 | 0.71177  | 0.01821  | 0.6947   | 0.00937  |
| 0.263895 | 7.02E-09 | 0.329871 | 2.57E-13 | 0.258063 | 1.53E-08 | 0.311122 | 6.12E-12 | 0.225029 |
| 0.044432 | 0.33802  | 0.17268  | 0.00018  | 0.070761 | 0.12677  | 0.218881 | 1.79E-06 | 0.193919 |
| 0.02493  | 0.591    | -0.00367 | 0.93701  | 0.014603 | 0.75295  | 0.000544 | 0.99064  | -0.0013  |
| 0.004465 | 0.92333  | 0.007529 | 0.87109  | 0.01683  | 0.71679  | 0.007658 | 0.8689   | 0.04733  |
| 0.310522 | 6.75E-12 | 0.222506 | 1.19E-06 | 0.21463  | 2.86E-06 | 0.176573 | 0.00013  | 0.100344 |
| 0.159432 | 0.00054  | 0.080315 | 0.08296  | 0.051781 | 0.26411  | 0.111626 | 0.01581  | 0.04203  |
| 0.032983 | 0.47706  | 0.076739 | 0.09765  | 0.05262  | 0.25643  | 0.110079 | 0.01733  | 0.079932 |
| 0.143751 | 0.00184  | 0.181238 | 8.19E-05 | 0.151158 | 0.00105  | 0.165956 | 0.00032  | 0.132519 |
| 0.037679 | 0.41659  | 0.23898  | 1.73E-07 | 0.094324 | 0.04161  | 0.313916 | 3.87E-12 | 0.294228 |
| 0.047214 | 0.30861  | 0.083313 | 0.07207  | 0.06394  | 0.16775  | 0.076083 | 0.10056  | 0.299786 |
| 0.043524 | 0.34799  | 0.0456   | 0.32546  | 0.009295 | 0.84122  | 0.07081  | 0.1265   | 0.0419   |
| 0.045874 | 0.32256  | 0.207833 | 5.93E-06 | 0.088794 | 0.05517  | 0.280879 | 6.48E-10 | 0.17633  |
| 0.099562 | 0.03147  | 0.099713 | 0.03121  | 0.085129 | 0.06605  | 0.079461 | 0.08629  | 0.044228 |
| 0.134156 | 0.00368  | 0.137466 | 0.00291  | 0.091653 | 0.04776  | 0.166885 | 0.00029  | 0.094635 |
| 0.177756 | 0.00011  | 0.276249 | 1.26E-09 | 0.13701  | 0.00301  | 0.355699 | 2.25E-15 | 0.213794 |
| -0.02266 | 0.62529  | -0.00561 | 0.90378  | -0.0075  | 0.87166  | -0.01491 | 0.74794  | 0.19614  |
| 0.08784  | 0.05785  | 0.163442 | 0.00039  | 0.072774 | 0.11629  | 0.221338 | 1.36E-06 | 0.119432 |
| 0.085118 | 0.06609  | 0.099232 | 0.03203  | 0.061577 | 0.18405  | 0.1101   | 0.01731  | 0.102827 |
| 0.105504 | 0.02259  | 0.081273 | 0.07934  | 0.084732 | 0.06733  | 0.08705  | 0.06015  | 0.037007 |
| 0.276532 | 1.21E-09 | 0.100113 | 0.03053  | 0.079706 | 0.08533  | 0.126996 | 0.00599  | 0.201638 |
| 0.098075 | 0.0341   | 0.005422 | 0.90698  | 0.025475 | 0.58292  | 0.013265 | 0.77495  | 0.002209 |
| 0.096669 | 0.03677  | 0.04029  | 0.38501  | 0.028453 | 0.53964  | 0.038499 | 0.40651  | 0.060059 |
| 0.327832 | 3.67E-13 | 0.132197 | 0.00421  | 0.192973 | 2.69E-05 | 0.059885 | 0.19642  | 0.027817 |
| 0.200057 | 1.33E-05 | 0.237812 | 1.99E-07 | 0.113238 | 0.01435  | 0.290728 | 1.51E-10 | 0.151674 |
| 0.259643 | 1.24E-08 | 0.114432 | 0.01335  | 0.112701 | 0.01482  | 0.111912 | 0.01554  | 0.043505 |

|          |          |          |          |          |          |          |          |          |
|----------|----------|----------|----------|----------|----------|----------|----------|----------|
| 0.31629  | 2.61E-12 | 0.149208 | 0.00122  | 0.163121 | 0.0004   | 0.132161 | 0.00422  | 0.14775  |
| 0.149594 | 0.00119  | 0.075289 | 0.10417  | 0.074659 | 0.10711  | 0.084439 | 0.06829  | 0.091119 |
| -0.01204 | 0.79523  | -0.01573 | 0.7345   | -0.0124  | 0.78927  | -0.00838 | 0.85673  | -0.02843 |
| -0.01333 | 0.7738   | -0.00398 | 0.93169  | -0.01042 | 0.82226  | -0.00277 | 0.95246  | 0.004508 |
| 0.06869  | 0.13829  | 0.152206 | 0.00097  | 0.103254 | 0.02566  | 0.210616 | 4.41E-06 | 0.108611 |
| 0.064158 | 0.1663   | 0.08398  | 0.06981  | 0.075623 | 0.10264  | 0.088802 | 0.05515  | 0.203897 |
| 0.07172  | 0.12169  | 0.118033 | 0.01069  | 0.087302 | 0.05941  | 0.13682  | 0.00305  | 0.037106 |
| 0.151546 | 0.00102  | 0.081057 | 0.08015  | 0.086462 | 0.06191  | 0.071741 | 0.12158  | 0.04692  |
| 0.296679 | 6.07E-11 | 0.276626 | 1.19E-09 | 0.223011 | 1.13E-06 | 0.252708 | 3.08E-08 | 0.212179 |
| 0.05635  | 0.2242   | 0.118139 | 0.01061  | 0.08506  | 0.06627  | 0.15371  | 0.00086  | 0.186043 |
| 0.072216 | 0.11912  | 0.043728 | 0.34574  | 0.083664 | 0.07087  | -0.01077 | 0.81649  | -0.01131 |
| 0.241414 | 1.28E-07 | 0.197192 | 1.77E-05 | 0.161487 | 0.00046  | 0.218135 | 1.95E-06 | 0.15492  |
| 0.135058 | 0.00345  | 0.043418 | 0.34917  | 0.054413 | 0.24055  | 0.037698 | 0.41636  | 0.029699 |
| 0.053228 | 0.25097  | 0.164752 | 0.00035  | 0.078531 | 0.09005  | 0.201755 | 1.12E-05 | 0.095363 |
| 0.174447 | 0.00015  | 0.183291 | 6.77E-05 | 0.210082 | 4.67E-06 | 0.108931 | 0.01854  | 0.071576 |
| 0.209477 | 4.98E-06 | 0.173515 | 0.00016  | 0.228837 | 5.78E-07 | 0.078859 | 0.08871  | 0.089415 |
| 0.27736  | 1.08E-09 | 0.191923 | 2.98E-05 | 0.232443 | 3.79E-07 | 0.123386 | 0.0076   | 0.067415 |
| 0.066573 | 0.15089  | 0.020917 | 0.65208  | 0.018001 | 0.69802  | 0.018124 | 0.69606  | 0.007221 |
| 0.323434 | 7.82E-13 | 0.248546 | 5.26E-08 | 0.146667 | 0.00148  | 0.309482 | 8.00E-12 | 0.151501 |
| 0.050677 | 0.27443  | -0.06062 | 0.19094  | 2.25E-05 | 0.99961  | -0.10248 | 0.02679  | -0.08138 |
| 0.208303 | 5.64E-06 | 0.104005 | 0.0246   | 0.113272 | 0.01432  | 0.081407 | 0.07884  | 0.170365 |
| -0.03436 | 0.45884  | -0.03009 | 0.51652  | -0.02559 | 0.58119  | -0.02388 | 0.60678  | -0.0593  |
| -0.0358  | 0.4402   | -0.02761 | 0.55175  | -0.01679 | 0.7175   | -0.02799 | 0.54619  | -0.06108 |
| -0.02567 | 0.57997  | -0.09305 | 0.04446  | -0.05986 | 0.19658  | -0.10621 | 0.0217   | -0.10972 |
| 0.03129  | 0.49996  | 0.025006 | 0.58988  | 0.020113 | 0.66464  | 0.016689 | 0.71907  | 0.054213 |
| 0.076536 | 0.09855  | 0.047144 | 0.30934  | 0.030813 | 0.50653  | 0.033105 | 0.47543  | 0.165493 |
| 0.11095  | 0.01646  | -0.00452 | 0.92233  | 0.078955 | 0.08832  | -0.05826 | 0.20888  | -0.06166 |
| -0.01917 | 0.6795   | -0.11809 | 0.01065  | -0.03628 | 0.4341   | -0.15625 | 0.0007   | -0.13039 |
| -0.05382 | 0.2457   | -0.06017 | 0.19428  | -0.03243 | 0.48451  | -0.06656 | 0.15096  | -0.15999 |
| -0.13226 | 0.0042   | -0.08601 | 0.06329  | -0.08313 | 0.07269  | -0.07554 | 0.10303  | -0.14276 |
| 0.075076 | 0.10516  | 0.158394 | 0.00059  | 0.097033 | 0.03606  | 0.169884 | 0.00023  | 0.156019 |
| 0.115012 | 0.01288  | 0.091602 | 0.04788  | 0.118251 | 0.01054  | 0.03346  | 0.4707   | 0.010552 |
| 0.090387 | 0.05093  | 0.069043 | 0.13627  | 0.079695 | 0.08537  | 0.04858  | 0.29481  | 0.039642 |
| 0.042008 | 0.36506  | 0.050459 | 0.2765   | 0.036516 | 0.43113  | 0.048876 | 0.29187  | 0.054545 |
| 0.007704 | 0.86812  | 0.017124 | 0.71207  | -0.00526 | 0.9097   | 0.0453   | 0.32865  | 0.007079 |
| 0.011631 | 0.80207  | 0.043311 | 0.35036  | 0.011331 | 0.80706  | 0.065153 | 0.15982  | 0.030863 |
| -0.00797 | 0.86356  | -0.02173 | 0.63943  | -0.02028 | 0.66202  | -0.01482 | 0.74943  | -0.04461 |
| 0.270279 | 2.92E-09 | 0.258664 | 1.41E-08 | 0.291044 | 1.44E-10 | 0.1537   | 0.00086  | 0.137487 |
| -0.0022  | 0.96214  | -0.05921 | 0.2015   | -0.04393 | 0.34356  | -0.04314 | 0.35232  | -0.16641 |
| 0.042077 | 0.36427  | 0.051557 | 0.26618  | 0.048166 | 0.29894  | 0.056446 | 0.22341  | 0.008157 |
| 0.199731 | 1.37E-05 | 0.20506  | 7.93E-06 | 0.235831 | 2.53E-07 | 0.113081 | 0.01449  | 0.258285 |
| 0.328487 | 3.27E-13 | 0.165295 | 0.00033  | 0.211287 | 4.11E-06 | 0.096974 | 0.03618  | 0.260041 |
| -0.07899 | 0.08817  | -0.18908 | 3.92E-05 | -0.10906 | 0.0184   | -0.1977  | 1.68E-05 | -0.31714 |
| 0.007185 | 0.87693  | -0.00392 | 0.9327   | 0.000159 | 0.99726  | 0.016461 | 0.72274  | 0.026855 |
| 0.120308 | 0.00926  | 0.120373 | 0.00922  | 0.063654 | 0.16967  | 0.12745  | 0.00581  | 0.235768 |

|          |          |          |          |          |          |          |          |          |
|----------|----------|----------|----------|----------|----------|----------|----------|----------|
| 0.064837 | 0.16185  | 0.058943 | 0.20356  | 0.066491 | 0.1514   | 0.067389 | 0.14594  | 0.031456 |
| 0.148292 | 0.00131  | 0.161216 | 0.00047  | 0.218063 | 1.96E-06 | 0.025081 | 0.58876  | 0.138864 |
| 0.035209 | 0.44781  | 0.02492  | 0.59116  | -0.03817 | 0.41057  | 0.06333  | 0.17185  | 0.000785 |
| -0.03448 | 0.45732  | -0.083   | 0.07315  | -0.00981 | 0.83259  | -0.10642 | 0.02144  | -0.18202 |
| -0.07033 | 0.12908  | -0.13908 | 0.00259  | -0.05702 | 0.21877  | -0.15844 | 0.00059  | -0.27731 |
| -0.11295 | 0.0146   | -0.10475 | 0.02358  | -0.1041  | 0.02447  | -0.08971 | 0.05271  | -0.16998 |
| 0.056623 | 0.22196  | -0.01016 | 0.82664  | -0.00636 | 0.89094  | -0.00191 | 0.96709  | -0.05306 |
| 0.141925 | 0.00211  | 0.10242  | 0.02688  | 0.122674 | 0.00796  | 0.060991 | 0.18827  | 0.150924 |
| 0.071723 | 0.12167  | 0.2269   | 7.23E-07 | 0.105501 | 0.0226   | 0.286325 | 2.91E-10 | 0.182219 |
| 0.095451 | 0.03922  | 0.238908 | 1.74E-07 | 0.115412 | 0.01257  | 0.311883 | 5.41E-12 | 0.140588 |
| 0.056591 | 0.22222  | 0.004779 | 0.91797  | 0.004577 | 0.92143  | 0.00337  | 0.9421   | 0.033368 |
| -0.06627 | 0.15276  | -0.06713 | 0.14751  | -0.07167 | 0.12194  | -0.04647 | 0.31631  | 0.001279 |
| 0.101575 | 0.02817  | 0.092643 | 0.04539  | 0.058559 | 0.20653  | 0.115448 | 0.01254  | 0.148324 |
| 0.117723 | 0.01089  | -0.05005 | 0.28043  | 0.008544 | 0.8539   | -0.06568 | 0.15645  | -0.09853 |
| -0.11165 | 0.01579  | -0.0823  | 0.07559  | -0.10015 | 0.03047  | -0.05728 | 0.21661  | -0.05912 |
| -0.08677 | 0.06097  | -0.14836 | 0.0013   | -0.079   | 0.08812  | -0.17237 | 0.00018  | -0.29038 |
| 0.007717 | 0.86791  | 0.020072 | 0.66527  | 0.042764 | 0.35648  | -0.00993 | 0.83048  | -0.02569 |
| 0.01379  | 0.76629  | 0.063475 | 0.17087  | 0.014046 | 0.76209  | 0.081666 | 0.0779   | 0.015328 |
| 0.064533 | 0.16384  | 0.069918 | 0.13136  | 0.055006 | 0.23547  | 0.078791 | 0.08899  | 0.045265 |
| 0.035118 | 0.44898  | -0.02451 | 0.59733  | -0.00435 | 0.92535  | -0.0208  | 0.65387  | -0.02877 |
| -0.12288 | 0.00785  | -0.23306 | 3.52E-07 | -0.1373  | 0.00295  | -0.23656 | 2.32E-07 | -0.41163 |
| 0.156665 | 0.00068  | 0.126549 | 0.00617  | 0.133769 | 0.00378  | 0.085727 | 0.06417  | 0.123173 |
| 0.126389 | 0.00624  | 0.142334 | 0.00205  | 0.116832 | 0.01152  | 0.120579 | 0.0091   | 0.076337 |
| 0.107852 | 0.01974  | 0.088231 | 0.05674  | 0.083439 | 0.07163  | 0.045484 | 0.3267   | 0.149352 |
| 0.103116 | 0.02586  | 0.227902 | 6.44E-07 | 0.10686  | 0.02091  | 0.291265 | 1.39E-10 | 0.200277 |
| 0.21145  | 4.04E-06 | 0.168863 | 0.00025  | 0.181357 | 8.10E-05 | 0.094256 | 0.04175  | 0.062902 |
| -0.10193 | 0.02762  | -0.14419 | 0.00178  | -0.05544 | 0.23178  | -0.18577 | 5.37E-05 | -0.17975 |
| -0.07106 | 0.12519  | -0.03607 | 0.43673  | -0.05907 | 0.20258  | -0.03054 | 0.5103   | -0.02003 |
| 0.046311 | 0.31797  | -0.12037 | 0.00922  | -0.03395 | 0.46424  | -0.13397 | 0.00373  | -0.27382 |
| 0.002027 | 0.96516  | -0.04708 | 0.30997  | -0.03212 | 0.48864  | -0.04511 | 0.33073  | -0.0647  |
| 0.100317 | 0.0302   | 0.033661 | 0.46804  | 0.069343 | 0.13458  | 0.004515 | 0.92248  | -0.03715 |
| 0.110578 | 0.01682  | 0.055208 | 0.23375  | 0.042995 | 0.35389  | 0.06018  | 0.19422  | 0.139892 |
| -0.06377 | 0.16885  | -0.15114 | 0.00105  | -0.09492 | 0.04033  | -0.16506 | 0.00034  | -0.16376 |
| -0.01406 | 0.76185  | -0.05949 | 0.19943  | -0.03497 | 0.45091  | -0.05266 | 0.25604  | -0.09682 |
| 0.014795 | 0.74982  | -0.0828  | 0.07383  | -0.03374 | 0.46698  | -0.11256 | 0.01494  | -0.16909 |
| 0.189703 | 3.69E-05 | 0.17537  | 0.00014  | 0.199748 | 1.37E-05 | 0.093409 | 0.04363  | 0.047615 |
| 0.100317 | 0.0302   | 0.074667 | 0.10707  | 0.069756 | 0.13226  | 0.058619 | 0.20606  | 0.048906 |
| -0.05597 | 0.22737  | 0.049441 | 0.28633  | 0.003045 | 0.94767  | 0.063018 | 0.17398  | 0.153646 |
| 0.016472 | 0.72256  | 0.082302 | 0.0756   | 0.051591 | 0.26586  | 0.077585 | 0.094    | 0.254967 |
| 0.09506  | 0.04003  | 0.011317 | 0.8073   | 0.078102 | 0.09182  | -0.03287 | 0.4786   | -0.01909 |
| 0.007311 | 0.8748   | -0.06294 | 0.17449  | 0.0224   | 0.62921  | -0.1289  | 0.00527  | -0.0774  |
| -0.0132  | 0.77599  | 0.047383 | 0.30689  | 0.020268 | 0.66221  | 0.040747 | 0.37965  | 0.094183 |
| 0.068719 | 0.13813  | 0.006112 | 0.8952   | -0.02918 | 0.52936  | 0.059275 | 0.20103  | -0.02426 |
| 0.002945 | 0.94939  | -0.0707  | 0.12711  | -0.03949 | 0.39456  | -0.08148 | 0.07859  | -0.14041 |
| 0.170679 | 0.00021  | 0.121175 | 0.00876  | 0.147171 | 0.00143  | 0.06304  | 0.17383  | 0.152954 |

|          |          |          |          |          |          |          |          |          |
|----------|----------|----------|----------|----------|----------|----------|----------|----------|
| -0.01613 | 0.72807  | -0.09778 | 0.03464  | -0.03911 | 0.39908  | -0.10965 | 0.01777  | -0.1476  |
| 5.53E-05 | 0.99905  | 0.027105 | 0.55903  | 0.013774 | 0.76657  | 0.034932 | 0.4514   | 0.018404 |
| -0.01842 | 0.69128  | -0.11892 | 0.01011  | -0.04162 | 0.36949  | -0.16098 | 0.00048  | -0.2132  |
| 0.142531 | 0.00202  | 0.033328 | 0.47246  | 0.0598   | 0.19706  | 0.009701 | 0.83438  | 0.090042 |
| 0.1051   | 0.02312  | 0.105405 | 0.02272  | 0.105996 | 0.02197  | 0.082055 | 0.07648  | 0.101377 |
| 0.159299 | 0.00055  | 0.1023   | 0.02706  | 0.127599 | 0.00576  | 0.054714 | 0.23796  | 0.043339 |
| 0.007206 | 0.87658  | 0.017544 | 0.70533  | 0.018391 | 0.6918   | 0.009635 | 0.8355   | -0.00588 |
| 0.002898 | 0.95021  | 0.076219 | 0.09995  | 0.007959 | 0.86381  | 0.113093 | 0.01448  | 0.088527 |
| 0.047071 | 0.31008  | 0.067658 | 0.14433  | 0.064289 | 0.16544  | 0.065411 | 0.15816  | 0.04715  |
| -0.01993 | 0.66749  | -0.02164 | 0.64084  | -0.01377 | 0.7666   | -0.02453 | 0.59703  | -0.07856 |
| 0.223691 | 1.04E-06 | 0.069335 | 0.13462  | 0.148799 | 0.00126  | -0.0113  | 0.80753  | 0.044048 |
| 0.010341 | 0.82363  | -0.07442 | 0.10823  | -0.05656 | 0.22246  | -0.05961 | 0.19847  | -0.16245 |
| -0.11399 | 0.01371  | -0.01643 | 0.72321  | -0.0738  | 0.11123  | 0.024152 | 0.60263  | 0.103407 |
| 0.004126 | 0.92914  | -0.0269  | 0.56199  | -0.05137 | 0.26795  | 0.006075 | 0.89583  | -0.04652 |
| 0.004684 | 0.91958  | 0.017041 | 0.7134   | 0.003756 | 0.93548  | 0.022967 | 0.62056  | 0.080805 |
| 0.123829 | 0.00738  | 0.251344 | 3.68E-08 | 0.137497 | 0.00291  | 0.264735 | 6.26E-09 | 0.311866 |
| 0.154507 | 0.00081  | 0.331942 | 1.79E-13 | 0.242287 | 1.15E-07 | 0.303751 | 2.01E-11 | 0.260894 |
| 0.116002 | 0.01212  | 0.213925 | 3.09E-06 | 0.151825 | 0.001    | 0.217797 | 2.02E-06 | 0.134636 |
| 0.031647 | 0.49509  | 0.101104 | 0.02892  | 0.042649 | 0.35779  | 0.09671  | 0.03669  | 0.098897 |
| 0.018878 | 0.68408  | 0.02445  | 0.59818  | 0.030381 | 0.51251  | 0.012082 | 0.79455  | -0.00661 |
| 0.162155 | 0.00043  | 0.092145 | 0.04657  | 0.12244  | 0.00808  | 0.058415 | 0.20765  | 0.040299 |
| 0.061616 | 0.18377  | 0.106552 | 0.02128  | 0.050742 | 0.27382  | 0.130124 | 0.00486  | 0.251269 |
| 0.171842 | 0.00019  | 0.091577 | 0.04795  | 0.051598 | 0.2658   | 0.115464 | 0.01253  | 0.137007 |
| 0.030762 | 0.50723  | 0.085814 | 0.06389  | 0.028493 | 0.53907  | 0.116117 | 0.01204  | 0.23867  |
| 0.003265 | 0.9439   | 0.064106 | 0.16665  | 0.016307 | 0.72523  | 0.109312 | 0.01813  | 0.079432 |
| 0.017232 | 0.71033  | 0.104537 | 0.02387  | 0.037152 | 0.42314  | 0.149243 | 0.00122  | 0.120866 |
| 0.00633  | 0.89148  | 0.159944 | 0.00052  | 0.046553 | 0.31544  | 0.218903 | 1.79E-06 | 0.183088 |
| 0.059646 | 0.19821  | 0.101566 | 0.02819  | 0.078584 | 0.08983  | 0.088414 | 0.05623  | 0.165607 |
| 0.118437 | 0.01042  | 0.151803 | 0.001    | 0.109612 | 0.01781  | 0.156996 | 0.00066  | 0.164193 |
| 0.072315 | 0.11862  | 0.205667 | 7.44E-06 | 0.112197 | 0.01528  | 0.24896  | 4.99E-08 | 0.266623 |
| 0.0615   | 0.1846   | 0.114935 | 0.01294  | 0.089171 | 0.05414  | 0.10838  | 0.01914  | 0.107659 |
| 0.074056 | 0.10998  | 0.082794 | 0.07386  | 0.046679 | 0.31414  | 0.109968 | 0.01744  | 0.094602 |
| 0.007371 | 0.87378  | 0.088359 | 0.05638  | 0.028668 | 0.53658  | 0.11927  | 0.00989  | 0.192961 |
| 0.058037 | 0.21061  | 0.103083 | 0.02591  | 0.054248 | 0.24199  | 0.142105 | 0.00208  | 0.127477 |
| 0.043714 | 0.34589  | 0.069498 | 0.1337   | 0.039477 | 0.39469  | 0.088162 | 0.05694  | 0.07101  |
| 0.061308 | 0.18597  | 0.170052 | 0.00022  | 0.074944 | 0.10577  | 0.225852 | 8.16E-07 | 0.171375 |
| 0.031634 | 0.49526  | 0.116687 | 0.01162  | 0.069604 | 0.13311  | 0.115927 | 0.01218  | 0.190295 |
| 0.046898 | 0.31187  | 0.110793 | 0.01661  | 0.06309  | 0.17348  | 0.1341   | 0.00369  | 0.154252 |
| 0.015061 | 0.74547  | 0.066996 | 0.1483   | 0.022842 | 0.62247  | 0.077003 | 0.0965   | 0.108359 |
| -0.04421 | 0.34045  | 0.001552 | 0.97331  | -0.01292 | 0.78067  | 0.001825 | 0.96863  | 0.033136 |
| 0.083158 | 0.0726   | -0.12589 | 0.00645  | -0.0137  | 0.76777  | -0.16537 | 0.00033  | -0.25747 |
| 0.07736  | 0.09496  | 0.04705  | 0.3103   | 0.034958 | 0.45106  | 0.043387 | 0.34951  | -0.00254 |
| 0.030257 | 0.51423  | 0.088096 | 0.05712  | 0.055836 | 0.22846  | 0.101585 | 0.02816  | 0.094044 |
| -0.00657 | 0.88746  | -0.00822 | 0.85937  | 0.003777 | 0.93513  | -0.01775 | 0.70205  | -0.0549  |
| -0.0699  | 0.13145  | -0.01161 | 0.80241  | -0.04798 | 0.30078  | 0.020624 | 0.65664  | -0.00945 |

|          |          |          |          |          |          |          |          |          |
|----------|----------|----------|----------|----------|----------|----------|----------|----------|
| 0.04542  | 0.32737  | 0.10511  | 0.02311  | 0.074774 | 0.10657  | 0.103125 | 0.02585  | 0.130946 |
| 0.083018 | 0.07308  | 0.016774 | 0.71769  | 0.056884 | 0.21983  | -0.01453 | 0.7542   | -0.04252 |
| 0.018302 | 0.69323  | 0.031691 | 0.49449  | 0.028259 | 0.54241  | 0.01645  | 0.72292  | 0.18847  |
| -0.02231 | 0.63066  | 0.033115 | 0.47529  | 0.01401  | 0.76268  | 0.032104 | 0.48888  | 0.084746 |
| -0.07631 | 0.09955  | -0.06465 | 0.1631   | -0.03915 | 0.39865  | -0.08144 | 0.07874  | -0.11694 |
| -0.05796 | 0.2112   | -0.03028 | 0.5139   | -0.06005 | 0.19519  | 0.003618 | 0.93785  | -0.03588 |
| 0.030536 | 0.51037  | 0.058485 | 0.2071   | 0.028821 | 0.53441  | 0.085821 | 0.06387  | 0.075566 |
| 0.187184 | 4.70E-05 | 0.206723 | 6.67E-06 | 0.212142 | 3.75E-06 | 0.125991 | 0.00641  | 0.117138 |
| 0.056944 | 0.21935  | 0.228546 | 5.98E-07 | 0.107117 | 0.0206   | 0.260109 | 1.17E-08 | 0.324839 |
| 0.114582 | 0.01322  | 0.059412 | 0.19998  | 0.080732 | 0.08137  | 0.058743 | 0.20511  | 0.016772 |
| 0.042536 | 0.35906  | 0.024025 | 0.60455  | 0.046428 | 0.31675  | -0.0045  | 0.92275  | 0.05164  |
| 0.350118 | 6.50E-15 | 0.255675 | 2.10E-08 | 0.281402 | 6.00E-10 | 0.161483 | 0.00046  | 0.108424 |
| 0.097448 | 0.03527  | 0.02725  | 0.55693  | 0.030666 | 0.50856  | 0.014345 | 0.75719  | 0.044624 |
| -0.1014  | 0.02844  | -0.10714 | 0.02057  | -0.10455 | 0.02385  | -0.06683 | 0.14935  | -0.05189 |
| 0.13304  | 0.00398  | 0.105227 | 0.02295  | 0.147448 | 0.0014   | 0.056201 | 0.22543  | 0.020971 |
| 0.096318 | 0.03746  | 0.003233 | 0.94444  | 0.038625 | 0.40498  | -0.01957 | 0.6732   | -0.03346 |
| 0.063962 | 0.16761  | 0.072184 | 0.11929  | 0.114184 | 0.01355  | 0.030773 | 0.50708  | 0.045085 |
| -0.04578 | 0.32358  | -0.03632 | 0.43363  | -0.00756 | 0.87058  | -0.0535  | 0.24859  | -0.05343 |
| -0.10085 | 0.02933  | -0.12299 | 0.00779  | -0.1125  | 0.015    | -0.11374 | 0.01392  | -0.16649 |
| 0.146081 | 0.00155  | 0.161322 | 0.00047  | 0.092498 | 0.04574  | 0.190813 | 3.32E-05 | 0.103031 |
| -0.01628 | 0.72563  | -0.01316 | 0.77671  | 0.002153 | 0.96299  | 0.000738 | 0.9873   | -0.04189 |
| 0.254432 | 2.47E-08 | 0.133434 | 0.00387  | 0.112928 | 0.01462  | 0.131731 | 0.00435  | 0.087356 |
| 0.292976 | 1.07E-10 | 0.158289 | 0.0006   | 0.236091 | 2.45E-07 | 0.047912 | 0.30151  | 0.061592 |
| 0.053414 | 0.24931  | 0.096426 | 0.03725  | 0.09301  | 0.04454  | 0.07486  | 0.10616  | 0.174561 |
| 0.026211 | 0.57208  | -0.03566 | 0.44199  | -0.02236 | 0.62987  | -0.0236  | 0.61102  | -0.09286 |
| 0.066458 | 0.1516   | 0.055089 | 0.23476  | 0.08337  | 0.07187  | 0.009921 | 0.83069  | -0.00751 |
| -0.02896 | 0.53246  | -0.05192 | 0.26283  | -0.04863 | 0.29431  | -0.03329 | 0.47293  | 0.059108 |
| -0.04964 | 0.28437  | -0.10657 | 0.02125  | -0.11217 | 0.0153   | -0.0668  | 0.14951  | -0.14244 |
| 0.285199 | 3.44E-10 | 0.148632 | 0.00128  | 0.191711 | 3.04E-05 | 0.074942 | 0.10578  | 0.036749 |
| -0.01409 | 0.76133  | 0.017509 | 0.70588  | -0.00214 | 0.96321  | -0.00011 | 0.99815  | 0.064892 |
| -0.09241 | 0.04594  | -0.13525 | 0.00341  | -0.12286 | 0.00786  | -0.10832 | 0.01921  | -0.1986  |
| -0.01061 | 0.81904  | -0.00637 | 0.89078  | 0.000298 | 0.99488  | -0.00616 | 0.89436  | 0.02287  |
| 0.011003 | 0.81254  | 0.008966 | 0.84676  | 0.007647 | 0.86909  | 0.000189 | 0.99675  | 0.010869 |
| 0.166898 | 0.00029  | 0.045426 | 0.32731  | 0.045816 | 0.32317  | 0.053015 | 0.25287  | 0.030222 |
| 0.04851  | 0.29551  | -0.09744 | 0.03528  | -0.03002 | 0.5175   | -0.12134 | 0.00867  | -0.15058 |
| 0.022624 | 0.62579  | 0.026565 | 0.56689  | 0.034798 | 0.45314  | 0.022462 | 0.62827  | 0.095203 |
| 0.081713 | 0.07772  | 0.058288 | 0.20864  | 0.089423 | 0.05347  | 0.046975 | 0.31107  | -0.03298 |
| 0.117425 | 0.0111   | 0.133161 | 0.00394  | 0.188388 | 4.19E-05 | 0.035444 | 0.44478  | 0.091152 |
| 0.058315 | 0.20843  | 0.042491 | 0.35957  | 0.056833 | 0.22025  | 0.011503 | 0.8042   | 0.018715 |
| 0.267974 | 4.02E-09 | 0.210986 | 4.24E-06 | 0.215168 | 2.70E-06 | 0.132146 | 0.00423  | 0.14528  |
| 0.158804 | 0.00057  | 0.133703 | 0.0038   | 0.113854 | 0.01382  | 0.102817 | 0.0263   | 0.199678 |
| 0.071786 | 0.12134  | 0.155996 | 0.00072  | 0.099249 | 0.03201  | 0.178243 | 0.00011  | 0.209316 |
| -0.04215 | 0.36342  | -0.14356 | 0.00187  | -0.06774 | 0.14382  | -0.17976 | 9.38E-05 | -0.2182  |
| 0.004348 | 0.92534  | 0.040732 | 0.37981  | 0.022376 | 0.62958  | 0.045328 | 0.32836  | 0.090514 |
| 0.009695 | 0.83449  | 0.061102 | 0.18747  | 0.049211 | 0.28858  | 0.045414 | 0.32744  | 0.101641 |

|          |          |          |          |          |          |          |          |          |
|----------|----------|----------|----------|----------|----------|----------|----------|----------|
| 0.061912 | 0.18167  | 0.17761  | 0.00011  | 0.098347 | 0.03361  | 0.225781 | 8.23E-07 | 0.100163 |
| 0.080268 | 0.08314  | 0.052593 | 0.25668  | 0.043105 | 0.35266  | 0.05096  | 0.27176  | 0.149103 |
| 0.023318 | 0.61523  | -0.1057  | 0.02235  | -0.02343 | 0.61352  | -0.13705 | 0.003    | -0.25503 |
| -0.01415 | 0.76044  | -0.11543 | 0.01256  | -0.00725 | 0.87583  | -0.16329 | 0.0004   | -0.17139 |
| 0.03476  | 0.45362  | 0.012469 | 0.78812  | -0.00012 | 0.99785  | 0.007917 | 0.86452  | 0.022406 |
| 0.069011 | 0.13646  | 0.043125 | 0.35243  | 0.027204 | 0.5576   | 0.048595 | 0.29466  | 0.079001 |
| 0.140118 | 0.00241  | 0.095598 | 0.03891  | 0.125749 | 0.00651  | 0.033678 | 0.46782  | 0.041884 |
| 0.094185 | 0.04191  | 0.126515 | 0.00619  | 0.109796 | 0.01762  | 0.093801 | 0.04275  | 0.065769 |
| -0.02954 | 0.5242   | 0.07467  | 0.10706  | -0.00224 | 0.96156  | 0.121468 | 0.0086   | 0.024735 |
| 0.023055 | 0.61922  | -0.02816 | 0.5439   | 0.02517  | 0.58744  | -0.05577 | 0.22897  | -0.12104 |
| 0.03142  | 0.49818  | -0.01149 | 0.80443  | -0.00361 | 0.93794  | 0.007416 | 0.87302  | -0.07156 |
| 0.008234 | 0.85914  | -0.03953 | 0.39402  | -0.00855 | 0.85382  | -0.0382  | 0.41013  | -0.03024 |
| 0.016462 | 0.72273  | -0.04389 | 0.34396  | 0.035758 | 0.44075  | -0.08908 | 0.05439  | -0.20714 |
| -0.16091 | 0.00048  | -0.09991 | 0.03087  | -0.08236 | 0.0754   | -0.11829 | 0.01052  | -0.10083 |
| 0.078014 | 0.09219  | 0.01736  | 0.70827  | 0.050058 | 0.28035  | 0.009908 | 0.83091  | -0.03772 |
| 0.063696 | 0.16938  | 0.075876 | 0.10149  | 0.070931 | 0.12585  | 0.047749 | 0.30316  | 0.146258 |
| 0.117592 | 0.01098  | 0.088688 | 0.05547  | 0.082828 | 0.07374  | 0.069737 | 0.13237  | 0.230819 |
| -0.03945 | 0.39499  | -0.04212 | 0.36383  | -0.01462 | 0.75265  | -0.04572 | 0.32417  | 0.004351 |
| 0.006314 | 0.89175  | -0.17763 | 0.00011  | -0.06722 | 0.14695  | -0.21122 | 4.14E-06 | -0.28255 |
| 0.032953 | 0.47745  | 0.024098 | 0.60345  | 0.025396 | 0.58408  | 0.018395 | 0.69175  | 0.023902 |
| 0.010104 | 0.82761  | -0.08136 | 0.07903  | 0.002624 | 0.9549   | -0.13516 | 0.00343  | -0.04095 |
| 0.09922  | 0.03206  | 0.025047 | 0.58926  | 0.073523 | 0.11257  | -0.02294 | 0.62103  | -0.00816 |
| 0.063137 | 0.17317  | 0.044418 | 0.33817  | 0.03469  | 0.45453  | 0.03372  | 0.46726  | 0.046706 |
| -0.13398 | 0.00372  | -0.07842 | 0.09049  | -0.08208 | 0.07639  | -0.06383 | 0.16852  | -0.13356 |
| 0.018731 | 0.68642  | -0.03593 | 0.43861  | -0.02223 | 0.63185  | -0.05101 | 0.27128  | 0.040932 |
| -0.04472 | 0.33488  | -0.03095 | 0.50458  | -0.01335 | 0.77362  | -0.04975 | 0.28336  | -0.04498 |
| 0.083702 | 0.07074  | 0.019648 | 0.67194  | 0.053906 | 0.24497  | -0.01592 | 0.73145  | 0.055842 |
| -0.06135 | 0.1857   | -0.02003 | 0.66589  | -0.03116 | 0.50175  | -0.02552 | 0.58221  | -0.0356  |
| 0.055028 | 0.23528  | 0.045442 | 0.32715  | 0.043214 | 0.35144  | 0.03395  | 0.46422  | 0.081312 |
| 0.13307  | 0.00397  | 0.096699 | 0.03671  | 0.151174 | 0.00105  | 0.029506 | 0.52474  | 0.01048  |
| 0.108104 | 0.01945  | 0.084528 | 0.068    | 0.061475 | 0.18478  | 0.092873 | 0.04486  | 0.063497 |
| 0.104873 | 0.02342  | 0.148874 | 0.00125  | 0.131603 | 0.00439  | 0.106665 | 0.02114  | 0.237723 |
| 0.205964 | 7.22E-06 | 0.171923 | 0.00019  | 0.157564 | 0.00063  | 0.123777 | 0.00741  | 0.134906 |
| -0.04401 | 0.34263  | -0.09474 | 0.04072  | -0.05962 | 0.19838  | -0.09628 | 0.03754  | -0.11946 |
| 0.155618 | 0.00074  | 0.27793  | 9.91E-10 | 0.222532 | 1.19E-06 | 0.232349 | 3.83E-07 | 0.324342 |
| 0.012765 | 0.78322  | 0.04041  | 0.38361  | 0.02107  | 0.64972  | 0.050503 | 0.27609  | 0.158296 |
| 0.007546 | 0.87081  | 0.101933 | 0.02762  | 0.042738 | 0.35677  | 0.104972 | 0.02329  | 0.091088 |
| 0.095641 | 0.03883  | 0.061188 | 0.18684  | 0.050304 | 0.27799  | 0.05258  | 0.25679  | 0.17576  |
| 0.00778  | 0.86683  | 0.024784 | 0.59318  | 0.045351 | 0.32812  | -0.01839 | 0.69177  | -0.01114 |
| -0.06006 | 0.19509  | -0.0647  | 0.16274  | -0.03766 | 0.41686  | -0.06698 | 0.14839  | -0.14754 |
| 0.046557 | 0.3154   | -0.01814 | 0.69587  | -0.00863 | 0.8524   | -0.01335 | 0.77348  | -0.07273 |
| 0.038344 | 0.40841  | 0.073394 | 0.11321  | 0.072604 | 0.11715  | 0.0533   | 0.25033  | 0.029334 |
| 0.229087 | 5.61E-07 | 0.254966 | 2.30E-08 | 0.245498 | 7.72E-08 | 0.206118 | 7.10E-06 | 0.128004 |
| -0.06711 | 0.14761  | -0.04681 | 0.31278  | -0.04108 | 0.37579  | -0.05392 | 0.24485  | -0.04379 |
| 0.093893 | 0.04255  | 0.022851 | 0.62233  | 0.046853 | 0.31233  | 0.014894 | 0.74819  | 0.030512 |



|          |          |          |          |          |          |          |          |          |
|----------|----------|----------|----------|----------|----------|----------|----------|----------|
| 0.145083 | 0.00167  | 0.004849 | 0.91676  | 0.106052 | 0.0219   | -0.07407 | 0.10992  | -0.03052 |
| 0.098266 | 0.03375  | 0.112529 | 0.01498  | 0.12061  | 0.00908  | 0.084241 | 0.06894  | 0.099435 |
| 0.163661 | 0.00038  | 0.099075 | 0.03231  | 0.187074 | 4.75E-05 | -0.00155 | 0.97337  | 0.064811 |
| -0.03902 | 0.40014  | 0.002306 | 0.96035  | 0.012322 | 0.79057  | -0.02052 | 0.65833  | -0.04774 |
| -0.08034 | 0.08286  | -0.08353 | 0.07132  | -0.07076 | 0.12677  | -0.08346 | 0.07158  | -0.1196  |
| 0.194628 | 2.28E-05 | 0.226335 | 7.72E-07 | 0.206584 | 6.76E-06 | 0.158335 | 0.00059  | 0.198087 |
| -0.08376 | 0.07054  | -0.00192 | 0.96703  | -0.02604 | 0.57464  | 0.008158 | 0.86042  | 0.051085 |
| 0.035765 | 0.44067  | -0.05437 | 0.24094  | 0.002451 | 0.95788  | -0.07189 | 0.12079  | -0.1182  |
| 0.286835 | 2.70E-10 | 0.212423 | 3.64E-06 | 0.212678 | 3.54E-06 | 0.179878 | 9.28E-05 | 0.227025 |
| 0.038639 | 0.40481  | 0.05949  | 0.1994   | 0.020972 | 0.65124  | 0.075511 | 0.10315  | 0.096932 |
| 0.078634 | 0.08963  | 0.031545 | 0.49648  | 0.063185 | 0.17284  | 0.016142 | 0.72789  | 0.028481 |
| 0.007585 | 0.87014  | 0.098228 | 0.03382  | 0.043328 | 0.35017  | 0.116582 | 0.0117   | 0.280063 |
| -0.03661 | 0.42989  | -0.10065 | 0.02965  | -0.05971 | 0.19771  | -0.089   | 0.0546   | -0.21732 |
| 0.14203  | 0.00209  | 0.103625 | 0.02513  | 0.115587 | 0.01244  | 0.063973 | 0.16754  | 0.131228 |
| -0.0679  | 0.14288  | -0.08422 | 0.06899  | -0.06572 | 0.15622  | -0.0845  | 0.06808  | -0.07955 |
| -0.04771 | 0.30357  | -0.06252 | 0.17743  | -0.03825 | 0.40959  | -0.06015 | 0.19443  | -0.11618 |
| -0.02385 | 0.60716  | -0.04623 | 0.31886  | -0.01102 | 0.81232  | -0.07593 | 0.10126  | -0.09277 |
| 0.022857 | 0.62223  | -0.00316 | 0.9457   | 0.012553 | 0.78672  | -0.01568 | 0.73536  | 0.036639 |
| 0.100259 | 0.03029  | 0.084563 | 0.06788  | 0.062341 | 0.17866  | 0.068241 | 0.1409   | 0.026002 |
| 0.053652 | 0.24721  | 0.028547 | 0.53831  | 0.074596 | 0.10741  | -0.02678 | 0.56369  | 0.064304 |
| 0.003478 | 0.94025  | -0.03141 | 0.49837  | -0.01099 | 0.81278  | -0.03716 | 0.42301  | 0.030502 |
| 0.014022 | 0.76249  | -0.02034 | 0.66104  | 9.60E-06 | 0.99983  | -0.01436 | 0.7569   | 0.023299 |
| 0.033515 | 0.46997  | 0.036391 | 0.43271  | 0.060176 | 0.19425  | -0.00839 | 0.85655  | 0.058393 |
| -0.01195 | 0.79681  | -0.07491 | 0.10593  | -0.02427 | 0.60083  | -0.10883 | 0.01865  | -0.07923 |
| -0.09609 | 0.03791  | -0.19505 | 2.19E-05 | -0.11934 | 0.00984  | -0.19174 | 3.03E-05 | -0.28909 |
| 0.030379 | 0.51254  | -0.0367  | 0.4288   | -0.01263 | 0.78544  | -0.04066 | 0.38064  | -0.08423 |
| 0.035973 | 0.43801  | -0.01245 | 0.78844  | 0.032765 | 0.47997  | -0.04008 | 0.38749  | -0.02121 |
| 0.104428 | 0.02402  | 0.235113 | 2.76E-07 | 0.15708  | 0.00066  | 0.222475 | 1.20E-06 | 0.36837  |
| -0.07568 | 0.10237  | -0.00629 | 0.89211  | -0.02865 | 0.53681  | -0.01276 | 0.78331  | 0.289634 |
| 0.115091 | 0.01282  | 0.097663 | 0.03487  | 0.111794 | 0.01565  | 0.053285 | 0.25046  | 0.072882 |
| -0.15074 | 0.00109  | -0.15512 | 0.00077  | -0.13679 | 0.00306  | -0.14307 | 0.00194  | -0.26552 |
| 0.132683 | 0.00407  | 0.104706 | 0.02364  | 0.123689 | 0.00745  | 0.069344 | 0.13457  | 0.042278 |
| 0.102384 | 0.02694  | 0.000991 | 0.98297  | 0.043089 | 0.35284  | -0.03864 | 0.40476  | 0.036373 |
| -0.03858 | 0.40557  | -0.07337 | 0.11331  | -0.06626 | 0.15285  | -0.03778 | 0.41537  | -0.19938 |
| -0.0034  | 0.94162  | -0.06335 | 0.17174  | -0.02877 | 0.53514  | -0.08531 | 0.06547  | -0.12414 |
| 0.081916 | 0.07699  | 0.041308 | 0.37311  | 0.026091 | 0.57383  | 0.040256 | 0.38541  | 0.052664 |
| 0.084503 | 0.06808  | 0.037043 | 0.4245   | 0.02281  | 0.62294  | 0.023108 | 0.61842  | 0.090318 |
| 0.056591 | 0.22222  | -0.00893 | 0.84741  | 0.013706 | 0.76768  | -0.01544 | 0.7393   | -0.01995 |
| -0.02791 | 0.54738  | 0.021967 | 0.63585  | 0.032523 | 0.48322  | -0.01371 | 0.76756  | 0.039244 |
| 0.02188  | 0.63719  | -0.00425 | 0.92697  | 0.016068 | 0.7291   | -0.00547 | 0.90608  | -0.01288 |
| 0.341471 | 3.23E-14 | 0.350232 | 6.36E-15 | 0.356599 | 1.89E-15 | 0.242794 | 1.08E-07 | 0.342538 |
| 0.100415 | 0.03003  | 0.045811 | 0.32323  | 0.068583 | 0.13891  | 0.01699  | 0.71422  | -0.02963 |
| 0.016814 | 0.71704  | 0.024621 | 0.59562  | 0.025178 | 0.58732  | 0.022376 | 0.62958  | 0.085888 |
| 0.100178 | 0.03043  | 0.061115 | 0.18737  | 0.065959 | 0.1547   | 0.046054 | 0.32067  | 0.114394 |
| 0.000973 | 0.98327  | -0.02715 | 0.5584   | -0.01393 | 0.76407  | -0.0204  | 0.66021  | -0.04095 |

|          |          |          |          |          |          |          |          |          |
|----------|----------|----------|----------|----------|----------|----------|----------|----------|
| 0.010592 | 0.81942  | 0.012194 | 0.79268  | 0.014661 | 0.75201  | -0.01429 | 0.75801  | 0.061109 |
| 0.076789 | 0.09743  | 0.027326 | 0.55583  | 0.039639 | 0.39274  | 0.018862 | 0.68433  | 3.59E-05 |
| 0.078952 | 0.08834  | 0.03647  | 0.43171  | 0.04437  | 0.3387   | 0.025668 | 0.58007  | 0.047635 |
| -0.01171 | 0.80074  | 0.037754 | 0.41565  | 0.008821 | 0.84922  | 0.036143 | 0.43585  | 0.095075 |
| -0.00811 | 0.86126  | -0.03265 | 0.48157  | -0.04449 | 0.3374   | -0.00794 | 0.86415  | -0.07862 |
| 0.015164 | 0.74379  | 0.02358  | 0.61126  | 0.028898 | 0.53332  | 0.012788 | 0.78284  | 0.058391 |
| 0.077271 | 0.09534  | 0.048226 | 0.29835  | 0.085139 | 0.06602  | 0.01474  | 0.75071  | -0.03746 |
| -0.02192 | 0.63662  | 0.04582  | 0.32313  | 0.016004 | 0.73014  | 0.069594 | 0.13317  | 0.157429 |
| 0.092127 | 0.04662  | -0.03797 | 0.41303  | 0.036896 | 0.42634  | -0.07775 | 0.0933   | -0.07177 |
| 0.313801 | 3.94E-12 | 0.310721 | 6.54E-12 | 0.282158 | 5.38E-10 | 0.252835 | 3.03E-08 | 0.291572 |
| 0.198054 | 1.62E-05 | 0.198346 | 1.58E-05 | 0.246016 | 7.24E-08 | 0.076518 | 0.09863  | 0.119182 |
| -0.10315 | 0.02581  | -0.07742 | 0.0947   | -0.07493 | 0.10584  | -0.05964 | 0.19828  | -0.02244 |
| 0.127163 | 0.00593  | 0.111812 | 0.01563  | 0.148588 | 0.00128  | 0.035458 | 0.44461  | 0.219271 |
| 0.117622 | 0.01096  | 0.082864 | 0.07362  | 0.075341 | 0.10393  | 0.084588 | 0.0678   | 0.016807 |
| 0.252736 | 3.07E-08 | 0.16549  | 0.00033  | 0.179712 | 9.42E-05 | 0.119436 | 0.00978  | 0.076503 |
| 0.085635 | 0.06445  | 0.148184 | 0.00132  | 0.064074 | 0.16686  | 0.172669 | 0.00018  | 0.095887 |
| -0.0458  | 0.32332  | -0.03229 | 0.4863   | -0.02914 | 0.52995  | -0.02446 | 0.59797  | -0.08782 |
| 0.060617 | 0.191    | -0.05222 | 0.2601   | 0.006309 | 0.89185  | -0.07951 | 0.08612  | -0.12571 |
| 0.047716 | 0.30349  | -0.08071 | 0.08145  | -0.03855 | 0.40593  | -0.09876 | 0.03287  | -0.17013 |
| -0.09002 | 0.05189  | -0.08319 | 0.07249  | -0.10296 | 0.02608  | -0.04349 | 0.34843  | 0.011598 |
| 0.100807 | 0.02939  | 0.101137 | 0.02886  | 0.077154 | 0.09585  | 0.09255  | 0.04561  | 0.157973 |
| -0.02769 | 0.55051  | 0.022194 | 0.63237  | -0.0116  | 0.80265  | 0.054342 | 0.24118  | 0.02884  |
| -0.01543 | 0.73947  | -0.01032 | 0.82391  | -0.01179 | 0.79936  | -0.00775 | 0.86732  | -0.00506 |
| 0.031594 | 0.49581  | 0.051718 | 0.26468  | 0.063541 | 0.17043  | 0.023684 | 0.60969  | 0.04089  |
| 0.025742 | 0.57898  | 0.010224 | 0.82559  | 0.004294 | 0.92626  | 0.006515 | 0.88833  | 0.04577  |
| 0.081528 | 0.0784   | 0.175047 | 0.00014  | 0.077946 | 0.09248  | 0.221078 | 1.40E-06 | 0.141363 |
| 0.043882 | 0.34405  | 0.141662 | 0.00215  | 0.068241 | 0.14089  | 0.182531 | 7.27E-05 | 0.113794 |
| 0.03371  | 0.46739  | 0.031244 | 0.5006   | 0.006352 | 0.89111  | 0.060209 | 0.19401  | 0.041889 |
| 0.027598 | 0.55191  | 0.053423 | 0.24923  | 0.046645 | 0.31449  | 0.057657 | 0.21362  | 0.1233   |
| 0.058195 | 0.20937  | 0.040407 | 0.38364  | 0.073108 | 0.11462  | 0.001067 | 0.98165  | 0.080669 |
| 0.206086 | 7.13E-06 | 0.153117 | 0.0009   | 0.270395 | 2.87E-09 | -0.02439 | 0.59911  | -0.01204 |
| 0.0257   | 0.57958  | 0.016475 | 0.72251  | 0.016597 | 0.72055  | 0.022125 | 0.63342  | 0.011388 |
| 0.021317 | 0.64589  | 0.033404 | 0.47144  | 0.034411 | 0.45817  | 0.012442 | 0.78857  | 0.061516 |
| 0.099384 | 0.03177  | 0.099836 | 0.031    | 0.095436 | 0.03925  | 0.07908  | 0.08782  | 0.250411 |
| 0.188243 | 4.25E-05 | 0.23009  | 4.99E-07 | 0.162286 | 0.00043  | 0.21377  | 3.14E-06 | 0.272888 |
| -0.00316 | 0.94574  | 0.035246 | 0.44733  | 0.019325 | 0.67702  | 0.03259  | 0.48232  | 0.048426 |
| 0.023846 | 0.60724  | 0.055635 | 0.23014  | 0.031773 | 0.49337  | 0.0657   | 0.15633  | 0.132362 |
| 0.012229 | 0.79212  | -0.0159  | 0.73179  | -0.02293 | 0.62118  | -0.02055 | 0.65777  | 0.002505 |
| 0.004694 | 0.91941  | 0.121179 | 0.00876  | 0.018574 | 0.6889   | 0.203757 | 9.08E-06 | 0.03455  |
| 0.116767 | 0.01156  | 0.068389 | 0.14003  | 0.059912 | 0.19622  | 0.090448 | 0.05078  | 0.071269 |
| -0.00826 | 0.85867  | 0.186181 | 5.16E-05 | 0.041088 | 0.37567  | 0.265271 | 5.82E-09 | 0.111643 |
| -0.03796 | 0.41314  | -0.02421 | 0.60172  | -0.02954 | 0.52432  | -0.01785 | 0.70041  | -0.04396 |
| -0.06493 | 0.16127  | -0.04413 | 0.34127  | -0.06086 | 0.1892   | -0.029   | 0.5319   | -0.09075 |
| 0.035723 | 0.4412   | 0.06632  | 0.15245  | 0.047797 | 0.30267  | 0.076137 | 0.10032  | 0.084679 |
| 0.074285 | 0.10889  | 0.046353 | 0.31753  | 0.076692 | 0.09786  | 0.000747 | 0.98715  | -0.03987 |

|          |          |          |          |          |          |           |          |          |
|----------|----------|----------|----------|----------|----------|-----------|----------|----------|
| 0.077038 | 0.09635  | 0.067654 | 0.14435  | 0.114284 | 0.01347  | 0.01261   | 0.78579  | -0.01492 |
| 0.03786  | 0.41436  | -0.04313 | 0.35233  | -0.01716 | 0.71153  | -0.0511   | 0.27044  | -0.10633 |
| 0.067362 | 0.1461   | -0.09514 | 0.03986  | 0.015778 | 0.7338   | -0.15867  | 0.00058  | -0.16051 |
| -0.06769 | 0.14414  | -0.12136 | 0.00865  | -0.07198 | 0.12035  | -0.12894  | 0.00526  | -0.18826 |
| 0.090504 | 0.05063  | 0.056649 | 0.22174  | 0.101207 | 0.02875  | 0.016402  | 0.72369  | -0.01415 |
| -0.06597 | 0.15466  | -0.14212 | 0.00208  | -0.06001 | 0.19545  | -0.17766  | 0.00011  | -0.15788 |
| 0.202283 | 1.06E-05 | 0.216677 | 2.29E-06 | 0.199323 | 1.43E-05 | 0.1846    | 5.99E-05 | 0.137728 |
| 0.040716 | 0.38001  | 0.006048 | 0.89629  | 0.014743 | 0.75067  | 0.007805  | 0.86641  | -0.00269 |
| 0.060387 | 0.19269  | -0.02497 | 0.59047  | 0.006075 | 0.89584  | -0.03407  | 0.46261  | -0.08858 |
| 0.050454 | 0.27655  | 0.158056 | 0.00061  | 0.066217 | 0.15309  | 0.191206  | 3.19E-05 | 0.213744 |
| 0.120096 | 0.00938  | -0.07895 | 0.08834  | -0.02528 | 0.58583  | -0.09901  | 0.03243  | -0.13862 |
| -0.06178 | 0.18263  | -0.18153 | 7.97E-05 | -0.09604 | 0.03801  | -0.20446  | 8.44E-06 | -0.29303 |
| 0.135366 | 0.00338  | 0.106489 | 0.02136  | 0.109296 | 0.01814  | 0.082236  | 0.07584  | 0.149813 |
| 0.122601 | 0.00799  | 0.149843 | 0.00116  | 0.102537 | 0.02671  | 0.185536  | 5.49E-05 | 0.101264 |
| 0.022283 | 0.631    | 0.033707 | 0.46743  | -0.0023  | 0.96046  | 0.047457  | 0.30613  | 0.007882 |
| 0.000173 | 0.99702  | -0.1729  | 0.00017  | -0.06564 | 0.15673  | -0.19089  | 3.29E-05 | -0.30818 |
| -0.01016 | 0.82673  | 0.023996 | 0.60499  | 0.020623 | 0.65667  | 0.017929  | 0.69917  | 0.038327 |
| -0.05995 | 0.19597  | -0.0243  | 0.60042  | -0.01392 | 0.76412  | -0.04703  | 0.31053  | -0.04951 |
| 0.120301 | 0.00926  | 0.028304 | 0.54177  | 0.069624 | 0.133    | -0.01101  | 0.81249  | 0.141754 |
| -0.03256 | 0.48277  | -0.07808 | 0.0919   | -0.04241 | 0.36052  | -0.07112  | 0.12483  | -0.10173 |
| 0.109993 | 0.01742  | 0.220289 | 1.53E-06 | 0.121163 | 0.00877  | 0.234889  | 2.83E-07 | 0.201629 |
| -0.02112 | 0.64892  | -0.15575 | 0.00073  | -0.0601  | 0.19481  | -0.19484  | 2.24E-05 | -0.15579 |
| -0.00735 | 0.87414  | 0.038046 | 0.41206  | -0.00684 | 0.88279  | 0.052027  | 0.26184  | 0.331826 |
| 0.094479 | 0.04127  | 0.093115 | 0.0443   | 0.112293 | 0.01519  | 0.090983  | 0.04942  | 0.026702 |
| 0.020907 | 0.65225  | 0.129444 | 0.00508  | 0.045052 | 0.33131  | 0.167984  | 0.00027  | 0.123991 |
| 0.053695 | 0.24683  | 0.030235 | 0.51454  | 0.042948 | 0.35442  | 0.027616  | 0.55165  | 0.016973 |
| 0.031408 | 0.49836  | -0.00231 | 0.96031  | 0.021791 | 0.63856  | 0.011589  | 0.80275  | -0.0317  |
| 0.125646 | 0.00655  | 0.043653 | 0.34656  | 0.052052 | 0.26161  | 0.024061  | 0.604    | 0.005808 |
| 0.094239 | 0.04179  | 0.064893 | 0.16149  | 0.09024  | 0.05131  | 0.026065  | 0.57421  | 0.036472 |
| 0.04681  | 0.31277  | 0.056106 | 0.22622  | 0.068376 | 0.14011  | 0.033883  | 0.4651   | 0.097317 |
| 0.368853 | 1.69E-16 | 0.27258  | 2.12E-09 | 0.347804 | 1.00E-14 | 0.137275  | 0.00295  | 0.075247 |
| -0.0084  | 0.85628  | 0.027077 | 0.55943  | 0.007004 | 0.88001  | 0.032171  | 0.48797  | 0.007463 |
| 0.160468 | 0.0005   | 0.101536 | 0.02823  | 0.102772 | 0.02636  | 0.070299  | 0.12927  | 0.23262  |
| 0.005601 | 0.90392  | 4.88E-05 | 0.99916  | 0.000688 | 0.98817  | -9.21E-05 | 0.99842  | -0.00803 |
| 0.040865 | 0.37826  | 0.066844 | 0.14923  | 0.0558   | 0.22876  | 0.063247  | 0.17241  | 0.214182 |
| 0.106751 | 0.02104  | 0.118297 | 0.01051  | 0.05892  | 0.20374  | 0.128168  | 0.00554  | 0.085948 |
| 0.14448  | 0.00175  | 0.128174 | 0.00554  | 0.134187 | 0.00367  | 0.082341  | 0.07546  | 0.136087 |
| -0.11405 | 0.01366  | -0.08485 | 0.06695  | -0.07744 | 0.09461  | -0.05863  | 0.20599  | -0.02553 |
| 0.030919 | 0.50506  | -0.01051 | 0.82074  | 0.036469 | 0.43172  | -0.04866  | 0.29402  | 0.080411 |
| 0.004971 | 0.91468  | -0.03187 | 0.49208  | -0.01037 | 0.82316  | -0.05685  | 0.22012  | -0.01908 |
| 0.102194 | 0.02722  | -0.05265 | 0.25619  | 0.029041 | 0.53129  | -0.08681  | 0.06087  | -0.163   |
| 0.039839 | 0.39037  | -0.08663 | 0.0614   | -0.01462 | 0.7526   | -0.10262  | 0.02658  | -0.22724 |
| 0.145092 | 0.00167  | 0.090272 | 0.05123  | 0.130442 | 0.00475  | 0.033706  | 0.46744  | 0.093746 |
| -0.06929 | 0.13485  | -0.04633 | 0.31778  | -0.04721 | 0.30867  | -0.03351  | 0.47006  | 0.044379 |
| -0.00467 | 0.9198   | 0.053109 | 0.25203  | 0.024011 | 0.60476  | 0.05622   | 0.22527  | 0.230813 |

|          |          |          |          |          |          |          |          |          |
|----------|----------|----------|----------|----------|----------|----------|----------|----------|
| 0.022305 | 0.63068  | 0.0459   | 0.32228  | 0.001523 | 0.97381  | 0.059773 | 0.19726  | 0.020282 |
| -0.0026  | 0.95535  | 0.043232 | 0.35124  | 0.028395 | 0.54048  | 0.05646  | 0.2233   | 0.03994  |
| 0.039371 | 0.39595  | 0.01729  | 0.7094   | 0.064993 | 0.16084  | -0.03526 | 0.44717  | -0.06322 |
| 0.238998 | 1.72E-07 | 0.249766 | 4.50E-08 | 0.34728  | 1.11E-14 | 0.051188 | 0.26962  | 0.201492 |
| -0.0253  | 0.58553  | -0.11247 | 0.01503  | -0.10898 | 0.01849  | -0.09754 | 0.0351   | -0.10041 |
| 0.125768 | 0.0065   | 0.098336 | 0.03363  | 0.101543 | 0.02822  | 0.075467 | 0.10335  | 0.086212 |
| -0.06245 | 0.17789  | -0.06122 | 0.18663  | -0.04585 | 0.32281  | -0.04409 | 0.34172  | -0.06948 |
| 0.05105  | 0.27091  | 0.099605 | 0.03139  | 0.075802 | 0.10183  | 0.100542 | 0.02982  | 0.088041 |
| 0.124618 | 0.00701  | 0.168645 | 0.00025  | 0.125684 | 0.00654  | 0.156339 | 0.0007   | 0.178797 |
| 0.040436 | 0.38329  | 0.039743 | 0.3915   | 0.045241 | 0.32929  | 0.020522 | 0.65824  | 0.014924 |
| 0.164639 | 0.00035  | 0.07073  | 0.12693  | 0.071545 | 0.12261  | 0.065835 | 0.15548  | 0.039554 |
| -0.00889 | 0.84801  | -0.0079  | 0.86474  | 0.000291 | 0.995    | -0.02326 | 0.61607  | 0.08166  |
| 0.028469 | 0.53942  | 0.02315  | 0.61778  | 0.027899 | 0.54757  | 0.046418 | 0.31685  | -0.00458 |
| 0.121222 | 0.00873  | 0.112129 | 0.01534  | 0.142178 | 0.00207  | 0.044202 | 0.34053  | 0.212804 |
| -0.00593 | 0.89825  | -0.00574 | 0.90152  | 0.005555 | 0.90471  | -0.02274 | 0.62396  | -0.01115 |
| 0.269275 | 3.36E-09 | 0.173677 | 0.00016  | 0.24776  | 5.81E-08 | 0.045633 | 0.32511  | 0.041721 |
| -0.01289 | 0.78113  | -0.14422 | 0.00178  | -0.01992 | 0.66769  | -0.1893  | 3.84E-05 | -0.23967 |
| 0.015794 | 0.73354  | 0.037073 | 0.42413  | 0.040276 | 0.38519  | 0.069363 | 0.13446  | 0.015945 |
| 0.037859 | 0.41437  | 0.013474 | 0.7715   | 0.01809  | 0.6966   | 0.011727 | 0.80046  | 0.015975 |
| 0.058775 | 0.20486  | 0.095075 | 0.04     | 0.083565 | 0.0712   | 0.076844 | 0.0972   | 0.046222 |
| 0.100079 | 0.03059  | 0.035445 | 0.44478  | 0.041161 | 0.37482  | 0.030949 | 0.50466  | 0.013965 |
| -0.01084 | 0.81519  | 0.077732 | 0.09338  | 0.025564 | 0.58159  | 0.077249 | 0.09544  | 0.056754 |
| 0.006485 | 0.88884  | -0.02606 | 0.57435  | -0.01444 | 0.75567  | -0.03574 | 0.44102  | -0.06857 |
| 0.063484 | 0.17081  | 0.04947  | 0.28604  | 0.069942 | 0.13123  | 0.019407 | 0.67573  | 0.018693 |
| 0.115881 | 0.01221  | 0.083481 | 0.07149  | 0.046806 | 0.31282  | 0.100657 | 0.02964  | 0.034357 |
| -0.02446 | 0.598    | -0.0247  | 0.5945   | -0.02179 | 0.63861  | -0.01402 | 0.76253  | -0.06629 |
| 0.043568 | 0.34751  | 0.014102 | 0.76117  | 0.028397 | 0.54044  | 0.004422 | 0.92408  | -0.01833 |
| 0.139412 | 0.00253  | 0.10366  | 0.02508  | 0.09577  | 0.03856  | 0.103383 | 0.02547  | 0.045496 |
| 0.089962 | 0.05204  | -0.00656 | 0.88757  | 0.004452 | 0.92357  | -0.01358 | 0.76982  | -0.03411 |
| 0.192112 | 2.92E-05 | 0.083382 | 0.07183  | 0.164378 | 0.00036  | -0.00594 | 0.89805  | -0.06213 |
| 0.18099  | 8.38E-05 | 0.122927 | 0.00783  | 0.132204 | 0.00421  | 0.084784 | 0.06716  | 0.199106 |
| 0.086628 | 0.06141  | 0.04178  | 0.36767  | 0.056251 | 0.22501  | 0.037189 | 0.42268  | 0.058819 |
| 0.174994 | 0.00014  | 0.164953 | 0.00034  | 0.174398 | 0.00015  | 0.107664 | 0.01996  | 0.350712 |
| -0.07713 | 0.09594  | -0.05979 | 0.19716  | -0.05773 | 0.213    | -0.06506 | 0.16044  | -0.06444 |
| 0.300003 | 3.62E-11 | 0.209641 | 4.90E-06 | 0.239701 | 1.58E-07 | 0.1567   | 0.00068  | 0.061292 |
| 0.265416 | 5.71E-09 | 0.101345 | 0.02853  | 0.149406 | 0.0012   | 0.030597 | 0.50952  | 0.005727 |
| 0.080039 | 0.08403  | 0.029935 | 0.51872  | 0.065053 | 0.16046  | 0.01086  | 0.81494  | 0.011345 |
| -0.12012 | 0.00937  | -0.11687 | 0.01148  | -0.11888 | 0.01013  | -0.1025  | 0.02677  | -0.21535 |
| 0.046027 | 0.32095  | 0.086105 | 0.063    | 0.059036 | 0.20285  | 0.100362 | 0.03012  | 0.214932 |
| 0.005319 | 0.90873  | -0.01059 | 0.81947  | -0.00912 | 0.8441   | -0.00579 | 0.90062  | -0.06735 |
| 0.303594 | 2.06E-11 | 0.187892 | 4.39E-05 | 0.228414 | 6.07E-07 | 0.116317 | 0.01189  | 0.113268 |
| -0.05144 | 0.26729  | -0.12787 | 0.00565  | -0.08239 | 0.0753   | -0.11904 | 0.01003  | -0.18961 |
| 0.16359  | 0.00039  | 0.193133 | 2.64E-05 | 0.166502 | 0.0003   | 0.160486 | 0.0005   | 0.174318 |
| 0.008848 | 0.84876  | -0.11045 | 0.01696  | -0.05825 | 0.20893  | -0.12177 | 0.00843  | -0.23705 |
| 0.079291 | 0.08697  | 0.044931 | 0.33262  | 0.088994 | 0.05463  | 0.004402 | 0.92441  | 0.008474 |

|          |          |          |          |          |          |          |          |          |
|----------|----------|----------|----------|----------|----------|----------|----------|----------|
| 0.069817 | 0.13193  | -0.00283 | 0.95138  | 0.063174 | 0.17291  | -0.04776 | 0.30303  | -0.11198 |
| 0.062827 | 0.17529  | 0.186062 | 5.22E-05 | 0.12407  | 0.00727  | 0.176831 | 0.00012  | 0.351552 |
| 0.059358 | 0.20039  | 0.116549 | 0.01172  | 0.093526 | 0.04337  | 0.092081 | 0.04672  | 0.128104 |
| 0.087092 | 0.06003  | 0.062646 | 0.17654  | 0.118624 | 0.0103   | -0.04027 | 0.38521  | -0.05377 |
| 0.032041 | 0.48974  | 0.061332 | 0.18581  | 0.064229 | 0.16584  | 0.050507 | 0.27605  | 0.029747 |
| 0.00121  | 0.97919  | -0.00635 | 0.89117  | -0.00292 | 0.9499   | -0.00737 | 0.87382  | -0.00568 |
| 0.091645 | 0.04778  | 0.028666 | 0.53661  | 0.064757 | 0.16238  | -0.00016 | 0.99725  | -0.03882 |
| 0.092545 | 0.04563  | 0.021039 | 0.6502   | 0.051221 | 0.26931  | -0.00734 | 0.87433  | 0.001026 |
| -0.06394 | 0.16776  | -0.03919 | 0.39811  | -0.0469  | 0.31186  | -0.02143 | 0.64412  | -0.02713 |
| -0.12774 | 0.0057   | -0.09109 | 0.04916  | -0.10503 | 0.02321  | -0.07546 | 0.10336  | -0.08648 |
| 0.061818 | 0.18233  | 0.051416 | 0.26749  | 0.010231 | 0.82548  | 0.055117 | 0.23452  | 0.020054 |
| -0.05962 | 0.19844  | -0.01336 | 0.77334  | -0.03553 | 0.44365  | -0.00159 | 0.97262  | 0.037853 |
| 0.023278 | 0.61583  | 0.168177 | 0.00026  | 0.051917 | 0.26285  | 0.208003 | 5.83E-06 | 0.284679 |
| -0.00639 | 0.89049  | 0.002202 | 0.96214  | -0.00399 | 0.93145  | 0.023053 | 0.61926  | -0.03475 |
| 0.074116 | 0.10969  | 0.160011 | 0.00052  | 0.070734 | 0.12691  | 0.198365 | 1.57E-05 | 0.198667 |
| -0.02091 | 0.65225  | 0.019787 | 0.66974  | 0.030921 | 0.50504  | 0.007684 | 0.86846  | 0.020316 |
| 0.033468 | 0.4706   | 0.012219 | 0.79228  | 0.024284 | 0.60066  | 0.009983 | 0.82964  | -0.00398 |
| -0.07859 | 0.08981  | -0.15498 | 0.00078  | -0.10469 | 0.02367  | -0.17411 | 0.00016  | -0.12084 |
| 0.055943 | 0.22757  | -0.02709 | 0.55925  | 0.033447 | 0.47087  | -0.05377 | 0.24616  | -0.0762  |
| 0.047582 | 0.30485  | 0.07206  | 0.11993  | 0.062012 | 0.18097  | 0.053219 | 0.25105  | 0.085846 |
| -0.01223 | 0.79208  | -0.10047 | 0.02993  | -0.02758 | 0.55218  | -0.11935 | 0.00984  | -0.19553 |
| 0.076382 | 0.09923  | 0.117792 | 0.01085  | 0.105794 | 0.02222  | 0.084191 | 0.0691   | 0.214974 |
| 0.051383 | 0.2678   | 0.057897 | 0.21172  | 0.046152 | 0.31964  | 0.064534 | 0.16383  | 0.038926 |
| -0.00994 | 0.83031  | -0.02086 | 0.65299  | 0.000495 | 0.99149  | -0.03788 | 0.4141   | -0.02763 |
| 0.02627  | 0.57121  | 0.086978 | 0.06036  | 0.077173 | 0.09576  | 0.050702 | 0.2742   | 0.171359 |
| 0.013875 | 0.76491  | 0.055864 | 0.22823  | 0.03067  | 0.5085   | 0.057507 | 0.21481  | 0.055146 |
| 0.097003 | 0.03612  | 0.047518 | 0.3055   | 0.049807 | 0.28277  | 0.0219   | 0.63689  | 0.005804 |
| 0.111802 | 0.01564  | -0.00452 | 0.92238  | 0.008204 | 0.85964  | 0.001066 | 0.98168  | 0.001225 |
| -0.01943 | 0.67541  | 0.007455 | 0.87234  | -0.0034  | 0.94163  | 0.015492 | 0.73844  | 0.006465 |
| 0.281675 | 5.77E-10 | 0.181016 | 8.36E-05 | 0.240694 | 1.40E-07 | 0.052753 | 0.25523  | 0.070816 |
| -0.08957 | 0.05306  | -0.08303 | 0.07303  | -0.04633 | 0.31774  | -0.09051 | 0.0506   | -0.07606 |
| 0.090552 | 0.05051  | 0.086145 | 0.06287  | 0.055672 | 0.22983  | 0.095515 | 0.03909  | 0.106282 |
| 0.078961 | 0.0883   | 0.067503 | 0.14525  | 0.082156 | 0.07612  | 0.033669 | 0.46794  | 0.006982 |
| -0.05573 | 0.22936  | -0.00886 | 0.84862  | -0.02675 | 0.56412  | 0.005436 | 0.90674  | -0.00981 |
| 0.043055 | 0.35321  | 0.02371  | 0.60929  | 0.0248   | 0.59294  | 0.012625 | 0.78554  | 0.055934 |
| 0.247872 | 5.73E-08 | 0.322578 | 9.06E-13 | 0.230434 | 4.80E-07 | 0.306216 | 1.35E-11 | 0.270163 |
| 0.000164 | 0.99718  | 0.032277 | 0.48654  | -0.01585 | 0.73264  | 0.081331 | 0.07913  | -0.00329 |
| -0.05284 | 0.25445  | -0.09238 | 0.04601  | -0.03978 | 0.39109  | -0.11191 | 0.01554  | -0.08505 |
| -0.01027 | 0.82482  | -0.1321  | 0.00424  | -0.07598 | 0.101    | -0.12536 | 0.00668  | -0.24542 |
| 0.318182 | 1.90E-12 | 0.151869 | 0.00099  | 0.202478 | 1.04E-05 | 0.079856 | 0.08474  | 0.049927 |
| 0.057573 | 0.21429  | -0.07745 | 0.09458  | -0.03189 | 0.49176  | -0.06341 | 0.17134  | -0.18065 |
| -0.11276 | 0.01477  | -0.05672 | 0.22116  | -0.06201 | 0.18096  | -0.04382 | 0.3447   | -0.06603 |
| 0.044253 | 0.33997  | -0.0022  | 0.96221  | 0.04853  | 0.29531  | -0.04747 | 0.30603  | -0.00645 |
| -0.05502 | 0.23532  | -0.05783 | 0.21221  | -0.07203 | 0.12007  | -0.02049 | 0.65867  | -0.1884  |
| -0.06914 | 0.13574  | -0.02655 | 0.56708  | -0.03044 | 0.51173  | -0.02066 | 0.65614  | 0.014535 |

|          |          |          |          |          |          |          |          |          |
|----------|----------|----------|----------|----------|----------|----------|----------|----------|
| 0.038153 | 0.41074  | 0.02797  | 0.54655  | 0.032033 | 0.48984  | 0.025247 | 0.58629  | 0.005687 |
| 0.162564 | 0.00042  | 0.118266 | 0.01053  | 0.172325 | 0.00018  | 0.037887 | 0.41402  | 0.058319 |
| -0.08526 | 0.06562  | -0.09019 | 0.05145  | -0.10408 | 0.0245   | -0.07128 | 0.12401  | -0.17343 |
| -0.01201 | 0.79581  | -0.07643 | 0.09901  | -0.0394  | 0.39562  | -0.0903  | 0.05117  | -0.0265  |
| 0.011873 | 0.79803  | -0.07999 | 0.08423  | -0.0231  | 0.61856  | -0.11    | 0.01741  | -0.10446 |
| -0.12271 | 0.00794  | -0.17723 | 0.00012  | -0.11222 | 0.01525  | -0.18819 | 4.27E-05 | -0.28944 |
| -0.05278 | 0.25499  | 0.013103 | 0.77762  | -0.04501 | 0.33175  | 0.054438 | 0.24034  | 0.039814 |
| 0.08192  | 0.07697  | -0.06097 | 0.18842  | -0.00299 | 0.94866  | -0.07356 | 0.11239  | -0.17496 |
| 0.038111 | 0.41126  | 0.096947 | 0.03623  | 0.052405 | 0.25838  | 0.113372 | 0.01423  | 0.130337 |
| -0.01143 | 0.80538  | -0.05548 | 0.23141  | -0.0199  | 0.66801  | -0.06244 | 0.17799  | -0.02027 |
| -0.03121 | 0.50108  | -0.05731 | 0.21643  | -0.038   | 0.41263  | -0.04795 | 0.30114  | -0.06967 |
| 0.115882 | 0.01221  | 0.031154 | 0.50183  | 0.036442 | 0.43206  | 0.021024 | 0.65043  | 0.026714 |
| -0.00764 | 0.86916  | 0.022093 | 0.63392  | -0.0026  | 0.9553   | 0.053873 | 0.24527  | 0.002165 |
| -0.0736  | 0.11218  | 0.003197 | 0.94507  | -0.06709 | 0.14771  | 0.068858 | 0.13733  | 0.175431 |
| -0.02656 | 0.56695  | 0.028498 | 0.53901  | 0.037264 | 0.42174  | 0.009792 | 0.83286  | -0.12059 |
| 0.139114 | 0.00259  | 0.210575 | 4.43E-06 | 0.239896 | 1.55E-07 | 0.093057 | 0.04444  | 0.137163 |
| 0.002645 | 0.95455  | -0.00457 | 0.92146  | 0.037541 | 0.4183   | -0.04031 | 0.38474  | 0.044359 |
| 0.068358 | 0.14021  | -0.02587 | 0.57708  | -0.01381 | 0.7659   | -0.01241 | 0.78908  | -0.01985 |
| 0.015683 | 0.73534  | -0.01487 | 0.7486   | 0.008878 | 0.84825  | -0.03278 | 0.47973  | -0.08604 |
| 0.183466 | 6.66E-05 | 0.243564 | 9.83E-08 | 0.228822 | 5.79E-07 | 0.180794 | 8.53E-05 | 0.282769 |
| 0.001077 | 0.98149  | -0.01358 | 0.76974  | -0.02539 | 0.58419  | -0.01857 | 0.68897  | -0.01228 |
| 0.083732 | 0.07064  | -0.10735 | 0.02032  | -0.04399 | 0.34285  | -0.13122 | 0.00451  | -0.12048 |
| 0.060677 | 0.19056  | 0.073729 | 0.11157  | 0.052736 | 0.25538  | 0.069326 | 0.13467  | 0.123939 |
| 0.076218 | 0.09996  | 0.000431 | 0.99258  | 0.021741 | 0.63933  | -0.01063 | 0.81878  | 0.069364 |
| 0.121571 | 0.00854  | 0.032243 | 0.487    | 0.041922 | 0.36605  | 0.033292 | 0.47293  | 0.028958 |
| 0.051848 | 0.26348  | -0.05245 | 0.25798  | 0.006219 | 0.89338  | -0.07917 | 0.08745  | -0.05213 |
| 0.280536 | 6.81E-10 | 0.149693 | 0.00118  | 0.219497 | 1.67E-06 | 0.067787 | 0.14356  | 0.098536 |
| 0.03272  | 0.48058  | -0.04559 | 0.32552  | -0.03473 | 0.45395  | -0.02843 | 0.53995  | -0.06366 |
| 0.086859 | 0.06072  | 0.07893  | 0.08842  | 0.058289 | 0.20863  | 0.066921 | 0.14876  | 0.118328 |
| 0.046367 | 0.31738  | -0.0232  | 0.61697  | 0.001438 | 0.97527  | -0.02489 | 0.59159  | -0.04603 |
| 0.107049 | 0.02068  | 0.196767 | 1.85E-05 | 0.113709 | 0.01395  | 0.204954 | 8.02E-06 | 0.329605 |
| 0.163744 | 0.00038  | 0.090123 | 0.05162  | 0.136239 | 0.00318  | 0.040364 | 0.38414  | 0.018761 |
| 0.158771 | 0.00057  | 0.108193 | 0.01935  | 0.151848 | 0.001    | 0.057741 | 0.21295  | 0.017986 |
| -0.00178 | 0.96932  | -0.0071  | 0.87838  | -0.01349 | 0.77122  | 0.010034 | 0.82879  | 0.013808 |
| -0.01515 | 0.74403  | -0.12582 | 0.00648  | -0.06053 | 0.19165  | -0.15681 | 0.00067  | -0.20984 |
| 0.067862 | 0.14312  | 0.007364 | 0.87389  | 0.010009 | 0.8292   | 0.012038 | 0.79528  | 0.05138  |
| 0.183704 | 6.52E-05 | 0.092114 | 0.04665  | 0.092883 | 0.04484  | 0.087699 | 0.05826  | 0.040793 |
| 0.021401 | 0.64458  | 0.018832 | 0.6848   | -0.00088 | 0.98485  | 0.029612 | 0.52325  | 0.014691 |
| -0.02948 | 0.52509  | 0.127486 | 0.0058   | 0.010427 | 0.82219  | 0.203618 | 9.21E-06 | 0.070786 |
| -0.13966 | 0.00249  | -0.11301 | 0.01454  | -0.12835 | 0.00547  | -0.07733 | 0.09509  | -0.07228 |
| 0.053243 | 0.25084  | 0.108924 | 0.01854  | 0.046286 | 0.31822  | 0.14033  | 0.00237  | 0.212257 |
| 0.008771 | 0.85006  | -0.08323 | 0.07234  | -0.05538 | 0.2323   | -0.08068 | 0.08157  | -0.02707 |
| 0.012125 | 0.79385  | 0.123322 | 0.00763  | 0.084725 | 0.06735  | 0.12486  | 0.0069   | 0.053696 |
| 0.028637 | 0.53703  | -0.01721 | 0.71064  | -0.00806 | 0.86217  | -0.01378 | 0.76654  | 0.079614 |
| -0.00037 | 0.9937   | -0.04908 | 0.28991  | -0.00613 | 0.89485  | -0.09649 | 0.03711  | -0.1588  |

|          |          |          |          |          |          |          |          |          |
|----------|----------|----------|----------|----------|----------|----------|----------|----------|
| 0.08748  | 0.05889  | 0.188659 | 4.08E-05 | 0.099505 | 0.03156  | 0.208338 | 5.62E-06 | 0.331404 |
| 0.080031 | 0.08406  | 0.03171  | 0.49423  | 0.020255 | 0.66241  | 0.041313 | 0.37305  | -0.01066 |
| -0.02591 | 0.57647  | 0.003254 | 0.94409  | -0.01571 | 0.73488  | 0.01229  | 0.7911   | 0.029615 |
| 0.034486 | 0.4572   | 0.043051 | 0.35327  | 0.016067 | 0.72911  | 0.065473 | 0.15777  | 0.048016 |
| 0.188352 | 4.20E-05 | 0.199166 | 1.45E-05 | 0.155229 | 0.00076  | 0.186436 | 5.04E-05 | 0.128084 |
| 0.016657 | 0.71958  | 0.126571 | 0.00616  | 0.055199 | 0.23382  | 0.128391 | 0.00546  | 0.147233 |
| -0.05654 | 0.22263  | 0.048458 | 0.29602  | 0.064897 | 0.16147  | -0.02167 | 0.6405   | 0.042214 |
| 0.08149  | 0.07854  | 0.051098 | 0.27046  | 0.062489 | 0.17763  | 0.03553  | 0.44368  | 0.032447 |
| 0.229617 | 5.28E-07 | 0.251725 | 3.50E-08 | 0.271378 | 2.51E-09 | 0.166361 | 0.00031  | 0.228673 |
| 0.150845 | 0.00108  | 0.046475 | 0.31626  | 0.026629 | 0.56595  | 0.066563 | 0.15095  | 0.101451 |
| 0.071305 | 0.12387  | -0.00123 | 0.97888  | 0.041964 | 0.36556  | -0.0441  | 0.34168  | -0.05127 |
| 0.166424 | 0.0003   | 0.010857 | 0.81499  | 0.09537  | 0.03938  | -0.04848 | 0.29585  | -0.01978 |
| 0.073399 | 0.11318  | 0.015479 | 0.73867  | 0.048645 | 0.29416  | -0.01322 | 0.77569  | -0.05663 |
| 0.127587 | 0.00576  | 0.072786 | 0.11623  | 0.075588 | 0.1028   | 0.057728 | 0.21305  | 0.060013 |
| 0.244257 | 9.02E-08 | 0.173281 | 0.00017  | 0.156552 | 0.00069  | 0.145385 | 0.00163  | 0.102845 |
| 0.126443 | 0.00622  | 0.094453 | 0.04133  | 0.102784 | 0.02634  | 0.056633 | 0.22188  | 0.037555 |
| 0.080078 | 0.08387  | 0.067215 | 0.14698  | 0.033789 | 0.46635  | 0.082834 | 0.07372  | 0.027435 |
| 0.059915 | 0.19619  | 0.069714 | 0.1325   | 0.036384 | 0.4328   | 0.08414  | 0.06927  | 0.025882 |
| -0.07387 | 0.11087  | -0.1841  | 6.28E-05 | -0.1163  | 0.0119   | -0.19059 | 3.39E-05 | -0.28232 |
| -0.06928 | 0.13493  | -0.05986 | 0.19658  | -0.05853 | 0.20678  | -0.03792 | 0.41365  | -0.04459 |
| 0.055119 | 0.2345   | 0.080009 | 0.08414  | 0.07552  | 0.10311  | 0.04866  | 0.29402  | 0.068894 |
| 0.045206 | 0.32967  | 0.016012 | 0.73     | 0.02763  | 0.55144  | -0.00509 | 0.91263  | -0.09588 |
| 0.055221 | 0.23364  | 0.136291 | 0.00317  | 0.138801 | 0.00265  | 0.088674 | 0.05551  | 0.279906 |
| -0.06045 | 0.19225  | -0.15714 | 0.00065  | -0.11158 | 0.01585  | -0.15351 | 0.00087  | -0.27574 |
| 0.135684 | 0.0033   | 0.044405 | 0.33831  | 0.057012 | 0.2188   | 0.030029 | 0.51741  | 0.004217 |
| -0.00594 | 0.89805  | -0.18367 | 6.54E-05 | -0.12908 | 0.00521  | -0.15918 | 0.00055  | -0.25178 |
| 0.129626 | 0.00502  | 0.136807 | 0.00305  | 0.132224 | 0.00421  | 0.118166 | 0.0106   | 0.07557  |
| 0.338776 | 5.27E-14 | 0.155697 | 0.00073  | 0.131647 | 0.00438  | 0.178253 | 0.00011  | 0.175019 |
| 0.198085 | 1.62E-05 | 0.178306 | 0.00011  | 0.206883 | 6.55E-06 | 0.110725 | 0.01668  | 0.084343 |
| 0.231224 | 4.37E-07 | 0.217831 | 2.01E-06 | 0.220858 | 1.44E-06 | 0.151379 | 0.00103  | 0.133184 |
| 0.081675 | 0.07786  | 0.234539 | 2.95E-07 | 0.106687 | 0.02111  | 0.279331 | 8.10E-10 | 0.304551 |
| 0.055326 | 0.23275  | 0.001721 | 0.97042  | 0.068282 | 0.14066  | -0.06683 | 0.14934  | -0.00627 |
| 0.145482 | 0.00162  | 0.045612 | 0.32534  | 0.093599 | 0.04321  | 0.011772 | 0.7997   | 0.061448 |
| 0.137182 | 0.00297  | 0.148797 | 0.00126  | 0.218229 | 1.93E-06 | 0.013623 | 0.76905  | 0.230177 |
| 0.050326 | 0.27778  | 0.102623 | 0.02658  | 0.092505 | 0.04572  | 0.065467 | 0.15781  | 0.164037 |
| 0.12028  | 0.00927  | 0.166975 | 0.00029  | 0.179519 | 9.59E-05 | 0.098896 | 0.03262  | 0.106856 |
| 0.170194 | 0.00022  | 0.12758  | 0.00576  | 0.126263 | 0.00629  | 0.114586 | 0.01322  | 0.050476 |
| 0.014884 | 0.74836  | 0.001887 | 0.96756  | 0.030973 | 0.50433  | -0.0318  | 0.493    | -0.11603 |
| 0.128835 | 0.0053   | 0.047912 | 0.30151  | 0.100817 | 0.02938  | 0.008356 | 0.85709  | 0.011158 |
| 0.027119 | 0.55883  | -0.11899 | 0.01006  | -0.03296 | 0.47734  | -0.14849 | 0.00129  | -0.18927 |
| 0.023179 | 0.61734  | 0.096703 | 0.0367   | 0.056301 | 0.2246   | 0.100797 | 0.02941  | 0.081426 |
| 0.068235 | 0.14093  | 0.152774 | 0.00093  | 0.122956 | 0.00781  | 0.122358 | 0.00812  | 0.238347 |
| 0.017581 | 0.70474  | -0.05234 | 0.25897  | -0.0021  | 0.96394  | -0.0707  | 0.12707  | -0.13259 |
| 0.034883 | 0.45203  | 0.065291 | 0.15893  | 0.046434 | 0.31668  | 0.073011 | 0.11511  | 0.060828 |
| 0.278421 | 9.24E-10 | 0.280125 | 7.22E-10 | 0.296722 | 6.03E-11 | 0.179485 | 9.62E-05 | 0.12519  |

|          |          |          |          |           |          |          |          |          |
|----------|----------|----------|----------|-----------|----------|----------|----------|----------|
| 0.145518 | 0.00162  | 0.129791 | 0.00497  | 0.144124  | 0.00179  | 0.100984 | 0.02911  | 0.126299 |
| 0.013095 | 0.77776  | -0.11666 | 0.01164  | -0.05239  | 0.25856  | -0.11646 | 0.01179  | -0.15895 |
| 0.045313 | 0.32852  | -0.05537 | 0.23237  | -0.02437  | 0.59935  | -0.06628 | 0.15272  | -0.13011 |
| 0.04516  | 0.33016  | 0.099976 | 0.03076  | 0.034184  | 0.46115  | 0.129468 | 0.00508  | 0.175709 |
| 0.105737 | 0.0223   | 0.048559 | 0.29502  | 0.080582  | 0.08194  | -0.00286 | 0.95086  | 0.001359 |
| 0.202956 | 9.86E-06 | 0.168353 | 0.00026  | 0.199709  | 1.37E-05 | 0.09419  | 0.0419   | 0.212094 |
| 0.284207 | 3.98E-10 | 0.202378 | 1.05E-05 | 0.166969  | 0.00029  | 0.180458 | 8.80E-05 | 0.161596 |
| 0.218525 | 1.87E-06 | 0.208268 | 5.67E-06 | 0.215713  | 2.54E-06 | 0.147224 | 0.00142  | 0.138948 |
| -0.0172  | 0.71089  | -0.09518 | 0.03978  | -0.04425  | 0.34001  | -0.0902  | 0.05141  | -0.24891 |
| -0.02451 | 0.59726  | -0.05271 | 0.25559  | -0.05433  | 0.24129  | -0.03815 | 0.41074  | -0.0729  |
| 0.10868  | 0.01881  | 0.094952 | 0.04026  | 0.120383  | 0.00921  | 0.044773 | 0.33432  | 0.171975 |
| 0.115536 | 0.01247  | 0.082124 | 0.07624  | 0.089365  | 0.05362  | 0.043443 | 0.34889  | 0.048353 |
| 0.039772 | 0.39116  | 0.018579 | 0.68882  | 0.005473  | 0.9061   | 0.011581 | 0.8029   | 0.098246 |
| -0.13494 | 0.00348  | -0.2485  | 5.29E-08 | -0.17519  | 0.00014  | -0.24847 | 5.31E-08 | -0.32868 |
| 0.08277  | 0.07394  | -0.001   | 0.98272  | 0.004358  | 0.92517  | 0.002357 | 0.95949  | 0.042728 |
| 0.080284 | 0.08308  | 0.088005 | 0.05738  | 0.132616  | 0.00409  | 0.00314  | 0.94605  | 0.051062 |
| 0.00531  | 0.90889  | 0.151389 | 0.00103  | 0.033335  | 0.47236  | 0.221202 | 1.38E-06 | 0.094359 |
| 0.231889 | 4.04E-07 | 0.219788 | 1.62E-06 | 0.358744  | 1.25E-15 | -0.00171 | 0.97066  | 0.006509 |
| -0.03141 | 0.49829  | 0.009243 | 0.84209  | -0.00791  | 0.86463  | 0.014831 | 0.74922  | -0.02114 |
| 0.132878 | 0.00402  | 0.251419 | 3.64E-08 | 0.153919  | 0.00085  | 0.285337 | 3.37E-10 | 0.224588 |
| 0.052632 | 0.25632  | 0.086472 | 0.06188  | 0.084577  | 0.06784  | 0.054528 | 0.23956  | 0.1361   |
| -0.01415 | 0.76032  | 0.015248 | 0.74242  | -9.32E-05 | 0.9984   | 0.017569 | 0.70492  | 0.031012 |
| 0.074664 | 0.10709  | 0.026493 | 0.56794  | 0.080566  | 0.082    | -0.00707 | 0.87882  | -0.06024 |
| -0.05128 | 0.26877  | -0.014   | 0.76284  | -0.01516  | 0.74387  | -0.01689 | 0.71584  | 0.070555 |
| -0.03104 | 0.50338  | -0.0552  | 0.23385  | -0.0252   | 0.58704  | -0.06941 | 0.13418  | -0.04858 |
| 0.222866 | 1.15E-06 | 0.190558 | 3.40E-05 | 0.22225   | 1.23E-06 | 0.127198 | 0.00591  | 0.059437 |
| 0.036466 | 0.43176  | 0.032533 | 0.48309  | 0.069304  | 0.13479  | -0.01769 | 0.70294  | -0.01299 |
| 0.031334 | 0.49936  | 0.006672 | 0.88567  | 0.041317  | 0.37301  | -0.01804 | 0.69736  | -0.04723 |
| 0.214186 | 3.00E-06 | 0.208244 | 5.68E-06 | 0.225333  | 8.66E-07 | 0.133812 | 0.00377  | 0.101716 |
| 0.249921 | 4.41E-08 | 0.244523 | 8.72E-08 | 0.274785  | 1.55E-09 | 0.127083 | 0.00596  | 0.157374 |
| 0.078284 | 0.09107  | 0.083176 | 0.07254  | 0.078988  | 0.08819  | 0.060429 | 0.19238  | 0.079614 |
| 0.018428 | 0.69123  | -0.08831 | 0.05651  | -0.03946  | 0.3949   | -0.10065 | 0.02964  | -0.13872 |
| -0.02641 | 0.56916  | -0.00761 | 0.86967  | -0.02121  | 0.64748  | -0.00442 | 0.92403  | -0.13957 |
| 0.03243  | 0.48448  | 0.031571 | 0.49613  | 0.035828  | 0.43987  | 0.016237 | 0.72636  | -0.01751 |
| 0.143387 | 0.00189  | 0.085847 | 0.06379  | 0.065893  | 0.15512  | 0.112225 | 0.01525  | 0.104463 |
| -0.06879 | 0.13771  | -0.15565 | 0.00074  | -0.08401  | 0.0697   | -0.1812  | 8.22E-05 | -0.25417 |
| 0.019226 | 0.67858  | -0.06908 | 0.13609  | 0.02645   | 0.56856  | -0.14021 | 0.00239  | -0.23573 |
| 0.009796 | 0.83278  | -0.04207 | 0.36435  | -0.00582  | 0.90019  | -0.0694  | 0.13425  | -0.09438 |
| -0.00312 | 0.94634  | 0.034978 | 0.4508   | 0.02519   | 0.58714  | 0.028966 | 0.53235  | -0.02357 |
| -0.02538 | 0.58427  | -0.12048 | 0.00916  | -0.04648  | 0.31621  | -0.15581 | 0.00073  | -0.22003 |
| 0.109649 | 0.01777  | 0.149664 | 0.00118  | 0.21324   | 3.33E-06 | 0.025568 | 0.58154  | 0.208757 |
| -0.00252 | 0.95669  | 0.054891 | 0.23644  | 0.025149  | 0.58774  | 0.075049 | 0.10528  | 0.096232 |
| -0.0677  | 0.14407  | -0.04324 | 0.35117  | -0.04313  | 0.3524   | -0.03878 | 0.40313  | -0.05553 |
| 0.002163 | 0.96281  | 0.057211 | 0.21719  | 0.022335  | 0.63022  | 0.056125 | 0.22605  | 0.149397 |
| 0.12805  | 0.00559  | 0.106027 | 0.02193  | 0.172112  | 0.00019  | 0.012432 | 0.78874  | 0.214462 |



|          |          |          |          |          |          |          |          |          |
|----------|----------|----------|----------|----------|----------|----------|----------|----------|
| 0.097157 | 0.03582  | 0.083709 | 0.07072  | 0.048718 | 0.29344  | 0.098624 | 0.03311  | 0.094311 |
| 0.233329 | 3.41E-07 | 0.236938 | 2.21E-07 | 0.192876 | 2.71E-05 | 0.20333  | 9.49E-06 | 0.227011 |
| 0.164984 | 0.00034  | 0.217797 | 2.02E-06 | 0.210639 | 4.40E-06 | 0.160882 | 0.00048  | 0.137057 |
| 0.104067 | 0.02451  | 0.177857 | 0.00011  | 0.141674 | 0.00215  | 0.150317 | 0.00112  | 0.1888   |
| 0.040692 | 0.38029  | 0.077523 | 0.09426  | 0.038229 | 0.40982  | 0.094966 | 0.04023  | 0.106173 |
| 0.179132 | 9.93E-05 | 0.109645 | 0.01778  | 0.120617 | 0.00908  | 0.096839 | 0.03644  | 0.020905 |
| 0.166136 | 0.00031  | 0.095467 | 0.03918  | 0.126747 | 0.00609  | 0.042124 | 0.36374  | 0.209546 |
| 0.101187 | 0.02878  | 0.032107 | 0.48884  | 0.028688 | 0.5363   | 0.034023 | 0.46326  | 0.062933 |
| 0.060056 | 0.19514  | 0.00102  | 0.98246  | 0.066833 | 0.1493   | -0.07564 | 0.10254  | 0.035447 |
| -0.04117 | 0.37469  | -0.04445 | 0.33782  | -0.0123  | 0.79099  | -0.06275 | 0.17579  | -0.0944  |
| 0.161164 | 0.00047  | 0.050805 | 0.27322  | 0.053737 | 0.24646  | 0.05236  | 0.25879  | 0.016473 |
| 0.027022 | 0.56024  | 0.035651 | 0.44213  | 0.080956 | 0.08053  | -0.02496 | 0.59057  | 0.003033 |
| 0.123205 | 0.00769  | 0.127388 | 0.00584  | 0.10255  | 0.02669  | 0.115445 | 0.01254  | 0.19133  |
| -0.01129 | 0.80774  | 0.000383 | 0.99342  | -0.00977 | 0.83327  | 0.016696 | 0.71896  | 0.003871 |
| -0.01165 | 0.80169  | 0.059948 | 0.19595  | 0.014488 | 0.75484  | 0.07722  | 0.09556  | 0.140199 |
| 0.037091 | 0.42391  | 0.038905 | 0.40157  | 0.06725  | 0.14677  | 0.014842 | 0.74904  | 0.029151 |
| -0.03089 | 0.50552  | -0.05416 | 0.24277  | 0.006642 | 0.88616  | -0.09391 | 0.0425   | -0.13506 |
| 0.027131 | 0.55865  | 0.044681 | 0.33532  | 0.026291 | 0.5709   | 0.049686 | 0.28394  | 0.042971 |
| -0.01658 | 0.72079  | -0.03828 | 0.40913  | -0.02514 | 0.58795  | -0.049   | 0.29061  | -0.01227 |
| 0.019319 | 0.67711  | -0.00637 | 0.89073  | 0.010739 | 0.81696  | -0.0134  | 0.77265  | 0.001885 |
| 0.052035 | 0.26176  | 0.086833 | 0.06079  | 0.066062 | 0.15406  | 0.08033  | 0.0829   | 0.099076 |
| -0.03837 | 0.4081   | -0.04376 | 0.34536  | -0.03261 | 0.48208  | -0.03409 | 0.46237  | 0.010757 |
| -0.02484 | 0.59238  | -0.00797 | 0.86359  | -0.01526 | 0.74221  | -0.01168 | 0.80124  | 0.043309 |
| -0.03285 | 0.47884  | -0.01967 | 0.67155  | -0.01834 | 0.69263  | -0.00895 | 0.84712  | -0.02916 |
| -0.02862 | 0.53724  | -0.03643 | 0.43227  | -0.03272 | 0.48056  | -0.03117 | 0.5016   | -0.04381 |
| -0.04489 | 0.3331   | -0.03587 | 0.43933  | -0.03615 | 0.43583  | -0.02527 | 0.58592  | -0.04113 |
| -0.01402 | 0.76251  | -0.03323 | 0.47371  | -0.03047 | 0.5113   | -0.02519 | 0.58718  | -0.02845 |
| 0.049668 | 0.28411  | 0.031166 | 0.50167  | 0.029128 | 0.53007  | 0.010636 | 0.81869  | 0.011515 |
| 0.227117 | 7.05E-07 | 0.087535 | 0.05873  | 0.140048 | 0.00242  | 0.027783 | 0.54924  | 0.102008 |
| 0.021859 | 0.63752  | -0.04122 | 0.37414  | -0.02277 | 0.62364  | -0.03454 | 0.45649  | -0.03701 |
| -0.02931 | 0.52753  | -0.01089 | 0.8145   | -0.01757 | 0.70485  | -0.01091 | 0.81403  | 0.031958 |
| -0.00747 | 0.87209  | -0.01072 | 0.81728  | -0.0046  | 0.92102  | -0.00707 | 0.87888  | -0.02142 |
| 0.044985 | 0.33203  | -0.03356 | 0.46935  | -0.00941 | 0.83923  | -0.03911 | 0.39905  | -0.00664 |
| 0.285866 | 3.12E-10 | 0.248942 | 5.00E-08 | 0.205752 | 7.38E-06 | 0.228975 | 5.69E-07 | 0.208766 |
| -0.06636 | 0.15223  | -0.0241  | 0.60339  | -0.05366 | 0.24718  | 0.001044 | 0.98206  | -0.02922 |
| 0.041448 | 0.37149  | 0.005617 | 0.90364  | 0.014714 | 0.75113  | 0.006928 | 0.8813   | 0.081026 |
| -0.01683 | 0.71677  | -0.01558 | 0.73694  | -0.00993 | 0.83048  | -0.0098  | 0.83268  | -0.00102 |
| -0.03428 | 0.45991  | -0.03502 | 0.45024  | -0.02464 | 0.59531  | -0.02681 | 0.56325  | -0.0393  |
| -0.08758 | 0.0586   | -0.05061 | 0.27505  | -0.05253 | 0.25723  | -0.02646 | 0.56841  | -0.05802 |
| -0.00688 | 0.88219  | -0.00339 | 0.94179  | -0.00797 | 0.86362  | -0.00758 | 0.8703   | -0.01385 |
| 0.150207 | 0.00113  | 0.078152 | 0.09162  | 0.168831 | 0.00025  | -0.01133 | 0.80708  | 0.062033 |
| -0.07943 | 0.08643  | -0.05489 | 0.23645  | -0.06209 | 0.18043  | -0.04855 | 0.29507  | -0.04558 |
| 0.072548 | 0.11743  | 0.031296 | 0.49989  | 0.071219 | 0.12432  | -0.00595 | 0.89798  | -0.02257 |
| 0.049737 | 0.28345  | 0.140366 | 0.00236  | 0.069455 | 0.13395  | 0.149817 | 0.00117  | 0.266403 |
| -0.00411 | 0.92948  | -0.0141  | 0.76119  | -0.00256 | 0.95601  | -0.00352 | 0.93959  | -0.02192 |

|          |          |          |          |          |          |          |          |          |
|----------|----------|----------|----------|----------|----------|----------|----------|----------|
| -0.06373 | 0.16917  | -0.07293 | 0.1155   | -0.07924 | 0.08718  | -0.05536 | 0.23244  | -0.09004 |
| 0.113271 | 0.01432  | 0.073761 | 0.11141  | 0.156295 | 0.0007   | -0.0117  | 0.80091  | 0.035963 |
| -0.03899 | 0.40053  | -0.00877 | 0.85009  | -0.02173 | 0.63952  | -0.00919 | 0.84296  | 0.072353 |
| 0.006707 | 0.88507  | -0.03571 | 0.44139  | 0.019578 | 0.67304  | -0.08166 | 0.0779   | -0.11975 |
| -0.10002 | 0.0307   | -0.08942 | 0.05348  | -0.08999 | 0.05197  | -0.0665  | 0.15133  | -0.08049 |
| 0.016904 | 0.71559  | -0.02797 | 0.54648  | -0.01593 | 0.73139  | -0.02546 | 0.5832   | -0.03917 |
| -0.02303 | 0.61957  | -0.03471 | 0.45426  | -0.02218 | 0.63258  | -0.0299  | 0.51928  | -0.00071 |
| -0.06307 | 0.17362  | -0.04766 | 0.30407  | -0.051   | 0.27134  | -0.03923 | 0.39767  | -0.05913 |
| -0.03965 | 0.39262  | 0.004143 | 0.92885  | -0.00751 | 0.87149  | 0.004116 | 0.92931  | 0.223947 |
| -0.06553 | 0.15743  | -0.07453 | 0.10774  | -0.06223 | 0.17946  | -0.05492 | 0.23623  | -0.10026 |
| 0.083714 | 0.0707   | 0.087075 | 0.06008  | 0.081709 | 0.07774  | 0.094902 | 0.04037  | 0.030844 |
| -0.12628 | 0.00628  | -0.107   | 0.02073  | -0.09389 | 0.04257  | -0.07738 | 0.09489  | -0.1171  |
| 0.186821 | 4.86E-05 | 0.151485 | 0.00102  | 0.237164 | 2.15E-07 | 0.004829 | 0.91711  | 0.054143 |
| -0.08745 | 0.05898  | -0.04667 | 0.3142   | -0.05913 | 0.20212  | -0.03905 | 0.3998   | -0.02832 |
| 0.017212 | 0.71065  | 0.045551 | 0.32599  | 0.03545  | 0.4447   | 0.064829 | 0.16191  | 0.018038 |
| 0.017553 | 0.70518  | 0.037391 | 0.42016  | 0.077513 | 0.09431  | -0.02563 | 0.5806   | -0.00177 |
| 0.203897 | 8.95E-06 | 0.062956 | 0.1744   | 0.08483  | 0.06702  | 0.042681 | 0.35742  | 0.007283 |
| -0.06743 | 0.14569  | 0.036688 | 0.42896  | -0.01621 | 0.7268   | 0.058606 | 0.20616  | 0.234496 |
| -0.04646 | 0.31646  | -0.03335 | 0.47221  | -0.0368  | 0.42749  | -0.02506 | 0.58908  | -0.02799 |
| -0.09209 | 0.04671  | -0.08591 | 0.06359  | -0.0874  | 0.05913  | -0.05353 | 0.24825  | -0.09247 |
| -0.00778 | 0.86682  | 0.000723 | 0.98757  | -0.00295 | 0.94937  | -0.00095 | 0.98375  | 0.013673 |
| -0.02166 | 0.64058  | -0.01658 | 0.72081  | -0.0115  | 0.80424  | -0.00928 | 0.84155  | -0.01505 |
| -0.02064 | 0.6564   | -0.00722 | 0.87626  | -0.00355 | 0.93908  | -0.00777 | 0.86699  | 2.01E-05 |
| -0.03842 | 0.40752  | -0.02434 | 0.5998   | -0.02683 | 0.56303  | -0.01759 | 0.70451  | -0.04978 |
| -0.0262  | 0.57227  | -0.02281 | 0.62288  | -0.01843 | 0.69122  | -0.01453 | 0.75414  | -0.01852 |
| -0.11946 | 0.00977  | -0.07223 | 0.11906  | -0.07052 | 0.12805  | -0.05683 | 0.2203   | -0.09558 |
| -0.00202 | 0.96534  | -0.01704 | 0.71334  | -0.00759 | 0.86999  | -0.01562 | 0.73637  | -0.01133 |
| -0.05598 | 0.2273   | -0.05305 | 0.25252  | -0.05312 | 0.25195  | -0.04068 | 0.38041  | -0.04409 |
| -0.05391 | 0.24494  | -0.04603 | 0.32089  | -0.04464 | 0.33576  | -0.03941 | 0.39549  | -0.03092 |
| 0.09233  | 0.04613  | 0.002473 | 0.95749  | -0.00046 | 0.99212  | 0.002628 | 0.95483  | 0.005482 |
| 0.04107  | 0.37587  | -0.03546 | 0.44455  | -0.02929 | 0.52779  | -0.02158 | 0.64186  | -0.05531 |
| -0.02339 | 0.61408  | -0.0182  | 0.69487  | -0.02007 | 0.66533  | -0.01297 | 0.77978  | -0.0278  |
| 0.044864 | 0.33334  | 0.057897 | 0.21172  | 0.05418  | 0.24258  | 0.058773 | 0.20487  | 0.030024 |
| 0.059282 | 0.20097  | 0.23198  | 4.00E-07 | 0.133835 | 0.00376  | 0.230567 | 4.72E-07 | 0.311873 |
| 0.069326 | 0.13467  | 0.016351 | 0.72451  | 0.07379  | 0.11127  | -0.01622 | 0.72667  | 0.018381 |
| 0.172546 | 0.00018  | 0.08441  | 0.06838  | 0.068107 | 0.14168  | 0.079207 | 0.08731  | 0.312079 |
| -0.04679 | 0.31303  | -0.02987 | 0.51962  | -0.03706 | 0.42428  | -0.02612 | 0.57344  | -0.03216 |
| -0.0046  | 0.92097  | 0.002199 | 0.96219  | -0.00992 | 0.83072  | -0.0059  | 0.89881  | 0.176374 |
| -0.04614 | 0.31972  | 0.064282 | 0.16549  | -0.01025 | 0.8252   | 0.106456 | 0.0214   | 0.230092 |
| -0.06665 | 0.15039  | -0.05    | 0.28086  | -0.05504 | 0.23515  | -0.03984 | 0.39032  | 0.016153 |
| -0.02775 | 0.54966  | -0.015   | 0.74651  | -0.01659 | 0.72069  | -0.01724 | 0.71012  | 0.082603 |
| -0.02776 | 0.54958  | -0.01823 | 0.69433  | -0.02193 | 0.63643  | -0.01647 | 0.72253  | -0.01224 |
| -0.03868 | 0.40435  | -0.0254  | 0.58396  | -0.02827 | 0.54221  | -0.02954 | 0.52429  | -0.01039 |
| -0.04666 | 0.31438  | -0.03332 | 0.47261  | -0.03206 | 0.48942  | -0.03069 | 0.50817  | 0.144475 |
| 0.094241 | 0.04179  | 0.02299  | 0.62021  | 0.068532 | 0.1392   | 0.012452 | 0.78841  | 0.014539 |

|          |          |          |          |          |          |           |          |          |
|----------|----------|----------|----------|----------|----------|-----------|----------|----------|
| -0.06604 | 0.15417  | -0.06158 | 0.18405  | -0.06502 | 0.16065  | -0.05498  | 0.23571  | -0.0714  |
| 0.184216 | 6.21E-05 | 0.131121 | 0.00454  | 0.160084 | 0.00052  | 0.053534  | 0.24825  | 0.337911 |
| -0.06694 | 0.14866  | -0.0828  | 0.07383  | -0.07633 | 0.09947  | -0.0594   | 0.20005  | -0.08565 |
| -0.05053 | 0.27583  | -0.02138 | 0.64486  | -0.05517 | 0.23409  | 0.008012  | 0.86291  | 0.016957 |
| -0.02515 | 0.58775  | -0.01784 | 0.70061  | -0.01268 | 0.78469  | -0.01449  | 0.75483  | -0.01205 |
| -0.0464  | 0.31707  | -0.0349  | 0.45185  | -0.04095 | 0.3773   | -0.02562  | 0.58075  | -0.03121 |
| 0.088878 | 0.05494  | 0.014713 | 0.75116  | 0.009505 | 0.83769  | 0.011851  | 0.7984   | 0.119194 |
| 0.029968 | 0.51826  | -0.00456 | 0.92179  | 0.008343 | 0.8573   | 1.94E-05  | 0.99967  | -0.04577 |
| 0.021463 | 0.64363  | 0.003902 | 0.93297  | 0.011072 | 0.81139  | -0.00361  | 0.93806  | 0.00311  |
| -0.04678 | 0.31305  | -0.02853 | 0.53861  | -0.031   | 0.504    | -0.02149  | 0.64314  | -0.01977 |
| -0.07601 | 0.10087  | -0.04988 | 0.28202  | -0.05242 | 0.25824  | -0.03583  | 0.43988  | -0.04286 |
| -0.03453 | 0.45656  | -0.05307 | 0.25242  | -0.03885 | 0.4023   | -0.04826  | 0.29796  | 0.007163 |
| -0.02235 | 0.62996  | -0.01401 | 0.76269  | -0.01739 | 0.7078   | -0.01336  | 0.77332  | -0.01564 |
| 0.015525 | 0.73792  | 0.00963  | 0.83558  | 0.008494 | 0.85474  | 0.030836  | 0.50622  | -0.05468 |
| 0.065085 | 0.16026  | 0.02717  | 0.55809  | 0.02907  | 0.53088  | 0.045119  | 0.3306   | 0.086429 |
| -0.10507 | 0.02316  | -0.05817 | 0.20957  | -0.06291 | 0.17469  | -0.03804  | 0.41209  | -0.01339 |
| 0.107085 | 0.02064  | 0.100235 | 0.03033  | 0.068193 | 0.14117  | 0.123343  | 0.00762  | 0.170515 |
| -0.01554 | 0.73774  | -0.00458 | 0.92133  | -0.00185 | 0.96816  | 0.001929  | 0.96683  | 0.085383 |
| -0.03393 | 0.46444  | -0.0229  | 0.62153  | -0.0208  | 0.65393  | -0.0155   | 0.73836  | -0.00192 |
| -0.02364 | 0.61042  | -0.01471 | 0.75114  | -0.01607 | 0.72909  | -0.01713  | 0.71193  | -0.01946 |
| -0.04662 | 0.31476  | -0.03417 | 0.46127  | -0.04899 | 0.29071  | -0.01066  | 0.81831  | 0.103305 |
| -0.05003 | 0.2806   | -0.03291 | 0.478    | -0.03391 | 0.4648   | -0.02367  | 0.6099   | -0.04414 |
| -0.09274 | 0.04517  | -0.05707 | 0.21832  | -0.0593  | 0.20084  | -0.04251  | 0.35933  | -0.04638 |
| 0.161172 | 0.00047  | 0.024146 | 0.60273  | 0.074567 | 0.10754  | -0.00193  | 0.9669   | 0.067554 |
| 0.066734 | 0.1499   | 0.058486 | 0.2071   | 0.084565 | 0.06788  | 0.025797  | 0.57816  | -0.00552 |
| -0.00739 | 0.87352  | -0.01955 | 0.67351  | -0.01901 | 0.68196  | -0.01624  | 0.72639  | -0.02491 |
| -0.08431 | 0.06871  | -0.05536 | 0.2325   | -0.05504 | 0.23518  | -0.03902  | 0.40018  | -0.03942 |
| -0.01353 | 0.77059  | -0.03192 | 0.49139  | -0.02722 | 0.55729  | -0.01682  | 0.71702  | -0.02411 |
| 0.064477 | 0.1642   | 0.176497 | 0.00013  | 0.067192 | 0.14712  | 0.22734   | 6.88E-07 | 0.281986 |
| -0.08201 | 0.07664  | -0.06307 | 0.17362  | -0.05958 | 0.19868  | -0.04461  | 0.33613  | -0.06293 |
| 0.150787 | 0.00108  | 0.067766 | 0.14369  | 0.145454 | 0.00162  | -3.35E-05 | 0.99942  | 0.050843 |
| 0.117409 | 0.01111  | 0.044999 | 0.33188  | 0.062258 | 0.17924  | 0.026177  | 0.57257  | 0.125219 |
| -0.01868 | 0.68724  | -0.00966 | 0.83503  | -0.00971 | 0.83424  | -0.00079  | 0.98649  | -0.01315 |
| -0.03678 | 0.42775  | -0.02658 | 0.5667   | -0.01682 | 0.71688  | -0.01499  | 0.7466   | -0.02229 |
| 0.020681 | 0.65577  | -0.04735 | 0.30727  | 0.022744 | 0.62395  | -0.08049  | 0.08228  | -0.13558 |
| 0.028464 | 0.53949  | 0.033217 | 0.47393  | 0.011308 | 0.80745  | 0.029528  | 0.52442  | 0.110772 |
| 0.232117 | 3.93E-07 | 0.274605 | 1.59E-09 | 0.270962 | 2.66E-09 | 0.206768  | 6.63E-06 | 0.226974 |
| -0.06539 | 0.15829  | -0.03446 | 0.45755  | -0.0445  | 0.3373   | -0.0238   | 0.60794  | -0.02789 |
| -0.07541 | 0.1036   | -0.04044 | 0.38321  | -0.04105 | 0.37614  | -0.02515  | 0.58778  | 0.008754 |
| -0.01198 | 0.79626  | -0.00864 | 0.85231  | -0.00906 | 0.84523  | -0.00628  | 0.89232  | -0.00083 |
| 0.236553 | 2.32E-07 | 0.212775 | 3.50E-06 | 0.332502 | 1.62E-13 | 0.001415  | 0.97567  | 0.038414 |
| -0.01434 | 0.7573   | -0.0524  | 0.25841  | -0.05661 | 0.22203  | -0.04459  | 0.33628  | -0.01753 |
| 0.042019 | 0.36494  | 0.0063   | 0.89199  | 0.0226   | 0.62615  | 0.006964  | 0.88069  | -0.00558 |
| -0.1237  | 0.00744  | -0.07959 | 0.08578  | -0.08146 | 0.07866  | -0.05276  | 0.25515  | -0.10422 |
| 0.198735 | 1.52E-05 | 0.268323 | 3.83E-09 | 0.158843 | 0.00057  | 0.333879  | 1.27E-13 | 0.231374 |

|          |          |          |          |          |          |          |          |          |
|----------|----------|----------|----------|----------|----------|----------|----------|----------|
| -0.03951 | 0.39428  | -0.02915 | 0.52977  | -0.02754 | 0.55277  | -0.02395 | 0.60566  | -0.01033 |
| -0.08121 | 0.07957  | -0.04157 | 0.37012  | -0.05565 | 0.23006  | -0.01901 | 0.68207  | -0.03627 |
| 0.007474 | 0.87202  | 0.046731 | 0.3136   | 0.013615 | 0.76918  | 0.051039 | 0.27101  | 0.183381 |
| 0.027588 | 0.55204  | 0.025337 | 0.58496  | 0.036709 | 0.42869  | 0.029119 | 0.53019  | -0.0039  |
| -0.03853 | 0.40609  | -0.05785 | 0.21205  | -0.032   | 0.49029  | -0.06117 | 0.18695  | -0.00078 |
| -0.06239 | 0.17834  | 0.009916 | 0.83076  | -0.03037 | 0.5126   | 0.044828 | 0.33373  | 0.077703 |
| -0.02554 | 0.58188  | 0.023768 | 0.60843  | -0.01487 | 0.74863  | 0.060239 | 0.19378  | 0.065751 |
| -0.05969 | 0.19792  | -0.04862 | 0.29444  | -0.03713 | 0.42345  | -0.03847 | 0.40685  | -0.03157 |
| 0.045842 | 0.3229   | 0.106583 | 0.02124  | 0.037243 | 0.422    | 0.152836 | 0.00092  | 0.134974 |
| -0.05385 | 0.24543  | -0.03327 | 0.47324  | -0.0375  | 0.41882  | -0.03604 | 0.43722  | 0.184964 |
| 0.001325 | 0.97721  | 0.006296 | 0.89206  | 0.018609 | 0.68835  | 0.006347 | 0.8912   | 0.011571 |
| 0.295755 | 7.00E-11 | 0.314784 | 3.35E-12 | 0.30518  | 1.60E-11 | 0.232144 | 3.92E-07 | 0.191746 |
| 0.06044  | 0.1923   | -0.01261 | 0.7857   | 0.020091 | 0.66499  | -0.0515  | 0.26666  | -0.04169 |
| 0.325723 | 5.28E-13 | 0.20136  | 1.16E-05 | 0.250394 | 4.15E-08 | 0.127153 | 0.00593  | 0.094384 |
| -0.05196 | 0.26242  | -0.04634 | 0.31771  | -0.0376  | 0.41754  | -0.03845 | 0.40711  | -0.03102 |
| 0.081638 | 0.078    | 0.070296 | 0.12929  | 0.102203 | 0.02721  | 0.016532 | 0.72159  | -0.00429 |
| -0.06371 | 0.16931  | -0.0603  | 0.19331  | -0.05659 | 0.22223  | -0.0407  | 0.38015  | -0.06925 |
| -0.04233 | 0.3614   | -0.02694 | 0.56137  | -0.02245 | 0.62842  | -0.024   | 0.60491  | -0.01491 |
| 0.030596 | 0.50953  | 0.082538 | 0.07476  | 0.054778 | 0.23741  | 0.102975 | 0.02606  | 0.003763 |
| 0.030974 | 0.50431  | 0.013438 | 0.7721   | 0.032307 | 0.48614  | 0.007844 | 0.86575  | 0.005103 |
| -0.06102 | 0.18806  | -0.1006  | 0.02973  | -0.09886 | 0.0327   | -0.0786  | 0.08979  | -0.14285 |
| 0.036816 | 0.42735  | 0.150054 | 0.00114  | 0.082268 | 0.07572  | 0.156909 | 0.00067  | 0.192257 |
| -0.04639 | 0.31718  | -0.10674 | 0.02105  | -0.03372 | 0.46722  | -0.14523 | 0.00165  | -0.20761 |
| 0.085762 | 0.06406  | -0.12087 | 0.00893  | -0.02546 | 0.58312  | -0.14172 | 0.00214  | -0.21889 |
| -0.05833 | 0.20833  | 0.013778 | 0.76649  | 0.018631 | 0.688    | -0.00933 | 0.84064  | 0.01059  |
| 0.153005 | 0.00091  | 0.140981 | 0.00226  | 0.153867 | 0.00085  | 0.091656 | 0.04775  | 0.091728 |
| -0.00901 | 0.84604  | -0.0746  | 0.10739  | -0.05759 | 0.21412  | -0.08703 | 0.06022  | -0.128   |
| 0.007103 | 0.87833  | 0.03466  | 0.45492  | 0.01908  | 0.68089  | 0.042485 | 0.35964  | 0.023731 |
| 0.104058 | 0.02453  | 0.087595 | 0.05856  | 0.102585 | 0.02664  | 0.050202 | 0.27896  | 0.05024  |
| 0.134749 | 0.00353  | 0.089863 | 0.0523   | 0.066407 | 0.15191  | 0.074212 | 0.10923  | 0.325407 |
| 0.033727 | 0.46716  | 0.050177 | 0.2792   | 0.060483 | 0.19198  | 0.012295 | 0.79102  | 0.063293 |
| 0.044965 | 0.33225  | -0.01772 | 0.70253  | 0.04917  | 0.28898  | -0.04484 | 0.33356  | -0.08719 |
| -0.023   | 0.61998  | -0.14154 | 0.00217  | -0.10773 | 0.01988  | -0.11355 | 0.01408  | -0.2096  |
| 0.01657  | 0.72099  | -0.02646 | 0.56847  | 0.000391 | 0.99328  | -0.02922 | 0.52874  | -0.06412 |
| -0.00262 | 0.95496  | -0.01805 | 0.69718  | -0.01098 | 0.81288  | -0.01646 | 0.72276  | -0.05586 |
| 0.150578 | 0.0011   | 0.144895 | 0.00169  | 0.173752 | 0.00016  | 0.053841 | 0.24555  | 0.046702 |
| 0.031492 | 0.49721  | 0.068019 | 0.1422   | 0.066591 | 0.15078  | 0.046887 | 0.31198  | 0.029272 |
| 0.02932  | 0.52735  | 0.035369 | 0.44575  | 0.055273 | 0.2332   | 0.030773 | 0.50708  | 0.004632 |
| 0.06987  | 0.13163  | 0.108836 | 0.01864  | 0.072214 | 0.11913  | 0.098214 | 0.03385  | 0.204414 |
| 0.041139 | 0.37507  | 0.017148 | 0.71168  | 0.017966 | 0.69859  | 0.008315 | 0.85777  | -0.03952 |
| -0.02777 | 0.54942  | -0.11432 | 0.01343  | -0.05792 | 0.21152  | -0.1111  | 0.01631  | -0.20119 |
| -0.11336 | 0.01424  | -0.08776 | 0.05809  | -0.06548 | 0.15772  | -0.09668 | 0.03675  | -0.16475 |
| -0.00207 | 0.96448  | 0.003332 | 0.94274  | 0.008556 | 0.8537   | 0.007096 | 0.87844  | 0.099954 |
| 0.060251 | 0.19369  | 0.081499 | 0.07851  | 0.045752 | 0.32385  | 0.112342 | 0.01514  | 0.04247  |
| 0.298835 | 4.35E-11 | 0.113377 | 0.01423  | 0.171754 | 0.00019  | 0.057604 | 0.21404  | 0.012593 |

|          |          |          |          |          |          |          |          |          |
|----------|----------|----------|----------|----------|----------|----------|----------|----------|
| 0.011766 | 0.79981  | -0.07338 | 0.11326  | -0.03056 | 0.5101   | -0.09178 | 0.04744  | -0.12693 |
| -0.06197 | 0.18127  | -0.16123 | 0.00047  | -0.07511 | 0.105    | -0.20255 | 1.03E-05 | -0.16939 |
| -0.05851 | 0.20691  | -0.01342 | 0.77243  | -0.03747 | 0.41922  | 0.014854 | 0.74885  | -0.02083 |
| 0.182671 | 7.17E-05 | 0.147105 | 0.00143  | 0.163738 | 0.00038  | 0.098983 | 0.03247  | 0.07394  |
| -0.04258 | 0.35851  | -0.03545 | 0.44465  | -0.00453 | 0.92218  | -0.04196 | 0.36563  | -0.09199 |
| -0.07272 | 0.11654  | -0.07435 | 0.10858  | -0.07829 | 0.09105  | -0.04156 | 0.37025  | -0.08435 |
| -0.03152 | 0.49688  | -0.06509 | 0.16021  | -0.03428 | 0.45982  | -0.0639  | 0.16805  | -0.12929 |
| -0.02614 | 0.57312  | -0.04349 | 0.34839  | -0.00585 | 0.89973  | -0.06438 | 0.16484  | -0.17376 |
| 0.156625 | 0.00068  | 0.062917 | 0.17467  | 0.087206 | 0.05969  | 0.03249  | 0.48366  | 0.002264 |
| -0.08256 | 0.07468  | -0.10345 | 0.02538  | -0.04892 | 0.29142  | -0.11223 | 0.01525  | -0.2268  |
| 0.080799 | 0.08111  | 0.015003 | 0.74642  | 0.019901 | 0.66796  | 0.00718  | 0.87702  | -0.09949 |
| 0.077954 | 0.09245  | 0.085601 | 0.06456  | 0.115963 | 0.01215  | 0.073987 | 0.11031  | -0.01021 |
| -0.00443 | 0.92396  | -0.0312  | 0.50114  | -0.00516 | 0.91146  | -0.05065 | 0.27466  | -0.08134 |
| 0.000228 | 0.99608  | 0.008222 | 0.85934  | 0.016529 | 0.72164  | -0.01087 | 0.81479  | 0.004934 |
| -0.00907 | 0.84499  | -0.02705 | 0.55983  | -0.00418 | 0.92823  | -0.04083 | 0.37868  | -0.07318 |
| 0.042308 | 0.36164  | 0.043181 | 0.35182  | 0.060234 | 0.19382  | 0.007311 | 0.8748   | 0.047562 |
| -0.18637 | 5.07E-05 | -0.22143 | 1.35E-06 | -0.17906 | 1.00E-04 | -0.19472 | 2.26E-05 | -0.24531 |
| -0.10693 | 0.02082  | -0.14204 | 0.00209  | -0.07987 | 0.0847   | -0.14927 | 0.00122  | -0.17481 |
| 0.034647 | 0.4551   | 0.111251 | 0.01616  | 0.041629 | 0.36941  | 0.137365 | 0.00293  | 0.067351 |
| 0.019547 | 0.67352  | 0.02351  | 0.61232  | 0.026587 | 0.56656  | 0.019169 | 0.67947  | 0.001894 |
| 0.187317 | 4.64E-05 | 0.122149 | 0.00823  | 0.135864 | 0.00326  | 0.082301 | 0.0756   | 0.142968 |
| -0.04627 | 0.31838  | -0.0574  | 0.21571  | -0.0373  | 0.42126  | -0.05034 | 0.27765  | -0.04048 |
| -0.04278 | 0.35635  | 0.028111 | 0.54453  | -0.00027 | 0.99531  | 0.035695 | 0.44156  | 0.113776 |
| -0.01191 | 0.79749  | -0.00322 | 0.94475  | 0.013377 | 0.7731   | -0.00697 | 0.88054  | 0.011243 |
| 0.09604  | 0.03802  | 0.022088 | 0.63399  | 0.04794  | 0.30123  | 0.016398 | 0.72376  | 0.024367 |
| -0.17611 | 0.00013  | -0.17954 | 9.57E-05 | -0.14685 | 0.00146  | -0.16933 | 0.00024  | -0.2126  |
| 0.066718 | 0.15     | -0.07657 | 0.09839  | -0.00032 | 0.99457  | -0.1066  | 0.02122  | -0.11552 |
| 0.260527 | 1.10E-08 | 0.086476 | 0.06187  | 0.193768 | 2.48E-05 | -0.01941 | 0.67564  | 0.00689  |
| 0.019509 | 0.67412  | -0.02874 | 0.53559  | 0.017647 | 0.70367  | -0.04673 | 0.31362  | -0.06215 |
| 0.028188 | 0.54343  | 0.118949 | 0.01009  | 0.071098 | 0.12496  | 0.122883 | 0.00785  | 0.133411 |
| 0.004477 | 0.92313  | -0.01756 | 0.70501  | 0.011088 | 0.81111  | -0.05545 | 0.23172  | -0.03059 |
| 0.225478 | 8.52E-07 | 0.141278 | 0.00221  | 0.186888 | 4.83E-05 | 0.070222 | 0.12969  | 0.040995 |
| 0.02575  | 0.57885  | -0.08343 | 0.07168  | -0.03852 | 0.40623  | -0.10287 | 0.02622  | -0.14872 |
| -0.01262 | 0.78563  | 0.013919 | 0.76417  | 0.000322 | 0.99445  | 0.012683 | 0.78457  | 0.029834 |
| -0.06137 | 0.18552  | -0.18836 | 4.20E-05 | -0.10596 | 0.02201  | -0.21062 | 4.41E-06 | -0.34773 |
| 0.062173 | 0.17983  | 0.029663 | 0.52253  | 0.025138 | 0.5879   | 0.031189 | 0.50136  | -0.01246 |
| -0.03544 | 0.44482  | -0.08187 | 0.07715  | -0.03948 | 0.39466  | -0.09051 | 0.05061  | -0.19038 |
| 0.021596 | 0.64157  | 0.013661 | 0.76843  | -0.00109 | 0.98132  | 0.013301 | 0.77436  | -0.00785 |
| 0.044293 | 0.33954  | 0.15117  | 0.00105  | 0.062488 | 0.17763  | 0.188538 | 4.13E-05 | 0.220572 |
| 0.051244 | 0.2691   | 0.06149  | 0.18467  | 0.082921 | 0.07342  | 0.037405 | 0.41999  | 0.046848 |
| 0.006073 | 0.89586  | 0.045463 | 0.32692  | 0.035113 | 0.44905  | 0.042837 | 0.35567  | 0.060474 |
| 0.01414  | 0.76055  | 0.026059 | 0.5743   | 0.041603 | 0.36971  | 0.004658 | 0.92004  | 0.052665 |
| 0.239654 | 1.59E-07 | 0.164372 | 0.00036  | 0.21072  | 4.37E-06 | 0.054753 | 0.23763  | 0.0234   |
| 0.181964 | 7.66E-05 | 0.109113 | 0.01834  | 0.140361 | 0.00236  | 0.043093 | 0.35279  | 0.012974 |
| -0.01558 | 0.73708  | -0.03086 | 0.50585  | -0.03215 | 0.48822  | -0.02585 | 0.57745  | -0.04399 |

|          |          |          |          |          |          |          |          |          |
|----------|----------|----------|----------|----------|----------|----------|----------|----------|
| 0.028591 | 0.53768  | 0.036233 | 0.4347   | 0.012908 | 0.78085  | 0.043222 | 0.35136  | 0.086492 |
| 0.130719 | 0.00466  | 0.134017 | 0.00371  | 0.143098 | 0.00193  | 0.097062 | 0.03601  | 0.057991 |
| -0.0044  | 0.92437  | 0.058104 | 0.21009  | 0.037648 | 0.41698  | 0.054436 | 0.24036  | 0.214406 |
| 0.08727  | 0.0595   | 0.080754 | 0.08129  | 0.081618 | 0.07807  | 0.049667 | 0.28412  | 0.078578 |
| 0.155365 | 0.00075  | 0.123825 | 0.00738  | 0.147144 | 0.00143  | 0.086621 | 0.06143  | 0.0779   |
| 0.167847 | 0.00027  | 0.141223 | 0.00222  | 0.183948 | 6.37E-05 | 0.054138 | 0.24294  | 0.140769 |
| 0.219669 | 1.64E-06 | 0.257686 | 1.61E-08 | 0.21127  | 4.12E-06 | 0.232419 | 3.80E-07 | 0.355056 |
| 0.05748  | 0.21503  | 0.126546 | 0.00617  | 0.107393 | 0.02027  | 0.078459 | 0.09035  | 0.23403  |
| 0.188919 | 3.98E-05 | 0.021677 | 0.64032  | 0.077365 | 0.09494  | -0.00353 | 0.9393   | -0.01431 |
| -0.09912 | 0.03223  | 0.00561  | 0.90376  | -0.05171 | 0.26479  | 0.042531 | 0.35912  | -0.00795 |
| 0.11075  | 0.01665  | 0.128901 | 0.00527  | 0.114502 | 0.01329  | 0.116959 | 0.01143  | 0.134223 |
| 0.115878 | 0.01221  | 0.281287 | 6.10E-10 | 0.161708 | 0.00045  | 0.305955 | 1.41E-11 | 0.189457 |
| 0.070435 | 0.12853  | 0.10444  | 0.024    | 0.108797 | 0.01868  | 0.074033 | 0.1101   | 0.112573 |
| -0.01429 | 0.75808  | -0.00153 | 0.97364  | -0.00031 | 0.99471  | -0.0193  | 0.67734  | -0.01451 |
| 0.138994 | 0.00261  | 0.165049 | 0.00034  | 0.123948 | 0.00732  | 0.142904 | 0.00196  | 0.306497 |
| 0.108381 | 0.01914  | 0.013093 | 0.7778   | 0.041729 | 0.36825  | 0.001447 | 0.97512  | -0.03326 |
| 0.047406 | 0.30665  | 0.017173 | 0.71128  | 0.009175 | 0.84324  | 0.025567 | 0.58155  | -0.02844 |
| -0.04654 | 0.3156   | -0.06215 | 0.17997  | -0.06432 | 0.16521  | -0.04913 | 0.28938  | -0.08866 |
| -0.16049 | 0.0005   | -0.17491 | 0.00015  | -0.15853 | 0.00059  | -0.14471 | 0.00172  | -0.25996 |
| 0.046643 | 0.31451  | 0.055907 | 0.22787  | 0.036149 | 0.43578  | 0.053216 | 0.25108  | 0.082421 |
| 0.102998 | 0.02603  | 0.064115 | 0.16659  | 0.087875 | 0.05775  | 0.022887 | 0.62178  | 0.06479  |
| 0.014414 | 0.75605  | 0.025817 | 0.57787  | 0.011489 | 0.80442  | 0.026479 | 0.56815  | 0.048479 |
| 0.0606   | 0.19112  | 0.15848  | 0.00059  | 0.093919 | 0.04249  | 0.162481 | 0.00042  | 0.19814  |
| -0.14746 | 0.0014   | -0.05695 | 0.21927  | -0.0946  | 0.041    | -0.01241 | 0.78907  | -0.10811 |
| -0.02427 | 0.60092  | 0.003484 | 0.94014  | 0.035177 | 0.44823  | -0.04529 | 0.32879  | 0.02748  |
| 0.055156 | 0.23419  | 0.050173 | 0.27924  | 0.033374 | 0.47185  | 0.043315 | 0.35031  | 0.033045 |
| 0.050696 | 0.27425  | 0.039573 | 0.39354  | 0.054565 | 0.23924  | 0.010617 | 0.819    | 0.079695 |
| 0.147935 | 0.00135  | 0.076268 | 0.09973  | 0.127856 | 0.00566  | 0.019045 | 0.68144  | 0.127498 |
| 0.233963 | 3.16E-07 | 0.226405 | 7.66E-07 | 0.248193 | 5.50E-08 | 0.157371 | 0.00064  | 0.179711 |
| -0.02039 | 0.66033  | 0.037229 | 0.42217  | 0.020837 | 0.65333  | 0.020725 | 0.65508  | 0.049673 |
| 0.014021 | 0.7625   | -0.0633  | 0.17203  | -0.00777 | 0.86702  | -0.10094 | 0.02918  | -0.11485 |
| 0.082495 | 0.07492  | -0.05417 | 0.2427   | -0.01103 | 0.81207  | -0.07857 | 0.08988  | -0.10467 |
| -0.05199 | 0.26215  | -0.05537 | 0.2324   | -0.06124 | 0.18649  | -0.03546 | 0.44463  | -0.03578 |
| -0.0221  | 0.63376  | -0.04264 | 0.35783  | -0.03333 | 0.47246  | -0.02679 | 0.56359  | 0.061304 |
| 0.087307 | 0.05939  | 0.01441  | 0.75611  | 0.030484 | 0.51109  | 0.006714 | 0.88494  | -0.03272 |
| 0.070082 | 0.13046  | 0.10674  | 0.02105  | 0.087061 | 0.06012  | 0.09309  | 0.04436  | 0.205785 |
| 0.082978 | 0.07322  | 0.01137  | 0.80642  | 0.048076 | 0.29986  | -0.01729 | 0.70938  | 0.010685 |
| 0.079556 | 0.08592  | 0.117276 | 0.0112   | 0.079798 | 0.08497  | 0.1032   | 0.02574  | 0.144314 |
| -0.05817 | 0.2096   | -0.06009 | 0.19485  | -0.03235 | 0.48549  | -0.07418 | 0.1094   | -0.0352  |
| 0.110544 | 0.01686  | 0.259356 | 1.29E-08 | 0.114572 | 0.01323  | 0.34103  | 3.50E-14 | 0.162014 |
| 0.033191 | 0.47428  | 0.099666 | 0.03129  | 0.029036 | 0.53136  | 0.123684 | 0.00745  | 0.049895 |
| 0.089814 | 0.05243  | 0.166872 | 0.00029  | 0.168982 | 0.00024  | 0.092756 | 0.04513  | 0.249546 |
| 0.018568 | 0.68899  | -0.13218 | 0.00422  | -0.05023 | 0.27873  | -0.15727 | 0.00065  | -0.18421 |
| 0.109997 | 0.01741  | 0.130683 | 0.00467  | 0.120283 | 0.00927  | 0.085527 | 0.06479  | 0.198854 |
| 0.039742 | 0.39152  | -0.03104 | 0.50344  | 0.004419 | 0.92413  | -0.05213 | 0.2609   | -0.04574 |

|          |          |          |          |          |          |          |          |          |
|----------|----------|----------|----------|----------|----------|----------|----------|----------|
| 0.007786 | 0.86674  | 0.034986 | 0.45069  | 0.024433 | 0.59843  | 0.031571 | 0.49613  | 0.03673  |
| -0.07536 | 0.10386  | -0.03407 | 0.46259  | -0.04217 | 0.36324  | -0.02645 | 0.56856  | -0.02181 |
| 0.083329 | 0.07201  | 0.065365 | 0.15846  | 0.080174 | 0.0835   | 0.019845 | 0.66884  | 0.16422  |
| -0.05497 | 0.23573  | -0.02438 | 0.59915  | -0.03536 | 0.4459   | -0.00974 | 0.83374  | -0.02032 |
| -0.03024 | 0.5145   | -0.00631 | 0.89191  | -0.00136 | 0.97665  | -0.01812 | 0.69605  | -0.09402 |
| 0.131595 | 0.00439  | 0.153021 | 0.00091  | 0.061998 | 0.18107  | 0.194066 | 2.41E-05 | 0.096716 |
| 0.046428 | 0.31674  | 0.020257 | 0.66237  | 0.040331 | 0.38453  | 0.00566  | 0.90292  | -0.02191 |
| 0.001769 | 0.96959  | -0.03689 | 0.42647  | -0.04315 | 0.35211  | -0.03053 | 0.5105   | -0.06972 |
| 0.10846  | 0.01905  | 0.14454  | 0.00174  | 0.114335 | 0.01342  | 0.123292 | 0.00764  | 0.068235 |
| -0.08474 | 0.06732  | -0.05181 | 0.26383  | -0.04796 | 0.30106  | -0.05315 | 0.25169  | -0.0671  |
| 0.030806 | 0.50663  | 0.185276 | 5.62E-05 | 0.067452 | 0.14556  | 0.252381 | 3.22E-08 | 0.167956 |
| 0.002555 | 0.95609  | -0.01657 | 0.72103  | -0.0202  | 0.66324  | -0.00267 | 0.95416  | -0.00667 |
| 0.035068 | 0.44964  | 0.03118  | 0.50148  | 0.009329 | 0.84065  | 0.047182 | 0.30894  | 0.019812 |
| 0.097491 | 0.03519  | 0.050072 | 0.28021  | 0.033293 | 0.47291  | 0.049992 | 0.28098  | 0.066302 |
| -0.04633 | 0.31777  | 0.012342 | 0.79023  | -0.01178 | 0.79964  | 0.024259 | 0.60103  | 0.090198 |
| 0.035472 | 0.44443  | -0.00703 | 0.8795   | 0.033769 | 0.46662  | -0.02804 | 0.54557  | -0.07377 |
| -0.04989 | 0.28194  | 0.007962 | 0.86375  | -0.00573 | 0.90164  | 0.023424 | 0.61362  | 0.035373 |
| 0.023615 | 0.61073  | 0.008427 | 0.85587  | 0.067683 | 0.14418  | -0.023   | 0.62005  | -0.11479 |
| 0.007303 | 0.87493  | -0.0112  | 0.80927  | -0.00456 | 0.92163  | -0.0016  | 0.97257  | -0.07625 |
| 0.057346 | 0.21611  | 0.072004 | 0.12022  | 0.056464 | 0.22326  | 0.060414 | 0.19249  | 0.187993 |
| 0.263598 | 7.31E-09 | 0.203857 | 8.98E-06 | 0.232964 | 3.56E-07 | 0.116799 | 0.01154  | 0.246843 |
| -0.02849 | 0.53912  | -0.04599 | 0.3213   | -0.00943 | 0.83902  | -0.05438 | 0.24082  | -0.08352 |
| 0.056571 | 0.22238  | -0.13711 | 0.00299  | -0.02866 | 0.53664  | -0.15875 | 0.00057  | -0.30157 |
| 0.049992 | 0.28098  | 0.054904 | 0.23633  | 0.05206  | 0.26153  | 0.034903 | 0.45177  | 0.039257 |
| 0.020779 | 0.65424  | 0.040966 | 0.37708  | 0.030561 | 0.51002  | 0.047238 | 0.30836  | 0.028105 |
| 0.160078 | 0.00052  | 0.067159 | 0.14732  | 0.126755 | 0.00609  | -0.00405 | 0.9305   | 0.12359  |
| -0.008   | 0.86312  | -0.03033 | 0.51325  | -0.00187 | 0.96784  | -0.03307 | 0.47587  | -0.07607 |
| 0.06576  | 0.15595  | 0.037222 | 0.42227  | 0.050806 | 0.27322  | 0.007878 | 0.86518  | 0.004562 |
| 0.096775 | 0.03656  | 0.127788 | 0.00568  | 0.131518 | 0.00441  | 0.07197  | 0.12039  | 0.238835 |
| 0.034084 | 0.46246  | 0.046903 | 0.31181  | 0.064853 | 0.16175  | 0.003261 | 0.94397  | 0.089162 |
| 0.130043 | 0.00488  | 0.054583 | 0.23909  | 0.076441 | 0.09896  | 0.016386 | 0.72396  | 0.035716 |
| 0.187988 | 4.35E-05 | 0.232947 | 3.57E-07 | 0.234763 | 2.87E-07 | 0.155446 | 0.00075  | 0.114043 |
| 0.008911 | 0.84769  | -0.01217 | 0.79317  | -0.02683 | 0.56309  | 0.007434 | 0.87271  | -0.03015 |
| 0.031472 | 0.49748  | 0.025546 | 0.58187  | 0.039205 | 0.39795  | -0.00688 | 0.88206  | 0.086862 |
| 0.038985 | 0.4006   | 0.088886 | 0.05492  | 0.069868 | 0.13164  | 0.066382 | 0.15207  | 0.119627 |
| 0.115885 | 0.01221  | 0.101613 | 0.02811  | 0.085839 | 0.06382  | 0.096695 | 0.03672  | 0.155823 |
| -0.03047 | 0.51127  | 0.059252 | 0.2012   | 0.024661 | 0.59502  | 0.066491 | 0.15139  | 0.164989 |
| 0.102959 | 0.02609  | 0.069774 | 0.13216  | 0.103437 | 0.0254   | 0.016077 | 0.72896  | 0.134919 |
| -0.06602 | 0.1543   | -0.10563 | 0.02244  | -0.05764 | 0.21376  | -0.11711 | 0.01132  | -0.07341 |
| 0.05138  | 0.26783  | -0.10725 | 0.02044  | -0.0247  | 0.59444  | -0.1429  | 0.00196  | -0.20402 |
| 0.145361 | 0.00163  | 0.106379 | 0.02149  | 0.107138 | 0.02057  | 0.070188 | 0.12988  | 0.174173 |
| 0.123922 | 0.00734  | -0.03032 | 0.5133   | 0.068166 | 0.14133  | -0.11369 | 0.01396  | -0.04596 |
| 0.125554 | 0.00659  | -0.06045 | 0.19225  | 0.058194 | 0.20938  | -0.13006 | 0.00488  | -0.12623 |
| 0.156351 | 0.0007   | 0.110249 | 0.01715  | 0.111809 | 0.01563  | 0.074022 | 0.11015  | 0.158317 |
| 0.030397 | 0.51229  | 0.022971 | 0.62051  | 0.05682  | 0.22036  | -0.0283  | 0.54177  | 0.101408 |

|          |          |          |          |          |          |          |          |          |
|----------|----------|----------|----------|----------|----------|----------|----------|----------|
| 0.015188 | 0.7434   | 0.018312 | 0.69306  | 0.015375 | 0.74036  | 0.012822 | 0.78228  | -0.01083 |
| -0.02621 | 0.57208  | 0.050325 | 0.27778  | -0.00173 | 0.97023  | 0.072089 | 0.11978  | 0.061298 |
| 0.083948 | 0.06991  | 0.019225 | 0.67859  | 0.047276 | 0.30798  | -0.00882 | 0.84924  | -0.0314  |
| 0.06449  | 0.16412  | 0.179058 | 0.0001   | 0.128588 | 0.00539  | 0.16383  | 0.00038  | 0.164379 |
| 0.083935 | 0.06996  | 0.067828 | 0.14332  | 0.074435 | 0.10817  | 0.01589  | 0.73199  | 0.077369 |
| 0.348754 | 8.40E-15 | 0.270862 | 2.69E-09 | 0.308889 | 8.80E-12 | 0.16022  | 0.00051  | 0.178358 |
| 0.018405 | 0.69159  | 0.068723 | 0.1381   | 0.043388 | 0.34951  | 0.057721 | 0.21311  | 0.106055 |
| -0.00521 | 0.91063  | 0.04233  | 0.36139  | 0.016581 | 0.7208   | 0.05301  | 0.25291  | 0.07441  |
| 0.137494 | 0.00291  | 0.121373 | 0.00865  | 0.164774 | 0.00035  | 0.053677 | 0.24699  | 0.026967 |
| -0.01479 | 0.74988  | 0.045355 | 0.32807  | 0.032829 | 0.47911  | 0.038804 | 0.4028   | -0.02032 |
| 0.077397 | 0.0948   | 0.082953 | 0.07331  | 0.099984 | 0.03075  | 0.04607  | 0.32049  | 0.088566 |
| 0.034462 | 0.45751  | 0.068227 | 0.14098  | 0.025841 | 0.57751  | 0.096194 | 0.03771  | 0.031189 |
| 0.016636 | 0.71992  | -0.08311 | 0.07276  | -0.03528 | 0.44685  | -0.09923 | 0.03204  | -0.16761 |
| 0.099816 | 0.03103  | 0.204441 | 8.46E-06 | 0.108891 | 0.01858  | 0.242039 | 1.19E-07 | 0.209156 |
| 0.051708 | 0.26478  | 0.170502 | 0.00021  | 0.08527  | 0.06561  | 0.186139 | 5.18E-05 | 0.174936 |
| 0.012905 | 0.78091  | -0.01136 | 0.80653  | 0.02095  | 0.65158  | -0.03101 | 0.5038   | -0.08464 |
| 0.065345 | 0.15859  | -0.01126 | 0.80821  | 0.083897 | 0.07008  | -0.08487 | 0.06688  | -0.09978 |
| 0.033325 | 0.4725   | 0.029779 | 0.52091  | 0.029902 | 0.51919  | 0.014152 | 0.76036  | 0.069387 |
| -0.05689 | 0.21982  | -0.02879 | 0.53481  | -0.07308 | 0.11475  | 0.003922 | 0.93264  | -0.08654 |
| 0.059148 | 0.202    | 0.031009 | 0.50383  | 0.02035  | 0.66092  | 0.01974  | 0.67049  | -0.01227 |
| -0.08634 | 0.06228  | -0.06602 | 0.15434  | -0.06391 | 0.16794  | -0.05359 | 0.24774  | -0.02565 |
| 0.065837 | 0.15547  | 0.110589 | 0.01681  | 0.055159 | 0.23416  | 0.125817 | 0.00648  | 0.079985 |
| 0.028589 | 0.5377   | 0.082251 | 0.07578  | 0.065237 | 0.15928  | 0.062758 | 0.17576  | 0.120069 |
| 0.009119 | 0.84419  | -0.04099 | 0.37685  | 0.036855 | 0.42686  | -0.07381 | 0.11116  | -0.2143  |
| -0.00972 | 0.83408  | -0.11303 | 0.01453  | -0.02535 | 0.58472  | -0.15606 | 0.00071  | -0.16772 |
| 0.090377 | 0.05096  | 0.007648 | 0.86908  | 0.080159 | 0.08356  | -0.03963 | 0.39284  | -0.07628 |
| 0.0403   | 0.3849   | 0.07918  | 0.08741  | 0.026951 | 0.56126  | 0.109279 | 0.01816  | 0.054309 |
| -0.00466 | 0.91998  | -0.00019 | 0.99668  | -0.01584 | 0.73275  | 0.018413 | 0.69146  | -0.0491  |
| 0.110639 | 0.01676  | 0.069761 | 0.13223  | 0.078356 | 0.09077  | 0.03783  | 0.41472  | 0.052327 |
| -0.0013  | 0.97766  | 0.0093   | 0.84113  | 0.015552 | 0.73748  | -0.00425 | 0.92709  | -0.03018 |
| 0.099292 | 0.03193  | 0.096535 | 0.03703  | 0.130159 | 0.00484  | 0.044653 | 0.33562  | 0.103717 |
| 0.172297 | 0.00018  | 0.076794 | 0.09741  | 0.111811 | 0.01563  | 0.034229 | 0.46056  | 0.050385 |
| 0.116762 | 0.01157  | 0.093201 | 0.04411  | 0.053248 | 0.25079  | 0.104719 | 0.02363  | 0.012741 |
| 0.114898 | 0.01297  | 0.2083   | 5.65E-06 | 0.173256 | 0.00017  | 0.173475 | 0.00016  | 0.108504 |
| -0.00331 | 0.94313  | -0.00648 | 0.88887  | -0.01912 | 0.68018  | -0.00374 | 0.93584  | 0.001552 |
| 0.095983 | 0.03813  | 0.155512 | 0.00075  | 0.12661  | 0.00615  | 0.134294 | 0.00364  | 0.123822 |
| 0.1522   | 0.00097  | 0.121141 | 0.00878  | 0.136855 | 0.00304  | 0.089413 | 0.05349  | 0.094753 |
| 0.072844 | 0.11594  | 0.042948 | 0.35442  | 0.054752 | 0.23763  | 0.041    | 0.37669  | -0.00858 |
| 0.000986 | 0.98304  | -0.14882 | 0.00126  | -0.03656 | 0.43053  | -0.19171 | 3.04E-05 | -0.27388 |
| 0.088127 | 0.05704  | 0.034945 | 0.45123  | 0.035651 | 0.44213  | 0.040006 | 0.38837  | -0.0108  |
| 0.085297 | 0.06552  | 0.090117 | 0.05163  | 0.060435 | 0.19234  | 0.101328 | 0.02856  | 0.10577  |
| 0.154064 | 0.00084  | 0.11669  | 0.01162  | 0.148077 | 0.00133  | 0.04636  | 0.31746  | 0.070172 |
| 0.133427 | 0.00387  | 0.125073 | 0.00681  | 0.092294 | 0.04622  | 0.103829 | 0.02484  | 0.111523 |
| 0.157108 | 0.00066  | 0.108485 | 0.01903  | 0.09231  | 0.04618  | 0.083557 | 0.07123  | 0.178947 |
| 0.047754 | 0.3031   | 0.091507 | 0.04812  | 0.080378 | 0.08272  | 0.074541 | 0.10767  | 0.08314  |



|          |          |          |          |          |          |          |          |          |
|----------|----------|----------|----------|----------|----------|----------|----------|----------|
| -0.05932 | 0.20069  | -0.00813 | 0.86094  | -0.04232 | 0.36153  | 0.008851 | 0.84871  | 0.016146 |
| 0.035705 | 0.44144  | -0.06497 | 0.16096  | -0.03242 | 0.4846   | -0.07871 | 0.08932  | -0.09734 |
| 0.063946 | 0.16771  | -0.01849 | 0.69017  | 0.001641 | 0.97179  | -0.03178 | 0.49324  | 0.033023 |
| 0.114339 | 0.01342  | 0.233085 | 3.51E-07 | 0.144613 | 0.00173  | 0.223758 | 1.04E-06 | 0.252288 |
| 0.007464 | 0.87219  | -0.00872 | 0.85097  | -0.00294 | 0.94948  | -0.01508 | 0.74517  | 0.063237 |
| -0.01332 | 0.77411  | 0.041194 | 0.37443  | 0.012185 | 0.79284  | 0.045982 | 0.32143  | 0.038595 |
| 0.231587 | 4.19E-07 | 0.319089 | 1.63E-12 | 0.286211 | 2.96E-10 | 0.258735 | 1.40E-08 | 0.188917 |
| 0.04588  | 0.32249  | 0.137085 | 0.00299  | 0.062098 | 0.18036  | 0.172016 | 0.00019  | 0.136888 |
| 0.000611 | 0.9895   | 0.019735 | 0.67056  | 0.020742 | 0.65481  | 0.020684 | 0.65571  | -0.01125 |
| 0.034043 | 0.463    | 0.020991 | 0.65095  | 0.048409 | 0.29652  | -0.00658 | 0.88716  | 0.025368 |
| 0.23343  | 3.37E-07 | 0.14014  | 0.0024   | 0.16099  | 0.00048  | 0.10179  | 0.02784  | 0.050396 |
| 0.026074 | 0.57409  | 0.031112 | 0.50242  | 0.024012 | 0.60474  | 0.027561 | 0.55243  | 0.092303 |
| 0.030227 | 0.51465  | 0.03145  | 0.49778  | 0.03005  | 0.51712  | 0.032714 | 0.48065  | -0.0057  |
| 0.131896 | 0.0043   | 0.155786 | 0.00073  | 0.135834 | 0.00327  | 0.124716 | 0.00697  | 0.150229 |
| -0.07762 | 0.09386  | -0.00607 | 0.89599  | -0.03533 | 0.4462   | 0.005111 | 0.91228  | 0.11073  |
| 0.038558 | 0.40579  | 0.120013 | 0.00943  | 0.045325 | 0.32839  | 0.131861 | 0.00431  | 0.156244 |
| -0.03811 | 0.41127  | 0.04133  | 0.37286  | -0.00206 | 0.9646   | 0.073059 | 0.11487  | 0.011577 |
| -0.06442 | 0.16455  | -0.08526 | 0.06563  | -0.0632  | 0.17272  | -0.07626 | 0.09976  | -0.18398 |
| 0.197244 | 1.76E-05 | 0.123198 | 0.00769  | 0.146191 | 0.00154  | 0.063252 | 0.17238  | 0.038491 |
| 0.04437  | 0.3387   | 0.011919 | 0.79727  | -0.00023 | 0.99609  | 0.010545 | 0.82021  | 0.131951 |
| 0.144584 | 0.00173  | 0.305544 | 1.51E-11 | 0.209192 | 5.14E-06 | 0.285166 | 3.46E-10 | 0.32706  |
| 0.304708 | 1.72E-11 | 0.269868 | 3.09E-09 | 0.267494 | 4.29E-09 | 0.209916 | 4.76E-06 | 0.199721 |
| 0.056764 | 0.22081  | 0.157692 | 0.00063  | 0.062739 | 0.1759   | 0.179907 | 9.25E-05 | 0.105202 |
| 0.018842 | 0.68464  | -0.05897 | 0.20335  | -0.00288 | 0.95053  | -0.07866 | 0.08953  | -0.19023 |
| 0.065488 | 0.15767  | 0.039913 | 0.38948  | 0.059768 | 0.1973   | 0.009245 | 0.84206  | -0.01173 |
| 0.343542 | 2.21E-14 | 0.30434  | 1.83E-11 | 0.277181 | 1.10E-09 | 0.279321 | 8.11E-10 | 0.161298 |
| 0.162477 | 0.00042  | 0.167734 | 0.00027  | 0.218546 | 1.86E-06 | 0.085711 | 0.06422  | 0.25197  |
| 0.14641  | 0.00151  | 0.146467 | 0.0015   | 0.119885 | 0.00951  | 0.141534 | 0.00217  | 0.123841 |
| 0.237499 | 2.07E-07 | 0.170599 | 0.00021  | 0.189146 | 3.89E-05 | 0.113938 | 0.01375  | 0.143203 |
| -0.07607 | 0.10061  | -0.04923 | 0.28841  | -0.04617 | 0.31942  | -0.04061 | 0.38127  | -0.12252 |
| -0.0561  | 0.2263   | 0.000851 | 0.98536  | -0.0188  | 0.68533  | 0.031206 | 0.50112  | 0.038126 |
| -0.02214 | 0.63319  | -0.10236 | 0.02697  | -0.05546 | 0.23164  | -0.08735 | 0.05926  | -0.14791 |
| -0.0385  | 0.40654  | 0.074276 | 0.10893  | -0.0043  | 0.92624  | 0.102762 | 0.02638  | 0.111386 |
| 0.174767 | 0.00015  | 0.021418 | 0.64433  | 0.073618 | 0.11211  | -0.01851 | 0.68989  | 0.046053 |
| 0.195693 | 2.05E-05 | 0.162141 | 0.00044  | 0.214918 | 2.77E-06 | 0.084123 | 0.06933  | 0.116144 |
| 0.120439 | 0.00918  | 0.090486 | 0.05068  | 0.117097 | 0.01133  | 0.034639 | 0.4552   | 0.173391 |
| 0.029117 | 0.53022  | 0.043528 | 0.34795  | 0.032649 | 0.48153  | 0.020317 | 0.66145  | -0.1139  |
| 0.206891 | 6.55E-06 | 0.13085  | 0.00462  | 0.205393 | 7.66E-06 | 0.030167 | 0.51549  | 0.026187 |
| 0.169284 | 0.00024  | 0.036826 | 0.42722  | 0.125223 | 0.00674  | -0.03233 | 0.48582  | -0.06325 |
| 0.166332 | 0.00031  | 0.11305  | 0.01451  | 0.145552 | 0.00161  | 0.045915 | 0.32213  | 0.01398  |
| 0.090498 | 0.05065  | 0.048173 | 0.29888  | 0.061979 | 0.1812   | 0.029366 | 0.52671  | -0.02818 |
| 0.100703 | 0.02956  | 0.055333 | 0.23269  | 0.032511 | 0.48338  | 0.055437 | 0.23181  | 0.144813 |
| 0.048964 | 0.29101  | -0.0645  | 0.16403  | -0.02518 | 0.5873   | -0.07304 | 0.11494  | -0.03713 |
| 0.224697 | 9.31E-07 | 0.246523 | 6.79E-08 | 0.248502 | 5.29E-08 | 0.169551 | 0.00023  | 0.130428 |
| 0.037167 | 0.42295  | 0.0788   | 0.08895  | 0.063627 | 0.16984  | 0.06324  | 0.17246  | 0.109283 |

|          |          |          |          |          |          |          |          |          |
|----------|----------|----------|----------|----------|----------|----------|----------|----------|
| 0.066622 | 0.15059  | 0.091061 | 0.04922  | 0.055205 | 0.23377  | 0.081197 | 0.07962  | 0.231625 |
| 0.050465 | 0.27645  | 0.095416 | 0.03929  | 0.039134 | 0.39881  | 0.111568 | 0.01586  | 0.077518 |
| -0.00798 | 0.86345  | -0.08739 | 0.05916  | -0.01113 | 0.81045  | -0.11499 | 0.0129   | -0.1988  |
| 0.082837 | 0.07371  | 0.106728 | 0.02106  | 0.073918 | 0.11065  | 0.099286 | 0.03194  | 0.160119 |
| -0.09819 | 0.03389  | -0.07918 | 0.08743  | -0.07773 | 0.0934   | -0.06053 | 0.19164  | -0.13218 |
| 0.028091 | 0.54482  | 0.009631 | 0.83556  | 0.03689  | 0.42643  | -0.01727 | 0.70978  | -0.07244 |
| 0.072536 | 0.11749  | 0.119638 | 0.00966  | 0.070975 | 0.12562  | 0.114802 | 0.01305  | 0.180248 |
| 0.201413 | 1.15E-05 | 0.14204  | 0.00209  | 0.164577 | 0.00036  | 0.081814 | 0.07735  | 0.234381 |
| 0.351657 | 4.86E-15 | 0.384774 | 6.29E-18 | 0.344183 | 1.96E-14 | 0.300244 | 3.49E-11 | 0.229409 |
| 0.072295 | 0.11872  | 0.065572 | 0.15714  | 0.044794 | 0.33409  | 0.048935 | 0.29129  | 0.081111 |
| 0.135043 | 0.00346  | 0.07316  | 0.11436  | 0.045863 | 0.32268  | 0.089815 | 0.05242  | 0.026102 |
| 0.363582 | 4.84E-16 | 0.164841 | 0.00035  | 0.208716 | 5.40E-06 | 0.092208 | 0.04642  | 0.110905 |
| 0.12282  | 0.00788  | 0.273025 | 1.99E-09 | 0.181561 | 7.95E-05 | 0.269989 | 3.04E-09 | 0.213815 |
| 0.188991 | 3.95E-05 | 0.109993 | 0.01742  | 0.137208 | 0.00297  | 0.077546 | 0.09417  | 0.113815 |
| -0.09099 | 0.04939  | -0.14737 | 0.00141  | -0.13532 | 0.00339  | -0.11791 | 0.01077  | -0.23381 |
| -0.09371 | 0.04295  | 0.017602 | 0.70439  | -0.05454 | 0.23944  | 0.063349 | 0.17173  | -0.00132 |
| 0.101733 | 0.02793  | 0.089676 | 0.05279  | 0.097107 | 0.03592  | 0.047476 | 0.30594  | 0.065253 |
| -0.02324 | 0.61638  | -0.03716 | 0.4231   | -0.02827 | 0.54232  | -0.04638 | 0.31728  | -0.09549 |
| -0.03238 | 0.48521  | 0.047711 | 0.30354  | -0.00208 | 0.96425  | 0.066536 | 0.15112  | 0.084194 |
| -0.0036  | 0.93823  | -0.05817 | 0.2096   | -0.02992 | 0.51891  | -0.06517 | 0.15968  | -0.14983 |
| 0.215242 | 2.68E-06 | 0.107593 | 0.02004  | 0.174634 | 0.00015  | 0.021375 | 0.64499  | 0.198348 |
| 0.229479 | 5.36E-07 | 0.14308  | 0.00194  | 0.121412 | 0.00863  | 0.135625 | 0.00332  | 0.328022 |
| -0.00399 | 0.93145  | -0.17765 | 0.00011  | -0.06291 | 0.17471  | -0.19992 | 1.34E-05 | -0.30556 |
| 0.067869 | 0.14308  | 0.135668 | 0.00331  | 0.107612 | 0.02002  | 0.127458 | 0.00581  | 0.14837  |
| 0.038673 | 0.40439  | -0.01143 | 0.80534  | 0.02945  | 0.52552  | -0.03188 | 0.4919   | -0.04207 |
| 0.2203   | 1.53E-06 | 0.098068 | 0.03412  | 0.114355 | 0.01341  | 0.056261 | 0.22493  | 0.02153  |
| 0.100508 | 0.02988  | -0.11872 | 0.01024  | -0.00541 | 0.90718  | -0.15461 | 0.0008   | -0.25256 |
| 0.069964 | 0.13111  | 0.044414 | 0.33821  | 0.053477 | 0.24876  | 0.020912 | 0.65217  | 0.056314 |
| 0.051099 | 0.27045  | 0.051141 | 0.27006  | 0.067965 | 0.14251  | 0.048638 | 0.29423  | 0.047689 |
| 0.02769  | 0.55058  | 0.103526 | 0.02527  | 0.006858 | 0.8825   | 0.149657 | 0.00118  | 0.104025 |
| 0.033433 | 0.47106  | 0.052915 | 0.25377  | 0.049408 | 0.28664  | 0.048367 | 0.29694  | 0.094634 |
| -0.0385  | 0.40655  | -0.15358 | 0.00087  | -0.11008 | 0.01733  | -0.16684 | 0.00029  | -0.19077 |
| 0.047785 | 0.30279  | -0.0689  | 0.1371   | -0.03233 | 0.48576  | -0.07515 | 0.10484  | -0.17681 |
| 0.029442 | 0.52564  | 0.039015 | 0.40024  | 0.036876 | 0.4266   | 0.017136 | 0.71187  | 0.004543 |
| 0.052492 | 0.25759  | 0.064601 | 0.16339  | 0.054567 | 0.23923  | 0.063069 | 0.17363  | 0.182833 |
| 0.220952 | 1.42E-06 | 0.348092 | 9.50E-15 | 0.265624 | 5.55E-09 | 0.322449 | 9.26E-13 | 0.233998 |
| 0.078638 | 0.08961  | 0.004705 | 0.91923  | 0.038892 | 0.40173  | -0.01817 | 0.69534  | -0.00116 |
| 0.140373 | 0.00236  | 0.009329 | 0.84065  | 0.021485 | 0.64329  | 0.016268 | 0.72587  | -0.03659 |
| 0.102394 | 0.02692  | 0.010153 | 0.82679  | 0.050943 | 0.27192  | -0.02121 | 0.64759  | 0.019297 |
| 0.143806 | 0.00184  | 0.03805  | 0.41202  | 0.076725 | 0.09771  | 0.022758 | 0.62375  | 0.072516 |
| 0.1758   | 0.00013  | 0.083358 | 0.07191  | 0.138137 | 0.00278  | 0.013623 | 0.76904  | 0.003068 |
| 0.110554 | 0.01685  | 0.188314 | 4.22E-05 | 0.115353 | 0.01261  | 0.198319 | 1.58E-05 | 0.123887 |
| 0.014444 | 0.75556  | 0.034182 | 0.46117  | 0.026278 | 0.57109  | 0.022845 | 0.62243  | 0.028618 |
| 0.085214 | 0.06578  | 0.090985 | 0.04941  | 0.089058 | 0.05445  | 0.064459 | 0.16432  | 0.088205 |
| 0.155706 | 0.00073  | 0.116032 | 0.0121   | 0.124074 | 0.00726  | 0.100069 | 0.03061  | 0.097659 |

|          |          |          |          |          |          |          |          |          |
|----------|----------|----------|----------|----------|----------|----------|----------|----------|
| 0.073537 | 0.1125   | 0.0919   | 0.04716  | 0.073598 | 0.11221  | 0.069606 | 0.1331   | 0.205832 |
| 0.089735 | 0.05264  | 0.1864   | 5.06E-05 | 0.086694 | 0.06121  | 0.233337 | 3.41E-07 | 0.141057 |
| 0.00529  | 0.90923  | 0.018777 | 0.68568  | -0.00774 | 0.86758  | 0.040684 | 0.38038  | 0.05521  |
| 0.116898 | 0.01147  | 0.100699 | 0.02957  | 0.100018 | 0.03069  | 0.082433 | 0.07513  | 0.056191 |
| 0.145503 | 0.00162  | 0.164693 | 0.00035  | 0.174173 | 0.00016  | 0.098055 | 0.03414  | 0.163063 |
| 0.019666 | 0.67164  | -0.02691 | 0.56186  | -0.00371 | 0.93628  | -0.03117 | 0.50159  | -0.10105 |
| 0.055843 | 0.2284   | -0.01513 | 0.74428  | -0.00483 | 0.91716  | -0.0268  | 0.56352  | -0.04587 |
| 0.136968 | 0.00302  | 0.147549 | 0.00139  | 0.164979 | 0.00034  | 0.11462  | 0.01319  | 0.126833 |
| -0.05092 | 0.27214  | 0.029818 | 0.52037  | -0.01918 | 0.67927  | 0.060114 | 0.19471  | 0.109327 |
| 0.161055 | 0.00048  | 0.190497 | 3.42E-05 | 0.182468 | 7.31E-05 | 0.143774 | 0.00184  | 0.100328 |
| 0.028827 | 0.53432  | 0.054378 | 0.24086  | 0.013836 | 0.76555  | 0.067912 | 0.14283  | 0.190264 |
| 0.062876 | 0.17495  | 0.005617 | 0.90365  | 0.014104 | 0.76114  | 0.001614 | 0.97226  | 0.01206  |
| 0.024985 | 0.59019  | 0.159865 | 0.00052  | 0.091446 | 0.04827  | 0.165209 | 0.00034  | 0.349111 |
| 0.033751 | 0.46685  | 0.024143 | 0.60278  | 0.030819 | 0.50645  | 0.00452  | 0.9224   | 0.019473 |
| 0.2118   | 3.89E-06 | 0.197383 | 1.74E-05 | 0.217353 | 2.12E-06 | 0.135145 | 0.00343  | 0.28406  |
| 0.061501 | 0.18459  | -0.02627 | 0.57124  | 0.029509 | 0.5247   | -0.05872 | 0.20527  | -0.08408 |
| -0.02049 | 0.65877  | 0.048051 | 0.3001   | -0.00283 | 0.95131  | 0.064084 | 0.1668   | 0.183832 |
| 0.034753 | 0.45372  | 0.053743 | 0.2464   | 0.026349 | 0.57004  | 0.071601 | 0.12231  | 0.111104 |
| 0.01671  | 0.71873  | 0.062021 | 0.1809   | 0.003913 | 0.9328   | 0.09137  | 0.04845  | 0.111317 |
| 0.377535 | 2.88E-17 | 0.193648 | 2.51E-05 | 0.281975 | 5.52E-10 | 0.083131 | 0.07269  | 0.168521 |
| 0.126276 | 0.00629  | 0.087819 | 0.05791  | 0.053109 | 0.25203  | 0.089204 | 0.05406  | 0.207133 |
| -0.01918 | 0.67926  | 0.000459 | 0.9921   | -0.00592 | 0.89851  | 0.003726 | 0.936    | 0.016921 |
| 0.045034 | 0.33151  | 0.119479 | 0.00976  | 0.078176 | 0.09152  | 0.116343 | 0.01187  | 0.154819 |
| 0.028421 | 0.5401   | 0.108925 | 0.01854  | 0.066704 | 0.15009  | 0.112197 | 0.01528  | 0.243695 |
| -0.04052 | 0.38225  | 0.06493  | 0.16125  | 0.019866 | 0.6685   | 0.060497 | 0.19188  | 0.154184 |
| 0.06404  | 0.16709  | 0.057968 | 0.21116  | 0.069435 | 0.13406  | 0.014701 | 0.75136  | 0.091369 |
| 0.048183 | 0.29878  | 0.02477  | 0.59339  | 0.029123 | 0.53013  | 0.021    | 0.65081  | 0.024251 |
| 0.063351 | 0.17171  | 0.08858  | 0.05577  | 0.065955 | 0.15472  | 0.073559 | 0.1124   | 0.15221  |
| 0.026758 | 0.56407  | 0.046771 | 0.31318  | 0.037096 | 0.42383  | 0.038934 | 0.40123  | 0.113031 |
| -0.01039 | 0.82273  | -0.01272 | 0.78391  | -0.00615 | 0.8945   | -0.02571 | 0.57949  | -0.0183  |
| 0.045597 | 0.32549  | 0.067259 | 0.14672  | 0.048187 | 0.29874  | 0.064974 | 0.16097  | 0.024255 |
| 0.153476 | 0.00088  | 0.05489  | 0.23645  | 0.118267 | 0.01053  | -0.00085 | 0.98541  | 0.008912 |
| -0.03954 | 0.39391  | 0.062223 | 0.17948  | 0.001384 | 0.97621  | 0.081462 | 0.07864  | 0.311202 |
| 0.026934 | 0.56151  | 0.009517 | 0.83748  | -0.01019 | 0.82616  | 0.022922 | 0.62125  | 0.130871 |
| -0.12764 | 0.00574  | -0.05439 | 0.24073  | -0.06503 | 0.1606   | -0.04011 | 0.38711  | -0.05847 |
| 0.039175 | 0.39831  | -0.00724 | 0.87597  | 0.008812 | 0.84938  | -0.00068 | 0.98833  | -0.02383 |
| 0.202886 | 9.93E-06 | 0.186337 | 5.09E-05 | 0.227939 | 6.41E-07 | 0.071938 | 0.12056  | 0.186635 |
| -0.01447 | 0.75514  | -0.02645 | 0.56863  | -0.00867 | 0.85181  | -0.02016 | 0.66386  | 0.010423 |
| -0.0348  | 0.45314  | -0.03325 | 0.47348  | -0.03079 | 0.50686  | -0.03582 | 0.43991  | -0.03026 |
| 0.138611 | 0.00268  | 0.098964 | 0.0325   | 0.069897 | 0.13148  | 0.105922 | 0.02206  | 0.265435 |
| 0.204536 | 8.37E-06 | 0.023141 | 0.61791  | 0.058358 | 0.2081   | 0.019211 | 0.67882  | 0.02572  |
| 0.049998 | 0.28092  | 0.01517  | 0.74369  | 0.030524 | 0.51053  | 0.007249 | 0.87585  | -0.05965 |
| -0.05721 | 0.21719  | -0.04169 | 0.36865  | -0.03905 | 0.3998   | -0.04069 | 0.38033  | -0.03144 |
| -0.02745 | 0.55403  | 0.031061 | 0.50312  | 0.004552 | 0.92184  | 0.046295 | 0.31813  | 0.078975 |
| -0.01135 | 0.80675  | -0.08238 | 0.07533  | -0.04271 | 0.35706  | -0.09593 | 0.03824  | -0.07108 |

|          |          |          |          |          |          |          |          |          |
|----------|----------|----------|----------|----------|----------|----------|----------|----------|
| -0.11564 | 0.01239  | -0.17192 | 0.00019  | -0.10774 | 0.01987  | -0.17279 | 0.00018  | -0.29868 |
| 0.146754 | 0.00147  | 0.107597 | 0.02003  | 0.139643 | 0.00249  | 0.048921 | 0.29143  | 0.02447  |
| 0.04266  | 0.35766  | 0.050713 | 0.27409  | 0.055726 | 0.22938  | 0.040971 | 0.37702  | 0.016745 |
| -0.02344 | 0.61333  | -0.0046  | 0.92105  | 0.024075 | 0.60379  | -0.03412 | 0.46201  | -0.006   |
| 0.344707 | 1.78E-14 | 0.392994 | 1.07E-18 | 0.362158 | 6.41E-16 | 0.318829 | 1.71E-12 | 0.199976 |
| 0.069925 | 0.13132  | 0.160802 | 0.00049  | 0.07749  | 0.09441  | 0.204424 | 8.47E-06 | 0.277267 |
| 0.071999 | 0.12024  | 0.045578 | 0.32569  | 0.074766 | 0.1066   | 0.019393 | 0.67594  | -0.02707 |
| -0.09993 | 0.03084  | -0.0729  | 0.11565  | -0.07276 | 0.11638  | -0.05449 | 0.23986  | -0.09495 |
| 0.070786 | 0.12663  | 0.099201 | 0.03209  | 0.10833  | 0.0192   | 0.055844 | 0.22839  | 0.088652 |
| -0.07486 | 0.10616  | -0.05315 | 0.25164  | -0.0652  | 0.15952  | -0.02222 | 0.63201  | -0.08195 |
| 0.162692 | 0.00042  | 0.078363 | 0.09074  | 0.089973 | 0.05201  | 0.056902 | 0.21969  | -0.00332 |
| 0.067537 | 0.14505  | -0.02624 | 0.57159  | 0.007109 | 0.87823  | -0.03101 | 0.50383  | -0.09439 |
| -0.12975 | 0.00498  | -0.22089 | 1.43E-06 | -0.17011 | 0.00022  | -0.21306 | 3.39E-06 | -0.2696  |
| -0.07764 | 0.09375  | -0.08096 | 0.08052  | -0.05868 | 0.2056   | -0.10162 | 0.02811  | -0.06874 |
| 0.028788 | 0.53489  | -0.05417 | 0.24263  | -0.01072 | 0.81723  | -0.06774 | 0.14384  | -0.18873 |
| 0.069759 | 0.13225  | 0.095407 | 0.03931  | 0.050579 | 0.27537  | 0.106921 | 0.02083  | 0.200845 |
| 0.319265 | 1.59E-12 | 0.284225 | 3.97E-10 | 0.258613 | 1.42E-08 | 0.227244 | 6.95E-07 | 0.148102 |
| -0.08061 | 0.08184  | -0.07747 | 0.09449  | -0.03981 | 0.39069  | -0.09309 | 0.04436  | -0.21614 |
| 0.313487 | 4.15E-12 | 0.232042 | 3.97E-07 | 0.26987  | 3.09E-09 | 0.126024 | 0.00639  | 0.310719 |
| 0.029604 | 0.52336  | 0.015361 | 0.74059  | 0.019871 | 0.66843  | -0.00806 | 0.8621   | 0.048751 |
| 0.016731 | 0.71839  | 0.012196 | 0.79265  | 0.023414 | 0.61377  | 0.022785 | 0.62333  | 0.042867 |
| 0.170074 | 0.00022  | 0.255232 | 2.22E-08 | 0.178928 | 0.0001   | 0.241582 | 1.26E-07 | 0.236337 |
| 0.026215 | 0.57201  | 0.020033 | 0.66589  | 0.025245 | 0.58632  | 0.000661 | 0.98864  | 0.050734 |
| 0.272738 | 2.07E-09 | 0.257862 | 1.57E-08 | 0.250505 | 4.10E-08 | 0.18324  | 6.80E-05 | 0.326902 |
| -0.04222 | 0.36263  | -0.04042 | 0.38353  | -0.05384 | 0.24557  | -0.02975 | 0.52129  | -0.09972 |
| 0.069211 | 0.13532  | 0.092563 | 0.04558  | 0.081253 | 0.07941  | 0.08931  | 0.05377  | 0.052576 |
| -0.04359 | 0.34729  | -0.01754 | 0.70541  | -0.0369  | 0.42635  | -0.00037 | 0.99365  | 0.084276 |
| 0.13003  | 0.00489  | 0.17647  | 0.00013  | 0.195513 | 2.09E-05 | 0.122737 | 0.00792  | 0.086411 |
| 0.078925 | 0.08844  | 0.066713 | 0.15003  | 0.084674 | 0.06752  | 0.051795 | 0.26397  | 0.090149 |
| 0.04543  | 0.32727  | -0.04822 | 0.29838  | -0.04066 | 0.38064  | -0.04555 | 0.32598  | -0.07088 |
| 0.003294 | 0.94341  | 0.049806 | 0.28278  | 0.011968 | 0.79645  | 0.054974 | 0.23574  | 0.014994 |
| 0.021962 | 0.63593  | 0.124177 | 0.00722  | 0.036226 | 0.4348   | 0.163216 | 0.0004   | 0.066538 |
| -0.00907 | 0.84495  | -0.01085 | 0.8151   | 0.006472 | 0.88906  | 0.007796 | 0.86657  | -0.02092 |
| 0.073585 | 0.11227  | 0.022407 | 0.62911  | 0.042905 | 0.3549   | 0.003988 | 0.9315   | 0.039226 |
| 0.058564 | 0.20649  | 0.156843 | 0.00067  | 0.062504 | 0.17752  | 0.18826  | 4.24E-05 | 0.091513 |
| -0.05903 | 0.20288  | -0.05068 | 0.27437  | -0.04461 | 0.33608  | -0.04348 | 0.34848  | -0.0434  |
| 0.061586 | 0.18398  | 0.014153 | 0.76033  | 0.012426 | 0.78884  | -0.00259 | 0.95554  | 0.059849 |
| 0.093252 | 0.04399  | 0.011991 | 0.79607  | 0.020105 | 0.66475  | 0.011097 | 0.81098  | -0.01614 |
| 0.074275 | 0.10893  | 0.013676 | 0.76818  | 0.015395 | 0.74003  | 0.010538 | 0.82032  | -0.0237  |
| -0.00941 | 0.83922  | -0.00395 | 0.93215  | -0.00289 | 0.95038  | -0.00704 | 0.87937  | -0.00669 |
| -0.00556 | 0.90459  | 0.012247 | 0.79182  | 0.006095 | 0.89549  | 0.008372 | 0.85681  | 0.06012  |
| 0.025122 | 0.58814  | 0.122936 | 0.00782  | 0.047106 | 0.30973  | 0.166684 | 0.0003   | 0.094915 |
| 0.327292 | 4.03E-13 | 0.302351 | 2.50E-11 | 0.323373 | 7.91E-13 | 0.201225 | 1.18E-05 | 0.166344 |
| 0.025245 | 0.58632  | 0.114312 | 0.01344  | 0.045666 | 0.32476  | 0.15345  | 0.00088  | 0.07468  |
| 0.054157 | 0.24278  | 0.183874 | 6.41E-05 | 0.079603 | 0.08573  | 0.227117 | 7.05E-07 | 0.152282 |

|          |          |          |          |          |          |          |          |          |
|----------|----------|----------|----------|----------|----------|----------|----------|----------|
| 0.056446 | 0.22341  | 0.240253 | 1.48E-07 | 0.090491 | 0.05067  | 0.320908 | 1.20E-12 | 0.155839 |
| -0.01965 | 0.67195  | -0.16231 | 0.00043  | -0.05587 | 0.22814  | -0.18789 | 4.39E-05 | -0.28563 |
| 0.19387  | 2.46E-05 | 0.231247 | 4.36E-07 | 0.24696  | 6.43E-08 | 0.136908 | 0.00303  | 0.107316 |
| 0.137228 | 0.00296  | 0.075554 | 0.10296  | 0.065457 | 0.15787  | 0.060317 | 0.1932   | 0.22798  |
| 0.222456 | 1.20E-06 | 0.300791 | 3.20E-11 | 0.158608 | 0.00058  | 0.370809 | 1.14E-16 | 0.207167 |
| -0.01408 | 0.76151  | -0.00421 | 0.92774  | -0.00539 | 0.90759  | -0.00622 | 0.89335  | -0.00641 |
| 0.267869 | 4.08E-09 | 0.128312 | 0.00549  | 0.137643 | 0.00288  | 0.140373 | 0.00236  | 0.149606 |
| 0.194124 | 2.40E-05 | 0.051483 | 0.26686  | 0.085396 | 0.06521  | 0.041619 | 0.36951  | 0.035184 |
| 0.3411   | 3.46E-14 | 0.236229 | 2.41E-07 | 0.251825 | 3.46E-08 | 0.18161  | 7.91E-05 | 0.193751 |
| 0.265703 | 5.49E-09 | 0.284226 | 3.97E-10 | 0.368043 | 1.99E-16 | 0.103153 | 0.0258   | 0.169109 |
| 0.035632 | 0.44237  | -0.08579 | 0.06397  | -0.03059 | 0.5096   | -0.09864 | 0.03308  | -0.19662 |
| -0.03933 | 0.39648  | 0.034696 | 0.45446  | -0.00876 | 0.85031  | 0.04834  | 0.2972   | 0.097314 |
| 0.152256 | 0.00096  | 0.060193 | 0.19413  | 0.095801 | 0.0385   | 0.013684 | 0.76805  | -0.02286 |
| 0.050539 | 0.27574  | 0.093719 | 0.04294  | 0.041512 | 0.37075  | 0.110448 | 0.01695  | 0.248291 |
| 0.056275 | 0.22482  | 0.147594 | 0.00138  | 0.047344 | 0.30729  | 0.19072  | 3.35E-05 | 0.178963 |
| -0.01017 | 0.82649  | -0.09922 | 0.03206  | -0.08216 | 0.0761   | -0.10163 | 0.02808  | -0.06564 |
| 0.175407 | 0.00014  | 0.182641 | 7.19E-05 | 0.276344 | 1.24E-09 | 0.011605 | 0.8025   | 0.06349  |
| 0.038609 | 0.40517  | 0.057309 | 0.2164   | 0.016647 | 0.71974  | 0.089592 | 0.05301  | 0.018916 |
| 0.009811 | 0.83254  | 0.019441 | 0.67519  | 0.033606 | 0.46876  | -0.00685 | 0.88255  | 0.06708  |
| -0.04397 | 0.3431   | -0.14943 | 0.0012   | -0.11699 | 0.0114   | -0.13455 | 0.00358  | -0.18193 |
| -0.03078 | 0.50696  | -0.10866 | 0.01883  | -0.08338 | 0.07183  | -0.0983  | 0.03369  | -0.15773 |
| 0.018183 | 0.69512  | 0.028453 | 0.53965  | 0.020047 | 0.66567  | 0.040191 | 0.38618  | 0.037106 |
| 0.081054 | 0.08016  | 0.048388 | 0.29672  | 0.091071 | 0.0492   | -0.00503 | 0.91374  | -0.0238  |
| 0.069746 | 0.13232  | 0.1835   | 6.64E-05 | 0.072403 | 0.11817  | 0.22823  | 6.20E-07 | 0.194218 |
| -0.01762 | 0.70412  | -0.05016 | 0.27941  | -0.02265 | 0.62544  | -0.04046 | 0.38302  | -0.05342 |
| 0.114587 | 0.01322  | 0.119174 | 0.00995  | 0.117284 | 0.0112   | 0.086196 | 0.06272  | 0.073424 |
| 0.040406 | 0.38365  | 0.048154 | 0.29907  | 0.04618  | 0.31934  | 0.028382 | 0.54066  | 0.112029 |
| 0.028893 | 0.53339  | 0.005256 | 0.90981  | -0.00081 | 0.98613  | -0.01098 | 0.81297  | 0.080471 |
| 0.042956 | 0.35433  | 0.175563 | 0.00014  | 0.073273 | 0.1138   | 0.231546 | 4.21E-07 | 0.136965 |
| -0.0842  | 0.06906  | -0.11871 | 0.01024  | -0.09034 | 0.05104  | -0.09592 | 0.03826  | -0.2446  |
| 0.052314 | 0.25921  | 0.106282 | 0.02161  | 0.088146 | 0.05698  | 0.083356 | 0.07192  | 0.266209 |
| -0.01841 | 0.69144  | -0.02288 | 0.62192  | -0.02703 | 0.56014  | -0.01503 | 0.74599  | -0.00117 |
| 0.109502 | 0.01793  | 0.126348 | 0.00626  | 0.08637  | 0.06219  | 0.123849 | 0.00737  | 0.187273 |
| 0.130605 | 0.0047   | 0.106647 | 0.02116  | 0.115142 | 0.01278  | 0.088533 | 0.0559   | 0.085274 |
| 0.008986 | 0.84644  | -0.00653 | 0.88813  | 0.01091  | 0.8141   | -0.00698 | 0.88049  | 0.056019 |
| 0.038245 | 0.40962  | 0.016798 | 0.7173   | 0.024499 | 0.59744  | -0.00069 | 0.98817  | 0.093572 |
| -0.15418 | 0.00083  | -0.12815 | 0.00555  | -0.12264 | 0.00797  | -0.10431 | 0.02418  | -0.17221 |
| -0.01136 | 0.80659  | -0.12322 | 0.00768  | -0.04492 | 0.33274  | -0.1404  | 0.00236  | -0.12109 |
| 0.039938 | 0.38918  | -0.02914 | 0.52991  | -0.01359 | 0.76953  | -0.03325 | 0.47354  | -0.06037 |
| 0.080661 | 0.08164  | 0.021038 | 0.65022  | 0.073173 | 0.1143   | -0.01486 | 0.74877  | -0.01847 |
| -0.06796 | 0.14255  | -0.04187 | 0.36668  | -0.04008 | 0.38755  | -0.05865 | 0.20585  | -0.03898 |
| 0.061826 | 0.18228  | 0.044218 | 0.34035  | 0.113459 | 0.01416  | -0.02797 | 0.54658  | -0.04405 |
| 0.094488 | 0.04125  | 0.157114 | 0.00066  | 0.106316 | 0.02157  | 0.172878 | 0.00017  | 0.157377 |
| -0.09422 | 0.04182  | -0.06195 | 0.18143  | -0.06486 | 0.16174  | -0.05773 | 0.21303  | -0.07427 |
| 0.077275 | 0.09533  | 0.153453 | 0.00088  | 0.10255  | 0.02669  | 0.176698 | 0.00012  | 0.038474 |

|          |          |          |          |          |          |          |          |          |
|----------|----------|----------|----------|----------|----------|----------|----------|----------|
| 0.096681 | 0.03674  | -0.0175  | 0.70596  | 0.047444 | 0.30626  | -0.07115 | 0.1247   | -0.07148 |
| 0.058301 | 0.20854  | 0.030203 | 0.51499  | 0.03582  | 0.43996  | 0.026146 | 0.57303  | 0.026845 |
| 0.052953 | 0.25343  | -0.1644  | 0.00036  | -0.07927 | 0.08705  | -0.17531 | 0.00014  | -0.23955 |
| 0.212232 | 3.71E-06 | 0.108444 | 0.01907  | 0.140395 | 0.00236  | 0.074022 | 0.11015  | 0.155233 |
| 0.107848 | 0.01974  | 0.058734 | 0.20517  | 0.057599 | 0.21408  | 0.052808 | 0.25473  | 0.013421 |
| -0.00365 | 0.93726  | -0.01047 | 0.82144  | -0.00735 | 0.87412  | -0.00542 | 0.90706  | -0.00272 |
| 0.019635 | 0.67214  | 0.033054 | 0.47611  | 0.046864 | 0.31221  | 0.014055 | 0.76194  | -0.01263 |
| 0.049531 | 0.28545  | 0.017456 | 0.70673  | 0.025271 | 0.58593  | 0.015825 | 0.73304  | 0.016894 |
| 0.173943 | 0.00016  | 0.24094  | 1.36E-07 | 0.124751 | 0.00695  | 0.302169 | 2.58E-11 | 0.217076 |
| 0.223096 | 1.12E-06 | 0.245884 | 7.36E-08 | 0.177549 | 0.00011  | 0.243448 | 9.97E-08 | 0.149599 |
| 0.259742 | 1.23E-08 | 0.129826 | 0.00496  | 0.109571 | 0.01785  | 0.140576 | 0.00233  | 0.074837 |
| -0.12831 | 0.00549  | -0.07035 | 0.129    | -0.07306 | 0.11484  | -0.04786 | 0.302    | -0.02796 |
| 0.02178  | 0.63874  | 0.032715 | 0.48065  | -0.00548 | 0.90606  | 0.069746 | 0.13232  | 0.085315 |
| -0.07404 | 0.11004  | -0.05812 | 0.20997  | -0.03821 | 0.4101   | -0.06979 | 0.13207  | -0.10262 |
| 0.030394 | 0.51234  | 0.027973 | 0.54651  | -0.01254 | 0.78703  | 0.043859 | 0.34429  | 0.042405 |
| -0.03747 | 0.41914  | -0.16153 | 0.00046  | -0.11083 | 0.01657  | -0.15871 | 0.00058  | -0.2633  |
| 0.071308 | 0.12385  | 0.03312  | 0.47523  | 0.016694 | 0.71899  | 0.037338 | 0.42083  | 0.090483 |
| -0.0438  | 0.3449   | -0.00849 | 0.85473  | -0.01656 | 0.72107  | -0.02037 | 0.66055  | 0.057715 |
| 0.028238 | 0.54271  | 0.026632 | 0.56591  | 0.03403  | 0.46317  | 0.017296 | 0.7093   | 0.032793 |
| 0.265659 | 5.52E-09 | 0.181728 | 7.83E-05 | 0.166594 | 0.0003   | 0.148082 | 0.00133  | 0.127379 |
| 0.005557 | 0.90466  | 0.064775 | 0.16226  | 0.035581 | 0.44302  | 0.050866 | 0.27264  | 0.103827 |
| 0.021242 | 0.64704  | 0.089752 | 0.05259  | 0.030449 | 0.51157  | 0.117453 | 0.01108  | 0.089001 |
| 0.096094 | 0.03791  | 0.048519 | 0.29542  | 0.065894 | 0.15511  | 0.032562 | 0.48269  | -0.02175 |
| 0.147089 | 0.00144  | 0.130288 | 0.0048   | 0.176207 | 0.00013  | 0.056067 | 0.22654  | 0.172827 |
| 0.018399 | 0.69168  | -0.11398 | 0.01372  | -0.0469  | 0.31182  | -0.13723 | 0.00296  | -0.16887 |
| 0.263629 | 7.28E-09 | 0.276828 | 1.16E-09 | 0.356148 | 2.06E-15 | 0.107291 | 0.02039  | 0.20161  |
| -0.06209 | 0.18043  | -0.10224 | 0.02715  | -0.04534 | 0.32827  | -0.14007 | 0.00241  | -0.07317 |
| 0.113504 | 0.01412  | 0.188063 | 4.32E-05 | 0.182018 | 7.62E-05 | 0.130839 | 0.00463  | 0.100052 |
| -0.01953 | 0.67378  | 0.021423 | 0.64425  | 0.011249 | 0.80843  | 0.004665 | 0.91991  | 0.011233 |
| 0.045948 | 0.32178  | 0.154026 | 0.00084  | 0.06561  | 0.1569   | 0.197501 | 1.72E-05 | 0.147763 |
| -0.07149 | 0.12291  | -0.08292 | 0.07343  | -0.07892 | 0.08846  | -0.0744  | 0.10833  | -0.12252 |
| 0.050844 | 0.27285  | -0.1366  | 0.0031   | -0.03556 | 0.44323  | -0.19408 | 2.41E-05 | -0.13844 |
| -0.10352 | 0.02528  | -0.26362 | 7.29E-09 | -0.17932 | 9.77E-05 | -0.26201 | 9.05E-09 | -0.34773 |
| -0.04183 | 0.36709  | -0.19786 | 1.66E-05 | -0.10068 | 0.0296   | -0.21491 | 2.78E-06 | -0.28127 |
| 0.02906  | 0.53102  | 0.054793 | 0.23728  | 0.082124 | 0.07624  | 0.00494  | 0.91521  | 0.072116 |
| -0.03999 | 0.38856  | -0.03446 | 0.4575   | -0.02213 | 0.63336  | -0.02618 | 0.5726   | 0.000165 |
| 0.034103 | 0.46221  | -0.04251 | 0.35938  | 0.002249 | 0.96135  | -0.04403 | 0.3424   | -0.08632 |
| -0.06721 | 0.14703  | 0.069444 | 0.13401  | 0.010492 | 0.8211   | 0.080524 | 0.08216  | 0.102832 |
| 0.344996 | 1.69E-14 | 0.270665 | 2.77E-09 | 0.319231 | 1.60E-12 | 0.16141  | 0.00046  | 0.322681 |
| 0.050999 | 0.2714   | 0.061541 | 0.18431  | 0.10586  | 0.02214  | -0.00081 | 0.98611  | 0.030848 |
| 0.029291 | 0.52776  | 0.038958 | 0.40094  | 0.026795 | 0.56353  | 0.05087  | 0.27261  | 0.02861  |
| 0.000335 | 0.99423  | -0.07734 | 0.09504  | -0.0357  | 0.44152  | -0.07306 | 0.11485  | -0.20283 |
| 0.116172 | 0.012    | 0.100007 | 0.03071  | 0.069002 | 0.13651  | 0.102889 | 0.02619  | 0.205561 |
| -0.05896 | 0.20341  | -0.05246 | 0.25791  | -0.02401 | 0.60473  | -0.07265 | 0.11693  | -0.03162 |
| 0.120114 | 0.00937  | 0.181797 | 7.78E-05 | 0.108943 | 0.01852  | 0.206858 | 6.57E-06 | 0.135254 |

|          |          |           |          |          |          |          |          |          |
|----------|----------|-----------|----------|----------|----------|----------|----------|----------|
| 0.210741 | 4.36E-06 | 0.145709  | 0.00159  | 0.180006 | 9.17E-05 | 0.095481 | 0.03915  | 0.124599 |
| 0.22432  | 9.72E-07 | 0.164132  | 0.00037  | 0.118725 | 0.01023  | 0.157198 | 0.00065  | 0.306727 |
| 0.090185 | 0.05146  | -0.02806  | 0.54524  | 0.028563 | 0.53808  | -0.05709 | 0.2182   | -0.03683 |
| 0.007818 | 0.8662   | 0.085825  | 0.06386  | 0.040249 | 0.3855   | 0.107341 | 0.02033  | 0.176903 |
| 0.072869 | 0.11582  | 0.036631  | 0.42967  | 0.07012  | 0.13025  | 0.001829 | 0.96856  | -0.02524 |
| 0.087356 | 0.05925  | 0.030917  | 0.5051   | 0.058142 | 0.20979  | 0.020502 | 0.65855  | 0.170718 |
| -0.01361 | 0.76931  | -0.01159  | 0.80267  | -0.0072  | 0.8766   | -0.0177  | 0.70288  | 0.038058 |
| 0.085639 | 0.06444  | 0.191371  | 3.14E-05 | 0.108498 | 0.01901  | 0.198134 | 1.61E-05 | 0.264832 |
| 0.072352 | 0.11843  | 0.092875  | 0.04486  | 0.080858 | 0.08089  | 0.09237  | 0.04604  | 0.06489  |
| 0.043554 | 0.34766  | -0.02539  | 0.58416  | 0.032958 | 0.47739  | -0.04786 | 0.302    | -0.13337 |
| 0.059466 | 0.19958  | 0.03379   | 0.46633  | 0.077381 | 0.09487  | -0.02846 | 0.53956  | 0.062982 |
| 0.016665 | 0.71946  | 0.036957  | 0.42558  | -0.00121 | 0.97926  | 0.06199  | 0.18112  | 0.04775  |
| 0.053797 | 0.24593  | 0.145328  | 0.00164  | 0.08907  | 0.05442  | 0.142931 | 0.00196  | 0.214902 |
| 0.003459 | 0.94057  | -0.12777  | 0.00569  | -0.02929 | 0.52781  | -0.15408 | 0.00084  | -0.27238 |
| 0.079947 | 0.08438  | -0.00887  | 0.84838  | 0.023039 | 0.61946  | -0.02571 | 0.57937  | -0.11345 |
| 0.058808 | 0.20461  | 0.003599  | 0.93816  | 0.010206 | 0.8259   | -0.01424 | 0.75888  | -0.05978 |
| 0.054229 | 0.24215  | 0.033171  | 0.47455  | 0.02203  | 0.63488  | 0.039451 | 0.395    | -0.00035 |
| 0.039119 | 0.39899  | 0.009099  | 0.84452  | 0.03076  | 0.50727  | -0.01543 | 0.73942  | 0.049275 |
| 0.059    | 0.20313  | 0.140442  | 0.00235  | 0.072892 | 0.1157   | 0.149507 | 0.00119  | 0.126039 |
| 0.176536 | 0.00013  | 0.174406  | 0.00015  | 0.182515 | 7.28E-05 | 0.115016 | 0.01288  | 0.232535 |
| 0.128201 | 0.00553  | 0.1111002 | 0.01641  | 0.112632 | 0.01488  | 0.098478 | 0.03337  | 0.042736 |
| -0.00649 | 0.8888   | 0.029118  | 0.53021  | 0.026837 | 0.56293  | 0.026699 | 0.56493  | 0.057607 |
| 0.021807 | 0.63832  | -0.03633  | 0.43352  | -0.02178 | 0.63881  | -0.04869 | 0.29371  | -0.11861 |
| 0.072774 | 0.11629  | 0.109353  | 0.01808  | 0.097145 | 0.03585  | 0.120679 | 0.00904  | 0.074506 |
| -0.00919 | 0.84293  | -0.03192  | 0.49143  | -0.02815 | 0.54394  | -0.01914 | 0.68     | -0.01169 |
| 0.018417 | 0.6914   | -0.00518  | 0.9111   | 0.003601 | 0.93814  | -0.00926 | 0.84176  | -0.0191  |
| 0.096948 | 0.03623  | 0.056899  | 0.21971  | 0.064883 | 0.16156  | 0.051347 | 0.26813  | 0.033595 |
| 0.000106 | 0.99818  | -0.0383   | 0.40893  | -0.00657 | 0.88743  | -0.05809 | 0.21022  | -0.05209 |
| 0.275493 | 1.40E-09 | 0.148591  | 0.00128  | 0.193982 | 2.43E-05 | 0.087335 | 0.05931  | 0.016897 |
| -0.09025 | 0.05128  | -0.05547  | 0.23154  | -0.03862 | 0.40498  | -0.07118 | 0.12453  | -0.03297 |
| 0.149679 | 0.00118  | 0.126026  | 0.00639  | 0.166262 | 0.00031  | 0.062841 | 0.17519  | 0.028318 |
| -0.06867 | 0.13839  | 0.05144   | 0.26727  | -0.01506 | 0.74556  | 0.060367 | 0.19284  | 0.157014 |
| 0.192066 | 2.94E-05 | 0.119907  | 0.0095   | 0.097186 | 0.03577  | 0.118649 | 0.01028  | 0.076524 |
| 0.073688 | 0.11177  | 0.107288  | 0.02039  | 0.085761 | 0.06406  | 0.092412 | 0.04594  | 0.30661  |
| 0.019642 | 0.67203  | 0.035471  | 0.44443  | 0.003694 | 0.93655  | 0.040842 | 0.37853  | 0.066475 |
| 0.042874 | 0.35525  | 0.071936  | 0.12057  | 0.039173 | 0.39834  | 0.064598 | 0.16341  | 0.127092 |
| 0.128851 | 0.00529  | 0.097263  | 0.03562  | 0.141653 | 0.00215  | 0.032904 | 0.47811  | 0.010935 |
| 0.071784 | 0.12136  | 0.100731  | 0.02952  | 0.09228  | 0.04625  | 0.092536 | 0.04565  | 0.040294 |
| -0.03807 | 0.41178  | 0.035475  | 0.44439  | -0.00457 | 0.92153  | 0.069685 | 0.13266  | 0.055817 |
| 0.057445 | 0.21531  | -0.08077  | 0.08121  | -0.00462 | 0.92073  | -0.11139 | 0.01603  | -0.1845  |
| 0.07017  | 0.12998  | 0.086574  | 0.06157  | 0.084088 | 0.06945  | 0.069301 | 0.13481  | 0.027522 |
| 0.028439 | 0.53984  | 0.076219  | 0.09995  | 0.0441   | 0.34164  | 0.083671 | 0.07084  | 0.110076 |
| 0.033096 | 0.47554  | 0.106606  | 0.02121  | 0.082471 | 0.075    | 0.086819 | 0.06084  | 0.127328 |
| 0.122339 | 0.00813  | 0.071413  | 0.1233   | 0.114958 | 0.01292  | 0.037756 | 0.41564  | -0.00324 |
| 0.039064 | 0.39965  | -0.03045  | 0.51151  | 0.02619  | 0.57238  | -0.07316 | 0.11435  | 0.020659 |

|          |          |          |          |          |          |          |          |          |
|----------|----------|----------|----------|----------|----------|----------|----------|----------|
| -0.18225 | 7.46E-05 | -0.19566 | 2.06E-05 | -0.12957 | 0.00504  | -0.21567 | 2.55E-06 | -0.19087 |
| 0.086813 | 0.06085  | -0.04988 | 0.28209  | 0.05542  | 0.23195  | -0.11633 | 0.01188  | -0.10654 |
| -0.03133 | 0.49948  | -0.14057 | 0.00233  | -0.05267 | 0.25599  | -0.1711  | 0.0002   | -0.21219 |
| 0.052719 | 0.25553  | 0.117786 | 0.01085  | 0.085345 | 0.06537  | 0.107146 | 0.02056  | 0.114836 |
| 0.052056 | 0.26157  | 0.036059 | 0.43692  | 0.039088 | 0.39936  | 0.036484 | 0.43153  | 0.023398 |
| 0.177155 | 0.00012  | 0.230603 | 4.70E-07 | 0.241975 | 1.20E-07 | 0.144711 | 0.00172  | 0.176604 |
| 0.144223 | 0.00178  | 0.190194 | 3.52E-05 | 0.127868 | 0.00565  | 0.183546 | 6.61E-05 | 0.334497 |
| 0.087603 | 0.05853  | 0.07032  | 0.12916  | 0.081278 | 0.07932  | 0.066434 | 0.15175  | 0.032639 |
| 0.014052 | 0.76199  | 0.026509 | 0.56771  | 0.024536 | 0.59688  | 0.033154 | 0.47477  | 0.070388 |
| 0.036391 | 0.43271  | 0.040188 | 0.38622  | 0.021061 | 0.64986  | 0.045577 | 0.3257   | 0.061593 |
| -0.09558 | 0.03895  | -0.07087 | 0.12618  | -0.06416 | 0.16628  | -0.08988 | 0.05225  | -0.00538 |
| 0.050238 | 0.27862  | -0.11005 | 0.01735  | 0.003699 | 0.93645  | -0.15047 | 0.00111  | -0.21875 |
| 0.078479 | 0.09026  | -0.03599 | 0.43776  | 0.000917 | 0.98422  | -0.03662 | 0.42982  | -0.12828 |
| 0.082233 | 0.07584  | 0.014566 | 0.75356  | 0.026675 | 0.56528  | -0.00595 | 0.89798  | 0.060613 |
| -0.03335 | 0.47223  | -0.06601 | 0.15439  | -0.05273 | 0.25541  | -0.07663 | 0.09811  | -0.14676 |
| 0.045726 | 0.32413  | 0.014096 | 0.76126  | -0.01529 | 0.74181  | 0.030455 | 0.51148  | 0.085339 |
| -0.04533 | 0.32838  | -0.13988 | 0.00245  | -0.05711 | 0.21798  | -0.18535 | 5.58E-05 | -0.20821 |
| 0.103101 | 0.02588  | 0.077458 | 0.09454  | 0.089871 | 0.05228  | 0.053022 | 0.25281  | 0.08431  |
| 0.088737 | 0.05533  | 0.009092 | 0.84465  | 0.008332 | 0.85749  | 0.009064 | 0.84512  | -0.07266 |
| 0.138839 | 0.00264  | 0.221261 | 1.37E-06 | 0.190216 | 3.51E-05 | 0.171159 | 0.0002   | 0.235877 |
| 0.169981 | 0.00022  | 0.284738 | 3.68E-10 | 0.229389 | 5.42E-07 | 0.24687  | 6.50E-08 | 0.196387 |
| -0.01455 | 0.75385  | -0.02788 | 0.54791  | -0.01683 | 0.71674  | -0.02154 | 0.64242  | -0.01555 |
| 0.042899 | 0.35497  | 0.013718 | 0.76749  | 0.02027  | 0.66218  | -0.00512 | 0.91218  | 0.031692 |
| -0.04246 | 0.35991  | -0.01931 | 0.67721  | -0.02497 | 0.59036  | -0.02954 | 0.52422  | -0.02738 |
| -0.0364  | 0.43254  | -0.00564 | 0.90322  | -0.00212 | 0.96362  | -0.02021 | 0.66306  | -0.00955 |
| 0.002862 | 0.95082  | -0.01572 | 0.73469  | -0.0072  | 0.87662  | -0.01332 | 0.77411  | 0.007037 |
| 0.117292 | 0.01119  | 0.06273  | 0.17596  | 0.064613 | 0.16331  | 0.058991 | 0.2032   | 0.184125 |
| -0.03529 | 0.44677  | -0.02265 | 0.62536  | -0.01864 | 0.68784  | -0.00859 | 0.85307  | -0.01249 |
| 0.200974 | 1.21E-05 | 0.040769 | 0.37939  | 0.042775 | 0.35636  | 0.046748 | 0.31342  | 0.042783 |
| 0.179342 | 9.74E-05 | 0.025056 | 0.58913  | 0.030984 | 0.50417  | 0.026229 | 0.57181  | -0.00911 |
| -0.03479 | 0.45325  | -0.01679 | 0.71736  | -0.02407 | 0.60382  | -0.00675 | 0.88438  | 0.0153   |
| -0.09521 | 0.03972  | -0.0383  | 0.40898  | -0.03663 | 0.42971  | -0.03104 | 0.50336  | 0.020473 |
| -0.03151 | 0.497    | -0.09476 | 0.04067  | -0.01996 | 0.66697  | -0.13775 | 0.00285  | -0.22631 |
| 0.089271 | 0.05387  | 0.001433 | 0.97536  | 0.06642  | 0.15183  | -0.03448 | 0.45725  | -0.03462 |
| 0.076731 | 0.09769  | 0.11646  | 0.01178  | 0.09569  | 0.03873  | 0.100242 | 0.03032  | 0.079755 |
| 0.01248  | 0.78794  | -0.01521 | 0.74309  | 0.014266 | 0.75848  | -0.01877 | 0.6858   | -0.02913 |
| 0.008329 | 0.85754  | -0.00474 | 0.91859  | -0.00707 | 0.87885  | 0.002012 | 0.9654   | -0.00071 |
| 0.010179 | 0.82634  | 0.054484 | 0.23994  | 0.047672 | 0.30394  | 0.042861 | 0.35539  | 0.029961 |
| 0.020975 | 0.6512   | 0.020475 | 0.65897  | 0.044398 | 0.33839  | -0.01398 | 0.76311  | 0.052874 |
| 0.156112 | 0.00071  | 0.155851 | 0.00073  | 0.158741 | 0.00058  | 0.115821 | 0.01226  | 0.142823 |
| 0.065646 | 0.15667  | 0.120656 | 0.00906  | 0.091081 | 0.04917  | 0.096689 | 0.03673  | 0.175526 |
| 0.124883 | 0.00689  | 0.130637 | 0.00469  | 0.130131 | 0.00485  | 0.087146 | 0.05987  | 0.104746 |
| 0.107554 | 0.02008  | 0.094972 | 0.04022  | 0.103846 | 0.02482  | 0.055795 | 0.22881  | 0.052001 |
| 0.08803  | 0.05731  | 0.060122 | 0.19465  | 0.073644 | 0.11198  | 0.042066 | 0.3644   | 0.002651 |
| 0.139618 | 0.0025   | 0.06727  | 0.14665  | 0.122727 | 0.00793  | 0.024086 | 0.60363  | 0.010578 |



|          |          |          |          |          |          |          |          |          |
|----------|----------|----------|----------|----------|----------|----------|----------|----------|
| 0.099476 | 0.03161  | 0.045695 | 0.32445  | 0.078427 | 0.09048  | 0.0157   | 0.73507  | 0.074801 |
| -0.01436 | 0.75686  | -0.0606  | 0.19113  | -0.03616 | 0.43562  | -0.05103 | 0.27106  | -0.04506 |
| -0.01007 | 0.8282   | 0.005123 | 0.91208  | 0.002975 | 0.94888  | -0.00169 | 0.97099  | 0.113631 |
| 0.081311 | 0.0792   | 0.079716 | 0.08529  | 0.080817 | 0.08105  | 0.052763 | 0.25514  | 0.068204 |
| 0.121891 | 0.00837  | 0.181989 | 7.64E-05 | 0.10852  | 0.01899  | 0.200662 | 1.25E-05 | 0.245029 |
| 0.007293 | 0.8751   | -0.02767 | 0.5508   | -0.01781 | 0.70113  | -0.04392 | 0.34365  | -0.0731  |
| 0.061849 | 0.18212  | 0.06457  | 0.1636   | 0.075522 | 0.1031   | 0.050927 | 0.27208  | 0.029014 |
| -0.01567 | 0.7355   | -0.00237 | 0.95919  | -0.00766 | 0.86886  | 0.016794 | 0.71738  | 0.001831 |
| -0.10223 | 0.02716  | -0.09778 | 0.03465  | -0.09693 | 0.03627  | -0.08962 | 0.05295  | -0.11674 |
| 0.277207 | 1.10E-09 | 0.301635 | 2.80E-11 | 0.276645 | 1.19E-09 | 0.220696 | 1.46E-06 | 0.207304 |
| 0.230796 | 4.60E-07 | 0.249289 | 4.78E-08 | 0.228152 | 6.26E-07 | 0.189629 | 3.72E-05 | 0.128091 |
| 0.014466 | 0.7552   | 0.045955 | 0.32171  | 0.029129 | 0.53006  | 0.037258 | 0.42181  | 0.24966  |
| 0.000706 | 0.98787  | -0.07528 | 0.10421  | -0.07256 | 0.11735  | -0.05614 | 0.22594  | -0.19181 |
| -0.01809 | 0.69663  | 0.069758 | 0.13226  | 0.021411 | 0.64443  | 0.094486 | 0.04125  | 0.094677 |
| 0.079509 | 0.0861   | 0.114434 | 0.01334  | 0.092221 | 0.04639  | 0.098291 | 0.03371  | 0.207296 |
| 0.057299 | 0.21648  | 0.119978 | 0.00945  | 0.087693 | 0.05827  | 0.103835 | 0.02484  | 0.201833 |
| 0.193528 | 2.54E-05 | 0.107009 | 0.02073  | 0.133205 | 0.00393  | 0.052444 | 0.25802  | 0.081105 |
| 0.025947 | 0.57595  | 0.105397 | 0.02273  | 0.048582 | 0.29479  | 0.105723 | 0.02231  | 0.207421 |
| 0.013848 | 0.76534  | -0.10476 | 0.02357  | -0.02568 | 0.57992  | -0.13822 | 0.00276  | -0.17848 |
| 0.16464  | 0.00035  | 0.195532 | 2.09E-05 | 0.169606 | 0.00023  | 0.148976 | 0.00124  | 0.336033 |
| 0.063838 | 0.16843  | 0.079589 | 0.08579  | 0.087023 | 0.06023  | 0.049856 | 0.28229  | 0.067948 |
| 0.158064 | 0.00061  | 0.018911 | 0.68356  | 0.0678   | 0.14349  | -0.00597 | 0.89768  | -0.03924 |
| 0.091778 | 0.04745  | 0.156793 | 0.00067  | 0.053914 | 0.2449   | 0.210518 | 4.46E-06 | 0.327576 |
| 0.061875 | 0.18194  | -0.02313 | 0.61813  | 0.020455 | 0.65929  | -0.04877 | 0.29289  | 0.064502 |
| 0.089737 | 0.05263  | 0.153107 | 0.0009   | 0.097649 | 0.03489  | 0.149615 | 0.00118  | 0.23385  |
| 0.077971 | 0.09237  | 0.05399  | 0.24424  | 0.066145 | 0.15354  | 0.037709 | 0.41622  | 0.051275 |
| 0.066578 | 0.15086  | 0.033028 | 0.47645  | 0.023997 | 0.60498  | 0.028264 | 0.54235  | 0.124914 |
| 0.131137 | 0.00453  | 0.070383 | 0.12881  | 0.071377 | 0.12349  | 0.040406 | 0.38364  | 0.1701   |
| 0.184874 | 5.84E-05 | 0.148785 | 0.00126  | 0.190137 | 3.54E-05 | 0.075971 | 0.10106  | 0.120309 |
| -0.01783 | 0.7007   | -0.04152 | 0.37071  | 0.012255 | 0.79167  | -0.06729 | 0.14655  | -0.13884 |
| 0.001518 | 0.9739   | -0.22718 | 7.00E-07 | -0.12101 | 0.00885  | -0.24348 | 9.93E-08 | -0.32864 |
| 0.125789 | 0.00649  | 0.090744 | 0.05002  | 0.069363 | 0.13446  | 0.081025 | 0.08027  | 0.114583 |
| 0.149983 | 0.00115  | 0.163517 | 0.00039  | 0.16812  | 0.00026  | 0.090185 | 0.05146  | 0.200636 |
| 0.097216 | 0.03571  | 0.073551 | 0.11243  | 0.125635 | 0.00656  | 0.013698 | 0.76781  | -0.02098 |
| 0.355612 | 2.29E-15 | 0.254766 | 2.36E-08 | 0.320506 | 1.29E-12 | 0.109665 | 0.01775  | 0.137293 |
| 0.212055 | 3.78E-06 | 0.130311 | 0.00479  | 0.156058 | 0.00071  | 0.100088 | 0.03057  | 0.055039 |
| 0.111796 | 0.01565  | 0.193771 | 2.48E-05 | 0.126629 | 0.00614  | 0.217038 | 2.20E-06 | 0.175634 |
| 0.082401 | 0.07525  | 0.151334 | 0.00104  | 0.093226 | 0.04405  | 0.153092 | 0.0009   | 0.066489 |
| 0.315121 | 3.17E-12 | 0.323645 | 7.55E-13 | 0.218452 | 1.88E-06 | 0.350014 | 6.63E-15 | 0.303346 |
| 0.053522 | 0.24836  | 0.105697 | 0.02235  | 0.064236 | 0.16579  | 0.115754 | 0.01231  | 0.133035 |
| 0.055039 | 0.23518  | 0.051733 | 0.26455  | 0.063463 | 0.17095  | 0.029335 | 0.52714  | 0.071799 |
| -0.11134 | 0.01608  | 0.006074 | 0.89585  | -0.00872 | 0.85092  | 0.001863 | 0.96797  | 0.052952 |
| 0.041923 | 0.36603  | 0.115901 | 0.0122   | 0.053848 | 0.24548  | 0.145941 | 0.00157  | 0.175784 |
| 0.007612 | 0.86968  | -0.002   | 0.96569  | 0.005585 | 0.90419  | -0.00458 | 0.92145  | -0.00716 |
| -0.0339  | 0.46484  | 0.011478 | 0.80461  | -0.00745 | 0.87247  | 0.011873 | 0.79803  | 0.047551 |

|          |          |          |          |          |          |          |          |          |
|----------|----------|----------|----------|----------|----------|----------|----------|----------|
| 0.01493  | 0.74762  | 0.039604 | 0.39316  | 0.026223 | 0.57189  | 0.04353  | 0.34793  | 0.060565 |
| -0.08096 | 0.08051  | 0.004267 | 0.92673  | -0.03751 | 0.41863  | 0.031108 | 0.50247  | 0.01474  |
| 0.015722 | 0.73471  | -0.01584 | 0.73287  | 0.035477 | 0.44436  | -0.04758 | 0.30488  | -0.06553 |
| -0.04771 | 0.30352  | -0.01849 | 0.69025  | 0.004253 | 0.92697  | -0.04237 | 0.36098  | 0.050479 |
| 0.011625 | 0.80215  | -0.00413 | 0.92912  | -0.01906 | 0.68127  | -0.00595 | 0.89788  | 0.004426 |
| -0.0604  | 0.1926   | -0.04789 | 0.30173  | -0.07438 | 0.10844  | -0.02222 | 0.63198  | -0.0259  |
| -0.00787 | 0.86525  | 0.003346 | 0.94251  | 0.000877 | 0.98492  | 0.004713 | 0.91909  | -0.00646 |
| 0.188966 | 3.96E-05 | 0.034626 | 0.45537  | 0.061621 | 0.18374  | 0.019063 | 0.68115  | 0.038109 |
| 0.047926 | 0.30136  | 0.100214 | 0.03037  | 0.065191 | 0.15957  | 0.09821  | 0.03386  | 0.037758 |
| 0.055297 | 0.23299  | 0.036642 | 0.42954  | 0.043823 | 0.34469  | 0.020374 | 0.66055  | -0.03238 |
| 0.120185 | 0.00933  | 0.05534  | 0.23263  | 0.071223 | 0.1243   | 0.056344 | 0.22425  | -0.00107 |
| 0.026436 | 0.56878  | 0.158849 | 0.00057  | 0.086086 | 0.06306  | 0.158521 | 0.00059  | 0.313039 |
| 0.11532  | 0.01264  | 0.008547 | 0.85385  | 0.070566 | 0.12782  | -0.02887 | 0.5337   | 0.085785 |
| 0.078447 | 0.09039  | 0.095121 | 0.0399   | 0.043157 | 0.35208  | 0.141549 | 0.00217  | 0.080331 |
| 0.107587 | 0.02004  | 0.117354 | 0.01115  | 0.129258 | 0.00515  | 0.092659 | 0.04536  | 0.173326 |
| 0.025956 | 0.57582  | -0.00811 | 0.86124  | 0.027902 | 0.54753  | -0.03424 | 0.46042  | 0.045004 |
| 0.093215 | 0.04407  | 0.026859 | 0.5626   | 0.063454 | 0.17102  | -0.01153 | 0.80382  | 0.011712 |
| 0.130619 | 0.00469  | 0.03311  | 0.47536  | 0.033335 | 0.47236  | 0.028125 | 0.54433  | 0.03506  |
| 0.07692  | 0.09686  | 0.136544 | 0.00311  | 0.07637  | 0.09928  | 0.138202 | 0.00276  | 0.231175 |
| -0.03982 | 0.39054  | -0.2085  | 5.53E-06 | -0.1305  | 0.00473  | -0.20492 | 8.05E-06 | -0.35466 |
| -0.01937 | 0.6763   | -0.02298 | 0.62033  | -0.03591 | 0.43877  | -0.00211 | 0.9637   | -0.07208 |
| 0.035017 | 0.45029  | 0.026861 | 0.56257  | -0.00393 | 0.93242  | 0.040771 | 0.37936  | 0.033658 |
| 0.027307 | 0.55611  | 0.088244 | 0.05671  | 0.049294 | 0.28776  | 0.120527 | 0.00913  | 0.077528 |
| -0.00901 | 0.84598  | -0.05515 | 0.23425  | -0.03516 | 0.44844  | -0.05704 | 0.21859  | -0.11444 |
| 0.107767 | 0.01984  | -0.01663 | 0.71997  | 0.055072 | 0.2349   | -0.06903 | 0.13634  | -0.00815 |
| 0.084936 | 0.06667  | 0.070244 | 0.12957  | 0.075671 | 0.10242  | 0.049891 | 0.28196  | 0.017156 |
| 0.069205 | 0.13536  | 0.031324 | 0.49951  | 0.027363 | 0.55529  | 0.020553 | 0.65776  | 0.078465 |
| 0.041908 | 0.3662   | 0.101102 | 0.02892  | 0.034772 | 0.45347  | 0.130328 | 0.00479  | 0.158119 |
| 0.123637 | 0.00747  | 0.185098 | 5.72E-05 | 0.117827 | 0.01082  | 0.184475 | 6.06E-05 | 0.332606 |
| 0.04978  | 0.28303  | -0.01042 | 0.82235  | 0.013542 | 0.77038  | -0.02562 | 0.58081  | -0.04716 |
| 0.006579 | 0.88723  | -0.04854 | 0.29521  | -0.00079 | 0.98641  | -0.07872 | 0.08928  | -0.09384 |
| 0.068424 | 0.13983  | -0.00233 | 0.95992  | 0.063101 | 0.17341  | -0.0435  | 0.34829  | -0.1227  |
| 0.033212 | 0.474    | 0.015199 | 0.74321  | 0.024108 | 0.60331  | 0.009717 | 0.83411  | -0.00134 |
| 0.041714 | 0.36843  | 0.037749 | 0.41572  | 0.027064 | 0.55962  | 0.011874 | 0.79801  | 0.140055 |
| 0.042528 | 0.35915  | 0.06984  | 0.1318   | 0.02668  | 0.56521  | 0.09145  | 0.04826  | 0.092965 |
| -0.03722 | 0.42232  | -0.02755 | 0.55255  | -0.03287 | 0.47861  | -0.01718 | 0.71124  | -0.03611 |
| 0.061127 | 0.18729  | 0.092908 | 0.04478  | 0.083916 | 0.07002  | 0.066716 | 0.15002  | 0.02617  |
| 0.023027 | 0.61965  | 0.05207  | 0.26144  | 0.049098 | 0.28969  | 0.056744 | 0.22097  | 0.010768 |
| 0.017789 | 0.70141  | -0.01332 | 0.77403  | 0.005696 | 0.90229  | -0.00657 | 0.88737  | -0.05622 |
| 0.002929 | 0.94967  | -0.00114 | 0.98036  | -0.00328 | 0.94368  | 0.00037  | 0.99363  | -0.03521 |
| 0.323266 | 8.05E-13 | 0.335859 | 8.91E-14 | 0.288543 | 2.09E-10 | 0.2762   | 1.27E-09 | 0.225295 |
| 0.035778 | 0.44051  | 0.06518  | 0.15964  | 0.054171 | 0.24266  | 0.054039 | 0.24381  | 0.091417 |
| 0.022617 | 0.6259   | 0.027185 | 0.55788  | 0.027381 | 0.55503  | 0.022739 | 0.62403  | 0.043749 |
| 0.126088 | 0.00636  | 0.111079 | 0.01633  | 0.170313 | 0.00022  | 0.044038 | 0.34233  | 0.048664 |
| -0.07217 | 0.11939  | -0.06356 | 0.17033  | -0.09036 | 0.05101  | -0.03101 | 0.5038   | -0.06483 |

|          |          |          |          |          |          |          |          |          |
|----------|----------|----------|----------|----------|----------|----------|----------|----------|
| 0.194095 | 2.41E-05 | 0.215482 | 2.61E-06 | 0.217248 | 2.15E-06 | 0.158121 | 0.0006   | 0.246088 |
| 0.155549 | 0.00074  | 0.000107 | 0.99817  | 0.012165 | 0.79318  | 0.006582 | 0.88719  | -0.00643 |
| -0.05121 | 0.26945  | -0.02509 | 0.58869  | -0.01978 | 0.66979  | -0.02569 | 0.57971  | 0.019766 |
| -0.00389 | 0.9331   | -0.04517 | 0.33001  | -0.03086 | 0.50592  | -0.04716 | 0.30917  | -0.09779 |
| 0.057068 | 0.21834  | -0.09427 | 0.04172  | -0.0147  | 0.75132  | -0.12522 | 0.00674  | -0.14861 |
| 0.032392 | 0.48499  | 0.02873  | 0.5357   | 0.008775 | 0.84999  | 0.042291 | 0.36184  | 0.04283  |
| -0.00127 | 0.9781   | 0.021561 | 0.64211  | 0.044336 | 0.33907  | 0.015537 | 0.73772  | 0.015808 |
| 0.049027 | 0.29039  | 0.050532 | 0.27581  | 0.051139 | 0.27008  | 0.035485 | 0.44425  | 0.076054 |
| 0.136179 | 0.00319  | 0.090108 | 0.05166  | 0.180352 | 8.89E-05 | -0.02439 | 0.5991   | -0.06145 |
| 0.140518 | 0.00234  | 0.141185 | 0.00223  | 0.133694 | 0.0038   | 0.107396 | 0.02027  | 0.176824 |
| 0.097321 | 0.03551  | -0.03087 | 0.50574  | -0.00623 | 0.89312  | -0.0157  | 0.73506  | -0.07197 |
| -0.06823 | 0.14097  | -0.20823 | 5.69E-06 | -0.1477  | 0.00137  | -0.19259 | 2.79E-05 | -0.35068 |
| 0.182381 | 7.37E-05 | 0.087565 | 0.05864  | 0.13523  | 0.00341  | 0.039197 | 0.39805  | 0.04513  |
| 0.186847 | 4.85E-05 | 0.245123 | 8.09E-08 | 0.130408 | 0.00476  | 0.286839 | 2.70E-10 | 0.268799 |
| 0.14912  | 0.00123  | 0.099352 | 0.03183  | 0.109365 | 0.01807  | 0.082497 | 0.07491  | 0.070838 |
| 0.092213 | 0.04641  | 0.097768 | 0.03467  | 0.154251 | 0.00082  | 0.011632 | 0.80205  | -0.00852 |
| 0.103812 | 0.02487  | -0.06525 | 0.1592   | 0.031124 | 0.50225  | -0.08652 | 0.06174  | -0.14406 |
| 0.098424 | 0.03347  | 0.068881 | 0.1372   | 0.120359 | 0.00923  | 0.019211 | 0.67881  | -0.00908 |
| 0.044471 | 0.3376   | -0.09032 | 0.0511   | -0.02084 | 0.65331  | -0.11805 | 0.01067  | -0.19719 |
| 0.037016 | 0.42485  | 0.004695 | 0.91939  | 0.025245 | 0.58633  | -0.00789 | 0.86505  | -0.02459 |
| 0.15354  | 0.00087  | 0.06543  | 0.15805  | 0.074455 | 0.10807  | 0.07314  | 0.11447  | 0.01044  |
| 0.188557 | 4.12E-05 | 0.160223 | 0.00051  | 0.227891 | 6.45E-07 | 0.044038 | 0.34233  | 0.101545 |
| 0.031405 | 0.4984   | 0.054254 | 0.24193  | 0.044174 | 0.34084  | 0.07257  | 0.11732  | 0.035453 |
| -0.08713 | 0.0599   | -0.04275 | 0.35667  | -0.01426 | 0.75858  | -0.04735 | 0.30719  | -0.05032 |
| 0.085065 | 0.06626  | 0.070401 | 0.12872  | 0.065278 | 0.15901  | 0.055313 | 0.23285  | 0.187462 |
| 0.0393   | 0.3968   | 0.005652 | 0.90304  | 0.018017 | 0.69776  | -0.01047 | 0.82144  | -0.03008 |
| 0.046576 | 0.31521  | 0.156633 | 0.00068  | 0.074619 | 0.1073   | 0.181215 | 8.21E-05 | 0.234585 |
| -0.04538 | 0.3278   | -0.00334 | 0.94254  | -0.02029 | 0.66194  | 0.01142  | 0.80557  | -0.02148 |
| 0.01351  | 0.7709   | -0.04502 | 0.33168  | -0.02637 | 0.56968  | -0.0465  | 0.31603  | -0.08815 |
| -0.01445 | 0.75544  | -0.03721 | 0.42237  | 0.016374 | 0.72415  | -0.06294 | 0.17451  | -0.06268 |
| -0.07261 | 0.11713  | -0.15933 | 0.00055  | -0.10284 | 0.02626  | -0.1475  | 0.00139  | -0.3146  |
| 0.132022 | 0.00426  | 0.203653 | 9.18E-06 | 0.169203 | 0.00024  | 0.197144 | 1.78E-05 | 0.086482 |
| 0.040862 | 0.3783   | 0.033066 | 0.47595  | 0.035899 | 0.43895  | 0.023757 | 0.60859  | -0.0049  |
| 0.00965  | 0.83523  | -0.10356 | 0.02522  | -0.0473  | 0.30769  | -0.11725 | 0.01122  | -0.19179 |
| 0.097292 | 0.03557  | 0.09526  | 0.03961  | 0.083179 | 0.07252  | 0.090654 | 0.05025  | 0.148982 |
| 0.153558 | 0.00087  | 0.104123 | 0.02444  | 0.083971 | 0.06984  | 0.096646 | 0.03681  | 0.091799 |
| 0.045029 | 0.33157  | 0.07176  | 0.12148  | 0.047512 | 0.30557  | 0.065784 | 0.1558   | 0.06875  |
| -0.01627 | 0.72575  | -0.04283 | 0.35578  | -0.01001 | 0.82919  | -0.06183 | 0.18222  | -0.10433 |
| 0.057281 | 0.21663  | 0.119853 | 0.00953  | 0.079725 | 0.08525  | 0.10924  | 0.0182   | 0.084766 |
| 0.098146 | 0.03397  | 0.197033 | 1.80E-05 | 0.138296 | 0.00274  | 0.18123  | 8.20E-05 | 0.269837 |
| -0.06123 | 0.18655  | -0.05357 | 0.24792  | -0.04864 | 0.29426  | -0.05429 | 0.24163  | -0.07888 |
| -0.01574 | 0.7344   | -0.0082  | 0.8597   | -0.01803 | 0.69763  | 0.001866 | 0.96792  | 0.059145 |
| 0.149153 | 0.00123  | 0.07668  | 0.09791  | 0.060717 | 0.19026  | 0.096116 | 0.03786  | 0.219658 |
| 0.01049  | 0.82113  | 0.062025 | 0.18087  | 0.064792 | 0.16215  | 0.032161 | 0.48811  | 0.083096 |
| -0.02951 | 0.5247   | -0.13617 | 0.00319  | -0.10791 | 0.01968  | -0.11303 | 0.01453  | -0.19493 |

|          |          |          |          |          |          |          |          |          |
|----------|----------|----------|----------|----------|----------|----------|----------|----------|
| 0.175506 | 0.00014  | 0.100735 | 0.02951  | 0.074895 | 0.106    | 0.095992 | 0.03811  | 0.261614 |
| 0.013985 | 0.7631   | 0.022122 | 0.63347  | 0.001463 | 0.97485  | 0.031044 | 0.50335  | 0.02686  |
| -0.08133 | 0.07913  | -0.0359  | 0.43899  | -0.02687 | 0.56247  | -0.02533 | 0.58502  | -0.06748 |
| 0.06117  | 0.18697  | -0.04906 | 0.29007  | 0.009771 | 0.8332   | -0.0749  | 0.10599  | -0.08946 |
| 0.002985 | 0.94871  | -0.03213 | 0.48851  | 0.028547 | 0.5383   | -0.0746  | 0.10738  | -0.03356 |
| -0.02194 | 0.63622  | -0.02506 | 0.58911  | 0.012998 | 0.77936  | -0.06798 | 0.1424   | -0.06434 |
| 0.100838 | 0.02934  | 0.049507 | 0.28568  | 0.075696 | 0.10231  | 0.036721 | 0.42854  | 0.046425 |
| 0.0787   | 0.08936  | -0.00019 | 0.99671  | 0.030995 | 0.50402  | -0.03177 | 0.49348  | -0.08633 |
| 0.129768 | 0.00497  | 0.065378 | 0.15838  | 0.067535 | 0.14506  | 0.055273 | 0.2332   | 0.064467 |
| 0.012803 | 0.78259  | 0.016821 | 0.71693  | 0.00886  | 0.84857  | 0.023005 | 0.61999  | 0.005509 |
| 0.042519 | 0.35925  | 0.095907 | 0.03829  | 0.080529 | 0.08214  | 0.08759  | 0.05857  | 0.053075 |
| 0.078147 | 0.09164  | 0.083021 | 0.07307  | 0.069007 | 0.13648  | 0.086917 | 0.06054  | 0.074823 |
| 0.012365 | 0.78985  | -0.06156 | 0.1842   | -0.03543 | 0.44502  | -0.04975 | 0.28336  | -0.0428  |
| 0.006208 | 0.89356  | -0.07257 | 0.11733  | -0.05192 | 0.26286  | -0.06369 | 0.16941  | -0.05379 |
| 0.033513 | 0.47     | -0.03101 | 0.50382  | 0.017523 | 0.70566  | -0.02579 | 0.57832  | -0.03051 |
| 0.177218 | 0.00012  | 0.128146 | 0.00555  | 0.159119 | 0.00056  | 0.082054 | 0.07649  | 0.031204 |
| 0.069321 | 0.1347   | 0.04736  | 0.30712  | 0.026239 | 0.57166  | 0.067007 | 0.14824  | 0.07365  |
| 0.096666 | 0.03677  | 0.023449 | 0.61325  | 0.041786 | 0.3676   | 0.027092 | 0.55922  | -0.00338 |
| -0.07805 | 0.09203  | -0.06402 | 0.16723  | -0.06202 | 0.18089  | -0.03349 | 0.47036  | -0.08697 |
| -0.08855 | 0.05584  | -0.12449 | 0.00707  | -0.07234 | 0.11848  | -0.12964 | 0.00502  | -0.10048 |
| -0.05645 | 0.22335  | -0.07697 | 0.09664  | -0.06425 | 0.16569  | -0.06192 | 0.18164  | -0.09482 |
| 0.078788 | 0.089    | 0.059734 | 0.19756  | 0.074857 | 0.10618  | 0.027163 | 0.55819  | 0.021205 |
| 0.292011 | 1.24E-10 | 0.309271 | 8.27E-12 | 0.291532 | 1.33E-10 | 0.243546 | 9.85E-08 | 0.162214 |
| -0.01535 | 0.74075  | -0.00728 | 0.8753   | -0.00641 | 0.89004  | -0.00825 | 0.85891  | -0.00505 |
| 0.018286 | 0.69347  | 0.079574 | 0.08585  | 0.028541 | 0.53838  | 0.112425 | 0.01507  | 0.063477 |
| 0.029633 | 0.52296  | 0.041935 | 0.36589  | 0.026702 | 0.56489  | 0.049109 | 0.28957  | 0.117092 |
| 0.093304 | 0.04387  | 0.047555 | 0.30513  | 0.040291 | 0.385    | 0.056132 | 0.226    | 0.05186  |
| -0.12551 | 0.00661  | -0.145   | 0.00168  | -0.10214 | 0.0273   | -0.15486 | 0.00079  | -0.24942 |
| -0.07213 | 0.11956  | -0.05016 | 0.2794   | -0.04654 | 0.31553  | -0.03027 | 0.51403  | -0.07696 |
| 0.035082 | 0.44945  | -0.0972  | 0.03575  | 0.016751 | 0.71806  | -0.16342 | 0.00039  | -0.23579 |
| -0.04817 | 0.29889  | -0.02051 | 0.65842  | -0.03277 | 0.47996  | -0.01821 | 0.69469  | 0.081971 |
| 0.038148 | 0.4108   | 0.025948 | 0.57593  | 0.032478 | 0.48382  | -0.01266 | 0.78502  | 0.04315  |
| 0.106223 | 0.02168  | 0.04946  | 0.28614  | 0.042277 | 0.36199  | 0.044439 | 0.33794  | 0.012075 |
| -0.01073 | 0.81715  | 0.04673  | 0.31361  | -0.00233 | 0.95992  | 0.040667 | 0.38057  | 0.140399 |
| 0.009201 | 0.84281  | 0.137657 | 0.00287  | 0.049343 | 0.28728  | 0.164114 | 0.00037  | 0.243703 |
| 0.000755 | 0.98701  | -0.01486 | 0.7488   | 0.00851  | 0.85447  | -0.03235 | 0.48561  | -0.04447 |
| -0.01574 | 0.73439  | 0.034119 | 0.462    | 0.018709 | 0.68675  | 0.0288   | 0.5347   | 0.16285  |
| 0.085095 | 0.06616  | 0.132217 | 0.00421  | 0.094441 | 0.04135  | 0.122331 | 0.00813  | 0.184175 |
| -0.0028  | 0.95192  | 0.036    | 0.43767  | 0.008203 | 0.85968  | 0.051975 | 0.26232  | 0.140292 |
| -0.09864 | 0.03308  | -0.08582 | 0.06387  | -0.07461 | 0.10735  | -0.07794 | 0.0925   | -0.09862 |
| 0.138326 | 0.00274  | 0.112264 | 0.01521  | 0.100768 | 0.02946  | 0.088375 | 0.05634  | 0.098649 |
| -0.04747 | 0.30598  | -0.0711  | 0.12496  | -0.03172 | 0.49404  | -0.08324 | 0.07232  | -0.1599  |
| -0.03862 | 0.40502  | -0.11476 | 0.01308  | -0.03215 | 0.48829  | -0.15473 | 0.00079  | -0.2253  |
| -0.02227 | 0.63119  | 0.001414 | 0.97568  | -0.01561 | 0.73658  | -0.00606 | 0.89613  | 0.002711 |
| 0.092253 | 0.04631  | 0.040053 | 0.38781  | 0.093493 | 0.04344  | -0.01397 | 0.7633   | 0.013013 |

|          |          |          |          |          |          |          |          |          |
|----------|----------|----------|----------|----------|----------|----------|----------|----------|
| 0.012876 | 0.78139  | 0.04596  | 0.32165  | 0.048806 | 0.29257  | 0.002718 | 0.95329  | 0.002682 |
| -0.09068 | 0.05017  | -0.06651 | 0.15126  | -0.0676  | 0.14464  | -0.0539  | 0.245    | -0.06743 |
| 0.044822 | 0.3338   | 0.098186 | 0.0339   | 0.06322  | 0.1726   | 0.096943 | 0.03623  | 0.253403 |
| 0.031507 | 0.497    | 0.209128 | 5.17E-06 | 0.099426 | 0.0317   | 0.23826  | 1.89E-07 | 0.174843 |
| 0.079072 | 0.08785  | 0.112122 | 0.01534  | 0.06431  | 0.1653   | 0.113525 | 0.0141   | 0.215919 |
| -0.05052 | 0.2759   | -0.06229 | 0.17899  | -0.0364  | 0.43255  | -0.04769 | 0.30375  | -0.11224 |
| 0.042106 | 0.36394  | 0.085587 | 0.06461  | 0.064566 | 0.16362  | 0.075633 | 0.1026   | 0.231791 |
| -0.06808 | 0.14185  | -0.16003 | 0.00052  | -0.05869 | 0.20549  | -0.21697 | 2.22E-06 | -0.33518 |
| 0.124348 | 0.00714  | -0.0173  | 0.70921  | 0.059844 | 0.19672  | -0.05815 | 0.20974  | -0.07454 |
| -0.06757 | 0.14486  | -0.21073 | 4.36E-06 | -0.14515 | 0.00166  | -0.22136 | 1.36E-06 | -0.26649 |
| 0.073075 | 0.11479  | 0.143705 | 0.00185  | 0.076045 | 0.10073  | 0.153887 | 0.00085  | 0.157459 |
| 0.187624 | 4.50E-05 | 0.148572 | 0.00128  | 0.167759 | 0.00027  | 0.095275 | 0.03958  | 0.105918 |
| -0.02271 | 0.62446  | 0.010585 | 0.81954  | -0.0083  | 0.85795  | 0.015341 | 0.7409   | -0.06245 |
| 0.063792 | 0.16874  | 0.027174 | 0.55803  | 0.0441   | 0.34164  | 0.020823 | 0.65356  | 0.082391 |
| 0.22035  | 1.52E-06 | 0.363187 | 5.23E-16 | 0.351407 | 5.09E-15 | 0.236695 | 2.28E-07 | 0.26875  |
| 0.108593 | 0.01891  | 0.056987 | 0.219    | 0.106247 | 0.02165  | 0.037322 | 0.42102  | 0.039232 |
| 0.051017 | 0.27123  | 0.04788  | 0.30183  | 0.054924 | 0.23617  | 0.04394  | 0.3434   | 0.09532  |
| 0.034827 | 0.45275  | 0.016441 | 0.72307  | 0.011538 | 0.80361  | 0.025003 | 0.58992  | 0.005975 |
| -0.05443 | 0.24039  | -0.07783 | 0.09297  | -0.04244 | 0.36018  | -0.07609 | 0.10054  | -0.11419 |
| 0.05837  | 0.208    | 0.096255 | 0.03759  | 0.071547 | 0.12259  | 0.074002 | 0.11024  | 0.05093  |
| 0.102245 | 0.02715  | 0.039069 | 0.39959  | 0.070088 | 0.13043  | 0.012955 | 0.78008  | -0.02535 |
| -0.00994 | 0.83039  | 0.003057 | 0.94747  | 0.005655 | 0.90299  | -0.01157 | 0.80305  | 0.102671 |
| -0.03067 | 0.50851  | -0.09657 | 0.03696  | -0.03473 | 0.45399  | -0.12232 | 0.00814  | -0.21668 |
| -0.10879 | 0.01869  | -0.12775 | 0.0057   | -0.03984 | 0.39039  | -0.17595 | 0.00013  | -0.21547 |
| -0.00188 | 0.96775  | 0.029133 | 0.53     | 0.023416 | 0.61375  | 0.016807 | 0.71716  | 0.262626 |
| 0.009309 | 0.84099  | 0.0047   | 0.91931  | 0.003072 | 0.94722  | 0.003359 | 0.94229  | 0.012011 |
| 0.016372 | 0.72419  | 0.041391 | 0.37215  | 0.041597 | 0.36978  | 0.040892 | 0.37795  | 0.122628 |
| 0.040604 | 0.38132  | 0.070091 | 0.13041  | 0.046853 | 0.31233  | 0.067579 | 0.1448   | 0.029523 |
| -0.04563 | 0.32517  | 0.083491 | 0.07146  | 0.025978 | 0.5755   | 0.087542 | 0.05871  | 0.107881 |
| -0.02736 | 0.55535  | -0.02701 | 0.56043  | -0.01849 | 0.6903   | -0.01975 | 0.6704   | -0.0686  |
| -0.095   | 0.04016  | 0.011709 | 0.80075  | -0.04233 | 0.36142  | 0.041138 | 0.37509  | 0.075361 |
| 0.008523 | 0.85426  | -0.06447 | 0.16425  | -0.01934 | 0.67674  | -0.07715 | 0.09587  | -0.08441 |
| 0.059409 | 0.20001  | 0.076722 | 0.09773  | 0.047634 | 0.30432  | 0.082187 | 0.07601  | 0.124834 |
| 0.184913 | 5.82E-05 | 0.148065 | 0.00133  | 0.119927 | 0.00949  | 0.13665  | 0.00309  | 0.151894 |
| 0.049636 | 0.28443  | 0.141425 | 0.00219  | 0.101057 | 0.02899  | 0.140998 | 0.00226  | 0.137706 |
| 0.259548 | 1.26E-08 | 0.329966 | 2.53E-13 | 0.30892  | 8.76E-12 | 0.228264 | 6.18E-07 | 0.268709 |
| 0.138771 | 0.00265  | 0.179845 | 9.31E-05 | 0.135214 | 0.00342  | 0.179503 | 9.60E-05 | 0.210552 |
| 0.088899 | 0.05489  | 0.134838 | 0.00351  | 0.119606 | 0.00968  | 0.094131 | 0.04203  | 0.070147 |
| -0.01088 | 0.81458  | 0.013221 | 0.77568  | 0.025627 | 0.58067  | 0.017286 | 0.70947  | -0.00118 |
| 0.170336 | 0.00022  | 0.176975 | 0.00012  | 0.18409  | 6.29E-05 | 0.092617 | 0.04546  | 0.093822 |
| 0.127195 | 0.00591  | 0.075547 | 0.10299  | 0.152727 | 0.00093  | -0.01093 | 0.81376  | -0.02871 |
| -0.03297 | 0.47716  | 0.082771 | 0.07394  | 0.017333 | 0.7087   | 0.092951 | 0.04468  | 0.104714 |
| 0.005178 | 0.91113  | 0.04917  | 0.28898  | 0.023391 | 0.61412  | 0.073491 | 0.11273  | 0.114397 |
| 0.068313 | 0.14048  | 0.201497 | 1.14E-05 | 0.146576 | 0.00149  | 0.171832 | 0.00019  | 0.339036 |
| 0.004684 | 0.91959  | -0.03398 | 0.46379  | -0.00846 | 0.85524  | -0.01585 | 0.73268  | -0.07304 |

|          |          |          |          |          |          |          |          |          |
|----------|----------|----------|----------|----------|----------|----------|----------|----------|
| 0.050352 | 0.27753  | 0.158326 | 0.00059  | 0.07594  | 0.1012   | 0.18713  | 4.72E-05 | 0.222761 |
| -0.01954 | 0.67355  | 0.025978 | 0.57549  | 0.016329 | 0.72488  | 0.020722 | 0.65513  | 0.169009 |
| -0.04934 | 0.28734  | -0.01942 | 0.67555  | -0.01598 | 0.7305   | -0.01917 | 0.67947  | 0.035884 |
| -0.00848 | 0.85492  | 0.036506 | 0.43126  | 0.01113  | 0.81042  | 0.04948  | 0.28595  | -0.00495 |
| 0.095671 | 0.03876  | 0.071789 | 0.12133  | 0.127306 | 0.00587  | 0.001562 | 0.97314  | 0.003039 |
| -0.09198 | 0.04696  | -0.03748 | 0.41899  | -0.05601 | 0.22704  | -0.02074 | 0.65487  | -0.03981 |
| -0.04502 | 0.3317   | -0.02495 | 0.59066  | -0.03253 | 0.48319  | -0.02342 | 0.61364  | -0.04688 |
| 0.134287 | 0.00364  | 0.098416 | 0.03348  | 0.098108 | 0.03404  | 0.053196 | 0.25126  | 0.100437 |
| 0.007403 | 0.87323  | 0.070141 | 0.13014  | 0.030356 | 0.51286  | 0.075358 | 0.10385  | 0.142481 |
| -0.06453 | 0.16383  | -0.12768 | 0.00573  | -0.06856 | 0.13902  | -0.15882 | 0.00057  | -0.21354 |
| 0.013668 | 0.7683   | 0.064821 | 0.16196  | 0.023694 | 0.60954  | 0.048209 | 0.29852  | 0.128276 |
| 0.004004 | 0.93123  | 0.079232 | 0.08721  | 0.015646 | 0.73595  | 0.097381 | 0.0354   | 0.111402 |
| -0.01251 | 0.7875   | 0.00362  | 0.9378   | 0.004545 | 0.92196  | -0.0113  | 0.80759  | 0.057201 |
| -0.10767 | 0.01995  | -0.06285 | 0.17512  | -0.06663 | 0.15051  | -0.04261 | 0.35818  | -0.06317 |
| 0.180917 | 8.44E-05 | 0.105987 | 0.02198  | 0.12831  | 0.00549  | 0.075828 | 0.10171  | 0.124256 |
| -0.00576 | 0.90124  | -0.09154 | 0.04805  | -0.03875 | 0.40351  | -0.12065 | 0.00906  | -0.23061 |
| 0.111371 | 0.01605  | 0.145774 | 0.00158  | 0.1222   | 0.0082   | 0.173031 | 0.00017  | 0.079068 |
| 0.134675 | 0.00355  | 0.07894  | 0.08838  | 0.096398 | 0.0373   | 0.054053 | 0.24369  | 0.028343 |
| 0.058364 | 0.20805  | 0.026463 | 0.56838  | 0.039977 | 0.38872  | 0.020621 | 0.6567   | -0.02026 |
| 0.050218 | 0.27881  | 0.01912  | 0.68026  | 0.013179 | 0.77637  | 0.028567 | 0.53803  | 0.028364 |
| 0.004519 | 0.92241  | 0.00847  | 0.85514  | 0.012578 | 0.78631  | 0.008273 | 0.85849  | 0.159051 |
| 0.057229 | 0.21704  | 0.031754 | 0.49363  | 0.006654 | 0.88596  | 0.039832 | 0.39044  | 0.075002 |
| 0.077664 | 0.09367  | 0.017363 | 0.70823  | 0.026089 | 0.57386  | 0.002532 | 0.95648  | 0.008886 |
| -0.03652 | 0.43111  | -0.11881 | 0.01018  | -0.0499  | 0.2819   | -0.13049 | 0.00474  | -0.19864 |
| 0.042498 | 0.35948  | 0.061692 | 0.18323  | 0.096566 | 0.03697  | 0.022965 | 0.62059  | 0.030757 |
| -0.00019 | 0.9967   | -0.1447  | 0.00172  | -0.06107 | 0.1877   | -0.16468 | 0.00035  | -0.20397 |
| -0.06912 | 0.13581  | -0.16691 | 0.00029  | -0.07046 | 0.12841  | -0.19066 | 3.37E-05 | -0.2729  |
| -0.06076 | 0.18994  | -0.19237 | 2.85E-05 | -0.11086 | 0.01655  | -0.21149 | 4.02E-06 | -0.2604  |
| -0.00174 | 0.97007  | 0.038586 | 0.40546  | 0.020971 | 0.65125  | 0.026284 | 0.571    | 0.095599 |
| 0.051492 | 0.26678  | 0.065013 | 0.16072  | 0.06662  | 0.1506   | 0.037208 | 0.42244  | 0.027682 |
| 0.092773 | 0.04509  | 0.080346 | 0.08284  | 0.05348  | 0.24873  | 0.080096 | 0.0838   | 0.07659  |
| -0.01882 | 0.68498  | 0.084497 | 0.0681   | 0.039997 | 0.38848  | 0.107108 | 0.02061  | 0.242373 |
| 0.206377 | 6.91E-06 | 0.190906 | 3.29E-05 | 0.184883 | 5.84E-05 | 0.139877 | 0.00245  | 0.05633  |
| 0.152884 | 0.00092  | 0.153744 | 0.00086  | 0.157415 | 0.00064  | 0.106147 | 0.02178  | 0.070194 |
| 0.170164 | 0.00022  | 0.162536 | 0.00042  | 0.149711 | 0.00117  | 0.118811 | 0.01018  | 0.176    |
| 0.140671 | 0.00231  | 0.084943 | 0.06665  | 0.109904 | 0.01751  | 0.051337 | 0.26823  | 0.030995 |
| 0.294442 | 8.57E-11 | 0.248648 | 5.19E-08 | 0.286142 | 2.99E-10 | 0.144344 | 0.00176  | 0.298582 |
| 0.08702  | 0.06024  | -0.01091 | 0.81414  | 0.036979 | 0.4253   | -0.05337 | 0.24971  | -0.07329 |
| 0.05404  | 0.2438   | 0.019588 | 0.67287  | 0.018979 | 0.68248  | 0.010844 | 0.81521  | 0.066951 |
| 0.028108 | 0.54457  | -0.17442 | 0.00015  | -0.06985 | 0.13173  | -0.20031 | 1.29E-05 | -0.31311 |
| 0.21224  | 3.71E-06 | 0.266241 | 5.10E-09 | 0.197867 | 1.65E-05 | 0.26346  | 7.44E-09 | 0.306193 |
| 0.270701 | 2.75E-09 | 0.184142 | 6.26E-05 | 0.263395 | 7.51E-09 | 0.078518 | 0.0901   | 0.051997 |
| 0.06003  | 0.19534  | 0.008847 | 0.84877  | 0.048645 | 0.29417  | -0.01347 | 0.77154  | -0.04703 |
| -0.01051 | 0.82075  | 0.003467 | 0.94044  | -0.0344  | 0.45835  | 0.043453 | 0.34878  | 0.117299 |
| 0.008764 | 0.85019  | -0.03593 | 0.4386   | -0.04911 | 0.28954  | -0.02657 | 0.56687  | -0.05928 |

|          |          |          |          |          |          |          |          |          |
|----------|----------|----------|----------|----------|----------|----------|----------|----------|
| 0.061394 | 0.18536  | 0.098103 | 0.03405  | 0.088058 | 0.05723  | 0.103822 | 0.02485  | 0.164544 |
| -0.00977 | 0.83317  | -0.00522 | 0.91041  | -0.00392 | 0.9326   | 0.005302 | 0.90902  | -0.00701 |
| -0.00653 | 0.88813  | -0.00629 | 0.89224  | -0.0142  | 0.75959  | -0.00471 | 0.91922  | -0.00902 |
| -0.06626 | 0.1528   | -0.05044 | 0.2767   | -0.07591 | 0.10134  | -0.01402 | 0.76259  | -0.23039 |
| 0.118776 | 0.0102   | 0.062125 | 0.18017  | 0.091316 | 0.04859  | 0.036304 | 0.4338   | 0.027953 |
| 0.034116 | 0.46204  | 0.011521 | 0.80389  | -0.00164 | 0.97184  | 0.038796 | 0.4029   | -0.00692 |
| 0.006212 | 0.8935   | 0.018758 | 0.68598  | 0.030661 | 0.50863  | -0.00953 | 0.83731  | 0.025448 |
| -0.03035 | 0.51293  | 0.023197 | 0.61706  | -0.01743 | 0.70721  | 0.052859 | 0.25428  | 0.132549 |
| -0.11328 | 0.01431  | -0.1712  | 0.0002   | -0.09899 | 0.03246  | -0.18373 | 6.50E-05 | -0.22469 |
| -0.03281 | 0.47943  | 0.01198  | 0.79625  | -0.01348 | 0.77142  | 0.034652 | 0.45504  | 0.042816 |
| -0.02306 | 0.61912  | -0.05344 | 0.24912  | -0.0342  | 0.46089  | -0.05762 | 0.21389  | -0.09712 |
| 0.30256  | 2.42E-11 | 0.230594 | 4.71E-07 | 0.326794 | 4.39E-13 | 0.11445  | 0.01333  | 0.021213 |
| -0.042   | 0.36512  | -0.01889 | 0.68388  | -0.02767 | 0.5509   | -0.03193 | 0.49129  | 0.031707 |
| 0.152085 | 0.00098  | 0.154835 | 0.00079  | 0.21006  | 4.68E-06 | 0.031726 | 0.49402  | 0.107248 |
| 0.077048 | 0.09631  | 0.250567 | 4.06E-08 | 0.11422  | 0.01352  | 0.309575 | 7.88E-12 | 0.197218 |
| 0.241061 | 1.34E-07 | 0.121868 | 0.00838  | 0.129884 | 0.00494  | 0.101975 | 0.02756  | 0.110133 |
| -0.05645 | 0.22334  | -0.1206  | 0.00909  | -0.05983 | 0.19684  | -0.14534 | 0.00164  | -0.159   |
| 0.133979 | 0.00372  | 0.056024 | 0.22689  | 0.042521 | 0.35923  | 0.071647 | 0.12207  | 0.022768 |
| 0.017976 | 0.69842  | -0.00357 | 0.93873  | 0.016462 | 0.72272  | -0.03288 | 0.47838  | -0.03986 |
| -0.04427 | 0.33979  | -0.05362 | 0.24746  | -0.0479  | 0.30163  | -0.02062 | 0.65672  | -0.01737 |
| 0.018332 | 0.69275  | 0.017789 | 0.70141  | 0.015964 | 0.73078  | 0.024916 | 0.59121  | 0.074005 |
| 0.036064 | 0.43686  | 0.007382 | 0.87359  | 0.027913 | 0.54738  | 0.003871 | 0.93352  | 0.010059 |
| 0.112715 | 0.01481  | -0.01514 | 0.74418  | 0.071347 | 0.12364  | -0.08328 | 0.07219  | 0.01497  |
| 0.075555 | 0.10295  | 0.109808 | 0.01761  | 0.088046 | 0.05726  | 0.116047 | 0.01209  | 0.179864 |
| -0.00703 | 0.87957  | -0.03738 | 0.42033  | -0.02203 | 0.63487  | -0.05549 | 0.23139  | 0.073387 |
| -0.06319 | 0.17283  | -0.08475 | 0.06726  | -0.07135 | 0.12364  | -0.07516 | 0.10476  | -0.16052 |
| -0.09049 | 0.05066  | -0.07478 | 0.10652  | -0.03431 | 0.45951  | -0.09831 | 0.03367  | -0.15435 |
| 0.025644 | 0.58041  | 0.072688 | 0.11673  | 0.042401 | 0.36058  | 0.067845 | 0.14322  | 0.159453 |
| -0.0051  | 0.91256  | -0.01085 | 0.81514  | 0.006568 | 0.88743  | -0.00885 | 0.84877  | -0.01668 |
| 0.064149 | 0.16636  | 0.118007 | 0.0107   | 0.074083 | 0.10985  | 0.130849 | 0.00462  | 0.142615 |
| -0.02345 | 0.61328  | 0.044581 | 0.3364   | 0.030329 | 0.51323  | 0.026084 | 0.57394  | 0.137995 |
| 0.02097  | 0.65127  | -0.03563 | 0.44237  | 0.005998 | 0.89714  | -0.05106 | 0.2708   | -0.10559 |
| -0.02232 | 0.63044  | -0.15311 | 0.0009   | -0.0824  | 0.07525  | -0.1705  | 0.00021  | -0.26762 |
| -0.01598 | 0.73058  | -0.07513 | 0.10489  | -0.03891 | 0.40157  | -0.08196 | 0.07682  | -0.13056 |
| -0.02709 | 0.55923  | 0.054409 | 0.24059  | 0.007579 | 0.87025  | 0.052621 | 0.25642  | 0.112057 |
| -0.07508 | 0.10516  | -0.09789 | 0.03444  | -0.07891 | 0.08849  | -0.08864 | 0.0556   | -0.15515 |
| 0.044324 | 0.3392   | -0.04693 | 0.31153  | 0.028018 | 0.54587  | -0.09613 | 0.03784  | -0.18606 |
| 0.00938  | 0.83979  | -0.16139 | 0.00046  | -0.06862 | 0.13872  | -0.18999 | 3.59E-05 | -0.31779 |
| 0.054414 | 0.24055  | 0.109218 | 0.01823  | 0.106481 | 0.02137  | 0.075712 | 0.10223  | 0.045193 |
| 0.071463 | 0.12303  | 0.117543 | 0.01102  | 0.112846 | 0.01469  | 0.080165 | 0.08354  | 0.053312 |
| 0.036646 | 0.42949  | 0.083103 | 0.07279  | 0.034397 | 0.45836  | 0.091175 | 0.04894  | 0.116612 |
| -0.14462 | 0.00173  | -0.24062 | 1.41E-07 | -0.12515 | 0.00677  | -0.27261 | 2.11E-09 | -0.33024 |
| -0.08625 | 0.06256  | -0.15045 | 0.00111  | -0.06469 | 0.1628   | -0.17332 | 0.00017  | -0.25842 |
| -0.02415 | 0.60271  | 0.044894 | 0.33301  | 0.011247 | 0.80846  | 0.049208 | 0.2886   | 0.19221  |
| 0.050899 | 0.27234  | 0.140435 | 0.00235  | 0.078712 | 0.08931  | 0.149148 | 0.00123  | 0.151179 |

|          |          |          |          |          |          |          |          |          |
|----------|----------|----------|----------|----------|----------|----------|----------|----------|
| -0.14682 | 0.00146  | -0.1679  | 0.00027  | -0.15261 | 0.00094  | -0.15922 | 0.00055  | -0.20569 |
| 0.196317 | 1.93E-05 | 0.054278 | 0.24173  | 0.099548 | 0.03149  | 0.018584 | 0.68874  | -0.03462 |
| 0.192255 | 2.88E-05 | 0.157419 | 0.00064  | 0.216365 | 2.37E-06 | 0.057198 | 0.21729  | 0.126007 |
| 0.161351 | 0.00046  | 0.132541 | 0.00411  | 0.094933 | 0.0403   | 0.138723 | 0.00266  | 0.064358 |
| 0.192819 | 2.73E-05 | 0.120131 | 0.00936  | 0.157909 | 0.00062  | 0.048111 | 0.2995   | 0.208363 |
| 0.116516 | 0.01174  | 0.133785 | 0.00377  | 0.095776 | 0.03855  | 0.119936 | 0.00948  | 0.16654  |
| 0.237902 | 1.97E-07 | 0.090198 | 0.05142  | 0.144071 | 0.0018   | 0.026636 | 0.56585  | 0.1671   |
| 0.035609 | 0.44267  | 0.019601 | 0.67267  | 0.010141 | 0.82698  | 0.016936 | 0.71508  | 0.027124 |
| -0.00944 | 0.83872  | 0.002817 | 0.95159  | -0.00118 | 0.97976  | -0.00455 | 0.92185  | -0.00288 |
| 0.042849 | 0.35553  | 0.020663 | 0.65605  | 0.01202  | 0.79558  | 0.016805 | 0.7172   | 0.035698 |
| 0.186392 | 5.06E-05 | 0.182756 | 7.12E-05 | 0.264201 | 6.73E-09 | 0.04566  | 0.32483  | 0.148784 |
| 0.081452 | 0.07868  | 0.037986 | 0.4128   | 0.058864 | 0.20417  | 0.046623 | 0.31472  | 0.002383 |
| 0.097494 | 0.03518  | 0.170037 | 0.00022  | 0.123023 | 0.00778  | 0.168812 | 0.00025  | 0.102232 |
| 0.026798 | 0.56349  | 0.082823 | 0.07376  | 0.047656 | 0.3041   | 0.09742  | 0.03532  | 0.148551 |
| 0.077394 | 0.09482  | 0.099905 | 0.03088  | 0.115257 | 0.01269  | 0.045315 | 0.3285   | 0.160045 |
| 0.016927 | 0.71523  | 0.030853 | 0.50598  | 0.011894 | 0.79768  | 0.038946 | 0.40108  | 0.139756 |
| 0.04846  | 0.29601  | 0.088104 | 0.0571   | 0.102228 | 0.02717  | 0.047539 | 0.3053   | 0.094002 |
| 0.115791 | 0.01228  | 0.119439 | 0.00978  | 0.095774 | 0.03856  | 0.098477 | 0.03337  | 0.252576 |
| 0.04915  | 0.28917  | 0.081364 | 0.079    | 0.076477 | 0.09881  | 0.069411 | 0.13419  | 0.046247 |
| -0.00918 | 0.84308  | 0.0538   | 0.24591  | -0.01002 | 0.82904  | 0.088819 | 0.05511  | 0.113422 |
| 0.041837 | 0.36702  | -0.11655 | 0.01172  | 0.001658 | 0.9715   | -0.17253 | 0.00018  | -0.20112 |
| 0.214001 | 3.07E-06 | 0.149892 | 0.00116  | 0.176914 | 0.00012  | 0.096016 | 0.03806  | 0.078227 |
| 0.323732 | 7.44E-13 | 0.195433 | 2.11E-05 | 0.273677 | 1.82E-09 | 0.066496 | 0.15137  | 0.070892 |
| 0.061951 | 0.18139  | -0.02697 | 0.56097  | -0.01353 | 0.77063  | -0.01246 | 0.78823  | -0.04625 |
| 0.057784 | 0.21261  | 0.137017 | 0.00301  | 0.076217 | 0.09996  | 0.15428  | 0.00082  | 0.238858 |
| 0.054101 | 0.24327  | 0.034937 | 0.45133  | 0.061238 | 0.18648  | 0.007327 | 0.87452  | 0.084608 |
| 0.266407 | 4.98E-09 | 0.346533 | 1.27E-14 | 0.314345 | 3.61E-12 | 0.265552 | 5.60E-09 | 0.317418 |
| 0.020521 | 0.65825  | -0.02524 | 0.58633  | -0.01803 | 0.69762  | -0.03599 | 0.43774  | -0.05162 |
| 0.044285 | 0.33963  | 0.039332 | 0.39642  | 0.071738 | 0.1216   | -0.00178 | 0.96938  | 0.002694 |
| 0.131156 | 0.00453  | 0.042277 | 0.36199  | 0.074048 | 0.11002  | -0.0011  | 0.98113  | 0.079976 |
| 0.167063 | 0.00029  | 0.088982 | 0.05466  | 0.128341 | 0.00548  | 0.03624  | 0.43462  | 0.0415   |
| 0.144417 | 0.00175  | 0.092922 | 0.04475  | 0.103901 | 0.02474  | 0.081422 | 0.07879  | 0.071362 |
| 0.160833 | 0.00048  | 0.128802 | 0.00531  | 0.173226 | 0.00017  | 0.053912 | 0.24492  | -0.00839 |
| 0.116547 | 0.01172  | 0.02504  | 0.58937  | 0.024579 | 0.59625  | 0.033474 | 0.47052  | 0.000274 |
| -0.00136 | 0.97659  | -0.03361 | 0.46872  | -0.01791 | 0.69947  | -0.03463 | 0.45531  | -0.03964 |
| 0.01062  | 0.81895  | 0.026909 | 0.56188  | 0.031624 | 0.4954   | 0.013956 | 0.76358  | -0.0033  |
| 0.065735 | 0.15611  | 0.073997 | 0.11027  | 0.01674  | 0.71824  | 0.105655 | 0.0224   | 0.187784 |
| -0.10503 | 0.02321  | -0.0438  | 0.34498  | -0.05147 | 0.267    | -0.01947 | 0.67473  | -0.07069 |
| -0.01178 | 0.79956  | -0.03334 | 0.47226  | 0.007667 | 0.86876  | -0.05725 | 0.21689  | -0.11161 |
| 0.120594 | 0.00909  | 0.144202 | 0.00178  | 0.120988 | 0.00887  | 0.157315 | 0.00065  | 0.121161 |
| 0.056872 | 0.21993  | 0.071092 | 0.125    | 0.052428 | 0.25818  | 0.07451  | 0.10781  | 0.08318  |
| -0.13469 | 0.00354  | -0.09111 | 0.0491   | -0.0985  | 0.03333  | -0.07711 | 0.09602  | -0.12086 |
| -0.0671  | 0.14767  | -0.08949 | 0.05329  | -0.06535 | 0.15858  | -0.07404 | 0.11008  | -0.16215 |
| 0.128559 | 0.0054   | 0.192675 | 2.77E-05 | 0.137494 | 0.00291  | 0.186005 | 5.25E-05 | 0.19071  |
| 0.074387 | 0.1084   | 0.008628 | 0.85247  | 0.004126 | 0.92915  | 0.024067 | 0.60392  | -0.02608 |



|          |          |          |          |          |          |          |          |          |
|----------|----------|----------|----------|----------|----------|----------|----------|----------|
| -0.0092  | 0.84289  | -0.00756 | 0.87059  | -0.00358 | 0.93849  | -0.00369 | 0.93657  | -0.00132 |
| -0.01782 | 0.7009   | -0.01047 | 0.82141  | -0.00907 | 0.84496  | -0.01095 | 0.8134   | -0.01863 |
| 0.022831 | 0.62263  | 0.062535 | 0.17731  | 0.039299 | 0.39682  | 0.0937   | 0.04298  | 0.059745 |
| 0.045134 | 0.33043  | 0.046824 | 0.31263  | 0.040993 | 0.37677  | 0.033472 | 0.47054  | 0.251308 |
| 0.067442 | 0.14562  | -0.12617 | 0.00633  | -0.02533 | 0.58502  | -0.18052 | 8.75E-05 | -0.25381 |
| 0.097098 | 0.03594  | 0.031911 | 0.4915   | 0.059552 | 0.19892  | -0.0033  | 0.94324  | 0.092527 |
| 0.088666 | 0.05553  | 0.153875 | 0.00085  | 0.112575 | 0.01493  | 0.134996 | 0.00347  | 0.271728 |
| 0.103916 | 0.02472  | 0.216535 | 2.32E-06 | 0.156084 | 0.00071  | 0.198313 | 1.58E-05 | 0.325714 |
| -0.00608 | 0.8958   | -0.0114  | 0.80593  | -0.00804 | 0.86243  | -0.002   | 0.96564  | -0.02158 |
| 0.0494   | 0.28672  | 0.036949 | 0.42568  | 0.05552  | 0.23111  | 0.01103  | 0.8121   | 0.041588 |
| 0.062958 | 0.17439  | 0.053501 | 0.24854  | 0.067884 | 0.14299  | 0.035553 | 0.44339  | 0.00811  |
| 0.065489 | 0.15767  | 0.070902 | 0.12601  | 0.03778  | 0.41534  | 0.08681  | 0.06086  | 0.167738 |
| 0.053923 | 0.24482  | 0.003502 | 0.93984  | 0.015699 | 0.73508  | -0.01555 | 0.73751  | 0.017793 |
| 0.029469 | 0.52525  | -0.06153 | 0.18439  | -0.03166 | 0.49488  | -0.06769 | 0.14412  | -0.13393 |
| -0.05608 | 0.2264   | -0.12822 | 0.00552  | -0.02208 | 0.63406  | -0.17748 | 0.00012  | -0.2375  |
| -0.10387 | 0.02478  | -0.13905 | 0.0026   | -0.11528 | 0.01267  | -0.10213 | 0.02733  | -0.24056 |
| -0.058   | 0.21091  | -0.13927 | 0.00256  | -0.07406 | 0.10996  | -0.1585  | 0.00059  | -0.08865 |
| 0.014384 | 0.75654  | 0.092152 | 0.04655  | 0.060597 | 0.19114  | 0.098966 | 0.0325   | 0.029846 |
| -0.00946 | 0.83836  | -0.00757 | 0.87041  | -0.00503 | 0.9136   | -0.0067  | 0.88511  | -0.00872 |
| -0.00851 | 0.85449  | -0.00294 | 0.94943  | 0.000199 | 0.99657  | -0.00672 | 0.8848   | -0.00925 |
| -0.02635 | 0.5701   | -0.02027 | 0.66221  | -0.01999 | 0.66657  | -0.02189 | 0.637    | -0.07484 |
| 0.045057 | 0.33127  | 0.029726 | 0.52166  | 0.015637 | 0.73609  | 0.03527  | 0.44702  | 0.076153 |
| 0.035857 | 0.43949  | 0.002787 | 0.95211  | 0.009226 | 0.84238  | 0.018094 | 0.69653  | 0.023112 |
| 0.062626 | 0.17668  | 0.101216 | 0.02874  | 0.101539 | 0.02823  | 0.06739  | 0.14593  | 0.065948 |
| 0.011029 | 0.81211  | 0.010022 | 0.82899  | 0.011117 | 0.81063  | 0.021011 | 0.65063  | 0.045373 |
| 0.046826 | 0.31261  | 0.001252 | 0.97848  | 0.037803 | 0.41506  | -0.03027 | 0.51406  | -0.02709 |
| -0.15151 | 0.00102  | -0.12425 | 0.00718  | -0.10117 | 0.02881  | -0.13018 | 0.00484  | -0.20468 |
| 0.0474   | 0.30671  | 0.00504  | 0.9135   | 0.037434 | 0.41962  | -0.0127  | 0.78436  | -0.06832 |
| -0.04913 | 0.2894   | 0.036536 | 0.43087  | 0.010573 | 0.81975  | 0.018098 | 0.69647  | 0.06149  |
| 0.018889 | 0.68391  | 0.00603  | 0.8966   | 0.013509 | 0.77093  | 0.008298 | 0.85806  | 0.049483 |
| -0.10917 | 0.01828  | 0.012257 | 0.79165  | -0.0253  | 0.58551  | 0.028949 | 0.5326   | 0.030519 |
| 0.271943 | 2.32E-09 | 0.112211 | 0.01526  | 0.157264 | 0.00065  | 0.056215 | 0.22531  | 0.023619 |
| -0.08982 | 0.05241  | -0.09309 | 0.04435  | -0.09173 | 0.04758  | -0.07558 | 0.10286  | -0.18348 |
| 0.037313 | 0.42113  | -0.02628 | 0.57106  | 0.004535 | 0.92213  | -0.05271 | 0.25564  | -0.07942 |
| 0.014552 | 0.75379  | -0.13001 | 0.00489  | -0.05978 | 0.19721  | -0.14216 | 0.00207  | -0.21453 |
| 0.078136 | 0.09168  | -0.01475 | 0.75057  | 0.014345 | 0.75719  | -0.03754 | 0.41835  | 0.010618 |
| 0.070883 | 0.12611  | 0.055184 | 0.23395  | 0.048152 | 0.29909  | 0.027633 | 0.55139  | 0.108222 |
| 0.023906 | 0.60634  | 0.055353 | 0.23252  | 0.053888 | 0.24513  | 0.030056 | 0.51703  | 0.105408 |
| 0.003072 | 0.94722  | 0.052901 | 0.2539   | 0.030309 | 0.51351  | 0.046609 | 0.31486  | 0.083381 |
| 0.262499 | 8.47E-09 | 0.257525 | 1.64E-08 | 0.294552 | 8.42E-11 | 0.139258 | 0.00256  | 0.095975 |
| 0.017342 | 0.70856  | 0.063477 | 0.17086  | 0.037784 | 0.41529  | 0.074686 | 0.10698  | 0.051648 |
| 0.034528 | 0.45665  | 0.05699  | 0.21898  | 0.048078 | 0.29983  | 0.053677 | 0.24699  | 0.021268 |
| 0.132527 | 0.00412  | 0.055266 | 0.23325  | 0.077801 | 0.09309  | 0.046279 | 0.3183   | 0.002297 |
| 0.058996 | 0.20316  | 0.07952  | 0.08606  | 0.032532 | 0.4831   | 0.112188 | 0.01528  | 0.104368 |
| 0.080854 | 0.08091  | 0.126926 | 0.00602  | 0.078185 | 0.09148  | 0.141671 | 0.00215  | 0.098434 |

|          |         |          |          |          |         |          |          |          |
|----------|---------|----------|----------|----------|---------|----------|----------|----------|
| 0.110007 | 0.0174  | 0.124519 | 0.00706  | 0.122279 | 0.00816 | 0.101114 | 0.0289   | 0.04774  |
| -0.00516 | 0.91145 | 0.059189 | 0.20168  | 0.028305 | 0.54175 | 0.052171 | 0.26052  | 0.065022 |
| 0.144984 | 0.00168 | 0.067823 | 0.14335  | 0.116222 | 0.01196 | 0.009163 | 0.84345  | 0.005618 |
| -0.08548 | 0.06494 | -0.12851 | 0.00542  | -0.11863 | 0.0103  | -0.09733 | 0.0355   | -0.05218 |
| 0.054767 | 0.23751 | -0.04197 | 0.3655   | -0.03445 | 0.45769 | -0.03448 | 0.45728  | -0.12391 |
| 0.006736 | 0.88457 | -0.00855 | 0.85384  | 0.004136 | 0.92898 | -0.01614 | 0.72787  | 0.04063  |
| -0.03821 | 0.41007 | -0.00429 | 0.92632  | -0.01341 | 0.77248 | -0.00922 | 0.84246  | 0.076791 |
| 0.031158 | 0.50178 | -0.01882 | 0.68503  | 0.013129 | 0.77721 | -0.05163 | 0.26552  | 0.027295 |
| 0.063806 | 0.16865 | 0.043509 | 0.34816  | 0.050104 | 0.2799  | 0.036609 | 0.42996  | 0.086483 |
| 0.088051 | 0.05725 | 0.070806 | 0.12652  | 0.101763 | 0.02788 | 0.008545 | 0.85389  | 0.01347  |
| 0.128164 | 0.00554 | 0.052318 | 0.25917  | 0.120308 | 0.00926 | -0.01548 | 0.73864  | -0.01003 |
| -0.09053 | 0.05057 | -0.04094 | 0.37741  | -0.07315 | 0.11439 | -0.02082 | 0.65358  | -0.00228 |
| -0.02826 | 0.54246 | -0.02916 | 0.52957  | -0.05544 | 0.2318  | 0.005325 | 0.90862  | -0.07315 |
| 0.080029 | 0.08406 | 0.077793 | 0.09312  | 0.049949 | 0.2814  | 0.084913 | 0.06675  | 0.063009 |
| 0.067378 | 0.146   | -0.03081 | 0.50651  | -0.02165 | 0.64077 | -0.02249 | 0.62783  | -0.01982 |
| 0.069246 | 0.13512 | 0.039067 | 0.39961  | 0.051606 | 0.26572 | 0.016751 | 0.71806  | 0.053289 |
| 0.066272 | 0.15275 | 0.093015 | 0.04453  | 0.084223 | 0.069   | 0.048429 | 0.29632  | 0.028738 |
| 0.051855 | 0.26342 | -0.01744 | 0.70705  | -0.00522 | 0.91037 | -0.00734 | 0.87433  | 0.020917 |
| 0.087001 | 0.06029 | 0.096918 | 0.03628  | 0.104707 | 0.02364 | 0.052122 | 0.26096  | 0.048259 |
| 0.055756 | 0.22913 | 0.002981 | 0.94878  | 0.035821 | 0.43995 | -0.03185 | 0.49227  | -0.02712 |
| 0.137537 | 0.0029  | 0.125927 | 0.00643  | 0.144101 | 0.0018  | 0.067501 | 0.14527  | 0.086455 |
| 0.018744 | 0.68621 | -0.00624 | 0.89294  | 0.030249 | 0.51435 | -0.0249  | 0.59147  | -0.03729 |
| 0.077569 | 0.09407 | 0.034747 | 0.4538   | 0.073129 | 0.11452 | -0.00122 | 0.97896  | -0.01863 |
| 0.056113 | 0.22616 | 0.001999 | 0.96563  | 0.007407 | 0.87316 | -0.0031  | 0.9468   | 0.024316 |
| -0.01594 | 0.73122 | -0.03434 | 0.45912  | -0.01128 | 0.80793 | -0.03764 | 0.41709  | -0.06348 |
| 0.077873 | 0.09278 | 0.093367 | 0.04373  | 0.052337 | 0.259   | 0.090113 | 0.05164  | 0.190976 |
| 0.019508 | 0.67413 | 0.010832 | 0.8154   | 0.024397 | 0.59897 | 0.00368  | 0.93678  | -0.01039 |
| 0.135922 | 0.00325 | 0.053281 | 0.2505   | 0.075249 | 0.10435 | 0.019024 | 0.68177  | 0.096704 |
| 0.048563 | 0.29498 | 0.028654 | 0.53678  | 0.017598 | 0.70445 | 0.038329 | 0.40859  | 0.08016  |
| -0.00685 | 0.88259 | 0.01075  | 0.81678  | 0.003348 | 0.94248 | 0.007164 | 0.87729  | 0.059771 |
| -0.01929 | 0.6775  | 0.003638 | 0.9375   | -0.00225 | 0.96137 | 0.003608 | 0.93801  | 0.014632 |
| 0.018629 | 0.68802 | 0.033155 | 0.47476  | 0.028176 | 0.5436  | 0.035963 | 0.43814  | 0.138132 |
| 0.084548 | 0.06793 | 0.085514 | 0.06483  | 0.053082 | 0.25228 | 0.105146 | 0.02306  | 0.04906  |
| 0.056389 | 0.22388 | 0.089659 | 0.05284  | 0.05455  | 0.23937 | 0.106653 | 0.02116  | 0.077729 |
| 0.065337 | 0.15864 | 0.048326 | 0.29735  | 0.056709 | 0.22126 | 0.038585 | 0.40547  | 0.084547 |
| 0.033961 | 0.46408 | 0.053844 | 0.24552  | 0.022145 | 0.63312 | 0.08045  | 0.08244  | 0.106652 |
| 0.079432 | 0.08641 | 0.075349 | 0.1039   | 0.091137 | 0.04903 | 0.055995 | 0.22714  | 0.065784 |
| 0.006495 | 0.88867 | 0.126417 | 0.00623  | 0.02766  | 0.551   | 0.168331 | 0.00026  | 0.240795 |
| 0.051623 | 0.26556 | 0.112154 | 0.01532  | 0.089611 | 0.05296 | 0.086476 | 0.06187  | 0.130938 |
| 0.052444 | 0.25803 | 0.056552 | 0.22254  | 0.054339 | 0.2412  | 0.066384 | 0.15206  | 0.144564 |
| 0.006987 | 0.8803  | -0.13767 | 0.00287  | -0.03746 | 0.41932 | -0.1755  | 0.00014  | -0.23497 |
| 0.169008 | 0.00024 | 0.221933 | 1.27E-06 | 0.154358 | 0.00082 | 0.211891 | 3.85E-06 | 0.253924 |
| -0.05933 | 0.20064 | -0.03039 | 0.51243  | -0.01545 | 0.73912 | -0.03352 | 0.46994  | -0.10692 |
| -0.05017 | 0.27927 | -0.03851 | 0.40638  | -0.04689 | 0.31195 | -0.03089 | 0.50549  | 0.005366 |
| -0.08038 | 0.08272 | -0.08991 | 0.05216  | -0.08975 | 0.05259 | -0.07027 | 0.1294   | -0.09358 |

|          |          |          |          |          |          |          |          |          |
|----------|----------|----------|----------|----------|----------|----------|----------|----------|
| -0.08676 | 0.061    | -0.0577  | 0.21329  | -0.06533 | 0.15868  | -0.04352 | 0.34809  | -0.03871 |
| -0.03679 | 0.42771  | -0.02807 | 0.54515  | -0.02707 | 0.55954  | -0.01917 | 0.67942  | -0.06045 |
| -0.08342 | 0.07168  | -0.14949 | 0.0012   | -0.08691 | 0.06056  | -0.16676 | 0.0003   | -0.2874  |
| 0.00665  | 0.88604  | 0.002453 | 0.95783  | 0.016975 | 0.71446  | -0.01606 | 0.72927  | 0.063072 |
| 0.294534 | 8.44E-11 | 0.362511 | 5.98E-16 | 0.34256  | 2.65E-14 | 0.281303 | 6.09E-10 | 0.312988 |
| 0.087552 | 0.05868  | 0.02164  | 0.6409   | 0.072459 | 0.11788  | -0.01003 | 0.82877  | 0.070623 |
| 0.059372 | 0.20029  | 0.04128  | 0.37343  | 0.053329 | 0.25007  | -0.006   | 0.89714  | 0.110327 |
| -0.15096 | 0.00107  | -0.11998 | 0.00946  | -0.13337 | 0.00389  | -0.08624 | 0.06259  | -0.16443 |
| 0.027056 | 0.55974  | 0.082065 | 0.07645  | 0.040745 | 0.37967  | 0.104772 | 0.02355  | 0.080496 |
| -0.04535 | 0.3281   | -0.10837 | 0.01916  | -0.09004 | 0.05182  | -0.08997 | 0.05201  | -0.14976 |
| -0.01307 | 0.77813  | 0.021144 | 0.64857  | -0.01092 | 0.81386  | 0.034746 | 0.45381  | 0.062403 |
| -0.04846 | 0.29601  | -0.15154 | 0.00102  | -0.11946 | 0.00977  | -0.14586 | 0.00158  | -0.15157 |
| -0.05487 | 0.23665  | -0.16279 | 0.00041  | -0.10308 | 0.02591  | -0.18493 | 5.81E-05 | -0.19671 |
| 0.174149 | 0.00016  | 0.013547 | 0.77029  | 0.092029 | 0.04685  | -0.05412 | 0.24308  | -0.03289 |
| -0.00883 | 0.84899  | -0.03109 | 0.50271  | -0.04117 | 0.37465  | -0.02759 | 0.55201  | -0.05161 |
| 0.144598 | 0.00173  | 0.150747 | 0.00108  | 0.128743 | 0.00533  | 0.121442 | 0.00861  | 0.219628 |
| -0.00969 | 0.83449  | 0.003283 | 0.94359  | -0.0238  | 0.60797  | 0.008578 | 0.85332  | 0.052875 |
| 0.029513 | 0.52464  | -0.04649 | 0.31613  | -0.01002 | 0.82905  | -0.05796 | 0.21121  | -0.04138 |
| 0.019145 | 0.67985  | 0.022763 | 0.62366  | 0.035695 | 0.44157  | 0.002331 | 0.95993  | 0.050268 |
| 0.080599 | 0.08187  | 0.019987 | 0.6666   | 0.024862 | 0.59201  | 0.017197 | 0.71089  | -0.01985 |
| -0.0826  | 0.07454  | -0.02698 | 0.56084  | -0.0372  | 0.42254  | -0.02587 | 0.57707  | -0.06412 |
| -0.04333 | 0.35014  | -0.03067 | 0.50846  | -0.01073 | 0.81714  | -0.0188  | 0.68526  | -0.11177 |
| 0.056547 | 0.22258  | 0.075482 | 0.10329  | 0.046997 | 0.31084  | 0.085755 | 0.06408  | 0.249884 |
| 0.006782 | 0.88379  | -0.03134 | 0.49926  | -0.0032  | 0.94508  | -0.04961 | 0.28465  | -0.02818 |
| -0.06606 | 0.1541   | -0.04287 | 0.3553   | -0.03921 | 0.39791  | -0.02753 | 0.55294  | 0.0273   |
| 0.07495  | 0.10574  | 0.039988 | 0.38859  | 0.028967 | 0.53234  | 0.038239 | 0.40969  | 0.089568 |
| 0.107351 | 0.02032  | 0.042161 | 0.36331  | 0.062602 | 0.17685  | 0.01772  | 0.70251  | 0.019087 |
| 0.067736 | 0.14386  | 0.204055 | 8.80E-06 | 0.106892 | 0.02087  | 0.233727 | 3.25E-07 | 0.278723 |
| 0.036147 | 0.4358   | -0.09531 | 0.0395   | -0.04866 | 0.29397  | -0.11202 | 0.01544  | -0.0617  |
| 0.113738 | 0.01392  | 0.075328 | 0.10399  | 0.051906 | 0.26295  | 0.077446 | 0.09459  | 0.023346 |
| -0.01886 | 0.6844   | -0.02275 | 0.62394  | -0.036   | 0.43767  | -0.01003 | 0.82877  | -0.05627 |
| 0.033196 | 0.47421  | 0.115055 | 0.01285  | 0.065435 | 0.15801  | 0.14422  | 0.00178  | 0.094726 |
| 0.137217 | 0.00296  | 0.212717 | 3.52E-06 | 0.115942 | 0.01217  | 0.227337 | 6.88E-07 | 0.21102  |
| -0.03479 | 0.45329  | -0.01224 | 0.79198  | -0.02625 | 0.57156  | -0.00637 | 0.89074  | -0.0209  |
| 0.01779  | 0.7014   | 0.04065  | 0.38077  | 0.025382 | 0.58429  | 0.039827 | 0.3905   | 0.141601 |
| 0.061517 | 0.18448  | 0.060844 | 0.18934  | 0.072037 | 0.12005  | 0.026165 | 0.57274  | 0.185288 |
| 0.152337 | 0.00096  | -0.02867 | 0.53656  | 0.029231 | 0.52861  | -0.05968 | 0.19799  | -0.13234 |
| 0.159759 | 0.00053  | 0.142352 | 0.00204  | 0.147773 | 0.00136  | 0.08268  | 0.07426  | 0.143454 |
| 0.063781 | 0.16881  | 0.037507 | 0.41872  | 0.058924 | 0.20371  | 0.017023 | 0.71368  | 0.058099 |
| 0.148767 | 0.00126  | 0.159043 | 0.00056  | 0.124312 | 0.00715  | 0.152256 | 0.00096  | 0.247336 |
| 0.046876 | 0.31209  | 0.034365 | 0.45878  | 0.050818 | 0.2731   | 0.011252 | 0.80838  | 0.091892 |
| -0.0504  | 0.27707  | -0.03794 | 0.4133   | -0.07114 | 0.12476  | 0.002612 | 0.9551   | 0.018033 |
| 0.008296 | 0.85809  | -0.0809  | 0.08073  | -0.03195 | 0.49103  | -0.10549 | 0.02261  | -0.14801 |
| 0.060345 | 0.193    | 0.105076 | 0.02315  | 0.097432 | 0.0353   | 0.07445  | 0.1081   | 0.248129 |
| -0.04279 | 0.35614  | -0.14053 | 0.00234  | -0.08567 | 0.06436  | -0.14595 | 0.00156  | -0.18038 |

|          |          |          |          |          |          |          |          |          |
|----------|----------|----------|----------|----------|----------|----------|----------|----------|
| -0.01972 | 0.67077  | -0.05236 | 0.25882  | -0.01073 | 0.81709  | -0.08065 | 0.08168  | -0.03291 |
| 0.055924 | 0.22773  | 0.138934 | 0.00262  | 0.092012 | 0.04689  | 0.1438   | 0.00184  | 0.167203 |
| -0.13896 | 0.00262  | -0.0826  | 0.07454  | -0.06464 | 0.16316  | -0.09197 | 0.047    | -0.00729 |
| 0.1363   | 0.00316  | 0.0085   | 0.85465  | 0.083452 | 0.07159  | -0.04553 | 0.32619  | -0.00739 |
| -0.03429 | 0.4598   | 0.016626 | 0.72008  | 0.021801 | 0.63842  | 0.013618 | 0.76913  | 0.030244 |
| 0.009287 | 0.84135  | -0.1759  | 0.00013  | -0.06824 | 0.14089  | -0.20813 | 5.75E-06 | -0.31378 |
| 0.051133 | 0.27013  | 0.050002 | 0.28088  | 0.069091 | 0.136    | 0.009507 | 0.83765  | 0.094181 |
| 0.028169 | 0.5437   | 0.072215 | 0.11913  | 0.077773 | 0.09321  | 0.026343 | 0.57014  | 0.187353 |
| -0.08079 | 0.08115  | -0.04092 | 0.37763  | -0.05428 | 0.24168  | -0.03521 | 0.44781  | 0.009833 |
| 0.005898 | 0.89885  | -0.02403 | 0.60451  | 0.028459 | 0.53956  | -0.08776 | 0.05808  | -0.00096 |
| -0.02955 | 0.52418  | -0.07471 | 0.10686  | -0.05507 | 0.23496  | -0.07835 | 0.09078  | -0.05526 |
| 0.171562 | 0.0002   | -0.00155 | 0.97335  | 0.08082  | 0.08103  | -0.07017 | 0.12996  | -0.00221 |
| 0.10337  | 0.02549  | 0.022051 | 0.63457  | 0.066652 | 0.15041  | -0.01828 | 0.69355  | 0.014049 |
| 0.09463  | 0.04095  | -0.03193 | 0.49126  | 0.037608 | 0.41746  | -0.08651 | 0.06176  | -0.06136 |
| 0.121574 | 0.00854  | 0.214873 | 2.79E-06 | 0.157828 | 0.00062  | 0.207446 | 6.18E-06 | 0.322894 |
| 0.008725 | 0.85084  | -0.06103 | 0.18799  | 0.004613 | 0.92081  | -0.10274 | 0.02641  | -0.17462 |
| 0.001629 | 0.97199  | -0.0197  | 0.67105  | -0.00426 | 0.92685  | -0.02189 | 0.63699  | 0.016618 |
| 0.035715 | 0.4413   | 0.021915 | 0.63665  | 0.052217 | 0.2601   | -0.00207 | 0.96443  | 0.006534 |
| 0.002165 | 0.96279  | 0.016028 | 0.72975  | 0.071972 | 0.12038  | -0.0378  | 0.41508  | 0.032639 |
| 0.151385 | 0.00103  | 0.154148 | 0.00083  | 0.122456 | 0.00807  | 0.142923 | 0.00196  | 0.233436 |
| 0.062587 | 0.17694  | 0.026809 | 0.56333  | 0.015962 | 0.73082  | 0.028931 | 0.53286  | 0.051602 |
| 0.070428 | 0.12857  | -0.04615 | 0.31963  | 0.009434 | 0.83888  | -0.06647 | 0.15151  | -0.14018 |
| -0.00035 | 0.994    | 0.100436 | 0.03     | 0.033911 | 0.46474  | 0.132834 | 0.00403  | 0.104528 |
| 0.014875 | 0.74851  | 0.007854 | 0.86558  | 0.005685 | 0.90248  | 0.02703  | 0.56012  | -0.01466 |
| 0.047412 | 0.30659  | 0.001514 | 0.97397  | 0.006368 | 0.89084  | -0.0084  | 0.85639  | -0.08378 |
| 0.021884 | 0.63713  | -0.11798 | 0.01072  | -0.0268  | 0.56339  | -0.16073 | 0.00049  | -0.1806  |
| -0.02481 | 0.59279  | -0.11767 | 0.01093  | -0.03836 | 0.40821  | -0.14974 | 0.00117  | -0.17513 |
| 0.190552 | 3.40E-05 | 0.196159 | 1.96E-05 | 0.205062 | 7.93E-06 | 0.152443 | 0.00095  | 0.16995  |
| 0.244631 | 8.61E-08 | 0.124756 | 0.00695  | 0.160607 | 0.00049  | 0.069388 | 0.13432  | 0.070287 |
| 0.034723 | 0.45411  | 0.083172 | 0.07255  | 0.067672 | 0.14424  | 0.07562  | 0.10265  | 0.17958  |
| 0.020531 | 0.6581   | 0.107302 | 0.02038  | 0.056449 | 0.22338  | 0.090289 | 0.05119  | 0.222633 |
| 0.130757 | 0.00465  | 0.115404 | 0.01258  | 0.142477 | 0.00203  | 0.048944 | 0.29121  | 0.143232 |
| 0.04453  | 0.33695  | 0.084027 | 0.06965  | 0.054214 | 0.24229  | 0.091439 | 0.04828  | 0.039738 |
| 0.10336  | 0.02551  | 0.167266 | 0.00028  | 0.11436  | 0.0134   | 0.174155 | 0.00016  | 0.203731 |
| -0.02038 | 0.66039  | -0.20871 | 5.41E-06 | -0.09136 | 0.04847  | -0.23845 | 1.84E-07 | -0.32557 |
| -0.1539  | 0.00085  | -0.208   | 5.83E-06 | -0.16701 | 0.00029  | -0.18921 | 3.87E-05 | -0.23577 |
| 0.029527 | 0.52445  | 0.123619 | 0.00748  | 0.068837 | 0.13745  | 0.119557 | 0.00971  | 0.241964 |
| 0.04673  | 0.3136   | 0.163073 | 0.0004   | 0.098908 | 0.0326   | 0.147209 | 0.00142  | 0.17274  |
| 0.053563 | 0.24799  | 0.021235 | 0.64716  | 0.063659 | 0.16963  | -0.03751 | 0.41868  | 0.027977 |
| 0.062806 | 0.17543  | 0.176114 | 0.00013  | 0.108225 | 0.01932  | 0.196635 | 1.87E-05 | 0.196157 |
| 0.147903 | 0.00135  | 0.251844 | 3.45E-08 | 0.148875 | 0.00125  | 0.294478 | 8.52E-11 | 0.279435 |
| 0.140042 | 0.00242  | 0.2897   | 1.76E-10 | 0.167939 | 0.00027  | 0.315178 | 3.14E-12 | 0.297263 |
| -0.04505 | 0.33135  | -0.10375 | 0.02496  | -0.02357 | 0.61144  | -0.14957 | 0.00119  | -0.14936 |
| 0.02686  | 0.56259  | -0.00529 | 0.90928  | 0.016768 | 0.7178   | -0.02698 | 0.56085  | -0.05093 |
| 0.050591 | 0.27525  | -0.01372 | 0.76744  | 0.04058  | 0.3816   | -0.03906 | 0.39972  | -0.03529 |

|          |          |          |          |          |          |          |          |          |
|----------|----------|----------|----------|----------|----------|----------|----------|----------|
| 0.085454 | 0.06502  | -0.06448 | 0.1642   | 0.008053 | 0.8622   | -0.10452 | 0.02389  | -0.10946 |
| 0.059208 | 0.20154  | 0.015099 | 0.74485  | 0.069225 | 0.13524  | -0.02423 | 0.60146  | 0.065102 |
| -0.01024 | 0.82533  | -0.18228 | 7.44E-05 | -0.05455 | 0.23935  | -0.2139  | 3.10E-06 | -0.25483 |
| 0.040241 | 0.3856   | 0.044407 | 0.3383   | 0.017778 | 0.70158  | 0.044531 | 0.33694  | 0.064271 |
| -0.02023 | 0.66287  | -0.05855 | 0.20657  | -0.01389 | 0.76459  | -0.06159 | 0.18397  | -0.05379 |
| 0.148512 | 0.00129  | 0.079729 | 0.08524  | 0.112255 | 0.01522  | 0.029369 | 0.52667  | 0.10405  |
| 0.078682 | 0.08943  | 0.101537 | 0.02823  | 0.094536 | 0.04115  | 0.077135 | 0.09593  | 0.229876 |
| 0.017189 | 0.71102  | 0.131764 | 0.00434  | 0.072265 | 0.11887  | 0.152619 | 0.00094  | 0.211798 |
| 0.039391 | 0.39572  | 0.129165 | 0.00518  | 0.057039 | 0.21858  | 0.160692 | 0.00049  | 0.113152 |
| -0.02187 | 0.6374   | -0.0573  | 0.21647  | -0.05232 | 0.25915  | -0.05496 | 0.23583  | -0.07425 |
| 0.127263 | 0.00589  | 0.177403 | 0.00012  | 0.120623 | 0.00907  | 0.188169 | 4.28E-05 | 0.211518 |
| -0.0306  | 0.50945  | -0.0826  | 0.07455  | -0.05643 | 0.22354  | -0.08168 | 0.07784  | -0.1741  |
| 0.271259 | 2.55E-09 | 0.276957 | 1.14E-09 | 0.26478  | 6.22E-09 | 0.218153 | 1.94E-06 | 0.168268 |
| 0.108668 | 0.01882  | 0.143367 | 0.0019   | 0.119038 | 0.01003  | 0.126688 | 0.00612  | 0.097834 |
| 0.08146  | 0.07865  | 0.042614 | 0.35818  | 0.086429 | 0.06201  | -0.00856 | 0.85369  | -0.02628 |
| 0.228268 | 6.17E-07 | 0.148192 | 0.00132  | 0.222975 | 1.13E-06 | 0.047695 | 0.3037   | 0.038972 |
| -0.05067 | 0.27453  | -0.0722  | 0.11921  | -0.04211 | 0.36395  | -0.09124 | 0.04877  | -0.05031 |
| -0.03134 | 0.49934  | 0.084582 | 0.06782  | 0.019749 | 0.67034  | 0.097548 | 0.03508  | 0.117319 |
| 0.319109 | 1.63E-12 | 0.197965 | 1.64E-05 | 0.275391 | 1.42E-09 | 0.082896 | 0.0735   | 0.043522 |
| 0.030721 | 0.5078   | 0.025202 | 0.58695  | 0.019654 | 0.67183  | 0.022287 | 0.63095  | 0.058839 |
| 0.105574 | 0.0225   | 0.000263 | 0.99548  | 0.029074 | 0.53083  | -0.02124 | 0.64712  | 0.0185   |
| 0.073512 | 0.11263  | 0.024301 | 0.6004   | 0.036406 | 0.43252  | 0.004167 | 0.92843  | 0.030862 |
| 0.084351 | 0.06858  | 0.035765 | 0.44067  | 0.099201 | 0.03209  | -0.03607 | 0.43682  | -0.01906 |
| -0.0059  | 0.89887  | 0.000112 | 0.99808  | 0.041901 | 0.36629  | -0.03201 | 0.49013  | -0.03277 |
| -0.07478 | 0.10655  | -0.04331 | 0.35034  | -0.04308 | 0.35291  | -0.01748 | 0.70634  | 0.045648 |
| 0.068047 | 0.14203  | 0.17276  | 0.00018  | 0.111968 | 0.01549  | 0.170015 | 0.00022  | 0.140677 |
| 0.029279 | 0.52793  | 0.059652 | 0.19817  | 0.096094 | 0.03791  | -0.00935 | 0.84037  | -0.05337 |
| -0.06037 | 0.19284  | -0.04896 | 0.29103  | -0.01006 | 0.82835  | -0.07707 | 0.09622  | -0.09277 |
| 0.054686 | 0.2382   | 0.01869  | 0.68706  | 0.081297 | 0.07925  | -0.04306 | 0.35312  | -0.04692 |
| -0.04181 | 0.36733  | -0.02272 | 0.62431  | -0.01591 | 0.73173  | -0.03405 | 0.46294  | -0.08428 |
| 0.085976 | 0.0634   | 0.055231 | 0.23355  | 0.102456 | 0.02683  | -0.01015 | 0.8268   | -0.03673 |
| 0.03724  | 0.42204  | 0.159559 | 0.00054  | 0.082466 | 0.07502  | 0.169937 | 0.00022  | 0.191628 |
| -0.01613 | 0.72816  | 0.006871 | 0.88228  | 0.011442 | 0.80521  | -0.01334 | 0.77372  | -0.0294  |
| -0.00697 | 0.88061  | -0.01837 | 0.69212  | 0.008164 | 0.86033  | -0.03512 | 0.4489   | -0.09476 |
| -0.00216 | 0.96291  | -0.16205 | 0.00044  | -0.02599 | 0.57527  | -0.21385 | 3.12E-06 | -0.26133 |
| 0.45686  | 1.85E-25 | 0.305024 | 1.64E-11 | 0.348894 | 8.18E-15 | 0.180429 | 8.82E-05 | 0.136083 |
| -0.02328 | 0.61582  | -0.06708 | 0.14781  | -0.03191 | 0.49148  | -0.07588 | 0.10146  | -0.14114 |
| 0.024008 | 0.60481  | -0.00841 | 0.85615  | 0.049939 | 0.2815   | -0.06297 | 0.1743   | -0.12653 |
| -0.00064 | 0.98905  | 0.067653 | 0.14436  | 0.035722 | 0.44122  | 0.073282 | 0.11376  | 0.161569 |
| 0.156831 | 0.00067  | 0.138616 | 0.00268  | 0.095558 | 0.039    | 0.135485 | 0.00335  | 0.096453 |
| 0.010616 | 0.81902  | 0.055193 | 0.23387  | 0.04518  | 0.32995  | 0.031957 | 0.49087  | 0.041179 |
| 0.024498 | 0.59746  | 0.02924  | 0.52848  | 0.012396 | 0.78934  | 0.034628 | 0.45534  | 0.009698 |
| 0.044717 | 0.33492  | 0.058627 | 0.20601  | 0.074002 | 0.11024  | 0.030438 | 0.51173  | 0.019301 |
| 0.12149  | 0.00859  | 0.125635 | 0.00656  | 0.1319   | 0.0043   | 0.070758 | 0.12678  | 0.057766 |
| 0.143947 | 0.00182  | 0.120435 | 0.00918  | 0.198285 | 1.59E-05 | 0.010888 | 0.81446  | -0.03829 |

|          |          |          |          |          |          |          |          |          |
|----------|----------|----------|----------|----------|----------|----------|----------|----------|
| 0.093661 | 0.04307  | 0.015944 | 0.7311   | 0.072491 | 0.11772  | -0.0413  | 0.37315  | -0.07383 |
| -0.02607 | 0.57408  | -0.04942 | 0.28655  | -0.00591 | 0.89872  | -0.07867 | 0.08947  | -0.17078 |
| -0.02631 | 0.57062  | 0.040923 | 0.37759  | 0.008577 | 0.85333  | 0.039951 | 0.38903  | 0.035434 |
| -0.06525 | 0.15921  | -0.0066  | 0.88688  | -0.03469 | 0.45455  | 0.002751 | 0.95272  | -0.01096 |
| -0.00412 | 0.92927  | -0.00625 | 0.89282  | 0.014671 | 0.75185  | -0.03019 | 0.51514  | -0.05245 |
| 0.036756 | 0.4281   | 0.07782  | 0.09301  | 0.053804 | 0.24587  | 0.069661 | 0.13279  | 0.069606 |
| 0.224075 | 1.00E-06 | 0.118274 | 0.01053  | 0.177063 | 0.00012  | 0.041484 | 0.37107  | -0.02077 |
| -0.0239  | 0.60646  | -0.01392 | 0.7641   | 0.013531 | 0.77057  | -0.04388 | 0.34407  | -0.07222 |
| 0.122546 | 0.00802  | 0.098878 | 0.03266  | 0.099719 | 0.0312   | 0.071105 | 0.12493  | 0.053054 |
| -0.05025 | 0.27855  | -0.02009 | 0.66498  | -0.01981 | 0.66933  | -0.02074 | 0.65477  | -0.06774 |
| -0.02514 | 0.58786  | -0.0616  | 0.18392  | -0.02851 | 0.53885  | -0.07768 | 0.09358  | -0.11656 |
| 0.05417  | 0.24266  | 0.200945 | 1.21E-05 | 0.115848 | 0.01224  | 0.201657 | 1.13E-05 | 0.257067 |
| 0.010997 | 0.81265  | 0.001868 | 0.96789  | 0.005964 | 0.89772  | -0.01546 | 0.73898  | 0.03732  |
| -0.02632 | 0.57046  | 0.056059 | 0.22661  | 0.006616 | 0.88662  | 0.055269 | 0.23323  | 0.089973 |
| -0.01273 | 0.78374  | -0.04112 | 0.37526  | 0.008705 | 0.85119  | -0.08258 | 0.07462  | -0.13671 |
| 0.00342  | 0.94125  | -0.03404 | 0.46308  | 0.00846  | 0.85532  | -0.06751 | 0.14522  | -0.11873 |
| 0.045136 | 0.33041  | 0.044088 | 0.34178  | 0.059225 | 0.20141  | 0.009113 | 0.8443   | 0.008316 |
| 0.011745 | 0.80016  | 0.050351 | 0.27754  | 0.048574 | 0.29487  | 0.025912 | 0.57646  | 0.03181  |
| -0.04351 | 0.34813  | 0.005393 | 0.90747  | -0.02289 | 0.6217   | 0.012839 | 0.782    | -0.01828 |
| 0.005492 | 0.90578  | 0.057752 | 0.21286  | 0.031816 | 0.49279  | 0.054994 | 0.23557  | 0.026078 |
| -0.0471  | 0.30978  | -0.04791 | 0.3015   | -0.0261  | 0.57368  | -0.06315 | 0.17307  | -0.15635 |
| 0.04949  | 0.28585  | 0.073421 | 0.11307  | 0.069919 | 0.13136  | 0.052433 | 0.25813  | -0.02514 |
| 0.018249 | 0.69407  | -0.02979 | 0.52069  | 0.020414 | 0.65993  | -0.05719 | 0.21737  | -0.16196 |
| 0.112195 | 0.01528  | 0.031457 | 0.49769  | 0.083235 | 0.07233  | -0.01288 | 0.78137  | -0.07781 |
| -0.00064 | 0.98903  | -0.02504 | 0.5894   | -0.00078 | 0.98652  | -0.04981 | 0.28272  | -0.09896 |
| -0.00521 | 0.91057  | -0.01926 | 0.67803  | 0.02122  | 0.64739  | -0.04145 | 0.37149  | -0.10192 |
| -0.03906 | 0.39969  | -0.04635 | 0.31755  | -0.02683 | 0.56305  | -0.05775 | 0.21285  | -0.08421 |
| -0.04627 | 0.31841  | -0.04175 | 0.36796  | -0.02433 | 0.59993  | -0.05259 | 0.25668  | -0.10086 |
| 0.054893 | 0.23643  | 0.09142  | 0.04833  | 0.081734 | 0.07765  | 0.062195 | 0.17968  | 0.091195 |
| 0.160359 | 0.0005   | 0.226576 | 7.51E-07 | 0.205941 | 7.23E-06 | 0.163106 | 0.0004   | 0.349679 |
| 0.518358 | 1.79E-33 | 0.432513 | 1.04E-22 | 0.474326 | 1.42E-27 | 0.255892 | 2.04E-08 | 0.180411 |
| -0.00248 | 0.95738  | -0.07976 | 0.0851   | -0.03013 | 0.51603  | -0.10124 | 0.02869  | -0.18283 |
| 0.014645 | 0.75226  | -0.01116 | 0.80998  | -0.00958 | 0.8364   | -0.01239 | 0.78937  | -0.01254 |
| 0.003077 | 0.94712  | 0.035505 | 0.444    | 0.0169   | 0.71566  | 0.035017 | 0.45029  | -0.00557 |
| -0.01603 | 0.72975  | -0.04004 | 0.38794  | 0.012812 | 0.78244  | -0.08518 | 0.0659   | -0.15124 |
| 0.001158 | 0.98009  | 0.001133 | 0.98052  | 0.014652 | 0.75216  | -0.02301 | 0.61992  | -0.00724 |
| -0.04    | 0.38847  | -0.04352 | 0.34801  | -0.00345 | 0.94078  | -0.0772  | 0.09565  | -0.11953 |
| -0.03248 | 0.48381  | -0.0232  | 0.61696  | -0.00559 | 0.90407  | -0.03569 | 0.44161  | -0.05489 |
| -0.0441  | 0.34164  | -0.01485 | 0.74885  | -0.01626 | 0.72602  | -0.02317 | 0.6175   | -0.03004 |
| 0.023704 | 0.60939  | -0.02907 | 0.53094  | 0.027415 | 0.55455  | -0.07279 | 0.11624  | -0.12672 |
| 0.009869 | 0.83155  | -0.01855 | 0.68932  | -0.01308 | 0.77808  | -0.01179 | 0.79948  | -0.00889 |
| -0.02283 | 0.6227   | 0.049193 | 0.28875  | 0.022936 | 0.62103  | 0.038504 | 0.40645  | 0.109206 |
| 0.145735 | 0.00159  | 0.101262 | 0.02867  | 0.11647  | 0.01178  | 0.072887 | 0.11572  | 0.075605 |
| 0.0515   | 0.2667   | 0.116103 | 0.01205  | 0.072941 | 0.11545  | 0.103702 | 0.02502  | 0.14817  |
| -0.03482 | 0.4528   | -0.07069 | 0.12714  | 0.004156 | 0.92863  | -0.10698 | 0.02076  | -0.20221 |

|          |          |          |          |          |          |          |          |          |
|----------|----------|----------|----------|----------|----------|----------|----------|----------|
| -0.05051 | 0.276    | -0.05357 | 0.24794  | -0.00931 | 0.84093  | -0.09249 | 0.04575  | -0.0806  |
| 0.033296 | 0.47288  | -0.03258 | 0.48247  | 0.014438 | 0.75566  | -0.07441 | 0.10829  | -0.08085 |
| 0.092527 | 0.04567  | -0.00519 | 0.91088  | 0.083006 | 0.07312  | -0.07254 | 0.11746  | -0.16329 |
| -0.0019  | 0.96729  | 0.074387 | 0.1084   | 0.050591 | 0.27525  | 0.054492 | 0.23988  | 0.045742 |
| 0.022662 | 0.62521  | 0.05327  | 0.25059  | 0.066577 | 0.15086  | 0.020431 | 0.65967  | 0.032949 |
| -0.0175  | 0.70604  | -0.04082 | 0.37884  | -0.02793 | 0.54707  | -0.04856 | 0.29501  | -0.07662 |
| 0.170256 | 0.00022  | 0.154212 | 0.00083  | 0.191867 | 2.99E-05 | 0.07827  | 0.09112  | 0.044242 |
| 0.062247 | 0.17931  | 0.033215 | 0.47395  | 0.062724 | 0.176    | -0.00145 | 0.97505  | -0.04528 |
| -0.03164 | 0.49514  | -0.03008 | 0.51665  | -0.034   | 0.46361  | -0.0145  | 0.75461  | -0.03791 |
| -0.0503  | 0.27804  | -0.08149 | 0.07852  | -0.04384 | 0.34455  | -0.09975 | 0.03114  | -0.21845 |
| 0.308266 | 9.73E-12 | 0.211554 | 3.99E-06 | 0.284321 | 3.92E-10 | 0.08208  | 0.0764   | 0.031376 |
| 0.168112 | 0.00026  | 0.173312 | 0.00017  | 0.178481 | 0.00011  | 0.098203 | 0.03387  | 0.118008 |
| 0.046801 | 0.31287  | 0.096552 | 0.037    | 0.064974 | 0.16097  | 0.084524 | 0.06801  | 0.077111 |
| 0.081712 | 0.07773  | 0.235183 | 2.73E-07 | 0.120137 | 0.00936  | 0.274469 | 1.62E-09 | 0.133077 |
| 0.038578 | 0.40555  | 0.079147 | 0.08755  | 0.043152 | 0.35213  | 0.076464 | 0.09886  | 0.087301 |
| -0.00495 | 0.915    | 0.023655 | 0.61013  | 0.00899  | 0.84636  | 0.027095 | 0.55917  | 0.04154  |
| 0.071153 | 0.12467  | 0.066894 | 0.14893  | 0.075764 | 0.102    | 0.027995 | 0.54619  | -0.0009  |
| 0.04776  | 0.30304  | 0.006442 | 0.88957  | 0.038951 | 0.40102  | -0.02292 | 0.62122  | -0.07688 |
| 0.112052 | 0.01541  | 0.065684 | 0.15643  | 0.110066 | 0.01734  | 0.002237 | 0.96155  | -0.03381 |
| -0.01244 | 0.78857  | 0.101892 | 0.02768  | 0.025641 | 0.58046  | 0.121933 | 0.00834  | 0.08836  |
| 0.005292 | 0.90919  | 0.007163 | 0.8773   | -0.01357 | 0.76993  | 0.019025 | 0.68176  | 0.036342 |
| -0.0267  | 0.56491  | -0.01327 | 0.77483  | 0.032021 | 0.49001  | -0.05605 | 0.22667  | -0.13054 |
| -0.01679 | 0.71744  | 0.015124 | 0.74445  | 0.036444 | 0.43204  | -0.01388 | 0.76479  | -0.09774 |
| -0.019   | 0.68214  | -0.01326 | 0.7751   | 0.024197 | 0.60197  | -0.04526 | 0.32911  | -0.09164 |
| 0.110386 | 0.01702  | 0.053368 | 0.24972  | 0.076878 | 0.09705  | 0.011552 | 0.80337  | -0.04825 |
| 0.108681 | 0.01881  | 0.172446 | 0.00018  | 0.147204 | 0.00142  | 0.119278 | 0.00988  | 0.211887 |
| 0.026868 | 0.56247  | 0.199228 | 1.44E-05 | 0.060803 | 0.18964  | 0.248819 | 5.08E-08 | 0.321022 |
| -0.05516 | 0.23415  | -0.07617 | 0.10017  | -0.07253 | 0.11752  | -0.06799 | 0.14239  | -0.10642 |
| -0.00748 | 0.87195  | -0.03155 | 0.49647  | -0.01285 | 0.78186  | -0.04562 | 0.32521  | -0.06939 |
| 0.013107 | 0.77756  | -0.0215  | 0.64303  | 0.016644 | 0.71979  | -0.04745 | 0.30622  | -0.11135 |
| 0.058085 | 0.21024  | 0.049028 | 0.29037  | 0.055238 | 0.23349  | 0.015746 | 0.73432  | 0.053133 |
| -0.04385 | 0.34444  | -0.01209 | 0.79435  | 0.020173 | 0.6637   | -0.05126 | 0.26896  | -0.07553 |
| -0.01763 | 0.70397  | -0.01577 | 0.73388  | 0.0301   | 0.51643  | -0.0515  | 0.26672  | -0.10239 |
| -0.01977 | 0.67001  | -0.02817 | 0.54371  | 0.004842 | 0.91688  | -0.04839 | 0.29669  | -0.10889 |
| -0.0486  | 0.29461  | -0.01373 | 0.7673   | -0.01706 | 0.71302  | -0.01186 | 0.79822  | -0.03084 |
| -0.01064 | 0.81869  | -0.0365  | 0.43127  | 0.018412 | 0.69147  | -0.06921 | 0.13531  | -0.13833 |
| 0.017873 | 0.70007  | -0.05434 | 0.24121  | 0.020786 | 0.65412  | -0.10639 | 0.02148  | -0.21116 |
| 0.025531 | 0.58209  | 0.020761 | 0.65451  | 0.04332  | 0.35026  | -0.01368 | 0.76809  | -0.02721 |
| 0.073312 | 0.11361  | 0.024057 | 0.60407  | 0.041081 | 0.37574  | -0.00451 | 0.92263  | -0.03656 |
| 0.011879 | 0.79792  | 0.107201 | 0.0205   | 0.051148 | 0.26999  | 0.110905 | 0.0165   | 0.133406 |
| -0.03077 | 0.50717  | -0.00537 | 0.9079   | -0.00382 | 0.93441  | -0.01369 | 0.768    | -0.02661 |
| -0.00253 | 0.95656  | 0.054163 | 0.24273  | 0.027384 | 0.55499  | 0.037089 | 0.42393  | 0.047785 |
| 0.026108 | 0.57359  | 0.001835 | 0.96845  | 0.024348 | 0.5997   | -0.0196  | 0.67275  | -0.03684 |
| -0.02345 | 0.6133   | -0.03846 | 0.40698  | -0.02124 | 0.6471   | -0.05597 | 0.22733  | -0.08473 |
| 0.027512 | 0.55314  | 0.069255 | 0.13507  | 0.040765 | 0.37943  | 0.071273 | 0.12404  | 0.147113 |

|          |          |          |          |          |          |          |          |          |
|----------|----------|----------|----------|----------|----------|----------|----------|----------|
| 0.038226 | 0.40985  | 0.036091 | 0.43651  | 0.041596 | 0.36979  | 0.007044 | 0.87934  | -0.0487  |
| 0.005467 | 0.9062   | 0.006672 | 0.88567  | 0.011118 | 0.81062  | -0.00841 | 0.85609  | 0.018957 |
| 0.02713  | 0.55867  | -0.0372  | 0.42249  | -0.01357 | 0.76988  | -0.0539  | 0.24502  | -0.03978 |
| 0.079676 | 0.08544  | 0.151266 | 0.00104  | 0.144092 | 0.0018   | 0.093283 | 0.04392  | 0.162583 |
| 0.014056 | 0.76193  | 0.033201 | 0.47414  | 0.03732  | 0.42104  | 0.003864 | 0.93364  | -0.00971 |
| -0.07446 | 0.10807  | -0.06061 | 0.19108  | -0.05027 | 0.27829  | -0.06402 | 0.1672   | -0.08764 |
| -0.00205 | 0.96469  | -0.01581 | 0.73336  | 0.012784 | 0.7829   | -0.04262 | 0.35815  | -0.1098  |
| 0.163249 | 0.0004   | 0.150231 | 0.00113  | 0.168185 | 0.00026  | 0.074296 | 0.10883  | 0.115718 |
| -0.01743 | 0.70715  | 0.030072 | 0.51682  | -0.00074 | 0.98731  | 0.037067 | 0.4242   | 0.064941 |
| 0.009096 | 0.84457  | -0.03208 | 0.48919  | -0.02502 | 0.58963  | -0.03705 | 0.42447  | -0.10142 |
| 0.015372 | 0.7404   | -0.01489 | 0.7483   | 0.021927 | 0.63648  | -0.05411 | 0.2432   | -0.09865 |
| 0.062365 | 0.17849  | 0.02255  | 0.62692  | 0.048492 | 0.29569  | -0.0122  | 0.79254  | -0.01909 |
| 0.03705  | 0.42441  | 0.117005 | 0.01139  | 0.069287 | 0.13489  | 0.108387 | 0.01913  | 0.215062 |
| 0.011083 | 0.8112   | 0.019492 | 0.67438  | 0.009569 | 0.83661  | 0.024834 | 0.59244  | -0.03294 |
| 0.080683 | 0.08155  | 0.063192 | 0.17279  | 0.063363 | 0.17163  | 0.055066 | 0.23495  | 0.10147  |
| 0.005253 | 0.90987  | 0.008398 | 0.85637  | 0.006238 | 0.89304  | 0.005198 | 0.9108   | -0.0494  |
| 0.007074 | 0.87882  | 0.084883 | 0.06684  | 0.070951 | 0.12575  | 0.064979 | 0.16094  | 0.086838 |
| 0.018617 | 0.68821  | 0.103304 | 0.02559  | 0.071619 | 0.12222  | 0.088362 | 0.05637  | 0.086796 |
| 0.040238 | 0.38562  | 0.177442 | 0.00012  | 0.0998   | 0.03106  | 0.18851  | 4.14E-05 | 0.137933 |
| 0.057595 | 0.21412  | 0.200476 | 1.27E-05 | 0.105001 | 0.02325  | 0.220773 | 1.45E-06 | 0.180626 |
| 0.083133 | 0.07268  | 0.224151 | 9.91E-07 | 0.141441 | 0.00219  | 0.223889 | 1.02E-06 | 0.147172 |
| -0.02747 | 0.55379  | -0.04003 | 0.38812  | 0.007548 | 0.87078  | -0.07427 | 0.10897  | -0.13947 |
| 0.101707 | 0.02797  | 0.090785 | 0.04992  | 0.115224 | 0.01272  | 0.042816 | 0.3559   | -0.00456 |
| 0.423292 | 1.00E-21 | 0.270703 | 2.75E-09 | 0.352189 | 4.39E-15 | 0.123443 | 0.00757  | 0.312225 |
| 0.096343 | 0.03741  | 0.110541 | 0.01686  | 0.102453 | 0.02683  | 0.068577 | 0.13895  | 0.107097 |
| -0.01605 | 0.72936  | -0.04026 | 0.38538  | -0.00537 | 0.90788  | -0.07393 | 0.11057  | -0.09273 |
| 0.035926 | 0.43862  | 0.040715 | 0.38001  | 0.028826 | 0.53434  | 0.028878 | 0.5336   | 0.035554 |
| 0.065331 | 0.15868  | 0.036224 | 0.43483  | 0.089391 | 0.05355  | -0.04026 | 0.38541  | -0.09364 |
| 0.299324 | 4.03E-11 | 0.15944  | 0.00054  | 0.184764 | 5.90E-05 | 0.101556 | 0.0282   | 0.051694 |
| 0.132222 | 0.00421  | 0.071021 | 0.12538  | 0.122731 | 0.00793  | 0.023987 | 0.60512  | -0.02574 |
| 0.009221 | 0.84246  | -0.00429 | 0.9263   | 0.03686  | 0.4268   | -0.03994 | 0.38914  | -0.06416 |
| 0.177793 | 0.00011  | 0.111895 | 0.01555  | 0.14677  | 0.00147  | 0.035592 | 0.44288  | 0.024323 |
| -0.00317 | 0.9456   | 0.00017  | 0.99707  | 0.055774 | 0.22898  | -0.04093 | 0.37755  | 0.000261 |
| -0.03376 | 0.46678  | 0.035079 | 0.44949  | 0.038383 | 0.40793  | 0.024581 | 0.59622  | 0.024233 |
| 0.004577 | 0.92142  | 0.031481 | 0.49736  | 0.0172   | 0.71085  | 0.021459 | 0.6437   | 0.037172 |
| -0.00112 | 0.9808   | 0.000925 | 0.9841   | -0.0219  | 0.63692  | 0.009936 | 0.83043  | -0.01079 |
| 0.037912 | 0.4137   | 0.035625 | 0.44246  | 0.048316 | 0.29744  | 0.021014 | 0.65059  | 0.041618 |
| -0.04638 | 0.31725  | -0.04707 | 0.31014  | -0.03664 | 0.42955  | -0.05315 | 0.25163  | -0.08563 |
| 0.289232 | 1.89E-10 | 0.192504 | 2.81E-05 | 0.296547 | 6.20E-11 | 0.030393 | 0.51235  | 0.058037 |
| 0.170181 | 0.00022  | 0.054607 | 0.23888  | 0.121313 | 0.00868  | -0.02648 | 0.56813  | -0.09511 |
| -0.05577 | 0.229    | -0.08404 | 0.0696   | -0.03856 | 0.40577  | -0.09963 | 0.03134  | -0.17796 |
| 0.14883  | 0.00126  | 0.163254 | 0.0004   | 0.158874 | 0.00057  | 0.100666 | 0.02962  | 0.256565 |
| 0.089585 | 0.05303  | 0.105675 | 0.02238  | 0.125769 | 0.0065   | 0.051101 | 0.27043  | 0.041302 |
| 0.061409 | 0.18525  | 0.065721 | 0.1562   | 0.067722 | 0.14395  | 0.034668 | 0.45482  | 0.011184 |
| 0.156185 | 0.00071  | 0.098587 | 0.03317  | 0.153126 | 0.0009   | 0.024565 | 0.59646  | 0.030858 |



|          |          |          |          |          |          |          |          |          |
|----------|----------|----------|----------|----------|----------|----------|----------|----------|
| 0.10098  | 0.02912  | 0.032678 | 0.48114  | 0.064686 | 0.16284  | -0.00478 | 0.91799  | -0.01336 |
| 0.024158 | 0.60255  | 0.091637 | 0.0478   | 0.056595 | 0.22219  | 0.077853 | 0.09287  | 0.138125 |
| -0.01279 | 0.78285  | -0.00918 | 0.84319  | -0.01055 | 0.82021  | -0.00278 | 0.95222  | -0.03698 |
| 0.151219 | 0.00105  | 0.258922 | 1.37E-08 | 0.195023 | 2.20E-05 | 0.216315 | 2.38E-06 | 0.286216 |
| -0.0428  | 0.35603  | -0.0868  | 0.0609   | -0.04161 | 0.36963  | -0.08622 | 0.06263  | -0.10623 |
| -0.01774 | 0.70226  | -0.03971 | 0.39191  | -0.00178 | 0.96932  | -0.06101 | 0.18814  | -0.11652 |
| 0.008944 | 0.84714  | 0.03981  | 0.39071  | 0.019811 | 0.66936  | 0.033668 | 0.46794  | -0.00191 |
| -0.01957 | 0.67312  | -0.02444 | 0.59826  | -0.00834 | 0.85738  | -0.04544 | 0.32713  | -0.08004 |
| 0.046444 | 0.31658  | 0.017815 | 0.701    | 0.029717 | 0.52178  | -0.00506 | 0.91308  | 0.013358 |
| -0.07317 | 0.1143   | -0.05476 | 0.23757  | -0.05691 | 0.21964  | -0.03949 | 0.39447  | -0.10898 |
| 0.084398 | 0.06842  | 0.03785  | 0.41447  | 0.069765 | 0.13222  | -0.00288 | 0.95044  | -0.04069 |
| 0.056452 | 0.22336  | 0.041452 | 0.37144  | 0.071462 | 0.12304  | -0.00082 | 0.98598  | -0.01732 |
| 0.095647 | 0.03881  | 0.125627 | 0.00656  | 0.127201 | 0.00591  | 0.075387 | 0.10372  | 0.07933  |
| 0.035514 | 0.44389  | -0.02919 | 0.52912  | -0.02264 | 0.62549  | -0.03465 | 0.45507  | -0.08478 |
| 0.024679 | 0.59475  | 0.052221 | 0.26006  | 0.064402 | 0.16469  | 0.019926 | 0.66757  | -0.01838 |
| -0.0242  | 0.60191  | -0.03974 | 0.39157  | -0.00769 | 0.86833  | -0.05528 | 0.23318  | -0.11528 |
| 0.011042 | 0.81188  | -0.0168  | 0.71733  | 0.033769 | 0.46661  | -0.05689 | 0.21979  | -0.10231 |
| 0.133619 | 0.00382  | 0.151648 | 0.00101  | 0.152645 | 0.00094  | 0.085232 | 0.06573  | 0.120142 |
| 0.032044 | 0.48969  | 0.023805 | 0.60787  | 0.070135 | 0.13017  | -0.00194 | 0.96663  | -0.02132 |
| -0.04143 | 0.37169  | -0.00848 | 0.85501  | -0.03184 | 0.49246  | 0.002973 | 0.9489   | -0.00395 |
| 0.196732 | 1.85E-05 | 0.183952 | 6.37E-05 | 0.19916  | 1.45E-05 | 0.129378 | 0.00511  | 0.054166 |
| 0.03737  | 0.42042  | -0.01126 | 0.80823  | 0.050972 | 0.27165  | -0.06498 | 0.16094  | -0.1436  |
| -0.02672 | 0.5646   | -0.01571 | 0.73497  | -0.00799 | 0.86335  | -0.0356  | 0.44275  | -0.06913 |
| 0.253501 | 2.78E-08 | 0.277288 | 1.09E-09 | 0.261424 | 9.79E-09 | 0.215883 | 2.50E-06 | 0.205118 |
| -0.01432 | 0.75761  | 0.074552 | 0.10762  | 0.045207 | 0.32966  | 0.064228 | 0.16584  | 0.061532 |
| -0.0029  | 0.95012  | -0.04262 | 0.35816  | -0.01618 | 0.72722  | -0.05982 | 0.19694  | -0.13835 |
| 0.076327 | 0.09947  | 0.003342 | 0.94258  | 0.066739 | 0.14987  | -0.05416 | 0.24274  | -0.04365 |
| -0.01066 | 0.81835  | 0.041018 | 0.37648  | 0.027675 | 0.55079  | 0.032589 | 0.48234  | 0.035205 |
| 0.000448 | 0.99229  | 0.121835 | 0.0084   | 0.048927 | 0.29137  | 0.139537 | 0.00251  | 0.163651 |
| 0.053049 | 0.25257  | 0.023527 | 0.61206  | 0.050026 | 0.28066  | 0.001812 | 0.96885  | -0.04718 |
| -0.02388 | 0.60673  | -0.02689 | 0.5621   | -0.00474 | 0.91855  | -0.04258 | 0.35851  | -0.09569 |
| 0.042452 | 0.36     | 0.004795 | 0.91769  | 0.061208 | 0.1867   | -0.05426 | 0.24189  | -0.10702 |
| 0.109314 | 0.01813  | 0.062176 | 0.17981  | 0.087622 | 0.05848  | 0.024901 | 0.59143  | 0.01693  |
| 0.038307 | 0.40886  | 0.079997 | 0.08419  | 0.082461 | 0.07503  | 0.033699 | 0.46754  | 0.07691  |
| 0.067875 | 0.14304  | 0.081176 | 0.0797   | 0.081696 | 0.07779  | 0.048384 | 0.29676  | 0.02577  |
| -0.03126 | 0.50035  | 0.00175  | 0.96991  | -0.00469 | 0.91951  | -0.00692 | 0.88149  | -0.00951 |
| 0.135192 | 0.00342  | 0.022988 | 0.62024  | 0.083088 | 0.07284  | -0.03336 | 0.47197  | -0.07156 |
| -0.0341  | 0.46229  | 0.010039 | 0.82871  | 0.009134 | 0.84394  | -0.01144 | 0.80532  | -0.0472  |
| 0.048677 | 0.29385  | -0.03351 | 0.47005  | 0.050694 | 0.27428  | -0.08992 | 0.05214  | -0.1575  |
| 0.028947 | 0.53263  | 0.099438 | 0.03168  | 0.056792 | 0.22058  | 0.099726 | 0.03118  | 0.084333 |
| -0.00647 | 0.8891   | -0.01265 | 0.78519  | 0.001525 | 0.97378  | -0.02119 | 0.64784  | -0.0421  |
| 0.034139 | 0.46174  | -0.03551 | 0.44388  | -0.00315 | 0.94596  | -0.04528 | 0.32886  | -0.09433 |
| 0.095985 | 0.03813  | 0.188013 | 4.34E-05 | 0.144918 | 0.00169  | 0.158303 | 0.0006   | 0.26846  |
| 0.070343 | 0.12903  | 0.032305 | 0.48616  | 0.068845 | 0.1374   | -0.01896 | 0.68277  | -0.0175  |
| 0.122333 | 0.00813  | 0.059806 | 0.19701  | 0.092741 | 0.04517  | 0.017658 | 0.70351  | -0.03576 |

|          |          |          |          |          |          |          |          |          |
|----------|----------|----------|----------|----------|----------|----------|----------|----------|
| 0.235788 | 2.54E-07 | 0.129075 | 0.00521  | 0.185096 | 5.72E-05 | 0.05117  | 0.26978  | 0.00688  |
| 0.021936 | 0.63634  | 0.097684 | 0.03483  | 0.066231 | 0.15301  | 0.081814 | 0.07735  | 0.069603 |
| 0.066559 | 0.15098  | 0.183981 | 6.35E-05 | 0.117582 | 0.01099  | 0.173621 | 0.00016  | 0.213798 |
| -0.02908 | 0.53069  | 0.006624 | 0.88648  | -0.0041  | 0.92967  | 0.004491 | 0.92289  | -0.00334 |
| 0.04259  | 0.35844  | 0.006224 | 0.89328  | 0.049374 | 0.28698  | -0.03311 | 0.47534  | -0.05481 |
| 0.070512 | 0.12811  | 0.12666  | 0.00613  | 0.091011 | 0.04935  | 0.110574 | 0.01683  | 0.122763 |
| 0.064162 | 0.16628  | 0.074273 | 0.10894  | 0.091776 | 0.04746  | 0.027822 | 0.54868  | -0.03683 |
| 0.065274 | 0.15904  | 0.064341 | 0.16509  | 0.078387 | 0.09064  | 0.024542 | 0.5968   | 0.001427 |
| -0.01622 | 0.72666  | 0.001748 | 0.96994  | -0.006   | 0.89716  | -0.00577 | 0.90097  | -0.01505 |
| 0.115891 | 0.0122   | 0.067269 | 0.14666  | 0.126464 | 0.00621  | -0.00235 | 0.95963  | -0.01054 |
| 0.096162 | 0.03777  | 0.131308 | 0.00448  | 0.109427 | 0.01801  | 0.091961 | 0.04701  | 0.179585 |
| 0.101832 | 0.02778  | 0.036188 | 0.43527  | 0.086376 | 0.06217  | -0.01624 | 0.72625  | 0.06055  |
| -0.0243  | 0.60044  | 0.106905 | 0.02085  | 0.01115  | 0.81009  | 0.146619 | 0.00149  | 0.182276 |
| 0.02024  | 0.66264  | 0.115114 | 0.0128   | 0.059166 | 0.20186  | 0.11684  | 0.01151  | 0.168665 |
| 0.146368 | 0.00152  | 0.092816 | 0.04499  | 0.124489 | 0.00707  | 0.051461 | 0.26707  | 0.060778 |
| 0.064748 | 0.16243  | 0.124515 | 0.00706  | 0.078017 | 0.09218  | 0.120298 | 0.00926  | 0.083211 |
| -0.00672 | 0.88487  | -0.01375 | 0.76697  | -0.00997 | 0.82982  | -0.01673 | 0.71836  | -0.02907 |
| 0.16551  | 0.00033  | 0.046188 | 0.31925  | 0.085427 | 0.06511  | 0.020577 | 0.65738  | -0.07099 |
| 0.019242 | 0.67832  | -0.01967 | 0.67163  | 0.018719 | 0.6866   | -0.05401 | 0.24409  | -0.13251 |
| 0.011718 | 0.8006   | 0.090873 | 0.04969  | 0.052636 | 0.25629  | 0.086143 | 0.06288  | 0.156681 |
| 0.001714 | 0.97053  | -0.02722 | 0.55732  | 0.007407 | 0.87317  | -0.05621 | 0.22537  | -0.08414 |
| 0.0487   | 0.29362  | -0.02027 | 0.66214  | -0.02092 | 0.65202  | -0.00772 | 0.86787  | -0.02798 |
| 0.050241 | 0.27859  | 0.041379 | 0.37229  | 0.045802 | 0.32332  | 0.016207 | 0.72686  | -0.00286 |
| 0.09873  | 0.03292  | 0.118582 | 0.01032  | 0.103665 | 0.02507  | 0.087805 | 0.05795  | 0.257629 |
| 0.118759 | 0.01021  | 0.165187 | 0.00034  | 0.142402 | 0.00204  | 0.124181 | 0.00721  | 0.191469 |
| 0.048657 | 0.29404  | -0.0015  | 0.97415  | 0.040763 | 0.37945  | -0.04465 | 0.33566  | -0.10719 |
| 0.010217 | 0.82571  | 0.046369 | 0.31737  | 0.008944 | 0.84714  | 0.061533 | 0.18436  | 0.118509 |
| 0.23136  | 4.30E-07 | 0.1441   | 0.0018   | 0.184773 | 5.90E-05 | 0.060776 | 0.18983  | 0.077294 |
| 0.076931 | 0.09682  | 0.108729 | 0.01876  | 0.076467 | 0.09885  | 0.108692 | 0.0188   | 0.071011 |
| 0.026346 | 0.57009  | 0.089734 | 0.05264  | 0.045033 | 0.33152  | 0.101722 | 0.02795  | 0.135815 |
| 0.033501 | 0.47016  | 0.057578 | 0.21425  | 0.06103  | 0.18799  | 0.024135 | 0.60289  | 0.026154 |
| 0.020548 | 0.65784  | 0.058712 | 0.20535  | 0.047428 | 0.30642  | 0.043795 | 0.345    | 0.055861 |
| 0.106918 | 0.02084  | 0.112479 | 0.01502  | 0.121537 | 0.00856  | 0.07357  | 0.11234  | 0.110781 |
| 0.469781 | 5.19E-27 | 0.571853 | 6.60E-42 | 0.468734 | 6.97E-27 | 0.510573 | 2.29E-32 | 0.332495 |
| 0.296998 | 5.78E-11 | 0.395139 | 6.68E-19 | 0.349569 | 7.21E-15 | 0.316943 | 2.34E-12 | 0.361102 |
| 0.124803 | 0.00693  | 0.158969 | 0.00056  | 0.102047 | 0.02745  | 0.184612 | 5.99E-05 | 0.061332 |
| 0.124084 | 0.00726  | 0.324547 | 6.47E-13 | 0.176396 | 0.00013  | 0.345466 | 1.55E-14 | 0.494471 |
| 0.499593 | 7.47E-31 | 0.49669  | 1.84E-30 | 0.522412 | 4.64E-34 | 0.310748 | 6.51E-12 | 0.478316 |
| -0.01046 | 0.82159  | 0.009458 | 0.83847  | -0.00187 | 0.96786  | 0.013544 | 0.77035  | -0.00908 |
| 0.028549 | 0.53827  | 0.051851 | 0.26346  | 0.039204 | 0.39797  | 0.061021 | 0.18805  | 0.022213 |
| 0.197655 | 1.69E-05 | 0.388999 | 2.55E-18 | 0.190509 | 3.41E-05 | 0.474716 | 1.27E-27 | 0.346175 |
| 0.133175 | 0.00394  | 0.213613 | 3.20E-06 | 0.143049 | 0.00194  | 0.211247 | 4.13E-06 | 0.20889  |
| 0.167354 | 0.00028  | 0.195728 | 2.05E-05 | 0.191883 | 2.99E-05 | 0.149774 | 0.00117  | 0.084523 |
| 0.169039 | 0.00024  | 0.134638 | 0.00356  | 0.089341 | 0.05369  | 0.154084 | 0.00084  | 0.123572 |
| 0.365607 | 3.24E-16 | 0.294502 | 8.49E-11 | 0.291895 | 1.26E-10 | 0.223845 | 1.03E-06 | 0.18037  |

|          |          |          |          |          |          |          |          |          |
|----------|----------|----------|----------|----------|----------|----------|----------|----------|
| 0.462411 | 4.05E-26 | 0.332764 | 1.54E-13 | 0.422218 | 1.30E-21 | 0.165849 | 0.00032  | 0.113868 |
| 0.137286 | 0.00295  | 0.114076 | 0.01364  | 0.170947 | 0.00021  | 0.014738 | 0.75075  | 0.02552  |
| 0.061279 | 0.18619  | 0.033315 | 0.47263  | 0.042693 | 0.35728  | 0.025494 | 0.58263  | 0.01605  |
| 0.050359 | 0.27746  | 0.044012 | 0.34261  | 0.040544 | 0.38202  | 0.021489 | 0.64322  | 0.171803 |
| 0.178538 | 0.0001   | 0.052678 | 0.25591  | 0.037578 | 0.41784  | 0.06542  | 0.15811  | 0.003543 |
| 0.029234 | 0.52857  | 0.061465 | 0.18485  | 0.060577 | 0.19129  | 0.036471 | 0.4317   | 0.023807 |
| 0.063141 | 0.17314  | 0.203653 | 9.18E-06 | 0.096328 | 0.03744  | 0.253651 | 2.73E-08 | 0.307927 |
| 0.054952 | 0.23593  | 0.072697 | 0.11668  | 0.074495 | 0.10788  | 0.055279 | 0.23314  | 0.028047 |
| 0.046296 | 0.31813  | 0.127701 | 0.00572  | 0.079348 | 0.08674  | 0.106511 | 0.02133  | 0.279935 |
| 0.063309 | 0.172    | 0.084745 | 0.06729  | 0.056773 | 0.22073  | 0.088568 | 0.0558   | 0.063154 |
| 0.207417 | 6.20E-06 | 0.074013 | 0.11019  | 0.084343 | 0.0686   | 0.05992  | 0.19616  | 0.027999 |
| 0.138757 | 0.00266  | 0.312925 | 4.56E-12 | 0.135472 | 0.00335  | 0.399114 | 2.77E-19 | 0.226715 |
| 0.161436 | 0.00046  | 0.104235 | 0.02428  | 0.12012  | 0.00937  | 0.062842 | 0.17519  | 0.045152 |
| 0.221841 | 1.29E-06 | 0.245216 | 8.00E-08 | 0.33828  | 5.76E-14 | 0.061778 | 0.18262  | 0.103648 |
| 0.084308 | 0.06872  | 0.085285 | 0.06556  | 0.094443 | 0.04135  | 0.050817 | 0.27311  | 0.053325 |
| 0.215954 | 2.48E-06 | 0.274387 | 1.64E-09 | 0.324586 | 6.42E-13 | 0.121982 | 0.00832  | 0.087565 |
| 0.075024 | 0.1054   | 0.026621 | 0.56607  | 0.038    | 0.41262  | 0.016444 | 0.72301  | 0.017709 |
| 0.32206  | 9.89E-13 | 0.111467 | 0.01596  | 0.15551  | 0.00075  | 0.097158 | 0.03582  | 0.055974 |
| 0.0459   | 0.32229  | 0.020234 | 0.66274  | 0.029395 | 0.5263   | 0.017811 | 0.70105  | 0.016839 |
| 0.067448 | 0.14558  | 0.103181 | 0.02576  | 0.061806 | 0.18242  | 0.11121  | 0.0162   | 0.080462 |
| 0.169473 | 0.00023  | 0.155039 | 0.00077  | 0.203798 | 9.04E-06 | 0.050307 | 0.27796  | 0.061013 |
| 0.081265 | 0.07937  | 0.199985 | 1.34E-05 | 0.095449 | 0.03922  | 0.243572 | 9.82E-08 | 0.145964 |
| 0.064083 | 0.1668   | 0.114995 | 0.0129   | 0.096091 | 0.03791  | 0.095383 | 0.03936  | 0.065053 |
| 0.148683 | 0.00127  | 0.141155 | 0.00223  | 0.14362  | 0.00186  | 0.108413 | 0.01911  | 0.08591  |
| 0.108607 | 0.01889  | 0.127339 | 0.00586  | 0.107558 | 0.02008  | 0.117066 | 0.01135  | 0.11139  |
| 0.576347 | 1.09E-42 | 0.561977 | 3.12E-40 | 0.550135 | 2.68E-38 | 0.421088 | 1.70E-21 | 0.394647 |
| 0.030671 | 0.50849  | 0.092999 | 0.04457  | 0.033229 | 0.47377  | 0.117026 | 0.01138  | 0.090819 |
| 0.055079 | 0.23484  | 0.057734 | 0.213    | 0.072268 | 0.11886  | 0.02427  | 0.60086  | 0.011578 |
| 0.055642 | 0.23008  | 0.024716 | 0.5942   | 0.026142 | 0.57308  | 0.008089 | 0.86161  | 0.015117 |
| 0.230493 | 4.76E-07 | 0.203358 | 9.46E-06 | 0.271396 | 2.50E-09 | 0.061723 | 0.18301  | 0.074613 |
| 0.159573 | 0.00054  | 0.154583 | 0.0008   | 0.200673 | 1.25E-05 | 0.038471 | 0.40685  | 0.052067 |
| 0.067061 | 0.14791  | 0.213817 | 3.13E-06 | 0.092677 | 0.04532  | 0.272602 | 2.11E-09 | 0.168221 |
| 0.092629 | 0.04543  | 0.150426 | 0.00111  | 0.074658 | 0.10712  | 0.17454  | 0.00015  | 0.123885 |
| 0.05669  | 0.22141  | 0.079613 | 0.08569  | 0.062633 | 0.17663  | 0.092901 | 0.0448   | 0.021242 |
| 0.033652 | 0.46816  | 0.118296 | 0.01051  | 0.055179 | 0.23399  | 0.151893 | 0.00099  | 0.080969 |
| 0.073055 | 0.11489  | 0.079003 | 0.08813  | 0.075899 | 0.10139  | 0.071272 | 0.12404  | 0.040421 |
| 0.248974 | 4.98E-08 | 0.434411 | 6.45E-23 | 0.31728  | 2.21E-12 | 0.423525 | 9.46E-22 | 0.282051 |
| 0.213557 | 3.22E-06 | 0.36416  | 4.32E-16 | 0.211639 | 3.96E-06 | 0.409378 | 2.69E-20 | 0.231947 |
| 0.203368 | 9.45E-06 | 0.260716 | 1.08E-08 | 0.203081 | 9.73E-06 | 0.23561  | 2.60E-07 | 0.141925 |
| 0.005817 | 0.90024  | 0.078592 | 0.0898   | 0.048986 | 0.29079  | 0.062207 | 0.17959  | 0.108096 |
| -0.03135 | 0.49919  | 0.07356  | 0.11239  | -0.01249 | 0.78786  | 0.103467 | 0.02535  | 0.128197 |
| 0.100118 | 0.03053  | 0.324256 | 6.80E-13 | 0.138097 | 0.00278  | 0.387199 | 3.75E-18 | 0.436511 |
| -0.02921 | 0.52897  | 0.031634 | 0.49527  | 0.001428 | 0.97544  | 0.03421  | 0.46081  | 0.053575 |
| 0.119171 | 0.00995  | 0.287108 | 2.59E-10 | 0.190071 | 3.56E-05 | 0.26737  | 4.37E-09 | 0.428811 |
| 0.039902 | 0.38961  | 0.128669 | 0.00536  | 0.074348 | 0.10859  | 0.132788 | 0.00405  | 0.132948 |

|          |          |          |          |          |          |          |          |          |
|----------|----------|----------|----------|----------|----------|----------|----------|----------|
| 0.001855 | 0.96811  | 0.074039 | 0.11006  | 0.030392 | 0.51236  | 0.071359 | 0.12358  | 0.060323 |
| -0.06572 | 0.15622  | -0.03948 | 0.39463  | -0.0345  | 0.457    | -0.04724 | 0.3084   | -0.05014 |
| -0.00933 | 0.84058  | 0.153986 | 0.00084  | 0.056624 | 0.22195  | 0.170447 | 0.00022  | 0.176446 |
| -0.00987 | 0.83161  | 0.054484 | 0.23994  | 0.039498 | 0.39444  | 0.041717 | 0.36839  | 0.074483 |
| 0.040145 | 0.38673  | 0.053435 | 0.24913  | 0.033162 | 0.47466  | 0.042237 | 0.36245  | 0.049204 |
| 0.024735 | 0.59391  | 0.086883 | 0.06064  | 0.054394 | 0.24073  | 0.08888  | 0.05494  | 0.092049 |
| 0.069525 | 0.13355  | 0.151263 | 0.00104  | 0.088497 | 0.056    | 0.133448 | 0.00386  | 0.235599 |
| -0.00198 | 0.96589  | 0.069317 | 0.13472  | 0.032694 | 0.48092  | 0.063147 | 0.1731   | 0.206963 |
| 0.03244  | 0.48433  | 0.101025 | 0.02904  | 0.060693 | 0.19044  | 0.084437 | 0.06829  | 0.104659 |
| 0.013741 | 0.7671   | 0.091667 | 0.04773  | 0.034399 | 0.45833  | 0.098679 | 0.03301  | 0.281559 |
| -0.05579 | 0.22888  | 0.030953 | 0.5046   | -0.01977 | 0.67005  | 0.03978  | 0.39107  | 0.045967 |
| 0.119491 | 0.00975  | 0.254678 | 2.39E-08 | 0.170804 | 0.00021  | 0.229729 | 5.21E-07 | 0.431019 |
| 0.156512 | 0.00069  | 0.348689 | 8.50E-15 | 0.263819 | 7.09E-09 | 0.283101 | 4.68E-10 | 0.372472 |
| 0.088505 | 0.05597  | 0.146431 | 0.00151  | 0.106856 | 0.02091  | 0.144651 | 0.00172  | 0.238851 |
| -0.06285 | 0.17514  | 0.005266 | 0.90964  | -0.02347 | 0.61287  | 0.016406 | 0.72363  | 0.039869 |
| -0.04894 | 0.29127  | 0.066337 | 0.15235  | -0.01888 | 0.68397  | 0.117322 | 0.01117  | 0.098144 |
| 0.14346  | 0.00188  | 0.207644 | 6.05E-06 | 0.154191 | 0.00083  | 0.16936  | 0.00024  | 0.195392 |
| -0.09358 | 0.04325  | -0.05936 | 0.20039  | -0.07302 | 0.11504  | -0.02768 | 0.55065  | -0.08745 |
| -0.04438 | 0.33858  | 0.101018 | 0.02905  | 0.005403 | 0.90729  | 0.12807  | 0.00558  | 0.147156 |
| 0.03182  | 0.49274  | 0.083392 | 0.07179  | 0.042286 | 0.36189  | 0.083636 | 0.07097  | 0.130895 |
| 0.093243 | 0.04401  | 0.17683  | 0.00012  | 0.084583 | 0.06781  | 0.196347 | 1.93E-05 | 0.180656 |
| -0.01708 | 0.71282  | 0.098121 | 0.03402  | 0.033782 | 0.46643  | 0.119904 | 0.0095   | 0.076697 |
| -0.02654 | 0.56726  | 0.092922 | 0.04475  | 0.001987 | 0.96585  | 0.113165 | 0.01441  | 0.157313 |
| 0.244028 | 9.28E-08 | 0.22889  | 5.74E-07 | 0.187692 | 4.47E-05 | 0.203685 | 9.14E-06 | 0.267885 |
| -0.03728 | 0.42156  | 0.056422 | 0.22361  | 0.01294  | 0.78032  | 0.053113 | 0.252    | 0.067297 |
| -0.04049 | 0.38266  | 0.007739 | 0.86752  | -0.00065 | 0.98887  | -0.01    | 0.82939  | -0.01231 |
| 0.185066 | 5.74E-05 | 0.433398 | 8.31E-23 | 0.260356 | 1.13E-08 | 0.4373   | 3.11E-23 | 0.548312 |
| 0.011891 | 0.79772  | 0.08908  | 0.05439  | 0.063758 | 0.16897  | 0.06504  | 0.16055  | 0.06975  |
| 0.189826 | 3.65E-05 | 0.393734 | 9.10E-19 | 0.270037 | 3.02E-09 | 0.351131 | 5.37E-15 | 0.539005 |
| -0.01416 | 0.76022  | 0.083305 | 0.07209  | 0.015253 | 0.74234  | 0.098826 | 0.03275  | 0.175386 |
| 0.008731 | 0.85074  | 0.01223  | 0.79209  | 0.014917 | 0.74783  | -0.00626 | 0.89266  | -0.02293 |
| -0.02915 | 0.52982  | 0.050689 | 0.27433  | -0.0061  | 0.89535  | 0.064778 | 0.16224  | 0.061521 |
| -0.04974 | 0.28341  | 0.037226 | 0.42222  | -0.00919 | 0.84292  | 0.043056 | 0.35321  | 0.095888 |
| 0.082688 | 0.07423  | 0.247889 | 5.71E-08 | 0.121494 | 0.00858  | 0.267427 | 4.33E-09 | 0.373362 |
| 0.109116 | 0.01834  | 0.268525 | 3.73E-09 | 0.139705 | 0.00248  | 0.283902 | 4.16E-10 | 0.324395 |
| -0.01403 | 0.76242  | 0.088691 | 0.05546  | 0.04841  | 0.29651  | 0.06808  | 0.14184  | 0.075969 |
| 0.0004   | 0.99312  | -0.0446  | 0.33623  | -0.03753 | 0.41842  | -0.03523 | 0.44749  | -0.06053 |
| 0.019708 | 0.67099  | 0.092225 | 0.04638  | 0.067686 | 0.14417  | 0.065275 | 0.15904  | 0.085566 |
| 0.258676 | 1.41E-08 | 0.518273 | 1.85E-33 | 0.306305 | 1.33E-11 | 0.551535 | 1.60E-38 | 0.498667 |
| 0.044197 | 0.34059  | 0.148968 | 0.00124  | 0.109788 | 0.01763  | 0.120501 | 0.00915  | 0.182103 |
| 0.064096 | 0.16671  | 0.177537 | 0.00011  | 0.101101 | 0.02892  | 0.181024 | 8.35E-05 | 0.249193 |
| 0.088038 | 0.05729  | 0.196936 | 1.82E-05 | 0.116935 | 0.01144  | 0.181169 | 8.24E-05 | 0.23562  |
| 0.112461 | 0.01504  | 0.283417 | 4.47E-10 | 0.162968 | 0.00041  | 0.280808 | 6.54E-10 | 0.337784 |
| 0.057029 | 0.21866  | 0.21395  | 3.08E-06 | 0.116772 | 0.01156  | 0.208035 | 5.81E-06 | 0.263904 |
| 0.059716 | 0.19769  | 0.189811 | 3.65E-05 | 0.082841 | 0.0737   | 0.226337 | 7.72E-07 | 0.16462  |

|          |          |          |          |          |          |          |          |          |
|----------|----------|----------|----------|----------|----------|----------|----------|----------|
| -0.02381 | 0.60778  | 0.038633 | 0.40488  | 0.007648 | 0.86907  | 0.044995 | 0.33193  | 0.044885 |
| 0.089842 | 0.05235  | 0.247654 | 5.89E-08 | 0.124155 | 0.00723  | 0.2601   | 1.17E-08 | 0.402304 |
| 0.097446 | 0.03527  | 0.12018  | 0.00933  | 0.112336 | 0.01515  | 0.085723 | 0.06418  | 0.094171 |
| 0.009187 | 0.84305  | 0.1252   | 0.00675  | 0.067204 | 0.14705  | 0.11162  | 0.01581  | 0.159181 |
| -0.08611 | 0.06298  | 0.041496 | 0.37094  | -0.01797 | 0.69846  | 0.061485 | 0.18471  | -0.01419 |
| -0.12506 | 0.00681  | -0.08996 | 0.05204  | -0.13191 | 0.0043   | -0.04527 | 0.329    | -0.12284 |
| -0.01429 | 0.75812  | 0.046414 | 0.31689  | 0.010747 | 0.81683  | 0.04892  | 0.29144  | 0.049314 |
| -0.03179 | 0.49308  | 0.033055 | 0.47609  | -0.01047 | 0.82155  | 0.036797 | 0.42759  | 0.005327 |
| -0.04707 | 0.31007  | 0.029427 | 0.52585  | -0.00714 | 0.87774  | 0.025639 | 0.58049  | 0.008529 |
| -0.00966 | 0.83507  | 0.136422 | 0.00314  | 0.053226 | 0.25099  | 0.146345 | 0.00152  | 0.18366  |
| -0.04933 | 0.2874   | 0.094369 | 0.04151  | 0.006406 | 0.89019  | 0.109507 | 0.01792  | 0.184826 |
| -0.02947 | 0.5253   | 0.160245 | 0.00051  | 0.043547 | 0.34774  | 0.195021 | 2.20E-05 | 0.282745 |
| 0.06319  | 0.1728   | 0.325077 | 5.90E-13 | 0.149792 | 0.00117  | 0.378916 | 2.16E-17 | 0.278852 |
| 0.020031 | 0.66592  | 0.096598 | 0.03691  | 0.018743 | 0.68622  | 0.125243 | 0.00673  | 0.209179 |
| 0.086136 | 0.0629   | 0.133188 | 0.00393  | 0.082101 | 0.07632  | 0.137892 | 0.00282  | 0.300326 |
| 0.04785  | 0.30213  | 0.083571 | 0.07118  | 0.055106 | 0.23461  | 0.074621 | 0.10729  | 0.044305 |
| 0.041215 | 0.37418  | 0.207568 | 6.10E-06 | 0.086844 | 0.06076  | 0.225344 | 8.65E-07 | 0.387837 |
| 0.002774 | 0.95232  | 0.123749 | 0.00742  | 0.02045  | 0.65936  | 0.158491 | 0.00059  | 0.209963 |
| 0.057845 | 0.21213  | 0.159043 | 0.00056  | 0.079439 | 0.08638  | 0.161732 | 0.00045  | 0.26948  |
| -0.03237 | 0.4853   | 0.024718 | 0.59416  | 0.02451  | 0.59728  | -0.00792 | 0.86446  | 0.033684 |
| -0.01295 | 0.78017  | 0.108    | 0.01957  | 0.0424   | 0.3606   | 0.113126 | 0.01445  | 0.180458 |
| 0.149777 | 0.00117  | 0.223341 | 1.09E-06 | 0.143766 | 0.00184  | 0.217167 | 2.17E-06 | 0.346553 |
| 0.438893 | 2.07E-23 | 0.454434 | 3.55E-25 | 0.371504 | 9.91E-17 | 0.388561 | 2.80E-18 | 0.400474 |
| 0.023633 | 0.61045  | 0.19552  | 2.09E-05 | 0.092791 | 0.04505  | 0.200845 | 1.22E-05 | 0.355084 |
| 0.01274  | 0.78364  | 0.127338 | 0.00586  | 0.074924 | 0.10587  | 0.10532  | 0.02283  | 0.181596 |
| 0.00107  | 0.9816   | 0.150255 | 0.00113  | 0.056584 | 0.22228  | 0.170275 | 0.00022  | 0.160254 |
| 0.4219   | 1.40E-21 | 0.467249 | 1.06E-26 | 0.439443 | 1.80E-23 | 0.328078 | 3.51E-13 | 0.40026  |
| -0.02214 | 0.63319  | 0.129381 | 0.00511  | 0.039971 | 0.38879  | 0.144202 | 0.00178  | 0.149323 |
| -0.08066 | 0.08163  | 0.054974 | 0.23573  | -0.00956 | 0.83672  | 0.075668 | 0.10243  | 0.064348 |
| 0.09931  | 0.0319   | 0.127021 | 0.00598  | 0.094249 | 0.04177  | 0.100105 | 0.03055  | 0.140603 |
| -0.04697 | 0.31114  | 0.086974 | 0.06038  | 0.019704 | 0.67105  | 0.087173 | 0.05979  | 0.197186 |
| 0.073639 | 0.112    | 0.065542 | 0.15733  | 0.065597 | 0.15699  | 0.030926 | 0.50497  | 0.022159 |
| 0.312243 | 5.10E-12 | 0.251012 | 3.84E-08 | 0.271415 | 2.49E-09 | 0.158011 | 0.00061  | 0.207879 |
| 0.055425 | 0.23191  | 0.097171 | 0.0358   | 0.04684  | 0.31247  | 0.099351 | 0.03183  | 0.152595 |
| 0.18394  | 6.38E-05 | 0.32143  | 1.10E-12 | 0.233123 | 3.49E-07 | 0.27647  | 1.22E-09 | 0.383586 |
| -0.05073 | 0.27394  | 0.107798 | 0.0198   | 0.004175 | 0.9283   | 0.139575 | 0.0025   | 0.162622 |
| 0.013595 | 0.76951  | 0.173565 | 0.00016  | 0.0851   | 0.06615  | 0.174395 | 0.00015  | 0.25242  |
| 0.095273 | 0.03959  | 0.205066 | 7.93E-06 | 0.144526 | 0.00174  | 0.179197 | 9.87E-05 | 0.254396 |
| 0.041487 | 0.37105  | 0.16339  | 0.00039  | 0.107277 | 0.02041  | 0.144349 | 0.00176  | 0.178526 |
| -0.06213 | 0.18011  | 0.016882 | 0.71595  | -0.01882 | 0.68502  | 0.012642 | 0.78526  | 0.063875 |
| -0.07526 | 0.10433  | -0.03007 | 0.51682  | -0.0273  | 0.55619  | -0.04445 | 0.33785  | -0.04389 |
| -0.0681  | 0.14171  | 0.004182 | 0.92819  | -0.0235  | 0.61242  | 0.001958 | 0.96634  | 0.008285 |
| 0.039727 | 0.3917   | 0.241305 | 1.30E-07 | 0.117552 | 0.01101  | 0.267965 | 4.02E-09 | 0.342056 |
| -0.06569 | 0.1564   | 0.056958 | 0.21923  | -0.01226 | 0.7916   | 0.08845  | 0.05613  | 0.125779 |
| 0.059706 | 0.19776  | 0.189679 | 3.70E-05 | 0.100479 | 0.02993  | 0.184475 | 6.06E-05 | 0.318245 |

|          |          |          |          |          |          |          |          |          |
|----------|----------|----------|----------|----------|----------|----------|----------|----------|
| 0.043337 | 0.35007  | 0.225628 | 8.37E-07 | 0.114849 | 0.01301  | 0.217703 | 2.04E-06 | 0.429715 |
| 0.002297 | 0.96052  | 0.168912 | 0.00025  | 0.061909 | 0.18169  | 0.196087 | 1.98E-05 | 0.23943  |
| 0.0336   | 0.46884  | 0.218833 | 1.80E-06 | 0.106135 | 0.02179  | 0.226268 | 7.78E-07 | 0.36329  |
| 0.006868 | 0.88233  | 0.071285 | 0.12397  | 0.019488 | 0.67445  | 0.091051 | 0.04925  | 0.058509 |
| 0.136851 | 0.00304  | 0.208178 | 5.72E-06 | 0.150493 | 0.00111  | 0.18493  | 5.81E-05 | 0.253752 |
| 0.028179 | 0.54355  | 0.055414 | 0.23201  | 0.037761 | 0.41557  | 0.04827  | 0.29791  | 0.054068 |
| 0.144833 | 0.0017   | 0.213071 | 3.39E-06 | 0.137942 | 0.00282  | 0.205714 | 7.41E-06 | 0.217998 |
| 0.020874 | 0.65276  | 0.001709 | 0.97062  | -0.01537 | 0.74042  | -0.00023 | 0.996    | 0.007286 |
| 0.037214 | 0.42237  | 0.124129 | 0.00724  | 0.055806 | 0.22871  | 0.132702 | 0.00407  | 0.18056  |
| 0.001574 | 0.97295  | 0.059691 | 0.19787  | 0.026514 | 0.56763  | 0.054538 | 0.23948  | 0.079354 |
| 0.134692 | 0.00354  | 0.297257 | 5.55E-11 | 0.241733 | 1.23E-07 | 0.23827  | 1.88E-07 | 0.214491 |
| 0.109736 | 0.01768  | 0.255433 | 2.16E-08 | 0.161312 | 0.00047  | 0.248261 | 5.45E-08 | 0.345631 |
| -0.05476 | 0.2376   | -0.06867 | 0.13839  | -0.04674 | 0.31354  | -0.08307 | 0.07291  | -0.11367 |
| -0.02336 | 0.61453  | 0.084595 | 0.06778  | 0.020829 | 0.65346  | 0.085436 | 0.06508  | 0.146586 |
| 0.103835 | 0.02484  | 0.289521 | 1.81E-10 | 0.106413 | 0.02145  | 0.359695 | 1.04E-15 | 0.289526 |
| 0.029566 | 0.52389  | 0.06104  | 0.18792  | 0.049411 | 0.28661  | 0.053523 | 0.24835  | 0.126667 |
| 0.060931 | 0.1887   | 0.094738 | 0.04071  | 0.077728 | 0.0934   | 0.063546 | 0.17039  | 0.122889 |
| -0.01771 | 0.7026   | -0.01431 | 0.75769  | 0.003681 | 0.93676  | -0.03503 | 0.45012  | 0.013257 |
| 0.028388 | 0.54057  | 0.135176 | 0.00342  | 0.074065 | 0.10994  | 0.12185  | 0.00839  | 0.238302 |
| 0.009004 | 0.84614  | 0.018774 | 0.68572  | 0.017496 | 0.70609  | 0.011116 | 0.81066  | -0.00033 |
| -0.03458 | 0.45599  | 0.020326 | 0.66131  | -0.03126 | 0.50044  | 0.044612 | 0.33606  | 0.038483 |
| 0.11407  | 0.01364  | 0.203457 | 9.36E-06 | 0.097066 | 0.036    | 0.229154 | 5.57E-07 | 0.32295  |
| -0.08069 | 0.08151  | -0.0743  | 0.1088   | -0.09866 | 0.03304  | -0.05296 | 0.25339  | -0.06353 |
| 0.175544 | 0.00014  | 0.399972 | 2.28E-19 | 0.240422 | 1.45E-07 | 0.410576 | 2.04E-20 | 0.450271 |
| 0.031256 | 0.50044  | 0.144144 | 0.00179  | 0.040255 | 0.38543  | 0.178573 | 0.0001   | 0.247928 |
| 0.048173 | 0.29888  | 0.078691 | 0.08939  | 0.071147 | 0.12471  | 0.060766 | 0.1899   | 0.128875 |
| 0.062793 | 0.17552  | 0.068139 | 0.14149  | 0.049344 | 0.28727  | 0.071009 | 0.12544  | 0.06318  |
| 0.212442 | 3.63E-06 | 0.298621 | 4.49E-11 | 0.321519 | 1.08E-12 | 0.15212  | 0.00097  | 0.267301 |
| 0.060394 | 0.19264  | 0.275441 | 1.41E-09 | 0.103369 | 0.02549  | 0.340013 | 4.21E-14 | 0.441888 |
| 0.145914 | 0.00157  | 0.464401 | 2.34E-26 | 0.227544 | 6.72E-07 | 0.535846 | 4.59E-36 | 0.478096 |
| 0.094289 | 0.04168  | 0.207873 | 5.91E-06 | 0.152368 | 0.00096  | 0.173139 | 0.00017  | 0.28124  |
| 0.084343 | 0.0686   | 0.191018 | 3.25E-05 | 0.112207 | 0.01527  | 0.195296 | 2.14E-05 | 0.254866 |
| 0.041371 | 0.37239  | 0.120663 | 0.00905  | 0.068966 | 0.13671  | 0.121086 | 0.00881  | 0.196724 |
| -0.08412 | 0.06934  | 0.040919 | 0.37763  | -0.00903 | 0.84564  | 0.061941 | 0.18147  | 0.080387 |
| -0.03818 | 0.41044  | 0.04344  | 0.34893  | 0.009434 | 0.83889  | 0.045547 | 0.32602  | 0.079331 |
| 0.004024 | 0.93088  | 0.10888  | 0.01859  | 0.06126  | 0.18633  | 0.096619 | 0.03687  | 0.158555 |
| 0.125351 | 0.00668  | 0.122854 | 0.00786  | 0.146834 | 0.00146  | 0.056251 | 0.22501  | 0.035295 |
| -0.06992 | 0.13134  | 0.015672 | 0.73552  | -0.0272  | 0.55769  | 0.04357  | 0.34748  | 0.060374 |
| -0.04142 | 0.37187  | 0.113261 | 0.01433  | 0.064306 | 0.16533  | 0.099886 | 0.03091  | 0.085503 |
| -0.03239 | 0.48497  | 0.074658 | 0.10711  | -0.00571 | 0.90199  | 0.10287  | 0.02622  | 0.134689 |
| -0.06914 | 0.13574  | 0.001814 | 0.96882  | -0.02096 | 0.65142  | 0.009021 | 0.84585  | -0.0023  |
| -0.09391 | 0.04251  | 0.001848 | 0.96823  | -0.05854 | 0.2067   | 0.027706 | 0.55034  | 0.036697 |
| 0.018032 | 0.69753  | 0.095327 | 0.03947  | 0.040704 | 0.38015  | 0.093044 | 0.04447  | 0.107229 |
| 0.11501  | 0.01288  | 0.377095 | 3.15E-17 | 0.188666 | 4.08E-05 | 0.407021 | 4.63E-20 | 0.648206 |
| 0.035547 | 0.44347  | 0.074382 | 0.10842  | 0.053197 | 0.25125  | 0.05527  | 0.23322  | 0.155474 |

|          |          |          |          |          |          |          |          |          |
|----------|----------|----------|----------|----------|----------|----------|----------|----------|
| 0.401777 | 1.52E-19 | 0.359232 | 1.14E-15 | 0.385635 | 5.24E-18 | 0.210421 | 4.51E-06 | 0.288653 |
| -0.02093 | 0.65183  | 0.097442 | 0.03528  | 0.019936 | 0.66741  | 0.108104 | 0.01945  | 0.138879 |
| -0.06022 | 0.19392  | 0.079465 | 0.08628  | -0.00232 | 0.96021  | 0.09777  | 0.03467  | 0.103912 |
| -0.0264  | 0.56927  | 0.081693 | 0.0778   | 0.02097  | 0.65127  | 0.079955 | 0.08435  | 0.135286 |
| -0.02069 | 0.65557  | 0.03269  | 0.48097  | -0.00589 | 0.89906  | 0.055593 | 0.2305   | 0.045258 |
| 0.005321 | 0.90869  | 0.143046 | 0.00194  | 0.064331 | 0.16516  | 0.151657 | 0.00101  | 0.23873  |
| 0.265144 | 5.92E-09 | 0.373221 | 6.99E-17 | 0.283978 | 4.12E-10 | 0.33361  | 1.33E-13 | 0.375742 |
| -0.07176 | 0.12151  | 0.06578  | 0.15582  | -0.01811 | 0.69628  | 0.093639 | 0.04312  | 0.098355 |
| -0.02308 | 0.61882  | 0.09009  | 0.0517   | 0.027563 | 0.5524   | 0.091826 | 0.04734  | 0.111933 |
| 0.030302 | 0.51361  | 0.20075  | 1.24E-05 | 0.090936 | 0.04954  | 0.221302 | 1.37E-06 | 0.32481  |
| 0.04073  | 0.37984  | 0.223023 | 1.13E-06 | 0.100904 | 0.02924  | 0.24561  | 7.61E-08 | 0.298163 |
| 0.01418  | 0.75989  | 0.088428 | 0.05619  | 0.03455  | 0.45636  | 0.085967 | 0.06342  | 0.084302 |
| 0.025965 | 0.57569  | 0.103854 | 0.02481  | 0.050404 | 0.27703  | 0.098499 | 0.03333  | 0.10955  |
| -0.16317 | 0.0004   | -0.12313 | 0.00772  | -0.10956 | 0.01786  | -0.11781 | 0.01083  | -0.1253  |
| 0.11661  | 0.01168  | 0.267204 | 4.47E-09 | 0.187648 | 4.49E-05 | 0.233421 | 3.37E-07 | 0.355683 |
| 0.212649 | 3.55E-06 | 0.197625 | 1.69E-05 | 0.158169 | 0.0006   | 0.154408 | 0.00081  | 0.272632 |
| 0.017887 | 0.69984  | 0.091104 | 0.04912  | 0.039149 | 0.39863  | 0.088306 | 0.05653  | 0.067649 |
| 0.042563 | 0.35875  | 0.203203 | 9.61E-06 | 0.086955 | 0.06043  | 0.242003 | 1.19E-07 | 0.253216 |
| 0.000412 | 0.99292  | -0.0354  | 0.44539  | -0.01603 | 0.7297   | -0.04259 | 0.35847  | -0.10724 |
| -0.05873 | 0.20522  | -0.03985 | 0.3902   | -0.0326  | 0.48225  | -0.05342 | 0.24923  | -0.06929 |
| 0.034116 | 0.46204  | 0.147745 | 0.00137  | 0.065875 | 0.15523  | 0.155529 | 0.00074  | 0.233661 |
| 0.037983 | 0.41283  | 0.176396 | 0.00013  | 0.076179 | 0.10013  | 0.199046 | 1.47E-05 | 0.229893 |
| 0.05227  | 0.25961  | 0.15611  | 0.00071  | 0.096139 | 0.03782  | 0.133465 | 0.00386  | 0.170469 |
| 0.04255  | 0.3589   | 0.215118 | 2.71E-06 | 0.111518 | 0.01591  | 0.22002  | 1.58E-06 | 0.420853 |
| 0.222693 | 1.17E-06 | 0.267234 | 4.45E-09 | 0.210707 | 4.37E-06 | 0.219557 | 1.66E-06 | 0.243442 |
| 0.008191 | 0.85986  | 0.127385 | 0.00584  | 0.058048 | 0.21052  | 0.131977 | 0.00428  | 0.219517 |
| -0.01405 | 0.76206  | 0.083305 | 0.07209  | 0.019305 | 0.67733  | 0.100027 | 0.03068  | 0.211795 |
| 0.027541 | 0.55273  | 0.136166 | 0.00319  | 0.061083 | 0.1876   | 0.145089 | 0.00167  | 0.220423 |
| 0.024109 | 0.60329  | 0.003139 | 0.94606  | 0.024727 | 0.59403  | -0.02548 | 0.58277  | 0.047702 |
| 0.044402 | 0.33835  | 0.096283 | 0.03753  | 0.049936 | 0.28152  | 0.109375 | 0.01806  | 0.123108 |
| -0.01614 | 0.72794  | 0.051448 | 0.26719  | 0.014448 | 0.7555   | 0.057015 | 0.21877  | 0.091688 |
| -0.06418 | 0.16615  | 0.055129 | 0.23442  | -0.00524 | 0.91015  | 0.06427  | 0.16556  | 0.115809 |
| 0.007173 | 0.87714  | 0.158162 | 0.0006   | 0.048639 | 0.29422  | 0.188184 | 4.27E-05 | 0.355587 |
| -0.00841 | 0.85615  | 0.009777 | 0.8331   | -0.01725 | 0.71004  | 0.020614 | 0.65681  | 0.045586 |
| 0.114623 | 0.01319  | 0.106513 | 0.02133  | 0.066942 | 0.14863  | 0.106241 | 0.02166  | 0.138704 |
| -0.04932 | 0.28746  | 0.022428 | 0.62879  | -0.03432 | 0.45941  | 0.058429 | 0.20754  | 0.085563 |
| 0.043952 | 0.34327  | 0.108627 | 0.01887  | 0.036077 | 0.43669  | 0.129748 | 0.00498  | 0.164129 |
| 0.063871 | 0.16821  | 0.180777 | 8.55E-05 | 0.114172 | 0.01356  | 0.165823 | 0.00032  | 0.237625 |
| -0.03132 | 0.4996   | 0.11882  | 0.01017  | 0.021797 | 0.63847  | 0.144765 | 0.00171  | 0.245039 |
| -0.01821 | 0.69464  | 0.09018  | 0.05147  | 0.032169 | 0.488    | 0.094121 | 0.04205  | 0.192178 |
| 0.008391 | 0.85648  | 0.147144 | 0.00143  | 0.075775 | 0.10195  | 0.130729 | 0.00466  | 0.348597 |
| 0.067232 | 0.14688  | 0.209418 | 5.02E-06 | 0.105023 | 0.02322  | 0.22648  | 7.59E-07 | 0.317281 |
| 0.017481 | 0.70633  | 0.063748 | 0.16904  | 0.048824 | 0.29239  | 0.060287 | 0.19343  | 0.114804 |
| -0.04581 | 0.32322  | 0.040823 | 0.37875  | -0.01225 | 0.79173  | 0.065293 | 0.15892  | 0.097181 |
| 0.05529  | 0.23305  | 0.142839 | 0.00197  | 0.089664 | 0.05282  | 0.128674 | 0.00536  | 0.209071 |

|          |         |          |          |          |          |          |          |          |
|----------|---------|----------|----------|----------|----------|----------|----------|----------|
| 0.010284 | 0.82458 | 0.214988 | 2.75E-06 | 0.066703 | 0.15009  | 0.266468 | 4.94E-09 | 0.380223 |
| 0.095934 | 0.03823 | 0.21995  | 1.59E-06 | 0.156182 | 0.00071  | 0.194768 | 2.25E-05 | 0.40523  |
| 0.006477 | 0.88899 | 0.140907 | 0.00227  | 0.065471 | 0.15778  | 0.13551  | 0.00335  | 0.267151 |
| 0.062992 | 0.17416 | 0.120266 | 0.00928  | 0.097597 | 0.03499  | 0.075903 | 0.10137  | 0.162581 |
| 0.047675 | 0.30391 | 0.108973 | 0.01849  | 0.07574  | 0.10211  | 0.099836 | 0.031    | 0.243771 |
| 0.029152 | 0.52973 | 0.154485 | 0.00081  | 0.06522  | 0.15939  | 0.178581 | 0.0001   | 0.094202 |
| 0.063563 | 0.17028 | 0.173011 | 0.00017  | 0.074283 | 0.10889  | 0.190566 | 3.40E-05 | 0.176555 |
| 0.173175 | 0.00017 | 0.301596 | 2.82E-11 | 0.137225 | 0.00296  | 0.358746 | 1.25E-15 | 0.401186 |
| 0.046473 | 0.31627 | 0.115396 | 0.01258  | 0.048746 | 0.29316  | 0.122798 | 0.00789  | 0.19368  |
| -0.00098 | 0.98313 | 0.111908 | 0.01554  | 0.042762 | 0.35651  | 0.136504 | 0.00312  | 0.166658 |
| -0.0807  | 0.0815  | -0.04419 | 0.34071  | -0.10592 | 0.02206  | -0.00489 | 0.91611  | 0.059371 |
| 0.025    | 0.58996 | 0.145011 | 0.00168  | 0.080189 | 0.08344  | 0.16315  | 0.0004   | 0.204298 |
| -0.00965 | 0.83531 | 0.093678 | 0.04303  | 0.014906 | 0.748    | 0.116719 | 0.0116   | 0.144114 |
| 0.107698 | 0.01992 | 0.285568 | 3.26E-10 | 0.167223 | 0.00028  | 0.291727 | 1.30E-10 | 0.428203 |
| 0.01004  | 0.82868 | -0.02385 | 0.6072   | -0.01942 | 0.67548  | -0.03186 | 0.49224  | -0.09681 |
| -0.03484 | 0.45263 | 0.083063 | 0.07293  | 0.029088 | 0.53063  | 0.107758 | 0.01985  | 0.179482 |
| 0.001951 | 0.96646 | 0.077972 | 0.09237  | 0.019611 | 0.67252  | 0.093463 | 0.04351  | 0.148179 |
| -0.06815 | 0.1414  | 0.069287 | 0.13489  | -0.00642 | 0.89002  | 0.092633 | 0.04542  | 0.124661 |
| 0.00326  | 0.94399 | 0.154474 | 0.00081  | 0.062908 | 0.17474  | 0.174139 | 0.00016  | 0.253988 |
| -0.02803 | 0.54562 | 0.106218 | 0.02169  | 0.035254 | 0.44723  | 0.119766 | 0.00958  | 0.2957   |
| 0.10185  | 0.02775 | 0.215939 | 2.48E-06 | 0.150751 | 0.00108  | 0.198452 | 1.56E-05 | 0.158479 |
| -0.02301 | 0.61996 | 0.010601 | 0.81927  | -0.00145 | 0.97505  | 0.013648 | 0.76864  | 0.001258 |
| 0.016364 | 0.7243  | 0.169341 | 0.00024  | 0.068838 | 0.13745  | 0.202309 | 1.05E-05 | 0.318351 |
| 0.021735 | 0.63944 | 0.044178 | 0.34079  | 0.016929 | 0.7152   | 0.038764 | 0.40328  | 0.063997 |
| 0.019181 | 0.67928 | 0.178877 | 0.0001   | 0.047829 | 0.30235  | 0.234617 | 2.92E-07 | 0.254885 |
| 0.059494 | 0.19937 | 0.301703 | 2.77E-11 | 0.116375 | 0.01185  | 0.357933 | 1.46E-15 | 0.408764 |
| -0.00777 | 0.86695 | 0.187278 | 4.65E-05 | 0.039633 | 0.39281  | 0.243394 | 1.00E-07 | 0.379781 |
| 0.139267 | 0.00256 | 0.248549 | 5.26E-08 | 0.218524 | 1.87E-06 | 0.169378 | 0.00024  | 0.212297 |
| 0.013849 | 0.76533 | 0.161137 | 0.00047  | 0.064558 | 0.16368  | 0.179352 | 9.74E-05 | 0.259543 |
| 0.098571 | 0.0332  | 0.285575 | 3.25E-10 | 0.158145 | 0.0006   | 0.293043 | 1.06E-10 | 0.402453 |
| 0.039609 | 0.3931  | 0.294648 | 8.30E-11 | 0.111805 | 0.01564  | 0.354624 | 2.76E-15 | 0.350257 |
| 0.039736 | 0.39158 | 0.274721 | 1.57E-09 | 0.100148 | 0.03048  | 0.330755 | 2.20E-13 | 0.3103   |
| 0.035968 | 0.43808 | 0.181723 | 7.83E-05 | 0.065603 | 0.15694  | 0.206769 | 6.63E-06 | 0.42196  |
| 0.096815 | 0.03648 | 0.16817  | 0.00026  | 0.148023 | 0.00134  | 0.115488 | 0.01251  | 0.213029 |
| -0.08552 | 0.0648  | 0.025024 | 0.58961  | -0.04503 | 0.33153  | 0.063183 | 0.17285  | 0.063007 |
| 0.076422 | 0.09905 | 0.238491 | 1.83E-07 | 0.12204  | 0.00829  | 0.24699  | 6.40E-08 | 0.337785 |
| -0.006   | 0.89709 | 0.106555 | 0.02128  | 0.046249 | 0.31862  | 0.109291 | 0.01815  | 0.176807 |
| 0.025282 | 0.58578 | 0.177133 | 0.00012  | 0.101778 | 0.02786  | 0.171829 | 0.00019  | 0.199826 |
| 0.059254 | 0.20119 | 0.090758 | 0.04999  | 0.063522 | 0.17055  | 0.084055 | 0.06956  | 0.073348 |
| 0.02419  | 0.60208 | 0.105324 | 0.02283  | 0.047102 | 0.30977  | 0.114887 | 0.01298  | 0.134748 |
| 0.016076 | 0.72897 | 0.068495 | 0.13942  | 0.06674  | 0.14987  | 0.041837 | 0.36701  | 0.076314 |
| 0.008067 | 0.86198 | 0.113368 | 0.01424  | 0.035143 | 0.44866  | 0.129682 | 0.005    | 0.166952 |
| -0.07102 | 0.12536 | 0.006737 | 0.88456  | -0.04202 | 0.36498  | 0.018198 | 0.69488  | 0.016803 |
| 0.039213 | 0.39786 | 0.12715  | 0.00593  | 0.056483 | 0.2231   | 0.134732 | 0.00353  | 0.140273 |
| 0.019898 | 0.668   | 0.141255 | 0.00222  | 0.09829  | 0.03371  | 0.125559 | 0.00659  | 0.189545 |



|          |          |          |          |          |          |          |          |          |
|----------|----------|----------|----------|----------|----------|----------|----------|----------|
| 0.025905 | 0.57657  | 0.075909 | 0.10134  | 0.037747 | 0.41575  | 0.07576  | 0.10202  | 0.055465 |
| 0.024835 | 0.59241  | 0.07254  | 0.11747  | 0.036989 | 0.42518  | 0.080805 | 0.08109  | 0.207626 |
| 0.065516 | 0.1575   | 0.167581 | 0.00028  | 0.091753 | 0.04752  | 0.179616 | 9.50E-05 | 0.21818  |
| 0.057439 | 0.21536  | 0.122654 | 0.00797  | 0.091855 | 0.04727  | 0.105504 | 0.02259  | 0.23287  |
| 0.319282 | 1.58E-12 | 0.21348  | 3.24E-06 | 0.285407 | 3.34E-10 | 0.08536  | 0.06532  | 0.060282 |
| 0.029923 | 0.51889  | 0.068022 | 0.14218  | 0.04685  | 0.31236  | 0.069493 | 0.13373  | 0.046483 |
| 0.047259 | 0.30815  | 0.117679 | 0.01092  | 0.081932 | 0.07693  | 0.116048 | 0.01209  | 0.083889 |
| 0.244117 | 9.18E-08 | 0.158717 | 0.00058  | 0.199406 | 1.42E-05 | 0.081384 | 0.07893  | 0.080412 |
| 0.247043 | 6.36E-08 | 0.217709 | 2.04E-06 | 0.289471 | 1.82E-10 | 0.089513 | 0.05323  | 0.077261 |
| 0.025344 | 0.58485  | 0.079136 | 0.08759  | 0.0385   | 0.4065   | 0.086058 | 0.06314  | 0.06734  |
| 0.16078  | 0.00049  | 0.117504 | 0.01104  | 0.146757 | 0.00147  | 0.065858 | 0.15534  | 0.032328 |
| 0.061159 | 0.18706  | 0.053959 | 0.24451  | 0.076171 | 0.10017  | 0.011788 | 0.79944  | 0.002152 |
| 0.111672 | 0.01576  | 0.210771 | 4.34E-06 | 0.119211 | 0.00992  | 0.222057 | 1.26E-06 | 0.147726 |
| 0.04664  | 0.31453  | 0.095341 | 0.03945  | 0.065438 | 0.158    | 0.099472 | 0.03162  | 0.053801 |
| 0.127863 | 0.00566  | 0.1078   | 0.0198   | 0.112602 | 0.01491  | 0.072141 | 0.11951  | 0.043718 |
| 0.44572  | 3.56E-24 | 0.29658  | 6.17E-11 | 0.384461 | 6.72E-18 | 0.139952 | 0.00244  | 0.098793 |
| 0.063333 | 0.17183  | 0.167654 | 0.00027  | 0.116271 | 0.01192  | 0.169157 | 0.00024  | 0.207762 |
| 0.086125 | 0.06294  | 0.206533 | 6.80E-06 | 0.125807 | 0.00648  | 0.20547  | 7.60E-06 | 0.292375 |
| 0.159952 | 0.00052  | 0.27807  | 9.71E-10 | 0.232075 | 3.95E-07 | 0.213495 | 3.24E-06 | 0.22794  |
| 0.239219 | 1.68E-07 | 0.426185 | 4.95E-22 | 0.312154 | 5.17E-12 | 0.406707 | 4.97E-20 | 0.265616 |
| 0.177004 | 0.00012  | 0.127727 | 0.00571  | 0.147608 | 0.00138  | 0.08131  | 0.07921  | 0.043985 |
| 0.274331 | 1.66E-09 | 0.107983 | 0.01959  | 0.106464 | 0.02139  | 0.085294 | 0.06553  | 0.05931  |
| 0.129976 | 0.0049   | 0.175313 | 0.00014  | 0.143552 | 0.00187  | 0.142635 | 0.002    | 0.122499 |
| 0.031226 | 0.50084  | 0.093102 | 0.04433  | 0.050253 | 0.27848  | 0.113664 | 0.01398  | 0.047882 |
| 0.032197 | 0.48762  | 0.059554 | 0.19891  | 0.050269 | 0.27832  | 0.059673 | 0.19801  | 0.035816 |
| 0.052772 | 0.25506  | 0.119596 | 0.00969  | 0.073247 | 0.11393  | 0.137116 | 0.00299  | 0.072554 |
| 0.306046 | 1.39E-11 | 0.156219 | 0.0007   | 0.195683 | 2.06E-05 | 0.0782   | 0.09142  | 0.116362 |
| 0.183921 | 6.39E-05 | 0.184246 | 6.19E-05 | 0.16965  | 0.00023  | 0.141196 | 0.00223  | 0.231663 |
| 0.029023 | 0.53155  | 0.042728 | 0.35689  | 0.037402 | 0.42003  | 0.032325 | 0.48589  | 0.028037 |
| 0.07546  | 0.10339  | 0.147531 | 0.00139  | 0.08326  | 0.07225  | 0.159142 | 0.00056  | 0.063449 |
| 0.273718 | 1.80E-09 | 0.255955 | 2.02E-08 | 0.252609 | 3.12E-08 | 0.197515 | 1.71E-05 | 0.157159 |
| 0.132686 | 0.00407  | 0.132776 | 0.00405  | 0.096559 | 0.03698  | 0.128204 | 0.00553  | 0.098273 |
| 0.18551  | 5.50E-05 | 0.231149 | 4.41E-07 | 0.197375 | 1.74E-05 | 0.187765 | 4.44E-05 | 0.205473 |
| 0.154686 | 0.0008   | 0.128865 | 0.00529  | 0.147406 | 0.0014   | 0.070329 | 0.12911  | 0.046652 |
| 0.107718 | 0.01989  | 0.093293 | 0.0439   | 0.124144 | 0.00723  | 0.043465 | 0.34865  | 0.040479 |
| 0.123458 | 0.00756  | 0.122213 | 0.0082   | 0.142822 | 0.00197  | 0.074859 | 0.10617  | 0.124394 |
| 0.162071 | 0.00044  | 0.337228 | 6.97E-14 | 0.211893 | 3.85E-06 | 0.357589 | 1.56E-15 | 0.294877 |
| 0.104051 | 0.02453  | 0.162421 | 0.00043  | 0.096632 | 0.03684  | 0.161508 | 0.00046  | 0.202654 |
| 0.068047 | 0.14203  | 0.080201 | 0.0834   | 0.092548 | 0.04562  | 0.04224  | 0.36242  | 0.142918 |
| 0.227968 | 6.39E-07 | 0.370357 | 1.25E-16 | 0.34194  | 2.96E-14 | 0.267491 | 4.30E-09 | 0.166603 |
| 0.12627  | 0.00629  | 0.157672 | 0.00063  | 0.140616 | 0.00232  | 0.121428 | 0.00862  | 0.157443 |
| 0.071205 | 0.1244   | 0.089908 | 0.05218  | 0.072733 | 0.1165   | 0.08516  | 0.06595  | 0.075726 |
| 0.076142 | 0.1003   | 0.078153 | 0.09161  | 0.070688 | 0.12716  | 0.074688 | 0.10697  | 0.062466 |
| 0.235518 | 2.62E-07 | 0.273747 | 1.80E-09 | 0.1787   | 0.0001   | 0.301299 | 2.95E-11 | 0.249567 |
| 0.426938 | 4.12E-22 | 0.480296 | 2.53E-28 | 0.387864 | 3.25E-18 | 0.42468  | 7.15E-22 | 0.265866 |

|          |          |          |          |          |          |          |          |          |
|----------|----------|----------|----------|----------|----------|----------|----------|----------|
| 0.319931 | 1.42E-12 | 0.5092   | 3.57E-32 | 0.368672 | 1.76E-16 | 0.484871 | 6.57E-29 | 0.321194 |
| 0.137304 | 0.00295  | 0.405284 | 6.88E-20 | 0.170563 | 0.00021  | 0.499366 | 8.01E-31 | 0.420544 |
| 0.069699 | 0.13258  | 0.243808 | 9.54E-08 | 0.116734 | 0.01159  | 0.316135 | 2.68E-12 | 0.160557 |
| 0.181124 | 8.28E-05 | 0.192317 | 2.86E-05 | 0.169616 | 0.00023  | 0.170756 | 0.00021  | 0.121613 |
| 0.059751 | 0.19742  | 0.109231 | 0.01821  | 0.076206 | 0.10001  | 0.088414 | 0.05623  | 0.223732 |
| 0.227871 | 6.47E-07 | 0.271646 | 2.41E-09 | 0.264154 | 6.78E-09 | 0.204306 | 8.58E-06 | 0.145845 |
| 0.123713 | 0.00744  | 0.282403 | 5.19E-10 | 0.171846 | 0.00019  | 0.294052 | 9.09E-11 | 0.357028 |
| 0.076316 | 0.09952  | 0.14517  | 0.00166  | 0.096633 | 0.03684  | 0.171884 | 0.00019  | 0.056089 |
| 0.250823 | 3.93E-08 | 0.50157  | 4.03E-31 | 0.321106 | 1.16E-12 | 0.507574 | 6.01E-32 | 0.536561 |
| 0.508949 | 3.87E-32 | 0.420704 | 1.87E-21 | 0.498978 | 9.04E-31 | 0.228401 | 6.08E-07 | 0.171154 |
| 0.104984 | 0.02327  | 0.097946 | 0.03434  | 0.073054 | 0.11489  | 0.092731 | 0.04519  | 0.034027 |
| 0.095112 | 0.03992  | 0.056318 | 0.22447  | 0.093101 | 0.04434  | 0.006369 | 0.89082  | 0.004865 |
| 0.135273 | 0.0034   | 0.066687 | 0.15019  | 0.10368  | 0.02505  | 0.031057 | 0.50318  | 0.00691  |
| 0.067471 | 0.14544  | 0.081822 | 0.07733  | 0.071401 | 0.12336  | 0.076577 | 0.09836  | 0.032817 |
| 0.01301  | 0.77917  | 0.023626 | 0.61056  | 0.015905 | 0.73174  | 0.025601 | 0.58105  | 0.0217   |
| 0.029325 | 0.52729  | 0.113228 | 0.01436  | 0.059192 | 0.20166  | 0.145108 | 0.00167  | 0.122871 |
| 0.034328 | 0.45927  | 0.061799 | 0.18247  | 0.043878 | 0.34408  | 0.077121 | 0.09599  | 0.05177  |
| 0.050218 | 0.27881  | 0.007797 | 0.86655  | 0.024825 | 0.59257  | 0.001204 | 0.97929  | -0.00983 |
| 0.095206 | 0.03973  | 0.024132 | 0.60294  | 0.038731 | 0.40369  | 0.017134 | 0.71191  | 0.012985 |
| 0.121019 | 0.00885  | 0.163031 | 0.0004   | 0.163099 | 0.0004   | 0.11432  | 0.01344  | 0.159973 |
| -0.12714 | 0.00594  | -0.30512 | 1.61E-11 | -0.22215 | 1.24E-06 | -0.28205 | 5.46E-10 | -0.41489 |
| -0.13851 | 0.0027   | -0.16541 | 0.00033  | -0.13499 | 0.00347  | -0.15087 | 0.00107  | -0.23938 |
| -0.14925 | 0.00122  | -0.17586 | 0.00013  | -0.15383 | 0.00085  | -0.14227 | 0.00206  | -0.2293  |
| -0.09343 | 0.0436   | -0.14262 | 0.002    | -0.10891 | 0.01856  | -0.15133 | 0.00104  | -0.18612 |
| -0.07552 | 0.10309  | -0.1263  | 0.00628  | -0.12686 | 0.00605  | -0.08838 | 0.05633  | -0.19511 |
| -0.09772 | 0.03477  | -0.17128 | 0.0002   | -0.13658 | 0.0031   | -0.15885 | 0.00057  | -0.26222 |
| -0.16054 | 0.0005   | -0.15503 | 0.00077  | -0.16345 | 0.00039  | -0.11555 | 0.01246  | -0.17913 |
| 0.015117 | 0.74455  | -0.05173 | 0.26456  | -0.03471 | 0.45422  | -0.05232 | 0.25913  | -0.05015 |
| -0.11606 | 0.01208  | -0.23281 | 3.62E-07 | -0.18643 | 5.04E-05 | -0.20191 | 1.10E-05 | -0.30072 |
| -0.11394 | 0.01375  | -0.24693 | 6.45E-08 | -0.17581 | 0.00013  | -0.23585 | 2.52E-07 | -0.38666 |
| -0.15783 | 0.00062  | -0.17659 | 0.00013  | -0.17178 | 0.00019  | -0.13922 | 0.00257  | -0.24085 |
| -0.11744 | 0.01109  | -0.094   | 0.0423   | -0.12959 | 0.00504  | -0.05169 | 0.26496  | -0.13453 |
| -0.19878 | 1.51E-05 | -0.20367 | 9.16E-06 | -0.21531 | 2.66E-06 | -0.14324 | 0.00192  | -0.24061 |
| 0.249741 | 4.52E-08 | 0.182739 | 7.13E-05 | 0.256819 | 1.81E-08 | 0.071988 | 0.1203   | 0.164796 |
| -0.19416 | 2.39E-05 | -0.26279 | 8.15E-09 | -0.20191 | 1.10E-05 | -0.24846 | 5.31E-08 | -0.36245 |
| -0.14052 | 0.00234  | -0.25047 | 4.12E-08 | -0.1744  | 0.00015  | -0.26254 | 8.43E-09 | -0.33137 |
| -0.11037 | 0.01703  | -0.11868 | 0.01026  | -0.12844 | 0.00544  | -0.0862  | 0.06271  | -0.14705 |
| -0.11985 | 0.00953  | -0.04945 | 0.28626  | -0.11619 | 0.01198  | 0.003855 | 0.93378  | 0.008011 |
| -0.13817 | 0.00277  | -0.20264 | 1.02E-05 | -0.17707 | 0.00012  | -0.17868 | 0.0001   | -0.28754 |
| -0.15405 | 0.00084  | -0.20067 | 1.25E-05 | -0.18132 | 8.13E-05 | -0.16481 | 0.00035  | -0.28336 |
| -0.20138 | 1.16E-05 | -0.12507 | 0.0068   | -0.18838 | 4.19E-05 | -0.05121 | 0.26937  | -0.12447 |
| -0.18287 | 7.05E-05 | -0.18582 | 5.34E-05 | -0.19201 | 2.95E-05 | -0.11875 | 0.01022  | -0.22673 |
| -0.26081 | 1.06E-08 | -0.3123  | 5.05E-12 | -0.26725 | 4.44E-09 | -0.26578 | 5.43E-09 | -0.39196 |
| -0.0871  | 0.06     | -0.13845 | 0.00272  | -0.11614 | 0.01202  | -0.11661 | 0.01168  | -0.13167 |
| -0.16664 | 0.0003   | -0.23313 | 3.49E-07 | -0.17455 | 0.00015  | -0.222   | 1.27E-06 | -0.37014 |

|          |          |          |          |          |          |          |          |          |
|----------|----------|----------|----------|----------|----------|----------|----------|----------|
| -0.17054 | 0.00021  | -0.20678 | 6.63E-06 | -0.20077 | 1.23E-05 | -0.15704 | 0.00066  | -0.27357 |
| -0.16365 | 0.00038  | -0.06715 | 0.14738  | -0.12608 | 0.00637  | -0.01343 | 0.7722   | -0.00707 |
| -0.03982 | 0.39057  | -0.01396 | 0.76356  | -0.0631  | 0.17344  | 0.024798 | 0.59297  | 5.33E-05 |
| -0.22805 | 6.33E-07 | -0.22793 | 6.42E-07 | -0.21169 | 3.93E-06 | -0.19692 | 1.82E-05 | -0.25589 |
| -0.10122 | 0.02873  | -0.05413 | 0.24301  | -0.07426 | 0.10899  | -0.02567 | 0.5801   | -0.03057 |
| -0.17866 | 0.0001   | -0.29324 | 1.03E-10 | -0.2047  | 8.24E-06 | -0.29034 | 1.60E-10 | -0.39594 |
| -0.07534 | 0.10394  | -0.12229 | 0.00816  | -0.10121 | 0.02876  | -0.08512 | 0.06608  | -0.32133 |
| -0.13281 | 0.00404  | -0.18451 | 6.04E-05 | -0.16779 | 0.00027  | -0.15453 | 0.00081  | -0.24554 |
| -0.18955 | 3.74E-05 | -0.22405 | 1.00E-06 | -0.19212 | 2.92E-05 | -0.18072 | 8.59E-05 | -0.29829 |
| -0.15321 | 0.0009   | -0.12772 | 0.00571  | -0.14837 | 0.0013   | -0.09794 | 0.03435  | -0.10696 |
| -0.17978 | 9.36E-05 | -0.10783 | 0.01977  | -0.15536 | 0.00075  | -0.04745 | 0.30621  | -0.10335 |
| -0.19538 | 2.12E-05 | -0.27611 | 1.29E-09 | -0.21806 | 1.96E-06 | -0.24291 | 1.07E-07 | -0.43982 |
| -0.22128 | 1.37E-06 | -0.18834 | 4.20E-05 | -0.19199 | 2.96E-05 | -0.14987 | 0.00116  | -0.17984 |
| -0.06558 | 0.1571   | -0.17034 | 0.00022  | -0.12601 | 0.0064   | -0.16826 | 0.00026  | -0.24043 |
| -0.22586 | 8.15E-07 | -0.20169 | 1.12E-05 | -0.20093 | 1.21E-05 | -0.13151 | 0.00442  | -0.31168 |
| -0.17978 | 9.36E-05 | -0.11393 | 0.01376  | -0.15679 | 0.00067  | -0.06451 | 0.16399  | -0.04505 |
| -0.14789 | 0.00135  | -0.12896 | 0.00525  | -0.13739 | 0.00293  | -0.081   | 0.08037  | -0.16389 |
| -0.15625 | 0.0007   | -0.1152  | 0.01273  | -0.16009 | 0.00052  | -0.05827 | 0.20877  | -0.11485 |
| -0.15931 | 0.00055  | -0.20329 | 9.52E-06 | -0.15535 | 0.00076  | -0.18995 | 3.60E-05 | -0.33536 |
| -0.16618 | 0.00031  | -0.13372 | 0.00379  | -0.18144 | 8.04E-05 | -0.05901 | 0.20305  | -0.16843 |
| -0.02442 | 0.59859  | 0.006193 | 0.89381  | -0.0567  | 0.22131  | 0.042338 | 0.3613   | 0.03144  |
| 0.166975 | 0.00029  | 0.207462 | 6.17E-06 | 0.197994 | 1.63E-05 | 0.1786   | 0.0001   | 0.09241  |
| -0.18097 | 8.40E-05 | -0.12991 | 0.00493  | -0.16116 | 0.00047  | -0.0732  | 0.11417  | -0.19308 |
| -0.18184 | 7.75E-05 | -0.13164 | 0.00438  | -0.17683 | 0.00012  | -0.07121 | 0.12435  | -0.12516 |
| -0.06347 | 0.1709   | -0.16057 | 0.0005   | -0.10907 | 0.01838  | -0.16874 | 0.00025  | -0.22357 |
| -0.19835 | 1.58E-05 | -0.22032 | 1.53E-06 | -0.16288 | 0.00041  | -0.20621 | 7.03E-06 | -0.35452 |
| -0.14842 | 0.0013   | -0.24946 | 4.68E-08 | -0.19981 | 1.36E-05 | -0.21895 | 1.78E-06 | -0.39543 |
| -0.14904 | 0.00124  | -0.14107 | 0.00225  | -0.12219 | 0.00821  | -0.1177  | 0.01091  | -0.21563 |
| -0.15008 | 0.00114  | -0.21611 | 2.43E-06 | -0.17521 | 0.00014  | -0.20736 | 6.23E-06 | -0.29284 |
| -0.19694 | 1.82E-05 | -0.21752 | 2.08E-06 | -0.20437 | 8.52E-06 | -0.18918 | 3.88E-05 | -0.24947 |
| -0.10667 | 0.02114  | -0.15268 | 0.00093  | -0.15342 | 0.00088  | -0.12076 | 0.009    | -0.17825 |
| -0.03525 | 0.44728  | -0.11529 | 0.01267  | -0.06963 | 0.13295  | -0.14146 | 0.00218  | -0.15338 |
| -0.11446 | 0.01332  | -0.0961  | 0.03789  | -0.12436 | 0.00713  | -0.05792 | 0.21155  | -0.09713 |
| -0.08179 | 0.07744  | -0.24852 | 5.28E-08 | -0.17008 | 0.00022  | -0.24467 | 8.57E-08 | -0.39656 |
| -0.12226 | 0.00817  | -0.18779 | 4.43E-05 | -0.17281 | 0.00017  | -0.14611 | 0.00155  | -0.29171 |
| -0.21571 | 2.54E-06 | -0.25823 | 1.50E-08 | -0.21936 | 1.70E-06 | -0.21761 | 2.06E-06 | -0.3038  |
| -0.0394  | 0.39563  | -0.12343 | 0.00758  | -0.09579 | 0.03852  | -0.11005 | 0.01735  | -0.20811 |
| -0.12528 | 0.00671  | -0.1574  | 0.00064  | -0.15269 | 0.00093  | -0.11678 | 0.01155  | -0.21602 |
| -0.09892 | 0.03259  | -0.02592 | 0.57636  | -0.06874 | 0.13801  | 0.010461 | 0.82162  | -0.10948 |
| -0.112   | 0.01546  | -0.16248 | 0.00042  | -0.16717 | 0.00029  | -0.11524 | 0.0127   | -0.15761 |
| -0.11315 | 0.01442  | -0.13793 | 0.00282  | -0.14    | 0.00243  | -0.11159 | 0.01584  | -0.11903 |
| -0.25906 | 1.34E-08 | -0.27365 | 1.82E-09 | -0.27133 | 2.52E-09 | -0.21063 | 4.41E-06 | -0.30028 |
| -0.06179 | 0.18253  | -0.12244 | 0.00808  | -0.1231  | 0.00774  | -0.07483 | 0.10633  | -0.20742 |
| -0.13112 | 0.00454  | -0.14944 | 0.0012   | -0.15483 | 0.00079  | -0.11134 | 0.01608  | -0.13187 |
| -0.13673 | 0.00307  | -0.04395 | 0.34331  | -0.102   | 0.02751  | 0.00122  | 0.97902  | -0.02505 |

|          |          |          |          |          |          |          |          |          |
|----------|----------|----------|----------|----------|----------|----------|----------|----------|
| -0.18254 | 7.26E-05 | -0.19986 | 1.35E-05 | -0.21733 | 2.13E-06 | -0.1367  | 0.00308  | -0.24832 |
| -0.06111 | 0.18738  | -0.08183 | 0.0773   | -0.07989 | 0.08462  | -0.08364 | 0.07093  | -0.03714 |
| -0.16244 | 0.00042  | -0.18263 | 7.20E-05 | -0.1842  | 6.22E-05 | -0.12164 | 0.0085   | -0.19099 |
| -0.14704 | 0.00144  | -0.18804 | 4.33E-05 | -0.16211 | 0.00044  | -0.15181 | 0.001    | -0.20254 |
| -0.23926 | 1.67E-07 | -0.15032 | 0.00112  | -0.19649 | 1.90E-05 | -0.077   | 0.09651  | -0.17037 |
| -0.18118 | 8.23E-05 | -0.19102 | 3.25E-05 | -0.16281 | 0.00041  | -0.16484 | 0.00035  | -0.22593 |
| -0.11463 | 0.01318  | -0.16306 | 0.0004   | -0.11977 | 0.00958  | -0.17193 | 0.00019  | -0.18658 |
| -0.12852 | 0.00541  | -0.17165 | 0.00019  | -0.16559 | 0.00033  | -0.14172 | 0.00214  | -0.19049 |
| -0.1134  | 0.01421  | -0.06063 | 0.19092  | -0.11837 | 0.01046  | 0.013588 | 0.76962  | 0.01966  |
| -0.12525 | 0.00673  | 0.027471 | 0.55373  | -0.04836 | 0.29698  | 0.058919 | 0.20375  | 0.134317 |
| -0.13233 | 0.00418  | -0.14719 | 0.00142  | -0.14499 | 0.00168  | -0.11303 | 0.01453  | -0.13959 |
| -0.1196  | 0.00968  | -0.10934 | 0.0181   | -0.12912 | 0.0052   | -0.05553 | 0.23105  | -0.22508 |
| -0.12948 | 0.00507  | -0.03556 | 0.44328  | -0.0675  | 0.14527  | -0.01129 | 0.80773  | -0.00501 |
| -0.14754 | 0.00139  | -0.26297 | 7.96E-09 | -0.21069 | 4.38E-06 | -0.2415  | 1.27E-07 | -0.37652 |
| -0.15781 | 0.00062  | -0.08846 | 0.0561   | -0.14671 | 0.00148  | -0.02526 | 0.58603  | -0.08918 |
| -0.14734 | 0.00141  | -0.13365 | 0.00381  | -0.12867 | 0.00536  | -0.12285 | 0.00787  | -0.17984 |
| -0.19228 | 2.87E-05 | -0.18876 | 4.04E-05 | -0.18906 | 3.93E-05 | -0.13999 | 0.00243  | -0.31434 |
| 0.007897 | 0.86486  | -0.0939  | 0.04254  | -0.07589 | 0.10143  | -0.08648 | 0.06186  | -0.09909 |
| -0.19792 | 1.64E-05 | -0.14577 | 0.00159  | -0.18197 | 7.65E-05 | -0.09152 | 0.04809  | -0.13339 |
| -0.20944 | 5.00E-06 | -0.21928 | 1.72E-06 | -0.22717 | 7.01E-07 | -0.16811 | 0.00026  | -0.22772 |
| -0.2066  | 6.75E-06 | -0.23836 | 1.86E-07 | -0.21412 | 3.03E-06 | -0.1981  | 1.62E-05 | -0.25585 |
| -0.22843 | 6.06E-07 | -0.21913 | 1.74E-06 | -0.21148 | 4.03E-06 | -0.18033 | 8.90E-05 | -0.27278 |
| -0.21999 | 1.59E-06 | -0.09998 | 0.03075  | -0.16378 | 0.00038  | -0.04319 | 0.35166  | -0.03378 |
| -0.18782 | 4.42E-05 | -0.29362 | 9.71E-11 | -0.26258 | 8.39E-09 | -0.2352  | 2.73E-07 | -0.32256 |
| -0.23054 | 4.74E-07 | -0.10166 | 0.02804  | -0.15721 | 0.00065  | -0.04284 | 0.35564  | -0.06488 |
| -0.19311 | 2.65E-05 | -0.14838 | 0.0013   | -0.15708 | 0.00066  | -0.10534 | 0.0228   | -0.16662 |
| -0.16795 | 0.00027  | -0.13744 | 0.00292  | -0.13758 | 0.00289  | -0.12144 | 0.00861  | -0.13943 |
| -0.12457 | 0.00703  | -0.05893 | 0.20366  | -0.10184 | 0.02776  | -0.02019 | 0.66349  | -0.05698 |
| -0.16817 | 0.00026  | -0.13133 | 0.00447  | -0.15084 | 0.00108  | -0.0937  | 0.04298  | -0.10797 |
| -0.07528 | 0.10422  | -0.16809 | 0.00026  | -0.11674 | 0.01158  | -0.16715 | 0.00029  | -0.28018 |
| -0.17478 | 0.00015  | -0.20436 | 8.52E-06 | -0.16157 | 0.00046  | -0.19657 | 1.88E-05 | -0.26168 |
| -0.14638 | 0.00151  | -0.21524 | 2.68E-06 | -0.16312 | 0.0004   | -0.20707 | 6.43E-06 | -0.29172 |
| -0.21952 | 1.67E-06 | -0.1339  | 0.00374  | -0.17484 | 0.00015  | -0.06531 | 0.15881  | -0.12513 |
| -0.18573 | 5.39E-05 | -0.26449 | 6.47E-09 | -0.23407 | 3.12E-07 | -0.2206  | 1.48E-06 | -0.39849 |
| -0.00021 | 0.99632  | -0.11189 | 0.01556  | -0.11482 | 0.01303  | -0.07979 | 0.08499  | -0.11101 |
| 0.024082 | 0.60369  | -0.08274 | 0.07406  | -0.03185 | 0.49229  | -0.11312 | 0.01445  | -0.10026 |
| 0.036684 | 0.42901  | -0.00719 | 0.87686  | -0.0396  | 0.39327  | 0.007796 | 0.86657  | 0.04836  |
| -0.04082 | 0.37878  | -0.17671 | 0.00012  | -0.12719 | 0.00591  | -0.15733 | 0.00064  | -0.36317 |
| -0.23683 | 2.24E-07 | -0.20978 | 4.83E-06 | -0.20726 | 6.30E-06 | -0.16558 | 0.00033  | -0.20168 |
| -0.18825 | 4.24E-05 | -0.20599 | 7.20E-06 | -0.1753  | 0.00014  | -0.18115 | 8.26E-05 | -0.18746 |
| -0.16162 | 0.00045  | -0.17735 | 0.00012  | -0.21282 | 3.48E-06 | -0.10489 | 0.0234   | -0.17906 |
| -0.19673 | 1.85E-05 | -0.22383 | 1.03E-06 | -0.21664 | 2.30E-06 | -0.17553 | 0.00014  | -0.29885 |
| -0.15242 | 0.00095  | -0.22171 | 1.31E-06 | -0.17232 | 0.00018  | -0.19859 | 1.54E-05 | -0.35461 |
| -0.19073 | 3.34E-05 | -0.20576 | 7.37E-06 | -0.21954 | 1.67E-06 | -0.13744 | 0.00292  | -0.28128 |
| 0.117224 | 0.01124  | -0.00841 | 0.8562   | 0.09227  | 0.04627  | -0.07119 | 0.1245   | -0.15104 |

|          |          |          |          |          |          |          |          |          |
|----------|----------|----------|----------|----------|----------|----------|----------|----------|
| 0.09893  | 0.03256  | 0.010549 | 0.82015  | 0.087539 | 0.05872  | -0.04823 | 0.29834  | -0.06126 |
| 0.113865 | 0.01381  | 0.053987 | 0.24427  | 0.112737 | 0.01479  | 0.006285 | 0.89225  | 0.018575 |
| 0.098795 | 0.0328   | 0.001273 | 0.97811  | 0.097091 | 0.03595  | -0.05886 | 0.20422  | -0.13654 |
| 0.0747   | 0.10692  | 0.03669  | 0.42893  | 0.11536  | 0.01261  | -0.01825 | 0.69399  | -0.05386 |
| 0.111438 | 0.01599  | 0.027546 | 0.55265  | 0.104738 | 0.0236   | -0.03062 | 0.50915  | -0.05459 |
| 0.1199   | 0.0095   | 0.015424 | 0.73956  | 0.103829 | 0.02484  | -0.04103 | 0.37635  | -0.08203 |
| 0.077108 | 0.09605  | -0.02755 | 0.55264  | 0.068608 | 0.13877  | -0.0794  | 0.08655  | -0.14821 |
| 0.090654 | 0.05025  | 0.014508 | 0.75452  | 0.121185 | 0.00875  | -0.06089 | 0.189    | -0.14274 |
| 0.122507 | 0.00804  | -0.00305 | 0.94757  | 0.088212 | 0.0568   | -0.06059 | 0.19118  | -0.1085  |
| 0.141483 | 0.00218  | 0.028618 | 0.5373   | 0.080169 | 0.08352  | -0.00716 | 0.87738  | -0.02015 |
| 0.133104 | 0.00396  | 0.063284 | 0.17216  | 0.106534 | 0.0213   | 0.019148 | 0.67982  | 0.047611 |
| 0.076889 | 0.097    | -0.00623 | 0.89321  | 0.080468 | 0.08237  | -0.07163 | 0.12213  | -0.0933  |
| -0.10657 | 0.02125  | -0.15549 | 0.00075  | -0.15977 | 0.00053  | -0.10483 | 0.02348  | -0.18671 |
| -0.22466 | 9.35E-07 | -0.16113 | 0.00047  | -0.18425 | 6.19E-05 | -0.11142 | 0.016    | -0.14233 |
| -0.12458 | 0.00703  | -0.12679 | 0.00607  | -0.14636 | 0.00152  | -0.08635 | 0.06226  | -0.12784 |
| -0.20004 | 1.33E-05 | -0.25142 | 3.64E-08 | -0.20674 | 6.66E-06 | -0.23158 | 4.19E-07 | -0.23358 |
| -0.22477 | 9.23E-07 | -0.26001 | 1.18E-08 | -0.20766 | 6.04E-06 | -0.23329 | 3.43E-07 | -0.36053 |
| -0.18643 | 5.04E-05 | -0.22105 | 1.41E-06 | -0.18135 | 8.10E-05 | -0.19348 | 2.56E-05 | -0.31558 |
| -0.20709 | 6.42E-06 | -0.26809 | 3.96E-09 | -0.21961 | 1.65E-06 | -0.23295 | 3.57E-07 | -0.33943 |
| -0.1201  | 0.00938  | -0.07338 | 0.1133   | -0.10536 | 0.02278  | -0.03167 | 0.49474  | -0.00259 |
| -0.16259 | 0.00042  | -0.16225 | 0.00043  | -0.15475 | 0.00079  | -0.13677 | 0.00306  | -0.15151 |
| -0.1387  | 0.00267  | -0.21094 | 4.26E-06 | -0.18818 | 4.27E-05 | -0.17688 | 0.00012  | -0.30366 |
| -0.17703 | 0.00012  | -0.11975 | 0.00959  | -0.14916 | 0.00123  | -0.07146 | 0.12306  | -0.09692 |
| 0.035743 | 0.44095  | 0.00692  | 0.88144  | 0.040591 | 0.38147  | -0.05142 | 0.26742  | 0.005237 |
| -0.28467 | 3.72E-10 | -0.25665 | 1.85E-08 | -0.24228 | 1.15E-07 | -0.21588 | 2.50E-06 | -0.3215  |
| -0.0529  | 0.25394  | -0.08363 | 0.07098  | -0.11313 | 0.01444  | -0.03855 | 0.40586  | -0.10952 |
| -0.0676  | 0.14466  | -0.06318 | 0.17285  | -0.05955 | 0.19896  | -0.05821 | 0.20928  | 0.035284 |
| -0.18085 | 8.49E-05 | -0.18735 | 4.62E-05 | -0.1926  | 2.79E-05 | -0.14122 | 0.00222  | -0.2229  |
| -0.22879 | 5.81E-07 | -0.14551 | 0.00162  | -0.19132 | 3.15E-05 | -0.09185 | 0.04729  | -0.09211 |
| -0.0652  | 0.15952  | -0.09052 | 0.0506   | -0.09787 | 0.03448  | -0.06731 | 0.14639  | -0.12746 |
| -0.15296 | 0.00091  | -0.23792 | 1.97E-07 | -0.16708 | 0.00029  | -0.23761 | 2.04E-07 | -0.32808 |
| -0.05375 | 0.24636  | -0.11813 | 0.01062  | -0.13248 | 0.00413  | -0.0791  | 0.08772  | -0.14407 |
| -0.172   | 0.00019  | -0.09563 | 0.03886  | -0.13225 | 0.0042   | -0.0541  | 0.24327  | -0.09273 |
| -0.16849 | 0.00025  | -0.04244 | 0.3602   | -0.13059 | 0.0047   | 0.020228 | 0.66283  | -0.04705 |
| -0.12385 | 0.00737  | -0.07591 | 0.10133  | -0.12956 | 0.00504  | -0.01551 | 0.7382   | -0.13575 |
| -0.2163  | 2.38E-06 | -0.27964 | 7.75E-10 | -0.23963 | 1.60E-07 | -0.22468 | 9.33E-07 | -0.40744 |
| -0.15156 | 0.00102  | -0.22164 | 1.32E-06 | -0.15895 | 0.00057  | -0.22527 | 8.72E-07 | -0.30141 |
| -0.15074 | 0.00109  | -0.13022 | 0.00482  | -0.14017 | 0.0024   | -0.09904 | 0.03237  | -0.16956 |
| -0.09124 | 0.04879  | -0.19395 | 2.44E-05 | -0.1654  | 0.00033  | -0.16932 | 0.00024  | -0.28201 |
| -0.10019 | 0.03041  | 0.002898 | 0.95019  | -0.08152 | 0.07841  | 0.067353 | 0.14615  | 0.071959 |
| 0.040433 | 0.38333  | 0.097139 | 0.03586  | 0.054396 | 0.24071  | 0.101526 | 0.02825  | 0.149064 |
| -0.16843 | 0.00026  | -0.03495 | 0.45118  | -0.10877 | 0.01871  | 0.02252  | 0.62737  | 0.0018   |
| -0.13943 | 0.00253  | -0.17791 | 0.00011  | -0.14893 | 0.00125  | -0.16457 | 0.00036  | -0.21347 |
| -0.05446 | 0.24016  | -0.15026 | 0.00113  | -0.11845 | 0.01041  | -0.13667 | 0.00308  | -0.13733 |
| -0.19312 | 2.65E-05 | -0.1949  | 2.22E-05 | -0.18437 | 6.12E-05 | -0.16332 | 0.00039  | -0.28872 |

|          |          |          |          |          |          |          |          |          |
|----------|----------|----------|----------|----------|----------|----------|----------|----------|
| -0.14863 | 0.00128  | -0.12974 | 0.00499  | -0.1367  | 0.00308  | -0.10763 | 0.02     | -0.18396 |
| -0.14715 | 0.00143  | -0.24767 | 5.87E-08 | -0.20315 | 9.67E-06 | -0.21125 | 4.12E-06 | -0.39979 |
| -0.18223 | 7.48E-05 | -0.08493 | 0.06668  | -0.13722 | 0.00296  | -0.03609 | 0.43648  | 0.000297 |
| -0.12851 | 0.00542  | -0.19014 | 3.54E-05 | -0.16261 | 0.00042  | -0.16439 | 0.00036  | -0.19003 |
| -0.22302 | 1.13E-06 | -0.11405 | 0.01366  | -0.14216 | 0.00207  | -0.07245 | 0.11793  | -0.13445 |
| -0.15618 | 0.00071  | -0.13679 | 0.00306  | -0.13376 | 0.00378  | -0.11228 | 0.0152   | -0.18397 |
| -0.10167 | 0.02802  | -0.2052  | 7.81E-06 | -0.17246 | 0.00018  | -0.16859 | 0.00025  | -0.31968 |
| -0.15898 | 0.00056  | -0.15489 | 0.00078  | -0.16681 | 0.00029  | -0.10643 | 0.02142  | -0.16781 |
| -0.11594 | 0.01217  | -0.14144 | 0.00218  | -0.15194 | 0.00099  | -0.10624 | 0.02167  | -0.09225 |
| -0.00799 | 0.86322  | -0.04216 | 0.36337  | -0.10339 | 0.02547  | 0.009249 | 0.842    | 0.005038 |
| -0.12657 | 0.00616  | -0.17469 | 0.00015  | -0.17293 | 0.00017  | -0.13291 | 0.00401  | -0.22177 |
| -0.10978 | 0.01764  | -0.05777 | 0.2127   | -0.10704 | 0.02068  | -0.01767 | 0.70331  | 0.066941 |
| -0.11316 | 0.01442  | -0.09832 | 0.03367  | -0.13764 | 0.00288  | -0.052   | 0.26207  | -0.13213 |
| -0.13295 | 0.004    | -0.08043 | 0.08251  | -0.09164 | 0.0478   | -0.06846 | 0.13961  | -0.04068 |
| -0.03431 | 0.45955  | -0.15992 | 0.00052  | -0.07886 | 0.08871  | -0.18173 | 7.83E-05 | -0.19787 |
| -0.18923 | 3.86E-05 | -0.18993 | 3.61E-05 | -0.18202 | 7.62E-05 | -0.16352 | 0.00039  | -0.22689 |
| -0.16955 | 0.00023  | -0.12328 | 0.00765  | -0.14464 | 0.00173  | -0.06966 | 0.13282  | -0.14317 |
| -0.1264  | 0.00624  | -0.03624 | 0.43463  | -0.08427 | 0.06886  | 0.002779 | 0.95223  | -0.07112 |
| -0.22881 | 5.80E-07 | -0.28471 | 3.70E-10 | -0.24079 | 1.39E-07 | -0.24803 | 5.61E-08 | -0.36239 |
| -0.12789 | 0.00565  | -0.14041 | 0.00236  | -0.16666 | 0.0003   | -0.0853  | 0.06552  | -0.1838  |
| -0.20612 | 7.10E-06 | -0.15026 | 0.00113  | -0.16305 | 0.0004   | -0.10685 | 0.02092  | -0.22696 |
| -0.17528 | 0.00014  | -0.16606 | 0.00031  | -0.16763 | 0.00027  | -0.12668 | 0.00612  | -0.20185 |
| -0.1136  | 0.01404  | -0.10691 | 0.02084  | -0.10498 | 0.02328  | -0.08571 | 0.06421  | -0.11372 |
| -0.18357 | 6.60E-05 | -0.25449 | 2.45E-08 | -0.21394 | 3.09E-06 | -0.22401 | 1.01E-06 | -0.28052 |
| -0.16829 | 0.00026  | -0.18951 | 3.76E-05 | -0.16266 | 0.00042  | -0.16207 | 0.00044  | -0.21755 |
| -0.09028 | 0.05122  | -0.11149 | 0.01594  | -0.11795 | 0.01074  | -0.07613 | 0.10033  | -0.2239  |
| -0.16342 | 0.00039  | -0.15562 | 0.00074  | -0.19142 | 3.13E-05 | -0.08768 | 0.05831  | -0.22099 |
| -0.17947 | 9.63E-05 | -0.1829  | 7.02E-05 | -0.1816  | 7.92E-05 | -0.1439  | 0.00182  | -0.1554  |
| -0.19943 | 1.41E-05 | -0.24629 | 7.00E-08 | -0.19474 | 2.26E-05 | -0.23696 | 2.21E-07 | -0.29438 |
| -0.2565  | 1.88E-08 | -0.24716 | 6.27E-08 | -0.23795 | 1.96E-07 | -0.20309 | 9.73E-06 | -0.30013 |
| -0.08951 | 0.05323  | -0.18749 | 4.56E-05 | -0.16931 | 0.00024  | -0.14892 | 0.00125  | -0.19451 |
| -0.09671 | 0.03669  | -0.1132  | 0.01438  | -0.12985 | 0.00495  | -0.06525 | 0.15921  | -0.05664 |
| -0.13066 | 0.00468  | -0.28679 | 2.72E-10 | -0.19476 | 2.25E-05 | -0.28509 | 3.50E-10 | -0.36939 |
| -0.20687 | 6.57E-06 | -0.21828 | 1.92E-06 | -0.21243 | 3.63E-06 | -0.16636 | 0.00031  | -0.27315 |
| -0.06303 | 0.17389  | -0.06567 | 0.15653  | -0.07947 | 0.08628  | -0.04168 | 0.36887  | -0.11447 |
| -0.17959 | 9.53E-05 | -0.0946  | 0.041    | -0.15616 | 0.00071  | -0.03893 | 0.40132  | -0.03659 |
| 0.065494 | 0.15764  | -0.03024 | 0.51454  | -0.00184 | 0.9683   | -0.05076 | 0.27363  | -0.00107 |
| -0.11343 | 0.01418  | -0.15464 | 0.0008   | -0.11686 | 0.01149  | -0.14292 | 0.00196  | -0.17518 |
| -0.15152 | 0.00102  | -0.15767 | 0.00063  | -0.13299 | 0.00399  | -0.13675 | 0.00307  | -0.18128 |
| -0.19406 | 2.42E-05 | -0.21115 | 4.17E-06 | -0.22744 | 6.80E-07 | -0.15245 | 0.00095  | -0.22266 |
| -0.17951 | 9.59E-05 | -0.22514 | 8.85E-07 | -0.19707 | 1.79E-05 | -0.20076 | 1.23E-05 | -0.24129 |
| -0.07656 | 0.09843  | 0.045481 | 0.32673  | -0.04337 | 0.34972  | 0.09917  | 0.03214  | 0.110045 |
| -0.11136 | 0.01606  | -0.14514 | 0.00166  | -0.11144 | 0.01599  | -0.15531 | 0.00076  | -0.14202 |
| -0.15173 | 0.001    | -0.2546  | 2.41E-08 | -0.18682 | 4.86E-05 | -0.24164 | 1.25E-07 | -0.4079  |
| -0.10695 | 0.02079  | -0.16754 | 0.00028  | -0.17159 | 0.00019  | -0.11908 | 0.01     | -0.22291 |

|          |          |          |          |          |          |          |          |          |
|----------|----------|----------|----------|----------|----------|----------|----------|----------|
| -0.16942 | 0.00024  | -0.18072 | 8.59E-05 | -0.1637  | 0.00038  | -0.16514 | 0.00034  | -0.21031 |
| -0.1951  | 2.18E-05 | -0.23725 | 2.13E-07 | -0.21743 | 2.10E-06 | -0.18042 | 8.83E-05 | -0.32081 |
| -0.10428 | 0.02422  | -0.18976 | 3.67E-05 | -0.16805 | 0.00026  | -0.16235 | 0.00043  | -0.27914 |
| -0.17373 | 0.00016  | -0.17412 | 0.00016  | -0.13521 | 0.00342  | -0.17429 | 0.00015  | -0.25024 |
| -0.16585 | 0.00032  | -0.089   | 0.0546   | -0.12445 | 0.00709  | -0.05014 | 0.27951  | -0.07327 |
| 0.002957 | 0.94918  | -0.12105 | 0.00883  | -0.07566 | 0.10247  | -0.12575 | 0.00651  | -0.22326 |
| -0.14686 | 0.00146  | -0.14734 | 0.00141  | -0.14442 | 0.00175  | -0.12538 | 0.00667  | -0.15431 |
| -0.16123 | 0.00047  | -0.1416  | 0.00216  | -0.17358 | 0.00016  | -0.09143 | 0.04831  | -0.13779 |
| -0.10936 | 0.01807  | -0.04132 | 0.37302  | -0.0775  | 0.09436  | -0.00818 | 0.86008  | -0.02947 |
| -0.13471 | 0.00354  | -0.2348  | 2.86E-07 | -0.10913 | 0.01832  | -0.28079 | 6.56E-10 | -0.37094 |
| -0.11734 | 0.01115  | -0.06005 | 0.19517  | -0.09845 | 0.03342  | -0.02102 | 0.65053  | -0.04378 |
| -0.13837 | 0.00273  | -0.22765 | 6.63E-07 | -0.18333 | 6.75E-05 | -0.20125 | 1.17E-05 | -0.3253  |
| -0.17125 | 0.0002   | -0.22097 | 1.42E-06 | -0.20558 | 7.52E-06 | -0.18481 | 5.87E-05 | -0.30674 |
| -0.06838 | 0.14009  | -0.17556 | 0.00014  | -0.13912 | 0.00259  | -0.15542 | 0.00075  | -0.18588 |
| -0.14252 | 0.00202  | -0.10722 | 0.02048  | -0.13776 | 0.00285  | -0.07266 | 0.11688  | -0.07954 |
| -0.28365 | 4.32E-10 | -0.24141 | 1.28E-07 | -0.22299 | 1.13E-06 | -0.1975  | 1.72E-05 | -0.27834 |
| -0.11275 | 0.01477  | -0.08897 | 0.0547   | -0.14384 | 0.00183  | -0.0268  | 0.5634   | -0.11434 |
| -0.10095 | 0.02917  | -0.21314 | 3.37E-06 | -0.19369 | 2.50E-05 | -0.17882 | 0.0001   | -0.27555 |
| -0.15703 | 0.00066  | -0.13384 | 0.00376  | -0.13654 | 0.00311  | -0.09674 | 0.03664  | -0.22498 |
| -0.2134  | 3.27E-06 | -0.18836 | 4.20E-05 | -0.1831  | 6.89E-05 | -0.13536 | 0.00338  | -0.29188 |
| -0.01313 | 0.77722  | 0.063225 | 0.17256  | 0.030676 | 0.50842  | 0.066508 | 0.15129  | 0.085072 |
| -0.07115 | 0.12467  | -0.04365 | 0.34663  | -0.04129 | 0.3733   | -0.06021 | 0.19397  | -0.13334 |
| 0.102108 | 0.02735  | 0.037573 | 0.4179   | 0.084803 | 0.0671   | -0.00402 | 0.93087  | -0.08016 |
| -0.01548 | 0.73867  | 0.085669 | 0.06435  | 0.00176  | 0.96974  | 0.120833 | 0.00895  | 0.081655 |
| -0.06434 | 0.1651   | 0.051472 | 0.26696  | -0.02461 | 0.59575  | 0.078948 | 0.08835  | 0.105549 |
| -0.03223 | 0.48723  | 0.129648 | 0.00502  | 0.019455 | 0.67496  | 0.154986 | 0.00078  | 0.233153 |
| 0.05213  | 0.26089  | 0.262626 | 8.33E-09 | 0.13289  | 0.00402  | 0.27472  | 1.57E-09 | 0.397837 |
| -0.04504 | 0.33139  | 0.097338 | 0.03548  | 0.032965 | 0.4773   | 0.092494 | 0.04574  | 0.143806 |
| -0.0236  | 0.61103  | 0.137416 | 0.00292  | 0.03982  | 0.39059  | 0.162592 | 0.00042  | 0.304145 |
| -0.03588 | 0.4392   | 0.055264 | 0.23327  | -0.00792 | 0.86452  | 0.080258 | 0.08318  | 0.078323 |
| 0.041366 | 0.37244  | 0.106641 | 0.02117  | 0.06961  | 0.13308  | 0.101162 | 0.02883  | 0.104245 |
| -0.00593 | 0.89825  | -0.03391 | 0.46477  | -0.04979 | 0.28291  | -0.01915 | 0.67982  | -0.03584 |
| -0.02245 | 0.62848  | 0.08456  | 0.06789  | 0.014217 | 0.75928  | 0.109797 | 0.01762  | 0.098888 |
| -0.03489 | 0.45199  | 0.066989 | 0.14835  | 0.012228 | 0.79213  | 0.074397 | 0.10835  | 0.07821  |
| 0.032321 | 0.48595  | 0.01655  | 0.7213   | 0.043656 | 0.34654  | -0.01199 | 0.79607  | -0.06379 |
| -0.07233 | 0.11852  | 0.026329 | 0.57034  | -0.00269 | 0.9538   | 0.021213 | 0.64749  | 0.065229 |
| -0.01104 | 0.81195  | -0.01727 | 0.70973  | -0.01803 | 0.69753  | -0.03199 | 0.4904   | -0.14194 |
| -0.02992 | 0.519    | 0.069165 | 0.13558  | 0.020987 | 0.651    | 0.065953 | 0.15474  | 0.069149 |
| -0.01625 | 0.72614  | 0.110065 | 0.01734  | 0.034228 | 0.46058  | 0.116233 | 0.01195  | 0.142215 |
| 0.000397 | 0.99317  | -0.00062 | 0.98928  | 0.015077 | 0.74522  | -0.02835 | 0.54109  | -0.11897 |
| -0.11449 | 0.0133   | 0.019417 | 0.67556  | -0.0555  | 0.23128  | 0.048682 | 0.2938   | 0.04835  |
| -0.06034 | 0.19301  | 0.03227  | 0.48663  | -0.02065 | 0.6563   | 0.052362 | 0.25878  | 0.023319 |
| -0.05429 | 0.24161  | 0.062542 | 0.17726  | -0.00123 | 0.97883  | 0.078056 | 0.09202  | 0.091691 |
| -0.07605 | 0.10073  | 0.024528 | 0.59701  | -0.02569 | 0.57967  | 0.037643 | 0.41704  | 0.017014 |
| -0.06194 | 0.18148  | 0.076438 | 0.09898  | 0.009039 | 0.84554  | 0.09351  | 0.04341  | 0.156573 |

|          |          |          |          |          |          |          |         |          |
|----------|----------|----------|----------|----------|----------|----------|---------|----------|
| 0.123636 | 0.00748  | 0.199642 | 1.38E-05 | 0.208397 | 5.59E-06 | 0.10971  | 0.01771 | 0.144914 |
| 0.020941 | 0.65172  | -0.04328 | 0.35075  | 0.020406 | 0.66005  | -0.08349 | 0.07145 | -0.16692 |
| 0.089511 | 0.05323  | 0.046005 | 0.32118  | 0.046606 | 0.31489  | 0.012909 | 0.78084 | 0.13097  |
| -0.05479 | 0.23734  | -0.07445 | 0.10811  | -0.02434 | 0.59981  | -0.1051  | 0.02312 | -0.25379 |
| 0.002418 | 0.95844  | 0.071744 | 0.12156  | 0.029746 | 0.52136  | 0.078584 | 0.08983 | 0.02004  |
| -0.14986 | 0.00116  | -0.04782 | 0.30246  | -0.1082  | 0.01934  | -0.01089 | 0.81443 | -0.05817 |
| -0.03426 | 0.46013  | -0.12775 | 0.0057   | -0.09869 | 0.033    | -0.11807 | 0.01066 | -0.1964  |
| -0.02591 | 0.57653  | 0.005675 | 0.90266  | -0.02029 | 0.66179  | 0.012161 | 0.79324 | -0.04192 |
| 0.083838 | 0.07028  | 0.106763 | 0.02102  | 0.085246 | 0.06568  | 0.08682  | 0.06083 | 0.130922 |
| -0.10418 | 0.02435  | -0.01087 | 0.81478  | -0.05209 | 0.26129  | 0.005559 | 0.90463 | -0.00748 |
| -0.04243 | 0.36024  | 0.000108 | 0.99815  | -0.0253  | 0.58552  | 0.012911 | 0.7808  | -0.05382 |
| -0.04236 | 0.3611   | 0.029194 | 0.52913  | -0.00873 | 0.85077  | 0.037757 | 0.41562 | -0.01261 |
| -0.04001 | 0.38835  | 0.007783 | 0.86678  | -0.03329 | 0.47293  | 0.023193 | 0.61712 | 0.007607 |
| -0.0061  | 0.89533  | 0.022783 | 0.62337  | 0.008604 | 0.85288  | 0.017592 | 0.70456 | -0.07246 |
| -0.04502 | 0.33161  | -0.02209 | 0.63403  | -0.03494 | 0.45124  | -0.01481 | 0.74962 | -0.02254 |
| 0.034845 | 0.45252  | 0.068674 | 0.13839  | 0.041706 | 0.36852  | 0.055863 | 0.22823 | 0.009995 |
| 0.01692  | 0.71535  | 0.15017  | 0.00113  | 0.056627 | 0.22193  | 0.162315 | 0.00043 | 0.262378 |
| -0.05656 | 0.22244  | 0.052895 | 0.25395  | -0.00902 | 0.84592  | 0.057301 | 0.21647 | 0.097578 |
| -0.03258 | 0.48245  | 0.087417 | 0.05907  | 0.020181 | 0.66357  | 0.095127 | 0.03989 | 0.162608 |
| 0.02923  | 0.52863  | 0.111814 | 0.01563  | 0.047535 | 0.30533  | 0.119599 | 0.00968 | 0.256644 |
| -0.03045 | 0.51158  | 0.086159 | 0.06283  | -0.00424 | 0.92721  | 0.123901 | 0.00735 | 0.091297 |
| -0.00295 | 0.9493   | 0.025832 | 0.57764  | 0.020266 | 0.66224  | 0.001286 | 0.97789 | -0.03769 |
| 0.111361 | 0.01606  | 0.074866 | 0.10614  | 0.09822  | 0.03384  | 0.03455  | 0.45635 | 0.018277 |
| -0.04443 | 0.33808  | 0.096055 | 0.03799  | 0.000998 | 0.98284  | 0.129068 | 0.00522 | 0.218625 |
| 0.012437 | 0.78866  | 0.145472 | 0.00162  | 0.060704 | 0.19036  | 0.157498 | 0.00064 | 0.22031  |
| 0.053226 | 0.25099  | 0.047596 | 0.30471  | 0.017473 | 0.70647  | 0.051094 | 0.2705  | 0.150457 |
| -0.03059 | 0.50963  | 0.079518 | 0.08607  | 0.039973 | 0.38877  | 0.059203 | 0.20157 | 0.148736 |
| 0.022495 | 0.62776  | 0.128692 | 0.00535  | 0.093826 | 0.0427   | 0.102397 | 0.02692 | 0.127323 |
| -0.01128 | 0.80794  | 0.045837 | 0.32295  | 0.031795 | 0.49307  | 0.031433 | 0.49802 | 0.114392 |
| -0.07157 | 0.12246  | 0.058959 | 0.20344  | -0.01348 | 0.77146  | 0.0779   | 0.09267 | 0.146994 |
| 0.077667 | 0.09366  | 0.113735 | 0.01392  | 0.118023 | 0.01069  | 0.062932 | 0.17457 | 0.16014  |
| 0.062618 | 0.17673  | 0.050434 | 0.27675  | 0.010907 | 0.81414  | 0.057395 | 0.21571 | 0.053503 |
| -0.07086 | 0.12626  | -0.00733 | 0.8744   | -0.02646 | 0.56844  | -0.00941 | 0.83929 | -0.01699 |
| -0.04252 | 0.3592   | 0.005222 | 0.91038  | -0.03309 | 0.47564  | 0.023509 | 0.61234 | 0.007117 |
| -0.18944 | 3.78E-05 | -0.18098 | 8.39E-05 | -0.15526 | 0.00076  | -0.16522 | 0.00034 | -0.25564 |
| 0.033331 | 0.47241  | 0.166464 | 0.0003   | 0.091314 | 0.04859  | 0.162156 | 0.00043 | 0.289713 |
| -0.00741 | 0.87315  | 0.009257 | 0.84187  | -0.00047 | 0.99197  | 0.007274 | 0.87542 | -0.01205 |
| -0.02404 | 0.60429  | -0.03412 | 0.46196  | -0.04276 | 0.35648  | -0.03511 | 0.44905 | -0.1095  |
| -0.07619 | 0.10007  | -0.09567 | 0.03876  | -0.10405 | 0.02454  | -0.082   | 0.07667 | -0.11792 |
| 0.020713 | 0.65526  | 0.107108 | 0.02061  | 0.033258 | 0.47338  | 0.116425 | 0.01181 | 0.211437 |
| 0.023812 | 0.60775  | 0.071632 | 0.12215  | 0.015424 | 0.73956  | 0.074873 | 0.10611 | 0.169704 |
| -0.07952 | 0.08606  | 0.089856 | 0.05232  | 0.000256 | 0.99561  | 0.129429 | 0.00509 | 0.2556   |
| 0.08592  | 0.06357  | 0.006074 | 0.89584  | 0.053731 | 0.24651  | -0.0241  | 0.60335 | -0.0575  |
| 0.001235 | 0.97877  | 0.131086 | 0.00455  | 0.019424 | 0.67545  | 0.166221 | 0.00031 | 0.283293 |
| -0.12503 | 0.00682  | 0.064747 | 0.16244  | -0.04084 | 0.37854  | 0.121291 | 0.0087  | 0.290005 |



|          |          |          |          |          |         |          |          |          |
|----------|----------|----------|----------|----------|---------|----------|----------|----------|
| -0.02234 | 0.63011  | 0.195662 | 2.06E-05 | 0.055319 | 0.23281 | 0.240488 | 1.44E-07 | 0.406647 |
| 0.073796 | 0.11124  | -0.08945 | 0.05338  | 0.025749 | 0.57886 | -0.15276 | 0.00093  | -0.31579 |
| -0.07145 | 0.12309  | 0.049508 | 0.28567  | -0.03677 | 0.42789 | 0.09258  | 0.04554  | 0.134748 |
| -0.10409 | 0.02448  | 0.06106  | 0.18776  | -0.00736 | 0.87402 | 0.072165 | 0.11939  | 0.197599 |
| -0.10281 | 0.02631  | 0.020977 | 0.65116  | -0.05109 | 0.27054 | 0.05621  | 0.22535  | 0.135462 |
| -0.18827 | 4.23E-05 | -0.07827 | 0.09114  | -0.1247  | 0.00697 | -0.03873 | 0.40375  | -0.05941 |
| -0.07632 | 0.09949  | 0.054264 | 0.24185  | -0.01169 | 0.80106 | 0.076276 | 0.0997   | 0.139332 |
| -0.08981 | 0.05244  | -0.04383 | 0.34458  | -0.06514 | 0.15988 | -0.03173 | 0.49393  | -0.02285 |
| -0.12015 | 0.00935  | -0.00358 | 0.93857  | -0.05731 | 0.21638 | 0.014049 | 0.76204  | 0.128614 |
| -0.09935 | 0.03184  | 0.079878 | 0.08465  | -0.01141 | 0.80569 | 0.112742 | 0.01478  | 0.219907 |
| -0.06596 | 0.15469  | 0.078848 | 0.08876  | -0.01362 | 0.76912 | 0.115665 | 0.01238  | 0.200799 |
| -0.0761  | 0.10047  | 0.062139 | 0.18007  | 0.004352 | 0.92527 | 0.067084 | 0.14778  | 0.09763  |
| -0.03911 | 0.3991   | 0.130109 | 0.00486  | 0.029099 | 0.53047 | 0.164847 | 0.00035  | 0.299191 |
| -0.20164 | 1.13E-05 | -0.11824 | 0.01055  | -0.1597  | 0.00053 | -0.06186 | 0.18204  | -0.07906 |
| -0.07873 | 0.08924  | -0.02707 | 0.55951  | -0.06893 | 0.13689 | 0.013361 | 0.77337  | 0.067587 |
| -0.15646 | 0.00069  | -0.0227  | 0.6247   | -0.07609 | 0.10055 | 0.016097 | 0.72863  | 0.012292 |
| -0.08592 | 0.06358  | 0.088731 | 0.05535  | 0.004324 | 0.92575 | 0.123295 | 0.00764  | 0.1125   |
| -0.0196  | 0.67274  | 0.095392 | 0.03934  | 0.063782 | 0.16881 | 0.077482 | 0.09444  | 0.176025 |
| 0.034253 | 0.46024  | 0.178593 | 0.0001   | 0.07728  | 0.0953  | 0.191468 | 3.11E-05 | 0.399926 |
| -0.13328 | 0.00391  | -0.03257 | 0.48265  | -0.09465 | 0.04091 | 0.007687 | 0.86842  | 0.073626 |
| -0.03713 | 0.42345  | 0.162878 | 0.00041  | 0.060794 | 0.1897  | 0.189326 | 3.83E-05 | 0.325931 |
| -0.11399 | 0.01371  | 0.039887 | 0.38979  | -0.03268 | 0.48112 | 0.069729 | 0.13241  | 0.175002 |
| -0.02982 | 0.52033  | 0.107171 | 0.02053  | 0.024658 | 0.59506 | 0.130825 | 0.00463  | 0.311556 |
| -0.07299 | 0.11523  | 0.094265 | 0.04173  | 0.004544 | 0.92198 | 0.12446  | 0.00708  | 0.249528 |
| -0.05311 | 0.25201  | 0.096988 | 0.03615  | -0.00059 | 0.98981 | 0.137832 | 0.00284  | 0.256899 |
| -0.00696 | 0.88069  | 0.066672 | 0.15028  | -0.01253 | 0.78712 | 0.111262 | 0.01615  | 0.079808 |
| -0.0504  | 0.27711  | 0.047374 | 0.30698  | -0.02517 | 0.58748 | 0.073461 | 0.11288  | 0.214152 |
| -0.07311 | 0.11461  | 0.016303 | 0.7253   | -0.04135 | 0.37265 | 0.044297 | 0.33949  | 0.093518 |
| -0.07781 | 0.09306  | 0.067828 | 0.14332  | -0.03172 | 0.49415 | 0.12838  | 0.00546  | 0.187663 |
| -0.01603 | 0.72974  | -0.00155 | 0.97332  | -0.02607 | 0.57415 | 0.015022 | 0.7461   | 0.04024  |
| -0.02587 | 0.57706  | 0.123884 | 0.00736  | 0.051438 | 0.26728 | 0.133954 | 0.00373  | 0.176224 |
| -0.00485 | 0.91667  | 0.040483 | 0.38274  | -0.00665 | 0.88607 | 0.044109 | 0.34155  | 0.111029 |
| -0.0975  | 0.03517  | 0.119444 | 0.00978  | -0.00439 | 0.92468 | 0.172294 | 0.00018  | 0.254254 |
| 0.010014 | 0.82913  | 0.127351 | 0.00585  | 0.026533 | 0.56736 | 0.171678 | 0.00019  | 0.295718 |
| -0.05536 | 0.23248  | -0.03961 | 0.39304  | -0.02419 | 0.6021  | -0.04299 | 0.35396  | -0.05012 |
| 0.012615 | 0.78571  | 0.108843 | 0.01863  | 0.030128 | 0.51603 | 0.126846 | 0.00605  | 0.233705 |
| 0.172511 | 0.00018  | -0.01109 | 0.81106  | 0.076863 | 0.09711 | -0.06853 | 0.1392   | -0.11008 |
| 0.034143 | 0.46169  | 0.174399 | 0.00015  | 0.095341 | 0.03945 | 0.175478 | 0.00014  | 0.331761 |
| -0.08803 | 0.05731  | 0.020515 | 0.65835  | -0.05841 | 0.20766 | 0.058408 | 0.2077   | 6.76E-05 |
| -0.04565 | 0.32494  | 0.127617 | 0.00575  | 0.017612 | 0.70424 | 0.166807 | 0.00029  | 0.287126 |
| -0.00348 | 0.94013  | 0.08852  | 0.05593  | 0.027854 | 0.54822 | 0.114845 | 0.01301  | 0.172907 |
| 0.008297 | 0.85807  | 0.075834 | 0.10168  | 0.063116 | 0.17331 | 0.045453 | 0.32703  | 0.15695  |
| -0.1381  | 0.00278  | -0.01643 | 0.72324  | -0.06814 | 0.14148 | 0.011702 | 0.80088  | 0.112328 |
| -0.0947  | 0.0408   | 0.068093 | 0.14176  | -0.0354  | 0.44532 | 0.112855 | 0.01468  | 0.179195 |
| -0.02451 | 0.59726  | 0.18703  | 4.76E-05 | 0.062233 | 0.17941 | 0.224657 | 9.36E-07 | 0.372719 |

|          |          |          |          |          |         |          |          |          |
|----------|----------|----------|----------|----------|---------|----------|----------|----------|
| -0.1289  | 0.00528  | 0.015782 | 0.73373  | -0.06161 | 0.18381 | 0.052758 | 0.25519  | 0.168435 |
| -0.19571 | 2.05E-05 | -0.07869 | 0.08938  | -0.13095 | 0.00459 | -0.04056 | 0.38188  | 0.004777 |
| -0.1469  | 0.00146  | 0.011966 | 0.79648  | -0.07936 | 0.08668 | 0.07358  | 0.11229  | 0.106298 |
| -0.13831 | 0.00274  | 0.010579 | 0.81963  | -0.07518 | 0.10465 | 0.061644 | 0.18358  | 0.080864 |
| -0.15193 | 0.00099  | -0.02754 | 0.55268  | -0.09795 | 0.03433 | 0.023533 | 0.61197  | 0.063107 |
| -0.02388 | 0.60673  | 0.073828 | 0.11109  | 0.005883 | 0.8991  | 0.113921 | 0.01377  | 0.157841 |
| -0.04525 | 0.32923  | 0.188811 | 4.02E-05 | 0.042463 | 0.35988 | 0.233846 | 3.21E-07 | 0.433758 |
| -0.02518 | 0.58728  | 0.161968 | 0.00044  | 0.049377 | 0.28695 | 0.196685 | 1.86E-05 | 0.404052 |
| -0.15222 | 0.00097  | 0.033423 | 0.47119  | -0.05695 | 0.21933 | 0.075149 | 0.10482  | 0.114771 |
| -0.02008 | 0.6652   | 0.091426 | 0.04832  | 0.01899  | 0.68232 | 0.108827 | 0.01865  | 0.216932 |
| -0.19292 | 2.70E-05 | -0.12021 | 0.00932  | -0.15575 | 0.00073 | -0.07485 | 0.10623  | -0.04375 |
| -0.06686 | 0.14914  | 0.076787 | 0.09744  | -0.00251 | 0.95691 | 0.111127 | 0.01628  | 0.122896 |
| -0.06859 | 0.13887  | 0.145385 | 0.00163  | 0.031242 | 0.50062 | 0.196541 | 1.89E-05 | 0.213586 |
| -0.07148 | 0.12293  | 0.039007 | 0.40034  | -0.02688 | 0.56224 | 0.067333 | 0.14627  | 0.084581 |
| -0.1757  | 0.00014  | -0.01695 | 0.71492  | -0.08948 | 0.0533  | 0.03163  | 0.49533  | 0.111497 |
| -0.05956 | 0.19886  | 0.081198 | 0.07962  | -0.00575 | 0.90144 | 0.111626 | 0.01581  | 0.245962 |
| -0.11188 | 0.01557  | -0.00407 | 0.93012  | -0.04214 | 0.36358 | 0.016169 | 0.72746  | 0.077278 |
| -0.02148 | 0.64332  | 0.077216 | 0.09558  | 0.027742 | 0.54982 | 0.086681 | 0.06125  | 0.214767 |
| -0.03384 | 0.46566  | 0.080977 | 0.08044  | 0.011852 | 0.79837 | 0.092908 | 0.04478  | 0.213342 |
| -0.14051 | 0.00234  | -0.00122 | 0.979    | -0.06176 | 0.18274 | 0.007619 | 0.86956  | 0.045653 |
| -0.12072 | 0.00902  | 0.059437 | 0.1998   | -0.03659 | 0.43025 | 0.104747 | 0.02359  | 0.228348 |
| -0.1072  | 0.0205   | 0.061773 | 0.18265  | -0.01622 | 0.72663 | 0.104638 | 0.02373  | 0.156383 |
| -0.04464 | 0.3358   | 0.069799 | 0.13202  | -0.00192 | 0.96695 | 0.093396 | 0.04366  | 0.176632 |
| -0.06382 | 0.16858  | 0.045945 | 0.32181  | -0.02531 | 0.58531 | 0.078758 | 0.08912  | 0.076864 |
| -0.06526 | 0.15914  | 0.088456 | 0.05611  | -0.0063  | 0.89207 | 0.127772 | 0.00569  | 0.235553 |
| -0.20315 | 9.66E-06 | -0.07446 | 0.10806  | -0.1123  | 0.01518 | -0.04257 | 0.35866  | -0.01482 |
| -0.05573 | 0.22937  | 0.019986 | 0.66662  | -0.04566 | 0.32479 | 0.068322 | 0.14042  | 0.149825 |
| 0.020586 | 0.65724  | 0.217281 | 2.14E-06 | 0.051624 | 0.26555 | 0.288729 | 2.03E-10 | 0.385986 |
| -0.1254  | 0.00666  | 0.060623 | 0.19095  | -0.05319 | 0.25131 | 0.119015 | 0.01005  | 0.249568 |
| -0.02007 | 0.66529  | 0.064798 | 0.16211  | 0.002689 | 0.95378 | 0.095042 | 0.04007  | 0.151819 |
| -0.06189 | 0.18183  | 0.100978 | 0.02912  | -0.00815 | 0.86065 | 0.150406 | 0.00111  | 0.218942 |
| -0.03181 | 0.49281  | 0.093273 | 0.04394  | 0.074668 | 0.10707 | 0.047298 | 0.30775  | 0.21446  |
| -0.1421  | 0.00208  | 0.054988 | 0.23562  | -0.03964 | 0.39269 | 0.110003 | 0.0174   | 0.231852 |
| -0.12973 | 0.00499  | -0.00538 | 0.90776  | -0.07035 | 0.12899 | 0.040297 | 0.38494  | 0.035778 |
| -0.0552  | 0.23382  | 0.097677 | 0.03484  | -0.01913 | 0.68008 | 0.156585 | 0.00068  | 0.273376 |
| -0.04359 | 0.34724  | 0.096919 | 0.03628  | 0.017774 | 0.70165 | 0.113208 | 0.01437  | 0.224147 |
| -0.04072 | 0.37997  | -0.01286 | 0.78157  | -0.04128 | 0.37345 | 0.002636 | 0.95469  | 0.090742 |
| -0.01373 | 0.76736  | 0.065622 | 0.15683  | 0.003424 | 0.94118 | 0.0888   | 0.05516  | 0.340453 |
| 0.041963 | 0.36557  | -0.10201 | 0.02751  | -0.03536 | 0.44584 | -0.13071 | 0.00466  | -0.22056 |
| -0.04996 | 0.28129  | 0.126177 | 0.00633  | 0.033656 | 0.4681  | 0.149792 | 0.00117  | 0.351594 |
| -0.07154 | 0.12262  | -0.05683 | 0.22023  | -0.04871 | 0.29357 | -0.0425  | 0.35946  | -0.09756 |
| -0.06481 | 0.16203  | 0.120714 | 0.00902  | 0.02906  | 0.53103 | 0.13683  | 0.00305  | 0.321279 |
| -0.08628 | 0.06246  | 0.032935 | 0.47769  | -0.04571 | 0.32433 | 0.085275 | 0.06559  | 0.237936 |
| -0.01527 | 0.74198  | 0.09503  | 0.0401   | 0.046388 | 0.31717 | 0.091783 | 0.04744  | 0.179598 |
| -0.2341  | 3.11E-07 | -0.10359 | 0.02518  | -0.13561 | 0.00332 | -0.05041 | 0.27694  | -0.02436 |

|          |          |          |          |          |         |          |          |          |
|----------|----------|----------|----------|----------|---------|----------|----------|----------|
| -0.13045 | 0.00475  | -0.06417 | 0.1662   | -0.07195 | 0.12051 | -0.04629 | 0.31819  | -0.05293 |
| -0.04852 | 0.29541  | 0.000816 | 0.98597  | -0.00378 | 0.93509 | -0.01472 | 0.75102  | -0.02989 |
| -0.13315 | 0.00395  | -0.00976 | 0.83333  | -0.09376 | 0.04285 | 0.050127 | 0.27968  | 0.113779 |
| -0.12772 | 0.00571  | -0.02444 | 0.59838  | -0.05442 | 0.24047 | -0.00042 | 0.99274  | 0.043316 |
| -0.1134  | 0.01421  | 0.052492 | 0.25759  | -0.05103 | 0.27111 | 0.110612 | 0.01679  | 0.225098 |
| -0.0589  | 0.20392  | -0.05497 | 0.23573  | -0.06376 | 0.16897 | -0.05375 | 0.24632  | -0.00405 |
| -0.1158  | 0.01228  | 0.0555   | 0.23128  | -0.02511 | 0.58835 | 0.078735 | 0.08921  | 0.208135 |
| -0.14494 | 0.00169  | -0.02327 | 0.61602  | -0.11201 | 0.01545 | 0.035844 | 0.43966  | 0.09844  |
| -0.03598 | 0.43794  | 0.008985 | 0.84645  | 0.003507 | 0.93975 | -0.00932 | 0.84079  | 0.036494 |
| -0.21281 | 3.49E-06 | -0.1534  | 0.00088  | -0.15268 | 0.00093 | -0.13247 | 0.00414  | -0.12946 |
| -0.16965 | 0.00023  | 0.037195 | 0.4226   | -0.06817 | 0.14132 | 0.103934 | 0.0247   | 0.227797 |
| -0.00756 | 0.87064  | 0.054042 | 0.24378  | 0.013456 | 0.7718  | 0.061011 | 0.18812  | 0.126006 |
| -0.01607 | 0.72901  | 0.090615 | 0.05035  | 0.064743 | 0.16246 | 0.082754 | 0.074    | 0.204059 |
| -0.12743 | 0.00582  | 0.049242 | 0.28827  | -0.02673 | 0.56445 | 0.082517 | 0.07484  | 0.217223 |
| -0.13248 | 0.00413  | -0.02028 | 0.66208  | -0.06854 | 0.13915 | -0.01053 | 0.82046  | 0.148214 |
| -0.07376 | 0.1114   | 0.138677 | 0.00267  | 0.03091  | 0.5052  | 0.175401 | 0.00014  | 0.337377 |
| -0.10018 | 0.03041  | 0.040031 | 0.38808  | -0.02729 | 0.55634 | 0.071226 | 0.12428  | 0.126663 |
| 0.092999 | 0.04457  | 0.197094 | 1.79E-05 | 0.084883 | 0.06684 | 0.23695  | 2.21E-07 | 0.270915 |
| -0.01173 | 0.80034  | 0.179968 | 9.20E-05 | 0.066552 | 0.15102 | 0.195435 | 2.11E-05 | 0.400933 |
| -0.00414 | 0.92885  | 0.152177 | 0.00097  | 0.056673 | 0.22155 | 0.169077 | 0.00024  | 0.24596  |
| -0.08718 | 0.05978  | -0.05143 | 0.26738  | -0.03673 | 0.42847 | -0.0671  | 0.14766  | -0.00961 |
| -0.05613 | 0.22602  | 0.012491 | 0.78776  | -0.00468 | 0.91962 | 0.012319 | 0.79061  | 0.071187 |
| -0.0992  | 0.0321   | 0.069038 | 0.1363   | -0.00245 | 0.95795 | 0.084759 | 0.06724  | 0.183033 |
| 0.014263 | 0.75852  | 0.2086   | 5.47E-06 | 0.091558 | 0.04799 | 0.234691 | 2.90E-07 | 0.345914 |
| -0.21546 | 2.61E-06 | -0.10817 | 0.01937  | -0.16309 | 0.0004  | -0.05663 | 0.22192  | -0.10702 |
| -0.12321 | 0.00769  | -0.08861 | 0.05568  | -0.11205 | 0.01541 | -0.05404 | 0.24378  | -0.03451 |
| 0.001619 | 0.97217  | -0.0799  | 0.08457  | -0.01754 | 0.70534 | -0.10515 | 0.02305  | -0.18659 |
| -0.06673 | 0.14991  | 0.161998 | 0.00044  | 0.022383 | 0.62948 | 0.215478 | 2.61E-06 | 0.37443  |
| -0.05745 | 0.21529  | 0.187116 | 4.73E-05 | 0.057526 | 0.21467 | 0.220353 | 1.52E-06 | 0.364017 |
| -0.09095 | 0.04949  | -0.03518 | 0.44821  | -0.06131 | 0.18595 | -0.00459 | 0.92112  | 0.031254 |
| -0.04053 | 0.38216  | 0.138337 | 0.00274  | 0.031802 | 0.49298 | 0.169469 | 0.00023  | 0.301441 |
| -0.13628 | 0.00317  | -0.01964 | 0.6721   | -0.09143 | 0.04831 | 0.036298 | 0.43389  | -0.01219 |
| -0.11312 | 0.01445  | 0.048633 | 0.29429  | -0.03389 | 0.46506 | 0.081913 | 0.077    | 0.116869 |
| -0.05289 | 0.25397  | 0.134841 | 0.00351  | 0.009914 | 0.8308  | 0.189994 | 3.59E-05 | 0.215668 |
| 0.013853 | 0.76526  | 0.209821 | 4.80E-06 | 0.079165 | 0.08747 | 0.250264 | 4.22E-08 | 0.325736 |
| -0.10252 | 0.02674  | 0.052505 | 0.25747  | -0.03107 | 0.50305 | 0.082145 | 0.07616  | 0.148561 |
| -0.11717 | 0.01127  | -0.02405 | 0.60424  | -0.10072 | 0.02954 | 0.046506 | 0.31593  | 0.036897 |
| -0.03283 | 0.47911  | 0.09812  | 0.03402  | 0.024958 | 0.59059 | 0.123421 | 0.00758  | 0.284347 |
| -0.01206 | 0.795    | 0.001816 | 0.96878  | -0.00373 | 0.93587 | 0.002651 | 0.95444  | 0.04436  |
| -0.07196 | 0.12044  | 0.032779 | 0.47978  | -0.05467 | 0.23838 | 0.074261 | 0.109    | 0.242818 |
| 0.002395 | 0.95884  | 0.155545 | 0.00074  | 0.038865 | 0.40207 | 0.18403  | 6.32E-05 | 0.424725 |
| -0.13154 | 0.00441  | 0.016328 | 0.72489  | -0.06112 | 0.18732 | 0.05548  | 0.23145  | 0.134868 |
| -0.08319 | 0.07248  | 0.040043 | 0.38794  | -0.01469 | 0.75149 | 0.063194 | 0.17277  | 0.142351 |
| -0.18939 | 3.80E-05 | -0.08375 | 0.0706   | -0.14099 | 0.00226 | -0.02319 | 0.61721  | -0.07499 |
| -0.02095 | 0.6516   | 0.115396 | 0.01258  | 0.034577 | 0.45601 | 0.145613 | 0.0016   | 0.226987 |

|          |          |          |          |          |          |          |          |          |
|----------|----------|----------|----------|----------|----------|----------|----------|----------|
| -0.12558 | 0.00658  | 0.023972 | 0.60534  | -0.04416 | 0.34102  | 0.051992 | 0.26216  | 0.16995  |
| -0.02613 | 0.57321  | -0.09228 | 0.04624  | -0.05292 | 0.25374  | -0.10627 | 0.02162  | -0.08696 |
| -0.06462 | 0.16329  | 0.065409 | 0.15818  | -0.02763 | 0.55141  | 0.11368  | 0.01397  | 0.138213 |
| -0.0288  | 0.53467  | 0.083321 | 0.07204  | 0.005579 | 0.90429  | 0.109531 | 0.0179   | 0.232295 |
| -0.0962  | 0.0377   | 0.034113 | 0.46207  | -0.02709 | 0.55924  | 0.073547 | 0.11245  | 0.131371 |
| -0.04084 | 0.37853  | 0.085633 | 0.06446  | 0.018312 | 0.69307  | 0.117995 | 0.01071  | 0.188787 |
| -0.07227 | 0.11883  | 0.135856 | 0.00326  | 0.004546 | 0.92195  | 0.183936 | 6.38E-05 | 0.302462 |
| 0.016415 | 0.72348  | 0.216828 | 2.25E-06 | 0.080828 | 0.081    | 0.257709 | 1.61E-08 | 0.438476 |
| -0.17353 | 0.00016  | -0.0804  | 0.08264  | -0.09863 | 0.0331   | -0.04471 | 0.33499  | -0.05898 |
| -0.06834 | 0.14032  | 0.007078 | 0.87875  | -0.0454  | 0.32757  | 0.028417 | 0.54016  | 0.049877 |
| -0.09137 | 0.04844  | -0.10162 | 0.0281   | -0.11673 | 0.01159  | -0.05037 | 0.27739  | -0.11292 |
| -0.05132 | 0.26838  | 0.145544 | 0.00161  | 0.014547 | 0.75387  | 0.207414 | 6.20E-06 | 0.277793 |
| -0.00923 | 0.84238  | 0.082002 | 0.07667  | 0.047035 | 0.31045  | 0.069487 | 0.13377  | 0.240111 |
| -0.13781 | 0.00284  | -0.00544 | 0.90663  | -0.06974 | 0.13237  | 0.028856 | 0.53391  | 0.068451 |
| -0.05024 | 0.27864  | 0.168156 | 0.00026  | 0.039003 | 0.40039  | 0.208239 | 5.68E-06 | 0.361311 |
| -0.06957 | 0.13329  | 0.003141 | 0.94602  | -0.03788 | 0.41414  | 0.024915 | 0.59123  | 0.033437 |
| 0.009554 | 0.83685  | 0.104171 | 0.02437  | 0.035876 | 0.43925  | 0.111912 | 0.01554  | 0.28453  |
| -0.11026 | 0.01714  | 0.044806 | 0.33397  | -0.0403  | 0.38486  | 0.085021 | 0.0664   | 0.125145 |
| -0.01594 | 0.73124  | 0.176539 | 0.00013  | 0.039452 | 0.39499  | 0.227765 | 6.55E-07 | 0.387252 |
| -0.25279 | 3.05E-08 | -0.14295 | 0.00196  | -0.18323 | 6.81E-05 | -0.08375 | 0.07057  | -0.11504 |
| -0.10912 | 0.01833  | 0.057949 | 0.2113   | -0.02816 | 0.54383  | 0.085799 | 0.06394  | 0.169874 |
| -0.03438 | 0.45856  | 0.172538 | 0.00018  | 0.036217 | 0.43491  | 0.238421 | 1.85E-07 | 0.334783 |
| -0.02144 | 0.64404  | 0.132434 | 0.00415  | 0.037313 | 0.42113  | 0.156006 | 0.00072  | 0.26169  |
| -0.05581 | 0.22871  | 0.090851 | 0.04975  | 0.032798 | 0.47953  | 0.093341 | 0.04379  | 0.284132 |
| -0.02968 | 0.52225  | 0.097364 | 0.03543  | 0.052232 | 0.25996  | 0.097196 | 0.03575  | 0.13466  |
| -0.07159 | 0.12237  | 0.130064 | 0.00488  | 0.0278   | 0.549    | 0.169734 | 0.00023  | 0.299058 |
| -0.02555 | 0.58188  | -0.12693 | 0.00602  | -0.04086 | 0.37837  | -0.15186 | 0.00099  | -0.21164 |
| -0.10908 | 0.01838  | 0.014445 | 0.75555  | -0.04282 | 0.35588  | 0.032831 | 0.47909  | 0.175838 |
| -0.04317 | 0.35192  | 0.067011 | 0.14822  | -0.00448 | 0.9231   | 0.097523 | 0.03513  | 0.133884 |
| -0.06983 | 0.13185  | -0.06118 | 0.18687  | -0.08838 | 0.05632  | -0.03488 | 0.4521   | -0.08947 |
| -0.03442 | 0.45804  | 0.074263 | 0.10899  | -0.00708 | 0.87877  | 0.118331 | 0.01049  | 0.246703 |
| 0.088433 | 0.05617  | -0.15068 | 0.00109  | -0.03288 | 0.47849  | -0.20348 | 9.34E-06 | -0.28538 |
| -0.069   | 0.13654  | -0.00297 | 0.949    | -0.03823 | 0.40986  | 0.01475  | 0.75054  | 0.032039 |
| -0.06828 | 0.14065  | 0.035293 | 0.44673  | -0.01849 | 0.69022  | 0.041588 | 0.36988  | 0.213168 |
| 0.019574 | 0.6731   | 0.070346 | 0.12902  | 0.059751 | 0.19743  | 0.061329 | 0.18582  | 0.093369 |
| -0.12006 | 0.00941  | 0.042681 | 0.35742  | -0.04584 | 0.32291  | 0.077697 | 0.09353  | 0.20931  |
| 0.002377 | 0.95914  | 0.098715 | 0.03295  | 0.027711 | 0.55027  | 0.099317 | 0.03189  | 0.264925 |
| -0.17199 | 0.00019  | -0.00917 | 0.84334  | -0.0738  | 0.11123  | 0.029485 | 0.52504  | 0.15731  |
| 0.044014 | 0.34258  | 0.163037 | 0.0004   | 0.074218 | 0.1092   | 0.16661  | 0.0003   | 0.389438 |
| -0.05492 | 0.23623  | -0.00535 | 0.90828  | -0.03642 | 0.43234  | 0.007221 | 0.87632  | 0.114713 |
| -0.05214 | 0.26079  | 0.111823 | 0.01562  | 0.022515 | 0.62745  | 0.13373  | 0.00379  | 0.32355  |
| -0.0107  | 0.81767  | 0.135332 | 0.00339  | 0.064318 | 0.16525  | 0.14074  | 0.0023   | 0.225685 |
| -0.0298  | 0.52067  | 0.111969 | 0.01549  | 0.05049  | 0.27621  | 0.106439 | 0.02142  | 0.257887 |
| -0.03101 | 0.50378  | 0.120991 | 0.00886  | 0.02732  | 0.55592  | 0.141791 | 0.00213  | 0.277309 |
| -0.0263  | 0.57079  | 0.155517 | 0.00075  | 0.054725 | 0.23786  | 0.175019 | 0.00014  | 0.298048 |

|          |          |          |          |          |         |          |          |          |
|----------|----------|----------|----------|----------|---------|----------|----------|----------|
| -0.09367 | 0.04304  | 0.091957 | 0.04702  | -0.00476 | 0.91835 | 0.129016 | 0.00523  | 0.286456 |
| -0.1312  | 0.00451  | -0.12862 | 0.00537  | -0.10466 | 0.0237  | -0.1134  | 0.01421  | -0.15898 |
| -0.04382 | 0.34474  | 0.062777 | 0.17563  | 0.006491 | 0.88874 | 0.084566 | 0.06787  | 0.164771 |
| -0.0225  | 0.62765  | 0.113626 | 0.01402  | 0.040952 | 0.37724 | 0.118943 | 0.01009  | 0.32678  |
| -0.07998 | 0.08425  | 0.117655 | 0.01094  | -0.00966 | 0.83509 | 0.167095 | 0.00029  | 0.246008 |
| -0.13513 | 0.00344  | 0.008427 | 0.85589  | -0.06641 | 0.1519  | 0.047608 | 0.30459  | 0.097304 |
| -0.13848 | 0.00271  | -0.06841 | 0.13994  | -0.11658 | 0.0117  | -0.02569 | 0.57972  | -0.04792 |
| 0.080919 | 0.08066  | 0.012197 | 0.79263  | 0.035976 | 0.43798 | 0.005824 | 0.90011  | -0.08724 |
| -0.05345 | 0.249    | 0.129493 | 0.00507  | 0.015558 | 0.73737 | 0.175812 | 0.00013  | 0.334588 |
| -0.13427 | 0.00365  | 0.00081  | 0.98607  | -0.08541 | 0.06516 | 0.055619 | 0.23027  | 0.129001 |
| 0.013045 | 0.77858  | -0.07336 | 0.11336  | 0.035628 | 0.44242 | -0.14327 | 0.00191  | -0.2368  |
| -0.02516 | 0.58766  | 0.074613 | 0.10733  | -0.00832 | 0.85776 | 0.103519 | 0.02528  | 0.185798 |
| -0.03353 | 0.46972  | -0.0139  | 0.76453  | -0.02935 | 0.52691 | -0.01579 | 0.73366  | 0.056016 |
| -0.01757 | 0.70494  | 0.015232 | 0.74269  | -0.04563 | 0.32513 | 0.053553 | 0.24808  | 0.053273 |
| -0.07269 | 0.11671  | 0.00035  | 0.99398  | -0.04271 | 0.35708 | 0.018339 | 0.69264  | 0.083276 |
| -0.10858 | 0.01892  | -0.04312 | 0.35244  | -0.08599 | 0.06336 | 0.009693 | 0.83452  | -0.00235 |
| -0.06331 | 0.17202  | -0.0327  | 0.48084  | -0.04099 | 0.37679 | -0.03721 | 0.42244  | -0.03971 |
| 0.060172 | 0.19428  | 0.180203 | 9.01E-05 | 0.126883 | 0.00604 | 0.162698 | 0.00042  | 0.27532  |
| -0.12279 | 0.0079   | 0.013044 | 0.77861  | -0.03019 | 0.51514 | 0.026711 | 0.56476  | 0.106323 |
| -0.09794 | 0.03435  | 0.026745 | 0.56427  | -0.02464 | 0.59527 | 0.06323  | 0.17253  | 0.116983 |
| 0.006697 | 0.88523  | 0.137575 | 0.00289  | 0.052858 | 0.25428 | 0.156552 | 0.00069  | 0.352316 |
| -0.11582 | 0.01226  | 0.02435  | 0.59967  | -0.0419  | 0.36628 | 0.046196 | 0.31917  | 0.076138 |
| 0.010062 | 0.82831  | 0.213809 | 3.13E-06 | 0.081301 | 0.07924 | 0.248278 | 5.44E-08 | 0.357839 |
| -0.08329 | 0.07213  | 0.00601  | 0.89693  | -0.05016 | 0.27934 | 0.046202 | 0.31911  | 0.062929 |
| -0.05577 | 0.22903  | -0.04116 | 0.37479  | -0.03249 | 0.4836  | -0.03823 | 0.40985  | 0.004539 |
| -0.11191 | 0.01554  | -0.00357 | 0.93871  | -0.01889 | 0.6839  | 0.00134  | 0.97696  | 0.056309 |
| -0.13638 | 0.00315  | 0.026761 | 0.56404  | -0.04014 | 0.38681 | 0.053686 | 0.24691  | 0.091349 |
| -0.11064 | 0.01676  | 0.000572 | 0.99016  | -0.06249 | 0.17764 | 0.028182 | 0.54352  | 0.116158 |
| -0.07243 | 0.11805  | 0.025038 | 0.5894   | -0.04478 | 0.33422 | 0.048313 | 0.29748  | 0.093489 |
| -0.08835 | 0.05642  | -0.07734 | 0.09506  | -0.08991 | 0.05217 | -0.06578 | 0.15583  | -0.02742 |
| -0.20322 | 9.60E-06 | -0.06535 | 0.15856  | -0.13929 | 0.00256 | -0.00288 | 0.95053  | -0.01968 |
| -0.10363 | 0.02513  | 0.01253  | 0.78711  | -0.0408  | 0.37906 | 0.054534 | 0.23951  | 0.137762 |
| -0.02825 | 0.54259  | 0.10116  | 0.02883  | 0.032647 | 0.48155 | 0.12735  | 0.00585  | 0.172438 |
| -0.09301 | 0.04454  | -0.04528 | 0.32888  | -0.04823 | 0.29827 | -0.05586 | 0.22823  | 0.010827 |
| -0.10502 | 0.02323  | 0.053821 | 0.24572  | -0.01798 | 0.69832 | 0.09137  | 0.04845  | 0.177113 |
| -0.07702 | 0.09641  | -0.00492 | 0.91549  | -0.06555 | 0.15726 | 0.053904 | 0.245    | 0.071737 |
| 0.001344 | 0.97689  | 0.136168 | 0.00319  | 0.056341 | 0.22428 | 0.15514  | 0.00077  | 0.20627  |
| 0.026109 | 0.57357  | 0.156164 | 0.00071  | 0.057578 | 0.21425 | 0.181614 | 7.91E-05 | 0.258496 |
| -0.02717 | 0.5581   | 0.009944 | 0.83029  | -0.01502 | 0.74615 | 0.030052 | 0.51709  | 0.024411 |
| -0.01197 | 0.79635  | 0.15822  | 0.0006   | 0.068609 | 0.13876 | 0.169815 | 0.00023  | 0.261917 |
| -0.05889 | 0.20396  | 0.074407 | 0.1083   | 0.000399 | 0.99313 | 0.112492 | 0.01501  | 0.198622 |
| 0.016322 | 0.72498  | 0.109848 | 0.01757  | 0.065095 | 0.16019 | 0.098179 | 0.03391  | 0.267639 |
| -0.01015 | 0.8269   | 0.05601  | 0.22701  | -0.02113 | 0.64884 | 0.09667  | 0.03677  | 0.207538 |
| -0.02987 | 0.51963  | 0.093381 | 0.0437   | 0.023484 | 0.61271 | 0.134208 | 0.00366  | 0.224178 |
| 0.066533 | 0.15114  | -0.13313 | 0.00395  | -0.01599 | 0.73032 | -0.18748 | 4.57E-05 | -0.35097 |

|          |          |          |         |          |         |          |          |          |
|----------|----------|----------|---------|----------|---------|----------|----------|----------|
| -0.14395 | 0.00182  | -0.03823 | 0.40977 | -0.09199 | 0.04693 | 0.013711 | 0.76761  | 0.011575 |
| 0.033109 | 0.47537  | 0.104729 | 0.02361 | 0.063655 | 0.16966 | 0.102167 | 0.02726  | 0.235073 |
| -0.13908 | 0.00259  | -0.03407 | 0.46262 | -0.08397 | 0.06984 | 0.002573 | 0.95577  | 0.061148 |
| 0.0023   | 0.96047  | 0.086424 | 0.06202 | 0.024489 | 0.59759 | 0.105832 | 0.02218  | 0.155939 |
| -0.13311 | 0.00396  | -0.0286  | 0.53762 | -0.06761 | 0.14464 | -0.0149  | 0.74817  | 0.067043 |
| -0.15704 | 0.00066  | 0.041569 | 0.3701  | -0.05518 | 0.23402 | 0.0905   | 0.05064  | 0.159495 |
| -0.05007 | 0.28022  | 0.025995 | 0.57524 | -0.00261 | 0.95512 | 0.026729 | 0.5645   | 0.146314 |
| -0.07413 | 0.10963  | 0.155974 | 0.00072 | 0.024777 | 0.59328 | 0.193859 | 2.46E-05 | 0.399629 |
| -0.12154 | 0.00856  | 0.020289 | 0.66187 | -0.02255 | 0.62692 | 0.031956 | 0.49088  | 0.160817 |
| -0.17319 | 0.00017  | -0.06549 | 0.15765 | -0.0893  | 0.05379 | -0.05136 | 0.26799  | -0.02519 |
| -0.03712 | 0.42355  | 0.072735 | 0.11649 | 0.037163 | 0.423   | 0.061502 | 0.18459  | 0.163579 |
| -0.04756 | 0.30507  | 0.030333 | 0.51318 | -0.0325  | 0.48358 | 0.064209 | 0.16597  | 0.049535 |
| -0.09182 | 0.04735  | 0.105392 | 0.02274 | 0.002107 | 0.96379 | 0.149346 | 0.00121  | 0.263309 |
| 0.074879 | 0.10608  | -0.09654 | 0.03702 | -0.01487 | 0.74866 | -0.12546 | 0.00663  | -0.16295 |
| -0.00783 | 0.86595  | 0.130432 | 0.00476 | 0.040817 | 0.37882 | 0.149616 | 0.00118  | 0.268072 |
| 0.008694 | 0.85136  | 0.032841 | 0.47895 | -0.01054 | 0.82025 | 0.035526 | 0.44373  | 0.074973 |
| -0.11618 | 0.01199  | 0.049524 | 0.28552 | -0.04974 | 0.28341 | 0.109231 | 0.01821  | 0.172917 |
| -0.00914 | 0.84382  | 0.08144  | 0.07872 | 0.002635 | 0.95472 | 0.12567  | 0.00654  | 0.233988 |
| -0.18951 | 3.76E-05 | -0.05897 | 0.20338 | -0.11174 | 0.0157  | -0.01255 | 0.78673  | -0.01288 |
| -0.17468 | 0.00015  | -0.00417 | 0.92833 | -0.07825 | 0.0912  | 0.037789 | 0.41522  | 0.138098 |
| -0.11062 | 0.01679  | 0.042949 | 0.35441 | -0.03419 | 0.46109 | 0.079304 | 0.08692  | 0.197859 |
| -0.11177 | 0.01567  | -0.05383 | 0.24562 | -0.06606 | 0.15406 | -0.03295 | 0.47746  | -0.04383 |
| -0.10668 | 0.02112  | 0.06186  | 0.18204 | -0.0173  | 0.7092  | 0.087236 | 0.0596   | 0.208459 |
| -0.07216 | 0.11942  | 0.085589 | 0.0646  | -0.00509 | 0.91272 | 0.115653 | 0.01238  | 0.278078 |
| -0.08944 | 0.05341  | 0.048085 | 0.29976 | -0.01166 | 0.8015  | 0.058182 | 0.20947  | 0.197921 |
| -0.17409 | 0.00016  | -0.05599 | 0.22722 | -0.0905  | 0.05063 | -0.02988 | 0.51953  | 0.017274 |
| 0.016084 | 0.72884  | 0.087634 | 0.05844 | 0.080713 | 0.08144 | 0.048601 | 0.29461  | 0.194173 |
| -0.08739 | 0.05915  | 0.041236 | 0.37394 | -0.02683 | 0.56301 | 0.062617 | 0.17674  | 0.178588 |
| -0.09244 | 0.04588  | 0.003055 | 0.94751 | -0.01953 | 0.67382 | 0.013195 | 0.7761   | 0.064828 |
| -0.03461 | 0.45555  | -0.0604  | 0.19258 | -0.04505 | 0.33133 | -0.05899 | 0.20317  | -0.0727  |
| 0.009382 | 0.83975  | 0.059663 | 0.19809 | 0.009416 | 0.83919 | 0.071465 | 0.12302  | 0.082441 |
| -0.12706 | 0.00597  | 0.014233 | 0.75903 | -0.04364 | 0.34669 | 0.037825 | 0.41479  | 0.159644 |
| -0.08653 | 0.06171  | -0.01954 | 0.67369 | -0.06363 | 0.16981 | 0.004222 | 0.9275   | 0.111402 |
| -0.01327 | 0.77484  | 0.142726 | 0.00199 | 0.079206 | 0.08731 | 0.144702 | 0.00172  | 0.346456 |
| -0.11553 | 0.01248  | 0.05902  | 0.20297 | -0.03659 | 0.43026 | 0.098657 | 0.03305  | 0.165719 |
| -0.15925 | 0.00055  | -0.00843 | 0.85588 | -0.11984 | 0.00953 | 0.069893 | 0.13151  | 0.10365  |
| -0.14798 | 0.00134  | -0.08276 | 0.07397 | -0.11406 | 0.01366 | -0.05574 | 0.22925  | 0.002432 |
| -0.16627 | 0.00031  | -0.09362 | 0.04316 | -0.12382 | 0.00739 | -0.06639 | 0.15203  | -0.06273 |
| -0.07312 | 0.11455  | 0.021465 | 0.6436  | -0.00993 | 0.83053 | 0.030549 | 0.51018  | 0.053949 |
| -0.11723 | 0.01124  | 0.104197 | 0.02433 | -0.00469 | 0.91951 | 0.143738 | 0.00185  | 0.208896 |
| -0.01302 | 0.77895  | 0.061466 | 0.18484 | 0.02263  | 0.6257  | 0.066969 | 0.14847  | 0.168025 |
| 0.022667 | 0.62513  | 0.178244 | 0.00011 | 0.088987 | 0.05464 | 0.193722 | 2.50E-05 | 0.368406 |
| -0.08866 | 0.05555  | 0.083686 | 0.07079 | -0.02393 | 0.60603 | 0.141739 | 0.00214  | 0.203243 |
| -0.11542 | 0.01256  | -0.01576 | 0.73418 | -0.08184 | 0.07725 | 0.029235 | 0.52855  | 0.103095 |
| -0.08932 | 0.05373  | 0.052839 | 0.25446 | 0.010452 | 0.82176 | 0.045006 | 0.33181  | 0.155354 |

|          |          |          |          |          |         |          |          |          |
|----------|----------|----------|----------|----------|---------|----------|----------|----------|
| -0.05223 | 0.26     | 0.136859 | 0.00304  | 0.028378 | 0.54072 | 0.174063 | 0.00016  | 0.350239 |
| 0.230925 | 4.53E-07 | 0.075497 | 0.10321  | 0.12693  | 0.00602 | 0.035211 | 0.44778  | 0.028956 |
| -0.03369 | 0.46765  | 0.014539 | 0.754    | -0.02418 | 0.60229 | 0.042448 | 0.36005  | 0.077365 |
| -0.05296 | 0.25335  | 0.018333 | 0.69273  | -0.0308  | 0.50665 | 0.048911 | 0.29153  | 0.097164 |
| -0.08061 | 0.08182  | 0.064634 | 0.16317  | 0.002669 | 0.95413 | 0.080641 | 0.08171  | 0.14384  |
| 0.025174 | 0.58738  | 0.198511 | 1.55E-05 | 0.083964 | 0.06986 | 0.227319 | 6.89E-07 | 0.370299 |
| 0.016855 | 0.71638  | -0.10335 | 0.02552  | -0.01671 | 0.71868 | -0.12757 | 0.00577  | -0.27164 |
| -0.02058 | 0.65737  | 0.10567  | 0.02238  | 0.059737 | 0.19753 | 0.090913 | 0.04959  | 0.121303 |
| 0.096621 | 0.03686  | -0.13355 | 0.00384  | 0.000381 | 0.99345 | -0.19143 | 3.12E-05 | -0.28138 |
| -0.05212 | 0.26095  | 0.051015 | 0.27125  | -0.03015 | 0.51568 | 0.092465 | 0.04581  | 0.153658 |
| -0.12033 | 0.00925  | 0.028988 | 0.53204  | -0.05972 | 0.19767 | 0.088512 | 0.05595  | 0.139907 |
| -0.07483 | 0.10632  | 0.096505 | 0.03709  | 0.021284 | 0.6464  | 0.112579 | 0.01493  | 0.205288 |
| -0.16392 | 0.00038  | -0.06904 | 0.13632  | -0.12797 | 0.00562 | -0.02123 | 0.64717  | 0.037509 |
| -0.14858 | 0.00128  | -0.04767 | 0.30394  | -0.05428 | 0.24169 | -0.04777 | 0.3029   | -0.11058 |
| -0.02552 | 0.58224  | 0.139096 | 0.00259  | 0.033201 | 0.47414 | 0.164815 | 0.00035  | 0.340263 |
| -0.15623 | 0.0007   | -0.00111 | 0.98099  | -0.06225 | 0.17928 | 0.029379 | 0.52653  | 0.091463 |
| -0.05989 | 0.19638  | 0.010439 | 0.82199  | -0.03136 | 0.49903 | 0.046493 | 0.31607  | 0.091084 |
| -0.18191 | 7.70E-05 | 0.000628 | 0.98921  | -0.08208 | 0.0764  | 0.053693 | 0.24684  | 0.140517 |
| -0.05465 | 0.23855  | 0.152212 | 0.00097  | 0.04372  | 0.34583 | 0.181085 | 8.31E-05 | 0.304866 |
| -0.0841  | 0.0694   | 0.073234 | 0.11399  | -0.0165  | 0.72217 | 0.124061 | 0.00727  | 0.1924   |
| -0.13839 | 0.00273  | -0.00028 | 0.99521  | -0.07314 | 0.11444 | 0.034436 | 0.45785  | 0.123303 |
| -0.03649 | 0.43148  | 0.102698 | 0.02647  | -0.00081 | 0.98599 | 0.147436 | 0.0014   | 0.27168  |
| -0.0276  | 0.55181  | 0.016189 | 0.72714  | 0.013846 | 0.76537 | 0.000426 | 0.99268  | 0.030719 |
| -0.06232 | 0.1788   | 0.02017  | 0.66375  | -0.06031 | 0.19325 | 0.085599 | 0.06457  | 0.024806 |
| -0.02328 | 0.61585  | 0.061325 | 0.18586  | -0.00916 | 0.84342 | 0.090595 | 0.0504   | 0.099773 |
| 0.000813 | 0.98602  | 0.178962 | 0.0001   | 0.108842 | 0.01863 | 0.161218 | 0.00047  | 0.366026 |
| -0.11106 | 0.01635  | 0.093501 | 0.04343  | 0.001438 | 0.97528 | 0.12764  | 0.00574  | 0.251168 |
| -0.00871 | 0.85101  | 0.087796 | 0.05798  | 0.051769 | 0.26421 | 0.068161 | 0.14136  | 0.181517 |
| -0.02894 | 0.53273  | 0.135507 | 0.00335  | 0.059714 | 0.1977  | 0.153962 | 0.00084  | 0.300003 |
| -0.12617 | 0.00633  | -0.04807 | 0.29995  | -0.07262 | 0.11705 | -0.03057 | 0.50986  | 0.030045 |
| -0.1424  | 0.00204  | 0.003976 | 0.93172  | -0.0752  | 0.10461 | 0.059009 | 0.20305  | 0.126712 |
| 0.036816 | 0.42735  | -0.05991 | 0.19627  | 0.055592 | 0.23051 | -0.12595 | 0.00642  | -0.21557 |
| -0.05779 | 0.21254  | -0.01176 | 0.79995  | -0.01968 | 0.67138 | -0.02688 | 0.56237  | 0.061029 |
| 0.164325 | 0.00036  | -0.01995 | 0.66713  | 0.086147 | 0.06287 | -0.08125 | 0.07944  | -0.12949 |
| -0.07624 | 0.09986  | 0.129226 | 0.00516  | 0.021998 | 0.63539 | 0.15737  | 0.00064  | 0.348295 |
| -0.09842 | 0.03348  | 0.067765 | 0.1437   | -0.02879 | 0.5348  | 0.120415 | 0.0092   | 0.241769 |
| -0.1039  | 0.02475  | -0.07212 | 0.11962  | -0.08178 | 0.07748 | -0.05413 | 0.24299  | 0.002025 |
| -0.05027 | 0.27829  | 0.027418 | 0.5545   | 0.004066 | 0.93017 | 0.024023 | 0.60458  | 0.134965 |
| 0.032244 | 0.48699  | 0.141804 | 0.00213  | 0.080331 | 0.0829  | 0.1411   | 0.00224  | 0.248962 |
| -0.17228 | 0.00018  | 0.00342  | 0.94123  | -0.0677  | 0.14407 | 0.027616 | 0.55164  | 0.122435 |
| -0.11089 | 0.01652  | -0.08404 | 0.06961  | -0.10942 | 0.01801 | -0.03672 | 0.42854  | -0.0023  |
| 0.051292 | 0.26864  | -0.11532 | 0.01264  | -0.0241  | 0.60344 | -0.12698 | 0.006    | -0.34162 |
| -0.0049  | 0.91586  | 0.160872 | 0.00048  | 0.056964 | 0.21919 | 0.189076 | 3.92E-05 | 0.308568 |
| -0.0016  | 0.97242  | 0.202228 | 1.06E-05 | 0.069399 | 0.13426 | 0.251055 | 3.82E-08 | 0.329931 |
| -0.06824 | 0.14093  | 0.065726 | 0.15617  | 0.004231 | 0.92734 | 0.081889 | 0.07708  | 0.243408 |

|          |          |          |          |          |          |          |          |          |
|----------|----------|----------|----------|----------|----------|----------|----------|----------|
| -0.10239 | 0.02693  | -0.00519 | 0.91093  | -0.03401 | 0.46348  | 0.01753  | 0.70555  | 0.056008 |
| -0.11932 | 0.00985  | 0.08169  | 0.07781  | -0.07048 | 0.12827  | 0.172904 | 0.00017  | 0.300798 |
| 0.006537 | 0.88796  | 0.16245  | 0.00042  | 0.060352 | 0.19295  | 0.195679 | 2.06E-05 | 0.358874 |
| 0.019845 | 0.66883  | 0.032326 | 0.48588  | 0.057584 | 0.2142   | -0.00079 | 0.98637  | 0.068322 |
| 0.003039 | 0.94777  | 0.1215   | 0.00858  | 0.057009 | 0.21882  | 0.141129 | 0.00224  | 0.17492  |
| -0.01802 | 0.69771  | 0.072443 | 0.11797  | 0.052949 | 0.25347  | 0.061596 | 0.18392  | 0.216473 |
| 0.017303 | 0.70918  | 0.169801 | 0.00023  | 0.084981 | 0.06653  | 0.174187 | 0.00015  | 0.261819 |
| -0.16408 | 0.00037  | 0.010538 | 0.82032  | -0.04453 | 0.33694  | 0.03335  | 0.47216  | 0.0494   |
| -0.13323 | 0.00392  | 0.050176 | 0.27921  | -0.00976 | 0.83342  | 0.077335 | 0.09507  | 0.115764 |
| -0.08607 | 0.06309  | 0.057795 | 0.21253  | -0.04809 | 0.29967  | 0.133829 | 0.00376  | 0.080567 |
| -0.07531 | 0.10405  | 0.068484 | 0.13948  | 0.007629 | 0.8694   | 0.076643 | 0.09807  | 0.239651 |
| -0.18055 | 8.73E-05 | -0.0023  | 0.96047  | -0.07701 | 0.09648  | 0.040018 | 0.38823  | 0.116844 |
| -0.05455 | 0.23935  | 0.084589 | 0.0678   | 0.025086 | 0.58868  | 0.091853 | 0.04727  | 0.21169  |
| -0.05617 | 0.22568  | 0.083941 | 0.06994  | -0.00543 | 0.90678  | 0.115917 | 0.01219  | 0.229976 |
| -0.09577 | 0.03856  | 0.028507 | 0.53888  | -0.03961 | 0.3931   | 0.068771 | 0.13783  | 0.084375 |
| -0.12006 | 0.0094   | 0.012601 | 0.78594  | -0.03344 | 0.47095  | 0.034062 | 0.46275  | 0.026913 |
| -0.08327 | 0.07221  | 0.031623 | 0.49541  | -0.04039 | 0.38383  | 0.057614 | 0.21396  | 0.182348 |
| -0.02477 | 0.59338  | 0.148691 | 0.00127  | 0.052823 | 0.2546   | 0.169038 | 0.00024  | 0.322721 |
| 0.011213 | 0.80903  | 0.053923 | 0.24483  | 0.004968 | 0.91473  | 0.068906 | 0.13706  | 0.146697 |
| -0.03802 | 0.41235  | 0.109199 | 0.01825  | 0.003845 | 0.93396  | 0.155108 | 0.00077  | 0.271915 |
| 0.02457  | 0.59637  | 0.158896 | 0.00057  | 0.094766 | 0.04066  | 0.136169 | 0.00319  | 0.266377 |
| -0.05176 | 0.2643   | 0.020892 | 0.65249  | -0.02854 | 0.53834  | 0.024686 | 0.59465  | 0.177632 |
| -0.07396 | 0.11044  | 0.08165  | 0.07795  | 0.010242 | 0.82529  | 0.094206 | 0.04186  | 0.119472 |
| -0.0047  | 0.91932  | 0.033699 | 0.46753  | -0.00355 | 0.9391   | 0.036386 | 0.43277  | 0.046649 |
| -0.01422 | 0.75924  | 0.191468 | 3.11E-05 | 0.097958 | 0.03432  | 0.200048 | 1.33E-05 | 0.378157 |
| -0.04035 | 0.38429  | 0.038629 | 0.40493  | -0.00706 | 0.87907  | 0.050405 | 0.27702  | 0.145561 |
| 0.286033 | 3.04E-10 | 0.093048 | 0.04446  | 0.223032 | 1.13E-06 | -0.0208  | 0.65393  | -0.04026 |
| -0.02117 | 0.64809  | 0.09476  | 0.04067  | 0.026574 | 0.56676  | 0.105288 | 0.02287  | 0.256383 |
| -0.05279 | 0.25486  | 0.006274 | 0.89244  | -0.01727 | 0.70977  | 0.007249 | 0.87584  | 0.180398 |
| 0.062767 | 0.1757   | 0.175204 | 0.00014  | 0.089015 | 0.05457  | 0.163152 | 0.0004   | 0.292979 |
| -0.06293 | 0.17458  | 0.091921 | 0.04711  | 0.001497 | 0.97427  | 0.123866 | 0.00736  | 0.252621 |
| -0.11618 | 0.01199  | 0.062035 | 0.1808   | -0.04553 | 0.3262   | 0.118417 | 0.01043  | 0.214033 |
| -0.04836 | 0.29697  | 0.098634 | 0.03309  | 0.021168 | 0.6482   | 0.116111 | 0.01204  | 0.313621 |
| 0.033691 | 0.46764  | 0.177938 | 0.00011  | 0.08503  | 0.06637  | 0.196884 | 1.82E-05 | 0.365167 |
| -0.08469 | 0.06746  | 0.046215 | 0.31897  | -0.02279 | 0.62324  | 0.070114 | 0.13029  | 0.119218 |
| -0.13206 | 0.00425  | -0.04777 | 0.30295  | -0.07585 | 0.10162  | -0.03626 | 0.43438  | 0.06391  |
| -0.04293 | 0.35462  | 0.103915 | 0.02472  | 0.022845 | 0.62242  | 0.141524 | 0.00217  | 0.200998 |
| -0.10943 | 0.01801  | 0.007767 | 0.86706  | -0.04338 | 0.34956  | 0.032004 | 0.49024  | 0.084592 |
| -0.03884 | 0.40241  | 0.0534   | 0.24944  | 0.003893 | 0.93314  | 0.067508 | 0.14522  | 0.126696 |
| -0.08883 | 0.05508  | 0.054836 | 0.23691  | -0.02967 | 0.52244  | 0.093573 | 0.04327  | 0.134382 |
| -0.00927 | 0.84159  | 0.141772 | 0.00213  | 0.034965 | 0.45096  | 0.172653 | 0.00018  | 0.204131 |
| -0.13562 | 0.00332  | -0.04325 | 0.35102  | -0.0773  | 0.09521  | -0.01882 | 0.68499  | -0.02464 |
| -0.22302 | 1.13E-06 | -0.09329 | 0.04391  | -0.11672 | 0.01159  | -0.07463 | 0.10727  | -0.06992 |
| -0.02958 | 0.52373  | 0.111587 | 0.01584  | 0.043458 | 0.34872  | 0.130082 | 0.00487  | 0.176907 |
| -0.12577 | 0.0065   | -0.01712 | 0.71205  | -0.0404  | 0.38371  | -0.01901 | 0.682    | 0.082353 |



|          |          |          |          |          |         |          |          |          |
|----------|----------|----------|----------|----------|---------|----------|----------|----------|
| -0.10682 | 0.02095  | -0.00611 | 0.89516  | -0.06467 | 0.16295 | 0.017958 | 0.69871  | 0.274742 |
| -0.10042 | 0.03003  | -0.02924 | 0.52842  | -0.08664 | 0.06138 | 0.019256 | 0.67811  | -0.04048 |
| -0.11059 | 0.01681  | 0.010508 | 0.82083  | -0.04487 | 0.33331 | 0.031862 | 0.49217  | 0.109269 |
| -0.07512 | 0.10495  | -0.02171 | 0.63983  | -0.02874 | 0.53551 | -0.00357 | 0.93872  | 0.031602 |
| -0.02696 | 0.56114  | 0.144317 | 0.00177  | 0.034414 | 0.45814 | 0.185837 | 5.33E-05 | 0.30602  |
| -0.06411 | 0.16659  | 0.132909 | 0.00401  | 0.032774 | 0.47985 | 0.159948 | 0.00052  | 0.351631 |
| -0.14542 | 0.00163  | -0.01631 | 0.72512  | -0.07414 | 0.10957 | 0.010879 | 0.81462  | 0.045292 |
| -0.13619 | 0.00319  | 0.006165 | 0.89429  | -0.07001 | 0.13086 | 0.056907 | 0.21965  | 0.096288 |
| -0.06692 | 0.14876  | 0.139162 | 0.00258  | 0.020886 | 0.65257 | 0.173015 | 0.00017  | 0.361176 |
| -0.07598 | 0.10102  | 0.035134 | 0.44878  | -0.0332  | 0.4741  | 0.070094 | 0.13039  | 0.106657 |
| -0.03853 | 0.40612  | 0.049711 | 0.2837   | 0.02951  | 0.52468 | 0.039208 | 0.39792  | 0.129068 |
| -0.00592 | 0.89844  | 0.113035 | 0.01453  | 0.014886 | 0.74833 | 0.14816  | 0.00132  | 0.165234 |
| -0.06911 | 0.1359   | 0.117558 | 0.01101  | 0.035688 | 0.44165 | 0.1398   | 0.00246  | 0.254105 |
| -0.00716 | 0.87735  | 0.160494 | 0.0005   | 0.059901 | 0.1963  | 0.192665 | 2.77E-05 | 0.370991 |
| -0.02278 | 0.62336  | 0.103836 | 0.02483  | 0.039877 | 0.38991 | 0.120067 | 0.0094   | 0.259806 |
| -0.01645 | 0.72287  | 0.106842 | 0.02093  | 0.018999 | 0.68216 | 0.137157 | 0.00298  | 0.258382 |
| -0.13834 | 0.00274  | -0.06159 | 0.18393  | -0.10294 | 0.02611 | -0.02897 | 0.53229  | -0.0197  |
| 0.005724 | 0.90182  | 0.240611 | 1.42E-07 | 0.086252 | 0.06255 | 0.29428  | 8.78E-11 | 0.441547 |
| -0.02261 | 0.62603  | 0.128318 | 0.00549  | 0.046075 | 0.32045 | 0.149241 | 0.00122  | 0.227343 |
| -0.11261 | 0.0149   | 0.003746 | 0.93565  | -0.05352 | 0.2484  | 0.032602 | 0.48215  | 0.078407 |
| -0.07288 | 0.11575  | 0.079362 | 0.08669  | -0.03111 | 0.50239 | 0.137799 | 0.00284  | 0.164878 |
| -0.10875 | 0.01873  | 0.038324 | 0.40864  | -0.02615 | 0.57294 | 0.070518 | 0.12808  | 0.169913 |
| -0.00748 | 0.8719   | 0.031355 | 0.49908  | 0.023564 | 0.6115  | 0.025893 | 0.57675  | 0.052589 |
| -0.03176 | 0.49355  | 0.126667 | 0.00613  | 0.012424 | 0.78888 | 0.173719 | 0.00016  | 0.31171  |
| -0.05101 | 0.27125  | 0.062429 | 0.17804  | -0.00825 | 0.85891 | 0.080706 | 0.08147  | 0.160569 |
| -0.08681 | 0.06087  | 0.107341 | 0.02033  | 0.016586 | 0.72072 | 0.121515 | 0.00857  | 0.28111  |
| -0.00188 | 0.96762  | 0.047021 | 0.3106   | 0.00497  | 0.91469 | 0.059732 | 0.19757  | 0.116057 |
| -0.043   | 0.35381  | 0.129935 | 0.00492  | 0.039042 | 0.39992 | 0.145985 | 0.00156  | 0.325878 |
| -0.12335 | 0.00761  | 0.092724 | 0.04521  | -0.01547 | 0.73875 | 0.13144  | 0.00444  | 0.247966 |
| -0.00297 | 0.94894  | 0.139746 | 0.00247  | 0.083685 | 0.0708  | 0.131472 | 0.00443  | 0.225646 |
| -0.1055  | 0.0226   | -0.00359 | 0.93834  | -0.04955 | 0.28531 | 0.023608 | 0.61084  | -0.04197 |
| -0.06082 | 0.18949  | 0.050975 | 0.27162  | -0.01143 | 0.80533 | 0.065873 | 0.15524  | 0.117254 |
| -0.17071 | 0.00021  | -0.09116 | 0.04899  | -0.13376 | 0.00378 | -0.03626 | 0.43431  | -0.06993 |
| -0.13952 | 0.00251  | -0.01206 | 0.79491  | -0.07354 | 0.11248 | 0.01648  | 0.72244  | 0.082518 |
| -0.11546 | 0.01253  | 0.007938 | 0.86415  | -0.07763 | 0.0938  | 0.073247 | 0.11393  | 0.148603 |
| -0.1414  | 0.00219  | -0.13066 | 0.00468  | -0.12973 | 0.00499 | -0.09991 | 0.03088  | -0.1124  |
| -0.03131 | 0.49968  | 0.133318 | 0.0039   | 0.036327 | 0.43352 | 0.156799 | 0.00067  | 0.2823   |
| -0.0459  | 0.3223   | 0.133178 | 0.00394  | 0.039594 | 0.39328 | 0.152047 | 0.00098  | 0.33722  |
| -0.1529  | 0.00092  | -0.03839 | 0.40782  | -0.08686 | 0.06073 | -0.01133 | 0.80705  | 0.08823  |
| -0.03726 | 0.42181  | 0.072451 | 0.11792  | 0.024758 | 0.59356 | 0.068815 | 0.13757  | 0.209652 |
| 0.010411 | 0.82246  | 0.029682 | 0.52227  | 0.005152 | 0.91159 | 0.036486 | 0.43151  | 0.010091 |
| -0.04606 | 0.32059  | 0.125564 | 0.00659  | 0.044756 | 0.33451 | 0.149079 | 0.00123  | 0.223404 |
| -0.27184 | 2.35E-09 | -0.13643 | 0.00314  | -0.17881 | 0.0001  | -0.0851  | 0.06615  | -0.13783 |
| 0.052971 | 0.25327  | -0.09486 | 0.04046  | 0.033061 | 0.47601 | -0.17831 | 0.00011  | -0.21562 |
| -0.03388 | 0.46516  | 0.08134  | 0.07909  | 0.001391 | 0.97608 | 0.094277 | 0.04171  | 0.239052 |

|          |          |          |          |          |         |          |          |          |
|----------|----------|----------|----------|----------|---------|----------|----------|----------|
| -0.11357 | 0.01407  | 0.02542  | 0.58373  | -0.0921  | 0.04667 | 0.109276 | 0.01817  | 0.069971 |
| -0.03028 | 0.51392  | 0.183521 | 6.63E-05 | 0.059827 | 0.19685 | 0.226869 | 7.26E-07 | 0.317953 |
| -0.02343 | 0.61359  | 0.099183 | 0.03212  | 0.022473 | 0.6281  | 0.133272 | 0.00391  | 0.167434 |
| -0.05392 | 0.24481  | 0.101977 | 0.02755  | 0.027359 | 0.55535 | 0.106624 | 0.02119  | 0.186049 |
| 0.019884 | 0.66823  | 0.012613 | 0.78573  | 0.050929 | 0.27206 | -0.01313 | 0.77714  | -0.11137 |
| -0.05928 | 0.20097  | 0.023471 | 0.61291  | -0.00819 | 0.85981 | 0.018785 | 0.68555  | 0.090475 |
| -0.07556 | 0.10294  | 0.076174 | 0.10015  | -0.03005 | 0.51719 | 0.139923 | 0.00244  | 0.212121 |
| -0.14045 | 0.00235  | -0.01589 | 0.73195  | -0.08412 | 0.06934 | 0.029909 | 0.51909  | 0.127458 |
| -0.03532 | 0.44635  | -0.00028 | 0.99523  | 0.001794 | 0.96915 | -0.01728 | 0.70959  | 0.093248 |
| -0.10997 | 0.01744  | 0.003284 | 0.94358  | -0.07539 | 0.10373 | 0.051232 | 0.26921  | 0.046892 |
| -0.08527 | 0.06561  | -0.02109 | 0.64944  | -0.04736 | 0.30709 | -0.0181  | 0.69638  | 0.05537  |
| -0.01228 | 0.79119  | 0.151961 | 0.00099  | 0.051669 | 0.26514 | 0.153593 | 0.00087  | 0.339566 |
| -0.10072 | 0.02953  | 0.059245 | 0.20125  | -0.04666 | 0.31429 | 0.104399 | 0.02406  | 0.235501 |
| -0.11788 | 0.01079  | 0.018374 | 0.69208  | -0.0511  | 0.27041 | 0.055457 | 0.23164  | 0.168479 |
| -0.06352 | 0.1706   | 0.098307 | 0.03368  | 0.017028 | 0.7136  | 0.115876 | 0.01222  | 0.330082 |
| 0.033101 | 0.47548  | 0.143238 | 0.00191  | 0.079815 | 0.0849  | 0.158824 | 0.00057  | 0.306743 |
| -0.08819 | 0.05687  | 0.120694 | 0.00903  | -0.00104 | 0.98211 | 0.164894 | 0.00035  | 0.270342 |
| -0.05337 | 0.24967  | 0.081313 | 0.07919  | 0.01386  | 0.76515 | 0.103718 | 0.025    | 0.228197 |
| -0.02869 | 0.5362   | 0.073293 | 0.1137   | 0.045609 | 0.32537 | 0.046654 | 0.3144   | 0.1754   |
| -0.1155  | 0.0125   | -0.05975 | 0.19745  | -0.09057 | 0.05047 | -0.0337  | 0.46748  | -0.04523 |
| -0.04364 | 0.34671  | 0.086683 | 0.06124  | 0.029419 | 0.52596 | 0.091528 | 0.04807  | 0.250963 |
| -0.00649 | 0.8888   | 0.135787 | 0.00328  | 0.031212 | 0.50105 | 0.186201 | 5.15E-05 | 0.21977  |
| -0.08235 | 0.07544  | 0.056217 | 0.22529  | -0.00571 | 0.90205 | 0.074716 | 0.10684  | 0.167018 |
| -0.12788 | 0.00565  | -0.10733 | 0.02034  | -0.13261 | 0.00409 | -0.06321 | 0.17265  | -0.06304 |
| 0.057494 | 0.21492  | 0.203306 | 9.51E-06 | 0.07385  | 0.11098 | 0.243576 | 9.82E-08 | 0.303574 |
| -0.07486 | 0.10616  | 0.101952 | 0.02759  | 0.017137 | 0.71186 | 0.12535  | 0.00668  | 0.216052 |
| 0.042921 | 0.35473  | -0.17384 | 0.00016  | -0.05983 | 0.19683 | -0.20275 | 1.01E-05 | -0.4116  |
| -0.13207 | 0.00425  | 0.005525 | 0.90521  | -0.06841 | 0.13991 | 0.056674 | 0.22154  | 0.063227 |
| 0.123065 | 0.00776  | -0.02047 | 0.65899  | 0.073535 | 0.11251 | -0.08896 | 0.05472  | -0.16751 |
| 0.02959  | 0.52356  | 0.165765 | 0.00032  | 0.116495 | 0.01176 | 0.14773  | 0.00137  | 0.295341 |
| -0.19153 | 3.09E-05 | -0.1499  | 0.00116  | -0.14849 | 0.00129 | -0.12202 | 0.0083   | -0.05795 |
| -0.0745  | 0.10788  | -0.05026 | 0.27845  | -0.08468 | 0.06751 | -0.01958 | 0.67303  | 0.050471 |
| 0.007911 | 0.86462  | 0.06381  | 0.16862  | 0.043098 | 0.35274 | 0.031133 | 0.50213  | 0.256416 |
| -0.07848 | 0.09027  | 0.041089 | 0.37565  | 0.026408 | 0.56918 | 0.034172 | 0.46131  | 0.092527 |
| -0.05682 | 0.22032  | 0.056174 | 0.22565  | -0.02387 | 0.60693 | 0.089938 | 0.0521   | 0.118696 |
| -0.04249 | 0.35961  | 0.090741 | 0.05003  | 0.021516 | 0.6428  | 0.106727 | 0.02107  | 0.289679 |
| -0.03968 | 0.39222  | 0.056863 | 0.22     | -0.01465 | 0.75217 | 0.085231 | 0.06573  | 0.177751 |
| -0.14011 | 0.00241  | -0.07037 | 0.12891  | -0.13814 | 0.00278 | -0.0121  | 0.79427  | 0.007796 |
| -0.01464 | 0.75242  | 0.02329  | 0.61565  | -0.01729 | 0.70935 | 0.045671 | 0.32471  | 0.023523 |
| -0.08924 | 0.05395  | 0.041044 | 0.37618  | -0.04195 | 0.36573 | 0.080114 | 0.08374  | 0.169285 |
| -0.17872 | 0.0001   | -0.03888 | 0.40182  | -0.10929 | 0.01815 | 0.012696 | 0.78437  | 0.028251 |
| 0.021092 | 0.64937  | 0.054086 | 0.2434   | -0.00603 | 0.89655 | 0.085427 | 0.06511  | 0.183136 |
| 0.000306 | 0.99473  | 0.212194 | 3.73E-06 | 0.084895 | 0.0668  | 0.243856 | 9.48E-08 | 0.348374 |
| -0.05568 | 0.22978  | 0.127637 | 0.00574  | 0.035749 | 0.44087 | 0.138173 | 0.00277  | 0.314322 |
| -0.10035 | 0.03015  | -0.01429 | 0.75814  | -0.05459 | 0.239   | 0.005247 | 0.90996  | 0.144824 |

|          |          |          |          |           |         |          |          |          |
|----------|----------|----------|----------|-----------|---------|----------|----------|----------|
| -0.11978 | 0.00958  | 0.025985 | 0.57539  | -0.03889  | 0.40175 | 0.049593 | 0.28485  | 0.167658 |
| -0.05491 | 0.23624  | 0.105319 | 0.02283  | 0.02614   | 0.57311 | 0.119154 | 0.00996  | 0.255469 |
| -0.05454 | 0.2395   | 0.131086 | 0.00455  | 0.011653  | 0.8017  | 0.17277  | 0.00018  | 0.357721 |
| -0.11226 | 0.01521  | 0.054327 | 0.2413   | -0.05741  | 0.21561 | 0.110865 | 0.01654  | 0.195656 |
| -0.15157 | 0.00102  | -0.04815 | 0.29913  | -0.06825  | 0.14087 | -0.02994 | 0.5187   | 0.073492 |
| -0.1575  | 0.00064  | -0.00355 | 0.93903  | -0.05908  | 0.2025  | 0.014754 | 0.75049  | 0.112926 |
| -0.01795 | 0.6988   | 0.046631 | 0.31463  | 0.032429  | 0.48449 | 0.023859 | 0.60705  | 0.143035 |
| -0.11044 | 0.01696  | -0.01989 | 0.66806  | -0.05937  | 0.20033 | -0.00411 | 0.92937  | 0.059274 |
| -0.08355 | 0.07126  | 0.039203 | 0.39798  | -0.05574  | 0.22924 | 0.09176  | 0.0475   | 0.123179 |
| -0.09746 | 0.03525  | -0.02755 | 0.55254  | -0.02678  | 0.56378 | -0.01183 | 0.79867  | 0.058689 |
| -0.04869 | 0.29371  | 0.027195 | 0.55773  | -0.01676  | 0.71796 | 0.042433 | 0.36022  | 0.140039 |
| -0.14578 | 0.00158  | -0.02402 | 0.60464  | -0.07635  | 0.09936 | 0.012496 | 0.78768  | 0.070369 |
| -0.08005 | 0.08397  | 0.007799 | 0.86651  | -0.03349  | 0.47027 | 0.018294 | 0.69336  | 0.12953  |
| -0.06883 | 0.13748  | 0.087332 | 0.05932  | 0.009159  | 0.84351 | 0.118312 | 0.0105   | 0.218575 |
| -0.0556  | 0.23045  | 0.011046 | 0.81182  | -0.03591  | 0.43881 | 0.042753 | 0.35661  | 0.0272   |
| -0.17213 | 0.00019  | -0.0329  | 0.4781   | -0.08588  | 0.0637  | 0.002553 | 0.95612  | 0.032082 |
| -0.06795 | 0.14261  | 0.115625 | 0.01241  | 0.024659  | 0.59505 | 0.159341 | 0.00055  | 0.345752 |
| 0.012014 | 0.79568  | 0.093679 | 0.04303  | 0.034923  | 0.45151 | 0.11132  | 0.0161   | 0.21282  |
| -0.05843 | 0.2075   | 0.14186  | 0.00212  | 0.025499  | 0.58257 | 0.194339 | 2.35E-05 | 0.293124 |
| -0.12791 | 0.00564  | 0.073272 | 0.11381  | 0.002577  | 0.95571 | 0.088341 | 0.05643  | 0.231134 |
| -0.0515  | 0.26673  | 0.054229 | 0.24215  | -3.62E-05 | 0.99938 | 0.064811 | 0.16202  | 0.208023 |
| -0.04743 | 0.30641  | 0.094374 | 0.0415   | 0.015824  | 0.73305 | 0.133141 | 0.00395  | 0.23435  |
| -0.04037 | 0.38402  | 0.123812 | 0.00739  | 0.01742   | 0.70731 | 0.167405 | 0.00028  | 0.238143 |
| -0.06314 | 0.17311  | 0.127108 | 0.00595  | 0.028263  | 0.54236 | 0.150088 | 0.00114  | 0.290699 |
| -0.15125 | 0.00104  | -0.0391  | 0.39922  | -0.07807  | 0.09194 | -0.00926 | 0.84175  | 0.031878 |
| -0.03089 | 0.5054   | 0.145253 | 0.00165  | 0.021361  | 0.64521 | 0.200325 | 1.29E-05 | 0.334921 |
| -0.03976 | 0.39131  | 0.047092 | 0.30986  | 0.007539  | 0.87092 | 0.064915 | 0.16135  | 0.090157 |
| -0.06019 | 0.19414  | 0.137035 | 0.003    | 0.038004  | 0.41258 | 0.168167 | 0.00026  | 0.349601 |
| -0.11399 | 0.01371  | 0.053696 | 0.24682  | -0.02237  | 0.62968 | 0.065289 | 0.15894  | 0.245226 |
| -0.06724 | 0.14684  | 0.076879 | 0.09704  | -0.02119  | 0.64789 | 0.114744 | 0.01309  | 0.138787 |
| 0.053415 | 0.24931  | 0.24912  | 4.89E-08 | 0.131494  | 0.00442 | 0.259844 | 1.21E-08 | 0.429657 |
| -0.0503  | 0.27803  | 0.017557 | 0.70512  | 0.026264  | 0.5713  | -0.00377 | 0.93527  | 0.068798 |
| -0.04959 | 0.28483  | 0.107078 | 0.02064  | 0.027639  | 0.55132 | 0.143089 | 0.00194  | 0.262641 |
| 0.153015 | 0.00091  | 0.080096 | 0.0838   | 0.161042  | 0.00048 | -0.00716 | 0.87741  | 0.042386 |
| -0.20851 | 5.52E-06 | -0.14316 | 0.00193  | -0.15781  | 0.00062 | -0.10625 | 0.02166  | -0.07174 |
| -0.06967 | 0.13272  | 0.056831 | 0.22026  | -0.00542  | 0.90708 | 0.086891 | 0.06062  | 0.105402 |
| -0.02623 | 0.57182  | 0.048139 | 0.29922  | -0.02089  | 0.65254 | 0.065506 | 0.15756  | 0.229168 |
| 0.123186 | 0.0077   | 0.03365  | 0.46819  | 0.097729  | 0.03474 | -0.01303 | 0.77878  | -0.0124  |
| 0.117615 | 0.01097  | -0.0263  | 0.57076  | 0.047067  | 0.31012 | -0.06551 | 0.15756  | -0.17081 |
| 0.032588 | 0.48234  | 0.078992 | 0.08817  | 0.061266  | 0.18628 | 0.060931 | 0.1887   | 0.145484 |
| 0.021101 | 0.64924  | 0.231314 | 4.33E-07 | 0.074433  | 0.10818 | 0.288716 | 2.04E-10 | 0.369918 |
| -0.05445 | 0.24025  | 0.136498 | 0.00312  | -0.00398  | 0.93164 | 0.196479 | 1.90E-05 | 0.342943 |
| 0.10503  | 0.02321  | -0.00236 | 0.95943  | 0.080188  | 0.08345 | -0.06708 | 0.1478   | -0.13085 |
| -0.02032 | 0.66132  | 0.101135 | 0.02887  | 0.030665  | 0.50858 | 0.113572 | 0.01406  | 0.17008  |
| -0.1347  | 0.00354  | 0.041898 | 0.36632  | -0.05164  | 0.2654  | 0.096231 | 0.03763  | 0.18447  |

|          |          |          |         |          |         |          |          |          |
|----------|----------|----------|---------|----------|---------|----------|----------|----------|
| -0.01114 | 0.81024  | 0.146351 | 0.00152 | 0.069713 | 0.1325  | 0.155168 | 0.00077  | 0.28167  |
| -0.01454 | 0.75401  | 0.067774 | 0.14364 | 0.017721 | 0.7025  | 0.082553 | 0.07471  | 0.179519 |
| 0.169581 | 0.00023  | -0.01591 | 0.73162 | 0.073229 | 0.11402 | -0.06545 | 0.15793  | -0.12078 |
| -0.0363  | 0.43386  | 0.126934 | 0.00602 | 0.011623 | 0.8022  | 0.170491 | 0.00021  | 0.335666 |
| -0.08544 | 0.06506  | 0.044    | 0.34275 | -0.03484 | 0.45257 | 0.083822 | 0.07033  | 0.221653 |
| 0.091813 | 0.04737  | -0.11289 | 0.01466 | -0.00902 | 0.84591 | -0.14606 | 0.00155  | -0.2279  |
| -0.1096  | 0.01782  | -0.05996 | 0.19586 | -0.07509 | 0.10509 | -0.0547  | 0.23805  | -0.0545  |
| -0.07533 | 0.104    | 0.073919 | 0.11064 | -0.00466 | 0.92    | 0.101341 | 0.02854  | 0.218258 |
| -0.13465 | 0.00355  | 0.028792 | 0.53482 | -0.05207 | 0.26147 | 0.074162 | 0.10947  | 0.164051 |
| -0.10504 | 0.02319  | 0.077357 | 0.09497 | -0.03722 | 0.4223  | 0.133427 | 0.00387  | 0.193759 |
| -0.14514 | 0.00166  | -0.00357 | 0.93872 | -0.10051 | 0.02987 | 0.050928 | 0.27206  | 0.077946 |
| -0.13499 | 0.00347  | -0.03184 | 0.49245 | -0.10591 | 0.02208 | 0.036503 | 0.43129  | 0.001154 |
| -0.03238 | 0.4852   | 0.101179 | 0.0288  | 0.028218 | 0.543   | 0.105887 | 0.02211  | 0.233811 |
| -0.03089 | 0.50543  | 0.066153 | 0.15349 | -0.01446 | 0.75524 | 0.112882 | 0.01466  | 0.188276 |
| -0.12897 | 0.00525  | -0.033   | 0.47685 | -0.09117 | 0.04895 | 0.017812 | 0.70104  | 0.068319 |
| -0.05611 | 0.22614  | 0.048616 | 0.29445 | -0.00742 | 0.8729  | 0.057916 | 0.21157  | 0.132578 |
| -0.03094 | 0.50475  | 0.163071 | 0.0004  | 0.063165 | 0.17297 | 0.185786 | 5.36E-05 | 0.408854 |
| -0.07398 | 0.11034  | 0.061408 | 0.18526 | 0.01476  | 0.75039 | 0.062534 | 0.17731  | 0.163396 |
| -0.11185 | 0.0156   | -0.01123 | 0.80877 | -0.06194 | 0.18149 | 0.013673 | 0.76823  | 0.039017 |
| -0.09838 | 0.03355  | -0.10052 | 0.02986 | -0.06399 | 0.16744 | -0.11036 | 0.01704  | -0.10132 |
| -0.06219 | 0.17972  | 0.076263 | 0.09975 | 0.023247 | 0.61631 | 0.073279 | 0.11378  | 0.139346 |
| -0.05799 | 0.211    | 0.054017 | 0.244   | -0.00095 | 0.9837  | 0.06959  | 0.13319  | 0.149795 |
| 0.226899 | 7.23E-07 | 0.065598 | 0.15698 | 0.129182 | 0.00518 | 0.005315 | 0.9088   | 0.033017 |
| -0.13141 | 0.00445  | 0.025664 | 0.58012 | -0.05895 | 0.20354 | 0.068331 | 0.14037  | 0.158155 |
| -0.04442 | 0.33812  | 0.09967  | 0.03128 | 0.020632 | 0.65653 | 0.131678 | 0.00437  | 0.279907 |
| -0.03393 | 0.46451  | -0.13563 | 0.00332 | -0.08247 | 0.075   | -0.13762 | 0.00288  | -0.32139 |
| -0.0035  | 0.93989  | 0.077738 | 0.09335 | 0.020026 | 0.666   | 0.105006 | 0.02324  | 0.170153 |
| -0.04892 | 0.29147  | 0.080929 | 0.08063 | 0.012073 | 0.79471 | 0.098105 | 0.03405  | 0.152951 |
| -0.03227 | 0.48669  | 0.102121 | 0.02733 | 0.008308 | 0.85789 | 0.124134 | 0.00724  | 0.279586 |
| -0.09497 | 0.04022  | 0.076398 | 0.09916 | -0.01246 | 0.78832 | 0.111204 | 0.01621  | 0.219408 |
| -0.15025 | 0.00113  | -0.07268 | 0.11677 | -0.08009 | 0.08383 | -0.06397 | 0.16757  | -0.06825 |
| -0.11879 | 0.01019  | -0.03706 | 0.4243  | -0.06737 | 0.14606 | -0.02395 | 0.60575  | 0.052749 |
| 0.040449 | 0.38315  | 0.167336 | 0.00028 | 0.09619  | 0.03772 | 0.165223 | 0.00034  | 0.337338 |
| -0.09545 | 0.03922  | 0.078545 | 0.08999 | -0.02105 | 0.64995 | 0.121536 | 0.00856  | 0.236375 |
| 0.006951 | 0.88092  | 0.16434  | 0.00036 | 0.079992 | 0.08421 | 0.175716 | 0.00014  | 0.292863 |
| -0.14076 | 0.0023   | -0.04967 | 0.28407 | -0.0689  | 0.13706 | -0.03333 | 0.47239  | -0.00576 |
| -0.00514 | 0.91183  | 0.121143 | 0.00878 | 0.054276 | 0.24175 | 0.121915 | 0.00835  | 0.22711  |
| -0.02606 | 0.57425  | 0.131617 | 0.00438 | 0.055311 | 0.23288 | 0.148789 | 0.00126  | 0.356755 |
| -0.13256 | 0.00411  | 0.020787 | 0.65411 | -0.05652 | 0.22277 | 0.070153 | 0.13007  | 0.159114 |
| -0.19478 | 2.25E-05 | -0.10997 | 0.01744 | -0.14444 | 0.00175 | -0.065   | 0.16083  | -0.13088 |
| 0.014758 | 0.75042  | 0.026592 | 0.5665  | 0.000962 | 0.98346 | 0.013029 | 0.77884  | 0.168265 |
| -0.07941 | 0.08651  | 0.096434 | 0.03723 | -0.02417 | 0.6023  | 0.150005 | 0.00115  | 0.188218 |
| -0.02936 | 0.52686  | 0.051229 | 0.26923 | 0.01498  | 0.74679 | 0.068097 | 0.14174  | 0.135209 |
| 0.012335 | 0.79035  | -0.12703 | 0.00598 | -0.08398 | 0.06981 | -0.10928 | 0.01816  | -0.16602 |
| 0.084579 | 0.06783  | 0.034843 | 0.45255 | 0.078013 | 0.09219 | 0.000938 | 0.98388  | -0.04163 |

|          |          |          |          |          |         |          |          |          |
|----------|----------|----------|----------|----------|---------|----------|----------|----------|
| -0.12103 | 0.00884  | -0.03572 | 0.44119  | -0.07382 | 0.11112 | -0.00023 | 0.99598  | -0.03464 |
| -0.03467 | 0.45483  | 0.085371 | 0.06529  | -0.00166 | 0.97147 | 0.108057 | 0.01951  | 0.220625 |
| -0.0785  | 0.09016  | -0.01108 | 0.8113   | -0.04131 | 0.37305 | 0.004843 | 0.91688  | 0.055694 |
| -0.0677  | 0.14405  | 0.10659  | 0.02123  | 0.001749 | 0.96994 | 0.151632 | 0.00101  | 0.309348 |
| 0.004235 | 0.92728  | 0.079472 | 0.08625  | 0.061728 | 0.18298 | 0.053125 | 0.25189  | 0.175128 |
| -0.02801 | 0.54592  | 0.056594 | 0.22219  | -0.01471 | 0.75119 | 0.089918 | 0.05215  | 0.166438 |
| -0.00046 | 0.99211  | 0.083548 | 0.07126  | 0.032915 | 0.47796 | 0.119824 | 0.00955  | 0.180043 |
| -0.18884 | 4.01E-05 | -0.04812 | 0.29944  | -0.12014 | 0.00936 | 0.005311 | 0.90887  | 0.045653 |
| -0.00056 | 0.99038  | 0.097062 | 0.03601  | 0.038565 | 0.4057  | 0.114875 | 0.01299  | 0.204475 |
| -0.00074 | 0.98722  | 0.143039 | 0.00194  | 0.039297 | 0.39685 | 0.171208 | 0.0002   | 0.313182 |
| -0.0889  | 0.05489  | 0.009714 | 0.83417  | -0.02126 | 0.64671 | 0.032581 | 0.48244  | 0.073504 |
| 0.019564 | 0.67324  | 0.211925 | 3.84E-06 | 0.09101  | 0.04935 | 0.227435 | 6.80E-07 | 0.410489 |
| -0.03793 | 0.41353  | 0.144768 | 0.00171  | 0.04377  | 0.34527 | 0.162025 | 0.00044  | 0.358562 |
| -0.21769 | 2.05E-06 | -0.16872 | 0.00025  | -0.1759  | 0.00013 | -0.12879 | 0.00531  | -0.24769 |
| -0.09288 | 0.04485  | 0.079698 | 0.08536  | -0.00451 | 0.92256 | 0.114949 | 0.01293  | 0.198331 |
| -0.09008 | 0.05174  | 0.060651 | 0.19075  | -0.02962 | 0.52319 | 0.116662 | 0.01164  | 0.069824 |
| 0.024674 | 0.59482  | 0.170079 | 0.00022  | 0.08653  | 0.0617  | 0.172211 | 0.00018  | 0.351051 |
| -0.13734 | 0.00294  | -0.09242 | 0.04591  | -0.08761 | 0.0585  | -0.07561 | 0.10272  | -0.15366 |
| -0.15029 | 0.00112  | -0.1431  | 0.00193  | -0.1225  | 0.00805 | -0.12475 | 0.00695  | -0.14688 |
| -0.04069 | 0.38036  | 0.215924 | 2.49E-06 | 0.053421 | 0.24926 | 0.296134 | 6.60E-11 | 0.327653 |
| -0.14849 | 0.00129  | -0.0339  | 0.46494  | -0.09533 | 0.03947 | 0.023448 | 0.61326  | -0.01986 |
| -0.02366 | 0.6101   | 0.106779 | 0.021    | 0.015431 | 0.73944 | 0.138555 | 0.00269  | 0.233871 |
| -0.08385 | 0.07023  | 0.055291 | 0.23304  | -0.02415 | 0.60263 | 0.084657 | 0.06758  | 0.253635 |
| -0.03881 | 0.4027   | 0.033355 | 0.4721   | -0.01739 | 0.70774 | 0.055174 | 0.23403  | 0.145813 |
| -0.04049 | 0.38261  | 0.007809 | 0.86635  | 0.003511 | 0.93969 | -0.02147 | 0.64351  | 0.096005 |
| -0.01885 | 0.6845   | 0.08661  | 0.06146  | 0.034337 | 0.45914 | 0.087381 | 0.05918  | 0.143032 |
| -0.05158 | 0.26601  | 0.028936 | 0.53277  | 0.00024  | 0.99587 | 0.041156 | 0.37487  | 0.049385 |
| -0.02963 | 0.52305  | 0.114119 | 0.0136   | 0.018123 | 0.69608 | 0.145838 | 0.00158  | 0.314503 |
| -0.05473 | 0.23781  | 0.03043  | 0.51183  | 0.02826  | 0.5424  | 0.000513 | 0.99117  | 0.034582 |
| 0.083878 | 0.07015  | 0.258595 | 1.43E-08 | 0.150813 | 0.00108 | 0.265882 | 5.36E-09 | 0.399198 |
| -0.0699  | 0.13145  | 0.075268 | 0.10427  | -0.00528 | 0.90939 | 0.101327 | 0.02856  | 0.266828 |
| -0.04347 | 0.34858  | 0.127702 | 0.00572  | 0.037715 | 0.41615 | 0.151016 | 0.00106  | 0.220349 |
| -0.04384 | 0.34453  | 0.085189 | 0.06586  | -0.01977 | 0.67    | 0.141159 | 0.00223  | 0.215713 |
| -0.06459 | 0.16345  | 0.189828 | 3.65E-05 | 0.054149 | 0.24285 | 0.235616 | 2.59E-07 | 0.384885 |
| -0.0815  | 0.07849  | -0.01575 | 0.73425  | -0.0556  | 0.2304  | 0.007478 | 0.87196  | 0.081949 |
| -0.13841 | 0.00272  | -0.05188 | 0.2632   | -0.09034 | 0.05106 | -0.02364 | 0.61041  | 0.046989 |
| -0.07577 | 0.10199  | 0.084125 | 0.06932  | 0.013545 | 0.77033 | 0.094319 | 0.04162  | 0.256313 |
| 0.139015 | 0.00261  | 0.043105 | 0.35266  | 0.077158 | 0.09583 | 0.006016 | 0.89684  | 0.065804 |
| -0.0759  | 0.10137  | 0.110423 | 0.01698  | 0.003145 | 0.94596 | 0.147573 | 0.00138  | 0.367947 |
| -0.08052 | 0.08218  | 0.115862 | 0.01223  | -0.01126 | 0.80832 | 0.177528 | 0.00011  | 0.346272 |
| -0.10997 | 0.01743  | 0.074993 | 0.10554  | -0.02585 | 0.57731 | 0.113931 | 0.01376  | 0.230354 |
| -0.00435 | 0.92536  | 0.21068  | 4.38E-06 | 0.094962 | 0.04024 | 0.231097 | 4.44E-07 | 0.292748 |
| 0.103867 | 0.02479  | 0.009822 | 0.83236  | 0.065904 | 0.15505 | -0.0398  | 0.39085  | -0.05832 |
| -0.1102  | 0.0172   | 0.026557 | 0.56701  | -0.02964 | 0.52285 | 0.056996 | 0.21893  | 0.132124 |
| -0.05717 | 0.21752  | 0.09223  | 0.04637  | -0.0063  | 0.89207 | 0.124933 | 0.00687  | 0.343284 |

|          |          |          |          |          |         |          |          |          |
|----------|----------|----------|----------|----------|---------|----------|----------|----------|
| -0.05475 | 0.23769  | 0.138003 | 0.0028   | 0.005718 | 0.90193 | 0.195853 | 2.02E-05 | 0.321605 |
| 0.001467 | 0.97478  | 0.016462 | 0.72273  | -0.0192  | 0.67906 | 0.031652 | 0.49502  | 0.071643 |
| -0.01593 | 0.73128  | 0.046424 | 0.31679  | -0.02241 | 0.629   | 0.074751 | 0.10667  | 0.15295  |
| -0.06522 | 0.15936  | 0.069039 | 0.1363   | -0.02662 | 0.56614 | 0.104312 | 0.02418  | 0.179859 |
| -0.11408 | 0.01363  | -0.13704 | 0.003    | -0.10018 | 0.03042 | -0.14712 | 0.00143  | -0.09933 |
| -0.05879 | 0.20475  | 0.068954 | 0.13678  | -0.01409 | 0.7613  | 0.109498 | 0.01793  | 0.258406 |
| -0.09843 | 0.03346  | -0.03588 | 0.43925  | -0.07679 | 0.09742 | -0.00968 | 0.8348   | 0.110818 |
| -0.05695 | 0.21933  | 0.036084 | 0.4366   | -0.02237 | 0.62963 | 0.056964 | 0.21918  | 0.121997 |
| -0.04543 | 0.32724  | 0.119815 | 0.00955  | 0.040062 | 0.38771 | 0.130246 | 0.00482  | 0.302389 |
| -0.14054 | 0.00233  | -0.04679 | 0.31294  | -0.05551 | 0.23118 | -0.03561 | 0.44264  | -0.00613 |
| -0.06547 | 0.15778  | 0.018851 | 0.68451  | -0.03014 | 0.51585 | 0.053432 | 0.24915  | 0.11054  |
| -0.08256 | 0.07469  | 0.130311 | 0.00479  | 0.024053 | 0.60412 | 0.151043 | 0.00106  | 0.218729 |
| -0.1185  | 0.01038  | -0.02368 | 0.6097   | -0.07049 | 0.12825 | 0.008434 | 0.85576  | 0.070729 |
| -0.0109  | 0.81427  | -0.12736 | 0.00585  | -0.06428 | 0.16549 | -0.1445  | 0.00174  | -0.3337  |
| -0.14855 | 0.00128  | -0.05133 | 0.26829  | -0.07138 | 0.12347 | -0.02409 | 0.60351  | -0.00165 |
| -0.03815 | 0.41073  | 0.047658 | 0.30408  | -0.00429 | 0.92627 | 0.055854 | 0.22831  | 0.259727 |
| 0.01706  | 0.71309  | 0.149623 | 0.00118  | 0.128031 | 0.00559 | 0.112206 | 0.01527  | 0.20513  |
| -0.01824 | 0.69426  | 0.112701 | 0.01482  | 0.078513 | 0.09012 | 0.093827 | 0.0427   | 0.298114 |
| -0.12918 | 0.00518  | -0.03821 | 0.40999  | -0.07396 | 0.11044 | -0.01377 | 0.76669  | 0.031066 |
| -0.08505 | 0.06631  | 0.089044 | 0.05449  | 0.009059 | 0.84521 | 0.122014 | 0.0083   | 0.225754 |
| -0.09935 | 0.03182  | -0.03078 | 0.50696  | -0.05748 | 0.21504 | -0.01945 | 0.675    | -0.01849 |
| -0.03921 | 0.39793  | 0.140629 | 0.00232  | 0.010645 | 0.81854 | 0.214348 | 2.95E-06 | 0.216066 |
| -0.05055 | 0.27567  | 0.102029 | 0.02747  | 0.049389 | 0.28683 | 0.094093 | 0.04211  | 0.287746 |
| -0.14945 | 0.0012   | -0.00243 | 0.95816  | -0.05634 | 0.22432 | 0.026641 | 0.56578  | 0.117442 |
| -0.14423 | 0.00178  | 0.042442 | 0.36013  | -0.05002 | 0.28074 | 0.08511  | 0.06611  | 0.237188 |
| 0.172685 | 0.00018  | 0.006059 | 0.8961   | 0.048193 | 0.29867 | -0.00537 | 0.90785  | 0.075176 |
| 0.234064 | 3.12E-07 | 0.070338 | 0.12906  | 0.169957 | 0.00022 | -0.01043 | 0.82215  | -0.02563 |
| 0.046898 | 0.31187  | -0.17088 | 0.00021  | 0.016524 | 0.72172 | -0.28592 | 3.09E-10 | -0.42952 |
| -0.0088  | 0.84958  | 0.146153 | 0.00154  | 0.034832 | 0.45269 | 0.185133 | 5.70E-05 | 0.292951 |
| -0.1428  | 0.00198  | 0.047434 | 0.30636  | -0.01221 | 0.79247 | 0.067898 | 0.14291  | 0.096129 |
| -0.06903 | 0.13634  | 0.057029 | 0.21865  | 0.023048 | 0.61933 | 0.047446 | 0.30624  | 0.189302 |
| -0.08797 | 0.05748  | 0.064841 | 0.16183  | -0.00295 | 0.94922 | 0.081305 | 0.07922  | 0.164292 |
| -0.10332 | 0.02557  | 0.040206 | 0.38601  | -0.04945 | 0.28622 | 0.091354 | 0.0485   | 0.22143  |
| -0.0489  | 0.29167  | 0.105298 | 0.02286  | 0.027476 | 0.55366 | 0.122957 | 0.00781  | 0.250991 |
| -0.056   | 0.2271   | 0.065959 | 0.1547   | 0.015411 | 0.73976 | 0.07827  | 0.09113  | 0.145973 |
| -0.09701 | 0.03611  | 0.027047 | 0.55988  | -0.02192 | 0.63658 | 0.046503 | 0.31596  | 0.241594 |
| -0.12118 | 0.00876  | 0.048867 | 0.29196  | -0.03774 | 0.41589 | 0.079641 | 0.08558  | 0.22271  |
| 0.026045 | 0.57451  | 0.20975  | 4.84E-06 | 0.086792 | 0.06092 | 0.240141 | 1.50E-07 | 0.456307 |
| -0.11319 | 0.01439  | 0.119629 | 0.00967  | 0.010748 | 0.81681 | 0.15273  | 0.00093  | 0.316384 |
| -0.00193 | 0.96683  | 0.150654 | 0.00109  | 0.042271 | 0.36206 | 0.191031 | 3.25E-05 | 0.219305 |
| -0.07422 | 0.1092   | -0.02999 | 0.51802  | -0.03462 | 0.45545 | -0.0112  | 0.80923  | -0.0043  |
| -0.13331 | 0.0039   | -0.04617 | 0.31946  | -0.07583 | 0.1017  | -0.01905 | 0.68137  | 0.020149 |
| -0.13315 | 0.00394  | 0.025859 | 0.57724  | -0.04901 | 0.29055 | 0.066186 | 0.15328  | 0.114168 |
| -0.12479 | 0.00693  | -0.01773 | 0.7024   | -0.08138 | 0.07894 | 0.028862 | 0.53382  | 0.105096 |
| 0.012211 | 0.79241  | 0.046585 | 0.31511  | 0.019905 | 0.6679  | 0.037043 | 0.4245   | 0.163871 |

|          |          |          |          |          |         |          |          |          |
|----------|----------|----------|----------|----------|---------|----------|----------|----------|
| -0.08334 | 0.07198  | 0.038971 | 0.40077  | -0.05254 | 0.25719 | 0.099187 | 0.03211  | 0.079241 |
| -0.0283  | 0.54186  | 0.083529 | 0.07133  | -0.00379 | 0.93496 | 0.117636 | 0.01095  | 0.248126 |
| 0.024688 | 0.59462  | -0.00811 | 0.86118  | 0.058224 | 0.20915 | -0.08155 | 0.07833  | -0.14031 |
| -0.10735 | 0.02033  | 0.060073 | 0.19502  | -0.01786 | 0.70033 | 0.085256 | 0.06565  | 0.095896 |
| -0.00641 | 0.89007  | 0.181186 | 8.23E-05 | 0.060877 | 0.1891  | 0.198639 | 1.53E-05 | 0.396505 |
| -0.01773 | 0.70239  | 0.121636 | 0.00851  | 0.052854 | 0.25432 | 0.129976 | 0.0049   | 0.214084 |
| -0.13296 | 0.004    | 0.085091 | 0.06618  | -0.03038 | 0.51255 | 0.146432 | 0.00151  | 0.188312 |
| -0.15677 | 0.00067  | -0.07267 | 0.1168   | -0.12005 | 0.00941 | -0.0351  | 0.44916  | 0.004977 |
| -0.08946 | 0.05336  | 0.057108 | 0.21802  | -0.02567 | 0.58002 | 0.099618 | 0.03137  | 0.143421 |
| -0.02092 | 0.65201  | 0.187611 | 4.51E-05 | 0.062252 | 0.17928 | 0.222634 | 1.18E-06 | 0.421606 |
| -0.0349  | 0.45185  | 0.084425 | 0.06833  | -0.01614 | 0.72795 | 0.121958 | 0.00833  | 0.226796 |
| 0.001493 | 0.97434  | 0.17762  | 0.00011  | 0.087123 | 0.05993 | 0.185793 | 5.36E-05 | 0.304724 |
| 0.025536 | 0.58201  | 0.1681   | 0.00026  | 0.058284 | 0.20867 | 0.189511 | 3.76E-05 | 0.322746 |
| -0.07617 | 0.10016  | -0.05313 | 0.25181  | -0.04267 | 0.35753 | -0.04583 | 0.32306  | -0.09908 |
| -0.01852 | 0.68968  | 0.157906 | 0.00062  | 0.047338 | 0.30734 | 0.175452 | 0.00014  | 0.380867 |
| -0.02144 | 0.64398  | 0.086263 | 0.06251  | 0.039036 | 0.4     | 0.087549 | 0.05869  | 0.189359 |
| -0.04247 | 0.35981  | -0.00835 | 0.85725  | -0.02535 | 0.5847  | -0.01107 | 0.81139  | 0.14234  |
| -0.18362 | 6.57E-05 | -0.05184 | 0.26354  | -0.12964 | 0.00502 | 0.008921 | 0.84753  | -0.00695 |
| -0.11723 | 0.01123  | 0.052644 | 0.25621  | -0.04408 | 0.34191 | 0.095034 | 0.04009  | 0.191399 |
| -0.06115 | 0.18708  | 0.005989 | 0.8973   | -0.03066 | 0.50868 | 0.021986 | 0.63556  | 0.076783 |
| 0.004441 | 0.92375  | 0.184116 | 6.27E-05 | 0.05074  | 0.27384 | 0.22692  | 7.22E-07 | 0.318704 |
| -0.09007 | 0.05175  | 0.006695 | 0.88528  | -0.0413  | 0.37322 | 0.023673 | 0.60986  | 0.106056 |
| -0.00745 | 0.87251  | 0.169264 | 0.00024  | 0.056549 | 0.22256 | 0.19334  | 2.59E-05 | 0.292806 |
| 0.030547 | 0.51022  | 0.196739 | 1.85E-05 | 0.067557 | 0.14493 | 0.230305 | 4.87E-07 | 0.309252 |
| -0.01815 | 0.69572  | 0.150525 | 0.0011   | 0.054741 | 0.23773 | 0.167847 | 0.00027  | 0.302637 |
| -0.07309 | 0.11471  | 0.002618 | 0.955    | -0.04386 | 0.34423 | 0.024403 | 0.59887  | 0.081028 |
| -0.03816 | 0.41065  | 0.021448 | 0.64386  | -0.04828 | 0.29778 | 0.067368 | 0.14606  | 0.096225 |
| -0.08134 | 0.07908  | 0.037134 | 0.42337  | -0.02563 | 0.58069 | 0.062466 | 0.17779  | 0.209449 |
| -0.06186 | 0.18204  | 0.122467 | 0.00806  | 0.002618 | 0.955   | 0.17309  | 0.00017  | 0.295789 |
| -0.06137 | 0.18554  | 0.099886 | 0.03092  | 0.01534  | 0.74092 | 0.115506 | 0.0125   | 0.256578 |
| 0.012029 | 0.79543  | 0.111727 | 0.01571  | 0.028451 | 0.53968 | 0.134049 | 0.00371  | 0.13565  |
| -0.12192 | 0.00835  | 0.08165  | 0.07796  | -0.03268 | 0.48114 | 0.130356 | 0.00478  | 0.167103 |
| -0.04828 | 0.29782  | 0.139528 | 0.00251  | 0.048988 | 0.29077 | 0.154201 | 0.00083  | 0.305542 |
| -0.07272 | 0.11658  | 0.039279 | 0.39706  | -0.02604 | 0.57453 | 0.062785 | 0.17558  | 0.094331 |
| -0.08666 | 0.0613   | 0.074693 | 0.10695  | 0.021057 | 0.64992 | 0.087567 | 0.05864  | 0.123419 |
| -0.12331 | 0.00763  | -0.05788 | 0.21183  | -0.06679 | 0.14958 | -0.04877 | 0.29291  | -0.01525 |
| -0.02281 | 0.6229   | 0.127321 | 0.00586  | 0.046603 | 0.31493 | 0.13466  | 0.00355  | 0.345182 |
| -0.06295 | 0.17444  | -0.04054 | 0.38203  | -0.05243 | 0.25812 | -0.0265  | 0.56788  | 0.031421 |
| 0.007083 | 0.87867  | 0.185834 | 5.34E-05 | 0.144624 | 0.00173 | 0.143781 | 0.00184  | 0.277355 |
| -0.02521 | 0.58684  | 0.118924 | 0.0101   | 0.026204 | 0.57217 | 0.146394 | 0.00151  | 0.316014 |
| -0.10828 | 0.01926  | 0.102041 | 0.02746  | -0.04437 | 0.33871 | 0.185184 | 5.67E-05 | 0.368125 |
| -0.00069 | 0.98807  | 0.146516 | 0.0015   | 0.085579 | 0.06463 | 0.129126 | 0.0052   | 0.328825 |
| -0.06862 | 0.1387   | 0.113811 | 0.01386  | 0.013823 | 0.76576 | 0.151747 | 0.001    | 0.190079 |
| -0.00387 | 0.93351  | 0.152629 | 0.00094  | 0.052416 | 0.25828 | 0.1828   | 7.09E-05 | 0.297989 |
| -0.10831 | 0.01923  | 0.066061 | 0.15406  | -0.06326 | 0.17234 | 0.132959 | 0.004    | 0.229512 |

|          |          |          |          |          |         |          |          |          |
|----------|----------|----------|----------|----------|---------|----------|----------|----------|
| -0.11197 | 0.01548  | 0.058946 | 0.20354  | -0.03476 | 0.45362 | 0.103138 | 0.02583  | 0.208597 |
| -0.05375 | 0.24638  | 0.10553  | 0.02256  | 0.013889 | 0.76467 | 0.138563 | 0.00269  | 0.24771  |
| -0.0348  | 0.45314  | 0.071804 | 0.12125  | 0.03319  | 0.47429 | 0.075375 | 0.10378  | 0.249892 |
| 0.00093  | 0.98402  | 0.157445 | 0.00064  | 0.044967 | 0.33223 | 0.180945 | 8.41E-05 | 0.31557  |
| -0.03701 | 0.42489  | 0.073213 | 0.1141   | -0.00843 | 0.85582 | 0.089695 | 0.05274  | 0.233687 |
| 0.04587  | 0.32261  | 0.144746 | 0.00171  | 0.073505 | 0.11266 | 0.133811 | 0.00377  | 0.225903 |
| -0.11595 | 0.01216  | 0.002677 | 0.95399  | -0.06049 | 0.1919  | 0.030147 | 0.51577  | 0.077325 |
| 0.038295 | 0.40901  | 0.281515 | 5.90E-10 | 0.10602  | 0.02194 | 0.340993 | 3.52E-14 | 0.505916 |
| -0.02968 | 0.52228  | 0.094905 | 0.04036  | 0.038426 | 0.40741 | 0.100954 | 0.02916  | 0.168402 |
| -0.11096 | 0.01645  | -0.00047 | 0.99187  | -0.06195 | 0.18143 | 0.042639 | 0.35789  | 0.107222 |
| -0.08173 | 0.07765  | 0.061312 | 0.18595  | -0.02669 | 0.56511 | 0.100207 | 0.03038  | 0.155238 |
| -0.10466 | 0.02371  | 0.004111 | 0.9294   | -0.01749 | 0.70614 | 0.022679 | 0.62495  | 0.051358 |
| 0.003469 | 0.9404   | 0.166052 | 0.00031  | 0.059424 | 0.19989 | 0.179607 | 9.51E-05 | 0.386968 |
| -0.09828 | 0.03373  | -0.07484 | 0.10627  | -0.08624 | 0.06258 | -0.06456 | 0.16363  | -0.0475  |
| -0.03577 | 0.44058  | -0.02038 | 0.66052  | -0.02712 | 0.55878 | -0.02618 | 0.57247  | 0.120484 |
| 0.01295  | 0.78015  | -0.20488 | 8.08E-06 | -0.1072  | 0.02049 | -0.2166  | 2.31E-06 | -0.31774 |
| 0.044165 | 0.34094  | -0.11355 | 0.01408  | -0.02904 | 0.53133 | -0.15455 | 0.0008   | -0.29959 |
| -0.07515 | 0.10484  | 0.079172 | 0.08745  | -0.00539 | 0.90744 | 0.109013 | 0.01845  | 0.202937 |
| -0.02752 | 0.55304  | 0.097155 | 0.03583  | 0.041912 | 0.36616 | 0.105803 | 0.02221  | 0.22462  |
| -0.12047 | 0.00916  | -0.0955  | 0.03911  | -0.11457 | 0.01323 | -0.06062 | 0.19101  | -0.14381 |
| -0.1828  | 7.09E-05 | -0.12155 | 0.00855  | -0.12505 | 0.00682 | -0.08254 | 0.07474  | -0.12871 |
| 0.011314 | 0.80735  | 0.140461 | 0.00235  | 0.081711 | 0.07773 | 0.143313 | 0.0019   | 0.285421 |
| -0.02076 | 0.65449  | 0.080481 | 0.08232  | 0.052572 | 0.25687 | 0.077768 | 0.09323  | 0.166217 |
| -0.11728 | 0.0112   | -0.03644 | 0.43214  | -0.05401 | 0.24403 | -0.02336 | 0.61461  | 0.067279 |
| -0.05285 | 0.25438  | 0.07928  | 0.08701  | -0.0003  | 0.99484 | 0.104655 | 0.02371  | 0.238969 |
| -0.15992 | 0.00052  | -0.08309 | 0.07285  | -0.09858 | 0.03318 | -0.05467 | 0.23834  | -0.10547 |
| -0.04347 | 0.34861  | 0.037257 | 0.42182  | -0.02157 | 0.64203 | 0.059638 | 0.19827  | 0.184681 |
| -0.04101 | 0.3766   | 0.111102 | 0.01631  | 0.021889 | 0.63706 | 0.140971 | 0.00226  | 0.264155 |
| -0.19978 | 1.36E-05 | -0.05782 | 0.21232  | -0.12482 | 0.00692 | 8.78E-05 | 0.99849  | 0.050444 |
| -0.10811 | 0.01944  | 0.049367 | 0.28705  | -0.02313 | 0.61814 | 0.080029 | 0.08406  | 0.233156 |
| -0.06742 | 0.14577  | 0.066591 | 0.15078  | 0.008105 | 0.86132 | 0.073546 | 0.11246  | 0.240624 |
| -0.06602 | 0.15429  | 0.093857 | 0.04263  | 0.014026 | 0.76242 | 0.127802 | 0.00568  | 0.239094 |
| -0.01276 | 0.78334  | 0.168649 | 0.00025  | 0.070287 | 0.12934 | 0.176684 | 0.00012  | 0.267698 |
| -0.08153 | 0.07839  | 0.075716 | 0.10222  | 0.00866  | 0.85195 | 0.083502 | 0.07142  | 0.186565 |
| -0.04433 | 0.33909  | 0.116669 | 0.01163  | 0.056428 | 0.22356 | 0.116461 | 0.01178  | 0.213723 |
| -0.04135 | 0.37261  | 0.109655 | 0.01777  | 0.022833 | 0.6226  | 0.131334 | 0.00447  | 0.247038 |
| -0.11451 | 0.01328  | 0.092053 | 0.04679  | -0.0092  | 0.84284 | 0.116045 | 0.01209  | 0.296186 |
| -0.09429 | 0.04168  | 0.080631 | 0.08175  | -0.01067 | 0.81819 | 0.125833 | 0.00647  | 0.207469 |
| -0.05344 | 0.2491   | 0.079977 | 0.08427  | -0.01435 | 0.75715 | 0.117397 | 0.01112  | 0.295628 |
| -0.14327 | 0.00191  | -0.06054 | 0.19153  | -0.08442 | 0.06834 | -0.0461  | 0.32017  | -0.03971 |
| -0.10329 | 0.02561  | -0.01237 | 0.78984  | -0.06971 | 0.13254 | 0.027863 | 0.54809  | 0.050354 |
| -0.01418 | 0.75983  | 0.130715 | 0.00466  | 0.035178 | 0.44821 | 0.145658 | 0.0016   | 0.217552 |
| -0.01395 | 0.76361  | 0.115041 | 0.01286  | 0.031042 | 0.50337 | 0.124709 | 0.00697  | 0.292988 |
| -0.00067 | 0.9884   | 0.020327 | 0.66128  | -0.03911 | 0.39909 | 0.058954 | 0.20348  | 0.083885 |
| -0.15189 | 0.00099  | 0.024422 | 0.59858  | -0.03439 | 0.45843 | 0.048348 | 0.29712  | 0.123684 |



|          |          |          |          |          |         |          |          |          |
|----------|----------|----------|----------|----------|---------|----------|----------|----------|
| -0.14116 | 0.00223  | -0.01254 | 0.78688  | -0.07101 | 0.12545 | 0.029167 | 0.52951  | 0.105226 |
| -0.09848 | 0.03337  | 0.076597 | 0.09828  | -0.02613 | 0.57332 | 0.12056  | 0.00911  | 0.304923 |
| -0.04747 | 0.30602  | 0.00745  | 0.87244  | -0.04288 | 0.35514 | 0.019708 | 0.67098  | 0.039928 |
| -0.11977 | 0.00958  | -0.01505 | 0.74571  | -0.04448 | 0.33745 | -0.01747 | 0.70647  | 0.056653 |
| -0.05192 | 0.26278  | 0.076837 | 0.09723  | 0.051413 | 0.26751 | 0.044521 | 0.33705  | 0.256754 |
| -0.18583 | 5.34E-05 | 0.004981 | 0.91451  | -0.08884 | 0.05505 | 0.05768  | 0.21344  | 0.139158 |
| -0.10063 | 0.02968  | -0.03076 | 0.50733  | -0.08934 | 0.0537  | 0.008091 | 0.86157  | -0.01196 |
| -0.04967 | 0.28408  | 0.117766 | 0.01087  | 0.04117  | 0.37471 | 0.138707 | 0.00266  | 0.212988 |
| -0.05882 | 0.20449  | 0.159602 | 0.00054  | 0.031105 | 0.50252 | 0.20412  | 8.74E-06 | 0.349164 |
| 0.13377  | 0.00378  | 0.069288 | 0.13488  | 0.076881 | 0.09703 | 0.051152 | 0.26996  | 0.103086 |
| -0.11579 | 0.01228  | -0.01855 | 0.68927  | -0.04657 | 0.31528 | -0.01292 | 0.78071  | 0.07263  |
| -0.04803 | 0.30033  | -0.01366 | 0.7685   | -0.03384 | 0.46567 | 0.012921 | 0.78064  | 0.003051 |
| -0.06533 | 0.15867  | 0.120767 | 0.00899  | 0.01762  | 0.70411 | 0.151882 | 0.00099  | 0.313547 |
| -0.06213 | 0.18012  | 0.055731 | 0.22934  | -0.02929 | 0.52782 | 0.10656  | 0.02127  | 0.205392 |
| -0.03195 | 0.49094  | 0.120704 | 0.00903  | 0.01766  | 0.70348 | 0.170842 | 0.00021  | 0.215543 |
| -0.15379 | 0.00085  | -0.00659 | 0.88703  | -0.06223 | 0.17943 | 0.017603 | 0.70438  | 0.060545 |
| -0.02209 | 0.63402  | 0.13945  | 0.00253  | 0.049945 | 0.28144 | 0.157519 | 0.00063  | 0.296082 |
| -0.02505 | 0.58917  | 0.113412 | 0.0142   | 0.005235 | 0.91017 | 0.159066 | 0.00056  | 0.229552 |
| -0.06022 | 0.19394  | 0.08804  | 0.05728  | -0.00056 | 0.99043 | 0.11883  | 0.01017  | 0.22199  |
| -0.05939 | 0.20015  | 0.075831 | 0.1017   | 0.003547 | 0.93907 | 0.096256 | 0.03758  | 0.238206 |
| -0.09448 | 0.04128  | -0.0431  | 0.35275  | -0.04528 | 0.32884 | -0.05637 | 0.22406  | -0.0547  |
| -0.03903 | 0.40009  | 0.03739  | 0.42018  | 0.004973 | 0.91465 | 0.035989 | 0.43781  | 0.135299 |
| 0.05589  | 0.22801  | -0.04718 | 0.30899  | 0.0351   | 0.44922 | -0.09781 | 0.0346   | -0.22245 |
| -0.02318 | 0.61728  | 0.121375 | 0.00865  | 0.068229 | 0.14096 | 0.125834 | 0.00647  | 0.21179  |
| -0.04226 | 0.36219  | 0.116296 | 0.0119   | 0.024279 | 0.60073 | 0.13505  | 0.00346  | 0.316042 |
| -0.10767 | 0.01995  | 0.026465 | 0.56835  | -0.05922 | 0.20145 | 0.077921 | 0.09258  | 0.135447 |
| -0.06443 | 0.16449  | 0.062541 | 0.17726  | 0.013358 | 0.77341 | 0.06924  | 0.13516  | 0.189912 |
| -0.10633 | 0.02155  | 0.091663 | 0.04773  | 0.005543 | 0.90491 | 0.115268 | 0.01268  | 0.257481 |
| -0.19197 | 2.96E-05 | -0.02607 | 0.57416  | -0.12753 | 0.00578 | 0.04899  | 0.29075  | 0.085719 |
| 0.02567  | 0.58004  | 0.194594 | 2.29E-05 | 0.096294 | 0.03751 | 0.210871 | 4.30E-06 | 0.340032 |
| -0.06767 | 0.14427  | 0.033175 | 0.47449  | -0.02491 | 0.59131 | 0.068774 | 0.13781  | 0.140187 |
| -0.03572 | 0.44128  | 0.122707 | 0.00794  | 0.034802 | 0.45308 | 0.139332 | 0.00255  | 0.255179 |
| -0.1266  | 0.00615  | -0.01951 | 0.67408  | -0.07699 | 0.09655 | 0.029462 | 0.52536  | -0.01229 |
| 0.049854 | 0.28232  | 0.158607 | 0.00058  | 0.078318 | 0.09093 | 0.154061 | 0.00084  | 0.339907 |
| -0.01572 | 0.73479  | -0.01959 | 0.67286  | -0.00865 | 0.8521  | -0.02434 | 0.59976  | -0.00952 |
| -0.12332 | 0.00763  | 0.018589 | 0.68867  | -0.06657 | 0.1509  | 0.072546 | 0.11744  | 0.133947 |
| -0.09948 | 0.03161  | -0.08306 | 0.07294  | -0.09954 | 0.0315  | -0.0568  | 0.22053  | -0.13797 |
| -0.16191 | 0.00044  | -0.08185 | 0.07724  | -0.12519 | 0.00675 | -0.02592 | 0.57637  | -0.03488 |
| -0.00193 | 0.96683  | 0.155725 | 0.00073  | 0.058901 | 0.20389 | 0.188866 | 4.00E-05 | 0.360606 |
| -0.09084 | 0.04978  | 0.058683 | 0.20557  | -0.0288  | 0.53469 | 0.087054 | 0.06014  | 0.192038 |
| -0.05896 | 0.20342  | 0.14523  | 0.00165  | 0.027976 | 0.54647 | 0.19033  | 3.47E-05 | 0.218774 |
| -0.10373 | 0.02498  | 0.001363 | 0.97657  | -0.02398 | 0.60523 | 0.014913 | 0.74788  | -0.00328 |
| -0.0944  | 0.04145  | 0.03761  | 0.41744  | -0.04348 | 0.34848 | 0.086273 | 0.06248  | 0.087406 |
| -0.17531 | 0.00014  | -0.01535 | 0.74077  | -0.08188 | 0.07713 | 0.039555 | 0.39376  | 0.075884 |
| -0.01964 | 0.67208  | 0.101163 | 0.02882  | 0.016316 | 0.72509 | 0.112608 | 0.0149   | 0.262887 |

|          |          |          |         |          |          |          |          |          |
|----------|----------|----------|---------|----------|----------|----------|----------|----------|
| -0.05115 | 0.26996  | 0.107783 | 0.01982 | 0.028827 | 0.53433  | 0.115191 | 0.01274  | 0.204885 |
| -0.13412 | 0.00369  | 0.009221 | 0.84246 | -0.06694 | 0.14865  | 0.056727 | 0.22111  | 0.073937 |
| -0.03738 | 0.42035  | 0.139849 | 0.00245 | 0.026184 | 0.57246  | 0.181706 | 7.84E-05 | 0.337603 |
| -0.10716 | 0.02054  | 0.066925 | 0.14874 | 0.002269 | 0.961    | 0.080936 | 0.0806   | 0.233332 |
| -0.11225 | 0.01522  | 0.009612 | 0.83587 | -0.05243 | 0.25813  | 0.036198 | 0.43515  | 0.152086 |
| -0.04835 | 0.29715  | 0.087006 | 0.06028 | 0.00597  | 0.89762  | 0.117351 | 0.01115  | 0.199914 |
| -0.098   | 0.03425  | -0.03465 | 0.45505 | -0.01862 | 0.68816  | -0.04805 | 0.30014  | -0.0684  |
| -0.01368 | 0.76811  | 0.151888 | 0.00099 | 0.060672 | 0.19059  | 0.163359 | 0.00039  | 0.296528 |
| -0.10254 | 0.0267   | 0.088997 | 0.05462 | -0.01906 | 0.68116  | 0.129185 | 0.00517  | 0.296891 |
| -0.08439 | 0.06843  | 0.073106 | 0.11463 | 0.00929  | 0.84131  | 0.096874 | 0.03637  | 0.185164 |
| -0.09804 | 0.03417  | 0.098218 | 0.03384 | 0.01212  | 0.79392  | 0.110929 | 0.01648  | 0.230334 |
| -0.07752 | 0.09426  | 0.021839 | 0.63783 | -0.03397 | 0.46392  | 0.054672 | 0.23832  | 0.173987 |
| -0.0517  | 0.26489  | -0.00658 | 0.88724 | -0.01891 | 0.68351  | -0.0229  | 0.62162  | 0.085533 |
| -0.09073 | 0.05005  | 0.012655 | 0.78505 | -0.0484  | 0.29657  | 0.038889 | 0.40178  | 0.099014 |
| -0.09965 | 0.03131  | 0.089342 | 0.05368 | -0.02088 | 0.65268  | 0.131152 | 0.00453  | 0.23688  |
| -0.06131 | 0.18599  | 0.121653 | 0.0085  | 0.03226  | 0.48677  | 0.153215 | 0.00089  | 0.230956 |
| -0.18212 | 7.55E-05 | -0.00622 | 0.89342 | -0.08446 | 0.06821  | 0.044499 | 0.33729  | 0.091141 |
| -0.05111 | 0.27035  | 0.016343 | 0.72465 | -0.0213  | 0.64618  | 0.031796 | 0.49306  | 0.092926 |
| -0.02563 | 0.58063  | 0.022563 | 0.62672 | -0.02165 | 0.64074  | 0.045959 | 0.32166  | 0.13514  |
| -0.00049 | 0.99154  | 0.114331 | 0.01343 | 0.010581 | 0.81961  | 0.16232  | 0.00043  | 0.217989 |
| 0.016123 | 0.72821  | 0.056713 | 0.22122 | -0.00134 | 0.97695  | 0.089339 | 0.05369  | 0.112713 |
| -0.11333 | 0.01427  | 0.015239 | 0.74257 | -0.0388  | 0.40283  | 0.042707 | 0.35713  | 0.049472 |
| -0.15861 | 0.00058  | -0.07312 | 0.11456 | -0.09908 | 0.03231  | -0.05829 | 0.20864  | -0.1233  |
| -0.0572  | 0.21724  | 0.088433 | 0.05617 | 0.030813 | 0.50653  | 0.09436  | 0.04153  | 0.228287 |
| -0.13068 | 0.00468  | -0.0305  | 0.51084 | -0.06519 | 0.15957  | -0.01852 | 0.68977  | 0.066581 |
| 0.008633 | 0.8524   | 0.130353 | 0.00478 | 0.052467 | 0.25781  | 0.143501 | 0.00188  | 0.272163 |
| -0.01031 | 0.82419  | 0.068206 | 0.1411  | 0.023099 | 0.61856  | 0.065774 | 0.15587  | 0.150969 |
| -0.03105 | 0.50326  | 0.121987 | 0.00832 | 0.012574 | 0.78639  | 0.162025 | 0.00044  | 0.284268 |
| -0.15004 | 0.00115  | -0.0579  | 0.2117  | -0.09846 | 0.03341  | -0.03052 | 0.51053  | 0.015667 |
| -0.04126 | 0.3737   | 0.159607 | 0.00054 | 0.058666 | 0.2057   | 0.185876 | 5.32E-05 | 0.329141 |
| -0.16163 | 0.00045  | -0.07854 | 0.09001 | -0.10482 | 0.0235   | -0.03482 | 0.45288  | -0.05105 |
| -0.0193  | 0.67743  | 0.112794 | 0.01474 | 0.043617 | 0.34697  | 0.133746 | 0.00378  | 0.250132 |
| -0.06391 | 0.16793  | 0.096713 | 0.03668 | 0.047201 | 0.30874  | 0.086093 | 0.06303  | 0.198629 |
| -0.06777 | 0.14368  | 0.109964 | 0.01745 | 0.024529 | 0.59698  | 0.133622 | 0.00382  | 0.319956 |
| -0.00343 | 0.94109  | -0.13143 | 0.00444 | -0.06346 | 0.17097  | -0.14684 | 0.00146  | -0.26207 |
| 0.253098 | 2.93E-08 | 0.094289 | 0.04168 | 0.187636 | 4.50E-05 | 0.007264 | 0.87559  | -0.00136 |
| -0.1516  | 0.00101  | -0.08147 | 0.07863 | -0.1004  | 0.03006  | -0.05759 | 0.21419  | -0.06848 |
| -0.09347 | 0.0435   | 0.081453 | 0.07868 | -0.00171 | 0.97068  | 0.104971 | 0.02329  | 0.216839 |
| -0.06581 | 0.15563  | 0.137432 | 0.00292 | 0.018117 | 0.69618  | 0.187779 | 4.44E-05 | 0.344073 |
| -0.10448 | 0.02395  | -0.04672 | 0.31368 | -0.08334 | 0.07199  | -0.01396 | 0.76354  | 0.033199 |
| 0.004276 | 0.92657  | 0.079443 | 0.08637 | 0.015807 | 0.73333  | 0.091131 | 0.04905  | 0.255859 |
| -0.05477 | 0.23751  | 0.123882 | 0.00736 | 0.060157 | 0.19439  | 0.132369 | 0.00416  | 0.307397 |
| -0.04553 | 0.32615  | 0.110763 | 0.01664 | 0.014205 | 0.75947  | 0.146297 | 0.00152  | 0.179232 |
| -0.0272  | 0.5577   | -0.14313 | 0.00193 | -0.03586 | 0.43942  | -0.18693 | 4.81E-05 | -0.29422 |
| -0.06127 | 0.18629  | 0.081249 | 0.07943 | 0.010472 | 0.82144  | 0.08614  | 0.06289  | 0.236871 |

|          |         |          |         |          |         |          |          |          |
|----------|---------|----------|---------|----------|---------|----------|----------|----------|
| -0.0295  | 0.52486 | 0.108652 | 0.01884 | 0.035895 | 0.439   | 0.122482 | 0.00806  | 0.260207 |
| -0.06111 | 0.1874  | 0.038344 | 0.40841 | -0.00809 | 0.86159 | 0.065968 | 0.15465  | 0.118679 |
| -0.05887 | 0.20412 | -0.00087 | 0.98507 | -0.03117 | 0.50162 | 0.02046  | 0.6592   | 0.070373 |
| -0.14141 | 0.00219 | -0.07923 | 0.08723 | -0.08737 | 0.05921 | -0.05933 | 0.20061  | -0.08018 |
| -0.04888 | 0.29187 | 0.037264 | 0.42174 | -0.00674 | 0.88448 | 0.043255 | 0.35099  | 0.105214 |
| -0.08108 | 0.08007 | -0.04172 | 0.36833 | -0.01678 | 0.71766 | -0.06836 | 0.14023  | -0.02668 |
| -0.07778 | 0.09318 | 0.007594 | 0.86998 | -0.04897 | 0.29096 | 0.04502  | 0.33166  | 0.023025 |
| -0.06426 | 0.16562 | 0.014817 | 0.74945 | -0.0073  | 0.87498 | 0.013137 | 0.77707  | 0.102458 |
| -0.07675 | 0.09759 | 0.071566 | 0.12249 | -0.02019 | 0.6634  | 0.11106  | 0.01635  | 0.260518 |
| -0.0955  | 0.03911 | 0.114272 | 0.01348 | 0.038548 | 0.40591 | 0.133561 | 0.00383  | 0.186699 |
| -0.03108 | 0.50291 | 0.057005 | 0.21885 | 0.029006 | 0.53178 | 0.050114 | 0.27981  | 0.17782  |
| -0.15956 | 0.00054 | -0.03022 | 0.51482 | -0.06348 | 0.17083 | 0.007845 | 0.86573  | 0.046209 |
| -0.02612 | 0.57345 | 0.135503 | 0.00335 | 0.035003 | 0.45048 | 0.174823 | 0.00015  | 0.21445  |
| -0.1642  | 0.00037 | -0.00308 | 0.94715 | -0.08891 | 0.05485 | 0.055322 | 0.23278  | 0.11968  |
| -0.08508 | 0.0662  | 0.080888 | 0.08078 | 0.029667 | 0.52247 | 0.077118 | 0.096    | 0.229851 |
| -0.13355 | 0.00384 | -0.01045 | 0.8218  | -0.07602 | 0.10082 | 0.024839 | 0.59236  | 0.14169  |
| -0.02615 | 0.57295 | 0.157417 | 0.00064 | 0.055053 | 0.23506 | 0.172139 | 0.00019  | 0.338524 |
| -0.08065 | 0.08168 | 0.085152 | 0.06598 | -0.00056 | 0.99031 | 0.112705 | 0.01482  | 0.204085 |
| -0.05491 | 0.23632 | 0.144809 | 0.0017  | 0.017694 | 0.70292 | 0.189682 | 3.70E-05 | 0.278113 |
| -0.01851 | 0.68999 | 0.060297 | 0.19335 | -0.00218 | 0.96246 | 0.074645 | 0.10718  | 0.194369 |
| -0.05631 | 0.22456 | 0.061875 | 0.18193 | -0.00131 | 0.97754 | 0.074951 | 0.10574  | 0.2433   |
| -0.06833 | 0.1404  | 0.113478 | 0.01414 | 0.054989 | 0.23561 | 0.10348  | 0.02534  | 0.203814 |
| -0.09272 | 0.04521 | 0.074543 | 0.10766 | 0.01035  | 0.82347 | 0.077568 | 0.09407  | 0.219809 |
| -0.05741 | 0.21555 | 0.071568 | 0.12248 | 0.00869  | 0.85143 | 0.085649 | 0.06441  | 0.188667 |
| 0.046018 | 0.32104 | -0.16207 | 0.00044 | -0.00999 | 0.82947 | -0.23392 | 3.18E-07 | -0.31654 |
| -0.08395 | 0.06992 | 0.091067 | 0.04921 | -0.02105 | 0.6501  | 0.137082 | 0.00299  | 0.158505 |
| -0.10018 | 0.03042 | 0.093258 | 0.04398 | -0.00249 | 0.95714 | 0.134291 | 0.00364  | 0.218644 |
| -0.1553  | 0.00076 | 0.007034 | 0.87951 | -0.08695 | 0.06044 | 0.06971  | 0.13252  | 0.105284 |
| -0.09632 | 0.03745 | -0.01689 | 0.71583 | -0.05279 | 0.2549  | 0.002202 | 0.96214  | 0.088291 |
| -0.03102 | 0.50364 | 0.095056 | 0.04004 | 0.015255 | 0.74231 | 0.124172 | 0.00722  | 0.124644 |
| -0.14363 | 0.00186 | -0.05872 | 0.20525 | -0.10648 | 0.02136 | -0.01515 | 0.74397  | 0.000858 |
| -0.07684 | 0.09721 | 0.018811 | 0.68514 | -0.04765 | 0.30414 | 0.066199 | 0.1532   | 0.106118 |
| -0.08428 | 0.06882 | -0.01548 | 0.73862 | -0.04231 | 0.36167 | -0.01028 | 0.82461  | 0.076278 |
| 0.134427 | 0.00361 | -0.06227 | 0.17917 | 0.034455 | 0.4576  | -0.12327 | 0.00765  | -0.19107 |
| 0.010958 | 0.8133  | 0.120025 | 0.00943 | 0.054202 | 0.24239 | 0.114889 | 0.01298  | 0.233818 |
| 0.055412 | 0.23202 | 0.14487  | 0.0017  | 0.07936  | 0.0867  | 0.137679 | 0.00287  | 0.200537 |
| -0.02294 | 0.62095 | 0.051966 | 0.26239 | 0.008983 | 0.84648 | 0.080282 | 0.08309  | 0.163575 |
| -0.15753 | 0.00063 | -0.01427 | 0.75838 | -0.06235 | 0.17857 | 0.008103 | 0.86136  | 0.187268 |
| -0.08015 | 0.08361 | 0.042924 | 0.35469 | -0.03673 | 0.42843 | 0.078456 | 0.09036  | 0.136597 |
| -0.11155 | 0.01588 | 0.018017 | 0.69776 | -0.05153 | 0.26646 | 0.049731 | 0.2835   | 0.147733 |
| -0.07587 | 0.10152 | 0.012981 | 0.77964 | -0.02935 | 0.527   | 0.031968 | 0.49072  | 0.066289 |
| -0.10168 | 0.02801 | 0.080728 | 0.08138 | -0.02063 | 0.65658 | 0.11122  | 0.01619  | 0.25386  |
| -0.04924 | 0.28824 | 0.097356 | 0.03545 | 0.01841  | 0.69151 | 0.111313 | 0.0161   | 0.226672 |
| -0.07984 | 0.08479 | 0.124411 | 0.00711 | -0.00268 | 0.95401 | 0.175071 | 0.00014  | 0.260545 |
| -0.01662 | 0.72011 | 0.134175 | 0.00367 | 0.053001 | 0.253   | 0.144278 | 0.00177  | 0.271436 |

|          |          |          |          |          |         |          |          |          |
|----------|----------|----------|----------|----------|---------|----------|----------|----------|
| -0.09153 | 0.04805  | 0.047568 | 0.30499  | -0.03766 | 0.41678 | 0.085675 | 0.06433  | 0.237499 |
| -0.08235 | 0.07543  | 0.043817 | 0.34475  | -0.02257 | 0.62668 | 0.067065 | 0.14789  | 0.200512 |
| -0.07502 | 0.10544  | 0.031195 | 0.50128  | -0.01875 | 0.68609 | 0.056619 | 0.22199  | 0.139768 |
| -0.07495 | 0.10576  | 0.056547 | 0.22258  | -0.01223 | 0.7921  | 0.089247 | 0.05394  | 0.19033  |
| -0.1596  | 0.00054  | -0.04831 | 0.29746  | -0.08718 | 0.05975 | -0.01384 | 0.76549  | 0.037552 |
| -0.0122  | 0.79256  | -0.17125 | 0.0002   | -0.06158 | 0.184   | -0.19699 | 1.80E-05 | -0.3864  |
| -0.02419 | 0.60202  | 0.088453 | 0.05612  | 0.003869 | 0.93355 | 0.119419 | 0.00979  | 0.190795 |
| -0.10345 | 0.02537  | 0.046536 | 0.31562  | -0.03603 | 0.43728 | 0.07824  | 0.09125  | 0.160315 |
| -0.06938 | 0.13436  | 0.017627 | 0.704    | -0.01292 | 0.78065 | 0.007117 | 0.87809  | 0.150227 |
| -0.12196 | 0.00833  | 0.044522 | 0.33704  | -0.04708 | 0.30994 | 0.080708 | 0.08146  | 0.271669 |
| -0.05259 | 0.2567   | 0.012275 | 0.79134  | 0.021622 | 0.64117 | -0.0115  | 0.80422  | 0.075812 |
| 0.02127  | 0.64662  | 0.172655 | 0.00018  | 0.085939 | 0.06351 | 0.175672 | 0.00014  | 0.338705 |
| -0.04837 | 0.29695  | 0.12878  | 0.00532  | 0.037325 | 0.42098 | 0.145421 | 0.00163  | 0.311016 |
| 0.088857 | 0.055    | -0.01483 | 0.7493   | 0.069606 | 0.1331  | -0.07142 | 0.12325  | -0.14926 |
| -0.06474 | 0.16251  | 0.065485 | 0.1577   | -0.00233 | 0.95992 | 0.093923 | 0.04248  | 0.222948 |
| -0.02766 | 0.55105  | 0.001661 | 0.97145  | -0.01276 | 0.78328 | -0.00225 | 0.96134  | 0.015792 |
| -0.00767 | 0.86864  | 0.146143 | 0.00154  | 0.053295 | 0.25037 | 0.164156 | 0.00037  | 0.289174 |
| -0.03385 | 0.46553  | 0.137332 | 0.00294  | 0.03778  | 0.41533 | 0.168451 | 0.00026  | 0.349554 |
| -0.02853 | 0.53859  | 0.143262 | 0.00191  | 0.068943 | 0.13684 | 0.131553 | 0.0044   | 0.297979 |
| -0.15135 | 0.00104  | -0.02824 | 0.54264  | -0.08911 | 0.05432 | 0.011979 | 0.79627  | 0.09489  |
| 0.004348 | 0.92535  | 0.13735  | 0.00294  | 0.063752 | 0.16901 | 0.152224 | 0.00097  | 0.239416 |
| -0.10742 | 0.02025  | 0.041377 | 0.37232  | -0.03689 | 0.42648 | 0.07744  | 0.09462  | 0.174314 |
| -0.18052 | 8.75E-05 | -0.03555 | 0.44343  | -0.09023 | 0.05134 | 0.006202 | 0.89367  | 0.008057 |
| -0.0196  | 0.67275  | 0.124934 | 0.00687  | 0.045422 | 0.32736 | 0.127616 | 0.00575  | 0.216976 |
| -0.04694 | 0.31145  | 0.097181 | 0.03578  | 0.009957 | 0.83007 | 0.123822 | 0.00739  | 0.301509 |
| -0.128   | 0.0056   | 0.026246 | 0.57156  | -0.03859 | 0.40539 | 0.046691 | 0.314    | 0.150929 |
| -0.18369 | 6.53E-05 | -0.05366 | 0.24715  | -0.1114  | 0.01602 | -0.00895 | 0.84709  | 0.052862 |
| 0.026565 | 0.56689  | 0.241775 | 1.23E-07 | 0.130177 | 0.00484 | 0.241008 | 1.35E-07 | 0.476594 |
| 0.012664 | 0.78489  | 0.065565 | 0.15719  | -0.01309 | 0.77792 | 0.105104 | 0.02312  | 0.135787 |
| 0.027383 | 0.555    | 0.088068 | 0.0572   | 0.090128 | 0.0516  | 0.042008 | 0.36506  | 0.138788 |
| -0.13392 | 0.00374  | -0.08262 | 0.07448  | -0.07266 | 0.11686 | -0.09569 | 0.03873  | 4.07E-05 |
| -0.00364 | 0.93739  | 0.03706  | 0.42429  | 0.036697 | 0.42884 | 0.017898 | 0.69967  | 0.069437 |
| -0.09255 | 0.04561  | -0.01401 | 0.76272  | -0.07753 | 0.09424 | 0.025097 | 0.58853  | 0.010727 |
| 0.035136 | 0.44876  | 0.119449 | 0.00978  | 0.040518 | 0.38232 | 0.151727 | 0.001    | 0.237543 |
| -0.14447 | 0.00175  | -0.03805 | 0.41195  | -0.05818 | 0.20947 | -0.01516 | 0.74385  | 0.028724 |
| 0.02408  | 0.60372  | 0.017873 | 0.70006  | 0.043399 | 0.34938 | -0.02038 | 0.66047  | -0.01841 |
| 0.023334 | 0.61498  | 0.057019 | 0.21874  | 0.017697 | 0.70288 | 0.054008 | 0.24408  | 0.161277 |
| -0.08488 | 0.06686  | 0.023832 | 0.60746  | -0.02565 | 0.58031 | 0.034917 | 0.45159  | 0.056957 |
| -0.09398 | 0.04237  | 0.078353 | 0.09078  | -0.02686 | 0.5626  | 0.1193   | 0.00987  | 0.250175 |
| -0.0927  | 0.04525  | 0.094506 | 0.04121  | -0.01273 | 0.7838  | 0.138942 | 0.00262  | 0.258923 |
| -0.07438 | 0.10843  | 0.134266 | 0.00365  | 0.0214   | 0.64461 | 0.163344 | 0.00039  | 0.30891  |
| -0.18078 | 8.55E-05 | -0.13857 | 0.00269  | -0.14785 | 0.00135 | -0.11863 | 0.01029  | -0.12695 |
| -0.20206 | 1.08E-05 | -0.07903 | 0.08802  | -0.1264  | 0.00623 | -0.04194 | 0.36578  | 0.013649 |
| -0.14063 | 0.00232  | 0.049076 | 0.28991  | -0.04098 | 0.37692 | 0.098285 | 0.03372  | 0.179026 |
| -0.07892 | 0.08848  | 0.090727 | 0.05006  | 0.00248  | 0.95737 | 0.115485 | 0.01251  | 0.251419 |

|          |         |          |          |           |         |          |          |          |
|----------|---------|----------|----------|-----------|---------|----------|----------|----------|
| -0.06486 | 0.1617  | 0.05942  | 0.19992  | -0.03729  | 0.42144 | 0.101471 | 0.02834  | 0.213557 |
| -0.02882 | 0.5344  | 0.074098 | 0.10978  | 0.01225   | 0.79175 | 0.080041 | 0.08402  | 0.254116 |
| -0.03473 | 0.45406 | -0.04826 | 0.29804  | -0.03578  | 0.44052 | -0.05512 | 0.23453  | -0.00336 |
| -0.06813 | 0.14157 | 0.108832 | 0.01864  | 0.02906   | 0.53102 | 0.122128 | 0.00824  | 0.186025 |
| -0.12056 | 0.00911 | 0.08389  | 0.07011  | 0.008917  | 0.8476  | 0.105096 | 0.02313  | 0.150068 |
| 0.077542 | 0.09418 | 0.262435 | 8.55E-09 | 0.128893  | 0.00528 | 0.295715 | 7.04E-11 | 0.512691 |
| -0.08467 | 0.06753 | 0.086852 | 0.06074  | -0.00107  | 0.98163 | 0.109931 | 0.01748  | 0.245239 |
| -0.04124 | 0.37392 | 0.117995 | 0.01071  | 0.010265  | 0.82491 | 0.160736 | 0.00049  | 0.198096 |
| -0.05142 | 0.26747 | 0.132585 | 0.0041   | 0.02872   | 0.53584 | 0.171176 | 0.0002   | 0.302506 |
| -0.04336 | 0.34979 | 0.025863 | 0.57719  | -0.03933  | 0.39644 | 0.047409 | 0.30662  | 0.126382 |
| -0.04288 | 0.35517 | 0.173946 | 0.00016  | 0.051428  | 0.26737 | 0.214016 | 3.06E-06 | 0.29856  |
| -0.03069 | 0.50825 | 0.119822 | 0.00955  | 0.045895  | 0.32233 | 0.119864 | 0.00952  | 0.285431 |
| 0.041207 | 0.37428 | 0.155651 | 0.00074  | 0.107178  | 0.02052 | 0.158351 | 0.00059  | 0.272054 |
| -0.12062 | 0.00907 | -0.03806 | 0.41193  | -0.09454  | 0.04114 | 0.007295 | 0.87507  | 0.038234 |
| -0.00187 | 0.96781 | 0.11406  | 0.01365  | 0.036618  | 0.42984 | 0.125516 | 0.00661  | 0.212783 |
| -0.14676 | 0.00147 | 0.047493 | 0.30576  | -0.05637  | 0.224   | 0.092483 | 0.04577  | 0.180916 |
| -0.00269 | 0.95375 | 0.088118 | 0.05706  | 0.013066  | 0.77824 | 0.116722 | 0.01159  | 0.214816 |
| 0.021451 | 0.64382 | 0.157025 | 0.00066  | 0.087308  | 0.05939 | 0.14564  | 0.0016   | 0.339975 |
| 0.01958  | 0.673   | 0.1711   | 0.0002   | 0.098942  | 0.03254 | 0.167279 | 0.00028  | 0.339468 |
| -0.09889 | 0.03264 | 0.007481 | 0.87191  | -0.04174  | 0.36808 | 0.031951 | 0.49096  | 0.110675 |
| 0.018958 | 0.68282 | 0.105745 | 0.02229  | 0.058104  | 0.21009 | 0.103872 | 0.02478  | 0.230545 |
| -0.00262 | 0.95505 | 0.061115 | 0.18737  | 0.001642  | 0.97177 | 0.077322 | 0.09512  | 0.237256 |
| -0.01004 | 0.82861 | 0.146842 | 0.00146  | 0.079098  | 0.08774 | 0.152223 | 0.00097  | 0.356708 |
| -0.12874 | 0.00533 | -0.171   | 0.00021  | -0.12323  | 0.00767 | -0.15256 | 0.00094  | -0.27593 |
| -0.07437 | 0.10848 | 0.100827 | 0.02936  | 0.020302  | 0.66168 | 0.116199 | 0.01198  | 0.282984 |
| -0.06307 | 0.17363 | 0.091833 | 0.04732  | 0.016148  | 0.7278  | 0.10815  | 0.0194   | 0.269831 |
| -0.11774 | 0.01088 | -0.00684 | 0.88283  | -0.08908  | 0.0544  | 0.049449 | 0.28625  | 0.08344  |
| -0.01956 | 0.67332 | 0.122592 | 0.008    | 0.044321  | 0.33922 | 0.130894 | 0.00461  | 0.161817 |
| 0.0055   | 0.90564 | 0.135692 | 0.0033   | 0.058688  | 0.20553 | 0.143002 | 0.00195  | 0.303354 |
| 0.053773 | 0.24614 | 0.21464  | 2.86E-06 | 0.136706  | 0.00307 | 0.213514 | 3.23E-06 | 0.415121 |
| -0.01072 | 0.81729 | 0.026326 | 0.57039  | 0.074913  | 0.10592 | -0.04717 | 0.30904  | 0.027613 |
| -0.15363 | 0.00087 | -0.11289 | 0.01465  | -0.1215   | 0.00858 | -0.06725 | 0.14675  | -0.07952 |
| 0.065703 | 0.15631 | -0.00661 | 0.88663  | 0.011989  | 0.7961  | -0.02976 | 0.52124  | -0.03252 |
| -0.03601 | 0.43758 | 0.083479 | 0.0715   | -1.64E-05 | 0.99972 | 0.11896  | 0.01008  | 0.166542 |
| 0.008721 | 0.8509  | -0.16902 | 0.00024  | -0.05422  | 0.24227 | -0.21577 | 2.53E-06 | -0.23642 |
| -0.07845 | 0.09038 | 0.110341 | 0.01706  | 0.024822  | 0.59262 | 0.119418 | 0.0098   | 0.26863  |
| -0.04699 | 0.31088 | 0.032522 | 0.48324  | -0.02641  | 0.56915 | 0.051719 | 0.26468  | 0.140131 |
| -0.05524 | 0.23345 | 0.100866 | 0.0293   | 0.024232  | 0.60145 | 0.117709 | 0.0109   | 0.197947 |
| -0.09173 | 0.04756 | 0.032235 | 0.4871   | -0.0083   | 0.85799 | 0.047605 | 0.30462  | 0.07282  |
| -0.07587 | 0.10154 | 0.035779 | 0.44049  | 0.003525  | 0.93944 | 0.032707 | 0.48075  | 0.117594 |
| 0.061317 | 0.18591 | -0.08723 | 0.05961  | 0.011799  | 0.79925 | -0.13737 | 0.00293  | -0.25733 |
| -0.1773  | 0.00012 | -0.05038 | 0.27721  | -0.11093  | 0.01648 | 0.000802 | 0.9862   | 0.003074 |
| -0.1187  | 0.01025 | -0.07118 | 0.12452  | -0.074    | 0.11027 | -0.06311 | 0.17336  | -0.05433 |
| -0.02801 | 0.54605 | 0.095875 | 0.03835  | 0.037384  | 0.42024 | 0.097446 | 0.03527  | 0.249208 |
| -0.06207 | 0.18059 | 0.110646 | 0.01676  | 0.037471  | 0.41916 | 0.121779 | 0.00843  | 0.268422 |

|          |         |          |          |          |         |          |          |          |
|----------|---------|----------|----------|----------|---------|----------|----------|----------|
| -0.11123 | 0.01618 | 0.048892 | 0.29172  | -0.04364 | 0.34672 | 0.098081 | 0.03409  | 0.211838 |
| -0.13904 | 0.0026  | -0.08454 | 0.06797  | -0.08338 | 0.07183 | -0.07222 | 0.1191   | -0.08032 |
| -0.08358 | 0.07115 | -0.01483 | 0.74918  | -0.02738 | 0.55504 | -0.01134 | 0.80696  | 0.060819 |
| -0.00173 | 0.97024 | 0.072881 | 0.11576  | 0.017543 | 0.70534 | 0.077728 | 0.09339  | 0.22152  |
| -0.11202 | 0.01544 | 0.060956 | 0.18852  | -0.03691 | 0.42617 | 0.10738  | 0.02029  | 0.186185 |
| -0.00717 | 0.87711 | 0.040686 | 0.38036  | -0.00154 | 0.97345 | 0.042941 | 0.3545   | 0.11025  |
| -0.08031 | 0.083   | 0.048368 | 0.29692  | -0.03513 | 0.44887 | 0.091696 | 0.04765  | 0.233478 |
| -0.10419 | 0.02435 | 0.00473  | 0.9188   | -0.04075 | 0.37961 | 0.015277 | 0.74194  | 0.155782 |
| -0.03629 | 0.43395 | 0.081713 | 0.07772  | 0.022142 | 0.63317 | 0.092805 | 0.04502  | 0.178025 |
| -0.00562 | 0.90365 | 0.157505 | 0.00064  | 0.045475 | 0.32679 | 0.202795 | 1.00E-05 | 0.309074 |
| -0.05532 | 0.2328  | 0.027951 | 0.54683  | -0.00749 | 0.87182 | 0.040243 | 0.38557  | 0.081279 |
| -0.05083 | 0.273   | 0.080168 | 0.08352  | 0.006196 | 0.89377 | 0.099565 | 0.03146  | 0.178068 |
| 0.03274  | 0.4803  | 0.142761 | 0.00198  | 0.096077 | 0.03794 | 0.127458 | 0.00581  | 0.333337 |
| -0.04572 | 0.32418 | 0.04758  | 0.30488  | -0.02286 | 0.62218 | 0.070946 | 0.12577  | 0.070983 |
| -0.04782 | 0.30244 | 0.078962 | 0.08829  | 0.012225 | 0.79218 | 0.101801 | 0.02782  | 0.146323 |
| -0.08518 | 0.0659  | 0.052321 | 0.25914  | -0.00576 | 0.90125 | 0.069287 | 0.13489  | 0.134862 |
| -0.10823 | 0.01931 | -0.03506 | 0.44967  | -0.07288 | 0.11576 | -0.00318 | 0.94529  | 0.0069   |
| 0.00535  | 0.9082  | 0.207933 | 5.87E-06 | 0.093127 | 0.04428 | 0.226793 | 7.32E-07 | 0.434925 |
| -0.06878 | 0.13778 | 0.097671 | 0.03485  | 0.047032 | 0.31049 | 0.08718  | 0.05977  | 0.240115 |
| 0.008088 | 0.86161 | 0.194476 | 2.32E-05 | 0.075193 | 0.10462 | 0.209503 | 4.97E-06 | 0.384996 |
| -0.03978 | 0.39109 | -0.01407 | 0.7617   | -0.02242 | 0.62889 | -0.025   | 0.58991  | 0.004164 |
| -0.12177 | 0.00843 | -0.00618 | 0.89411  | -0.07274 | 0.11645 | 0.02376  | 0.60855  | 0.044852 |
| -0.14332 | 0.0019  | 0.002159 | 0.96289  | -0.07108 | 0.12505 | 0.037171 | 0.4229   | 0.129976 |
| -0.08897 | 0.0547  | 0.051595 | 0.26582  | -0.00733 | 0.87454 | 0.077389 | 0.09484  | 0.202661 |
| -0.13216 | 0.00422 | 0.022111 | 0.63364  | -0.04348 | 0.34846 | 0.050211 | 0.27888  | 0.066815 |
| -0.10931 | 0.01813 | 0.122059 | 0.00828  | -0.01796 | 0.69872 | 0.183227 | 6.81E-05 | 0.331038 |
| -0.07936 | 0.08668 | 0.095464 | 0.03919  | 0.018785 | 0.68556 | 0.122391 | 0.0081   | 0.227889 |
| -0.12555 | 0.00659 | 0.05162  | 0.26559  | -0.0285  | 0.53902 | 0.078635 | 0.08962  | 0.187803 |
| -0.12807 | 0.00558 | 0.031332 | 0.4994   | -0.01396 | 0.76354 | 0.059645 | 0.19822  | 0.114966 |
| -0.04865 | 0.29415 | -0.01156 | 0.80318  | -0.05557 | 0.23068 | 0.016416 | 0.72346  | -0.00166 |
| -0.00866 | 0.85191 | 0.213805 | 3.13E-06 | 0.096055 | 0.03799 | 0.233758 | 3.24E-07 | 0.403405 |
| -0.11762 | 0.01097 | -0.01305 | 0.77858  | -0.06049 | 0.19192 | 0.014078 | 0.76157  | 0.002157 |
| -0.08184 | 0.07725 | 0.106714 | 0.02108  | 0.029012 | 0.5317  | 0.126863 | 0.00605  | 0.237526 |
| 0.082117 | 0.07626 | -0.07996 | 0.08434  | -0.00745 | 0.87235 | -0.10473 | 0.02362  | -0.23359 |
| 0.010702 | 0.81757 | 0.253916 | 2.64E-08 | 0.089595 | 0.05301 | 0.313353 | 4.25E-12 | 0.385172 |
| -0.08452 | 0.06803 | 0.098403 | 0.03351  | -0.03216 | 0.48817 | 0.167049 | 0.00029  | 0.282006 |
| 0.060076 | 0.195   | 0.127971 | 0.00561  | 0.089051 | 0.05447 | 0.108485 | 0.01903  | 0.191995 |
| -0.13737 | 0.00293 | -0.06829 | 0.14063  | -0.0656  | 0.15698 | -0.07977 | 0.08509  | 0.033399 |
| -0.06184 | 0.18217 | 0.018912 | 0.68354  | -0.04164 | 0.36926 | 0.039721 | 0.39177  | 0.144182 |
| -0.09306 | 0.04443 | 0.044179 | 0.34078  | -0.03144 | 0.49795 | 0.074954 | 0.10573  | 0.035442 |
| 0.009839 | 0.83206 | 0.148431 | 0.0013   | 0.081598 | 0.07814 | 0.157293 | 0.00065  | 0.282557 |
| -0.01003 | 0.8289  | 0.167975 | 0.00027  | 0.02785  | 0.54828 | 0.227775 | 6.54E-07 | 0.307563 |
| -0.04478 | 0.33424 | 0.080629 | 0.08176  | 0.00428  | 0.9265  | 0.117175 | 0.01127  | 0.15943  |
| -0.06409 | 0.16674 | 0.029865 | 0.51971  | -0.00539 | 0.90747 | 0.028044 | 0.54549  | 0.109182 |
| -0.066   | 0.15443 | 0.049955 | 0.28134  | 0.011646 | 0.80181 | 0.040604 | 0.38131  | 0.141064 |

|          |         |          |          |          |         |          |          |          |
|----------|---------|----------|----------|----------|---------|----------|----------|----------|
| -0.04111 | 0.37542 | 0.092386 | 0.046    | 0.045565 | 0.32584 | 0.088854 | 0.05501  | 0.147785 |
| -0.01078 | 0.81626 | 0.016757 | 0.71797  | -0.0169  | 0.71559 | 0.043887 | 0.34399  | 0.061172 |
| -0.13209 | 0.00425 | 0.00517  | 0.91128  | -0.08561 | 0.06453 | 0.050243 | 0.27857  | 0.127641 |
| 0.011561 | 0.80323 | 0.225832 | 8.18E-07 | 0.117916 | 0.01076 | 0.229483 | 5.36E-07 | 0.419178 |
| 0.009893 | 0.83115 | 0.006339 | 0.89133  | 0.006939 | 0.88112 | -0.00725 | 0.87585  | 0.11293  |
| -0.14722 | 0.00142 | 0.034344 | 0.45906  | -0.04341 | 0.34926 | 0.062732 | 0.17594  | 0.151169 |
| -0.06491 | 0.16138 | 0.120965 | 0.00888  | 0.012804 | 0.78258 | 0.154773 | 0.00079  | 0.327752 |
| -0.05214 | 0.26081 | 0.098325 | 0.03365  | 0.029882 | 0.51946 | 0.11005  | 0.01736  | 0.183254 |
| -0.08257 | 0.07465 | 0.013884 | 0.76475  | -0.03463 | 0.45538 | 0.026898 | 0.56204  | 0.110949 |
| -0.08361 | 0.07104 | 0.065209 | 0.15946  | -0.01152 | 0.80388 | 0.080066 | 0.08392  | 0.232826 |
| -0.04931 | 0.28765 | -0.01663 | 0.72008  | -0.0263  | 0.57078 | -0.01376 | 0.76672  | 0.043983 |
| -0.05491 | 0.23633 | 0.123366 | 0.00761  | 0.038997 | 0.40046 | 0.142392 | 0.00204  | 0.26834  |
| 0.080886 | 0.08079 | 0.008344 | 0.85728  | 0.059352 | 0.20044 | -0.02977 | 0.52108  | -0.01575 |
| -0.03339 | 0.47167 | 0.091919 | 0.04712  | 0.043438 | 0.34895 | 0.083461 | 0.07156  | 0.253503 |
| 0.125514 | 0.00661 | 0.178116 | 0.00011  | 0.126521 | 0.00618 | 0.163555 | 0.00039  | 0.215772 |
| -0.00694 | 0.88118 | 0.119123 | 0.00998  | 0.059996 | 0.19559 | 0.120609 | 0.00908  | 0.237432 |
| -0.0236  | 0.61099 | 0.122901 | 0.00784  | 0.060973 | 0.1884  | 0.122254 | 0.00817  | 0.221163 |
| -0.16798 | 0.00027 | -0.05352 | 0.24838  | -0.08474 | 0.06729 | -0.0295  | 0.52486  | 0.024265 |
| -0.03677 | 0.42792 | 0.065011 | 0.16073  | -0.00511 | 0.91238 | 0.093889 | 0.04256  | 0.156854 |
| -0.01296 | 0.77991 | 0.086021 | 0.06326  | 0.029994 | 0.5179  | 0.0989   | 0.03262  | 0.199649 |
| 0.024291 | 0.60056 | 0.139148 | 0.00258  | 0.055896 | 0.22796 | 0.159925 | 0.00052  | 0.18648  |
| -0.05768 | 0.21341 | 0.016551 | 0.7213   | -0.02553 | 0.58209 | 0.036581 | 0.43031  | 0.101535 |
| -0.05138 | 0.26786 | 0.117519 | 0.01103  | 0.021312 | 0.64596 | 0.147806 | 0.00136  | 0.274596 |
| -0.14629 | 0.00152 | -0.1375  | 0.00291  | -0.15717 | 0.00065 | -0.10975 | 0.01766  | -0.11757 |
| -0.12454 | 0.00705 | 0.009578 | 0.83645  | -0.05396 | 0.24452 | 0.060146 | 0.19447  | 0.122557 |
| -0.1089  | 0.01857 | -0.04111 | 0.37541  | -0.08476 | 0.06723 | 0.005866 | 0.8994   | 0.040835 |
| -0.02361 | 0.61083 | 0.044859 | 0.3334   | 0.005435 | 0.90675 | 0.047619 | 0.30448  | 0.080818 |
| -0.08849 | 0.05603 | 0.01569  | 0.73524  | -0.0229  | 0.62154 | 0.012941 | 0.7803   | 0.122738 |
| -0.10996 | 0.01745 | -0.00432 | 0.92575  | -0.04513 | 0.33048 | 0.015124 | 0.74444  | 0.066986 |
| 0.056229 | 0.2252  | 0.099716 | 0.0312   | 0.059885 | 0.19642 | 0.106533 | 0.0213   | 0.221691 |
| -0.06968 | 0.13267 | -0.00925 | 0.84199  | -0.04129 | 0.37328 | 0.001593 | 0.97261  | 0.084141 |
| -0.0713  | 0.12388 | 0.079495 | 0.08616  | 0.04565  | 0.32493 | 0.068712 | 0.13817  | 0.124734 |
| 0.015773 | 0.73389 | 0.061891 | 0.18182  | 0.035345 | 0.44606 | 0.060594 | 0.19116  | 0.180719 |
| -0.14815 | 0.00132 | -0.05013 | 0.27965  | -0.09249 | 0.04576 | -0.03115 | 0.50191  | 0.105331 |
| -0.0668  | 0.14953 | 0.128814 | 0.00531  | 0.033265 | 0.47329 | 0.163887 | 0.00038  | 0.280403 |
| -0.108   | 0.01957 | 0.029218 | 0.52879  | -0.05083 | 0.27296 | 0.088154 | 0.05696  | 0.19857  |
| -0.07253 | 0.11753 | 0.086002 | 0.06331  | -0.00343 | 0.94104 | 0.124205 | 0.0072   | 0.247801 |
| -0.06666 | 0.15037 | 0.027714 | 0.55022  | -0.03134 | 0.49932 | 0.050421 | 0.27687  | 0.084201 |
| -0.15042 | 0.00111 | -0.00246 | 0.95767  | -0.06458 | 0.16353 | 0.036537 | 0.43086  | 0.194056 |
| -0.15444 | 0.00081 | -0.03198 | 0.4906   | -0.10185 | 0.02774 | 0.025007 | 0.58985  | 0.12452  |
| -0.00583 | 0.89994 | 0.203989 | 8.86E-06 | 0.100434 | 0.03    | 0.219066 | 1.76E-06 | 0.374273 |
| -0.12466 | 0.00699 | -0.11186 | 0.01559  | -0.13379 | 0.00377 | -0.08634 | 0.06229  | -0.08725 |
| -0.07055 | 0.12791 | 0.083276 | 0.07219  | 0.033103 | 0.47545 | 0.072713 | 0.1166   | 0.143092 |
| -0.07673 | 0.09768 | 0.120923 | 0.0089   | 0.023179 | 0.61734 | 0.147457 | 0.0014   | 0.214903 |
| -0.12345 | 0.00757 | 0.097619 | 0.03495  | -0.01946 | 0.67496 | 0.145124 | 0.00166  | 0.277069 |

|          |          |          |          |          |          |          |          |          |
|----------|----------|----------|----------|----------|----------|----------|----------|----------|
| -0.08985 | 0.05233  | -0.01186 | 0.7983   | -0.04771 | 0.30352  | -0.00506 | 0.91313  | 0.126742 |
| -0.07644 | 0.09898  | 0.042608 | 0.35824  | -0.01602 | 0.7299   | 0.055699 | 0.22961  | 0.113387 |
| -0.07693 | 0.09684  | 0.050515 | 0.27598  | -0.0506  | 0.27513  | 0.095023 | 0.04011  | 0.181744 |
| -0.00436 | 0.92509  | 0.016888 | 0.71586  | -0.02163 | 0.6411   | 0.023749 | 0.6087   | 0.094518 |
| -0.03827 | 0.40931  | 0.122641 | 0.00797  | 0.001475 | 0.97464  | 0.174316 | 0.00015  | 0.265087 |
| -0.09806 | 0.03414  | -0.02218 | 0.63259  | -0.04332 | 0.35022  | -0.01093 | 0.81372  | 0.030774 |
| -0.09298 | 0.04462  | 0.093705 | 0.04297  | 0.025203 | 0.58694  | 0.09198  | 0.04697  | 0.221494 |
| -0.07284 | 0.11597  | -0.09642 | 0.03726  | -0.07876 | 0.08913  | -0.10499 | 0.02326  | -0.13204 |
| -0.0382  | 0.41018  | 0.134445 | 0.0036   | 0.022989 | 0.62022  | 0.159357 | 0.00055  | 0.311912 |
| -0.07666 | 0.098    | 0.016554 | 0.72124  | -0.04653 | 0.31563  | 0.057424 | 0.21548  | 0.016238 |
| -0.07228 | 0.11878  | 0.049959 | 0.2813   | -0.01296 | 0.77995  | 0.072841 | 0.11595  | 0.210605 |
| -0.05801 | 0.2108   | 0.063153 | 0.17306  | -0.01052 | 0.82059  | 0.09239  | 0.04599  | 0.198773 |
| -0.24203 | 1.19E-07 | -0.08135 | 0.07907  | -0.14867 | 0.00127  | -0.0205  | 0.65858  | -0.00028 |
| -0.14164 | 0.00215  | -0.02884 | 0.5341   | -0.10211 | 0.02734  | 0.029379 | 0.52653  | 0.068752 |
| -0.06307 | 0.17363  | 0.078789 | 0.08899  | 0.018614 | 0.68827  | 0.07359  | 0.11225  | 0.224292 |
| -0.00609 | 0.89562  | 0.121222 | 0.00873  | 0.019442 | 0.67518  | 0.169046 | 0.00024  | 0.207876 |
| -0.08935 | 0.05367  | 0.052018 | 0.26192  | -0.04269 | 0.35732  | 0.097278 | 0.03559  | 0.188927 |
| -0.07219 | 0.11928  | 0.110837 | 0.01657  | 0.006723 | 0.88479  | 0.153007 | 0.00091  | 0.245345 |
| -0.07808 | 0.0919   | 0.04031  | 0.38477  | -0.0189  | 0.68367  | 0.042056 | 0.36451  | 0.218217 |
| -0.05813 | 0.20986  | 0.131545 | 0.00441  | 0.01006  | 0.82835  | 0.177136 | 0.00012  | 0.275578 |
| -0.03636 | 0.43308  | 0.148869 | 0.00125  | 0.020452 | 0.65933  | 0.191353 | 3.15E-05 | 0.401327 |
| -0.09755 | 0.03508  | 0.088539 | 0.05588  | 0.01483  | 0.74924  | 0.097215 | 0.03571  | 0.274835 |
| -0.08152 | 0.07841  | -0.02415 | 0.60266  | -0.02756 | 0.55248  | -0.03788 | 0.41417  | 0.07669  |
| 0.023972 | 0.60535  | 0.150104 | 0.00114  | 0.112525 | 0.01498  | 0.118737 | 0.01022  | 0.25143  |
| -0.16051 | 0.0005   | -0.02565 | 0.58035  | -0.06384 | 0.16841  | -0.00478 | 0.91801  | 0.011208 |
| -0.14672 | 0.00148  | -0.12939 | 0.0051   | -0.1304  | 0.00477  | -0.11053 | 0.01687  | -0.09738 |
| -0.13194 | 0.00429  | -0.05653 | 0.22272  | -0.04018 | 0.38626  | -0.06351 | 0.17063  | 0.026273 |
| -0.14251 | 0.00202  | -0.02087 | 0.6529   | -0.09402 | 0.04227  | 0.034918 | 0.45157  | 0.06835  |
| -0.14034 | 0.00237  | 0.091387 | 0.04841  | -0.04246 | 0.35988  | 0.157191 | 0.00065  | 0.228392 |
| 0.011298 | 0.80762  | 0.114251 | 0.01349  | 0.024745 | 0.59377  | 0.138268 | 0.00275  | 0.293161 |
| 0.025657 | 0.58022  | 0.12462  | 0.00701  | 0.077364 | 0.09494  | 0.108814 | 0.01866  | 0.239328 |
| -0.1357  | 0.0033   | -0.0726  | 0.11719  | -0.11846 | 0.0104   | -0.02422 | 0.60164  | -0.07239 |
| -0.04824 | 0.29824  | 0.100825 | 0.02936  | 0.035328 | 0.44628  | 0.098927 | 0.03257  | 0.314592 |
| -0.05488 | 0.23652  | -0.02387 | 0.60687  | -0.06309 | 0.17352  | 0.01594  | 0.73117  | 0.00341  |
| -0.09905 | 0.03235  | 0.044754 | 0.33453  | -0.04284 | 0.35566  | 0.097463 | 0.03524  | 0.169561 |
| 0.044836 | 0.33365  | 0.204777 | 8.17E-06 | 0.0737   | 0.11171  | 0.25447  | 2.45E-08 | 0.382331 |
| -0.14843 | 0.0013   | 0.045783 | 0.32352  | -0.02625 | 0.5715   | 0.074059 | 0.10997  | 0.148102 |
| -0.11587 | 0.01222  | 0.05976  | 0.19736  | -0.01988 | 0.66833  | 0.087495 | 0.05885  | 0.152889 |
| -0.07083 | 0.12641  | 0.054193 | 0.24247  | -0.03445 | 0.4577   | 0.095619 | 0.03887  | 0.184423 |
| 0.087266 | 0.05952  | -0.04037 | 0.3841   | 0.075489 | 0.10325  | -0.12733 | 0.00586  | -0.16451 |
| -0.14271 | 0.00199  | 0.061966 | 0.18129  | -0.05765 | 0.2137   | 0.128719 | 0.00534  | 0.272696 |
| -0.06852 | 0.13929  | 0.114906 | 0.01297  | 0.004319 | 0.92583  | 0.15551  | 0.00075  | 0.241206 |
| -0.01913 | 0.68012  | 0.15437  | 0.00082  | 0.047906 | 0.30157  | 0.180594 | 8.69E-05 | 0.379268 |
| -0.26282 | 8.12E-09 | -0.09982 | 0.03103  | -0.17938 | 9.71E-05 | -0.01805 | 0.69728  | -0.00598 |
| 0.040454 | 0.38308  | -0.04176 | 0.36793  | 0.021354 | 0.64531  | -0.08678 | 0.06095  | -0.1789  |



|          |          |          |          |          |          |          |          |          |
|----------|----------|----------|----------|----------|----------|----------|----------|----------|
| -0.13909 | 0.00259  | -0.09493 | 0.04031  | -0.12553 | 0.0066   | -0.06097 | 0.1884   | -0.0538  |
| -0.12291 | 0.00783  | 0.044982 | 0.33207  | -0.03926 | 0.39733  | 0.074862 | 0.10616  | 0.242431 |
| -0.00698 | 0.88045  | 0.127792 | 0.00568  | 0.048597 | 0.29464  | 0.129993 | 0.0049   | 0.337116 |
| -0.0505  | 0.27615  | 0.024254 | 0.60111  | -0.01887 | 0.68417  | 0.04436  | 0.3388   | 0.140054 |
| -0.11435 | 0.01341  | -0.01367 | 0.76822  | -0.04058 | 0.3816   | -0.00329 | 0.94356  | 0.11549  |
| -0.0874  | 0.05912  | 0.007541 | 0.87089  | -0.00766 | 0.86886  | 0.007673 | 0.86866  | 0.036274 |
| -0.07853 | 0.09004  | 0.00918  | 0.84316  | -0.02814 | 0.54407  | 0.017943 | 0.69895  | 0.143148 |
| 0.165804 | 0.00032  | 0.024509 | 0.59729  | 0.067166 | 0.14728  | 0.0026   | 0.95531  | -0.15829 |
| 0.114116 | 0.0136   | -0.10588 | 0.02211  | -0.01458 | 0.75333  | -0.13939 | 0.00254  | -0.26585 |
| -0.10653 | 0.02131  | 0.022056 | 0.63448  | -0.06718 | 0.14721  | 0.070294 | 0.1293   | 0.150244 |
| -0.09132 | 0.04859  | 0.033478 | 0.47046  | -0.01087 | 0.81476  | 0.046449 | 0.31653  | 0.184875 |
| -0.08135 | 0.07905  | 0.078511 | 0.09013  | -0.00628 | 0.89227  | 0.111096 | 0.01631  | 0.28427  |
| -0.04689 | 0.31193  | 0.087796 | 0.05798  | -0.0041  | 0.92956  | 0.122769 | 0.00791  | 0.257378 |
| -0.05722 | 0.21711  | 0.002122 | 0.96352  | -0.03799 | 0.41269  | 0.027226 | 0.55728  | 0.041153 |
| 0.004451 | 0.92358  | 0.087095 | 0.06002  | 0.038354 | 0.40828  | 0.079062 | 0.08789  | 0.238298 |
| -0.06144 | 0.18505  | 0.00793  | 0.86429  | -0.02752 | 0.55299  | 0.025476 | 0.58291  | 0.014647 |
| -0.01398 | 0.76314  | 0.168786 | 0.00025  | 0.078418 | 0.09051  | 0.172826 | 0.00017  | 0.337115 |
| 0.00608  | 0.89575  | -0.17922 | 9.85E-05 | -0.06183 | 0.18229  | -0.21797 | 1.98E-06 | -0.43032 |
| -0.09506 | 0.04003  | -0.04153 | 0.37058  | -0.06515 | 0.15985  | -0.03669 | 0.42897  | 0.012037 |
| -0.05965 | 0.1982   | 0.08361  | 0.07105  | 0.003512 | 0.93967  | 0.113803 | 0.01387  | 0.196252 |
| -0.15031 | 0.00112  | -0.01465 | 0.75214  | -0.06116 | 0.18706  | 0.00624  | 0.89302  | 0.081971 |
| -0.15497 | 0.00078  | -0.06153 | 0.18437  | -0.09407 | 0.04215  | -0.02801 | 0.54599  | 0.055282 |
| -0.09346 | 0.04351  | -0.01821 | 0.69465  | -0.04117 | 0.37476  | -0.02257 | 0.62664  | 0.018521 |
| -0.08705 | 0.06015  | 0.125754 | 0.00651  | 0.021924 | 0.63652  | 0.153486 | 0.00088  | 0.307496 |
| 0.020755 | 0.65462  | 0.16964  | 0.00023  | 0.109377 | 0.01806  | 0.165333 | 0.00033  | 0.340271 |
| -0.1455  | 0.00162  | 0.012699 | 0.78432  | -0.0697  | 0.13256  | 0.058965 | 0.20339  | 0.117292 |
| -0.02092 | 0.65204  | 0.122297 | 0.00815  | 0.034268 | 0.46005  | 0.143329 | 0.0019   | 0.292915 |
| -0.15899 | 0.00056  | 0.009717 | 0.83412  | -0.06245 | 0.17789  | 0.045719 | 0.3242   | 0.145085 |
| 0.096964 | 0.0362   | -0.07901 | 0.08808  | 0.032119 | 0.48867  | -0.13233 | 0.00418  | -0.16984 |
| -0.09128 | 0.04867  | 0.018015 | 0.69779  | -0.04099 | 0.37677  | 0.04162  | 0.36951  | 0.154931 |
| -0.12884 | 0.0053   | 0.033543 | 0.4696   | -0.06185 | 0.18212  | 0.087085 | 0.06005  | 0.150126 |
| 0.008937 | 0.84727  | 0.060418 | 0.19246  | 0.025607 | 0.58096  | 0.083849 | 0.07024  | 0.109367 |
| -0.1093  | 0.01814  | 0.003433 | 0.94103  | -0.06082 | 0.18954  | 0.032594 | 0.48227  | 0.162413 |
| -0.10894 | 0.01853  | 0.032995 | 0.4769   | -0.04084 | 0.37861  | 0.061982 | 0.18118  | 0.172501 |
| -0.0265  | 0.56777  | 0.136234 | 0.00318  | 0.027762 | 0.54954  | 0.171802 | 0.00019  | 0.315145 |
| -0.02639 | 0.56938  | 0.040978 | 0.37695  | 0.001509 | 0.97406  | 0.06201  | 0.18098  | 0.130236 |
| -0.07786 | 0.09283  | 0.084301 | 0.06874  | -0.02219 | 0.63246  | 0.132872 | 0.00402  | 0.225214 |
| 0.084911 | 0.06675  | -0.04323 | 0.35122  | 0.03481  | 0.45298  | -0.07601 | 0.10087  | -0.11945 |
| -0.02946 | 0.52532  | 0.118417 | 0.01043  | 0.032063 | 0.48943  | 0.149978 | 0.00115  | 0.216319 |
| -0.18454 | 6.03E-05 | -0.15456 | 0.0008   | -0.17055 | 0.00021  | -0.10967 | 0.01775  | -0.12264 |
| -0.08571 | 0.06422  | 0.050277 | 0.27825  | -0.04388 | 0.34403  | 0.095223 | 0.03969  | 0.22304  |
| 0.103278 | 0.02563  | 0.160711 | 0.00049  | 0.118599 | 0.01031  | 0.149481 | 0.0012   | 0.173368 |
| -0.02032 | 0.66135  | 0.086633 | 0.06139  | 0.035495 | 0.44413  | 0.099978 | 0.03076  | 0.213134 |
| -0.21302 | 3.41E-06 | -0.18959 | 3.73E-05 | -0.2019  | 1.10E-05 | -0.12875 | 0.00533  | -0.16076 |
| -0.04059 | 0.38144  | 0.078328 | 0.09088  | 0.040065 | 0.38768  | 0.062772 | 0.17567  | 0.215016 |

|          |          |          |          |          |         |          |          |          |
|----------|----------|----------|----------|----------|---------|----------|----------|----------|
| -0.13022 | 0.00483  | 0.024031 | 0.60445  | -0.02738 | 0.55511 | 0.03009  | 0.51656  | 0.190352 |
| 0.088337 | 0.05644  | 0.149574 | 0.00119  | 0.093874 | 0.04259 | 0.145077 | 0.00167  | 0.282766 |
| -0.03886 | 0.40207  | 0.145907 | 0.00157  | 0.036888 | 0.42645 | 0.176975 | 0.00012  | 0.383404 |
| -0.13684 | 0.00304  | -0.04491 | 0.33288  | -0.10582 | 0.02219 | -0.00146 | 0.97491  | 0.0514   |
| 0.286715 | 2.75E-10 | 0.071591 | 0.12236  | 0.172411 | 0.00018 | -0.03032 | 0.5133   | -0.0843  |
| 0.032128 | 0.48856  | 0.142867 | 0.00197  | 0.093646 | 0.0431  | 0.135341 | 0.00339  | 0.275331 |
| -0.00417 | 0.92839  | 0.175943 | 0.00013  | 0.096308 | 0.03748 | 0.189846 | 3.64E-05 | 0.292671 |
| -0.017   | 0.71398  | 0.091752 | 0.04752  | 0.012835 | 0.78207 | 0.13182  | 0.00432  | 0.162692 |
| -0.01265 | 0.7852   | 0.08382  | 0.07034  | 0.021662 | 0.64056 | 0.091613 | 0.04786  | 0.196576 |
| 0.019093 | 0.68068  | 0.206997 | 6.48E-06 | 0.108085 | 0.01947 | 0.216315 | 2.38E-06 | 0.36853  |
| -0.13455 | 0.00358  | -0.13103 | 0.00456  | -0.0834  | 0.07175 | -0.15407 | 0.00084  | -0.09799 |
| -0.0045  | 0.92265  | -0.10816 | 0.01939  | -0.02889 | 0.5334  | -0.1439  | 0.00182  | -0.21081 |
| -0.12179 | 0.00842  | -0.08837 | 0.05636  | -0.08522 | 0.06576 | -0.07455 | 0.10762  | 0.030602 |
| -0.01367 | 0.76821  | 0.148343 | 0.0013   | 0.059174 | 0.2018  | 0.158214 | 0.0006   | 0.326592 |
| -0.00225 | 0.9613   | 0.166869 | 0.00029  | 0.054869 | 0.23664 | 0.208587 | 5.48E-06 | 0.293645 |
| 0.035495 | 0.44413  | 0.20082  | 1.23E-05 | 0.106885 | 0.02087 | 0.191107 | 3.22E-05 | 0.456903 |
| 0.012771 | 0.78311  | 0.161098 | 0.00047  | 0.10355  | 0.02524 | 0.146071 | 0.00155  | 0.332012 |
| -0.16205 | 0.00044  | 0.024979 | 0.59028  | -0.06769 | 0.14412 | 0.077828 | 0.09297  | 0.154395 |
| 0.029342 | 0.52704  | -0.06052 | 0.19169  | -0.03136 | 0.499   | -0.07897 | 0.08826  | -0.02616 |
| -0.03983 | 0.39047  | 0.009884 | 0.8313   | -0.02928 | 0.52795 | 0.020138 | 0.66424  | 0.154022 |
| -0.10403 | 0.02456  | -0.06249 | 0.17763  | -0.07438 | 0.10841 | -0.04333 | 0.35019  | -0.0503  |
| -0.13263 | 0.00409  | -0.15651 | 0.00069  | -0.16985 | 0.00023 | -0.11095 | 0.01646  | -0.15647 |
| -0.08423 | 0.06897  | -0.18512 | 5.71E-05 | -0.1526  | 0.00094 | -0.16536 | 0.00033  | -0.30537 |
| 0.112788 | 0.01474  | 0.023904 | 0.60638  | 0.033256 | 0.47341 | 0.009519 | 0.83745  | 0.056032 |
| -0.01989 | 0.66819  | 0.010896 | 0.81433  | -0.01342 | 0.77238 | 0.00563  | 0.90342  | 0.07894  |
| -0.04502 | 0.33163  | -0.05416 | 0.24278  | -0.07986 | 0.08472 | -0.03171 | 0.49427  | 0.013504 |
| 0.014927 | 0.74766  | 0.04242  | 0.36037  | -0.00709 | 0.87847 | 0.061678 | 0.18333  | 0.225651 |
| -0.12103 | 0.00884  | -0.11637 | 0.01185  | -0.0955  | 0.03912 | -0.12855 | 0.0054   | -0.16298 |
| 0.063967 | 0.16758  | -0.09911 | 0.03224  | -0.06467 | 0.16293 | -0.09508 | 0.03999  | -0.18445 |
| 0.021519 | 0.64276  | -0.01276 | 0.78324  | -0.04385 | 0.34436 | -0.00153 | 0.97371  | 0.135751 |
| -0.01415 | 0.76043  | -0.06289 | 0.17483  | -0.06422 | 0.16592 | -0.04831 | 0.29747  | -0.04898 |
| -0.04526 | 0.32908  | 0.013311 | 0.77419  | -0.06308 | 0.17354 | 0.04646  | 0.31641  | 0.163471 |
| 0.001546 | 0.97342  | -0.04456 | 0.33664  | -0.04474 | 0.33469 | -0.04287 | 0.35527  | 0.062466 |
| 0.053557 | 0.24805  | 0.039742 | 0.39152  | 0.002659 | 0.9543  | 0.056868 | 0.21997  | 0.137954 |
| -0.12833 | 0.00548  | -0.21547 | 2.61E-06 | -0.17896 | 0.0001  | -0.18832 | 4.22E-05 | -0.2642  |
| -0.14157 | 0.00216  | -0.08893 | 0.05479  | -0.08836 | 0.05637 | -0.08038 | 0.08269  | -0.02231 |
| -0.11546 | 0.01253  | -0.12859 | 0.00539  | -0.14023 | 0.00239 | -0.09648 | 0.03714  | -0.09196 |
| 0.004573 | 0.92149  | 0.045816 | 0.32318  | -0.00297 | 0.94894 | 0.054781 | 0.23739  | 0.172042 |
| -0.15315 | 0.0009   | -0.10141 | 0.02843  | -0.12546 | 0.00664 | -0.07828 | 0.09108  | -0.06898 |
| 0.005075 | 0.91291  | -0.00418 | 0.92818  | -0.04533 | 0.32837 | 0.004825 | 0.91717  | 0.10401  |
| 0.151941 | 0.00099  | 0.036425 | 0.43228  | 0.165022 | 0.00034 | -0.07642 | 0.09905  | -0.14896 |
| -0.11639 | 0.01184  | -0.20327 | 9.55E-06 | -0.15617 | 0.00071 | -0.20102 | 1.20E-05 | -0.25385 |
| -0.01592 | 0.73142  | -0.14054 | 0.00233  | -0.10662 | 0.0212  | -0.13438 | 0.00362  | -0.18291 |
| 0.057965 | 0.21118  | -0.18784 | 4.41E-05 | -0.04455 | 0.33678 | -0.25367 | 2.72E-08 | -0.31309 |
| -0.02291 | 0.62142  | 0.027019 | 0.56028  | -0.03604 | 0.4371  | 0.068278 | 0.14068  | 0.129416 |

|          |          |          |          |          |          |          |          |          |
|----------|----------|----------|----------|----------|----------|----------|----------|----------|
| -0.00959 | 0.83622  | 0.003025 | 0.94802  | -0.03766 | 0.41688  | 0.01606  | 0.72923  | 0.115176 |
| 0.018859 | 0.68439  | 0.049551 | 0.28525  | -0.00408 | 0.92986  | 0.064763 | 0.16234  | 0.157096 |
| -0.20339 | 9.43E-06 | -0.15751 | 0.00064  | -0.17678 | 0.00012  | -0.12399 | 0.0073   | -0.05062 |
| -0.03514 | 0.4487   | 0.05381  | 0.24582  | -0.02749 | 0.55347  | 0.099865 | 0.03095  | 0.219983 |
| 0.157001 | 0.00066  | 0.158915 | 0.00057  | 0.101787 | 0.02785  | 0.141961 | 0.0021   | 0.365997 |
| 0.019877 | 0.66833  | -0.09636 | 0.03738  | -0.06891 | 0.13701  | -0.08946 | 0.05336  | -0.06155 |
| 0.054216 | 0.24226  | -0.0751  | 0.10505  | -0.00094 | 0.98381  | -0.11053 | 0.01687  | -0.10777 |
| 0.106447 | 0.02141  | 0.0451   | 0.33081  | 0.02286  | 0.62218  | 0.047898 | 0.30165  | 0.076795 |
| 0.076952 | 0.09672  | -0.07698 | 0.09661  | 0.003057 | 0.94747  | -0.11944 | 0.00978  | -0.21186 |
| -0.01473 | 0.7508   | -0.00289 | 0.95034  | -0.04109 | 0.37563  | 0.016045 | 0.72948  | 0.137131 |
| -0.01127 | 0.80813  | -0.00312 | 0.94642  | -0.01319 | 0.77619  | -0.00043 | 0.99256  | 0.079424 |
| -0.11649 | 0.01176  | -0.09757 | 0.03504  | -0.08124 | 0.07946  | -0.10166 | 0.02804  | -0.11539 |
| 0.040432 | 0.38334  | -0.08034 | 0.08285  | 0.053952 | 0.24457  | -0.15248 | 0.00095  | -0.22697 |
| -0.02878 | 0.53504  | -0.05333 | 0.25003  | -0.06082 | 0.18954  | -0.04659 | 0.31501  | 0.027298 |
| -0.17267 | 0.00018  | -0.10323 | 0.02569  | -0.14781 | 0.00136  | -0.057   | 0.21893  | -0.01706 |
| -0.10081 | 0.02939  | -0.13266 | 0.00408  | -0.12272 | 0.00793  | -0.12223 | 0.00819  | -0.06817 |
| 0.013693 | 0.76789  | -0.03834 | 0.40842  | -0.04017 | 0.38648  | -0.0432  | 0.35158  | 0.047465 |
| -0.12158 | 0.00853  | -0.11479 | 0.01305  | -0.14503 | 0.00168  | -0.07082 | 0.12644  | -0.09537 |
| 0.014187 | 0.75978  | -0.07023 | 0.12965  | -0.05456 | 0.23925  | -0.07431 | 0.10877  | -0.02199 |
| -0.0288  | 0.53474  | -0.01178 | 0.79958  | -0.03665 | 0.42938  | -0.00992 | 0.83077  | 0.133179 |
| -0.09328 | 0.04392  | -0.0685  | 0.13937  | -0.07066 | 0.12731  | -0.07732 | 0.09515  | 0.030764 |
| 0.034562 | 0.4562   | -0.07408 | 0.10989  | -0.03622 | 0.43488  | -0.0893  | 0.05379  | -0.14686 |
| -0.09834 | 0.03362  | -0.13832 | 0.00274  | -0.14421 | 0.00178  | -0.10375 | 0.02495  | -0.04703 |
| -0.01797 | 0.69857  | 0.032445 | 0.48427  | -0.02325 | 0.61632  | 0.065803 | 0.15568  | 0.073858 |
| -0.03519 | 0.44802  | -0.05824 | 0.20902  | -0.04258 | 0.35853  | -0.07179 | 0.12135  | -0.04621 |
| 0.002091 | 0.96406  | -0.07482 | 0.10637  | -0.07385 | 0.11096  | -0.05342 | 0.24928  | -0.02421 |
| -0.19756 | 1.70E-05 | -0.14652 | 0.0015   | -0.16416 | 0.00037  | -0.11349 | 0.01413  | -0.09298 |
| 0.004778 | 0.91799  | -0.14323 | 0.00192  | -0.0573  | 0.21648  | -0.1708  | 0.00021  | -0.13885 |
| 0.006956 | 0.88082  | -0.09719 | 0.03576  | -0.0846  | 0.06776  | -0.07798 | 0.09234  | -0.12553 |
| -0.0632  | 0.17273  | -0.21109 | 4.20E-06 | -0.13814 | 0.00278  | -0.22393 | 1.02E-06 | -0.34459 |
| 0.021275 | 0.64653  | 0.065035 | 0.16058  | -0.00518 | 0.91102  | 0.104032 | 0.02456  | 0.144076 |
| 0.00068  | 0.98832  | -0.04087 | 0.37823  | -0.06568 | 0.15649  | -0.01799 | 0.69815  | 0.053111 |
| -0.06678 | 0.14964  | -0.0517  | 0.26484  | -0.10411 | 0.02445  | 0.002222 | 0.9618   | 0.023001 |
| 0.05273  | 0.25543  | -0.1098  | 0.01761  | -0.08156 | 0.07829  | -0.09858 | 0.03318  | -0.09372 |
| -0.13383 | 0.00376  | -0.14976 | 0.00117  | -0.1264  | 0.00624  | -0.13494 | 0.00348  | -0.12972 |
| 0.01211  | 0.79409  | 0.008611 | 0.85276  | -0.03216 | 0.48811  | 0.023463 | 0.61303  | 0.171216 |
| 0.082493 | 0.07492  | 0.038039 | 0.41214  | 0.136838 | 0.00305  | -0.05454 | 0.23945  | -0.00777 |
| -0.16143 | 0.00046  | -0.10676 | 0.02103  | -0.1028  | 0.02632  | -0.10151 | 0.02828  | -0.12226 |
| -0.03391 | 0.46469  | -0.15031 | 0.00112  | -0.07879 | 0.08899  | -0.17269 | 0.00018  | -0.13446 |
| -0.03509 | 0.44937  | -0.21804 | 1.97E-06 | -0.11424 | 0.0135   | -0.25232 | 3.24E-08 | -0.31555 |
| -0.06942 | 0.13416  | -0.08986 | 0.0523   | -0.08836 | 0.05638  | -0.05775 | 0.2129   | 0.058412 |
| -0.0356  | 0.44277  | -0.15905 | 0.00056  | -0.12359 | 0.0075   | -0.14881 | 0.00126  | -0.1767  |
| 0.135565 | 0.00333  | 0.090661 | 0.05023  | 0.206574 | 6.77E-06 | -0.03537 | 0.44571  | -0.06434 |
| -0.00216 | 0.96295  | 0.01048  | 0.8213   | -0.00358 | 0.93848  | 0.002242 | 0.96145  | 0.082639 |
| 0.121509 | 0.00858  | 0.136149 | 0.0032   | 0.125241 | 0.00673  | 0.101789 | 0.02784  | 0.265051 |

|          |          |          |          |          |          |          |          |          |
|----------|----------|----------|----------|----------|----------|----------|----------|----------|
| -0.09017 | 0.05149  | -0.15071 | 0.00109  | -0.14692 | 0.00145  | -0.11847 | 0.0104   | -0.14001 |
| -0.05915 | 0.20196  | -0.21022 | 4.61E-06 | -0.13965 | 0.00249  | -0.21337 | 3.28E-06 | -0.25125 |
| 0.030838 | 0.50618  | 0.017299 | 0.70925  | -0.00012 | 0.998    | 0.011921 | 0.79723  | 0.16713  |
| 0.003438 | 0.94093  | 0.025242 | 0.58637  | -0.01781 | 0.70114  | 0.044508 | 0.3372   | 0.183666 |
| 0.02885  | 0.534    | -0.15304 | 0.00091  | -0.09155 | 0.04802  | -0.16215 | 0.00043  | -0.16067 |
| -0.02691 | 0.56186  | -0.15833 | 0.00059  | -0.07406 | 0.10995  | -0.1857  | 5.40E-05 | -0.17497 |
| 0.088778 | 0.05522  | -0.08553 | 0.06478  | 0.003375 | 0.94202  | -0.13798 | 0.00281  | -0.2239  |
| 0.140556 | 0.00233  | 0.063427 | 0.1712   | 0.016567 | 0.72103  | 0.088305 | 0.05653  | 0.142609 |
| -0.0329  | 0.47816  | -0.02249 | 0.62777  | -0.04637 | 0.31734  | -0.01093 | 0.81375  | 0.079147 |
| -0.12838 | 0.00546  | -0.10442 | 0.02403  | -0.12898 | 0.00525  | -0.07107 | 0.12511  | -0.09296 |
| 0.007972 | 0.86358  | -0.07859 | 0.08979  | -0.03356 | 0.46943  | -0.08826 | 0.05666  | -0.07683 |
| -0.01164 | 0.80194  | -0.07735 | 0.09501  | -0.08053 | 0.08215  | -0.06219 | 0.17973  | -0.11363 |
| -0.14489 | 0.00169  | -0.14368 | 0.00185  | -0.15618 | 0.00071  | -0.1098  | 0.01761  | 0.025288 |
| -0.09008 | 0.05174  | -0.05443 | 0.24044  | -0.0927  | 0.04525  | -0.02556 | 0.58172  | -0.02146 |
| -0.04207 | 0.36437  | -0.03965 | 0.39259  | -0.04303 | 0.35346  | -0.0459  | 0.32231  | -0.04082 |
| -0.03036 | 0.51283  | -0.03785 | 0.41453  | -0.06872 | 0.1381   | -0.02182 | 0.63814  | -0.03291 |
| -0.04565 | 0.32497  | -0.17159 | 0.00019  | -0.12559 | 0.00658  | -0.16711 | 0.00029  | -0.20441 |
| 0.011166 | 0.80981  | 0.084432 | 0.06831  | 0.036151 | 0.43575  | 0.102183 | 0.02724  | 0.207886 |
| -0.04527 | 0.32896  | -0.09374 | 0.04288  | -0.08694 | 0.06048  | -0.07947 | 0.08628  | -0.08142 |
| -0.11567 | 0.01237  | -0.12837 | 0.00547  | -0.13287 | 0.00402  | -0.1072  | 0.0205   | -0.13637 |
| -0.0342  | 0.46094  | -0.20483 | 8.12E-06 | -0.13962 | 0.0025   | -0.20378 | 9.05E-06 | -0.27579 |
| -0.00359 | 0.93824  | -0.15481 | 0.00079  | -0.1046  | 0.02379  | -0.16375 | 0.00038  | -0.20189 |
| -0.18378 | 6.47E-05 | -0.20983 | 4.80E-06 | -0.19684 | 1.83E-05 | -0.16635 | 0.00031  | -0.18256 |
| -0.11761 | 0.01097  | -0.08398 | 0.06979  | -0.10822 | 0.01933  | -0.04883 | 0.29237  | -0.02807 |
| 0.10727  | 0.02042  | 0.095311 | 0.03951  | 0.067065 | 0.14789  | 0.088534 | 0.05589  | 0.267808 |
| -0.01875 | 0.68615  | -0.02583 | 0.57768  | -0.04339 | 0.34946  | -0.01815 | 0.69565  | 0.056331 |
| -0.13753 | 0.0029   | -0.13168 | 0.00437  | -0.16024 | 0.00051  | -0.07717 | 0.09579  | -0.06042 |
| -0.06185 | 0.18212  | -0.09471 | 0.04077  | -0.11295 | 0.0146   | -0.05485 | 0.23683  | -0.12501 |
| -0.10851 | 0.019    | -0.1279  | 0.00564  | -0.13008 | 0.00487  | -0.08887 | 0.05497  | -0.13185 |
| -0.07191 | 0.1207   | -0.10474 | 0.0236   | -0.10856 | 0.01895  | -0.07513 | 0.10489  | -0.14402 |
| 0.073869 | 0.11089  | -0.03926 | 0.39731  | -0.01396 | 0.76343  | -0.03829 | 0.40904  | -0.02982 |
| -0.08127 | 0.07936  | -0.19326 | 2.61E-05 | -0.14716 | 0.00143  | -0.17672 | 0.00012  | -0.2186  |
| -0.0401  | 0.3873   | -0.15424 | 0.00082  | -0.11863 | 0.01029  | -0.15726 | 0.00065  | -0.14059 |
| -0.06959 | 0.13319  | -0.11241 | 0.01508  | -0.10049 | 0.02991  | -0.10288 | 0.02621  | -0.09422 |
| 0.002591 | 0.95547  | 0.025191 | 0.58713  | -0.03279 | 0.47969  | 0.060289 | 0.19341  | 0.1351   |
| -0.03535 | 0.44597  | -0.03492 | 0.45151  | -0.05265 | 0.25617  | -0.01373 | 0.7673   | -0.00546 |
| -0.10934 | 0.0181   | -0.13133 | 0.00447  | -0.13227 | 0.00419  | -0.10123 | 0.02871  | -0.08489 |
| -0.2009  | 1.22E-05 | -0.19499 | 2.20E-05 | -0.1987  | 1.52E-05 | -0.15165 | 0.00101  | -0.13522 |
| -0.07363 | 0.11205  | -0.0428  | 0.35611  | 0.001331 | 0.97711  | -0.05826 | 0.20886  | -0.07425 |
| -0.06979 | 0.13207  | -0.10168 | 0.02802  | -0.10327 | 0.02563  | -0.07553 | 0.10309  | -0.15235 |
| -0.01224 | 0.79191  | 0.01121  | 0.80909  | 0.046126 | 0.31991  | -0.02389 | 0.60656  | 0.028591 |
| -0.10044 | 0.02999  | -0.1259  | 0.00645  | -0.11617 | 0.012    | -0.1128  | 0.01473  | -0.0844  |
| -0.13303 | 0.00398  | -0.12176 | 0.00844  | -0.14636 | 0.00152  | -0.08414 | 0.06926  | -0.03654 |
| -0.13199 | 0.00427  | -0.06318 | 0.17288  | -0.08764 | 0.05843  | -0.03886 | 0.40213  | 0.06028  |
| -0.00831 | 0.85779  | -0.00917 | 0.84325  | -0.02003 | 0.66598  | -0.01264 | 0.78527  | 0.091633 |

|          |          |          |          |          |          |          |          |          |
|----------|----------|----------|----------|----------|----------|----------|----------|----------|
| -0.21734 | 2.13E-06 | -0.16046 | 0.0005   | -0.2064  | 6.89E-06 | -0.09322 | 0.04407  | -0.08603 |
| 0.029368 | 0.52668  | -0.07861 | 0.08974  | -0.04182 | 0.36718  | -0.07845 | 0.09039  | -0.03479 |
| -0.00175 | 0.96984  | 0.023267 | 0.616    | -0.02071 | 0.65532  | 0.032762 | 0.48001  | 0.212663 |
| 0.028597 | 0.5376   | 0.070417 | 0.12863  | 0.02792  | 0.54727  | 0.066391 | 0.15201  | 0.235407 |
| 0.079609 | 0.08571  | 0.050751 | 0.27374  | 0.029571 | 0.52383  | 0.036801 | 0.42753  | 0.203437 |
| -0.03183 | 0.49253  | -0.1725  | 0.00018  | -0.07959 | 0.08579  | -0.20662 | 6.74E-06 | -0.18451 |
| 0.003105 | 0.94664  | -0.04801 | 0.30052  | -0.05487 | 0.2366   | -0.04539 | 0.32769  | 0.068576 |
| -0.01834 | 0.69258  | 0.019621 | 0.67236  | -0.04563 | 0.32518  | 0.064151 | 0.16635  | 0.176399 |
| -0.0691  | 0.13596  | -0.02743 | 0.55428  | -0.05636 | 0.22409  | -0.00999 | 0.8296   | 0.103031 |
| 0.07958  | 0.08582  | -0.03052 | 0.51058  | -0.00076 | 0.98691  | -0.02511 | 0.5883   | -0.06719 |
| -0.03683 | 0.42711  | -0.10404 | 0.02454  | -0.11574 | 0.01232  | -0.07611 | 0.10044  | -0.0736  |
| 0.139858 | 0.00245  | 0.160472 | 0.0005   | 0.107096 | 0.02062  | 0.158296 | 0.0006   | 0.240759 |
| -0.12882 | 0.0053   | -0.06906 | 0.13618  | -0.10655 | 0.02128  | -0.0449  | 0.33296  | 0.042104 |
| 0.02511  | 0.58832  | 0.013109 | 0.77753  | -0.0183  | 0.69321  | 0.030875 | 0.50567  | 0.092444 |
| -0.05149 | 0.26677  | 0.000381 | 0.99344  | -0.06577 | 0.15592  | 0.047128 | 0.30949  | 0.018095 |
| -0.12233 | 0.00814  | -0.21376 | 3.15E-06 | -0.17976 | 9.38E-05 | -0.1902  | 3.52E-05 | -0.24386 |
| -0.01013 | 0.8271   | -0.08694 | 0.06049  | -0.011   | 0.81259  | -0.11185 | 0.01559  | -0.10064 |
| 0.065478 | 0.15774  | 0.058653 | 0.2058   | 0.029419 | 0.52596  | 0.069958 | 0.13114  | 0.176387 |
| 0.117568 | 0.011    | -0.07859 | 0.08981  | -0.00947 | 0.83832  | -0.11292 | 0.01463  | -0.16979 |
| -0.00998 | 0.82969  | -0.16346 | 0.00039  | -0.10627 | 0.02162  | -0.15309 | 0.0009   | -0.18946 |
| 0.043183 | 0.35179  | 0.062263 | 0.1792   | 0.032457 | 0.48411  | 0.074145 | 0.10956  | 0.127644 |
| 0.11745  | 0.01108  | 0.04687  | 0.31216  | 0.031913 | 0.49147  | 0.034814 | 0.45292  | 0.199797 |
| 0.046224 | 0.31888  | -0.11742 | 0.01111  | -0.06341 | 0.17134  | -0.1198  | 0.00956  | -0.102   |
| -0.02825 | 0.54259  | -0.06192 | 0.18159  | -0.0526  | 0.25662  | -0.0547  | 0.23811  | -0.00847 |
| -0.1585  | 0.00059  | -0.13275 | 0.00406  | -0.15695 | 0.00066  | -0.09494 | 0.04028  | -0.07612 |
| -0.0401  | 0.38727  | -0.09143 | 0.04831  | -0.08117 | 0.07974  | -0.08373 | 0.07064  | -0.01903 |
| -0.08359 | 0.07112  | -0.05932 | 0.20071  | -0.08234 | 0.07546  | -0.03083 | 0.50628  | -0.05326 |
| 0.084663 | 0.06756  | -0.08207 | 0.07644  | 0.031733 | 0.49392  | -0.14309 | 0.00194  | -0.17064 |
| -0.06827 | 0.14074  | -0.0628  | 0.17547  | -0.06567 | 0.1565   | -0.07013 | 0.1302   | 0.018073 |
| -0.13284 | 0.00403  | -0.18595 | 5.28E-05 | -0.18773 | 4.46E-05 | -0.1402  | 0.00239  | -0.16285 |
| -0.11825 | 0.01054  | -0.16798 | 0.00027  | -0.15616 | 0.00071  | -0.1339  | 0.00374  | -0.21815 |
| -0.08354 | 0.0713   | -0.04741 | 0.30658  | -0.09464 | 0.04093  | -0.00694 | 0.88113  | -0.00425 |
| 0.056693 | 0.22138  | 0.138109 | 0.00278  | 0.041148 | 0.37497  | 0.167225 | 0.00028  | 0.242579 |
| -0.09934 | 0.03184  | -0.0908  | 0.04987  | -0.11146 | 0.01596  | -0.05759 | 0.21416  | -0.11856 |
| 0.032131 | 0.48851  | 0.028264 | 0.54234  | 0.011247 | 0.80847  | 0.043851 | 0.34438  | 0.092346 |
| 0.071365 | 0.12355  | -0.04037 | 0.38408  | 0.012134 | 0.79368  | -0.06414 | 0.16642  | 0.010213 |
| -0.01054 | 0.82034  | -0.00234 | 0.95985  | -0.02371 | 0.60935  | 0.001949 | 0.9665   | 0.029912 |
| 0.024739 | 0.59385  | 0.037171 | 0.4229   | 0.095608 | 0.03889  | -0.01407 | 0.76173  | -0.05167 |
| 0.001503 | 0.97416  | -0.08601 | 0.06328  | -0.09212 | 0.04663  | -0.06482 | 0.16193  | -0.05063 |
| 0.129112 | 0.0052   | 0.181078 | 8.31E-05 | 0.113906 | 0.01378  | 0.171447 | 0.0002   | 0.414599 |
| 0.002779 | 0.95224  | -0.01996 | 0.66701  | -0.04377 | 0.34523  | -0.00938 | 0.83986  | 0.187207 |
| -0.04184 | 0.36701  | -0.18936 | 3.82E-05 | -0.14806 | 0.00133  | -0.16525 | 0.00034  | -0.1644  |
| 0.081567 | 0.07826  | 0.043168 | 0.35195  | 0.032265 | 0.48671  | 0.049241 | 0.28828  | 0.220757 |
| -0.17253 | 0.00018  | -0.13087 | 0.00461  | -0.14951 | 0.00119  | -0.09204 | 0.04682  | -0.06651 |
| -0.00208 | 0.9643   | 0.147029 | 0.00144  | -0.00237 | 0.95933  | 0.217708 | 2.04E-06 | 0.298125 |

|          |          |          |          |          |          |          |         |          |
|----------|----------|----------|----------|----------|----------|----------|---------|----------|
| -0.08737 | 0.05922  | 0.0462   | 0.31913  | -0.05267 | 0.25601  | 0.094158 | 0.04197 | 0.189696 |
| -0.1674  | 0.00028  | -0.11665 | 0.01164  | -0.14717 | 0.00143  | -0.07376 | 0.1114  | -0.0833  |
| -0.2089  | 5.30E-06 | -0.17136 | 0.0002   | -0.19493 | 2.22E-05 | -0.12027 | 0.00928 | -0.0824  |
| -0.00421 | 0.92776  | 0.042549 | 0.35891  | -0.02196 | 0.636    | 0.062245 | 0.17933 | 0.219639 |
| 0.065266 | 0.15909  | -0.04594 | 0.32191  | 0.001473 | 0.97467  | -0.08013 | 0.08367 | -0.04325 |
| -0.03696 | 0.42559  | 0.025068 | 0.58896  | -0.04398 | 0.34298  | 0.057917 | 0.21156 | 0.170584 |
| -0.02465 | 0.59512  | -0.04412 | 0.34147  | -0.06255 | 0.17722  | -0.03686 | 0.42682 | -0.0532  |
| 0.062047 | 0.18072  | 0.006031 | 0.89657  | -0.02305 | 0.6193   | 0.015954 | 0.73095 | 0.012316 |
| -0.09404 | 0.04223  | -0.18968 | 3.70E-05 | -0.19781 | 1.66E-05 | -0.13572 | 0.0033  | -0.15053 |
| -0.08622 | 0.06263  | -0.10195 | 0.0276   | -0.12308 | 0.00775  | -0.07892 | 0.08846 | 0.018456 |
| -0.0831  | 0.07281  | -0.145   | 0.00168  | -0.11315 | 0.01442  | -0.13318 | 0.00394 | -0.19741 |
| 0.008033 | 0.86255  | -0.05577 | 0.22902  | -0.04574 | 0.32396  | -0.05429 | 0.24166 | -0.04981 |
| -0.03234 | 0.48563  | -0.01703 | 0.71358  | -0.06825 | 0.14086  | 0.016592 | 0.72062 | 0.151705 |
| 0.093147 | 0.04423  | -0.10498 | 0.02328  | -0.04193 | 0.36599  | -0.12013 | 0.00936 | -0.15928 |
| -0.02253 | 0.62724  | -0.0467  | 0.31391  | -0.07308 | 0.11474  | -0.01849 | 0.69025 | 0.07109  |
| -0.06405 | 0.16702  | -0.02161 | 0.64138  | -0.07285 | 0.11592  | 0.017636 | 0.70385 | 0.140587 |
| 0.076964 | 0.09667  | -0.06905 | 0.13622  | -0.00947 | 0.83823  | -0.08956 | 0.0531  | -0.17877 |
| 0.081972 | 0.07678  | 0.064264 | 0.1656   | 0.024024 | 0.60457  | 0.089284 | 0.05384 | 0.148264 |
| 0.077196 | 0.09567  | -0.07174 | 0.12161  | -0.00987 | 0.8316   | -0.09893 | 0.03256 | 0.008934 |
| 0.090818 | 0.04983  | 0.069409 | 0.1342   | 0.045316 | 0.32848  | 0.054883 | 0.23652 | 0.262429 |
| -0.05882 | 0.2045   | -0.03245 | 0.48422  | -0.09036 | 0.051    | 0.007285 | 0.87524 | 0.051296 |
| -0.06309 | 0.17351  | -0.11494 | 0.01294  | -0.10119 | 0.02878  | -0.09957 | 0.03144 | -0.07725 |
| -0.11249 | 0.01501  | -0.1077  | 0.01991  | -0.1153  | 0.01265  | -0.09346 | 0.04352 | 0.006021 |
| -0.07411 | 0.10971  | -0.08081 | 0.08106  | -0.07321 | 0.11412  | -0.08676 | 0.06101 | 0.025308 |
| -0.09662 | 0.03686  | -0.13207 | 0.00425  | -0.12953 | 0.00506  | -0.10797 | 0.01961 | -0.08808 |
| -0.05533 | 0.23272  | -0.02968 | 0.52223  | -0.0699  | 0.13149  | -0.01135 | 0.80681 | 0.053391 |
| 0.079903 | 0.08455  | -0.03173 | 0.49393  | -0.02556 | 0.5816   | -0.0329  | 0.47812 | 0.031774 |
| -0.02873 | 0.53571  | -0.13714 | 0.00298  | -0.09068 | 0.05018  | -0.12951 | 0.00506 | -0.16859 |
| -0.00938 | 0.83982  | -0.13842 | 0.00272  | -0.10757 | 0.02007  | -0.1115  | 0.01592 | -0.21012 |
| 0.017765 | 0.70179  | -0.13072 | 0.00466  | -0.07873 | 0.08925  | -0.13066 | 0.00468 | -0.17886 |
| -0.16749 | 0.00028  | -0.1153  | 0.01265  | -0.14495 | 0.00169  | -0.05724 | 0.21693 | -0.16309 |
| -0.14448 | 0.00175  | -0.06488 | 0.16158  | -0.13566 | 0.00331  | -0.01535 | 0.74071 | 0.041291 |
| -0.03578 | 0.44052  | -0.14473 | 0.00171  | -0.12343 | 0.00758  | -0.1211  | 0.0088  | -0.15349 |
| 0.009109 | 0.84435  | 0.005125 | 0.91205  | -0.02569 | 0.57969  | 0.028559 | 0.53813 | 0.107149 |
| -0.03469 | 0.45454  | -0.03926 | 0.39734  | -0.06009 | 0.19492  | -0.02566 | 0.58014 | 0.055834 |
| -0.01462 | 0.75268  | -0.14314 | 0.00193  | -0.08153 | 0.07841  | -0.15095 | 0.00107 | -0.18424 |
| -0.0926  | 0.0455   | -0.17165 | 0.00019  | -0.1717  | 0.00019  | -0.12569 | 0.00653 | -0.1351  |
| -0.01148 | 0.80451  | -0.05158 | 0.266    | -0.05288 | 0.25405  | -0.04631 | 0.31801 | 0.00946  |
| -0.07871 | 0.08932  | -0.04943 | 0.2864   | -0.0809  | 0.08073  | -0.02775 | 0.54977 | -0.01831 |
| -0.0431  | 0.35277  | -0.01449 | 0.75483  | -0.05658 | 0.22234  | 0.007366 | 0.87387 | 0.156271 |
| 0.06043  | 0.19237  | -0.03261 | 0.48207  | -0.01387 | 0.76505  | -0.04399 | 0.3429  | 0.02665  |
| -0.21307 | 3.39E-06 | -0.15614 | 0.00071  | -0.16642 | 0.0003   | -0.12706 | 0.00597 | -0.123   |
| 0.014426 | 0.75586  | 0.067228 | 0.1469   | -0.00734 | 0.87428  | 0.096786 | 0.03654 | 0.17107  |
| -0.0992  | 0.03208  | -0.1609  | 0.00048  | -0.12978 | 0.00497  | -0.16821 | 0.00026 | -0.12858 |
| -0.21498 | 2.76E-06 | -0.18782 | 4.42E-05 | -0.16987 | 0.00023  | -0.15847 | 0.00059 | -0.25564 |

|          |          |          |          |          |          |          |          |          |
|----------|----------|----------|----------|----------|----------|----------|----------|----------|
| -0.01145 | 0.805    | 0.053062 | 0.25245  | -0.01557 | 0.73726  | 0.07721  | 0.09561  | 0.177055 |
| -0.15423 | 0.00083  | 0.02028  | 0.66203  | -0.09761 | 0.03497  | 0.093502 | 0.04343  | 0.182826 |
| 0.115355 | 0.01261  | -0.0163  | 0.72529  | -0.00337 | 0.94213  | -0.02842 | 0.54014  | 0.044146 |
| -0.12645 | 0.00621  | 0.002196 | 0.96225  | -0.08047 | 0.08238  | 0.046866 | 0.3122   | 0.085369 |
| -0.16287 | 0.00041  | -0.19601 | 1.99E-05 | -0.18564 | 5.43E-05 | -0.16576 | 0.00032  | -0.21673 |
| -0.07565 | 0.10252  | -0.03889 | 0.40173  | -0.07457 | 0.10755  | -0.02326 | 0.61611  | -0.065   |
| -0.09599 | 0.03812  | -0.08424 | 0.06896  | -0.09743 | 0.03531  | -0.07096 | 0.12569  | -0.00062 |
| -0.10988 | 0.01753  | -0.08829 | 0.05658  | -0.10735 | 0.02032  | -0.04806 | 0.29997  | -0.00599 |
| 0.057351 | 0.21606  | 0.077982 | 0.09233  | 0.037086 | 0.42397  | 0.092575 | 0.04556  | 0.201004 |
| -0.17208 | 0.00019  | -0.2296  | 5.29E-07 | -0.19927 | 1.44E-05 | -0.19208 | 2.93E-05 | -0.25946 |
| -0.02444 | 0.59831  | -0.03812 | 0.4112   | -0.05222 | 0.26011  | -0.02692 | 0.56168  | -0.0553  |
| -0.0226  | 0.62612  | -0.03359 | 0.46896  | -0.06891 | 0.13703  | -0.00219 | 0.96234  | 0.030407 |
| 0.009888 | 0.83124  | -0.16787 | 0.00027  | -0.09815 | 0.03397  | -0.17897 | 0.0001   | -0.24753 |
| 0.031725 | 0.49403  | -0.11619 | 0.01198  | -0.05381 | 0.24585  | -0.14175 | 0.00214  | -0.1015  |
| -0.18481 | 5.87E-05 | -0.19714 | 1.78E-05 | -0.16428 | 0.00036  | -0.17985 | 9.30E-05 | -0.24129 |
| -0.00034 | 0.99416  | -0.07335 | 0.11342  | -0.0662  | 0.15318  | -0.0377  | 0.41633  | -0.10516 |
| 0.063673 | 0.16953  | -0.02465 | 0.59524  | 0.003593 | 0.93828  | -0.03756 | 0.41811  | -0.03991 |
| -0.15845 | 0.00059  | -0.15801 | 0.00061  | -0.13334 | 0.00389  | -0.13287 | 0.00402  | -0.20136 |
| -0.16758 | 0.00028  | -0.13558 | 0.00333  | -0.16112 | 0.00047  | -0.08304 | 0.07302  | -0.12991 |
| -0.10968 | 0.01774  | -0.0181  | 0.69646  | -0.08726 | 0.05954  | 0.023196 | 0.61708  | 0.091537 |
| -0.03752 | 0.41861  | 0.066609 | 0.15067  | -0.0183  | 0.69329  | 0.09783  | 0.03456  | 0.159804 |
| -0.15314 | 0.0009   | -0.1169  | 0.01147  | -0.14626 | 0.00153  | -0.07708 | 0.09617  | -0.05617 |
| 0.028137 | 0.54416  | -0.08476 | 0.06725  | -0.05998 | 0.19569  | -0.07751 | 0.09434  | -0.06552 |
| -0.12389 | 0.00735  | -0.00518 | 0.91119  | -0.07265 | 0.11692  | 0.048289 | 0.29772  | 0.00396  |
| -0.02043 | 0.6597   | -0.13218 | 0.00422  | -0.10987 | 0.01754  | -0.11266 | 0.01486  | -0.0778  |
| 0.026892 | 0.56213  | -0.05234 | 0.25896  | -0.06282 | 0.17531  | -0.01448 | 0.75498  | -0.12635 |
| 0.036977 | 0.42533  | 0.001533 | 0.97364  | 0.00416  | 0.92856  | -0.0157  | 0.73506  | 0.052304 |
| -0.01588 | 0.73213  | -0.00273 | 0.95302  | -0.0531  | 0.25214  | 0.031849 | 0.49234  | 0.092157 |
| -0.06647 | 0.15153  | 0.029636 | 0.52291  | -0.06376 | 0.16893  | 0.072651 | 0.11691  | 0.217291 |
| -0.14819 | 0.00132  | -0.21589 | 2.49E-06 | -0.19644 | 1.91E-05 | -0.18408 | 6.29E-05 | -0.25186 |
| -0.01699 | 0.71426  | -0.18466 | 5.96E-05 | -0.09553 | 0.03906  | -0.21204 | 3.79E-06 | -0.28994 |
| -0.15849 | 0.00059  | -0.06026 | 0.19365  | -0.12044 | 0.00918  | -0.01511 | 0.74467  | 0.027306 |
| -0.05935 | 0.20042  | -0.02708 | 0.55947  | -0.07862 | 0.08968  | 0.00372  | 0.93609  | 0.120163 |
| -0.15098 | 0.00107  | -0.15853 | 0.00059  | -0.17643 | 0.00013  | -0.11765 | 0.01095  | -0.14037 |
| -0.08659 | 0.06151  | -0.10054 | 0.02982  | -0.12036 | 0.00923  | -0.06751 | 0.1452   | -0.08119 |
| 0.064047 | 0.16704  | -0.09316 | 0.04421  | -0.02809 | 0.54478  | -0.11889 | 0.01013  | -0.11945 |
| -0.08901 | 0.05458  | -0.18359 | 6.59E-05 | -0.11296 | 0.01459  | -0.20494 | 8.03E-06 | -0.24768 |
| 0.107566 | 0.02007  | -0.01832 | 0.69296  | 0.013306 | 0.77427  | -0.03662 | 0.42984  | -0.00809 |
| -0.07261 | 0.11712  | -0.02744 | 0.55415  | -0.05799 | 0.21098  | 0.01121  | 0.80908  | -0.03517 |
| -0.18345 | 6.67E-05 | -0.20061 | 1.25E-05 | -0.18335 | 6.74E-05 | -0.16619 | 0.00031  | -0.16977 |
| -0.1145  | 0.01329  | -0.10906 | 0.0184   | -0.13763 | 0.00288  | -0.06879 | 0.13774  | -0.00148 |
| -0.01976 | 0.67014  | -0.00362 | 0.93785  | -0.0333  | 0.47279  | 0.008231 | 0.8592   | 0.06735  |
| 0.00125  | 0.97851  | -0.09185 | 0.04728  | -0.08735 | 0.05928  | -0.07667 | 0.09796  | -0.07499 |
| 0.107929 | 0.01965  | 0.044646 | 0.3357   | 0.034797 | 0.45314  | 0.035105 | 0.44916  | 0.12713  |
| -0.07631 | 0.09955  | -0.06446 | 0.16429  | -0.0867  | 0.06118  | -0.04912 | 0.28952  | 0.10267  |

|          |          |          |          |          |          |          |          |          |
|----------|----------|----------|----------|----------|----------|----------|----------|----------|
| -0.01886 | 0.68434  | -0.08769 | 0.05827  | -0.0604  | 0.19259  | -0.10012 | 0.03051  | 0.004465 |
| 0.032295 | 0.4863   | -0.11106 | 0.01635  | -0.06609 | 0.1539   | -0.10462 | 0.02376  | -0.09161 |
| -0.06669 | 0.15014  | -0.1708  | 0.00021  | -0.13391 | 0.00374  | -0.15928 | 0.00055  | -0.20021 |
| -0.0779  | 0.09267  | -0.03538 | 0.44562  | -0.06965 | 0.13287  | -0.02369 | 0.60961  | 0.13878  |
| -0.14853 | 0.00129  | -0.14772 | 0.00137  | -0.16843 | 0.00026  | -0.10627 | 0.02162  | -0.09947 |
| -0.0198  | 0.66951  | -0.0795  | 0.08615  | -0.09793 | 0.03437  | -0.05487 | 0.23666  | -0.04143 |
| -0.14737 | 0.00141  | -0.09583 | 0.03843  | -0.12802 | 0.0056   | -0.05036 | 0.27749  | -0.10368 |
| -0.00986 | 0.83173  | -0.135   | 0.00347  | -0.0646  | 0.16341  | -0.1654  | 0.00033  | -0.15964 |
| -0.02704 | 0.55999  | -0.0347  | 0.4544   | -0.06552 | 0.15746  | -0.01967 | 0.67158  | 0.099104 |
| -0.02031 | 0.66158  | -0.09911 | 0.03225  | -0.07851 | 0.09014  | -0.07816 | 0.09159  | -0.10273 |
| -0.11002 | 0.01739  | -0.07716 | 0.09583  | -0.08561 | 0.06452  | -0.0482  | 0.29861  | -0.09365 |
| -0.10825 | 0.01928  | -0.04439 | 0.33852  | -0.08319 | 0.07249  | -0.01192 | 0.79717  | -0.03948 |
| 0.085039 | 0.06634  | -0.10124 | 0.02871  | -0.03341 | 0.47132  | -0.13371 | 0.0038   | -0.19839 |
| -0.07323 | 0.11399  | -0.06205 | 0.18071  | -0.08734 | 0.0593   | -0.03979 | 0.3909   | 0.00363  |
| -0.05335 | 0.24992  | -0.01992 | 0.66762  | -0.05183 | 0.26367  | -0.015   | 0.7465   | 0.081182 |
| -0.01049 | 0.8211   | -0.02623 | 0.57183  | -0.02681 | 0.56326  | -0.02751 | 0.55317  | -0.01162 |
| -0.17398 | 0.00016  | -0.21837 | 1.90E-06 | -0.18648 | 5.02E-05 | -0.19959 | 1.39E-05 | -0.28433 |
| -0.09771 | 0.03479  | -0.10738 | 0.02029  | -0.14009 | 0.00241  | -0.06559 | 0.157    | -0.05963 |
| -0.2264  | 7.66E-07 | -0.1913  | 3.16E-05 | -0.22109 | 1.40E-06 | -0.1141  | 0.01362  | -0.24134 |
| -0.06196 | 0.1813   | -0.09589 | 0.03831  | -0.10053 | 0.02985  | -0.08421 | 0.06906  | -0.00166 |
| -0.00416 | 0.92864  | -0.02279 | 0.62328  | 0.011549 | 0.80343  | -0.04571 | 0.3243   | 0.043283 |
| 0.042983 | 0.35402  | -0.03571 | 0.44135  | -0.03533 | 0.44624  | -0.03636 | 0.43311  | -0.01215 |
| -0.026   | 0.57522  | -0.10688 | 0.02088  | -0.09644 | 0.03723  | -0.08461 | 0.06773  | -0.11403 |
| 0.017115 | 0.7122   | 0.015882 | 0.73212  | 0.004442 | 0.92372  | 0.014034 | 0.76229  | 0.041361 |
| -0.00714 | 0.8777   | -0.10378 | 0.02492  | -0.09923 | 0.03204  | -0.09222 | 0.04639  | -0.04062 |
| -0.12026 | 0.00929  | 0.018476 | 0.69046  | -0.0652  | 0.15954  | 0.062001 | 0.18104  | 0.170847 |
| -0.18257 | 7.24E-05 | -0.14537 | 0.00163  | -0.1639  | 0.00038  | -0.09562 | 0.03886  | -0.15706 |
| -0.09829 | 0.03371  | -0.00895 | 0.84711  | -0.06229 | 0.17904  | 0.013821 | 0.76579  | 0.127893 |
| 0.104267 | 0.02424  | -0.08319 | 0.07248  | 0.003382 | 0.9419   | -0.12531 | 0.0067   | -0.16049 |
| -0.07658 | 0.09836  | -0.02955 | 0.52416  | -0.07964 | 0.08559  | 0.01185  | 0.79841  | 0.083741 |
| -0.00714 | 0.87769  | -0.06418 | 0.16615  | -0.06315 | 0.17309  | -0.06397 | 0.16757  | -0.01193 |
| -0.08758 | 0.05859  | -0.07384 | 0.11105  | -0.10467 | 0.02369  | -0.05337 | 0.24974  | -0.03112 |
| -0.01702 | 0.71372  | 0.033831 | 0.46579  | -0.02529 | 0.58566  | 0.068289 | 0.14062  | 0.10982  |
| -0.02131 | 0.64606  | -0.07276 | 0.11638  | -0.0781  | 0.09181  | -0.06851 | 0.13931  | -0.01881 |
| -0.12134 | 0.00867  | -0.15197 | 0.00099  | -0.15743 | 0.00064  | -0.11049 | 0.01691  | -0.03188 |
| 0.085589 | 0.0646   | -0.02287 | 0.62201  | 0.014746 | 0.75061  | -0.0577  | 0.21324  | -0.01702 |
| 0.000143 | 0.99754  | -0.12628 | 0.00628  | -0.07681 | 0.09735  | -0.12611 | 0.00635  | -0.18216 |
| 0.133249 | 0.00392  | -0.00978 | 0.83302  | -0.01328 | 0.77478  | 0.003358 | 0.94231  | 0.050796 |
| -0.04526 | 0.32911  | -0.04681 | 0.31274  | -0.06987 | 0.13163  | -0.02762 | 0.55165  | 0.000306 |
| 0.00227  | 0.96097  | -0.11662 | 0.01167  | -0.05552 | 0.23112  | -0.13586 | 0.00326  | -0.06151 |
| 0.022148 | 0.63308  | -0.12881 | 0.00531  | -0.08064 | 0.08171  | -0.13899 | 0.00261  | -0.23381 |
| -0.02947 | 0.5252   | 0.04416  | 0.34099  | -0.04585 | 0.32277  | 0.099509 | 0.03156  | 0.159075 |
| -0.01555 | 0.73753  | -0.01078 | 0.81632  | -0.04426 | 0.33994  | 0.005687 | 0.90245  | 0.019922 |
| -0.06345 | 0.17104  | 0.000223 | 0.99616  | -0.05701 | 0.2188   | 0.02383  | 0.60748  | 0.094808 |
| -0.06935 | 0.13452  | -0.13434 | 0.00363  | -0.11857 | 0.01033  | -0.12822 | 0.00552  | -0.09136 |



|          |          |          |          |          |          |          |          |          |
|----------|----------|----------|----------|----------|----------|----------|----------|----------|
| 0.040343 | 0.38438  | -0.0054  | 0.90738  | -0.03534 | 0.4461   | 0.031112 | 0.50241  | 0.080282 |
| -0.036   | 0.43761  | -0.18176 | 7.81E-05 | -0.13617 | 0.00319  | -0.17371 | 0.00016  | -0.25768 |
| 0.159118 | 0.00056  | -0.09744 | 0.03529  | 0.021412 | 0.64441  | -0.15691 | 0.00067  | -0.15399 |
| 0.096399 | 0.0373   | -0.03386 | 0.46547  | 0.010975 | 0.81302  | -0.06084 | 0.18935  | -0.0099  |
| 0.016134 | 0.72804  | -0.08816 | 0.05693  | -0.04274 | 0.35673  | -0.1163  | 0.0119   | -0.05966 |
| -0.11788 | 0.01079  | -0.13872 | 0.00266  | -0.14692 | 0.00145  | -0.11292 | 0.01462  | -0.07125 |
| -0.06945 | 0.13398  | -0.19405 | 2.42E-05 | -0.14553 | 0.00161  | -0.17409 | 0.00016  | -0.26806 |
| -0.0642  | 0.166    | -0.07342 | 0.11307  | -0.08688 | 0.06065  | -0.06027 | 0.19352  | 0.010152 |
| -0.12628 | 0.00628  | -0.10771 | 0.01991  | -0.08266 | 0.07434  | -0.09194 | 0.04707  | -0.23438 |
| -0.09414 | 0.04201  | -0.03086 | 0.50585  | -0.08162 | 0.07805  | -0.00665 | 0.88609  | 0.030161 |
| -0.00551 | 0.90547  | -0.04232 | 0.36155  | -0.05092 | 0.27214  | -0.03553 | 0.44362  | 0.04358  |
| -0.01234 | 0.79025  | 0.016669 | 0.71938  | -0.03487 | 0.45222  | 0.024995 | 0.59003  | 0.188174 |
| 0.080997 | 0.08037  | 0.057893 | 0.21175  | 0.027063 | 0.55964  | 0.050575 | 0.2754   | 0.182096 |
| -0.0375  | 0.4188   | -0.04509 | 0.33093  | -0.09107 | 0.04919  | 0.002076 | 0.96432  | 0.031256 |
| -0.17911 | 9.96E-05 | -0.12107 | 0.00882  | -0.16038 | 0.0005   | -0.06189 | 0.18185  | -0.09421 |
| 0.027351 | 0.55547  | 0.008222 | 0.85935  | -0.01194 | 0.79686  | 0.020033 | 0.66589  | 0.183511 |
| 0.130032 | 0.00489  | 0.06196  | 0.18133  | 0.060391 | 0.19266  | 0.051619 | 0.2656   | 0.157998 |
| -0.07899 | 0.08818  | -0.12936 | 0.00511  | -0.12064 | 0.00906  | -0.11571 | 0.01234  | -0.17791 |
| 0.015476 | 0.73871  | 0.049897 | 0.2819   | -0.0044  | 0.92448  | 0.062105 | 0.18031  | 0.254097 |
| 0.082757 | 0.07399  | 0.021546 | 0.64234  | 0.02354  | 0.61187  | 0.009881 | 0.83136  | 0.079228 |
| -0.0342  | 0.46098  | -0.11333 | 0.01427  | -0.10989 | 0.01753  | -0.08544 | 0.06505  | -0.03101 |
| -0.09068 | 0.05019  | -0.04197 | 0.36547  | -0.07214 | 0.11951  | -0.03289 | 0.47825  | 0.075479 |
| 0.02111  | 0.6491   | -0.01379 | 0.76636  | -0.00773 | 0.86764  | -0.03422 | 0.46074  | 0.133538 |
| -0.0113  | 0.80758  | -0.02009 | 0.66507  | -0.03455 | 0.4564   | -0.02378 | 0.60821  | 0.115371 |
| 0.063845 | 0.16838  | -0.18121 | 8.21E-05 | -0.03913 | 0.39887  | -0.23685 | 2.24E-07 | -0.32365 |
| -0.16272 | 0.00041  | -0.19655 | 1.89E-05 | -0.17816 | 0.00011  | -0.17371 | 0.00016  | -0.1825  |
| -0.0382  | 0.41012  | -0.06879 | 0.13774  | -0.06789 | 0.14298  | -0.04842 | 0.29637  | -0.00057 |
| -0.04357 | 0.34752  | -0.02225 | 0.63145  | -0.05506 | 0.235    | -0.00679 | 0.88374  | 0.047625 |
| 0.030089 | 0.51657  | -0.1112  | 0.01621  | -0.01984 | 0.66898  | -0.1591  | 0.00056  | -0.22836 |
| -0.06952 | 0.1336   | -0.15927 | 0.00055  | -0.13835 | 0.00273  | -0.1427  | 0.00199  | -0.13841 |
| -0.02636 | 0.56992  | -0.10934 | 0.0181   | -0.05501 | 0.23541  | -0.10916 | 0.01829  | -0.06885 |
| -0.0765  | 0.09871  | -0.17819 | 0.00011  | -0.14365 | 0.00186  | -0.15986 | 0.00053  | -0.17703 |
| -0.13557 | 0.00333  | -0.1072  | 0.0205   | -0.14771 | 0.00137  | -0.0627  | 0.17619  | -0.00343 |
| -0.10702 | 0.02071  | -0.16152 | 0.00046  | -0.16478 | 0.00035  | -0.13418 | 0.00367  | -0.12229 |
| 0.092979 | 0.04462  | 0.155695 | 0.00073  | 0.121483 | 0.00859  | 0.116917 | 0.01146  | 0.33385  |
| -0.17785 | 0.00011  | -0.22552 | 8.48E-07 | -0.22053 | 1.49E-06 | -0.18315 | 6.86E-05 | -0.20215 |
| -0.18596 | 5.27E-05 | -0.17006 | 0.00022  | -0.19138 | 3.14E-05 | -0.12039 | 0.00921  | -0.10454 |
| -0.17331 | 0.00017  | -0.20474 | 8.20E-06 | -0.18712 | 4.72E-05 | -0.16606 | 0.00031  | -0.31776 |
| -0.07831 | 0.09096  | -0.07674 | 0.09766  | -0.12242 | 0.00809  | -0.01856 | 0.68915  | -0.09848 |
| -0.0476  | 0.30464  | -0.12722 | 0.0059   | -0.11513 | 0.01279  | -0.11669 | 0.01162  | -0.14782 |
| -0.11355 | 0.01408  | -0.15355 | 0.00087  | -0.12833 | 0.00548  | -0.15883 | 0.00057  | -0.19876 |
| 0.025928 | 0.57622  | -0.06777 | 0.14369  | -0.04101 | 0.37659  | -0.06466 | 0.16299  | -0.03235 |
| -0.01034 | 0.8236   | 0.068575 | 0.13896  | 0.005656 | 0.90297  | 0.079094 | 0.08776  | 0.13454  |
| -0.11354 | 0.01409  | -0.00264 | 0.95457  | -0.04013 | 0.38686  | 0.021087 | 0.64945  | 0.0822   |
| -0.05917 | 0.20186  | -0.08172 | 0.07771  | -0.09673 | 0.03664  | -0.05836 | 0.20809  | -0.03249 |

|          |          |          |          |          |          |          |          |          |
|----------|----------|----------|----------|----------|----------|----------|----------|----------|
| 0.013254 | 0.77514  | -0.10401 | 0.02459  | -0.06915 | 0.13568  | -0.10357 | 0.02521  | -0.13215 |
| 0.145183 | 0.00166  | 0.101592 | 0.02815  | 0.048208 | 0.29852  | 0.104905 | 0.02338  | 0.217663 |
| -0.06432 | 0.16525  | -0.18236 | 7.39E-05 | -0.12784 | 0.00567  | -0.18531 | 5.61E-05 | -0.24411 |
| -0.06969 | 0.13265  | 0.033003 | 0.47679  | -0.02371 | 0.60935  | 0.06466  | 0.163    | 0.197493 |
| -0.12565 | 0.00655  | -0.19181 | 3.01E-05 | -0.16456 | 0.00036  | -0.16889 | 0.00025  | -0.18912 |
| 0.185841 | 5.33E-05 | -0.00217 | 0.96267  | 0.064287 | 0.16545  | -0.05563 | 0.23022  | -0.10647 |
| -0.12612 | 0.00635  | -0.07885 | 0.08876  | -0.11234 | 0.01514  | -0.05968 | 0.19793  | 0.032174 |
| 0.087145 | 0.05987  | -0.05126 | 0.26898  | 0.017868 | 0.70014  | -0.07496 | 0.10571  | -0.13365 |
| 0.050573 | 0.27542  | 0.047157 | 0.3092   | 0.031256 | 0.50043  | 0.042703 | 0.35717  | 0.166847 |
| -0.0859  | 0.06362  | -0.04771 | 0.30355  | -0.08357 | 0.07119  | -0.01499 | 0.74658  | 0.077315 |
| 0.096495 | 0.03711  | -0.10176 | 0.02788  | -0.00079 | 0.98641  | -0.15092 | 0.00107  | -0.15654 |
| 0.051712 | 0.26474  | 0.022588 | 0.62634  | 0.021853 | 0.63761  | 0.00814  | 0.86074  | 0.115661 |
| -0.13814 | 0.00278  | -0.09746 | 0.03526  | -0.14398 | 0.00181  | -0.03517 | 0.44834  | -0.05441 |
| -0.00668 | 0.88547  | 0.0071   | 0.87838  | -0.00151 | 0.97405  | -0.00826 | 0.85869  | 0.126507 |
| -0.01378 | 0.76638  | -0.13646 | 0.00313  | -0.10677 | 0.02101  | -0.13853 | 0.0027   | -0.15064 |
| -0.05604 | 0.22678  | -0.05264 | 0.25629  | -0.06831 | 0.14047  | -0.03293 | 0.47772  | 0.052165 |
| -0.08949 | 0.05329  | -0.17039 | 0.00022  | -0.05046 | 0.27653  | -0.20841 | 5.58E-06 | -0.34942 |
| -0.03464 | 0.45513  | 0.020168 | 0.66377  | -0.05271 | 0.25562  | 0.04305  | 0.35327  | 0.141028 |
| 0.010737 | 0.81699  | -0.09319 | 0.04412  | -0.05803 | 0.21069  | -0.10672 | 0.02107  | -0.19056 |
| -0.1051  | 0.02312  | -0.23752 | 2.06E-07 | -0.21022 | 4.61E-06 | -0.19334 | 2.59E-05 | -0.30498 |
| -0.05948 | 0.19949  | -0.15133 | 0.00104  | -0.12314 | 0.00772  | -0.14213 | 0.00208  | -0.11387 |
| 0.011486 | 0.80448  | -0.0023  | 0.96047  | -0.03105 | 0.50325  | 0.019486 | 0.67449  | 0.084385 |
| 0.052739 | 0.25535  | -0.02616 | 0.57276  | 0.058702 | 0.20542  | -0.09262 | 0.04545  | -0.10949 |
| -0.10015 | 0.03047  | -0.16369 | 0.00038  | -0.17338 | 0.00017  | -0.11511 | 0.0128   | -0.2392  |
| -0.02023 | 0.66278  | -0.15259 | 0.00094  | -0.10696 | 0.02078  | -0.15988 | 0.00052  | -0.1484  |
| -0.01133 | 0.80711  | -0.11589 | 0.01221  | -0.08386 | 0.0702   | -0.11975 | 0.00959  | -0.16788 |
| 0.079834 | 0.08483  | -0.0526  | 0.25657  | -0.02266 | 0.62523  | -0.06901 | 0.13647  | -0.08159 |
| -0.06894 | 0.13683  | -0.08476 | 0.06724  | -0.07713 | 0.09596  | -0.07803 | 0.09213  | -0.12989 |
| -0.16263 | 0.00042  | -0.10933 | 0.0181   | -0.1435  | 0.00188  | -0.07369 | 0.11174  | -0.00598 |
| 0.049837 | 0.28248  | -0.0255  | 0.58252  | -0.0239  | 0.60646  | -0.01465 | 0.75214  | -0.01874 |
| -0.01033 | 0.82374  | 0.065185 | 0.15961  | 0.009049 | 0.84536  | 0.080827 | 0.08101  | 0.245025 |
| 0.063845 | 0.16838  | -0.08195 | 0.07685  | -0.00019 | 0.9967   | -0.13214 | 0.00423  | -0.07711 |
| -0.07572 | 0.10222  | -0.11982 | 0.00955  | -0.11968 | 0.00964  | -0.09394 | 0.04244  | -0.06794 |
| -0.00183 | 0.96853  | 0.036382 | 0.43282  | -0.01498 | 0.74676  | 0.072855 | 0.11589  | 0.228874 |
| 0.066756 | 0.14977  | -0.13276 | 0.00405  | -0.02795 | 0.54684  | -0.17832 | 0.00011  | -0.1774  |
| -0.00979 | 0.83288  | -0.02997 | 0.51823  | -0.06732 | 0.14636  | 0.000934 | 0.98395  | 0.026453 |
| 0.022832 | 0.62262  | -0.03081 | 0.50659  | -0.03584 | 0.43969  | -0.03219 | 0.48777  | -0.03547 |
| -0.07559 | 0.1028   | -0.13176 | 0.00434  | -0.12216 | 0.00823  | -0.09158 | 0.04793  | -0.13973 |
| -0.03089 | 0.50551  | -0.08212 | 0.07626  | -0.0667  | 0.1501   | -0.09192 | 0.04712  | 0.014734 |
| 0.045625 | 0.3252   | -0.01644 | 0.723    | 0.000528 | 0.99092  | -0.03614 | 0.43584  | 0.07372  |
| 0.081993 | 0.07671  | -0.05239 | 0.25848  | 0.033441 | 0.47095  | -0.11579 | 0.01228  | -0.10807 |
| -0.05608 | 0.22645  | -0.06227 | 0.17917  | -0.06838 | 0.1401   | -0.06836 | 0.14019  | 0.034629 |
| 0.00867  | 0.85177  | -0.04005 | 0.38785  | -0.02693 | 0.56152  | -0.04205 | 0.36461  | 0.113101 |
| -0.02567 | 0.58003  | -0.11333 | 0.01427  | -0.09492 | 0.04034  | -0.09892 | 0.03259  | -0.11749 |
| -0.01728 | 0.70958  | -0.04548 | 0.32675  | -0.05945 | 0.19968  | -0.02843 | 0.53997  | -0.00903 |

|          |         |           |          |          |         |          |          |          |
|----------|---------|-----------|----------|----------|---------|----------|----------|----------|
| 0.057152 | 0.21766 | -0.03563  | 0.44236  | 7.75E-06 | 0.99987 | -0.06131 | 0.18595  | -0.04282 |
| 0.004686 | 0.91956 | -9.17E-05 | 0.99842  | -0.05582 | 0.2286  | 0.04243  | 0.36026  | 0.145685 |
| -0.07746 | 0.09455 | -0.24238  | 1.14E-07 | -0.17813 | 0.00011 | -0.21609 | 2.44E-06 | -0.37917 |
| 0.007454 | 0.87237 | -0.07871  | 0.08932  | -0.06204 | 0.1808  | -0.07157 | 0.12247  | -0.04753 |
| 0.074545 | 0.10765 | 0.098602  | 0.03315  | 0.04802  | 0.30042 | 0.099843 | 0.03099  | 0.242825 |
| 0.044138 | 0.34123 | 0.133855  | 0.00376  | 0.100557 | 0.0298  | 0.118399 | 0.01044  | 0.284268 |
| 0.043461 | 0.3487  | 0.173309  | 0.00017  | 0.080427 | 0.08253 | 0.211093 | 4.19E-06 | 0.319717 |
| -0.00395 | 0.93211 | 0.024616  | 0.59569  | 0.025085 | 0.5887  | 0.02516  | 0.58758  | 0.084399 |
| 0.011227 | 0.80879 | -0.02594  | 0.57608  | 0.032403 | 0.48485 | -0.06541 | 0.15816  | -0.06414 |
| -0.07325 | 0.11393 | -0.02908  | 0.5308   | -0.06079 | 0.18977 | 0.003782 | 0.93503  | 0.005234 |
| -0.04075 | 0.37956 | 0.038121  | 0.41114  | 0.014757 | 0.75044 | 0.027094 | 0.55919  | 0.145674 |
| 0.024894 | 0.59154 | -0.05056  | 0.27557  | 0.035581 | 0.44303 | -0.0886  | 0.05571  | -0.16595 |
| -0.01967 | 0.67163 | 0.040338  | 0.38445  | 0.017365 | 0.70819 | 0.06045  | 0.19223  | 0.09721  |
| -0.02615 | 0.57297 | -0.06268  | 0.1763   | -0.00106 | 0.98184 | -0.077   | 0.09651  | -0.12709 |
| -0.00504 | 0.91348 | 0.066206  | 0.15316  | 0.034629 | 0.45532 | 0.06285  | 0.17513  | 0.180736 |
| -0.03053 | 0.51046 | 0.008937  | 0.84726  | -0.03033 | 0.5132  | 0.034697 | 0.45445  | 0.084615 |
| 0.036067 | 0.43681 | 0.18304   | 6.93E-05 | 0.098595 | 0.03316 | 0.195876 | 2.02E-05 | 0.313229 |
| -0.05034 | 0.2776  | 0.023642  | 0.61033  | 0.004216 | 0.9276  | 0.024728 | 0.59401  | 0.092528 |
| -0.02262 | 0.62581 | -0.03718  | 0.42273  | 0.003743 | 0.93571 | -0.04705 | 0.31029  | -0.04383 |
| -0.07061 | 0.12756 | -0.02568  | 0.57992  | -0.02107 | 0.64966 | -0.02089 | 0.65247  | 0.01359  |
| -0.07121 | 0.12439 | -0.0125   | 0.78762  | -0.02781 | 0.54892 | 0.003518 | 0.93957  | 0.093379 |
| -0.00352 | 0.93952 | 0.052065  | 0.26148  | 0.023637 | 0.6104  | 0.077539 | 0.0942   | 0.154951 |
| -0.0013  | 0.97766 | -0.06336  | 0.17167  | -0.02325 | 0.6163  | -0.06313 | 0.1732   | -0.01319 |
| -0.02212 | 0.63351 | 0.008909  | 0.84774  | 0.029538 | 0.52429 | -0.00037 | 0.99372  | 0.069081 |
| -0.00678 | 0.88388 | 0.097042  | 0.03605  | 0.066484 | 0.15144 | 0.093467 | 0.0435   | 0.188347 |
| 0.001912 | 0.96712 | -0.04143  | 0.3717   | 0.015777 | 0.73381 | -0.07816 | 0.0916   | -0.07052 |
| -0.0139  | 0.76448 | -0.07228  | 0.11878  | -0.01943 | 0.6753  | -0.08821 | 0.0568   | -0.11318 |
| -0.00936 | 0.84005 | 0.040363  | 0.38416  | 0.02561  | 0.58092 | 0.040174 | 0.38638  | 0.142636 |
| 0.001721 | 0.97042 | 0.077278  | 0.09531  | 0.054778 | 0.23742 | 0.074812 | 0.10639  | 0.15468  |
| -0.02149 | 0.64321 | 0.019251  | 0.67818  | 0.018546 | 0.68934 | 0.007225 | 0.87626  | 0.12453  |
| -0.03872 | 0.40385 | -0.00071  | 0.98779  | -0.00192 | 0.96691 | -0.00938 | 0.83973  | 0.009013 |
| -0.07229 | 0.11875 | -0.07382  | 0.11112  | -0.02988 | 0.51947 | -0.09568 | 0.03874  | -0.05961 |
| -0.00194 | 0.96673 | 0.063296  | 0.17208  | 0.060202 | 0.19406 | 0.039971 | 0.38879  | 0.148103 |
| -0.04554 | 0.32612 | 0.044378  | 0.33861  | 0.012589 | 0.78614 | 0.051705 | 0.26481  | 0.116867 |
| -0.04924 | 0.28825 | 0.050545  | 0.27569  | 0.002112 | 0.9637  | 0.066089 | 0.15389  | 0.239118 |
| -0.031   | 0.504   | 0.049763  | 0.2832   | 0.00918  | 0.84316 | 0.066163 | 0.15343  | 0.178077 |
| 0.016037 | 0.7296  | 0.066564  | 0.15094  | 0.016698 | 0.71891 | 0.091859 | 0.04726  | 0.131728 |
| -0.00443 | 0.92396 | 0.019333  | 0.67689  | 0.025881 | 0.57692 | 0.005892 | 0.89895  | 0.076869 |
| -0.1023  | 0.02706 | -0.00667  | 0.88565  | -0.04119 | 0.37443 | -0.00134 | 0.97694  | 0.06153  |
| 0.008111 | 0.86122 | 0.09824   | 0.0338   | 0.070369 | 0.12889 | 0.088907 | 0.05486  | 0.222496 |
| -0.03353 | 0.46978 | -0.09064  | 0.05029  | -0.01588 | 0.73222 | -0.12677 | 0.00608  | -0.13724 |
| -0.07989 | 0.08462 | -0.03033  | 0.51318  | -0.033   | 0.47689 | -0.02666 | 0.56557  | 0.068061 |
| -0.05326 | 0.25068 | -0.04236  | 0.36108  | -0.02287 | 0.622   | -0.05605 | 0.22664  | -0.05549 |
| -0.06432 | 0.16526 | -0.00098  | 0.9832   | -0.00396 | 0.93204 | -0.01068 | 0.81789  | 0.075665 |
| -0.00761 | 0.86978 | -0.05992  | 0.19619  | -0.00286 | 0.95077 | -0.08957 | 0.05308  | -0.08994 |

|          |          |          |          |          |          |          |         |          |
|----------|----------|----------|----------|----------|----------|----------|---------|----------|
| -0.12811 | 0.00556  | -0.1395  | 0.00252  | -0.12632 | 0.00627  | -0.1324  | 0.00415 | -0.12181 |
| -0.05518 | 0.23402  | -0.06569 | 0.1564   | -0.01801 | 0.69789  | -0.09777 | 0.03468 | -0.06514 |
| -0.10373 | 0.02498  | -0.05396 | 0.24453  | -0.04818 | 0.29878  | -0.0586  | 0.20622 | -0.00239 |
| -0.00703 | 0.87958  | -0.03224 | 0.48709  | 0.023818 | 0.60767  | -0.05626 | 0.22498 | -0.00749 |
| -0.06076 | 0.18999  | -0.01003 | 0.82892  | -0.03308 | 0.47582  | 0.01112  | 0.81059 | 0.103016 |
| -0.02935 | 0.527    | 0.045946 | 0.3218   | 0.002556 | 0.95607  | 0.065879 | 0.15521 | 0.111806 |
| 0.01703  | 0.71357  | 0.077795 | 0.09311  | 0.085808 | 0.06391  | 0.045251 | 0.32919 | 0.085609 |
| -0.04122 | 0.37409  | -0.01279 | 0.78287  | -0.0036  | 0.93811  | -0.01034 | 0.8236  | 0.006306 |
| 0.052273 | 0.25959  | 0.113643 | 0.014    | 0.086392 | 0.06212  | 0.110763 | 0.01664 | 0.174153 |
| -0.04656 | 0.31536  | -0.04622 | 0.31889  | -0.02622 | 0.57189  | -0.05333 | 0.25005 | -0.00535 |
| -0.02143 | 0.64413  | -0.07292 | 0.11556  | 0.006768 | 0.88402  | -0.11506 | 0.01285 | -0.15398 |
| -0.01472 | 0.75105  | -0.03933 | 0.39646  | 0.004799 | 0.91762  | -0.06629 | 0.15261 | -0.0526  |
| -0.01117 | 0.80977  | 0.008087 | 0.86164  | 0.009546 | 0.83699  | 0.013015 | 0.77909 | 0.08108  |
| 0.013001 | 0.77932  | 0.000912 | 0.98431  | 0.041216 | 0.37417  | -0.02406 | 0.604   | 0.014305 |
| -0.03632 | 0.43367  | 0.05651  | 0.22288  | 0.020245 | 0.66256  | 0.058599 | 0.20622 | 0.201112 |
| -0.00057 | 0.99019  | 0.007453 | 0.87239  | -0.00769 | 0.86844  | 0.025142 | 0.58784 | 0.124617 |
| -0.07359 | 0.11222  | -0.01631 | 0.72515  | -0.02508 | 0.58878  | 0.002977 | 0.94885 | 0.033163 |
| -0.0032  | 0.94498  | 0.011416 | 0.80564  | 0.031553 | 0.49638  | -0.00788 | 0.8652  | 0.016684 |
| -0.06897 | 0.13666  | -0.08805 | 0.05726  | -0.0491  | 0.28969  | -0.09744 | 0.03528 | -0.08549 |
| 0.018745 | 0.68619  | 0.043992 | 0.34283  | 0.042537 | 0.35905  | 0.024086 | 0.60363 | 0.109883 |
| 0.007702 | 0.86816  | 0.087016 | 0.06025  | 0.050672 | 0.27448  | 0.08819  | 0.05686 | 0.137156 |
| -0.0083  | 0.85796  | -0.06232 | 0.17883  | -0.02043 | 0.6597   | -0.06677 | 0.14971 | -0.06369 |
| -0.10944 | 0.01799  | -0.05385 | 0.24544  | -0.06429 | 0.16546  | -0.03194 | 0.49114 | -0.05237 |
| -0.01324 | 0.77531  | 0.036876 | 0.4266   | 0.012854 | 0.78175  | 0.037858 | 0.41437 | 0.158835 |
| 0.00921  | 0.84266  | 0.048027 | 0.30034  | 0.042444 | 0.3601   | 0.039773 | 0.39115 | 0.112034 |
| 0.012306 | 0.79082  | -0.01188 | 0.79794  | 0.051008 | 0.2713   | -0.04426 | 0.33986 | -0.0622  |
| -0.06391 | 0.16794  | -0.01669 | 0.71906  | -0.04697 | 0.31117  | 0.005774 | 0.90097 | 0.013196 |
| -0.0328  | 0.47948  | 0.07476  | 0.10663  | 0.045227 | 0.32944  | 0.074908 | 0.10594 | 0.227952 |
| -0.01385 | 0.76536  | 0.073177 | 0.11428  | 0.022442 | 0.62857  | 0.083686 | 0.07079 | 0.252876 |
| -0.02358 | 0.61129  | -0.01753 | 0.70549  | -0.00983 | 0.83225  | -0.0217  | 0.64002 | 0.048458 |
| -0.01993 | 0.66754  | 0.088907 | 0.05486  | 0.05154  | 0.26634  | 0.079018 | 0.08807 | 0.213441 |
| 0.010521 | 0.82062  | 0.033392 | 0.4716   | 0.052756 | 0.2552   | 0.006096 | 0.89547 | 0.129122 |
| -0.06109 | 0.18758  | -0.1067  | 0.0211   | -0.06577 | 0.15588  | -0.11977 | 0.00958 | -0.19455 |
| -0.02148 | 0.64342  | -0.03301 | 0.47671  | -0.01788 | 0.69992  | -0.04426 | 0.33988 | -0.12632 |
| 0.067539 | 0.14504  | 0.010607 | 0.81918  | 0.008491 | 0.8548   | 0.006056 | 0.89616 | -0.02513 |
| 0.011746 | 0.80015  | 0.116875 | 0.01148  | 0.061634 | 0.18364  | 0.119235 | 0.00991 | 0.119368 |
| 0.067097 | 0.14769  | 0.091975 | 0.04698  | 0.063717 | 0.16924  | 0.072519 | 0.11758 | 0.027269 |
| -0.05156 | 0.26614  | 0.001669 | 0.9713   | 0.006074 | 0.89584  | -0.01954 | 0.67366 | -0.06785 |
| 0.286494 | 2.84E-10 | 0.190778 | 3.33E-05 | 0.208742 | 5.39E-06 | 0.113536 | 0.01409 | 0.064102 |
| -0.02573 | 0.57922  | 0.005662 | 0.90287  | -0.02712 | 0.55888  | 0.015363 | 0.74055 | 0.010727 |
| -0.04493 | 0.33262  | -0.00254 | 0.95638  | -0.05713 | 0.21787  | 0.020825 | 0.65352 | -0.0177  |
| 0.026445 | 0.56864  | 0.102881 | 0.0262   | 0.076829 | 0.09726  | 0.077171 | 0.09578 | 0.068176 |
| 0.004483 | 0.92303  | -0.03263 | 0.48177  | 0.006439 | 0.88963  | -0.06923 | 0.13522 | -0.15125 |
| -0.02807 | 0.54507  | 0.004293 | 0.92628  | 0.016645 | 0.71977  | -0.02365 | 0.61025 | -0.10561 |
| 0.156269 | 0.0007   | 0.136306 | 0.00316  | 0.221584 | 1.33E-06 | -0.00339 | 0.94169 | 0.006229 |

|          |          |          |          |          |          |          |          |          |
|----------|----------|----------|----------|----------|----------|----------|----------|----------|
| 0.31057  | 6.70E-12 | 0.377998 | 2.61E-17 | 0.375778 | 4.13E-17 | 0.24663  | 6.70E-08 | 0.172816 |
| -0.04755 | 0.30521  | -0.0794  | 0.08655  | -0.04651 | 0.31588  | -0.08635 | 0.06226  | -0.18287 |
| 0.057681 | 0.21343  | -0.00886 | 0.84862  | 0.050781 | 0.27345  | -0.04646 | 0.31644  | -0.07204 |
| -0.01259 | 0.78616  | -0.08494 | 0.06666  | -0.0542  | 0.24236  | -0.0974  | 0.03537  | -0.17687 |
| 0.066139 | 0.15358  | 0.024149 | 0.60269  | 0.082029 | 0.07658  | -0.0199  | 0.66803  | -0.05424 |
| 0.280737 | 6.61E-10 | 0.159941 | 0.00052  | 0.24683  | 6.53E-08 | 0.030355 | 0.51287  | 0.02351  |
| -0.02699 | 0.56071  | 0.110033 | 0.01737  | 0.058406 | 0.20772  | 0.096385 | 0.03733  | 0.103594 |
| -0.00217 | 0.9627   | 0.05512  | 0.23449  | 0.017611 | 0.70424  | 0.069968 | 0.13109  | 0.02508  |
| 0.252339 | 3.24E-08 | 0.187646 | 4.49E-05 | 0.250817 | 3.94E-08 | 0.056498 | 0.22298  | 0.084876 |
| 0.145345 | 0.00164  | 0.083011 | 0.07311  | 0.129476 | 0.00507  | 0.033475 | 0.4705   | -0.03884 |
| 0.06091  | 0.18885  | 0.129832 | 0.00495  | 0.118233 | 0.01055  | 0.081896 | 0.07706  | 0.046666 |
| -0.0223  | 0.63069  | 0.00572  | 0.90188  | 0.03655  | 0.4307   | -0.02868 | 0.53636  | -0.04966 |
| -0.06347 | 0.17093  | -0.05341 | 0.24932  | -0.02958 | 0.52376  | -0.07608 | 0.10057  | -0.16337 |
| -0.04727 | 0.30803  | -0.04259 | 0.35841  | -0.03795 | 0.41329  | -0.05213 | 0.26089  | -0.126   |
| -0.04639 | 0.31711  | -0.06053 | 0.19161  | -0.05961 | 0.19849  | -0.06204 | 0.18078  | -0.14938 |
| 0.026229 | 0.57181  | 0.002943 | 0.94943  | 0.019162 | 0.67959  | -0.022   | 0.63535  | -0.07038 |
| 0.044722 | 0.33487  | 0.019801 | 0.66952  | 0.024203 | 0.60187  | -0.00563 | 0.90338  | -0.04335 |
| 0.116347 | 0.01187  | 0.118518 | 0.01037  | 0.077281 | 0.0953   | 0.108554 | 0.01895  | 0.122157 |
| 0.120097 | 0.00938  | 0.123848 | 0.00737  | 0.120378 | 0.00922  | 0.082963 | 0.07327  | 0.096627 |
| -0.07765 | 0.09375  | -0.11213 | 0.01534  | -0.06851 | 0.13933  | -0.12398 | 0.00731  | -0.23428 |
| 0.04024  | 0.3856   | 0.020321 | 0.66139  | 0.047342 | 0.3073   | 0.003849 | 0.93389  | -0.02961 |
| -0.01681 | 0.71711  | 0.012714 | 0.78407  | 0.043115 | 0.35255  | -0.02923 | 0.52857  | -0.10151 |
| 0.023482 | 0.61274  | -0.04047 | 0.38284  | -0.01823 | 0.69438  | -0.03738 | 0.42031  | -0.08043 |
| -0.06261 | 0.17682  | 0.006761 | 0.88414  | -0.03027 | 0.51406  | 0.016919 | 0.71536  | -0.01803 |
| -0.00012 | 0.99792  | -0.02718 | 0.55798  | 0.036538 | 0.43085  | -0.05241 | 0.2583   | -0.11587 |
| -0.01447 | 0.75511  | 0.029398 | 0.52626  | 0.003736 | 0.93582  | 0.045245 | 0.32925  | 0.047122 |
| -0.04711 | 0.3097   | 0.037771 | 0.41546  | -0.01167 | 0.80135  | 0.052267 | 0.25964  | 0.00576  |
| 0.008726 | 0.85083  | 0.025092 | 0.5886   | 0.050945 | 0.2719   | -0.01592 | 0.73145  | -0.00292 |
| 0.163508 | 0.00039  | 0.081607 | 0.07811  | 0.104425 | 0.02402  | 0.048959 | 0.29106  | -0.03598 |
| -0.10116 | 0.02883  | -0.04416 | 0.34104  | -0.05119 | 0.26962  | -0.04056 | 0.3818   | -0.09732 |
| 0.025589 | 0.58122  | 0.076655 | 0.09802  | 0.054241 | 0.24205  | 0.069007 | 0.13648  | -0.00276 |
| -0.0707  | 0.12708  | -0.01486 | 0.74878  | -0.03217 | 0.48794  | -0.01158 | 0.80287  | -0.04027 |
| -0.03507 | 0.44961  | 0.062741 | 0.17588  | 0.024747 | 0.59374  | 0.061685 | 0.18328  | -0.00411 |
| -0.00717 | 0.87726  | 0.057193 | 0.21734  | 0.023563 | 0.61151  | 0.064257 | 0.16565  | 0.013305 |
| -0.08614 | 0.06288  | -0.00088 | 0.98494  | -0.06026 | 0.19365  | 0.040727 | 0.37988  | -0.04014 |
| -0.02893 | 0.53283  | -0.0473  | 0.30776  | -0.02541 | 0.58386  | -0.07396 | 0.11043  | -0.18158 |
| 0.002119 | 0.96357  | 0.001351 | 0.97678  | -0.01265 | 0.78505  | -0.00177 | 0.96949  | -0.03113 |
| 0.012414 | 0.78903  | -0.00451 | 0.92265  | 0.009968 | 0.8299   | -0.03431 | 0.45944  | -0.05774 |
| 0.023053 | 0.61924  | 0.052504 | 0.25748  | 0.038623 | 0.405    | 0.02655  | 0.56712  | -0.0009  |
| -0.00853 | 0.85405  | 0.030595 | 0.50955  | 0.008885 | 0.84813  | 0.018714 | 0.68667  | -0.01623 |
| 0.109199 | 0.01825  | 0.048299 | 0.29762  | 0.069691 | 0.13263  | -0.01555 | 0.73751  | -0.03212 |
| 0.021296 | 0.64622  | 0.057732 | 0.21303  | 0.068154 | 0.1414   | 0.006953 | 0.88089  | 0.063907 |
| 0.346956 | 1.17E-14 | 0.291216 | 1.40E-10 | 0.311158 | 6.09E-12 | 0.184734 | 5.92E-05 | 0.139827 |
| 0.073166 | 0.11433  | 0.067329 | 0.14629  | 0.057409 | 0.2156   | 0.046482 | 0.31618  | 0.019701 |
| 0.092715 | 0.04523  | 0.140451 | 0.00235  | 0.115531 | 0.01248  | 0.095055 | 0.04004  | 0.068452 |

|          |          |          |          |          |          |          |         |          |
|----------|----------|----------|----------|----------|----------|----------|---------|----------|
| -0.0128  | 0.78261  | -0.00718 | 0.87698  | -0.00636 | 0.89092  | -0.0137  | 0.76773 | 0.006113 |
| -0.10366 | 0.02508  | -0.05391 | 0.24492  | -0.06239 | 0.17831  | -0.0381  | 0.41134 | -0.08502 |
| 0.05774  | 0.21296  | 0.009515 | 0.83751  | 0.048184 | 0.29877  | -0.03372 | 0.46722 | -0.06175 |
| -0.00684 | 0.88279  | -0.08456 | 0.06789  | -0.02641 | 0.56915  | -0.12387 | 0.00736 | -0.23572 |
| 0.12804  | 0.00559  | 0.130634 | 0.00469  | 0.116697 | 0.01161  | 0.093941 | 0.04245 | 0.072613 |
| 0.276445 | 1.23E-09 | 0.204457 | 8.44E-06 | 0.266237 | 5.10E-09 | 0.086298 | 0.06241 | 0.070981 |
| -0.10716 | 0.02054  | -0.11198 | 0.01547  | -0.08545 | 0.06504  | -0.09555 | 0.03902 | -0.18602 |
| 0.001906 | 0.96724  | 0.034261 | 0.46013  | 0.00803  | 0.86259  | 0.040529 | 0.3822  | -0.00352 |
| 0.039926 | 0.38932  | 0.063532 | 0.17049  | 0.035348 | 0.44602  | 0.04092  | 0.37762 | 0.092532 |
| 0.032103 | 0.48889  | 0.004829 | 0.91711  | 0.031844 | 0.49241  | -0.04193 | 0.36593 | -0.05258 |
| 0.002186 | 0.96242  | 0.080364 | 0.08277  | 0.046878 | 0.31207  | 0.069033 | 0.13633 | 0.066093 |
| 0.002308 | 0.96032  | 0.010024 | 0.82895  | 0.014889 | 0.74828  | -0.00267 | 0.95403 | -0.04183 |
| -0.0701  | 0.13035  | -0.08084 | 0.08096  | -0.04162 | 0.36955  | -0.1016  | 0.02813 | -0.17763 |
| 0.045295 | 0.32871  | -0.02744 | 0.5542   | -0.01313 | 0.77725  | -0.04929 | 0.2878  | -0.07478 |
| -0.00182 | 0.96878  | 0.003347 | 0.94249  | -0.01476 | 0.7504   | -0.00333 | 0.94276 | -0.02227 |
| 0.100181 | 0.03042  | 0.140059 | 0.00242  | 0.104855 | 0.02344  | 0.122362 | 0.00812 | 0.148507 |
| -0.02133 | 0.64574  | 0.021528 | 0.64263  | -0.00455 | 0.92191  | 0.036226 | 0.4348  | -0.00466 |
| 0.230682 | 4.66E-07 | 0.197954 | 1.64E-05 | 0.274733 | 1.56E-09 | 0.064925 | 0.16129 | 0.164026 |
| -0.07969 | 0.08541  | -0.08066 | 0.08164  | -0.07519 | 0.10464  | -0.08757 | 0.05862 | -0.16928 |
| -0.10415 | 0.0244   | -0.17799 | 0.00011  | -0.13863 | 0.00268  | -0.16268 | 0.00042 | -0.38829 |
| -0.0948  | 0.04058  | -0.13992 | 0.00244  | -0.12062 | 0.00908  | -0.12698 | 0.006   | -0.27794 |
| 0.02752  | 0.55303  | -0.04757 | 0.30498  | -0.0365  | 0.43134  | -0.05224 | 0.25992 | -0.11809 |
| -0.00196 | 0.96631  | 0.051278 | 0.26878  | 0.041119 | 0.3753   | 0.025531 | 0.58208 | 0.010802 |
| -0.02247 | 0.62816  | -0.02727 | 0.55669  | -0.00069 | 0.98821  | -0.05951 | 0.19925 | -0.12815 |
| 0.067396 | 0.1459   | 0.016445 | 0.723    | 0.052796 | 0.25484  | -0.01969 | 0.67129 | -0.07472 |
| 0.080652 | 0.08167  | 0.084661 | 0.06756  | 0.09285  | 0.04491  | 0.043068 | 0.35307 | 0.017547 |
| 0.062347 | 0.17861  | -0.0109  | 0.81434  | 0.031923 | 0.49134  | -0.0536  | 0.24769 | -0.1137  |
| -0.0227  | 0.62469  | -0.10996 | 0.01745  | -0.02813 | 0.54425  | -0.15502 | 0.00078 | -0.32165 |
| 0.20228  | 1.06E-05 | 0.170868 | 0.00021  | 0.183227 | 6.81E-05 | 0.107306 | 0.02037 | 0.093732 |
| 0.005151 | 0.91161  | 0.017938 | 0.69903  | -0.00098 | 0.98313  | 0.01255  | 0.78678 | -0.05077 |
| -0.06145 | 0.18499  | -0.07521 | 0.10454  | -0.0734  | 0.11317  | -0.06299 | 0.17415 | -0.16071 |
| 0.048555 | 0.29505  | 0.034639 | 0.45521  | 0.044435 | 0.33798  | 0.005577 | 0.90432 | -0.00335 |
| -0.00252 | 0.95663  | -0.00782 | 0.86619  | 0.010118 | 0.82738  | -0.03909 | 0.39936 | -0.10742 |
| 0.012419 | 0.78896  | 0.075067 | 0.1052   | 0.062713 | 0.17608  | 0.051086 | 0.27057 | -0.00027 |
| 0.078197 | 0.09143  | 0.175031 | 0.00014  | 0.160791 | 0.00049  | 0.116893 | 0.01147 | 0.061079 |
| 0.028972 | 0.53227  | 0.100522 | 0.02986  | 0.041782 | 0.36765  | 0.09402  | 0.04227 | 0.037248 |
| 0.014381 | 0.75659  | 0.010818 | 0.81564  | 0.01434  | 0.75727  | -0.01142 | 0.80554 | -0.02227 |
| 0.0244   | 0.59893  | -0.02739 | 0.55491  | 0.009977 | 0.82975  | -0.06629 | 0.15264 | -0.12889 |
| 0.134849 | 0.0035   | 0.145347 | 0.00164  | 0.153821 | 0.00085  | 0.080476 | 0.08234 | 0.075054 |
| 0.036724 | 0.4285   | -0.00569 | 0.90242  | 0.038694 | 0.40414  | -0.04545 | 0.3271  | -0.10353 |
| -0.00584 | 0.89986  | -0.00628 | 0.89235  | 0.050997 | 0.27141  | -0.05498 | 0.23567 | -0.07826 |
| -0.03792 | 0.41361  | -0.01901 | 0.68197  | -0.01046 | 0.82156  | -0.01883 | 0.68487 | -0.09514 |
| 0.006117 | 0.89511  | 0.063287 | 0.17214  | 0.001076 | 0.9815   | 0.083072 | 0.07289 | 0.079197 |
| -0.10102 | 0.02905  | -0.02635 | 0.5701   | -0.02654 | 0.56722  | -0.01902 | 0.68176 | -0.13442 |
| 0.012397 | 0.78933  | -0.00207 | 0.96436  | 0.033726 | 0.46718  | -0.04242 | 0.36038 | -0.11542 |

|          |          |          |          |          |          |          |          |          |
|----------|----------|----------|----------|----------|----------|----------|----------|----------|
| 0.011957 | 0.79663  | -0.05599 | 0.22717  | 0.010584 | 0.81956  | -0.08671 | 0.06115  | -0.15135 |
| 0.014967 | 0.74701  | -0.00481 | 0.91749  | 0.014451 | 0.75545  | -0.03143 | 0.49801  | -0.04118 |
| 0.008477 | 0.85504  | 0.024947 | 0.59075  | 0.039919 | 0.38941  | -0.01493 | 0.74759  | -0.02625 |
| -0.13063 | 0.00469  | -0.04621 | 0.31907  | -0.08356 | 0.07123  | -0.01259 | 0.78615  | -0.11544 |
| 0.02772  | 0.55015  | -0.0067  | 0.88525  | 0.015839 | 0.73282  | -0.0225  | 0.62762  | -0.11743 |
| 0.00151  | 0.97404  | 0.002111 | 0.96371  | -0.01365 | 0.76854  | -0.00409 | 0.92969  | -0.06547 |
| 0.023038 | 0.61947  | -0.00205 | 0.96484  | 0.027497 | 0.55336  | -0.04476 | 0.33446  | -0.10044 |
| -0.00692 | 0.88137  | 0.060432 | 0.19235  | 0.021987 | 0.63554  | 0.062281 | 0.17908  | 0.035254 |
| -0.01204 | 0.79526  | 0.023722 | 0.60911  | -0.00268 | 0.95399  | 0.020936 | 0.65179  | -0.0162  |
| 0.019607 | 0.67258  | 0.020719 | 0.65517  | 0.011559 | 0.80327  | 0.003282 | 0.9436   | -0.04722 |
| -0.0309  | 0.5053   | -0.04559 | 0.32553  | -0.01048 | 0.82135  | -0.08309 | 0.07282  | -0.16574 |
| -0.04791 | 0.30149  | -0.05539 | 0.23223  | -0.05721 | 0.21716  | -0.05058 | 0.27535  | -0.07645 |
| -0.02501 | 0.58988  | -0.00203 | 0.96504  | -0.02403 | 0.60446  | 0.001708 | 0.97063  | 0.016868 |
| -0.02994 | 0.51871  | -0.02656 | 0.56697  | -0.02242 | 0.62898  | -0.03519 | 0.44812  | -0.08018 |
| -0.04403 | 0.34241  | -0.04289 | 0.35504  | -0.02872 | 0.53589  | -0.05999 | 0.19565  | -0.1445  |
| -0.03403 | 0.4632   | -0.03475 | 0.45379  | -0.03466 | 0.45494  | -0.04037 | 0.38405  | -0.08911 |
| 0.047276 | 0.30798  | 0.05143  | 0.26736  | 0.047914 | 0.30148  | 0.029841 | 0.52004  | 0.004055 |
| -0.00732 | 0.87456  | -0.05084 | 0.2729   | -0.00935 | 0.84024  | -0.08319 | 0.07247  | -0.18092 |
| 0.031503 | 0.49706  | 0.001744 | 0.97002  | 0.004017 | 0.93101  | -0.00732 | 0.87468  | -0.08619 |
| -0.04747 | 0.30605  | -0.03421 | 0.46079  | -0.03995 | 0.38905  | -0.04574 | 0.32403  | -0.0959  |
| -0.05305 | 0.25259  | -0.08014 | 0.08362  | -0.05358 | 0.24782  | -0.10053 | 0.02985  | -0.19435 |
| -0.05538 | 0.2323   | -0.06164 | 0.18361  | -0.03615 | 0.43581  | -0.08745 | 0.05896  | -0.15086 |
| 0.018626 | 0.68808  | -0.08184 | 0.07726  | -0.02986 | 0.51981  | -0.09603 | 0.03803  | -0.19995 |
| 0.00641  | 0.89012  | 0.025252 | 0.58622  | 0.011046 | 0.81182  | 0.028469 | 0.53942  | -0.06886 |
| 0.224771 | 9.24E-07 | 0.250212 | 4.25E-08 | 0.197838 | 1.66E-05 | 0.225183 | 8.81E-07 | 0.113872 |
| 0.141477 | 0.00218  | 0.111825 | 0.01562  | 0.132292 | 0.00419  | 0.061207 | 0.18671  | 0.032729 |
| 0.060199 | 0.19408  | 0.020477 | 0.65895  | 0.038233 | 0.40977  | 0.008564 | 0.85357  | -0.03701 |
| 0.069861 | 0.13168  | 0.180347 | 8.89E-05 | 0.133613 | 0.00382  | 0.143065 | 0.00194  | 0.234518 |
| 0.027324 | 0.55585  | 0.053773 | 0.24614  | 0.060222 | 0.19391  | 0.024944 | 0.5908   | 0.062117 |
| 0.284924 | 3.58E-10 | 0.170996 | 0.00021  | 0.245982 | 7.27E-08 | 0.064281 | 0.16549  | 0.010094 |
| 0.040224 | 0.3858   | -0.03699 | 0.42513  | 0.032004 | 0.49024  | -0.10124 | 0.0287   | -0.17833 |
| 0.081404 | 0.07886  | -0.02313 | 0.61809  | 0.008408 | 0.8562   | -0.05668 | 0.22147  | -0.10541 |
| 0.213807 | 3.13E-06 | 0.116431 | 0.01181  | 0.160496 | 0.0005   | 0.06046  | 0.19215  | 0.08878  |
| -0.00908 | 0.84487  | -0.01844 | 0.69101  | -0.00882 | 0.84923  | -0.04419 | 0.34069  | -0.04301 |
| 0.099314 | 0.03189  | 0.027051 | 0.55982  | 0.05939  | 0.20015  | -0.00242 | 0.95847  | -0.02824 |
| 0.117319 | 0.01117  | 0.088625 | 0.05564  | 0.059983 | 0.19569  | 0.069058 | 0.13619  | 0.046903 |
| 0.077455 | 0.09456  | 0.11733  | 0.01116  | 0.086465 | 0.0619   | 0.086217 | 0.06266  | 0.122435 |
| -0.02653 | 0.5674   | -0.03369 | 0.46764  | -0.03864 | 0.40476  | -0.03451 | 0.45691  | -0.09739 |
| 0.097264 | 0.03562  | 0.094788 | 0.04061  | 0.113998 | 0.0137   | 0.056744 | 0.22097  | 0.141415 |
| 0.041298 | 0.37322  | 0.020524 | 0.65821  | 0.039606 | 0.39314  | 0.0046   | 0.92102  | -0.02612 |
| 0.078283 | 0.09107  | 0.023525 | 0.61209  | -0.0066  | 0.88682  | 0.046732 | 0.31359  | 0.002722 |
| 0.079566 | 0.08588  | 0.019894 | 0.66806  | 0.028149 | 0.54399  | 0.00487  | 0.91641  | -0.06935 |
| 0.010955 | 0.81334  | 0.062962 | 0.17436  | 0.039315 | 0.39663  | 0.045934 | 0.32193  | 0.043932 |
| 0.028368 | 0.54086  | 0.06549  | 0.15767  | 0.047255 | 0.30819  | 0.045753 | 0.32384  | -0.00906 |
| 0.070241 | 0.12959  | 0.069291 | 0.13487  | 0.089092 | 0.05436  | 0.01719  | 0.711    | 0.009604 |

|          |          |          |          |          |          |          |          |          |
|----------|----------|----------|----------|----------|----------|----------|----------|----------|
| 0.057829 | 0.21225  | 0.028029 | 0.5457   | 0.077863 | 0.09283  | -0.02261 | 0.62604  | -0.03788 |
| 0.036489 | 0.43147  | 0.0943   | 0.04166  | 0.038855 | 0.40218  | 0.100946 | 0.02917  | 0.089619 |
| 0.129043 | 0.00522  | 0.124083 | 0.00726  | 0.120312 | 0.00926  | 0.066158 | 0.15346  | 0.0126   |
| 0.001243 | 0.97863  | 0.063803 | 0.16867  | 0.034867 | 0.45224  | 0.065173 | 0.15969  | 0.006242 |
| 0.024244 | 0.60126  | 0.064907 | 0.1614   | 0.070048 | 0.13065  | 0.019515 | 0.67402  | 0.012648 |
| 0.027298 | 0.55624  | 0.104342 | 0.02414  | 0.040505 | 0.38248  | 0.117449 | 0.01108  | 0.077005 |
| 0.062946 | 0.17447  | 0.092406 | 0.04595  | 0.102191 | 0.02723  | 0.03103  | 0.50354  | 0.06196  |
| -0.00647 | 0.88911  | 0.0388   | 0.40285  | 0.025594 | 0.58116  | 0.018592 | 0.68861  | 0.021234 |
| 0.131576 | 0.0044   | 0.186757 | 4.89E-05 | 0.179738 | 9.40E-05 | 0.115708 | 0.01234  | 0.135195 |
| -0.03031 | 0.51353  | -0.00167 | 0.97134  | -0.02916 | 0.52959  | 0.003508 | 0.93973  | -0.03537 |
| -0.00526 | 0.90979  | -0.05913 | 0.2021   | 0.025012 | 0.58978  | -0.10976 | 0.01766  | -0.17433 |
| 0.006439 | 0.88962  | 0.012581 | 0.78626  | 0.008377 | 0.85673  | 0.018709 | 0.68676  | -0.04293 |
| 0.042976 | 0.3541   | 0.048709 | 0.29353  | 0.057149 | 0.21769  | 0.009706 | 0.8343   | -0.03454 |
| -0.05014 | 0.27955  | -0.06064 | 0.19082  | -0.02912 | 0.53015  | -0.08028 | 0.08311  | -0.16277 |
| 0.053715 | 0.24665  | 0.035578 | 0.44306  | 0.085492 | 0.0649   | -0.02972 | 0.52168  | -0.10939 |
| 0.030689 | 0.50824  | -0.03777 | 0.4155   | 0.011115 | 0.81066  | -0.08425 | 0.06892  | -0.14305 |
| 0.012072 | 0.79472  | 0.089972 | 0.05201  | 0.067054 | 0.14795  | 0.067497 | 0.14529  | -0.00163 |
| -0.0343  | 0.4596   | -0.01894 | 0.68308  | -0.04245 | 0.36     | -0.01584 | 0.7328   | -0.06381 |
| 0.055691 | 0.22967  | 0.079003 | 0.08813  | 0.073783 | 0.1113   | 0.03793  | 0.41348  | 0.019891 |
| 0.089531 | 0.05318  | 0.128729 | 0.00534  | 0.110402 | 0.017    | 0.0829   | 0.07349  | 0.08749  |
| 0.0294   | 0.52623  | 0.04496  | 0.33231  | 0.058418 | 0.20763  | -0.01002 | 0.82903  | 0.030982 |
| 0.024855 | 0.59212  | 0.01165  | 0.80175  | 0.012195 | 0.79267  | -0.01214 | 0.79354  | -0.12593 |
| 0.09872  | 0.03294  | 0.054826 | 0.237    | 0.076735 | 0.09767  | 0.00536  | 0.90804  | -0.01921 |
| -0.06832 | 0.14046  | 0.027386 | 0.55496  | -0.02285 | 0.62238  | 0.044884 | 0.33312  | 0.079645 |
| -0.03259 | 0.4823   | -0.03203 | 0.48985  | -0.0365  | 0.43132  | -0.03506 | 0.44971  | -0.10934 |
| -0.0183  | 0.69333  | -0.02034 | 0.66108  | 0.015581 | 0.737    | -0.05955 | 0.19894  | -0.11833 |
| 0.000444 | 0.99237  | -0.0151  | 0.74488  | -0.01102 | 0.81229  | -0.02551 | 0.58238  | -0.04227 |
| 0.018066 | 0.69698  | -0.00345 | 0.94078  | 0.001978 | 0.966    | -0.02551 | 0.58238  | -0.07456 |
| 0.023215 | 0.6168   | -0.06392 | 0.16787  | -0.00437 | 0.9249   | -0.09987 | 0.03094  | -0.18555 |
| -0.02968 | 0.52231  | -0.04134 | 0.37273  | -0.00875 | 0.85042  | -0.06147 | 0.18478  | -0.12611 |
| 0.008524 | 0.85423  | 0.020975 | 0.65119  | 0.032052 | 0.48959  | -0.01476 | 0.75044  | -0.08158 |
| -0.04161 | 0.36957  | 0.013074 | 0.77811  | -0.02328 | 0.61577  | 0.026545 | 0.56719  | -0.00783 |
| 0.057847 | 0.21211  | 0.012121 | 0.79391  | 0.004735 | 0.91872  | 0.009129 | 0.84402  | -0.02967 |
| -0.02891 | 0.53316  | -0.06075 | 0.19005  | -0.01509 | 0.74501  | -0.08599 | 0.06336  | -0.09865 |
| 0.205937 | 7.24E-06 | 0.11779  | 0.01085  | 0.149229 | 0.00122  | 0.048151 | 0.2991   | 0.03754  |
| 0.118493 | 0.01038  | 0.054823 | 0.23702  | 0.0593   | 0.20084  | 0.028324 | 0.54148  | -0.02503 |
| 0.456262 | 2.17E-25 | 0.309522 | 7.94E-12 | 0.376784 | 3.36E-17 | 0.160589 | 0.00049  | 0.111271 |
| 0.018111 | 0.69626  | 0.032419 | 0.48463  | 0.041359 | 0.37252  | 0.010192 | 0.82613  | 0.027239 |
| 0.06113  | 0.18726  | 0.008671 | 0.85175  | 0.009905 | 0.83096  | 0.006834 | 0.88291  | -0.03072 |
| 0.008483 | 0.85493  | -0.02241 | 0.62907  | 0.047589 | 0.30478  | -0.088   | 0.05738  | -0.13931 |
| -0.03045 | 0.5116   | -0.02083 | 0.65348  | -0.00252 | 0.95662  | -0.03333 | 0.47244  | -0.09034 |
| 0.195369 | 2.12E-05 | 0.153833 | 0.00085  | 0.222223 | 1.23E-06 | 0.043795 | 0.345    | 0.090015 |
| 0.178391 | 0.00011  | 0.091203 | 0.04887  | 0.180887 | 8.46E-05 | -0.02361 | 0.61078  | -0.04598 |
| -0.06046 | 0.19218  | -0.13988 | 0.00245  | -0.0835  | 0.07141  | -0.15502 | 0.00078  | -0.28057 |
| -0.15732 | 0.00065  | -0.24482 | 8.40E-08 | -0.15907 | 0.00056  | -0.25103 | 3.83E-08 | -0.40385 |



|          |          |          |          |          |          |          |         |          |
|----------|----------|----------|----------|----------|----------|----------|---------|----------|
| -0.05185 | 0.26345  | -0.10538 | 0.02275  | -0.012   | 0.79586  | -0.15884 | 0.00057 | -0.27888 |
| 0.030473 | 0.51124  | 0.047497 | 0.30572  | 0.018317 | 0.69299  | 0.044047 | 0.34222 | -0.00888 |
| 0.38394  | 7.51E-18 | 0.286746 | 2.74E-10 | 0.405664 | 6.31E-20 | 0.066466 | 0.15155 | 0.037036 |
| -0.03774 | 0.41587  | -0.08056 | 0.08201  | -0.07247 | 0.11783  | -0.07965 | 0.08555 | -0.08159 |
| -0.01552 | 0.73801  | 0.044781 | 0.33423  | 0.013017 | 0.77904  | 0.0601   | 0.19482 | 0.040095 |
| -0.01525 | 0.74238  | -0.056   | 0.22707  | -0.0228  | 0.6231   | -0.08054 | 0.08211 | -0.15546 |
| 0.109826 | 0.01759  | 0.157851 | 0.00062  | 0.162501 | 0.00042  | 0.082838 | 0.07371 | 0.158222 |
| 0.036161 | 0.43563  | 0.083514 | 0.07138  | 0.068103 | 0.1417   | 0.075954 | 0.10114 | 0.051862 |
| 0.019016 | 0.6819   | -0.08766 | 0.05838  | -0.0444  | 0.33842  | -0.11463 | 0.01318 | -0.1546  |
| -0.00964 | 0.83542  | -0.02128 | 0.64645  | -0.00185 | 0.96818  | -0.02495 | 0.59068 | -0.09389 |
| 0.072313 | 0.11863  | 0.051486 | 0.26684  | 0.127945 | 0.00562  | -0.03891 | 0.40156 | -0.05556 |
| 0.043549 | 0.34771  | -0.03323 | 0.47373  | -0.02737 | 0.55516  | -0.01636 | 0.72432 | -0.12987 |
| 0.109835 | 0.01758  | 0.025949 | 0.57592  | 0.073187 | 0.11423  | -0.02349 | 0.61255 | -0.07335 |
| 0.0442   | 0.34055  | 0.102277 | 0.0271   | 0.093007 | 0.04455  | 0.042025 | 0.36487 | 0.221706 |
| -0.08508 | 0.06621  | -0.00248 | 0.95729  | -0.05298 | 0.25317  | 0.028892 | 0.5334  | -0.05089 |
| -0.04611 | 0.32011  | -0.11283 | 0.0147   | -0.05758 | 0.21427  | -0.12284 | 0.00787 | -0.2108  |
| 0.030282 | 0.51389  | 0.020417 | 0.65988  | 0.042197 | 0.3629   | -0.02192 | 0.63656 | -0.07442 |
| 0.008473 | 0.85509  | 0.044561 | 0.33662  | 0.024374 | 0.59932  | 0.016138 | 0.72796 | -0.00115 |
| -0.00186 | 0.96798  | 0.044215 | 0.34039  | 0.014816 | 0.74948  | 0.040341 | 0.38442 | 0.035943 |
| 0.057134 | 0.21781  | 0.087995 | 0.05741  | 0.047154 | 0.30923  | 0.087178 | 0.05977 | 0.049796 |
| 0.043084 | 0.35289  | 0.058052 | 0.21049  | 0.063933 | 0.1678   | 0.013882 | 0.76478 | 0.014644 |
| 0.034882 | 0.45204  | 0.03163  | 0.49532  | 0.024746 | 0.59375  | 0.010233 | 0.82544 | -0.04949 |
| 0.018546 | 0.68935  | -0.04631 | 0.31797  | -0.03485 | 0.45246  | -0.06368 | 0.16947 | -0.04572 |
| 0.155517 | 0.00075  | 0.251189 | 3.75E-08 | 0.235096 | 2.76E-07 | 0.149806 | 0.00117 | 0.12946  |
| -0.00568 | 0.90264  | 0.000241 | 0.99586  | -0.00268 | 0.9539   | -0.01775 | 0.70205 | -0.04003 |
| -0.0426  | 0.35838  | 0.020762 | 0.6545   | -0.01522 | 0.74294  | 0.049637 | 0.28441 | -0.00617 |
| 0.019729 | 0.67066  | 0.061512 | 0.18452  | 0.007745 | 0.86742  | 0.07314  | 0.11446 | 0.040253 |
| 0.043872 | 0.34415  | 0.047288 | 0.30785  | 0.046363 | 0.31743  | 0.034918 | 0.45158 | 0.01076  |
| 0.005269 | 0.90958  | 0.016972 | 0.7145   | 0.018374 | 0.69207  | -0.0099  | 0.83103 | -0.06396 |
| 0.127907 | 0.00564  | 0.138838 | 0.00264  | 0.103022 | 0.026    | 0.116    | 0.01212 | 0.075867 |
| 0.005892 | 0.89895  | -0.00151 | 0.97411  | -0.00738 | 0.87359  | -0.01494 | 0.74752 | -0.10072 |
| 0.058768 | 0.20491  | 0.047765 | 0.303    | 0.02342  | 0.61369  | 0.039049 | 0.39984 | -0.01753 |
| 0.002743 | 0.95285  | 0.077935 | 0.09252  | 0.018633 | 0.68796  | 0.088326 | 0.05647 | 0.058469 |
| 0.042036 | 0.36474  | 0.055238 | 0.23349  | 0.043813 | 0.3448   | 0.036058 | 0.43693 | 0.038801 |
| 0.010901 | 0.81425  | -0.03293 | 0.4778   | -0.02903 | 0.53151  | -0.01572 | 0.73467 | -0.12065 |
| 0.009911 | 0.83086  | -0.03052 | 0.51059  | -0.01244 | 0.78857  | -0.04497 | 0.33224 | -0.13485 |
| 0.332752 | 1.55E-13 | 0.19251  | 2.81E-05 | 0.232118 | 3.93E-07 | 0.087913 | 0.05764 | 0.112314 |
| 0.013599 | 0.76944  | -0.01875 | 0.68616  | -0.00312 | 0.94635  | -0.02968 | 0.52233 | -0.04967 |
| 0.016851 | 0.71645  | -0.03685 | 0.42695  | -0.00449 | 0.92295  | -0.06798 | 0.14244 | -0.15676 |
| 0.046379 | 0.31726  | 0.061784 | 0.18258  | 0.07883  | 0.08883  | 0.03139  | 0.4986  | 0.028417 |
| -0.09779 | 0.03463  | -0.08269 | 0.07424  | -0.07588 | 0.10146  | -0.07012 | 0.13028 | -0.20135 |
| 0.086434 | 0.06199  | 0.076121 | 0.10039  | 0.070265 | 0.12946  | 0.04822  | 0.29841 | 0.06936  |
| 0.069884 | 0.13155  | 0.032814 | 0.47932  | 0.093951 | 0.04242  | -0.03045 | 0.51151 | -0.04048 |
| -0.06243 | 0.17806  | -0.04984 | 0.28242  | -0.0365  | 0.43138  | -0.06748 | 0.14539 | -0.09528 |
| -0.0079  | 0.86486  | 0.049101 | 0.28965  | 0.026205 | 0.57217  | 0.03141  | 0.49833 | 0.060408 |

|          |          |          |          |          |          |          |          |          |
|----------|----------|----------|----------|----------|----------|----------|----------|----------|
| 0.050824 | 0.27305  | -0.04731 | 0.30764  | 0.008958 | 0.8469   | -0.07329 | 0.11374  | -0.18628 |
| 0.075034 | 0.10536  | 0.050253 | 0.27847  | 0.077802 | 0.09308  | -0.00627 | 0.8925   | -0.02516 |
| 0.15021  | 0.00113  | 0.106565 | 0.02126  | 0.121873 | 0.00838  | 0.065023 | 0.16066  | 0.026006 |
| 0.159439 | 0.00054  | 0.07699  | 0.09656  | 0.111025 | 0.01638  | 0.015812 | 0.73326  | -0.04542 |
| 0.011818 | 0.79894  | -0.02239 | 0.62934  | -0.01369 | 0.76799  | -0.03418 | 0.46123  | -0.0565  |
| -0.03251 | 0.48334  | 0.020309 | 0.66157  | 0.002231 | 0.96165  | 0.0319   | 0.49164  | 0.006985 |
| 0.076037 | 0.10077  | 0.053566 | 0.24797  | 0.073626 | 0.11207  | 0.011143 | 0.8102   | -0.0459  |
| -0.01394 | 0.76375  | -0.05959 | 0.19865  | 0.007185 | 0.87694  | -0.10164 | 0.02808  | -0.15442 |
| -0.04067 | 0.38057  | -0.02818 | 0.54349  | -0.02015 | 0.6641   | -0.04362 | 0.34693  | -0.09754 |
| -0.00882 | 0.84923  | -0.06065 | 0.19072  | 0.011236 | 0.80865  | -0.09866 | 0.03304  | -0.19308 |
| 0.128673 | 0.00536  | 0.068863 | 0.1373   | 0.10057  | 0.02978  | 0.024757 | 0.59358  | 0.032892 |
| -0.02764 | 0.55131  | -0.02301 | 0.61995  | -0.01337 | 0.77327  | -0.03503 | 0.45007  | -0.11997 |
| 0.249285 | 4.79E-08 | 0.262497 | 8.48E-09 | 0.25704  | 1.75E-08 | 0.167915 | 0.00027  | 0.211734 |
| 0.020716 | 0.65522  | 0.004828 | 0.91713  | 0.026453 | 0.56853  | -0.01579 | 0.73369  | -0.07907 |
| -0.02538 | 0.58427  | -0.06726 | 0.14669  | -0.03594 | 0.43843  | -0.09074 | 0.05003  | -0.14258 |
| -0.01279 | 0.7828   | -0.05946 | 0.19958  | -0.01875 | 0.68614  | -0.08788 | 0.05773  | -0.24616 |
| -0.0634  | 0.17138  | 0.003477 | 0.94027  | -0.02815 | 0.54403  | 0.005642 | 0.90322  | -0.02408 |
| 0.042971 | 0.35416  | 0.004622 | 0.92065  | 0.041378 | 0.37231  | -0.00547 | 0.90619  | -0.00612 |
| -0.04889 | 0.29169  | -0.13425 | 0.00365  | -0.04697 | 0.31116  | -0.16783 | 0.00027  | -0.2965  |
| 0.018076 | 0.69682  | 0.053051 | 0.25255  | 0.036973 | 0.42538  | 0.052083 | 0.26132  | -0.00911 |
| 0.187034 | 4.76E-05 | 0.156988 | 0.00066  | 0.184383 | 6.12E-05 | 0.07765  | 0.09373  | 0.042474 |
| -0.01397 | 0.76334  | -0.04056 | 0.38188  | -0.02215 | 0.63302  | -0.03343 | 0.47111  | -0.15651 |
| 0.293634 | 9.69E-11 | 0.190808 | 3.32E-05 | 0.29876  | 4.40E-11 | 0.025953 | 0.57586  | 0.031158 |
| 0.151573 | 0.00102  | 0.060965 | 0.18846  | 0.10433  | 0.02415  | -0.00047 | 0.99196  | -0.02049 |
| -0.13708 | 0.00299  | 0.003149 | 0.94589  | -0.02385 | 0.60721  | 0.000792 | 0.98638  | 0.062793 |
| -0.12465 | 0.007    | 0.014172 | 0.76001  | -0.01313 | 0.77715  | 0.02834  | 0.54125  | 0.032713 |
| -0.04016 | 0.3865   | 0.092027 | 0.04685  | 0.046899 | 0.31186  | 0.075543 | 0.10301  | 0.202522 |
| -0.1253  | 0.00671  | -0.0609  | 0.18894  | -0.06085 | 0.18928  | -0.04649 | 0.31611  | -0.05949 |
| -0.08552 | 0.06482  | 0.11498  | 0.01291  | -0.02667 | 0.56541  | 0.191889 | 2.99E-05 | 0.381439 |
| -0.12101 | 0.00885  | -0.01739 | 0.70774  | -0.042   | 0.36515  | -0.00393 | 0.93252  | -0.00428 |
| -0.02588 | 0.577    | 0.106352 | 0.02152  | 0.051325 | 0.26834  | 0.123607 | 0.00749  | 0.060335 |
| -0.18092 | 8.43E-05 | -0.00125 | 0.97853  | -0.06853 | 0.13924  | 0.0376   | 0.41757  | 0.062413 |
| -0.10838 | 0.01914  | 0.035973 | 0.43801  | -0.03427 | 0.46001  | 0.060312 | 0.19325  | 0.180869 |
| -0.03448 | 0.45725  | 0.120529 | 0.00913  | 0.066325 | 0.15242  | 0.116835 | 0.01151  | 0.223448 |
| -0.04001 | 0.38839  | 0.148949 | 0.00125  | 0.080354 | 0.08281  | 0.150993 | 0.00106  | 0.280649 |
| -0.07928 | 0.087    | 0.093468 | 0.0435   | 0.006569 | 0.88741  | 0.129255 | 0.00515  | 0.207389 |
| -0.06174 | 0.18287  | -0.00838 | 0.85673  | 0.00189  | 0.96751  | -0.01735 | 0.70841  | -0.03545 |
| -0.01082 | 0.81566  | 0.013508 | 0.77094  | 0.037746 | 0.41575  | -0.02582 | 0.57778  | -0.01909 |
| -0.08745 | 0.05898  | -0.05386 | 0.24538  | -0.04834 | 0.29723  | -0.05263 | 0.25633  | 0.041238 |
| -0.0497  | 0.2838   | 0.058376 | 0.20795  | 0.029223 | 0.52873  | 0.054095 | 0.24332  | 0.121545 |
| -0.25281 | 3.04E-08 | -0.25013 | 4.29E-08 | -0.18634 | 5.09E-05 | -0.24289 | 1.07E-07 | -0.30539 |
| -0.06686 | 0.14911  | 0.02887  | 0.53372  | -0.01502 | 0.74617  | 0.059556 | 0.19889  | 0.062671 |
| -0.02407 | 0.60383  | 0.101411 | 0.02843  | 0.059177 | 0.20178  | 0.077417 | 0.09472  | 0.202423 |
| -0.08995 | 0.05206  | 0.019429 | 0.67538  | -0.04111 | 0.37537  | 0.058039 | 0.2106   | 0.096195 |
| -0.12003 | 0.00942  | -0.04586 | 0.32274  | -0.05039 | 0.27718  | -0.02916 | 0.52959  | -0.08438 |

|          |          |          |         |          |         |          |         |          |
|----------|----------|----------|---------|----------|---------|----------|---------|----------|
| -0.01892 | 0.68341  | 0.138228 | 0.00276 | 0.04202  | 0.36492 | 0.163676 | 0.00038 | 0.280941 |
| -0.08732 | 0.05936  | 0.031985 | 0.49049 | -0.01735 | 0.7085  | 0.044126 | 0.34136 | 0.125216 |
| -0.09858 | 0.03319  | 0.05648  | 0.22313 | -0.0118  | 0.79926 | 0.090916 | 0.04959 | 0.183057 |
| -0.10409 | 0.02448  | 0.103925 | 0.02471 | -0.01519 | 0.74336 | 0.168098 | 0.00026 | 0.266181 |
| -0.08661 | 0.06148  | 0.058368 | 0.20802 | -0.00111 | 0.98099 | 0.071289 | 0.12395 | 0.163283 |
| -0.10506 | 0.02317  | 0.067087 | 0.14775 | 0.018168 | 0.69535 | 0.067785 | 0.14357 | 0.144032 |
| -0.15361 | 0.00087  | -0.09412 | 0.04205 | -0.09053 | 0.05057 | -0.07301 | 0.11513 | -0.08302 |
| -0.10567 | 0.02238  | 0.0391   | 0.39922 | -0.01446 | 0.75527 | 0.050341 | 0.27763 | 0.152454 |
| -0.07539 | 0.1037   | -0.00618 | 0.894   | 0.010213 | 0.82578 | -0.03525 | 0.44727 | 0.033162 |
| -0.0756  | 0.10277  | 0.045102 | 0.33078 | -0.01816 | 0.69543 | 0.080831 | 0.08099 | 0.114695 |
| -0.10226 | 0.02713  | 0.048287 | 0.29773 | -0.00136 | 0.97662 | 0.068383 | 0.14007 | 0.184055 |
| 0.046379 | 0.31726  | 0.041331 | 0.37284 | 0.045613 | 0.32533 | 0.021783 | 0.6387  | 0.0977   |
| 0.009412 | 0.83924  | 0.077276 | 0.09532 | 0.047236 | 0.30839 | 0.063608 | 0.16997 | 0.220757 |
| -0.05834 | 0.2082   | 0.017514 | 0.7058  | -0.00432 | 0.92583 | 0.018199 | 0.69486 | 0.096843 |
| -0.03454 | 0.45645  | 0.031309 | 0.49971 | 0.027829 | 0.54858 | 0.010769 | 0.81645 | 0.040735 |
| -0.06365 | 0.1697   | 0.013235 | 0.77544 | -0.01085 | 0.81511 | 0.013656 | 0.7685  | 0.098847 |
| -0.12198 | 0.00832  | -0.08891 | 0.05485 | -0.07783 | 0.09298 | -0.09095 | 0.0495  | -0.07137 |
| -0.05826 | 0.20888  | 0.04445  | 0.33782 | 0.013446 | 0.77197 | 0.028199 | 0.54327 | 0.136051 |
| -0.12321 | 0.00768  | -0.05487 | 0.23658 | -0.03832 | 0.40874 | -0.06385 | 0.16836 | -0.07537 |
| -0.18076 | 8.55E-05 | -0.16718 | 0.00028 | -0.15309 | 0.0009  | -0.14265 | 0.002   | -0.18266 |
| -0.11264 | 0.01487  | 0.058325 | 0.20835 | -0.03525 | 0.4473  | 0.113314 | 0.01428 | 0.134518 |
| -0.06412 | 0.16654  | 0.005344 | 0.9083  | -0.03069 | 0.5082  | 0.020059 | 0.66549 | 0.067726 |
| -0.09005 | 0.0518   | 0.051806 | 0.26387 | -0.00176 | 0.96979 | 0.065778 | 0.15584 | 0.154208 |
| -0.10733 | 0.02034  | -0.00811 | 0.86127 | -0.01288 | 0.78127 | -0.01463 | 0.75253 | 0.077558 |
| -0.05606 | 0.2266   | 0.124155 | 0.00723 | 0.054977 | 0.23571 | 0.131929 | 0.00429 | 0.300413 |
| -0.19696 | 1.81E-05 | -0.09163 | 0.04782 | -0.12613 | 0.00635 | -0.05109 | 0.27055 | -0.00435 |
| -0.12707 | 0.00596  | -0.05049 | 0.27625 | -0.05003 | 0.28063 | -0.05686 | 0.22007 | -0.07972 |
| -0.12103 | 0.00884  | -0.05763 | 0.2138  | -0.05585 | 0.22834 | -0.04043 | 0.38331 | -0.01125 |
| -0.09647 | 0.03717  | 0.021041 | 0.65017 | -0.04205 | 0.36458 | 0.067815 | 0.1434  | 0.100221 |
| -0.02928 | 0.5279   | 0.099832 | 0.03101 | 0.066128 | 0.15364 | 0.087595 | 0.05856 | 0.227374 |
| -0.14697 | 0.00145  | -0.14475 | 0.00171 | -0.09377 | 0.04283 | -0.16473 | 0.00035 | -0.16157 |
| 0.0276   | 0.55187  | 0.074191 | 0.10934 | 0.078634 | 0.08963 | 0.036155 | 0.4357  | 0.110163 |
| -0.07821 | 0.09136  | 0.047297 | 0.30776 | 0.01235  | 0.79011 | 0.04367  | 0.34638 | 0.227119 |
| -0.22339 | 1.08E-06 | -0.07979 | 0.08498 | -0.1514  | 0.00103 | -0.00362 | 0.93784 | -0.02343 |
| -0.0845  | 0.0681   | 0.032704 | 0.48079 | -0.01341 | 0.7726  | 0.058249 | 0.20895 | 0.064175 |
| -0.10509 | 0.02313  | 0.049337 | 0.28735 | -0.03549 | 0.44421 | 0.088735 | 0.05534 | 0.161691 |
| -0.12362 | 0.00748  | -0.00209 | 0.964   | -0.04018 | 0.38637 | 0.011403 | 0.80587 | 0.075067 |
| -0.06163 | 0.18368  | 0.005151 | 0.9116  | -0.03346 | 0.47064 | 0.045089 | 0.33092 | 0.026732 |
| -0.05238 | 0.25863  | 0.076852 | 0.09716 | 0.007843 | 0.86577 | 0.105057 | 0.02318 | 0.149616 |
| -0.06689 | 0.14896  | 0.019426 | 0.67542 | -0.00834 | 0.85737 | 0.023161 | 0.61761 | 0.116732 |
| -0.04748 | 0.30588  | 0.015725 | 0.73467 | -0.01711 | 0.71231 | 0.032433 | 0.48443 | 0.103415 |
| -0.12895 | 0.00526  | -0.0407  | 0.38014 | -0.04163 | 0.36943 | -0.04994 | 0.28146 | -0.00555 |
| -0.01837 | 0.6922   | 0.114475 | 0.01331 | 0.102385 | 0.02694 | 0.081485 | 0.07856 | 0.104645 |
| -0.07362 | 0.11207  | 0.025102 | 0.58844 | 0.016991 | 0.7142  | 0.006824 | 0.88307 | 0.192897 |
| -0.07804 | 0.09209  | 0.041303 | 0.37317 | -0.00162 | 0.97212 | 0.050704 | 0.27418 | 0.1608   |

|          |          |          |          |          |         |          |          |          |
|----------|----------|----------|----------|----------|---------|----------|----------|----------|
| -0.10717 | 0.02054  | 0.085469 | 0.06497  | -0.02144 | 0.64397 | 0.13502  | 0.00346  | 0.233415 |
| -0.18236 | 7.38E-05 | -0.02094 | 0.6518   | -0.09497 | 0.04022 | 0.027835 | 0.54849  | 0.111659 |
| -0.0853  | 0.0655   | 0.037372 | 0.42039  | -0.00644 | 0.88963 | 0.058124 | 0.20993  | 0.115682 |
| -0.10237 | 0.02696  | -0.00323 | 0.94456  | -0.02671 | 0.56475 | 0.007073 | 0.87884  | 0.05281  |
| -0.16373 | 0.00038  | -0.11048 | 0.01693  | -0.09515 | 0.03983 | -0.09329 | 0.04391  | -0.15268 |
| -0.08498 | 0.06654  | 0.003648 | 0.93733  | -0.00357 | 0.93872 | -0.00984 | 0.83207  | 0.024199 |
| -0.07559 | 0.10279  | 0.021109 | 0.64912  | -0.00518 | 0.91104 | 0.024937 | 0.5909   | 0.101201 |
| -0.08364 | 0.07094  | 0.031306 | 0.49976  | -0.00079 | 0.98634 | 0.037679 | 0.41659  | 0.063724 |
| -0.05978 | 0.19717  | -0.07979 | 0.08501  | -0.00497 | 0.91465 | -0.137   | 0.00301  | -0.08731 |
| -0.08042 | 0.08254  | 0.034775 | 0.45343  | 0.00871  | 0.85109 | 0.036748 | 0.4282   | 0.138992 |
| -0.13897 | 0.00261  | -0.15134 | 0.00104  | -0.10603 | 0.02192 | -0.15657 | 0.00069  | -0.23263 |
| -0.22932 | 5.46E-07 | -0.17609 | 0.00013  | -0.16443 | 0.00036 | -0.14998 | 0.00115  | -0.19148 |
| -0.04245 | 0.36001  | 0.026465 | 0.56836  | 0.001363 | 0.97656 | 0.028557 | 0.53816  | 0.122798 |
| -0.09633 | 0.03744  | -0.02773 | 0.55001  | -0.05106 | 0.27084 | -0.00464 | 0.92038  | -0.03543 |
| -0.08942 | 0.05347  | 0.050054 | 0.28038  | -0.00765 | 0.86901 | 0.068526 | 0.13924  | 0.20884  |
| -0.24563 | 7.60E-08 | -0.14993 | 0.00116  | -0.15268 | 0.00093 | -0.11301 | 0.01454  | -0.1171  |
| -0.16853 | 0.00025  | -0.121   | 0.00886  | -0.10566 | 0.0224  | -0.10893 | 0.01854  | -0.15325 |
| -0.06234 | 0.17863  | 0.110315 | 0.01709  | 0.037985 | 0.41281 | 0.139449 | 0.00253  | 0.169257 |
| -0.11028 | 0.01712  | -0.00168 | 0.9711   | -0.0508  | 0.27332 | 0.038831 | 0.40247  | 0.017872 |
| -0.06912 | 0.13584  | 0.005256 | 0.90982  | -0.01631 | 0.72515 | 0.004046 | 0.93051  | 0.053828 |
| -0.13183 | 0.00432  | 0.009736 | 0.83379  | -0.02443 | 0.59844 | 0.022012 | 0.63517  | 0.021743 |
| -0.09065 | 0.05026  | 0.091156 | 0.04899  | 0.014068 | 0.76174 | 0.110745 | 0.01666  | 0.253067 |
| -0.07386 | 0.11094  | -0.16394 | 0.00037  | -0.09119 | 0.04889 | -0.16026 | 0.00051  | -0.3092  |
| -0.04161 | 0.36959  | -0.03271 | 0.48065  | -0.02853 | 0.53853 | -0.04052 | 0.38226  | 0.005235 |
| -0.12835 | 0.00547  | -0.13651 | 0.00312  | -0.09156 | 0.04798 | -0.12841 | 0.00545  | -0.21643 |
| -0.00758 | 0.87026  | 0.157792 | 0.00062  | 0.071371 | 0.12352 | 0.175372 | 0.00014  | 0.328784 |
| -0.09163 | 0.04782  | 0.051389 | 0.26774  | -0.00186 | 0.96799 | 0.071776 | 0.1214   | 0.166258 |
| -0.07566 | 0.10248  | 0.00851  | 0.85448  | -0.03381 | 0.466   | 0.040275 | 0.38519  | 0.049982 |
| -0.13935 | 0.00254  | 0.040264 | 0.38532  | -0.02652 | 0.56751 | 0.05659  | 0.22223  | 0.16536  |
| 0.009631 | 0.83556  | 0.184924 | 5.81E-05 | 0.095361 | 0.0394  | 0.185668 | 5.42E-05 | 0.347408 |
| -0.0547  | 0.23805  | 0.047697 | 0.30369  | -0.00475 | 0.91843 | 0.070639 | 0.12742  | 0.111608 |
| -0.0345  | 0.45706  | 0.055479 | 0.23146  | 0.013999 | 0.76286 | 0.056751 | 0.22091  | 0.148106 |
| -0.08266 | 0.07434  | 0.031672 | 0.49475  | 0.04653  | 0.31568 | -0.00673 | 0.88463  | 0.012214 |
| 0.045842 | 0.3229   | 0.186123 | 5.19E-05 | 0.119512 | 0.00974 | 0.179906 | 9.26E-05 | 0.273751 |
| -0.14069 | 0.00231  | -0.00415 | 0.92874  | -0.05114 | 0.27011 | 0.017216 | 0.71058  | 0.131616 |
| 0.079985 | 0.08423  | 0.185676 | 5.42E-05 | 0.16681  | 0.00029 | 0.145826 | 0.00158  | 0.214851 |
| -0.12059 | 0.00909  | -0.00179 | 0.96917  | -0.02965 | 0.5227  | 0.013762 | 0.76675  | 0.058214 |
| -0.13683 | 0.00305  | 0.005186 | 0.91101  | -0.05245 | 0.25795 | 0.049264 | 0.28806  | 0.078057 |
| -0.09745 | 0.03527  | -0.05711 | 0.21802  | -0.03464 | 0.45524 | -0.05966 | 0.19809  | -0.10535 |
| -0.12037 | 0.00922  | -0.08758 | 0.05859  | -0.05274 | 0.25536 | -0.0903  | 0.05117  | -0.12098 |
| -0.1482  | 0.00132  | -0.0469  | 0.31181  | -0.03589 | 0.43911 | -0.05276 | 0.25515  | 0.009062 |
| -0.11091 | 0.0165   | 0.0877   | 0.05825  | -0.02019 | 0.6635  | 0.142685 | 0.00199  | 0.221766 |
| -0.04718 | 0.30895  | 0.112967 | 0.01459  | 0.031317 | 0.49961 | 0.135549 | 0.00334  | 0.26389  |
| -0.17188 | 0.00019  | 0.018978 | 0.6825   | -0.07356 | 0.11238 | 0.078634 | 0.08963  | 0.12591  |
| -0.19001 | 3.58E-05 | -0.1471  | 0.00143  | -0.11537 | 0.0126  | -0.1534  | 0.00088  | -0.18865 |

|          |          |          |          |          |          |          |          |          |
|----------|----------|----------|----------|----------|----------|----------|----------|----------|
| -0.15636 | 0.0007   | -0.00582 | 0.90026  | -0.07565 | 0.1025   | 0.030445 | 0.51162  | 0.066782 |
| -0.03626 | 0.43438  | 0.052187 | 0.26037  | 0.030209 | 0.5149   | 0.057754 | 0.21285  | 0.099138 |
| 0.065546 | 0.15731  | 0.196791 | 1.84E-05 | 0.142246 | 0.00206  | 0.168339 | 0.00026  | 0.353738 |
| -0.16136 | 0.00046  | 0.01354  | 0.77041  | -0.08131 | 0.07921  | 0.071575 | 0.12244  | 0.047175 |
| -0.14503 | 0.00168  | -0.01869 | 0.68708  | -0.06088 | 0.18908  | 0.013851 | 0.7653   | 0.058921 |
| -0.17209 | 0.00019  | -0.05226 | 0.25967  | -0.10841 | 0.01911  | 0.000992 | 0.98295  | -0.10574 |
| -0.05205 | 0.26166  | 0.009505 | 0.83768  | 0.003323 | 0.94291  | -0.01    | 0.82931  | 0.041377 |
| -0.18816 | 4.28E-05 | -0.14754 | 0.00139  | -0.15164 | 0.00101  | -0.11741 | 0.01111  | -0.08816 |
| -0.06997 | 0.13106  | 0.002475 | 0.95746  | -0.00222 | 0.96176  | -0.01936 | 0.67646  | -0.00348 |
| 0.102666 | 0.02652  | 0.192608 | 2.78E-05 | 0.228024 | 6.35E-07 | 0.090357 | 0.05101  | 0.206516 |
| -0.14524 | 0.00165  | -0.16309 | 0.0004   | -0.12716 | 0.00593  | -0.14695 | 0.00145  | -0.23775 |
| -0.21484 | 2.80E-06 | -0.06332 | 0.17195  | -0.11178 | 0.01566  | -0.02335 | 0.6147   | 0.024181 |
| -0.11126 | 0.01616  | -0.08597 | 0.0634   | -0.05901 | 0.20302  | -0.09353 | 0.04336  | -0.1063  |
| -0.08994 | 0.05209  | -0.0636  | 0.17     | -0.05567 | 0.22982  | -0.04695 | 0.3113   | -0.0656  |
| -0.15219 | 0.00097  | -0.11087 | 0.01653  | -0.09973 | 0.03119  | -0.10481 | 0.02351  | -0.11054 |
| -0.01351 | 0.77085  | 0.134972 | 0.00347  | 0.049671 | 0.28409  | 0.154639 | 0.0008   | 0.284738 |
| -0.11737 | 0.01114  | 0.050928 | 0.27206  | -0.0207  | 0.65549  | 0.076027 | 0.10081  | 0.178216 |
| -0.04712 | 0.30961  | 0.047172 | 0.30905  | 0.036941 | 0.42578  | 0.019935 | 0.66742  | 0.081189 |
| 0.034903 | 0.45178  | 0.090071 | 0.05175  | 0.059549 | 0.19895  | 0.090002 | 0.05193  | 0.12782  |
| -0.09    | 0.05193  | 0.038068 | 0.41178  | 0.007125 | 0.87796  | 0.035619 | 0.44253  | 0.150967 |
| -0.00657 | 0.88741  | 0.173754 | 0.00016  | 0.072516 | 0.1176   | 0.198953 | 1.48E-05 | 0.354322 |
| -0.06381 | 0.16864  | -0.02107 | 0.64974  | -0.01462 | 0.7526   | -0.02959 | 0.52359  | -0.03257 |
| -0.06416 | 0.16629  | 0.103077 | 0.02592  | 0.03444  | 0.4578   | 0.097646 | 0.0349   | 0.213996 |
| -0.09208 | 0.04672  | 0.051836 | 0.26359  | -0.00201 | 0.96549  | 0.073505 | 0.11266  | 0.139364 |
| -0.15109 | 0.00106  | 0.001769 | 0.96959  | -0.06445 | 0.16436  | 0.035616 | 0.44257  | 0.124556 |
| -0.0655  | 0.15757  | 0.100263 | 0.03028  | 0.017574 | 0.70485  | 0.128075 | 0.00558  | 0.24717  |
| -0.13269 | 0.00407  | 0.049787 | 0.28296  | -0.02095 | 0.65159  | 0.073027 | 0.11503  | 0.185119 |
| -0.06055 | 0.19149  | 0.007051 | 0.87921  | -0.011   | 0.81264  | -0.00269 | 0.95377  | 0.157324 |
| -0.10639 | 0.02147  | 0.087334 | 0.05931  | 0.000324 | 0.99443  | 0.108276 | 0.01926  | 0.21459  |
| -0.06202 | 0.18089  | 0.060748 | 0.19004  | 0.041925 | 0.36601  | 0.036378 | 0.43287  | 0.135013 |
| -0.1168  | 0.01154  | 0.012522 | 0.78724  | -0.03765 | 0.41697  | 0.032358 | 0.48545  | 0.120295 |
| -0.08638 | 0.06216  | 0.040523 | 0.38227  | 0.019053 | 0.68131  | 0.038376 | 0.40802  | 0.100075 |
| -0.01401 | 0.7627   | 0.114095 | 0.01362  | 0.066183 | 0.1533   | 0.105112 | 0.0231   | 0.251506 |
| -0.0804  | 0.08262  | 0.031751 | 0.49368  | 0.015984 | 0.73047  | 0.012294 | 0.79102  | 0.113743 |
| -0.13794 | 0.00282  | -0.05388 | 0.24522  | -0.08479 | 0.06714  | -0.022   | 0.63536  | -0.06585 |
| -0.09348 | 0.04347  | 0.075545 | 0.10299  | -0.01813 | 0.69589  | 0.116502 | 0.01175  | 0.24253  |
| -0.11603 | 0.0121   | -0.00475 | 0.91838  | -0.02873 | 0.53577  | 0.018425 | 0.69127  | 0.052442 |
| 0.361832 | 6.83E-16 | 0.310277 | 7.03E-12 | 0.313176 | 4.37E-12 | 0.223497 | 1.07E-06 | 0.166776 |
| 0.01114  | 0.81026  | 0.012668 | 0.78483  | 0.015274 | 0.742    | 0.00731  | 0.8748   | -0.00522 |
| 0.205931 | 7.24E-06 | 0.184777 | 5.89E-05 | 0.091028 | 0.0493   | 0.231154 | 4.41E-07 | 0.116508 |
| 0.08324  | 0.07232  | 0.098198 | 0.03388  | 0.083274 | 0.0722   | 0.080672 | 0.0816   | 0.145253 |
| 0.333255 | 1.42E-13 | 0.323295 | 8.01E-13 | 0.361689 | 7.03E-16 | 0.182417 | 7.35E-05 | 0.119316 |
| 0.014664 | 0.75196  | 0.054288 | 0.24165  | 0.036685 | 0.429    | 0.049588 | 0.2849   | 0.02708  |
| -0.00804 | 0.8624   | -0.01262 | 0.78563  | -0.02038 | 0.66043  | -0.0033  | 0.94327  | -0.02676 |
| 0.048099 | 0.29962  | 0.052267 | 0.25964  | 0.05031  | 0.27793  | 0.032439 | 0.48436  | 0.011968 |

|          |          |          |          |          |          |          |          |          |
|----------|----------|----------|----------|----------|----------|----------|----------|----------|
| 0.178991 | 0.0001   | 0.139701 | 0.00248  | 0.154497 | 0.00081  | 0.076748 | 0.09761  | 0.17631  |
| -0.01295 | 0.78019  | 0.001596 | 0.97255  | -0.01336 | 0.7734   | 0.019252 | 0.67817  | -0.01791 |
| -0.00939 | 0.83956  | -0.00528 | 0.90947  | -0.01146 | 0.80483  | 0.007024 | 0.87967  | 0.010498 |
| 0.029307 | 0.52754  | 0.056135 | 0.22598  | 0.045341 | 0.32822  | 0.040918 | 0.37764  | 0.00985  |
| 0.064331 | 0.16516  | 0.068131 | 0.14154  | 0.066859 | 0.14914  | 0.044931 | 0.33262  | 0.09779  |
| 0.047777 | 0.30287  | 0.097455 | 0.03526  | 0.040842 | 0.37853  | 0.124084 | 0.00726  | 0.054939 |
| -0.00638 | 0.89068  | -0.00149 | 0.97431  | 0.010961 | 0.81324  | 0.000135 | 0.99767  | -0.03699 |
| 0.03928  | 0.39706  | 0.069677 | 0.1327   | 0.038807 | 0.40276  | 0.088943 | 0.05476  | 0.021911 |
| -0.01718 | 0.71116  | -0.00408 | 0.92988  | -0.01485 | 0.74893  | 0.002446 | 0.95796  | -0.01296 |
| 0.479131 | 3.55E-28 | 0.232755 | 3.65E-07 | 0.283758 | 4.25E-10 | 0.129026 | 0.00523  | 0.094704 |
| 0.16655  | 0.0003   | 0.013195 | 0.77611  | 0.030497 | 0.5109   | 0.0129   | 0.78099  | -0.00281 |
| 0.209518 | 4.96E-06 | 0.069234 | 0.13519  | 0.070743 | 0.12686  | 0.052969 | 0.25328  | 0.095942 |
| 0.581012 | 1.65E-43 | 0.344676 | 1.79E-14 | 0.468125 | 8.27E-27 | 0.116551 | 0.01172  | 0.183451 |
| 0.051333 | 0.26826  | 0.092565 | 0.04558  | 0.053342 | 0.24995  | 0.114161 | 0.01357  | 0.091041 |
| 0.077291 | 0.09526  | 0.062724 | 0.176    | 0.057792 | 0.21255  | 0.042635 | 0.35794  | 0.115475 |
| 0.534432 | 7.53E-36 | 0.507677 | 5.81E-32 | 0.622185 | 2.18E-51 | 0.207469 | 6.16E-06 | 0.257366 |
| 0.200721 | 1.24E-05 | 0.24531  | 7.91E-08 | 0.127744 | 0.0057   | 0.296712 | 6.04E-11 | 0.240461 |
| 0.063621 | 0.16988  | 0.027571 | 0.55229  | 0.044927 | 0.33266  | -0.00014 | 0.99768  | -0.00366 |
| 0.377172 | 3.10E-17 | 0.215081 | 2.73E-06 | 0.279033 | 8.46E-10 | 0.08332  | 0.07204  | 0.065947 |
| 0.068032 | 0.14212  | 0.074889 | 0.10603  | 0.064978 | 0.16094  | 0.053638 | 0.24733  | 0.030951 |
| 0.417574 | 3.94E-21 | 0.245679 | 7.55E-08 | 0.299728 | 3.78E-11 | 0.125489 | 0.00662  | 0.080121 |
| 0.066435 | 0.15174  | 0.095025 | 0.04011  | 0.044418 | 0.33817  | 0.127658 | 0.00573  | 0.05472  |
| 0.003658 | 0.93715  | 0.040146 | 0.38671  | 0.005555 | 0.9047   | 0.0539   | 0.24503  | 0.029796 |
| 0.156743 | 0.00068  | 0.251868 | 3.44E-08 | 0.235298 | 2.70E-07 | 0.174269 | 0.00015  | 0.109078 |
| 0.015312 | 0.74138  | 0.02473  | 0.59398  | -0.00068 | 0.98831  | 0.042766 | 0.35646  | 0.006363 |
| 0.106545 | 0.02129  | 0.092655 | 0.04537  | 0.052485 | 0.25766  | 0.108128 | 0.01943  | 0.050988 |
| 0.033719 | 0.46727  | -0.00077 | 0.98677  | -0.00262 | 0.955    | 0.001256 | 0.9784   | -0.01043 |
| 0.038372 | 0.40806  | 0.088343 | 0.05643  | 0.02919  | 0.52919  | 0.116178 | 0.01199  | 0.070061 |
| 0.004274 | 0.92661  | 0.064327 | 0.16519  | 0.01121  | 0.80909  | 0.087074 | 0.06008  | 0.036476 |
| 0.013748 | 0.76699  | 0.036818 | 0.42733  | 0.020465 | 0.65913  | 0.040693 | 0.38028  | 0.078711 |
| 0.029271 | 0.52804  | 0.024629 | 0.5955   | 0.018155 | 0.69557  | 0.025581 | 0.58135  | 0.00422  |
| 0.501286 | 4.40E-31 | 0.254111 | 2.57E-08 | 0.322235 | 9.60E-13 | 0.120213 | 0.00931  | 0.066956 |
| 0.004329 | 0.92566  | 0.011608 | 0.80245  | -0.00585 | 0.89974  | 0.020993 | 0.65091  | 0.010556 |
| -0.01875 | 0.68617  | -0.01033 | 0.82374  | -0.00138 | 0.9763   | -0.02057 | 0.65756  | -0.02475 |
| 0.023668 | 0.60993  | 0.034086 | 0.46243  | 0.014364 | 0.75687  | 0.051142 | 0.27005  | -0.00523 |
| 0.184312 | 6.16E-05 | 0.162904 | 0.00041  | 0.208595 | 5.47E-06 | 0.052971 | 0.25327  | 0.032376 |
| 0.15669  | 0.00068  | 0.065171 | 0.1597   | 0.035325 | 0.44632  | 0.079905 | 0.08455  | 0.030564 |
| 0.048258 | 0.29802  | 0.002788 | 0.95209  | -0.00074 | 0.98734  | 0.003398 | 0.94162  | -0.01014 |
| 0.029448 | 0.52555  | 0.047742 | 0.30323  | 0.015368 | 0.74046  | 0.060004 | 0.19553  | 0.021732 |
| 0.069329 | 0.13465  | 0.029844 | 0.51999  | 0.010177 | 0.82639  | 0.040561 | 0.38182  | 0.007354 |
| 0.00185  | 0.96819  | 0.026736 | 0.5644   | 0.003133 | 0.94617  | 0.037372 | 0.4204   | 0.007393 |
| 0.118206 | 0.01057  | 0.034846 | 0.45251  | 0.048294 | 0.29767  | 0.009913 | 0.83081  | -0.00628 |
| -0.00093 | 0.98407  | 0.012594 | 0.78605  | 0.013988 | 0.76304  | -0.00024 | 0.99583  | -0.02047 |
| -0.00572 | 0.90192  | 0.002075 | 0.96432  | -0.0122  | 0.79258  | 0.011364 | 0.80651  | -0.01195 |
| -0.01358 | 0.76972  | 0.020029 | 0.66594  | -0.01171 | 0.80068  | 0.038883 | 0.40184  | -0.00409 |

|          |          |          |          |          |          |          |          |          |
|----------|----------|----------|----------|----------|----------|----------|----------|----------|
| 0.006587 | 0.88711  | 0.132957 | 0.004    | 0.043384 | 0.34955  | 0.173412 | 0.00017  | 0.167412 |
| 0.46877  | 6.90E-27 | 0.174894 | 0.00015  | 0.239851 | 1.55E-07 | 0.081512 | 0.07846  | 0.065992 |
| 0.392976 | 1.07E-18 | 0.303375 | 2.13E-11 | 0.232791 | 3.63E-07 | 0.281718 | 5.73E-10 | 0.47555  |
| 0.029237 | 0.52852  | -0.00328 | 0.94362  | -0.00764 | 0.86929  | -0.00403 | 0.93073  | -0.00838 |
| 0.015967 | 0.73074  | 0.025984 | 0.5754   | 0.007718 | 0.86789  | 0.032658 | 0.4814   | 0.008576 |
| 0.008542 | 0.85394  | -0.00292 | 0.94978  | -0.00422 | 0.92755  | -0.00414 | 0.92896  | -0.01157 |
| 0.405074 | 7.22E-20 | 0.282958 | 4.78E-10 | 0.408165 | 3.56E-20 | 0.058503 | 0.20697  | 0.087086 |
| 0.127068 | 0.00596  | 0.025678 | 0.57992  | 0.022806 | 0.62301  | 0.030675 | 0.50844  | -0.00083 |
| 0.381532 | 1.25E-17 | 0.220007 | 1.58E-06 | 0.252895 | 3.01E-08 | 0.13246  | 0.00414  | 0.081454 |
| 0.180738 | 8.58E-05 | 0.063229 | 0.17254  | 0.076627 | 0.09814  | 0.054524 | 0.23959  | 0.031505 |
| -0.00904 | 0.84559  | -0.00492 | 0.91556  | -0.01244 | 0.78868  | -0.00191 | 0.96719  | -0.00664 |
| 0.461483 | 5.23E-26 | 0.198954 | 1.48E-05 | 0.281162 | 6.22E-10 | 0.067751 | 0.14378  | 0.048992 |
| 0.273103 | 1.97E-09 | 0.059878 | 0.19647  | 0.072069 | 0.11988  | 0.057377 | 0.21586  | 0.022396 |
| 0.270367 | 2.89E-09 | 0.184617 | 5.98E-05 | 0.280666 | 6.68E-10 | 0.038752 | 0.40343  | 0.038182 |
| 0.178582 | 0.0001   | 0.132303 | 0.00418  | 0.127553 | 0.00577  | 0.096325 | 0.03745  | 0.063789 |
| 0.382297 | 1.06E-17 | 0.229394 | 5.42E-07 | 0.298847 | 4.34E-11 | 0.101465 | 0.02835  | 0.08666  |
| 0.181843 | 7.75E-05 | 0.231799 | 4.09E-07 | 0.165986 | 0.00032  | 0.232305 | 3.85E-07 | 0.119199 |
| 0.018739 | 0.68629  | -0.00668 | 0.88556  | -0.00224 | 0.96146  | 0.003583 | 0.93844  | -0.02832 |
| 0.13266  | 0.00408  | 0.286977 | 2.64E-10 | 0.199278 | 1.43E-05 | 0.266787 | 4.73E-09 | 0.260412 |
| 0.045303 | 0.32863  | -0.08771 | 0.05822  | -0.01404 | 0.76214  | -0.12175 | 0.00845  | -0.24465 |
| -0.07724 | 0.09547  | -0.18434 | 6.14E-05 | -0.13069 | 0.00467  | -0.16682 | 0.00029  | -0.28324 |
| -0.07191 | 0.12073  | -0.16676 | 0.0003   | -0.07556 | 0.10293  | -0.20053 | 1.26E-05 | -0.3515  |
| -0.06338 | 0.1715   | -0.19278 | 2.74E-05 | -0.08103 | 0.08025  | -0.20618 | 7.05E-06 | -0.36656 |
| 0.117541 | 0.01102  | 0.002292 | 0.9606   | 0.071335 | 0.12371  | -0.03683 | 0.42715  | -0.07858 |
| -0.0733  | 0.11366  | -0.13602 | 0.00323  | -0.13029 | 0.0048   | -0.10202 | 0.02749  | -0.19228 |
| -0.01155 | 0.80337  | -0.2256  | 8.40E-07 | -0.14623 | 0.00153  | -0.21069 | 4.38E-06 | -0.31349 |
| -0.06221 | 0.17955  | -0.17564 | 0.00014  | -0.09505 | 0.04005  | -0.18855 | 4.12E-05 | -0.39172 |
| -0.09938 | 0.03177  | -0.23431 | 3.03E-07 | -0.10298 | 0.02606  | -0.2664  | 4.99E-09 | -0.51175 |
| 0.049585 | 0.28492  | -0.15951 | 0.00054  | -0.06355 | 0.17037  | -0.17237 | 0.00018  | -0.28603 |
| -0.06778 | 0.1436   | -0.10824 | 0.0193   | -0.11988 | 0.00951  | -0.07103 | 0.12533  | -0.17475 |
| -0.01203 | 0.79538  | -0.13278 | 0.00405  | -0.07904 | 0.08799  | -0.14058 | 0.00233  | -0.25267 |
| -0.07348 | 0.11279  | -0.21067 | 4.39E-06 | -0.07969 | 0.08538  | -0.23819 | 1.90E-07 | -0.47659 |
| 0.035776 | 0.44053  | -0.15114 | 0.00105  | 0.004809 | 0.91745  | -0.2181  | 1.96E-06 | -0.44634 |
| -0.01292 | 0.78063  | -0.06548 | 0.1577   | -0.03084 | 0.50611  | -0.08091 | 0.08068  | -0.11823 |
| -0.02035 | 0.661    | -0.19293 | 2.70E-05 | -0.03166 | 0.49488  | -0.26496 | 6.07E-09 | -0.46626 |
| 0.030493 | 0.51096  | -0.17629 | 0.00013  | -0.05628 | 0.22476  | -0.21242 | 3.64E-06 | -0.39319 |
| -0.04461 | 0.3361   | -0.12284 | 0.00787  | -0.03533 | 0.44623  | -0.15928 | 0.00055  | -0.34158 |
| 0.007666 | 0.86878  | -0.1609  | 0.00048  | -0.02148 | 0.64336  | -0.21558 | 2.58E-06 | -0.45679 |
| -0.00417 | 0.92844  | -0.08871 | 0.0554   | 0.014109 | 0.76106  | -0.14756 | 0.00138  | -0.2775  |
| -0.01121 | 0.80915  | -0.17115 | 0.0002   | -0.01564 | 0.73606  | -0.23743 | 2.09E-07 | -0.48709 |
| -0.04867 | 0.29395  | -0.21565 | 2.56E-06 | -0.10039 | 0.03007  | -0.24955 | 4.63E-08 | -0.36069 |
| -0.02308 | 0.61878  | -0.20068 | 1.24E-05 | -0.12098 | 0.00887  | -0.20463 | 8.29E-06 | -0.3449  |
| -0.06327 | 0.17228  | -0.18127 | 8.17E-05 | -0.08685 | 0.06074  | -0.2047  | 8.23E-06 | -0.33121 |
| -0.00186 | 0.96797  | -0.17986 | 9.29E-05 | -0.03512 | 0.44895  | -0.23691 | 2.22E-07 | -0.47057 |
| -0.0929  | 0.0448   | -0.20193 | 1.10E-05 | -0.11225 | 0.01523  | -0.21164 | 3.96E-06 | -0.43466 |

|          |          |          |          |          |          |          |          |          |
|----------|----------|----------|----------|----------|----------|----------|----------|----------|
| -0.06199 | 0.18109  | -0.17885 | 0.0001   | -0.09508 | 0.04     | -0.18353 | 6.62E-05 | -0.38168 |
| -0.00362 | 0.93782  | -0.23279 | 3.64E-07 | -0.10843 | 0.01909  | -0.25033 | 4.19E-08 | -0.47015 |
| -0.11344 | 0.01417  | -0.2778  | 1.01E-09 | -0.18013 | 9.07E-05 | -0.26539 | 5.73E-09 | -0.52869 |
| -0.01869 | 0.68703  | -0.07109 | 0.12498  | 0.014486 | 0.75488  | -0.10943 | 0.018    | -0.21492 |
| -0.01443 | 0.75585  | -0.17582 | 0.00013  | -0.04235 | 0.36119  | -0.2211  | 1.40E-06 | -0.45195 |
| -0.13466 | 0.00355  | -0.21394 | 3.09E-06 | -0.13061 | 0.0047   | -0.22859 | 5.95E-07 | -0.34513 |
| -0.01554 | 0.73762  | -0.17423 | 0.00015  | -0.09039 | 0.05093  | -0.19231 | 2.87E-05 | -0.35271 |
| -0.08678 | 0.06096  | -0.19597 | 2.00E-05 | -0.13409 | 0.00369  | -0.1929  | 2.71E-05 | -0.3053  |
| -0.04465 | 0.33565  | -0.26808 | 3.96E-09 | -0.13499 | 0.00347  | -0.30188 | 2.70E-11 | -0.46574 |
| -0.08295 | 0.07332  | -0.19248 | 2.82E-05 | -0.09255 | 0.04561  | -0.21909 | 1.75E-06 | -0.38997 |
| -0.08099 | 0.08041  | -0.18799 | 4.35E-05 | -0.10207 | 0.02741  | -0.20537 | 7.68E-06 | -0.35751 |
| -0.11155 | 0.01588  | -0.24258 | 1.11E-07 | -0.13986 | 0.00245  | -0.25742 | 1.67E-08 | -0.39324 |
| -0.14095 | 0.00227  | -0.19313 | 2.65E-05 | -0.14883 | 0.00126  | -0.17465 | 0.00015  | -0.29105 |
| -0.1233  | 0.00764  | -0.25162 | 3.55E-08 | -0.13717 | 0.00297  | -0.27399 | 1.74E-09 | -0.47118 |
| -0.1082  | 0.01934  | -0.19228 | 2.87E-05 | -0.14203 | 0.00209  | -0.17958 | 9.54E-05 | -0.30259 |
| 0.02572  | 0.57929  | -0.05574 | 0.22929  | -0.02827 | 0.54219  | -0.06432 | 0.16527  | -0.03073 |
| -0.08431 | 0.06872  | -0.09118 | 0.04892  | -0.04901 | 0.2906   | -0.10547 | 0.02264  | -0.19125 |
| -0.06982 | 0.13191  | -0.20599 | 7.20E-06 | -0.11605 | 0.01208  | -0.22322 | 1.10E-06 | -0.33388 |
| -0.04527 | 0.32896  | -0.15443 | 0.00081  | -0.06251 | 0.17746  | -0.19702 | 1.80E-05 | -0.22895 |
| -0.04828 | 0.29776  | -0.20603 | 7.17E-06 | -0.10747 | 0.02018  | -0.20791 | 5.88E-06 | -0.44815 |
| 0.047211 | 0.30864  | -0.15883 | 0.00057  | -0.0317  | 0.49439  | -0.20093 | 1.21E-05 | -0.4031  |
| -0.04945 | 0.28621  | -0.14316 | 0.00193  | -0.05565 | 0.23004  | -0.17394 | 0.00016  | -0.28601 |
| 0.003712 | 0.93624  | -0.08769 | 0.05827  | -0.00439 | 0.92463  | -0.12252 | 0.00804  | -0.21174 |
| 0.023561 | 0.61154  | -0.15024 | 0.00113  | -0.05369 | 0.24685  | -0.18033 | 8.90E-05 | -0.33675 |
| -0.20476 | 8.18E-06 | -0.17238 | 0.00018  | -0.16674 | 0.0003   | -0.13062 | 0.00469  | -0.24117 |
| 0.023196 | 0.61707  | -0.15863 | 0.00058  | -0.03094 | 0.50477  | -0.2031  | 9.71E-06 | -0.32396 |
| 0.003362 | 0.94223  | -0.08749 | 0.05887  | -0.04833 | 0.29734  | -0.10905 | 0.01841  | -0.18825 |
| 0.042355 | 0.36111  | -0.14236 | 0.00204  | -0.04772 | 0.30341  | -0.16442 | 0.00036  | -0.40034 |
| -0.13056 | 0.00471  | -0.32632 | 4.76E-13 | -0.19223 | 2.89E-05 | -0.34314 | 2.38E-14 | -0.51787 |
| -0.0696  | 0.13316  | -0.16263 | 0.00042  | -0.06483 | 0.1619   | -0.18905 | 3.93E-05 | -0.36751 |
| -0.0461  | 0.32013  | -0.12299 | 0.00779  | -0.09005 | 0.05182  | -0.12995 | 0.00491  | -0.25988 |
| -0.02108 | 0.64959  | -0.12461 | 0.00701  | -0.02745 | 0.55398  | -0.15833 | 0.00059  | -0.28658 |
| 0.059464 | 0.19959  | -0.00228 | 0.96081  | 0.077302 | 0.09521  | -0.0647  | 0.16273  | -0.05769 |
| -0.07993 | 0.08444  | -0.20416 | 8.71E-06 | -0.14587 | 0.00157  | -0.18705 | 4.76E-05 | -0.3692  |
| -0.03579 | 0.44036  | -0.19934 | 1.43E-05 | -0.08414 | 0.06928  | -0.23291 | 3.58E-07 | -0.43353 |
| -0.02463 | 0.59554  | -0.19444 | 2.32E-05 | -0.06602 | 0.15432  | -0.23596 | 2.49E-07 | -0.45586 |
| 0.02239  | 0.62937  | -0.12474 | 0.00696  | -0.00751 | 0.87145  | -0.17714 | 0.00012  | -0.35587 |
| -0.06117 | 0.187    | -0.14708 | 0.00144  | -0.05448 | 0.23998  | -0.19252 | 2.81E-05 | -0.27716 |
| 0.001815 | 0.9688   | -0.18369 | 6.53E-05 | -0.0819  | 0.07703  | -0.21356 | 3.21E-06 | -0.41208 |
| -0.02617 | 0.5727   | -0.13372 | 0.00379  | -0.08216 | 0.0761   | -0.14029 | 0.00238  | -0.25104 |
| 0.054651 | 0.2385   | -0.1079  | 0.01969  | 0.015971 | 0.73068  | -0.17121 | 0.0002   | -0.27367 |
| -0.01914 | 0.67989  | -0.11791 | 0.01077  | -0.03012 | 0.51617  | -0.15563 | 0.00074  | -0.32648 |
| -0.0763  | 0.09958  | -0.17545 | 0.00014  | -0.08537 | 0.06529  | -0.20268 | 1.01E-05 | -0.38089 |
| -0.11832 | 0.0105   | -0.17203 | 0.00019  | -0.07289 | 0.11573  | -0.20625 | 7.00E-06 | -0.40799 |
| -0.05424 | 0.24206  | -0.15331 | 0.00089  | -0.06493 | 0.16126  | -0.17271 | 0.00018  | -0.34892 |



|          |         |          |          |          |         |          |          |          |
|----------|---------|----------|----------|----------|---------|----------|----------|----------|
| -0.1592  | 0.00055 | -0.20991 | 4.76E-06 | -0.14975 | 0.00117 | -0.21138 | 4.07E-06 | -0.40088 |
| -0.04153 | 0.37054 | -0.18357 | 6.60E-05 | -0.0899  | 0.05221 | -0.2     | 1.33E-05 | -0.3899  |
| -0.03013 | 0.51595 | -0.11948 | 0.00976  | -0.00036 | 0.99385 | -0.18508 | 5.73E-05 | -0.34713 |
| -0.08859 | 0.05573 | -0.20684 | 6.58E-06 | -0.13716 | 0.00298 | -0.1838  | 6.46E-05 | -0.42158 |
| -0.05733 | 0.21626 | -0.28053 | 6.82E-10 | -0.1669  | 0.00029 | -0.28413 | 4.03E-10 | -0.47596 |
| -0.09632 | 0.03746 | -0.23413 | 3.10E-07 | -0.12406 | 0.00727 | -0.2503  | 4.20E-08 | -0.44096 |
| -0.04706 | 0.31018 | -0.13907 | 0.0026   | -0.07472 | 0.1068  | -0.1542  | 0.00083  | -0.29549 |
| -0.03186 | 0.49219 | -0.13813 | 0.00278  | -0.02997 | 0.51828 | -0.17813 | 0.00011  | -0.33588 |
| -0.11266 | 0.01486 | -0.12889 | 0.00528  | -0.07794 | 0.09251 | -0.13225 | 0.0042   | -0.3827  |
| -0.1047  | 0.02365 | -0.15196 | 0.00099  | -0.10901 | 0.01845 | -0.13499 | 0.00347  | -0.25329 |
| 0.052764 | 0.25513 | -0.10997 | 0.01744  | -0.01465 | 0.75213 | -0.15824 | 0.0006   | -0.24406 |
| -0.00199 | 0.96582 | -0.09997 | 0.03077  | -0.01489 | 0.7482  | -0.14773 | 0.00137  | -0.23439 |
| -0.06712 | 0.14757 | -0.17589 | 0.00013  | -0.08013 | 0.08366 | -0.2076  | 6.08E-06 | -0.33371 |
| -0.0499  | 0.2819  | -0.15399 | 0.00084  | -0.08359 | 0.07113 | -0.17423 | 0.00015  | -0.33496 |
| -0.05697 | 0.2191  | -0.24655 | 6.77E-08 | -0.14665 | 0.00148 | -0.24867 | 5.17E-08 | -0.51728 |
| -0.05896 | 0.20346 | -0.13786 | 0.00283  | -0.09104 | 0.04929 | -0.1428  | 0.00198  | -0.20823 |
| 0.021794 | 0.63852 | -0.17604 | 0.00013  | -0.05466 | 0.23844 | -0.21174 | 3.91E-06 | -0.40011 |
| -0.01484 | 0.74909 | -0.17054 | 0.00021  | -0.05976 | 0.19736 | -0.2145  | 2.90E-06 | -0.40868 |
| -0.04441 | 0.33822 | -0.1955  | 2.09E-05 | -0.13351 | 0.00385 | -0.19491 | 2.22E-05 | -0.33786 |
| 0.039356 | 0.39613 | -0.04646 | 0.31643  | 0.028855 | 0.53393 | -0.08302 | 0.07309  | -0.14375 |
| -0.14679 | 0.00147 | -0.20785 | 5.92E-06 | -0.10308 | 0.02592 | -0.24692 | 6.46E-08 | -0.32214 |
| 0.001768 | 0.96961 | -0.13688 | 0.00304  | -0.02531 | 0.58536 | -0.17216 | 0.00019  | -0.38434 |
| 0.028193 | 0.54336 | -0.24045 | 1.44E-07 | -0.12052 | 0.00913 | -0.25871 | 1.41E-08 | -0.45465 |
| -0.07303 | 0.11503 | -0.17052 | 0.00021  | -0.10495 | 0.02332 | -0.17128 | 0.0002   | -0.28724 |
| -0.03924 | 0.39759 | -0.21077 | 4.34E-06 | -0.12138 | 0.00865 | -0.20908 | 5.20E-06 | -0.3907  |
| -0.014   | 0.76289 | -0.20374 | 9.09E-06 | -0.04735 | 0.30717 | -0.25282 | 3.04E-08 | -0.4929  |
| -0.04387 | 0.34412 | -0.14383 | 0.00183  | -0.04388 | 0.34409 | -0.19093 | 3.28E-05 | -0.28967 |
| -0.02493 | 0.59105 | -0.17977 | 9.37E-05 | -0.069   | 0.1365  | -0.2135  | 3.24E-06 | -0.3965  |
| 0.018713 | 0.6867  | -0.19566 | 2.06E-05 | -0.0147  | 0.75135 | -0.273   | 2.00E-09 | -0.4618  |
| -0.0497  | 0.28379 | -0.1621  | 0.00044  | -0.07588 | 0.10146 | -0.19876 | 1.51E-05 | -0.30473 |
| -0.0345  | 0.45708 | -0.21658 | 2.31E-06 | -0.08185 | 0.07721 | -0.25523 | 2.22E-08 | -0.46618 |
| -0.02182 | 0.6382  | -0.22496 | 9.03E-07 | -0.09435 | 0.04154 | -0.25673 | 1.83E-08 | -0.4716  |
| -0.00689 | 0.88197 | -0.08597 | 0.06341  | 0.003561 | 0.93882 | -0.13697 | 0.00302  | -0.3137  |
| 0.027772 | 0.54939 | -0.17436 | 0.00015  | -0.02026 | 0.66231 | -0.24042 | 1.45E-07 | -0.44102 |
| -0.04288 | 0.35517 | -0.12886 | 0.00529  | -0.06229 | 0.17903 | -0.13902 | 0.0026   | -0.24958 |
| -0.06883 | 0.13751 | -0.17678 | 0.00012  | -0.09879 | 0.03281 | -0.18607 | 5.22E-05 | -0.37142 |
| 0.017415 | 0.70739 | -0.14288 | 0.00197  | -0.02007 | 0.6653  | -0.18918 | 3.88E-05 | -0.34424 |
| -0.02274 | 0.62403 | -0.15088 | 0.00107  | -0.02575 | 0.57891 | -0.20443 | 8.46E-06 | -0.38662 |
| -0.09168 | 0.0477  | -0.21648 | 2.34E-06 | -0.15111 | 0.00105 | -0.20072 | 1.24E-05 | -0.342   |
| -0.02599 | 0.57534 | -0.11813 | 0.01062  | -0.08751 | 0.05881 | -0.11664 | 0.01165  | -0.14505 |
| -0.12348 | 0.00755 | -0.20561 | 7.49E-06 | -0.13684 | 0.00305 | -0.2223  | 1.22E-06 | -0.30442 |
| 0.018445 | 0.69095 | -0.16575 | 0.00032  | -0.0607  | 0.1904  | -0.19696 | 1.81E-05 | -0.40627 |
| -0.02638 | 0.56964 | -0.16603 | 0.00031  | -0.08423 | 0.06896 | -0.17523 | 0.00014  | -0.30626 |
| -0.088   | 0.0574  | -0.19674 | 1.85E-05 | -0.11189 | 0.01556 | -0.2033  | 9.52E-06 | -0.42266 |
| -0.03614 | 0.43589 | -0.06931 | 0.13474  | -0.05589 | 0.22804 | -0.0589  | 0.20391  | -0.21224 |

|          |          |          |          |          |          |          |          |          |
|----------|----------|----------|----------|----------|----------|----------|----------|----------|
| -0.04266 | 0.35768  | -0.18249 | 7.30E-05 | -0.05557 | 0.2307   | -0.22399 | 1.01E-06 | -0.42154 |
| -0.05735 | 0.2161   | -0.27491 | 1.52E-09 | -0.18741 | 4.59E-05 | -0.26111 | 1.02E-08 | -0.38715 |
| -0.0257  | 0.5796   | -0.21819 | 1.94E-06 | -0.08528 | 0.06557  | -0.2514  | 3.65E-08 | -0.50474 |
| -0.02864 | 0.53705  | -0.18968 | 3.70E-05 | -0.07923 | 0.08722  | -0.21271 | 3.53E-06 | -0.38272 |
| -0.03972 | 0.39173  | -0.06886 | 0.13733  | -0.04649 | 0.31614  | -0.05502 | 0.23533  | -0.11141 |
| -0.00985 | 0.83184  | -0.14221 | 0.00207  | -0.03796 | 0.41311  | -0.17182 | 0.00019  | -0.36664 |
| -0.15156 | 0.00102  | -0.1669  | 0.00029  | -0.15272 | 0.00093  | -0.12777 | 0.00569  | -0.25034 |
| -0.08188 | 0.07711  | -0.19584 | 2.02E-05 | -0.13946 | 0.00252  | -0.17488 | 0.00015  | -0.35566 |
| -0.04366 | 0.34649  | -0.17142 | 0.0002   | -0.09064 | 0.05028  | -0.19071 | 3.35E-05 | -0.26166 |
| -0.08649 | 0.06181  | -0.25103 | 3.83E-08 | -0.13179 | 0.00433  | -0.26712 | 4.52E-09 | -0.52528 |
| -0.08059 | 0.08192  | -0.26266 | 8.29E-09 | -0.14391 | 0.00182  | -0.28446 | 3.83E-10 | -0.48889 |
| -0.12429 | 0.00716  | -0.16123 | 0.00047  | -0.09325 | 0.044    | -0.16748 | 0.00028  | -0.39497 |
| 0.002933 | 0.9496   | -0.07266 | 0.11688  | -0.02058 | 0.65736  | -0.09786 | 0.0345   | -0.23732 |
| -0.05922 | 0.20142  | -0.08895 | 0.05474  | -0.02717 | 0.55814  | -0.09927 | 0.03196  | -0.18437 |
| -0.00657 | 0.88741  | -0.22482 | 9.18E-07 | -0.12112 | 0.00879  | -0.22996 | 5.07E-07 | -0.4179  |
| 0.035471 | 0.44444  | -0.13141 | 0.00445  | 0.020191 | 0.66341  | -0.20207 | 1.08E-05 | -0.41647 |
| 0.054472 | 0.24005  | -0.20318 | 9.63E-06 | -0.08147 | 0.0786   | -0.22915 | 5.58E-07 | -0.41139 |
| -0.061   | 0.1882   | -0.19552 | 2.09E-05 | -0.0676  | 0.14467  | -0.23425 | 3.06E-07 | -0.44085 |
| -0.05206 | 0.26152  | -0.11177 | 0.01567  | -0.05171 | 0.2648   | -0.14259 | 0.00201  | -0.16444 |
| 0.654936 | 1.51E-58 | 0.657654 | 3.50E-59 | 0.669769 | 4.30E-62 | 0.449491 | 1.32E-24 | 0.306871 |
| 0.570881 | 9.71E-42 | 0.463874 | 2.71E-26 | 0.56632  | 5.82E-41 | 0.210884 | 4.29E-06 | 0.324001 |
| 0.543243 | 3.30E-37 | 0.390436 | 1.87E-18 | 0.316593 | 2.48E-12 | 0.35355  | 3.39E-15 | 0.497997 |
| 0.593404 | 9.21E-46 | 0.372573 | 7.97E-17 | 0.529024 | 4.91E-35 | 0.134216 | 0.00366  | 0.124337 |
| 0.615111 | 5.96E-50 | 0.296868 | 5.90E-11 | 0.413059 | 1.14E-20 | 0.134214 | 0.00366  | 0.194351 |
| 0.545406 | 1.51E-37 | 0.294622 | 8.33E-11 | 0.446661 | 2.79E-24 | 0.089072 | 0.05441  | 0.096751 |
| 0.434363 | 6.52E-23 | 0.237341 | 2.11E-07 | 0.382516 | 1.01E-17 | 0.055012 | 0.23541  | 0.06943  |
| 0.672854 | 7.42E-63 | 0.533264 | 1.13E-35 | 0.62488  | 6.04E-52 | 0.298456 | 4.61E-11 | 0.306647 |
| 0.719323 | 1.38E-75 | 0.447441 | 2.27E-24 | 0.467175 | 1.08E-26 | 0.311407 | 5.84E-12 | 0.352552 |
| 0.811868 | #####    | 0.609405 | 8.08E-49 | 0.629961 | 5.20E-53 | 0.432967 | 9.26E-23 | 0.366227 |
| 0.783175 | 5.27E-98 | 0.403018 | 1.15E-19 | 0.59322  | 9.96E-46 | 0.119882 | 0.00951  | 0.107901 |
| 0.76546  | 4.50E-91 | 0.657117 | 4.68E-59 | 0.624027 | 9.08E-52 | 0.506678 | 8.00E-32 | 0.574599 |
| 0.473648 | 1.73E-27 | 0.28493  | 3.58E-10 | 0.385559 | 5.32E-18 | 0.116067 | 0.01207  | 0.117879 |
| 0.656448 | 6.71E-59 | 0.501879 | 3.65E-31 | 0.430387 | 1.76E-22 | 0.423243 | 1.01E-21 | 0.447757 |
| 0.811371 | #####    | 0.693743 | 2.81E-68 | 0.802738 | #####    | 0.385582 | 5.30E-18 | 0.336929 |
| 0.841887 | #####    | 0.656414 | 6.83E-59 | 0.747417 | 1.29E-84 | 0.384473 | 6.71E-18 | 0.314234 |
| 0.591229 | 2.33E-45 | 0.373206 | 7.01E-17 | 0.518335 | 1.81E-33 | 0.131671 | 0.00437  | 0.152567 |
| 0.948051 | #####    | 0.694361 | 1.91E-68 | 0.824164 | #####    | 0.369632 | 1.45E-16 | 0.299102 |
| 0.466885 | 1.17E-26 | 0.341327 | 3.32E-14 | 0.388814 | 2.65E-18 | 0.193451 | 2.56E-05 | 0.30737  |
| 0.652114 | 6.77E-58 | 0.342452 | 2.70E-14 | 0.48167  | 1.69E-28 | 0.130596 | 0.0047   | 0.106084 |
| 0.78194  | 1.68E-97 | 0.690691 | 1.86E-67 | 0.811803 | #####    | 0.341328 | 3.32E-14 | 0.318629 |
| 0.783168 | 5.30E-98 | 0.60172  | 2.50E-47 | 0.578752 | 4.14E-43 | 0.466584 | 1.27E-26 | 0.341636 |
| 0.518895 | 1.50E-33 | 0.293613 | 9.72E-11 | 0.294938 | 7.94E-11 | 0.231449 | 4.26E-07 | 0.189265 |
| 0.948083 | #####    | 0.582753 | 8.05E-44 | 0.776429 | 2.73E-95 | 0.228439 | 6.05E-07 | 0.252025 |
| 0.482424 | 1.35E-28 | 0.325807 | 5.21E-13 | 0.460573 | 6.72E-26 | 0.112848 | 0.01469  | 0.227967 |
| 0.411065 | 1.82E-20 | 0.26583  | 5.39E-09 | 0.343138 | 2.38E-14 | 0.114254 | 0.01349  | 0.123522 |

|          |          |          |          |          |          |          |          |          |
|----------|----------|----------|----------|----------|----------|----------|----------|----------|
| 0.562267 | 2.79E-40 | 0.311361 | 5.89E-12 | 0.456597 | 1.98E-25 | 0.087401 | 0.05912  | 0.223656 |
| 0.457296 | 1.64E-25 | 0.219063 | 1.76E-06 | 0.227789 | 6.53E-07 | 0.215317 | 2.66E-06 | 0.124393 |
| 0.465443 | 1.75E-26 | 0.240286 | 1.47E-07 | 0.325482 | 5.51E-13 | 0.119583 | 0.00969  | 0.092755 |
| 0.763392 | 2.65E-90 | 0.592485 | 1.36E-45 | 0.766558 | 1.74E-91 | 0.239292 | 1.66E-07 | 0.219854 |
| 0.786046 | 3.44E-99 | 0.710385 | 6.07E-73 | 0.76564  | 3.85E-91 | 0.461805 | 4.79E-26 | 0.353793 |
| 0.909473 | #####    | 0.552399 | 1.16E-38 | 0.783887 | 2.69E-98 | 0.171189 | 0.0002   | 0.184306 |
| 0.700032 | 5.29E-70 | 0.600501 | 4.26E-47 | 0.619246 | 8.71E-51 | 0.389854 | 2.12E-18 | 0.679042 |
| 0.658207 | 2.60E-59 | 0.541784 | 5.58E-37 | 0.625322 | 4.89E-52 | 0.288235 | 2.19E-10 | 0.269562 |
| 0.516758 | 3.04E-33 | 0.248774 | 5.11E-08 | 0.32689  | 4.32E-13 | 0.110807 | 0.0166   | 0.039387 |
| 0.422466 | 1.22E-21 | 0.294041 | 9.11E-11 | 0.344792 | 1.75E-14 | 0.162514 | 0.00042  | 0.155346 |
| 0.503776 | 2.01E-31 | 0.320593 | 1.27E-12 | 0.372934 | 7.41E-17 | 0.161337 | 0.00047  | 0.227016 |
| 0.720049 | 8.31E-76 | 0.523408 | 3.32E-34 | 0.678273 | 3.21E-64 | 0.212748 | 3.51E-06 | 0.172372 |
| 0.399614 | 2.47E-19 | 0.334121 | 1.21E-13 | 0.407367 | 4.27E-20 | 0.149731 | 0.00117  | 0.21645  |
| 0.547332 | 7.49E-38 | 0.329453 | 2.76E-13 | 0.44126  | 1.13E-23 | 0.138174 | 0.00277  | 0.103613 |
| 0.891656 | #####    | 0.584174 | 4.47E-44 | 0.797053 | #####    | 0.210644 | 4.40E-06 | 0.197277 |
| 0.934821 | #####    | 0.608813 | 1.06E-48 | 0.659458 | 1.32E-59 | 0.424518 | 7.43E-22 | 0.2789   |
| 0.650783 | 1.37E-57 | 0.536896 | 3.17E-36 | 0.607561 | 1.86E-48 | 0.310882 | 6.37E-12 | 0.332314 |
| 0.433522 | 8.05E-23 | 0.300886 | 3.15E-11 | 0.286855 | 2.69E-10 | 0.23548  | 2.64E-07 | 0.35031  |
| 0.677513 | 5.01E-64 | 0.613856 | 1.06E-49 | 0.726247 | 1.04E-77 | 0.310782 | 6.47E-12 | 0.26238  |
| 0.701789 | 1.71E-70 | 0.515555 | 4.52E-33 | 0.669966 | 3.85E-62 | 0.215321 | 2.66E-06 | 0.386283 |
| 0.720509 | 6.03E-76 | 0.63869  | 6.90E-55 | 0.628162 | 1.25E-52 | 0.474324 | 1.42E-27 | 0.313062 |
| 0.730282 | 5.65E-79 | 0.397365 | 4.08E-19 | 0.307174 | 1.16E-11 | 0.443138 | 6.97E-24 | 0.245916 |
| 0.581255 | 1.49E-43 | 0.354976 | 2.58E-15 | 0.366545 | 2.69E-16 | 0.261708 | 9.43E-09 | 0.232821 |
| 0.776207 | 3.34E-95 | 0.70204  | 1.45E-70 | 0.731095 | 3.12E-79 | 0.461828 | 4.76E-26 | 0.353346 |
| 0.88195  | #####    | 0.670639 | 2.63E-62 | 0.756028 | 1.26E-87 | 0.396263 | 5.21E-19 | 0.346305 |
| 0.697981 | 1.95E-69 | 0.448112 | 1.90E-24 | 0.570803 | 1.00E-41 | 0.206586 | 6.76E-06 | 0.219216 |
| 0.846843 | #####    | 0.752242 | 2.74E-86 | 0.801289 | #####    | 0.495856 | 2.38E-30 | 0.350242 |
| 0.476026 | 8.73E-28 | 0.327122 | 4.15E-13 | 0.449472 | 1.33E-24 | 0.116794 | 0.01154  | 0.102292 |
| 0.739499 | 5.92E-82 | 0.334889 | 1.06E-13 | 0.489183 | 1.81E-29 | 0.117223 | 0.01124  | 0.105814 |
| 0.414108 | 8.94E-21 | 0.3093   | 8.23E-12 | 0.339087 | 4.98E-14 | 0.201385 | 1.16E-05 | 0.176325 |
| 0.599358 | 7.03E-47 | 0.377002 | 3.21E-17 | 0.439208 | 1.91E-23 | 0.237497 | 2.07E-07 | 0.424886 |
| 0.422689 | 1.16E-21 | 0.336043 | 8.62E-14 | 0.338165 | 5.88E-14 | 0.248763 | 5.11E-08 | 0.213312 |
| 0.923601 | #####    | 0.534867 | 6.47E-36 | 0.671399 | 1.70E-62 | 0.266741 | 4.76E-09 | 0.320166 |
| 0.625263 | 5.03E-52 | 0.605409 | 4.87E-48 | 0.527867 | 7.29E-35 | 0.541741 | 5.66E-37 | 0.449056 |
| 0.863061 | #####    | 0.486964 | 3.52E-29 | 0.684736 | 6.95E-66 | 0.149234 | 0.00122  | 0.241787 |
| 0.68056  | 8.37E-65 | 0.540442 | 9.01E-37 | 0.546755 | 9.25E-38 | 0.373728 | 6.30E-17 | 0.453001 |
| 0.513081 | 1.02E-32 | 0.474988 | 1.18E-27 | 0.466746 | 1.22E-26 | 0.331767 | 1.84E-13 | 0.226878 |
| 0.579861 | 2.63E-43 | 0.577693 | 6.36E-43 | 0.502829 | 2.71E-31 | 0.492201 | 7.26E-30 | 0.368231 |
| 0.795631 | #####    | 0.591389 | 2.17E-45 | 0.589901 | 4.08E-45 | 0.426916 | 4.14E-22 | 0.466034 |
| 0.550879 | 2.04E-38 | 0.437848 | 2.70E-23 | 0.440468 | 1.39E-23 | 0.326712 | 4.45E-13 | 0.327788 |
| 0.763228 | 3.04E-90 | 0.633972 | 7.26E-54 | 0.810233 | #####    | 0.249531 | 4.64E-08 | 0.480316 |
| 0.617317 | 2.14E-50 | 0.455003 | 3.05E-25 | 0.525527 | 1.62E-34 | 0.277294 | 1.09E-09 | 0.211348 |
| 0.623764 | 1.03E-51 | 0.40422  | 8.77E-20 | 0.586843 | 1.47E-44 | 0.112691 | 0.01483  | 0.12848  |
| 0.574922 | 1.94E-42 | 0.451406 | 7.97E-25 | 0.544385 | 2.19E-37 | 0.232077 | 3.95E-07 | 0.217054 |
| 0.630681 | 3.66E-53 | 0.572142 | 5.89E-42 | 0.692279 | 6.96E-68 | 0.273585 | 1.84E-09 | 0.225067 |

|          |          |          |          |          |          |          |          |          |
|----------|----------|----------|----------|----------|----------|----------|----------|----------|
| 0.499577 | 7.50E-31 | 0.330507 | 2.30E-13 | 0.433571 | 7.96E-23 | 0.159077 | 0.00056  | 0.181945 |
| 0.934209 | #####    | 0.567537 | 3.62E-41 | 0.742051 | 8.41E-83 | 0.25421  | 2.54E-08 | 0.206203 |
| 0.666472 | 2.75E-61 | 0.537183 | 2.86E-36 | 0.712913 | 1.11E-73 | 0.193721 | 2.50E-05 | 0.24309  |
| 0.430734 | 1.61E-22 | 0.265098 | 5.96E-09 | 0.336869 | 7.43E-14 | 0.142744 | 0.00199  | 0.115292 |
| 0.698789 | 1.17E-69 | 0.507393 | 6.37E-32 | 0.71166  | 2.58E-73 | 0.126211 | 0.00631  | 0.216908 |
| 0.599577 | 6.39E-47 | 0.244404 | 8.85E-08 | 0.370933 | 1.11E-16 | 0.084804 | 0.0671   | 0.056304 |
| 0.907966 | #####    | 0.521864 | 5.57E-34 | 0.666928 | 2.13E-61 | 0.270856 | 2.70E-09 | 0.209569 |
| 0.454602 | 3.39E-25 | 0.276446 | 1.23E-09 | 0.356138 | 2.07E-15 | 0.126674 | 0.00612  | 0.104654 |
| 0.846638 | #####    | 0.483974 | 8.57E-29 | 0.58833  | 7.91E-45 | 0.263784 | 7.12E-09 | 0.223307 |
| 0.668242 | 1.02E-61 | 0.48698  | 3.51E-29 | 0.605205 | 5.33E-48 | 0.241042 | 1.34E-07 | 0.299874 |
| 0.756637 | 7.60E-88 | 0.383038 | 9.09E-18 | 0.50146  | 4.17E-31 | 0.205666 | 7.44E-06 | 0.136743 |
| 0.725089 | 2.39E-77 | 0.71427  | 4.43E-74 | 0.709434 | 1.14E-72 | 0.501413 | 4.23E-31 | 0.662264 |
| 0.614834 | 6.77E-50 | 0.341851 | 3.01E-14 | 0.419168 | 2.70E-21 | 0.209575 | 4.93E-06 | 0.129095 |
| 0.906343 | #####    | 0.544278 | 2.27E-37 | 0.569245 | 1.85E-41 | 0.410877 | 1.90E-20 | 0.261941 |
| 0.671203 | 1.91E-62 | 0.259086 | 1.34E-08 | 0.318722 | 1.74E-12 | 0.165581 | 0.00033  | 0.10289  |
| 0.562435 | 2.61E-40 | 0.384437 | 6.76E-18 | 0.438527 | 2.28E-23 | 0.214136 | 3.02E-06 | 0.195715 |
| 0.458065 | 1.33E-25 | 0.287161 | 2.57E-10 | 0.30537  | 1.55E-11 | 0.207382 | 6.22E-06 | 0.17456  |
| 0.882285 | #####    | 0.652038 | 7.05E-58 | 0.718782 | 2.00E-75 | 0.432144 | 1.14E-22 | 0.284148 |
| 0.391984 | 1.33E-18 | 0.220663 | 1.47E-06 | 0.323176 | 8.18E-13 | 0.061956 | 0.18136  | 0.023923 |
| 0.452349 | 6.20E-25 | 0.278419 | 9.24E-10 | 0.360934 | 8.15E-16 | 0.129245 | 0.00515  | 0.122373 |
| 0.520059 | 1.02E-33 | 0.357323 | 1.64E-15 | 0.388885 | 2.61E-18 | 0.244104 | 9.19E-08 | 0.251594 |
| 0.486652 | 3.87E-29 | 0.315758 | 2.85E-12 | 0.358437 | 1.33E-15 | 0.219437 | 1.69E-06 | 0.139962 |
| 0.614309 | 8.62E-50 | 0.360715 | 8.50E-16 | 0.448802 | 1.59E-24 | 0.187921 | 4.38E-05 | 0.131809 |
| 0.489262 | 1.77E-29 | 0.381923 | 1.15E-17 | 0.445346 | 3.93E-24 | 0.21982  | 1.62E-06 | 0.362468 |
| 0.408623 | 3.20E-20 | 0.227528 | 6.73E-07 | 0.285899 | 3.10E-10 | 0.121145 | 0.00878  | 0.058653 |
| 0.572112 | 5.96E-42 | 0.279348 | 8.08E-10 | 0.274704 | 1.57E-09 | 0.25413  | 2.57E-08 | 0.16621  |
| 0.628366 | 1.13E-52 | 0.378547 | 2.33E-17 | 0.472251 | 2.58E-27 | 0.197725 | 1.68E-05 | 0.160427 |
| 0.779478 | 1.66E-96 | 0.622939 | 1.52E-51 | 0.562324 | 2.73E-40 | 0.520864 | 7.79E-34 | 0.309798 |
| 0.456897 | 1.83E-25 | 0.323661 | 7.53E-13 | 0.293957 | 9.23E-11 | 0.259526 | 1.26E-08 | 0.268975 |
| 0.730908 | 3.58E-79 | 0.442625 | 7.96E-24 | 0.576896 | 8.78E-43 | 0.195107 | 2.18E-05 | 0.218322 |
| 0.511282 | 1.82E-32 | 0.364951 | 3.69E-16 | 0.374525 | 5.35E-17 | 0.288427 | 2.13E-10 | 0.288113 |
| 0.487992 | 2.59E-29 | 0.404768 | 7.74E-20 | 0.358774 | 1.24E-15 | 0.333972 | 1.25E-13 | 0.412242 |
| 0.64612  | 1.56E-56 | 0.410393 | 2.13E-20 | 0.312258 | 5.08E-12 | 0.422432 | 1.23E-21 | 0.23784  |
| 0.725642 | 1.61E-77 | 0.484776 | 6.76E-29 | 0.611635 | 2.94E-49 | 0.214482 | 2.91E-06 | 0.386427 |
| 0.896543 | #####    | 0.582068 | 1.07E-43 | 0.774542 | 1.51E-94 | 0.246807 | 6.55E-08 | 0.211507 |
| 0.818387 | #####    | 0.370995 | 1.10E-16 | 0.464083 | 2.55E-26 | 0.23376  | 3.24E-07 | 0.163807 |
| 0.422693 | 1.16E-21 | 0.23202  | 3.98E-07 | 0.182956 | 6.99E-05 | 0.268881 | 3.55E-09 | 0.153024 |
| 0.904728 | #####    | 0.434081 | 7.00E-23 | 0.621002 | 3.81E-51 | 0.144913 | 0.00169  | 0.147213 |
| 0.538344 | 1.90E-36 | 0.255584 | 2.12E-08 | 0.31207  | 5.24E-12 | 0.159844 | 0.00053  | 0.136502 |
| 0.374692 | 5.17E-17 | 0.237229 | 2.14E-07 | 0.281399 | 6.00E-10 | 0.13111  | 0.00454  | 0.09988  |
| 0.415271 | 6.80E-21 | 0.278477 | 9.16E-10 | 0.347961 | 9.74E-15 | 0.151587 | 0.00102  | 0.220967 |
| 0.787179 | 1.16E-99 | 0.541245 | 6.76E-37 | 0.659427 | 1.34E-59 | 0.252701 | 3.09E-08 | 0.584005 |
| 0.664514 | 8.18E-61 | 0.438626 | 2.22E-23 | 0.603097 | 1.36E-47 | 0.171659 | 0.00019  | 0.188564 |
| 0.620407 | 5.04E-51 | 0.617045 | 2.43E-50 | 0.692946 | 4.61E-68 | 0.383602 | 8.07E-18 | 0.245434 |
| 0.602409 | 1.84E-47 | 0.459063 | 1.02E-25 | 0.311412 | 5.84E-12 | 0.520997 | 7.45E-34 | 0.32129  |

|          |          |          |          |          |          |          |          |          |
|----------|----------|----------|----------|----------|----------|----------|----------|----------|
| 0.731709 | 1.99E-79 | 0.556792 | 2.24E-39 | 0.526369 | 1.22E-34 | 0.462928 | 3.52E-26 | 0.31978  |
| 0.438008 | 2.60E-23 | 0.276593 | 1.20E-09 | 0.376146 | 3.83E-17 | 0.105644 | 0.02241  | 0.090701 |
| 0.232182 | 3.90E-07 | 0.160119 | 0.00051  | 0.20444  | 8.46E-06 | 0.061513 | 0.18451  | 0.043745 |
| 0.535    | 6.17E-36 | 0.363762 | 4.67E-16 | 0.385944 | 4.90E-18 | 0.261273 | 9.99E-09 | 0.267277 |
| 0.469553 | 5.53E-27 | 0.300128 | 3.55E-11 | 0.352926 | 3.82E-15 | 0.197043 | 1.80E-05 | 0.127589 |
| 0.498514 | 1.04E-30 | 0.279302 | 8.14E-10 | 0.400832 | 1.88E-19 | 0.110096 | 0.01731  | 0.08236  |
| 0.488623 | 2.14E-29 | 0.327125 | 4.15E-13 | 0.409762 | 2.46E-20 | 0.167657 | 0.00027  | 0.120583 |
| 0.422886 | 1.10E-21 | 0.212765 | 3.50E-06 | 0.274133 | 1.70E-09 | 0.124632 | 0.007    | 0.16957  |
| 0.289061 | 1.94E-10 | 0.111927 | 0.01553  | 0.211567 | 3.99E-06 | 0.011657 | 0.80162  | 0.014232 |
| 0.586566 | 1.66E-44 | 0.506219 | 9.26E-32 | 0.549981 | 2.84E-38 | 0.316131 | 2.68E-12 | 0.322696 |
| 0.84319  | #####    | 0.708572 | 2.03E-72 | 0.736555 | 5.47E-81 | 0.495334 | 2.79E-30 | 0.324338 |
| 0.601003 | 3.42E-47 | 0.508423 | 4.58E-32 | 0.527465 | 8.37E-35 | 0.334995 | 1.04E-13 | 0.238625 |
| 0.820029 | #####    | 0.556005 | 3.01E-39 | 0.563685 | 1.62E-40 | 0.419929 | 2.25E-21 | 0.281619 |
| 0.775517 | 6.25E-95 | 0.858105 | #####    | 0.79722  | #####    | 0.639191 | 5.36E-55 | 0.437008 |
| 0.682238 | 3.09E-65 | 0.336526 | 7.90E-14 | 0.443945 | 5.65E-24 | 0.148799 | 0.00126  | 0.114331 |
| 0.803221 | #####    | 0.620133 | 5.74E-51 | 0.755574 | 1.82E-87 | 0.306159 | 1.37E-11 | 0.351373 |
| 0.689669 | 3.48E-67 | 0.396958 | 4.47E-19 | 0.506763 | 7.79E-32 | 0.19911  | 1.46E-05 | 0.151493 |
| 0.490222 | 1.32E-29 | 0.3673   | 2.31E-16 | 0.387408 | 3.58E-18 | 0.242112 | 1.18E-07 | 0.435442 |
| 0.783849 | 2.79E-98 | 0.67544  | 1.67E-63 | 0.764076 | 1.48E-90 | 0.38875  | 2.69E-18 | 0.343684 |
| 0.526185 | 1.29E-34 | 0.396197 | 5.29E-19 | 0.462238 | 4.25E-26 | 0.233271 | 3.43E-07 | 0.178282 |
| 0.172269 | 0.00018  | 0.169946 | 0.00022  | 0.153543 | 0.00087  | 0.139502 | 0.00252  | 0.098974 |
| 0.86165  | #####    | 0.395477 | 6.20E-19 | 0.527747 | 7.60E-35 | 0.180124 | 9.07E-05 | 0.140474 |
| 0.351696 | 4.82E-15 | 0.245558 | 7.67E-08 | 0.317509 | 2.13E-12 | 0.082841 | 0.0737   | 0.074223 |
| 0.538555 | 1.76E-36 | 0.379114 | 2.07E-17 | 0.410611 | 2.02E-20 | 0.264429 | 6.53E-09 | 0.34286  |
| 0.655851 | 9.25E-59 | 0.605242 | 5.24E-48 | 0.6988   | 1.16E-69 | 0.30227  | 2.54E-11 | 0.620667 |
| 0.636133 | 2.48E-54 | 0.326486 | 4.63E-13 | 0.291257 | 1.39E-10 | 0.298007 | 4.94E-11 | 0.249381 |
| 0.792011 | #####    | 0.42639  | 4.71E-22 | 0.626844 | 2.35E-52 | 0.13846  | 0.00271  | 0.129844 |
| 0.44629  | 3.07E-24 | 0.302504 | 2.44E-11 | 0.397425 | 4.03E-19 | 0.120096 | 0.00938  | 0.139801 |
| 0.636448 | 2.12E-54 | 0.420252 | 2.08E-21 | 0.500276 | 6.03E-31 | 0.234525 | 2.96E-07 | 0.309565 |
| 0.50985  | 2.89E-32 | 0.221765 | 1.30E-06 | 0.28728  | 2.53E-10 | 0.129365 | 0.00511  | 0.143    |
| 0.802667 | #####    | 0.609999 | 6.18E-49 | 0.597316 | 1.71E-46 | 0.456856 | 1.85E-25 | 0.660554 |
| 0.45039  | 1.04E-24 | 0.26644  | 4.96E-09 | 0.376579 | 3.50E-17 | 0.097366 | 0.03543  | 0.120426 |
| 0.820828 | #####    | 0.735327 | 1.37E-80 | 0.850754 | #####    | 0.395766 | 5.82E-19 | 0.34224  |
| 0.752677 | 1.93E-86 | 0.45967  | 8.60E-26 | 0.450805 | 9.35E-25 | 0.401641 | 1.57E-19 | 0.239838 |
| 0.854133 | #####    | 0.537626 | 2.45E-36 | 0.634637 | 5.22E-54 | 0.291088 | 1.43E-10 | 0.496288 |
| 0.571217 | 8.50E-42 | 0.433852 | 7.42E-23 | 0.4681   | 8.33E-27 | 0.265482 | 5.66E-09 | 0.507922 |
| 0.444945 | 4.36E-24 | 0.259836 | 1.21E-08 | 0.364418 | 4.10E-16 | 0.106049 | 0.0219   | 0.07114  |
| 0.38123  | 1.33E-17 | 0.191968 | 2.96E-05 | 0.251327 | 3.69E-08 | 0.081335 | 0.07911  | 0.030346 |
| 0.797349 | #####    | 0.70687  | 6.25E-72 | 0.601664 | 2.56E-47 | 0.636536 | 2.03E-54 | 0.37321  |
| 0.765086 | 6.21E-91 | 0.573734 | 3.12E-42 | 0.605364 | 4.97E-48 | 0.399216 | 2.71E-19 | 0.332726 |
| 0.87536  | #####    | 0.522617 | 4.33E-34 | 0.707408 | 4.38E-72 | 0.194708 | 2.26E-05 | 0.179839 |
| 0.414388 | 8.37E-21 | 0.320172 | 1.36E-12 | 0.247448 | 6.04E-08 | 0.368424 | 1.85E-16 | 0.254829 |
| 0.7631   | 3.39E-90 | 0.619157 | 9.07E-51 | 0.673415 | 5.38E-63 | 0.372709 | 7.75E-17 | 0.670115 |
| 0.627662 | 1.59E-52 | 0.433072 | 9.02E-23 | 0.512772 | 1.12E-32 | 0.243493 | 9.92E-08 | 0.181471 |
| 0.461692 | 4.94E-26 | 0.41157  | 1.62E-20 | 0.470979 | 3.70E-27 | 0.216212 | 2.41E-06 | 0.236022 |

|          |          |          |          |          |          |          |          |          |
|----------|----------|----------|----------|----------|----------|----------|----------|----------|
| 0.428909 | 2.54E-22 | 0.323364 | 7.92E-13 | 0.2703   | 2.91E-09 | 0.312214 | 5.12E-12 | 0.211347 |
| 0.63374  | 8.14E-54 | 0.561637 | 3.55E-40 | 0.624238 | 8.21E-52 | 0.356686 | 1.86E-15 | 0.36397  |
| 0.734189 | 3.20E-80 | 0.539162 | 1.42E-36 | 0.689664 | 3.49E-67 | 0.26229  | 8.72E-09 | 0.212763 |
| 0.542514 | 4.29E-37 | 0.32702  | 4.22E-13 | 0.408282 | 3.46E-20 | 0.169592 | 0.00023  | 0.104228 |
| 0.414329 | 8.49E-21 | 0.178157 | 0.00011  | 0.243122 | 1.04E-07 | 0.087904 | 0.05767  | 0.061182 |
| 0.569466 | 1.70E-41 | 0.359245 | 1.13E-15 | 0.451329 | 8.14E-25 | 0.191446 | 3.12E-05 | 0.140077 |
| 0.870508 | #####    | 0.561666 | 3.51E-40 | 0.799812 | #####    | 0.167166 | 0.00029  | 0.178994 |
| 0.402025 | 1.44E-19 | 0.195443 | 2.11E-05 | 0.204874 | 8.08E-06 | 0.142559 | 0.00201  | 0.141226 |
| 0.594382 | 6.06E-46 | 0.344337 | 1.91E-14 | 0.480153 | 2.64E-28 | 0.138265 | 0.00275  | 0.132006 |
| 0.77108  | 3.33E-93 | 0.556746 | 2.28E-39 | 0.778402 | 4.49E-96 | 0.162062 | 0.00044  | 0.196478 |
| 0.378665 | 2.27E-17 | 0.290212 | 1.63E-10 | 0.367066 | 2.42E-16 | 0.125209 | 0.00674  | 0.126045 |
| 0.575981 | 1.27E-42 | 0.382168 | 1.09E-17 | 0.439686 | 1.69E-23 | 0.246279 | 7.00E-08 | 0.202196 |
| 0.57575  | 1.39E-42 | 0.42622  | 4.91E-22 | 0.620535 | 4.75E-51 | 0.08687  | 0.06068  | 0.201069 |
| 0.904305 | #####    | 0.501393 | 4.25E-31 | 0.653396 | 3.43E-58 | 0.229489 | 5.36E-07 | 0.179239 |
| 0.442327 | 8.59E-24 | 0.123366 | 0.00761  | 0.140937 | 0.00227  | 0.10594  | 0.02204  | 0.132191 |
| 0.848662 | #####    | 0.472808 | 2.20E-27 | 0.469846 | 5.09E-27 | 0.38879  | 2.66E-18 | 0.284557 |
| 0.607421 | 1.98E-48 | 0.55305  | 9.10E-39 | 0.378113 | 2.55E-17 | 0.567835 | 3.22E-41 | 0.404483 |
| 0.804854 | #####    | 0.570174 | 1.28E-41 | 0.837697 | #####    | 0.113163 | 0.01441  | 0.201029 |
| 0.48456  | 7.20E-29 | 0.451758 | 7.26E-25 | 0.443661 | 6.08E-24 | 0.344129 | 1.98E-14 | 0.267901 |
| 0.803107 | #####    | 0.29537  | 7.43E-11 | 0.401028 | 1.80E-19 | 0.157016 | 0.00066  | 0.123525 |
| 0.903043 | #####    | 0.56344  | 1.78E-40 | 0.744244 | 1.54E-83 | 0.234866 | 2.84E-07 | 0.240706 |
| 0.900981 | #####    | 0.405724 | 6.23E-20 | 0.583387 | 6.20E-44 | 0.158001 | 0.00061  | 0.134114 |
| 0.350299 | 6.28E-15 | 0.402139 | 1.40E-19 | 0.447779 | 2.08E-24 | 0.214382 | 2.94E-06 | 0.242342 |
| 0.742963 | 4.17E-83 | 0.587015 | 1.37E-44 | 0.691054 | 1.48E-67 | 0.289418 | 1.84E-10 | 0.32434  |
| 0.614959 | 6.39E-50 | 0.456942 | 1.81E-25 | 0.520925 | 7.63E-34 | 0.29338  | 1.01E-10 | 0.206121 |
| 0.746089 | 3.66E-84 | 0.692147 | 7.56E-68 | 0.705374 | 1.67E-71 | 0.491465 | 9.08E-30 | 0.365135 |
| 0.832544 | #####    | 0.654086 | 2.38E-58 | 0.643801 | 5.14E-56 | 0.503813 | 1.99E-31 | 0.319929 |
| 0.815805 | #####    | 0.637319 | 1.37E-54 | 0.626041 | 3.46E-52 | 0.477164 | 6.29E-28 | 0.603724 |
| 0.407307 | 4.33E-20 | 0.38931  | 2.38E-18 | 0.347279 | 1.11E-14 | 0.336405 | 8.08E-14 | 0.293949 |
| 0.4845   | 7.33E-29 | 0.435384 | 5.05E-23 | 0.428943 | 2.51E-22 | 0.299212 | 4.10E-11 | 0.442211 |
| 0.457564 | 1.53E-25 | 0.320197 | 1.36E-12 | 0.418635 | 3.06E-21 | 0.142821 | 0.00197  | 0.088419 |
| 0.663192 | 1.70E-60 | 0.36926  | 1.56E-16 | 0.527157 | 9.30E-35 | 0.141224 | 0.00222  | 0.117988 |
| 0.720748 | 5.10E-76 | 0.50999  | 2.77E-32 | 0.552255 | 1.22E-38 | 0.34892  | 8.14E-15 | 0.326187 |
| 0.777398 | 1.13E-95 | 0.36569  | 3.19E-16 | 0.409212 | 2.79E-20 | 0.274964 | 1.51E-09 | 0.218228 |
| 0.452339 | 6.22E-25 | 0.362605 | 5.87E-16 | 0.414395 | 8.36E-21 | 0.209445 | 5.00E-06 | 0.13961  |
| 0.606383 | 3.15E-48 | 0.254874 | 2.33E-08 | 0.315964 | 2.76E-12 | 0.131077 | 0.00455  | 0.441113 |
| 0.422647 | 1.17E-21 | 0.231332 | 4.32E-07 | 0.183895 | 6.40E-05 | 0.244207 | 9.07E-08 | 0.353399 |
| 0.35755  | 1.57E-15 | 0.235494 | 2.63E-07 | 0.297359 | 5.47E-11 | 0.133492 | 0.00385  | 0.056933 |
| 0.542274 | 4.68E-37 | 0.316208 | 2.65E-12 | 0.388407 | 2.89E-18 | 0.195715 | 2.05E-05 | 0.102226 |
| 0.150494 | 0.00111  | 0.172157 | 0.00019  | 0.167274 | 0.00028  | 0.136275 | 0.00317  | 0.095136 |
| 0.562965 | 2.13E-40 | 0.464336 | 2.38E-26 | 0.50988  | 2.87E-32 | 0.269602 | 3.21E-09 | 0.457145 |
| 0.608487 | 1.22E-48 | 0.586619 | 1.62E-44 | 0.651199 | 1.10E-57 | 0.325917 | 5.11E-13 | 0.2608   |
| 0.824032 | #####    | 0.584814 | 3.43E-44 | 0.737721 | 2.28E-81 | 0.2606   | 1.09E-08 | 0.259472 |
| 0.515274 | 4.96E-33 | 0.282928 | 4.80E-10 | 0.349407 | 7.43E-15 | 0.16018  | 0.00051  | 0.236493 |
| 0.511242 | 1.85E-32 | 0.27499  | 1.51E-09 | 0.388012 | 3.15E-18 | 0.099063 | 0.03233  | 0.084944 |

|          |          |          |          |          |          |          |          |          |
|----------|----------|----------|----------|----------|----------|----------|----------|----------|
| 0.778309 | 4.89E-96 | 0.527459 | 8.39E-35 | 0.650989 | 1.23E-57 | 0.250725 | 3.98E-08 | 0.247836 |
| 0.565567 | 7.79E-41 | 0.330238 | 2.41E-13 | 0.414709 | 7.76E-21 | 0.1724   | 0.00018  | 0.089523 |
| 0.692725 | 5.28E-68 | 0.399201 | 2.71E-19 | 0.609715 | 7.03E-49 | 0.093216 | 0.04407  | 0.14285  |
| 0.503933 | 1.91E-31 | 0.452403 | 6.11E-25 | 0.481337 | 1.86E-28 | 0.279949 | 7.41E-10 | 0.258505 |
| 0.752376 | 2.46E-86 | 0.472593 | 2.34E-27 | 0.446257 | 3.10E-24 | 0.394703 | 7.35E-19 | 0.244143 |
| 0.949324 | #####    | 0.658293 | 2.48E-59 | 0.773134 | 5.34E-94 | 0.378437 | 2.38E-17 | 0.279394 |
| 0.78626  | 2.80E-99 | 0.442518 | 8.18E-24 | 0.638442 | 7.82E-55 | 0.149714 | 0.00117  | 0.143624 |
| 0.099467 | 0.03163  | 0.178923 | 0.0001   | 0.1358   | 0.00328  | 0.156785 | 0.00067  | 0.124999 |
| 0.397039 | 4.39E-19 | 0.288907 | 1.98E-10 | 0.313971 | 3.83E-12 | 0.171227 | 0.0002   | 0.291199 |
| 0.632553 | 1.46E-53 | 0.357224 | 1.68E-15 | 0.402472 | 1.30E-19 | 0.233551 | 3.32E-07 | 0.160606 |
| 0.708668 | 1.90E-72 | 0.536651 | 3.45E-36 | 0.634603 | 5.31E-54 | 0.293928 | 9.27E-11 | 0.443059 |
| 0.482526 | 1.31E-28 | 0.353925 | 3.16E-15 | 0.349208 | 7.71E-15 | 0.301213 | 3.00E-11 | 0.196188 |
| 0.878198 | #####    | 0.463982 | 2.63E-26 | 0.63937  | 4.90E-55 | 0.192149 | 2.91E-05 | 0.146769 |
| 0.809551 | #####    | 0.717189 | 6.02E-75 | 0.820569 | #####    | 0.396441 | 5.01E-19 | 0.306048 |
| 0.674474 | 2.92E-63 | 0.522945 | 3.88E-34 | 0.608817 | 1.05E-48 | 0.28943  | 1.83E-10 | 0.218424 |
| 0.62889  | 8.75E-53 | 0.539626 | 1.20E-36 | 0.655023 | 1.44E-58 | 0.247086 | 6.32E-08 | 0.290459 |
| 0.307581 | 1.09E-11 | 0.166024 | 0.00031  | 0.211092 | 4.20E-06 | 0.089231 | 0.05398  | 0.046132 |
| 0.398666 | 3.06E-19 | 0.151553 | 0.00102  | 0.211542 | 4.00E-06 | 0.076784 | 0.09746  | 0.047673 |
| 0.82655  | #####    | 0.432302 | 1.09E-22 | 0.618206 | 1.42E-50 | 0.125136 | 0.00678  | 0.119919 |
| 0.909133 | #####    | 0.493246 | 5.28E-30 | 0.691536 | 1.10E-67 | 0.176123 | 0.00013  | 0.175132 |
| 0.853324 | #####    | 0.393903 | 8.77E-19 | 0.545471 | 1.47E-37 | 0.145634 | 0.0016   | 0.199792 |
| 0.810937 | #####    | 0.505868 | 1.04E-31 | 0.739527 | 5.80E-82 | 0.116976 | 0.01141  | 0.197979 |
| 0.826787 | #####    | 0.391731 | 1.41E-18 | 0.526448 | 1.18E-34 | 0.182396 | 7.36E-05 | 0.147458 |
| 0.790423 | #####    | 0.548391 | 5.09E-38 | 0.782524 | 9.72E-98 | 0.1185   | 0.01038  | 0.272341 |
| 0.782348 | 1.15E-97 | 0.367633 | 2.16E-16 | 0.447684 | 2.13E-24 | 0.205528 | 7.55E-06 | 0.192018 |
| 0.803933 | #####    | 0.280957 | 6.40E-10 | 0.382873 | 9.41E-18 | 0.145512 | 0.00162  | 0.141921 |
| 0.773777 | 3.00E-94 | 0.572995 | 4.19E-42 | 0.742972 | 4.14E-83 | 0.217745 | 2.03E-06 | 0.313767 |
| 0.54641  | 1.05E-37 | 0.174809 | 0.00015  | 0.18129  | 8.15E-05 | 0.165216 | 0.00034  | 0.22165  |
| 0.557607 | 1.65E-39 | 0.13511  | 0.00344  | 0.179498 | 9.61E-05 | 0.10619  | 0.02173  | 0.064034 |
| 0.836771 | #####    | 0.647592 | 7.26E-57 | 0.77098  | 3.64E-93 | 0.346998 | 1.17E-14 | 0.261233 |
| 0.768401 | 3.51E-92 | 0.631222 | 2.81E-53 | 0.631249 | 2.77E-53 | 0.476613 | 7.37E-28 | 0.304411 |
| 0.750092 | 1.54E-85 | 0.48282  | 1.20E-28 | 0.633503 | 9.16E-54 | 0.188304 | 4.22E-05 | 0.31137  |
| 0.670645 | 2.62E-62 | 0.335547 | 9.42E-14 | 0.481494 | 1.78E-28 | 0.119496 | 0.00975  | 0.110523 |
| 0.610267 | 5.47E-49 | 0.384139 | 7.20E-18 | 0.407337 | 4.30E-20 | 0.288365 | 2.15E-10 | 0.234155 |
| 0.804262 | #####    | 0.563177 | 1.96E-40 | 0.769388 | 1.48E-92 | 0.188888 | 3.99E-05 | 0.183938 |
| 0.893293 | #####    | 0.582886 | 7.62E-44 | 0.817851 | #####    | 0.171581 | 0.00019  | 0.212967 |
| 0.75058  | 1.04E-85 | 0.331104 | 2.07E-13 | 0.465201 | 1.87E-26 | 0.135585 | 0.00333  | 0.111062 |
| 0.702943 | 8.12E-71 | 0.61719  | 2.27E-50 | 0.65325  | 3.71E-58 | 0.405766 | 6.17E-20 | 0.350532 |
| 0.376596 | 3.49E-17 | 0.308993 | 8.65E-12 | 0.317166 | 2.26E-12 | 0.21047  | 4.48E-06 | 0.135985 |
| 0.464414 | 2.33E-26 | 0.296952 | 5.82E-11 | 0.438305 | 2.41E-23 | 0.065844 | 0.15542  | 0.068896 |
| 0.372966 | 7.36E-17 | 0.137193 | 0.00297  | 0.181623 | 7.90E-05 | 0.129695 | 0.005    | 0.067552 |
| 0.884002 | #####    | 0.663    | 1.89E-60 | 0.800212 | #####    | 0.343684 | 2.15E-14 | 0.332696 |
| 0.482065 | 1.50E-28 | 0.127679 | 0.00573  | 0.161059 | 0.00048  | 0.116443 | 0.0118   | 0.057629 |
| 0.491516 | 8.94E-30 | 0.387249 | 3.71E-18 | 0.45613  | 2.25E-25 | 0.196356 | 1.92E-05 | 0.215118 |
| 0.539898 | 1.09E-36 | 0.199814 | 1.36E-05 | 0.250042 | 4.35E-08 | 0.130694 | 0.00467  | 0.073416 |

|          |          |          |          |          |          |          |          |          |
|----------|----------|----------|----------|----------|----------|----------|----------|----------|
| 0.46545  | 1.75E-26 | 0.244011 | 9.30E-08 | 0.30039  | 3.41E-11 | 0.142138 | 0.00208  | 0.14346  |
| 0.804659 | #####    | 0.58885  | 6.35E-45 | 0.685432 | 4.57E-66 | 0.331938 | 1.79E-13 | 0.404824 |
| 0.616703 | 2.85E-50 | 0.589787 | 4.28E-45 | 0.542647 | 4.09E-37 | 0.47257  | 2.35E-27 | 0.459797 |
| 0.447377 | 2.31E-24 | 0.336188 | 8.40E-14 | 0.318023 | 1.96E-12 | 0.261375 | 9.86E-09 | 0.372416 |
| 0.640824 | 2.35E-55 | 0.542856 | 3.79E-37 | 0.529942 | 3.58E-35 | 0.437684 | 2.82E-23 | 0.315108 |
| 0.899818 | #####    | 0.648796 | 3.88E-57 | 0.856648 | #####    | 0.250138 | 4.29E-08 | 0.228503 |
| 0.666677 | 2.45E-61 | 0.471373 | 3.31E-27 | 0.639202 | 5.33E-55 | 0.170569 | 0.00021  | 0.220457 |
| 0.592103 | 1.60E-45 | 0.40274  | 1.23E-19 | 0.483909 | 8.73E-29 | 0.212279 | 3.69E-06 | 0.206555 |
| 0.374432 | 5.45E-17 | 0.24785  | 5.74E-08 | 0.357947 | 1.46E-15 | 0.076427 | 0.09903  | 0.150219 |
| 0.839462 | #####    | 0.445848 | 3.45E-24 | 0.654547 | 1.86E-58 | 0.137159 | 0.00298  | 0.141254 |
| 0.569127 | 1.94E-41 | 0.526334 | 1.23E-34 | 0.405887 | 6.00E-20 | 0.536129 | 4.15E-36 | 0.2847   |
| 0.799342 | #####    | 0.728394 | 2.23E-78 | 0.723926 | 5.45E-77 | 0.516723 | 3.08E-33 | 0.42843  |
| 0.581826 | 1.18E-43 | 0.490644 | 1.16E-29 | 0.497461 | 1.45E-30 | 0.339627 | 4.52E-14 | 0.379596 |
| 0.856947 | #####    | 0.69905  | 9.89E-70 | 0.863698 | #####    | 0.322371 | 9.38E-13 | 0.281304 |
| 0.695875 | 7.38E-69 | 0.665833 | 3.93E-61 | 0.723494 | 7.40E-77 | 0.398993 | 2.84E-19 | 0.317787 |
| 0.731709 | 1.99E-79 | 0.422843 | 1.12E-21 | 0.577476 | 6.94E-43 | 0.162578 | 0.00042  | 0.171744 |
| 0.373205 | 7.01E-17 | 0.297864 | 5.05E-11 | 0.275074 | 1.49E-09 | 0.25033  | 4.19E-08 | 0.119238 |
| 0.470904 | 3.78E-27 | 0.311254 | 5.99E-12 | 0.363456 | 4.96E-16 | 0.200014 | 1.33E-05 | 0.143598 |
| 0.566199 | 6.10E-41 | 0.418421 | 3.22E-21 | 0.539344 | 1.33E-36 | 0.182054 | 7.60E-05 | 0.148115 |
| 0.662555 | 2.42E-60 | 0.401801 | 1.52E-19 | 0.49233  | 6.98E-30 | 0.218852 | 1.80E-06 | 0.190542 |
| 0.520722 | 8.17E-34 | 0.323104 | 8.28E-13 | 0.445647 | 3.63E-24 | 0.124005 | 0.0073   | 0.114278 |
| 0.420499 | 1.96E-21 | 0.257576 | 1.63E-08 | 0.35031  | 6.27E-15 | 0.087181 | 0.05976  | 0.209749 |
| 0.504852 | 1.43E-31 | 0.485805 | 4.98E-29 | 0.468536 | 7.37E-27 | 0.360682 | 8.56E-16 | 0.411955 |
| 0.786989 | 1.39E-99 | 0.311083 | 6.16E-12 | 0.39438  | 7.89E-19 | 0.199914 | 1.35E-05 | 0.173378 |
| 0.759446 | 7.39E-89 | 0.735661 | 1.07E-80 | 0.669535 | 4.91E-62 | 0.594471 | 5.83E-46 | 0.3768   |
| 0.392914 | 1.09E-18 | 0.290744 | 1.50E-10 | 0.371679 | 9.56E-17 | 0.125403 | 0.00666  | 0.105894 |
| 0.928737 | #####    | 0.63788  | 1.04E-54 | 0.781396 | 2.80E-97 | 0.322023 | 9.95E-13 | 0.257234 |
| 0.437877 | 2.68E-23 | 0.37522  | 4.64E-17 | 0.354628 | 2.76E-15 | 0.30725  | 1.15E-11 | 0.405696 |
| 0.680232 | 1.02E-64 | 0.519987 | 1.04E-33 | 0.633953 | 7.33E-54 | 0.269659 | 3.18E-09 | 0.239112 |
| 0.711462 | 2.95E-73 | 0.549461 | 3.43E-38 | 0.462224 | 4.27E-26 | 0.494927 | 3.16E-30 | 0.315184 |
| 0.822683 | #####    | 0.550928 | 2.00E-38 | 0.55052  | 2.32E-38 | 0.443529 | 6.30E-24 | 0.244575 |
| 0.470656 | 4.05E-27 | 0.292911 | 1.08E-10 | 0.368528 | 1.81E-16 | 0.151234 | 0.00104  | 0.121661 |
| 0.100158 | 0.03046  | 0.198307 | 1.58E-05 | 0.109797 | 0.01762  | 0.206317 | 6.96E-06 | 0.372341 |
| 0.56524  | 8.85E-41 | 0.459231 | 9.70E-26 | 0.51846  | 1.73E-33 | 0.261476 | 9.72E-09 | 0.276901 |
| 0.818128 | #####    | 0.588321 | 7.94E-45 | 0.789943 | #####    | 0.223334 | 1.09E-06 | 0.217133 |
| 0.700769 | 3.30E-70 | 0.636816 | 1.77E-54 | 0.665905 | 3.77E-61 | 0.423112 | 1.05E-21 | 0.294249 |
| 0.722801 | 1.21E-76 | 0.338951 | 5.11E-14 | 0.498967 | 9.07E-31 | 0.112839 | 0.0147   | 0.112976 |
| 0.48585  | 4.91E-29 | 0.322224 | 9.62E-13 | 0.497031 | 1.65E-30 | 0.046349 | 0.31757  | 0.07924  |
| 0.786637 | 1.95E-99 | 0.641671 | 1.53E-55 | 0.695384 | 1.00E-68 | 0.400788 | 1.90E-19 | 0.298455 |
| 0.844625 | #####    | 0.568619 | 2.37E-41 | 0.717184 | 6.04E-75 | 0.271585 | 2.43E-09 | 0.243643 |
| 0.834938 | #####    | 0.59126  | 2.30E-45 | 0.758823 | 1.24E-88 | 0.270718 | 2.75E-09 | 0.213841 |
| 0.433574 | 7.95E-23 | 0.296826 | 5.94E-11 | 0.396325 | 5.14E-19 | 0.123259 | 0.00766  | 0.121906 |
| 0.866877 | #####    | 0.665797 | 4.01E-61 | 0.84925  | #####    | 0.286973 | 2.64E-10 | 0.259252 |
| 0.745313 | 6.72E-84 | 0.54429  | 2.26E-37 | 0.680282 | 9.86E-65 | 0.267199 | 4.47E-09 | 0.294812 |
| 0.429123 | 2.41E-22 | 0.261063 | 1.03E-08 | 0.365116 | 3.57E-16 | 0.102104 | 0.02736  | 0.121827 |



|          |          |          |          |          |          |          |          |          |
|----------|----------|----------|----------|----------|----------|----------|----------|----------|
| 0.621282 | 3.34E-51 | 0.411234 | 1.75E-20 | 0.509771 | 2.97E-32 | 0.206149 | 7.08E-06 | 0.235099 |
| 0.691171 | 1.38E-67 | 0.415124 | 7.04E-21 | 0.558821 | 1.04E-39 | 0.189906 | 3.62E-05 | 0.173095 |
| 0.547717 | 6.51E-38 | 0.376718 | 3.41E-17 | 0.569838 | 1.47E-41 | 0.077048 | 0.09631  | 0.098267 |
| 0.438916 | 2.06E-23 | 0.283914 | 4.16E-10 | 0.348005 | 9.66E-15 | 0.14351  | 0.00188  | 0.242129 |
| 0.63929  | 5.10E-55 | 0.394854 | 7.11E-19 | 0.418706 | 3.01E-21 | 0.293284 | 1.02E-10 | 0.353056 |
| 0.632851 | 1.26E-53 | 0.430932 | 1.54E-22 | 0.511849 | 1.52E-32 | 0.237631 | 2.04E-07 | 0.210028 |
| 0.854387 | #####    | 0.548004 | 5.86E-38 | 0.698179 | 1.72E-69 | 0.257171 | 1.72E-08 | 0.313919 |
| 0.427583 | 3.51E-22 | 0.15724  | 0.00065  | 0.248592 | 5.23E-08 | 0.061181 | 0.18689  | 0.083756 |
| 0.598795 | 8.99E-47 | 0.339869 | 4.32E-14 | 0.4838   | 9.02E-29 | 0.107434 | 0.02022  | 0.124906 |
| 0.631025 | 3.09E-53 | 0.543501 | 3.01E-37 | 0.586588 | 1.64E-44 | 0.348096 | 9.50E-15 | 0.236292 |
| 0.692558 | 5.86E-68 | 0.288301 | 2.17E-10 | 0.414178 | 8.79E-21 | 0.130131 | 0.00485  | 0.140628 |
| 0.544452 | 2.13E-37 | 0.47015  | 4.67E-27 | 0.512589 | 1.19E-32 | 0.291138 | 1.42E-10 | 0.310892 |
| 0.375216 | 4.64E-17 | 0.280432 | 6.91E-10 | 0.180205 | 9.01E-05 | 0.343576 | 2.20E-14 | 0.165669 |
| 0.500555 | 5.53E-31 | 0.168707 | 0.00025  | 0.187936 | 4.37E-05 | 0.18861  | 4.10E-05 | 0.094198 |
| 0.401153 | 1.75E-19 | 0.304855 | 1.68E-11 | 0.409187 | 2.81E-20 | 0.127347 | 0.00585  | 0.139835 |
| 0.772465 | 9.72E-94 | 0.532984 | 1.25E-35 | 0.608945 | 9.96E-49 | 0.28249  | 5.12E-10 | 0.626369 |
| 0.768332 | 3.73E-92 | 0.664433 | 8.56E-61 | 0.735656 | 1.07E-80 | 0.375194 | 4.66E-17 | 0.693697 |
| 0.708181 | 2.63E-72 | 0.356776 | 1.83E-15 | 0.488275 | 2.38E-29 | 0.142851 | 0.00197  | 0.123748 |
| 0.890967 | #####    | 0.468288 | 7.90E-27 | 0.574616 | 2.19E-42 | 0.256812 | 1.81E-08 | 0.18678  |
| 0.597681 | 1.46E-46 | 0.292176 | 1.21E-10 | 0.28211  | 5.41E-10 | 0.241065 | 1.34E-07 | 0.151968 |
| 0.662658 | 2.28E-60 | 0.269027 | 3.48E-09 | 0.218722 | 1.83E-06 | 0.304186 | 1.87E-11 | 0.151949 |
| 0.41996  | 2.23E-21 | 0.423755 | 8.95E-22 | 0.312799 | 4.65E-12 | 0.403834 | 9.57E-20 | 0.32496  |
| 0.895579 | #####    | 0.45786  | 1.41E-25 | 0.532957 | 1.26E-35 | 0.307374 | 1.12E-11 | 0.200307 |
| 0.843125 | #####    | 0.569338 | 1.78E-41 | 0.786485 | 2.26E-99 | 0.201507 | 1.14E-05 | 0.187936 |
| 0.856308 | #####    | 0.744636 | 1.14E-83 | 0.808856 | #####    | 0.484806 | 6.70E-29 | 0.33828  |
| 0.863194 | #####    | 0.604703 | 6.66E-48 | 0.683231 | 1.71E-65 | 0.378143 | 2.53E-17 | 0.26085  |
| 0.911004 | #####    | 0.456296 | 2.15E-25 | 0.647447 | 7.83E-57 | 0.167904 | 0.00027  | 0.156994 |
| 0.468232 | 8.02E-27 | 0.503387 | 2.27E-31 | 0.318367 | 1.85E-12 | 0.609164 | 9.02E-49 | 0.306463 |
| 0.852569 | #####    | 0.575677 | 1.43E-42 | 0.813531 | #####    | 0.145931 | 0.00157  | 0.192328 |
| 0.830762 | #####    | 0.594102 | 6.83E-46 | 0.58477  | 3.50E-44 | 0.443396 | 6.52E-24 | 0.336912 |
| 0.895562 | #####    | 0.709031 | 1.50E-72 | 0.871633 | #####    | 0.327921 | 3.61E-13 | 0.268082 |
| 0.918574 | #####    | 0.64679  | 1.10E-56 | 0.762148 | 7.61E-90 | 0.363519 | 4.90E-16 | 0.255288 |
| 0.910056 | #####    | 0.627147 | 2.03E-52 | 0.792993 | #####    | 0.284473 | 3.83E-10 | 0.245779 |
| 0.691642 | 1.03E-67 | 0.678511 | 2.80E-64 | 0.695617 | 8.68E-69 | 0.458838 | 1.08E-25 | 0.454099 |
| 0.874421 | #####    | 0.742909 | 4.34E-83 | 0.720775 | 5.01E-76 | 0.567783 | 3.29E-41 | 0.426464 |
| 0.736708 | 4.88E-81 | 0.565761 | 7.23E-41 | 0.792473 | #####    | 0.156881 | 0.00067  | 0.303225 |
| 0.480022 | 2.74E-28 | 0.340625 | 3.77E-14 | 0.352864 | 3.87E-15 | 0.255522 | 2.14E-08 | 0.170132 |
| 0.705806 | 1.26E-71 | 0.469001 | 6.46E-27 | 0.538964 | 1.52E-36 | 0.281024 | 6.34E-10 | 0.27651  |
| 0.782847 | 7.17E-98 | 0.640064 | 3.45E-55 | 0.780243 | 8.19E-97 | 0.286029 | 3.04E-10 | 0.292394 |
| 0.749255 | 3.00E-85 | 0.423409 | 9.73E-22 | 0.455143 | 2.93E-25 | 0.308282 | 9.71E-12 | 0.191779 |
| 0.86764  | #####    | 0.472299 | 2.54E-27 | 0.667068 | 1.97E-61 | 0.17592  | 0.00013  | 0.153322 |
| 0.886055 | #####    | 0.581123 | 1.57E-43 | 0.599779 | 5.85E-47 | 0.426948 | 4.11E-22 | 0.281107 |
| 0.613759 | 1.11E-49 | 0.209901 | 4.76E-06 | 0.214134 | 3.02E-06 | 0.202242 | 1.06E-05 | 0.132847 |
| 0.656703 | 5.85E-59 | 0.41924  | 2.65E-21 | 0.260003 | 1.18E-08 | 0.504599 | 1.55E-31 | 0.276726 |
| 0.88529  | #####    | 0.368449 | 1.84E-16 | 0.503246 | 2.38E-31 | 0.170174 | 0.00022  | 0.204592 |

|          |          |          |          |          |          |          |          |          |
|----------|----------|----------|----------|----------|----------|----------|----------|----------|
| 0.559924 | 6.83E-40 | 0.269565 | 3.23E-09 | 0.391332 | 1.54E-18 | 0.092492 | 0.04575  | 0.067718 |
| 0.715309 | 2.18E-74 | 0.493998 | 4.20E-30 | 0.390556 | 1.82E-18 | 0.474609 | 1.31E-27 | 0.353159 |
| 0.778858 | 2.95E-96 | 0.261322 | 9.93E-09 | 0.315347 | 3.05E-12 | 0.190053 | 3.57E-05 | 0.159557 |
| 0.816341 | #####    | 0.340771 | 3.67E-14 | 0.472549 | 2.37E-27 | 0.140431 | 0.00235  | 0.112211 |
| 0.903606 | #####    | 0.620806 | 4.18E-51 | 0.742551 | 5.73E-83 | 0.329169 | 2.91E-13 | 0.243056 |
| 0.842167 | #####    | 0.420654 | 1.89E-21 | 0.486263 | 4.34E-29 | 0.298897 | 4.30E-11 | 0.206639 |
| 0.815072 | #####    | 0.518536 | 1.69E-33 | 0.647539 | 7.47E-57 | 0.233315 | 3.41E-07 | 0.266099 |
| 0.689225 | 4.57E-67 | 0.467118 | 1.10E-26 | 0.623709 | 1.06E-51 | 0.166607 | 0.0003   | 0.348456 |
| 0.576546 | 1.01E-42 | 0.268485 | 3.75E-09 | 0.345388 | 1.57E-14 | 0.142643 | 0.002    | 0.083493 |
| 0.619913 | 6.36E-51 | 0.363942 | 4.51E-16 | 0.486115 | 4.54E-29 | 0.154039 | 0.00084  | 0.378993 |
| 0.881633 | #####    | 0.626281 | 3.09E-52 | 0.663844 | 1.19E-60 | 0.429973 | 1.95E-22 | 0.36548  |
| 0.68589  | 3.47E-66 | 0.271577 | 2.44E-09 | 0.25182  | 3.46E-08 | 0.294468 | 8.53E-11 | 0.150171 |
| 0.818076 | #####    | 0.633532 | 9.02E-54 | 0.84668  | #####    | 0.214377 | 2.94E-06 | 0.2055   |
| 0.720449 | 6.29E-76 | 0.304129 | 1.89E-11 | 0.322707 | 8.86E-13 | 0.228431 | 6.06E-07 | 0.162197 |
| 0.667495 | 1.55E-61 | 0.155978 | 0.00072  | 0.177878 | 0.00011  | 0.151018 | 0.00106  | 0.097096 |
| 0.476289 | 8.09E-28 | 0.1011   | 0.02892  | 0.120962 | 0.00888  | 0.096964 | 0.03619  | 0.109882 |
| 0.601859 | 2.35E-47 | 0.141326 | 0.0022   | 0.150486 | 0.00111  | 0.15537  | 0.00075  | 0.058966 |
| 0.672189 | 1.09E-62 | 0.273884 | 1.76E-09 | 0.227736 | 6.57E-07 | 0.308272 | 9.72E-12 | 0.218167 |
| 0.741723 | 1.08E-82 | 0.330261 | 2.40E-13 | 0.469613 | 5.44E-27 | 0.144314 | 0.00177  | 0.114342 |
| 0.87179  | #####    | 0.370404 | 1.24E-16 | 0.49165  | 8.59E-30 | 0.186887 | 4.83E-05 | 0.16324  |
| 0.58459  | 3.77E-44 | 0.2968   | 5.96E-11 | 0.237654 | 2.03E-07 | 0.311576 | 5.68E-12 | 0.191465 |
| 0.533904 | 9.05E-36 | 0.214857 | 2.79E-06 | 0.232879 | 3.60E-07 | 0.24292  | 1.06E-07 | 0.094097 |
| 0.351976 | 4.57E-15 | 0.261707 | 9.43E-09 | 0.169705 | 0.00023  | 0.289808 | 1.73E-10 | 0.254746 |
| 0.764753 | 8.26E-91 | 0.742771 | 4.83E-83 | 0.747691 | 1.04E-84 | 0.503128 | 2.47E-31 | 0.332936 |
| 0.747564 | 1.15E-84 | 0.560878 | 4.75E-40 | 0.647519 | 7.54E-57 | 0.317512 | 2.13E-12 | 0.227656 |
| 0.906349 | #####    | 0.663217 | 1.68E-60 | 0.680421 | 9.08E-65 | 0.46943  | 5.73E-27 | 0.30853  |
| 0.514306 | 6.81E-33 | 0.423753 | 8.95E-22 | 0.305834 | 1.44E-11 | 0.459081 | 1.01E-25 | 0.40209  |
| 0.91488  | #####    | 0.472047 | 2.73E-27 | 0.679486 | 1.58E-64 | 0.145587 | 0.00161  | 0.160254 |
| 0.924051 | #####    | 0.517251 | 2.59E-33 | 0.700189 | 4.78E-70 | 0.217841 | 2.01E-06 | 0.200861 |
| 0.884857 | #####    | 0.714256 | 4.47E-74 | 0.797336 | #####    | 0.415964 | 5.77E-21 | 0.306972 |
| 0.804184 | #####    | 0.337283 | 6.90E-14 | 0.464181 | 2.49E-26 | 0.175639 | 0.00014  | 0.119673 |
| 0.748711 | 4.63E-85 | 0.781571 | 2.38E-97 | 0.728673 | 1.82E-78 | 0.617495 | 1.97E-50 | 0.444189 |
| 0.783987 | 2.45E-98 | 0.552735 | 1.02E-38 | 0.721965 | 2.17E-76 | 0.242528 | 1.12E-07 | 0.194507 |
| 0.882752 | #####    | 0.659123 | 1.58E-59 | 0.793547 | #####    | 0.353832 | 3.21E-15 | 0.27381  |
| 0.683469 | 1.48E-65 | 0.606295 | 3.28E-48 | 0.720926 | 4.50E-76 | 0.320627 | 1.26E-12 | 0.249316 |
| 0.855215 | #####    | 0.767418 | 8.27E-92 | 0.818942 | #####    | 0.494573 | 3.52E-30 | 0.384079 |
| 0.909258 | #####    | 0.62908  | 7.98E-53 | 0.72719  | 5.30E-78 | 0.364153 | 4.32E-16 | 0.281045 |
| 0.501715 | 3.85E-31 | 0.433435 | 8.23E-23 | 0.279482 | 7.93E-10 | 0.506791 | 7.72E-32 | 0.267851 |
| 0.871002 | #####    | 0.482939 | 1.16E-28 | 0.631902 | 2.01E-53 | 0.212253 | 3.70E-06 | 0.174019 |
| 0.898145 | #####    | 0.579247 | 3.38E-43 | 0.719531 | 1.19E-75 | 0.276717 | 1.18E-09 | 0.220142 |
| 0.59614  | 2.84E-46 | 0.356039 | 2.11E-15 | 0.289696 | 1.76E-10 | 0.403217 | 1.10E-19 | 0.208947 |
| 0.822007 | #####    | 0.576353 | 1.09E-42 | 0.719738 | 1.03E-75 | 0.263784 | 7.12E-09 | 0.201891 |
| 0.904013 | #####    | 0.553297 | 8.30E-39 | 0.772236 | 1.19E-93 | 0.198815 | 1.50E-05 | 0.184402 |
| 0.936927 | #####    | 0.595611 | 3.57E-46 | 0.751865 | 3.72E-86 | 0.278289 | 9.41E-10 | 0.262268 |
| 0.503938 | 1.91E-31 | 0.282765 | 4.92E-10 | 0.230507 | 4.76E-07 | 0.322056 | 9.90E-13 | 0.260536 |

|          |          |          |          |          |          |          |          |          |
|----------|----------|----------|----------|----------|----------|----------|----------|----------|
| 0.740412 | 2.96E-82 | 0.672578 | 8.69E-63 | 0.616775 | 2.76E-50 | 0.519337 | 1.30E-33 | 0.413793 |
| 0.857223 | #####    | 0.50631  | 9.00E-32 | 0.64945  | 2.75E-57 | 0.241302 | 1.30E-07 | 0.220611 |
| 0.672208 | 1.07E-62 | 0.665137 | 5.79E-61 | 0.613619 | 1.18E-49 | 0.518805 | 1.55E-33 | 0.586026 |
| 0.601273 | 3.04E-47 | 0.305473 | 1.52E-11 | 0.327231 | 4.07E-13 | 0.224886 | 9.11E-07 | 0.375751 |
| 0.79634  | #####    | 0.631827 | 2.09E-53 | 0.696553 | 4.82E-69 | 0.402981 | 1.16E-19 | 0.277608 |
| 0.77478  | 1.22E-94 | 0.652637 | 5.13E-58 | 0.718778 | 2.01E-75 | 0.397879 | 3.64E-19 | 0.282883 |
| 0.811156 | #####    | 0.683676 | 1.31E-65 | 0.85519  | #####    | 0.313632 | 4.06E-12 | 0.274159 |
| 0.873268 | #####    | 0.348141 | 9.42E-15 | 0.497649 | 1.37E-30 | 0.147766 | 0.00136  | 0.161392 |
| 0.759506 | 7.03E-89 | 0.512871 | 1.09E-32 | 0.528381 | 6.12E-35 | 0.372755 | 7.68E-17 | 0.314682 |
| 0.472944 | 2.11E-27 | 0.336913 | 7.37E-14 | 0.257023 | 1.76E-08 | 0.350833 | 5.68E-15 | 0.370519 |
| 0.79506  | #####    | 0.591126 | 2.43E-45 | 0.722799 | 1.21E-76 | 0.286693 | 2.76E-10 | 0.312612 |
| 0.752078 | 3.13E-86 | 0.617229 | 2.23E-50 | 0.724341 | 4.06E-77 | 0.336925 | 7.36E-14 | 0.244202 |
| 0.702512 | 1.07E-70 | 0.580354 | 2.15E-43 | 0.75602  | 1.26E-87 | 0.222184 | 1.24E-06 | 0.334073 |
| 0.803729 | #####    | 0.636413 | 2.16E-54 | 0.751792 | 3.94E-86 | 0.3682   | 1.93E-16 | 0.25671  |
| 0.402411 | 1.32E-19 | 0.143321 | 0.0019   | 0.147202 | 0.00142  | 0.166643 | 0.0003   | 0.050495 |
| 0.814347 | #####    | 0.448978 | 1.52E-24 | 0.617933 | 1.61E-50 | 0.176701 | 0.00012  | 0.16852  |
| 0.580718 | 1.86E-43 | 0.423943 | 8.55E-22 | 0.506401 | 8.74E-32 | 0.255802 | 2.06E-08 | 0.164569 |
| 0.869782 | #####    | 0.496908 | 1.72E-30 | 0.543794 | 2.71E-37 | 0.349668 | 7.07E-15 | 0.225086 |
| 0.804592 | #####    | 0.423374 | 9.81E-22 | 0.400831 | 1.88E-19 | 0.384299 | 6.96E-18 | 0.240343 |
| 0.703221 | 6.78E-71 | 0.539342 | 1.33E-36 | 0.734536 | 2.47E-80 | 0.151828 | 0.001    | 0.298346 |
| 0.932096 | #####    | 0.652847 | 4.59E-58 | 0.750425 | 1.18E-85 | 0.383906 | 7.56E-18 | 0.279228 |
| 0.445971 | 3.34E-24 | 0.177828 | 0.00011  | 0.147203 | 0.00142  | 0.215168 | 2.70E-06 | 0.085112 |
| 0.906807 | #####    | 0.714167 | 4.75E-74 | 0.793472 | #####    | 0.44028  | 1.45E-23 | 0.328764 |
| 0.383198 | 8.79E-18 | 0.289515 | 1.81E-10 | 0.308776 | 8.96E-12 | 0.19258  | 2.79E-05 | 0.140658 |
| 0.637034 | 1.58E-54 | 0.498144 | 1.17E-30 | 0.591667 | 1.93E-45 | 0.266513 | 4.91E-09 | 0.198207 |
| 0.621477 | 3.05E-51 | 0.230567 | 4.72E-07 | 0.188525 | 4.13E-05 | 0.25937  | 1.29E-08 | 0.133371 |
| 0.47244  | 2.44E-27 | 0.402598 | 1.27E-19 | 0.461403 | 5.35E-26 | 0.222764 | 1.16E-06 | 0.174229 |
| 0.860311 | #####    | 0.542643 | 4.10E-37 | 0.62298  | 1.49E-51 | 0.358596 | 1.29E-15 | 0.236114 |
| 0.766452 | 1.91E-91 | 0.621687 | 2.76E-51 | 0.840337 | #####    | 0.212298 | 3.69E-06 | 0.200091 |
| 0.7907   | #####    | 0.575116 | 1.80E-42 | 0.731483 | 2.35E-79 | 0.261707 | 9.43E-09 | 0.250765 |
| 0.775039 | 9.64E-95 | 0.598189 | 1.17E-46 | 0.642545 | 9.78E-56 | 0.371568 | 9.78E-17 | 0.526421 |
| 0.875565 | #####    | 0.497757 | 1.32E-30 | 0.601121 | 3.25E-47 | 0.276372 | 1.24E-09 | 0.198382 |
| 0.827986 | #####    | 0.344825 | 1.74E-14 | 0.500028 | 6.52E-31 | 0.126501 | 0.00619  | 0.115194 |
| 0.50362  | 2.11E-31 | 0.252922 | 3.00E-08 | 0.264219 | 6.72E-09 | 0.182304 | 7.42E-05 | 0.383323 |
| 0.643164 | 7.13E-56 | 0.444557 | 4.82E-24 | 0.502032 | 3.48E-31 | 0.283923 | 4.15E-10 | 0.308371 |
| 0.637774 | 1.09E-54 | 0.434173 | 6.84E-23 | 0.526819 | 1.04E-34 | 0.238554 | 1.82E-07 | 0.189156 |
| 0.871296 | #####    | 0.659118 | 1.58E-59 | 0.745247 | 7.07E-84 | 0.408286 | 3.46E-20 | 0.294136 |
| 0.662465 | 2.54E-60 | 0.549489 | 3.40E-38 | 0.577299 | 7.46E-43 | 0.361199 | 7.74E-16 | 0.277403 |
| 0.431465 | 1.35E-22 | 0.263416 | 7.49E-09 | 0.357769 | 1.51E-15 | 0.113909 | 0.01378  | 0.14192  |
| 0.155141 | 0.00077  | 0.301193 | 3.00E-11 | 0.212949 | 3.44E-06 | 0.278645 | 8.94E-10 | 0.336432 |
| 0.390835 | 1.71E-18 | 0.200935 | 1.21E-05 | 0.230047 | 5.02E-07 | 0.123362 | 0.00761  | 0.130593 |
| 0.590969 | 2.60E-45 | 0.357851 | 1.48E-15 | 0.516342 | 3.49E-33 | 0.096426 | 0.03725  | 0.370288 |
| 0.82632  | #####    | 0.446182 | 3.16E-24 | 0.630356 | 4.29E-53 | 0.162077 | 0.00044  | 0.136899 |
| 0.806594 | #####    | 0.567612 | 3.51E-41 | 0.677807 | 4.22E-64 | 0.33678  | 7.55E-14 | 0.260043 |
| 0.828376 | #####    | 0.498103 | 1.19E-30 | 0.679171 | 1.90E-64 | 0.210212 | 4.61E-06 | 0.193984 |

|          |          |          |          |          |          |          |          |          |
|----------|----------|----------|----------|----------|----------|----------|----------|----------|
| 0.526789 | 1.05E-34 | 0.238316 | 1.87E-07 | 0.323823 | 7.32E-13 | 0.119887 | 0.00951  | 0.105633 |
| 0.93577  | #####    | 0.670197 | 3.37E-62 | 0.79877  | #####    | 0.371665 | 9.59E-17 | 0.305686 |
| 0.434947 | 5.63E-23 | 0.361858 | 6.80E-16 | 0.369069 | 1.62E-16 | 0.242768 | 1.09E-07 | 0.241931 |
| 0.885217 | #####    | 0.698361 | 1.53E-69 | 0.774694 | 1.32E-94 | 0.445587 | 3.69E-24 | 0.320672 |
| 0.672918 | 7.15E-63 | 0.553196 | 8.62E-39 | 0.53271  | 1.37E-35 | 0.460739 | 6.42E-26 | 0.284258 |
| 0.648668 | 4.14E-57 | 0.712175 | 1.83E-73 | 0.608286 | 1.34E-48 | 0.606649 | 2.80E-48 | 0.412165 |
| 0.628465 | 1.08E-52 | 0.505795 | 1.06E-31 | 0.633428 | 9.50E-54 | 0.238172 | 1.91E-07 | 0.210852 |
| 0.847955 | #####    | 0.547951 | 5.97E-38 | 0.794466 | #####    | 0.152817 | 0.00092  | 0.170726 |
| 0.562411 | 2.64E-40 | 0.373084 | 7.18E-17 | 0.509497 | 3.24E-32 | 0.118929 | 0.0101   | 0.124571 |
| 0.771107 | 3.25E-93 | 0.510517 | 2.33E-32 | 0.657179 | 4.53E-59 | 0.220306 | 1.53E-06 | 0.190284 |
| 0.929621 | #####    | 0.546841 | 8.96E-38 | 0.743173 | 3.54E-83 | 0.211561 | 3.99E-06 | 0.212338 |
| 0.666714 | 2.40E-61 | 0.435852 | 4.48E-23 | 0.620852 | 4.09E-51 | 0.127838 | 0.00567  | 0.11711  |
| 0.376728 | 3.40E-17 | 0.277582 | 1.04E-09 | 0.372771 | 7.66E-17 | 0.099082 | 0.0323   | 0.139625 |
| 0.456642 | 1.96E-25 | 0.474724 | 1.27E-27 | 0.427718 | 3.40E-22 | 0.385377 | 5.53E-18 | 0.373831 |
| 0.928288 | #####    | 0.562913 | 2.17E-40 | 0.673299 | 5.75E-63 | 0.319291 | 1.58E-12 | 0.250028 |
| 0.416616 | 4.95E-21 | 0.275405 | 1.42E-09 | 0.350804 | 5.71E-15 | 0.159943 | 0.00052  | 0.101795 |
| 0.790058 | #####    | 0.44074  | 1.29E-23 | 0.546633 | 9.67E-38 | 0.245833 | 7.41E-08 | 0.210179 |
| 0.662058 | 3.18E-60 | 0.177491 | 0.00012  | 0.206677 | 6.70E-06 | 0.156993 | 0.00066  | 0.078103 |
| 0.702398 | 1.15E-70 | 0.404991 | 7.36E-20 | 0.60543  | 4.82E-48 | 0.114384 | 0.01339  | 0.12315  |
| 0.666712 | 2.40E-61 | 0.429625 | 2.12E-22 | 0.635851 | 2.86E-54 | 0.102411 | 0.0269   | 0.183385 |
| 0.685213 | 5.22E-66 | 0.556969 | 2.09E-39 | 0.729069 | 1.37E-78 | 0.21992  | 1.60E-06 | 0.282    |
| 0.822489 | #####    | 0.425853 | 5.37E-22 | 0.60389  | 9.56E-48 | 0.173044 | 0.00017  | 0.147664 |
| 0.390652 | 1.78E-18 | 0.211025 | 4.23E-06 | 0.268047 | 3.98E-09 | 0.100052 | 0.03064  | 0.124989 |
| 0.813294 | #####    | 0.665335 | 5.19E-61 | 0.76941  | 1.45E-92 | 0.362564 | 5.92E-16 | 0.373724 |
| 0.720885 | 4.64E-76 | 0.631279 | 2.73E-53 | 0.675904 | 1.28E-63 | 0.39426  | 8.10E-19 | 0.427072 |
| 0.844784 | #####    | 0.693735 | 2.82E-68 | 0.774201 | 2.05E-94 | 0.403704 | 9.86E-20 | 0.495513 |
| 0.904312 | #####    | 0.452758 | 5.56E-25 | 0.658838 | 1.84E-59 | 0.142535 | 0.00202  | 0.137159 |
| 0.755939 | 1.35E-87 | 0.621284 | 3.34E-51 | 0.776768 | 2.01E-95 | 0.272449 | 2.16E-09 | 0.299918 |
| 0.386055 | 4.79E-18 | 0.236938 | 2.21E-07 | 0.37116  | 1.06E-16 | 0.026937 | 0.56147  | 0.054451 |
| 0.34289  | 2.49E-14 | 0.211862 | 3.86E-06 | 0.276129 | 1.28E-09 | 0.089919 | 0.05215  | 0.082995 |
| 0.474286 | 1.44E-27 | 0.300617 | 3.29E-11 | 0.404285 | 8.64E-20 | 0.128811 | 0.00531  | 0.126211 |
| 0.595012 | 4.62E-46 | 0.547288 | 7.61E-38 | 0.622141 | 2.23E-51 | 0.294362 | 8.67E-11 | 0.341928 |
| 0.899767 | #####    | 0.544861 | 1.84E-37 | 0.710244 | 6.67E-73 | 0.246007 | 7.25E-08 | 0.212172 |
| 0.578732 | 4.17E-43 | 0.431308 | 1.40E-22 | 0.509358 | 3.39E-32 | 0.230599 | 4.70E-07 | 0.189552 |
| 0.432871 | 9.48E-23 | 0.35581  | 2.20E-15 | 0.424183 | 8.06E-22 | 0.190632 | 3.37E-05 | 0.137595 |
| 0.481569 | 1.74E-28 | 0.336282 | 8.26E-14 | 0.445691 | 3.59E-24 | 0.13801  | 0.0028   | 0.119704 |
| 0.657907 | 3.05E-59 | 0.567493 | 3.68E-41 | 0.659689 | 1.16E-59 | 0.315501 | 2.98E-12 | 0.229803 |
| 0.464632 | 2.19E-26 | 0.406038 | 5.79E-20 | 0.458246 | 1.27E-25 | 0.22217  | 1.24E-06 | 0.36215  |
| 0.606614 | 2.84E-48 | 0.57033  | 1.21E-41 | 0.671116 | 2.00E-62 | 0.292281 | 1.19E-10 | 0.276006 |
| 0.68044  | 8.98E-65 | 0.520284 | 9.45E-34 | 0.542052 | 5.06E-37 | 0.345376 | 1.58E-14 | 0.503583 |
| 0.76293  | 3.92E-90 | 0.514019 | 7.48E-33 | 0.554335 | 5.63E-39 | 0.348721 | 8.45E-15 | 0.299351 |
| 0.909043 | #####    | 0.571557 | 7.43E-42 | 0.711474 | 2.93E-73 | 0.277247 | 1.09E-09 | 0.215036 |
| 0.465413 | 1.77E-26 | 0.302045 | 2.63E-11 | 0.431342 | 1.39E-22 | 0.068515 | 0.1393   | 0.195658 |
| 0.664178 | 9.86E-61 | 0.177908 | 0.00011  | 0.218862 | 1.80E-06 | 0.133911 | 0.00374  | 0.07824  |
| 0.462502 | 3.95E-26 | 0.298056 | 4.91E-11 | 0.434183 | 6.83E-23 | 0.086925 | 0.06052  | 0.100753 |

|          |          |          |          |          |          |          |          |          |
|----------|----------|----------|----------|----------|----------|----------|----------|----------|
| 0.579573 | 2.96E-43 | 0.139219 | 0.00257  | 0.162099 | 0.00044  | 0.117179 | 0.01127  | 0.063036 |
| 0.706312 | 9.02E-72 | 0.467829 | 8.99E-27 | 0.515208 | 5.07E-33 | 0.310906 | 6.34E-12 | 0.253471 |
| 0.576955 | 8.57E-43 | 0.305916 | 1.42E-11 | 0.478408 | 4.38E-28 | 0.083295 | 0.07212  | 0.067164 |
| 0.569404 | 1.74E-41 | 0.279684 | 7.70E-10 | 0.41161  | 1.60E-20 | 0.089772 | 0.05254  | 0.070709 |
| 0.781289 | 3.09E-97 | 0.593165 | 1.02E-45 | 0.769936 | 9.14E-93 | 0.220265 | 1.54E-06 | 0.235339 |
| 0.645889 | 1.76E-56 | 0.267966 | 4.02E-09 | 0.274155 | 1.70E-09 | 0.25356  | 2.76E-08 | 0.197136 |
| 0.684489 | 8.06E-66 | 0.445037 | 4.26E-24 | 0.56074  | 5.00E-40 | 0.216552 | 2.32E-06 | 0.190472 |
| 0.633098 | 1.12E-53 | 0.293454 | 9.96E-11 | 0.286967 | 2.65E-10 | 0.264038 | 6.88E-09 | 0.193904 |
| 0.536067 | 4.24E-36 | 0.384162 | 7.16E-18 | 0.504008 | 1.87E-31 | 0.149137 | 0.00123  | 0.144303 |
| 0.911872 | #####    | 0.738283 | 1.49E-81 | 0.893208 | #####    | 0.371913 | 9.12E-17 | 0.294155 |
| 0.520896 | 7.71E-34 | 0.318662 | 1.76E-12 | 0.483267 | 1.06E-28 | 0.088397 | 0.05628  | 0.088963 |
| 0.658421 | 2.31E-59 | 0.4861   | 4.56E-29 | 0.457271 | 1.65E-25 | 0.377053 | 3.18E-17 | 0.560896 |
| 0.661126 | 5.30E-60 | 0.559217 | 8.94E-40 | 0.695795 | 7.76E-69 | 0.246765 | 6.59E-08 | 0.259571 |
| 0.395859 | 5.70E-19 | 0.273808 | 1.78E-09 | 0.250638 | 4.03E-08 | 0.226474 | 7.60E-07 | 0.344932 |
| 0.816024 | #####    | 0.736459 | 5.88E-81 | 0.692776 | 5.12E-68 | 0.597519 | 1.56E-46 | 0.422806 |
| 0.64171  | 1.50E-55 | 0.667224 | 1.80E-61 | 0.654288 | 2.13E-58 | 0.49106  | 1.03E-29 | 0.366    |
| 0.522125 | 5.11E-34 | 0.322324 | 9.46E-13 | 0.454767 | 3.25E-25 | 0.113374 | 0.01423  | 0.164151 |
| 0.394345 | 7.96E-19 | 0.238007 | 1.94E-07 | 0.277828 | 1.01E-09 | 0.159972 | 0.00052  | 0.140685 |
| 0.850623 | #####    | 0.554885 | 4.59E-39 | 0.621984 | 2.40E-51 | 0.343066 | 2.41E-14 | 0.46201  |
| 0.942299 | #####    | 0.514464 | 6.47E-33 | 0.68564  | 4.03E-66 | 0.228732 | 5.85E-07 | 0.192123 |
| 0.634067 | 6.93E-54 | 0.428846 | 2.58E-22 | 0.516016 | 3.89E-33 | 0.248069 | 5.59E-08 | 0.245803 |
| 0.511435 | 1.73E-32 | 0.345689 | 1.49E-14 | 0.375763 | 4.15E-17 | 0.229417 | 5.40E-07 | 0.20395  |
| 0.60492  | 6.05E-48 | 0.530702 | 2.75E-35 | 0.556979 | 2.09E-39 | 0.345471 | 1.55E-14 | 0.50644  |
| 0.403059 | 1.14E-19 | 0.280591 | 6.75E-10 | 0.329811 | 2.60E-13 | 0.165867 | 0.00032  | 0.151159 |
| 0.618795 | 1.07E-50 | 0.409212 | 2.79E-20 | 0.477384 | 5.90E-28 | 0.252351 | 3.23E-08 | 0.17978  |
| 0.752438 | 2.34E-86 | 0.401963 | 1.46E-19 | 0.550875 | 2.04E-38 | 0.17706  | 0.00012  | 0.150896 |
| 0.356943 | 1.77E-15 | 0.273978 | 1.74E-09 | 0.33856  | 5.48E-14 | 0.150775 | 0.00108  | 0.115389 |
| 0.879653 | #####    | 0.731992 | 1.62E-79 | 0.866932 | #####    | 0.367069 | 2.42E-16 | 0.334719 |
| 0.85583  | #####    | 0.508876 | 3.96E-32 | 0.685357 | 4.78E-66 | 0.216226 | 2.40E-06 | 0.183248 |
| 0.899747 | #####    | 0.631968 | 1.95E-53 | 0.733543 | 5.16E-80 | 0.374675 | 5.19E-17 | 0.364303 |
| 0.688574 | 6.80E-67 | 0.40081  | 1.89E-19 | 0.506121 | 9.56E-32 | 0.216524 | 2.33E-06 | 0.21718  |
| 0.450399 | 1.04E-24 | 0.292392 | 1.17E-10 | 0.352745 | 3.95E-15 | 0.178127 | 0.00011  | 0.351919 |
| 0.639145 | 5.49E-55 | 0.660815 | 6.28E-60 | 0.626441 | 2.86E-52 | 0.509636 | 3.10E-32 | 0.379193 |
| 0.379657 | 1.85E-17 | 0.235037 | 2.78E-07 | 0.320306 | 1.33E-12 | 0.088718 | 0.05538  | 0.075238 |
| 0.846131 | #####    | 0.751984 | 3.38E-86 | 0.803047 | #####    | 0.47805  | 4.86E-28 | 0.389317 |
| 0.522873 | 3.97E-34 | 0.3193   | 1.58E-12 | 0.46154  | 5.15E-26 | 0.116587 | 0.01169  | 0.104845 |
| 0.68706  | 1.71E-66 | 0.386694 | 4.18E-18 | 0.478374 | 4.43E-28 | 0.218362 | 1.90E-06 | 0.149474 |
| 0.29168  | 1.30E-10 | 0.25305  | 2.95E-08 | 0.295615 | 7.15E-11 | 0.12896  | 0.00525  | 0.182344 |
| 0.913968 | #####    | 0.65986  | 1.06E-59 | 0.827185 | #####    | 0.315369 | 3.04E-12 | 0.267146 |
| 0.559739 | 7.33E-40 | 0.534859 | 6.48E-36 | 0.590678 | 2.94E-45 | 0.316007 | 2.74E-12 | 0.220808 |
| 0.780716 | 5.28E-97 | 0.570097 | 1.32E-41 | 0.679437 | 1.62E-64 | 0.326438 | 4.67E-13 | 0.215261 |
| 0.691769 | 9.55E-68 | 0.654008 | 2.48E-58 | 0.564853 | 1.03E-40 | 0.598328 | 1.10E-46 | 0.367277 |
| 0.640644 | 2.57E-55 | 0.364523 | 4.02E-16 | 0.479087 | 3.60E-28 | 0.174748 | 0.00015  | 0.223064 |
| 0.46638  | 1.35E-26 | 0.326474 | 4.64E-13 | 0.419693 | 2.38E-21 | 0.136367 | 0.00315  | 0.104058 |
| 0.873112 | #####    | 0.477832 | 5.18E-28 | 0.639699 | 4.15E-55 | 0.208016 | 5.82E-06 | 0.174738 |

|          |          |          |          |          |          |          |          |          |
|----------|----------|----------|----------|----------|----------|----------|----------|----------|
| 0.591858 | 1.78E-45 | 0.306261 | 1.34E-11 | 0.450068 | 1.14E-24 | 0.128058 | 0.00558  | 0.164184 |
| 0.423055 | 1.06E-21 | 0.308319 | 9.65E-12 | 0.373288 | 6.89E-17 | 0.15644  | 0.00069  | 0.259186 |
| 0.855539 | #####    | 0.543173 | 3.39E-37 | 0.604505 | 7.28E-48 | 0.36265  | 5.82E-16 | 0.239292 |
| 0.936709 | #####    | 0.540887 | 7.68E-37 | 0.742055 | 8.39E-83 | 0.204956 | 8.02E-06 | 0.20492  |
| 0.801857 | #####    | 0.603038 | 1.39E-47 | 0.755805 | 1.51E-87 | 0.283675 | 4.31E-10 | 0.27808  |
| 0.842801 | #####    | 0.715756 | 1.61E-74 | 0.828653 | #####    | 0.393257 | 1.01E-18 | 0.335933 |
| 0.411744 | 1.55E-20 | 0.278925 | 8.59E-10 | 0.316667 | 2.45E-12 | 0.166459 | 0.0003   | 0.241622 |
| 0.768084 | 4.63E-92 | 0.530889 | 2.58E-35 | 0.508104 | 5.07E-32 | 0.421727 | 1.46E-21 | 0.251101 |
| 0.678711 | 2.49E-64 | 0.55823  | 1.30E-39 | 0.66477  | 7.10E-61 | 0.274817 | 1.54E-09 | 0.241404 |
| 0.904572 | #####    | 0.490023 | 1.41E-29 | 0.675945 | 1.25E-63 | 0.192257 | 2.88E-05 | 0.200217 |
| 0.800025 | #####    | 0.528571 | 5.73E-35 | 0.689361 | 4.20E-67 | 0.231376 | 4.29E-07 | 0.18149  |
| 0.587331 | 1.20E-44 | 0.289166 | 1.91E-10 | 0.308182 | 9.87E-12 | 0.203322 | 9.49E-06 | 0.11691  |
| 0.518716 | 1.59E-33 | 0.461433 | 5.31E-26 | 0.488767 | 2.05E-29 | 0.291311 | 1.38E-10 | 0.31283  |
| 0.750165 | 1.45E-85 | 0.649725 | 2.38E-57 | 0.801656 | #####    | 0.303562 | 2.07E-11 | 0.34171  |
| 0.850476 | #####    | 0.766744 | 1.49E-91 | 0.821967 | #####    | 0.488005 | 2.58E-29 | 0.38427  |
| 0.529275 | 4.50E-35 | 0.453575 | 4.47E-25 | 0.478614 | 4.13E-28 | 0.280613 | 6.73E-10 | 0.495258 |
| 0.58412  | 4.58E-44 | 0.488942 | 1.95E-29 | 0.385953 | 4.89E-18 | 0.471291 | 3.38E-27 | 0.420009 |
| 0.470818 | 3.87E-27 | 0.381182 | 1.34E-17 | 0.482079 | 1.50E-28 | 0.181815 | 7.77E-05 | 0.191907 |
| 0.663085 | 1.80E-60 | 0.599901 | 5.55E-47 | 0.454995 | 3.05E-25 | 0.599986 | 5.34E-47 | 0.331788 |
| 0.548504 | 4.88E-38 | 0.471185 | 3.49E-27 | 0.445414 | 3.86E-24 | 0.376571 | 3.51E-17 | 0.237582 |
| 0.730194 | 6.03E-79 | 0.452553 | 5.88E-25 | 0.619685 | 7.08E-51 | 0.182359 | 7.38E-05 | 0.160882 |
| 0.831456 | #####    | 0.601771 | 2.44E-47 | 0.813069 | #####    | 0.210731 | 4.36E-06 | 0.3268   |
| 0.497164 | 1.59E-30 | 0.408035 | 3.67E-20 | 0.449376 | 1.37E-24 | 0.25251  | 3.17E-08 | 0.41096  |
| 0.417797 | 3.74E-21 | 0.33194  | 1.79E-13 | 0.427856 | 3.29E-22 | 0.152441 | 0.00095  | 0.129074 |
| 0.904721 | #####    | 0.484822 | 6.67E-29 | 0.648456 | 4.63E-57 | 0.211901 | 3.85E-06 | 0.188973 |
| 0.826161 | #####    | 0.511293 | 1.82E-32 | 0.473406 | 1.85E-27 | 0.434484 | 6.33E-23 | 0.31669  |
| 0.792306 | #####    | 0.778518 | 4.03E-96 | 0.675163 | 1.96E-63 | 0.670639 | 2.63E-62 | 0.435009 |
| 0.735703 | 1.03E-80 | 0.552958 | 9.41E-39 | 0.6311   | 2.98E-53 | 0.328291 | 3.39E-13 | 0.265164 |
| 0.880349 | #####    | 0.469623 | 5.42E-27 | 0.559127 | 9.25E-40 | 0.28868  | 2.05E-10 | 0.200312 |
| 0.705552 | 1.48E-71 | 0.45601  | 2.32E-25 | 0.59034  | 3.39E-45 | 0.210378 | 4.53E-06 | 0.181955 |
| 0.802533 | #####    | 0.556677 | 2.34E-39 | 0.555582 | 3.53E-39 | 0.399283 | 2.67E-19 | 0.315049 |
| 0.439728 | 1.67E-23 | 0.239215 | 1.68E-07 | 0.345167 | 1.64E-14 | 0.085336 | 0.06539  | 0.074716 |
| 0.717396 | 5.22E-75 | 0.669057 | 6.43E-62 | 0.75505  | 2.80E-87 | 0.383264 | 8.67E-18 | 0.323273 |
| 0.748705 | 4.65E-85 | 0.682316 | 2.95E-65 | 0.636645 | 1.92E-54 | 0.517341 | 2.51E-33 | 0.563486 |
| 0.396424 | 5.03E-19 | 0.211638 | 3.96E-06 | 0.269524 | 3.24E-09 | 0.107375 | 0.02029  | 0.032873 |
| 0.679891 | 1.24E-64 | 0.401229 | 1.72E-19 | 0.45682  | 1.87E-25 | 0.249466 | 4.68E-08 | 0.235651 |
| 0.433386 | 8.34E-23 | 0.261184 | 1.01E-08 | 0.380054 | 1.70E-17 | 0.085795 | 0.06396  | 0.084027 |
| 0.725662 | 1.58E-77 | 0.466566 | 1.28E-26 | 0.53706  | 2.99E-36 | 0.312119 | 5.20E-12 | 0.250722 |
| 0.493452 | 4.96E-30 | 0.254953 | 2.30E-08 | 0.351563 | 4.95E-15 | 0.111581 | 0.01585  | 0.093106 |
| 0.35654  | 1.91E-15 | 0.237186 | 2.15E-07 | 0.258945 | 1.36E-08 | 0.141725 | 0.00214  | 0.097205 |
| 0.499299 | 8.18E-31 | 0.235697 | 2.57E-07 | 0.289252 | 1.88E-10 | 0.142901 | 0.00196  | 0.109576 |
| 0.406305 | 5.45E-20 | 0.186959 | 4.80E-05 | 0.243212 | 1.03E-07 | 0.094501 | 0.04122  | 0.128822 |
| 0.634584 | 5.36E-54 | 0.457378 | 1.60E-25 | 0.494367 | 3.75E-30 | 0.311233 | 6.01E-12 | 0.267802 |
| 0.653223 | 3.76E-58 | 0.260037 | 1.18E-08 | 0.349657 | 7.09E-15 | 0.144638 | 0.00173  | 0.131501 |
| 0.421444 | 1.56E-21 | 0.201571 | 1.14E-05 | 0.280776 | 6.57E-10 | 0.085907 | 0.06361  | 0.075511 |

|          |          |          |          |          |          |          |          |          |
|----------|----------|----------|----------|----------|----------|----------|----------|----------|
| 0.474337 | 1.42E-27 | 0.360621 | 8.66E-16 | 0.35245  | 4.18E-15 | 0.264528 | 6.44E-09 | 0.170629 |
| 0.396975 | 4.45E-19 | 0.231996 | 3.99E-07 | 0.291507 | 1.34E-10 | 0.11294  | 0.01461  | 0.086989 |
| 0.374631 | 5.23E-17 | 0.247223 | 6.22E-08 | 0.31502  | 3.22E-12 | 0.099313 | 0.03189  | 0.108042 |
| 0.610539 | 4.84E-49 | 0.563154 | 1.98E-40 | 0.517617 | 2.29E-33 | 0.438942 | 2.05E-23 | 0.495903 |
| 0.601871 | 2.34E-47 | 0.466906 | 1.16E-26 | 0.572804 | 4.53E-42 | 0.219034 | 1.76E-06 | 0.203574 |
| 0.727938 | 3.09E-78 | 0.6067   | 2.73E-48 | 0.67815  | 3.45E-64 | 0.360838 | 8.30E-16 | 0.276197 |
| 0.381662 | 1.21E-17 | 0.055445 | 0.23174  | 0.056377 | 0.22398  | 0.057833 | 0.21222  | 0.025987 |
| 0.379855 | 1.77E-17 | 0.14525  | 0.00165  | 0.222607 | 1.18E-06 | 0.047479 | 0.3059   | 0.058914 |
| 0.925138 | #####    | 0.502735 | 2.79E-31 | 0.649906 | 2.17E-57 | 0.242071 | 1.18E-07 | 0.196883 |
| 0.880847 | #####    | 0.557789 | 1.54E-39 | 0.739998 | 4.05E-82 | 0.223668 | 1.05E-06 | 0.246091 |
| 0.630166 | 4.71E-53 | 0.480348 | 2.49E-28 | 0.654463 | 1.94E-58 | 0.154116 | 0.00083  | 0.183273 |
| 0.649379 | 2.86E-57 | 0.449369 | 1.37E-24 | 0.536792 | 3.29E-36 | 0.226154 | 7.88E-07 | 0.452866 |
| 0.818843 | #####    | 0.680671 | 7.84E-65 | 0.765887 | 3.11E-91 | 0.39055  | 1.82E-18 | 0.294542 |
| 0.555045 | 4.32E-39 | 0.387376 | 3.61E-18 | 0.441146 | 1.16E-23 | 0.220139 | 1.56E-06 | 0.461443 |
| 0.659037 | 1.66E-59 | 0.618963 | 9.94E-51 | 0.610692 | 4.51E-49 | 0.417098 | 4.41E-21 | 0.497479 |
| 0.909754 | #####    | 0.465806 | 1.58E-26 | 0.6241   | 8.77E-52 | 0.219375 | 1.70E-06 | 0.173545 |
| 0.464655 | 2.18E-26 | 0.347453 | 1.07E-14 | 0.384825 | 6.22E-18 | 0.229128 | 5.59E-07 | 0.230342 |
| 0.687299 | 1.48E-66 | 0.582533 | 8.81E-44 | 0.671421 | 1.68E-62 | 0.324114 | 6.96E-13 | 0.277146 |
| 0.695537 | 9.13E-69 | 0.47615  | 8.43E-28 | 0.647392 | 8.06E-57 | 0.178332 | 0.00011  | 0.189531 |
| 0.024155 | 0.6026   | 0.121395 | 0.00864  | 0.061889 | 0.18184  | 0.135707 | 0.0033   | 0.256568 |
| -0.03002 | 0.51747  | 0.166308 | 0.00031  | 0.031477 | 0.49741  | 0.209715 | 4.86E-06 | 0.404304 |
| -0.03453 | 0.45659  | 0.13517  | 0.00343  | 0.045853 | 0.32278  | 0.160427 | 0.0005   | 0.289416 |
| -0.00637 | 0.8908   | 0.148601 | 0.00128  | 0.03796  | 0.41311  | 0.189528 | 3.75E-05 | 0.326058 |
| -0.0744  | 0.10833  | -0.00443 | 0.9239   | -0.07177 | 0.1214   | 0.039555 | 0.39375  | 0.001364 |
| -0.01955 | 0.67341  | 0.116338 | 0.01187  | 0.033585 | 0.46904  | 0.137795 | 0.00284  | 0.245038 |
| -0.05679 | 0.22062  | 0.036826 | 0.42723  | -0.00543 | 0.9069   | 0.057819 | 0.21233  | 0.09843  |
| 0.111222 | 0.01619  | 0.172417 | 0.00018  | 0.102268 | 0.02711  | 0.164821 | 0.00035  | 0.379141 |
| -0.04136 | 0.37256  | 0.06211  | 0.18028  | -0.0009  | 0.98461  | 0.086143 | 0.06288  | 0.147509 |
| -0.01379 | 0.76635  | 0.157914 | 0.00061  | 0.024629 | 0.59549  | 0.222933 | 1.14E-06 | 0.320373 |
| -0.03903 | 0.40012  | 0.081944 | 0.07689  | 0.012539 | 0.78696  | 0.102703 | 0.02646  | 0.190353 |
| -0.02317 | 0.61744  | 0.076304 | 0.09958  | 0.007156 | 0.87743  | 0.107214 | 0.02048  | 0.153718 |
| 0.023367 | 0.61449  | 0.166391 | 0.0003   | 0.069914 | 0.13139  | 0.18894  | 3.97E-05 | 0.397898 |
| 0.031622 | 0.49544  | 0.144992 | 0.00168  | 0.084956 | 0.06661  | 0.133475 | 0.00386  | 0.313385 |
| -0.04651 | 0.31588  | 0.081252 | 0.07942  | 0.031217 | 0.50097  | 0.087135 | 0.0599   | 0.111216 |
| -0.14948 | 0.0012   | -0.15541 | 0.00075  | -0.13087 | 0.00462  | -0.13839 | 0.00273  | -0.15451 |
| -0.11872 | 0.01023  | 0.048645 | 0.29417  | -0.03965 | 0.39259  | 0.090837 | 0.04978  | 0.212004 |
| -0.0606  | 0.19109  | 0.041306 | 0.37313  | 0.00332  | 0.94295  | 0.050413 | 0.27695  | 0.054503 |
| -0.02092 | 0.65202  | 0.034793 | 0.4532   | -0.00149 | 0.97442  | 0.045431 | 0.32726  | 0.1651   |
| 0.04345  | 0.34881  | 0.071747 | 0.12155  | 0.02376  | 0.60854  | 0.085759 | 0.06407  | 0.187624 |
| 0.011406 | 0.80582  | 0.177961 | 0.00011  | 0.060511 | 0.19177  | 0.209526 | 4.96E-06 | 0.385798 |
| 0.066803 | 0.14948  | 0.109271 | 0.01817  | 0.082243 | 0.07581  | 0.096117 | 0.03786  | 0.257045 |
| -0.00493 | 0.9154   | 0.157417 | 0.00064  | 0.089645 | 0.05287  | 0.157711 | 0.00063  | 0.326948 |
| -0.00088 | 0.98484  | 0.154084 | 0.00084  | 0.035291 | 0.44676  | 0.201972 | 1.09E-05 | 0.298089 |
| -0.03508 | 0.44949  | 0.117247 | 0.01122  | 0.034591 | 0.45582  | 0.135251 | 0.00341  | 0.303712 |
| -0.04265 | 0.35782  | 0.053828 | 0.24566  | 0.000493 | 0.99152  | 0.081477 | 0.07859  | 0.13148  |

|          |         |          |          |          |         |          |          |          |
|----------|---------|----------|----------|----------|---------|----------|----------|----------|
| -0.01171 | 0.80079 | 0.153985 | 0.00084  | 0.059593 | 0.19861 | 0.176275 | 0.00013  | 0.293086 |
| -0.08993 | 0.05212 | -0.02311 | 0.61838  | -0.07172 | 0.12169 | 0.01287  | 0.78147  | 0.023829 |
| -0.14535 | 0.00164 | -0.05154 | 0.26631  | -0.1093  | 0.01814 | 0.002758 | 0.9526   | -0.01951 |
| -0.1294  | 0.0051  | -0.03395 | 0.4642   | -0.06955 | 0.13344 | -0.0209  | 0.65242  | -0.02862 |
| -0.07216 | 0.11942 | 0.092166 | 0.04652  | -0.00413 | 0.92913 | 0.121423 | 0.00862  | 0.248961 |
| -0.05168 | 0.26499 | 0.017056 | 0.71315  | 0.008836 | 0.84896 | 0.011543 | 0.80352  | 0.085097 |
| -0.0996  | 0.0314  | 0.101389 | 0.02847  | -0.00513 | 0.91205 | 0.141167 | 0.00223  | 0.261448 |
| -0.06261 | 0.17681 | 0.10224  | 0.02715  | 0.018754 | 0.68604 | 0.123835 | 0.00738  | 0.303355 |
| 0.041386 | 0.37221 | 0.170688 | 0.00021  | 0.060115 | 0.1947  | 0.19541  | 2.11E-05 | 0.415452 |
| 0.073758 | 0.11142 | 0.164643 | 0.00035  | 0.09581  | 0.03848 | 0.168507 | 0.00025  | 0.275162 |
| -0.0292  | 0.52906 | 0.08171  | 0.07773  | 0.023607 | 0.61085 | 0.098448 | 0.03342  | 0.194341 |
| -0.03335 | 0.47212 | 0.130646 | 0.00469  | 0.060453 | 0.1922  | 0.130725 | 0.00466  | 0.203707 |
| -0.06288 | 0.17489 | 0.075904 | 0.10137  | 0.009144 | 0.84377 | 0.104351 | 0.02412  | 0.245173 |
| 0.036752 | 0.42816 | 0.227055 | 7.11E-07 | 0.105564 | 0.02252 | 0.248825 | 5.07E-08 | 0.466994 |
| -0.04359 | 0.34722 | -0.04773 | 0.30338  | -0.0409  | 0.37787 | -0.05733 | 0.21627  | -0.00384 |
| -0.05923 | 0.20137 | 0.039441 | 0.39512  | -0.00751 | 0.87149 | 0.044481 | 0.33749  | 0.143112 |
| -0.07619 | 0.10006 | 0.123805 | 0.00739  | 0.031271 | 0.50023 | 0.138791 | 0.00265  | 0.292963 |
| -0.05285 | 0.25436 | 0.079598 | 0.08575  | 0.013414 | 0.7725  | 0.11129  | 0.01613  | 0.134808 |
| 0.020362 | 0.66074 | 0.157132 | 0.00066  | 0.048898 | 0.29166 | 0.179558 | 9.55E-05 | 0.387487 |
| -0.01438 | 0.75665 | 0.110799 | 0.0166   | 0.013507 | 0.77096 | 0.155905 | 0.00072  | 0.200692 |
| -0.04476 | 0.33443 | 0.052865 | 0.25422  | -0.01905 | 0.68137 | 0.083964 | 0.06986  | 0.177094 |
| 0.034471 | 0.45739 | 0.201168 | 1.18E-05 | 0.105684 | 0.02236 | 0.202157 | 1.07E-05 | 0.406811 |
| -0.02905 | 0.53116 | 0.066853 | 0.14917  | 0.023705 | 0.60937 | 0.077107 | 0.09605  | 0.205903 |
| -0.07072 | 0.127   | 0.016703 | 0.71884  | -0.0554  | 0.23212 | 0.06076  | 0.18995  | 0.188955 |
| -0.00727 | 0.87549 | 0.160175 | 0.00051  | 0.074319 | 0.10872 | 0.163583 | 0.00039  | 0.342158 |
| -0.00114 | 0.98047 | 0.047278 | 0.30796  | 0.012977 | 0.77971 | 0.047309 | 0.30764  | 0.104346 |
| 0.012066 | 0.79482 | 0.204771 | 8.17E-06 | 0.084648 | 0.0676  | 0.225216 | 8.78E-07 | 0.370073 |
| -0.01121 | 0.80912 | 0.196081 | 1.98E-05 | 0.078978 | 0.08823 | 0.218621 | 1.85E-06 | 0.432864 |
| -0.0131  | 0.77766 | 0.136157 | 0.0032   | 0.041201 | 0.37435 | 0.156466 | 0.00069  | 0.341601 |
| -0.09551 | 0.0391  | 0.048603 | 0.29458  | -0.02587 | 0.57714 | 0.078114 | 0.09177  | 0.20151  |
| -0.11185 | 0.0156  | 0.091605 | 0.04788  | -0.01982 | 0.66927 | 0.14515  | 0.00166  | 0.25414  |
| -0.04078 | 0.37923 | 0.007586 | 0.87013  | -0.02865 | 0.53688 | 0.034727 | 0.45406  | -0.03566 |
| 0.00648  | 0.88892 | 0.201486 | 1.15E-05 | 0.047071 | 0.31009 | 0.262866 | 8.07E-09 | 0.388373 |
| 0.003741 | 0.93573 | 0.131438 | 0.00444  | 0.050175 | 0.27923 | 0.145374 | 0.00163  | 0.281795 |
| -0.11448 | 0.0133  | -0.02172 | 0.6397   | -0.08898 | 0.05466 | 0.024309 | 0.60029  | -0.02305 |
| -0.01249 | 0.78773 | 0.112188 | 0.01528  | 0.033145 | 0.4749  | 0.130392 | 0.00477  | 0.186711 |
| -0.04423 | 0.34023 | -0.00475 | 0.91851  | -0.03944 | 0.39519 | 0.016554 | 0.72124  | 0.027063 |
| -0.05388 | 0.24517 | 0.095088 | 0.03997  | 0.009499 | 0.83779 | 0.127587 | 0.00576  | 0.191396 |
| 0.053715 | 0.24665 | 0.245012 | 8.21E-08 | 0.106895 | 0.02086 | 0.271514 | 2.46E-09 | 0.480051 |
| 0.036052 | 0.43701 | 0.163978 | 0.00037  | 0.056058 | 0.22662 | 0.185165 | 5.68E-05 | 0.430604 |
| -0.06691 | 0.14886 | 0.091812 | 0.04737  | -0.01709 | 0.71262 | 0.147943 | 0.00135  | 0.294963 |
| -0.07066 | 0.12731 | 0.065569 | 0.15716  | -0.00324 | 0.94427 | 0.093592 | 0.04322  | 0.182646 |
| 0.038228 | 0.40982 | 0.191413 | 3.13E-05 | 0.093281 | 0.04392 | 0.208361 | 5.61E-06 | 0.380098 |
| -0.04469 | 0.33526 | 0.125309 | 0.0067   | 0.027233 | 0.55718 | 0.156903 | 0.00067  | 0.320218 |
| 0.001658 | 0.97149 | -0.02351 | 0.6123   | 0.017864 | 0.70021 | -0.06149 | 0.18464  | 0.012198 |



|          |         |          |         |          |         |          |         |          |
|----------|---------|----------|---------|----------|---------|----------|---------|----------|
| -0.00622 | 0.89328 | 0.099054 | 0.03235 | 0.014272 | 0.75838 | 0.136804 | 0.00305 | 0.263781 |
| -0.01306 | 0.77831 | 0.119232 | 0.00991 | 0.046732 | 0.31358 | 0.128332 | 0.00548 | 0.232052 |
| 0.056881 | 0.21986 | 0.103494 | 0.02532 | 0.021609 | 0.64138 | 0.132818 | 0.00404 | 0.269505 |
| 0.034071 | 0.46264 | 0.126801 | 0.00607 | 0.111868 | 0.01558 | 0.094372 | 0.0415  | 0.31309  |
| -0.04388 | 0.34402 | 0.10083  | 0.02936 | 0.014484 | 0.75491 | 0.134238 | 0.00366 | 0.234758 |
| -0.0396  | 0.39324 | -0.03386 | 0.46539 | -0.01121 | 0.8091  | -0.06313 | 0.17324 | -0.10569 |
| -0.00868 | 0.85166 | -0.02652 | 0.56758 | 0.026076 | 0.57405 | -0.07772 | 0.09342 | -0.06735 |
| -0.0014  | 0.97599 | 0.102951 | 0.0261  | 0.055947 | 0.22753 | 0.085041 | 0.06633 | 0.157592 |
| -0.11755 | 0.01101 | -0.03353 | 0.46974 | -0.07141 | 0.12329 | -0.01418 | 0.75996 | -0.06206 |
| -0.03483 | 0.45272 | -0.0368  | 0.42761 | -0.01651 | 0.72196 | -0.0506  | 0.27518 | -0.11974 |
| -0.00841 | 0.85616 | 0.008115 | 0.86116 | 0.001169 | 0.9799  | -0.01944 | 0.67522 | 0.01614  |
| -0.01905 | 0.68129 | 0.03673  | 0.42844 | 0.029103 | 0.53042 | 0.008902 | 0.84785 | 0.078034 |
| -0.0009  | 0.98456 | 0.037595 | 0.41763 | 0.076242 | 0.09985 | -0.029   | 0.53182 | -0.01745 |
| -0.04462 | 0.336   | 0.016416 | 0.72347 | -0.008   | 0.86314 | 0.008739 | 0.85061 | 0.039479 |
| 0.052777 | 0.25501 | 0.023702 | 0.60942 | 0.055368 | 0.23239 | -0.03271 | 0.48073 | -0.02308 |
| -0.00306 | 0.94746 | -0.04167 | 0.36892 | -0.00149 | 0.97434 | -0.06877 | 0.13786 | -0.16797 |
| 0.024021 | 0.60461 | 0.001587 | 0.97272 | 0.012144 | 0.79353 | -0.01951 | 0.67403 | -0.07928 |
| -0.02602 | 0.5748  | 0.066382 | 0.15207 | 0.011264 | 0.80818 | 0.064206 | 0.16599 | 0.071264 |
| -0.02096 | 0.65148 | -0.06945 | 0.13397 | -0.02582 | 0.57776 | -0.10144 | 0.02839 | -0.24564 |
| -0.05313 | 0.25185 | -0.04973 | 0.28352 | -0.03597 | 0.43801 | -0.06152 | 0.18448 | -0.18873 |
| -0.09694 | 0.03624 | -0.12752 | 0.00579 | -0.10075 | 0.02948 | -0.12994 | 0.00492 | -0.27666 |
| -0.06833 | 0.14036 | -0.06841 | 0.13994 | -0.03907 | 0.39955 | -0.08917 | 0.05414 | -0.18825 |
| -0.00612 | 0.89508 | -0.02789 | 0.54774 | 0.003529 | 0.93937 | -0.05628 | 0.2248  | -0.13511 |
| -0.03051 | 0.51069 | -0.05751 | 0.21483 | -0.05143 | 0.26735 | -0.05214 | 0.26078 | -0.14172 |
| -0.02557 | 0.58146 | -0.03686 | 0.42676 | -0.03757 | 0.41798 | -0.02942 | 0.52599 | -0.03809 |
| -0.04343 | 0.34902 | -0.07513 | 0.10491 | -0.01851 | 0.68984 | -0.10924 | 0.01821 | -0.23703 |
| -0.05235 | 0.25889 | -0.1069  | 0.02086 | -0.07356 | 0.11239 | -0.12341 | 0.00759 | -0.23211 |
| -0.00384 | 0.93406 | -0.12885 | 0.00529 | -0.05025 | 0.27846 | -0.14768 | 0.00137 | -0.27567 |
| -0.04052 | 0.38229 | -0.11665 | 0.01165 | -0.06297 | 0.17428 | -0.13602 | 0.00323 | -0.29616 |
| -0.02379 | 0.60812 | -0.13312 | 0.00395 | -0.05256 | 0.25693 | -0.16274 | 0.00041 | -0.3126  |
| -0.03669 | 0.42894 | -0.09136 | 0.04848 | -0.0307  | 0.50811 | -0.13434 | 0.00363 | -0.24052 |
| -0.0883  | 0.05654 | -0.13895 | 0.00262 | -0.08869 | 0.05545 | -0.15066 | 0.00109 | -0.21979 |
| 0.068968 | 0.1367  | 0.070101 | 0.13036 | 0.073475 | 0.11281 | 0.037513 | 0.41864 | 0.060789 |
| 0.035004 | 0.45047 | -0.05886 | 0.20419 | -0.01652 | 0.72184 | -0.08077 | 0.08124 | -0.1514  |
| -0.03462 | 0.45545 | -0.08779 | 0.05799 | -0.03042 | 0.51193 | -0.1215  | 0.00858 | -0.23601 |
| -0.04905 | 0.29014 | -0.06789 | 0.14297 | -0.03562 | 0.44248 | -0.09019 | 0.05144 | -0.19901 |
| -0.03643 | 0.43215 | -0.05172 | 0.26462 | -0.02833 | 0.54139 | -0.06442 | 0.16456 | -0.15952 |
| -0.10182 | 0.02779 | -0.09111 | 0.04911 | -0.08379 | 0.07045 | -0.09522 | 0.0397  | -0.16348 |
| -0.06264 | 0.1766  | 0.005761 | 0.90119 | -0.00801 | 0.8629  | -0.00325 | 0.94419 | -0.02423 |
| 0.044133 | 0.34129 | -0.04993 | 0.28153 | -0.00533 | 0.90859 | -0.08596 | 0.06344 | -0.17894 |
| -0.01018 | 0.82633 | -0.1017  | 0.02798 | -0.08482 | 0.06703 | -0.1007  | 0.02956 | -0.15715 |
| -0.0145  | 0.75461 | 0.075329 | 0.10399 | 0.035104 | 0.44917 | 0.050018 | 0.28073 | 0.113861 |
| 0.057969 | 0.21115 | -0.00775 | 0.86727 | 0.034555 | 0.45629 | -0.05658 | 0.22228 | -0.09859 |
| -0.04714 | 0.30941 | -0.06173 | 0.18294 | -0.07039 | 0.12877 | -0.05294 | 0.25354 | -0.09131 |
| 0.081126 | 0.07989 | -0.04177 | 0.36778 | 0.030739 | 0.50756 | -0.08076 | 0.08128 | -0.21185 |

|          |         |          |          |          |         |          |          |          |
|----------|---------|----------|----------|----------|---------|----------|----------|----------|
| 0.016257 | 0.72605 | -0.12106 | 0.00883  | 0.002547 | 0.95622 | -0.19654 | 1.89E-05 | -0.23275 |
| 0.008018 | 0.8628  | -0.03496 | 0.45101  | 0.023493 | 0.61258 | -0.06021 | 0.19401  | -0.15611 |
| -0.04975 | 0.28337 | -0.21122 | 4.14E-06 | -0.11133 | 0.01609 | -0.2417  | 1.24E-07 | -0.35411 |
| -0.00367 | 0.93693 | -0.03784 | 0.41456  | -0.03248 | 0.48377 | -0.03701 | 0.42493  | 0.063746 |
| -0.08199 | 0.07673 | -0.09603 | 0.03803  | -0.093   | 0.04457 | -0.05336 | 0.24979  | -0.11724 |
| 0.017587 | 0.70464 | -0.17255 | 0.00018  | -0.05778 | 0.21267 | -0.21571 | 2.54E-06 | -0.28502 |
| -0.05434 | 0.24117 | -0.18676 | 4.89E-05 | -0.11754 | 0.01102 | -0.17269 | 0.00018  | -0.3657  |
| 0.074194 | 0.10932 | -0.05645 | 0.22334  | 0.063133 | 0.17319 | -0.14135 | 0.0022   | -0.17805 |
| -0.0489  | 0.29163 | -0.13834 | 0.00274  | -0.09816 | 0.03394 | -0.12137 | 0.00865  | -0.25972 |
| 0.053574 | 0.24789 | 0.018306 | 0.69316  | 0.06795  | 0.1426  | -0.02264 | 0.6256   | 0.018216 |
| -0.0474  | 0.30667 | -0.09211 | 0.04666  | -0.03533 | 0.44623 | -0.11356 | 0.01407  | -0.30268 |
| -0.08239 | 0.07527 | -0.07135 | 0.12365  | -0.04938 | 0.28694 | -0.0689  | 0.13709  | -0.21138 |
| -0.10734 | 0.02033 | -0.18826 | 4.24E-05 | -0.08359 | 0.07112 | -0.19949 | 1.40E-05 | -0.39444 |
| -0.13826 | 0.00275 | -0.1522  | 0.00097  | -0.08355 | 0.07125 | -0.15447 | 0.00081  | -0.27558 |
| -0.05358 | 0.24781 | -0.11582 | 0.01226  | -0.05113 | 0.27018 | -0.12519 | 0.00675  | -0.28375 |
| -0.04606 | 0.32061 | -0.14756 | 0.00138  | -0.05983 | 0.19683 | -0.17023 | 0.00022  | -0.32685 |
| -0.16981 | 0.00023 | -0.15611 | 0.00071  | -0.10844 | 0.01908 | -0.14498 | 0.00168  | -0.30307 |
| -0.12969 | 0.005   | -0.14235 | 0.00204  | -0.07777 | 0.09323 | -0.15484 | 0.00079  | -0.25647 |
| -0.02289 | 0.62173 | -0.04983 | 0.28254  | -0.01556 | 0.73735 | -0.05098 | 0.27161  | -0.18447 |
| -0.08354 | 0.07127 | -0.19853 | 1.55E-05 | -0.06592 | 0.15497 | -0.2406  | 1.42E-07 | -0.46682 |
| -0.0134  | 0.7728  | -0.06652 | 0.1512   | -0.02353 | 0.61199 | -0.07292 | 0.11554  | -0.17775 |
| -0.09297 | 0.04465 | -0.16973 | 0.00023  | -0.06217 | 0.17988 | -0.20235 | 1.05E-05 | -0.37298 |
| -0.16575 | 0.00032 | -0.22991 | 5.10E-07 | -0.15768 | 0.00063 | -0.22762 | 6.66E-07 | -0.39539 |
| -0.07125 | 0.12418 | -0.14078 | 0.00229  | -0.06415 | 0.16638 | -0.16126 | 0.00047  | -0.29599 |
| -0.01522 | 0.74283 | -0.17572 | 0.00014  | -0.05782 | 0.21231 | -0.20069 | 1.24E-05 | -0.24657 |
| -0.04909 | 0.28975 | -0.09519 | 0.03977  | -0.02131 | 0.64599 | -0.12464 | 0.007    | -0.23657 |
| -0.04652 | 0.31581 | -0.20082 | 1.23E-05 | -0.07166 | 0.12202 | -0.23142 | 4.27E-07 | -0.39632 |
| 0.168496 | 0.00025 | -0.01754 | 0.70542  | 0.057826 | 0.21228 | -0.05522 | 0.2336   | -0.07466 |
| 0.085999 | 0.06332 | 0.000352 | 0.99395  | 0.097279 | 0.03559 | -0.07413 | 0.10962  | -0.07574 |
| -0.02639 | 0.56947 | -0.17982 | 9.33E-05 | -0.0624  | 0.17823 | -0.21949 | 1.68E-06 | -0.40341 |
| 0.018992 | 0.68228 | -0.11587 | 0.01222  | -0.062   | 0.18104 | -0.10208 | 0.0274   | -0.24042 |
| -0.13844 | 0.00272 | -0.18496 | 5.79E-05 | -0.14483 | 0.0017  | -0.16387 | 0.00038  | -0.32041 |
| -0.02006 | 0.66543 | -0.03881 | 0.40268  | 0.008724 | 0.85085 | -0.06284 | 0.17519  | -0.13058 |
| 0.0617   | 0.18317 | -0.01571 | 0.73488  | 0.02036  | 0.66077 | -0.02789 | 0.54768  | -0.2092  |
| 0.09299  | 0.04459 | -0.12458 | 0.00703  | 0.054487 | 0.23991 | -0.21989 | 1.60E-06 | -0.4081  |
| 0.158423 | 0.00059 | 0.063411 | 0.1713   | 0.113141 | 0.01443 | 0.009705 | 0.83432  | -0.06096 |
| 0.039168 | 0.3984  | -0.07541 | 0.10363  | -0.00055 | 0.9906  | -0.10208 | 0.0274   | -0.21284 |
| 0.035082 | 0.44945 | -0.05253 | 0.2572   | 0.051757 | 0.26432 | -0.11753 | 0.01103  | -0.21737 |
| -0.06252 | 0.17741 | -0.12585 | 0.00646  | -0.06393 | 0.1678  | -0.12937 | 0.00511  | -0.29629 |
| -0.00585 | 0.8997  | -0.14701 | 0.00144  | -0.06786 | 0.1431  | -0.14693 | 0.00145  | -0.31273 |
| -0.08217 | 0.07607 | -0.0774  | 0.09481  | -0.01474 | 0.7507  | -0.1027  | 0.02647  | -0.18448 |
| 0.07975  | 0.08515 | -0.0816  | 0.07815  | 0.018304 | 0.69319 | -0.1316  | 0.00439  | -0.25367 |
| -0.04528 | 0.32885 | -0.12396 | 0.00732  | -0.06709 | 0.14776 | -0.12596 | 0.00642  | -0.26427 |
| -0.07633 | 0.09945 | -0.14086 | 0.00228  | -0.07069 | 0.12718 | -0.15047 | 0.00111  | -0.3446  |
| 0.070641 | 0.12741 | -0.12033 | 0.00925  | 0.048908 | 0.29156 | -0.20434 | 8.55E-06 | -0.34901 |

|          |         |          |          |          |         |          |          |          |
|----------|---------|----------|----------|----------|---------|----------|----------|----------|
| -0.05388 | 0.24522 | -0.12621 | 0.00631  | -0.05629 | 0.22473 | -0.15427 | 0.00082  | -0.2576  |
| 0.053931 | 0.24475 | -0.04114 | 0.37509  | 0.023676 | 0.60981 | -0.07168 | 0.12191  | -0.10796 |
| 0.078455 | 0.09036 | -0.10527 | 0.0229   | 0.012561 | 0.7866  | -0.16245 | 0.00042  | -0.26721 |
| -0.01645 | 0.72288 | -0.14215 | 0.00207  | -0.03938 | 0.39582 | -0.17327 | 0.00017  | -0.28896 |
| -0.04977 | 0.2831  | -0.09413 | 0.04203  | -0.04023 | 0.38569 | -0.10304 | 0.02597  | -0.27424 |
| 0.033678 | 0.46781 | -0.09457 | 0.04107  | 0.000497 | 0.99146 | -0.13819 | 0.00276  | -0.15105 |
| -0.08403 | 0.06964 | -0.176   | 0.00013  | -0.11126 | 0.01615 | -0.16506 | 0.00034  | -0.36829 |
| -0.02889 | 0.53337 | -0.01879 | 0.6855   | 0.044867 | 0.33331 | -0.055   | 0.23555  | -0.19827 |
| 0.015199 | 0.74322 | -0.08158 | 0.07821  | -0.05221 | 0.26015 | -0.07066 | 0.12731  | -0.17799 |
| 0.033807 | 0.46611 | -0.09532 | 0.03949  | 0.039944 | 0.38911 | -0.16693 | 0.00029  | -0.18524 |
| -0.07843 | 0.09046 | -0.07761 | 0.09389  | -0.04773 | 0.30339 | -0.07635 | 0.09935  | -0.25961 |
| -0.06071 | 0.19034 | -0.15433 | 0.00082  | -0.1189  | 0.01012 | -0.13863 | 0.00268  | -0.25775 |
| -0.07879 | 0.08899 | -0.22643 | 7.63E-07 | -0.08589 | 0.06367 | -0.27038 | 2.88E-09 | -0.49807 |
| 0.00188  | 0.96769 | -0.10981 | 0.0176   | -0.03215 | 0.48828 | -0.12927 | 0.00514  | -0.33762 |
| -0.1491  | 0.00123 | -0.21498 | 2.76E-06 | -0.15571 | 0.00073 | -0.20845 | 5.56E-06 | -0.36604 |
| -0.00348 | 0.94022 | -0.09847 | 0.03338  | -0.01071 | 0.81737 | -0.14349 | 0.00188  | -0.29894 |
| -0.04401 | 0.34263 | -0.12006 | 0.0094   | -0.05208 | 0.26134 | -0.12216 | 0.00823  | -0.25634 |
| 0.021243 | 0.64704 | -0.11658 | 0.0117   | -0.0253  | 0.58556 | -0.14592 | 0.00157  | -0.30123 |
| -0.08956 | 0.0531  | -0.15882 | 0.00057  | -0.09842 | 0.03348 | -0.16118 | 0.00047  | -0.37509 |
| -0.04085 | 0.37843 | -0.13298 | 0.00399  | -0.06605 | 0.15411 | -0.1403  | 0.00237  | -0.27504 |
| -0.09292 | 0.04476 | -0.13352 | 0.00384  | -0.11939 | 0.00981 | -0.09416 | 0.04196  | -0.27629 |
| -0.09632 | 0.03746 | -0.19634 | 1.93E-05 | -0.12116 | 0.00877 | -0.1933  | 2.60E-05 | -0.39858 |
| -0.0475  | 0.30566 | -0.05032 | 0.27781  | -0.00654 | 0.88793 | -0.0672  | 0.1471   | -0.2088  |
| 0.00851  | 0.85447 | -0.13715 | 0.00298  | -0.0235  | 0.61249 | -0.17582 | 0.00013  | -0.36129 |
| -0.00488 | 0.9163  | -0.07094 | 0.12582  | 0.000864 | 0.98515 | -0.10652 | 0.02131  | -0.17583 |
| -0.03738 | 0.42035 | -0.05342 | 0.2493   | -0.01505 | 0.74561 | -0.06647 | 0.1515   | -0.17637 |
| -0.0888  | 0.05516 | -0.13831 | 0.00274  | -0.07399 | 0.1103  | -0.15287 | 0.00092  | -0.28311 |
| -0.10564 | 0.02242 | -0.18441 | 6.10E-05 | -0.15129 | 0.00104 | -0.15251 | 0.00095  | -0.39126 |
| 0.032737 | 0.48035 | -0.07546 | 0.10337  | 0.017317 | 0.70896 | -0.10917 | 0.01828  | -0.33609 |
| -0.12456 | 0.00704 | -0.21654 | 2.32E-06 | -0.13721 | 0.00297 | -0.21364 | 3.19E-06 | -0.42572 |
| 0.024613 | 0.59574 | -0.11245 | 0.01504  | -0.00525 | 0.90984 | -0.14497 | 0.00168  | -0.31681 |
| -0.11789 | 0.01078 | -0.08601 | 0.06328  | -0.06495 | 0.16112 | -0.08033 | 0.08289  | -0.22646 |
| -0.04967 | 0.28412 | -0.08314 | 0.07267  | -0.06681 | 0.14946 | -0.06151 | 0.1845   | -0.24686 |
| -0.13333 | 0.0039  | -0.13848 | 0.00271  | -0.09327 | 0.04395 | -0.13779 | 0.00285  | -0.30323 |
| -0.00145 | 0.97508 | -0.05678 | 0.22069  | 0.023655 | 0.61012 | -0.12076 | 0.009    | -0.16548 |
| 0.030931 | 0.50491 | -0.07519 | 0.10464  | -0.03586 | 0.4395  | -0.08245 | 0.07508  | -0.10384 |
| -0.01985 | 0.66873 | -0.09458 | 0.04106  | -0.00486 | 0.91661 | -0.13382 | 0.00377  | -0.28747 |
| 0.015823 | 0.73308 | -0.0725  | 0.1177   | -0.00082 | 0.98587 | -0.09052 | 0.0506   | -0.16705 |
| 0.02318  | 0.61732 | -0.12359 | 0.0075   | -0.03868 | 0.40428 | -0.15068 | 0.00109  | -0.2206  |
| 0.02364  | 0.61035 | -0.01293 | 0.78045  | 0.062378 | 0.1784  | -0.05987 | 0.19652  | -0.11424 |
| -0.07229 | 0.11873 | -0.20018 | 1.31E-05 | -0.13756 | 0.00289 | -0.19474 | 2.26E-05 | -0.31082 |
| 0.126539 | 0.00618 | -0.03266 | 0.48137  | 0.06053  | 0.19163 | -0.08922 | 0.05402  | -0.06537 |
| 0.043457 | 0.34874 | -0.16366 | 0.00038  | -0.03893 | 0.40131 | -0.21203 | 3.79E-06 | -0.41803 |
| 0.037206 | 0.42246 | -0.15312 | 0.0009   | -0.03691 | 0.42612 | -0.2108  | 4.33E-06 | -0.26042 |
| -0.06369 | 0.16945 | -0.14061 | 0.00232  | -0.06933 | 0.13466 | -0.15882 | 0.00057  | -0.33053 |

|          |          |          |          |          |         |          |          |          |
|----------|----------|----------|----------|----------|---------|----------|----------|----------|
| -0.03453 | 0.45667  | -0.15372 | 0.00086  | -0.04606 | 0.32057 | -0.20008 | 1.32E-05 | -0.36025 |
| -0.00778 | 0.86682  | -0.20736 | 6.24E-06 | -0.02495 | 0.59072 | -0.29402 | 9.14E-11 | -0.5068  |
| -0.05997 | 0.19576  | -0.23786 | 1.98E-07 | -0.10538 | 0.02276 | -0.26991 | 3.08E-09 | -0.49907 |
| -0.14091 | 0.00227  | -0.17054 | 0.00021  | -0.08406 | 0.06955 | -0.20369 | 9.14E-06 | -0.28875 |
| -0.05713 | 0.21784  | -0.20707 | 6.43E-06 | -0.06727 | 0.14665 | -0.26141 | 9.80E-09 | -0.43634 |
| -0.01891 | 0.6835   | -0.13871 | 0.00266  | -0.0716  | 0.12231 | -0.15656 | 0.00069  | -0.26211 |
| -0.08666 | 0.06131  | -0.19542 | 2.11E-05 | -0.14194 | 0.00211 | -0.1839  | 6.40E-05 | -0.33836 |
| 0.164835 | 0.00035  | 0.017275 | 0.70963  | 0.098837 | 0.03273 | -0.04131 | 0.37309  | -0.0661  |
| 0.139697 | 0.00248  | 0.002665 | 0.95419  | 0.113638 | 0.01401 | -0.07749 | 0.09439  | -0.05657 |
| -0.0124  | 0.78922  | 0.110186 | 0.01722  | 0.016975 | 0.71445 | 0.133048 | 0.00397  | 0.363089 |
| -0.07734 | 0.09506  | -0.22125 | 1.38E-06 | -0.10065 | 0.02964 | -0.24265 | 1.10E-07 | -0.4104  |
| -0.05168 | 0.26502  | -0.09658 | 0.03693  | -0.0945  | 0.04122 | -0.07711 | 0.09605  | -0.17684 |
| 0.078373 | 0.0907   | -0.0671  | 0.14768  | 0.024588 | 0.59611 | -0.10759 | 0.02004  | -0.19368 |
| -0.07542 | 0.10357  | -0.08795 | 0.05755  | -0.06133 | 0.1858  | -0.0835  | 0.07142  | -0.21455 |
| 0.062527 | 0.17736  | -0.11945 | 0.00977  | 0.010536 | 0.82036 | -0.17281 | 0.00017  | -0.32557 |
| 0.062997 | 0.17412  | -0.05836 | 0.20811  | 0.031442 | 0.4979  | -0.10541 | 0.02271  | -0.23186 |
| 0.001528 | 0.97374  | -0.17082 | 0.00021  | -0.02634 | 0.57019 | -0.23466 | 2.91E-07 | -0.43014 |
| 0.172435 | 0.00018  | -0.0379  | 0.41384  | 0.076204 | 0.10002 | -0.11373 | 0.01392  | -0.16076 |
| 0.055349 | 0.23256  | -0.00752 | 0.8713   | 0.071374 | 0.1235  | -0.05519 | 0.23389  | -0.16773 |
| -0.09496 | 0.04025  | -0.12517 | 0.00676  | -0.06353 | 0.17048 | -0.13922 | 0.00257  | -0.24717 |
| 0.019418 | 0.67555  | -0.03979 | 0.39091  | 0.016402 | 0.7237  | -0.07796 | 0.09242  | -0.14639 |
| 0.01442  | 0.75595  | -0.11757 | 0.011    | 0.023231 | 0.61655 | -0.18441 | 6.10E-05 | -0.36621 |
| -0.05294 | 0.25355  | -0.1036  | 0.02517  | -0.03077 | 0.50709 | -0.11878 | 0.0102   | -0.25583 |
| -0.06058 | 0.19127  | -0.06721 | 0.14703  | -0.01213 | 0.79373 | -0.09768 | 0.03484  | -0.14808 |
| 0.044595 | 0.33625  | -0.09142 | 0.04834  | 0.005331 | 0.90853 | -0.14532 | 0.00164  | -0.14705 |
| -0.05856 | 0.20651  | -0.14044 | 0.00235  | -0.05332 | 0.25017 | -0.18173 | 7.83E-05 | -0.26153 |
| -0.02823 | 0.54286  | -0.10682 | 0.02096  | -0.06256 | 0.17714 | -0.11854 | 0.01035  | -0.21034 |
| -0.02244 | 0.62856  | 0.006542 | 0.88787  | 0.044023 | 0.34249 | -0.01586 | 0.73241  | -0.11154 |
| -0.18562 | 5.44E-05 | -0.2698  | 3.12E-09 | -0.16689 | 0.00029 | -0.27322 | 1.94E-09 | -0.4335  |
| 0.034153 | 0.46155  | -0.07493 | 0.10582  | 0.006397 | 0.89033 | -0.12282 | 0.00788  | -0.23401 |
| 0.009979 | 0.8297   | 0.051227 | 0.26925  | 0.069538 | 0.13348 | 0.027181 | 0.55793  | -0.00692 |
| 0.019426 | 0.67542  | -0.07948 | 0.08623  | -0.0033  | 0.9433  | -0.11272 | 0.01481  | -0.18661 |
| 0.079432 | 0.08641  | 0.048398 | 0.29663  | 0.038127 | 0.41106 | 0.052138 | 0.26082  | 0.151447 |
| -0.0101  | 0.82768  | -0.14269 | 0.00199  | -0.02545 | 0.58321 | -0.18019 | 9.02E-05 | -0.36467 |
| -0.03797 | 0.41301  | -0.14394 | 0.00182  | -0.04439 | 0.33849 | -0.17541 | 0.00014  | -0.36952 |
| -0.07835 | 0.09078  | -0.13666 | 0.00308  | -0.12013 | 0.00937 | -0.0898  | 0.05247  | -0.38427 |
| -0.12187 | 0.00838  | -0.15772 | 0.00062  | -0.09043 | 0.05082 | -0.15992 | 0.00052  | -0.29744 |
| 0.009782 | 0.83302  | 0.017979 | 0.69836  | 0.010697 | 0.81766 | -0.00419 | 0.92798  | 0.148993 |
| -0.13817 | 0.00277  | -0.17449 | 0.00015  | -0.11527 | 0.01268 | -0.16727 | 0.00028  | -0.36888 |
| -0.0495  | 0.28577  | -0.07985 | 0.08474  | -0.0262  | 0.57222 | -0.10579 | 0.02223  | -0.15214 |
| 0.011433 | 0.80537  | -0.08388 | 0.07015  | -0.00563 | 0.90346 | -0.11131 | 0.01611  | -0.19713 |
| -0.03138 | 0.49871  | -0.04138 | 0.37233  | 0.004349 | 0.92532 | -0.06669 | 0.15014  | -0.15405 |
| 0.02747  | 0.55375  | -0.09259 | 0.04553  | 0.025859 | 0.57725 | -0.15315 | 0.0009   | -0.19713 |
| 0.035643 | 0.44223  | 0.053123 | 0.25191  | 0.027644 | 0.55124 | 0.062114 | 0.18025  | 0.19957  |
| -0.07261 | 0.11713  | -0.10762 | 0.02001  | -0.07854 | 0.09003 | -0.08208 | 0.07639  | -0.28079 |

|          |         |          |          |          |         |          |          |          |
|----------|---------|----------|----------|----------|---------|----------|----------|----------|
| 0.000428 | 0.99263 | -0.12911 | 0.0052   | -0.02132 | 0.64587 | -0.16804 | 0.00026  | -0.35544 |
| -0.02972 | 0.52167 | -0.16397 | 0.00037  | -0.07295 | 0.1154  | -0.1974  | 1.73E-05 | -0.29383 |
| -0.01066 | 0.81827 | -0.10715 | 0.02055  | -0.01927 | 0.67787 | -0.13474 | 0.00353  | -0.27925 |
| 0.030416 | 0.51203 | 0.213015 | 3.41E-06 | 0.07475  | 0.10668 | 0.243859 | 9.48E-08 | 0.552148 |
| -0.02043 | 0.65961 | -0.2235  | 1.07E-06 | -0.09523 | 0.03968 | -0.25861 | 1.43E-08 | -0.40884 |
| -0.10263 | 0.02657 | -0.22906 | 5.63E-07 | -0.13336 | 0.00389 | -0.23775 | 2.01E-07 | -0.42898 |
| -0.02403 | 0.60454 | -0.19393 | 2.45E-05 | -0.08922 | 0.05402 | -0.22976 | 5.19E-07 | -0.37085 |
| -0.1719  | 0.00019 | -0.1557  | 0.00073  | -0.10755 | 0.02009 | -0.17449 | 0.00015  | -0.22067 |
| -0.03605 | 0.43706 | -0.15143 | 0.00103  | -0.10516 | 0.02305 | -0.14486 | 0.0017   | -0.2888  |
| -0.03934 | 0.39631 | 0.067779 | 0.14361  | -0.00892 | 0.84752 | 0.092454 | 0.04584  | 0.278605 |
| 0.069052 | 0.13622 | -0.0189  | 0.68369  | 0.031622 | 0.49543 | -0.04924 | 0.2883   | -0.03757 |
| 0.03983  | 0.39046 | 0.019072 | 0.68101  | 0.012477 | 0.78799 | 0.018856 | 0.68443  | -0.08476 |
| -0.03201 | 0.49022 | -0.10087 | 0.02929  | -0.02526 | 0.58612 | -0.12458 | 0.00703  | -0.26357 |
| 0.008821 | 0.84923 | -0.10731 | 0.02037  | -0.022   | 0.63538 | -0.14352 | 0.00187  | -0.28419 |
| -0.0709  | 0.12603 | -0.16098 | 0.00048  | -0.09088 | 0.04968 | -0.18098 | 8.39E-05 | -0.31992 |
| 0.037576 | 0.41786 | -0.1431  | 0.00193  | -0.04205 | 0.36457 | -0.15764 | 0.00063  | -0.34538 |
| -0.07441 | 0.10831 | -0.19769 | 1.68E-05 | -0.08245 | 0.07507 | -0.22883 | 5.78E-07 | -0.39449 |
| -0.10944 | 0.01799 | -0.16342 | 0.00039  | -0.08949 | 0.0533  | -0.17833 | 0.00011  | -0.33964 |
| -0.10764 | 0.01998 | -0.18478 | 5.89E-05 | -0.12805 | 0.00559 | -0.17048 | 0.00021  | -0.29583 |
| -0.16677 | 0.00029 | -0.16929 | 0.00024  | -0.12075 | 0.009   | -0.15875 | 0.00057  | -0.30234 |
| -0.01183 | 0.79875 | -0.10726 | 0.02043  | -0.05509 | 0.23472 | -0.10257 | 0.02667  | -0.23473 |
| -0.02917 | 0.52942 | -0.04504 | 0.33149  | -0.00041 | 0.99289 | -0.06041 | 0.1925   | -0.18892 |
| -0.03915 | 0.39863 | -0.18619 | 5.16E-05 | -0.0534  | 0.2494  | -0.23807 | 1.93E-07 | -0.41943 |
| -0.00853 | 0.85416 | -0.18167 | 7.87E-05 | -0.05617 | 0.22569 | -0.21497 | 2.76E-06 | -0.37099 |
| -0.07062 | 0.12754 | -0.11767 | 0.01093  | -0.0338  | 0.46619 | -0.14509 | 0.00167  | -0.31519 |
| -0.0792  | 0.08733 | -0.15294 | 0.00091  | -0.07011 | 0.13032 | -0.16566 | 0.00032  | -0.29773 |
| -0.09141 | 0.04837 | -0.10862 | 0.01887  | -0.08721 | 0.05968 | -0.07252 | 0.11755  | -0.28965 |
| 0.041908 | 0.3662  | -0.12067 | 0.00905  | 0.01796  | 0.69868 | -0.18105 | 8.33E-05 | -0.40916 |
| -0.00428 | 0.92658 | -0.06278 | 0.17562  | 0.02062  | 0.65671 | -0.1058  | 0.02222  | -0.22013 |
| 0.056406 | 0.22374 | 0.037935 | 0.41343  | 0.057778 | 0.21266 | 0.021379 | 0.64493  | 0.062359 |
| 0.006349 | 0.89116 | -0.09615 | 0.0378   | -0.02038 | 0.66044 | -0.11643 | 0.01181  | -0.2975  |
| -0.03402 | 0.46332 | -0.0631  | 0.17343  | 0.015476 | 0.73871 | -0.09874 | 0.0329   | -0.2176  |
| 0.069635 | 0.13294 | 0.075858 | 0.10157  | 0.084915 | 0.06674 | 0.041947 | 0.36576  | 0.060593 |
| -0.09133 | 0.04855 | -0.03249 | 0.48363  | -0.02855 | 0.5383  | -0.03062 | 0.5092   | -0.06016 |
| -0.07317 | 0.1143  | -0.05407 | 0.24357  | -0.04995 | 0.28134 | -0.04826 | 0.29805  | -0.04588 |
| 0.051528 | 0.26645 | -0.10096 | 0.02915  | -0.03115 | 0.50191 | -0.12775 | 0.0057   | -0.18948 |
| 0.033955 | 0.46416 | -0.01454 | 0.754    | 0.016723 | 0.71851 | -0.04127 | 0.37356  | -0.1445  |
| 0.107819 | 0.01978 | -0.06969 | 0.13266  | 0.011703 | 0.80085 | -0.08434 | 0.06861  | -0.17799 |
| 0.016781 | 0.71759 | -0.11188 | 0.01557  | -0.02551 | 0.5824  | -0.13877 | 0.00265  | -0.27758 |
| -0.07993 | 0.08446 | -0.11683 | 0.01152  | -0.04233 | 0.3614  | -0.14043 | 0.00235  | -0.29855 |
| -0.06793 | 0.14269 | -0.16104 | 0.00048  | -0.05518 | 0.23396 | -0.20195 | 1.09E-05 | -0.33073 |
| -0.00733 | 0.87439 | -0.11242 | 0.01507  | -0.00794 | 0.86413 | -0.15419 | 0.00083  | -0.31305 |
| -0.0019  | 0.96741 | -0.1668  | 0.00029  | -0.06739 | 0.14596 | -0.19488 | 2.23E-05 | -0.37344 |
| -0.05375 | 0.24637 | -0.18291 | 7.02E-05 | -0.0788  | 0.08893 | -0.20619 | 7.05E-06 | -0.40957 |
| -0.10072 | 0.02953 | -0.12644 | 0.00622  | -0.08859 | 0.05574 | -0.13068 | 0.00468  | -0.26062 |

|          |          |          |          |          |          |          |          |          |
|----------|----------|----------|----------|----------|----------|----------|----------|----------|
| 0.020406 | 0.66006  | -0.10179 | 0.02785  | 0.005235 | 0.91017  | -0.15841 | 0.00059  | -0.21098 |
| -0.05332 | 0.25017  | -0.09291 | 0.04476  | -0.02896 | 0.53249  | -0.10786 | 0.01973  | -0.28753 |
| -0.15145 | 0.00103  | -0.18888 | 3.99E-05 | -0.13901 | 0.00261  | -0.16946 | 0.00023  | -0.32146 |
| -0.00638 | 0.89058  | -0.14162 | 0.00216  | -0.01787 | 0.7001   | -0.19379 | 2.48E-05 | -0.32711 |
| -0.02107 | 0.6497   | -0.17502 | 0.00014  | -0.04006 | 0.38776  | -0.21548 | 2.61E-06 | -0.48306 |
| 0.044485 | 0.33745  | -0.12642 | 0.00622  | 0.024695 | 0.59451  | -0.20691 | 6.53E-06 | -0.36543 |
| -0.1719  | 0.00019  | -0.16122 | 0.00047  | -0.12081 | 0.00897  | -0.14178 | 0.00213  | -0.27537 |
| -0.06756 | 0.14492  | -0.2053  | 7.73E-06 | -0.10412 | 0.02443  | -0.21369 | 3.17E-06 | -0.43844 |
| -0.05832 | 0.20841  | -0.04262 | 0.35806  | -0.02854 | 0.53845  | -0.0447  | 0.33509  | -0.11094 |
| -0.03658 | 0.43032  | -0.09543 | 0.03927  | -0.06356 | 0.17027  | -0.07312 | 0.11455  | -0.33949 |
| -0.1155  | 0.0125   | -0.13296 | 0.004    | -0.11672 | 0.0116   | -0.10228 | 0.02709  | -0.26058 |
| -0.10536 | 0.02277  | -0.1213  | 0.00869  | -0.0803  | 0.08303  | -0.11478 | 0.01306  | -0.2511  |
| -0.0125  | 0.78764  | -0.17483 | 0.00015  | -0.05342 | 0.24929  | -0.20415 | 8.72E-06 | -0.45703 |
| -0.10813 | 0.01942  | -0.15295 | 0.00091  | -0.09238 | 0.04602  | -0.15344 | 0.00088  | -0.25682 |
| -0.08778 | 0.05802  | -0.08667 | 0.06127  | -0.05311 | 0.25199  | -0.08589 | 0.06367  | -0.14703 |
| -0.02387 | 0.60683  | -0.14502 | 0.00168  | -0.04013 | 0.3869   | -0.17691 | 0.00012  | -0.38516 |
| -0.06487 | 0.16161  | -0.13684 | 0.00305  | -0.06901 | 0.13645  | -0.13811 | 0.00278  | -0.36394 |
| 0.081914 | 0.07699  | -0.12881 | 0.00531  | 0.007556 | 0.87063  | -0.18494 | 5.80E-05 | -0.39858 |
| 0.07153  | 0.12268  | -0.09444 | 0.04137  | 0.003239 | 0.94434  | -0.14025 | 0.00238  | -0.26356 |
| -0.09421 | 0.04186  | -0.21894 | 1.78E-06 | -0.10022 | 0.03036  | -0.25705 | 1.75E-08 | -0.38432 |
| -0.08288 | 0.07355  | -0.12253 | 0.00803  | -0.04375 | 0.3455   | -0.1452  | 0.00165  | -0.30004 |
| 0.076562 | 0.09843  | 0.003213 | 0.9448   | 0.074287 | 0.10887  | -0.04101 | 0.37653  | -0.03565 |
| -0.1524  | 0.00095  | -0.18662 | 4.95E-05 | -0.12557 | 0.00659  | -0.18065 | 8.64E-05 | -0.36646 |
| -0.07875 | 0.08916  | -0.1265  | 0.00619  | -0.0554  | 0.23214  | -0.14673 | 0.00148  | -0.22685 |
| 0.034239 | 0.46043  | -0.14398 | 0.00181  | -0.03237 | 0.48529  | -0.18256 | 7.25E-05 | -0.32494 |
| -0.10476 | 0.02357  | -0.22655 | 7.53E-07 | -0.12998 | 0.0049   | -0.23081 | 4.59E-07 | -0.40536 |
| 0.007457 | 0.87231  | 0.036752 | 0.42815  | 0.008531 | 0.85412  | 0.034908 | 0.4517   | 0.1673   |
| -0.09249 | 0.04577  | -0.21564 | 2.56E-06 | -0.10287 | 0.02621  | -0.25436 | 2.49E-08 | -0.412   |
| -0.08231 | 0.07558  | -0.09073 | 0.05005  | -0.04577 | 0.32361  | -0.0925  | 0.04573  | -0.26677 |
| 0.010844 | 0.8152   | 0.119151 | 0.00996  | 0.027062 | 0.55965  | 0.145047 | 0.00167  | 0.193801 |
| -0.08341 | 0.07174  | -0.06981 | 0.13195  | -0.04919 | 0.28874  | -0.05532 | 0.23282  | -0.01466 |
| 0.126089 | 0.00636  | 0.057943 | 0.21135  | 0.137574 | 0.00289  | -0.02373 | 0.60905  | -0.05238 |
| -0.21279 | 3.49E-06 | -0.25742 | 1.67E-08 | -0.16972 | 0.00023  | -0.25568 | 2.10E-08 | -0.44838 |
| -0.22519 | 8.81E-07 | -0.28304 | 4.72E-10 | -0.22102 | 1.41E-06 | -0.25433 | 2.50E-08 | -0.40271 |
| -0.07401 | 0.11021  | -0.14616 | 0.00154  | -0.05284 | 0.25447  | -0.17622 | 0.00013  | -0.33238 |
| 0.047353 | 0.30719  | -0.15666 | 0.00068  | 0.011698 | 0.80094  | -0.25255 | 3.15E-08 | -0.39969 |
| -0.02283 | 0.62258  | -0.09331 | 0.04385  | 0.011676 | 0.80131  | -0.14778 | 0.00136  | -0.24499 |
| 0.037904 | 0.41381  | -0.16306 | 0.0004   | -0.02281 | 0.62291  | -0.22126 | 1.37E-06 | -0.45512 |
| -0.00621 | 0.89347  | -0.13819 | 0.00277  | -0.02301 | 0.61993  | -0.19328 | 2.61E-05 | -0.24487 |
| 0.055699 | 0.22961  | -0.08636 | 0.06221  | 0.020608 | 0.65691  | -0.14237 | 0.00204  | -0.22485 |
| -0.03439 | 0.45844  | -0.13225 | 0.0042   | -0.08413 | 0.06931  | -0.13199 | 0.00427  | -0.24472 |
| -0.01843 | 0.69125  | 0.006106 | 0.8953   | 0.038791 | 0.40296  | -0.0246  | 0.59596  | -0.11882 |
| 0.071856 | 0.12098  | -0.04638 | 0.31723  | 0.039317 | 0.3966   | -0.08656 | 0.06162  | -0.17425 |
| 0.038241 | 0.40966  | -0.14577 | 0.00159  | -0.03271 | 0.48077  | -0.1879  | 4.39E-05 | -0.32564 |
| -0.0809  | 0.08074  | -0.2134  | 3.27E-06 | -0.12117 | 0.00876  | -0.21652 | 2.33E-06 | -0.3915  |

|          |         |          |          |          |         |          |          |          |
|----------|---------|----------|----------|----------|---------|----------|----------|----------|
| -0.11201 | 0.01544 | -0.07504 | 0.10531  | -0.09309 | 0.04437 | -0.03443 | 0.4579   | -0.16079 |
| -0.0366  | 0.43008 | -0.09229 | 0.04622  | -0.01536 | 0.74065 | -0.14452 | 0.00174  | -0.16474 |
| 0.000242 | 0.99583 | -0.14335 | 0.0019   | -0.00362 | 0.93785 | -0.20711 | 6.40E-06 | -0.41436 |
| 0.032263 | 0.48673 | -0.08953 | 0.05319  | -0.01097 | 0.81302 | -0.11084 | 0.01656  | -0.25617 |
| -0.06391 | 0.16795 | -0.21864 | 1.84E-06 | -0.10413 | 0.02442 | -0.22884 | 5.77E-07 | -0.4449  |
| -0.04621 | 0.31897 | -0.05591 | 0.22783  | -0.00176 | 0.9698  | -0.07386 | 0.11092  | -0.13997 |
| -0.01181 | 0.79907 | 0.013879 | 0.76484  | 0.05254  | 0.25715 | -0.03275 | 0.4802   | -0.05437 |
| -0.07865 | 0.08957 | -0.10225 | 0.02715  | -0.0471  | 0.30983 | -0.1121  | 0.01537  | -0.18619 |
| 0.021845 | 0.63773 | 0.010757 | 0.81665  | 0.011766 | 0.79981 | 0.011558 | 0.80328  | -0.1174  |
| -0.03977 | 0.39113 | -0.09378 | 0.04279  | -0.0146  | 0.75303 | -0.12149 | 0.00859  | -0.23351 |
| 0.01421  | 0.7594  | -0.17918 | 9.89E-05 | -0.03327 | 0.47318 | -0.23708 | 2.18E-07 | -0.37965 |
| -0.10002 | 0.03069 | -0.19537 | 2.12E-05 | -0.0909  | 0.04963 | -0.22069 | 1.47E-06 | -0.39544 |
| -0.04984 | 0.28242 | -0.08691 | 0.06057  | -0.02666 | 0.56548 | -0.09752 | 0.03513  | -0.25873 |
| 0.026084 | 0.57393 | -0.05886 | 0.2042   | 0.037816 | 0.4149  | -0.11983 | 0.00954  | -0.10184 |
| -0.14799 | 0.00134 | -0.12486 | 0.0069   | -0.10253 | 0.02672 | -0.10906 | 0.0184   | -0.27748 |
| -0.04036 | 0.38419 | -0.18162 | 7.91E-05 | -0.06321 | 0.17264 | -0.22063 | 1.48E-06 | -0.41285 |
| -0.12504 | 0.00682 | -0.22003 | 1.58E-06 | -0.15145 | 0.00103 | -0.20934 | 5.06E-06 | -0.45911 |
| -0.0265  | 0.56779 | -0.17138 | 0.0002   | -0.06853 | 0.13924 | -0.20253 | 1.03E-05 | -0.38847 |
| -0.05914 | 0.20206 | -0.1263  | 0.00628  | -0.05932 | 0.20069 | -0.12984 | 0.00495  | -0.29796 |
| -0.17154 | 0.0002  | -0.24546 | 7.76E-08 | -0.13698 | 0.00302 | -0.25974 | 1.23E-08 | -0.43061 |
| -0.17796 | 0.00011 | -0.18549 | 5.51E-05 | -0.09469 | 0.04083 | -0.22133 | 1.36E-06 | -0.3684  |
| 0.022041 | 0.63472 | -0.07276 | 0.11635  | 0.008657 | 0.85198 | -0.09747 | 0.03523  | -0.29856 |
| -0.15998 | 0.00052 | -0.14722 | 0.00142  | -0.12369 | 0.00745 | -0.14072 | 0.0023   | -0.23565 |
| -0.09132 | 0.04858 | -0.04381 | 0.34481  | -0.00762 | 0.86957 | -0.05845 | 0.2074   | -0.08815 |
| 0.059004 | 0.2031  | -0.08696 | 0.06041  | 0.029533 | 0.52435 | -0.14967 | 0.00118  | -0.29921 |
| 0.089794 | 0.05248 | 0.015948 | 0.73105  | 0.051856 | 0.26341 | -0.00892 | 0.84753  | -0.01672 |
| 0.032521 | 0.48325 | -0.09622 | 0.03765  | 0.035552 | 0.44339 | -0.16744 | 0.00028  | -0.20003 |
| 0.019165 | 0.67954 | -0.153   | 0.00091  | -0.05571 | 0.22951 | -0.18018 | 9.02E-05 | -0.33118 |
| 0.112919 | 0.01463 | -0.00803 | 0.86254  | 0.071862 | 0.12095 | -0.06807 | 0.14187  | -0.05534 |
| 0.067493 | 0.14531 | -0.11016 | 0.01725  | 0.003503 | 0.93981 | -0.16704 | 0.00029  | -0.26033 |
| 0.039207 | 0.39793 | 0.116071 | 0.01207  | 0.051338 | 0.26822 | 0.141834 | 0.00212  | 0.269491 |
| -0.08345 | 0.07161 | -0.07941 | 0.08648  | -0.03195 | 0.491   | -0.09823 | 0.03383  | -0.18875 |
| -0.0537  | 0.24679 | -0.22351 | 1.07E-06 | -0.12114 | 0.00878 | -0.24312 | 1.04E-07 | -0.38673 |
| 0.117643 | 0.01095 | -0.00699 | 0.88028  | 0.052576 | 0.25683 | -0.02824 | 0.54265  | -0.07906 |
| 0.051828 | 0.26367 | -0.19163 | 3.06E-05 | -0.04653 | 0.31565 | -0.2449  | 8.32E-08 | -0.34428 |
| -0.07217 | 0.11938 | -0.16246 | 0.00042  | -0.08737 | 0.05922 | -0.16805 | 0.00026  | -0.42849 |
| -0.11665 | 0.01165 | -0.21047 | 4.48E-06 | -0.13474 | 0.00353 | -0.23027 | 4.89E-07 | -0.29439 |
| 0.013301 | 0.77435 | -0.14558 | 0.00161  | -0.02528 | 0.58582 | -0.18931 | 3.83E-05 | -0.41494 |
| -0.12149 | 0.00858 | -0.07479 | 0.1065   | -0.07278 | 0.11626 | -0.05195 | 0.26258  | -0.059   |
| -0.03649 | 0.43148 | 0.029016 | 0.53165  | 0.052475 | 0.25774 | 0.00273  | 0.95308  | -0.04688 |
| -0.12461 | 0.00701 | -0.19733 | 1.74E-05 | -0.1624  | 0.00043 | -0.15575 | 0.00073  | -0.34891 |
| -0.09816 | 0.03395 | -0.17032 | 0.00022  | -0.08143 | 0.07877 | -0.19482 | 2.24E-05 | -0.29081 |
| -0.03038 | 0.51256 | -0.06428 | 0.16549  | -0.03537 | 0.4457  | -0.07375 | 0.11149  | -0.17884 |
| -0.11222 | 0.01526 | -0.18198 | 7.65E-05 | -0.07736 | 0.09496 | -0.21612 | 2.43E-06 | -0.39264 |
| -0.06208 | 0.18047 | -0.20776 | 5.98E-06 | -0.10941 | 0.01802 | -0.22099 | 1.42E-06 | -0.37332 |

|          |         |          |          |          |          |          |          |          |
|----------|---------|----------|----------|----------|----------|----------|----------|----------|
| 0.028268 | 0.54229 | -0.0655  | 0.15759  | -0.00251 | 0.9569   | -0.09825 | 0.03378  | -0.24846 |
| -0.07665 | 0.09803 | -0.16382 | 0.00038  | -0.07952 | 0.08605  | -0.19068 | 3.36E-05 | -0.264   |
| -0.0913  | 0.04862 | -0.10427 | 0.02423  | -0.07518 | 0.10468  | -0.09195 | 0.04704  | -0.20846 |
| -0.11019 | 0.01721 | -0.16889 | 0.00025  | -0.1055  | 0.0226   | -0.15449 | 0.00081  | -0.32761 |
| 0.080047 | 0.08399 | -0.02481 | 0.59276  | 0.042498 | 0.35949  | -0.07042 | 0.1286   | -0.1502  |
| -0.09639 | 0.03732 | -0.10221 | 0.0272   | -0.04036 | 0.38424  | -0.1264  | 0.00623  | -0.29057 |
| 0.040558 | 0.38186 | -0.1473  | 0.00141  | 0.009394 | 0.83955  | -0.22116 | 1.39E-06 | -0.42285 |
| -0.07198 | 0.12035 | -0.08406 | 0.06955  | -0.02488 | 0.59168  | -0.11748 | 0.01106  | -0.2265  |
| 0.023898 | 0.60646 | -0.00056 | 0.99035  | 0.070403 | 0.1287   | -0.05524 | 0.23349  | -0.15955 |
| 0.051257 | 0.26897 | 0.038345 | 0.4084   | 0.032331 | 0.48581  | 0.025451 | 0.58327  | 0.196191 |
| -0.03818 | 0.41044 | -0.12139 | 0.00864  | -0.00663 | 0.88631  | -0.18522 | 5.65E-05 | -0.22007 |
| -0.01658 | 0.72076 | 0.050535 | 0.27578  | 0.027453 | 0.55399  | 0.066379 | 0.15209  | -0.02852 |
| 0.071666 | 0.12197 | 0.011429 | 0.80543  | 0.056722 | 0.22115  | -0.01919 | 0.67918  | -0.10996 |
| -0.11491 | 0.01296 | -0.09723 | 0.03569  | -0.0487  | 0.29366  | -0.099   | 0.03245  | -0.1959  |
| -0.13332 | 0.0039  | -0.2249  | 9.10E-07 | -0.11829 | 0.01052  | -0.24731 | 6.14E-08 | -0.40997 |
| -0.0241  | 0.60346 | -0.13671 | 0.00307  | -0.03903 | 0.40003  | -0.17377 | 0.00016  | -0.30585 |
| -0.10987 | 0.01754 | -0.15511 | 0.00077  | -0.11481 | 0.01304  | -0.14018 | 0.0024   | -0.35492 |
| 0.007069 | 0.87891 | -0.10034 | 0.03015  | 0.005353 | 0.90816  | -0.1499  | 0.00116  | -0.27813 |
| 0.012631 | 0.78544 | 0.016013 | 0.72999  | 0.040092 | 0.38735  | -0.00667 | 0.88574  | -0.09949 |
| 0.011913 | 0.79737 | -0.20495 | 8.02E-06 | -0.05802 | 0.21078  | -0.24607 | 7.19E-08 | -0.51036 |
| -0.00715 | 0.87749 | -0.13321 | 0.00393  | -0.03183 | 0.49257  | -0.1705  | 0.00021  | -0.31342 |
| 0.033307 | 0.47273 | -0.13752 | 0.0029   | -0.02329 | 0.6157   | -0.18074 | 8.57E-05 | -0.40961 |
| -0.06122 | 0.18663 | -0.06411 | 0.16661  | -0.0145  | 0.75464  | -0.08657 | 0.06157  | -0.22798 |
| 0.046815 | 0.31273 | -0.09316 | 0.04421  | 0.001866 | 0.96791  | -0.12902 | 0.00523  | -0.31788 |
| -0.0073  | 0.87504 | -0.08094 | 0.08057  | -0.02313 | 0.61803  | -0.11401 | 0.01369  | -0.20736 |
| -0.04973 | 0.28347 | -0.19028 | 3.49E-05 | -0.09294 | 0.0447   | -0.2084  | 5.59E-06 | -0.39281 |
| -0.01276 | 0.78327 | -0.16113 | 0.00047  | -0.02224 | 0.63173  | -0.21967 | 1.64E-06 | -0.38028 |
| -0.12997 | 0.00491 | -0.23641 | 2.36E-07 | -0.18613 | 5.19E-05 | -0.20979 | 4.82E-06 | -0.33015 |
| -0.16704 | 0.00029 | -0.21331 | 3.30E-06 | -0.15139 | 0.00103  | -0.20031 | 1.29E-05 | -0.35923 |
| 0.102259 | 0.02713 | -0.0494  | 0.28673  | 0.052737 | 0.25538  | -0.10601 | 0.02195  | -0.26198 |
| 0.025705 | 0.57951 | -0.17052 | 0.00021  | -0.01241 | 0.78911  | -0.23777 | 2.00E-07 | -0.45882 |
| -0.09442 | 0.0414  | -0.20913 | 5.17E-06 | -0.07993 | 0.08443  | -0.25561 | 2.12E-08 | -0.40975 |
| 0.054311 | 0.24145 | -0.03095 | 0.50464  | -0.00037 | 0.99357  | -0.02053 | 0.65817  | -0.27563 |
| -0.03863 | 0.40488 | -0.17042 | 0.00022  | -0.1042  | 0.02433  | -0.19304 | 2.67E-05 | -0.28301 |
| -0.10219 | 0.02724 | -0.23507 | 2.77E-07 | -0.12924 | 0.00516  | -0.24551 | 7.71E-08 | -0.35615 |
| 0.023381 | 0.61428 | -0.04663 | 0.31464  | 0.036775 | 0.42787  | -0.08155 | 0.07833  | -0.21814 |
| -0.11905 | 0.01002 | -0.12046 | 0.00917  | -0.08862 | 0.05564  | -0.11125 | 0.01617  | -0.2661  |
| 0.067904 | 0.14287 | -0.07704 | 0.09634  | 0.006412 | 0.89009  | -0.10865 | 0.01884  | -0.27148 |
| 0.063759 | 0.16896 | -0.04866 | 0.29399  | 0.045894 | 0.32235  | -0.09334 | 0.04379  | -0.19667 |
| -0.06827 | 0.14075 | -0.20662 | 6.74E-06 | -0.11069 | 0.01672  | -0.2185  | 1.87E-06 | -0.43229 |
| 0.023882 | 0.6067  | -0.04179 | 0.36756  | 0.017879 | 0.69997  | -0.06714 | 0.14743  | -0.13919 |
| 0.019188 | 0.67918 | -0.03253 | 0.4831   | 0.022114 | 0.63361  | -0.07378 | 0.11132  | -0.20463 |
| 0.082677 | 0.07427 | -0.14332 | 0.0019   | 0.00559  | 0.9041   | -0.22152 | 1.33E-06 | -0.30942 |
| 0.016002 | 0.73017 | -0.02135 | 0.64535  | -0.00554 | 0.90497  | -0.03252 | 0.48324  | 0.002296 |
| 0.043396 | 0.34941 | -0.091   | 0.04937  | -0.01377 | 0.76661  | -0.10773 | 0.01988  | -0.19581 |



|          |          |          |          |          |          |          |          |          |
|----------|----------|----------|----------|----------|----------|----------|----------|----------|
| -0.17709 | 0.00012  | -0.29405 | 9.09E-11 | -0.19626 | 1.94E-05 | -0.28488 | 3.61E-10 | -0.52117 |
| -0.01559 | 0.73687  | -0.19111 | 3.22E-05 | -0.10113 | 0.02888  | -0.2046  | 8.32E-06 | -0.34962 |
| 0.028002 | 0.54609  | -0.08645 | 0.06195  | -0.02432 | 0.60016  | -0.11667 | 0.01163  | -0.2434  |
| 0.066055 | 0.1541   | -0.12694 | 0.00601  | 0.011682 | 0.80121  | -0.1868  | 4.87E-05 | -0.32102 |
| -0.07174 | 0.12158  | -0.10192 | 0.02764  | -0.0387  | 0.40404  | -0.13114 | 0.00453  | -0.26142 |
| -0.10399 | 0.02463  | -0.10964 | 0.01778  | -0.08686 | 0.06071  | -0.10343 | 0.0254   | -0.2501  |
| -0.06873 | 0.13809  | -0.01494 | 0.74738  | -0.01605 | 0.72945  | -0.01106 | 0.81163  | -0.04786 |
| -0.00534 | 0.90831  | -0.06912 | 0.13586  | 0.003138 | 0.94608  | -0.10489 | 0.02339  | -0.15747 |
| 0.006423 | 0.8899   | -0.07534 | 0.10395  | -0.00743 | 0.87271  | -0.08272 | 0.07411  | -0.28111 |
| -0.0631  | 0.17345  | -0.23902 | 1.72E-07 | -0.13962 | 0.0025   | -0.23572 | 2.56E-07 | -0.46232 |
| -0.06612 | 0.15372  | 0.041092 | 0.37562  | 0.016136 | 0.72799  | 0.044002 | 0.34272  | 0.048114 |
| 0.117132 | 0.0113   | -0.07659 | 0.09832  | 0.039344 | 0.39628  | -0.13801 | 0.0028   | -0.30758 |
| 0.030956 | 0.50456  | -0.04114 | 0.37508  | 0.050015 | 0.28076  | -0.09535 | 0.03944  | -0.17888 |
| -0.00762 | 0.86962  | -0.12645 | 0.00622  | -0.0158  | 0.73337  | -0.17058 | 0.00021  | -0.34182 |
| -0.07017 | 0.12996  | -0.13541 | 0.00337  | -0.05615 | 0.22585  | -0.14987 | 0.00116  | -0.39819 |
| -0.00434 | 0.92545  | -0.20479 | 8.15E-06 | -0.09757 | 0.03504  | -0.2292  | 5.54E-07 | -0.42519 |
| 0.044499 | 0.33729  | -0.00522 | 0.91042  | 0.049534 | 0.28542  | -0.04221 | 0.36278  | -0.13269 |
| 0.098634 | 0.03309  | -0.06152 | 0.18444  | 0.046694 | 0.31398  | -0.12785 | 0.00566  | -0.1401  |
| -0.12076 | 0.009    | -0.19765 | 1.69E-05 | -0.14753 | 0.00139  | -0.17629 | 0.00013  | -0.35337 |
| -0.02888 | 0.53363  | -0.12324 | 0.00767  | -0.02093 | 0.65185  | -0.18299 | 6.97E-05 | -0.24318 |
| 0.018826 | 0.6849   | -0.15917 | 0.00056  | -0.03689 | 0.42645  | -0.21197 | 3.82E-06 | -0.39394 |
| -0.12332 | 0.00763  | -0.21004 | 4.69E-06 | -0.13507 | 0.00345  | -0.2191  | 1.75E-06 | -0.33732 |
| -0.01932 | 0.67702  | -0.10015 | 0.03047  | -0.05155 | 0.26621  | -0.10168 | 0.02801  | -0.17347 |
| -0.03418 | 0.46124  | -0.05527 | 0.23326  | 0.016415 | 0.72349  | -0.08541 | 0.06516  | -0.2383  |
| -0.02133 | 0.64569  | -0.12333 | 0.00763  | -0.03316 | 0.47472  | -0.1685  | 0.00025  | -0.23598 |
| -0.03407 | 0.46262  | 0.102988 | 0.02604  | 0.019114 | 0.68035  | 0.124122 | 0.00724  | 0.324492 |
| 0.026153 | 0.57293  | 0.09821  | 0.03386  | 0.072456 | 0.1179   | 0.101    | 0.02908  | 0.097456 |
| -0.05892 | 0.20376  | -0.14596 | 0.00156  | -0.06786 | 0.14312  | -0.15726 | 0.00065  | -0.27912 |
| 0.027961 | 0.54669  | -0.10366 | 0.02508  | -0.01907 | 0.68101  | -0.12348 | 0.00755  | -0.25553 |
| -0.01997 | 0.66683  | -0.11206 | 0.0154   | -0.04664 | 0.31455  | -0.11344 | 0.01418  | -0.21958 |
| 0.0426   | 0.35834  | -0.09721 | 0.03573  | -0.02103 | 0.65034  | -0.13412 | 0.00369  | -0.18406 |
| -0.02582 | 0.57788  | -0.0438  | 0.34498  | 0.053052 | 0.25254  | -0.11796 | 0.01073  | -0.20964 |
| 0.010401 | 0.82262  | -0.09384 | 0.04266  | 0.03975  | 0.39142  | -0.16811 | 0.00026  | -0.3127  |
| 0.619407 | 8.07E-51 | 0.726711 | 7.48E-78 | 0.703966 | 4.18E-71 | 0.517725 | 2.21E-33 | 0.680129 |
| 0.181377 | 8.09E-05 | 0.43823  | 2.45E-23 | 0.204092 | 8.77E-06 | 0.524493 | 2.30E-34 | 0.746847 |
| 0.046718 | 0.31373  | 0.11311  | 0.01446  | 0.058309 | 0.20848  | 0.120954 | 0.00889  | 0.301465 |
| 0.135047 | 0.00346  | 0.287387 | 2.49E-10 | 0.148351 | 0.0013   | 0.316664 | 2.45E-12 | 0.483566 |
| 0.363952 | 4.50E-16 | 0.337722 | 6.37E-14 | 0.256834 | 1.80E-08 | 0.311432 | 5.82E-12 | 0.478132 |
| 0.346813 | 1.21E-14 | 0.493201 | 5.36E-30 | 0.367489 | 2.23E-16 | 0.437596 | 2.88E-23 | 0.814792 |
| 0.283417 | 4.47E-10 | 0.577357 | 7.28E-43 | 0.328919 | 3.03E-13 | 0.616256 | 3.51E-50 | 0.867743 |
| 0.428121 | 3.08E-22 | 0.416651 | 4.91E-21 | 0.336115 | 8.51E-14 | 0.363297 | 5.12E-16 | 0.530246 |
| 0.178964 | 0.0001   | 0.28686  | 2.69E-10 | 0.188518 | 4.13E-05 | 0.273577 | 1.84E-09 | 0.537517 |
| 0.533729 | 9.62E-36 | 0.499886 | 6.81E-31 | 0.507847 | 5.51E-32 | 0.34463  | 1.81E-14 | 0.554183 |
| 0.193453 | 2.56E-05 | 0.628374 | 1.12E-52 | 0.276258 | 1.26E-09 | 0.76506  | 6.35E-91 | 0.835163 |
| 0.146078 | 0.00155  | 0.469912 | 5.00E-27 | 0.203957 | 8.89E-06 | 0.54729  | 7.61E-38 | 0.867328 |

|          |          |          |          |          |          |          |          |          |
|----------|----------|----------|----------|----------|----------|----------|----------|----------|
| 0.120727 | 0.00901  | 0.260846 | 1.06E-08 | 0.157844 | 0.00062  | 0.256101 | 1.98E-08 | 0.499595 |
| 0.050181 | 0.27917  | 0.287671 | 2.38E-10 | 0.104995 | 0.02326  | 0.351272 | 5.23E-15 | 0.490403 |
| 0.01094  | 0.81359  | 0.033385 | 0.4717   | 0.019333 | 0.6769   | 0.022413 | 0.62902  | 0.374693 |
| 0.297945 | 4.99E-11 | 0.54325  | 3.29E-37 | 0.361434 | 7.39E-16 | 0.51489  | 5.63E-33 | 0.884405 |
| 0.3088   | 8.93E-12 | 0.342119 | 2.87E-14 | 0.30959  | 7.86E-12 | 0.235609 | 2.60E-07 | 0.737691 |
| 0.541618 | 5.92E-37 | 0.631846 | 2.07E-53 | 0.495826 | 2.40E-30 | 0.552626 | 1.07E-38 | 0.773596 |
| 0.187527 | 4.55E-05 | 0.403973 | 9.27E-20 | 0.194725 | 2.26E-05 | 0.467878 | 8.86E-27 | 0.702799 |
| 0.286358 | 2.90E-10 | 0.558868 | 1.02E-39 | 0.288154 | 2.22E-10 | 0.637896 | 1.03E-54 | 0.886965 |
| 0.171398 | 0.0002   | 0.506176 | 9.39E-32 | 0.240954 | 1.36E-07 | 0.565184 | 9.04E-41 | 0.942319 |
| 0.137534 | 0.0029   | 0.279441 | 7.97E-10 | 0.150955 | 0.00107  | 0.288557 | 2.09E-10 | 0.725508 |
| 0.114953 | 0.01293  | 0.337952 | 6.12E-14 | 0.154389 | 0.00082  | 0.395944 | 5.59E-19 | 0.526931 |
| 0.315428 | 3.01E-12 | 0.273264 | 1.92E-09 | 0.321412 | 1.10E-12 | 0.102834 | 0.02627  | 0.634832 |
| 0.138674 | 0.00267  | 0.289389 | 1.84E-10 | 0.122114 | 0.00825  | 0.340541 | 3.83E-14 | 0.607778 |
| 0.195769 | 2.04E-05 | 0.47335  | 1.88E-27 | 0.228033 | 6.35E-07 | 0.53856  | 1.76E-36 | 0.794527 |
| 0.149424 | 0.0012   | 0.457872 | 1.40E-25 | 0.203947 | 8.90E-06 | 0.520706 | 8.21E-34 | 0.903208 |
| 0.148636 | 0.00128  | 0.443248 | 6.77E-24 | 0.203921 | 8.92E-06 | 0.510232 | 2.56E-32 | 0.847488 |
| 0.044528 | 0.33698  | 0.09335  | 0.04377  | 0.062774 | 0.17565  | 0.09317  | 0.04418  | 0.336526 |
| 0.231404 | 4.28E-07 | 0.426316 | 4.79E-22 | 0.327786 | 3.70E-13 | 0.350698 | 5.83E-15 | 0.807335 |
| 0.169927 | 0.00022  | 0.458515 | 1.18E-25 | 0.216762 | 2.27E-06 | 0.51145  | 1.73E-32 | 0.948072 |
| 0.116    | 0.01212  | 0.197786 | 1.67E-05 | 0.096272 | 0.03755  | 0.22136  | 1.36E-06 | 0.547591 |
| 0.10514  | 0.02307  | 0.380523 | 1.54E-17 | 0.159886 | 0.00052  | 0.443482 | 6.37E-24 | 0.715201 |
| 0.079685 | 0.08541  | 0.222186 | 1.24E-06 | 0.097737 | 0.03473  | 0.246435 | 6.87E-08 | 0.638088 |
| 0.520613 | 8.47E-34 | 0.519884 | 1.08E-33 | 0.513758 | 8.15E-33 | 0.343565 | 2.20E-14 | 0.587586 |
| 0.136388 | 0.00314  | 0.296476 | 6.26E-11 | 0.152527 | 0.00094  | 0.311357 | 5.89E-12 | 0.655049 |
| 0.143492 | 0.00188  | 0.311959 | 5.34E-12 | 0.192868 | 2.71E-05 | 0.296385 | 6.35E-11 | 0.675257 |
| 0.216723 | 2.28E-06 | 0.538245 | 1.97E-36 | 0.298893 | 4.31E-11 | 0.561983 | 3.11E-40 | 0.967087 |
| 0.223866 | 1.02E-06 | 0.465523 | 1.71E-26 | 0.240315 | 1.47E-07 | 0.523897 | 2.81E-34 | 0.804555 |
| 0.304101 | 1.90E-11 | 0.438248 | 2.44E-23 | 0.384231 | 7.06E-18 | 0.320144 | 1.37E-12 | 0.538612 |
| 0.162736 | 0.00041  | 0.401081 | 1.78E-19 | 0.235389 | 2.67E-07 | 0.406252 | 5.52E-20 | 0.742133 |
| 0.402942 | 1.17E-19 | 0.604414 | 7.58E-48 | 0.481543 | 1.75E-28 | 0.498939 | 9.15E-31 | 0.793683 |
| 0.278177 | 9.57E-10 | 0.450318 | 1.06E-24 | 0.319391 | 1.55E-12 | 0.417202 | 4.31E-21 | 0.653914 |
| 0.130959 | 0.00459  | 0.344748 | 1.77E-14 | 0.169903 | 0.00023  | 0.364838 | 3.78E-16 | 0.888272 |
| 0.306451 | 1.30E-11 | 0.512039 | 1.43E-32 | 0.36712  | 2.40E-16 | 0.484703 | 6.90E-29 | 0.631749 |
| 0.240552 | 1.43E-07 | 0.454579 | 3.42E-25 | 0.344387 | 1.89E-14 | 0.38317  | 8.84E-18 | 0.708245 |
| 0.112025 | 0.01543  | 0.409767 | 2.46E-20 | 0.202156 | 1.07E-05 | 0.447914 | 2.01E-24 | 0.764719 |
| 0.05552  | 0.23111  | 0.124502 | 0.00706  | 0.041905 | 0.36624  | 0.169678 | 0.00023  | 0.141943 |
| 0.185705 | 5.40E-05 | 0.352833 | 3.89E-15 | 0.223511 | 1.07E-06 | 0.35009  | 6.53E-15 | 0.56025  |
| 0.392089 | 1.30E-18 | 0.293758 | 9.51E-11 | 0.356161 | 2.06E-15 | 0.148298 | 0.00131  | 0.470121 |
| 0.297928 | 5.00E-11 | 0.392679 | 1.15E-18 | 0.379578 | 1.88E-17 | 0.27184  | 2.35E-09 | 0.469828 |
| 0.461834 | 4.75E-26 | 0.627976 | 1.36E-52 | 0.493594 | 4.75E-30 | 0.533828 | 9.30E-36 | 0.914575 |
| 0.056508 | 0.2229   | 0.327736 | 3.73E-13 | 0.147697 | 0.00137  | 0.352726 | 3.97E-15 | 0.450888 |
| 0.432996 | 9.19E-23 | 0.545627 | 1.39E-37 | 0.472989 | 2.09E-27 | 0.409232 | 2.78E-20 | 0.909706 |
| 0.151272 | 0.00104  | 0.323069 | 8.33E-13 | 0.204107 | 8.75E-06 | 0.316844 | 2.38E-12 | 0.560044 |
| 0.658868 | 1.81E-59 | 0.717096 | 6.42E-75 | 0.659516 | 1.28E-59 | 0.565986 | 6.62E-41 | 0.624811 |
| 0.261976 | 9.09E-09 | 0.562961 | 2.13E-40 | 0.379628 | 1.86E-17 | 0.539576 | 1.23E-36 | 0.711559 |

|          |          |          |          |          |          |          |          |          |
|----------|----------|----------|----------|----------|----------|----------|----------|----------|
| 0.083364 | 0.07189  | 0.303264 | 2.17E-11 | 0.124805 | 0.00693  | 0.379633 | 1.86E-17 | 0.542237 |
| 0.087422 | 0.05906  | 0.179738 | 9.40E-05 | 0.104214 | 0.02431  | 0.168367 | 0.00026  | 0.425593 |
| 0.195239 | 2.15E-05 | 0.287119 | 2.59E-10 | 0.164843 | 0.00035  | 0.298914 | 4.29E-11 | 0.483427 |
| 0.123952 | 0.00732  | 0.349684 | 7.05E-15 | 0.194082 | 2.41E-05 | 0.362521 | 5.97E-16 | 0.538266 |
| 0.184696 | 5.94E-05 | 0.245026 | 8.19E-08 | 0.210039 | 4.69E-06 | 0.185158 | 5.69E-05 | 0.568681 |
| 0.131957 | 0.00428  | 0.446004 | 3.31E-24 | 0.203194 | 9.62E-06 | 0.526857 | 1.03E-34 | 0.801249 |
| 0.53192  | 1.81E-35 | 0.648336 | 4.93E-57 | 0.446798 | 2.69E-24 | 0.630855 | 3.36E-53 | 0.871503 |
| 0.094028 | 0.04225  | 0.31395  | 3.85E-12 | 0.13928  | 0.00256  | 0.347925 | 9.81E-15 | 0.73617  |
| 0.249352 | 4.75E-08 | 0.463001 | 3.45E-26 | 0.288641 | 2.06E-10 | 0.474568 | 1.33E-27 | 0.752274 |
| 0.255762 | 2.07E-08 | 0.592157 | 1.57E-45 | 0.381888 | 1.16E-17 | 0.571533 | 7.50E-42 | 0.822704 |
| 0.094498 | 0.04123  | 0.292619 | 1.13E-10 | 0.12454  | 0.00705  | 0.358275 | 1.37E-15 | 0.624531 |
| 0.196209 | 1.95E-05 | 0.356571 | 1.90E-15 | 0.190318 | 3.48E-05 | 0.378918 | 2.16E-17 | 0.776184 |
| 0.146419 | 0.00151  | 0.412906 | 1.18E-20 | 0.193741 | 2.49E-05 | 0.469416 | 5.75E-27 | 0.808949 |
| 0.045651 | 0.32492  | 0.075681 | 0.10237  | 0.052824 | 0.25459  | 0.040881 | 0.37808  | 0.4349   |
| 0.112835 | 0.0147   | 0.315762 | 2.85E-12 | 0.141068 | 0.00225  | 0.346156 | 1.36E-14 | 0.64822  |
| 0.226612 | 7.48E-07 | 0.435706 | 4.65E-23 | 0.278885 | 8.64E-10 | 0.421297 | 1.62E-21 | 0.880632 |
| 0.151288 | 0.00104  | 0.379931 | 1.75E-17 | 0.179551 | 9.56E-05 | 0.440668 | 1.32E-23 | 0.621222 |
| 0.239224 | 1.68E-07 | 0.511716 | 1.58E-32 | 0.249778 | 4.49E-08 | 0.578132 | 5.32E-43 | 0.874465 |
| 0.167053 | 0.00029  | 0.339608 | 4.53E-14 | 0.242619 | 1.11E-07 | 0.307635 | 1.08E-11 | 0.5188   |
| 0.225293 | 8.70E-07 | 0.57627  | 1.13E-42 | 0.324967 | 6.02E-13 | 0.600043 | 5.21E-47 | 0.950321 |
| 0.322793 | 8.73E-13 | 0.392454 | 1.20E-18 | 0.317338 | 2.19E-12 | 0.354529 | 2.81E-15 | 0.480872 |
| 0.19982  | 1.36E-05 | 0.461469 | 5.26E-26 | 0.300832 | 3.18E-11 | 0.446165 | 3.17E-24 | 0.830457 |
| 0.151058 | 0.00106  | 0.37677  | 3.37E-17 | 0.245134 | 8.08E-08 | 0.372408 | 8.25E-17 | 0.614238 |
| 0.057641 | 0.21375  | 0.21724  | 2.15E-06 | 0.144268 | 0.00177  | 0.210596 | 4.42E-06 | 0.319357 |
| 0.083121 | 0.07273  | 0.280636 | 6.71E-10 | 0.124122 | 0.00724  | 0.326597 | 4.54E-13 | 0.65004  |
| 0.250677 | 4.01E-08 | 0.452884 | 5.38E-25 | 0.337324 | 6.85E-14 | 0.418963 | 2.83E-21 | 0.476973 |
| 0.16212  | 0.00044  | 0.429981 | 1.95E-22 | 0.233146 | 3.48E-07 | 0.45069  | 9.64E-25 | 0.882657 |
| 0.116708 | 0.0116   | 0.371995 | 8.97E-17 | 0.17724  | 0.00012  | 0.409679 | 2.51E-20 | 0.86745  |
| 0.15557  | 0.00074  | 0.394941 | 6.98E-19 | 0.222896 | 1.14E-06 | 0.405226 | 6.97E-20 | 0.844356 |
| 0.26131  | 9.94E-09 | 0.278064 | 9.72E-10 | 0.278651 | 8.94E-10 | 0.183123 | 6.88E-05 | 0.413292 |
| 0.266134 | 5.17E-09 | 0.509734 | 3.00E-32 | 0.276137 | 1.28E-09 | 0.554245 | 5.83E-39 | 0.82719  |
| 0.28868  | 2.05E-10 | 0.67438  | 3.09E-63 | 0.402762 | 1.22E-19 | 0.720356 | 6.71E-76 | 0.76011  |
| 0.121019 | 0.00885  | 0.356745 | 1.84E-15 | 0.184439 | 6.08E-05 | 0.393121 | 1.04E-18 | 0.451282 |
| 0.19047  | 3.43E-05 | 0.390245 | 1.95E-18 | 0.242733 | 1.09E-07 | 0.397223 | 4.22E-19 | 0.752337 |
| 0.059942 | 0.19599  | 0.298925 | 4.29E-11 | 0.148241 | 0.00131  | 0.328002 | 3.56E-13 | 0.598385 |
| 0.333353 | 1.39E-13 | 0.403402 | 1.06E-19 | 0.401416 | 1.65E-19 | 0.247319 | 6.14E-08 | 0.545319 |
| 0.228728 | 5.85E-07 | 0.443527 | 6.30E-24 | 0.305911 | 1.42E-11 | 0.409168 | 2.82E-20 | 0.644233 |
| 0.072939 | 0.11547  | 0.248995 | 4.97E-08 | 0.107172 | 0.02053  | 0.303522 | 2.08E-11 | 0.370865 |
| 0.194428 | 2.33E-05 | 0.207467 | 6.16E-06 | 0.197953 | 1.64E-05 | 0.127644 | 0.00574  | 0.440129 |
| -0.15176 | 0.001    | -0.39191 | 1.35E-18 | -0.22661 | 7.48E-07 | -0.40734 | 4.30E-20 | -0.60757 |
| 0.179259 | 9.82E-05 | 0.510772 | 2.15E-32 | 0.245572 | 7.65E-08 | 0.581479 | 1.36E-43 | 0.859295 |
| 0.171703 | 0.00019  | 0.501826 | 3.71E-31 | 0.23207  | 3.96E-07 | 0.588879 | 6.28E-45 | 0.635514 |
| 0.098965 | 0.0325   | 0.178426 | 0.00011  | 0.139677 | 0.00248  | 0.159102 | 0.00056  | 0.256693 |
| 0.293315 | 1.02E-10 | 0.477597 | 5.54E-28 | 0.361278 | 7.62E-16 | 0.423542 | 9.42E-22 | 0.718432 |
| 0.271088 | 2.61E-09 | 0.353189 | 3.63E-15 | 0.33567  | 9.21E-14 | 0.251914 | 3.42E-08 | 0.492092 |

|          |          |          |          |          |          |          |          |          |
|----------|----------|----------|----------|----------|----------|----------|----------|----------|
| 0.508144 | 5.01E-32 | 0.685986 | 3.27E-66 | 0.643056 | 7.54E-56 | 0.481752 | 1.65E-28 | 0.69158  |
| 0.40773  | 3.93E-20 | 0.293856 | 9.37E-11 | 0.33622  | 8.35E-14 | 0.184335 | 6.14E-05 | 0.408543 |
| 0.29512  | 7.72E-11 | 0.351039 | 5.46E-15 | 0.245961 | 7.29E-08 | 0.321592 | 1.07E-12 | 0.656185 |
| 0.195811 | 2.03E-05 | 0.395086 | 6.76E-19 | 0.293482 | 9.92E-11 | 0.335579 | 9.36E-14 | 0.594389 |
| 0.128659 | 0.00536  | 0.330878 | 2.15E-13 | 0.170703 | 0.00021  | 0.362639 | 5.83E-16 | 0.62707  |
| 0.153409 | 0.00088  | 0.364325 | 4.18E-16 | 0.211646 | 3.95E-06 | 0.386044 | 4.80E-18 | 0.592261 |
| 0.304022 | 1.92E-11 | 0.255545 | 2.13E-08 | 0.269462 | 3.27E-09 | 0.142457 | 0.00203  | 0.544338 |
| -0.07132 | 0.1238   | -0.21841 | 1.89E-06 | -0.11691 | 0.01146  | -0.24898 | 4.97E-08 | -0.39815 |
| 0.145305 | 0.00164  | 0.367121 | 2.40E-16 | 0.181566 | 7.95E-05 | 0.396317 | 5.15E-19 | 0.855091 |
| 0.212465 | 3.62E-06 | 0.445762 | 3.52E-24 | 0.29272  | 1.11E-10 | 0.428512 | 2.80E-22 | 0.725685 |
| 0.279483 | 7.93E-10 | 0.68857  | 6.82E-67 | 0.383053 | 9.06E-18 | 0.738687 | 1.10E-81 | 0.875858 |
| 0.33289  | 1.51E-13 | 0.585314 | 2.79E-44 | 0.378612 | 2.30E-17 | 0.57118  | 8.62E-42 | 0.967313 |
| 0.296833 | 5.93E-11 | 0.396115 | 5.39E-19 | 0.280162 | 7.19E-10 | 0.383613 | 8.05E-18 | 0.625966 |
| 0.47534  | 1.06E-27 | 0.68112  | 6.01E-65 | 0.500175 | 6.23E-31 | 0.622636 | 1.76E-51 | 0.882471 |
| 0.117281 | 0.0112   | 0.358544 | 1.30E-15 | 0.212668 | 3.54E-06 | 0.356346 | 1.99E-15 | 0.652884 |
| 0.527208 | 9.14E-35 | 0.531387 | 2.17E-35 | 0.499312 | 8.15E-31 | 0.402531 | 1.29E-19 | 0.610836 |
| 0.174669 | 0.00015  | 0.439798 | 1.65E-23 | 0.237024 | 2.19E-07 | 0.469558 | 5.52E-27 | 0.722263 |
| -0.05687 | 0.21992  | -0.29916 | 4.13E-11 | -0.15805 | 0.00061  | -0.31422 | 3.68E-12 | -0.47755 |
| 0.266366 | 5.01E-09 | 0.587564 | 1.09E-44 | 0.324177 | 6.89E-13 | 0.6274   | 1.80E-52 | 0.877557 |
| 0.19324  | 2.62E-05 | 0.43975  | 1.67E-23 | 0.260992 | 1.04E-08 | 0.438693 | 2.18E-23 | 0.734612 |
| 0.198613 | 1.53E-05 | 0.351565 | 4.95E-15 | 0.25218  | 3.30E-08 | 0.313191 | 4.36E-12 | 0.516076 |
| 0.325026 | 5.96E-13 | 0.429985 | 1.94E-22 | 0.239707 | 1.58E-07 | 0.485292 | 5.80E-29 | 0.742436 |
| 0.241697 | 1.24E-07 | 0.401106 | 1.77E-19 | 0.241792 | 1.22E-07 | 0.430628 | 1.66E-22 | 0.446788 |
| 0.446274 | 3.08E-24 | 0.678532 | 2.76E-64 | 0.463824 | 2.74E-26 | 0.655013 | 1.45E-58 | 0.912584 |
| 0.357458 | 1.60E-15 | 0.649549 | 2.61E-57 | 0.496144 | 2.17E-30 | 0.584214 | 4.40E-44 | 0.641851 |
| 0.279462 | 7.95E-10 | 0.257156 | 1.73E-08 | 0.337645 | 6.46E-14 | 0.085735 | 0.06414  | 0.35041  |
| 0.413808 | 9.59E-21 | 0.589057 | 5.82E-45 | 0.462813 | 3.63E-26 | 0.533014 | 1.23E-35 | 0.584498 |
| 0.40994  | 2.36E-20 | 0.64831  | 5.00E-57 | 0.502701 | 2.82E-31 | 0.566447 | 5.53E-41 | 0.697723 |
| 0.15374  | 0.00086  | 0.402239 | 1.37E-19 | 0.219281 | 1.72E-06 | 0.411025 | 1.84E-20 | 0.841765 |
| 0.319263 | 1.59E-12 | 0.471102 | 3.57E-27 | 0.438151 | 2.50E-23 | 0.337391 | 6.77E-14 | 0.600293 |
| 0.150465 | 0.00111  | 0.422054 | 1.35E-21 | 0.201511 | 1.14E-05 | 0.464427 | 2.32E-26 | 0.906471 |
| 0.115622 | 0.01241  | 0.438909 | 2.06E-23 | 0.16006  | 0.00052  | 0.566788 | 4.85E-41 | 0.538583 |
| 0.171157 | 0.0002   | 0.38099  | 1.40E-17 | 0.191949 | 2.97E-05 | 0.442766 | 7.67E-24 | 0.549342 |
| 0.106961 | 0.02078  | 0.192884 | 2.71E-05 | 0.094767 | 0.04065  | 0.204942 | 8.03E-06 | 0.392178 |
| 0.168901 | 0.00025  | 0.417105 | 4.41E-21 | 0.212752 | 3.51E-06 | 0.458919 | 1.06E-25 | 0.855421 |
| 0.323005 | 8.42E-13 | 0.622122 | 2.25E-51 | 0.406804 | 4.86E-20 | 0.591862 | 1.78E-45 | 0.915277 |
| 0.340011 | 4.21E-14 | 0.409528 | 2.60E-20 | 0.373598 | 6.47E-17 | 0.277153 | 1.11E-09 | 0.502819 |
| 0.190444 | 3.44E-05 | 0.273537 | 1.85E-09 | 0.202564 | 1.03E-05 | 0.221393 | 1.35E-06 | 0.697525 |
| 0.207312 | 6.27E-06 | 0.354227 | 2.98E-15 | 0.270568 | 2.81E-09 | 0.31787  | 2.01E-12 | 0.598463 |
| 0.178751 | 0.0001   | 0.564051 | 1.40E-40 | 0.335479 | 9.53E-14 | 0.579399 | 3.18E-43 | 0.60156  |
| 0.192898 | 2.71E-05 | 0.433227 | 8.67E-23 | 0.254646 | 2.40E-08 | 0.427397 | 3.68E-22 | 0.750054 |
| 0.47109  | 3.58E-27 | 0.66673  | 2.38E-61 | 0.451574 | 7.63E-25 | 0.656885 | 5.30E-59 | 0.917785 |
| 0.309124 | 8.47E-12 | 0.490126 | 1.36E-29 | 0.304612 | 1.75E-11 | 0.505651 | 1.11E-31 | 0.81119  |
| 0.183613 | 6.57E-05 | 0.407108 | 4.54E-20 | 0.249239 | 4.81E-08 | 0.389566 | 2.25E-18 | 0.673419 |
| 0.19001  | 3.58E-05 | 0.503843 | 1.97E-31 | 0.268662 | 3.66E-09 | 0.536959 | 3.10E-36 | 0.881601 |

|          |          |          |          |          |          |          |          |          |
|----------|----------|----------|----------|----------|----------|----------|----------|----------|
| 0.17105  | 0.0002   | 0.397018 | 4.41E-19 | 0.227707 | 6.59E-07 | 0.392367 | 1.23E-18 | 0.91875  |
| 0.147794 | 0.00136  | 0.305497 | 1.52E-11 | 0.191256 | 3.18E-05 | 0.286478 | 2.85E-10 | 0.611668 |
| 0.112167 | 0.0153   | 0.225721 | 8.28E-07 | 0.140036 | 0.00242  | 0.222839 | 1.15E-06 | 0.377136 |
| -0.19663 | 1.87E-05 | -0.24877 | 5.11E-08 | -0.1503  | 0.00112  | -0.27676 | 1.17E-09 | -0.40804 |
| 0.086734 | 0.06109  | 0.27754  | 1.05E-09 | 0.148601 | 0.00128  | 0.302186 | 2.57E-11 | 0.415516 |
| 0.400015 | 2.26E-19 | 0.49327  | 5.25E-30 | 0.316947 | 2.34E-12 | 0.506573 | 8.27E-32 | 0.8169   |
| 0.219766 | 1.63E-06 | 0.447725 | 2.11E-24 | 0.309791 | 7.60E-12 | 0.421486 | 1.55E-21 | 0.724874 |
| 0.15216  | 0.00097  | 0.463568 | 2.95E-26 | 0.204384 | 8.51E-06 | 0.534227 | 8.09E-36 | 0.891723 |
| 0.16915  | 0.00024  | 0.382991 | 9.18E-18 | 0.209443 | 5.00E-06 | 0.415049 | 7.16E-21 | 0.622849 |
| 0.194915 | 2.22E-05 | 0.345977 | 1.41E-14 | 0.234953 | 2.81E-07 | 0.325543 | 5.45E-13 | 0.511785 |
| 0.158746 | 0.00057  | 0.31022  | 7.09E-12 | 0.198115 | 1.61E-05 | 0.305871 | 1.43E-11 | 0.593784 |
| 0.151431 | 0.00103  | 0.538622 | 1.72E-36 | 0.228103 | 6.29E-07 | 0.64783  | 6.42E-57 | 0.821085 |
| 0.352073 | 4.49E-15 | 0.585809 | 2.27E-44 | 0.443563 | 6.24E-24 | 0.501087 | 4.68E-31 | 0.901969 |
| 0.067992 | 0.14235  | 0.271594 | 2.43E-09 | 0.11046  | 0.01694  | 0.332105 | 1.74E-13 | 0.523032 |
| 0.516201 | 3.66E-33 | 0.611895 | 2.61E-49 | 0.518089 | 1.96E-33 | 0.502817 | 2.72E-31 | 0.715596 |
| 0.243757 | 9.60E-08 | 0.422472 | 1.22E-21 | 0.307828 | 1.04E-11 | 0.389134 | 2.47E-18 | 0.685588 |
| 0.300117 | 3.56E-11 | 0.494388 | 3.73E-30 | 0.371485 | 9.95E-17 | 0.447807 | 2.06E-24 | 0.670628 |
| 0.244633 | 8.60E-08 | 0.54695  | 8.61E-38 | 0.337042 | 7.20E-14 | 0.573022 | 4.15E-42 | 0.595108 |
| -0.16496 | 0.00034  | -0.26775 | 4.14E-09 | -0.16145 | 0.00046  | -0.2902  | 1.63E-10 | -0.36457 |
| 0.161627 | 0.00045  | 0.438498 | 2.29E-23 | 0.173864 | 0.00016  | 0.53957  | 1.23E-36 | 0.566251 |
| 0.100786 | 0.02943  | 0.322754 | 8.79E-13 | 0.159692 | 0.00053  | 0.349727 | 6.99E-15 | 0.720539 |
| 0.270984 | 2.65E-09 | 0.552585 | 1.08E-38 | 0.319581 | 1.50E-12 | 0.581194 | 1.53E-43 | 0.877606 |
| 0.233498 | 3.34E-07 | 0.602512 | 1.76E-47 | 0.310862 | 6.39E-12 | 0.672932 | 7.09E-63 | 0.79976  |
| -0.03074 | 0.50755  | -0.24422 | 9.07E-08 | -0.09943 | 0.03169  | -0.26554 | 5.61E-09 | -0.46084 |
| 0.259541 | 1.26E-08 | 0.466382 | 1.35E-26 | 0.338841 | 5.21E-14 | 0.440973 | 1.22E-23 | 0.500866 |
| 0.146045 | 0.00155  | 0.282773 | 4.91E-10 | 0.216764 | 2.27E-06 | 0.242922 | 1.06E-07 | 0.488369 |
| 0.167369 | 0.00028  | 0.322413 | 9.31E-13 | 0.232183 | 3.90E-07 | 0.287868 | 2.31E-10 | 0.447262 |
| 0.210308 | 4.56E-06 | 0.450684 | 9.66E-25 | 0.323822 | 7.32E-13 | 0.406234 | 5.54E-20 | 0.608538 |
| 0.074362 | 0.10852  | 0.169279 | 0.00024  | 0.097473 | 0.03522  | 0.161427 | 0.00046  | 0.540854 |
| 0.123424 | 0.00758  | 0.294826 | 8.08E-11 | 0.160293 | 0.00051  | 0.316169 | 2.66E-12 | 0.60744  |
| 0.614021 | 9.85E-50 | 0.597391 | 1.65E-46 | 0.494892 | 3.19E-30 | 0.530845 | 2.62E-35 | 0.592815 |
| 0.271    | 2.64E-09 | 0.257703 | 1.61E-08 | 0.227428 | 6.81E-07 | 0.209939 | 4.74E-06 | 0.388702 |
| 0.380453 | 1.57E-17 | 0.45992  | 8.03E-26 | 0.43171  | 1.27E-22 | 0.312396 | 4.97E-12 | 0.589936 |
| 0.317522 | 2.13E-12 | 0.237306 | 2.12E-07 | 0.253732 | 2.70E-08 | 0.141817 | 0.00213  | 0.350208 |
| 0.230234 | 4.91E-07 | 0.647221 | 8.81E-57 | 0.329512 | 2.74E-13 | 0.727596 | 3.96E-78 | 0.826637 |
| 0.367655 | 2.15E-16 | 0.481588 | 1.73E-28 | 0.361657 | 7.07E-16 | 0.433758 | 7.59E-23 | 0.545988 |
| 0.2313   | 4.33E-07 | 0.243793 | 9.55E-08 | 0.25353  | 2.77E-08 | 0.145097 | 0.00167  | 0.368644 |
| 0.146    | 0.00156  | 0.244759 | 8.47E-08 | 0.13155  | 0.00441  | 0.282802 | 4.89E-10 | 0.239732 |
| 0.100543 | 0.02982  | 0.206445 | 6.86E-06 | 0.130483 | 0.00474  | 0.187358 | 4.62E-05 | 0.478219 |
| 0.285281 | 3.40E-10 | 0.523788 | 2.92E-34 | 0.346197 | 1.35E-14 | 0.502593 | 2.92E-31 | 0.860208 |
| -0.12865 | 0.00536  | -0.29674 | 6.02E-11 | -0.20651 | 6.82E-06 | -0.2863  | 2.92E-10 | -0.47893 |
| 0.112495 | 0.01501  | 0.284434 | 3.85E-10 | 0.17306  | 0.00017  | 0.295074 | 7.77E-11 | 0.476319 |
| 0.239895 | 1.55E-07 | 0.386403 | 4.45E-18 | 0.291354 | 1.37E-10 | 0.350545 | 6.00E-15 | 0.556112 |
| -0.0967  | 0.03671  | -0.25421 | 2.54E-08 | -0.17897 | 0.0001   | -0.23354 | 3.32E-07 | -0.37718 |
| 0.156659 | 0.00068  | 0.292165 | 1.21E-10 | 0.190165 | 3.53E-05 | 0.280215 | 7.13E-10 | 0.425687 |

|          |          |          |          |          |          |          |          |          |
|----------|----------|----------|----------|----------|----------|----------|----------|----------|
| -0.08216 | 0.07612  | -0.22172 | 1.31E-06 | -0.11797 | 0.01073  | -0.24554 | 7.69E-08 | -0.42695 |
| 0.263724 | 7.18E-09 | 0.46546  | 1.74E-26 | 0.322042 | 9.92E-13 | 0.431005 | 1.51E-22 | 0.750409 |
| 0.296524 | 6.22E-11 | 0.252204 | 3.29E-08 | 0.269365 | 3.32E-09 | 0.161636 | 0.00045  | 0.403083 |
| 0.171202 | 0.0002   | 0.318175 | 1.91E-12 | 0.226124 | 7.91E-07 | 0.275116 | 1.48E-09 | 0.65491  |
| 0.399297 | 2.66E-19 | 0.367227 | 2.35E-16 | 0.289619 | 1.78E-10 | 0.319774 | 1.46E-12 | 0.439765 |
| 0.345896 | 1.43E-14 | 0.375152 | 4.70E-17 | 0.380932 | 1.42E-17 | 0.216612 | 2.30E-06 | 0.677916 |
| 0.191968 | 2.96E-05 | 0.337701 | 6.40E-14 | 0.233808 | 3.22E-07 | 0.310759 | 6.50E-12 | 0.583883 |
| 0.32601  | 5.03E-13 | 0.480772 | 2.20E-28 | 0.388836 | 2.64E-18 | 0.377855 | 2.69E-17 | 0.861575 |
| 0.143788 | 0.00184  | 0.35498  | 2.58E-15 | 0.23425  | 3.05E-07 | 0.32744  | 3.93E-13 | 0.694986 |
| 0.132679 | 0.00408  | 0.350597 | 5.94E-15 | 0.17108  | 0.0002   | 0.370149 | 1.30E-16 | 0.896153 |
| 0.055575 | 0.23064  | 0.208046 | 5.80E-06 | 0.097856 | 0.03451  | 0.255356 | 2.19E-08 | 0.388091 |
| 0.160056 | 0.00052  | 0.494414 | 3.70E-30 | 0.223282 | 1.09E-06 | 0.560067 | 6.47E-40 | 0.899739 |
| -0.00518 | 0.91111  | -0.20393 | 8.92E-06 | -0.08476 | 0.06723  | -0.22747 | 6.78E-07 | -0.32483 |
| 0.175415 | 0.00014  | 0.373817 | 6.18E-17 | 0.237557 | 2.05E-07 | 0.366354 | 2.79E-16 | 0.48771  |
| 0.166008 | 0.00031  | 0.375188 | 4.67E-17 | 0.220812 | 1.45E-06 | 0.377359 | 2.98E-17 | 0.647362 |
| 0.59162  | 1.97E-45 | 0.533016 | 1.23E-35 | 0.521081 | 7.24E-34 | 0.371476 | 9.97E-17 | 0.554882 |
| 0.157027 | 0.00066  | 0.341795 | 3.04E-14 | 0.168418 | 0.00026  | 0.409538 | 2.59E-20 | 0.565334 |
| 0.269852 | 3.10E-09 | 0.472296 | 2.54E-27 | 0.238074 | 1.93E-07 | 0.539492 | 1.26E-36 | 0.613299 |
| 0.075592 | 0.10278  | 0.195946 | 2.00E-05 | 0.110011 | 0.0174   | 0.189477 | 3.77E-05 | 0.508379 |
| 0.166267 | 0.00031  | 0.398825 | 2.95E-19 | 0.212152 | 3.74E-06 | 0.460246 | 7.35E-26 | 0.509371 |
| 0.212187 | 3.73E-06 | 0.401852 | 1.50E-19 | 0.238424 | 1.85E-07 | 0.438469 | 2.31E-23 | 0.516111 |
| 0.439741 | 1.67E-23 | 0.658881 | 1.80E-59 | 0.457727 | 1.46E-25 | 0.655001 | 1.46E-58 | 0.630349 |
| 0.138268 | 0.00275  | 0.297816 | 5.09E-11 | 0.260499 | 1.11E-08 | 0.214679 | 2.85E-06 | 0.390375 |
| 0.138397 | 0.00272  | 0.309353 | 8.16E-12 | 0.188374 | 4.19E-05 | 0.294392 | 8.63E-11 | 0.791913 |
| 0.286231 | 2.95E-10 | 0.438829 | 2.11E-23 | 0.3477   | 1.02E-14 | 0.36821  | 1.93E-16 | 0.800744 |
| 0.027413 | 0.55458  | 0.06909  | 0.13601  | 0.038018 | 0.4124   | 0.063198 | 0.17275  | 0.296759 |
| 0.172375 | 0.00018  | 0.501094 | 4.67E-31 | 0.218652 | 1.84E-06 | 0.617171 | 2.29E-50 | 0.574466 |
| 0.051896 | 0.26304  | 0.072352 | 0.11843  | 0.045302 | 0.32864  | 0.036123 | 0.43611  | 0.311428 |
| 0.088299 | 0.05655  | 0.26532  | 5.78E-09 | 0.146942 | 0.00145  | 0.281609 | 5.82E-10 | 0.609901 |
| 0.106895 | 0.02086  | 0.354451 | 2.86E-15 | 0.157383 | 0.00064  | 0.423009 | 1.07E-21 | 0.539852 |
| 0.516939 | 2.87E-33 | 0.553246 | 8.46E-39 | 0.444722 | 4.62E-24 | 0.488925 | 1.96E-29 | 0.528866 |
| 0.125685 | 0.00654  | 0.386486 | 4.37E-18 | 0.207685 | 6.02E-06 | 0.414181 | 8.79E-21 | 0.754131 |
| 0.092354 | 0.04608  | 0.34212  | 2.87E-14 | 0.14853  | 0.00129  | 0.378459 | 2.37E-17 | 0.736231 |
| 0.491141 | 1.00E-29 | 0.808297 | #####    | 0.529127 | 4.74E-35 | 0.812888 | #####    | 0.80264  |
| 0.210298 | 4.57E-06 | 0.451283 | 8.24E-25 | 0.280682 | 6.66E-10 | 0.472415 | 2.46E-27 | 0.710055 |
| 0.205389 | 7.66E-06 | 0.489571 | 1.61E-29 | 0.280623 | 6.72E-10 | 0.504908 | 1.40E-31 | 0.828777 |
| 0.334954 | 1.05E-13 | 0.287475 | 2.45E-10 | 0.276144 | 1.28E-09 | 0.216337 | 2.38E-06 | 0.385425 |
| 0.101712 | 0.02796  | 0.24354  | 9.86E-08 | 0.148773 | 0.00126  | 0.237232 | 2.14E-07 | 0.516385 |
| 0.321732 | 1.05E-12 | 0.362864 | 5.58E-16 | 0.345766 | 1.47E-14 | 0.252435 | 3.20E-08 | 0.487872 |
| 0.4016   | 1.59E-19 | 0.670141 | 3.48E-62 | 0.328137 | 3.48E-13 | 0.788142 | #####    | 0.731723 |
| 0.213813 | 3.13E-06 | 0.399991 | 2.27E-19 | 0.261386 | 9.84E-09 | 0.376558 | 3.52E-17 | 0.786633 |
| 0.299183 | 4.12E-11 | 0.453963 | 4.03E-25 | 0.306524 | 1.29E-11 | 0.43768  | 2.82E-23 | 0.443732 |
| 0.177844 | 0.00011  | 0.405022 | 7.31E-20 | 0.246857 | 6.51E-08 | 0.411034 | 1.83E-20 | 0.70357  |
| 0.221899 | 1.28E-06 | 0.288085 | 2.24E-10 | 0.248603 | 5.22E-08 | 0.217611 | 2.06E-06 | 0.481872 |
| -0.11165 | 0.01578  | -0.23497 | 2.80E-07 | -0.15131 | 0.00104  | -0.21964 | 1.65E-06 | -0.47577 |

|          |          |          |          |          |          |          |          |          |
|----------|----------|----------|----------|----------|----------|----------|----------|----------|
| 0.14285  | 0.00197  | 0.240862 | 1.37E-07 | 0.152611 | 0.00094  | 0.236757 | 2.26E-07 | 0.486088 |
| 0.180465 | 8.79E-05 | 0.26039  | 1.12E-08 | 0.200556 | 1.26E-05 | 0.228377 | 6.10E-07 | 0.437366 |
| 0.721689 | 2.64E-76 | 0.783756 | 3.04E-98 | 0.722582 | 1.41E-76 | 0.59083  | 2.75E-45 | 0.669217 |
| 0.114072 | 0.01364  | 0.26685  | 4.69E-09 | 0.164515 | 0.00036  | 0.24803  | 5.61E-08 | 0.542879 |
| 0.165208 | 0.00034  | 0.448056 | 1.93E-24 | 0.189862 | 3.63E-05 | 0.550482 | 2.36E-38 | 0.566387 |
| 0.359204 | 1.14E-15 | 0.471732 | 2.98E-27 | 0.394606 | 7.51E-19 | 0.381713 | 1.20E-17 | 0.446523 |
| 0.15389  | 0.00085  | 0.277315 | 1.08E-09 | 0.184165 | 6.24E-05 | 0.263411 | 7.49E-09 | 0.519668 |
| 0.336857 | 7.45E-14 | 0.413411 | 1.05E-20 | 0.321952 | 1.01E-12 | 0.377407 | 2.95E-17 | 0.557987 |
| 0.583055 | 7.10E-44 | 0.617866 | 1.66E-50 | 0.550634 | 2.23E-38 | 0.475454 | 1.03E-27 | 0.856595 |
| 0.14179  | 0.00213  | 0.278687 | 8.89E-10 | 0.158472 | 0.00059  | 0.308372 | 9.57E-12 | 0.384707 |
| 0.119191 | 0.00994  | 0.212453 | 3.62E-06 | 0.140786 | 0.00229  | 0.195052 | 2.19E-05 | 0.394945 |
| 0.279676 | 7.71E-10 | 0.318316 | 1.86E-12 | 0.268721 | 3.63E-09 | 0.251997 | 3.38E-08 | 0.542057 |
| 0.085078 | 0.06621  | 0.245905 | 7.34E-08 | 0.116895 | 0.01147  | 0.291229 | 1.40E-10 | 0.481225 |
| 0.250331 | 4.19E-08 | 0.697997 | 1.93E-69 | 0.351581 | 4.93E-15 | 0.792642 | #####    | 0.879915 |
| 0.083703 | 0.07074  | 0.127872 | 0.00565  | 0.073454 | 0.11291  | 0.10641  | 0.02145  | 0.531707 |
| 0.143302 | 0.00191  | 0.454294 | 3.69E-25 | 0.196575 | 1.88E-05 | 0.543812 | 2.69E-37 | 0.8029   |
| 0.028267 | 0.5423   | -0.19218 | 2.90E-05 | -0.07401 | 0.11021  | -0.21226 | 3.70E-06 | -0.45976 |
| 0.541884 | 5.38E-37 | 0.455907 | 2.39E-25 | 0.419808 | 2.31E-21 | 0.35317  | 3.65E-15 | 0.617111 |
| 0.45172  | 7.34E-25 | 0.462381 | 4.09E-26 | 0.360909 | 8.19E-16 | 0.40486  | 7.58E-20 | 0.750765 |
| 0.199051 | 1.47E-05 | 0.42952  | 2.18E-22 | 0.255256 | 2.22E-08 | 0.427797 | 3.33E-22 | 0.806126 |
| 0.155099 | 0.00077  | 0.369655 | 1.44E-16 | 0.20167  | 1.12E-05 | 0.388229 | 3.01E-18 | 0.672647 |
| 0.241103 | 1.33E-07 | 0.651707 | 8.40E-58 | 0.287747 | 2.36E-10 | 0.796015 | #####    | 0.73917  |
| 0.300952 | 3.12E-11 | 0.445923 | 3.38E-24 | 0.336545 | 7.88E-14 | 0.387909 | 3.22E-18 | 0.565298 |
| 0.463227 | 3.24E-26 | 0.654841 | 1.59E-58 | 0.503106 | 2.48E-31 | 0.58495  | 3.24E-44 | 0.7105   |
| 0.138011 | 0.0028   | 0.196552 | 1.89E-05 | 0.171976 | 0.00019  | 0.146119 | 0.00154  | 0.527126 |
| 0.602992 | 1.42E-47 | 0.673488 | 5.16E-63 | 0.497105 | 1.62E-30 | 0.630668 | 3.68E-53 | 0.709149 |
| 0.099698 | 0.03123  | 0.047178 | 0.30898  | 0.038237 | 0.40971  | 0.031271 | 0.50023  | 0.336085 |
| 0.130744 | 0.00465  | 0.462927 | 3.52E-26 | 0.200519 | 1.27E-05 | 0.547352 | 7.44E-38 | 0.749625 |
| 0.019242 | 0.67833  | 0.07475  | 0.10668  | 0.047543 | 0.30525  | 0.06399  | 0.16742  | 0.415781 |
| 0.105446 | 0.02267  | 0.231667 | 4.15E-07 | 0.147379 | 0.0014   | 0.218574 | 1.86E-06 | 0.533069 |
| 0.31224  | 5.10E-12 | 0.656621 | 6.11E-59 | 0.457766 | 1.44E-25 | 0.59768  | 1.46E-46 | 0.884498 |
| 0.200584 | 1.26E-05 | 0.317328 | 2.20E-12 | 0.148135 | 0.00133  | 0.38916  | 2.46E-18 | 0.378518 |
| 0.212996 | 3.42E-06 | 0.196331 | 1.93E-05 | 0.226323 | 7.73E-07 | 0.095942 | 0.03821  | 0.374921 |
| 0.226922 | 7.22E-07 | 0.318823 | 1.71E-12 | 0.264808 | 6.20E-09 | 0.231871 | 4.05E-07 | 0.788425 |
| 0.254115 | 2.57E-08 | 0.498172 | 1.16E-30 | 0.30828  | 9.71E-12 | 0.523329 | 3.41E-34 | 0.601923 |
| 0.169296 | 0.00024  | 0.396507 | 4.94E-19 | 0.186106 | 5.20E-05 | 0.436813 | 3.52E-23 | 0.851898 |
| 0.195791 | 2.03E-05 | 0.494574 | 3.52E-30 | 0.243049 | 1.05E-07 | 0.55401  | 6.36E-39 | 0.925019 |
| 0.024036 | 0.60439  | 0.093775 | 0.04281  | 0.054654 | 0.23848  | 0.082167 | 0.07608  | 0.392384 |
| 0.113032 | 0.01453  | 0.169313 | 0.00024  | 0.135601 | 0.00332  | 0.149579 | 0.00119  | 0.353214 |
| 0.371972 | 9.01E-17 | 0.390274 | 1.93E-18 | 0.367019 | 2.45E-16 | 0.269105 | 3.44E-09 | 0.582846 |
| 0.351955 | 4.59E-15 | 0.343376 | 2.28E-14 | 0.309788 | 7.61E-12 | 0.249618 | 4.59E-08 | 0.539955 |
| 0.234539 | 2.95E-07 | 0.390935 | 1.67E-18 | 0.270155 | 2.97E-09 | 0.357135 | 1.70E-15 | 0.781731 |
| 0.14056  | 0.00233  | 0.421387 | 1.58E-21 | 0.169429 | 0.00023  | 0.505567 | 1.14E-31 | 0.642362 |
| 0.429799 | 2.04E-22 | 0.653015 | 4.20E-58 | 0.511653 | 1.62E-32 | 0.564483 | 1.19E-40 | 0.911973 |
| 0.2307   | 4.65E-07 | 0.533768 | 9.49E-36 | 0.302974 | 2.27E-11 | 0.549188 | 3.80E-38 | 0.951793 |

|          |          |          |          |          |          |          |          |          |
|----------|----------|----------|----------|----------|----------|----------|----------|----------|
| 0.091913 | 0.04713  | 0.271056 | 2.62E-09 | 0.149284 | 0.00121  | 0.266257 | 5.09E-09 | 0.598838 |
| 0.093731 | 0.04291  | -0.12414 | 0.00723  | 0.025468 | 0.58302  | -0.19736 | 1.74E-05 | -0.32985 |
| 0.264535 | 6.43E-09 | 0.28911  | 1.92E-10 | 0.280756 | 6.59E-10 | 0.187032 | 4.76E-05 | 0.441757 |
| 0.344038 | 2.02E-14 | 0.275752 | 1.35E-09 | 0.275773 | 1.35E-09 | 0.186524 | 5.00E-05 | 0.362869 |
| 0.497716 | 1.34E-30 | 0.487043 | 3.44E-29 | 0.610447 | 5.04E-49 | 0.182459 | 7.32E-05 | 0.447701 |
| 0.686831 | 1.96E-66 | 0.761929 | 9.16E-90 | 0.689657 | 3.51E-67 | 0.586348 | 1.81E-44 | 0.741476 |
| 0.14629  | 0.00152  | 0.512756 | 1.13E-32 | 0.21456  | 2.88E-06 | 0.612892 | 1.65E-49 | 0.816335 |
| 0.427783 | 3.35E-22 | 0.694778 | 1.47E-68 | 0.629969 | 5.18E-53 | 0.502097 | 3.41E-31 | 0.720129 |
| 0.18732  | 4.64E-05 | 0.456056 | 2.29E-25 | 0.199524 | 1.40E-05 | 0.547749 | 6.43E-38 | 0.810147 |
| -0.0601  | 0.19485  | -0.2891  | 1.92E-10 | -0.19367 | 2.51E-05 | -0.27612 | 1.28E-09 | -0.51519 |
| 0.156533 | 0.00069  | 0.473342 | 1.89E-27 | 0.217855 | 2.01E-06 | 0.550481 | 2.36E-38 | 0.931413 |
| 0.021139 | 0.64865  | 0.116447 | 0.01179  | 0.031898 | 0.49167  | 0.151386 | 0.00103  | 0.323785 |
| 0.111244 | 0.01617  | 0.199292 | 1.43E-05 | 0.156259 | 0.0007   | 0.149489 | 0.0012   | 0.585247 |
| 0.190868 | 3.30E-05 | 0.21729  | 2.14E-06 | 0.184444 | 6.08E-05 | 0.155357 | 0.00076  | 0.365829 |
| 0.158882 | 0.00057  | 0.39153  | 1.47E-18 | 0.216744 | 2.27E-06 | 0.409936 | 2.36E-20 | 0.709786 |
| 0.098204 | 0.03387  | 0.358912 | 1.21E-15 | 0.149015 | 0.00124  | 0.411539 | 1.63E-20 | 0.808515 |
| 0.13205  | 0.00426  | 0.376281 | 3.73E-17 | 0.210357 | 4.54E-06 | 0.394217 | 8.18E-19 | 0.631967 |
| 0.196778 | 1.84E-05 | 0.401058 | 1.79E-19 | 0.209262 | 5.10E-06 | 0.430625 | 1.66E-22 | 0.907627 |
| 0.262382 | 8.61E-09 | 0.355544 | 2.32E-15 | 0.292809 | 1.10E-10 | 0.318488 | 1.81E-12 | 0.467056 |
| 0.148948 | 0.00125  | 0.382199 | 1.08E-17 | 0.199092 | 1.46E-05 | 0.386528 | 4.33E-18 | 0.79997  |
| 0.18145  | 8.03E-05 | 0.314414 | 3.56E-12 | 0.217966 | 1.98E-06 | 0.292928 | 1.08E-10 | 0.420028 |
| 0.146702 | 0.00148  | 0.398641 | 3.08E-19 | 0.186079 | 5.21E-05 | 0.464505 | 2.27E-26 | 0.571806 |
| 0.190867 | 3.30E-05 | 0.291751 | 1.29E-10 | 0.240612 | 1.42E-07 | 0.230858 | 4.56E-07 | 0.468826 |
| 0.146435 | 0.00151  | 0.263598 | 7.31E-09 | 0.170932 | 0.00021  | 0.265038 | 6.01E-09 | 0.428558 |
| 0.101522 | 0.02826  | 0.135171 | 0.00343  | 0.080235 | 0.08327  | 0.12621  | 0.00631  | 0.410953 |
| 0.201273 | 1.17E-05 | 0.510121 | 2.65E-32 | 0.25878  | 1.39E-08 | 0.571043 | 9.11E-42 | 0.78217  |
| -0.0236  | 0.61094  | -0.20366 | 9.16E-06 | -0.05721 | 0.21718  | -0.25202 | 3.37E-08 | -0.3848  |
| 0.198317 | 1.58E-05 | 0.490879 | 1.08E-29 | 0.282816 | 4.88E-10 | 0.531027 | 2.46E-35 | 0.589285 |
| 0.116364 | 0.01185  | 0.350674 | 5.85E-15 | 0.164011 | 0.00037  | 0.391604 | 1.45E-18 | 0.613954 |
| 0.164988 | 0.00034  | 0.421517 | 1.54E-21 | 0.201398 | 1.16E-05 | 0.479144 | 3.54E-28 | 0.725555 |
| 0.088048 | 0.05726  | 0.308678 | 9.11E-12 | 0.154065 | 0.00084  | 0.340157 | 4.10E-14 | 0.546698 |
| 0.005849 | 0.89968  | -0.21838 | 1.90E-06 | -0.06848 | 0.1395   | -0.26304 | 7.88E-09 | -0.45793 |
| 0.491635 | 8.63E-30 | 0.451604 | 7.56E-25 | 0.359756 | 1.03E-15 | 0.406554 | 5.15E-20 | 0.691849 |
| 0.122357 | 0.00812  | 0.25618  | 1.96E-08 | 0.143287 | 0.00191  | 0.270983 | 2.65E-09 | 0.467805 |
| 0.180312 | 8.92E-05 | 0.481987 | 1.54E-28 | 0.220361 | 1.52E-06 | 0.558214 | 1.31E-39 | 0.863683 |
| 0.233785 | 3.23E-07 | 0.32955  | 2.72E-13 | 0.353273 | 3.58E-15 | 0.180448 | 8.81E-05 | 0.341887 |
| 0.316325 | 2.60E-12 | 0.635304 | 3.75E-54 | 0.469503 | 5.61E-27 | 0.574415 | 2.38E-42 | 0.632215 |
| 0.312453 | 4.92E-12 | 0.393545 | 9.48E-19 | 0.213823 | 3.13E-06 | 0.47696  | 6.67E-28 | 0.502279 |
| 0.191857 | 3.00E-05 | 0.412805 | 1.21E-20 | 0.246395 | 6.90E-08 | 0.420876 | 1.79E-21 | 0.722181 |
| 0.269425 | 3.29E-09 | 0.717999 | 3.44E-75 | 0.392587 | 1.17E-18 | 0.777011 | 1.61E-95 | 0.885885 |
| 0.423888 | 8.66E-22 | 0.679206 | 1.86E-64 | 0.495766 | 2.44E-30 | 0.641854 | 1.39E-55 | 0.644376 |
| 0.137616 | 0.00288  | 0.190261 | 3.50E-05 | 0.140998 | 0.00226  | 0.156987 | 0.00066  | 0.572227 |
| 0.104566 | 0.02383  | 0.085939 | 0.06351  | 0.066962 | 0.14851  | 0.069365 | 0.13445  | 0.262714 |
| 0.09959  | 0.03142  | 0.273438 | 1.88E-09 | 0.156509 | 0.00069  | 0.291708 | 1.30E-10 | 0.397778 |
| 0.193241 | 2.62E-05 | 0.591439 | 2.13E-45 | 0.261804 | 9.30E-09 | 0.712239 | 1.75E-73 | 0.734637 |



|          |          |          |          |          |          |          |          |          |
|----------|----------|----------|----------|----------|----------|----------|----------|----------|
| 0.295413 | 7.38E-11 | 0.502026 | 3.49E-31 | 0.393339 | 9.92E-19 | 0.393899 | 8.77E-19 | 0.884327 |
| 0.168358 | 0.00026  | 0.386664 | 4.20E-18 | 0.189913 | 3.62E-05 | 0.4455   | 3.77E-24 | 0.577904 |
| 0.29315  | 1.04E-10 | 0.578144 | 5.29E-43 | 0.34303  | 2.43E-14 | 0.593954 | 7.28E-46 | 0.920651 |
| 0.335741 | 9.10E-14 | 0.566735 | 4.95E-41 | 0.446254 | 3.10E-24 | 0.479822 | 2.90E-28 | 0.645365 |
| 0.075935 | 0.10123  | 0.201344 | 1.16E-05 | 0.08731  | 0.05938  | 0.223814 | 1.03E-06 | 0.539895 |
| 0.058286 | 0.20865  | 0.191461 | 3.11E-05 | 0.094819 | 0.04054  | 0.196506 | 1.89E-05 | 0.388012 |
| 0.381659 | 1.22E-17 | 0.701972 | 1.52E-70 | 0.532075 | 1.71E-35 | 0.604138 | 8.57E-48 | 0.870145 |
| 0.134451 | 0.0036   | 0.365563 | 3.27E-16 | 0.180652 | 8.64E-05 | 0.390042 | 2.03E-18 | 0.845034 |
| 0.153639 | 0.00087  | 0.351909 | 4.63E-15 | 0.211505 | 4.01E-06 | 0.368825 | 1.70E-16 | 0.419957 |
| -0.09527 | 0.03959  | -0.25582 | 2.06E-08 | -0.14166 | 0.00215  | -0.27732 | 1.08E-09 | -0.39733 |
| 0.193919 | 2.45E-05 | 0.316965 | 2.33E-12 | 0.285043 | 3.52E-10 | 0.221553 | 1.33E-06 | 0.460415 |
| 0.094511 | 0.0412   | 0.257759 | 1.59E-08 | 0.153946 | 0.00084  | 0.255131 | 2.25E-08 | 0.546419 |
| 0.18406  | 6.30E-05 | 0.338825 | 5.22E-14 | 0.180052 | 9.13E-05 | 0.373384 | 6.76E-17 | 0.634281 |
| 0.409569 | 2.57E-20 | 0.420652 | 1.89E-21 | 0.472254 | 2.57E-27 | 0.24684  | 6.52E-08 | 0.452728 |
| 0.134298 | 0.00364  | 0.266537 | 4.90E-09 | 0.177384 | 0.00012  | 0.261118 | 1.02E-08 | 0.395067 |
| 0.094134 | 0.04202  | 0.195252 | 2.15E-05 | 0.104565 | 0.02383  | 0.210513 | 4.46E-06 | 0.383009 |
| 0.143915 | 0.00182  | 0.345888 | 1.43E-14 | 0.184001 | 6.34E-05 | 0.372214 | 8.58E-17 | 0.696569 |
| 0.100342 | 0.03015  | 0.28586  | 3.12E-10 | 0.149865 | 0.00116  | 0.318889 | 1.69E-12 | 0.448421 |
| 0.113838 | 0.01384  | 0.304854 | 1.68E-11 | 0.173489 | 0.00016  | 0.304622 | 1.75E-11 | 0.706699 |
| 0.395217 | 6.57E-19 | 0.452765 | 5.55E-25 | 0.32458  | 6.43E-13 | 0.421297 | 1.62E-21 | 0.792583 |
| 0.27793  | 9.91E-10 | 0.60167  | 2.55E-47 | 0.37519  | 4.67E-17 | 0.591479 | 2.09E-45 | 0.970954 |
| -0.12577 | 0.0065   | -0.25296 | 2.98E-08 | -0.13939 | 0.00254  | -0.26854 | 3.72E-09 | -0.42254 |
| 0.144914 | 0.00169  | 0.511772 | 1.55E-32 | 0.218511 | 1.87E-06 | 0.602477 | 1.79E-47 | 0.816836 |
| 0.163673 | 0.00038  | 0.338697 | 5.35E-14 | 0.194578 | 2.29E-05 | 0.345796 | 1.46E-14 | 0.82573  |
| 0.091612 | 0.04786  | 0.275759 | 1.35E-09 | 0.155949 | 0.00072  | 0.281145 | 6.23E-10 | 0.560721 |
| 0.191421 | 3.13E-05 | 0.241687 | 1.24E-07 | 0.170716 | 0.00021  | 0.234441 | 2.99E-07 | 0.378273 |
| 0.105742 | 0.02229  | 0.307623 | 1.08E-11 | 0.144607 | 0.00173  | 0.369941 | 1.36E-16 | 0.350978 |
| 0.178209 | 0.00011  | 0.401361 | 1.67E-19 | 0.251207 | 3.74E-08 | 0.411459 | 1.66E-20 | 0.672453 |
| 0.397177 | 4.26E-19 | 0.427751 | 3.37E-22 | 0.366662 | 2.63E-16 | 0.367236 | 2.34E-16 | 0.475726 |
| 0.288979 | 1.96E-10 | 0.45398  | 4.01E-25 | 0.359689 | 1.04E-15 | 0.363378 | 5.04E-16 | 0.711896 |
| 0.259536 | 1.26E-08 | 0.343837 | 2.09E-14 | 0.250215 | 4.25E-08 | 0.284854 | 3.62E-10 | 0.797655 |
| 0.545302 | 1.57E-37 | 0.445576 | 3.70E-24 | 0.439712 | 1.68E-23 | 0.329252 | 2.86E-13 | 0.598075 |
| 0.093964 | 0.04239  | 0.279812 | 7.56E-10 | 0.143313 | 0.0019   | 0.318465 | 1.82E-12 | 0.37873  |
| 0.245954 | 7.29E-08 | 0.486298 | 4.30E-29 | 0.340711 | 3.71E-14 | 0.450717 | 9.57E-25 | 0.624134 |
| 0.12175  | 0.00844  | 0.311879 | 5.41E-12 | 0.157564 | 0.00063  | 0.344248 | 1.94E-14 | 0.635636 |
| 0.175487 | 0.00014  | 0.477896 | 5.08E-28 | 0.25406  | 2.59E-08 | 0.515079 | 5.29E-33 | 0.844368 |
| 0.13471  | 0.00354  | 0.25834  | 1.48E-08 | 0.183168 | 6.85E-05 | 0.222001 | 1.26E-06 | 0.572698 |
| 0.193148 | 2.64E-05 | 0.372179 | 8.64E-17 | 0.243859 | 9.48E-08 | 0.379686 | 1.84E-17 | 0.364104 |
| 0.168912 | 0.00025  | 0.397532 | 3.94E-19 | 0.222596 | 1.18E-06 | 0.411639 | 1.59E-20 | 0.631251 |
| 0.187741 | 4.45E-05 | 0.329512 | 2.74E-13 | 0.257556 | 1.64E-08 | 0.28234  | 5.24E-10 | 0.555994 |
| 0.143906 | 0.00182  | 0.385341 | 5.58E-18 | 0.212212 | 3.72E-06 | 0.419305 | 2.61E-21 | 0.52434  |
| 0.066816 | 0.1494   | 0.209546 | 4.95E-06 | 0.102594 | 0.02662  | 0.247943 | 5.68E-08 | 0.343373 |
| 0.305709 | 1.47E-11 | 0.456727 | 1.91E-25 | 0.388706 | 2.71E-18 | 0.361729 | 6.97E-16 | 0.631299 |
| 0.228599 | 5.94E-07 | 0.392534 | 1.18E-18 | 0.296616 | 6.13E-11 | 0.353147 | 3.66E-15 | 0.56091  |
| 0.08765  | 0.0584   | 0.156984 | 0.00066  | 0.109162 | 0.01829  | 0.143722 | 0.00185  | 0.390926 |

|          |          |          |          |          |          |          |          |          |
|----------|----------|----------|----------|----------|----------|----------|----------|----------|
| 0.284796 | 3.65E-10 | 0.516648 | 3.16E-33 | 0.378622 | 2.29E-17 | 0.475717 | 9.55E-28 | 0.607542 |
| 0.423414 | 9.72E-22 | 0.66599  | 3.60E-61 | 0.521164 | 7.05E-34 | 0.584085 | 4.64E-44 | 0.621068 |
| 0.105855 | 0.02215  | 0.230891 | 4.55E-07 | 0.137686 | 0.00287  | 0.220449 | 1.51E-06 | 0.43133  |
| 0.189203 | 3.87E-05 | 0.484234 | 7.93E-29 | 0.251128 | 3.78E-08 | 0.522426 | 4.61E-34 | 0.901602 |
| 0.189432 | 3.79E-05 | 0.280008 | 7.35E-10 | 0.236585 | 2.31E-07 | 0.227514 | 6.74E-07 | 0.532604 |
| 0.16122  | 0.00047  | 0.263633 | 7.27E-09 | 0.209064 | 5.21E-06 | 0.235561 | 2.61E-07 | 0.442464 |
| 0.245124 | 8.09E-08 | 0.317823 | 2.02E-12 | 0.226463 | 7.61E-07 | 0.297206 | 5.60E-11 | 0.399023 |
| -0.03201 | 0.49021  | -0.20785 | 5.92E-06 | -0.09064 | 0.05028  | -0.23442 | 2.99E-07 | -0.33227 |
| 0.089303 | 0.05379  | 0.249005 | 4.96E-08 | 0.125522 | 0.00661  | 0.268281 | 3.85E-09 | 0.506525 |
| 0.179845 | 9.31E-05 | 0.49037  | 1.27E-29 | 0.257993 | 1.55E-08 | 0.524686 | 2.15E-34 | 0.921507 |
| 0.041245 | 0.37384  | 0.21812  | 1.95E-06 | 0.09014  | 0.05157  | 0.254379 | 2.48E-08 | 0.399317 |
| 0.368818 | 1.71E-16 | 0.412398 | 1.33E-20 | 0.407299 | 4.34E-20 | 0.297764 | 5.13E-11 | 0.469529 |
| 0.409213 | 2.79E-20 | 0.411437 | 1.67E-20 | 0.343552 | 2.21E-14 | 0.337298 | 6.88E-14 | 0.598253 |
| 0.227802 | 6.52E-07 | 0.447474 | 2.25E-24 | 0.277052 | 1.12E-09 | 0.4445   | 4.89E-24 | 0.810942 |
| 0.522746 | 4.14E-34 | 0.623144 | 1.38E-51 | 0.54304  | 3.55E-37 | 0.508597 | 4.33E-32 | 0.548933 |
| 0.233116 | 3.50E-07 | 0.404123 | 8.96E-20 | 0.273937 | 1.75E-09 | 0.392933 | 1.08E-18 | 0.510816 |
| 0.064801 | 0.16209  | 0.19974  | 1.37E-05 | 0.098088 | 0.03408  | 0.225497 | 8.50E-07 | 0.353605 |
| 0.281598 | 5.83E-10 | 0.547837 | 6.23E-38 | 0.374376 | 5.52E-17 | 0.540998 | 7.39E-37 | 0.561717 |
| 0.202768 | 1.01E-05 | 0.473946 | 1.59E-27 | 0.337607 | 6.51E-14 | 0.422172 | 1.31E-21 | 0.757995 |
| 0.245891 | 7.35E-08 | 0.354805 | 2.67E-15 | 0.293693 | 9.61E-11 | 0.285507 | 3.29E-10 | 0.605946 |
| 0.090497 | 0.05065  | 0.257164 | 1.72E-08 | 0.111378 | 0.01604  | 0.297741 | 5.15E-11 | 0.527952 |
| 0.148042 | 0.00134  | 0.23563  | 2.59E-07 | 0.173517 | 0.00016  | 0.207046 | 6.44E-06 | 0.446868 |
| 0.028329 | 0.54141  | 0.10905  | 0.01841  | 0.04308  | 0.35294  | 0.117866 | 0.0108   | 0.403177 |
| 0.213411 | 3.27E-06 | 0.477561 | 5.60E-28 | 0.282883 | 4.84E-10 | 0.500692 | 5.30E-31 | 0.71802  |
| -0.0709  | 0.12604  | -0.28081 | 6.54E-10 | -0.14556 | 0.00161  | -0.30352 | 2.08E-11 | -0.52167 |
| 0.172437 | 0.00018  | 0.256864 | 1.79E-08 | 0.169989 | 0.00022  | 0.27153  | 2.45E-09 | 0.47212  |
| 0.22625  | 7.80E-07 | 0.504076 | 1.83E-31 | 0.325189 | 5.79E-13 | 0.498229 | 1.14E-30 | 0.643796 |
| 0.049862 | 0.28224  | -0.20134 | 1.16E-05 | -0.05746 | 0.21516  | -0.24377 | 9.58E-08 | -0.39824 |
| -0.23561 | 2.60E-07 | -0.34881 | 8.31E-15 | -0.24561 | 7.61E-08 | -0.3396  | 4.54E-14 | -0.54683 |
| 0.13883  | 0.00264  | 0.435411 | 5.01E-23 | 0.196072 | 1.98E-05 | 0.507335 | 6.49E-32 | 0.818103 |
| 0.203273 | 9.54E-06 | 0.306143 | 1.37E-11 | 0.159906 | 0.00052  | 0.378403 | 2.40E-17 | 0.339626 |
| -0.12499 | 0.00684  | -0.23312 | 3.50E-07 | -0.14719 | 0.00142  | -0.22046 | 1.50E-06 | -0.37357 |
| 0.309018 | 8.62E-12 | 0.456956 | 1.80E-25 | 0.367441 | 2.25E-16 | 0.39611  | 5.39E-19 | 0.455979 |
| 0.259521 | 1.26E-08 | 0.427231 | 3.83E-22 | 0.320353 | 1.32E-12 | 0.374705 | 5.15E-17 | 0.662235 |
| 0.133043 | 0.00397  | 0.381737 | 1.20E-17 | 0.220083 | 1.57E-06 | 0.383972 | 7.46E-18 | 0.5864   |
| 0.614036 | 9.78E-50 | 0.551439 | 1.65E-38 | 0.631209 | 2.83E-53 | 0.294965 | 7.91E-11 | 0.582227 |
| 0.323255 | 8.07E-13 | 0.402332 | 1.34E-19 | 0.356779 | 1.83E-15 | 0.31933  | 1.57E-12 | 0.409727 |
| 0.248331 | 5.40E-08 | 0.427746 | 3.38E-22 | 0.286711 | 2.75E-10 | 0.408349 | 3.41E-20 | 0.719607 |
| 0.202659 | 1.02E-05 | 0.160145 | 0.00051  | 0.182183 | 7.51E-05 | 0.090323 | 0.0511   | 0.287011 |
| 0.208922 | 5.29E-06 | 0.332082 | 1.74E-13 | 0.256775 | 1.82E-08 | 0.297701 | 5.18E-11 | 0.45564  |
| 0.320318 | 1.33E-12 | 0.631865 | 2.05E-53 | 0.432833 | 9.57E-23 | 0.605608 | 4.45E-48 | 0.643799 |
| 0.594038 | 7.02E-46 | 0.744152 | 1.66E-83 | 0.598961 | 8.36E-47 | 0.641691 | 1.51E-55 | 0.751247 |
| 0.498936 | 9.16E-31 | 0.621982 | 2.40E-51 | 0.649811 | 2.28E-57 | 0.368379 | 1.86E-16 | 0.549507 |
| 0.653721 | 2.89E-58 | 0.625795 | 3.90E-52 | 0.613527 | 1.24E-49 | 0.438159 | 2.50E-23 | 0.630918 |
| 0.272041 | 2.28E-09 | 0.33035  | 2.36E-13 | 0.323544 | 7.68E-13 | 0.22489  | 9.11E-07 | 0.263874 |

|          |          |          |          |          |          |          |          |          |
|----------|----------|----------|----------|----------|----------|----------|----------|----------|
| 0.259692 | 1.23E-08 | 0.454044 | 3.94E-25 | 0.30341  | 2.12E-11 | 0.439649 | 1.71E-23 | 0.676956 |
| 0.390968 | 1.66E-18 | 0.387327 | 3.65E-18 | 0.420024 | 2.20E-21 | 0.219181 | 1.73E-06 | 0.454714 |
| 0.207715 | 6.01E-06 | 0.375105 | 4.75E-17 | 0.227725 | 6.58E-07 | 0.374898 | 4.96E-17 | 0.406006 |
| 0.11732  | 0.01117  | 0.243192 | 1.03E-07 | 0.167407 | 0.00028  | 0.225722 | 8.28E-07 | 0.460908 |
| 0.142265 | 0.00206  | 0.303916 | 1.95E-11 | 0.192593 | 2.79E-05 | 0.291792 | 1.28E-10 | 0.531338 |
| 0.155442 | 0.00075  | 0.415137 | 7.02E-21 | 0.223058 | 1.12E-06 | 0.444934 | 4.37E-24 | 0.802876 |
| 0.199496 | 1.40E-05 | 0.367912 | 2.05E-16 | 0.252749 | 3.07E-08 | 0.345467 | 1.55E-14 | 0.622932 |
| 0.204646 | 8.28E-06 | 0.45347  | 4.60E-25 | 0.263723 | 7.18E-09 | 0.482044 | 1.51E-28 | 0.659149 |
| -0.28196 | 5.53E-10 | -0.3205  | 1.29E-12 | -0.25304 | 2.95E-08 | -0.28568 | 3.20E-10 | -0.44419 |
| 0.204968 | 8.01E-06 | 0.615443 | 5.11E-50 | 0.299058 | 4.20E-11 | 0.698841 | 1.13E-69 | 0.891725 |
| 0.257204 | 1.72E-08 | 0.396622 | 4.82E-19 | 0.330467 | 2.31E-13 | 0.326625 | 4.52E-13 | 0.579569 |
| 0.482694 | 1.25E-28 | 0.650172 | 1.89E-57 | 0.465261 | 1.84E-26 | 0.616505 | 3.12E-50 | 0.662341 |
| 0.109698 | 0.01772  | 0.286493 | 2.84E-10 | 0.145408 | 0.00163  | 0.332039 | 1.76E-13 | 0.423569 |
| 0.127821 | 0.00567  | 0.475034 | 1.16E-27 | 0.189208 | 3.87E-05 | 0.581946 | 1.12E-43 | 0.746062 |
| 0.15647  | 0.00069  | 0.321979 | 1.00E-12 | 0.176886 | 0.00012  | 0.353548 | 3.39E-15 | 0.639922 |
| 0.207312 | 6.27E-06 | 0.591112 | 2.44E-45 | 0.263458 | 7.45E-09 | 0.705855 | 1.22E-71 | 0.783064 |
| 0.274496 | 1.62E-09 | 0.553044 | 9.12E-39 | 0.365114 | 3.57E-16 | 0.523115 | 3.66E-34 | 0.676966 |
| -0.06039 | 0.19269  | -0.25857 | 1.43E-08 | -0.11144 | 0.01598  | -0.29898 | 4.25E-11 | -0.52625 |
| 0.080165 | 0.08354  | 0.294948 | 7.93E-11 | 0.136973 | 0.00302  | 0.340205 | 4.07E-14 | 0.54301  |
| 0.630464 | 4.07E-53 | 0.647973 | 5.96E-57 | 0.592341 | 1.45E-45 | 0.504526 | 1.59E-31 | 0.694729 |
| 0.06997  | 0.13108  | 0.172826 | 0.00017  | 0.127953 | 0.00562  | 0.126456 | 0.00621  | 0.541018 |
| 0.300384 | 3.41E-11 | 0.415262 | 6.81E-21 | 0.339674 | 4.48E-14 | 0.334759 | 1.08E-13 | 0.764197 |
| 0.054814 | 0.2371   | 0.185387 | 5.57E-05 | 0.088765 | 0.05525  | 0.197643 | 1.69E-05 | 0.434969 |
| 0.246137 | 7.13E-08 | 0.223383 | 1.08E-06 | 0.141885 | 0.00212  | 0.250552 | 4.07E-08 | 0.332148 |
| 0.361782 | 6.90E-16 | 0.733988 | 3.71E-80 | 0.467649 | 9.45E-27 | 0.736186 | 7.21E-81 | 0.880113 |
| 0.083451 | 0.07159  | 0.247854 | 5.74E-08 | 0.105663 | 0.02239  | 0.30197  | 2.66E-11 | 0.444834 |
| 0.341116 | 3.45E-14 | 0.467278 | 1.05E-26 | 0.341536 | 3.19E-14 | 0.418804 | 2.94E-21 | 0.804474 |
| 0.28761  | 2.41E-10 | 0.434613 | 6.13E-23 | 0.341657 | 3.12E-14 | 0.348273 | 9.19E-15 | 0.856508 |
| 0.229085 | 5.62E-07 | 0.307473 | 1.11E-11 | 0.285668 | 3.21E-10 | 0.21524  | 2.68E-06 | 0.351152 |
| 0.289736 | 1.75E-10 | 0.359681 | 1.04E-15 | 0.235858 | 2.52E-07 | 0.37101  | 1.10E-16 | 0.362355 |
| 0.591369 | 2.19E-45 | 0.552276 | 1.21E-38 | 0.556649 | 2.36E-39 | 0.349761 | 6.95E-15 | 0.810101 |
| 0.466878 | 1.17E-26 | 0.464928 | 2.02E-26 | 0.38454  | 6.61E-18 | 0.390108 | 2.00E-18 | 0.541761 |
| 0.238952 | 1.73E-07 | 0.597734 | 1.43E-46 | 0.280084 | 7.27E-10 | 0.726726 | 7.40E-78 | 0.739724 |
| 0.179022 | 0.0001   | 0.548522 | 4.85E-38 | 0.24313  | 1.04E-07 | 0.662184 | 2.96E-60 | 0.77479  |
| 0.634671 | 5.14E-54 | 0.764916 | 7.18E-91 | 0.67538  | 1.73E-63 | 0.599496 | 6.62E-47 | 0.784455 |
| 0.241509 | 1.27E-07 | 0.54146  | 6.26E-37 | 0.294063 | 9.08E-11 | 0.577868 | 5.92E-43 | 0.893344 |
| 0.155988 | 0.00072  | 0.38154  | 1.25E-17 | 0.18527  | 5.63E-05 | 0.435737 | 4.62E-23 | 0.745675 |
| 0.543628 | 2.87E-37 | 0.846589 | #####    | 0.734781 | 2.06E-80 | 0.660565 | 7.20E-60 | 0.764023 |
| 0.193085 | 2.66E-05 | 0.680525 | 8.54E-65 | 0.27958  | 7.82E-10 | 0.836741 | #####    | 0.818052 |
| 0.138815 | 0.00264  | 0.060447 | 0.19225  | 0.040123 | 0.38699  | 0.041023 | 0.37642  | 0.376828 |
| 0.342405 | 2.72E-14 | 0.496702 | 1.83E-30 | 0.271493 | 2.47E-09 | 0.586101 | 2.01E-44 | 0.520988 |
| 0.316808 | 2.40E-12 | 0.444821 | 4.50E-24 | 0.21965  | 1.65E-06 | 0.530745 | 2.71E-35 | 0.624377 |
| 0.347996 | 9.68E-15 | 0.428119 | 3.08E-22 | 0.391541 | 1.47E-18 | 0.319317 | 1.57E-12 | 0.620466 |
| 0.26987  | 3.09E-09 | 0.464538 | 2.25E-26 | 0.279145 | 8.32E-10 | 0.492719 | 6.20E-30 | 0.622184 |
| 0.215851 | 2.51E-06 | 0.297294 | 5.52E-11 | 0.276939 | 1.14E-09 | 0.170459 | 0.00021  | 0.783097 |

|          |          |          |          |          |          |          |          |          |
|----------|----------|----------|----------|----------|----------|----------|----------|----------|
| 0.305537 | 1.51E-11 | 0.390082 | 2.02E-18 | 0.393237 | 1.01E-18 | 0.209264 | 5.10E-06 | 0.821366 |
| 0.076614 | 0.0982   | 0.273959 | 1.74E-09 | 0.121846 | 0.00839  | 0.336441 | 8.02E-14 | 0.393963 |
| 0.074179 | 0.10939  | 0.066275 | 0.15273  | 0.048452 | 0.29608  | 0.056279 | 0.22478  | 0.42657  |
| 0.200722 | 1.24E-05 | 0.224727 | 9.28E-07 | 0.145706 | 0.00159  | 0.247809 | 5.77E-08 | 0.478012 |
| 0.293548 | 9.82E-11 | 0.35133  | 5.17E-15 | 0.210148 | 4.64E-06 | 0.423121 | 1.04E-21 | 0.449672 |
| 0.300683 | 3.26E-11 | 0.127748 | 0.0057   | 0.103797 | 0.02489  | 0.105392 | 0.02274  | 0.418319 |
| 0.079157 | 0.08751  | 0.215318 | 2.66E-06 | 0.098484 | 0.03336  | 0.257077 | 1.74E-08 | 0.364957 |
| 0.194563 | 2.30E-05 | 0.539997 | 1.06E-36 | 0.241856 | 1.21E-07 | 0.633935 | 7.39E-54 | 0.842634 |
| 0.193948 | 2.44E-05 | 0.371656 | 9.61E-17 | 0.194717 | 2.26E-05 | 0.425518 | 5.83E-22 | 0.637143 |
| 0.571544 | 7.47E-42 | 0.479553 | 3.14E-28 | 0.312125 | 5.20E-12 | 0.518453 | 1.74E-33 | 0.751117 |
| 0.154385 | 0.00082  | 0.373351 | 6.80E-17 | 0.180811 | 8.52E-05 | 0.412208 | 1.39E-20 | 0.754219 |
| 0.103681 | 0.02505  | 0.263447 | 7.46E-09 | 0.135846 | 0.00327  | 0.264349 | 6.60E-09 | 0.760589 |
| 0.544917 | 1.80E-37 | 0.583479 | 5.97E-44 | 0.494003 | 4.19E-30 | 0.488494 | 2.23E-29 | 0.60845  |
| 0.672181 | 1.09E-62 | 0.67752  | 4.99E-64 | 0.590119 | 3.72E-45 | 0.526432 | 1.19E-34 | 0.812802 |
| 0.138182 | 0.00277  | 0.385887 | 4.96E-18 | 0.186685 | 4.92E-05 | 0.417429 | 4.08E-21 | 0.836172 |
| 0.259737 | 1.23E-08 | 0.432278 | 1.10E-22 | 0.245301 | 7.92E-08 | 0.470858 | 3.83E-27 | 0.730997 |
| 0.330178 | 2.44E-13 | 0.684181 | 9.69E-66 | 0.351464 | 5.04E-15 | 0.779937 | 1.09E-96 | 0.797509 |
| 0.216282 | 2.39E-06 | 0.628943 | 8.53E-53 | 0.273798 | 1.78E-09 | 0.753938 | 6.94E-87 | 0.768791 |
| 0.179666 | 9.46E-05 | 0.483562 | 9.68E-29 | 0.249786 | 4.49E-08 | 0.536856 | 3.21E-36 | 0.573192 |
| 0.381183 | 1.34E-17 | 0.749825 | 1.91E-85 | 0.547273 | 7.65E-38 | 0.660922 | 5.92E-60 | 0.876025 |
| 0.105644 | 0.02242  | 0.361373 | 7.48E-16 | 0.155284 | 0.00076  | 0.433232 | 8.66E-23 | 0.687978 |
| 0.239806 | 1.56E-07 | 0.616216 | 3.57E-50 | 0.351129 | 5.37E-15 | 0.640725 | 2.47E-55 | 0.829731 |
| 0.147822 | 0.00136  | 0.274692 | 1.57E-09 | 0.158206 | 0.0006   | 0.306598 | 1.27E-11 | 0.343226 |
| 0.193972 | 2.44E-05 | 0.589858 | 4.16E-45 | 0.257832 | 1.58E-08 | 0.707808 | 3.37E-72 | 0.730536 |
| 0.286785 | 2.72E-10 | 0.350144 | 6.47E-15 | 0.277684 | 1.03E-09 | 0.293327 | 1.02E-10 | 0.431152 |
| 0.317481 | 2.14E-12 | 0.677253 | 5.83E-64 | 0.319289 | 1.58E-12 | 0.817251 | #####    | 0.748828 |
| 0.250046 | 4.34E-08 | 0.416535 | 5.04E-21 | 0.209725 | 4.85E-06 | 0.465853 | 1.56E-26 | 0.765458 |
| 0.12105  | 0.00883  | 0.428268 | 2.97E-22 | 0.175192 | 0.00014  | 0.52562  | 1.57E-34 | 0.489066 |
| 0.384471 | 6.71E-18 | 0.497328 | 1.51E-30 | 0.274713 | 1.57E-09 | 0.573211 | 3.85E-42 | 0.58518  |
| 0.321353 | 1.12E-12 | 0.519567 | 1.20E-33 | 0.281348 | 6.05E-10 | 0.579434 | 3.14E-43 | 0.916127 |
| 0.236503 | 2.33E-07 | 0.480531 | 2.36E-28 | 0.243325 | 1.01E-07 | 0.566397 | 5.64E-41 | 0.661737 |
| 0.260507 | 1.11E-08 | 0.42617  | 4.97E-22 | 0.411897 | 1.50E-20 | 0.292094 | 1.23E-10 | 0.395904 |
| 0.393089 | 1.05E-18 | 0.566898 | 4.64E-41 | 0.437936 | 2.64E-23 | 0.506847 | 7.58E-32 | 0.560522 |
| 0.472502 | 2.40E-27 | 0.473528 | 1.79E-27 | 0.387084 | 3.84E-18 | 0.394088 | 8.42E-19 | 0.515835 |
| 0.23075  | 4.62E-07 | 0.336508 | 7.93E-14 | 0.314874 | 3.30E-12 | 0.227037 | 7.12E-07 | 0.427912 |
| 0.366447 | 2.74E-16 | 0.596513 | 2.42E-46 | 0.433627 | 7.85E-23 | 0.532698 | 1.38E-35 | 0.774808 |
| 0.222296 | 1.22E-06 | 0.460741 | 6.42E-26 | 0.227791 | 6.53E-07 | 0.535567 | 5.06E-36 | 0.796842 |
| 0.186861 | 4.84E-05 | 0.469817 | 5.14E-27 | 0.256455 | 1.89E-08 | 0.490215 | 1.33E-29 | 0.811811 |
| 0.154268 | 0.00082  | 0.359832 | 1.01E-15 | 0.183273 | 6.78E-05 | 0.386482 | 4.37E-18 | 0.751711 |
| 0.487219 | 3.26E-29 | 0.626978 | 2.21E-52 | 0.569117 | 1.95E-41 | 0.443835 | 5.82E-24 | 0.812507 |
| 0.295837 | 6.91E-11 | 0.489348 | 1.72E-29 | 0.341861 | 3.01E-14 | 0.438887 | 2.08E-23 | 0.838436 |
| 0.177819 | 0.00011  | 0.559916 | 6.85E-40 | 0.242642 | 1.10E-07 | 0.661446 | 4.44E-60 | 0.90097  |
| 0.097192 | 0.03576  | 0.17659  | 0.00012  | 0.130066 | 0.00487  | 0.140829 | 0.00229  | 0.469151 |
| 0.087291 | 0.05944  | 0.306927 | 1.21E-11 | 0.135362 | 0.00338  | 0.383036 | 9.09E-18 | 0.44826  |
| 0.204463 | 8.44E-06 | 0.350563 | 5.98E-15 | 0.232803 | 3.63E-07 | 0.35748  | 1.60E-15 | 0.357809 |

|          |          |          |          |          |          |          |          |          |
|----------|----------|----------|----------|----------|----------|----------|----------|----------|
| 0.228809 | 5.80E-07 | 0.251218 | 3.74E-08 | 0.130501 | 0.00473  | 0.310489 | 6.79E-12 | 0.34505  |
| 0.265082 | 5.97E-09 | 0.689048 | 5.09E-67 | 0.334786 | 1.08E-13 | 0.799467 | #####    | 0.884959 |
| 0.132479 | 0.00413  | 0.426138 | 5.01E-22 | 0.207969 | 5.85E-06 | 0.479963 | 2.79E-28 | 0.694898 |
| 0.241425 | 1.28E-07 | 0.609082 | 9.36E-49 | 0.312692 | 4.73E-12 | 0.689872 | 3.07E-67 | 0.815222 |
| 0.173172 | 0.00017  | 0.23078  | 4.61E-07 | 0.193107 | 2.65E-05 | 0.197171 | 1.77E-05 | 0.521455 |
| 0.390615 | 1.80E-18 | 0.650685 | 1.44E-57 | 0.520726 | 8.16E-34 | 0.523784 | 2.92E-34 | 0.911504 |
| 0.276826 | 1.16E-09 | 0.404658 | 7.94E-20 | 0.283995 | 4.11E-10 | 0.398231 | 3.37E-19 | 0.640075 |
| 0.43335  | 8.41E-23 | 0.63557  | 3.29E-54 | 0.557571 | 1.67E-39 | 0.472646 | 2.30E-27 | 0.789204 |
| -0.05154 | 0.26634  | -0.18481 | 5.88E-05 | -0.11448 | 0.01331  | -0.18638 | 5.07E-05 | -0.37195 |
| 0.229153 | 5.57E-07 | 0.328262 | 3.40E-13 | 0.233338 | 3.41E-07 | 0.32665  | 4.50E-13 | 0.325991 |
| 0.029715 | 0.52181  | 0.33039  | 2.35E-13 | 0.114328 | 0.01343  | 0.412068 | 1.44E-20 | 0.618856 |
| 0.410448 | 2.10E-20 | 0.354487 | 2.84E-15 | 0.339157 | 4.92E-14 | 0.283106 | 4.68E-10 | 0.450177 |
| 0.37511  | 4.74E-17 | 0.680313 | 9.68E-65 | 0.45662  | 1.97E-25 | 0.661591 | 4.11E-60 | 0.90252  |
| 0.102916 | 0.02615  | 0.153902 | 0.00085  | 0.153578 | 0.00087  | 0.082475 | 0.07499  | 0.465256 |
| 0.287542 | 2.43E-10 | 0.547349 | 7.44E-38 | 0.362136 | 6.44E-16 | 0.50685  | 7.58E-32 | 0.922603 |
| 0.236613 | 2.30E-07 | 0.417582 | 3.93E-21 | 0.271948 | 2.31E-09 | 0.415981 | 5.75E-21 | 0.570517 |
| 0.160158 | 0.00051  | 0.246542 | 6.77E-08 | 0.167471 | 0.00028  | 0.20614  | 7.09E-06 | 0.790914 |
| 0.202133 | 1.07E-05 | 0.437098 | 3.27E-23 | 0.232033 | 3.97E-07 | 0.468183 | 8.14E-27 | 0.830828 |
| 0.38758  | 3.46E-18 | 0.348962 | 8.08E-15 | 0.252728 | 3.08E-08 | 0.330045 | 2.49E-13 | 0.459348 |
| 0.27162  | 2.42E-09 | 0.481242 | 1.92E-28 | 0.377707 | 2.77E-17 | 0.406354 | 5.39E-20 | 0.499434 |
| 0.379874 | 1.77E-17 | 0.6807   | 7.70E-65 | 0.444919 | 4.39E-24 | 0.670463 | 2.90E-62 | 0.915789 |
| 0.135128 | 0.00344  | 0.230353 | 4.84E-07 | 0.16445  | 0.00036  | 0.229763 | 5.19E-07 | 0.355988 |
| 0.249969 | 4.39E-08 | 0.600187 | 4.89E-47 | 0.350204 | 6.39E-15 | 0.615696 | 4.55E-50 | 0.945679 |
| 0.193521 | 2.55E-05 | 0.475179 | 1.11E-27 | 0.22174  | 1.30E-06 | 0.557766 | 1.55E-39 | 0.713306 |
| 0.223373 | 1.08E-06 | 0.207768 | 5.97E-06 | 0.168095 | 0.00026  | 0.179424 | 9.67E-05 | 0.356588 |
| 0.131742 | 0.00435  | 0.216336 | 2.38E-06 | 0.110568 | 0.01683  | 0.26446  | 6.50E-09 | 0.362397 |
| 0.174494 | 0.00015  | 0.274173 | 1.69E-09 | 0.127312 | 0.00587  | 0.325613 | 5.38E-13 | 0.471296 |
| 0.179941 | 9.23E-05 | 0.512018 | 1.44E-32 | 0.21411  | 3.03E-06 | 0.611059 | 3.82E-49 | 0.72231  |
| -0.12685 | 0.00605  | -0.22291 | 1.14E-06 | -0.13551 | 0.00334  | -0.22431 | 9.74E-07 | -0.3778  |
| 0.21516  | 2.70E-06 | 0.45159  | 7.59E-25 | 0.279963 | 7.39E-10 | 0.462504 | 3.95E-26 | 0.771189 |
| 0.263976 | 6.94E-09 | 0.442653 | 7.90E-24 | 0.297103 | 5.69E-11 | 0.415297 | 6.76E-21 | 0.818779 |
| 0.35009  | 6.53E-15 | 0.455493 | 2.67E-25 | 0.302601 | 2.41E-11 | 0.437455 | 2.99E-23 | 0.826081 |
| 0.123241 | 0.00767  | 0.27928  | 8.16E-10 | 0.13941  | 0.00253  | 0.308499 | 9.37E-12 | 0.545538 |
| 0.124794 | 0.00693  | 0.214502 | 2.90E-06 | 0.175031 | 0.00014  | 0.160903 | 0.00048  | 0.494511 |
| 0.168796 | 0.00025  | 0.423503 | 9.51E-22 | 0.226682 | 7.42E-07 | 0.455254 | 2.85E-25 | 0.845458 |
| 0.088408 | 0.05624  | 0.11989  | 0.00951  | 0.115198 | 0.01274  | 0.060855 | 0.18926  | 0.52704  |
| 0.348774 | 8.36E-15 | 0.549045 | 4.00E-38 | 0.417255 | 4.25E-21 | 0.46558  | 1.69E-26 | 0.838896 |
| 0.352213 | 4.37E-15 | 0.344226 | 1.95E-14 | 0.369151 | 1.59E-16 | 0.197989 | 1.63E-05 | 0.587583 |
| 0.296754 | 6.00E-11 | 0.375455 | 4.42E-17 | 0.301931 | 2.68E-11 | 0.317042 | 2.30E-12 | 0.46074  |
| 0.365833 | 3.10E-16 | 0.510331 | 2.48E-32 | 0.366062 | 2.96E-16 | 0.458414 | 1.21E-25 | 0.948548 |
| 0.657204 | 4.47E-59 | 0.624679 | 6.65E-52 | 0.60747  | 1.93E-48 | 0.436358 | 3.95E-23 | 0.648307 |
| 0.608368 | 1.29E-48 | 0.681025 | 6.36E-65 | 0.59477  | 5.13E-46 | 0.545391 | 1.52E-37 | 0.675958 |
| 0.53561  | 4.98E-36 | 0.564479 | 1.19E-40 | 0.490885 | 1.08E-29 | 0.464433 | 2.32E-26 | 0.574691 |
| 0.399985 | 2.28E-19 | 0.577142 | 7.95E-43 | 0.454201 | 3.78E-25 | 0.496603 | 1.89E-30 | 0.766093 |
| 0.673092 | 6.47E-63 | 0.694278 | 2.01E-68 | 0.624664 | 6.70E-52 | 0.547339 | 7.47E-38 | 0.687101 |

|          |          |          |          |          |          |          |          |          |
|----------|----------|----------|----------|----------|----------|----------|----------|----------|
| 0.337983 | 6.08E-14 | 0.521765 | 5.76E-34 | 0.438947 | 2.04E-23 | 0.393448 | 9.68E-19 | 0.704093 |
| -0.09284 | 0.04493  | -0.28987 | 1.72E-10 | -0.12394 | 0.00733  | -0.33815 | 5.90E-14 | -0.49946 |
| 0.204574 | 8.34E-06 | 0.349551 | 7.23E-15 | 0.325436 | 5.55E-13 | 0.233969 | 3.16E-07 | 0.326528 |
| 0.110733 | 0.01667  | 0.353092 | 3.70E-15 | 0.153109 | 0.0009   | 0.396932 | 4.50E-19 | 0.836872 |
| 0.18028  | 8.94E-05 | 0.243034 | 1.05E-07 | 0.189168 | 3.89E-05 | 0.226855 | 7.27E-07 | 0.46343  |
| -0.18163 | 7.90E-05 | -0.35024 | 6.35E-15 | -0.2681  | 3.95E-09 | -0.3126  | 4.81E-12 | -0.53632 |
| 0.121615 | 0.00852  | 0.37632  | 3.70E-17 | 0.16245  | 0.00042  | 0.43774  | 2.78E-23 | 0.582589 |
| 0.089082 | 0.05439  | 0.292258 | 1.20E-10 | 0.141947 | 0.00211  | 0.342038 | 2.91E-14 | 0.580065 |
| 0.164874 | 0.00035  | 0.444204 | 5.29E-24 | 0.211827 | 3.88E-06 | 0.496067 | 2.23E-30 | 0.929401 |
| 0.391354 | 1.53E-18 | 0.688857 | 5.72E-67 | 0.53768  | 2.40E-36 | 0.585077 | 3.08E-44 | 0.655067 |
| 0.176578 | 0.00013  | 0.402727 | 1.23E-19 | 0.218446 | 1.88E-06 | 0.43935  | 1.84E-23 | 0.505999 |
| 0.090361 | 0.051    | 0.285962 | 3.07E-10 | 0.138462 | 0.00271  | 0.314447 | 3.55E-12 | 0.612753 |
| 0.115127 | 0.01279  | 0.322604 | 9.02E-13 | 0.153147 | 0.0009   | 0.3481   | 9.49E-15 | 0.686729 |
| 0.16258  | 0.00042  | 0.351093 | 5.41E-15 | 0.212993 | 3.42E-06 | 0.331984 | 1.77E-13 | 0.737868 |
| 0.202648 | 1.02E-05 | 0.19844  | 1.56E-05 | 0.192994 | 2.68E-05 | 0.098814 | 0.03277  | 0.637476 |
| 0.378346 | 2.43E-17 | 0.642291 | 1.11E-55 | 0.431637 | 1.29E-22 | 0.619766 | 6.82E-51 | 0.882384 |
| 0.148096 | 0.00133  | 0.253367 | 2.83E-08 | 0.133786 | 0.00377  | 0.269856 | 3.10E-09 | 0.480007 |
| 0.282741 | 4.94E-10 | 0.309761 | 7.64E-12 | 0.269098 | 3.44E-09 | 0.255588 | 2.12E-08 | 0.381396 |
| 0.168691 | 0.00025  | 0.310818 | 6.43E-12 | 0.222257 | 1.23E-06 | 0.268247 | 3.87E-09 | 0.616728 |
| 0.058768 | 0.20491  | 0.213448 | 3.26E-06 | 0.095897 | 0.03831  | 0.23955  | 1.61E-07 | 0.491638 |
| 0.111046 | 0.01636  | 0.207989 | 5.83E-06 | 0.112056 | 0.01541  | 0.220114 | 1.56E-06 | 0.527729 |
| 0.165132 | 0.00034  | 0.362243 | 6.30E-16 | 0.316031 | 2.73E-12 | 0.255246 | 2.22E-08 | 0.409178 |
| 0.085804 | 0.06393  | 0.311201 | 6.04E-12 | 0.156257 | 0.0007   | 0.329602 | 2.69E-13 | 0.648689 |
| 0.14127  | 0.00221  | 0.366618 | 2.65E-16 | 0.193403 | 2.58E-05 | 0.403959 | 9.30E-20 | 0.564533 |
| 0.215608 | 2.57E-06 | 0.27215  | 2.25E-09 | 0.259695 | 1.23E-08 | 0.1647   | 0.00035  | 0.522881 |
| 0.061746 | 0.18285  | 0.141044 | 0.00225  | 0.055996 | 0.22713  | 0.171093 | 0.0002   | 0.405095 |
| 0.20233  | 1.05E-05 | 0.454463 | 3.52E-25 | 0.244686 | 8.55E-08 | 0.476104 | 8.54E-28 | 0.931593 |
| 0.122772 | 0.00791  | 0.342974 | 2.45E-14 | 0.151787 | 0.001    | 0.396767 | 4.66E-19 | 0.703756 |
| 0.219666 | 1.64E-06 | 0.406826 | 4.84E-20 | 0.286718 | 2.75E-10 | 0.380553 | 1.53E-17 | 0.597401 |
| -0.12235 | 0.00812  | -0.26476 | 6.24E-09 | -0.19925 | 1.44E-05 | -0.25037 | 4.16E-08 | -0.42304 |
| 0.32831  | 3.37E-13 | 0.595804 | 3.29E-46 | 0.386893 | 4.00E-18 | 0.601506 | 2.74E-47 | 0.718072 |
| -0.19022 | 3.51E-05 | -0.3225  | 9.17E-13 | -0.24548 | 7.74E-08 | -0.29787 | 5.05E-11 | -0.49805 |
| 0.077488 | 0.09441  | 0.309052 | 8.57E-12 | 0.103475 | 0.02534  | 0.3795   | 1.91E-17 | 0.717117 |
| 0.094219 | 0.04184  | 0.304072 | 1.91E-11 | 0.124524 | 0.00705  | 0.34959  | 7.18E-15 | 0.690936 |
| 0.057866 | 0.21197  | 0.20774  | 5.99E-06 | 0.080408 | 0.0826   | 0.249749 | 4.51E-08 | 0.474766 |
| 0.176119 | 0.00013  | 0.172943 | 0.00017  | 0.127661 | 0.00573  | 0.159339 | 0.00055  | 0.458776 |
| 0.177025 | 0.00012  | 0.444254 | 5.22E-24 | 0.246706 | 6.64E-08 | 0.455171 | 2.91E-25 | 0.924196 |
| 0.056452 | 0.22336  | 0.291696 | 1.30E-10 | 0.106666 | 0.02114  | 0.350774 | 5.74E-15 | 0.51201  |
| 0.453264 | 4.86E-25 | 0.630056 | 4.96E-53 | 0.479046 | 3.64E-28 | 0.556087 | 2.92E-39 | 0.925233 |
| 0.292274 | 1.19E-10 | 0.372146 | 8.70E-17 | 0.397846 | 3.67E-19 | 0.189101 | 3.91E-05 | 0.66794  |
| 0.002296 | 0.96054  | 0.01389  | 0.76465  | 0.005559 | 0.90464  | 0.009907 | 0.83092  | 0.27798  |
| 0.165663 | 0.00032  | 0.357546 | 1.57E-15 | 0.221821 | 1.29E-06 | 0.363981 | 4.47E-16 | 0.70179  |
| 0.234252 | 3.05E-07 | 0.355547 | 2.31E-15 | 0.20443  | 8.47E-06 | 0.363972 | 4.48E-16 | 0.750289 |
| 0.093625 | 0.04315  | 0.371114 | 1.07E-16 | 0.15035  | 0.00112  | 0.433547 | 8.01E-23 | 0.713458 |
| 0.115081 | 0.01283  | 0.249301 | 4.78E-08 | 0.167776 | 0.00027  | 0.226463 | 7.61E-07 | 0.55267  |

|          |          |          |          |          |          |          |          |          |
|----------|----------|----------|----------|----------|----------|----------|----------|----------|
| 0.201752 | 1.12E-05 | 0.583283 | 6.47E-44 | 0.34076  | 3.68E-14 | 0.587205 | 1.27E-44 | 0.749274 |
| 0.012358 | 0.78997  | 0.026542 | 0.56723  | 0.01939  | 0.67599  | 0.017945 | 0.69891  | 0.365626 |
| 0.03354  | 0.46964  | 0.158435 | 0.00059  | 0.0677   | 0.14408  | 0.173919 | 0.00016  | 0.591788 |
| 0.320627 | 1.26E-12 | 0.556656 | 2.36E-39 | 0.388813 | 2.65E-18 | 0.50737  | 6.41E-32 | 0.954382 |
| 0.132512 | 0.00412  | 0.456916 | 1.82E-25 | 0.198884 | 1.49E-05 | 0.54091  | 7.62E-37 | 0.721355 |
| 0.257635 | 1.62E-08 | 0.332458 | 1.63E-13 | 0.250735 | 3.98E-08 | 0.294413 | 8.60E-11 | 0.605572 |
| 0.032035 | 0.48981  | 0.023921 | 0.60612  | 0.024512 | 0.59724  | 0.011359 | 0.8066   | 0.263316 |
| 0.143746 | 0.00184  | 0.461456 | 5.27E-26 | 0.196308 | 1.93E-05 | 0.561544 | 3.68E-40 | 0.65129  |
| 0.037989 | 0.41276  | 0.087142 | 0.05988  | 0.052495 | 0.25757  | 0.045748 | 0.32389  | 0.559186 |
| 0.219889 | 1.60E-06 | 0.415117 | 7.05E-21 | 0.285238 | 3.42E-10 | 0.372318 | 8.40E-17 | 0.695572 |
| 0.053286 | 0.25045  | 0.094885 | 0.0404   | 0.065906 | 0.15503  | 0.058342 | 0.20822  | 0.502307 |
| 0.036006 | 0.43759  | 0.073628 | 0.11206  | 0.048706 | 0.29356  | 0.039395 | 0.39567  | 0.387477 |
| 0.347534 | 1.05E-14 | 0.48255  | 1.30E-28 | 0.403963 | 9.29E-20 | 0.363072 | 5.35E-16 | 0.83418  |
| 0.14171  | 0.00214  | 0.464754 | 2.12E-26 | 0.23258  | 3.73E-07 | 0.500122 | 6.33E-31 | 0.813313 |
| 0.175086 | 0.00014  | 0.444633 | 4.73E-24 | 0.275238 | 1.46E-09 | 0.425404 | 5.99E-22 | 0.867419 |
| 0.116699 | 0.01161  | 0.337951 | 6.12E-14 | 0.15005  | 0.00114  | 0.387458 | 3.55E-18 | 0.795473 |
| 0.164387 | 0.00036  | 0.34343  | 2.26E-14 | 0.159232 | 0.00055  | 0.414553 | 8.05E-21 | 0.507991 |
| 0.320057 | 1.39E-12 | 0.306216 | 1.35E-11 | 0.242147 | 1.17E-07 | 0.26668  | 4.80E-09 | 0.578239 |
| 0.272241 | 2.22E-09 | 0.343397 | 2.27E-14 | 0.28431  | 3.92E-10 | 0.281374 | 6.03E-10 | 0.445782 |
| 0.312639 | 4.78E-12 | 0.396531 | 4.91E-19 | 0.281019 | 6.35E-10 | 0.363666 | 4.76E-16 | 0.667619 |
| 0.136191 | 0.00319  | 0.342746 | 2.56E-14 | 0.172831 | 0.00017  | 0.390901 | 1.69E-18 | 0.515972 |
| 0.147897 | 0.00135  | 0.31697  | 2.33E-12 | 0.217055 | 2.20E-06 | 0.262114 | 8.93E-09 | 0.777608 |
| 0.110885 | 0.01652  | 0.401184 | 1.74E-19 | 0.160435 | 0.0005   | 0.485407 | 5.60E-29 | 0.689775 |
| 0.173714 | 0.00016  | 0.565403 | 8.31E-41 | 0.240214 | 1.49E-07 | 0.664558 | 7.99E-61 | 0.89855  |
| 0.161236 | 0.00047  | 0.543006 | 3.60E-37 | 0.246789 | 6.57E-08 | 0.633514 | 9.11E-54 | 0.825312 |
| 0.368121 | 1.96E-16 | 0.544377 | 2.19E-37 | 0.484499 | 7.34E-29 | 0.399046 | 2.81E-19 | 0.729043 |
| 0.101702 | 0.02798  | 0.259094 | 1.34E-08 | 0.146598 | 0.00149  | 0.278083 | 9.70E-10 | 0.418886 |
| 0.522492 | 4.51E-34 | 0.648368 | 4.85E-57 | 0.460303 | 7.23E-26 | 0.629244 | 7.37E-53 | 0.712678 |
| 0.24808  | 5.58E-08 | 0.436696 | 3.62E-23 | 0.25409  | 2.58E-08 | 0.484067 | 8.34E-29 | 0.4982   |
| 0.141614 | 0.00216  | 0.307375 | 1.12E-11 | 0.214124 | 3.03E-06 | 0.297939 | 5.00E-11 | 0.378627 |
| 0.444188 | 5.31E-24 | 0.650552 | 1.54E-57 | 0.521736 | 5.82E-34 | 0.557776 | 1.54E-39 | 0.58497  |
| 0.122312 | 0.00814  | 0.328981 | 3.00E-13 | 0.240129 | 1.50E-07 | 0.293944 | 9.24E-11 | 0.488602 |
| -0.06662 | 0.1506   | -0.30895 | 8.71E-12 | -0.14839 | 0.0013   | -0.345   | 1.69E-14 | -0.4923  |
| 0.420042 | 2.19E-21 | 0.320675 | 1.25E-12 | 0.310551 | 6.72E-12 | 0.22118  | 1.39E-06 | 0.525659 |
| 0.122317 | 0.00814  | 0.202817 | 1.00E-05 | 0.14407  | 0.0018   | 0.170014 | 0.00022  | 0.564584 |
| 0.333942 | 1.25E-13 | 0.318343 | 1.85E-12 | 0.319744 | 1.46E-12 | 0.217154 | 2.17E-06 | 0.415059 |
| 0.288632 | 2.06E-10 | 0.320537 | 1.28E-12 | 0.324431 | 6.60E-13 | 0.201534 | 1.14E-05 | 0.427718 |
| 0.147738 | 0.00137  | 0.38675  | 4.13E-18 | 0.201261 | 1.17E-05 | 0.446948 | 2.59E-24 | 0.496485 |
| 0.120812 | 0.00897  | 0.364947 | 3.69E-16 | 0.181914 | 7.70E-05 | 0.420076 | 2.17E-21 | 0.500145 |
| -0.17312 | 0.00017  | -0.27804 | 9.76E-10 | -0.18712 | 4.72E-05 | -0.27554 | 1.39E-09 | -0.46975 |
| 0.133948 | 0.00373  | 0.20808  | 5.78E-06 | 0.124116 | 0.00725  | 0.19416  | 2.39E-05 | 0.642139 |
| 0.162916 | 0.00041  | 0.222204 | 1.24E-06 | 0.154336 | 0.00082  | 0.23812  | 1.92E-07 | 0.402333 |
| 0.476779 | 7.03E-28 | 0.538233 | 1.98E-36 | 0.386538 | 4.32E-18 | 0.520269 | 9.50E-34 | 0.509347 |
| 0.159231 | 0.00055  | 0.45057  | 9.95E-25 | 0.208215 | 5.70E-06 | 0.531029 | 2.46E-35 | 0.628744 |
| 0.593345 | 9.44E-46 | 0.652471 | 5.61E-58 | 0.564327 | 1.26E-40 | 0.520468 | 8.89E-34 | 0.840288 |

|          |          |          |          |          |          |          |          |          |
|----------|----------|----------|----------|----------|----------|----------|----------|----------|
| -0.04186 | 0.36673  | -0.19864 | 1.53E-05 | -0.08669 | 0.06123  | -0.22723 | 6.96E-07 | -0.42309 |
| 0.284647 | 3.73E-10 | 0.368445 | 1.84E-16 | 0.276591 | 1.20E-09 | 0.351565 | 4.94E-15 | 0.59967  |
| 0.42595  | 5.24E-22 | 0.728981 | 1.46E-78 | 0.506415 | 8.70E-32 | 0.703768 | 4.75E-71 | 0.755788 |
| 0.158688 | 0.00058  | 0.260144 | 1.16E-08 | 0.246862 | 6.51E-08 | 0.187323 | 4.63E-05 | 0.328219 |
| 0.073615 | 0.11212  | 0.21458  | 2.88E-06 | 0.110425 | 0.01698  | 0.234833 | 2.85E-07 | 0.336484 |
| 0.102062 | 0.02742  | 0.291811 | 1.28E-10 | 0.147854 | 0.00135  | 0.34126  | 3.36E-14 | 0.495601 |
| 0.253526 | 2.77E-08 | 0.443276 | 6.72E-24 | 0.292808 | 1.10E-10 | 0.428657 | 2.70E-22 | 0.775191 |
| 0.207723 | 6.00E-06 | 0.3308   | 2.18E-13 | 0.25898  | 1.36E-08 | 0.280562 | 6.78E-10 | 0.605178 |
| 0.264104 | 6.82E-09 | 0.307059 | 1.18E-11 | 0.278402 | 9.26E-10 | 0.21412  | 3.03E-06 | 0.376906 |
| 0.408841 | 3.05E-20 | 0.576342 | 1.10E-42 | 0.446864 | 2.64E-24 | 0.520706 | 8.21E-34 | 0.508963 |
| 0.529142 | 4.71E-35 | 0.417394 | 4.11E-21 | 0.473839 | 1.64E-27 | 0.274023 | 1.73E-09 | 0.300409 |
| -0.02286 | 0.62217  | -0.24092 | 1.36E-07 | -0.10439 | 0.02407  | -0.2711  | 2.61E-09 | -0.49133 |
| 0.336089 | 8.55E-14 | 0.499072 | 8.78E-31 | 0.403442 | 1.05E-19 | 0.421127 | 1.69E-21 | 0.672527 |
| 0.08     | 0.08418  | 0.183102 | 6.89E-05 | 0.113952 | 0.01374  | 0.183353 | 6.73E-05 | 0.355297 |
| 0.147454 | 0.0014   | 0.350101 | 6.52E-15 | 0.247143 | 6.28E-08 | 0.319652 | 1.49E-12 | 0.490691 |
| 0.113585 | 0.01405  | 0.185586 | 5.46E-05 | 0.129483 | 0.00507  | 0.179665 | 9.46E-05 | 0.372142 |
| 0.116793 | 0.01154  | 0.252373 | 3.22E-08 | 0.157168 | 0.00065  | 0.260968 | 1.04E-08 | 0.404298 |
| 0.159939 | 0.00052  | 0.245274 | 7.94E-08 | 0.161935 | 0.00044  | 0.250969 | 3.86E-08 | 0.464448 |
| 0.246498 | 6.81E-08 | 0.210671 | 4.39E-06 | 0.218792 | 1.81E-06 | 0.152245 | 0.00097  | 0.387228 |
| 0.331181 | 2.04E-13 | 0.289259 | 1.88E-10 | 0.246776 | 6.58E-08 | 0.265876 | 5.36E-09 | 0.434465 |
| 0.170647 | 0.00021  | 0.408962 | 2.96E-20 | 0.223638 | 1.05E-06 | 0.428324 | 2.93E-22 | 0.814582 |
| 0.120798 | 0.00897  | 0.2316   | 4.18E-07 | 0.140412 | 0.00236  | 0.240858 | 1.37E-07 | 0.427222 |
| 0.070513 | 0.12811  | 0.201436 | 1.15E-05 | 0.094007 | 0.0423   | 0.228419 | 6.07E-07 | 0.379737 |
| 0.119134 | 0.00997  | 0.242899 | 1.07E-07 | 0.119655 | 0.00965  | 0.269854 | 3.10E-09 | 0.514462 |
| 0.311161 | 6.08E-12 | 0.527617 | 7.94E-35 | 0.341617 | 3.14E-14 | 0.523361 | 3.37E-34 | 0.810938 |
| 0.095346 | 0.03944  | 0.162175 | 0.00043  | 0.103422 | 0.02542  | 0.17703  | 0.00012  | 0.43329  |
| 0.110122 | 0.01728  | 0.300947 | 3.12E-11 | 0.18664  | 4.94E-05 | 0.315914 | 2.78E-12 | 0.518535 |
| 0.284079 | 4.06E-10 | 0.56557  | 7.79E-41 | 0.354072 | 3.07E-15 | 0.554719 | 4.88E-39 | 0.935072 |
| -0.16203 | 0.00044  | -0.27333 | 1.91E-09 | -0.18034 | 8.90E-05 | -0.26551 | 5.63E-09 | -0.43409 |
| 0.086923 | 0.06053  | 0.284526 | 3.80E-10 | 0.168039 | 0.00026  | 0.267499 | 4.29E-09 | 0.608575 |
| -0.1459  | 0.00157  | -0.24779 | 5.79E-08 | -0.19097 | 3.26E-05 | -0.22407 | 1.00E-06 | -0.41728 |
| 0.123534 | 0.00752  | 0.412719 | 1.24E-20 | 0.21001  | 4.71E-06 | 0.45821  | 1.28E-25 | 0.718988 |
| 0.384503 | 6.66E-18 | 0.753117 | 1.35E-86 | 0.563701 | 1.61E-40 | 0.663817 | 1.20E-60 | 0.707385 |
| 0.330254 | 2.40E-13 | 0.450668 | 9.70E-25 | 0.309689 | 7.73E-12 | 0.41702  | 4.50E-21 | 0.62529  |
| 0.205618 | 7.48E-06 | 0.313381 | 4.23E-12 | 0.215801 | 2.52E-06 | 0.291089 | 1.43E-10 | 0.429521 |
| 0.263836 | 7.07E-09 | 0.487088 | 3.39E-29 | 0.336235 | 8.33E-14 | 0.453395 | 4.69E-25 | 0.772948 |
| 0.24743  | 6.06E-08 | 0.599308 | 7.19E-47 | 0.311987 | 5.31E-12 | 0.657874 | 3.11E-59 | 0.940435 |
| 0.126139 | 0.00634  | 0.345491 | 1.54E-14 | 0.158213 | 0.0006   | 0.375092 | 4.76E-17 | 0.843155 |
| 0.002235 | 0.96158  | 0.040485 | 0.38271  | 0.021831 | 0.63795  | 0.015406 | 0.73984  | 0.401948 |
| 0.35553  | 2.32E-15 | 0.516867 | 2.94E-33 | 0.384081 | 7.29E-18 | 0.452337 | 6.22E-25 | 0.911827 |
| 0.099371 | 0.03179  | 0.06283  | 0.17527  | 0.039746 | 0.39147  | 0.055583 | 0.23058  | 0.367883 |
| 0.216898 | 2.23E-06 | 0.166457 | 0.0003   | 0.091227 | 0.04881  | 0.18297  | 6.98E-05 | 0.413346 |
| 0.198618 | 1.53E-05 | 0.387913 | 3.22E-18 | 0.187428 | 4.59E-05 | 0.427268 | 3.80E-22 | 0.821283 |
| 0.19593  | 2.01E-05 | 0.405219 | 6.98E-20 | 0.319728 | 1.47E-12 | 0.32736  | 3.98E-13 | 0.454521 |
| 0.398794 | 2.97E-19 | 0.80193  | #####    | 0.522326 | 4.77E-34 | 0.789282 | #####    | 0.844248 |



|          |          |          |          |          |          |          |          |          |
|----------|----------|----------|----------|----------|----------|----------|----------|----------|
| 0.428172 | 3.04E-22 | 0.733475 | 5.42E-80 | 0.536226 | 4.01E-36 | 0.657757 | 3.31E-59 | 0.826966 |
| 0.100099 | 0.03056  | 0.282141 | 5.39E-10 | 0.135239 | 0.00341  | 0.292903 | 1.08E-10 | 0.697637 |
| 0.153377 | 0.00088  | 0.293418 | 1.00E-10 | 0.176866 | 0.00012  | 0.320485 | 1.29E-12 | 0.362664 |
| 0.301819 | 2.72E-11 | 0.48984  | 1.49E-29 | 0.350885 | 5.62E-15 | 0.431986 | 1.18E-22 | 0.855297 |
| -0.19053 | 3.41E-05 | -0.35358 | 3.37E-15 | -0.26764 | 4.21E-09 | -0.31903 | 1.65E-12 | -0.50807 |
| 0.236958 | 2.21E-07 | 0.672019 | 1.20E-62 | 0.341104 | 3.45E-14 | 0.755148 | 2.58E-87 | 0.910917 |
| 0.224288 | 9.76E-07 | 0.443132 | 6.98E-24 | 0.261201 | 1.01E-08 | 0.451947 | 6.90E-25 | 0.868393 |
| 0.095773 | 0.03856  | 0.209043 | 5.22E-06 | 0.135336 | 0.00339  | 0.204742 | 8.20E-06 | 0.424044 |
| 0.175108 | 0.00014  | 0.265746 | 5.46E-09 | 0.227602 | 6.67E-07 | 0.217108 | 2.18E-06 | 0.434057 |
| 0.37505  | 4.80E-17 | 0.63353  | 9.03E-54 | 0.46156  | 5.12E-26 | 0.560802 | 4.89E-40 | 0.892426 |
| 0.243393 | 1.00E-07 | 0.248454 | 5.32E-08 | 0.234863 | 2.84E-07 | 0.176984 | 0.00012  | 0.358117 |
| 0.123832 | 0.00738  | 0.200243 | 1.30E-05 | 0.140035 | 0.00242  | 0.194278 | 2.36E-05 | 0.380851 |
| 0.095855 | 0.03839  | 0.234588 | 2.93E-07 | 0.134897 | 0.00349  | 0.218845 | 1.80E-06 | 0.521963 |
| 0.395105 | 6.73E-19 | 0.594272 | 6.35E-46 | 0.43411  | 6.95E-23 | 0.563456 | 1.76E-40 | 0.449828 |
| 0.263313 | 7.59E-09 | 0.440342 | 1.43E-23 | 0.230048 | 5.02E-07 | 0.523135 | 3.63E-34 | 0.534664 |
| -0.08001 | 0.08415  | -0.24139 | 1.29E-07 | -0.14203 | 0.00209  | -0.25598 | 2.02E-08 | -0.35801 |
| 0.494556 | 3.54E-30 | 0.438526 | 2.28E-23 | 0.443077 | 7.08E-24 | 0.305689 | 1.47E-11 | 0.518199 |
| 0.091487 | 0.04817  | 0.226757 | 7.35E-07 | 0.119755 | 0.00959  | 0.257928 | 1.56E-08 | 0.3394   |
| 0.135868 | 0.00326  | 0.391327 | 1.54E-18 | 0.175599 | 0.00014  | 0.472097 | 2.69E-27 | 0.715205 |
| 0.244109 | 9.19E-08 | 0.537305 | 2.74E-36 | 0.302917 | 2.29E-11 | 0.564402 | 1.22E-40 | 0.963515 |
| 0.08763  | 0.05846  | 0.344029 | 2.02E-14 | 0.151144 | 0.00105  | 0.393147 | 1.03E-18 | 0.729163 |
| 0.171589 | 0.00019  | 0.42564  | 5.65E-22 | 0.240974 | 1.35E-07 | 0.436388 | 3.92E-23 | 0.84699  |
| 0.131118 | 0.00454  | 0.336601 | 7.80E-14 | 0.144301 | 0.00177  | 0.39392  | 8.73E-19 | 0.805621 |
| 0.195756 | 2.04E-05 | 0.480284 | 2.54E-28 | 0.249134 | 4.88E-08 | 0.512867 | 1.09E-32 | 0.948956 |
| 0.174501 | 0.00015  | 0.470819 | 3.87E-27 | 0.242113 | 1.18E-07 | 0.504187 | 1.77E-31 | 0.951656 |
| 0.123812 | 0.00739  | 0.34842  | 8.94E-15 | 0.160986 | 0.00048  | 0.39082  | 1.72E-18 | 0.844463 |
| 0.22205  | 1.26E-06 | 0.454284 | 3.70E-25 | 0.274873 | 1.53E-09 | 0.456123 | 2.25E-25 | 0.847183 |
| 0.403635 | 1.00E-19 | 0.772798 | 7.22E-94 | 0.482674 | 1.26E-28 | 0.78916  | #####    | 0.847742 |
| 0.072341 | 0.11849  | 0.148857 | 0.00125  | 0.097597 | 0.03499  | 0.112917 | 0.01463  | 0.758647 |
| 0.365528 | 3.29E-16 | 0.697189 | 3.22E-69 | 0.421991 | 1.37E-21 | 0.737759 | 2.21E-81 | 0.798633 |
| 0.128267 | 0.0055   | 0.292877 | 1.09E-10 | 0.155229 | 0.00076  | 0.29232  | 1.18E-10 | 0.831927 |
| 0.154455 | 0.00081  | 0.448814 | 1.58E-24 | 0.207655 | 6.04E-06 | 0.503978 | 1.89E-31 | 0.929292 |
| 0.164735 | 0.00035  | 0.481303 | 1.88E-28 | 0.220787 | 1.45E-06 | 0.549175 | 3.81E-38 | 0.949353 |
| 0.375965 | 3.98E-17 | 0.546116 | 1.17E-37 | 0.452355 | 6.19E-25 | 0.437078 | 3.29E-23 | 0.645265 |
| 0.147518 | 0.00139  | 0.384685 | 6.41E-18 | 0.196377 | 1.92E-05 | 0.444213 | 5.27E-24 | 0.63758  |
| 0.206914 | 6.53E-06 | 0.538767 | 1.64E-36 | 0.247659 | 5.88E-08 | 0.633248 | 1.04E-53 | 0.750352 |
| 0.327334 | 4.00E-13 | 0.406355 | 5.39E-20 | 0.258929 | 1.37E-08 | 0.413861 | 9.47E-21 | 0.707968 |
| 0.019455 | 0.67497  | 0.029041 | 0.53129  | 0.021147 | 0.64853  | 0.016303 | 0.72529  | 0.324168 |
| 0.119286 | 0.00988  | 0.369955 | 1.36E-16 | 0.169167 | 0.00024  | 0.427944 | 3.22E-22 | 0.632111 |
| 0.13919  | 0.00257  | 0.328577 | 3.22E-13 | 0.17717  | 0.00012  | 0.360304 | 9.22E-16 | 0.533835 |
| 0.397553 | 3.92E-19 | 0.559631 | 7.64E-40 | 0.3803   | 1.62E-17 | 0.561161 | 4.26E-40 | 0.72083  |
| 0.476342 | 7.97E-28 | 0.617207 | 2.25E-50 | 0.504621 | 1.54E-31 | 0.509087 | 3.70E-32 | 0.744071 |
| 0.363643 | 4.78E-16 | 0.264967 | 6.07E-09 | 0.273045 | 1.98E-09 | 0.176326 | 0.00013  | 0.373246 |
| 0.026557 | 0.567    | 0.270235 | 2.94E-09 | 0.079068 | 0.08786  | 0.344124 | 1.99E-14 | 0.50769  |
| 0.044256 | 0.33994  | 0.058391 | 0.20784  | 0.029514 | 0.52462  | 0.062772 | 0.17567  | 0.304712 |

|          |          |          |          |          |          |          |          |          |
|----------|----------|----------|----------|----------|----------|----------|----------|----------|
| 0.200223 | 1.30E-05 | 0.237373 | 2.10E-07 | 0.225413 | 8.58E-07 | 0.165271 | 0.00033  | 0.358505 |
| -0.03708 | 0.42409  | -0.2362  | 2.42E-07 | -0.11359 | 0.01404  | -0.27098 | 2.65E-09 | -0.47843 |
| 0.146871 | 0.00146  | 0.429833 | 2.02E-22 | 0.20078  | 1.23E-05 | 0.4809   | 2.12E-28 | 0.921407 |
| -0.15071 | 0.00109  | -0.2991  | 4.17E-11 | -0.21638 | 2.36E-06 | -0.28588 | 3.11E-10 | -0.42289 |
| -0.09183 | 0.04733  | -0.22503 | 8.96E-07 | -0.12203 | 0.00829  | -0.24463 | 8.60E-08 | -0.39623 |
| 0.510351 | 2.46E-32 | 0.73883  | 9.84E-82 | 0.509473 | 3.27E-32 | 0.726546 | 8.42E-78 | 0.809213 |
| 0.241536 | 1.26E-07 | 0.341197 | 3.40E-14 | 0.322972 | 8.47E-13 | 0.225514 | 8.48E-07 | 0.360981 |
| 0.344996 | 1.69E-14 | 0.30356  | 2.07E-11 | 0.323712 | 7.46E-13 | 0.162035 | 0.00044  | 0.638861 |
| 0.177604 | 0.00011  | 0.188664 | 4.08E-05 | 0.183504 | 6.64E-05 | 0.121199 | 0.00875  | 0.339742 |
| 0.170207 | 0.00022  | 0.309089 | 8.52E-12 | 0.225783 | 8.23E-07 | 0.248724 | 5.14E-08 | 0.814004 |
| 0.116205 | 0.01197  | 0.299249 | 4.07E-11 | 0.165154 | 0.00034  | 0.308555 | 9.29E-12 | 0.597334 |
| 0.653555 | 3.15E-58 | 0.610937 | 4.04E-49 | 0.620436 | 4.98E-51 | 0.394376 | 7.90E-19 | 0.748457 |
| 0.540311 | 9.44E-37 | 0.696983 | 3.67E-69 | 0.635132 | 4.09E-54 | 0.510435 | 2.40E-32 | 0.716814 |
| 0.100156 | 0.03046  | 0.251911 | 3.42E-08 | 0.15248  | 0.00095  | 0.26621  | 5.12E-09 | 0.40569  |
| 0.468366 | 7.73E-27 | 0.478779 | 3.93E-28 | 0.578731 | 4.17E-43 | 0.188329 | 4.21E-05 | 0.554812 |
| -0.04075 | 0.37966  | -0.17693 | 0.00012  | -0.12488 | 0.00689  | -0.16571 | 0.00032  | -0.32577 |
| 0.084496 | 0.0681   | 0.22914  | 5.58E-07 | 0.125485 | 0.00662  | 0.227639 | 6.64E-07 | 0.443774 |
| 0.122141 | 0.00823  | 0.275848 | 1.33E-09 | 0.155778 | 0.00073  | 0.26172  | 9.41E-09 | 0.681013 |
| 0.314664 | 3.42E-12 | 0.38844  | 2.87E-18 | 0.264882 | 6.14E-09 | 0.365272 | 3.46E-16 | 0.733171 |
| 0.336494 | 7.95E-14 | 0.674787 | 2.44E-63 | 0.460504 | 6.85E-26 | 0.642465 | 1.02E-55 | 0.701287 |
| 0.477936 | 5.03E-28 | 0.759388 | 7.76E-89 | 0.517484 | 2.40E-33 | 0.73674  | 4.76E-81 | 0.857402 |
| 0.230169 | 4.95E-07 | 0.301298 | 2.96E-11 | 0.311881 | 5.41E-12 | 0.174749 | 0.00015  | 0.396828 |
| 0.315642 | 2.91E-12 | 0.370948 | 1.11E-16 | 0.346618 | 1.25E-14 | 0.269563 | 3.23E-09 | 0.43499  |
| 0.156842 | 0.00067  | 0.199169 | 1.45E-05 | 0.170636 | 0.00021  | 0.167678 | 0.00027  | 0.408127 |
| 0.157786 | 0.00062  | 0.348935 | 8.12E-15 | 0.176732 | 0.00012  | 0.384853 | 6.19E-18 | 0.674467 |
| 0.144028 | 0.00181  | 0.282194 | 5.35E-10 | 0.17548  | 0.00014  | 0.280023 | 7.33E-10 | 0.494258 |
| 0.409152 | 2.83E-20 | 0.539116 | 1.44E-36 | 0.390183 | 1.97E-18 | 0.511547 | 1.67E-32 | 0.758056 |
| 0.613658 | 1.16E-49 | 0.577478 | 6.94E-43 | 0.585122 | 3.02E-44 | 0.368994 | 1.65E-16 | 0.684816 |
| -0.14713 | 0.00143  | -0.2597  | 1.23E-08 | -0.18853 | 4.13E-05 | -0.23854 | 1.82E-07 | -0.4151  |
| 0.049304 | 0.28767  | 0.18052  | 8.75E-05 | 0.070788 | 0.12662  | 0.210953 | 4.26E-06 | 0.39108  |
| 0.158163 | 0.0006   | 0.347784 | 1.01E-14 | 0.152257 | 0.00096  | 0.410229 | 2.21E-20 | 0.564991 |
| 0.395603 | 6.03E-19 | 0.539327 | 1.34E-36 | 0.367601 | 2.18E-16 | 0.504927 | 1.40E-31 | 0.950438 |
| 0.227406 | 6.82E-07 | 0.200437 | 1.28E-05 | 0.275928 | 1.32E-09 | 0.04751  | 0.30558  | 0.363819 |
| 0.203809 | 9.03E-06 | 0.293899 | 9.31E-11 | 0.166557 | 0.0003   | 0.315076 | 3.19E-12 | 0.625319 |
| 0.241584 | 1.26E-07 | 0.357186 | 1.69E-15 | 0.258919 | 1.37E-08 | 0.315962 | 2.76E-12 | 0.681919 |
| 0.188663 | 4.08E-05 | 0.49611  | 2.20E-30 | 0.262413 | 8.57E-09 | 0.541504 | 6.16E-37 | 0.892905 |
| 0.311129 | 6.11E-12 | 0.30756  | 1.09E-11 | 0.328475 | 3.28E-13 | 0.178455 | 0.00011  | 0.358979 |
| 0.078867 | 0.08868  | 0.234439 | 2.99E-07 | 0.100017 | 0.03069  | 0.261025 | 1.03E-08 | 0.590472 |
| 0.151959 | 0.00099  | 0.395571 | 6.07E-19 | 0.266842 | 4.70E-09 | 0.363567 | 4.86E-16 | 0.662628 |
| 0.367953 | 2.03E-16 | 0.773538 | 3.72E-94 | 0.474548 | 1.34E-27 | 0.802974 | #####    | 0.802298 |
| 0.119318 | 0.00986  | 0.176608 | 0.00012  | 0.108522 | 0.01898  | 0.182638 | 7.20E-05 | 0.525387 |
| 0.083    | 0.07314  | 0.273212 | 1.94E-09 | 0.126307 | 0.00627  | 0.286673 | 2.77E-10 | 0.763578 |
| 0.164388 | 0.00036  | 0.39677  | 4.66E-19 | 0.194177 | 2.39E-05 | 0.432933 | 9.34E-23 | 0.904013 |
| 0.252007 | 3.38E-08 | 0.302135 | 2.59E-11 | 0.281614 | 5.82E-10 | 0.223249 | 1.10E-06 | 0.489136 |
| 0.154263 | 0.00082  | 0.398418 | 3.23E-19 | 0.195162 | 2.17E-05 | 0.430585 | 1.68E-22 | 0.854766 |

|          |          |          |          |          |          |          |          |          |
|----------|----------|----------|----------|----------|----------|----------|----------|----------|
| 0.179816 | 9.33E-05 | 0.281035 | 6.33E-10 | 0.224011 | 1.01E-06 | 0.234187 | 3.08E-07 | 0.557027 |
| -0.10707 | 0.02065  | -0.2574  | 1.67E-08 | -0.1826  | 7.22E-05 | -0.24134 | 1.29E-07 | -0.39919 |
| 0.228911 | 5.73E-07 | 0.625612 | 4.26E-52 | 0.312136 | 5.19E-12 | 0.71374  | 6.35E-74 | 0.728791 |
| 0.042823 | 0.35582  | 0.084046 | 0.06959  | 0.056575 | 0.22235  | 0.065544 | 0.15732  | 0.416778 |
| 0.365576 | 3.26E-16 | 0.546835 | 8.98E-38 | 0.25536  | 2.19E-08 | 0.665096 | 5.92E-61 | 0.688121 |
| 0.079673 | 0.08546  | 0.11448  | 0.01331  | 0.073839 | 0.11103  | 0.093376 | 0.04371  | 0.573967 |
| 0.450724 | 9.56E-25 | 0.506438 | 8.64E-32 | 0.439317 | 1.86E-23 | 0.422601 | 1.18E-21 | 0.659995 |
| 0.349798 | 6.90E-15 | 0.411306 | 1.72E-20 | 0.369531 | 1.48E-16 | 0.303816 | 1.99E-11 | 0.520011 |
| 0.063522 | 0.17055  | 0.133025 | 0.00398  | 0.093693 | 0.043    | 0.103578 | 0.0252   | 0.450383 |
| 0.165987 | 0.00032  | 0.282566 | 5.07E-10 | 0.193272 | 2.61E-05 | 0.283633 | 4.33E-10 | 0.502081 |
| 0.466515 | 1.30E-26 | 0.638549 | 7.41E-55 | 0.539639 | 1.20E-36 | 0.498217 | 1.15E-30 | 0.84979  |
| 0.05981  | 0.19698  | -0.1548  | 0.00079  | -0.0527  | 0.25571  | -0.17874 | 0.0001   | -0.36881 |
| 0.302574 | 2.42E-11 | 0.395906 | 5.64E-19 | 0.311933 | 5.36E-12 | 0.36482  | 3.79E-16 | 0.487614 |
| 0.086219 | 0.06265  | 0.338033 | 6.03E-14 | 0.15211  | 0.00098  | 0.376092 | 3.87E-17 | 0.726577 |
| 0.665105 | 5.89E-61 | 0.72745  | 4.40E-78 | 0.650527 | 1.56E-57 | 0.586264 | 1.88E-44 | 0.651506 |
| 0.304001 | 1.93E-11 | 0.313972 | 3.83E-12 | 0.321583 | 1.07E-12 | 0.204729 | 8.21E-06 | 0.401724 |
| 0.296893 | 5.87E-11 | 0.472131 | 2.66E-27 | 0.335025 | 1.03E-13 | 0.423974 | 8.48E-22 | 0.753922 |
| 0.339506 | 4.62E-14 | 0.449475 | 1.33E-24 | 0.238822 | 1.76E-07 | 0.496956 | 1.69E-30 | 0.740409 |
| 0.196717 | 1.86E-05 | 0.41997  | 2.23E-21 | 0.226382 | 7.68E-07 | 0.453258 | 4.87E-25 | 0.56913  |
| 0.086648 | 0.06135  | 0.153916 | 0.00085  | 0.110677 | 0.01673  | 0.127096 | 0.00595  | 0.506916 |
| -0.15835 | 0.00059  | -0.28954 | 1.80E-10 | -0.1793  | 9.78E-05 | -0.29608 | 6.66E-11 | -0.37782 |
| 0.12072  | 0.00902  | 0.221502 | 1.34E-06 | 0.146132 | 0.00154  | 0.202856 | 9.96E-06 | 0.354943 |
| -0.16283 | 0.00041  | -0.34695 | 1.18E-14 | -0.25699 | 1.76E-08 | -0.32719 | 4.10E-13 | -0.49902 |
| 0.205774 | 7.36E-06 | 0.285139 | 3.47E-10 | 0.272403 | 2.17E-09 | 0.197014 | 1.80E-05 | 0.404714 |
| 0.212269 | 3.70E-06 | 0.349492 | 7.31E-15 | 0.242681 | 1.10E-07 | 0.317064 | 2.30E-12 | 0.788945 |
| 0.267776 | 4.13E-09 | 0.556628 | 2.38E-39 | 0.280554 | 6.79E-10 | 0.668067 | 1.12E-61 | 0.632522 |
| 0.221658 | 1.31E-06 | 0.343202 | 2.35E-14 | 0.182573 | 7.24E-05 | 0.399956 | 2.29E-19 | 0.457873 |
| 0.245446 | 7.77E-08 | 0.43108  | 1.48E-22 | 0.287328 | 2.51E-10 | 0.41502  | 7.21E-21 | 0.742344 |
| 0.24111  | 1.33E-07 | 0.05524  | 0.23347  | 0.058309 | 0.20848  | 0.043371 | 0.3497   | 0.40208  |
| 0.094263 | 0.04174  | 0.187293 | 4.65E-05 | 0.139131 | 0.00258  | 0.161343 | 0.00046  | 0.348655 |
| 0.166685 | 0.0003   | 0.331239 | 2.02E-13 | 0.1879   | 4.39E-05 | 0.367331 | 2.30E-16 | 0.53243  |
| 0.275874 | 1.33E-09 | 0.46456  | 2.24E-26 | 0.328321 | 3.37E-13 | 0.417498 | 4.01E-21 | 0.825522 |
| 0.2394   | 1.64E-07 | 0.388239 | 3.00E-18 | 0.302382 | 2.49E-11 | 0.317491 | 2.14E-12 | 0.67607  |
| 0.097424 | 0.03532  | 0.2147   | 2.84E-06 | 0.129915 | 0.00493  | 0.226695 | 7.41E-07 | 0.376615 |
| 0.175611 | 0.00014  | 0.359869 | 1.00E-15 | 0.199813 | 1.36E-05 | 0.384893 | 6.13E-18 | 0.777572 |
| 0.236469 | 2.34E-07 | 0.463069 | 3.38E-26 | 0.290894 | 1.47E-10 | 0.448722 | 1.62E-24 | 0.714979 |
| 0.231191 | 4.39E-07 | 0.347711 | 1.02E-14 | 0.2709   | 2.68E-09 | 0.299186 | 4.11E-11 | 0.698049 |
| 0.389514 | 2.28E-18 | 0.367345 | 2.29E-16 | 0.382415 | 1.04E-17 | 0.238272 | 1.88E-07 | 0.439598 |
| 0.089281 | 0.05385  | 0.209272 | 5.09E-06 | 0.118268 | 0.01053  | 0.211513 | 4.01E-06 | 0.423655 |
| 0.232427 | 3.79E-07 | 0.277044 | 1.13E-09 | 0.23173  | 4.12E-07 | 0.221777 | 1.30E-06 | 0.495994 |
| 0.353759 | 3.26E-15 | 0.489165 | 1.82E-29 | 0.411219 | 1.76E-20 | 0.409813 | 2.43E-20 | 0.496985 |
| 0.140407 | 0.00236  | 0.428929 | 2.52E-22 | 0.212817 | 3.48E-06 | 0.488403 | 2.29E-29 | 0.710732 |
| 0.180866 | 8.48E-05 | 0.341536 | 3.19E-14 | 0.204614 | 8.31E-06 | 0.343937 | 2.05E-14 | 0.695701 |
| 0.114518 | 0.01328  | 0.393898 | 8.77E-19 | 0.187119 | 4.72E-05 | 0.454901 | 3.13E-25 | 0.54249  |
| 0.184899 | 5.83E-05 | 0.401364 | 1.67E-19 | 0.250695 | 4.00E-08 | 0.394776 | 7.24E-19 | 0.709908 |

|          |          |          |          |           |          |          |          |          |
|----------|----------|----------|----------|-----------|----------|----------|----------|----------|
| 0.266211 | 5.12E-09 | 0.318487 | 1.81E-12 | 0.26163   | 9.52E-09 | 0.249161 | 4.86E-08 | 0.591542 |
| 0.366006 | 2.99E-16 | 0.395614 | 6.02E-19 | 0.400839  | 1.88E-19 | 0.238581 | 1.81E-07 | 0.638442 |
| 0.287298 | 2.52E-10 | 0.466535 | 1.29E-26 | 0.327843  | 3.66E-13 | 0.456487 | 2.04E-25 | 0.536377 |
| 0.350337 | 6.24E-15 | 0.545735 | 1.34E-37 | 0.487334  | 3.15E-29 | 0.404384 | 8.45E-20 | 0.602001 |
| 0.043116 | 0.35254  | 0.14374  | 0.00184  | 0.087535  | 0.05873  | 0.122979 | 0.0078   | 0.655988 |
| 0.253846 | 2.66E-08 | 0.37775  | 2.75E-17 | 0.304557  | 1.76E-11 | 0.3089   | 8.78E-12 | 0.446028 |
| 0.001753 | 0.96986  | -0.1077  | 0.01991  | -0.01734  | 0.70861  | -0.1314  | 0.00445  | -0.31456 |
| 0.028595 | 0.53762  | -0.03889 | 0.40181  | 0.004419  | 0.92412  | -0.06532 | 0.15872  | -0.13288 |
| -0.03939 | 0.39574  | -0.22849 | 6.02E-07 | -0.09885  | 0.03271  | -0.25826 | 1.49E-08 | -0.48269 |
| 0.006988 | 0.88028  | 0.260124 | 1.17E-08 | 0.089902  | 0.05219  | 0.312845 | 4.62E-12 | 0.487872 |
| 0.058374 | 0.20797  | 0.059971 | 0.19578  | 0.053908  | 0.24496  | 0.038157 | 0.41069  | 0.23871  |
| 0.083962 | 0.06987  | 0.080809 | 0.08108  | 0.036214  | 0.43494  | 0.091928 | 0.04709  | 0.189418 |
| 0.040788 | 0.37916  | 0.042083 | 0.3642   | 0.029954  | 0.51845  | 0.02996  | 0.51838  | 0.169054 |
| 0.034539 | 0.45651  | 0.133159 | 0.00394  | 0.049731  | 0.2835   | 0.163761 | 0.00038  | 0.352112 |
| -0.03945 | 0.39504  | 0.027647 | 0.5512   | -0.01269  | 0.78445  | 0.038091 | 0.41151  | 0.157863 |
| 0.025611 | 0.5809   | 0.201999 | 1.09E-05 | 0.071167  | 0.1246   | 0.224947 | 9.05E-07 | 0.455083 |
| -0.00955 | 0.83697  | -0.13156 | 0.0044   | -0.02351  | 0.61235  | -0.19265 | 2.77E-05 | -0.30146 |
| -0.02139 | 0.64476  | 0.117241 | 0.01123  | 0.029145  | 0.52982  | 0.133796 | 0.00377  | 0.241856 |
| -0.01774 | 0.70221  | 0.101826 | 0.02778  | -0.00524  | 0.91001  | 0.16666  | 0.0003   | 0.29437  |
| 0.013486 | 0.77131  | 0.188898 | 3.99E-05 | 0.073558  | 0.1124   | 0.209888 | 4.77E-06 | 0.399253 |
| 0.105943 | 0.02204  | 0.229551 | 5.32E-07 | 0.145988  | 0.00156  | 0.211559 | 3.99E-06 | 0.395582 |
| -0.01123 | 0.80874  | -0.11633 | 0.01188  | -0.0557   | 0.2296   | -0.14028 | 0.00238  | -0.18686 |
| 0.01586  | 0.73247  | 0.060893 | 0.18898  | 0.039426  | 0.3953   | 0.050128 | 0.27968  | 0.148635 |
| 0.140327 | 0.00237  | 0.340706 | 3.71E-14 | 0.197302  | 1.75E-05 | 0.368005 | 2.01E-16 | 0.395663 |
| -0.0458  | 0.32331  | 0.030523 | 0.51054  | 0.005667  | 0.90279  | 0.030199 | 0.51504  | 0.09552  |
| -0.04561 | 0.3254   | 0.099161 | 0.03216  | 0.031493  | 0.49719  | 0.101315 | 0.02858  | 0.295123 |
| 0.009769 | 0.83323  | 0.106091 | 0.02185  | 0.043203  | 0.35157  | 0.110859 | 0.01655  | 0.147619 |
| -0.07455 | 0.10761  | 0.112265 | 0.01521  | 0.025254  | 0.58619  | 0.120944 | 0.00889  | 0.236348 |
| 0.153463 | 0.00088  | 0.133286 | 0.00391  | 0.111968  | 0.01549  | 0.112098 | 0.01537  | 0.240821 |
| -0.04768 | 0.30384  | 0.046716 | 0.31375  | -0.03482  | 0.45289  | 0.094178 | 0.04192  | 0.107015 |
| 0.024715 | 0.59421  | 0.11796  | 0.01073  | 0.044529  | 0.33696  | 0.131756 | 0.00434  | 0.22488  |
| 0.07178  | 0.12138  | 0.154014 | 0.00084  | 0.07548   | 0.1033   | 0.166219 | 0.00031  | 0.308761 |
| 0.007776 | 0.8669   | 0.089567 | 0.05308  | 0.039555  | 0.39375  | 0.109358 | 0.01808  | 0.176926 |
| -0.01362 | 0.76916  | 0.062833 | 0.17524  | 0.018926  | 0.68332  | 0.063918 | 0.1679   | 0.133024 |
| -0.02997 | 0.51825  | -0.00012 | 0.99798  | -0.04642  | 0.31684  | 0.029629 | 0.52301  | 0.06299  |
| -0.08135 | 0.07906  | 0.082526 | 0.0748   | -7.33E-05 | 0.99874  | 0.107377 | 0.02029  | 0.222545 |
| -0.00989 | 0.83119  | 0.1813   | 8.14E-05 | 0.074746  | 0.1067   | 0.196567 | 1.88E-05 | 0.403826 |
| -0.00303 | 0.94786  | 0.042708 | 0.35711  | 0.031402  | 0.49843  | 0.027999 | 0.54614  | 0.12284  |
| 0.015526 | 0.7379   | 0.05073  | 0.27393  | 0.014135  | 0.76063  | 0.074292 | 0.10885  | 0.085121 |
| 0.201729 | 1.12E-05 | 0.320672 | 1.25E-12 | 0.271983  | 2.30E-09 | 0.248936 | 5.00E-08 | 0.412367 |
| -0.02282 | 0.62279  | 0.159191 | 0.00055  | 0.048597  | 0.29464  | 0.177086 | 0.00012  | 0.413318 |
| 0.017514 | 0.70581  | 0.117584 | 0.01099  | 0.078785  | 0.08901  | 0.095079 | 0.03999  | 0.256859 |
| -0.05736 | 0.216    | 0.04798  | 0.30082  | -0.04197  | 0.36548  | 0.087291 | 0.05944  | 0.183567 |
| 0.024507 | 0.59731  | 0.18062  | 8.67E-05 | 0.086017  | 0.06327  | 0.19602  | 1.99E-05 | 0.396331 |
| 0.103426 | 0.02541  | 0.203813 | 9.02E-06 | 0.120067  | 0.0094   | 0.227266 | 6.93E-07 | 0.311962 |

|          |         |          |          |          |         |          |          |          |
|----------|---------|----------|----------|----------|---------|----------|----------|----------|
| 0.017639 | 0.70381 | -0.10029 | 0.03024  | -0.04549 | 0.32665 | -0.12091 | 0.00891  | -0.12736 |
| 0.082021 | 0.07661 | 0.210735 | 4.36E-06 | 0.070136 | 0.13016 | 0.248766 | 5.11E-08 | 0.432767 |
| -0.04883 | 0.29229 | 0.153325 | 0.00089  | 0.037789 | 0.41522 | 0.193789 | 2.48E-05 | 0.298779 |
| -0.00216 | 0.96282 | 0.164328 | 0.00036  | 0.073193 | 0.1142  | 0.174103 | 0.00016  | 0.339918 |
| -0.0019  | 0.96727 | 0.059296 | 0.20086  | 0.024684 | 0.59468 | 0.058562 | 0.20651  | 0.13839  |
| -0.01982 | 0.66916 | 0.088183 | 0.05688  | 0.013057 | 0.77838 | 0.131259 | 0.00449  | 0.245056 |
| 0.083721 | 0.07068 | 0.153067 | 0.0009   | 0.082117 | 0.07626 | 0.15993  | 0.00052  | 0.322457 |
| -0.02062 | 0.65666 | 0.184858 | 5.85E-05 | 0.071965 | 0.12042 | 0.201694 | 1.12E-05 | 0.405745 |
| -0.06702 | 0.14818 | -0.01562 | 0.73633  | -0.0316  | 0.49576 | 0.000992 | 0.98294  | 0.056648 |
| 0.069283 | 0.13492 | -0.00269 | 0.95381  | 0.010885 | 0.81452 | -0.0189  | 0.68372  | 0.009781 |
| 0.015991 | 0.73035 | 0.045924 | 0.32203  | 0.025052 | 0.58919 | 0.041002 | 0.37667  | 0.152516 |
| -0.06056 | 0.19139 | 0.07675  | 0.09761  | -0.00278 | 0.95218 | 0.103989 | 0.02462  | 0.247648 |
| 0.058986 | 0.20324 | 0.302263 | 2.54E-11 | 0.165292 | 0.00033 | 0.311485 | 5.77E-12 | 0.534026 |
| 0.018035 | 0.69747 | 0.099237 | 0.03203  | 0.034223 | 0.46064 | 0.122207 | 0.0082   | 0.252719 |
| -0.08839 | 0.0563  | 0.087564 | 0.05865  | -0.03077 | 0.50717 | 0.148347 | 0.0013   | 0.313653 |
| -0.00288 | 0.95044 | -0.05024 | 0.2786   | 0.001401 | 0.9759  | -0.06331 | 0.17196  | -0.10735 |
| 0.04759  | 0.30477 | -0.10618 | 0.02174  | -0.01092 | 0.81396 | -0.14702 | 0.00144  | -0.24757 |
| 0.070297 | 0.12928 | 0.196646 | 1.87E-05 | 0.10061  | 0.02971 | 0.21832  | 1.91E-06 | 0.424135 |
| -0.00204 | 0.96494 | 0.173464 | 0.00017  | 0.062417 | 0.17813 | 0.19822  | 1.60E-05 | 0.361801 |
| -0.04025 | 0.38543 | 0.088343 | 0.05643  | -0.00313 | 0.94626 | 0.118085 | 0.01065  | 0.210369 |
| -0.00819 | 0.85981 | 0.092093 | 0.0467   | 0.032809 | 0.47938 | 0.102583 | 0.02664  | 0.184902 |
| 0.00911  | 0.84433 | 0.129006 | 0.00524  | 0.062727 | 0.17598 | 0.129864 | 0.00494  | 0.242865 |
| 0.000245 | 0.99579 | 0.201478 | 1.15E-05 | 0.088916 | 0.05484 | 0.212223 | 3.72E-06 | 0.451488 |
| -0.04659 | 0.31509 | 0.131341 | 0.00447  | 0.008384 | 0.85661 | 0.17441  | 0.00015  | 0.277892 |
| -0.05349 | 0.24865 | -0.17925 | 9.82E-05 | -0.09157 | 0.04796 | -0.19537 | 2.12E-05 | -0.36963 |
| 0.088237 | 0.05673 | 0.079742 | 0.08519  | 0.085067 | 0.06625 | 0.062162 | 0.17991  | 0.162741 |
| -0.03512 | 0.4489  | 0.097378 | 0.0354   | -0.01424 | 0.75892 | 0.144713 | 0.00172  | 0.293437 |
| -0.02873 | 0.53567 | -0.17129 | 0.0002   | -0.1019  | 0.02768 | -0.1741  | 0.00016  | -0.36553 |
| 0.107902 | 0.01968 | 0.274309 | 1.66E-09 | 0.171929 | 0.00019 | 0.270603 | 2.79E-09 | 0.409588 |
| -0.01047 | 0.82148 | 0.147915 | 0.00135  | 0.053837 | 0.24558 | 0.162508 | 0.00042  | 0.342636 |
| 0.025143 | 0.58784 | 0.178124 | 0.00011  | 0.08027  | 0.08313 | 0.189725 | 3.68E-05 | 0.36678  |
| -0.01398 | 0.76322 | 0.134762 | 0.00353  | 0.032845 | 0.4789  | 0.165786 | 0.00032  | 0.258553 |
| -0.07837 | 0.0907  | 0.090976 | 0.04944  | -0.02679 | 0.56354 | 0.142286 | 0.00205  | 0.229003 |
| 0.033759 | 0.46674 | 0.044072 | 0.34195  | 0.057282 | 0.21661 | 0.015641 | 0.73602  | 0.070936 |
| -0.04457 | 0.33656 | 0.16139  | 0.00046  | 0.028888 | 0.53347 | 0.20184  | 1.11E-05 | 0.402098 |
| 0.034825 | 0.45279 | -0.09534 | 0.03945  | -0.03284 | 0.47898 | -0.11245 | 0.01504  | -0.26336 |
| 0.087454 | 0.05896 | -0.01596 | 0.73078  | 0.067144 | 0.14741 | -0.08977 | 0.05254  | -0.14052 |
| 0.027689 | 0.5506  | 0.173873 | 0.00016  | 0.051047 | 0.27094 | 0.219609 | 1.65E-06 | 0.352376 |
| 0.068217 | 0.14103 | 0.037716 | 0.41613  | 0.035049 | 0.44988 | 0.015295 | 0.74165  | 0.098715 |
| 0.056967 | 0.21916 | 0.190868 | 3.30E-05 | 0.085677 | 0.06432 | 0.214706 | 2.84E-06 | 0.362729 |
| 0.027596 | 0.55193 | 0.23514  | 2.75E-07 | 0.103773 | 0.02492 | 0.25742  | 1.67E-08 | 0.463654 |
| -0.03946 | 0.39487 | 0.156424 | 0.00069  | 0.031755 | 0.49362 | 0.196424 | 1.91E-05 | 0.364561 |
| 0.038039 | 0.41215 | 0.206274 | 6.99E-06 | 0.090252 | 0.05128 | 0.22992  | 5.09E-07 | 0.406115 |
| -0.07226 | 0.11888 | -0.14473 | 0.00171  | -0.07577 | 0.10196 | -0.15781 | 0.00062  | -0.22935 |
| -0.0426  | 0.35832 | -0.1419  | 0.00211  | -0.04988 | 0.28206 | -0.17868 | 0.0001   | -0.32865 |

|           |         |          |          |          |         |          |          |          |
|-----------|---------|----------|----------|----------|---------|----------|----------|----------|
| 0.057094  | 0.21813 | 0.180646 | 8.65E-05 | 0.093065 | 0.04442 | 0.184542 | 6.03E-05 | 0.36207  |
| -0.04499  | 0.33195 | -0.25378 | 2.68E-08 | -0.11058 | 0.01682 | -0.28685 | 2.70E-10 | -0.42642 |
| 0.022573  | 0.62658 | 0.087919 | 0.05763  | 0.028052 | 0.54538 | 0.08538  | 0.06526  | 0.159825 |
| -0.00508  | 0.91283 | 0.193196 | 2.63E-05 | 0.058159 | 0.20965 | 0.237658 | 2.03E-07 | 0.398742 |
| 0.006654  | 0.88597 | 0.049461 | 0.28613  | 0.015852 | 0.7326  | 0.05586  | 0.22826  | 0.209082 |
| -0.00782  | 0.86619 | 0.019513 | 0.67405  | -0.02729 | 0.55635 | 0.049609 | 0.28469  | 0.081467 |
| 0.053811  | 0.24581 | 0.08522  | 0.06576  | 0.067904 | 0.14287 | 0.059984 | 0.19568  | 0.180774 |
| 0.075876  | 0.10149 | 0.138443 | 0.00272  | 0.063864 | 0.16826 | 0.14551  | 0.00162  | 0.339167 |
| 0.025344  | 0.58485 | -0.14068 | 0.00231  | -0.06015 | 0.19441 | -0.15428 | 0.00082  | -0.32718 |
| 0.019836  | 0.66898 | 0.123902 | 0.00735  | 0.051633 | 0.26547 | 0.126373 | 0.00625  | 0.163949 |
| 0.045089  | 0.33092 | 0.071045 | 0.12525  | 0.061558 | 0.18419 | 0.047259 | 0.30815  | 0.185163 |
| 0.017529  | 0.70556 | 0.092284 | 0.04624  | 0.041061 | 0.37598 | 0.111851 | 0.0156   | 0.206685 |
| 0.017648  | 0.70365 | 0.174175 | 0.00016  | 0.098022 | 0.0342  | 0.169559 | 0.00023  | 0.382331 |
| -0.02085  | 0.65309 | 0.044999 | 0.33188  | -0.00032 | 0.99453 | 0.050591 | 0.27525  | 0.102177 |
| 0.020992  | 0.65092 | 0.068425 | 0.13982  | 0.030193 | 0.51512 | 0.077117 | 0.09601  | 0.116602 |
| 0.017334  | 0.70869 | 0.194354 | 2.35E-05 | 0.101003 | 0.02908 | 0.19456  | 2.30E-05 | 0.395337 |
| -0.01131  | 0.80741 | 0.163829 | 0.00038  | 0.062867 | 0.17501 | 0.175305 | 0.00014  | 0.336709 |
| 0.043951  | 0.34328 | 0.177865 | 0.00011  | 0.061196 | 0.18679 | 0.218258 | 1.92E-06 | 0.302145 |
| -0.04752  | 0.30553 | 0.130211 | 0.00483  | 0.035879 | 0.43921 | 0.149742 | 0.00117  | 0.349866 |
| 0.100393  | 0.03007 | 0.137164 | 0.00298  | 0.057653 | 0.21365 | 0.160653 | 0.00049  | 0.297669 |
| 0.0447    | 0.33511 | 0.211882 | 3.85E-06 | 0.113986 | 0.01371 | 0.22095  | 1.42E-06 | 0.373997 |
| -7.47E-05 | 0.99872 | 0.166116 | 0.00031  | 0.065819 | 0.15558 | 0.192328 | 2.86E-05 | 0.369613 |
| 0.008055  | 0.86217 | 0.079107 | 0.08771  | 0.036848 | 0.42694 | 0.100071 | 0.0306   | 0.165594 |
| -0.04687  | 0.31211 | 0.079512 | 0.08609  | 0.03437  | 0.45871 | 0.074063 | 0.10995  | 0.234843 |
| 0.033123  | 0.47518 | 0.097822 | 0.03457  | 0.069892 | 0.13151 | 0.072354 | 0.11842  | 0.233786 |
| 0.026214  | 0.57203 | 0.186149 | 5.18E-05 | 0.086083 | 0.06306 | 0.198654 | 1.53E-05 | 0.31713  |
| 0.03162   | 0.49546 | 0.22929  | 5.48E-07 | 0.119305 | 0.00987 | 0.229942 | 5.08E-07 | 0.474267 |
| 0.075183  | 0.10466 | 0.160291 | 0.00051  | 0.135803 | 0.00328 | 0.135093 | 0.00344  | 0.284015 |
| 0.012422  | 0.78891 | -0.00457 | 0.92162  | -0.0101  | 0.82772 | -0.00479 | 0.91777  | 0.11678  |
| -0.05641  | 0.22368 | 0.03263  | 0.48178  | -0.00565 | 0.90301 | 0.050773 | 0.27353  | 0.148874 |
| -0.06497  | 0.16099 | 0.102638 | 0.02656  | 0.024149 | 0.60269 | 0.12095  | 0.00889  | 0.251197 |
| -0.0267   | 0.56488 | 0.129702 | 0.005    | 0.036132 | 0.43599 | 0.159072 | 0.00056  | 0.31612  |
| -0.00859  | 0.85321 | 0.138416 | 0.00272  | 0.052998 | 0.25302 | 0.152387 | 0.00095  | 0.326782 |
| -0.04555  | 0.32604 | 0.131396 | 0.00445  | 0.030418 | 0.512   | 0.153727 | 0.00086  | 0.388682 |
| 0.048761  | 0.29302 | 0.169094 | 0.00024  | 0.080632 | 0.08175 | 0.173215 | 0.00017  | 0.315828 |
| -0.09988  | 0.03092 | -0.02555 | 0.58179  | -0.07766 | 0.0937  | 0.019125 | 0.68018  | 0.031459 |
| -0.03889  | 0.40177 | 0.086554 | 0.06163  | 0.032095 | 0.489   | 0.087923 | 0.05762  | 0.250225 |
| 0.02989   | 0.51936 | 0.147801 | 0.00136  | 0.055127 | 0.23444 | 0.160577 | 0.0005   | 0.332836 |
| 0.069269  | 0.13499 | 0.144623 | 0.00173  | 0.072592 | 0.11721 | 0.168834 | 0.00025  | 0.304277 |
| 0.171535  | 0.0002  | 0.215008 | 2.75E-06 | 0.161207 | 0.00047 | 0.194363 | 2.34E-05 | 0.404599 |
| -0.12585  | 0.00646 | -0.11429 | 0.01346  | -0.12427 | 0.00717 | -0.09008 | 0.05173  | 0.018138 |
| -0.06547  | 0.15776 | 0.078888 | 0.08859  | 0.024302 | 0.60039 | 0.082821 | 0.07377  | 0.169848 |
| -0.01395  | 0.76363 | -0.16575 | 0.00032  | -0.05935 | 0.20042 | -0.20729 | 6.28E-06 | -0.34441 |
| -0.02731  | 0.55606 | 0.038096 | 0.41144  | 0.031657 | 0.49496 | 0.025219 | 0.5867   | 0.129263 |
| -0.01066  | 0.81832 | 0.151842 | 0.001    | 0.05205  | 0.26163 | 0.183755 | 6.49E-05 | 0.313364 |

|          |         |          |          |          |         |          |          |          |
|----------|---------|----------|----------|----------|---------|----------|----------|----------|
| -0.00938 | 0.83974 | 0.166829 | 0.00029  | 0.05552  | 0.23111 | 0.195157 | 2.17E-05 | 0.411018 |
| 0.081136 | 0.07985 | 0.229351 | 5.44E-07 | 0.115886 | 0.01221 | 0.258117 | 1.52E-08 | 0.391683 |
| -0.07194 | 0.12057 | -0.14318 | 0.00192  | -0.05025 | 0.27855 | -0.17529 | 0.00014  | -0.21314 |
| -0.08103 | 0.08025 | 0.043091 | 0.35281  | -0.01872 | 0.68654 | 0.076631 | 0.09812  | 0.084802 |
| 0.040135 | 0.38685 | 0.239914 | 1.54E-07 | 0.116484 | 0.01177 | 0.256491 | 1.88E-08 | 0.341653 |
| 0.040159 | 0.38657 | 0.166993 | 0.00029  | 0.07061  | 0.12758 | 0.183826 | 6.44E-05 | 0.314477 |
| -0.06013 | 0.1946  | 0.088839 | 0.05505  | 0.030955 | 0.50457 | 0.092292 | 0.04622  | 0.207048 |
| -0.01735 | 0.70835 | 0.075251 | 0.10435  | 0.04888  | 0.29184 | 0.060182 | 0.1942   | 0.137923 |
| -0.01299 | 0.77956 | 0.112342 | 0.01514  | 0.039009 | 0.40032 | 0.121675 | 0.00848  | 0.309842 |
| -0.00799 | 0.86321 | 0.151874 | 0.00099  | 0.060575 | 0.19131 | 0.163407 | 0.00039  | 0.296268 |
| 0.033314 | 0.47264 | 0.271802 | 2.36E-09 | 0.119665 | 0.00964 | 0.312508 | 4.88E-12 | 0.439118 |
| 0.018913 | 0.68353 | 0.104044 | 0.02455  | 0.029394 | 0.52631 | 0.115959 | 0.01215  | 0.25972  |
| -0.05469 | 0.23821 | 0.079138 | 0.08758  | 0.004368 | 0.92499 | 0.093586 | 0.04324  | 0.299296 |
| 0.007361 | 0.87395 | 0.174558 | 0.00015  | 0.055523 | 0.23108 | 0.20977  | 4.83E-06 | 0.418291 |
| 0.099198 | 0.0321  | 0.181822 | 7.76E-05 | 0.109685 | 0.01773 | 0.188349 | 4.20E-05 | 0.210518 |
| 0.045579 | 0.32569 | 0.195631 | 2.07E-05 | 0.083997 | 0.06975 | 0.216349 | 2.37E-06 | 0.449821 |
| 0.045372 | 0.32788 | -0.02859 | 0.53763  | 0.042706 | 0.35714 | -0.06022 | 0.19392  | -0.13636 |
| 0.064488 | 0.16413 | 0.194254 | 2.37E-05 | 0.092811 | 0.045   | 0.202339 | 1.05E-05 | 0.417396 |
| 0.001236 | 0.97876 | -0.06822 | 0.14104  | 0.000685 | 0.98822 | -0.09321 | 0.04408  | -0.16712 |
| -0.03563 | 0.44243 | 0.01709  | 0.71261  | -0.03412 | 0.46197 | 0.04609  | 0.32029  | 0.066098 |
| 0.074681 | 0.10701 | 0.128652 | 0.00536  | 0.063349 | 0.17173 | 0.132706 | 0.00407  | 0.230582 |
| 0.013563 | 0.77004 | 0.130845 | 0.00462  | 0.062789 | 0.17555 | 0.141818 | 0.00213  | 0.16762  |
| 0.028418 | 0.54014 | 0.062082 | 0.18047  | 0.028973 | 0.53226 | 0.063237 | 0.17248  | 0.19734  |
| 0.014257 | 0.75862 | 0.195701 | 2.05E-05 | 0.099051 | 0.03235 | 0.212918 | 3.45E-06 | 0.318636 |
| 0.014676 | 0.75176 | 0.099327 | 0.03187  | 0.035013 | 0.45035 | 0.111046 | 0.01636  | 0.212282 |
| 0.126505 | 0.00619 | 0.222652 | 1.18E-06 | 0.139965 | 0.00243 | 0.222393 | 1.21E-06 | 0.425039 |
| 0.01181  | 0.79908 | 0.196091 | 1.97E-05 | 0.052612 | 0.2565  | 0.25028  | 4.22E-08 | 0.399338 |
| 0.031765 | 0.49348 | 0.032373 | 0.48525  | 0.018556 | 0.68918 | 0.021992 | 0.63547  | 0.123781 |
| -0.04012 | 0.38701 | 0.049939 | 0.28149  | 0.008188 | 0.85992 | 0.062093 | 0.18039  | 0.086077 |
| 0.002665 | 0.9542  | 0.085711 | 0.06422  | 0.005234 | 0.91019 | 0.136002 | 0.00323  | 0.109736 |
| -0.00881 | 0.84932 | 0.120374 | 0.00922  | 0.059116 | 0.20224 | 0.110996 | 0.01641  | 0.244499 |
| -0.01764 | 0.70387 | 0.154453 | 0.00081  | 0.036154 | 0.43571 | 0.197273 | 1.76E-05 | 0.36105  |
| -0.00205 | 0.96477 | 0.090542 | 0.05053  | 0.010924 | 0.81387 | 0.126351 | 0.00625  | 0.226787 |
| 0.036392 | 0.43269 | 0.231152 | 4.41E-07 | 0.086276 | 0.06247 | 0.265986 | 5.28E-09 | 0.332422 |
| -0.06486 | 0.16169 | 0.101128 | 0.02888  | 0.025824 | 0.57776 | 0.116271 | 0.01192  | 0.279522 |
| 0.018611 | 0.68832 | 0.138922 | 0.00262  | 0.05548  | 0.23144 | 0.160062 | 0.00052  | 0.346583 |
| 0.038718 | 0.40384 | 0.104382 | 0.02408  | 0.053266 | 0.25063 | 0.104332 | 0.02415  | 0.198316 |
| -0.0417  | 0.36857 | 0.117045 | 0.01136  | 0.040753 | 0.37957 | 0.1361   | 0.00321  | 0.296996 |
| 0.053718 | 0.24663 | 0.15119  | 0.00105  | 0.098422 | 0.03347 | 0.132324 | 0.00418  | 0.339123 |
| -0.01409 | 0.7614  | 0.131561 | 0.0044   | 0.047534 | 0.30534 | 0.135002 | 0.00347  | 0.309501 |
| -0.06211 | 0.18029 | 0.04261  | 0.35823  | 0.044554 | 0.33669 | 0.018323 | 0.69289  | 0.108657 |
| 0.004084 | 0.92987 | -0.04457 | 0.33648  | 0.017491 | 0.70618 | -0.06924 | 0.13518  | -0.12965 |
| -0.00813 | 0.8609  | 0.167837 | 0.00027  | 0.075123 | 0.10494 | 0.168737 | 0.00025  | 0.384627 |
| 0.05779  | 0.21257 | 0.105924 | 0.02206  | 0.061049 | 0.18785 | 0.104261 | 0.02425  | 0.233766 |
| 0.064004 | 0.16733 | 0.013479 | 0.77142  | 0.024633 | 0.59543 | 0.003061 | 0.9474   | 0.143713 |

|          |          |          |          |          |         |          |          |          |
|----------|----------|----------|----------|----------|---------|----------|----------|----------|
| -0.11218 | 0.01529  | -0.00774 | 0.86753  | -0.07896 | 0.08831 | 0.03438  | 0.45858  | 0.116819 |
| 0.037715 | 0.41614  | 0.195612 | 2.07E-05 | 0.077386 | 0.09485 | 0.223927 | 1.02E-06 | 0.40853  |
| -0.00396 | 0.93204  | 0.060219 | 0.19393  | -0.00027 | 0.99539 | 0.101717 | 0.02795  | 0.18426  |
| 0.060234 | 0.19382  | 0.120978 | 0.00887  | 0.088519 | 0.05594 | 0.099345 | 0.03184  | 0.288907 |
| 0.04169  | 0.36871  | -0.06311 | 0.17335  | 0.006344 | 0.89124 | -0.09819 | 0.03389  | -0.16888 |
| 0.016928 | 0.71521  | 0.076822 | 0.09729  | 0.054921 | 0.23619 | 0.071952 | 0.12048  | 0.194396 |
| 0.028654 | 0.53678  | 0.188344 | 4.20E-05 | 0.071822 | 0.12116 | 0.224676 | 9.34E-07 | 0.413993 |
| -0.03594 | 0.43849  | 0.114929 | 0.01295  | 0.042279 | 0.36197 | 0.14087  | 0.00228  | 0.257022 |
| 0.074093 | 0.1098   | 0.227067 | 7.10E-07 | 0.120247 | 0.00929 | 0.251361 | 3.67E-08 | 0.339989 |
| -0.00929 | 0.84134  | -0.10083 | 0.02936  | -0.01479 | 0.74993 | -0.1479  | 0.00135  | -0.2778  |
| -0.12977 | 0.00497  | -0.14153 | 0.00217  | -0.09082 | 0.04984 | -0.13791 | 0.00282  | -0.25987 |
| 0.035106 | 0.44914  | 0.123492 | 0.00755  | 0.056261 | 0.22493 | 0.149312 | 0.00121  | 0.158137 |
| -0.04254 | 0.35905  | -0.02204 | 0.63473  | -0.04471 | 0.33503 | 0.008819 | 0.84925  | 0.000284 |
| 0.013719 | 0.76747  | 0.123128 | 0.00773  | 0.058261 | 0.20886 | 0.125806 | 0.00648  | 0.268128 |
| -0.02855 | 0.53828  | 0.051339 | 0.26821  | 0.009234 | 0.84225 | 0.058849 | 0.20429  | 0.191682 |
| 0.004197 | 0.92793  | 0.03936  | 0.39609  | 0.027018 | 0.5603  | 0.0325   | 0.48353  | 0.179217 |
| 0.006417 | 0.89001  | 0.25529  | 2.21E-08 | 0.101369 | 0.0285  | 0.281136 | 6.24E-10 | 0.597326 |
| 0.019029 | 0.6817   | 0.171495 | 0.0002   | 0.06588  | 0.1552  | 0.193057 | 2.66E-05 | 0.422511 |
| 0.020027 | 0.66598  | 0.094316 | 0.04162  | 0.03299  | 0.47696 | 0.119567 | 0.0097   | 0.201252 |
| 0.021872 | 0.63733  | 0.032988 | 0.47698  | 0.001667 | 0.97135 | 0.042058 | 0.36449  | 0.112896 |
| -0.0759  | 0.10138  | 0.11473  | 0.01311  | 0.035957 | 0.43822 | 0.124254 | 0.00718  | 0.348494 |
| 0.145041 | 0.00167  | 0.149306 | 0.00121  | 0.132898 | 0.00401 | 0.116529 | 0.01173  | 0.284396 |
| -0.02758 | 0.55209  | 0.156317 | 0.0007   | 0.074269 | 0.10896 | 0.160213 | 0.00051  | 0.321725 |
| 0.021575 | 0.64191  | 0.092852 | 0.04491  | 0.028729 | 0.53572 | 0.098957 | 0.03252  | 0.228248 |
| 0.103411 | 0.02543  | 0.154277 | 0.00082  | 0.06503  | 0.16061 | 0.19957  | 1.39E-05 | 0.276656 |
| -0.0038  | 0.93478  | 0.029773 | 0.52099  | 0.021416 | 0.64436 | 0.025709 | 0.57946  | 0.260624 |
| -0.05844 | 0.20746  | 0.15261  | 0.00094  | 0.030242 | 0.51444 | 0.186645 | 4.94E-05 | 0.321072 |
| 0.051256 | 0.26898  | 0.178832 | 0.0001   | 0.114193 | 0.01354 | 0.165803 | 0.00032  | 0.310186 |
| 0.017063 | 0.71304  | -0.06264 | 0.17655  | -0.04501 | 0.33179 | -0.05994 | 0.19603  | -0.02339 |
| -0.00415 | 0.9288   | 0.136695 | 0.00308  | 0.045077 | 0.33105 | 0.148608 | 0.00128  | 0.255153 |
| 0.032576 | 0.48251  | 0.143228 | 0.00192  | 0.062212 | 0.17956 | 0.153675 | 0.00086  | 0.360392 |
| 0.08503  | 0.06637  | 0.187336 | 4.63E-05 | 0.137927 | 0.00282 | 0.170322 | 0.00022  | 0.286348 |
| -0.14333 | 0.0019   | -0.03252 | 0.48327  | -0.08335 | 0.07192 | 0.006129 | 0.89491  | 0.115287 |
| 0.023945 | 0.60576  | 0.083375 | 0.07185  | 0.055971 | 0.22734 | 0.080362 | 0.08278  | 0.174625 |
| -0.04436 | 0.33881  | 0.073103 | 0.11465  | 0.010635 | 0.8187  | 0.092649 | 0.04538  | 0.278842 |
| 0.009639 | 0.83543  | 0.0618   | 0.18246  | 0.042486 | 0.35963 | 0.06414  | 0.16642  | 0.129094 |
| 0.09946  | 0.03164  | 0.07215  | 0.11946  | 0.037438 | 0.41958 | 0.079142 | 0.08757  | 0.180375 |
| -0.03239 | 0.48502  | 0.055776 | 0.22896  | 0.033347 | 0.4722  | 0.063384 | 0.17149  | 0.146503 |
| -0.00053 | 0.99083  | 0.050193 | 0.27905  | 0.029901 | 0.5192  | 0.046104 | 0.32013  | 0.123541 |
| 0.005758 | 0.90125  | 0.129371 | 0.00511  | 0.051991 | 0.26217 | 0.141939 | 0.00211  | 0.209518 |
| 0.093673 | 0.04304  | 0.222405 | 1.21E-06 | 0.14011  | 0.00241 | 0.207475 | 6.16E-06 | 0.390427 |
| -0.02046 | 0.65922  | -0.07125 | 0.12413  | -0.06277 | 0.17566 | -0.06242 | 0.17813  | -0.10222 |
| 0.219686 | 1.64E-06 | 0.228347 | 6.12E-07 | 0.176794 | 0.00012 | 0.200606 | 1.25E-05 | 0.286588 |
| -0.05086 | 0.27275  | -0.05593 | 0.2277   | -0.06201 | 0.181   | -0.03467 | 0.45483  | 0.008356 |
| -0.07002 | 0.13082  | -0.03009 | 0.51658  | -0.01035 | 0.82348 | -0.05125 | 0.26905  | -0.04008 |



|          |         |          |         |          |         |          |          |          |
|----------|---------|----------|---------|----------|---------|----------|----------|----------|
| -0.02523 | 0.58651 | -0.00343 | 0.94112 | -0.00109 | 0.98131 | -0.02072 | 0.6552   | 0.051172 |
| 0.004572 | 0.92151 | 0.023149 | 0.6178  | 0.025922 | 0.57632 | -0.00177 | 0.96956  | 0.003158 |
| 0.02179  | 0.63858 | 0.000262 | 0.99549 | 0.019475 | 0.67465 | -0.02665 | 0.56562  | -0.12613 |
| 0.0226   | 0.62616 | -0.13637 | 0.00315 | -0.08073 | 0.08139 | -0.12216 | 0.00823  | -0.31897 |
| -0.07668 | 0.09791 | -0.17393 | 0.00016 | -0.10726 | 0.02043 | -0.1866  | 4.96E-05 | -0.28271 |
| -0.02349 | 0.61265 | -0.0361  | 0.43635 | -0.01937 | 0.67635 | -0.0438  | 0.34497  | -0.11098 |
| -0.00571 | 0.90204 | -0.01848 | 0.69041 | -0.0043  | 0.92611 | -0.02954 | 0.52429  | -0.06287 |
| -0.04475 | 0.33452 | -0.0559  | 0.22793 | -0.02466 | 0.59497 | -0.07734 | 0.09503  | -0.12234 |
| 0.010847 | 0.81516 | -0.00748 | 0.87186 | 0.008537 | 0.85401 | -0.03892 | 0.4014   | -0.05241 |
| -0.07545 | 0.10344 | -0.05215 | 0.26071 | -0.05853 | 0.20679 | -0.04407 | 0.34196  | -0.06084 |
| 0.044756 | 0.33451 | 0.037516 | 0.41861 | 0.032996 | 0.47688 | 0.035601 | 0.44277  | 0.044632 |
| -0.02953 | 0.52438 | -0.03417 | 0.46131 | -0.01931 | 0.67723 | -0.05251 | 0.25742  | -0.07287 |
| -0.01548 | 0.73857 | -0.0259  | 0.57663 | -0.02321 | 0.61693 | -0.01493 | 0.74759  | -0.00571 |
| 0.034224 | 0.46063 | 0.046485 | 0.31615 | 0.050289 | 0.27813 | 0.01661  | 0.72034  | -0.01634 |
| -0.06781 | 0.14345 | -0.05084 | 0.27285 | -0.04879 | 0.29272 | -0.05163 | 0.26547  | -0.07662 |
| 0.020417 | 0.65989 | 0.042095 | 0.36406 | 0.016472 | 0.72256 | 0.04991  | 0.28178  | 0.077954 |
| 0.005199 | 0.91079 | -0.00561 | 0.90377 | 0.02003  | 0.66593 | -0.02255 | 0.6269   | -0.06519 |
| 0.070111 | 0.1303  | 0.088856 | 0.055   | 0.068982 | 0.13662 | 0.065933 | 0.15486  | 0.05489  |
| -0.03283 | 0.47914 | 0.019284 | 0.67766 | -0.0012  | 0.97933 | 0.016096 | 0.72865  | -0.03347 |
| -0.00402 | 0.93093 | -0.03321 | 0.47406 | -0.00121 | 0.97923 | -0.03182 | 0.49275  | -0.05135 |
| -0.02067 | 0.65591 | -0.03573 | 0.44114 | -0.02105 | 0.64998 | -0.04181 | 0.36734  | -0.06042 |
| 0.012968 | 0.77986 | -0.03325 | 0.4735  | -0.00828 | 0.85843 | -0.04898 | 0.29087  | -0.11962 |
| 0.088308 | 0.05652 | 0.055696 | 0.22963 | 0.065114 | 0.16007 | 0.052029 | 0.26182  | 0.098435 |
| -0.01841 | 0.69155 | 0.054809 | 0.23715 | 0.008395 | 0.85642 | 0.080292 | 0.08305  | 0.072711 |
| 0.002713 | 0.95338 | -0.04979 | 0.28293 | -0.00109 | 0.98124 | -0.06497 | 0.161    | -0.09734 |
| 0.012865 | 0.78156 | -0.06203 | 0.18086 | -0.0103  | 0.82438 | -0.08007 | 0.08391  | -0.12844 |
| -0.14064 | 0.00232 | -0.14333 | 0.0019  | -0.13803 | 0.0028  | -0.11409 | 0.01363  | -0.17869 |
| -0.04838 | 0.29683 | -0.09755 | 0.03508 | -0.08002 | 0.08411 | -0.08261 | 0.07452  | -0.22606 |
| -0.1061  | 0.02184 | -0.13168 | 0.00437 | -0.09251 | 0.04572 | -0.14098 | 0.00226  | -0.22128 |
| -0.11557 | 0.01245 | -0.08883 | 0.05508 | -0.09319 | 0.04412 | -0.07614 | 0.10031  | -0.1609  |
| 0.00776  | 0.86718 | 0.036874 | 0.42662 | 0.032961 | 0.47734 | 0.033509 | 0.47005  | -0.01526 |
| 0.021764 | 0.63899 | 0.039927 | 0.38931 | 0.002739 | 0.95292 | 0.048974 | 0.29091  | 0.000949 |
| -0.00792 | 0.86454 | -0.05867 | 0.20566 | -0.0033  | 0.94338 | -0.09791 | 0.03441  | -0.09315 |
| -0.04057 | 0.38177 | -0.01912 | 0.68022 | -0.03143 | 0.4981  | -0.00518 | 0.91111  | -0.04189 |
| -0.00671 | 0.885   | -0.00784 | 0.86588 | 0.002299 | 0.96049 | -0.0227  | 0.62461  | -0.01823 |
| 0.039829 | 0.39048 | 0.083866 | 0.07019 | 0.07296  | 0.11536 | 0.061771 | 0.18267  | 0.147554 |
| -0.03674 | 0.4283  | -0.00784 | 0.86587 | -0.0083  | 0.85809 | -0.02007 | 0.66523  | -0.0345  |
| 0.100477 | 0.02993 | 0.060732 | 0.19016 | 0.048618 | 0.29443 | 0.055772 | 0.22899  | 0.052443 |
| -0.07038 | 0.12881 | -0.089   | 0.05462 | -0.06421 | 0.16593 | -0.08211 | 0.0763   | -0.25179 |
| -0.05476 | 0.23755 | -0.10663 | 0.02119 | -0.10634 | 0.02154 | -0.07374 | 0.11149  | -0.16315 |
| -0.00398 | 0.93169 | 0.046113 | 0.32004 | 0.017041 | 0.7134  | 0.044616 | 0.33602  | -0.00151 |
| -0.03928 | 0.39706 | 0.03469  | 0.45454 | 0.001607 | 0.97237 | 0.030094 | 0.51651  | 0.070009 |
| 0.019386 | 0.67605 | -0.01234 | 0.79023 | 0.018317 | 0.69299 | -0.04095 | 0.37731  | -0.1075  |
| -0.02443 | 0.59851 | -0.04271 | 0.35706 | 0.001377 | 0.97633 | -0.08957 | 0.05308  | -0.06913 |
| 0.000309 | 0.99468 | 0.04452  | 0.33706 | 0.009726 | 0.83396 | 0.045982 | 0.32142  | 0.029089 |

|          |         |          |         |          |         |          |         |          |
|----------|---------|----------|---------|----------|---------|----------|---------|----------|
| -0.07307 | 0.1148  | -0.09484 | 0.0405  | -0.06575 | 0.15602 | -0.11111 | 0.0163  | -0.16512 |
| 0.112649 | 0.01487 | 0.014864 | 0.74868 | 0.040799 | 0.37904 | 0.003949 | 0.93217 | -0.02212 |
| -0.04244 | 0.36009 | -0.02069 | 0.65557 | -0.01641 | 0.72359 | -0.03646 | 0.43178 | -0.02322 |
| -0.03543 | 0.44494 | -0.0473  | 0.30776 | -0.02453 | 0.597   | -0.06268 | 0.1763  | -0.11567 |
| -0.07914 | 0.08758 | -0.02297 | 0.62051 | -0.0228  | 0.62308 | -0.03197 | 0.49063 | -0.09367 |
| -0.05506 | 0.23501 | -0.02571 | 0.57944 | -0.01772 | 0.70258 | -0.0384  | 0.40776 | -0.03694 |
| -0.04087 | 0.37823 | 0.021273 | 0.64657 | 0.005608 | 0.9038  | 0.006552 | 0.8877  | 0.044872 |
| 0.038141 | 0.41089 | 0.101725 | 0.02794 | 0.081744 | 0.07761 | 0.077777 | 0.09319 | 0.101738 |
| 0.019255 | 0.67812 | -0.01421 | 0.75939 | -0.00339 | 0.94179 | -0.02558 | 0.58139 | 0.009023 |
| 0.021377 | 0.64496 | 0.028478 | 0.53929 | 0.039882 | 0.38985 | -0.01096 | 0.81329 | -0.06907 |
| 0.042976 | 0.3541  | -0.0284  | 0.54041 | -0.00519 | 0.91097 | -0.02986 | 0.51971 | -0.02399 |
| 0.006192 | 0.89383 | -0.01164 | 0.80193 | -0.00033 | 0.99435 | -0.02751 | 0.55324 | -0.06025 |
| 0.03295  | 0.47749 | 0.052151 | 0.2607  | 0.053778 | 0.2461  | 0.009116 | 0.84423 | 0.010801 |
| -0.01869 | 0.68701 | 0.00601  | 0.89693 | -0.00916 | 0.84347 | 0.010229 | 0.8255  | 0.042833 |
| 0.111719 | 0.01572 | 0.024442 | 0.5983  | 0.089129 | 0.05426 | -0.02687 | 0.5625  | -0.05345 |
| -0.08953 | 0.05318 | -0.06451 | 0.16396 | -0.07653 | 0.09857 | -0.04475 | 0.33461 | -0.14478 |
| -0.02351 | 0.61239 | 0.007703 | 0.86815 | 0.01128  | 0.80792 | -0.01026 | 0.82502 | -0.01938 |
| 0.008962 | 0.84684 | -0.09238 | 0.04602 | -0.03129 | 0.50002 | -0.12013 | 0.00937 | -0.17339 |
| 0.140016 | 0.00242 | 0.104357 | 0.02411 | 0.118281 | 0.01052 | 0.076124 | 0.10038 | 0.134065 |
| 0.0128   | 0.78264 | 0.046341 | 0.31765 | 0.032005 | 0.49022 | 0.051317 | 0.26841 | 0.215593 |
| -0.0159  | 0.73176 | -0.01469 | 0.75146 | 0.000179 | 0.99692 | -0.00378 | 0.9351  | 0.021836 |
| 0.150541 | 0.0011  | 0.076555 | 0.09846 | 0.120055 | 0.00941 | 0.035854 | 0.43954 | 0.031913 |
| -0.01043 | 0.82213 | 0.013828 | 0.76567 | 0.019221 | 0.67865 | 0.000952 | 0.98364 | 0.092319 |
| -0.04979 | 0.28292 | -0.05482 | 0.23704 | -0.01578 | 0.73375 | -0.08482 | 0.06705 | -0.08958 |
| -0.04474 | 0.3347  | -0.04098 | 0.37693 | -0.02402 | 0.60456 | -0.04549 | 0.32664 | -0.0704  |
| -0.01212 | 0.79389 | 0.010992 | 0.81273 | 0.001621 | 0.97213 | 0.017671 | 0.70329 | 0.08768  |
| -0.0234  | 0.61405 | -0.07014 | 0.13013 | -0.05112 | 0.27025 | -0.07333 | 0.1135  | -0.03728 |
| 0.046599 | 0.31497 | -0.03409 | 0.46236 | 0.029277 | 0.52796 | -0.07943 | 0.08641 | -0.10774 |
| -0.03515 | 0.44854 | -0.03604 | 0.43718 | -0.01468 | 0.7517  | -0.05955 | 0.19892 | -0.08974 |
| 0.129183 | 0.00518 | 0.089551 | 0.05312 | 0.085154 | 0.06597 | 0.083261 | 0.07224 | 0.13267  |
| 0.121201 | 0.00875 | 0.018847 | 0.68457 | 0.060259 | 0.19364 | -0.01156 | 0.80323 | 0.104627 |
| -0.00419 | 0.92809 | -0.05269 | 0.2558  | -0.01564 | 0.73604 | -0.06484 | 0.16183 | -0.1074  |
| 0.052164 | 0.26058 | 0.018648 | 0.68773 | 0.051072 | 0.27071 | -0.00869 | 0.8514  | 0.022928 |
| 0.03592  | 0.43869 | 0.020158 | 0.66392 | 0.014875 | 0.74851 | 0.026612 | 0.56621 | 0.003965 |
| -0.11434 | 0.01342 | -0.09313 | 0.04428 | -0.08869 | 0.05546 | -0.09362 | 0.04317 | -0.15082 |
| -0.0564  | 0.22377 | 0.039996 | 0.38849 | -0.00679 | 0.88364 | 0.039214 | 0.39784 | 0.059767 |
| 0.023331 | 0.61503 | -0.01036 | 0.82326 | 0.01288  | 0.78132 | -0.03256 | 0.48274 | 0.030871 |
| -0.00241 | 0.95858 | -0.03301 | 0.47671 | 0.000662 | 0.98862 | -0.06575 | 0.15604 | -0.08508 |
| 0.000175 | 0.997   | -0.00568 | 0.90265 | 0.020663 | 0.65604 | -0.0288  | 0.53467 | 0.005529 |
| -0.04206 | 0.36449 | -0.04079 | 0.37918 | -0.04875 | 0.29315 | -0.02447 | 0.59788 | -0.05308 |
| 0.010613 | 0.81907 | -0.06589 | 0.15516 | -0.05947 | 0.19957 | -0.04474 | 0.33473 | -0.08383 |
| -0.04653 | 0.3157  | 0.009955 | 0.83011 | -0.02087 | 0.65281 | 0.027593 | 0.55198 | 0.00325  |
| -0.04612 | 0.31997 | -0.03356 | 0.46932 | -0.02295 | 0.62078 | -0.05215 | 0.26071 | -0.04091 |
| -0.03934 | 0.39638 | 0.020042 | 0.66575 | -0.00076 | 0.98688 | 0.015186 | 0.74343 | 0.063712 |
| 0.017769 | 0.70173 | 0.032211 | 0.48744 | 0.024959 | 0.59057 | 0.024211 | 0.60175 | -0.04675 |

|          |         |          |         |          |         |          |         |          |
|----------|---------|----------|---------|----------|---------|----------|---------|----------|
| -0.01878 | 0.68556 | 0.029314 | 0.52743 | 0.002465 | 0.95764 | 0.035215 | 0.44773 | -0.00795 |
| 0.050091 | 0.28003 | 0.002882 | 0.95047 | 0.037441 | 0.41954 | -0.02883 | 0.53428 | -0.12806 |
| -0.02211 | 0.63368 | 0.022762 | 0.62369 | -0.0043  | 0.92615 | 0.031084 | 0.5028  | 0.170227 |
| 0.053873 | 0.24527 | 0.044835 | 0.33365 | 0.00437  | 0.92496 | 0.067331 | 0.14628 | -0.05256 |
| -0.02256 | 0.62676 | -0.0645  | 0.16403 | -0.03165 | 0.49508 | -0.07685 | 0.09717 | -0.17787 |
| -0.0925  | 0.04572 | -0.06604 | 0.15419 | -0.078   | 0.09226 | -0.04343 | 0.34901 | -0.10923 |
| 0.015207 | 0.7431  | 0.023998 | 0.60496 | 0.016995 | 0.71414 | 0.006224 | 0.89329 | -0.0209  |
| 0.11811  | 0.01063 | 0.056312 | 0.22451 | 0.056636 | 0.22185 | 0.058614 | 0.2061  | 0.093504 |
| -0.02405 | 0.60416 | -0.01307 | 0.77816 | 0.002647 | 0.9545  | -0.01428 | 0.7583  | -0.06348 |
| -0.00396 | 0.93204 | -0.08498 | 0.06652 | -0.04122 | 0.37411 | -0.09393 | 0.04247 | -0.19542 |
| 0.007103 | 0.87832 | -0.07665 | 0.09803 | -0.01923 | 0.67847 | -0.10478 | 0.02354 | -0.21474 |
| -0.09291 | 0.04476 | -0.08305 | 0.07298 | -0.06691 | 0.14883 | -0.09099 | 0.04941 | -0.05697 |
| 0.060064 | 0.19508 | 0.001057 | 0.98183 | 0.080249 | 0.08321 | -0.07738 | 0.09486 | -0.0985  |
| -0.00145 | 0.97515 | -0.0364  | 0.43253 | 0.018026 | 0.69762 | -0.08648 | 0.06185 | -0.09648 |
| -0.08915 | 0.05419 | -0.05098 | 0.27156 | -0.06222 | 0.17948 | -0.02686 | 0.5626  | 0.029833 |
| -0.01812 | 0.69607 | -0.02085 | 0.65306 | 0.019951 | 0.66717 | -0.06375 | 0.16904 | -0.07729 |
| -0.00229 | 0.96055 | -0.02681 | 0.56338 | -0.01145 | 0.80509 | -0.02933 | 0.52725 | -0.06461 |
| 0.101758 | 0.02789 | 0.049059 | 0.29007 | 0.047445 | 0.30625 | 0.045961 | 0.32164 | 0.074669 |
| 0.083321 | 0.07204 | 0.054017 | 0.244   | 0.036145 | 0.43583 | 0.058442 | 0.20744 | 0.123899 |
| -0.03869 | 0.40424 | -0.04878 | 0.29283 | -0.0214  | 0.64462 | -0.0652  | 0.1595  | -0.14274 |
| 0.10619  | 0.02173 | 0.047174 | 0.30903 | 0.07959  | 0.08578 | 0.001271 | 0.97815 | -0.02086 |
| -0.05263 | 0.25633 | -0.05372 | 0.24665 | -0.05774 | 0.213   | -0.02752 | 0.55298 | -0.09256 |
| -0.02776 | 0.54961 | -0.00554 | 0.9049  | -0.01921 | 0.67889 | -0.01034 | 0.82357 | -0.06479 |
| -0.12424 | 0.00719 | -0.07541 | 0.10362 | -0.08406 | 0.06953 | -0.06415 | 0.16634 | -0.06775 |
| 0.021662 | 0.64055 | 0.105075 | 0.02315 | 0.079182 | 0.08741 | 0.080322 | 0.08293 | 0.136524 |
| -0.00672 | 0.88481 | 0.030124 | 0.51609 | -0.01289 | 0.78119 | 0.048703 | 0.29359 | 4.43E-05 |
| -0.02467 | 0.59489 | 0.023073 | 0.61894 | 0.002742 | 0.95288 | 0.023262 | 0.61608 | 0.091639 |
| -0.01978 | 0.66992 | -0.04817 | 0.29892 | -0.01688 | 0.71606 | -0.06689 | 0.14893 | -0.15043 |
| -0.04824 | 0.29825 | -0.0018  | 0.96901 | -0.02125 | 0.64694 | -0.00036 | 0.99376 | 0.032971 |
| 0.048168 | 0.29893 | 0.037893 | 0.41394 | 0.065601 | 0.15696 | 0.004608 | 0.9209  | -0.03735 |
| 0.033039 | 0.4763  | -0.0058  | 0.90051 | 0.018705 | 0.68682 | -0.02135 | 0.64545 | -0.10303 |
| -0.08001 | 0.08413 | -0.01016 | 0.82664 | -0.02091 | 0.65227 | -0.00916 | 0.84352 | -0.00246 |
| 0.067801 | 0.14348 | 0.042357 | 0.36109 | 0.037431 | 0.41967 | 0.033854 | 0.46549 | 0.082715 |
| -0.01709 | 0.7126  | -0.01072 | 0.8172  | 0.007635 | 0.86929 | -0.02561 | 0.58095 | -0.07324 |
| 0.001739 | 0.9701  | -0.00624 | 0.89297 | 0.012296 | 0.79099 | -0.00677 | 0.88408 | -0.01235 |
| 0.007336 | 0.87438 | -0.05212 | 0.26099 | -0.0121  | 0.79433 | -0.06777 | 0.14366 | -0.08928 |
| 0.016411 | 0.72354 | -0.06109 | 0.18752 | 0.010779 | 0.8163  | -0.11097 | 0.01644 | -0.14622 |
| -0.09615 | 0.03779 | -0.11967 | 0.00964 | -0.10365 | 0.02509 | -0.10951 | 0.01792 | -0.18338 |
| 0.001626 | 0.97205 | 0.015379 | 0.74029 | 0.006531 | 0.88807 | 0.023663 | 0.61001 | 0.001245 |
| -0.00404 | 0.93063 | -0.01458 | 0.75341 | -0.00548 | 0.90593 | -0.03269 | 0.48095 | -0.00855 |
| 0.079358 | 0.0867  | 0.053091 | 0.25219 | 0.064628 | 0.16321 | 0.050825 | 0.27303 | 0.042791 |
| -0.08827 | 0.05664 | -0.04818 | 0.29884 | -0.02271 | 0.62452 | -0.08736 | 0.05923 | -0.1105  |
| 0.036954 | 0.42562 | 0.022981 | 0.62034 | 0.049524 | 0.28552 | -0.01476 | 0.75036 | -0.02192 |
| -0.02254 | 0.62704 | -0.05773 | 0.21302 | -0.02527 | 0.586   | -0.06829 | 0.14059 | -0.09478 |
| -0.01677 | 0.71779 | 0.007072 | 0.87886 | -0.00406 | 0.93032 | -0.00491 | 0.91572 | 0.063118 |

|          |          |          |          |          |          |          |          |          |
|----------|----------|----------|----------|----------|----------|----------|----------|----------|
| 0.041943 | 0.3658   | -0.15383 | 0.00085  | -0.00569 | 0.90236  | -0.20332 | 9.50E-06 | -0.31809 |
| 0.103631 | 0.02512  | 0.286789 | 2.72E-10 | 0.132974 | 0.00399  | 0.320248 | 1.34E-12 | 0.535949 |
| 0.107991 | 0.01958  | 0.232853 | 3.61E-07 | 0.117892 | 0.01078  | 0.237282 | 2.12E-07 | 0.433718 |
| 0.161568 | 0.00046  | 0.183923 | 6.38E-05 | 0.146994 | 0.00145  | 0.142889 | 0.00197  | 0.317918 |
| 0.070975 | 0.12562  | 0.193771 | 2.48E-05 | 0.077149 | 0.09587  | 0.256127 | 1.98E-08 | 0.339374 |
| 0.160303 | 0.00051  | 0.316559 | 2.50E-12 | 0.185075 | 5.73E-05 | 0.326619 | 4.53E-13 | 0.644301 |
| 0.283222 | 4.60E-10 | 0.296925 | 5.84E-11 | 0.291171 | 1.41E-10 | 0.201076 | 1.20E-05 | 0.35059  |
| 0.057955 | 0.21126  | 0.174087 | 0.00016  | 0.062688 | 0.17625  | 0.205126 | 7.88E-06 | 0.354614 |
| 0.064455 | 0.16435  | 0.158927 | 0.00057  | 0.076064 | 0.10065  | 0.167982 | 0.00027  | 0.451866 |
| 0.128152 | 0.00555  | 0.335533 | 9.44E-14 | 0.179826 | 9.32E-05 | 0.354793 | 2.67E-15 | 0.686555 |
| -0.04085 | 0.37846  | -0.11274 | 0.01478  | -0.02997 | 0.51819  | -0.15635 | 0.0007   | -0.2394  |
| -0.01449 | 0.75483  | 0.075854 | 0.10159  | 0.016951 | 0.71484  | 0.089295 | 0.05381  | 0.307955 |
| -0.07108 | 0.12504  | -0.23124 | 4.36E-07 | -0.13717 | 0.00298  | -0.22016 | 1.55E-06 | -0.43421 |
| 0.018332 | 0.69275  | 0.113553 | 0.01408  | 0.058286 | 0.20866  | 0.112983 | 0.01457  | 0.322946 |
| -0.09481 | 0.04055  | -0.32148 | 1.09E-12 | -0.18777 | 4.44E-05 | -0.33029 | 2.39E-13 | -0.55919 |
| 0.02417  | 0.60237  | 0.17949  | 9.61E-05 | 0.042078 | 0.36426  | 0.223482 | 1.07E-06 | 0.411477 |
| -0.01824 | 0.69428  | 0.083197 | 0.07246  | 0.024219 | 0.60164  | 0.09684  | 0.03643  | 0.294309 |
| -0.06192 | 0.18159  | -0.13714 | 0.00298  | -0.04583 | 0.32305  | -0.1725  | 0.00018  | -0.32994 |
| 0.108053 | 0.01951  | 0.08163  | 0.07803  | 0.058404 | 0.20774  | 0.082852 | 0.07366  | 0.277054 |
| -0.02393 | 0.60605  | 0.172687 | 0.00018  | 0.03277  | 0.4799   | 0.220023 | 1.58E-06 | 0.445576 |
| -0.03945 | 0.39505  | -0.23905 | 1.71E-07 | -0.08812 | 0.05705  | -0.27608 | 1.29E-09 | -0.50664 |
| -0.09923 | 0.03203  | -0.29066 | 1.52E-10 | -0.14642 | 0.00151  | -0.31196 | 5.34E-12 | -0.56318 |
| 0.102138 | 0.02731  | 0.160138 | 0.00051  | 0.064983 | 0.16091  | 0.190764 | 3.33E-05 | 0.317529 |
| -0.05118 | 0.26967  | -0.1729  | 0.00017  | -0.10866 | 0.01884  | -0.1615  | 0.00046  | -0.34788 |
| 0.031187 | 0.50138  | 0.178329 | 0.00011  | 0.063766 | 0.16891  | 0.207293 | 6.28E-06 | 0.390505 |
| 0.006411 | 0.8901   | -0.05903 | 0.20287  | 0.004642 | 0.92031  | -0.09344 | 0.04356  | -0.20443 |
| -0.10354 | 0.02525  | -0.26549 | 5.65E-09 | -0.12642 | 0.00622  | -0.28873 | 2.03E-10 | -0.48163 |
| 0.040847 | 0.37847  | 0.22456  | 9.46E-07 | 0.083932 | 0.06997  | 0.255943 | 2.03E-08 | 0.541396 |
| 0.057621 | 0.21391  | 0.302167 | 2.58E-11 | 0.118283 | 0.01052  | 0.344816 | 1.75E-14 | 0.556349 |
| 0.014827 | 0.74929  | 0.147717 | 0.00137  | 0.042284 | 0.36192  | 0.166649 | 0.0003   | 0.400549 |
| 0.051821 | 0.26373  | 0.211172 | 4.16E-06 | 0.092886 | 0.04483  | 0.230278 | 4.88E-07 | 0.518276 |
| 0.016039 | 0.72957  | -0.1823  | 7.43E-05 | -0.03245 | 0.48417  | -0.2378  | 2.00E-07 | -0.43315 |
| 0.012191 | 0.79273  | -0.12271 | 0.00794  | 0.007238 | 0.87604  | -0.19936 | 1.42E-05 | -0.32837 |
| 0.040487 | 0.38269  | -0.12538 | 0.00667  | 0.017467 | 0.70655  | -0.19338 | 2.58E-05 | -0.38603 |
| 0.094974 | 0.04021  | 0.359017 | 1.18E-15 | 0.138075 | 0.00279  | 0.455301 | 2.81E-25 | 0.447972 |
| 0.215006 | 2.75E-06 | 0.345743 | 1.47E-14 | 0.241895 | 1.21E-07 | 0.326682 | 4.48E-13 | 0.519292 |
| 0.125644 | 0.00655  | 0.354702 | 2.72E-15 | 0.191128 | 3.22E-05 | 0.376879 | 3.29E-17 | 0.662253 |
| -0.02474 | 0.59387  | -0.11238 | 0.01511  | -0.02729 | 0.55639  | -0.14645 | 0.00151  | -0.29335 |
| 0.050161 | 0.27936  | 0.179066 | 9.99E-05 | 0.082585 | 0.07459  | 0.194774 | 2.25E-05 | 0.406917 |
| -0.1957  | 2.05E-05 | -0.25315 | 2.91E-08 | -0.18376 | 6.48E-05 | -0.23274 | 3.66E-07 | -0.37764 |
| 0.047956 | 0.30107  | 0.092193 | 0.04646  | 0.06414  | 0.16642  | 0.073974 | 0.11038  | 0.210377 |
| -0.11904 | 0.01003  | -0.27213 | 2.26E-09 | -0.1515  | 0.00102  | -0.29304 | 1.06E-10 | -0.51718 |
| 0.020832 | 0.65342  | -0.06528 | 0.15902  | 0.041732 | 0.36822  | -0.11618 | 0.01199  | -0.1603  |
| 0.033036 | 0.47634  | 0.160348 | 0.0005   | 0.071618 | 0.12222  | 0.195678 | 2.06E-05 | 0.336511 |
| 0.138041 | 0.0028   | 0.196673 | 1.86E-05 | 0.134054 | 0.0037   | 0.191111 | 3.22E-05 | 0.33772  |

|          |          |          |          |          |          |          |          |          |
|----------|----------|----------|----------|----------|----------|----------|----------|----------|
| 0.028163 | 0.54378  | 0.180111 | 9.08E-05 | 0.086505 | 0.06178  | 0.192956 | 2.69E-05 | 0.437464 |
| 0.024297 | 0.60047  | -0.1492  | 0.00122  | -0.0298  | 0.52064  | -0.19667 | 1.86E-05 | -0.31594 |
| -0.00106 | 0.98177  | 0.193387 | 2.58E-05 | 0.047196 | 0.3088   | 0.271178 | 2.58E-09 | 0.340669 |
| 0.06693  | 0.1487   | 0.158342 | 0.00059  | 0.071727 | 0.12165  | 0.181904 | 7.70E-05 | 0.371673 |
| -0.05131 | 0.26848  | -0.21366 | 3.18E-06 | -0.06409 | 0.16676  | -0.28312 | 4.67E-10 | -0.44181 |
| 0.046487 | 0.31613  | 0.177115 | 0.00012  | 0.093854 | 0.04264  | 0.191075 | 3.23E-05 | 0.376945 |
| -0.03137 | 0.49883  | -0.23407 | 3.12E-07 | -0.12215 | 0.00823  | -0.24042 | 1.45E-07 | -0.46959 |
| 0.019446 | 0.67512  | 0.234458 | 2.98E-07 | 0.071868 | 0.12092  | 0.288041 | 2.26E-10 | 0.512726 |
| 0.033286 | 0.47301  | 0.143396 | 0.00189  | 0.117536 | 0.01102  | 0.107363 | 0.02031  | 0.238024 |
| -0.0073  | 0.87491  | 0.117052 | 0.01136  | 0.014525 | 0.75424  | 0.159757 | 0.00053  | 0.310339 |
| 0.065194 | 0.15956  | -0.1208  | 0.00898  | 0.029433 | 0.52577  | -0.19212 | 2.92E-05 | -0.29593 |
| -0.14225 | 0.00206  | -0.26667 | 4.81E-09 | -0.1302  | 0.00483  | -0.30075 | 3.22E-11 | -0.50591 |
| -0.05845 | 0.20737  | -0.13105 | 0.00456  | -0.05393 | 0.24475  | -0.15751 | 0.00064  | -0.27946 |
| -0.02532 | 0.58527  | -0.09314 | 0.04425  | 0.004264 | 0.92679  | -0.13904 | 0.0026   | -0.21785 |
| 0.101684 | 0.028    | 0.267797 | 4.12E-09 | 0.146253 | 0.00153  | 0.271439 | 2.49E-09 | 0.552465 |
| -0.0473  | 0.30769  | -0.18327 | 6.79E-05 | -0.05732 | 0.2163   | -0.21735 | 2.12E-06 | -0.44046 |
| 0.070732 | 0.12693  | 0.213575 | 3.21E-06 | 0.089263 | 0.0539   | 0.234472 | 2.97E-07 | 0.448715 |
| 0.045077 | 0.33105  | -0.17014 | 0.00022  | -0.01927 | 0.67793  | -0.22985 | 5.14E-07 | -0.45259 |
| -0.0577  | 0.21325  | -0.19899 | 1.48E-05 | -0.0787  | 0.08937  | -0.22248 | 1.20E-06 | -0.44645 |
| 0.004878 | 0.91627  | 0.115657 | 0.01238  | 0.0267   | 0.56492  | 0.144517 | 0.00174  | 0.352414 |
| 0.096648 | 0.03681  | 0.198664 | 1.53E-05 | 0.094306 | 0.04164  | 0.215416 | 2.63E-06 | 0.434453 |
| 0.095536 | 0.03904  | 0.265668 | 5.51E-09 | 0.144279 | 0.00177  | 0.29461  | 8.35E-11 | 0.369886 |
| -0.03166 | 0.49491  | -0.11405 | 0.01366  | -0.00876 | 0.85025  | -0.17589 | 0.00013  | -0.23015 |
| -0.2195  | 1.67E-06 | -0.29238 | 1.17E-10 | -0.2192  | 1.73E-06 | -0.28757 | 2.42E-10 | -0.43854 |
| 0.059085 | 0.20248  | 0.232583 | 3.72E-07 | 0.096493 | 0.03711  | 0.260029 | 1.18E-08 | 0.425031 |
| -0.02107 | 0.64966  | 0.088067 | 0.05721  | 0.035082 | 0.44945  | 0.087463 | 0.05894  | 0.370338 |
| 0.011161 | 0.8099   | 0.088386 | 0.05631  | 0.046024 | 0.32098  | 0.09392  | 0.04249  | 0.335849 |
| -0.0456  | 0.32542  | -0.16083 | 0.00048  | -0.02864 | 0.53697  | -0.21485 | 2.79E-06 | -0.34086 |
| -0.03122 | 0.50092  | -0.2397  | 1.58E-07 | -0.06297 | 0.17432  | -0.30484 | 1.69E-11 | -0.5295  |
| 0.039543 | 0.3939   | 0.189638 | 3.71E-05 | 0.079037 | 0.08799  | 0.213553 | 3.22E-06 | 0.404219 |
| 0.05186  | 0.26337  | 0.270166 | 2.97E-09 | 0.129072 | 0.00521  | 0.305875 | 1.43E-11 | 0.32975  |
| 0.144816 | 0.0017   | 0.326204 | 4.86E-13 | 0.190286 | 3.49E-05 | 0.347371 | 1.09E-14 | 0.547184 |
| -0.00538 | 0.90776  | 0.184249 | 6.19E-05 | 0.055315 | 0.23284  | 0.220253 | 1.54E-06 | 0.479187 |
| 0.057459 | 0.2152   | 0.151831 | 0.001    | 0.079257 | 0.08711  | 0.151124 | 0.00105  | 0.286446 |
| -0.01752 | 0.70574  | -0.17575 | 0.00013  | -0.05762 | 0.21394  | -0.21789 | 2.00E-06 | -0.36152 |
| 0.057004 | 0.21886  | 0.017724 | 0.70245  | 0.001873 | 0.9678   | 0.023798 | 0.60796  | 0.10247  |
| 0.083969 | 0.06984  | 0.282066 | 5.45E-10 | 0.120723 | 0.00902  | 0.318762 | 1.73E-12 | 0.642951 |
| 0.146394 | 0.00151  | 0.148511 | 0.00129  | 0.144296 | 0.00177  | 0.094312 | 0.04163  | 0.25269  |
| 0.20384  | 9.00E-06 | 0.298361 | 4.68E-11 | 0.195313 | 2.13E-05 | 0.277034 | 1.13E-09 | 0.555504 |
| -0.02804 | 0.54551  | -0.1123  | 0.01519  | -0.03348 | 0.4704   | -0.1374  | 0.00293  | -0.2746  |
| 0.084982 | 0.06653  | 0.256935 | 1.78E-08 | 0.127304 | 0.00587  | 0.296469 | 6.27E-11 | 0.344023 |
| 0.136245 | 0.00318  | 0.323896 | 7.23E-13 | 0.170468 | 0.00021  | 0.338029 | 6.03E-14 | 0.569687 |
| 0.039812 | 0.39069  | 0.177934 | 0.00011  | 0.067497 | 0.14529  | 0.204924 | 8.04E-06 | 0.418642 |
| 0.054656 | 0.23846  | -0.09564 | 0.03883  | -0.00633 | 0.89141  | -0.11674 | 0.01158  | -0.24991 |
| 0.054296 | 0.24157  | 0.119938 | 0.00948  | 0.056623 | 0.22196  | 0.120429 | 0.00919  | 0.316916 |

|          |          |          |          |          |          |          |          |          |
|----------|----------|----------|----------|----------|----------|----------|----------|----------|
| 0.074543 | 0.10766  | 0.185318 | 5.60E-05 | 0.07605  | 0.10071  | 0.186573 | 4.98E-05 | 0.453429 |
| 0.088196 | 0.05684  | 0.155319 | 0.00076  | 0.094577 | 0.04106  | 0.152397 | 0.00095  | 0.389549 |
| -0.00864 | 0.8522   | 0.063007 | 0.17405  | 0.02174  | 0.63936  | 0.062751 | 0.17581  | 0.227288 |
| -0.04247 | 0.35985  | -0.07223 | 0.11905  | -0.06284 | 0.1752   | -0.06134 | 0.18575  | -0.13564 |
| -0.0886  | 0.05572  | -0.08357 | 0.07119  | -0.04454 | 0.33681  | -0.0977  | 0.03479  | -0.17554 |
| -0.00458 | 0.92131  | 0.082138 | 0.07619  | 0.012583 | 0.78624  | 0.088141 | 0.057    | 0.262929 |
| 0.103039 | 0.02597  | 0.124457 | 0.00709  | 0.082505 | 0.07488  | 0.124158 | 0.00723  | 0.300357 |
| 0.096408 | 0.03728  | 0.20108  | 1.19E-05 | 0.09451  | 0.0412   | 0.226854 | 7.27E-07 | 0.41632  |
| -0.01935 | 0.67661  | 0.146184 | 0.00154  | 0.034346 | 0.45903  | 0.185379 | 5.57E-05 | 0.376776 |
| -0.02562 | 0.58074  | -0.14179 | 0.00213  | -0.08327 | 0.0722   | -0.14981 | 0.00117  | -0.34356 |
| 0.078523 | 0.09008  | 0.062387 | 0.17834  | 0.035491 | 0.44418  | 0.074126 | 0.10965  | 0.286419 |
| 0.141546 | 0.00217  | 0.235669 | 2.58E-07 | 0.13218  | 0.00422  | 0.234093 | 3.11E-07 | 0.477466 |
| 0.099041 | 0.03237  | 0.135177 | 0.00342  | 0.067417 | 0.14577  | 0.139119 | 0.00259  | 0.341381 |
| 0.039391 | 0.39572  | 0.175529 | 0.00014  | 0.082379 | 0.07533  | 0.180477 | 8.78E-05 | 0.427437 |
| 0.100844 | 0.02933  | 0.110568 | 0.01683  | 0.065208 | 0.15946  | 0.121059 | 0.00883  | 0.290007 |
| 0.033619 | 0.46859  | 0.20229  | 1.06E-05 | 0.070087 | 0.13043  | 0.227566 | 6.70E-07 | 0.461481 |
| 0.058466 | 0.20725  | 0.115058 | 0.01285  | 0.107464 | 0.02019  | 0.062279 | 0.17909  | 0.181316 |
| 0.059659 | 0.19812  | 0.202607 | 1.02E-05 | 0.095988 | 0.03812  | 0.221282 | 1.37E-06 | 0.40434  |
| 0.046667 | 0.31426  | 0.201197 | 1.18E-05 | 0.110592 | 0.01681  | 0.20257  | 1.03E-05 | 0.494335 |
| 0.231695 | 4.14E-07 | 0.203221 | 9.59E-06 | 0.227496 | 6.75E-07 | 0.085598 | 0.06457  | 0.34722  |
| -0.00136 | 0.97665  | -0.19733 | 1.74E-05 | -0.07061 | 0.12756  | -0.22975 | 5.19E-07 | -0.44277 |
| 0.069088 | 0.13602  | 0.121296 | 0.00869  | 0.062415 | 0.17814  | 0.120858 | 0.00894  | 0.280676 |
| -0.10645 | 0.02141  | -0.166   | 0.00031  | -0.05003 | 0.28062  | -0.21639 | 2.36E-06 | -0.33829 |
| 0.058673 | 0.20564  | 0.170057 | 0.00022  | 0.067565 | 0.14488  | 0.203131 | 9.68E-06 | 0.353594 |
| 0.113134 | 0.01444  | 0.183574 | 6.60E-05 | 0.156609 | 0.00068  | 0.13045  | 0.00475  | 0.405314 |
| 0.168152 | 0.00026  | 0.164868 | 0.00035  | 0.120569 | 0.00911  | 0.141765 | 0.00213  | 0.418866 |
| 0.090326 | 0.05109  | 0.220057 | 1.57E-06 | 0.113973 | 0.01372  | 0.253024 | 2.96E-08 | 0.418636 |
| 0.017356 | 0.70834  | 0.140069 | 0.00242  | 0.045704 | 0.32436  | 0.158476 | 0.00059  | 0.395561 |
| 0.057027 | 0.21867  | 0.125927 | 0.00643  | 0.074979 | 0.10561  | 0.123795 | 0.0074   | 0.2855   |
| 0.086769 | 0.06098  | 0.13353  | 0.00384  | 0.071103 | 0.12494  | 0.12417  | 0.00722  | 0.419917 |
| 0.117239 | 0.01123  | 0.165948 | 0.00032  | 0.139447 | 0.00253  | 0.118155 | 0.0106   | 0.203168 |
| 0.037881 | 0.41409  | 0.060651 | 0.19075  | 0.012059 | 0.79494  | 0.087872 | 0.05776  | 0.222711 |
| 0.016598 | 0.72053  | -0.09195 | 0.04705  | -0.01422 | 0.7592   | -0.12073 | 0.00901  | -0.20838 |
| 0.041888 | 0.36643  | 0.174077 | 0.00016  | 0.087595 | 0.05856  | 0.176247 | 0.00013  | 0.391134 |
| -0.05502 | 0.23533  | -0.14003 | 0.00242  | -0.0354  | 0.44534  | -0.1794  | 9.70E-05 | -0.31152 |
| 0.077322 | 0.09513  | -0.08192 | 0.07696  | 0.051058 | 0.27084  | -0.15595 | 0.00072  | -0.27088 |
| 0.00757  | 0.8704   | 0.159648 | 0.00053  | 0.052889 | 0.254    | 0.179305 | 9.78E-05 | 0.454803 |
| -0.16424 | 0.00037  | -0.23345 | 3.36E-07 | -0.15951 | 0.00054  | -0.22842 | 6.06E-07 | -0.41524 |
| 0.067036 | 0.14806  | 0.217953 | 1.99E-06 | 0.102981 | 0.02606  | 0.237542 | 2.06E-07 | 0.354147 |
| -0.06082 | 0.18953  | -0.16072 | 0.00049  | -0.06054 | 0.19158  | -0.18932 | 3.83E-05 | -0.31599 |
| -0.10655 | 0.02128  | -0.23889 | 1.75E-07 | -0.09038 | 0.05096  | -0.28217 | 5.36E-10 | -0.48767 |
| 0.079475 | 0.08624  | 0.269491 | 3.26E-09 | 0.118529 | 0.01036  | 0.313263 | 4.31E-12 | 0.5249   |
| -0.08116 | 0.07975  | -0.16145 | 0.00046  | -0.11285 | 0.01469  | -0.15394 | 0.00084  | -0.3084  |
| 0.049332 | 0.28739  | 0.236092 | 2.45E-07 | 0.109577 | 0.01785  | 0.253023 | 2.96E-08 | 0.528925 |
| -0.09475 | 0.04069  | -0.23066 | 4.67E-07 | -0.11536 | 0.01261  | -0.26045 | 1.12E-08 | -0.41084 |

|          |          |          |          |          |          |          |          |          |
|----------|----------|----------|----------|----------|----------|----------|----------|----------|
| 0.09129  | 0.04865  | 0.243951 | 9.37E-08 | 0.139237 | 0.00256  | 0.243122 | 1.04E-07 | 0.374624 |
| 0.083913 | 0.07003  | 0.171335 | 0.0002   | 0.09802  | 0.0342   | 0.177052 | 0.00012  | 0.314569 |
| 0.159162 | 0.00056  | 0.172045 | 0.00019  | 0.116795 | 0.01154  | 0.159224 | 0.00055  | 0.361342 |
| 0.075854 | 0.10159  | -0.08197 | 0.07678  | 0.020048 | 0.66565  | -0.14143 | 0.00219  | -0.20337 |
| -0.02439 | 0.59914  | -0.09376 | 0.04284  | -0.04303 | 0.3535   | -0.12086 | 0.00894  | -0.28233 |
| -0.06458 | 0.16356  | -0.19071 | 3.35E-05 | -0.06508 | 0.16032  | -0.23887 | 1.75E-07 | -0.37616 |
| 0.088783 | 0.0552   | 0.349703 | 7.03E-15 | 0.139253 | 0.00256  | 0.420642 | 1.90E-21 | 0.508586 |
| 0.074402 | 0.10833  | 0.225269 | 8.72E-07 | 0.080966 | 0.08048  | 0.293594 | 9.75E-11 | 0.384475 |
| 0.078086 | 0.09189  | 0.253304 | 2.86E-08 | 0.117128 | 0.01131  | 0.304685 | 1.73E-11 | 0.440593 |
| 0.088481 | 0.05604  | 0.219768 | 1.62E-06 | 0.105382 | 0.02275  | 0.26033  | 1.13E-08 | 0.415223 |
| 0.253534 | 2.77E-08 | 0.309201 | 8.37E-12 | 0.259634 | 1.24E-08 | 0.259328 | 1.30E-08 | 0.367815 |
| 0.06066  | 0.19068  | 0.126224 | 0.00631  | 0.07348  | 0.11278  | 0.117255 | 0.01122  | 0.319489 |
| -0.01656 | 0.72112  | 0.170712 | 0.00021  | 0.056336 | 0.22431  | 0.186286 | 5.11E-05 | 0.463842 |
| 0.063812 | 0.16861  | 0.113564 | 0.01407  | 0.070712 | 0.12703  | 0.098468 | 0.03339  | 0.240224 |
| -0.16475 | 0.00035  | -0.13615 | 0.0032   | -0.10712 | 0.0206   | -0.1405  | 0.00234  | -0.19847 |
| 0.121438 | 0.00861  | 0.184521 | 6.04E-05 | 0.118756 | 0.01021  | 0.179522 | 9.59E-05 | 0.255542 |
| 0.024047 | 0.60423  | 0.134571 | 0.00357  | 0.048708 | 0.29354  | 0.160218 | 0.00051  | 0.378306 |
| -0.01982 | 0.66924  | -0.17191 | 0.00019  | -0.0791  | 0.08772  | -0.19033 | 3.47E-05 | -0.39024 |
| 0.089602 | 0.05299  | 0.042677 | 0.35747  | 0.066737 | 0.14989  | 0.006549 | 0.88776  | 0.179073 |
| -0.02515 | 0.58771  | -0.205   | 7.98E-06 | -0.07293 | 0.11553  | -0.23603 | 2.47E-07 | -0.43589 |
| 0.062076 | 0.18051  | -0.11692 | 0.01145  | 0.024169 | 0.60239  | -0.1846  | 5.99E-05 | -0.30771 |
| 0.108372 | 0.01915  | 0.315131 | 3.17E-12 | 0.1432   | 0.00192  | 0.354493 | 2.83E-15 | 0.605729 |
| 0.115256 | 0.01269  | 0.272247 | 2.22E-09 | 0.15419  | 0.00083  | 0.281186 | 6.19E-10 | 0.483027 |
| 0.154783 | 0.00079  | 0.336195 | 8.39E-14 | 0.191927 | 2.98E-05 | 0.343752 | 2.13E-14 | 0.676948 |
| -0.11343 | 0.01418  | -0.13469 | 0.00354  | -0.10244 | 0.02686  | -0.10756 | 0.02008  | -0.18877 |
| 0.130783 | 0.00464  | 0.193378 | 2.58E-05 | 0.104099 | 0.02447  | 0.203002 | 9.81E-06 | 0.381647 |
| -0.04771 | 0.30353  | 0.046005 | 0.32118  | 0.001343 | 0.97691  | 0.045342 | 0.32821  | 0.2025   |
| -0.21366 | 3.18E-06 | -0.26849 | 3.75E-09 | -0.18882 | 4.02E-05 | -0.26966 | 3.18E-09 | -0.40374 |
| -0.06798 | 0.14243  | -0.27839 | 9.28E-10 | -0.10858 | 0.01892  | -0.32923 | 2.87E-13 | -0.53321 |
| 0.082252 | 0.07578  | 0.223806 | 1.03E-06 | 0.073206 | 0.11413  | 0.278246 | 9.47E-10 | 0.419482 |
| -0.07197 | 0.12039  | -0.1512  | 0.00105  | -0.10781 | 0.01979  | -0.12692 | 0.00602  | -0.26591 |
| 0.027888 | 0.54772  | 0.154508 | 0.00081  | 0.082609 | 0.07451  | 0.154559 | 0.0008   | 0.369755 |
| -0.04251 | 0.35931  | -0.16178 | 0.00045  | -0.08278 | 0.07392  | -0.15451 | 0.00081  | -0.34952 |
| -0.03702 | 0.42484  | -0.15371 | 0.00086  | -0.06974 | 0.13234  | -0.15675 | 0.00068  | -0.33402 |
| 0.122802 | 0.00789  | 0.251423 | 3.64E-08 | 0.170523 | 0.00021  | 0.240888 | 1.37E-07 | 0.474884 |
| -0.10794 | 0.01964  | -0.20078 | 1.23E-05 | -0.12476 | 0.00695  | -0.19332 | 2.60E-05 | -0.34095 |
| -0.11467 | 0.01316  | -0.21873 | 1.82E-06 | -0.10018 | 0.03042  | -0.25066 | 4.01E-08 | -0.32088 |
| -0.04269 | 0.35728  | -0.12028 | 0.00928  | -0.02572 | 0.57926  | -0.15562 | 0.00074  | -0.21476 |
| 0.169199 | 0.00024  | 0.193866 | 2.46E-05 | 0.124041 | 0.00728  | 0.189815 | 3.65E-05 | 0.390952 |
| -0.00935 | 0.84025  | 0.10769  | 0.01993  | 0.005047 | 0.91338  | 0.154122 | 0.00083  | 0.282834 |
| 0.168008 | 0.00027  | 0.245022 | 8.20E-08 | 0.137592 | 0.00289  | 0.260594 | 1.09E-08 | 0.557127 |
| 0.103969 | 0.02465  | 0.341555 | 3.18E-14 | 0.154746 | 0.00079  | 0.378849 | 2.19E-17 | 0.68536  |
| 0.042466 | 0.35985  | 0.131923 | 0.00429  | 0.026    | 0.57518  | 0.167636 | 0.00027  | 0.287749 |
| -0.12536 | 0.00668  | -0.17872 | 0.0001   | -0.09597 | 0.03815  | -0.19299 | 2.68E-05 | -0.40957 |
| 0.01475  | 0.75056  | -0.13331 | 0.0039   | 0.002123 | 0.96351  | -0.20824 | 5.68E-06 | -0.23986 |

|          |         |          |          |          |         |          |          |          |
|----------|---------|----------|----------|----------|---------|----------|----------|----------|
| 0.074009 | 0.11021 | 0.106795 | 0.02098  | 0.053922 | 0.24484 | 0.109718 | 0.0177   | 0.249962 |
| 0.020033 | 0.66589 | 0.200338 | 1.29E-05 | 0.060296 | 0.19336 | 0.240699 | 1.40E-07 | 0.496919 |
| -0.02176 | 0.63901 | -0.18753 | 4.54E-05 | -0.03945 | 0.39495 | -0.24551 | 7.71E-08 | -0.38065 |
| 0.066502 | 0.15133 | 0.200559 | 1.26E-05 | 0.152978 | 0.00091 | 0.15363  | 0.00087  | 0.334205 |
| 0.010231 | 0.82547 | 0.22225  | 1.23E-06 | 0.054863 | 0.23668 | 0.303231 | 2.18E-11 | 0.270083 |
| 0.091081 | 0.04917 | 0.148427 | 0.0013   | 0.102797 | 0.02632 | 0.132152 | 0.00423  | 0.390502 |
| -0.04803 | 0.30029 | -0.2249  | 9.10E-07 | -0.1105  | 0.0169  | -0.23847 | 1.84E-07 | -0.46157 |
| -0.06933 | 0.13463 | -0.24928 | 4.79E-08 | -0.10401 | 0.02459 | -0.27992 | 7.45E-10 | -0.49383 |
| 0.010046 | 0.82858 | 0.083307 | 0.07209  | 0.001427 | 0.97547 | 0.112256 | 0.01522  | 0.402883 |
| 0.06325  | 0.17239 | 0.216114 | 2.43E-06 | 0.083651 | 0.07091 | 0.251016 | 3.84E-08 | 0.452479 |
| -0.07866 | 0.08953 | -0.14385 | 0.00183  | -0.04876 | 0.29306 | -0.18521 | 5.66E-05 | -0.29629 |
| 0.048234 | 0.29827 | -0.04538 | 0.3278   | 0.043748 | 0.34552 | -0.0807  | 0.0815   | -0.18115 |
| -0.01111 | 0.8107  | -0.14173 | 0.00214  | -0.01401 | 0.76265 | -0.20584 | 7.31E-06 | -0.33998 |
| -0.08613 | 0.06291 | -0.1238  | 0.00739  | -0.06761 | 0.1446  | -0.12117 | 0.00876  | -0.25909 |
| 0.004201 | 0.92786 | -0.16246 | 0.00042  | -0.03054 | 0.51037 | -0.21161 | 3.97E-06 | -0.44276 |
| 0.08206  | 0.07647 | 0.350104 | 6.52E-15 | 0.160037 | 0.00052 | 0.38786  | 3.25E-18 | 0.729575 |
| 0.037941 | 0.41336 | 0.150547 | 0.0011   | 0.079076 | 0.08783 | 0.171185 | 0.0002   | 0.343066 |
| -0.00635 | 0.89121 | 0.101943 | 0.02761  | 0.041117 | 0.37532 | 0.11128  | 0.01614  | 0.279004 |
| -0.01773 | 0.7024  | 0.083087 | 0.07284  | 0.00482  | 0.91726 | 0.092856 | 0.0449   | 0.255236 |
| 0.110353 | 0.01705 | 0.159307 | 0.00055  | 0.112011 | 0.01545 | 0.13189  | 0.0043   | 0.278135 |
| 0.063366 | 0.1716  | 0.102684 | 0.02649  | 0.060141 | 0.19451 | 0.090736 | 0.05004  | 0.22558  |
| 0.083309 | 0.07208 | 0.236416 | 2.36E-07 | 0.127254 | 0.00589 | 0.254384 | 2.48E-08 | 0.437198 |
| -0.08993 | 0.05212 | -0.2407  | 1.40E-07 | -0.15118 | 0.00105 | -0.23849 | 1.83E-07 | -0.39366 |
| -0.01687 | 0.71619 | 0.103768 | 0.02493  | 0.014032 | 0.76232 | 0.141559 | 0.00217  | 0.259711 |
| 0.162487 | 0.00042 | 0.208709 | 5.41E-06 | 0.147435 | 0.0014  | 0.194797 | 2.25E-05 | 0.339528 |
| 0.064686 | 0.16284 | 0.204629 | 8.29E-06 | 0.112358 | 0.01513 | 0.203896 | 8.95E-06 | 0.426525 |
| 0.036975 | 0.42536 | -0.136   | 0.00323  | -0.01076 | 0.81667 | -0.19043 | 3.44E-05 | -0.25433 |
| -0.09419 | 0.0419  | -0.07521 | 0.10454  | -0.04814 | 0.29918 | -0.08564 | 0.06442  | -0.14839 |
| 0.046543 | 0.31555 | -0.05021 | 0.27892  | 0.01195  | 0.79675 | -0.06354 | 0.17046  | -0.15967 |
| 0.126097 | 0.00636 | 0.308421 | 9.49E-12 | 0.152399 | 0.00095 | 0.345841 | 1.45E-14 | 0.601941 |
| 0.028456 | 0.5396  | 0.140827 | 0.00229  | 0.074881 | 0.10607 | 0.130548 | 0.00472  | 0.351759 |
| 0.099667 | 0.03129 | 0.049161 | 0.28906  | 0.074648 | 0.10716 | 0.000414 | 0.99288  | 0.19839  |
| 0.048387 | 0.29674 | 0.14535  | 0.00164  | 0.053746 | 0.24638 | 0.18081  | 8.52E-05 | 0.279181 |
| 0.156139 | 0.00071 | 0.116454 | 0.01179  | 0.086165 | 0.06281 | 0.112659 | 0.01486  | 0.288318 |
| -0.05423 | 0.24215 | -0.20473 | 8.20E-06 | -0.05566 | 0.22992 | -0.27008 | 3.00E-09 | -0.43343 |
| 0.045483 | 0.3267  | 0.171748 | 0.00019  | 0.076666 | 0.09797 | 0.191494 | 3.10E-05 | 0.392214 |
| 0.073435 | 0.113   | 0.164029 | 0.00037  | 0.103251 | 0.02566 | 0.154176 | 0.00083  | 0.347758 |
| 0.02159  | 0.64167 | 0.112931 | 0.01462  | 0.02133  | 0.64569 | 0.131679 | 0.00437  | 0.351856 |
| -0.00121 | 0.97918 | 0.097578 | 0.03503  | 0.034693 | 0.45449 | 0.114085 | 0.01363  | 0.280496 |
| 0.079687 | 0.0854  | 0.183226 | 6.81E-05 | 0.093374 | 0.04371 | 0.188271 | 4.23E-05 | 0.429076 |
| 0.040267 | 0.38529 | 0.065479 | 0.15773  | 0.040487 | 0.3827  | 0.05957  | 0.19879  | 0.209796 |
| 0.084784 | 0.06716 | 0.237745 | 2.01E-07 | 0.134442 | 0.00361 | 0.244935 | 8.29E-08 | 0.502989 |
| -0.06017 | 0.19431 | -0.11972 | 0.00961  | -0.01201 | 0.79572 | -0.17624 | 0.00013  | -0.29664 |
| 0.027063 | 0.55963 | -0.17807 | 0.00011  | -0.00567 | 0.90272 | -0.25887 | 1.38E-08 | -0.41606 |
| -0.06567 | 0.15649 | -0.19796 | 1.64E-05 | -0.11875 | 0.01022 | -0.18697 | 4.79E-05 | -0.35715 |



|          |          |          |          |          |          |          |          |          |
|----------|----------|----------|----------|----------|----------|----------|----------|----------|
| -0.039   | 0.40038  | -0.10104 | 0.02903  | 0.001838 | 0.9684   | -0.1619  | 0.00044  | -0.26219 |
| 0.311766 | 5.51E-12 | 0.423478 | 9.57E-22 | 0.299195 | 4.11E-11 | 0.388211 | 3.02E-18 | 0.608696 |
| 0.055581 | 0.2306   | 0.227078 | 7.09E-07 | 0.089704 | 0.05272  | 0.255309 | 2.20E-08 | 0.543894 |
| -0.01692 | 0.7154   | -0.25721 | 1.72E-08 | -0.09522 | 0.0397   | -0.30844 | 9.46E-12 | -0.56406 |
| -0.09239 | 0.04599  | -0.21457 | 2.88E-06 | -0.10101 | 0.02907  | -0.23964 | 1.59E-07 | -0.42513 |
| 0.075102 | 0.10504  | 0.20234  | 1.05E-05 | 0.087351 | 0.05926  | 0.232582 | 3.72E-07 | 0.43662  |
| -0.08254 | 0.07477  | -0.15976 | 0.00053  | -0.08452 | 0.06802  | -0.15379 | 0.00086  | -0.36421 |
| 0.095774 | 0.03855  | 0.108827 | 0.01865  | 0.112322 | 0.01516  | 0.040992 | 0.37678  | 0.182016 |
| 0.072973 | 0.1153   | 0.237696 | 2.02E-07 | 0.107896 | 0.01969  | 0.257251 | 1.71E-08 | 0.482977 |
| -0.09872 | 0.03293  | -0.28301 | 4.75E-10 | -0.12816 | 0.00554  | -0.31703 | 2.31E-12 | -0.56056 |
| -0.00917 | 0.84326  | -0.1293  | 0.00513  | -0.02057 | 0.65748  | -0.16941 | 0.00024  | -0.24783 |
| 0.082303 | 0.0756   | 0.242289 | 1.15E-07 | 0.122942 | 0.00782  | 0.256275 | 1.94E-08 | 0.469651 |
| 0.160772 | 0.00049  | 0.254932 | 2.31E-08 | 0.148041 | 0.00134  | 0.261492 | 9.70E-09 | 0.503978 |
| 0.02061  | 0.65687  | 0.20518  | 7.83E-06 | 0.070612 | 0.12757  | 0.239489 | 1.62E-07 | 0.487367 |
| 0.083175 | 0.07254  | 0.285723 | 3.18E-10 | 0.141169 | 0.00223  | 0.305418 | 1.54E-11 | 0.569145 |
| 0.065231 | 0.15932  | 0.264096 | 6.83E-09 | 0.117895 | 0.01078  | 0.296334 | 6.40E-11 | 0.601464 |
| 0.08388  | 0.07014  | 0.224388 | 9.65E-07 | 0.089306 | 0.05378  | 0.258372 | 1.47E-08 | 0.454884 |
| 0.107175 | 0.02053  | 0.285285 | 3.40E-10 | 0.152877 | 0.00092  | 0.303181 | 2.20E-11 | 0.583999 |
| 0.055884 | 0.22806  | 0.174916 | 0.00015  | 0.06544  | 0.15798  | 0.196755 | 1.85E-05 | 0.378968 |
| 0.087103 | 0.05999  | 0.214282 | 2.97E-06 | 0.100876 | 0.02928  | 0.226321 | 7.73E-07 | 0.503002 |
| 0.013184 | 0.77628  | 0.14063  | 0.00232  | 0.071677 | 0.12191  | 0.130204 | 0.00483  | 0.285316 |
| 0.019011 | 0.68197  | 0.115414 | 0.01257  | 0.047141 | 0.30936  | 0.113554 | 0.01408  | 0.265963 |
| 0.06776  | 0.14372  | 0.071189 | 0.12448  | 0.041357 | 0.37254  | 0.076772 | 0.09751  | 0.165362 |
| -0.11334 | 0.01426  | -0.20416 | 8.70E-06 | -0.10431 | 0.02419  | -0.22404 | 1.00E-06 | -0.34727 |
| 0.151008 | 0.00106  | 0.270738 | 2.74E-09 | 0.182624 | 7.21E-05 | 0.259662 | 1.24E-08 | 0.468264 |
| 0.118734 | 0.01023  | 0.144863 | 0.0017   | 0.065042 | 0.16053  | 0.156877 | 0.00067  | 0.395752 |
| 0.106961 | 0.02078  | 0.161702 | 0.00045  | 0.099724 | 0.03119  | 0.163726 | 0.00038  | 0.326626 |
| 0.083054 | 0.07296  | 0.118064 | 0.01067  | 0.055479 | 0.23145  | 0.142257 | 0.00206  | 0.203562 |
| 0.105986 | 0.02198  | 0.225844 | 8.17E-07 | 0.09891  | 0.0326   | 0.243209 | 1.03E-07 | 0.509635 |
| 0.222667 | 1.17E-06 | 0.343252 | 2.33E-14 | 0.322503 | 9.17E-13 | 0.239211 | 1.68E-07 | 0.480984 |
| 0.203331 | 9.49E-06 | 0.380985 | 1.40E-17 | 0.235959 | 2.49E-07 | 0.378918 | 2.16E-17 | 0.709791 |
| 0.035928 | 0.43859  | 0.088951 | 0.05474  | 0.038701 | 0.40405  | 0.10129  | 0.02862  | 0.300279 |
| 0.287165 | 2.57E-10 | 0.376243 | 3.76E-17 | 0.234445 | 2.98E-07 | 0.386858 | 4.03E-18 | 0.601413 |
| 0.115977 | 0.01214  | 0.201143 | 1.19E-05 | 0.122921 | 0.00783  | 0.193853 | 2.46E-05 | 0.357161 |
| -0.03363 | 0.46842  | 0.129271 | 0.00514  | 0.002111 | 0.96372  | 0.188753 | 4.04E-05 | 0.402117 |
| 0.113447 | 0.01417  | 0.204211 | 8.66E-06 | 0.136888 | 0.00303  | 0.192741 | 2.75E-05 | 0.305848 |
| 0.129445 | 0.00508  | 0.194586 | 2.29E-05 | 0.121228 | 0.00873  | 0.184943 | 5.80E-05 | 0.387578 |
| 0.145339 | 0.00164  | 0.262032 | 9.02E-09 | 0.166402 | 0.0003   | 0.248615 | 5.21E-08 | 0.499966 |
| 0.102452 | 0.02684  | 0.181141 | 8.26E-05 | 0.111793 | 0.01565  | 0.176666 | 0.00012  | 0.357631 |
| 0.086942 | 0.06047  | 0.217241 | 2.15E-06 | 0.14157  | 0.00217  | 0.202537 | 1.03E-05 | 0.466336 |
| 0.238309 | 1.87E-07 | 0.135807 | 0.00328  | 0.159937 | 0.00052  | 0.071917 | 0.12066  | 0.199283 |
| 0.148324 | 0.00131  | 0.311632 | 5.63E-12 | 0.174123 | 0.00016  | 0.328595 | 3.21E-13 | 0.523011 |
| 0.102171 | 0.02726  | 0.161926 | 0.00044  | 0.149657 | 0.00118  | 0.09601  | 0.03808  | 0.472954 |
| -0.0287  | 0.53613  | 0.083978 | 0.06981  | 0.01484  | 0.74907  | 0.089401 | 0.05353  | 0.290421 |
| 0.064422 | 0.16456  | 0.222163 | 1.24E-06 | 0.117412 | 0.01111  | 0.234302 | 3.04E-07 | 0.408768 |

|          |          |          |          |          |          |          |          |          |
|----------|----------|----------|----------|----------|----------|----------|----------|----------|
| 0.166413 | 0.0003   | 0.23686  | 2.23E-07 | 0.135189 | 0.00342  | 0.263189 | 7.72E-09 | 0.303547 |
| 0.072684 | 0.11674  | 0.12848  | 0.00543  | 0.073996 | 0.11027  | 0.124064 | 0.00727  | 0.313629 |
| 0.148291 | 0.00131  | 0.282613 | 5.03E-10 | 0.167868 | 0.00027  | 0.287682 | 2.38E-10 | 0.550191 |
| 0.160838 | 0.00048  | 0.313496 | 4.15E-12 | 0.181119 | 8.28E-05 | 0.327848 | 3.66E-13 | 0.60332  |
| 0.015025 | 0.74606  | 0.15773  | 0.00062  | 0.074748 | 0.10669  | 0.173634 | 0.00016  | 0.233342 |
| 0.079726 | 0.08525  | 0.138227 | 0.00276  | 0.101405 | 0.02844  | 0.107586 | 0.02005  | 0.380165 |
| 0.010902 | 0.81423  | 0.182707 | 7.15E-05 | 0.079089 | 0.08778  | 0.193536 | 2.54E-05 | 0.376721 |
| -0.12748 | 0.0058   | -0.19866 | 1.53E-05 | -0.13346 | 0.00386  | -0.19101 | 3.25E-05 | -0.3196  |
| 0.020262 | 0.66231  | 0.086249 | 0.06256  | 0.012422 | 0.7889   | 0.103491 | 0.02532  | 0.346977 |
| 0.163451 | 0.00039  | 0.287403 | 2.48E-10 | 0.189367 | 3.81E-05 | 0.277126 | 1.11E-09 | 0.514255 |
| 0.327684 | 3.76E-13 | 0.403595 | 1.01E-19 | 0.321084 | 1.17E-12 | 0.381486 | 1.26E-17 | 0.318591 |
| 0.111466 | 0.01596  | 0.091508 | 0.04812  | 0.093638 | 0.04312  | 0.050414 | 0.27693  | 0.076001 |
| 0.030231 | 0.51459  | 0.072093 | 0.11976  | 0.047735 | 0.3033   | 0.082624 | 0.07446  | 0.085765 |
| 0.169717 | 0.00023  | 0.171605 | 0.00019  | 0.219214 | 1.73E-06 | 0.086726 | 0.06111  | 0.077131 |
| 0.130708 | 0.00467  | 0.051044 | 0.27097  | 0.075814 | 0.10177  | 0.035255 | 0.44721  | 0.012827 |
| 0.063015 | 0.174    | 0.116577 | 0.0117   | 0.086263 | 0.06251  | 0.11379  | 0.01388  | 0.313893 |
| 0.142007 | 0.0021   | 0.124072 | 0.00727  | 0.111323 | 0.0161   | 0.111376 | 0.01604  | 0.054419 |
| 0.141488 | 0.00218  | 0.229472 | 5.37E-07 | 0.178877 | 0.0001   | 0.23147  | 4.25E-07 | 0.154824 |
| 0.468644 | 7.15E-27 | 0.394643 | 7.45E-19 | 0.409776 | 2.45E-20 | 0.28623  | 2.95E-10 | 0.204788 |
| 0.04574  | 0.32397  | 0.061207 | 0.18671  | 0.063755 | 0.16899  | 0.056778 | 0.2207   | 0.182623 |
| 0.164337 | 0.00036  | 0.189594 | 3.73E-05 | 0.174645 | 0.00015  | 0.16254  | 0.00042  | 0.313865 |
| 0.060659 | 0.19069  | 0.054235 | 0.2421   | 0.076762 | 0.09755  | 0.028232 | 0.54279  | 0.00726  |
| 0.15786  | 0.00062  | 0.113752 | 0.01391  | 0.094696 | 0.0408   | 0.129099 | 0.0052   | 0.07789  |
| 0.009598 | 0.83612  | 0.006923 | 0.88139  | -0.00091 | 0.98432  | 0.03634  | 0.43335  | 0.020134 |
| 0.057048 | 0.2185   | 0.084913 | 0.06675  | 0.08279  | 0.07388  | 0.066473 | 0.1515   | 0.061002 |
| 0.391172 | 1.59E-18 | 0.266489 | 4.93E-09 | 0.348872 | 8.21E-15 | 0.122825 | 0.00788  | 0.100593 |
| 0.079706 | 0.08533  | 0.244922 | 8.30E-08 | 0.11339  | 0.01422  | 0.296911 | 5.86E-11 | 0.406189 |
| 0.119752 | 0.00959  | 0.106791 | 0.02099  | 0.153327 | 0.00089  | 0.047717 | 0.30348  | 0.063443 |
| 0.05559  | 0.23052  | 0.008874 | 0.84832  | 0.016719 | 0.71857  | 0.013588 | 0.76963  | 0.015395 |
| 0.067936 | 0.14268  | 0.075536 | 0.10304  | 0.091299 | 0.04863  | 0.043108 | 0.35262  | 0.086758 |
| 0.105053 | 0.02318  | 0.10997  | 0.01744  | 0.111665 | 0.01577  | 0.104291 | 0.02421  | 0.081176 |
| 0.144123 | 0.00179  | 0.170191 | 0.00022  | 0.14556  | 0.00161  | 0.164678 | 0.00035  | 0.180553 |
| 0.386165 | 4.68E-18 | 0.271263 | 2.55E-09 | 0.318244 | 1.88E-12 | 0.145929 | 0.00157  | 0.159755 |
| 0.078017 | 0.09218  | 0.097836 | 0.03454  | 0.121504 | 0.00858  | 0.059404 | 0.20004  | 0.06313  |
| 0.077802 | 0.09308  | 0.092053 | 0.04679  | 0.097766 | 0.03467  | 0.070648 | 0.12738  | 0.055092 |
| 0.114801 | 0.01305  | 0.156455 | 0.00069  | 0.141287 | 0.00221  | 0.139424 | 0.00253  | 0.276629 |
| 0.131106 | 0.00454  | 0.151193 | 0.00105  | 0.146323 | 0.00152  | 0.098507 | 0.03332  | 0.20669  |
| -0.01698 | 0.71443  | -0.01087 | 0.81476  | -0.00549 | 0.90584  | -0.00466 | 0.91997  | -0.00758 |
| 0.117108 | 0.01132  | 0.289953 | 1.69E-10 | 0.172389 | 0.00018  | 0.324295 | 6.75E-13 | 0.360718 |
| 0.032258 | 0.4868   | 0.097132 | 0.03587  | 0.059986 | 0.19567  | 0.110576 | 0.01683  | 0.167776 |
| 0.128775 | 0.00532  | 0.221826 | 1.29E-06 | 0.172866 | 0.00017  | 0.20954  | 4.95E-06 | 0.142944 |
| 0.002931 | 0.94963  | -0.00304 | 0.94769  | 0.001228 | 0.97889  | 0.024659 | 0.59505  | 0.001705 |
| 0.057977 | 0.21108  | 0.105174 | 0.02302  | 0.081056 | 0.08015  | 0.089275 | 0.05386  | 0.110192 |
| 0.047187 | 0.30889  | 0.030818 | 0.50647  | 0.040024 | 0.38816  | 0.021785 | 0.63867  | 0.002704 |
| 0.188797 | 4.03E-05 | 0.135244 | 0.00341  | 0.179446 | 9.65E-05 | 0.071847 | 0.12103  | 0.059159 |

|          |          |          |          |          |          |          |          |          |
|----------|----------|----------|----------|----------|----------|----------|----------|----------|
| 0.252993 | 2.97E-08 | 0.241158 | 1.32E-07 | 0.242897 | 1.07E-07 | 0.182898 | 7.02E-05 | 0.241594 |
| 0.126344 | 0.00626  | 0.076168 | 0.10018  | 0.099875 | 0.03093  | 0.053261 | 0.25067  | 0.082406 |
| 0.080806 | 0.08109  | 0.088091 | 0.05714  | 0.094527 | 0.04117  | 0.065945 | 0.15479  | 0.11372  |
| 0.065452 | 0.15791  | 0.135933 | 0.00325  | 0.10906  | 0.0184   | 0.125811 | 0.00648  | 0.176727 |
| 0.066777 | 0.14964  | 0.06524  | 0.15926  | 0.066506 | 0.15131  | 0.06387  | 0.16822  | 0.039639 |
| 0.288352 | 2.15E-10 | 0.199735 | 1.37E-05 | 0.257799 | 1.59E-08 | 0.099611 | 0.03138  | 0.111778 |
| 0.028972 | 0.53227  | 0.041311 | 0.37308  | 0.044957 | 0.33233  | 0.032314 | 0.48603  | 0.008929 |
| 0.087745 | 0.05812  | 0.062757 | 0.17577  | 0.104876 | 0.02342  | 0.014615 | 0.75276  | 0.039229 |
| 0.358829 | 1.23E-15 | 0.165091 | 0.00034  | 0.233945 | 3.17E-07 | 0.088732 | 0.05535  | 0.066178 |
| 0.510897 | 2.06E-32 | 0.252479 | 3.18E-08 | 0.329583 | 2.70E-13 | 0.140041 | 0.00242  | 0.153602 |
| 0.097118 | 0.0359   | 0.102268 | 0.02711  | 0.109923 | 0.01749  | 0.07589  | 0.10143  | -0.00091 |
| 0.327189 | 4.10E-13 | 0.457852 | 1.41E-25 | 0.43617  | 4.14E-23 | 0.324501 | 6.52E-13 | 0.439682 |
| 0.136561 | 0.00311  | 0.148218 | 0.00132  | 0.18841  | 4.18E-05 | 0.073694 | 0.11174  | 0.059676 |
| 0.052079 | 0.26136  | 0.140825 | 0.00229  | 0.062094 | 0.18039  | 0.193203 | 2.63E-05 | 0.128986 |
| 0.006544 | 0.88784  | 0.007798 | 0.86653  | 0.016777 | 0.71765  | 0.018697 | 0.68695  | 0.014515 |
| 0.148715 | 0.00127  | 0.051028 | 0.27112  | 0.058887 | 0.20399  | 0.061488 | 0.18469  | 0.037266 |
| 0.187123 | 4.72E-05 | 0.15543  | 0.00075  | 0.141644 | 0.00215  | 0.145972 | 0.00156  | 0.175504 |
| 0.068309 | 0.1405   | 0.092137 | 0.04659  | 0.076014 | 0.10087  | 0.098146 | 0.03397  | 0.075086 |
| 0.177798 | 0.00011  | 0.082498 | 0.0749   | 0.092853 | 0.04491  | 0.069023 | 0.13639  | 0.025023 |
| 0.130372 | 0.00477  | 0.231314 | 4.33E-07 | 0.169919 | 0.00023  | 0.225599 | 8.40E-07 | 0.239137 |
| 0.095167 | 0.03981  | 0.327345 | 3.99E-13 | 0.159794 | 0.00053  | 0.390057 | 2.03E-18 | 0.334491 |
| 0.064799 | 0.1621   | 0.131306 | 0.00448  | 0.086524 | 0.06172  | 0.135029 | 0.00346  | 0.207944 |
| 0.015026 | 0.74604  | -0.00292 | 0.94987  | 0.001606 | 0.97239  | 0.001774 | 0.9695   | -0.01009 |
| 0.005839 | 0.89985  | 0.001449 | 0.97509  | 0.008574 | 0.8534   | 0.000791 | 0.98639  | -0.00087 |
| 0.375589 | 4.30E-17 | 0.443654 | 6.10E-24 | 0.546359 | 1.07E-37 | 0.185249 | 5.64E-05 | 0.229777 |
| 0.179034 | 0.0001   | 0.197818 | 1.66E-05 | 0.189744 | 3.68E-05 | 0.16793  | 0.00027  | 0.119158 |
| 0.01739  | 0.70779  | 0.028972 | 0.53226  | 0.042896 | 0.355    | 0.011701 | 0.80089  | 0.014192 |
| 0.094989 | 0.04018  | 0.326787 | 4.40E-13 | 0.136539 | 0.00311  | 0.417161 | 4.35E-21 | 0.304131 |
| 0.048936 | 0.29128  | 0.088164 | 0.05693  | 0.082083 | 0.07638  | 0.070995 | 0.12551  | 0.040096 |
| 0.022364 | 0.62976  | 0.174049 | 0.00016  | 0.066346 | 0.15229  | 0.206867 | 6.57E-06 | 0.333759 |
| 0.374135 | 5.79E-17 | 0.262167 | 8.86E-09 | 0.327293 | 4.03E-13 | 0.137729 | 0.00286  | 0.141211 |
| 0.047262 | 0.30812  | 0.046945 | 0.31138  | 0.050754 | 0.2737   | 0.033648 | 0.46821  | 0.032577 |
| 0.302858 | 2.31E-11 | 0.239739 | 1.57E-07 | 0.208074 | 5.78E-06 | 0.227645 | 6.64E-07 | 0.168086 |
| 0.116351 | 0.01186  | 0.079649 | 0.08555  | 0.104731 | 0.02361  | 0.046567 | 0.31529  | 0.048005 |
| 0.030644 | 0.50886  | 0.017625 | 0.70403  | 0.049536 | 0.28539  | -0.00743 | 0.87273  | -0.02277 |
| 0.029507 | 0.52472  | 0.081937 | 0.07691  | 0.059519 | 0.19917  | 0.087709 | 0.05823  | 0.050337 |
| 0.142107 | 0.00208  | 0.153334 | 0.00089  | 0.161852 | 0.00045  | 0.113943 | 0.01375  | 0.087981 |
| 0.303906 | 1.96E-11 | 0.368088 | 1.97E-16 | 0.32562  | 5.38E-13 | 0.294027 | 9.13E-11 | 0.361757 |
| 0.030513 | 0.51068  | 0.049816 | 0.28268  | 0.046203 | 0.3191   | 0.05467  | 0.23834  | 0.066727 |
| 0.458853 | 1.07E-25 | 0.368722 | 1.74E-16 | 0.400222 | 2.16E-19 | 0.249447 | 4.69E-08 | 0.209537 |
| 0.064702 | 0.16273  | 0.220386 | 1.52E-06 | 0.099639 | 0.03133  | 0.274355 | 1.65E-09 | 0.299874 |
| 0.079804 | 0.08494  | 0.194486 | 2.32E-05 | 0.11929  | 0.00987  | 0.218129 | 1.95E-06 | 0.200289 |
| 0.319184 | 1.61E-12 | 0.260426 | 1.12E-08 | 0.31121  | 6.03E-12 | 0.141877 | 0.00212  | 0.135002 |
| 0.25859  | 1.43E-08 | 0.161033 | 0.00048  | 0.220495 | 1.50E-06 | 0.092379 | 0.04602  | 0.073327 |
| 0.200134 | 1.32E-05 | 0.127526 | 0.00578  | 0.181528 | 7.97E-05 | 0.0567   | 0.22133  | 0.16427  |

|          |          |          |          |          |          |          |          |          |
|----------|----------|----------|----------|----------|----------|----------|----------|----------|
| 0.350528 | 6.01E-15 | 0.339303 | 4.79E-14 | 0.375594 | 4.29E-17 | 0.205883 | 7.28E-06 | 0.162619 |
| 0.620396 | 5.07E-51 | 0.465176 | 1.89E-26 | 0.535316 | 5.52E-36 | 0.271028 | 2.63E-09 | 0.292519 |
| 0.14533  | 0.00164  | 0.235347 | 2.68E-07 | 0.198128 | 1.61E-05 | 0.200595 | 1.26E-05 | 0.188805 |
| 0.02817  | 0.54369  | 0.049375 | 0.28697  | 0.041141 | 0.37505  | 0.060942 | 0.18862  | 0.033143 |
| 0.020796 | 0.65397  | 0.010382 | 0.82295  | 0.008498 | 0.85467  | 0.009749 | 0.83358  | 0.060212 |
| 0.016909 | 0.71553  | 0.04856  | 0.29501  | 0.019913 | 0.66777  | 0.066913 | 0.14881  | 0.060074 |
| 0.117991 | 0.01071  | 0.129238 | 0.00516  | 0.113922 | 0.01377  | 0.126122 | 0.00635  | 0.165676 |
| -0.00673 | 0.88471  | -0.00615 | 0.89452  | -0.00354 | 0.9392   | 0.006644 | 0.88614  | -0.00386 |
| 0.127366 | 0.00585  | 0.209676 | 4.88E-06 | 0.143729 | 0.00185  | 0.211462 | 4.03E-06 | 0.346867 |
| 0.133524 | 0.00384  | 0.133298 | 0.0039   | 0.127297 | 0.00587  | 0.111104 | 0.01637  | 0.096107 |
| 0.363392 | 5.03E-16 | 0.343693 | 2.15E-14 | 0.406991 | 4.66E-20 | 0.165214 | 0.00034  | 0.152196 |
| -0.00709 | 0.87855  | 0.018411 | 0.69148  | 0.045606 | 0.3254   | -0.00727 | 0.87547  | -0.00956 |
| 0.068608 | 0.13876  | 0.013474 | 0.7715   | 0.023287 | 0.61569  | 0.018134 | 0.69589  | -0.02046 |
| 0.164789 | 0.00035  | 0.204625 | 8.30E-06 | 0.201467 | 1.15E-05 | 0.164063 | 0.00037  | 0.12357  |
| 0.150088 | 0.00114  | 0.06644  | 0.15171  | 0.078985 | 0.0882   | 0.06621  | 0.15313  | 0.033118 |
| 0.124946 | 0.00686  | 0.106825 | 0.02095  | 0.145682 | 0.0016   | 0.033415 | 0.4713   | 0.017211 |
| 0.002903 | 0.95012  | 0.006632 | 0.88633  | 0.01821  | 0.69468  | 0.003408 | 0.94145  | 0.051244 |
| 0.092506 | 0.04572  | 0.069352 | 0.13453  | 0.081854 | 0.07721  | 0.050036 | 0.28055  | 0.109868 |
| 0.09424  | 0.04179  | 0.112213 | 0.01526  | 0.113341 | 0.01426  | 0.109601 | 0.01782  | 0.154285 |
| 0.127258 | 0.00589  | 0.15483  | 0.00079  | 0.185012 | 5.77E-05 | 0.081528 | 0.0784   | 0.089397 |
| 0.458237 | 1.27E-25 | 0.359961 | 9.85E-16 | 0.32456  | 6.45E-13 | 0.327505 | 3.88E-13 | 0.222512 |
| -0.07642 | 0.09906  | -0.07856 | 0.08994  | -0.02525 | 0.58627  | -0.09849 | 0.03335  | -0.19441 |
| 0.091893 | 0.04718  | 0.051498 | 0.26672  | 0.070419 | 0.12862  | -0.00259 | 0.9555   | 0.003869 |
| -0.07524 | 0.10441  | -0.04112 | 0.3753   | -0.00561 | 0.90372  | -0.07687 | 0.09708  | -0.02746 |
| -0.02819 | 0.54338  | -0.13642 | 0.00314  | -0.01715 | 0.71169  | -0.19083 | 3.31E-05 | -0.26654 |
| -0.03552 | 0.44384  | -0.04764 | 0.30426  | -0.00199 | 0.96577  | -0.0623  | 0.17894  | -0.13549 |
| 0.015973 | 0.73064  | 0.06947  | 0.13386  | 0.02752  | 0.55303  | 0.069454 | 0.13395  | 0.139568 |
| -0.06313 | 0.17321  | -0.11794 | 0.01074  | -0.08219 | 0.07601  | -0.1068  | 0.02097  | -0.15424 |
| 0.014402 | 0.75624  | -0.01562 | 0.73632  | 0.017664 | 0.7034   | -0.04494 | 0.33256  | -0.00431 |
| 0.102994 | 0.02604  | 0.067591 | 0.14473  | 0.058221 | 0.20917  | 0.064895 | 0.16148  | 0.205022 |
| -0.09051 | 0.05061  | -0.0672  | 0.14706  | -0.04089 | 0.37795  | -0.07232 | 0.11859  | -0.1496  |
| -0.16587 | 0.00032  | -0.25892 | 1.37E-08 | -0.1466  | 0.00149  | -0.27207 | 2.28E-09 | -0.4176  |
| -0.22232 | 1.22E-06 | -0.15458 | 0.0008   | -0.17064 | 0.00021  | -0.10107 | 0.02897  | -0.14711 |
| 0.042753 | 0.35661  | -0.03793 | 0.4135   | -0.04081 | 0.37896  | -0.0198  | 0.66949  | -0.03639 |
| -0.02002 | 0.6661   | -0.04078 | 0.37925  | 0.021442 | 0.64396  | -0.06614 | 0.15355  | -0.13664 |
| -0.21659 | 2.31E-06 | -0.24057 | 1.42E-07 | -0.18663 | 4.95E-05 | -0.21223 | 3.71E-06 | -0.28814 |
| -0.17059 | 0.00021  | -0.1762  | 0.00013  | -0.15345 | 0.00088  | -0.14844 | 0.00129  | -0.12659 |
| -0.09497 | 0.04022  | -0.17267 | 0.00018  | -0.10217 | 0.02726  | -0.16818 | 0.00026  | -0.32177 |
| -0.08196 | 0.07682  | -0.25707 | 1.75E-08 | -0.18647 | 5.03E-05 | -0.24188 | 1.21E-07 | -0.33086 |
| -0.15574 | 0.00073  | -0.2304  | 4.81E-07 | -0.19875 | 1.51E-05 | -0.19085 | 3.30E-05 | -0.30022 |
| -0.07967 | 0.08547  | -0.21971 | 1.64E-06 | -0.05962 | 0.19845  | -0.2854  | 3.34E-10 | -0.39543 |
| -0.00348 | 0.94015  | -0.18752 | 4.55E-05 | -0.04058 | 0.38161  | -0.24076 | 1.39E-07 | -0.37702 |
| -0.11191 | 0.01554  | -0.16984 | 0.00023  | -0.12751 | 0.00579  | -0.15971 | 0.00053  | -0.19455 |
| 0.037736 | 0.41588  | -0.02304 | 0.61945  | 0.065602 | 0.15695  | -0.11123 | 0.01619  | -0.1271  |
| -0.1228  | 0.00789  | -0.18217 | 7.52E-05 | -0.11841 | 0.01044  | -0.195   | 2.20E-05 | -0.24172 |

|          |          |          |          |          |          |          |          |          |
|----------|----------|----------|----------|----------|----------|----------|----------|----------|
| -0.07078 | 0.12666  | -0.16842 | 0.00026  | -0.09066 | 0.05025  | -0.18149 | 8.00E-05 | -0.25828 |
| -0.02389 | 0.60664  | -0.06566 | 0.15658  | -0.02705 | 0.55981  | -0.08911 | 0.0543   | -0.08449 |
| -0.05042 | 0.27683  | -0.03994 | 0.38913  | -0.04888 | 0.29183  | -0.02069 | 0.65558  | -0.06336 |
| 0.120246 | 0.00929  | 0.037818 | 0.41487  | 0.097081 | 0.03597  | -0.02027 | 0.6622   | 0.005703 |
| -0.12719 | 0.00591  | -0.08656 | 0.06163  | -0.03917 | 0.39843  | -0.0969  | 0.03631  | -0.16688 |
| -0.16317 | 0.0004   | -0.19602 | 1.99E-05 | -0.10974 | 0.01768  | -0.20485 | 8.11E-06 | -0.30294 |
| -0.22597 | 8.05E-07 | -0.15002 | 0.00115  | -0.12976 | 0.00498  | -0.12992 | 0.00492  | -0.20665 |
| 0.033983 | 0.46379  | 0.068907 | 0.13705  | 0.033506 | 0.47009  | 0.080285 | 0.08307  | 0.113923 |
| 0.02116  | 0.64832  | 0.093784 | 0.04279  | 0.016669 | 0.71938  | 0.127546 | 0.00578  | 0.239375 |
| -0.10514 | 0.02307  | -0.1199  | 0.0095   | -0.06495 | 0.16111  | -0.13379 | 0.00377  | -0.23014 |
| -0.03896 | 0.40094  | -0.13563 | 0.00332  | -0.02062 | 0.65668  | -0.1782  | 0.00011  | -0.32375 |
| -0.13456 | 0.00358  | -0.28263 | 5.02E-10 | -0.16198 | 0.00044  | -0.30088 | 3.15E-11 | -0.44331 |
| -0.03007 | 0.51681  | -0.10967 | 0.01775  | -0.07929 | 0.08698  | -0.10705 | 0.02067  | -0.21157 |
| 0.090186 | 0.05145  | -0.00818 | 0.86007  | 0.00835  | 0.85718  | -0.01522 | 0.74286  | 0.008564 |
| 0.060389 | 0.19267  | -0.08281 | 0.07382  | 0.029233 | 0.52859  | -0.14799 | 0.00134  | -0.15169 |
| -0.11602 | 0.01211  | -0.09245 | 0.04586  | -0.05729 | 0.21653  | -0.09322 | 0.04407  | -0.13736 |
| -0.09652 | 0.03707  | -0.12655 | 0.00617  | -0.06719 | 0.14711  | -0.14704 | 0.00144  | -0.19201 |
| 0.083969 | 0.06984  | -0.06693 | 0.14873  | -0.00049 | 0.99151  | -0.1029  | 0.02618  | -0.17364 |
| 0.014778 | 0.75009  | -0.08719 | 0.05974  | -0.00323 | 0.94447  | -0.10264 | 0.02656  | -0.3137  |
| 0.111499 | 0.01593  | 0.009232 | 0.84227  | 0.082749 | 0.07402  | -0.03603 | 0.43731  | -0.25834 |
| 0.068714 | 0.13816  | 0.027283 | 0.55645  | 0.093456 | 0.04353  | -0.04459 | 0.33633  | 0.01148  |
| -0.13938 | 0.00254  | -0.02972 | 0.52173  | -0.02059 | 0.65718  | -0.05703 | 0.21866  | -0.00404 |
| -0.1289  | 0.00528  | -0.20531 | 7.73E-06 | -0.10354 | 0.02525  | -0.2298  | 5.17E-07 | -0.42985 |
| -0.17448 | 0.00015  | -0.23173 | 4.12E-07 | -0.12485 | 0.00691  | -0.25156 | 3.58E-08 | -0.39311 |
| -0.1818  | 7.78E-05 | -0.23679 | 2.25E-07 | -0.17949 | 9.61E-05 | -0.21824 | 1.92E-06 | -0.30378 |
| -0.06002 | 0.19541  | -0.13362 | 0.00382  | -0.04702 | 0.31058  | -0.16204 | 0.00044  | -0.26378 |
| 0.029989 | 0.51797  | -0.10268 | 0.0265   | 0.032213 | 0.48741  | -0.17798 | 0.00011  | -0.27519 |
| 0.027542 | 0.5527   | -0.14079 | 0.00229  | 0.012704 | 0.78423  | -0.21221 | 3.72E-06 | -0.38876 |
| -0.14057 | 0.00233  | -0.24182 | 1.22E-07 | -0.11447 | 0.01332  | -0.27982 | 7.55E-10 | -0.38855 |
| -0.04512 | 0.33057  | -0.12362 | 0.00748  | -0.01758 | 0.70481  | -0.17149 | 0.0002   | -0.25283 |
| -0.04521 | 0.32962  | -0.16143 | 0.00046  | -0.05363 | 0.2474   | -0.20714 | 6.38E-06 | -0.24523 |
| -0.09315 | 0.04421  | -0.06001 | 0.19552  | -0.05961 | 0.19851  | -0.06204 | 0.18074  | 0.016239 |
| 0.025032 | 0.58949  | -0.17002 | 0.00022  | 0.007013 | 0.87986  | -0.25263 | 3.11E-08 | -0.42547 |
| -0.0051  | 0.91248  | -0.16884 | 0.00025  | -0.03549 | 0.44415  | -0.21736 | 2.12E-06 | -0.32714 |
| -0.06558 | 0.15711  | -0.22133 | 1.36E-06 | -0.07413 | 0.10961  | -0.2742  | 1.69E-09 | -0.39731 |
| -0.07076 | 0.12679  | -0.02868 | 0.53638  | -0.00697 | 0.88059  | -0.04135 | 0.37261  | -0.04319 |
| -0.15886 | 0.00057  | -0.05872 | 0.20531  | -0.05358 | 0.24782  | -0.0601  | 0.19479  | -0.03305 |
| -0.02944 | 0.52561  | -0.02455 | 0.59664  | 0.020171 | 0.66372  | -0.04841 | 0.29651  | -0.11257 |
| -0.07883 | 0.08885  | -0.17845 | 0.00011  | -0.06469 | 0.16283  | -0.22317 | 1.11E-06 | -0.26336 |
| -0.20207 | 1.08E-05 | -0.24404 | 9.26E-08 | -0.16764 | 0.00027  | -0.24267 | 1.10E-07 | -0.36293 |
| -0.09044 | 0.05081  | -0.10988 | 0.01753  | -0.00771 | 0.86802  | -0.16179 | 0.00045  | -0.22189 |
| -0.19324 | 2.62E-05 | -0.17324 | 0.00017  | -0.1495  | 0.00119  | -0.15235 | 0.00096  | -0.183   |
| -0.14691 | 0.00145  | -0.20463 | 8.30E-06 | -0.12031 | 0.00926  | -0.20529 | 7.74E-06 | -0.38483 |
| -0.08111 | 0.07994  | -0.14312 | 0.00193  | -0.03586 | 0.43944  | -0.19086 | 3.30E-05 | -0.30017 |
| 0.023615 | 0.61074  | -0.17124 | 0.0002   | -0.00992 | 0.83062  | -0.24608 | 7.18E-08 | -0.42607 |

|          |          |          |          |          |          |          |          |          |
|----------|----------|----------|----------|----------|----------|----------|----------|----------|
| -0.01219 | 0.79268  | -0.17699 | 0.00012  | -0.02198 | 0.63568  | -0.24545 | 7.77E-08 | -0.43184 |
| -0.11776 | 0.01087  | -0.26671 | 4.78E-09 | -0.1243  | 0.00716  | -0.30509 | 1.62E-11 | -0.42233 |
| -0.16592 | 0.00032  | -0.16597 | 0.00032  | -0.14636 | 0.00152  | -0.13617 | 0.00319  | -0.18737 |
| -0.07308 | 0.11476  | -0.06788 | 0.143    | -0.02636 | 0.56984  | -0.07328 | 0.11378  | -0.15468 |
| -0.0455  | 0.32653  | -0.10784 | 0.01976  | -0.00516 | 0.91148  | -0.1586  | 0.00058  | -0.28232 |
| -0.00852 | 0.85428  | -0.05852 | 0.2068   | 0.011767 | 0.7998   | -0.09114 | 0.04902  | -0.20169 |
| -0.01112 | 0.81067  | -0.14074 | 0.0023   | 0.009805 | 0.83263  | -0.21337 | 3.28E-06 | -0.37418 |
| -0.09872 | 0.03294  | -0.10921 | 0.01824  | -0.05186 | 0.26335  | -0.12761 | 0.00575  | -0.19745 |
| -0.06113 | 0.18724  | -0.17824 | 0.00011  | -0.04632 | 0.31784  | -0.23115 | 4.41E-07 | -0.43524 |
| -0.02255 | 0.62688  | -0.00966 | 0.83511  | 0.048545 | 0.29516  | -0.04923 | 0.28841  | -0.08432 |
| -0.11971 | 0.00962  | -0.08392 | 0.07001  | -0.08216 | 0.07612  | -0.05507 | 0.23493  | -0.06973 |
| -0.23009 | 4.99E-07 | -0.24435 | 8.92E-08 | -0.15618 | 0.00071  | -0.25358 | 2.76E-08 | -0.39373 |
| -0.04075 | 0.37957  | -0.17048 | 0.00021  | -0.04695 | 0.31131  | -0.2169  | 2.23E-06 | -0.29874 |
| -0.09277 | 0.0451   | -0.16471 | 0.00035  | -0.09039 | 0.05092  | -0.16352 | 0.00039  | -0.27251 |
| -0.0519  | 0.26299  | -0.13628 | 0.00317  | -0.03384 | 0.46561  | -0.1715  | 0.0002   | -0.28536 |
| -0.16213 | 0.00044  | -0.0262  | 0.57222  | -0.03522 | 0.44766  | -0.01965 | 0.67189  | -0.01114 |
| -0.10154 | 0.02823  | -0.15607 | 0.00071  | -0.04877 | 0.29292  | -0.1953  | 2.14E-05 | -0.24951 |
| -0.24754 | 5.98E-08 | -0.20314 | 9.67E-06 | -0.19762 | 1.70E-05 | -0.15394 | 0.00084  | -0.23413 |
| -0.0779  | 0.09267  | -0.14624 | 0.00153  | -0.05315 | 0.25168  | -0.18579 | 5.36E-05 | -0.21647 |
| -0.11679 | 0.01154  | -0.13785 | 0.00283  | -0.05997 | 0.19577  | -0.15921 | 0.00055  | -0.19675 |
| -0.14177 | 0.00213  | -0.10814 | 0.01942  | -0.10255 | 0.02669  | -0.09098 | 0.04944  | -0.10279 |
| -0.03918 | 0.39831  | -0.24952 | 4.64E-08 | -0.1316  | 0.00439  | -0.26541 | 5.71E-09 | -0.40387 |
| -0.03313 | 0.47507  | -0.00626 | 0.89265  | 0.05598  | 0.22726  | -0.05798 | 0.21102  | -0.09858 |
| -0.10287 | 0.02621  | -0.25077 | 3.96E-08 | -0.1422  | 0.00207  | -0.26394 | 6.97E-09 | -0.42002 |
| -0.03892 | 0.40144  | -0.23919 | 1.68E-07 | -0.07323 | 0.114    | -0.29155 | 1.33E-10 | -0.51539 |
| 0.00505  | 0.91334  | -0.19361 | 2.52E-05 | -0.02726 | 0.55672  | -0.26834 | 3.82E-09 | -0.4751  |
| -0.09258 | 0.04553  | -0.1138  | 0.01387  | -0.03377 | 0.46657  | -0.15086 | 0.00107  | -0.23802 |
| -0.08116 | 0.07978  | -0.21426 | 2.98E-06 | -0.07861 | 0.08972  | -0.26143 | 9.78E-09 | -0.41021 |
| -0.17342 | 0.00017  | -0.17967 | 9.46E-05 | -0.14541 | 0.00163  | -0.16641 | 0.0003   | -0.24048 |
| -0.14992 | 0.00116  | -0.18883 | 4.01E-05 | -0.12076 | 0.009    | -0.19964 | 1.38E-05 | -0.28633 |
| -0.01858 | 0.6888   | -0.23515 | 2.74E-07 | -0.09851 | 0.03331  | -0.2655  | 5.64E-09 | -0.45206 |
| -0.17901 | 0.0001   | -0.12979 | 0.00497  | -0.12069 | 0.00903  | -0.10046 | 0.02996  | -0.13315 |
| -0.09658 | 0.03694  | -0.12381 | 0.00739  | -0.04157 | 0.37013  | -0.15454 | 0.00081  | -0.22482 |
| -0.06988 | 0.13158  | -0.19298 | 2.68E-05 | -0.07972 | 0.08528  | -0.22802 | 6.36E-07 | -0.35333 |
| -0.0729  | 0.11565  | -0.18252 | 7.28E-05 | -0.04551 | 0.32642  | -0.23113 | 4.42E-07 | -0.3448  |
| -0.0052  | 0.91071  | -0.18898 | 3.96E-05 | -0.04857 | 0.29495  | -0.23689 | 2.23E-07 | -0.43274 |
| -0.06902 | 0.1364   | -0.0386  | 0.40533  | -0.00041 | 0.99304  | -0.05209 | 0.26129  | -0.1079  |
| -0.22129 | 1.37E-06 | -0.20626 | 7.00E-06 | -0.15452 | 0.00081  | -0.19121 | 3.19E-05 | -0.22406 |
| -0.11003 | 0.01738  | -0.08424 | 0.06896  | -0.0399  | 0.38966  | -0.09568 | 0.03875  | -0.15626 |
| -0.17372 | 0.00016  | -0.10509 | 0.02314  | -0.07085 | 0.12627  | -0.10824 | 0.0193   | -0.12002 |
| -0.09159 | 0.0479   | -0.15788 | 0.00062  | -0.06093 | 0.18874  | -0.19041 | 3.45E-05 | -0.3213  |
| -0.08573 | 0.06415  | -0.06327 | 0.17225  | -0.03284 | 0.47892  | -0.06419 | 0.1661   | -0.09112 |
| -0.12674 | 0.0061   | -0.13786 | 0.00283  | -0.10495 | 0.02332  | -0.12806 | 0.00558  | -0.21816 |
| 0.025077 | 0.58881  | -0.16738 | 0.00028  | -0.06313 | 0.17323  | -0.19007 | 3.56E-05 | -0.42991 |
| -0.17688 | 0.00012  | -0.15136 | 0.00103  | -0.1274  | 0.00584  | -0.13841 | 0.00272  | -0.22848 |

|          |         |          |          |          |         |          |          |          |
|----------|---------|----------|----------|----------|---------|----------|----------|----------|
| -0.05475 | 0.23764 | -0.22223 | 1.23E-06 | -0.10252 | 0.02673 | -0.24624 | 7.03E-08 | -0.40981 |
| -0.17569 | 0.00014 | -0.1049  | 0.02339  | -0.09822 | 0.03384 | -0.08972 | 0.05267  | -0.07944 |
| -0.1043  | 0.02419 | -0.20826 | 5.67E-06 | -0.10376 | 0.02494 | -0.23189 | 4.04E-07 | -0.34678 |
| -0.08868 | 0.05548 | -0.23867 | 1.79E-07 | -0.11648 | 0.01177 | -0.26664 | 4.83E-09 | -0.42469 |
| -0.07314 | 0.11444 | -0.17558 | 0.00014  | -0.06952 | 0.13356 | -0.21168 | 3.94E-06 | -0.31528 |
| -0.12092 | 0.00891 | -0.0798  | 0.08495  | -0.04121 | 0.3743  | -0.08279 | 0.07387  | -0.12311 |
| -0.06133 | 0.1858  | -0.1734  | 0.00017  | -0.0748  | 0.10646 | -0.19155 | 3.09E-05 | -0.32296 |
| -0.08749 | 0.05887 | -0.25233 | 3.24E-08 | -0.07603 | 0.10078 | -0.32341 | 7.86E-13 | -0.49948 |
| -0.00679 | 0.88357 | -0.12059 | 0.00909  | -0.02427 | 0.60085 | -0.16157 | 0.00046  | -0.30231 |
| -0.08136 | 0.07902 | -0.12216 | 0.00823  | -0.03779 | 0.41528 | -0.15681 | 0.00067  | -0.21334 |
| 0.069389 | 0.13432 | 0.029944 | 0.51861  | 0.033092 | 0.47559 | 0.021431 | 0.64413  | 0.009163 |
| -0.01359 | 0.76954 | -0.1321  | 0.00424  | -0.07839 | 0.09064 | -0.13185 | 0.00431  | -0.24548 |
| -0.05365 | 0.24722 | -0.12698 | 0.006    | -0.03841 | 0.40758 | -0.18029 | 8.93E-05 | -0.22429 |
| -0.14735 | 0.00141 | -0.13775 | 0.00285  | -0.08483 | 0.06702 | -0.14399 | 0.00181  | -0.25523 |
| -0.16989 | 0.00023 | -0.18283 | 7.07E-05 | -0.1679  | 0.00027 | -0.15345 | 0.00088  | -0.18399 |
| -0.03221 | 0.48751 | -0.12018 | 0.00933  | -0.10026 | 0.03029 | -0.11763 | 0.01096  | -0.18277 |
| -0.17045 | 0.00022 | -0.16654 | 0.0003   | -0.13633 | 0.00316 | -0.13433 | 0.00363  | -0.29312 |
| 0.005615 | 0.90367 | -0.05036 | 0.27745  | 0.017119 | 0.71215 | -0.08832 | 0.0565   | -0.1234  |
| -0.01548 | 0.73866 | -0.19242 | 2.84E-05 | -0.0664  | 0.15198 | -0.22807 | 6.32E-07 | -0.42714 |
| -0.01443 | 0.75582 | -0.00141 | 0.97567  | 0.019377 | 0.6762  | -0.00247 | 0.95754  | -0.21267 |
| 0.05719  | 0.21736 | 0.046012 | 0.3211   | 0.048379 | 0.29682 | 0.047808 | 0.30256  | -0.05071 |
| -0.04755 | 0.30513 | -0.10438 | 0.02408  | 0.005407 | 0.90723 | -0.16079 | 0.00049  | -0.19403 |
| -0.13655 | 0.00311 | -0.13568 | 0.00331  | -0.06293 | 0.17459 | -0.14183 | 0.00212  | -0.22887 |
| -0.05494 | 0.23605 | -0.2397  | 1.58E-07 | -0.11044 | 0.01696 | -0.28339 | 4.49E-10 | -0.42419 |
| 0.04923  | 0.28839 | -0.02796 | 0.54667  | 0.044952 | 0.33239 | -0.07164 | 0.12211  | -0.12349 |
| -0.06911 | 0.13588 | -0.15501 | 0.00078  | -0.10244 | 0.02685 | -0.16061 | 0.00049  | -0.22459 |
| 0.091462 | 0.04823 | -0.06182 | 0.18236  | 0.049138 | 0.28929 | -0.12229 | 0.00816  | -0.18635 |
| 0.027705 | 0.55036 | -0.11429 | 0.01346  | -0.04205 | 0.36457 | -0.12179 | 0.00842  | -0.31278 |
| -0.06818 | 0.14125 | -0.22336 | 1.08E-06 | -0.11992 | 0.00949 | -0.24484 | 8.39E-08 | -0.38565 |
| 0.049973 | 0.28117 | -0.04609 | 0.3203   | -0.00307 | 0.94732 | -0.08517 | 0.06594  | -0.01734 |
| -0.0623  | 0.17892 | -0.1727  | 0.00018  | -0.08163 | 0.07801 | -0.19848 | 1.55E-05 | -0.33706 |
| -0.01564 | 0.73598 | -0.16973 | 0.00023  | -0.0802  | 0.08339 | -0.1843  | 6.17E-05 | -0.30078 |
| 0.021978 | 0.63569 | -0.15087 | 0.00107  | -0.06111 | 0.18743 | -0.17042 | 0.00022  | -0.26504 |
| 0.096585 | 0.03693 | 0.145713 | 0.00159  | 0.100096 | 0.03056 | 0.131037 | 0.00456  | 0.251807 |
| -0.02833 | 0.54146 | -0.19163 | 3.06E-05 | -0.11795 | 0.01074 | -0.20403 | 8.83E-06 | -0.30977 |
| -0.13225 | 0.0042  | -0.16731 | 0.00028  | -0.10031 | 0.0302  | -0.17164 | 0.00019  | -0.3068  |
| 0.077095 | 0.0961  | -0.12551 | 0.00661  | -0.02412 | 0.60307 | -0.16756 | 0.00028  | -0.19312 |
| -0.04505 | 0.33134 | -0.19603 | 1.99E-05 | -0.15164 | 0.00101 | -0.16843 | 0.00026  | -0.35057 |
| 0.018391 | 0.69181 | -0.14383 | 0.00183  | -0.06598 | 0.15456 | -0.15578 | 0.00073  | -0.23049 |
| 0.077359 | 0.09497 | -0.11247 | 0.01503  | -0.00864 | 0.85227 | -0.14825 | 0.00131  | -0.26702 |
| -0.06031 | 0.19327 | -0.24536 | 7.86E-08 | -0.1479  | 0.00135 | -0.25996 | 1.19E-08 | -0.36264 |
| 0.027976 | 0.54646 | -0.05539 | 0.23222  | -0.00705 | 0.87925 | -0.07654 | 0.09853  | -0.20932 |
| -0.08414 | 0.06926 | -0.11693 | 0.01145  | -0.08301 | 0.07312 | -0.12895 | 0.00526  | -0.15609 |
| -0.08098 | 0.08044 | -0.09219 | 0.04647  | -0.06072 | 0.19027 | -0.08227 | 0.07572  | -0.20599 |
| -0.10506 | 0.02318 | -0.20172 | 1.12E-05 | -0.17193 | 0.00019 | -0.16621 | 0.00031  | -0.35375 |

|          |         |          |          |          |         |          |          |          |
|----------|---------|----------|----------|----------|---------|----------|----------|----------|
| 0.009406 | 0.83935 | -0.17139 | 0.0002   | -0.05972 | 0.19767 | -0.20663 | 6.73E-06 | -0.40432 |
| 0.069376 | 0.13439 | 0.034891 | 0.45192  | 0.080207 | 0.08337 | 0.000873 | 0.98499  | 0.056037 |
| 0.075481 | 0.10329 | -0.08074 | 0.08134  | 0.030779 | 0.507   | -0.14731 | 0.00141  | -0.17836 |
| 0.046133 | 0.31983 | -0.12956 | 0.00505  | -0.00933 | 0.84066 | -0.17343 | 0.00017  | -0.2937  |
| 0.112145 | 0.01532 | -0.05481 | 0.23711  | 0.041705 | 0.36853 | -0.09143 | 0.0483   | -0.13002 |
| 0.002143 | 0.96317 | -0.1997  | 1.37E-05 | -0.10967 | 0.01775 | -0.20626 | 7.00E-06 | -0.37437 |
| 0.095997 | 0.0381  | -0.13487 | 0.0035   | -0.02126 | 0.64675 | -0.16456 | 0.00036  | -0.33663 |
| 0.100105 | 0.03055 | -0.01786 | 0.70029  | 0.014654 | 0.75212 | -0.03197 | 0.49071  | -0.04062 |
| 0.054774 | 0.23745 | -0.1395  | 0.00252  | -0.08544 | 0.06505 | -0.1488  | 0.00126  | -0.30673 |
| -0.09648 | 0.03714 | -0.17243 | 0.00018  | -0.08068 | 0.08158 | -0.21027 | 4.58E-06 | -0.28601 |
| 0.036422 | 0.43231 | -0.14952 | 0.00119  | -0.04454 | 0.33685 | -0.1846  | 5.99E-05 | -0.35546 |
| -0.00517 | 0.91125 | -0.21026 | 4.59E-06 | -0.10948 | 0.01795 | -0.22493 | 9.07E-07 | -0.31408 |
| -0.00446 | 0.92334 | -0.15916 | 0.00056  | -0.12129 | 0.0087  | -0.1321  | 0.00424  | -0.27531 |
| -0.06273 | 0.17598 | -0.18718 | 4.70E-05 | -0.11143 | 0.01599 | -0.18643 | 5.04E-05 | -0.37195 |
| -0.00147 | 0.97474 | -0.12443 | 0.0071   | -0.07512 | 0.10497 | -0.11354 | 0.01409  | -0.21923 |
| -0.00493 | 0.91544 | -0.08578 | 0.064    | -0.06478 | 0.16222 | -0.0714  | 0.12338  | -0.2176  |
| 0.035541 | 0.44354 | -0.08768 | 0.05831  | -0.03591 | 0.43887 | -0.08489 | 0.06683  | -0.07314 |
| -0.06204 | 0.18077 | -0.18026 | 8.96E-05 | -0.12741 | 0.00583 | -0.16767 | 0.00027  | -0.28572 |
| -0.00303 | 0.948   | -0.12017 | 0.00934  | -0.07311 | 0.11461 | -0.11101 | 0.0164   | -0.11715 |
| -0.01519 | 0.74329 | -0.23245 | 3.78E-07 | -0.11153 | 0.01589 | -0.26926 | 3.36E-09 | -0.43463 |
| 0.04658  | 0.31516 | -0.16578 | 0.00032  | -0.04189 | 0.36639 | -0.21041 | 4.51E-06 | -0.30228 |
| -0.00269 | 0.95372 | -0.20536 | 7.69E-06 | -0.08776 | 0.05809 | -0.2401  | 1.51E-07 | -0.36303 |
| -0.02545 | 0.58329 | -0.16779 | 0.00027  | -0.10194 | 0.02761 | -0.16656 | 0.0003   | -0.3152  |
| 0.16051  | 0.0005  | 0.052035 | 0.26176  | 0.059576 | 0.19874 | 0.030013 | 0.51764  | 0.048896 |
| -0.02897 | 0.53234 | -0.20728 | 6.29E-06 | -0.13169 | 0.00436 | -0.21245 | 3.63E-06 | -0.2663  |
| 0.008617 | 0.85266 | -0.0795  | 0.08614  | 0.00989  | 0.83121 | -0.12453 | 0.00705  | -0.22366 |
| 0.115906 | 0.01219 | 0.017753 | 0.70198  | 0.007414 | 0.87305 | 0.020764 | 0.65446  | 0.018441 |
| 0.006883 | 0.88207 | -0.1636  | 0.00039  | -0.09801 | 0.03422 | -0.16093 | 0.00048  | -0.3307  |
| 0.021326 | 0.64575 | -0.10334 | 0.02554  | -0.06026 | 0.19364 | -0.10276 | 0.02638  | -0.15118 |
| 0.003693 | 0.93657 | -0.23114 | 4.42E-07 | -0.10583 | 0.02218 | -0.26062 | 1.09E-08 | -0.45286 |
| -0.09275 | 0.04516 | -0.18505 | 5.75E-05 | -0.12408 | 0.00726 | -0.17545 | 0.00014  | -0.35911 |
| -0.02315 | 0.61777 | -0.12312 | 0.00773  | -0.05758 | 0.21426 | -0.14051 | 0.00234  | -0.23588 |
| 0.058533 | 0.20673 | -0.13072 | 0.00466  | -0.04799 | 0.30072 | -0.15713 | 0.00066  | -0.25088 |
| -0.12898 | 0.00525 | -0.27744 | 1.06E-09 | -0.15023 | 0.00113 | -0.30641 | 1.31E-11 | -0.46324 |
| 0.005687 | 0.90245 | -0.18708 | 4.74E-05 | -0.10927 | 0.01817 | -0.19952 | 1.40E-05 | -0.32197 |
| 0.066708 | 0.15006 | -0.10597 | 0.022    | -0.01224 | 0.79192 | -0.14702 | 0.00144  | -0.25977 |
| -0.07397 | 0.11041 | -0.19796 | 1.64E-05 | -0.12151 | 0.00857 | -0.20006 | 1.33E-05 | -0.32274 |
| 0.109123 | 0.01833 | -0.04026 | 0.38537  | -0.00496 | 0.91495 | -0.05251 | 0.25742  | -0.13442 |
| 0.088036 | 0.05729 | -0.0582  | 0.20932  | 0.037782 | 0.41531 | -0.11545 | 0.01254  | -0.16705 |
| 0.046826 | 0.31261 | -0.1712  | 0.0002   | -0.1099  | 0.01751 | -0.1551  | 0.00077  | -0.30399 |
| 0.027645 | 0.55123 | -0.15283 | 0.00092  | -0.08818 | 0.05687 | -0.15541 | 0.00075  | -0.20995 |
| -0.05575 | 0.22922 | -0.23064 | 4.68E-07 | -0.12539 | 0.00666 | -0.24526 | 7.95E-08 | -0.4244  |
| 0.064656 | 0.16303 | -0.18788 | 4.40E-05 | -0.03542 | 0.44513 | -0.24841 | 5.35E-08 | -0.43278 |
| 0.00603  | 0.89659 | -0.09551 | 0.03909  | -0.04377 | 0.34531 | -0.11775 | 0.01088  | -0.11755 |
| 0.052204 | 0.26021 | -0.06585 | 0.15538  | -0.03179 | 0.49314 | -0.06771 | 0.14401  | -0.08697 |



|          |          |           |          |          |         |          |          |          |
|----------|----------|-----------|----------|----------|---------|----------|----------|----------|
| 0.062406 | 0.17821  | -0.09861  | 0.03314  | -0.01699 | 0.71429 | -0.11642 | 0.01181  | -0.24287 |
| 0.056089 | 0.22636  | 0.035348  | 0.44602  | 0.008013 | 0.86289 | 0.046804 | 0.31284  | 0.110837 |
| -0.02868 | 0.53646  | -0.19523  | 2.15E-05 | -0.11155 | 0.01587 | -0.19789 | 1.65E-05 | -0.37136 |
| 0.029731 | 0.52158  | -0.0952   | 0.03975  | -0.02795 | 0.54677 | -0.11418 | 0.01355  | -0.2143  |
| -0.00906 | 0.84511  | -0.0906   | 0.0504   | -0.04002 | 0.38817 | -0.09322 | 0.04407  | -0.21517 |
| -0.111   | 0.01641  | -0.18335  | 6.73E-05 | -0.15744 | 0.00064 | -0.1533  | 0.00089  | -0.28911 |
| 0.010857 | 0.81499  | -0.10299  | 0.02604  | -0.07368 | 0.11181 | -0.07799 | 0.09227  | -0.1791  |
| 0.183531 | 6.62E-05 | 0.094365  | 0.04152  | 0.177512 | 0.00012 | 0.016425 | 0.72333  | 0.037004 |
| 0.103128 | 0.02584  | 0.036183  | 0.43534  | 0.00088  | 0.98488 | 0.058714 | 0.20533  | 0.084859 |
| 0.064899 | 0.16145  | -0.0537   | 0.24678  | 0.000418 | 0.99282 | -0.0771  | 0.09608  | -0.02939 |
| -0.02328 | 0.61586  | -0.17104  | 0.0002   | -0.07473 | 0.10676 | -0.193   | 2.68E-05 | -0.32868 |
| -0.11558 | 0.01244  | -0.18988  | 3.63E-05 | -0.13518 | 0.00342 | -0.18481 | 5.87E-05 | -0.27684 |
| -0.04011 | 0.38713  | -0.18324  | 6.80E-05 | -0.08204 | 0.07653 | -0.21027 | 4.58E-06 | -0.31967 |
| -0.00588 | 0.89908  | -0.24585  | 7.39E-08 | -0.08855 | 0.05584 | -0.29751 | 5.34E-11 | -0.46398 |
| 0.00557  | 0.90445  | -0.04863  | 0.29428  | -0.04278 | 0.35629 | -0.04907 | 0.28997  | -0.02003 |
| 0.156332 | 0.0007   | -0.06449  | 0.16412  | 0.046453 | 0.31648 | -0.12919 | 0.00517  | -0.17947 |
| 0.078148 | 0.09163  | -0.07356  | 0.11241  | -0.04351 | 0.34813 | -0.05686 | 0.22003  | -0.07173 |
| 0.060465 | 0.19211  | -0.04988  | 0.28202  | 0.015584 | 0.73695 | -0.07895 | 0.08835  | -0.08134 |
| -0.05682 | 0.22039  | -0.06851  | 0.13935  | -0.05574 | 0.2293  | -0.05432 | 0.24136  | -0.02813 |
| 0.081858 | 0.07719  | -1.48E-05 | 0.99975  | 0.021858 | 0.63753 | -0.02739 | 0.55488  | 0.026615 |
| -0.05821 | 0.20926  | -0.1873   | 4.65E-05 | -0.0494  | 0.28676 | -0.24308 | 1.04E-07 | -0.35576 |
| -0.13631 | 0.00316  | -0.21047  | 4.48E-06 | -0.13648 | 0.00312 | -0.20823 | 5.69E-06 | -0.36944 |
| -0.01984 | 0.66887  | -0.21192  | 3.84E-06 | -0.11224 | 0.01524 | -0.22441 | 9.62E-07 | -0.44386 |
| -0.11024 | 0.01717  | -0.19973  | 1.37E-05 | -0.17583 | 0.00013 | -0.16464 | 0.00035  | -0.31316 |
| -0.01102 | 0.81231  | -0.13743  | 0.00292  | -0.0433  | 0.35048 | -0.16579 | 0.00032  | -0.38327 |
| -0.0147  | 0.75142  | -0.16232  | 0.00043  | -0.08321 | 0.07242 | -0.17476 | 0.00015  | -0.29939 |
| -0.03541 | 0.4452   | -0.14679  | 0.00147  | -0.04535 | 0.32808 | -0.18457 | 6.01E-05 | -0.26343 |
| 0.076021 | 0.10084  | -0.02814  | 0.5441   | 0.081621 | 0.07806 | -0.10339 | 0.02546  | -0.14302 |
| -0.00227 | 0.96089  | -0.14723  | 0.00142  | -0.01426 | 0.75862 | -0.20771 | 6.01E-06 | -0.37415 |
| 0.055016 | 0.23538  | -0.15407  | 0.00084  | -0.01482 | 0.74942 | -0.2183  | 1.91E-06 | -0.39603 |
| -0.02142 | 0.64434  | -0.15647  | 0.00069  | -0.05882 | 0.20453 | -0.19005 | 3.57E-05 | -0.35768 |
| -0.04514 | 0.33034  | -0.20596  | 7.22E-06 | -0.12051 | 0.00914 | -0.20761 | 6.08E-06 | -0.29458 |
| 0.06571  | 0.15627  | -0.07727  | 0.09534  | -0.00753 | 0.87107 | -0.10478 | 0.02354  | -0.21904 |
| 0.056924 | 0.21951  | -0.06729  | 0.14656  | 0.008347 | 0.85723 | -0.10661 | 0.02121  | -0.20965 |
| 0.116603 | 0.01168  | -0.11628  | 0.01191  | -0.00544 | 0.90669 | -0.15932 | 0.00055  | -0.2677  |
| -0.01795 | 0.69882  | -0.13843  | 0.00272  | -0.04699 | 0.3109  | -0.17467 | 0.00015  | -0.26884 |
| -0.00974 | 0.83377  | -0.12703  | 0.00598  | -0.01219 | 0.79281 | -0.1689  | 0.00025  | -0.30985 |
| 0.006881 | 0.88211  | -0.12852  | 0.00541  | -0.03664 | 0.42956 | -0.16117 | 0.00047  | -0.35784 |
| -0.04736 | 0.30716  | -0.18843  | 4.17E-05 | -0.08867 | 0.05552 | -0.21817 | 1.94E-06 | -0.34845 |
| 0.000495 | 0.99149  | -0.07928  | 0.087    | -0.02009 | 0.66493 | -0.10626 | 0.02163  | -0.21929 |
| 0.007446 | 0.8725   | -0.17475  | 0.00015  | -0.05452 | 0.23966 | -0.21206 | 3.78E-06 | -0.30629 |
| -0.08755 | 0.05868  | -0.2783   | 9.40E-10 | -0.1592  | 0.00055 | -0.28316 | 4.65E-10 | -0.51671 |
| 0.035531 | 0.44367  | -0.08263  | 0.07445  | 0.005215 | 0.9105  | -0.11139 | 0.01603  | -0.25333 |
| 0.124667 | 0.00699  | -0.05196  | 0.26241  | 0.040824 | 0.37875 | -0.09592 | 0.03826  | -0.16581 |
| -0.01153 | 0.80375  | -0.11344  | 0.01418  | -0.01938 | 0.67622 | -0.15386 | 0.00085  | -0.31982 |

|          |          |          |          |          |          |          |          |          |
|----------|----------|----------|----------|----------|----------|----------|----------|----------|
| -0.06925 | 0.1351   | -0.18565 | 5.43E-05 | -0.13957 | 0.0025   | -0.15275 | 0.00093  | -0.41259 |
| 0.004098 | 0.92962  | -0.10549 | 0.02261  | -0.03169 | 0.49449  | -0.12585 | 0.00647  | -0.21836 |
| 0.035153 | 0.44854  | -0.1659  | 0.00032  | -0.05119 | 0.26959  | -0.18684 | 4.85E-05 | -0.37789 |
| 0.059928 | 0.1961   | -0.08739 | 0.05914  | -0.00552 | 0.90535  | -0.10831 | 0.01922  | -0.2537  |
| 0.1011   | 0.02892  | -0.02127 | 0.64654  | 0.062931 | 0.17458  | -0.07238 | 0.11827  | -0.09679 |
| -0.04236 | 0.36104  | -0.18336 | 6.73E-05 | -0.09776 | 0.03468  | -0.1892  | 3.87E-05 | -0.38521 |
| 0.014809 | 0.74958  | -0.14561 | 0.0016   | -0.04009 | 0.38734  | -0.178   | 0.00011  | -0.30324 |
| 0.018097 | 0.69649  | -0.08652 | 0.06174  | 0.002723 | 0.95321  | -0.12717 | 0.00592  | -0.27154 |
| 0.060311 | 0.19325  | -0.12105 | 0.00883  | -0.01428 | 0.75828  | -0.15994 | 0.00052  | -0.33974 |
| 0.009848 | 0.83192  | -0.09886 | 0.03269  | -0.05178 | 0.26414  | -0.09708 | 0.03597  | -0.24402 |
| 0.078561 | 0.08992  | -0.14108 | 0.00224  | 0.033106 | 0.47541  | -0.24379 | 9.56E-08 | -0.38024 |
| -0.04361 | 0.34708  | -0.19876 | 1.51E-05 | -0.09659 | 0.03693  | -0.20836 | 5.61E-06 | -0.41694 |
| -0.00245 | 0.95792  | -0.14783 | 0.00136  | -0.05286 | 0.25423  | -0.16312 | 0.0004   | -0.36099 |
| -0.03055 | 0.5102   | -0.072   | 0.12022  | -0.03278 | 0.47978  | -0.08203 | 0.07658  | -0.15977 |
| 0.011604 | 0.80251  | -0.16583 | 0.00032  | -0.07758 | 0.09402  | -0.17329 | 0.00017  | -0.38918 |
| -0.0648  | 0.16209  | -0.17808 | 0.00011  | -0.06381 | 0.1686   | -0.21683 | 2.25E-06 | -0.41572 |
| 0.072564 | 0.11735  | -0.16412 | 0.00037  | -0.01935 | 0.67665  | -0.22032 | 1.53E-06 | -0.38456 |
| -0.02401 | 0.6048   | -0.18817 | 4.27E-05 | -0.10535 | 0.0228   | -0.19523 | 2.15E-05 | -0.35982 |
| -0.06519 | 0.1596   | -0.13624 | 0.00318  | -0.05922 | 0.20143  | -0.1612  | 0.00047  | -0.29582 |
| -0.14264 | 0.002    | -0.22393 | 1.02E-06 | -0.12722 | 0.0059   | -0.23279 | 3.63E-07 | -0.39135 |
| 0.025402 | 0.58399  | -0.13123 | 0.0045   | -0.02378 | 0.60824  | -0.17072 | 0.00021  | -0.37882 |
| 0.013702 | 0.76775  | -0.20466 | 8.27E-06 | -0.0506  | 0.27514  | -0.27126 | 2.55E-09 | -0.43447 |
| -0.03381 | 0.466    | -0.15616 | 0.00071  | -0.01896 | 0.68284  | -0.22864 | 5.92E-07 | -0.2682  |
| -0.05886 | 0.20422  | -0.18757 | 4.52E-05 | -0.09    | 0.05195  | -0.20174 | 1.12E-05 | -0.40609 |
| 0.026919 | 0.56174  | -0.09178 | 0.04746  | -0.01201 | 0.79581  | -0.12138 | 0.00865  | -0.23915 |
| 0.055923 | 0.22774  | -0.04973 | 0.28347  | 0.054333 | 0.24125  | -0.11971 | 0.00962  | -0.18869 |
| -0.1292  | 0.00517  | -0.23832 | 1.87E-07 | -0.19053 | 3.41E-05 | -0.20313 | 9.68E-06 | -0.4479  |
| -0.0583  | 0.20858  | -0.18051 | 8.75E-05 | -0.08223 | 0.07587  | -0.20396 | 8.89E-06 | -0.31655 |
| -0.06977 | 0.13217  | -0.24446 | 8.80E-08 | -0.13431 | 0.00364  | -0.25156 | 3.58E-08 | -0.51736 |
| -0.05107 | 0.2707   | -0.26285 | 8.08E-09 | -0.14113 | 0.00224  | -0.27514 | 1.48E-09 | -0.47906 |
| -0.13346 | 0.00386  | -0.19813 | 1.61E-05 | -0.11446 | 0.01332  | -0.20923 | 5.12E-06 | -0.42717 |
| -0.04963 | 0.28444  | -0.2112  | 4.15E-06 | -0.06244 | 0.178    | -0.27058 | 2.80E-09 | -0.48899 |
| -0.20065 | 1.25E-05 | -0.18055 | 8.73E-05 | -0.18084 | 8.49E-05 | -0.13318 | 0.00394  | -0.23304 |
| -0.06003 | 0.19534  | -0.17766 | 0.00011  | -0.08105 | 0.08016  | -0.19172 | 3.04E-05 | -0.39354 |
| 0.050301 | 0.27802  | -0.13192 | 0.00429  | -0.02243 | 0.62883  | -0.17197 | 0.00019  | -0.40096 |
| -0.12594 | 0.00643  | -0.24359 | 9.80E-08 | -0.14921 | 0.00122  | -0.24561 | 7.62E-08 | -0.48547 |
| 0.067276 | 0.14661  | -0.04831 | 0.29746  | 0.053215 | 0.25109  | -0.10472 | 0.02362  | -0.17143 |
| -0.01003 | 0.82889  | -0.08913 | 0.05425  | -0.00078 | 0.98653  | -0.14167 | 0.00215  | -0.19732 |
| 0.053965 | 0.24446  | -0.09883 | 0.03274  | 0.023588 | 0.61115  | -0.15664 | 0.00068  | -0.27184 |
| 0.003203 | 0.94496  | -0.11261 | 0.0149   | 0.015222 | 0.74284  | -0.20356 | 9.26E-06 | -0.25799 |
| -0.05191 | 0.2629   | -0.2208  | 1.45E-06 | -0.079   | 0.08815  | -0.26693 | 4.64E-09 | -0.35601 |
| -0.08861 | 0.05568  | -0.24871 | 5.15E-08 | -0.10309 | 0.02589  | -0.28218 | 5.36E-10 | -0.49336 |
| -0.03834 | 0.40843  | -0.17991 | 9.25E-05 | -0.08501 | 0.06642  | -0.19335 | 2.59E-05 | -0.39327 |
| 0.040429 | 0.38338  | -0.12303 | 0.00777  | 0.014181 | 0.75986  | -0.18099 | 8.38E-05 | -0.32244 |
| -0.02937 | 0.52661  | -0.23411 | 3.11E-07 | -0.08244 | 0.0751   | -0.27886 | 8.67E-10 | -0.50355 |

|          |         |          |          |          |         |          |          |          |
|----------|---------|----------|----------|----------|---------|----------|----------|----------|
| -0.04496 | 0.3323  | -0.18783 | 4.42E-05 | -0.07237 | 0.11835 | -0.22439 | 9.65E-07 | -0.39325 |
| -0.03326 | 0.47337 | -0.16864 | 0.00025  | -0.08374 | 0.07063 | -0.17389 | 0.00016  | -0.39097 |
| -0.06455 | 0.16371 | -0.26986 | 3.10E-09 | -0.11802 | 0.01069 | -0.30939 | 8.12E-12 | -0.50916 |
| -0.08771 | 0.05823 | -0.23139 | 4.28E-07 | -0.14877 | 0.00126 | -0.22533 | 8.66E-07 | -0.39758 |
| 0.071756 | 0.1215  | -0.12953 | 0.00506  | -0.00541 | 0.90709 | -0.16878 | 0.00025  | -0.33235 |
| -0.03409 | 0.46242 | -0.17287 | 0.00017  | -0.05053 | 0.27583 | -0.21296 | 3.43E-06 | -0.38893 |
| 0.037403 | 0.42002 | 0.142211 | 0.00207  | 0.065051 | 0.16047 | 0.149803 | 0.00117  | 0.373823 |
| 0.00518  | 0.91111 | -0.14191 | 0.00211  | -0.03495 | 0.45122 | -0.1775  | 0.00012  | -0.32248 |
| 0.076638 | 0.09809 | -0.09785 | 0.03452  | 0.006759 | 0.88418 | -0.149   | 0.00124  | -0.27487 |
| -0.03251 | 0.48345 | -0.11302 | 0.01454  | -0.05025 | 0.27854 | -0.12007 | 0.0094   | -0.25637 |
| -0.14573 | 0.00159 | -0.25391 | 2.64E-08 | -0.14141 | 0.00219 | -0.27022 | 2.94E-09 | -0.40589 |
| 0.025392 | 0.58414 | -0.10315 | 0.02581  | 0.005657 | 0.90296 | -0.16172 | 0.00045  | -0.21023 |
| -0.09312 | 0.0443  | -0.23549 | 2.63E-07 | -0.15443 | 0.00081 | -0.22734 | 6.87E-07 | -0.43036 |
| 0.051755 | 0.26434 | -0.13422 | 0.00366  | -0.01969 | 0.6713  | -0.17843 | 0.00011  | -0.33453 |
| -0.07868 | 0.08944 | -0.24576 | 7.48E-08 | -0.13164 | 0.00438 | -0.26142 | 9.79E-09 | -0.51196 |
| -0.1245  | 0.00707 | -0.17934 | 9.74E-05 | -0.16082 | 0.00049 | -0.1475  | 0.00139  | -0.32043 |
| -0.07419 | 0.10932 | -0.22002 | 1.58E-06 | -0.14773 | 0.00137 | -0.20511 | 7.89E-06 | -0.4104  |
| 0.001585 | 0.97275 | -0.17558 | 0.00014  | -0.07128 | 0.12402 | -0.19624 | 1.95E-05 | -0.35819 |
| 0.022635 | 0.62562 | -0.13524 | 0.00341  | -0.0467  | 0.31387 | -0.1668  | 0.00029  | -0.32292 |
| -0.04888 | 0.29186 | -0.2011  | 1.19E-05 | -0.06289 | 0.17485 | -0.25198 | 3.39E-08 | -0.44332 |
| -0.04488 | 0.33318 | -0.24164 | 1.25E-07 | -0.11439 | 0.01338 | -0.27195 | 2.32E-09 | -0.46409 |
| -0.17859 | 0.0001  | -0.23183 | 4.07E-07 | -0.17546 | 0.00014 | -0.20297 | 9.84E-06 | -0.30983 |
| -0.00395 | 0.93218 | -0.20141 | 1.16E-05 | -0.09694 | 0.03624 | -0.23355 | 3.32E-07 | -0.39353 |
| 0.01631  | 0.72518 | -0.15186 | 0.00099  | -0.00623 | 0.89327 | -0.23228 | 3.86E-07 | -0.3485  |
| -0.00477 | 0.91818 | -0.18241 | 7.35E-05 | -0.07719 | 0.09571 | -0.2114  | 4.06E-06 | -0.33602 |
| 0.008129 | 0.86091 | -0.17711 | 0.00012  | -0.04525 | 0.32917 | -0.21948 | 1.68E-06 | -0.38014 |
| -0.03782 | 0.41486 | -0.1703  | 0.00022  | -0.0822  | 0.07596 | -0.2017  | 1.12E-05 | -0.35008 |
| -0.05468 | 0.23826 | -0.15115 | 0.00105  | -0.11008 | 0.01732 | -0.13824 | 0.00276  | -0.28539 |
| 0.083774 | 0.0705  | -0.15106 | 0.00106  | -0.03163 | 0.49527 | -0.18553 | 5.49E-05 | -0.37233 |
| -0.00902 | 0.84587 | -0.1846  | 5.99E-05 | -0.06151 | 0.18451 | -0.22969 | 5.23E-07 | -0.38733 |
| -0.01341 | 0.77249 | -0.15545 | 0.00075  | -0.0765  | 0.09869 | -0.16559 | 0.00033  | -0.38204 |
| 0.090047 | 0.05182 | -0.08721 | 0.05968  | 0.032705 | 0.48078 | -0.1364  | 0.00314  | -0.27631 |
| -0.05659 | 0.22223 | -0.24783 | 5.75E-08 | -0.1032  | 0.02574 | -0.28086 | 6.49E-10 | -0.50149 |
| -0.09984 | 0.03099 | -0.13913 | 0.00258  | -0.12986 | 0.00494 | -0.1108  | 0.0166   | -0.24321 |
| -0.12762 | 0.00575 | -0.28061 | 6.73E-10 | -0.16758 | 0.00028 | -0.28569 | 3.20E-10 | -0.52311 |
| 0.040212 | 0.38594 | -0.04687 | 0.3122   | 0.011054 | 0.81169 | -0.0819  | 0.07703  | -0.08068 |
| 0.079486 | 0.08619 | -0.14174 | 0.00214  | -0.06627 | 0.15276 | -0.14996 | 0.00115  | -0.34547 |
| 0.066188 | 0.15327 | -0.06044 | 0.19232  | 0.025351 | 0.58475 | -0.1076  | 0.02003  | -0.24732 |
| -0.01325 | 0.77522 | -0.20148 | 1.15E-05 | -0.07594 | 0.10122 | -0.22522 | 8.77E-07 | -0.43327 |
| 0.008477 | 0.85503 | -0.15958 | 0.00054  | -0.05926 | 0.20111 | -0.19881 | 1.50E-05 | -0.36003 |
| -0.01327 | 0.77487 | -0.11362 | 0.01402  | -0.03479 | 0.45318 | -0.13982 | 0.00246  | -0.20462 |
| -0.09988 | 0.03093 | -0.21261 | 3.56E-06 | -0.13293 | 0.00401 | -0.2063  | 6.97E-06 | -0.39983 |
| -0.065   | 0.16083 | -0.18522 | 5.65E-05 | -0.08148 | 0.07857 | -0.21443 | 2.93E-06 | -0.2181  |
| -0.0075  | 0.87159 | -0.20541 | 7.64E-06 | -0.0189  | 0.68366 | -0.29161 | 1.32E-10 | -0.47843 |
| 0.010396 | 0.8227  | -0.1855  | 5.51E-05 | -0.05156 | 0.26613 | -0.227   | 7.15E-07 | -0.42837 |

|           |         |          |          |          |          |          |          |          |
|-----------|---------|----------|----------|----------|----------|----------|----------|----------|
| -0.11257  | 0.01493 | -0.19141 | 3.13E-05 | -0.11636 | 0.01185  | -0.18999 | 3.59E-05 | -0.37231 |
| 0.079954  | 0.08436 | -0.05727 | 0.21673  | 0.035733 | 0.44107  | -0.11449 | 0.0133   | -0.09042 |
| -6.47E-05 | 0.99889 | -0.20659 | 6.76E-06 | -0.09289 | 0.04482  | -0.23005 | 5.02E-07 | -0.42565 |
| -0.01749  | 0.70623 | -0.23383 | 3.21E-07 | -0.0677  | 0.14406  | -0.30081 | 3.19E-11 | -0.40079 |
| 0.035783  | 0.44044 | -0.18758 | 4.52E-05 | -0.02846 | 0.53958  | -0.26027 | 1.14E-08 | -0.37085 |
| -0.09543  | 0.03925 | -0.21595 | 2.48E-06 | -0.11708 | 0.01134  | -0.23665 | 2.29E-07 | -0.44254 |
| -0.12188  | 0.00837 | -0.25401 | 2.61E-08 | -0.15347 | 0.00088  | -0.26175 | 9.37E-09 | -0.40804 |
| 0.015496  | 0.73838 | -0.19139 | 3.14E-05 | -0.09411 | 0.04207  | -0.20469 | 8.24E-06 | -0.38766 |
| -0.0124   | 0.78921 | -0.15562 | 0.00074  | -0.04601 | 0.3211   | -0.1898  | 3.65E-05 | -0.35028 |
| 0.041662  | 0.36903 | -0.02676 | 0.56403  | 0.056587 | 0.22225  | -0.09731 | 0.03553  | -0.05242 |
| -0.08816  | 0.05694 | -0.29741 | 5.42E-11 | -0.17101 | 0.0002   | -0.30217 | 2.58E-11 | -0.48385 |
| -0.05318  | 0.25138 | -0.19638 | 1.92E-05 | -0.07249 | 0.11772  | -0.23523 | 2.72E-07 | -0.44931 |
| -0.01592  | 0.73145 | -0.13755 | 0.0029   | -0.04604 | 0.32077  | -0.16664 | 0.0003   | -0.35034 |
| -0.05474  | 0.23775 | -0.21987 | 1.61E-06 | -0.13782 | 0.00284  | -0.21516 | 2.70E-06 | -0.3392  |
| 0.061792  | 0.18252 | -0.1393  | 0.00255  | -0.00747 | 0.87213  | -0.18655 | 4.99E-05 | -0.35429 |
| -0.05868  | 0.20559 | -0.25651 | 1.88E-08 | -0.14821 | 0.00132  | -0.25996 | 1.19E-08 | -0.49379 |
| -0.01924  | 0.6783  | -0.1532  | 0.0009   | -0.05413 | 0.243    | -0.18495 | 5.80E-05 | -0.33716 |
| -0.11384  | 0.01383 | -0.22967 | 5.24E-07 | -0.09503 | 0.0401   | -0.28144 | 5.97E-10 | -0.43054 |
| 0.018677  | 0.68727 | -0.09257 | 0.04557  | 0.020434 | 0.65962  | -0.16829 | 0.00026  | -0.2346  |
| -0.11176  | 0.01568 | -0.26311 | 7.81E-09 | -0.18031 | 8.92E-05 | -0.25273 | 3.07E-08 | -0.36803 |
| 0.020988  | 0.65098 | -0.11475 | 0.01309  | -0.00307 | 0.94727  | -0.18144 | 8.04E-05 | -0.2697  |
| -0.01043  | 0.82222 | -0.13984 | 0.00246  | -0.02445 | 0.59819  | -0.20645 | 6.86E-06 | -0.33001 |
| 0.034     | 0.46356 | -0.1597  | 0.00053  | -0.0127  | 0.78436  | -0.23128 | 4.34E-07 | -0.38588 |
| 0.036144  | 0.43584 | 0.061096 | 0.18751  | 0.109274 | 0.01817  | -0.00386 | 0.93367  | 0.11008  |
| -0.10441  | 0.02404 | 0.026806 | 0.56338  | -0.02852 | 0.53873  | 0.059454 | 0.19967  | 0.021292 |
| -0.08399  | 0.06977 | 0.034341 | 0.45909  | 0.028108 | 0.54457  | 0.004644 | 0.92027  | 0.041608 |
| -0.01696  | 0.71472 | -0.11403 | 0.01367  | -0.11161 | 0.01583  | -0.08742 | 0.05908  | -0.11174 |
| -0.15383  | 0.00085 | -0.10242 | 0.02689  | -0.10717 | 0.02054  | -0.07382 | 0.11113  | -0.10994 |
| -0.06202  | 0.18092 | 0.017714 | 0.7026   | 0.02199  | 0.63551  | -0.00423 | 0.92736  | 0.002133 |
| -0.07881  | 0.08889 | 0.000806 | 0.98614  | -0.00559 | 0.90405  | -0.00408 | 0.92989  | -0.00254 |
| -0.10221  | 0.0272  | -0.07575 | 0.10205  | -0.02104 | 0.65012  | -0.09775 | 0.0347   | -0.15603 |
| -0.14509  | 0.00167 | -0.11939 | 0.00981  | -0.08679 | 0.06092  | -0.11636 | 0.01185  | -0.20557 |
| -0.00942  | 0.83916 | -0.17783 | 0.00011  | -0.08828 | 0.05661  | -0.18832 | 4.21E-05 | -0.274   |
| -0.10945  | 0.01798 | -0.06085 | 0.18926  | -0.06498 | 0.16094  | -0.04276 | 0.35648  | 0.01079  |
| -0.05774  | 0.21294 | 0.035291 | 0.44675  | 0.00642  | 0.88996  | 0.052702 | 0.25569  | 0.049003 |
| -0.10409  | 0.02448 | -0.08943 | 0.05345  | -0.06946 | 0.13391  | -0.07458 | 0.10746  | -0.08602 |
| -0.08749  | 0.05885 | 0.05939  | 0.20015  | -0.00068 | 0.98836  | 0.08862  | 0.05565  | 0.113856 |
| -0.1347   | 0.00354 | -0.10984 | 0.01757  | -0.10565 | 0.0224   | -0.09291 | 0.04478  | -0.26101 |
| -0.06822  | 0.14102 | 0.103449 | 0.02538  | 0.034167 | 0.46137  | 0.118848 | 0.01015  | 0.194947 |
| -0.17192  | 0.00019 | -0.13992 | 0.00244  | -0.10297 | 0.02607  | -0.1352  | 0.00342  | -0.20567 |
| -0.06319  | 0.17283 | 0.067128 | 0.1475   | 0.041124 | 0.37525  | 0.060215 | 0.19396  | 0.066214 |
| -0.13276  | 0.00405 | -0.11216 | 0.01531  | -0.05304 | 0.25266  | -0.13428 | 0.00365  | -0.17732 |
| -0.16574  | 0.00032 | -0.08267 | 0.0743   | -0.03645 | 0.43193  | -0.11269 | 0.01483  | -0.14881 |
| -0.09445  | 0.04133 | -0.03407 | 0.4627   | -0.01878 | 0.68563  | -0.0323  | 0.48623  | -0.05592 |
| -0.16481  | 0.00035 | -0.06243 | 0.17807  | -0.07639 | 0.09921  | -0.04189 | 0.36645  | -0.10622 |

|          |          |          |          |          |         |          |          |          |
|----------|----------|----------|----------|----------|---------|----------|----------|----------|
| -0.08575 | 0.0641   | -0.04985 | 0.28239  | -0.01298 | 0.77962 | -0.06085 | 0.18927  | -0.10573 |
| -0.01525 | 0.74231  | 0.086501 | 0.06179  | 0.028895 | 0.53336 | 0.101121 | 0.02889  | 0.071875 |
| -0.11762 | 0.01096  | -0.01011 | 0.82747  | -0.02048 | 0.65893 | -0.00983 | 0.8322   | 0.040342 |
| 0.012076 | 0.79466  | 0.071113 | 0.12488  | 0.063254 | 0.17237 | 0.05068  | 0.27441  | 0.12564  |
| 0.013647 | 0.76866  | 0.19172  | 3.04E-05 | 0.087147 | 0.05986 | 0.209225 | 5.12E-06 | 0.338324 |
| -0.05122 | 0.26935  | 0.075801 | 0.10183  | 0.01622  | 0.72664 | 0.110334 | 0.01707  | 0.127989 |
| -0.10659 | 0.02123  | -0.07093 | 0.12584  | -0.03817 | 0.41055 | -0.08911 | 0.05431  | -0.10306 |
| -0.05169 | 0.26498  | 0.056618 | 0.222    | 0.026585 | 0.56659 | 0.059781 | 0.1972   | 0.081524 |
| -0.0595  | 0.19934  | 0.032133 | 0.48849  | 0.018948 | 0.68298 | 0.024293 | 0.60053  | 0.056459 |
| -0.09831 | 0.03368  | -0.03355 | 0.46956  | -0.04726 | 0.30809 | -0.02044 | 0.65959  | 0.047414 |
| -0.19864 | 1.53E-05 | -0.17428 | 0.00015  | -0.15264 | 0.00094 | -0.15613 | 0.00071  | -0.18961 |
| -0.22466 | 9.36E-07 | -0.14727 | 0.00142  | -0.17098 | 0.00021 | -0.10366 | 0.02509  | -0.12496 |
| -0.02124 | 0.64713  | 0.134236 | 0.00366  | 0.074906 | 0.10595 | 0.126994 | 0.00599  | 0.202879 |
| -0.16325 | 0.0004   | -0.1057  | 0.02234  | -0.10288 | 0.0262  | -0.07136 | 0.1236   | -0.12871 |
| -0.09205 | 0.04679  | -0.10523 | 0.02295  | -0.09013 | 0.0516  | -0.08765 | 0.0584   | -0.19024 |
| -0.0061  | 0.89547  | 0.089058 | 0.05445  | 0.020889 | 0.65252 | 0.120432 | 0.00919  | 0.127994 |
| -0.19623 | 1.95E-05 | -0.01845 | 0.69089  | -0.08857 | 0.05579 | 0.031881 | 0.4919   | -0.05586 |
| -0.15944 | 0.00054  | -0.00899 | 0.84632  | -0.07455 | 0.10761 | 0.039254 | 0.39737  | -0.01532 |
| -0.10062 | 0.02969  | 0.014935 | 0.74753  | -0.00887 | 0.84844 | 0.017274 | 0.70966  | 0.039497 |
| -0.07706 | 0.09625  | 0.112299 | 0.01518  | -0.00104 | 0.98212 | 0.161833 | 0.00045  | 0.188431 |
| -0.10706 | 0.02067  | -0.02923 | 0.52857  | -0.06458 | 0.16355 | 0.002329 | 0.95996  | 0.052376 |
| 0.005401 | 0.90733  | 0.12779  | 0.00568  | 0.069104 | 0.13593 | 0.141904 | 0.00211  | 0.19356  |
| -0.07431 | 0.10875  | -0.01014 | 0.82695  | -0.00252 | 0.95666 | -0.00863 | 0.85241  | -0.09016 |
| -0.00403 | 0.93071  | 0.019425 | 0.67545  | 0.056949 | 0.21931 | -0.02098 | 0.65115  | -0.02475 |
| -0.22592 | 8.10E-07 | -0.12567 | 0.00654  | -0.11947 | 0.00976 | -0.11164 | 0.01579  | -0.17032 |
| -0.08903 | 0.05453  | -0.0227  | 0.62457  | -0.01749 | 0.70622 | -0.01892 | 0.68347  | -0.07856 |
| -0.02786 | 0.54818  | -0.0416  | 0.36971  | -0.00461 | 0.92091 | -0.04908 | 0.2899   | -0.17503 |
| -0.14736 | 0.00141  | -0.04659 | 0.31507  | -0.08034 | 0.08287 | -0.01516 | 0.7439   | -0.04522 |
| 0.245011 | 8.21E-08 | 0.120715 | 0.00902  | 0.106034 | 0.02192 | 0.119187 | 0.00994  | 0.099895 |
| -0.0459  | 0.32233  | 0.118757 | 0.01021  | 0.061245 | 0.18643 | 0.126251 | 0.0063   | 0.186148 |
| 0.07493  | 0.10584  | 0.160431 | 0.0005   | 0.109689 | 0.01773 | 0.149963 | 0.00115  | 0.21168  |
| -0.0249  | 0.59148  | 0.053676 | 0.247    | 0.039408 | 0.39552 | 0.027238 | 0.55711  | 0.172771 |
| -0.09202 | 0.04687  | -0.11688 | 0.01148  | -0.06953 | 0.13353 | -0.11507 | 0.01284  | -0.17588 |
| -0.05583 | 0.22854  | -0.05926 | 0.20111  | -0.03145 | 0.49772 | -0.05891 | 0.20383  | -0.07289 |
| -0.06425 | 0.1657   | -0.01152 | 0.80399  | 0.005057 | 0.91321 | -0.01696 | 0.71467  | -0.05227 |
| -0.03264 | 0.48164  | 0.077464 | 0.09452  | 0.04433  | 0.33913 | 0.095523 | 0.03907  | 0.085125 |
| -0.15797 | 0.00061  | -0.18445 | 6.08E-05 | -0.13066 | 0.00468 | -0.17794 | 0.00011  | -0.32895 |
| -0.19716 | 1.78E-05 | -0.17925 | 9.82E-05 | -0.17114 | 0.0002  | -0.12825 | 0.00551  | -0.23929 |
| -0.12147 | 0.0086   | -0.04898 | 0.29086  | -0.04233 | 0.36135 | -0.04133 | 0.3728   | -0.07683 |
| -0.06969 | 0.13265  | 0.052632 | 0.25633  | 0.008726 | 0.85082 | 0.060865 | 0.18919  | 0.136908 |
| -0.07617 | 0.10018  | -0.10773 | 0.01988  | -0.04786 | 0.30199 | -0.11997 | 0.00946  | -0.2426  |
| -0.11582 | 0.01226  | 0.020858 | 0.65302  | -0.02951 | 0.52465 | 0.045879 | 0.32251  | 0.158874 |
| -0.19795 | 1.64E-05 | -0.09258 | 0.04555  | -0.1079  | 0.01968 | -0.06072 | 0.19023  | -0.05551 |
| -0.15719 | 0.00065  | -0.1384  | 0.00272  | -0.1322  | 0.00421 | -0.10019 | 0.03041  | -0.17163 |
| -0.14372 | 0.00185  | -0.02115 | 0.64846  | -0.0663  | 0.15256 | 0.006231 | 0.89318  | 0.045141 |

|          |          |          |          |          |         |          |          |          |
|----------|----------|----------|----------|----------|---------|----------|----------|----------|
| -0.04791 | 0.30154  | -0.01879 | 0.68548  | -0.01244 | 0.78856 | -0.02496 | 0.59051  | -0.03668 |
| -0.18224 | 7.47E-05 | -0.16047 | 0.0005   | -0.15002 | 0.00115 | -0.13112 | 0.00454  | -0.21554 |
| -0.09578 | 0.03854  | 0.004324 | 0.92576  | -0.0256  | 0.58107 | 0.027766 | 0.54948  | -0.06409 |
| -0.01637 | 0.7242   | 0.064082 | 0.16681  | 0.047977 | 0.30085 | 0.050533 | 0.2758   | 0.111885 |
| -0.04832 | 0.29744  | -0.20049 | 1.27E-05 | -0.11282 | 0.01471 | -0.2173  | 2.14E-06 | -0.30983 |
| -0.0341  | 0.46219  | -0.01009 | 0.82784  | 0.009107 | 0.8444  | -0.00581 | 0.90035  | -0.06594 |
| -0.17354 | 0.00016  | -0.08058 | 0.08196  | -0.10026 | 0.03028 | -0.06133 | 0.18585  | -0.04899 |
| -0.00861 | 0.85282  | 0.069724 | 0.13244  | 0.11006  | 0.01735 | 0.008162 | 0.86036  | 0.017575 |
| -0.06217 | 0.17987  | -0.01545 | 0.73906  | -0.03517 | 0.44829 | -0.0087  | 0.85135  | -0.12262 |
| 0.04396  | 0.34319  | 0.108581 | 0.01892  | 0.114954 | 0.01293 | 0.069461 | 0.13391  | 0.145762 |
| -0.09299 | 0.0446   | 0.017239 | 0.71021  | -0.03267 | 0.48128 | 0.058695 | 0.20548  | 0.057141 |
| -0.16897 | 0.00024  | -0.06681 | 0.14947  | -0.11073 | 0.01667 | -0.02152 | 0.64268  | -0.00894 |
| -0.00566 | 0.90286  | 0.034599 | 0.45573  | 0.025217 | 0.58674 | 0.024906 | 0.59137  | -0.01183 |
| -0.20849 | 5.53E-06 | -0.13252 | 0.00412  | -0.13027 | 0.00481 | -0.0989  | 0.03263  | -0.1034  |
| -0.18308 | 6.91E-05 | -0.06849 | 0.13942  | -0.07567 | 0.10242 | -0.05534 | 0.23263  | -0.09057 |
| -0.164   | 0.00037  | -0.07976 | 0.08511  | -0.08558 | 0.06462 | -0.05028 | 0.27818  | -0.14574 |
| -0.10522 | 0.02296  | -0.01173 | 0.80049  | -0.04663 | 0.31462 | 0.002954 | 0.94924  | -0.01828 |
| -0.12037 | 0.00922  | -0.0793  | 0.08694  | -0.08062 | 0.08179 | -0.06686 | 0.14912  | -0.07422 |
| -0.12624 | 0.0063   | -0.06227 | 0.17915  | -0.10336 | 0.02551 | -0.01736 | 0.70822  | -0.07458 |
| -0.23233 | 3.84E-07 | -0.16466 | 0.00035  | -0.12942 | 0.00509 | -0.16121 | 0.00047  | -0.20417 |
| -0.07469 | 0.10697  | -0.05842 | 0.20762  | -0.05917 | 0.20181 | -0.04397 | 0.34311  | -0.14847 |
| -0.14102 | 0.00225  | -0.01751 | 0.70592  | -0.06774 | 0.14383 | 0.021323 | 0.64579  | 0.024367 |
| 0.00376  | 0.93541  | -0.01807 | 0.69688  | 0.036422 | 0.43231 | -0.04849 | 0.29568  | -0.12472 |
| -0.07242 | 0.11809  | 0.006118 | 0.8951   | -0.02196 | 0.63589 | 0.035301 | 0.44662  | -0.07    |
| -0.08849 | 0.05601  | 0.030142 | 0.51584  | -0.01366 | 0.76846 | 0.05682  | 0.22035  | 0.075089 |
| -0.14245 | 0.00203  | -0.01698 | 0.71438  | -0.07372 | 0.11163 | 0.027188 | 0.55783  | 0.102613 |
| -0.08    | 0.08417  | -0.02742 | 0.55447  | -0.06353 | 0.17053 | 0.008406 | 0.85623  | -0.10377 |
| -0.13439 | 0.00362  | -0.03492 | 0.45155  | -0.06765 | 0.14435 | -0.00589 | 0.89903  | -0.07954 |
| -0.05695 | 0.2193   | -0.01604 | 0.72949  | 0.010041 | 0.82866 | -0.02803 | 0.54567  | -0.00693 |
| -0.12276 | 0.00791  | -0.06831 | 0.14051  | -0.07356 | 0.11241 | -0.07023 | 0.12965  | -0.01707 |
| -0.13566 | 0.00331  | -0.17284 | 0.00017  | -0.10773 | 0.01988 | -0.18077 | 8.55E-05 | -0.24946 |
| -0.16671 | 0.0003   | -0.12013 | 0.00936  | -0.12744 | 0.00582 | -0.09057 | 0.05046  | -0.20736 |
| -0.12762 | 0.00575  | -0.03736 | 0.42052  | -0.0422  | 0.36283 | -0.03214 | 0.48833  | -0.05678 |
| -0.06248 | 0.17767  | 0.051159 | 0.26989  | 0.029315 | 0.52743 | 0.054553 | 0.23935  | 0.07075  |
| -0.06688 | 0.14902  | -0.0238  | 0.60799  | 0.000437 | 0.99249 | -0.04356 | 0.34754  | 0.052646 |
| -0.04423 | 0.34027  | -0.01279 | 0.78276  | -0.00316 | 0.94569 | -0.01642 | 0.72336  | -0.07945 |
| -0.13734 | 0.00294  | -0.07495 | 0.10577  | -0.05898 | 0.2033  | -0.06726 | 0.1467   | -0.13194 |
| -0.11403 | 0.01368  | 0.04539  | 0.3277   | -0.02894 | 0.53274 | 0.084087 | 0.06945  | 0.146463 |
| -0.09432 | 0.04161  | -0.0856  | 0.06455  | -0.08423 | 0.06899 | -0.05866 | 0.20577  | -0.10067 |
| -0.11987 | 0.00952  | -0.1248  | 0.00693  | -0.09013 | 0.0516  | -0.12312 | 0.00773  | -0.13817 |
| -0.06819 | 0.14121  | -0.02451 | 0.59729  | -0.01283 | 0.78207 | -0.03932 | 0.39654  | -0.05422 |
| -0.13258 | 0.0041   | 0.000881 | 0.98485  | -0.01618 | 0.72733 | 0.0007   | 0.98796  | -0.00121 |
| 0.089789 | 0.05249  | 0.201644 | 1.13E-05 | 0.128761 | 0.00532 | 0.202987 | 9.83E-06 | 0.242319 |
| -0.12977 | 0.00497  | 0.00578  | 0.90086  | -0.02518 | 0.58721 | 0.017401 | 0.70761  | 0.066552 |
| -0.10909 | 0.01837  | -0.00714 | 0.87773  | -0.05585 | 0.22831 | 0.028043 | 0.54551  | 0.08838  |

|          |          |          |         |          |         |          |          |          |
|----------|----------|----------|---------|----------|---------|----------|----------|----------|
| -0.02618 | 0.57251  | 0.032421 | 0.48459 | 0.039445 | 0.39506 | 0.010141 | 0.82698  | 0.034747 |
| -0.05306 | 0.25243  | 0.001715 | 0.97051 | -0.02765 | 0.55109 | 0.019476 | 0.67464  | 0.061638 |
| -0.19241 | 2.84E-05 | -0.08514 | 0.06602 | -0.12926 | 0.00515 | -0.03795 | 0.41322  | 0.007963 |
| -0.09236 | 0.04607  | -0.06342 | 0.17127 | -0.09112 | 0.04908 | -0.0279  | 0.54761  | -0.05053 |
| -0.15072 | 0.00109  | -0.0691  | 0.13595 | -0.07189 | 0.12078 | -0.05964 | 0.19828  | -0.02877 |
| 0.001017 | 0.98251  | 0.004757 | 0.91834 | 0.038893 | 0.40172 | -0.02065 | 0.65623  | -0.03651 |
| -0.01572 | 0.73468  | 0.054674 | 0.2383  | 0.045781 | 0.32354 | 0.036165 | 0.43558  | 0.066703 |
| -0.18534 | 5.59E-05 | -0.10171 | 0.02796 | -0.09968 | 0.03127 | -0.09613 | 0.03783  | -0.10262 |
| -0.12714 | 0.00594  | -0.04362 | 0.34698 | -0.05159 | 0.2659  | -0.03225 | 0.48686  | -0.04044 |
| -0.02407 | 0.60383  | 0.07058  | 0.12775 | 0.028506 | 0.5389  | 0.076421 | 0.09906  | 0.091582 |
| -0.14537 | 0.00163  | -0.09501 | 0.04013 | -0.09721 | 0.03572 | -0.06603 | 0.15424  | -0.14402 |
| -0.13666 | 0.00308  | -0.0482  | 0.29856 | -0.07674 | 0.09765 | -0.01282 | 0.78229  | -0.04413 |
| -0.02587 | 0.57707  | 0.099355 | 0.03182 | 0.049814 | 0.2827  | 0.1024   | 0.02691  | 0.237322 |
| 0.003763 | 0.93536  | -0.01447 | 0.75509 | 0.008739 | 0.8506  | -0.02954 | 0.52431  | -0.06188 |
| -0.12015 | 0.00935  | -0.08206 | 0.07646 | -0.1065  | 0.02134 | -0.04333 | 0.35016  | -0.12974 |
| -0.11523 | 0.01271  | -0.03775 | 0.41567 | -0.04067 | 0.38058 | -0.02368 | 0.60977  | -0.02621 |
| 0.039655 | 0.39256  | 0.167628 | 0.00027 | 0.088763 | 0.05526 | 0.187041 | 4.76E-05 | 0.259088 |
| -0.0582  | 0.20937  | -0.05375 | 0.24639 | -0.02799 | 0.54627 | -0.05398 | 0.24433  | -0.14529 |
| -0.11658 | 0.01169  | 0.008956 | 0.84693 | -0.03683 | 0.42723 | 0.030718 | 0.50784  | 0.027022 |
| -0.13301 | 0.00398  | 0.008289 | 0.85822 | -0.04299 | 0.3539  | 0.034112 | 0.4621   | 0.10306  |
| -0.1286  | 0.00538  | -0.0355  | 0.44402 | -0.07277 | 0.11631 | -0.00247 | 0.95759  | -0.08954 |
| -0.01135 | 0.80672  | 0.118829 | 0.01017 | 0.044456 | 0.33776 | 0.158367 | 0.00059  | 0.106058 |
| -0.14018 | 0.0024   | -0.01416 | 0.76019 | -0.06406 | 0.16693 | 0.004946 | 0.91511  | 0.093734 |
| -0.15272 | 0.00093  | -0.05869 | 0.2055  | -0.07894 | 0.0884  | -0.03807 | 0.41171  | 0.011652 |
| -0.09331 | 0.04385  | -0.05435 | 0.24106 | -0.06444 | 0.16446 | -0.04337 | 0.34969  | -0.07162 |
| 0.03776  | 0.41559  | 0.125288 | 0.00671 | 0.100884 | 0.02927 | 0.107581 | 0.02005  | 0.187863 |
| -0.153   | 0.00091  | 0.006416 | 0.89002 | -0.05833 | 0.20833 | 0.058753 | 0.20503  | -0.05963 |
| 0.066852 | 0.14918  | -0.10356 | 0.02522 | -0.02452 | 0.59712 | -0.13849 | 0.00271  | -0.13972 |
| -0.05166 | 0.26521  | 0.050369 | 0.27737 | 0.01966  | 0.67174 | 0.05901  | 0.20305  | 0.131323 |
| -0.10988 | 0.01753  | 0.033121 | 0.47521 | -0.0364  | 0.43263 | 0.06914  | 0.13572  | 0.195544 |
| -0.0334  | 0.47154  | -0.02671 | 0.56471 | -0.01547 | 0.73877 | -0.02216 | 0.63295  | -0.07793 |
| -0.18352 | 6.63E-05 | -0.10482 | 0.02348 | -0.12392 | 0.00734 | -0.05938 | 0.20023  | -0.07141 |
| 0.050902 | 0.2723   | -0.13714 | 0.00298 | -0.08002 | 0.08412 | -0.13903 | 0.0026   | -0.18514 |
| -0.077   | 0.09652  | 0.005576 | 0.90434 | -0.03366 | 0.46807 | 0.039723 | 0.39175  | 0.012759 |
| 0.092648 | 0.04538  | -0.01922 | 0.67868 | 0.037924 | 0.41357 | -0.06612 | 0.1537   | -0.09089 |
| -0.04432 | 0.33925  | 0.083712 | 0.07071 | 0.045928 | 0.32199 | 0.062809 | 0.17541  | 0.178909 |
| -0.14185 | 0.00212  | -0.03398 | 0.46382 | -0.03161 | 0.49555 | -0.03862 | 0.40506  | 0.016056 |
| -0.03415 | 0.46156  | 0.120673 | 0.00905 | 0.031443 | 0.49788 | 0.161744 | 0.00045  | 0.166722 |
| -0.13246 | 0.00414  | -0.03358 | 0.46917 | -0.03616 | 0.43559 | -0.03663 | 0.42969  | -0.05085 |
| -0.09072 | 0.05009  | -0.0947  | 0.04079 | -0.03746 | 0.41936 | -0.10473 | 0.02361  | -0.24343 |
| -0.14826 | 0.00131  | -0.02214 | 0.63316 | -0.06761 | 0.14462 | 0.018076 | 0.69683  | 0.013063 |
| -0.14989 | 0.00116  | -0.01079 | 0.81614 | -0.04596 | 0.32165 | 0.004065 | 0.93019  | 0.024637 |
| -0.163   | 0.0004   | -0.00021 | 0.99632 | -0.06996 | 0.13113 | 0.04701  | 0.31071  | 0.052008 |
| -0.1598  | 0.00053  | -0.11279 | 0.01474 | -0.12864 | 0.00537 | -0.06996 | 0.13113  | -0.08591 |
| -0.10343 | 0.02541  | 0.028436 | 0.53988 | -0.03139 | 0.49858 | 0.058075 | 0.21031  | 0.106718 |

|          |          |          |         |          |         |          |          |          |
|----------|----------|----------|---------|----------|---------|----------|----------|----------|
| -0.18298 | 6.97E-05 | -0.17277 | 0.00018 | -0.13475 | 0.00353 | -0.15116 | 0.00105  | -0.26157 |
| -0.14813 | 0.00133  | 0.001169 | 0.97989 | -0.06573 | 0.15612 | 0.041667 | 0.36897  | 0.069098 |
| -0.06798 | 0.14243  | -0.00327 | 0.94375 | -0.00153 | 0.97378 | 0.011246 | 0.80848  | -0.06634 |
| -0.15412 | 0.00083  | 0.024268 | 0.6009  | -0.06363 | 0.16985 | 0.07894  | 0.08838  | 0.087814 |
| -0.06785 | 0.14318  | 0.029664 | 0.52252 | -0.02097 | 0.65128 | 0.044908 | 0.33287  | 0.072121 |
| 0.080542 | 0.08209  | 0.076689 | 0.09787 | 0.100104 | 0.03055 | 0.029208 | 0.52894  | 0.11986  |
| -0.10525 | 0.02292  | -0.08905 | 0.05448 | -0.09625 | 0.03759 | -0.05873 | 0.20522  | -0.15172 |
| -0.08366 | 0.0709   | 0.01178  | 0.79958 | -0.01628 | 0.72567 | 0.018672 | 0.68735  | 0.065835 |
| -0.19331 | 2.60E-05 | -0.10947 | 0.01796 | -0.11114 | 0.01627 | -0.07575 | 0.10206  | -0.10381 |
| -0.03943 | 0.39522  | 0.078088 | 0.09188 | 0.025305 | 0.58543 | 0.095731 | 0.03864  | 0.135331 |
| -0.03398 | 0.46382  | 0.009057 | 0.84523 | -0.00441 | 0.92425 | 0.017203 | 0.7108   | 0.029747 |
| 0.004108 | 0.92945  | -0.13637 | 0.00315 | -0.07017 | 0.12996 | -0.14766 | 0.00137  | -0.15584 |
| -0.18968 | 3.70E-05 | -0.07839 | 0.09061 | -0.10197 | 0.02757 | -0.03008 | 0.51666  | -0.18141 |
| -0.13942 | 0.00253  | -0.12883 | 0.0053  | -0.10875 | 0.01874 | -0.11123 | 0.01619  | -0.22515 |
| -0.12736 | 0.00585  | -0.04008 | 0.38749 | -0.05555 | 0.23089 | -0.02575 | 0.5788   | -0.02941 |
| -0.19295 | 2.69E-05 | -0.12101 | 0.00885 | -0.13793 | 0.00282 | -0.06812 | 0.14162  | -0.14578 |
| -0.15423 | 0.00083  | -0.12375 | 0.00742 | -0.10236 | 0.02697 | -0.11195 | 0.01551  | -0.25675 |
| -0.05745 | 0.21526  | -0.005   | 0.91421 | -0.01309 | 0.77776 | -0.00603 | 0.89656  | -0.08631 |
| -0.23102 | 4.48E-07 | -0.16669 | 0.0003  | -0.17852 | 0.00011 | -0.11652 | 0.01174  | -0.19246 |
| -0.05904 | 0.20279  | -0.10992 | 0.01749 | -0.09318 | 0.04416 | -0.09802 | 0.0342   | -0.09602 |
| -0.13013 | 0.00485  | -0.02194 | 0.63621 | -0.04109 | 0.37569 | -0.00399 | 0.93146  | 0.034837 |
| -0.00074 | 0.98736  | 0.081319 | 0.07917 | 0.068284 | 0.14064 | 0.063173 | 0.17292  | 0.104478 |
| -0.11077 | 0.01663  | 0.037738 | 0.41586 | -0.03642 | 0.43238 | 0.091931 | 0.04709  | 0.13645  |
| -0.15151 | 0.00102  | -0.08299 | 0.07319 | -0.06667 | 0.1503  | -0.08889 | 0.05491  | -0.12027 |
| -0.12116 | 0.00877  | -0.03923 | 0.39765 | -0.04965 | 0.28429 | -0.02528 | 0.58579  | 0.042306 |
| 0.06525  | 0.1592   | 0.123446 | 0.00757 | 0.144496 | 0.00174 | 0.068991 | 0.13657  | 0.027681 |
| -0.10196 | 0.02758  | -0.03955 | 0.39381 | -0.02821 | 0.54308 | -0.04815 | 0.29909  | 0.046271 |
| -0.09456 | 0.04111  | -0.02021 | 0.66313 | -0.05409 | 0.2434  | -0.00537 | 0.90779  | 0.036691 |
| -0.1765  | 0.00013  | -0.13046 | 0.00475 | -0.10455 | 0.02385 | -0.12692 | 0.00602  | -0.20607 |
| -0.09233 | 0.04613  | 0.009663 | 0.83502 | -0.04897 | 0.29093 | 0.04724  | 0.30835  | 0.089572 |
| -0.05513 | 0.23437  | 0.061566 | 0.18413 | 0.013234 | 0.77547 | 0.071962 | 0.12043  | 0.154881 |
| -0.21213 | 3.75E-06 | -0.16707 | 0.00029 | -0.16226 | 0.00043 | -0.12531 | 0.0067   | -0.23362 |
| -0.1441  | 0.0018   | -0.11172 | 0.01572 | -0.13512 | 0.00344 | -0.0721  | 0.11973  | -0.17559 |
| -0.08023 | 0.0833   | 0.015938 | 0.73121 | -0.04211 | 0.36392 | 0.059338 | 0.20055  | 0.019875 |
| -0.07611 | 0.10044  | 0.026685 | 0.56514 | -0.00065 | 0.98891 | 0.037097 | 0.42383  | 0.072455 |
| -0.10602 | 0.02193  | -0.05954 | 0.19903 | -0.03818 | 0.41039 | -0.06262 | 0.17675  | -0.11564 |
| -0.02622 | 0.57195  | -0.15436 | 0.00082 | -0.06398 | 0.16748 | -0.17558 | 0.00014  | -0.28659 |
| -0.06221 | 0.17955  | -0.04565 | 0.32494 | -0.05349 | 0.24861 | -0.0342  | 0.46096  | -0.08221 |
| 0.133359 | 0.00389  | -0.03393 | 0.46454 | 0.030528 | 0.51048 | -0.06657 | 0.15091  | -0.03614 |
| -0.13651 | 0.00312  | -0.08051 | 0.08221 | -0.10499 | 0.02327 | -0.04733 | 0.30738  | -0.07443 |
| 0.018891 | 0.68387  | -0.17452 | 0.00015 | -0.08738 | 0.05919 | -0.19625 | 1.94E-05 | -0.22105 |
| -0.01553 | 0.73789  | 0.070532 | 0.128   | 0.029255 | 0.52827 | 0.07585  | 0.10161  | 0.171661 |
| -0.13746 | 0.00291  | -0.04645 | 0.31653 | -0.05058 | 0.27535 | -0.02414 | 0.60285  | -0.14336 |
| -0.11502 | 0.01287  | 0.031535 | 0.49661 | -0.01939 | 0.67597 | 0.050243 | 0.27857  | 0.048902 |
| -0.10094 | 0.02918  | -0.04074 | 0.37969 | -0.04567 | 0.32469 | -0.02862 | 0.53729  | -0.0785  |



|          |          |          |          |          |         |          |          |          |
|----------|----------|----------|----------|----------|---------|----------|----------|----------|
| -0.09694 | 0.03624  | -0.07499 | 0.10557  | -0.06631 | 0.1525  | -0.06683 | 0.14932  | 0.024067 |
| -0.17746 | 0.00012  | -0.15274 | 0.00093  | -0.15507 | 0.00077 | -0.10566 | 0.02239  | -0.23416 |
| -0.07919 | 0.08738  | -0.05502 | 0.23536  | -0.05511 | 0.23458 | -0.03627 | 0.43421  | -0.12526 |
| -0.13918 | 0.00258  | 0.002822 | 0.9515   | -0.0443  | 0.33943 | 0.016808 | 0.71715  | 0.003648 |
| -0.08307 | 0.07291  | 0.103195 | 0.02575  | 0.029736 | 0.52151 | 0.13121  | 0.00451  | 0.130688 |
| -0.15406 | 0.00084  | -0.02204 | 0.63467  | -0.05837 | 0.20798 | -0.00804 | 0.86236  | 0.008723 |
| -0.15246 | 0.00095  | -0.07916 | 0.08749  | -0.07672 | 0.09775 | -0.06788 | 0.14301  | -0.16585 |
| -0.1322  | 0.00421  | 0.032622 | 0.48189  | -0.02314 | 0.61786 | 0.047561 | 0.30507  | 0.148801 |
| -0.06199 | 0.18111  | 0.054502 | 0.23979  | -0.04344 | 0.34896 | 0.102127 | 0.02733  | 0.144342 |
| -0.0971  | 0.03593  | -0.03747 | 0.41923  | -0.04652 | 0.31583 | -0.02647 | 0.56828  | -0.10002 |
| -0.10377 | 0.02493  | -0.01907 | 0.68109  | -0.00602 | 0.89684 | -0.03731 | 0.42114  | -0.05738 |
| -0.06239 | 0.1783   | 0.058148 | 0.20974  | 0.00591  | 0.89865 | 0.077642 | 0.09376  | 0.1209   |
| -0.02506 | 0.58904  | 0.103795 | 0.02489  | 0.051089 | 0.27055 | 0.1242   | 0.00721  | 0.097546 |
| -0.16352 | 0.00039  | -0.0341  | 0.4623   | -0.08202 | 0.0766  | 0.007458 | 0.8723   | 0.021227 |
| -0.11359 | 0.01404  | -0.08833 | 0.05646  | -0.07609 | 0.10054 | -0.08896 | 0.05472  | -0.0267  |
| -0.13525 | 0.00341  | -0.08785 | 0.05783  | -0.1235  | 0.00754 | -0.02552 | 0.58227  | -0.09665 |
| -0.07079 | 0.12662  | 0.013859 | 0.76517  | 0.059151 | 0.20197 | -0.04422 | 0.34034  | -0.05066 |
| -0.18443 | 6.09E-05 | -0.08691 | 0.06056  | -0.1181  | 0.01064 | -0.05237 | 0.25867  | -0.03938 |
| -0.09025 | 0.05129  | 0.01822  | 0.69452  | -0.00533 | 0.90858 | 0.028482 | 0.53923  | 0.063384 |
| 0.000835 | 0.98564  | 0.13829  | 0.00275  | 0.099826 | 0.03102 | 0.129379 | 0.00511  | 0.223717 |
| -0.1437  | 0.00185  | -0.19923 | 1.44E-05 | -0.14838 | 0.0013  | -0.18407 | 6.30E-05 | -0.31794 |
| -0.03825 | 0.40958  | -0.05451 | 0.23973  | -0.0058  | 0.90059 | -0.08099 | 0.08039  | -0.14017 |
| -0.1283  | 0.00549  | -0.10469 | 0.02367  | -0.11629 | 0.01191 | -0.06979 | 0.1321   | -0.11959 |
| -0.16625 | 0.00031  | -0.06415 | 0.16635  | -0.09919 | 0.03212 | -0.02994 | 0.5186   | -0.01918 |
| -0.08601 | 0.06327  | 0.0233   | 0.61551  | 0.026049 | 0.57445 | 0.014208 | 0.75943  | 0.03577  |
| -0.02313 | 0.6181   | 0.035938 | 0.43846  | 0.062957 | 0.17439 | 6.97E-05 | 0.9988   | 0.027201 |
| -0.0654  | 0.15821  | 0.075177 | 0.10469  | 0.005632 | 0.9034  | 0.094209 | 0.04186  | 0.204562 |
| -0.13038 | 0.00477  | -0.1339  | 0.00374  | -0.12321 | 0.00769 | -0.11513 | 0.01279  | -0.15579 |
| -0.17552 | 0.00014  | -0.02853 | 0.53857  | -0.05832 | 0.20841 | -0.00964 | 0.83535  | -0.03928 |
| -0.07828 | 0.0911   | -0.04323 | 0.35122  | -0.02269 | 0.62485 | -0.05637 | 0.22404  | -0.02327 |
| -0.16608 | 0.00031  | -0.07243 | 0.11805  | -0.08379 | 0.07045 | -0.0453  | 0.32861  | -0.14247 |
| -0.17264 | 0.00018  | -0.11261 | 0.01491  | -0.10273 | 0.02642 | -0.09397 | 0.04238  | -0.15997 |
| 0.033819 | 0.46595  | 0.132957 | 0.004    | 0.067811 | 0.14342 | 0.141847 | 0.00212  | 0.304506 |
| -0.07386 | 0.11095  | 0.020875 | 0.65275  | -0.0319  | 0.49164 | 0.034329 | 0.45925  | 0.056413 |
| -0.08322 | 0.0724   | 0.026897 | 0.56205  | 0.002785 | 0.95214 | 0.049248 | 0.28821  | 0.045564 |
| -0.04726 | 0.30817  | 0.017515 | 0.70578  | 0.005821 | 0.90016 | 0.015111 | 0.74465  | 0.015196 |
| -0.07935 | 0.08674  | -0.04492 | 0.33269  | -0.02474 | 0.59382 | -0.05162 | 0.26562  | -0.01426 |
| -0.04365 | 0.34658  | 0.007674 | 0.86863  | -0.00849 | 0.85473 | 0.00545  | 0.90649  | -0.04513 |
| -0.09774 | 0.03473  | 0.054042 | 0.24378  | -0.00761 | 0.86967 | 0.081964 | 0.07681  | 0.140389 |
| -0.04698 | 0.31101  | -0.00928 | 0.84153  | -0.00449 | 0.92284 | -0.00834 | 0.85733  | -0.01288 |
| -0.13664 | 0.00309  | -0.05592 | 0.22779  | -0.0872  | 0.0597  | -0.01656 | 0.72111  | -0.05898 |
| -0.21402 | 3.06E-06 | -0.10454 | 0.02387  | -0.13584 | 0.00327 | -0.05648 | 0.22312  | -0.10596 |
| -0.18656 | 4.98E-05 | -0.14613 | 0.00154  | -0.14091 | 0.00227 | -0.1124  | 0.01509  | -0.15549 |
| -0.15768 | 0.00063  | -0.11647 | 0.01178  | -0.13474 | 0.00353 | -0.09412 | 0.04206  | -0.19861 |
| -0.04868 | 0.29386  | 0.045104 | 0.33076  | 0.040579 | 0.38161 | 0.026131 | 0.57325  | 0.038538 |

|          |          |          |         |          |          |          |         |          |
|----------|----------|----------|---------|----------|----------|----------|---------|----------|
| -0.06264 | 0.17658  | 0.077986 | 0.09231 | 0.026044 | 0.57453  | 0.092594 | 0.04551 | 0.186578 |
| -0.05679 | 0.22057  | -0.01121 | 0.80913 | -0.02254 | 0.62706  | -0.00554 | 0.90502 | 0.086413 |
| -0.12314 | 0.00772  | 0.001664 | 0.97139 | -0.03749 | 0.41892  | 0.020402 | 0.66012 | 0.087195 |
| -0.01843 | 0.69119  | -0.02379 | 0.60809 | -0.03168 | 0.49461  | -0.01921 | 0.67882 | 0.04294  |
| -0.19162 | 3.07E-05 | -0.08152 | 0.07842 | -0.10267 | 0.02652  | -0.05645 | 0.22341 | 0.003443 |
| -0.11761 | 0.01097  | -0.08104 | 0.08019 | -0.08079 | 0.08116  | -0.06614 | 0.15355 | -0.1444  |
| -0.07853 | 0.09007  | 0.095633 | 0.03884 | 0.016578 | 0.72085  | 0.132304 | 0.00418 | 0.130388 |
| -0.2235  | 1.07E-06 | -0.16064 | 0.00049 | -0.17983 | 9.32E-05 | -0.10281 | 0.0263  | -0.21192 |
| -0.13647 | 0.00313  | 0.00446  | 0.92342 | -0.04963 | 0.28449  | 0.041227 | 0.37405 | 0.069594 |
| -0.09894 | 0.03255  | -0.02106 | 0.64985 | -0.03149 | 0.49721  | -0.01228 | 0.79123 | 0.025888 |
| -0.07893 | 0.0884   | 0.014706 | 0.75128 | 0.014451 | 0.75544  | 0.002272 | 0.96094 | 0.045317 |
| -0.12824 | 0.00551  | -0.05104 | 0.271   | -0.1043  | 0.0242   | 4.51E-05 | 0.99922 | 0.020077 |
| -0.20365 | 9.18E-06 | -0.14392 | 0.00182 | -0.12281 | 0.00789  | -0.12896 | 0.00525 | -0.16608 |
| -0.07956 | 0.08589  | 0.108791 | 0.01869 | 0.045883 | 0.32246  | 0.106879 | 0.02088 | 0.157638 |
| 0.11884  | 0.01016  | 0.004104 | 0.92952 | -0.00482 | 0.91719  | 0.009373 | 0.83991 | 0.002654 |
| -0.07469 | 0.10695  | 0.018051 | 0.69723 | 0.001341 | 0.97694  | 0.021632 | 0.64103 | 0.079578 |
| -0.09057 | 0.05046  | -0.01072 | 0.81734 | -0.00376 | 0.93545  | -0.02537 | 0.58448 | -0.03954 |
| -0.14612 | 0.00154  | -0.04577 | 0.32371 | -0.03425 | 0.46022  | -0.04544 | 0.3272  | -0.07024 |
| -0.06157 | 0.18411  | -0.02465 | 0.59519 | -0.04162 | 0.36952  | -0.01872 | 0.68666 | -0.07802 |
| -0.11689 | 0.01148  | -0.05787 | 0.21195 | -0.02667 | 0.56542  | -0.06841 | 0.13993 | -0.12083 |
| -0.0805  | 0.08227  | 0.017463 | 0.70663 | 0.000588 | 0.98989  | 0.021437 | 0.64403 | -0.03644 |
| -0.0821  | 0.07632  | -0.00613 | 0.89486 | -0.04145 | 0.37152  | 0.001829 | 0.96856 | 0.031712 |
| -0.11806 | 0.01067  | -0.14377 | 0.00184 | -0.10495 | 0.02332  | -0.14201 | 0.0021  | -0.19229 |
| -0.13837 | 0.00273  | -0.04056 | 0.38181 | -0.04938 | 0.2869   | -0.03571 | 0.44143 | -0.0129  |
| -0.1131  | 0.01446  | -0.02567 | 0.57997 | -0.03515 | 0.44852  | -0.03376 | 0.46673 | 0.042671 |
| -0.07284 | 0.11594  | -0.05497 | 0.23579 | -0.01451 | 0.75454  | -0.07938 | 0.08661 | -0.14731 |
| -0.13808 | 0.00279  | -0.12531 | 0.0067  | -0.09521 | 0.03971  | -0.11711 | 0.01132 | -0.21544 |
| -0.0749  | 0.106    | 0.057637 | 0.21378 | 0.005326 | 0.90862  | 0.07759  | 0.09398 | 0.108685 |
| -0.05976 | 0.19736  | 0.047742 | 0.30323 | 0.02577  | 0.57856  | 0.03804  | 0.41213 | 0.025787 |
| -0.15913 | 0.00056  | -0.11012 | 0.01728 | -0.10998 | 0.01743  | -0.0808  | 0.08113 | -0.17653 |
| -0.04346 | 0.34874  | 0.046498 | 0.31602 | 0.016168 | 0.72747  | 0.0397   | 0.39201 | 0.183744 |
| -0.09749 | 0.0352   | -0.00089 | 0.98461 | -0.02651 | 0.56768  | 0.000144 | 0.99752 | 0.064345 |
| 0.110004 | 0.0174   | -0.06884 | 0.13742 | -0.00073 | 0.98746  | -0.09674 | 0.03663 | -0.10156 |
| -0.10367 | 0.02507  | -0.1003  | 0.03022 | -0.06594 | 0.1548   | -0.10395 | 0.02468 | -0.21053 |
| -0.14733 | 0.00141  | -0.15016 | 0.00113 | -0.10169 | 0.02799  | -0.14087 | 0.00228 | -0.29822 |
| 0.044885 | 0.33311  | 0.083519 | 0.07136 | 0.068053 | 0.142    | 0.072065 | 0.1199  | 0.101249 |
| -0.09831 | 0.03367  | -0.02574 | 0.57907 | -0.01587 | 0.73225  | -0.04053 | 0.38219 | -0.09582 |
| -0.11876 | 0.01021  | 0.108538 | 0.01897 | 0.018406 | 0.69158  | 0.130614 | 0.0047  | 0.222131 |
| 0.002399 | 0.95877  | 0.092478 | 0.04578 | 0.068455 | 0.13965  | 0.073302 | 0.11366 | 0.152109 |
| -0.1311  | 0.00454  | -0.08842 | 0.05622 | -0.05678 | 0.22064  | -0.08665 | 0.06134 | -0.11322 |
| -0.11905 | 0.01002  | -0.02452 | 0.59718 | -0.03077 | 0.50707  | -0.01628 | 0.72564 | -0.00279 |
| -0.15942 | 0.00054  | -0.0701  | 0.13036 | -0.05981 | 0.19695  | -0.07366 | 0.11192 | -0.04841 |
| -0.16185 | 0.00045  | 0.016428 | 0.72327 | -0.06764 | 0.14443  | 0.068116 | 0.14163 | 0.089301 |
| -0.0613  | 0.18604  | 0.061107 | 0.18743 | 0.01015  | 0.82683  | 0.072562 | 0.11736 | 0.12795  |
| -0.00147 | 0.97477  | 0.051802 | 0.26391 | 0.039227 | 0.39769  | 0.039722 | 0.39176 | 0.033096 |

|          |          |          |          |          |         |          |          |          |
|----------|----------|----------|----------|----------|---------|----------|----------|----------|
| -0.00571 | 0.90207  | 0.080603 | 0.08186  | 0.052451 | 0.25797 | 0.08901  | 0.05458  | 0.111185 |
| 0.098512 | 0.03331  | -0.09845 | 0.03342  | 0.000723 | 0.98756 | -0.14176 | 0.00213  | -0.25276 |
| 0.026763 | 0.56401  | 0.093462 | 0.04351  | 0.065981 | 0.15457 | 0.085438 | 0.06507  | 0.244161 |
| 0.132967 | 0.004    | 0.234869 | 2.84E-07 | 0.173429 | 0.00017 | 0.196454 | 1.90E-05 | 0.312859 |
| 0.116563 | 0.01171  | 0.204775 | 8.17E-06 | 0.148946 | 0.00125 | 0.173437 | 0.00017  | 0.33268  |
| -0.00718 | 0.87694  | 0.029427 | 0.52585  | 0.012568 | 0.78648 | 0.020081 | 0.66513  | 0.133098 |
| 0.022087 | 0.63402  | 0.058291 | 0.20862  | 0.02879  | 0.53486 | 0.052676 | 0.25593  | 0.147606 |
| 0.065024 | 0.16064  | 0.01993  | 0.6675   | 0.042475 | 0.35974 | -0.01183 | 0.79876  | 0.036084 |
| 0.017566 | 0.70496  | 0.103377 | 0.02548  | 0.046559 | 0.31538 | 0.119108 | 0.00999  | 0.211788 |
| 0.029889 | 0.51937  | 0.100151 | 0.03047  | 0.072682 | 0.11675 | 0.085591 | 0.06459  | 0.177974 |
| 0.047307 | 0.30766  | -0.09774 | 0.03472  | -0.01406 | 0.76188 | -0.12545 | 0.00664  | -0.19449 |
| -0.07581 | 0.10179  | -0.01838 | 0.69201  | -0.06596 | 0.15472 | 0.026219 | 0.57196  | -0.01957 |
| 0.032183 | 0.48781  | 0.080737 | 0.08135  | 0.057075 | 0.21829 | 0.069064 | 0.13616  | 0.179855 |
| -0.03683 | 0.42712  | 0.014045 | 0.76211  | -0.0071  | 0.87834 | 0.023036 | 0.61951  | 0.075462 |
| -0.09024 | 0.05131  | -0.00991 | 0.83092  | -0.03386 | 0.46541 | -0.00386 | 0.93376  | -0.03679 |
| 0.093625 | 0.04315  | 0.049784 | 0.28299  | 0.046284 | 0.31825 | 0.044407 | 0.33829  | 0.099192 |
| 0.046066 | 0.32053  | 0.222861 | 1.15E-06 | 0.089368 | 0.05361 | 0.260988 | 1.04E-08 | 0.402393 |
| -0.01443 | 0.75578  | -0.00697 | 0.88066  | -0.00275 | 0.95271 | -0.01141 | 0.80567  | -0.04577 |
| -0.00016 | 0.99723  | 0.02203  | 0.63489  | 0.018593 | 0.6886  | 0.019573 | 0.6731   | 0.122537 |
| -0.03538 | 0.44562  | -0.06147 | 0.18482  | -0.03693 | 0.42596 | -0.05464 | 0.23863  | -0.09189 |
| 0.069015 | 0.13644  | 0.033655 | 0.46812  | 0.069123 | 0.13582 | 0.004879 | 0.91626  | 0.001472 |
| 0.019822 | 0.66919  | -0.02061 | 0.65693  | 0.00555  | 0.90479 | -0.03025 | 0.5143   | -0.06739 |
| -0.07787 | 0.09278  | -0.11595 | 0.01216  | -0.09472 | 0.04076 | -0.11568 | 0.01236  | -0.08858 |
| 0.03839  | 0.40784  | 0.03439  | 0.45845  | -0.00031 | 0.99474 | 0.047582 | 0.30485  | 0.045746 |
| -0.02238 | 0.62955  | -0.0669  | 0.14889  | -0.02295 | 0.62087 | -0.07744 | 0.0946   | -0.08644 |
| 0.22091  | 1.43E-06 | 0.099413 | 0.03172  | 0.176562 | 0.00013 | 0.027672 | 0.55084  | 0.028673 |
| -0.01162 | 0.80218  | 0.054061 | 0.24362  | 0.029774 | 0.52097 | 0.053062 | 0.25245  | 0.230243 |
| 0.090024 | 0.05187  | 0.040386 | 0.38389  | 0.076296 | 0.09961 | 0.006495 | 0.88867  | 0.072965 |
| -0.03263 | 0.48185  | -0.00689 | 0.88187  | -0.02418 | 0.60217 | -0.00467 | 0.91975  | 0.143112 |
| 0.098621 | 0.03311  | 0.027451 | 0.55402  | 0.066727 | 0.14995 | 0.002706 | 0.9535   | 0.055376 |
| 0.030174 | 0.51539  | 0.100513 | 0.02987  | 0.061192 | 0.18682 | 0.096795 | 0.03652  | 0.196269 |
| 0.020924 | 0.65198  | 0.029545 | 0.52419  | 0.020627 | 0.65661 | 0.020061 | 0.66544  | 0.01903  |
| 0.004404 | 0.92438  | 0.040516 | 0.38235  | 0.019237 | 0.67841 | 0.026281 | 0.57105  | 0.068266 |
| 0.0551   | 0.23466  | 0.097174 | 0.03579  | 0.064783 | 0.1622  | 0.088957 | 0.05473  | 0.218483 |
| -0.00866 | 0.85194  | -0.00854 | 0.85403  | 0.011521 | 0.8039  | -0.00679 | 0.88358  | 0.000292 |
| 0.078368 | 0.09072  | 0.052357 | 0.25882  | 0.038049 | 0.41203 | 0.073024 | 0.11504  | 0.181397 |
| 0.084548 | 0.06793  | 0.121255 | 0.00872  | 0.090249 | 0.05129 | 0.127939 | 0.00563  | 0.062622 |
| -0.03711 | 0.42372  | -0.04218 | 0.36308  | -0.05119 | 0.26962 | -0.03087 | 0.50572  | 0.033799 |
| 0.056183 | 0.22558  | 0.000277 | 0.99523  | -0.00678 | 0.8839  | -0.00214 | 0.96324  | 0.047117 |
| 0.013521 | 0.77072  | 0.054008 | 0.24408  | 0.029029 | 0.53147 | 0.063355 | 0.17168  | 0.063054 |
| 0.072682 | 0.11676  | 0.112214 | 0.01526  | 0.10298  | 0.02606 | 0.081092 | 0.08001  | 0.076288 |
| -0.0316  | 0.4957   | -0.02313 | 0.61804  | -0.02722 | 0.55742 | -0.01419 | 0.75968  | -0.00074 |
| 0.082346 | 0.07544  | 0.081486 | 0.07856  | 0.099256 | 0.03199 | 0.034181 | 0.46119  | 0.133505 |
| 0.022008 | 0.63523  | -0.02411 | 0.60326  | 0.018991 | 0.68229 | -0.03697 | 0.42541  | -0.07301 |
| 0.131359 | 0.00446  | 0.103011 | 0.02601  | 0.119975 | 0.00946 | 0.068041 | 0.14206  | 0.098889 |

|          |          |          |          |          |          |           |          |          |
|----------|----------|----------|----------|----------|----------|-----------|----------|----------|
| -0.08798 | 0.05745  | -0.0833  | 0.0721   | -0.06585 | 0.15537  | -0.08206  | 0.07647  | -0.08391 |
| 0.019584 | 0.67294  | -0.07135 | 0.12361  | -0.01116 | 0.80984  | -0.08678  | 0.06095  | -0.09032 |
| -0.03036 | 0.51278  | 0.036054 | 0.43698  | 0.011061 | 0.81158  | 0.043751  | 0.34548  | 0.09119  |
| 0.051333 | 0.26826  | -0.00321 | 0.94481  | -0.00163 | 0.97198  | 0.001187  | 0.97959  | 0.037855 |
| 0.01603  | 0.72972  | 0.083608 | 0.07106  | 0.053877 | 0.24523  | 0.06832   | 0.14044  | 0.090717 |
| -0.04711 | 0.30966  | -0.01121 | 0.80915  | -0.02487 | 0.59196  | -0.00296  | 0.94912  | -0.03942 |
| -0.00821 | 0.8595   | -0.10509 | 0.02313  | -0.07645 | 0.09891  | -0.0999   | 0.0309   | -0.12971 |
| -0.06505 | 0.16047  | -0.16596 | 0.00032  | -0.11775 | 0.01087  | -0.15089  | 0.00107  | -0.30132 |
| 0.026352 | 0.57     | 0.053026 | 0.25278  | 0.017084 | 0.7127   | 0.062908  | 0.17473  | 0.202052 |
| -0.05865 | 0.20585  | -0.07088 | 0.12613  | -0.07813 | 0.09172  | -0.05375  | 0.24636  | -0.15521 |
| 0.085736 | 0.06414  | 0.225486 | 8.51E-07 | 0.115813 | 0.01226  | 0.231432  | 4.27E-07 | 0.527273 |
| 0.367786 | 2.10E-16 | 0.41108  | 1.81E-20 | 0.36059  | 8.71E-16 | 0.321487  | 1.09E-12 | 0.337965 |
| 0.003088 | 0.94693  | 0.093968 | 0.04239  | 0.037526 | 0.41848  | 0.112582  | 0.01493  | 0.230423 |
| -0.042   | 0.36516  | -0.02258 | 0.62651  | -0.02971 | 0.52188  | -0.01779  | 0.70137  | -0.03446 |
| -0.10214 | 0.0273   | -0.05023 | 0.27869  | -0.04843 | 0.2963   | -0.05638  | 0.22397  | 0.020933 |
| -0.01601 | 0.7301   | 0.011303 | 0.80753  | 0.002277 | 0.96086  | 0.013742  | 0.7671   | 0.112611 |
| 0.010517 | 0.82068  | 0.019548 | 0.6735   | 0.02938  | 0.52652  | -9.27E-05 | 0.99841  | 0.099048 |
| -0.08856 | 0.05581  | -0.12954 | 0.00505  | -0.09657 | 0.03697  | -0.1317   | 0.00436  | -0.1641  |
| -0.06955 | 0.1334   | -0.19775 | 1.67E-05 | -0.13268 | 0.00407  | -0.17724  | 0.00012  | -0.37476 |
| 0.0057   | 0.90222  | -0.01477 | 0.75027  | -0.02553 | 0.58206  | -0.01651  | 0.72192  | -0.03687 |
| 0.06876  | 0.13789  | 0.067596 | 0.1447   | 0.07093  | 0.12586  | 0.040176  | 0.38637  | 0.064714 |
| -0.07606 | 0.10065  | -0.08305 | 0.07296  | -0.04398 | 0.343    | -0.09972  | 0.0312   | -0.15302 |
| 0.051151 | 0.26996  | 0.265584 | 5.58E-09 | 0.115902 | 0.0122   | 0.321205  | 1.14E-12 | 0.296833 |
| 0.083881 | 0.07014  | 0.095651 | 0.03881  | 0.047057 | 0.31023  | 0.11378   | 0.01389  | 0.181434 |
| 0.013332 | 0.77385  | 0.083339 | 0.07198  | 0.0465   | 0.316    | 0.072759  | 0.11637  | 0.208962 |
| 0.184545 | 6.02E-05 | 0.19744  | 1.73E-05 | 0.170007 | 0.00022  | 0.165522  | 0.00033  | 0.287378 |
| -0.01878 | 0.68557  | 0.011843 | 0.79852  | 0.00353  | 0.93936  | 0.009947  | 0.83025  | 0.092762 |
| 0.072467 | 0.11784  | 0.066223 | 0.15306  | 0.050257 | 0.27844  | 0.066131  | 0.15363  | 0.10897  |
| 0.150144 | 0.00114  | 0.100822 | 0.02937  | 0.161677 | 0.00045  | 0.025967  | 0.57565  | 0.055621 |
| 0.013972 | 0.76331  | -0.09376 | 0.04285  | -0.00359 | 0.9384   | -0.14597  | 0.00156  | -0.09912 |
| 0.020764 | 0.65446  | 0.046997 | 0.31084  | 0.036623 | 0.42977  | 0.04236   | 0.36106  | 0.180596 |
| 0.074993 | 0.10555  | 0.129601 | 0.00503  | 0.120447 | 0.00918  | 0.072011  | 0.12018  | 0.28918  |
| 0.065215 | 0.15942  | -0.02986 | 0.51981  | 0.022006 | 0.63526  | -0.06255  | 0.17723  | -0.05553 |
| -0.07212 | 0.11961  | -0.00181 | 0.96885  | -0.02966 | 0.52256  | 0.013908  | 0.76436  | 0.088811 |
| -0.10589 | 0.0221   | -0.08691 | 0.06055  | -0.08391 | 0.07004  | -0.07087  | 0.12621  | -0.12216 |
| 0.020735 | 0.65492  | -0.00855 | 0.85378  | 0.023752 | 0.60867  | -0.02776  | 0.54953  | -0.02206 |
| 0.012435 | 0.78869  | 0.032189 | 0.48773  | 0.019265 | 0.67796  | 0.030716  | 0.50787  | 0.073675 |
| -0.13422 | 0.00366  | -0.21068 | 4.38E-06 | -0.16961 | 0.00023  | -0.18368  | 6.53E-05 | -0.35415 |
| 0.054169 | 0.24268  | 0.090616 | 0.05035  | 0.077787 | 0.09314  | 0.058406  | 0.20772  | 0.227936 |
| 0.046597 | 0.31499  | 0.056614 | 0.22203  | 0.035405 | 0.44528  | 0.080291  | 0.08305  | 0.161729 |
| 0.022732 | 0.62414  | -0.0298  | 0.52055  | 0.001756 | 0.9698   | -0.0464   | 0.31706  | -0.04239 |
| -0.1001  | 0.03056  | -0.18359 | 6.59E-05 | -0.15331 | 0.00089  | -0.16368  | 0.00038  | -0.2952  |
| -0.00833 | 0.85753  | -0.03748 | 0.41902  | -0.04931 | 0.28763  | -0.00674  | 0.8845   | -0.25065 |
| -0.01894 | 0.68313  | -0.02889 | 0.53337  | 0.005686 | 0.90247  | -0.05653  | 0.2227   | -0.07969 |
| 0.030389 | 0.51241  | 0.094104 | 0.04209  | 0.05669  | 0.22141  | 0.095571  | 0.03897  | 0.161761 |

|          |          |          |          |          |          |          |          |          |
|----------|----------|----------|----------|----------|----------|----------|----------|----------|
| 0.384996 | 6.00E-18 | 0.209498 | 4.97E-06 | 0.294279 | 8.78E-11 | 0.080076 | 0.08388  | 0.072799 |
| -0.0156  | 0.73674  | 0.03079  | 0.50685  | 0.032259 | 0.48678  | 0.000565 | 0.99029  | 0.085527 |
| 0.017616 | 0.70417  | 0.109788 | 0.01763  | 0.067555 | 0.14494  | 0.096344 | 0.03741  | 0.225478 |
| -0.01041 | 0.82245  | 0.0272   | 0.55765  | 0.014337 | 0.75731  | 0.030049 | 0.51713  | 0.175382 |
| 0.041985 | 0.36532  | -0.02387 | 0.60684  | 0.004074 | 0.93004  | -0.02958 | 0.52376  | 0.033512 |
| 0.00041  | 0.99294  | 0.123889 | 0.00735  | 0.061394 | 0.18536  | 0.147017 | 0.00144  | 0.250819 |
| 0.049466 | 0.28608  | 0.063874 | 0.1682   | 0.061381 | 0.18545  | 0.04665  | 0.31443  | 0.124234 |
| 0.015234 | 0.74266  | 0.054476 | 0.24001  | 0.050753 | 0.27372  | 0.040718 | 0.37999  | 0.179316 |
| 0.060286 | 0.19343  | 0.000878 | 0.9849   | -0.01124 | 0.80862  | 0.001587 | 0.97271  | 0.103655 |
| -0.05164 | 0.26543  | -0.09521 | 0.03972  | -0.03079 | 0.50691  | -0.13726 | 0.00295  | -0.17761 |
| -0.02496 | 0.5905   | -0.04906 | 0.2901   | -0.01512 | 0.74446  | -0.06443 | 0.16452  | -0.0132  |
| 0.042574 | 0.35863  | 0.108136 | 0.01942  | 0.064833 | 0.16188  | 0.095644 | 0.03882  | 0.232686 |
| 0.075596 | 0.10276  | -0.03026 | 0.51414  | -0.01399 | 0.76293  | -0.02513 | 0.58808  | 0.037414 |
| -0.0827  | 0.0742   | -0.10493 | 0.02335  | -0.09734 | 0.03547  | -0.09644 | 0.03721  | -0.10712 |
| 0.100781 | 0.02944  | 0.122096 | 0.00826  | 0.083927 | 0.06998  | 0.110386 | 0.01702  | 0.287316 |
| 0.006052 | 0.89622  | 0.017098 | 0.71247  | 0.014602 | 0.75297  | -0.006   | 0.89705  | 0.181928 |
| 0.003575 | 0.93859  | 0.054253 | 0.24194  | 0.033724 | 0.46721  | 0.052946 | 0.25349  | 0.129294 |
| 0.10303  | 0.02598  | 0.146911 | 0.00145  | 0.117329 | 0.01117  | 0.117181 | 0.01127  | 0.239499 |
| 0.004412 | 0.92424  | 0.039621 | 0.39296  | -0.00612 | 0.8951   | 0.059286 | 0.20094  | 0.039638 |
| -0.00052 | 0.99111  | 0.016636 | 0.71992  | 0.038641 | 0.40478  | 0.006653 | 0.88599  | 0.002064 |
| 0.124791 | 0.00693  | 0.340459 | 3.88E-14 | 0.174034 | 0.00016  | 0.373779 | 6.23E-17 | 0.514467 |
| 0.028228 | 0.54285  | -0.02691 | 0.56188  | 0.006257 | 0.89272  | -0.03928 | 0.39703  | -0.11849 |
| 0.041766 | 0.36783  | -0.09076 | 0.04999  | -0.02961 | 0.52324  | -0.12785 | 0.00566  | -0.13794 |
| 0.057554 | 0.21444  | 0.029357 | 0.52684  | 0.021691 | 0.64011  | 0.024395 | 0.59899  | 0.144958 |
| -0.01491 | 0.74792  | -0.04201 | 0.36504  | -0.0246  | 0.59587  | -0.05863 | 0.20594  | -0.08904 |
| 0.253082 | 2.94E-08 | 0.340725 | 3.70E-14 | 0.319916 | 1.42E-12 | 0.250791 | 3.95E-08 | 0.198165 |
| 0.020614 | 0.65681  | 0.038938 | 0.40118  | 0.035139 | 0.44871  | 0.028154 | 0.54391  | 0.064101 |
| -0.00035 | 0.99399  | 0.068573 | 0.13897  | 0.042877 | 0.35522  | 0.066594 | 0.15076  | 0.13378  |
| -0.1274  | 0.00583  | -0.1505  | 0.00111  | -0.10354 | 0.02525  | -0.13828 | 0.00275  | -0.22512 |
| -0.07225 | 0.11895  | -0.0116  | 0.80262  | -0.06254 | 0.17725  | 0.029819 | 0.52035  | 0.08185  |
| 0.026529 | 0.56742  | -0.01324 | 0.77543  | 0.003112 | 0.94652  | -0.00686 | 0.88249  | -0.01471 |
| 0.091964 | 0.04701  | -0.13414 | 0.00368  | -0.00953 | 0.83721  | -0.19196 | 2.97E-05 | -0.29144 |
| -0.04382 | 0.34469  | -0.16915 | 0.00024  | -0.10548 | 0.02263  | -0.17264 | 0.00018  | -0.28998 |
| 0.049894 | 0.28193  | 0.005185 | 0.91102  | 0.022847 | 0.62239  | -0.00748 | 0.87199  | 0.010258 |
| -0.08418 | 0.06913  | -0.16359 | 0.00039  | -0.12216 | 0.00822  | -0.1481  | 0.00133  | -0.35103 |
| -0.01835 | 0.69244  | -0.12023 | 0.0093   | -0.07002 | 0.13079  | -0.11773 | 0.01089  | -0.35027 |
| 0.056311 | 0.22452  | 0.026574 | 0.56676  | 0.022784 | 0.62335  | 0.031287 | 0.50001  | 0.090151 |
| 0.002672 | 0.95408  | -0.00783 | 0.86592  | -0.0079  | 0.86477  | -0.00964 | 0.83544  | 0.134209 |
| 0.073423 | 0.11306  | 0.244898 | 8.33E-08 | 0.12094  | 0.00889  | 0.263856 | 7.06E-09 | 0.443479 |
| 0.043528 | 0.34795  | 0.176197 | 0.00013  | 0.07487  | 0.10612  | 0.203807 | 9.03E-06 | 0.225916 |
| 0.010819 | 0.81562  | 0.090999 | 0.04938  | 0.04072  | 0.37995  | 0.104925 | 0.02335  | 0.227206 |
| 0.0904   | 0.0509   | 0.078168 | 0.09155  | 0.097695 | 0.03481  | 0.058626 | 0.20601  | 0.047725 |
| -0.0515  | 0.26668  | -0.23692 | 2.22E-07 | -0.13149 | 0.00442  | -0.26361 | 7.29E-09 | -0.30213 |
| 0.01702  | 0.71374  | 0.017598 | 0.70446  | 0.026899 | 0.56202  | 0.00366  | 0.93713  | 0.095112 |
| -0.02742 | 0.55445  | 0.076533 | 0.09856  | 0.036748 | 0.42821  | 0.070325 | 0.12913  | 0.128859 |

|          |          |          |          |          |          |          |          |          |
|----------|----------|----------|----------|----------|----------|----------|----------|----------|
| 0.051555 | 0.2662   | 0.029494 | 0.5249   | 0.062768 | 0.1757   | -0.01342 | 0.77237  | 0.002736 |
| -0.08369 | 0.07077  | -0.14813 | 0.00133  | -0.09922 | 0.03205  | -0.13817 | 0.00277  | -0.24255 |
| 0.059816 | 0.19694  | 0.085846 | 0.0638   | 0.064745 | 0.16245  | 0.076418 | 0.09907  | 0.227642 |
| -0.09709 | 0.03595  | 0.03636  | 0.4331   | -0.02324 | 0.61635  | 0.0622   | 0.17964  | 0.102184 |
| 0.023739 | 0.60886  | 0.089791 | 0.05249  | 0.052338 | 0.25899  | 0.09704  | 0.03605  | 0.131741 |
| 0.000741 | 0.98726  | -0.04023 | 0.38571  | -0.02413 | 0.60302  | -0.04467 | 0.33542  | -0.06162 |
| 0.064277 | 0.16552  | -0.01215 | 0.79339  | -0.00272 | 0.95333  | -0.00872 | 0.85087  | 0.020711 |
| -0.02669 | 0.56503  | -0.01    | 0.8294   | -0.01702 | 0.71366  | -0.00092 | 0.98424  | 0.076692 |
| -0.04792 | 0.30143  | -0.01451 | 0.75448  | -0.02418 | 0.6022   | -0.01697 | 0.71461  | 0.088217 |
| 0.049855 | 0.28231  | 0.006063 | 0.89604  | -0.01783 | 0.70073  | 0.034484 | 0.45723  | -0.04885 |
| 0.032777 | 0.47981  | 0.033772 | 0.46657  | 0.031584 | 0.49595  | 0.024798 | 0.59297  | 0.050316 |
| 0.075039 | 0.10533  | 0.187351 | 4.62E-05 | 0.121194 | 0.00875  | 0.190867 | 3.30E-05 | 0.285926 |
| 0.037886 | 0.41403  | 0.134663 | 0.00355  | 0.071911 | 0.12069  | 0.139336 | 0.00255  | 0.208731 |
| 0.086355 | 0.06223  | 0.06635  | 0.15227  | 0.042686 | 0.35737  | 0.051055 | 0.27086  | 0.059203 |
| 0.034812 | 0.45295  | 0.126208 | 0.00631  | 0.06256  | 0.17713  | 0.143524 | 0.00187  | 0.210855 |
| 0.012565 | 0.78653  | -0.03649 | 0.43142  | 0.008085 | 0.86167  | -0.06126 | 0.18631  | -0.09514 |
| 0.041576 | 0.37002  | 0.010069 | 0.8282   | 0.020817 | 0.65364  | 0.004987 | 0.91441  | 0.03189  |
| 0.042299 | 0.36174  | 0.068405 | 0.13994  | 0.050603 | 0.27513  | 0.06059  | 0.19119  | 0.154247 |
| 0.029092 | 0.53057  | 0.010088 | 0.82788  | -0.00287 | 0.95063  | 0.012282 | 0.79123  | 0.089236 |
| 0.227361 | 6.86E-07 | 0.183657 | 6.55E-05 | 0.193844 | 2.47E-05 | 0.121068 | 0.00882  | 0.086002 |
| 0.009243 | 0.84209  | 0.072111 | 0.11967  | 0.050396 | 0.27711  | 0.050797 | 0.2733   | 0.07548  |
| 0.109661 | 0.01776  | 0.103113 | 0.02586  | 0.079436 | 0.08639  | 0.094619 | 0.04097  | 0.256011 |
| -0.02324 | 0.61643  | 0.034764 | 0.45358  | 0.016685 | 0.71912  | 0.024773 | 0.59334  | 0.080007 |
| -0.02119 | 0.64784  | 0.026895 | 0.56207  | -0.00947 | 0.83828  | 0.056261 | 0.22493  | 0.078413 |
| 0.056687 | 0.22144  | 0.083575 | 0.07117  | 0.094031 | 0.04225  | 0.041433 | 0.37167  | 0.159544 |
| 0.001699 | 0.9708   | -0.03143 | 0.49807  | 0.022721 | 0.62431  | -0.06957 | 0.1333   | -0.0703  |
| 0.003751 | 0.93557  | 0.084658 | 0.06757  | 0.072292 | 0.11874  | 0.062018 | 0.18093  | 0.135702 |
| 0.095117 | 0.03991  | 0.02423  | 0.60147  | 0.024246 | 0.60123  | 0.018343 | 0.69257  | 0.060946 |
| 0.068453 | 0.13966  | 0.033429 | 0.47111  | 0.039915 | 0.38946  | 0.02431  | 0.60027  | 0.047617 |
| -0.04437 | 0.33869  | -0.08235 | 0.07544  | -0.07117 | 0.12461  | -0.068   | 0.14233  | -0.10721 |
| 0.030137 | 0.5159   | 0.087581 | 0.0586   | 0.055551 | 0.23085  | 0.081148 | 0.07981  | 0.179698 |
| -0.04804 | 0.30025  | -0.03689 | 0.42636  | -0.05656 | 0.22249  | -0.00178 | 0.96947  | -0.01953 |
| 0.09446  | 0.04131  | -0.10815 | 0.0194   | 0.016232 | 0.72645  | -0.16393 | 0.00037  | -0.25939 |
| 0.104362 | 0.02411  | -0.00473 | 0.91884  | 0.078466 | 0.09032  | -0.06403 | 0.16717  | -0.09158 |
| -0.00742 | 0.87286  | 0.016629 | 0.72004  | 0.014848 | 0.74896  | 0.015643 | 0.736    | 0.061808 |
| -0.0017  | 0.97085  | -0.0609  | 0.18896  | -0.06976 | 0.13223  | -0.00167 | 0.97134  | -0.08672 |
| 0.054446 | 0.24028  | -0.00171 | 0.9706   | 0.038841 | 0.40235  | -0.01937 | 0.67623  | -0.06347 |
| 0.055074 | 0.23488  | 0.052461 | 0.25787  | 0.091379 | 0.04843  | 0.012259 | 0.79161  | -0.00934 |
| 0.033789 | 0.46635  | -0.03432 | 0.45933  | -0.00068 | 0.98838  | -0.03148 | 0.4974   | -0.06952 |
| 0.011697 | 0.80096  | 0.099626 | 0.03136  | 0.039652 | 0.3926   | 0.116831 | 0.01152  | 0.220981 |
| -0.07607 | 0.10061  | -0.11532 | 0.01264  | -0.06311 | 0.17336  | -0.14734 | 0.00141  | -0.16186 |
| -0.02887 | 0.53371  | -0.00474 | 0.91864  | 0.003718 | 0.93613  | -0.02901 | 0.53176  | 0.000489 |
| 0.071143 | 0.12473  | 0.00229  | 0.96064  | 0.031436 | 0.49797  | 0.008015 | 0.86285  | 0.013086 |
| 0.057906 | 0.21164  | 0.138568 | 0.00269  | 0.078538 | 0.09002  | 0.139104 | 0.00259  | 0.230004 |
| 0.026126 | 0.57331  | 0.049557 | 0.2852   | -0.00178 | 0.96945  | 0.060483 | 0.19198  | 0.035793 |

|          |          |          |          |          |          |          |          |          |
|----------|----------|----------|----------|----------|----------|----------|----------|----------|
| -0.04445 | 0.3378   | -0.0004  | 0.99315  | -0.01097 | 0.81313  | 0.002712 | 0.95338  | 0.093167 |
| 0.045046 | 0.33138  | 0.021942 | 0.63624  | 0.0211   | 0.64924  | 0.027458 | 0.55392  | 0.007302 |
| 0.038139 | 0.41092  | 0.068437 | 0.13976  | 0.038412 | 0.40758  | 0.078809 | 0.08891  | 0.110119 |
| 0.027764 | 0.54951  | 0.112297 | 0.01519  | 0.078999 | 0.08814  | 0.101075 | 0.02896  | 0.0909   |
| 0.021117 | 0.64898  | 0.004779 | 0.91796  | 0.006609 | 0.88672  | -0.00112 | 0.9808   | 0.008423 |
| 0.031616 | 0.49551  | 0.033055 | 0.47609  | 0.044793 | 0.33411  | 0.011486 | 0.80448  | 0.078592 |
| 0.240078 | 1.51E-07 | 0.313162 | 4.38E-12 | 0.315022 | 3.22E-12 | 0.193538 | 2.54E-05 | 0.228655 |
| -0.03098 | 0.50425  | 0.032701 | 0.48082  | -0.01154 | 0.80363  | 0.046968 | 0.31115  | 0.121283 |
| 0.055503 | 0.23126  | 0.099502 | 0.03157  | 0.097754 | 0.0347   | 0.074076 | 0.10989  | 0.238348 |
| 0.002673 | 0.95406  | -0.0492  | 0.28871  | 0.009973 | 0.82981  | -0.07604 | 0.10074  | -0.09959 |
| 0.098643 | 0.03307  | 0.121195 | 0.00875  | 0.102992 | 0.02604  | 0.100379 | 0.03009  | 0.191707 |
| -0.00877 | 0.85004  | 0.03736  | 0.42055  | 0.006695 | 0.88526  | 0.04091  | 0.37774  | 0.104324 |
| 0.227496 | 6.75E-07 | 0.136212 | 0.00318  | 0.223685 | 1.05E-06 | 0.034709 | 0.45429  | 0.019253 |
| 0.01316  | 0.77668  | 0.029367 | 0.52669  | 0.027905 | 0.54749  | 0.023817 | 0.60768  | 0.149719 |
| 0.011872 | 0.79805  | 0.011745 | 0.80017  | 0.018672 | 0.68734  | 0.015814 | 0.73321  | 0.074875 |
| 0.009476 | 0.83817  | -0.0108  | 0.81596  | 0.0095   | 0.83777  | -0.01551 | 0.73808  | 0.010999 |
| 0.018589 | 0.68866  | 0.112667 | 0.01485  | 0.068394 | 0.14001  | 0.121002 | 0.00886  | 0.218128 |
| 0.146438 | 0.00151  | 0.211433 | 4.04E-06 | 0.169095 | 0.00024  | 0.181743 | 7.82E-05 | 0.356908 |
| 0.000718 | 0.98765  | 0.008135 | 0.86082  | 0.015334 | 0.74102  | 0.019463 | 0.67484  | 0.046191 |
| -0.01604 | 0.72957  | -0.05437 | 0.24095  | -0.05174 | 0.26448  | -0.05015 | 0.27946  | 0.008432 |
| -0.04757 | 0.30496  | 0.035728 | 0.44115  | 0.014343 | 0.75722  | 0.034617 | 0.45549  | 0.137376 |
| -0.035   | 0.45056  | -0.09646 | 0.03719  | -0.07562 | 0.10265  | -0.08587 | 0.06371  | -0.11369 |
| -0.12614 | 0.00634  | -0.19385 | 2.47E-05 | -0.14951 | 0.00119  | -0.17824 | 0.00011  | -0.34894 |
| 0.052425 | 0.2582   | 0.042389 | 0.36072  | 0.063435 | 0.17114  | 0.004937 | 0.91527  | 0.065011 |
| -0.00873 | 0.85075  | 0.053718 | 0.24662  | 0.010648 | 0.81849  | 0.070028 | 0.13076  | 0.080066 |
| 0.029656 | 0.52263  | 0.141884 | 0.00212  | 0.071325 | 0.12376  | 0.166113 | 0.00031  | 0.22089  |
| 0.05448  | 0.23998  | 0.021613 | 0.64131  | 0.025518 | 0.58227  | 0.005406 | 0.90725  | 0.035269 |
| 0.049414 | 0.28658  | -0.11013 | 0.01728  | -0.03976 | 0.39128  | -0.12414 | 0.00724  | -0.1562  |
| 0.020724 | 0.6551   | -0.12036 | 0.00923  | -0.06425 | 0.16568  | -0.11018 | 0.01722  | -0.16615 |
| -0.04229 | 0.36184  | -0.00347 | 0.94032  | 0.00301  | 0.94827  | -0.0326  | 0.4822   | -0.05999 |
| 0.005867 | 0.89937  | 0.013055 | 0.77842  | 0.011269 | 0.8081   | 0.004769 | 0.91813  | 0.047062 |
| -0.04007 | 0.38757  | 0.007283 | 0.87527  | -0.00608 | 0.89582  | 0.01937  | 0.67631  | 0.077255 |
| -0.00655 | 0.88775  | 0.068433 | 0.13978  | 0.051924 | 0.26279  | 0.056526 | 0.22275  | 0.130653 |
| -0.03706 | 0.42431  | -0.02885 | 0.534    | -0.01103 | 0.8121   | -0.02137 | 0.64503  | -0.00945 |
| 0.036063 | 0.43686  | 0.044134 | 0.34127  | 0.063299 | 0.17206  | 0.010844 | 0.8152   | 0.058485 |
| 0.01596  | 0.73085  | 0.013486 | 0.7713   | 0.022608 | 0.62604  | 0.002719 | 0.95327  | 0.0543   |
| 0.015797 | 0.73349  | -0.01493 | 0.74758  | -0.00127 | 0.97821  | -0.02321 | 0.61694  | 0.009721 |
| -0.05129 | 0.26868  | -0.1032  | 0.02574  | -0.03023 | 0.5146   | -0.13347 | 0.00386  | -0.16002 |
| 0.001897 | 0.96739  | 0.006488 | 0.88879  | 0.011609 | 0.80243  | 0.002848 | 0.95105  | 0.036535 |
| -0.07058 | 0.12772  | -0.00649 | 0.88868  | -0.02356 | 0.61155  | -0.00469 | 0.91944  | 0.006415 |
| 0.046929 | 0.31155  | 0.0569   | 0.2197   | 0.064362 | 0.16496  | 0.035392 | 0.44545  | 0.123252 |
| 0.336701 | 7.66E-14 | 0.468474 | 7.50E-27 | 0.368535 | 1.81E-16 | 0.411837 | 1.52E-20 | 0.425041 |
| -0.03456 | 0.45627  | 0.05905  | 0.20274  | 0.011214 | 0.80901  | 0.073284 | 0.11375  | 0.077775 |
| 0.071744 | 0.12157  | 0.2377   | 2.02E-07 | 0.104207 | 0.02432  | 0.306267 | 1.34E-11 | 0.288101 |
| 0.084796 | 0.06712  | 0.134067 | 0.0037   | 0.100925 | 0.0292   | 0.122941 | 0.00782  | 0.196498 |

|          |          |          |          |          |          |          |          |          |
|----------|----------|----------|----------|----------|----------|----------|----------|----------|
| -0.02912 | 0.5302   | -0.01456 | 0.75358  | 0.011617 | 0.8023   | -0.03387 | 0.46524  | -0.00403 |
| 0.042993 | 0.35391  | -0.01758 | 0.70472  | 0.010426 | 0.8222   | -0.03183 | 0.49255  | -0.05286 |
| 0.366517 | 2.70E-16 | 0.404465 | 8.29E-20 | 0.364172 | 4.31E-16 | 0.301379 | 2.92E-11 | 0.521282 |
| 0.092133 | 0.0466   | 0.013885 | 0.76474  | 0.054282 | 0.24169  | -0.01468 | 0.75167  | -0.05521 |
| -0.01552 | 0.73804  | 0.036193 | 0.43522  | 0.013201 | 0.776    | 0.039589 | 0.39334  | 0.08733  |
| 0.009692 | 0.83453  | 0.004844 | 0.91685  | 0.013824 | 0.76573  | -0.0065  | 0.88855  | 0.030356 |
| 0.340165 | 4.10E-14 | 0.188301 | 4.22E-05 | 0.251449 | 3.63E-08 | 0.086479 | 0.06186  | 0.132004 |
| -0.036   | 0.43764  | -0.01948 | 0.67465  | -0.02514 | 0.58787  | -0.00616 | 0.89435  | 0.010836 |
| 0.25218  | 3.30E-08 | 0.221117 | 1.40E-06 | 0.238669 | 1.79E-07 | 0.1559   | 0.00072  | 0.134673 |
| -0.00502 | 0.91391  | -0.06018 | 0.19424  | -0.02338 | 0.61423  | -0.07164 | 0.12212  | -0.06807 |
| -0.05174 | 0.26448  | -0.02184 | 0.6378   | -0.04474 | 0.33467  | -0.00164 | 0.97173  | -0.02075 |
| 0.004232 | 0.92733  | 0.062056 | 0.18066  | 0.04512  | 0.33059  | 0.061905 | 0.18172  | 0.162235 |
| -0.00676 | 0.88409  | 0.01971  | 0.67096  | 0.012091 | 0.79441  | 0.00438  | 0.92479  | 0.082951 |
| 0.158694 | 0.00058  | 0.157163 | 0.00065  | 0.175983 | 0.00013  | 0.092666 | 0.04534  | 0.064314 |
| -0.00857 | 0.85338  | 0.18773  | 4.46E-05 | 0.060554 | 0.19146  | 0.219211 | 1.73E-06 | 0.425353 |
| -0.01141 | 0.80569  | -0.03123 | 0.50073  | -0.02778 | 0.54932  | -0.02429 | 0.6005   | -0.05471 |
| -0.02677 | 0.56395  | 0.023308 | 0.61538  | 0.013985 | 0.7631   | 0.022257 | 0.63141  | 0.112705 |
| -0.10873 | 0.01876  | -0.0917  | 0.04765  | -0.04584 | 0.32295  | -0.08917 | 0.05416  | -0.13853 |
| -0.00822 | 0.85933  | 0.024032 | 0.60444  | 0.014732 | 0.75084  | 0.032933 | 0.47772  | 0.051729 |
| 0.266274 | 5.08E-09 | 0.121979 | 0.00832  | 0.122476 | 0.00806  | 0.102481 | 0.02679  | 0.089722 |
| 0.002222 | 0.9618   | -0.0382  | 0.41012  | -0.01973 | 0.67069  | -0.03019 | 0.51511  | -0.03946 |
| 0.039709 | 0.39191  | 0.05628  | 0.22478  | 0.061443 | 0.18501  | 0.027331 | 0.55576  | 0.056267 |
| 0.020544 | 0.6579   | 0.084351 | 0.06858  | 0.034733 | 0.45397  | 0.098078 | 0.0341   | 0.199717 |
| 0.009595 | 0.83617  | 0.06317  | 0.17294  | 0.014021 | 0.7625   | 0.08145  | 0.07869  | 0.113795 |
| 0.006691 | 0.88533  | 0.106532 | 0.0213   | 0.062009 | 0.18099  | 0.095475 | 0.03917  | 0.289408 |
| -0.04862 | 0.29438  | -0.03682 | 0.42732  | -0.03361 | 0.46874  | -0.02102 | 0.65046  | -0.04746 |
| -0.01647 | 0.72256  | 0.060701 | 0.19038  | 0.031885 | 0.49185  | 0.05927  | 0.20106  | 0.110982 |
| 0.019846 | 0.66882  | 0.002784 | 0.95215  | 0.017791 | 0.70138  | -0.00647 | 0.88911  | 0.037317 |
| 0.14072  | 0.0023   | 0.131063 | 0.00455  | 0.129925 | 0.00492  | 0.099939 | 0.03082  | 0.153843 |
| -0.02323 | 0.6165   | -0.08564 | 0.06443  | -0.04985 | 0.28236  | -0.0901  | 0.05169  | -0.20536 |
| -0.07186 | 0.12095  | 0.031705 | 0.4943   | -0.02484 | 0.59228  | 0.061774 | 0.18265  | 0.103085 |
| 0.020215 | 0.66304  | -0.01698 | 0.71437  | 0.020914 | 0.65213  | -0.03396 | 0.46414  | -0.01207 |
| -0.02213 | 0.63343  | -0.02001 | 0.66623  | -0.02131 | 0.646    | -0.01123 | 0.80881  | 0.006043 |
| 0.00359  | 0.93833  | -0.00553 | 0.9052   | 0.005613 | 0.90371  | -0.01233 | 0.79039  | -0.01093 |
| -0.03028 | 0.51398  | 0.075287 | 0.10418  | 0.020623 | 0.65666  | 0.101312 | 0.02859  | 0.186017 |
| -0.10473 | 0.02361  | -0.04305 | 0.35333  | -0.07165 | 0.12204  | -0.01757 | 0.70483  | 0.014053 |
| 0.085134 | 0.06604  | 0.031238 | 0.50069  | 0.042508 | 0.35937  | 0.017004 | 0.714    | 0.004445 |
| 0.012871 | 0.78146  | 0.016986 | 0.71428  | 0.018991 | 0.6823   | 0.008915 | 0.84763  | 0.036435 |
| 0.191148 | 3.21E-05 | 0.168701 | 0.00025  | 0.200281 | 1.30E-05 | 0.082494 | 0.07492  | 0.025441 |
| 0.268034 | 3.99E-09 | 0.111434 | 0.01599  | 0.146435 | 0.00151  | 0.056623 | 0.22196  | 0.058298 |
| 0.076029 | 0.1008   | -0.0072  | 0.87671  | 0.047753 | 0.30311  | -0.0436  | 0.34714  | -0.00744 |
| 0.070942 | 0.1258   | 0.019493 | 0.67437  | 0.062332 | 0.17872  | -0.0065  | 0.88863  | 0.028012 |
| -0.03714 | 0.4233   | 0.005478 | 0.90602  | -0.00014 | 0.99764  | 0.001212 | 0.97916  | 0.120943 |
| 0.026781 | 0.56374  | 0.105268 | 0.0229   | 0.043348 | 0.34995  | 0.12739  | 0.00584  | 0.169715 |
| 0.063334 | 0.17182  | 0.118852 | 0.01015  | 0.12453  | 0.00705  | 0.059226 | 0.2014   | 0.055459 |



|          |          |          |          |          |          |          |          |          |
|----------|----------|----------|----------|----------|----------|----------|----------|----------|
| 0.010101 | 0.82766  | 0.111132 | 0.01628  | 0.041558 | 0.37022  | 0.136452 | 0.00313  | 0.182297 |
| -0.02398 | 0.60516  | -0.02029 | 0.66179  | 0.023495 | 0.61255  | -0.05299 | 0.25308  | -0.04387 |
| 0.085343 | 0.06537  | 0.100727 | 0.02952  | 0.138341 | 0.00274  | 0.057782 | 0.21262  | 0.023237 |
| 0.115022 | 0.01287  | 0.221481 | 1.34E-06 | 0.110093 | 0.01731  | 0.247762 | 5.81E-08 | 0.39691  |
| 0.022973 | 0.62047  | -0.02388 | 0.60671  | 0.01005  | 0.82852  | -0.04145 | 0.37141  | -0.04464 |
| 0.123174 | 0.0077   | 0.082848 | 0.07367  | 0.10654  | 0.02129  | 0.047563 | 0.30505  | 0.152812 |
| -0.03772 | 0.41607  | -0.08877 | 0.05524  | -0.0458  | 0.32331  | -0.09479 | 0.0406   | -0.1451  |
| -0.00431 | 0.92605  | 0.043488 | 0.34839  | 0.036807 | 0.42746  | 0.031286 | 0.50003  | 0.073111 |
| -0.02362 | 0.61065  | 0.00251  | 0.95686  | 0.000102 | 0.99825  | -0.00609 | 0.89551  | 0.133229 |
| 0.002279 | 0.96082  | 0.023674 | 0.60984  | 0.027047 | 0.55988  | 0.017965 | 0.69859  | 0.13104  |
| -0.0108  | 0.81598  | 0.003494 | 0.93997  | 0.016057 | 0.72928  | -0.00847 | 0.8552   | 0.056135 |
| -0.00381 | 0.93455  | 0.059831 | 0.19683  | 0.026554 | 0.56705  | 0.056992 | 0.21896  | 0.139212 |
| -0.01226 | 0.79158  | 0.000726 | 0.98751  | -0.00207 | 0.96436  | 0.005286 | 0.90929  | 0.070911 |
| 0.011226 | 0.80882  | 0.010008 | 0.82922  | 0.039467 | 0.39481  | -0.00872 | 0.85091  | 0.066737 |
| 0.047234 | 0.30841  | 0.04291  | 0.35484  | 0.042275 | 0.36201  | 0.037122 | 0.42351  | 0.038275 |
| -0.01911 | 0.68041  | 0.019072 | 0.68101  | -0.00611 | 0.89522  | 0.029991 | 0.51794  | 0.058708 |
| -0.03998 | 0.38868  | -0.13226 | 0.0042   | -0.097   | 0.03613  | -0.12913 | 0.00519  | -0.24235 |
| -0.03222 | 0.48732  | -0.07069 | 0.12717  | -0.0356  | 0.44272  | -0.07848 | 0.09027  | -0.22434 |
| 0.019762 | 0.67014  | 0.041236 | 0.37395  | 0.064195 | 0.16606  | 0.026775 | 0.56383  | -0.00765 |
| -0.02603 | 0.57466  | -0.10989 | 0.01752  | -0.06684 | 0.14927  | -0.09414 | 0.04202  | -0.20979 |
| 0.048636 | 0.29425  | 0.023613 | 0.61077  | 0.035509 | 0.44395  | 0.013305 | 0.77429  | 0.023893 |
| 0.139361 | 0.00254  | 0.077477 | 0.09446  | 0.131385 | 0.00446  | 0.039404 | 0.39556  | -0.03321 |
| -0.14286 | 0.00197  | -0.16982 | 0.00023  | -0.12853 | 0.00541  | -0.15164 | 0.00101  | -0.29548 |
| 0.04536  | 0.32802  | 0.029859 | 0.51978  | 0.091764 | 0.04749  | -0.03394 | 0.4644   | 0.026104 |
| -0.00194 | 0.96667  | 0.096657 | 0.03679  | 0.047663 | 0.30403  | 0.107392 | 0.02027  | 0.141295 |
| -0.05257 | 0.25693  | -0.00087 | 0.98509  | -0.02247 | 0.62813  | 0.015108 | 0.7447   | 0.052967 |
| 0.134126 | 0.00369  | 0.117394 | 0.01112  | 0.12125  | 0.00872  | 0.07265  | 0.11692  | 0.174507 |
| -0.00805 | 0.86234  | 0.058621 | 0.20605  | 0.022995 | 0.62013  | 0.058795 | 0.20471  | 0.200344 |
| -0.0069  | 0.88173  | 0.007687 | 0.86841  | 0.002261 | 0.96113  | 0.016991 | 0.7142   | 0.051671 |
| 0.038216 | 0.40998  | -0.03982 | 0.39055  | 0.021391 | 0.64474  | -0.07221 | 0.11916  | -0.05522 |
| -0.02184 | 0.63782  | -0.02789 | 0.54773  | -0.02697 | 0.56102  | -0.03113 | 0.50213  | 0.046364 |
| 0.11929  | 0.00987  | 0.224631 | 9.38E-07 | 0.160781 | 0.00049  | 0.204937 | 8.03E-06 | 0.378561 |
| 0.048413 | 0.29648  | 0.099465 | 0.03163  | 0.087597 | 0.05855  | 0.082064 | 0.07645  | 0.124617 |
| -0.01131 | 0.80733  | 0.059684 | 0.19793  | -0.00349 | 0.94002  | 0.078168 | 0.09155  | 0.206685 |
| 0.011141 | 0.81024  | 0.027501 | 0.5533   | 0.023252 | 0.61623  | 0.028601 | 0.53754  | 0.106999 |
| 0.114031 | 0.01368  | 0.006486 | 0.88883  | 0.045246 | 0.32924  | -0.00886 | 0.84863  | 0.064943 |
| -0.07156 | 0.12251  | -0.05681 | 0.22047  | -0.03848 | 0.40673  | -0.05809 | 0.21021  | -0.10767 |
| 0.085876 | 0.0637   | 0.014762 | 0.75035  | 0.056704 | 0.2213   | -0.01663 | 0.72003  | 0.015936 |
| 0.003622 | 0.93778  | 0.040504 | 0.38249  | 0.02847  | 0.5394   | 0.03078  | 0.50698  | 0.157321 |
| 0.085089 | 0.06618  | 0.01144  | 0.80524  | 0.037316 | 0.42109  | -0.02703 | 0.56012  | -0.01058 |
| -0.06639 | 0.15203  | -0.09514 | 0.03987  | -0.06171 | 0.18311  | -0.09343 | 0.0436   | -0.10543 |
| -0.07106 | 0.12516  | -0.14412 | 0.00179  | -0.10114 | 0.02887  | -0.14328 | 0.00191  | -0.32834 |
| 0.20963  | 4.90E-06 | 0.198793 | 1.51E-05 | 0.215585 | 2.58E-06 | 0.113589 | 0.01405  | 0.231272 |
| -0.05272 | 0.25554  | -0.0446  | 0.33616  | -0.03839 | 0.40778  | -0.03124 | 0.50064  | -0.02026 |
| -0.03143 | 0.498    | -0.11386 | 0.01382  | -0.06121 | 0.18671  | -0.12756 | 0.00577  | -0.16655 |

|          |          |          |          |          |          |          |          |          |
|----------|----------|----------|----------|----------|----------|----------|----------|----------|
| 0.004483 | 0.92303  | 0.009633 | 0.83552  | 0.003121 | 0.94636  | 0.003558 | 0.93887  | 0.088683 |
| 0.063615 | 0.16993  | -0.03111 | 0.50241  | 0.030806 | 0.50663  | -0.06159 | 0.18398  | -0.06251 |
| 0.077593 | 0.09397  | 0.160591 | 0.00049  | 0.109801 | 0.01761  | 0.166577 | 0.0003   | 0.175547 |
| 0.02392  | 0.60612  | -0.05199 | 0.26215  | -0.02336 | 0.61462  | -0.04789 | 0.30171  | -0.09184 |
| 0.123909 | 0.00734  | 0.08788  | 0.05774  | 0.099273 | 0.03196  | 0.05823  | 0.2091   | 0.028319 |
| -0.02544 | 0.58347  | 0.009412 | 0.83925  | 0.006078 | 0.89577  | 0.005713 | 0.90201  | 0.034291 |
| -0.10163 | 0.02809  | -0.01569 | 0.73531  | -0.05568 | 0.22974  | 0.002638 | 0.95465  | 0.071104 |
| -0.04813 | 0.29927  | 0.007062 | 0.87902  | -0.01192 | 0.79727  | 0.007801 | 0.86647  | 0.100149 |
| -0.02024 | 0.66268  | 0.008847 | 0.84879  | 0.014696 | 0.75144  | 0.001499 | 0.97423  | 0.062183 |
| 0.04443  | 0.33804  | 0.076112 | 0.10043  | 0.07961  | 0.08571  | 0.036594 | 0.43014  | 0.156763 |
| 0.004828 | 0.91713  | 0.087357 | 0.05925  | 0.051675 | 0.26508  | 0.093205 | 0.0441   | 0.170686 |
| -0.01855 | 0.68922  | 0.060748 | 0.19004  | 0.018454 | 0.69081  | 0.081857 | 0.0772   | 0.170424 |
| 0.011699 | 0.80092  | 0.097159 | 0.03582  | 0.024474 | 0.59782  | 0.133564 | 0.00383  | 0.136356 |
| -0.05396 | 0.2445   | -0.05334 | 0.24994  | -0.03089 | 0.50547  | -0.06409 | 0.16677  | 0.01574  |
| -0.00159 | 0.97274  | 0.010449 | 0.82182  | 0.026669 | 0.56538  | 0.009585 | 0.83634  | 0.071098 |
| 0.001768 | 0.96961  | 0.019051 | 0.68134  | 0.025311 | 0.58534  | 0.020037 | 0.66583  | 0.048631 |
| -0.04927 | 0.288    | -0.05713 | 0.21782  | -0.07426 | 0.109    | -0.03628 | 0.43412  | 0.045479 |
| -0.02627 | 0.57116  | 0.111334 | 0.01608  | 0.057094 | 0.21813  | 0.105357 | 0.02278  | 0.234537 |
| -0.02741 | 0.5546   | 0.007414 | 0.87304  | 0.018961 | 0.68277  | -0.00971 | 0.83429  | 0.08538  |
| -0.02149 | 0.64327  | -0.02409 | 0.60358  | 0.004348 | 0.92533  | -0.03333 | 0.47246  | -0.0253  |
| 0.035845 | 0.43964  | 0.025467 | 0.58303  | 0.054417 | 0.24052  | -0.00255 | 0.95618  | -0.06046 |
| -0.19734 | 1.74E-05 | -0.12721 | 0.00591  | -0.13338 | 0.00388  | -0.08381 | 0.07037  | -0.20006 |
| -0.00436 | 0.92519  | -0.08727 | 0.05952  | -0.02881 | 0.53463  | -0.10412 | 0.02443  | -0.19214 |
| -0.0844  | 0.06841  | -0.07156 | 0.12252  | -0.09129 | 0.04864  | -0.04833 | 0.29731  | 0.049668 |
| 0.021807 | 0.63832  | 0.016208 | 0.72684  | 0.018104 | 0.69639  | 0.010764 | 0.81653  | 0.042624 |
| -0.04587 | 0.32259  | -0.04499 | 0.33199  | -0.04797 | 0.30089  | -0.02717 | 0.55812  | 0.074357 |
| 0.040964 | 0.3771   | 0.095561 | 0.03899  | 0.035437 | 0.44487  | 0.10458  | 0.02381  | 0.195939 |
| 0.082557 | 0.07469  | 0.129678 | 0.00501  | 0.076156 | 0.10024  | 0.138429 | 0.00272  | 0.227715 |
| -0.0647  | 0.16276  | -0.03065 | 0.50879  | -0.02601 | 0.57501  | -0.03632 | 0.43364  | 0.046514 |
| -0.03953 | 0.39409  | -0.05057 | 0.27542  | -0.04144 | 0.37159  | -0.05328 | 0.25047  | -0.01188 |
| -0.02205 | 0.63452  | 0.064446 | 0.16441  | 0.02211  | 0.63366  | 0.070691 | 0.12714  | 0.210227 |
| -0.15591 | 0.00072  | -0.32184 | 1.03E-12 | -0.21936 | 1.70E-06 | -0.3201  | 1.38E-12 | -0.48876 |
| 0.15101  | 0.00106  | 0.105639 | 0.02242  | 0.139167 | 0.00258  | 0.044688 | 0.33524  | 0.100568 |
| 0.013449 | 0.77191  | 0.024084 | 0.60366  | 0.031066 | 0.50305  | 0.017525 | 0.70564  | 0.071474 |
| 0.034565 | 0.45617  | 0.066466 | 0.15155  | 0.049334 | 0.28737  | 0.05347  | 0.24881  | 0.074472 |
| 0.024722 | 0.5941   | -0.01854 | 0.6894   | 0.012515 | 0.78737  | -0.03327 | 0.4732   | -0.05299 |
| 0.079942 | 0.0844   | 0.025543 | 0.58191  | 0.043325 | 0.3502   | -0.02145 | 0.64377  | 0.065804 |
| 0.006504 | 0.88851  | 0.07093  | 0.12586  | 0.018404 | 0.6916   | 0.088598 | 0.05571  | 0.176757 |
| 0.094431 | 0.04137  | 0.150469 | 0.00111  | 0.123632 | 0.00748  | 0.131561 | 0.0044   | 0.137019 |
| -0.02551 | 0.5824   | -0.04042 | 0.38349  | -0.04271 | 0.35704  | -0.0137  | 0.76784  | -0.03971 |
| 0.014507 | 0.75452  | 0.061176 | 0.18693  | 0.029536 | 0.52431  | 0.053817 | 0.24575  | 0.164181 |
| -0.01034 | 0.82366  | -0.03411 | 0.46215  | -0.00765 | 0.86902  | -0.03934 | 0.39637  | -0.03827 |
| -0.02262 | 0.62583  | 0.060852 | 0.18928  | 0.026527 | 0.56744  | 0.055865 | 0.22822  | 0.222713 |
| -0.03731 | 0.42119  | 0.048801 | 0.29261  | 0.02561  | 0.58092  | 0.050965 | 0.27172  | 0.238035 |
| 0.023207 | 0.61692  | -0.01874 | 0.68632  | 0.018089 | 0.69662  | -0.04718 | 0.30897  | 0.008205 |

|          |          |          |          |          |          |          |          |          |
|----------|----------|----------|----------|----------|----------|----------|----------|----------|
| -0.01544 | 0.73931  | -0.05399 | 0.24421  | -0.01883 | 0.68481  | -0.05225 | 0.25982  | -0.03797 |
| 0.062584 | 0.17697  | 0.179046 | 0.0001   | 0.087806 | 0.05795  | 0.201454 | 1.15E-05 | 0.304304 |
| 0.056006 | 0.22704  | -0.04329 | 0.35062  | 0.049172 | 0.28896  | -0.09518 | 0.03979  | -0.04637 |
| 0.123792 | 0.0074   | 0.043778 | 0.34519  | 0.063648 | 0.16971  | 0.018991 | 0.68229  | 0.018282 |
| 0.033283 | 0.47305  | 0.041422 | 0.37179  | 0.042482 | 0.35967  | 0.021937 | 0.63632  | 0.086678 |
| 0.152619 | 0.00094  | 0.151525 | 0.00102  | 0.16775  | 0.00027  | 0.078031 | 0.09212  | 0.053044 |
| 0.067587 | 0.14475  | 0.141451 | 0.00218  | 0.122491 | 0.00805  | 0.112345 | 0.01514  | 0.353884 |
| -0.0571  | 0.21809  | -0.11118 | 0.01623  | -0.09752 | 0.03514  | -0.0971  | 0.03594  | -0.19334 |
| 0.014322 | 0.75755  | -0.00886 | 0.84855  | 0.015231 | 0.74271  | -0.0162  | 0.72696  | 0.016303 |
| -0.02607 | 0.57415  | -0.02555 | 0.58179  | -0.02067 | 0.65586  | -0.02458 | 0.59618  | -0.00269 |
| -0.02656 | 0.56702  | 0.076806 | 0.09736  | 0.0102   | 0.82599  | 0.102913 | 0.02615  | 0.193211 |
| 0.00731  | 0.87482  | 0.059519 | 0.19918  | 0.018117 | 0.69617  | 0.068746 | 0.13797  | 0.103806 |
| -0.00012 | 0.99801  | -0.02257 | 0.62665  | 0.00215  | 0.96305  | -0.03351 | 0.47003  | -0.01391 |
| -0.02623 | 0.57184  | -0.02563 | 0.5806   | -0.03099 | 0.50408  | -0.00152 | 0.97389  | 0.006307 |
| 0.224036 | 1.00E-06 | 0.328031 | 3.54E-13 | 0.226906 | 7.23E-07 | 0.327495 | 3.89E-13 | 0.36062  |
| 0.147473 | 0.00139  | 0.076287 | 0.09965  | 0.09249  | 0.04575  | 0.047853 | 0.30211  | 0.108521 |
| 0.104396 | 0.02406  | 0.205471 | 7.60E-06 | 0.156509 | 0.00069  | 0.189    | 3.95E-05 | 0.269582 |
| -0.0447  | 0.3351   | 0.013193 | 0.77614  | -0.03675 | 0.42822  | 0.031287 | 0.50001  | 0.106131 |
| -0.10494 | 0.02333  | -0.0293  | 0.52761  | -0.05192 | 0.26286  | -0.00881 | 0.84946  | 0.019605 |
| 0.108629 | 0.01887  | 0.115531 | 0.01248  | 0.088207 | 0.05681  | 0.108871 | 0.0186   | 0.22753  |
| 0.072723 | 0.11655  | 0.035652 | 0.44212  | 0.056564 | 0.22244  | 0.001635 | 0.97189  | -0.07778 |
| -0.01536 | 0.74052  | -0.02187 | 0.63739  | -0.01966 | 0.6717   | -0.01997 | 0.66694  | 0.004861 |
| -0.0419  | 0.36625  | 0.057057 | 0.21843  | 0.002223 | 0.96179  | 0.084465 | 0.0682   | 0.111548 |
| 0.074937 | 0.10581  | 0.112486 | 0.01501  | 0.093226 | 0.04405  | 0.086184 | 0.06276  | 0.242508 |
| 0.060016 | 0.19544  | 0.122399 | 0.0081   | 0.102198 | 0.02722  | 0.088386 | 0.05631  | 0.129568 |
| 0.206223 | 7.02E-06 | 0.324024 | 7.07E-13 | 0.273911 | 1.76E-09 | 0.265768 | 5.44E-09 | 0.17803  |
| 0.126479 | 0.0062   | 0.087784 | 0.05801  | 0.058951 | 0.2035   | 0.095244 | 0.03965  | 0.219579 |
| 0.105982 | 0.02199  | 0.028233 | 0.54279  | 0.054467 | 0.24009  | 0.015108 | 0.7447   | 0.052157 |
| 0.036667 | 0.42922  | 0.127366 | 0.00585  | 0.069016 | 0.13643  | 0.132636 | 0.00409  | 0.242486 |
| 3.04E-05 | 0.99948  | 0.031841 | 0.49245  | 0.014893 | 0.74822  | 0.025425 | 0.58365  | 0.127058 |
| -0.05679 | 0.22059  | -0.12468 | 0.00698  | -0.10483 | 0.02348  | -0.10582 | 0.02219  | -0.22606 |
| 0.021581 | 0.64181  | 0.108736 | 0.01875  | 0.099263 | 0.03198  | 0.080575 | 0.08196  | 0.165823 |
| 0.009034 | 0.84563  | 0.07995  | 0.08437  | 0.059806 | 0.19701  | 0.073954 | 0.11047  | 0.183723 |
| 0.021034 | 0.65028  | 0.067663 | 0.1443   | 0.041926 | 0.36599  | 0.072701 | 0.11666  | 0.170876 |
| 0.075156 | 0.10478  | 0.032746 | 0.48023  | 0.087952 | 0.05753  | -0.01839 | 0.69183  | -0.04594 |
| -0.01982 | 0.66929  | 0.029643 | 0.52281  | 0.004877 | 0.91628  | 0.030987 | 0.50413  | 0.06812  |
| 0.04743  | 0.3064   | -0.03809 | 0.41146  | 0.013626 | 0.769    | -0.06539 | 0.15829  | -0.07192 |
| 0.067597 | 0.14469  | -0.02709 | 0.55918  | 0.020574 | 0.65744  | -0.0535  | 0.24851  | -0.05853 |
| 0.064138 | 0.16643  | 0.002724 | 0.95318  | 0.062629 | 0.17666  | -0.0282  | 0.54321  | -0.0746  |
| -0.01787 | 0.70009  | -0.07008 | 0.13048  | 0.004258 | 0.92687  | -0.11248 | 0.01502  | -0.16933 |
| 0.019933 | 0.66746  | -0.00684 | 0.88287  | 0.02117  | 0.64816  | -0.01699 | 0.71414  | 0.059687 |
| -0.05759 | 0.21417  | -0.06609 | 0.15388  | -0.03598 | 0.43793  | -0.0821  | 0.07631  | -0.01809 |
| -0.05344 | 0.24909  | -0.02096 | 0.65145  | -0.01322 | 0.77576  | -0.03488 | 0.45212  | 0.057389 |
| -0.11743 | 0.01109  | -0.13956 | 0.00251  | -0.11776 | 0.01087  | -0.12802 | 0.0056   | -0.07562 |
| -0.0206  | 0.65696  | -0.0632  | 0.17273  | 0.003387 | 0.94181  | -0.08865 | 0.05558  | -0.11534 |

|          |          |          |          |          |          |          |          |          |
|----------|----------|----------|----------|----------|----------|----------|----------|----------|
| 0.091351 | 0.0485   | 0.179462 | 9.64E-05 | 0.103645 | 0.0251   | 0.176415 | 0.00013  | 0.332737 |
| -0.03493 | 0.4514   | 0.046059 | 0.32061  | 0.010598 | 0.81933  | 0.050618 | 0.27499  | 0.192779 |
| 0.073776 | 0.11134  | 0.001362 | 0.97659  | 0.051625 | 0.26555  | -0.0111  | 0.81092  | -0.04561 |
| -0.07606 | 0.10068  | -0.09141 | 0.04836  | -0.0521  | 0.2612   | -0.09638 | 0.03733  | -0.1102  |
| 0.026219 | 0.57195  | 0.00356  | 0.93885  | 0.018108 | 0.69632  | -0.0028  | 0.9519   | -0.01003 |
| 0.026885 | 0.56223  | 0.015605 | 0.73662  | 0.015327 | 0.74114  | -0.0024  | 0.95876  | 0.150549 |
| -0.01014 | 0.82709  | -0.07582 | 0.10176  | -0.00148 | 0.97456  | -0.11026 | 0.01714  | -0.22388 |
| -0.14276 | 0.00198  | -0.17503 | 0.00014  | -0.14095 | 0.00227  | -0.16724 | 0.00028  | -0.29723 |
| 0.053774 | 0.24613  | 0.080838 | 0.08097  | 0.093609 | 0.04318  | 0.039159 | 0.39851  | 0.107392 |
| -0.03192 | 0.49131  | 0.063819 | 0.16856  | 0.006946 | 0.88099  | 0.101526 | 0.02825  | 0.196411 |
| 0.026173 | 0.57263  | 0.112926 | 0.01462  | 0.061758 | 0.18276  | 0.127467 | 0.00581  | 0.16897  |
| 0.038089 | 0.41154  | -0.11915 | 0.00996  | -0.06344 | 0.17111  | -0.11863 | 0.0103   | -0.19996 |
| 0.021733 | 0.63946  | 0.105198 | 0.02299  | 0.053572 | 0.24791  | 0.118516 | 0.01037  | 0.213872 |
| 0.010626 | 0.81885  | 0.073741 | 0.11151  | 0.057042 | 0.21855  | 0.061176 | 0.18693  | 0.068915 |
| -0.01322 | 0.77567  | 0.041287 | 0.37336  | 0.006467 | 0.88915  | 0.053609 | 0.24758  | 0.078226 |
| 0.106294 | 0.0216   | 0.174201 | 0.00015  | 0.14665  | 0.00148  | 0.151133 | 0.00105  | 0.13723  |
| 0.09193  | 0.04709  | -0.01364 | 0.76873  | 0.004683 | 0.91961  | -0.01135 | 0.80678  | -0.02665 |
| 0.007439 | 0.87263  | 0.0898   | 0.05246  | 0.013745 | 0.76704  | 0.114593 | 0.01322  | 0.271412 |
| 0.150967 | 0.00107  | 0.108212 | 0.01933  | 0.138673 | 0.00267  | 0.074249 | 0.10906  | 0.036222 |
| 0.066104 | 0.1538   | -0.0188  | 0.6854   | 0.010728 | 0.81714  | -0.04725 | 0.30823  | -0.15444 |
| -0.09514 | 0.03987  | -0.19115 | 3.21E-05 | -0.12057 | 0.00911  | -0.18463 | 5.97E-05 | -0.2394  |
| 0.03326  | 0.47336  | 0.014598 | 0.75303  | 0.010591 | 0.81944  | 0.00257  | 0.95582  | 0.147291 |
| 0.053377 | 0.24964  | 0.060328 | 0.19313  | 0.077275 | 0.09533  | 0.045796 | 0.32339  | 0.097078 |
| 0.071832 | 0.12111  | 0.037575 | 0.41788  | 0.046034 | 0.32087  | 0.014919 | 0.74779  | 0.124398 |
| -0.03201 | 0.49019  | -0.01134 | 0.80688  | -0.02022 | 0.66299  | -0.00199 | 0.96581  | -0.01046 |
| 0.05316  | 0.25158  | 0.012789 | 0.78282  | 0.042562 | 0.35876  | 0.002992 | 0.94858  | -0.00958 |
| -0.10214 | 0.02731  | -0.10437 | 0.0241   | -0.06879 | 0.1377   | -0.08249 | 0.07493  | -0.16817 |
| -0.04982 | 0.28266  | 0.046485 | 0.31616  | -0.00781 | 0.8663   | 0.065921 | 0.15494  | 0.17973  |
| 0.058919 | 0.20375  | 0.12853  | 0.00541  | 0.062766 | 0.17571  | 0.141956 | 0.0021   | 0.18679  |
| 0.046061 | 0.32059  | 0.089943 | 0.05209  | 0.05076  | 0.27365  | 0.078188 | 0.09146  | 0.080119 |
| 0.048305 | 0.29755  | 0.020909 | 0.65221  | 0.038621 | 0.40503  | 0.006247 | 0.8929   | 0.006906 |
| 0.012006 | 0.79582  | -0.07057 | 0.12778  | -0.00844 | 0.85572  | -0.09489 | 0.0404   | -0.23465 |
| 0.048946 | 0.29118  | 0.079178 | 0.08742  | 0.050451 | 0.27658  | 0.090571 | 0.05046  | 0.185983 |
| -0.00232 | 0.96015  | 0.05407  | 0.24354  | 0.015983 | 0.73048  | 0.072918 | 0.11557  | 0.095548 |
| -0.00744 | 0.87254  | -0.03423 | 0.46056  | -0.02016 | 0.66385  | -0.0243  | 0.60045  | -0.07366 |
| 0.000238 | 0.9959   | 0.053442 | 0.24907  | 0.028916 | 0.53307  | 0.068107 | 0.14168  | 0.07927  |
| 0.021491 | 0.6432   | 0.003634 | 0.93758  | 0.010187 | 0.82622  | 0.006212 | 0.89349  | 0.055109 |
| -0.02681 | 0.56332  | 0.035962 | 0.43816  | 0.012013 | 0.79569  | 0.026541 | 0.56725  | 0.118898 |
| -0.00533 | 0.90849  | 0.030262 | 0.51416  | 0.013643 | 0.76872  | 0.030646 | 0.50885  | 0.120034 |
| 0.042615 | 0.35816  | 0.0431   | 0.35272  | 0.040087 | 0.38742  | 0.028384 | 0.54063  | 0.065991 |
| 0.367469 | 2.24E-16 | 0.253115 | 2.93E-08 | 0.355947 | 2.14E-15 | 0.06436  | 0.16497  | 0.131863 |
| 0.031691 | 0.49449  | 0.130043 | 0.00488  | 0.069723 | 0.13245  | 0.133961 | 0.00373  | 0.1305   |
| -0.01553 | 0.73789  | 0.059733 | 0.19756  | 0.03672  | 0.42856  | 0.068643 | 0.13856  | 0.141606 |
| -0.00745 | 0.87246  | -0.03458 | 0.45594  | -0.00788 | 0.86522  | -0.04068 | 0.38039  | -0.03527 |
| 0.009549 | 0.83694  | 0.035273 | 0.44699  | 0.025145 | 0.5878   | 0.037765 | 0.41552  | 0.024113 |

|          |         |          |          |          |         |          |          |          |
|----------|---------|----------|----------|----------|---------|----------|----------|----------|
| 0.038774 | 0.40317 | 0.012745 | 0.78355  | 0.007865 | 0.8654  | 0.008916 | 0.84762  | 0.020224 |
| 0.131662 | 0.00437 | 0.172357 | 0.00018  | 0.172264 | 0.00018 | 0.129011 | 0.00524  | 0.234961 |
| -0.01782 | 0.70084 | 0.105262 | 0.02291  | 0.032448 | 0.48423 | 0.141136 | 0.00223  | 0.135409 |
| 0.013763 | 0.76674 | -0.03798 | 0.41285  | -0.02768 | 0.55072 | -0.02338 | 0.61429  | -0.07524 |
| 0.022407 | 0.6291  | 0.12921  | 0.00517  | 0.059069 | 0.2026  | 0.152181 | 0.00097  | 0.200012 |
| -0.02524 | 0.58634 | -0.09014 | 0.05156  | -0.03412 | 0.46198 | -0.1088  | 0.01868  | -0.14542 |
| -0.0027  | 0.95368 | 0.055734 | 0.22931  | 0.021447 | 0.64388 | 0.055101 | 0.23465  | 0.161643 |
| 0.133466 | 0.00386 | 0.117821 | 0.01083  | 0.12607  | 0.00637 | 0.075739 | 0.10211  | 0.236939 |
| -0.00504 | 0.91347 | 0.077005 | 0.09649  | 0.025255 | 0.58617 | 0.090914 | 0.04959  | 0.159856 |
| 0.064225 | 0.16586 | -0.01223 | 0.79203  | 0.048126 | 0.29935 | -0.0476  | 0.30462  | -0.12285 |
| 0.033577 | 0.46914 | 0.058553 | 0.20658  | 0.066426 | 0.1518  | 0.05356  | 0.24802  | 0.059337 |
| -0.0542  | 0.24244 | -0.05879 | 0.20474  | -0.01982 | 0.66928 | -0.08436 | 0.06853  | -0.04738 |
| 0.024079 | 0.60374 | 0.034037 | 0.46307  | 0.042988 | 0.35397 | 0.013807 | 0.76601  | 0.038706 |
| 0.039414 | 0.39544 | 0.192647 | 2.77E-05 | 0.077192 | 0.09568 | 0.226042 | 7.98E-07 | 0.296851 |
| 0.035313 | 0.44647 | 0.049854 | 0.28232  | 0.04914  | 0.28927 | 0.020207 | 0.66316  | 0.091544 |
| 0.062945 | 0.17448 | 0.004266 | 0.92675  | 0.034121 | 0.46197 | -0.01896 | 0.68276  | -0.01162 |
| 0.003647 | 0.93734 | -0.01259 | 0.78612  | 0.002642 | 0.95459 | -0.01779 | 0.70136  | 0.003407 |
| 0.031127 | 0.50221 | 0.092479 | 0.04578  | 0.055956 | 0.22746 | 0.102857 | 0.02624  | 0.072782 |
| 0.046778 | 0.31311 | 0.0593   | 0.20083  | 0.066497 | 0.15136 | 0.058363 | 0.20805  | 0.081053 |
| 0.031865 | 0.49212 | 0.042765 | 0.35648  | 0.020474 | 0.659   | 0.049503 | 0.28572  | 0.071908 |
| -0.06139 | 0.18536 | 0.043896 | 0.34389  | -0.0008  | 0.98621 | 0.054169 | 0.24267  | 0.183111 |
| -0.01315 | 0.77691 | -0.0691  | 0.13594  | -0.02268 | 0.62493 | -0.09612 | 0.03785  | -0.12076 |
| 0.005999 | 0.89713 | 0.014979 | 0.74682  | 0.03107  | 0.503   | -0.00524 | 0.91009  | -0.01933 |
| 0.021928 | 0.63646 | 0.084078 | 0.06948  | 0.056924 | 0.21951 | 0.068669 | 0.13841  | 0.205229 |
| 0.006881 | 0.88211 | 0.043892 | 0.34393  | 0.021217 | 0.64744 | 0.045439 | 0.32717  | 0.146939 |
| -0.03053 | 0.51042 | 0.050242 | 0.27858  | 0.012554 | 0.78671 | 0.078187 | 0.09147  | 0.133448 |
| 0.016519 | 0.72181 | 0.064524 | 0.1639   | 0.048661 | 0.29401 | 0.053483 | 0.2487   | 0.200549 |
| -0.0292  | 0.52907 | 0.006629 | 0.88639  | -0.00756 | 0.87058 | 0.003667 | 0.937    | 0.115039 |
| 0.036397 | 0.43263 | 0.016703 | 0.71884  | 0.013477 | 0.77146 | 0.019198 | 0.67902  | 0.051469 |
| -0.08636 | 0.06221 | -0.15049 | 0.00111  | -0.05648 | 0.22315 | -0.19004 | 3.57E-05 | -0.21772 |
| 0.007164 | 0.8773  | 0.04766  | 0.30406  | 0.035858 | 0.43948 | 0.038823 | 0.40257  | 0.081244 |
| 0.053116 | 0.25197 | 0.057322 | 0.21629  | 0.059321 | 0.20067 | 0.03185  | 0.49233  | 0.045812 |
| 0.033315 | 0.47263 | 0.070371 | 0.12888  | 0.060106 | 0.19477 | 0.049688 | 0.28392  | 0.038703 |
| 0.028344 | 0.5412  | 0.055067 | 0.23495  | 0.036028 | 0.43731 | 0.027617 | 0.55163  | 0.101536 |
| -0.00335 | 0.94244 | 0.057429 | 0.21544  | 0.031902 | 0.49162 | 0.05572  | 0.22943  | 0.168311 |
| -0.07899 | 0.08818 | -0.02615 | 0.57301  | -0.01797 | 0.6985  | -0.03312 | 0.47518  | 0.058003 |
| 0.042538 | 0.35904 | -0.10004 | 0.03065  | -0.01538 | 0.74033 | -0.12248 | 0.00805  | -0.23633 |
| -0.06459 | 0.16348 | -0.09294 | 0.0447   | -0.09087 | 0.04969 | -0.07533 | 0.10399  | -0.05668 |
| 0.028832 | 0.53426 | -0.00813 | 0.86095  | 0.002266 | 0.96104 | -0.00581 | 0.90034  | 0.051002 |
| 0.018297 | 0.6933  | 0.049158 | 0.2891   | 0.043906 | 0.34378 | 0.031183 | 0.50144  | 0.158962 |
| 0.043901 | 0.34383 | 0.100607 | 0.02972  | 0.066509 | 0.15128 | 0.089778 | 0.05252  | 0.188089 |
| 0.140681 | 0.00231 | 0.153922 | 0.00085  | 0.156554 | 0.00069 | 0.119678 | 0.00964  | 0.135926 |
| 0.01879  | 0.68547 | -0.04612 | 0.31999  | -0.01926 | 0.67811 | -0.06184 | 0.18219  | -0.02544 |
| 0.046749 | 0.31341 | 0.029452 | 0.52549  | 0.010348 | 0.82351 | 0.022197 | 0.63233  | 0.102918 |
| 0.00553  | 0.90513 | 0.013475 | 0.77149  | 0.007747 | 0.8674  | 0.015951 | 0.731    | 0.039825 |

|          |          |          |          |          |          |          |          |          |
|----------|----------|----------|----------|----------|----------|----------|----------|----------|
| -0.01217 | 0.79304  | -0.02389 | 0.60654  | -0.00433 | 0.92571  | -0.04312 | 0.35248  | -0.00663 |
| -0.01223 | 0.79216  | -0.01348 | 0.77138  | 0.012871 | 0.78147  | -0.03859 | 0.40537  | 0.048128 |
| 0.002441 | 0.95805  | 0.01411  | 0.76103  | 0.018122 | 0.69609  | -0.00384 | 0.93398  | 0.117883 |
| 0.270217 | 2.95E-09 | 0.095469 | 0.03918  | 0.108945 | 0.01852  | 0.072328 | 0.11855  | 0.056263 |
| -0.03617 | 0.43553  | -0.03143 | 0.49806  | -0.04882 | 0.29245  | -0.00285 | 0.95094  | 0.016937 |
| -0.01404 | 0.76223  | -0.0223  | 0.63072  | 0.012906 | 0.78089  | -0.04582 | 0.32308  | -0.0048  |
| 0.036003 | 0.43763  | 0.027707 | 0.55033  | 0.034312 | 0.45947  | 0.004055 | 0.93036  | 0.139267 |
| -0.00176 | 0.96968  | 0.122053 | 0.00828  | 0.038864 | 0.40207  | 0.141671 | 0.00215  | 0.262291 |
| -0.0058  | 0.90044  | 0.078806 | 0.08893  | 0.009431 | 0.83892  | 0.110243 | 0.01716  | 0.201432 |
| 0.029532 | 0.52437  | -0.04847 | 0.29588  | -0.00331 | 0.94315  | -0.08077 | 0.08121  | -0.04635 |
| 0.116858 | 0.0115   | 0.153242 | 0.00089  | 0.166259 | 0.00031  | 0.083649 | 0.07092  | 0.193336 |
| 0.026109 | 0.57357  | 0.050936 | 0.27198  | 0.033616 | 0.46864  | 0.043475 | 0.34854  | 0.073935 |
| -0.05406 | 0.24362  | -0.06161 | 0.18384  | -0.05106 | 0.27087  | -0.06361 | 0.16996  | -0.14742 |
| 0.009735 | 0.83381  | 0.056726 | 0.22112  | 0.031664 | 0.49485  | 0.055314 | 0.23285  | 0.262136 |
| 0.026859 | 0.5626   | 0.11883  | 0.01017  | 0.052402 | 0.25841  | 0.133717 | 0.00379  | 0.262024 |
| -0.03345 | 0.47089  | 0.019289 | 0.67758  | 0.015067 | 0.74538  | 0.007258 | 0.87569  | 0.155543 |
| 0.076019 | 0.10085  | 0.127218 | 0.0059   | 0.116029 | 0.0121   | 0.092497 | 0.04574  | 0.08415  |
| 0.083596 | 0.0711   | 0.13839  | 0.00273  | 0.09943  | 0.03169  | 0.123219 | 0.00768  | 0.349096 |
| -0.07358 | 0.11227  | 0.014629 | 0.75252  | -0.00735 | 0.87416  | 0.016797 | 0.71732  | 0.121131 |
| 0.066298 | 0.15259  | -0.03052 | 0.51065  | 0.039495 | 0.39447  | -0.05592 | 0.22772  | -0.09058 |
| 0.036573 | 0.43041  | 0.029765 | 0.5211   | 0.037163 | 0.42301  | 0.02698  | 0.56085  | 0.009586 |
| -0.00532 | 0.9088   | -0.03893 | 0.40122  | -0.01706 | 0.71316  | -0.03663 | 0.42964  | -0.02278 |
| -0.03841 | 0.40765  | 0.021059 | 0.64988  | -0.00767 | 0.86877  | 0.019048 | 0.6814   | 0.10291  |
| -0.03142 | 0.49813  | -0.01241 | 0.78913  | -0.00913 | 0.84399  | -0.009   | 0.84625  | 0.079245 |
| -0.01284 | 0.782    | 0.08239  | 0.07529  | 0.030998 | 0.50398  | 0.100326 | 0.03018  | 0.1976   |
| 0.036831 | 0.42716  | 0.056246 | 0.22506  | 0.016049 | 0.7294   | 0.075961 | 0.10111  | 0.046003 |
| 0.040401 | 0.3837   | -0.00941 | 0.83923  | -0.03105 | 0.50322  | 0.006842 | 0.88277  | 0.062569 |
| -0.00089 | 0.98469  | 0.045355 | 0.32807  | 0.004924 | 0.91548  | 0.071459 | 0.12306  | 0.118041 |
| 0.10147  | 0.02834  | 0.07766  | 0.09368  | 0.075153 | 0.1048   | 0.07239  | 0.11824  | 0.214513 |
| -0.01184 | 0.79859  | 0.019394 | 0.67593  | 0.000762 | 0.9869   | 0.030253 | 0.5143   | 0.158257 |
| -0.03549 | 0.44421  | -0.12176 | 0.00844  | -0.06206 | 0.18064  | -0.12903 | 0.00523  | -0.22351 |
| 0.035336 | 0.44617  | 0.057789 | 0.21257  | 0.042011 | 0.36502  | 0.050877 | 0.27254  | 0.056409 |
| -0.03848 | 0.4067   | -0.06015 | 0.19444  | -0.05838 | 0.20794  | -0.03493 | 0.45144  | -0.08089 |
| 0.053864 | 0.24534  | 0.022577 | 0.62651  | 0.018708 | 0.68677  | 0.013461 | 0.77171  | -0.0417  |
| -0.11752 | 0.01104  | -0.22127 | 1.37E-06 | -0.14551 | 0.00162  | -0.20961 | 4.92E-06 | -0.39967 |
| 0.143379 | 0.0019   | 0.12269  | 0.00795  | 0.117064 | 0.01135  | 0.097357 | 0.03544  | 0.248921 |
| 0.017257 | 0.70993  | 0.0224   | 0.62922  | 0.019912 | 0.66779  | 0.020254 | 0.66243  | 0.046048 |
| 0.006806 | 0.88337  | -0.06043 | 0.19238  | -0.02511 | 0.58837  | -0.05671 | 0.22127  | -0.07692 |
| -0.01602 | 0.72992  | 0.020145 | 0.66413  | 0.006302 | 0.89196  | -0.00248 | 0.95744  | 0.128142 |
| -0.01315 | 0.77678  | 0.035412 | 0.4452   | 0.01622  | 0.72664  | 0.04072  | 0.37996  | 0.044134 |
| 0.207625 | 6.06E-06 | 0.323541 | 7.68E-13 | 0.214559 | 2.89E-06 | 0.352693 | 3.99E-15 | 0.288739 |
| 0.254479 | 2.45E-08 | 0.397242 | 4.20E-19 | 0.303717 | 2.02E-11 | 0.337489 | 6.65E-14 | 0.438056 |
| 0.401035 | 1.80E-19 | 0.30676  | 1.24E-11 | 0.263629 | 7.28E-09 | 0.294978 | 7.89E-11 | 0.266251 |
| -0.02996 | 0.51837  | -0.00263 | 0.95483  | -0.00848 | 0.85495  | 0.001979 | 0.96598  | -0.00545 |
| -0.03914 | 0.3987   | -0.08336 | 0.07189  | -0.05689 | 0.21977  | -0.07428 | 0.10892  | -0.16127 |

|          |          |          |          |          |          |          |          |          |
|----------|----------|----------|----------|----------|----------|----------|----------|----------|
| -0.01602 | 0.72983  | 0.011068 | 0.81146  | 0.0151   | 0.74483  | -0.00093 | 0.98395  | 0.157371 |
| -0.03911 | 0.39909  | 0.00727  | 0.87549  | -0.00538 | 0.90769  | 0.009888 | 0.83124  | 0.141035 |
| 0.019352 | 0.6766   | 0.022655 | 0.62532  | 0.027537 | 0.55279  | 0.022153 | 0.63301  | 0.050768 |
| 0.010521 | 0.82061  | 0.023667 | 0.60994  | 0.019718 | 0.67083  | 0.018976 | 0.68254  | 0.051067 |
| 0.012939 | 0.78033  | -0.03384 | 0.46574  | 0.028793 | 0.53481  | -0.07237 | 0.11836  | -0.12353 |
| 0.016685 | 0.71913  | 0.14524  | 0.00165  | 0.060455 | 0.19218  | 0.170214 | 0.00022  | 0.216374 |
| 0.030568 | 0.50992  | -0.12424 | 0.00719  | -0.05174 | 0.26444  | -0.12524 | 0.00673  | -0.28743 |
| -0.00724 | 0.876    | 0.058973 | 0.20333  | 0.02625  | 0.5715   | 0.080481 | 0.08232  | 0.154399 |
| -0.0311  | 0.50254  | -0.04837 | 0.29693  | -0.03513 | 0.44885  | -0.0338  | 0.46625  | -0.07877 |
| -0.03004 | 0.51726  | -0.01812 | 0.6961   | 0.010227 | 0.82555  | -0.03578 | 0.44046  | 0.012207 |
| 0.02759  | 0.55202  | 0.007556 | 0.87064  | 0.017021 | 0.71372  | 0.002451 | 0.95788  | 0.049864 |
| 0.060755 | 0.18999  | 0.072731 | 0.11651  | 0.064991 | 0.16086  | 0.043168 | 0.35196  | 0.132956 |
| -0.01056 | 0.81998  | 0.111537 | 0.01589  | 0.046097 | 0.32022  | 0.11817  | 0.01059  | 0.249535 |
| 0.087493 | 0.05885  | 0.070475 | 0.12831  | 0.074692 | 0.10695  | 0.039735 | 0.3916   | 0.042312 |
| 0.024566 | 0.59644  | 0.022804 | 0.62304  | 0.053843 | 0.24553  | -0.02064 | 0.65644  | -0.05968 |
| 0.089701 | 0.05273  | 0.053865 | 0.24533  | 0.080827 | 0.08101  | 0.03715  | 0.42317  | 0.05567  |
| 0.462273 | 4.21E-26 | 0.347933 | 9.79E-15 | 0.418991 | 2.81E-21 | 0.179798 | 9.35E-05 | 0.172261 |
| 0.030726 | 0.50774  | 0.079247 | 0.08715  | 0.047178 | 0.30899  | 0.086239 | 0.06259  | 0.069542 |
| 0.087571 | 0.05863  | 0.064801 | 0.16209  | 0.076077 | 0.10059  | 0.041763 | 0.36786  | 0.093558 |
| -0.02388 | 0.60669  | 0.042311 | 0.3616   | 0.031049 | 0.50328  | 0.035267 | 0.44706  | 0.143066 |
| -0.13697 | 0.00302  | -0.09013 | 0.0516   | -0.10137 | 0.0285   | -0.07755 | 0.09417  | -0.16372 |
| -0.03131 | 0.49976  | -0.0725  | 0.11766  | -0.02608 | 0.57395  | -0.09968 | 0.03126  | -0.1644  |
| 0.027303 | 0.55617  | 0.029846 | 0.51997  | 0.038616 | 0.40509  | 0.006612 | 0.88669  | 0.070814 |
| 0.028363 | 0.54092  | 0.09066  | 0.05023  | 0.049704 | 0.28377  | 0.111265 | 0.01615  | 0.130005 |
| 0.116403 | 0.01183  | 0.071265 | 0.12408  | 0.096402 | 0.03729  | 0.020198 | 0.66331  | 0.080192 |
| 0.103098 | 0.02588  | 0.010837 | 0.81532  | 0.024044 | 0.60426  | 0.000115 | 0.99802  | 0.0388   |
| -0.07554 | 0.10303  | -0.03794 | 0.41339  | -0.02533 | 0.58511  | -0.03768 | 0.41654  | -0.00413 |
| -0.00562 | 0.90358  | 0.095599 | 0.03891  | 0.065484 | 0.1577   | 0.081765 | 0.07753  | 0.191479 |
| 0.056705 | 0.22129  | 0.00851  | 0.85448  | 0.050197 | 0.27901  | -0.02386 | 0.60697  | -0.02277 |
| 0.011955 | 0.79667  | 0.012449 | 0.78845  | 0.028591 | 0.53768  | 0.004214 | 0.92763  | -0.07972 |
| -0.05556 | 0.23075  | -0.15696 | 0.00066  | -0.0879  | 0.05768  | -0.14623 | 0.00153  | -0.26745 |
| -0.04568 | 0.3246   | -0.13603 | 0.00323  | -0.08484 | 0.06697  | -0.13288 | 0.00402  | -0.24383 |
| 0.006878 | 0.88215  | -0.01141 | 0.80579  | -0.01414 | 0.76049  | 0.007184 | 0.87695  | -0.00698 |
| 0.053085 | 0.25225  | 0.038303 | 0.40891  | 0.050781 | 0.27345  | 0.022082 | 0.6341   | 0.053716 |
| 0.342197 | 2.83E-14 | 0.329395 | 2.79E-13 | 0.382685 | 9.79E-18 | 0.152983 | 0.00091  | 0.452513 |
| -0.05103 | 0.27112  | -0.05967 | 0.19806  | -0.05637 | 0.22405  | -0.0438  | 0.34494  | 0.006771 |
| 0.00786  | 0.86548  | -0.0075  | 0.87162  | -0.00138 | 0.97621  | -0.01017 | 0.8265   | 0.065096 |
| 0.045    | 0.33187  | 0.125956 | 0.00642  | 0.073662 | 0.11189  | 0.133905 | 0.00374  | 0.25522  |
| -0.00993 | 0.83047  | 0.022468 | 0.62817  | -0.04344 | 0.34895  | 0.073238 | 0.11398  | 0.125052 |
| -0.02299 | 0.62023  | -0.03146 | 0.4976   | -0.0048  | 0.91755  | -0.03705 | 0.42439  | 0.015038 |
| -0.06814 | 0.14147  | -0.0052  | 0.91071  | -0.02384 | 0.60732  | 0.002444 | 0.958    | 0.073032 |
| 0.172212 | 0.00018  | 0.19117  | 3.20E-05 | 0.169284 | 0.00024  | 0.144189 | 0.00178  | 0.296422 |
| 0.092813 | 0.045    | 0.061386 | 0.18542  | 0.047203 | 0.30873  | 0.058992 | 0.20319  | 0.155361 |
| 0.045533 | 0.32618  | 0.079333 | 0.08681  | 0.055668 | 0.22987  | 0.082868 | 0.0736   | 0.124826 |
| 0.093799 | 0.04276  | 0.137205 | 0.00297  | 0.090416 | 0.05086  | 0.133639 | 0.00381  | 0.304178 |

|          |          |          |          |          |          |          |          |          |
|----------|----------|----------|----------|----------|----------|----------|----------|----------|
| 0.020759 | 0.65455  | 0.035265 | 0.44709  | 0.01091  | 0.8141   | 0.055328 | 0.23273  | 0.121127 |
| 0.094772 | 0.04064  | 0.108385 | 0.01914  | 0.078786 | 0.089    | 0.101546 | 0.02822  | 0.311598 |
| 0.023663 | 0.61     | 0.081722 | 0.07769  | 0.054986 | 0.23563  | 0.075213 | 0.10452  | 0.224244 |
| -0.04435 | 0.3389   | 0.026537 | 0.5673   | -0.00382 | 0.93445  | 0.040731 | 0.37983  | 0.143336 |
| 0.042652 | 0.35775  | -0.03791 | 0.41373  | -0.02316 | 0.61768  | -0.03285 | 0.47882  | -0.16964 |
| -0.0338  | 0.46617  | -0.03126 | 0.50039  | -0.00382 | 0.93435  | -0.04502 | 0.33163  | -0.00757 |
| 0.03512  | 0.44896  | 0.068522 | 0.13926  | 0.056083 | 0.22641  | 0.055151 | 0.23423  | 0.193855 |
| 0.158871 | 0.00057  | 0.352939 | 3.81E-15 | 0.221591 | 1.32E-06 | 0.350879 | 5.63E-15 | 0.420764 |
| 0.052662 | 0.25605  | 0.031134 | 0.50211  | 0.036859 | 0.4268   | 0.025504 | 0.58249  | 0.048511 |
| -0.04773 | 0.30338  | -0.01043 | 0.82216  | -0.00875 | 0.85044  | -0.0039  | 0.9331   | 0.010619 |
| 0.197909 | 1.65E-05 | 0.222412 | 1.21E-06 | 0.252792 | 3.05E-08 | 0.129377 | 0.00511  | 0.281965 |
| -0.08529 | 0.06555  | -0.04891 | 0.29153  | -0.05466 | 0.23842  | -0.03902 | 0.40015  | 0.010338 |
| -0.09843 | 0.03346  | -0.16434 | 0.00036  | -0.13591 | 0.00325  | -0.15721 | 0.00065  | -0.21045 |
| 0.012363 | 0.78989  | 0.023424 | 0.61363  | 0.021493 | 0.64316  | 0.018697 | 0.68696  | 0.147751 |
| -0.02575 | 0.5789   | -0.15271 | 0.00093  | -0.07372 | 0.11161  | -0.16513 | 0.00034  | -0.33054 |
| 0.067064 | 0.14789  | 0.054778 | 0.23741  | 0.05683  | 0.22027  | 0.038533 | 0.4061   | 0.075616 |
| 0.000154 | 0.99735  | -0.00537 | 0.90794  | 0.008646 | 0.85218  | -0.01459 | 0.75323  | 0.015606 |
| 0.021799 | 0.63844  | 0.032323 | 0.48591  | 0.087786 | 0.05801  | -0.04644 | 0.3166   | 0.092447 |
| 0.036333 | 0.43343  | 0.128871 | 0.00529  | 0.083396 | 0.07178  | 0.126875 | 0.00604  | 0.331957 |
| 0.057049 | 0.21849  | 0.062374 | 0.17843  | 0.044252 | 0.33998  | 0.072939 | 0.11547  | 0.150346 |
| -0.05602 | 0.22692  | -0.12879 | 0.00531  | -0.05778 | 0.21268  | -0.1519  | 0.00099  | -0.25158 |
| -0.05095 | 0.27187  | -0.06215 | 0.17999  | -0.06636 | 0.15219  | -0.0441  | 0.34165  | 0.006691 |
| 0.071075 | 0.12509  | 0.052026 | 0.26185  | 0.068722 | 0.13811  | 0.025795 | 0.57819  | 0.047519 |
| -0.08733 | 0.05933  | -0.04211 | 0.36388  | -0.02921 | 0.52892  | -0.05113 | 0.2702   | -0.0097  |
| -0.03911 | 0.39906  | -0.04195 | 0.36567  | -0.0173  | 0.70921  | -0.05103 | 0.2711   | -0.00409 |
| 0.218427 | 1.89E-06 | 0.074185 | 0.10937  | 0.124311 | 0.00715  | 0.040139 | 0.3868   | 0.022839 |
| 0.157675 | 0.00063  | 0.128555 | 0.0054   | 0.161632 | 0.00045  | 0.059347 | 0.20048  | 0.083652 |
| 0.025496 | 0.58261  | -0.00081 | 0.98614  | 0.009169 | 0.84334  | -0.00326 | 0.94392  | -0.00847 |
| -0.04155 | 0.37036  | -0.13292 | 0.00401  | -0.0757  | 0.10227  | -0.13036 | 0.00478  | -0.15493 |
| 0.002592 | 0.95545  | 0.041601 | 0.36973  | 0.068436 | 0.13976  | -0.00648 | 0.88885  | 0.062073 |
| -0.01618 | 0.72734  | -0.03859 | 0.40544  | 0.01103  | 0.81209  | -0.07692 | 0.09685  | -0.18706 |
| 0.05694  | 0.21938  | 0.180157 | 9.04E-05 | 0.111041 | 0.01637  | 0.172876 | 0.00017  | 0.361744 |
| 0.081566 | 0.07826  | 0.071112 | 0.12489  | 0.090298 | 0.05116  | 0.033191 | 0.47427  | 0.04522  |
| 0.00185  | 0.9682   | -0.0242  | 0.60195  | 0.019217 | 0.67872  | -0.05479 | 0.2373   | -0.02431 |
| -0.05186 | 0.26337  | -0.05345 | 0.249    | -0.05362 | 0.24752  | -0.04674 | 0.31345  | -0.11353 |
| 0.022046 | 0.63464  | -0.09006 | 0.05179  | -0.0198  | 0.66961  | -0.11877 | 0.0102   | -0.09756 |
| -0.03119 | 0.50134  | 0.043049 | 0.35328  | -0.01685 | 0.71648  | 0.067561 | 0.14491  | 0.042711 |
| -0.00974 | 0.83381  | -0.00229 | 0.96056  | 0.002294 | 0.96057  | -0.0074  | 0.87331  | 0.074529 |
| 0.103292 | 0.02561  | 0.044132 | 0.3413   | 0.086615 | 0.06145  | 0.013231 | 0.77551  | 0.022793 |
| -0.07629 | 0.09964  | -0.03285 | 0.47878  | -0.04463 | 0.33591  | -0.02353 | 0.61197  | -0.0593  |
| -0.03942 | 0.39541  | 0.034063 | 0.46274  | 0.029462 | 0.52536  | 0.029324 | 0.52731  | 0.088085 |
| 0.043603 | 0.34712  | -0.01989 | 0.66816  | 0.031275 | 0.50018  | -0.06029 | 0.1934   | -0.0352  |
| 0.021165 | 0.64824  | 0.036439 | 0.4321   | 0.080517 | 0.08219  | -0.01535 | 0.74083  | 0.017908 |
| -0.04629 | 0.31823  | -0.02264 | 0.62551  | 0.004693 | 0.91944  | -0.026   | 0.5752   | 0.054749 |
| -0.06303 | 0.17393  | -0.05479 | 0.2373   | -0.02239 | 0.62944  | -0.05321 | 0.25116  | -0.02923 |



|          |         |          |          |          |         |          |          |          |
|----------|---------|----------|----------|----------|---------|----------|----------|----------|
| 0.002531 | 0.95649 | 0.055714 | 0.22948  | 0.01973  | 0.67064 | 0.085248 | 0.06567  | 0.080449 |
| 0.049047 | 0.29018 | 0.187242 | 4.67E-05 | 0.124525 | 0.00705 | 0.177995 | 0.00011  | 0.169023 |
| 0.046554 | 0.31544 | 0.02639  | 0.56944  | 0.024732 | 0.59395 | 0.01473  | 0.75087  | 0.110812 |
| 0.078494 | 0.0902  | 0.034121 | 0.46197  | 0.09312  | 0.04429 | -0.01497 | 0.74693  | 0.004636 |
| 0.099081 | 0.0323  | -0.01518 | 0.74358  | 0.029112 | 0.53029 | -0.03786 | 0.41436  | -0.09988 |
| 0.062054 | 0.18067 | -0.01262 | 0.78561  | 0.004796 | 0.91768 | -0.04422 | 0.34037  | -0.07083 |
| 0.096578 | 0.03695 | 0.163508 | 0.00039  | 0.08808  | 0.05717 | 0.204814 | 8.14E-06 | 0.215865 |
| -0.0776  | 0.09396 | 0.004726 | 0.91887  | -0.03295 | 0.4775  | 0.026503 | 0.5678   | 0.062019 |
| 0.012493 | 0.78772 | 0.049829 | 0.28255  | 0.047777 | 0.30287 | 0.031825 | 0.49267  | 0.054964 |
| 0.032074 | 0.48929 | 0.033542 | 0.46961  | 0.022222 | 0.63194 | 0.037097 | 0.42383  | 0.043835 |
| -0.00891 | 0.84767 | -0.0297  | 0.52204  | 0.013032 | 0.7788  | -0.04733 | 0.30747  | -0.05594 |
| 0.027046 | 0.55989 | -0.00411 | 0.92935  | 0.040952 | 0.37725 | -0.03135 | 0.49921  | -0.03191 |
| -0.02858 | 0.53788 | -0.01352 | 0.77082  | -0.01467 | 0.75183 | -0.02436 | 0.59957  | 0.03331  |
| -0.01807 | 0.69688 | -0.02182 | 0.63816  | -0.01629 | 0.72543 | -0.00496 | 0.91486  | -0.02642 |
| -0.02547 | 0.58296 | -0.05859 | 0.20628  | -0.0211  | 0.64931 | -0.05628 | 0.22478  | -0.08315 |
| -0.00812 | 0.8611  | -0.00269 | 0.95376  | -0.00639 | 0.89053 | 0.003019 | 0.94812  | 0.008465 |
| -0.02664 | 0.56583 | 0.041491 | 0.371    | 0.011177 | 0.80963 | 0.060684 | 0.19051  | 0.044923 |
| 0.034626 | 0.45537 | 0.100133 | 0.0305   | 0.065666 | 0.15654 | 0.114437 | 0.01334  | 0.053273 |
| 0.035266 | 0.44708 | 0.118587 | 0.01032  | 0.058301 | 0.20854 | 0.141841 | 0.00212  | 0.134138 |
| -0.00018 | 0.99683 | 0.083237 | 0.07232  | 0.027416 | 0.55453 | 0.094522 | 0.04118  | 0.234782 |
| -0.11409 | 0.01363 | -0.07915 | 0.08752  | -0.05932 | 0.20072 | -0.07966 | 0.08552  | -0.10747 |
| 0.003009 | 0.94829 | -0.04114 | 0.37505  | 0.02214  | 0.6332  | -0.08623 | 0.06261  | -0.1332  |
| -0.03507 | 0.44954 | -0.0697  | 0.1326   | -0.05254 | 0.25715 | -0.0615  | 0.18461  | -0.19805 |
| 0.12082  | 0.00896 | 0.152254 | 0.00096  | 0.151481 | 0.00102 | 0.107343 | 0.02033  | 0.254187 |
| 0.071954 | 0.12047 | 0.020952 | 0.65154  | 0.046534 | 0.31564 | 0.005951 | 0.89794  | 0.109822 |
| 0.001918 | 0.96702 | 0.045515 | 0.32637  | 0.018764 | 0.68589 | 0.044874 | 0.33323  | 0.021655 |
| 0.016548 | 0.72134 | -0.02753 | 0.55291  | 0.039095 | 0.39928 | -0.06885 | 0.13739  | -0.07971 |
| 0.077321 | 0.09513 | 0.055077 | 0.23486  | 0.084151 | 0.06924 | 0.010712 | 0.81742  | 0.08521  |
| 0.031787 | 0.49318 | 0.146483 | 0.0015   | 0.079775 | 0.08505 | 0.165096 | 0.00034  | 0.259399 |
| -0.01575 | 0.73429 | -0.18392 | 6.39E-05 | -0.10811 | 0.01945 | -0.19939 | 1.42E-05 | -0.33663 |
| 0.055365 | 0.23242 | -0.03579 | 0.44033  | -0.00962 | 0.83569 | -0.04287 | 0.35531  | -0.05468 |
| 0.078611 | 0.08972 | 0.062226 | 0.17946  | 0.062408 | 0.17819 | 0.054687 | 0.23819  | 0.152885 |
| 0.096005 | 0.03809 | -0.00409 | 0.92971  | 0.02012  | 0.66452 | -0.02411 | 0.60322  | -0.07843 |
| 0.111711 | 0.01573 | 0.027707 | 0.55034  | 0.06443  | 0.16451 | 0.005668 | 0.90278  | 0.026847 |
| 0.004054 | 0.93037 | 0.008747 | 0.85047  | 0.003722 | 0.93607 | 0.011469 | 0.80476  | 0.047293 |
| 0.080253 | 0.0832  | 0.075164 | 0.10475  | 0.119744 | 0.0096  | 0.013178 | 0.7764   | -0.01502 |
| 0.025144 | 0.58782 | 0.237845 | 1.98E-07 | 0.07328  | 0.11377 | 0.318434 | 1.82E-12 | 0.196015 |
| -0.0327  | 0.48085 | -0.00974 | 0.83366  | -0.03351 | 0.47006 | 0.021839 | 0.63783  | 0.127891 |
| 0.027642 | 0.55126 | 0.02517  | 0.58743  | 0.029099 | 0.53048 | 0.015278 | 0.74193  | 0.059695 |
| 0.051875 | 0.26323 | 0.041166 | 0.37475  | 0.059981 | 0.1957  | 0.027091 | 0.55923  | 0.075358 |
| -0.0657  | 0.15636 | -0.03368 | 0.46777  | -0.03993 | 0.38931 | -0.04225 | 0.36226  | 0.107028 |
| 0.017275 | 0.70964 | 0.017162 | 0.71144  | 0.021021 | 0.65047 | 0.015144 | 0.74412  | 0.116417 |
| 0.040172 | 0.3864  | 0.054001 | 0.24415  | 0.0577   | 0.21328 | 0.032634 | 0.48173  | 0.048125 |
| -0.08825 | 0.05668 | -0.0643  | 0.16535  | -0.066   | 0.15446 | -0.04366 | 0.34648  | -0.06022 |
| 0.008948 | 0.84707 | 0.006566 | 0.88747  | 0.011743 | 0.8002  | 0.009888 | 0.83124  | -0.0028  |

|          |          |          |          |          |          |           |          |          |
|----------|----------|----------|----------|----------|----------|-----------|----------|----------|
| 0.109718 | 0.0177   | 0.022167 | 0.63279  | 0.04362  | 0.34693  | 0.010084  | 0.82795  | 0.078998 |
| -0.01648 | 0.72237  | 0.031111 | 0.50243  | 0.011032 | 0.81205  | 0.036531  | 0.43093  | 0.120059 |
| -0.00799 | 0.86321  | 0.082784 | 0.0739   | 0.029463 | 0.52534  | 0.081852  | 0.07722  | 0.101531 |
| 0.196648 | 1.87E-05 | 0.135168 | 0.00343  | 0.185968 | 5.27E-05 | 0.047453  | 0.30617  | 0.143155 |
| -0.03426 | 0.4601   | -0.0112  | 0.80927  | -0.02017 | 0.66377  | 0.011138  | 0.81029  | 0.006036 |
| -0.03611 | 0.43628  | -0.01331 | 0.7742   | -0.01848 | 0.6904   | -0.00604  | 0.89641  | 0.032374 |
| 0.056078 | 0.22645  | 0.003042 | 0.94773  | 0.041952 | 0.3657   | -0.02858  | 0.53783  | -0.03846 |
| 0.015445 | 0.73921  | 0.110816 | 0.01659  | 0.040904 | 0.37781  | 0.126292  | 0.00628  | 0.218467 |
| -0.04771 | 0.30357  | -0.02577 | 0.57857  | -0.00662 | 0.88648  | -0.03751  | 0.41865  | 0.011978 |
| 0.049021 | 0.29044  | 0.02548  | 0.58284  | 0.030893 | 0.50543  | 0.027382  | 0.55502  | 0.03082  |
| -0.01156 | 0.80316  | 0.006411 | 0.8901   | 0.021734 | 0.63945  | -0.01023  | 0.82548  | 0.042389 |
| 0.005569 | 0.90446  | 0.030936 | 0.50483  | 0.029593 | 0.52351  | 0.027867  | 0.54803  | 0.093231 |
| -0.01807 | 0.6969   | 0.090904 | 0.04962  | 0.028939 | 0.53273  | 0.107649  | 0.01997  | 0.169595 |
| 0.008447 | 0.85554  | 0.005893 | 0.89894  | 0.010912 | 0.81406  | 0.005247  | 0.90996  | 0.006656 |
| 0.02982  | 0.52033  | 0.018242 | 0.69418  | 0.037707 | 0.41625  | 0.002672  | 0.95407  | 0.019414 |
| 0.0045   | 0.92274  | -0.03822 | 0.40995  | -0.02708 | 0.55936  | -0.03176  | 0.49348  | -0.00873 |
| 0.046172 | 0.31943  | 0.110955 | 0.01645  | 0.06812  | 0.1416   | 0.110682  | 0.01672  | 0.284055 |
| 0.247035 | 6.37E-08 | 0.25816  | 1.51E-08 | 0.406215 | 5.56E-20 | -0.00026  | 0.99556  | 0.075032 |
| 0.269598 | 3.21E-09 | 0.414392 | 8.36E-21 | 0.369105 | 1.61E-16 | 0.325528  | 5.46E-13 | 0.431227 |
| 0.202816 | 1.00E-05 | 0.197256 | 1.76E-05 | 0.217399 | 2.11E-06 | 0.121845  | 0.00839  | 0.089113 |
| 0.102753 | 0.02639  | 0.095284 | 0.03956  | 0.094383 | 0.04148  | 0.098479  | 0.03337  | 0.071686 |
| 0.112359 | 0.01513  | 0.304895 | 1.67E-11 | 0.181566 | 7.95E-05 | 0.310866  | 6.38E-12 | 0.450286 |
| 0.070668 | 0.12727  | 0.03639  | 0.43272  | 0.082874 | 0.07358  | -0.01033  | 0.82383  | 0.088871 |
| 0.029555 | 0.52405  | 0.039656 | 0.39254  | 0.03279  | 0.47963  | 0.043446  | 0.34886  | 0.049425 |
| 0.010801 | 0.81593  | 0.063436 | 0.17114  | 0.009789 | 0.8329   | 0.088516  | 0.05594  | 0.243654 |
| 0.019858 | 0.66863  | 0.040426 | 0.38341  | 0.056311 | 0.22452  | 0.006147  | 0.8946   | 0.082996 |
| -0.04517 | 0.33008  | -0.01618 | 0.72723  | -0.01825 | 0.69412  | -0.0002   | 0.99659  | -0.00657 |
| 0.079565 | 0.08588  | 0.041052 | 0.37608  | 0.01893  | 0.68326  | 0.064925  | 0.16129  | 0.016277 |
| -0.04966 | 0.28416  | 0.02193  | 0.63643  | -0.0006  | 0.98966  | 0.035688  | 0.44165  | 0.008517 |
| 0.021967 | 0.63586  | 0.016163 | 0.72757  | 0.030051 | 0.5171   | 0.014555  | 0.75375  | -0.00403 |
| -0.00404 | 0.93054  | 0.014636 | 0.75241  | 0.006122 | 0.89504  | 0.02438   | 0.59922  | 0.029398 |
| 0.009738 | 0.83376  | -0.01087 | 0.81472  | 0.0088   | 0.84957  | -0.02444  | 0.59831  | -0.01417 |
| 0.059451 | 0.19969  | 0.012608 | 0.78581  | 0.025962 | 0.57573  | -7.27E-05 | 0.99875  | -0.00227 |
| -0.01339 | 0.77284  | 0.011898 | 0.79761  | -0.00023 | 0.99608  | 0.01385   | 0.76532  | 0.133492 |
| 0.047029 | 0.31052  | 0.085196 | 0.06584  | 0.039556 | 0.39373  | 0.090959  | 0.04948  | 0.202297 |
| 0.022524 | 0.62732  | -0.01511 | 0.74464  | 0.019544 | 0.67357  | -0.01938  | 0.6761   | 0.040261 |
| -0.03711 | 0.42369  | -0.08282 | 0.07376  | -0.03612 | 0.43612  | -0.09759  | 0.035    | -0.13133 |
| 0.043945 | 0.34334  | 0.110929 | 0.01648  | 0.055432 | 0.23185  | 0.126016  | 0.0064   | 0.219661 |
| 0.010319 | 0.82399  | 0.044577 | 0.33644  | 0.038906 | 0.40157  | 0.026783  | 0.56372  | 0.190744 |
| 0.039449 | 0.39502  | 0.033614 | 0.46866  | 0.043194 | 0.35167  | 0.016911  | 0.71549  | 0.10135  |
| -0.02812 | 0.54442  | 0.017183 | 0.71111  | 0.009324 | 0.84073  | 0.019021  | 0.68182  | 0.067147 |
| 0.050092 | 0.28002  | 0.090073 | 0.05175  | 0.080099 | 0.08379  | 0.067318  | 0.14636  | 0.18986  |
| 0.011298 | 0.80762  | -0.00814 | 0.86071  | 0.009634 | 0.8355   | -0.02405  | 0.60422  | 0.059525 |
| 0.023277 | 0.61585  | 0.031612 | 0.49557  | 0.077476 | 0.09447  | -0.02042  | 0.65981  | 0.052478 |
| 0.00766  | 0.86887  | -0.03973 | 0.39166  | -0.03417 | 0.4613   | -0.01991  | 0.66781  | -0.02325 |

|          |          |          |          |          |          |          |         |          |
|----------|----------|----------|----------|----------|----------|----------|---------|----------|
| 0.032345 | 0.48562  | 0.053854 | 0.24543  | 0.041028 | 0.37636  | 0.046489 | 0.31611 | 0.125861 |
| 0.404228 | 8.75E-20 | 0.263735 | 7.17E-09 | 0.330807 | 2.18E-13 | 0.141079 | 0.00224 | 0.120005 |
| 0.012115 | 0.794    | -0.03392 | 0.46467  | 0.011429 | 0.80544  | -0.06397 | 0.16755 | -0.08615 |
| -0.10025 | 0.03031  | -0.06377 | 0.16891  | -0.07445 | 0.10809  | -0.04914 | 0.28931 | 0.025379 |
| -0.00141 | 0.97583  | 0.091485 | 0.04817  | 0.043432 | 0.34902  | 0.094154 | 0.04198 | 0.272919 |
| -0.00684 | 0.88286  | 0.050647 | 0.27472  | 0.018484 | 0.69033  | 0.053135 | 0.2518  | 0.156274 |
| 0.050165 | 0.27932  | 0.138823 | 0.00264  | 0.065257 | 0.15915  | 0.161469 | 0.00046 | 0.301379 |
| -0.02023 | 0.66279  | 0.069271 | 0.13498  | 0.014141 | 0.76053  | 0.071601 | 0.12231 | 0.169889 |
| -0.00472 | 0.91891  | -0.02209 | 0.63402  | -0.03507 | 0.44961  | 0.00259  | 0.95548 | 0.031568 |
| 0.436567 | 3.74E-23 | 0.199655 | 1.38E-05 | 0.278297 | 9.40E-10 | 0.083212 | 0.07241 | 0.082133 |
| 0.02673  | 0.56449  | 0.026761 | 0.56403  | 0.025412 | 0.58385  | 0.014504 | 0.75457 | 0.018192 |
| -0.01809 | 0.69655  | 0.019532 | 0.67375  | -0.00383 | 0.93424  | 0.032747 | 0.48021 | 0.037351 |
| 0.050155 | 0.27942  | 0.086919 | 0.06054  | 0.107134 | 0.02058  | 0.026455 | 0.5685  | 0.070244 |
| 0.000322 | 0.99446  | -0.03479 | 0.45322  | -0.01311 | 0.77754  | -0.0437  | 0.34608 | -0.10725 |
| 0.060929 | 0.18872  | 0.047243 | 0.30831  | 0.062179 | 0.17979  | 0.023376 | 0.61435 | 0.233492 |
| 0.097176 | 0.03579  | 0.17195  | 0.00019  | 0.108502 | 0.01901  | 0.166741 | 0.0003  | 0.177835 |
| 0.003501 | 0.93986  | 0.070981 | 0.12559  | 0.038181 | 0.4104   | 0.067914 | 0.14281 | 0.229845 |
| -0.02262 | 0.62585  | 0.046372 | 0.31733  | 0.020595 | 0.6571   | 0.059601 | 0.19856 | 0.130102 |
| -0.00114 | 0.98046  | -0.05119 | 0.2696   | -0.02842 | 0.54016  | -0.05107 | 0.27075 | -0.19441 |
| 0.053617 | 0.24752  | 0.086466 | 0.0619   | 0.054224 | 0.2422   | 0.093039 | 0.04448 | 0.254484 |
| -0.0425  | 0.35944  | -0.00458 | 0.92139  | -0.01465 | 0.75216  | 0.016745 | 0.71817 | 0.049591 |
| 0.013858 | 0.76518  | -0.05112 | 0.27023  | -0.02111 | 0.64911  | -0.06971 | 0.13253 | -0.07148 |
| 0.053441 | 0.24908  | 0.013031 | 0.77882  | 0.026474 | 0.56822  | 0.007825 | 0.86607 | 0.035219 |
| -0.02412 | 0.60305  | -0.03324 | 0.47357  | -0.02476 | 0.59347  | -0.02771 | 0.55029 | -0.01127 |
| -0.03037 | 0.51261  | 0.036478 | 0.43161  | 0.011063 | 0.81155  | 0.046811 | 0.31277 | 0.145952 |
| 0.091363 | 0.04847  | 0.063005 | 0.17407  | 0.080367 | 0.08276  | 0.031893 | 0.49175 | 0.028053 |
| 0.033584 | 0.46906  | 0.031071 | 0.50298  | 0.040566 | 0.38177  | 0.020038 | 0.66581 | 0.102061 |
| 0.043692 | 0.34613  | 0.077057 | 0.09627  | 0.060117 | 0.19469  | 0.063653 | 0.16967 | 0.22704  |
| 0.035003 | 0.45047  | 0.004688 | 0.91952  | 0.033206 | 0.47408  | -0.01402 | 0.7625  | -0.04238 |
| -0.01329 | 0.77451  | 0.044479 | 0.33751  | 0.014957 | 0.74718  | 0.049539 | 0.28537 | 0.162807 |
| 0.010008 | 0.82923  | 0.061034 | 0.18795  | 0.025678 | 0.57991  | 0.081355 | 0.07904 | 0.073059 |
| 0.313869 | 3.90E-12 | 0.172284 | 0.00018  | 0.229539 | 5.33E-07 | 0.085432 | 0.06509 | 0.056327 |
| 0.030234 | 0.51455  | 0.032756 | 0.48009  | 0.038538 | 0.40604  | 0.039549 | 0.39382 | 0.006934 |
| -0.02698 | 0.5609   | -0.00572 | 0.90192  | -0.00454 | 0.92202  | -0.00959 | 0.83631 | 0.044951 |
| 0.046973 | 0.31109  | 0.153614 | 0.00087  | 0.0681   | 0.14172  | 0.174107 | 0.00016 | 0.311434 |
| 0.039085 | 0.3994   | -0.04552 | 0.32627  | 0.004143 | 0.92885  | -0.06618 | 0.15331 | -0.11529 |
| -0.03168 | 0.49461  | 0.062314 | 0.17885  | 0.024064 | 0.60397  | 0.067302 | 0.14646 | 0.185472 |
| 0.036558 | 0.4306   | 0.026083 | 0.57394  | 0.028883 | 0.53352  | 0.026536 | 0.56732 | 0.039385 |
| 4.03E-05 | 0.99931  | 0.032928 | 0.47779  | 0.029734 | 0.52153  | 0.031974 | 0.49064 | 0.046612 |
| 0.005363 | 0.90798  | 0.032186 | 0.48777  | 0.026339 | 0.57019  | 0.021641 | 0.64089 | 0.100424 |
| -0.00981 | 0.83249  | -0.03229 | 0.48631  | -0.01266 | 0.78488  | -0.03819 | 0.41031 | -0.01995 |
| 0.059703 | 0.19778  | 0.083689 | 0.07079  | 0.066575 | 0.15088  | 0.052443 | 0.25804 | 0.086283 |
| 0.027226 | 0.55727  | 0.111698 | 0.01574  | 0.028867 | 0.53376  | 0.150482 | 0.00111 | 0.253586 |
| 0.035928 | 0.43859  | 0.003909 | 0.93285  | -0.01327 | 0.7749   | 0.028476 | 0.53931 | 0.044688 |
| -0.0302  | 0.51504  | 0.029742 | 0.52143  | -0.01253 | 0.78706  | 0.028914 | 0.53309 | 0.066876 |

|          |          |          |          |          |          |          |          |          |
|----------|----------|----------|----------|----------|----------|----------|----------|----------|
| 0.015095 | 0.74491  | -0.09993 | 0.03084  | -0.03165 | 0.49505  | -0.13024 | 0.00482  | -0.20583 |
| 0.214357 | 2.95E-06 | 0.270026 | 3.03E-09 | 0.24873  | 5.14E-08 | 0.195447 | 2.11E-05 | 0.296064 |
| 0.06045  | 0.19223  | 0.151157 | 0.00105  | 0.130533 | 0.00472  | 0.11577  | 0.0123   | 0.255278 |
| 0.026594 | 0.56647  | 0.164062 | 0.00037  | 0.078846 | 0.08876  | 0.172895 | 0.00017  | 0.346674 |
| 0.043444 | 0.34889  | 0.100169 | 0.03044  | 0.083723 | 0.07067  | 0.076536 | 0.09855  | 0.325057 |
| 0.033906 | 0.4648   | 0.084491 | 0.06812  | 0.05104  | 0.27101  | 0.09179  | 0.04743  | 0.258693 |
| -0.00777 | 0.86698  | 0.007974 | 0.86355  | -0.01422 | 0.75927  | 0.014785 | 0.74997  | 0.099241 |
| 0.037214 | 0.42236  | 0.034249 | 0.4603   | 0.048568 | 0.29493  | 0.003093 | 0.94685  | 0.005133 |
| 0.078183 | 0.09149  | -0.00596 | 0.89783  | 0.028005 | 0.54605  | -0.01062 | 0.81889  | -0.01814 |
| 0.039661 | 0.39249  | -0.01255 | 0.78686  | 0.024942 | 0.59082  | -0.02072 | 0.65512  | -0.02047 |
| 0.011278 | 0.80795  | 0.17905  | 0.0001   | 0.05217  | 0.26052  | 0.22171  | 1.31E-06 | 0.483814 |
| 0.016434 | 0.72319  | 0.123813 | 0.00739  | 0.057047 | 0.21851  | 0.144815 | 0.0017   | 0.25363  |
| 0.040073 | 0.38758  | 0.182421 | 7.34E-05 | 0.088928 | 0.05481  | 0.199262 | 1.44E-05 | 0.433584 |
| 0.002544 | 0.95628  | -0.0083  | 0.85799  | 0.029584 | 0.52364  | -0.04308 | 0.35288  | -0.02759 |
| 0.066243 | 0.15293  | 0.06813  | 0.14155  | 0.052112 | 0.26106  | 0.072726 | 0.11653  | 0.178063 |
| 0.235326 | 2.69E-07 | 0.219115 | 1.75E-06 | 0.222348 | 1.22E-06 | 0.136104 | 0.00321  | 0.239351 |
| 0.011935 | 0.79699  | -0.00015 | 0.99739  | 0.010838 | 0.81531  | -0.00982 | 0.83242  | 0.024357 |
| 0.010806 | 0.81584  | -0.06923 | 0.1352   | -0.0282  | 0.5432   | -0.07056 | 0.12786  | -0.06565 |
| -0.00818 | 0.86009  | -0.02199 | 0.63546  | -0.00904 | 0.84548  | -0.0272  | 0.55768  | -0.02419 |
| 0.07495  | 0.10575  | 0.098366 | 0.03357  | 0.071912 | 0.12069  | 0.08837  | 0.05635  | 0.159619 |
| -0.04374 | 0.34562  | -0.1782  | 0.00011  | -0.09707 | 0.03598  | -0.19298 | 2.69E-05 | -0.3373  |
| -0.03185 | 0.49231  | 0.081591 | 0.07817  | 0.02513  | 0.58803  | 0.109953 | 0.01746  | 0.150749 |
| -0.00084 | 0.98554  | 0.041295 | 0.37326  | 0.038913 | 0.40148  | 0.026223 | 0.57189  | 0.081135 |
| 0.04333  | 0.35015  | 0.132517 | 0.00412  | 0.079014 | 0.08808  | 0.133764 | 0.00378  | 0.203356 |
| -0.0383  | 0.40897  | 0.057501 | 0.21486  | 0.024783 | 0.5932   | 0.061767 | 0.1827   | 0.123505 |
| 0.047224 | 0.30851  | 0.01615  | 0.72777  | 0.024901 | 0.59144  | -0.00962 | 0.83571  | 0.014911 |
| 0.079507 | 0.08611  | 0.182477 | 7.30E-05 | 0.075913 | 0.10133  | 0.216609 | 2.31E-06 | 0.349902 |
| -0.01679 | 0.71743  | 0.031118 | 0.50233  | 0.004465 | 0.92333  | 0.051627 | 0.26552  | 0.091994 |
| 0.037565 | 0.418    | 0.032266 | 0.48669  | 0.032494 | 0.48362  | 0.046115 | 0.32002  | 0.110431 |
| 0.133752 | 0.00378  | 0.161719 | 0.00045  | 0.116387 | 0.01184  | 0.148619 | 0.00128  | 0.292971 |
| -0.00871 | 0.85105  | 0.026676 | 0.56527  | 0.000577 | 0.99008  | 0.037327 | 0.42096  | 0.129738 |
| 0.093657 | 0.04308  | 0.083638 | 0.07096  | 0.052842 | 0.25442  | 0.088261 | 0.05666  | 0.160811 |
| -0.03075 | 0.50735  | 0.096904 | 0.03631  | 0.035987 | 0.43783  | 0.093015 | 0.04453  | 0.220304 |
| -0.00466 | 0.92006  | 0.024073 | 0.60384  | 0.024904 | 0.59139  | 0.016043 | 0.72951  | 0.054569 |
| -0.14563 | 0.0016   | -0.11584 | 0.01224  | -0.08458 | 0.06782  | -0.12301 | 0.00778  | -0.20807 |
| -0.02731 | 0.55601  | -0.02858 | 0.53786  | -0.03    | 0.5178   | -0.02589 | 0.57674  | -0.0447  |
| 0.003252 | 0.94412  | 0.048451 | 0.2961   | 0.01334  | 0.77372  | 0.050252 | 0.27849  | 0.112766 |
| 0.015644 | 0.73598  | 0.0932   | 0.04411  | 0.057109 | 0.21801  | 0.092414 | 0.04593  | 0.142885 |
| -0.08383 | 0.07032  | -0.16406 | 0.00037  | -0.12759 | 0.00576  | -0.15083 | 0.00108  | -0.22503 |
| 0.132549 | 0.00411  | 0.104739 | 0.0236   | 0.10305  | 0.02595  | 0.077755 | 0.09328  | 0.248295 |
| -0.0413  | 0.37318  | -0.04467 | 0.33548  | -0.05447 | 0.2401   | -0.02953 | 0.52435  | 0.037154 |
| 0.088885 | 0.05492  | 0.161379 | 0.00046  | 0.133804 | 0.00377  | 0.1466   | 0.00149  | 0.179172 |
| 0.034896 | 0.45186  | 0.055573 | 0.23067  | 0.06191  | 0.18169  | 0.025279 | 0.58582  | 0.167557 |
| 0.082723 | 0.07411  | 0.15194  | 0.00099  | 0.094831 | 0.04052  | 0.138271 | 0.00275  | 0.285489 |
| -0.01942 | 0.67554  | -0.18343 | 6.68E-05 | -0.09118 | 0.04893  | -0.19038 | 3.46E-05 | -0.26404 |

|          |          |          |          |           |          |          |          |          |
|----------|----------|----------|----------|-----------|----------|----------|----------|----------|
| -0.05857 | 0.20646  | -0.10857 | 0.01893  | -0.08449  | 0.06813  | -0.0956  | 0.03891  | -0.193   |
| 0.037659 | 0.41683  | 0.00584  | 0.89983  | 0.00175   | 0.96991  | -0.00217 | 0.9627   | 0.142733 |
| -0.03288 | 0.47848  | -0.01158 | 0.80287  | -0.01196  | 0.79663  | 0.007368 | 0.87383  | 0.047206 |
| -0.00245 | 0.95781  | -0.13017 | 0.00484  | -0.06367  | 0.16956  | -0.14576 | 0.00159  | -0.2572  |
| -0.09266 | 0.04536  | -0.09751 | 0.03515  | -0.06134  | 0.18573  | -0.0925  | 0.04572  | -0.10568 |
| 0.478033 | 4.89E-28 | 0.512893 | 1.08E-32 | 0.544422  | 2.16E-37 | 0.320543 | 1.28E-12 | 0.249804 |
| 0.139783 | 0.00247  | 0.275844 | 1.34E-09 | 0.131558  | 0.0044   | 0.349581 | 7.19E-15 | 0.212478 |
| -0.00158 | 0.97282  | 0.002704 | 0.95353  | 0.000819  | 0.98592  | 0.003907 | 0.93289  | 0.024052 |
| 0.028517 | 0.53874  | 0.090883 | 0.04967  | 0.092638  | 0.04541  | 0.03918  | 0.39825  | 0.141818 |
| -0.00432 | 0.92589  | 0.018626 | 0.68808  | 0.029404  | 0.52618  | -0.02527 | 0.58594  | -0.01128 |
| -0.04961 | 0.2847   | -0.15594 | 0.00072  | -0.0747   | 0.10693  | -0.1898  | 3.65E-05 | -0.26984 |
| 0.188208 | 4.26E-05 | 0.142194 | 0.00207  | 0.176709  | 0.00012  | 0.060255 | 0.19366  | 0.031516 |
| -0.00034 | 0.9941   | 0.067596 | 0.1447   | 0.036964  | 0.42549  | 0.066125 | 0.15367  | 0.14904  |
| 0.070594 | 0.12767  | 0.076531 | 0.09857  | 0.067513  | 0.14519  | 0.069361 | 0.13447  | 0.077566 |
| 0.037012 | 0.42489  | 0.130627 | 0.00469  | 0.064088  | 0.16677  | 0.141638 | 0.00215  | 0.273709 |
| -0.02729 | 0.55637  | -0.00401 | 0.9311   | -0.0033   | 0.94331  | -0.00728 | 0.87534  | 0.082697 |
| 0.011871 | 0.79806  | 0.113479 | 0.01414  | 0.066314  | 0.15249  | 0.116759 | 0.01157  | 0.207285 |
| 0.011781 | 0.79956  | -0.07392 | 0.11065  | -0.03732  | 0.42102  | -0.06461 | 0.16331  | -0.03602 |
| 0.015945 | 0.73109  | 0.059566 | 0.19882  | 0.037104  | 0.42374  | 0.041989 | 0.36528  | 0.077607 |
| 0.028712 | 0.53596  | 0.001334 | 0.97707  | 0.051346  | 0.26814  | -0.03682 | 0.42728  | -0.01048 |
| 0.036337 | 0.43339  | 0.006683 | 0.88547  | 0.014581  | 0.75331  | 0.005843 | 0.89979  | 0.009416 |
| -0.03629 | 0.43395  | -0.0081  | 0.86144  | -0.01221  | 0.79243  | -0.01096 | 0.81328  | -0.01401 |
| -0.02274 | 0.62402  | 0.004829 | 0.91711  | 0.008994  | 0.8463   | -0.01649 | 0.72226  | -0.03233 |
| -0.00433 | 0.92563  | 0.002659 | 0.95431  | 0.015998  | 0.73024  | -0.0143  | 0.75784  | 0.071323 |
| -0.00259 | 0.95556  | -0.02575 | 0.57892  | -7.31E-05 | 0.99874  | -0.03487 | 0.45223  | 0.000124 |
| 0.013909 | 0.76434  | 0.042694 | 0.35727  | 0.048631  | 0.2943   | 0.02521  | 0.58684  | 0.083464 |
| 0.035289 | 0.44677  | 0.042981 | 0.35405  | 0.058893  | 0.20395  | 0.002568 | 0.95587  | 0.033539 |
| -0.02561 | 0.58096  | -0.13495 | 0.00348  | -0.10949  | 0.01794  | -0.10664 | 0.02117  | -0.15174 |
| -0.01884 | 0.68464  | -0.02206 | 0.63444  | 0.004905  | 0.91582  | -0.04153 | 0.3705   | -0.03105 |
| -0.03549 | 0.44413  | 0.007703 | 0.86814  | -0.01521  | 0.74302  | 0.013762 | 0.76676  | 0.096669 |
| 0.060422 | 0.19243  | 0.128852 | 0.00529  | 0.115876  | 0.01222  | 0.073977 | 0.11036  | 0.37858  |
| -0.0166  | 0.72043  | 0.081493 | 0.07853  | 0.025529  | 0.58212  | 0.097897 | 0.03443  | 0.258729 |
| 0.013969 | 0.76335  | 0.066514 | 0.15125  | 0.057067  | 0.21835  | 0.051898 | 0.26302  | 0.185955 |
| 0.001978 | 0.966    | -0.06189 | 0.18186  | -0.02864  | 0.53694  | -0.05851 | 0.20688  | -0.18972 |
| 0.046409 | 0.31694  | 0.162258 | 0.00043  | 0.102887  | 0.02619  | 0.166795 | 0.00029  | 0.346169 |
| 0.040511 | 0.38242  | 0.083379 | 0.07184  | 0.072587  | 0.11723  | 0.062796 | 0.1755   | 0.190272 |
| 0.146671 | 0.00148  | 0.11852  | 0.01036  | 0.10476   | 0.02357  | 0.090455 | 0.05076  | 0.194028 |
| -0.02787 | 0.54804  | -0.02103 | 0.65033  | -0.0043   | 0.92615  | -0.02219 | 0.63246  | -0.03642 |
| -0.00497 | 0.91465  | -0.00414 | 0.92892  | -0.00351  | 0.9397   | 0.005516 | 0.90536  | 0.019315 |
| 0.008983 | 0.84648  | 0.021982 | 0.63563  | -0.00625  | 0.89289  | 0.0241   | 0.60342  | 0.061785 |
| -0.05539 | 0.23221  | -0.16796 | 0.00027  | -0.08291  | 0.07346  | -0.19738 | 1.74E-05 | -0.33154 |
| 0.074343 | 0.10861  | -0.00951 | 0.83754  | 0.049642  | 0.28437  | -0.06432 | 0.16523  | -0.10357 |
| -0.04475 | 0.33453  | -0.01905 | 0.68141  | -0.02648  | 0.56812  | -0.01775 | 0.70204  | 0.154106 |
| 0.018376 | 0.69205  | 0.059607 | 0.19851  | 0.020097  | 0.66489  | 0.067612 | 0.1446   | 0.106805 |
| -0.06074 | 0.1901   | -0.05364 | 0.24728  | -0.02841  | 0.5403   | -0.06341 | 0.1713   | -0.06298 |

|          |         |          |          |           |          |          |          |          |
|----------|---------|----------|----------|-----------|----------|----------|----------|----------|
| 0.003829 | 0.93423 | 0.047967 | 0.30095  | 0.025616  | 0.58083  | 0.034343 | 0.45907  | 0.117656 |
| 0.096971 | 0.03618 | 0.065375 | 0.1584   | 0.066754  | 0.14978  | 0.04507  | 0.33112  | 0.046306 |
| -0.02219 | 0.6324  | -0.0581  | 0.21013  | -0.02937  | 0.52667  | -0.06179 | 0.18255  | -0.04978 |
| 0.000367 | 0.99369 | 0.024469 | 0.59789  | 0.036048  | 0.43706  | 0.002463 | 0.95767  | 0.09985  |
| 0.138707 | 0.00266 | 0.239919 | 1.54E-07 | 0.1808    | 8.53E-05 | 0.206223 | 7.02E-06 | 0.279429 |
| 0.031955 | 0.4909  | 0.021608 | 0.64139  | 0.093306  | 0.04387  | -0.04633 | 0.31773  | -0.05313 |
| -0.04079 | 0.37911 | 0.008828 | 0.8491   | -3.06E-05 | 0.99947  | 0.01451  | 0.75448  | 0.066608 |
| 0.029582 | 0.52367 | -0.06616 | 0.15346  | 0.004135  | 0.92898  | -0.09494 | 0.04028  | -0.14141 |
| 0.021559 | 0.64215 | -0.04805 | 0.30013  | 0.004566  | 0.9216   | -0.0766  | 0.09827  | -0.1998  |
| -0.12939 | 0.0051  | -0.13505 | 0.00346  | -0.08578  | 0.064    | -0.15357 | 0.00087  | -0.2552  |
| 0.063118 | 0.17329 | 0.010932 | 0.81373  | 0.034963  | 0.45099  | -0.01428 | 0.75822  | 0.056444 |
| 0.072512 | 0.11761 | 0.069351 | 0.13453  | 0.081108  | 0.07995  | 0.038856 | 0.40217  | 0.175384 |
| 0.058316 | 0.20843 | 0.083594 | 0.07111  | 0.071861  | 0.12095  | 0.076849 | 0.09717  | 0.098859 |
| -0.07582 | 0.10177 | -0.14829 | 0.00131  | -0.12756  | 0.00577  | -0.09491 | 0.04035  | -0.18305 |
| -0.04214 | 0.36356 | -0.03816 | 0.41064  | -0.03415  | 0.46162  | -0.01134 | 0.80689  | 0.001655 |
| 0.000359 | 0.99382 | 0.049395 | 0.28677  | 0.028702  | 0.5361   | 0.044756 | 0.33451  | 0.232118 |
| 0.036052 | 0.43701 | 0.047465 | 0.30605  | 0.104464  | 0.02397  | -0.03138 | 0.49872  | 0.024002 |
| 0.067488 | 0.14534 | -0.02809 | 0.54479  | -0.02856  | 0.53812  | -0.0162  | 0.7269   | 0.009263 |
| -0.06011 | 0.19475 | -0.05089 | 0.27247  | -0.051    | 0.27136  | -0.0285  | 0.53902  | -0.02574 |
| -0.04778 | 0.30283 | -0.08941 | 0.05351  | -0.06453  | 0.16387  | -0.09464 | 0.04092  | -0.08976 |
| 0.015971 | 0.73067 | -0.0214  | 0.64456  | 0.000933  | 0.98396  | -0.03169 | 0.49455  | -0.01975 |
| 0.012009 | 0.79577 | 0.003641 | 0.93745  | 0.019694  | 0.67121  | -0.00435 | 0.92529  | 0.023475 |
| 0.010955 | 0.81335 | -0.05556 | 0.23079  | 0.0201    | 0.66483  | -0.09331 | 0.04386  | -0.13085 |
| 0.028149 | 0.54399 | 0.03036  | 0.51281  | 0.025241  | 0.58638  | 0.024368 | 0.5994   | 0.092435 |
| 0.052448 | 0.258   | 0.123521 | 0.00753  | 0.07009   | 0.13042  | 0.112335 | 0.01515  | 0.158211 |
| -0.00656 | 0.8875  | 0.003826 | 0.93429  | 0.005634  | 0.90335  | -0.0025  | 0.95701  | 0.02853  |
| 0.103077 | 0.02592 | 0.078255 | 0.09119  | 0.083974  | 0.06983  | 0.054714 | 0.23796  | 0.05669  |
| 0.104024 | 0.02457 | 0.026778 | 0.56378  | 0.078954  | 0.08833  | -0.00603 | 0.89667  | -0.03946 |
| 0.043794 | 0.34501 | 0.101309 | 0.02859  | 0.076548  | 0.09849  | 0.097797 | 0.03462  | 0.121292 |
| 0.140517 | 0.00234 | 0.130936 | 0.00459  | 0.145514  | 0.00162  | 0.09021  | 0.05139  | 0.107533 |
| -0.01329 | 0.77448 | -0.00454 | 0.92198  | -0.01668  | 0.71921  | 0.024867 | 0.59195  | 0.02072  |
| 0.041664 | 0.36901 | 0.119426 | 0.00979  | 0.086365  | 0.0622   | 0.093446 | 0.04355  | 0.224046 |
| 0.068011 | 0.14224 | 0.171864 | 0.00019  | 0.112973  | 0.01458  | 0.1714   | 0.0002   | 0.413112 |
| 0.148045 | 0.00133 | 0.050945 | 0.27191  | 0.08706   | 0.06012  | 0.004905 | 0.91581  | 0.000212 |
| 0.077296 | 0.09524 | 0.000764 | 0.98686  | 0.035887  | 0.43911  | -0.01725 | 0.71005  | -0.03762 |
| 0.075145 | 0.10484 | -0.09169 | 0.04768  | -0.02686  | 0.56263  | -0.1096  | 0.01782  | -0.20394 |
| 0.048966 | 0.29099 | -0.03269 | 0.48101  | -0.02614  | 0.57317  | -0.02625 | 0.57146  | -0.01883 |
| 0.003017 | 0.94815 | 0.036982 | 0.42527  | 0.01062   | 0.81896  | 0.057314 | 0.21636  | 0.044157 |
| 0.041422 | 0.37179 | 0.042641 | 0.35787  | 0.044939  | 0.33253  | 0.0307   | 0.50809  | 0.102874 |
| 0.044579 | 0.33642 | 0.10639  | 0.02148  | 0.067101  | 0.14767  | 0.11219  | 0.01528  | 0.183128 |
| 0.020798 | 0.65395 | 0.092695 | 0.04527  | 0.053677  | 0.24699  | 0.105338 | 0.02281  | 0.082246 |
| 0.074055 | 0.10999 | 0.154588 | 0.0008   | 0.107674  | 0.01994  | 0.13684  | 0.00304  | 0.308156 |
| 0.054943 | 0.236   | 0.174577 | 0.00015  | 0.079346  | 0.08675  | 0.194742 | 2.26E-05 | 0.383163 |
| 0.08801  | 0.05737 | 0.001376 | 0.97634  | 0.030155  | 0.51565  | -0.03133 | 0.49941  | 0.03825  |
| 0.022051 | 0.63457 | -0.05833 | 0.20829  | 0.022203  | 0.63224  | -0.10594 | 0.02204  | -0.16009 |

|          |          |          |          |          |          |          |          |          |
|----------|----------|----------|----------|----------|----------|----------|----------|----------|
| 0.01466  | 0.75203  | 0.018867 | 0.68425  | 0.012736 | 0.7837   | 0.028127 | 0.54431  | 0.031613 |
| 0.055262 | 0.23329  | -0.03203 | 0.48987  | -0.00245 | 0.95787  | -0.04418 | 0.34073  | -0.06765 |
| -0.03928 | 0.39701  | -0.05227 | 0.25965  | -0.01799 | 0.69813  | -0.07079 | 0.12659  | -0.05153 |
| -0.01249 | 0.78785  | 0.032716 | 0.48063  | 0.001101 | 0.98107  | 0.037606 | 0.41749  | 0.151751 |
| -0.05233 | 0.25905  | -0.05732 | 0.21632  | -0.04979 | 0.28291  | -0.0681  | 0.14171  | -0.07155 |
| 0.050216 | 0.27883  | 0.078046 | 0.09206  | 0.067089 | 0.14774  | 0.081634 | 0.07801  | 0.13222  |
| 0.033231 | 0.47374  | 0.092877 | 0.04485  | 0.066817 | 0.1494   | 0.070415 | 0.12864  | 0.145342 |
| 0.054321 | 0.24135  | -0.01038 | 0.82297  | 0.016004 | 0.73014  | -0.02605 | 0.57443  | -0.10087 |
| -0.02311 | 0.61842  | 0.103193 | 0.02575  | 0.033425 | 0.47117  | 0.132151 | 0.00423  | 0.318187 |
| -0.00973 | 0.83391  | 0.009184 | 0.8431   | 0.009892 | 0.83117  | 0.008477 | 0.85504  | 0.085391 |
| -0.0006  | 0.9897   | 0.037985 | 0.4128   | 0.019547 | 0.67352  | 0.033256 | 0.47341  | 0.075124 |
| -0.01564 | 0.73608  | -0.00871 | 0.85106  | -0.05012 | 0.27976  | 0.019486 | 0.67448  | -0.01184 |
| -0.05771 | 0.21317  | -0.0602  | 0.19411  | -0.02967 | 0.5225   | -0.05236 | 0.2588   | -0.03557 |
| -0.13403 | 0.00371  | -0.14849 | 0.00129  | -0.14056 | 0.00233  | -0.10321 | 0.02572  | -0.24542 |
| 0.080405 | 0.08261  | 0.041817 | 0.36724  | 0.067168 | 0.14727  | 0.012868 | 0.78152  | 0.016164 |
| 0.002988 | 0.94864  | -0.00717 | 0.87714  | -0.00024 | 0.99595  | -0.00567 | 0.90279  | -0.00686 |
| -0.03001 | 0.51765  | 0.028171 | 0.54367  | 0.011575 | 0.80299  | 0.027895 | 0.54763  | 0.102147 |
| 0.034025 | 0.46324  | 0.043791 | 0.34504  | 0.052922 | 0.25371  | 0.015483 | 0.7386   | 0.057791 |
| 0.064884 | 0.16155  | 0.118156 | 0.0106   | 0.091013 | 0.04934  | 0.093885 | 0.04257  | 0.277978 |
| 0.086813 | 0.06085  | 0.016906 | 0.71557  | 0.086498 | 0.0618   | -0.04831 | 0.29747  | -0.02105 |
| 0.028128 | 0.54429  | -0.02612 | 0.57345  | 0.003612 | 0.93794  | -0.0226  | 0.62616  | -0.0036  |
| 0.033254 | 0.47344  | -0.01661 | 0.72034  | -0.00199 | 0.96577  | -0.00386 | 0.93363  | -0.03623 |
| 0.012812 | 0.78245  | 0.114564 | 0.01324  | 0.042047 | 0.36461  | 0.138605 | 0.00268  | 0.215502 |
| -0.02331 | 0.61537  | 0.026875 | 0.56237  | 0.007964 | 0.86372  | 0.030076 | 0.51675  | 0.054063 |
| 0.099294 | 0.03193  | 0.15466  | 0.0008   | 0.102205 | 0.02721  | 0.149299 | 0.00121  | 0.278997 |
| 0.05392  | 0.24485  | -0.03937 | 0.39596  | -0.00514 | 0.91185  | -0.04594 | 0.32182  | 0.000109 |
| 0.106117 | 0.02182  | 0.06351  | 0.17063  | 0.095953 | 0.03819  | 0.01895  | 0.68294  | 0.049503 |
| 0.035319 | 0.4464   | 0.054282 | 0.24169  | 0.060867 | 0.18917  | 0.029502 | 0.52479  | 0.076857 |
| -0.01311 | 0.77756  | 0.07761  | 0.09389  | 0.044692 | 0.3352   | 0.066309 | 0.15252  | 0.200167 |
| 0.065803 | 0.15568  | 0.061524 | 0.18443  | 0.083445 | 0.07161  | 0.026938 | 0.56146  | 0.017424 |
| 0.202121 | 1.07E-05 | 0.243246 | 1.02E-07 | 0.220507 | 1.50E-06 | 0.191483 | 3.11E-05 | 0.409518 |
| -0.00488 | 0.91623  | 0.103295 | 0.0256   | 0.050562 | 0.27553  | 0.116292 | 0.01191  | 0.21375  |
| 0.100147 | 0.03048  | 0.091423 | 0.04832  | 0.096552 | 0.037    | 0.065492 | 0.15765  | 0.238684 |
| 0.254732 | 2.37E-08 | 0.148474 | 0.00129  | 0.209808 | 4.81E-06 | 0.061009 | 0.18814  | 0.069613 |
| 0.076554 | 0.09846  | 0.035764 | 0.44068  | 0.026397 | 0.56935  | 0.048347 | 0.29713  | 0.03823  |
| 0.045715 | 0.32424  | 0.002847 | 0.95107  | 0.023305 | 0.61542  | -0.01863 | 0.68806  | 0.075129 |
| 0.102817 | 0.02629  | 0.148754 | 0.00126  | 0.131144 | 0.00453  | 0.124575 | 0.00703  | 0.138664 |
| 0.037889 | 0.41399  | 0.039598 | 0.39324  | 0.049885 | 0.28201  | 0.020058 | 0.66549  | 0.077784 |
| 0.049809 | 0.28275  | 0.073774 | 0.11135  | 0.050626 | 0.27491  | 0.067067 | 0.14788  | 0.100442 |
| -0.02327 | 0.61592  | -0.02931 | 0.52746  | -0.01266 | 0.78499  | -0.04098 | 0.37688  | 0.004909 |
| -0.06177 | 0.1827   | -0.05087 | 0.27262  | -0.04972 | 0.28363  | -0.04099 | 0.37678  | 0.023438 |
| 0.069607 | 0.13309  | -0.0243  | 0.60047  | 0.004419 | 0.92412  | -0.03505 | 0.44986  | -0.09404 |
| 0.023717 | 0.6092   | 0.152478 | 0.00095  | 0.065943 | 0.1548   | 0.182599 | 7.22E-05 | 0.232532 |
| 0.03023  | 0.51461  | 0.130436 | 0.00475  | 0.055886 | 0.22804  | 0.149742 | 0.00117  | 0.335154 |
| -0.03347 | 0.47055  | -0.06496 | 0.16104  | -0.053   | 0.25301  | -0.05579 | 0.22881  | -0.01115 |

|          |          |          |          |          |          |          |          |          |
|----------|----------|----------|----------|----------|----------|----------|----------|----------|
| 0.009588 | 0.83628  | 0.014971 | 0.74693  | 0.022187 | 0.63248  | -0.00527 | 0.90955  | 0.061604 |
| 0.036352 | 0.4332   | 0.089889 | 0.05223  | 0.052697 | 0.25574  | 0.08815  | 0.05697  | 0.222312 |
| 0.032501 | 0.48352  | 0.069328 | 0.13466  | 0.066091 | 0.15388  | 0.053097 | 0.25214  | 0.179534 |
| -0.08704 | 0.06018  | -0.02536 | 0.58463  | -0.03616 | 0.43559  | -0.01847 | 0.69055  | 0.033799 |
| 0.052562 | 0.25695  | 0.008767 | 0.85013  | 0.050617 | 0.27501  | -0.02139 | 0.64473  | 0.005812 |
| 0.06274  | 0.17589  | 0.074761 | 0.10663  | 0.05963  | 0.19833  | 0.056817 | 0.22038  | 0.224109 |
| -0.06486 | 0.16172  | -0.05544 | 0.23178  | -0.0471  | 0.30974  | -0.04578 | 0.32359  | -0.00567 |
| -0.11117 | 0.01624  | -0.0677  | 0.1441   | -0.08896 | 0.05472  | -0.03208 | 0.48916  | -0.05036 |
| 0.175504 | 0.00014  | 0.151453 | 0.00103  | 0.104893 | 0.02339  | 0.161081 | 0.00047  | 0.219917 |
| -0.00941 | 0.83927  | 0.05466  | 0.23843  | 0.003001 | 0.94842  | 0.075613 | 0.10268  | 0.110793 |
| 0.092856 | 0.0449   | 0.004194 | 0.92797  | 0.013633 | 0.76888  | -0.00516 | 0.91144  | -0.00405 |
| 0.003714 | 0.93619  | 0.013415 | 0.77248  | 0.015121 | 0.74449  | 0.016229 | 0.72649  | 0.089283 |
| 0.055075 | 0.23488  | 0.034118 | 0.46202  | 0.037708 | 0.41623  | 0.029027 | 0.5315   | 0.146584 |
| -0.06717 | 0.14726  | -0.03959 | 0.39336  | -0.04362 | 0.34698  | -0.02275 | 0.62383  | -0.02897 |
| 0.072131 | 0.11956  | -0.05152 | 0.26651  | 0.041687 | 0.36874  | -0.10408 | 0.0245   | -0.0747  |
| 0.030997 | 0.504    | 0.090282 | 0.0512   | 0.059696 | 0.19784  | 0.080857 | 0.0809   | 0.165954 |
| -0.03822 | 0.40991  | -0.03306 | 0.47604  | -0.02302 | 0.61971  | -0.03574 | 0.44097  | -0.02028 |
| 0.094551 | 0.04112  | 0.062781 | 0.1756   | 0.087979 | 0.05746  | 0.027295 | 0.55628  | 0.073689 |
| -0.07502 | 0.10543  | -0.11848 | 0.01039  | -0.05349 | 0.24863  | -0.13702 | 0.00301  | -0.17753 |
| -0.09457 | 0.04107  | -0.08427 | 0.06885  | -0.05752 | 0.21475  | -0.09868 | 0.03301  | -0.17927 |
| 0.001955 | 0.96639  | 0.062963 | 0.17435  | 0.021808 | 0.63831  | 0.075843 | 0.10164  | 0.156529 |
| -0.00637 | 0.89075  | -0.0317  | 0.49431  | -0.01949 | 0.67449  | -0.02436 | 0.59958  | -0.02445 |
| 0.002045 | 0.96485  | 0.045261 | 0.32907  | 0.042233 | 0.36249  | 0.039216 | 0.39782  | 0.079996 |
| 0.008122 | 0.86104  | 0.000642 | 0.98895  | 0.002678 | 0.95398  | 0.014049 | 0.76204  | 0.025425 |
| -0.09167 | 0.04772  | -0.06375 | 0.169    | -0.04472 | 0.33484  | -0.07484 | 0.10625  | -0.10627 |
| 0.060874 | 0.18912  | 0.187783 | 4.44E-05 | 0.102608 | 0.0266   | 0.194085 | 2.41E-05 | 0.307317 |
| 0.034996 | 0.45056  | 0.063795 | 0.16872  | 0.075898 | 0.10139  | 0.03538  | 0.44561  | 0.037462 |
| 0.159094 | 0.00056  | 0.163998 | 0.00037  | 0.15095  | 0.00107  | 0.117249 | 0.01122  | 0.199351 |
| 0.049052 | 0.29013  | 0.166531 | 0.0003   | 0.06338  | 0.17151  | 0.212216 | 3.72E-06 | 0.216012 |
| -0.03826 | 0.40939  | -0.12327 | 0.00766  | -0.08346 | 0.07155  | -0.12402 | 0.00729  | -0.26562 |
| -0.01629 | 0.72554  | 0.056775 | 0.22072  | 0.022668 | 0.62512  | 0.061097 | 0.1875   | 0.173271 |
| -0.02969 | 0.52222  | -0.1127  | 0.01482  | -0.05466 | 0.23845  | -0.11939 | 0.00981  | -0.1067  |
| -0.01877 | 0.68573  | -0.02918 | 0.52926  | -0.00805 | 0.86233  | -0.0301  | 0.51639  | -0.04168 |
| 0.020925 | 0.65196  | -0.0116  | 0.80263  | 0.010111 | 0.82749  | -0.02573 | 0.57908  | 0.018995 |
| 0.121249 | 0.00872  | 0.057597 | 0.2141   | 0.045137 | 0.33041  | 0.065474 | 0.15777  | 0.045395 |
| 0.24243  | 1.13E-07 | 0.227662 | 6.62E-07 | 0.228974 | 5.69E-07 | 0.164485 | 0.00036  | 0.094758 |
| 0.131454 | 0.00443  | 0.076478 | 0.0988   | 0.082461 | 0.07504  | 0.058621 | 0.20605  | 0.127137 |
| 0.042884 | 0.35514  | -0.01116 | 0.80989  | -0.0091  | 0.84447  | -0.00903 | 0.84566  | 0.01172  |
| 0.131732 | 0.00435  | 0.101096 | 0.02893  | 0.139429 | 0.00253  | 0.049454 | 0.2862   | 0.070073 |
| 0.028994 | 0.53195  | 0.015554 | 0.73744  | 0.044235 | 0.34017  | -0.01604 | 0.7295   | -0.09206 |
| 6.07E-05 | 0.99896  | 0.098981 | 0.03247  | 0.050629 | 0.27489  | 0.100723 | 0.02953  | 0.231685 |
| 0.016926 | 0.71525  | 0.096396 | 0.0373   | 0.05853  | 0.20676  | 0.089195 | 0.05408  | 0.180841 |
| -0.02898 | 0.5321   | 0.009264 | 0.84174  | 0.000929 | 0.98403  | 0.019033 | 0.68162  | 0.088138 |
| -0.03772 | 0.41608  | -0.06306 | 0.17367  | -0.01527 | 0.74212  | -0.07521 | 0.10453  | -0.08351 |
| 0.010911 | 0.81409  | 0.073493 | 0.11272  | 0.040925 | 0.37756  | 0.072046 | 0.12     | 0.151414 |



|          |         |          |          |          |          |          |          |          |
|----------|---------|----------|----------|----------|----------|----------|----------|----------|
| -0.01037 | 0.82315 | -0.04083 | 0.37871  | -0.02936 | 0.52678  | -0.03623 | 0.4347   | -0.09447 |
| -0.01507 | 0.74538 | -0.01528 | 0.74194  | -0.0042  | 0.92781  | -0.00826 | 0.85877  | 0.00775  |
| 0.090155 | 0.05153 | 0.152562 | 0.00094  | 0.121813 | 0.00841  | 0.139466 | 0.00252  | 0.18552  |
| -0.06648 | 0.15143 | 0.031957 | 0.49087  | -0.02606 | 0.57436  | 0.052997 | 0.25304  | 0.104083 |
| 0.077383 | 0.09486 | -0.01705 | 0.71328  | 0.026065 | 0.57422  | -0.03323 | 0.4738   | -0.02579 |
| -0.01511 | 0.74472 | 0.038715 | 0.40388  | 0.020404 | 0.66009  | 0.036029 | 0.4373   | 0.189114 |
| 0.032309 | 0.4861  | 0.030898 | 0.50535  | 0.036872 | 0.42665  | 0.023546 | 0.61178  | 0.137864 |
| 0.04837  | 0.2969  | 0.120531 | 0.00913  | 0.075828 | 0.10171  | 0.124106 | 0.00725  | 0.306451 |
| -0.05742 | 0.21549 | -0.11279 | 0.01474  | -0.07678 | 0.09749  | -0.11987 | 0.00952  | -0.18865 |
| 0.109319 | 0.01812 | 0.076399 | 0.09915  | 0.083245 | 0.0723   | 0.052578 | 0.25681  | 0.077815 |
| -0.02791 | 0.54743 | 0.003699 | 0.93646  | -0.00316 | 0.94577  | -0.00578 | 0.90079  | 0.047667 |
| -0.06243 | 0.17806 | -0.01389 | 0.76473  | -0.02332 | 0.61525  | -0.01787 | 0.70016  | 0.056664 |
| 0.092572 | 0.04556 | 0.021265 | 0.6467   | 0.040468 | 0.38291  | -0.00044 | 0.99241  | 0.039052 |
| -0.01954 | 0.67361 | 0.088493 | 0.05601  | 0.032875 | 0.4785   | 0.10189  | 0.02769  | 0.128388 |
| -0.13595 | 0.00324 | -0.16464 | 0.00035  | -0.11259 | 0.01492  | -0.1622  | 0.00043  | -0.30255 |
| 0.028078 | 0.54501 | 0.034116 | 0.46204  | 0.041924 | 0.36602  | 0.025555 | 0.58173  | 0.040433 |
| -0.03582 | 0.43991 | 0.052059 | 0.26155  | 0.024224 | 0.60156  | 0.051444 | 0.26723  | 0.158233 |
| 0.004471 | 0.92324 | 0.032414 | 0.48469  | 0.012044 | 0.79518  | 0.056157 | 0.2258   | 0.040689 |
| 0.034909 | 0.45169 | 0.098523 | 0.03329  | 0.083789 | 0.07045  | 0.092731 | 0.04519  | 0.138917 |
| 0.014045 | 0.76211 | 0.04406  | 0.34208  | 0.026995 | 0.56063  | 0.044587 | 0.33633  | 0.096534 |
| 0.0511   | 0.27044 | 0.178028 | 0.00011  | 0.096842 | 0.03643  | 0.202238 | 1.06E-05 | 0.310853 |
| 0.006613 | 0.88666 | 0.094673 | 0.04085  | 0.049835 | 0.28249  | 0.120633 | 0.00907  | 0.155376 |
| -0.01132 | 0.80718 | 0.057009 | 0.21882  | 0.013282 | 0.77468  | 0.094759 | 0.04067  | 0.166531 |
| 0.042298 | 0.36175 | 0.116272 | 0.01192  | 0.069115 | 0.13587  | 0.127703 | 0.00572  | 0.20295  |
| -0.00032 | 0.99444 | 0.041455 | 0.37141  | 0.020258 | 0.66237  | 0.066014 | 0.15436  | 0.0822   |
| -0.00978 | 0.8331  | 0.079783 | 0.08502  | 0.019566 | 0.67321  | 0.122213 | 0.0082   | 0.107172 |
| 0.079402 | 0.08653 | 0.134394 | 0.00362  | 0.108257 | 0.01928  | 0.127148 | 0.00593  | 0.129093 |
| 0.042407 | 0.36052 | 0.090758 | 0.04998  | 0.079102 | 0.08773  | 0.063367 | 0.1716   | 0.193632 |
| 0.052432 | 0.25814 | 0.157196 | 0.00065  | 0.075437 | 0.10349  | 0.194178 | 2.39E-05 | 0.194379 |
| -0.00553 | 0.90511 | 0.059651 | 0.19818  | 0.01208  | 0.79459  | 0.09492  | 0.04033  | 0.206886 |
| 0.097982 | 0.03427 | 0.245433 | 7.79E-08 | 0.136246 | 0.00318  | 0.275913 | 1.32E-09 | 0.376996 |
| 0.132932 | 0.00401 | 0.260943 | 1.04E-08 | 0.17193  | 0.00019  | 0.269125 | 3.43E-09 | 0.385575 |
| 0.151226 | 0.00104 | 0.273856 | 1.77E-09 | 0.179708 | 9.42E-05 | 0.27653  | 1.21E-09 | 0.358603 |
| -0.01491 | 0.74797 | 0.031425 | 0.49812  | 0.000607 | 0.98956  | 0.035545 | 0.44349  | 0.181615 |
| -0.00579 | 0.90076 | 0.08131  | 0.0792   | 0.029196 | 0.52911  | 0.090805 | 0.04987  | 0.16925  |
| -0.01752 | 0.70579 | 0.01566  | 0.73572  | -0.00588 | 0.89911  | 0.024971 | 0.5904   | 0.105733 |
| 0.041911 | 0.36617 | 0.051504 | 0.26667  | -0.01277 | 0.78309  | 0.095282 | 0.03957  | 0.038831 |
| 0.083184 | 0.07251 | 0.192384 | 2.85E-05 | 0.139021 | 0.00261  | 0.165283 | 0.00033  | 0.367033 |
| 0.076439 | 0.09897 | 0.117082 | 0.01134  | 0.089569 | 0.05308  | 0.10971  | 0.01771  | 0.171807 |
| 0.059121 | 0.2022  | 0.067391 | 0.14592  | 0.063734 | 0.16913  | 0.051737 | 0.26451  | 0.048004 |
| 0.036501 | 0.43132 | 0.085974 | 0.0634   | 0.057238 | 0.21697  | 0.092225 | 0.04638  | 0.067013 |
| 0.02351  | 0.61233 | -0.01715 | 0.71158  | -0.0089  | 0.84783  | -0.01112 | 0.81064  | -0.00306 |
| 0.024517 | 0.59717 | 0.180613 | 8.68E-05 | 0.092556 | 0.0456   | 0.1916   | 3.07E-05 | 0.366002 |
| 0.050916 | 0.27218 | 0.124739 | 0.00696  | 0.087508 | 0.05881  | 0.107487 | 0.02016  | 0.230999 |
| 0.044232 | 0.3402  | 0.059666 | 0.19807  | 0.039981 | 0.38868  | 0.054168 | 0.24268  | 0.141815 |

|          |          |          |          |          |          |          |          |          |
|----------|----------|----------|----------|----------|----------|----------|----------|----------|
| -0.02113 | 0.64872  | 0.038597 | 0.40531  | 0.019265 | 0.67797  | 0.028031 | 0.54567  | 0.15559  |
| -0.02386 | 0.60696  | 0.029916 | 0.51899  | 0.020737 | 0.6549   | 0.01158  | 0.8029   | 0.149571 |
| -0.05327 | 0.25059  | -0.0552  | 0.2338   | -0.05401 | 0.24411  | -0.05142 | 0.26748  | -0.01059 |
| -0.14901 | 0.00124  | -0.12662 | 0.00615  | -0.1167  | 0.01161  | -0.12172 | 0.00846  | -0.21266 |
| -0.00698 | 0.88038  | 0.072084 | 0.1198   | 0.02018  | 0.66358  | 0.08813  | 0.05703  | 0.162018 |
| -0.01515 | 0.74408  | -0.0738  | 0.11122  | -0.01028 | 0.82457  | -0.10563 | 0.02244  | -0.11133 |
| -0.00792 | 0.86446  | 0.017642 | 0.70376  | 0.01581  | 0.73329  | 0.012895 | 0.78108  | 0.026748 |
| 0.006953 | 0.88088  | -0.11368 | 0.01397  | -0.01175 | 0.80003  | -0.16064 | 0.00049  | -0.19991 |
| 0.043938 | 0.34342  | 0.040973 | 0.377    | 0.059839 | 0.19676  | 0.002906 | 0.95007  | 0.081856 |
| 0.04446  | 0.33771  | 0.031058 | 0.50315  | 0.05097  | 0.27166  | 0.023031 | 0.61959  | 0.01078  |
| -0.07198 | 0.12031  | -0.04061 | 0.38127  | -0.03708 | 0.42402  | -0.05615 | 0.22585  | -0.00257 |
| 0.018718 | 0.68662  | 0.034879 | 0.45207  | 0.022943 | 0.62093  | 0.030044 | 0.5172   | 0.040073 |
| -0.007   | 0.88016  | -0.00675 | 0.88438  | 0.001898 | 0.96736  | -0.00034 | 0.99419  | 0.045599 |
| -0.04464 | 0.3358   | -0.01337 | 0.77329  | -0.04739 | 0.30682  | 0.009602 | 0.83605  | 0.01945  |
| -0.01782 | 0.70096  | -0.00202 | 0.96529  | -0.00444 | 0.92382  | -0.01056 | 0.82001  | 0.117953 |
| -0.03376 | 0.46668  | -0.11821 | 0.01056  | -0.11263 | 0.01488  | -0.07739 | 0.09482  | -0.14247 |
| 0.00416  | 0.92855  | 0.022164 | 0.63284  | 0.024426 | 0.59852  | 0.007897 | 0.86486  | 0.023953 |
| 0.053518 | 0.24839  | -0.01111 | 0.8108   | 0.020457 | 0.65926  | -0.0325  | 0.48354  | -0.01758 |
| 0.029637 | 0.5229   | 0.077887 | 0.09273  | 0.019302 | 0.67739  | 0.101274 | 0.02865  | 0.164528 |
| 0.015699 | 0.73509  | 0.014744 | 0.75065  | 0.005581 | 0.90425  | 0.005637 | 0.9033   | 0.017697 |
| 0.016432 | 0.72322  | -0.11185 | 0.0156   | -0.05801 | 0.21081  | -0.1271  | 0.00595  | -0.24545 |
| -0.13822 | 0.00276  | -0.12913 | 0.00519  | -0.12108 | 0.00881  | -0.11381 | 0.01386  | -0.23594 |
| -0.00172 | 0.97046  | -0.02516 | 0.58759  | -0.01853 | 0.68961  | -0.03182 | 0.49267  | 0.007045 |
| -0.02402 | 0.6047   | -0.08145 | 0.07869  | -0.02292 | 0.62124  | -0.10907 | 0.01839  | -0.14508 |
| 0.135624 | 0.00332  | 0.112709 | 0.01481  | 0.169354 | 0.00024  | 0.024487 | 0.59762  | 0.142449 |
| -0.05236 | 0.25881  | -0.08955 | 0.05312  | -0.05639 | 0.22386  | -0.08131 | 0.07921  | -0.1958  |
| -0.02472 | 0.59417  | 0.07525  | 0.10435  | 0.026064 | 0.57422  | 0.089236 | 0.05397  | 0.238258 |
| 0.08499  | 0.0665   | 0.040816 | 0.37884  | 0.089037 | 0.05451  | -0.01118 | 0.80966  | -0.00757 |
| 0.052603 | 0.25659  | 0.142277 | 0.00206  | 0.085822 | 0.06387  | 0.145616 | 0.0016   | 0.271432 |
| -0.0084  | 0.85629  | 0.007482 | 0.87189  | -0.00349 | 0.94008  | 0.01541  | 0.73978  | -0.00757 |
| 0.056757 | 0.22086  | 0.001878 | 0.96772  | 0.043288 | 0.35062  | -0.02508 | 0.58872  | -0.00382 |
| -0.00231 | 0.96024  | 0.007503 | 0.87154  | 0.001309 | 0.9775   | 0.001586 | 0.97273  | 0.037001 |
| 0.083801 | 0.07041  | 0.198187 | 1.60E-05 | 0.10204  | 0.02746  | 0.228258 | 6.18E-07 | 0.325589 |
| -0.10189 | 0.02769  | -0.07192 | 0.12064  | -0.07922 | 0.08727  | -0.06208 | 0.18049  | -0.08686 |
| 0.061651 | 0.18352  | 0.088703 | 0.05542  | 0.090931 | 0.04955  | 0.05632  | 0.22444  | 0.118639 |
| -0.04209 | 0.36408  | -0.04134 | 0.37277  | -0.03753 | 0.41839  | -0.0349  | 0.45179  | -0.11799 |
| 0.379654 | 1.85E-17 | 0.292498 | 1.15E-10 | 0.350928 | 5.58E-15 | 0.15206  | 0.00098  | 0.184737 |
| -0.04292 | 0.35471  | 0.028326 | 0.54146  | -0.00346 | 0.94064  | 0.040445 | 0.38319  | 0.156646 |
| 0.120954 | 0.00889  | -0.02393 | 0.60604  | 0.06149  | 0.18467  | -0.08256 | 0.0747   | 0.003057 |
| 0.011044 | 0.81186  | 0.110267 | 0.01714  | 0.050223 | 0.27876  | 0.116586 | 0.01169  | 0.280675 |
| 0.046517 | 0.31581  | -0.03874 | 0.40352  | 0.030519 | 0.5106   | -0.08639 | 0.06213  | -0.11423 |
| -0.06104 | 0.18788  | -0.15939 | 0.00055  | -0.11807 | 0.01066  | -0.1471  | 0.00143  | -0.29323 |
| 0.061609 | 0.18382  | 0.016193 | 0.72708  | 0.023642 | 0.61032  | 0.021766 | 0.63896  | 0.022252 |
| 0.020771 | 0.65436  | 0.109979 | 0.01743  | 0.054632 | 0.23866  | 0.108903 | 0.01857  | 0.295966 |
| 0.062048 | 0.18071  | 0.074873 | 0.10611  | 0.077507 | 0.09433  | 0.069016 | 0.13643  | 0.16221  |

|          |         |          |          |          |          |          |          |          |
|----------|---------|----------|----------|----------|----------|----------|----------|----------|
| 0.065958 | 0.15471 | -0.00423 | 0.92731  | 0.033521 | 0.46989  | -0.03132 | 0.49955  | 0.000296 |
| 0.024223 | 0.60158 | 0.085626 | 0.06448  | 0.059095 | 0.2024   | 0.092321 | 0.04615  | 0.131113 |
| -0.00292 | 0.94989 | -0.00881 | 0.84941  | -0.01483 | 0.74926  | -0.00151 | 0.97396  | 0.025572 |
| 0.061906 | 0.18172 | 0.104724 | 0.02362  | 0.082076 | 0.07641  | 0.073523 | 0.11257  | 0.266416 |
| 0.101463 | 0.02835 | 0.052198 | 0.26027  | 0.071437 | 0.12317  | 0.02751  | 0.55317  | 0.056797 |
| 0.159043 | 0.00056 | 0.105126 | 0.02309  | 0.186632 | 4.95E-05 | 0.005523 | 0.90525  | 0.046006 |
| -0.00509 | 0.91264 | 0.05086  | 0.27271  | 0.020782 | 0.65419  | 0.058924 | 0.20371  | 0.120031 |
| -0.15441 | 0.00081 | -0.15973 | 0.00053  | -0.10537 | 0.02277  | -0.17329 | 0.00017  | -0.30661 |
| 0.031322 | 0.49954 | 0.083544 | 0.07128  | 0.038843 | 0.40233  | 0.100008 | 0.03071  | 0.114001 |
| 0.002173 | 0.96265 | 0.075651 | 0.10251  | 0.034173 | 0.46129  | 0.08592  | 0.06357  | 0.188076 |
| 0.086372 | 0.06218 | 0.122691 | 0.00795  | 0.10806  | 0.0195   | 0.104269 | 0.02424  | 0.178164 |
| -0.01422 | 0.75923 | 0.082638 | 0.07441  | 0.018716 | 0.68665  | 0.100929 | 0.0292   | 0.256337 |
| -0.03509 | 0.44931 | -0.00367 | 0.93693  | -0.01446 | 0.75535  | 0.004191 | 0.92803  | 0.010283 |
| 0.073948 | 0.11051 | -0.08476 | 0.06723  | -0.03329 | 0.47291  | -0.10078 | 0.02944  | -0.21882 |
| 0.091423 | 0.04833 | 0.068413 | 0.1399   | 0.09634  | 0.03742  | 0.036078 | 0.43667  | 0.00251  |
| 0.022785 | 0.62334 | -0.02684 | 0.5629   | -0.01794 | 0.69905  | -0.02022 | 0.66301  | 0.001043 |
| -0.05005 | 0.28046 | -0.10581 | 0.02221  | -0.06815 | 0.1414   | -0.11087 | 0.01654  | -0.159   |
| -0.12207 | 0.00827 | -0.21097 | 4.25E-06 | -0.14922 | 0.00122  | -0.18747 | 4.57E-05 | -0.37236 |
| -0.04399 | 0.34287 | -0.1179  | 0.01077  | -0.11111 | 0.0163   | -0.10131 | 0.0286   | -0.15206 |
| 0.130465 | 0.00474 | 0.095265 | 0.0396   | 0.123155 | 0.00771  | 0.050358 | 0.27747  | 0.061822 |
| -0.03446 | 0.45749 | -0.1787  | 0.0001   | -0.13164 | 0.00438  | -0.16419 | 0.00037  | -0.33343 |
| -0.03885 | 0.4023  | 0.105032 | 0.02321  | 0.035492 | 0.44417  | 0.127259 | 0.00589  | 0.150483 |
| 0.064962 | 0.16105 | 0.040953 | 0.37723  | 0.075113 | 0.10499  | -0.00606 | 0.89612  | 0.036629 |
| 0.072576 | 0.11729 | 0.069866 | 0.13166  | 0.083043 | 0.07299  | 0.047465 | 0.30605  | 0.037713 |
| 0.135097 | 0.00344 | 0.117575 | 0.011    | 0.093345 | 0.04378  | 0.102662 | 0.02652  | 0.152677 |
| 0.047677 | 0.30388 | 0.018576 | 0.68886  | 0.05975  | 0.19743  | -0.01482 | 0.74938  | 0.044085 |
| 0.026126 | 0.57332 | 0.131286 | 0.00449  | 0.071328 | 0.12374  | 0.133419 | 0.00387  | 0.181937 |
| 0.0008   | 0.98625 | 0.046311 | 0.31796  | 0.012769 | 0.78315  | 0.058376 | 0.20795  | 0.158179 |
| -0.04192 | 0.36603 | -0.11029 | 0.01711  | -0.02869 | 0.53634  | -0.14932 | 0.00121  | -0.1017  |
| -0.01118 | 0.80955 | -0.02837 | 0.54077  | 0.02551  | 0.5824   | -0.04388 | 0.3441   | -0.13012 |
| -0.08339 | 0.07182 | -0.11394 | 0.01375  | -0.06801 | 0.14225  | -0.12058 | 0.0091   | -0.15039 |
| -0.00187 | 0.96782 | 0.063491 | 0.17076  | 0.029776 | 0.52096  | 0.083178 | 0.07253  | 0.100693 |
| -0.00035 | 0.99404 | -0.04241 | 0.3605   | 0.009919 | 0.83071  | -0.08293 | 0.07338  | -0.06017 |
| 0.058852 | 0.20427 | 0.051716 | 0.2647   | 0.050189 | 0.27909  | 0.034192 | 0.46105  | 0.204975 |
| 0.030117 | 0.51619 | 0.073682 | 0.1118   | 0.038781 | 0.40308  | 0.065937 | 0.15484  | 0.286047 |
| -0.03784 | 0.41461 | -0.01138 | 0.80622  | -0.01815 | 0.69563  | -0.00428 | 0.92647  | 0.027724 |
| 0.020538 | 0.65799 | -0.01166 | 0.80164  | 0.002158 | 0.9629   | -0.01907 | 0.68105  | -0.02814 |
| -0.00346 | 0.94053 | 0.025214 | 0.58679  | 0.017589 | 0.7046   | 0.02495  | 0.59071  | 0.126314 |
| 0.040815 | 0.37884 | 0.067183 | 0.14718  | 0.064589 | 0.16347  | 0.03952  | 0.39417  | 0.209792 |
| 0.085193 | 0.06585 | 0.020236 | 0.6627   | 0.011814 | 0.79902  | 0.019878 | 0.66832  | -0.01423 |
| 0.024884 | 0.59168 | 0.077996 | 0.09227  | 0.032444 | 0.48429  | 0.07346  | 0.11288  | 0.159746 |
| 0.00347  | 0.94039 | 0.028888 | 0.53347  | 0.032912 | 0.47801  | 0.016335 | 0.72478  | 0.1601   |
| 0.006133 | 0.89483 | -0.09072 | 0.05009  | -0.05192 | 0.26284  | -0.10632 | 0.02156  | -0.16819 |
| 0.006632 | 0.88635 | -0.03544 | 0.44483  | 0.046404 | 0.31699  | -0.0849  | 0.06679  | -0.15401 |
| -0.13134 | 0.00447 | -0.11355 | 0.01408  | -0.1348  | 0.00352  | -0.06983 | 0.13186  | -0.07059 |

|          |          |          |          |          |          |          |          |          |
|----------|----------|----------|----------|----------|----------|----------|----------|----------|
| -0.00542 | 0.90694  | 0.06015  | 0.19445  | 0.01077  | 0.81645  | 0.080251 | 0.08321  | 0.18572  |
| -0.00821 | 0.85948  | 0.076912 | 0.0969   | 0.027285 | 0.55643  | 0.099415 | 0.03172  | 0.157421 |
| -0.01288 | 0.78126  | -0.00764 | 0.86926  | -0.01355 | 0.77033  | 0.006449 | 0.88945  | -0.00347 |
| 0.048353 | 0.29707  | 0.205173 | 7.84E-06 | 0.091835 | 0.04732  | 0.242886 | 1.07E-07 | 0.264521 |
| 0.148001 | 0.00134  | 0.112479 | 0.01502  | 0.116687 | 0.01162  | 0.08361  | 0.07105  | 0.043391 |
| -0.02149 | 0.64327  | 0.036821 | 0.42728  | -0.00511 | 0.9123   | 0.056084 | 0.22639  | 0.104853 |
| 0.048391 | 0.29669  | 0.004368 | 0.92499  | 0.014517 | 0.75436  | 0.003869 | 0.93355  | 0.052602 |
| -0.03587 | 0.43939  | -0.00513 | 0.9119   | 0.018345 | 0.69254  | -0.02261 | 0.62603  | -0.06425 |
| -0.04563 | 0.32514  | 0.056446 | 0.22341  | 0.010131 | 0.82715  | 0.072028 | 0.12009  | 0.181112 |
| -0.00661 | 0.88668  | -0.00129 | 0.97787  | -0.01667 | 0.71932  | 0.010532 | 0.82043  | -0.07851 |
| 0.245751 | 7.48E-08 | 0.195029 | 2.19E-05 | 0.229276 | 5.49E-07 | 0.105142 | 0.02307  | 0.205219 |
| -0.01536 | 0.74054  | 0.065597 | 0.15699  | 0.012296 | 0.791    | 0.091573 | 0.04796  | 0.04775  |
| 0.07268  | 0.11676  | -0.0598  | 0.19709  | 0.035107 | 0.44913  | -0.11504 | 0.01286  | -0.20674 |
| 0.049955 | 0.28134  | -0.07244 | 0.11799  | 0.003124 | 0.94631  | -0.11291 | 0.01464  | -0.18858 |
| 0.168203 | 0.00026  | 0.148016 | 0.00134  | 0.170749 | 0.00021  | 0.086761 | 0.06101  | 0.159552 |
| 0.061563 | 0.18415  | 0.009327 | 0.84069  | 0.080362 | 0.08278  | -0.05505 | 0.23505  | -0.06484 |
| 0.087544 | 0.05871  | 0.055265 | 0.23327  | 0.097743 | 0.03472  | -0.00265 | 0.95445  | 0.102876 |
| -0.01267 | 0.7848   | 0.03489  | 0.45194  | 0.027722 | 0.55012  | 0.030354 | 0.51289  | 0.107171 |
| -0.07474 | 0.10671  | -0.01086 | 0.815    | -0.02914 | 0.52994  | 0.018088 | 0.69663  | 0.022922 |
| -0.02249 | 0.62782  | 0.020522 | 0.65824  | 0.004183 | 0.92816  | 0.034721 | 0.45413  | 0.104362 |
| 0.012711 | 0.78412  | 0.084717 | 0.06738  | 0.032994 | 0.47691  | 0.114898 | 0.01297  | 0.173511 |
| 0.006675 | 0.8856   | 0.012357 | 0.78998  | 0.046192 | 0.31921  | -0.01465 | 0.75226  | -0.02523 |
| 0.001976 | 0.96603  | -0.02299 | 0.62014  | 0.015975 | 0.73061  | -0.0423  | 0.36172  | -0.03192 |
| -0.01928 | 0.67767  | -0.00232 | 0.96006  | -0.01227 | 0.79137  | -0.00272 | 0.9533   | 0.089088 |
| 0.135683 | 0.0033   | 0.043729 | 0.34573  | 0.081791 | 0.07744  | 0.000595 | 0.98977  | 0.023976 |
| 0.040633 | 0.38098  | 0.056218 | 0.22529  | 0.034295 | 0.4597   | 0.05406  | 0.24363  | 0.129616 |
| 0.112957 | 0.01459  | 0.208696 | 5.41E-06 | 0.173795 | 0.00016  | 0.168327 | 0.00026  | 0.351205 |
| 0.089423 | 0.05347  | 0.068705 | 0.1382   | 0.070862 | 0.12623  | 0.051983 | 0.26224  | 0.06141  |
| 0.067123 | 0.14754  | -0.0212  | 0.64765  | 0.046418 | 0.31685  | -0.06413 | 0.16652  | -0.09162 |
| -0.01106 | 0.81162  | 0.016139 | 0.72795  | 0.001382 | 0.97625  | 0.022046 | 0.63464  | 0.094304 |
| -0.01769 | 0.70293  | 0.037955 | 0.41318  | 0.005713 | 0.902    | 0.063228 | 0.17255  | 0.062897 |
| 0.172698 | 0.00018  | 0.142082 | 0.00209  | 0.209874 | 4.78E-06 | 0.030045 | 0.51719  | 0.051261 |
| -0.01218 | 0.793    | 0.017329 | 0.70876  | 0.009079 | 0.84487  | 0.015932 | 0.7313   | 0.048225 |
| 0.015581 | 0.73701  | 0.001435 | 0.97532  | 0.015482 | 0.73862  | -0.01284 | 0.78196  | 0.018067 |
| 0.066945 | 0.14862  | 0.033409 | 0.47138  | 0.091967 | 0.047    | -0.01727 | 0.70978  | 0.064542 |
| 0.014438 | 0.75566  | 0.044255 | 0.33995  | 0.039613 | 0.39305  | 0.030553 | 0.51012  | 0.001029 |
| 0.051114 | 0.27031  | 0.087068 | 0.0601   | 0.045301 | 0.32865  | 0.082111 | 0.07628  | 0.241363 |
| -0.00943 | 0.83901  | -0.13889 | 0.00263  | -0.04594 | 0.32182  | -0.17518 | 0.00014  | -0.28375 |
| 0.05062  | 0.27498  | 0.075769 | 0.10197  | 0.071605 | 0.12229  | 0.059288 | 0.20093  | 0.187461 |
| -0.07048 | 0.12831  | -0.0508  | 0.27331  | -0.0422  | 0.36289  | -0.04252 | 0.3592   | -0.02339 |
| 0.017239 | 0.71021  | 0.114606 | 0.01321  | 0.05638  | 0.22395  | 0.121333 | 0.00867  | 0.168052 |
| 0.007275 | 0.87541  | 0.097114 | 0.03591  | 0.040354 | 0.38426  | 0.114723 | 0.01311  | 0.066286 |
| -0.03739 | 0.42017  | -0.07807 | 0.09195  | -0.02172 | 0.63972  | -0.09308 | 0.04438  | -0.10868 |
| 0.065067 | 0.16037  | 0.111408 | 0.01601  | 0.120362 | 0.00923  | 0.064224 | 0.16587  | 0.213694 |
| -0.12435 | 0.00713  | -0.16694 | 0.00029  | -0.13005 | 0.00488  | -0.14281 | 0.00198  | -0.24318 |

|          |          |          |          |          |          |          |          |          |
|----------|----------|----------|----------|----------|----------|----------|----------|----------|
| 0.093121 | 0.04429  | 0.026048 | 0.57446  | 0.037091 | 0.4239   | 0.019408 | 0.67571  | 0.015293 |
| 0.02071  | 0.65531  | -0.00393 | 0.93251  | -0.01687 | 0.71618  | -0.00503 | 0.91369  | -0.00671 |
| -0.02514 | 0.58784  | -0.04232 | 0.36154  | -0.03334 | 0.47234  | -0.03434 | 0.45904  | 0.024629 |
| -0.02936 | 0.52684  | -0.05256 | 0.25701  | -0.00627 | 0.89253  | -0.08524 | 0.06569  | -0.10534 |
| -0.07864 | 0.0896   | -0.10095 | 0.02916  | -0.08226 | 0.07577  | -0.09054 | 0.05054  | -0.19806 |
| -0.10584 | 0.02216  | 0.032468 | 0.48396  | -0.05121 | 0.26943  | 0.079917 | 0.0845   | 0.214701 |
| -0.06586 | 0.1553   | 0.063525 | 0.17053  | 0.005822 | 0.90015  | 0.080139 | 0.08364  | 0.172881 |
| 0.016004 | 0.73014  | 0.066891 | 0.14894  | 0.040424 | 0.38343  | 0.075245 | 0.10437  | 0.123191 |
| -0.01799 | 0.69816  | -0.08798 | 0.05746  | -0.02417 | 0.60238  | -0.10792 | 0.01967  | -0.15455 |
| 0.216806 | 2.26E-06 | 0.271848 | 2.35E-09 | 0.21521  | 2.69E-06 | 0.245915 | 7.33E-08 | 0.384304 |
| 0.050999 | 0.27139  | 0.075771 | 0.10197  | 0.074465 | 0.10803  | 0.047716 | 0.3035   | 0.215058 |
| 0.037187 | 0.4227   | 0.170299 | 0.00022  | 0.074206 | 0.10926  | 0.196844 | 1.83E-05 | 0.261906 |
| 0.006129 | 0.89491  | -0.01925 | 0.67827  | 0.004967 | 0.91475  | -0.02192 | 0.63651  | -0.02303 |
| -0.01793 | 0.69915  | -0.08784 | 0.05786  | -0.02223 | 0.63181  | -0.11767 | 0.01093  | -0.15214 |
| 0.035933 | 0.43853  | 0.096953 | 0.03622  | 0.049009 | 0.29056  | 0.10748  | 0.02017  | 0.236239 |
| 0.032584 | 0.4824   | -0.06274 | 0.17587  | 0.02422  | 0.60162  | -0.11997 | 0.00946  | -0.15237 |
| -0.06986 | 0.13167  | -0.02482 | 0.5927   | -0.0315  | 0.49704  | -0.00782 | 0.86614  | 0.081676 |
| 0.02921  | 0.52891  | 0.042965 | 0.35423  | 0.050741 | 0.27383  | 0.01684  | 0.71663  | 0.185346 |
| 0.002711 | 0.9534   | 0.022815 | 0.62288  | 0.050285 | 0.27817  | -0.01021 | 0.82578  | 0.037847 |
| 0.041309 | 0.3731   | -0.01919 | 0.67917  | 0.019363 | 0.67641  | -0.02522 | 0.58675  | -0.05909 |
| 0.090568 | 0.05047  | 0.16505  | 0.00034  | 0.139403 | 0.00253  | 0.145885 | 0.00157  | 0.244444 |
| 0.008755 | 0.85033  | -0.02837 | 0.54079  | 0.006708 | 0.88505  | -0.03392 | 0.46456  | -0.07825 |
| 0.010043 | 0.82864  | -0.02344 | 0.61342  | 0.005094 | 0.91259  | -0.02867 | 0.53659  | 0.00666  |
| 0.008484 | 0.85491  | 0.063928 | 0.16783  | 0.044191 | 0.34065  | 0.054095 | 0.24332  | 0.118358 |
| -0.00437 | 0.92504  | 0.128959 | 0.00525  | 0.031941 | 0.49109  | 0.164864 | 0.00035  | 0.28775  |
| -0.04927 | 0.28799  | 0.022754 | 0.62381  | -0.02346 | 0.61301  | 0.045845 | 0.32286  | 0.205143 |
| 0.025552 | 0.58178  | 0.016284 | 0.7256   | 0.027954 | 0.54679  | 0.008987 | 0.84641  | 0.031906 |
| 0.099096 | 0.03227  | 0.122208 | 0.0082   | 0.110112 | 0.01729  | 0.088832 | 0.05507  | 0.120942 |
| 0.063191 | 0.1728   | 0.06698  | 0.14841  | 0.065617 | 0.15686  | 0.041    | 0.37668  | 0.09926  |
| 0.104459 | 0.02398  | 0.12267  | 0.00796  | 0.095356 | 0.03941  | 0.100448 | 0.02998  | 0.114269 |
| 0.062616 | 0.17675  | 0.163979 | 0.00037  | 0.091981 | 0.04697  | 0.179759 | 9.38E-05 | 0.306149 |
| -0.02964 | 0.52285  | -0.01036 | 0.82327  | 0.000223 | 0.99616  | -0.00409 | 0.92981  | -0.03738 |
| 0.013195 | 0.77611  | -0.02418 | 0.60228  | -0.00655 | 0.88775  | -0.03436 | 0.45888  | -0.09948 |
| -0.03727 | 0.4217   | 0.0026   | 0.95531  | -0.0198  | 0.66949  | 0.024806 | 0.59285  | 0.104617 |
| 0.073594 | 0.11222  | 0.125682 | 0.00654  | 0.093531 | 0.04336  | 0.1125   | 0.015    | 0.211667 |
| 0.028952 | 0.53256  | 0.081128 | 0.07988  | 0.066221 | 0.15307  | 0.061737 | 0.18291  | 0.16393  |
| 0.008557 | 0.85369  | 0.029373 | 0.52661  | 0.028953 | 0.53254  | 0.008221 | 0.85937  | 0.055499 |
| 0.081113 | 0.07993  | 0.017327 | 0.7088   | 0.060473 | 0.19206  | -0.01943 | 0.67529  | -0.03281 |
| -0.12635 | 0.00625  | -0.1097  | 0.01772  | -0.10827 | 0.01927  | -0.08231 | 0.07558  | -0.1354  |
| 0.010198 | 0.82603  | 0.066524 | 0.15119  | 0.030597 | 0.50952  | 0.078567 | 0.0899   | 0.106759 |
| 0.019267 | 0.67794  | 0.019555 | 0.67339  | 0.039428 | 0.39528  | -0.00873 | 0.85075  | 0.016803 |
| 0.088154 | 0.05696  | 0.248501 | 5.29E-08 | 0.145048 | 0.00167  | 0.260495 | 1.11E-08 | 0.37906  |
| 0.038271 | 0.4093   | 0.049689 | 0.28392  | 0.026548 | 0.56713  | 0.055119 | 0.2345   | 0.088044 |
| -0.00153 | 0.97362  | 0.037836 | 0.41465  | 0.03299  | 0.47696  | 0.034824 | 0.4528   | 0.139646 |
| 0.020562 | 0.65762  | -0.01261 | 0.78579  | -0.00503 | 0.91363  | -0.02182 | 0.63814  | -0.06312 |

|          |          |          |          |          |          |          |         |          |
|----------|----------|----------|----------|----------|----------|----------|---------|----------|
| 0.076421 | 0.09905  | 0.148585 | 0.00128  | 0.090102 | 0.05167  | 0.169752 | 0.00023 | 0.17613  |
| -0.02253 | 0.62721  | 0.01808  | 0.69676  | 0.005489 | 0.90583  | 0.013064 | 0.77827 | 0.057353 |
| 0.013595 | 0.76951  | 0.046183 | 0.31931  | 0.032322 | 0.48593  | 0.042125 | 0.36372 | 0.212478 |
| 0.103345 | 0.02553  | 0.081566 | 0.07826  | 0.0981   | 0.03406  | 0.048557 | 0.29504 | 0.054465 |
| -0.0295  | 0.52488  | -0.01362 | 0.76914  | -0.01117 | 0.80967  | -0.02192 | 0.63664 | -0.02466 |
| -0.10502 | 0.02323  | -0.12907 | 0.00521  | -0.09512 | 0.03992  | -0.13364 | 0.00381 | -0.13452 |
| -0.02719 | 0.55784  | -0.06932 | 0.13471  | -0.03256 | 0.4827   | -0.08664 | 0.06136 | -0.15404 |
| 0.039048 | 0.39984  | 0.048139 | 0.29922  | 0.018925 | 0.68334  | 0.04877  | 0.29292 | 0.09612  |
| 0.11962  | 0.00967  | 0.120283 | 0.00927  | 0.120674 | 0.00904  | 0.065955 | 0.15473 | 0.23034  |
| 0.046114 | 0.32004  | -0.08631 | 0.06237  | -0.03338 | 0.47177  | -0.10503 | 0.02321 | -0.11837 |
| 0.060747 | 0.19004  | 0.044725 | 0.33484  | 0.053621 | 0.24749  | 0.014144 | 0.76048 | 0.11828  |
| -0.02094 | 0.65176  | -0.13414 | 0.00368  | -0.08608 | 0.06306  | -0.13846 | 0.00271 | -0.28976 |
| -0.04504 | 0.33147  | -0.01765 | 0.70367  | -0.00817 | 0.86016  | -0.02785 | 0.54833 | -0.03003 |
| 0.090359 | 0.051    | 0.081788 | 0.07745  | 0.092557 | 0.0456   | 0.047326 | 0.30746 | 0.114843 |
| 0.001959 | 0.96633  | 0.025258 | 0.58613  | -0.00552 | 0.90526  | 0.034428 | 0.45795 | 0.170563 |
| 0.00327  | 0.94382  | 0.032252 | 0.48688  | 0.029606 | 0.52334  | 0.01534  | 0.74093 | 0.238198 |
| 0.028155 | 0.5439   | 0.159997 | 0.00052  | 0.077567 | 0.09408  | 0.177218 | 0.00012 | 0.241806 |
| -0.0028  | 0.95196  | 0.078457 | 0.09035  | 0.024828 | 0.59253  | 0.120002 | 0.00944 | 0.077639 |
| -0.0393  | 0.39684  | -0.02201 | 0.63515  | -0.02786 | 0.54818  | -0.01799 | 0.69817 | -0.01001 |
| 0.051456 | 0.26712  | 0.140647 | 0.00232  | 0.094098 | 0.0421   | 0.134523 | 0.00359 | 0.267556 |
| -0.09698 | 0.03617  | -0.05258 | 0.25677  | -0.06441 | 0.16463  | -0.04173 | 0.3682  | -0.03062 |
| -0.03172 | 0.49408  | -0.02423 | 0.60142  | -0.02407 | 0.6039   | -0.02012 | 0.66455 | 0.005571 |
| -0.05246 | 0.25792  | -0.10874 | 0.01874  | -0.09629 | 0.03752  | -0.10468 | 0.02368 | -0.25415 |
| 0.004079 | 0.92994  | 0.021478 | 0.64339  | -0.00456 | 0.92169  | 0.048468 | 0.29593 | 0.019151 |
| -0.03107 | 0.50297  | -0.06375 | 0.16899  | -0.04475 | 0.33454  | -0.06939 | 0.13433 | -0.15559 |
| -0.02819 | 0.54336  | -0.014   | 0.76287  | -0.04387 | 0.34415  | 0.011552 | 0.80338 | 0.041541 |
| 0.041711 | 0.36846  | 0.090057 | 0.05179  | 0.083814 | 0.07036  | 0.056453 | 0.22335 | 0.184183 |
| 0.050853 | 0.27277  | -0.00867 | 0.85173  | 0.008552 | 0.85376  | -0.01572 | 0.73481 | -0.00236 |
| -0.0183  | 0.69319  | 0.005018 | 0.91387  | -0.00684 | 0.88274  | -0.00108 | 0.98139 | 0.036257 |
| 0.011039 | 0.81194  | -0.08795 | 0.05754  | -0.0117  | 0.80083  | -0.12083 | 0.00896 | -0.1171  |
| -0.11714 | 0.01129  | -0.05745 | 0.2153   | -0.07011 | 0.13029  | -0.02453 | 0.59692 | -0.06664 |
| 0.021556 | 0.6422   | 0.10553  | 0.02256  | 0.049834 | 0.28251  | 0.111296 | 0.01612 | 0.136363 |
| 0.06296  | 0.17437  | 0.083277 | 0.07219  | 0.073244 | 0.11395  | 0.065452 | 0.15791 | 0.236893 |
| 0.042391 | 0.3607   | -0.03146 | 0.4976   | 0.006817 | 0.8832   | -0.04531 | 0.32852 | 0.009047 |
| 0.20049  | 1.27E-05 | 0.21735  | 2.12E-06 | 0.192063 | 2.94E-05 | 0.165139 | 0.00034 | 0.323719 |
| 0.122391 | 0.0081   | 0.188449 | 4.16E-05 | 0.139925 | 0.00244  | 0.176799 | 0.00012 | 0.244484 |
| 0.030625 | 0.50913  | -0.07579 | 0.10186  | 0.00287  | 0.95067  | -0.10444 | 0.024   | -0.25183 |
| 0.027661 | 0.551    | 0.039125 | 0.39892  | 0.019441 | 0.67519  | 0.042152 | 0.36341 | 0.098456 |
| 0.133501 | 0.00385  | -0.06771 | 0.14402  | 0.0139   | 0.76449  | -0.09756 | 0.03505 | -0.22675 |
| 0.043123 | 0.35246  | 0.113962 | 0.01373  | 0.077938 | 0.09251  | 0.092786 | 0.04506 | 0.300649 |
| 0.023887 | 0.60663  | 0.136527 | 0.00311  | 0.072127 | 0.11958  | 0.149201 | 0.00122 | 0.337355 |
| -0.08147 | 0.0786   | -0.02151 | 0.6429   | -0.04961 | 0.28467  | -0.00173 | 0.9703  | 0.069545 |
| 0.086733 | 0.06109  | 0.143063 | 0.00194  | 0.082135 | 0.0762   | 0.154191 | 0.00083 | 0.231715 |
| 0.038129 | 0.41104  | -0.05119 | 0.26957  | 0.002965 | 0.94904  | -0.0898  | 0.05246 | -0.09345 |
| 0.034507 | 0.45692  | -0.06357 | 0.17024  | -0.03408 | 0.46247  | -0.08158 | 0.0782  | -0.08505 |

|          |          |          |          |          |          |          |          |          |
|----------|----------|----------|----------|----------|----------|----------|----------|----------|
| 0.049575 | 0.28502  | 0.033655 | 0.46812  | 0.039605 | 0.39316  | 0.018101 | 0.69643  | 0.006759 |
| 0.094927 | 0.04031  | -0.02913 | 0.53006  | 0.051113 | 0.27032  | -0.07419 | 0.10933  | -0.09525 |
| 0.077406 | 0.09477  | 0.068174 | 0.14129  | 0.087546 | 0.0587   | 0.04224  | 0.36241  | -0.01929 |
| 0.119362 | 0.00983  | 0.088816 | 0.05512  | 0.102431 | 0.02687  | 0.065824 | 0.15555  | 0.076492 |
| 0.047811 | 0.30253  | 0.071226 | 0.12428  | 0.054786 | 0.23734  | 0.083965 | 0.06986  | 0.099843 |
| -0.01011 | 0.82751  | 0.039826 | 0.39052  | 0.025295 | 0.58558  | 0.038721 | 0.40381  | 0.095414 |
| -0.00138 | 0.97632  | 0.023234 | 0.6165   | 0.016618 | 0.72021  | 0.005486 | 0.90589  | 0.059336 |
| 0.169705 | 0.00023  | 0.373276 | 6.91E-17 | 0.209933 | 4.75E-06 | 0.404668 | 7.92E-20 | 0.499451 |
| -0.10153 | 0.02824  | -0.0911  | 0.04914  | -0.0686  | 0.13881  | -0.08215 | 0.07616  | -0.14581 |
| -0.01411 | 0.76105  | 0.016539 | 0.72148  | 0.008869 | 0.8484   | 0.010087 | 0.8279   | 0.078947 |
| -0.0762  | 0.10003  | -0.10308 | 0.02591  | -0.07852 | 0.09009  | -0.10668 | 0.02112  | -0.23056 |
| 0.091329 | 0.04856  | 0.14693  | 0.00145  | 0.119311 | 0.00986  | 0.129836 | 0.00495  | 0.090347 |
| 0.020983 | 0.65107  | 0.068103 | 0.1417   | 0.045092 | 0.33089  | 0.064325 | 0.1652   | 0.153705 |
| -0.01636 | 0.72435  | -0.0695  | 0.1337   | -0.00371 | 0.93626  | -0.09393 | 0.04246  | -0.20241 |
| 0.072079 | 0.11983  | 0.023748 | 0.60872  | 0.055607 | 0.23037  | 0.001899 | 0.96735  | -0.02359 |
| -0.00873 | 0.85074  | 0.074435 | 0.10817  | 0.032277 | 0.48654  | 0.075702 | 0.10228  | 0.185118 |
| -0.12422 | 0.00719  | -0.04579 | 0.32342  | -0.07759 | 0.09399  | 0.0005   | 0.99139  | -0.05957 |
| -0.01745 | 0.70679  | 0.007693 | 0.86831  | 0.017232 | 0.71033  | 0.009225 | 0.8424   | -0.01702 |
| 0.011042 | 0.81189  | 0.006366 | 0.89087  | 0.011049 | 0.81178  | -0.01318 | 0.77632  | 0.133115 |
| 0.010142 | 0.82697  | -0.0011  | 0.98109  | 0.016044 | 0.72949  | -0.01782 | 0.70096  | -0.03284 |
| -0.01825 | 0.69405  | -0.07351 | 0.11264  | -0.01643 | 0.7232   | -0.11581 | 0.01227  | -0.13827 |
| 0.031474 | 0.49745  | 0.10376  | 0.02494  | 0.054588 | 0.23904  | 0.109313 | 0.01813  | 0.111122 |
| -0.00774 | 0.8675   | 0.03483  | 0.45272  | 0.024442 | 0.5983   | 0.033453 | 0.47079  | -0.00615 |
| 0.082047 | 0.07651  | 0.123469 | 0.00756  | 0.080689 | 0.08153  | 0.129416 | 0.00509  | 0.318434 |
| -0.05732 | 0.21634  | 0.068641 | 0.13858  | -0.00185 | 0.96818  | 0.102169 | 0.02726  | 0.200889 |
| -0.05438 | 0.2408   | -0.10406 | 0.02452  | -0.04222 | 0.36269  | -0.12379 | 0.0074   | -0.22128 |
| 0.000108 | 0.99814  | -0.00091 | 0.98429  | 0.02834  | 0.54126  | -0.02643 | 0.56891  | 0.088337 |
| 0.004429 | 0.92396  | -0.02345 | 0.61319  | 0.008681 | 0.85159  | -0.04873 | 0.29335  | 0.022454 |
| 0.002292 | 0.9606   | -0.01319 | 0.77624  | 0.003866 | 0.9336   | -0.01845 | 0.69085  | -0.03449 |
| -0.07056 | 0.12785  | -0.01368 | 0.76813  | -0.04721 | 0.30864  | 0.007313 | 0.87476  | 0.04638  |
| 0.134665 | 0.00355  | 0.21607  | 2.45E-06 | 0.180935 | 8.42E-05 | 0.163225 | 0.0004   | 0.4479   |
| -0.0445  | 0.33726  | 0.057195 | 0.21732  | 0.022874 | 0.62197  | 0.064015 | 0.16725  | 0.117471 |
| -0.00376 | 0.93547  | -0.00589 | 0.89901  | -0.02185 | 0.63773  | -0.00887 | 0.84843  | 0.014802 |
| -0.00794 | 0.86412  | 0.046623 | 0.31472  | 0.03155  | 0.49641  | 0.047144 | 0.30933  | 0.184081 |
| 0.041492 | 0.37098  | -0.03196 | 0.49086  | 0.017933 | 0.6991   | -0.04798 | 0.30083  | -0.05338 |
| -0.02424 | 0.60129  | -0.02559 | 0.58122  | 0.025004 | 0.5899   | -0.07856 | 0.08993  | -0.02831 |
| -0.01017 | 0.82653  | -0.00429 | 0.92629  | -0.03583 | 0.43979  | 0.027101 | 0.55908  | -0.06174 |
| 0.017139 | 0.71182  | -0.04746 | 0.30605  | -0.01441 | 0.75612  | -0.07855 | 0.08997  | -0.03858 |
| 0.297511 | 5.34E-11 | 0.299116 | 4.16E-11 | 0.312109 | 5.21E-12 | 0.174467 | 0.00015  | 0.298448 |
| 0.190101 | 3.55E-05 | 0.22299  | 1.13E-06 | 0.191188 | 3.20E-05 | 0.176443 | 0.00013  | 0.254096 |
| -0.04834 | 0.29723  | -0.06483 | 0.16192  | -0.04585 | 0.32283  | -0.06524 | 0.15925  | -0.03642 |
| 0.06463  | 0.1632   | 0.044849 | 0.3335   | 0.023228 | 0.61659  | 0.047184 | 0.30892  | 0.080612 |
| -0.02337 | 0.61446  | -0.01692 | 0.71534  | -0.02317 | 0.61751  | -0.01252 | 0.7873   | 0.013561 |
| -0.09006 | 0.05177  | -0.07027 | 0.12941  | -0.08333 | 0.072    | -0.05122 | 0.26928  | -0.13015 |
| 0.054951 | 0.23594  | 0.177764 | 0.00011  | 0.098149 | 0.03397  | 0.194202 | 2.38E-05 | 0.353683 |

|          |         |          |          |          |         |          |          |          |
|----------|---------|----------|----------|----------|---------|----------|----------|----------|
| 0.082971 | 0.07324 | 0.066653 | 0.1504   | 0.076992 | 0.09655 | 0.031739 | 0.49383  | 0.098511 |
| 0.04504  | 0.33145 | -0.01012 | 0.82735  | 0.034036 | 0.46309 | -0.03139 | 0.49857  | -0.0347  |
| -0.02632 | 0.5704  | -0.00038 | 0.99353  | -0.00928 | 0.84151 | 0.009191 | 0.84297  | 0.026958 |
| 0.113195 | 0.01439 | 0.106604 | 0.02122  | 0.085324 | 0.06543 | 0.091314 | 0.04859  | 0.204208 |
| -0.03313 | 0.47505 | -0.0439  | 0.34379  | -0.02506 | 0.58904 | -0.04412 | 0.34138  | 0.003051 |
| 0.007296 | 0.87504 | -0.17699 | 0.00012  | -0.08291 | 0.07346 | -0.19661 | 1.88E-05 | -0.32883 |
| 0.084957 | 0.0666  | -0.02693 | 0.5616   | 0.028323 | 0.54151 | -0.05925 | 0.20125  | -0.06047 |
| 0.045089 | 0.33092 | 0.023604 | 0.6109   | 0.031853 | 0.49228 | 0.013063 | 0.77828  | 0.09992  |
| 0.044927 | 0.33266 | -0.02363 | 0.61045  | 0.023384 | 0.61423 | -0.05558 | 0.23064  | -0.06935 |
| 0.089513 | 0.05323 | 0.040477 | 0.38281  | 0.069077 | 0.13608 | 0.008411 | 0.85614  | 0.05612  |
| 0.092328 | 0.04614 | -0.03152 | 0.4968   | 0.018746 | 0.68617 | -0.07163 | 0.12218  | -0.16135 |
| 0.002596 | 0.95538 | 0.04126  | 0.37367  | 0.015834 | 0.7329  | 0.047957 | 0.30105  | 0.151012 |
| 0.11341  | 0.0142  | 0.213271 | 3.32E-06 | 0.146789 | 0.00147 | 0.19963  | 1.38E-05 | 0.282241 |
| 0.088083 | 0.05716 | 0.003137 | 0.9461   | 0.060964 | 0.18847 | -0.03408 | 0.46253  | -0.10075 |
| -0.01157 | 0.80312 | 0.023151 | 0.61776  | -0.01432 | 0.7576  | 0.056899 | 0.21971  | -0.00024 |
| 0.045286 | 0.32881 | -0.01306 | 0.77828  | 0.0282   | 0.54326 | -0.03018 | 0.51534  | -0.06256 |
| -0.0155  | 0.7383  | -0.0845  | 0.06809  | -0.05214 | 0.26084 | -0.06664 | 0.15048  | -0.23711 |
| -0.00937 | 0.83992 | 0.006048 | 0.8963   | 0.02003  | 0.66593 | -0.01595 | 0.73108  | 0.031488 |
| 0.031133 | 0.50212 | 0.107565 | 0.02007  | 0.063113 | 0.17333 | 0.120911 | 0.00891  | 0.194162 |
| 0.039341 | 0.39632 | 0.014044 | 0.76212  | 0.030962 | 0.50447 | 0.001884 | 0.9676   | 0.010423 |
| -0.01977 | 0.66998 | -0.05321 | 0.25109  | -0.04166 | 0.36902 | -0.03443 | 0.45786  | -0.12824 |
| 0.05592  | 0.22776 | 0.112714 | 0.01481  | 0.072549 | 0.11743 | 0.115678 | 0.01237  | 0.210712 |
| 0.014789 | 0.74991 | 0.01012  | 0.82734  | 0.027977 | 0.54645 | 0.002686 | 0.95383  | -0.00675 |
| -0.06209 | 0.18039 | -0.00709 | 0.87861  | -0.01238 | 0.78955 | -0.00629 | 0.89219  | 0.097848 |
| -0.02014 | 0.66425 | -0.00353 | 0.93933  | -0.01646 | 0.72271 | 0.011852 | 0.79837  | -0.01158 |
| 0.001193 | 0.97949 | 0.004242 | 0.92715  | -0.00358 | 0.93856 | 0.004786 | 0.91784  | 0.021267 |
| -0.03197 | 0.49074 | 0.030711 | 0.50794  | 0.002025 | 0.96518 | 0.036449 | 0.43198  | 0.112936 |
| 0.031245 | 0.50058 | -0.08748 | 0.05888  | -0.03779 | 0.41519 | -0.10148 | 0.02832  | -0.11632 |
| -0.05451 | 0.23974 | -0.01706 | 0.71309  | -0.03508 | 0.44945 | 0.001053 | 0.98189  | 0.024473 |
| -0.01364 | 0.76877 | -0.04087 | 0.37821  | -0.01774 | 0.70217 | -0.04176 | 0.36788  | -0.0232  |
| -0.01774 | 0.70211 | 0.093019 | 0.04452  | 0.045921 | 0.32207 | 0.100016 | 0.0307   | 0.181522 |
| -0.04582 | 0.32318 | -0.09759 | 0.03499  | -0.04894 | 0.2912  | -0.09353 | 0.04336  | -0.0832  |
| -0.01251 | 0.78741 | 0.053375 | 0.24966  | 0.051866 | 0.26332 | 0.040147 | 0.3867   | 0.09403  |
| 0.036047 | 0.43707 | 0.081306 | 0.07922  | 0.048016 | 0.30046 | 0.084985 | 0.06652  | 0.175425 |
| -0.04085 | 0.37848 | -0.01473 | 0.75082  | -0.02076 | 0.65446 | 0.002281 | 0.9608   | 0.084729 |
| -0.00291 | 0.94996 | 0.036388 | 0.43275  | 0.033184 | 0.47436 | 0.035015 | 0.45032  | 0.127348 |
| 0.052017 | 0.26193 | 0.024698 | 0.59447  | 0.036636 | 0.42962 | 0.001156 | 0.98013  | 0.12235  |
| 0.048364 | 0.29697 | 0.00602  | 0.89676  | 0.008176 | 0.86013 | 0.0186   | 0.68849  | 0.040148 |
| 0.111404 | 0.01602 | 0.148259 | 0.00131  | 0.131015 | 0.00457 | 0.120703 | 0.00903  | 0.173662 |
| -0.06846 | 0.1396  | -0.10838 | 0.01914  | -0.07545 | 0.10342 | -0.09827 | 0.03374  | -0.09744 |
| -0.03553 | 0.44364 | -0.06799 | 0.14236  | -0.07952 | 0.08605 | -0.04436 | 0.33884  | -0.01565 |
| 0.072177 | 0.11933 | 0.057217 | 0.21714  | 0.074343 | 0.10861 | 0.029989 | 0.51797  | 0.070144 |
| -0.01773 | 0.70232 | 0.030765 | 0.50719  | 0.022885 | 0.6218  | 0.02184  | 0.63781  | 0.110927 |
| -0.00896 | 0.84682 | 0.027844 | 0.54837  | 0.006332 | 0.89144 | 0.030524 | 0.51054  | 0.102895 |
| -0.01282 | 0.78224 | -0.11669 | 0.01162  | -0.01447 | 0.75514 | -0.15184 | 0.001    | -0.206   |



|          |          |          |          |          |          |          |          |          |
|----------|----------|----------|----------|----------|----------|----------|----------|----------|
| 0.115686 | 0.01236  | 0.146014 | 0.00156  | 0.082503 | 0.07489  | 0.173527 | 0.00016  | 0.10847  |
| -0.02936 | 0.52679  | -0.04802 | 0.30046  | -0.03749 | 0.41888  | -0.03143 | 0.49812  | -0.02288 |
| -0.02612 | 0.57346  | -0.00797 | 0.86355  | -0.00749 | 0.87168  | -0.00049 | 0.99153  | 0.035475 |
| -0.00674 | 0.88457  | -0.01366 | 0.7684   | 0.009661 | 0.83506  | -0.04845 | 0.29613  | -0.10412 |
| -0.06062 | 0.19101  | -0.02373 | 0.60895  | -0.03461 | 0.45552  | -0.01721 | 0.7107   | 0.02651  |
| 0.049563 | 0.28514  | -0.00325 | 0.94415  | 0.017841 | 0.70058  | -0.00701 | 0.87997  | 0.056741 |
| -0.0309  | 0.50536  | 0.02589  | 0.57678  | -0.02612 | 0.57347  | 0.06277  | 0.17568  | 0.050464 |
| 0.054765 | 0.23752  | -0.01834 | 0.69264  | 0.01643  | 0.72324  | -0.05486 | 0.23669  | -0.04228 |
| 0.027085 | 0.55932  | -0.03387 | 0.46523  | -0.0092  | 0.84279  | -0.05691 | 0.21962  | -0.0292  |
| 0.279009 | 8.49E-10 | 0.193826 | 2.47E-05 | 0.243358 | 1.01E-07 | 0.120353 | 0.00923  | 0.066848 |
| -0.03878 | 0.40308  | -0.13655 | 0.00311  | -0.06378 | 0.16885  | -0.17082 | 0.00021  | -0.24688 |
| -0.01372 | 0.76745  | -0.1469  | 0.00146  | -0.08213 | 0.07621  | -0.15994 | 0.00052  | -0.16677 |
| 0.125275 | 0.00672  | 0.0824   | 0.07525  | 0.117318 | 0.01117  | 0.029501 | 0.52481  | 0.036421 |
| -0.13207 | 0.00425  | -0.03788 | 0.41414  | -0.05564 | 0.23013  | -0.02622 | 0.57194  | -0.12967 |
| 0.011119 | 0.8106   | 0.001376 | 0.97635  | 0.010307 | 0.8242   | 0.004398 | 0.92449  | 0.008436 |
| 0.031547 | 0.49645  | 0.080427 | 0.08253  | 0.048083 | 0.29979  | 0.085711 | 0.06422  | 0.163232 |
| 0.036321 | 0.43359  | -0.00096 | 0.98352  | 0.039253 | 0.39737  | -0.0294  | 0.52629  | -0.01067 |
| 0.002711 | 0.9534   | 0.053012 | 0.2529   | 0.014423 | 0.75591  | 0.054222 | 0.24222  | 0.132021 |
| -0.01142 | 0.80565  | 0.008995 | 0.84628  | 0.002755 | 0.95265  | 0.005639 | 0.90326  | 0.052766 |
| 0.041867 | 0.36667  | 0.050063 | 0.2803   | 0.056376 | 0.22398  | 0.03208  | 0.4892   | 0.018475 |
| 0.070959 | 0.12571  | 0.032927 | 0.47779  | 0.053127 | 0.25187  | 0.01715  | 0.71165  | 0.03109  |
| 0.09558  | 0.03895  | 0.043565 | 0.34754  | 0.053104 | 0.25208  | 0.037224 | 0.42224  | -0.01871 |
| -0.00545 | 0.90657  | 0.034168 | 0.46135  | 0.030125 | 0.51607  | 0.022217 | 0.63203  | 0.058187 |
| -0.06979 | 0.13207  | -0.0618  | 0.18244  | -0.0814  | 0.07889  | -0.04385 | 0.34436  | 0.034898 |
| 0.000561 | 0.99035  | 0.01757  | 0.70491  | 0.010749 | 0.8168   | 0.022536 | 0.62713  | 0.170158 |
| 0.001578 | 0.97286  | 0.035737 | 0.44102  | 0.012886 | 0.78122  | 0.058534 | 0.20672  | 0.135798 |
| -0.05605 | 0.22667  | -0.12281 | 0.00789  | -0.07903 | 0.08801  | -0.12721 | 0.00591  | -0.1385  |
| 0.053256 | 0.25072  | 0.123041 | 0.00777  | 0.104271 | 0.02423  | 0.087645 | 0.05841  | 0.195114 |
| 0.361354 | 7.51E-16 | 0.283492 | 4.42E-10 | 0.291401 | 1.36E-10 | 0.190424 | 3.44E-05 | 0.255183 |
| -0.00024 | 0.99589  | 0.108835 | 0.01864  | 0.039346 | 0.39626  | 0.126629 | 0.00614  | 0.26119  |
| -0.01306 | 0.77839  | 0.009664 | 0.83501  | -0.00289 | 0.95037  | 0.011634 | 0.80201  | 0.040011 |
| 0.124574 | 0.00703  | 0.146841 | 0.00146  | 0.12873  | 0.00534  | 0.111506 | 0.01592  | 0.316443 |
| -0.04287 | 0.35535  | -0.03212 | 0.48863  | -0.02327 | 0.61598  | -0.0398  | 0.39087  | 0.022325 |
| -0.07662 | 0.09817  | -0.05924 | 0.20133  | -0.05359 | 0.24773  | -0.06249 | 0.17765  | -0.10145 |
| 0.060347 | 0.19298  | 0.127726 | 0.00571  | 0.068705 | 0.13821  | 0.147529 | 0.00139  | 0.181251 |
| -0.0373  | 0.42129  | -0.08452 | 0.06801  | -0.02107 | 0.64979  | -0.10357 | 0.02521  | -0.1117  |
| 0.052844 | 0.25441  | 0.090039 | 0.05184  | 0.064755 | 0.16239  | 0.078087 | 0.09189  | 0.157773 |
| 0.068458 | 0.13964  | 0.060042 | 0.19525  | 0.051888 | 0.26311  | 0.039199 | 0.39803  | 0.073546 |
| 0.309954 | 7.40E-12 | 0.143484 | 0.00188  | 0.163135 | 0.0004   | 0.106289 | 0.0216   | 0.141944 |
| 0.032408 | 0.48477  | 0.046652 | 0.31442  | 0.042828 | 0.35576  | 0.034765 | 0.45356  | 0.181022 |
| 0.008859 | 0.84858  | -0.00647 | 0.88903  | -0.01069 | 0.81781  | 0.005663 | 0.90286  | 0.002556 |
| -0.02686 | 0.56261  | -0.00844 | 0.85566  | -0.0051  | 0.91248  | -0.02428 | 0.60075  | -0.01634 |
| 0.012457 | 0.78832  | 0.094687 | 0.04082  | 0.042141 | 0.36354  | 0.121868 | 0.00838  | 0.133244 |
| 0.024823 | 0.5926   | 0.075756 | 0.10204  | 0.060804 | 0.18963  | 0.058035 | 0.21063  | 0.175931 |
| -0.06711 | 0.14763  | 0.029725 | 0.52167  | -0.01633 | 0.72485  | 0.044092 | 0.34174  | 0.14213  |

|          |          |          |          |          |         |          |         |          |
|----------|----------|----------|----------|----------|---------|----------|---------|----------|
| -0.03026 | 0.51425  | -0.02671 | 0.56483  | -0.03326 | 0.47335 | -0.02228 | 0.63104 | -0.01554 |
| -0.01173 | 0.80046  | -0.01161 | 0.80249  | -0.01239 | 0.78951 | -0.00764 | 0.86921 | 0.04302  |
| 0.049329 | 0.28742  | 0.12045  | 0.00917  | 0.076532 | 0.09856 | 0.104739 | 0.0236  | 0.400449 |
| 0.113823 | 0.01385  | 0.135543 | 0.00334  | 0.109418 | 0.01802 | 0.110392 | 0.01701 | 0.163907 |
| -0.00676 | 0.88415  | 0.032622 | 0.48188  | -0.00058 | 0.99003 | 0.059529 | 0.1991  | 0.037348 |
| -0.01042 | 0.82229  | -0.03162 | 0.49544  | -0.00258 | 0.95567 | -0.03767 | 0.41667 | -0.07247 |
| -0.00549 | 0.90579  | 0.030869 | 0.50576  | 0.018633 | 0.68797 | 0.022318 | 0.63046 | 0.115183 |
| 0.060338 | 0.19305  | 0.093657 | 0.04308  | 0.084111 | 0.06937 | 0.078314 | 0.09094 | 0.116796 |
| 0.020808 | 0.65379  | 0.077497 | 0.09438  | 0.036183 | 0.43534 | 0.09654  | 0.03702 | 0.180353 |
| 0.043103 | 0.35269  | 0.085048 | 0.06631  | 0.066665 | 0.15033 | 0.079445 | 0.08636 | 0.103373 |
| 0.092186 | 0.04648  | 0.128037 | 0.00559  | 0.094503 | 0.04122 | 0.127447 | 0.00582 | 0.175603 |
| -0.00513 | 0.9119   | 0.055143 | 0.23429  | 0.028849 | 0.53401 | 0.052076 | 0.26139 | 0.154979 |
| 0.019041 | 0.6815   | 0.078148 | 0.09163  | 0.035906 | 0.43887 | 0.100364 | 0.03012 | 0.126055 |
| -0.02447 | 0.59781  | 0.098117 | 0.03403  | 0.026054 | 0.57437 | 0.120023 | 0.00943 | 0.228155 |
| -0.01526 | 0.74229  | -0.02371 | 0.60936  | -0.02539 | 0.58424 | -0.01416 | 0.76019 | 0.002993 |
| -0.0453  | 0.32863  | -0.07847 | 0.09029  | -0.04115 | 0.37489 | -0.08445 | 0.06824 | -0.10073 |
| 0.01401  | 0.76268  | 0.032785 | 0.47971  | 0.021545 | 0.64237 | 0.045522 | 0.3263  | 0.088685 |
| -0.16191 | 0.00044  | -0.18278 | 7.10E-05 | -0.14167 | 0.00215 | -0.16542 | 0.00033 | -0.3769  |
| 0.022902 | 0.62155  | -0.09928 | 0.03195  | -0.00337 | 0.94205 | -0.15232 | 0.00096 | -0.23791 |
| -0.05965 | 0.19816  | -0.00284 | 0.95118  | -0.04299 | 0.35396 | 0.013861 | 0.76513 | 0.026406 |
| -0.06493 | 0.16126  | 0.003819 | 0.9344   | -0.04296 | 0.35428 | 0.032627 | 0.48182 | 0.133336 |
| 0.011658 | 0.8016   | 0.039448 | 0.39504  | 0.013685 | 0.76803 | 0.038216 | 0.40997 | 0.015791 |
| -0.03488 | 0.45209  | -0.03036 | 0.51278  | -0.04009 | 0.38736 | -0.00918 | 0.84323 | 0.048566 |
| 0.07695  | 0.09673  | 0.014913 | 0.74788  | 0.044983 | 0.33206 | -0.00569 | 0.90242 | 0.033998 |
| -0.00676 | 0.88415  | -0.01861 | 0.68827  | -0.00056 | 0.99037 | -0.02656 | 0.56701 | 0.109281 |
| 0.034939 | 0.4513   | 0.119853 | 0.00953  | 0.06553  | 0.15741 | 0.121341 | 0.00867 | 0.153661 |
| -0.07689 | 0.097    | -0.02182 | 0.63811  | -0.03344 | 0.471   | -0.01746 | 0.70671 | 0.033161 |
| -0.02469 | 0.59451  | -0.01139 | 0.80609  | -0.00641 | 0.89018 | -0.01633 | 0.72494 | -0.02152 |
| -0.05145 | 0.26717  | -0.06362 | 0.16989  | -0.03874 | 0.40363 | -0.07881 | 0.08892 | -0.11439 |
| -0.09114 | 0.04903  | -0.10734 | 0.02033  | -0.06787 | 0.14308 | -0.10696 | 0.02078 | -0.17799 |
| 0.016898 | 0.7157   | 0.017119 | 0.71214  | 0.020086 | 0.66506 | 0.022093 | 0.63393 | 0.05936  |
| -0.02766 | 0.55101  | -0.01452 | 0.75427  | -0.02574 | 0.57901 | -0.00614 | 0.89467 | -0.00153 |
| -0.03143 | 0.49801  | 0.003885 | 0.93328  | 0.018292 | 0.69339 | -0.01566 | 0.73567 | 0.077822 |
| -0.02634 | 0.57025  | -0.02219 | 0.63236  | -0.01685 | 0.71652 | -0.01645 | 0.723   | -0.01474 |
| 0.037653 | 0.41691  | 0.007013 | 0.87987  | 0.023555 | 0.61165 | -0.01293 | 0.78056 | -0.00332 |
| 0.034255 | 0.46021  | 0.164723 | 0.00035  | 0.117651 | 0.01094 | 0.13093  | 0.0046  | 0.30553  |
| 0.05843  | 0.20753  | 0.097187 | 0.03577  | 0.063842 | 0.1684  | 0.070145 | 0.13011 | 0.168958 |
| 0.17933  | 9.76E-05 | 0.104421 | 0.02403  | 0.114367 | 0.0134  | 0.074568 | 0.10754 | 0.09853  |
| 0.039314 | 0.39665  | -0.05134 | 0.26821  | 0.011038 | 0.81196 | -0.08124 | 0.07946 | -0.05692 |
| -0.01941 | 0.67565  | -0.05788 | 0.21186  | -0.03269 | 0.48102 | -0.05524 | 0.23349 | -0.07383 |
| 0.057066 | 0.21836  | 0.161647 | 0.00045  | 0.094455 | 0.04132 | 0.165326 | 0.00033 | 0.293666 |
| 0.037013 | 0.42487  | -0.03114 | 0.50204  | 0.000726 | 0.98751 | -0.06649 | 0.15137 | -0.0173  |
| 0.003833 | 0.93415  | 0.104871 | 0.02342  | 0.05756  | 0.21439 | 0.109502 | 0.01793 | 0.192345 |
| -0.01717 | 0.71125  | -0.05973 | 0.19756  | -0.01375 | 0.76689 | -0.07427 | 0.10897 | -0.09447 |
| -0.03495 | 0.45118  | -0.00626 | 0.89269  | -0.00636 | 0.89091 | -0.02108 | 0.64959 | 0.014404 |

|          |         |          |          |          |         |          |          |          |
|----------|---------|----------|----------|----------|---------|----------|----------|----------|
| 0.011711 | 0.80073 | 0.083531 | 0.07132  | 0.034175 | 0.46126 | 0.089485 | 0.0533   | 0.168168 |
| -0.00343 | 0.94114 | -0.03495 | 0.45121  | -0.01352 | 0.77076 | -0.05134 | 0.26817  | -0.04612 |
| -0.02405 | 0.60415 | -0.00316 | 0.94573  | -0.00538 | 0.90762 | -0.01155 | 0.80341  | -0.01966 |
| 0.037676 | 0.41662 | 0.026851 | 0.56273  | 0.029861 | 0.51976 | 0.034827 | 0.45275  | 0.026246 |
| 0.018975 | 0.68254 | -0.07076 | 0.12675  | -0.03683 | 0.42714 | -0.07548 | 0.10328  | -0.06136 |
| 0.061188 | 0.18684 | 0.10236  | 0.02697  | 0.074079 | 0.10987 | 0.088904 | 0.05487  | 0.170931 |
| 0.020873 | 0.65277 | 0.034383 | 0.45854  | 0.038434 | 0.40731 | 0.010808 | 0.81581  | 0.15836  |
| -0.04512 | 0.33063 | -0.0138  | 0.76617  | -0.01327 | 0.77481 | -0.01744 | 0.70692  | 0.02229  |
| -0.0363  | 0.43382 | -0.04964 | 0.28436  | -0.05292 | 0.25369 | -0.0282  | 0.54319  | -0.01437 |
| -0.01137 | 0.80647 | 0.000448 | 0.9923   | 5.34E-05 | 0.99908 | 0.005451 | 0.90647  | 0.07764  |
| -0.11195 | 0.01551 | -0.15018 | 0.00113  | -0.09789 | 0.03444 | -0.16494 | 0.00034  | -0.26992 |
| -0.00292 | 0.94974 | -0.07222 | 0.11911  | -0.002   | 0.96568 | -0.10737 | 0.0203   | -0.16682 |
| 0.025272 | 0.58592 | 0.043302 | 0.35046  | 0.018888 | 0.68392 | 0.055628 | 0.2302   | 0.192259 |
| 0.022932 | 0.62109 | 0.077594 | 0.09396  | 0.057365 | 0.21595 | 0.073619 | 0.1121   | 0.136381 |
| -0.00985 | 0.83192 | -0.10043 | 0.03001  | -0.07253 | 0.11754 | -0.09436 | 0.04152  | -0.07208 |
| 0.079842 | 0.08479 | -0.06059 | 0.19119  | 0.015144 | 0.74412 | -0.09635 | 0.0374   | -0.18807 |
| 0.026957 | 0.56119 | -0.05876 | 0.20497  | -0.0092  | 0.84276 | -0.08475 | 0.06726  | -0.10263 |
| 0.00172  | 0.97042 | 0.002344 | 0.95971  | 0.029638 | 0.52288 | -0.01179 | 0.79938  | -0.0136  |
| 0.026276 | 0.57112 | -0.05431 | 0.24149  | -0.00615 | 0.89447 | -0.0859  | 0.06363  | -0.18462 |
| -0.00311 | 0.94658 | -0.02349 | 0.61259  | -0.01757 | 0.70485 | -0.01952 | 0.67395  | 0.007963 |
| -0.00846 | 0.85535 | -0.00812 | 0.8611   | 0.037549 | 0.4182  | -0.04491 | 0.33281  | -0.06743 |
| -0.10143 | 0.02839 | -0.13851 | 0.0027   | -0.10923 | 0.01822 | -0.12114 | 0.00878  | -0.20095 |
| 0.011337 | 0.80697 | 0.048403 | 0.29658  | 0.032683 | 0.48107 | 0.042843 | 0.3556   | 0.184285 |
| -0.04096 | 0.37715 | 0.041125 | 0.37523  | 0.019598 | 0.67272 | 0.03691  | 0.42616  | 0.182173 |
| -0.03848 | 0.40675 | -0.0233  | 0.61552  | -0.01979 | 0.66974 | -0.02258 | 0.62644  | 0.006058 |
| -0.02192 | 0.63665 | 0.03394  | 0.46436  | 0.004015 | 0.93104 | 0.047453 | 0.30617  | 0.219224 |
| -0.02413 | 0.60294 | 0.03687  | 0.42667  | 0.027713 | 0.55025 | 0.012764 | 0.78324  | 0.100461 |
| -0.01646 | 0.72279 | -0.12198 | 0.00832  | -0.0867  | 0.06118 | -0.11073 | 0.01668  | -0.23429 |
| 0.040168 | 0.38646 | -0.00115 | 0.98021  | 0.037965 | 0.41306 | -0.02411 | 0.60324  | -0.03851 |
| 0.034016 | 0.46336 | -0.00326 | 0.94391  | -0.00484 | 0.9169  | -0.00138 | 0.97629  | 0.050673 |
| 0.039492 | 0.39451 | 0.099864 | 0.03095  | 0.037828 | 0.41475 | 0.121494 | 0.00858  | 0.110305 |
| -0.04179 | 0.3675  | 0.018847 | 0.68458  | -0.00829 | 0.85821 | 0.024639 | 0.59534  | 0.014562 |
| -0.1168  | 0.01154 | -0.06702 | 0.14816  | -0.07471 | 0.10688 | -0.06053 | 0.19164  | 0.026525 |
| 0.017718 | 0.70254 | 0.089481 | 0.05331  | 0.04963  | 0.28448 | 0.095058 | 0.04004  | 0.162666 |
| 0.017461 | 0.70666 | 0.163554 | 0.00039  | 0.081242 | 0.07946 | 0.189334 | 3.82E-05 | 0.216622 |
| -0.05049 | 0.27617 | -0.14731 | 0.00141  | -0.0999  | 0.03089 | -0.15727 | 0.00065  | -0.23453 |
| 0.047794 | 0.30271 | -0.04026 | 0.38531  | 0.043133 | 0.35234 | -0.08772 | 0.0582   | -0.08904 |
| -0.01784 | 0.70058 | -0.13311 | 0.00395  | -0.08058 | 0.08194 | -0.14594 | 0.00157  | -0.26851 |
| 0.085701 | 0.06425 | -0.07821 | 0.09137  | -0.02357 | 0.61136 | -0.10108 | 0.02895  | -0.13247 |
| 0.035468 | 0.44447 | 0.00398  | 0.93164  | -0.03966 | 0.39255 | 0.024608 | 0.59581  | -0.0045  |
| 0.055405 | 0.23208 | 0.183288 | 6.77E-05 | 0.09937  | 0.0318  | 0.193991 | 2.43E-05 | 0.295813 |
| -0.03396 | 0.46414 | -0.00301 | 0.94829  | -0.03967 | 0.39237 | 0.018128 | 0.69599  | 0.007032 |
| -0.00652 | 0.88828 | 0.010547 | 0.82017  | 0.010211 | 0.82581 | 0.000254 | 0.99564  | 0.033279 |
| 0.148463 | 0.00129 | 0.126961 | 0.00601  | 0.146737 | 0.00147 | 0.087216 | 0.05966  | 0.176305 |
| 0.011732 | 0.80038 | 0.028033 | 0.54565  | 0.010856 | 0.81501 | 0.030276 | 0.51397  | 0.113916 |

|          |          |          |          |          |          |          |          |          |
|----------|----------|----------|----------|----------|----------|----------|----------|----------|
| 0.071401 | 0.12336  | -0.01821 | 0.69467  | 0.024436 | 0.59837  | -0.03674 | 0.42837  | -0.03698 |
| -0.01143 | 0.80537  | -0.02506 | 0.5891   | -0.01837 | 0.69209  | -0.02824 | 0.5427   | 0.041752 |
| -0.1296  | 0.00503  | -0.20653 | 6.80E-06 | -0.1508  | 0.00108  | -0.20297 | 9.85E-06 | -0.37753 |
| -0.09919 | 0.03211  | -0.02968 | 0.52235  | -0.05769 | 0.21335  | -0.0001  | 0.9982   | 0.06478  |
| -0.05984 | 0.19675  | -0.12296 | 0.00781  | -0.02808 | 0.54502  | -0.16105 | 0.00048  | -0.20681 |
| 0.080331 | 0.0829   | 0.209026 | 5.23E-06 | 0.087755 | 0.0581   | 0.26118  | 1.01E-08 | 0.219128 |
| 0.08207  | 0.07643  | -0.10932 | 0.01812  | -0.01898 | 0.6824   | -0.12054 | 0.00912  | -0.26986 |
| 0.104484 | 0.02394  | 0.013403 | 0.77268  | 0.045769 | 0.32367  | -0.01609 | 0.72873  | -0.04825 |
| 0.060146 | 0.19447  | -0.00569 | 0.90242  | -0.00077 | 0.98674  | -0.00018 | 0.9969   | -0.03833 |
| 0.149644 | 0.00118  | 0.031968 | 0.49072  | 0.037996 | 0.41268  | 0.029615 | 0.5232   | -0.0021  |
| 0.006442 | 0.88958  | 0.038145 | 0.41084  | 0.031757 | 0.49359  | 0.032798 | 0.47953  | 0.078362 |
| -0.00175 | 0.96996  | -0.10748 | 0.02018  | -0.05568 | 0.22976  | -0.1191  | 0.00999  | -0.16415 |
| 4.49E-05 | 0.99923  | 0.055104 | 0.23463  | 0.002781 | 0.9522   | 0.071728 | 0.12165  | 0.177495 |
| 0.06327  | 0.17226  | 0.148248 | 0.00131  | 0.093266 | 0.04396  | 0.148644 | 0.00128  | 0.097573 |
| 0.026349 | 0.57004  | 0.102424 | 0.02688  | 0.077078 | 0.09617  | 0.071791 | 0.12132  | 0.204821 |
| -0.02438 | 0.59923  | -0.02759 | 0.55208  | -0.02657 | 0.56685  | -0.02626 | 0.57134  | -0.01132 |
| -0.06875 | 0.13794  | -0.00013 | 0.99782  | -0.03051 | 0.51076  | 0.018945 | 0.68303  | 0.073518 |
| -0.0181  | 0.69649  | 0.039094 | 0.39929  | 0.005749 | 0.9014   | 0.042523 | 0.3592   | 0.156007 |
| 0.210467 | 4.49E-06 | 0.192729 | 2.75E-05 | 0.19994  | 1.34E-05 | 0.146932 | 0.00145  | 0.136035 |
| 0.024805 | 0.59287  | 0.066112 | 0.15375  | 0.044243 | 0.34009  | 0.076277 | 0.09969  | 0.081545 |
| 0.123323 | 0.00763  | 0.04922  | 0.28849  | 0.135193 | 0.00342  | -0.02298 | 0.62032  | -0.03556 |
| 0.055609 | 0.23036  | 0.038097 | 0.41143  | 0.044891 | 0.33305  | 0.030499 | 0.51087  | 0.081056 |
| 0.050408 | 0.27699  | 0.138959 | 0.00262  | 0.097396 | 0.03537  | 0.133197 | 0.00393  | 0.276762 |
| -0.03174 | 0.4938   | 0.007035 | 0.87948  | -0.01253 | 0.78703  | 0.017119 | 0.71214  | 0.118972 |
| 0.032795 | 0.47957  | -0.02273 | 0.62419  | 0.035941 | 0.43842  | -0.05879 | 0.20475  | -0.13627 |
| 0.18208  | 7.58E-05 | 0.212575 | 3.58E-06 | 0.184816 | 5.87E-05 | 0.173302 | 0.00017  | 0.268895 |
| -0.07668 | 0.09791  | -0.17295 | 0.00017  | -0.11389 | 0.0138   | -0.17427 | 0.00015  | -0.28871 |
| 0.237693 | 2.02E-07 | 0.208977 | 5.26E-06 | 0.202599 | 1.02E-05 | 0.148906 | 0.00125  | 0.248876 |
| 0.004002 | 0.93127  | -0.01615 | 0.72775  | -0.01552 | 0.73793  | -0.01613 | 0.72813  | -0.03042 |
| 0.061234 | 0.18651  | 0.270223 | 2.94E-09 | 0.098083 | 0.03409  | 0.341605 | 3.15E-14 | 0.26546  |
| 0.112601 | 0.01491  | 0.227644 | 6.64E-07 | 0.129455 | 0.00508  | 0.216004 | 2.46E-06 | 0.372803 |
| -0.00374 | 0.93584  | 0.022624 | 0.62579  | 0.012094 | 0.79436  | 0.030553 | 0.51013  | 0.137451 |
| -0.00864 | 0.85232  | 0.054544 | 0.23943  | 0.028372 | 0.54079  | 0.051855 | 0.26342  | 0.122189 |
| -0.05725 | 0.21686  | -0.09147 | 0.0482   | -0.06499 | 0.16088  | -0.09501 | 0.04013  | -0.16399 |
| 0.045005 | 0.33183  | 0.034848 | 0.45249  | 0.045655 | 0.32488  | 0.028232 | 0.5428   | 0.062758 |
| -0.00677 | 0.88398  | 0.034953 | 0.45112  | 0.019918 | 0.66769  | 0.030151 | 0.51571  | 0.114982 |
| 0.019748 | 0.67036  | -0.0367  | 0.42887  | 0.011973 | 0.79637  | -0.05858 | 0.20639  | -0.09525 |
| 0.015527 | 0.73788  | -0.07997 | 0.08428  | -0.02558 | 0.58135  | -0.09267 | 0.04533  | -0.1493  |
| -0.04792 | 0.30146  | 0.000336 | 0.99422  | -0.00814 | 0.86077  | 0.008557 | 0.85368  | 0.050554 |
| 0.075611 | 0.1027   | -0.00591 | 0.8987   | 0.020241 | 0.66263  | -0.02222 | 0.63191  | -0.0071  |
| -0.0175  | 0.70599  | -0.06441 | 0.16462  | -0.03076 | 0.50728  | -0.06778 | 0.14362  | -0.10089 |
| 0.061465 | 0.18485  | -0.0019  | 0.96733  | 0.069945 | 0.13122  | -0.05741 | 0.21556  | -0.03093 |
| 0.072479 | 0.11778  | 0.039131 | 0.39885  | 0.029581 | 0.52369  | 0.03717  | 0.42292  | 0.148293 |
| -0.03747 | 0.41916  | -0.08175 | 0.0776   | -0.0903  | 0.05117  | -0.04446 | 0.33771  | -0.13613 |
| 0.022173 | 0.63269  | 0.035681 | 0.44175  | 0.022919 | 0.62128  | 0.034428 | 0.45796  | 0.067958 |

|          |          |          |          |          |          |          |          |          |
|----------|----------|----------|----------|----------|----------|----------|----------|----------|
| 0.033435 | 0.47103  | 0.013413 | 0.77251  | 0.020109 | 0.6647   | -0.00169 | 0.9709   | 0.131261 |
| -0.03656 | 0.43061  | -0.04885 | 0.29214  | -0.03192 | 0.49142  | -0.04197 | 0.36545  | -0.04272 |
| 0.023737 | 0.60889  | -0.07355 | 0.11244  | -0.01262 | 0.78555  | -0.08955 | 0.05312  | -0.09511 |
| 0.032187 | 0.48775  | -0.04394 | 0.34343  | 0.001383 | 0.97622  | -0.06489 | 0.16153  | -0.04046 |
| 0.222291 | 1.22E-06 | 0.201739 | 1.12E-05 | 0.21784  | 2.01E-06 | 0.124656 | 0.00699  | 0.289326 |
| 0.002236 | 0.96157  | 0.011769 | 0.79976  | 0.038771 | 0.4032   | -0.02828 | 0.54218  | -0.00158 |
| -0.02062 | 0.65678  | -0.03318 | 0.4744   | -0.00986 | 0.83172  | -0.0418  | 0.36744  | -0.01263 |
| 0.034792 | 0.45321  | 0.089376 | 0.05359  | 0.060102 | 0.1948   | 0.074688 | 0.10697  | 0.163511 |
| -0.02789 | 0.54764  | -0.02626 | 0.57131  | -0.01319 | 0.7762   | -0.02312 | 0.61816  | -0.01864 |
| -0.0023  | 0.96039  | 0.019062 | 0.68118  | -0.01297 | 0.77983  | 0.046731 | 0.3136   | 0.026771 |
| -0.04166 | 0.36899  | -0.06294 | 0.1745   | -0.04604 | 0.32084  | -0.05779 | 0.21254  | -0.15577 |
| -0.04691 | 0.31178  | -0.07922 | 0.08727  | -0.04146 | 0.37136  | -0.07769 | 0.09355  | -0.20932 |
| -0.03561 | 0.44266  | -0.02169 | 0.64015  | -0.03458 | 0.45595  | 0.00671  | 0.88501  | -0.00182 |
| 0.054    | 0.24415  | -0.0724  | 0.11821  | -0.01062 | 0.819    | -0.10013 | 0.0305   | -0.20711 |
| -0.01845 | 0.69082  | -0.12362 | 0.00748  | -0.08855 | 0.05584  | -0.117   | 0.0114   | -0.28318 |
| -0.01723 | 0.71038  | -0.12315 | 0.00772  | -0.02078 | 0.65425  | -0.17221 | 0.00018  | -0.25444 |
| 0.002885 | 0.95042  | 0.042384 | 0.36078  | 0.01282  | 0.78231  | 0.052201 | 0.26024  | 0.146304 |
| 0.003144 | 0.94598  | 0.064005 | 0.16732  | 0.039125 | 0.39891  | 0.060821 | 0.1895   | 0.181662 |
| 0.031477 | 0.49741  | 0.045047 | 0.33136  | 0.045887 | 0.32242  | 0.016948 | 0.7149   | 0.143724 |
| 0.16034  | 0.0005   | 0.025365 | 0.58454  | 0.105909 | 0.02208  | -0.051   | 0.27137  | -0.08687 |
| 0.021239 | 0.64709  | 0.011274 | 0.80802  | 0.019961 | 0.66702  | 0.002584 | 0.95558  | 0.082183 |
| 0.054053 | 0.24369  | 0.0792   | 0.08734  | 0.094645 | 0.04091  | 0.042017 | 0.36496  | 0.016525 |
| -0.02847 | 0.53941  | 0.0311   | 0.50258  | 0.00196  | 0.9663   | 0.030805 | 0.50664  | 0.085632 |
| 0.003619 | 0.93783  | 0.093148 | 0.04423  | 0.034953 | 0.45113  | 0.1089   | 0.01857  | 0.271685 |
| 0.069946 | 0.13121  | 0.133009 | 0.00398  | 0.110709 | 0.01669  | 0.119247 | 0.0099   | 0.117279 |
| 0.023683 | 0.6097   | 0.014774 | 0.75016  | 0.028818 | 0.53445  | -0.00279 | 0.95204  | 0.01303  |
| 0.031767 | 0.49346  | -0.10121 | 0.02874  | 0.002277 | 0.96085  | -0.1636  | 0.00039  | -0.1883  |
| -0.04649 | 0.31613  | -0.00209 | 0.96401  | -0.00696 | 0.88077  | 0.001887 | 0.96755  | 0.05381  |
| 0.007402 | 0.87325  | 0.029043 | 0.53126  | 0.005736 | 0.90162  | 0.044224 | 0.34028  | 0.044317 |
| 0.077953 | 0.09245  | 0.009651 | 0.83523  | 0.027782 | 0.54925  | 0.000719 | 0.98764  | 0.008361 |
| 0.092753 | 0.04514  | 0.171525 | 0.0002   | 0.148447 | 0.00129  | 0.121739 | 0.00845  | 0.420846 |
| -0.05932 | 0.20071  | -0.05713 | 0.21787  | -0.05322 | 0.25107  | -0.05077 | 0.27355  | -0.05451 |
| 0.042267 | 0.36211  | 0.043963 | 0.34315  | 0.038829 | 0.4025   | 0.038041 | 0.41212  | 0.039455 |
| 0.004597 | 0.92108  | 0.017437 | 0.70704  | 0.014699 | 0.75138  | 0.011419 | 0.8056   | 0.019593 |
| 0.151151 | 0.00105  | 0.247141 | 6.28E-08 | 0.187866 | 4.40E-05 | 0.225852 | 8.16E-07 | 0.338932 |
| 0.006602 | 0.88685  | -0.01207 | 0.79467  | -0.00287 | 0.95063  | -0.00646 | 0.88926  | 0.039999 |
| 0.101212 | 0.02874  | 0.151106 | 0.00105  | 0.128844 | 0.0053   | 0.137625 | 0.00288  | 0.227525 |
| 0.058952 | 0.2035   | 0.03056  | 0.51003  | 0.032035 | 0.48981  | 0.024122 | 0.60309  | 0.060646 |
| 0.060409 | 0.19252  | 0.003663 | 0.93707  | -0.00073 | 0.98744  | 0.012179 | 0.79293  | 0.053384 |
| 0.020079 | 0.66517  | 0.029934 | 0.51873  | 0.013104 | 0.77762  | 0.039398 | 0.39563  | 0.09115  |
| -0.00239 | 0.95888  | 0.08694  | 0.06048  | 0.041833 | 0.36707  | 0.077111 | 0.09603  | 0.195851 |
| -0.04257 | 0.35867  | -0.00887 | 0.84833  | -0.03166 | 0.49488  | 0.008648 | 0.85214  | 0.114524 |
| 0.07532  | 0.10403  | 0.12341  | 0.00759  | 0.11039  | 0.01701  | 0.11769  | 0.01092  | 0.039987 |
| -0.00472 | 0.91897  | 0.040859 | 0.37833  | 0.024673 | 0.59483  | 0.045873 | 0.32258  | 0.143131 |
| -0.11006 | 0.01735  | -0.0375  | 0.41887  | -0.07499 | 0.10557  | 0.00283  | 0.95136  | -0.12973 |

|          |          |          |          |          |          |          |          |          |
|----------|----------|----------|----------|----------|----------|----------|----------|----------|
| 0.089577 | 0.05305  | 0.11477  | 0.01307  | 0.110349 | 0.01705  | 0.076949 | 0.09673  | 0.369886 |
| -0.0166  | 0.72058  | -0.15787 | 0.00062  | -0.05442 | 0.24051  | -0.21105 | 4.21E-06 | -0.29858 |
| 0.097336 | 0.03548  | 0.08154  | 0.07836  | 0.070794 | 0.12659  | 0.068368 | 0.14016  | 0.096081 |
| -0.02237 | 0.62972  | -0.03447 | 0.45742  | -0.01746 | 0.70675  | -0.04566 | 0.32478  | -0.02231 |
| 0.133437 | 0.00387  | 0.038526 | 0.40618  | 0.073217 | 0.11408  | 0.016642 | 0.71982  | 0.116862 |
| 0.012277 | 0.79132  | -0.0469  | 0.31186  | -0.05491 | 0.23632  | -0.02915 | 0.52974  | -0.02423 |
| 0.14961  | 0.00118  | 0.215283 | 2.67E-06 | 0.169188 | 0.00024  | 0.17455  | 0.00015  | 0.434577 |
| -0.03636 | 0.43304  | -0.04166 | 0.36903  | -0.02402 | 0.60461  | -0.0461  | 0.32021  | -0.02818 |
| 0.005785 | 0.90077  | 0.063516 | 0.1706   | 0.046667 | 0.31425  | 0.044863 | 0.33335  | 0.146986 |
| -0.03203 | 0.48987  | -0.00327 | 0.94378  | -0.00678 | 0.88378  | 0.000168 | 0.99712  | 0.046115 |
| 0.183341 | 6.74E-05 | 0.194925 | 2.22E-05 | 0.220887 | 1.43E-06 | 0.102729 | 0.02642  | 0.078985 |
| 0.093072 | 0.0444   | 0.189323 | 3.83E-05 | 0.135839 | 0.00327  | 0.162602 | 0.00042  | 0.469839 |
| 0.097856 | 0.03451  | 0.083928 | 0.06998  | 0.046356 | 0.3175   | 0.094318 | 0.04162  | 0.148919 |
| 0.053409 | 0.24936  | 0.105227 | 0.02295  | 0.064347 | 0.16506  | 0.10724  | 0.02045  | 0.230631 |
| 0.016245 | 0.72624  | -0.06375 | 0.16904  | -0.03742 | 0.41976  | -0.05338 | 0.24959  | -0.11137 |
| 0.006629 | 0.88639  | 0.099184 | 0.03212  | 0.071161 | 0.12463  | 0.086792 | 0.06092  | 0.239016 |
| 0.029973 | 0.5182   | 0.207864 | 5.91E-06 | 0.092937 | 0.04471  | 0.232728 | 3.66E-07 | 0.397774 |
| 0.053711 | 0.24669  | 0.19279  | 2.74E-05 | 0.078916 | 0.08848  | 0.231173 | 4.40E-07 | 0.341196 |
| -0.03159 | 0.4959   | -0.10325 | 0.02567  | -0.08493 | 0.0667   | -0.08726 | 0.05954  | -0.12777 |
| 0.031104 | 0.50253  | 0.070393 | 0.12876  | 0.062742 | 0.17587  | 0.061686 | 0.18327  | 0.145322 |
| 0.198656 | 1.53E-05 | 0.184867 | 5.84E-05 | 0.182259 | 7.45E-05 | 0.132049 | 0.00426  | 0.19251  |
| 0.033216 | 0.47394  | 0.070323 | 0.12914  | 0.038847 | 0.40228  | 0.080004 | 0.08416  | 0.212415 |
| 0.020879 | 0.65268  | 0.144794 | 0.00171  | 0.081259 | 0.07939  | 0.14829  | 0.00131  | 0.277786 |
| 0.07151  | 0.12279  | 0.031426 | 0.49811  | 0.104948 | 0.02332  | -0.0445  | 0.33725  | 0.062173 |
| 0.134754 | 0.00353  | 0.229102 | 5.60E-07 | 0.152412 | 0.00095  | 0.223024 | 1.13E-06 | 0.324659 |
| -0.09319 | 0.04413  | -0.00075 | 0.98711  | -0.0146  | 0.75297  | -0.00768 | 0.86857  | 0.004921 |
| 0.098142 | 0.03398  | 0.163802 | 0.00038  | 0.095056 | 0.04004  | 0.17179  | 0.00019  | 0.457429 |
| 0.013969 | 0.76335  | 0.104705 | 0.02365  | 0.04279  | 0.3562   | 0.122939 | 0.00782  | 0.204722 |
| 0.045599 | 0.32547  | 0.116525 | 0.01174  | 0.087134 | 0.0599   | 0.09478  | 0.04063  | 0.17774  |
| -0.0057  | 0.90225  | 0.070795 | 0.12659  | 0.031363 | 0.49897  | 0.082606 | 0.07452  | 0.144942 |
| 0.172032 | 0.00019  | 0.201114 | 1.19E-05 | 0.196764 | 1.85E-05 | 0.145057 | 0.00167  | 0.3191   |
| 0.099184 | 0.03212  | 0.108015 | 0.01955  | 0.090588 | 0.05042  | 0.097396 | 0.03537  | 0.275902 |
| 0.123842 | 0.00738  | 0.018806 | 0.68522  | 0.10377  | 0.02493  | -0.05452 | 0.23966  | 0.018718 |
| 0.024356 | 0.59958  | 0.061789 | 0.18254  | 0.069029 | 0.13635  | 0.028216 | 0.54303  | 0.125211 |
| 0.12917  | 0.00518  | 0.253435 | 2.81E-08 | 0.188068 | 4.32E-05 | 0.232914 | 3.58E-07 | 0.365399 |
| 0.037162 | 0.42302  | -0.15169 | 0.00101  | -0.08308 | 0.07287  | -0.15776 | 0.00062  | -0.2906  |
| 0.167891 | 0.00027  | 0.209198 | 5.13E-06 | 0.189563 | 3.74E-05 | 0.153366 | 0.00088  | 0.235789 |
| 0.07254  | 0.11747  | 0.138557 | 0.00269  | 0.102293 | 0.02707  | 0.145127 | 0.00166  | 0.223716 |
| 0.052265 | 0.25966  | 0.09896  | 0.03251  | 0.083735 | 0.07063  | 0.088254 | 0.05668  | 0.258569 |
| 0.025666 | 0.58009  | 0.015164 | 0.74379  | 0.026101 | 0.57369  | -0.00217 | 0.96278  | 0.008365 |
| 0.137346 | 0.00294  | 0.085616 | 0.06451  | 0.12189  | 0.00837  | 0.036283 | 0.43407  | 0.083707 |
| 0.018245 | 0.69413  | -0.16516 | 0.00034  | -0.07371 | 0.11168  | -0.18723 | 4.68E-05 | -0.28567 |
| 0.611937 | 2.56E-49 | 0.731516 | 2.29E-79 | 0.665324 | 5.22E-61 | 0.55005  | 2.76E-38 | 0.488119 |
| 0.539024 | 1.49E-36 | 0.712702 | 1.28E-73 | 0.551315 | 1.73E-38 | 0.662374 | 2.67E-60 | 0.43492  |
| 0.470786 | 3.90E-27 | 0.813892 | #####    | 0.64976  | 2.34E-57 | 0.698643 | 1.28E-69 | 0.665837 |

|          |          |          |          |          |          |          |          |          |
|----------|----------|----------|----------|----------|----------|----------|----------|----------|
| 0.665406 | 4.99E-61 | 0.889224 | #####    | 0.704573 | 2.81E-71 | 0.794398 | #####    | 0.626393 |
| 0.231282 | 4.34E-07 | 0.442951 | 7.31E-24 | 0.288804 | 2.01E-10 | 0.458083 | 1.33E-25 | 0.312654 |
| 0.481229 | 1.92E-28 | 0.719898 | 9.23E-76 | 0.688907 | 5.55E-67 | 0.481596 | 1.73E-28 | 0.403692 |
| 0.719389 | 1.31E-75 | 0.83179  | #####    | 0.761717 | 1.10E-89 | 0.648603 | 4.29E-57 | 0.488021 |
| 0.473617 | 1.74E-27 | 0.729777 | 8.17E-79 | 0.536666 | 3.44E-36 | 0.699271 | 8.59E-70 | 0.457511 |
| 0.45643  | 2.07E-25 | 0.909634 | #####    | 0.700409 | 4.15E-70 | 0.814745 | #####    | 0.532398 |
| 0.388152 | 3.06E-18 | 0.459186 | 9.82E-26 | 0.379668 | 1.84E-17 | 0.38138  | 1.29E-17 | 0.260973 |
| 0.090634 | 0.0503   | 0.107594 | 0.02004  | 0.098156 | 0.03395  | 0.08858  | 0.05577  | 0.090047 |
| 0.572795 | 4.54E-42 | 0.889179 | #####    | 0.786487 | 2.25E-99 | 0.666813 | 2.27E-61 | 0.516703 |
| 0.51483  | 5.74E-33 | 0.603011 | 1.41E-47 | 0.530116 | 3.37E-35 | 0.48403  | 8.43E-29 | 0.302857 |
| 0.447351 | 2.33E-24 | 0.522677 | 4.24E-34 | 0.486702 | 3.81E-29 | 0.410026 | 2.32E-20 | 0.265353 |
| 0.721539 | 2.93E-76 | 0.897832 | #####    | 0.827146 | #####    | 0.677235 | 5.89E-64 | 0.628113 |
| 0.477391 | 5.89E-28 | 0.621103 | 3.63E-51 | 0.565816 | 7.08E-41 | 0.460046 | 7.76E-26 | 0.461668 |
| 0.490557 | 1.20E-29 | 0.91455  | #####    | 0.668185 | 1.05E-61 | 0.855227 | #####    | 0.593172 |
| 0.290449 | 1.57E-10 | 0.409903 | 2.38E-20 | 0.315928 | 2.77E-12 | 0.381716 | 1.20E-17 | 0.255493 |
| 0.21118  | 4.16E-06 | 0.289027 | 1.95E-10 | 0.314596 | 3.46E-12 | 0.183849 | 6.43E-05 | 0.07342  |
| 0.551726 | 1.49E-38 | 0.837497 | #####    | 0.653468 | 3.30E-58 | 0.752173 | 2.90E-86 | 0.465413 |
| 0.377838 | 2.70E-17 | 0.488307 | 2.36E-29 | 0.391544 | 1.47E-18 | 0.448488 | 1.73E-24 | 0.322689 |
| 0.738908 | 9.28E-82 | 0.857376 | #####    | 0.821233 | #####    | 0.619579 | 7.45E-51 | 0.447037 |
| 0.309268 | 8.28E-12 | 0.408322 | 3.43E-20 | 0.488462 | 2.25E-29 | 0.158851 | 0.00057  | 0.226003 |
| 0.243204 | 1.03E-07 | 0.417389 | 4.12E-21 | 0.284658 | 3.73E-10 | 0.408059 | 3.65E-20 | 0.37035  |
| 0.503218 | 2.40E-31 | 0.86624  | #####    | 0.770208 | 7.19E-93 | 0.665777 | 4.05E-61 | 0.405879 |
| 0.58599  | 2.10E-44 | 0.826143 | #####    | 0.811632 | #####    | 0.529818 | 3.73E-35 | 0.45078  |
| 0.314141 | 3.73E-12 | 0.458198 | 1.28E-25 | 0.374489 | 5.39E-17 | 0.376771 | 3.37E-17 | 0.408403 |
| 0.652748 | 4.84E-58 | 0.882966 | #####    | 0.773107 | 5.47E-94 | 0.683171 | 1.77E-65 | 0.623332 |
| 0.398678 | 3.05E-19 | 0.511081 | 1.94E-32 | 0.40278  | 1.21E-19 | 0.460609 | 6.65E-26 | 0.360144 |
| 0.436895 | 3.44E-23 | 0.821223 | #####    | 0.605494 | 4.69E-48 | 0.76014  | 4.13E-89 | 0.554983 |
| 0.543845 | 2.66E-37 | 0.830475 | #####    | 0.746381 | 2.91E-84 | 0.629384 | 6.89E-53 | 0.470902 |
| 0.490814 | 1.11E-29 | 0.844727 | #####    | 0.764975 | 6.83E-91 | 0.626304 | 3.05E-52 | 0.426818 |
| 0.472281 | 2.55E-27 | 0.758984 | 1.09E-88 | 0.620221 | 5.51E-51 | 0.645099 | 2.64E-56 | 0.424973 |
| 0.396335 | 5.13E-19 | 0.473625 | 1.74E-27 | 0.444006 | 5.56E-24 | 0.360394 | 9.05E-16 | 0.25646  |
| 0.085731 | 0.06416  | 0.333532 | 1.35E-13 | 0.144805 | 0.0017   | 0.378085 | 2.57E-17 | 0.3923   |
| 0.607286 | 2.10E-48 | 0.818926 | #####    | 0.794059 | #####    | 0.575669 | 1.44E-42 | 0.369208 |
| 0.481101 | 2.00E-28 | 0.678582 | 2.68E-64 | 0.624099 | 8.77E-52 | 0.496987 | 1.68E-30 | 0.402335 |
| 0.514069 | 7.36E-33 | 0.674834 | 2.37E-63 | 0.579426 | 3.15E-43 | 0.565191 | 9.02E-41 | 0.345629 |
| 0.365663 | 3.21E-16 | 0.556035 | 2.98E-39 | 0.482948 | 1.16E-28 | 0.440665 | 1.32E-23 | 0.272808 |
| 0.403469 | 1.04E-19 | 0.645892 | 1.75E-56 | 0.520608 | 8.49E-34 | 0.550201 | 2.61E-38 | 0.369536 |
| 0.565829 | 7.04E-41 | 0.69228  | 6.96E-68 | 0.646848 | 1.07E-56 | 0.503372 | 2.28E-31 | 0.550733 |
| 0.307066 | 1.18E-11 | 0.427685 | 3.43E-22 | 0.336397 | 8.09E-14 | 0.383761 | 7.80E-18 | 0.250092 |
| 0.338189 | 5.86E-14 | 0.717528 | 4.77E-75 | 0.533766 | 9.50E-36 | 0.644395 | 3.79E-56 | 0.443396 |
| 0.527263 | 8.97E-35 | 0.837162 | #####    | 0.722354 | 1.65E-76 | 0.644498 | 3.60E-56 | 0.515288 |
| 0.3258   | 5.21E-13 | 0.383029 | 9.11E-18 | 0.279167 | 8.30E-10 | 0.373515 | 6.58E-17 | 0.19033  |
| 0.280154 | 7.19E-10 | 0.479807 | 2.92E-28 | 0.373309 | 6.86E-17 | 0.410803 | 1.93E-20 | 0.418054 |
| 0.423605 | 9.28E-22 | 0.847549 | #####    | 0.636927 | 1.67E-54 | 0.757568 | 3.53E-88 | 0.572229 |
| 0.522485 | 4.52E-34 | 0.700188 | 4.78E-70 | 0.563484 | 1.75E-40 | 0.601069 | 3.32E-47 | 0.420682 |

|          |          |          |          |          |          |          |          |          |
|----------|----------|----------|----------|----------|----------|----------|----------|----------|
| 0.419493 | 2.50E-21 | 0.90462  | #####    | 0.625541 | 4.40E-52 | 0.865378 | #####    | 0.657528 |
| 0.409839 | 2.42E-20 | 0.811882 | #####    | 0.623866 | 9.81E-52 | 0.729446 | 1.04E-78 | 0.419365 |
| 0.479653 | 3.05E-28 | 0.837153 | #####    | 0.61553  | 4.91E-50 | 0.780317 | 7.65E-97 | 0.560609 |
| 0.491114 | 1.01E-29 | 0.874649 | #####    | 0.638367 | 8.12E-55 | 0.815559 | #####    | 0.576703 |
| 0.266451 | 4.95E-09 | 0.422786 | 1.13E-21 | 0.271668 | 2.41E-09 | 0.444294 | 5.16E-24 | 0.330592 |
| 0.521441 | 6.42E-34 | 0.892999 | #####    | 0.682964 | 2.01E-65 | 0.809139 | #####    | 0.51819  |
| 0.362612 | 5.86E-16 | 0.452966 | 5.26E-25 | 0.403622 | 1.00E-19 | 0.335572 | 9.37E-14 | 0.46037  |
| 0.287425 | 2.47E-10 | 0.463029 | 3.42E-26 | 0.406377 | 5.36E-20 | 0.35391  | 3.17E-15 | 0.335668 |
| 0.414125 | 8.90E-21 | 0.494993 | 3.10E-30 | 0.464917 | 2.03E-26 | 0.374865 | 4.99E-17 | 0.288577 |
| 0.443005 | 7.21E-24 | 0.602472 | 1.79E-47 | 0.607103 | 2.28E-48 | 0.377784 | 2.73E-17 | 0.443886 |
| 0.561862 | 3.26E-40 | 0.84934  | #####    | 0.714315 | 4.30E-74 | 0.708586 | 2.01E-72 | 0.473376 |
| 0.611715 | 2.83E-49 | 0.752787 | 1.76E-86 | 0.708284 | 2.46E-72 | 0.558635 | 1.12E-39 | 0.395424 |
| 0.580921 | 1.71E-43 | 0.651286 | 1.05E-57 | 0.600419 | 4.42E-47 | 0.489858 | 1.48E-29 | 0.562355 |
| 0.464658 | 2.18E-26 | 0.692973 | 4.53E-68 | 0.535698 | 4.83E-36 | 0.631289 | 2.72E-53 | 0.516757 |
| 0.441664 | 1.02E-23 | 0.586548 | 1.67E-44 | 0.47311  | 2.02E-27 | 0.504773 | 1.47E-31 | 0.424139 |
| 0.557601 | 1.65E-39 | 0.640524 | 2.73E-55 | 0.514465 | 6.47E-33 | 0.568552 | 2.43E-41 | 0.45252  |
| 0.5662   | 6.09E-41 | 0.618982 | 9.85E-51 | 0.49792  | 1.26E-30 | 0.536583 | 3.54E-36 | 0.378769 |
| 0.435282 | 5.18E-23 | 0.803902 | #####    | 0.664915 | 6.55E-61 | 0.645408 | 2.25E-56 | 0.734307 |
| 0.462402 | 4.07E-26 | 0.711762 | 2.41E-73 | 0.535309 | 5.54E-36 | 0.646958 | 1.01E-56 | 0.414281 |
| 0.545228 | 1.61E-37 | 0.83716  | #####    | 0.726333 | 9.81E-78 | 0.665501 | 4.73E-61 | 0.511171 |
| 0.470026 | 4.84E-27 | 0.6575   | 3.81E-59 | 0.734817 | 2.00E-80 | 0.350475 | 6.08E-15 | 0.320326 |
| 0.56108  | 4.40E-40 | 0.781105 | 3.67E-97 | 0.694597 | 1.65E-68 | 0.591047 | 2.51E-45 | 0.600336 |
| 0.54967  | 3.18E-38 | 0.860138 | #####    | 0.851842 | #####    | 0.56262  | 2.43E-40 | 0.456743 |
| 0.610095 | 5.92E-49 | 0.835215 | #####    | 0.884475 | #####    | 0.513189 | 9.81E-33 | 0.340995 |
| 0.573465 | 3.48E-42 | 0.902762 | #####    | 0.778387 | 4.55E-96 | 0.719258 | 1.44E-75 | 0.462186 |
| 0.532416 | 1.52E-35 | 0.92053  | #####    | 0.807263 | #####    | 0.709156 | 1.38E-72 | 0.459894 |
| 0.450549 | 1.00E-24 | 0.448095 | 1.91E-24 | 0.249637 | 4.58E-08 | 0.51238  | 1.28E-32 | 0.46016  |
| 0.586915 | 1.43E-44 | 0.837596 | #####    | 0.830883 | #####    | 0.562476 | 2.57E-40 | 0.370659 |
| 0.757409 | 4.02E-88 | 0.882037 | #####    | 0.753687 | 8.51E-87 | 0.733385 | 5.80E-80 | 0.460898 |
| 0.561253 | 4.11E-40 | 0.944832 | #####    | 0.77411  | 2.23E-94 | 0.797058 | #####    | 0.504731 |
| 0.545577 | 1.42E-37 | 0.82982  | #####    | 0.652792 | 4.73E-58 | 0.74943  | 2.61E-85 | 0.478959 |
| 0.52787  | 7.29E-35 | 0.788274 | #####    | 0.591287 | 2.27E-45 | 0.748381 | 6.01E-85 | 0.494949 |
| 0.428845 | 2.58E-22 | 0.892622 | #####    | 0.623455 | 1.19E-51 | 0.857117 | #####    | 0.51653  |
| 0.564622 | 1.12E-40 | 0.919282 | #####    | 0.791437 | #####    | 0.708555 | 2.05E-72 | 0.674911 |
| 0.309421 | 8.07E-12 | 0.469388 | 5.80E-27 | 0.37504  | 4.81E-17 | 0.391921 | 1.35E-18 | 0.445498 |
| 0.375291 | 4.57E-17 | 0.433608 | 7.88E-23 | 0.31916  | 1.62E-12 | 0.416405 | 5.20E-21 | 0.23134  |
| 0.239123 | 1.70E-07 | 0.475506 | 1.01E-27 | 0.307272 | 1.14E-11 | 0.479931 | 2.81E-28 | 0.414937 |
| 0.411824 | 1.53E-20 | 0.591096 | 2.46E-45 | 0.575008 | 1.88E-42 | 0.392796 | 1.12E-18 | 0.294329 |
| 0.40779  | 3.88E-20 | 0.500227 | 6.13E-31 | 0.383984 | 7.44E-18 | 0.460598 | 6.67E-26 | 0.316501 |
| 0.366545 | 2.69E-16 | 0.428296 | 2.95E-22 | 0.335227 | 9.97E-14 | 0.376299 | 3.71E-17 | 0.254287 |
| 0.204565 | 8.35E-06 | 0.408351 | 3.41E-20 | 0.175183 | 0.00014  | 0.50452  | 1.59E-31 | 0.310922 |
| 0.272203 | 2.23E-09 | 0.390105 | 2.01E-18 | 0.245855 | 7.38E-08 | 0.401944 | 1.47E-19 | 0.355117 |
| 0.493764 | 4.51E-30 | 0.636295 | 2.29E-54 | 0.487008 | 3.48E-29 | 0.573201 | 3.86E-42 | 0.356434 |
| 0.596594 | 2.34E-46 | 0.736701 | 4.90E-81 | 0.618284 | 1.37E-50 | 0.630682 | 3.66E-53 | 0.497182 |
| 0.338211 | 5.84E-14 | 0.478391 | 4.40E-28 | 0.495701 | 2.49E-30 | 0.289    | 1.95E-10 | 0.282747 |



|          |          |          |          |          |          |          |          |          |
|----------|----------|----------|----------|----------|----------|----------|----------|----------|
| 0.290493 | 1.56E-10 | 0.426007 | 5.17E-22 | 0.347579 | 1.05E-14 | 0.378387 | 2.41E-17 | 0.201096 |
| 0.663167 | 1.72E-60 | 0.804369 | #####    | 0.735353 | 1.34E-80 | 0.618502 | 1.23E-50 | 0.441179 |
| 0.430014 | 1.93E-22 | 0.783361 | 4.42E-98 | 0.575085 | 1.82E-42 | 0.745139 | 7.69E-84 | 0.51319  |
| 0.591585 | 2.00E-45 | 0.789907 | #####    | 0.765543 | 4.19E-91 | 0.548233 | 5.39E-38 | 0.439006 |
| 0.484938 | 6.44E-29 | 0.735033 | 1.71E-80 | 0.583103 | 6.97E-44 | 0.621735 | 2.70E-51 | 0.544815 |
| 0.415337 | 6.69E-21 | 0.715488 | 1.93E-74 | 0.59241  | 1.41E-45 | 0.568543 | 2.44E-41 | 0.358604 |
| 0.284962 | 3.56E-10 | 0.463793 | 2.77E-26 | 0.329533 | 2.73E-13 | 0.463115 | 3.34E-26 | 0.242903 |
| 0.55055  | 2.30E-38 | 0.649219 | 3.11E-57 | 0.554618 | 5.07E-39 | 0.53835  | 1.90E-36 | 0.466803 |
| 0.458141 | 1.30E-25 | 0.664202 | 9.73E-61 | 0.612933 | 1.62E-49 | 0.471323 | 3.35E-27 | 0.367131 |
| 0.52025  | 9.56E-34 | 0.753483 | 1.00E-86 | 0.676825 | 7.48E-64 | 0.564533 | 1.16E-40 | 0.557011 |
| 0.36312  | 5.30E-16 | 0.471621 | 3.08E-27 | 0.387616 | 3.43E-18 | 0.404303 | 8.60E-20 | 0.264294 |
| 0.553196 | 8.62E-39 | 0.924056 | #####    | 0.713265 | 8.76E-74 | 0.816728 | #####    | 0.608202 |
| 0.476175 | 8.36E-28 | 0.828015 | #####    | 0.619086 | 9.38E-51 | 0.761139 | 1.78E-89 | 0.476547 |
| 0.690525 | 2.06E-67 | 0.927425 | #####    | 0.756766 | 6.84E-88 | 0.81     | #####    | 0.540871 |
| 0.541109 | 7.10E-37 | 0.652139 | 6.68E-58 | 0.530144 | 3.34E-35 | 0.582758 | 8.03E-44 | 0.369582 |
| 0.55569  | 3.39E-39 | 0.825113 | #####    | 0.743554 | 2.64E-83 | 0.624721 | 6.52E-52 | 0.554614 |
| 0.548871 | 4.26E-38 | 0.912642 | #####    | 0.767241 | 9.65E-92 | 0.758966 | 1.10E-88 | 0.484978 |
| 0.385772 | 5.09E-18 | 0.530743 | 2.71E-35 | 0.536957 | 3.10E-36 | 0.324757 | 6.24E-13 | 0.497885 |
| 0.480351 | 2.49E-28 | 0.932415 | #####    | 0.729362 | 1.10E-78 | 0.794239 | #####    | 0.6805   |
| 0.362164 | 6.40E-16 | 0.458364 | 1.23E-25 | 0.400753 | 1.92E-19 | 0.386344 | 4.50E-18 | 0.295364 |
| 0.5763   | 1.12E-42 | 0.766295 | 2.19E-91 | 0.646504 | 1.28E-56 | 0.625071 | 5.52E-52 | 0.492104 |
| 0.743271 | 3.28E-83 | 0.867011 | #####    | 0.82389  | #####    | 0.609194 | 8.90E-49 | 0.696978 |
| 0.482483 | 1.33E-28 | 0.725026 | 2.50E-77 | 0.60761  | 1.82E-48 | 0.591987 | 1.68E-45 | 0.584114 |
| 0.357191 | 1.69E-15 | 0.563609 | 1.66E-40 | 0.47542  | 1.04E-27 | 0.453739 | 4.28E-25 | 0.423395 |
| 0.584147 | 4.53E-44 | 0.608753 | 1.09E-48 | 0.557107 | 1.99E-39 | 0.460945 | 6.07E-26 | 0.510943 |
| 0.298203 | 4.79E-11 | 0.48907  | 1.87E-29 | 0.383808 | 7.72E-18 | 0.424148 | 8.13E-22 | 0.346836 |
| 0.413567 | 1.01E-20 | 0.429305 | 2.30E-22 | 0.400402 | 2.07E-19 | 0.303708 | 2.02E-11 | 0.371535 |
| 0.472216 | 2.60E-27 | 0.868129 | #####    | 0.677912 | 3.97E-64 | 0.747924 | 8.63E-85 | 0.52661  |
| 0.420523 | 1.95E-21 | 0.491249 | 9.70E-30 | 0.411826 | 1.52E-20 | 0.436848 | 3.49E-23 | 0.309702 |
| 0.630363 | 4.27E-53 | 0.938226 | #####    | 0.794391 | #####    | 0.766497 | 1.84E-91 | 0.523392 |
| 0.617625 | 1.86E-50 | 0.808932 | #####    | 0.692041 | 8.07E-68 | 0.655582 | 1.07E-58 | 0.531502 |
| 0.598864 | 8.72E-47 | 0.924504 | #####    | 0.834665 | #####    | 0.69706  | 3.50E-69 | 0.53537  |
| 0.532776 | 1.34E-35 | 0.562239 | 2.82E-40 | 0.523437 | 3.28E-34 | 0.413795 | 9.62E-21 | 0.482436 |
| 0.341132 | 3.44E-14 | 0.442167 | 8.95E-24 | 0.309775 | 7.62E-12 | 0.454613 | 3.38E-25 | 0.281265 |
| 0.415466 | 6.49E-21 | 0.552688 | 1.04E-38 | 0.461243 | 5.59E-26 | 0.465393 | 1.78E-26 | 0.277672 |
| 0.35359  | 3.37E-15 | 0.5645   | 1.18E-40 | 0.541936 | 5.28E-37 | 0.392992 | 1.07E-18 | 0.313563 |
| 0.291027 | 1.44E-10 | 0.501381 | 4.27E-31 | 0.4184   | 3.24E-21 | 0.402775 | 1.22E-19 | 0.455599 |
| 0.354831 | 2.66E-15 | 0.511294 | 1.82E-32 | 0.379896 | 1.76E-17 | 0.471194 | 3.48E-27 | 0.468169 |
| 0.42827  | 2.97E-22 | 0.78259  | 9.14E-98 | 0.642044 | 1.26E-55 | 0.653899 | 2.63E-58 | 0.454374 |
| 0.503682 | 2.07E-31 | 0.527887 | 7.24E-35 | 0.806443 | #####    | 0.03223  | 0.48717  | 0.131889 |
| 0.297222 | 5.58E-11 | 0.305422 | 1.54E-11 | 0.488278 | 2.38E-29 | 0.015092 | 0.74496  | 0.077801 |
| 0.374397 | 5.49E-17 | 0.535934 | 4.45E-36 | 0.58583  | 2.25E-44 | 0.270524 | 2.82E-09 | 0.394229 |
| 0.368376 | 1.86E-16 | 0.281648 | 5.79E-10 | 0.427247 | 3.82E-22 | 0.053992 | 0.24422  | 0.071193 |
| 0.361417 | 7.41E-16 | 0.513505 | 8.85E-33 | 0.54363  | 2.87E-37 | 0.317887 | 2.00E-12 | 0.320551 |
| 0.397774 | 3.73E-19 | 0.386309 | 4.54E-18 | 0.483491 | 9.88E-29 | 0.170899 | 0.00021  | 0.344004 |

|          |          |          |          |          |          |          |          |          |
|----------|----------|----------|----------|----------|----------|----------|----------|----------|
| 0.616087 | 3.79E-50 | 0.576746 | 9.32E-43 | 0.700801 | 3.23E-70 | 0.289776 | 1.74E-10 | 0.249565 |
| 0.54657  | 9.89E-38 | 0.473479 | 1.81E-27 | 0.51082  | 2.12E-32 | 0.328037 | 3.54E-13 | 0.278914 |
| 0.591127 | 2.43E-45 | 0.699011 | 1.01E-69 | 0.860843 | #####    | 0.283089 | 4.69E-10 | 0.294548 |
| 0.379272 | 2.00E-17 | 0.405987 | 5.86E-20 | 0.428889 | 2.55E-22 | 0.277914 | 9.93E-10 | 0.176337 |
| 0.387588 | 3.45E-18 | 0.397637 | 3.85E-19 | 0.429761 | 2.05E-22 | 0.247554 | 5.96E-08 | 0.180764 |
| 0.311334 | 5.91E-12 | 0.342941 | 2.47E-14 | 0.529826 | 3.72E-35 | 0.007568 | 0.87043  | 0.055323 |
| 0.510961 | 2.02E-32 | 0.495481 | 2.67E-30 | 0.559542 | 7.90E-40 | 0.293065 | 1.06E-10 | 0.20295  |
| 0.38063  | 1.51E-17 | 0.411277 | 1.73E-20 | 0.453099 | 5.08E-25 | 0.234415 | 3.00E-07 | 0.218694 |
| 0.712839 | 1.17E-73 | 0.719558 | 1.17E-75 | 0.812158 | #####    | 0.395126 | 6.70E-19 | 0.464465 |
| 0.863116 | #####    | 0.835987 | #####    | 0.905747 | #####    | 0.514256 | 6.92E-33 | 0.415299 |
| 0.614758 | 7.01E-50 | 0.66128  | 4.87E-60 | 0.797215 | #####    | 0.306546 | 1.28E-11 | 0.318669 |
| 0.750134 | 1.49E-85 | 0.659802 | 1.09E-59 | 0.832784 | #####    | 0.298085 | 4.88E-11 | 0.242557 |
| 0.510175 | 2.61E-32 | 0.527679 | 7.78E-35 | 0.569632 | 1.59E-41 | 0.314423 | 3.56E-12 | 0.500674 |
| 0.444306 | 5.15E-24 | 0.535173 | 5.81E-36 | 0.606156 | 3.49E-48 | 0.286752 | 2.73E-10 | 0.38754  |
| 0.70497  | 2.17E-71 | 0.724924 | 2.68E-77 | 0.77607  | 3.78E-95 | 0.453543 | 4.51E-25 | 0.477235 |
| 0.740425 | 2.93E-82 | 0.800502 | #####    | 0.864269 | #####    | 0.467534 | 9.76E-27 | 0.499424 |
| 0.741792 | 1.03E-82 | 0.818294 | #####    | 0.887559 | #####    | 0.48793  | 2.64E-29 | 0.354905 |
| 0.409734 | 2.48E-20 | 0.313031 | 4.48E-12 | 0.448219 | 1.85E-24 | 0.100342 | 0.03015  | 0.183606 |
| 0.667734 | 1.36E-61 | 0.849111 | #####    | 0.862518 | #####    | 0.544503 | 2.09E-37 | 0.434176 |
| 0.354131 | 3.04E-15 | 0.40965  | 2.53E-20 | 0.467844 | 8.95E-27 | 0.219438 | 1.69E-06 | 0.316443 |
| 0.377374 | 2.97E-17 | 0.406328 | 5.42E-20 | 0.394436 | 7.80E-19 | 0.307789 | 1.05E-11 | 0.281359 |
| 0.564351 | 1.25E-40 | 0.658054 | 2.82E-59 | 0.681931 | 3.71E-65 | 0.407899 | 3.78E-20 | 0.340251 |
| 0.19813  | 1.61E-05 | 0.228317 | 6.14E-07 | 0.37175  | 9.43E-17 | -0.01804 | 0.69733  | 0.046092 |
| 0.678254 | 3.25E-64 | 0.878288 | #####    | 0.885115 | #####    | 0.558588 | 1.14E-39 | 0.42515  |
| 0.365417 | 3.37E-16 | 0.462376 | 4.09E-26 | 0.484652 | 7.01E-29 | 0.28231  | 5.26E-10 | 0.300389 |
| 0.660638 | 6.92E-60 | 0.771508 | 2.28E-93 | 0.833658 | #####    | 0.433965 | 7.21E-23 | 0.419905 |
| 0.764492 | 1.03E-90 | 0.635622 | 3.20E-54 | 0.815953 | #####    | 0.278475 | 9.17E-10 | 0.250322 |
| 0.704686 | 2.61E-71 | 0.729499 | 1.00E-78 | 0.834724 | #####    | 0.396903 | 4.52E-19 | 0.294848 |
| 0.400943 | 1.84E-19 | 0.481028 | 2.04E-28 | 0.533329 | 1.11E-35 | 0.274025 | 1.73E-09 | 0.172352 |
| 0.535721 | 4.79E-36 | 0.516824 | 2.98E-33 | 0.551772 | 1.46E-38 | 0.343389 | 2.27E-14 | 0.485939 |
| 0.503578 | 2.14E-31 | 0.495783 | 2.43E-30 | 0.50842  | 4.58E-32 | 0.345119 | 1.65E-14 | 0.258295 |
| 0.46007  | 7.71E-26 | 0.473288 | 1.92E-27 | 0.619156 | 9.08E-51 | 0.172869 | 0.00017  | 0.178334 |
| 0.496686 | 1.84E-30 | 0.504921 | 1.40E-31 | 0.560435 | 5.62E-40 | 0.297301 | 5.51E-11 | 0.37067  |
| 0.472373 | 2.49E-27 | 0.623747 | 1.04E-51 | 0.694916 | 1.35E-68 | 0.347914 | 9.83E-15 | 0.278658 |
| 0.510044 | 2.72E-32 | 0.552572 | 1.09E-38 | 0.551154 | 1.84E-38 | 0.368781 | 1.72E-16 | 0.361262 |
| 0.655884 | 9.08E-59 | 0.60813  | 1.44E-48 | 0.861258 | #####    | 0.123925 | 0.00734  | 0.356268 |
| 0.644739 | 3.18E-56 | 0.672682 | 8.19E-63 | 0.706329 | 8.92E-72 | 0.447936 | 2.00E-24 | 0.350373 |
| 0.668929 | 6.92E-62 | 0.753478 | 1.01E-86 | 0.843574 | #####    | 0.430548 | 1.69E-22 | 0.327983 |
| 0.607182 | 2.20E-48 | 0.807213 | #####    | 0.905903 | #####    | 0.406464 | 5.26E-20 | 0.350418 |
| 0.559219 | 8.93E-40 | 0.613693 | 1.14E-49 | 0.679775 | 1.33E-64 | 0.34528  | 1.60E-14 | 0.282745 |
| 0.358133 | 1.41E-15 | 0.479573 | 3.12E-28 | 0.504235 | 1.74E-31 | 0.319934 | 1.42E-12 | 0.208738 |
| 0.685707 | 3.87E-66 | 0.732796 | 8.95E-80 | 0.86777  | #####    | 0.355852 | 2.18E-15 | 0.386978 |
| 0.419195 | 2.68E-21 | 0.522091 | 5.16E-34 | 0.616256 | 3.51E-50 | 0.253311 | 2.85E-08 | 0.221651 |
| 0.642037 | 1.27E-55 | 0.632107 | 1.82E-53 | 0.741328 | 1.47E-82 | 0.306538 | 1.29E-11 | 0.399345 |
| 0.623333 | 1.26E-51 | 0.508722 | 4.16E-32 | 0.754184 | 5.68E-87 | 0.113345 | 0.01426  | 0.135339 |

|          |          |          |          |          |          |          |          |          |
|----------|----------|----------|----------|----------|----------|----------|----------|----------|
| 0.370072 | 1.32E-16 | 0.332916 | 1.50E-13 | 0.405932 | 5.94E-20 | 0.17534  | 0.00014  | 0.130113 |
| 0.342729 | 2.57E-14 | 0.35003  | 6.61E-15 | 0.403448 | 1.04E-19 | 0.175665 | 0.00014  | 0.324352 |
| 0.435198 | 5.29E-23 | 0.341741 | 3.07E-14 | 0.510234 | 2.56E-32 | 0.084571 | 0.06785  | 0.071934 |
| 0.460926 | 6.10E-26 | 0.388988 | 2.55E-18 | 0.505561 | 1.14E-31 | 0.170249 | 0.00022  | 0.16594  |
| 0.42804  | 3.14E-22 | 0.35937  | 1.11E-15 | 0.554192 | 5.94E-39 | 0.043068 | 0.35307  | 0.131294 |
| 0.274726 | 1.56E-09 | 0.375236 | 4.62E-17 | 0.449915 | 1.18E-24 | 0.162986 | 0.00041  | 0.103248 |
| 0.315028 | 3.22E-12 | 0.299733 | 3.78E-11 | 0.437003 | 3.35E-23 | 0.049981 | 0.28109  | 0.376101 |
| 0.5721   | 5.99E-42 | 0.654165 | 2.28E-58 | 0.860265 | #####    | 0.199573 | 1.39E-05 | 0.216262 |
| 0.547715 | 6.51E-38 | 0.512523 | 1.22E-32 | 0.714664 | 3.39E-74 | 0.132809 | 0.00404  | 0.17271  |
| 0.378334 | 2.44E-17 | 0.333531 | 1.35E-13 | 0.416545 | 5.03E-21 | 0.164559 | 0.00036  | 0.177262 |
| 0.390898 | 1.69E-18 | 0.427771 | 3.36E-22 | 0.496734 | 1.81E-30 | 0.239314 | 1.66E-07 | 0.362011 |
| 0.727838 | 3.33E-78 | 0.585137 | 3.00E-44 | 0.769528 | 1.31E-92 | 0.230871 | 4.56E-07 | 0.215647 |
| 0.401021 | 1.81E-19 | 0.503132 | 2.46E-31 | 0.533193 | 1.16E-35 | 0.312202 | 5.13E-12 | 0.336934 |
| 0.352106 | 4.46E-15 | 0.326842 | 4.35E-13 | 0.472237 | 2.58E-27 | 0.080895 | 0.08075  | 0.131997 |
| 0.531104 | 2.40E-35 | 0.51137  | 1.77E-32 | 0.656844 | 5.42E-59 | 0.207602 | 6.08E-06 | 0.177117 |
| 0.284901 | 3.59E-10 | 0.306205 | 1.36E-11 | 0.457769 | 1.44E-25 | 0.037012 | 0.42489  | 0.105614 |
| 0.661182 | 5.14E-60 | 0.641188 | 1.95E-55 | 0.751623 | 4.52E-86 | 0.330369 | 2.35E-13 | 0.261222 |
| 0.659435 | 1.33E-59 | 0.673185 | 6.14E-63 | 0.714296 | 4.35E-74 | 0.44134  | 1.11E-23 | 0.307259 |
| 0.562484 | 2.57E-40 | 0.579542 | 3.00E-43 | 0.602    | 2.21E-47 | 0.364572 | 3.98E-16 | 0.544918 |
| 0.652171 | 6.57E-58 | 0.728427 | 2.17E-78 | 0.695678 | 8.36E-69 | 0.556668 | 2.35E-39 | 0.392154 |
| 0.429896 | 1.99E-22 | 0.562443 | 2.61E-40 | 0.654882 | 1.55E-58 | 0.275975 | 1.31E-09 | 0.257725 |
| 0.379831 | 1.78E-17 | 0.51216  | 1.37E-32 | 0.51802  | 2.01E-33 | 0.341521 | 3.20E-14 | 0.249636 |
| 0.391483 | 1.49E-18 | 0.414152 | 8.85E-21 | 0.433272 | 8.58E-23 | 0.26661  | 4.85E-09 | 0.382775 |
| 0.482491 | 1.33E-28 | 0.44199  | 9.37E-24 | 0.550998 | 1.95E-38 | 0.192128 | 2.92E-05 | 0.25368  |
| 0.576374 | 1.08E-42 | 0.531592 | 2.02E-35 | 0.758355 | 1.83E-88 | 0.123746 | 0.00742  | 0.22112  |
| 0.821841 | #####    | 0.73895  | 8.99E-82 | 0.935352 | #####    | 0.310446 | 6.84E-12 | 0.282386 |
| 0.49348  | 4.92E-30 | 0.538925 | 1.55E-36 | 0.765904 | 3.07E-91 | 0.115945 | 0.01216  | 0.136945 |
| 0.520789 | 7.99E-34 | 0.572582 | 4.94E-42 | 0.801139 | #####    | 0.129652 | 0.00501  | 0.284132 |
| 0.3985   | 3.17E-19 | 0.40545  | 6.63E-20 | 0.607718 | 1.73E-48 | 0.040085 | 0.38744  | 0.181757 |
| 0.72778  | 3.47E-78 | 0.75559  | 1.80E-87 | 0.815178 | #####    | 0.476012 | 8.77E-28 | 0.453971 |
| 0.621844 | 2.56E-51 | 0.654535 | 1.87E-58 | 0.847295 | #####    | 0.243098 | 1.04E-07 | 0.23389  |
| 0.731306 | 2.68E-79 | 0.815502 | #####    | 0.859387 | #####    | 0.514245 | 6.95E-33 | 0.376216 |
| 0.557458 | 1.74E-39 | 0.509403 | 3.34E-32 | 0.772898 | 6.60E-94 | 0.066457 | 0.1516   | 0.16639  |
| 0.381202 | 1.34E-17 | 0.478712 | 4.01E-28 | 0.551663 | 1.52E-38 | 0.245331 | 7.89E-08 | 0.384969 |
| 0.678057 | 3.65E-64 | 0.771187 | 3.03E-93 | 0.829765 | #####    | 0.456789 | 1.88E-25 | 0.419626 |
| 0.564743 | 1.07E-40 | 0.48934  | 1.73E-29 | 0.737532 | 2.62E-81 | 0.083529 | 0.07133  | 0.228115 |
| 0.656122 | 8.00E-59 | 0.811977 | #####    | 0.893091 | #####    | 0.45737  | 1.61E-25 | 0.412857 |
| 0.574472 | 2.33E-42 | 0.763639 | 2.14E-90 | 0.900343 | #####    | 0.344604 | 1.82E-14 | 0.286184 |
| 0.801207 | #####    | 0.693215 | 3.90E-68 | 0.921296 | #####    | 0.245944 | 7.30E-08 | 0.227125 |
| 0.64545  | 2.20E-56 | 0.853032 | #####    | 0.894726 | #####    | 0.529361 | 4.37E-35 | 0.400316 |
| 0.480492 | 2.39E-28 | 0.524244 | 2.50E-34 | 0.761594 | 1.22E-89 | 0.109335 | 0.0181   | 0.149468 |
| 0.522211 | 4.96E-34 | 0.553049 | 9.10E-39 | 0.756038 | 1.25E-87 | 0.120238 | 0.0093   | 0.345199 |
| 0.584644 | 3.68E-44 | 0.79156  | #####    | 0.781352 | 2.91E-97 | 0.541562 | 6.04E-37 | 0.367489 |
| 0.699265 | 8.63E-70 | 0.721586 | 2.84E-76 | 0.887506 | #####    | 0.286915 | 2.67E-10 | 0.444884 |
| 0.680229 | 1.02E-64 | 0.792802 | #####    | 0.809773 | #####    | 0.493099 | 5.53E-30 | 0.500219 |

|          |          |          |          |          |          |          |          |          |
|----------|----------|----------|----------|----------|----------|----------|----------|----------|
| 0.468248 | 7.99E-27 | 0.493878 | 4.36E-30 | 0.740507 | 2.75E-82 | 0.06635  | 0.15226  | 0.119235 |
| 0.735336 | 1.36E-80 | 0.624533 | 7.13E-52 | 0.850871 | #####    | 0.198372 | 1.57E-05 | 0.269262 |
| 0.582853 | 7.72E-44 | 0.868909 | #####    | 0.902199 | #####    | 0.525206 | 1.81E-34 | 0.376113 |
| 0.648955 | 3.57E-57 | 0.677873 | 4.06E-64 | 0.826048 | #####    | 0.260281 | 1.14E-08 | 0.577381 |
| 0.593028 | 1.08E-45 | 0.854951 | #####    | 0.919508 | #####    | 0.47948  | 3.21E-28 | 0.357765 |
| 0.620229 | 5.49E-51 | 0.745177 | 7.47E-84 | 0.908245 | #####    | 0.311918 | 5.37E-12 | 0.271476 |
| 0.327772 | 3.71E-13 | 0.384332 | 6.91E-18 | 0.480063 | 2.71E-28 | 0.152789 | 0.00092  | 0.129432 |
| 0.3365   | 7.94E-14 | 0.29024  | 1.62E-10 | 0.44216  | 8.97E-24 | 0.043818 | 0.34475  | 0.090256 |
| 0.600337 | 4.58E-47 | 0.634268 | 6.27E-54 | 0.807048 | #####    | 0.231549 | 4.21E-07 | 0.253667 |
| 0.363431 | 4.99E-16 | 0.390586 | 1.81E-18 | 0.392895 | 1.09E-18 | 0.276991 | 1.13E-09 | 0.266889 |
| 0.440976 | 1.22E-23 | 0.541012 | 7.35E-37 | 0.572296 | 5.54E-42 | 0.326826 | 4.37E-13 | 0.252545 |
| 0.414532 | 8.09E-21 | 0.412805 | 1.21E-20 | 0.511702 | 1.59E-32 | 0.182012 | 7.63E-05 | 0.251259 |
| 0.444841 | 4.48E-24 | 0.397176 | 4.26E-19 | 0.463592 | 2.93E-26 | 0.207295 | 6.28E-06 | 0.299004 |
| 0.720588 | 5.71E-76 | 0.78556  | 5.47E-99 | 0.944879 | #####    | 0.35743  | 1.61E-15 | 0.295494 |
| 0.537691 | 2.39E-36 | 0.476876 | 6.83E-28 | 0.632156 | 1.78E-53 | 0.180009 | 9.17E-05 | 0.328867 |
| 0.725285 | 2.07E-77 | 0.656661 | 5.98E-59 | 0.801995 | #####    | 0.30748  | 1.10E-11 | 0.302288 |
| 0.251464 | 3.62E-08 | 0.257042 | 1.75E-08 | 0.394961 | 6.95E-19 | 0.012034 | 0.79535  | 0.037951 |
| 0.625854 | 3.79E-52 | 0.795767 | #####    | 0.885574 | #####    | 0.409623 | 2.54E-20 | 0.320202 |
| 0.356867 | 1.80E-15 | 0.455509 | 2.66E-25 | 0.485349 | 5.70E-29 | 0.25486  | 2.33E-08 | 0.301828 |
| -0.00973 | 0.83385  | 0.006244 | 0.89294  | -0.00092 | 0.9841   | 0.013115 | 0.77743  | 0.035608 |
| 0.526881 | 1.02E-34 | 0.381819 | 1.18E-17 | 0.565351 | 8.47E-41 | 0.106523 | 0.02131  | 0.122646 |
| 0.284053 | 4.07E-10 | 0.275161 | 1.47E-09 | 0.437098 | 3.27E-23 | 0.014138 | 0.76058  | 0.063771 |
| 0.708162 | 2.66E-72 | 0.559176 | 9.08E-40 | 0.82262  | #####    | 0.121533 | 0.00856  | 0.164294 |
| 0.440739 | 1.29E-23 | 0.423617 | 9.25E-22 | 0.503195 | 2.41E-31 | 0.210819 | 4.32E-06 | 0.215841 |
| 0.574669 | 2.15E-42 | 0.670454 | 2.92E-62 | 0.687287 | 1.49E-66 | 0.451824 | 7.14E-25 | 0.399591 |
| 0.466697 | 1.23E-26 | 0.413824 | 9.56E-21 | 0.549553 | 3.32E-38 | 0.164056 | 0.00037  | 0.263311 |
| 0.353817 | 3.22E-15 | 0.354134 | 3.03E-15 | 0.462015 | 4.52E-26 | 0.122142 | 0.00823  | 0.192085 |
| 0.657339 | 4.15E-59 | 0.593732 | 8.00E-46 | 0.732599 | 1.03E-79 | 0.25854  | 1.44E-08 | 0.33208  |
| 0.3832   | 8.78E-18 | 0.422712 | 1.15E-21 | 0.454655 | 3.35E-25 | 0.259102 | 1.33E-08 | 0.206898 |
| 0.584973 | 3.21E-44 | 0.710925 | 4.23E-73 | 0.765363 | 4.89E-91 | 0.415719 | 6.12E-21 | 0.416888 |
| 0.453772 | 4.24E-25 | 0.455698 | 2.53E-25 | 0.500201 | 6.18E-31 | 0.265961 | 5.30E-09 | 0.219031 |
| 0.574232 | 2.56E-42 | 0.682642 | 2.43E-65 | 0.659119 | 1.58E-59 | 0.514839 | 5.72E-33 | 0.34519  |
| 0.549167 | 3.82E-38 | 0.572936 | 4.29E-42 | 0.538206 | 1.99E-36 | 0.43623  | 4.08E-23 | 0.293583 |
| 0.474745 | 1.26E-27 | 0.54697  | 8.55E-38 | 0.571864 | 6.58E-42 | 0.35093  | 5.58E-15 | 0.305835 |
| 0.388089 | 3.10E-18 | 0.359603 | 1.06E-15 | 0.410143 | 2.25E-20 | 0.199581 | 1.39E-05 | 0.178733 |
| 0.335547 | 9.42E-14 | 0.354557 | 2.80E-15 | 0.509178 | 3.59E-32 | 0.0744   | 0.10834  | 0.068934 |
| 0.341608 | 3.15E-14 | 0.275865 | 1.33E-09 | 0.424728 | 7.06E-22 | 0.049864 | 0.28222  | 0.056549 |
| 0.79814  | #####    | 0.782438 | 1.05E-97 | 0.885021 | #####    | 0.414355 | 8.43E-21 | 0.315385 |
| 0.421877 | 1.41E-21 | 0.406689 | 4.99E-20 | 0.508655 | 4.25E-32 | 0.195388 | 2.12E-05 | 0.153398 |
| 0.754517 | 4.33E-87 | 0.782607 | 8.99E-98 | 0.847336 | #####    | 0.476547 | 7.51E-28 | 0.349995 |
| 0.392322 | 1.24E-18 | 0.317112 | 2.28E-12 | 0.445405 | 3.87E-24 | 0.100642 | 0.02966  | 0.258159 |
| 0.614187 | 9.12E-50 | 0.680706 | 7.67E-65 | 0.687249 | 1.52E-66 | 0.479839 | 2.89E-28 | 0.356859 |
| 0.66414  | 1.01E-60 | 0.612133 | 2.34E-49 | 0.768537 | 3.12E-92 | 0.274437 | 1.63E-09 | 0.298625 |
| 0.781128 | 3.59E-97 | 0.762342 | 6.46E-90 | 0.933952 | #####    | 0.340832 | 3.63E-14 | 0.298298 |
| 0.521848 | 5.60E-34 | 0.43886  | 2.09E-23 | 0.586832 | 1.48E-44 | 0.18094  | 8.42E-05 | 0.185951 |

|          |          |          |          |          |          |          |          |          |
|----------|----------|----------|----------|----------|----------|----------|----------|----------|
| 0.720108 | 7.97E-76 | 0.734769 | 2.08E-80 | 0.947695 | #####    | 0.266364 | 5.01E-09 | 0.279172 |
| 0.488538 | 2.20E-29 | 0.563682 | 1.62E-40 | 0.614495 | 7.91E-50 | 0.323278 | 8.04E-13 | 0.363264 |
| 0.781633 | 2.24E-97 | 0.712434 | 1.54E-73 | 0.89432  | #####    | 0.299616 | 3.85E-11 | 0.266369 |
| -0.03988 | 0.38985  | 0.024316 | 0.60018  | -0.01303 | 0.77883  | 0.040076 | 0.38754  | 0.132555 |
| 0.017473 | 0.70646  | 0.156478 | 0.00069  | 0.061282 | 0.18616  | 0.182137 | 7.54E-05 | 0.376932 |
| -0.00162 | 0.97219  | 0.070182 | 0.12991  | 0.028073 | 0.54508  | 0.095657 | 0.03879  | 0.161409 |
| -0.06669 | 0.1502   | 0.036777 | 0.42784  | -0.01338 | 0.77299  | 0.065872 | 0.15525  | 0.065884 |
| 0.074086 | 0.10984  | 0.068142 | 0.14147  | 0.061304 | 0.18601  | 0.065335 | 0.15865  | -0.0004  |
| -0.05505 | 0.23508  | -0.15562 | 0.00074  | -0.09413 | 0.04202  | -0.16183 | 0.00045  | -0.24161 |
| -0.09914 | 0.0322   | -0.04055 | 0.38195  | -0.09351 | 0.04341  | 0.012463 | 0.78822  | -0.04732 |
| -0.04424 | 0.34011  | 0.028995 | 0.53195  | -0.01546 | 0.73891  | 0.05617  | 0.22568  | 0.093956 |
| -0.08262 | 0.07447  | -0.0668  | 0.14951  | -0.0835  | 0.07142  | -0.03126 | 0.50035  | -0.10823 |
| -0.01765 | 0.70358  | 0.024488 | 0.59761  | -0.02594 | 0.57599  | 0.064362 | 0.16496  | 0.156247 |
| -0.12353 | 0.00753  | -0.04942 | 0.28655  | -0.0575  | 0.2149   | -0.02924 | 0.52852  | -0.06931 |
| 0.050158 | 0.27939  | 0.220372 | 1.52E-06 | 0.09996  | 0.03079  | 0.249383 | 4.73E-08 | 0.317517 |
| -0.04856 | 0.29505  | 0.003684 | 0.93671  | -0.00051 | 0.99129  | 0.013674 | 0.7682   | 0.095831 |
| -0.01559 | 0.7369   | 0.013904 | 0.76443  | -0.00863 | 0.85245  | 0.037726 | 0.41601  | 0.078339 |
| 0.037083 | 0.424    | 0.043093 | 0.35279  | 0.01595  | 0.73101  | 0.062767 | 0.1757   | 0.006295 |
| -0.05288 | 0.2541   | 0.0715   | 0.12284  | 0.009656 | 0.83514  | 0.097784 | 0.03464  | 0.172988 |
| -0.08292 | 0.07343  | 0.03599  | 0.43779  | -0.02046 | 0.65919  | 0.069093 | 0.13599  | 0.216908 |
| -0.08928 | 0.05384  | 0.048273 | 0.29788  | -0.0303  | 0.51361  | 0.104422 | 0.02403  | 0.117178 |
| -0.11517 | 0.01276  | -0.09506 | 0.04004  | -0.0959  | 0.03829  | -0.07092 | 0.12589  | -0.1147  |
| -0.01102 | 0.81232  | -0.07389 | 0.11076  | -0.01347 | 0.77163  | -0.09335 | 0.04376  | -0.10436 |
| -0.0045  | 0.92281  | -0.03329 | 0.47297  | -0.015   | 0.74654  | -0.02912 | 0.53021  | 0.012652 |
| -0.02486 | 0.59211  | 0.010723 | 0.81724  | 0.031735 | 0.49389  | 0.005087 | 0.9127   | 0.017272 |
| -0.12225 | 0.00818  | 0.009419 | 0.83914  | -0.05954 | 0.19901  | 0.051972 | 0.26234  | 0.091629 |
| 0.025195 | 0.58707  | -0.13296 | 0.004    | -0.0703  | 0.12927  | -0.12775 | 0.0057   | -0.2208  |
| -0.09167 | 0.04772  | -0.13963 | 0.00249  | -0.1261  | 0.00636  | -0.09861 | 0.03314  | -0.21649 |
| 0.104798 | 0.02352  | 0.187865 | 4.40E-05 | 0.146349 | 0.00152  | 0.171307 | 0.0002   | 0.274694 |
| -0.0606  | 0.19114  | -0.06638 | 0.15208  | -0.08083 | 0.081    | -0.03699 | 0.42516  | -0.10877 |
| -0.10699 | 0.02075  | -0.1297  | 0.005    | -0.14662 | 0.00149  | -0.07061 | 0.12756  | -0.16495 |
| 0.02924  | 0.52848  | 0.089202 | 0.05406  | 0.059697 | 0.19783  | 0.092209 | 0.04642  | 0.126662 |
| -0.06928 | 0.13493  | -0.1025  | 0.02676  | -0.09567 | 0.03876  | -0.08353 | 0.07131  | -0.11711 |
| -0.06518 | 0.15962  | -0.01388 | 0.76481  | -0.02175 | 0.63916  | 0.005758 | 0.90124  | -0.04752 |
| -0.05205 | 0.26163  | 0.033873 | 0.46523  | 0.014107 | 0.76109  | 0.040274 | 0.3852   | 0.057328 |
| -0.03252 | 0.48327  | -0.10004 | 0.03066  | -0.03823 | 0.40977  | -0.09804 | 0.03417  | -0.25098 |
| 0.011943 | 0.79687  | 0.064152 | 0.16634  | 0.064466 | 0.16428  | 0.057861 | 0.212    | 0.059442 |
| -0.10906 | 0.0184   | -0.00472 | 0.91895  | -0.07208 | 0.11983  | 0.042502 | 0.35944  | 0.052836 |
| -0.02329 | 0.61565  | 0.107333 | 0.02034  | 0.039352 | 0.39619  | 0.120354 | 0.00923  | 0.183008 |
| 0.014212 | 0.75937  | -0.03123 | 0.50085  | -0.00496 | 0.91487  | -0.04399 | 0.34288  | -0.03117 |
| -0.05325 | 0.25076  | -0.06131 | 0.18594  | -0.0403  | 0.38493  | -0.04848 | 0.29579  | -0.19555 |
| 0.027939 | 0.547    | -0.03829 | 0.40912  | -0.024   | 0.60492  | -0.01807 | 0.697    | -0.07639 |
| 0.008511 | 0.85446  | 0.166207 | 0.00031  | 0.081615 | 0.07808  | 0.180295 | 8.93E-05 | 0.247741 |
| 0.007197 | 0.87673  | 0.069818 | 0.13192  | 0.016543 | 0.72143  | 0.089419 | 0.05348  | 0.030785 |
| -0.10662 | 0.02119  | -0.10968 | 0.01774  | -0.12272 | 0.00793  | -0.07581 | 0.10179  | -0.12898 |

|          |         |          |          |          |         |          |          |          |
|----------|---------|----------|----------|----------|---------|----------|----------|----------|
| -0.08361 | 0.07104 | 0.002183 | 0.96248  | -0.02581 | 0.57795 | 0.02629  | 0.57091  | 0.058854 |
| -0.07232 | 0.11858 | 0.011128 | 0.81046  | 0.007436 | 0.87267 | 0.010802 | 0.8159   | 0.042883 |
| -0.12097 | 0.00888 | -0.1485  | 0.00129  | -0.11414 | 0.01359 | -0.12277 | 0.0079   | -0.1349  |
| -0.07371 | 0.11167 | -0.03035 | 0.51296  | -0.06441 | 0.16462 | 0.008457 | 0.85538  | 0.007681 |
| -0.12416 | 0.00722 | -0.21469 | 2.84E-06 | -0.16385 | 0.00038 | -0.19395 | 2.44E-05 | -0.33276 |
| -0.06444 | 0.16444 | 0.073466 | 0.11285  | 0.004905 | 0.9158  | 0.110624 | 0.01678  | 0.178902 |
| -0.03357 | 0.46928 | 0.064546 | 0.16375  | 0.013228 | 0.77557 | 0.085214 | 0.06578  | 0.074304 |
| -0.07302 | 0.11508 | 0.073184 | 0.11425  | -0.01241 | 0.78905 | 0.108848 | 0.01863  | 0.181668 |
| -0.05619 | 0.2255  | 0.087184 | 0.05976  | 0.02707  | 0.55954 | 0.099513 | 0.03155  | 0.193867 |
| -0.13946 | 0.00252 | -0.03869 | 0.40423  | -0.08557 | 0.06466 | 0.002394 | 0.95886  | -0.00095 |
| -0.10782 | 0.01978 | -0.05751 | 0.2148   | -0.09029 | 0.05118 | -0.02536 | 0.58458  | -0.06899 |
| -0.07416 | 0.1095  | -0.04791 | 0.30149  | -0.07134 | 0.12371 | -0.01431 | 0.7578   | -0.13287 |
| -0.04378 | 0.34521 | 0.023281 | 0.61578  | -0.05253 | 0.25723 | 0.082112 | 0.07628  | 0.062676 |
| -0.00106 | 0.98173 | -0.00573 | 0.90164  | -0.00624 | 0.89295 | -0.00016 | 0.99725  | 0.018003 |
| 0.023013 | 0.61987 | 0.10776  | 0.01984  | 0.089011 | 0.05458 | 0.088654 | 0.05556  | 0.14448  |
| -0.01487 | 0.74864 | 0.007583 | 0.87017  | -0.00498 | 0.9145  | 0.013316 | 0.77411  | 0.04829  |
| -0.00099 | 0.98304 | -0.1181  | 0.01064  | -0.03099 | 0.50413 | -0.14787 | 0.00135  | -0.18537 |
| 0.043574 | 0.34744 | 0.083084 | 0.07285  | 0.094298 | 0.04166 | 0.056159 | 0.22578  | 0.157191 |
| -0.01122 | 0.80897 | -0.11474 | 0.0131   | -0.04087 | 0.37816 | -0.12651 | 0.00619  | -0.21451 |
| -0.06797 | 0.14249 | 0.068026 | 0.14215  | -0.00978 | 0.83301 | 0.100447 | 0.02998  | 0.104957 |
| -0.09469 | 0.04081 | -0.05314 | 0.25177  | -0.07909 | 0.08778 | -0.0088  | 0.84962  | -0.10604 |
| 0.13105  | 0.00456 | 0.251441 | 3.63E-08 | 0.171376 | 0.0002  | 0.250813 | 3.94E-08 | 0.368925 |
| -0.00584 | 0.8998  | 0.093396 | 0.04366  | 0.034236 | 0.46046 | 0.105398 | 0.02273  | 0.203588 |
| -0.07562 | 0.10267 | -0.15623 | 0.0007   | -0.10669 | 0.02111 | -0.14895 | 0.00125  | -0.22679 |
| -0.0648  | 0.16208 | 0.108033 | 0.01953  | 0.003495 | 0.93996 | 0.155775 | 0.00073  | 0.246903 |
| -0.0492  | 0.28871 | -0.1892  | 3.87E-05 | -0.10618 | 0.02173 | -0.18948 | 3.77E-05 | -0.39466 |
| -0.03727 | 0.42167 | -0.08942 | 0.05347  | -0.0995  | 0.03157 | -0.04424 | 0.3401   | -0.05863 |
| -0.05809 | 0.21023 | 0.000517 | 0.9911   | -0.04274 | 0.35675 | 0.030918 | 0.50509  | 0.095917 |
| 0.003717 | 0.93615 | -0.13262 | 0.00409  | -0.07877 | 0.08907 | -0.12901 | 0.00524  | -0.16451 |
| 0.072549 | 0.11743 | 0.036218 | 0.43489  | 0.024338 | 0.59985 | 0.041005 | 0.37663  | 0.083039 |
| -0.05996 | 0.19586 | -0.00336 | 0.94224  | -0.0286  | 0.53757 | 0.001412 | 0.97573  | 0.036873 |
| 0.017952 | 0.6988  | -0.0107  | 0.81764  | -0.02983 | 0.52019 | 0.009984 | 0.82963  | -0.03453 |
| -0.10182 | 0.02779 | -0.06496 | 0.16104  | -0.05464 | 0.23857 | -0.05693 | 0.21946  | -0.11628 |
| -0.04975 | 0.28331 | 0.093824 | 0.0427   | 0.001695 | 0.97086 | 0.137826 | 0.00284  | 0.153629 |
| -0.00827 | 0.85851 | 0.06278  | 0.17561  | 0.019102 | 0.68054 | 0.071832 | 0.12111  | 0.11851  |
| 0.012809 | 0.78248 | -0.04501 | 0.33177  | -0.01737 | 0.70818 | -0.0416  | 0.36973  | -0.07929 |
| 0.03417  | 0.46134 | 0.095582 | 0.03895  | 0.068376 | 0.14011 | 0.099447 | 0.03166  | 0.099483 |
| -0.03304 | 0.47627 | 0.074136 | 0.1096   | 0.014145 | 0.76047 | 0.111017 | 0.01639  | 0.172524 |
| -0.08532 | 0.06545 | -0.03631 | 0.4337   | -0.06402 | 0.16725 | -0.01387 | 0.76493  | 0.020629 |
| -0.05299 | 0.25311 | -0.00028 | 0.99519  | -0.02093 | 0.65182 | 0.01024  | 0.82532  | 0.006437 |
| -0.10233 | 0.02702 | 0.051188 | 0.26962  | 0.00137  | 0.97644 | 0.067447 | 0.14559  | 0.126488 |
| -0.13011 | 0.00486 | -0.02308 | 0.61888  | -0.08539 | 0.06524 | 0.021446 | 0.64389  | 0.044645 |
| -0.00809 | 0.86162 | 0.052878 | 0.2541   | 0.006417 | 0.89001 | 0.079036 | 0.08799  | 0.103371 |
| -0.12592 | 0.00644 | -0.12488 | 0.00689  | -0.0983  | 0.03369 | -0.11581 | 0.01226  | -0.1963  |
| -0.10839 | 0.01913 | -0.04976 | 0.28324  | -0.08541 | 0.06517 | -0.00728 | 0.87539  | -0.01757 |

|          |         |          |         |          |         |          |         |          |
|----------|---------|----------|---------|----------|---------|----------|---------|----------|
| -0.05559 | 0.23052 | 0.065252 | 0.15918 | -0.01228 | 0.7912  | 0.116326 | 0.01188 | 0.121867 |
| -0.01918 | 0.67936 | 0.12712  | 0.00594 | 0.047325 | 0.30747 | 0.147327 | 0.00141 | 0.230649 |
| 0.031723 | 0.49405 | 0.131992 | 0.00427 | 0.080657 | 0.08165 | 0.138741 | 0.00266 | 0.253182 |
| -0.01826 | 0.69387 | -0.07553 | 0.10306 | -0.07331 | 0.11363 | -0.03581 | 0.44007 | -0.09653 |
| -0.0691  | 0.13594 | -0.0917  | 0.04765 | -0.10304 | 0.02597 | -0.04923 | 0.28837 | -0.03394 |
| -0.01396 | 0.76352 | 0.117867 | 0.0108  | 0.036052 | 0.43701 | 0.145749 | 0.00159 | 0.24746  |
| 0.045184 | 0.3299  | -0.09081 | 0.04986 | -0.011   | 0.81265 | -0.12145 | 0.00861 | -0.09988 |
| 0.015954 | 0.73095 | 0.095671 | 0.03877 | 0.052383 | 0.25858 | 0.113529 | 0.0141  | 0.159661 |
| -0.08267 | 0.07429 | -0.15882 | 0.00057 | -0.09016 | 0.05151 | -0.15583 | 0.00073 | -0.24604 |

| p.MMred  | MMbisque | p.MMbisc | MMmediu  | p.MMmec  | MMdarkgr | p.MMdarl | MMturquo | p.MMturg |
|----------|----------|----------|----------|----------|----------|----------|----------|----------|
| 1.60E-13 | 0.625576 | 4.33E-52 | 0.039575 | 0.39351  | -0.01909 | 0.68073  | 0.169928 | 0.00022  |
| 0.27209  | 0.843928 | #####    | 0.140291 | 0.00238  | 0.278805 | 8.74E-10 | 0.530039 | 3.46E-35 |
| 0.1151   | 0.881777 | #####    | 0.033286 | 0.47302  | 0.034729 | 0.45403  | 0.23733  | 2.11E-07 |
| 0.00148  | 0.905987 | #####    | 0.015281 | 0.74189  | 0.044458 | 0.33774  | 0.287447 | 2.46E-10 |
| 3.23E-08 | 0.593904 | 7.43E-46 | 0.185807 | 5.35E-05 | 0.221403 | 1.35E-06 | 0.431333 | 1.39E-22 |
| 8.51E-07 | 0.82376  | #####    | 0.075004 | 0.10549  | 0.020514 | 0.65836  | 0.283402 | 4.48E-10 |
| 3.52E-06 | 0.60114  | 3.22E-47 | 0.018326 | 0.69284  | 0.009373 | 0.83991  | 0.190903 | 3.29E-05 |
| 0.00035  | 0.819574 | #####    | 0.104377 | 0.02409  | 0.100049 | 0.03064  | 0.345444 | 1.56E-14 |
| 0.07228  | 0.839597 | #####    | -0.01507 | 0.74529  | -0.01359 | 0.76953  | 0.238044 | 1.94E-07 |
| 0.26017  | 0.571548 | 7.46E-42 | -0.00895 | 0.84706  | 0.1278   | 0.00568  | 0.351116 | 5.38E-15 |
| 1.01E-09 | 0.791825 | #####    | 0.034118 | 0.46201  | -0.00851 | 0.8544   | 0.1865   | 5.01E-05 |
| 0.0411   | 0.586241 | 1.90E-44 | 0.052986 | 0.25313  | 0.004074 | 0.93004  | 0.169468 | 0.00023  |
| 0.95318  | 0.561637 | 3.55E-40 | 0.131599 | 0.00439  | 0.250502 | 4.10E-08 | 0.446468 | 2.93E-24 |
| 3.81E-10 | 0.705285 | 1.77E-71 | 0.108918 | 0.01855  | 0.035014 | 0.45034  | 0.263791 | 7.12E-09 |
| 0.07507  | 0.860476 | #####    | 0.043299 | 0.35049  | 0.100558 | 0.0298   | 0.289938 | 1.70E-10 |
| 0.16751  | 0.636742 | 1.83E-54 | -0.0223  | 0.63072  | 0.036545 | 0.43076  | 0.27544  | 1.41E-09 |
| 0.16135  | 0.594877 | 4.90E-46 | 0.111486 | 0.01594  | 0.146568 | 0.00149  | 0.286345 | 2.90E-10 |
| 1.09E-18 | 0.737343 | 3.03E-81 | 0.037503 | 0.41877  | 0.026662 | 0.56548  | 0.231043 | 4.47E-07 |
| 0.69915  | 0.560348 | 5.81E-40 | -0.04611 | 0.32011  | -0.04649 | 0.31611  | 0.087387 | 0.05916  |
| 0.34764  | 0.777207 | 1.34E-95 | 0.22938  | 5.43E-07 | 0.145548 | 0.00161  | 0.318207 | 1.90E-12 |
| 0.00726  | 0.727481 | 4.30E-78 | 0.012361 | 0.78992  | -0.03112 | 0.50228  | 0.197371 | 1.74E-05 |
| 0.00198  | 0.595412 | 3.89E-46 | -0.06288 | 0.1749   | -0.11534 | 0.01263  | 0.072003 | 0.12022  |
| 2.30E-09 | 0.674171 | 3.48E-63 | 0.166572 | 0.0003   | 0.06343  | 0.17118  | 0.256391 | 1.91E-08 |
| 0.01115  | 0.57268  | 4.76E-42 | 0.009422 | 0.83908  | -0.02839 | 0.54054  | 0.16945  | 0.00023  |
| 0.99918  | 0.553218 | 8.55E-39 | -0.01868 | 0.6872   | -0.05409 | 0.24336  | 0.079507 | 0.08611  |
| 1.57E-06 | 0.831249 | #####    | 0.279265 | 8.18E-10 | 0.28449  | 3.82E-10 | 0.550927 | 2.00E-38 |
| 0.00014  | 0.601662 | 2.56E-47 | 0.110707 | 0.0167   | 0.226049 | 7.98E-07 | 0.365694 | 3.19E-16 |
| 0.049    | 0.62824  | 1.20E-52 | 0.120537 | 0.00912  | 0.067531 | 0.14509  | 0.318336 | 1.86E-12 |
| 0.31053  | 0.575544 | 1.51E-42 | 0.042692 | 0.3573   | 0.062644 | 0.17655  | 0.234284 | 3.04E-07 |
| 0.69089  | 0.625473 | 4.55E-52 | -0.07827 | 0.09111  | 0.010027 | 0.82889  | 0.137589 | 0.00289  |
| 0.29932  | 0.840555 | #####    | 0.175225 | 0.00014  | 0.225343 | 8.65E-07 | 0.437397 | 3.03E-23 |
| 0.18037  | 0.645781 | 1.86E-56 | 0.209556 | 4.94E-06 | 0.289983 | 1.69E-10 | 0.531319 | 2.22E-35 |
| 0.00077  | 0.796904 | #####    | 0.112512 | 0.01499  | 0.294324 | 8.72E-11 | 0.555487 | 3.66E-39 |
| 0.98263  | 0.66254  | 2.44E-60 | 0.114372 | 0.01339  | 0.072026 | 0.1201   | 0.174473 | 0.00015  |
| 0.00087  | 0.564763 | 1.06E-40 | 0.10573  | 0.02231  | 0.006534 | 0.88801  | 0.215604 | 2.57E-06 |
| 0.81724  | 0.67225  | 1.05E-62 | 0.157741 | 0.00062  | 0.151796 | 0.001    | 0.295207 | 7.62E-11 |
| 5.74E-06 | 0.778295 | 4.95E-96 | 0.130248 | 0.00481  | 0.161316 | 0.00047  | 0.365527 | 3.29E-16 |
| 0.99501  | 0.692005 | 8.26E-68 | -0.03602 | 0.4374   | 0.00251  | 0.95686  | 0.128714 | 0.00534  |
| 0.04728  | 0.791617 | #####    | -0.01272 | 0.78389  | -0.01895 | 0.68294  | 0.176432 | 0.00013  |
| 1.05E-12 | 0.699104 | 9.56E-70 | 0.270371 | 2.88E-09 | 0.300316 | 3.45E-11 | 0.518395 | 1.77E-33 |
| 0.37928  | 0.724313 | 4.14E-77 | 0.093723 | 0.04293  | 0.198508 | 1.55E-05 | 0.386329 | 4.52E-18 |
| 0.87308  | 0.780699 | 5.36E-97 | 0.097235 | 0.03568  | 0.157917 | 0.00061  | 0.426172 | 4.97E-22 |
| 2.38E-09 | 0.058462 | 0.20729  | 0.008031 | 0.86258  | -0.04721 | 0.30864  | 0.108833 | 0.01864  |
| 0.01254  | -0.03135 | 0.49921  | 0.072926 | 0.11553  | -0.06571 | 0.15625  | 0.022955 | 0.62074  |



|          |          |          |          |          |          |          |          |          |
|----------|----------|----------|----------|----------|----------|----------|----------|----------|
| 0.02538  | 0.085513 | 0.06484  | 0.330408 | 2.34E-13 | 0.149167 | 0.00123  | 0.17393  | 0.00016  |
| 0.16669  | 0.14102  | 0.00225  | 0.486923 | 3.57E-29 | 0.410161 | 2.24E-20 | 0.489108 | 1.85E-29 |
| 0.36503  | 0.013708 | 0.76765  | 0.359011 | 1.19E-15 | 0.181295 | 8.15E-05 | 0.235782 | 2.54E-07 |
| 3.83E-06 | -0.00347 | 0.94044  | 0.142674 | 0.002    | 0.104393 | 0.02407  | 0.155596 | 0.00074  |
| 0.00015  | 0.193016 | 2.68E-05 | 0.304661 | 1.74E-11 | 0.26869  | 3.64E-09 | 0.365347 | 3.41E-16 |
| 0.58456  | -0.04018 | 0.38635  | -0.00636 | 0.89101  | -0.01455 | 0.75375  | 0.006193 | 0.89381  |
| 0.01059  | -0.09279 | 0.04506  | -0.10055 | 0.02981  | -0.26857 | 3.70E-09 | -0.19688 | 1.83E-05 |
| 3.84E-05 | 0.008571 | 0.85344  | 0.15705  | 0.00066  | -0.00144 | 0.9753   | 0.05862  | 0.20606  |
| 0.1412   | 0.128963 | 0.00525  | 0.176338 | 0.00013  | 0.181871 | 7.73E-05 | 0.237987 | 1.95E-07 |
| 1.93E-05 | -0.01037 | 0.82315  | 0.03236  | 0.48542  | -0.11568 | 0.01237  | -0.13343 | 0.00387  |
| 2.03E-05 | -0.01771 | 0.70264  | 0.06294  | 0.17451  | -0.16046 | 0.0005   | -0.10262 | 0.02659  |
| 0.03115  | 0.070118 | 0.13026  | 0.49992  | 6.74E-31 | 0.276963 | 1.14E-09 | 0.328751 | 3.13E-13 |
| 1.94E-10 | -0.02216 | 0.63296  | 0.145563 | 0.00161  | -0.0969  | 0.03632  | 0.008293 | 0.85814  |
| 2.32E-05 | -0.06528 | 0.15901  | 0.207576 | 6.09E-06 | 0.017467 | 0.70656  | -0.01409 | 0.76143  |
| 0.00807  | -0.00542 | 0.90704  | -0.05528 | 0.23314  | -0.13308 | 0.00396  | -0.0949  | 0.04038  |
| 0.00014  | -0.11512 | 0.0128   | 0.176581 | 0.00013  | -0.04051 | 0.38247  | -0.11307 | 0.01449  |
| 0.01044  | 0.068138 | 0.1415   | 0.158439 | 0.00059  | 0.094661 | 0.04088  | 0.154545 | 0.00081  |
| 2.94E-15 | 0.095546 | 0.03902  | 0.106305 | 0.02158  | -0.08628 | 0.06247  | 0.127298 | 0.00587  |
| 0.03445  | 0.037009 | 0.42492  | 0.532242 | 1.61E-35 | 0.380706 | 1.48E-17 | 0.452057 | 6.70E-25 |
| 0.74154  | 0.023852 | 0.60716  | -0.14216 | 0.00207  | -0.03591 | 0.43888  | -0.02468 | 0.59466  |
| 4.96E-23 | 0.051516 | 0.26656  | 0.165353 | 0.00033  | -0.02595 | 0.57591  | 0.100781 | 0.02944  |
| 0.21099  | -0.09269 | 0.04529  | -0.01822 | 0.69454  | -0.07048 | 0.12826  | -0.06295 | 0.17442  |
| 2.94E-08 | 0.162844 | 0.00041  | 0.186038 | 5.23E-05 | 0.107239 | 0.02045  | 0.23317  | 3.47E-07 |
| 0.51943  | -0.05966 | 0.19813  | -0.31108 | 6.16E-12 | -0.16491 | 0.00035  | -0.24345 | 9.97E-08 |
| 0.0015   | 0.116187 | 0.01198  | 0.193735 | 2.49E-05 | 0.012217 | 0.79231  | 0.224743 | 9.27E-07 |
| 0.00032  | 0.259541 | 1.26E-08 | 0.380878 | 1.43E-17 | 0.308694 | 9.08E-12 | 0.501703 | 3.86E-31 |
| 0.0011   | 0.048831 | 0.29232  | 0.012414 | 0.78903  | 0.010284 | 0.82458  | 0.077495 | 0.09439  |
| 4.48E-05 | 0.136521 | 0.00311  | 0.091929 | 0.04709  | -0.04442 | 0.33817  | 0.063738 | 0.1691   |
| 3.12E-09 | 0.038311 | 0.4088   | 0.3604   | 9.04E-16 | 0.060082 | 0.19495  | 0.22892  | 5.72E-07 |
| 0.00084  | 0.027325 | 0.55584  | 0.473008 | 2.08E-27 | 0.301978 | 2.66E-11 | 0.420164 | 2.13E-21 |
| 0.00156  | 0.170484 | 0.00021  | 0.109348 | 0.01809  | 0.077894 | 0.0927   | 0.203283 | 9.53E-06 |
| 1.15E-12 | 0.006954 | 0.88086  | 0.141875 | 0.00212  | -0.04371 | 0.34589  | 0.055355 | 0.2325   |
| 1.83E-06 | 0.163645 | 0.00038  | 0.080873 | 0.08084  | -0.09407 | 0.04217  | 0.093017 | 0.04453  |
| 0.84739  | -0.00869 | 0.85136  | -0.10972 | 0.0177   | -0.01856 | 0.68905  | -0.06906 | 0.13619  |
| 6.62E-07 | 0.303499 | 2.09E-11 | 0.436421 | 3.88E-23 | 0.464368 | 2.36E-26 | 0.645728 | 1.91E-56 |
| 1.03E-13 | 0.134322 | 0.00364  | 0.217024 | 2.20E-06 | 0.008528 | 0.85417  | 0.157716 | 0.00062  |
| 0.14383  | -0.01769 | 0.70297  | 0.119946 | 0.00947  | -0.00774 | 0.86758  | 0.016882 | 0.71595  |
| 0.00929  | -0.12169 | 0.00848  | -0.18105 | 8.33E-05 | -0.19779 | 1.67E-05 | -0.26189 | 9.20E-09 |
| 1.84E-05 | -0.09338 | 0.04369  | -0.03477 | 0.45353  | -0.31303 | 4.48E-12 | -0.218   | 1.98E-06 |
| 0.00143  | -0.031   | 0.50397  | 0.154442 | 0.00081  | 0.125732 | 0.00652  | 0.099424 | 0.0317   |
| 1.33E-09 | 0.132174 | 0.00422  | 0.238602 | 1.81E-07 | 0.08908  | 0.05439  | 0.234527 | 2.96E-07 |
| 3.05E-05 | 0.095213 | 0.03971  | -0.00924 | 0.84211  | -0.01054 | 0.82032  | 0.083264 | 0.07223  |
| 0.10266  | 0.148489 | 0.00129  | 0.375352 | 4.51E-17 | 0.325851 | 5.17E-13 | 0.42883  | 2.59E-22 |
| 5.15E-10 | 0.229513 | 5.34E-07 | 0.24828  | 5.44E-08 | 0.265142 | 5.92E-09 | 0.453112 | 5.06E-25 |
| 0.1281   | 0.049257 | 0.28812  | 0.220845 | 1.44E-06 | -0.08877 | 0.05524  | 0.032015 | 0.49009  |

|          |          |          |          |          |          |          |          |          |
|----------|----------|----------|----------|----------|----------|----------|----------|----------|
| 1.17E-09 | 0.030163 | 0.51555  | 0.083007 | 0.07312  | -0.0323  | 0.48625  | 0.059049 | 0.20275  |
| 0.08571  | -0.03983 | 0.39052  | 0.424734 | 7.05E-22 | 0.184897 | 5.83E-05 | 0.150406 | 0.00111  |
| 6.17E-15 | 0.135063 | 0.00345  | 0.314722 | 3.39E-12 | 0.130281 | 0.0048   | 0.279876 | 7.49E-10 |
| 4.38E-08 | 0.004648 | 0.9202   | 0.227885 | 6.46E-07 | 0.032107 | 0.48884  | 0.116952 | 0.01143  |
| 1.46E-15 | -0.03692 | 0.42601  | 0.092608 | 0.04548  | -0.05813 | 0.20992  | -0.03641 | 0.43251  |
| 1.40E-23 | 0.212627 | 3.56E-06 | 0.223463 | 1.07E-06 | 0.174518 | 0.00015  | 0.356799 | 1.82E-15 |
| 0.01341  | -0.0257  | 0.57962  | 0.108442 | 0.01907  | -0.00881 | 0.84932  | 0.01708  | 0.71277  |
| 3.82E-13 | 0.199715 | 1.37E-05 | 0.448413 | 1.76E-24 | 0.44615  | 3.19E-24 | 0.525544 | 1.61E-34 |
| 9.01E-08 | 0.021521 | 0.64273  | 0.077469 | 0.0945   | -0.11869 | 0.01025  | -0.00777 | 0.86704  |
| 0.0036   | 0.132367 | 0.00416  | 0.121371 | 0.00865  | 0.039846 | 0.39027  | 0.224758 | 9.25E-07 |
| 0.04267  | 0.136552 | 0.00311  | 0.410826 | 1.92E-20 | 0.280626 | 6.72E-10 | 0.343689 | 2.15E-14 |
| 0.0731   | -0.04995 | 0.2814   | 0.05762  | 0.21392  | -0.14454 | 0.00174  | -0.06482 | 0.16197  |
| 0.00166  | 0.167367 | 0.00028  | 0.344389 | 1.89E-14 | 0.269762 | 3.14E-09 | 0.400848 | 1.88E-19 |
| 2.02E-06 | -0.03685 | 0.42692  | 0.093421 | 0.04361  | -0.06492 | 0.16129  | 0.034376 | 0.45864  |
| 1.06E-12 | -0.05449 | 0.23989  | -0.09163 | 0.0478   | -0.2496  | 4.60E-08 | -0.2338  | 3.22E-07 |
| 0.00437  | 0.218756 | 1.82E-06 | 0.153974 | 0.00084  | 0.091863 | 0.04725  | 0.203957 | 8.89E-06 |
| 6.63E-09 | -0.00465 | 0.92022  | -0.0279  | 0.54759  | -0.27574 | 1.35E-09 | -0.20641 | 6.89E-06 |
| 0.00271  | 0.207935 | 5.87E-06 | 0.315492 | 2.98E-12 | 0.34567  | 1.49E-14 | 0.520291 | 9.43E-34 |
| 0.09804  | -0.01715 | 0.71172  | 0.094561 | 0.04109  | -0.08441 | 0.06838  | 0.026107 | 0.5736   |
| 0.5284   | 0.150459 | 0.00111  | 0.145387 | 0.00163  | 0.005228 | 0.91028  | 0.181875 | 7.72E-05 |
| 0.49759  | 0.02581  | 0.57797  | -0.15242 | 0.00095  | -0.0376  | 0.4176   | -0.04599 | 0.32138  |
| 0.01989  | 0.133298 | 0.0039   | 0.394611 | 7.50E-19 | 0.22674  | 7.37E-07 | 0.376247 | 3.75E-17 |
| 1.28E-11 | -0.12268 | 0.00795  | -0.31956 | 1.51E-12 | -0.10007 | 0.0306   | -0.26424 | 6.70E-09 |
| 3.44E-18 | 0.108646 | 0.01885  | 0.231467 | 4.25E-07 | 0.059109 | 0.20229  | 0.230267 | 4.89E-07 |
| 0.69585  | 0.057189 | 0.21737  | 0.300288 | 3.46E-11 | 0.142218 | 0.00206  | 0.22565  | 8.35E-07 |
| 0.59401  | 0.002239 | 0.9615   | 0.080207 | 0.08337  | -0.13655 | 0.00311  | -0.07233 | 0.11856  |
| 0.79855  | 0.179612 | 9.51E-05 | 0.155183 | 0.00077  | 0.271208 | 2.57E-09 | 0.262236 | 8.78E-09 |
| 6.22E-06 | 0.143269 | 0.00191  | 0.202541 | 1.03E-05 | 0.106224 | 0.02168  | 0.245666 | 7.56E-08 |
| 0.00014  | -0.07759 | 0.094    | 0.063911 | 0.16795  | -0.20652 | 6.81E-06 | -0.15778 | 0.00062  |
| 2.42E-18 | -0.12251 | 0.00804  | -0.26399 | 6.92E-09 | -0.19944 | 1.41E-05 | -0.30737 | 1.13E-11 |
| 0.00662  | 0.064494 | 0.16409  | 0.08874  | 0.05532  | 0.039566 | 0.39362  | 0.076958 | 0.0967   |
| 0.04206  | 0.155232 | 0.00076  | 0.045273 | 0.32895  | 0.297463 | 5.38E-11 | 0.371229 | 1.05E-16 |
| 0.01431  | -0.07901 | 0.08811  | -0.29854 | 4.55E-11 | -0.25443 | 2.47E-08 | -0.29109 | 1.43E-10 |
| 2.48E-08 | -0.05192 | 0.26283  | -0.20558 | 7.51E-06 | -0.16264 | 0.00042  | -0.18725 | 4.67E-05 |
| 8.69E-13 | -0.02216 | 0.63288  | 0.091225 | 0.04881  | -0.10562 | 0.02245  | 0.014846 | 0.74898  |
| 0.9918   | 0.061211 | 0.18668  | -0.22697 | 7.18E-07 | -0.05079 | 0.27332  | -0.08051 | 0.08219  |
| 0.36098  | 0.1362   | 0.00319  | 0.103126 | 0.02584  | 0.175207 | 0.00014  | 0.286324 | 2.91E-10 |
| 0.93835  | -0.0056  | 0.90398  | -0.09152 | 0.04808  | -0.05733 | 0.2162   | -0.03146 | 0.49759  |
| 0.59639  | -0.04138 | 0.37232  | -0.26791 | 4.05E-09 | -0.06526 | 0.15911  | -0.17078 | 0.00021  |
| 1.97E-14 | -0.26268 | 8.27E-09 | -0.20012 | 1.32E-05 | -0.20232 | 1.05E-05 | -0.38591 | 4.93E-18 |
| 7.60E-06 | 0.141188 | 0.00223  | 0.100152 | 0.03047  | 0.098557 | 0.03323  | 0.291563 | 1.33E-10 |
| 0.21277  | 0.119186 | 0.00994  | 0.143859 | 0.00183  | 0.181902 | 7.70E-05 | 0.262273 | 8.74E-09 |
| 1.75E-07 | 0.062901 | 0.17478  | 0.216027 | 2.46E-06 | -0.06297 | 0.17428  | 0.103982 | 0.02463  |
| 0.03541  | -0.14075 | 0.0023   | 0.092201 | 0.04644  | -0.22267 | 1.17E-06 | -0.21492 | 2.78E-06 |
| 3.25E-09 | 0.153467 | 0.00088  | 0.180202 | 9.01E-05 | 0.054185 | 0.24254  | 0.221347 | 1.36E-06 |

|          |          |          |          |          |          |          |          |          |
|----------|----------|----------|----------|----------|----------|----------|----------|----------|
| 3.36E-13 | 0.123071 | 0.00775  | -0.06804 | 0.1421   | 0.173461 | 0.00017  | 0.19479  | 2.25E-05 |
| 5.11E-09 | 0.033261 | 0.47334  | 0.172179 | 0.00018  | -0.02548 | 0.58285  | 0.075574 | 0.10287  |
| 1.44E-12 | -0.13725 | 0.00296  | -0.26561 | 5.56E-09 | -0.12901 | 0.00524  | -0.25586 | 2.05E-08 |
| 0.02094  | -0.06137 | 0.18556  | -0.1828  | 7.09E-05 | -0.1092  | 0.01825  | -0.16858 | 0.00025  |
| 0.00457  | -0.07334 | 0.11348  | -0.17442 | 0.00015  | 0.015238 | 0.74258  | -0.1474  | 0.0014   |
| 0.9466   | -0.0259  | 0.57662  | -0.14016 | 0.0024   | -0.12911 | 0.0052   | -0.11287 | 0.01467  |
| 3.31E-06 | -0.03118 | 0.50142  | -0.11901 | 0.01005  | 0.003094 | 0.94683  | -0.07283 | 0.11603  |
| 4.02E-16 | 0.218486 | 1.87E-06 | 0.242287 | 1.15E-07 | 0.110772 | 0.01663  | 0.31496  | 3.26E-12 |
| 0.57574  | 0.022866 | 0.62209  | -0.23408 | 3.12E-07 | -0.12387 | 0.00736  | -0.0783  | 0.09098  |
| 0.02107  | 0.175083 | 0.00014  | 0.256886 | 1.79E-08 | 0.21188  | 3.86E-06 | 0.37647  | 3.58E-17 |
| 6.82E-11 | 0.054627 | 0.23871  | 0.133741 | 0.00379  | -0.0913  | 0.04862  | 0.055775 | 0.22897  |
| 3.69E-09 | -0.03531 | 0.44651  | -0.21778 | 2.03E-06 | -0.13315 | 0.00394  | -0.16476 | 0.00035  |
| 0.00608  | -0.13127 | 0.00449  | -0.1607  | 0.00049  | -0.11072 | 0.01669  | -0.24085 | 1.37E-07 |
| 7.38E-11 | 0.019608 | 0.67256  | 0.094569 | 0.04108  | -0.07334 | 0.11347  | 0.026917 | 0.56176  |
| 0.45085  | 0.071842 | 0.12106  | 0.30494  | 1.66E-11 | -0.01829 | 0.69349  | 0.043205 | 0.35154  |
| 0.96303  | 0.178458 | 0.00011  | 0.283183 | 4.63E-10 | 0.13346  | 0.00386  | 0.321584 | 1.07E-12 |
| 0.60102  | 0.039804 | 0.39077  | 0.121558 | 0.00855  | 0.00274  | 0.95291  | 0.094262 | 0.04174  |
| 0.00017  | -0.02558 | 0.58132  | -0.13845 | 0.00271  | -0.08545 | 0.06504  | -0.1952  | 2.16E-05 |
| 0.70803  | -0.03174 | 0.49388  | 0.136233 | 0.00318  | -0.04212 | 0.36382  | 0.014309 | 0.75777  |
| 0.12581  | -0.02749 | 0.5535   | -0.17369 | 0.00016  | -0.09201 | 0.04689  | -0.12718 | 0.00592  |
| 0.00016  | -0.00249 | 0.95722  | -0.0217  | 0.64003  | -0.07604 | 0.10076  | 0.074715 | 0.10685  |
| 0.49978  | -0.03868 | 0.40433  | 0.105692 | 0.02235  | -0.09883 | 0.03275  | -0.05054 | 0.27573  |
| 0.06961  | 0.300951 | 3.12E-11 | 0.199431 | 1.41E-05 | 0.327342 | 3.99E-13 | 0.481008 | 2.05E-28 |
| 2.22E-08 | -0.06902 | 0.1364   | -0.202   | 1.09E-05 | -0.16498 | 0.00034  | -0.17289 | 0.00017  |
| 5.19E-08 | -0.0666  | 0.1507   | -0.03122 | 0.50095  | -0.22346 | 1.07E-06 | -0.1212  | 0.00874  |
| 0.11814  | 0.122591 | 0.008    | 0.503223 | 2.39E-31 | 0.359814 | 1.01E-15 | 0.46288  | 3.56E-26 |
| 0.06722  | -0.05084 | 0.27287  | -0.08198 | 0.07675  | -0.21057 | 4.44E-06 | -0.12171 | 0.00846  |
| 3.10E-06 | 0.030027 | 0.51744  | 0.179714 | 9.42E-05 | -0.01384 | 0.76543  | 0.059722 | 0.19764  |
| 0.01936  | -0.20132 | 1.17E-05 | -0.32713 | 4.14E-13 | -0.34791 | 9.83E-15 | -0.4397  | 1.69E-23 |
| 0.18818  | 0.052725 | 0.25549  | 0.447628 | 2.16E-24 | 0.432806 | 9.64E-23 | 0.42259  | 1.19E-21 |
| 0.00135  | -0.16082 | 0.00049  | -0.13998 | 0.00243  | -0.05268 | 0.25591  | -0.28613 | 3.00E-10 |
| 0.05331  | 0.139031 | 0.0026   | 0.035828 | 0.43987  | -0.05724 | 0.21695  | 0.146106 | 0.00155  |
| 0.11905  | 0.138802 | 0.00265  | 0.180336 | 8.90E-05 | 0.248976 | 4.98E-08 | 0.303956 | 1.94E-11 |
| 0.00044  | 0.187831 | 4.42E-05 | 0.470927 | 3.75E-27 | 0.486803 | 3.70E-29 | 0.526279 | 1.25E-34 |
| 0.00346  | -0.01945 | 0.67511  | 0.214297 | 2.97E-06 | -0.03699 | 0.42517  | 0.090398 | 0.05091  |
| 0.0304   | 0.31905  | 1.65E-12 | 0.4269   | 4.16E-22 | 0.426128 | 5.02E-22 | 0.520449 | 8.95E-34 |
| 0.02145  | -0.07423 | 0.10917  | -0.18633 | 5.09E-05 | -0.06233 | 0.17871  | -0.12389 | 0.00735  |
| 3.77E-05 | 0.170619 | 0.00021  | 0.221801 | 1.29E-06 | 0.139304 | 0.00255  | 0.347649 | 1.03E-14 |
| 4.66E-05 | 0.024488 | 0.5976   | 0.235513 | 2.63E-07 | 0.036544 | 0.43077  | 0.117466 | 0.01107  |
| 1.75E-10 | -0.05121 | 0.26942  | -0.04818 | 0.29878  | -0.20497 | 8.01E-06 | -0.15345 | 0.00088  |
| 3.02E-06 | 0.044715 | 0.33495  | 0.043371 | 0.34969  | -0.11367 | 0.01397  | 0.010679 | 0.81796  |
| 0.02785  | -0.07955 | 0.08595  | -0.2944  | 8.62E-11 | -0.22149 | 1.34E-06 | -0.26759 | 4.24E-09 |
| 4.62E-05 | -0.09028 | 0.05121  | 0.113974 | 0.01372  | -0.06408 | 0.16682  | -0.00373 | 0.93591  |
| 0.04703  | 0.102468 | 0.02681  | 0.341831 | 3.02E-14 | 0.143905 | 0.00182  | 0.246534 | 6.78E-08 |
| 0.00049  | -0.00416 | 0.92855  | 0.253117 | 2.93E-08 | 0.093971 | 0.04238  | 0.180229 | 8.99E-05 |

|          |          |          |          |          |          |          |          |          |
|----------|----------|----------|----------|----------|----------|----------|----------|----------|
| 0.00018  | 0.181961 | 7.66E-05 | 0.507309 | 6.54E-32 | 0.397589 | 3.89E-19 | 0.499216 | 8.40E-31 |
| 0.27885  | 0.029329 | 0.52722  | 0.094932 | 0.0403   | 0.037363 | 0.42051  | 0.127195 | 0.00591  |
| 0.02167  | -0.02354 | 0.61188  | -0.00383 | 0.93426  | 0.06812  | 0.1416   | 0.055899 | 0.22794  |
| 1.37E-11 | 0.231134 | 4.42E-07 | 0.227651 | 6.63E-07 | 0.153124 | 0.0009   | 0.345947 | 1.42E-14 |
| 9.64E-06 | 0.037677 | 0.41661  | 0.180613 | 8.68E-05 | 0.044126 | 0.34136  | 0.119823 | 0.00955  |
| 0.06529  | 0.127358 | 0.00585  | 0.133213 | 0.00393  | 0.054644 | 0.23857  | 0.226243 | 7.80E-07 |
| 0.00104  | 0.126993 | 0.00599  | 0.383366 | 8.48E-18 | 0.333941 | 1.25E-13 | 0.408155 | 3.57E-20 |
| 4.07E-05 | 0.170598 | 0.00021  | 0.047154 | 0.30922  | -0.00078 | 0.98658  | 0.092187 | 0.04647  |
| 0.00498  | 0.181353 | 8.10E-05 | 0.196679 | 1.86E-05 | 0.061871 | 0.18196  | 0.191767 | 3.02E-05 |
| 8.41E-09 | 0.146693 | 0.00148  | 0.052481 | 0.25769  | -0.03466 | 0.45487  | 0.153128 | 0.0009   |
| 0.89476  | -0.19216 | 2.91E-05 | -0.0651  | 0.16015  | -0.24272 | 1.09E-07 | -0.27581 | 1.34E-09 |
| 3.40E-09 | 0.197487 | 1.72E-05 | 0.135223 | 0.00341  | 0.119913 | 0.00949  | 0.341831 | 3.02E-14 |
| 2.92E-12 | -0.00234 | 0.95979  | 0.157036 | 0.00066  | -0.11963 | 0.00966  | -0.05003 | 0.28066  |
| 0.37633  | -0.0033  | 0.94324  | -0.2537  | 2.71E-08 | -0.15654 | 0.00069  | -0.13694 | 0.00302  |
| 4.33E-10 | 0.145224 | 0.00165  | 0.368066 | 1.98E-16 | 0.265181 | 5.89E-09 | 0.403102 | 1.13E-19 |
| 2.42E-15 | 0.131929 | 0.00429  | 0.211715 | 3.92E-06 | -0.01155 | 0.80336  | 0.180092 | 9.10E-05 |
| 6.64E-09 | 0.094244 | 0.04178  | 0.340266 | 4.02E-14 | 0.304942 | 1.66E-11 | 0.339307 | 4.79E-14 |
| 5.89E-05 | -0.15305 | 0.00091  | 0.019055 | 0.68129  | -0.17912 | 9.94E-05 | -0.25051 | 4.10E-08 |
| 2.15E-06 | -0.22529 | 8.70E-07 | -0.06119 | 0.18684  | -0.23574 | 2.55E-07 | -0.31091 | 6.33E-12 |
| 0.00137  | 0.021643 | 0.64085  | 0.208284 | 5.66E-06 | 0.045723 | 0.32416  | 0.11456  | 0.01324  |
| 0.07472  | 0.064566 | 0.16362  | 0.424261 | 7.91E-22 | 0.303585 | 2.06E-11 | 0.329936 | 2.54E-13 |
| 0.00148  | 0.147264 | 0.00142  | 0.21945  | 1.68E-06 | 0.061466 | 0.18484  | 0.238987 | 1.73E-07 |
| 0.00264  | 0.201321 | 1.17E-05 | 0.134531 | 0.00358  | 0.084127 | 0.06932  | 0.271665 | 2.41E-09 |
| 0.01383  | 0.051632 | 0.26548  | 0.393855 | 8.86E-19 | 0.17481  | 0.00015  | 0.271726 | 2.39E-09 |
| 3.10E-10 | 0.100812 | 0.02939  | 0.405432 | 6.65E-20 | 0.252372 | 3.22E-08 | 0.367175 | 2.37E-16 |
| 3.02E-10 | 0.074315 | 0.10874  | 0.222241 | 1.23E-06 | 0.162936 | 0.00041  | 0.152392 | 0.00095  |
| 0.00401  | 0.016799 | 0.71729  | -0.10086 | 0.0293   | 0.045291 | 0.32875  | 0.101308 | 0.02859  |
| 5.15E-05 | 0.125241 | 0.00673  | 0.306715 | 1.25E-11 | 0.205404 | 7.65E-06 | 0.328906 | 3.04E-13 |
| 8.70E-06 | -0.19523 | 2.15E-05 | -0.034   | 0.4636   | -0.18973 | 3.68E-05 | -0.22422 | 9.84E-07 |
| 0.60701  | -0.02017 | 0.66375  | 0.213372 | 3.28E-06 | -0.02312 | 0.61818  | -0.00348 | 0.94024  |
| 0.89937  | 0.06782  | 0.14337  | 0.039268 | 0.39719  | -0.00123 | 0.97881  | 0.045107 | 0.33073  |
| 2.00E-06 | -0.00627 | 0.89254  | 0.263971 | 6.95E-09 | 0.184272 | 6.18E-05 | 0.215787 | 2.52E-06 |
| 0.35813  | 0.273523 | 1.85E-09 | 0.186436 | 5.04E-05 | -0.00732 | 0.87461  | 0.140536 | 0.00233  |
| 0.00297  | 0.07968  | 0.08543  | 0.190412 | 3.45E-05 | 0.155403 | 0.00075  | 0.267024 | 4.58E-09 |
| 0.31527  | -0.07157 | 0.12246  | -0.37992 | 1.75E-17 | -0.25473 | 2.37E-08 | -0.27037 | 2.88E-09 |
| 0.01295  | 0.024367 | 0.59941  | 0.418424 | 3.22E-21 | 0.296029 | 6.71E-11 | 0.345528 | 1.53E-14 |
| 0.31296  | 0.135376 | 0.00338  | 0.135837 | 0.00327  | 0.249551 | 4.63E-08 | 0.307439 | 1.11E-11 |
| 3.57E-06 | 0.141778 | 0.00213  | 0.238157 | 1.91E-07 | 0.273126 | 1.96E-09 | 0.38906  | 2.51E-18 |
| 1.59E-09 | -0.17665 | 0.00012  | 0.109447 | 0.01798  | -0.22679 | 7.33E-07 | -0.27223 | 2.22E-09 |
| 0.0079   | 0.208344 | 5.62E-06 | 0.200821 | 1.23E-05 | 0.187268 | 4.66E-05 | 0.313803 | 3.94E-12 |
| 0.02411  | 0.119928 | 0.00948  | 0.274182 | 1.69E-09 | 0.239148 | 1.69E-07 | 0.383365 | 8.48E-18 |
| 0.00593  | 0.00616  | 0.89438  | 0.127016 | 0.00598  | 0.126794 | 0.00607  | 0.147037 | 0.00144  |
| 6.53E-06 | 0.101806 | 0.02782  | 0.22483  | 9.17E-07 | 0.08018  | 0.08348  | 0.220959 | 1.42E-06 |
| 0.27659  | 0.022426 | 0.62882  | 0.093353 | 0.04376  | -0.09567 | 0.03876  | 0.052603 | 0.25659  |
| 0.59969  | -0.00598 | 0.8975   | -0.09644 | 0.03722  | 0.043516 | 0.34809  | 0.024261 | 0.60101  |

|          |          |          |          |          |          |          |          |          |
|----------|----------|----------|----------|----------|----------|----------|----------|----------|
| 0.33886  | -0.00017 | 0.99708  | 0.064914 | 0.16136  | 0.025508 | 0.58242  | 0.077161 | 0.09582  |
| 1.69E-06 | -0.12393 | 0.00733  | 0.010516 | 0.82069  | -0.17903 | 0.0001   | -0.19444 | 2.33E-05 |
| 8.36E-07 | 0.182653 | 7.19E-05 | 0.20243  | 1.04E-05 | 0.236943 | 2.21E-07 | 0.371747 | 9.43E-17 |
| 9.11E-05 | -0.05013 | 0.27963  | -0.17919 | 9.88E-05 | -0.11731 | 0.01118  | -0.18639 | 5.06E-05 |
| 5.51E-09 | 0.12111  | 0.0088   | 0.239088 | 1.71E-07 | 0.113392 | 0.01422  | 0.260866 | 1.06E-08 |
| 0.00069  | 0.324627 | 6.38E-13 | 0.380831 | 1.45E-17 | 0.349609 | 7.15E-15 | 0.564118 | 1.37E-40 |
| 1.33E-05 | -0.04041 | 0.3836   | 0.078392 | 0.09062  | -0.03249 | 0.48369  | -0.03143 | 0.4981   |
| 0.00656  | 0.093816 | 0.04272  | 0.093324 | 0.04383  | 0.015104 | 0.74477  | 0.124396 | 0.00711  |
| 7.12E-18 | 0.292846 | 1.09E-10 | 0.384953 | 6.06E-18 | 0.269516 | 3.25E-09 | 0.514959 | 5.50E-33 |
| 0.00824  | -0.1707  | 0.00021  | -0.21758 | 2.07E-06 | -0.21438 | 2.94E-06 | -0.30979 | 7.61E-12 |
| 6.20E-16 | -0.03211 | 0.4888   | 0.003848 | 0.9339   | -0.20956 | 4.94E-06 | -0.11639 | 0.01183  |
| 0.00282  | 0.085041 | 0.06633  | 0.184358 | 6.13E-05 | 0.034588 | 0.45586  | 0.184668 | 5.95E-05 |
| 0.09667  | -0.0176  | 0.70445  | 0.189866 | 3.63E-05 | -0.00158 | 0.97286  | 0.007991 | 0.86326  |
| 0.60911  | -0.00078 | 0.98659  | -0.13956 | 0.0025   | -0.03046 | 0.51147  | -0.04203 | 0.3648   |
| 0.35741  | -0.10149 | 0.0283   | 0.058924 | 0.20371  | -0.19377 | 2.48E-05 | -0.23119 | 4.39E-07 |
| 2.55E-11 | 0.153431 | 0.00088  | 0.123857 | 0.00737  | 0.03727  | 0.42166  | 0.263846 | 7.06E-09 |
| 1.62E-11 | -0.09773 | 0.03473  | 0.091154 | 0.04899  | -0.20513 | 7.87E-06 | -0.11658 | 0.0117   |
| 2.36E-15 | -0.0022  | 0.96226  | 0.171853 | 0.00019  | -0.1037  | 0.02503  | -0.00574 | 0.90153  |
| 9.26E-05 | -0.01649 | 0.72228  | 0.335683 | 9.19E-14 | 0.101193 | 0.02878  | 0.127085 | 0.00596  |
| 0.91164  | -0.05015 | 0.2795   | -0.16365 | 0.00038  | -0.15129 | 0.00104  | -0.20127 | 1.17E-05 |
| 3.41E-07 | 0.098374 | 0.03356  | 0.165867 | 0.00032  | 0.107491 | 0.02016  | 0.168853 | 0.00025  |
| 9.98E-19 | 0.174687 | 0.00015  | 0.294099 | 9.03E-11 | 0.140975 | 0.00226  | 0.352877 | 3.85E-15 |
| 0.16009  | 0.247937 | 5.68E-08 | 0.057275 | 0.21667  | 0.073449 | 0.11294  | 0.319657 | 1.49E-12 |
| 0.51475  | 0.079856 | 0.08474  | 0.050645 | 0.27474  | 0.053572 | 0.24792  | 0.152086 | 0.00098  |
| 2.70E-09 | 0.20893  | 5.28E-06 | 0.222348 | 1.22E-06 | 0.182251 | 7.46E-05 | 0.404403 | 8.41E-20 |
| 0.05679  | -0.03175 | 0.49375  | 0.129778 | 0.00497  | 0.109561 | 0.01786  | 0.05059  | 0.27526  |
| 2.16E-10 | -0.12988 | 0.00494  | -0.24303 | 1.05E-07 | -0.11491 | 0.01296  | -0.22879 | 5.81E-07 |
| 0.96138  | 0.040401 | 0.3837   | 0.249793 | 4.49E-08 | 0.005491 | 0.90579  | 0.141557 | 0.00217  |
| 0.00011  | 0.156781 | 0.00067  | 0.21872  | 1.83E-06 | 0.161503 | 0.00046  | 0.250485 | 4.11E-08 |
| 0.03035  | 0.097609 | 0.03497  | 0.073571 | 0.11234  | 0.084398 | 0.06842  | 0.113269 | 0.01432  |
| 3.42E-05 | -0.03249 | 0.48366  | 0.05788  | 0.21185  | -0.107   | 0.02074  | -0.00859 | 0.85314  |
| 6.75E-11 | 0.150702 | 0.00109  | 0.241503 | 1.27E-07 | 0.10375  | 0.02495  | 0.283382 | 4.49E-10 |
| 6.56E-05 | -0.12623 | 0.00631  | 0.184358 | 6.13E-05 | -0.1785  | 0.00011  | -0.13913 | 0.00258  |
| 0.00166  | 0.15671  | 0.00068  | 0.170896 | 0.00021  | 0.178847 | 0.0001   | 0.302331 | 2.51E-11 |
| 2.57E-05 | -0.03855 | 0.40588  | 0.080761 | 0.08126  | -0.1587  | 0.00058  | -0.10641 | 0.02146  |
| 0.20895  | 0.130125 | 0.00486  | 0.473792 | 1.66E-27 | 0.244885 | 8.34E-08 | 0.292981 | 1.07E-10 |
| 2.11E-05 | -0.0618  | 0.18248  | -0.09791 | 0.0344   | -0.26978 | 3.13E-09 | -0.3005  | 3.35E-11 |
| 3.57E-09 | 0.052192 | 0.26032  | 0.104395 | 0.02406  | 0.071651 | 0.12205  | 0.104834 | 0.02347  |
| 0.56097  | -0.10461 | 0.02377  | 0.037371 | 0.42041  | -0.04512 | 0.33054  | -0.11182 | 0.01563  |
| 2.81E-06 | 0.106443 | 0.02141  | 0.136939 | 0.00302  | 0.009045 | 0.84543  | 0.167198 | 0.00028  |
| 0.00012  | 0.030993 | 0.50405  | 0.073809 | 0.11118  | -0.10621 | 0.0217   | -0.0132  | 0.77606  |
| 0.15435  | 0.186178 | 5.17E-05 | 0.275753 | 1.35E-09 | 0.279627 | 7.76E-10 | 0.442409 | 8.41E-24 |
| 7.79E-09 | 0.131297 | 0.00448  | 0.230206 | 4.93E-07 | 0.090233 | 0.05133  | 0.284699 | 3.70E-10 |
| 1.37E-05 | 0.130374 | 0.00477  | 0.219802 | 1.62E-06 | -0.00292 | 0.9498   | 0.117785 | 0.01085  |
| 6.21E-09 | 0.249222 | 4.82E-08 | 0.36652  | 2.70E-16 | 0.394169 | 8.27E-19 | 0.556049 | 2.96E-39 |

|          |          |          |          |          |          |          |          |          |
|----------|----------|----------|----------|----------|----------|----------|----------|----------|
| 1.13E-05 | 0.070516 | 0.12809  | 0.060123 | 0.19464  | 0.041671 | 0.36892  | 0.125145 | 0.00677  |
| 0.02603  | -0.01648 | 0.72238  | 0.122978 | 0.0078   | -0.11982 | 0.00955  | -0.07907 | 0.08784  |
| 0.07333  | -0.07083 | 0.12638  | 0.216046 | 2.45E-06 | -0.04369 | 0.3462   | -0.07298 | 0.11527  |
| 0.0175   | 0.154474 | 0.00081  | 0.19341  | 2.57E-05 | 0.28234  | 5.24E-10 | 0.285793 | 3.15E-10 |
| 0.00037  | 0.115029 | 0.01287  | 0.192879 | 2.71E-05 | 0.187539 | 4.54E-05 | 0.181991 | 7.64E-05 |
| 0.03242  | -0.02152 | 0.64273  | 0.25194  | 3.41E-08 | 0.098705 | 0.03296  | 0.128307 | 0.00549  |
| 1.04E-10 | 0.165472 | 0.00033  | 0.324942 | 6.04E-13 | 0.175009 | 0.00014  | 0.342053 | 2.90E-14 |
| 0.03505  | -0.03213 | 0.48854  | 0.120023 | 0.00943  | -0.00033 | 0.99426  | 0.058586 | 0.20632  |
| 3.41E-06 | 0.018035 | 0.69747  | 0.188791 | 4.03E-05 | 0.132524 | 0.00412  | 0.168547 | 0.00025  |
| 9.83E-08 | -0.0714  | 0.12338  | -0.13335 | 0.00389  | -0.04331 | 0.35038  | -0.13506 | 0.00345  |
| 7.57E-07 | 0.045122 | 0.33057  | 0.203071 | 9.74E-06 | -0.02462 | 0.5957   | 0.108476 | 0.01904  |
| 0.08042  | 0.080943 | 0.08057  | 0.170789 | 0.00021  | 0.083471 | 0.07152  | 0.165393 | 0.00033  |
| 0.05205  | -0.13521 | 0.00342  | -0.43217 | 1.13E-22 | -0.24609 | 7.17E-08 | -0.32405 | 7.04E-13 |
| 1.89E-07 | 0.160737 | 0.00049  | 0.394406 | 7.85E-19 | 0.331326 | 1.99E-13 | 0.464461 | 2.30E-26 |
| 5.42E-15 | 7.63E-05 | 0.99869  | -0.06108 | 0.18765  | 0.128209 | 0.00553  | 0.057181 | 0.21743  |
| 0.00185  | -0.08926 | 0.05389  | -0.16887 | 0.00025  | -0.05928 | 0.20098  | -0.21427 | 2.98E-06 |
| 4.47E-05 | 0.203648 | 9.18E-06 | 0.324253 | 6.80E-13 | 0.199425 | 1.41E-05 | 0.396689 | 4.75E-19 |
| 0.00039  | 0.100964 | 0.02914  | 0.15255  | 0.00094  | 0.064896 | 0.16148  | 0.236802 | 2.25E-07 |
| 2.49E-12 | 0.042713 | 0.35706  | 0.082378 | 0.07533  | -0.07308 | 0.11476  | 0.058866 | 0.20416  |
| 2.41E-14 | 0.080929 | 0.08062  | 0.168558 | 0.00025  | 0.050764 | 0.27361  | 0.192106 | 2.92E-05 |
| 9.56E-12 | 0.221936 | 1.27E-06 | 0.156314 | 0.0007   | 0.083127 | 0.07271  | 0.254596 | 2.41E-08 |
| 0.61397  | -0.06869 | 0.13827  | 0.219023 | 1.77E-06 | 0.094495 | 0.04124  | 0.077005 | 0.09649  |
| 2.24E-10 | 0.07837  | 0.09071  | 0.154662 | 0.0008   | 0.089498 | 0.05327  | 0.151654 | 0.00101  |
| 0.0084   | -0.07401 | 0.11019  | -0.14531 | 0.00164  | -0.0945  | 0.04123  | -0.19269 | 2.76E-05 |
| 5.29E-07 | 0.165656 | 0.00032  | 0.296081 | 6.66E-11 | 0.162612 | 0.00042  | 0.329423 | 2.78E-13 |
| 0.01476  | 0.029041 | 0.53129  | -0.12804 | 0.00559  | -0.08021 | 0.08337  | -0.04143 | 0.37175  |
| 0.00133  | -0.07009 | 0.13043  | -0.21443 | 2.93E-06 | -0.05313 | 0.25182  | -0.16706 | 0.00029  |
| 0.08604  | -0.01369 | 0.76798  | 0.489312 | 1.74E-29 | 0.353276 | 3.57E-15 | 0.335853 | 8.91E-14 |
| 0.15303  | -0.14867 | 0.00127  | 0.059678 | 0.19798  | -0.25155 | 3.58E-08 | -0.26307 | 7.84E-09 |
| 0.43366  | -0.17523 | 0.00014  | 0.110995 | 0.01641  | -0.08826 | 0.05665  | -0.12972 | 0.00499  |
| 0.00081  | -0.16151 | 0.00046  | 0.050228 | 0.27871  | -0.22634 | 7.72E-07 | -0.19961 | 1.39E-05 |
| 1.58E-12 | 0.007679 | 0.86855  | 0.072751 | 0.11641  | 0.222754 | 1.16E-06 | 0.113618 | 0.01402  |
| 0.0071   | -0.07762 | 0.09387  | -0.24016 | 1.50E-07 | -0.16637 | 0.00031  | -0.21026 | 4.58E-06 |
| 0.00023  | 0.323892 | 7.23E-13 | 0.189881 | 3.63E-05 | 0.225165 | 8.83E-07 | 0.406162 | 5.63E-20 |
| 0.00628  | 0.007395 | 0.87338  | 0.086602 | 0.06149  | -0.1748  | 0.00015  | -0.04817 | 0.29888  |
| 3.04E-09 | 0.102811 | 0.0263   | 0.057707 | 0.21322  | -0.03943 | 0.39527  | 0.096821 | 0.03647  |
| 5.92E-06 | 0.062608 | 0.1768   | 0.347442 | 1.07E-14 | 0.317359 | 2.18E-12 | 0.381633 | 1.22E-17 |
| 0.00186  | 0.002075 | 0.96433  | -0.24506 | 8.16E-08 | -0.11494 | 0.01294  | -0.05512 | 0.2345   |
| 2.44E-06 | -0.04022 | 0.38585  | 0.337897 | 6.18E-14 | 0.145907 | 0.00157  | 0.135751 | 0.00329  |
| 0.06164  | -0.16678 | 0.00029  | 0.310951 | 6.30E-12 | 0.272803 | 2.05E-09 | 0.203504 | 9.32E-06 |
| 0.00264  | 0.045033 | 0.33152  | 0.492334 | 6.98E-30 | 0.293868 | 9.35E-11 | 0.353661 | 3.32E-15 |
| 0.48078  | -0.15378 | 0.00086  | 0.041635 | 0.36934  | -0.25144 | 3.63E-08 | -0.2787  | 8.88E-10 |
| 2.03E-06 | 0.136512 | 0.00312  | 0.396198 | 5.29E-19 | 0.229446 | 5.38E-07 | 0.309554 | 7.90E-12 |
| 0.00172  | -0.00632 | 0.89159  | 0.372232 | 8.55E-17 | 0.29004  | 1.67E-10 | 0.26274  | 8.20E-09 |
| 6.72E-05 | 0.190363 | 3.46E-05 | 0.315543 | 2.96E-12 | 0.372949 | 7.38E-17 | 0.426412 | 4.68E-22 |

|          |          |          |          |          |          |          |          |          |
|----------|----------|----------|----------|----------|----------|----------|----------|----------|
| 5.00E-06 | -0.08673 | 0.0611   | 0.072464 | 0.11786  | -0.17104 | 0.0002   | -0.12791 | 0.00564  |
| 0.63464  | 0.090659 | 0.05024  | 0.228769 | 5.83E-07 | 0.034324 | 0.45931  | 0.149401 | 0.0012   |
| 2.80E-06 | 0.09458  | 0.04105  | -0.02448 | 0.59765  | 0.113262 | 0.01433  | 0.155758 | 0.00073  |
| 0.01989  | 0.092545 | 0.04563  | 0.355605 | 2.29E-15 | 0.336408 | 8.07E-14 | 0.430798 | 1.59E-22 |
| 1.65E-15 | 0.187183 | 4.70E-05 | 0.257724 | 1.60E-08 | 0.176002 | 0.00013  | 0.307265 | 1.14E-11 |
| 7.65E-10 | 0.147123 | 0.00143  | 0.189032 | 3.94E-05 | 0.090771 | 0.04995  | 0.304221 | 1.86E-11 |
| 2.90E-06 | 0.205761 | 7.37E-06 | 0.192699 | 2.76E-05 | 0.17948  | 9.62E-05 | 0.372268 | 8.48E-17 |
| 0.00106  | 0.153778 | 0.00086  | 0.224694 | 9.32E-07 | 0.161294 | 0.00047  | 0.32741  | 3.95E-13 |
| 5.64E-09 | 0.157455 | 0.00064  | 0.352621 | 4.05E-15 | 0.27458  | 1.60E-09 | 0.393566 | 9.44E-19 |
| 0.00087  | -0.03679 | 0.42773  | 0.051562 | 0.26613  | -0.12336 | 0.00761  | -0.04908 | 0.28985  |
| 0.82639  | -0.04154 | 0.37048  | 0.008384 | 0.85661  | -0.17466 | 0.00015  | -0.09948 | 0.0316   |
| 0.0455   | -0.0132  | 0.77607  | 0.00647  | 0.88909  | -0.22403 | 1.00E-06 | -0.10268 | 0.02649  |
| 6.15E-13 | 0.132605 | 0.0041   | 0.178965 | 0.0001   | 0.085256 | 0.06565  | 0.220973 | 1.42E-06 |
| 0.67161  | 0.039274 | 0.39713  | 0.308773 | 8.97E-12 | 0.045492 | 0.32661  | 0.058772 | 0.20488  |
| 0.01089  | -0.02853 | 0.53859  | 0.074819 | 0.10636  | -0.09039 | 0.05092  | -0.01436 | 0.75692  |
| 0.00015  | 0.091935 | 0.04708  | 0.166631 | 0.0003   | 0.178088 | 0.00011  | 0.250581 | 4.06E-08 |
| 2.49E-10 | -0.04843 | 0.29631  | 0.091278 | 0.04868  | -0.09316 | 0.04419  | -0.03256 | 0.48278  |
| 1.88E-05 | 0.031984 | 0.49051  | 0.391156 | 1.60E-18 | 0.100594 | 0.02974  | 0.217025 | 2.20E-06 |
| 0.00306  | -0.12016 | 0.00935  | 0.042342 | 0.36126  | -0.24951 | 4.65E-08 | -0.19524 | 2.15E-05 |
| 0.15181  | 0.048864 | 0.29199  | -0.02749 | 0.55347  | -0.08601 | 0.06328  | 0.017238 | 0.71023  |
| 1.65E-06 | -0.02387 | 0.60689  | 0.175673 | 0.00014  | -0.12346 | 0.00756  | -0.00736 | 0.87401  |
| 5.01E-07 | -0.00093 | 0.98406  | 0.068858 | 0.13733  | 0.007811 | 0.86632  | 0.062192 | 0.1797   |
| 4.16E-16 | 0.161162 | 0.00047  | 0.096974 | 0.03618  | -0.15122 | 0.00105  | 0.030347 | 0.51299  |
| 6.92E-10 | 0.178737 | 0.0001   | 0.366333 | 2.81E-16 | 0.199272 | 1.44E-05 | 0.404077 | 9.06E-20 |
| 3.13E-09 | 0.22767  | 6.62E-07 | 0.319511 | 1.52E-12 | 0.377468 | 2.92E-17 | 0.548976 | 4.10E-38 |
| 0.27526  | -0.07098 | 0.12562  | 0.131499 | 0.00442  | 0.072367 | 0.11835  | -0.04211 | 0.36387  |
| 1.47E-17 | 0.154917 | 0.00078  | 0.162778 | 0.00041  | 0.054754 | 0.23761  | 0.264273 | 6.67E-09 |
| 0.38593  | 0.153815 | 0.00085  | 0.309326 | 8.20E-12 | 0.073195 | 0.11419  | 0.246847 | 6.52E-08 |
| 0.00327  | 0.161492 | 0.00046  | 0.420321 | 2.05E-21 | 0.29565  | 7.12E-11 | 0.413112 | 1.13E-20 |
| 0.00016  | 0.259436 | 1.28E-08 | 0.281437 | 5.97E-10 | 0.313089 | 4.43E-12 | 0.492209 | 7.25E-30 |
| 4.69E-07 | -0.11914 | 0.00997  | 0.125355 | 0.00668  | -0.12638 | 0.00624  | -0.15587 | 0.00072  |
| 3.25E-06 | 0.203187 | 9.63E-06 | 0.367381 | 2.27E-16 | 0.365736 | 3.16E-16 | 0.504922 | 1.40E-31 |
| 8.96E-13 | 0.144872 | 0.0017   | 0.353146 | 3.66E-15 | 0.248056 | 5.60E-08 | 0.369629 | 1.45E-16 |
| 0.0002   | -0.16578 | 0.00032  | -0.27779 | 1.01E-09 | -0.17311 | 0.00017  | -0.29588 | 6.87E-11 |
| 0.04708  | -0.04121 | 0.37429  | 0.224436 | 9.60E-07 | -0.01839 | 0.69189  | 0.027048 | 0.55986  |
| 4.01E-10 | 0.18851  | 4.14E-05 | 0.280565 | 6.78E-10 | 0.177666 | 0.00011  | 0.39601  | 5.51E-19 |
| 0.01544  | 0.184018 | 6.33E-05 | 0.338096 | 5.96E-14 | 0.265481 | 5.66E-09 | 0.364949 | 3.69E-16 |
| 0.01524  | 0.008304 | 0.85796  | 0.242693 | 1.10E-07 | 0.043044 | 0.35334  | 0.067821 | 0.14336  |
| 0.54005  | 0.011745 | 0.80016  | 0.216871 | 2.24E-06 | 0.085558 | 0.0647   | 0.055851 | 0.22833  |
| 0.00805  | 0.117016 | 0.01138  | 0.09336  | 0.04374  | 0.116765 | 0.01156  | 0.202302 | 1.05E-05 |
| 7.86E-07 | -0.06215 | 0.17999  | -0.02667 | 0.56542  | -0.10165 | 0.02805  | -0.08697 | 0.06038  |
| 7.29E-05 | -0.03316 | 0.47471  | -0.07316 | 0.11436  | 0.045947 | 0.3218   | -0.07116 | 0.12461  |
| 2.25E-05 | -0.00385 | 0.93381  | 0.140743 | 0.0023   | -0.11141 | 0.01602  | -0.04964 | 0.28437  |
| 2.15E-08 | 0.010948 | 0.81346  | 0.086326 | 0.06232  | -0.09069 | 0.05015  | -0.01682 | 0.71696  |
| 4.15E-10 | -0.0578  | 0.21252  | 0.043685 | 0.34621  | -0.20446 | 8.44E-06 | -0.12818 | 0.00554  |

|          |          |          |          |          |          |          |          |          |
|----------|----------|----------|----------|----------|----------|----------|----------|----------|
| 1.55E-07 | 0.075063 | 0.10522  | 0.086436 | 0.06199  | -0.03066 | 0.50859  | 0.071826 | 0.12114  |
| 1.66E-14 | -0.10188 | 0.0277   | 0.057227 | 0.21706  | -0.17719 | 0.00012  | -0.17269 | 0.00018  |
| 8.64E-05 | 0.200293 | 1.29E-05 | 0.205781 | 7.36E-06 | 0.146469 | 0.0015   | 0.300042 | 3.60E-11 |
| 1.61E-08 | 0.037568 | 0.41796  | 0.179314 | 9.77E-05 | 0.166996 | 0.00029  | 0.078484 | 0.09024  |
| 7.52E-05 | -0.05404 | 0.24377  | -0.04546 | 0.32696  | -0.22095 | 1.42E-06 | -0.22468 | 9.34E-07 |
| 0.00024  | -0.00502 | 0.91382  | 0.50759  | 5.98E-32 | 0.311217 | 6.03E-12 | 0.267422 | 4.34E-09 |
| 0.77558  | -0.13484 | 0.00351  | -0.00932 | 0.84074  | -0.20912 | 5.18E-06 | -0.25678 | 1.81E-08 |
| 0.25298  | 0.074462 | 0.10804  | 0.384605 | 6.52E-18 | 0.293015 | 1.07E-10 | 0.353792 | 3.24E-15 |
| 0.00011  | -0.05711 | 0.218    | -0.06188 | 0.18191  | -0.07042 | 0.12863  | -0.0959  | 0.03829  |
| 1.94E-10 | 0.109738 | 0.01768  | 0.47936  | 3.32E-28 | 0.329831 | 2.59E-13 | 0.42628  | 4.84E-22 |
| 0.19998  | 0.133155 | 0.00394  | -0.16568 | 0.00032  | -0.16464 | 0.00035  | 0.007067 | 0.87895  |
| 0.77308  | 0.029752 | 0.52128  | 0.326438 | 4.67E-13 | 0.31338  | 4.23E-12 | 0.305238 | 1.58E-11 |
| 0.052    | -0.17817 | 0.00011  | -0.39808 | 3.49E-19 | -0.21019 | 4.62E-06 | -0.37023 | 1.28E-16 |
| 3.24E-11 | 0.069057 | 0.13619  | 0.230046 | 5.02E-07 | 0.14914  | 0.00123  | 0.261389 | 9.84E-09 |
| 0.03168  | 0.150477 | 0.00111  | 0.326747 | 4.43E-13 | 0.320042 | 1.39E-12 | 0.408782 | 3.09E-20 |
| 1.45E-07 | -0.03012 | 0.51611  | 1.34E-05 | 0.99977  | 0.118244 | 0.01055  | 0.011279 | 0.80793  |
| 0.00026  | 0.050825 | 0.27303  | 0.243401 | 1.00E-07 | -0.05195 | 0.26257  | 0.034485 | 0.4572   |
| 0.59633  | 0.246014 | 7.24E-08 | 0.061323 | 0.18587  | 0.10464  | 0.02373  | 0.26413  | 6.80E-09 |
| 0.92156  | 0.152917 | 0.00092  | 0.319616 | 1.50E-12 | 0.24603  | 7.22E-08 | 0.354235 | 2.98E-15 |
| 0.00075  | -0.05769 | 0.21334  | 0.351837 | 4.70E-15 | -0.03468 | 0.45462  | -0.01924 | 0.67837  |
| 6.30E-07 | 0.065533 | 0.15739  | 0.249323 | 4.76E-08 | 0.085379 | 0.06526  | 0.186389 | 5.06E-05 |
| 0.09663  | 0.268812 | 3.58E-09 | 0.207405 | 6.20E-06 | 0.362125 | 6.45E-16 | 0.503079 | 2.50E-31 |
| 0.84358  | -0.1561  | 0.00071  | -0.11453 | 0.01327  | -0.29621 | 6.53E-11 | -0.32208 | 9.86E-13 |
| 0.03098  | 0.125448 | 0.00664  | 0.167768 | 0.00027  | 0.117994 | 0.01071  | 0.219438 | 1.69E-06 |
| 7.50E-05 | 0.049456 | 0.28618  | -0.1424  | 0.00204  | -0.02173 | 0.63948  | -0.03417 | 0.46133  |
| 0.00081  | -0.07378 | 0.11131  | -0.04958 | 0.28492  | -0.03013 | 0.51595  | -0.02288 | 0.62187  |
| 0.00265  | -0.04048 | 0.38273  | 0.007659 | 0.86888  | 0.051638 | 0.26542  | 0.040617 | 0.38117  |
| 0.00033  | 0.074397 | 0.10835  | 0.182423 | 7.34E-05 | 0.025447 | 0.58333  | 0.170226 | 0.00022  |
| 2.68E-09 | 0.006673 | 0.88565  | 0.119861 | 0.00952  | -0.10115 | 0.02884  | -0.05044 | 0.27671  |
| 0.00015  | 0.043076 | 0.35298  | -0.03883 | 0.40243  | 0.008298 | 0.85806  | 0.128481 | 0.00543  |
| 0.0036   | -0.00849 | 0.85473  | -0.01436 | 0.75697  | -0.16796 | 0.00027  | -0.06921 | 0.13534  |
| 7.55E-12 | 0.055047 | 0.23512  | 0.293329 | 1.02E-10 | 0.117914 | 0.01077  | 0.205612 | 7.49E-06 |
| 0.09756  | 0.04584  | 0.32292  | 0.103761 | 0.02494  | 0.070735 | 0.12691  | 0.149202 | 0.00122  |
| 0.06009  | -0.05042 | 0.27689  | -0.24175 | 1.23E-07 | -0.22235 | 1.22E-06 | -0.20903 | 5.23E-06 |
| 0.00023  | -0.14738 | 0.0014   | 0.049636 | 0.28442  | -0.29997 | 3.64E-11 | -0.34187 | 3.00E-14 |
| 1.18E-05 | -0.08277 | 0.07395  | -0.17244 | 0.00018  | -0.10464 | 0.02373  | -0.15983 | 0.00053  |
| 1.29E-15 | -0.10195 | 0.02759  | -0.2453  | 7.92E-08 | -0.20461 | 8.31E-06 | -0.29954 | 3.90E-11 |
| 0.75941  | -0.03795 | 0.41329  | -0.23567 | 2.58E-07 | -0.08494 | 0.06665  | -0.08693 | 0.0605   |
| 0.70779  | -0.00544 | 0.90668  | 0.001624 | 0.97208  | -0.16477 | 0.00035  | -0.07272 | 0.11656  |
| 0.18228  | 0.009426 | 0.83901  | -0.05572 | 0.22939  | -0.02285 | 0.62228  | 0.047901 | 0.30162  |
| 5.11E-05 | -0.03564 | 0.44224  | -0.20853 | 5.51E-06 | -0.10457 | 0.02382  | -0.12817 | 0.00554  |
| 1.01E-10 | -0.09031 | 0.05114  | -0.01154 | 0.80356  | 0.042398 | 0.36062  | -0.10005 | 0.03064  |
| 0.00199  | 0.204923 | 8.04E-06 | 0.112815 | 0.01472  | 0.125815 | 0.00648  | 0.351393 | 5.11E-15 |
| 2.12E-11 | 0.138778 | 0.00265  | 0.036459 | 0.43184  | 0.047398 | 0.30673  | 0.164125 | 0.00037  |
| 0.00303  | -0.11456 | 0.01324  | -0.16487 | 0.00035  | -0.26514 | 5.93E-09 | -0.28578 | 3.16E-10 |



|          |          |          |          |          |          |          |          |          |
|----------|----------|----------|----------|----------|----------|----------|----------|----------|
| 3.17E-06 | -0.04035 | 0.38428  | -0.04583 | 0.323    | -0.2117  | 3.93E-06 | -0.12042 | 0.0092   |
| 2.32E-09 | 0.137699 | 0.00286  | 0.04012  | 0.38702  | 0.058049 | 0.21052  | 0.233477 | 3.35E-07 |
| 8.68E-05 | -0.16907 | 0.00024  | 0.059658 | 0.19812  | -0.23256 | 3.74E-07 | -0.22963 | 5.27E-07 |
| 0.32243  | 0.110715 | 0.01669  | 0.110497 | 0.0169   | 0.054159 | 0.24276  | 0.221843 | 1.29E-06 |
| 0.00177  | 0.142906 | 0.00196  | 0.367598 | 2.18E-16 | 0.14825  | 0.00131  | 0.359843 | 1.01E-15 |
| 0.00477  | -0.01135 | 0.8068   | 0.515811 | 4.16E-33 | 0.411005 | 1.85E-20 | 0.368407 | 1.85E-16 |
| 0.82708  | -0.09039 | 0.05094  | -0.26737 | 4.37E-09 | -0.1308  | 0.00464  | -0.1598  | 0.00053  |
| 0.00025  | -0.13347 | 0.00386  | 0.426158 | 4.98E-22 | 0.280339 | 7.00E-10 | 0.195987 | 2.00E-05 |
| 0.00467  | -0.02961 | 0.52329  | 0.309474 | 8.00E-12 | 0.290914 | 1.46E-10 | 0.245532 | 7.69E-08 |
| 0.2818   | 0.05229  | 0.25943  | 0.303293 | 2.16E-11 | 0.313232 | 4.33E-12 | 0.316411 | 2.56E-12 |
| 0.06589  | -0.1642  | 0.00037  | 0.146641 | 0.00148  | -0.18018 | 9.02E-05 | -0.18063 | 8.66E-05 |
| 7.83E-09 | 0.117086 | 0.01134  | 0.222691 | 1.17E-06 | 0.03302  | 0.47656  | 0.129433 | 0.00509  |
| 3.05E-08 | 0.034693 | 0.45449  | 0.140919 | 0.00227  | -0.01743 | 0.70718  | 0.078316 | 0.09094  |
| 1.65E-08 | 0.231099 | 4.44E-07 | 0.319327 | 1.57E-12 | 0.320139 | 1.37E-12 | 0.46196  | 4.59E-26 |
| 0.01156  | 0.056017 | 0.22695  | 0.195199 | 2.16E-05 | 0.194588 | 2.29E-05 | 0.240011 | 1.52E-07 |
| 0.0022   | -0.02935 | 0.52697  | 0.084204 | 0.06906  | -0.12168 | 0.00848  | -0.03652 | 0.43109  |
| 5.76E-11 | 0.094871 | 0.04043  | 0.324513 | 6.50E-13 | 0.21129  | 4.11E-06 | 0.266433 | 4.97E-09 |
| 6.99E-06 | 0.103909 | 0.02473  | 0.364875 | 3.75E-16 | 0.243731 | 9.63E-08 | 0.272393 | 2.17E-09 |
| 0.0131   | -0.12079 | 0.00898  | -0.31117 | 6.08E-12 | -0.21026 | 4.59E-06 | -0.3028  | 2.33E-11 |
| 4.65E-05 | -0.17992 | 9.24E-05 | -0.34057 | 3.80E-14 | -0.18842 | 4.17E-05 | -0.32418 | 6.89E-13 |
| 2.73E-07 | -0.12017 | 0.00934  | -0.28389 | 4.17E-10 | -0.13909 | 0.00259  | -0.26329 | 7.61E-09 |
| 0.00062  | -0.10582 | 0.02219  | -0.30263 | 2.40E-11 | -0.18137 | 8.09E-05 | -0.23472 | 2.89E-07 |
| 0.00078  | -0.09869 | 0.03299  | 0.261868 | 9.23E-09 | 0.09225  | 0.04632  | 0.14532  | 0.00164  |
| 9.44E-10 | 0.014574 | 0.75344  | -0.17246 | 0.00018  | 0.041274 | 0.37351  | -0.04456 | 0.33666  |
| 0.10251  | 0.113734 | 0.01392  | 0.066627 | 0.15056  | 0.051477 | 0.26692  | 0.216912 | 2.23E-06 |
| 4.76E-06 | 0.099209 | 0.03208  | 0.254476 | 2.45E-08 | 0.102409 | 0.0269   | 0.151243 | 0.00104  |
| 0.05489  | 0.066804 | 0.14948  | 0.267198 | 4.47E-09 | 0.264392 | 6.56E-09 | 0.263656 | 7.25E-09 |
| 0.03456  | 0.063915 | 0.16792  | 0.066506 | 0.1513   | -0.06781 | 0.1434   | 0.071459 | 0.12306  |
| 0.00204  | 0.087823 | 0.0579   | -0.01794 | 0.69893  | 0.030036 | 0.51732  | 0.127931 | 0.00563  |
| 7.44E-16 | 0.052548 | 0.25708  | 0.155426 | 0.00075  | 0.022417 | 0.62895  | 0.134805 | 0.00352  |
| 0.00055  | -0.02903 | 0.53148  | -0.03378 | 0.46645  | -0.03745 | 0.41944  | -0.00621 | 0.89347  |
| 1.37E-15 | -0.07236 | 0.1184   | -0.15954 | 0.00054  | 0.057657 | 0.21362  | -0.10871 | 0.01878  |
| 0.00326  | -0.09713 | 0.03588  | -0.04993 | 0.28162  | -0.14802 | 0.00134  | -0.14844 | 0.0013   |
| 6.42E-07 | 0.081671 | 0.07788  | 0.026278 | 0.57109  | -0.07756 | 0.09409  | 0.037742 | 0.41581  |
| 3.38E-08 | 0.199499 | 1.40E-05 | 0.240055 | 1.52E-07 | 0.162277 | 0.00043  | 0.329137 | 2.92E-13 |
| 0.82303  | -0.1657  | 0.00032  | 0.321007 | 1.18E-12 | 0.078387 | 0.09064  | 0.057239 | 0.21696  |
| 0.11031  | -0.01479 | 0.74991  | -0.23627 | 2.40E-07 | -0.09001 | 0.05191  | -0.15244 | 0.00095  |
| 0.23059  | 0.076864 | 0.09711  | 0.340617 | 3.77E-14 | 0.402387 | 1.33E-19 | 0.462692 | 3.75E-26 |
| 4.20E-16 | 0.037124 | 0.42348  | 0.122529 | 0.00803  | -0.10763 | 0.02     | 0.055213 | 0.2337   |
| 1.02E-11 | 0.058534 | 0.20672  | 0.188322 | 4.21E-05 | -0.00426 | 0.92689  | 0.087211 | 0.05967  |
| 1.47E-08 | 0.01913  | 0.68009  | 0.135595 | 0.00333  | 0.129283 | 0.00514  | 0.138816 | 0.00264  |
| 1.42E-12 | 0.084531 | 0.06799  | 0.109861 | 0.01755  | -0.02635 | 0.57011  | 0.147888 | 0.00135  |
| 1.32E-10 | 0.061746 | 0.18285  | 0.187292 | 4.65E-05 | -0.0558  | 0.22878  | 0.134262 | 0.00365  |
| 0.11995  | -0.16362 | 0.00038  | 0.087136 | 0.0599   | -0.22    | 1.58E-06 | -0.26538 | 5.73E-09 |
| 0.11159  | 0.063411 | 0.17131  | 0.06565  | 0.15665  | -0.00246 | 0.95768  | 0.060142 | 0.1945   |

|          |          |          |          |          |          |          |          |          |
|----------|----------|----------|----------|----------|----------|----------|----------|----------|
| 2.16E-05 | 0.053797 | 0.24593  | 0.091583 | 0.04793  | -0.0473  | 0.30775  | 0.056327 | 0.22439  |
| 1.49E-05 | 0.021215 | 0.64746  | -0.04926 | 0.28814  | 0.156574 | 0.00069  | 0.055631 | 0.23018  |
| 8.53E-06 | -0.09055 | 0.05051  | -0.30421 | 1.87E-11 | -0.08482 | 0.06705  | -0.1712  | 0.0002   |
| 0.0003   | -0.20267 | 1.01E-05 | -0.10727 | 0.02041  | -0.31764 | 2.08E-12 | -0.31278 | 4.67E-12 |
| 1.19E-08 | -0.04139 | 0.3722   | -0.2771  | 1.12E-09 | -0.11155 | 0.01588  | -0.16826 | 0.00026  |
| 0.10605  | 0.073811 | 0.11117  | -0.07961 | 0.0857   | 0.041632 | 0.36937  | 0.036872 | 0.42665  |
| 1.75E-05 | -0.04463 | 0.33584  | 0.107379 | 0.02029  | -0.0133  | 0.77435  | 0.021281 | 0.64644  |
| 0.00051  | -0.11885 | 0.01015  | -0.22812 | 6.28E-07 | -0.15309 | 0.0009   | -0.26776 | 4.14E-09 |
| 0.57838  | -0.05897 | 0.20339  | -0.21509 | 2.72E-06 | -0.21529 | 2.66E-06 | -0.18036 | 8.88E-05 |
| 0.0144   | 0.168978 | 0.00024  | 0.048471 | 0.2959   | -0.00198 | 0.96589  | 0.166443 | 0.0003   |
| 5.08E-05 | -0.0568  | 0.2205   | 0.100233 | 0.03033  | -0.04498 | 0.33208  | -0.01723 | 0.71032  |
| 0.01816  | -0.02395 | 0.60567  | 0.118508 | 0.01037  | -0.08015 | 0.08359  | -0.0522  | 0.26025  |
| 0.05547  | -0.07761 | 0.09392  | 0.247519 | 5.99E-08 | 0.053437 | 0.24911  | 0.079413 | 0.08648  |
| 0.00044  | 0.036544 | 0.43077  | 0.189211 | 3.87E-05 | 0.050544 | 0.2757   | 0.095297 | 0.03954  |
| 0.00032  | 0.157835 | 0.00062  | 0.23569  | 2.57E-07 | 0.209608 | 4.92E-06 | 0.298788 | 4.38E-11 |
| 0.27328  | 0.204312 | 8.57E-06 | 0.573772 | 3.08E-42 | 0.467251 | 1.06E-26 | 0.561338 | 3.98E-40 |
| 4.38E-06 | -0.03785 | 0.41443  | 0.148427 | 0.0013   | -0.07443 | 0.10819  | -0.03869 | 0.40417  |
| 0.1334   | -0.12233 | 0.00814  | -0.22352 | 1.06E-06 | -0.07872 | 0.08926  | -0.16329 | 0.0004   |
| 0.00027  | 0.243806 | 9.54E-08 | 0.168992 | 0.00024  | 0.24685  | 6.52E-08 | 0.387459 | 3.55E-18 |
| 3.31E-06 | 0.257345 | 1.68E-08 | 0.072406 | 0.11815  | -0.00988 | 0.83135  | 0.127281 | 0.00588  |
| 0.58458  | -0.12768 | 0.00573  | -0.13082 | 0.00463  | -0.13386 | 0.00376  | -0.22776 | 6.55E-07 |
| 1.81E-06 | -0.1647  | 0.00035  | -0.25636 | 1.92E-08 | -0.15096 | 0.00107  | -0.27635 | 1.24E-09 |
| 0.00121  | -0.06924 | 0.13518  | 0.059139 | 0.20206  | -0.17659 | 0.00013  | -0.1372  | 0.00297  |
| 0.00975  | 0.167344 | 0.00028  | 0.045147 | 0.33029  | -0.01591 | 0.73159  | 0.156798 | 0.00067  |
| 0.9076   | -0.07083 | 0.12642  | 0.024526 | 0.59703  | -0.19265 | 2.77E-05 | -0.14096 | 0.00226  |
| 0.43759  | 0.265807 | 5.41E-09 | 0.205518 | 7.56E-06 | 0.216285 | 2.39E-06 | 0.449009 | 1.50E-24 |
| 1.04E-06 | 0.013564 | 0.77002  | 0.010259 | 0.825    | -0.10581 | 0.02221  | -0.01561 | 0.73653  |
| 0.00537  | -0.08478 | 0.06719  | 0.075646 | 0.10254  | -0.12368 | 0.00745  | -0.0901  | 0.05167  |
| 0.00014  | 0.114483 | 0.0133   | 0.233739 | 3.25E-07 | 0.094787 | 0.04061  | 0.291104 | 1.42E-10 |
| 0.24016  | 0.018551 | 0.68927  | 0.137575 | 0.00289  | 0.032411 | 0.48473  | 0.102173 | 0.02726  |
| 0.98026  | 0.127589 | 0.00576  | 0.380044 | 1.71E-17 | 0.309844 | 7.54E-12 | 0.413733 | 9.76E-21 |
| 0.00441  | -0.00185 | 0.96819  | -0.06977 | 0.13218  | -0.14757 | 0.00138  | -0.14693 | 0.00145  |
| 0.00248  | 0.08347  | 0.07153  | -0.11621 | 0.01197  | -0.18785 | 4.41E-05 | -0.10589 | 0.0221   |
| 0.86867  | -0.19988 | 1.35E-05 | -0.38777 | 3.31E-18 | -0.37564 | 4.25E-17 | -0.46456 | 2.24E-26 |
| 0.00025  | 0.165844 | 0.00032  | 0.507104 | 6.98E-32 | 0.311967 | 5.33E-12 | 0.449026 | 1.50E-24 |
| 6.22E-05 | -0.06227 | 0.17917  | 0.054941 | 0.23602  | -0.13728 | 0.00295  | -0.08769 | 0.05828  |
| 0.32778  | 0.028036 | 0.5456   | -0.12194 | 0.00834  | -0.06983 | 0.13185  | 0.002493 | 0.95715  |
| 0.47448  | -0.09794 | 0.03434  | 0.02116  | 0.64831  | -0.08494 | 0.06665  | -0.0884  | 0.05628  |
| 0.00014  | -0.03907 | 0.39952  | 0.04833  | 0.29731  | -0.14566 | 0.0016   | -0.12984 | 0.00495  |
| 0.00363  | -0.09983 | 0.03101  | -0.08407 | 0.06951  | -0.24603 | 7.22E-08 | -0.23449 | 2.97E-07 |
| 0.13603  | -0.055   | 0.23553  | 0.192815 | 2.73E-05 | 0.308042 | 1.01E-11 | 0.258533 | 1.44E-08 |
| 0.47422  | -0.11364 | 0.014    | -0.29592 | 6.82E-11 | -0.22736 | 6.86E-07 | -0.29348 | 9.92E-11 |
| 1.70E-10 | 0.149399 | 0.0012   | 0.115505 | 0.0125   | 0.040564 | 0.38179  | 0.220822 | 1.44E-06 |
| 0.80507  | -0.06443 | 0.16452  | 0.005089 | 0.91267  | -0.16682 | 0.00029  | -0.12264 | 0.00797  |
| 0.18578  | -0.03723 | 0.42216  | 0.272932 | 2.02E-09 | 0.221352 | 1.36E-06 | 0.227036 | 7.12E-07 |

|          |          |          |          |          |          |          |          |          |
|----------|----------|----------|----------|----------|----------|----------|----------|----------|
| 0.07119  | -0.07877 | 0.08905  | 0.136706 | 0.00307  | 0.081186 | 0.07966  | 0.059865 | 0.19657  |
| 0.29111  | 0.400646 | 1.96E-19 | 0.117033 | 0.01137  | 0.056713 | 0.22122  | 0.226793 | 7.32E-07 |
| 0.01842  | 0.058888 | 0.20399  | -0.10516 | 0.02304  | -0.27177 | 2.37E-09 | -0.145   | 0.00168  |
| 0.02222  | 0.01067  | 0.81811  | -0.07166 | 0.12203  | -0.2524  | 3.21E-08 | -0.12617 | 0.00633  |
| 0.65311  | 0.044446 | 0.33787  | 0.391204 | 1.58E-18 | 0.117515 | 0.01104  | 0.183336 | 6.74E-05 |
| 0.00044  | -0.00352 | 0.93946  | -0.05359 | 0.24779  | -0.1583  | 0.0006   | -0.10753 | 0.02011  |
| 7.49E-05 | -0.16202 | 0.00044  | -0.05777 | 0.21274  | -0.16041 | 0.0005   | -0.23644 | 2.35E-07 |
| 0.28049  | -0.00024 | 0.99588  | 0.408276 | 3.47E-20 | 0.199119 | 1.46E-05 | 0.262334 | 8.66E-09 |
| 0.87522  | 0.225967 | 8.05E-07 | 0.209986 | 4.72E-06 | 0.209069 | 5.20E-06 | 0.385112 | 5.86E-18 |
| 0.30858  | 0.031869 | 0.49207  | -0.11371 | 0.01395  | -0.16217 | 0.00043  | 0.001447 | 0.97511  |
| 0.0028   | -0.02974 | 0.52139  | -0.05309 | 0.25218  | 0.103202 | 0.02573  | -0.0444  | 0.3384   |
| 2.73E-05 | 0.004562 | 0.92168  | 0.016596 | 0.72056  | -0.13165 | 0.00437  | -0.02767 | 0.55091  |
| 0.00397  | 0.185045 | 5.75E-05 | 0.256628 | 1.85E-08 | 0.334772 | 1.08E-13 | 0.434625 | 6.11E-23 |
| 2.75E-16 | 0.050176 | 0.27922  | 0.159208 | 0.00055  | -0.00412 | 0.92917  | 0.106979 | 0.02076  |
| 0.45074  | -0.04499 | 0.33202  | 0.04712  | 0.30958  | -0.16533 | 0.00033  | -0.0926  | 0.0455   |
| 9.68E-21 | 0.03896  | 0.40091  | 0.151476 | 0.00102  | -0.05082 | 0.27307  | 0.091503 | 0.04813  |
| 0.0586   | -0.11591 | 0.01219  | 0.121383 | 0.00864  | -0.18545 | 5.53E-05 | -0.18189 | 7.71E-05 |
| 0.00034  | -0.20515 | 7.86E-06 | 0.058046 | 0.21054  | -0.28681 | 2.71E-10 | -0.29968 | 3.81E-11 |
| 0.00821  | 0.04389  | 0.34395  | 0.025727 | 0.57919  | -0.14913 | 0.00123  | -0.04005 | 0.38785  |
| 0.00949  | 0.108659 | 0.01883  | 0.005411 | 0.90716  | 0.004843 | 0.91687  | 0.154897 | 0.00078  |
| 6.41E-13 | 0.011113 | 0.81071  | 0.055396 | 0.23215  | -0.19057 | 3.40E-05 | -0.09513 | 0.03989  |
| 0.01189  | -0.12653 | 0.00618  | -0.30888 | 8.82E-12 | -0.20259 | 1.02E-05 | -0.32269 | 8.89E-13 |
| 0.00105  | -0.06493 | 0.16123  | -0.1018  | 0.02783  | -0.04254 | 0.35904  | -0.11936 | 0.00983  |
| 0.00475  | 0.052716 | 0.25556  | 0.038793 | 0.40293  | -0.10227 | 0.0271   | 0.021653 | 0.6407   |
| 0.27173  | 0.062081 | 0.18048  | -0.08299 | 0.07317  | -0.0821  | 0.07633  | 0.055111 | 0.23457  |
| 0.02638  | 0.045523 | 0.32628  | 0.03771  | 0.4162   | -0.11864 | 0.01028  | -0.02138 | 0.64497  |
| 0.00098  | 0.059563 | 0.19884  | 0.182515 | 7.28E-05 | 0.135842 | 0.00327  | 0.132085 | 0.00425  |
| 0.15979  | 0.146057 | 0.00155  | 0.168956 | 0.00024  | 0.086685 | 0.06124  | 0.259243 | 1.31E-08 |
| 1.82E-07 | -0.10764 | 0.01999  | 0.077159 | 0.09583  | -0.12166 | 0.00849  | -0.1496  | 0.00118  |
| 9.51E-10 | -0.04554 | 0.3261   | 0.074719 | 0.10683  | -0.04303 | 0.35351  | -0.01661 | 0.72041  |
| 9.16E-12 | 0.01169  | 0.80108  | 0.116653 | 0.01164  | -0.0389  | 0.40169  | 0.059695 | 0.19785  |
| 5.60E-06 | -0.08313 | 0.0727   | -0.0117  | 0.80097  | -0.12876 | 0.00533  | -0.16991 | 0.00023  |
| 0.00029  | -0.15617 | 0.00071  | -0.17197 | 0.00019  | 0.029209 | 0.52891  | -0.20788 | 5.90E-06 |
| 0.00057  | 0.084804 | 0.0671   | 0.098504 | 0.03332  | 0.032086 | 0.48912  | 0.138424 | 0.00272  |
| 2.20E-05 | -0.07871 | 0.08933  | -0.05383 | 0.24562  | 0.019915 | 0.66773  | -0.11059 | 0.01681  |
| 5.00E-05 | 0.017477 | 0.70639  | 0.160525 | 0.0005   | 0.01726  | 0.70988  | 0.019851 | 0.66874  |
| 6.03E-13 | 0.152248 | 0.00096  | 0.302058 | 2.62E-11 | 0.177376 | 0.00012  | 0.332695 | 1.56E-13 |
| 1.05E-09 | 0.168874 | 0.00025  | 0.311215 | 6.03E-12 | 0.309235 | 8.32E-12 | 0.427647 | 3.46E-22 |
| 2.95E-06 | 0.322604 | 9.02E-13 | 0.276371 | 1.24E-09 | 0.305994 | 1.40E-11 | 0.513205 | 9.76E-33 |
| 2.14E-22 | 0.086275 | 0.06248  | 0.215996 | 2.47E-06 | 0.026266 | 0.57127  | 0.175814 | 0.00013  |
| 7.97E-05 | 0.06657  | 0.15091  | 0.313251 | 4.32E-12 | 0.275385 | 1.43E-09 | 0.195881 | 2.02E-05 |
| 3.02E-09 | -0.0165  | 0.72216  | 0.024377 | 0.59926  | -0.19471 | 2.26E-05 | -0.0645  | 0.16406  |
| 3.27E-14 | 0.058142 | 0.20979  | 0.036365 | 0.43304  | -0.08079 | 0.08113  | 0.079264 | 0.08708  |
| 0.00505  | 0.086026 | 0.06324  | 0.223032 | 1.13E-06 | 0.215504 | 2.60E-06 | 0.351761 | 4.76E-15 |
| 0.00178  | 0.117626 | 0.01096  | 0.219782 | 1.62E-06 | 0.245175 | 8.04E-08 | 0.347721 | 1.02E-14 |

|          |          |          |          |          |          |          |          |          |
|----------|----------|----------|----------|----------|----------|----------|----------|----------|
| 5.05E-06 | -0.05251 | 0.2574   | -0.26398 | 6.94E-09 | 0.097009 | 0.03611  | -0.0711  | 0.12494  |
| 6.61E-07 | 0.106529 | 0.02131  | 0.380221 | 1.64E-17 | 0.257195 | 1.72E-08 | 0.362822 | 5.62E-16 |
| 0.00809  | -0.00508 | 0.91274  | 0.170298 | 0.00022  | 0.24968  | 4.55E-08 | 0.226978 | 7.17E-07 |
| 1.97E-08 | 0.039656 | 0.39255  | -0.19783 | 1.66E-05 | -0.05884 | 0.20433  | -0.04376 | 0.34542  |
| 0.95193  | -0.15884 | 0.00057  | -0.22419 | 9.86E-07 | -0.13278 | 0.00405  | -0.25732 | 1.69E-08 |
| 2.41E-13 | 0.124643 | 0.007    | 0.264605 | 6.37E-09 | 0.131391 | 0.00445  | 0.246372 | 6.92E-08 |
| 0.0691   | 0.002119 | 0.96357  | 0.190635 | 3.37E-05 | -0.05531 | 0.23285  | 0.053776 | 0.24612  |
| 9.88E-10 | 0.313766 | 3.97E-12 | 0.315206 | 3.13E-12 | 0.369833 | 1.39E-16 | 0.571345 | 8.08E-42 |
| 5.83E-09 | 0.128512 | 0.00541  | 0.157034 | 0.00066  | -0.00397 | 0.9318   | 0.202714 | 1.01E-05 |
| 1.68E-05 | 0.113335 | 0.01426  | 0.421837 | 1.42E-21 | 0.125786 | 0.00649  | 0.228905 | 5.73E-07 |
| 0.12874  | -0.1844  | 6.11E-05 | -0.16795 | 0.00027  | -0.15701 | 0.00066  | -0.35032 | 6.26E-15 |
| 0.20141  | -0.04743 | 0.30643  | 0.009517 | 0.83747  | -0.12345 | 0.00757  | -0.11394 | 0.01375  |
| 0.23581  | 0.022742 | 0.624    | 0.189161 | 3.89E-05 | 0.134965 | 0.00348  | 0.192205 | 2.90E-05 |
| 0.00085  | 0.117328 | 0.01117  | -0.01138 | 0.80623  | -0.03229 | 0.4863   | 0.113308 | 0.01429  |
| 2.09E-07 | -0.07331 | 0.11361  | 0.048364 | 0.29697  | -0.11421 | 0.01353  | -0.16528 | 0.00033  |
| 0.29864  | -0.0719  | 0.12074  | -0.24599 | 7.26E-08 | -0.17152 | 0.0002   | -0.15083 | 0.00108  |
| 4.74E-05 | -0.05287 | 0.25422  | -0.2539  | 2.64E-08 | -0.11407 | 0.01365  | -0.13368 | 0.0038   |
| 0.04676  | -0.04051 | 0.38245  | 0.25365  | 2.73E-08 | 0.069848 | 0.13175  | 0.044523 | 0.33704  |
| 0.40921  | 0.216662 | 2.29E-06 | 0.260123 | 1.17E-08 | 0.139539 | 0.00251  | 0.381878 | 1.16E-17 |
| 0.63914  | 0.012713 | 0.78407  | -0.21003 | 4.70E-06 | -0.04795 | 0.3011   | -0.07365 | 0.11197  |
| 0.00034  | 0.14633  | 0.00152  | 0.189499 | 3.76E-05 | 0.258756 | 1.40E-08 | 0.419932 | 2.25E-21 |
| 0.06352  | -0.10306 | 0.02594  | -0.30171 | 2.77E-11 | -0.27978 | 7.60E-10 | -0.27726 | 1.09E-09 |
| 2.83E-14 | 0.078312 | 0.09095  | 0.099263 | 0.03198  | -0.07765 | 0.09371  | 0.100197 | 0.03039  |
| 0.1811   | -0.02465 | 0.59524  | 0.118368 | 0.01046  | -0.11043 | 0.01697  | 0.003127 | 0.94627  |
| 0.40766  | -0.04329 | 0.35056  | 0.010666 | 0.81818  | -0.05128 | 0.26873  | -0.07746 | 0.09455  |
| 0.36657  | 0.02302  | 0.61975  | -0.06658 | 0.15085  | 0.01277  | 0.78314  | -0.00903 | 0.84573  |
| 0.87429  | -0.11486 | 0.013    | 0.042915 | 0.35479  | -0.13217 | 0.00422  | -0.21035 | 4.54E-06 |
| 0.97999  | -0.13398 | 0.00372  | -0.05067 | 0.27454  | -0.27549 | 1.40E-09 | -0.33167 | 1.87E-13 |
| 1.19E-11 | 0.102129 | 0.02732  | 0.271554 | 2.45E-09 | 0.14668  | 0.00148  | 0.265473 | 5.66E-09 |
| 0.00022  | -0.02265 | 0.62539  | 0.334828 | 1.07E-13 | 0.176934 | 0.00012  | 0.148135 | 0.00133  |
| 0.00627  | 0.042412 | 0.36047  | -0.06748 | 0.14537  | 0.0508   | 0.27327  | -0.03433 | 0.45929  |
| 0.0843   | 0.061262 | 0.18631  | 0.030994 | 0.50404  | 0.054188 | 0.24251  | 0.038453 | 0.40707  |
| 2.42E-19 | 0.093925 | 0.04248  | 0.15465  | 0.0008   | 0.032784 | 0.47971  | 0.183047 | 6.93E-05 |
| 6.25E-13 | 0.028587 | 0.53774  | 0.143771 | 0.00184  | -0.05193 | 0.26275  | 0.062561 | 0.17712  |
| 0.00041  | -0.03225 | 0.48695  | -0.07347 | 0.11281  | -0.20411 | 8.75E-06 | -0.09388 | 0.04259  |
| 0.82877  | -0.04386 | 0.3443   | -0.04067 | 0.38055  | -0.18356 | 6.60E-05 | -0.11177 | 0.01567  |
| 0.06776  | -0.00594 | 0.89822  | 0.015979 | 0.73054  | -0.19282 | 2.73E-05 | -0.11915 | 0.00996  |
| 0.00642  | -0.11478 | 0.01307  | -0.4163  | 5.34E-21 | -0.32555 | 5.44E-13 | -0.31741 | 2.17E-12 |
| 0.03123  | -0.1912  | 3.19E-05 | -0.01155 | 0.80343  | -0.25185 | 3.45E-08 | -0.28734 | 2.50E-10 |
| 0.54459  | -0.04576 | 0.32381  | 0.160393 | 0.0005   | -0.10431 | 0.02418  | -0.09892 | 0.03258  |
| 0.95175  | 0.096052 | 0.03799  | 0.51554  | 4.54E-33 | 0.21771  | 2.04E-06 | 0.295858 | 6.89E-11 |
| 2.48E-08 | -0.00773 | 0.86774  | 0.12996  | 0.00491  | -0.12879 | 0.00531  | -0.08243 | 0.07515  |
| 6.18E-05 | -0.20528 | 7.75E-06 | -0.11851 | 0.01037  | -0.23495 | 2.81E-07 | -0.23975 | 1.57E-07 |
| 0.00091  | 0.193347 | 2.59E-05 | 0.248718 | 5.14E-08 | 0.178988 | 0.0001   | 0.341936 | 2.97E-14 |
| 0.03666  | 0.147681 | 0.00137  | 0.210627 | 4.41E-06 | 0.179149 | 9.92E-05 | 0.330204 | 2.42E-13 |

|          |          |          |          |          |          |          |          |          |
|----------|----------|----------|----------|----------|----------|----------|----------|----------|
| 0.19227  | -0.14295 | 0.00196  | -0.05619 | 0.22551  | -0.26039 | 1.12E-08 | -0.28304 | 4.73E-10 |
| 0.05901  | 0.181105 | 8.29E-05 | 0.45614  | 2.24E-25 | 0.334902 | 1.06E-13 | 0.491792 | 8.23E-30 |
| 5.35E-05 | -0.0455  | 0.32648  | 0.147793 | 0.00136  | -0.04854 | 0.29525  | -0.0371  | 0.42376  |
| 7.14E-09 | 0.109902 | 0.01751  | 0.320886 | 1.21E-12 | 0.30247  | 2.46E-11 | 0.358602 | 1.28E-15 |
| 0.00328  | 0.123831 | 0.00738  | 0.279015 | 8.48E-10 | 0.230303 | 4.87E-07 | 0.312781 | 4.67E-12 |
| 0.00534  | -0.12653 | 0.00618  | 0.073296 | 0.11369  | -0.21841 | 1.89E-06 | -0.22287 | 1.15E-06 |
| 3.46E-08 | 0.010154 | 0.82677  | -0.13542 | 0.00337  | 0.09668  | 0.03675  | -0.00254 | 0.95627  |
| 0.00017  | 0.004132 | 0.92904  | 0.033269 | 0.47324  | -0.11034 | 0.01706  | -0.03636 | 0.43316  |
| 0.26244  | -0.04094 | 0.37738  | 0.152537 | 0.00094  | 0.109869 | 0.01754  | 0.193844 | 2.47E-05 |
| 0.00031  | -0.07962 | 0.08566  | -0.27955 | 7.85E-10 | -0.19996 | 1.34E-05 | -0.24362 | 9.76E-08 |
| 0.16659  | -0.04238 | 0.36084  | -0.07475 | 0.10669  | -0.20964 | 4.90E-06 | -0.14583 | 0.00158  |
| 0.012    | 0.069923 | 0.13134  | 0.169817 | 0.00023  | 0.060779 | 0.18981  | 0.155652 | 0.00074  |
| 1.77E-08 | -0.03834 | 0.40849  | 0.191411 | 3.13E-05 | -0.08415 | 0.06923  | -0.08157 | 0.07826  |
| 2.25E-05 | -0.12836 | 0.00547  | -0.01496 | 0.74704  | -0.16267 | 0.00042  | -0.19421 | 2.38E-05 |
| 0.01212  | 0.072207 | 0.11917  | 0.19769  | 1.68E-05 | 0.100628 | 0.02968  | 0.177873 | 0.00011  |
| 0.51303  | 0.014268 | 0.75844  | 0.207688 | 6.02E-06 | 0.047788 | 0.30276  | 0.125785 | 0.00649  |
| 0.33193  | 0.147303 | 0.00141  | 0.020667 | 0.65599  | -0.0399  | 0.38966  | 0.147625 | 0.00138  |
| 0.22696  | -0.22673 | 7.37E-07 | 0.052299 | 0.25935  | -0.20904 | 5.22E-06 | -0.23777 | 2.00E-07 |
| 8.92E-05 | 0.074775 | 0.10656  | 0.133988 | 0.00372  | 0.010491 | 0.82111  | 0.09844  | 0.03344  |
| 2.98E-05 | 0.014499 | 0.75465  | 0.422798 | 1.13E-21 | 0.318945 | 1.67E-12 | 0.390435 | 1.87E-18 |
| 0.18829  | 0.071003 | 0.12547  | 0.441126 | 1.17E-23 | 0.218342 | 1.90E-06 | 0.352576 | 4.08E-15 |
| 8.91E-05 | -0.09312 | 0.04429  | 0.078001 | 0.09224  | -0.28597 | 3.07E-10 | -0.20567 | 7.44E-06 |
| 0.00016  | 0.104139 | 0.02441  | 0.188335 | 4.21E-05 | 0.088473 | 0.05606  | 0.159168 | 0.00056  |
| 2.21E-09 | 0.018276 | 0.69365  | -0.1431  | 0.00193  | 0.083207 | 0.07243  | -0.02533 | 0.58506  |
| 0.00284  | -0.27034 | 2.90E-09 | -0.30139 | 2.91E-11 | -0.18201 | 7.63E-05 | -0.39803 | 3.53E-19 |
| 3.63E-07 | 0.094846 | 0.04049  | 0.115067 | 0.01284  | 0.087983 | 0.05744  | 0.141768 | 0.00213  |
| 0.97848  | 0.078595 | 0.08979  | 0.073807 | 0.11119  | -0.0629  | 0.17479  | 0.050699 | 0.27422  |
| 1.16E-08 | -0.12424 | 0.00719  | -0.20726 | 6.30E-06 | -0.03155 | 0.4964   | -0.13359 | 0.00383  |
| 0.20676  | 0.145273 | 0.00165  | 0.296451 | 6.29E-11 | 0.378845 | 2.19E-17 | 0.443234 | 6.80E-24 |
| 0.00017  | 0.266027 | 5.25E-09 | 0.324087 | 7.00E-13 | 0.32625  | 4.82E-13 | 0.469071 | 6.34E-27 |
| 1.17E-05 | 0.083712 | 0.07071  | 0.271604 | 2.43E-09 | 0.201764 | 1.11E-05 | 0.275186 | 1.47E-09 |
| 0.46067  | -0.13412 | 0.00369  | -0.17619 | 0.00013  | -0.18314 | 6.87E-05 | -0.3255  | 5.48E-13 |
| 2.92E-11 | 0.066617 | 0.15062  | 0.052009 | 0.262    | -0.03372 | 0.46728  | 0.038077 | 0.41168  |
| 2.03E-07 | 0.179613 | 9.51E-05 | 0.142652 | 0.002    | 0.206569 | 6.77E-06 | 0.264555 | 6.42E-09 |
| 6.80E-10 | 0.158193 | 0.0006   | 0.364223 | 4.27E-16 | 0.275889 | 1.33E-09 | 0.350608 | 5.92E-15 |
| 1.19E-13 | 0.154    | 0.00084  | 0.1644   | 0.00036  | 0.0936   | 0.0432   | 0.251453 | 3.63E-08 |
| 0.00066  | -0.01677 | 0.71774  | -0.18861 | 4.10E-05 | -0.22335 | 1.09E-06 | -0.13585 | 0.00327  |
| 0.07776  | -0.14089 | 0.00227  | -0.1019  | 0.02767  | -0.24524 | 7.98E-08 | -0.24514 | 8.07E-08 |
| 2.33E-11 | 0.000702 | 0.98793  | 0.118587 | 0.01032  | 0.034539 | 0.4565   | 0.056433 | 0.22352  |
| 0.05423  | -0.04839 | 0.29667  | -0.01186 | 0.79831  | -0.00455 | 0.92187  | -0.10268 | 0.02649  |
| 2.02E-08 | 0.099154 | 0.03217  | 0.090742 | 0.05003  | -0.03202 | 0.48998  | 0.130938 | 0.00459  |
| 0.00011  | 0.052854 | 0.25432  | 0.377451 | 2.93E-17 | 0.144911 | 0.00169  | 0.303409 | 2.12E-11 |
| 0.31773  | -0.09939 | 0.03176  | -0.15505 | 0.00077  | -0.15298 | 0.00091  | -0.2301  | 4.99E-07 |
| 0.0979   | 0.000564 | 0.99031  | 0.33464  | 1.11E-13 | 0.259533 | 1.26E-08 | 0.310917 | 6.33E-12 |
| 0.59192  | 0.060145 | 0.19448  | 0.368387 | 1.86E-16 | 0.152359 | 0.00096  | 0.211613 | 3.97E-06 |

|          |          |          |          |          |          |          |          |          |
|----------|----------|----------|----------|----------|----------|----------|----------|----------|
| 0.00014  | -0.16438 | 0.00036  | -0.20102 | 1.20E-05 | -0.07896 | 0.08829  | -0.2152  | 2.69E-06 |
| 0.00218  | 0.176906 | 0.00012  | 0.465887 | 1.55E-26 | 0.427322 | 3.75E-22 | 0.454678 | 3.33E-25 |
| 0.0045   | -0.0381  | 0.41138  | 0.026859 | 0.56261  | -0.11405 | 0.01366  | -0.08906 | 0.05444  |
| 0.00581  | -0.01066 | 0.81824  | 0.120155 | 0.00935  | -0.04033 | 0.38453  | -0.034   | 0.46354  |
| 1.90E-06 | -0.11965 | 0.00965  | 0.102762 | 0.02638  | 0.00553  | 0.90513  | -0.10134 | 0.02854  |
| 1.40E-05 | 0.15198  | 0.00099  | 0.417553 | 3.96E-21 | 0.363374 | 5.04E-16 | 0.484646 | 7.02E-29 |
| 3.62E-09 | -0.05873 | 0.2052   | -0.18377 | 6.47E-05 | -0.19236 | 2.85E-05 | -0.20805 | 5.80E-06 |
| 1.87E-13 | 0.181791 | 7.78E-05 | 0.25291  | 3.01E-08 | 0.145133 | 0.00166  | 0.347864 | 9.92E-15 |
| 0.25989  | -0.05714 | 0.21774  | 0.174639 | 0.00015  | 0.160433 | 0.0005   | 0.07072  | 0.12699  |
| 0.00102  | 0.048163 | 0.29898  | 0.197965 | 1.64E-05 | 0.224731 | 9.28E-07 | 0.159067 | 0.00056  |
| 0.001    | -0.04807 | 0.29994  | 0.04815  | 0.29911  | -0.23625 | 2.40E-07 | -0.1431  | 0.00193  |
| 0.00323  | 0.182183 | 7.51E-05 | 0.071712 | 0.12173  | 0.012198 | 0.79263  | 0.046657 | 0.31436  |
| 1.73E-16 | 0.108879 | 0.01859  | 0.141446 | 0.00218  | 0.072915 | 0.11559  | 0.186222 | 5.14E-05 |
| 0.02925  | -0.06875 | 0.13794  | 0.073687 | 0.11177  | -0.16175 | 0.00045  | -0.13542 | 0.00337  |
| 0.24128  | 0.077471 | 0.09449  | 0.214619 | 2.87E-06 | 0.138782 | 0.00265  | 0.214007 | 3.06E-06 |
| 0.00074  | -0.03713 | 0.42343  | 0.049864 | 0.28222  | 0.011297 | 0.80763  | -0.00672 | 0.88484  |
| 0.01556  | 0.058896 | 0.20393  | 0.154755 | 0.00079  | 0.067107 | 0.14764  | 0.103076 | 0.02592  |
| 2.03E-06 | -0.1216  | 0.00852  | 0.168959 | 0.00024  | -0.05939 | 0.20018  | -0.07023 | 0.12967  |
| 1.16E-08 | 0.052561 | 0.25696  | 0.118856 | 0.01015  | 0.020139 | 0.66423  | 0.064702 | 0.16273  |
| 0.00041  | 0.183016 | 6.95E-05 | 0.447229 | 2.40E-24 | 0.371484 | 9.95E-17 | 0.498635 | 1.01E-30 |
| 0.00663  | -0.03419 | 0.46111  | 0.054236 | 0.24209  | 0.098761 | 0.03286  | 0.154591 | 0.0008   |
| 2.01E-13 | 0.157904 | 0.00062  | 0.19238  | 2.85E-05 | 0.130351 | 0.00478  | 0.334867 | 1.06E-13 |
| 0.0557   | 0.01418  | 0.75989  | 0.004754 | 0.91839  | -0.09737 | 0.03541  | 0.017641 | 0.70377  |
| 0.88991  | 0.107423 | 0.02024  | 0.274922 | 1.52E-09 | 0.24386  | 9.48E-08 | 0.280134 | 7.21E-10 |
| 0.39168  | -0.01961 | 0.67251  | 0.089326 | 0.05373  | 0.114247 | 0.0135   | 0.052937 | 0.25357  |
| 0.00182  | -0.0421  | 0.36406  | -0.18401 | 6.33E-05 | -0.06513 | 0.15994  | -0.16844 | 0.00026  |
| 1.66E-05 | 0.098534 | 0.03327  | 0.198785 | 1.51E-05 | -0.006   | 0.89715  | 0.154409 | 0.00081  |
| 3.31E-13 | 0.201812 | 1.11E-05 | 0.185107 | 5.71E-05 | 0.143166 | 0.00193  | 0.315819 | 2.82E-12 |
| 0.3096   | 0.001796 | 0.96913  | -0.19755 | 1.71E-05 | -0.11821 | 0.01057  | -0.06816 | 0.14135  |
| 1.45E-07 | -0.08676 | 0.061    | 0.107525 | 0.02012  | -0.15318 | 0.0009   | -0.0963  | 0.03749  |
| 0.11502  | 0.032434 | 0.48442  | 0.047167 | 0.30909  | 0.05631  | 0.22453  | 0.123185 | 0.0077   |
| 4.32E-12 | -0.12006 | 0.00941  | 0.069864 | 0.13167  | -0.29543 | 7.36E-11 | -0.23071 | 4.65E-07 |
| 0.0075   | 0.154174 | 0.00083  | 0.078363 | 0.09074  | 0.124262 | 0.00718  | 0.260319 | 1.14E-08 |
| 0.01101  | 0.075194 | 0.10461  | 0.012576 | 0.78635  | -0.06933 | 0.13464  | -0.02877 | 0.53507  |
| 0.50794  | 0.171013 | 0.0002   | 0.253347 | 2.84E-08 | 0.240415 | 1.45E-07 | 0.308285 | 9.70E-12 |
| 0.16994  | 0.083383 | 0.07183  | 0.395828 | 5.74E-19 | 0.261967 | 9.10E-09 | 0.329481 | 2.75E-13 |
| 0.00014  | 0.071488 | 0.1229   | 0.194087 | 2.41E-05 | 0.037167 | 0.42295  | 0.15016  | 0.00113  |
| 0.00014  | 0.086261 | 0.06252  | 0.215599 | 2.58E-06 | 0.177904 | 0.00011  | 0.247244 | 6.20E-08 |
| 7.46E-17 | 0.068045 | 0.14204  | 0.212197 | 3.73E-06 | 0.063585 | 0.17013  | 0.193907 | 2.45E-05 |
| 6.01E-06 | 0.042447 | 0.36007  | 0.229499 | 5.35E-07 | 0.215025 | 2.74E-06 | 0.052385 | 0.25856  |
| 0.2412   | 0.127668 | 0.00573  | 0.245384 | 7.83E-08 | 0.246394 | 6.90E-08 | 0.239746 | 1.57E-07 |
| 4.45E-06 | 0.120011 | 0.00943  | 0.401203 | 1.73E-19 | 0.340818 | 3.64E-14 | 0.475956 | 8.91E-28 |
| 0.29383  | 0.046685 | 0.31407  | -0.08111 | 0.07994  | -0.16932 | 0.00024  | -0.16597 | 0.00032  |
| 0.28045  | -0.04909 | 0.28972  | 0.001294 | 0.97776  | -0.17718 | 0.00012  | -0.0872  | 0.0597   |
| 0.06367  | 0.082506 | 0.07487  | 0.208736 | 5.39E-06 | 0.151717 | 0.00101  | 0.220576 | 1.48E-06 |

|          |          |          |          |          |          |          |          |          |
|----------|----------|----------|----------|----------|----------|----------|----------|----------|
| 0.25895  | 0.035435 | 0.44489  | -0.05488 | 0.23657  | -0.18873 | 4.05E-05 | -0.0688  | 0.13764  |
| 0.56439  | -0.00835 | 0.85712  | 0.130663 | 0.00468  | -0.12014 | 0.00936  | 0.04647  | 0.31631  |
| 3.60E-07 | 0.030024 | 0.51748  | 0.090865 | 0.04972  | 0.036059 | 0.43692  | 0.086778 | 0.06096  |
| 0.65322  | 0.318949 | 1.67E-12 | 0.217806 | 2.02E-06 | 0.176249 | 0.00013  | 0.360092 | 9.60E-16 |
| 0.41388  | -0.04957 | 0.28511  | 0.082614 | 0.0745   | -0.07598 | 0.10102  | 0.028713 | 0.53594  |
| 3.43E-10 | -0.1096  | 0.01782  | -0.26794 | 4.04E-09 | -0.06706 | 0.14789  | -0.23723 | 2.14E-07 |
| 2.99E-05 | -0.09793 | 0.03437  | -0.02446 | 0.598    | -0.24877 | 5.11E-08 | -0.2544  | 2.48E-08 |
| 0.00436  | 0.123561 | 0.00751  | 0.284722 | 3.69E-10 | 0.206816 | 6.60E-06 | 0.317278 | 2.21E-12 |
| 0.04444  | -0.04568 | 0.32465  | -0.19092 | 3.28E-05 | -0.05278 | 0.25497  | -0.13928 | 0.00256  |
| 0.37811  | 0.033754 | 0.46681  | -0.02763 | 0.5515   | 0.160301 | 0.00051  | 0.11355  | 0.01408  |
| 4.05E-10 | -0.16602 | 0.00031  | -0.2041  | 8.76E-06 | -0.26482 | 6.19E-09 | -0.47423 | 1.46E-27 |
| 0.18686  | -0.12506 | 0.00681  | 0.239865 | 1.55E-07 | 0.06485  | 0.16177  | -0.00049 | 0.99164  |
| 0.88696  | -0.25444 | 2.46E-08 | 0.044489 | 0.3374   | -0.07809 | 0.09189  | -0.22262 | 1.18E-06 |
| 0.25232  | -0.09515 | 0.03984  | -0.31622 | 2.64E-12 | -0.26239 | 8.59E-09 | -0.27356 | 1.85E-09 |
| 0.08861  | 0.06719  | 0.14713  | 0.167331 | 0.00028  | 0.060613 | 0.19102  | 0.132605 | 0.0041   |
| 4.73E-09 | 0.04748  | 0.30589  | 0.270296 | 2.91E-09 | 0.038689 | 0.40419  | 0.153007 | 0.00091  |
| 0.0016   | 0.036439 | 0.4321   | 0.391211 | 1.58E-18 | 0.344807 | 1.75E-14 | 0.257411 | 1.67E-08 |
| 8.68E-08 | 0.025873 | 0.57703  | 0.178577 | 0.0001   | -0.01706 | 0.71308  | 0.083485 | 0.07148  |
| 5.14E-05 | -0.11655 | 0.01172  | -0.04528 | 0.32886  | -0.12184 | 0.0084   | -0.11465 | 0.01317  |
| 1.21E-12 | 0.010438 | 0.82201  | 0.158167 | 0.0006   | -0.00854 | 0.854    | 0.067357 | 0.14613  |
| 0.02636  | -0.01188 | 0.7979   | -0.19296 | 2.69E-05 | -0.03304 | 0.47623  | -0.03758 | 0.41783  |
| 0.26745  | 0.141722 | 0.00214  | 0.291235 | 1.40E-10 | 0.248482 | 5.30E-08 | 0.312367 | 4.99E-12 |
| 0.38015  | 0.060017 | 0.19544  | 0.109979 | 0.01743  | 0.110848 | 0.01656  | 0.105646 | 0.02241  |
| 3.27E-13 | 0.058349 | 0.20817  | 0.186819 | 4.86E-05 | 0.003442 | 0.94087  | 0.132158 | 0.00422  |
| 1.01E-07 | 0.067191 | 0.14713  | 0.19366  | 2.51E-05 | -0.02349 | 0.61256  | 0.100083 | 0.03058  |
| 0.1406   | 0.063826 | 0.16851  | 0.423226 | 1.02E-21 | 0.263977 | 6.94E-09 | 0.390047 | 2.03E-18 |
| 0.61494  | 0.124849 | 0.00691  | 0.179211 | 9.86E-05 | 0.087048 | 0.06016  | 0.181208 | 8.21E-05 |
| 0.00339  | 0.181266 | 8.17E-05 | 0.07578  | 0.10193  | 0.098748 | 0.03289  | 0.269774 | 3.13E-09 |
| 5.60E-09 | 0.103279 | 0.02562  | 0.337804 | 6.28E-14 | 0.206939 | 6.52E-06 | 0.331945 | 1.78E-13 |
| 6.44E-07 | 0.037286 | 0.42147  | 0.055288 | 0.23307  | -0.04921 | 0.28861  | 0.087693 | 0.05827  |
| 0.05435  | 0.175997 | 0.00013  | 0.290445 | 1.57E-10 | 0.263093 | 7.82E-09 | 0.394763 | 7.26E-19 |
| 3.37E-05 | -0.00384 | 0.93399  | 0.027914 | 0.54735  | -0.0774  | 0.09479  | -0.02262 | 0.62581  |
| 0.8087   | 0.175132 | 0.00014  | 0.227821 | 6.50E-07 | 0.10575  | 0.02228  | 0.201707 | 1.12E-05 |
| 0.66309  | 0.01705  | 0.71325  | 0.077666 | 0.09366  | -0.01894 | 0.68302  | 0.003221 | 0.94466  |
| 0.09659  | 0.001205 | 0.97928  | -0.28022 | 7.13E-10 | -0.09032 | 0.05112  | -0.12043 | 0.00919  |
| 0.00089  | -0.09487 | 0.04043  | -0.00019 | 0.99675  | -0.26868 | 3.65E-09 | -0.24233 | 1.15E-07 |
| 2.86E-05 | 0.090877 | 0.04968  | 0.170249 | 0.00022  | 0.010669 | 0.81813  | 0.204145 | 8.72E-06 |
| 0.00657  | 0.222028 | 1.26E-06 | 0.275511 | 1.40E-09 | 0.211448 | 4.04E-06 | 0.394648 | 7.44E-19 |
| 3.96E-14 | 0.146659 | 0.00148  | 0.265735 | 5.46E-09 | 0.08573  | 0.06416  | 0.204869 | 8.09E-06 |
| 0.09081  | 0.00149  | 0.97439  | -0.09783 | 0.03455  | 0.001953 | 0.96642  | -0.06497 | 0.16098  |
| 1.99E-05 | -0.18347 | 6.66E-05 | 0.104937 | 0.02334  | -0.25554 | 2.14E-08 | -0.29438 | 8.64E-11 |
| 2.42E-12 | -0.02101 | 0.65061  | -0.01458 | 0.75334  | -0.20292 | 9.90E-06 | -0.14824 | 0.00131  |
| 0.88677  | -0.15098 | 0.00107  | 0.08213  | 0.07621  | -0.25941 | 1.28E-08 | -0.26532 | 5.78E-09 |
| 0.72416  | -0.07761 | 0.09391  | 0.042096 | 0.36405  | -0.05189 | 0.26311  | -0.05768 | 0.21345  |
| 0.33725  | -0.06083 | 0.18947  | 0.344881 | 1.73E-14 | 0.018031 | 0.69754  | 0.033095 | 0.47556  |

|          |          |          |          |          |          |          |          |          |
|----------|----------|----------|----------|----------|----------|----------|----------|----------|
| 0.06105  | 0.217042 | 2.20E-06 | 0.170725 | 0.00021  | 0.209967 | 4.73E-06 | 0.33548  | 9.53E-14 |
| 0.00012  | -0.09923 | 0.03204  | -0.03966 | 0.3925   | -0.18506 | 5.74E-05 | -0.17442 | 0.00015  |
| 0.0001   | -0.06503 | 0.16059  | -0.02382 | 0.60757  | -0.25714 | 1.73E-08 | -0.1937  | 2.50E-05 |
| 0.21705  | -0.17003 | 0.00022  | -0.38649 | 4.36E-18 | -0.29658 | 6.17E-11 | -0.3719  | 9.15E-17 |
| 0.01411  | -0.01796 | 0.69872  | 0.112069 | 0.01539  | -0.0454  | 0.32755  | 0.035998 | 0.4377   |
| 0.02568  | 0.245936 | 7.31E-08 | 0.093651 | 0.04309  | 0.14049  | 0.00234  | 0.363343 | 5.08E-16 |
| 0.01304  | 0.124792 | 0.00693  | 0.060786 | 0.18976  | -0.02002 | 0.66612  | 0.116316 | 0.01189  |
| 4.79E-05 | -0.08736 | 0.05924  | 0.078891 | 0.08858  | -0.14455 | 0.00174  | -0.14276 | 0.00198  |
| 1.48E-08 | -0.0431  | 0.35268  | 0.199817 | 1.36E-05 | -0.06776 | 0.14374  | -0.02141 | 0.64447  |
| 2.84E-12 | 0.033672 | 0.4679   | 0.137681 | 0.00287  | 0.027304 | 0.55615  | 0.110301 | 0.0171   |
| 6.74E-08 | 0.112045 | 0.01542  | 0.222131 | 1.25E-06 | 0.144343 | 0.00176  | 0.28958  | 1.79E-10 |
| 0.00235  | -0.17627 | 0.00013  | -0.07131 | 0.12383  | -0.24101 | 1.35E-07 | -0.19927 | 1.44E-05 |
| 8.18E-05 | 0.15594  | 0.00072  | 0.478711 | 4.01E-28 | 0.396085 | 5.42E-19 | 0.537966 | 2.17E-36 |
| 3.96E-06 | 0.10318  | 0.02577  | 0.216029 | 2.46E-06 | 0.110963 | 0.01644  | 0.268775 | 3.60E-09 |
| 0.00164  | 0.144601 | 0.00173  | 0.299672 | 3.81E-11 | 0.121302 | 0.00869  | 0.256871 | 1.79E-08 |
| 0.00011  | -0.01671 | 0.71873  | 0.08113  | 0.07987  | -0.13513 | 0.00344  | -0.07012 | 0.13027  |
| 0.00098  | 0.101584 | 0.02816  | 0.201696 | 1.12E-05 | 0.234961 | 2.81E-07 | 0.281149 | 6.23E-10 |
| 4.22E-10 | 0.167919 | 0.00027  | 0.108339 | 0.01919  | 0.137517 | 0.0029   | 0.248534 | 5.27E-08 |
| 0.79298  | -0.15798 | 0.00061  | -0.109   | 0.01846  | -0.23602 | 2.47E-07 | -0.2619  | 9.19E-09 |
| 0.22839  | -0.00136 | 0.97661  | 0.226887 | 7.24E-07 | 0.067679 | 0.14421  | 0.111803 | 0.01564  |
| 1.32E-06 | -0.06944 | 0.13405  | -0.29122 | 1.40E-10 | -0.17872 | 0.0001   | -0.22557 | 8.42E-07 |
| 0.36385  | -0.04391 | 0.34376  | 0.039724 | 0.39173  | 0.031209 | 0.50108  | 0.004877 | 0.91629  |
| 0.62696  | 0.093675 | 0.04304  | 0.306399 | 1.31E-11 | -0.00771 | 0.86808  | 0.171989 | 0.00019  |
| 1.72E-09 | 0.141542 | 0.00217  | 0.282076 | 5.44E-10 | 0.206388 | 6.90E-06 | 0.301417 | 2.90E-11 |
| 1.25E-06 | 0.171556 | 0.0002   | 0.235904 | 2.51E-07 | 0.026889 | 0.56217  | 0.233749 | 3.24E-07 |
| 0.61045  | -0.03751 | 0.4187   | 0.107827 | 0.01977  | -0.03095 | 0.50464  | 0.011033 | 0.81205  |
| 0.0179   | -0.14753 | 0.00139  | 0.129526 | 0.00506  | -0.24539 | 7.82E-08 | -0.22572 | 8.29E-07 |
| 3.32E-08 | 0.136836 | 0.00305  | 0.233894 | 3.19E-07 | 0.171341 | 0.0002   | 0.286852 | 2.69E-10 |
| 0.00066  | -0.02163 | 0.64103  | -0.246   | 7.25E-08 | -0.12853 | 0.00541  | -0.17501 | 0.00014  |
| 0.00121  | 0.172641 | 0.00018  | 0.123663 | 0.00746  | 0.081205 | 0.07959  | 0.259858 | 1.21E-08 |
| 0.50231  | 0.006758 | 0.8842   | -0.16046 | 0.0005   | -0.1079  | 0.01968  | -0.12153 | 0.00857  |
| 2.38E-07 | 0.022048 | 0.63461  | 0.109111 | 0.01834  | -0.06783 | 0.14328  | 0.060015 | 0.19545  |
| 1.33E-14 | 0.071834 | 0.12109  | 0.02425  | 0.60117  | -0.00305 | 0.94764  | 0.103537 | 0.02526  |
| 0.00363  | 0.064989 | 0.16087  | 0.165072 | 0.00034  | 0.021849 | 0.63768  | 0.067648 | 0.14439  |
| 0.18066  | -0.16847 | 0.00026  | 0.044451 | 0.33781  | -0.18229 | 7.43E-05 | -0.23483 | 2.85E-07 |
| 0.71243  | 0.01971  | 0.67095  | 0.197168 | 1.77E-05 | 0.219401 | 1.69E-06 | 0.141932 | 0.00211  |
| 1.48E-05 | 0.005163 | 0.91139  | -0.04098 | 0.37696  | -0.13047 | 0.00474  | -0.04589 | 0.32243  |
| 0.09089  | 0.165849 | 0.00032  | 0.284991 | 3.55E-10 | 0.258651 | 1.42E-08 | 0.373776 | 6.24E-17 |
| 2.45E-12 | 0.144553 | 0.00174  | 0.20261  | 1.02E-05 | 0.056165 | 0.22573  | 0.2432   | 1.03E-07 |
| 0.06471  | 0.100042 | 0.03065  | 0.324802 | 6.19E-13 | 0.251713 | 3.51E-08 | 0.293334 | 1.01E-10 |
| 3.78E-11 | 0.195426 | 2.11E-05 | 0.185554 | 5.48E-05 | 0.104138 | 0.02442  | 0.343527 | 2.22E-14 |
| 0.76366  | -0.02936 | 0.52686  | -0.2192  | 1.73E-06 | -0.12862 | 0.00538  | -0.18939 | 3.80E-05 |
| 0.0161   | -0.05178 | 0.26412  | -0.30061 | 3.29E-11 | -0.24864 | 5.20E-08 | -0.23683 | 2.24E-07 |
| 0.30203  | 0.21216  | 3.74E-06 | 0.233062 | 3.52E-07 | 0.217386 | 2.12E-06 | 0.379469 | 1.92E-17 |
| 0.23895  | 0.175557 | 0.00014  | 0.352807 | 3.91E-15 | 0.336863 | 7.44E-14 | 0.450919 | 9.07E-25 |



|          |          |          |          |          |          |          |          |          |
|----------|----------|----------|----------|----------|----------|----------|----------|----------|
| 0.57832  | 0.206041 | 7.16E-06 | -0.03808 | 0.41169  | -0.21806 | 1.96E-06 | -0.00459 | 0.92124  |
| 0.87771  | -0.0365  | 0.43138  | 0.128551 | 0.0054   | -0.08361 | 0.07104  | -0.05466 | 0.23846  |
| 1.79E-05 | 0.087526 | 0.05876  | 0.252968 | 2.98E-08 | 0.08419  | 0.06911  | 0.193356 | 2.59E-05 |
| 7.14E-10 | -0.07253 | 0.11751  | -0.03536 | 0.44587  | -0.21704 | 2.20E-06 | -0.17135 | 0.0002   |
| 0.01745  | 0.00645  | 0.88943  | 0.09715  | 0.03584  | -0.05985 | 0.19672  | 0.039309 | 0.3967   |
| 6.50E-10 | 0.193195 | 2.63E-05 | 0.133441 | 0.00387  | 0.072164 | 0.11939  | 0.266804 | 4.72E-09 |
| 0.00023  | 0.037221 | 0.42228  | 0.064298 | 0.16538  | -0.04934 | 0.28727  | -0.00586 | 0.89957  |
| 0.83799  | 0.164555 | 0.00036  | 0.183078 | 6.91E-05 | 0.151722 | 0.00101  | 0.31955  | 1.51E-12 |
| 1.26E-06 | -0.11883 | 0.01016  | -0.06774 | 0.14384  | -0.2355  | 2.63E-07 | -0.24809 | 5.57E-08 |
| 1.50E-13 | -0.08845 | 0.05612  | -0.27999 | 7.36E-10 | -0.20351 | 9.31E-06 | -0.26199 | 9.07E-09 |
| 0.60364  | 0.038089 | 0.41153  | 0.012529 | 0.78713  | -0.08751 | 0.05881  | 0.047987 | 0.30075  |
| 1.52E-09 | 0.179123 | 9.94E-05 | 0.483352 | 1.03E-28 | 0.333941 | 1.25E-13 | 0.51594  | 3.98E-33 |
| 1.02E-08 | 0.011697 | 0.80097  | 0.051801 | 0.26392  | -0.10509 | 0.02314  | 0.039296 | 0.39686  |
| 7.06E-07 | 0.143141 | 0.00193  | 0.269242 | 3.37E-09 | 0.104348 | 0.02413  | 0.198652 | 1.53E-05 |
| 0.00025  | 0.069543 | 0.13345  | 0.142895 | 0.00196  | -0.05699 | 0.21899  | 0.081619 | 0.07807  |
| 3.47E-11 | 0.152524 | 0.00094  | 0.036246 | 0.43455  | 0.003941 | 0.93231  | 0.176191 | 0.00013  |
| 0.3939   | -0.01065 | 0.81847  | -0.06917 | 0.13554  | -0.20161 | 1.13E-05 | -0.12064 | 0.00907  |
| 0.00077  | 0.006889 | 0.88197  | -0.13054 | 0.00472  | 0.059562 | 0.19885  | -0.01587 | 0.73238  |
| 0.00362  | 0.150109 | 0.00114  | 0.170632 | 0.00021  | 0.07477  | 0.10659  | 0.228964 | 5.69E-07 |
| 0.08477  | -0.11986 | 0.00952  | -0.32402 | 7.08E-13 | -0.25233 | 3.24E-08 | -0.33063 | 2.25E-13 |
| 0.00597  | 0.009774 | 0.83315  | 0.148791 | 0.00126  | -0.04829 | 0.29774  | -0.01612 | 0.72825  |
| 8.77E-15 | 0.091016 | 0.04933  | 0.189386 | 3.80E-05 | -0.0002  | 0.99654  | 0.175062 | 0.00014  |
| 3.31E-06 | 0.068874 | 0.13724  | 0.016315 | 0.7251   | 0.130231 | 0.00482  | 0.079369 | 0.08666  |
| 0.66745  | -0.01879 | 0.68543  | 0.022693 | 0.62474  | -0.11861 | 0.01031  | -0.07202 | 0.12013  |
| 0.12499  | 0.079452 | 0.08633  | 0.171318 | 0.0002   | 0.143789 | 0.00184  | 0.200889 | 1.22E-05 |
| 2.61E-09 | 0.085833 | 0.06384  | 0.233609 | 3.30E-07 | 0.213154 | 3.36E-06 | 0.282695 | 4.97E-10 |
| 0.50903  | 0.109599 | 0.01782  | 0.303492 | 2.09E-11 | 0.128109 | 0.00556  | 0.234082 | 3.12E-07 |
| 1.27E-08 | -0.01894 | 0.68316  | 0.026339 | 0.57019  | -0.06841 | 0.13992  | -0.05088 | 0.27249  |
| 4.86E-11 | 0.20127  | 1.17E-05 | 0.334801 | 1.08E-13 | 0.19677  | 1.85E-05 | 0.412701 | 1.24E-20 |
| 0.00525  | -0.03537 | 0.44573  | -0.09327 | 0.04395  | 0.061332 | 0.1858   | -0.04976 | 0.28319  |
| 0.52549  | 0.017132 | 0.71193  | 0.032906 | 0.47809  | -0.12328 | 0.00765  | -0.06352 | 0.17059  |
| 5.08E-05 | 0.171163 | 0.0002   | 0.196305 | 1.93E-05 | 0.176705 | 0.00012  | 0.348398 | 8.97E-15 |
| 1.96E-11 | 0.125254 | 0.00672  | -0.01529 | 0.74179  | -0.05449 | 0.23991  | 0.115009 | 0.01288  |
| 0.00431  | 0.122834 | 0.00787  | 0.11916  | 0.00996  | 0.27541  | 1.42E-09 | 0.351672 | 4.85E-15 |
| 1.39E-15 | 0.161009 | 0.00048  | 0.026507 | 0.56774  | 0.030363 | 0.51276  | 0.200395 | 1.28E-05 |
| 1.34E-15 | 0.071928 | 0.12061  | -0.02418 | 0.60224  | 0.041329 | 0.37287  | 0.075134 | 0.10489  |
| 5.42E-18 | 0.204571 | 8.34E-06 | 0.322133 | 9.77E-13 | 0.164811 | 0.00035  | 0.442009 | 9.33E-24 |
| 1.91E-24 | 0.205348 | 7.70E-06 | 0.136703 | 0.00307  | 0.14199  | 0.0021   | 0.289276 | 1.87E-10 |
| 3.21E-46 | 0.194303 | 2.36E-05 | 0.167413 | 0.00028  | 0.121996 | 0.00831  | 0.339458 | 4.66E-14 |
| 0.00015  | 0.18127  | 8.17E-05 | -0.01585 | 0.73259  | 0.149904 | 0.00116  | 0.300212 | 3.50E-11 |
| 3.94E-24 | 0.18526  | 5.63E-05 | 0.110054 | 0.01735  | 0.121289 | 0.0087   | 0.288286 | 2.17E-10 |
| 2.98E-11 | -0.04135 | 0.37257  | 0.15088  | 0.00107  | 0.07736  | 0.09496  | 0.064094 | 0.16673  |
| 0.00027  | -0.08032 | 0.08295  | -0.31108 | 6.17E-12 | -0.25924 | 1.31E-08 | -0.33448 | 1.14E-13 |
| 1.39E-10 | -0.26168 | 9.46E-09 | -0.06343 | 0.17116  | -0.169   | 0.00024  | -0.39315 | 1.03E-18 |
| 9.62E-05 | 0.055489 | 0.23137  | 0.129003 | 0.00524  | 0.164382 | 0.00036  | 0.178244 | 0.00011  |

|          |          |          |          |          |          |          |          |          |
|----------|----------|----------|----------|----------|----------|----------|----------|----------|
| 8.05E-05 | 0.006161 | 0.89436  | 0.154089 | 0.00083  | 0.125582 | 0.00658  | 0.097865 | 0.03449  |
| 0.55151  | -0.06847 | 0.13956  | -0.2905  | 1.56E-10 | -0.15463 | 0.0008   | -0.25419 | 2.54E-08 |
| 7.68E-17 | 0.131645 | 0.00438  | 0.2084   | 5.59E-06 | 0.105035 | 0.02321  | 0.309087 | 8.52E-12 |
| 6.33E-27 | 0.173264 | 0.00017  | 0.063787 | 0.16877  | -0.06834 | 0.14034  | 0.180192 | 9.02E-05 |
| 2.76E-14 | 0.18487  | 5.84E-05 | 0.210342 | 4.55E-06 | 0.220255 | 1.54E-06 | 0.410733 | 1.97E-20 |
| 3.91E-05 | -0.13676 | 0.00306  | -0.16405 | 0.00037  | -0.16268 | 0.00042  | -0.28246 | 5.14E-10 |
| 1.88E-06 | 0.083641 | 0.07095  | 0.098246 | 0.03379  | -0.01793 | 0.6992   | 0.078071 | 0.09195  |
| 3.03E-10 | 0.066355 | 0.15224  | 0.150553 | 0.0011   | 0.192305 | 2.87E-05 | 0.261052 | 1.03E-08 |
| 8.54E-24 | -0.23507 | 2.77E-07 | -0.22693 | 7.20E-07 | -0.27378 | 1.79E-09 | -0.40353 | 1.02E-19 |
| 4.28E-13 | 0.151723 | 0.00101  | 0.299334 | 4.02E-11 | 0.248615 | 5.21E-08 | 0.345747 | 1.47E-14 |
| 4.94E-20 | 0.140607 | 0.00232  | 0.279773 | 7.60E-10 | 0.142575 | 0.00201  | 0.289573 | 1.79E-10 |
| 2.84E-11 | -0.00088 | 0.98482  | -0.06388 | 0.16812  | 0.034433 | 0.45789  | 0.001004 | 0.98274  |
| 2.79E-09 | -0.04099 | 0.3768   | -0.02874 | 0.53558  | -0.07544 | 0.10346  | -0.01899 | 0.68236  |
| 1.13E-19 | 0.128341 | 0.00548  | 0.176499 | 0.00013  | 0.23312  | 3.49E-07 | 0.34385  | 2.09E-14 |
| 1.22E-12 | -0.2585  | 1.45E-08 | -0.26917 | 3.41E-09 | -0.29213 | 1.22E-10 | -0.43524 | 5.24E-23 |
| 8.70E-19 | -0.04705 | 0.31031  | 0.058431 | 0.20753  | -0.10037 | 0.03011  | 0.004904 | 0.91582  |
| 3.65E-09 | -0.22267 | 1.17E-06 | -0.33096 | 2.12E-13 | -0.25517 | 2.24E-08 | -0.44437 | 5.06E-24 |
| 2.54E-09 | -0.05375 | 0.24633  | 0.199198 | 1.45E-05 | 0.142157 | 0.00207  | 0.119697 | 0.00962  |
| 5.49E-27 | 0.023577 | 0.6113   | -0.02237 | 0.62974  | 0.14565  | 0.0016   | 0.081877 | 0.07713  |
| 5.84E-16 | 0.143926 | 0.00182  | 0.189846 | 3.64E-05 | 0.190724 | 3.34E-05 | 0.302793 | 2.33E-11 |
| 3.81E-28 | 0.194455 | 2.32E-05 | 0.311412 | 5.84E-12 | 0.305886 | 1.43E-11 | 0.471824 | 2.91E-27 |
| 5.05E-20 | 0.050608 | 0.27509  | 0.270775 | 2.73E-09 | 0.279389 | 8.03E-10 | 0.296363 | 6.37E-11 |
| 8.13E-30 | 0.169221 | 0.00024  | 0.146821 | 0.00146  | 0.105469 | 0.02264  | 0.268704 | 3.63E-09 |
| 1.23E-17 | 0.271787 | 2.37E-09 | 0.085021 | 0.0664   | 0.167513 | 0.00028  | 0.394683 | 7.39E-19 |
| 3.57E-25 | 0.090454 | 0.05076  | 0.033626 | 0.46851  | -0.0514  | 0.26766  | 0.12444  | 0.00709  |
| 3.93E-36 | 0.062011 | 0.18098  | 0.125011 | 0.00683  | -0.01533 | 0.74112  | 0.100871 | 0.02929  |
| 3.21E-11 | 0.235955 | 2.49E-07 | 0.157238 | 0.00065  | 0.074773 | 0.10658  | 0.287179 | 2.56E-10 |
| 3.02E-07 | 0.174253 | 0.00015  | 0.202336 | 1.05E-05 | 0.2573   | 1.69E-08 | 0.443295 | 6.69E-24 |
| 4.11E-38 | 0.192153 | 2.91E-05 | 0.143951 | 0.00182  | 0.014348 | 0.75713  | 0.235573 | 2.61E-07 |
| 7.74E-23 | 0.029642 | 0.52282  | 0.146935 | 0.00145  | -0.1082  | 0.01935  | 0.062113 | 0.18026  |
| 3.47E-06 | -0.1147  | 0.01313  | -0.12281 | 0.00789  | -0.13437 | 0.00362  | -0.22751 | 6.74E-07 |
| 0.057    | 0.079911 | 0.08452  | -0.0115  | 0.80427  | -0.02837 | 0.54076  | 0.095139 | 0.03987  |
| 3.24E-08 | -0.01548 | 0.73867  | 0.026572 | 0.56678  | -0.01409 | 0.76132  | 0.041554 | 0.37027  |
| 4.23E-11 | 0.040933 | 0.37747  | 0.195646 | 2.06E-05 | 0.025263 | 0.58606  | 0.129616 | 0.00503  |
| 0.00507  | 0.249768 | 4.50E-08 | 0.133899 | 0.00374  | 0.153416 | 0.00088  | 0.335699 | 9.16E-14 |
| 4.30E-26 | 0.177153 | 0.00012  | 0.204692 | 8.24E-06 | 0.265949 | 5.31E-09 | 0.386352 | 4.49E-18 |
| 8.10E-13 | 0.09484  | 0.0405   | -0.02552 | 0.58232  | 0.12339  | 0.0076   | 0.174835 | 0.00015  |
| 1.09E-19 | 0.129948 | 0.00491  | 0.135115 | 0.00344  | 0.080297 | 0.08303  | 0.232429 | 3.79E-07 |
| 5.96E-29 | 0.106637 | 0.02118  | 0.065459 | 0.15786  | -0.02218 | 0.63256  | 0.130321 | 0.00479  |
| 0.00398  | 0.199694 | 1.38E-05 | 0.293559 | 9.80E-11 | 0.342442 | 2.70E-14 | 0.4929   | 5.87E-30 |
| 2.18E-15 | 0.079622 | 0.08566  | 0.433528 | 8.04E-23 | 0.230697 | 4.65E-07 | 0.339483 | 4.64E-14 |
| 1.78E-18 | 0.40904  | 2.91E-20 | 0.030277 | 0.51396  | 0.121614 | 0.00852  | 0.382837 | 9.48E-18 |
| 2.62E-19 | 0.082124 | 0.07624  | 0.22629  | 7.76E-07 | 0.202614 | 1.02E-05 | 0.276621 | 1.20E-09 |
| 3.89E-10 | -0.13187 | 0.00431  | -0.08176 | 0.07754  | -0.11049 | 0.01691  | -0.28001 | 7.34E-10 |
| 9.14E-12 | 0.275194 | 1.46E-09 | 0.376982 | 3.22E-17 | 0.223218 | 1.10E-06 | 0.391692 | 1.42E-18 |

|          |          |          |          |          |          |          |          |          |
|----------|----------|----------|----------|----------|----------|----------|----------|----------|
| 8.11E-21 | 0.145978 | 0.00156  | 0.297255 | 5.55E-11 | 0.167003 | 0.00029  | 0.331544 | 1.92E-13 |
| 5.67E-07 | 0.333309 | 1.40E-13 | 0.116595 | 0.01169  | 0.302253 | 2.54E-11 | 0.478393 | 4.40E-28 |
| 5.65E-15 | 0.084247 | 0.06892  | 0.083488 | 0.07147  | -0.01389 | 0.76473  | 0.15477  | 0.00079  |
| 8.11E-11 | 0.242668 | 1.10E-07 | 0.22286  | 1.15E-06 | 0.187347 | 4.62E-05 | 0.387616 | 3.43E-18 |
| 1.21E-13 | 0.157165 | 0.00065  | 0.121992 | 0.00831  | 0.085693 | 0.06427  | 0.26956  | 3.23E-09 |
| 4.49E-07 | 0.114111 | 0.01361  | 0.108867 | 0.01861  | 0.059646 | 0.19822  | 0.174171 | 0.00016  |
| 1.85E-09 | 0.019446 | 0.67512  | 0.118645 | 0.01028  | -0.0195  | 0.67433  | 0.063663 | 0.1696   |
| 2.21E-25 | -0.04023 | 0.38571  | -0.01143 | 0.80538  | 0.078281 | 0.09108  | 0.053112 | 0.252    |
| 0.00012  | -0.09897 | 0.0325   | -0.18434 | 6.14E-05 | -0.16845 | 0.00026  | -0.26649 | 4.93E-09 |
| 0.08588  | 0.056268 | 0.22488  | -0.06804 | 0.14206  | 0.049846 | 0.28239  | 0.033052 | 0.47613  |
| 2.19E-17 | 0.076977 | 0.09661  | 0.116412 | 0.01182  | 0.058805 | 0.20463  | 0.120659 | 0.00905  |
| 1.44E-14 | 0.207441 | 6.18E-06 | 0.32521  | 5.77E-13 | 0.270865 | 2.69E-09 | 0.407567 | 4.08E-20 |
| 2.42E-15 | 0.388524 | 2.82E-18 | 0.23022  | 4.92E-07 | 0.235904 | 2.51E-07 | 0.464763 | 2.11E-26 |
| 4.33E-23 | 0.048732 | 0.2933   | 0.368684 | 1.75E-16 | 0.25985  | 1.21E-08 | 0.343175 | 2.36E-14 |
| 2.10E-26 | 0.17974  | 9.40E-05 | 0.161914 | 0.00044  | 0.113526 | 0.0141   | 0.318505 | 1.80E-12 |
| 6.05E-16 | 0.052453 | 0.25795  | 0.318066 | 1.94E-12 | 0.196336 | 1.93E-05 | 0.298839 | 4.34E-11 |
| 1.76E-13 | 0.086372 | 0.06218  | 0.290781 | 1.49E-10 | 0.222824 | 1.15E-06 | 0.320284 | 1.34E-12 |
| 0.01483  | 0.20973  | 4.85E-06 | 0.203435 | 9.38E-06 | 0.255383 | 2.18E-08 | 0.373658 | 6.39E-17 |
| 3.95E-34 | 0.042529 | 0.35914  | 0.080486 | 0.0823   | -0.08465 | 0.06758  | 0.054756 | 0.2376   |
| 5.57E-14 | 0.231211 | 4.38E-07 | 0.260429 | 1.12E-08 | 0.323534 | 7.69E-13 | 0.481104 | 2.00E-28 |
| 1.24E-09 | 0.097647 | 0.0349   | 0.344701 | 1.78E-14 | 0.399703 | 2.43E-19 | 0.477383 | 5.90E-28 |
| 3.60E-25 | 0.164062 | 0.00037  | 0.298107 | 4.87E-11 | 0.168838 | 0.00025  | 0.328709 | 3.15E-13 |
| 9.70E-14 | 0.107053 | 0.02067  | 0.170029 | 0.00022  | 0.202465 | 1.04E-05 | 0.375063 | 4.79E-17 |
| 5.56E-21 | 0.029001 | 0.53186  | -0.05196 | 0.26244  | 0.100567 | 0.02978  | 0.09779  | 0.03463  |
| 3.54E-11 | 0.095635 | 0.03884  | 0.17059  | 0.00021  | 0.203208 | 9.61E-06 | 0.25917  | 1.32E-08 |
| 3.49E-07 | 0.027248 | 0.55695  | -0.05978 | 0.1972   | 0.030076 | 0.51676  | 0.015165 | 0.74378  |
| 0.00017  | 0.076575 | 0.09837  | 0.263465 | 7.44E-09 | 0.215698 | 2.55E-06 | 0.268662 | 3.66E-09 |
| 9.96E-12 | 0.22863  | 5.92E-07 | 0.251735 | 3.50E-08 | 0.239293 | 1.66E-07 | 0.287117 | 2.59E-10 |
| 3.43E-10 | -0.32217 | 9.70E-13 | -0.09463 | 0.04095  | -0.04874 | 0.29324  | -0.32828 | 3.39E-13 |
| 0.02596  | 0.174692 | 0.00015  | 0.26869  | 3.64E-09 | 0.31949  | 1.53E-12 | 0.395869 | 5.69E-19 |
| 4.29E-09 | 0.125572 | 0.00659  | 0.272614 | 2.11E-09 | 0.170332 | 0.00022  | 0.289019 | 1.95E-10 |
| 8.45E-09 | -0.32832 | 3.37E-13 | -0.25127 | 3.71E-08 | -0.32701 | 4.23E-13 | -0.55449 | 5.31E-39 |
| 2.39E-05 | 0.101673 | 0.02802  | 0.300239 | 3.49E-11 | 0.18016  | 9.04E-05 | 0.239644 | 1.59E-07 |
| 6.58E-15 | 0.1188   | 0.01018  | 0.160095 | 0.00051  | 0.069925 | 0.13133  | 0.240131 | 1.50E-07 |
| 0.31899  | 0.187085 | 4.74E-05 | 0.04913  | 0.28937  | 0.239387 | 1.64E-07 | 0.356159 | 2.06E-15 |
| 1.20E-44 | 0.021869 | 0.63737  | 0.110298 | 0.0171   | -0.04852 | 0.29536  | 0.067812 | 0.14342  |
| 1.16E-15 | 0.132727 | 0.00406  | 0.17722  | 0.00012  | 0.145144 | 0.00166  | 0.308197 | 9.84E-12 |
| 4.44E-13 | 0.122887 | 0.00785  | 0.281684 | 5.76E-10 | 0.163372 | 0.00039  | 0.322471 | 9.22E-13 |
| 0.00486  | 0.130352 | 0.00478  | 0.347526 | 1.06E-14 | 0.267896 | 4.06E-09 | 0.344931 | 1.71E-14 |
| 9.65E-22 | 0.122812 | 0.00789  | 0.104799 | 0.02352  | 0.047231 | 0.30844  | 0.183146 | 6.86E-05 |
| 3.85E-33 | 0.198821 | 1.50E-05 | 0.216997 | 2.21E-06 | 0.266088 | 5.21E-09 | 0.428223 | 3.00E-22 |
| 0.00606  | -0.16561 | 0.00033  | -0.1766  | 0.00012  | -0.28389 | 4.17E-10 | -0.3315  | 1.93E-13 |
| 2.52E-09 | 0.135753 | 0.00329  | 0.167992 | 0.00027  | 0.227372 | 6.85E-07 | 0.305112 | 1.61E-11 |
| 1.58E-38 | 0.251307 | 3.70E-08 | 0.290754 | 1.50E-10 | 0.270002 | 3.04E-09 | 0.438669 | 2.19E-23 |
| 1.62E-13 | 0.196927 | 1.82E-05 | 0.256118 | 1.98E-08 | 0.234924 | 2.82E-07 | 0.389295 | 2.39E-18 |

|          |          |          |          |          |          |          |          |          |
|----------|----------|----------|----------|----------|----------|----------|----------|----------|
| 3.24E-16 | 0.168683 | 0.00025  | 0.239408 | 1.64E-07 | 0.19407  | 2.41E-05 | 0.35198  | 4.57E-15 |
| 1.20E-13 | 0.033609 | 0.46872  | 0.137152 | 0.00298  | 0.039783 | 0.39103  | 0.199221 | 1.44E-05 |
| 0.00184  | 0.092646 | 0.04539  | 0.245921 | 7.32E-08 | 0.330561 | 2.28E-13 | 0.450733 | 9.53E-25 |
| 4.65E-21 | 0.122512 | 0.00804  | 0.209334 | 5.06E-06 | 0.136706 | 0.00307  | 0.269908 | 3.08E-09 |
| 1.67E-09 | 0.242289 | 1.15E-07 | 0.01407  | 0.76169  | 0.177988 | 0.00011  | 0.234275 | 3.05E-07 |
| 6.48E-36 | -0.04302 | 0.35356  | -0.06599 | 0.15451  | -0.11452 | 0.01327  | -0.05311 | 0.25199  |
| 3.79E-31 | 0.183058 | 6.92E-05 | 0.293959 | 9.22E-11 | 0.18078  | 8.54E-05 | 0.337623 | 6.49E-14 |
| 1.70E-24 | 0.123444 | 0.00757  | 0.511798 | 1.54E-32 | 0.46297  | 3.47E-26 | 0.540117 | 1.01E-36 |
| 5.60E-30 | 0.053598 | 0.24769  | 0.094087 | 0.04212  | 0.111176 | 0.01624  | 0.169402 | 0.00024  |
| 4.54E-15 | 0.016697 | 0.71894  | 0.077668 | 0.09365  | -0.05018 | 0.27922  | 0.057217 | 0.21714  |
| 1.42E-16 | 0.252039 | 3.36E-08 | 0.118126 | 0.01062  | 0.086039 | 0.0632   | 0.359044 | 1.18E-15 |
| 1.15E-12 | -0.17047 | 0.00021  | -0.13678 | 0.00306  | -0.21844 | 1.88E-06 | -0.39118 | 1.59E-18 |
| 2.43E-26 | 0.11798  | 0.01072  | 0.327721 | 3.74E-13 | 0.252086 | 3.34E-08 | 0.371398 | 1.01E-16 |
| 4.21E-47 | 0.168429 | 0.00026  | 0.296611 | 6.14E-11 | 0.20745  | 6.18E-06 | 0.366927 | 2.49E-16 |
| 1.62E-27 | 0.186816 | 4.86E-05 | 0.149246 | 0.00122  | 0.211553 | 3.99E-06 | 0.331751 | 1.85E-13 |
| 7.65E-09 | 0.231097 | 4.44E-07 | 0.219035 | 1.76E-06 | 0.22051  | 1.50E-06 | 0.455883 | 2.40E-25 |
| 1.09E-13 | 0.176255 | 0.00013  | 0.149684 | 0.00118  | 0.142896 | 0.00196  | 0.336618 | 7.77E-14 |
| 7.90E-18 | 0.186091 | 5.21E-05 | 0.147823 | 0.00136  | 0.115527 | 0.01248  | 0.292014 | 1.24E-10 |
| 0.00119  | 0.130762 | 0.00465  | 0.266996 | 4.60E-09 | 0.432953 | 9.29E-23 | 0.464936 | 2.02E-26 |
| 1.32E-32 | -0.18743 | 4.59E-05 | -0.24016 | 1.50E-07 | -0.22512 | 8.88E-07 | -0.37745 | 2.93E-17 |
| 3.99E-35 | 0.136741 | 0.00307  | 0.2148   | 2.81E-06 | 0.134454 | 0.0036   | 0.318325 | 1.86E-12 |
| 7.57E-08 | 0.102797 | 0.02632  | 0.009433 | 0.83889  | 0.136637 | 0.00309  | 0.297567 | 5.29E-11 |
| 7.17E-13 | 0.28165  | 5.79E-10 | 0.282923 | 4.81E-10 | 0.270264 | 2.93E-09 | 0.519701 | 1.15E-33 |
| 7.34E-12 | 0.061252 | 0.18638  | 0.082974 | 0.07323  | -0.08326 | 0.07225  | 0.061918 | 0.18163  |
| 4.79E-08 | 0.164168 | 0.00037  | 0.101272 | 0.02865  | 0.18656  | 4.98E-05 | 0.337433 | 6.72E-14 |
| 1.87E-08 | 0.20784  | 5.93E-06 | 0.318161 | 1.91E-12 | 0.271308 | 2.53E-09 | 0.426069 | 5.09E-22 |
| 1.98E-15 | -0.03469 | 0.45454  | -0.18914 | 3.90E-05 | -0.02935 | 0.52693  | -0.13156 | 0.0044   |
| 6.35E-08 | 0.105183 | 0.02301  | 0.269189 | 3.40E-09 | 0.162013 | 0.00044  | 0.34506  | 1.67E-14 |
| 2.01E-17 | 0.142456 | 0.00203  | 0.509651 | 3.09E-32 | 0.393991 | 8.60E-19 | 0.527721 | 7.67E-35 |
| 1.50E-14 | 0.197262 | 1.76E-05 | 0.354133 | 3.03E-15 | 0.405585 | 6.43E-20 | 0.535061 | 6.04E-36 |
| 1.43E-05 | -0.20274 | 1.01E-05 | -0.23236 | 3.82E-07 | -0.22657 | 7.52E-07 | -0.41154 | 1.63E-20 |
| 4.98E-36 | 0.167914 | 0.00027  | 0.133246 | 0.00392  | 0.106707 | 0.02109  | 0.28808  | 2.24E-10 |
| 4.33E-11 | -0.05621 | 0.22536  | -0.18519 | 5.67E-05 | -0.12874 | 0.00533  | -0.22372 | 1.04E-06 |
| 3.77E-35 | 0.045447 | 0.32709  | 0.07837  | 0.09071  | -0.12122 | 0.00874  | -0.00069 | 0.98805  |
| 2.47E-27 | 0.113282 | 0.01431  | 0.193951 | 2.44E-05 | 0.117737 | 0.01089  | 0.238705 | 1.79E-07 |
| 3.13E-13 | -0.01516 | 0.74382  | 0.188991 | 3.95E-05 | 0.051539 | 0.26634  | 0.074506 | 0.10783  |
| 3.78E-21 | 0.093705 | 0.04297  | 0.224507 | 9.52E-07 | 0.084174 | 0.06916  | 0.243458 | 9.96E-08 |
| 5.47E-07 | -0.02776 | 0.54952  | -0.12651 | 0.00619  | -0.00971 | 0.83432  | 0.063927 | 0.16784  |
| 0.78315  | 0.237695 | 2.02E-07 | 0.159537 | 0.00054  | 0.229058 | 5.63E-07 | 0.314578 | 3.47E-12 |
| 7.31E-15 | -0.18279 | 7.09E-05 | 0.169874 | 0.00023  | -0.00062 | 0.98932  | -0.14836 | 0.0013   |
| 1.21E-17 | 0.093151 | 0.04422  | 0.202713 | 1.01E-05 | 0.032396 | 0.48494  | 0.204084 | 8.78E-06 |
| 2.14E-07 | 0.109963 | 0.01745  | 0.01492  | 0.74777  | 0.058064 | 0.2104   | 0.189241 | 3.86E-05 |
| 8.92E-24 | 0.078988 | 0.08819  | -0.05124 | 0.26917  | 0.109643 | 0.01778  | 0.041117 | 0.37532  |
| 2.17E-06 | 0.173951 | 0.00016  | 0.22137  | 1.36E-06 | 0.089093 | 0.05436  | 0.285276 | 3.40E-10 |
| 7.97E-12 | 0.116385 | 0.01184  | 0.140317 | 0.00237  | 0.202182 | 1.07E-05 | 0.376411 | 3.63E-17 |

|          |          |          |          |          |          |          |          |          |
|----------|----------|----------|----------|----------|----------|----------|----------|----------|
| 0.00045  | 0.061256 | 0.18635  | -0.03245 | 0.48426  | 0.137158 | 0.00298  | 0.154071 | 0.00084  |
| 5.83E-05 | 0.122702 | 0.00794  | 0.14637  | 0.00152  | 0.020969 | 0.65129  | 0.19514  | 2.17E-05 |
| 5.93E-11 | 0.067197 | 0.14709  | 0.226726 | 7.38E-07 | 0.110289 | 0.01711  | 0.20171  | 1.12E-05 |
| 3.22E-22 | 0.070157 | 0.13005  | 0.020576 | 0.6574   | -0.08127 | 0.07935  | 0.087289 | 0.05945  |
| 2.93E-20 | 0.279647 | 7.74E-10 | 0.268829 | 3.57E-09 | 0.38273  | 9.70E-18 | 0.526463 | 1.18E-34 |
| 1.46E-14 | 0.071055 | 0.12519  | 0.115933 | 0.01217  | 0.055899 | 0.22794  | 0.248149 | 5.53E-08 |
| 7.79E-07 | 0.232137 | 3.93E-07 | 0.043418 | 0.34917  | 0.20367  | 9.16E-06 | 0.367892 | 2.05E-16 |
| 0.0002   | 0.153342 | 0.00089  | 0.024039 | 0.60434  | 0.093855 | 0.04264  | 0.24924  | 4.81E-08 |
| 9.78E-21 | 0.002207 | 0.96206  | -0.06157 | 0.18411  | -0.04889 | 0.29175  | -0.0186  | 0.68855  |
| 3.13E-08 | -0.2408  | 1.38E-07 | -0.16806 | 0.00026  | -0.28394 | 4.14E-10 | -0.45529 | 2.82E-25 |
| 3.07E-09 | 0.101646 | 0.02806  | 0.26107  | 1.03E-08 | 0.189176 | 3.88E-05 | 0.345828 | 1.45E-14 |
| 5.61E-19 | -0.10393 | 0.0247   | -0.01989 | 0.66812  | 0.04418  | 0.34077  | -0.13922 | 0.00257  |
| 3.69E-12 | 0.175426 | 0.00014  | 0.05252  | 0.25733  | 0.037241 | 0.42203  | 0.159993 | 0.00052  |
| 1.48E-13 | 0.174091 | 0.00016  | 0.233957 | 3.16E-07 | 0.202589 | 1.02E-05 | 0.382666 | 9.83E-18 |
| 1.69E-08 | 0.173903 | 0.00016  | 0.062892 | 0.17484  | 0.02024  | 0.66265  | 0.22843  | 6.06E-07 |
| 1.77E-17 | 0.112331 | 0.01515  | -0.00251 | 0.95691  | 0.050895 | 0.27238  | 0.195153 | 2.17E-05 |
| 4.72E-08 | -0.03335 | 0.4721   | 0.095989 | 0.03812  | 0.054874 | 0.23659  | -0.01279 | 0.78288  |
| 5.22E-23 | -0.03364 | 0.46834  | -0.04512 | 0.33055  | -0.12859 | 0.00539  | -0.04086 | 0.37831  |
| 4.59E-14 | -0.16386 | 0.00038  | -0.21047 | 4.49E-06 | -0.29349 | 9.91E-11 | -0.42258 | 1.19E-21 |
| 0.4976   | 0.243132 | 1.04E-07 | 0.229236 | 5.52E-07 | 0.46602  | 1.49E-26 | 0.534382 | 7.66E-36 |
| 5.05E-06 | 0.130677 | 0.00468  | 0.323315 | 7.99E-13 | 0.272997 | 2.00E-09 | 0.337946 | 6.12E-14 |
| 0.0035   | 0.079109 | 0.0877   | 0.240832 | 1.38E-07 | 0.371205 | 1.05E-16 | 0.528571 | 5.73E-35 |
| 0.02409  | 0.134969 | 0.00347  | 0.141632 | 0.00216  | 0.197704 | 1.68E-05 | 0.239683 | 1.59E-07 |
| 3.11E-21 | 0.18894  | 3.97E-05 | 0.102775 | 0.02636  | 0.090661 | 0.05023  | 0.285106 | 3.49E-10 |
| 1.38E-29 | -0.19354 | 2.54E-05 | -0.1236  | 0.00749  | -0.14847 | 0.00129  | -0.32288 | 8.61E-13 |
| 3.71E-29 | 0.177135 | 0.00012  | 0.226077 | 7.95E-07 | 0.210435 | 4.50E-06 | 0.415676 | 6.18E-21 |
| 7.67E-10 | 0.163864 | 0.00038  | 0.245753 | 7.48E-08 | 0.264581 | 6.39E-09 | 0.393311 | 9.98E-19 |
| 6.70E-31 | 0.113409 | 0.0142   | 0.162277 | 0.00043  | 0.033236 | 0.47367  | 0.21555  | 2.59E-06 |
| 8.73E-18 | -0.00453 | 0.92221  | 0.139667 | 0.00249  | 0.013649 | 0.76861  | 0.05478  | 0.2374   |
| 3.89E-05 | 0.240631 | 1.41E-07 | 0.106147 | 0.02178  | 0.167798 | 0.00027  | 0.40437  | 8.47E-20 |
| 8.69E-27 | 0.147983 | 0.00134  | 0.123654 | 0.00747  | 0.080911 | 0.08069  | 0.247714 | 5.84E-08 |
| 9.41E-33 | -0.22124 | 1.38E-06 | -0.24592 | 7.33E-08 | -0.25023 | 4.24E-08 | -0.37573 | 4.18E-17 |
| 2.05E-16 | 0.078862 | 0.0887   | 0.100772 | 0.02945  | 0.105604 | 0.02247  | 0.215539 | 2.59E-06 |
| 5.01E-28 | -0.00535 | 0.90828  | 0.114278 | 0.01347  | -0.05603 | 0.22681  | 0.053139 | 0.25176  |
| 9.03E-24 | 0.114997 | 0.01289  | 0.075177 | 0.10469  | 0.190348 | 3.47E-05 | 0.333782 | 1.29E-13 |
| 2.56E-21 | 0.055623 | 0.23025  | 0.165327 | 0.00033  | 0.048353 | 0.29708  | 0.152967 | 0.00091  |
| 4.98E-11 | 0.29095  | 1.46E-10 | 0.238109 | 1.92E-07 | 0.397207 | 4.23E-19 | 0.582676 | 8.31E-44 |
| 0.00045  | 0.25169  | 3.52E-08 | 0.240453 | 1.44E-07 | 0.237863 | 1.98E-07 | 0.35647  | 1.94E-15 |
| 2.89E-05 | 0.130791 | 0.00464  | 0.368605 | 1.78E-16 | 0.304788 | 1.70E-11 | 0.360212 | 9.38E-16 |
| 5.15E-19 | 0.161946 | 0.00044  | 0.203795 | 9.04E-06 | 0.220954 | 1.42E-06 | 0.386965 | 3.94E-18 |
| 1.80E-11 | 0.037761 | 0.41557  | -0.06713 | 0.14749  | 0.078724 | 0.08926  | 0.048106 | 0.29955  |
| 1.58E-17 | 0.200289 | 1.30E-05 | 0.257411 | 1.67E-08 | 0.289602 | 1.79E-10 | 0.389154 | 2.46E-18 |
| 5.32E-13 | 0.116723 | 0.01159  | 0.150695 | 0.00109  | 0.163185 | 0.0004   | 0.308693 | 9.09E-12 |
| 1.46E-06 | -0.11763 | 0.01096  | -0.01269 | 0.78443  | -0.10935 | 0.01808  | -0.24841 | 5.35E-08 |
| 7.21E-13 | 0.056278 | 0.22479  | 0.183032 | 6.94E-05 | 0.080972 | 0.08046  | 0.202486 | 1.03E-05 |

|          |          |          |          |          |          |          |          |          |
|----------|----------|----------|----------|----------|----------|----------|----------|----------|
| 5.51E-22 | 0.175714 | 0.00014  | 0.102905 | 0.02617  | 0.022406 | 0.62912  | 0.252824 | 3.04E-08 |
| 6.29E-16 | 0.131583 | 0.0044   | 0.05805  | 0.21051  | 0.024714 | 0.59422  | 0.198405 | 1.57E-05 |
| 6.14E-10 | 0.100613 | 0.02971  | 0.321152 | 1.15E-12 | 0.310856 | 6.39E-12 | 0.347337 | 1.09E-14 |
| 0.00102  | 0.013519 | 0.77076  | 0.275889 | 1.33E-09 | 0.314305 | 3.63E-12 | 0.375778 | 4.13E-17 |
| 1.53E-23 | -0.21346 | 3.25E-06 | 0.00766  | 0.86886  | 0.011393 | 0.80603  | -0.14047 | 0.00235  |
| 4.98E-10 | 0.056701 | 0.22133  | 0.072513 | 0.11761  | 0.097821 | 0.03457  | 0.212861 | 3.47E-06 |
| 4.00E-13 | 0.154451 | 0.00081  | 0.186808 | 4.87E-05 | 0.057556 | 0.21442  | 0.233217 | 3.45E-07 |
| 3.69E-23 | 0.13773  | 0.00286  | 0.147281 | 0.00141  | 0.027675 | 0.55079  | 0.200249 | 1.30E-05 |
| 0.00207  | 0.214622 | 2.87E-06 | 0.319173 | 1.61E-12 | 0.253156 | 2.91E-08 | 0.400013 | 2.26E-19 |
| 1.72E-21 | 0.16478  | 0.00035  | 0.343452 | 2.25E-14 | 0.45066  | 9.72E-25 | 0.570395 | 1.18E-41 |
| 8.57E-15 | 0.111212 | 0.0162   | 0.134492 | 0.00359  | 0.014443 | 0.75557  | 0.185143 | 5.69E-05 |
| 9.31E-19 | -0.28927 | 1.88E-10 | -0.23674 | 2.27E-07 | -0.28091 | 6.45E-10 | -0.51402 | 7.47E-33 |
| 7.67E-12 | 0.252447 | 3.19E-08 | 0.352404 | 4.22E-15 | 0.392103 | 1.30E-18 | 0.546129 | 1.16E-37 |
| 1.02E-21 | 0.026617 | 0.56613  | 0.000931 | 0.98399  | 0.028457 | 0.53959  | 0.000375 | 0.99355  |
| 2.71E-24 | 0.291039 | 1.44E-10 | 0.164702 | 0.00035  | 0.233191 | 3.46E-07 | 0.463619 | 2.90E-26 |
| 1.94E-09 | 0.264382 | 6.57E-09 | 0.247531 | 5.98E-08 | 0.319455 | 1.54E-12 | 0.50624  | 9.20E-32 |
| 3.06E-32 | 0.009534 | 0.83719  | 0.008492 | 0.85478  | -0.13859 | 0.00269  | -0.00895 | 0.84698  |
| 1.17E-29 | 0.099473 | 0.03162  | 0.200789 | 1.23E-05 | 0.201864 | 1.10E-05 | 0.342742 | 2.56E-14 |
| 4.20E-13 | 0.005539 | 0.90497  | 0.045031 | 0.33154  | -0.11559 | 0.01244  | -0.07951 | 0.08609  |
| 1.67E-32 | 0.168636 | 0.00025  | 0.081765 | 0.07753  | -0.02972 | 0.52179  | 0.154527 | 0.00081  |
| 9.28E-41 | 0.099099 | 0.03227  | 0.040809 | 0.37892  | -0.08613 | 0.06291  | 0.077758 | 0.09327  |
| 3.55E-12 | 0.102617 | 0.02659  | -0.00481 | 0.91746  | 0.055746 | 0.22922  | 0.139849 | 0.00245  |
| 2.75E-07 | 0.253438 | 2.81E-08 | 0.301943 | 2.67E-11 | 0.368162 | 1.95E-16 | 0.597879 | 1.34E-46 |
| 2.45E-28 | 0.321404 | 1.11E-12 | 0.253192 | 2.90E-08 | 0.341322 | 3.32E-14 | 0.5121   | 1.40E-32 |
| 1.86E-25 | 0.094975 | 0.04021  | 0.037172 | 0.42289  | -0.01656 | 0.72118  | 0.153487 | 0.00088  |
| 5.20E-25 | 0.151218 | 0.00105  | 0.038371 | 0.40808  | 0.042571 | 0.35866  | 0.20895  | 5.27E-06 |
| 4.08E-10 | 0.126855 | 0.00605  | 0.195157 | 2.17E-05 | 0.158725 | 0.00058  | 0.299814 | 3.73E-11 |
| 2.60E-25 | -0.00074 | 0.98727  | 0.109712 | 0.01771  | 0.265701 | 5.49E-09 | 0.194769 | 2.25E-05 |
| 2.31E-11 | 0.180936 | 8.42E-05 | 0.231921 | 4.03E-07 | 0.199306 | 1.43E-05 | 0.390651 | 1.78E-18 |
| 3.19E-23 | 0.086585 | 0.06154  | 0.170198 | 0.00022  | 0.117911 | 0.01077  | 0.234441 | 2.99E-07 |
| 5.20E-26 | 0.178418 | 0.00011  | 0.219982 | 1.59E-06 | 0.205956 | 7.22E-06 | 0.350125 | 6.49E-15 |
| 1.36E-17 | 0.107391 | 0.02027  | 0.222525 | 1.19E-06 | 0.126278 | 0.00629  | 0.277882 | 9.98E-10 |
| 2.17E-32 | 0.22747  | 6.77E-07 | 0.311657 | 5.61E-12 | 0.320864 | 1.21E-12 | 0.472532 | 2.38E-27 |
| 2.17E-29 | 0.165652 | 0.00032  | 0.072427 | 0.11805  | 0.20143  | 1.15E-05 | 0.347871 | 9.90E-15 |
| 2.17E-21 | -0.11172 | 0.01572  | -0.19531 | 2.14E-05 | -0.24051 | 1.43E-07 | -0.29377 | 9.50E-11 |
| 1.35E-20 | 0.128353 | 0.00547  | 0.225639 | 8.36E-07 | 0.1967   | 1.86E-05 | 0.368706 | 1.74E-16 |
| 2.32E-20 | -0.13771 | 0.00286  | -0.18834 | 4.21E-05 | -0.14766 | 0.00137  | -0.24197 | 1.20E-07 |
| 3.52E-25 | 0.046283 | 0.31826  | 0.002555 | 0.95609  | -0.06781 | 0.14343  | 0.033514 | 0.46998  |
| 9.04E-16 | -0.04346 | 0.34868  | 0.16478  | 0.00035  | -0.10804 | 0.01953  | -0.21788 | 2.00E-06 |
| 2.16E-07 | 0.106116 | 0.02182  | 0.445839 | 3.45E-24 | 0.20491  | 8.05E-06 | 0.334314 | 1.17E-13 |
| 4.87E-06 | 0.211805 | 3.89E-06 | 0.250841 | 3.92E-08 | 0.320921 | 1.20E-12 | 0.446267 | 3.09E-24 |
| 1.27E-15 | -0.25948 | 1.27E-08 | -0.25405 | 2.59E-08 | -0.20158 | 1.14E-05 | -0.46084 | 6.24E-26 |
| 1.34E-32 | 0.169123 | 0.00024  | 0.22094  | 1.42E-06 | 0.167999 | 0.00027  | 0.330563 | 2.28E-13 |
| 1.73E-26 | 0.174895 | 0.00015  | 0.093899 | 0.04254  | -0.02727 | 0.55663  | 0.133972 | 0.00373  |
| 1.95E-06 | 0.311044 | 6.20E-12 | 0.201602 | 1.13E-05 | 0.255841 | 2.05E-08 | 0.48241  | 1.36E-28 |

|          |          |          |          |          |          |          |          |          |
|----------|----------|----------|----------|----------|----------|----------|----------|----------|
| 4.92E-06 | 0.033968 | 0.46399  | 0.110278 | 0.01713  | -0.06525 | 0.15918  | 0.003439 | 0.94091  |
| 5.31E-08 | 0.209718 | 4.86E-06 | 0.341382 | 3.28E-14 | 0.320992 | 1.19E-12 | 0.492832 | 6.00E-30 |
| 6.17E-08 | 0.166597 | 0.0003   | 0.471458 | 3.23E-27 | 0.474129 | 1.51E-27 | 0.606245 | 3.35E-48 |
| 8.15E-13 | 0.044047 | 0.34223  | 0.29178  | 1.28E-10 | 0.339976 | 4.24E-14 | 0.359453 | 1.09E-15 |
| 3.00E-11 | 0.283834 | 4.21E-10 | 0.133872 | 0.00375  | 0.290296 | 1.61E-10 | 0.452558 | 5.87E-25 |
| 9.72E-36 | 0.122013 | 0.0083   | 0.189085 | 3.92E-05 | 0.174613 | 0.00015  | 0.295068 | 7.78E-11 |
| 8.41E-32 | -0.06257 | 0.17705  | -0.08504 | 0.06634  | 0.027718 | 0.55018  | -0.15635 | 0.0007   |
| 2.96E-13 | 0.130771 | 0.00465  | 0.230141 | 4.96E-07 | 0.156247 | 0.0007   | 0.262926 | 8.00E-09 |
| 0.00021  | -0.1881  | 4.30E-05 | -0.21455 | 2.89E-06 | -0.21294 | 3.44E-06 | -0.31795 | 1.98E-12 |
| 2.68E-13 | 0.036725 | 0.4285   | 0.090396 | 0.05091  | 0.072687 | 0.11673  | 0.143137 | 0.00193  |
| 2.46E-29 | 0.063059 | 0.1737   | 0.046658 | 0.31435  | -0.01502 | 0.74612  | 0.128055 | 0.00558  |
| 8.15E-20 | 0.183747 | 6.49E-05 | 0.156329 | 0.0007   | 0.13965  | 0.00249  | 0.309919 | 7.45E-12 |
| 6.14E-17 | 0.13846  | 0.00271  | 0.169362 | 0.00024  | 0.23673  | 2.27E-07 | 0.322239 | 9.59E-13 |
| 1.65E-09 | 0.231357 | 4.30E-07 | 0.178153 | 0.00011  | 0.203208 | 9.61E-06 | 0.378133 | 2.54E-17 |
| 7.44E-07 | 0.078695 | 0.08938  | 0.065673 | 0.1565   | 0.057185 | 0.21739  | 0.168458 | 0.00026  |
| 6.78E-15 | 0.106776 | 0.02101  | 0.295138 | 7.70E-11 | 0.204462 | 8.44E-06 | 0.335631 | 9.28E-14 |
| 0.00012  | 0.028419 | 0.54013  | 0.106992 | 0.02075  | 0.049184 | 0.28884  | 0.091538 | 0.04804  |
| 0.0012   | 0.100457 | 0.02996  | 0.266183 | 5.14E-09 | 0.218352 | 1.90E-06 | 0.342185 | 2.83E-14 |
| 1.86E-17 | -0.09101 | 0.04934  | 0.024994 | 0.59005  | -0.00682 | 0.88322  | -0.21061 | 4.42E-06 |
| 6.09E-28 | -0.28448 | 3.83E-10 | -0.24638 | 6.91E-08 | -0.31083 | 6.43E-12 | -0.53332 | 1.11E-35 |
| 7.89E-21 | -0.25841 | 1.46E-08 | -0.12507 | 0.00681  | -0.1473  | 0.00141  | -0.37125 | 1.04E-16 |
| 1.42E-22 | 0.159047 | 0.00056  | 0.220083 | 1.57E-06 | 0.295167 | 7.66E-11 | 0.385904 | 4.95E-18 |
| 4.14E-14 | 0.137159 | 0.00298  | -0.09729 | 0.03557  | 0.084021 | 0.06967  | 0.092982 | 0.04461  |
| 7.37E-20 | 0.11697  | 0.01142  | 0.243223 | 1.03E-07 | 0.314391 | 3.58E-12 | 0.324792 | 6.20E-13 |
| 2.03E-09 | 0.117233 | 0.01123  | 0.149206 | 0.00122  | 0.259293 | 1.30E-08 | 0.321193 | 1.15E-12 |
| 7.38E-13 | -0.08889 | 0.05491  | -0.25249 | 3.17E-08 | -0.1507  | 0.00109  | -0.22198 | 1.27E-06 |
| 2.01E-17 | -0.13729 | 0.00295  | -0.24164 | 1.25E-07 | -0.12444 | 0.00709  | -0.28236 | 5.22E-10 |
| 5.18E-06 | 0.103437 | 0.0254   | 0.12144  | 0.00861  | 0.090385 | 0.05094  | 0.216827 | 2.25E-06 |
| 2.02E-20 | 0.252244 | 3.28E-08 | 0.165556 | 0.00033  | 0.316972 | 2.33E-12 | 0.511929 | 1.48E-32 |
| 9.86E-28 | 0.152891 | 0.00092  | 0.284339 | 3.91E-10 | 0.170916 | 0.00021  | 0.369503 | 1.49E-16 |
| 1.60E-13 | -0.00604 | 0.89645  | 0.304176 | 1.87E-11 | 0.151804 | 0.001    | 0.214053 | 3.05E-06 |
| 0.00041  | 0.296273 | 6.46E-11 | 0.221872 | 1.28E-06 | 0.396988 | 4.44E-19 | 0.493137 | 5.46E-30 |
| 2.42E-18 | 0.124608 | 0.00702  | 0.136317 | 0.00316  | 0.053676 | 0.247    | 0.24811  | 5.56E-08 |
| 3.50E-13 | -0.27129 | 2.54E-09 | -0.04197 | 0.36545  | -0.05844 | 0.20748  | -0.18517 | 5.68E-05 |
| 8.89E-05 | 0.052429 | 0.25816  | 0.243469 | 9.95E-08 | 0.16085  | 0.00048  | 0.177354 | 0.00012  |
| 1.25E-22 | 0.002953 | 0.94925  | 0.098036 | 0.03417  | 0.066009 | 0.15439  | 0.108349 | 0.01918  |
| 0.01468  | 0.157858 | 0.00062  | 0.17186  | 0.00019  | 0.233423 | 3.37E-07 | 0.371954 | 9.04E-17 |
| 3.44E-09 | 0.139085 | 0.00259  | 0.440699 | 1.31E-23 | 0.3408   | 3.65E-14 | 0.436141 | 4.17E-23 |
| 4.63E-12 | 0.085928 | 0.06354  | 0.191752 | 3.03E-05 | 0.08789  | 0.05771  | 0.278398 | 9.27E-10 |
| 4.80E-08 | 0.012175 | 0.79301  | 0.19541  | 2.11E-05 | -0.02134 | 0.64557  | 0.077897 | 0.09268  |
| 1.54E-22 | 0.180375 | 8.87E-05 | 0.290135 | 1.65E-10 | 0.262605 | 8.35E-09 | 0.418455 | 3.20E-21 |
| 5.55E-08 | 0.045554 | 0.32595  | 0.06404  | 0.16709  | 0.196725 | 1.85E-05 | 0.242433 | 1.13E-07 |
| 1.83E-14 | 0.146172 | 0.00154  | 0.065112 | 0.16008  | 0.032591 | 0.48231  | 0.187896 | 4.39E-05 |
| 1.02E-18 | 0.144078 | 0.0018   | 0.182721 | 7.14E-05 | 0.084027 | 0.06965  | 0.2912   | 1.40E-10 |
| 8.11E-15 | 0.033607 | 0.46875  | 0.354283 | 2.95E-15 | 0.182096 | 7.57E-05 | 0.292158 | 1.21E-10 |

|          |          |          |          |          |          |          |          |          |
|----------|----------|----------|----------|----------|----------|----------|----------|----------|
| 1.16E-10 | 0.176892 | 0.00012  | 0.138001 | 0.0028   | 0.137945 | 0.00281  | 0.319093 | 1.63E-12 |
| 7.89E-25 | -0.12778 | 0.00569  | -0.26359 | 7.31E-09 | -0.30522 | 1.59E-11 | -0.31929 | 1.58E-12 |
| 1.31E-09 | 0.235105 | 2.76E-07 | 0.173045 | 0.00017  | 0.240678 | 1.40E-07 | 0.446226 | 3.12E-24 |
| 4.97E-21 | -0.1224  | 0.0081   | -0.1429  | 0.00196  | -0.20983 | 4.80E-06 | -0.26334 | 7.56E-09 |
| 5.24E-11 | -0.26218 | 8.85E-09 | -0.31339 | 4.22E-12 | -0.29866 | 4.47E-11 | -0.54784 | 6.23E-38 |
| 2.07E-13 | -0.35828 | 1.37E-15 | -0.2398  | 1.56E-07 | -0.23384 | 3.21E-07 | -0.54439 | 2.19E-37 |
| 1.95E-10 | 0.223649 | 1.05E-06 | 0.1419   | 0.00211  | 0.125834 | 0.00647  | 0.219189 | 1.73E-06 |
| 0.07009  | 0.153206 | 0.0009   | 0.167991 | 0.00027  | 0.104101 | 0.02447  | 0.200374 | 1.28E-05 |
| 1.79E-10 | 0.057818 | 0.21234  | 0.131831 | 0.00432  | 0.137438 | 0.00292  | 0.232339 | 3.83E-07 |
| 1.88E-06 | -0.03711 | 0.42361  | 0.202483 | 1.03E-05 | 0.058847 | 0.20431  | 0.127292 | 0.00588  |
| 3.36E-15 | 0.107365 | 0.0203   | 0.05264  | 0.25625  | -0.00267 | 0.95409  | 0.162279 | 0.00043  |
| 8.10E-09 | 0.181961 | 7.66E-05 | 0.124086 | 0.00726  | 0.028235 | 0.54275  | 0.268075 | 3.96E-09 |
| 1.96E-24 | 0.147861 | 0.00135  | 0.16606  | 0.00031  | 0.077757 | 0.09327  | 0.30195  | 2.67E-11 |
| 6.49E-05 | 0.045524 | 0.32627  | 0.177294 | 0.00012  | 0.087486 | 0.05887  | 0.19217  | 2.91E-05 |
| 2.49E-06 | 0.008978 | 0.84657  | 0.066938 | 0.14866  | -0.08952 | 0.05321  | -0.00065 | 0.9888   |
| 4.21E-26 | 0.117821 | 0.01083  | 0.064648 | 0.16309  | -0.06191 | 0.18165  | 0.102994 | 0.02604  |
| 8.19E-08 | 0.121561 | 0.00855  | 0.106605 | 0.02121  | 0.029094 | 0.53055  | 0.203154 | 9.66E-06 |
| 6.93E-16 | 0.104933 | 0.02334  | 0.403715 | 9.83E-20 | 0.330504 | 2.30E-13 | 0.404384 | 8.45E-20 |
| 3.17E-21 | 0.174641 | 0.00015  | 0.120922 | 0.0089   | 0.098901 | 0.03262  | 0.282703 | 4.96E-10 |
| 7.16E-14 | -0.03109 | 0.50275  | 0.12165  | 0.0085   | 0.048676 | 0.29386  | 0.096352 | 0.03739  |
| 8.68E-33 | 0.073283 | 0.11375  | 0.201391 | 1.16E-05 | 0.106729 | 0.02106  | 0.18774  | 4.45E-05 |
| 1.29E-17 | -0.07372 | 0.11159  | -0.03456 | 0.45627  | -0.06913 | 0.1358   | -0.02158 | 0.64187  |
| 1.41E-18 | -0.16346 | 0.00039  | -0.26766 | 4.20E-09 | -0.26133 | 9.91E-09 | -0.36252 | 5.97E-16 |
| 1.69E-24 | -0.22785 | 6.48E-07 | -0.23001 | 5.04E-07 | -0.36072 | 8.49E-16 | -0.45289 | 5.38E-25 |
| 2.16E-16 | -0.23477 | 2.87E-07 | -0.31044 | 6.84E-12 | -0.39541 | 6.30E-19 | -0.50539 | 1.20E-31 |
| 0.00488  | -0.03669 | 0.42895  | 0.173015 | 0.00017  | 0.092346 | 0.04609  | 0.12478  | 0.00694  |
| 9.20E-15 | 0.158735 | 0.00058  | 0.161956 | 0.00044  | 0.057022 | 0.21872  | 0.252294 | 3.25E-08 |
| 9.99E-10 | -0.05102 | 0.27116  | -0.03473 | 0.45407  | -0.1013  | 0.0286   | -0.09691 | 0.03629  |
| 8.83E-09 | -0.22265 | 1.17E-06 | -0.22272 | 1.17E-06 | -0.18032 | 8.91E-05 | -0.41933 | 2.60E-21 |
| 7.57E-18 | 0.197217 | 1.77E-05 | 0.209727 | 4.85E-06 | 0.218135 | 1.95E-06 | 0.347168 | 1.13E-14 |
| 5.37E-25 | 0.275162 | 1.47E-09 | 0.285907 | 3.10E-10 | 0.425035 | 6.55E-22 | 0.524293 | 2.46E-34 |
| 4.86E-18 | 0.220552 | 1.49E-06 | 0.236692 | 2.28E-07 | 0.238909 | 1.74E-07 | 0.39423  | 8.16E-19 |
| 1.55E-13 | 0.409104 | 2.87E-20 | 0.140547 | 0.00233  | 0.163877 | 0.00038  | 0.389969 | 2.07E-18 |
| 3.14E-14 | 0.302351 | 2.50E-11 | 0.240104 | 1.51E-07 | 0.251028 | 3.83E-08 | 0.447374 | 2.31E-24 |
| 1.88E-11 | 0.094455 | 0.04132  | 0.056231 | 0.22518  | 0.212274 | 3.70E-06 | 0.279818 | 7.55E-10 |
| 5.11E-08 | -0.16041 | 0.0005   | -0.13344 | 0.00387  | -0.15793 | 0.00061  | -0.26713 | 4.51E-09 |
| 0.11914  | 0.204197 | 8.67E-06 | 0.229894 | 5.11E-07 | 0.364482 | 4.05E-16 | 0.505678 | 1.10E-31 |
| 1.38E-14 | -0.07722 | 0.09557  | -0.17477 | 0.00015  | -0.17603 | 0.00013  | -0.18815 | 4.28E-05 |
| 1.21E-06 | -0.11755 | 0.01101  | -0.06689 | 0.14898  | -0.09803 | 0.03418  | -0.14645 | 0.00151  |
| 1.73E-14 | -0.00897 | 0.84667  | -0.05034 | 0.27766  | -0.03951 | 0.39425  | -0.04089 | 0.37803  |
| 0.00544  | 0.023759 | 0.60856  | 0.142298 | 0.00205  | -0.01963 | 0.67226  | 0.088015 | 0.05735  |
| 4.16E-12 | 0.164377 | 0.00036  | 0.054091 | 0.24336  | 0.205942 | 7.23E-06 | 0.313306 | 4.28E-12 |
| 2.23E-32 | 0.116761 | 0.01157  | 0.105996 | 0.02197  | 0.071234 | 0.12424  | 0.184313 | 6.16E-05 |
| 0.40074  | 0.088923 | 0.05482  | 0.089993 | 0.05196  | 0.08544  | 0.06507  | 0.168397 | 0.00026  |
| 7.30E-36 | 0.182793 | 7.09E-05 | 0.15694  | 0.00067  | 0.196154 | 1.96E-05 | 0.359045 | 1.18E-15 |



|          |          |          |          |          |          |          |          |          |
|----------|----------|----------|----------|----------|----------|----------|----------|----------|
| 3.68E-36 | 0.157281 | 0.00065  | 0.260482 | 1.11E-08 | 0.252365 | 3.22E-08 | 0.388356 | 2.92E-18 |
| 1.12E-14 | -0.03492 | 0.4515   | -0.09835 | 0.0336   | -0.0833  | 0.0721   | -0.14587 | 0.00157  |
| 2.63E-07 | 0.241914 | 1.21E-07 | 0.315582 | 2.94E-12 | 0.484372 | 7.62E-29 | 0.626012 | 3.51E-52 |
| 6.38E-08 | 0.105456 | 0.02266  | 0.281878 | 5.60E-10 | 0.258794 | 1.39E-08 | 0.329826 | 2.59E-13 |
| 9.21E-25 | 0.164286 | 0.00036  | 0.235048 | 2.78E-07 | 0.194341 | 2.35E-05 | 0.353667 | 3.32E-15 |
| 3.23E-12 | -0.03808 | 0.41163  | -0.03786 | 0.41441  | -0.14835 | 0.0013   | -0.03569 | 0.44166  |
| 4.27E-33 | 0.125133 | 0.00678  | 0.20856  | 5.49E-06 | 0.077453 | 0.09457  | 0.262754 | 8.19E-09 |
| 9.96E-23 | 0.351391 | 5.11E-15 | 0.197858 | 1.66E-05 | 0.291645 | 1.31E-10 | 0.554393 | 5.51E-39 |
| 5.51E-16 | -0.07845 | 0.09037  | -0.16413 | 0.00037  | -0.06772 | 0.14395  | -0.20404 | 8.82E-06 |
| 0.1087   | -0.07797 | 0.09238  | -0.16188 | 0.00044  | -0.13517 | 0.00343  | -0.23001 | 5.04E-07 |
| 2.95E-08 | 0.087508 | 0.05881  | 0.406822 | 4.84E-20 | 0.370823 | 1.14E-16 | 0.399288 | 2.66E-19 |
| 2.96E-31 | 0.125393 | 0.00666  | 0.191393 | 3.13E-05 | 0.165811 | 0.00032  | 0.31954  | 1.52E-12 |
| 1.88E-20 | 0.174793 | 0.00015  | 0.008525 | 0.85421  | 0.066746 | 0.14983  | 0.200184 | 1.31E-05 |
| 2.97E-22 | -0.17283 | 0.00017  | -0.21569 | 2.55E-06 | -0.13054 | 0.00472  | -0.32038 | 1.31E-12 |
| 1.13E-12 | -0.10818 | 0.01937  | -0.17149 | 0.0002   | -0.09877 | 0.03285  | -0.19284 | 2.72E-05 |
| 4.48E-21 | 0.151624 | 0.00101  | 0.229617 | 5.28E-07 | 0.301432 | 2.89E-11 | 0.4093   | 2.74E-20 |
| 1.63E-11 | 0.147796 | 0.00136  | 0.295793 | 6.96E-11 | 0.361257 | 7.65E-16 | 0.454053 | 3.93E-25 |
| 3.03E-11 | 0.287538 | 2.43E-10 | 0.263448 | 7.46E-09 | 0.297341 | 5.48E-11 | 0.51505  | 5.34E-33 |
| 1.76E-08 | 0.201313 | 1.17E-05 | 0.247835 | 5.75E-08 | 0.361615 | 7.13E-16 | 0.50302  | 2.55E-31 |
| 3.81E-12 | -0.05165 | 0.26528  | -0.03496 | 0.45104  | -0.08731 | 0.05939  | -0.00195 | 0.96649  |
| 9.24E-07 | -0.1878  | 4.43E-05 | -0.09113 | 0.04906  | -0.07793 | 0.09256  | -0.32681 | 4.38E-13 |
| 4.89E-11 | -0.09182 | 0.04735  | -0.2175  | 2.09E-06 | -0.21617 | 2.42E-06 | -0.23986 | 1.55E-07 |
| 1.50E-15 | 0.136712 | 0.00307  | 0.197432 | 1.73E-05 | 0.138587 | 0.00269  | 0.307859 | 1.04E-11 |
| 4.32E-17 | 0.043124 | 0.35245  | -0.25738 | 1.68E-08 | -0.10797 | 0.0196   | -0.0463  | 0.31807  |
| 5.01E-14 | -0.00136 | 0.9766   | 0.021742 | 0.63932  | -0.13059 | 0.0047   | -0.04633 | 0.31778  |
| 2.68E-24 | 0.213588 | 3.21E-06 | 0.259496 | 1.27E-08 | 0.376333 | 3.69E-17 | 0.489497 | 1.65E-29 |
| 6.50E-18 | -0.00604 | 0.89648  | -0.16384 | 0.00038  | -0.05671 | 0.22122  | -0.05872 | 0.20532  |
| 1.66E-07 | 0.133016 | 0.00398  | 0.233658 | 3.28E-07 | 0.231489 | 4.24E-07 | 0.32919  | 2.89E-13 |
| 1.22E-18 | 0.153543 | 0.00087  | 0.053923 | 0.24482  | 0.039685 | 0.3922   | 0.230231 | 4.91E-07 |
| 5.83E-11 | 0.05578  | 0.22893  | 0.08068  | 0.08157  | 0.156483 | 0.00069  | 0.220515 | 1.49E-06 |
| 7.24E-07 | 0.319268 | 1.59E-12 | 0.414585 | 7.99E-21 | 0.464545 | 2.25E-26 | 0.688547 | 6.91E-67 |
| 0.4249   | 0.206789 | 6.62E-06 | 0.355983 | 2.13E-15 | 0.418448 | 3.20E-21 | 0.564385 | 1.23E-40 |
| 4.41E-06 | 0.042347 | 0.36119  | 0.15593  | 0.00072  | 0.002359 | 0.95945  | 0.106723 | 0.02107  |
| 1.96E-15 | -0.18234 | 7.40E-05 | -0.1819  | 7.71E-05 | -0.26216 | 8.87E-09 | -0.35495 | 2.60E-15 |
| 1.94E-20 | 0.038615 | 0.4051   | -0.12278 | 0.0079   | -0.05131 | 0.26848  | -0.06508 | 0.16031  |
| 5.97E-17 | -0.02922 | 0.52882  | -0.32101 | 1.18E-12 | -0.17219 | 0.00018  | -0.17072 | 0.00021  |
| 6.20E-24 | 0.101432 | 0.0284   | 0.022313 | 0.63054  | -0.11077 | 0.01664  | 0.015626 | 0.73628  |
| 0.00368  | 0.214552 | 2.89E-06 | 0.030417 | 0.51201  | 0.155028 | 0.00078  | 0.365    | 3.66E-16 |
| 2.80E-08 | 0.219576 | 1.66E-06 | 0.140678 | 0.00231  | 0.297277 | 5.54E-11 | 0.4118   | 1.53E-20 |
| 3.43E-17 | 0.019993 | 0.66651  | 0.163229 | 0.0004   | 0.020714 | 0.65524  | 0.146044 | 0.00155  |
| 1.07E-22 | -0.2398  | 1.56E-07 | -0.33364 | 1.32E-13 | -0.30755 | 1.09E-11 | -0.43852 | 2.28E-23 |
| 7.40E-24 | 0.15346  | 0.00088  | 0.290178 | 1.64E-10 | 0.267043 | 4.57E-09 | 0.424578 | 7.32E-22 |
| 4.23E-32 | 0.113189 | 0.01439  | 0.184588 | 6.00E-05 | 0.205585 | 7.51E-06 | 0.281766 | 5.69E-10 |
| 3.21E-15 | -0.05321 | 0.25113  | -0.21233 | 3.67E-06 | -0.17847 | 0.00011  | -0.19556 | 2.08E-05 |
| 2.59E-05 | 0.148476 | 0.00129  | 0.037631 | 0.41718  | 0.050699 | 0.27423  | 0.212197 | 3.73E-06 |

|          |          |          |          |          |          |          |          |          |
|----------|----------|----------|----------|----------|----------|----------|----------|----------|
| 3.60E-17 | -0.18861 | 4.10E-05 | -0.11568 | 0.01236  | -0.27302 | 1.99E-09 | -0.37808 | 2.57E-17 |
| 5.19E-16 | -0.09688 | 0.03635  | 0.06355  | 0.17036  | -0.15607 | 0.00071  | -0.117   | 0.01139  |
| 7.63E-06 | -0.10242 | 0.02688  | -0.03402 | 0.46326  | -0.15422 | 0.00083  | -0.20356 | 9.27E-06 |
| 2.00E-05 | 0.086415 | 0.06205  | 0.450614 | 9.84E-25 | 0.474383 | 1.40E-27 | 0.424771 | 6.99E-22 |
| 0.00083  | 0.109993 | 0.01742  | 0.073821 | 0.11112  | 0.082496 | 0.07491  | 0.155533 | 0.00074  |
| 1.76E-25 | 0.127961 | 0.00562  | 0.015294 | 0.74167  | -0.13643 | 0.00314  | 0.033208 | 0.47405  |
| 2.98E-19 | 0.171656 | 0.00019  | 0.233496 | 3.34E-07 | 0.248193 | 5.50E-08 | 0.419939 | 2.24E-21 |
| 9.89E-08 | 0.205933 | 7.24E-06 | 0.189463 | 3.78E-05 | 0.233486 | 3.35E-07 | 0.399175 | 2.73E-19 |
| 1.80E-14 | -0.02228 | 0.63101  | -0.13395 | 0.00373  | -0.20571 | 7.41E-06 | -0.27548 | 1.41E-09 |
| 4.09E-19 | 0.228472 | 6.03E-07 | 0.206559 | 6.78E-06 | 0.287152 | 2.57E-10 | 0.438122 | 2.52E-23 |
| 1.93E-05 | 0.136026 | 0.00323  | 0.390912 | 1.68E-18 | 0.403954 | 9.31E-20 | 0.396432 | 5.02E-19 |
| 3.61E-08 | -0.12815 | 0.00555  | -0.15491 | 0.00078  | -0.26041 | 1.12E-08 | -0.28514 | 3.47E-10 |
| 1.07E-11 | 0.205071 | 7.92E-06 | 0.149441 | 0.0012   | 0.151473 | 0.00103  | 0.339297 | 4.80E-14 |
| 2.21E-34 | 0.09852  | 0.03329  | 0.052366 | 0.25874  | 0.030856 | 0.50594  | 0.120962 | 0.00888  |
| 2.06E-33 | 0.227776 | 6.54E-07 | 0.343892 | 2.07E-14 | 0.273767 | 1.79E-09 | 0.459241 | 9.67E-26 |
| 5.07E-16 | -0.17755 | 0.00011  | -0.24923 | 4.82E-08 | -0.30853 | 9.32E-12 | -0.38933 | 2.37E-18 |
| 0.00302  | 0.077018 | 0.09643  | 0.192432 | 2.83E-05 | 0.194256 | 2.37E-05 | 0.339006 | 5.06E-14 |
| 2.04E-06 | 0.111105 | 0.01631  | 0.251903 | 3.42E-08 | 0.285653 | 3.22E-10 | 0.295347 | 7.46E-11 |
| 0.00018  | 0.123798 | 0.0074   | 0.281319 | 6.07E-10 | 0.12199  | 0.00831  | 0.185362 | 5.58E-05 |
| 6.96E-10 | -0.07283 | 0.11599  | 0.155995 | 0.00072  | -0.11021 | 0.0172   | -0.06055 | 0.19153  |
| 3.77E-11 | 0.106162 | 0.02176  | 0.062972 | 0.17429  | 0.058012 | 0.21081  | 0.2027   | 1.01E-05 |
| 2.75E-15 | -0.10638 | 0.02149  | -0.30759 | 1.09E-11 | -0.1413  | 0.00221  | -0.28004 | 7.31E-10 |
| 3.41E-34 | 0.133113 | 0.00395  | 0.290132 | 1.65E-10 | 0.250152 | 4.29E-08 | 0.383643 | 8.00E-18 |
| 5.61E-10 | 0.043392 | 0.34946  | 0.084028 | 0.06965  | 0.078785 | 0.08901  | 0.172517 | 0.00018  |
| 5.70E-14 | -0.16173 | 0.00045  | -0.04981 | 0.28277  | -0.22749 | 6.76E-07 | -0.23807 | 1.93E-07 |
| 4.85E-05 | 0.166074 | 0.00031  | 0.174422 | 0.00015  | 0.125965 | 0.00642  | 0.342415 | 2.72E-14 |
| 8.18E-11 | 0.09174  | 0.04755  | 0.158805 | 0.00057  | 0.110593 | 0.01681  | 0.223197 | 1.10E-06 |
| 7.87E-11 | 0.109561 | 0.01786  | 0.131784 | 0.00434  | 0.142315 | 0.00205  | 0.261906 | 9.18E-09 |
| 8.82E-22 | 0.209332 | 5.06E-06 | 0.021554 | 0.64222  | 0.037113 | 0.42362  | 0.194246 | 2.37E-05 |
| 0.03679  | 0.241896 | 1.21E-07 | 0.32523  | 5.75E-13 | 0.444161 | 5.35E-24 | 0.560852 | 4.79E-40 |
| 3.70E-10 | 0.137797 | 0.00284  | -0.00888 | 0.84826  | -0.03074 | 0.5075   | 0.134519 | 0.00359  |
| 4.43E-08 | 0.36417  | 4.31E-16 | 0.051288 | 0.26868  | 0.155008 | 0.00078  | 0.313767 | 3.97E-12 |
| 2.51E-23 | 0.159942 | 0.00052  | 0.379796 | 1.80E-17 | 0.335865 | 8.90E-14 | 0.448662 | 1.65E-24 |
| 3.78E-42 | 0.083874 | 0.07016  | 0.242173 | 1.17E-07 | 0.129952 | 0.00491  | 0.216262 | 2.39E-06 |
| 9.43E-06 | 0.179128 | 9.94E-05 | 0.034146 | 0.46165  | 0.108966 | 0.0185   | 0.232941 | 3.57E-07 |
| 7.72E-16 | 0.197339 | 1.74E-05 | 0.298968 | 4.26E-11 | 0.328233 | 3.42E-13 | 0.480071 | 2.70E-28 |
| 4.01E-17 | 0.152071 | 0.00098  | 0.234999 | 2.79E-07 | 0.314285 | 3.64E-12 | 0.402744 | 1.22E-19 |
| 7.55E-09 | 0.187046 | 4.76E-05 | -0.00762 | 0.86949  | -0.07192 | 0.12063  | 0.187667 | 4.48E-05 |
| 2.65E-05 | 0.156219 | 0.0007   | 0.274048 | 1.72E-09 | 0.214509 | 2.90E-06 | 0.310006 | 7.34E-12 |
| 4.29E-06 | 0.201984 | 1.09E-05 | 0.141867 | 0.00212  | 0.212608 | 3.56E-06 | 0.430981 | 1.52E-22 |
| 6.81E-10 | 0.372202 | 8.60E-17 | 0.240539 | 1.43E-07 | 0.366602 | 2.66E-16 | 0.624004 | 9.18E-52 |
| 1.91E-20 | 0.237257 | 2.13E-07 | 0.250555 | 4.07E-08 | 0.266248 | 5.09E-09 | 0.406025 | 5.81E-20 |
| 6.15E-16 | 0.354942 | 2.60E-15 | 0.051019 | 0.2712   | 0.171122 | 0.0002   | 0.405775 | 6.15E-20 |
| 1.18E-07 | 0.159563 | 0.00054  | 0.250326 | 4.19E-08 | 0.298273 | 4.74E-11 | 0.451553 | 7.67E-25 |
| 6.05E-18 | 0.258443 | 1.46E-08 | 0.21207  | 3.78E-06 | 0.123209 | 0.00769  | 0.190671 | 3.36E-05 |

|          |          |          |          |          |          |          |          |          |
|----------|----------|----------|----------|----------|----------|----------|----------|----------|
| 4.55E-14 | -0.18233 | 7.41E-05 | -0.34843 | 8.91E-15 | -0.33304 | 1.47E-13 | -0.38272 | 9.73E-18 |
| 1.34E-23 | 0.16662  | 0.0003   | 0.136012 | 0.00323  | 0.115714 | 0.01234  | 0.288995 | 1.96E-10 |
| 7.40E-23 | 0.028828 | 0.53432  | 0.117164 | 0.01128  | -0.01552 | 0.73805  | 0.109726 | 0.01769  |
| 6.44E-13 | 0.026881 | 0.56229  | 0.14731  | 0.00141  | 0.195025 | 2.20E-05 | 0.18117  | 8.24E-05 |
| 2.65E-12 | 0.303232 | 2.18E-11 | 0.121545 | 0.00856  | 0.199941 | 1.34E-05 | 0.402576 | 1.27E-19 |
| 3.74E-11 | 0.165387 | 0.00033  | 0.098803 | 0.03279  | 0.126669 | 0.00612  | 0.284253 | 3.95E-10 |
| 1.30E-14 | 0.004766 | 0.91818  | -0.18407 | 6.30E-05 | -0.07178 | 0.12137  | -0.14089 | 0.00227  |
| 9.14E-16 | -0.14576 | 0.00159  | -0.24544 | 7.78E-08 | -0.23924 | 1.67E-07 | -0.34971 | 7.02E-15 |
| 1.62E-23 | 0.275883 | 1.33E-09 | 0.343987 | 2.04E-14 | 0.389287 | 2.39E-18 | 0.572787 | 4.56E-42 |
| 2.19E-28 | 0.210078 | 4.68E-06 | 0.117593 | 0.01098  | 0.200393 | 1.28E-05 | 0.356    | 2.12E-15 |
| 3.08E-11 | 0.101102 | 0.02892  | 0.044042 | 0.34228  | 0.114375 | 0.01339  | 0.254949 | 2.31E-08 |
| 9.18E-09 | 0.226988 | 7.16E-07 | 0.2329   | 3.59E-07 | 0.353511 | 3.42E-15 | 0.523463 | 3.25E-34 |
| 0.0106   | 0.117979 | 0.01072  | 0.25087  | 3.91E-08 | 0.188842 | 4.01E-05 | 0.234746 | 2.88E-07 |
| 1.10E-13 | -0.01178 | 0.79954  | -0.24315 | 1.04E-07 | -0.26116 | 1.01E-08 | -0.19964 | 1.38E-05 |
| 6.52E-19 | -0.05417 | 0.24268  | -0.1826  | 7.22E-05 | -0.06871 | 0.13817  | -0.21594 | 2.48E-06 |
| 1.20E-10 | 0.150961 | 0.00107  | 0.183537 | 6.62E-05 | 0.254168 | 2.55E-08 | 0.398021 | 3.53E-19 |
| 1.82E-10 | 0.288873 | 1.99E-10 | 0.264668 | 6.32E-09 | 0.390455 | 1.86E-18 | 0.615639 | 4.67E-50 |
| 4.00E-23 | 0.124116 | 0.00724  | 0.08819  | 0.05686  | 0.037641 | 0.41706  | 0.190614 | 3.38E-05 |
| 1.07E-05 | 0.131978 | 0.00428  | 0.208776 | 5.37E-06 | 0.307183 | 1.16E-11 | 0.362565 | 5.92E-16 |
| 7.42E-14 | 0.228285 | 6.16E-07 | 0.183439 | 6.68E-05 | 0.247692 | 5.86E-08 | 0.438623 | 2.22E-23 |
| 2.99E-24 | 0.229041 | 5.64E-07 | 0.308542 | 9.31E-12 | 0.324297 | 6.75E-13 | 0.522567 | 4.40E-34 |
| 2.64E-11 | 0.094366 | 0.04151  | 0.299179 | 4.12E-11 | 0.176101 | 0.00013  | 0.308007 | 1.01E-11 |
| 1.50E-06 | -0.01887 | 0.68419  | 0.032387 | 0.48506  | -0.11109 | 0.01632  | -0.02994 | 0.51863  |
| 8.49E-05 | 0.022478 | 0.62802  | -0.27683 | 1.16E-09 | -0.13039 | 0.00477  | -0.08209 | 0.07637  |
| 8.47E-10 | 0.210783 | 4.34E-06 | 0.033001 | 0.47681  | 0.086455 | 0.06193  | 0.200275 | 1.30E-05 |
| 0.02142  | 0.121885 | 0.00837  | 0.100879 | 0.02928  | 0.238289 | 1.88E-07 | 0.261597 | 9.57E-09 |
| 9.37E-09 | 0.101903 | 0.02767  | 0.057267 | 0.21674  | 0.09526  | 0.03961  | 0.179539 | 9.57E-05 |
| 2.44E-19 | -0.17233 | 0.00018  | -0.09916 | 0.03217  | -0.08866 | 0.05554  | -0.28809 | 2.24E-10 |
| 1.24E-10 | 0.082664 | 0.07432  | 0.164709 | 0.00035  | 0.279313 | 8.12E-10 | 0.320042 | 1.39E-12 |
| 3.05E-06 | 0.242332 | 1.15E-07 | 0.131938 | 0.00429  | 0.226321 | 7.73E-07 | 0.332435 | 1.64E-13 |
| 2.14E-14 | 0.258234 | 1.50E-08 | 0.30643  | 1.31E-11 | 0.37658  | 3.50E-17 | 0.58229  | 9.74E-44 |
| 5.10E-15 | 0.034895 | 0.45188  | 0.148739 | 0.00127  | 0.066386 | 0.15204  | 0.162618 | 0.00042  |
| 5.92E-28 | 0.219616 | 1.65E-06 | 0.310355 | 6.94E-12 | 0.256963 | 1.77E-08 | 0.461747 | 4.87E-26 |
| 1.39E-13 | 0.224998 | 9.00E-07 | 0.244149 | 9.14E-08 | 0.398396 | 3.25E-19 | 0.548819 | 4.35E-38 |
| 6.73E-22 | 0.226525 | 7.55E-07 | -0.04056 | 0.38184  | -0.17221 | 0.00018  | -0.03194 | 0.49108  |
| 2.87E-24 | 0.076594 | 0.09829  | 0.318598 | 1.78E-12 | 0.164582 | 0.00035  | 0.162474 | 0.00042  |
| 8.08E-26 | -0.05794 | 0.21141  | -0.1417  | 0.00214  | 0.002196 | 0.96225  | -0.06767 | 0.14424  |
| 1.53E-06 | -0.07528 | 0.10421  | -0.11003 | 0.01738  | -0.16219 | 0.00043  | -0.16807 | 0.00026  |
| 1.69E-11 | 0.065104 | 0.16013  | 0.385576 | 5.30E-18 | 0.137166 | 0.00298  | 0.213899 | 3.10E-06 |
| 3.05E-36 | -0.03693 | 0.42595  | -0.14109 | 0.00224  | -0.06559 | 0.15703  | -0.15398 | 0.00084  |
| 1.39E-17 | 0.068655 | 0.13849  | 0.027241 | 0.55706  | -0.04966 | 0.28421  | 0.095471 | 0.03918  |
| 6.93E-21 | -0.1445  | 0.00174  | -0.16287 | 0.00041  | -0.03693 | 0.42594  | -0.12157 | 0.00854  |
| 3.54E-15 | -0.17572 | 0.00014  | -0.21347 | 3.25E-06 | -0.17249 | 0.00018  | -0.32521 | 5.77E-13 |
| 2.89E-12 | 0.125923 | 0.00643  | 0.124039 | 0.00728  | -0.01767 | 0.70338  | 0.09504  | 0.04008  |
| 1.78E-09 | 0.091208 | 0.04886  | 0.404023 | 9.17E-20 | 0.222894 | 1.14E-06 | 0.304055 | 1.91E-11 |

|          |          |          |          |          |          |          |          |          |
|----------|----------|----------|----------|----------|----------|----------|----------|----------|
| 3.11E-14 | -0.07457 | 0.10753  | 0.216072 | 2.45E-06 | -0.00369 | 0.93655  | -0.03788 | 0.41408  |
| 4.38E-31 | 0.215385 | 2.64E-06 | 0.208612 | 5.46E-06 | 0.147789 | 0.00136  | 0.316017 | 2.73E-12 |
| 6.61E-19 | 0.099384 | 0.03177  | 0.306625 | 1.27E-11 | 0.289874 | 1.71E-10 | 0.305846 | 1.44E-11 |
| 8.52E-24 | 0.050475 | 0.27635  | 0.206188 | 7.05E-06 | 0.14943  | 0.0012   | 0.235946 | 2.49E-07 |
| 2.49E-10 | 0.134996 | 0.00347  | 0.063389 | 0.17145  | 0.102798 | 0.02632  | 0.252222 | 3.28E-08 |
| 7.47E-17 | -0.08833 | 0.05647  | -0.19405 | 2.42E-05 | -0.22648 | 7.59E-07 | -0.33012 | 2.46E-13 |
| 5.18E-11 | -0.07445 | 0.10811  | 0.098907 | 0.0326   | 0.042725 | 0.35692  | 0.059016 | 0.203    |
| 2.95E-21 | 0.179711 | 9.42E-05 | 0.237073 | 2.18E-07 | 0.188782 | 4.03E-05 | 0.368414 | 1.85E-16 |
| 4.14E-25 | -0.01906 | 0.68121  | 0.151056 | 0.00106  | 0.084689 | 0.06747  | 0.099297 | 0.03192  |
| 0.04759  | 0.078931 | 0.08842  | 0.328792 | 3.10E-13 | 0.116787 | 0.01155  | 0.160745 | 0.00049  |
| 2.31E-06 | -0.10287 | 0.02621  | 0.004162 | 0.92853  | -0.11067 | 0.01674  | -0.05765 | 0.21367  |
| 6.04E-21 | -0.19645 | 1.91E-05 | -0.09466 | 0.04087  | -0.14673 | 0.00147  | -0.31739 | 2.17E-12 |
| 4.41E-21 | 0.229492 | 5.35E-07 | 0.40248  | 1.30E-19 | 0.447296 | 2.36E-24 | 0.614746 | 7.05E-50 |
| 2.81E-13 | 0.219017 | 1.77E-06 | -0.02052 | 0.65821  | 0.140626 | 0.00232  | 0.23545  | 2.65E-07 |
| 3.18E-05 | 0.065925 | 0.15492  | 0.106175 | 0.02174  | 0.047029 | 0.31051  | 0.09521  | 0.03972  |
| 1.24E-12 | 0.095489 | 0.03914  | 0.275714 | 1.36E-09 | 0.224159 | 9.90E-07 | 0.214655 | 2.86E-06 |
| 1.55E-19 | 0.077382 | 0.09487  | 0.13194  | 0.00429  | 0.032911 | 0.47802  | 0.129194 | 0.00517  |
| 9.42E-09 | -0.03121 | 0.50112  | -0.03007 | 0.51679  | -0.08294 | 0.07337  | -0.05143 | 0.26739  |
| 0.00024  | 0.083925 | 0.06999  | 0.04147  | 0.37124  | 0.060087 | 0.19491  | 0.154386 | 0.00082  |
| 3.41E-29 | 0.105078 | 0.02315  | 0.158123 | 0.0006   | 0.122681 | 0.00795  | 0.242622 | 1.10E-07 |
| 0.00821  | -0.02657 | 0.56676  | 0.029083 | 0.5307   | 0.027539 | 0.55275  | 0.102038 | 0.02746  |
| 3.01E-07 | 0.283005 | 4.75E-10 | 0.208099 | 5.77E-06 | 0.185288 | 5.62E-05 | 0.422431 | 1.23E-21 |
| 4.14E-52 | 0.04739  | 0.30681  | 0.074476 | 0.10798  | -0.09321 | 0.04409  | 0.014173 | 0.76     |
| 1.30E-20 | 0.064998 | 0.16081  | -0.09679 | 0.03654  | -0.06543 | 0.15804  | -0.03254 | 0.48302  |
| 1.25E-11 | 0.080951 | 0.08054  | -0.00884 | 0.84894  | 0.001624 | 0.97208  | 0.058567 | 0.20647  |
| 1.11E-17 | 0.152893 | 0.00092  | 0.250838 | 3.92E-08 | 0.196481 | 1.90E-05 | 0.325283 | 5.70E-13 |
| 3.64E-14 | 0.144459 | 0.00175  | 0.195147 | 2.17E-05 | 0.117569 | 0.011    | 0.260078 | 1.17E-08 |
| 0.01855  | 0.136117 | 0.00321  | 0.31321  | 4.35E-12 | 0.209364 | 5.04E-06 | 0.308806 | 8.92E-12 |
| 7.85E-08 | 0.103256 | 0.02566  | 0.233822 | 3.21E-07 | 0.265117 | 5.94E-09 | 0.330273 | 2.39E-13 |
| 0.00055  | -0.09263 | 0.04543  | 0.017147 | 0.71169  | -0.16059 | 0.00049  | -0.16616 | 0.00031  |
| 1.59E-06 | 0.165388 | 0.00033  | 0.348174 | 9.36E-15 | 0.364959 | 3.69E-16 | 0.487575 | 2.93E-29 |
| 1.61E-10 | 0.229245 | 5.51E-07 | 0.24654  | 6.78E-08 | 0.248205 | 5.49E-08 | 0.439443 | 1.80E-23 |
| 2.57E-05 | -0.09423 | 0.04181  | 0.052947 | 0.25348  | 0.04131  | 0.37309  | -0.05005 | 0.28045  |
| 0.0842   | 0.091193 | 0.04889  | 0.195058 | 2.19E-05 | 0.200495 | 1.27E-05 | 0.215371 | 2.64E-06 |
| 1.07E-17 | 0.209577 | 4.93E-06 | 0.087219 | 0.05965  | 0.243185 | 1.03E-07 | 0.378034 | 2.59E-17 |
| 2.41E-05 | 0.146111 | 0.00155  | 0.092481 | 0.04578  | 0.169743 | 0.00023  | 0.310653 | 6.61E-12 |
| 1.82E-18 | 0.091898 | 0.04717  | 0.037163 | 0.42301  | 0.045299 | 0.32867  | 0.137241 | 0.00296  |
| 0.02644  | -0.00929 | 0.84134  | 0.209702 | 4.87E-06 | 0.037832 | 0.4147   | 0.106838 | 0.02093  |
| 4.83E-09 | 0.046075 | 0.32044  | 0.033129 | 0.4751   | 0.031181 | 0.50147  | 0.122042 | 0.00829  |
| 1.55E-06 | 0.141217 | 0.00222  | 0.129596 | 0.00503  | 0.150266 | 0.00113  | 0.230346 | 4.85E-07 |
| 7.13E-05 | 0.117789 | 0.01085  | 0.324087 | 7.00E-13 | 0.14122  | 0.00222  | 0.305528 | 1.51E-11 |
| 0.07508  | 0.12007  | 0.0094   | 0.016653 | 0.71965  | 0.18682  | 4.86E-05 | 0.212509 | 3.60E-06 |
| 2.07E-05 | -0.05272 | 0.25552  | 0.071899 | 0.12076  | -0.09461 | 0.041    | -0.01665 | 0.71973  |
| 9.33E-10 | 0.028819 | 0.53444  | 0.093084 | 0.04437  | -0.03352 | 0.46994  | 0.184334 | 6.14E-05 |
| 2.42E-17 | 0.028769 | 0.53515  | -0.00178 | 0.96938  | -0.00359 | 0.9384   | 0.043566 | 0.34753  |

|          |          |          |          |          |          |          |          |          |
|----------|----------|----------|----------|----------|----------|----------|----------|----------|
| 4.82E-15 | -0.22544 | 8.56E-07 | -0.21128 | 4.11E-06 | -0.18914 | 3.89E-05 | -0.41849 | 3.17E-21 |
| 0.00459  | 0.16723  | 0.00028  | 0.381415 | 1.28E-17 | 0.226323 | 7.73E-07 | 0.373083 | 7.19E-17 |
| 2.30E-11 | -0.11151 | 0.01592  | 0.039741 | 0.39153  | -0.18422 | 6.21E-05 | -0.1059  | 0.02208  |
| 2.65E-15 | -0.25057 | 4.06E-08 | -0.0672  | 0.14706  | -0.14392 | 0.00182  | -0.33977 | 4.40E-14 |
| 3.71E-16 | -0.16605 | 0.00031  | -0.23059 | 4.71E-07 | -0.08959 | 0.05301  | -0.26883 | 3.57E-09 |
| 9.00E-16 | -0.25042 | 4.14E-08 | -0.26933 | 3.33E-09 | -0.36456 | 3.99E-16 | -0.47778 | 5.25E-28 |
| 1.17E-13 | 0.005798 | 0.90056  | -0.02484 | 0.59239  | -0.15695 | 0.00066  | -0.00901 | 0.8461   |
| 7.29E-12 | -0.13261 | 0.00409  | -0.18874 | 4.05E-05 | -0.29379 | 9.46E-11 | -0.37116 | 1.06E-16 |
| 7.40E-22 | -0.02659 | 0.56659  | -0.08284 | 0.07369  | -0.02319 | 0.61713  | -0.08089 | 0.08077  |
| 2.80E-25 | -0.21755 | 2.08E-06 | -0.2051  | 7.90E-06 | -0.13592 | 0.00325  | -0.36558 | 3.26E-16 |
| 1.23E-10 | 0.187627 | 4.50E-05 | 0.319246 | 1.59E-12 | 0.349056 | 7.93E-15 | 0.444859 | 4.46E-24 |
| 4.62E-09 | 0.084332 | 0.06864  | 0.063215 | 0.17263  | -0.00039 | 0.99328  | 0.128754 | 0.00533  |
| 1.34E-11 | 0.197018 | 1.80E-05 | 0.103438 | 0.0254   | -0.00202 | 0.96535  | 0.165453 | 0.00033  |
| 3.86E-10 | 0.210568 | 4.44E-06 | 0.136127 | 0.0032   | 0.049507 | 0.28568  | 0.253806 | 2.68E-08 |
| 2.03E-38 | 0.221252 | 1.38E-06 | 0.159982 | 0.00052  | 0.172619 | 0.00018  | 0.368613 | 1.78E-16 |
| 1.29E-17 | 0.309846 | 7.54E-12 | 0.317796 | 2.03E-12 | 0.513685 | 8.34E-33 | 0.668588 | 8.38E-62 |
| 5.33E-09 | -0.0407  | 0.38024  | 0.254054 | 2.59E-08 | 0.137747 | 0.00285  | 0.176572 | 0.00013  |
| 1.75E-12 | 0.179439 | 9.66E-05 | 0.204694 | 8.24E-06 | 0.21047  | 4.48E-06 | 0.404282 | 8.64E-20 |
| 5.19E-12 | 0.009678 | 0.83477  | 0.038913 | 0.40148  | 0.055524 | 0.23108  | 0.087822 | 0.0579   |
| 2.26E-11 | 0.04236  | 0.36105  | 0.149436 | 0.0012   | 0.074901 | 0.10597  | 0.147151 | 0.00143  |
| 0.00852  | 0.086048 | 0.06317  | 0.073625 | 0.11207  | 0.004038 | 0.93065  | 0.164285 | 0.00036  |
| 2.68E-14 | 0.152195 | 0.00097  | 0.303217 | 2.18E-11 | 0.36694  | 2.48E-16 | 0.44248  | 8.26E-24 |
| 5.02E-29 | 0.219833 | 1.61E-06 | 0.241197 | 1.32E-07 | 0.294271 | 8.79E-11 | 0.50333  | 2.31E-31 |
| 1.72E-32 | 0.186721 | 4.91E-05 | 0.233556 | 3.32E-07 | 0.122582 | 0.008    | 0.300301 | 3.46E-11 |
| 8.12E-07 | 0.137656 | 0.00287  | 0.259472 | 1.27E-08 | 0.242151 | 1.17E-07 | 0.316214 | 2.64E-12 |
| 1.04E-32 | 0.058713 | 0.20534  | 0.080973 | 0.08046  | 0.010743 | 0.81689  | 0.108704 | 0.01878  |
| 5.90E-06 | 0.277099 | 1.12E-09 | 0.27689  | 1.15E-09 | 0.283331 | 4.53E-10 | 0.448183 | 1.87E-24 |
| 6.93E-25 | 0.420363 | 2.03E-21 | 0.102944 | 0.02611  | 0.117261 | 0.01121  | 0.420356 | 2.03E-21 |
| 5.89E-17 | 0.112774 | 0.01476  | 0.18931  | 3.83E-05 | 0.023712 | 0.60927  | 0.115488 | 0.01251  |
| 2.87E-21 | 0.20701  | 6.47E-06 | 0.238681 | 1.79E-07 | 0.405202 | 7.01E-20 | 0.527541 | 8.15E-35 |
| 2.71E-08 | -0.22025 | 1.54E-06 | -0.31741 | 2.16E-12 | -0.32085 | 1.22E-12 | -0.47256 | 2.36E-27 |
| 1.37E-30 | 0.118749 | 0.01022  | 0.335636 | 9.27E-14 | 0.215799 | 2.52E-06 | 0.317406 | 2.17E-12 |
| 3.64E-12 | 0.168138 | 0.00026  | 0.177748 | 0.00011  | 0.106873 | 0.02089  | 0.32194  | 1.01E-12 |
| 1.05E-10 | 0.079032 | 0.08801  | 0.202951 | 9.86E-06 | 0.145842 | 0.00158  | 0.208854 | 5.32E-06 |
| 0.00268  | 0.286398 | 2.88E-10 | 0.189162 | 3.89E-05 | 0.123863 | 0.00737  | 0.235594 | 2.60E-07 |
| 6.28E-09 | -0.09668 | 0.03674  | -0.28143 | 5.98E-10 | -0.17091 | 0.00021  | -0.18591 | 5.30E-05 |
| 2.88E-24 | -0.14081 | 0.00229  | -0.10488 | 0.02341  | 0.032479 | 0.48382  | -0.13129 | 0.00448  |
| 4.05E-15 | -0.18915 | 3.89E-05 | 0.308703 | 9.07E-12 | 0.262449 | 8.53E-09 | 0.079923 | 0.08448  |
| 1.40E-20 | 0.088075 | 0.05718  | 0.051575 | 0.26601  | 0.031464 | 0.4976   | 0.118132 | 0.01062  |
| 3.38E-14 | 0.112621 | 0.01489  | 0.098163 | 0.03394  | 0.044904 | 0.3329   | 0.205709 | 7.41E-06 |
| 2.15E-07 | 0.074979 | 0.10561  | 0.184819 | 5.87E-05 | 0.121524 | 0.00857  | 0.203456 | 9.36E-06 |
| 2.21E-16 | 0.273747 | 1.80E-09 | 0.284816 | 3.64E-10 | 0.313317 | 4.27E-12 | 0.506464 | 8.57E-32 |
| 4.41E-08 | 0.076897 | 0.09696  | 0.049872 | 0.28214  | 0.137659 | 0.00287  | 0.165361 | 0.00033  |
| 0.00218  | 0.06456  | 0.16366  | 0.281362 | 6.04E-10 | 0.387193 | 3.75E-18 | 0.395647 | 5.97E-19 |
| 1.03E-37 | -0.04415 | 0.34106  | 0.049406 | 0.28667  | -0.08167 | 0.07786  | -0.05846 | 0.20731  |

|          |          |          |          |          |          |          |          |          |
|----------|----------|----------|----------|----------|----------|----------|----------|----------|
| 0.00013  | 0.241188 | 1.32E-07 | 0.179665 | 9.46E-05 | 0.171863 | 0.00019  | 0.344439 | 1.87E-14 |
| 7.58E-15 | 0.238677 | 1.79E-07 | 0.179272 | 9.81E-05 | 0.243423 | 1.00E-07 | 0.438175 | 2.49E-23 |
| 0.00041  | -0.01959 | 0.67284  | 0.202559 | 1.03E-05 | 0.28149  | 5.93E-10 | 0.257418 | 1.67E-08 |
| 1.34E-13 | 0.046438 | 0.31664  | -0.012   | 0.79591  | -0.03206 | 0.48948  | 0.075985 | 0.101    |
| 3.31E-10 | 0.180274 | 8.95E-05 | 0.376612 | 3.48E-17 | 0.495268 | 2.85E-30 | 0.56324  | 1.92E-40 |
| 2.24E-10 | -0.15382 | 0.00085  | -0.21794 | 1.99E-06 | -0.2213  | 1.37E-06 | -0.41216 | 1.41E-20 |
| 2.16E-16 | -0.0838  | 0.07041  | -0.04425 | 0.34003  | -0.29507 | 7.78E-11 | -0.24961 | 4.59E-08 |
| 1.31E-07 | 0.135517 | 0.00334  | 0.180527 | 8.74E-05 | 0.189758 | 3.67E-05 | 0.369486 | 1.49E-16 |
| 1.25E-64 | 0.160983 | 0.00048  | 0.216057 | 2.45E-06 | 0.15049  | 0.00111  | 0.300722 | 3.24E-11 |
| 6.35E-23 | 0.167093 | 0.00029  | 0.311196 | 6.05E-12 | 0.343563 | 2.20E-14 | 0.345204 | 1.63E-14 |
| 1.08E-07 | 0.17887  | 0.0001   | 0.500472 | 5.67E-31 | 0.422369 | 1.25E-21 | 0.55719  | 1.93E-39 |
| 1.56E-63 | 0.071268 | 0.12406  | 0.097373 | 0.03541  | -0.01922 | 0.67875  | 0.119995 | 0.00944  |
| 1.30E-24 | 0.093041 | 0.04447  | 0.210027 | 4.70E-06 | 0.052842 | 0.25443  | 0.145854 | 0.00158  |
| 1.08E-18 | 0.14425  | 0.00178  | 0.018499 | 0.69009  | 0.024236 | 0.60137  | 0.230712 | 4.64E-07 |
| 9.05E-07 | -0.01982 | 0.66928  | 0.05372  | 0.24661  | 0.131081 | 0.00455  | 0.061308 | 0.18598  |
| 2.42E-20 | 0.077895 | 0.09269  | 0.070213 | 0.12974  | 0.009298 | 0.84118  | 0.136198 | 0.00319  |
| 1.30E-18 | -0.25787 | 1.57E-08 | -0.15633 | 0.0007   | -0.22511 | 8.88E-07 | -0.42312 | 1.04E-21 |
| 2.82E-15 | 0.163365 | 0.00039  | 0.370022 | 1.34E-16 | 0.249619 | 4.59E-08 | 0.366965 | 2.47E-16 |
| 2.76E-23 | -0.05344 | 0.24907  | -0.04349 | 0.34834  | -0.15491 | 0.00078  | -0.08368 | 0.0708   |
| 6.28E-14 | 0.117716 | 0.0109   | 0.193546 | 2.54E-05 | 0.140372 | 0.00236  | 0.207296 | 6.28E-06 |
| 1.01E-14 | 0.25681  | 1.81E-08 | 0.331466 | 1.94E-13 | 0.22436  | 9.68E-07 | 0.466017 | 1.49E-26 |
| 5.59E-15 | 0.028753 | 0.53538  | 0.104976 | 0.02328  | 0.166722 | 0.0003   | 0.129757 | 0.00498  |
| 1.05E-17 | 0.220951 | 1.42E-06 | 0.304914 | 1.67E-11 | 0.457499 | 1.55E-25 | 0.511557 | 1.67E-32 |
| 4.76E-22 | 0.162239 | 0.00043  | 0.355276 | 2.44E-15 | 0.277217 | 1.10E-09 | 0.447251 | 2.39E-24 |
| 6.32E-08 | 0.072455 | 0.11791  | 0.10635  | 0.02153  | 0.003338 | 0.94265  | 0.076351 | 0.09937  |
| 4.45E-17 | -0.10609 | 0.02185  | -0.10437 | 0.0241   | -0.06022 | 0.19396  | -0.17767 | 0.00011  |
| 3.66E-16 | 0.192304 | 2.87E-05 | 0.264966 | 6.07E-09 | 0.278717 | 8.85E-10 | 0.435278 | 5.18E-23 |
| 3.96E-17 | -0.01025 | 0.82508  | -0.04046 | 0.38296  | 0.096179 | 0.03774  | -0.02055 | 0.65774  |
| 2.38E-05 | 0.104898 | 0.02339  | 0.14656  | 0.00149  | 0.101352 | 0.02852  | 0.252527 | 3.16E-08 |
| 2.76E-52 | 0.255975 | 2.02E-08 | 0.211809 | 3.88E-06 | 0.147055 | 0.00144  | 0.363612 | 4.81E-16 |
| 4.25E-15 | 0.195781 | 2.04E-05 | 0.181671 | 7.87E-05 | 0.165148 | 0.00034  | 0.376704 | 3.41E-17 |
| 5.36E-08 | 0.245801 | 7.44E-08 | 0.054354 | 0.24107  | 0.273281 | 1.92E-09 | 0.366702 | 2.61E-16 |
| 8.88E-16 | 0.063275 | 0.17222  | 0.301072 | 3.06E-11 | 0.220724 | 1.46E-06 | 0.344947 | 1.71E-14 |
| 3.41E-10 | 0.192273 | 2.88E-05 | 0.0733   | 0.11367  | 0.208914 | 5.29E-06 | 0.357738 | 1.52E-15 |
| 0.00033  | 0.113576 | 0.01406  | 0.063596 | 0.17005  | 0.100423 | 0.03002  | 0.200083 | 1.32E-05 |
| 1.14E-05 | 0.097343 | 0.03547  | 0.084618 | 0.0677   | 0.064606 | 0.16336  | 0.185195 | 5.67E-05 |
| 1.17E-28 | 0.154177 | 0.00083  | 0.254958 | 2.30E-08 | 0.2632   | 7.71E-09 | 0.497214 | 1.56E-30 |
| 1.32E-23 | 0.455761 | 2.48E-25 | 0.252491 | 3.17E-08 | 0.160544 | 0.0005   | 0.388848 | 2.63E-18 |
| 8.35E-08 | 0.109063 | 0.01839  | -0.08869 | 0.05546  | 0.013839 | 0.76549  | 0.12632  | 0.00627  |
| 0.01488  | 0.205314 | 7.72E-06 | 0.367937 | 2.04E-16 | 0.33416  | 1.21E-13 | 0.445461 | 3.81E-24 |
| 2.29E-10 | 0.01622  | 0.72664  | 0.091854 | 0.04727  | -0.14312 | 0.00193  | 0.038336 | 0.4085   |
| 8.09E-18 | 0.076512 | 0.09865  | -0.04189 | 0.3664   | 0.053401 | 0.24943  | 0.125999 | 0.0064   |
| 2.40E-10 | -0.09876 | 0.03286  | 0.153668 | 0.00086  | 0.050284 | 0.27818  | 0.002201 | 0.96217  |
| 2.77E-10 | 0.123286 | 0.00765  | 0.152434 | 0.00095  | 0.141904 | 0.00211  | 0.292853 | 1.09E-10 |
| 1.89E-20 | -0.05888 | 0.20406  | 0.120638 | 0.00907  | -0.11091 | 0.01649  | -0.06354 | 0.17046  |

|          |          |          |          |          |          |          |          |          |
|----------|----------|----------|----------|----------|----------|----------|----------|----------|
| 1.35E-07 | 0.260864 | 1.06E-08 | 0.311252 | 5.99E-12 | 0.383802 | 7.73E-18 | 0.541265 | 6.71E-37 |
| 6.04E-16 | 0.096134 | 0.03783  | 0.203618 | 9.21E-06 | 0.046649 | 0.31444  | 0.164486 | 0.00036  |
| 3.39E-11 | 0.075962 | 0.10111  | 0.092996 | 0.04458  | -0.0306  | 0.5095   | 0.121604 | 0.00852  |
| 2.93E-15 | 0.105963 | 0.02201  | -0.06789 | 0.14296  | -0.20618 | 7.05E-06 | -0.0673  | 0.14647  |
| 5.57E-19 | 0.011173 | 0.8097   | 0.074464 | 0.10803  | -0.05807 | 0.21035  | -0.00987 | 0.83148  |
| 8.81E-28 | 0.113936 | 0.01375  | 0.199599 | 1.39E-05 | 0.202367 | 1.05E-05 | 0.293257 | 1.03E-10 |
| 2.70E-30 | 0.235134 | 2.75E-07 | 0.29195  | 1.25E-10 | 0.27767  | 1.03E-09 | 0.444703 | 4.64E-24 |
| 2.65E-08 | 0.104994 | 0.02326  | 0.194162 | 2.39E-05 | 0.109817 | 0.0176   | 0.283904 | 4.16E-10 |
| 1.94E-21 | 0.361514 | 7.27E-16 | 0.155462 | 0.00075  | 0.199707 | 1.37E-05 | 0.499046 | 8.85E-31 |
| 2.02E-20 | -0.03793 | 0.41347  | -0.00377 | 0.93519  | -0.1038  | 0.02489  | -0.05199 | 0.26216  |
| 1.09E-11 | 0.082197 | 0.07597  | -0.1426  | 0.00201  | -0.07041 | 0.12867  | 0.021419 | 0.64431  |
| 2.18E-26 | -0.28551 | 3.29E-10 | -0.17341 | 0.00017  | -0.309   | 8.64E-12 | -0.45837 | 1.22E-25 |
| 1.49E-25 | 0.177318 | 0.00012  | 0.30775  | 1.06E-11 | 0.257413 | 1.67E-08 | 0.390287 | 1.93E-18 |
| 5.28E-15 | 0.220665 | 1.47E-06 | 0.213771 | 3.14E-06 | 0.231247 | 4.36E-07 | 0.317466 | 2.15E-12 |
| 6.51E-09 | -0.03492 | 0.45154  | -0.03776 | 0.41558  | -0.08275 | 0.07401  | 0.002629 | 0.95481  |
| 2.60E-13 | 0.099575 | 0.03144  | -0.00314 | 0.94598  | -0.00507 | 0.91303  | 0.141841 | 0.00212  |
| 1.01E-10 | 0.110627 | 0.01677  | 0.328981 | 3.00E-13 | 0.327347 | 3.99E-13 | 0.372125 | 8.73E-17 |
| 2.62E-20 | 0.204448 | 8.45E-06 | 0.340689 | 3.72E-14 | 0.190737 | 3.34E-05 | 0.407583 | 4.07E-20 |
| 1.00E-06 | 0.136967 | 0.00302  | 0.35979  | 1.02E-15 | 0.256259 | 1.94E-08 | 0.344384 | 1.89E-14 |
| 2.92E-05 | 0.109975 | 0.01743  | 0.365007 | 3.65E-16 | 0.356815 | 1.81E-15 | 0.45471  | 3.30E-25 |
| 2.03E-18 | 0.187619 | 4.51E-05 | 0.150011 | 0.00115  | 0.196517 | 1.89E-05 | 0.331457 | 1.95E-13 |
| 1.95E-07 | 0.106466 | 0.02138  | 0.163882 | 0.00038  | 0.034048 | 0.46293  | 0.192471 | 2.82E-05 |
| 6.87E-14 | -0.07989 | 0.08461  | -0.28918 | 1.90E-10 | -0.30389 | 1.96E-11 | -0.31793 | 1.98E-12 |
| 2.21E-17 | 0.219515 | 1.67E-06 | 0.063179 | 0.17288  | 0.051045 | 0.27096  | 0.277866 | 1.00E-09 |
| 9.56E-25 | 0.159873 | 0.00052  | 0.259052 | 1.34E-08 | 0.184432 | 6.09E-05 | 0.346578 | 1.26E-14 |
| 1.20E-09 | 0.172242 | 0.00018  | 0.385737 | 5.13E-18 | 0.340198 | 4.07E-14 | 0.522331 | 4.76E-34 |
| 8.85E-13 | 0.157306 | 0.00065  | 0.37387  | 6.12E-17 | 0.349216 | 7.70E-15 | 0.416857 | 4.67E-21 |
| 1.32E-06 | 0.15571  | 0.00073  | 0.247174 | 6.26E-08 | 0.204338 | 8.55E-06 | 0.378305 | 2.45E-17 |
| 3.70E-28 | 0.103753 | 0.02495  | 0.194784 | 2.25E-05 | 0.118059 | 0.01067  | 0.199903 | 1.35E-05 |
| 2.02E-25 | 0.320609 | 1.27E-12 | 0.109906 | 0.0175   | 0.261274 | 9.99E-09 | 0.489452 | 1.67E-29 |
| 1.71E-21 | 0.195231 | 2.15E-05 | 0.101563 | 0.02819  | 0.177448 | 0.00012  | 0.358564 | 1.29E-15 |
| 1.04E-14 | 0.147868 | 0.00135  | 0.155419 | 0.00075  | 0.134563 | 0.00358  | 0.319484 | 1.53E-12 |
| 0.00037  | 0.114487 | 0.0133   | 0.333072 | 1.46E-13 | 0.25788  | 1.57E-08 | 0.365774 | 3.14E-16 |
| 0.00021  | 0.126609 | 0.00615  | 0.004714 | 0.91907  | 0.050785 | 0.27341  | 0.167842 | 0.00027  |
| 3.37E-37 | 0.02982  | 0.52033  | -0.12328 | 0.00765  | -0.09588 | 0.03834  | -0.00345 | 0.94072  |
| 0.00353  | 0.161888 | 0.00044  | 0.353121 | 3.68E-15 | 0.358339 | 1.35E-15 | 0.48758  | 2.93E-29 |
| 5.45E-28 | 0.020388 | 0.66034  | -0.02408 | 0.60379  | -0.0769  | 0.09694  | 0.008963 | 0.84682  |
| 1.11E-21 | 0.173719 | 0.00016  | 0.233254 | 3.44E-07 | 0.157655 | 0.00063  | 0.325738 | 5.27E-13 |
| 6.81E-05 | -0.05649 | 0.22308  | -0.11861 | 0.01031  | -0.23025 | 4.90E-07 | -0.21919 | 1.73E-06 |
| 2.45E-46 | 0.087437 | 0.05901  | 0.013125 | 0.77726  | -0.06604 | 0.15421  | 0.066624 | 0.15058  |
| 0.00568  | 0.124807 | 0.00692  | 0.319369 | 1.56E-12 | 0.065557 | 0.15724  | 0.215768 | 2.53E-06 |
| 4.42E-14 | 0.125324 | 0.00669  | 0.205602 | 7.49E-06 | 0.106186 | 0.02173  | 0.287727 | 2.36E-10 |
| 1.29E-05 | 0.204642 | 8.28E-06 | 0.414487 | 8.18E-21 | 0.481848 | 1.60E-28 | 0.557208 | 1.91E-39 |
| 7.79E-08 | 0.184317 | 6.15E-05 | 0.37789  | 2.67E-17 | 0.344135 | 1.98E-14 | 0.37688  | 3.29E-17 |
| 6.58E-16 | 0.05973  | 0.19758  | 0.17373  | 0.00016  | 0.11333  | 0.01427  | 0.175028 | 0.00014  |

|          |          |          |          |          |          |          |          |          |
|----------|----------|----------|----------|----------|----------|----------|----------|----------|
| 0.00019  | 0.00445  | 0.92359  | 0.332409 | 1.64E-13 | 0.241816 | 1.22E-07 | 0.239601 | 1.60E-07 |
| 1.56E-07 | 0.120824 | 0.00896  | 0.00672  | 0.88484  | -0.03225 | 0.48691  | 0.109318 | 0.01812  |
| 2.27E-08 | -0.05197 | 0.2624   | 0.338002 | 6.06E-14 | 0.162461 | 0.00042  | 0.158605 | 0.00058  |
| 4.40E-17 | 0.074229 | 0.10915  | 0.063901 | 0.16801  | 0.08448  | 0.06815  | 0.127154 | 0.00593  |
| 5.26E-25 | -0.25283 | 3.04E-08 | -0.22278 | 1.16E-06 | -0.31811 | 1.93E-12 | -0.49448 | 3.63E-30 |
| 1.75E-22 | 0.091655 | 0.04775  | 0.03686  | 0.4268   | 0.038485 | 0.40668  | 0.129408 | 0.0051   |
| 9.75E-25 | 0.14998  | 0.00115  | 0.184109 | 6.27E-05 | 0.145262 | 0.00165  | 0.28121  | 6.17E-10 |
| 9.90E-09 | 0.03338  | 0.47176  | 0.112228 | 0.01525  | 0.075272 | 0.10425  | 0.116077 | 0.01207  |
| 5.90E-07 | 0.199824 | 1.36E-05 | 0.254317 | 2.50E-08 | 0.218292 | 1.91E-06 | 0.324619 | 6.39E-13 |
| 4.70E-09 | 0.153573 | 0.00087  | 0.469078 | 6.33E-27 | 0.53577  | 4.71E-36 | 0.652761 | 4.81E-58 |
| 1.90E-18 | 0.179204 | 9.87E-05 | 0.170356 | 0.00022  | 0.138427 | 0.00272  | 0.271467 | 2.48E-09 |
| 5.35E-38 | 0.262963 | 7.96E-09 | 0.160112 | 0.00051  | 0.129581 | 0.00504  | 0.385079 | 5.90E-18 |
| 1.14E-16 | 0.116181 | 0.01199  | 0.427463 | 3.62E-22 | 0.262717 | 8.23E-09 | 0.459528 | 8.94E-26 |
| 3.63E-20 | 0.137606 | 0.00288  | 0.180354 | 8.88E-05 | 0.084501 | 0.06808  | 0.285408 | 3.34E-10 |
| 1.09E-11 | 0.171216 | 0.0002   | 0.060116 | 0.1947   | 0.079992 | 0.08421  | 0.2528   | 3.05E-08 |
| 4.79E-08 | -0.08228 | 0.07569  | 0.155531 | 0.00074  | 0.234687 | 2.90E-07 | 0.221006 | 1.41E-06 |
| 1.78E-11 | 0.100587 | 0.02975  | 0.105576 | 0.0225   | 0.13975  | 0.00247  | 0.218137 | 1.95E-06 |
| 6.20E-06 | 0.222556 | 1.19E-06 | 0.275951 | 1.32E-09 | 0.33288  | 1.51E-13 | 0.534295 | 7.90E-36 |
| 1.26E-30 | 0.139126 | 0.00259  | 0.172355 | 0.00018  | 0.150127 | 0.00114  | 0.329772 | 2.61E-13 |
| 5.33E-08 | 0.214846 | 2.80E-06 | 0.01571  | 0.73491  | 0.143945 | 0.00182  | 0.309239 | 8.32E-12 |
| 5.52E-11 | 0.146013 | 0.00156  | 0.205291 | 7.74E-06 | 0.227358 | 6.86E-07 | 0.326936 | 4.28E-13 |
| 1.03E-32 | 0.163462 | 0.00039  | 0.294026 | 9.13E-11 | 0.367746 | 2.11E-16 | 0.385543 | 5.34E-18 |
| 3.05E-09 | -0.08739 | 0.05916  | -0.20296 | 9.86E-06 | -0.13009 | 0.00487  | -0.21494 | 2.77E-06 |
| 2.04E-05 | -0.11811 | 0.01063  | -0.13282 | 0.00404  | -0.14621 | 0.00153  | -0.23182 | 4.07E-07 |
| 4.96E-23 | 0.131006 | 0.00457  | 0.141261 | 0.00221  | 0.039472 | 0.39475  | 0.210091 | 4.67E-06 |
| 1.49E-10 | 0.022057 | 0.63447  | 0.35831  | 1.36E-15 | 0.021533 | 0.64255  | 0.137257 | 0.00296  |
| 1.15E-19 | 0.038952 | 0.401    | 0.114949 | 0.01293  | 0.048713 | 0.29349  | 0.153915 | 0.00085  |
| 3.35E-14 | -0.16402 | 0.00037  | -0.17294 | 0.00017  | -0.27329 | 1.92E-09 | -0.39545 | 6.24E-19 |
| 3.55E-07 | 0.003276 | 0.94371  | 0.20191  | 1.10E-05 | 0.137786 | 0.00285  | 0.149104 | 0.00123  |
| 6.74E-14 | 0.127619 | 0.00575  | 0.18824  | 4.25E-05 | 0.135947 | 0.00324  | 0.256394 | 1.91E-08 |
| 1.35E-10 | -0.0716  | 0.12229  | -0.04377 | 0.34527  | -0.14352 | 0.00188  | -0.18977 | 3.67E-05 |
| 2.19E-14 | 0.054669 | 0.23835  | 0.238062 | 1.93E-07 | 0.078522 | 0.09008  | 0.148148 | 0.00132  |
| 8.22E-15 | -0.01196 | 0.79657  | 0.040809 | 0.37892  | -0.01866 | 0.68753  | 0.064703 | 0.16273  |
| 8.66E-40 | 0.118793 | 0.01019  | 0.19133  | 3.15E-05 | 0.143653 | 0.00186  | 0.27163  | 2.42E-09 |
| 3.87E-12 | 0.1074   | 0.02026  | 0.138645 | 0.00268  | 0.155937 | 0.00072  | 0.236853 | 2.24E-07 |
| 0.00072  | 0.294432 | 8.58E-11 | 0.282119 | 5.41E-10 | 0.347791 | 1.01E-14 | 0.341651 | 3.13E-14 |
| 8.83E-23 | 0.056984 | 0.21902  | 0.096911 | 0.0363   | -0.01359 | 0.76967  | 0.125713 | 0.00652  |
| 2.27E-20 | 0.12934  | 0.00512  | 0.172065 | 0.00019  | 0.090669 | 0.05021  | 0.253633 | 2.74E-08 |
| 7.32E-16 | 0.182052 | 7.60E-05 | 0.348911 | 8.15E-15 | 0.287271 | 2.53E-10 | 0.468755 | 6.93E-27 |
| 1.59E-24 | 0.058106 | 0.21007  | 0.078893 | 0.08857  | -0.00422 | 0.92746  | 0.130136 | 0.00485  |
| 4.22E-13 | 0.15876  | 0.00057  | 0.245069 | 8.15E-08 | 0.249593 | 4.60E-08 | 0.403982 | 9.25E-20 |
| 1.18E-12 | 0.014343 | 0.75721  | 0.143497 | 0.00188  | -0.02399 | 0.60501  | 0.077265 | 0.09537  |
| 2.93E-06 | 0.291977 | 1.25E-10 | 0.207429 | 6.19E-06 | 0.294247 | 8.83E-11 | 0.503841 | 1.97E-31 |
| 5.97E-15 | 0.176618 | 0.00012  | 0.384419 | 6.78E-18 | 0.559141 | 9.21E-40 | 0.612288 | 2.18E-49 |
| 1.66E-14 | 0.328484 | 3.27E-13 | 0.392466 | 1.20E-18 | 0.488165 | 2.46E-29 | 0.644288 | 4.01E-56 |



|          |          |          |          |          |          |          |          |          |
|----------|----------|----------|----------|----------|----------|----------|----------|----------|
| 1.29E-18 | 0.137385 | 0.00293  | 0.035261 | 0.44714  | 0.009655 | 0.83515  | 0.156705 | 0.00068  |
| 3.50E-10 | 0.193845 | 2.47E-05 | 0.18341  | 6.70E-05 | 0.099059 | 0.03234  | 0.295878 | 6.87E-11 |
| 7.05E-05 | 0.307607 | 1.08E-11 | 0.331565 | 1.91E-13 | 0.298999 | 4.24E-11 | 0.421394 | 1.58E-21 |
| 1.16E-28 | -0.0296  | 0.52345  | -0.05096 | 0.27178  | -0.11155 | 0.01588  | -0.03004 | 0.51723  |
| 3.57E-12 | -0.10528 | 0.02289  | -0.14708 | 0.00144  | -0.23604 | 2.47E-07 | -0.31034 | 6.95E-12 |
| 1.47E-33 | 0.189874 | 3.63E-05 | 0.180914 | 8.44E-05 | 0.047677 | 0.30389  | 0.26552  | 5.63E-09 |
| 9.59E-05 | -0.26883 | 3.57E-09 | -0.14332 | 0.0019   | -0.25361 | 2.75E-08 | -0.27109 | 2.61E-09 |
| 2.90E-23 | 0.130961 | 0.00459  | 0.271303 | 2.53E-09 | 0.103786 | 0.0249   | 0.259083 | 1.34E-08 |
| 1.28E-14 | 0.253807 | 2.68E-08 | 0.346568 | 1.26E-14 | 0.382368 | 1.05E-17 | 0.552255 | 1.22E-38 |
| 2.18E-19 | 0.066731 | 0.14992  | 0.084946 | 0.06664  | 0.032571 | 0.48258  | 0.140565 | 0.00233  |
| 2.95E-08 | 0.125085 | 0.0068   | 0.096887 | 0.03634  | -0.02912 | 0.53019  | 0.205581 | 7.51E-06 |
| 3.89E-08 | 0.059869 | 0.19654  | 0.079515 | 0.08608  | -0.05458 | 0.23914  | 0.00782  | 0.86616  |
| 1.33E-18 | 0.054795 | 0.23726  | 0.027386 | 0.55496  | 0.030186 | 0.51523  | 0.126593 | 0.00616  |
| 0.39635  | 0.224984 | 9.01E-07 | 0.187084 | 4.74E-05 | 0.281061 | 6.31E-10 | 0.418335 | 3.29E-21 |
| 9.01E-17 | 0.09576  | 0.03858  | -0.05055 | 0.27566  | 0.041759 | 0.36791  | 0.160817 | 0.00049  |
| 7.36E-10 | 0.051232 | 0.26921  | 0.273968 | 1.74E-09 | 0.031909 | 0.49152  | 0.202411 | 1.04E-05 |
| 2.70E-20 | -0.20165 | 1.13E-05 | -0.1423  | 0.00205  | -0.2764  | 1.23E-09 | -0.40319 | 1.11E-19 |
| 7.70E-21 | -0.19486 | 2.23E-05 | -0.31183 | 5.45E-12 | -0.217   | 2.21E-06 | -0.39362 | 9.32E-19 |
| 4.98E-21 | 0.131368 | 0.00446  | -0.01614 | 0.72793  | 0.091414 | 0.04835  | 0.226246 | 7.80E-07 |
| 3.07E-37 | 0.170341 | 0.00022  | 0.147517 | 0.00139  | 0.021666 | 0.6405   | 0.216632 | 2.30E-06 |
| 4.17E-13 | 0.077324 | 0.09512  | 0.015167 | 0.74374  | 0.01794  | 0.699    | 0.147198 | 0.00142  |
| 3.48E-20 | 0.146762 | 0.00147  | 0.295458 | 7.33E-11 | 0.135449 | 0.00336  | 0.339722 | 4.44E-14 |
| 1.14E-09 | 0.048209 | 0.29851  | 0.210719 | 4.37E-06 | 0.133488 | 0.00385  | 0.246696 | 6.64E-08 |
| 3.01E-16 | 0.129244 | 0.00515  | 0.171223 | 0.0002   | 0.158552 | 0.00058  | 0.299426 | 3.96E-11 |
| 1.81E-16 | 0.141422 | 0.00219  | 0.162695 | 0.00042  | 0.088584 | 0.05575  | 0.266171 | 5.15E-09 |
| 2.75E-25 | -0.29926 | 4.07E-11 | -0.20597 | 7.21E-06 | -0.31093 | 6.31E-12 | -0.44884 | 1.57E-24 |
| 1.97E-40 | 0.126367 | 0.00625  | 0.109499 | 0.01793  | 0.054339 | 0.2412   | 0.201156 | 1.19E-05 |
| 8.85E-33 | 0.165775 | 0.00032  | 0.049352 | 0.2872   | 0.051599 | 0.26579  | 0.248922 | 5.01E-08 |
| 9.92E-16 | 0.239344 | 1.65E-07 | 0.12417  | 0.00722  | 0.152654 | 0.00093  | 0.321665 | 1.06E-12 |
| 1.35E-13 | -0.07513 | 0.10492  | 0.022085 | 0.63405  | -0.07202 | 0.12012  | -0.03213 | 0.48855  |
| 2.65E-23 | 0.050691 | 0.2743   | 0.059    | 0.20312  | 0.038929 | 0.40128  | 0.157973 | 0.00061  |
| 5.97E-16 | -0.04591 | 0.32221  | 0.043846 | 0.34443  | 0.246929 | 6.45E-08 | 0.15504  | 0.00077  |
| 0.0075   | 0.290478 | 1.56E-10 | 0.114635 | 0.01318  | 0.203282 | 9.53E-06 | 0.427488 | 3.60E-22 |
| 1.35E-14 | -0.15005 | 0.00114  | -0.15845 | 0.00059  | -0.09547 | 0.03919  | -0.25654 | 1.87E-08 |
| 3.80E-41 | 0.205714 | 7.41E-06 | 0.133529 | 0.00384  | 0.190237 | 3.51E-05 | 0.35443  | 2.87E-15 |
| 1.45E-20 | 0.28607  | 3.02E-10 | 0.288721 | 2.04E-10 | 0.346133 | 1.37E-14 | 0.535199 | 5.76E-36 |
| 5.74E-08 | 0.124362 | 0.00713  | 0.150825 | 0.00108  | 0.211028 | 4.22E-06 | 0.367467 | 2.24E-16 |
| 2.70E-09 | 0.071047 | 0.12524  | 0.169745 | 0.00023  | 0.101507 | 0.02828  | 0.179726 | 9.41E-05 |
| 3.22E-13 | 0.305192 | 1.59E-11 | 0.392048 | 1.31E-18 | 0.423734 | 8.99E-22 | 0.634823 | 4.76E-54 |
| 0.06946  | 0.203556 | 9.27E-06 | 0.14267  | 0.002    | 0.282767 | 4.92E-10 | 0.381574 | 1.24E-17 |
| 0.0204   | 0.001802 | 0.96903  | 0.006064 | 0.89602  | 0.113139 | 0.01444  | 0.190954 | 3.27E-05 |
| 2.45E-12 | -0.09206 | 0.04679  | -0.09365 | 0.04308  | -0.1013  | 0.0286   | -0.27613 | 1.28E-09 |
| 4.49E-16 | -0.13547 | 0.00335  | -0.38189 | 1.16E-17 | -0.32102 | 1.18E-12 | -0.36321 | 5.21E-16 |
| 1.88E-21 | -0.09326 | 0.04397  | -0.19999 | 1.34E-05 | -0.11989 | 0.00951  | -0.21553 | 2.59E-06 |
| 2.42E-19 | -0.18371 | 6.52E-05 | -0.28106 | 6.31E-10 | -0.2179  | 2.00E-06 | -0.4084  | 3.37E-20 |

|          |          |          |          |          |          |          |          |          |
|----------|----------|----------|----------|----------|----------|----------|----------|----------|
| 1.08E-25 | -0.09861 | 0.03313  | -0.24548 | 7.74E-08 | -0.26073 | 1.07E-08 | -0.2851  | 3.49E-10 |
| 4.57E-05 | 0.05245  | 0.25797  | 0.264484 | 6.48E-09 | 0.25455  | 2.43E-08 | 0.331495 | 1.93E-13 |
| 1.03E-08 | 0.12636  | 0.00625  | 0.316927 | 2.35E-12 | 0.215975 | 2.47E-06 | 0.338938 | 5.12E-14 |
| 7.07E-13 | 0.171052 | 0.0002   | 0.049633 | 0.28446  | -0.12633 | 0.00626  | 9.24E-05 | 0.99841  |
| 1.30E-13 | 0.198645 | 1.53E-05 | 0.052165 | 0.26057  | 0.105536 | 0.02255  | 0.322814 | 8.70E-13 |
| 8.37E-12 | -0.10475 | 0.02359  | -0.17471 | 0.00015  | -0.10244 | 0.02686  | -0.27514 | 1.48E-09 |
| 8.22E-06 | -0.07032 | 0.12917  | -0.06321 | 0.17267  | -0.15928 | 0.00055  | -0.18645 | 5.03E-05 |
| 1.96E-11 | -0.06234 | 0.17866  | -0.03078 | 0.50693  | -0.07587 | 0.10151  | -0.18526 | 5.63E-05 |
| 4.16E-14 | 0.103486 | 0.02533  | -0.0742  | 0.10931  | -0.09855 | 0.03323  | -0.01821 | 0.69465  |
| 1.15E-08 | 0.1872   | 4.69E-05 | 0.109964 | 0.01745  | 0.197758 | 1.67E-05 | 0.317561 | 2.11E-12 |
| 2.13E-09 | 0.184352 | 6.13E-05 | 0.128816 | 0.00531  | 0.229565 | 5.31E-07 | 0.35145  | 5.05E-15 |
| 4.38E-14 | 0.188017 | 4.34E-05 | 0.235951 | 2.49E-07 | 0.23343  | 3.37E-07 | 0.400935 | 1.84E-19 |
| 2.39E-08 | 0.102508 | 0.02675  | 0.340863 | 3.61E-14 | 0.316343 | 2.59E-12 | 0.387439 | 3.56E-18 |
| 4.26E-12 | 0.231257 | 4.35E-07 | 0.230012 | 5.04E-07 | 0.272625 | 2.10E-09 | 0.44088  | 1.25E-23 |
| 1.17E-17 | 0.175206 | 0.00014  | 0.115697 | 0.01235  | 0.159838 | 0.00053  | 0.336056 | 8.60E-14 |
| 7.27E-06 | 0.258045 | 1.54E-08 | 0.088158 | 0.05695  | 0.19545  | 2.10E-05 | 0.400885 | 1.86E-19 |
| 0.00193  | 0.11438  | 0.01339  | 0.266514 | 4.91E-09 | 0.293362 | 1.01E-10 | 0.271468 | 2.47E-09 |
| 8.26E-18 | 0.17893  | 0.0001   | 0.078903 | 0.08853  | 0.051463 | 0.26705  | 0.296994 | 5.78E-11 |
| 1.37E-11 | 0.010949 | 0.81345  | 0.107573 | 0.02006  | -0.01291 | 0.78085  | -0.02036 | 0.66084  |
| 0.04384  | 0.217056 | 2.19E-06 | 0.170867 | 0.00021  | 0.189038 | 3.93E-05 | 0.430339 | 1.78E-22 |
| 4.21E-16 | -0.09941 | 0.03172  | -0.04138 | 0.37227  | -0.20873 | 5.39E-06 | -0.09188 | 0.04722  |
| 0.00481  | 0.108188 | 0.01936  | 0.301431 | 2.89E-11 | 0.35874  | 1.25E-15 | 0.398231 | 3.37E-19 |
| 1.38E-16 | -0.2002  | 1.31E-05 | -0.03395 | 0.46421  | -0.23308 | 3.51E-07 | -0.26642 | 4.98E-09 |
| 2.35E-40 | 0.299475 | 3.93E-11 | 0.260397 | 1.12E-08 | 0.36833  | 1.88E-16 | 0.561353 | 3.96E-40 |
| 0.00331  | 0.103504 | 0.0253   | 0.103842 | 0.02483  | 0.282327 | 5.25E-10 | 0.30874  | 9.02E-12 |
| 1.74E-28 | 0.075182 | 0.10466  | 0.189403 | 3.80E-05 | -0.01944 | 0.67523  | 0.120471 | 0.00916  |
| 0.00025  | 0.190212 | 3.51E-05 | 0.106512 | 0.02133  | 0.123432 | 0.00757  | 0.286092 | 3.01E-10 |
| 6.84E-11 | -0.16982 | 0.00023  | -0.05328 | 0.2505   | -0.00739 | 0.87338  | -0.22807 | 6.32E-07 |
| 1.21E-18 | 0.008758 | 0.85028  | 0.09446  | 0.04131  | 0.017266 | 0.70979  | 0.081008 | 0.08033  |
| 2.02E-15 | 0.090079 | 0.05173  | 0.154831 | 0.00079  | 0.077119 | 0.096    | 0.272122 | 2.26E-09 |
| 7.41E-16 | -0.03182 | 0.49278  | -0.04431 | 0.33934  | 0.017454 | 0.70677  | -0.13446 | 0.0036   |
| 3.90E-08 | -0.16397 | 0.00037  | -0.1172  | 0.01125  | -0.02161 | 0.64137  | -0.19967 | 1.38E-05 |
| 9.30E-13 | 0.177295 | 0.00012  | 0.023135 | 0.61801  | 0.034363 | 0.4588   | 0.170025 | 0.00022  |
| 6.36E-19 | 0.038782 | 0.40307  | 0.061168 | 0.18699  | 0.010235 | 0.8254   | 0.149086 | 0.00123  |
| 1.47E-19 | 0.203589 | 9.24E-06 | 0.173242 | 0.00017  | 0.118055 | 0.01067  | 0.304669 | 1.73E-11 |
| 7.62E-08 | 0.237802 | 1.99E-07 | 0.168005 | 0.00027  | 0.196446 | 1.91E-05 | 0.358183 | 1.39E-15 |
| 2.83E-12 | 0.115422 | 0.01256  | -0.02096 | 0.65142  | 0.052032 | 0.26179  | 0.161305 | 0.00047  |
| 7.97E-28 | 0.223319 | 1.09E-06 | 0.107639 | 0.01999  | 0.129256 | 0.00515  | 0.313215 | 4.34E-12 |
| 0.00019  | 0.166133 | 0.00031  | 0.005938 | 0.89817  | 0.078467 | 0.09031  | 0.173487 | 0.00016  |
| 0.00016  | 0.041597 | 0.36978  | 0.181941 | 7.68E-05 | 0.109397 | 0.01804  | 0.122394 | 0.0081   |
| 2.41E-27 | 0.195831 | 2.03E-05 | 0.111458 | 0.01597  | 0.187832 | 4.41E-05 | 0.340202 | 4.07E-14 |
| 3.20E-25 | 0.165746 | 0.00032  | 0.139997 | 0.00243  | 0.068474 | 0.13954  | 0.21814  | 1.95E-06 |
| 0.22116  | 0.161739 | 0.00045  | 0.243982 | 9.33E-08 | 0.335788 | 9.02E-14 | 0.415394 | 6.60E-21 |
| 1.44E-13 | 0.034295 | 0.45969  | 0.196199 | 1.95E-05 | 0.020539 | 0.65798  | 0.143565 | 0.00187  |
| 7.02E-13 | 0.115168 | 0.01276  | 0.094911 | 0.04035  | -0.11182 | 0.01563  | -0.00392 | 0.93268  |

|          |          |          |          |          |          |          |          |          |
|----------|----------|----------|----------|----------|----------|----------|----------|----------|
| 3.14E-15 | 0.051706 | 0.2648   | 0.062648 | 0.17652  | 0.015727 | 0.73462  | 0.097337 | 0.03548  |
| 1.14E-07 | -0.0088  | 0.8495   | 0.082272 | 0.07571  | 0.093705 | 0.04297  | 0.07453  | 0.10772  |
| 6.26E-18 | -0.10479 | 0.02354  | -0.16637 | 0.00031  | -0.05389 | 0.2451   | -0.21935 | 1.70E-06 |
| 5.95E-15 | 0.22205  | 1.26E-06 | 0.169549 | 0.00023  | 0.232432 | 3.79E-07 | 0.420655 | 1.89E-21 |
| 1.14E-13 | 0.187304 | 4.64E-05 | 0.160823 | 0.00049  | 0.316798 | 2.40E-12 | 0.403258 | 1.09E-19 |
| 0.00427  | 0.244093 | 9.20E-08 | 0.26759  | 4.24E-09 | 0.319645 | 1.49E-12 | 0.485646 | 5.22E-29 |
| 1.57E-19 | 0.053126 | 0.25188  | 0.138273 | 0.00275  | 0.068975 | 0.13666  | 0.181978 | 7.65E-05 |
| 1.14E-09 | 0.077203 | 0.09564  | -0.08942 | 0.05347  | -0.14558 | 0.00161  | -0.03727 | 0.42164  |
| 1.18E-28 | 0.093339 | 0.04379  | 0.191738 | 3.03E-05 | 0.099506 | 0.03156  | 0.226113 | 7.92E-07 |
| 5.70E-05 | 0.17798  | 0.00011  | 0.252574 | 3.14E-08 | 0.209605 | 4.92E-06 | 0.316647 | 2.46E-12 |
| 0.00015  | 0.074548 | 0.10764  | 0.058377 | 0.20795  | 0.04816  | 0.29901  | 0.109116 | 0.01834  |
| 3.63E-06 | -0.16569 | 0.00032  | -0.09564 | 0.03883  | 0.02986  | 0.51977  | -0.17333 | 0.00017  |
| 3.36E-21 | -0.18372 | 6.50E-05 | -0.18805 | 4.33E-05 | -0.18322 | 6.82E-05 | -0.36988 | 1.38E-16 |
| 3.32E-14 | -0.01352 | 0.7708   | 0.054806 | 0.23717  | -0.16048 | 0.0005   | -0.05819 | 0.2094   |
| 5.72E-28 | 0.187063 | 4.75E-05 | 0.189527 | 3.75E-05 | 0.134983 | 0.00347  | 0.324942 | 6.04E-13 |
| 4.86E-24 | 0.096677 | 0.03675  | 0.112546 | 0.01496  | 0.065027 | 0.16063  | 0.155344 | 0.00076  |
| 4.17E-06 | 0.053783 | 0.24605  | 0.211934 | 3.83E-06 | 0.116663 | 0.01164  | 0.155495 | 0.00075  |
| 1.82E-15 | 0.085843 | 0.06381  | 0.280325 | 7.02E-10 | 0.141936 | 0.00211  | 0.213159 | 3.36E-06 |
| 5.43E-16 | -0.10627 | 0.02163  | -0.05282 | 0.25466  | -0.22607 | 7.96E-07 | -0.18068 | 8.62E-05 |
| 5.79E-30 | 0.148144 | 0.00132  | 0.15978  | 0.00053  | 0.034975 | 0.45083  | 0.253421 | 2.81E-08 |
| 3.80E-15 | -0.11313 | 0.01444  | -0.09012 | 0.05163  | -0.11256 | 0.01495  | -0.22724 | 6.96E-07 |
| 1.07E-29 | 0.155069 | 0.00077  | 0.218511 | 1.87E-06 | 0.098306 | 0.03368  | 0.281996 | 5.50E-10 |
| 1.48E-14 | -0.20385 | 8.99E-06 | -0.18117 | 8.24E-05 | -0.33333 | 1.40E-13 | -0.38531 | 5.61E-18 |
| 2.54E-13 | -0.0649  | 0.16142  | -0.07979 | 0.08499  | -0.16958 | 0.00023  | -0.26104 | 1.03E-08 |
| 3.69E-07 | 0.23941  | 1.64E-07 | 0.176867 | 0.00012  | 0.313216 | 4.34E-12 | 0.499742 | 7.13E-31 |
| 4.39E-26 | 0.141973 | 0.0021   | 0.227061 | 7.10E-07 | 0.159345 | 0.00055  | 0.318626 | 1.77E-12 |
| 1.56E-17 | 0.079879 | 0.08465  | -0.02817 | 0.54363  | 0.041183 | 0.37456  | 0.137631 | 0.00288  |
| 1.97E-16 | 0.044806 | 0.33396  | 0.192809 | 2.73E-05 | 0.092884 | 0.04483  | 0.186829 | 4.86E-05 |
| 7.89E-19 | -0.21307 | 3.39E-06 | -0.18512 | 5.71E-05 | -0.30052 | 3.34E-11 | -0.38549 | 5.40E-18 |
| 4.08E-10 | 0.05939  | 0.20015  | 0.190011 | 3.58E-05 | 0.091845 | 0.04729  | 0.200961 | 1.21E-05 |
| 2.84E-17 | -0.12502 | 0.00683  | -0.20916 | 5.15E-06 | -0.17179 | 0.00019  | -0.25029 | 4.21E-08 |
| 6.17E-30 | 0.084262 | 0.06887  | 0.092687 | 0.04529  | 0.068392 | 0.14001  | 0.187296 | 4.65E-05 |
| 4.66E-09 | 0.144265 | 0.00177  | 0.027196 | 0.55771  | 0.03117  | 0.50162  | 0.217885 | 2.00E-06 |
| 2.18E-10 | -0.23687 | 2.23E-07 | -0.30455 | 1.77E-11 | -0.30904 | 8.59E-12 | -0.43654 | 3.77E-23 |
| 5.63E-19 | -0.22128 | 1.37E-06 | -0.224   | 1.01E-06 | -0.28539 | 3.34E-10 | -0.46394 | 2.66E-26 |
| 3.42E-09 | -0.20898 | 5.25E-06 | -0.2528  | 3.05E-08 | -0.22855 | 5.98E-07 | -0.43527 | 5.20E-23 |
| 4.56E-27 | 0.021032 | 0.6503   | -0.00332 | 0.94298  | -0.10199 | 0.02754  | 0.003282 | 0.94361  |
| 0.05398  | 0.147961 | 0.00134  | 0.124699 | 0.00697  | 0.180473 | 8.79E-05 | 0.297515 | 5.33E-11 |
| 7.10E-06 | 0.334276 | 1.18E-13 | 0.215842 | 2.51E-06 | 0.138454 | 0.00271  | 0.353051 | 3.73E-15 |
| 1.79E-16 | -0.1222  | 0.0082   | -0.10295 | 0.0261   | -0.10815 | 0.0194   | -0.20573 | 7.40E-06 |
| 3.25E-25 | 0.147714 | 0.00137  | 0.159157 | 0.00056  | 0.247148 | 6.28E-08 | 0.32828  | 3.39E-13 |
| 1.07E-15 | 0.135431 | 0.00336  | 0.220315 | 1.53E-06 | 0.215684 | 2.55E-06 | 0.343149 | 2.38E-14 |
| 2.63E-15 | 0.007826 | 0.86606  | -0.00673 | 0.88459  | -0.03593 | 0.43858  | 0.027374 | 0.55514  |
| 4.01E-22 | 0.178076 | 0.00011  | 0.427024 | 4.03E-22 | 0.337011 | 7.24E-14 | 0.471007 | 3.67E-27 |
| 9.94E-11 | 0.141798 | 0.00213  | 0.204967 | 8.01E-06 | 0.156067 | 0.00071  | 0.322244 | 9.59E-13 |

|          |          |          |          |          |          |          |          |          |
|----------|----------|----------|----------|----------|----------|----------|----------|----------|
| 1.14E-19 | -0.16812 | 0.00026  | -0.15982 | 0.00053  | -0.26721 | 4.46E-09 | -0.3871  | 3.83E-18 |
| 4.04E-07 | 0.144942 | 0.00169  | 0.313467 | 4.17E-12 | 0.44109  | 1.18E-23 | 0.44387  | 5.76E-24 |
| 1.13E-06 | 0.265551 | 5.60E-09 | 0.201739 | 1.12E-05 | 0.335388 | 9.69E-14 | 0.498521 | 1.04E-30 |
| 8.20E-28 | 0.167447 | 0.00028  | 0.087746 | 0.05812  | -0.05392 | 0.24483  | 0.180338 | 8.90E-05 |
| 5.44E-28 | 0.079011 | 0.08809  | 0.102031 | 0.02747  | 0.108716 | 0.01877  | 0.227306 | 6.90E-07 |
| 3.84E-11 | 0.095287 | 0.03956  | 0.146376 | 0.00151  | 0.133794 | 0.00377  | 0.260644 | 1.09E-08 |
| 4.06E-18 | -0.30944 | 8.05E-12 | -0.20031 | 1.29E-05 | -0.37454 | 5.34E-17 | -0.59003 | 3.86E-45 |
| 1.91E-09 | 0.054103 | 0.24326  | 0.232519 | 3.75E-07 | 0.177039 | 0.00012  | 0.343504 | 2.23E-14 |
| 8.42E-06 | 0.238093 | 1.92E-07 | -0.14267 | 0.002    | -0.07096 | 0.12569  | 0.169076 | 0.00024  |
| 5.63E-18 | 0.154897 | 0.00078  | 0.12963  | 0.00502  | 0.124744 | 0.00695  | 0.261753 | 9.37E-09 |
| 6.81E-24 | 0.172657 | 0.00018  | 0.231468 | 4.25E-07 | 0.120955 | 0.00888  | 0.322643 | 8.96E-13 |
| 9.45E-23 | 0.086596 | 0.06151  | 0.165577 | 0.00033  | 0.093714 | 0.04295  | 0.26665  | 4.82E-09 |
| 0.01922  | 0.132442 | 0.00414  | 0.349081 | 7.90E-15 | 0.185563 | 5.47E-05 | 0.373622 | 6.44E-17 |
| 3.81E-09 | -0.09651 | 0.03709  | -0.23798 | 1.95E-07 | -0.09611 | 0.03787  | -0.23064 | 4.68E-07 |
| 2.06E-09 | 0.232595 | 3.72E-07 | 0.283345 | 4.52E-10 | 0.294284 | 8.77E-11 | 0.461076 | 5.85E-26 |
| 2.37E-09 | -0.03885 | 0.4022   | 0.091138 | 0.04903  | 0.003487 | 0.94009  | -0.01466 | 0.75208  |
| 2.05E-18 | 0.113581 | 0.01405  | 0.262556 | 8.41E-09 | 0.253866 | 2.66E-08 | 0.444593 | 4.78E-24 |
| 4.18E-06 | 0.199006 | 1.47E-05 | 0.259487 | 1.27E-08 | 0.369868 | 1.38E-16 | 0.599811 | 5.77E-47 |
| 5.81E-19 | 0.103689 | 0.02504  | -0.13642 | 0.00314  | -0.12222 | 0.00819  | 0.035693 | 0.44159  |
| 2.69E-05 | -0.07496 | 0.1057   | -0.03229 | 0.48632  | -0.15463 | 0.0008   | -0.19641 | 1.91E-05 |
| 8.77E-11 | 0.13665  | 0.00309  | 0.096479 | 0.03714  | 0.18452  | 6.04E-05 | 0.247096 | 6.32E-08 |
| 2.71E-19 | 0.156938 | 0.00067  | 0.222408 | 1.21E-06 | 0.125051 | 0.00681  | 0.333552 | 1.34E-13 |
| 0.00032  | 0.156083 | 0.00071  | 0.23172  | 4.12E-07 | 0.132194 | 0.00421  | 0.315769 | 2.85E-12 |
| 0.03139  | 0.209365 | 5.04E-06 | 0.096538 | 0.03702  | 0.276916 | 1.15E-09 | 0.374236 | 5.68E-17 |
| 9.30E-09 | 0.072624 | 0.11705  | 0.111869 | 0.01558  | 0.106148 | 0.02178  | 0.208697 | 5.41E-06 |
| 2.07E-05 | 0.061176 | 0.18693  | 0.196235 | 1.95E-05 | 0.194202 | 2.38E-05 | 0.284372 | 3.89E-10 |
| 4.70E-09 | 0.058341 | 0.20823  | 0.369785 | 1.40E-16 | 0.331954 | 1.78E-13 | 0.392687 | 1.14E-18 |
| 1.85E-13 | 0.112832 | 0.0147   | 0.162588 | 0.00042  | 0.191352 | 3.15E-05 | 0.209653 | 4.89E-06 |
| 3.57E-06 | 0.135414 | 0.00337  | 0.428085 | 3.11E-22 | 0.284069 | 4.06E-10 | 0.428129 | 3.07E-22 |
| 3.44E-05 | 0.048379 | 0.29682  | 0.351088 | 5.41E-15 | 0.441446 | 1.08E-23 | 0.418251 | 3.36E-21 |
| 1.82E-08 | -0.04514 | 0.33033  | 0.133752 | 0.00378  | -0.02538 | 0.58436  | -0.02737 | 0.55517  |
| 2.56E-07 | 0.132929 | 0.00401  | 0.178297 | 0.00011  | 0.167765 | 0.00027  | 0.317569 | 2.11E-12 |
| 4.64E-10 | 0.203845 | 8.99E-06 | 0.191842 | 3.00E-05 | 0.220972 | 1.42E-06 | 0.362544 | 5.94E-16 |
| 1.65E-20 | 0.229285 | 5.49E-07 | 0.372172 | 8.65E-17 | 0.359086 | 1.17E-15 | 0.572613 | 4.88E-42 |
| 0.27886  | -0.06459 | 0.16345  | -0.21282 | 3.48E-06 | -0.28399 | 4.11E-10 | -0.3146  | 3.46E-12 |
| 1.34E-10 | -0.10598 | 0.02199  | 0.255798 | 2.06E-08 | 0.149315 | 0.00121  | 0.188823 | 4.02E-05 |
| 1.01E-10 | 0.240399 | 1.45E-07 | 0.040018 | 0.38823  | 0.107588 | 0.02004  | 0.363533 | 4.89E-16 |
| 9.72E-09 | 0.009452 | 0.83857  | 0.055043 | 0.23515  | -0.01012 | 0.8273   | 0.067659 | 0.14432  |
| 0.67343  | 0.247971 | 5.66E-08 | 0.216378 | 2.36E-06 | 0.311499 | 5.76E-12 | 0.476088 | 8.58E-28 |
| 2.09E-16 | -0.14603 | 0.00155  | -0.15884 | 0.00057  | -0.1939  | 2.45E-05 | -0.26527 | 5.82E-09 |
| 9.86E-22 | -0.17125 | 0.0002   | -0.2641  | 6.83E-09 | -0.16607 | 0.00031  | -0.35387 | 3.19E-15 |
| 1.39E-14 | -0.23063 | 4.69E-07 | -0.20868 | 5.43E-06 | -0.33786 | 6.22E-14 | -0.4555  | 2.67E-25 |
| 8.67E-41 | -0.32289 | 8.58E-13 | -0.10666 | 0.02115  | -0.14215 | 0.00207  | -0.39209 | 1.30E-18 |
| 6.76E-25 | 0.192015 | 2.95E-05 | 0.13275  | 0.00406  | 0.094281 | 0.0417   | 0.333155 | 1.44E-13 |
| 5.01E-06 | 0.101301 | 0.0286   | -0.03943 | 0.39522  | 0.048304 | 0.29757  | 0.134434 | 0.00361  |

|          |          |          |          |          |          |          |          |          |
|----------|----------|----------|----------|----------|----------|----------|----------|----------|
| 2.00E-10 | -0.10745 | 0.0202   | 0.278289 | 9.41E-10 | 0.041489 | 0.37101  | 0.049368 | 0.28704  |
| 5.02E-29 | 0.145335 | 0.00164  | 0.300876 | 3.16E-11 | 0.347656 | 1.03E-14 | 0.417397 | 4.11E-21 |
| 1.59E-39 | 0.078109 | 0.09179  | 0.069153 | 0.13565  | -0.024   | 0.60491  | 0.105404 | 0.02272  |
| 3.57E-06 | 0.263049 | 7.87E-09 | 0.272333 | 2.19E-09 | 0.288895 | 1.98E-10 | 0.477988 | 4.95E-28 |
| 4.12E-18 | 0.210138 | 4.65E-06 | 0.207374 | 6.23E-06 | 0.178441 | 0.00011  | 0.408406 | 3.37E-20 |
| 2.04E-39 | 0.111907 | 0.01554  | 0.033906 | 0.46481  | 0.024682 | 0.5947   | 0.208142 | 5.74E-06 |
| 3.77E-07 | -0.00536 | 0.90805  | 0.18236  | 7.38E-05 | 0.129102 | 0.0052   | 0.09076  | 0.04998  |
| 2.54E-17 | 0.30274  | 2.35E-11 | 0.204397 | 8.50E-06 | 0.313383 | 4.23E-12 | 0.488731 | 2.07E-29 |
| 1.66E-14 | 0.12141  | 0.00863  | 0.348532 | 8.75E-15 | 0.29695  | 5.82E-11 | 0.383721 | 7.87E-18 |
| 3.51E-12 | -0.19883 | 1.50E-05 | -0.16253 | 0.00042  | -0.25497 | 2.30E-08 | -0.40401 | 9.19E-20 |
| 7.21E-24 | 0.063565 | 0.17027  | 0.203256 | 9.56E-06 | 0.139926 | 0.00244  | 0.261953 | 9.12E-09 |
| 1.38E-19 | 0.196415 | 1.91E-05 | 0.235899 | 2.51E-07 | 0.158648 | 0.00058  | 0.376617 | 3.48E-17 |
| 2.70E-35 | 0.128101 | 0.00557  | 0.259274 | 1.30E-08 | 0.130481 | 0.00474  | 0.269307 | 3.34E-09 |
| 7.89E-09 | -0.01368 | 0.76815  | -0.10871 | 0.01877  | -0.10921 | 0.01824  | -0.10336 | 0.0255   |
| 1.01E-06 | 0.241679 | 1.24E-07 | 0.378999 | 2.12E-17 | 0.427526 | 3.56E-22 | 0.57366  | 3.22E-42 |
| 1.98E-18 | 0.142238 | 0.00206  | 0.096795 | 0.03652  | 0.08307  | 0.0729   | 0.271142 | 2.59E-09 |
| 2.36E-08 | 0.082749 | 0.07402  | 0.035764 | 0.44069  | -0.0244  | 0.59889  | 0.055991 | 0.22717  |
| 2.08E-23 | 0.232244 | 3.88E-07 | 0.272344 | 2.19E-09 | 0.275804 | 1.34E-09 | 0.421884 | 1.41E-21 |
| 1.28E-10 | -0.09605 | 0.038    | 0.069877 | 0.13159  | -0.00639 | 0.89047  | -0.00261 | 0.95513  |
| 5.21E-06 | -0.15092 | 0.00107  | 0.059613 | 0.19847  | 0.000476 | 0.99181  | -0.02071 | 0.65524  |
| 0.00034  | 0.051976 | 0.26231  | 0.196332 | 1.93E-05 | 0.2796   | 7.79E-10 | 0.286771 | 2.73E-10 |
| 0.00018  | 0.270429 | 2.86E-09 | 0.044937 | 0.33255  | 0.235521 | 2.62E-07 | 0.323665 | 7.52E-13 |
| 6.11E-14 | 0.321366 | 1.11E-12 | 0.241064 | 1.34E-07 | 0.34176  | 3.06E-14 | 0.375268 | 4.59E-17 |
| 2.74E-13 | -0.03923 | 0.39761  | 0.237752 | 2.01E-07 | -0.02552 | 0.58231  | 0.035162 | 0.44841  |
| 2.47E-41 | 0.197597 | 1.70E-05 | 0.22181  | 1.29E-06 | 0.16216  | 0.00043  | 0.359779 | 1.02E-15 |
| 3.08E-07 | 0.067136 | 0.14746  | 0.251395 | 3.65E-08 | 0.144145 | 0.00179  | 0.189665 | 3.70E-05 |
| 7.93E-05 | -0.06844 | 0.13975  | -0.10074 | 0.02951  | 0.075486 | 0.10327  | -0.01732 | 0.70894  |
| 2.52E-09 | -0.13026 | 0.00481  | 0.18752  | 4.55E-05 | -0.029   | 0.53193  | -0.01221 | 0.79234  |
| 1.26E-18 | -0.13291 | 0.00401  | 0.178771 | 0.0001   | 0.003817 | 0.93444  | -0.10569 | 0.02235  |
| 9.20E-11 | 0.218751 | 1.82E-06 | 0.063057 | 0.17371  | 0.057734 | 0.213    | 0.286777 | 2.72E-10 |
| 5.35E-09 | 0.275857 | 1.33E-09 | 0.196211 | 1.95E-05 | 0.333754 | 1.30E-13 | 0.497702 | 1.34E-30 |
| 8.89E-07 | 0.068902 | 0.13708  | 0.138294 | 0.00274  | 0.124057 | 0.00727  | 0.294791 | 8.12E-11 |
| 1.77E-19 | 0.111688 | 0.01575  | 0.189753 | 3.67E-05 | 0.233226 | 3.45E-07 | 0.326534 | 4.59E-13 |
| 8.59E-07 | 0.248793 | 5.10E-08 | 0.316431 | 2.55E-12 | 0.459468 | 9.09E-26 | 0.624227 | 8.25E-52 |
| 1.68E-42 | 0.070185 | 0.12989  | 0.031433 | 0.49802  | -0.09833 | 0.03364  | 0.036733 | 0.4284   |
| 1.29E-22 | -0.1492  | 0.00122  | -0.2401  | 1.51E-07 | -0.18622 | 5.15E-05 | -0.30034 | 3.43E-11 |
| 2.50E-15 | 0.239736 | 1.58E-07 | 0.247584 | 5.94E-08 | 0.123633 | 0.00748  | 0.323709 | 7.46E-13 |
| 1.78E-24 | 0.098124 | 0.03401  | 0.110447 | 0.01695  | 0.022252 | 0.63149  | 0.186701 | 4.92E-05 |
| 1.51E-17 | 0.113264 | 0.01433  | 0.214122 | 3.03E-06 | 0.234079 | 3.12E-07 | 0.399143 | 2.75E-19 |
| 0.01337  | 0.260329 | 1.13E-08 | 0.240495 | 1.44E-07 | 0.229281 | 5.49E-07 | 0.39616  | 5.33E-19 |
| 4.69E-09 | 0.103722 | 0.02499  | 0.207183 | 6.35E-06 | 0.214478 | 2.91E-06 | 0.301489 | 2.87E-11 |
| 1.71E-15 | 0.184788 | 5.89E-05 | 0.423891 | 8.66E-22 | 0.465532 | 1.71E-26 | 0.631591 | 2.35E-53 |
| 1.17E-07 | 0.140398 | 0.00236  | 0.083751 | 0.07058  | 0.176336 | 0.00013  | 0.38031  | 1.61E-17 |
| 0.41689  | 0.061971 | 0.18126  | 0.296633 | 6.12E-11 | 0.318839 | 1.70E-12 | 0.293247 | 1.03E-10 |
| 4.98E-07 | 0.167474 | 0.00028  | 0.121415 | 0.00863  | 0.247395 | 6.08E-08 | 0.32935  | 2.81E-13 |

|          |          |          |          |          |          |          |          |          |
|----------|----------|----------|----------|----------|----------|----------|----------|----------|
| 7.53E-19 | -0.08004 | 0.08402  | 0.021715 | 0.63975  | -0.10133 | 0.02856  | -0.03727 | 0.42163  |
| 7.60E-27 | -0.1298  | 0.00496  | -0.15979 | 0.00053  | -0.26994 | 3.06E-09 | -0.33759 | 6.53E-14 |
| 4.57E-26 | 0.16585  | 0.00032  | 0.149362 | 0.00121  | 0.140587 | 0.00233  | 0.348784 | 8.35E-15 |
| 0.00766  | -0.05908 | 0.20248  | -0.15632 | 0.0007   | -0.21137 | 4.07E-06 | -0.22418 | 9.88E-07 |
| 1.98E-08 | 0.130001 | 0.0049   | 0.242634 | 1.10E-07 | 0.155111 | 0.00077  | 0.268909 | 3.53E-09 |
| 2.06E-09 | 0.209537 | 4.95E-06 | 0.242363 | 1.14E-07 | 0.270101 | 2.99E-09 | 0.460036 | 7.78E-26 |
| 2.29E-08 | -0.02674 | 0.56434  | 0.183465 | 6.66E-05 | 0.042317 | 0.36154  | 0.108363 | 0.01916  |
| 5.48E-27 | 0.104079 | 0.0245   | 0.088063 | 0.05722  | 0.016932 | 0.71515  | 0.126986 | 0.006    |
| 0.21585  | 0.102501 | 0.02676  | 0.075526 | 0.10309  | 0.258256 | 1.49E-08 | 0.244276 | 9.00E-08 |
| 1.84E-18 | 0.250006 | 4.37E-08 | 0.244954 | 8.27E-08 | 0.179518 | 9.59E-05 | 0.364797 | 3.81E-16 |
| 8.12E-11 | 0.15003  | 0.00115  | 0.086822 | 0.06083  | 0.068837 | 0.13745  | 0.256697 | 1.83E-08 |
| 2.15E-10 | -0.0481  | 0.29966  | 0.105187 | 0.02301  | 0.051561 | 0.26614  | 0.039726 | 0.39171  |
| 6.42E-16 | 0.117614 | 0.01097  | 0.195085 | 2.18E-05 | 0.251611 | 3.55E-08 | 0.343636 | 2.17E-14 |
| 5.45E-24 | 0.062429 | 0.17805  | 0.067024 | 0.14814  | -0.03862 | 0.40505  | 0.160411 | 0.0005   |
| 1.02E-11 | 0.182459 | 7.32E-05 | 0.099335 | 0.03186  | 0.179375 | 9.72E-05 | 0.357832 | 1.49E-15 |
| 3.52E-06 | 0.195213 | 2.15E-05 | 0.42146  | 1.56E-21 | 0.425922 | 5.28E-22 | 0.535778 | 4.70E-36 |
| 1.18E-07 | 0.23525  | 2.71E-07 | 0.328872 | 3.06E-13 | 0.340728 | 3.70E-14 | 0.477987 | 4.95E-28 |
| 4.98E-26 | -0.10281 | 0.0263   | -0.17502 | 0.00014  | -0.32792 | 3.61E-13 | -0.30247 | 2.46E-11 |
| 3.58E-09 | -0.13416 | 0.00368  | -0.04798 | 0.30086  | -0.03905 | 0.39986  | -0.18003 | 9.15E-05 |
| 1.47E-16 | 0.171613 | 0.00019  | 0.409259 | 2.76E-20 | 0.228889 | 5.74E-07 | 0.406773 | 4.90E-20 |
| 2.75E-06 | 0.089983 | 0.05198  | 0.059965 | 0.19582  | -0.0028  | 0.95183  | 0.193415 | 2.57E-05 |
| 3.87E-20 | -0.15522 | 0.00076  | -0.05464 | 0.23858  | -0.22537 | 8.62E-07 | -0.27187 | 2.34E-09 |
| 2.63E-11 | 0.063269 | 0.17227  | 0.092524 | 0.04567  | 0.067801 | 0.14348  | 0.154126 | 0.00083  |
| 2.89E-23 | 0.129605 | 0.00503  | 0.023324 | 0.61513  | -0.01516 | 0.74386  | 0.167017 | 0.00029  |
| 2.05E-15 | 0.001939 | 0.96667  | -0.20178 | 1.11E-05 | -0.1474  | 0.0014   | -0.0873  | 0.05941  |
| 2.46E-18 | 0.11996  | 0.00946  | 0.121799 | 0.00842  | 0.162491 | 0.00042  | 0.273801 | 1.78E-09 |
| 9.36E-34 | 0.20249  | 1.03E-05 | 0.296231 | 6.51E-11 | 0.276402 | 1.23E-09 | 0.447854 | 2.04E-24 |
| 4.09E-09 | 0.240346 | 1.46E-07 | 0.371802 | 9.33E-17 | 0.194568 | 2.30E-05 | 0.335218 | 9.99E-14 |
| 2.09E-32 | 0.20884  | 5.33E-06 | 0.252939 | 2.99E-08 | 0.257564 | 1.64E-08 | 0.420942 | 1.76E-21 |
| 1.39E-05 | -0.14243 | 0.00203  | -0.27906 | 8.43E-10 | -0.24982 | 4.47E-08 | -0.36766 | 2.15E-16 |
| 2.82E-11 | -0.03753 | 0.41838  | -0.03153 | 0.49675  | -0.14364 | 0.00186  | -0.16323 | 0.0004   |
| 2.36E-13 | 0.145301 | 0.00164  | 0.254147 | 2.56E-08 | 0.267271 | 4.43E-09 | 0.378864 | 2.18E-17 |
| 2.77E-24 | 0.120143 | 0.00936  | 0.069997 | 0.13093  | -0.00359 | 0.93839  | 0.157753 | 0.00062  |
| 1.01E-09 | -0.00355 | 0.93895  | 0.205806 | 7.34E-06 | 0.066347 | 0.15228  | 0.119242 | 0.0099   |
| 2.42E-13 | 0.287033 | 2.62E-10 | 0.300587 | 3.30E-11 | 0.271053 | 2.62E-09 | 0.459404 | 9.25E-26 |
| 4.08E-37 | 0.072244 | 0.11898  | 0.107765 | 0.01984  | -0.00964 | 0.83541  | 0.114309 | 0.01345  |
| 4.02E-16 | 0.1126   | 0.01491  | 0.302416 | 2.48E-11 | 0.111807 | 0.01564  | 0.244126 | 9.17E-08 |
| 5.64E-17 | 0.11797  | 0.01073  | 0.156896 | 0.00067  | 0.090636 | 0.0503   | 0.26896  | 3.51E-09 |
| 2.38E-28 | 0.270734 | 2.74E-09 | 0.253381 | 2.83E-08 | 0.330915 | 2.14E-13 | 0.480294 | 2.53E-28 |
| 1.15E-08 | -0.23752 | 2.06E-07 | -0.37057 | 1.20E-16 | -0.4116  | 1.61E-20 | -0.52624 | 1.27E-34 |
| 9.44E-44 | 0.082575 | 0.07463  | 0.016744 | 0.71817  | -0.07016 | 0.13002  | 0.071728 | 0.12165  |
| 7.23E-09 | -0.17769 | 0.00011  | -0.31102 | 6.23E-12 | -0.28912 | 1.92E-10 | -0.42442 | 7.61E-22 |
| 1.76E-06 | -0.2616  | 9.56E-09 | -0.10189 | 0.02769  | -0.20404 | 8.81E-06 | -0.3218  | 1.03E-12 |
| 4.56E-15 | 0.099726 | 0.03119  | 0.097375 | 0.03541  | 0.056656 | 0.22169  | 0.210949 | 4.26E-06 |
| 8.29E-10 | -0.19544 | 2.11E-05 | -0.23196 | 4.01E-07 | -0.24414 | 9.15E-08 | -0.32427 | 6.79E-13 |

|          |          |          |          |          |          |          |          |          |
|----------|----------|----------|----------|----------|----------|----------|----------|----------|
| 3.86E-08 | 0.170604 | 0.00021  | 0.298582 | 4.52E-11 | 0.355886 | 2.17E-15 | 0.473993 | 1.57E-27 |
| 1.49E-17 | 0.293768 | 9.50E-11 | 0.353034 | 3.74E-15 | 0.325623 | 5.37E-13 | 0.548224 | 5.41E-38 |
| 9.71E-14 | -0.1816  | 7.93E-05 | -0.26529 | 5.81E-09 | -0.32985 | 2.58E-13 | -0.43851 | 2.28E-23 |
| 4.61E-22 | 0.281795 | 5.67E-10 | 0.421117 | 1.69E-21 | 0.423001 | 1.07E-21 | 0.587531 | 1.11E-44 |
| 9.60E-27 | 0.147076 | 0.00144  | 0.134872 | 0.0035   | -0.06045 | 0.19222  | 0.156469 | 0.00069  |
| 3.42E-08 | -0.06589 | 0.1551   | -0.24499 | 8.23E-08 | -0.19792 | 1.64E-05 | -0.22342 | 1.08E-06 |
| 1.04E-09 | 0.175066 | 0.00014  | 0.088117 | 0.05706  | 0.112325 | 0.01516  | 0.281149 | 6.23E-10 |
| 9.50E-11 | 0.146517 | 0.0015   | 0.314876 | 3.30E-12 | 0.223725 | 1.04E-06 | 0.44044  | 1.40E-23 |
| 1.67E-05 | 0.179063 | 1.00E-04 | 0.267108 | 4.53E-09 | 0.227524 | 6.73E-07 | 0.353021 | 3.75E-15 |
| 2.01E-10 | 0.299985 | 3.63E-11 | 0.38781  | 3.29E-18 | 0.391665 | 1.43E-18 | 0.517985 | 2.03E-33 |
| 4.34E-17 | 0.229162 | 5.56E-07 | 0.321613 | 1.07E-12 | 0.389504 | 2.28E-18 | 0.541815 | 5.51E-37 |
| 4.05E-08 | 0.170876 | 0.00021  | 0.295665 | 7.10E-11 | 0.27692  | 1.15E-09 | 0.437776 | 2.75E-23 |
| 3.49E-14 | 0.36938  | 1.52E-16 | 0.432645 | 1.00E-22 | 0.556897 | 2.15E-39 | 0.668014 | 1.16E-61 |
| 1.63E-24 | -0.02874 | 0.53553  | -0.01771 | 0.70268  | 0.11869  | 0.01025  | 0.009074 | 0.84495  |
| 1.59E-08 | 0.149544 | 0.00119  | 0.322524 | 9.14E-13 | 0.313472 | 4.16E-12 | 0.409349 | 2.71E-20 |
| 7.76E-08 | 0.117939 | 0.01075  | 0.241207 | 1.32E-07 | 0.197842 | 1.66E-05 | 0.360704 | 8.52E-16 |
| 6.75E-21 | -0.17879 | 0.0001   | -0.27768 | 1.03E-09 | -0.24001 | 1.52E-07 | -0.39981 | 2.37E-19 |
| 4.95E-07 | 0.104536 | 0.02387  | 0.080123 | 0.0837   | -0.00272 | 0.95317  | 0.156721 | 0.00068  |
| 1.01E-21 | 0.235663 | 2.58E-07 | 0.118881 | 0.01013  | 0.148312 | 0.00131  | 0.311489 | 5.77E-12 |
| 1.46E-15 | 0.251181 | 3.76E-08 | -0.01283 | 0.78212  | 0.062471 | 0.17775  | 0.275051 | 1.49E-09 |
| 3.55E-20 | 0.114578 | 0.01323  | 0.153203 | 0.0009   | 0.114684 | 0.01314  | 0.206143 | 7.08E-06 |
| 2.11E-06 | 0.027652 | 0.55112  | 0.40691  | 4.75E-20 | 0.329902 | 2.56E-13 | 0.381003 | 1.40E-17 |
| 4.45E-51 | 0.189066 | 3.92E-05 | 0.168467 | 0.00026  | 0.127388 | 0.00584  | 0.30146  | 2.88E-11 |
| 3.28E-08 | 0.211756 | 3.91E-06 | 0.106961 | 0.02078  | 0.168679 | 0.00025  | 0.275617 | 1.38E-09 |
| 4.40E-16 | -0.17968 | 9.45E-05 | -0.17937 | 9.72E-05 | -0.255   | 2.29E-08 | -0.3764  | 3.64E-17 |
| 1.30E-15 | 0.044619 | 0.33599  | 0.134624 | 0.00356  | 0.016965 | 0.71462  | 0.112139 | 0.01533  |
| 1.85E-14 | 0.108822 | 0.01865  | 0.267297 | 4.41E-09 | 0.15048  | 0.00111  | 0.291233 | 1.40E-10 |
| 1.68E-23 | 0.107343 | 0.02033  | 0.242519 | 1.12E-07 | 0.303436 | 2.11E-11 | 0.365278 | 3.46E-16 |
| 1.42E-10 | 0.165555 | 0.00033  | 0.319083 | 1.64E-12 | 0.455556 | 2.63E-25 | 0.560068 | 6.47E-40 |
| 2.93E-26 | 0.094229 | 0.04181  | 0.33428  | 1.18E-13 | 0.250859 | 3.91E-08 | 0.334831 | 1.07E-13 |
| 6.22E-13 | 0.001715 | 0.97052  | 0.225835 | 8.18E-07 | 0.34548  | 1.55E-14 | 0.353066 | 3.72E-15 |
| 4.02E-24 | 0.081003 | 0.08035  | 0.008056 | 0.86216  | 0.053314 | 0.2502   | 0.151445 | 0.00103  |
| 6.49E-08 | 0.193522 | 2.55E-05 | 0.277328 | 1.08E-09 | 0.244452 | 8.80E-08 | 0.382216 | 1.08E-17 |
| 0.00952  | 0.191385 | 3.14E-05 | 0.340884 | 3.59E-14 | 0.364873 | 3.75E-16 | 0.393436 | 9.71E-19 |
| 7.50E-07 | 0.02301  | 0.61991  | 0.018548 | 0.68931  | 0.101503 | 0.02829  | 0.238201 | 1.90E-07 |
| 2.46E-05 | 0.00209  | 0.96407  | 0.034537 | 0.45653  | -0.0492  | 0.28865  | 0.087418 | 0.05907  |
| 3.12E-21 | 0.053442 | 0.24907  | 0.091636 | 0.0478   | -0.06862 | 0.13868  | 0.113463 | 0.01416  |
| 2.13E-09 | -0.07402 | 0.11014  | -0.20951 | 4.96E-06 | -0.08374 | 0.0706   | -0.18182 | 7.76E-05 |
| 1.11E-18 | -0.05424 | 0.24204  | -0.23544 | 2.65E-07 | -0.26392 | 7.00E-09 | -0.26347 | 7.44E-09 |
| 3.39E-39 | 0.124728 | 0.00696  | 0.021373 | 0.64501  | -0.066   | 0.15443  | 0.126614 | 0.00615  |
| 1.16E-20 | 0.146192 | 0.00154  | 0.081028 | 0.08025  | 0.074642 | 0.10719  | 0.243015 | 1.05E-07 |
| 8.14E-40 | 0.030185 | 0.51524  | 0.109553 | 0.01787  | 0.008216 | 0.85945  | 0.117602 | 0.01098  |
| 1.92E-23 | -0.07717 | 0.0958   | -0.22284 | 1.15E-06 | -0.14489 | 0.00169  | -0.18556 | 5.47E-05 |
| 0.00089  | 0.26324  | 7.67E-09 | 0.138748 | 0.00266  | 0.346173 | 1.36E-14 | 0.491363 | 9.37E-30 |
| 2.31E-05 | 0.175205 | 0.00014  | 0.079178 | 0.08742  | 0.139451 | 0.00253  | 0.306168 | 1.36E-11 |

|          |          |          |          |          |          |          |          |          |
|----------|----------|----------|----------|----------|----------|----------|----------|----------|
| 3.24E-17 | 0.237433 | 2.08E-07 | 0.408132 | 3.59E-20 | 0.424473 | 7.51E-22 | 0.598249 | 1.14E-46 |
| 9.14E-10 | 0.14079  | 0.00229  | 0.001758 | 0.96977  | 0.059059 | 0.20268  | 0.229984 | 5.06E-07 |
| 9.43E-10 | 0.114724 | 0.01311  | 0.225023 | 8.97E-07 | 0.226858 | 7.27E-07 | 0.299834 | 3.72E-11 |
| 2.83E-05 | 0.038798 | 0.40287  | 0.199483 | 1.41E-05 | 0.149312 | 0.00121  | 0.240535 | 1.43E-07 |
| 1.30E-13 | 0.127929 | 0.00563  | 0.081792 | 0.07744  | 0.01591  | 0.73165  | 0.190309 | 3.48E-05 |
| 2.50E-22 | 0.14834  | 0.00131  | 0.242569 | 1.11E-07 | 0.190288 | 3.49E-05 | 0.359343 | 1.11E-15 |
| 8.75E-19 | 0.056922 | 0.21952  | 0.327114 | 4.15E-13 | 0.20332  | 9.50E-06 | 0.366257 | 2.85E-16 |
| 1.94E-20 | 0.097358 | 0.03544  | 0.229616 | 5.28E-07 | 0.052668 | 0.25599  | 0.193029 | 2.67E-05 |
| 6.38E-12 | -0.20189 | 1.10E-05 | -0.36582 | 3.11E-16 | -0.36491 | 3.72E-16 | -0.4416  | 1.04E-23 |
| 3.03E-16 | -0.13662 | 0.00309  | -0.1071  | 0.02061  | -0.25138 | 3.66E-08 | -0.36618 | 2.89E-16 |
| 0.00461  | 0.126725 | 0.0061   | 0.348819 | 8.30E-15 | 0.211414 | 4.05E-06 | 0.31142  | 5.83E-12 |
| 3.75E-07 | 0.295948 | 6.80E-11 | 0.391485 | 1.49E-18 | 0.186047 | 5.23E-05 | 0.345553 | 1.52E-14 |
| 1.79E-31 | -0.09126 | 0.04873  | 0.046518 | 0.31581  | 0.153842 | 0.00085  | -0.08894 | 0.05477  |
| 2.07E-10 | 0.157755 | 0.00062  | 0.280005 | 7.35E-10 | 0.279425 | 7.99E-10 | 0.432858 | 9.51E-23 |
| 0.00603  | 0.139043 | 0.0026   | 0.079897 | 0.08458  | 0.12019  | 0.00933  | 0.191344 | 3.15E-05 |
| 5.94E-39 | 0.195939 | 2.00E-05 | 0.365824 | 3.10E-16 | 0.26144  | 9.77E-09 | 0.421381 | 1.59E-21 |
| 3.83E-18 | 0.215479 | 2.61E-06 | 0.149564 | 0.00119  | 0.178363 | 0.00011  | 0.404713 | 7.84E-20 |
| 5.29E-41 | 0.222042 | 1.26E-06 | 0.200968 | 1.21E-05 | 0.268771 | 3.60E-09 | 0.462083 | 4.44E-26 |
| 6.47E-39 | 0.181939 | 7.68E-05 | 0.173161 | 0.00017  | 0.048307 | 0.29753  | 0.286559 | 2.81E-10 |
| 3.83E-09 | -0.01223 | 0.79205  | -0.06448 | 0.16418  | -0.09752 | 0.03514  | -0.04712 | 0.30954  |
| 2.02E-19 | 0.071037 | 0.12529  | 0.120539 | 0.00912  | -0.05403 | 0.24385  | 0.143479 | 0.00188  |
| 6.65E-27 | 0.11051  | 0.01689  | 0.072492 | 0.11772  | -0.01634 | 0.72463  | 0.153852 | 0.00085  |
| 1.18E-19 | 0.172252 | 0.00018  | 0.290979 | 1.45E-10 | 0.376618 | 3.48E-17 | 0.538207 | 1.99E-36 |
| 2.45E-11 | 0.012456 | 0.78834  | 0.018335 | 0.69269  | -0.09292 | 0.04476  | 0.082026 | 0.07659  |
| 0.00053  | 0.200393 | 1.28E-05 | 0.291534 | 1.33E-10 | 0.398017 | 3.53E-19 | 0.423342 | 9.89E-22 |
| 2.45E-06 | -0.03412 | 0.462    | 0.37784  | 2.70E-17 | 0.208966 | 5.26E-06 | 0.321531 | 1.08E-12 |
| 8.45E-10 | 0.114426 | 0.01335  | 0.150907 | 0.00107  | 0.301468 | 2.88E-11 | 0.385891 | 4.96E-18 |
| 3.49E-07 | 0.255679 | 2.10E-08 | 0.283932 | 4.15E-10 | 0.310929 | 6.32E-12 | 0.482075 | 1.50E-28 |
| 0.01605  | 0.073069 | 0.11482  | 0.142988 | 0.00195  | 0.404083 | 9.04E-20 | 0.397238 | 4.20E-19 |
| 8.84E-09 | 0.134771 | 0.00352  | 0.151782 | 0.001    | 0.260427 | 1.12E-08 | 0.332463 | 1.63E-13 |
| 1.97E-09 | 0.038753 | 0.40342  | 0.03618  | 0.43538  | 0.01496  | 0.74713  | 0.072402 | 0.11817  |
| 3.99E-08 | 0.161173 | 0.00047  | 0.333859 | 1.27E-13 | 0.348301 | 9.14E-15 | 0.517932 | 2.07E-33 |
| 7.03E-08 | 0.192177 | 2.90E-05 | 0.163803 | 0.00038  | 0.253462 | 2.80E-08 | 0.426247 | 4.88E-22 |
| 1.28E-15 | 0.099998 | 0.03073  | 0.0557   | 0.2296   | -0.01166 | 0.80152  | 0.130061 | 0.00488  |
| 2.23E-06 | 0.080231 | 0.08328  | 0.127299 | 0.00587  | 0.200513 | 1.27E-05 | 0.274214 | 1.68E-09 |
| 2.75E-19 | -0.0807  | 0.08148  | -0.23407 | 3.12E-07 | -0.27909 | 8.38E-10 | -0.32564 | 5.36E-13 |
| 3.92E-15 | 0.129351 | 0.00512  | 0.256624 | 1.85E-08 | 0.288181 | 2.21E-10 | 0.37071  | 1.16E-16 |
| 1.48E-13 | -0.19561 | 2.07E-05 | -0.22712 | 7.05E-07 | -0.28404 | 4.08E-10 | -0.38324 | 8.71E-18 |
| 2.68E-28 | 0.189142 | 3.89E-05 | 0.138857 | 0.00264  | 0.136464 | 0.00313  | 0.321806 | 1.03E-12 |
| 1.41E-14 | -0.2557  | 2.09E-08 | -0.0792  | 0.08735  | -0.07    | 0.13089  | -0.3377  | 6.39E-14 |
| 2.99E-14 | 0.140849 | 0.00228  | 0.32068  | 1.25E-12 | 0.274938 | 1.52E-09 | 0.431793 | 1.24E-22 |
| 2.33E-19 | 0.194814 | 2.24E-05 | 0.347671 | 1.03E-14 | 0.363384 | 5.03E-16 | 0.54045  | 8.98E-37 |
| 0.00198  | 0.259929 | 1.20E-08 | 0.27724  | 1.09E-09 | 0.224731 | 9.28E-07 | 0.388593 | 2.78E-18 |
| 6.28E-24 | 0.288002 | 2.27E-10 | 0.287488 | 2.45E-10 | 0.362769 | 5.68E-16 | 0.49231  | 7.03E-30 |
| 1.42E-09 | 0.079827 | 0.08485  | 0.085831 | 0.06384  | -0.06009 | 0.19489  | 0.114855 | 0.01301  |



|          |           |          |          |          |          |          |          |          |
|----------|-----------|----------|----------|----------|----------|----------|----------|----------|
| 8.55E-18 | 0.082691  | 0.07422  | 0.202036 | 1.08E-05 | 0.09815  | 0.03397  | 0.168403 | 0.00026  |
| 7.41E-39 | 0.043753  | 0.34546  | 0.009652 | 0.83521  | -0.14874 | 0.00127  | 0.0244   | 0.59891  |
| 1.44E-28 | -0.05136  | 0.268    | -0.27583 | 1.34E-09 | -0.23196 | 4.01E-07 | -0.23797 | 1.95E-07 |
| 8.07E-22 | 0.204693  | 8.24E-06 | 0.006629 | 0.88639  | 0.006005 | 0.89702  | 0.244709 | 8.52E-08 |
| 5.96E-08 | 0.194094  | 2.41E-05 | 0.086079 | 0.06308  | 0.11916  | 0.00996  | 0.364888 | 3.74E-16 |
| 1.14E-13 | -0.0143   | 0.75786  | -0.31609 | 2.70E-12 | -0.20731 | 6.27E-06 | -0.16854 | 0.00025  |
| 8.59E-12 | 0.138551  | 0.00269  | 0.342534 | 2.66E-14 | 0.345169 | 1.64E-14 | 0.44141  | 1.09E-23 |
| 5.64E-12 | -0.17967  | 9.46E-05 | -0.05773 | 0.21307  | -0.06287 | 0.17498  | -0.20348 | 9.34E-06 |
| 3.35E-09 | 0.060972  | 0.18841  | 0.045516 | 0.32636  | 0.118223 | 0.01056  | 0.18052  | 8.75E-05 |
| 2.05E-05 | 0.252296  | 3.25E-08 | 0.185507 | 5.50E-05 | 0.209041 | 5.22E-06 | 0.465741 | 1.61E-26 |
| 1.01E-19 | -0.18517  | 5.68E-05 | -0.27898 | 8.52E-10 | -0.35219 | 4.40E-15 | -0.42652 | 4.56E-22 |
| 4.87E-17 | 0.232589  | 3.72E-07 | 0.166012 | 0.00031  | 0.176044 | 0.00013  | 0.413655 | 9.94E-21 |
| 2.80E-09 | 0.11113   | 0.01628  | 0.134503 | 0.00359  | 0.122334 | 0.00813  | 0.232745 | 3.65E-07 |
| 2.70E-15 | 0.142414  | 0.00203  | 0.21899  | 1.77E-06 | 0.098275 | 0.03374  | 0.31442  | 3.56E-12 |
| 3.64E-09 | -7.02E-05 | 0.99879  | 0.246421 | 6.88E-08 | 0.064426 | 0.16454  | 0.090163 | 0.05151  |
| 0.00053  | 0.144105  | 0.0018   | 0.314734 | 3.38E-12 | 0.280094 | 7.26E-10 | 0.365895 | 3.06E-16 |
| 1.29E-22 | 0.118509  | 0.01037  | 0.098955 | 0.03252  | -0.09132 | 0.04859  | 0.100355 | 0.03013  |
| 4.70E-38 | 0.225679  | 8.32E-07 | 0.181497 | 8.00E-05 | 0.208986 | 5.25E-06 | 0.37197  | 9.01E-17 |
| 1.86E-30 | 0.207842  | 5.93E-06 | 0.263927 | 6.99E-09 | 0.22369  | 1.04E-06 | 0.385255 | 5.68E-18 |
| 8.04E-10 | 0.135009  | 0.00347  | 0.26076  | 1.07E-08 | 0.187225 | 4.68E-05 | 0.356935 | 1.77E-15 |
| 2.47E-14 | 0.276644  | 1.19E-09 | 0.173054 | 0.00017  | 0.094079 | 0.04214  | 0.363467 | 4.95E-16 |
| 1.51E-30 | 0.341413  | 3.26E-14 | 0.202293 | 1.06E-05 | 0.13943  | 0.00253  | 0.394215 | 8.19E-19 |
| 4.96E-22 | 0.108985  | 0.01848  | 0.112603 | 0.01491  | 0.142927 | 0.00196  | 0.264442 | 6.52E-09 |
| 2.19E-23 | 0.175429  | 0.00014  | 0.269167 | 3.41E-09 | 0.178613 | 0.0001   | 0.362736 | 5.72E-16 |
| 3.37E-18 | 0.261271  | 9.99E-09 | 0.234315 | 3.03E-07 | 0.215067 | 2.73E-06 | 0.42323  | 1.02E-21 |
| 5.25E-31 | -0.04745  | 0.3062   | -0.10374 | 0.02497  | -0.03568 | 0.44177  | -0.07729 | 0.09527  |
| 3.43E-10 | 0.017464  | 0.7066   | 0.223048 | 1.12E-06 | 0.307125 | 1.17E-11 | 0.356054 | 2.10E-15 |
| 1.70E-21 | 0.206539  | 6.80E-06 | 0.300338 | 3.44E-11 | 0.273742 | 1.80E-09 | 0.405887 | 6.00E-20 |
| 9.39E-24 | 0.108791  | 0.01869  | 0.087379 | 0.05918  | 0.06417  | 0.16623  | 0.205326 | 7.71E-06 |
| 5.10E-27 | 0.153074  | 0.0009   | 0.122739 | 0.00792  | 0.062006 | 0.18101  | 0.271444 | 2.48E-09 |
| 1.06E-41 | 0.218993  | 1.77E-06 | 0.067365 | 0.14608  | 0.044798 | 0.33405  | 0.318096 | 1.93E-12 |
| 3.82E-05 | 0.039562  | 0.39367  | 0.061067 | 0.18772  | 0.060532 | 0.19162  | 0.20226  | 1.06E-05 |
| 2.75E-20 | 0.278684  | 8.89E-10 | 0.206905 | 6.54E-06 | 0.212591 | 3.57E-06 | 0.426686 | 4.38E-22 |
| 4.22E-12 | -0.27579  | 1.35E-09 | -0.27743 | 1.06E-09 | -0.20627 | 6.99E-06 | -0.46065 | 6.58E-26 |
| 3.53E-06 | 0.105639  | 0.02242  | 0.208521 | 5.52E-06 | 0.195571 | 2.08E-05 | 0.279791 | 7.58E-10 |
| 0.15917  | 0.198111  | 1.61E-05 | 0.379588 | 1.88E-17 | 0.266001 | 5.27E-09 | 0.34926  | 7.64E-15 |
| 5.57E-09 | -0.20959  | 4.93E-06 | -0.26313 | 7.78E-09 | -0.20896 | 5.27E-06 | -0.41103 | 1.83E-20 |
| 1.07E-07 | 0.214567  | 2.88E-06 | 0.475441 | 1.03E-27 | 0.374581 | 5.29E-17 | 0.518892 | 1.50E-33 |
| 7.92E-15 | 0.01573   | 0.73457  | 0.112091 | 0.01537  | 0.01609  | 0.72874  | 0.023213 | 0.61682  |
| 6.02E-05 | 0.128183  | 0.00554  | 0.288613 | 2.07E-10 | 0.211032 | 4.22E-06 | 0.261599 | 9.56E-09 |
| 2.18E-12 | 0.166226  | 0.00031  | 0.075147 | 0.10483  | 0.05337  | 0.2497   | 0.204892 | 8.07E-06 |
| 9.94E-13 | 0.113773  | 0.01389  | 0.28704  | 2.62E-10 | 0.278955 | 8.55E-10 | 0.353729 | 3.28E-15 |
| 1.16E-12 | 0.065738  | 0.15609  | 0.260083 | 1.17E-08 | 0.224751 | 9.26E-07 | 0.294743 | 8.18E-11 |
| 0.02129  | 0.090934  | 0.04954  | 0.402788 | 1.21E-19 | 0.184148 | 6.25E-05 | 0.266172 | 5.15E-09 |
| 1.60E-14 | 0.108788  | 0.01869  | -0.01645 | 0.72298  | -0.00172 | 0.97051  | 0.134154 | 0.00368  |

|          |          |          |          |          |          |          |          |          |
|----------|----------|----------|----------|----------|----------|----------|----------|----------|
| 1.21E-05 | 0.29352  | 9.86E-11 | 0.116991 | 0.0114   | 0.336918 | 7.37E-14 | 0.483785 | 9.06E-29 |
| 1.74E-06 | 0.203137 | 9.68E-06 | 0.410683 | 1.99E-20 | 0.328055 | 3.53E-13 | 0.501343 | 4.32E-31 |
| 1.51E-11 | 0.077821 | 0.093    | 0.492288 | 7.07E-30 | 0.262357 | 8.64E-09 | 0.341385 | 3.28E-14 |
| 3.36E-06 | 0.104424 | 0.02402  | 0.32268  | 8.90E-13 | 0.16762  | 0.00027  | 0.304939 | 1.66E-11 |
| 1.33E-16 | -0.07418 | 0.10938  | 0.031189 | 0.50136  | -0.08366 | 0.07089  | -0.07187 | 0.12092  |
| 0.00213  | 0.259815 | 1.21E-08 | 0.418402 | 3.24E-21 | 0.485231 | 5.90E-29 | 0.647759 | 6.66E-57 |
| 0.00694  | 0.178775 | 0.0001   | 0.314964 | 3.25E-12 | 0.380874 | 1.43E-17 | 0.451269 | 8.27E-25 |
| 2.49E-09 | -0.02563 | 0.58062  | -0.00399 | 0.93151  | 0.119972 | 0.00946  | 0.022735 | 0.6241   |
| 4.30E-05 | 0.135869 | 0.00326  | 0.043434 | 0.349    | -0.01892 | 0.6834   | 0.146748 | 0.00147  |
| 0.00259  | 0.268927 | 3.52E-09 | 0.107919 | 0.01966  | 0.325819 | 5.20E-13 | 0.427073 | 3.98E-22 |
| 7.47E-08 | 0.155475 | 0.00075  | 0.268089 | 3.96E-09 | 0.178586 | 0.0001   | 0.287051 | 2.61E-10 |
| 1.48E-10 | -0.03962 | 0.39294  | 0.249357 | 4.74E-08 | 0.012788 | 0.78284  | 0.038528 | 0.40616  |
| 2.58E-13 | 0.267413 | 4.34E-09 | 0.19907  | 1.47E-05 | 0.356595 | 1.89E-15 | 0.46524  | 1.85E-26 |
| 0.01765  | 0.164319 | 0.00036  | 0.181942 | 7.68E-05 | 0.246256 | 7.02E-08 | 0.346454 | 1.29E-14 |
| 3.76E-26 | 0.16426  | 0.00036  | 0.264123 | 6.80E-09 | 0.224461 | 9.57E-07 | 0.352933 | 3.81E-15 |
| 7.67E-14 | 0.041187 | 0.37451  | 0.157456 | 0.00064  | 0.000614 | 0.98944  | 0.148531 | 0.00129  |
| 3.04E-15 | 0.0682   | 0.14114  | 0.099759 | 0.03113  | 0.052037 | 0.26175  | 0.144683 | 0.00172  |
| 2.61E-20 | 0.040033 | 0.38806  | -0.01034 | 0.82371  | -0.10645 | 0.02141  | -0.03513 | 0.44889  |
| 3.86E-08 | 0.0606   | 0.19112  | 0.020912 | 0.65218  | 0.04957  | 0.28507  | 0.105208 | 0.02298  |
| 4.52E-12 | -0.06501 | 0.16073  | 0.209979 | 4.72E-06 | 0.28858  | 2.08E-10 | 0.296487 | 6.25E-11 |
| 3.48E-06 | 0.128996 | 0.00524  | 0.191595 | 3.07E-05 | 0.329514 | 2.74E-13 | 0.34597  | 1.41E-14 |
| 6.67E-11 | 0.181048 | 8.34E-05 | 0.398668 | 3.06E-19 | 0.389878 | 2.11E-18 | 0.519678 | 1.16E-33 |
| 0.0003   | -0.18219 | 7.50E-05 | -0.07328 | 0.11375  | -0.14646 | 0.00151  | -0.25171 | 3.51E-08 |
| 4.63E-07 | 0.033262 | 0.47333  | 0.138849 | 0.00264  | 0.256864 | 1.79E-08 | 0.331918 | 1.79E-13 |
| 1.37E-09 | 0.268836 | 3.57E-09 | 0.403766 | 9.72E-20 | 0.416464 | 5.13E-21 | 0.576514 | 1.02E-42 |
| 1.21E-08 | -0.21951 | 1.67E-06 | -0.00049 | 0.9915   | -0.13755 | 0.0029   | -0.30633 | 1.33E-11 |
| 6.31E-13 | -0.13011 | 0.00486  | 0.01521  | 0.74303  | -0.05061 | 0.27509  | -0.18824 | 4.25E-05 |
| 1.17E-10 | -0.15883 | 0.00057  | -0.12182 | 0.0084   | -0.18314 | 6.87E-05 | -0.2948  | 8.11E-11 |
| 1.01E-13 | 0.105323 | 0.02283  | 0.197232 | 1.76E-05 | 0.185551 | 5.48E-05 | 0.274396 | 1.64E-09 |
| 1.07E-10 | -0.26353 | 7.37E-09 | -0.29112 | 1.42E-10 | -0.16505 | 0.00034  | -0.36414 | 4.33E-16 |
| 0.00239  | 0.365125 | 3.57E-16 | 0.068052 | 0.142    | 0.074297 | 0.10883  | 0.367119 | 2.40E-16 |
| 9.89E-12 | -0.1823  | 7.43E-05 | -0.12864 | 0.00537  | 0.011756 | 0.79997  | -0.21909 | 1.75E-06 |
| 3.15E-09 | 0.211431 | 4.05E-06 | 0.278206 | 9.53E-10 | 0.233429 | 3.37E-07 | 0.432326 | 1.09E-22 |
| 2.42E-24 | -0.00166 | 0.97145  | 0.117992 | 0.01071  | -0.00023 | 0.99605  | 0.040629 | 0.38102  |
| 7.86E-07 | 0.08121  | 0.07958  | 0.213779 | 3.14E-06 | 0.215426 | 2.62E-06 | 0.305451 | 1.53E-11 |
| 3.77E-24 | 0.046665 | 0.31428  | 0.124427 | 0.0071   | 0.120543 | 0.00912  | 0.150376 | 0.00112  |
| 0.08459  | 0.099134 | 0.03221  | 0.300873 | 3.16E-11 | 0.238647 | 1.80E-07 | 0.350144 | 6.47E-15 |
| 9.95E-15 | 0.286885 | 2.68E-10 | 0.287111 | 2.59E-10 | 0.219257 | 1.72E-06 | 0.285819 | 3.14E-10 |
| 1.73E-17 | 0.068311 | 0.14049  | 0.045947 | 0.32179  | -0.08887 | 0.05497  | 0.044883 | 0.33313  |
| 6.79E-16 | -0.17364 | 0.00016  | -0.20497 | 8.00E-06 | -0.28459 | 3.76E-10 | -0.41144 | 1.67E-20 |
| 6.63E-27 | -0.13514 | 0.00343  | -0.17294 | 0.00017  | -0.19098 | 3.26E-05 | -0.27699 | 1.13E-09 |
| 1.00E-09 | 0.254402 | 2.48E-08 | -0.0802  | 0.0834   | 0.069073 | 0.1361   | 0.270005 | 3.03E-09 |
| 4.03E-19 | 0.049586 | 0.28491  | -0.03247 | 0.48393  | 0.009552 | 0.8369   | 0.007019 | 0.87976  |
| 9.12E-10 | 0.170019 | 0.00022  | 0.230147 | 4.96E-07 | 0.178793 | 0.0001   | 0.296754 | 6.00E-11 |
| 2.04E-12 | 0.110441 | 0.01696  | 0.241895 | 1.21E-07 | 0.21531  | 2.66E-06 | 0.315832 | 2.82E-12 |

|          |          |          |          |          |          |          |          |          |
|----------|----------|----------|----------|----------|----------|----------|----------|----------|
| 1.37E-23 | -0.06836 | 0.14019  | -0.08704 | 0.06018  | -0.13414 | 0.00368  | -0.19877 | 1.51E-05 |
| 0.00095  | -0.06672 | 0.14999  | -0.27886 | 8.67E-10 | -0.18404 | 6.32E-05 | -0.19777 | 1.67E-05 |
| 7.92E-32 | 0.153947 | 0.00084  | 0.313882 | 3.89E-12 | 0.352544 | 4.11E-15 | 0.48554  | 5.38E-29 |
| 7.40E-10 | -0.03427 | 0.46008  | -0.23144 | 4.26E-07 | -0.17361 | 0.00016  | -0.19727 | 1.76E-05 |
| 4.59E-29 | 0.275179 | 1.47E-09 | 0.342522 | 2.67E-14 | 0.421062 | 1.71E-21 | 0.560769 | 4.95E-40 |
| 5.43E-28 | -0.0378  | 0.41515  | 0.0765   | 0.0987   | -0.02889 | 0.53349  | -0.02727 | 0.5566   |
| 3.63E-10 | 0.207903 | 5.89E-06 | 0.292434 | 1.16E-10 | 0.1897   | 3.69E-05 | 0.357769 | 1.51E-15 |
| 3.02E-14 | 0.179558 | 9.55E-05 | 0.227067 | 7.10E-07 | 0.108682 | 0.01881  | 0.26157  | 9.60E-09 |
| 2.32E-18 | 0.035472 | 0.44443  | 0.024419 | 0.59863  | -0.08275 | 0.07401  | 0.012833 | 0.78209  |
| 3.22E-18 | 0.178764 | 0.0001   | 0.220025 | 1.58E-06 | 0.140922 | 0.00227  | 0.297863 | 5.05E-11 |
| 8.06E-06 | -0.06398 | 0.1675   | 0.213832 | 3.12E-06 | 0.198238 | 1.59E-05 | 0.179307 | 9.78E-05 |
| 8.31E-11 | 0.15203  | 0.00098  | 0.112041 | 0.01542  | 0.144025 | 0.00181  | 0.284587 | 3.76E-10 |
| 3.31E-29 | 0.054936 | 0.23606  | 0.043027 | 0.35353  | -0.02618 | 0.5725   | 0.106304 | 0.02158  |
| 5.80E-13 | 0.01948  | 0.67457  | 0.222541 | 1.19E-06 | 0.008447 | 0.85553  | 0.163592 | 0.00039  |
| 2.27E-33 | -0.00812 | 0.86108  | 0.138139 | 0.00278  | -0.0483  | 0.29765  | -0.00192 | 0.96693  |
| 2.85E-23 | 0.115272 | 0.01268  | 0.152563 | 0.00094  | 0.005439 | 0.90669  | 0.184468 | 6.07E-05 |
| 1.91E-08 | 0.048482 | 0.29579  | 0.047011 | 0.3107   | -0.00834 | 0.85742  | 0.087023 | 0.06023  |
| 1.72E-18 | 0.276295 | 1.25E-09 | 0.267238 | 4.45E-09 | 0.275789 | 1.35E-09 | 0.444121 | 5.40E-24 |
| 2.85E-11 | -0.0364  | 0.43257  | 0.114251 | 0.01349  | 0.003887 | 0.93323  | 0.030885 | 0.50554  |
| 1.28E-07 | 0.179918 | 9.25E-05 | 0.299749 | 3.77E-11 | 0.289323 | 1.86E-10 | 0.405922 | 5.95E-20 |
| 7.78E-14 | 0.189009 | 3.95E-05 | 0.377618 | 2.83E-17 | 0.485912 | 4.82E-29 | 0.633449 | 9.40E-54 |
| 1.13E-07 | 0.011364 | 0.80651  | 0.105725 | 0.02231  | 0.01855  | 0.68929  | 0.099613 | 0.03138  |
| 4.72E-27 | 0.127617 | 0.00575  | 0.19571  | 2.05E-05 | -0.0099  | 0.8311   | 0.202451 | 1.04E-05 |
| 6.70E-14 | 0.212025 | 3.80E-06 | 0.225391 | 8.60E-07 | 0.206109 | 7.11E-06 | 0.449081 | 1.48E-24 |
| 9.80E-10 | 0.216386 | 2.36E-06 | 0.328539 | 3.24E-13 | 0.268865 | 3.55E-09 | 0.476037 | 8.71E-28 |
| 0.07617  | 0.240036 | 1.52E-07 | 0.255662 | 2.10E-08 | 0.390808 | 1.72E-18 | 0.469374 | 5.82E-27 |
| 1.18E-13 | 0.063986 | 0.16744  | 0.196075 | 1.98E-05 | 0.050903 | 0.2723   | 0.193936 | 2.44E-05 |
| 6.58E-20 | 0.222201 | 1.24E-06 | 0.063119 | 0.17328  | 0.085153 | 0.06598  | 0.26608  | 5.21E-09 |
| 7.95E-31 | 0.152932 | 0.00091  | 0.202049 | 1.08E-05 | 0.166421 | 0.0003   | 0.348751 | 8.40E-15 |
| 5.14E-39 | 0.111012 | 0.0164   | 0.130065 | 0.00488  | 0.039301 | 0.3968   | 0.209026 | 5.23E-06 |
| 1.35E-19 | 0.104188 | 0.02435  | 0.095032 | 0.04009  | 0.05433  | 0.24127  | 0.229781 | 5.18E-07 |
| 3.06E-11 | 0.073914 | 0.11067  | 0.247783 | 5.79E-08 | 0.142637 | 0.002    | 0.250688 | 4.00E-08 |
| 5.66E-17 | 0.135276 | 0.0034   | 0.45227  | 6.34E-25 | 0.574739 | 2.09E-42 | 0.61552  | 4.93E-50 |
| 4.71E-14 | 0.190034 | 3.57E-05 | 0.401746 | 1.53E-19 | 0.452497 | 5.96E-25 | 0.57605  | 1.23E-42 |
| 1.10E-35 | 0.150367 | 0.00112  | 0.134857 | 0.0035   | 0.157118 | 0.00066  | 0.311921 | 5.37E-12 |
| 1.22E-13 | 0.115567 | 0.01245  | 0.212226 | 3.71E-06 | 0.201654 | 1.13E-05 | 0.348757 | 8.39E-15 |
| 2.31E-05 | -0.00842 | 0.85601  | -0.01907 | 0.68112  | -0.0862  | 0.0627   | -0.15763 | 0.00063  |
| 0.00105  | 0.05315  | 0.25166  | 0.336906 | 7.38E-14 | 0.327333 | 4.00E-13 | 0.358438 | 1.32E-15 |
| 3.59E-17 | 0.298545 | 4.55E-11 | 0.386849 | 4.04E-18 | 0.316445 | 2.54E-12 | 0.556419 | 2.58E-39 |
| 7.67E-11 | 0.054463 | 0.24013  | 0.195066 | 2.19E-05 | 0.092589 | 0.04552  | 0.212306 | 3.68E-06 |
| 1.50E-21 | 0.210406 | 4.51E-06 | 0.169913 | 0.00023  | 0.136275 | 0.00317  | 0.32738  | 3.97E-13 |
| 1.85E-16 | 0.17417  | 0.00016  | 0.276951 | 1.14E-09 | 0.282036 | 5.47E-10 | 0.451859 | 7.07E-25 |
| 2.13E-06 | 0.248008 | 5.63E-08 | 0.243351 | 1.01E-07 | 0.127615 | 0.00575  | 0.326497 | 4.62E-13 |
| 1.47E-13 | 0.089325 | 0.05373  | 0.150204 | 0.00113  | 0.095493 | 0.03913  | 0.200186 | 1.31E-05 |
| 1.11E-12 | 0.114717 | 0.01312  | 0.170112 | 0.00022  | 0.185274 | 5.63E-05 | 0.266447 | 4.96E-09 |

|          |          |          |          |          |          |          |          |          |
|----------|----------|----------|----------|----------|----------|----------|----------|----------|
| 1.57E-17 | 0.148995 | 0.00124  | 0.254281 | 2.52E-08 | 0.136009 | 0.00323  | 0.359363 | 1.11E-15 |
| 6.30E-20 | 0.296675 | 6.08E-11 | 0.181923 | 7.69E-05 | 0.094501 | 0.04122  | 0.3482   | 9.31E-15 |
| 2.61E-13 | 0.217855 | 2.01E-06 | 0.392167 | 1.28E-18 | 0.317309 | 2.20E-12 | 0.453701 | 4.32E-25 |
| 5.24E-09 | 0.091281 | 0.04868  | 0.186855 | 4.85E-05 | 0.224771 | 9.24E-07 | 0.231821 | 4.07E-07 |
| 2.85E-26 | 0.073288 | 0.11373  | 0.12836  | 0.00547  | -0.02027 | 0.66222  | 0.149383 | 0.0012   |
| 2.46E-06 | 0.248408 | 5.35E-08 | 0.298765 | 4.39E-11 | 0.346728 | 1.23E-14 | 0.508428 | 4.57E-32 |
| 3.69E-29 | 0.026409 | 0.56918  | -0.02401 | 0.60479  | -0.15935 | 0.00055  | 0.007276 | 0.87538  |
| 3.66E-06 | 0.084724 | 0.06736  | 0.259919 | 1.20E-08 | 0.137426 | 0.00292  | 0.300916 | 3.14E-11 |
| 1.99E-07 | 0.110325 | 0.01708  | 0.052648 | 0.25618  | -0.00943 | 0.83895  | 0.175931 | 0.00013  |
| 9.01E-23 | 0.201041 | 1.20E-05 | 0.201044 | 1.20E-05 | 0.147716 | 0.00137  | 0.350213 | 6.38E-15 |
| 5.77E-14 | 0.116923 | 0.01145  | 0.477803 | 5.22E-28 | 0.347804 | 1.00E-14 | 0.441874 | 9.65E-24 |
| 1.24E-11 | 0.075805 | 0.10181  | -0.05989 | 0.19636  | -0.03579 | 0.44033  | 0.088171 | 0.05691  |
| 5.90E-15 | 0.216567 | 2.32E-06 | 0.234446 | 2.98E-07 | 0.228412 | 6.07E-07 | 0.422891 | 1.10E-21 |
| 0.71991  | 0.115228 | 0.01271  | 0.121055 | 0.00883  | 0.196718 | 1.86E-05 | 0.240887 | 1.37E-07 |
| 9.45E-12 | 0.075907 | 0.10135  | 0.002603 | 0.95526  | -0.13229 | 0.00419  | 0.006802 | 0.88344  |
| 2.21E-15 | -0.01798 | 0.69834  | -0.03627 | 0.43423  | -0.23757 | 2.05E-07 | -0.12457 | 0.00703  |
| 2.74E-05 | -0.04342 | 0.34911  | 0.1837   | 6.52E-05 | 0.151179 | 0.00105  | 0.118911 | 0.01011  |
| 1.37E-15 | -0.11088 | 0.01652  | 0.047269 | 0.30805  | -0.07527 | 0.10427  | -0.12765 | 0.00574  |
| 1.87E-12 | 0.158904 | 0.00057  | 0.157016 | 0.00066  | 0.116545 | 0.01172  | 0.304067 | 1.91E-11 |
| 2.29E-07 | -0.19964 | 1.38E-05 | -0.18227 | 7.45E-05 | -0.22628 | 7.77E-07 | -0.40862 | 3.20E-20 |
| 1.77E-11 | -0.17318 | 0.00017  | -0.21288 | 3.46E-06 | -0.16941 | 0.00024  | -0.34759 | 1.04E-14 |
| 0.03172  | 0.099488 | 0.03159  | 0.137509 | 0.0029   | 0.104656 | 0.02371  | 0.159522 | 0.00054  |
| 5.51E-05 | 0.040653 | 0.38074  | 0.265494 | 5.65E-09 | 0.32224  | 9.59E-13 | 0.42305  | 1.06E-21 |
| 5.90E-22 | 0.075574 | 0.10286  | 0.135343 | 0.00338  | 0.051192 | 0.26958  | 0.131496 | 0.00442  |
| 2.57E-19 | 0.180735 | 8.58E-05 | 0.102259 | 0.02712  | 0.078135 | 0.09169  | 0.247364 | 6.11E-08 |
| 3.19E-21 | 0.059792 | 0.19711  | 0.142662 | 0.002    | 0.031603 | 0.49569  | 0.13831  | 0.00274  |
| 1.44E-16 | 0.094799 | 0.04058  | 0.208008 | 5.82E-06 | 0.126549 | 0.00617  | 0.253666 | 2.72E-08 |
| 3.31E-20 | 0.025548 | 0.58184  | 0.126489 | 0.0062   | 0.01934  | 0.67677  | 0.102353 | 0.02698  |
| 0.00057  | -0.10063 | 0.02967  | -0.06445 | 0.16441  | -0.02525 | 0.58627  | -0.13483 | 0.00351  |
| 2.11E-13 | 0.000571 | 0.99019  | -0.09683 | 0.03646  | -0.07025 | 0.12956  | -0.11888 | 0.01013  |
| 1.55E-14 | 0.182695 | 7.16E-05 | 0.238925 | 1.74E-07 | 0.259823 | 1.21E-08 | 0.42717  | 3.89E-22 |
| 3.57E-30 | 0.116325 | 0.01188  | 0.171543 | 0.0002   | 0.064201 | 0.16602  | 0.221138 | 1.39E-06 |
| 4.85E-23 | -0.03405 | 0.46285  | 0.128065 | 0.00558  | 0.03699  | 0.42516  | 0.057441 | 0.21534  |
| 4.40E-11 | -0.14939 | 0.0012   | -0.27283 | 2.04E-09 | -0.2742  | 1.69E-09 | -0.32692 | 4.29E-13 |
| 0.00047  | 0.178062 | 0.00011  | 0.336723 | 7.63E-14 | 0.222014 | 1.26E-06 | 0.346824 | 1.20E-14 |
| 2.34E-06 | 0.080975 | 0.08045  | 0.144016 | 0.00181  | 0.113938 | 0.01375  | 0.255556 | 2.13E-08 |
| 7.13E-13 | 0.100656 | 0.02964  | 0.032022 | 0.49     | 0.070335 | 0.12907  | 0.205148 | 7.86E-06 |
| 0.01294  | 0.00481  | 0.91744  | 0.313807 | 3.94E-12 | 0.302118 | 2.60E-11 | 0.268228 | 3.88E-09 |
| 5.01E-12 | 0.011079 | 0.81127  | -0.06041 | 0.19254  | -0.09873 | 0.03291  | -0.09101 | 0.04935  |
| 0.00014  | -0.12793 | 0.00563  | -0.1868  | 4.87E-05 | -0.21593 | 2.49E-06 | -0.28402 | 4.09E-10 |
| 1.27E-22 | 0.194652 | 2.28E-05 | 0.242535 | 1.12E-07 | 0.361934 | 6.70E-16 | 0.420134 | 2.14E-21 |
| 6.98E-15 | 0.055602 | 0.23042  | 0.172515 | 0.00018  | 0.137001 | 0.00301  | 0.249866 | 4.44E-08 |
| 1.45E-16 | 0.075767 | 0.10199  | 0.345462 | 1.55E-14 | 0.243239 | 1.02E-07 | 0.312587 | 4.82E-12 |
| 1.96E-10 | 0.181523 | 7.98E-05 | 0.212375 | 3.66E-06 | 0.137688 | 0.00287  | 0.341843 | 3.02E-14 |
| 2.85E-22 | 0.253071 | 2.94E-08 | 0.277728 | 1.02E-09 | 0.326485 | 4.63E-13 | 0.526762 | 1.06E-34 |

|          |          |          |          |          |          |          |          |          |
|----------|----------|----------|----------|----------|----------|----------|----------|----------|
| 2.61E-09 | 0.052749 | 0.25526  | -0.05058 | 0.27533  | -0.15227 | 0.00096  | -0.01968 | 0.67138  |
| 5.91E-09 | 0.161674 | 0.00045  | 0.203838 | 9.00E-06 | 0.273499 | 1.86E-09 | 0.437204 | 3.18E-23 |
| 5.27E-30 | 0.106953 | 0.02079  | 0.288638 | 2.06E-10 | 0.147006 | 0.00144  | 0.289597 | 1.79E-10 |
| 1.24E-05 | 0.160366 | 0.0005   | 0.218434 | 1.88E-06 | 0.353184 | 3.64E-15 | 0.352908 | 3.83E-15 |
| 0.0016   | 0.068327 | 0.14039  | 0.124604 | 0.00702  | 0.195691 | 2.05E-05 | 0.26606  | 5.23E-09 |
| 5.06E-05 | 0.226768 | 7.34E-07 | 0.132835 | 0.00403  | 0.166491 | 0.0003   | 0.3382   | 5.85E-14 |
| 1.28E-27 | 0.119798 | 0.00956  | 0.097267 | 0.03561  | 0.079595 | 0.08576  | 0.224104 | 9.97E-07 |
| 9.61E-29 | 0.097122 | 0.03589  | 0.074999 | 0.10551  | 9.43E-05 | 0.99838  | 0.185538 | 5.49E-05 |
| 1.38E-19 | 0.119787 | 0.00957  | 0.2024   | 1.04E-05 | 0.169162 | 0.00024  | 0.274873 | 1.53E-09 |
| 1.43E-13 | 0.212985 | 3.42E-06 | 0.105629 | 0.02243  | 0.272014 | 2.29E-09 | 0.431171 | 1.45E-22 |
| 2.66E-29 | 0.133341 | 0.00389  | 0.21142  | 4.05E-06 | 0.149411 | 0.0012   | 0.335988 | 8.70E-14 |
| 3.88E-15 | 0.127163 | 0.00593  | 0.170539 | 0.00021  | 0.09175  | 0.04752  | 0.230728 | 4.63E-07 |
| 3.57E-06 | 0.262133 | 8.90E-09 | 0.239252 | 1.67E-07 | 0.289186 | 1.90E-10 | 0.366855 | 2.53E-16 |
| 2.79E-16 | 0.192535 | 2.80E-05 | 0.246121 | 7.14E-08 | 0.261441 | 9.77E-09 | 0.380914 | 1.42E-17 |
| 2.45E-15 | -0.064   | 0.16738  | -0.10675 | 0.02104  | -0.15731 | 0.00065  | -0.17082 | 0.00021  |
| 1.85E-27 | 0.164865 | 0.00035  | 0.27127  | 2.54E-09 | 0.217377 | 2.12E-06 | 0.39448  | 7.72E-19 |
| 1.41E-21 | 0.097484 | 0.0352   | 0.219134 | 1.74E-06 | 0.024864 | 0.59199  | 0.154498 | 0.00081  |
| 0.01149  | 0.141472 | 0.00218  | 0.367586 | 2.18E-16 | 0.326392 | 4.71E-13 | 0.457388 | 1.60E-25 |
| 0.0204   | 0.242554 | 1.11E-07 | -0.03675 | 0.42814  | 0.086371 | 0.06218  | 0.21184  | 3.87E-06 |
| 0.00018  | 0.001609 | 0.97233  | 0.041736 | 0.36817  | -0.0394  | 0.39556  | 0.061756 | 0.18278  |
| 5.66E-06 | 0.08054  | 0.0821   | 0.405448 | 6.63E-20 | 0.153611 | 0.00087  | 0.286    | 3.06E-10 |
| 8.23E-11 | 0.098414 | 0.03349  | 0.051948 | 0.26256  | 0.110552 | 0.01685  | 0.20927  | 5.09E-06 |
| 0.04895  | 0.024747 | 0.59373  | -0.04785 | 0.30209  | 0.105887 | 0.02211  | 0.125385 | 0.00667  |
| 4.65E-13 | 0.205754 | 7.38E-06 | 0.325096 | 5.88E-13 | 0.256428 | 1.90E-08 | 0.482205 | 1.44E-28 |
| 1.51E-18 | -0.17427 | 0.00015  | -0.30426 | 1.85E-11 | -0.34346 | 2.25E-14 | -0.43115 | 1.45E-22 |
| 7.81E-32 | 0.047135 | 0.30943  | 0.264102 | 6.82E-09 | 0.120282 | 0.00927  | 0.207418 | 6.20E-06 |
| 4.82E-17 | 0.154904 | 0.00078  | 0.413598 | 1.01E-20 | 0.288978 | 1.96E-10 | 0.446108 | 3.22E-24 |
| 3.75E-11 | 0.268745 | 3.61E-09 | 0.086658 | 0.06132  | 0.134054 | 0.0037   | 0.36224  | 6.31E-16 |
| 5.73E-23 | -0.11675 | 0.01157  | -0.16216 | 0.00043  | -0.23676 | 2.26E-07 | -0.23754 | 2.06E-07 |
| 1.69E-27 | 0.153697 | 0.00086  | 0.053489 | 0.24865  | 0.073642 | 0.11199  | 0.21059  | 4.43E-06 |
| 0.00032  | 0.057422 | 0.21549  | -0.0389  | 0.40169  | -0.07744 | 0.09461  | 0.046064 | 0.32056  |
| 2.70E-12 | 0.148665 | 0.00127  | 0.275666 | 1.37E-09 | 0.271097 | 2.61E-09 | 0.319381 | 1.56E-12 |
| 8.00E-08 | 0.057003 | 0.21887  | 0.049567 | 0.28509  | 0.137741 | 0.00286  | 0.240058 | 1.51E-07 |
| 1.86E-15 | 0.322062 | 9.89E-13 | -0.02309 | 0.61864  | 0.169758 | 0.00023  | 0.373319 | 6.85E-17 |
| 1.51E-10 | 0.300966 | 3.11E-11 | 0.251655 | 3.53E-08 | 0.404713 | 7.84E-20 | 0.595316 | 4.05E-46 |
| 9.78E-12 | -0.02611 | 0.57351  | 0.027189 | 0.55781  | -0.09973 | 0.03117  | -0.03423 | 0.46057  |
| 7.67E-06 | 0.060058 | 0.19513  | 0.156717 | 0.00068  | 0.238654 | 1.80E-07 | 0.326331 | 4.76E-13 |
| 3.10E-16 | 0.191943 | 2.97E-05 | 0.171165 | 0.0002   | 0.123512 | 0.00754  | 0.304128 | 1.89E-11 |
| 1.30E-22 | -0.29319 | 1.04E-10 | -0.18251 | 7.28E-05 | -0.32387 | 7.27E-13 | -0.4764  | 7.84E-28 |
| 4.81E-16 | 0.15792  | 0.00061  | 0.186988 | 4.78E-05 | 0.197344 | 1.74E-05 | 0.362652 | 5.82E-16 |
| 5.92E-27 | 0.165843 | 0.00032  | -0.08907 | 0.05443  | 0.07314  | 0.11446  | 0.044515 | 0.33711  |
| 1.35E-06 | 0.070384 | 0.12881  | 0.443466 | 6.40E-24 | 0.401931 | 1.47E-19 | 0.455594 | 2.60E-25 |
| 1.44E-23 | -0.17361 | 0.00016  | -0.27277 | 2.06E-09 | -0.28819 | 2.21E-10 | -0.33842 | 5.62E-14 |
| 3.46E-36 | 0.102437 | 0.02686  | -0.01403 | 0.76243  | -0.04234 | 0.36131  | 0.133708 | 0.00379  |
| 2.58E-15 | 0.102247 | 0.02714  | 0.104644 | 0.02373  | 0.158772 | 0.00057  | 0.269141 | 3.42E-09 |

|          |          |          |          |          |          |          |          |          |
|----------|----------|----------|----------|----------|----------|----------|----------|----------|
| 6.21E-25 | 0.228566 | 5.96E-07 | 0.143791 | 0.00184  | 0.154453 | 0.00081  | 0.413359 | 1.07E-20 |
| 5.78E-11 | -0.07743 | 0.09465  | 0.063077 | 0.17358  | 0.023664 | 0.60999  | 0.010937 | 0.81364  |
| 2.25E-12 | -0.01817 | 0.69539  | -0.14325 | 0.00191  | -0.12771 | 0.00571  | -0.20421 | 8.66E-06 |
| 0.00187  | 0.204075 | 8.78E-06 | 0.015019 | 0.74616  | 0.04367  | 0.34638  | 0.146148 | 0.00154  |
| 6.74E-18 | -0.18163 | 7.90E-05 | -0.31242 | 4.95E-12 | -0.2837  | 4.29E-10 | -0.3707  | 1.17E-16 |
| 1.74E-15 | -0.08587 | 0.06374  | -0.10621 | 0.0217   | -0.06886 | 0.13732  | -0.20233 | 1.05E-05 |
| 7.29E-11 | 0.319797 | 1.45E-12 | 0.218703 | 1.83E-06 | 0.360059 | 9.67E-16 | 0.577114 | 8.04E-43 |
| 5.60E-08 | 0.004104 | 0.92952  | 0.176781 | 0.00012  | 0.124365 | 0.00713  | 0.161353 | 0.00046  |
| 2.67E-10 | 0.083504 | 0.07141  | 0.176805 | 0.00012  | 0.045298 | 0.32868  | 0.167137 | 0.00029  |
| 0.24617  | 0.105212 | 0.02297  | 0.415065 | 7.14E-21 | 0.253996 | 2.61E-08 | 0.364607 | 3.95E-16 |
| 2.49E-07 | -0.09357 | 0.04328  | -0.11243 | 0.01506  | -0.15454 | 0.00081  | -0.30144 | 2.89E-11 |
| 3.64E-06 | -0.07981 | 0.08493  | -0.06285 | 0.17515  | -0.02734 | 0.55569  | -0.10587 | 0.02213  |
| 5.37E-10 | 0.0075   | 0.87159  | 0.082903 | 0.07348  | 0.039626 | 0.3929   | 0.088392 | 0.05629  |
| 1.71E-33 | 0.084968 | 0.06657  | 0.135353 | 0.00338  | 0.087055 | 0.06013  | 0.221336 | 1.36E-06 |
| 9.21E-09 | 0.293112 | 1.05E-10 | 0.325669 | 5.33E-13 | 0.270971 | 2.65E-09 | 0.483905 | 8.75E-29 |
| 1.71E-16 | -0.186   | 5.25E-05 | -0.18618 | 5.16E-05 | -0.29708 | 5.71E-11 | -0.40042 | 2.07E-19 |
| 6.10E-15 | 0.058311 | 0.20846  | 0.106812 | 0.02096  | 0.094699 | 0.0408   | 0.17744  | 0.00012  |
| 1.67E-05 | 0.172218 | 0.00018  | 0.151943 | 0.00099  | 0.249179 | 4.85E-08 | 0.385518 | 5.37E-18 |
| 6.70E-07 | -0.06794 | 0.14269  | 0.103684 | 0.02505  | -0.07668 | 0.09793  | -0.0025  | 0.95709  |
| 1.60E-13 | 0.028194 | 0.54334  | 0.27268  | 2.09E-09 | 0.208965 | 5.26E-06 | 0.282905 | 4.82E-10 |
| 3.06E-14 | -0.20385 | 8.99E-06 | -0.04283 | 0.35571  | -0.1316  | 0.00439  | -0.30662 | 1.27E-11 |
| 7.11E-13 | 0.12985  | 0.00495  | 0.233105 | 3.50E-07 | 0.139603 | 0.0025   | 0.268313 | 3.84E-09 |
| 2.72E-27 | 0.216515 | 2.33E-06 | 0.21771  | 2.04E-06 | 0.275651 | 1.37E-09 | 0.403306 | 1.08E-19 |
| 7.98E-07 | -0.01887 | 0.68417  | -0.23421 | 3.07E-07 | -0.27453 | 1.61E-09 | -0.18743 | 4.59E-05 |
| 3.89E-05 | 0.17173  | 0.00019  | 0.167537 | 0.00028  | 0.116085 | 0.01206  | 0.314322 | 3.62E-12 |
| 1.18E-15 | -0.20311 | 9.70E-06 | -0.27849 | 9.15E-10 | -0.25751 | 1.65E-08 | -0.44977 | 1.23E-24 |
| 1.20E-13 | 0.020084 | 0.66509  | 0.104731 | 0.02361  | 0.101967 | 0.02757  | 0.12666  | 0.00613  |
| 1.05E-17 | 0.04384  | 0.34451  | 0.145237 | 0.00165  | 0.033696 | 0.46757  | 0.164619 | 0.00035  |
| 1.26E-17 | -0.07803 | 0.09211  | -0.23202 | 3.98E-07 | -0.12125 | 0.00872  | -0.16829 | 0.00026  |
| 0.00013  | 0.136934 | 0.00302  | 0.366129 | 2.92E-16 | 0.301304 | 2.95E-11 | 0.444451 | 4.96E-24 |
| 1.35E-17 | -0.26527 | 5.82E-09 | -0.20444 | 8.45E-06 | -0.28438 | 3.88E-10 | -0.49324 | 5.29E-30 |
| 1.52E-08 | -0.24117 | 1.32E-07 | -0.32041 | 1.31E-12 | -0.29297 | 1.07E-10 | -0.45294 | 5.30E-25 |
| 4.47E-24 | 0.16905  | 0.00024  | 0.27914  | 8.33E-10 | 0.197099 | 1.79E-05 | 0.350879 | 5.63E-15 |
| 1.69E-09 | 0.023348 | 0.61477  | 0.404998 | 7.35E-20 | 0.295087 | 7.76E-11 | 0.345801 | 1.46E-14 |
| 1.17E-14 | 0.134297 | 0.00364  | 0.188912 | 3.98E-05 | 0.077789 | 0.09314  | 0.211414 | 4.05E-06 |
| 9.79E-18 | 0.068028 | 0.14214  | 0.145863 | 0.00157  | 0.098657 | 0.03305  | 0.225679 | 8.32E-07 |
| 3.44E-19 | 0.043752 | 0.34547  | 0.070083 | 0.13046  | -0.00119 | 0.97954  | 0.078571 | 0.08988  |
| 1.94E-21 | 0.081299 | 0.07925  | 0.16665  | 0.0003   | 0.084774 | 0.0672   | 0.191566 | 3.08E-05 |
| 5.63E-13 | 0.30512  | 1.61E-11 | 0.318917 | 1.68E-12 | 0.384773 | 6.29E-18 | 0.610671 | 4.55E-49 |
| 1.20E-19 | -0.06688 | 0.14901  | -0.13801 | 0.0028   | -0.26003 | 1.18E-08 | -0.25593 | 2.03E-08 |
| 1.09E-27 | 0.081483 | 0.07857  | 0.110481 | 0.01692  | 0.011089 | 0.8111   | 0.158566 | 0.00058  |
| 5.26E-14 | 0.050758 | 0.27367  | 0.051767 | 0.26424  | -0.01119 | 0.80936  | 0.13611  | 0.00321  |
| 0.00527  | -0.0158  | 0.73349  | 0.203725 | 9.11E-06 | 0.115155 | 0.01277  | 0.122887 | 0.00785  |
| 1.59E-06 | 0.140949 | 0.00227  | 0.186102 | 5.20E-05 | 0.185885 | 5.31E-05 | 0.287951 | 2.29E-10 |
| 1.18E-12 | 0.095157 | 0.03983  | 0.036198 | 0.43516  | 0.02464  | 0.59532  | 0.108297 | 0.01924  |

|          |          |          |          |          |          |          |          |          |
|----------|----------|----------|----------|----------|----------|----------|----------|----------|
| 2.47E-22 | 0.123182 | 0.0077   | 0.137412 | 0.00292  | 0.063382 | 0.1715   | 0.223434 | 1.08E-06 |
| 1.52E-09 | 0.159053 | 0.00056  | 0.120898 | 0.00892  | 0.189586 | 3.73E-05 | 0.32128  | 1.13E-12 |
| 5.80E-05 | -0.05715 | 0.21771  | -0.28051 | 6.83E-10 | -0.23818 | 1.90E-07 | -0.22913 | 5.59E-07 |
| 4.42E-13 | 0.07628  | 0.09968  | 0.05237  | 0.25871  | 0.006758 | 0.88419  | 0.187451 | 4.58E-05 |
| 1.57E-12 | -0.05895 | 0.20348  | -0.12746 | 0.00581  | -0.02669 | 0.56504  | -0.04855 | 0.29516  |
| 4.93E-25 | 0.147314 | 0.00141  | 0.180074 | 9.11E-05 | 0.110238 | 0.01717  | 0.253782 | 2.68E-08 |
| 4.17E-10 | -0.06858 | 0.13893  | 0.059779 | 0.19721  | -0.10263 | 0.02656  | -0.06174 | 0.18288  |
| 3.55E-15 | -0.24815 | 5.53E-08 | -0.25093 | 3.88E-08 | -0.32908 | 2.95E-13 | -0.50448 | 1.61E-31 |
| 1.99E-14 | 0.252708 | 3.09E-08 | 0.181676 | 7.87E-05 | 0.185885 | 5.31E-05 | 0.359172 | 1.15E-15 |
| 5.92E-28 | 0.185588 | 5.46E-05 | 0.262019 | 9.04E-09 | 0.19752  | 1.71E-05 | 0.402607 | 1.26E-19 |
| 3.53E-31 | -0.24821 | 5.48E-08 | -0.21805 | 1.97E-06 | -0.1541  | 0.00083  | -0.37436 | 5.53E-17 |
| 1.16E-05 | 0.246727 | 6.62E-08 | 0.313041 | 4.47E-12 | 0.270764 | 2.73E-09 | 0.524417 | 2.36E-34 |
| 8.45E-25 | -0.06386 | 0.16827  | -0.14774 | 0.00137  | -0.04591 | 0.32221  | -0.09945 | 0.03166  |
| 9.31E-14 | -0.11394 | 0.01375  | -0.19369 | 2.51E-05 | -0.10965 | 0.01777  | -0.26668 | 4.80E-09 |
| 7.56E-25 | 0.294651 | 8.30E-11 | 0.325604 | 5.39E-13 | 0.426535 | 4.54E-22 | 0.609866 | 6.56E-49 |
| 1.12E-16 | 0.120283 | 0.00927  | 0.067808 | 0.14344  | 0.036318 | 0.43363  | 0.212194 | 3.73E-06 |
| 5.04E-23 | 0.167559 | 0.00028  | 0.061905 | 0.18172  | 0.059204 | 0.20157  | 0.264308 | 6.64E-09 |
| 2.24E-15 | 0.141932 | 0.00211  | 0.180035 | 9.15E-05 | 0.035864 | 0.4394   | 0.202988 | 9.83E-06 |
| 1.43E-10 | 0.216729 | 2.28E-06 | 0.202339 | 1.05E-05 | 0.264869 | 6.15E-09 | 0.451257 | 8.30E-25 |
| 2.13E-11 | 0.086039 | 0.0632   | 0.119641 | 0.00966  | 0.071787 | 0.12134  | 0.215015 | 2.75E-06 |
| 4.22E-13 | 0.057338 | 0.21617  | -0.01654 | 0.7214   | 0.153027 | 0.00091  | 0.121824 | 0.0084   |
| 1.31E-08 | 0.215637 | 2.56E-06 | 0.154652 | 0.0008   | 0.144526 | 0.00174  | 0.330134 | 2.45E-13 |
| 1.13E-23 | -0.1753  | 0.00014  | -0.08218 | 0.07603  | -0.16011 | 0.00051  | -0.30999 | 7.36E-12 |
| 4.69E-05 | 0.150942 | 0.00107  | 0.386047 | 4.80E-18 | 0.278229 | 9.50E-10 | 0.473175 | 1.98E-27 |
| 3.44E-06 | -0.11754 | 0.01102  | -0.33613 | 8.48E-14 | -0.26681 | 4.72E-09 | -0.4209  | 1.78E-21 |
| 8.12E-10 | 0.022015 | 0.63512  | 0.174345 | 0.00015  | 0.114999 | 0.01289  | 0.143207 | 0.00192  |
| 3.34E-30 | -0.01778 | 0.70159  | 0.072041 | 0.12003  | -0.09202 | 0.04687  | -0.01882 | 0.68499  |
| 3.96E-16 | -0.06867 | 0.13842  | -0.04373 | 0.34568  | 0.027598 | 0.5519   | -0.07101 | 0.12544  |
| 4.51E-13 | -0.25301 | 2.97E-08 | -0.21507 | 2.73E-06 | -0.26794 | 4.04E-09 | -0.44875 | 1.61E-24 |
| 9.42E-18 | 0.017547 | 0.70527  | 0.033512 | 0.47001  | -0.07487 | 0.1061   | 0.006014 | 0.89687  |
| 8.84E-14 | 0.11415  | 0.01358  | 0.121428 | 0.00862  | 0.071659 | 0.12201  | 0.247069 | 6.34E-08 |
| 3.04E-23 | 0.09097  | 0.04945  | 0.159255 | 0.00055  | -0.005   | 0.91421  | 0.127977 | 0.00561  |
| 1.95E-08 | 0.184753 | 5.91E-05 | 0.303007 | 2.26E-11 | 0.437037 | 3.32E-23 | 0.557182 | 1.93E-39 |
| 8.15E-17 | 0.106431 | 0.02143  | 0.33889  | 5.16E-14 | 0.283206 | 4.61E-10 | 0.357352 | 1.63E-15 |
| 4.02E-29 | 0.11488  | 0.01299  | 0.107681 | 0.01994  | 0.119833 | 0.00954  | 0.248372 | 5.38E-08 |
| 2.21E-24 | 0.096103 | 0.03789  | 0.152604 | 0.00094  | 0.089515 | 0.05322  | 0.218293 | 1.91E-06 |
| 3.16E-11 | -0.16048 | 0.0005   | -0.00421 | 0.92779  | -0.09719 | 0.03577  | -0.20885 | 5.33E-06 |
| 7.70E-10 | 0.015152 | 0.74399  | 0.138065 | 0.00279  | 0.117431 | 0.01109  | 0.14176  | 0.00214  |
| 2.30E-06 | -0.09192 | 0.04711  | -0.22315 | 1.11E-06 | -0.1557  | 0.00073  | -0.2224  | 1.21E-06 |
| 6.64E-35 | 0.050848 | 0.27282  | 0.149431 | 0.0012   | 0.021495 | 0.64314  | 0.17425  | 0.00015  |
| 1.14E-15 | 0.091381 | 0.04843  | 0.147476 | 0.00139  | 0.047176 | 0.309    | 0.163825 | 0.00038  |
| 2.68E-27 | 0.159832 | 0.00053  | 0.177712 | 0.00011  | 0.126158 | 0.00634  | 0.306268 | 1.34E-11 |
| 1.28E-05 | 0.218602 | 1.85E-06 | 0.189767 | 3.67E-05 | 0.236195 | 2.42E-07 | 0.397844 | 3.67E-19 |
| 1.56E-26 | -0.26216 | 8.87E-09 | -0.28855 | 2.09E-10 | -0.35889 | 1.21E-15 | -0.50929 | 3.47E-32 |
| 3.57E-23 | 0.009019 | 0.84588  | -0.07995 | 0.08438  | 0.010378 | 0.82301  | -0.00106 | 0.98184  |

|          |          |          |          |          |          |          |          |          |
|----------|----------|----------|----------|----------|----------|----------|----------|----------|
| 4.76E-11 | 0.081673 | 0.07787  | -0.19277 | 2.74E-05 | -0.10641 | 0.02145  | -0.09632 | 0.03746  |
| 2.81E-22 | 0.140876 | 0.00228  | 0.236329 | 2.38E-07 | 0.213863 | 3.11E-06 | 0.355503 | 2.33E-15 |
| 1.11E-05 | 0.161376 | 0.00046  | -0.0059  | 0.89879  | 0.011422 | 0.80555  | 0.13868  | 0.00267  |
| 9.63E-29 | 0.140644 | 0.00232  | 0.042693 | 0.35728  | 0.101914 | 0.02765  | 0.175844 | 0.00013  |
| 4.94E-19 | 0.089789 | 0.05249  | 0.161208 | 0.00047  | 0.215569 | 2.58E-06 | 0.377486 | 2.90E-17 |
| 2.67E-16 | 0.024728 | 0.59402  | 0.109135 | 0.01832  | -0.00858 | 0.85333  | 0.035404 | 0.4453   |
| 1.05E-18 | 0.079732 | 0.08523  | 0.046248 | 0.31862  | 0.033317 | 0.47259  | 0.156119 | 0.00071  |
| 7.11E-06 | 0.085323 | 0.06544  | 0.083157 | 0.0726   | 0.116611 | 0.01167  | 0.177761 | 0.00011  |
| 6.15E-15 | 0.16679  | 0.00029  | 0.090116 | 0.05163  | -0.07447 | 0.10801  | 0.101072 | 0.02897  |
| 1.80E-10 | 0.120538 | 0.00912  | 0.205679 | 7.44E-06 | 0.195759 | 2.04E-05 | 0.330856 | 2.16E-13 |
| 1.06E-27 | 0.119201 | 0.00993  | 0.125747 | 0.00651  | -0.03513 | 0.44883  | 0.177278 | 0.00012  |
| 3.77E-12 | 0.015426 | 0.73952  | 0.109555 | 0.01787  | 0.141292 | 0.00221  | 0.207622 | 6.06E-06 |
| 6.51E-14 | 0.113397 | 0.01421  | 0.153255 | 0.00089  | 0.126205 | 0.00632  | 0.247451 | 6.04E-08 |
| 5.60E-08 | 0.018253 | 0.69401  | 0.05549  | 0.23136  | -0.01977 | 0.66996  | 0.022891 | 0.62172  |
| 3.10E-20 | 0.153499 | 0.00087  | 0.38958  | 2.25E-18 | 0.388086 | 3.10E-18 | 0.454791 | 3.23E-25 |
| 1.87E-08 | 0.139628 | 0.00249  | 0.045587 | 0.32561  | 0.111058 | 0.01635  | 0.288535 | 2.09E-10 |
| 6.36E-15 | -0.00142 | 0.97555  | -0.03807 | 0.41177  | -0.08007 | 0.0839   | -0.04961 | 0.28471  |
| 0.00796  | 0.229208 | 5.54E-07 | 0.274691 | 1.57E-09 | 0.411533 | 1.63E-20 | 0.508105 | 5.07E-32 |
| 0.01148  | -0.13069 | 0.00467  | -0.1653  | 0.00033  | -0.32231 | 9.47E-13 | -0.37069 | 1.17E-16 |
| 8.72E-38 | 0.097261 | 0.03563  | 0.101698 | 0.02798  | 0.032076 | 0.48926  | 0.148949 | 0.00125  |
| 3.76E-12 | 0.044724 | 0.33485  | -0.02168 | 0.64029  | 0.0269   | 0.562    | 0.03447  | 0.4574   |
| 3.80E-18 | -0.03257 | 0.48262  | 0.045891 | 0.32238  | -0.05984 | 0.19675  | -0.04526 | 0.32909  |
| 1.02E-41 | 0.056182 | 0.22559  | 0.164111 | 0.00037  | 0.121888 | 0.00837  | 0.226393 | 7.67E-07 |
| 7.30E-29 | 0.108594 | 0.01891  | 0.198501 | 1.55E-05 | 0.200349 | 1.29E-05 | 0.228776 | 5.82E-07 |
| 8.65E-26 | 0.120769 | 0.00899  | 0.123024 | 0.00778  | 0.161462 | 0.00046  | 0.264057 | 6.87E-09 |
| 6.41E-07 | -0.10628 | 0.02161  | -0.16784 | 0.00027  | -0.10389 | 0.02476  | -0.15739 | 0.00064  |
| 2.10E-11 | 0.06581  | 0.15564  | 0.189768 | 3.67E-05 | 0.193419 | 2.57E-05 | 0.284253 | 3.96E-10 |
| 1.22E-14 | 0.147869 | 0.00135  | 0.193872 | 2.46E-05 | 0.090066 | 0.05177  | 0.219397 | 1.69E-06 |
| 1.56E-14 | 0.065205 | 0.15948  | 0.056841 | 0.22018  | 0.003974 | 0.93174  | 0.121089 | 0.00881  |
| 1.94E-24 | 0.095768 | 0.03857  | 0.060666 | 0.19064  | 0.007235 | 0.87609  | 0.130659 | 0.00468  |
| 3.25E-08 | -0.01791 | 0.69955  | 0.143668 | 0.00185  | 0.111322 | 0.0161   | 0.119401 | 0.00981  |
| 8.76E-13 | 0.008634 | 0.85237  | -0.05148 | 0.26691  | -0.14262 | 0.002    | 0.002225 | 0.96176  |
| 4.75E-06 | 0.283063 | 4.71E-10 | 0.168537 | 0.00025  | 0.267774 | 4.13E-09 | 0.458438 | 1.20E-25 |
| 1.12E-07 | 0.155145 | 0.00077  | 0.293904 | 9.30E-11 | 0.224212 | 9.84E-07 | 0.34043  | 3.90E-14 |
| 1.11E-11 | 0.086466 | 0.0619   | 0.308779 | 8.96E-12 | 0.195795 | 2.03E-05 | 0.30048  | 3.36E-11 |
| 6.66E-20 | 0.106268 | 0.02163  | 0.073548 | 0.11245  | 0.0315   | 0.49709  | 0.108407 | 0.01911  |
| 5.85E-29 | 0.099183 | 0.03212  | 0.221022 | 1.41E-06 | 0.121596 | 0.00853  | 0.226264 | 7.78E-07 |
| 1.18E-14 | 0.062227 | 0.17946  | 0.124448 | 0.00709  | 0.027452 | 0.55402  | 0.167843 | 0.00027  |
| 8.10E-17 | 0.09128  | 0.04868  | 0.053371 | 0.2497   | 0.009884 | 0.8313   | 0.135108 | 0.00344  |
| 5.62E-11 | 0.172838 | 0.00017  | 0.151574 | 0.00102  | 0.1482   | 0.00132  | 0.358134 | 1.41E-15 |
| 7.67E-15 | 0.102657 | 0.02653  | 0.09924  | 0.03202  | 0.053085 | 0.25225  | 0.213141 | 3.37E-06 |
| 4.65E-11 | 0.181774 | 7.80E-05 | 0.255611 | 2.11E-08 | 0.278962 | 8.54E-10 | 0.393581 | 9.41E-19 |
| 2.10E-09 | 0.152999 | 0.00091  | 0.182376 | 7.37E-05 | 0.184725 | 5.92E-05 | 0.34626  | 1.34E-14 |
| 1.84E-11 | 0.139314 | 0.00255  | 0.114061 | 0.01365  | 0.167953 | 0.00027  | 0.291592 | 1.32E-10 |
| 2.21E-22 | 0.059868 | 0.19655  | 0.002323 | 0.96006  | -0.12836 | 0.00547  | 0.03272  | 0.48058  |



|          |          |          |          |          |          |          |          |          |
|----------|----------|----------|----------|----------|----------|----------|----------|----------|
| 4.23E-16 | -0.06621 | 0.15315  | -0.25754 | 1.64E-08 | -0.20514 | 7.86E-06 | -0.23224 | 3.88E-07 |
| 0.00589  | 0.063614 | 0.16993  | 0.02333  | 0.61505  | 0.076254 | 0.09979  | 0.082952 | 0.07331  |
| 2.83E-21 | 0.122292 | 0.00815  | 0.20588  | 7.28E-06 | 0.1267   | 0.00611  | 0.298687 | 4.45E-11 |
| 1.36E-15 | 0.133811 | 0.00377  | 0.271328 | 2.52E-09 | 0.171316 | 0.0002   | 0.321845 | 1.03E-12 |
| 2.69E-09 | 0.041074 | 0.37582  | 0.201538 | 1.14E-05 | 0.113165 | 0.01441  | 0.219448 | 1.68E-06 |
| 1.38E-15 | 0.053422 | 0.24924  | 0.149358 | 0.00121  | 0.094275 | 0.04171  | 0.129427 | 0.00509  |
| 4.46E-35 | 0.105141 | 0.02307  | 0.128998 | 0.00524  | 0.021799 | 0.63844  | 0.191607 | 3.07E-05 |
| 1.47E-39 | 0.172013 | 0.00019  | 0.153091 | 0.0009   | 0.20472  | 8.22E-06 | 0.314635 | 3.44E-12 |
| 2.06E-09 | 0.160636 | 0.00049  | 0.315294 | 3.08E-12 | 0.219029 | 1.76E-06 | 0.435211 | 5.27E-23 |
| 2.44E-10 | 0.173165 | 0.00017  | 0.202033 | 1.08E-05 | 0.348045 | 9.59E-15 | 0.478551 | 4.20E-28 |
| 0.00031  | 0.136076 | 0.00321  | 0.20029  | 1.29E-05 | 0.306521 | 1.29E-11 | 0.381964 | 1.14E-17 |
| 8.43E-07 | 0.197104 | 1.79E-05 | 0.175273 | 0.00014  | 0.156882 | 0.00067  | 0.374502 | 5.37E-17 |
| 4.40E-10 | -0.02166 | 0.64066  | 0.019905 | 0.6679   | -0.03356 | 0.46937  | 0.009212 | 0.84262  |
| 3.25E-23 | 0.15125  | 0.00104  | 0.186403 | 5.06E-05 | 0.114962 | 0.01292  | 0.285365 | 3.36E-10 |
| 9.10E-13 | 0.136266 | 0.00317  | 0.131242 | 0.0045   | -0.04169 | 0.36875  | 0.088297 | 0.05656  |
| 1.34E-14 | 0.088    | 0.0574   | 0.244553 | 8.69E-08 | 0.129257 | 0.00515  | 0.257305 | 1.69E-08 |
| 1.54E-22 | 0.146917 | 0.00145  | 0.11331  | 0.01429  | 0.120168 | 0.00934  | 0.302023 | 2.64E-11 |
| 0.00165  | 0.164089 | 0.00037  | 0.182403 | 7.35E-05 | 0.168174 | 0.00026  | 0.345772 | 1.46E-14 |
| 2.45E-13 | -0.17361 | 0.00016  | -0.04646 | 0.31637  | -0.13802 | 0.0028   | -0.23677 | 2.26E-07 |
| 6.43E-19 | 0.154173 | 0.00083  | 0.141237 | 0.00222  | 0.131442 | 0.00444  | 0.322147 | 9.74E-13 |
| 1.27E-12 | 0.2336   | 3.30E-07 | 0.228368 | 6.10E-07 | 0.21249  | 3.61E-06 | 0.452599 | 5.80E-25 |
| 1.82E-23 | 0.161261 | 0.00047  | 0.174908 | 0.00015  | 0.083037 | 0.07302  | 0.275847 | 1.33E-09 |
| 3.17E-23 | 0.127578 | 0.00576  | 0.166703 | 0.0003   | 0.048593 | 0.29468  | 0.214917 | 2.77E-06 |
| 5.57E-25 | 0.155177 | 0.00077  | 0.039247 | 0.39745  | 0.033739 | 0.467    | 0.232552 | 3.74E-07 |
| 4.55E-20 | -0.08417 | 0.06918  | -0.00439 | 0.92459  | -0.07746 | 0.09455  | -0.11792 | 0.01076  |
| 1.95E-11 | 0.197895 | 1.65E-05 | 0.299229 | 4.09E-11 | 0.315068 | 3.20E-12 | 0.477435 | 5.81E-28 |
| 2.68E-12 | 0.211565 | 3.99E-06 | 0.283444 | 4.45E-10 | 0.265314 | 5.79E-09 | 0.480659 | 2.27E-28 |
| 1.10E-27 | 0.28983  | 1.72E-10 | 0.258249 | 1.49E-08 | 0.31308  | 4.44E-12 | 0.484244 | 7.91E-29 |
| 4.58E-07 | 0.11558  | 0.01244  | 0.337526 | 6.60E-14 | 0.226403 | 7.66E-07 | 0.378789 | 2.22E-17 |
| 7.24E-31 | 0.334843 | 1.07E-13 | 0.193558 | 2.54E-05 | 0.282203 | 5.34E-10 | 0.487074 | 3.41E-29 |
| 7.96E-10 | 0.155043 | 0.00077  | 0.152563 | 0.00094  | 0.17332  | 0.00017  | 0.29296  | 1.07E-10 |
| 1.96E-09 | 0.047805 | 0.30259  | 0.070256 | 0.12951  | 0.033205 | 0.47409  | 0.052354 | 0.25884  |
| 2.80E-13 | 0.170936 | 0.00021  | 0.130392 | 0.00477  | 0.143383 | 0.00189  | 0.30205  | 2.63E-11 |
| 5.00E-14 | -0.03537 | 0.4458   | 0.159387 | 0.00055  | 0.053511 | 0.24846  | 0.031207 | 0.50111  |
| 3.51E-20 | 0.285251 | 3.41E-10 | 0.104905 | 0.02338  | 0.241213 | 1.31E-07 | 0.40187  | 1.49E-19 |
| 1.07E-23 | -0.35224 | 4.35E-15 | -0.26879 | 3.59E-09 | -0.37747 | 2.91E-17 | -0.60997 | 6.26E-49 |
| 9.96E-05 | 0.041315 | 0.37303  | 0.190105 | 3.55E-05 | 0.097353 | 0.03545  | 0.136876 | 0.00304  |
| 2.26E-43 | 0.057861 | 0.212    | 0.065824 | 0.15555  | -0.01762 | 0.70415  | 0.134558 | 0.00358  |
| 3.05E-07 | -0.21715 | 2.17E-06 | -0.16842 | 0.00026  | -0.14007 | 0.00242  | -0.34291 | 2.48E-14 |
| 3.39E-13 | -0.11929 | 0.00987  | -0.18067 | 8.63E-05 | -0.13717 | 0.00297  | -0.23814 | 1.91E-07 |
| 2.20E-11 | 0.04207  | 0.36435  | -0.05049 | 0.27617  | -0.05626 | 0.22495  | 0.060592 | 0.19118  |
| 3.79E-09 | 0.171238 | 0.0002   | 0.198948 | 1.48E-05 | 0.195901 | 2.01E-05 | 0.299161 | 4.13E-11 |
| 1.47E-09 | 0.170606 | 0.00021  | 0.25149  | 3.61E-08 | 0.18119  | 8.23E-05 | 0.355203 | 2.47E-15 |
| 3.79E-07 | 0.182177 | 7.51E-05 | 0.15403  | 0.00084  | 0.288235 | 2.19E-10 | 0.455026 | 3.03E-25 |
| 1.08E-05 | 0.201457 | 1.15E-05 | 0.08209  | 0.07636  | 0.173136 | 0.00017  | 0.360356 | 9.12E-16 |

|          |          |          |          |          |          |          |          |          |
|----------|----------|----------|----------|----------|----------|----------|----------|----------|
| 0.0039   | 0.176612 | 0.00012  | 0.193081 | 2.66E-05 | 0.218102 | 1.96E-06 | 0.349145 | 7.80E-15 |
| 6.15E-05 | 0.238881 | 1.75E-07 | 0.270575 | 2.80E-09 | 0.244249 | 9.03E-08 | 0.430721 | 1.62E-22 |
| 7.93E-06 | 0.197421 | 1.73E-05 | 0.302089 | 2.61E-11 | 0.256587 | 1.86E-08 | 0.402125 | 1.41E-19 |
| 9.06E-22 | 0.247752 | 5.81E-08 | 0.239163 | 1.69E-07 | 0.263709 | 7.20E-09 | 0.457107 | 1.73E-25 |
| 1.58E-26 | 0.125148 | 0.00677  | 0.219189 | 1.73E-06 | 0.187858 | 4.40E-05 | 0.311153 | 6.09E-12 |
| 1.32E-11 | 0.208543 | 5.50E-06 | 0.130712 | 0.00467  | 0.2262   | 7.84E-07 | 0.402328 | 1.35E-19 |
| 9.72E-14 | 0.05803  | 0.21066  | 0.078813 | 0.0889   | 0.038339 | 0.40846  | 0.136717 | 0.00307  |
| 1.60E-07 | 0.112292 | 0.01519  | 0.120733 | 0.00901  | 0.018987 | 0.68236  | 0.19048  | 3.42E-05 |
| 3.20E-07 | 0.229789 | 5.17E-07 | 0.201755 | 1.12E-05 | 0.1387   | 0.00267  | 0.356175 | 2.05E-15 |
| 1.39E-16 | 0.207037 | 6.45E-06 | 0.246981 | 6.41E-08 | 0.176451 | 0.00013  | 0.431664 | 1.28E-22 |
| 5.76E-18 | 0.132867 | 0.00402  | 0.263684 | 7.22E-09 | 0.282874 | 4.84E-10 | 0.351159 | 5.34E-15 |
| 4.66E-23 | 0.155934 | 0.00072  | 0.032693 | 0.48094  | 0.025323 | 0.58516  | 0.243328 | 1.01E-07 |
| 1.59E-25 | -0.01455 | 0.75388  | 0.079298 | 0.08694  | -0.08719 | 0.05974  | 0.032568 | 0.48262  |
| 7.04E-16 | 0.090113 | 0.05164  | 0.064814 | 0.16201  | -0.0734  | 0.11319  | 0.126043 | 0.00638  |
| 8.64E-13 | 0.219537 | 1.67E-06 | 0.252505 | 3.17E-08 | 0.24382  | 9.52E-08 | 0.389629 | 2.22E-18 |
| 4.26E-23 | 0.007155 | 0.87744  | 0.036821 | 0.42728  | -0.07159 | 0.12236  | 0.002108 | 0.96376  |
| 9.04E-17 | -0.02612 | 0.57337  | 0.010041 | 0.82867  | -0.08473 | 0.06733  | -0.05094 | 0.27195  |
| 1.98E-20 | 0.161859 | 0.00045  | 0.187608 | 4.51E-05 | 0.119516 | 0.00973  | 0.330168 | 2.44E-13 |
| 2.40E-17 | -0.06033 | 0.1931   | -0.08944 | 0.05343  | -0.21486 | 2.79E-06 | -0.16921 | 0.00024  |
| 3.01E-18 | 0.088367 | 0.05636  | 0.059039 | 0.20283  | -0.04602 | 0.32103  | 0.142133 | 0.00208  |
| 7.44E-16 | 0.192643 | 2.77E-05 | 0.087662 | 0.05836  | 0.043391 | 0.34947  | 0.277362 | 1.08E-09 |
| 3.98E-27 | 0.167437 | 0.00028  | 0.117034 | 0.01137  | 0.104728 | 0.02361  | 0.29533  | 7.47E-11 |
| 2.59E-17 | 0.131607 | 0.00439  | 0.039929 | 0.38929  | 0.035178 | 0.44821  | 0.164934 | 0.00034  |
| 1.66E-19 | 0.094914 | 0.04034  | -0.08958 | 0.05305  | -0.02353 | 0.61201  | 0.105762 | 0.02226  |
| 1.91E-06 | 0.255077 | 2.27E-08 | 0.30821  | 9.82E-12 | 0.338124 | 5.93E-14 | 0.525913 | 1.42E-34 |
| 8.47E-18 | 0.102958 | 0.02609  | 0.050715 | 0.27407  | 0.014179 | 0.75991  | 0.165848 | 0.00032  |
| 8.61E-07 | 0.136173 | 0.00319  | 0.224316 | 9.73E-07 | 0.212508 | 3.60E-06 | 0.347463 | 1.07E-14 |
| 8.47E-12 | 0.132941 | 0.004    | 0.166772 | 0.00029  | 0.060396 | 0.19262  | 0.257238 | 1.71E-08 |
| 0.00304  | 0.092562 | 0.04559  | 0.066354 | 0.15224  | -0.04249 | 0.35961  | 0.128962 | 0.00525  |
| 2.57E-13 | -0.02772 | 0.55019  | -0.08193 | 0.07695  | -0.17575 | 0.00013  | -0.12464 | 0.007    |
| 1.93E-19 | -0.0953  | 0.03954  | -0.08121 | 0.07957  | -0.1197  | 0.00962  | -0.20264 | 1.02E-05 |
| 0.0013   | 0.220093 | 1.57E-06 | 0.140744 | 0.0023   | 0.227707 | 6.59E-07 | 0.429957 | 1.96E-22 |
| 8.52E-09 | -0.05177 | 0.26419  | 0.032862 | 0.47867  | -0.06588 | 0.15521  | -0.02652 | 0.56752  |
| 1.52E-31 | 0.105593 | 0.02248  | 0.209962 | 4.73E-06 | 0.089606 | 0.05298  | 0.222114 | 1.25E-06 |
| 1.10E-14 | 0.085224 | 0.06575  | 0.111871 | 0.01558  | 0.029225 | 0.5287   | 0.182196 | 7.50E-05 |
| 9.20E-18 | 0.163129 | 0.0004   | 0.15614  | 0.00071  | 0.151041 | 0.00106  | 0.367653 | 2.15E-16 |
| 4.59E-34 | 0.038421 | 0.40747  | 0.072271 | 0.11885  | 0.051482 | 0.26688  | 0.109849 | 0.01756  |
| 5.62E-07 | 0.16001  | 0.00052  | -0.03708 | 0.42399  | 0.028548 | 0.53829  | 0.156242 | 0.0007   |
| 3.80E-19 | -0.00033 | 0.99428  | 0.16261  | 0.00042  | -0.08133 | 0.07913  | 0.053891 | 0.2451   |
| 3.72E-23 | 0.212555 | 3.58E-06 | 0.277811 | 1.01E-09 | 0.351879 | 4.66E-15 | 0.511116 | 1.92E-32 |
| 5.33E-15 | 0.149562 | 0.00119  | 0.199651 | 1.38E-05 | -0.04085 | 0.37839  | 0.170947 | 0.00021  |
| 4.91E-13 | 0.186682 | 4.92E-05 | 0.212614 | 3.56E-06 | 0.103349 | 0.02552  | 0.294961 | 7.91E-11 |
| 0.00048  | 0.159497 | 0.00054  | 0.173314 | 0.00017  | 0.139415 | 0.00253  | 0.301762 | 2.75E-11 |
| 1.99E-38 | 0.112372 | 0.01512  | 0.12721  | 0.00591  | 0.016552 | 0.72128  | 0.184573 | 6.01E-05 |
| 3.34E-09 | -0.05948 | 0.1995   | -0.02844 | 0.53987  | -0.14695 | 0.00145  | -0.10825 | 0.01929  |

|          |          |          |          |          |          |          |          |          |
|----------|----------|----------|----------|----------|----------|----------|----------|----------|
| 1.99E-12 | 0.251699 | 3.51E-08 | 0.177633 | 0.00011  | 0.250363 | 4.17E-08 | 0.452296 | 6.29E-25 |
| 2.31E-16 | 0.153771 | 0.00086  | 0.117285 | 0.0112   | 0.154786 | 0.00079  | 0.296927 | 5.84E-11 |
| 4.32E-19 | 0.039773 | 0.39114  | 0.023887 | 0.60663  | -0.02285 | 0.62232  | 0.127794 | 0.00568  |
| 2.53E-10 | 0.118589 | 0.01032  | 0.027621 | 0.55157  | 0.027821 | 0.54869  | 0.176421 | 0.00013  |
| 5.07E-12 | 0.247817 | 5.77E-08 | 0.20617  | 7.06E-06 | 0.222245 | 1.23E-06 | 0.485308 | 5.77E-29 |
| 8.87E-20 | 0.151888 | 0.00099  | 0.172948 | 0.00017  | 0.15215  | 0.00097  | 0.356161 | 2.06E-15 |
| 6.43E-13 | 0.146862 | 0.00146  | 0.122907 | 0.00784  | 0.071056 | 0.12519  | 0.267172 | 4.49E-09 |
| 1.68E-17 | -0.0956  | 0.03891  | -0.14967 | 0.00118  | -0.17725 | 0.00012  | -0.22064 | 1.47E-06 |
| 1.93E-24 | 0.087125 | 0.05993  | 0.14627  | 0.00153  | 0.065242 | 0.15924  | 0.185912 | 5.30E-05 |
| 4.30E-12 | 0.170453 | 0.00021  | 0.184216 | 6.21E-05 | 0.063139 | 0.17315  | 0.245834 | 7.40E-08 |
| 0.00113  | 0.089844 | 0.05235  | 0.381883 | 1.16E-17 | 0.27196  | 2.31E-09 | 0.33311  | 1.45E-13 |
| 2.71E-16 | 0.20197  | 1.09E-05 | 0.123257 | 0.00766  | 0.236665 | 2.29E-07 | 0.447185 | 2.43E-24 |
| 5.82E-19 | 0.359586 | 1.06E-15 | 0.053493 | 0.24862  | 0.124485 | 0.00707  | 0.336405 | 8.08E-14 |
| 2.24E-15 | 0.175998 | 0.00013  | 0.237173 | 2.15E-07 | 0.077105 | 0.09606  | 0.277261 | 1.09E-09 |
| 2.31E-74 | 0.174246 | 0.00015  | 0.114178 | 0.01355  | 0.059676 | 0.19799  | 0.242005 | 1.19E-07 |
| 4.74E-36 | 0.143912 | 0.00182  | 0.1848   | 5.88E-05 | 0.143975 | 0.00181  | 0.272733 | 2.07E-09 |
| 6.44E-09 | 0.196766 | 1.85E-05 | 0.178004 | 0.00011  | 0.162152 | 0.00043  | 0.286478 | 2.85E-10 |
| 5.23E-16 | 0.176512 | 0.00013  | 0.232217 | 3.89E-07 | 0.220712 | 1.46E-06 | 0.397999 | 3.55E-19 |
| 2.00E-36 | 0.063929 | 0.16782  | 0.085934 | 0.06352  | 0.035021 | 0.45024  | 0.12206  | 0.00828  |
| 1.80E-16 | 0.176144 | 0.00013  | 0.187751 | 4.45E-05 | 0.068155 | 0.1414   | 0.240143 | 1.50E-07 |
| 2.75E-49 | 0.223538 | 1.06E-06 | 0.173761 | 0.00016  | 0.122806 | 0.00789  | 0.392561 | 1.18E-18 |
| 2.86E-12 | 0.009436 | 0.83884  | -0.17049 | 0.00021  | -0.29751 | 5.34E-11 | -0.16376 | 0.00038  |
| 6.36E-17 | 0.267789 | 4.12E-09 | 0.286714 | 2.75E-10 | 0.21584  | 2.51E-06 | 0.418426 | 3.22E-21 |
| 9.46E-06 | 0.059917 | 0.19618  | 0.127651 | 0.00574  | 0.029118 | 0.5302   | 0.168076 | 0.00026  |
| 0.00067  | 0.068289 | 0.14062  | 0.15806  | 0.00061  | 0.069765 | 0.13222  | 0.191432 | 3.12E-05 |
| 1.03E-19 | -0.0414  | 0.37201  | -0.01485 | 0.7489   | -0.16749 | 0.00028  | -0.14918 | 0.00122  |
| 3.31E-10 | -0.06721 | 0.14698  | -0.18642 | 5.05E-05 | -0.18214 | 7.54E-05 | -0.19716 | 1.77E-05 |
| 2.75E-12 | 0.021021 | 0.65047  | -0.10669 | 0.02111  | -0.00208 | 0.96422  | -0.04494 | 0.33254  |
| 2.70E-11 | 0.229483 | 5.36E-07 | 0.122554 | 0.00802  | 0.056385 | 0.22392  | 0.286017 | 3.05E-10 |
| 2.72E-11 | 0.180616 | 8.67E-05 | -0.00621 | 0.89354  | 0.041794 | 0.36751  | 0.216664 | 2.29E-06 |
| 3.80E-07 | 0.059858 | 0.19662  | 0.015754 | 0.73419  | 0.035041 | 0.44998  | 0.080958 | 0.08052  |
| 3.88E-17 | 0.073169 | 0.11432  | 0.205988 | 7.20E-06 | 0.112625 | 0.01489  | 0.198795 | 1.51E-05 |
| 3.61E-12 | 0.184377 | 6.12E-05 | 0.331265 | 2.01E-13 | 0.348868 | 8.22E-15 | 0.488136 | 2.48E-29 |
| 1.18E-08 | 0.075399 | 0.10366  | 0.111837 | 0.01561  | -0.0474  | 0.30675  | 0.163059 | 0.0004   |
| 1.39E-11 | -0.0796  | 0.08574  | -0.13689 | 0.00303  | -0.1842  | 6.22E-05 | -0.21046 | 4.49E-06 |
| 6.77E-17 | 0.208603 | 5.47E-06 | 0.126189 | 0.00632  | 0.139893 | 0.00245  | 0.230853 | 4.57E-07 |
| 3.75E-14 | 0.268625 | 3.67E-09 | 0.280121 | 7.23E-10 | 0.264556 | 6.42E-09 | 0.4164   | 5.21E-21 |
| 1.03E-27 | 0.124369 | 0.00713  | 0.136764 | 0.00306  | 0.068536 | 0.13918  | 0.282648 | 5.00E-10 |
| 5.11E-10 | 0.062954 | 0.17442  | 0.033162 | 0.47466  | 0.031666 | 0.49483  | 0.055702 | 0.22958  |
| 7.79E-08 | -0.09485 | 0.04048  | -0.13828 | 0.00275  | -0.16917 | 0.00024  | -0.17769 | 0.00011  |
| 5.23E-20 | 0.147698 | 0.00137  | 0.089362 | 0.05363  | 0.0569   | 0.2197   | 0.220543 | 1.49E-06 |
| 8.39E-12 | 0.157181 | 0.00065  | 0.254654 | 2.40E-08 | 0.208955 | 5.27E-06 | 0.342889 | 2.49E-14 |
| 0.00605  | 0.308283 | 9.71E-12 | 0.135182 | 0.00342  | 0.237724 | 2.01E-07 | 0.456849 | 1.85E-25 |
| 1.73E-16 | 0.283171 | 4.64E-10 | 0.270506 | 2.83E-09 | 0.173131 | 0.00017  | 0.435204 | 5.28E-23 |
| 1.75E-54 | 0.163251 | 0.0004   | 0.12134  | 0.00867  | 0.037285 | 0.42148  | 0.200029 | 1.33E-05 |

|          |          |          |          |          |          |          |          |          |
|----------|----------|----------|----------|----------|----------|----------|----------|----------|
| 9.89E-21 | 0.166459 | 0.0003   | 0.341884 | 3.00E-14 | 0.027465 | 0.55383  | 0.196508 | 1.89E-05 |
| 8.68E-27 | 0.000527 | 0.99093  | -0.04058 | 0.38164  | -0.13158 | 0.0044   | -0.05836 | 0.20807  |
| 8.80E-06 | 0.11337  | 0.01423  | 0.240618 | 1.41E-07 | 0.197218 | 1.76E-05 | 0.336204 | 8.37E-14 |
| 3.69E-11 | 0.161827 | 0.00045  | 0.27446  | 1.62E-09 | 0.12796  | 0.00562  | 0.362092 | 6.49E-16 |
| 6.67E-17 | 0.042376 | 0.36087  | 0.121032 | 0.00884  | -0.04798 | 0.30082  | 0.086687 | 0.06123  |
| 1.98E-19 | 0.201977 | 1.09E-05 | 0.071947 | 0.12051  | 0.127006 | 0.00599  | 0.311952 | 5.34E-12 |
| 1.65E-27 | 0.195546 | 2.08E-05 | 0.145531 | 0.00161  | 0.120128 | 0.00936  | 0.296419 | 6.32E-11 |
| 2.95E-43 | 0.035649 | 0.44215  | 0.172083 | 0.00019  | 0.025509 | 0.58241  | 0.155234 | 0.00076  |
| 1.32E-22 | 0.058347 | 0.20818  | 0.089212 | 0.05403  | -0.09707 | 0.03599  | 0.027374 | 0.55514  |
| 3.67E-12 | 0.107381 | 0.02029  | 0.015257 | 0.74228  | -0.04036 | 0.38415  | 0.052333 | 0.25904  |
| 1.15E-11 | 0.065797 | 0.15572  | -0.02246 | 0.62837  | 0.079626 | 0.08564  | 0.144802 | 0.0017   |
| 2.46E-10 | 0.029802 | 0.52059  | -0.06031 | 0.19324  | -0.13917 | 0.00258  | -0.08002 | 0.08412  |
| 1.36E-10 | 0.136517 | 0.00312  | -0.0022  | 0.96221  | 0.024177 | 0.60227  | 0.179843 | 9.31E-05 |
| 5.84E-10 | -0.00054 | 0.99065  | -0.07831 | 0.09096  | -0.03792 | 0.41359  | 0.082342 | 0.07546  |
| 2.95E-15 | 0.205376 | 7.67E-06 | 0.0559   | 0.22793  | 0.067529 | 0.1451   | 0.254467 | 2.46E-08 |
| 1.22E-29 | 0.122949 | 0.00782  | 0.164596 | 0.00035  | 0.166789 | 0.00029  | 0.272445 | 2.16E-09 |
| 7.87E-05 | -0.08339 | 0.07179  | -0.08732 | 0.05936  | -0.15782 | 0.00062  | -0.1464  | 0.00151  |
| 0.00156  | 0.049267 | 0.28803  | -0.06557 | 0.15715  | -0.06873 | 0.13808  | 0.021348 | 0.64541  |
| 4.61E-22 | 0.05544  | 0.23179  | 0.080392 | 0.08266  | 0.060196 | 0.19411  | 0.088185 | 0.05687  |
| 5.91E-06 | 0.195254 | 2.15E-05 | -0.00988 | 0.83139  | 0.03227  | 0.48664  | 0.234735 | 2.88E-07 |
| 4.53E-21 | 0.228255 | 6.18E-07 | 0.101065 | 0.02898  | 0.197672 | 1.69E-05 | 0.35482  | 2.66E-15 |
| 2.59E-16 | -0.01997 | 0.66687  | -0.05556 | 0.23079  | -0.01505 | 0.7456   | -0.04869 | 0.29373  |
| 7.97E-57 | 0.136487 | 0.00312  | 0.083715 | 0.0707   | 0.013666 | 0.76834  | 0.176077 | 0.00013  |
| 0.00089  | -0.0825  | 0.07489  | -0.32609 | 4.96E-13 | -0.22978 | 5.18E-07 | -0.2341  | 3.11E-07 |
| 1.15E-12 | 0.222841 | 1.15E-06 | 0.230498 | 4.76E-07 | 0.252021 | 3.37E-08 | 0.478956 | 3.74E-28 |
| 0.2034   | 0.069102 | 0.13594  | 0.070018 | 0.13081  | 0.084875 | 0.06687  | 0.217375 | 2.12E-06 |
| 0.00463  | 0.263483 | 7.42E-09 | 0.194412 | 2.33E-05 | 0.276062 | 1.29E-09 | 0.522322 | 4.78E-34 |
| 1.54E-06 | -0.01194 | 0.79685  | 0.163534 | 0.00039  | 0.017649 | 0.70365  | 0.093284 | 0.04392  |
| 3.23E-16 | 0.032409 | 0.48476  | 0.125218 | 0.00674  | 0.069162 | 0.1356   | 0.166498 | 0.0003   |
| 1.03E-13 | -0.02795 | 0.54687  | 0.176148 | 0.00013  | 0.015    | 0.74647  | 0.050797 | 0.2733   |
| 9.83E-12 | 0.302743 | 2.35E-11 | 0.200963 | 1.21E-05 | 0.308275 | 9.72E-12 | 0.550699 | 2.18E-38 |
| 1.04E-17 | 0.242752 | 1.09E-07 | 0.135851 | 0.00327  | 0.155569 | 0.00074  | 0.403596 | 1.01E-19 |
| 1.22E-20 | 0.248145 | 5.53E-08 | 0.301268 | 2.97E-11 | 0.281927 | 5.56E-10 | 0.528317 | 6.25E-35 |
| 1.12E-26 | 0.128372 | 0.00547  | 0.120214 | 0.00931  | 0.029338 | 0.5271   | 0.231298 | 4.33E-07 |
| 0.05666  | 0.193426 | 2.57E-05 | -0.01842 | 0.69135  | 0.024474 | 0.59782  | 0.136223 | 0.00318  |
| 1.74E-16 | 0.073105 | 0.11464  | -0.04913 | 0.28938  | 0.012698 | 0.78433  | 0.062299 | 0.17895  |
| 0.0078   | 0.065085 | 0.16026  | -0.02654 | 0.56721  | 0.057108 | 0.21802  | 0.101745 | 0.02791  |
| 0.04403  | -0.01068 | 0.81789  | -0.22747 | 6.77E-07 | -0.11691 | 0.01146  | -0.13209 | 0.00424  |
| 0.00114  | -0.04719 | 0.30884  | 0.00462  | 0.92069  | 0.060831 | 0.18943  | -0.03098 | 0.50418  |
| 0.71758  | 0.111863 | 0.01559  | 0.137196 | 0.00297  | 0.251236 | 3.73E-08 | 0.261863 | 9.23E-09 |
| 0.50963  | -0.05446 | 0.24014  | -0.06383 | 0.16851  | -0.02967 | 0.52238  | -0.04643 | 0.31674  |
| 0.15418  | -0.03717 | 0.42286  | -0.11974 | 0.0096   | -0.11932 | 0.00986  | -0.1141  | 0.01362  |
| 0.98506  | -0.03835 | 0.40837  | -0.03457 | 0.45614  | 0.078645 | 0.08958  | -0.00514 | 0.91171  |
| 0.00026  | 0.235486 | 2.64E-07 | -0.12136 | 0.00866  | 0.013179 | 0.77638  | 0.159172 | 0.00056  |
| 0.19473  | 0.046927 | 0.31157  | 0.049794 | 0.28289  | 0.129923 | 0.00492  | 0.171251 | 0.0002   |

|          |          |          |          |          |          |          |          |          |
|----------|----------|----------|----------|----------|----------|----------|----------|----------|
| 5.20E-13 | 0.020435 | 0.65959  | 0.035832 | 0.43982  | 0.044047 | 0.34223  | 0.094061 | 0.04218  |
| 0.0044   | -0.03566 | 0.44202  | -0.08147 | 0.07861  | -0.02171 | 0.63983  | -0.1024  | 0.02691  |
| 0.50262  | -0.04588 | 0.32246  | -0.11654 | 0.01173  | 0.014334 | 0.75736  | -0.03506 | 0.4497   |
| 0.12643  | -0.0867  | 0.0612   | 0.03409  | 0.46238  | 0.014554 | 0.75376  | -0.0187  | 0.68689  |
| 0.02533  | -0.11069 | 0.01671  | -0.2609  | 1.05E-08 | -0.14817 | 0.00132  | -0.21891 | 1.79E-06 |
| 0.36265  | -0.08085 | 0.08093  | -0.23517 | 2.74E-07 | -0.21112 | 4.18E-06 | -0.24193 | 1.20E-07 |
| 3.16E-08 | 0.217003 | 2.21E-06 | -0.06458 | 0.16355  | -0.02119 | 0.6479   | 0.04835  | 0.2971   |
| 0.00188  | 0.030768 | 0.50715  | -0.08935 | 0.05366  | 0.089661 | 0.05283  | 0.11051  | 0.01689  |
| 3.62E-07 | -0.11331 | 0.01428  | -0.01688 | 0.71599  | -0.21731 | 2.13E-06 | -0.26484 | 6.18E-09 |
| 0.01463  | 0.040172 | 0.38641  | -0.08427 | 0.06883  | -0.03216 | 0.48809  | 0.019983 | 0.66667  |
| 8.93E-07 | 0.124587 | 0.00703  | 0.012188 | 0.79279  | 0.12543  | 0.00665  | 0.12314  | 0.00772  |
| 0.75614  | 0.053809 | 0.24583  | -0.27802 | 9.79E-10 | 0.013372 | 0.77319  | -0.04097 | 0.37709  |
| 7.93E-05 | 0.021203 | 0.64765  | -0.10161 | 0.02812  | 0.082355 | 0.07541  | 0.124491 | 0.00707  |
| 0.0037   | -0.05436 | 0.24102  | 0.099601 | 0.0314   | 0.07935  | 0.08674  | 0.042143 | 0.36352  |
| 0.39084  | -0.04344 | 0.34893  | 0.188182 | 4.27E-05 | 0.218452 | 1.88E-06 | 0.131291 | 0.00448  |
| 0.49829  | -0.04556 | 0.3259   | 0.006839 | 0.88281  | 0.117501 | 0.01105  | 0.106201 | 0.02171  |
| 0.00023  | -0.00949 | 0.83796  | -0.11879 | 0.01019  | 0.000714 | 0.98773  | 0.00993  | 0.83053  |
| 0.48959  | -0.00343 | 0.94109  | 0.024523 | 0.59708  | 0.151496 | 0.00102  | 0.096715 | 0.03668  |
| 0.00184  | -0.03049 | 0.51106  | -0.11528 | 0.01267  | 0.003464 | 0.94049  | -0.0352  | 0.44797  |
| 0.67589  | -0.01675 | 0.71808  | 0.01401  | 0.76268  | -0.01017 | 0.82654  | -0.05128 | 0.26877  |
| 0.13453  | -0.07981 | 0.08491  | -0.19438 | 2.34E-05 | -0.15862 | 0.00058  | -0.16707 | 0.00029  |
| 0.00422  | 0.007501 | 0.87157  | -0.13385 | 0.00376  | -0.00389 | 0.93316  | 0.018193 | 0.69496  |
| 6.84E-07 | 0.110156 | 0.01725  | 0.21842  | 1.89E-06 | 0.13879  | 0.00265  | 0.25233  | 3.24E-08 |
| 0.91749  | -0.05437 | 0.24094  | 0.066442 | 0.1517   | -0.06188 | 0.18191  | -0.06452 | 0.16395  |
| 0.08132  | -0.21221 | 3.72E-06 | -0.10753 | 0.02011  | -0.11164 | 0.01579  | -0.2615  | 9.69E-09 |
| 0.63301  | -0.12149 | 0.00858  | -0.18685 | 4.85E-05 | -0.04262 | 0.35816  | -0.12247 | 0.00806  |
| 0.19524  | -0.08075 | 0.08128  | -0.13858 | 0.00269  | -0.07669 | 0.09789  | -0.09725 | 0.03564  |
| 0.49091  | -0.03648 | 0.43157  | -0.08537 | 0.06528  | 0.003756 | 0.93549  | -0.02386 | 0.607    |
| 1.87E-09 | -0.01033 | 0.82384  | -0.0606  | 0.19111  | -0.04176 | 0.36795  | 0.002547 | 0.95622  |
| 0.75722  | -0.0531  | 0.25213  | -0.16576 | 0.00032  | -0.0169  | 0.71567  | -0.05321 | 0.25116  |
| 0.76046  | 0.167661 | 0.00027  | 0.237426 | 2.09E-07 | 0.509974 | 2.78E-32 | 0.435367 | 5.07E-23 |
| 0.78798  | -0.03819 | 0.41032  | -0.01163 | 0.80209  | 0.059867 | 0.19655  | 0.005369 | 0.90788  |
| 0.00281  | -0.00616 | 0.89445  | -0.07222 | 0.1191   | -0.00273 | 0.95305  | -0.04718 | 0.309    |
| 0.00862  | -0.10858 | 0.01892  | -0.11916 | 0.00995  | -0.10041 | 0.03003  | -0.16375 | 0.00038  |
| 0.3179   | -0.02215 | 0.63299  | -0.18769 | 4.47E-05 | 0.03171  | 0.49424  | -0.03187 | 0.49204  |
| 0.00163  | 0.121665 | 0.00849  | -0.05224 | 0.25987  | -0.05237 | 0.25872  | 0.045285 | 0.32882  |
| 0.59618  | -0.09182 | 0.04735  | -0.20447 | 8.43E-06 | -0.15059 | 0.0011   | -0.2056  | 7.50E-06 |
| 0.0547   | -0.06817 | 0.14131  | -0.28802 | 2.26E-10 | -0.12345 | 0.00757  | -0.22371 | 1.04E-06 |
| 0.76668  | -0.01173 | 0.8004   | -0.16108 | 0.00047  | -0.05458 | 0.23914  | -0.08227 | 0.07573  |
| 2.01E-14 | -0.02309 | 0.61862  | -0.05182 | 0.26374  | 0.065274 | 0.15904  | -0.00678 | 0.88376  |
| 0.09872  | -0.13497 | 0.00348  | -0.20764 | 6.05E-06 | -0.13375 | 0.00378  | -0.23056 | 4.72E-07 |
| 2.21E-10 | 0.023122 | 0.6182   | -0.12233 | 0.00813  | -0.00076 | 0.98689  | 0.068609 | 0.13876  |
| 1.63E-08 | -0.03804 | 0.41207  | 0.012287 | 0.79114  | 0.063777 | 0.16884  | -0.01527 | 0.74213  |
| 0.19257  | 0.080837 | 0.08097  | 0.035792 | 0.44032  | 0.11023  | 0.01717  | 0.124021 | 0.00729  |
| 0.00025  | -0.03883 | 0.40252  | -0.03261 | 0.48203  | 0.092646 | 0.04539  | 0.039108 | 0.39912  |

|          |          |          |          |          |          |          |          |          |
|----------|----------|----------|----------|----------|----------|----------|----------|----------|
| 4.29E-09 | -0.00388 | 0.93332  | -0.09488 | 0.0404   | 0.033064 | 0.47597  | 0.032966 | 0.47728  |
| 0.12398  | -0.05421 | 0.2423   | -0.02493 | 0.59105  | 0.050577 | 0.27538  | -0.02796 | 0.54665  |
| 0.37787  | 0.01088  | 0.8146   | -0.09566 | 0.03879  | 0.044947 | 0.33244  | -0.00553 | 0.90521  |
| 0.01776  | -0.05353 | 0.24825  | -0.13345 | 0.00386  | -0.04965 | 0.28428  | -0.08163 | 0.07804  |
| 6.65E-21 | 0.174494 | 0.00015  | -0.03968 | 0.39231  | -0.04012 | 0.38708  | 0.167427 | 0.00028  |
| 0.39576  | 0.012278 | 0.79129  | 0.031065 | 0.50307  | 0.198936 | 1.49E-05 | 0.112471 | 0.01503  |
| 0.58655  | 0.011546 | 0.80347  | -0.08106 | 0.08013  | -0.15774 | 0.00062  | -0.14366 | 0.00186  |
| 2.63E-06 | 0.047601 | 0.30466  | -0.00699 | 0.88031  | -0.01257 | 0.78641  | 0.044707 | 0.33504  |
| 8.62E-06 | 0.006998 | 0.88012  | -0.08901 | 0.05458  | -0.06122 | 0.18659  | 0.020785 | 0.65414  |
| 0.1952   | 0.174516 | 0.00015  | 0.002496 | 0.95709  | 0.125254 | 0.00672  | 0.228012 | 6.36E-07 |
| 5.87E-07 | -0.07705 | 0.09629  | -0.18999 | 3.59E-05 | -0.1356  | 0.00332  | -0.23131 | 4.33E-07 |
| 0.43431  | 0.03936  | 0.39609  | -0.15964 | 0.00053  | -0.03118 | 0.50143  | 0.007952 | 0.86392  |
| 0.72051  | -0.0392  | 0.39805  | -0.12789 | 0.00565  | 0.00372  | 0.9361   | -0.02265 | 0.62536  |
| 0.14748  | -0.03471 | 0.45422  | -0.10164 | 0.02808  | -0.03489 | 0.452    | -0.10212 | 0.02733  |
| 5.33E-07 | 0.012225 | 0.79218  | -0.11017 | 0.01723  | 0.02405  | 0.60417  | 0.03641  | 0.43246  |
| 0.08012  | 0.098258 | 0.03377  | -0.00042 | 0.99271  | 0.175761 | 0.00013  | 0.292681 | 1.12E-10 |
| 0.4971   | -0.03742 | 0.41984  | -0.00247 | 0.95747  | 0.068509 | 0.13934  | -0.02645 | 0.56857  |
| 0.3044   | 0.0206   | 0.65702  | -0.00583 | 0.9      | 0.0856   | 0.06456  | 0.047095 | 0.30984  |
| 0.13878  | 0.01601  | 0.73004  | 0.055044 | 0.23514  | -0.13166 | 0.00437  | -0.12835 | 0.00547  |
| 0.08461  | -0.03802 | 0.41242  | -0.12049 | 0.00915  | 0.011258 | 0.80829  | -0.02311 | 0.61842  |
| 0.00046  | -0.20242 | 1.04E-05 | -0.32721 | 4.09E-13 | -0.31547 | 2.99E-12 | -0.422   | 1.37E-21 |
| 0.0006   | 0.092392 | 0.04599  | -0.0618  | 0.18249  | 0.054729 | 0.23784  | 0.140399 | 0.00236  |
| 0.03169  | -0.10885 | 0.01863  | -0.06016 | 0.19435  | 0.011517 | 0.80396  | -0.10726 | 0.02043  |
| 0.43762  | 0.062603 | 0.17683  | -0.03161 | 0.49558  | 0.213517 | 3.23E-06 | 0.229082 | 5.62E-07 |
| 2.16E-08 | -0.04381 | 0.34483  | 0.108041 | 0.01952  | 0.187799 | 4.43E-05 | 0.136083 | 0.00321  |
| 0.02552  | -0.17943 | 9.67E-05 | -0.11295 | 0.0146   | 0.012695 | 0.78438  | -0.11087 | 0.01654  |
| 0.00083  | 0.20027  | 1.30E-05 | -0.01423 | 0.75913  | 0.078375 | 0.09069  | 0.245247 | 7.97E-08 |
| 1.85E-19 | 0.25208  | 3.35E-08 | -0.01556 | 0.73741  | 0.126757 | 0.00609  | 0.283206 | 4.61E-10 |
| 5.29E-09 | -0.10977 | 0.01765  | -0.02582 | 0.57775  | -0.07224 | 0.11898  | -0.19239 | 2.84E-05 |
| 0.00036  | 0.066985 | 0.14837  | -0.01153 | 0.80375  | -0.0511  | 0.27047  | 0.056617 | 0.22201  |
| 5.22E-15 | 0.046323 | 0.31784  | -0.05885 | 0.20425  | 0.001462 | 0.97486  | 0.107818 | 0.01978  |
| 1.79E-10 | -0.02567 | 0.58     | -0.15617 | 0.00071  | -0.08012 | 0.08372  | -0.03883 | 0.4025   |
| 0.05154  | -0.10169 | 0.02799  | -0.13531 | 0.00339  | -0.08172 | 0.0777   | -0.13464 | 0.00356  |
| 0.18482  | 0.034463 | 0.4575   | -0.07226 | 0.11891  | 0.013868 | 0.76502  | 0.083257 | 0.07225  |
| 0.84439  | -0.02921 | 0.52897  | 0.069075 | 0.13609  | 0.084221 | 0.069    | -0.01543 | 0.73953  |
| 0.46226  | -0.04347 | 0.34854  | -0.07692 | 0.09687  | 0.022596 | 0.62622  | -0.05341 | 0.24931  |
| 0.08889  | -0.28264 | 5.01E-10 | -0.14566 | 0.0016   | -0.14757 | 0.00138  | -0.30681 | 1.23E-11 |
| 0.17018  | 0.045934 | 0.32193  | 0.107857 | 0.01973  | 0.080535 | 0.08212  | 0.174292 | 0.00015  |
| 1.26E-09 | -0.00906 | 0.84518  | -0.19142 | 3.13E-05 | -0.04853 | 0.29533  | -0.08697 | 0.06038  |
| 0.78764  | -0.0847  | 0.06744  | -0.18749 | 4.56E-05 | -0.14142 | 0.00219  | -0.16405 | 0.00037  |
| 0.81445  | 0.026715 | 0.5647   | -0.14867 | 0.00127  | -0.09168 | 0.04769  | -0.00477 | 0.9182   |
| 0.00967  | 0.027001 | 0.56054  | -0.08625 | 0.06255  | -0.01918 | 0.67932  | 0.060778 | 0.18982  |
| 1.32E-08 | 0.200631 | 1.25E-05 | -0.02585 | 0.57731  | 0.251033 | 3.83E-08 | 0.384049 | 7.34E-18 |
| 1.34E-05 | 0.016536 | 0.72153  | -0.10338 | 0.02547  | -0.10092 | 0.02921  | -0.02774 | 0.54992  |
| 3.01E-08 | 0.064611 | 0.16333  | 0.036706 | 0.42873  | 0.085514 | 0.06483  | 0.076691 | 0.09786  |

|          |          |          |          |          |          |          |          |          |
|----------|----------|----------|----------|----------|----------|----------|----------|----------|
| 0.0002   | 0.174644 | 0.00015  | -0.04782 | 0.30239  | 0.050441 | 0.27668  | 0.07341  | 0.11313  |
| 4.47E-08 | 0.018273 | 0.69369  | -0.10933 | 0.01811  | -0.02973 | 0.52159  | -0.07845 | 0.09038  |
| 0.42027  | -0.06372 | 0.16922  | -0.11852 | 0.01036  | -0.00412 | 0.92921  | -0.09561 | 0.03888  |
| 0.01806  | -0.07172 | 0.12167  | -0.06972 | 0.13248  | -0.00258 | 0.95566  | -0.09294 | 0.0447   |
| 0.0009   | -0.02139 | 0.64479  | -0.11877 | 0.0102   | -0.11382 | 0.01385  | -0.10523 | 0.02295  |
| 0.05337  | -0.0695  | 0.13368  | -0.17777 | 0.00011  | -0.13928 | 0.00256  | -0.16733 | 0.00028  |
| 5.80E-08 | -0.20799 | 5.83E-06 | -0.23223 | 3.88E-07 | -0.12411 | 0.00725  | -0.25851 | 1.44E-08 |
| 0.56327  | -0.1143  | 0.01346  | -0.19393 | 2.45E-05 | -0.06314 | 0.17314  | -0.13059 | 0.0047   |
| 0.39894  | -0.00934 | 0.84048  | -0.09431 | 0.04163  | -0.18071 | 8.60E-05 | -0.1516  | 0.00101  |
| 9.53E-05 | -0.03081 | 0.50653  | -0.19291 | 2.70E-05 | -0.12979 | 0.00497  | -0.11304 | 0.01452  |
| 0.00308  | 0.065402 | 0.15823  | 0.140921 | 0.00227  | 0.189404 | 3.80E-05 | 0.314163 | 3.72E-12 |
| 0.0016   | 0.072593 | 0.11721  | 0.04183  | 0.3671   | 0.053387 | 0.24956  | 0.112697 | 0.01482  |
| 0.14283  | 0.043796 | 0.34499  | -0.04476 | 0.33441  | 0.022535 | 0.62715  | 0.080614 | 0.08182  |
| 0.28369  | -0.03121 | 0.50104  | 0.107434 | 0.02022  | 0.154708 | 0.0008   | 0.067566 | 0.14488  |
| 0.00309  | 0.063622 | 0.16988  | 0.118563 | 0.01034  | 0.145088 | 0.00167  | 0.219409 | 1.69E-06 |
| 9.40E-17 | 0.098473 | 0.03338  | -0.03803 | 0.41223  | 0.135315 | 0.00339  | 0.223305 | 1.09E-06 |
| 0.74628  | -0.01336 | 0.77344  | -0.12247 | 0.00806  | -0.04893 | 0.29133  | -0.06436 | 0.16494  |
| 0.27798  | 0.136969 | 0.00302  | -0.22842 | 6.07E-07 | -0.01122 | 0.80888  | 0.08198  | 0.07675  |
| 1.32E-05 | 0.00443  | 0.92394  | -0.04184 | 0.36693  | -0.01391 | 0.76432  | 0.009566 | 0.83666  |
| 0.98301  | 0.030983 | 0.50418  | 0.344609 | 1.82E-14 | 0.078109 | 0.09179  | 0.159133 | 0.00056  |
| 0.00155  | -0.0357  | 0.44155  | -0.1349  | 0.00349  | -0.13975 | 0.00247  | -0.14484 | 0.0017   |
| 3.84E-11 | 0.170517 | 0.00021  | 0.072789 | 0.11622  | 0.066912 | 0.14881  | 0.191155 | 3.21E-05 |
| 0.08236  | 0.003483 | 0.94017  | -0.13214 | 0.00423  | -0.0174  | 0.70756  | 0.001147 | 0.98028  |
| 0.54646  | -0.04509 | 0.3309   | -0.00259 | 0.95548  | 0.130762 | 0.00465  | 0.134177 | 0.00367  |
| 0.00027  | 0.126368 | 0.00625  | -0.09514 | 0.03986  | -0.03101 | 0.50386  | 0.054609 | 0.23886  |
| 2.15E-07 | 0.093323 | 0.04383  | -0.0651  | 0.16018  | -0.03776 | 0.41559  | 0.060492 | 0.19192  |
| 0.35719  | -0.05842 | 0.20762  | -0.16048 | 0.0005   | -0.02131 | 0.64594  | -0.08652 | 0.06173  |
| 0.41132  | -0.13822 | 0.00276  | -0.10992 | 0.01749  | -0.28336 | 4.51E-10 | -0.2562  | 1.96E-08 |
| 0.39871  | -0.05837 | 0.20801  | -0.15972 | 0.00053  | -0.08114 | 0.07985  | -0.10588 | 0.02211  |
| 0.28153  | 0.021819 | 0.63813  | 0.09786  | 0.0345   | 0.050763 | 0.27362  | 0.059146 | 0.20201  |
| 0.08329  | 0.025312 | 0.58533  | -0.09402 | 0.04228  | 0.030825 | 0.50637  | 0.065245 | 0.15923  |
| 0.91114  | 0.040103 | 0.38722  | -0.09193 | 0.04708  | 0.028484 | 0.5392   | 0.08756  | 0.05866  |
| 0.25312  | 0.007985 | 0.86336  | -0.09743 | 0.03531  | 0.068463 | 0.1396   | 0.073267 | 0.11383  |
| 0.11116  | 0.012225 | 0.79217  | -0.04983 | 0.28256  | -0.00863 | 0.85253  | -0.03966 | 0.39253  |
| 1.03E-06 | -0.02523 | 0.58648  | -0.18955 | 3.74E-05 | -0.17384 | 0.00016  | -0.11593 | 0.01217  |
| 2.71E-21 | -0.03425 | 0.46023  | -0.06011 | 0.19475  | -0.04076 | 0.37951  | -0.06156 | 0.18416  |
| 3.36E-08 | 0.082879 | 0.07356  | -0.09603 | 0.03805  | -0.13632 | 0.00316  | 0.050536 | 0.27578  |
| 2.72E-07 | 0.031781 | 0.49327  | 0.002797 | 0.95193  | 0.076305 | 0.09957  | 0.115681 | 0.01236  |
| 0.17252  | -0.11854 | 0.01035  | -0.29561 | 7.16E-11 | -0.21006 | 4.69E-06 | -0.24032 | 1.47E-07 |
| 0.36177  | -0.03871 | 0.40389  | -0.01688 | 0.71596  | 0.060082 | 0.19495  | 0.053587 | 0.24778  |
| 0.74284  | -0.06703 | 0.14811  | -0.24637 | 6.92E-08 | -0.21065 | 4.40E-06 | -0.18912 | 3.90E-05 |
| 0.29717  | 0.050189 | 0.27909  | -0.05005 | 0.28043  | 0.063339 | 0.17179  | 0.124013 | 0.00729  |
| 0.10473  | -0.05442 | 0.24051  | -0.09116 | 0.04899  | 0.001993 | 0.96574  | -0.04561 | 0.32536  |
| 0.69712  | -0.12676 | 0.00609  | -0.14993 | 0.00116  | -0.04928 | 0.28787  | -0.14875 | 0.00126  |
| 0.01326  | -0.04725 | 0.3082   | -0.00024 | 0.99581  | -0.07151 | 0.12279  | -0.02365 | 0.61025  |

|          |          |          |          |          |          |          |          |          |
|----------|----------|----------|----------|----------|----------|----------|----------|----------|
| 0.86162  | -0.041   | 0.37664  | -0.15422 | 0.00083  | -0.04038 | 0.38391  | -0.07822 | 0.09135  |
| 0.12476  | -0.11554 | 0.01247  | -0.19176 | 3.03E-05 | -0.19082 | 3.31E-05 | -0.21803 | 1.97E-06 |
| 0.80626  | -0.01236 | 0.79001  | -0.20356 | 9.26E-06 | -0.00337 | 0.94209  | -0.04067 | 0.38057  |
| 0.07794  | -0.04392 | 0.34364  | -0.14777 | 0.00136  | -0.09342 | 0.04361  | -0.11892 | 0.01011  |
| 0.20672  | -0.01252 | 0.78736  | 0.107195 | 0.02051  | 0.024063 | 0.60397  | 0.056374 | 0.224    |
| 0.15609  | -0.02542 | 0.58367  | -0.09562 | 0.03887  | 0.013262 | 0.775    | -0.04107 | 0.37588  |
| 0.11022  | -0.1007  | 0.02957  | 0.107627 | 0.02     | -0.17354 | 0.00016  | -0.19476 | 2.25E-05 |
| 0.80059  | 0.080735 | 0.08136  | -0.17116 | 0.0002   | -0.06231 | 0.17886  | 0.045647 | 0.32496  |
| 1.14E-38 | 0.111718 | 0.01572  | -0.06773 | 0.14391  | 0.012311 | 0.79074  | 0.121814 | 0.00841  |
| 0.10515  | 0.01421  | 0.75939  | -0.05903 | 0.20288  | -0.01193 | 0.79713  | -0.03449 | 0.4572   |
| 0.02531  | 0.01488  | 0.74842  | -0.09803 | 0.03418  | -0.04284 | 0.35568  | -0.08948 | 0.05331  |
| 0.91588  | -0.05451 | 0.2397   | -0.16371 | 0.00038  | -0.01097 | 0.81306  | -0.06392 | 0.16788  |
| 4.24E-05 | -0.05383 | 0.24567  | 0.036815 | 0.42736  | 0.063304 | 0.17203  | 0.110763 | 0.01664  |
| 0.03593  | -0.20588 | 7.28E-06 | -0.12092 | 0.0089   | -0.09878 | 0.03282  | -0.24358 | 9.82E-08 |
| 0.9733   | -0.05312 | 0.25189  | -0.13896 | 0.00262  | 0.028303 | 0.54179  | -0.02443 | 0.59851  |
| 0.98799  | -0.07954 | 0.08599  | -0.15227 | 0.00096  | 0.002852 | 0.95099  | -0.07063 | 0.12747  |
| 0.61305  | -0.03771 | 0.41624  | -0.19262 | 2.78E-05 | -0.06698 | 0.14837  | -0.13354 | 0.00384  |
| 0.17959  | -0.00264 | 0.9546   | -0.10873 | 0.01875  | 0.036858 | 0.42682  | 0.050153 | 0.27943  |
| 0.21373  | 0.039211 | 0.39788  | 0.11367  | 0.01398  | -0.03531 | 0.44657  | 0.044224 | 0.34029  |
| 0.87316  | -0.03166 | 0.49489  | -0.1009  | 0.02925  | -0.02334 | 0.61489  | -0.06062 | 0.19098  |
| 0.24299  | -0.00746 | 0.87233  | -0.13819 | 0.00277  | -0.09828 | 0.03372  | -0.03976 | 0.3913   |
| 0.44888  | -0.06433 | 0.16519  | -0.07662 | 0.09818  | 0.051268 | 0.26887  | -0.00595 | 0.89791  |
| 0.20088  | -0.05805 | 0.21049  | -0.22443 | 9.60E-07 | -0.23625 | 2.40E-07 | -0.13279 | 0.00404  |
| 0.84783  | -0.11905 | 0.01003  | -0.27052 | 2.83E-09 | -0.25561 | 2.11E-08 | -0.26681 | 4.72E-09 |
| 0.29269  | -0.15324 | 0.00089  | -0.29723 | 5.57E-11 | -0.19965 | 1.38E-05 | -0.26561 | 5.56E-09 |
| 0.51129  | -0.01926 | 0.67802  | -0.11955 | 0.00971  | -0.00324 | 0.94431  | -0.03608 | 0.43664  |
| 0.3058   | 0.083837 | 0.07029  | 0.153843 | 0.00085  | 0.259515 | 1.26E-08 | 0.403433 | 1.05E-19 |
| 0.42886  | 0.000348 | 0.99401  | -0.03001 | 0.51763  | 0.010993 | 0.81271  | 0.002664 | 0.95422  |
| 0.05448  | -0.17025 | 0.00022  | -0.19401 | 2.43E-05 | -0.18424 | 6.20E-05 | -0.30768 | 1.07E-11 |
| 0.39     | -0.05419 | 0.24246  | -0.20304 | 9.78E-06 | -0.09697 | 0.03618  | -0.11757 | 0.011    |
| 0.67685  | -0.07501 | 0.10545  | -0.17249 | 0.00018  | -0.13168 | 0.00437  | -0.16303 | 0.0004   |
| 0.16006  | 0.013582 | 0.76972  | -0.14214 | 0.00208  | 0.011779 | 0.7996   | 0.03645  | 0.43196  |
| 0.0146   | -0.04849 | 0.29573  | -0.11131 | 0.01611  | -0.04098 | 0.37698  | -0.06704 | 0.14806  |
| 0.01738  | -0.15106 | 0.00106  | 0.007669 | 0.86872  | 0.004873 | 0.91635  | -0.09505 | 0.04005  |
| 0.00571  | -0.00513 | 0.91201  | -0.15632 | 0.0007   | -0.01916 | 0.67967  | 0.005346 | 0.90826  |
| 8.12E-05 | -0.09703 | 0.03607  | -0.15762 | 0.00063  | -0.12084 | 0.00895  | -0.17154 | 0.0002   |
| 0.02328  | -0.07534 | 0.10396  | -0.1912  | 3.19E-05 | -0.15193 | 0.00099  | -0.14756 | 0.00139  |
| 0.68695  | -0.03785 | 0.41452  | -0.15391 | 0.00085  | -0.0139  | 0.76455  | -0.04386 | 0.34424  |
| 0.00012  | 0.034736 | 0.45394  | -0.1171  | 0.01133  | -0.00822 | 0.8593   | 0.018482 | 0.69036  |
| 0.10733  | 0.078079 | 0.09192  | -0.0926  | 0.04549  | 0.083488 | 0.07146  | 0.137806 | 0.00284  |
| 0.27057  | -0.05317 | 0.25145  | -0.1359  | 0.00325  | -0.03539 | 0.44548  | -0.04218 | 0.36307  |
| 3.20E-23 | 0.008797 | 0.84962  | -0.1435  | 0.00188  | -0.05954 | 0.19901  | -0.01474 | 0.75079  |
| 6.18E-22 | 0.12342  | 0.00758  | -0.03115 | 0.50189  | 0.073838 | 0.11104  | 0.130542 | 0.00472  |
| 0.09424  | -0.12661 | 0.00615  | -0.01398 | 0.76311  | -0.23093 | 4.52E-07 | -0.26317 | 7.74E-09 |
| 0.00838  | 0.033303 | 0.47279  | -0.07396 | 0.11047  | 0.032578 | 0.48248  | 0.067182 | 0.14718  |



|          |          |          |          |          |          |          |          |          |
|----------|----------|----------|----------|----------|----------|----------|----------|----------|
| 0.58764  | -0.16232 | 0.00043  | -0.20914 | 5.17E-06 | -0.24046 | 1.44E-07 | -0.31725 | 2.22E-12 |
| 0.04364  | -0.0609  | 0.18892  | -0.20804 | 5.80E-06 | -0.1829  | 7.02E-05 | -0.13721 | 0.00297  |
| 0.10834  | -0.03901 | 0.40031  | -0.16209 | 0.00044  | -0.05155 | 0.26623  | -0.05752 | 0.21473  |
| 0.33656  | -0.03298 | 0.47713  | 0.00056  | 0.99038  | 0.099509 | 0.03156  | -0.0059  | 0.89887  |
| 2.32E-14 | -0.01849 | 0.69029  | -0.06992 | 0.13138  | -0.12326 | 0.00766  | -0.06104 | 0.18795  |
| 0.25443  | 0.083359 | 0.07191  | 0.160579 | 0.00049  | 0.165964 | 0.00032  | 0.271306 | 2.53E-09 |
| 0.0169   | -0.17539 | 0.00014  | -0.23782 | 1.99E-07 | -0.19272 | 2.75E-05 | -0.29462 | 8.33E-11 |
| 0.53721  | -0.08575 | 0.06409  | -0.14409 | 0.0018   | -0.06364 | 0.16976  | -0.10258 | 0.02665  |
| 0.49499  | 0.001724 | 0.97036  | -0.12604 | 0.00639  | 0.009252 | 0.84194  | 0.060016 | 0.19544  |
| 0.70766  | -0.05743 | 0.21546  | -0.13443 | 0.00361  | -0.02938 | 0.52644  | -0.06315 | 0.17311  |
| 0.41986  | -0.06014 | 0.19452  | -0.13577 | 0.00328  | 0.008085 | 0.86167  | -0.05319 | 0.25131  |
| 0.00048  | -0.01378 | 0.76642  | -0.24636 | 6.93E-08 | -0.2652  | 5.88E-09 | -0.21094 | 4.26E-06 |
| 0.1005   | -0.02763 | 0.55139  | -0.1929  | 2.71E-05 | -0.09738 | 0.0354   | -0.07577 | 0.10195  |
| 0.01834  | 0.050433 | 0.27676  | -0.03432 | 0.45939  | 0.11033  | 0.01707  | 0.098353 | 0.0336   |
| 0.05256  | -0.11533 | 0.01264  | -0.15313 | 0.0009   | -0.23963 | 1.60E-07 | -0.27939 | 8.04E-10 |
| 0.0832   | 0.122674 | 0.00796  | 0.001459 | 0.97492  | -0.0304  | 0.51229  | 0.126986 | 0.006    |
| 0.08695  | 0.006653 | 0.88598  | -0.07929 | 0.08697  | -0.03209 | 0.48909  | 0.090612 | 0.05036  |
| 0.32379  | -0.05742 | 0.21549  | -0.13783 | 0.00284  | -0.05477 | 0.23748  | -0.0944  | 0.04144  |
| 0.47614  | -0.16195 | 0.00044  | -0.20392 | 8.92E-06 | -0.15802 | 0.00061  | -0.26465 | 6.34E-09 |
| 0.72006  | -0.05182 | 0.2637   | -0.07452 | 0.10776  | -0.03699 | 0.42523  | -0.07713 | 0.09594  |
| 0.78107  | -0.10633 | 0.02156  | -0.18589 | 5.31E-05 | -0.14402 | 0.00181  | -0.2242  | 9.86E-07 |
| 0.00058  | -0.20319 | 9.62E-06 | -0.20262 | 1.02E-05 | -0.10627 | 0.02163  | -0.29377 | 9.49E-11 |
| 1.27E-16 | 0.17244  | 0.00018  | 0.043324 | 0.35022  | 0.163869 | 0.00038  | 0.292291 | 1.19E-10 |
| 0.71765  | -0.08512 | 0.06608  | -0.16271 | 0.00041  | -0.04451 | 0.33712  | -0.0918  | 0.04741  |
| 0.12572  | 0.117091 | 0.01133  | 0.039281 | 0.39704  | 0.065091 | 0.16022  | 0.096563 | 0.03698  |
| 0.01345  | -0.03179 | 0.49312  | -0.16324 | 0.0004   | -0.06124 | 0.18646  | -0.06366 | 0.1696   |
| 2.95E-14 | -0.00886 | 0.84859  | -0.17689 | 0.00012  | -0.07752 | 0.09426  | -0.0714  | 0.12338  |
| 0.90893  | -0.05325 | 0.25079  | -0.17974 | 9.40E-05 | -0.02569 | 0.57973  | -0.0787  | 0.08935  |
| 0.449    | 0.003724 | 0.93602  | -0.14798 | 0.00134  | 0.027512 | 0.55314  | 0.02809  | 0.54484  |
| 3.00E-06 | -0.10588 | 0.02212  | -0.13429 | 0.00364  | -0.06307 | 0.17359  | -0.14057 | 0.00233  |
| 1.31E-08 | 0.084761 | 0.06724  | 0.116313 | 0.01189  | 0.206746 | 6.65E-06 | 0.281638 | 5.80E-10 |
| 0.57626  | -0.03851 | 0.40636  | -0.01461 | 0.75278  | -0.0125  | 0.78756  | -0.02621 | 0.5721   |
| 0.26961  | -0.03761 | 0.41741  | -0.10129 | 0.02863  | 0.030266 | 0.51411  | 0.01247  | 0.7881   |
| 0.15597  | -0.08138 | 0.07893  | -0.088   | 0.05738  | -0.08094 | 0.08058  | -0.09489 | 0.04038  |
| 0.64918  | -0.05858 | 0.20636  | -0.18215 | 7.53E-05 | -0.07594 | 0.10121  | -0.13111 | 0.00454  |
| 0.11384  | -0.19229 | 2.87E-05 | -0.18519 | 5.67E-05 | -0.25459 | 2.42E-08 | -0.35034 | 6.23E-15 |
| 0.07111  | -0.0211  | 0.64924  | -0.14221 | 0.00207  | -0.00956 | 0.83678  | -0.01373 | 0.7673   |
| 9.54E-11 | -0.09226 | 0.04631  | -0.11634 | 0.01188  | -0.29211 | 1.22E-10 | -0.19663 | 1.87E-05 |
| 0.10455  | -0.06763 | 0.14451  | -0.04316 | 0.35204  | -0.06051 | 0.19181  | -0.0354  | 0.4453   |
| 1.17E-21 | 0.035279 | 0.44691  | 0.059974 | 0.19576  | -0.0408  | 0.37901  | 0.045162 | 0.33014  |
| 0.93162  | 0.002922 | 0.94979  | -0.22767 | 6.62E-07 | -0.10316 | 0.02579  | -0.0755  | 0.10322  |
| 0.60618  | -0.09374 | 0.04288  | -0.27908 | 8.40E-10 | -0.08204 | 0.07652  | -0.11642 | 0.01182  |
| 0.78157  | -0.15657 | 0.00069  | -0.17223 | 0.00018  | -0.24584 | 7.40E-08 | -0.28498 | 3.55E-10 |
| 0.40816  | -0.09992 | 0.03085  | -0.15134 | 0.00104  | -0.15053 | 0.0011   | -0.24842 | 5.34E-08 |
| 0.20692  | -0.01156 | 0.80325  | -0.14278 | 0.00198  | 0.050531 | 0.27582  | 0.025457 | 0.58318  |

|          |          |          |          |          |          |          |          |          |
|----------|----------|----------|----------|----------|----------|----------|----------|----------|
| 0.24159  | 0.044812 | 0.33391  | -0.02291 | 0.62144  | 0.090062 | 0.05178  | 0.084656 | 0.06758  |
| 0.00186  | -0.04568 | 0.32457  | -0.13828 | 0.00275  | -0.07784 | 0.09292  | -0.05606 | 0.2266   |
| 0.00143  | -0.01204 | 0.79526  | -0.01182 | 0.79888  | 0.074523 | 0.10775  | 0.085278 | 0.06558  |
| 5.77E-15 | 0.078075 | 0.09194  | -0.09378 | 0.04281  | 0.047585 | 0.30482  | 0.138883 | 0.00263  |
| 0.03513  | -0.15827 | 0.0006   | -0.36678 | 2.56E-16 | -0.25277 | 3.06E-08 | -0.32239 | 9.35E-13 |
| 0.43978  | 0.027344 | 0.55558  | -0.19306 | 2.66E-05 | 0.071925 | 0.12062  | 0.050406 | 0.27701  |
| 2.05E-26 | 0.04504  | 0.33145  | -0.0529  | 0.25386  | -0.04721 | 0.30866  | 0.054662 | 0.23841  |
| 0.50119  | -0.05052 | 0.27593  | -0.19466 | 2.28E-05 | -0.0434  | 0.34941  | -0.04886 | 0.29201  |
| 0.05866  | -0.04546 | 0.32699  | -0.2076  | 6.08E-06 | -0.05635 | 0.22423  | -0.09064 | 0.05028  |
| 1.94E-14 | 0.145957 | 0.00156  | -0.04456 | 0.33663  | 0.077386 | 0.09485  | 0.184601 | 5.99E-05 |
| 0.47138  | -0.11443 | 0.01334  | -0.09078 | 0.04992  | -0.07893 | 0.08842  | -0.12376 | 0.00742  |
| 0.51133  | -0.07379 | 0.11129  | -0.17377 | 0.00016  | -0.02817 | 0.54363  | -0.09772 | 0.03476  |
| 0.00351  | -0.06421 | 0.16599  | -0.17097 | 0.00021  | -0.07712 | 0.09598  | -0.17681 | 0.00012  |
| 0.02325  | -0.02311 | 0.61841  | -0.1123  | 0.01518  | 0.054528 | 0.23956  | 0.004524 | 0.92233  |
| 6.26E-05 | -0.02715 | 0.55835  | -0.1094  | 0.01803  | -0.03062 | 0.50918  | -0.0286  | 0.53756  |
| 0.0002   | 0.093484 | 0.04347  | -0.16216 | 0.00043  | -0.06611 | 0.15374  | 0.069831 | 0.13185  |
| 0.3572   | 0.017482 | 0.70632  | -0.07925 | 0.08712  | -0.00261 | 0.95514  | 0.027411 | 0.5546   |
| 0.42176  | 0.033516 | 0.46996  | 0.049899 | 0.28188  | 0.093453 | 0.04353  | 0.154853 | 0.00079  |
| 0.78448  | -0.08655 | 0.06164  | -0.24417 | 9.12E-08 | -0.05825 | 0.20895  | -0.1402  | 0.00239  |
| 0.01648  | 0.091101 | 0.04912  | 0.033109 | 0.47537  | 0.219602 | 1.66E-06 | 0.333102 | 1.45E-13 |
| 0.34275  | -0.00564 | 0.90318  | -0.12283 | 0.00788  | -0.12678 | 0.00608  | -0.08345 | 0.07158  |
| 0.70189  | -0.27299 | 2.00E-09 | -0.12012 | 0.00937  | -0.23575 | 2.55E-07 | -0.32399 | 7.12E-13 |
| 0.36459  | 0.223782 | 1.03E-06 | 0.054994 | 0.23556  | 0.236653 | 2.29E-07 | 0.397607 | 3.87E-19 |
| 0.1503   | -0.08675 | 0.06103  | -0.14326 | 0.00191  | -0.03383 | 0.46578  | -0.10585 | 0.02215  |
| 0.10782  | 0.01491  | 0.74794  | -0.1406  | 0.00232  | 0.057477 | 0.21505  | 0.036194 | 0.4352   |
| 0.81487  | 0.018175 | 0.69525  | -0.10583 | 0.02218  | 0.07631  | 0.09954  | 0.121359 | 0.00866  |
| 0.71793  | -0.15025 | 0.00113  | -0.01139 | 0.80611  | -0.02917 | 0.52945  | -0.2187  | 1.83E-06 |
| 0.90381  | -0.16233 | 0.00043  | -0.06384 | 0.16842  | -0.1737  | 0.00016  | -0.25235 | 3.23E-08 |
| 0.00042  | -0.18738 | 4.61E-05 | -0.23205 | 3.96E-07 | -0.23552 | 2.63E-07 | -0.38806 | 3.12E-18 |
| 0.41001  | 0.000447 | 0.99232  | -0.11361 | 0.01403  | -0.08602 | 0.06327  | -0.05796 | 0.21119  |
| 0.37046  | -0.07988 | 0.08463  | -0.28033 | 7.01E-10 | -0.12    | 0.00944  | -0.15512 | 0.00077  |
| 0.902    | -0.10293 | 0.02613  | -0.09432 | 0.04162  | -0.06895 | 0.13682  | -0.15806 | 0.00061  |
| 0.3537   | -0.00334 | 0.94267  | -0.07952 | 0.08606  | -0.2176  | 2.07E-06 | -0.17182 | 0.00019  |
| 0.03664  | -0.01743 | 0.70717  | -0.05704 | 0.21856  | -0.01252 | 0.78735  | -0.05342 | 0.24925  |
| 0.15701  | 0.004354 | 0.92524  | -0.13119 | 0.00451  | 0.02885  | 0.534    | 0.024297 | 0.60047  |
| 0.98672  | -0.0625  | 0.17758  | -0.11955 | 0.00971  | 0.024104 | 0.60336  | -0.04942 | 0.28657  |
| 0.52506  | 0.006237 | 0.89307  | -0.0629  | 0.17477  | -0.08709 | 0.06002  | -0.0314  | 0.49846  |
| 3.59E-08 | 0.208586 | 5.48E-06 | 0.089442 | 0.05342  | 0.362714 | 5.74E-16 | 0.458821 | 1.08E-25 |
| 0.00195  | 0.01335  | 0.77355  | 0.135819 | 0.00327  | 0.071377 | 0.12348  | -0.04361 | 0.34707  |
| 0.05455  | 0.149935 | 0.00115  | -0.0269  | 0.56204  | 0.154664 | 0.0008   | 0.255086 | 2.27E-08 |
| 0.00493  | -0.03295 | 0.47756  | -0.04502 | 0.33163  | -0.06987 | 0.13164  | -0.09926 | 0.03199  |
| 0.00043  | -0.11938 | 0.00982  | -0.22604 | 7.98E-07 | -0.33255 | 1.60E-13 | -0.34913 | 7.83E-15 |
| 0.46452  | -0.07067 | 0.12727  | 0.094165 | 0.04195  | 0.236829 | 2.24E-07 | 0.112049 | 0.01541  |
| 0.65768  | -0.01008 | 0.82794  | -0.18727 | 4.66E-05 | -0.12003 | 0.00942  | -0.15097 | 0.00107  |
| 0.41384  | 0.019769 | 0.67003  | -0.01563 | 0.73622  | -0.00372 | 0.93614  | -0.01853 | 0.68964  |

|          |          |          |          |          |          |          |          |          |
|----------|----------|----------|----------|----------|----------|----------|----------|----------|
| 0.00068  | 0.104315 | 0.02417  | -0.01147 | 0.80481  | 0.060279 | 0.19349  | 0.194552 | 2.30E-05 |
| 0.01427  | 0.097728 | 0.03474  | -0.01456 | 0.75365  | -0.00794 | 0.86417  | 0.125755 | 0.00651  |
| 0.0051   | -0.02689 | 0.56213  | 0.018695 | 0.68699  | -0.06932 | 0.1347   | -0.00601 | 0.89686  |
| 1.36E-14 | -0.01664 | 0.71987  | -0.0938  | 0.04275  | -0.09745 | 0.03527  | -0.00885 | 0.84879  |
| 0.00108  | 0.010645 | 0.81853  | 0.133671 | 0.0038   | 0.002238 | 0.96153  | -0.00688 | 0.88204  |
| 0.00045  | -0.09948 | 0.0316   | 0.111201 | 0.01621  | 0.108465 | 0.01905  | -0.03466 | 0.4549   |
| 0.01131  | 0.143005 | 0.00195  | -0.08229 | 0.07564  | 0.02955  | 0.52411  | 0.135334 | 0.00339  |
| 0.10212  | -0.01124 | 0.80864  | -0.15379 | 0.00085  | -0.01984 | 0.66899  | 0.035876 | 0.43925  |
| 8.39E-05 | -0.04847 | 0.29593  | -0.13188 | 0.00431  | -0.05323 | 0.25095  | -0.05    | 0.28086  |
| 0.67501  | -0.01509 | 0.74492  | -0.10525 | 0.02292  | -0.08602 | 0.06325  | -0.00719 | 0.87684  |
| 0.00014  | -0.02951 | 0.52472  | -0.11612 | 0.01203  | -0.02473 | 0.59395  | -0.02108 | 0.64951  |
| 0.40569  | -0.10947 | 0.01796  | -0.1917  | 3.04E-05 | -0.07877 | 0.08908  | -0.16235 | 0.00043  |
| 0.17055  | -0.03027 | 0.51407  | -0.11911 | 0.00998  | -0.03641 | 0.43244  | -0.02767 | 0.55087  |
| 0.53194  | -0.00414 | 0.92882  | -0.11286 | 0.01468  | 0.013743 | 0.76707  | 0.042487 | 0.35961  |
| 0.90345  | -0.07328 | 0.11375  | -0.16519 | 0.00034  | -0.04964 | 0.28438  | -0.06584 | 0.15547  |
| 7.28E-27 | 0.030915 | 0.50512  | -0.09586 | 0.03838  | -0.00937 | 0.83994  | 0.063084 | 0.17353  |
| 0.24585  | -0.05072 | 0.27399  | -0.14208 | 0.00209  | -0.02795 | 0.54677  | -0.0519  | 0.26297  |
| 0.11528  | 0.047231 | 0.30844  | 0.003921 | 0.93265  | 0.226227 | 7.82E-07 | 0.282068 | 5.45E-10 |
| 0.00138  | -0.01403 | 0.76233  | -0.11432 | 0.01344  | -0.02574 | 0.57905  | 0.005003 | 0.91413  |
| 2.12E-14 | 0.02863  | 0.53712  | -0.03431 | 0.45951  | 0.055592 | 0.2305   | 0.115993 | 0.01213  |
| 9.69E-11 | 0.034664 | 0.45488  | -0.12593 | 0.00643  | -0.01898 | 0.68246  | 0.036578 | 0.43034  |
| 0.43309  | -0.03403 | 0.46314  | -0.14815 | 0.00132  | -0.01255 | 0.78671  | -0.05105 | 0.27093  |
| 0.8895   | -0.04687 | 0.31217  | -0.13226 | 0.0042   | 0.004929 | 0.9154   | -0.0582  | 0.20936  |
| 0.42606  | -0.07884 | 0.08879  | 0.146942 | 0.00145  | 0.105071 | 0.02316  | 0.074638 | 0.10721  |
| 0.33622  | 0.002472 | 0.95752  | -0.00683 | 0.88293  | 0.224551 | 9.47E-07 | 0.030418 | 0.512    |
| 0.95651  | -0.03878 | 0.40303  | -0.0838  | 0.07042  | 0.003943 | 0.93227  | -0.05173 | 0.26453  |
| 0.03959  | -0.10711 | 0.0206   | -0.11077 | 0.01663  | -0.03322 | 0.47389  | -0.16802 | 0.00027  |
| 0.81887  | -0.05833 | 0.20833  | -0.00815 | 0.86051  | 0.032902 | 0.47814  | -0.05934 | 0.20053  |
| 0.00056  | 0.230489 | 4.77E-07 | 0.127046 | 0.00597  | 0.135384 | 0.00338  | 0.245435 | 7.78E-08 |
| 0.45298  | -0.01284 | 0.78193  | 0.075229 | 0.10445  | -0.0362  | 0.43518  | -0.04763 | 0.30436  |
| 0.08715  | -0.07098 | 0.12559  | -0.11444 | 0.01334  | -0.06065 | 0.19076  | -0.11403 | 0.01368  |
| 0.00072  | 0.037721 | 0.41607  | -0.11731 | 0.01118  | -0.02763 | 0.55142  | -0.00662 | 0.8866   |
| 0.26729  | -0.16581 | 0.00032  | -0.092   | 0.04692  | -0.11734 | 0.01116  | -0.28082 | 6.54E-10 |
| 0.06513  | 0.040205 | 0.38602  | -0.08879 | 0.05518  | -0.02333 | 0.61509  | 0.07368  | 0.11181  |
| 8.35E-33 | 0.070722 | 0.12698  | -0.01534 | 0.74089  | 0.013087 | 0.7779   | 0.047434 | 0.30636  |
| 0.74871  | -0.11323 | 0.01435  | -0.22731 | 6.90E-07 | -0.20314 | 9.68E-06 | -0.18622 | 5.14E-05 |
| 1.38E-30 | 0.009152 | 0.84363  | -0.02218 | 0.63258  | -0.0389  | 0.40169  | 0.041526 | 0.37059  |
| 0.52581  | 0.057254 | 0.21684  | 0.010178 | 0.82636  | 0.008178 | 0.86009  | -0.00817 | 0.86029  |
| 1.45E-09 | -0.10961 | 0.01781  | -0.0869  | 0.06059  | -0.11493 | 0.01295  | -0.09174 | 0.04754  |
| 0.26237  | 0.083806 | 0.07039  | 0.10771  | 0.0199   | 0.201007 | 1.20E-05 | 0.283185 | 4.63E-10 |
| 0.89776  | -0.02458 | 0.5962   | -0.08538 | 0.06525  | 0.03196  | 0.49084  | 0.003562 | 0.93881  |
| 0.95599  | -0.02546 | 0.58319  | -0.11354 | 0.01409  | -0.16785 | 0.00027  | -0.14138 | 0.0022   |
| 1.69E-06 | 0.001531 | 0.97368  | -0.10721 | 0.02049  | 0.016599 | 0.72051  | -0.03794 | 0.41341  |
| 5.85E-28 | 0.054803 | 0.2372   | -0.05346 | 0.2489   | -0.07656 | 0.09845  | 0.0481   | 0.29961  |
| 0.00011  | 0.012626 | 0.78551  | -0.01533 | 0.74103  | -0.03673 | 0.4284   | 0.071959 | 0.12045  |

|          |           |          |          |          |          |          |          |          |
|----------|-----------|----------|----------|----------|----------|----------|----------|----------|
| 9.96E-06 | 0.024505  | 0.59734  | -0.0514  | 0.26761  | -0.05215 | 0.26075  | 0.003046 | 0.94766  |
| 5.58E-05 | 0.036134  | 0.43597  | -0.01644 | 0.72315  | 0.071652 | 0.12204  | 0.112561 | 0.01495  |
| 0.16832  | -8.34E-05 | 0.99857  | -0.03188 | 0.49187  | 0.084422 | 0.06834  | 0.082262 | 0.07574  |
| 0.05429  | -0.0942   | 0.04188  | -0.11494 | 0.01294  | -0.13582 | 0.00327  | -0.15555 | 0.00074  |
| 0.49363  | -0.10843  | 0.01908  | -0.10628 | 0.02162  | -0.07412 | 0.10965  | -0.15258 | 0.00094  |
| 0.00036  | 0.046315  | 0.31793  | 0.161861 | 0.00045  | 0.276438 | 1.23E-09 | 0.262671 | 8.28E-09 |
| 3.05E-06 | 0.014323  | 0.75755  | 0.074013 | 0.11019  | 0.108054 | 0.01951  | 0.123532 | 0.00753  |
| 0.51873  | 0.128835  | 0.0053   | -0.00712 | 0.87803  | 0.177215 | 0.00012  | 0.215119 | 2.71E-06 |
| 4.96E-06 | 0.120096  | 0.00938  | -0.05978 | 0.19719  | 0.099308 | 0.0319   | 0.216107 | 2.44E-06 |
| 0.47975  | 0.10604   | 0.02191  | -0.02796 | 0.5467   | 0.01472  | 0.75103  | 0.115131 | 0.01279  |
| 1.57E-05 | -0.1535   | 0.00087  | -0.25841 | 1.46E-08 | -0.19307 | 2.66E-05 | -0.31173 | 5.55E-12 |
| 0.35859  | -0.01091  | 0.81402  | -0.23964 | 1.59E-07 | -0.12685 | 0.00605  | -0.11843 | 0.01042  |
| 0.18257  | -0.06083  | 0.18945  | 0.016751 | 0.71807  | 0.049938 | 0.2815   | -0.08195 | 0.07685  |
| 0.00206  | -0.18046  | 8.80E-05 | 0.036911 | 0.42616  | 0.033565 | 0.46931  | -0.11764 | 0.01095  |
| 0.00766  | -0.02512  | 0.58819  | -0.08031 | 0.08298  | -0.02867 | 0.53649  | -0.05116 | 0.26992  |
| 0.00079  | -0.05548  | 0.23143  | -0.26577 | 5.44E-09 | -0.11833 | 0.01049  | -0.18773 | 4.46E-05 |
| 0.02285  | 0.080803  | 0.0811   | -0.07606 | 0.10067  | 0.086227 | 0.06262  | 0.207134 | 6.38E-06 |
| 0.04172  | 0.030096  | 0.51648  | -0.10697 | 0.02077  | 0.098111 | 0.03404  | 0.146475 | 0.0015   |
| 0.24687  | 0.003774  | 0.93517  | 0.024374 | 0.59931  | -0.00941 | 0.83921  | -0.01584 | 0.73279  |
| 0.04033  | 0.055136  | 0.23435  | -0.01043 | 0.8222   | 0.112557 | 0.01495  | 0.181166 | 8.25E-05 |
| 1.60E-23 | 0.040876  | 0.37814  | -0.06332 | 0.17192  | -0.09449 | 0.04124  | 0.010598 | 0.81932  |
| 0.01573  | 0.023254  | 0.61621  | -0.15762 | 0.00063  | -0.02591 | 0.57643  | 0.042436 | 0.36019  |
| 0.00979  | 0.039441  | 0.39512  | -0.05392 | 0.24482  | 0.028988 | 0.53205  | 0.04866  | 0.29402  |
| 0.70734  | -0.08842  | 0.05621  | 0.086696 | 0.0612   | 0.012352 | 0.79006  | -0.01837 | 0.69221  |
| 2.85E-13 | -0.21988  | 1.60E-06 | 0.009096 | 0.84457  | -0.07695 | 0.09672  | -0.09263 | 0.04544  |
| 1.07E-13 | 0.083887  | 0.07012  | 0.149586 | 0.00119  | 0.178637 | 0.0001   | 0.18017  | 9.03E-05 |
| 0.00027  | -0.20522  | 7.80E-06 | -0.11347 | 0.01415  | -0.12942 | 0.00509  | -0.22689 | 7.24E-07 |
| 0.23495  | -0.07209  | 0.1198   | -0.05454 | 0.23947  | -0.04923 | 0.28841  | -0.06192 | 0.1816   |
| 0.0909   | -0.10447  | 0.02396  | -0.00422 | 0.9276   | -0.04189 | 0.36643  | -0.15039 | 0.00111  |
| 0.24837  | -0.14539  | 0.00163  | -0.21674 | 2.27E-06 | -0.07221 | 0.11915  | -0.2588  | 1.39E-08 |
| 0.02537  | -0.01052  | 0.82071  | 0.040365 | 0.38413  | 0.142725 | 0.00199  | 0.064173 | 0.1662   |
| 0.19848  | -0.12751  | 0.00579  | 0.036283 | 0.43407  | -0.00552 | 0.90522  | -0.14133 | 0.0022   |
| 0.00295  | -0.09162  | 0.04784  | 0.076722 | 0.09773  | 0.001754 | 0.96984  | -0.12979 | 0.00497  |
| 1.60E-06 | -0.01684  | 0.71666  | 0.027461 | 0.55388  | 0.108609 | 0.01889  | -0.02319 | 0.61713  |
| 2.16E-20 | -0.01219  | 0.79273  | -0.10982 | 0.01759  | -0.03387 | 0.46527  | -0.03452 | 0.45676  |
| 2.58E-31 | 0.054039  | 0.24381  | -0.12883 | 0.0053   | -0.0698  | 0.132    | -0.00196 | 0.96634  |
| 0.00257  | 0.093842  | 0.04266  | -0.03148 | 0.49741  | 0.018299 | 0.69327  | 0.068722 | 0.13811  |
| 0.00121  | 0.024779  | 0.59326  | -0.13561 | 0.00332  | 0.002247 | 0.96138  | 0.089738 | 0.05263  |
| 0.62797  | 0.00636   | 0.89097  | -0.20563 | 7.47E-06 | -0.02924 | 0.52844  | 0.033659 | 0.46806  |
| 4.24E-05 | -0.21371  | 3.16E-06 | -0.27038 | 2.88E-09 | -0.11641 | 0.01182  | -0.29533 | 7.47E-11 |
| 0.00049  | -0.07462  | 0.10729  | -0.00162 | 0.9722   | 0.083427 | 0.07168  | -0.0418  | 0.36742  |
| 0.22325  | 0.080348  | 0.08283  | -0.13983 | 0.00246  | 0.005594 | 0.90404  | 0.171415 | 0.0002   |
| 6.10E-05 | 0.008196  | 0.85979  | 0.112388 | 0.0151   | 0.018841 | 0.68467  | 0.003389 | 0.94177  |
| 5.47E-26 | 0.007517  | 0.8713   | -0.08434 | 0.06861  | -0.0616  | 0.18389  | 0.018903 | 0.68368  |
| 3.45E-05 | -0.11812  | 0.01063  | -0.11052 | 0.01688  | -0.14686 | 0.00146  | -0.15893 | 0.00057  |

|          |          |          |          |          |          |          |          |          |
|----------|----------|----------|----------|----------|----------|----------|----------|----------|
| 7.98E-14 | 0.034466 | 0.45746  | -0.08845 | 0.05612  | 0.010132 | 0.82714  | 0.091371 | 0.04845  |
| 0.91899  | -0.04313 | 0.35235  | -0.16736 | 0.00028  | 0.168129 | 0.00026  | 0.133535 | 0.00384  |
| 0.00816  | -0.11696 | 0.01142  | -0.1821  | 7.57E-05 | -0.04666 | 0.31433  | -0.16324 | 0.0004   |
| 0.84169  | 0.069267 | 0.135    | 0.222972 | 1.13E-06 | 0.157014 | 0.00066  | 0.165719 | 0.00032  |
| 0.00158  | -0.15841 | 0.00059  | -0.15358 | 0.00087  | -0.04079 | 0.37912  | -0.17175 | 0.00019  |
| 7.61E-06 | -0.22505 | 8.94E-07 | -0.15893 | 0.00057  | -0.08357 | 0.07119  | -0.30463 | 1.74E-11 |
| 2.11E-09 | 0.051655 | 0.26527  | -0.16631 | 0.00031  | -0.05192 | 0.26286  | 0.004017 | 0.93101  |
| 0.03738  | -0.1048  | 0.02352  | -0.07806 | 0.09199  | -0.12969 | 0.005    | -0.18136 | 8.10E-05 |
| 0.38486  | -0.0133  | 0.77432  | -0.1097  | 0.01772  | 0.029318 | 0.52739  | 0.006226 | 0.89326  |
| 0.34493  | -0.08248 | 0.07497  | 0.146392 | 0.00151  | 0.075085 | 0.10512  | -0.02691 | 0.56185  |
| 0.34466  | -0.05899 | 0.2032   | -0.12379 | 0.0074   | -0.0089  | 0.84781  | -0.06504 | 0.16052  |
| 0.45734  | -0.1437  | 0.00185  | -0.19017 | 3.53E-05 | -0.14452 | 0.00174  | -0.21161 | 3.97E-06 |
| 0.00177  | -0.01217 | 0.79308  | -0.11072 | 0.01668  | -0.01244 | 0.78854  | 0.015665 | 0.73563  |
| 3.26E-15 | 0.005877 | 0.8992   | -0.06869 | 0.13828  | -0.10038 | 0.0301   | -0.05037 | 0.27738  |
| 0.0006   | -0.02064 | 0.65645  | -0.14195 | 0.00211  | -0.00357 | 0.93874  | -0.01028 | 0.82467  |
| 0.00617  | 0.080737 | 0.08135  | -0.20274 | 1.01E-05 | -0.09204 | 0.04682  | -0.0102  | 0.826    |
| 0.00574  | -0.03713 | 0.42336  | -0.13871 | 0.00266  | -0.04291 | 0.35488  | -0.053   | 0.25304  |
| 1.58E-08 | -0.02605 | 0.5744   | -0.11021 | 0.0172   | -0.03519 | 0.44806  | -0.01559 | 0.73678  |
| 1.60E-10 | -0.00155 | 0.97341  | -0.12889 | 0.00528  | -0.02805 | 0.54536  | 0.013386 | 0.77295  |
| 2.62E-30 | 0.021301 | 0.64613  | -0.0587  | 0.20542  | -0.02904 | 0.53134  | 0.059854 | 0.19666  |
| 0.0711   | -0.02037 | 0.66068  | -0.05311 | 0.252    | 0.009983 | 0.82964  | 0.016129 | 0.7281   |
| 0.32143  | -0.04596 | 0.32164  | -0.14843 | 0.0013   | -0.00118 | 0.9797   | -0.04392 | 0.34363  |
| 0.36775  | -0.01941 | 0.67574  | -0.08908 | 0.0544   | 0.031988 | 0.49045  | 0.016405 | 0.72364  |
| 0.02066  | -0.05722 | 0.21713  | -0.11062 | 0.01678  | -0.0709  | 0.12605  | -0.09044 | 0.05081  |
| 0.11092  | -0.1171  | 0.01133  | -0.18805 | 4.32E-05 | -0.08458 | 0.06783  | -0.15825 | 0.0006   |
| 0.00053  | -0.11095 | 0.01646  | 0.067158 | 0.14732  | -0.02077 | 0.6544   | -0.08054 | 0.08209  |
| 4.08E-10 | 0.053498 | 0.24857  | 0.023156 | 0.61769  | -0.01332 | 0.774    | 0.092441 | 0.04587  |
| 9.70E-08 | -0.13122 | 0.00451  | -0.12696 | 0.00601  | -0.18856 | 4.12E-05 | -0.24222 | 1.16E-07 |
| 0.99354  | -0.0286  | 0.53755  | -0.13658 | 0.0031   | -0.0797  | 0.08534  | -0.10522 | 0.02296  |
| 0.04838  | 0.0923   | 0.0462   | -0.16848 | 0.00025  | -0.08489 | 0.06683  | -0.05192 | 0.26286  |
| 3.34E-07 | -0.2044  | 8.50E-06 | -0.27838 | 9.29E-10 | -0.3733  | 6.87E-17 | -0.42633 | 4.78E-22 |
| 0.08627  | -0.05686 | 0.22005  | -0.04026 | 0.38541  | -0.09772 | 0.03476  | -0.08303 | 0.07303  |
| 0.73411  | -0.05754 | 0.21453  | -0.15653 | 0.00069  | -0.04483 | 0.33376  | -0.07162 | 0.1222   |
| 0.93965  | -0.07112 | 0.12485  | -0.15911 | 0.00056  | -0.04664 | 0.31458  | -0.1063  | 0.02159  |
| 2.12E-06 | -0.02128 | 0.64644  | -0.11494 | 0.01294  | -0.03028 | 0.51395  | -0.09081 | 0.04986  |
| 9.56E-05 | -0.00314 | 0.94605  | -0.10579 | 0.02222  | 0.049458 | 0.28616  | 0.043129 | 0.35239  |
| 0.46371  | -0.01178 | 0.79955  | -0.05118 | 0.2697   | 0.017058 | 0.71312  | -0.02235 | 0.63005  |
| 0.52106  | -0.01041 | 0.82247  | 0.048516 | 0.29545  | 0.018669 | 0.68739  | -0.01878 | 0.68564  |
| 0.69414  | -0.01586 | 0.73254  | 0.062199 | 0.17965  | 0.07661  | 0.09822  | 0.049388 | 0.28684  |
| 0.71309  | -0.02169 | 0.64006  | 0.023432 | 0.6135   | -0.00054 | 0.99066  | -0.05335 | 0.24992  |
| 0.05107  | -0.15626 | 0.0007   | 0.044153 | 0.34106  | -0.1297  | 0.005    | -0.18737 | 4.61E-05 |
| 1.28E-07 | -0.04865 | 0.29413  | 0.000877 | 0.98492  | -0.01121 | 0.80906  | -0.0239  | 0.60644  |
| 2.84E-05 | 0.141976 | 0.0021   | 0.073194 | 0.11419  | 0.20788  | 5.90E-06 | 0.338247 | 5.80E-14 |
| 0.13814  | -0.04349 | 0.34834  | 0.245956 | 7.29E-08 | 0.2313   | 4.33E-07 | 0.16619  | 0.00031  |
| 0.05747  | -0.03391 | 0.46473  | -0.17347 | 0.00016  | -0.05629 | 0.22468  | -0.07325 | 0.1139   |

|          |          |          |          |          |          |          |          |          |
|----------|----------|----------|----------|----------|----------|----------|----------|----------|
| 0.65794  | -0.05627 | 0.22488  | -0.25408 | 2.58E-08 | -0.1015  | 0.02829  | -0.09474 | 0.04072  |
| 2.89E-22 | 0.216032 | 2.46E-06 | 0.155791 | 0.00073  | 0.226738 | 7.37E-07 | 0.423171 | 1.03E-21 |
| 8.71E-06 | 0.119035 | 0.01003  | 0.004765 | 0.9182   | 0.052741 | 0.25534  | 0.206763 | 6.64E-06 |
| 1.87E-07 | -0.17543 | 0.00014  | -0.24176 | 1.23E-07 | -0.2315  | 4.23E-07 | -0.28684 | 2.70E-10 |
| 0.9655   | -0.02437 | 0.59931  | -0.11311 | 0.01446  | 0.041836 | 0.36703  | 0.026355 | 0.56996  |
| 6.40E-05 | -0.27253 | 2.13E-09 | -0.25456 | 2.43E-08 | -0.25956 | 1.26E-08 | -0.47375 | 1.68E-27 |
| 3.89E-07 | 0.0737   | 0.11171  | -0.03194 | 0.49112  | 0.03682  | 0.42729  | 0.112253 | 0.01523  |
| 0.09094  | -0.08395 | 0.06991  | -0.19131 | 3.16E-05 | -0.13863 | 0.00268  | -0.15526 | 0.00076  |
| 4.80E-12 | 0.06378  | 0.16882  | -0.07735 | 0.095    | -0.08397 | 0.06985  | 0.047877 | 0.30186  |
| 8.53E-05 | 0.136906 | 0.00303  | 0.052193 | 0.26032  | 0.227523 | 6.73E-07 | 0.296654 | 6.10E-11 |
| 2.16E-06 | 0.10127  | 0.02865  | -0.03598 | 0.43794  | 0.052426 | 0.25819  | 0.152566 | 0.00094  |
| 0.00259  | 0.047463 | 0.30607  | 0.040793 | 0.37911  | -0.10373 | 0.02498  | -0.16066 | 0.00049  |
| 0.01261  | 0.146107 | 0.00155  | -0.18523 | 5.65E-05 | 0.049969 | 0.2812   | 0.06455  | 0.16373  |
| 0.06473  | 0.061985 | 0.18116  | -0.14906 | 0.00123  | 0.053607 | 0.24761  | 0.03083  | 0.5063   |
| 5.44E-13 | 0.062379 | 0.1784   | -0.13008 | 0.00487  | 0.023236 | 0.61647  | 0.126823 | 0.00606  |
| 0.04109  | -0.05404 | 0.24384  | -0.03675 | 0.42823  | -0.01916 | 0.67968  | -0.11016 | 0.01725  |
| 0.27269  | 0.084849 | 0.06695  | -0.06955 | 0.13339  | 0.090102 | 0.05167  | 0.131661 | 0.00437  |
| 7.29E-05 | -0.02539 | 0.58419  | -0.17447 | 0.00015  | -0.04609 | 0.32025  | -0.04833 | 0.29735  |
| 3.94E-05 | -0.05726 | 0.21683  | -0.21013 | 4.65E-06 | -0.22418 | 9.88E-07 | -0.19121 | 3.19E-05 |
| 0.1971   | -0.02762 | 0.5516   | -0.16601 | 0.00031  | -0.05326 | 0.25067  | -0.07271 | 0.11661  |
| 1.68E-05 | 0.012605 | 0.78587  | -0.10139 | 0.02846  | 0.005186 | 0.91101  | 0.031077 | 0.50289  |
| 3.94E-10 | 0.045127 | 0.33051  | -0.01763 | 0.70393  | 0.024616 | 0.59569  | 0.099297 | 0.03192  |
| 0.00504  | 0.004364 | 0.92506  | -0.14709 | 0.00144  | -0.03464 | 0.45518  | 0.016365 | 0.7243   |
| 2.07E-06 | 0.01996  | 0.66703  | -0.0566  | 0.22216  | 0.016063 | 0.72918  | 0.064481 | 0.16418  |
| 2.36E-05 | 0.039451 | 0.395    | -0.08728 | 0.05948  | 0.021022 | 0.65045  | 0.108439 | 0.01908  |
| 0.51833  | -0.24862 | 5.21E-08 | -0.11326 | 0.01433  | -0.2119  | 3.85E-06 | -0.32278 | 8.75E-13 |
| 1.29E-05 | 0.029524 | 0.52448  | -0.27431 | 1.66E-09 | 0.027157 | 0.55827  | 0.05574  | 0.22927  |
| 0.94267  | -0.00809 | 0.86161  | -0.18606 | 5.22E-05 | -0.16385 | 0.00038  | -0.20182 | 1.11E-05 |
| 9.14E-05 | 0.112933 | 0.01461  | 0.037648 | 0.41698  | 0.165134 | 0.00034  | 0.304618 | 1.75E-11 |
| 0.4468   | -0.13379 | 0.00377  | -0.07466 | 0.10712  | -0.08107 | 0.08009  | -0.19572 | 2.05E-05 |
| 5.78E-07 | -0.00603 | 0.89666  | -0.046   | 0.32122  | 0.06359  | 0.1701   | -0.00157 | 0.97308  |
| 0.34256  | -0.05798 | 0.21102  | -0.14257 | 0.00201  | -0.01732 | 0.70898  | -0.05008 | 0.28016  |
| 0.00011  | -0.01284 | 0.7819   | -0.07858 | 0.08985  | -0.03273 | 0.48049  | -0.01374 | 0.76713  |
| 0.0057   | -0.03442 | 0.45802  | -0.24089 | 1.37E-07 | -0.24389 | 9.44E-08 | -0.26752 | 4.28E-09 |
| 8.57E-14 | 0.011205 | 0.80916  | -0.02709 | 0.5592   | 0.020034 | 0.66587  | 0.017947 | 0.69889  |
| 6.89E-06 | 0.225154 | 8.84E-07 | -0.04293 | 0.35463  | 0.015088 | 0.74503  | 0.250137 | 4.29E-08 |
| 0.48424  | -0.11453 | 0.01326  | -0.05737 | 0.21591  | -0.0767  | 0.0978   | -0.15329 | 0.00089  |
| 0.39436  | -0.05684 | 0.2202   | -0.03218 | 0.48786  | 0.061243 | 0.18644  | 0.024485 | 0.59764  |
| 0.98961  | -0.09095 | 0.0495   | -0.21938 | 1.70E-06 | -0.13503 | 0.00346  | -0.13939 | 0.00254  |
| 4.41E-06 | 0.049852 | 0.28233  | -0.1385  | 0.0027   | -0.01543 | 0.73951  | -0.01888 | 0.68404  |
| 0.00799  | -0.03599 | 0.43776  | -0.18182 | 7.76E-05 | -0.07798 | 0.09232  | -0.02064 | 0.65641  |
| 0.01386  | -0.14375 | 0.00184  | 0.065289 | 0.15894  | -0.18689 | 4.83E-05 | -0.21363 | 3.19E-06 |
| 0.77449  | -0.059   | 0.20316  | 0.231864 | 4.05E-07 | 0.026632 | 0.56591  | 0.039124 | 0.39893  |
| 0.01391  | -0.23907 | 1.71E-07 | -0.1822  | 7.50E-05 | -0.14973 | 0.00117  | -0.26115 | 1.02E-08 |
| 0.33605  | 0.173518 | 0.00016  | 0.054444 | 0.24029  | 0.10411  | 0.02445  | 0.161101 | 0.00047  |

|          |          |          |          |          |          |          |          |          |
|----------|----------|----------|----------|----------|----------|----------|----------|----------|
| 0.43073  | -0.06702 | 0.14818  | -0.22772 | 6.58E-07 | -0.14751 | 0.00139  | -0.14235 | 0.00205  |
| 0.007    | -0.05684 | 0.22018  | -0.11569 | 0.01236  | -0.05299 | 0.2531   | -0.00658 | 0.88728  |
| 0.92281  | 0.172247 | 0.00018  | 0.063926 | 0.16785  | 0.103937 | 0.02469  | 0.205285 | 7.75E-06 |
| 0.01865  | 0.044335 | 0.33908  | 0.152713 | 0.00093  | 0.261821 | 9.28E-09 | 0.233356 | 3.40E-07 |
| 0.61699  | 0.044751 | 0.33456  | -0.15408 | 0.00084  | 0.008784 | 0.84984  | 0.082904 | 0.07348  |
| 0.00103  | -0.07941 | 0.08651  | -0.25095 | 3.87E-08 | -0.18098 | 8.39E-05 | -0.21195 | 3.82E-06 |
| 0.79712  | -0.06406 | 0.16694  | -0.042   | 0.36518  | 0.034055 | 0.46284  | -0.05853 | 0.20675  |
| 0.39404  | 0.145589 | 0.00161  | 0.049714 | 0.28367  | 0.14606  | 0.00155  | 0.169415 | 0.00024  |
| 1.44E-19 | -0.0344  | 0.45834  | -0.0666  | 0.15074  | -0.12782 | 0.00567  | -0.14887 | 0.00125  |
| 2.41E-05 | 0.103901 | 0.02474  | -0.03987 | 0.38998  | 0.024656 | 0.59508  | 0.08182  | 0.07733  |
| 0.01229  | -0.02077 | 0.65432  | -0.14044 | 0.00235  | -0.01544 | 0.73937  | -0.00102 | 0.98245  |
| 0.3777   | 0.066776 | 0.14965  | 0.059919 | 0.19617  | 0.06857  | 0.13899  | 0.14585  | 0.00158  |
| 0.57555  | 0.33019  | 2.43E-13 | 0.113772 | 0.01389  | 0.262542 | 8.43E-09 | 0.448221 | 1.85E-24 |
| 0.1405   | 0.024288 | 0.6006   | -0.00057 | 0.99022  | -0.03931 | 0.39665  | 0.029313 | 0.52746  |
| 0.62847  | -0.07224 | 0.119    | -0.1279  | 0.00564  | 0.018135 | 0.69588  | -0.06198 | 0.18118  |
| 0.25489  | -0.02641 | 0.56912  | -0.09559 | 0.03894  | -0.00572 | 0.90181  | -0.08764 | 0.05844  |
| 0.01     | -0.11604 | 0.01209  | -0.01449 | 0.75481  | 0.020648 | 0.65628  | -0.0254  | 0.58408  |
| 0.17494  | 0.007063 | 0.87901  | -0.12827 | 0.0055   | 0.03729  | 0.42141  | 0.03792  | 0.41361  |
| 4.85E-20 | 0.213916 | 3.09E-06 | 0.138779 | 0.00265  | 0.237874 | 1.98E-07 | 0.431143 | 1.46E-22 |
| 0.12615  | -0.11013 | 0.01727  | -0.21289 | 3.46E-06 | -0.16852 | 0.00025  | -0.21157 | 3.98E-06 |
| 0.47651  | 0.029711 | 0.52187  | 0.074939 | 0.1058   | 0.045594 | 0.32553  | 0.03057  | 0.5099   |
| 1.83E-07 | 0.171706 | 0.00019  | -0.05422 | 0.24222  | 0.048774 | 0.29288  | 0.210603 | 4.42E-06 |
| 0.81975  | -0.07784 | 0.09294  | -0.15579 | 0.00073  | -0.02863 | 0.53709  | -0.0898  | 0.05246  |
| 2.10E-08 | 0.02187  | 0.63735  | -0.21348 | 3.24E-06 | -0.03961 | 0.39312  | -0.05332 | 0.25012  |
| 0.00211  | -0.04224 | 0.36237  | -0.09533 | 0.03946  | -0.08277 | 0.07396  | -0.01856 | 0.68918  |
| 0.30182  | -0.0504  | 0.27705  | -0.09227 | 0.04628  | 0.047214 | 0.30862  | 0.00109  | 0.98125  |
| 3.08E-17 | -0.0304  | 0.51232  | -0.11392 | 0.01377  | -0.14683 | 0.00146  | -0.1202  | 0.00932  |
| 0.43194  | 0.164117 | 0.00037  | 0.115065 | 0.01284  | -0.13162 | 0.00438  | -0.07183 | 0.12113  |
| 5.42E-22 | -0.04055 | 0.38193  | -0.08505 | 0.06629  | -0.17013 | 0.00022  | -0.10393 | 0.0247   |
| 0.98213  | 0.06599  | 0.15451  | -0.08028 | 0.08308  | 0.103503 | 0.0253   | 0.143744 | 0.00184  |
| 0.03945  | -0.05922 | 0.20146  | -0.17941 | 9.68E-05 | -0.1083  | 0.01923  | -0.14189 | 0.00211  |
| 1.09E-06 | -0.03993 | 0.38924  | -0.18827 | 4.23E-05 | -0.03921 | 0.39785  | -0.02764 | 0.55129  |
| 0.23948  | -0.08929 | 0.05383  | -0.12763 | 0.00574  | 0.009542 | 0.83705  | -0.04432 | 0.33928  |
| 0.30373  | -0.05256 | 0.257    | -0.18341 | 6.70E-05 | -0.03299 | 0.47694  | -0.0533  | 0.25035  |
| 0.25481  | -0.00387 | 0.9336   | -0.04143 | 0.37172  | -0.06621 | 0.15311  | -0.05902 | 0.203    |
| 0.13297  | -0.01896 | 0.68283  | -0.09476 | 0.04066  | -0.07752 | 0.09427  | -0.01647 | 0.72265  |
| 0.7386   | 0.006618 | 0.88657  | 0.052858 | 0.25429  | 0.040677 | 0.38047  | 0.117192 | 0.01126  |
| 0.8209   | -0.06123 | 0.18652  | -0.13111 | 0.00454  | 0.020218 | 0.663    | -0.05061 | 0.27505  |
| 0.18292  | -0.00844 | 0.85565  | -0.05737 | 0.21587  | -0.1143  | 0.01346  | -0.02423 | 0.60144  |
| 0.01893  | -0.07409 | 0.10983  | -0.08484 | 0.06698  | -0.09006 | 0.05179  | -0.13318 | 0.00394  |
| 1.22E-48 | 0.130608 | 0.0047   | -0.02185 | 0.63768  | -0.03565 | 0.4422   | 0.120125 | 0.00937  |
| 2.16E-20 | 0.117499 | 0.01105  | 0.035387 | 0.44552  | -0.02835 | 0.5411   | 0.17057  | 0.00021  |
| 0.06861  | 0.023541 | 0.61185  | -0.1116  | 0.01583  | -0.04017 | 0.38648  | 0.042549 | 0.35891  |
| 0.97265  | -0.21738 | 2.12E-06 | -0.28107 | 6.30E-10 | -0.36967 | 1.44E-16 | -0.45874 | 1.11E-25 |
| 0.02186  | -0.0315  | 0.49714  | -0.01327 | 0.77481  | -0.06335 | 0.17175  | 0.000666 | 0.98856  |

|          |          |          |          |          |          |          |          |          |
|----------|----------|----------|----------|----------|----------|----------|----------|----------|
| 0.14539  | 0.006106 | 0.89531  | -0.1414  | 0.00219  | -0.05583 | 0.22854  | -0.03797 | 0.41296  |
| 3.00E-06 | -0.21129 | 4.11E-06 | -0.26189 | 9.20E-09 | -0.36877 | 1.72E-16 | -0.399   | 2.84E-19 |
| 0.14299  | -0.0664  | 0.15197  | -0.06423 | 0.1658   | 0.004956 | 0.91493  | -0.07226 | 0.1189   |
| 8.41E-05 | 0.041429 | 0.37171  | 0.018218 | 0.69455  | -0.01891 | 0.68363  | -0.00308 | 0.94712  |
| 0.81114  | 0.025812 | 0.57793  | -0.15017 | 0.00113  | 0.032987 | 0.47701  | 0.028226 | 0.54288  |
| 0.16859  | 0.033633 | 0.46841  | -0.00789 | 0.86499  | 0.084207 | 0.06905  | 0.095957 | 0.03818  |
| 6.91E-22 | 0.003272 | 0.94378  | -0.18987 | 3.63E-05 | -0.13783 | 0.00284  | -0.03908 | 0.39942  |
| 0.02759  | -0.04017 | 0.38645  | -0.06456 | 0.16363  | -0.05165 | 0.26534  | -0.06166 | 0.18349  |
| 5.79E-05 | -0.04235 | 0.36114  | -0.17125 | 0.0002   | -0.06702 | 0.14814  | -0.0751  | 0.10503  |
| 5.21E-05 | -0.05132 | 0.2684   | -0.24275 | 1.09E-07 | -0.13829 | 0.00275  | -0.16523 | 0.00034  |
| 0.00122  | 0.133846 | 0.00376  | 0.356795 | 1.82E-15 | 0.204934 | 8.03E-06 | 0.335657 | 9.23E-14 |
| 0.02106  | 0.052772 | 0.25506  | -0.11934 | 0.00984  | -0.00551 | 0.90548  | -0.01046 | 0.82168  |
| 3.54E-16 | -0.03409 | 0.46236  | 0.089671 | 0.05281  | -0.07147 | 0.123    | -0.0293  | 0.52763  |
| 4.99E-05 | 0.096457 | 0.03718  | 0.025515 | 0.58232  | 0.274251 | 1.67E-09 | 0.305986 | 1.40E-11 |
| 2.07E-06 | 0.102671 | 0.02651  | -0.01692 | 0.71532  | 0.083493 | 0.07145  | 0.130742 | 0.00466  |
| 0.00172  | -0.05019 | 0.27906  | -0.12397 | 0.00731  | -0.0797  | 0.08534  | -0.15266 | 0.00093  |
| 0.18475  | -0.15995 | 0.00052  | 0.186708 | 4.91E-05 | -0.08316 | 0.0726   | -0.16162 | 0.00045  |
| 0.94996  | -0.11955 | 0.00971  | -0.1441  | 0.0018   | -0.13074 | 0.00465  | -0.21037 | 4.53E-06 |
| 0.31003  | -0.06687 | 0.14907  | -0.08279 | 0.07389  | -0.01512 | 0.74454  | -0.13289 | 0.00402  |
| 0.08292  | 0.032473 | 0.48389  | -0.06194 | 0.18146  | -0.01816 | 0.69544  | 0.007314 | 0.87474  |
| 4.32E-05 | -0.00357 | 0.93862  | -0.02151 | 0.6429   | 0.031038 | 0.50343  | 0.009042 | 0.84548  |
| 0.07362  | -0.22217 | 1.24E-06 | -0.22754 | 6.72E-07 | -0.17796 | 0.00011  | -0.30748 | 1.11E-11 |
| 0.75036  | -0.07135 | 0.12364  | -0.16015 | 0.00051  | -0.08279 | 0.07388  | -0.13781 | 0.00284  |
| 0.00084  | 0.021066 | 0.64978  | -0.16022 | 0.00051  | -0.02801 | 0.54602  | -0.04508 | 0.33105  |
| 0.0007   | -0.04936 | 0.28713  | -0.10849 | 0.01902  | -0.02979 | 0.52073  | -0.05495 | 0.23593  |
| 1.91E-20 | 0.000496 | 0.99147  | -0.05058 | 0.27533  | -0.06702 | 0.14819  | 0.008507 | 0.85452  |
| 5.27E-10 | 0.048163 | 0.29898  | -0.04562 | 0.32529  | 0.032385 | 0.48508  | 0.164649 | 0.00035  |
| 0.89908  | 0.070286 | 0.12935  | 0.23863  | 1.80E-07 | 0.166956 | 0.00029  | 0.215436 | 2.62E-06 |
| 0.02266  | -0.12378 | 0.00741  | -0.1074  | 0.02026  | 0.014329 | 0.75745  | -0.15764 | 0.00063  |
| 0.00211  | 0.03057  | 0.5099   | -0.16348 | 0.00039  | -0.04903 | 0.29036  | 0.024551 | 0.59667  |
| 0.97517  | -0.13557 | 0.00333  | 0.133209 | 0.00393  | 0.159268 | 0.00055  | 0.020809 | 0.65378  |
| 8.49E-07 | 0.129701 | 0.005    | 0.094814 | 0.04055  | 0.184957 | 5.80E-05 | 0.259521 | 1.26E-08 |
| 0.10873  | -0.14961 | 0.00118  | 0.004832 | 0.91706  | -0.15656 | 0.00069  | -0.22434 | 9.70E-07 |
| 0.14308  | -0.04492 | 0.3327   | -0.16095 | 0.00048  | -0.12018 | 0.00933  | -0.17332 | 0.00017  |
| 0.77741  | -0.05729 | 0.21655  | -0.13231 | 0.00418  | 0.016019 | 0.7299   | -0.05142 | 0.26744  |
| 0.15328  | -0.03572 | 0.44123  | -0.13769 | 0.00287  | -0.07883 | 0.08883  | -0.13534 | 0.00338  |
| 0.00025  | 0.133093 | 0.00396  | 0.143064 | 0.00194  | 0.207626 | 6.06E-06 | 0.295111 | 7.73E-11 |
| 0.10373  | 0.050406 | 0.27702  | -0.05485 | 0.23682  | 0.056694 | 0.22138  | 0.037926 | 0.41354  |
| 0.60218  | -0.12822 | 0.00552  | 0.185333 | 5.59E-05 | 0.04397  | 0.34307  | -0.02076 | 0.6546   |
| 0.22909  | -0.0344  | 0.45832  | -0.20715 | 6.37E-06 | -0.00231 | 0.96026  | -0.06496 | 0.16106  |
| 1.76E-06 | -0.00649 | 0.88876  | -0.14413 | 0.00179  | -0.04292 | 0.35471  | -0.03298 | 0.47711  |
| 2.19E-24 | 0.034282 | 0.45987  | -0.03998 | 0.38871  | 0.022627 | 0.62574  | -0.00542 | 0.90705  |
| 0.53915  | 0.025353 | 0.58472  | -0.09041 | 0.05088  | -0.06825 | 0.14085  | -0.0283  | 0.54187  |
| 0.14345  | 0.010906 | 0.81416  | -0.08203 | 0.07657  | -0.14766 | 0.00137  | -0.10517 | 0.02303  |
| 3.88E-11 | 0.073499 | 0.11269  | -0.00019 | 0.99672  | -0.01823 | 0.69442  | 0.054336 | 0.24123  |



|          |          |          |          |          |          |          |          |          |
|----------|----------|----------|----------|----------|----------|----------|----------|----------|
| 0.29777  | -0.08668 | 0.06125  | 0.062429 | 0.17804  | 0.017832 | 0.70072  | 0.026204 | 0.57217  |
| 0.37405  | 0.084935 | 0.06668  | 0.047577 | 0.3049   | -0.00131 | 0.97752  | 0.084052 | 0.06957  |
| 0.13205  | -0.09685 | 0.03642  | -0.01103 | 0.81204  | -0.06497 | 0.161    | -0.12735 | 0.00585  |
| 0.73674  | -0.13353 | 0.00384  | -0.1448  | 0.0017   | -0.07854 | 0.09002  | -0.23157 | 4.20E-07 |
| 0.01414  | -0.02599 | 0.57525  | -0.1927  | 2.76E-05 | -0.07325 | 0.11392  | -0.04085 | 0.37844  |
| 1.90E-06 | -0.01308 | 0.77795  | -0.20351 | 9.32E-06 | -0.09514 | 0.03986  | -0.12471 | 0.00697  |
| 0.00045  | 0.14656  | 0.00149  | 0.00493  | 0.91538  | 0.049666 | 0.28413  | 0.183035 | 6.94E-05 |
| 0.33509  | 0.117922 | 0.01076  | -0.14049 | 0.00234  | -0.05607 | 0.22655  | -0.08128 | 0.07932  |
| 1.60E-09 | 0.064944 | 0.16116  | -0.00177 | 0.96955  | 0.043392 | 0.34945  | 0.131671 | 0.00437  |
| 3.32E-08 | 0.056741 | 0.22099  | -0.02945 | 0.5255   | -0.01697 | 0.71455  | 0.019609 | 0.67254  |
| 8.47E-08 | 0.066438 | 0.15172  | 0.044778 | 0.33427  | 0.10381  | 0.02487  | 0.162664 | 0.00042  |
| 0.00039  | 0.022174 | 0.63268  | 0.085509 | 0.06485  | 0.110776 | 0.01663  | 0.12766  | 0.00573  |
| 0.01629  | 0.080637 | 0.08173  | -0.01777 | 0.70171  | 0.041674 | 0.36889  | 0.127489 | 0.0058   |
| 0.16304  | -0.15665 | 0.00068  | -0.08281 | 0.07382  | -0.15988 | 0.00052  | -0.26394 | 6.98E-09 |
| 0.45997  | -0.1449  | 0.00169  | -0.07391 | 0.1107   | -0.02533 | 0.58503  | -0.12659 | 0.00616  |
| 0.64722  | -0.02977 | 0.52099  | 0.032984 | 0.47704  | 0.097714 | 0.03477  | -0.00258 | 0.95558  |
| 6.07E-07 | 0.048417 | 0.29644  | -0.10461 | 0.02377  | -0.00766 | 0.86881  | 0.015672 | 0.73553  |
| 0.00251  | 0.003965 | 0.93189  | 0.187335 | 4.63E-05 | -0.12774 | 0.0057   | -0.04937 | 0.28703  |
| 0.49404  | 0.073499 | 0.11269  | -0.07888 | 0.08864  | 0.015455 | 0.73904  | 0.127063 | 0.00597  |
| 4.47E-09 | 0.239159 | 1.69E-07 | 0.073903 | 0.11072  | 0.278829 | 8.71E-10 | 0.450279 | 1.08E-24 |
| 0.54938  | 0.064974 | 0.16097  | 0.060198 | 0.19409  | 0.196592 | 1.88E-05 | 0.256518 | 1.88E-08 |
| 0.92149  | -0.02713 | 0.55873  | 0.102084 | 0.02739  | -0.11004 | 0.01737  | -0.05873 | 0.20521  |
| 0.18653  | -0.02921 | 0.5289   | 0.055009 | 0.23543  | 0.202951 | 9.86E-06 | 0.078092 | 0.09186  |
| 5.01E-08 | -0.06341 | 0.17132  | -0.20512 | 7.88E-06 | -0.02868 | 0.53642  | 0.008721 | 0.8509   |
| 0.06314  | -0.06231 | 0.17889  | -0.20474 | 8.20E-06 | -0.12947 | 0.00508  | -0.12152 | 0.00857  |
| 0.00034  | 0.003136 | 0.94611  | -0.0785  | 0.09019  | 0.081237 | 0.07947  | 0.1139   | 0.01378  |
| 0.49469  | 0.200147 | 1.31E-05 | -0.10826 | 0.01928  | -0.0796  | 0.08574  | -0.0319  | 0.49165  |
| 0.74329  | -0.01368 | 0.76814  | -0.07836 | 0.09075  | 0.015755 | 0.73417  | -0.0017  | 0.9708   |
| 0.00299  | 0.248513 | 5.28E-08 | 0.211415 | 4.05E-06 | 0.151788 | 0.001    | 0.254097 | 2.58E-08 |
| 8.67E-08 | 0.032174 | 0.48793  | -0.05327 | 0.2506   | 0.153711 | 0.00086  | 0.11692  | 0.01145  |
| 0.5835   | 0.261679 | 9.46E-09 | -0.08155 | 0.07832  | -0.05053 | 0.27579  | 0.018569 | 0.68898  |
| 0.52168  | 0.040879 | 0.37811  | -0.13351 | 0.00385  | 0.033089 | 0.47564  | 0.047243 | 0.30832  |
| 0.00256  | 0.22487  | 9.13E-07 | 0.044841 | 0.33359  | 0.248947 | 5.00E-08 | 0.368446 | 1.84E-16 |
| 6.73E-26 | 0.046996 | 0.31085  | -0.04343 | 0.34906  | 0.003095 | 0.94682  | 0.086746 | 0.06105  |
| 0.10986  | 0.040482 | 0.38276  | -0.07428 | 0.10892  | -0.04928 | 0.28792  | -0.04827 | 0.29788  |
| 0.696    | -0.11272 | 0.0148   | 0.030983 | 0.50419  | 0.029157 | 0.52966  | -0.08792 | 0.05764  |
| 0.00038  | 0.010044 | 0.82861  | -0.02972 | 0.52169  | -0.05786 | 0.21202  | -0.03594 | 0.43844  |
| 1.21E-18 | 0.065623 | 0.15682  | -0.05262 | 0.25642  | 0.02866  | 0.5367   | 0.0282   | 0.54326  |
| 0.52919  | -0.06501 | 0.16074  | 0.118447 | 0.01041  | 0.115685 | 0.01236  | -0.01426 | 0.75864  |
| 0.10344  | 0.029183 | 0.52929  | 0.081373 | 0.07897  | 0.081633 | 0.07802  | 0.112282 | 0.0152   |
| 0.00031  | 0.036739 | 0.42832  | 0.162287 | 0.00043  | 0.113656 | 0.01399  | 0.194208 | 2.38E-05 |
| 0.37483  | 0.057622 | 0.2139   | -0.04568 | 0.32462  | 0.104693 | 0.02366  | 0.172517 | 0.00018  |
| 0.00697  | -0.00659 | 0.88705  | -0.16224 | 0.00043  | -0.01341 | 0.77254  | -0.02459 | 0.59608  |
| 0.00343  | 0.032459 | 0.48408  | 0.299936 | 3.66E-11 | 0.170109 | 0.00022  | 0.105896 | 0.02209  |
| 0.76249  | -0.18154 | 7.96E-05 | 0.058171 | 0.20956  | -0.14155 | 0.00217  | -0.223   | 1.13E-06 |

|          |          |          |          |          |          |          |          |          |
|----------|----------|----------|----------|----------|----------|----------|----------|----------|
| 0.30157  | -0.12411 | 0.00725  | -0.04179 | 0.36759  | -0.0662  | 0.15319  | -0.1815  | 8.00E-05 |
| 0.12309  | -0.17339 | 0.00017  | -0.14868 | 0.00127  | -0.23278 | 3.64E-07 | -0.28845 | 2.12E-10 |
| 0.00137  | 0.020495 | 0.65866  | -0.13932 | 0.00255  | -0.01465 | 0.75222  | -0.07051 | 0.12811  |
| 0.79848  | -0.16066 | 0.00049  | -0.16467 | 0.00035  | -0.12149 | 0.00859  | -0.16314 | 0.0004   |
| 0.00227  | -0.13612 | 0.0032   | -0.1153  | 0.01266  | -0.06818 | 0.14123  | -0.08021 | 0.08334  |
| 0.04343  | -0.14048 | 0.00234  | -0.18955 | 3.74E-05 | -0.09543 | 0.03927  | -0.11535 | 0.01262  |
| 0.61943  | -0.18331 | 6.76E-05 | -0.16306 | 0.0004   | -0.13962 | 0.00249  | -0.21835 | 1.90E-06 |
| 0.62795  | -0.20495 | 8.02E-06 | -0.15345 | 0.00088  | -0.14028 | 0.00238  | -0.22659 | 7.50E-07 |
| 0.8861   | -0.08253 | 0.07481  | -0.2407  | 1.40E-07 | -0.04337 | 0.34968  | -0.11222 | 0.01525  |
| 0.404    | -0.00156 | 0.97313  | -0.13798 | 0.00281  | -0.06269 | 0.17622  | -0.04057 | 0.38173  |
| 0.01089  | -0.08837 | 0.05635  | -0.03072 | 0.50777  | -0.06484 | 0.16181  | -0.163   | 0.00041  |
| 0.04499  | -0.01681 | 0.71714  | -0.08845 | 0.05612  | 0.035786 | 0.4404   | -0.0197  | 0.67118  |
| 0.58733  | 0.302629 | 2.40E-11 | 0.048061 | 0.3      | 0.315012 | 3.23E-12 | 0.448893 | 1.55E-24 |
| 2.56E-06 | -0.01658 | 0.72082  | -0.06702 | 0.14819  | -0.02868 | 0.5364   | 0.020241 | 0.66262  |
| 3.88E-16 | 0.17425  | 0.00015  | 0.059002 | 0.20311  | 0.203984 | 8.87E-06 | 0.303806 | 1.99E-11 |
| 0.595    | -0.02554 | 0.58192  | -0.13432 | 0.00364  | 0.006277 | 0.89239  | -0.05864 | 0.20587  |
| 0.14652  | 0.044344 | 0.33898  | -0.12661 | 0.00615  | -0.12112 | 0.00879  | -0.09486 | 0.04046  |
| 0.52789  | 0.027032 | 0.5601   | 0.003337 | 0.94267  | 0.014077 | 0.76159  | 0.049311 | 0.28759  |
| 0.18077  | -0.01137 | 0.80636  | -0.23005 | 5.02E-07 | -0.14743 | 0.0014   | -0.10685 | 0.02092  |
| 0.00116  | -0.0955  | 0.03912  | -0.13127 | 0.00449  | -0.19158 | 3.08E-05 | -0.17931 | 9.77E-05 |
| 0.18623  | 0.005851 | 0.89966  | -0.13832 | 0.00274  | -0.02776 | 0.54961  | -0.03296 | 0.47734  |
| 0.00088  | -0.17257 | 0.00018  | -0.20991 | 4.76E-06 | -0.11897 | 0.01008  | -0.21062 | 4.41E-06 |
| 0.70999  | 0.059105 | 0.20232  | -0.03773 | 0.41601  | 0.012259 | 0.7916   | 0.120355 | 0.00923  |
| 0.1817   | 0.001923 | 0.96695  | -0.04605 | 0.32075  | -0.09803 | 0.03418  | 0.039097 | 0.39925  |
| 0.00786  | -0.00023 | 0.99604  | -0.06489 | 0.16153  | -0.01444 | 0.75561  | 0.071537 | 0.12264  |
| 3.86E-09 | 0.088334 | 0.05645  | 0.076041 | 0.10075  | 0.109003 | 0.01846  | 0.220315 | 1.53E-06 |
| 0.01754  | 0.065552 | 0.15727  | 0.005832 | 0.89997  | 0.083648 | 0.07092  | 0.077438 | 0.09463  |
| 4.05E-10 | -0.01598 | 0.73054  | -0.1817  | 7.85E-05 | -0.03796 | 0.4131   | 0.011618 | 0.80228  |
| 0.22507  | 0.028549 | 0.53828  | -0.20231 | 1.05E-05 | -0.03228 | 0.48644  | 0.021442 | 0.64396  |
| 0.00107  | -0.05096 | 0.27172  | -0.03825 | 0.40953  | 0.046181 | 0.31933  | -0.01028 | 0.82467  |
| 0.9374   | -0.13073 | 0.00466  | -0.10398 | 0.02463  | -0.0981  | 0.03405  | -0.24297 | 1.06E-07 |
| 0.81838  | -0.03169 | 0.49452  | -0.04449 | 0.33743  | 0.013421 | 0.77237  | -0.04117 | 0.37476  |
| 8.33E-11 | 0.025231 | 0.58653  | -0.09074 | 0.05002  | 0.020408 | 0.66002  | 0.014966 | 0.74703  |
| 0.05666  | -0.02846 | 0.5396   | -0.13574 | 0.00329  | 0.001875 | 0.96776  | -0.00241 | 0.9585   |
| 7.36E-17 | 0.021565 | 0.64206  | 0.06983  | 0.13186  | 0.158619 | 0.00058  | 0.178676 | 0.0001   |
| 0.03035  | 0.059526 | 0.19912  | 0.039874 | 0.38995  | 0.059511 | 0.19924  | 0.119202 | 0.00993  |
| 0.0502   | -0.02866 | 0.53674  | -0.10116 | 0.02882  | -0.02543 | 0.5836   | -0.03929 | 0.39697  |
| 5.68E-29 | 0.099344 | 0.03184  | 0.034456 | 0.45759  | -0.01355 | 0.77027  | 0.137661 | 0.00287  |
| 3.95E-06 | -0.00323 | 0.94446  | 0.039864 | 0.39007  | 0.183697 | 6.52E-05 | 0.110456 | 0.01695  |
| 0.00133  | -0.04651 | 0.31593  | -0.3186  | 1.78E-12 | -0.32943 | 2.78E-13 | -0.22503 | 8.97E-07 |
| 0.68169  | -0.10317 | 0.02578  | -0.28607 | 3.02E-10 | -0.19108 | 3.23E-05 | -0.25727 | 1.70E-08 |
| 0.36572  | -0.02701 | 0.56035  | 0.017263 | 0.70983  | -0.02314 | 0.61792  | -0.00911 | 0.84442  |
| 0.03636  | 0.077065 | 0.09623  | -0.22727 | 6.93E-07 | -0.1508  | 0.00108  | -0.10211 | 0.02735  |
| 2.36E-10 | -0.01692 | 0.71534  | -0.01363 | 0.76887  | -0.07795 | 0.09248  | -0.02595 | 0.5759   |
| 0.02233  | -0.03949 | 0.3945   | -0.05642 | 0.2236   | -0.06961 | 0.1331   | -0.00177 | 0.96949  |

|          |          |          |          |          |          |          |          |          |
|----------|----------|----------|----------|----------|----------|----------|----------|----------|
| 0.00733  | 0.031948 | 0.49099  | 0.042843 | 0.3556   | -0.03652 | 0.43111  | -0.06114 | 0.1872   |
| 2.34E-05 | -0.02935 | 0.52697  | -0.09873 | 0.03292  | -0.0199  | 0.66793  | -0.03249 | 0.48363  |
| 0.16497  | -0.07799 | 0.0923   | -0.19807 | 1.62E-05 | -0.05354 | 0.2482   | -0.09266 | 0.04535  |
| 0.37037  | -0.04277 | 0.35641  | -0.0653  | 0.15886  | 0.044327 | 0.33917  | -0.06003 | 0.19533  |
| 9.36E-07 | 0.009086 | 0.84475  | -0.09818 | 0.03391  | 0.104045 | 0.02454  | 0.071403 | 0.12335  |
| 1.56E-05 | -0.05086 | 0.27273  | -0.27652 | 1.21E-09 | -0.21249 | 3.61E-06 | -0.14243 | 0.00203  |
| 1.79E-07 | -0.1842  | 6.22E-05 | -0.01924 | 0.6784   | -0.1241  | 0.00725  | -0.21759 | 2.07E-06 |
| 0.10845  | -0.09636 | 0.03738  | -0.04402 | 0.34253  | 0.038294 | 0.40902  | -0.01631 | 0.72517  |
| 0.00026  | -0.01968 | 0.67144  | -0.1175  | 0.01105  | -0.00814 | 0.86068  | -0.041   | 0.37672  |
| 0.07865  | -0.13703 | 0.003    | -0.1437  | 0.00185  | -0.26479 | 6.22E-09 | -0.25704 | 1.75E-08 |
| 0.13776  | 0.058076 | 0.21031  | -0.03911 | 0.39912  | -0.02849 | 0.53916  | -0.02058 | 0.65729  |
| 4.57E-16 | 0.269168 | 3.41E-09 | -0.02637 | 0.56968  | 0.12523  | 0.00674  | 0.353984 | 3.12E-15 |
| 0.00789  | 0.109937 | 0.01747  | 0.162435 | 0.00042  | 0.505607 | 1.13E-31 | 0.528823 | 5.26E-35 |
| 0.00031  | -0.04245 | 0.36001  | -0.11653 | 0.01173  | -0.01394 | 0.76387  | -0.03341 | 0.4713   |
| 0.00691  | 0.167885 | 0.00027  | -0.01203 | 0.79536  | 0.127665 | 0.00573  | 0.265141 | 5.92E-09 |
| 0.00145  | -0.04177 | 0.3678   | 0.267138 | 4.51E-09 | 0.186543 | 4.99E-05 | 0.157674 | 0.00063  |
| 0.00075  | 0.048627 | 0.29434  | -0.13351 | 0.00385  | -0.09811 | 0.03404  | -0.02169 | 0.64007  |
| 0.0001   | -0.05437 | 0.24089  | 0.01361  | 0.76927  | -0.04904 | 0.29027  | -0.0026  | 0.95524  |
| 1.41E-46 | 0.126493 | 0.0062   | 0.1046   | 0.02379  | 0.066228 | 0.15302  | 0.200284 | 1.30E-05 |
| 0.98859  | -0.15563 | 0.00074  | -0.20972 | 4.85E-06 | -0.03393 | 0.46453  | -0.09792 | 0.03438  |
| 0.00116  | 0.007864 | 0.8654   | -0.23081 | 4.59E-07 | -0.14553 | 0.00161  | -0.14006 | 0.00242  |
| 1.49E-06 | 0.224216 | 9.84E-07 | 0.048608 | 0.29453  | 0.254314 | 2.50E-08 | 0.385839 | 5.01E-18 |
| 2.62E-06 | 0.037269 | 0.42168  | -0.0215  | 0.64312  | 0.075831 | 0.1017   | 0.140587 | 0.00233  |
| 1.38E-11 | 0.001786 | 0.9693   | 0.165503 | 0.00033  | 0.146711 | 0.00148  | 0.200905 | 1.22E-05 |
| 6.12E-13 | -0.09363 | 0.04314  | -0.03633 | 0.43342  | -0.19618 | 1.96E-05 | -0.16964 | 0.00023  |
| 0.47509  | -0.06192 | 0.18161  | -0.22178 | 1.30E-06 | -0.16748 | 0.00028  | -0.18063 | 8.66E-05 |
| 0.00047  | 0.045281 | 0.32887  | -0.13775 | 0.00285  | -0.00308 | 0.94704  | 0.084898 | 0.0668   |
| 0.1451   | 0.107779 | 0.01982  | 0.032129 | 0.48854  | 0.250358 | 4.17E-08 | 0.296836 | 5.93E-11 |
| 0.69664  | -0.03597 | 0.43809  | -0.13792 | 0.00282  | 0.015041 | 0.74579  | -0.01772 | 0.70243  |
| 4.91E-05 | -0.15518 | 0.00077  | -0.17996 | 9.21E-05 | -0.33311 | 1.45E-13 | -0.30022 | 3.50E-11 |
| 3.44E-20 | -0.03723 | 0.42217  | 0.018654 | 0.68763  | -0.09265 | 0.04539  | -0.00561 | 0.90384  |
| 0.00114  | -0.00878 | 0.84988  | -0.10584 | 0.02216  | -0.05553 | 0.23101  | -0.00533 | 0.90856  |
| 0.92617  | -0.17537 | 0.00014  | -0.21505 | 2.74E-06 | -0.19419 | 2.38E-05 | -0.26993 | 3.07E-09 |
| 6.69E-14 | 0.014185 | 0.75981  | -0.08418 | 0.06915  | -0.03722 | 0.42227  | -0.04171 | 0.3685   |
| 0.00113  | -0.10911 | 0.01835  | -0.2613  | 9.96E-09 | -0.20458 | 8.34E-06 | -0.2808  | 6.55E-10 |
| 1.16E-07 | 0.139294 | 0.00255  | 0.127339 | 0.00586  | 0.210425 | 4.51E-06 | 0.230721 | 4.64E-07 |
| 0.00023  | 0.138167 | 0.00277  | -0.17336 | 0.00017  | -0.07321 | 0.11412  | 0.079573 | 0.08585  |
| 6.44E-10 | 0.118649 | 0.01028  | 0.006627 | 0.88642  | 0.050171 | 0.27926  | 0.129954 | 0.00491  |
| 1.57E-06 | -0.01628 | 0.72574  | -0.02456 | 0.59655  | 0.153398 | 0.00088  | 0.041201 | 0.37435  |
| 0.0773   | -0.11059 | 0.01681  | -0.17178 | 0.00019  | -0.01933 | 0.67698  | -0.0918  | 0.04741  |
| 0.00936  | -0.01154 | 0.80359  | -0.02234 | 0.63011  | -0.06217 | 0.17984  | -0.01223 | 0.79207  |
| 0.51213  | -0.02608 | 0.57397  | -0.16998 | 0.00022  | -0.03728 | 0.42155  | -0.04807 | 0.29987  |
| 0.60258  | 0.315478 | 2.99E-12 | 0.042828 | 0.35577  | 0.284025 | 4.09E-10 | 0.437784 | 2.75E-23 |
| 0.00025  | 0.013802 | 0.7661   | -0.15232 | 0.00096  | -0.03363 | 0.46848  | -0.08842 | 0.05622  |
| 1.65E-08 | -0.04071 | 0.38012  | 0.000208 | 0.99643  | -0.03731 | 0.42122  | -0.11559 | 0.01243  |

|          |          |          |          |          |          |          |          |          |
|----------|----------|----------|----------|----------|----------|----------|----------|----------|
| 0.00675  | -0.07354 | 0.1125   | -0.20988 | 4.78E-06 | -0.14076 | 0.0023   | -0.17733 | 0.00012  |
| 9.65E-11 | 0.229472 | 5.37E-07 | 0.203749 | 9.08E-06 | 0.304343 | 1.83E-11 | 0.488546 | 2.19E-29 |
| 7.82E-10 | -0.01773 | 0.70229  | -0.12782 | 0.00567  | -0.04822 | 0.2984   | -0.02351 | 0.61238  |
| 0.97268  | -0.08357 | 0.0712   | -0.19013 | 3.54E-05 | -0.0248  | 0.59288  | -0.0809  | 0.08072  |
| 3.06E-27 | 0.077042 | 0.09633  | -0.14536 | 0.00163  | -0.08625 | 0.06256  | 0.060011 | 0.19548  |
| 0.4226   | 0.008647 | 0.85215  | -0.24215 | 1.17E-07 | -0.25152 | 3.59E-08 | -0.21803 | 1.97E-06 |
| 0.95833  | -0.00587 | 0.89933  | -0.18738 | 4.61E-05 | -0.05831 | 0.20845  | -0.05427 | 0.24178  |
| 1.19E-08 | -0.05682 | 0.22032  | -0.05126 | 0.2689   | -0.14058 | 0.00233  | -0.15236 | 0.00096  |
| 5.51E-06 | 0.007303 | 0.87493  | -0.09246 | 0.04584  | -0.02086 | 0.65295  | 0.025602 | 0.58103  |
| 0.66466  | 0.021723 | 0.63961  | -0.0988  | 0.03279  | -0.04005 | 0.3879   | -0.06839 | 0.14001  |
| 0.0878   | 0.040253 | 0.38545  | -0.09394 | 0.04245  | 0.044469 | 0.33761  | 0.049895 | 0.28192  |
| 0.22331  | -0.01287 | 0.78153  | -0.2217  | 1.31E-06 | -0.17916 | 9.91E-05 | -0.10317 | 0.02577  |
| 0.26681  | -0.03117 | 0.50157  | -0.04397 | 0.34307  | 0.01876  | 0.68595  | -0.00505 | 0.91331  |
| 1.07E-07 | -0.08447 | 0.06817  | -0.1192  | 0.00993  | -0.07581 | 0.10177  | -0.10655 | 0.02128  |
| 0.18377  | -0.09702 | 0.03608  | -0.13526 | 0.0034   | -0.09171 | 0.04763  | -0.0862  | 0.0627   |
| 0.02537  | -0.01394 | 0.76375  | -0.1015  | 0.02829  | -0.03246 | 0.48413  | -0.06847 | 0.13955  |
| 6.98E-14 | 0.042203 | 0.36283  | -0.10222 | 0.02718  | -0.0014  | 0.97596  | 0.039592 | 0.39331  |
| 0.70549  | -0.04491 | 0.33288  | -0.11069 | 0.01671  | 0.05696  | 0.21922  | 0.011418 | 0.8056   |
| 0.97231  | 0.160872 | 0.00048  | 0.164828 | 0.00035  | 0.114077 | 0.01364  | 0.192497 | 2.81E-05 |
| 0.19874  | -0.03143 | 0.49811  | -0.11196 | 0.01549  | 0.004719 | 0.91899  | -0.02864 | 0.53699  |
| 0.1092   | -0.03838 | 0.40792  | -0.17599 | 0.00013  | -0.02259 | 0.62636  | -0.05502 | 0.23533  |
| 0.15557  | 0.006297 | 0.89205  | -0.13779 | 0.00285  | -0.05729 | 0.21652  | -0.01106 | 0.81152  |
| 2.24E-12 | 0.141175 | 0.00223  | -0.05974 | 0.19751  | 0.031425 | 0.49813  | 0.194113 | 2.40E-05 |
| 0.32204  | -0.03277 | 0.47994  | -0.06492 | 0.16131  | 0.028837 | 0.53419  | -0.0354  | 0.44533  |
| 0.87247  | -0.00483 | 0.9171   | 0.069211 | 0.13532  | 0.004329 | 0.92566  | 0.060763 | 0.18993  |
| 0.74345  | -0.05146 | 0.26705  | -0.23077 | 4.61E-07 | -0.11506 | 0.01284  | -0.12447 | 0.00708  |
| 0.53126  | -0.08606 | 0.06313  | -0.1256  | 0.00657  | 0.000532 | 0.99086  | -0.08121 | 0.07959  |
| 0.16052  | 0.004549 | 0.9219   | -0.06549 | 0.15769  | 0.074209 | 0.10925  | 0.064483 | 0.16416  |
| 4.40E-06 | 0.173647 | 0.00016  | 0.172439 | 0.00018  | 0.160069 | 0.00052  | 0.33203  | 1.76E-13 |
| 0.31263  | -0.12803 | 0.00559  | -0.25887 | 1.38E-08 | -0.22591 | 8.11E-07 | -0.28229 | 5.27E-10 |
| 0.00015  | -0.05508 | 0.23483  | -0.10243 | 0.02686  | -0.05872 | 0.2053   | -0.06517 | 0.15972  |
| 7.78E-06 | 0.026706 | 0.56483  | -0.09364 | 0.04312  | 0.004592 | 0.92117  | 0.050112 | 0.27982  |
| 0.9751   | -0.05284 | 0.25447  | -0.16527 | 0.00033  | -0.006   | 0.89713  | -0.06869 | 0.13832  |
| 0.10681  | -0.05092 | 0.27217  | -0.25839 | 1.47E-08 | -0.17776 | 0.00011  | -0.20098 | 1.21E-05 |
| 0.13032  | -0.01184 | 0.79852  | -0.12606 | 0.00638  | -0.00101 | 0.98264  | -0.0268  | 0.56348  |
| 2.53E-13 | -0.01057 | 0.81973  | -0.07287 | 0.1158   | -0.0524  | 0.25844  | 0.022066 | 0.63433  |
| 1.67E-07 | 0.00547  | 0.90616  | -0.10492 | 0.02335  | -0.09314 | 0.04424  | -0.01108 | 0.81129  |
| 0.56248  | -0.04252 | 0.35926  | -0.16706 | 0.00029  | -0.06662 | 0.15058  | -0.08048 | 0.08232  |
| 1.04E-07 | -0.18047 | 8.79E-05 | -0.16879 | 0.00025  | -0.2247  | 9.31E-07 | -0.31648 | 2.53E-12 |
| 0.98082  | -0.08968 | 0.05279  | -0.07103 | 0.12533  | 0.03226  | 0.48677  | -0.09653 | 0.03705  |
| 0.01611  | -0.07011 | 0.13032  | -0.00041 | 0.99296  | 0.057572 | 0.2143   | -0.08764 | 0.05843  |
| 0.11641  | -0.14455 | 0.00174  | -0.22951 | 5.34E-07 | -0.04706 | 0.31024  | -0.17154 | 0.0002   |
| 5.82E-08 | 0.063467 | 0.17092  | 0.010429 | 0.82215  | 0.036185 | 0.43531  | 0.194296 | 2.36E-05 |
| 1.38E-07 | 0.122382 | 0.00811  | -0.08826 | 0.05666  | 0.073859 | 0.11093  | 0.1971   | 1.79E-05 |
| 8.98E-07 | -0.14894 | 0.00125  | 0.100534 | 0.02984  | 0.09328  | 0.04393  | 0.068667 | 0.13843  |

|          |          |          |          |          |          |          |          |          |
|----------|----------|----------|----------|----------|----------|----------|----------|----------|
| 5.31E-23 | 0.006945 | 0.88102  | -0.0952  | 0.03974  | -0.06453 | 0.16383  | -0.00687 | 0.8823   |
| 0.12036  | 0.189765 | 3.67E-05 | 0.252908 | 3.01E-08 | 0.318782 | 1.72E-12 | 0.387641 | 3.41E-18 |
| 0.02368  | -0.03928 | 0.39704  | -0.12914 | 0.00519  | -0.01102 | 0.81221  | -0.02321 | 0.61694  |
| 0.50293  | 0.167904 | 0.00027  | 0.068599 | 0.13882  | 0.326613 | 4.53E-13 | 0.405222 | 6.98E-20 |
| 0.15919  | 0.060844 | 0.18934  | 0.140635 | 0.00232  | 0.141397 | 0.00219  | 0.126385 | 0.00624  |
| 0.7592   | -0.16398 | 0.00037  | -0.28426 | 3.95E-10 | -0.29341 | 1.00E-10 | -0.30398 | 1.93E-11 |
| 0.06458  | -0.02292 | 0.62125  | -0.17078 | 0.00021  | -0.20508 | 7.92E-06 | -0.11717 | 0.01127  |
| 0.55376  | 0.12108  | 0.00881  | 0.002935 | 0.94956  | 0.186877 | 4.83E-05 | 0.204309 | 8.57E-06 |
| 0.47715  | 0.001173 | 0.97982  | -0.12567 | 0.00654  | -0.00822 | 0.85935  | 0.02124  | 0.64708  |
| 0.46388  | 0.047234 | 0.3084   | 0.081005 | 0.08034  | 0.031131 | 0.50215  | 0.06462  | 0.16327  |
| 0.00142  | 0.063927 | 0.16784  | 0.060895 | 0.18897  | -0.09684 | 0.03644  | -0.00375 | 0.93553  |
| 0.46777  | 0.11615  | 0.01201  | 0.231654 | 4.16E-07 | 0.033032 | 0.47639  | 0.10598  | 0.02199  |
| 0.18265  | -0.08519 | 0.06586  | -0.17369 | 0.00016  | -0.05328 | 0.25054  | -0.14929 | 0.00121  |
| 0.19546  | 0.023286 | 0.61572  | -0.11507 | 0.01284  | 0.024301 | 0.60041  | 0.070653 | 0.12735  |
| 6.69E-10 | 0.051921 | 0.26281  | -0.0747  | 0.10691  | -0.02272 | 0.6244   | 0.080075 | 0.08389  |
| 0.85817  | -0.13291 | 0.00401  | -0.19555 | 2.08E-05 | -0.18517 | 5.68E-05 | -0.26243 | 8.56E-09 |
| 0.00765  | -0.0489  | 0.29168  | -0.1525  | 0.00095  | -0.11324 | 0.01435  | -0.04829 | 0.29772  |
| 2.11E-05 | 0.091912 | 0.04713  | -0.04148 | 0.37109  | 0.084337 | 0.06862  | 0.212879 | 3.46E-06 |
| 1.08E-06 | -0.05281 | 0.25471  | -0.04542 | 0.32736  | -0.05995 | 0.19592  | -0.11225 | 0.01522  |
| 1.58E-05 | -0.04736 | 0.3071   | -0.2321  | 3.94E-07 | -0.21433 | 2.96E-06 | -0.23756 | 2.05E-07 |
| 0.01589  | -0.05005 | 0.2804   | -0.25326 | 2.87E-08 | -0.16556 | 0.00033  | -0.12817 | 0.00554  |
| 0.00381  | 0.035091 | 0.44934  | -0.06558 | 0.1571   | 0.05927  | 0.20106  | 0.161019 | 0.00048  |
| 1.99E-09 | 0.173271 | 0.00017  | -0.06337 | 0.17161  | 0.125722 | 0.00652  | 0.204546 | 8.36E-06 |
| 5.40E-05 | -0.12929 | 0.00514  | -0.11741 | 0.01111  | -0.04528 | 0.32887  | -0.14698 | 0.00145  |
| 0.08258  | -0.05287 | 0.25414  | -0.17414 | 0.00016  | -0.05526 | 0.23334  | -0.07405 | 0.11002  |
| 0.00094  | -0.22275 | 1.16E-06 | -0.24413 | 9.16E-08 | -0.11416 | 0.01357  | -0.27996 | 7.39E-10 |
| 1.27E-05 | -0.00155 | 0.9734   | -0.15742 | 0.00064  | -0.11449 | 0.0133   | -0.14831 | 0.00131  |
| 0.97972  | -0.15945 | 0.00054  | -0.07411 | 0.10972  | -0.25842 | 1.46E-08 | -0.238   | 1.95E-07 |
| 0.02569  | -0.01811 | 0.69628  | -0.14328 | 0.00191  | -0.18376 | 6.48E-05 | -0.10182 | 0.0278   |
| 0.07218  | 0.166664 | 0.0003   | 0.02289  | 0.62173  | -0.07107 | 0.12512  | 0.049895 | 0.28192  |
| 0.1963   | -0.08357 | 0.07118  | 0.156718 | 0.00068  | -0.13795 | 0.00281  | -0.17328 | 0.00017  |
| 0.00171  | -0.0338  | 0.46617  | -0.15486 | 0.00079  | -0.17378 | 0.00016  | -0.08262 | 0.07446  |
| 5.26E-07 | 0.100089 | 0.03057  | -0.05038 | 0.27724  | 0.021791 | 0.63857  | 0.128126 | 0.00556  |
| 4.26E-06 | 0.000639 | 0.98901  | -0.20693 | 6.52E-06 | -0.10876 | 0.01873  | -0.09625 | 0.03759  |
| 0.01641  | 0.089867 | 0.05229  | -0.209   | 5.24E-06 | -0.07407 | 0.10994  | 0.026293 | 0.57087  |
| 0.6832   | -0.09723 | 0.03568  | -0.25584 | 2.05E-08 | -0.19506 | 2.19E-05 | -0.22893 | 5.72E-07 |
| 0.52068  | -0.06317 | 0.17296  | -0.22736 | 6.86E-07 | -0.11096 | 0.01645  | -0.1622  | 0.00043  |
| 0.94094  | 0.070485 | 0.12826  | 0.070279 | 0.12938  | -0.04222 | 0.36269  | 0.073443 | 0.11297  |
| 0.79329  | -0.02702 | 0.56025  | -0.11557 | 0.01245  | 0.086946 | 0.06046  | 0.071255 | 0.12413  |
| 0.0713   | -0.0972  | 0.03575  | -0.02154 | 0.64243  | -0.05162 | 0.26558  | -0.02883 | 0.53425  |
| 0.15194  | -0.07891 | 0.08851  | -0.01542 | 0.73964  | -0.00242 | 0.95842  | -0.06184 | 0.18215  |
| 5.89E-07 | 0.005568 | 0.90449  | -0.07653 | 0.09856  | 0.004094 | 0.92969  | 0.011082 | 0.81123  |
| 0.49721  | -0.03544 | 0.44488  | -0.02798 | 0.54645  | 0.132535 | 0.00412  | 0.081118 | 0.07992  |
| 0.20991  | 0.000345 | 0.99406  | -0.16029 | 0.00051  | -0.01779 | 0.70131  | 0.012165 | 0.79317  |
| 0.17888  | -0.07776 | 0.09327  | -0.00171 | 0.97062  | 0.017461 | 0.70666  | -0.11314 | 0.01444  |

|          |          |          |          |          |          |          |          |          |
|----------|----------|----------|----------|----------|----------|----------|----------|----------|
| 0.07096  | -0.16152 | 0.00046  | 0.089027 | 0.05454  | 0.01516  | 0.74386  | -0.13167 | 0.00437  |
| 0.25846  | 0.028246 | 0.54259  | -0.04849 | 0.2957   | 0.060526 | 0.19167  | 0.057649 | 0.21368  |
| 4.70E-09 | -0.01182 | 0.79884  | -0.01622 | 0.72664  | -0.01866 | 0.68749  | -0.03329 | 0.47301  |
| 0.97499  | -0.11361 | 0.01403  | -0.08372 | 0.07068  | 0.05677  | 0.22076  | -0.12483 | 0.00691  |
| 0.03497  | -0.04806 | 0.30002  | -0.09009 | 0.05171  | -0.02642 | 0.56904  | -0.06278 | 0.17563  |
| 0.50533  | -0.17415 | 0.00016  | -0.22698 | 7.17E-07 | -0.24551 | 7.71E-08 | -0.29497 | 7.89E-11 |
| 0.01072  | -0.20998 | 4.73E-06 | -0.26189 | 9.20E-09 | -0.28307 | 4.70E-10 | -0.35757 | 1.57E-15 |
| 0.31527  | 0.082765 | 0.07396  | -0.12843 | 0.00544  | -0.02129 | 0.64626  | 0.019668 | 0.67161  |
| 0.00499  | 0.015857 | 0.73252  | -0.10622 | 0.02169  | -0.01983 | 0.669    | -0.02481 | 0.59277  |
| 0.25938  | -0.07032 | 0.12914  | -0.11384 | 0.01384  | -0.15143 | 0.00103  | -0.09809 | 0.03408  |
| 0.03029  | -0.00395 | 0.93219  | -0.02303 | 0.61962  | 0.102097 | 0.02737  | 0.106388 | 0.02148  |
| 0.11715  | 0.153317 | 0.00089  | -0.10054 | 0.02983  | -0.00747 | 0.87206  | 0.078695 | 0.08938  |
| 0.09794  | 0.013656 | 0.76851  | 0.084241 | 0.06894  | -0.01279 | 0.78281  | 0.001508 | 0.97407  |
| 0.70251  | 0.041112 | 0.37539  | -0.0316  | 0.49575  | -0.0575  | 0.21491  | -0.01181 | 0.79911  |
| 0.8522   | -0.00794 | 0.86418  | -0.0926  | 0.04549  | 0.066952 | 0.14857  | -0.02795 | 0.54681  |
| 8.27E-14 | 0.008271 | 0.85852  | -0.11817 | 0.0106   | -0.02959 | 0.52354  | -0.01208 | 0.79466  |
| 1.52E-07 | 0.050502 | 0.27609  | -0.12798 | 0.00561  | -0.06109 | 0.18758  | 0.012941 | 0.78031  |
| 5.37E-09 | -0.02425 | 0.60123  | -0.17037 | 0.00022  | -0.04265 | 0.3578   | -0.02592 | 0.57637  |
| 0.91601  | 0.064528 | 0.16387  | -0.14819 | 0.00132  | -0.03536 | 0.44584  | 0.069897 | 0.13148  |
| 0.10941  | 0.06672  | 0.14999  | -0.11003 | 0.01738  | 0.068231 | 0.14095  | 0.056941 | 0.21937  |
| 0.17393  | 0.031976 | 0.49061  | -0.04229 | 0.36181  | -0.02823 | 0.54287  | -0.01895 | 0.68299  |
| 1.91E-09 | 0.092433 | 0.04589  | -0.0082  | 0.85971  | 0.086349 | 0.06225  | 0.240202 | 1.49E-07 |
| 0.244    | -0.0397  | 0.39198  | -0.09047 | 0.05072  | -0.03134 | 0.49926  | -0.03615 | 0.43574  |
| 0.00215  | 0.053646 | 0.24726  | -0.00029 | 0.99497  | -0.00796 | 0.86372  | 0.137577 | 0.00289  |
| 4.44E-05 | -0.02538 | 0.58427  | -0.15212 | 0.00097  | -0.03602 | 0.43743  | -0.03196 | 0.49084  |
| 0.24139  | 0.046487 | 0.31613  | 0.050545 | 0.27569  | 0.152024 | 0.00098  | 0.043609 | 0.34706  |
| 1.42E-28 | 0.028244 | 0.54262  | -0.08903 | 0.05453  | -0.10808 | 0.01948  | -0.00095 | 0.98375  |
| 0.29585  | -0.0621  | 0.18037  | -0.12387 | 0.00736  | -0.06691 | 0.14883  | -0.08911 | 0.0543   |
| 5.01E-09 | -0.00467 | 0.91991  | -0.10121 | 0.02875  | -0.02467 | 0.59489  | 0.026493 | 0.56795  |
| 0.00632  | -0.00328 | 0.94362  | 0.026888 | 0.56218  | -0.10214 | 0.02731  | -0.02944 | 0.52567  |
| 0.1405   | -0.15935 | 0.00055  | -0.17134 | 0.0002   | -0.11642 | 0.01181  | -0.29881 | 4.36E-11 |
| 5.05E-05 | -0.00653 | 0.88814  | -0.14221 | 0.00206  | -0.07481 | 0.10638  | -0.06573 | 0.15614  |
| 0.04339  | 0.226478 | 7.59E-07 | 0.013714 | 0.76755  | 0.104105 | 0.02446  | 0.249262 | 4.80E-08 |
| 1.69E-09 | 0.010546 | 0.8202   | -0.26941 | 3.29E-09 | -0.15435 | 0.00082  | -0.07831 | 0.09097  |
| 3.36E-10 | -0.01413 | 0.76065  | 0.103839 | 0.02483  | -0.00961 | 0.83588  | 0.015646 | 0.73595  |
| 0.01008  | -0.16667 | 0.0003   | -0.20562 | 7.48E-06 | -0.14555 | 0.00161  | -0.27755 | 1.05E-09 |
| 1.99E-05 | -0.0482  | 0.29856  | -0.20516 | 7.85E-06 | -0.21828 | 1.92E-06 | -0.1251  | 0.00679  |
| 0.26803  | -0.13235 | 0.00417  | 0.128811 | 0.00531  | 0.14238  | 0.00204  | 0.10473  | 0.02361  |
| 0.15316  | -0.01733 | 0.7087   | -0.11499 | 0.0129   | 0.050505 | 0.27607  | -0.01057 | 0.81984  |
| 1.44E-05 | -0.06879 | 0.13771  | -0.08571 | 0.06421  | -0.13575 | 0.00329  | -0.12874 | 0.00533  |
| 0.0512   | -0.04938 | 0.28696  | -0.16529 | 0.00033  | -0.04617 | 0.3194   | -0.06983 | 0.13185  |
| 0.15523  | 0.009378 | 0.83982  | -0.10354 | 0.02526  | 0.043734 | 0.34567  | 0.040279 | 0.38515  |
| 0.68332  | -0.0383  | 0.40898  | -0.09258 | 0.04555  | 0.072619 | 0.11708  | 0.051854 | 0.26343  |
| 0.18317  | -0.19285 | 2.72E-05 | -0.0616  | 0.18387  | -0.22544 | 8.56E-07 | -0.24179 | 1.22E-07 |
| 6.51E-17 | -0.09012 | 0.05163  | -0.03062 | 0.50922  | -0.0564  | 0.22378  | -0.06436 | 0.16499  |

|          |          |          |          |          |          |          |          |          |
|----------|----------|----------|----------|----------|----------|----------|----------|----------|
| 0.01037  | -0.17339 | 0.00017  | -0.2047  | 8.23E-06 | 0.020734 | 0.65493  | -0.176   | 0.00013  |
| 0.05385  | 0.038509 | 0.40639  | 0.014601 | 0.75299  | 0.160778 | 0.00049  | 0.180624 | 8.67E-05 |
| 0.29112  | -0.06004 | 0.19529  | -0.02457 | 0.59641  | -0.02614 | 0.57318  | -0.11088 | 0.01652  |
| 1.37E-05 | -0.04642 | 0.3168   | -0.06965 | 0.13286  | 0.040583 | 0.38156  | -0.02262 | 0.62591  |
| 9.96E-07 | 0.108883 | 0.01859  | -0.02046 | 0.65921  | 0.056855 | 0.22007  | 0.122119 | 0.00825  |
| 0.05754  | 0.043948 | 0.34332  | -0.00041 | 0.993    | -0.0143  | 0.75789  | -0.01215 | 0.79347  |
| 0.47312  | -0.06031 | 0.19323  | -0.16056 | 0.0005   | -0.06625 | 0.15292  | -0.07619 | 0.10008  |
| 0.48678  | -0.13315 | 0.00395  | -0.01519 | 0.74339  | -0.18015 | 9.05E-05 | -0.25701 | 1.76E-08 |
| 0.93881  | -0.03828 | 0.40916  | -0.17298 | 0.00017  | 0.027824 | 0.54864  | 0.002279 | 0.96082  |
| 0.00019  | 0.049861 | 0.28225  | 0.144274 | 0.00177  | 0.101338 | 0.02855  | 0.199648 | 1.38E-05 |
| 0.43657  | 0.062306 | 0.1789   | -0.02134 | 0.64554  | 0.039574 | 0.39353  | 0.088403 | 0.05626  |
| 0.01182  | -0.13394 | 0.00373  | -0.19075 | 3.34E-05 | -0.13434 | 0.00363  | -0.22822 | 6.21E-07 |
| 0.25212  | 0.059806 | 0.19701  | -0.011   | 0.81262  | 0.112857 | 0.01468  | 0.165141 | 0.00034  |
| 0.31738  | -0.04436 | 0.33878  | -0.0015  | 0.97414  | -0.05402 | 0.24396  | -0.05612 | 0.22611  |
| 0.43339  | 0.064356 | 0.165    | 0.222958 | 1.14E-06 | 0.372969 | 7.35E-17 | 0.343784 | 2.11E-14 |
| 0.16491  | -0.02851 | 0.53888  | 0.242772 | 1.08E-07 | 0.159226 | 0.00055  | 0.159264 | 0.00055  |
| 0.25022  | -0.11521 | 0.01273  | 0.176905 | 0.00012  | 0.062904 | 0.17476  | 0.012449 | 0.78846  |
| 9.70E-05 | -0.07261 | 0.11714  | 0.081828 | 0.0773   | 0.108685 | 0.0188   | 0.038577 | 0.40557  |
| 1.38E-10 | 0.076285 | 0.09966  | -0.12512 | 0.00678  | -0.09859 | 0.03317  | 0.045844 | 0.32288  |
| 0.04366  | -0.03886 | 0.40217  | -0.11759 | 0.01098  | -0.0883  | 0.05654  | -0.11846 | 0.0104   |
| 0.10944  | 0.001541 | 0.97351  | -0.04462 | 0.33603  | -0.05404 | 0.24382  | 0.012003 | 0.79587  |
| 0.12131  | 0.053551 | 0.2481   | 0.126111 | 0.00636  | 0.067474 | 0.14543  | 0.108804 | 0.01868  |
| 1.44E-05 | -0.32265 | 8.94E-13 | -0.02907 | 0.53095  | 0.009139 | 0.84386  | -0.17107 | 0.0002   |
| 0.86854  | 0.106555 | 0.02128  | -0.18146 | 8.02E-05 | -0.02894 | 0.53273  | 0.018161 | 0.69547  |
| 0.00013  | -0.01278 | 0.78299  | -0.15106 | 0.00106  | -0.03971 | 0.39191  | -0.05614 | 0.22589  |
| 0.45511  | -0.03386 | 0.46543  | -0.03011 | 0.51633  | -0.02068 | 0.65571  | -0.10147 | 0.02834  |
| 0.00016  | 0.038849 | 0.40226  | -0.10973 | 0.01768  | -0.1175  | 0.01105  | -0.05083 | 0.27298  |
| 0.01321  | 0.223276 | 1.09E-06 | 0.199172 | 1.45E-05 | 0.21358  | 3.21E-06 | 0.324408 | 6.62E-13 |
| 0.43566  | -0.00356 | 0.93878  | -0.06147 | 0.18479  | -0.00102 | 0.98244  | -0.05025 | 0.27848  |
| 3.24E-09 | -0.12992 | 0.00492  | -0.03105 | 0.50331  | -0.20674 | 6.66E-06 | -0.18682 | 4.86E-05 |
| 0.34663  | -0.08496 | 0.06659  | -0.04898 | 0.29083  | -0.05407 | 0.2435   | -0.1314  | 0.00445  |
| 0.68211  | -0.0442  | 0.34053  | -0.15515 | 0.00077  | -0.02477 | 0.59337  | -0.04132 | 0.37297  |
| 0.00193  | -0.05081 | 0.27322  | -0.19676 | 1.85E-05 | -0.11489 | 0.01297  | -0.09436 | 0.04153  |
| 0.39481  | -0.02772 | 0.5501   | -0.1552  | 0.00076  | -0.01108 | 0.81126  | -0.01754 | 0.70536  |
| 0.01914  | 0.021367 | 0.64511  | 0.078997 | 0.08815  | 0.14843  | 0.0013   | 0.162997 | 0.00041  |
| 0.06884  | -0.10852 | 0.01899  | 0.085355 | 0.06534  | 0.132577 | 0.0041   | 0.040403 | 0.38368  |
| 0.12554  | -0.2601  | 1.17E-08 | -0.0288  | 0.53466  | -0.20709 | 6.42E-06 | -0.30196 | 2.66E-11 |
| 0.00545  | -0.03356 | 0.46936  | -0.11668 | 0.01162  | -0.06971 | 0.13252  | -0.10203 | 0.02748  |
| 0.00409  | -0.14275 | 0.00199  | 0.086004 | 0.06331  | -0.11115 | 0.01626  | -0.13117 | 0.00452  |
| 0.20533  | -0.1202  | 0.00932  | -0.09599 | 0.03812  | -0.04579 | 0.32344  | -0.21035 | 4.54E-06 |
| 0.02442  | -0.04631 | 0.31798  | -0.11076 | 0.01665  | 0.093364 | 0.04374  | -0.03922 | 0.39772  |
| 3.22E-08 | -0.08506 | 0.06627  | 0.004144 | 0.92884  | -0.17343 | 0.00017  | -0.15816 | 0.0006   |
| 0.00023  | -0.19448 | 2.32E-05 | -0.10819 | 0.01935  | -0.20006 | 1.33E-05 | -0.24746 | 6.03E-08 |
| 0.00222  | -0.16019 | 0.00051  | -0.16413 | 0.00037  | -0.20823 | 5.69E-06 | -0.26799 | 4.01E-09 |
| 4.07E-06 | -0.04713 | 0.30952  | -0.1111  | 0.01631  | 0.045743 | 0.32395  | -0.04883 | 0.29235  |

|          |          |          |          |          |          |          |          |          |
|----------|----------|----------|----------|----------|----------|----------|----------|----------|
| 2.04E-05 | -0.22    | 1.58E-06 | -0.08152 | 0.07845  | -0.23573 | 2.56E-07 | -0.26375 | 7.15E-09 |
| 0.95419  | -0.14734 | 0.00141  | -0.07314 | 0.11447  | -0.01127 | 0.80811  | -0.206   | 7.19E-06 |
| 0.28638  | 0.002084 | 0.96417  | -0.08735 | 0.05928  | 0.068275 | 0.1407   | 0.026431 | 0.56885  |
| 0.59703  | 0.111807 | 0.01564  | 0.187611 | 4.51E-05 | 0.092891 | 0.04482  | 0.135461 | 0.00336  |
| 0.27131  | -0.12158 | 0.00854  | -0.14388 | 0.00183  | -0.24426 | 9.02E-08 | -0.26588 | 5.36E-09 |
| 0.00043  | 0.048443 | 0.29617  | -0.15136 | 0.00103  | -0.01757 | 0.70485  | -0.01024 | 0.82541  |
| 0.92821  | -0.07374 | 0.11154  | 0.107697 | 0.01992  | 0.16557  | 0.00033  | 0.094786 | 0.04061  |
| 0.93434  | 0.066904 | 0.14887  | 0.043954 | 0.34325  | 0.006206 | 0.8936   | 0.094378 | 0.04149  |
| 0.00944  | -0.12339 | 0.0076   | -0.0691  | 0.13597  | -0.17015 | 0.00022  | -0.28348 | 4.43E-10 |
| 0.0237   | 0.004433 | 0.92389  | -0.13565 | 0.00331  | -0.04179 | 0.36758  | -0.02045 | 0.65929  |
| 4.27E-05 | 0.064203 | 0.16601  | -0.06316 | 0.173    | -0.01506 | 0.74543  | 0.078778 | 0.08904  |
| 0.02756  | -0.06305 | 0.17375  | -0.29524 | 7.58E-11 | -0.13221 | 0.00421  | -0.18007 | 9.12E-05 |
| 0.1513   | -0.0216  | 0.64145  | -0.16238 | 0.00043  | -0.09534 | 0.03945  | -0.11108 | 0.01633  |
| 0.16055  | -0.14683 | 0.00146  | -0.12444 | 0.00709  | -0.24502 | 8.20E-08 | -0.23256 | 3.73E-07 |
| 0.726    | -0.03529 | 0.44675  | -0.12392 | 0.00734  | 0.033444 | 0.47092  | -0.01708 | 0.71271  |
| 0.1727   | -0.04372 | 0.34579  | -0.1368  | 0.00305  | -0.00353 | 0.93938  | -0.01108 | 0.81117  |
| 0.00117  | -0.01593 | 0.73129  | -0.16605 | 0.00031  | -0.05767 | 0.21353  | -0.01871 | 0.6868   |
| 0.00126  | 0.017313 | 0.70902  | -0.10491 | 0.02338  | -0.01655 | 0.72134  | -0.03198 | 0.49051  |
| 0.43615  | 0.051642 | 0.26539  | -0.03445 | 0.45766  | -0.00346 | 0.94055  | 0.055038 | 0.23519  |
| 0.62801  | -0.08374 | 0.07061  | -0.08485 | 0.06696  | -0.07792 | 0.09257  | -0.17088 | 0.00021  |
| 0.55132  | 0.000517 | 0.99111  | -0.18406 | 6.30E-05 | -0.04973 | 0.28351  | -0.00058 | 0.99007  |
| 0.9499   | -0.04903 | 0.29038  | -0.13418 | 0.00367  | 0.032083 | 0.48916  | -0.00124 | 0.9786   |
| 0.9353   | -0.01855 | 0.68928  | -0.1087  | 0.01879  | -0.06289 | 0.17487  | -0.02949 | 0.52499  |
| 0.02968  | -0.06773 | 0.14393  | 0.025445 | 0.58336  | 0.03714  | 0.42329  | -0.01445 | 0.75541  |
| 0.01978  | -0.02102 | 0.65056  | -0.10208 | 0.0274   | -0.00175 | 0.96996  | 0.055003 | 0.23549  |
| 0.00088  | -0.1338  | 0.00377  | -0.33554 | 9.43E-14 | -0.18822 | 4.25E-05 | -0.26905 | 3.46E-09 |
| 0.00575  | 0.042565 | 0.35873  | -0.25287 | 3.02E-08 | -0.19994 | 1.34E-05 | -0.08783 | 0.05787  |
| 3.64E-11 | 0.15722  | 0.00065  | 0.075335 | 0.10396  | 0.225742 | 8.26E-07 | 0.263085 | 7.83E-09 |
| 1.06E-12 | 0.143079 | 0.00194  | -0.0436  | 0.34714  | 0.042183 | 0.36307  | 0.191012 | 3.25E-05 |
| 5.60E-05 | 0.084654 | 0.06758  | -0.11846 | 0.0104   | -0.04247 | 0.35978  | 0.130728 | 0.00466  |
| 0.12474  | -0.11894 | 0.0101   | -0.05313 | 0.25186  | -0.03053 | 0.51042  | -0.16647 | 0.0003   |
| 0.00175  | -0.03515 | 0.44851  | 0.030763 | 0.50722  | 0.054195 | 0.24245  | -0.00866 | 0.85201  |
| 0.00874  | -0.05603 | 0.22687  | -0.08568 | 0.0643   | -0.12092 | 0.00891  | -0.14584 | 0.00158  |
| 0.99065  | -0.03208 | 0.48915  | -0.07466 | 0.10711  | -0.05204 | 0.2617   | -0.05535 | 0.23257  |
| 4.90E-06 | 0.093344 | 0.04378  | -0.00076 | 0.98692  | 0.194347 | 2.35E-05 | 0.270804 | 2.72E-09 |
| 2.37E-08 | 0.120662 | 0.00905  | -0.14562 | 0.0016   | -0.07175 | 0.12152  | 0.123647 | 0.00747  |
| 0.58091  | -0.02158 | 0.64181  | -0.03058 | 0.50975  | -0.04163 | 0.36945  | -0.00305 | 0.94755  |
| 0.00014  | -0.0036  | 0.9381   | -0.1027  | 0.02646  | 0.104174 | 0.02437  | 0.037364 | 0.4205   |
| 3.25E-11 | -0.05539 | 0.23219  | -0.14071 | 0.00231  | -0.16371 | 0.00038  | -0.07187 | 0.12093  |
| 0.7806   | -0.03853 | 0.40613  | -0.14181 | 0.00213  | -0.12615 | 0.00634  | -0.09907 | 0.03232  |
| 0.4868   | -0.04998 | 0.28106  | -0.16744 | 0.00028  | -0.03246 | 0.48405  | -0.04936 | 0.28712  |
| 6.24E-06 | -0.26175 | 9.37E-09 | -0.09458 | 0.04104  | -0.25315 | 2.91E-08 | -0.30459 | 1.75E-11 |
| 0.8924   | -0.06871 | 0.13816  | -0.12633 | 0.00626  | -0.13376 | 0.00378  | -0.17381 | 0.00016  |
| 0.95287  | -0.10904 | 0.01842  | -0.20001 | 1.33E-05 | -0.24434 | 8.93E-08 | -0.26984 | 3.10E-09 |
| 0.3947   | 0.084458 | 0.06823  | 0.033101 | 0.47548  | 0.267793 | 4.12E-09 | 0.301685 | 2.78E-11 |



|          |          |          |          |          |          |          |          |          |
|----------|----------|----------|----------|----------|----------|----------|----------|----------|
| 4.84E-14 | -0.06563 | 0.15676  | -0.00182 | 0.96864  | -0.08327 | 0.07222  | -0.00163 | 0.97192  |
| 0.17323  | 0.055083 | 0.23481  | 0.095293 | 0.03955  | 0.011391 | 0.80607  | 0.092392 | 0.04599  |
| 1.65E-05 | 0.259783 | 1.22E-08 | -0.0101  | 0.8276   | 0.160184 | 0.00051  | 0.296337 | 6.40E-11 |
| 0.00017  | 0.013384 | 0.77298  | -0.00543 | 0.90684  | 0.042591 | 0.35844  | 0.073961 | 0.11044  |
| 0.0016   | 0.060929 | 0.18872  | 0.079643 | 0.08557  | 0.209332 | 5.06E-06 | 0.260186 | 1.16E-08 |
| 0.18956  | -0.06177 | 0.18266  | -0.15464 | 0.0008   | -0.05619 | 0.22556  | -0.05867 | 0.20569  |
| 0.50021  | -0.06559 | 0.15704  | -0.15873 | 0.00058  | -0.07614 | 0.1003   | -0.12768 | 0.00573  |
| 0.65251  | -0.10581 | 0.0222   | -0.22581 | 8.20E-07 | -0.2097  | 4.87E-06 | -0.24782 | 5.77E-08 |
| 0.66992  | -0.04244 | 0.36009  | -0.16456 | 0.00036  | 0.00549  | 0.90581  | -0.05122 | 0.26928  |
| 0.00026  | -0.00924 | 0.84213  | 0.035186 | 0.44811  | 0.308017 | 1.01E-11 | 0.197173 | 1.77E-05 |
| 9.24E-06 | -0.0281  | 0.54465  | 0.155431 | 0.00075  | 0.03087  | 0.50574  | 0.02736  | 0.55533  |
| 0.00608  | -0.00362 | 0.93783  | -0.0599  | 0.19634  | 0.11577  | 0.0123   | 0.006653 | 0.88598  |
| 3.77E-18 | 0.068289 | 0.14061  | -0.13995 | 0.00244  | -0.0974  | 0.03537  | 0.023644 | 0.61029  |
| 0.00031  | -0.02816 | 0.54386  | 0.087211 | 0.05967  | -0.0414  | 0.37209  | -0.09032 | 0.05111  |
| 0.01304  | -0.00157 | 0.97301  | -0.09617 | 0.03776  | -0.039   | 0.40047  | -0.06188 | 0.18193  |
| 0.83026  | -0.07796 | 0.09243  | -0.14651 | 0.0015   | -0.02908 | 0.53076  | -0.09295 | 0.04468  |
| 5.12E-19 | 0.029856 | 0.51983  | -0.10098 | 0.02911  | -0.02273 | 0.62415  | 0.037301 | 0.42128  |
| 0.98583  | -0.02989 | 0.5194   | -0.03874 | 0.40362  | -0.07454 | 0.10769  | -0.0703  | 0.12927  |
| 0.00021  | 0.072499 | 0.11768  | 0.042846 | 0.35556  | 0.015035 | 0.74589  | 0.09949  | 0.03159  |
| 9.08E-24 | 0.08256  | 0.07468  | -0.09215 | 0.04656  | -0.05287 | 0.25417  | 0.097504 | 0.03516  |
| 9.79E-09 | 0.043258 | 0.35095  | -0.0299  | 0.51919  | 0.022455 | 0.62837  | 0.026807 | 0.56337  |
| 1.07E-05 | -0.01018 | 0.82635  | 0.082233 | 0.07585  | 0.110325 | 0.01708  | 0.054771 | 0.23747  |
| 5.14E-08 | 0.021736 | 0.63942  | -0.08532 | 0.06545  | -0.06219 | 0.17968  | -0.01365 | 0.76865  |
| 2.83E-06 | 0.074437 | 0.10816  | -0.14011 | 0.00241  | 0.007074 | 0.87883  | 0.054672 | 0.23832  |
| 0.0282   | -0.04067 | 0.38056  | -0.18374 | 6.50E-05 | -0.12889 | 0.00528  | -0.15475 | 0.00079  |
| 3.82E-09 | -0.00297 | 0.94904  | -0.13023 | 0.00482  | -0.05579 | 0.22881  | -0.04367 | 0.34635  |
| 0.60047  | 0.084894 | 0.06681  | 0.031525 | 0.49675  | 0.168618 | 0.00025  | 0.291476 | 1.35E-10 |
| 0.02976  | 0.004756 | 0.91836  | -0.1161  | 0.01205  | 0.086062 | 0.06313  | 0.055932 | 0.22766  |
| 1.95E-11 | 0.02738  | 0.55505  | -0.04865 | 0.29413  | 0.042038 | 0.36472  | 0.150824 | 0.00108  |
| 1.19E-19 | 0.032842 | 0.47894  | 0.060554 | 0.19146  | -0.06459 | 0.16349  | 0.059725 | 0.19762  |
| 0.24664  | 0.102622 | 0.02658  | 0.041812 | 0.3673   | 0.282698 | 4.97E-10 | 0.223399 | 1.08E-06 |
| 0.43104  | -0.12261 | 0.00799  | -0.16366 | 0.00038  | -0.06635 | 0.15226  | -0.14485 | 0.0017   |
| 0.00802  | -0.00873 | 0.85067  | -0.09354 | 0.04333  | 0.000177 | 0.99696  | 0.00133  | 0.97714  |
| 0.00121  | -0.00254 | 0.95631  | -0.10324 | 0.02568  | -0.02357 | 0.61138  | 0.004051 | 0.93043  |
| 0.99286  | 0.031885 | 0.49185  | -0.13907 | 0.0026   | -0.063   | 0.1741   | -0.04701 | 0.31072  |
| 1.86E-10 | -0.00982 | 0.83232  | -0.0831  | 0.07279  | -0.02257 | 0.62655  | 0.002563 | 0.95595  |
| 0.0367   | -0.03792 | 0.41361  | -0.1195  | 0.00975  | -0.01417 | 0.7601   | -0.02925 | 0.52831  |
| 0.16028  | 0.029574 | 0.52378  | -0.13171 | 0.00436  | 0.044929 | 0.33264  | 0.087361 | 0.05924  |
| 0.74545  | 0.002165 | 0.96278  | 0.057683 | 0.21341  | 0.09638  | 0.03734  | 0.108182 | 0.01936  |
| 0.00013  | -0.09759 | 0.03499  | -0.06929 | 0.13487  | -0.06053 | 0.19165  | -0.04062 | 0.38115  |
| 0.53053  | -0.12163 | 0.00851  | -0.0531  | 0.2521   | -0.00411 | 0.92935  | -0.06065 | 0.19073  |
| 0.00052  | -0.07876 | 0.08911  | -0.08409 | 0.06946  | -0.15866 | 0.00058  | -0.11633 | 0.01188  |
| 0.11525  | -0.27039 | 2.88E-09 | -0.01072 | 0.81724  | -0.07358 | 0.11232  | -0.33205 | 1.75E-13 |
| 2.02E-10 | -0.12462 | 0.00701  | -0.01295 | 0.78012  | -0.1007  | 0.02957  | -0.22115 | 1.39E-06 |
| 0.09586  | -0.07094 | 0.12579  | -0.16081 | 0.00049  | -0.03855 | 0.40588  | -0.12942 | 0.00509  |

|          |          |          |          |          |          |          |          |          |
|----------|----------|----------|----------|----------|----------|----------|----------|----------|
| 0.02337  | -0.17436 | 0.00015  | -0.06581 | 0.15565  | 0.010176 | 0.8264   | -0.1443  | 0.00177  |
| 0.2984   | -0.05561 | 0.23038  | 0.059389 | 0.20016  | 0.10094  | 0.02918  | 0.022327 | 0.63034  |
| 0.00227  | -0.26291 | 8.02E-09 | -0.04456 | 0.33668  | -0.04131 | 0.37312  | -0.22578 | 8.23E-07 |
| 0.14066  | -0.06086 | 0.18925  | -0.00376 | 0.93542  | 0.103683 | 0.02505  | 0.010922 | 0.8139   |
| 1.82E-06 | 0.024641 | 0.59531  | -0.09543 | 0.03926  | -0.02622 | 0.57195  | 0.034141 | 0.46171  |
| 0.09573  | -0.11836 | 0.01047  | -0.04001 | 0.38828  | -0.01749 | 0.70626  | -0.17318 | 0.00017  |
| 0.62886  | -0.12945 | 0.00508  | -0.01225 | 0.79177  | -0.00895 | 0.84708  | -0.1339  | 0.00374  |
| 0.47816  | -0.076   | 0.10093  | 0.184796 | 5.88E-05 | 0.201869 | 1.10E-05 | 0.252253 | 3.27E-08 |
| 0.24851  | 0.007434 | 0.8727   | -0.12516 | 0.00677  | 0.001402 | 0.9759   | 0.003868 | 0.93357  |
| 0.00153  | 0.016349 | 0.72456  | -0.11423 | 0.01351  | -0.04557 | 0.32577  | -0.05711 | 0.21799  |
| 0.27576  | 0.048567 | 0.29494  | -0.01718 | 0.71122  | 0.00398  | 0.93164  | -0.00294 | 0.94948  |
| 0.00102  | 0.016403 | 0.72368  | 0.094787 | 0.04061  | 0.085459 | 0.06501  | 0.119675 | 0.00964  |
| 0.30075  | -0.07438 | 0.10843  | 0.04085  | 0.37844  | 0.001234 | 0.97878  | -0.02304 | 0.61945  |
| 0.46205  | -0.05456 | 0.2393   | 0.021001 | 0.65079  | 0.069726 | 0.13243  | -0.04272 | 0.35696  |
| 0.13928  | -0.10116 | 0.02884  | 0.017811 | 0.70106  | 0.05197  | 0.26236  | -0.12231 | 0.00814  |
| 0.80075  | -0.05937 | 0.20027  | -0.05794 | 0.21137  | 0.082427 | 0.07515  | -0.02694 | 0.56143  |
| 0.65549  | 0.1075   | 0.02015  | 0.1555   | 0.00075  | 0.034026 | 0.46322  | 0.090096 | 0.05169  |
| 3.87E-06 | -0.05658 | 0.2223   | 0.342267 | 2.79E-14 | 0.015393 | 0.74006  | 0.012539 | 0.78697  |
| 5.39E-07 | 0.019064 | 0.68113  | -0.19318 | 2.63E-05 | -0.03654 | 0.43082  | 0.002102 | 0.96387  |
| 0.00576  | -0.06125 | 0.18638  | -0.17585 | 0.00013  | -0.14397 | 0.00181  | -0.1791  | 9.96E-05 |
| 1.72E-06 | 0.059921 | 0.19615  | -0.04628 | 0.31826  | 0.081927 | 0.07695  | 0.0853   | 0.06551  |
| 0.01828  | 0.062307 | 0.1789   | -0.04939 | 0.28679  | -0.17218 | 0.00018  | -0.0738  | 0.1112   |
| 0.04917  | -0.03475 | 0.45369  | -0.03632 | 0.43359  | 0.039475 | 0.3947   | 0.038993 | 0.40052  |
| 0.0026   | -0.08702 | 0.06023  | 0.039076 | 0.39951  | -0.13414 | 0.00368  | -0.19731 | 1.75E-05 |
| 0.37044  | 0.038642 | 0.40477  | -0.01878 | 0.68571  | 0.009874 | 0.83147  | 0.067545 | 0.145    |
| 0.84881  | -0.18404 | 6.31E-05 | -0.10673 | 0.02106  | -0.16514 | 0.00034  | -0.23918 | 1.69E-07 |
| 0.33324  | 0.152227 | 0.00097  | 0.423311 | 9.96E-22 | 0.352292 | 4.31E-15 | 0.371629 | 9.66E-17 |
| 0.00042  | -0.11502 | 0.01288  | -0.13883 | 0.00264  | -0.21019 | 4.62E-06 | -0.19713 | 1.78E-05 |
| 3.14E-08 | -0.10974 | 0.01767  | -0.0596  | 0.19856  | -0.09884 | 0.03272  | -0.10938 | 0.01805  |
| 0.02989  | -0.07847 | 0.09029  | -0.10241 | 0.0269   | -0.07696 | 0.09668  | -0.19592 | 2.01E-05 |
| 0.00466  | 0.010504 | 0.8209   | 0.056981 | 0.21904  | 0.032143 | 0.48835  | 0.117787 | 0.01085  |
| 0.80114  | -0.10279 | 0.02633  | -0.02081 | 0.65378  | 0.080638 | 0.08173  | -0.11513 | 0.01279  |
| 0.00383  | -0.22532 | 8.67E-07 | 0.035077 | 0.44952  | -0.19821 | 1.60E-05 | -0.24301 | 1.05E-07 |
| 0.00108  | -0.03944 | 0.39509  | -0.01674 | 0.71817  | -0.06266 | 0.17647  | -0.02697 | 0.56093  |
| 0.13614  | -0.13899 | 0.00261  | -0.13537 | 0.00338  | -0.08263 | 0.07445  | -0.17141 | 0.0002   |
| 0.16903  | 0.030244 | 0.51441  | -0.03334 | 0.47233  | 0.011893 | 0.7977   | 0.024896 | 0.59151  |
| 0.04268  | -0.03184 | 0.49249  | 0.033909 | 0.46477  | -0.07824 | 0.09126  | -0.04953 | 0.28543  |
| 0.00018  | 0.028954 | 0.53252  | -0.05664 | 0.22186  | 0.136986 | 0.00301  | 0.111584 | 0.01585  |
| 0.01011  | -0.07376 | 0.11144  | -0.14313 | 0.00193  | -0.09671 | 0.03669  | -0.11292 | 0.01463  |
| 0.1114   | -0.03185 | 0.49227  | -0.15087 | 0.00107  | -0.00099 | 0.98296  | -0.01609 | 0.72882  |
| 0.01073  | -0.0266  | 0.56635  | -0.1376  | 0.00289  | -0.1472  | 0.00142  | -0.08571 | 0.06421  |
| 0.38262  | -0.14613 | 0.00154  | -0.16765 | 0.00027  | -0.24576 | 7.47E-08 | -0.2735  | 1.86E-09 |
| 0.25623  | 0.124754 | 0.00695  | 0.042656 | 0.3577   | 0.132672 | 0.00408  | 0.242694 | 1.10E-07 |
| 0.00094  | -0.06564 | 0.15669  | -0.13452 | 0.00359  | -0.04555 | 0.32604  | -0.11503 | 0.01286  |
| 0.8542   | 0.02889  | 0.53343  | -0.00099 | 0.98303  | -0.01034 | 0.82363  | 0.001719 | 0.97044  |

|          |          |          |          |          |          |          |          |          |
|----------|----------|----------|----------|----------|----------|----------|----------|----------|
| 0.09279  | -0.05686 | 0.21999  | 0.014499 | 0.75465  | -0.07392 | 0.11062  | -0.06088 | 0.1891   |
| 0.80358  | 0.199776 | 1.36E-05 | -0.01082 | 0.81556  | -0.11726 | 0.01122  | -0.00323 | 0.94457  |
| 1.05E-08 | -0.12587 | 0.00646  | -0.05702 | 0.21875  | -0.21761 | 2.07E-06 | -0.23238 | 3.81E-07 |
| 0.16105  | 0.062855 | 0.1751   | 0.030108 | 0.51631  | 0.127705 | 0.00572  | 0.078328 | 0.09089  |
| 0.55467  | -0.16345 | 0.00039  | -0.17268 | 0.00018  | -0.06264 | 0.17658  | -0.17714 | 0.00012  |
| 0.06831  | 0.182861 | 7.05E-05 | -0.15643 | 0.00069  | 0.057676 | 0.21347  | 0.180252 | 8.97E-05 |
| 0.54499  | -0.04533 | 0.32833  | 0.184635 | 5.97E-05 | 0.164346 | 0.00036  | 0.083489 | 0.07146  |
| 0.2317   | -0.0118  | 0.79926  | -0.17229 | 0.00018  | -0.0401  | 0.38722  | -0.05019 | 0.27907  |
| 0.09169  | 0.186741 | 4.90E-05 | -0.15716 | 0.00065  | -0.05227 | 0.25965  | 0.051606 | 0.26572  |
| 0.00584  | -0.01188 | 0.79792  | 0.009662 | 0.83505  | 0.027819 | 0.54872  | 0.006125 | 0.89497  |
| 1.25E-09 | 0.208419 | 5.58E-06 | -0.03026 | 0.51422  | -0.05589 | 0.228    | 0.00693  | 0.88126  |
| 0.12204  | 0.06819  | 0.14119  | -0.14558 | 0.00161  | -0.11562 | 0.01241  | -0.11605 | 0.01209  |
| 0.61988  | -0.05622 | 0.22525  | -0.12194 | 0.00834  | -0.02522 | 0.58671  | -0.12128 | 0.0087   |
| 6.89E-08 | 0.148762 | 0.00126  | 0.105652 | 0.02241  | 0.105112 | 0.0231   | 0.145217 | 0.00165  |
| 7.24E-05 | -0.23264 | 3.70E-07 | -0.3353  | 9.83E-14 | -0.29912 | 4.16E-11 | -0.43075 | 1.61E-22 |
| 4.15E-28 | 0.192106 | 2.92E-05 | -0.13182 | 0.00432  | -0.02751 | 0.55319  | 0.122921 | 0.00783  |
| 0.80024  | -0.07219 | 0.11926  | -0.0088  | 0.84958  | -0.04165 | 0.36914  | -0.09459 | 0.04104  |
| 1.31E-09 | 0.131427 | 0.00444  | -0.08264 | 0.07439  | -0.0431  | 0.35272  | 0.121199 | 0.00875  |
| 0.0179   | -0.06497 | 0.161    | -0.15484 | 0.00079  | -0.08902 | 0.05457  | -0.11774 | 0.01088  |
| 0.98305  | -0.14151 | 0.00218  | -0.07687 | 0.09707  | -0.01599 | 0.73035  | -0.14439 | 0.00176  |
| 0.26341  | -0.10618 | 0.02174  | -0.38342 | 8.39E-18 | -0.29099 | 1.45E-10 | -0.25153 | 3.59E-08 |
| 0.3658   | 0.036761 | 0.42804  | 0.029752 | 0.52129  | 0.138012 | 0.0028   | 0.152186 | 0.00097  |
| 0.00571  | -0.04409 | 0.34171  | 0.198883 | 1.49E-05 | -0.04933 | 0.28741  | -0.0898  | 0.05247  |
| 9.31E-05 | -0.24874 | 5.13E-08 | -0.40293 | 1.18E-19 | -0.32613 | 4.93E-13 | -0.51008 | 2.68E-32 |
| 0.27929  | -0.05266 | 0.25607  | 0.00095  | 0.98366  | 0.035006 | 0.45043  | -0.10304 | 0.02597  |
| 0.00019  | -0.0763  | 0.09961  | -0.21875 | 1.82E-06 | -0.28996 | 1.69E-10 | -0.25477 | 2.36E-08 |
| 0.2722   | -0.02103 | 0.6504   | -0.13539 | 0.00337  | 0.036877 | 0.42658  | 0.033987 | 0.46373  |
| 0.00158  | 0.020139 | 0.66423  | 0.021033 | 0.65028  | 0.040297 | 0.38493  | 0.046313 | 0.31794  |
| 0.01149  | -0.04485 | 0.33351  | 0.145658 | 0.0016   | 0.108944 | 0.01852  | 0.079011 | 0.08809  |
| 0.1271   | 0.102601 | 0.02661  | -0.23411 | 3.11E-07 | -0.14542 | 0.00163  | -0.02398 | 0.60528  |
| 0.05485  | -0.28879 | 2.02E-10 | -0.18112 | 8.28E-05 | -0.18223 | 7.48E-05 | -0.29438 | 8.64E-11 |
| 0.59414  | 0.095162 | 0.03982  | -0.09095 | 0.0495   | 0.062085 | 0.18045  | 0.204058 | 8.80E-06 |
| 8.06E-06 | 0.083002 | 0.07314  | -0.03322 | 0.47389  | 0.006817 | 0.8832   | 0.093116 | 0.0443   |
| 0.72721  | -0.16216 | 0.00043  | -0.18427 | 6.18E-05 | -0.13742 | 0.00292  | -0.19097 | 3.27E-05 |
| 2.42E-10 | -0.09017 | 0.0515   | -0.08314 | 0.07265  | -0.08001 | 0.08414  | -0.11112 | 0.01629  |
| 3.43E-07 | 0.181061 | 8.33E-05 | 0.081925 | 0.07695  | 0.11722  | 0.01124  | 0.310651 | 6.61E-12 |
| 3.27E-11 | -0.01032 | 0.82396  | -0.07728 | 0.09529  | -0.07685 | 0.09718  | -0.00914 | 0.84378  |
| 0.04726  | 0.048679 | 0.29383  | -0.05482 | 0.23708  | 0.008636 | 0.85235  | 0.129841 | 0.00495  |
| 0.41933  | 0.000712 | 0.98775  | -0.15853 | 0.00059  | 0.003034 | 0.94787  | -0.00872 | 0.85097  |
| 0.011    | -0.07787 | 0.09279  | -0.19427 | 2.36E-05 | -0.13238 | 0.00416  | -0.13771 | 0.00286  |
| 0.37444  | -0.06911 | 0.13589  | -0.05622 | 0.22523  | 0.045168 | 0.33007  | -0.01276 | 0.78332  |
| 0.77607  | -0.07315 | 0.11442  | -0.27242 | 2.17E-09 | -0.18805 | 4.32E-05 | -0.14648 | 0.0015   |
| 0.33414  | -0.15699 | 0.00066  | -0.17675 | 0.00012  | -0.23474 | 2.88E-07 | -0.29881 | 4.36E-11 |
| 0.00555  | 0.062531 | 0.17734  | -0.11124 | 0.01617  | 0.028395 | 0.54048  | 0.15241  | 0.00095  |
| 1.34E-11 | 0.132187 | 0.00422  | 0.003724 | 0.93603  | 0.052271 | 0.25961  | 0.178087 | 0.00011  |

|          |          |          |          |          |          |          |          |          |
|----------|----------|----------|----------|----------|----------|----------|----------|----------|
| 1.32E-25 | -0.02211 | 0.6337   | -0.1292  | 0.00517  | -0.03852 | 0.40628  | -0.01257 | 0.7864   |
| 5.45E-12 | 0.238568 | 1.82E-07 | 0.090259 | 0.05126  | 0.164499 | 0.00036  | 0.357897 | 1.47E-15 |
| 0.60714  | -0.02319 | 0.61715  | -0.15171 | 0.00101  | -0.0382  | 0.41011  | -0.02563 | 0.5806   |
| 0.03226  | -0.04336 | 0.3498   | 0.02923  | 0.52863  | 0.075064 | 0.10521  | -0.0528  | 0.25477  |
| 0.4446   | -0.07079 | 0.12661  | -0.21427 | 2.98E-06 | -0.11474 | 0.0131   | -0.1516  | 0.00102  |
| 1.40E-07 | 0.063418 | 0.17126  | -0.07085 | 0.12627  | 0.079669 | 0.08547  | 0.168405 | 0.00026  |
| 0.59276  | -0.01621 | 0.72687  | -0.20624 | 7.01E-06 | -0.13924 | 0.00256  | -0.11823 | 0.01056  |
| 0.74299  | 0.00317  | 0.94554  | -0.09587 | 0.03836  | 0.073462 | 0.11287  | 0.010044 | 0.82862  |
| 2.19E-06 | -0.1752  | 0.00014  | -0.09368 | 0.04304  | -0.12602 | 0.00639  | -0.27938 | 8.04E-10 |
| 7.46E-14 | -0.0312  | 0.50116  | -0.04687 | 0.31212  | -0.07252 | 0.11757  | -0.12723 | 0.0059   |
| 0.48904  | -0.03711 | 0.42362  | -0.20206 | 1.08E-05 | -0.12699 | 0.00599  | -0.07047 | 0.12835  |
| 0.0903   | -0.01765 | 0.70364  | -0.11549 | 0.01251  | 0.023379 | 0.6143   | 0.028468 | 0.53943  |
| 2.46E-08 | -0.02945 | 0.52559  | -0.24172 | 1.23E-07 | -0.1837  | 6.52E-05 | -0.0922  | 0.04645  |
| 1.40E-08 | 0.091811 | 0.04738  | 0.012035 | 0.79533  | 0.073772 | 0.11136  | 0.14786  | 0.00135  |
| 5.79E-09 | -0.01668 | 0.71923  | -0.10859 | 0.01891  | 0.059705 | 0.19777  | 0.032338 | 0.48572  |
| 0.05997  | -0.16351 | 0.00039  | -0.09106 | 0.04922  | -0.12222 | 0.00819  | -0.15735 | 0.00064  |
| 1.19E-16 | 0.134423 | 0.00361  | -0.00643 | 0.88976  | 0.101035 | 0.02903  | 0.18686  | 4.84E-05 |
| 2.51E-07 | 0.103004 | 0.02602  | -0.03797 | 0.41301  | 0.06369  | 0.16942  | 0.180862 | 8.48E-05 |
| 2.19E-05 | -0.09574 | 0.03862  | -0.07855 | 0.08997  | -0.24103 | 1.34E-07 | -0.20152 | 1.14E-05 |
| 0.61596  | -0.03526 | 0.44713  | -0.12362 | 0.00748  | 0.010226 | 0.82555  | -0.01446 | 0.75533  |
| 0.74476  | -0.03759 | 0.41773  | -0.11079 | 0.01661  | 0.027462 | 0.55386  | -0.00554 | 0.90495  |
| 0.00388  | -0.03672 | 0.42852  | -0.23012 | 4.98E-07 | -0.18084 | 8.49E-05 | -0.12708 | 0.00596  |
| 0.90108  | -0.03944 | 0.39512  | -0.12054 | 0.00912  | -0.07435 | 0.10857  | -0.10218 | 0.02724  |
| 0.31649  | -0.19133 | 3.15E-05 | -0.06469 | 0.16283  | -0.04937 | 0.28701  | -0.17708 | 0.00012  |
| 0.03589  | 0.101442 | 0.02838  | 0.182006 | 7.63E-05 | 0.002464 | 0.95764  | 0.100983 | 0.02911  |
| 0.14959  | -0.0779  | 0.09267  | -0.29491 | 7.97E-11 | -0.11594 | 0.01217  | -0.17377 | 0.00016  |
| 1.98E-06 | -0.06356 | 0.1703   | -0.16398 | 0.00037  | -0.07421 | 0.10925  | -0.13729 | 0.00295  |
| 1.88E-06 | 0.039046 | 0.39987  | -0.19272 | 2.75E-05 | -0.05401 | 0.24405  | -0.02303 | 0.61954  |
| 0.01888  | 0.021886 | 0.6371   | -0.1413  | 0.00221  | -0.04286 | 0.35544  | 0.001757 | 0.96979  |
| 0.17531  | 0.090276 | 0.05122  | -0.1523  | 0.00096  | -0.01834 | 0.6926   | 0.074428 | 0.1082   |
| 0.55922  | -0.04419 | 0.34062  | -0.14685 | 0.00146  | -0.11827 | 0.01053  | -0.15161 | 0.00101  |
| 0.33311  | -0.08777 | 0.05804  | -0.10485 | 0.02345  | -0.05146 | 0.26712  | -0.16117 | 0.00047  |
| 0.09978  | -0.10103 | 0.02904  | -0.15201 | 0.00098  | -0.16307 | 0.0004   | -0.27041 | 2.87E-09 |
| 0.01098  | 0.053839 | 0.24557  | -0.05061 | 0.27504  | 0.06792  | 0.14278  | 0.189279 | 3.84E-05 |
| 0.00045  | 0.074784 | 0.10652  | 0.141813 | 0.00213  | 0.424095 | 8.24E-22 | 0.438568 | 2.25E-23 |
| 0.00026  | 0.020708 | 0.65534  | -0.01735 | 0.70849  | 0.005413 | 0.90714  | 0.036833 | 0.42714  |
| 0.00025  | -0.14315 | 0.00193  | -0.008   | 0.86309  | -0.02985 | 0.51989  | -0.121   | 0.00886  |
| 0.71212  | -0.06984 | 0.1318   | 0.124678 | 0.00698  | -0.04333 | 0.35011  | -0.0601  | 0.19484  |
| 0.02902  | 0.059441 | 0.19977  | -0.25633 | 1.92E-08 | -0.08865 | 0.05558  | 0.013962 | 0.76346  |
| 0.71215  | -0.01279 | 0.78274  | -0.12    | 0.00944  | 0.02769  | 0.55057  | 0.017356 | 0.70834  |
| 0.00017  | 0.093257 | 0.04398  | 0.011266 | 0.80815  | 0.204856 | 8.10E-06 | 0.308296 | 9.69E-12 |
| 0.87924  | -0.08949 | 0.05328  | -0.19335 | 2.59E-05 | -0.18009 | 9.10E-05 | -0.18013 | 9.07E-05 |
| 0.55783  | -0.03682 | 0.42724  | -0.11206 | 0.01541  | 0.033503 | 0.47012  | -0.02322 | 0.61669  |
| 0.0268   | 0.003384 | 0.94187  | -0.03333 | 0.4724   | -0.01775 | 0.70199  | 0.040983 | 0.37689  |
| 0.6473   | 0.044594 | 0.33626  | -0.01509 | 0.74507  | -0.11099 | 0.01642  | 0.004341 | 0.92546  |

|          |          |          |          |          |          |          |          |          |
|----------|----------|----------|----------|----------|----------|----------|----------|----------|
| 3.57E-08 | 0.140721 | 0.0023   | 0.012412 | 0.78908  | 0.098707 | 0.03296  | 0.233966 | 3.16E-07 |
| 0.93216  | -0.05259 | 0.25671  | -0.10084 | 0.02933  | 0.026129 | 0.57327  | -0.00963 | 0.8355   |
| 0.17165  | -0.11901 | 0.01005  | -0.2076  | 6.08E-06 | -0.13335 | 0.00389  | -0.17367 | 0.00016  |
| 0.17409  | 0.024381 | 0.5992   | -0.084   | 0.06975  | 0.077927 | 0.09256  | 0.068964 | 0.13672  |
| 0.41573  | -0.07203 | 0.12009  | -0.13111 | 0.00454  | -0.00717 | 0.87719  | -0.08793 | 0.0576   |
| 0.31731  | 0.013381 | 0.77304  | -0.09022 | 0.05137  | 0.002131 | 0.96336  | 0.015045 | 0.74574  |
| 9.69E-19 | 0.011968 | 0.79645  | -0.04814 | 0.29919  | -0.07931 | 0.08688  | 0.020987 | 0.65101  |
| 0.03802  | -0.10348 | 0.02534  | -0.04207 | 0.36434  | -0.03383 | 0.46584  | -0.1931  | 2.65E-05 |
| 0.13715  | -0.10508 | 0.02315  | -0.06868 | 0.13834  | -0.08126 | 0.0794   | -0.19434 | 2.35E-05 |
| 0.03771  | -0.01534 | 0.74096  | -0.03112 | 0.50232  | 0.065099 | 0.16016  | 0.140109 | 0.00241  |
| 1.88E-08 | -0.02833 | 0.54143  | -0.06522 | 0.15939  | -0.04876 | 0.29305  | 0.002894 | 0.95027  |
| 0.00702  | -0.01151 | 0.80401  | -0.12463 | 0.007    | -0.05152 | 0.26654  | -0.08243 | 0.07515  |
| 1.08E-09 | 0.079436 | 0.08639  | -0.02095 | 0.65164  | 0.003805 | 0.93464  | 0.087951 | 0.05754  |
| 1.44E-07 | 0.041164 | 0.37478  | -0.10318 | 0.02576  | 0.007984 | 0.86338  | -0.02422 | 0.60166  |
| 0.1007   | -0.04568 | 0.32466  | -0.04976 | 0.28326  | 0.02172  | 0.63966  | -0.02484 | 0.59231  |
| 0.19701  | -0.04812 | 0.29941  | 0.09231  | 0.04618  | 0.207178 | 6.35E-06 | 0.06132  | 0.18589  |
| 0.0379   | -0.07885 | 0.08874  | -0.05334 | 0.24998  | -0.10129 | 0.02862  | -0.11019 | 0.01722  |
| 0.40468  | -0.04715 | 0.30932  | -0.21454 | 2.89E-06 | -0.05854 | 0.20664  | -0.11981 | 0.00956  |
| 2.98E-07 | 0.064428 | 0.16452  | -0.08563 | 0.06447  | 0.065431 | 0.15804  | 0.089122 | 0.05428  |
| 0.84014  | -0.07364 | 0.112    | -0.05191 | 0.26289  | -0.01681 | 0.71708  | -0.0299  | 0.51923  |
| 0.69811  | 0.022335 | 0.63021  | -0.18479 | 5.89E-05 | -0.11384 | 0.01383  | -0.18935 | 3.82E-05 |
| 1.47E-08 | -0.07916 | 0.08748  | 0.049335 | 0.28736  | 0.066306 | 0.15254  | -0.06899 | 0.13657  |
| 0.00749  | 0.071221 | 0.12431  | 0.033929 | 0.4645   | 0.00952  | 0.83744  | 0.149707 | 0.00118  |
| 0.48822  | -0.03668 | 0.42904  | -0.19312 | 2.65E-05 | -0.13488 | 0.0035   | -0.17949 | 9.61E-05 |
| 0.57549  | -0.05184 | 0.26359  | -0.02545 | 0.58333  | -0.06786 | 0.14311  | -0.06481 | 0.16201  |
| 0.60127  | -0.02247 | 0.62815  | -0.20271 | 1.01E-05 | -0.02508 | 0.58877  | -0.02384 | 0.60734  |
| 0.0778   | 0.046014 | 0.32108  | 0.079482 | 0.08621  | 0.047901 | 0.30162  | 0.099741 | 0.03116  |
| 0.21254  | 0.00262  | 0.95497  | -0.13015 | 0.00485  | 0.021274 | 0.64656  | 0.056529 | 0.22273  |
| 0.81432  | -0.01182 | 0.79892  | -0.07132 | 0.12377  | 0.019475 | 0.67466  | 0.024377 | 0.59926  |
| 2.29E-05 | -0.00586 | 0.89956  | -0.1027  | 0.02647  | 0.001572 | 0.97298  | 0.038496 | 0.40655  |
| 0.58614  | -0.13214 | 0.00423  | -0.16982 | 0.00023  | -0.25446 | 2.46E-08 | -0.29553 | 7.25E-11 |
| 0.85017  | -0.09452 | 0.04117  | -0.15741 | 0.00064  | -0.21378 | 3.14E-06 | -0.24211 | 1.18E-07 |
| 0.17728  | 0.037763 | 0.41555  | 0.255535 | 2.14E-08 | 0.044117 | 0.34146  | 0.116628 | 0.01166  |
| 0.78904  | 0.025246 | 0.5863   | -0.08221 | 0.07593  | -0.01    | 0.8294   | 0.031096 | 0.50264  |
| 0.43666  | -0.05029 | 0.27808  | -0.1041  | 0.02447  | -0.03636 | 0.43307  | -0.10604 | 0.02191  |
| 0.89684  | -0.12332 | 0.00763  | -0.10886 | 0.01861  | -0.15533 | 0.00076  | -0.20123 | 1.18E-05 |
| 1.26E-21 | 0.047196 | 0.3088   | -0.03417 | 0.46129  | -0.09337 | 0.04373  | 0.075408 | 0.10363  |
| 0.52771  | -0.21291 | 3.45E-06 | -0.12033 | 0.00925  | -0.20462 | 8.30E-06 | -0.32119 | 1.15E-12 |
| 0.50829  | -0.15169 | 0.00101  | -0.25632 | 1.93E-08 | -0.21176 | 3.91E-06 | -0.27274 | 2.07E-09 |
| 0.00027  | 0.052141 | 0.2608   | -0.0572  | 0.21731  | -0.03257 | 0.48262  | 0.048432 | 0.29628  |
| 0.08935  | -0.05126 | 0.26895  | -0.13955 | 0.00251  | 0.016428 | 0.72327  | -0.04782 | 0.30243  |
| 0.46565  | 0.107967 | 0.01961  | -0.12391 | 0.00734  | 0.050681 | 0.27439  | 0.058792 | 0.20473  |
| 0.3991   | -0.04178 | 0.36764  | -0.10275 | 0.02639  | 0.006252 | 0.89282  | -0.12017 | 0.00934  |
| 0.43666  | -0.07284 | 0.11594  | -0.18935 | 3.82E-05 | -0.09519 | 0.03975  | -0.14668 | 0.00148  |
| 0.28336  | -0.12418 | 0.00722  | -0.16967 | 0.00023  | -0.14883 | 0.00126  | -0.2128  | 3.49E-06 |

|          |          |          |          |          |           |          |          |          |
|----------|----------|----------|----------|----------|-----------|----------|----------|----------|
| 0.00022  | 0.017549 | 0.70524  | 0.134738 | 0.00353  | 0.10546   | 0.02265  | 0.124527 | 0.00705  |
| 0.00333  | 0.124227 | 0.00719  | -0.06027 | 0.19355  | 0.202558  | 1.03E-05 | 0.292198 | 1.21E-10 |
| 0.09464  | -0.06042 | 0.19245  | -0.02035 | 0.66093  | 0.15496   | 0.00078  | 0.074976 | 0.10562  |
| 0.00639  | -0.03061 | 0.50928  | -0.11739 | 0.01112  | -0.13939  | 0.00254  | -0.1677  | 0.00027  |
| 6.77E-05 | -0.01373 | 0.76724  | 0.011328 | 0.80711  | -0.01469  | 0.75155  | 0.074608 | 0.10735  |
| 0.00039  | -0.08278 | 0.0739   | -0.12801 | 0.0056   | -0.04479  | 0.33415  | -0.1744  | 0.00015  |
| 0.19703  | -0.07136 | 0.12359  | -0.17053 | 0.00021  | -0.24122  | 1.31E-07 | -0.26564 | 5.54E-09 |
| 0.04005  | -0.05282 | 0.25459  | -0.12639 | 0.00624  | -0.09107  | 0.04919  | -0.14805 | 0.00133  |
| 0.6509   | -0.10542 | 0.0227   | -0.11223 | 0.01525  | -0.10724  | 0.02046  | -0.20712 | 6.39E-06 |
| 0.96825  | -0.09789 | 0.03445  | -0.15983 | 0.00053  | 0.022297  | 0.63079  | -0.15515 | 0.00077  |
| 0.51711  | -0.04067 | 0.38054  | -0.09299 | 0.04459  | -0.13029  | 0.0048   | -0.0925  | 0.04572  |
| 0.00152  | -0.00526 | 0.90978  | -0.10103 | 0.02903  | 0.023949  | 0.60569  | 0.009575 | 0.8365   |
| 0.88506  | 0.047412 | 0.30658  | -0.07291 | 0.11563  | 0.003378  | 0.94196  | 0.05026  | 0.27841  |
| 0.98371  | 0.061788 | 0.18255  | -0.10006 | 0.03062  | 0.067156  | 0.14734  | 0.109351 | 0.01809  |
| 1.04E-14 | -0.06368 | 0.16949  | -0.16613 | 0.00031  | -0.18061  | 8.68E-05 | -0.09851 | 0.03332  |
| 0.73527  | -0.05738 | 0.21586  | -0.15192 | 0.00099  | -0.05856  | 0.20648  | -0.10056 | 0.0298   |
| 0.00498  | -0.28275 | 4.93E-10 | -0.20004 | 1.33E-05 | -0.15701  | 0.00066  | -0.34776 | 1.01E-14 |
| 4.32E-08 | 0.016769 | 0.71778  | -0.0433  | 0.3505   | 0.009569  | 0.83661  | 0.048803 | 0.29259  |
| 0.65513  | -0.01448 | 0.75503  | -0.02594 | 0.57601  | -0.05732  | 0.21627  | 0.001126 | 0.98063  |
| 0.15098  | -0.03726 | 0.4218   | -0.11282 | 0.01471  | -0.11238  | 0.01511  | -0.1088  | 0.01868  |
| 0.58893  | 0.001108 | 0.98095  | -0.20525 | 7.77E-06 | -0.01652  | 0.72173  | 0.008259 | 0.85872  |
| 0.00111  | -0.02674 | 0.56436  | -0.19474 | 2.26E-05 | -0.03955  | 0.39386  | -0.07916 | 0.0875   |
| 2.06E-08 | 0.001222 | 0.97899  | -0.12783 | 0.00567  | -0.08013  | 0.08367  | -0.02089 | 0.65251  |
| 0.97902  | -0.02258 | 0.62641  | -0.12625 | 0.0063   | 0.041716  | 0.36841  | 0.023034 | 0.61954  |
| 3.56E-05 | -0.00341 | 0.94135  | -0.06962 | 0.13302  | -0.09949  | 0.03159  | -0.02547 | 0.58297  |
| 0.093    | -0.03136 | 0.49894  | -0.12199 | 0.00832  | 0.001256  | 0.97841  | -0.00469 | 0.91951  |
| 1.96E-05 | 0.051485 | 0.26685  | -0.00115 | 0.98026  | -0.02512  | 0.58817  | 0.11979  | 0.00957  |
| 0.00521  | -0.00147 | 0.97473  | -0.05138 | 0.26786  | -0.0388   | 0.40279  | 0.041152 | 0.37492  |
| 5.23E-07 | 0.09454  | 0.04114  | -0.15572 | 0.00073  | -0.00429  | 0.92638  | 0.152488 | 0.00095  |
| 1.19E-09 | -0.12236 | 0.00812  | -0.1672  | 0.00028  | -0.20678  | 6.63E-06 | -0.18432 | 6.15E-05 |
| 9.52E-05 | -0.03131 | 0.49972  | -0.16064 | 0.00049  | -0.0822   | 0.07596  | -0.10998 | 0.01743  |
| 0.01273  | 0.195231 | 2.15E-05 | 0.149547 | 0.00119  | 0.070789  | 0.12662  | 0.179234 | 9.84E-05 |
| 1.63E-07 | -0.06287 | 0.17497  | 0.061089 | 0.18756  | -0.03233  | 0.48576  | -0.04708 | 0.30996  |
| 0.14345  | -0.06344 | 0.1711   | -0.14788 | 0.00135  | -0.03245  | 0.48421  | -0.07287 | 0.1158   |
| 1.24E-07 | -0.03947 | 0.39472  | 0.044399 | 0.33838  | -0.12526  | 0.00672  | -0.01649 | 0.72227  |
| 0.00543  | 0.051447 | 0.2672   | -0.1427  | 0.00199  | 0.003125  | 0.9463   | 0.073687 | 0.11177  |
| 7.61E-09 | 0.063353 | 0.1717   | 0.13524  | 0.00341  | 0.209914  | 4.76E-06 | 0.290219 | 1.63E-10 |
| 4.31E-05 | -0.01541 | 0.7398   | -0.1472  | 0.00142  | -0.05097  | 0.27171  | -0.02079 | 0.654    |
| 7.49E-06 | -0.09749 | 0.0352   | -0.00379 | 0.93493  | -0.10902  | 0.01844  | -0.20341 | 9.41E-06 |
| 1.22E-30 | 0.0691   | 0.13595  | -0.0923  | 0.04621  | -0.10285  | 0.02625  | 0.069217 | 0.13528  |
| 0.49819  | -0.1579  | 0.00062  | -0.09386 | 0.04263  | -0.00154  | 0.97354  | -0.05719 | 0.21738  |
| 0.14589  | -0.12017 | 0.00934  | -0.30535 | 1.56E-11 | -0.23268  | 3.68E-07 | -0.3014  | 2.91E-11 |
| 0.97031  | 0.019987 | 0.66661  | -0.00389 | 0.93323  | 0.022631  | 0.62568  | 0.030457 | 0.51146  |
| 7.34E-06 | -0.10356 | 0.02522  | -0.24835 | 5.39E-08 | -0.14191  | 0.00211  | -0.21161 | 3.97E-06 |
| 0.02072  | -0.1126  | 0.01492  | -0.03995 | 0.38905  | -3.87E-05 | 0.99933  | -0.05734 | 0.21612  |

|          |          |          |          |          |          |          |          |          |
|----------|----------|----------|----------|----------|----------|----------|----------|----------|
| 0.29769  | -0.06499 | 0.16085  | 0.023697 | 0.6095   | -0.13027 | 0.00481  | -0.17639 | 0.00013  |
| 5.80E-27 | 0.024708 | 0.59432  | 0.029305 | 0.52757  | 0.132203 | 0.00421  | 0.191673 | 3.05E-05 |
| 0.16201  | -0.03459 | 0.45583  | -0.2274  | 6.83E-07 | -0.11434 | 0.01342  | -0.10027 | 0.03028  |
| 1.11E-12 | 0.037514 | 0.41864  | 0.05694  | 0.21938  | -0.03856 | 0.4058   | 0.042941 | 0.35449  |
| 0.83074  | -0.13866 | 0.00267  | -0.06025 | 0.19373  | -0.08521 | 0.0658   | -0.21172 | 3.92E-06 |
| 0.04665  | 0.011046 | 0.81183  | -0.23135 | 4.31E-07 | -0.12845 | 0.00544  | -0.09816 | 0.03395  |
| 0.23559  | -0.04856 | 0.29503  | -0.15831 | 0.0006   | -0.12554 | 0.0066   | -0.16137 | 0.00046  |
| 0.56547  | 0.168884 | 0.00025  | 0.113156 | 0.01442  | 0.064449 | 0.16439  | 0.174213 | 0.00015  |
| 0.18921  | 0.090282 | 0.0512   | -0.10943 | 0.018    | 0.073296 | 0.11369  | 0.191384 | 3.14E-05 |
| 0.01427  | 0.000139 | 0.9976   | -0.03242 | 0.48462  | -0.13678 | 0.00306  | -0.09072 | 0.05008  |
| 2.21E-08 | -0.0115  | 0.80416  | -0.16689 | 0.00029  | -0.12823 | 0.00552  | -0.08025 | 0.08321  |
| 0.66532  | 0.003824 | 0.93432  | 0.210991 | 4.24E-06 | 0.02989  | 0.51935  | 0.037714 | 0.41615  |
| 0.0002   | -0.0524  | 0.25845  | -0.19458 | 2.29E-05 | -0.0362  | 0.43509  | -0.14377 | 0.00184  |
| 0.38415  | -0.02017 | 0.66372  | -0.28527 | 3.40E-10 | -0.20749 | 6.15E-06 | -0.21691 | 2.23E-06 |
| 0.63764  | 0.185193 | 5.67E-05 | 0.045993 | 0.3213   | 0.04344  | 0.34893  | 0.162205 | 0.00043  |
| 0.24028  | -0.04634 | 0.3177   | -0.06953 | 0.13351  | 0.063747 | 0.16904  | 0.023287 | 0.6157   |
| 0.40416  | -0.02362 | 0.61065  | -0.13321 | 0.00393  | 0.016585 | 0.72075  | 0.004231 | 0.92735  |
| 3.09E-09 | 0.053524 | 0.24834  | -0.01466 | 0.75209  | -0.06629 | 0.15267  | 0.026047 | 0.57448  |
| 0.65659  | -0.05933 | 0.2006   | -0.13452 | 0.00359  | -0.03939 | 0.39568  | -0.12212 | 0.00825  |
| 0.14004  | 0.066757 | 0.14976  | -0.00381 | 0.93448  | 0.178126 | 0.00011  | 0.247781 | 5.79E-08 |
| 0.02167  | -0.04863 | 0.29428  | -0.20248 | 1.04E-05 | -0.00261 | 0.95515  | -0.06061 | 0.19108  |
| 0.44101  | -0.0679  | 0.14287  | -0.30526 | 1.58E-11 | -0.19505 | 2.19E-05 | -0.23893 | 1.74E-07 |
| 2.35E-09 | 0.184331 | 6.15E-05 | 0.10051  | 0.02988  | 0.114962 | 0.01292  | 0.310077 | 7.26E-12 |
| 0.25673  | -0.00037 | 0.9936   | -0.02784 | 0.54841  | -0.06266 | 0.17644  | -0.04429 | 0.33956  |
| 0.81395  | -0.06144 | 0.18506  | -0.11872 | 0.01023  | 0.01754  | 0.70539  | -0.04749 | 0.30579  |
| 3.98E-05 | -0.03728 | 0.4215   | -0.16591 | 0.00032  | -0.04093 | 0.37753  | -0.03973 | 0.39162  |
| 0.00113  | -0.08705 | 0.06016  | -0.23231 | 3.84E-07 | -0.25265 | 3.11E-08 | -0.23113 | 4.42E-07 |
| 0.00026  | 0.049764 | 0.28318  | -0.07252 | 0.11756  | -0.02952 | 0.52458  | 0.06705  | 0.14798  |
| 3.05E-12 | 0.067527 | 0.14511  | 0.077308 | 0.09519  | 0.0865   | 0.06179  | 0.189436 | 3.79E-05 |
| 0.01656  | -0.03884 | 0.40234  | -0.12231 | 0.00814  | -0.02913 | 0.53004  | -0.02372 | 0.60918  |
| 0.01636  | -0.03501 | 0.4504   | -0.11765 | 0.01095  | -0.06862 | 0.13869  | -0.08121 | 0.07958  |
| 0.40641  | -0.17493 | 0.00014  | -0.24499 | 8.23E-08 | -0.25263 | 3.12E-08 | -0.26767 | 4.19E-09 |
| 1.47E-05 | -0.03034 | 0.51305  | -0.08255 | 0.07473  | -0.02645 | 0.5685   | -0.01495 | 0.74732  |
| 0.63544  | -0.12526 | 0.00672  | -0.18049 | 8.78E-05 | -0.25673 | 1.83E-08 | -0.30336 | 2.14E-11 |
| 3.95E-17 | 0.039544 | 0.39388  | -0.12358 | 0.0075   | -0.05918 | 0.20175  | 0.027066 | 0.5596   |
| 0.00094  | -0.05027 | 0.27829  | -0.21736 | 2.12E-06 | -0.08285 | 0.07366  | -0.11486 | 0.013    |
| 0.76629  | -0.05852 | 0.20685  | -0.18462 | 5.98E-05 | -0.13752 | 0.0029   | -0.16752 | 0.00028  |
| 0.0047   | -0.03323 | 0.47372  | -0.09705 | 0.03602  | 0.009619 | 0.83577  | -0.01309 | 0.7779   |
| 0.6416   | 0.124237 | 0.00719  | 0.128855 | 0.00529  | 0.245671 | 7.56E-08 | 0.284937 | 3.58E-10 |
| 0.18969  | 0.124952 | 0.00686  | -0.01507 | 0.74537  | 0.066247 | 0.15291  | 0.174892 | 0.00015  |
| 0.53061  | -0.09986 | 0.03096  | 0.019646 | 0.67197  | -0.01121 | 0.80913  | -0.15092 | 0.00107  |
| 4.13E-09 | -0.0307  | 0.50806  | -0.06887 | 0.13727  | -0.17182 | 0.00019  | -0.15238 | 0.00096  |
| 0.00019  | -0.03122 | 0.50097  | -0.1781  | 0.00011  | -0.05416 | 0.24274  | -0.04325 | 0.35104  |
| 0.01074  | 0.001769 | 0.96959  | -0.00787 | 0.86526  | 0.087052 | 0.06014  | 0.03287  | 0.47857  |
| 0.32676  | -0.09719 | 0.03577  | -0.25406 | 2.59E-08 | -0.12168 | 0.00848  | -0.14845 | 0.00129  |

|          |          |          |          |          |          |          |          |          |
|----------|----------|----------|----------|----------|----------|----------|----------|----------|
| 0.00548  | 0.21395  | 3.08E-06 | -0.04435 | 0.33893  | 0.182793 | 7.09E-05 | 0.337925 | 6.15E-14 |
| 0.00123  | 0.034395 | 0.45839  | 0.063727 | 0.16918  | 0.171943 | 0.00019  | 0.107747 | 0.01986  |
| 0.00857  | 0.00443  | 0.92393  | -0.20687 | 6.57E-06 | -0.09    | 0.05195  | -0.03445 | 0.45772  |
| 0.00947  | 0.109425 | 0.01801  | -0.13064 | 0.00469  | 0.079092 | 0.08777  | 0.231642 | 4.16E-07 |
| 0.00121  | -0.088   | 0.05741  | 0.086442 | 0.06197  | -0.06755 | 0.14497  | -0.17879 | 0.0001   |
| 0.00711  | -0.05727 | 0.21668  | -0.11054 | 0.01687  | -0.11176 | 0.01568  | -0.11253 | 0.01497  |
| 0.27371  | -0.02415 | 0.60272  | -0.14125 | 0.00222  | -0.1778  | 0.00011  | -0.14048 | 0.00234  |
| 0.33309  | 0.013393 | 0.77283  | 0.08702  | 0.06024  | 0.223321 | 1.09E-06 | 0.178783 | 0.0001   |
| 0.27437  | -0.10437 | 0.02409  | -0.19457 | 2.30E-05 | -0.09133 | 0.04856  | -0.1656  | 0.00033  |
| 0.39019  | -0.02021 | 0.6631   | -0.20464 | 8.28E-06 | -0.03659 | 0.43025  | -0.03524 | 0.44738  |
| 1.25E-09 | 0.272768 | 2.06E-09 | 0.167009 | 0.00029  | 0.297122 | 5.67E-11 | 0.507614 | 5.93E-32 |
| 5.52E-05 | 0.051949 | 0.26255  | 0.048856 | 0.29207  | 0.109329 | 0.01811  | 0.193204 | 2.63E-05 |
| 3.04E-19 | 0.015735 | 0.7345   | -0.19984 | 1.36E-05 | -0.17627 | 0.00013  | -0.09128 | 0.04868  |
| 0.00996  | -0.00255 | 0.95616  | -0.10641 | 0.02145  | -0.08419 | 0.06911  | -0.01888 | 0.68404  |
| 0.00083  | 0.048696 | 0.29365  | 0.006857 | 0.88252  | 0.042589 | 0.35846  | 0.120491 | 0.00915  |
| 0.00214  | -0.03894 | 0.40121  | -0.07985 | 0.08478  | -0.07184 | 0.12105  | -0.01997 | 0.66682  |
| 7.25E-11 | -0.07072 | 0.127    | -0.13088 | 0.00461  | -0.13023 | 0.00482  | -0.08034 | 0.08284  |
| 1.01E-06 | 0.053472 | 0.2488   | -0.13853 | 0.0027   | 0.00714  | 0.87769  | 0.005947 | 0.89801  |
| 0.00029  | -0.0035  | 0.93981  | -0.21653 | 2.32E-06 | -0.24451 | 8.74E-08 | -0.12582 | 0.00648  |
| 0.13354  | -0.04878 | 0.29285  | -0.1045  | 0.02392  | -0.03741 | 0.4199   | -0.05147 | 0.267    |
| 1.63E-05 | 0.006824 | 0.88307  | -0.06877 | 0.13781  | 0.025253 | 0.5862   | 0.044156 | 0.34103  |
| 0.25828  | -0.1057  | 0.02234  | -0.07384 | 0.11102  | -0.10564 | 0.02243  | -0.14105 | 0.00225  |
| 0.50986  | 0.051241 | 0.26912  | 0.041669 | 0.36895  | -0.04511 | 0.33067  | 0.085685 | 0.0643   |
| 1.03E-06 | 0.204085 | 8.77E-06 | -0.03761 | 0.41745  | 0.022347 | 0.63003  | 0.254104 | 2.57E-08 |
| 0.00093  | 0.05299  | 0.2531   | 0.00078  | 0.98658  | 0.171229 | 0.0002   | 0.145376 | 0.00163  |
| 1.01E-07 | 0.011502 | 0.80421  | 0.00731  | 0.87481  | -0.14182 | 0.00213  | -0.10269 | 0.02648  |
| 0.07486  | -0.04073 | 0.3799   | 0.017193 | 0.71095  | 0.035364 | 0.44582  | -0.04872 | 0.29337  |
| 0.00874  | 0.072113 | 0.11965  | -0.0361  | 0.43643  | 0.030975 | 0.5043   | 0.110307 | 0.0171   |
| 1.37E-08 | -0.01401 | 0.76274  | -0.24302 | 1.05E-07 | -0.18365 | 6.55E-05 | -0.10213 | 0.02733  |
| 0.00027  | -0.04545 | 0.32709  | 0.115333 | 0.01263  | -0.09835 | 0.0336   | 0.021305 | 0.64608  |
| 0.16134  | -0.0699  | 0.13146  | 0.027339 | 0.55565  | 0.007704 | 0.86813  | -0.0204  | 0.66014  |
| 0.01641  | 0.131376 | 0.00446  | 0.053793 | 0.24596  | 0.000619 | 0.98935  | 0.13918  | 0.00258  |
| 0.34786  | -0.07734 | 0.09506  | 0.11389  | 0.01379  | -0.02977 | 0.5211   | -0.13093 | 0.0046   |
| 3.79E-16 | 0.109997 | 0.01741  | 0.07114  | 0.12474  | -0.03378 | 0.46647  | 0.09434  | 0.04157  |
| 0.6589   | -0.05463 | 0.2387   | 0.058973 | 0.20334  | -0.01378 | 0.76655  | -0.0139  | 0.76445  |
| 0.02059  | 0.186468 | 5.03E-05 | 0.199248 | 1.44E-05 | 0.090565 | 0.05048  | 0.223133 | 1.11E-06 |
| 3.88E-06 | -0.09037 | 0.05097  | 0.005553 | 0.90474  | -0.12005 | 0.00941  | -0.14088 | 0.00228  |
| 0.78167  | -0.0119  | 0.79763  | -0.01017 | 0.82646  | 0.001354 | 0.97672  | 0.050341 | 0.27763  |
| 0.00109  | -0.02745 | 0.55403  | 0.065825 | 0.15554  | 0.045212 | 0.3296   | 0.009556 | 0.83683  |
| 1.41E-08 | 0.015048 | 0.74568  | 0.180222 | 8.99E-05 | 0.055994 | 0.22714  | 0.091212 | 0.04885  |
| 6.57E-07 | 0.033471 | 0.47055  | 0.090263 | 0.05125  | -0.04664 | 0.31455  | 0.089    | 0.05461  |
| 0.97368  | 0.023214 | 0.61681  | 0.11584  | 0.01224  | 0.0937   | 0.04298  | 0.136959 | 0.00302  |
| 1.07E-12 | 0.142747 | 0.00199  | 0.15949  | 0.00054  | 0.035061 | 0.44973  | 0.198942 | 1.48E-05 |
| 7.32E-08 | -0.09892 | 0.03258  | 0.130252 | 0.00481  | -0.02883 | 0.53427  | -0.06619 | 0.15327  |
| 2.41E-07 | 0.057211 | 0.21719  | 0.153452 | 0.00088  | 0.062475 | 0.17772  | 0.133453 | 0.00386  |



|          |          |          |          |          |          |          |          |          |
|----------|----------|----------|----------|----------|----------|----------|----------|----------|
| 0.03364  | 0.046324 | 0.31783  | 0.033333 | 0.47238  | 0.004077 | 0.92998  | 0.065337 | 0.15864  |
| 1.35E-06 | 0.041197 | 0.37439  | -0.047   | 0.31078  | 0.026349 | 0.57005  | 0.068113 | 0.14164  |
| 0.00024  | -0.13454 | 0.00358  | -0.06536 | 0.15847  | -0.19041 | 3.45E-05 | -0.24427 | 9.00E-08 |
| 5.16E-09 | 0.087487 | 0.05887  | 0.104728 | 0.02361  | -0.06775 | 0.14379  | 0.029664 | 0.52251  |
| 0.03521  | -0.05532 | 0.23279  | -0.10065 | 0.02964  | -0.22431 | 9.74E-07 | -0.26242 | 8.56E-09 |
| 1.86E-25 | 0.134266 | 0.00365  | 0.171974 | 0.00019  | 0.123666 | 0.00746  | 0.265646 | 5.53E-09 |
| 0.19755  | -0.08759 | 0.05856  | -0.11699 | 0.01141  | -0.11158 | 0.01585  | -0.1598  | 0.00053  |
| 0.00184  | -0.14555 | 0.00161  | 0.020099 | 0.66485  | -0.11302 | 0.01454  | -0.15704 | 0.00066  |
| 9.54E-11 | 0.121881 | 0.00837  | 0.170436 | 0.00022  | 0.143911 | 0.00182  | 0.251645 | 3.54E-08 |
| 0.36473  | 0.013167 | 0.77657  | 0.11572  | 0.01233  | 0.133459 | 0.00386  | 0.096953 | 0.03622  |
| 6.85E-07 | 0.178261 | 0.00011  | 0.233951 | 3.17E-07 | 0.179766 | 9.37E-05 | 0.333143 | 1.44E-13 |
| 0.11802  | -0.10862 | 0.01887  | -0.02995 | 0.51846  | -0.11448 | 0.01331  | -0.13088 | 0.00461  |
| 1.60E-06 | 0.026191 | 0.57237  | 0.049063 | 0.29003  | -0.06854 | 0.13913  | 0.034013 | 0.4634   |
| 3.07E-06 | 0.012961 | 0.77997  | 0.156001 | 0.00072  | 0.056592 | 0.22221  | 0.120057 | 0.00941  |
| 4.82E-24 | 0.170972 | 0.00021  | 0.348393 | 8.98E-15 | 0.320584 | 1.27E-12 | 0.479243 | 3.44E-28 |
| 1.03E-06 | -0.00879 | 0.84978  | -0.02977 | 0.52108  | -0.06748 | 0.14541  | -0.03302 | 0.47658  |
| 6.35E-08 | 0.089631 | 0.05291  | 0.116486 | 0.01176  | 0.077518 | 0.09429  | 0.196534 | 1.89E-05 |
| 3.34E-06 | 0.115282 | 0.01267  | 0.220187 | 1.55E-06 | 0.107892 | 0.01969  | 0.181097 | 8.30E-05 |
| 0.43755  | 0.00574  | 0.90155  | 0.10705  | 0.02068  | -0.1388  | 0.00265  | -0.08598 | 0.06338  |
| 0.16747  | 0.193123 | 2.65E-05 | 0.234965 | 2.80E-07 | 0.239211 | 1.68E-07 | 0.370811 | 1.14E-16 |
| 2.30E-06 | 0.074833 | 0.10629  | 0.093007 | 0.04455  | -0.02134 | 0.64553  | 0.099322 | 0.03188  |
| 0.0267   | 0.070339 | 0.12906  | 0.268531 | 3.72E-09 | 0.27202  | 2.29E-09 | 0.256211 | 1.96E-08 |
| 0.04364  | 0.067129 | 0.1475   | 0.022637 | 0.6256   | 0.047095 | 0.30984  | 0.116994 | 0.0114   |
| 0.70425  | 0.172912 | 0.00017  | 0.217523 | 2.08E-06 | 0.287226 | 2.55E-10 | 0.324152 | 6.92E-13 |
| 0.58134  | 0.024301 | 0.60041  | 0.094733 | 0.04073  | -0.03897 | 0.40085  | -0.00082 | 0.98586  |
| 0.30225  | -0.16163 | 0.00045  | 0.071916 | 0.12067  | -0.17271 | 0.00018  | -0.25493 | 2.31E-08 |
| 4.25E-11 | 0.093821 | 0.04271  | 0.185333 | 5.59E-05 | 0.051934 | 0.26269  | 0.172802 | 0.00018  |
| 0.01385  | -0.07133 | 0.12373  | 0.059358 | 0.2004   | -0.10313 | 0.02584  | -0.09051 | 0.05061  |
| 0.18041  | 0.261444 | 9.77E-09 | -0.06461 | 0.16332  | -0.0288  | 0.53469  | 0.090177 | 0.05148  |
| 4.32E-09 | 0.060783 | 0.18978  | 0.201803 | 1.11E-05 | 0.122189 | 0.00821  | 0.195679 | 2.06E-05 |
| 1.80E-23 | 0.105285 | 0.02288  | 0.095662 | 0.03878  | -0.02479 | 0.59304  | 0.113134 | 0.01444  |
| 0.0566   | 0.01998  | 0.66672  | 0.123827 | 0.00738  | -0.02404 | 0.60436  | 0.04051  | 0.38242  |
| 0.37579  | 0.223482 | 1.07E-06 | -0.01352 | 0.77067  | -0.07291 | 0.11562  | 0.125009 | 0.00683  |
| 5.51E-52 | 0.133227 | 0.00392  | 0.009902 | 0.83101  | -0.00348 | 0.94027  | 0.059815 | 0.19695  |
| 4.84E-18 | 0.092381 | 0.04601  | -0.01965 | 0.67197  | -0.008   | 0.86302  | 0.039812 | 0.39069  |
| 9.36E-16 | 0.042875 | 0.35523  | 0.002389 | 0.95894  | 0.013263 | 0.77499  | 0.015747 | 0.7343   |
| 4.07E-10 | 0.059482 | 0.19945  | -0.0289  | 0.53336  | -0.03417 | 0.4613   | -0.01868 | 0.68724  |
| 3.67E-12 | 0.062932 | 0.17457  | 0.048882 | 0.29181  | -0.03973 | 0.39163  | 0.005959 | 0.89782  |
| 3.02E-18 | 0.04809  | 0.29971  | -0.00675 | 0.88431  | -0.0329  | 0.47819  | -0.03029 | 0.51374  |
| 6.22E-27 | 0.190876 | 3.30E-05 | 0.186626 | 4.95E-05 | 0.343605 | 2.18E-14 | 0.403801 | 9.64E-20 |
| 5.47E-22 | 0.12181  | 0.00841  | 0.053421 | 0.24925  | -0.03674 | 0.42835  | 0.059351 | 0.20045  |
| 5.97E-26 | 0.115114 | 0.0128   | 0.024917 | 0.5912   | 0.002009 | 0.96546  | 0.042395 | 0.36065  |
| 1.74E-29 | 0.147827 | 0.00136  | 0.018194 | 0.69494  | 0.006405 | 0.89021  | 0.061171 | 0.18697  |
| 0.05588  | 0.071254 | 0.12413  | 0.00627  | 0.8925   | 0.10835  | 0.01918  | 0.093042 | 0.04447  |
| 9.51E-15 | 0.080038 | 0.08403  | 0.008894 | 0.84798  | -0.03378 | 0.46647  | 0.024313 | 0.60023  |

|          |          |          |          |          |          |          |          |          |
|----------|----------|----------|----------|----------|----------|----------|----------|----------|
| 6.19E-38 | 0.163324 | 0.00039  | 0.021669 | 0.64044  | 0.047664 | 0.30402  | 0.086596 | 0.0615   |
| 8.30E-17 | 0.10071  | 0.02955  | 0.048515 | 0.29545  | 0.037161 | 0.42302  | 0.046838 | 0.31249  |
| 1.61E-47 | 0.136142 | 0.0032   | -0.00448 | 0.923    | -0.01302 | 0.77897  | 0.059678 | 0.19798  |
| 7.06E-12 | 0.127669 | 0.00573  | -0.0037  | 0.93636  | -0.02432 | 0.60013  | 0.011875 | 0.798    |
| 1.07E-21 | 0.096549 | 0.037    | -0.04313 | 0.35238  | -0.11165 | 0.01579  | 0.005184 | 0.91105  |
| 1.00E-48 | 0.121663 | 0.00849  | -0.00773 | 0.8677   | -0.01178 | 0.79962  | 0.023502 | 0.61244  |
| 1.33E-10 | 0.160645 | 0.00049  | 0.039462 | 0.39487  | 0.020347 | 0.66097  | 0.089607 | 0.05298  |
| 2.49E-12 | 0.068399 | 0.13998  | -0.05644 | 0.22345  | -0.01968 | 0.67139  | -0.01355 | 0.77029  |
| 9.25E-16 | 0.167037 | 0.00029  | 0.004003 | 0.93125  | 0.046233 | 0.31878  | 0.068939 | 0.13687  |
| 6.30E-36 | 0.112044 | 0.01542  | -0.01189 | 0.79766  | -0.04257 | 0.35872  | 0.007227 | 0.87623  |
| 3.19E-18 | 0.102298 | 0.02707  | -0.03846 | 0.40699  | -0.007   | 0.88009  | 0.048912 | 0.29151  |
| 2.55E-26 | 0.134511 | 0.00359  | -0.03646 | 0.43178  | 0.001715 | 0.97051  | 0.040076 | 0.38754  |
| 1.25E-18 | 0.08712  | 0.05994  | -0.03949 | 0.39449  | -0.0017  | 0.97085  | 0.075493 | 0.10324  |
| 2.00E-53 | 0.122755 | 0.00791  | -0.00877 | 0.85     | -0.04274 | 0.35676  | 0.047719 | 0.30346  |
| 2.58E-30 | 0.144662 | 0.00172  | 0.016094 | 0.72867  | 0.022438 | 0.62864  | 0.076879 | 0.09704  |
| 3.54E-20 | 0.212241 | 3.71E-06 | 0.221685 | 1.31E-06 | 0.338515 | 5.52E-14 | 0.399341 | 2.63E-19 |
| 7.33E-38 | 0.152311 | 0.00096  | 0.003273 | 0.94377  | 0.00029  | 0.99501  | 0.063353 | 0.1717   |
| 1.25E-14 | 0.086099 | 0.06302  | -0.00144 | 0.97522  | 0.00661  | 0.88671  | 0.003859 | 0.93371  |
| 1.04E-08 | 0.186135 | 5.19E-05 | 0.034765 | 0.45356  | 0.023688 | 0.60963  | 0.040958 | 0.37717  |
| 1.53E-20 | 0.104689 | 0.02367  | 0.074924 | 0.10587  | 0.125173 | 0.00676  | 0.136084 | 0.00321  |
| 3.74E-10 | 0.123025 | 0.00778  | 0.008684 | 0.85153  | 0.047387 | 0.30684  | 0.01509  | 0.74499  |
| 1.74E-47 | 0.136514 | 0.00312  | 0.00072  | 0.98761  | 0.023574 | 0.61135  | 0.061729 | 0.18297  |
| 1.01E-20 | 0.170722 | 0.00021  | 0.033789 | 0.46634  | 0.217049 | 2.20E-06 | 0.347765 | 1.01E-14 |
| 1.79E-07 | 0.069169 | 0.13556  | 0.067962 | 0.14253  | 0.035561 | 0.44328  | 0.041199 | 0.37438  |
| 1.78E-25 | 0.070513 | 0.12811  | -0.01324 | 0.77543  | -0.04995 | 0.28141  | 0.006536 | 0.88797  |
| 8.69E-20 | 0.042414 | 0.36043  | 0.02472  | 0.59413  | -0.00655 | 0.88778  | -0.00202 | 0.96525  |
| 3.41E-25 | 0.078929 | 0.08843  | 0.026708 | 0.5648   | -0.00121 | 0.9792   | 0.06226  | 0.17922  |
| 2.51E-13 | 0.07763  | 0.09381  | -0.05428 | 0.24171  | -0.08304 | 0.073    | 0.006155 | 0.89446  |
| 8.99E-42 | 0.130917 | 0.0046   | 0.041314 | 0.37304  | 0.002126 | 0.96345  | 0.064621 | 0.16326  |
| 8.26E-33 | 0.135624 | 0.00332  | 0.009656 | 0.83514  | 0.006815 | 0.88322  | 0.058911 | 0.20381  |
| 7.02E-11 | 0.098378 | 0.03355  | 0.048014 | 0.30048  | 0.001271 | 0.97814  | 0.029323 | 0.52731  |
| 6.54E-30 | 0.130403 | 0.00476  | 0.006385 | 0.89054  | 0.005226 | 0.91032  | 0.047008 | 0.31073  |
| 3.92E-37 | 0.134435 | 0.00361  | -0.01002 | 0.82898  | -0.00775 | 0.86737  | 0.0359   | 0.43895  |
| 1.77E-21 | 0.112585 | 0.01492  | -0.04713 | 0.30948  | -0.03967 | 0.39235  | -0.01144 | 0.80517  |
| 6.44E-17 | 0.108285 | 0.01925  | 0.004638 | 0.92037  | 0.003262 | 0.94395  | 0.038343 | 0.40842  |
| 6.11E-32 | 0.205717 | 7.41E-06 | 0.033099 | 0.47551  | 0.033461 | 0.47069  | 0.102881 | 0.0262   |
| 4.29E-08 | 0.148541 | 0.00129  | -0.02817 | 0.54367  | -0.01339 | 0.77283  | 0.078494 | 0.0902   |
| 0.00102  | 0.177351 | 0.00012  | 0.069026 | 0.13637  | 0.024786 | 0.59315  | 0.090438 | 0.0508   |
| 2.70E-23 | 0.136841 | 0.00304  | -0.02507 | 0.58894  | -0.06497 | 0.16101  | -0.01767 | 0.70334  |
| 1.62E-22 | 0.118905 | 0.01012  | 0.005804 | 0.90046  | 0.014082 | 0.7615   | 0.05878  | 0.20482  |
| 1.07E-18 | 0.115993 | 0.01213  | -0.02456 | 0.59656  | 0.045828 | 0.32305  | 0.096655 | 0.03679  |
| 9.52E-53 | 0.161138 | 0.00047  | -0.00287 | 0.95076  | -0.01546 | 0.73896  | 0.116555 | 0.01172  |
| 8.01E-05 | 0.041703 | 0.36855  | -0.01503 | 0.74598  | -0.02251 | 0.62747  | -0.01411 | 0.76104  |
| 5.98E-13 | 0.125485 | 0.00662  | 0.002408 | 0.95861  | 0.053916 | 0.24489  | 0.081833 | 0.07729  |
| 1.94E-23 | 0.164005 | 0.00037  | 0.000898 | 0.98455  | 0.002979 | 0.94881  | 0.038658 | 0.40458  |

|          |          |          |          |         |          |         |          |          |
|----------|----------|----------|----------|---------|----------|---------|----------|----------|
| 8.67E-85 | 0.160328 | 0.00051  | 0.046474 | 0.31626 | 0.023137 | 0.61797 | 0.09866  | 0.03304  |
| 4.57E-42 | 0.203085 | 9.73E-06 | 0.038974 | 0.40074 | 0.03385  | 0.46554 | 0.101606 | 0.02813  |
| 2.76E-10 | 0.051575 | 0.26601  | 0.017481 | 0.70633 | -0.03608 | 0.43661 | 0.047241 | 0.30834  |
| 0.03138  | 0.043061 | 0.35315  | -0.02397 | 0.60532 | 0.039581 | 0.39344 | 0.067939 | 0.14267  |
| 0.24675  | -0.04131 | 0.37309  | -0.00616 | 0.89431 | -0.01788 | 0.69987 | -0.03277 | 0.47992  |
| 4.90E-26 | 0.100937 | 0.02918  | 0.017533 | 0.7055  | -0.00353 | 0.93941 | 0.044046 | 0.34224  |
| 1.70E-71 | 0.164795 | 0.00035  | 0.010332 | 0.82379 | 0.005686 | 0.90247 | 0.070079 | 0.13048  |
| 5.90E-22 | 0.12536  | 0.00668  | 0.015338 | 0.74096 | 0.082663 | 0.07432 | 0.155485 | 0.00075  |
| 9.15E-06 | 0.067559 | 0.14492  | -0.05637 | 0.22402 | -0.04397 | 0.34307 | -0.02907 | 0.53084  |
| 1.84E-08 | 0.158354 | 0.00059  | -0.00944 | 0.83878 | -0.04584 | 0.32288 | 0.068396 | 0.13999  |
| 4.80E-46 | 0.144518 | 0.00174  | 0.025853 | 0.57733 | -0.01023 | 0.82543 | 0.054475 | 0.24002  |
| 2.72E-06 | 0.151045 | 0.00106  | -0.02189 | 0.63701 | -0.0121  | 0.79418 | 0.059351 | 0.20045  |
| 1.78E-15 | 0.077505 | 0.09434  | -0.0459  | 0.32231 | -0.05618 | 0.22561 | 0.006152 | 0.89452  |
| 1.67E-05 | 0.017461 | 0.70665  | -0.03333 | 0.47242 | -0.00096 | 0.98349 | -0.01731 | 0.70916  |
| 2.08E-45 | 0.134591 | 0.00357  | 0.002635 | 0.95472 | -0.00932 | 0.84073 | 0.046054 | 0.32066  |
| 2.01E-12 | 0.170224 | 0.00022  | 0.001575 | 0.97292 | 0.01414  | 0.76054 | 0.054845 | 0.23684  |
| 9.04E-13 | 0.071732 | 0.12163  | 0.003214 | 0.94477 | -0.00313 | 0.94615 | 0.002237 | 0.96155  |
| 2.56E-28 | 0.110446 | 0.01696  | 0.003294 | 0.94341 | -0.01242 | 0.78889 | 0.027203 | 0.55761  |
| 1.75E-56 | 0.123445 | 0.00757  | 0.002653 | 0.9544  | -0.01249 | 0.78781 | 0.048006 | 0.30056  |
| 9.68E-53 | 0.130452 | 0.00475  | 0.015759 | 0.73411 | 0.016076 | 0.72898 | 0.07172  | 0.12169  |
| 1.24E-07 | 0.097937 | 0.03436  | 0.017592 | 0.70456 | 0.011768 | 0.79977 | 0.046125 | 0.31992  |
| 2.77E-22 | 0.142755 | 0.00198  | 0.004171 | 0.92837 | -0.00042 | 0.99285 | 0.048611 | 0.29451  |
| 1.46E-17 | 0.104404 | 0.02405  | 0.016785 | 0.71752 | -0.03038 | 0.51254 | 0.062709 | 0.17611  |
| 5.91E-15 | 0.099643 | 0.03133  | 0.071205 | 0.12439 | -0.00197 | 0.96616 | 0.065197 | 0.15954  |
| 1.19E-12 | 0.066298 | 0.15259  | -0.04983 | 0.28257 | -0.0746  | 0.10737 | -0.03845 | 0.40715  |
| 8.61E-21 | 0.139126 | 0.00259  | -0.02092 | 0.65199 | 0.005325 | 0.90864 | 0.042222 | 0.36262  |
| 1.57E-23 | 0.10792  | 0.01966  | 0.024971 | 0.59039 | 0.009351 | 0.84027 | 0.028637 | 0.53702  |
| 1.69E-22 | 0.124293 | 0.00716  | 0.095368 | 0.03939 | 0.040779 | 0.37927 | 0.092678 | 0.04531  |
| 8.43E-18 | 0.260216 | 1.15E-08 | 0.073719 | 0.11162 | 0.142701 | 0.00199 | 0.273311 | 1.91E-09 |
| 1.62E-12 | 0.087275 | 0.05949  | -0.0683  | 0.14057 | -0.04648 | 0.31618 | -0.0012  | 0.97943  |
| 1.02E-19 | 0.111053 | 0.01636  | -0.02447 | 0.5979  | -0.00374 | 0.93583 | 0.028735 | 0.53563  |
| 0.10607  | 0.085236 | 0.06571  | 0.058215 | 0.20921 | 0.00851  | 0.85447 | 0.072069 | 0.11988  |
| 1.48E-10 | 0.046418 | 0.31685  | -0.01198 | 0.79626 | -0.0103  | 0.82436 | -0.01305 | 0.77843  |
| 1.00E-26 | 0.099314 | 0.03189  | 0.043321 | 0.35025 | -0.00971 | 0.83431 | 0.064737 | 0.16251  |
| 6.31E-26 | 0.124871 | 0.0069   | 0.064852 | 0.16176 | 0.089277 | 0.05386 | 0.118032 | 0.01069  |
| 9.85E-30 | 0.102409 | 0.0269   | 0.095033 | 0.04009 | 0.019917 | 0.6677  | 0.064971 | 0.16099  |
| 6.80E-06 | 0.05308  | 0.25229  | 0.024098 | 0.60346 | 0.014013 | 0.76263 | 0.02121  | 0.64755  |
| 0.28515  | 0.003653 | 0.93724  | -0.0065  | 0.88852 | -0.03581 | 0.44011 | -0.01212 | 0.794    |
| 1.42E-22 | 0.108968 | 0.0185   | 0.018221 | 0.69451 | 0.018152 | 0.69562 | 0.034201 | 0.46092  |
| 5.40E-19 | 0.10392  | 0.02472  | -0.05026 | 0.27843 | -0.01331 | 0.77424 | 0.007044 | 0.87933  |
| 3.77E-15 | 0.102895 | 0.02618  | 0.001692 | 0.9709  | -0.01611 | 0.72843 | 0.046247 | 0.31864  |
| 7.22E-11 | 0.100155 | 0.03046  | 0.011813 | 0.79903 | 0.009942 | 0.83033 | 0.039812 | 0.39068  |
| 7.26E-14 | 0.234154 | 3.09E-07 | 0.029376 | 0.52657 | -0.03429 | 0.45975 | 0.058678 | 0.20561  |
| 9.11E-11 | 0.059608 | 0.1985   | -0.03158 | 0.49597 | 0.000903 | 0.98447 | -0.00355 | 0.93894  |
| 4.30E-18 | 0.101639 | 0.02808  | 0.024556 | 0.59659 | 0.006486 | 0.88883 | 0.025987 | 0.57536  |

|          |          |          |          |         |          |         |          |         |
|----------|----------|----------|----------|---------|----------|---------|----------|---------|
| 3.35E-39 | 0.174303 | 0.00015  | -0.02881 | 0.53462 | -0.02361 | 0.61075 | 0.030504 | 0.5108  |
| 5.82E-18 | 0.127726 | 0.00571  | 0.026959 | 0.56115 | 0.045871 | 0.32259 | 0.04673  | 0.31361 |
| 4.12E-37 | 0.184913 | 5.82E-05 | 0.093572 | 0.04327 | 0.092814 | 0.045   | 0.17187  | 0.00019 |
| 1.87E-18 | 0.08625  | 0.06255  | -0.02085 | 0.65311 | -0.01672 | 0.71859 | 0.011601 | 0.80256 |
| 1.14E-19 | 0.136979 | 0.00302  | 0.024202 | 0.60189 | -0.00262 | 0.95495 | 0.035811 | 0.44009 |
| 1.81E-14 | 0.031298 | 0.49986  | 0.026598 | 0.56641 | -0.02606 | 0.57422 | -0.00076 | 0.987   |
| 6.96E-26 | 0.148286 | 0.00131  | 0.149091 | 0.00123 | 0.079892 | 0.0846  | 0.165647 | 0.00032 |
| 1.17E-17 | 0.064937 | 0.16121  | -0.00281 | 0.95174 | -0.02485 | 0.59217 | -0.01391 | 0.76439 |
| 3.09E-06 | 0.024944 | 0.5908   | -0.05495 | 0.23596 | 0.000816 | 0.98597 | -0.0173  | 0.7092  |
| 2.93E-41 | 0.134438 | 0.00361  | 0.029917 | 0.51897 | 0.001163 | 0.97999 | 0.057038 | 0.21859 |
| 2.13E-24 | 0.118324 | 0.01049  | -0.0047  | 0.91937 | 0.017716 | 0.70257 | 0.043908 | 0.34376 |
| 2.18E-05 | 0.124111 | 0.00725  | -0.03969 | 0.3921  | -0.07697 | 0.09664 | 0.002289 | 0.96065 |
| 2.83E-19 | 0.101921 | 0.02764  | -0.00983 | 0.83218 | 0.001457 | 0.97495 | 0.028214 | 0.54306 |
| 1.88E-24 | 0.135214 | 0.00342  | -0.0061  | 0.89543 | -0.01746 | 0.70663 | 0.042463 | 0.35988 |
| 1.01E-33 | 0.126765 | 0.00609  | -0.00739 | 0.87343 | 0.010113 | 0.82746 | 0.041561 | 0.37018 |
| 0.64455  | 0.04206  | 0.36447  | 0.057802 | 0.21247 | 0.032538 | 0.48302 | 0.039776 | 0.39111 |
| 1.16E-30 | 0.137716 | 0.00286  | 0.020426 | 0.65974 | 0.004768 | 0.91815 | 0.053268 | 0.25061 |
| 1.37E-21 | 0.127042 | 0.00597  | -0.02764 | 0.55134 | -0.01749 | 0.70626 | 0.023378 | 0.61433 |
| 2.95E-21 | 0.11846  | 0.0104   | 0.006922 | 0.88141 | 0.00021  | 0.99639 | 0.033959 | 0.46411 |
| 9.36E-17 | 0.080965 | 0.08049  | -0.02694 | 0.56145 | 0.005556 | 0.90469 | 0.021747 | 0.63925 |
| 7.38E-17 | 0.189679 | 3.70E-05 | -0.05473 | 0.23779 | -0.03405 | 0.4629  | 0.026831 | 0.56301 |
| 7.36E-26 | 0.117649 | 0.01094  | -0.01128 | 0.80784 | -0.0042  | 0.92783 | 0.047966 | 0.30097 |
| 2.61E-64 | 0.150707 | 0.00109  | 0.048059 | 0.30003 | 0.024542 | 0.59679 | 0.073738 | 0.11152 |
| 3.11E-10 | 0.071101 | 0.12495  | -0.03705 | 0.42442 | -0.06477 | 0.16228 | 0.027017 | 0.5603  |
| 2.96E-42 | 0.110582 | 0.01682  | 0.07717  | 0.09578 | 0.033671 | 0.46791 | 0.088384 | 0.05631 |
| 8.39E-31 | 0.153854 | 0.00085  | 0.031853 | 0.49229 | 0.012401 | 0.78925 | 0.084313 | 0.0687  |
| 1.74E-05 | 0.046038 | 0.32083  | -0.11325 | 0.01434 | -0.05136 | 0.26803 | -0.00203 | 0.96517 |
| 3.21E-46 | 0.138254 | 0.00275  | 0.004768 | 0.91815 | -0.01492 | 0.74782 | 0.036806 | 0.42748 |
| 1.99E-24 | 0.089136 | 0.05424  | -0.00997 | 0.82991 | 0.009137 | 0.84389 | 0.015762 | 0.73407 |
| 4.35E-08 | 0.018293 | 0.69337  | 0.00571  | 0.90205 | 0.001392 | 0.97606 | -0.03402 | 0.46332 |
| 3.27E-08 | 0.042795 | 0.35614  | -0.01699 | 0.71424 | 0.022569 | 0.62664 | -0.00034 | 0.99413 |
| 7.66E-25 | 0.103913 | 0.02473  | 0.024252 | 0.60114 | 0.009293 | 0.84125 | 0.032292 | 0.48633 |
| 1.21E-13 | 0.105314 | 0.02284  | -0.00483 | 0.91707 | -0.0181  | 0.69637 | 0.026532 | 0.56738 |
| 2.11E-51 | 0.133806 | 0.00377  | 0.071559 | 0.12253 | 0.033987 | 0.46374 | 0.105794 | 0.02222 |
| 1.89E-24 | 0.24883  | 5.07E-08 | 0.009562 | 0.83673 | 0.072386 | 0.11826 | 0.150462 | 0.00111 |
| 4.26E-05 | 0.022801 | 0.62309  | 0.066292 | 0.15262 | 0.045008 | 0.33179 | 0.015574 | 0.73711 |
| 2.87E-38 | 0.129415 | 0.00509  | -0.0025  | 0.95698 | 0.011707 | 0.8008  | 0.059962 | 0.19584 |
| 4.42E-20 | 0.095884 | 0.03833  | -0.02042 | 0.65984 | -0.01433 | 0.75751 | 0.062891 | 0.17485 |
| 1.44E-09 | 0.29629  | 6.45E-11 | 0.045712 | 0.32427 | 0.022861 | 0.62217 | 0.081008 | 0.08033 |
| 2.56E-12 | 0.097362 | 0.03543  | -0.00023 | 0.99607 | 0.015861 | 0.73245 | 0.041381 | 0.37227 |
| 4.75E-29 | 0.142517 | 0.00202  | 0.016774 | 0.71769 | -0.03186 | 0.49224 | 0.052232 | 0.25996 |
| 5.26E-14 | 0.139262 | 0.00256  | -0.03596 | 0.43817 | 0.030014 | 0.51762 | 0.140789 | 0.00229 |
| 2.12E-17 | 0.13519  | 0.00342  | -0.06852 | 0.13927 | -0.00349 | 0.94009 | 0.059313 | 0.20073 |
| 6.28E-48 | 0.111884 | 0.01557  | 0.028452 | 0.53965 | 0.002886 | 0.95041 | 0.067718 | 0.14398 |
| 1.40E-11 | 0.110158 | 0.01725  | 0.038693 | 0.40414 | 0.017472 | 0.70648 | 0.048308 | 0.29752 |

|          |          |          |          |         |          |          |          |          |
|----------|----------|----------|----------|---------|----------|----------|----------|----------|
| 1.16E-14 | 0.099651 | 0.03131  | -0.02024 | 0.66258 | -0.03058 | 0.50982  | 0.013253 | 0.77515  |
| 1.65E-07 | 0.103525 | 0.02527  | -0.11196 | 0.0155  | -0.06838 | 0.14011  | 0.021145 | 0.64855  |
| 2.90E-23 | 0.125332 | 0.00669  | 0.053906 | 0.24498 | 0.013865 | 0.76506  | 0.073002 | 0.11515  |
| 1.21E-20 | 0.13303  | 0.00398  | 0.070843 | 0.12633 | 0.014516 | 0.75438  | 0.070715 | 0.12702  |
| 1.69E-21 | 0.171612 | 0.00019  | 0.036405 | 0.43253 | 0.008695 | 0.85135  | 0.070258 | 0.1295   |
| 4.33E-27 | 0.104299 | 0.02419  | 0.033453 | 0.47079 | 0.030964 | 0.50444  | 0.046877 | 0.31208  |
| 2.48E-46 | 0.125858 | 0.00646  | 0.025741 | 0.57899 | 0.017425 | 0.70724  | 0.056988 | 0.21899  |
| 2.20E-17 | 0.125779 | 0.0065   | -0.06329 | 0.1721  | -0.05325 | 0.25078  | 0.008695 | 0.85134  |
| 1.30E-36 | 0.171982 | 0.00019  | -0.00488 | 0.91623 | -0.01565 | 0.73588  | 0.044183 | 0.34074  |
| 3.66E-25 | 0.146715 | 0.00148  | -0.00839 | 0.85649 | 0.012118 | 0.79395  | 0.075857 | 0.10158  |
| 3.53E-10 | 0.06921  | 0.13532  | -0.01173 | 0.80045 | -0.04138 | 0.37231  | 0.008222 | 0.85935  |
| 1.14E-31 | 0.139045 | 0.0026   | 0.023749 | 0.60871 | 0.002969 | 0.94898  | 0.057479 | 0.21504  |
| 8.46E-16 | 0.078526 | 0.09007  | 0.00196  | 0.96631 | 0.008837 | 0.84895  | 0.032001 | 0.49028  |
| 5.36E-25 | 0.113532 | 0.0141   | 0.009733 | 0.83384 | 0.027139 | 0.55854  | 0.062445 | 0.17793  |
| 0.29207  | 0.083171 | 0.07255  | 0.059187 | 0.2017  | 0.011078 | 0.81128  | 0.049617 | 0.28461  |
| 1.47E-43 | 0.197832 | 1.66E-05 | 0.074526 | 0.10774 | 0.05471  | 0.238    | 0.141803 | 0.00213  |
| 4.76E-17 | 0.09801  | 0.03422  | -0.02775 | 0.5497  | -0.0301  | 0.51641  | 0.002506 | 0.95693  |
| 2.16E-32 | 0.129589 | 0.00504  | 0.025393 | 0.58413 | -0.00352 | 0.93953  | 0.056855 | 0.22007  |
| 2.84E-27 | 0.099799 | 0.03106  | 0.007551 | 0.87072 | 0.001517 | 0.97391  | 0.031963 | 0.4908   |
| 5.90E-33 | 0.128907 | 0.00527  | 0.010201 | 0.82599 | 0.006555 | 0.88765  | 0.048229 | 0.29832  |
| 1.81E-20 | 0.104948 | 0.02332  | -0.01145 | 0.80516 | 0.015716 | 0.73481  | 0.030617 | 0.50925  |
| 7.44E-68 | 0.131584 | 0.00439  | 0.026339 | 0.5702  | 0.017852 | 0.7004   | 0.082439 | 0.07511  |
| 1.13E-12 | 0.185326 | 5.60E-05 | -0.01277 | 0.78318 | -0.033   | 0.47685  | 0.030658 | 0.50867  |
| 3.46E-43 | 0.136316 | 0.00316  | 0.028272 | 0.54223 | -0.00876 | 0.85029  | 0.064562 | 0.16364  |
| 7.49E-18 | 0.098069 | 0.03411  | -0.04417 | 0.34086 | 0.018872 | 0.68418  | 0.050001 | 0.2809   |
| 2.77E-15 | 0.096726 | 0.03666  | -0.01268 | 0.78463 | -0.03628 | 0.43409  | 0.013197 | 0.77608  |
| 1.07E-48 | 0.186589 | 4.97E-05 | 0.014652 | 0.75216 | 0.021171 | 0.64815  | 0.093707 | 0.04296  |
| 4.36E-34 | 0.143025 | 0.00195  | 0.011023 | 0.81221 | -0.03473 | 0.454    | 0.043527 | 0.34796  |
| 3.02E-31 | 0.293097 | 1.05E-10 | 0.081975 | 0.07677 | 0.181972 | 7.65E-05 | 0.30195  | 2.67E-11 |
| 1.00E-36 | 0.103306 | 0.02558  | 0.066614 | 0.15064 | -0.0178  | 0.70116  | 0.059596 | 0.19859  |
| 2.97E-28 | 0.131643 | 0.00438  | 0.000134 | 0.99769 | -0.01062 | 0.81888  | 0.044164 | 0.34094  |
| 5.11E-14 | 0.087326 | 0.05934  | -0.07484 | 0.10626 | -0.01685 | 0.71645  | 0.006205 | 0.89361  |
| 1.01E-16 | 0.124887 | 0.00689  | 0.00674  | 0.8845  | 0.009932 | 0.8305   | 0.048558 | 0.29503  |
| 9.04E-40 | 0.129599 | 0.00503  | 0.004206 | 0.92776 | -0.01154 | 0.80352  | 0.04541  | 0.32749  |
| 6.88E-22 | 0.124428 | 0.0071   | 1.30E-05 | 0.99978 | 0.018725 | 0.68651  | 0.057937 | 0.2114   |
| 3.68E-39 | 0.14332  | 0.0019   | 0.040265 | 0.3853  | 0.011339 | 0.80693  | 0.069155 | 0.13564  |
| 3.18E-25 | 0.144752 | 0.00171  | -0.01141 | 0.80578 | 0.025612 | 0.58089  | 0.079275 | 0.08703  |
| 1.60E-40 | 0.11728  | 0.0112   | 0.045765 | 0.32371 | -0.00444 | 0.92379  | 0.059606 | 0.19851  |
| 6.08E-26 | 0.108644 | 0.01885  | -0.01982 | 0.66921 | 0.008304 | 0.85796  | 0.029145 | 0.52982  |
| 1.82E-69 | 0.120385 | 0.00921  | 0.0132   | 0.77602 | 0.003951 | 0.93214  | 0.062203 | 0.17962  |
| 4.22E-10 | 0.067827 | 0.14332  | 0.044773 | 0.33432 | -0.00685 | 0.88264  | 0.03065  | 0.50878  |
| 4.92E-24 | 0.11397  | 0.01373  | -0.00902 | 0.8458  | 0.02385  | 0.60719  | 0.03817  | 0.41054  |
| 2.17E-14 | 0.091991 | 0.04694  | -0.04287 | 0.35527 | -0.04742 | 0.30652  | 0.001791 | 0.9692   |
| 8.53E-07 | 0.047718 | 0.30347  | -0.06645 | 0.15166 | -0.03093 | 0.50487  | -0.04173 | 0.3682   |
| 3.56E-18 | 0.110197 | 0.01721  | -0.01085 | 0.81507 | -0.01743 | 0.70715  | 0.023089 | 0.61871  |

|          |          |          |           |         |          |         |          |          |
|----------|----------|----------|-----------|---------|----------|---------|----------|----------|
| 1.22E-36 | 0.114303 | 0.01345  | -0.0032   | 0.94506 | 0.008916 | 0.84762 | 0.04029  | 0.38501  |
| 2.00E-49 | 0.136053 | 0.00322  | 0.039949  | 0.38905 | 0.024871 | 0.59189 | 0.086179 | 0.06277  |
| 3.66E-12 | 0.157399 | 0.00064  | -0.03429  | 0.4598  | -0.00671 | 0.88503 | 0.033388 | 0.47165  |
| 8.49E-11 | 0.064852 | 0.16176  | -0.01307  | 0.77814 | -0.00128 | 0.97802 | 0.00868  | 0.85161  |
| 4.01E-20 | 0.119884 | 0.00951  | 0.039732  | 0.39164 | 0.004841 | 0.91691 | 0.072202 | 0.1192   |
| 8.60E-12 | 0.083502 | 0.07142  | 0.021507  | 0.64296 | 0.045764 | 0.32372 | 0.038616 | 0.40509  |
| 4.91E-17 | 0.254034 | 2.60E-08 | -0.00877  | 0.85015 | -0.00547 | 0.90608 | 0.064151 | 0.16635  |
| 1.56E-30 | 0.125421 | 0.00665  | -0.02392  | 0.60611 | -0.01017 | 0.82653 | 0.034737 | 0.45393  |
| 2.24E-29 | 0.09722  | 0.0357   | -0.01634  | 0.72464 | -0.02858 | 0.5378  | 0.024083 | 0.60368  |
| 1.32E-21 | 0.112387 | 0.0151   | 0.013099  | 0.77769 | 0.017801 | 0.70121 | 0.018767 | 0.68584  |
| 4.48E-31 | 0.117367 | 0.01114  | 0.001129  | 0.98059 | 0.006962 | 0.88072 | 0.03703  | 0.42466  |
| 1.82E-15 | 0.10206  | 0.02743  | -0.08066  | 0.08165 | -0.08118 | 0.07967 | -0.03255 | 0.48286  |
| 9.92E-38 | 0.144475 | 0.00175  | -0.02503  | 0.58951 | 0.000535 | 0.9908  | 0.036381 | 0.43283  |
| 7.56E-34 | 0.143518 | 0.00188  | 0.007638  | 0.86924 | 0.021588 | 0.6417  | 0.048324 | 0.29737  |
| 7.62E-34 | 0.124364 | 0.00713  | -6.16E-05 | 0.99894 | 0.004152 | 0.9287  | 0.043725 | 0.34578  |
| 1.66E-13 | 0.072456 | 0.1179   | -0.10075  | 0.02949 | -0.04681 | 0.31275 | -0.03545 | 0.44475  |
| 1.81E-28 | 0.131363 | 0.00446  | 0.034571  | 0.45608 | 0.04035  | 0.38431 | 0.075168 | 0.10473  |
| 1.41E-05 | 0.04735  | 0.30722  | -0.00996  | 0.83003 | -0.00428 | 0.92644 | 0.026991 | 0.56069  |
| 8.93E-37 | 0.123515 | 0.00753  | 0.05661   | 0.22207 | 0.030029 | 0.51741 | 0.076961 | 0.09668  |
| 2.17E-28 | 0.118426 | 0.01043  | -0.0031   | 0.94676 | 0.015142 | 0.74414 | 0.038162 | 0.41063  |
| 7.51E-20 | 0.128718 | 0.00534  | 0.015955  | 0.73093 | 0.000331 | 0.99431 | 0.050673 | 0.27447  |
| 9.72E-17 | 0.195453 | 2.10E-05 | -0.02252  | 0.6274  | -0.02231 | 0.63066 | 0.04094  | 0.37739  |
| 1.78E-08 | 0.084671 | 0.06753  | 0.010895  | 0.81434 | 0.00836  | 0.857   | 0.025027 | 0.58955  |
| 4.67E-26 | 0.141317 | 0.00221  | -0.02649  | 0.56803 | -0.02222 | 0.63204 | 0.02895  | 0.53258  |
| 4.46E-22 | 0.123987 | 0.00731  | 0.032758  | 0.48006 | -0.01591 | 0.73165 | 0.059744 | 0.19748  |
| 1.95E-22 | 0.097587 | 0.03501  | -0.06653  | 0.15116 | -0.04711 | 0.30967 | -0.0142  | 0.75954  |
| 8.49E-36 | 0.162356 | 0.00043  | 0.073546  | 0.11246 | 0.071937 | 0.12056 | 0.15724  | 0.00065  |
| 4.70E-12 | 0.248529 | 5.27E-08 | 0.002924  | 0.94975 | 0.097251 | 0.03565 | 0.204235 | 8.64E-06 |
| 1.92E-29 | 0.126481 | 0.0062   | -0.00244  | 0.95808 | -0.00341 | 0.94145 | 0.037611 | 0.41743  |
| 2.12E-07 | 0.050716 | 0.27406  | -0.01163  | 0.80212 | -0.00901 | 0.84598 | 0.007951 | 0.86393  |
| 2.47E-12 | 0.063929 | 0.16783  | -0.05705  | 0.21852 | -0.05384 | 0.24552 | -0.03356 | 0.4694   |
| 4.25E-31 | 0.132718 | 0.00406  | -0.00021  | 0.99647 | 0.015799 | 0.73346 | 0.077439 | 0.09462  |
| 1.62E-20 | 0.137361 | 0.00293  | -0.00798  | 0.86348 | -0.00817 | 0.8603  | 0.036204 | 0.43508  |
| 8.49E-40 | 0.116239 | 0.01195  | -0.03184  | 0.49243 | -0.02239 | 0.62935 | 0.022758 | 0.62375  |
| 1.07E-12 | 0.248604 | 5.22E-08 | 0.108846  | 0.01863 | 0.089012 | 0.05458 | 0.162201 | 0.00043  |
| 1.23E-25 | 0.102541 | 0.0267   | 0.019134  | 0.68003 | 0.011366 | 0.80648 | 0.039133 | 0.39882  |
| 2.25E-18 | 0.144427 | 0.00175  | 0.045773  | 0.32363 | 0.033967 | 0.464   | 0.089968 | 0.05202  |
| 1.57E-38 | 0.138967 | 0.00262  | 0.022014  | 0.63513 | 0.013664 | 0.76837 | 0.043369 | 0.34972  |
| 4.57E-08 | 0.087481 | 0.05889  | -0.01507  | 0.74537 | 0.001102 | 0.98105 | 0.056895 | 0.21974  |
| 6.06E-24 | 0.136119 | 0.0032   | -0.00527  | 0.90954 | 0.051284 | 0.26872 | 0.091259 | 0.04873  |
| 1.80E-07 | 0.08575  | 0.06409  | -0.03379  | 0.46627 | -0.02678 | 0.56381 | 0.024009 | 0.60478  |
| 8.51E-15 | 0.029669 | 0.52245  | -0.0518   | 0.26396 | -0.08508 | 0.06621 | -0.03704 | 0.42449  |
| 3.08E-44 | 0.137073 | 0.00299  | 0.046006  | 0.32116 | 0.007558 | 0.8706  | 0.073295 | 0.11369  |
| 0.0774   | 0.015335 | 0.74101  | -0.05671  | 0.22128 | -0.02801 | 0.54598 | -0.0229  | 0.62161  |
| 1.11E-05 | 0.077227 | 0.09553  | -0.02863  | 0.53716 | -0.04241 | 0.36047 | 0.010594 | 0.81939  |

|          |          |          |          |          |          |          |          |          |
|----------|----------|----------|----------|----------|----------|----------|----------|----------|
| 2.84E-20 | 0.165804 | 0.00032  | 0.00411  | 0.92942  | -0.0108  | 0.81592  | 0.052243 | 0.25986  |
| 2.49E-20 | 0.098581 | 0.03318  | 0.012842 | 0.78194  | 0.012654 | 0.78505  | 0.047916 | 0.30146  |
| 1.75E-23 | 0.110654 | 0.01675  | -0.05248 | 0.25768  | -0.03626 | 0.43433  | 0.030851 | 0.506    |
| 1.82E-15 | 0.160366 | 0.0005   | -0.00019 | 0.99678  | -0.01927 | 0.6779   | 0.037371 | 0.42041  |
| 3.55E-11 | 0.102142 | 0.0273   | -0.06312 | 0.17331  | -0.0025  | 0.95695  | 0.019441 | 0.67519  |
| 7.80E-24 | 0.12239  | 0.0081   | -0.08981 | 0.05244  | -0.07388 | 0.11083  | -0.00397 | 0.93187  |
| 8.89E-12 | 0.0937   | 0.04298  | -0.0634  | 0.17139  | -0.01614 | 0.72795  | 0.048602 | 0.29459  |
| 3.93E-31 | 0.125228 | 0.00674  | -0.0191  | 0.68062  | 0.010642 | 0.81859  | 0.070863 | 0.12622  |
| 3.23E-19 | 0.113286 | 0.01431  | 0.014981 | 0.74677  | 0.043032 | 0.35347  | 0.066506 | 0.1513   |
| 3.80E-15 | 0.106957 | 0.02079  | -0.0143  | 0.75785  | -0.02994 | 0.5186   | 0.034462 | 0.4575   |
| 1.81E-27 | 0.142193 | 0.00207  | -0.02167 | 0.64044  | 0.041289 | 0.37333  | 0.076494 | 0.09873  |
| 0.00017  | 0.102061 | 0.02742  | 0.022699 | 0.62464  | -0.00982 | 0.83232  | 0.023495 | 0.61254  |
| 3.31E-20 | 0.097793 | 0.03462  | -0.04426 | 0.33987  | -0.03303 | 0.47639  | -0.014   | 0.76283  |
| 9.95E-13 | 0.085943 | 0.0635   | -0.07702 | 0.09644  | -0.05771 | 0.21321  | 0.006645 | 0.88612  |
| 0.04354  | 0.086187 | 0.06274  | -0.06626 | 0.15285  | -0.0284  | 0.54047  | 0.008152 | 0.86053  |
| 0.29207  | 0.083171 | 0.07255  | 0.059187 | 0.2017   | 0.011078 | 0.81128  | 0.049617 | 0.28461  |
| 1.07E-28 | 0.136947 | 0.00302  | -0.01807 | 0.69689  | 0.004906 | 0.91579  | 0.048005 | 0.30057  |
| 5.18E-17 | 0.122551 | 0.00802  | -0.03773 | 0.41597  | -0.02154 | 0.64239  | 0.044459 | 0.33773  |
| 2.43E-24 | 0.102165 | 0.02727  | 0.04404  | 0.3423   | 0.028322 | 0.54151  | 0.043092 | 0.3528   |
| 1.10E-23 | 0.139939 | 0.00244  | 0.191121 | 3.22E-05 | 0.296729 | 6.02E-11 | 0.33712  | 7.10E-14 |
| 2.67E-21 | 0.183731 | 6.50E-05 | -0.07573 | 0.10216  | -0.019   | 0.6821   | 0.064195 | 0.16606  |
| 9.74E-22 | 0.105174 | 0.02302  | 0.009004 | 0.84613  | 0.013719 | 0.76746  | 0.048207 | 0.29854  |
| 5.91E-18 | 0.084241 | 0.06894  | 0.018605 | 0.68841  | 0.007151 | 0.87751  | 0.060739 | 0.1901   |
| 5.30E-05 | 0.043963 | 0.34315  | 0.061575 | 0.18407  | -0.02057 | 0.6575   | 0.036317 | 0.43364  |
| 9.88E-26 | 0.101935 | 0.02762  | -0.04218 | 0.36315  | -0.02072 | 0.65521  | 0.016732 | 0.71838  |
| 4.40E-16 | 0.07088  | 0.12613  | -0.03381 | 0.46602  | -0.00879 | 0.84971  | -0.00977 | 0.83321  |
| 2.21E-29 | 0.125447 | 0.00664  | 0.007578 | 0.87027  | 0.004999 | 0.9142   | 0.049441 | 0.28633  |
| 0.58938  | 0.018373 | 0.69209  | 0.597234 | 1.77E-46 | 0.825784 | #####    | 0.615085 | 6.03E-50 |
| 0.16162  | 0.103091 | 0.02589  | 0.409093 | 2.87E-20 | 0.757692 | 3.18E-88 | 0.678998 | 2.10E-64 |
| 0.15584  | 0.208068 | 5.79E-06 | 0.424171 | 8.09E-22 | 0.819707 | #####    | 0.825981 | #####    |
| 1.62E-05 | 0.169443 | 0.00023  | 0.190482 | 3.42E-05 | 0.293311 | 1.02E-10 | 0.376826 | 3.33E-17 |
| 0.04049  | 0.040752 | 0.37959  | 0.435597 | 4.78E-23 | 0.810484 | #####    | 0.61588  | 4.17E-50 |
| 0.04801  | -0.02776 | 0.54959  | 0.568612 | 2.37E-41 | 0.849954 | #####    | 0.567916 | 3.12E-41 |
| 0.31772  | 0.111178 | 0.01623  | 0.495801 | 2.42E-30 | 0.378161 | 2.53E-17 | 0.288576 | 2.08E-10 |
| 0.92373  | 0.047608 | 0.30459  | 0.387755 | 3.33E-18 | 0.716986 | 6.92E-75 | 0.587762 | 1.00E-44 |
| 0.08309  | 0.10502  | 0.02323  | 0.302915 | 2.29E-11 | 0.563261 | 1.90E-40 | 0.51681  | 2.99E-33 |
| 0.56341  | 0.065832 | 0.1555   | 0.086835 | 0.06079  | 0.391535 | 1.47E-18 | 0.339141 | 4.93E-14 |
| 0.07643  | -0.06862 | 0.13871  | 0.607116 | 2.27E-48 | 0.642919 | 8.08E-56 | 0.387916 | 3.21E-18 |
| 0.21872  | 0.050215 | 0.27884  | 0.579224 | 3.41E-43 | 0.841302 | #####    | 0.704221 | 3.54E-71 |
| 7.28E-06 | 0.281323 | 6.07E-10 | 0.623747 | 1.04E-51 | 0.837132 | #####    | 0.79008  | #####    |
| 0.83296  | 0.052223 | 0.26004  | 0.511936 | 1.47E-32 | 0.853077 | #####    | 0.692732 | 5.26E-68 |
| 0.00036  | 0.313666 | 4.03E-12 | 0.480069 | 2.70E-28 | 0.744449 | 1.32E-83 | 0.679586 | 1.49E-64 |
| 0.01088  | -0.034   | 0.46358  | 0.316629 | 2.47E-12 | 0.452393 | 6.13E-25 | 0.355816 | 2.20E-15 |
| 0.00261  | -0.01261 | 0.78583  | 0.43987  | 1.61E-23 | 0.547763 | 6.40E-38 | 0.445487 | 3.79E-24 |
| 0.58914  | 0.083859 | 0.07021  | 0.588962 | 6.06E-45 | 0.88754  | #####    | 0.750279 | 1.33E-85 |

|          |          |          |          |          |          |          |          |          |
|----------|----------|----------|----------|----------|----------|----------|----------|----------|
| 0.04005  | -0.03162 | 0.49548  | 0.462499 | 3.96E-26 | 0.447328 | 2.34E-24 | 0.345774 | 1.46E-14 |
| 0.42262  | 0.078233 | 0.09128  | 0.481318 | 1.87E-28 | 0.423453 | 9.62E-22 | 0.351378 | 5.12E-15 |
| 0.37371  | 0.09859  | 0.03317  | 0.372452 | 8.17E-17 | 0.541333 | 6.55E-37 | 0.431315 | 1.40E-22 |
| 0.66079  | 0.001551 | 0.97333  | 0.260814 | 1.06E-08 | 0.554047 | 6.27E-39 | 0.37335  | 6.80E-17 |
| 0.00517  | 0.215783 | 2.52E-06 | 0.287256 | 2.54E-10 | 0.635474 | 3.45E-54 | 0.526751 | 1.07E-34 |
| 6.97E-06 | 0.113297 | 0.0143   | 0.51754  | 2.35E-33 | 0.70842  | 2.25E-72 | 0.633159 | 1.08E-53 |
| 0.03088  | 0.168742 | 0.00025  | 0.292343 | 1.18E-10 | 0.53773  | 2.36E-36 | 0.470633 | 4.08E-27 |
| 0.80743  | 0.089448 | 0.0534   | 0.27218  | 2.24E-09 | 0.577692 | 6.36E-43 | 0.515815 | 4.15E-33 |
| 0.69886  | 0.27391  | 1.76E-09 | 0.25807  | 1.53E-08 | 0.688913 | 5.53E-67 | 0.627394 | 1.81E-52 |
| 0.15339  | 0.103158 | 0.0258   | 0.381988 | 1.13E-17 | 0.707734 | 3.53E-72 | 0.647668 | 6.98E-57 |
| 0.11733  | 0.116589 | 0.01169  | 0.547521 | 6.99E-38 | 0.862508 | #####    | 0.703023 | 7.71E-71 |
| 0.0032   | 0.028789 | 0.53486  | 0.682582 | 2.52E-65 | 0.881713 | #####    | 0.67697  | 6.88E-64 |
| 0.00361  | -0.06271 | 0.17611  | 0.191663 | 3.05E-05 | 0.465552 | 1.70E-26 | 0.349613 | 7.15E-15 |
| 0.47714  | -0.01762 | 0.70418  | 0.620122 | 5.77E-51 | 0.785032 | 9.06E-99 | 0.545199 | 1.63E-37 |
| 0.33158  | 0.160384 | 0.0005   | 0.218768 | 1.82E-06 | 0.476513 | 7.59E-28 | 0.415771 | 6.04E-21 |
| 0.00214  | 0.085735 | 0.06414  | 0.342247 | 2.80E-14 | 0.68411  | 1.01E-65 | 0.534232 | 8.07E-36 |
| 0.02318  | 0.015563 | 0.7373   | 0.542491 | 4.33E-37 | 0.90424  | #####    | 0.670926 | 2.23E-62 |
| 0.33145  | 0.180655 | 8.64E-05 | 0.514807 | 5.78E-33 | 0.89479  | #####    | 0.785654 | 5.01E-99 |
| 0.18579  | 0.237289 | 2.12E-07 | 0.443774 | 5.91E-24 | 0.705261 | 1.80E-71 | 0.596312 | 2.64E-46 |
| 0.14612  | 0.175514 | 0.00014  | 0.419263 | 2.64E-21 | 0.823721 | #####    | 0.776926 | 1.74E-95 |
| 0.00136  | 0.211891 | 3.85E-06 | 0.246692 | 6.65E-08 | 0.58102  | 1.64E-43 | 0.53974  | 1.16E-36 |
| 0.00218  | 0.268473 | 3.75E-09 | 0.447427 | 2.28E-24 | 0.81249  | #####    | 0.765945 | 2.96E-91 |
| 0.14514  | 0.107918 | 0.01966  | 0.596886 | 2.06E-46 | 0.536432 | 3.73E-36 | 0.436579 | 3.73E-23 |
| 0.72879  | 0.07863  | 0.08964  | 0.56022  | 6.10E-40 | 0.612214 | 2.25E-49 | 0.53229  | 1.59E-35 |
| 0.90845  | 0.114503 | 0.01329  | 0.554968 | 4.44E-39 | 0.946606 | #####    | 0.820443 | #####    |
| 0.00242  | 0.032588 | 0.48234  | 0.483043 | 1.13E-28 | 0.470553 | 4.17E-27 | 0.359494 | 1.08E-15 |
| 0.03364  | 0.099134 | 0.03221  | 0.472113 | 2.68E-27 | 0.773944 | 2.58E-94 | 0.727717 | 3.63E-78 |
| 0.47572  | 0.047747 | 0.30318  | 0.529629 | 3.98E-35 | 0.758623 | 1.47E-88 | 0.547711 | 6.52E-38 |
| 0.06013  | -0.03178 | 0.49324  | 0.552456 | 1.13E-38 | 0.708506 | 2.12E-72 | 0.511634 | 1.63E-32 |
| 0.53921  | -0.01195 | 0.79679  | 0.464587 | 2.22E-26 | 0.580926 | 1.70E-43 | 0.371387 | 1.01E-16 |
| 0.03117  | 0.044516 | 0.33711  | 0.418378 | 3.26E-21 | 0.750308 | 1.30E-85 | 0.596188 | 2.78E-46 |
| 0.10809  | -0.03224 | 0.48706  | 0.337028 | 7.22E-14 | 0.355962 | 2.14E-15 | 0.350167 | 6.44E-15 |
| 0.0067   | 0.038411 | 0.40759  | 0.21518  | 2.70E-06 | 0.465866 | 1.56E-26 | 0.37982  | 1.79E-17 |
| 0.17523  | 0.014871 | 0.74858  | 0.525644 | 1.56E-34 | 0.578483 | 4.62E-43 | 0.454017 | 3.97E-25 |
| 0.01744  | 0.183858 | 6.42E-05 | 0.343208 | 2.35E-14 | 0.461934 | 4.62E-26 | 0.358957 | 1.20E-15 |
| 0.00951  | 0.050617 | 0.27501  | 0.600087 | 5.11E-47 | 0.89922  | #####    | 0.722489 | 1.50E-76 |
| 0.05289  | 0.169923 | 0.00023  | 0.503402 | 2.26E-31 | 0.907647 | #####    | 0.84424  | #####    |
| 2.83E-05 | 0.178993 | 0.0001   | 0.604833 | 6.29E-48 | 0.766313 | 2.16E-91 | 0.533533 | 1.03E-35 |
| 0.08702  | 0.09552  | 0.03908  | 0.404235 | 8.74E-20 | 0.736592 | 5.32E-81 | 0.688752 | 6.10E-67 |
| 4.11E-06 | 0.051256 | 0.26898  | 0.532059 | 1.72E-35 | 0.675564 | 1.56E-63 | 0.571157 | 8.70E-42 |
| 0.33846  | 0.041484 | 0.37107  | 0.457638 | 1.50E-25 | 0.595866 | 3.20E-46 | 0.446582 | 2.85E-24 |
| 0.0872   | 0.075806 | 0.10181  | 0.423665 | 9.14E-22 | 0.719704 | 1.06E-75 | 0.625654 | 4.17E-52 |
| 0.00017  | 0.010323 | 0.82393  | 0.605378 | 4.93E-48 | 0.869447 | #####    | 0.646034 | 1.63E-56 |
| 1.92E-05 | 0.121043 | 0.00883  | 0.55941  | 8.31E-40 | 0.620834 | 4.13E-51 | 0.523337 | 3.40E-34 |
| 5.20E-06 | 0.162552 | 0.00042  | 0.318933 | 1.68E-12 | 0.471319 | 3.36E-27 | 0.274475 | 1.62E-09 |



|          |          |          |          |          |          |          |          |          |
|----------|----------|----------|----------|----------|----------|----------|----------|----------|
| 0.00112  | -0.03861 | 0.40514  | 0.563014 | 2.09E-40 | 0.774986 | 1.01E-94 | 0.533858 | 9.20E-36 |
| 0.05201  | 0.095111 | 0.03993  | 0.460312 | 7.22E-26 | 0.852957 | #####    | 0.746028 | 3.84E-84 |
| 0.28797  | 0.093998 | 0.04232  | 0.400731 | 1.93E-19 | 0.551538 | 1.60E-38 | 0.495973 | 2.29E-30 |
| 1.99E-07 | -0.05095 | 0.27187  | 0.350009 | 6.63E-15 | 0.595865 | 3.20E-46 | 0.346845 | 1.20E-14 |
| 0.00347  | 0.185974 | 5.27E-05 | 0.377837 | 2.70E-17 | 0.565529 | 7.91E-41 | 0.508548 | 4.40E-32 |
| 0.11372  | 0.13545  | 0.00336  | 0.391154 | 1.60E-18 | 0.675763 | 1.39E-63 | 0.61658  | 3.02E-50 |
| 0.04565  | 0.108901 | 0.01857  | 0.539501 | 1.26E-36 | 0.899525 | #####    | 0.727946 | 3.08E-78 |
| 3.03E-05 | -0.03205 | 0.48958  | 0.507968 | 5.30E-32 | 0.578066 | 5.47E-43 | 0.445421 | 3.85E-24 |
| 0.32029  | 0.112535 | 0.01497  | 0.545934 | 1.25E-37 | 0.838377 | #####    | 0.758103 | 2.26E-88 |
| 0.72889  | -0.0053  | 0.90912  | 0.466444 | 1.32E-26 | 0.622573 | 1.81E-51 | 0.461915 | 4.65E-26 |
| 0.00269  | -0.02052 | 0.65835  | 0.445007 | 4.29E-24 | 0.49492  | 3.17E-30 | 0.285188 | 3.45E-10 |
| 0.27687  | 0.084865 | 0.0669   | 0.393357 | 9.88E-19 | 0.844849 | #####    | 0.682717 | 2.33E-65 |
| 0.52514  | 0.113774 | 0.01389  | 0.236303 | 2.39E-07 | 0.570905 | 9.62E-42 | 0.402772 | 1.22E-19 |
| 0.91989  | 0.015217 | 0.74293  | 0.370791 | 1.15E-16 | 0.741883 | 9.57E-83 | 0.532914 | 1.28E-35 |
| 9.34E-15 | 0.128896 | 0.00528  | 0.348254 | 9.22E-15 | 0.685418 | 4.61E-66 | 0.651063 | 1.18E-57 |
| 0.25886  | 0.090727 | 0.05006  | 0.51971  | 1.14E-33 | 0.89711  | #####    | 0.730514 | 4.78E-79 |
| 0.39311  | 0.048205 | 0.29856  | 0.405331 | 6.81E-20 | 0.796098 | #####    | 0.611564 | 3.03E-49 |
| 0.32962  | 0.100946 | 0.02917  | 0.484385 | 7.59E-29 | 0.901972 | #####    | 0.755163 | 2.55E-87 |
| 0.38033  | 0.059645 | 0.19822  | 0.516859 | 2.95E-33 | 0.739544 | 5.72E-82 | 0.573327 | 3.68E-42 |
| 0.00435  | 0.018661 | 0.68752  | 0.327555 | 3.85E-13 | 0.468852 | 6.74E-27 | 0.381643 | 1.22E-17 |
| 0.39841  | 0.022046 | 0.63464  | 0.440894 | 1.24E-23 | 0.64344  | 6.19E-56 | 0.453207 | 4.93E-25 |
| 7.40E-18 | 0.047208 | 0.30867  | 0.364874 | 3.75E-16 | 0.377126 | 3.13E-17 | 0.263    | 7.92E-09 |
| 1.29E-05 | 0.091015 | 0.04934  | 0.608298 | 1.33E-48 | 0.841032 | #####    | 0.701717 | 1.79E-70 |
| 0.00185  | -0.08049 | 0.08229  | 0.579464 | 3.10E-43 | 0.621212 | 3.45E-51 | 0.312105 | 5.21E-12 |
| 2.35E-10 | 0.097992 | 0.03426  | 0.272881 | 2.03E-09 | 0.480519 | 2.37E-28 | 0.396714 | 4.72E-19 |
| 0.10006  | -0.0156  | 0.73666  | 0.316431 | 2.55E-12 | 0.442223 | 8.83E-24 | 0.363337 | 5.08E-16 |
| 5.81E-07 | -0.02957 | 0.52388  | 0.44906  | 1.48E-24 | 0.467923 | 8.75E-27 | 0.379828 | 1.78E-17 |
| 0.02953  | 0.279645 | 7.74E-10 | 0.516358 | 3.47E-33 | 0.754778 | 3.50E-87 | 0.683988 | 1.09E-65 |
| 3.70E-05 | 0.208524 | 5.51E-06 | 0.645934 | 1.72E-56 | 0.742528 | 5.83E-83 | 0.715769 | 1.59E-74 |
| 0.39164  | 0.115017 | 0.01288  | 0.636796 | 1.78E-54 | 0.722719 | 1.28E-76 | 0.640881 | 2.28E-55 |
| 0.31802  | 0.110266 | 0.01714  | 0.284948 | 3.57E-10 | 0.561614 | 3.58E-40 | 0.506861 | 7.55E-32 |
| 0.98653  | 0.097115 | 0.0359   | 0.402967 | 1.16E-19 | 0.727832 | 3.34E-78 | 0.630137 | 4.77E-53 |
| 0.36305  | 0.018653 | 0.68765  | -0.06957 | 0.1333   | -0.06439 | 0.16477  | -0.04168 | 0.36878  |
| 0.00068  | 0.016851 | 0.71646  | 0.500297 | 5.99E-31 | 0.638325 | 8.29E-55 | 0.52826  | 6.38E-35 |
| 0.00559  | 0.052557 | 0.257    | 0.416739 | 4.81E-21 | 0.44332  | 6.65E-24 | 0.429929 | 1.97E-22 |
| 5.04E-13 | 0.19794  | 1.64E-05 | 0.23304  | 3.53E-07 | 0.36175  | 6.94E-16 | 0.466915 | 1.16E-26 |
| 0.00079  | 0.183341 | 6.74E-05 | 0.08372  | 0.07068  | 0.22575  | 8.26E-07 | 0.332648 | 1.58E-13 |
| 0.04024  | 0.248212 | 5.49E-08 | 0.291678 | 1.31E-10 | 0.408722 | 3.13E-20 | 0.469162 | 6.18E-27 |
| 0.67447  | 0.109271 | 0.01817  | 0.364433 | 4.09E-16 | 0.582    | 1.10E-43 | 0.459963 | 7.94E-26 |
| 1.15E-06 | -0.12399 | 0.00731  | 0.251374 | 3.66E-08 | 0.400528 | 2.02E-19 | 0.28949  | 1.82E-10 |
| 0.57887  | 0.309094 | 8.51E-12 | 0.362848 | 5.60E-16 | 0.651554 | 9.11E-58 | 0.647015 | 9.80E-57 |
| 0.71834  | 0.071862 | 0.12095  | 0.187285 | 4.65E-05 | 0.522642 | 4.29E-34 | 0.410937 | 1.87E-20 |
| 0.03503  | 0.023099 | 0.61855  | 0.280765 | 6.58E-10 | 0.582958 | 7.40E-44 | 0.43731  | 3.10E-23 |
| 0.56138  | 0.24841  | 5.35E-08 | 0.533395 | 1.08E-35 | 0.801026 | #####    | 0.693508 | 3.25E-68 |
| 0.82722  | 0.055959 | 0.22744  | 0.610593 | 4.72E-49 | 0.674646 | 2.65E-63 | 0.525442 | 1.67E-34 |

|          |          |          |          |          |          |          |          |          |
|----------|----------|----------|----------|----------|----------|----------|----------|----------|
| 0.00226  | 0.031154 | 0.50183  | 0.410684 | 1.99E-20 | 0.645679 | 1.96E-56 | 0.562055 | 3.02E-40 |
| 0.08003  | 0.071153 | 0.12467  | 0.192497 | 2.81E-05 | 0.45156  | 7.65E-25 | 0.350312 | 6.27E-15 |
| 0.04518  | 0.110769 | 0.01663  | 0.241034 | 1.34E-07 | 0.619259 | 8.65E-51 | 0.444298 | 5.16E-24 |
| 0.00011  | 0.290745 | 1.50E-10 | 0.357338 | 1.64E-15 | 0.585502 | 2.58E-44 | 0.562049 | 3.03E-40 |
| 3.94E-20 | 0.184991 | 5.78E-05 | 0.20697  | 6.50E-06 | 0.467601 | 9.58E-27 | 0.438933 | 2.05E-23 |
| 6.33E-10 | 0.03182  | 0.49273  | 0.714155 | 4.79E-74 | 0.572434 | 5.24E-42 | 0.475747 | 9.46E-28 |
| 0.54851  | 0.045843 | 0.32289  | 0.62835  | 1.14E-52 | 0.59061  | 3.02E-45 | 0.434016 | 7.12E-23 |
| 0.03493  | 0.103567 | 0.02521  | 0.480164 | 2.63E-28 | 0.856143 | #####    | 0.740979 | 1.92E-82 |
| 0.17513  | 0.11199  | 0.01547  | 0.635113 | 4.13E-54 | 0.855516 | #####    | 0.751993 | 3.35E-86 |
| 1.41E-05 | 0.121236 | 0.00873  | 0.479229 | 3.45E-28 | 0.740345 | 3.11E-82 | 0.722599 | 1.39E-76 |
| 0.52284  | 0.101213 | 0.02874  | 0.383905 | 7.57E-18 | 0.620927 | 3.95E-51 | 0.585393 | 2.70E-44 |
| 0.0151   | 0.113766 | 0.0139   | 0.295644 | 7.12E-11 | 0.656962 | 5.09E-59 | 0.457864 | 1.41E-25 |
| 0.00431  | 0.041073 | 0.37583  | 0.246532 | 6.78E-08 | 0.44074  | 1.29E-23 | 0.302308 | 2.52E-11 |
| 0.54447  | 0.037187 | 0.4227   | 0.618262 | 1.38E-50 | 0.660561 | 7.21E-60 | 0.618246 | 1.39E-50 |
| 0.03944  | -0.01844 | 0.69104  | 0.257335 | 1.69E-08 | 0.623432 | 1.21E-51 | 0.355372 | 2.39E-15 |
| 0.01078  | 0.106251 | 0.02165  | 0.45341  | 4.67E-25 | 0.822904 | #####    | 0.720218 | 7.38E-76 |
| 0.31289  | 0.130232 | 0.00482  | 0.51947  | 1.24E-33 | 0.883679 | #####    | 0.749855 | 1.86E-85 |
| 0.03435  | 0.164214 | 0.00037  | 0.531312 | 2.23E-35 | 0.900941 | #####    | 0.854396 | #####    |
| 0.34014  | -0.02511 | 0.5884   | 0.263097 | 7.82E-09 | 0.465208 | 1.87E-26 | 0.28011  | 7.24E-10 |
| 0.83173  | 0.060608 | 0.19106  | 0.655504 | 1.11E-58 | 0.868864 | #####    | 0.655125 | 1.36E-58 |
| 0.05719  | 0.107195 | 0.02051  | 0.504851 | 1.43E-31 | 0.689806 | 3.20E-67 | 0.637382 | 1.33E-54 |
| 0.00036  | 0.111966 | 0.01549  | 0.42292  | 1.09E-21 | 0.528846 | 5.22E-35 | 0.458359 | 1.23E-25 |
| 0.4593   | 0.009669 | 0.83492  | 0.433576 | 7.95E-23 | 0.386278 | 4.57E-18 | 0.119231 | 0.00991  |
| 0.94426  | 0.023519 | 0.61219  | 0.483995 | 8.52E-29 | 0.575582 | 1.49E-42 | 0.405874 | 6.02E-20 |
| 0.00065  | 0.404592 | 8.06E-20 | 0.244194 | 9.09E-08 | 0.546344 | 1.07E-37 | 0.536754 | 3.33E-36 |
| 0.51696  | 0.067075 | 0.14782  | 0.648289 | 5.05E-57 | 0.787683 | #####    | 0.591419 | 2.15E-45 |
| 1.99E-07 | 0.017969 | 0.69852  | 0.567943 | 3.09E-41 | 0.653757 | 2.83E-58 | 0.535847 | 4.59E-36 |
| 0.92948  | -0.04319 | 0.35168  | 0.564081 | 1.39E-40 | 0.852267 | #####    | 0.564392 | 1.23E-40 |
| 0.09135  | 0.120224 | 0.00931  | 0.374105 | 5.83E-17 | 0.657152 | 4.59E-59 | 0.580043 | 2.45E-43 |
| 6.01E-08 | -0.17788 | 0.00011  | 0.490747 | 1.13E-29 | 0.546038 | 1.20E-37 | 0.247758 | 5.81E-08 |
| 0.33063  | 0.070134 | 0.13018  | 0.436541 | 3.77E-23 | 0.552161 | 1.27E-38 | 0.447102 | 2.48E-24 |
| 0.99607  | 0.030184 | 0.51526  | 0.570789 | 1.01E-41 | 0.69041  | 2.21E-67 | 0.580341 | 2.16E-43 |
| 0.00059  | 0.108698 | 0.01879  | 0.19146  | 3.11E-05 | 0.391018 | 1.64E-18 | 0.32183  | 1.03E-12 |
| 0.34687  | 0.101912 | 0.02765  | 0.349526 | 7.26E-15 | 0.715457 | 1.97E-74 | 0.603956 | 9.29E-48 |
| 0.07477  | -0.02152 | 0.64275  | 0.306744 | 1.24E-11 | 0.548794 | 4.39E-38 | 0.395191 | 6.61E-19 |
| 0.3912   | 0.003336 | 0.94268  | 0.472238 | 2.58E-27 | 0.462458 | 4.00E-26 | 0.30251  | 2.44E-11 |
| 2.50E-05 | 0.075747 | 0.10208  | 0.595421 | 3.87E-46 | 0.855703 | #####    | 0.722547 | 1.44E-76 |
| 0.00044  | 0.109076 | 0.01838  | 0.394333 | 7.98E-19 | 0.722602 | 1.39E-76 | 0.568286 | 2.70E-41 |
| 2.17E-05 | -0.10717 | 0.02053  | 0.293611 | 9.73E-11 | 0.563887 | 1.49E-40 | 0.2736   | 1.83E-09 |
| 0.99879  | 0.133594 | 0.00383  | 0.421887 | 1.41E-21 | 0.774164 | 2.12E-94 | 0.671354 | 1.75E-62 |
| 0.00921  | 0.104412 | 0.02404  | 0.144228 | 0.00178  | 0.422957 | 1.09E-21 | 0.355522 | 2.33E-15 |
| 0.02418  | 0.067194 | 0.14711  | 0.247881 | 5.72E-08 | 0.579129 | 3.55E-43 | 0.476456 | 7.71E-28 |
| 0.1407   | 0.199142 | 1.45E-05 | 0.607117 | 2.27E-48 | 0.777581 | 9.54E-96 | 0.707831 | 3.32E-72 |
| 0.56344  | -0.15129 | 0.00104  | 0.362341 | 6.18E-16 | 0.469101 | 6.28E-27 | 0.307609 | 1.08E-11 |
| 3.35E-05 | 0.068241 | 0.1409   | 0.588325 | 7.92E-45 | 0.697596 | 2.49E-69 | 0.613628 | 1.18E-49 |

|          |          |          |          |          |          |          |          |          |
|----------|----------|----------|----------|----------|----------|----------|----------|----------|
| 0.03347  | 0.267935 | 4.04E-09 | 0.623501 | 1.17E-51 | 0.862658 | #####    | 0.842308 | #####    |
| 0.09655  | 0.08475  | 0.06727  | 0.636073 | 2.56E-54 | 0.926975 | #####    | 0.75525  | 2.38E-87 |
| 0.31196  | 0.089642 | 0.05288  | 0.576421 | 1.06E-42 | 0.865676 | #####    | 0.711706 | 2.51E-73 |
| 0.46665  | 0.048646 | 0.29415  | 0.458623 | 1.14E-25 | 0.840592 | #####    | 0.659115 | 1.59E-59 |
| 0.69346  | 0.085392 | 0.06522  | 0.53594  | 4.44E-36 | 0.889543 | #####    | 0.750355 | 1.25E-85 |
| 0.04716  | -0.00835 | 0.8571   | 0.250293 | 4.21E-08 | 0.521272 | 6.80E-34 | 0.37002  | 1.34E-16 |
| 0.05003  | -0.02129 | 0.64636  | 0.45292  | 5.33E-25 | 0.610812 | 4.27E-49 | 0.409009 | 2.93E-20 |
| 0.11684  | 0.210825 | 4.32E-06 | 0.545045 | 1.72E-37 | 0.278314 | 9.38E-10 | 0.274234 | 1.68E-09 |
| 1.51E-10 | 0.365705 | 3.18E-16 | 0.355391 | 2.38E-15 | 0.59139  | 2.17E-45 | 0.634068 | 6.92E-54 |
| 6.85E-07 | 0.073866 | 0.1109   | 0.542231 | 4.75E-37 | 0.639969 | 3.62E-55 | 0.521946 | 5.42E-34 |
| 0.01028  | 0.0312   | 0.50121  | 0.547595 | 6.81E-38 | 0.866866 | #####    | 0.614498 | 7.91E-50 |
| 0.01219  | 0.28336  | 4.51E-10 | 0.48874  | 2.07E-29 | 0.856852 | #####    | 0.838577 | #####    |
| 0.00177  | 0.208225 | 5.69E-06 | 0.238105 | 1.92E-07 | 0.37497  | 4.88E-17 | 0.379082 | 2.08E-17 |
| 0.2529   | -0.1997  | 1.37E-05 | -0.08239 | 0.07528  | -0.44194 | 9.50E-24 | -0.4067  | 4.98E-20 |
| 0.00039  | 0.339745 | 4.42E-14 | 0.38883  | 2.64E-18 | 0.679719 | 1.37E-64 | 0.689502 | 3.85E-67 |
| 0.00189  | 0.037203 | 0.42251  | 0.321774 | 1.04E-12 | 0.661614 | 4.05E-60 | 0.526593 | 1.13E-34 |
| 0.23867  | 0.187117 | 4.73E-05 | 0.503264 | 2.36E-31 | 0.781205 | 3.34E-97 | 0.731989 | 1.62E-79 |
| 0.01132  | 0.189356 | 3.82E-05 | 0.332635 | 1.58E-13 | 0.652477 | 5.59E-58 | 0.567423 | 3.78E-41 |
| 1.80E-15 | 0.091151 | 0.049    | 0.345318 | 1.59E-14 | 0.516081 | 3.81E-33 | 0.393124 | 1.04E-18 |
| 0.00177  | 0.155188 | 0.00077  | 0.350787 | 5.73E-15 | 0.679594 | 1.48E-64 | 0.58578  | 2.30E-44 |
| 0.01123  | 0.164359 | 0.00036  | 0.554579 | 5.14E-39 | 0.71885  | 1.91E-75 | 0.603046 | 1.39E-47 |
| 0.13623  | 0.091764 | 0.04749  | 0.597626 | 1.49E-46 | 0.849457 | #####    | 0.733641 | 4.80E-80 |
| 0.00046  | 0.013076 | 0.77808  | 0.548587 | 4.73E-38 | 0.520741 | 8.12E-34 | 0.37029  | 1.27E-16 |
| 6.49E-05 | 0.110218 | 0.01719  | 0.496843 | 1.75E-30 | 0.613416 | 1.30E-49 | 0.601319 | 2.98E-47 |
| 0.3791   | 0.174699 | 0.00015  | 0.548378 | 5.11E-38 | 0.711501 | 2.88E-73 | 0.642265 | 1.13E-55 |
| 0.28217  | 0.077301 | 0.09522  | 0.483892 | 8.78E-29 | 0.803349 | #####    | 0.691688 | 1.00E-67 |
| 0.35025  | 0.053712 | 0.24668  | 0.604999 | 5.84E-48 | 0.885473 | #####    | 0.709583 | 1.04E-72 |
| 0.00026  | 0.075303 | 0.10411  | 0.426824 | 4.23E-22 | 0.444851 | 4.47E-24 | 0.359206 | 1.14E-15 |
| 0.02944  | 0.132703 | 0.00407  | 0.531061 | 2.43E-35 | 0.797916 | #####    | 0.728581 | 1.94E-78 |
| 0.07012  | 0.144065 | 0.0018   | 0.735434 | 1.27E-80 | 0.796685 | #####    | 0.655178 | 1.33E-58 |
| 0.41775  | 0.097843 | 0.03453  | 0.53293  | 1.27E-35 | 0.811092 | #####    | 0.630972 | 3.18E-53 |
| 0.12508  | 0.055219 | 0.23365  | 0.401991 | 1.45E-19 | 0.366375 | 2.78E-16 | 0.331267 | 2.01E-13 |
| 0.94217  | 0.029501 | 0.52481  | 0.186171 | 5.17E-05 | 0.472817 | 2.19E-27 | 0.380947 | 1.41E-17 |
| 0.31623  | -0.02477 | 0.59344  | 0.361992 | 6.62E-16 | 0.509497 | 3.24E-32 | 0.439643 | 1.71E-23 |
| 0.2048   | -0.00135 | 0.97683  | 0.562225 | 2.83E-40 | 0.695329 | 1.04E-68 | 0.43989  | 1.61E-23 |
| 0.51737  | -0.01567 | 0.7355   | 0.498625 | 1.01E-30 | 0.507505 | 6.15E-32 | 0.368353 | 1.87E-16 |
| 0.01389  | 0.108885 | 0.01859  | 0.507577 | 6.01E-32 | 0.812161 | #####    | 0.71046  | 5.77E-73 |
| 0.01126  | 0.079206 | 0.08731  | 0.009563 | 0.83671  | -0.06552 | 0.15745  | 0.097927 | 0.03438  |
| 0.00066  | 0.048506 | 0.29555  | 0.137015 | 0.00301  | 0.033206 | 0.47408  | 0.109112 | 0.01834  |
| 5.21E-08 | 0.019189 | 0.67917  | 0.108214 | 0.01933  | -0.17623 | 0.00013  | -0.05029 | 0.27812  |
| 1.92E-31 | 0.03847  | 0.40686  | 0.033806 | 0.46613  | -0.1789  | 0.0001   | 0.003265 | 0.9439   |
| 0.04053  | 0.090534 | 0.05056  | 0.200575 | 1.26E-05 | 0.017009 | 0.71391  | 0.158885 | 0.00057  |
| 0.11406  | -0.11499 | 0.0129   | -0.09269 | 0.04529  | -0.27862 | 8.97E-10 | -0.1933  | 2.60E-05 |
| 0.01103  | 0.047379 | 0.30693  | 0.187835 | 4.41E-05 | -0.01524 | 0.74259  | 0.092444 | 0.04586  |
| 0.1301   | -0.04179 | 0.3675   | -0.04657 | 0.31525  | -0.26588 | 5.35E-09 | -0.14968 | 0.00118  |

|          |          |         |          |          |          |          |          |          |
|----------|----------|---------|----------|----------|----------|----------|----------|----------|
| 0.36429  | 0.073826 | 0.1111  | -0.04832 | 0.2974   | -0.10332 | 0.02556  | 0.080078 | 0.08387  |
| 0.24465  | 0.035907 | 0.43886 | 0.064909 | 0.16139  | -0.061   | 0.18818  | 0.109659 | 0.01776  |
| 0.00082  | 0.091593 | 0.04791 | 0.250025 | 4.35E-08 | -0.008   | 0.86309  | 0.145941 | 0.00157  |
| 1.31E-10 | 0.077577 | 0.09404 | 0.044241 | 0.34011  | -0.1099  | 0.01751  | 0.06749  | 0.14533  |
| 2.32E-06 | -0.02551 | 0.58235 | 0.100851 | 0.02932  | -0.14966 | 0.00118  | -0.02798 | 0.54637  |
| 9.64E-10 | 0.015188 | 0.74339 | -0.11374 | 0.01392  | -0.12324 | 0.00767  | -0.10102 | 0.02906  |
| 0.01008  | -0.00935 | 0.84032 | -0.0302  | 0.51499  | -0.15381 | 0.00085  | -0.01112 | 0.8105   |
| 9.99E-13 | 0.119727 | 0.00961 | 0.028227 | 0.54288  | -0.0416  | 0.36973  | 0.135283 | 0.0034   |
| 0.0112   | 0.105942 | 0.02204 | 0.024543 | 0.59678  | -0.13395 | 0.00373  | 0.058679 | 0.2056   |
| 0.00999  | 0.084496 | 0.0681  | 0.130242 | 0.00482  | -0.01024 | 0.82531  | 0.132148 | 0.00423  |
| 0.38466  | -0.00278 | 0.95216 | 0.028072 | 0.54509  | -0.18169 | 7.86E-05 | -0.0554  | 0.23212  |
| 0.01551  | 0.005382 | 0.90766 | -0.07855 | 0.08998  | -0.19665 | 1.87E-05 | -0.06762 | 0.14454  |
| 0.00112  | -0.03509 | 0.44936 | 0.17046  | 0.00021  | -0.06959 | 0.13317  | -0.02529 | 0.58565  |
| 4.66E-20 | 0.057887 | 0.21179 | 0.042709 | 0.35711  | -0.18017 | 9.04E-05 | 0.003745 | 0.93567  |
| 0.0469   | -0.1011  | 0.02892 | -0.04092 | 0.37759  | -0.23125 | 4.36E-07 | -0.19224 | 2.89E-05 |
| 0.13238  | 0.038673 | 0.40439 | 0.219085 | 1.75E-06 | 0.077797 | 0.09311  | 0.191455 | 3.12E-05 |
| 5.66E-08 | 0.034625 | 0.45539 | 0.146324 | 0.00152  | -0.04403 | 0.34245  | 0.12868  | 0.00535  |
| 0.08682  | 0.026679 | 0.56523 | 0.034327 | 0.45928  | -0.09983 | 0.03101  | 0.000479 | 0.99176  |
| 0.33136  | -0.05889 | 0.20397 | 0.161148 | 0.00047  | -0.0973  | 0.03555  | -0.02436 | 0.59954  |
| 0.01512  | 0.077758 | 0.09327 | -0.11671 | 0.0116   | -0.28108 | 6.29E-10 | -0.13525 | 0.00341  |
| 4.15E-09 | -0.04915 | 0.28914 | 0.057224 | 0.21708  | -0.18582 | 5.34E-05 | -0.06946 | 0.13389  |
| 0.00081  | -0.03984 | 0.39041 | 0.068417 | 0.13987  | -0.15093 | 0.00107  | -0.05362 | 0.24746  |
| 0.03823  | 0.024585 | 0.59616 | 0.078846 | 0.08876  | -0.13579 | 0.00328  | 0.016006 | 0.73011  |
| 0.0007   | 0.013167 | 0.77656 | 0.049165 | 0.28903  | -0.12237 | 0.00811  | 0.002886 | 0.9504   |
| 0.41692  | -0.02704 | 0.55997 | 0.004464 | 0.92335  | -0.20497 | 8.00E-06 | -0.10163 | 0.02809  |
| 0.99868  | 0.004855 | 0.91666 | 0.143598 | 0.00186  | -0.02312 | 0.6183   | 0.097227 | 0.03569  |
| 0.00031  | 0.125077 | 0.0068  | 0.138257 | 0.00275  | 0.069273 | 0.13497  | 0.176421 | 0.00013  |
| 0.01759  | 0.024156 | 0.60257 | 0.219946 | 1.59E-06 | 0.031242 | 0.50062  | 0.15702  | 0.00066  |
| 2.02E-06 | 0.088456 | 0.05611 | 0.075911 | 0.10133  | -0.02005 | 0.66557  | 0.062195 | 0.17968  |
| 0.39468  | 0.067298 | 0.14648 | -0.02671 | 0.56476  | -0.10552 | 0.02258  | 0.042187 | 0.36302  |
| 1.00E-05 | -0.03097 | 0.50437 | 0.140968 | 0.00226  | -0.08407 | 0.06949  | -0.07471 | 0.10688  |
| 0.19167  | 0.028304 | 0.54176 | 0.036866 | 0.42672  | -0.13774 | 0.00286  | 0.032168 | 0.48801  |
| 1.06E-08 | 0.124566 | 0.00704 | 0.289083 | 1.93E-10 | 0.205404 | 7.65E-06 | 0.33931  | 4.78E-14 |
| 0.17444  | 0.107496 | 0.02015 | 0.058495 | 0.20703  | -0.04144 | 0.37159  | 0.131475 | 0.00443  |
| 0.01426  | 0.030707 | 0.50799 | 0.066184 | 0.1533   | -0.12576 | 0.0065   | 0.022361 | 0.62981  |
| 1.97E-12 | 0.004773 | 0.91807 | 0.037118 | 0.42356  | -0.21442 | 2.93E-06 | -0.07265 | 0.11691  |
| 9.98E-05 | 0.094543 | 0.04113 | 0.236289 | 2.39E-07 | 0.134867 | 0.0035   | 0.291591 | 1.32E-10 |
| 0.02437  | 0.038024 | 0.41233 | -0.01985 | 0.66881  | -0.13059 | 0.0047   | -0.0496  | 0.2848   |
| 0.18282  | 0.097661 | 0.03487 | 0.033261 | 0.47334  | -0.06948 | 0.13381  | 0.130028 | 0.00489  |
| 0.03224  | -0.05531 | 0.23287 | -0.13168 | 0.00437  | -0.21659 | 2.31E-06 | -0.20139 | 1.16E-05 |
| 0.03204  | -0.04297 | 0.35418 | 0.007631 | 0.86936  | -0.09729 | 0.03556  | -0.05159 | 0.2659   |
| 7.55E-09 | -0.03844 | 0.40727 | 0.114926 | 0.01295  | -0.10901 | 0.01845  | 0.013547 | 0.7703   |
| 0.00541  | 0.046938 | 0.31145 | 0.161722 | 0.00045  | 0.065847 | 0.1554   | 0.162516 | 0.00042  |
| 0.04929  | 0.013038 | 0.7787  | 0.031656 | 0.49497  | 0.021347 | 0.64543  | 0.028729 | 0.53572  |
| 2.11E-10 | -0.06328 | 0.17222 | 0.095283 | 0.03957  | -0.16965 | 0.00023  | -0.07675 | 0.09758  |

|          |          |         |          |          |          |          |           |          |
|----------|----------|---------|----------|----------|----------|----------|-----------|----------|
| 0.00111  | -0.06986 | 0.13169 | 0.052382 | 0.25859  | -0.11204 | 0.01542  | -0.06699  | 0.14833  |
| 3.10E-06 | 0.111038 | 0.01637 | 0.100139 | 0.03049  | -0.14048 | 0.00234  | 0.053166  | 0.25153  |
| 0.09365  | 0.130012 | 0.00489 | 0.211204 | 4.15E-06 | 0.159554 | 0.00054  | 0.338662  | 5.38E-14 |
| 3.67E-08 | 0.08612  | 0.06295 | 0.196609 | 1.88E-05 | 0.005318 | 0.90875  | 0.155582  | 0.00074  |
| 0.00014  | 0.032696 | 0.4809  | 0.102892 | 0.02619  | -0.09627 | 0.03755  | 0.063311  | 0.17198  |
| 7.28E-05 | -0.1514  | 0.00103 | -0.01095 | 0.81347  | -0.15353 | 0.00087  | -0.19228  | 2.87E-05 |
| 0.62697  | -0.04436 | 0.33875 | 0.040345 | 0.38436  | -0.10945 | 0.01798  | -7.92E-05 | 0.99864  |
| 0.00014  | 0.041623 | 0.36948 | 0.058344 | 0.20821  | -0.07996 | 0.08433  | 0.037448  | 0.41945  |
| 0.00259  | -0.03844 | 0.40724 | 0.064162 | 0.16627  | -0.13468 | 0.00354  | -0.02909  | 0.53063  |
| 0.00407  | 0.053624 | 0.24746 | 0.132171 | 0.00422  | 0.067582 | 0.14478  | 0.144407  | 0.00176  |
| 9.65E-07 | 0.137212 | 0.00297 | 0.03966  | 0.39249  | -0.02011 | 0.66464  | 0.128282  | 0.0055   |
| 0.00138  | 0.023707 | 0.60934 | 0.072466 | 0.11785  | -0.03037 | 0.51269  | 0.053693  | 0.24684  |
| 1.61E-09 | 0.097664 | 0.03486 | 0.131971 | 0.00428  | -0.0037  | 0.93638  | 0.152799  | 0.00092  |
| 2.19E-08 | -0.02377 | 0.6084  | -0.05577 | 0.22897  | -0.16851 | 0.00025  | -0.06     | 0.19558  |
| 0.00583  | 0.090338 | 0.05106 | 0.140707 | 0.00231  | -0.00091 | 0.98436  | 0.159114  | 0.00056  |
| 0.64314  | 0.077334 | 0.09507 | -0.06743 | 0.14569  | -0.17558 | 0.00014  | 0.012478  | 0.78798  |
| 1.93E-06 | 0.002872 | 0.95064 | 0.083797 | 0.07042  | -0.11615 | 0.01201  | -0.03351  | 0.47009  |
| 1.15E-05 | 0.062166 | 0.17988 | 0.148062 | 0.00133  | -0.01233 | 0.79047  | 0.134332  | 0.00363  |
| 0.00035  | 0.096748 | 0.03661 | 0.034086 | 0.46244  | 0.068339 | 0.14033  | 0.154617  | 0.0008   |
| 5.06E-08 | -0.04907 | 0.28997 | 0.077545 | 0.09417  | -0.16018 | 0.00051  | -0.10999  | 0.01741  |
| 7.20E-05 | 0.024254 | 0.60111 | 0.114258 | 0.01349  | -0.02232 | 0.63041  | 0.103895  | 0.02475  |
| 0.96299  | -0.04922 | 0.28845 | -0.03278 | 0.47976  | -0.21445 | 2.92E-06 | -0.1331   | 0.00396  |
| 0.36167  | 0.013273 | 0.77482 | 0.010944 | 0.81353  | -0.19869 | 1.52E-05 | -0.05701  | 0.21881  |
| 0.14217  | 0.076269 | 0.09973 | 0.225764 | 8.24E-07 | 0.026752 | 0.56417  | 0.186787  | 4.88E-05 |
| 0.3488   | -0.02357 | 0.6114  | 0.067604 | 0.14465  | -0.06451 | 0.16398  | 0.034518  | 0.45678  |
| 0.00075  | -0.1123  | 0.01519 | -0.03723 | 0.42221  | -0.24651 | 6.80E-08 | -0.19275  | 2.75E-05 |
| 0.00038  | 0.070842 | 0.12633 | 0.111842 | 0.0156   | -0.0432  | 0.3516   | 0.103495  | 0.02532  |
| 0.0105   | 0.042591 | 0.35843 | 0.124273 | 0.00717  | -0.03282 | 0.47926  | 0.124086  | 0.00726  |
| 0.40579  | 0.018245 | 0.69414 | 0.066453 | 0.15163  | -0.09353 | 0.04337  | 0.003093  | 0.94686  |
| 0.00938  | 0.046481 | 0.31619 | 0.027516 | 0.55308  | -0.19219 | 2.90E-05 | -0.03335  | 0.47219  |
| 9.05E-08 | -0.03875 | 0.40345 | 0.004137 | 0.92896  | -0.19418 | 2.39E-05 | -0.08826  | 0.05665  |
| 1.72E-06 | -0.04032 | 0.38467 | 0.090111 | 0.05165  | -0.1509  | 0.00107  | -0.08526  | 0.06564  |
| 0.46512  | -0.1021  | 0.02736 | 0.176455 | 0.00013  | -0.05059 | 0.2753   | -0.04638  | 0.31724  |
| 1.05E-07 | -0.02083 | 0.65349 | 0.051296 | 0.26861  | -0.10152 | 0.02826  | -0.02657  | 0.56677  |
| 1.13E-09 | 0.071627 | 0.12218 | 0.089222 | 0.05401  | -0.08747 | 0.05892  | 0.053419  | 0.24927  |
| 2.80E-07 | -0.04262 | 0.35812 | 0.14362  | 0.00186  | -0.18336 | 6.73E-05 | -0.09252  | 0.04568  |
| 0.00541  | -0.06882 | 0.13756 | 0.108761 | 0.01872  | -0.13732 | 0.00294  | -0.09239  | 0.04599  |
| 2.33E-10 | 0.038615 | 0.40509 | 0.06078  | 0.1898   | -0.09309 | 0.04436  | 0.012967  | 0.77988  |
| 0.00083  | -0.00256 | 0.95608 | 0.047058 | 0.31021  | -0.22948 | 5.36E-07 | -0.09073  | 0.05007  |
| 3.57E-06 | 0.000758 | 0.98696 | 0.015475 | 0.73872  | -0.20257 | 1.03E-05 | -0.06384  | 0.1684   |
| 6.03E-08 | 0.019855 | 0.66868 | 0.052227 | 0.26     | -0.14503 | 0.00168  | 0.004495  | 0.92282  |
| 3.43E-05 | -0.0368  | 0.4275  | 0.084064 | 0.06953  | -0.12425 | 0.00718  | -0.01975  | 0.6703   |
| 3.23E-07 | -0.01056 | 0.81995 | 0.069289 | 0.13488  | -0.15839 | 0.00059  | -0.07689  | 0.09698  |
| 0.04375  | -0.03282 | 0.47917 | 0.144331 | 0.00177  | 0.057995 | 0.21094  | 0.123858  | 0.00737  |
| 2.21E-07 | 0.014862 | 0.74872 | 0.058739 | 0.20513  | -0.14153 | 0.00217  | 0.012307  | 0.79082  |

|          |          |          |          |          |          |          |          |          |
|----------|----------|----------|----------|----------|----------|----------|----------|----------|
| 6.12E-07 | 0.006364 | 0.8909   | -0.02575 | 0.57886  | -0.207   | 6.48E-06 | -0.03962 | 0.39297  |
| 0.00096  | -0.00519 | 0.91099  | 0.139706 | 0.00248  | -0.04984 | 0.28242  | 0.064168 | 0.16624  |
| 0.02768  | 0.06654  | 0.15109  | -0.07526 | 0.10429  | -0.13683 | 0.00305  | 0.019311 | 0.67724  |
| 0.70309  | 0.014461 | 0.75527  | 0.140536 | 0.00233  | -0.05123 | 0.26919  | 0.096156 | 0.03778  |
| 0.38101  | 0.039841 | 0.39033  | 0.103515 | 0.02529  | 0.08356  | 0.07122  | 0.141354 | 0.0022   |
| 3.67E-12 | 0.027792 | 0.54911  | 0.078837 | 0.0888   | -0.1761  | 0.00013  | -0.01589 | 0.73198  |
| 0.77045  | 0.018973 | 0.68258  | 0.061261 | 0.18632  | -0.06362 | 0.16986  | 0.045731 | 0.32407  |
| 0.00508  | 0.006616 | 0.88662  | 0.101659 | 0.02804  | 0.009788 | 0.83292  | 0.057855 | 0.21205  |
| 0.00077  | 0.078769 | 0.08908  | 0.162064 | 0.00044  | 0.129043 | 0.00522  | 0.216211 | 2.41E-06 |
| 0.11127  | -0.05359 | 0.24779  | 0.034561 | 0.45621  | -0.10994 | 0.01747  | -0.0293  | 0.52758  |
| 0.93164  | 0.011691 | 0.80106  | 0.099207 | 0.03208  | -0.03165 | 0.49505  | 0.068388 | 0.14004  |
| 0.00021  | 0.047892 | 0.30171  | 0.074854 | 0.10619  | -0.14195 | 0.00211  | 0.040494 | 0.38262  |
| 1.18E-14 | 0.132264 | 0.00419  | 0.131487 | 0.00442  | -0.05827 | 0.20878  | 0.147091 | 0.00144  |
| 0.01529  | 0.102671 | 0.02651  | 0.20583  | 7.32E-06 | 0.15531  | 0.00076  | 0.273598 | 1.84E-09 |
| 8.93E-06 | 0.171133 | 0.0002   | 0.089076 | 0.0544   | 0.020155 | 0.66397  | 0.222121 | 1.25E-06 |
| 0.37298  | 0.124667 | 0.00699  | 0.189506 | 3.76E-05 | 0.153325 | 0.00089  | 0.318366 | 1.85E-12 |
| 0.21143  | -0.02356 | 0.61155  | 0.129095 | 0.00521  | -0.11746 | 0.01108  | -0.05264 | 0.25629  |
| 0.82284  | 0.00744  | 0.87261  | 0.059558 | 0.19888  | -0.09249 | 0.04575  | 0.040811 | 0.3789   |
| 0.00716  | 0.070885 | 0.1261   | 0.116434 | 0.0118   | -0.03698 | 0.42527  | 0.094143 | 0.042    |
| 0.07294  | 0.057999 | 0.21091  | 0.067248 | 0.14678  | -0.0628  | 0.17546  | 0.098768 | 0.03285  |
| 3.33E-05 | 0.033091 | 0.47561  | 0.142398 | 0.00204  | 0.040192 | 0.38618  | 0.174737 | 0.00015  |
| 0.02276  | 0.029999 | 0.51784  | -0.06869 | 0.13827  | -0.11136 | 0.01606  | 0.009014 | 0.84596  |
| 0.30816  | -0.18095 | 8.41E-05 | -0.07711 | 0.09602  | -0.26358 | 7.33E-09 | -0.34484 | 1.74E-14 |
| 0.00318  | 0.018041 | 0.69738  | 0.116725 | 0.01159  | -0.0781  | 0.09181  | 0.012175 | 0.79301  |
| 0.00407  | 0.124621 | 0.00701  | 0.167147 | 0.00029  | 0.054647 | 0.23854  | 0.238684 | 1.79E-07 |
| 0.47718  | 0.08311  | 0.07276  | 0.138557 | 0.00269  | -0.01015 | 0.82689  | 0.131439 | 0.00444  |
| 0.00496  | 0.090268 | 0.05124  | 0.246012 | 7.24E-08 | 0.099    | 0.03244  | 0.246467 | 6.84E-08 |
| 0.00086  | -0.01419 | 0.75979  | 0.047018 | 0.31063  | -0.13012 | 0.00486  | -0.00125 | 0.97856  |
| 0.02912  | -0.01444 | 0.75559  | 0.165558 | 0.00033  | -0.01333 | 0.77395  | 0.083873 | 0.07017  |
| 0.74115  | -0.10245 | 0.02684  | 0.019617 | 0.67241  | -0.18138 | 8.08E-05 | -0.11219 | 0.01529  |
| 3.41E-07 | 0.038977 | 0.40071  | 0.022271 | 0.63119  | -0.15641 | 0.00069  | 0.041811 | 0.36732  |
| 0.67322  | 0.044664 | 0.3355   | 0.064851 | 0.16177  | -0.06928 | 0.13494  | 0.099197 | 0.0321   |
| 0.83743  | 0.014193 | 0.75968  | -0.21256 | 3.58E-06 | -0.32939 | 2.79E-13 | -0.24384 | 9.49E-08 |
| 0.00124  | 0.028621 | 0.53726  | 0.040717 | 0.37999  | -0.10574 | 0.02229  | 0.034459 | 0.45755  |
| 0.05272  | -0.02412 | 0.60314  | 0.015084 | 0.7451   | -0.16805 | 0.00026  | -0.09938 | 0.03179  |
| 3.46E-05 | -0.0805  | 0.08224  | 0.131391 | 0.00445  | -0.03804 | 0.41219  | -0.04203 | 0.36479  |
| 0.23991  | 0.00326  | 0.94398  | 0.113106 | 0.01446  | 0.043167 | 0.35196  | 0.039725 | 0.39172  |
| 0.16653  | 0.096783 | 0.03655  | 0.255109 | 2.26E-08 | 0.191756 | 3.03E-05 | 0.315927 | 2.77E-12 |
| 0.00084  | -0.0123  | 0.79101  | 0.02391  | 0.60629  | -0.10631 | 0.02158  | 0.008044 | 0.86236  |
| 0.0037   | 0.04722  | 0.30856  | 0.100193 | 0.0304   | -0.06964 | 0.13291  | 0.106855 | 0.02091  |
| 0.96288  | -0.00316 | 0.9457   | 0.075239 | 0.1044   | -0.10343 | 0.0254   | -0.02568 | 0.57992  |
| 6.31E-06 | 0.01076  | 0.81661  | 0.196703 | 1.86E-05 | 0.010855 | 0.81502  | 0.070295 | 0.12929  |
| 0.00765  | -0.02967 | 0.52243  | 0.098489 | 0.03335  | -0.17206 | 0.00019  | -0.06048 | 0.19198  |
| 1.11E-05 | 0.019886 | 0.66819  | 0.167112 | 0.00029  | 0.015414 | 0.73971  | 0.11957  | 0.0097   |
| 3.76E-14 | 0.048455 | 0.29606  | 0.04518  | 0.32994  | -0.17621 | 0.00013  | 0.017659 | 0.70348  |

|          |          |         |          |          |          |          |          |          |
|----------|----------|---------|----------|----------|----------|----------|----------|----------|
| 5.95E-12 | 0.015491 | 0.73847 | 0.095643 | 0.03882  | -0.06751 | 0.14521  | 0.052533 | 0.25722  |
| 1.45E-14 | 0.053042 | 0.25264 | 0.12007  | 0.0094   | -0.06767 | 0.14428  | 0.082784 | 0.0739   |
| 0.76332  | 0.061677 | 0.18334 | 0.036487 | 0.4315   | -0.10859 | 0.01891  | 0.083408 | 0.07174  |
| 0.00037  | 0.031232 | 0.50077 | 0.08891  | 0.05486  | -0.03136 | 0.49906  | 0.087034 | 0.0602   |
| 1.55E-06 | 0.068789 | 0.13772 | 0.201632 | 1.13E-05 | 0.020036 | 0.66584  | 0.174914 | 0.00015  |
| 0.10383  | -0.09084 | 0.04979 | 0.215672 | 2.55E-06 | -0.09376 | 0.04284  | -0.04969 | 0.28394  |
| 0.05494  | 0.023103 | 0.61849 | 0.191182 | 3.20E-05 | -0.06047 | 0.19209  | 0.100467 | 0.02995  |
| 7.04E-05 | 0.058991 | 0.2032  | 0.04466  | 0.33554  | -0.1478  | 0.00136  | 0.018721 | 0.68657  |
| 4.57E-11 | 0.15167  | 0.00101 | 0.19102  | 3.25E-05 | 0.128229 | 0.00552  | 0.296513 | 6.23E-11 |
| 8.08E-07 | -0.04716 | 0.3092  | 0.098187 | 0.0339   | -0.01232 | 0.79058  | 0.005835 | 0.89993  |
| 2.50E-17 | -0.06428 | 0.16547 | 0.090701 | 0.05013  | -0.1768  | 0.00012  | -0.1057  | 0.02234  |
| 0.38795  | -0.0364  | 0.4326  | 0.007971 | 0.8636   | -0.04925 | 0.28816  | -0.10787 | 0.01972  |
| 0.81525  | -0.07771 | 0.09347 | 0.090199 | 0.05142  | -0.08222 | 0.0759   | -0.13683 | 0.00305  |
| 0.22256  | 0.111897 | 0.01555 | 0.072559 | 0.11738  | 0.081138 | 0.07984  | 0.145103 | 0.00167  |
| 0.21056  | 0.006706 | 0.88508 | 0.018658 | 0.68757  | -0.02221 | 0.63206  | -0.01908 | 0.6809   |
| 0.158    | -0.07703 | 0.09637 | 0.123903 | 0.00735  | -0.04402 | 0.34251  | -0.11074 | 0.01666  |
| 0.19533  | -0.02633 | 0.57027 | 0.033928 | 0.46451  | -0.05866 | 0.20575  | -0.10063 | 0.02968  |
| 0.48347  | -0.04305 | 0.35324 | 0.149283 | 0.00121  | 0.031879 | 0.49193  | -0.10301 | 0.02602  |
| 0.00102  | -0.00879 | 0.84974 | 0.138108 | 0.00278  | -0.05725 | 0.21691  | -0.06071 | 0.19031  |
| 0.40289  | -0.00879 | 0.84966 | 0.115484 | 0.01251  | -0.01979 | 0.66965  | -0.00918 | 0.84315  |
| 0.55487  | -0.01346 | 0.77166 | 0.113417 | 0.01419  | -0.00667 | 0.88568  | -0.01959 | 0.6728   |
| 0.69138  | 0.007229 | 0.87618 | 0.146547 | 0.0015   | 0.089919 | 0.05215  | 0.041765 | 0.36784  |
| 0.57464  | -0.0098  | 0.8328  | 0.052584 | 0.25676  | -0.02919 | 0.52924  | -0.03383 | 0.46575  |
| 0.82353  | -0.04495 | 0.33245 | 0.1582   | 0.0006   | 0.02058  | 0.65734  | -0.04138 | 0.37225  |
| 0.87798  | -0.0275  | 0.55325 | 0.166857 | 0.00029  | 0.002801 | 0.95186  | -0.01796 | 0.69864  |
| 0.52587  | 0.062256 | 0.17925 | 0.190864 | 3.30E-05 | 0.100861 | 0.02931  | 0.075399 | 0.10367  |
| 0.42476  | 0.010389 | 0.82282 | 0.36454  | 4.01E-16 | 0.228848 | 5.77E-07 | 0.184418 | 6.10E-05 |
| 1.26E-09 | 0.009687 | 0.83461 | 0.128209 | 0.00553  | 0.001942 | 0.96662  | 0.021397 | 0.64465  |
| 0.12037  | -0.06504 | 0.16055 | 0.004784 | 0.91788  | -0.06338 | 0.1715   | -0.12847 | 0.00543  |
| 0.03151  | -0.1415  | 0.00218 | 0.059465 | 0.19958  | -0.05436 | 0.24104  | -0.18233 | 7.41E-05 |
| 0.78285  | -0.16774 | 0.00027 | 0.215037 | 2.74E-06 | -0.01107 | 0.81145  | -0.15183 | 0.001    |
| 0.42168  | -0.0977  | 0.03479 | 0.134074 | 0.0037   | -0.03979 | 0.39094  | -0.06969 | 0.13263  |
| 0.00991  | -0.04395 | 0.34332 | 0.137394 | 0.00293  | -0.03209 | 0.48901  | -0.08112 | 0.07992  |
| 0.44212  | -0.08409 | 0.06943 | 0.038838 | 0.40239  | -0.19398 | 2.43E-05 | -0.17421 | 0.00015  |
| 0.96298  | -0.14216 | 0.00207 | -0.02942 | 0.52591  | -0.08198 | 0.07676  | -0.25535 | 2.19E-08 |
| 0.83795  | -0.01784 | 0.70052 | 0.109165 | 0.01828  | -0.02519 | 0.58707  | -0.03122 | 0.50099  |
| 0.33945  | -0.05654 | 0.22264 | 0.149558 | 0.00119  | -0.00624 | 0.89303  | -0.05863 | 0.20599  |
| 0.03862  | 0.018521 | 0.68975 | 0.058848 | 0.2043   | -0.0119  | 0.79765  | -0.0013  | 0.97768  |
| 0.83563  | 0.028431 | 0.53996 | 0.128153 | 0.00555  | 0.129358 | 0.00511  | 0.136253 | 0.00317  |
| 0.16865  | -0.07529 | 0.10415 | 0.058294 | 0.20859  | 0.094692 | 0.04081  | -0.00283 | 0.95142  |
| 0.09944  | -0.06549 | 0.15765 | -0.00632 | 0.8917   | -0.10286 | 0.02623  | -0.10928 | 0.01816  |
| 0.00851  | -0.12819 | 0.00553 | 0.049676 | 0.28403  | -0.12448 | 0.00708  | -0.21489 | 2.78E-06 |
| 0.04405  | -0.15403 | 0.00084 | 0.018643 | 0.6878   | -0.16664 | 0.0003   | -0.20567 | 7.44E-06 |
| 0.88567  | -0.00934 | 0.84052 | 0.092233 | 0.04636  | 0.017305 | 0.70915  | -0.01401 | 0.7626   |
| 0.55584  | -0.03555 | 0.44341 | 0.17803  | 0.00011  | 0.053096 | 0.25215  | -0.01352 | 0.77074  |

|         |           |          |          |          |          |          |          |          |
|---------|-----------|----------|----------|----------|----------|----------|----------|----------|
| 0.7198  | -0.02345  | 0.6133   | 0.211277 | 4.11E-06 | 0.031032 | 0.50351  | 0.009394 | 0.83955  |
| 0.23992 | -0.09151  | 0.0481   | 0.112623 | 0.01489  | -0.0872  | 0.05969  | -0.12062 | 0.00908  |
| 0.07577 | -0.11169  | 0.01575  | 0.096256 | 0.03758  | -0.08676 | 0.06101  | -0.16852 | 0.00025  |
| 0.13144 | -0.06854  | 0.13919  | 0.075544 | 0.103    | -0.07299 | 0.1152   | -0.11765 | 0.01094  |
| 0.26765 | -0.05969  | 0.19792  | 0.043278 | 0.35073  | -0.07287 | 0.11583  | -0.09275 | 0.04515  |
| 0.86866 | 0.020106  | 0.66475  | 0.137356 | 0.00294  | 0.071491 | 0.12289  | 0.028347 | 0.54116  |
| 0.03493 | 0.037664  | 0.41678  | 0.140917 | 0.00227  | -0.01179 | 0.79946  | 0.003485 | 0.94012  |
| 0.5013  | -0.04535  | 0.32811  | 0.011946 | 0.79682  | -0.0917  | 0.04765  | -0.1376  | 0.00288  |
| 0.99059 | -0.0011   | 0.98117  | 0.002241 | 0.96148  | -0.05539 | 0.23223  | -0.01674 | 0.71823  |
| 0.52442 | -0.04723  | 0.30842  | 0.153441 | 0.00088  | -0.06087 | 0.18918  | -0.08557 | 0.06466  |
| 0.73152 | -0.00415  | 0.92875  | 0.038121 | 0.41114  | -0.02549 | 0.58276  | -0.01128 | 0.80793  |
| 0.0001  | 0.054042  | 0.24378  | 0.010398 | 0.82267  | -0.02606 | 0.57426  | 0.014136 | 0.76062  |
| 0.57397 | -0.0277   | 0.55044  | 0.048008 | 0.30053  | -0.0392  | 0.39804  | -0.03879 | 0.40302  |
| 0.63912 | -0.02175  | 0.63918  | 0.041856 | 0.3668   | -0.03931 | 0.39666  | -0.03285 | 0.47878  |
| 0.39392 | -0.02413  | 0.60301  | 0.116282 | 0.01191  | -0.03093 | 0.50498  | -0.04707 | 0.31005  |
| 0.59157 | -0.08255  | 0.07473  | 0.025147 | 0.58777  | -0.02225 | 0.63149  | -0.1065  | 0.02134  |
| 0.01113 | -0.01634  | 0.72464  | 0.119141 | 0.00997  | -0.01934 | 0.67677  | -0.08149 | 0.07853  |
| 0.02057 | 0.048218  | 0.29843  | 0.147157 | 0.00143  | -0.00454 | 0.92208  | 0.066789 | 0.14957  |
| 0.27506 | -0.05466  | 0.23847  | 0.164327 | 0.00036  | -0.00331 | 0.94319  | -0.05819 | 0.20939  |
| 0.91824 | -0.04453  | 0.33693  | -0.00277 | 0.95243  | -0.06741 | 0.14581  | -0.15023 | 0.00113  |
| 0.51438 | -0.02517  | 0.58743  | 0.161388 | 0.00046  | -0.00361 | 0.93797  | -0.04508 | 0.33105  |
| 0.11628 | 0.001668  | 0.97133  | 0.031534 | 0.49663  | -0.04349 | 0.34841  | -0.07229 | 0.11873  |
| 0.075   | -0.16623  | 0.00031  | -0.11637 | 0.01185  | -0.1722  | 0.00018  | -0.32883 | 3.08E-13 |
| 0.4542  | -0.02589  | 0.57672  | 0.140294 | 0.00238  | -0.04543 | 0.32726  | -0.05514 | 0.2343   |
| 0.20813 | -0.02207  | 0.63423  | -0.01843 | 0.69125  | -0.05922 | 0.20147  | -0.07409 | 0.10984  |
| 0.36778 | -0.04482  | 0.33378  | 0.126222 | 0.00631  | 0.062848 | 0.17514  | -0.01879 | 0.68541  |
| 0.43215 | -0.04488  | 0.33322  | 0.155628 | 0.00074  | -0.03246 | 0.48406  | -0.05751 | 0.21482  |
| 0.78967 | -0.09253  | 0.04566  | 0.120704 | 0.00903  | -0.11474 | 0.0131   | -0.16114 | 0.00047  |
| 0.55052 | -0.04125  | 0.37375  | 0.02159  | 0.64167  | -0.09329 | 0.04389  | -0.12436 | 0.00713  |
| 0.83217 | -0.01962  | 0.67242  | 0.04302  | 0.35361  | 0.009425 | 0.83902  | -0.04419 | 0.34071  |
| 0.36136 | -0.04979  | 0.28296  | 0.185492 | 5.51E-05 | -0.01492 | 0.74785  | -0.04427 | 0.33981  |
| 0.03256 | -0.03794  | 0.4134   | 0.099487 | 0.0316   | 0.10335  | 0.02552  | -0.0482  | 0.2986   |
| 0.00534 | -0.19672  | 1.86E-05 | -0.12651 | 0.00619  | -0.28588 | 3.11E-10 | -0.36908 | 1.62E-16 |
| 0.02805 | -0.08515  | 0.06599  | 0.280284 | 7.06E-10 | 0.054869 | 0.23663  | -0.04845 | 0.2961   |
| 0.3622  | -0.07416  | 0.10946  | 0.038396 | 0.40776  | -0.02415 | 0.6026   | -0.13309 | 0.00396  |
| 0.60161 | -0.02577  | 0.57849  | 0.066306 | 0.15254  | -0.01177 | 0.7997   | -0.04204 | 0.36473  |
| 0.89884 | -0.11831  | 0.01051  | -0.01719 | 0.71095  | -0.01741 | 0.7075   | -0.2117  | 3.93E-06 |
| 0.71596 | -0.1456   | 0.00161  | -0.05029 | 0.2781   | -0.11278 | 0.01475  | -0.29596 | 6.79E-11 |
| 0.01419 | -0.14449  | 0.00174  | -0.02027 | 0.66221  | -0.09963 | 0.03134  | -0.26965 | 3.19E-09 |
| 0.33554 | -0.05493  | 0.23613  | 0.115862 | 0.01223  | -0.06569 | 0.15639  | -0.09612 | 0.03785  |
| 0.56001 | 0.032205  | 0.48752  | 0.152198 | 0.00097  | 0.04913  | 0.28937  | 0.098231 | 0.03382  |
| 0.07712 | -0.00063  | 0.98909  | 0.098141 | 0.03398  | 0.016764 | 0.71786  | 0.022292 | 0.63087  |
| 0.14121 | -9.25E-05 | 0.99841  | 0.124551 | 0.00704  | 0.015373 | 0.74038  | -0.01608 | 0.72891  |
| 0.02249 | -0.01665  | 0.71967  | 0.179202 | 9.87E-05 | 0.029545 | 0.52419  | 0.033327 | 0.47246  |
| 0.52648 | -0.07687  | 0.09706  | 0.102733 | 0.02642  | -0.08051 | 0.08219  | -0.09766 | 0.03487  |



|          |          |          |          |          |          |          |          |          |
|----------|----------|----------|----------|----------|----------|----------|----------|----------|
| 0.8146   | -0.09108 | 0.04917  | 0.072725 | 0.11654  | -0.00047 | 0.99187  | -0.14413 | 0.00179  |
| 0.51946  | -0.07142 | 0.12326  | -0.02427 | 0.60083  | -0.07577 | 0.10199  | -0.12956 | 0.00505  |
| 0.17189  | -0.02557 | 0.58144  | 0.129853 | 0.00495  | -0.06382 | 0.16858  | -0.06165 | 0.18353  |
| 0.44273  | -0.08232 | 0.07553  | 0.129539 | 0.00505  | 0.023534 | 0.61195  | -0.09303 | 0.04451  |
| 0.45776  | -0.04037 | 0.38408  | 0.187041 | 4.76E-05 | -0.01875 | 0.68611  | -0.04479 | 0.33412  |
| 0.93224  | -0.04666 | 0.31438  | 0.197143 | 1.78E-05 | 0.017761 | 0.70185  | -0.0228  | 0.62309  |
| 0.25473  | -0.02643 | 0.56881  | 0.172998 | 0.00017  | 0.001285 | 0.9779   | -0.00995 | 0.83026  |
| 0.07265  | -0.0606  | 0.19111  | 0.054406 | 0.24062  | -0.08618 | 0.06278  | -0.11952 | 0.00973  |
| 0.07611  | -0.08225 | 0.07579  | 0.070277 | 0.12939  | -0.08404 | 0.06961  | -0.13575 | 0.00329  |
| 0.26992  | -0.05947 | 0.19953  | 0.077357 | 0.09497  | -0.06268 | 0.17629  | -0.10231 | 0.02705  |
| 0.63718  | 0.158613 | 0.00058  | 0.041232 | 0.374    | -0.04573 | 0.32408  | 0.010139 | 0.82701  |
| 0.11177  | -0.06682 | 0.14935  | 0.130562 | 0.00471  | -0.03844 | 0.40729  | -0.09158 | 0.04794  |
| 0.28154  | -0.00254 | 0.95632  | 0.126237 | 0.0063   | -0.04253 | 0.35917  | -0.05173 | 0.26454  |
| 0.50745  | 0.382075 | 1.11E-17 | 0.135006 | 0.00347  | -0.02411 | 0.6033   | 0.067127 | 0.14751  |
| 0.92992  | 0.001644 | 0.97173  | 0.1012   | 0.02876  | -0.04771 | 0.3036   | -0.04286 | 0.35542  |
| 0.1708   | -0.06416 | 0.16628  | 0.11379  | 0.01388  | -0.00052 | 0.99103  | -0.06594 | 0.15482  |
| 0.8379   | -0.08814 | 0.05701  | 0.14082  | 0.00229  | -0.00808 | 0.8618   | -0.09672 | 0.03666  |
| 0.9918   | -0.01656 | 0.72122  | 0.111264 | 0.01615  | -0.02503 | 0.58957  | -0.03326 | 0.4733   |
| 0.85704  | -0.0096  | 0.83612  | 0.13332  | 0.0039   | -0.00464 | 0.92032  | -0.01966 | 0.67172  |
| 0.66873  | 0.012188 | 0.7928   | 0.155156 | 0.00077  | -0.01751 | 0.70592  | -0.02604 | 0.57462  |
| 0.25922  | -0.02622 | 0.572    | 0.164515 | 0.00036  | 0.032533 | 0.48309  | -0.02724 | 0.5571   |
| 0.13898  | -0.10572 | 0.02231  | 0.112851 | 0.01469  | -0.02958 | 0.52373  | -0.14691 | 0.00145  |
| 0.23217  | -0.08445 | 0.06824  | -0.07488 | 0.10607  | -0.11647 | 0.01178  | -0.12757 | 0.00577  |
| 0.78957  | -0.03368 | 0.46776  | 0.12948  | 0.00507  | -0.012   | 0.79583  | -0.05713 | 0.21784  |
| 0.00405  | -0.03442 | 0.4581   | 0.010926 | 0.81383  | -0.10833 | 0.0192   | -0.11558 | 0.01244  |
| 0.02449  | -0.09915 | 0.03218  | 0.011925 | 0.79716  | -0.12112 | 0.00879  | -0.2123  | 3.69E-06 |
| 3.74E-08 | 0.021404 | 0.64455  | -0.00749 | 0.87174  | 0.045211 | 0.32961  | 0.098736 | 0.03291  |
| 1.02E-35 | 0.04454  | 0.33685  | 0.167625 | 0.00027  | 0.087384 | 0.05917  | 0.110087 | 0.01732  |
| 6.33E-08 | 0.064308 | 0.16531  | 0.065588 | 0.15704  | 0.038468 | 0.40689  | 0.088622 | 0.05565  |
| 0.28437  | -0.10809 | 0.01947  | -0.06984 | 0.1318   | -0.20053 | 1.26E-05 | -0.27265 | 2.10E-09 |
| 0.24708  | 0.044558 | 0.33665  | -0.02613 | 0.57326  | 0.026454 | 0.56851  | 0.036139 | 0.4359   |
| 1.37E-17 | 0.118081 | 0.01065  | 0.021483 | 0.64333  | 0.081348 | 0.07906  | 0.200091 | 1.32E-05 |
| 0.01193  | 0.01167  | 0.80141  | 0.12673  | 0.0061   | 0.013293 | 0.77449  | 0.031273 | 0.5002   |
| 0.45872  | -0.01514 | 0.74417  | 0.089057 | 0.05445  | 0.007392 | 0.87342  | 0.088805 | 0.05514  |
| 1.75E-18 | 0.096532 | 0.03704  | 0.104596 | 0.02379  | 0.127013 | 0.00599  | 0.193904 | 2.45E-05 |
| 5.03E-06 | -0.00837 | 0.85684  | 0.094746 | 0.0407   | 0.002162 | 0.96284  | 0.086369 | 0.06219  |
| 0.19482  | 0.000628 | 0.98921  | 0.025912 | 0.57647  | -0.01075 | 0.8168   | -0.00435 | 0.92537  |
| 3.94E-11 | 0.056534 | 0.22269  | 0.055244 | 0.23344  | 0.040066 | 0.38766  | 0.135563 | 0.00333  |
| 1.56E-09 | -0.00773 | 0.86776  | -0.01102 | 0.81223  | -0.05473 | 0.23779  | -0.02234 | 0.63009  |
| 0.23091  | 0.034289 | 0.45977  | 0.221961 | 1.27E-06 | 0.104107 | 0.02446  | 0.154089 | 0.00083  |
| 1.34E-09 | -0.03263 | 0.48179  | -0.07504 | 0.10532  | -0.09771 | 0.03477  | -0.04952 | 0.28551  |
| 2.35E-16 | 0.181847 | 7.74E-05 | 0.262301 | 8.70E-09 | 0.224627 | 9.39E-07 | 0.398165 | 3.42E-19 |
| 2.50E-10 | -0.03168 | 0.49464  | 0.008047 | 0.86231  | 0.019938 | 0.66738  | 0.014836 | 0.74915  |
| 3.35E-11 | 0.131453 | 0.00443  | 0.168022 | 0.00027  | 0.24777  | 5.80E-08 | 0.323491 | 7.75E-13 |
| 1.33E-06 | -0.10817 | 0.01937  | 0.024194 | 0.602    | -0.14245 | 0.00203  | -0.15954 | 0.00054  |

|          |          |          |          |          |          |          |          |          |
|----------|----------|----------|----------|----------|----------|----------|----------|----------|
| 8.78E-09 | 0.043126 | 0.35242  | 0.1039   | 0.02475  | -0.05839 | 0.20784  | 0.06255  | 0.1772   |
| 6.91E-17 | 0.113118 | 0.01445  | 0.323536 | 7.69E-13 | 0.139531 | 0.00251  | 0.257892 | 1.57E-08 |
| 1.08E-34 | 0.12898  | 0.00525  | 0.109752 | 0.01766  | 0.050318 | 0.27786  | 0.163513 | 0.00039  |
| 4.27E-12 | 0.130309 | 0.0048   | 0.078318 | 0.09093  | 0.143776 | 0.00184  | 0.239935 | 1.54E-07 |
| 0.26195  | -0.0631  | 0.17344  | 0.052754 | 0.25522  | -0.07641 | 0.09908  | -0.09263 | 0.04543  |
| 2.83E-08 | -0.01193 | 0.79706  | -0.10126 | 0.02868  | -0.06051 | 0.1918   | -0.01032 | 0.82396  |
| 1.10E-09 | 0.089497 | 0.05327  | -0.17192 | 0.00019  | 0.016534 | 0.72156  | 0.09655  | 0.037    |
| 0.00016  | 0.094391 | 0.04146  | 0.067484 | 0.14536  | 0.115647 | 0.01239  | 0.19771  | 1.68E-05 |
| 4.90E-23 | -0.0186  | 0.68843  | -0.08468 | 0.06749  | -0.09321 | 0.04409  | -0.12096 | 0.00888  |
| 1.07E-07 | -0.03547 | 0.44448  | 0.155963 | 0.00072  | -0.02348 | 0.61274  | 0.062397 | 0.17827  |
| 1.23E-06 | 0.107659 | 0.01996  | -0.00522 | 0.91042  | -0.06888 | 0.13718  | 0.09093  | 0.04955  |
| 3.47E-06 | 0.069854 | 0.13172  | 0.210704 | 4.37E-06 | 0.078373 | 0.0907   | 0.081342 | 0.07908  |
| 0.025    | 0.131404 | 0.00445  | 0.234259 | 3.05E-07 | 0.206403 | 6.89E-06 | 0.285338 | 3.37E-10 |
| 6.84E-14 | -0.00802 | 0.86282  | 0.097411 | 0.03534  | 0.051051 | 0.2709   | 0.077694 | 0.09354  |
| 5.61E-06 | 0.117989 | 0.01072  | 0.086738 | 0.06108  | 0.011272 | 0.80804  | 0.152955 | 0.00091  |
| 1.45E-09 | 0.076041 | 0.10075  | 0.15549  | 0.00075  | -0.02157 | 0.64204  | 0.1115   | 0.01593  |
| 7.88E-23 | -0.03099 | 0.50406  | -0.05757 | 0.21433  | -0.13467 | 0.00355  | -0.0998  | 0.03107  |
| 0.00059  | -0.22959 | 5.29E-07 | -0.00056 | 0.99043  | -0.04792 | 0.30141  | -0.19414 | 2.40E-05 |
| 1.24E-26 | 0.16366  | 0.00038  | 0.058209 | 0.20926  | 0.089201 | 0.05406  | 0.210768 | 4.34E-06 |
| 0.00012  | 0.16716  | 0.00029  | 0.102162 | 0.02727  | 0.128447 | 0.00544  | 0.292892 | 1.09E-10 |
| 3.35E-11 | 0.04819  | 0.29871  | 0.078965 | 0.08828  | -0.01829 | 0.69339  | 0.072842 | 0.11595  |
| 1.44E-06 | 0.037847 | 0.41451  | -0.0677  | 0.14407  | 0.086112 | 0.06298  | 0.056658 | 0.22168  |
| 0.47323  | 0.155896 | 0.00072  | 0.122928 | 0.00783  | 0.161883 | 0.00044  | 0.146603 | 0.00149  |
| 0.00052  | -0.00874 | 0.85062  | -0.20693 | 6.52E-06 | -0.13221 | 0.00421  | -0.0793  | 0.08693  |
| 1.64E-15 | 0.043827 | 0.34464  | 0.08338  | 0.07183  | -0.03992 | 0.38934  | 0.077658 | 0.09369  |
| 4.33E-06 | -0.00035 | 0.99398  | 0.086429 | 0.06201  | 0.007882 | 0.8651   | 0.052476 | 0.25773  |
| 1.20E-31 | -0.0142  | 0.75964  | 0.011548 | 0.80344  | -0.10155 | 0.02821  | -0.01372 | 0.76752  |
| 9.38E-07 | 0.055041 | 0.23517  | -0.03783 | 0.41477  | -0.07918 | 0.08743  | 0.033157 | 0.47473  |
| 0.00046  | 0.057939 | 0.21138  | 0.078413 | 0.09053  | 0.111886 | 0.01556  | 0.175923 | 0.00013  |
| 0.00021  | -0.13343 | 0.00387  | 0.092718 | 0.04522  | -0.17202 | 0.00019  | -0.2341  | 3.11E-07 |
| 0.00011  | 0.075835 | 0.10168  | 0.090357 | 0.05101  | 0.09155  | 0.04801  | 0.210077 | 4.68E-06 |
| 1.09E-05 | -0.06188 | 0.18192  | 0.104448 | 0.02399  | -0.18802 | 4.34E-05 | -0.10026 | 0.03029  |
| 0.08325  | 0.084984 | 0.06652  | 0.11309  | 0.01448  | 0.079421 | 0.08645  | 0.152403 | 0.00095  |
| 0.2156   | -0.03086 | 0.50586  | -0.05337 | 0.24975  | -0.21821 | 1.93E-06 | -0.13797 | 0.00281  |
| 5.99E-06 | 0.069311 | 0.13475  | 0.067093 | 0.14772  | 0.130193 | 0.00483  | 0.128395 | 0.00546  |
| 2.13E-09 | -0.03534 | 0.44618  | 0.043968 | 0.34309  | -0.00435 | 0.9253   | 0.001802 | 0.96902  |
| 1.57E-05 | -0.01964 | 0.67205  | 0.212658 | 3.55E-06 | 0.144883 | 0.00169  | 0.196139 | 1.97E-05 |
| 1.54E-32 | 0.107136 | 0.02057  | 0.016894 | 0.71576  | 0.005121 | 0.91211  | 0.111094 | 0.01632  |
| 1.75E-05 | 0.049354 | 0.28718  | 0.123773 | 0.00741  | 0.036883 | 0.42651  | 0.10336  | 0.02551  |
| 0.30208  | -0.06324 | 0.17248  | 0.139601 | 0.0025   | -0.06684 | 0.14928  | -0.09103 | 0.0493   |
| 0.01167  | 0.135819 | 0.00327  | 0.17111  | 0.0002   | 0.285578 | 3.25E-10 | 0.2721   | 2.27E-09 |
| 5.73E-06 | -0.04512 | 0.33055  | 0.228754 | 5.84E-07 | 0.021744 | 0.63929  | 0.023887 | 0.60663  |
| 8.18E-10 | 0.036243 | 0.43458  | 0.089699 | 0.05273  | 0.000656 | 0.98871  | 0.036897 | 0.42633  |
| 0.03366  | -0.1475  | 0.00139  | -0.03047 | 0.51127  | -0.1821  | 7.56E-05 | -0.2628  | 8.14E-09 |
| 9.92E-07 | 0.134637 | 0.00356  | 0.007504 | 0.87152  | -0.03142 | 0.49818  | 0.156559 | 0.00069  |

|          |          |          |          |          |          |          |          |          |
|----------|----------|----------|----------|----------|----------|----------|----------|----------|
| 2.44E-07 | 0.051526 | 0.26646  | -0.01796 | 0.6987   | 0.059028 | 0.20292  | 0.120409 | 0.0092   |
| 1.20E-16 | 0.028431 | 0.53995  | 0.042134 | 0.36362  | -0.08312 | 0.07272  | -0.02957 | 0.52381  |
| 0.01271  | -0.08079 | 0.08114  | -0.13903 | 0.0026   | -0.04715 | 0.30924  | -0.10233 | 0.02702  |
| 3.10E-07 | -0.06836 | 0.14019  | 0.019987 | 0.66661  | -0.08051 | 0.08221  | -0.15716 | 0.00065  |
| 0.00037  | 0.016818 | 0.71699  | -0.02414 | 0.60289  | 0.034754 | 0.4537   | 0.01203  | 0.79541  |
| 5.06E-10 | -0.00505 | 0.91338  | 0.037626 | 0.41724  | -0.10334 | 0.02554  | 0.005901 | 0.8988   |
| 5.43E-05 | -0.00106 | 0.98171  | 0.085366 | 0.0653   | -0.11482 | 0.01303  | 0.008239 | 0.85906  |
| 2.95E-11 | 0.123379 | 0.0076   | 0.041141 | 0.37504  | 0.005905 | 0.89873  | 0.170747 | 0.00021  |
| 1.32E-13 | 0.102009 | 0.02751  | 0.081695 | 0.07779  | 0.002357 | 0.95949  | 0.144146 | 0.00179  |
| 0.00308  | -0.03303 | 0.47643  | -0.10713 | 0.02058  | 0.059447 | 0.19972  | 0.039462 | 0.39486  |
| 0.00194  | 0.08198  | 0.07676  | -0.06362 | 0.1699   | -0.0228  | 0.62311  | 0.051398 | 0.26765  |
| 1.18E-18 | 0.042698 | 0.35723  | 0.171233 | 0.0002   | 0.059603 | 0.19854  | 0.142361 | 0.00204  |
| 1.48E-12 | 0.102571 | 0.02666  | 0.027661 | 0.55099  | 0.09594  | 0.03822  | 0.100038 | 0.03066  |
| 5.82E-23 | 0.016129 | 0.72812  | 0.274028 | 1.73E-09 | 0.125539 | 0.0066   | 0.206036 | 7.16E-06 |
| 4.28E-08 | 0.050155 | 0.27942  | -0.02229 | 0.63089  | -0.13116 | 0.00453  | -0.02468 | 0.59473  |
| 4.81E-49 | 0.148628 | 0.00128  | 0.125865 | 0.00646  | 0.09444  | 0.04136  | 0.249492 | 4.66E-08 |
| 6.52E-19 | 0.181499 | 8.00E-05 | 0.03435  | 0.45897  | 0.070787 | 0.12663  | 0.247289 | 6.17E-08 |
| 3.46E-09 | -0.0412  | 0.37431  | 0.040541 | 0.38205  | -0.06435 | 0.16503  | -0.05138 | 0.26781  |
| 1.84E-09 | -0.01603 | 0.72965  | -0.01486 | 0.74879  | 0.117578 | 0.01099  | 0.184918 | 5.82E-05 |
| 1.97E-12 | 0.043441 | 0.34891  | 0.099311 | 0.0319   | -0.05632 | 0.22446  | 0.083903 | 0.07006  |
| 6.80E-13 | 0.113108 | 0.01446  | 0.121831 | 0.0084   | 0.123872 | 0.00736  | 0.221772 | 1.30E-06 |
| 1.61E-11 | 0.037247 | 0.42196  | 0.016576 | 0.72088  | 0.018583 | 0.68875  | 0.06272  | 0.17602  |
| 9.61E-08 | 0.050583 | 0.27532  | 0.00033  | 0.99432  | 0.002061 | 0.96456  | 0.030485 | 0.51107  |
| 1.39E-08 | 0.070931 | 0.12585  | 0.18767  | 4.48E-05 | 0.113713 | 0.01394  | 0.205733 | 7.39E-06 |
| 0.8873   | 0.057497 | 0.2149   | 0.337535 | 6.59E-14 | 0.24703  | 6.37E-08 | 0.253717 | 2.71E-08 |
| 0.00155  | -0.0271  | 0.55914  | 0.293007 | 1.07E-10 | 0.005804 | 0.90046  | -0.07104 | 0.12529  |
| 3.94E-07 | -0.0155  | 0.73836  | 0.065204 | 0.15949  | 0.044156 | 0.34103  | 0.019476 | 0.67464  |
| 0.00176  | -0.02993 | 0.51883  | -0.1612  | 0.00047  | -0.28107 | 6.30E-10 | -0.20173 | 1.12E-05 |
| 2.95E-16 | -0.06397 | 0.16754  | 0.006163 | 0.89432  | -0.11803 | 0.01069  | -0.06455 | 0.16374  |
| 0.00026  | 0.111231 | 0.01618  | 0.11365  | 0.014    | -0.02811 | 0.54455  | 0.089911 | 0.05217  |
| 2.29E-12 | 0.110983 | 0.01642  | -0.01581 | 0.73334  | -0.11123 | 0.01618  | 0.035857 | 0.43949  |
| 7.86E-18 | 0.162791 | 0.00041  | 0.157017 | 0.00066  | 0.09162  | 0.04784  | 0.230892 | 4.55E-07 |
| 2.90E-08 | 0.075703 | 0.10227  | 0.011784 | 0.79951  | -0.04172 | 0.3684   | 0.129414 | 0.0051   |
| 0.00918  | -0.05284 | 0.25445  | -0.02421 | 0.60182  | -0.09857 | 0.0332   | -0.10187 | 0.02772  |
| 9.23E-05 | 0.223011 | 1.13E-06 | 0.248415 | 5.35E-08 | 0.326805 | 4.38E-13 | 0.457061 | 1.75E-25 |
| 8.28E-21 | 0.058791 | 0.20474  | -0.0839  | 0.07008  | -0.21377 | 3.14E-06 | -0.13663 | 0.00309  |
| 1.52E-08 | 0.04343  | 0.34904  | 0.141471 | 0.00218  | -0.04758 | 0.30483  | 0.089784 | 0.05251  |
| 0.00012  | -0.03368 | 0.46784  | 0.116219 | 0.01196  | 0.195761 | 2.04E-05 | 0.148692 | 0.00127  |
| 3.69E-27 | 0.173293 | 0.00017  | 0.225285 | 8.71E-07 | 0.11922  | 0.00992  | 0.283571 | 4.37E-10 |
| 0.02231  | -0.1065  | 0.02134  | -0.14282 | 0.00198  | -0.34452 | 1.85E-14 | -0.3416  | 3.16E-14 |
| 0.18927  | -0.01481 | 0.74959  | -0.13918 | 0.00258  | -0.1074  | 0.02027  | -0.1318  | 0.00433  |
| 0.97949  | -0.10727 | 0.02042  | -0.05116 | 0.26984  | -0.24944 | 4.69E-08 | -0.22955 | 5.32E-07 |
| 2.13E-13 | -0.03358 | 0.46914  | -0.13629 | 0.00317  | -0.12639 | 0.00624  | -0.10994 | 0.01747  |
| 1.87E-13 | 0.115941 | 0.01217  | 0.154677 | 0.0008   | 0.234659 | 2.91E-07 | 0.326035 | 5.01E-13 |
| 4.56E-18 | 0.06249  | 0.17762  | 0.129701 | 0.005    | 0.061719 | 0.18304  | 0.133509 | 0.00385  |

|          |           |          |          |          |          |          |          |          |
|----------|-----------|----------|----------|----------|----------|----------|----------|----------|
| 0.00034  | -0.13306  | 0.00397  | -0.06309 | 0.17352  | -0.20943 | 5.01E-06 | -0.20419 | 8.68E-06 |
| 2.33E-22 | -8.12E-05 | 0.9986   | 0.054255 | 0.24193  | -0.04291 | 0.35481  | 0.029846 | 0.51997  |
| 0.19031  | 0.059597  | 0.19859  | -0.05376 | 0.24626  | -0.03257 | 0.48255  | 0.028378 | 0.54071  |
| 2.54E-60 | 0.166805  | 0.00029  | 0.06913  | 0.13578  | 0.0409   | 0.37786  | 0.1773   | 0.00012  |
| 5.05E-19 | 0.115622  | 0.01241  | 0.10776  | 0.01985  | 0.033223 | 0.47385  | 0.139535 | 0.00251  |
| 6.49E-18 | 0.105704  | 0.02234  | 0.153521 | 0.00087  | 0.088673 | 0.05551  | 0.221514 | 1.34E-06 |
| 2.52E-53 | -0.00178  | 0.96936  | 0.072783 | 0.11625  | -0.09952 | 0.03154  | -0.02059 | 0.65718  |
| 3.47E-18 | -0.00075  | 0.98707  | 0.153837 | 0.00085  | -0.00799 | 0.86326  | 0.070465 | 0.12837  |
| 0.00087  | -0.01136  | 0.80651  | 0.08549  | 0.06491  | -0.09922 | 0.03205  | -0.0245  | 0.59749  |
| 1.50E-44 | 0.102705  | 0.02646  | 0.076785 | 0.09745  | -0.0201  | 0.66489  | 0.129905 | 0.00493  |
| 0.04644  | -0.24245  | 1.13E-07 | -0.17656 | 0.00013  | -0.24516 | 8.06E-08 | -0.39685 | 4.58E-19 |
| 0.0007   | -0.42708  | 3.98E-22 | -0.34481 | 1.75E-14 | -0.49217 | 7.34E-30 | -0.6615  | 4.30E-60 |
| 0.32573  | -0.25415  | 2.56E-08 | -0.12841 | 0.00545  | -0.0659  | 0.15509  | -0.29732 | 5.50E-11 |
| 0.00524  | -0.32359  | 7.62E-13 | -0.2591  | 1.33E-08 | -0.44028 | 1.45E-23 | -0.61402 | 9.87E-50 |
| 0.00108  | -0.19885  | 1.50E-05 | -0.06648 | 0.15147  | -0.23622 | 2.41E-07 | -0.32736 | 3.98E-13 |
| 0.00121  | -0.3686   | 1.78E-16 | -0.27451 | 1.61E-09 | -0.4227  | 1.16E-21 | -0.62278 | 1.65E-51 |
| 0.13754  | -0.14731  | 0.00141  | -0.13568 | 0.00331  | -0.23133 | 4.32E-07 | -0.26605 | 5.24E-09 |
| 0.00022  | -0.36406  | 4.41E-16 | -0.36813 | 1.96E-16 | -0.47786 | 5.14E-28 | -0.61063 | 4.64E-49 |
| 0.85232  | -0.27528  | 1.45E-09 | -0.26761 | 4.23E-09 | -0.4168  | 4.73E-21 | -0.4552  | 2.89E-25 |
| 4.31E-06 | -0.35479  | 2.67E-15 | -0.32793 | 3.61E-13 | -0.45324 | 4.90E-25 | -0.62466 | 6.71E-52 |
| 1.36E-10 | -0.20422  | 8.65E-06 | -0.11581 | 0.01227  | -0.23861 | 1.81E-07 | -0.32487 | 6.11E-13 |
| 0.00764  | -0.33871  | 5.33E-14 | -0.33514 | 1.01E-13 | -0.40932 | 2.73E-20 | -0.56067 | 5.13E-40 |
| 0.12431  | -0.32996  | 2.53E-13 | -0.25432 | 2.50E-08 | -0.29583 | 6.92E-11 | -0.48863 | 2.13E-29 |
| 0.02708  | -0.4613   | 5.50E-26 | -0.14958 | 0.00119  | -0.36756 | 2.19E-16 | -0.5136  | 8.57E-33 |
| 0.00144  | -0.13233  | 0.00417  | -0.27015 | 2.98E-09 | -0.12463 | 0.00701  | -0.27212 | 2.26E-09 |
| 0.01624  | -0.24968  | 4.55E-08 | -0.14752 | 0.00139  | -0.15725 | 0.00065  | -0.19712 | 1.78E-05 |
| 0.06441  | -0.20673  | 6.66E-06 | -0.21833 | 1.91E-06 | -0.44515 | 4.14E-24 | -0.53142 | 2.14E-35 |
| 0.76589  | -0.35055  | 5.99E-15 | -0.12057 | 0.00911  | -0.32023 | 1.35E-12 | -0.50355 | 2.16E-31 |
| 0.92039  | -0.36756  | 2.19E-16 | -0.18976 | 3.67E-05 | -0.40816 | 3.56E-20 | -0.54382 | 2.68E-37 |
| 0.38455  | -0.29738  | 5.45E-11 | -0.10586 | 0.02214  | -0.26193 | 9.15E-09 | -0.31459 | 3.46E-12 |
| 0.45046  | -0.2338   | 3.22E-07 | -0.16007 | 0.00052  | -0.36661 | 2.66E-16 | -0.32548 | 5.51E-13 |
| 0.0353   | -0.17837  | 0.00011  | -0.33746 | 6.69E-14 | -0.39708 | 4.35E-19 | -0.44194 | 9.49E-24 |
| 0.80501  | -0.33384  | 1.28E-13 | -0.18393 | 6.38E-05 | -0.42772 | 3.40E-22 | -0.47436 | 1.41E-27 |
| 3.88E-06 | -0.35698  | 1.76E-15 | -0.32626 | 4.82E-13 | -0.34986 | 6.82E-15 | -0.51943 | 1.26E-33 |
| 0.0541   | -0.35547  | 2.35E-15 | -0.24352 | 9.88E-08 | -0.41348 | 1.04E-20 | -0.54925 | 3.70E-38 |
| 0.00239  | -0.41931  | 2.61E-21 | -0.32851 | 3.26E-13 | -0.48951 | 1.64E-29 | -0.65739 | 4.04E-59 |
| 0.00113  | -0.26144  | 9.77E-09 | -0.12139 | 0.00864  | -0.20374 | 9.09E-06 | -0.36916 | 1.59E-16 |
| 0.0087   | -0.30672  | 1.25E-11 | -0.35152 | 4.99E-15 | -0.41486 | 7.49E-21 | -0.53592 | 4.46E-36 |
| 0.41198  | -0.24755  | 5.96E-08 | -0.20775 | 5.98E-06 | -0.18677 | 4.88E-05 | -0.33266 | 1.57E-13 |
| 3.78E-06 | -0.42577  | 5.48E-22 | -0.29298 | 1.07E-10 | -0.46415 | 2.51E-26 | -0.67718 | 6.07E-64 |
| 0.13676  | -0.16175  | 0.00045  | -0.16469 | 0.00035  | -0.31947 | 1.53E-12 | -0.33822 | 5.83E-14 |
| 0.04086  | -0.19898  | 1.48E-05 | -0.15373 | 0.00086  | -0.12899 | 0.00524  | -0.28544 | 3.32E-10 |
| 0.1873   | -0.3754   | 4.47E-17 | -0.30533 | 1.56E-11 | -0.38299 | 9.18E-18 | -0.55831 | 1.26E-39 |
| 0.00084  | -0.21708  | 2.19E-06 | -0.3563  | 2.00E-15 | -0.20663 | 6.73E-06 | -0.35496 | 2.59E-15 |
| 0.48734  | -0.4481   | 1.91E-24 | -0.25222 | 3.29E-08 | -0.4523  | 6.28E-25 | -0.6267  | 2.52E-52 |

|          |          |          |          |          |          |          |          |          |
|----------|----------|----------|----------|----------|----------|----------|----------|----------|
| 0.02148  | -0.33395 | 1.25E-13 | -0.16925 | 0.00024  | -0.37689 | 3.29E-17 | -0.48618 | 4.45E-29 |
| 0.0001   | -0.03315 | 0.47486  | -0.30817 | 9.89E-12 | -0.36662 | 2.65E-16 | -0.4384  | 2.35E-23 |
| 0.09523  | -0.28478 | 3.66E-10 | -0.31958 | 1.50E-12 | -0.27352 | 1.86E-09 | -0.39137 | 1.52E-18 |
| 2.74E-05 | -0.27884 | 8.70E-10 | -0.28572 | 3.19E-10 | -0.36479 | 3.81E-16 | -0.50689 | 7.49E-32 |
| 0.5097   | -0.33689 | 7.40E-14 | -0.37074 | 1.16E-16 | -0.38857 | 2.79E-18 | -0.53729 | 2.76E-36 |
| 0.07274  | -0.33624 | 8.32E-14 | -0.22815 | 6.26E-07 | -0.45868 | 1.13E-25 | -0.536   | 4.34E-36 |
| 0.83669  | -0.33956 | 4.58E-14 | -0.2424  | 1.14E-07 | -0.43792 | 2.65E-23 | -0.61095 | 4.02E-49 |
| 0.00013  | -0.27909 | 8.39E-10 | -0.2014  | 1.16E-05 | -0.31279 | 4.66E-12 | -0.43812 | 2.53E-23 |
| 0.68749  | -0.3046  | 1.75E-11 | -0.29795 | 4.98E-11 | -0.3992  | 2.71E-19 | -0.55354 | 7.58E-39 |
| 0.99476  | -0.28626 | 2.94E-10 | -0.08939 | 0.05355  | -0.30417 | 1.88E-11 | -0.39624 | 5.24E-19 |
| 2.11E-07 | -0.1705  | 0.00021  | 0.003221 | 0.94465  | -0.12981 | 0.00496  | -0.25932 | 1.30E-08 |
| 0.03265  | -0.17534 | 0.00014  | -0.16382 | 0.00038  | -0.07113 | 0.12477  | -0.22783 | 6.50E-07 |
| 0.02539  | -0.40598 | 5.87E-20 | -0.36437 | 4.14E-16 | -0.55302 | 9.21E-39 | -0.69864 | 1.28E-69 |
| 0.10339  | -0.21558 | 2.58E-06 | -0.13074 | 0.00466  | -0.16245 | 0.00042  | -0.37056 | 1.20E-16 |
| 0.02644  | -0.22863 | 5.92E-07 | -0.2795  | 7.90E-10 | -0.18463 | 5.98E-05 | -0.37129 | 1.04E-16 |
| 0.05948  | -0.16863 | 0.00025  | -0.32694 | 4.28E-13 | -0.29304 | 1.06E-10 | -0.37213 | 8.72E-17 |
| 0.65612  | -0.21775 | 2.03E-06 | -0.09016 | 0.05152  | -0.18591 | 5.30E-05 | -0.3035  | 2.09E-11 |
| 0.04347  | -0.33092 | 2.14E-13 | -0.01747 | 0.70651  | -0.18769 | 4.48E-05 | -0.36413 | 4.35E-16 |
| 0.09136  | -0.32624 | 4.83E-13 | -0.20053 | 1.26E-05 | -0.39573 | 5.86E-19 | -0.50409 | 1.82E-31 |
| 0.00294  | -0.26751 | 4.29E-09 | -0.11488 | 0.01299  | -0.3562  | 2.04E-15 | -0.49528 | 2.84E-30 |
| 0.68352  | -0.3059  | 1.42E-11 | -0.1084  | 0.01911  | -0.17369 | 0.00016  | -0.31833 | 1.86E-12 |
| 0.03678  | -0.30995 | 7.41E-12 | -0.19095 | 3.27E-05 | -0.24231 | 1.15E-07 | -0.41632 | 5.30E-21 |
| 0.40702  | -0.23423 | 3.06E-07 | -0.16034 | 0.0005   | -0.27894 | 8.58E-10 | -0.34994 | 6.72E-15 |
| 0.10018  | -0.05571 | 0.2295   | 0.057697 | 0.2133   | 0.037776 | 0.41539  | 0.012921 | 0.78063  |
| 3.39E-09 | -0.19862 | 1.53E-05 | -0.16662 | 0.0003   | -0.2315  | 4.23E-07 | -0.3257  | 5.30E-13 |
| 0.00041  | -0.4069  | 4.76E-20 | -0.34363 | 2.18E-14 | -0.51256 | 1.20E-32 | -0.66092 | 5.92E-60 |
| 0.17596  | -0.13535 | 0.00338  | -0.36615 | 2.91E-16 | -0.46832 | 7.83E-27 | -0.48348 | 9.92E-29 |
| 0.00319  | -0.23265 | 3.69E-07 | -0.10128 | 0.02864  | -0.27446 | 1.62E-09 | -0.32646 | 4.65E-13 |
| 2.13E-07 | -0.40289 | 1.19E-19 | -0.31279 | 4.66E-12 | -0.41731 | 4.20E-21 | -0.63998 | 3.61E-55 |
| 3.64E-05 | -0.15472 | 0.00079  | -0.14934 | 0.00121  | -0.25391 | 2.64E-08 | -0.3355  | 9.50E-14 |
| 7.47E-07 | -0.41447 | 8.22E-21 | -0.29612 | 6.62E-11 | -0.45525 | 2.85E-25 | -0.65498 | 1.47E-58 |
| 0.43593  | -0.1622  | 0.00043  | 0.028073 | 0.54507  | -0.19626 | 1.94E-05 | -0.23909 | 1.70E-07 |
| 1.53E-06 | -0.32791 | 3.61E-13 | -0.38628 | 4.57E-18 | -0.37918 | 2.04E-17 | -0.5468  | 9.09E-38 |
| 0.00044  | -0.37974 | 1.82E-17 | -0.19595 | 2.00E-05 | -0.32673 | 4.44E-13 | -0.56304 | 2.07E-40 |
| 0.23712  | -0.19242 | 2.84E-05 | -0.08286 | 0.07364  | -0.20624 | 7.01E-06 | -0.28165 | 5.79E-10 |
| 0.16619  | -0.27813 | 9.63E-10 | 0.07265  | 0.11692  | -0.17589 | 0.00013  | -0.29191 | 1.26E-10 |
| 0.02785  | -0.2285  | 6.01E-07 | -0.18685 | 4.85E-05 | -0.10731 | 0.02037  | -0.32099 | 1.19E-12 |
| 0.00411  | -0.32778 | 3.70E-13 | -0.27081 | 2.71E-09 | -0.41655 | 5.03E-21 | -0.59456 | 5.60E-46 |
| 0.09285  | -0.20736 | 6.23E-06 | -0.24817 | 5.51E-08 | -0.10084 | 0.02934  | -0.31073 | 6.53E-12 |
| 9.92E-10 | -0.39277 | 1.12E-18 | -0.19534 | 2.13E-05 | -0.38774 | 3.34E-18 | -0.56356 | 1.70E-40 |
| 0.54559  | -0.06829 | 0.14058  | -0.24796 | 5.66E-08 | -0.2282  | 6.23E-07 | -0.24357 | 9.82E-08 |
| 0.00273  | -0.29757 | 5.29E-11 | -0.29737 | 5.45E-11 | -0.44676 | 2.72E-24 | -0.46874 | 6.96E-27 |
| 0.00038  | -0.27905 | 8.44E-10 | -0.21286 | 3.47E-06 | -0.4661  | 1.46E-26 | -0.50962 | 3.12E-32 |
| 0.206    | -0.29612 | 6.62E-11 | -0.1926  | 2.79E-05 | -0.32788 | 3.64E-13 | -0.50428 | 1.71E-31 |
| 0.23066  | -0.32827 | 3.40E-13 | -0.19014 | 3.54E-05 | -0.39509 | 6.76E-19 | -0.48891 | 1.97E-29 |

|          |          |          |          |          |          |          |          |          |
|----------|----------|----------|----------|----------|----------|----------|----------|----------|
| 0.64475  | -0.32298 | 8.46E-13 | -0.24486 | 8.36E-08 | -0.41524 | 6.85E-21 | -0.54165 | 5.84E-37 |
| 0.01683  | -0.24941 | 4.71E-08 | -0.26458 | 6.39E-09 | -0.33443 | 1.15E-13 | -0.45215 | 6.53E-25 |
| 1.08E-06 | -0.26437 | 6.58E-09 | -0.07545 | 0.10345  | -0.25187 | 3.44E-08 | -0.32079 | 1.23E-12 |
| 0.05465  | -0.30754 | 1.09E-11 | -0.28627 | 2.93E-10 | -0.23807 | 1.93E-07 | -0.42896 | 2.50E-22 |
| 0.6989   | -0.10985 | 0.01757  | -0.28312 | 4.67E-10 | -0.18399 | 6.35E-05 | -0.23558 | 2.60E-07 |
| 0.06318  | -0.28165 | 5.79E-10 | -0.26142 | 9.80E-09 | -0.36908 | 1.62E-16 | -0.45157 | 7.63E-25 |
| 0.00196  | -0.24638 | 6.91E-08 | -0.07139 | 0.12343  | -0.34255 | 2.65E-14 | -0.37287 | 7.50E-17 |
| 0.00548  | -0.32789 | 3.63E-13 | -0.27484 | 1.54E-09 | -0.35225 | 4.34E-15 | -0.50396 | 1.89E-31 |
| 0.01428  | -0.19902 | 1.47E-05 | -0.19987 | 1.35E-05 | -0.07886 | 0.08872  | -0.28158 | 5.85E-10 |
| 0.45353  | -0.27645 | 1.22E-09 | -0.09872 | 0.03294  | -0.21984 | 1.61E-06 | -0.32384 | 7.30E-13 |
| 4.43E-06 | -0.41144 | 1.67E-20 | -0.33985 | 4.34E-14 | -0.47461 | 1.31E-27 | -0.64748 | 7.69E-57 |
| 0.86626  | -0.08359 | 0.07111  | 0.034879 | 0.45208  | -0.14136 | 0.0022   | -0.12745 | 0.00582  |
| 0.00452  | -0.22233 | 1.22E-06 | -0.00683 | 0.88304  | -0.21211 | 3.76E-06 | -0.32613 | 4.93E-13 |
| 0.3488   | -0.24929 | 4.78E-08 | -0.21431 | 2.96E-06 | -0.28805 | 2.25E-10 | -0.40007 | 2.23E-19 |
| 0.0033   | -0.20966 | 4.89E-06 | -0.03858 | 0.40553  | -0.23768 | 2.02E-07 | -0.3441  | 1.99E-14 |
| 0.02721  | -0.26781 | 4.11E-09 | -0.25901 | 1.35E-08 | -0.33691 | 7.38E-14 | -0.44423 | 5.25E-24 |
| 0.0003   | -0.3876  | 3.44E-18 | -0.29683 | 5.93E-11 | -0.38896 | 2.57E-18 | -0.59475 | 5.17E-46 |
| 0.65407  | -0.23112 | 4.43E-07 | -0.0589  | 0.2039   | -0.17946 | 9.64E-05 | -0.33003 | 2.50E-13 |
| 0.00213  | -0.4174  | 4.11E-21 | -0.27779 | 1.01E-09 | -0.44607 | 3.25E-24 | -0.63354 | 8.98E-54 |
| 0.18852  | -0.27314 | 1.96E-09 | -0.23919 | 1.68E-07 | -0.32946 | 2.76E-13 | -0.48164 | 1.71E-28 |
| 0.29533  | -0.27046 | 2.85E-09 | -0.0765  | 0.09868  | -0.23195 | 4.01E-07 | -0.33034 | 2.37E-13 |
| 0.16072  | -0.18479 | 5.89E-05 | -0.1548  | 0.00079  | -0.36654 | 2.69E-16 | -0.33217 | 1.71E-13 |
| 0.86162  | -0.29116 | 1.41E-10 | -0.22118 | 1.39E-06 | -0.36887 | 1.69E-16 | -0.51635 | 3.48E-33 |
| 0.00121  | -0.36521 | 3.50E-16 | -0.2281  | 6.30E-07 | -0.35604 | 2.11E-15 | -0.52008 | 1.01E-33 |
| 0.68693  | -0.17328 | 0.00017  | -0.15234 | 0.00096  | -0.26256 | 8.41E-09 | -0.29173 | 1.29E-10 |
| 0.04039  | -0.21265 | 3.55E-06 | -0.20746 | 6.17E-06 | -0.2639  | 7.01E-09 | -0.37895 | 2.14E-17 |
| 0.00148  | -0.28025 | 7.09E-10 | -0.33697 | 7.30E-14 | -0.35041 | 6.14E-15 | -0.50302 | 2.55E-31 |
| 0.18396  | -0.29885 | 4.33E-11 | -0.16113 | 0.00047  | -0.38601 | 4.83E-18 | -0.42754 | 3.56E-22 |
| 0.22123  | -0.30216 | 2.58E-11 | -0.27092 | 2.67E-09 | -0.33885 | 5.20E-14 | -0.47513 | 1.13E-27 |
| 0.93236  | -0.31772 | 2.06E-12 | -0.06821 | 0.14106  | -0.30533 | 1.56E-11 | -0.48982 | 1.50E-29 |
| 9.33E-05 | -0.14759 | 0.00138  | -0.02738 | 0.55507  | -0.23216 | 3.92E-07 | -0.34046 | 3.89E-14 |
| 0.21005  | -0.23312 | 3.49E-07 | -0.08044 | 0.08249  | -0.28375 | 4.26E-10 | -0.3504  | 6.17E-15 |
| 0.01617  | -0.28255 | 5.08E-10 | -0.29505 | 7.81E-11 | -0.34109 | 3.46E-14 | -0.45787 | 1.40E-25 |
| 0.33562  | -0.23508 | 2.77E-07 | -0.06599 | 0.1545   | -0.14423 | 0.00178  | -0.24749 | 6.01E-08 |
| 0.08983  | -0.25427 | 2.52E-08 | -0.07276 | 0.11638  | -0.24217 | 1.17E-07 | -0.42844 | 2.84E-22 |
| 0.76982  | -0.18902 | 3.94E-05 | -0.03633 | 0.43343  | -0.08841 | 0.05625  | -0.21631 | 2.38E-06 |
| 0.00496  | -0.29641 | 6.33E-11 | -0.30707 | 1.18E-11 | -0.1899  | 3.62E-05 | -0.39069 | 1.77E-18 |
| 1.38E-05 | -0.40502 | 7.31E-20 | -0.15224 | 0.00097  | -0.4368  | 3.52E-23 | -0.60761 | 1.82E-48 |
| 0.25763  | -0.08514 | 0.06602  | -0.13836 | 0.00273  | 0.013491 | 0.77122  | -0.14468 | 0.00172  |
| 1.88E-05 | -0.40337 | 1.06E-19 | -0.19663 | 1.87E-05 | -0.45412 | 3.87E-25 | -0.6525  | 5.51E-58 |
| 0.00018  | -0.26201 | 9.05E-09 | -0.32683 | 4.36E-13 | -0.51638 | 3.45E-33 | -0.62092 | 3.96E-51 |
| 0.0006   | -0.45326 | 4.86E-25 | -0.2582  | 1.51E-08 | -0.4928  | 6.06E-30 | -0.68108 | 6.13E-65 |
| 1.28E-10 | -0.39992 | 2.31E-19 | -0.33118 | 2.04E-13 | -0.40205 | 1.43E-19 | -0.68008 | 1.11E-64 |
| 0.00173  | -0.29978 | 3.75E-11 | -0.39213 | 1.29E-18 | -0.42123 | 1.65E-21 | -0.55526 | 3.98E-39 |
| 1.16E-14 | -0.29562 | 7.15E-11 | -0.21314 | 3.37E-06 | -0.18881 | 4.02E-05 | -0.44009 | 1.53E-23 |

|          |          |          |          |          |          |          |          |          |
|----------|----------|----------|----------|----------|----------|----------|----------|----------|
| 1.82E-05 | -0.30613 | 1.37E-11 | -0.28257 | 5.06E-10 | -0.25742 | 1.67E-08 | -0.50312 | 2.47E-31 |
| 0.48242  | -0.33264 | 1.58E-13 | -0.05792 | 0.2115   | -0.23964 | 1.59E-07 | -0.39777 | 3.73E-19 |
| 6.29E-18 | -0.30469 | 1.73E-11 | -0.13182 | 0.00432  | -0.17183 | 0.00019  | -0.39591 | 5.64E-19 |
| 0.00013  | -0.35092 | 5.59E-15 | -0.27773 | 1.02E-09 | -0.30137 | 2.92E-11 | -0.54398 | 2.53E-37 |
| 4.43E-05 | -0.37623 | 3.77E-17 | -0.29979 | 3.74E-11 | -0.28718 | 2.57E-10 | -0.45637 | 2.11E-25 |
| 2.42E-09 | -0.33272 | 1.56E-13 | -0.13907 | 0.0026   | -0.30194 | 2.67E-11 | -0.4457  | 3.58E-24 |
| 0.00425  | -0.28637 | 2.89E-10 | -0.3846  | 6.52E-18 | -0.4479  | 2.02E-24 | -0.57717 | 7.85E-43 |
| 0.01227  | -0.28222 | 5.32E-10 | -0.27216 | 2.25E-09 | -0.26412 | 6.81E-09 | -0.3931  | 1.05E-18 |
| 0.64616  | -0.23473 | 2.88E-07 | -0.22498 | 9.02E-07 | -0.23695 | 2.21E-07 | -0.4168  | 4.74E-21 |
| 0.69911  | -0.08297 | 0.07325  | -0.11787 | 0.0108   | -0.15729 | 0.00065  | -0.16804 | 0.00026  |
| 0.00069  | -0.16483 | 0.00035  | -0.19683 | 1.83E-05 | -0.3052  | 1.59E-11 | -0.3992  | 2.71E-19 |
| 0.00041  | -0.35974 | 1.03E-15 | -0.11425 | 0.0135   | -0.12204 | 0.00829  | -0.2966  | 6.15E-11 |
| 5.44E-06 | -0.14415 | 0.00179  | -0.42282 | 1.12E-21 | -0.39554 | 6.11E-19 | -0.50516 | 1.30E-31 |
| 0.79213  | -0.24757 | 5.95E-08 | 0.001725 | 0.97034  | -0.17524 | 0.00014  | -0.29888 | 4.32E-11 |
| 3.37E-08 | -0.4432  | 6.86E-24 | -0.42217 | 1.31E-21 | -0.38597 | 4.88E-18 | -0.65459 | 1.82E-58 |
| 0.03715  | -0.20585 | 7.30E-06 | -0.23663 | 2.30E-07 | -0.28874 | 2.03E-10 | -0.34444 | 1.87E-14 |
| 0.08888  | -0.29542 | 7.37E-11 | -0.20347 | 9.35E-06 | -0.22977 | 5.18E-07 | -0.37593 | 4.01E-17 |
| 0.73758  | -0.35897 | 1.19E-15 | -0.26655 | 4.89E-09 | -0.46442 | 2.33E-26 | -0.54839 | 5.09E-38 |
| 1.38E-11 | -0.15613 | 0.00071  | -0.17053 | 0.00021  | -0.24744 | 6.05E-08 | -0.32449 | 6.53E-13 |
| 0.0113   | -0.16759 | 0.00028  | -0.34227 | 2.79E-14 | -0.29565 | 7.11E-11 | -0.32657 | 4.56E-13 |
| 0.00828  | -0.19185 | 3.00E-05 | -0.21814 | 1.95E-06 | -0.28632 | 2.92E-10 | -0.41849 | 3.17E-21 |
| 6.44E-12 | 0.292499 | 1.15E-10 | 0.222019 | 1.26E-06 | 0.287187 | 2.56E-10 | 0.514828 | 5.74E-33 |
| 4.50E-07 | 0.144254 | 0.00178  | 0.108726 | 0.01876  | 0.089102 | 0.05433  | 0.29334  | 1.01E-10 |
| 1.10E-05 | 0.103984 | 0.02463  | 0.080338 | 0.08287  | 0.040425 | 0.38343  | 0.217733 | 2.04E-06 |
| 1.83E-09 | 0.046342 | 0.31764  | 0.155052 | 0.00077  | 0.093956 | 0.04241  | 0.217211 | 2.16E-06 |
| 1.17E-17 | 0.242049 | 1.19E-07 | 0.136808 | 0.00305  | 0.172463 | 0.00018  | 0.405731 | 6.22E-20 |
| 2.65E-10 | 0.116753 | 0.01157  | 0.00631  | 0.89183  | 0.007989 | 0.86329  | 0.193251 | 2.61E-05 |
| 8.67E-06 | 0.07567  | 0.10243  | 0.064143 | 0.1664   | 0.151203 | 0.00105  | 0.211622 | 3.96E-06 |
| 0.01306  | 0.077462 | 0.09452  | 0.070437 | 0.12852  | 0.064793 | 0.16214  | 0.203053 | 9.76E-06 |
| 5.20E-06 | 0.059957 | 0.19588  | 0.143575 | 0.00187  | 0.093203 | 0.0441   | 0.201133 | 1.19E-05 |
| 1.61E-10 | 0.180858 | 8.48E-05 | 0.113366 | 0.01424  | 0.112292 | 0.01519  | 0.285178 | 3.45E-10 |
| 5.65E-10 | 0.148589 | 0.00128  | -0.04947 | 0.28606  | 0.037121 | 0.42352  | 0.148869 | 0.00125  |
| 1.19E-07 | 0.129089 | 0.00521  | 0.037921 | 0.4136   | 0.050797 | 0.2733   | 0.232495 | 3.76E-07 |
| 6.80E-05 | 0.149149 | 0.00123  | 0.028841 | 0.53412  | 0.096798 | 0.03652  | 0.261047 | 1.03E-08 |
| 7.06E-13 | 0.152231 | 0.00097  | 0.141334 | 0.0022   | 0.065332 | 0.15867  | 0.220274 | 1.54E-06 |
| 1.38E-34 | 0.186629 | 4.95E-05 | 0.150263 | 0.00113  | 0.144287 | 0.00177  | 0.322377 | 9.37E-13 |
| 3.28E-05 | 0.092705 | 0.04525  | -0.05331 | 0.25025  | -0.02741 | 0.55463  | 0.114652 | 0.01317  |
| 1.08E-30 | 0.093121 | 0.04429  | 0.018162 | 0.69545  | -0.06658 | 0.15087  | 0.080083 | 0.08385  |
| 0.03651  | 0.018919 | 0.68344  | -0.06295 | 0.17441  | -0.05462 | 0.23874  | 0.047294 | 0.30779  |
| 3.25E-05 | 0.120519 | 0.00914  | 0.122718 | 0.00793  | 0.090849 | 0.04976  | 0.261944 | 9.13E-09 |
| 0.26698  | 0.123547 | 0.00752  | 0.074673 | 0.10704  | 0.090094 | 0.05169  | 0.226825 | 7.30E-07 |
| 4.47E-19 | 0.162274 | 0.00043  | 0.180794 | 8.53E-05 | 0.161789 | 0.00045  | 0.332001 | 1.77E-13 |
| 6.08E-10 | 0.104532 | 0.02388  | -0.00819 | 0.85987  | 0.098965 | 0.0325   | 0.204545 | 8.37E-06 |
| 0.00048  | 0.106411 | 0.02145  | 0.012657 | 0.78502  | 0.079022 | 0.08805  | 0.179763 | 9.38E-05 |
| 0.17477  | 0.115622 | 0.01241  | -0.00514 | 0.9118   | -0.02177 | 0.63894  | 0.165166 | 0.00034  |

|          |          |          |          |          |          |          |          |          |
|----------|----------|----------|----------|----------|----------|----------|----------|----------|
| 3.82E-10 | 0.045533 | 0.32617  | -0.16391 | 0.00038  | -0.11345 | 0.01417  | -0.01366 | 0.76852  |
| 8.62E-06 | 0.146824 | 0.00146  | 0.1383   | 0.00274  | 0.087293 | 0.05943  | 0.259083 | 1.34E-08 |
| 1.09E-10 | 0.100974 | 0.02912  | 0.123375 | 0.0076   | 0.053507 | 0.24849  | 0.210527 | 4.46E-06 |
| 2.57E-10 | 0.262285 | 8.72E-09 | 0.128917 | 0.00527  | 0.266706 | 4.78E-09 | 0.463147 | 3.31E-26 |
| 1.96E-09 | 0.068464 | 0.1396   | 0.002137 | 0.96327  | 0.026077 | 0.57404  | 0.100984 | 0.02911  |
| 0.01005  | -0.00196 | 0.96626  | -0.0711  | 0.12496  | -0.01554 | 0.73767  | -0.01352 | 0.77069  |
| 2.07E-10 | 0.189375 | 3.81E-05 | 0.144197 | 0.00178  | 0.205105 | 7.89E-06 | 0.409675 | 2.51E-20 |
| 5.80E-07 | 0.107662 | 0.01996  | 0.023814 | 0.60773  | 0.002737 | 0.95296  | 0.134534 | 0.00358  |
| 3.53E-09 | 0.171655 | 0.00019  | 0.056595 | 0.22219  | 0.039481 | 0.39464  | 0.239238 | 1.67E-07 |
| 1.12E-07 | 0.270506 | 2.83E-09 | 0.235751 | 2.55E-07 | 0.234498 | 2.97E-07 | 0.409462 | 2.64E-20 |
| 6.24E-09 | 0.056011 | 0.227    | -0.08112 | 0.07991  | -0.10721 | 0.02049  | 0.0509   | 0.27232  |
| 0.00027  | 0.049887 | 0.28199  | -0.07983 | 0.08484  | -0.09408 | 0.04215  | 0.02347  | 0.61293  |
| 4.32E-12 | -0.00024 | 0.99594  | 0.032231 | 0.48717  | -0.01176 | 0.79999  | 0.058457 | 0.20732  |
| 1.22E-12 | 0.176052 | 0.00013  | 0.132719 | 0.00406  | 0.09672  | 0.03667  | 0.314035 | 3.79E-12 |
| 4.15E-10 | 0.213753 | 3.15E-06 | 0.22735  | 6.87E-07 | 0.270446 | 2.85E-09 | 0.43606  | 4.25E-23 |
| 2.18E-05 | 0.118451 | 0.01041  | 0.132085 | 0.00425  | -0.01967 | 0.67157  | 0.149923 | 0.00116  |
| 5.92E-06 | 0.072408 | 0.11815  | 0.128985 | 0.00525  | 0.036859 | 0.42681  | 0.177148 | 0.00012  |
| 2.54E-10 | 0.317387 | 2.17E-12 | 0.027665 | 0.55093  | 0.081225 | 0.07952  | 0.342925 | 2.48E-14 |
| 0.00306  | 0.074307 | 0.10878  | -0.00842 | 0.85592  | -0.09177 | 0.04748  | 0.039486 | 0.39457  |
| 6.97E-06 | 0.081761 | 0.07755  | -0.12052 | 0.00914  | -0.07315 | 0.11443  | 0.052874 | 0.25414  |
| 2.11E-09 | 0.032444 | 0.48428  | 0.042053 | 0.36455  | -0.04511 | 0.33069  | 0.088474 | 0.05606  |
| 2.91E-14 | -0.01534 | 0.74099  | -0.18839 | 4.19E-05 | -0.10621 | 0.02171  | -0.10341 | 0.02544  |
| 2.99E-06 | 0.113297 | 0.0143   | 0.02895  | 0.53258  | 0.036579 | 0.43034  | 0.148228 | 0.00132  |
| 3.78E-07 | 0.041431 | 0.37169  | 0.021946 | 0.63619  | 0.030716 | 0.50788  | 0.065213 | 0.15943  |
| 0.86934  | 0.170705 | 0.00021  | 0.030148 | 0.51576  | 0.208577 | 5.48E-06 | 0.383967 | 7.47E-18 |
| 0.0021   | 0.011486 | 0.80448  | -0.1342  | 0.00367  | -0.01058 | 0.8196   | -0.03423 | 0.46056  |
| 0.1407   | -0.04343 | 0.34904  | 0.007097 | 0.87843  | -0.01324 | 0.77532  | -0.01965 | 0.67185  |
| 0.26426  | 0.097685 | 0.03482  | -0.02275 | 0.62392  | -0.00298 | 0.94882  | 0.051339 | 0.2682   |
| 0.42397  | 0.037943 | 0.41333  | 0.036801 | 0.42754  | 0.060006 | 0.19552  | 0.052733 | 0.25541  |
| 0.02607  | 0.118064 | 0.01067  | 0.159776 | 0.00053  | 0.211205 | 4.15E-06 | 0.296603 | 6.14E-11 |
| 0.05601  | 0.037725 | 0.41602  | 0.367497 | 2.22E-16 | 0.383347 | 8.51E-18 | 0.334684 | 1.10E-13 |
| 1.95E-08 | -0.0545  | 0.23984  | 0.074419 | 0.10825  | -0.01611 | 0.72845  | -0.03262 | 0.48188  |
| 0.41115  | -0.1088  | 0.01868  | 0.104391 | 0.02407  | 0.015198 | 0.74324  | -0.08066 | 0.08164  |
| 6.19E-05 | -0.0247  | 0.59446  | 0.052848 | 0.25437  | 0.082491 | 0.07493  | 0.108361 | 0.01916  |
| 0.28719  | -0.02857 | 0.53802  | 0.174865 | 0.00015  | 0.216925 | 2.23E-06 | 0.233491 | 3.34E-07 |
| 0.05906  | 0.095733 | 0.03864  | 0.015293 | 0.7417   | 0.116227 | 0.01195  | 0.141146 | 0.00223  |
| 0.83369  | -0.03393 | 0.46452  | 0.059693 | 0.19786  | 0.154566 | 0.0008   | 0.09084  | 0.04978  |
| 0.00423  | 0.02845  | 0.53969  | 0.179518 | 9.59E-05 | 0.300108 | 3.56E-11 | 0.294315 | 8.73E-11 |
| 0.28825  | -0.12695 | 0.00601  | -0.09733 | 0.0355   | -0.03508 | 0.44948  | -0.15089 | 0.00107  |
| 0.01639  | -0.23556 | 2.61E-07 | -0.02648 | 0.5681   | 0.007682 | 0.86849  | -0.07367 | 0.11185  |
| 9.62E-05 | -0.11343 | 0.01418  | -0.05288 | 0.25408  | -0.04333 | 0.35011  | -0.09724 | 0.03567  |
| 0.81993  | -0.05456 | 0.23931  | 0.205508 | 7.57E-06 | 0.033024 | 0.47651  | -0.00022 | 0.99617  |
| 0.02281  | 0.088956 | 0.05473  | 0.040565 | 0.38177  | 0.218044 | 1.97E-06 | 0.279771 | 7.60E-10 |
| 1.35E-06 | 0.103289 | 0.02561  | 0.133674 | 0.0038   | 0.117156 | 0.01129  | 0.165273 | 0.00033  |
| 6.57E-10 | 0.144921 | 0.00169  | -0.07009 | 0.13042  | 0.011833 | 0.7987   | 0.135088 | 0.00345  |



|          |          |          |          |          |          |          |          |          |
|----------|----------|----------|----------|----------|----------|----------|----------|----------|
| 0.79205  | 0.004753 | 0.9184   | -0.0652  | 0.15954  | 0.054452 | 0.24022  | 0.044399 | 0.33838  |
| 0.002    | 0.054658 | 0.23844  | 0.217674 | 2.05E-06 | 0.336369 | 8.13E-14 | 0.28029  | 7.05E-10 |
| 9.20E-07 | 0.134585 | 0.00357  | 0.260665 | 1.08E-08 | 0.243092 | 1.04E-07 | 0.361097 | 7.89E-16 |
| 0.41097  | -0.07303 | 0.11503  | 0.075664 | 0.10245  | 0.02924  | 0.52848  | -0.04119 | 0.37445  |
| 0.80344  | 0.001974 | 0.96607  | 0.089031 | 0.05452  | 0.114447 | 0.01333  | 0.145636 | 0.0016   |
| 0.7888   | 0.070393 | 0.12876  | 0.076328 | 0.09947  | 0.229099 | 5.61E-07 | 0.245878 | 7.36E-08 |
| 1.08E-05 | 0.058491 | 0.20706  | 0.176787 | 0.00012  | 0.294476 | 8.52E-11 | 0.2325   | 3.76E-07 |
| 0.00058  | -0.06425 | 0.16566  | 0.053972 | 0.2444   | 0.055859 | 0.22827  | -0.03028 | 0.51395  |
| 0.71172  | -0.19771 | 1.68E-05 | -0.16511 | 0.00034  | -0.27392 | 1.75E-09 | -0.30779 | 1.05E-11 |
| 0.00773  | -0.13971 | 0.00248  | 0.19834  | 1.58E-05 | 0.096443 | 0.03721  | -0.02799 | 0.54634  |
| 0.29931  | -0.19934 | 1.43E-05 | 0.003685 | 0.9367   | -0.16509 | 0.00034  | -0.28944 | 1.83E-10 |
| 1.66E-05 | -0.03092 | 0.50502  | 0.130502 | 0.00473  | -0.04744 | 0.30625  | -0.0033  | 0.94322  |
| 0.00018  | -0.02986 | 0.51982  | 0.040587 | 0.38152  | 0.051951 | 0.26253  | 0.025243 | 0.58635  |
| 0.00037  | -0.1281  | 0.00557  | 0.042058 | 0.36449  | -0.0046  | 0.92108  | -0.02953 | 0.52442  |
| 1.86E-13 | 0.067066 | 0.14788  | 0.140892 | 0.00227  | 0.120265 | 0.00928  | 0.16319  | 0.0004   |
| 8.67E-12 | 0.082274 | 0.0757   | 0.224772 | 9.24E-07 | 0.101581 | 0.02816  | 0.195179 | 2.16E-05 |
| 0.23341  | -0.06802 | 0.14222  | -0.06674 | 0.14988  | -0.17821 | 0.00011  | -0.20995 | 4.74E-06 |
| 0.00016  | -0.1256  | 0.00657  | 0.00594  | 0.89813  | -0.01404 | 0.76224  | -0.0704  | 0.12873  |
| 0.00019  | -0.04949 | 0.28585  | -0.04887 | 0.29195  | -0.11611 | 0.01204  | -0.10058 | 0.02976  |
| 0.00812  | -0.02962 | 0.52318  | 0.06438  | 0.16484  | 0.086205 | 0.06269  | 0.078812 | 0.0889   |
| 2.50E-07 | -0.09756 | 0.03506  | -0.06622 | 0.15305  | -0.05758 | 0.21427  | -0.13058 | 0.00471  |
| 4.98E-05 | 0.043845 | 0.34445  | 0.037736 | 0.41588  | 0.204544 | 8.37E-06 | 0.163356 | 0.00039  |
| 0.00845  | -0.16643 | 0.0003   | -0.05665 | 0.22174  | -0.10888 | 0.01859  | -0.17372 | 0.00016  |
| 0.00995  | -0.03571 | 0.44135  | 0.008061 | 0.86208  | 0.032433 | 0.48443  | 0.048514 | 0.29547  |
| 0.00716  | 0.130987 | 0.00458  | 0.257608 | 1.63E-08 | 0.273817 | 1.78E-09 | 0.296868 | 5.90E-11 |
| 6.53E-06 | -0.017   | 0.71403  | 0.163077 | 0.0004   | 0.106486 | 0.02136  | 0.091517 | 0.04809  |
| 0.03136  | -0.02034 | 0.66104  | -0.21957 | 1.66E-06 | -0.05499 | 0.23557  | -0.0749  | 0.10598  |
| 7.83E-05 | 0.08458  | 0.06783  | 0.266477 | 4.94E-09 | 0.277653 | 1.03E-09 | 0.340835 | 3.63E-14 |
| 8.48E-09 | -0.06279 | 0.17553  | -0.13134 | 0.00447  | -0.25977 | 1.22E-08 | -0.20244 | 1.04E-05 |
| 2.25E-08 | 0.087553 | 0.05868  | 0.225056 | 8.94E-07 | 0.268473 | 3.75E-09 | 0.169726 | 0.00023  |
| 0.04926  | -0.04202 | 0.36487  | 0.131059 | 0.00456  | 0.027658 | 0.55104  | -0.00699 | 0.88032  |
| 8.32E-05 | -0.1369  | 0.00303  | -0.11205 | 0.01541  | -0.10773 | 0.01987  | -0.15609 | 0.00071  |
| 6.72E-14 | 0.018289 | 0.69344  | 0.170703 | 0.00021  | 0.060165 | 0.19433  | 0.118674 | 0.01026  |
| 0.02247  | 0.036843 | 0.427    | 0.112432 | 0.01506  | 0.127667 | 0.00573  | 0.113733 | 0.01392  |
| 0.0524   | -0.21538 | 2.64E-06 | -0.09658 | 0.03695  | -0.22419 | 9.87E-07 | -0.3579  | 1.47E-15 |
| 0.09138  | -0.01166 | 0.80151  | -0.10418 | 0.02436  | 0.020704 | 0.65541  | -0.01065 | 0.81841  |
| 7.26E-05 | -0.12267 | 0.00796  | 0.187679 | 4.48E-05 | 0.249019 | 4.95E-08 | 0.14691  | 0.00145  |
| 0.00488  | 0.125073 | 0.00681  | 0.207992 | 5.83E-06 | 0.291305 | 1.38E-10 | 0.377435 | 2.94E-17 |
| 0.31003  | -0.11563 | 0.0124   | 0.014705 | 0.75128  | -0.05696 | 0.2192   | -0.11995 | 0.00947  |
| 0.42882  | 0.019041 | 0.6815   | -0.02368 | 0.60981  | -0.00425 | 0.9271   | 0.02129  | 0.6463   |
| 8.41E-09 | 0.054876 | 0.23658  | -0.06475 | 0.16243  | -0.0402  | 0.38606  | 0.035321 | 0.44637  |
| 0.06563  | 0.125533 | 0.0066   | 0.146454 | 0.00151  | 0.291034 | 1.44E-10 | 0.334781 | 1.08E-13 |
| 0.00084  | -0.15932 | 0.00055  | -0.15212 | 0.00097  | -0.24301 | 1.05E-07 | -0.26055 | 1.10E-08 |
| 0.00144  | -0.1674  | 0.00028  | 0.022159 | 0.63291  | -0.11802 | 0.01069  | -0.2008  | 1.23E-05 |
| 2.18E-09 | -0.0945  | 0.04123  | -0.04231 | 0.3616   | -0.14058 | 0.00233  | -0.17164 | 0.00019  |

|          |          |          |          |          |          |          |          |          |
|----------|----------|----------|----------|----------|----------|----------|----------|----------|
| 0.06497  | 0.028762 | 0.53524  | 0.072104 | 0.1197   | 0.119371 | 0.00982  | 0.14222  | 0.00206  |
| 0.68573  | 0.056265 | 0.2249   | 0.047787 | 0.30277  | 0.156985 | 0.00066  | 0.044279 | 0.33969  |
| 0.00553  | 0.067676 | 0.14422  | 0.087847 | 0.05783  | 0.148339 | 0.00131  | 0.087651 | 0.05839  |
| 0.0012   | -0.08953 | 0.05318  | -0.02449 | 0.59763  | -0.04108 | 0.37581  | -0.05855 | 0.20656  |
| 2.96E-05 | -0.07968 | 0.08541  | 0.137539 | 0.0029   | 0.011583 | 0.80285  | -0.04412 | 0.34148  |
| 2.48E-05 | -0.14414 | 0.00179  | -0.04792 | 0.30143  | -0.11463 | 0.01318  | -0.1919  | 2.98E-05 |
| 0.82507  | -0.06962 | 0.133    | 0.027157 | 0.55828  | -0.03025 | 0.51429  | -0.04203 | 0.36485  |
| 0.35722  | 0.090869 | 0.0497   | -0.05203 | 0.26181  | 0.03533  | 0.44625  | 0.028324 | 0.54149  |
| 0.73345  | -0.09585 | 0.03839  | -0.11487 | 0.01299  | -0.26651 | 4.92E-09 | -0.35764 | 1.55E-15 |
| 3.80E-06 | 0.047751 | 0.30314  | -0.16161 | 0.00045  | -0.12737 | 0.00585  | -0.03546 | 0.44456  |
| 0.53201  | -0.03976 | 0.39133  | 0.134166 | 0.00368  | 0.224814 | 9.19E-07 | 0.25897  | 1.36E-08 |
| 0.61981  | 0.062337 | 0.17869  | 0.198735 | 1.52E-05 | 0.196841 | 1.83E-05 | 0.219002 | 1.77E-06 |
| 1.78E-08 | -0.00313 | 0.94618  | -0.1207  | 0.00903  | -0.16027 | 0.00051  | -0.08556 | 0.0647   |
| 0.0593   | 0.15013  | 0.00114  | 0.21479  | 2.81E-06 | 0.368456 | 1.83E-16 | 0.398055 | 3.50E-19 |
| 0.05389  | -0.07458 | 0.10747  | 0.02802  | 0.54584  | -0.05501 | 0.23541  | -0.11978 | 0.00958  |
| 0.37318  | 0.023542 | 0.61184  | 0.04149  | 0.37101  | 0.118459 | 0.0104   | 0.14875  | 0.00126  |
| 0.00013  | -0.19373 | 2.49E-05 | -0.04655 | 0.31546  | -0.1439  | 0.00182  | -0.23946 | 1.63E-07 |
| 1.21E-05 | -0.08369 | 0.07078  | 0.139077 | 0.00259  | 0.140606 | 0.00232  | 0.097479 | 0.03521  |
| 5.16E-10 | -0.0016  | 0.97244  | 0.215079 | 2.73E-06 | 0.160449 | 0.0005   | 0.135905 | 0.00325  |
| 0.00292  | 0.038937 | 0.40119  | 0.053521 | 0.24837  | 0.061738 | 0.18291  | 0.136084 | 0.00321  |
| 1.62E-17 | 0.053376 | 0.24966  | -0.01205 | 0.79507  | -0.02782 | 0.5487   | 0.073191 | 0.11421  |
| 0.0064   | 0.031563 | 0.49624  | 0.158676 | 0.00058  | 0.283375 | 4.50E-10 | 0.225433 | 8.56E-07 |
| 2.12E-05 | 0.005583 | 0.90423  | 0.051698 | 0.26487  | -0.0168  | 0.7172   | 0.060811 | 0.18958  |
| 0.00126  | 0.152006 | 0.00098  | 0.078598 | 0.08977  | 0.207525 | 6.13E-06 | 0.314824 | 3.33E-12 |
| 0.42202  | -0.11955 | 0.00972  | 0.03441  | 0.45819  | -0.07283 | 0.11599  | -0.09244 | 0.04588  |
| 0.07035  | 0.062443 | 0.17795  | 0.306767 | 1.24E-11 | 0.322409 | 9.32E-13 | 0.300485 | 3.36E-11 |
| 0.6012   | 0.064454 | 0.16436  | 0.325574 | 5.42E-13 | 0.310079 | 7.26E-12 | 0.297489 | 5.36E-11 |
| 9.52E-08 | -0.11716 | 0.01128  | 0.19992  | 1.34E-05 | -0.00894 | 0.84724  | -0.03751 | 0.41865  |
| 0.44667  | -0.22036 | 1.52E-06 | -0.18187 | 7.73E-05 | -0.28312 | 4.67E-10 | -0.4077  | 3.96E-20 |
| 0.01286  | 0.076357 | 0.09934  | -0.0343  | 0.45962  | 0.061519 | 0.18446  | 0.069455 | 0.13395  |
| 0.00752  | 0.06609  | 0.15388  | 0.113833 | 0.01384  | 0.087569 | 0.05863  | 0.13764  | 0.00288  |
| 0.10452  | -0.19438 | 2.34E-05 | 0.049875 | 0.28211  | -0.12363 | 0.00748  | -0.14505 | 0.00167  |
| 0.10632  | -0.12808 | 0.00557  | 0.0627   | 0.17616  | -0.0282  | 0.54327  | -0.08208 | 0.07638  |
| 0.51134  | -0.07186 | 0.12097  | -0.13995 | 0.00244  | -0.11272 | 0.0148   | -0.18329 | 6.77E-05 |
| 3.66E-11 | -0.10578 | 0.02224  | -0.11725 | 0.01122  | -0.07046 | 0.12842  | -0.1044  | 0.02405  |
| 0.68694  | 0.050459 | 0.27651  | 0.096099 | 0.0379   | 0.15744  | 0.00064  | 0.159773 | 0.00053  |
| 0.24214  | -0.28524 | 3.42E-10 | 0.056708 | 0.22127  | -0.03095 | 0.50468  | -0.14247 | 0.00203  |
| 0.00235  | -0.12002 | 0.00943  | -0.13551 | 0.00335  | -0.19435 | 2.35E-05 | -0.20387 | 8.97E-06 |
| 0.83078  | -0.03129 | 0.49992  | -0.1327  | 0.00407  | -0.11739 | 0.01112  | -0.07513 | 0.10489  |
| 0.01663  | -0.24255 | 1.11E-07 | -0.02373 | 0.60906  | -0.11588 | 0.01222  | -0.18151 | 7.99E-05 |
| 0.8797   | 0.180251 | 8.97E-05 | -0.12627 | 0.00629  | -0.00896 | 0.84685  | 0.123537 | 0.00752  |
| 0.71475  | -0.12452 | 0.00705  | 0.01059  | 0.81946  | -0.02592 | 0.57637  | -0.02734 | 0.55565  |
| 0.0026   | 0.038048 | 0.41203  | 0.035773 | 0.44056  | 0.1109   | 0.01651  | 0.155295 | 0.00076  |
| 0.02633  | -0.05288 | 0.25406  | -0.00233 | 0.95996  | 0.02366  | 0.61005  | 0.010896 | 0.81433  |
| 3.11E-06 | -0.01409 | 0.76145  | -0.14795 | 0.00134  | -0.02867 | 0.53656  | 0.005483 | 0.90593  |

|          |          |          |          |          |          |          |          |          |
|----------|----------|----------|----------|----------|----------|----------|----------|----------|
| 0.013    | -0.02603 | 0.57473  | -0.02327 | 0.61601  | -0.141   | 0.00226  | -0.10264 | 0.02656  |
| 0.27617  | -0.12288 | 0.00785  | -0.04055 | 0.38198  | -0.03918 | 0.39821  | -0.15487 | 0.00079  |
| 0.07068  | 0.073466 | 0.11285  | -0.13139 | 0.00446  | -0.0721  | 0.11974  | 0.004366 | 0.92502  |
| 0.59737  | -0.12302 | 0.00778  | -0.20874 | 5.39E-06 | -0.18116 | 8.25E-05 | -0.21797 | 1.98E-06 |
| 3.39E-17 | 0.041127 | 0.37521  | 0.013402 | 0.77269  | 0.075379 | 0.10376  | 0.159224 | 0.00055  |
| 1.84E-12 | 0.076944 | 0.09676  | 0.129167 | 0.00518  | 0.107626 | 0.02     | 0.239359 | 1.65E-07 |
| 3.54E-11 | -0.02495 | 0.59072  | -0.0392  | 0.39797  | -0.03981 | 0.39065  | -0.02296 | 0.62064  |
| 0.09864  | 0.028639 | 0.537    | 0.091129 | 0.04905  | 0.059342 | 0.20051  | 0.125564 | 0.00659  |
| 7.62E-10 | -0.03072 | 0.50786  | -0.16107 | 0.00048  | -0.10316 | 0.02579  | -0.03976 | 0.39131  |
| 2.45E-10 | 0.11189  | 0.01556  | 0.24219  | 1.17E-07 | 0.208115 | 5.76E-06 | 0.294435 | 8.57E-11 |
| 0.00012  | -0.10681 | 0.02097  | -0.00791 | 0.8646   | -0.06901 | 0.13644  | -0.09322 | 0.04406  |
| 0.33267  | -0.09023 | 0.05133  | -0.19996 | 1.34E-05 | -0.1777  | 0.00011  | -0.20189 | 1.10E-05 |
| 0.00693  | -0.03056 | 0.51006  | 0.069836 | 0.13182  | -0.14183 | 0.00212  | -0.15409 | 0.00083  |
| 0.00355  | -0.02823 | 0.54278  | 0.023718 | 0.60918  | 0.058088 | 0.21021  | 0.069148 | 0.13568  |
| 1.20E-07 | -0.00982 | 0.83234  | 0.170493 | 0.00021  | 0.015794 | 0.73355  | 0.075149 | 0.10482  |
| 0.02254  | -0.20758 | 6.09E-06 | -0.20802 | 5.81E-06 | -0.1671  | 0.00029  | -0.27069 | 2.76E-09 |
| 7.19E-09 | -0.0482  | 0.29859  | -0.10033 | 0.03018  | -0.05973 | 0.19755  | -0.06656 | 0.15097  |
| 0.84024  | -0.06814 | 0.14149  | 0.116087 | 0.01206  | 0.066005 | 0.15441  | 0.026856 | 0.56265  |
| 1.88E-07 | -0.16707 | 0.00029  | -0.09215 | 0.04657  | -0.28921 | 1.89E-10 | -0.25823 | 1.50E-08 |
| 0.01153  | -0.0974  | 0.03537  | -0.02747 | 0.55372  | -0.16068 | 0.00049  | -0.26661 | 4.84E-09 |
| 4.65E-08 | -0.0245  | 0.59744  | 0.169341 | 0.00024  | 0.090789 | 0.04991  | 0.10074  | 0.0295   |
| 0.02168  | 0.008961 | 0.84685  | -0.12412 | 0.00724  | 0.115327 | 0.01264  | 0.031547 | 0.49646  |
| 0.00021  | 0.011221 | 0.8089   | -0.02356 | 0.61162  | -0.05829 | 0.2086   | -0.06811 | 0.14167  |
| 0.00355  | -0.11046 | 0.01694  | -0.09382 | 0.04272  | -0.12208 | 0.00827  | -0.19975 | 1.37E-05 |
| 1.00E-08 | -0.03358 | 0.46914  | 0.080169 | 0.08352  | 0.039447 | 0.39504  | 0.05923  | 0.20137  |
| 0.00013  | -0.00226 | 0.9612   | -0.0132  | 0.77596  | 0.082537 | 0.07476  | 0.001086 | 0.98133  |
| 0.07041  | 0.020707 | 0.65536  | 0.005874 | 0.89925  | 0.042371 | 0.36093  | 0.062984 | 0.17421  |
| 0.00704  | -0.06271 | 0.17611  | 0.050527 | 0.27586  | -0.19361 | 2.52E-05 | -0.21475 | 2.83E-06 |
| 0.156    | 0.063854 | 0.16833  | 0.232937 | 3.57E-07 | 0.209632 | 4.90E-06 | 0.279994 | 7.36E-10 |
| 2.49E-06 | 0.066846 | 0.14922  | 0.38163  | 1.22E-17 | 0.341814 | 3.03E-14 | 0.379852 | 1.78E-17 |
| 0.919    | -0.16392 | 0.00038  | -0.03118 | 0.50142  | -0.10273 | 0.02642  | -0.15995 | 0.00052  |
| 0.00016  | -0.15144 | 0.00103  | -0.03811 | 0.41132  | -0.1631  | 0.0004   | -0.22734 | 6.88E-07 |
| 0.00058  | -0.10229 | 0.02708  | -0.16702 | 0.00029  | -0.15912 | 0.00056  | -0.15942 | 0.00054  |
| 0.07406  | -0.09901 | 0.03242  | 0.107486 | 0.02016  | -0.03724 | 0.42207  | -0.10787 | 0.01971  |
| 0.00385  | 0.015025 | 0.74606  | 0.083566 | 0.0712   | 0.025809 | 0.57798  | 0.108445 | 0.01907  |
| 3.19E-11 | -0.05383 | 0.24564  | -0.07088 | 0.12615  | -0.06799 | 0.14237  | -0.05279 | 0.2549   |
| 1.89E-07 | -0.08745 | 0.05897  | -0.01014 | 0.82705  | -0.06811 | 0.14165  | -0.17493 | 0.00014  |
| 0.00123  | -0.06527 | 0.15904  | 0.033605 | 0.46877  | -0.01582 | 0.73311  | -0.01936 | 0.67647  |
| 0.00101  | -0.12553 | 0.0066   | 0.119264 | 0.00989  | 0.10692  | 0.02083  | 0.051412 | 0.26753  |
| 0.02149  | 0.018904 | 0.68367  | 0.051219 | 0.26933  | 0.135567 | 0.00333  | 0.084446 | 0.06827  |
| 0.08705  | -0.04539 | 0.32771  | -0.04734 | 0.30729  | -0.09091 | 0.0496   | -0.05253 | 0.25723  |
| 0.00044  | 0.078699 | 0.08936  | 0.233495 | 3.34E-07 | 0.317155 | 2.26E-12 | 0.308644 | 9.16E-12 |
| 8.53E-05 | -0.0094  | 0.83952  | 0.014175 | 0.75997  | 0.046262 | 0.31848  | -0.04154 | 0.37047  |
| 2.20E-10 | -0.04892 | 0.29144  | 0.172729 | 0.00018  | 0.13422  | 0.00366  | 0.141182 | 0.00223  |
| 3.08E-08 | -0.03226 | 0.48671  | 0.091404 | 0.04837  | 0.154015 | 0.00084  | 0.112276 | 0.0152   |

|          |          |          |          |          |          |          |          |          |
|----------|----------|----------|----------|----------|----------|----------|----------|----------|
| 0.72284  | 0.060769 | 0.18988  | -0.02869 | 0.53631  | 0.006813 | 0.88326  | 0.072091 | 0.11977  |
| 3.14E-16 | 0.117303 | 0.01118  | 0.188847 | 4.01E-05 | 0.209446 | 5.00E-06 | 0.305943 | 1.41E-11 |
| 0.00113  | 0.094448 | 0.04134  | 0.103405 | 0.02544  | 0.153048 | 0.00091  | 0.175577 | 0.00014  |
| 0.05453  | 0.036043 | 0.43712  | 0.019705 | 0.67104  | 0.130149 | 0.00485  | 0.071052 | 0.12521  |
| 1.84E-05 | 0.123845 | 0.00737  | 0.27323  | 1.93E-09 | 0.385929 | 4.92E-18 | 0.409988 | 2.34E-20 |
| 0.34636  | 0.009549 | 0.83694  | -0.0994  | 0.03174  | 0.027249 | 0.55694  | 0.046589 | 0.31507  |
| 0.02686  | -0.01062 | 0.81897  | -0.07329 | 0.11374  | -0.07683 | 0.09724  | -0.04062 | 0.38118  |
| 0.36316  | -0.14676 | 0.00147  | -0.20309 | 9.73E-06 | -0.25495 | 2.31E-08 | -0.33465 | 1.10E-13 |
| 0.08382  | 0.086901 | 0.06059  | -0.00484 | 0.91695  | 0.016488 | 0.7223   | 0.029272 | 0.52804  |
| 9.15E-12 | 0.008402 | 0.85631  | 0.154523 | 0.00081  | 0.097124 | 0.03589  | 0.115135 | 0.01278  |
| 6.99E-06 | -0.12086 | 0.00894  | -0.04791 | 0.30154  | 0.053143 | 0.25173  | 0.020103 | 0.66479  |
| 1.48E-06 | 0.092505 | 0.04572  | -0.06745 | 0.14555  | 0.037768 | 0.41548  | 0.136171 | 0.00319  |
| 0.00109  | 0.163846 | 0.00038  | 0.259535 | 1.26E-08 | 0.350569 | 5.97E-15 | 0.394137 | 8.33E-19 |
| 0.08134  | 0.022081 | 0.6341   | -0.06562 | 0.15684  | 0.132772 | 0.00405  | 0.092675 | 0.04532  |
| 0.09076  | -0.09251 | 0.04572  | -0.22963 | 5.27E-07 | -0.18254 | 7.26E-05 | -0.24329 | 1.02E-07 |
| 0.2667   | -0.02134 | 0.64549  | 0.078178 | 0.09151  | -0.06873 | 0.13808  | -0.04128 | 0.37339  |
| 1.41E-06 | 0.034801 | 0.45309  | 0.091123 | 0.04907  | 0.095989 | 0.03812  | 0.173608 | 0.00016  |
| 3.46E-05 | -0.01428 | 0.7583   | 0.100625 | 0.02969  | 0.109526 | 0.0179   | 0.09607  | 0.03796  |
| 1.23E-07 | -0.04214 | 0.36358  | -0.00191 | 0.9671   | -0.0967  | 0.0367   | -0.15674 | 0.00068  |
| 3.78E-05 | -0.25031 | 4.20E-08 | -0.02821 | 0.54309  | -0.15536 | 0.00076  | -0.2975  | 5.35E-11 |
| 0.00408  | 0.107297 | 0.02038  | 0.06423  | 0.16583  | 0.192633 | 2.78E-05 | 0.267339 | 4.39E-09 |
| 1.42E-07 | 0.082884 | 0.07355  | 0.057513 | 0.21476  | 0.027767 | 0.54947  | 0.106192 | 0.02172  |
| 0.00439  | -0.15079 | 0.00108  | 0.292314 | 1.19E-10 | 0.071556 | 0.12255  | -0.0491  | 0.28966  |
| 1.66E-12 | 0.002548 | 0.9562   | 0.049185 | 0.28883  | 0.037922 | 0.41358  | 0.085565 | 0.06467  |
| 9.95E-07 | -0.1346  | 0.00357  | -0.13086 | 0.00462  | -0.24332 | 1.01E-07 | -0.29656 | 6.18E-11 |
| 0.28081  | -0.18401 | 6.34E-05 | -0.08008 | 0.08385  | 0.006411 | 0.8901   | -0.13301 | 0.00398  |
| 0.31867  | -0.00104 | 0.98209  | 0.013275 | 0.7748   | 0.120576 | 0.0091   | 0.129307 | 0.00513  |
| 0.15201  | -0.00481 | 0.91736  | 0.094382 | 0.04148  | 0.048178 | 0.29883  | 0.079825 | 0.08486  |
| 1.94E-13 | -0.09482 | 0.04053  | 0.08491  | 0.06676  | 0.045691 | 0.32449  | 0.027568 | 0.55233  |
| 0.06963  | -0.09295 | 0.04469  | -0.10166 | 0.02805  | -0.05567 | 0.22987  | -0.13309 | 0.00396  |
| 0.00015  | -0.05823 | 0.20908  | 0.196551 | 1.89E-05 | 0.082602 | 0.07453  | 0.105931 | 0.02205  |
| 0.00555  | 0.103052 | 0.02595  | 0.226429 | 7.64E-07 | 0.216111 | 2.44E-06 | 0.238635 | 1.80E-07 |
| 0.58176  | 0.098594 | 0.03316  | -0.05447 | 0.24003  | -0.04881 | 0.29252  | -0.02505 | 0.58921  |
| 2.08E-08 | -0.06924 | 0.13515  | 0.112702 | 0.01482  | -0.08441 | 0.06838  | -0.08614 | 0.06288  |
| 0.66119  | -0.30603 | 1.39E-11 | -0.05778 | 0.21261  | -0.108   | 0.01957  | -0.27318 | 1.95E-09 |
| 0.00018  | -0.00592 | 0.89848  | 0.069354 | 0.13451  | 0.023131 | 0.61806  | 0.059856 | 0.19664  |
| 7.51E-06 | -0.09593 | 0.03823  | -0.04534 | 0.32818  | -0.08649 | 0.06182  | -0.08303 | 0.07305  |
| 1.47E-07 | -0.02814 | 0.54409  | 0.177382 | 0.00012  | 0.181003 | 8.37E-05 | 0.1361   | 0.00321  |
| 1.43E-09 | -0.01419 | 0.75969  | 0.145205 | 0.00165  | -0.01394 | 0.76384  | 0.062376 | 0.17842  |
| 0.00022  | -0.01274 | 0.78362  | -0.19387 | 2.46E-05 | -0.27392 | 1.75E-09 | -0.22426 | 9.79E-07 |
| 2.84E-09 | 0.092991 | 0.04459  | 0.104821 | 0.02349  | 0.100387 | 0.03008  | 0.204358 | 8.53E-06 |
| 4.32E-09 | -0.04336 | 0.34979  | 0.134949 | 0.00348  | 0.146108 | 0.00155  | 0.087598 | 0.05855  |
| 0.01899  | -0.06914 | 0.1357   | -0.03802 | 0.41238  | -0.17067 | 0.00021  | -0.19052 | 3.41E-05 |
| 2.61E-07 | 0.095566 | 0.03898  | 0.121374 | 0.00865  | 0.04184  | 0.36699  | 0.153757 | 0.00086  |
| 0.02615  | 0.005182 | 0.91107  | -0.16736 | 0.00028  | -0.25332 | 2.85E-08 | -0.21633 | 2.38E-06 |

|          |          |          |          |          |          |          |          |          |
|----------|----------|----------|----------|----------|----------|----------|----------|----------|
| 3.24E-22 | 0.189897 | 3.62E-05 | 0.163391 | 0.00039  | 0.075572 | 0.10287  | 0.255144 | 2.25E-08 |
| 0.72005  | 0.294818 | 8.09E-11 | 0.070285 | 0.12935  | 0.221217 | 1.38E-06 | 0.415818 | 5.98E-21 |
| 4.75E-12 | 0.097355 | 0.03545  | -0.03356 | 0.46944  | -0.00853 | 0.85408  | 0.116004 | 0.01212  |
| 1.11E-20 | 0.225849 | 8.16E-07 | 0.19868  | 1.52E-05 | 0.171441 | 0.0002   | 0.413819 | 9.57E-21 |
| 1.20E-21 | 0.141792 | 0.00213  | 0.135737 | 0.00329  | -0.01161 | 0.80237  | 0.205232 | 7.79E-06 |
| 9.01E-10 | 0.230101 | 4.99E-07 | 0.056541 | 0.22263  | 0.130054 | 0.00488  | 0.330582 | 2.27E-13 |
| 1.94E-15 | 0.377109 | 3.14E-17 | 0.161949 | 0.00044  | 0.259169 | 1.32E-08 | 0.558869 | 1.02E-39 |
| 1.28E-18 | 0.076065 | 0.10064  | 0.116413 | 0.01182  | -0.08405 | 0.06957  | 0.082458 | 0.07505  |
| 0.01647  | 0.066185 | 0.15329  | -0.0839  | 0.07008  | -0.02299 | 0.62027  | 0.102396 | 0.02692  |
| 5.82E-10 | 0.261035 | 1.03E-08 | 0.105885 | 0.02211  | 0.204902 | 8.06E-06 | 0.444308 | 5.15E-24 |
| 9.34E-08 | 0.193785 | 2.48E-05 | -0.02932 | 0.52731  | 0.081333 | 0.07912  | 0.302338 | 2.51E-11 |
| 2.63E-12 | 0.29377  | 9.49E-11 | 0.08639  | 0.06213  | 0.158694 | 0.00058  | 0.415962 | 5.78E-21 |
| 5.88E-28 | 0.218624 | 1.85E-06 | 0.156691 | 0.00068  | 0.108831 | 0.01865  | 0.340734 | 3.69E-14 |
| 1.21E-18 | 0.156386 | 0.0007   | 0.019454 | 0.67499  | 0.027933 | 0.54708  | 0.24227  | 1.15E-07 |
| 8.37E-13 | 0.29047  | 1.57E-10 | 0.125078 | 0.0068   | 0.2519   | 3.42E-08 | 0.486092 | 4.57E-29 |
| 6.26E-07 | 0.237182 | 2.15E-07 | -0.0619  | 0.18177  | 0.157256 | 0.00065  | 0.324014 | 7.09E-13 |
| 1.91E-10 | 0.224529 | 9.49E-07 | 0.061176 | 0.18693  | 0.062511 | 0.17748  | 0.319127 | 1.62E-12 |
| 2.30E-20 | 0.167391 | 0.00028  | 0.056167 | 0.22571  | 0.079578 | 0.08583  | 0.274268 | 1.67E-09 |
| 3.89E-35 | 0.229515 | 5.34E-07 | 0.055244 | 0.23344  | 0.053442 | 0.24906  | 0.312669 | 4.75E-12 |
| 1.95E-23 | 0.252101 | 3.34E-08 | 0.060148 | 0.19446  | 0.110381 | 0.01702  | 0.334819 | 1.07E-13 |
| 4.83E-28 | 0.164632 | 0.00035  | 0.03596  | 0.43818  | 0.087861 | 0.05779  | 0.285693 | 3.20E-10 |
| 2.05E-32 | 0.235924 | 2.50E-07 | 0.021538 | 0.64247  | 0.115522 | 0.01249  | 0.297139 | 5.65E-11 |
| 8.09E-16 | 0.138382 | 0.00273  | -0.04616 | 0.31954  | -0.07723 | 0.09551  | 0.060392 | 0.19265  |
| 3.82E-28 | 0.260716 | 1.08E-08 | 0.117271 | 0.01121  | 0.106256 | 0.02164  | 0.366719 | 2.60E-16 |
| 6.83E-24 | 0.080296 | 0.08303  | 0.085673 | 0.06434  | 0.01544  | 0.7393   | 0.189008 | 3.95E-05 |
| 1.61E-16 | 0.27606  | 1.29E-09 | 0.110938 | 0.01647  | 0.182785 | 7.10E-05 | 0.418549 | 3.13E-21 |
| 2.21E-09 | 0.232968 | 3.56E-07 | 0.034385 | 0.45851  | 0.063058 | 0.1737   | 0.287882 | 2.31E-10 |
| 5.74E-15 | 0.190805 | 3.32E-05 | 0.17134  | 0.0002   | 0.119616 | 0.00967  | 0.291831 | 1.28E-10 |
| 5.07E-43 | 0.221596 | 1.32E-06 | 0.085393 | 0.06521  | 0.103163 | 0.02579  | 0.312687 | 4.74E-12 |
| 3.32E-33 | 0.24238  | 1.14E-07 | 0.152382 | 0.00095  | 0.080322 | 0.08293  | 0.338274 | 5.77E-14 |
| 6.34E-14 | 0.169205 | 0.00024  | 0.107478 | 0.02017  | 0.119134 | 0.00997  | 0.303339 | 2.14E-11 |
| 2.50E-10 | 0.136446 | 0.00313  | -0.07562 | 0.10267  | -0.14392 | 0.00182  | 0.066859 | 0.14914  |
| 0.00032  | 0.141456 | 0.00218  | -0.04302 | 0.35366  | 0.02182  | 0.63812  | 0.207784 | 5.96E-06 |
| 1.26E-23 | 0.137946 | 0.00281  | 0.092914 | 0.04477  | 0.076941 | 0.09677  | 0.218359 | 1.90E-06 |
| 1.52E-30 | 0.205339 | 7.70E-06 | 0.151796 | 0.001    | 0.137082 | 0.00299  | 0.308041 | 1.01E-11 |
| 8.41E-41 | 0.092677 | 0.04532  | 0.074891 | 0.10602  | 0.005835 | 0.89993  | 0.144048 | 0.0018   |
| 8.75E-34 | 0.154785 | 0.00079  | 0.091583 | 0.04793  | -0.01191 | 0.79747  | 0.19958  | 1.39E-05 |
| 1.25E-18 | 0.198243 | 1.59E-05 | 0.031812 | 0.49284  | 0.042367 | 0.36097  | 0.271454 | 2.48E-09 |
| 3.78E-23 | 0.130599 | 0.0047   | -0.02323 | 0.61652  | -0.16398 | 0.00037  | 0.037996 | 0.41267  |
| 1.39E-09 | 0.160075 | 0.00052  | -0.03068 | 0.5084   | 0.052824 | 0.25459  | 0.26787  | 4.08E-09 |
| 1.01E-06 | 0.102098 | 0.02737  | 0.320976 | 1.19E-12 | 0.195818 | 2.03E-05 | 0.163007 | 0.0004   |
| 0.41481  | -0.02353 | 0.612    | 0.133292 | 0.00391  | -0.01319 | 0.77625  | -0.03444 | 0.45775  |
| 0.87207  | 0.028045 | 0.54548  | 0.289755 | 1.74E-10 | 0.114628 | 0.01319  | 0.121517 | 0.00857  |
| 0.29131  | -0.02603 | 0.5747   | 0.218722 | 1.83E-06 | 0.023777 | 0.60829  | 0.023706 | 0.60936  |
| 0.99618  | -0.01382 | 0.76579  | 0.365942 | 3.03E-16 | 0.23085  | 4.57E-07 | 0.252724 | 3.08E-08 |

|          |          |         |          |          |          |          |          |          |
|----------|----------|---------|----------|----------|----------|----------|----------|----------|
| 0.02925  | -0.04126 | 0.37366 | 0.378584 | 2.31E-17 | 0.208795 | 5.36E-06 | 0.109374 | 0.01806  |
| 0.94697  | -0.00059 | 0.98982 | 0.171424 | 0.0002   | 0.022372 | 0.62964  | 0.002372 | 0.95922  |
| 0.25666  | 0.021014 | 0.65059 | 0.216868 | 2.24E-06 | 0.03347  | 0.47056  | 0.097239 | 0.03567  |
| 0.04573  | 0.045075 | 0.33107 | 0.093231 | 0.04404  | 0.049967 | 0.28123  | 0.069263 | 0.13503  |
| 0.20791  | 0.029124 | 0.53012 | 0.445954 | 3.35E-24 | 0.25224  | 3.28E-08 | 0.195308 | 2.13E-05 |
| 0.47124  | -0.01775 | 0.70209 | 0.105912 | 0.02207  | -0.04984 | 0.28247  | -0.06328 | 0.17217  |
| 0.39252  | 0.092759 | 0.04512 | 0.388848 | 2.63E-18 | 0.211149 | 4.17E-06 | 0.298424 | 4.63E-11 |
| 0.00689  | 0.091274 | 0.04869 | 0.379094 | 2.08E-17 | 0.123956 | 0.00732  | 0.13615  | 0.0032   |
| 0.47172  | 0.005479 | 0.90599 | 0.175174 | 0.00014  | 0.037106 | 0.42371  | -0.00686 | 0.88238  |
| 0.14977  | 0.132389 | 0.00416 | 0.418177 | 3.42E-21 | 0.231328 | 4.32E-07 | 0.24775  | 5.82E-08 |
| 0.81826  | 0.002594 | 0.95542 | 0.17957  | 9.54E-05 | 0.018725 | 0.6865   | 0.017118 | 0.71215  |
| 0.04188  | 0.0161   | 0.72858 | 0.139441 | 0.00253  | -0.02016 | 0.66391  | 0.002107 | 0.96378  |
| 0.83192  | -0.06309 | 0.17347 | 0.340142 | 4.11E-14 | 0.258835 | 1.38E-08 | 0.112052 | 0.01541  |
| 0.5908   | -0.03794 | 0.41336 | 0.110031 | 0.01738  | 0.006978 | 0.88046  | -0.06564 | 0.15672  |
| 0.22081  | 0.004518 | 0.92242 | 0.158902 | 0.00057  | -0.00168 | 0.97114  | -0.00054 | 0.99076  |
| 0.97181  | -0.00054 | 0.99074 | 0.153673 | 0.00086  | 0.056002 | 0.22708  | 0.007652 | 0.86901  |
| 0.26751  | -0.03329 | 0.4729  | 0.166162 | 0.00031  | 0.02452  | 0.59713  | -0.04325 | 0.35102  |
| 0.00824  | 0.112402 | 0.01509 | 0.152517 | 0.00094  | 0.249699 | 4.54E-08 | 0.280479 | 6.86E-10 |
| 0.28916  | -0.0387  | 0.40401 | 0.114502 | 0.01329  | -0.06252 | 0.17743  | -0.088   | 0.05739  |
| 0.18714  | 0.02422  | 0.60161 | 0.325428 | 5.56E-13 | 0.041897 | 0.36633  | 0.058476 | 0.20718  |
| 0.68077  | 0.015809 | 0.7333  | 0.253305 | 2.86E-08 | 0.12328  | 0.00765  | 0.125462 | 0.00663  |
| 0.00697  | 0.034601 | 0.45569 | 0.321944 | 1.01E-12 | 0.167275 | 0.00028  | 0.153282 | 0.00089  |
| 0.0041   | 0.037271 | 0.42165 | 0.017729 | 0.70236  | -0.02478 | 0.59324  | -0.04321 | 0.3515   |
| 0.42271  | -0.0315  | 0.49715 | 0.189915 | 3.62E-05 | -0.00972 | 0.83409  | -0.06732 | 0.14635  |
| 0.11024  | -0.03249 | 0.48371 | 0.228682 | 5.89E-07 | 0.072291 | 0.11874  | -0.00438 | 0.92481  |
| 0.11519  | -0.0686  | 0.13884 | 0.142974 | 0.00195  | 0.013743 | 0.76707  | -0.06775 | 0.14377  |
| 0.21794  | -0.05499 | 0.23559 | 0.245429 | 7.79E-08 | 0.053312 | 0.25022  | -0.05214 | 0.26083  |
| 0.42197  | -0.03576 | 0.44074 | 0.042083 | 0.3642   | 0.012057 | 0.79496  | -0.05227 | 0.25963  |
| 0.46458  | -0.00718 | 0.87709 | 0.067896 | 0.14292  | -0.03721 | 0.42238  | -0.04164 | 0.36932  |
| 0.54457  | 0.044467 | 0.33764 | 0.195104 | 2.18E-05 | 0.086174 | 0.06278  | 0.057857 | 0.21203  |
| 0.05692  | -0.038   | 0.41264 | 0.187332 | 4.63E-05 | 0.018781 | 0.68562  | -0.09247 | 0.0458   |
| 0.52653  | 0.005532 | 0.9051  | 0.215854 | 2.50E-06 | 0.074601 | 0.10739  | 0.016246 | 0.72621  |
| 0.00154  | 0.051225 | 0.26927 | 0.177048 | 0.00012  | 0.161601 | 0.00045  | 0.184932 | 5.81E-05 |
| 0.84261  | -0.0118  | 0.79929 | 0.121227 | 0.00873  | 0.019553 | 0.67343  | -0.03007 | 0.5169   |
| 0.75131  | -0.0029  | 0.9501  | 0.134296 | 0.00364  | 0.054936 | 0.23606  | 0.015095 | 0.74491  |
| 3.49E-05 | 0.030654 | 0.50873 | 0.090343 | 0.05105  | 0.001174 | 0.97981  | 0.057893 | 0.21175  |
| 0.14336  | 0.050041 | 0.28051 | 0.144665 | 0.00172  | -0.05394 | 0.24469  | -0.00138 | 0.97623  |
| 0.87149  | -0.01311 | 0.77744 | 0.274929 | 1.52E-09 | 0.01346  | 0.77173  | -0.01765 | 0.70357  |
| 0.22499  | -0.05682 | 0.22032 | 0.188064 | 4.32E-05 | 0.000952 | 0.98363  | -0.06301 | 0.17401  |
| 0.40489  | -0.00799 | 0.8632  | -0.02905 | 0.53114  | -0.21604 | 2.45E-06 | -0.13538 | 0.00338  |
| 0.26001  | -0.04617 | 0.31942 | 0.167485 | 0.00028  | 0.111499 | 0.01593  | -0.01485 | 0.74888  |
| 0.71539  | -0.03966 | 0.39244 | 0.188677 | 4.07E-05 | -0.13019 | 0.00483  | -0.09556 | 0.039    |
| 0.60054  | 0.039663 | 0.39246 | 0.242636 | 1.10E-07 | 0.005557 | 0.90467  | 0.024364 | 0.59945  |
| 0.03848  | -0.05188 | 0.2632  | 0.26013  | 1.16E-08 | 0.013793 | 0.76625  | -0.00423 | 0.9274   |
| 0.2253   | -0.02883 | 0.53427 | 0.181594 | 7.93E-05 | 0.077871 | 0.09279  | 0.040653 | 0.38074  |

|          |          |          |          |          |          |          |          |          |
|----------|----------|----------|----------|----------|----------|----------|----------|----------|
| 0.18734  | -0.02829 | 0.542    | 0.256155 | 1.97E-08 | -0.03198 | 0.4905   | -0.01806 | 0.69714  |
| 0.65797  | -0.01885 | 0.68446  | 0.161342 | 0.00046  | -0.09218 | 0.04648  | -0.10963 | 0.01779  |
| 0.79543  | 0.039889 | 0.38976  | 0.179967 | 9.20E-05 | 0.112651 | 0.01487  | 0.106415 | 0.02145  |
| 0.23143  | -0.02495 | 0.59069  | 0.099474 | 0.03162  | -0.03399 | 0.46371  | -0.0658  | 0.15571  |
| 0.58313  | 0.039909 | 0.38953  | 0.191776 | 3.02E-05 | 0.01803  | 0.69755  | 0.00407  | 0.9301   |
| 0.54487  | 0.030286 | 0.51383  | 0.059275 | 0.20102  | -0.01852 | 0.68982  | 0.035892 | 0.43904  |
| 0.48273  | -0.0448  | 0.33403  | 0.192885 | 2.71E-05 | -0.09451 | 0.0412   | -0.10703 | 0.0207   |
| 0.315    | -0.04036 | 0.38418  | 0.185762 | 5.37E-05 | 0.003241 | 0.9443   | -0.05683 | 0.22023  |
| 0.46501  | -0.02534 | 0.58488  | 0.170076 | 0.00022  | -0.02378 | 0.6083   | -0.07519 | 0.10463  |
| 0.43961  | -0.03053 | 0.51049  | 0.200416 | 1.28E-05 | -0.01231 | 0.7907   | -0.05006 | 0.28031  |
| 0.49241  | -0.03112 | 0.50237  | 0.130506 | 0.00473  | 0.003314 | 0.94306  | -0.05017 | 0.27927  |
| 0.34566  | -0.02586 | 0.57719  | 0.13669  | 0.00308  | -0.00591 | 0.89867  | -0.04748 | 0.30588  |
| 0.35001  | -0.03852 | 0.40624  | 0.225475 | 8.52E-07 | 0.090275 | 0.05122  | -0.00744 | 0.87253  |
| 0.5785   | 0.032222 | 0.48728  | 0.118746 | 0.01022  | -0.00055 | 0.99056  | 0.043642 | 0.34669  |
| 0.74999  | -0.02771 | 0.55032  | 0.055153 | 0.23421  | -0.13909 | 0.00259  | -0.10449 | 0.02394  |
| 0.02077  | -0.14062 | 0.00232  | 0.22398  | 1.01E-06 | -0.03328 | 0.47311  | -0.08812 | 0.05705  |
| 0.93914  | -0.10132 | 0.02857  | 0.177893 | 0.00011  | -0.06903 | 0.13637  | -0.16211 | 0.00044  |
| 0.99408  | 0.215552 | 2.59E-06 | 0.260839 | 1.06E-08 | 0.166996 | 0.00029  | 0.228842 | 5.78E-07 |
| 0.54939  | 0.038648 | 0.4047   | 0.20646  | 6.85E-06 | 0.185901 | 5.30E-05 | 0.205065 | 7.93E-06 |
| 0.37064  | 0.028373 | 0.54078  | 0.07548  | 0.1033   | 0.011199 | 0.80926  | 0.011365 | 0.8065   |
| 0.61123  | -0.02125 | 0.64688  | 0.239455 | 1.63E-07 | 0.042447 | 0.36006  | 0.026292 | 0.57088  |
| 0.00021  | -0.04016 | 0.38652  | 0.195489 | 2.10E-05 | 0.067818 | 0.14338  | 0.026675 | 0.56528  |
| 1.33E-07 | 0.15413  | 0.00083  | 0.193854 | 2.46E-05 | 0.193186 | 2.63E-05 | 0.216683 | 2.29E-06 |
| 0.2722   | -0.01207 | 0.79468  | 0.086922 | 0.06053  | -0.03883 | 0.40246  | -0.06021 | 0.19397  |
| 0.70634  | -0.08456 | 0.06789  | 0.051938 | 0.26266  | 0.023538 | 0.6119   | -0.11215 | 0.01532  |
| 0.2876   | 0.102493 | 0.02677  | 0.322414 | 9.31E-13 | 0.333445 | 1.37E-13 | 0.330523 | 2.29E-13 |
| 0.00079  | 0.046353 | 0.31753  | 0.241815 | 1.22E-07 | 0.137875 | 0.00283  | 0.121505 | 0.00858  |
| 0.24697  | -0.00711 | 0.87829  | 0.249394 | 4.72E-08 | 0.032531 | 0.48312  | -0.02065 | 0.65628  |
| 0.12916  | -0.00318 | 0.94541  | 0.207597 | 6.08E-06 | 0.111778 | 0.01566  | 0.045464 | 0.32691  |
| 0.00017  | 0.021125 | 0.64887  | 0.166948 | 0.00029  | 0.010854 | 0.81504  | 0.039657 | 0.39253  |
| 0.01022  | 0.042921 | 0.35472  | 0.226387 | 7.67E-07 | -0.01358 | 0.76983  | 0.036987 | 0.4252   |
| 0.05757  | 0.210569 | 4.44E-06 | 0.214827 | 2.80E-06 | 0.212591 | 3.57E-06 | 0.306119 | 1.37E-11 |
| 0.42145  | 0.016929 | 0.7152   | 0.288453 | 2.12E-10 | 0.067145 | 0.1474   | 0.176514 | 0.00013  |
| 0.49035  | -0.0059  | 0.89878  | 0.089139 | 0.05423  | -0.03798 | 0.41283  | -0.03401 | 0.46344  |
| 0.02489  | 0.011621 | 0.80223  | 0.116511 | 0.01175  | -0.0284  | 0.54037  | 0.005344 | 0.90831  |
| 0.00049  | 0.026378 | 0.56963  | 0.25198  | 3.39E-08 | 0.013292 | 0.77451  | -0.00424 | 0.92718  |
| 0.47648  | 0.137866 | 0.00283  | 0.430045 | 1.92E-22 | 0.218297 | 1.91E-06 | 0.367993 | 2.01E-16 |
| 0.84981  | -0.10833 | 0.01919  | 0.048338 | 0.29723  | -0.15976 | 0.00053  | -0.18292 | 7.01E-05 |
| 2.68E-06 | -0.01013 | 0.82724  | 0.250869 | 3.91E-08 | 0.067527 | 0.14511  | 0.01987  | 0.66845  |
| 0.013    | 0.039962 | 0.3889   | 0.180015 | 9.16E-05 | 0.060634 | 0.19088  | 0.055294 | 0.23302  |
| 0.00024  | 0.031039 | 0.50342  | 0.07781  | 0.09305  | 0.003178 | 0.94539  | 0.003396 | 0.94165  |
| 0.04213  | -0.09387 | 0.04261  | 0.398988 | 2.85E-19 | -0.02102 | 0.65045  | -0.03678 | 0.42779  |
| 0.80261  | 0.001269 | 0.97819  | 0.072231 | 0.11905  | 0.068885 | 0.13717  | 0.050294 | 0.27809  |
| 0.55559  | -0.0245  | 0.59743  | 0.178377 | 0.00011  | 0.173767 | 0.00016  | 0.141852 | 0.00212  |
| 0.4061   | -0.03548 | 0.44429  | 0.195252 | 2.15E-05 | 0.010813 | 0.81572  | -0.03579 | 0.44031  |

|          |          |          |          |          |          |          |          |          |
|----------|----------|----------|----------|----------|----------|----------|----------|----------|
| 0.50675  | 0.012101 | 0.79424  | 0.119924 | 0.00949  | 0.025576 | 0.58142  | 0.011691 | 0.80106  |
| 0.15339  | 0.047641 | 0.30425  | 0.284353 | 3.90E-10 | 0.119965 | 0.00946  | 0.121475 | 0.00859  |
| 0.80579  | -0.12029 | 0.00927  | 0.263091 | 7.82E-09 | 0.067198 | 0.14709  | 0.020458 | 0.65924  |
| 0.82595  | 0.005417 | 0.90707  | 0.195101 | 2.18E-05 | -0.13393 | 0.00374  | -0.09499 | 0.04019  |
| 0.40769  | 0.043926 | 0.34355  | 0.393464 | 9.65E-19 | 0.175876 | 0.00013  | 0.174126 | 0.00016  |
| 0.48524  | -0.03308 | 0.47573  | 0.133394 | 0.00388  | -0.03857 | 0.40567  | -0.04155 | 0.37032  |
| 0.81844  | 0.035561 | 0.44328  | 0.185169 | 5.68E-05 | 0.009839 | 0.83206  | 0.03505  | 0.44986  |
| 0.125    | -0.11838 | 0.01045  | 0.285688 | 3.20E-10 | 0.026931 | 0.56156  | -0.0038  | 0.93473  |
| 0.36237  | -0.03504 | 0.44995  | 0.047406 | 0.30665  | 0.022004 | 0.63529  | -0.07267 | 0.1168   |
| 0.53574  | 0.020744 | 0.65479  | 0.146279 | 0.00153  | 0.037654 | 0.4169   | 0.020669 | 0.65594  |
| 0.03258  | 0.050825 | 0.27304  | 0.155811 | 0.00073  | -0.00427 | 0.92671  | 0.025463 | 0.58309  |
| 0.42044  | 0.039505 | 0.39435  | 0.362687 | 5.78E-16 | 0.109609 | 0.01781  | 0.139763 | 0.00247  |
| 0.56502  | -0.07144 | 0.12314  | 0.246185 | 7.08E-08 | -0.07798 | 0.09234  | -0.09112 | 0.04908  |
| 0.00169  | 0.052379 | 0.25862  | 0.164651 | 0.00035  | 0.049497 | 0.28578  | 0.055326 | 0.23275  |
| 0.11426  | -0.06817 | 0.14128  | 0.171024 | 0.0002   | -0.04058 | 0.38162  | -0.04783 | 0.30232  |
| 0.05743  | 0.032976 | 0.47714  | 0.074422 | 0.10823  | 0.013698 | 0.76781  | 0.041413 | 0.37189  |
| 4.56E-07 | 0.035616 | 0.44257  | 0.221969 | 1.27E-06 | 0.046838 | 0.31248  | 0.061212 | 0.18667  |
| 0.83813  | 0.040314 | 0.38473  | 0.279491 | 7.92E-10 | 0.126886 | 0.00604  | 0.118196 | 0.01058  |
| 0.1078   | 0.056572 | 0.22237  | 0.158098 | 0.00061  | 0.012629 | 0.78546  | 0.066848 | 0.1492   |
| 0.33247  | -0.01009 | 0.82791  | 0.433212 | 8.71E-23 | 0.112826 | 0.01471  | 0.040495 | 0.3826   |
| 0.72712  | -0.00906 | 0.84514  | 0.138842 | 0.00264  | -0.03626 | 0.43432  | -0.02724 | 0.55705  |
| 0.50658  | -0.05373 | 0.24651  | 0.070323 | 0.12914  | -0.03452 | 0.45674  | -0.07197 | 0.1204   |
| 0.12297  | 0.149802 | 0.00117  | 0.304182 | 1.87E-11 | 0.23956  | 1.61E-07 | 0.259626 | 1.25E-08 |
| 0.50499  | -0.03339 | 0.47164  | 0.192605 | 2.78E-05 | 0.045144 | 0.33033  | -0.0116  | 0.80251  |
| 2.33E-06 | -0.03243 | 0.48444  | 0.383906 | 7.56E-18 | 0.255261 | 2.21E-08 | 0.166902 | 0.00029  |
| 0.65285  | -0.00334 | 0.94259  | 0.181828 | 7.76E-05 | 0.074723 | 0.10681  | 0.016439 | 0.7231   |
| 0.80634  | 0.207941 | 5.86E-06 | 0.421403 | 1.58E-21 | 0.158166 | 0.0006   | 0.25296  | 2.99E-08 |
| 0.84464  | -0.13149 | 0.00442  | 0.071572 | 0.12246  | -0.23574 | 2.56E-07 | -0.20177 | 1.11E-05 |
| 0.86112  | 0.016808 | 0.71715  | 0.159281 | 0.00055  | 0.051216 | 0.26936  | 0.024611 | 0.59576  |
| 1.99E-05 | 0.062782 | 0.1756   | 0.403012 | 1.15E-19 | 0.092035 | 0.04683  | 0.090826 | 0.04981  |
| 2.52E-06 | 0.146749 | 0.00147  | 0.159285 | 0.00055  | 0.128386 | 0.00546  | 0.211381 | 4.07E-06 |
| 0.76853  | 0.009027 | 0.84574  | 0.195628 | 2.07E-05 | 0.026452 | 0.56854  | -0.00085 | 0.98542  |
| 0.2563   | 0.068673 | 0.13839  | 0.315011 | 3.23E-12 | 0.249839 | 4.46E-08 | 0.223031 | 1.13E-06 |
| 0.15043  | 0.121337 | 0.00867  | 0.104497 | 0.02393  | -0.00621 | 0.89358  | -0.00837 | 0.85683  |
| 0.76496  | -0.00456 | 0.92172  | 0.170434 | 0.00022  | -0.01492 | 0.7478   | 0.004924 | 0.91549  |
| 0.37196  | -0.02806 | 0.54527  | 0.142328 | 0.00205  | 0.160478 | 0.0005   | 0.132266 | 0.00419  |
| 0.13528  | 0.080036 | 0.08404  | 0.172605 | 0.00018  | 0.088939 | 0.05478  | 0.123622 | 0.00748  |
| 0.53965  | -0.04865 | 0.29411  | 0.512388 | 1.27E-32 | 0.570937 | 9.50E-42 | 0.436424 | 3.88E-23 |
| 0.20902  | -0.07692 | 0.09687  | 0.177803 | 0.00011  | -0.09035 | 0.05104  | -0.08987 | 0.05228  |
| 0.07492  | 0.087717 | 0.0582   | 0.155192 | 0.00077  | 0.08702  | 0.06024  | 0.088005 | 0.05738  |
| 0.52471  | -0.04303 | 0.3535   | 0.0844   | 0.06841  | -0.04761 | 0.30454  | -0.08333 | 0.07199  |
| 0.06855  | -0.03947 | 0.39482  | 0.21391  | 3.10E-06 | 0.066832 | 0.14931  | 0.012775 | 0.78306  |
| 0.64748  | 0.071967 | 0.12041  | 0.163111 | 0.0004   | -0.08074 | 0.08135  | -0.02366 | 0.61004  |
| 0.89658  | -0.00473 | 0.91873  | 0.197982 | 1.63E-05 | 0.009002 | 0.84616  | 0.020789 | 0.65409  |
| 0.16177  | -0.01676 | 0.71797  | 0.2801   | 7.25E-10 | 0.111558 | 0.01587  | 0.083375 | 0.07185  |



|          |          |          |          |          |          |          |          |          |
|----------|----------|----------|----------|----------|----------|----------|----------|----------|
| 0.00669  | -0.03969 | 0.39215  | 0.143019 | 0.00195  | -0.08634 | 0.06227  | -0.10601 | 0.02195  |
| 0.38509  | 0.098627 | 0.0331   | 0.202953 | 9.86E-06 | 0.077218 | 0.09557  | 0.06407  | 0.16689  |
| 0.28885  | 0.056473 | 0.22319  | 0.188856 | 4.00E-05 | 0.059544 | 0.19898  | -0.00139 | 0.9761   |
| 0.00881  | 0.048611 | 0.2945   | 0.12327  | 0.00765  | -0.00689 | 0.88199  | -0.00859 | 0.8532   |
| 0.04456  | -0.02121 | 0.64757  | 0.031273 | 0.5002   | -0.00816 | 0.86033  | -0.07516 | 0.10475  |
| 0.0706   | -0.00853 | 0.85414  | 0.223955 | 1.01E-06 | 0.009845 | 0.83196  | 0.108482 | 0.01903  |
| 0.46666  | 0.005237 | 0.91014  | 0.199941 | 1.34E-05 | 0.06091  | 0.18886  | 0.054086 | 0.2434   |
| 0.04123  | -0.12304 | 0.00777  | 0.298129 | 4.85E-11 | 0.237421 | 2.09E-07 | 0.103811 | 0.02487  |
| 0.16527  | -0.1237  | 0.00744  | 0.162909 | 0.00041  | 0.026635 | 0.56587  | 0.000452 | 0.99222  |
| 0.96953  | -0.01567 | 0.7356   | 0.404808 | 7.67E-20 | 0.169939 | 0.00022  | 0.120998 | 0.00886  |
| 0.01607  | -0.22596 | 8.06E-07 | 0.135188 | 0.00342  | -0.1314  | 0.00445  | -0.22671 | 7.40E-07 |
| 0.65989  | 0.160443 | 0.0005   | 0.166215 | 0.00031  | -0.0074  | 0.87335  | 0.035896 | 0.439    |
| 0.98344  | -0.09131 | 0.04859  | 0.169557 | 0.00023  | -0.08316 | 0.07259  | -0.07608 | 0.10058  |
| 0.15194  | -0.02333 | 0.61498  | 0.311241 | 6.00E-12 | 0.119573 | 0.0097   | 0.097458 | 0.03525  |
| 0.01657  | 0.038296 | 0.40899  | 0.178389 | 0.00011  | 0.047999 | 0.30063  | 0.052398 | 0.25844  |
| 0.82083  | 0.033246 | 0.47355  | 0.19826  | 1.59E-05 | 0.083398 | 0.07177  | 0.107773 | 0.01983  |
| 0.37674  | 0.007022 | 0.87971  | 0.164039 | 0.00037  | 0.007367 | 0.87385  | 0.009092 | 0.84465  |
| 1.62E-37 | 0.010945 | 0.81352  | -0.04067 | 0.38055  | -0.10946 | 0.01797  | -0.09429 | 0.04167  |
| 0.10165  | -0.07294 | 0.11544  | -0.33655 | 7.87E-14 | -0.23833 | 1.87E-07 | -0.33191 | 1.80E-13 |
| 1.63E-52 | 0.038456 | 0.40704  | -0.00127 | 0.97823  | -0.08218 | 0.07605  | -0.04773 | 0.30334  |
| 3.44E-35 | -0.0171  | 0.71245  | -0.03278 | 0.47976  | -0.13161 | 0.00439  | -0.14739 | 0.0014   |
| 2.26E-17 | 0.042012 | 0.36501  | -0.1298  | 0.00496  | -0.13847 | 0.00271  | -0.08669 | 0.06122  |
| 3.47E-46 | 0.009274 | 0.84157  | -0.03087 | 0.50573  | -0.11822 | 0.01056  | -0.08642 | 0.06203  |
| 0.0741   | -0.10515 | 0.02306  | -0.17665 | 0.00012  | -0.16482 | 0.00035  | -0.23756 | 2.05E-07 |
| 1.84E-16 | -0.10544 | 0.02268  | -0.10229 | 0.02708  | -0.17122 | 0.0002   | -0.27093 | 2.67E-09 |
| 0.00074  | -0.15576 | 0.00073  | -0.1788  | 0.0001   | -0.17537 | 0.00014  | -0.33426 | 1.19E-13 |
| 1.22E-16 | -0.04895 | 0.29117  | -0.07996 | 0.08433  | -0.17192 | 0.00019  | -0.19402 | 2.42E-05 |
| 5.81E-36 | 0.015709 | 0.73492  | -0.04675 | 0.31339  | -0.12908 | 0.00521  | -0.10842 | 0.0191   |
| 6.30E-30 | -0.03321 | 0.474    | -0.06012 | 0.19467  | -0.16112 | 0.00047  | -0.15717 | 0.00065  |
| 5.23E-19 | -0.03499 | 0.45069  | -0.03462 | 0.4554   | -0.12275 | 0.00792  | -0.13843 | 0.00272  |
| 5.42E-14 | -0.0549  | 0.23633  | -0.07458 | 0.10749  | -0.15202 | 0.00098  | -0.19669 | 1.86E-05 |
| 1.68E-22 | -0.09062 | 0.05034  | -0.156   | 0.00072  | -0.2233  | 1.09E-06 | -0.2842  | 3.98E-10 |
| 7.44E-09 | -0.11137 | 0.01605  | -0.17869 | 0.0001   | -0.17057 | 0.00021  | -0.28134 | 6.05E-10 |
| 0.00828  | -0.13745 | 0.00292  | -0.24751 | 6.00E-08 | -0.23404 | 3.13E-07 | -0.35937 | 1.11E-15 |
| 3.00E-10 | -0.03845 | 0.40713  | -0.07843 | 0.09045  | -0.07634 | 0.0994   | -0.14522 | 0.00165  |
| 6.80E-29 | -0.0263  | 0.5708   | -0.02604 | 0.57459  | -0.09391 | 0.04252  | -0.13745 | 0.00292  |
| 2.07E-10 | -0.09633 | 0.03743  | -0.0927  | 0.04527  | -0.14041 | 0.00236  | -0.24174 | 1.23E-07 |
| 0.00038  | -0.14768 | 0.00137  | -0.08557 | 0.06466  | -0.20608 | 7.13E-06 | -0.30658 | 1.28E-11 |
| 1.22E-51 | 0.054096 | 0.24332  | 0.01782  | 0.70091  | -0.05289 | 0.25399  | -0.0216  | 0.64149  |
| 6.86E-06 | -0.10943 | 0.01801  | -0.20059 | 1.26E-05 | -0.23264 | 3.70E-07 | -0.29168 | 1.31E-10 |
| 0.54814  | -0.08423 | 0.06898  | -0.07175 | 0.12151  | -0.07474 | 0.10672  | -0.12324 | 0.00767  |
| 2.60E-31 | -0.02104 | 0.65015  | -0.06769 | 0.14412  | -0.20198 | 1.09E-05 | -0.17353 | 0.00016  |
| 3.40E-29 | 0.016782 | 0.71756  | 0.009134 | 0.84393  | -0.06272 | 0.17601  | -0.06387 | 0.16825  |
| 2.67E-24 | 0.030816 | 0.50649  | -0.14917 | 0.00122  | -0.17401 | 0.00016  | -0.1177  | 0.01091  |
| 1.58E-22 | -0.04066 | 0.38068  | -0.08769 | 0.05829  | -0.21259 | 3.57E-06 | -0.20453 | 8.37E-06 |

|          |          |          |          |          |          |          |          |          |
|----------|----------|----------|----------|----------|----------|----------|----------|----------|
| 3.66E-28 | -0.01476 | 0.75039  | 0.005944 | 0.89807  | -0.09662 | 0.03687  | -0.11969 | 0.00963  |
| 8.89E-38 | -0.01248 | 0.78797  | -0.06837 | 0.14017  | -0.17178 | 0.00019  | -0.15451 | 0.00081  |
| 2.05E-15 | 0.024201 | 0.60191  | -0.05401 | 0.24402  | -0.09952 | 0.03154  | -0.12383 | 0.00738  |
| 1.87E-07 | -0.15274 | 0.00093  | -0.15501 | 0.00078  | -0.19635 | 1.92E-05 | -0.36378 | 4.66E-16 |
| 1.95E-24 | -0.00611 | 0.89532  | -0.07404 | 0.11006  | -0.14232 | 0.00205  | -0.14957 | 0.00119  |
| 1.86E-11 | -0.03559 | 0.44291  | -0.18721 | 4.68E-05 | -0.17782 | 0.00011  | -0.18636 | 5.08E-05 |
| 0.00268  | -0.10746 | 0.0202   | -0.20897 | 5.26E-06 | -0.26233 | 8.67E-09 | -0.35844 | 1.32E-15 |
| 1.09E-20 | -0.00118 | 0.97965  | -0.00652 | 0.88831  | -0.07321 | 0.11411  | -0.08457 | 0.06787  |
| 4.57E-21 | -0.01455 | 0.75378  | -0.06633 | 0.15239  | -0.1743  | 0.00015  | -0.18022 | 9.00E-05 |
| 2.47E-37 | 0.010652 | 0.81842  | 0.038817 | 0.40264  | -0.09371 | 0.04296  | -0.08254 | 0.07476  |
| 7.59E-48 | 0.007524 | 0.87118  | -0.01563 | 0.73624  | -0.10319 | 0.02575  | -0.08093 | 0.08064  |
| 2.65E-61 | 0.028962 | 0.53241  | -0.01001 | 0.82923  | -0.11147 | 0.01596  | -0.04276 | 0.35654  |
| 5.91E-44 | -0.03842 | 0.40753  | -0.0832  | 0.07244  | -0.12524 | 0.00673  | -0.16146 | 0.00046  |
| 1.27E-30 | -0.06127 | 0.18627  | -0.02739 | 0.5549   | -0.1437  | 0.00185  | -0.18961 | 3.72E-05 |
| 1.78E-42 | 0.077907 | 0.09264  | 0.073247 | 0.11393  | 0.023939 | 0.60584  | 0.059897 | 0.19633  |
| 9.24E-10 | -0.0495  | 0.28579  | -0.08716 | 0.05982  | -0.1834  | 6.70E-05 | -0.22896 | 5.70E-07 |
| 0.7107   | -0.08339 | 0.0718   | -0.15893 | 0.00057  | -0.09922 | 0.03205  | -0.1561  | 0.00071  |
| 2.14E-11 | -0.03218 | 0.48791  | -0.1069  | 0.02086  | -0.10418 | 0.02436  | -0.12189 | 0.00837  |
| 1.93E-39 | 0.076952 | 0.09672  | 0.013204 | 0.77596  | -0.04123 | 0.37398  | -0.00992 | 0.83063  |
| 3.02E-54 | 0.031332 | 0.4994   | -0.00843 | 0.85584  | -0.09915 | 0.03218  | -0.06126 | 0.18633  |
| 1.73E-11 | -0.07396 | 0.11047  | -0.1905  | 3.42E-05 | -0.26342 | 7.48E-09 | -0.31469 | 3.40E-12 |
| 0.00723  | -0.06987 | 0.13163  | -0.10913 | 0.01832  | -0.11138 | 0.01604  | -0.20047 | 1.27E-05 |
| 2.65E-31 | -0.00022 | 0.99614  | -0.05437 | 0.24097  | -0.07227 | 0.11885  | -0.09348 | 0.04347  |
| 2.29E-36 | 0.062683 | 0.17628  | -0.06824 | 0.14091  | -0.12057 | 0.0091   | -0.07265 | 0.11692  |
| 5.79E-07 | 0.00361  | 0.93799  | -0.21821 | 1.93E-06 | -0.16484 | 0.00035  | -0.15815 | 0.0006   |
| 0.00515  | -0.04081 | 0.37886  | -0.21793 | 1.99E-06 | -0.20067 | 1.25E-05 | -0.20913 | 5.17E-06 |
| 0.14277  | -0.22529 | 8.70E-07 | -0.09996 | 0.03079  | -0.33557 | 9.38E-14 | -0.39361 | 9.35E-19 |
| 0.50432  | -0.03759 | 0.41772  | -0.13133 | 0.00447  | -0.24753 | 5.98E-08 | -0.14282 | 0.00198  |
| 0.00097  | -0.10766 | 0.01996  | -0.13966 | 0.00249  | -0.24609 | 7.17E-08 | -0.31247 | 4.91E-12 |
| 0.00176  | 0.122986 | 0.0078   | 0.060871 | 0.18914  | 0.336936 | 7.34E-14 | 0.331369 | 1.98E-13 |
| 0.32087  | -0.10876 | 0.01872  | -0.32542 | 5.57E-13 | -0.25832 | 1.48E-08 | -0.27037 | 2.88E-09 |
| 0.00719  | -0.10374 | 0.02497  | -0.20539 | 7.66E-06 | -0.23946 | 1.63E-07 | -0.24973 | 4.52E-08 |
| 0.00343  | -0.06509 | 0.16025  | -0.08882 | 0.05511  | -0.25514 | 2.25E-08 | -0.23632 | 2.38E-07 |
| 3.87E-08 | -0.00794 | 0.86407  | -0.12787 | 0.00565  | -0.17293 | 0.00017  | -0.11724 | 0.01123  |
| 0.12843  | -0.12232 | 0.00814  | -0.2889  | 1.98E-10 | -0.4485  | 1.72E-24 | -0.37251 | 8.07E-17 |
| 0.74126  | -0.05419 | 0.24247  | -0.07789 | 0.09271  | -0.25034 | 4.18E-08 | -0.15567 | 0.00074  |
| 0.33365  | -0.11195 | 0.01551  | -0.14632 | 0.00152  | -0.11961 | 0.00968  | -0.17303 | 0.00017  |
| 0.02249  | 0.02871  | 0.53598  | -0.02277 | 0.62353  | -0.14128 | 0.00221  | -0.01313 | 0.77718  |
| 0.16336  | 0.23096  | 4.51E-07 | -0.02729 | 0.55638  | 0.341577 | 3.17E-14 | 0.355246 | 2.45E-15 |
| 0.48625  | -0.12714 | 0.00593  | -0.43145 | 1.35E-22 | -0.35398 | 3.13E-15 | -0.3363  | 8.23E-14 |
| 0.1542   | -0.0587  | 0.20542  | -0.22962 | 5.28E-07 | -0.29425 | 8.82E-11 | -0.2335  | 3.34E-07 |
| 3.49E-09 | -0.16916 | 0.00024  | -0.19225 | 2.88E-05 | -0.3539  | 3.17E-15 | -0.36204 | 6.56E-16 |
| 0.08732  | -0.0961  | 0.0379   | -0.22442 | 9.61E-07 | -0.24013 | 1.50E-07 | -0.23884 | 1.76E-07 |
| 0.02391  | 0.02172  | 0.63966  | -0.11521 | 0.01272  | -0.21513 | 2.71E-06 | -0.07704 | 0.09634  |
| 0.97011  | 0.191812 | 3.01E-05 | -0.03851 | 0.40636  | 0.212891 | 3.46E-06 | 0.219091 | 1.75E-06 |

|          |          |          |          |          |          |          |          |          |
|----------|----------|----------|----------|----------|----------|----------|----------|----------|
| 0.01177  | -0.02802 | 0.54581  | -0.11813 | 0.01062  | -0.25038 | 4.16E-08 | -0.25299 | 2.97E-08 |
| 8.74E-05 | -0.1605  | 0.0005   | -0.12504 | 0.00682  | -0.42956 | 2.16E-22 | -0.40963 | 2.54E-20 |
| 0.62105  | -0.12883 | 0.0053   | -0.07791 | 0.09264  | -0.16336 | 0.00039  | -0.24277 | 1.09E-07 |
| 2.43E-06 | -0.08569 | 0.06429  | -0.21857 | 1.86E-06 | -0.33042 | 2.33E-13 | -0.2753  | 1.44E-09 |
| 0.66541  | 0.005675 | 0.90265  | -0.06121 | 0.18668  | -0.15179 | 0.001    | -0.05581 | 0.22867  |
| 0.01464  | -0.18368 | 6.53E-05 | -0.14209 | 0.00208  | -0.33163 | 1.89E-13 | -0.37845 | 2.38E-17 |
| 8.22E-05 | -0.18901 | 3.94E-05 | -0.16189 | 0.00044  | -0.46233 | 4.14E-26 | -0.43137 | 1.38E-22 |
| 2.75E-12 | -0.10115 | 0.02884  | -0.13851 | 0.0027   | -0.3659  | 3.06E-16 | -0.30223 | 2.55E-11 |
| 0.62387  | 0.14402  | 0.00181  | -0.12774 | 0.0057   | -0.14378 | 0.00184  | -0.01168 | 0.80128  |
| 0.2572   | 0.051851 | 0.26346  | -0.00553 | 0.90518  | 0.200787 | 1.23E-05 | 0.280004 | 7.35E-10 |
| 0.13798  | -0.19778 | 1.67E-05 | -0.31049 | 6.79E-12 | -0.44175 | 9.98E-24 | -0.48092 | 2.11E-28 |
| 0.00899  | -0.14053 | 0.00234  | 0.079046 | 0.08795  | -0.21262 | 3.56E-06 | -0.24589 | 7.35E-08 |
| 0.15927  | -0.14253 | 0.00202  | 0.067093 | 0.14772  | -0.17416 | 0.00016  | -0.1359  | 0.00325  |
| 0.00458  | -0.05268 | 0.25591  | -0.14502 | 0.00168  | -0.30567 | 1.48E-11 | -0.24049 | 1.44E-07 |
| 3.97E-09 | -0.10554 | 0.02255  | 0.027372 | 0.55517  | -0.13705 | 0.003    | -0.15867 | 0.00058  |
| 0.07999  | -0.29058 | 1.54E-10 | -0.31387 | 3.90E-12 | -0.58906 | 5.82E-45 | -0.67215 | 1.11E-62 |
| 1.24E-24 | -0.17661 | 0.00012  | -0.17924 | 9.83E-05 | -0.2854  | 3.34E-10 | -0.36662 | 2.65E-16 |
| 0.55497  | -0.11793 | 0.01075  | -0.17731 | 0.00012  | -0.27479 | 1.55E-09 | -0.2478  | 5.78E-08 |
| 4.65E-13 | -0.11923 | 0.00991  | -0.11941 | 0.0098   | -0.40365 | 9.97E-20 | -0.33164 | 1.88E-13 |
| 4.82E-06 | -0.03356 | 0.46931  | -0.11271 | 0.01481  | -0.3348  | 1.08E-13 | -0.23477 | 2.87E-07 |
| 8.87E-34 | -0.01163 | 0.80215  | -0.06198 | 0.18121  | -0.28654 | 2.82E-10 | -0.16301 | 0.0004   |
| 0.11271  | -0.11474 | 0.0131   | -0.05698 | 0.21904  | -0.28893 | 1.98E-10 | -0.24182 | 1.22E-07 |
| 1.09E-06 | -0.09909 | 0.03228  | -0.26158 | 9.59E-09 | -0.26495 | 6.08E-09 | -0.299   | 4.23E-11 |
| 1.62E-06 | -0.1288  | 0.00531  | -0.19081 | 3.32E-05 | -0.32099 | 1.19E-12 | -0.36364 | 4.79E-16 |
| 0.75743  | -0.18389 | 6.40E-05 | 0.058249 | 0.20895  | -0.138   | 0.0028   | -0.21242 | 3.64E-06 |
| 2.47E-07 | -0.24436 | 8.90E-08 | -0.39218 | 1.28E-18 | -0.34905 | 7.94E-15 | -0.43219 | 1.12E-22 |
| 0.90217  | -0.04497 | 0.33225  | -0.3624  | 6.11E-16 | -0.3419  | 2.99E-14 | -0.281   | 6.37E-10 |
| 0.32648  | -0.18952 | 3.75E-05 | -0.26081 | 1.06E-08 | -0.49198 | 7.76E-30 | -0.47634 | 7.98E-28 |
| 0.31738  | -0.18215 | 7.53E-05 | -0.2841  | 4.04E-10 | -0.51532 | 4.89E-33 | -0.51656 | 3.25E-33 |
| 0.00098  | -0.29645 | 6.29E-11 | -0.25765 | 1.62E-08 | -0.53251 | 1.47E-35 | -0.64269 | 9.08E-56 |
| 0.002    | -0.20116 | 1.19E-05 | -0.22685 | 7.27E-07 | -0.31188 | 5.41E-12 | -0.41606 | 5.64E-21 |
| 8.35E-14 | -0.01343 | 0.77227  | 0.089072 | 0.05441  | -0.17313 | 0.00017  | -0.02689 | 0.56213  |
| 4.13E-13 | -0.23376 | 3.24E-07 | -0.31918 | 1.61E-12 | -0.43531 | 5.14E-23 | -0.51672 | 3.08E-33 |
| 0.00198  | 0.204689 | 8.24E-06 | 0.091786 | 0.04744  | 0.212691 | 3.53E-06 | 0.308454 | 9.44E-12 |
| 0.00031  | -0.11465 | 0.01317  | -0.11958 | 0.00969  | -0.36412 | 4.35E-16 | -0.30176 | 2.75E-11 |
| 0.15809  | -0.26857 | 3.70E-09 | -0.3044  | 1.81E-11 | -0.57381 | 3.03E-42 | -0.62346 | 1.19E-51 |
| 5.63E-05 | -0.18267 | 7.17E-05 | -0.18047 | 8.79E-05 | -0.45814 | 1.31E-25 | -0.42205 | 1.35E-21 |
| 0.53539  | -0.03262 | 0.48186  | -0.29311 | 1.05E-10 | -0.41964 | 2.41E-21 | -0.34393 | 2.06E-14 |
| 0.00906  | -0.21768 | 2.05E-06 | -0.37936 | 1.97E-17 | -0.39949 | 2.54E-19 | -0.48056 | 2.34E-28 |
| 1.05E-07 | -0.12407 | 0.00727  | -0.07929 | 0.08698  | -0.3563  | 2.00E-15 | -0.28155 | 5.88E-10 |
| 1.35E-06 | -0.13288 | 0.00402  | -0.06088 | 0.1891   | -0.30738 | 1.12E-11 | -0.27566 | 1.37E-09 |
| 6.91E-35 | -0.0562  | 0.22541  | -0.02226 | 0.63141  | -0.27216 | 2.25E-09 | -0.18866 | 4.08E-05 |
| 0.57966  | -0.20942 | 5.02E-06 | -0.25151 | 3.60E-08 | -0.41924 | 2.65E-21 | -0.47864 | 4.10E-28 |
| 3.19E-08 | -0.05976 | 0.19733  | -0.06809 | 0.14179  | -0.36504 | 3.63E-16 | -0.27241 | 2.17E-09 |
| 0.0005   | -0.20057 | 1.26E-05 | -0.18383 | 6.44E-05 | -0.50506 | 1.34E-31 | -0.47866 | 4.07E-28 |

|          |          |          |          |          |          |          |          |          |
|----------|----------|----------|----------|----------|----------|----------|----------|----------|
| 0.00746  | -0.22224 | 1.23E-06 | -0.15193 | 0.00099  | -0.49987 | 6.86E-31 | -0.47094 | 3.74E-27 |
| 0.19816  | -0.08181 | 0.07736  | -0.02895 | 0.53256  | -0.25956 | 1.26E-08 | -0.23137 | 4.30E-07 |
| 3.28E-09 | -0.20121 | 1.18E-05 | -0.18854 | 4.13E-05 | -0.40544 | 6.64E-20 | -0.37865 | 2.28E-17 |
| 0.29943  | -0.20603 | 7.17E-06 | -0.1778  | 0.00011  | -0.40333 | 1.07E-19 | -0.33722 | 6.98E-14 |
| 3.91E-07 | -0.24049 | 1.44E-07 | -0.24742 | 6.06E-08 | -0.43476 | 5.91E-23 | -0.48852 | 2.21E-29 |
| 8.95E-08 | -0.14441 | 0.00175  | -0.01742 | 0.70732  | -0.31282 | 4.63E-12 | -0.29853 | 4.55E-11 |
| 0.13313  | -0.01975 | 0.67025  | -0.27264 | 2.10E-09 | -0.36846 | 1.83E-16 | -0.28914 | 1.91E-10 |
| 3.21E-05 | -0.27355 | 1.85E-09 | -0.31675 | 2.42E-12 | -0.54589 | 1.27E-37 | -0.6163  | 3.43E-50 |
| 0.30106  | 0.010548 | 0.82016  | -0.02453 | 0.597    | 0.173158 | 0.00017  | 0.12653  | 0.00618  |
| 0.52035  | -0.17222 | 0.00018  | -0.27636 | 1.24E-09 | -0.46179 | 4.81E-26 | -0.46591 | 1.54E-26 |
| 0.03057  | -0.1197  | 0.00962  | -0.1563  | 0.0007   | -0.28052 | 6.83E-10 | -0.25199 | 3.38E-08 |
| 1.52E-12 | 0.039377 | 0.39588  | 0.127112 | 0.00595  | -0.06812 | 0.1416   | 0.091821 | 0.04735  |
| 0.46509  | -0.0346  | 0.45571  | -0.22057 | 1.49E-06 | -0.31255 | 4.85E-12 | -0.23555 | 2.62E-07 |
| 0.00159  | -0.06945 | 0.13395  | -0.27546 | 1.41E-09 | -0.28965 | 1.77E-10 | -0.27117 | 2.58E-09 |
| 0.53671  | 0.007693 | 0.8683   | -0.27331 | 1.91E-09 | -0.27239 | 2.17E-09 | -0.15544 | 0.00075  |
| 5.25E-13 | -0.06759 | 0.14475  | -0.02966 | 0.52262  | -0.32265 | 8.95E-13 | -0.2202  | 1.55E-06 |
| 0.21684  | 0.103526 | 0.02527  | 0.049434 | 0.2864   | 0.235673 | 2.58E-07 | 0.214599 | 2.87E-06 |
| 0.1202   | -0.12327 | 0.00766  | -0.23359 | 3.31E-07 | -0.26192 | 9.17E-09 | -0.26811 | 3.95E-09 |
| 0.26202  | -0.02456 | 0.59656  | -0.27865 | 8.93E-10 | -0.3262  | 4.86E-13 | -0.22371 | 1.04E-06 |
| 6.70E-06 | -0.04731 | 0.30761  | 0.114845 | 0.01301  | -0.19549 | 2.10E-05 | -0.0798  | 0.08496  |
| 3.57E-13 | -0.03137 | 0.49882  | -0.16936 | 0.00024  | -0.30479 | 1.70E-11 | -0.18275 | 7.12E-05 |
| 0.2411   | 0.000544 | 0.99064  | -0.03192 | 0.49138  | -0.08373 | 0.07065  | -0.01503 | 0.74605  |
| 0.52916  | -0.01889 | 0.68387  | -0.13198 | 0.00428  | -0.31423 | 3.68E-12 | -0.18707 | 4.75E-05 |
| 0.00011  | -0.18449 | 6.05E-05 | 0.109169 | 0.01828  | -0.20422 | 8.65E-06 | -0.21652 | 2.33E-06 |
| 0.18843  | 0.048646 | 0.29416  | 0.253727 | 2.70E-08 | 0.229415 | 5.40E-07 | 0.171219 | 0.0002   |
| 0.26271  | -0.22149 | 1.34E-06 | -0.12965 | 0.00501  | -0.26883 | 3.57E-09 | -0.3117  | 5.57E-12 |
| 2.34E-11 | -0.14253 | 0.00202  | -0.08952 | 0.05322  | -0.40751 | 4.13E-20 | -0.36882 | 1.70E-16 |
| 0.71513  | 0.096293 | 0.03751  | -0.13451 | 0.00359  | -0.22246 | 1.20E-06 | -0.11447 | 0.01332  |
| 0.27043  | -0.10245 | 0.02684  | -0.09976 | 0.03113  | -0.35734 | 1.64E-15 | -0.33243 | 1.64E-13 |
| 2.02E-13 | 0.101683 | 0.02801  | 0.044004 | 0.3427   | -0.19547 | 2.10E-05 | 0.00901  | 0.84603  |
| 0.02425  | -0.09121 | 0.04885  | -0.10266 | 0.02652  | -0.27931 | 8.13E-10 | -0.27275 | 2.07E-09 |
| 0.00069  | 0.070118 | 0.13026  | -0.02806 | 0.54525  | -0.10887 | 0.0186   | 0.014041 | 0.76217  |
| 6.63E-20 | -0.02993 | 0.5188   | -0.11831 | 0.0105   | -0.29134 | 1.37E-10 | -0.18223 | 7.47E-05 |
| 2.36E-26 | -0.05117 | 0.26983  | -0.11819 | 0.01058  | -0.2972  | 5.60E-11 | -0.20618 | 7.06E-06 |
| 0.38563  | -0.05998 | 0.19569  | -0.17718 | 0.00012  | -0.2825  | 5.11E-10 | -0.20425 | 8.62E-06 |
| 0.18     | -0.03196 | 0.49089  | -0.21081 | 4.33E-06 | -0.32036 | 1.32E-12 | -0.18292 | 7.01E-05 |
| 0.20864  | -0.22262 | 1.18E-06 | -0.19587 | 2.02E-05 | -0.49416 | 3.99E-30 | -0.51051 | 2.34E-32 |
| 0.05582  | -0.28324 | 4.59E-10 | -0.28213 | 5.40E-10 | -0.60815 | 1.42E-48 | -0.64021 | 3.21E-55 |
| 0.57097  | -0.29396 | 9.22E-11 | -0.2657  | 5.49E-09 | -0.57724 | 7.62E-43 | -0.62861 | 1.00E-52 |
| 0.96578  | -0.17684 | 0.00012  | -0.28794 | 2.29E-10 | -0.44938 | 1.36E-24 | -0.46805 | 8.44E-27 |
| 4.99E-09 | -0.03339 | 0.47158  | -0.05628 | 0.22477  | -0.22659 | 7.50E-07 | -0.1483  | 0.00131  |
| 0.57077  | -0.18545 | 5.53E-05 | -0.22831 | 6.14E-07 | -0.49926 | 8.29E-31 | -0.50597 | 1.00E-31 |
| 1.28E-06 | -0.18394 | 6.38E-05 | -0.30278 | 2.34E-11 | -0.43819 | 2.48E-23 | -0.43023 | 1.83E-22 |
| 0.26744  | -0.16989 | 0.00023  | -0.11903 | 0.01004  | -0.35004 | 6.60E-15 | -0.29479 | 8.12E-11 |
| 0.01421  | -0.09665 | 0.03681  | -0.19191 | 2.98E-05 | -0.3266  | 4.54E-13 | -0.28719 | 2.56E-10 |

|          |          |          |          |          |          |          |          |          |
|----------|----------|----------|----------|----------|----------|----------|----------|----------|
| 0.35399  | 0.070143 | 0.13012  | 0.144463 | 0.00175  | 0.321556 | 1.08E-12 | 0.264979 | 6.06E-09 |
| 5.88E-15 | 0.001046 | 0.98202  | 0.173296 | 0.00017  | 0.246942 | 6.44E-08 | 0.269707 | 3.16E-09 |
| 0.00296  | -0.20604 | 7.16E-06 | -0.18399 | 6.34E-05 | -0.32487 | 6.12E-13 | -0.35283 | 3.89E-15 |
| 0.00358  | -0.32434 | 6.70E-13 | -0.3483  | 9.14E-15 | -0.6124  | 2.07E-49 | -0.70587 | 1.21E-71 |
| 0.06381  | -0.07409 | 0.10981  | -0.18361 | 6.57E-05 | -0.49408 | 4.10E-30 | -0.45106 | 8.74E-25 |
| 0.51559  | -0.20809 | 5.77E-06 | -0.32322 | 8.11E-13 | -0.52358 | 3.13E-34 | -0.52567 | 1.54E-34 |
| 0.21615  | -0.25974 | 1.23E-08 | -0.21596 | 2.48E-06 | -0.52411 | 2.62E-34 | -0.58365 | 5.56E-44 |
| 0.23547  | -0.23991 | 1.54E-07 | -0.22986 | 5.13E-07 | -0.51072 | 2.19E-32 | -0.56672 | 4.97E-41 |
| 0.00062  | -0.10916 | 0.01828  | -0.14688 | 0.00146  | -0.36802 | 2.00E-16 | -0.27487 | 1.53E-09 |
| 0.00721  | -0.18804 | 4.33E-05 | -0.20993 | 4.75E-06 | -0.47579 | 9.33E-28 | -0.47162 | 3.08E-27 |
| 0.01431  | -0.2229  | 1.14E-06 | -0.30841 | 9.52E-12 | -0.51479 | 5.81E-33 | -0.55992 | 6.84E-40 |
| 0.07054  | -0.15072 | 0.00109  | -0.12459 | 0.00703  | -0.41922 | 2.67E-21 | -0.37114 | 1.07E-16 |
| 0.11977  | -0.22326 | 1.10E-06 | -0.30546 | 1.53E-11 | -0.56154 | 3.68E-40 | -0.56551 | 7.98E-41 |
| 0.39963  | -0.19063 | 3.38E-05 | 0.007391 | 0.87344  | -0.21198 | 3.81E-06 | -0.2447  | 8.53E-08 |
| 0.17333  | -0.25465 | 2.40E-08 | -0.25051 | 4.09E-08 | -0.54542 | 1.50E-37 | -0.57608 | 1.22E-42 |
| 0.04682  | -0.13921 | 0.00257  | 0.168733 | 0.00025  | -0.05563 | 0.23022  | -0.05486 | 0.23669  |
| 0.14171  | -0.23626 | 2.40E-07 | -0.27368 | 1.81E-09 | -0.50319 | 2.42E-31 | -0.5134  | 9.17E-33 |
| 0.17172  | -0.17273 | 0.00018  | -0.21413 | 3.02E-06 | -0.42194 | 1.39E-21 | -0.46896 | 6.54E-27 |
| 0.11934  | -0.02083 | 0.65348  | -0.05072 | 0.27402  | -0.25878 | 1.39E-08 | -0.1265  | 0.00619  |
| 0.97349  | -0.10911 | 0.01835  | -0.32035 | 1.32E-12 | -0.31625 | 2.63E-12 | -0.29688 | 5.89E-11 |
| 0.88119  | -0.09802 | 0.0342   | -0.24954 | 4.63E-08 | -0.26485 | 6.16E-09 | -0.26361 | 7.30E-09 |
| 0.57716  | -0.20181 | 1.11E-05 | -0.23717 | 2.15E-07 | -0.46981 | 5.15E-27 | -0.49165 | 8.58E-30 |
| 0.03438  | -0.23514 | 2.75E-07 | -0.03203 | 0.48984  | -0.11183 | 0.01561  | -0.18399 | 6.34E-05 |
| 2.52E-07 | -0.29079 | 1.49E-10 | -0.30312 | 2.22E-11 | -0.52109 | 7.22E-34 | -0.64139 | 1.77E-55 |
| 0.01025  | 0.009721 | 0.83405  | 0.023605 | 0.61088  | -0.15413 | 0.00083  | -0.08446 | 0.0682   |
| 0.58354  | -0.21275 | 3.51E-06 | -0.2747  | 1.57E-09 | -0.51565 | 4.38E-33 | -0.51845 | 1.74E-33 |
| 2.58E-11 | -0.12153 | 0.00856  | -0.09392 | 0.04248  | -0.38559 | 5.29E-18 | -0.32136 | 1.11E-12 |
| 1.41E-05 | -0.19359 | 2.53E-05 | -0.15306 | 0.00091  | -0.48325 | 1.06E-28 | -0.44988 | 1.19E-24 |
| 0.24126  | -0.15865 | 0.00058  | -0.18074 | 8.57E-05 | -0.41055 | 2.05E-20 | -0.37335 | 6.80E-17 |
| 3.86E-13 | -0.05816 | 0.20962  | -0.12885 | 0.00529  | -0.37484 | 5.02E-17 | -0.29295 | 1.08E-10 |
| 1.08E-06 | -0.16684 | 0.00029  | -0.11454 | 0.01326  | -0.37205 | 8.87E-17 | -0.34182 | 3.03E-14 |
| 1.20E-06 | -0.08589 | 0.06367  | -0.16489 | 0.00035  | -0.36059 | 8.72E-16 | -0.29162 | 1.32E-10 |
| 0.2056   | -0.19735 | 1.74E-05 | -0.16473 | 0.00035  | -0.40669 | 4.99E-20 | -0.46126 | 5.57E-26 |
| 0.22185  | -0.15821 | 0.0006   | -0.10989 | 0.01752  | -0.43355 | 8.01E-23 | -0.40506 | 7.25E-20 |
| 2.06E-18 | 0.06219  | 0.17972  | 0.055646 | 0.23005  | -0.08772 | 0.0582   | 0.044183 | 0.34074  |
| 0.1963   | -0.23494 | 2.81E-07 | -0.22084 | 1.44E-06 | -0.4747  | 1.28E-27 | -0.51263 | 1.18E-32 |
| 0.00281  | -0.26398 | 6.93E-09 | -0.22865 | 5.91E-07 | -0.29431 | 8.74E-11 | -0.34342 | 2.26E-14 |
| 0.19496  | -0.26513 | 5.93E-09 | -0.23958 | 1.61E-07 | -0.50339 | 2.27E-31 | -0.55709 | 2.00E-39 |
| 2.86E-06 | -0.02754 | 0.55273  | -0.17011 | 0.00022  | -0.3677  | 2.13E-16 | -0.2287  | 5.87E-07 |
| 0.00429  | -0.10422 | 0.02431  | -0.18356 | 6.61E-05 | -0.36473 | 3.86E-16 | -0.29627 | 6.46E-11 |
| 0.34739  | 0.039671 | 0.39236  | -0.09706 | 0.03602  | -0.2295  | 5.35E-07 | -0.06651 | 0.15131  |
| 0.06624  | -0.03105 | 0.50332  | -0.09013 | 0.0516   | -0.21227 | 3.70E-06 | -0.15207 | 0.00098  |
| 0.89179  | 0.087698 | 0.05826  | 0.3493   | 7.58E-15 | 0.301306 | 2.95E-11 | 0.27012  | 2.99E-09 |
| 1.26E-05 | -0.12452 | 0.00706  | -0.16289 | 0.00041  | -0.31697 | 2.33E-12 | -0.29234 | 1.18E-10 |
| 0.01535  | -0.24027 | 1.48E-07 | -0.16692 | 0.00029  | -0.45562 | 2.58E-25 | -0.51632 | 3.52E-33 |

|          |          |          |          |          |          |          |          |          |
|----------|----------|----------|----------|----------|----------|----------|----------|----------|
| 0.0089   | -0.13866 | 0.00267  | -0.28911 | 1.92E-10 | -0.44077 | 1.28E-23 | -0.41898 | 2.82E-21 |
| 0.00276  | -0.10539 | 0.02275  | -0.15002 | 0.00115  | -0.45954 | 8.91E-26 | -0.36658 | 2.67E-16 |
| 0.31784  | -0.10571 | 0.02233  | -0.27881 | 8.73E-10 | -0.42698 | 4.07E-22 | -0.39306 | 1.05E-18 |
| 0.26358  | -0.05802 | 0.21072  | -0.10577 | 0.02225  | -0.14136 | 0.0022   | -0.04886 | 0.29199  |
| 0.48215  | -0.04301 | 0.35376  | -0.01814 | 0.69585  | -0.21558 | 2.58E-06 | -0.15695 | 0.00066  |
| 0.07047  | -0.00995 | 0.83014  | -0.06663 | 0.15055  | -0.17189 | 0.00019  | -0.07752 | 0.09427  |
| 0.29088  | -0.0168  | 0.71729  | -0.04648 | 0.3162   | -0.21879 | 1.81E-06 | -0.13611 | 0.00321  |
| 0.00035  | 0.202893 | 9.92E-06 | 0.076971 | 0.09664  | 0.26442  | 6.54E-09 | 0.338181 | 5.87E-14 |
| 0.02318  | -0.16608 | 0.00031  | -0.13392 | 0.00374  | -0.4083  | 3.45E-20 | -0.4034  | 1.06E-19 |
| 0.00035  | -0.12451 | 0.00706  | -0.08118 | 0.07968  | -0.3883  | 2.96E-18 | -0.30233 | 2.51E-11 |
| 0.00052  | -0.13274 | 0.00406  | -0.11389 | 0.01379  | -0.42219 | 1.31E-21 | -0.35606 | 2.10E-15 |
| 0.02079  | 0.033639 | 0.46832  | 0.022113 | 0.63361  | -0.29633 | 6.40E-11 | -0.14405 | 0.0018   |
| 0.05679  | -0.13578 | 0.00328  | -0.23926 | 1.67E-07 | -0.39661 | 4.83E-19 | -0.34219 | 2.83E-14 |
| 0.03412  | -0.34194 | 2.96E-14 | -0.32    | 1.40E-12 | -0.57674 | 9.34E-43 | -0.66555 | 4.59E-61 |
| 0.57052  | -0.02852 | 0.53872  | -0.26098 | 1.04E-08 | -0.34884 | 8.26E-15 | -0.29736 | 5.47E-11 |
| 1.41E-11 | -0.16492 | 0.00034  | -0.10256 | 0.02668  | -0.179   | 0.0001   | -0.26868 | 3.65E-09 |
| 0.57317  | -0.17137 | 0.0002   | -0.1388  | 0.00265  | -0.28092 | 6.43E-10 | -0.38828 | 2.98E-18 |
| 0.00964  | -0.19916 | 1.45E-05 | -0.22458 | 9.44E-07 | -0.32355 | 7.67E-13 | -0.40179 | 1.52E-19 |
| 0.00028  | -0.10337 | 0.02549  | -0.03115 | 0.50185  | -0.32843 | 3.31E-13 | -0.28407 | 4.07E-10 |
| 0.02013  | 0.060683 | 0.19052  | -0.0166  | 0.72045  | 0.203931 | 8.91E-06 | 0.196101 | 1.97E-05 |
| 0.00039  | -0.11392 | 0.01377  | -0.10184 | 0.02776  | -0.25239 | 3.22E-08 | -0.3091  | 8.50E-12 |
| 0.00031  | -0.07745 | 0.09459  | -0.23241 | 3.80E-07 | -0.28346 | 4.44E-10 | -0.25619 | 1.96E-08 |
| 0.0064   | -0.13216 | 0.00422  | -0.08695 | 0.06044  | -0.2497  | 4.54E-08 | -0.30258 | 2.42E-11 |
| 0.01572  | -0.1318  | 0.00433  | -0.04049 | 0.38264  | -0.14798 | 0.00134  | -0.16963 | 0.00023  |
| 0.00873  | -0.16574 | 0.00032  | -0.12347 | 0.00756  | -0.34975 | 6.97E-15 | -0.32273 | 8.83E-13 |
| 0.34502  | -0.08729 | 0.05943  | -0.04122 | 0.37415  | -0.11662 | 0.01167  | -0.15429 | 0.00082  |
| 0.03874  | -0.03088 | 0.50564  | -0.37959 | 1.87E-17 | -0.27021 | 2.95E-09 | -0.25291 | 3.01E-08 |
| 0.27373  | -0.24002 | 1.52E-07 | -0.22601 | 8.01E-07 | -0.47184 | 2.90E-27 | -0.46481 | 2.09E-26 |
| 0.00016  | -0.02717 | 0.55805  | -0.2108  | 4.33E-06 | -0.30941 | 8.08E-12 | -0.26837 | 3.81E-09 |
| 0.64286  | 0.318245 | 1.88E-12 | 0.174771 | 0.00015  | 0.384393 | 6.82E-18 | 0.516797 | 3.01E-33 |
| 0.00665  | -0.07139 | 0.12342  | -0.19633 | 1.93E-05 | -0.35543 | 2.37E-15 | -0.23585 | 2.52E-07 |
| 0.65695  | 0.056998 | 0.21891  | -0.06678 | 0.14965  | -0.17992 | 9.24E-05 | -0.08336 | 0.0719   |
| 0.56154  | -0.07177 | 0.12142  | -0.21658 | 2.31E-06 | -0.31804 | 1.95E-12 | -0.285   | 3.54E-10 |
| 0.05295  | -0.16813 | 0.00026  | -0.1391  | 0.00259  | -0.34806 | 9.56E-15 | -0.37258 | 7.96E-17 |
| 0.02988  | -0.0821  | 0.07631  | 0.036704 | 0.42876  | -0.03478 | 0.45341  | 0.073506 | 0.11265  |
| 0.59219  | 0.037357 | 0.42059  | 0.07671  | 0.09778  | -0.01025 | 0.82516  | 0.082387 | 0.0753   |
| 0.03235  | -0.01269 | 0.78454  | -0.18897 | 3.96E-05 | -0.23417 | 3.08E-07 | -0.16035 | 0.0005   |
| 0.20021  | 0.118055 | 0.01067  | 0.137748 | 0.00285  | 0.415634 | 6.24E-21 | 0.404493 | 8.24E-20 |
| 4.51E-05 | 0.053163 | 0.25155  | 0.176052 | 0.00013  | 0.222061 | 1.26E-06 | 0.192695 | 2.76E-05 |
| 0.01383  | 0.155301 | 0.00076  | 0.132257 | 0.0042   | 0.301636 | 2.80E-11 | 0.265935 | 5.32E-09 |
| 0.01842  | -0.15211 | 0.00098  | -0.23427 | 3.05E-07 | -0.43265 | 1.00E-22 | -0.39693 | 4.50E-19 |
| 2.33E-22 | -0.08649 | 0.06181  | -0.06571 | 0.15629  | -0.14188 | 0.00212  | -0.12902 | 0.00523  |
| 0.02797  | -0.22578 | 8.23E-07 | -0.25775 | 1.60E-08 | -0.40026 | 2.14E-19 | -0.47458 | 1.32E-27 |
| 0.00058  | -0.08501 | 0.06643  | -0.16887 | 0.00025  | -0.31361 | 4.07E-12 | -0.24348 | 9.94E-08 |
| 0.25065  | -0.02337 | 0.61447  | -0.0887  | 0.05542  | -0.24955 | 4.63E-08 | -0.1554  | 0.00075  |

|          |          |          |          |          |          |          |          |          |
|----------|----------|----------|----------|----------|----------|----------|----------|----------|
| 8.61E-11 | -0.15901 | 0.00056  | 0.185974 | 5.27E-05 | -0.15359 | 0.00087  | -0.10376 | 0.02494  |
| 3.03E-07 | -0.11926 | 0.00989  | -0.14172 | 0.00214  | -0.22645 | 7.62E-07 | -0.22446 | 9.57E-07 |
| 0.83384  | -0.04671 | 0.3138   | -0.00978 | 0.833    | -0.24236 | 1.14E-07 | -0.152   | 0.00098  |
| 0.60397  | -0.14683 | 0.00146  | -0.16906 | 0.00024  | -0.33417 | 1.20E-13 | -0.29369 | 9.61E-11 |
| 1.55E-06 | -0.13161 | 0.00439  | -0.14955 | 0.00119  | -0.37737 | 2.98E-17 | -0.3022  | 2.56E-11 |
| 0.43194  | -0.16429 | 0.00036  | -0.18431 | 6.16E-05 | -0.36752 | 2.21E-16 | -0.38302 | 9.12E-18 |
| 0.03922  | -0.02353 | 0.61203  | -0.14689 | 0.00146  | -0.1997  | 1.37E-05 | -0.11615 | 0.01201  |
| 5.47E-08 | -0.14015 | 0.0024   | -0.1797  | 9.43E-05 | -0.45372 | 4.30E-25 | -0.38751 | 3.51E-18 |
| 0.00096  | -0.16629 | 0.00031  | -0.1617  | 0.00045  | -0.44335 | 6.60E-24 | -0.4026  | 1.27E-19 |
| 0.76665  | 0.005426 | 0.90691  | -0.0799  | 0.08456  | -0.20498 | 7.99E-06 | -0.09318 | 0.04415  |
| 0.15383  | -0.00421 | 0.92768  | -0.25382 | 2.67E-08 | -0.28145 | 5.96E-10 | -0.20485 | 8.11E-06 |
| 0.07817  | -0.08403 | 0.06963  | -0.32023 | 1.35E-12 | -0.39826 | 3.35E-19 | -0.40112 | 1.77E-19 |
| 3.01E-08 | -0.09309 | 0.04435  | -0.17187 | 0.00019  | -0.42614 | 5.01E-22 | -0.44411 | 5.42E-24 |
| 0.34817  | -0.1789  | 0.0001   | -0.02246 | 0.62824  | -0.33999 | 4.23E-14 | -0.28744 | 2.47E-10 |
| 0.2867   | 0.127401 | 0.00583  | 0.059463 | 0.1996   | 0.275286 | 1.45E-09 | 0.304631 | 1.74E-11 |
| 1.39E-08 | -0.14981 | 0.00117  | -0.1558  | 0.00073  | -0.35537 | 2.39E-15 | -0.37891 | 2.16E-17 |
| 6.66E-09 | -0.14899 | 0.00124  | -0.05141 | 0.26755  | -0.39384 | 8.89E-19 | -0.34116 | 3.42E-14 |
| 0.11426  | -0.21329 | 3.31E-06 | -0.20655 | 6.79E-06 | -0.50232 | 3.18E-31 | -0.48683 | 3.66E-29 |
| 1.45E-13 | -0.11337 | 0.01423  | -0.13056 | 0.00471  | -0.39001 | 2.05E-18 | -0.32386 | 7.27E-13 |
| 0.53545  | -0.23279 | 3.63E-07 | -0.2495  | 4.66E-08 | -0.35509 | 2.52E-15 | -0.38777 | 3.32E-18 |
| 0.0483   | 0.014252 | 0.7587   | -0.31614 | 2.68E-12 | -0.1868  | 4.87E-05 | -0.08558 | 0.06463  |
| 0.59961  | -0.03699 | 0.42517  | 0.019827 | 0.66912  | -0.25127 | 3.71E-08 | -0.1347  | 0.00354  |
| 8.42E-15 | -0.19973 | 1.37E-05 | -0.27102 | 2.63E-09 | -0.31188 | 5.41E-12 | -0.4504  | 1.04E-24 |
| 0.63744  | -0.16289 | 0.00041  | -0.01794 | 0.69897  | -0.30191 | 2.68E-11 | -0.31541 | 3.02E-12 |
| 1.41E-05 | -0.00617 | 0.89428  | 0.009355 | 0.84021  | -0.29955 | 3.88E-11 | -0.17616 | 0.00013  |
| 0.0097   | -0.17172 | 0.00019  | -0.07756 | 0.09411  | -0.35212 | 4.45E-15 | -0.37706 | 3.17E-17 |
| 0.00335  | -0.06511 | 0.16007  | -0.14096 | 0.00226  | -0.31235 | 5.01E-12 | -0.27701 | 1.13E-09 |
| 0.0709   | 0.048141 | 0.2992   | -0.09903 | 0.03239  | -0.17269 | 0.00018  | -0.08752 | 0.05877  |
| 0.02525  | -0.1661  | 0.00031  | -0.20575 | 7.38E-06 | -0.39696 | 4.47E-19 | -0.3785  | 2.35E-17 |
| 2.23E-08 | -0.09995 | 0.0308   | -0.2164  | 2.36E-06 | -0.27421 | 1.68E-09 | -0.28204 | 5.47E-10 |
| 1.28E-06 | 0.06732  | 0.14635  | -0.04843 | 0.29632  | -0.2301  | 4.99E-07 | -0.01466 | 0.75205  |
| 0.02506  | -0.12633 | 0.00627  | -0.18515 | 5.69E-05 | -0.38413 | 7.22E-18 | -0.30004 | 3.60E-11 |
| 0.14185  | -0.08438 | 0.06848  | -0.27415 | 1.70E-09 | -0.38396 | 7.48E-18 | -0.31505 | 3.21E-12 |
| 0.00035  | -0.1008  | 0.0294   | -0.09064 | 0.05029  | -0.24974 | 4.52E-08 | -0.20319 | 9.62E-06 |
| 0.03753  | -0.19926 | 1.44E-05 | -0.15054 | 0.0011   | -0.42137 | 1.59E-21 | -0.41951 | 2.49E-21 |
| 3.07E-05 | -0.241   | 1.35E-07 | -0.29376 | 9.51E-11 | -0.47071 | 3.98E-27 | -0.53974 | 1.16E-36 |
| 0.11986  | 0.066433 | 0.15176  | -0.21912 | 1.75E-06 | -0.22716 | 7.02E-07 | -0.11686 | 0.0115   |
| 0.05153  | -0.13762 | 0.00288  | -0.3146  | 3.45E-12 | -0.50647 | 8.54E-32 | -0.50653 | 8.38E-32 |
| 0.6076   | -0.17571 | 0.00014  | -0.23775 | 2.01E-07 | -0.47595 | 8.93E-28 | -0.47663 | 7.33E-28 |
| 2.29E-07 | -0.22124 | 1.38E-06 | -0.06526 | 0.1591   | -0.33535 | 9.75E-14 | -0.30745 | 1.11E-11 |
| 0.00268  | -0.13982 | 0.00246  | -0.10604 | 0.02191  | -0.3296  | 2.69E-13 | -0.32798 | 3.57E-13 |
| 0.02751  | -0.19403 | 2.42E-05 | -0.16819 | 0.00026  | -0.42694 | 4.12E-22 | -0.39759 | 3.89E-19 |
| 3.46E-05 | -0.16535 | 0.00033  | -0.32415 | 6.92E-13 | -0.36252 | 5.97E-16 | -0.43257 | 1.02E-22 |
| 4.67E-06 | -0.20494 | 8.03E-06 | -0.16318 | 0.0004   | -0.4241  | 8.23E-22 | -0.40851 | 3.28E-20 |
| 0.0089   | -0.00818 | 0.86007  | -0.16215 | 0.00043  | -0.23904 | 1.72E-07 | -0.21375 | 3.15E-06 |

|          |          |          |          |          |          |          |          |          |
|----------|----------|----------|----------|----------|----------|----------|----------|----------|
| 0.00605  | -0.2197  | 1.64E-06 | -0.23417 | 3.08E-07 | -0.43631 | 3.99E-23 | -0.4952  | 2.90E-30 |
| 0.53953  | -0.11539 | 0.01259  | -0.25636 | 1.92E-08 | -0.30727 | 1.14E-11 | -0.29023 | 1.62E-10 |
| 0.14436  | -0.13621 | 0.00318  | -0.01861 | 0.68838  | -0.27726 | 1.09E-09 | -0.24402 | 9.29E-08 |
| 0.00197  | -0.09152 | 0.04808  | -0.12744 | 0.00582  | -0.294   | 9.16E-11 | -0.22678 | 7.34E-07 |
| 0.24149  | -0.07751 | 0.0943   | -0.02181 | 0.63829  | -0.30485 | 1.68E-11 | -0.22054 | 1.49E-06 |
| 0.83095  | -0.16491 | 0.00035  | -0.25154 | 3.59E-08 | -0.4587  | 1.12E-25 | -0.43827 | 2.43E-23 |
| 0.00125  | -0.19908 | 1.46E-05 | -0.1231  | 0.00774  | -0.13734 | 0.00294  | -0.21991 | 1.60E-06 |
| 0.93237  | 0.194426 | 2.33E-05 | -0.0863  | 0.0624   | 0.170778 | 0.00021  | 0.295161 | 7.67E-11 |
| 4.24E-13 | -0.17064 | 0.00021  | -0.12915 | 0.00519  | -0.3934  | 9.78E-19 | -0.36746 | 2.24E-16 |
| 8.28E-20 | -0.15597 | 0.00072  | -0.26821 | 3.89E-09 | -0.38901 | 2.54E-18 | -0.39634 | 5.13E-19 |
| 8.18E-06 | -0.13195 | 0.00429  | -0.19691 | 1.82E-05 | -0.45004 | 1.15E-24 | -0.39484 | 7.13E-19 |
| 0.00024  | -0.18844 | 4.16E-05 | -0.21683 | 2.25E-06 | -0.31934 | 1.57E-12 | -0.33853 | 5.51E-14 |
| 1.89E-06 | -0.13854 | 0.0027   | -0.11046 | 0.01694  | -0.38839 | 2.90E-18 | -0.34908 | 7.89E-15 |
| 0.12727  | -0.11864 | 0.01029  | -0.02552 | 0.58226  | -0.25295 | 2.99E-08 | -0.27197 | 2.31E-09 |
| 0.38526  | -0.17947 | 9.63E-05 | -0.23987 | 1.55E-07 | -0.4807  | 2.24E-28 | -0.45969 | 8.56E-26 |
| 0.73515  | 0.196906 | 1.82E-05 | 0.103951 | 0.02467  | 0.476999 | 6.59E-28 | 0.532044 | 1.73E-35 |
| 0.055    | -0.11122 | 0.01619  | -0.0528  | 0.25476  | -0.22268 | 1.17E-06 | -0.1794  | 9.69E-05 |
| 0.04876  | -0.17709 | 0.00012  | -0.19528 | 2.14E-05 | -0.47598 | 8.85E-28 | -0.45672 | 1.92E-25 |
| 0.12967  | -0.02502 | 0.58964  | -0.0861  | 0.06302  | -0.16716 | 0.00029  | -0.06085 | 0.18927  |
| 0.58602  | 0.045482 | 0.32671  | -0.14713 | 0.00143  | -0.21082 | 4.32E-06 | -0.06046 | 0.19216  |
| 0.01307  | -0.05277 | 0.25511  | -0.1532  | 0.0009   | -0.30241 | 2.48E-11 | -0.18188 | 7.72E-05 |
| 0.04337  | -0.22472 | 9.29E-07 | -0.20849 | 5.53E-06 | -0.51171 | 1.59E-32 | -0.5306  | 2.85E-35 |
| 0.12921  | -0.1627  | 0.00042  | 0.076767 | 0.09753  | -0.12641 | 0.00623  | -0.15655 | 0.00069  |
| 0.12408  | 0.059166 | 0.20186  | 0.110301 | 0.0171   | -0.088   | 0.05741  | -0.01179 | 0.79945  |
| 0.00455  | -0.16821 | 0.00026  | 0.099713 | 0.03121  | -0.12881 | 0.00531  | -0.19704 | 1.80E-05 |
| 0.19747  | 0.065104 | 0.16013  | -0.20803 | 5.81E-06 | -0.17235 | 0.00018  | -0.06626 | 0.15281  |
| 0.05433  | -0.1584  | 0.00059  | -0.10678 | 0.02101  | -0.33871 | 5.33E-14 | -0.35562 | 2.28E-15 |
| 0.62237  | -0.14414 | 0.00179  | -0.11287 | 0.01467  | -0.23897 | 1.73E-07 | -0.31067 | 6.59E-12 |
| 0.24255  | -0.27073 | 2.75E-09 | -0.34533 | 1.59E-14 | -0.60823 | 1.38E-48 | -0.61242 | 2.05E-49 |
| 0.00023  | -0.12028 | 0.00928  | -0.21153 | 4.00E-06 | -0.24036 | 1.46E-07 | -0.21701 | 2.21E-06 |
| 0.46656  | 0.169075 | 0.00024  | 0.174055 | 0.00016  | 0.271456 | 2.48E-09 | 0.31897  | 1.67E-12 |
| 0.03255  | -0.16695 | 0.00029  | -0.14421 | 0.00178  | -0.46661 | 1.26E-26 | -0.43984 | 1.63E-23 |
| 9.84E-06 | -0.02146 | 0.6436   | -0.11085 | 0.01655  | -0.26283 | 8.10E-09 | -0.18679 | 4.87E-05 |
| 3.95E-05 | -0.04177 | 0.36773  | -0.11837 | 0.01047  | -0.32027 | 1.34E-12 | -0.21584 | 2.51E-06 |
| 4.25E-05 | -0.05145 | 0.26721  | -0.22132 | 1.37E-06 | -0.28464 | 3.74E-10 | -0.26338 | 7.52E-09 |
| 9.94E-09 | -0.04133 | 0.37282  | -0.25717 | 1.72E-08 | -0.28521 | 3.43E-10 | -0.26356 | 7.34E-09 |
| 0.47737  | -0.18354 | 6.62E-05 | -0.17757 | 0.00011  | -0.48251 | 1.32E-28 | -0.46849 | 7.47E-27 |
| 0.03805  | -0.17846 | 0.00011  | -0.14257 | 0.00201  | -0.41177 | 1.54E-20 | -0.44132 | 1.11E-23 |
| 1.46E-28 | -0.03713 | 0.42342  | -0.13202 | 0.00426  | -0.33605 | 8.61E-14 | -0.20877 | 5.37E-06 |
| 0.00023  | -0.12038 | 0.00922  | 0.026965 | 0.56107  | -0.28013 | 7.21E-10 | -0.19437 | 2.34E-05 |
| 2.74E-05 | -0.14063 | 0.00232  | -0.2092  | 5.13E-06 | -0.49057 | 1.19E-29 | -0.4305  | 1.71E-22 |
| 0.09055  | 0.148308 | 0.00131  | -0.07307 | 0.11483  | -0.15895 | 0.00057  | 0.017127 | 0.71202  |
| 0.00028  | -0.06824 | 0.14088  | -0.18232 | 7.41E-05 | -0.33653 | 7.89E-14 | -0.27874 | 8.82E-10 |
| 0.00255  | -0.16836 | 0.00026  | -0.1564  | 0.00069  | -0.4797  | 3.01E-28 | -0.46825 | 7.99E-27 |
| 4.95E-19 | -0.18229 | 7.43E-05 | -0.30995 | 7.40E-12 | -0.40697 | 4.68E-20 | -0.45032 | 1.06E-24 |



|          |           |          |          |          |          |          |          |          |
|----------|-----------|----------|----------|----------|----------|----------|----------|----------|
| 0.00159  | -0.09782  | 0.03457  | -0.19763 | 1.69E-05 | -0.32119 | 1.15E-12 | -0.27504 | 1.50E-09 |
| 0.02474  | -0.17456  | 0.00015  | -0.07286 | 0.11588  | -0.36115 | 7.81E-16 | -0.4056  | 6.41E-20 |
| 1.31E-08 | -0.22523  | 8.76E-07 | -0.23074 | 4.63E-07 | -0.35684 | 1.81E-15 | -0.32566 | 5.34E-13 |
| 0.28618  | -0.06409  | 0.16673  | 0.190992 | 3.26E-05 | -0.17275 | 0.00018  | -0.06853 | 0.13922  |
| 0.3145   | -0.16181  | 0.00045  | -0.08503 | 0.06636  | -0.36583 | 3.10E-16 | -0.32665 | 4.50E-13 |
| 0.01033  | 0.236932  | 2.21E-07 | 0.30105  | 3.07E-11 | 0.465083 | 1.94E-26 | 0.492641 | 6.35E-30 |
| 0.00496  | 0.03103   | 0.50354  | -0.01934 | 0.67681  | -0.15895 | 0.00057  | -0.06031 | 0.19326  |
| 0.02045  | 0.008292  | 0.85816  | -0.20773 | 6.00E-06 | -0.19986 | 1.35E-05 | -0.13837 | 0.00273  |
| 0.00023  | -0.01971  | 0.67095  | -0.13351 | 0.00385  | -0.29225 | 1.20E-10 | -0.18202 | 7.62E-05 |
| 5.14E-05 | -0.03244  | 0.4843   | -0.02978 | 0.52083  | -0.22479 | 9.22E-07 | -0.09546 | 0.03921  |
| 2.14E-05 | -0.27447  | 1.62E-09 | -0.25585 | 2.05E-08 | -0.51605 | 3.85E-33 | -0.57889 | 3.90E-43 |
| 7.06E-13 | 0.054767  | 0.2375   | 0.009912 | 0.83083  | -0.17534 | 0.00014  | 0.019181 | 0.67928  |
| 7.85E-07 | -0.11399  | 0.01371  | -0.36418 | 4.30E-16 | -0.42439 | 7.66E-22 | -0.38153 | 1.25E-17 |
| 0.87188  | -0.10421  | 0.02432  | -0.09358 | 0.04324  | -0.25935 | 1.29E-08 | -0.24422 | 9.06E-08 |
| 0.4489   | -0.23498  | 2.80E-07 | -0.15362 | 0.00087  | -0.49528 | 2.83E-30 | -0.51949 | 1.23E-33 |
| 0.056    | -8.47E-05 | 0.99854  | -0.06394 | 0.16773  | -0.21871 | 1.83E-06 | -0.17911 | 9.95E-05 |
| 0.73422  | -0.13748  | 0.00291  | -0.15943 | 0.00054  | -0.23642 | 2.35E-07 | -0.29967 | 3.81E-11 |
| 0.0401   | 0.014433  | 0.75575  | -0.06246 | 0.17783  | -0.22302 | 1.13E-06 | -0.07938 | 0.08661  |
| 0.00032  | 0.059924  | 0.19613  | 0.152938 | 0.00091  | 0.221571 | 1.33E-06 | 0.166272 | 0.00031  |
| 1.33E-06 | 0.095181  | 0.03978  | 0.110814 | 0.01659  | 0.332826 | 1.53E-13 | 0.259563 | 1.26E-08 |
| 0.30755  | -0.15142  | 0.00103  | -0.12144 | 0.00861  | -0.34554 | 1.53E-14 | -0.38592 | 4.92E-18 |
| 5.24E-12 | -0.07113  | 0.12479  | -0.09701 | 0.0361   | -0.32657 | 4.56E-13 | -0.26893 | 3.52E-09 |
| 0.43941  | -0.16456  | 0.00036  | 0.009364 | 0.84006  | -0.27661 | 1.20E-09 | -0.25476 | 2.36E-08 |
| 0.39459  | -0.06315  | 0.17305  | -0.15882 | 0.00057  | -0.2476  | 5.93E-08 | -0.19734 | 1.74E-05 |
| 0.00933  | -0.07462  | 0.10727  | -0.25458 | 2.42E-08 | -0.37525 | 4.61E-17 | -0.29838 | 4.67E-11 |
| 7.49E-06 | -0.04554  | 0.32606  | -0.28907 | 1.93E-10 | -0.32674 | 4.43E-13 | -0.28519 | 3.45E-10 |
| 0.20716  | -0.03552  | 0.44383  | -0.17077 | 0.00021  | -0.28128 | 6.11E-10 | -0.17287 | 0.00017  |
| 8.95E-23 | -0.13604  | 0.00322  | -0.15771 | 0.00063  | -0.3462  | 1.35E-14 | -0.29275 | 1.11E-10 |
| 0.58726  | -0.15422  | 0.00083  | -0.06431 | 0.16532  | -0.3785  | 2.35E-17 | -0.3598  | 1.02E-15 |
| 0.88286  | 0.097744  | 0.03471  | -0.16997 | 0.00022  | -0.26576 | 5.45E-09 | -0.10421 | 0.02432  |
| 0.01295  | -0.16504  | 0.00034  | -0.1854  | 5.56E-05 | -0.48712 | 3.36E-29 | -0.44779 | 2.07E-24 |
| 0.00092  | -0.19715  | 1.78E-05 | -0.21097 | 4.25E-06 | -0.42917 | 2.38E-22 | -0.47295 | 2.11E-27 |
| 0.45193  | -0.19577  | 2.04E-05 | -0.09072 | 0.05008  | -0.24803 | 5.61E-08 | -0.29558 | 7.19E-11 |
| 0.00506  | -0.12182  | 0.0084   | -0.02357 | 0.61143  | -0.37206 | 8.85E-17 | -0.28615 | 2.99E-10 |
| 0.00085  | -0.19197  | 2.96E-05 | -0.0691  | 0.13595  | -0.19533 | 2.13E-05 | -0.27644 | 1.23E-09 |
| 0.15894  | -0.08106  | 0.08012  | -0.22988 | 5.12E-07 | -0.28581 | 3.14E-10 | -0.21423 | 2.99E-06 |
| 0.01224  | -0.04432  | 0.33928  | -0.26787 | 4.08E-09 | -0.26228 | 8.73E-09 | -0.21799 | 1.98E-06 |
| 0.81324  | -0.08652  | 0.06173  | -0.24673 | 6.61E-08 | -0.37044 | 1.23E-16 | -0.31644 | 2.55E-12 |
| 2.39E-06 | 0.022179  | 0.63261  | -0.05189 | 0.26313  | -0.18911 | 3.91E-05 | -0.03202 | 0.48997  |
| 0.0015   | -0.01426  | 0.75865  | -0.09385 | 0.04264  | -0.17184 | 0.00019  | -0.11701 | 0.01139  |
| 0.17976  | -0.01368  | 0.7681   | 0.054853 | 0.23677  | -0.18146 | 8.02E-05 | -0.05567 | 0.22988  |
| 0.9392   | 0.07916   | 0.08749  | 0.2861   | 3.01E-10 | 0.376944 | 3.25E-17 | 0.325421 | 5.56E-13 |
| 0.00109  | 0.063253  | 0.17237  | -0.11813 | 0.01062  | -0.15208 | 0.00098  | -0.06735 | 0.14619  |
| 0.57964  | -0.15241  | 0.00095  | 0.064313 | 0.16528  | -0.22147 | 1.34E-06 | -0.24689 | 6.48E-08 |
| 5.37E-08 | -0.11217  | 0.0153   | 0.038756 | 0.40339  | -0.1893  | 3.84E-05 | -0.1006  | 0.02973  |

|          |          |          |          |          |          |          |          |          |
|----------|----------|----------|----------|----------|----------|----------|----------|----------|
| 9.92E-14 | -0.18453 | 6.03E-05 | -0.10069 | 0.02958  | -0.27857 | 9.04E-10 | -0.34554 | 1.53E-14 |
| 0.33585  | -0.17051 | 0.00021  | -0.09089 | 0.04966  | -0.39735 | 4.10E-19 | -0.39696 | 4.47E-19 |
| 0.01767  | -0.13287 | 0.00402  | -0.01888 | 0.68398  | -0.32723 | 4.07E-13 | -0.26358 | 7.32E-09 |
| 0.81528  | -0.15629 | 0.0007   | -0.14596 | 0.00156  | -0.37086 | 1.13E-16 | -0.32717 | 4.11E-13 |
| 0.21976  | -0.16517 | 0.00034  | 0.023874 | 0.60683  | -0.21259 | 3.57E-06 | -0.26632 | 5.04E-09 |
| 0.01945  | -0.09205 | 0.04679  | -0.24441 | 8.85E-08 | -0.30388 | 1.97E-11 | -0.2491  | 4.90E-08 |
| 0.51011  | -0.1161  | 0.01205  | -0.13914 | 0.00258  | -0.30884 | 8.87E-12 | -0.25086 | 3.91E-08 |
| 0.34243  | -0.23857 | 1.82E-07 | -0.18943 | 3.79E-05 | -0.49734 | 1.50E-30 | -0.53103 | 2.46E-35 |
| 0.25207  | 0.014423 | 0.7559   | -0.01414 | 0.76047  | -0.09379 | 0.04279  | 0.023586 | 0.61117  |
| 1.65E-07 | -0.22149 | 1.34E-06 | -0.25871 | 1.41E-08 | -0.51113 | 1.92E-32 | -0.59303 | 1.08E-45 |
| 0.85393  | -0.28193 | 5.56E-10 | -0.18965 | 3.71E-05 | -0.48535 | 5.71E-29 | -0.52169 | 5.91E-34 |
| 0.0032   | -0.21071 | 4.37E-06 | -0.19314 | 2.64E-05 | -0.4226  | 1.18E-21 | -0.46297 | 3.48E-26 |
| 0.06252  | -0.11699 | 0.0114   | 0.156918 | 0.00067  | -0.1089  | 0.01857  | -0.21305 | 3.40E-06 |
| 0.18129  | 0.061767 | 0.1827   | -0.17437 | 0.00015  | -0.20864 | 5.45E-06 | -0.06751 | 0.14522  |
| 0.04895  | -0.18538 | 5.57E-05 | -0.26607 | 5.22E-09 | -0.39963 | 2.47E-19 | -0.4201  | 2.16E-21 |
| 0.00028  | -0.09618 | 0.03773  | -0.19967 | 1.38E-05 | -0.29731 | 5.51E-11 | -0.28861 | 2.07E-10 |
| 6.70E-06 | -0.08589 | 0.06364  | -0.10356 | 0.02522  | -0.258   | 1.55E-08 | -0.24614 | 7.13E-08 |
| 0.09711  | -0.20916 | 5.15E-06 | -0.35916 | 1.15E-15 | -0.47913 | 3.56E-28 | -0.47244 | 2.44E-27 |
| 2.34E-17 | -0.09418 | 0.04193  | -0.08144 | 0.07871  | -0.33681 | 7.51E-14 | -0.252   | 3.38E-08 |
| 0.14839  | 0.038187 | 0.41033  | -0.18439 | 6.11E-05 | -0.11061 | 0.01679  | -0.03351 | 0.46999  |
| 0.16342  | -0.04632 | 0.31787  | -0.11318 | 0.0144   | -0.28682 | 2.71E-10 | -0.15655 | 0.00069  |
| 0.93149  | -0.23673 | 2.27E-07 | -0.24856 | 5.25E-08 | -0.53275 | 1.35E-35 | -0.53958 | 1.22E-36 |
| 1.67E-10 | -0.0647  | 0.16271  | -0.30853 | 9.33E-12 | -0.20798 | 5.84E-06 | -0.20279 | 1.00E-05 |
| 0.00333  | -0.32276 | 8.78E-13 | -0.24917 | 4.86E-08 | -0.46152 | 5.19E-26 | -0.53094 | 2.53E-35 |
| 0.01627  | -0.05091 | 0.2722   | -0.18637 | 5.07E-05 | -0.27233 | 2.19E-09 | -0.1903  | 3.48E-05 |
| 0.08593  | -0.31887 | 1.70E-12 | -0.21533 | 2.65E-06 | -0.52352 | 3.19E-34 | -0.59185 | 1.78E-45 |
| 0.15645  | -0.18175 | 7.81E-05 | -0.14218 | 0.00207  | -0.42064 | 1.89E-21 | -0.40493 | 7.46E-20 |
| 0.00032  | -0.33308 | 1.46E-13 | -0.28024 | 7.10E-10 | -0.51684 | 2.96E-33 | -0.68871 | 6.27E-67 |
| 4.44E-06 | -0.33126 | 2.01E-13 | -0.17378 | 0.00016  | -0.40029 | 2.13E-19 | -0.48212 | 1.48E-28 |
| 0.61494  | 0.011716 | 0.80064  | -0.23588 | 2.51E-07 | -0.20417 | 8.70E-06 | -0.10948 | 0.01795  |
| 0.02701  | -0.05285 | 0.25439  | -0.25285 | 3.03E-08 | -0.28194 | 5.55E-10 | -0.2663  | 5.06E-09 |
| 0.00203  | 0.065694 | 0.15637  | -0.07331 | 0.11361  | -0.20357 | 9.25E-06 | -0.02645 | 0.56856  |
| 9.23E-05 | -0.06422 | 0.16592  | -0.07666 | 0.09798  | -0.24951 | 4.65E-08 | -0.18871 | 4.06E-05 |
| 0.08731  | -0.0894  | 0.05353  | -0.2249  | 9.11E-07 | -0.32305 | 8.35E-13 | -0.2644  | 6.55E-09 |
| 0.58399  | -0.08802 | 0.05733  | -0.23612 | 2.44E-07 | -0.39339 | 9.80E-19 | -0.30762 | 1.08E-11 |
| 2.70E-06 | -0.03201 | 0.4902   | 0.086275 | 0.06248  | -0.16097 | 0.00048  | -0.12369 | 0.00745  |
| 3.17E-08 | -0.19434 | 2.35E-05 | -0.17435 | 0.00015  | -0.27631 | 1.25E-09 | -0.3354  | 9.66E-14 |
| 0.00548  | 0.174582 | 0.00015  | 0.47282  | 2.19E-27 | 0.563789 | 1.55E-40 | 0.502553 | 2.96E-31 |
| 0.01047  | -0.16761 | 0.00027  | -0.2001  | 1.32E-05 | -0.41689 | 4.64E-21 | -0.408   | 3.69E-20 |
| 0.09087  | -0.05025 | 0.27846  | -0.09549 | 0.03914  | -0.31248 | 4.90E-12 | -0.1794  | 9.69E-05 |
| 0.24992  | -0.02227 | 0.63119  | -0.19269 | 2.76E-05 | -0.23124 | 4.36E-07 | -0.17235 | 0.00018  |
| 0.12262  | -0.10701 | 0.02072  | -0.13993 | 0.00244  | -0.20928 | 5.09E-06 | -0.26673 | 4.77E-09 |
| 0.03854  | -0.03472 | 0.45419  | 0.001764 | 0.96968  | -0.21141 | 4.06E-06 | -0.14821 | 0.00132  |
| 0.91043  | -0.14415 | 0.00179  | -0.04054 | 0.3821   | -0.34437 | 1.90E-14 | -0.30797 | 1.02E-11 |
| 1.46E-09 | -0.02358 | 0.61125  | -0.05396 | 0.2445   | -0.16168 | 0.00045  | -0.09714 | 0.03585  |

|          |          |          |          |          |          |          |          |          |
|----------|----------|----------|----------|----------|----------|----------|----------|----------|
| 0.07552  | -0.22468 | 9.33E-07 | -0.16649 | 0.0003   | -0.46278 | 3.66E-26 | -0.48855 | 2.19E-29 |
| 0.00087  | -0.13432 | 0.00364  | -0.19498 | 2.20E-05 | -0.33858 | 5.46E-14 | -0.36948 | 1.49E-16 |
| 0.00062  | 0.102861 | 0.02623  | 0.143659 | 0.00186  | 0.243424 | 1.00E-07 | 0.291594 | 1.32E-10 |
| 0.27901  | 0.061151 | 0.18711  | 0.152433 | 0.00095  | 0.315664 | 2.90E-12 | 0.178111 | 0.00011  |
| 0.01972  | -0.13339 | 0.00388  | -0.1884  | 4.18E-05 | -0.33487 | 1.06E-13 | -0.25264 | 3.11E-08 |
| 0.99557  | -0.15863 | 0.00058  | -0.06954 | 0.13344  | -0.39776 | 3.74E-19 | -0.29996 | 3.65E-11 |
| 0.33241  | -0.28276 | 4.92E-10 | -0.27215 | 2.25E-09 | -0.46653 | 1.29E-26 | -0.58457 | 3.80E-44 |
| 1.57E-07 | -0.08388 | 0.07016  | -0.08206 | 0.07645  | -0.34031 | 3.99E-14 | -0.24144 | 1.28E-07 |
| 0.0305   | 0.117194 | 0.01126  | 0.088678 | 0.05549  | 0.193407 | 2.57E-05 | 0.275638 | 1.38E-09 |
| 0.04385  | -0.21828 | 1.92E-06 | -0.19803 | 1.63E-05 | -0.51563 | 4.42E-33 | -0.49377 | 4.51E-30 |
| 1.19E-10 | -0.12333 | 0.00763  | -0.10567 | 0.02239  | -0.39578 | 5.80E-19 | -0.33522 | 9.98E-14 |
| 0.00148  | -0.16092 | 0.00048  | -0.13577 | 0.00328  | -0.44228 | 8.71E-24 | -0.37489 | 4.96E-17 |
| 3.28E-06 | -0.15029 | 0.00112  | -0.13221 | 0.00421  | -0.44504 | 4.25E-24 | -0.37109 | 1.08E-16 |
| 0.22325  | -0.20712 | 6.39E-06 | -0.18327 | 6.79E-05 | -0.47052 | 4.21E-27 | -0.49716 | 1.59E-30 |
| 0.29421  | -0.05413 | 0.24305  | -0.09592 | 0.03826  | -0.31056 | 6.71E-12 | -0.21477 | 2.82E-06 |
| 0.51201  | -0.25438 | 2.48E-08 | -0.19776 | 1.67E-05 | -0.49869 | 9.87E-31 | -0.53442 | 7.56E-36 |
| 9.99E-11 | -0.0499  | 0.28186  | -0.06581 | 0.15567  | -0.29527 | 7.55E-11 | -0.19144 | 3.12E-05 |
| 0.00544  | -0.21474 | 2.83E-06 | -0.33571 | 9.15E-14 | -0.49992 | 6.75E-31 | -0.50171 | 3.86E-31 |
| 0.00388  | -0.17824 | 0.00011  | -0.1391  | 0.00259  | -0.4331  | 8.95E-23 | -0.40419 | 8.82E-20 |
| 0.52915  | -0.22573 | 8.27E-07 | -0.30492 | 1.67E-11 | -0.55922 | 8.94E-40 | -0.56474 | 1.08E-40 |
| 0.6192   | -0.23769 | 2.02E-07 | -0.2493  | 4.78E-08 | -0.55545 | 3.70E-39 | -0.54733 | 7.50E-38 |
| 0.00282  | -0.0312  | 0.5012   | -0.08934 | 0.0537   | -0.18154 | 7.97E-05 | -0.16284 | 0.00041  |
| 0.01166  | -0.2617  | 9.44E-09 | -0.2583  | 1.49E-08 | -0.54898 | 4.09E-38 | -0.5899  | 4.08E-45 |
| 0.93622  | -0.09123 | 0.04879  | -0.2499  | 4.42E-08 | -0.3031  | 2.22E-11 | -0.28953 | 1.80E-10 |
| 0.00046  | -0.15956 | 0.00054  | -0.18901 | 3.95E-05 | -0.30297 | 2.27E-11 | -0.22133 | 1.36E-06 |
| 0.03114  | -0.0229  | 0.62165  | -0.23866 | 1.80E-07 | -0.26384 | 7.07E-09 | -0.18181 | 7.77E-05 |
| 0.85991  | -0.10559 | 0.02249  | -0.17695 | 0.00012  | -0.37299 | 7.32E-17 | -0.32923 | 2.88E-13 |
| 0.38693  | -0.1954  | 2.12E-05 | -0.23277 | 3.64E-07 | -0.48088 | 2.13E-28 | -0.46129 | 5.51E-26 |
| 2.08E-13 | -0.07645 | 0.09894  | -0.11486 | 0.013    | -0.29871 | 4.43E-11 | -0.2522  | 3.29E-08 |
| 0.70483  | -0.32151 | 1.09E-12 | -0.18724 | 4.67E-05 | -0.47337 | 1.87E-27 | -0.55143 | 1.66E-38 |
| 1.31E-07 | -0.03666 | 0.42934  | -0.22762 | 6.66E-07 | -0.22789 | 6.45E-07 | -0.1684  | 0.00026  |
| 4.16E-14 | -0.11624 | 0.01194  | -0.15809 | 0.00061  | -0.19869 | 1.52E-05 | -0.24083 | 1.38E-07 |
| 6.34E-07 | -0.04725 | 0.30824  | -0.15655 | 0.00069  | -0.3344  | 1.16E-13 | -0.233   | 3.55E-07 |
| 0.84261  | -0.18209 | 7.57E-05 | -0.00601 | 0.89701  | -0.28377 | 4.25E-10 | -0.28898 | 1.96E-10 |
| 0.01218  | -0.28274 | 4.94E-10 | -0.13745 | 0.00292  | -0.38543 | 5.47E-18 | -0.48085 | 2.15E-28 |
| 0.07723  | -0.05291 | 0.2538   | -0.14724 | 0.00142  | -0.19351 | 2.55E-05 | -0.16806 | 0.00026  |
| 0.10572  | -0.15117 | 0.00105  | -0.19683 | 1.83E-05 | -0.38669 | 4.18E-18 | -0.4104  | 2.12E-20 |
| 0.00158  | -0.1475  | 0.00139  | -0.21283 | 3.48E-06 | -0.4175  | 4.01E-21 | -0.41019 | 2.23E-20 |
| 0.00842  | -0.06153 | 0.18439  | 0.144403 | 0.00176  | -0.16062 | 0.00049  | -0.21403 | 3.06E-06 |
| 3.57E-06 | -0.07236 | 0.11838  | 0.125031 | 0.00682  | -0.21165 | 3.95E-06 | -0.18643 | 5.05E-05 |
| 0.4251   | -0.25836 | 1.47E-08 | -0.15371 | 0.00086  | -0.5008  | 5.12E-31 | -0.52366 | 3.05E-34 |
| 1.15E-05 | -0.16868 | 0.00025  | -0.08078 | 0.0812   | -0.42348 | 9.56E-22 | -0.40098 | 1.82E-19 |
| 0.82811  | -0.07211 | 0.11967  | -0.04177 | 0.36781  | -0.21016 | 4.64E-06 | -0.23505 | 2.78E-07 |
| 0.00312  | -0.1066  | 0.02122  | -0.12581 | 0.00648  | -0.31321 | 4.35E-12 | -0.236   | 2.48E-07 |
| 0.1845   | -0.09557 | 0.03898  | -0.19535 | 2.12E-05 | -0.29531 | 7.50E-11 | -0.25406 | 2.59E-08 |

|          |          |          |          |          |          |          |          |          |
|----------|----------|----------|----------|----------|----------|----------|----------|----------|
| 2.50E-06 | -0.2056  | 7.49E-06 | -0.19982 | 1.36E-05 | -0.36952 | 1.48E-16 | -0.35948 | 1.08E-15 |
| 0.15373  | 0.042871 | 0.35528  | -0.08094 | 0.0806   | -0.18941 | 3.80E-05 | -0.07245 | 0.11795  |
| 2.87E-06 | -0.06443 | 0.16448  | -0.00557 | 0.90437  | -0.13909 | 0.00259  | -0.15002 | 0.00115  |
| 0.07728  | 0.04951  | 0.28565  | 0.012866 | 0.78155  | 0.228472 | 6.03E-07 | 0.125392 | 0.00666  |
| 0.00178  | -0.17663 | 0.00012  | -0.2614  | 9.82E-09 | -0.32225 | 9.58E-13 | -0.30833 | 9.64E-12 |
| 0.2026   | -0.03869 | 0.40415  | -0.13409 | 0.00369  | -0.23935 | 1.65E-07 | -0.14427 | 0.00177  |
| 2.24E-16 | -0.18494 | 5.81E-05 | -0.27495 | 1.52E-09 | -0.32735 | 3.99E-13 | -0.36228 | 6.26E-16 |
| 1.61E-07 | -0.25392 | 2.64E-08 | -0.40162 | 1.58E-19 | -0.4941  | 4.07E-30 | -0.56838 | 2.60E-41 |
| 0.00159  | -0.13144 | 0.00444  | -0.25583 | 2.06E-08 | -0.27708 | 1.12E-09 | -0.28026 | 7.09E-10 |
| 0.02987  | 0.139046 | 0.0026   | 0.003562 | 0.93881  | -0.0886  | 0.0557   | -0.00884 | 0.8489   |
| 0.16876  | 0.134374 | 0.00362  | 0.139434 | 0.00253  | 0.293577 | 9.78E-11 | 0.294338 | 8.70E-11 |
| 0.13624  | 0.19987  | 1.35E-05 | -0.04268 | 0.35738  | 0.254321 | 2.50E-08 | 0.302248 | 2.54E-11 |
| 0.18563  | -0.15706 | 0.00066  | -0.22627 | 7.78E-07 | -0.47439 | 1.40E-27 | -0.42078 | 1.83E-21 |
| 1.43E-08 | -0.15031 | 0.00112  | -0.05817 | 0.20959  | -0.29457 | 8.41E-11 | -0.33002 | 2.50E-13 |
| 0.0002   | -0.02454 | 0.59677  | -0.10451 | 0.0239   | -0.1869  | 4.82E-05 | -0.08021 | 0.08335  |
| 1.16E-05 | -0.14592 | 0.00157  | -0.25625 | 1.94E-08 | -0.28477 | 3.66E-10 | -0.25391 | 2.64E-08 |
| 0.13854  | -0.06129 | 0.18611  | -0.06421 | 0.16594  | -0.11495 | 0.01293  | -0.15812 | 0.00061  |
| 0.66871  | -0.01521 | 0.74296  | -0.23291 | 3.58E-07 | -0.25531 | 2.20E-08 | -0.20296 | 9.85E-06 |
| 0.00823  | 0.026788 | 0.56363  | -0.169   | 0.00024  | -0.20091 | 1.22E-05 | -0.08353 | 0.07132  |
| 0.05494  | -0.25536 | 2.19E-08 | -0.1671  | 0.00029  | -0.39721 | 4.23E-19 | -0.46597 | 1.51E-26 |
| 0.63216  | 0.023384 | 0.61422  | -0.1283  | 0.00549  | -0.28629 | 2.93E-10 | -0.1554  | 0.00075  |
| 2.65E-06 | -0.10966 | 0.01776  | -0.0843  | 0.06873  | -0.30464 | 1.74E-11 | -0.24892 | 5.01E-08 |
| 0.05797  | -0.16287 | 0.00041  | -0.13945 | 0.00253  | -0.44595 | 3.35E-24 | -0.39707 | 4.36E-19 |
| 0.03533  | -0.16464 | 0.00035  | -0.18997 | 3.60E-05 | -0.46655 | 1.28E-26 | -0.42771 | 3.40E-22 |
| 0.0032   | -0.09095 | 0.04951  | -0.09479 | 0.04061  | -0.30055 | 3.32E-11 | -0.20676 | 6.64E-06 |
| 0.56608  | -0.1843  | 6.16E-05 | -0.1762  | 0.00013  | -0.50011 | 6.35E-31 | -0.4588  | 1.09E-25 |
| 1.31E-05 | -0.10526 | 0.02292  | -0.10088 | 0.02927  | -0.29247 | 1.16E-10 | -0.33223 | 1.70E-13 |
| 0.77703  | -0.07339 | 0.11321  | -0.07923 | 0.08721  | -0.30946 | 8.02E-12 | -0.23103 | 4.47E-07 |
| 2.67E-06 | -0.14875 | 0.00126  | -0.14824 | 0.00132  | -0.36453 | 4.02E-16 | -0.35692 | 1.78E-15 |
| 9.28E-14 | -0.0136  | 0.76939  | -0.08053 | 0.08212  | -0.32478 | 6.21E-13 | -0.17627 | 0.00013  |
| 0.00014  | -0.0656  | 0.15695  | -0.09919 | 0.0321   | -0.14304 | 0.00194  | -0.06715 | 0.14739  |
| 0.8623   | 0.084796 | 0.06712  | 0.063133 | 0.17319  | -0.10293 | 0.02614  | 0.058024 | 0.21071  |
| 0.9542   | -0.07526 | 0.10433  | -0.15197 | 0.00099  | -0.22819 | 6.23E-07 | -0.15704 | 0.00066  |
| 7.41E-06 | -0.13515 | 0.00343  | -0.20619 | 7.05E-06 | -0.27167 | 2.40E-09 | -0.35925 | 1.13E-15 |
| 0.34495  | -0.24767 | 5.88E-08 | -0.21499 | 2.75E-06 | -0.51907 | 1.42E-33 | -0.54902 | 4.03E-38 |
| 0.3366   | -0.16363 | 0.00038  | -0.06829 | 0.14063  | -0.30147 | 2.88E-11 | -0.30366 | 2.03E-11 |
| 0.95888  | -0.06452 | 0.16394  | -0.2667  | 4.79E-09 | -0.27872 | 8.84E-10 | -0.2271  | 7.07E-07 |
| 0.60732  | -0.08272 | 0.07411  | -0.20967 | 4.88E-06 | -0.25085 | 3.92E-08 | -0.23034 | 4.85E-07 |
| 0.43938  | -0.1573  | 0.00065  | 0.012728 | 0.78383  | -0.40397 | 9.28E-20 | -0.34572 | 1.48E-14 |
| 0.00516  | -0.09379 | 0.04278  | 0.257774 | 1.59E-08 | -0.09582 | 0.03845  | -0.09639 | 0.03731  |
| 0.82921  | -0.09868 | 0.033    | 0.18837  | 4.19E-05 | 0.289712 | 1.76E-10 | 0.186982 | 4.79E-05 |
| 0.00167  | -0.11311 | 0.01446  | -0.18469 | 5.94E-05 | -0.41029 | 2.18E-20 | -0.31697 | 2.33E-12 |
| 0.94305  | -0.11399 | 0.01371  | -0.04092 | 0.3776   | -0.07655 | 0.09848  | -0.20006 | 1.33E-05 |
| 0.94322  | -0.116   | 0.01212  | -0.24697 | 6.42E-08 | -0.45277 | 5.55E-25 | -0.34459 | 1.82E-14 |
| 0.0236   | -0.24921 | 4.83E-08 | -0.18073 | 8.58E-05 | -0.5222  | 4.98E-34 | -0.54888 | 4.25E-38 |

|          |          |          |          |          |          |          |          |          |
|----------|----------|----------|----------|----------|----------|----------|----------|----------|
| 0.01812  | -0.07765 | 0.09373  | -0.32917 | 2.91E-13 | -0.45576 | 2.49E-25 | -0.38184 | 1.17E-17 |
| 1.32E-36 | 0.028591 | 0.53767  | 0.019611 | 0.67251  | -0.18449 | 6.06E-05 | -0.05683 | 0.22025  |
| 0.82791  | -0.2231  | 1.12E-06 | -0.24818 | 5.51E-08 | -0.46984 | 5.11E-27 | -0.50132 | 4.35E-31 |
| 0.4878   | -0.03473 | 0.45404  | 0.068085 | 0.14181  | -0.1609  | 0.00048  | -0.08523 | 0.06572  |
| 0.03399  | -0.00766 | 0.86881  | -0.23795 | 1.96E-07 | -0.33519 | 1.00E-13 | -0.23461 | 2.93E-07 |
| 3.75E-09 | -0.05389 | 0.24514  | -0.29463 | 8.32E-11 | -0.30259 | 2.41E-11 | -0.22358 | 1.06E-06 |
| 0.00748  | -0.17825 | 0.00011  | -0.34245 | 2.70E-14 | -0.44223 | 8.81E-24 | -0.43466 | 6.05E-23 |
| 0.07097  | -0.11322 | 0.01436  | -0.21564 | 2.56E-06 | -0.34976 | 6.95E-15 | -0.25962 | 1.25E-08 |
| 6.26E-11 | -0.13528 | 0.0034   | -0.31335 | 4.25E-12 | -0.4542  | 3.78E-25 | -0.45594 | 2.37E-25 |
| 0.37627  | -0.17345 | 0.00017  | -0.37638 | 3.65E-17 | -0.34935 | 7.50E-15 | -0.36361 | 4.82E-16 |
| 0.00019  | -0.16301 | 0.0004   | -0.35646 | 1.94E-15 | -0.35644 | 1.95E-15 | -0.34893 | 8.13E-15 |
| 0.02215  | -0.11799 | 0.01072  | -0.30333 | 2.14E-11 | -0.40565 | 6.33E-20 | -0.37165 | 9.63E-17 |
| 8.67E-11 | -0.18637 | 5.07E-05 | -0.30418 | 1.87E-11 | -0.38862 | 2.76E-18 | -0.43468 | 6.03E-23 |
| 1.78E-10 | -0.15082 | 0.00108  | -0.32459 | 6.42E-13 | -0.37697 | 3.23E-17 | -0.38694 | 3.96E-18 |
| 0.00177  | -0.10284 | 0.02626  | -0.06477 | 0.16229  | -0.32277 | 8.76E-13 | -0.1904  | 3.45E-05 |
| 0.30083  | -0.12887 | 0.00529  | -0.01049 | 0.82114  | -0.26754 | 4.27E-09 | -0.20615 | 7.08E-06 |
| 4.76E-08 | -0.20724 | 6.31E-06 | -0.03043 | 0.51189  | -0.30255 | 2.42E-11 | -0.38328 | 8.64E-18 |
| 8.66E-24 | -0.01137 | 0.80645  | -0.08878 | 0.05522  | -0.28253 | 5.09E-10 | -0.10518 | 0.02302  |
| 0.27438  | -0.30546 | 1.53E-11 | -0.23495 | 2.81E-07 | -0.42923 | 2.34E-22 | -0.48588 | 4.86E-29 |
| 0.19366  | -0.19111 | 3.22E-05 | -0.28271 | 4.96E-10 | -0.46356 | 2.95E-26 | -0.47453 | 1.34E-27 |
| 0.01315  | -0.06399 | 0.16744  | -0.07129 | 0.12395  | -0.32278 | 8.75E-13 | -0.2624  | 8.59E-09 |
| 0.04835  | -0.09622 | 0.03766  | -0.1048  | 0.02352  | -0.38793 | 3.21E-18 | -0.34229 | 2.78E-14 |
| 0.31565  | -0.18427 | 6.18E-05 | -0.16913 | 0.00024  | -0.34965 | 7.10E-15 | -0.34588 | 1.44E-14 |
| 0.12922  | -0.1614  | 0.00046  | -0.34977 | 6.94E-15 | -0.40402 | 9.17E-20 | -0.36614 | 2.91E-16 |
| 2.56E-11 | 0.036587 | 0.43023  | -0.04548 | 0.32674  | -0.1638  | 0.00038  | -0.04812 | 0.29938  |
| 0.01311  | -0.29703 | 5.75E-11 | -0.29013 | 1.65E-10 | -0.55521 | 4.05E-39 | -0.66407 | 1.04E-60 |
| 0.66691  | -0.11685 | 0.01151  | -0.22567 | 8.34E-07 | -0.25665 | 1.84E-08 | -0.22302 | 1.13E-06 |
| 0.0001   | -0.16906 | 0.00024  | -0.11687 | 0.01149  | -0.32107 | 1.17E-12 | -0.36205 | 6.54E-16 |
| 0.17744  | -0.12309 | 0.00774  | 0.177138 | 0.00012  | -0.02799 | 0.54631  | -0.07769 | 0.09354  |
| 0.03841  | -0.22568 | 8.33E-07 | -0.18044 | 8.82E-05 | -0.40645 | 5.28E-20 | -0.39372 | 9.13E-19 |
| 1.47E-10 | 0.049466 | 0.28608  | -0.04482 | 0.33387  | -0.20786 | 5.92E-06 | -0.07356 | 0.11239  |
| 0.05187  | -0.10521 | 0.02298  | -0.09257 | 0.04557  | -0.25042 | 4.14E-08 | -0.23666 | 2.29E-07 |
| 0.37002  | -0.06783 | 0.1433   | -0.17891 | 0.0001   | -0.30073 | 3.23E-11 | -0.22223 | 1.23E-06 |
| 0.013    | -0.06343 | 0.1712   | -0.20574 | 7.39E-06 | -0.34325 | 2.33E-14 | -0.23327 | 3.43E-07 |
| 0.32617  | -0.17387 | 0.00016  | -0.15625 | 0.0007   | -0.41582 | 5.97E-21 | -0.33901 | 5.05E-14 |
| 0.01749  | -0.12856 | 0.0054   | -0.0331  | 0.47547  | -0.32101 | 1.18E-12 | -0.26865 | 3.66E-09 |
| 0.08602  | -0.21339 | 3.28E-06 | -0.2211  | 1.40E-06 | -0.50352 | 2.18E-31 | -0.50073 | 5.23E-31 |
| 0.00013  | -0.10347 | 0.02536  | -0.01429 | 0.7581   | -0.32757 | 3.84E-13 | -0.24719 | 6.24E-08 |
| 0.76131  | -0.23235 | 3.83E-07 | -0.18776 | 4.45E-05 | -0.49813 | 1.18E-30 | -0.51557 | 4.50E-33 |
| 0.34263  | -0.02579 | 0.57824  | -0.1868  | 4.87E-05 | -0.20312 | 9.70E-06 | -0.08902 | 0.05455  |
| 2.31E-06 | -0.10956 | 0.01786  | -0.18272 | 7.14E-05 | -0.42217 | 1.31E-21 | -0.28583 | 3.13E-10 |
| 0.11473  | -0.17672 | 0.00012  | -0.20678 | 6.63E-06 | -0.37799 | 2.61E-17 | -0.33357 | 1.34E-13 |
| 3.09E-05 | -0.14097 | 0.00226  | -0.0446  | 0.33619  | -0.18704 | 4.76E-05 | -0.25425 | 2.52E-08 |
| 0.1657   | 0.233035 | 3.53E-07 | 0.142856 | 0.00197  | 0.359733 | 1.03E-15 | 0.409006 | 2.93E-20 |
| 9.18E-15 | -0.06166 | 0.18348  | -0.1316  | 0.00439  | -0.23731 | 2.12E-07 | -0.15701 | 0.00066  |

|          |          |          |          |          |          |          |          |          |
|----------|----------|----------|----------|----------|----------|----------|----------|----------|
| 0.49288  | -0.00137 | 0.97647  | -0.32935 | 2.82E-13 | -0.19565 | 2.06E-05 | -0.12014 | 0.00936  |
| 2.82E-06 | -0.12604 | 0.00638  | -0.16401 | 0.00037  | -0.41773 | 3.80E-21 | -0.34982 | 6.88E-15 |
| 0.29981  | -0.24819 | 5.50E-08 | -0.27759 | 1.04E-09 | -0.53114 | 2.36E-35 | -0.56094 | 4.63E-40 |
| 0.20968  | -0.12519 | 0.00675  | -0.20464 | 8.29E-06 | -0.41627 | 5.37E-21 | -0.3856  | 5.27E-18 |
| 0.01121  | -0.04949 | 0.28584  | 0.000216 | 0.99628  | -0.19453 | 2.30E-05 | -0.18983 | 3.65E-05 |
| 0.10239  | 0.119516 | 0.00973  | 0.150247 | 0.00113  | 0.248556 | 5.25E-08 | 0.20379  | 9.05E-06 |
| 0.00349  | -0.21005 | 4.69E-06 | -0.07143 | 0.12321  | -0.26189 | 9.20E-09 | -0.33968 | 4.48E-14 |
| 0.91674  | -0.06268 | 0.17628  | -0.0848  | 0.0671   | -0.27533 | 1.44E-09 | -0.15279 | 0.00092  |
| 0.03632  | -0.14049 | 0.00234  | -0.13383 | 0.00376  | -0.42484 | 6.88E-22 | -0.38558 | 5.30E-18 |
| 4.92E-07 | -0.16102 | 0.00048  | 0.088538 | 0.05588  | -0.14723 | 0.00142  | -0.2777  | 1.02E-09 |
| 0.8337   | -0.13805 | 0.00279  | -0.27167 | 2.40E-09 | -0.42451 | 7.45E-22 | -0.37704 | 3.19E-17 |
| 0.0019   | -0.15811 | 0.00061  | -0.10507 | 0.02316  | -0.24651 | 6.80E-08 | -0.31486 | 3.31E-12 |
| 9.76E-05 | -0.2683  | 3.84E-09 | -0.33462 | 1.11E-13 | -0.42944 | 2.23E-22 | -0.50342 | 2.25E-31 |
| 0.0211   | -0.03748 | 0.41911  | -0.2734  | 1.89E-09 | -0.33103 | 2.10E-13 | -0.21322 | 3.34E-06 |
| 1.16E-05 | -0.08263 | 0.07445  | 0.057448 | 0.21529  | 0.185602 | 5.45E-05 | 0.057096 | 0.21811  |
| 0.00406  | -0.0538  | 0.2459   | -0.0362  | 0.43515  | -0.14677 | 0.00147  | -0.18996 | 3.60E-05 |
| 7.23E-05 | 0.213892 | 3.10E-06 | 0.284875 | 3.61E-10 | 0.362602 | 5.87E-16 | 0.373944 | 6.03E-17 |
| 9.98E-08 | -0.07699 | 0.09655  | -0.27684 | 1.16E-09 | -0.22312 | 1.11E-06 | -0.24143 | 1.28E-07 |
| 1.31E-14 | 0.025497 | 0.58259  | -0.05944 | 0.19975  | -0.15166 | 0.00101  | -0.04301 | 0.35375  |
| 2.39E-07 | -0.06206 | 0.18063  | -0.13357 | 0.00383  | -0.26508 | 5.97E-09 | -0.21791 | 2.00E-06 |
| 0.00021  | -0.02796 | 0.54674  | -0.04125 | 0.37373  | -0.23624 | 2.41E-07 | -0.1154  | 0.01258  |
| 3.51E-05 | -0.09782 | 0.03458  | -0.21149 | 4.02E-06 | -0.36728 | 2.32E-16 | -0.3213  | 1.13E-12 |
| 0.00012  | -0.02333 | 0.61506  | -0.02537 | 0.58446  | -0.31666 | 2.46E-12 | -0.24335 | 1.01E-07 |
| 0.23219  | -0.16158 | 0.00046  | -0.14377 | 0.00184  | -0.29066 | 1.52E-10 | -0.26616 | 5.15E-09 |
| 0.04886  | -0.06312 | 0.17329  | -0.25051 | 4.09E-08 | -0.26539 | 5.73E-09 | -0.24812 | 5.55E-08 |
| 4.17E-06 | -0.04716 | 0.30915  | -0.15393 | 0.00085  | -0.22133 | 1.36E-06 | -0.20078 | 1.23E-05 |
| 0.47328  | -0.29424 | 8.84E-11 | -0.36156 | 7.21E-16 | -0.46898 | 6.51E-27 | -0.58572 | 2.36E-44 |
| 0.07929  | -0.1776  | 0.00011  | -0.26293 | 8.00E-09 | -0.47214 | 2.66E-27 | -0.44607 | 3.25E-24 |
| 0.00029  | -0.00892 | 0.84746  | -0.10434 | 0.02414  | -0.24656 | 6.76E-08 | -0.10016 | 0.03045  |
| 5.49E-13 | 0.033944 | 0.46431  | -0.03003 | 0.51747  | -0.2405  | 1.44E-07 | -0.07841 | 0.09055  |
| 0.68518  | -0.28074 | 6.61E-10 | -0.22979 | 5.17E-07 | -0.4963  | 2.07E-30 | -0.58067 | 1.89E-43 |
| 4.66E-07 | -0.07144 | 0.12315  | -0.20533 | 7.71E-06 | -0.34705 | 1.16E-14 | -0.27267 | 2.09E-09 |
| 9.74E-07 | -0.09816 | 0.03396  | -0.07864 | 0.0896   | -0.24252 | 1.12E-07 | -0.25018 | 4.27E-08 |
| 0.83828  | -0.07778 | 0.09318  | -0.17321 | 0.00017  | -0.29502 | 7.84E-11 | -0.25641 | 1.90E-08 |
| 0.80472  | -0.19698 | 1.81E-05 | -0.09026 | 0.05125  | -0.33776 | 6.34E-14 | -0.34782 | 1.00E-14 |
| 0.05783  | -0.18415 | 6.25E-05 | -0.04129 | 0.37331  | -0.312   | 5.30E-12 | -0.33299 | 1.48E-13 |
| 0.23923  | -0.17508 | 0.00014  | -0.23453 | 2.95E-07 | -0.55944 | 8.22E-40 | -0.55594 | 3.08E-39 |
| 0.46083  | -0.0393  | 0.3968   | -0.21341 | 3.27E-06 | -0.31797 | 1.97E-12 | -0.23338 | 3.39E-07 |
| 3.57E-08 | -0.04264 | 0.35785  | -0.19625 | 1.94E-05 | -0.19798 | 1.64E-05 | -0.16647 | 0.0003   |
| 0.5366   | -0.05596 | 0.22746  | -0.07163 | 0.12216  | -0.28562 | 3.23E-10 | -0.14589 | 0.00157  |
| 0.82821  | -0.16498 | 0.00034  | -0.21236 | 3.66E-06 | -0.50888 | 3.95E-32 | -0.49121 | 9.81E-30 |
| 0.88688  | -0.19472 | 2.26E-05 | -0.18915 | 3.89E-05 | -0.49284 | 5.98E-30 | -0.49159 | 8.75E-30 |
| 0.04965  | -0.21854 | 1.86E-06 | -0.17085 | 0.00021  | -0.47576 | 9.44E-28 | -0.4945  | 3.60E-30 |
| 0.14721  | -0.14383 | 0.00183  | -0.22236 | 1.21E-06 | -0.35244 | 4.19E-15 | -0.39989 | 2.33E-19 |
| 1.85E-22 | -0.03566 | 0.44199  | -0.25052 | 4.09E-08 | -0.25887 | 1.38E-08 | -0.21197 | 3.82E-06 |

|          |          |          |          |          |          |          |          |          |
|----------|----------|----------|----------|----------|----------|----------|----------|----------|
| 1.73E-10 | -0.14622 | 0.00153  | -0.37862 | 2.29E-17 | -0.36662 | 2.65E-16 | -0.36686 | 2.53E-16 |
| 0.41476  | -0.16379 | 0.00038  | -0.13371 | 0.0038   | -0.42621 | 4.92E-22 | -0.34977 | 6.94E-15 |
| 0.02233  | -0.01725 | 0.71005  | -0.33739 | 6.77E-14 | -0.19753 | 1.71E-05 | -0.14169 | 0.00215  |
| 0.61357  | 0.013988 | 0.76305  | -0.0988  | 0.03279  | -0.20578 | 7.35E-06 | -0.07219 | 0.11927  |
| 8.79E-07 | -0.15088 | 0.00107  | -0.14033 | 0.00237  | -0.4097  | 2.50E-20 | -0.32979 | 2.61E-13 |
| 9.76E-05 | -0.15753 | 0.00063  | -0.13054 | 0.00472  | -0.32172 | 1.05E-12 | -0.31951 | 1.52E-12 |
| 0.98984  | -0.24508 | 8.13E-08 | -0.25677 | 1.82E-08 | -0.51775 | 2.19E-33 | -0.54344 | 3.08E-37 |
| 5.65E-05 | 0.180201 | 9.01E-05 | 0.181316 | 8.13E-05 | 0.290072 | 1.66E-10 | 0.307053 | 1.18E-11 |
| 1.65E-05 | -0.2542  | 2.54E-08 | -0.33223 | 1.70E-13 | -0.45027 | 1.08E-24 | -0.5409  | 7.65E-37 |
| 6.84E-06 | -0.26429 | 6.65E-09 | -0.16361 | 0.00039  | -0.31641 | 2.56E-12 | -0.43239 | 1.07E-22 |
| 0.00606  | -0.1846  | 5.99E-05 | -0.1835  | 6.64E-05 | -0.43501 | 5.54E-23 | -0.43799 | 2.61E-23 |
| 4.85E-05 | 0.035436 | 0.44489  | -0.06213 | 0.18011  | -0.18011 | 9.08E-05 | -0.05007 | 0.28018  |
| 0.01957  | -0.14042 | 0.00236  | -0.14868 | 0.00127  | -0.33425 | 1.19E-13 | -0.34209 | 2.88E-14 |
| 4.05E-06 | -0.14622 | 0.00153  | -0.3017  | 2.78E-11 | -0.35228 | 4.32E-15 | -0.3578  | 1.50E-15 |
| 0.7884   | -0.06067 | 0.19064  | -0.33262 | 1.59E-13 | -0.30591 | 1.42E-11 | -0.26716 | 4.49E-09 |
| 1.21E-10 | -0.13725 | 0.00296  | -0.00866 | 0.85186  | -0.28199 | 5.51E-10 | -0.26158 | 9.59E-09 |
| 0.0236   | -0.11514 | 0.01278  | -0.36977 | 1.41E-16 | -0.29915 | 4.14E-11 | -0.28351 | 4.41E-10 |
| 0.32448  | -0.08944 | 0.05341  | -0.05552 | 0.23115  | -0.29843 | 4.63E-11 | -0.31481 | 3.34E-12 |
| 0.0182   | 0.049224 | 0.28845  | 0.291633 | 1.31E-10 | 0.345149 | 1.64E-14 | 0.34127  | 3.35E-14 |
| 1.54E-08 | -0.10776 | 0.01985  | -0.30411 | 1.90E-11 | -0.32763 | 3.80E-13 | -0.31554 | 2.96E-12 |
| 0.08692  | -0.18251 | 7.28E-05 | -0.20489 | 8.07E-06 | -0.37056 | 1.20E-16 | -0.35578 | 2.21E-15 |
| 3.38E-08 | -0.26471 | 6.28E-09 | -0.24961 | 4.59E-08 | -0.44702 | 2.54E-24 | -0.50298 | 2.59E-31 |
| 2.82E-06 | -0.16767 | 0.00027  | 0.003938 | 0.93236  | -0.1813  | 8.15E-05 | -0.18273 | 7.14E-05 |
| 0.0032   | -0.03312 | 0.47516  | -0.25013 | 4.30E-08 | -0.39722 | 4.22E-19 | -0.303   | 2.26E-11 |
| 0.78128  | -0.16624 | 0.00031  | -0.27853 | 9.09E-10 | -0.4262  | 4.93E-22 | -0.44566 | 3.62E-24 |
| 0.00179  | -0.0121  | 0.7943   | -0.1347  | 0.00354  | -0.13798 | 0.00281  | -0.04945 | 0.28624  |
| 0.00012  | -0.28195 | 5.54E-10 | -0.25763 | 1.62E-08 | -0.51689 | 2.91E-33 | -0.60343 | 1.17E-47 |
| 6.51E-09 | -0.18386 | 6.42E-05 | -0.03444 | 0.45775  | -0.00476 | 0.91823  | -0.1047  | 0.02365  |
| 0.02069  | -0.15075 | 0.00108  | -0.04617 | 0.3195   | -0.24935 | 4.75E-08 | -0.30769 | 1.07E-11 |
| 6.11E-05 | 0.173985 | 0.00016  | 0.134649 | 0.00355  | 0.225644 | 8.36E-07 | 0.296741 | 6.01E-11 |
| 0.19007  | 0.043187 | 0.35175  | -0.24005 | 1.52E-07 | -0.29458 | 8.39E-11 | -0.24664 | 6.69E-08 |
| 0.00537  | -0.25584 | 2.05E-08 | -0.22945 | 5.38E-07 | -0.53191 | 1.81E-35 | -0.60019 | 4.89E-47 |
| 0.00015  | -0.18184 | 7.75E-05 | -0.19119 | 3.20E-05 | -0.4279  | 3.25E-22 | -0.40516 | 7.07E-20 |
| 0.03306  | -0.34843 | 8.93E-15 | -0.11321 | 0.01437  | -0.34969 | 7.04E-15 | -0.51473 | 5.92E-33 |
| 0.72742  | 0.218799 | 1.81E-06 | 0.093262 | 0.04397  | 0.30915  | 8.44E-12 | 0.30398  | 1.93E-11 |
| 0.01683  | -0.27632 | 1.25E-09 | -0.34524 | 1.61E-14 | -0.56111 | 4.34E-40 | -0.64879 | 3.88E-57 |
| 1.42E-07 | 0.114875 | 0.01299  | 0.04763  | 0.30436  | -0.10356 | 0.02522  | 0.083465 | 0.07154  |
| 0.03821  | -0.11455 | 0.01325  | -0.2379  | 1.97E-07 | -0.38218 | 1.09E-17 | -0.39946 | 2.56E-19 |
| 4.59E-07 | -0.16261 | 0.00042  | -0.19083 | 3.31E-05 | -0.37616 | 3.82E-17 | -0.38574 | 5.12E-18 |
| 1.62E-06 | 0.001345 | 0.97687  | 0.009012 | 0.84599  | -0.08232 | 0.07552  | 0.063875 | 0.16819  |
| 0.79242  | -0.09802 | 0.0342   | -0.16456 | 0.00036  | -0.3853  | 5.62E-18 | -0.35677 | 1.83E-15 |
| 5.03E-10 | -0.09611 | 0.03788  | -0.13556 | 0.00333  | -0.30723 | 1.15E-11 | -0.26757 | 4.25E-09 |
| 8.87E-20 | -0.10288 | 0.02621  | -0.16909 | 0.00024  | -0.39956 | 2.50E-19 | -0.32942 | 2.78E-13 |
| 0.06876  | -0.01203 | 0.79538  | -0.09653 | 0.03703  | -0.39745 | 4.01E-19 | -0.26363 | 7.27E-09 |
| 0.51958  | -0.03961 | 0.39309  | 0.011448 | 0.80511  | -0.27116 | 2.58E-09 | -0.18386 | 6.42E-05 |

|          |          |          |          |          |          |          |          |          |
|----------|----------|----------|----------|----------|----------|----------|----------|----------|
| 0.00086  | -0.03982 | 0.39061  | -0.17537 | 0.00014  | -0.37686 | 3.31E-17 | -0.28962 | 1.78E-10 |
| 0.9894   | -0.05724 | 0.21699  | -0.2999  | 3.68E-11 | -0.25378 | 2.69E-08 | -0.22592 | 8.09E-07 |
| 1.63E-11 | -0.27663 | 1.19E-09 | -0.28647 | 2.85E-10 | -0.39038 | 1.89E-18 | -0.50567 | 1.10E-31 |
| 0.00019  | -0.19059 | 3.39E-05 | -0.39811 | 3.46E-19 | -0.50081 | 5.11E-31 | -0.55966 | 7.55E-40 |
| 1.80E-07 | -0.22297 | 1.13E-06 | -0.36329 | 5.13E-16 | -0.43444 | 6.39E-23 | -0.46901 | 6.44E-27 |
| 5.68E-23 | -0.28833 | 2.16E-10 | -0.21397 | 3.08E-06 | -0.42587 | 5.35E-22 | -0.53328 | 1.12E-35 |
| 0.62798  | -0.1949  | 2.22E-05 | -0.13572 | 0.0033   | -0.48506 | 6.22E-29 | -0.46832 | 7.83E-27 |
| 2.32E-14 | -0.15062 | 0.0011   | -0.13403 | 0.00371  | -0.34078 | 3.66E-14 | -0.3728  | 7.61E-17 |
| 8.80E-18 | -0.19639 | 1.92E-05 | -0.29855 | 4.54E-11 | -0.35575 | 2.23E-15 | -0.44806 | 1.93E-24 |
| 0.05355  | -0.15363 | 0.00087  | -0.15758 | 0.00063  | -0.25577 | 2.07E-08 | -0.29919 | 4.11E-11 |
| 0.4464   | 0.046927 | 0.31157  | -0.11231 | 0.01517  | -0.24604 | 7.21E-08 | -0.11121 | 0.0162   |
| 2.51E-05 | -0.02067 | 0.65588  | -0.07671 | 0.09776  | -0.2524  | 3.21E-08 | -0.09294 | 0.0447   |
| 0.56084  | -0.0688  | 0.13767  | -0.20339 | 9.42E-06 | -0.31003 | 7.31E-12 | -0.2689  | 3.54E-09 |
| 0.38067  | 0.016965 | 0.71461  | -0.09252 | 0.0457   | -0.16666 | 0.0003   | -0.0599  | 0.19632  |
| 0.19702  | -0.17273 | 0.00018  | -0.17695 | 0.00012  | -0.45982 | 8.26E-26 | -0.44452 | 4.86E-24 |
| 0.00108  | -0.10421 | 0.02432  | -0.22267 | 1.17E-06 | -0.27267 | 2.09E-09 | -0.32204 | 9.92E-13 |
| 0.72945  | -0.16164 | 0.00045  | -0.18992 | 3.62E-05 | -0.44124 | 1.14E-23 | -0.39486 | 7.11E-19 |
| 0.00014  | -0.25806 | 1.53E-08 | -0.33538 | 9.71E-14 | -0.37141 | 1.01E-16 | -0.48796 | 2.61E-29 |
| 2.15E-07 | -0.14952 | 0.00119  | -0.15866 | 0.00058  | -0.31225 | 5.09E-12 | -0.35905 | 1.18E-15 |
| 6.19E-05 | -0.20669 | 6.69E-06 | -0.29418 | 8.92E-11 | -0.36745 | 2.24E-16 | -0.46445 | 2.30E-26 |
| 7.80E-05 | -0.12097 | 0.00888  | -0.07797 | 0.09239  | -0.15495 | 0.00078  | -0.18848 | 4.15E-05 |
| 0.2071   | -0.03133 | 0.49949  | 0.012671 | 0.78477  | -0.2088  | 5.36E-06 | -0.12567 | 0.00654  |
| 0.30801  | -0.11523 | 0.01271  | -0.05934 | 0.2005   | -0.23302 | 3.54E-07 | -0.23463 | 2.92E-07 |
| 0.11832  | -0.26775 | 4.14E-09 | -0.10826 | 0.01928  | -0.41639 | 5.22E-21 | -0.4434  | 6.51E-24 |
| 0.00012  | -0.13364 | 0.00381  | -0.12411 | 0.00725  | -0.30379 | 1.99E-11 | -0.30188 | 2.70E-11 |
| 0.0414   | -0.14642 | 0.00151  | -0.28591 | 3.10E-10 | -0.50496 | 1.38E-31 | -0.44871 | 1.63E-24 |
| 3.90E-10 | -0.19775 | 1.67E-05 | -0.03738 | 0.42029  | -0.33079 | 2.19E-13 | -0.37849 | 2.36E-17 |
| 0.2516   | -0.04346 | 0.34875  | -0.01934 | 0.67682  | -0.25714 | 1.73E-08 | -0.18634 | 5.09E-05 |
| 4.66E-12 | -0.23776 | 2.00E-07 | -0.0415  | 0.37087  | -0.2145  | 2.91E-06 | -0.25444 | 2.46E-08 |
| 0.00436  | -0.2805  | 6.84E-10 | -0.37052 | 1.21E-16 | -0.55088 | 2.03E-38 | -0.62656 | 2.70E-52 |
| 7.70E-05 | -0.09707 | 0.036    | -0.04457 | 0.33653  | -0.24281 | 1.08E-07 | -0.15057 | 0.0011   |
| 0.469    | -0.12165 | 0.0085   | -0.06087 | 0.18913  | -0.18062 | 8.67E-05 | -0.27155 | 2.45E-09 |
| 0.00487  | -0.19939 | 1.42E-05 | 0.024942 | 0.59083  | -0.29401 | 9.15E-11 | -0.3245  | 6.52E-13 |
| 0.00188  | -0.02543 | 0.58353  | -0.25197 | 3.39E-08 | -0.34034 | 3.97E-14 | -0.25861 | 1.43E-08 |
| 3.88E-07 | -0.15418 | 0.00083  | 0.082777 | 0.07392  | -0.29917 | 4.12E-11 | -0.25888 | 1.37E-08 |
| 0.8664   | -0.15715 | 0.00065  | 0.016576 | 0.72088  | -0.1339  | 0.00374  | -0.18487 | 5.84E-05 |
| 0.14807  | -0.10326 | 0.02565  | -0.19862 | 1.53E-05 | -0.26424 | 6.70E-09 | -0.27888 | 8.65E-10 |
| 9.87E-05 | -0.20995 | 4.74E-06 | -0.29968 | 3.81E-11 | -0.51412 | 7.24E-33 | -0.50437 | 1.67E-31 |
| 0.20169  | -0.20252 | 1.03E-05 | -0.20401 | 8.85E-06 | -0.50033 | 5.94E-31 | -0.4609  | 6.14E-26 |
| 1.45E-17 | -0.01552 | 0.73803  | -0.05161 | 0.26571  | -0.25547 | 2.16E-08 | -0.11932 | 0.00985  |
| 4.30E-11 | -0.06203 | 0.18086  | -0.12569 | 0.00654  | -0.14997 | 0.00115  | -0.10228 | 0.02709  |
| 0.17912  | -0.23236 | 3.82E-07 | -0.24069 | 1.40E-07 | -0.52194 | 5.44E-34 | -0.55354 | 7.58E-39 |
| 3.99E-05 | -0.13861 | 0.00268  | -0.18671 | 4.91E-05 | -0.4278  | 3.33E-22 | -0.36093 | 8.15E-16 |
| 1.24E-18 | -0.04826 | 0.29801  | -0.1709  | 0.00021  | -0.25648 | 1.89E-08 | -0.18579 | 5.36E-05 |
| 0.01745  | -0.17792 | 0.00011  | -0.22563 | 8.37E-07 | -0.52022 | 9.65E-34 | -0.48406 | 8.35E-29 |



|          |          |          |          |          |          |          |          |          |
|----------|----------|----------|----------|----------|----------|----------|----------|----------|
| 0.64355  | -0.04534 | 0.32824  | -0.23373 | 3.25E-07 | -0.31419 | 3.70E-12 | -0.17057 | 0.00021  |
| 0.0029   | -0.13122 | 0.00451  | -0.19893 | 1.49E-05 | -0.38811 | 3.08E-18 | -0.33696 | 7.31E-14 |
| 5.31E-09 | -0.01591 | 0.73158  | 0.157648 | 0.00063  | 0.183809 | 6.45E-05 | 0.12491  | 0.00688  |
| 0.12558  | 0.060087 | 0.19491  | 0.175041 | 0.00014  | 0.110449 | 0.01695  | 0.026236 | 0.57171  |
| 7.76E-17 | 0.071237 | 0.12423  | -0.07018 | 0.12992  | -0.18084 | 8.50E-05 | -0.07057 | 0.12777  |
| 1.42E-37 | 0.031186 | 0.5014   | -0.14485 | 0.0017   | -0.25937 | 1.29E-08 | -0.14586 | 0.00157  |
| 1.46E-07 | 0.058622 | 0.20604  | -0.10849 | 0.01902  | -0.20384 | 9.00E-06 | -0.04673 | 0.3136   |
| 0.08877  | 0.181011 | 8.36E-05 | 0.308613 | 9.20E-12 | 0.491444 | 9.14E-30 | 0.447613 | 2.17E-24 |
| 0.00358  | -0.28056 | 6.78E-10 | -0.19284 | 2.72E-05 | -0.48448 | 7.37E-29 | -0.53488 | 6.44E-36 |
| 0.10395  | -0.32073 | 1.24E-12 | -0.1697  | 0.00023  | -0.50533 | 1.23E-31 | -0.58606 | 2.04E-44 |
| 0.01334  | -0.0632  | 0.17272  | -0.21334 | 3.29E-06 | -0.26803 | 3.99E-09 | -0.2631  | 7.81E-09 |
| 7.44E-07 | -0.11408 | 0.01364  | -0.17712 | 0.00012  | -0.31323 | 4.34E-12 | -0.29421 | 8.87E-11 |
| 0.11485  | -0.07416 | 0.10947  | -0.06287 | 0.17501  | -0.31773 | 2.05E-12 | -0.23165 | 4.16E-07 |
| 0.82768  | -0.10367 | 0.02506  | -0.32027 | 1.34E-12 | -0.39526 | 6.51E-19 | -0.36635 | 2.80E-16 |
| 0.00652  | -0.22329 | 1.09E-06 | -0.31202 | 5.29E-12 | -0.52144 | 6.42E-34 | -0.57794 | 5.75E-43 |
| 1.04E-13 | -0.29641 | 6.33E-11 | -0.24056 | 1.42E-07 | -0.42007 | 2.17E-21 | -0.55158 | 1.57E-38 |
| 0.34508  | -0.18487 | 5.84E-05 | -0.04702 | 0.31063  | -0.32928 | 2.85E-13 | -0.3901  | 2.01E-18 |
| 4.50E-10 | -0.18081 | 8.52E-05 | -0.19237 | 2.85E-05 | -0.41482 | 7.57E-21 | -0.44674 | 2.73E-24 |
| 0.00113  | -0.1046  | 0.02378  | -0.07235 | 0.11843  | -0.30231 | 2.52E-11 | -0.21277 | 3.50E-06 |
| 0.80997  | -0.06926 | 0.13503  | -0.29821 | 4.79E-11 | -0.39187 | 1.37E-18 | -0.29767 | 5.21E-11 |
| 0.08926  | -0.01558 | 0.73709  | -0.16922 | 0.00024  | -0.34627 | 1.33E-14 | -0.1984  | 1.57E-05 |
| 0.51338  | -0.03386 | 0.46546  | -0.17183 | 0.00019  | -0.29081 | 1.49E-10 | -0.22424 | 9.81E-07 |
| 0.02582  | -0.12011 | 0.00938  | 0.003568 | 0.9387   | -0.30795 | 1.02E-11 | -0.287   | 2.63E-10 |
| 0.06651  | -0.08762 | 0.0585   | -0.17433 | 0.00015  | -0.3002  | 3.51E-11 | -0.28724 | 2.54E-10 |
| 0.64553  | -0.1033  | 0.02559  | -0.30183 | 2.72E-11 | -0.45839 | 1.22E-25 | -0.43591 | 4.41E-23 |
| 0.04746  | -0.10263 | 0.02657  | -0.07755 | 0.09414  | -0.28043 | 6.92E-10 | -0.2366  | 2.31E-07 |
| 5.48E-08 | -0.21591 | 2.49E-06 | -0.29106 | 1.43E-10 | -0.48317 | 1.09E-28 | -0.51013 | 2.65E-32 |
| 0.42747  | -0.10891 | 0.01856  | -0.06999 | 0.13094  | -0.2066  | 6.75E-06 | -0.22703 | 7.13E-07 |
| 0.37083  | -0.10225 | 0.02714  | -0.15767 | 0.00063  | -0.26702 | 4.58E-09 | -0.25061 | 4.04E-08 |
| 0.90258  | -0.14699 | 0.00145  | -0.23183 | 4.07E-07 | -0.44573 | 3.55E-24 | -0.44667 | 2.78E-24 |
| 4.79E-06 | -0.07534 | 0.10394  | -0.16519 | 0.00034  | -0.25988 | 1.20E-08 | -0.19898 | 1.48E-05 |
| 0.06414  | -0.08302 | 0.07307  | -0.04933 | 0.28738  | -0.19015 | 3.54E-05 | -0.18427 | 6.18E-05 |
| 0.67701  | -0.06962 | 0.13305  | -0.32445 | 6.58E-13 | -0.35389 | 3.18E-15 | -0.3177  | 2.06E-12 |
| 0.04553  | -0.0386  | 0.40531  | 0.062479 | 0.1777   | -0.17351 | 0.00016  | -0.10451 | 0.02391  |
| 0.01547  | -0.17651 | 0.00013  | -0.21426 | 2.98E-06 | -0.38361 | 8.05E-18 | -0.37082 | 1.14E-16 |
| 0.04507  | -0.08758 | 0.0586   | -0.27109 | 2.61E-09 | -0.2493  | 4.78E-08 | -0.22365 | 1.05E-06 |
| 0.00072  | -0.1749  | 0.00015  | -0.34824 | 9.25E-15 | -0.29678 | 5.98E-11 | -0.33663 | 7.76E-14 |
| 0.36316  | -0.12613 | 0.00635  | -0.35502 | 2.56E-15 | -0.36133 | 7.53E-16 | -0.31669 | 2.44E-12 |
| 0.00481  | -0.1351  | 0.00344  | -0.04361 | 0.34703  | -0.33744 | 6.70E-14 | -0.30192 | 2.68E-11 |
| 0.17946  | -0.0514  | 0.2676   | -0.03521 | 0.44776  | -0.24817 | 5.52E-08 | -0.15837 | 0.00059  |
| 0.72954  | -0.27265 | 2.10E-09 | -0.18481 | 5.88E-05 | -0.49843 | 1.07E-30 | -0.59184 | 1.80E-45 |
| 0.00702  | -0.20415 | 8.71E-06 | -0.22914 | 5.58E-07 | -0.34107 | 3.47E-14 | -0.4048  | 7.69E-20 |
| 1.28E-05 | -0.07008 | 0.13048  | -0.13503 | 0.00346  | -0.24131 | 1.30E-07 | -0.16107 | 0.00048  |
| 5.31E-10 | -0.14919 | 0.00122  | -0.07458 | 0.10748  | -0.38161 | 1.23E-17 | -0.30863 | 9.18E-12 |
| 0.0002   | -0.18961 | 3.72E-05 | -0.3024  | 2.49E-11 | -0.41526 | 6.82E-21 | -0.38905 | 2.52E-18 |

|          |          |          |          |          |          |          |          |          |
|----------|----------|----------|----------|----------|----------|----------|----------|----------|
| 0.00197  | -0.33991 | 4.29E-14 | -0.28493 | 3.58E-10 | -0.54681 | 9.07E-38 | -0.66777 | 1.33E-61 |
| 4.06E-12 | -0.06402 | 0.16723  | -0.17671 | 0.00012  | -0.32534 | 5.64E-13 | -0.20308 | 9.74E-06 |
| 0.5022   | -0.10313 | 0.02583  | -0.08606 | 0.06313  | -0.39432 | 8.01E-19 | -0.48847 | 2.24E-29 |
| 0.00025  | -0.11876 | 0.01021  | -0.19041 | 3.45E-05 | -0.31029 | 7.01E-12 | -0.32117 | 1.15E-12 |
| 1.96E-12 | -0.00298 | 0.94875  | -0.05702 | 0.2187   | -0.18065 | 8.65E-05 | -0.07141 | 0.12332  |
| 0.07692  | -0.14031 | 0.00237  | -0.03595 | 0.43835  | -0.21539 | 2.64E-06 | -0.27295 | 2.01E-09 |
| 3.91E-11 | 0.053905 | 0.24498  | 0.150536 | 0.0011   | -0.02113 | 0.64884  | 0.138182 | 0.00277  |
| 0.33049  | -0.09909 | 0.03229  | -0.14199 | 0.0021   | -0.26296 | 7.96E-09 | -0.20667 | 6.70E-06 |
| 0.08971  | -0.01472 | 0.75098  | -0.0782  | 0.0914   | -0.24233 | 1.15E-07 | -0.17329 | 0.00017  |
| 0.00284  | 0.139922 | 0.00244  | 0.07823  | 0.09129  | 0.245082 | 8.14E-08 | 0.229983 | 5.06E-07 |
| 0.45313  | -0.08591 | 0.06359  | -0.06379 | 0.16878  | -0.06421 | 0.16597  | -0.0377  | 0.41635  |
| 9.93E-08 | -0.05581 | 0.22871  | -0.20834 | 5.62E-06 | -0.25423 | 2.53E-08 | -0.18936 | 3.82E-05 |
| 0.08131  | 0.025469 | 0.583    | -0.12141 | 0.00863  | -0.37407 | 5.88E-17 | -0.30135 | 2.93E-11 |
| 0.75099  | 0.073227 | 0.11403  | 0.365174 | 3.53E-16 | 0.341795 | 3.04E-14 | 0.310854 | 6.40E-12 |
| 0.01103  | -0.05579 | 0.22882  | -0.18357 | 6.60E-05 | -0.32069 | 1.25E-12 | -0.289   | 1.96E-10 |
| 3.05E-06 | -0.14622 | 0.00153  | -0.21569 | 2.55E-06 | -0.4491  | 1.47E-24 | -0.4148  | 7.59E-21 |
| 1.58E-07 | -0.0727  | 0.11667  | -0.12788 | 0.00565  | -0.38788 | 3.24E-18 | -0.27581 | 1.34E-09 |
| 0.0549   | -0.2008  | 1.23E-05 | -0.20799 | 5.83E-06 | -0.40616 | 5.63E-20 | -0.47524 | 1.10E-27 |
| 6.67E-10 | -0.21207 | 3.78E-06 | -0.28042 | 6.92E-10 | -0.50211 | 3.39E-31 | -0.51065 | 2.24E-32 |
| 4.63E-13 | -0.08431 | 0.0687   | -0.1109  | 0.01651  | -0.18565 | 5.43E-05 | -0.20012 | 1.32E-05 |
| 0.69006  | -0.22031 | 1.53E-06 | -0.22841 | 6.07E-07 | -0.51026 | 2.53E-32 | -0.52647 | 1.18E-34 |
| 0.23796  | -0.25723 | 1.71E-08 | -0.25623 | 1.95E-08 | -0.54321 | 3.34E-37 | -0.57111 | 8.86E-42 |
| 2.47E-05 | -0.04279 | 0.35619  | -0.14008 | 0.00241  | -0.38116 | 1.35E-17 | -0.24357 | 9.82E-08 |
| 0.9011   | -0.069   | 0.1365   | -0.14273 | 0.00199  | -0.30322 | 2.18E-11 | -0.2044  | 8.49E-06 |
| 8.09E-14 | 0.040443 | 0.38321  | -0.13061 | 0.0047   | -0.21638 | 2.36E-06 | -0.1084  | 0.01912  |
| 0.73853  | 0.20276  | 1.01E-05 | -0.13917 | 0.00258  | 0.117672 | 0.01093  | 0.291051 | 1.43E-10 |
| 2.21E-09 | -0.19511 | 2.18E-05 | 0.061434 | 0.18507  | -0.20513 | 7.88E-06 | -0.26607 | 5.22E-09 |
| 0.55983  | -0.13422 | 0.00366  | -0.25198 | 3.39E-08 | -0.24036 | 1.46E-07 | -0.2349  | 2.83E-07 |
| 0.2565   | -0.20936 | 5.04E-06 | -0.2944  | 8.63E-11 | -0.39996 | 2.29E-19 | -0.43513 | 5.38E-23 |
| 0.26336  | 0.117566 | 0.011    | -0.11166 | 0.01578  | 0.083774 | 0.0705   | 0.087418 | 0.05907  |
| 0.14668  | -0.24609 | 7.17E-08 | -0.31604 | 2.72E-12 | -0.50301 | 2.56E-31 | -0.51204 | 1.42E-32 |
| 0.58645  | -0.18878 | 4.03E-05 | -0.16818 | 0.00026  | -0.31093 | 6.32E-12 | -0.36344 | 4.98E-16 |
| 0.03837  | -0.09638 | 0.03733  | -0.08417 | 0.06918  | -0.14732 | 0.00141  | -0.13645 | 0.00313  |
| 0.0208   | -0.15153 | 0.00102  | -0.05527 | 0.23326  | -0.37739 | 2.96E-17 | -0.39703 | 4.40E-19 |
| 0.07778  | 0.113792 | 0.01388  | -0.04948 | 0.28599  | -0.09973 | 0.03118  | 0.094603 | 0.041    |
| 0.30696  | -0.10416 | 0.02439  | 0.088574 | 0.05578  | -0.1225  | 0.00805  | -0.18424 | 6.20E-05 |
| 0.67261  | -0.09575 | 0.0386   | -0.02332 | 0.61514  | -0.29305 | 1.06E-10 | -0.22349 | 1.07E-06 |
| 0.00017  | 0.016156 | 0.72767  | -0.19291 | 2.70E-05 | -0.17024 | 0.00022  | -0.11422 | 0.01352  |
| 0.00222  | -0.0946  | 0.041    | -0.03104 | 0.50346  | -0.25853 | 1.44E-08 | -0.17219 | 0.00018  |
| 5.17E-09 | -0.07916 | 0.0875   | -0.04419 | 0.34071  | -0.25708 | 1.74E-08 | -0.17703 | 0.00012  |
| 0.94681  | -0.10536 | 0.02278  | -0.22532 | 8.68E-07 | -0.34321 | 2.35E-14 | -0.34132 | 3.32E-14 |
| 0.152    | -0.08372 | 0.07066  | 0.033779 | 0.46647  | -0.25048 | 4.11E-08 | -0.16537 | 0.00033  |
| 0.60667  | -0.23737 | 2.10E-07 | -0.33866 | 5.38E-14 | -0.46616 | 1.43E-26 | -0.52166 | 5.97E-34 |
| 6.14E-20 | -0.18839 | 4.19E-05 | -0.31655 | 2.50E-12 | -0.38005 | 1.70E-17 | -0.43816 | 2.50E-23 |
| 3.72E-19 | -0.1823  | 7.42E-05 | -0.35593 | 2.15E-15 | -0.4082  | 3.53E-20 | -0.43254 | 1.03E-22 |

|          |          |          |          |          |          |          |          |          |
|----------|----------|----------|----------|----------|----------|----------|----------|----------|
| 0.00155  | -0.16529 | 0.00033  | -0.3257  | 5.30E-13 | -0.43664 | 3.67E-23 | -0.42312 | 1.04E-21 |
| 4.04E-08 | -0.20907 | 5.20E-06 | -0.23353 | 3.33E-07 | -0.32989 | 2.56E-13 | -0.40566 | 6.32E-20 |
| 9.59E-05 | 0.076519 | 0.09862  | 0.159028 | 0.00056  | 0.379677 | 1.84E-17 | 0.326826 | 4.37E-13 |
| 0.00135  | -0.00084 | 0.98562  | -0.17289 | 0.00017  | -0.30868 | 9.11E-12 | -0.1802  | 9.01E-05 |
| 0.89535  | -0.23504 | 2.78E-07 | -0.28425 | 3.96E-10 | -0.54835 | 5.16E-38 | -0.56558 | 7.75E-41 |
| 0.29704  | -0.23598 | 2.48E-07 | -0.32003 | 1.39E-12 | -0.51648 | 3.33E-33 | -0.55833 | 1.25E-39 |
| 0.57349  | -0.18491 | 5.82E-05 | -0.16845 | 0.00026  | -0.48706 | 3.42E-29 | -0.46745 | 1.00E-26 |
| 0.02059  | -0.04963 | 0.28445  | -0.15235 | 0.00096  | -0.32795 | 3.59E-13 | -0.22376 | 1.04E-06 |
| 6.07E-10 | 0.161855 | 0.00045  | 0.087839 | 0.05786  | 0.296729 | 6.02E-11 | 0.253747 | 2.70E-08 |
| 6.07E-06 | 0.037258 | 0.42181  | -0.05159 | 0.26585  | -0.26219 | 8.84E-09 | -0.10763 | 0.01999  |
| 1.42E-19 | -0.13871 | 0.00266  | -0.23206 | 3.96E-07 | -0.39123 | 1.57E-18 | -0.38933 | 2.37E-18 |
| 1.40E-09 | -0.17827 | 0.00011  | -0.19998 | 1.34E-05 | -0.45017 | 1.11E-24 | -0.45114 | 8.55E-25 |
| 1.40E-09 | -0.15966 | 0.00053  | -0.24728 | 6.17E-08 | -0.39886 | 2.93E-19 | -0.39978 | 2.38E-19 |
| 0.61229  | -0.08868 | 0.05549  | -0.04864 | 0.29423  | -0.31386 | 3.91E-12 | -0.24333 | 1.01E-07 |
| 0.02022  | -0.00224 | 0.96152  | -0.16259 | 0.00042  | -0.1856  | 5.45E-05 | -0.08632 | 0.06233  |
| 0.07325  | -0.06158 | 0.18402  | -0.26191 | 9.17E-09 | -0.32963 | 2.68E-13 | -0.33491 | 1.05E-13 |
| 8.86E-09 | -0.07048 | 0.12828  | -0.06159 | 0.18393  | -0.34911 | 7.85E-15 | -0.23586 | 2.52E-07 |
| 0.26407  | 0.012844 | 0.78191  | -0.27427 | 1.67E-09 | -0.28741 | 2.48E-10 | -0.2157  | 2.55E-06 |
| 0.18344  | -0.04477 | 0.33431  | -0.21576 | 2.53E-06 | -0.22556 | 8.44E-07 | -0.25681 | 1.81E-08 |
| 0.01348  | -0.02022 | 0.66303  | -0.09517 | 0.0398   | -0.21095 | 4.26E-06 | -0.08822 | 0.05676  |
| 0.0112   | -0.28957 | 1.79E-10 | -0.30185 | 2.71E-11 | -0.55101 | 1.94E-38 | -0.61506 | 6.10E-50 |
| 0.97103  | -0.03824 | 0.40968  | -0.14891 | 0.00125  | -0.30506 | 1.63E-11 | -0.20469 | 8.24E-06 |
| 0.00014  | 0.043004 | 0.35379  | -0.0551  | 0.23464  | -0.17336 | 0.00017  | -0.05681 | 0.22047  |
| 0.07027  | -0.12899 | 0.00524  | -0.07432 | 0.10872  | -0.32574 | 5.27E-13 | -0.24569 | 7.54E-08 |
| 0.24692  | 0.021968 | 0.63585  | -0.17059 | 0.00021  | -0.1523  | 0.00096  | -0.14434 | 0.00176  |
| 2.87E-13 | -0.02775 | 0.5497   | -0.21716 | 2.17E-06 | -0.31833 | 1.86E-12 | -0.19235 | 2.86E-05 |
| 0.1276   | -0.01698 | 0.71434  | -0.13395 | 0.00373  | -0.23603 | 2.47E-07 | -0.20994 | 4.74E-06 |
| 3.52E-06 | -0.1606  | 0.00049  | 0.109656 | 0.01777  | -0.25946 | 1.27E-08 | -0.27754 | 1.05E-09 |
| 1.13E-06 | -0.12549 | 0.00662  | -0.21279 | 3.50E-06 | -0.33248 | 1.62E-13 | -0.29823 | 4.77E-11 |
| 0.0016   | -0.16849 | 0.00025  | -0.16989 | 0.00023  | -0.41224 | 1.38E-20 | -0.38651 | 4.35E-18 |
| 0.18373  | -0.14247 | 0.00203  | -0.2031  | 9.71E-06 | -0.30919 | 8.38E-12 | -0.28653 | 2.82E-10 |
| 0.08687  | -0.10537 | 0.02277  | 0.055212 | 0.23371  | -0.1703  | 0.00022  | -0.12107 | 0.00882  |
| 0.00038  | -0.24543 | 7.79E-08 | -0.04642 | 0.31685  | -0.1338  | 0.00377  | -0.23475 | 2.88E-07 |
| 0.663    | -0.0878  | 0.05798  | -0.1146  | 0.01321  | -0.24083 | 1.38E-07 | -0.22609 | 7.94E-07 |
| 0.00061  | 0.048038 | 0.30024  | -0.21615 | 2.43E-06 | -0.2282  | 6.22E-07 | -0.06531 | 0.15882  |
| 0.06288  | -0.15256 | 0.00094  | -0.12135 | 0.00866  | -0.28325 | 4.58E-10 | -0.26995 | 3.06E-09 |
| 0.0041   | -0.08554 | 0.06475  | -0.19615 | 1.96E-05 | -0.36693 | 2.49E-16 | -0.3508  | 5.71E-15 |
| 0.00205  | -0.17351 | 0.00016  | -0.21735 | 2.13E-06 | -0.36682 | 2.54E-16 | -0.35168 | 4.84E-15 |
| 0.31562  | 0.008352 | 0.85714  | 0.129621 | 0.00502  | -0.06214 | 0.18007  | -0.0104  | 0.82265  |
| 0.00011  | -0.12749 | 0.0058   | -0.17874 | 0.0001   | -0.45136 | 8.07E-25 | -0.39769 | 3.80E-19 |
| 0.01189  | -0.0441  | 0.34162  | -0.18617 | 5.17E-05 | -0.26001 | 1.18E-08 | -0.26876 | 3.61E-09 |
| 0.80668  | -0.21976 | 1.63E-06 | -0.1547  | 0.0008   | -0.4455  | 3.77E-24 | -0.43017 | 1.86E-22 |
| 0.00014  | -0.28385 | 4.19E-10 | -0.31316 | 4.39E-12 | -0.37565 | 4.24E-17 | -0.52957 | 4.07E-35 |
| 0.0669   | -0.04843 | 0.2963   | -0.29701 | 5.77E-11 | -0.36354 | 4.88E-16 | -0.25511 | 2.26E-08 |
| 0.32708  | -0.06036 | 0.19286  | -0.21377 | 3.14E-06 | -0.33097 | 2.12E-13 | -0.29219 | 1.21E-10 |

|          |          |          |          |          |          |          |          |          |
|----------|----------|----------|----------|----------|----------|----------|----------|----------|
| 1.05E-05 | -0.36268 | 5.79E-16 | -0.32581 | 5.20E-13 | -0.55658 | 2.42E-39 | -0.71055 | 5.45E-73 |
| 0.00098  | -0.141   | 0.00226  | 0.011847 | 0.79847  | -0.22185 | 1.29E-06 | -0.30144 | 2.89E-11 |
| 0.01017  | -0.08481 | 0.06708  | -0.26802 | 3.99E-09 | -0.32965 | 2.67E-13 | -0.31191 | 5.39E-12 |
| 0.00112  | 0.037268 | 0.4217   | 0.115608 | 0.01242  | 0.300378 | 3.41E-11 | 0.243437 | 9.99E-08 |
| 0.03033  | -0.17666 | 0.00012  | -0.07956 | 0.0859   | -0.12935 | 0.00512  | -0.27147 | 2.47E-09 |
| 0.16355  | -0.21452 | 2.90E-06 | -0.12899 | 0.00524  | -0.269   | 3.49E-09 | -0.35519 | 2.48E-15 |
| 1.54E-10 | 0.054816 | 0.23709  | 0.006203 | 0.89364  | -0.16684 | 0.00029  | 0.045836 | 0.32297  |
| 0.00014  | -0.06947 | 0.13386  | -0.10292 | 0.02614  | -0.28507 | 3.51E-10 | -0.24863 | 5.20E-08 |
| 0.21662  | -0.201   | 1.20E-05 | 0.001141 | 0.98039  | -0.32422 | 6.83E-13 | -0.35748 | 1.60E-15 |
| 0.45648  | -0.03002 | 0.51758  | -0.28923 | 1.89E-10 | -0.33599 | 8.69E-14 | -0.24518 | 8.03E-08 |
| 0.15     | 0.055108 | 0.2346   | -0.25705 | 1.75E-08 | -0.24867 | 5.17E-08 | -0.16144 | 0.00046  |
| 0.10201  | -0.06344 | 0.17108  | -0.18989 | 3.62E-05 | -0.39724 | 4.20E-19 | -0.33776 | 6.33E-14 |
| 5.08E-07 | 0.033774 | 0.46654  | -0.08023 | 0.08327  | -0.24484 | 8.39E-08 | -0.12142 | 0.00863  |
| 0.03141  | 0.048558 | 0.29503  | 0.151548 | 0.00102  | -0.04943 | 0.28646  | 0.095906 | 0.03829  |
| 9.93E-09 | 0.170382 | 0.00022  | 0.212289 | 3.69E-06 | 0.516947 | 2.86E-33 | 0.410729 | 1.97E-20 |
| 0.70075  | 0.084195 | 0.06909  | 0.056336 | 0.22432  | -0.11457 | 0.01324  | 0.010241 | 0.82531  |
| 0.74344  | 0.266457 | 4.95E-09 | 0.316131 | 2.68E-12 | 0.464559 | 2.24E-26 | 0.521836 | 5.63E-34 |
| 0.00024  | -0.12867 | 0.00536  | -0.22049 | 1.50E-06 | -0.45273 | 5.61E-25 | -0.37678 | 3.36E-17 |
| 2.89E-09 | -0.21557 | 2.58E-06 | -0.32226 | 9.56E-13 | -0.46921 | 6.09E-27 | -0.52668 | 1.09E-34 |
| 0.06292  | -0.09836 | 0.03358  | -0.21271 | 3.53E-06 | -0.27097 | 2.65E-09 | -0.2306  | 4.70E-07 |
| 0.02471  | -0.19929 | 1.43E-05 | -0.25215 | 3.31E-08 | -0.48986 | 1.48E-29 | -0.48072 | 2.23E-28 |
| 0.03512  | -0.25432 | 2.50E-08 | -0.18618 | 5.16E-05 | -0.51214 | 1.38E-32 | -0.51957 | 1.20E-33 |
| 0.09388  | -0.06198 | 0.18119  | -0.0021  | 0.96391  | -0.17341 | 0.00017  | -0.18468 | 5.95E-05 |
| 5.46E-10 | -0.00416 | 0.92852  | -0.04593 | 0.32201  | -0.23378 | 3.23E-07 | -0.07782 | 0.09301  |
| 0.04196  | 0.176239 | 0.00013  | 0.063534 | 0.17047  | 0.276949 | 1.14E-09 | 0.269758 | 3.14E-09 |
| 0.35231  | -0.13879 | 0.00265  | -0.01032 | 0.82391  | -0.32671 | 4.46E-13 | -0.28096 | 6.40E-10 |
| 0.78889  | -0.22535 | 8.64E-07 | -0.15963 | 0.00053  | -0.24293 | 1.06E-07 | -0.29761 | 5.26E-11 |
| 6.41E-05 | 0.140302 | 0.00237  | 0.063678 | 0.1695   | 0.245969 | 7.28E-08 | 0.274994 | 1.51E-09 |
| 0.89288  | -0.26444 | 6.52E-09 | -0.27392 | 1.75E-09 | -0.56945 | 1.71E-41 | -0.58794 | 9.32E-45 |
| 9.70E-14 | 0.029106 | 0.53038  | -0.06646 | 0.15159  | -0.21669 | 2.28E-06 | -0.01397 | 0.76326  |
| 0.53016  | -0.16568 | 0.00032  | -0.32383 | 7.31E-13 | -0.49543 | 2.71E-30 | -0.4615  | 5.21E-26 |
| 4.84E-06 | -0.10272 | 0.02643  | -0.0878  | 0.05797  | -0.1623  | 0.00043  | -0.16652 | 0.0003   |
| 0.26448  | -0.17288 | 0.00017  | -0.25423 | 2.53E-08 | -0.50346 | 2.22E-31 | -0.4391  | 1.97E-23 |
| 0.20787  | -0.24816 | 5.52E-08 | -0.33732 | 6.85E-14 | -0.55519 | 4.09E-39 | -0.5919  | 1.75E-45 |
| 0.00825  | -0.15353 | 0.00087  | -0.08787 | 0.05777  | -0.2784  | 9.26E-10 | -0.34047 | 3.87E-14 |
| 0.76222  | -0.02875 | 0.53541  | -0.13516 | 0.00343  | -0.19419 | 2.38E-05 | -0.11838 | 0.01045  |
| 4.76E-08 | -0.09742 | 0.03532  | -0.04736 | 0.30708  | -0.32071 | 1.24E-12 | -0.24118 | 1.32E-07 |
| 0.00054  | 0.019722 | 0.67077  | -0.07684 | 0.09719  | -0.23405 | 3.13E-07 | -0.10284 | 0.02626  |
| 2.74E-05 | -0.16677 | 0.00029  | -0.23101 | 4.48E-07 | -0.47967 | 3.03E-28 | -0.41234 | 1.35E-20 |
| 5.00E-06 | 0.020648 | 0.65628  | 0.187689 | 4.48E-05 | -0.06192 | 0.18163  | 0.061157 | 0.18707  |
| 0.00036  | -0.16704 | 0.00029  | -0.1148  | 0.01305  | -0.3606  | 8.70E-16 | -0.35666 | 1.87E-15 |
| 0.04535  | -0.20036 | 1.29E-05 | 0.191124 | 3.22E-05 | -0.23802 | 1.94E-07 | -0.3253  | 5.69E-13 |
| 0.00024  | -0.2191  | 1.75E-06 | -0.18012 | 9.07E-05 | -0.4926  | 6.43E-30 | -0.55301 | 9.22E-39 |
| 1.00E-08 | -0.06963 | 0.13294  | -0.0398  | 0.39087  | -0.30718 | 1.16E-11 | -0.26049 | 1.11E-08 |
| 0.97855  | -0.10044 | 0.02999  | 0.279681 | 7.70E-10 | -0.13773 | 0.00286  | -0.13193 | 0.00429  |

|          |          |          |          |          |          |          |          |          |
|----------|----------|----------|----------|----------|----------|----------|----------|----------|
| 0.70004  | -0.21174 | 3.91E-06 | -0.20358 | 9.24E-06 | -0.47972 | 2.99E-28 | -0.46587 | 1.55E-26 |
| 9.30E-18 | -0.11892 | 0.01011  | -0.08499 | 0.0665   | -0.26651 | 4.92E-09 | -0.23869 | 1.79E-07 |
| 0.01649  | -0.14807 | 0.00133  | -0.10538 | 0.02276  | -0.27787 | 1.00E-09 | -0.34096 | 3.54E-14 |
| 0.28296  | -0.2981  | 4.87E-11 | -0.32454 | 6.47E-13 | -0.56649 | 5.45E-41 | -0.63894 | 6.08E-55 |
| 8.72E-06 | -0.03966 | 0.39251  | -0.07877 | 0.08906  | -0.2849  | 3.59E-10 | -0.21674 | 2.27E-06 |
| 1.57E-05 | -0.17357 | 0.00016  | -0.25204 | 3.36E-08 | -0.42398 | 8.48E-22 | -0.4328  | 9.66E-23 |
| 0.03734  | -0.31687 | 2.37E-12 | -0.27145 | 2.48E-09 | -0.53586 | 4.56E-36 | -0.61334 | 1.35E-49 |
| 1.02E-10 | -0.03426 | 0.46011  | -0.23241 | 3.80E-07 | -0.2325  | 3.76E-07 | -0.25396 | 2.62E-08 |
| 0.08625  | 0.109838 | 0.01758  | -0.0123  | 0.79089  | -0.1409  | 0.00227  | 0.013418 | 0.77242  |
| 0.28321  | -0.1621  | 0.00044  | -0.09261 | 0.04548  | -0.28504 | 3.52E-10 | -0.30562 | 1.49E-11 |
| 0.25524  | -0.19933 | 1.43E-05 | -0.07516 | 0.10476  | -0.21996 | 1.59E-06 | -0.31843 | 1.83E-12 |
| 0.38459  | -0.22562 | 8.38E-07 | -0.07128 | 0.12402  | -0.42337 | 9.83E-22 | -0.48969 | 1.55E-29 |
| 0.01049  | -0.03166 | 0.49489  | -0.08317 | 0.07256  | -0.25007 | 4.33E-08 | -0.18732 | 4.64E-05 |
| 0.80494  | -0.05014 | 0.27952  | -0.23807 | 1.93E-07 | -0.34895 | 8.09E-15 | -0.22666 | 7.44E-07 |
| 0.00898  | -0.10707 | 0.02065  | -0.2156  | 2.57E-06 | -0.31226 | 5.08E-12 | -0.28331 | 4.55E-10 |
| 0.01165  | -0.07801 | 0.09222  | -0.18361 | 6.57E-05 | -0.34636 | 1.31E-14 | -0.24475 | 8.48E-08 |
| 0.13789  | -0.10488 | 0.02341  | -0.07509 | 0.10508  | -0.34487 | 1.73E-14 | -0.24715 | 6.27E-08 |
| 0.02471  | -0.2525  | 3.17E-08 | -0.26064 | 1.09E-08 | -0.47983 | 2.90E-28 | -0.53262 | 1.41E-35 |
| 0.04382  | -0.12825 | 0.00551  | -0.19668 | 1.86E-05 | -0.31336 | 4.24E-12 | -0.27982 | 7.55E-10 |
| 0.00014  | -0.08281 | 0.07381  | -0.21081 | 4.32E-06 | -0.34522 | 1.62E-14 | -0.2255  | 8.50E-07 |
| 0.55506  | 0.032233 | 0.48714  | 0.041669 | 0.36895  | 0.22863  | 5.92E-07 | 0.282604 | 5.04E-10 |
| 0.11633  | 0.111462 | 0.01596  | 0.228293 | 6.16E-07 | 0.237094 | 2.17E-07 | 0.271084 | 2.61E-09 |
| 0.00036  | -0.09382 | 0.0427   | -0.0646  | 0.16342  | -0.3435  | 2.23E-14 | -0.22979 | 5.17E-07 |
| 0.59864  | -0.01983 | 0.669    | -0.20086 | 1.22E-05 | -0.21333 | 3.30E-06 | -0.12694 | 0.00602  |
| 0.93612  | -0.13999 | 0.00243  | -0.1705  | 0.00021  | -0.37344 | 6.69E-17 | -0.3887  | 2.71E-18 |
| 0.0014   | 0.057067 | 0.21835  | -0.10482 | 0.02349  | -0.14179 | 0.00213  | 0.031902 | 0.49163  |
| 0.24942  | -0.08858 | 0.05576  | -0.08166 | 0.07791  | -0.28227 | 5.29E-10 | -0.24645 | 6.85E-08 |
| 8.91E-08 | 0.106273 | 0.02162  | 0.330253 | 2.40E-13 | 0.263166 | 7.75E-09 | 0.277547 | 1.05E-09 |
| 4.88E-05 | -0.16871 | 0.00025  | -0.03332 | 0.47256  | -0.37834 | 2.43E-17 | -0.32791 | 3.62E-13 |
| 6.30E-08 | -0.21455 | 2.89E-06 | -0.19709 | 1.79E-05 | -0.36861 | 1.78E-16 | -0.45325 | 4.88E-25 |
| 0.02834  | -0.09103 | 0.04929  | -0.20541 | 7.65E-06 | -0.29495 | 7.92E-11 | -0.223   | 1.13E-06 |
| 0.00463  | -0.11645 | 0.01179  | -0.12502 | 0.00683  | -0.38581 | 5.04E-18 | -0.29338 | 1.01E-10 |
| 1.25E-09 | -0.13592 | 0.00325  | -0.11539 | 0.01259  | -0.38978 | 2.15E-18 | -0.34899 | 8.04E-15 |
| 0.90383  | -0.11924 | 0.00991  | -0.25713 | 1.73E-08 | -0.34863 | 8.59E-15 | -0.31983 | 1.44E-12 |
| 0.50776  | -0.14088 | 0.00228  | -0.01857 | 0.68892  | -0.27334 | 1.90E-09 | -0.19739 | 1.73E-05 |
| 4.21E-06 | -0.01966 | 0.67177  | -0.14772 | 0.00137  | -0.16984 | 0.00023  | -0.18051 | 8.76E-05 |
| 0.01326  | -0.19728 | 1.75E-05 | -0.26526 | 5.83E-09 | -0.43915 | 1.94E-23 | -0.46451 | 2.27E-26 |
| 0.25449  | -0.21408 | 3.04E-06 | -0.24896 | 4.99E-08 | -0.42728 | 3.78E-22 | -0.43766 | 2.84E-23 |
| 0.00175  | -0.13808 | 0.00279  | -0.07335 | 0.11342  | -0.23426 | 3.05E-07 | -0.18452 | 6.04E-05 |
| 0.02947  | -0.01991 | 0.66784  | -0.17002 | 0.00022  | -0.21266 | 3.55E-06 | -0.10407 | 0.02451  |
| 0.00015  | -0.16288 | 0.00041  | -0.13483 | 0.00351  | -0.32063 | 1.26E-12 | -0.35908 | 1.17E-15 |
| 0.43434  | -0.07602 | 0.10083  | -0.0898  | 0.05245  | -0.29442 | 8.60E-11 | -0.21565 | 2.56E-06 |
| 0.60731  | -0.08498 | 0.06652  | -0.2134  | 3.27E-06 | -0.26512 | 5.94E-09 | -0.22577 | 8.24E-07 |
| 8.27E-21 | 0.022008 | 0.63523  | -0.16575 | 0.00032  | -0.18675 | 4.90E-05 | -0.06416 | 0.16631  |
| 0.00124  | 0.0305   | 0.51086  | 0.118162 | 0.0106   | 0.29337  | 1.01E-10 | 0.163036 | 0.0004   |

|          |          |          |          |          |          |          |          |          |
|----------|----------|----------|----------|----------|----------|----------|----------|----------|
| 0.00117  | -0.03464 | 0.45521  | -0.14841 | 0.0013   | -0.17121 | 0.0002   | -0.12714 | 0.00594  |
| 9.65E-06 | -0.15767 | 0.00063  | -0.16955 | 0.00023  | -0.22985 | 5.14E-07 | -0.25761 | 1.63E-08 |
| 1.31E-10 | 0.112862 | 0.01468  | 0.033697 | 0.46757  | 0.216118 | 2.43E-06 | 0.205652 | 7.46E-06 |
| 4.34E-12 | -0.04315 | 0.3522   | 0.077235 | 0.0955   | -0.18069 | 8.61E-05 | -0.08749 | 0.05885  |
| 1.41E-38 | -0.01575 | 0.73426  | -0.06248 | 0.17771  | -0.23299 | 3.55E-07 | -0.1296  | 0.00503  |
| 0.00046  | -0.0792  | 0.08732  | -0.0704  | 0.12874  | -0.32032 | 1.33E-12 | -0.24952 | 4.65E-08 |
| 0.00655  | -0.14239 | 0.00204  | -0.00472 | 0.91889  | -0.25714 | 1.73E-08 | -0.19448 | 2.32E-05 |
| 4.76E-14 | 0.065324 | 0.15872  | -0.04686 | 0.3123   | -0.1458  | 0.00158  | -0.00334 | 0.94256  |
| 6.21E-05 | -0.02226 | 0.63131  | -0.21908 | 1.75E-06 | -0.25801 | 1.54E-08 | -0.16611 | 0.00031  |
| 3.88E-08 | -0.01062 | 0.81888  | -0.01998 | 0.66671  | -0.2151  | 2.72E-06 | -0.10406 | 0.02452  |
| 0.6491   | -0.01285 | 0.78176  | -0.01988 | 0.66831  | -0.21753 | 2.08E-06 | -0.0345  | 0.45703  |
| 2.36E-16 | -0.07748 | 0.09446  | -0.17632 | 0.00013  | -0.37509 | 4.76E-17 | -0.29245 | 1.16E-10 |
| 5.94E-09 | -0.02486 | 0.59201  | -0.10138 | 0.02848  | -0.19315 | 2.64E-05 | -0.10672 | 0.02107  |
| 0.0608   | 0.102267 | 0.02711  | 0.09661  | 0.03688  | 0.183099 | 6.89E-05 | 0.223418 | 1.08E-06 |
| 0.61152  | -0.01999 | 0.66657  | -0.09141 | 0.04834  | -0.27675 | 1.17E-09 | -0.17078 | 0.00021  |
| 0.47657  | -0.26733 | 4.39E-09 | -0.21582 | 2.51E-06 | -0.3526  | 4.06E-15 | -0.39428 | 8.07E-19 |
| 0.0001   | -0.12696 | 0.00601  | -0.07976 | 0.08513  | -0.35185 | 4.68E-15 | -0.3021  | 2.60E-11 |
| 0.05848  | -0.31797 | 1.97E-12 | -0.26769 | 4.18E-09 | -0.57119 | 8.58E-42 | -0.64954 | 2.63E-57 |
| 2.04E-07 | -0.00049 | 0.99155  | -0.20858 | 5.48E-06 | -0.23117 | 4.40E-07 | -0.17578 | 0.00013  |
| 9.80E-10 | 0.060453 | 0.19221  | -0.0186  | 0.68845  | -0.01082 | 0.81555  | 0.071615 | 0.12224  |
| 0.87917  | -0.02493 | 0.59098  | 0.020211 | 0.66311  | -0.116   | 0.01212  | -0.06462 | 0.16326  |
| 9.21E-15 | -0.11994 | 0.00948  | 0.296196 | 6.54E-11 | 0.196056 | 1.98E-05 | 0.036502 | 0.4313   |
| 9.35E-17 | -0.04767 | 0.30398  | -0.13649 | 0.00312  | -0.18283 | 7.07E-05 | -0.11814 | 0.01061  |
| 0.00297  | -0.02004 | 0.66571  | -0.11264 | 0.01488  | -0.02292 | 0.62122  | -0.04629 | 0.31817  |
| 6.34E-08 | 0.038276 | 0.40923  | -0.00155 | 0.97335  | -0.0156  | 0.73662  | 0.067587 | 0.14475  |
| 9.66E-05 | -0.0673  | 0.1465   | -0.09481 | 0.04055  | -0.05043 | 0.27678  | -0.11733 | 0.01117  |
| 7.15E-35 | 0.096328 | 0.03744  | 0.068244 | 0.14088  | 0.081578 | 0.07822  | 0.207779 | 5.97E-06 |
| 1.69E-11 | 0.068925 | 0.13695  | -0.03089 | 0.5054   | -0.00371 | 0.93623  | 0.075985 | 0.101    |
| 7.99E-19 | 0.042965 | 0.35423  | 0.0767   | 0.09782  | 0.125464 | 0.00663  | 0.164863 | 0.00035  |
| 3.91E-18 | 0.014669 | 0.75187  | 0.123279 | 0.00765  | 0.102032 | 0.02747  | 0.141072 | 0.00225  |
| 2.66E-34 | 0.118168 | 0.0106   | 0.09536  | 0.03941  | 0.049962 | 0.28128  | 0.161471 | 0.00046  |
| 5.81E-10 | 0.0825   | 0.0749   | 0.01828  | 0.69358  | 0.074591 | 0.10743  | 0.166031 | 0.00031  |
| 8.30E-08 | 0.093627 | 0.04314  | -0.00963 | 0.83564  | 0.076847 | 0.09718  | 0.228602 | 5.94E-07 |
| 1.02E-12 | -0.13365 | 0.00381  | -0.19382 | 2.47E-05 | -0.23788 | 1.98E-07 | -0.30627 | 1.34E-11 |
| 1.35E-11 | 0.17265  | 0.00018  | 0.144746 | 0.00171  | 0.200928 | 1.21E-05 | 0.38186  | 1.17E-17 |
| 0.00025  | 0.081125 | 0.07989  | -0.06587 | 0.15527  | 0.066133 | 0.15362  | 0.038184 | 0.41036  |
| 4.66E-15 | -0.12373 | 0.00743  | 0.020068 | 0.66533  | -0.18934 | 3.82E-05 | -0.22749 | 6.76E-07 |
| 4.25E-08 | -0.13052 | 0.00473  | 0.088852 | 0.05502  | 0.031465 | 0.49757  | -0.14665 | 0.00148  |
| 2.69E-46 | 0.184968 | 5.79E-05 | 0.135477 | 0.00335  | 0.170678 | 0.00021  | 0.349375 | 7.47E-15 |
| 3.16E-46 | 0.13775  | 0.00285  | 0.053138 | 0.25177  | 0.005569 | 0.90446  | 0.210237 | 4.60E-06 |
| 1.44E-14 | 0.107037 | 0.02069  | -0.03129 | 0.49997  | 0.018305 | 0.69318  | 0.193678 | 2.51E-05 |
| 2.44E-24 | 0.28419  | 3.99E-10 | 0.281939 | 5.55E-10 | 0.371621 | 9.68E-17 | 0.585266 | 2.85E-44 |
| 3.35E-08 | 0.09872  | 0.03294  | -0.00168 | 0.97112  | -0.00579 | 0.90072  | 0.156639 | 0.00068  |
| 3.05E-13 | 0.131827 | 0.00432  | 0.002596 | 0.95539  | 0.102509 | 0.02675  | 0.257374 | 1.68E-08 |
| 4.54E-12 | 0.026469 | 0.5683   | -0.1152  | 0.01273  | -0.06299 | 0.17414  | 0.015947 | 0.73106  |

|          |          |          |          |          |          |          |          |          |
|----------|----------|----------|----------|----------|----------|----------|----------|----------|
| 8.67E-05 | 0.138045 | 0.00279  | -0.04954 | 0.28538  | 0.043416 | 0.34919  | 0.176966 | 0.00012  |
| 9.99E-09 | -0.07539 | 0.10371  | -0.20398 | 8.87E-06 | -0.20943 | 5.01E-06 | -0.16302 | 0.0004   |
| 3.62E-15 | 0.126994 | 0.00599  | -0.03776 | 0.4156   | 0.020568 | 0.65753  | 0.169779 | 0.00023  |
| 8.92E-24 | 0.078712 | 0.08931  | -0.16574 | 0.00032  | -0.152   | 0.00098  | 0.003243 | 0.94428  |
| 2.39E-13 | 0.134986 | 0.00347  | 0.077764 | 0.09324  | 0.192381 | 2.85E-05 | 0.265404 | 5.72E-09 |
| 2.61E-19 | 0.160743 | 0.00049  | 0.089944 | 0.05208  | 0.055818 | 0.22861  | 0.210991 | 4.24E-06 |
| 2.25E-18 | 0.139077 | 0.00259  | 0.233321 | 3.41E-07 | 0.421236 | 1.64E-21 | 0.450567 | 9.96E-25 |
| 1.83E-23 | 0.070751 | 0.12682  | -0.14401 | 0.00181  | -0.00541 | 0.90714  | 0.065393 | 0.15828  |
| 3.27E-19 | -0.01506 | 0.74546  | -0.20037 | 1.28E-05 | -0.1798  | 9.34E-05 | -0.09835 | 0.0336   |
| 7.38E-07 | -0.09712 | 0.03589  | -0.03249 | 0.4837   | -0.18324 | 6.80E-05 | -0.16001 | 0.00052  |
| 2.82E-21 | -0.04058 | 0.38154  | -0.0339  | 0.46488  | -0.10536 | 0.02277  | -0.03522 | 0.44772  |
| 7.88E-32 | 0.124477 | 0.00708  | 0.01442  | 0.75596  | 0.058709 | 0.20537  | 0.201475 | 1.15E-05 |
| 5.39E-12 | 0.01252  | 0.78728  | -0.05103 | 0.27108  | -0.0348  | 0.45308  | 0.0149   | 0.7481   |
| 1.24E-24 | 0.10278  | 0.02635  | -0.03272 | 0.48056  | 0.02442  | 0.59862  | 0.151853 | 0.001    |
| 3.46E-05 | -0.02807 | 0.54517  | -0.08001 | 0.08413  | -0.10981 | 0.0176   | -0.10364 | 0.02511  |
| 2.07E-32 | 0.078115 | 0.09177  | 0.132967 | 0.004    | 0.050237 | 0.27863  | 0.192278 | 2.88E-05 |
| 0.00316  | -0.00792 | 0.86446  | -0.04919 | 0.28881  | -0.01636 | 0.72433  | 0.050314 | 0.27789  |
| 2.84E-05 | 0.025061 | 0.58905  | -0.17527 | 0.00014  | -0.10816 | 0.01939  | -0.07863 | 0.08966  |
| 1.41E-09 | -0.05106 | 0.27079  | -0.04223 | 0.36254  | -0.17093 | 0.00021  | -0.11054 | 0.01686  |
| 2.79E-16 | 0.022526 | 0.62728  | 0.073821 | 0.11112  | -0.01132 | 0.80725  | 0.103432 | 0.0254   |
| 5.99E-18 | 0.172999 | 0.00017  | 0.089611 | 0.05297  | 0.150493 | 0.00111  | 0.337926 | 6.14E-14 |
| 4.78E-25 | 0.018838 | 0.68472  | -0.04821 | 0.29855  | -0.09769 | 0.03482  | 0.012809 | 0.78249  |
| 9.12E-14 | 0.097475 | 0.03522  | -0.04241 | 0.36049  | -0.02692 | 0.56178  | 0.131394 | 0.00445  |
| 5.14E-19 | 0.006093 | 0.89551  | -0.09159 | 0.04792  | -0.01519 | 0.74333  | 0.052287 | 0.25945  |
| 1.65E-11 | 0.173194 | 0.00017  | 0.185507 | 5.50E-05 | 0.278715 | 8.85E-10 | 0.380805 | 1.45E-17 |
| 1.29E-22 | 0.184512 | 6.04E-05 | 0.10013  | 0.03051  | 0.249746 | 4.51E-08 | 0.407854 | 3.82E-20 |
| 0.00033  | 0.004845 | 0.91684  | -0.13418 | 0.00367  | -0.05161 | 0.26573  | -0.03135 | 0.49918  |
| 1.43E-24 | 0.111735 | 0.0157   | 0.132874 | 0.00402  | 0.140769 | 0.0023   | 0.254919 | 2.31E-08 |
| 0.00071  | -0.07872 | 0.08926  | 0.009449 | 0.83863  | -0.02959 | 0.52356  | -0.14085 | 0.00228  |
| 1.19E-18 | 0.130687 | 0.00467  | 0.157444 | 0.00064  | 0.113154 | 0.01442  | 0.280075 | 7.28E-10 |
| 1.59E-09 | 0.052522 | 0.25732  | -0.07039 | 0.12875  | -0.10624 | 0.02167  | 0.094291 | 0.04168  |
| 2.02E-20 | 0.182113 | 7.56E-05 | 0.127089 | 0.00596  | 0.145581 | 0.00161  | 0.306583 | 1.28E-11 |
| 2.15E-08 | 0.019067 | 0.68108  | -0.01458 | 0.75331  | -0.08319 | 0.0725   | 0.017387 | 0.70785  |
| 1.05E-50 | 0.036672 | 0.42916  | 0.064676 | 0.1629   | -0.0501  | 0.27997  | 0.09964  | 0.03133  |
| 2.51E-05 | 0.183639 | 6.56E-05 | 0.064649 | 0.16308  | 0.123797 | 0.0074   | 0.234055 | 3.13E-07 |
| 9.28E-24 | 0.142649 | 0.002    | 0.208898 | 5.30E-06 | 0.137249 | 0.00296  | 0.285121 | 3.48E-10 |
| 1.76E-45 | 0.084315 | 0.06869  | 0.087108 | 0.05998  | 0.042082 | 0.36422  | 0.106759 | 0.02103  |
| 1.10E-12 | 0.199406 | 1.42E-05 | 0.068149 | 0.14144  | 0.179094 | 9.97E-05 | 0.322328 | 9.45E-13 |
| 0.00558  | 0.201083 | 1.19E-05 | 0.079567 | 0.08588  | 0.132294 | 0.00419  | 0.283914 | 4.16E-10 |
| 2.35E-06 | -0.07541 | 0.10363  | 0.074436 | 0.10816  | 0.082466 | 0.07502  | -0.04148 | 0.37108  |
| 1.69E-09 | -0.07708 | 0.09616  | -0.15025 | 0.00113  | -0.152   | 0.00098  | -0.18272 | 7.14E-05 |
| 2.14E-09 | -0.03102 | 0.50367  | -0.04698 | 0.31099  | -0.08928 | 0.05385  | -0.0985  | 0.03333  |
| 1.47E-08 | 0.115294 | 0.01266  | 0.07791  | 0.09263  | 0.007798 | 0.86652  | 0.180623 | 8.67E-05 |
| 3.67E-13 | -0.20248 | 1.04E-05 | -0.05048 | 0.27634  | -0.14829 | 0.00131  | -0.32401 | 7.09E-13 |
| 1.35E-23 | 0.065304 | 0.15885  | 0.056009 | 0.22702  | -0.01939 | 0.67604  | 0.096548 | 0.03701  |

|          |          |          |          |          |          |          |          |          |
|----------|----------|----------|----------|----------|----------|----------|----------|----------|
| 3.75E-21 | 0.054116 | 0.24314  | 0.092869 | 0.04487  | 0.090802 | 0.04987  | 0.154077 | 0.00084  |
| 1.08E-11 | -0.06777 | 0.14368  | -0.12475 | 0.00695  | -0.12186 | 0.00838  | -0.13625 | 0.00318  |
| 3.94E-64 | 0.117565 | 0.011    | 0.130346 | 0.00478  | 0.094622 | 0.04096  | 0.191669 | 3.05E-05 |
| 9.05E-17 | 0.066047 | 0.15415  | 0.082943 | 0.07334  | 0.027752 | 0.54968  | 0.177342 | 0.00012  |
| 4.54E-20 | 0.101888 | 0.02769  | 0.104817 | 0.0235   | 0.048736 | 0.29326  | 0.220134 | 1.56E-06 |
| 3.75E-15 | 0.050604 | 0.27513  | 0.022211 | 0.63211  | -0.08359 | 0.07112  | 0.057269 | 0.21672  |
| 8.10E-09 | 0.097051 | 0.03603  | 0.036706 | 0.42874  | 0.035915 | 0.43876  | 0.20875  | 5.38E-06 |
| 3.32E-12 | 0.05003  | 0.28062  | -0.13009 | 0.00487  | -0.12208 | 0.00826  | 0.029699 | 0.52203  |
| 4.76E-33 | 0.092649 | 0.04538  | 0.123257 | 0.00766  | 0.124985 | 0.00684  | 0.207921 | 5.88E-06 |
| 1.60E-21 | 0.070708 | 0.12705  | 0.066132 | 0.15362  | 0.025446 | 0.58334  | 0.148547 | 0.00128  |
| 1.45E-18 | 0.107151 | 0.02056  | -0.04993 | 0.28155  | -0.0202  | 0.6632   | 0.173618 | 0.00016  |
| 1.71E-07 | 0.24884  | 5.06E-08 | 0.033739 | 0.467    | 0.175033 | 0.00014  | 0.368419 | 1.85E-16 |
| 2.49E-11 | 0.014234 | 0.759    | -0.13231 | 0.00418  | -0.20476 | 8.18E-06 | -0.07357 | 0.11236  |
| 1.03E-17 | 0.156771 | 0.00067  | -0.0058  | 0.90046  | 0.112454 | 0.01504  | 0.189805 | 3.65E-05 |
| 3.30E-21 | -0.00963 | 0.83552  | -0.11504 | 0.01286  | -0.09738 | 0.03539  | -0.00789 | 0.86496  |
| 1.85E-10 | 0.092649 | 0.04538  | -0.05009 | 0.28006  | -0.02692 | 0.56179  | 0.076769 | 0.09752  |
| 8.89E-06 | 0.096925 | 0.03627  | -0.08786 | 0.05781  | 0.01711  | 0.71228  | 0.076535 | 0.09855  |
| 4.88E-15 | 0.174481 | 0.00015  | 0.240554 | 1.43E-07 | 0.218091 | 1.96E-06 | 0.435978 | 4.34E-23 |
| 1.48E-28 | 0.093621 | 0.04316  | 0.052354 | 0.25885  | 0.07432  | 0.10872  | 0.193839 | 2.47E-05 |
| 5.02E-18 | 0.187577 | 4.52E-05 | 0.129661 | 0.00501  | 0.040692 | 0.38028  | 0.159115 | 0.00056  |
| 1.37E-17 | 0.124378 | 0.00712  | 0.023717 | 0.6092   | -0.06234 | 0.17866  | 0.124796 | 0.00693  |
| 0.03206  | 0.16939  | 0.00024  | 0.136717 | 0.00307  | 0.168961 | 0.00024  | 0.353865 | 3.19E-15 |
| 3.95E-15 | 0.093286 | 0.04391  | 0.060901 | 0.18893  | -0.07418 | 0.10938  | 0.11014  | 0.01726  |
| 1.09E-17 | 0.023891 | 0.60656  | -0.12244 | 0.00808  | -0.03673 | 0.42841  | 0.051937 | 0.26267  |
| 1.48E-19 | 0.11913  | 0.00997  | -0.06354 | 0.17044  | -0.02159 | 0.64164  | 0.133062 | 0.00397  |
| 3.34E-09 | 0.078371 | 0.09071  | -0.1421  | 0.00208  | -0.10742 | 0.02024  | 0.045448 | 0.32708  |
| 4.59E-16 | 0.011804 | 0.79918  | 0.011901 | 0.79756  | -0.01922 | 0.67875  | 0.081351 | 0.07905  |
| 2.49E-13 | 0.007661 | 0.86886  | -0.13404 | 0.00371  | -0.18053 | 8.74E-05 | -0.07877 | 0.08909  |
| 4.13E-15 | 0.203105 | 9.71E-06 | 0.022538 | 0.62711  | 0.149336 | 0.00121  | 0.341945 | 2.96E-14 |
| 1.99E-08 | 0.003958 | 0.93202  | -0.02213 | 0.63328  | -0.02693 | 0.5616   | 0.075905 | 0.10136  |
| 2.89E-09 | 0.068102 | 0.14171  | 0.008086 | 0.86164  | -0.03783 | 0.41468  | 0.089167 | 0.05415  |
| 2.04E-09 | 0.153141 | 0.0009   | 0.122291 | 0.00816  | 0.195224 | 2.15E-05 | 0.29308  | 1.05E-10 |
| 2.43E-23 | 0.143296 | 0.00191  | -0.08572 | 0.0642   | -0.0338  | 0.46625  | 0.141023 | 0.00225  |
| 5.66E-40 | 0.055737 | 0.22929  | 0.109443 | 0.01799  | -0.04523 | 0.32945  | 0.068713 | 0.13816  |
| 2.93E-06 | 0.172129 | 0.00019  | -0.08539 | 0.06521  | 0.139124 | 0.00259  | 0.277452 | 1.06E-09 |
| 4.01E-16 | 0.06043  | 0.19237  | -0.09017 | 0.05148  | -0.03454 | 0.45647  | 0.056494 | 0.22302  |
| 2.66E-06 | 0.112118 | 0.01535  | -0.06089 | 0.18901  | 0.014679 | 0.75171  | 0.163202 | 0.0004   |
| 3.52E-25 | 0.105655 | 0.0224   | -0.01645 | 0.72287  | -0.1017  | 0.02798  | 0.084574 | 0.06785  |
| 3.38E-16 | 0.020388 | 0.66034  | -0.07369 | 0.11174  | -0.18133 | 8.12E-05 | -0.09001 | 0.05192  |
| 0.01821  | 0.181394 | 8.07E-05 | -0.07879 | 0.08898  | 0.022447 | 0.6285   | 0.207139 | 6.38E-06 |
| 4.40E-36 | 0.166733 | 0.0003   | 0.083987 | 0.06978  | 0.092565 | 0.04558  | 0.282569 | 5.06E-10 |
| 4.50E-08 | -0.03118 | 0.50147  | -0.12674 | 0.0061   | -0.09768 | 0.03484  | -0.03336 | 0.47199  |
| 1.77E-15 | 0.158761 | 0.00057  | 0.139077 | 0.00259  | 0.159928 | 0.00052  | 0.32898  | 3.00E-13 |
| 3.06E-14 | 0.024075 | 0.6038   | -0.0418  | 0.36743  | -0.1824  | 7.36E-05 | -0.08343 | 0.07165  |
| 4.75E-16 | 0.060543 | 0.19154  | -0.00942 | 0.83912  | 0.060278 | 0.19349  | 0.120524 | 0.00913  |



|          |          |          |          |          |          |          |          |          |
|----------|----------|----------|----------|----------|----------|----------|----------|----------|
| 1.19E-13 | 0.071375 | 0.1235   | -0.02764 | 0.55123  | 0.007788 | 0.86669  | 0.105333 | 0.02282  |
| 0.00054  | 0.062839 | 0.17521  | -0.10749 | 0.02016  | 0.018991 | 0.68229  | 0.092808 | 0.04501  |
| 7.11E-29 | 0.053582 | 0.24783  | 0.02098  | 0.65111  | -0.12558 | 0.00658  | 0.031951 | 0.49095  |
| 1.04E-11 | -0.03543 | 0.44494  | -0.06624 | 0.15293  | -0.11512 | 0.01279  | -0.08191 | 0.07701  |
| 7.63E-48 | 0.085071 | 0.06624  | 0.132987 | 0.00399  | 0.063826 | 0.16851  | 0.202476 | 1.04E-05 |
| 6.09E-40 | 0.209802 | 4.81E-06 | 0.183828 | 6.44E-05 | 0.276758 | 1.17E-09 | 0.418634 | 3.06E-21 |
| 1.87E-23 | 0.149659 | 0.00118  | 0.148217 | 0.00132  | 0.150517 | 0.0011   | 0.318119 | 1.92E-12 |
| 8.30E-43 | 0.185496 | 5.51E-05 | 0.028529 | 0.53857  | 0.10271  | 0.02645  | 0.293255 | 1.03E-10 |
| 6.17E-06 | 0.092114 | 0.04665  | 0.137254 | 0.00296  | 0.138144 | 0.00277  | 0.243106 | 1.04E-07 |
| 3.71E-11 | -0.0535  | 0.24854  | -0.12093 | 0.0089   | -0.11666 | 0.01164  | -0.08915 | 0.05421  |
| 7.52E-05 | 0.184066 | 6.30E-05 | 0.130868 | 0.00462  | 0.28051  | 6.83E-10 | 0.459475 | 9.07E-26 |
| 3.80E-39 | 0.11068  | 0.01672  | 0.11264  | 0.01488  | 0.12153  | 0.00856  | 0.222167 | 1.24E-06 |
| 1.57E-19 | 0.250062 | 4.33E-08 | 0.089054 | 0.05446  | 0.242311 | 1.15E-07 | 0.398842 | 2.94E-19 |
| 7.39E-11 | 0.075624 | 0.10264  | 0.081168 | 0.07973  | 0.076531 | 0.09857  | 0.16243  | 0.00042  |
| 5.25E-06 | 0.048653 | 0.29408  | -0.04382 | 0.34472  | -0.06732 | 0.14633  | 0.065459 | 0.15786  |
| 2.10E-08 | -0.05053 | 0.27584  | -0.16084 | 0.00048  | -0.14137 | 0.0022   | -0.08727 | 0.05949  |
| 1.06E-05 | -0.01352 | 0.77068  | -0.1767  | 0.00012  | -0.12536 | 0.00668  | -0.08088 | 0.08082  |
| 2.45E-22 | 0.116242 | 0.01194  | 0.013097 | 0.77772  | 0.062987 | 0.17419  | 0.201342 | 1.16E-05 |
| 1.82E-21 | -0.14743 | 0.0014   | -0.11147 | 0.01596  | -0.07934 | 0.08677  | -0.28724 | 2.54E-10 |
| 1.33E-07 | 0.098057 | 0.03414  | -0.03416 | 0.46149  | -0.07498 | 0.10562  | 0.119248 | 0.0099   |
| 7.16E-11 | 0.011166 | 0.80981  | -0.0713  | 0.12388  | -0.09273 | 0.04519  | -0.02017 | 0.66372  |
| 4.04E-08 | 0.125588 | 0.00658  | -0.05619 | 0.22553  | -0.08507 | 0.06623  | 0.113455 | 0.01416  |
| 6.88E-23 | 0.059863 | 0.19658  | 0.130862 | 0.00462  | 0.125844 | 0.00647  | 0.248543 | 5.26E-08 |
| 2.95E-27 | 0.095421 | 0.03928  | 0.002426 | 0.95831  | -0.03822 | 0.40989  | 0.106085 | 0.02186  |
| 3.00E-17 | 0.211784 | 3.90E-06 | 0.146564 | 0.00149  | 0.203705 | 9.13E-06 | 0.39856  | 3.13E-19 |
| 4.29E-19 | 0.173474 | 0.00016  | 0.140759 | 0.0023   | 0.239559 | 1.61E-07 | 0.361406 | 7.43E-16 |
| 2.99E-15 | 0.224739 | 9.27E-07 | 0.170298 | 0.00022  | 0.178799 | 0.0001   | 0.409477 | 2.63E-20 |
| 1.07E-14 | 0.103638 | 0.02511  | -0.01024 | 0.82527  | 0.130628 | 0.00469  | 0.174915 | 0.00015  |
| 7.06E-32 | 0.023922 | 0.6061   | -0.08573 | 0.06417  | -0.20933 | 5.06E-06 | -0.03734 | 0.42078  |
| 4.47E-20 | 0.079454 | 0.08632  | 0.069037 | 0.13631  | 0.035848 | 0.4396   | 0.102627 | 0.02658  |
| 1.52E-15 | 0.062742 | 0.17588  | -0.00313 | 0.9462   | -0.07958 | 0.08581  | 0.085967 | 0.06342  |
| 5.36E-21 | 0.154863 | 0.00079  | 0.019956 | 0.66709  | 0.086646 | 0.06135  | 0.253711 | 2.71E-08 |
| 0.00069  | 0.074794 | 0.10648  | -0.01886 | 0.68439  | 0.00938  | 0.83978  | 0.12493  | 0.00687  |
| 2.22E-08 | 0.057243 | 0.21693  | -0.19289 | 2.71E-05 | -0.12311 | 0.00773  | -0.01908 | 0.68093  |
| 7.18E-09 | 0.11609  | 0.01206  | 0.111136 | 0.01628  | 0.123988 | 0.00731  | 0.260933 | 1.05E-08 |
| 3.69E-07 | 0.124037 | 0.00728  | 0.117855 | 0.01081  | 0.134771 | 0.00352  | 0.285811 | 3.14E-10 |
| 1.67E-08 | 0.006067 | 0.89597  | 0.04855  | 0.29511  | 0.000412 | 0.99292  | 0.101829 | 0.02778  |
| 2.03E-10 | 0.093478 | 0.04348  | -0.00453 | 0.92216  | 0.033812 | 0.46605  | 0.176209 | 0.00013  |
| 5.33E-18 | 0.113975 | 0.01372  | 0.065617 | 0.15686  | 0.159862 | 0.00052  | 0.371371 | 1.02E-16 |
| 2.07E-53 | 0.086125 | 0.06294  | 0.039463 | 0.39486  | 0.048361 | 0.29699  | 0.126449 | 0.00621  |
| 1.03E-10 | 0.10282  | 0.02629  | -0.02939 | 0.52635  | 0.003415 | 0.94133  | 0.144437 | 0.00175  |
| 5.93E-14 | -0.08964 | 0.05289  | 0.027279 | 0.55651  | -0.04401 | 0.34261  | -0.11809 | 0.01065  |
| 4.18E-33 | 0.173826 | 0.00016  | 0.15764  | 0.00063  | 0.188631 | 4.09E-05 | 0.339856 | 4.33E-14 |
| 4.03E-14 | 0.149916 | 0.00116  | 0.05876  | 0.20497  | 0.030491 | 0.51099  | 0.238307 | 1.88E-07 |
| 1.52E-14 | 0.016031 | 0.72969  | -0.02392 | 0.60607  | -0.05029 | 0.27816  | 0.044547 | 0.33677  |

|          |          |          |          |          |          |          |          |          |
|----------|----------|----------|----------|----------|----------|----------|----------|----------|
| 1.61E-23 | 0.107184 | 0.02052  | -0.08069 | 0.08151  | -0.05514 | 0.23428  | 0.128024 | 0.00559  |
| 4.98E-10 | 0.092764 | 0.04511  | 0.06588  | 0.1552   | 0.116152 | 0.01201  | 0.180058 | 9.13E-05 |
| 1.29E-05 | 0.085425 | 0.06511  | -0.06445 | 0.1644   | 0.007884 | 0.86508  | 0.058246 | 0.20897  |
| 6.37E-10 | 0.048857 | 0.29206  | -0.02201 | 0.63525  | 0.152164 | 0.00097  | 0.191377 | 3.14E-05 |
| 7.47E-34 | 0.15211  | 0.00098  | -0.03975 | 0.39145  | 0.014939 | 0.74746  | 0.234985 | 2.80E-07 |
| 4.32E-13 | -0.01775 | 0.70207  | -0.19953 | 1.40E-05 | -0.18901 | 3.94E-05 | -0.09569 | 0.03873  |
| 1.02E-08 | 0.030464 | 0.51136  | 0.056702 | 0.22131  | -0.02732 | 0.5559   | 0.13016  | 0.00484  |
| 5.78E-10 | -0.02207 | 0.63421  | -0.11943 | 0.00979  | -0.08923 | 0.05399  | -0.08888 | 0.05495  |
| 4.93E-35 | 0.005556 | 0.90468  | -0.02241 | 0.62906  | -0.14246 | 0.00203  | -0.03209 | 0.48904  |
| 6.47E-26 | 0.154052 | 0.00084  | 0.115646 | 0.01239  | 0.099714 | 0.03121  | 0.321524 | 1.08E-12 |
| 9.29E-18 | 0.200482 | 1.27E-05 | 0.207408 | 6.20E-06 | 0.283025 | 4.74E-10 | 0.448268 | 1.83E-24 |
| 1.09E-10 | 0.032943 | 0.47759  | -0.00596 | 0.89776  | 0.055109 | 0.23458  | 0.11118  | 0.01623  |
| 1.75E-12 | 0.008582 | 0.85325  | -0.16655 | 0.0003   | -0.18311 | 6.89E-05 | -0.06333 | 0.17188  |
| 6.14E-08 | 0.204268 | 8.61E-06 | 0.049156 | 0.28912  | 0.15901  | 0.00056  | 0.327586 | 3.83E-13 |
| 2.10E-19 | 0.06957  | 0.1333   | 0.017208 | 0.71071  | -0.00109 | 0.98129  | 0.150378 | 0.00112  |
| 8.17E-05 | 0.078636 | 0.08962  | 0.010299 | 0.82434  | 0.188008 | 4.34E-05 | 0.230166 | 4.95E-07 |
| 1.87E-28 | -0.06827 | 0.14073  | -0.05631 | 0.22452  | -0.20161 | 1.13E-05 | -0.12657 | 0.00616  |
| 4.69E-23 | 0.108825 | 0.01865  | -0.04429 | 0.33962  | 0.067714 | 0.144    | 0.210472 | 4.48E-06 |
| 1.61E-23 | 0.173457 | 0.00017  | 0.03707  | 0.42417  | 0.053786 | 0.24603  | 0.19974  | 1.37E-05 |
| 7.66E-23 | 0.042894 | 0.35502  | 0.07875  | 0.08915  | 0.097547 | 0.03508  | 0.203991 | 8.86E-06 |
| 5.22E-08 | -0.08843 | 0.05618  | -0.10327 | 0.02563  | -0.18324 | 6.81E-05 | -0.16657 | 0.0003   |
| 1.81E-21 | 0.009709 | 0.83424  | 0.053842 | 0.24554  | -0.08688 | 0.06067  | 0.066077 | 0.15397  |
| 1.63E-18 | 0.062944 | 0.17449  | 0.022812 | 0.62292  | -0.02073 | 0.655    | 0.126593 | 0.00616  |
| 0.74296  | 0.191538 | 3.09E-05 | -0.03318 | 0.47441  | 0.099397 | 0.03175  | 0.308808 | 8.92E-12 |
| 1.07E-08 | -0.00515 | 0.91167  | -0.13146 | 0.00443  | -0.22381 | 1.03E-06 | -0.08636 | 0.06223  |
| 4.08E-13 | 0.109687 | 0.01773  | -0.04391 | 0.3437   | 0.019752 | 0.6703   | 0.131501 | 0.00442  |
| 1.59E-17 | -0.0179  | 0.69962  | 0.139153 | 0.00258  | -0.01454 | 0.75393  | 0.035365 | 0.4458   |
| 1.83E-05 | -0.00491 | 0.91571  | -0.04277 | 0.35642  | -0.12113 | 0.00879  | -0.0246  | 0.59591  |
| 1.80E-11 | -0.13391 | 0.00374  | -0.20504 | 7.94E-06 | -0.1803  | 8.92E-05 | -0.18735 | 4.62E-05 |
| 7.48E-56 | 0.126563 | 0.00617  | -0.00708 | 0.87874  | -0.03975 | 0.39148  | 0.135583 | 0.00333  |
| 3.61E-10 | 0.047151 | 0.30926  | 0.083917 | 0.07002  | 0.104639 | 0.02373  | 0.141523 | 0.00217  |
| 1.05E-14 | -0.03787 | 0.41417  | -0.02946 | 0.52536  | -0.1405  | 0.00234  | -0.00312 | 0.94631  |
| 2.33E-26 | 0.075811 | 0.10179  | -0.13725 | 0.00296  | -0.08616 | 0.06281  | 0.051912 | 0.2629   |
| 3.10E-18 | 0.098128 | 0.03401  | -0.01257 | 0.78641  | -0.05434 | 0.24119  | 0.11099  | 0.01642  |
| 5.49E-14 | 0.009757 | 0.83344  | -0.1213  | 0.00869  | -0.12999 | 0.0049   | -0.02493 | 0.591    |
| 3.37E-18 | 0.096784 | 0.03654  | 0.095914 | 0.03827  | -0.01115 | 0.81014  | 0.127158 | 0.00593  |
| 2.54E-10 | 0.081792 | 0.07744  | -0.14076 | 0.0023   | -0.14139 | 0.00219  | 0.010671 | 0.81809  |
| 6.93E-20 | 0.065607 | 0.15692  | 0.07146  | 0.12305  | -0.02907 | 0.5309   | 0.114085 | 0.01363  |
| 1.68E-31 | 0.111389 | 0.01603  | 0.060559 | 0.19142  | 0.022355 | 0.6299   | 0.212622 | 3.56E-06 |
| 0.25721  | 0.013545 | 0.77033  | -0.10967 | 0.01775  | -0.21038 | 4.53E-06 | -0.11406 | 0.01365  |
| 1.90E-14 | -0.03688 | 0.4265   | -0.0491  | 0.28967  | -0.11822 | 0.01056  | -0.07001 | 0.13088  |
| 0.00028  | -0.00919 | 0.84295  | 0.013067 | 0.77822  | -0.02246 | 0.62822  | 0.013298 | 0.7744   |
| 0.00115  | 0.007664 | 0.8688   | -0.05609 | 0.22638  | -0.11764 | 0.01095  | 0.029354 | 0.52687  |
| 5.85E-20 | 0.187296 | 4.65E-05 | 0.071597 | 0.12233  | 0.150723 | 0.00109  | 0.303703 | 2.02E-11 |
| 1.14E-08 | 0.155901 | 0.00072  | 0.022503 | 0.62763  | 0.116942 | 0.01144  | 0.258576 | 1.43E-08 |

|          |          |          |          |          |          |          |          |          |
|----------|----------|----------|----------|----------|----------|----------|----------|----------|
| 1.43E-19 | 0.103519 | 0.02528  | -0.0319  | 0.49162  | -0.00334 | 0.94258  | 0.172962 | 0.00017  |
| 6.37E-22 | 0.078595 | 0.08979  | -0.12335 | 0.00762  | -0.08566 | 0.06437  | 0.080162 | 0.08355  |
| 9.18E-18 | 0.184663 | 5.96E-05 | 0.103677 | 0.02506  | 0.176511 | 0.00013  | 0.347736 | 1.02E-14 |
| 3.89E-10 | 0.201558 | 1.14E-05 | 0.060404 | 0.19257  | 0.163331 | 0.00039  | 0.234866 | 2.84E-07 |
| 1.50E-23 | 0.176953 | 0.00012  | 0.080966 | 0.08049  | 0.201901 | 1.10E-05 | 0.390826 | 1.72E-18 |
| 5.52E-12 | -0.05379 | 0.24602  | -0.0847  | 0.06745  | -0.04712 | 0.30954  | -0.07117 | 0.12459  |
| 3.86E-83 | 0.05516  | 0.23415  | 0.003843 | 0.934    | -0.14075 | 0.0023   | 0.000997 | 0.98286  |
| 7.09E-16 | 0.063953 | 0.16767  | -0.06342 | 0.17126  | -0.10623 | 0.02167  | 0.06453  | 0.16385  |
| 5.46E-45 | 0.088988 | 0.05464  | 0.070347 | 0.12901  | 0.01635  | 0.72454  | 0.112781 | 0.01475  |
| 2.31E-06 | 0.006828 | 0.883    | 0.001485 | 0.97447  | -0.01376 | 0.76686  | 0.099412 | 0.03172  |
| 4.37E-69 | 0.100661 | 0.02963  | -0.01564 | 0.73609  | -0.00782 | 0.86608  | 0.126925 | 0.00602  |
| 4.10E-12 | 0.149392 | 0.0012   | 0.176767 | 0.00012  | 0.202852 | 9.96E-06 | 0.323031 | 8.38E-13 |
| 3.00E-12 | -0.0029  | 0.95015  | -0.0978  | 0.03462  | -0.08421 | 0.06903  | 0.035956 | 0.43823  |
| 1.10E-10 | -0.08004 | 0.08404  | 0.054104 | 0.24325  | -0.05447 | 0.2401   | -0.17985 | 9.30E-05 |
| 5.77E-27 | 0.105921 | 0.02206  | -0.04759 | 0.30475  | -0.03057 | 0.50993  | 0.099016 | 0.03241  |
| 2.80E-05 | -0.02489 | 0.59157  | -0.13991 | 0.00244  | -0.1935  | 2.55E-05 | -0.10247 | 0.02681  |
| 2.00E-18 | 0.107246 | 0.02044  | 0.159205 | 0.00055  | 0.082917 | 0.07343  | 0.200438 | 1.28E-05 |
| 6.83E-49 | 0.197811 | 1.66E-05 | 0.185711 | 5.40E-05 | 0.171549 | 0.0002   | 0.320381 | 1.31E-12 |
| 1.22E-07 | 0.164892 | 0.00035  | 0.156081 | 0.00071  | 0.19227  | 2.88E-05 | 0.393086 | 1.05E-18 |
| 0.00153  | 0.237791 | 2.00E-07 | 0.032218 | 0.48734  | 0.102048 | 0.02745  | 0.335665 | 9.22E-14 |
| 3.17E-31 | 0.125675 | 0.00654  | 0.053258 | 0.25071  | 0.039966 | 0.38885  | 0.177573 | 0.00011  |
| 1.20E-08 | 0.068709 | 0.13818  | -0.03702 | 0.42474  | 0.01143  | 0.80541  | 0.118799 | 0.01018  |
| 8.43E-30 | 0.239623 | 1.60E-07 | 0.277506 | 1.05E-09 | 0.362167 | 6.40E-16 | 0.559552 | 7.87E-40 |
| 1.50E-33 | 0.145807 | 0.00158  | 0.066737 | 0.14989  | 0.056101 | 0.22626  | 0.236254 | 2.40E-07 |
| 2.43E-10 | 0.014878 | 0.74846  | -0.0342  | 0.46095  | -0.20442 | 8.48E-06 | -0.03158 | 0.49605  |
| 4.02E-11 | 0.192219 | 2.89E-05 | 0.102011 | 0.0275   | 0.211751 | 3.91E-06 | 0.35147  | 5.03E-15 |
| 8.75E-19 | 0.077718 | 0.09344  | 0.170358 | 0.00022  | 0.107435 | 0.02022  | 0.216462 | 2.34E-06 |
| 9.13E-29 | 0.178741 | 0.0001   | 0.019037 | 0.68157  | 0.081931 | 0.07693  | 0.248921 | 5.01E-08 |
| 6.36E-12 | 0.111619 | 0.01581  | 0.06821  | 0.14108  | 0.143911 | 0.00182  | 0.251395 | 3.65E-08 |
| 1.27E-30 | 0.088856 | 0.055    | -0.02741 | 0.55462  | -0.11316 | 0.01442  | 0.035578 | 0.44306  |
| 3.08E-13 | -0.00636 | 0.89098  | -0.12831 | 0.00549  | -0.23918 | 1.69E-07 | -0.15645 | 0.00069  |
| 2.27E-10 | 0.050294 | 0.27808  | 0.137863 | 0.00283  | 0.068739 | 0.13801  | 0.200355 | 1.29E-05 |
| 2.49E-36 | 0.118535 | 0.01035  | -0.02246 | 0.62827  | -0.06026 | 0.19363  | 0.103716 | 0.025    |
| 0.08225  | 0.018104 | 0.69638  | -0.05652 | 0.22281  | 0.016376 | 0.72411  | 0.009587 | 0.8363   |
| 1.06E-16 | -0.08743 | 0.05905  | -0.04748 | 0.30585  | -0.23525 | 2.71E-07 | -0.13799 | 0.00281  |
| 2.67E-08 | 0.109132 | 0.01832  | 0.049969 | 0.28121  | 0.01791  | 0.69947  | 0.194588 | 2.29E-05 |
| 7.79E-08 | 0.044628 | 0.3359   | -0.01969 | 0.67129  | 0.083477 | 0.0715   | 0.137714 | 0.00286  |
| 1.46E-05 | 0.091835 | 0.04732  | 0.01511  | 0.74466  | -0.01695 | 0.71493  | 0.15866  | 0.00058  |
| 2.17E-37 | 0.084581 | 0.06782  | 0.132962 | 0.004    | -0.01818 | 0.6952   | 0.109586 | 0.01784  |
| 9.18E-45 | 0.073532 | 0.11253  | -0.02146 | 0.64374  | -0.01905 | 0.68143  | 0.086328 | 0.06232  |
| 1.22E-06 | -0.00668 | 0.88545  | -0.04436 | 0.3388   | -0.00437 | 0.92502  | 0.022977 | 0.6204   |
| 1.27E-09 | 0.086279 | 0.06246  | 0.036945 | 0.42573  | 0.057493 | 0.21492  | 0.15957  | 0.00054  |
| 1.84E-20 | 0.067895 | 0.14293  | -0.09334 | 0.04379  | -0.14008 | 0.00241  | 0.051524 | 0.26648  |
| 1.55E-25 | 0.102156 | 0.02728  | 0.065454 | 0.15789  | -0.01177 | 0.79969  | 0.176161 | 0.00013  |
| 4.68E-08 | 0.250124 | 4.30E-08 | 0.047439 | 0.30631  | 0.11535  | 0.01262  | 0.27699  | 1.13E-09 |

|          |          |          |          |          |          |          |          |          |
|----------|----------|----------|----------|----------|----------|----------|----------|----------|
| 2.03E-07 | 0.007425 | 0.87286  | -0.07533 | 0.10396  | -0.09082 | 0.04984  | 0.04939  | 0.28683  |
| 1.63E-27 | 0.111513 | 0.01591  | 0.06764  | 0.14444  | 0.054108 | 0.24321  | 0.23636  | 2.37E-07 |
| 2.88E-19 | 0.092876 | 0.04485  | -0.06686 | 0.14915  | -0.01699 | 0.71424  | 0.074468 | 0.10801  |
| 6.84E-22 | 0.062862 | 0.17505  | -0.02372 | 0.60921  | -0.10234 | 0.027    | 0.039184 | 0.39821  |
| 7.35E-28 | 0.227077 | 7.09E-07 | 0.157919 | 0.00061  | 0.060404 | 0.19256  | 0.252541 | 3.15E-08 |
| 3.53E-37 | 0.214586 | 2.88E-06 | 0.064552 | 0.16371  | -0.064   | 0.16733  | 0.125148 | 0.00677  |
| 1.15E-08 | 0.020821 | 0.65358  | -0.00742 | 0.873    | -0.04025 | 0.38548  | 0.017123 | 0.71207  |
| 1.04E-16 | -0.0114  | 0.80599  | -0.15884 | 0.00057  | -0.17337 | 0.00017  | -0.09227 | 0.04628  |
| 1.78E-14 | 0.113069 | 0.0145   | -0.04548 | 0.32679  | -0.09032 | 0.0511   | 0.10545  | 0.02266  |
| 3.51E-22 | 0.128524 | 0.00541  | -0.03875 | 0.40342  | 0.006076 | 0.89581  | 0.129175 | 0.00518  |
| 1.49E-15 | -0.06366 | 0.16965  | 0.041195 | 0.37442  | -0.07239 | 0.11822  | -0.03088 | 0.50566  |
| 5.13E-24 | 0.19146  | 3.11E-05 | 0.240319 | 1.47E-07 | 0.295049 | 7.80E-11 | 0.431695 | 1.27E-22 |
| 7.52E-50 | 0.224931 | 9.07E-07 | -0.02918 | 0.52934  | 0.036048 | 0.43706  | 0.207429 | 6.19E-06 |
| 9.61E-21 | 0.190052 | 3.57E-05 | 0.069653 | 0.13284  | 0.041489 | 0.37102  | 0.24783  | 5.76E-08 |
| 1.06E-11 | 0.214022 | 3.06E-06 | 0.030934 | 0.50486  | 0.098594 | 0.03316  | 0.25669  | 1.84E-08 |
| 4.29E-05 | 0.058305 | 0.20851  | 0.069012 | 0.13645  | 0.122265 | 0.00817  | 0.223659 | 1.05E-06 |
| 1.30E-10 | -0.05099 | 0.27143  | -0.1912  | 3.19E-05 | -0.16494 | 0.00034  | -0.15676 | 0.00067  |
| 1.54E-13 | 0.068379 | 0.14009  | -0.03298 | 0.47706  | -0.04102 | 0.37646  | 0.080636 | 0.08173  |
| 1.11E-25 | 0.113041 | 0.01452  | 0.017766 | 0.70177  | -0.01203 | 0.79548  | 0.18141  | 8.06E-05 |
| 3.64E-55 | 0.125207 | 0.00675  | 0.021913 | 0.6367   | -0.09752 | 0.03514  | 0.021692 | 0.64009  |
| 4.80E-28 | -0.01591 | 0.73166  | -0.02916 | 0.52956  | -0.17842 | 0.00011  | -0.06962 | 0.13303  |
| 1.85E-24 | 0.104684 | 0.02367  | -0.02144 | 0.64397  | -0.13101 | 0.00457  | 0.008713 | 0.85105  |
| 7.02E-28 | 0.068804 | 0.13764  | -0.02984 | 0.52     | -0.12749 | 0.0058   | 0.002506 | 0.95693  |
| 1.04E-11 | -0.04724 | 0.30832  | -0.12409 | 0.00726  | -0.18501 | 5.77E-05 | -0.12122 | 0.00873  |
| 8.72E-12 | 0.1318   | 0.00433  | -0.0244  | 0.59885  | 0.031507 | 0.497    | 0.210774 | 4.34E-06 |
| 1.55E-19 | 0.044047 | 0.34223  | -0.04761 | 0.3046   | -0.07087 | 0.12616  | 0.010905 | 0.81418  |
| 3.84E-35 | 0.185061 | 5.74E-05 | 0.114799 | 0.01305  | -0.01907 | 0.68104  | 0.147078 | 0.00144  |
| 1.99E-15 | 0.063506 | 0.17066  | -0.12612 | 0.00635  | -0.1041  | 0.02446  | 0.031459 | 0.49765  |
| 6.23E-20 | 0.058156 | 0.20968  | -0.01696 | 0.71472  | -0.09728 | 0.03559  | 0.052006 | 0.26203  |
| 4.23E-37 | 0.105609 | 0.02246  | 0.054422 | 0.24048  | -0.0767  | 0.09781  | 0.11841  | 0.01044  |
| 1.35E-10 | 0.012989 | 0.77952  | -0.00557 | 0.90439  | -0.15898 | 0.00056  | -0.04691 | 0.31173  |
| 1.15E-13 | 0.126619 | 0.00614  | -0.11896 | 0.01008  | 0.01187  | 0.79807  | 0.106479 | 0.02137  |
| 0.00277  | 0.166598 | 0.0003   | -0.08689 | 0.06062  | -0.01365 | 0.76857  | 0.127337 | 0.00586  |
| 1.01E-51 | 0.106526 | 0.02131  | 0.105287 | 0.02288  | 0.076524 | 0.0986   | 0.220455 | 1.50E-06 |
| 1.26E-24 | -0.00119 | 0.97955  | -0.06779 | 0.14355  | -0.07257 | 0.1173   | -0.01543 | 0.73941  |
| 1.32E-17 | -0.0024  | 0.95871  | 0.090234 | 0.05133  | 0.083861 | 0.0702   | 0.107474 | 0.02018  |
| 1.58E-13 | 0.007379 | 0.87364  | -0.0346  | 0.45567  | -0.06414 | 0.16645  | 0.029729 | 0.5216   |
| 2.11E-11 | 0.086059 | 0.06314  | -0.0561  | 0.22624  | 0.037791 | 0.41521  | 0.124183 | 0.00721  |
| 2.82E-14 | 0.082378 | 0.07533  | 0.08305  | 0.07297  | 0.02785  | 0.54828  | 0.187748 | 4.45E-05 |
| 1.89E-13 | 0.077549 | 0.09415  | -0.04397 | 0.34305  | -0.06694 | 0.14865  | 0.02881  | 0.53456  |
| 1.41E-13 | 0.001571 | 0.973    | -0.00241 | 0.9586   | -0.18247 | 7.31E-05 | -0.0509  | 0.27233  |
| 2.71E-06 | -0.06451 | 0.16401  | -0.04683 | 0.31257  | -0.22294 | 1.14E-06 | -0.17418 | 0.00016  |
| 1.86E-18 | 0.150903 | 0.00107  | -0.00626 | 0.89269  | 0.049475 | 0.28599  | 0.265405 | 5.72E-09 |
| 4.07E-18 | 0.074394 | 0.10837  | 0.122027 | 0.00829  | 0.060831 | 0.18943  | 0.238763 | 1.77E-07 |
| 2.56E-06 | -0.05485 | 0.23679  | 0.05881  | 0.20459  | -0.07784 | 0.09292  | -0.01026 | 0.82501  |

|          |          |          |          |          |          |          |          |          |
|----------|----------|----------|----------|----------|----------|----------|----------|----------|
| 2.53E-05 | 0.097584 | 0.03501  | 0.041104 | 0.37548  | 0.11721  | 0.01125  | 0.166727 | 0.0003   |
| 1.96E-05 | -0.20442 | 8.47E-06 | 0.120298 | 0.00926  | 0.158758 | 0.00057  | -0.03694 | 0.42581  |
| 0.00207  | 0.001134 | 0.98049  | -0.14823 | 0.00132  | -0.0658  | 0.15571  | -0.05214 | 0.26084  |
| 0.01752  | 0.058794 | 0.20471  | -0.03138 | 0.4987   | 0.028462 | 0.53952  | 0.037064 | 0.42424  |
| 0.00832  | -0.04098 | 0.37692  | 0.092511 | 0.04571  | -0.02007 | 0.66538  | -0.0002  | 0.99654  |
| 0.00063  | 0.053484 | 0.24869  | -0.12836 | 0.00547  | -0.08242 | 0.07518  | -0.07853 | 0.09005  |
| 0.01882  | 0.018521 | 0.68974  | -0.04911 | 0.28958  | -0.05944 | 0.19976  | 0.0456   | 0.32546  |
| 0.02184  | -0.0117  | 0.80085  | -0.13674 | 0.00307  | -0.16313 | 0.0004   | -0.13625 | 0.00317  |
| 0.0854   | 0.014962 | 0.74709  | -0.06645 | 0.15166  | -0.02356 | 0.6115   | 0.038669 | 0.40444  |
| 0.21558  | -0.08684 | 0.06077  | -0.08908 | 0.0544   | -0.0811  | 0.08     | -0.08067 | 0.0816   |
| 0.73914  | 0.146503 | 0.0015   | -0.07392 | 0.11066  | 0.119858 | 0.00953  | 0.216838 | 2.25E-06 |
| 0.01637  | -0.01973 | 0.67057  | 0.007547 | 0.87079  | -0.14897 | 0.00124  | -0.10097 | 0.02912  |
| 2.74E-07 | 0.108299 | 0.01923  | -0.01205 | 0.79501  | 0.044638 | 0.33579  | 0.106968 | 0.02078  |
| 0.02445  | 0.017675 | 0.70322  | -0.16263 | 0.00042  | -0.25757 | 1.64E-08 | -0.19415 | 2.39E-05 |
| 0.09053  | -0.10382 | 0.02485  | -0.28258 | 5.05E-10 | -0.22215 | 1.24E-06 | -0.28052 | 6.82E-10 |
| 4.36E-06 | 0.047823 | 0.30241  | -0.0443  | 0.33946  | -0.01753 | 0.70562  | -0.03211 | 0.4888   |
| 0.02677  | 0.022556 | 0.62683  | 0.032083 | 0.48917  | 0.054051 | 0.24371  | 0.052335 | 0.25902  |
| 0.18772  | -0.17995 | 9.22E-05 | 0.108475 | 0.01904  | -0.05122 | 0.26936  | -0.22623 | 7.82E-07 |
| 0.31415  | 0.141109 | 0.00224  | 0.198093 | 1.62E-05 | 0.283276 | 4.57E-10 | 0.337012 | 7.24E-14 |
| 0.83562  | -0.00678 | 0.88384  | -0.0364  | 0.43254  | -0.04797 | 0.30094  | 0.014814 | 0.7495   |
| 0.10469  | -0.20814 | 5.74E-06 | -0.16092 | 0.00048  | -0.17171 | 0.00019  | -0.35825 | 1.37E-15 |
| 0.00106  | 0.105731 | 0.0223   | 0.092165 | 0.04652  | 0.033779 | 0.46648  | 0.158761 | 0.00057  |
| 6.57E-10 | 0.172356 | 0.00018  | -0.14095 | 0.00227  | -0.07477 | 0.10659  | 0.061894 | 0.1818   |
| 0.96508  | 0.079011 | 0.08809  | -0.23142 | 4.27E-07 | -0.09643 | 0.03723  | -0.06071 | 0.19033  |
| 0.01462  | 0.035634 | 0.44235  | -0.1651  | 0.00034  | -0.18266 | 7.18E-05 | -0.10482 | 0.0235   |
| 0.0887   | -0.03554 | 0.44359  | -0.07982 | 0.08489  | -0.00627 | 0.89253  | -0.08796 | 0.0575   |
| 0.0003   | 0.024925 | 0.59108  | 0.161042 | 0.00048  | 0.17841  | 0.00011  | 0.159218 | 0.00055  |
| 4.97E-06 | 0.031541 | 0.49654  | -0.09722 | 0.0357   | -0.09335 | 0.04377  | -0.06807 | 0.1419   |
| 0.00074  | 0.218732 | 1.82E-06 | 0.124916 | 0.00688  | 0.0745   | 0.10786  | 0.194218 | 2.38E-05 |
| 0.36494  | 0.235769 | 2.55E-07 | -0.05999 | 0.1956   | 0.106697 | 0.0211   | 0.232853 | 3.61E-07 |
| 0.11639  | 0.023171 | 0.61746  | 0.286613 | 2.79E-10 | 0.245572 | 7.65E-08 | 0.189358 | 3.81E-05 |
| 0.22087  | -0.00868 | 0.8516   | 0.030999 | 0.50397  | -0.00821 | 0.85951  | -0.00602 | 0.89682  |
| 0.30794  | -0.02078 | 0.65428  | -0.05305 | 0.25253  | -0.04799 | 0.30071  | -0.06508 | 0.16032  |
| 0.52702  | -0.03495 | 0.45112  | 0.041016 | 0.3765   | -0.03005 | 0.51719  | 0.010612 | 0.81909  |
| 1.47E-05 | 0.025084 | 0.58871  | 0.049921 | 0.28167  | -0.07991 | 0.08451  | 0.073438 | 0.11299  |
| 1.95E-11 | 0.05927  | 0.20106  | 0.021213 | 0.6475   | -0.05451 | 0.23968  | 0.063681 | 0.16949  |
| 8.99E-09 | 0.034414 | 0.45813  | -0.03264 | 0.48158  | -0.04936 | 0.28707  | 0.096156 | 0.03778  |
| 3.65E-10 | 0.026966 | 0.56105  | -0.07147 | 0.12299  | -0.06294 | 0.17452  | 0.007944 | 0.86406  |
| 0.95815  | 0.011511 | 0.80405  | -0.16183 | 0.00045  | -0.07789 | 0.09271  | -0.0424  | 0.36064  |
| 0.03905  | -0.01336 | 0.77342  | -0.07247 | 0.11781  | -0.07179 | 0.1213   | -0.06767 | 0.14424  |
| 5.33E-09 | 0.037273 | 0.42163  | -0.06587 | 0.15525  | -0.07438 | 0.10845  | -0.02393 | 0.60597  |
| 0.95316  | -0.01049 | 0.82107  | -0.06871 | 0.1382   | 0.002337 | 0.95982  | 0.028795 | 0.53478  |
| 0.72097  | -0.02186 | 0.63746  | 0.017444 | 0.70693  | 0.01383  | 0.76565  | 0.014159 | 0.76023  |
| 0.62587  | 0.01838  | 0.69198  | 0.057581 | 0.21423  | 0.131947 | 0.00429  | 0.123516 | 0.00753  |
| 0.87691  | -0.01826 | 0.69395  | -0.01902 | 0.68191  | -0.03869 | 0.4042   | -0.02525 | 0.5863   |

|          |          |          |          |          |          |          |          |          |
|----------|----------|----------|----------|----------|----------|----------|----------|----------|
| 0.43636  | -0.03219 | 0.48773  | -0.01786 | 0.70031  | -0.03518 | 0.44815  | -0.05631 | 0.22454  |
| 1.18E-05 | 0.078977 | 0.08823  | -0.04762 | 0.30442  | -0.12674 | 0.00609  | -0.03492 | 0.4516   |
| 0.00077  | 0.007351 | 0.87412  | 0.066071 | 0.154    | -0.03859 | 0.40537  | -0.02808 | 0.54494  |
| 0.04425  | 0.036089 | 0.43654  | -0.03837 | 0.40812  | -0.0091  | 0.84446  | 0.01752  | 0.70571  |
| 0.00292  | 0.029903 | 0.51918  | -0.06393 | 0.1678   | -0.08003 | 0.08405  | -0.04798 | 0.30082  |
| 2.83E-06 | -0.00358 | 0.93843  | -0.13592 | 0.00325  | -0.05887 | 0.20414  | -0.02055 | 0.65775  |
| 0.45155  | -0.01084 | 0.81532  | -0.0799  | 0.08456  | -0.04039 | 0.38387  | -0.01584 | 0.73277  |
| 0.92611  | -0.00407 | 0.93009  | 0.02382  | 0.60764  | 0.01136  | 0.80658  | -0.01055 | 0.82007  |
| 0.91849  | -0.00097 | 0.9834   | 0.043085 | 0.35289  | 0.039581 | 0.39344  | 0.002748 | 0.95278  |
| 0.56005  | 0.034929 | 0.45144  | -0.02644 | 0.56868  | -0.00754 | 0.87094  | -0.02471 | 0.59427  |
| 0.96383  | 0.013467 | 0.77162  | 0.02255  | 0.62692  | 0.033131 | 0.47507  | 0.014989 | 0.74664  |
| 0.65229  | -0.02555 | 0.58176  | -0.02886 | 0.53386  | -0.06845 | 0.13967  | -0.03988 | 0.38988  |
| 0.50701  | -0.02718 | 0.55795  | 0.020682 | 0.65574  | 0.033991 | 0.46369  | -0.02585 | 0.57735  |
| 0.2254   | 0.117416 | 0.01111  | 0.062903 | 0.17477  | 0.200969 | 1.21E-05 | 0.240396 | 1.45E-07 |
| 0.52802  | -0.03034 | 0.51315  | -0.09313 | 0.04428  | -0.07925 | 0.08714  | -0.07335 | 0.1134   |
| 0.61553  | -0.01129 | 0.80774  | -0.08596 | 0.06346  | -0.03288 | 0.47836  | -0.04393 | 0.3435   |
| 0.49958  | -0.008   | 0.86317  | -0.03495 | 0.45118  | -0.06019 | 0.19415  | -0.06423 | 0.16585  |
| 0.0073   | -0.00072 | 0.9876   | -0.06143 | 0.18511  | -0.02537 | 0.58449  | -0.07162 | 0.12222  |
| 2.24E-06 | 0.252029 | 3.37E-08 | 0.079491 | 0.08617  | 0.031122 | 0.50228  | 0.101383 | 0.02848  |
| 0.00186  | 0.041843 | 0.36694  | -0.10677 | 0.02102  | -0.05314 | 0.25174  | 0.034623 | 0.45541  |
| 0.10593  | 0.03233  | 0.48583  | -0.05487 | 0.23662  | -0.04058 | 0.38159  | -0.04082 | 0.37876  |
| 0.00824  | -0.01047 | 0.82141  | -0.0869  | 0.06059  | -0.10894 | 0.01853  | -0.08679 | 0.06093  |
| 0.99632  | -0.00734 | 0.87431  | 0.007054 | 0.87917  | -0.05277 | 0.25506  | -0.01973 | 0.67069  |
| 0.86167  | 0.006717 | 0.8849   | 0.303355 | 2.14E-11 | 0.243697 | 9.67E-08 | 0.311222 | 6.02E-12 |
| 1.06E-05 | 0.008628 | 0.85248  | -0.0327  | 0.48078  | -0.03548 | 0.44434  | -0.04392 | 0.34358  |
| 0.03688  | -0.04811 | 0.29949  | -0.10132 | 0.02857  | -0.05335 | 0.24989  | -0.05642 | 0.22359  |
| 0.73838  | 0.032387 | 0.48505  | 0.07482  | 0.10635  | 0.004283 | 0.92645  | 0.017497 | 0.70607  |
| 0.00159  | 0.015779 | 0.73378  | 0.039188 | 0.39816  | 0.006837 | 0.88285  | 0.051528 | 0.26645  |
| 0.38835  | 0.039594 | 0.39328  | 0.009948 | 0.83023  | 0.037844 | 0.41455  | 0.041884 | 0.36647  |
| 0.75312  | -0.0018  | 0.96912  | 0.028157 | 0.54387  | 0.015638 | 0.73608  | 0.020338 | 0.66111  |
| 0.72395  | -0.02454 | 0.59679  | 0.023581 | 0.61125  | 0.020367 | 0.66067  | 0.002836 | 0.95126  |
| 0.45216  | -0.03442 | 0.45805  | -0.03659 | 0.43025  | -0.06066 | 0.19067  | -0.0836  | 0.07107  |
| 0.61001  | -0.04859 | 0.29475  | -0.04764 | 0.30424  | -0.04158 | 0.36998  | -0.09363 | 0.04314  |
| 0.24716  | -0.05933 | 0.20064  | 0.023026 | 0.61966  | 0.062183 | 0.17976  | 0.024495 | 0.59749  |
| 0.56629  | 0.030488 | 0.51103  | 0.075253 | 0.10434  | 0.099249 | 0.03201  | 0.140521 | 0.00234  |
| 0.94443  | 0.010864 | 0.81487  | 0.051002 | 0.27137  | 0.059269 | 0.20107  | 0.065512 | 0.15752  |
| 0.02081  | 0.01062  | 0.81896  | -0.00874 | 0.85051  | 0.047299 | 0.30774  | 0.0428   | 0.35608  |
| 0.73955  | -0.00941 | 0.8393   | -0.01513 | 0.74428  | -0.00574 | 0.90158  | -0.02095 | 0.65155  |
| 0.85809  | -0.00758 | 0.87016  | -0.09043 | 0.05081  | -0.02471 | 0.59434  | -0.00177 | 0.96956  |
| 0.70231  | -0.01596 | 0.73088  | 0.029126 | 0.53009  | -0.00039 | 0.99331  | -0.02019 | 0.66348  |
| 0.82932  | -0.00434 | 0.9255   | -0.01393 | 0.76399  | 0.002277 | 0.96086  | -0.00317 | 0.94557  |
| 0.27739  | -0.00336 | 0.9423   | -0.04392 | 0.34361  | -0.08755 | 0.05868  | -0.09324 | 0.04401  |
| 3.46E-09 | 0.068519 | 0.13928  | 0.152626 | 0.00094  | 0.251606 | 3.56E-08 | 0.346058 | 1.39E-14 |
| 0.69747  | 0.000751 | 0.98709  | -0.09908 | 0.0323   | -0.0423  | 0.36175  | -0.02875 | 0.53548  |
| 0.00223  | -0.01572 | 0.73468  | -0.18079 | 8.53E-05 | -0.07065 | 0.12739  | -0.08388 | 0.07014  |

|          |          |          |          |          |          |          |          |          |
|----------|----------|----------|----------|----------|----------|----------|----------|----------|
| 7.44E-07 | 0.045907 | 0.32221  | -0.1079  | 0.01968  | -0.09842 | 0.03347  | 0.036005 | 0.4376   |
| 8.15E-10 | 0.02106  | 0.64986  | 0.006592 | 0.88703  | -0.00941 | 0.83928  | 0.025855 | 0.57731  |
| 0.01051  | 0.051807 | 0.26386  | -0.00138 | 0.97627  | -0.05748 | 0.21505  | 0.00363  | 0.93764  |
| 0.10618  | -0.13008 | 0.00487  | -0.07395 | 0.11051  | -0.15005 | 0.00114  | -0.21937 | 1.70E-06 |
| 0.52138  | -0.05215 | 0.26075  | -0.05379 | 0.24599  | -0.04711 | 0.30964  | -0.07514 | 0.10485  |
| 0.67265  | -0.06318 | 0.17288  | -0.04072 | 0.37993  | -0.04951 | 0.28568  | -0.06413 | 0.16649  |
| 0.01431  | -0.07145 | 0.12312  | -0.15316 | 0.0009   | -0.11958 | 0.0097   | -0.15134 | 0.00104  |
| 2.79E-06 | 0.030823 | 0.5064   | -0.08327 | 0.07222  | -0.08258 | 0.07461  | -0.03451 | 0.45691  |
| 0.59974  | -0.05136 | 0.26798  | -0.00873 | 0.85076  | 0.030082 | 0.51668  | 0.013147 | 0.77691  |
| 0.00022  | 0.009785 | 0.83297  | 0.0444   | 0.33837  | -0.04594 | 0.3219   | -0.00888 | 0.84825  |
| 7.55E-06 | -0.18177 | 7.80E-05 | -0.15005 | 0.00114  | -0.17666 | 0.00012  | -0.3298  | 2.60E-13 |
| 0.36708  | 0.02461  | 0.59578  | 0.39209  | 1.30E-18 | 0.202466 | 1.04E-05 | 0.079966 | 0.08431  |
| 0.68241  | 0.041673 | 0.3689   | 0.099062 | 0.03233  | 0.132609 | 0.0041   | 0.064368 | 0.16492  |
| 1.16E-05 | 0.098488 | 0.03335  | -0.11461 | 0.0132   | 0.149619 | 0.00118  | 0.170536 | 0.00021  |
| 0.013    | -0.11145 | 0.01597  | 0.088263 | 0.05665  | 0.212766 | 3.50E-06 | 0.054673 | 0.23832  |
| 0.09264  | 0.076119 | 0.1004   | -0.10192 | 0.02764  | -0.03689 | 0.42647  | -0.13397 | 0.00373  |
| 0.97755  | 0.209218 | 5.12E-06 | 0.151957 | 0.00099  | 0.316117 | 2.69E-12 | 0.331445 | 1.95E-13 |
| 0.843    | 0.02453  | 0.59698  | 0.228406 | 6.08E-07 | 0.204136 | 8.73E-06 | 0.213809 | 3.13E-06 |
| 0.00266  | 0.001512 | 0.974    | -0.00384 | 0.93412  | 0.073704 | 0.11169  | 0.046316 | 0.31791  |
| 4.34E-06 | 0.043572 | 0.34746  | -0.0561  | 0.22627  | -0.18131 | 8.14E-05 | -0.14828 | 0.00131  |
| 3.88E-06 | -0.04208 | 0.36429  | -0.05362 | 0.24749  | 0.075386 | 0.10372  | 0.015299 | 0.7416   |
| 0.16962  | -0.10766 | 0.01996  | -0.30068 | 3.26E-11 | -0.2446  | 8.64E-08 | -0.37492 | 4.93E-17 |
| 0.20514  | 0.030376 | 0.51258  | 0.059426 | 0.19988  | 0.080521 | 0.08217  | 0.081493 | 0.07853  |
| 0.94052  | -0.1113  | 0.01612  | 0.015232 | 0.74268  | -0.15266 | 0.00093  | -0.24488 | 8.35E-08 |
| 0.0007   | -0.09669 | 0.03673  | -0.27813 | 9.63E-10 | -0.26946 | 3.27E-09 | -0.31279 | 4.66E-12 |
| 0.00074  | -0.0635  | 0.17072  | 0.023085 | 0.61876  | -0.11041 | 0.01699  | -0.14715 | 0.00143  |
| 0.19711  | 0.060245 | 0.19374  | 0.053359 | 0.2498   | 0.199363 | 1.42E-05 | 0.306964 | 1.20E-11 |
| 0.06342  | -0.09795 | 0.03433  | -0.22687 | 7.26E-07 | -0.18066 | 8.64E-05 | -0.1865  | 5.01E-05 |
| 1.50E-19 | 0.139298 | 0.00255  | -0.02928 | 0.52793  | 0.054104 | 0.24324  | 0.140099 | 0.00241  |
| 0.03468  | 0.053443 | 0.24906  | -0.21029 | 4.57E-06 | -0.20351 | 9.31E-06 | -0.17412 | 0.00016  |
| 0.00082  | 0.231218 | 4.37E-07 | -0.07447 | 0.10798  | 0.033657 | 0.46808  | 0.068413 | 0.13989  |
| 4.15E-11 | 0.07867  | 0.08948  | -0.0113  | 0.80762  | -0.04595 | 0.32177  | -0.0109  | 0.81434  |
| 0.0313   | 0.015615 | 0.73646  | -0.1667  | 0.0003   | 0.019099 | 0.68058  | 0.011605 | 0.8025   |
| 0.07271  | 0.026585 | 0.5666   | 0.061385 | 0.18543  | -0.02801 | 0.54595  | 0.002266 | 0.96105  |
| 0.73454  | -0.03281 | 0.47933  | 0.067884 | 0.14299  | 0.000541 | 0.9907   | -0.03344 | 0.47097  |
| 7.95E-12 | -0.05002 | 0.28073  | 0.118938 | 0.0101   | -0.14556 | 0.00161  | -0.1508  | 0.00108  |
| 0.39189  | -0.0106  | 0.81929  | -0.21227 | 3.70E-06 | -0.19527 | 2.14E-05 | -0.14117 | 0.00223  |
| 0.01159  | 0.184477 | 6.06E-05 | -0.00992 | 0.83064  | 0.080127 | 0.08368  | 0.165921 | 0.00032  |
| 6.70E-07 | -0.08489 | 0.06683  | 0.333925 | 1.26E-13 | 0.228047 | 6.34E-07 | 0.191605 | 3.07E-05 |
| 5.02E-12 | -0.16822 | 0.00026  | 0.141544 | 0.00217  | 0.015999 | 0.73022  | -0.13055 | 0.00472  |
| 0.1859   | 0.009266 | 0.8417   | -0.20739 | 6.22E-06 | -0.12497 | 0.00685  | -0.10949 | 0.01793  |
| 0.00432  | 0.072532 | 0.11751  | -0.1017  | 0.02798  | -0.0916  | 0.04789  | 0.02102  | 0.65049  |
| 0.13785  | 0.109469 | 0.01796  | -0.10139 | 0.02847  | -0.11446 | 0.01332  | 0.016413 | 0.72352  |
| 0.00519  | -0.03929 | 0.3969   | -0.22925 | 5.51E-07 | -0.21637 | 2.37E-06 | -0.14157 | 0.00216  |
| 0.73105  | -0.04713 | 0.30952  | -0.081   | 0.08035  | -0.02521 | 0.58688  | -0.03825 | 0.40951  |

|          |          |          |          |          |          |          |          |          |
|----------|----------|----------|----------|----------|----------|----------|----------|----------|
| 0.67091  | 0.099986 | 0.03075  | 0.062603 | 0.17684  | 0.165869 | 0.00032  | 0.149369 | 0.00121  |
| 0.0031   | 0.045503 | 0.32649  | -0.09523 | 0.03968  | -0.10378 | 0.02491  | 0.00384  | 0.93404  |
| 3.92E-08 | -0.19314 | 2.64E-05 | -0.15051 | 0.0011   | -0.01242 | 0.78897  | -0.20338 | 9.44E-06 |
| 7.33E-09 | 0.034143 | 0.46168  | -0.06291 | 0.17475  | -0.13645 | 0.00313  | 0.008487 | 0.85486  |
| 0.62559  | 0.016972 | 0.7145   | -0.0538  | 0.24594  | -0.04997 | 0.28117  | 0.005928 | 0.89834  |
| 0.01192  | -0.07519 | 0.10461  | 0.179746 | 9.39E-05 | -0.0716  | 0.12229  | -0.10765 | 0.01997  |
| 0.14714  | -0.07357 | 0.11234  | -0.15778 | 0.00062  | -0.14001 | 0.00243  | -0.10276 | 0.02638  |
| 2.15E-05 | 0.261677 | 9.46E-09 | 0.214978 | 2.76E-06 | 0.07296  | 0.11536  | 0.234443 | 2.99E-07 |
| 0.03553  | 0.053909 | 0.24495  | 0.060311 | 0.19325  | -0.00292 | 0.94984  | 0.097292 | 0.03557  |
| 1.99E-10 | 0.110972 | 0.01643  | 0.036451 | 0.43194  | -0.03915 | 0.39859  | 0.063345 | 0.17175  |
| 0.41625  | -0.04064 | 0.38086  | 0.415441 | 6.53E-21 | 0.088901 | 0.05488  | 0.083656 | 0.07089  |
| 2.02E-10 | 0.039193 | 0.3981   | 0.351825 | 4.71E-15 | 0.201048 | 1.20E-05 | 0.217027 | 2.20E-06 |
| 0.03926  | 0.128723 | 0.00534  | 0.005778 | 0.9009   | 0.096919 | 0.03628  | 0.249436 | 4.69E-08 |
| 1.43E-10 | 0.001786 | 0.96929  | -0.12069 | 0.00904  | -0.06735 | 0.1462   | -0.06937 | 0.13443  |
| 0.00128  | 0.237486 | 2.07E-07 | -0.19742 | 1.73E-05 | 0.119511 | 0.00974  | 0.236303 | 2.39E-07 |
| 4.37E-05 | -0.04092 | 0.37761  | -0.23087 | 4.56E-07 | -0.20504 | 7.95E-06 | -0.16508 | 0.00034  |
| 0.67813  | -0.00786 | 0.86553  | 0.043409 | 0.34927  | 0.037826 | 0.41478  | 0.034145 | 0.46167  |
| 0.45204  | 0.133412 | 0.00387  | -0.08393 | 0.06997  | 0.06783  | 0.14331  | 0.258763 | 1.40E-08 |
| 0.06316  | -0.0619  | 0.18175  | -0.25662 | 1.85E-08 | -0.25236 | 3.23E-08 | -0.28845 | 2.12E-10 |
| 8.10E-12 | 0.026146 | 0.57302  | -0.00764 | 0.86921  | -0.04003 | 0.38811  | -0.01649 | 0.7222   |
| 0.26214  | 0.061061 | 0.18776  | 0.033045 | 0.47623  | 0.05322  | 0.25104  | 0.07761  | 0.0939   |
| 0.69989  | -0.01009 | 0.82788  | -0.00855 | 0.85377  | 0.062394 | 0.17829  | 0.023566 | 0.61147  |
| 0.30137  | -0.11994 | 0.00948  | -0.00666 | 0.8858   | -0.26012 | 1.17E-08 | -0.33754 | 6.58E-14 |
| 0.41976  | -0.03374 | 0.46704  | -0.02172 | 0.63971  | 0.188313 | 4.22E-05 | 0.153486 | 0.00088  |
| 0.50114  | -0.04469 | 0.33524  | 0.041776 | 0.36772  | -0.10993 | 0.01748  | -0.0748  | 0.10645  |
| 0.73693  | -0.03221 | 0.4874   | 0.09896  | 0.03251  | 0.031222 | 0.50091  | 0.048838 | 0.29225  |
| 0.59267  | 0.169596 | 0.00023  | 0.069268 | 0.135    | 0.020332 | 0.6612   | 0.169908 | 0.00023  |
| 0.80718  | 0.122957 | 0.00781  | -0.09837 | 0.03356  | 0.06188  | 0.1819   | 0.154759 | 0.00079  |
| 0.76416  | 0.000861 | 0.98519  | 0.085238 | 0.06571  | 0.018995 | 0.68223  | 0.015347 | 0.74081  |
| 0.44321  | -0.07452 | 0.10775  | -0.08205 | 0.0765   | -0.10192 | 0.02764  | -0.06434 | 0.16511  |
| 0.12023  | -0.13244 | 0.00414  | 0.101119 | 0.02889  | -0.12519 | 0.00675  | -0.21213 | 3.75E-06 |
| 0.32346  | 0.136981 | 0.00301  | 0.121573 | 0.00854  | 0.072896 | 0.11568  | 0.164113 | 0.00037  |
| 0.75848  | -0.03172 | 0.49416  | -0.04102 | 0.37647  | -0.08373 | 0.07064  | -0.08911 | 0.05431  |
| 0.01183  | -0.02992 | 0.51899  | 0.095344 | 0.03944  | -0.11711 | 0.01132  | -0.1123  | 0.01518  |
| 0.00064  | 0.056811 | 0.22043  | 0.002141 | 0.96319  | 0.057817 | 0.21235  | 0.137    | 0.00301  |
| 0.06183  | -0.00743 | 0.87285  | -0.25375 | 2.70E-08 | -0.2473  | 6.16E-08 | -0.2317  | 4.13E-07 |
| 0.59486  | -0.075   | 0.10553  | 0.021989 | 0.63553  | -0.04929 | 0.28782  | -0.12571 | 0.00653  |
| 0.00276  | 0.039989 | 0.38858  | -0.05736 | 0.21597  | -0.07767 | 0.09365  | 0.008956 | 0.84695  |
| 0.11432  | -0.1832  | 6.83E-05 | -0.14831 | 0.00131  | -0.25646 | 1.89E-08 | -0.32445 | 6.57E-13 |
| 0.13866  | 0.227769 | 6.54E-07 | 0.16802  | 0.00027  | 0.276251 | 1.26E-09 | 0.342256 | 2.80E-14 |
| 0.15957  | 0.061763 | 0.18273  | 0.132558 | 0.00411  | 0.183415 | 6.69E-05 | 0.193122 | 2.65E-05 |
| 0.41563  | -0.00541 | 0.9072   | 0.066116 | 0.15372  | 0.107914 | 0.01967  | 0.121309 | 0.00869  |
| 0.114    | 0.178994 | 0.0001   | 0.107155 | 0.02055  | 0.178482 | 0.00011  | 0.345611 | 1.51E-14 |
| 0.17844  | -0.01027 | 0.82483  | 0.255797 | 2.06E-08 | 0.219182 | 1.73E-06 | 0.308    | 1.02E-11 |
| 1.25E-05 | 0.184378 | 6.12E-05 | 0.055561 | 0.23076  | 0.064212 | 0.16595  | 0.149491 | 0.00119  |



|          |          |          |          |          |          |          |          |          |
|----------|----------|----------|----------|----------|----------|----------|----------|----------|
| 0.79309  | -0.13925 | 0.00256  | -0.17046 | 0.00021  | -0.16687 | 0.00029  | -0.09978 | 0.03109  |
| 0.00015  | -0.14012 | 0.00241  | -0.17771 | 0.00011  | -0.21848 | 1.88E-06 | -0.34359 | 2.19E-14 |
| 0.00909  | 0.020419 | 0.65985  | -0.24602 | 7.23E-08 | -0.20163 | 1.13E-05 | -0.14466 | 0.00172  |
| 0.00047  | -0.0637  | 0.16937  | 0.005724 | 0.90181  | 0.014847 | 0.74896  | -0.05751 | 0.21481  |
| 0.93005  | -0.1313  | 0.00448  | -0.10334 | 0.02553  | -0.20617 | 7.06E-06 | -0.28935 | 1.85E-10 |
| 1.99E-06 | 0.067152 | 0.14736  | 0.134696 | 0.00354  | 0.079901 | 0.08456  | 0.124025 | 0.00729  |
| 0.07624  | 0.094126 | 0.04204  | 0.070201 | 0.12981  | 0.040175 | 0.38637  | 0.078581 | 0.08984  |
| 0.0552   | 0.278924 | 8.59E-10 | 0.085362 | 0.06531  | 0.048146 | 0.29915  | 0.225666 | 8.34E-07 |
| 0.10958  | 0.047347 | 0.30725  | 0.150794 | 0.00108  | 0.03996  | 0.38893  | 0.0996   | 0.0314   |
| 0.00028  | 0.116426 | 0.01181  | -0.03525 | 0.44723  | -0.0152  | 0.74316  | 0.00961  | 0.83592  |
| 0.34549  | -0.01342 | 0.77241  | -0.01852 | 0.68979  | -0.07032 | 0.12918  | 0.043547 | 0.34774  |
| 1.15E-05 | 0.087989 | 0.05743  | 0.056307 | 0.22455  | 0.208322 | 5.63E-06 | 0.305849 | 1.44E-11 |
| 0.00435  | 0.029102 | 0.53044  | -0.09794 | 0.03436  | -0.103   | 0.02603  | 0.021556 | 0.64219  |
| 0.42059  | -0.03403 | 0.46315  | -0.24797 | 5.66E-08 | -0.24112 | 1.33E-07 | -0.16929 | 0.00024  |
| 5.23E-05 | 0.052474 | 0.25776  | 0.128435 | 0.00544  | 0.145207 | 0.00165  | 0.114008 | 0.01369  |
| 0.37635  | 0.068598 | 0.13883  | -0.01151 | 0.80416  | -0.02221 | 0.63208  | 0.034009 | 0.46344  |
| 0.86904  | -0.08312 | 0.07272  | -0.09492 | 0.04033  | -0.09598 | 0.03814  | -0.19615 | 1.96E-05 |
| 0.0883   | -0.05614 | 0.22594  | -0.12993 | 0.00492  | -0.11615 | 0.01201  | -0.20115 | 1.19E-05 |
| 0.41648  | 0.038449 | 0.40713  | -0.06468 | 0.16287  | -0.04228 | 0.36198  | -0.06055 | 0.19148  |
| 0.57618  | 0.005837 | 0.89988  | -0.06355 | 0.1704   | -0.03149 | 0.49722  | -0.06682 | 0.14937  |
| 6.49E-07 | -0.01106 | 0.81159  | 0.102294 | 0.02707  | -0.01759 | 0.7046   | -0.0154  | 0.73993  |
| 4.36E-11 | 0.023721 | 0.60913  | -0.12393 | 0.00733  | -0.11592 | 0.01218  | -0.08483 | 0.067    |
| 0.49538  | 0.000731 | 0.98743  | -0.20947 | 4.99E-06 | -0.15762 | 0.00063  | -0.17193 | 0.00019  |
| 0.28175  | 0.065228 | 0.15934  | 0.002372 | 0.95922  | -0.07588 | 0.10147  | 0.015923 | 0.73145  |
| 0.7452   | -0.01086 | 0.81495  | -0.11902 | 0.01004  | -0.05187 | 0.26333  | -0.05484 | 0.2369   |
| 0.60331  | -0.01513 | 0.74435  | 0.034372 | 0.45868  | -0.0256  | 0.58102  | -0.00297 | 0.9489   |
| 0.034    | 0.061653 | 0.18351  | -0.04472 | 0.33485  | 0.010616 | 0.81902  | 0.050414 | 0.27694  |
| 5.72E-09 | 0.155791 | 0.00073  | 0.078992 | 0.08817  | 0.057033 | 0.21862  | 0.124699 | 0.00697  |
| 0.0559   | -0.00231 | 0.96021  | 0.065909 | 0.15502  | 0.065262 | 0.15911  | 0.035158 | 0.44846  |
| 0.79273  | 0.118573 | 0.01033  | -0.0232  | 0.61701  | 0.107981 | 0.01959  | 0.149226 | 0.00122  |
| 0.72892  | -0.01682 | 0.71688  | -0.1893  | 3.84E-05 | -0.15309 | 0.0009   | -0.13958 | 0.0025   |
| 0.00036  | -0.01721 | 0.7107   | -0.08225 | 0.07578  | 0.018489 | 0.69026  | -0.05841 | 0.20772  |
| 0.13451  | 0.129335 | 0.00512  | -0.01311 | 0.77751  | 0.022001 | 0.63534  | 0.04319  | 0.35171  |
| 0.75595  | -0.00279 | 0.95209  | 0.012977 | 0.77971  | 0.02737  | 0.55519  | 0.025606 | 0.58098  |
| 7.69E-05 | 0.091811 | 0.04738  | 0.068319 | 0.14044  | 0.122674 | 0.00796  | 0.072651 | 0.11691  |
| 0.0048   | 0.036329 | 0.4335   | 0.064864 | 0.16168  | 0.055122 | 0.23447  | 0.032979 | 0.4771   |
| 0.07746  | 0.062407 | 0.1782   | 0.090637 | 0.05029  | 0.028109 | 0.54456  | 0.073126 | 0.11453  |
| 0.47789  | 0.253953 | 2.63E-08 | -0.11262 | 0.01489  | 0.035042 | 0.44997  | 0.048216 | 0.29845  |
| 3.98E-08 | 0.038518 | 0.40628  | 0.169905 | 0.00023  | 0.098495 | 0.03334  | 0.089232 | 0.05398  |
| 0.00035  | 0.005763 | 0.90115  | -0.02273 | 0.62421  | 0.120118 | 0.00937  | 0.027582 | 0.55214  |
| 1.02E-06 | -0.07585 | 0.10161  | -0.21159 | 3.98E-06 | -0.17593 | 0.00013  | -0.22602 | 8.01E-07 |
| 1.76E-07 | 0.028303 | 0.54179  | -0.13326 | 0.00392  | -0.1959  | 2.01E-05 | -0.13801 | 0.0028   |
| 0.03996  | -0.03583 | 0.43983  | -0.07404 | 0.11006  | -0.03652 | 0.43109  | -0.04634 | 0.3177   |
| 0.00052  | 0.120211 | 0.00932  | -0.12396 | 0.00732  | 0.00632  | 0.89165  | 0.120383 | 0.00921  |
| 3.23E-05 | 0.042265 | 0.36213  | -0.05199 | 0.26219  | -0.12775 | 0.0057   | -0.01832 | 0.69291  |

|          |           |          |          |          |          |          |          |          |
|----------|-----------|----------|----------|----------|----------|----------|----------|----------|
| 0.8106   | 0.107986  | 0.01959  | 0.034013 | 0.46339  | 0.149012 | 0.00124  | 0.250093 | 4.32E-08 |
| 3.49E-08 | -0.00754  | 0.87092  | -0.2126  | 3.57E-06 | -0.19185 | 3.00E-05 | -0.15045 | 0.00111  |
| 0.00119  | 0.109742  | 0.01767  | 0.020901 | 0.65234  | 0.074967 | 0.10567  | 0.075852 | 0.1016   |
| 2.27E-12 | 0.108     | 0.01957  | 0.05919  | 0.20167  | 0.110136 | 0.01727  | 0.200173 | 1.31E-05 |
| 0.18566  | 0.062611  | 0.17678  | -0.04565 | 0.32496  | -0.07839 | 0.09062  | -0.00865 | 0.85206  |
| 0.89796  | -0.01617  | 0.72745  | -0.12097 | 0.00887  | -0.08704 | 0.06017  | -0.11179 | 0.01565  |
| 3.09E-08 | 0.043381  | 0.34958  | 0.251537 | 3.59E-08 | 0.009863 | 0.83166  | 0.042652 | 0.35775  |
| 0.15495  | -0.08163  | 0.07802  | 0.095    | 0.04016  | -0.02029 | 0.66186  | -0.0732  | 0.11417  |
| 0.04266  | -0.17809  | 0.00011  | -0.00558 | 0.90423  | -0.14424 | 0.00178  | -0.21126 | 4.12E-06 |
| 0.10429  | -0.16161  | 0.00045  | -0.21374 | 3.15E-06 | -0.14267 | 0.002    | -0.26728 | 4.42E-09 |
| 0.07533  | -0.09504  | 0.04007  | -0.14528 | 0.00164  | -0.0147  | 0.75144  | -0.08921 | 0.05404  |
| 2.70E-14 | 0.104551  | 0.02385  | -0.08056 | 0.08203  | -0.0899  | 0.05221  | 0.040497 | 0.38258  |
| 0.00154  | 0.216862  | 2.24E-06 | 0.007944 | 0.86405  | 0.081282 | 0.07931  | 0.21877  | 1.82E-06 |
| 0.3288   | 0.033053  | 0.47612  | -0.05614 | 0.22594  | -0.09171 | 0.04762  | -0.01126 | 0.80833  |
| 0.55108  | 0.020087  | 0.66504  | 0.006871 | 0.88227  | -0.04123 | 0.37403  | 0.017674 | 0.70324  |
| 0.30225  | -0.00827  | 0.85846  | 0.147649 | 0.00138  | -0.02564 | 0.58053  | -0.03599 | 0.43782  |
| 0.22919  | -0.09506  | 0.04003  | -0.12097 | 0.00887  | -0.05051 | 0.276    | -0.19999 | 1.34E-05 |
| 0.26939  | 0.060912  | 0.18884  | -0.00402 | 0.93097  | 0.047626 | 0.3044   | 0.077986 | 0.09231  |
| 2.64E-05 | 0.030049  | 0.51713  | 0.059666 | 0.19806  | -0.05486 | 0.23673  | 0.016365 | 0.7243   |
| 0.77604  | -0.01094  | 0.81356  | 0.042264 | 0.36214  | -0.02887 | 0.53368  | -0.01104 | 0.81198  |
| 0.01295  | 0.088552  | 0.05584  | -0.01438 | 0.75665  | 0.016252 | 0.72611  | 0.154887 | 0.00078  |
| 0.29766  | 0.082121  | 0.07625  | 0.018435 | 0.6911   | 0.045541 | 0.32609  | 0.061754 | 0.18279  |
| 0.11836  | -0.12878  | 0.00532  | -0.03533 | 0.44625  | -0.14889 | 0.00125  | -0.25415 | 2.56E-08 |
| 5.33E-08 | 0.003788  | 0.93493  | -0.05293 | 0.25368  | -0.04028 | 0.38516  | -0.04881 | 0.29249  |
| 0.36333  | -0.08119  | 0.07967  | -0.19551 | 2.09E-05 | -0.15923 | 0.00055  | -0.20058 | 1.26E-05 |
| 0.20385  | 0.111238  | 0.01618  | 0.041322 | 0.37295  | -0.00357 | 0.93867  | 0.106767 | 0.02102  |
| 0.82585  | 0.005987  | 0.89734  | 0.075345 | 0.10391  | -0.03961 | 0.3931   | -0.01773 | 0.70229  |
| 0.0004   | 0.010206  | 0.82589  | -0.09601 | 0.03808  | -0.06111 | 0.1874   | -0.0137  | 0.76783  |
| 0.00147  | 0.002053  | 0.96471  | -0.04353 | 0.34795  | -0.02838 | 0.54067  | -0.00804 | 0.86245  |
| 0.00092  | 0.04398   | 0.34296  | -0.07041 | 0.12864  | -0.01427 | 0.75837  | 0.046742 | 0.31348  |
| 6.72E-05 | 0.099468  | 0.03163  | -0.10612 | 0.02181  | 0.097387 | 0.03539  | 0.205522 | 7.56E-06 |
| 0.41348  | -0.19555  | 2.08E-05 | -0.3021  | 2.60E-11 | -0.2963  | 6.43E-11 | -0.3369  | 7.39E-14 |
| 1.88E-07 | -0.06939  | 0.13433  | 0.297631 | 5.24E-11 | 0.215519 | 2.60E-06 | 0.096394 | 0.03731  |
| 0.19071  | 0.184505  | 6.05E-05 | 0.043007 | 0.35375  | 0.198582 | 1.54E-05 | 0.269902 | 3.08E-09 |
| 0.02703  | -0.13209  | 0.00424  | 0.018266 | 0.6938   | -0.09268 | 0.0453   | -0.19018 | 3.53E-05 |
| 0.15084  | 0.054631  | 0.23868  | -0.06757 | 0.14487  | -0.04482 | 0.3338   | -0.00592 | 0.89849  |
| 0.32699  | -0.04958  | 0.28495  | -0.00242 | 0.95842  | -0.0623  | 0.17895  | -0.14262 | 0.002    |
| 0.00078  | 0.170225  | 0.00022  | 0.318464 | 1.82E-12 | 0.225142 | 8.85E-07 | 0.302616 | 2.40E-11 |
| 0.06282  | -0.01444  | 0.75569  | 0.198601 | 1.54E-05 | -0.0318  | 0.49297  | -0.01399 | 0.763    |
| 0.01446  | 0.081392  | 0.0789   | 0.213167 | 3.36E-06 | 0.07763  | 0.09381  | 0.209698 | 4.87E-06 |
| 3.49E-05 | -0.02467  | 0.59488  | -0.14824 | 0.00132  | -0.20632 | 6.95E-06 | -0.14058 | 0.00233  |
| 5.27E-10 | -7.08E-05 | 0.99878  | -0.13331 | 0.0039   | -0.11337 | 0.01423  | -0.0593  | 0.20085  |
| 0.28312  | -0.02825  | 0.5426   | -0.10116 | 0.02884  | -0.11153 | 0.0159   | -0.12705 | 0.00597  |
| 0.04582  | 0.055566  | 0.23073  | 0.012716 | 0.78403  | 0.022418 | 0.62895  | 0.06682  | 0.14938  |
| 0.00047  | 0.031523  | 0.49678  | 0.027268 | 0.55667  | -0.01344 | 0.77207  | 0.046152 | 0.31963  |

|          |          |          |          |          |          |          |          |          |
|----------|----------|----------|----------|----------|----------|----------|----------|----------|
| 2.08E-09 | 0.009591 | 0.83623  | -0.02947 | 0.52517  | -0.01518 | 0.74361  | 0.068843 | 0.13741  |
| 0.0027   | 0.061594 | 0.18393  | -0.09375 | 0.04286  | -0.11699 | 0.0114   | -0.01107 | 0.81136  |
| 1.16E-05 | -0.02376 | 0.60861  | 0.088982 | 0.05466  | -0.0877  | 0.05827  | -0.05622 | 0.22528  |
| 0.79843  | 0.156794 | 0.00067  | 0.008706 | 0.85117  | 0.163942 | 0.00037  | 0.286594 | 2.80E-10 |
| 1.59E-11 | 0.165145 | 0.00034  | -0.02635 | 0.57002  | -0.07402 | 0.11016  | 0.094534 | 0.04115  |
| 0.91996  | 0.01484  | 0.74907  | -0.14733 | 0.00141  | -0.21413 | 3.02E-06 | -0.09449 | 0.04124  |
| 0.46373  | -0.0964  | 0.03729  | 0.17464  | 0.00015  | 0.089684 | 0.05277  | -0.02806 | 0.54525  |
| 7.43E-11 | 0.164361 | 0.00036  | 0.124075 | 0.00726  | 0.26938  | 3.31E-09 | 0.400318 | 2.11E-19 |
| 2.56E-12 | 0.076181 | 0.10012  | 0.099683 | 0.03126  | 0.086078 | 0.06308  | 0.143154 | 0.00193  |
| 0.05092  | -0.00156 | 0.97324  | -0.06343 | 0.17121  | -0.09434 | 0.04158  | -0.12511 | 0.00679  |
| 0.46309  | -0.16503 | 0.00034  | 0.00937  | 0.83996  | -0.2018  | 1.11E-05 | -0.25375 | 2.69E-08 |
| 0.00121  | 0.037828 | 0.41475  | -0.01307 | 0.77819  | -0.0981  | 0.03406  | -0.0867  | 0.06119  |
| 0.65646  | -0.13083 | 0.00463  | -0.12374 | 0.00743  | -0.09533 | 0.03946  | -0.25421 | 2.54E-08 |
| 0.166    | 0.034808 | 0.45301  | -0.18703 | 4.76E-05 | -0.10677 | 0.02102  | -0.05174 | 0.26449  |
| 0.30836  | -0.10135 | 0.02852  | 0.094302 | 0.04165  | -0.01286 | 0.7816   | -0.10041 | 0.03005  |
| 0.00556  | -0.09251 | 0.0457   | -0.19233 | 2.86E-05 | -0.1004  | 0.03005  | -0.16935 | 0.00024  |
| 0.00064  | -0.24681 | 6.55E-08 | 0.036714 | 0.42863  | -0.13357 | 0.00383  | -0.32858 | 3.22E-13 |
| 0.14921  | -0.01152 | 0.80398  | -0.08436 | 0.06853  | 0.127832 | 0.00567  | 0.018042 | 0.69736  |
| 0.76729  | -0.21298 | 3.42E-06 | 0.043573 | 0.34745  | -0.14223 | 0.00206  | -0.15325 | 0.00089  |
| 0.68281  | -0.07264 | 0.11698  | -0.04892 | 0.29146  | 0.002357 | 0.95949  | -0.05694 | 0.21937  |
| 0.19171  | 0.148883 | 0.00125  | 0.03334  | 0.47229  | 0.165503 | 0.00033  | 0.241792 | 1.22E-07 |
| 0.65973  | -0.10696 | 0.02078  | -0.21441 | 2.93E-06 | -0.16367 | 0.00038  | -0.24933 | 4.76E-08 |
| 0.0002   | -0.00478 | 0.9179   | 0.021185 | 0.64794  | -0.03003 | 0.51737  | -0.01945 | 0.67498  |
| 0.54126  | 0.039546 | 0.39386  | -0.1531  | 0.0009   | -0.07172 | 0.12169  | 0.019954 | 0.66713  |
| 0.65557  | 0.065905 | 0.15504  | 0.14815  | 0.00132  | 0.186937 | 4.81E-05 | 0.244121 | 9.17E-08 |
| 0.83632  | -0.02324 | 0.61635  | -0.06113 | 0.18729  | -0.03599 | 0.43774  | -0.04338 | 0.34962  |
| 0.99561  | -0.01706 | 0.71307  | -0.05656 | 0.22251  | -0.00432 | 0.92574  | 0.000442 | 0.9924   |
| 0.13004  | -0.04261 | 0.35822  | -0.15448 | 0.00081  | -0.16053 | 0.0005   | -0.12179 | 0.00842  |
| 0.02208  | -0.03795 | 0.41329  | -0.11009 | 0.01732  | -0.10131 | 0.02859  | -0.11901 | 0.01005  |
| 0.20835  | -0.05705 | 0.21849  | -0.01987 | 0.66837  | -0.02827 | 0.54227  | -0.04219 | 0.36297  |
| 0.0013   | -0.12254 | 0.00802  | -0.10248 | 0.02679  | -0.11578 | 0.01229  | -0.21531 | 2.66E-06 |
| 3.10E-09 | -0.2312  | 4.39E-07 | -0.0879  | 0.05769  | -0.19271 | 2.76E-05 | -0.40183 | 1.51E-19 |
| 0.30836  | -0.09578 | 0.03853  | -0.13799 | 0.00281  | -0.18426 | 6.19E-05 | -0.26257 | 8.40E-09 |
| 5.93E-08 | 0.088586 | 0.05575  | 0.095919 | 0.03826  | 0.107641 | 0.01998  | 0.106573 | 0.02125  |
| 9.86E-05 | -0.10147 | 0.02833  | 0.03773  | 0.41596  | 0.004767 | 0.91818  | -0.11013 | 0.01728  |
| 0.02808  | 0.180537 | 8.74E-05 | 0.005205 | 0.91068  | 0.006533 | 0.88802  | 0.167343 | 0.00028  |
| 0.02307  | 0.150849 | 0.00108  | 0.019123 | 0.6802   | 0.065499 | 0.1576   | 0.12793  | 0.00563  |
| 0.97054  | -0.07472 | 0.10681  | -0.20215 | 1.07E-05 | -0.12665 | 0.00613  | -0.21492 | 2.77E-06 |
| 0.18947  | -0.0293  | 0.52763  | -0.15394 | 0.00085  | -0.19833 | 1.58E-05 | -0.20128 | 1.17E-05 |
| 0.07558  | -0.1824  | 7.36E-05 | -0.16159 | 0.00046  | -0.25772 | 1.60E-08 | -0.33874 | 5.30E-14 |
| 0.77482  | 0.01968  | 0.67142  | -0.05043 | 0.27678  | -0.02492 | 0.59109  | -0.02217 | 0.63267  |
| 0.00888  | 0.203229 | 9.59E-06 | 0.194536 | 2.30E-05 | 0.177929 | 0.00011  | 0.27109  | 2.61E-09 |
| 0.02234  | 0.050651 | 0.27468  | 0.253073 | 2.94E-08 | 0.06475  | 0.16242  | 0.152902 | 0.00092  |
| 0.29424  | 0.048348 | 0.29713  | -0.01991 | 0.66789  | 0.02185  | 0.63767  | 0.023079 | 0.61886  |
| 0.12992  | 0.024222 | 0.60159  | 0.064144 | 0.16639  | -0.02659 | 0.56649  | 0.004301 | 0.92615  |

|          |          |          |          |          |          |          |          |          |
|----------|----------|----------|----------|----------|----------|----------|----------|----------|
| 0.85276  | 0.151747 | 0.001    | -0.25208 | 3.35E-08 | -0.0774  | 0.09478  | 0.040432 | 0.38334  |
| 0.36733  | 0.049648 | 0.28431  | -0.04061 | 0.38126  | -0.00148 | 0.97448  | -0.00132 | 0.97736  |
| 0.01323  | 0.088086 | 0.05715  | -0.00421 | 0.92771  | 0.02301  | 0.61991  | 0.002847 | 0.95108  |
| 0.80501  | -0.17896 | 0.0001   | 0.086327 | 0.06232  | -0.02816 | 0.54377  | -0.1545  | 0.00081  |
| 0.14701  | 0.067004 | 0.14826  | -0.17492 | 0.00015  | -0.05348 | 0.24869  | -0.035   | 0.45046  |
| 0.17776  | -0.15442 | 0.00081  | -0.2945  | 8.49E-11 | -0.30817 | 9.89E-12 | -0.33647 | 7.98E-14 |
| 4.59E-16 | 0.303473 | 2.10E-11 | -0.10409 | 0.02448  | -0.18247 | 7.31E-05 | 0.011064 | 0.81152  |
| 0.56457  | -0.03003 | 0.51746  | -0.11481 | 0.01305  | -0.07514 | 0.10484  | -0.09881 | 0.03277  |
| 0.86337  | -0.03966 | 0.39253  | -0.1232  | 0.00769  | -0.08348 | 0.07149  | -0.11683 | 0.01152  |
| 0.05356  | -0.03576 | 0.44079  | -0.04905 | 0.29019  | -0.08708 | 0.06007  | -0.14136 | 0.0022   |
| 0.2372   | 0.124149 | 0.00723  | -0.07656 | 0.09844  | -0.02617 | 0.57273  | 0.07495  | 0.10574  |
| 0.17656  | -0.04121 | 0.37429  | -0.07581 | 0.10179  | -0.09564 | 0.03884  | -0.14517 | 0.00166  |
| 0.015    | 0.063584 | 0.17013  | -0.05677 | 0.22074  | 0.01305  | 0.77851  | 0.00259  | 0.95548  |
| 0.01556  | 0.146583 | 0.00149  | 0.047307 | 0.30766  | 0.161931 | 0.00044  | 0.230525 | 4.75E-07 |
| 0.64471  | 0.01027  | 0.82483  | 0.261556 | 9.62E-09 | 0.296636 | 6.11E-11 | 0.303158 | 2.20E-11 |
| 0.99574  | 0.090599 | 0.05039  | 0.165117 | 0.00034  | 0.197193 | 1.77E-05 | 0.302203 | 2.56E-11 |
| 0.23723  | -0.04254 | 0.35899  | 0.191928 | 2.98E-05 | -0.0731  | 0.11465  | -0.08842 | 0.05621  |
| 0.09946  | -0.15742 | 0.00064  | -0.10645 | 0.02141  | -0.17111 | 0.0002   | -0.22589 | 8.13E-07 |
| 5.83E-09 | 0.012812 | 0.78244  | -0.19911 | 1.46E-05 | -0.08658 | 0.06156  | -0.06572 | 0.15619  |
| 0.96058  | -0.08185 | 0.07722  | 0.104325 | 0.02416  | -0.1275  | 0.0058   | -0.14157 | 0.00216  |
| 1.35E-06 | 0.069426 | 0.13411  | 0.358898 | 1.21E-15 | 0.356057 | 2.10E-15 | 0.285887 | 3.11E-10 |
| 0.81655  | 0.161587 | 0.00046  | -0.08475 | 0.06726  | -0.01725 | 0.71002  | 0.018145 | 0.69573  |
| 0.12251  | 0.093327 | 0.04382  | -0.03645 | 0.43199  | -0.04884 | 0.29219  | 0.060849 | 0.1893   |
| 0.04511  | -0.09792 | 0.03439  | -0.13864 | 0.00268  | -0.09835 | 0.0336   | -0.19709 | 1.79E-05 |
| 0.38148  | -0.02607 | 0.57412  | -0.19501 | 2.20E-05 | -0.15093 | 0.00107  | -0.16775 | 0.00027  |
| 0.27509  | -0.05171 | 0.26476  | -0.02047 | 0.65904  | 0.061976 | 0.18122  | -0.03193 | 0.49127  |
| 7.44E-09 | 0.232735 | 3.66E-07 | 0.005283 | 0.90935  | 0.041154 | 0.3749   | 0.151208 | 0.00105  |
| 0.85857  | -0.14789 | 0.00135  | -0.06435 | 0.16502  | -0.20241 | 1.04E-05 | -0.22372 | 1.04E-06 |
| 0.43261  | 0.204426 | 8.47E-06 | -0.02842 | 0.54013  | -0.03148 | 0.49736  | 0.131098 | 0.00454  |
| 0.00024  | -0.05346 | 0.24888  | 0.056936 | 0.21941  | -0.1509  | 0.00107  | -0.1759  | 0.00013  |
| 0.2158   | 0.07071  | 0.12704  | -0.17287 | 0.00017  | -0.14607 | 0.00155  | -0.0317  | 0.49438  |
| 0.00533  | 0.1187   | 0.01025  | -0.09401 | 0.0423   | 0.068582 | 0.13892  | 0.125702 | 0.00653  |
| 0.01429  | -0.05168 | 0.26505  | -0.00232 | 0.9602   | -0.03385 | 0.46551  | -0.08395 | 0.06991  |
| 0.00014  | -0.01386 | 0.7652   | -0.08853 | 0.05591  | -0.09086 | 0.04973  | -0.05959 | 0.19864  |
| 0.15254  | 0.147171 | 0.00143  | 0.040644 | 0.38085  | 0.084386 | 0.06846  | 0.15337  | 0.00088  |
| 0.48553  | -0.04248 | 0.35974  | 0.139328 | 0.00255  | 0.200561 | 1.26E-05 | 0.187835 | 4.41E-05 |
| 8.15E-07 | -0.04329 | 0.35062  | 0.063508 | 0.17065  | 0.101304 | 0.0286   | 0.019187 | 0.67919  |
| 2.42E-12 | -0.06071 | 0.19032  | -0.04287 | 0.35527  | -0.1129  | 0.01465  | -0.14296 | 0.00195  |
| 0.55934  | -0.02211 | 0.63359  | 0.003486 | 0.9401   | -0.05435 | 0.24111  | -0.094   | 0.04232  |
| 0.36591  | 0.197212 | 1.77E-05 | 0.094099 | 0.0421   | 0.082986 | 0.07319  | 0.185044 | 5.75E-05 |
| 4.54E-06 | -0.18074 | 8.58E-05 | -0.14966 | 0.00118  | -0.20315 | 9.67E-06 | -0.3178  | 2.03E-12 |
| 0.00293  | 0.11329  | 0.0143   | 0.081912 | 0.077    | 0.054233 | 0.24212  | 0.215025 | 2.74E-06 |
| 0.20333  | 0.001917 | 0.96705  | 0.118423 | 0.01043  | 0.059241 | 0.20128  | 0.01694  | 0.71502  |
| 3.52E-08 | -0.05819 | 0.20944  | -0.19103 | 3.25E-05 | -0.18995 | 3.61E-05 | -0.24743 | 6.05E-08 |
| 0.08487  | 0.026203 | 0.57219  | 0.182392 | 7.36E-05 | 0.109717 | 0.0177   | 0.041788 | 0.36758  |

|          |          |          |          |          |          |          |          |          |
|----------|----------|----------|----------|----------|----------|----------|----------|----------|
| 0.77964  | -0.0152  | 0.74319  | -0.00036 | 0.99375  | -0.00299 | 0.9487   | -0.06916 | 0.13559  |
| 3.44E-05 | 0.169884 | 0.00023  | 0.167837 | 0.00027  | 0.203429 | 9.39E-06 | 0.30745  | 1.11E-11 |
| 0.59754  | -0.11029 | 0.01711  | -0.06851 | 0.13934  | -0.20558 | 7.52E-06 | -0.28743 | 2.47E-10 |
| 0.00029  | -0.01962 | 0.6724   | 0.237849 | 1.98E-07 | 0.034888 | 0.45197  | 0.091794 | 0.04742  |
| 0.46272  | 0.279563 | 7.84E-10 | 0.043855 | 0.34434  | 0.171643 | 0.00019  | 0.361917 | 6.72E-16 |
| 0.66438  | 0.350396 | 6.17E-15 | 0.024111 | 0.60325  | -0.05697 | 0.21912  | 0.028826 | 0.53434  |
| 0.02688  | -0.01943 | 0.67532  | 0.09252  | 0.04568  | -0.03597 | 0.43807  | -0.00685 | 0.88265  |
| 0.0231   | 0.253234 | 2.88E-08 | 0.138226 | 0.00276  | 0.154439 | 0.00081  | 0.346748 | 1.22E-14 |
| 0.02376  | 0.101949 | 0.0276   | -0.01888 | 0.684    | 0.005398 | 0.90739  | 0.036618 | 0.42984  |
| 2.30E-05 | 0.083698 | 0.07075  | -0.03162 | 0.49544  | 0.015307 | 0.74147  | 0.035197 | 0.44796  |
| 0.00245  | 0.126663 | 0.00613  | 0.18949  | 3.77E-05 | 0.280725 | 6.62E-10 | 0.323305 | 8.00E-13 |
| 0.1929   | 0.218176 | 1.94E-06 | 0.097739 | 0.03473  | 0.049444 | 0.2863   | 0.109575 | 0.01785  |
| 5.14E-06 | -0.10837 | 0.01915  | -0.23365 | 3.28E-07 | -0.21908 | 1.75E-06 | -0.22491 | 9.09E-07 |
| 0.97933  | -0.0255  | 0.58256  | 0.025844 | 0.57747  | 0.056213 | 0.22533  | 0.087006 | 0.06028  |
| 0.90139  | 0.079051 | 0.08794  | 0.025265 | 0.58602  | 0.03548  | 0.44432  | 0.056862 | 0.22001  |
| 0.00308  | -0.15688 | 0.00067  | -0.10381 | 0.02487  | -0.13419 | 0.00367  | -0.26152 | 9.66E-09 |
| 1.66E-07 | 0.041007 | 0.3766   | -0.03551 | 0.44396  | 0.014386 | 0.75652  | 0.052522 | 0.25731  |
| 0.03009  | 0.030552 | 0.51015  | 0.057011 | 0.2188   | 0.062628 | 0.17667  | 0.020294 | 0.66181  |
| 0.99013  | 0.046306 | 0.31802  | 0.051941 | 0.26263  | 0.098926 | 0.03257  | 0.080767 | 0.08123  |
| 0.4956   | -0.02271 | 0.62446  | -0.02475 | 0.59365  | -0.12852 | 0.00541  | -0.03693 | 0.4259   |
| 0.14512  | -0.05019 | 0.27905  | 0.328118 | 3.49E-13 | 0.173423 | 0.00017  | 0.176107 | 0.00013  |
| 0.79687  | 0.080611 | 0.08183  | -0.10137 | 0.02849  | 0.063712 | 0.16927  | 0.102364 | 0.02697  |
| 3.22E-05 | -0.15796 | 0.00061  | -0.21871 | 1.83E-06 | -0.21034 | 4.55E-06 | -0.35257 | 4.09E-15 |
| 8.29E-13 | 0.08885  | 0.05502  | 0.000665 | 0.98856  | 0.130926 | 0.0046   | 0.178085 | 0.00011  |
| 0.05096  | 0.240067 | 1.51E-07 | -0.03774 | 0.41579  | 0.018877 | 0.6841   | 0.080554 | 0.08204  |
| 0.48505  | -0.05131 | 0.26845  | -0.08993 | 0.05212  | -0.12069 | 0.00903  | -0.10714 | 0.02057  |
| 0.53619  | -0.10142 | 0.02842  | 0.145612 | 0.0016   | -0.00211 | 0.96377  | -0.09408 | 0.04214  |
| 0.17505  | 0.227851 | 6.48E-07 | 0.114646 | 0.01317  | 0.201567 | 1.14E-05 | 0.356882 | 1.79E-15 |
| 0.0624   | 0.004064 | 0.9302   | -0.21169 | 3.94E-06 | 0.019495 | 0.67433  | 0.033545 | 0.46957  |
| 0.2752   | 0.013792 | 0.76627  | -0.01939 | 0.676    | -0.06917 | 0.13554  | 0.026769 | 0.56392  |
| 0.35811  | 0.128742 | 0.00533  | 0.209523 | 4.96E-06 | 0.174065 | 0.00016  | 0.287128 | 2.58E-10 |
| 4.54E-07 | 0.347151 | 1.13E-14 | 0.133289 | 0.00391  | 0.098961 | 0.03251  | 0.370281 | 1.27E-16 |
| 0.23865  | 0.017318 | 0.70895  | -0.17057 | 0.00021  | -0.06784 | 0.14328  | -0.07295 | 0.11543  |
| 0.39726  | 0.059139 | 0.20206  | 0.126856 | 0.00605  | 0.05794  | 0.21138  | 0.035235 | 0.44747  |
| 0.06041  | 0.047966 | 0.30096  | 0.148075 | 0.00133  | 0.213558 | 3.22E-06 | 0.325014 | 5.97E-13 |
| 3.73E-13 | -0.11662 | 0.01167  | -0.05998 | 0.19571  | -0.05782 | 0.21236  | -0.12535 | 0.00668  |
| 0.02042  | -0.12781 | 0.00568  | -0.07451 | 0.10779  | -0.13405 | 0.00371  | -0.164   | 0.00037  |
| 0.28484  | 0.03454  | 0.45649  | -0.10841 | 0.01911  | -0.07731 | 0.09517  | -0.07115 | 0.1247   |
| 2.97E-05 | -0.07523 | 0.10445  | -0.03736 | 0.4205   | -0.02437 | 0.59943  | -0.14116 | 0.00223  |
| 0.61782  | -0.14464 | 0.00173  | -0.16714 | 0.00029  | -0.16079 | 0.00049  | -0.24515 | 8.06E-08 |
| 0.31633  | 0.004212 | 0.92768  | -0.03432 | 0.45936  | -0.08944 | 0.05343  | -0.06125 | 0.18637  |
| 0.45167  | 0.021257 | 0.64682  | -0.11848 | 0.01039  | -0.12056 | 0.00911  | -0.03801 | 0.41255  |
| 0.93114  | -0.04706 | 0.31018  | 0.043213 | 0.35146  | 0.057974 | 0.21111  | 0.01809  | 0.69661  |
| 5.52E-06 | -0.01866 | 0.6876   | -0.07221 | 0.11917  | -0.08799 | 0.05743  | -0.10236 | 0.02698  |
| 0.9827   | 0.022741 | 0.62401  | 0.008991 | 0.84634  | -0.07205 | 0.12     | -0.04653 | 0.31566  |

|          |          |          |          |          |          |          |          |          |
|----------|----------|----------|----------|----------|----------|----------|----------|----------|
| 2.85E-09 | 0.021837 | 0.63786  | -0.05008 | 0.28016  | -0.02672 | 0.5646   | 0.010749 | 0.8168   |
| 0.01565  | 0.043655 | 0.34655  | -0.05775 | 0.21291  | -0.08116 | 0.07975  | -0.02069 | 0.65568  |
| 0.02998  | -0.07868 | 0.08946  | -0.05475 | 0.23764  | -0.2519  | 3.43E-08 | -0.26754 | 4.27E-09 |
| 0.90281  | 0.23899  | 1.73E-07 | 0.151106 | 0.00105  | 0.191044 | 3.24E-05 | 0.324135 | 6.94E-13 |
| 0.99089  | 0.05912  | 0.2022   | -0.11011 | 0.0173   | -0.02536 | 0.58455  | -0.04387 | 0.34416  |
| 0.67196  | 0.009324 | 0.84073  | 0.008094 | 0.86151  | -0.06151 | 0.18454  | -0.05107 | 0.27071  |
| 0.00211  | -0.01576 | 0.73406  | -0.06871 | 0.13818  | 0.014981 | 0.74678  | 0.041901 | 0.36628  |
| 0.01279  | 0.060583 | 0.19125  | -0.0331  | 0.47547  | -0.161   | 0.00048  | -0.10308 | 0.02592  |
| 0.00058  | -0.11216 | 0.01531  | -0.1691  | 0.00024  | -0.16405 | 0.00037  | -0.27496 | 1.51E-09 |
| 0.04351  | 0.069857 | 0.1317   | -0.11356 | 0.01407  | -0.0413  | 0.37316  | -0.00583 | 0.89993  |
| 1.52E-13 | -0.12767 | 0.00573  | -0.0241  | 0.60347  | -0.05785 | 0.21209  | -0.11569 | 0.01235  |
| 0.88452  | 0.094169 | 0.04194  | 0.184641 | 5.97E-05 | 0.207157 | 6.37E-06 | 0.173767 | 0.00016  |
| 0.85605  | -0.07753 | 0.09425  | -0.05498 | 0.23567  | -0.04292 | 0.35477  | -0.1524  | 0.00095  |
| 8.61E-11 | -0.13517 | 0.00343  | -0.09958 | 0.03144  | -0.00845 | 0.85549  | -0.21682 | 2.25E-06 |
| 1.83E-05 | -0.16925 | 0.00024  | -0.23134 | 4.31E-07 | -0.25321 | 2.89E-08 | -0.33403 | 1.23E-13 |
| 0.94254  | -0.06004 | 0.19526  | -0.30793 | 1.03E-11 | -0.23732 | 2.11E-07 | -0.19906 | 1.47E-05 |
| 0.86289  | -0.163   | 0.00041  | 0.035264 | 0.4471   | -0.0983  | 0.03368  | -0.20207 | 1.08E-05 |
| 6.16E-07 | 0.000317 | 0.99456  | 0.116531 | 0.01173  | 0.164872 | 0.00035  | 0.115586 | 0.01244  |
| 0.08211  | 0.069342 | 0.13458  | -0.09529 | 0.03956  | -0.17942 | 9.68E-05 | -0.05897 | 0.20333  |
| 0.01741  | 0.100934 | 0.02919  | 0.186903 | 4.82E-05 | 0.14543  | 0.00163  | 0.234611 | 2.93E-07 |
| 0.01262  | 0.007328 | 0.87451  | 0.03182  | 0.49274  | -0.00835 | 0.85718  | -0.045   | 0.33183  |
| 0.05346  | -0.09717 | 0.03581  | -0.09072 | 0.05008  | -0.19119 | 3.20E-05 | -0.20538 | 7.67E-06 |
| 0.35871  | -0.01152 | 0.80392  | 0.104601 | 0.02378  | 0.131012 | 0.00457  | 0.077801 | 0.09309  |
| 0.33816  | 0.021993 | 0.63546  | -0.0834  | 0.07177  | -0.12176 | 0.00844  | -0.00748 | 0.87199  |
| 0.12574  | 0.082478 | 0.07497  | 0.215681 | 2.55E-06 | -0.05734 | 0.21615  | 0.044346 | 0.33896  |
| 0.00492  | -0.02937 | 0.52668  | 0.101464 | 0.02835  | 0.071747 | 0.12155  | 0.03326  | 0.47336  |
| 0.88471  | 0.056081 | 0.22643  | -0.02503 | 0.58956  | -0.04387 | 0.34413  | -0.01742 | 0.70733  |
| 7.24E-06 | -0.03047 | 0.51121  | -0.03675 | 0.42819  | -0.04275 | 0.35661  | -0.11245 | 0.01505  |
| 0.00013  | 0.053484 | 0.2487   | -0.02836 | 0.541    | -0.04192 | 0.36603  | -0.04005 | 0.38782  |
| 0.99534  | 0.113816 | 0.01386  | -0.04199 | 0.36526  | 0.079009 | 0.0881   | 0.108141 | 0.01941  |
| 0.01     | 0.257543 | 1.64E-08 | 0.105028 | 0.02322  | 0.228757 | 5.83E-07 | 0.39365  | 9.27E-19 |
| 0.01974  | 0.028891 | 0.53342  | 0.028548 | 0.5383   | -0.11416 | 0.01357  | -0.01264 | 0.78527  |
| 0.01368  | -0.04609 | 0.32024  | -0.08561 | 0.06453  | 0.11133  | 0.01609  | -0.01682 | 0.71689  |
| 0.15911  | 0.023155 | 0.6177   | 0.073003 | 0.11514  | 0.02317  | 0.61748  | 0.099488 | 0.03159  |
| 0.9969   | -0.16431 | 0.00036  | -0.16912 | 0.00024  | -0.20696 | 6.51E-06 | -0.31034 | 6.95E-12 |
| 0.16059  | 0.030642 | 0.50889  | 0.020072 | 0.66527  | -0.00111 | 0.98095  | -0.03274 | 0.48028  |
| 0.61954  | 0.033151 | 0.4748   | -0.02509 | 0.58865  | -0.08601 | 0.0633   | -0.12439 | 0.00712  |
| 0.22923  | -0.01414 | 0.76063  | -0.02794 | 0.54703  | 0.103172 | 0.02578  | 0.081694 | 0.07779  |
| 0.82039  | 0.063321 | 0.17191  | 0.153237 | 0.00089  | 0.055659 | 0.22994  | 0.093612 | 0.04318  |
| 0.07437  | 0.024193 | 0.60203  | -0.00393 | 0.93258  | -0.19502 | 2.20E-05 | -0.03699 | 0.42514  |
| 0.38948  | -0.06047 | 0.19209  | 0.002823 | 0.95149  | -0.11524 | 0.01271  | -0.13926 | 0.00256  |
| 0.00449  | 0.125915 | 0.00644  | 0.127442 | 0.00582  | 0.163317 | 0.00039  | 0.270771 | 2.73E-09 |
| 0.48654  | 0.013423 | 0.77234  | 0.005924 | 0.8984   | 0.02387  | 0.60688  | 0.039783 | 0.39103  |
| 1.70E-08 | -0.14348 | 0.00188  | -0.20228 | 1.06E-05 | -0.15551 | 0.00075  | -0.21349 | 3.24E-06 |
| 0.00035  | -0.0295  | 0.52487  | 0.201564 | 1.14E-05 | 0.166756 | 0.0003   | 0.137208 | 0.00297  |

|          |          |          |          |          |          |          |          |          |
|----------|----------|----------|----------|----------|----------|----------|----------|----------|
| 0.57381  | 0.158461 | 0.00059  | 0.209407 | 5.02E-06 | 0.234158 | 3.09E-07 | 0.293917 | 9.28E-11 |
| 0.64381  | 0.136611 | 0.00309  | 0.202138 | 1.07E-05 | 0.158356 | 0.00059  | 0.243207 | 1.03E-07 |
| 0.93323  | 0.05081  | 0.27317  | 0.023    | 0.62007  | 0.01325  | 0.77519  | 0.087964 | 0.0575   |
| 0.07575  | -0.03796 | 0.41316  | -0.11476 | 0.01308  | -0.02194 | 0.63624  | -0.00833 | 0.85756  |
| 0.17982  | -0.14066 | 0.00231  | -0.11579 | 0.01228  | -0.03739 | 0.42012  | -0.20398 | 8.87E-06 |
| 0.02467  | 0.047347 | 0.30725  | 0.066447 | 0.15167  | 0.027497 | 0.55337  | 0.02259  | 0.6263   |
| 0.05386  | 0.080235 | 0.08327  | -0.05558 | 0.23058  | -0.0431  | 0.35274  | -0.00355 | 0.93893  |
| 0.08725  | 0.04359  | 0.34726  | -0.1267  | 0.00611  | -0.08066 | 0.08164  | 0.042654 | 0.35773  |
| 0.58255  | -0.00254 | 0.95629  | 0.316906 | 2.36E-12 | 0.020579 | 0.65735  | 0.0292   | 0.52905  |
| 0.43811  | -0.01344 | 0.77199  | 0.163489 | 0.00039  | 0.165659 | 0.00032  | 0.057044 | 0.21853  |
| 3.86E-06 | -0.1727  | 0.00018  | -0.04132 | 0.37295  | -0.1315  | 0.00442  | -0.25606 | 1.99E-08 |
| 0.02957  | -0.07937 | 0.08667  | -0.19448 | 2.32E-05 | -0.02435 | 0.59965  | 0.034082 | 0.46249  |
| 0.45122  | -0.01265 | 0.78518  | 0.106224 | 0.02168  | -0.06559 | 0.15705  | -0.05663 | 0.22191  |
| 0.00754  | -0.01875 | 0.68607  | 0.053917 | 0.24487  | -0.04406 | 0.34213  | -0.0244  | 0.59892  |
| 0.03338  | -0.09231 | 0.04618  | 0.001497 | 0.97426  | -0.16478 | 0.00035  | -0.08904 | 0.0545   |
| 2.89E-08 | -0.19037 | 3.46E-05 | -0.11282 | 0.01471  | -0.19759 | 1.70E-05 | -0.26123 | 1.01E-08 |
| 0.25983  | -0.03573 | 0.44117  | -0.11948 | 0.00975  | 0.056025 | 0.22689  | -0.00109 | 0.98133  |
| 0.28787  | -0.14578 | 0.00158  | 0.020117 | 0.66458  | -0.03514 | 0.44873  | -0.19081 | 3.32E-05 |
| 0.72039  | -0.03592 | 0.43872  | -0.06629 | 0.15263  | -0.03042 | 0.51194  | -0.12718 | 0.00592  |
| 0.01227  | 0.04832  | 0.2974   | 0.276791 | 1.17E-09 | 0.21679  | 2.26E-06 | 0.230948 | 4.52E-07 |
| 0.01785  | -0.03734 | 0.42081  | 0.122817 | 0.00788  | -0.07727 | 0.09533  | -0.08852 | 0.05593  |
| 7.80E-08 | 0.091303 | 0.04862  | 0.242929 | 1.06E-07 | 0.079557 | 0.08591  | 0.105287 | 0.02288  |
| 0.01354  | 0.110413 | 0.01699  | 0.056792 | 0.22058  | 0.073342 | 0.11346  | 0.14941  | 0.0012   |
| 0.23436  | 0.18455  | 6.02E-05 | 0.056938 | 0.21939  | 0.055341 | 0.23262  | 0.258577 | 1.43E-08 |
| 2.94E-12 | 0.062689 | 0.17624  | 0.112609 | 0.0149   | 0.146257 | 0.00153  | 0.068878 | 0.13722  |
| 0.93269  | 0.151704 | 0.00101  | 0.234298 | 3.04E-07 | 0.115008 | 0.01288  | 0.277083 | 1.12E-09 |
| 0.4194   | 0.160724 | 0.00049  | 0.014459 | 0.75532  | 0.045165 | 0.3301   | 0.219952 | 1.59E-06 |
| 0.12879  | 0.162652 | 0.00042  | 0.073749 | 0.11147  | 0.172281 | 0.00018  | 0.326557 | 4.57E-13 |
| 0.03404  | -0.04768 | 0.3039   | 0.066669 | 0.1503   | -0.09175 | 0.04751  | -0.09561 | 0.03889  |
| 0.10415  | 0.031138 | 0.50205  | 0.124673 | 0.00699  | 0.174843 | 0.00015  | 0.150855 | 0.00108  |
| 0.16697  | -0.12462 | 0.00701  | -0.0554  | 0.23216  | -0.10298 | 0.02605  | -0.24487 | 8.35E-08 |
| 0.6505   | 0.142937 | 0.00196  | 0.006961 | 0.88075  | 0.103832 | 0.02484  | 0.183556 | 6.61E-05 |
| 0.18373  | -0.01399 | 0.76297  | 0.234643 | 2.92E-07 | 0.186911 | 4.82E-05 | 0.058074 | 0.21032  |
| 0.87687  | 0.024728 | 0.59402  | 0.090772 | 0.04995  | 0.005754 | 0.9013   | 0.034052 | 0.46288  |
| 5.49E-12 | 0.056607 | 0.22209  | 0.048768 | 0.29295  | 0.022584 | 0.62639  | 0.069459 | 0.13392  |
| 3.00E-08 | 0.213934 | 3.09E-06 | 0.2633   | 7.61E-09 | 0.191685 | 3.05E-05 | 0.299299 | 4.04E-11 |
| 0.24354  | -0.23294 | 3.57E-07 | -0.04818 | 0.29882  | -0.22351 | 1.07E-06 | -0.31989 | 1.43E-12 |
| 0.00744  | 0.064402 | 0.16469  | 0.012708 | 0.78417  | 0.155081 | 0.00077  | 0.170076 | 0.00022  |
| 0.52774  | 0.003811 | 0.93453  | -0.08078 | 0.08119  | -0.05683 | 0.22029  | -0.08939 | 0.05355  |
| 0.01025  | 0.001318 | 0.97735  | 0.033047 | 0.4762   | 0.038049 | 0.41202  | 0.056341 | 0.22427  |
| 0.02208  | 0.051121 | 0.27025  | -0.05579 | 0.22884  | -0.02418 | 0.60217  | -0.00872 | 0.85087  |
| 0.05014  | -0.03494 | 0.45128  | 0.10707  | 0.02065  | 0.037581 | 0.4178   | 0.103156 | 0.0258   |
| 0.09295  | -0.21081 | 4.32E-06 | -0.18798 | 4.35E-05 | -0.15728 | 0.00065  | -0.31783 | 2.02E-12 |
| 4.19E-08 | -0.08785 | 0.05781  | -0.17064 | 0.00021  | -0.14524 | 0.00165  | -0.2176  | 2.07E-06 |
| 2.96E-12 | -0.09108 | 0.04918  | -0.13433 | 0.00364  | -0.26227 | 8.74E-09 | -0.27865 | 8.94E-10 |

|          |          |          |          |          |          |          |          |          |
|----------|----------|----------|----------|----------|----------|----------|----------|----------|
| 0.78564  | 0.206918 | 6.53E-06 | 0.112686 | 0.01483  | 0.255346 | 2.19E-08 | 0.307354 | 1.13E-11 |
| 5.09E-08 | 0.013006 | 0.77924  | -0.18116 | 8.25E-05 | 0.016501 | 0.72209  | -0.02441 | 0.59872  |
| 0.03264  | -0.00716 | 0.87741  | 0.120526 | 0.00913  | -0.00311 | 0.94652  | 0.02197  | 0.63582  |
| 0.05842  | -0.0897  | 0.05274  | 0.424062 | 8.30E-22 | 0.159368 | 0.00055  | 0.131494 | 0.00442  |
| 0.00208  | 0.079257 | 0.08711  | -0.01521 | 0.74305  | -0.08698 | 0.06037  | 0.014122 | 0.76084  |
| 0.95804  | 0.041822 | 0.36719  | 0.051526 | 0.26646  | -0.06106 | 0.18777  | -0.03272 | 0.48061  |
| 0.95713  | -0.01818 | 0.69518  | -0.04933 | 0.28743  | -0.19127 | 3.17E-05 | -0.05662 | 0.22196  |
| 0.03625  | -0.0414  | 0.37209  | 0.002552 | 0.95614  | -0.07379 | 0.11127  | -0.05208 | 0.26133  |
| 0.73114  | 0.010014 | 0.82912  | 0.172972 | 0.00017  | 0.241097 | 1.33E-07 | 0.185159 | 5.69E-05 |
| 0.00019  | 0.098448 | 0.03342  | 0.058952 | 0.20349  | -0.00482 | 0.91723  | 0.111368 | 0.01605  |
| 0.14621  | -0.03184 | 0.49248  | -0.17561 | 0.00014  | -0.15762 | 0.00063  | -0.12391 | 0.00734  |
| 4.11E-07 | -0.03784 | 0.41456  | -0.22254 | 1.19E-06 | -0.08706 | 0.06013  | -0.11917 | 0.00995  |
| 0.67633  | 0.00185  | 0.96819  | 0.000728 | 0.98747  | 0.010639 | 0.81863  | -0.01947 | 0.6747   |
| 0.76766  | 0.065025 | 0.16064  | -0.04431 | 0.3394   | -0.04996 | 0.28132  | 0.00672  | 0.88485  |
| 0.40138  | -0.03349 | 0.47027  | -0.0693  | 0.13481  | -0.007   | 0.88014  | -0.07528 | 0.10421  |
| 0.27962  | -0.06397 | 0.16758  | 0.085161 | 0.06595  | 0.072395 | 0.11821  | -0.07206 | 0.11992  |
| 0.84601  | 0.011496 | 0.80431  | -0.06013 | 0.19463  | -0.06343 | 0.17119  | 0.004838 | 0.91695  |
| 0.37858  | 0.076366 | 0.0993   | 0.03465  | 0.45506  | -0.02697 | 0.56102  | 0.015482 | 0.73861  |
| 0.12774  | 0.004096 | 0.92965  | -0.00516 | 0.91141  | -0.00193 | 0.96683  | -0.04045 | 0.38311  |
| 0.04173  | -0.01023 | 0.82557  | -0.02408 | 0.60368  | -0.14375 | 0.00184  | -0.06079 | 0.18974  |
| 2.28E-08 | 0.090644 | 0.05027  | 0.086565 | 0.0616   | 0.061811 | 0.18239  | 0.065036 | 0.16057  |
| 0.11337  | 0.096309 | 0.03748  | 0.187295 | 4.65E-05 | 0.092239 | 0.04635  | 0.190318 | 3.48E-05 |
| 0.58468  | -0.02716 | 0.55817  | 0.099733 | 0.03117  | -0.00518 | 0.91106  | 0.00235  | 0.95961  |
| 0.04391  | 0.055125 | 0.23445  | 0.091363 | 0.04847  | 0.182727 | 7.14E-05 | 0.205176 | 7.83E-06 |
| 0.84779  | -0.03202 | 0.49006  | 0.138768 | 0.00265  | -0.026   | 0.57512  | 0.060658 | 0.1907   |
| 0.71862  | 0.058246 | 0.20897  | 0.022646 | 0.62545  | 0.007894 | 0.86489  | 0.060464 | 0.19212  |
| 0.01081  | -0.04435 | 0.33895  | -0.04838 | 0.29678  | -0.09119 | 0.0489   | -0.09658 | 0.03694  |
| 2.56E-06 | 0.116969 | 0.01142  | 0.057825 | 0.21228  | -0.06307 | 0.17365  | 0.100955 | 0.02916  |
| 1.44E-05 | 0.069669 | 0.13275  | 0.008444 | 0.85559  | -0.05361 | 0.24756  | 0.019243 | 0.67832  |
| 0.77073  | -0.05511 | 0.23454  | -0.02286 | 0.62226  | -0.07088 | 0.12613  | -0.1242  | 0.0072   |
| 0.02093  | -0.05166 | 0.26518  | -0.0436  | 0.34718  | -0.11371 | 0.01395  | -0.14459 | 0.00173  |
| 0.58416  | 0.061981 | 0.18119  | -0.00518 | 0.91119  | -0.07693 | 0.09682  | 0.019225 | 0.6786   |
| 0.0002   | 0.072853 | 0.1159   | -0.0804  | 0.08265  | 0.011922 | 0.79722  | 0.011713 | 0.8007   |
| 0.59392  | 0.050658 | 0.27462  | -0.08595 | 0.06349  | 0.042521 | 0.35923  | 0.124242 | 0.00719  |
| 0.23048  | 0.205747 | 7.38E-06 | 0.071661 | 0.12199  | 0.110934 | 0.01647  | 0.312366 | 4.99E-12 |
| 0.00166  | 0.013503 | 0.77103  | -0.24429 | 8.98E-08 | -0.04635 | 0.31753  | -0.07362 | 0.11209  |
| 0.99127  | 0.150081 | 0.00114  | 0.054007 | 0.24409  | 0.053736 | 0.24647  | 0.076824 | 0.09728  |
| 0.0036   | -0.04107 | 0.3759   | 0.303672 | 2.03E-11 | 0.121088 | 0.00881  | 0.056752 | 0.22091  |
| 0.64013  | -0.01647 | 0.72254  | -0.0398  | 0.39081  | -0.11293 | 0.01462  | -0.08143 | 0.07876  |
| 0.16632  | 0.117693 | 0.01092  | 0.050121 | 0.27974  | -0.12596 | 0.00642  | -0.04514 | 0.33041  |
| 0.00045  | 0.056173 | 0.22566  | 0.025869 | 0.5771   | -0.01705 | 0.7133   | -0.00205 | 0.96475  |
| 0.93028  | -0.10707 | 0.02066  | -0.09299 | 0.0446   | -0.05941 | 0.19998  | -0.20504 | 7.95E-06 |
| 0.07035  | 0.033936 | 0.46441  | -0.14781 | 0.00136  | -0.10375 | 0.02496  | -0.05055 | 0.27563  |
| 0.15619  | 0.020077 | 0.6652   | -0.07576 | 0.102    | -0.05914 | 0.20202  | -0.01479 | 0.7499   |
| 1.26E-05 | -0.13085 | 0.00462  | -0.11934 | 0.00985  | -0.2283  | 6.15E-07 | -0.2479  | 5.71E-08 |



|          |          |          |          |          |          |          |          |          |
|----------|----------|----------|----------|----------|----------|----------|----------|----------|
| 0.02838  | 0.016283 | 0.72562  | -0.18461 | 5.99E-05 | -0.13499 | 0.00347  | -0.08062 | 0.08178  |
| 0.91661  | 0.025984 | 0.5754   | -0.16197 | 0.00044  | -0.11973 | 0.0096   | -0.12532 | 0.00669  |
| 0.54575  | -0.03826 | 0.40947  | -0.14728 | 0.00142  | -0.18223 | 7.47E-05 | -0.16762 | 0.00027  |
| 4.54E-07 | 0.029927 | 0.51883  | -0.21852 | 1.87E-06 | -0.12379 | 0.0074   | -0.07696 | 0.09669  |
| 3.19E-05 | 0.215466 | 2.61E-06 | 0.167091 | 0.00029  | 0.229091 | 5.61E-07 | 0.273902 | 1.76E-09 |
| 0.00193  | -0.09711 | 0.03592  | -0.17374 | 0.00016  | -0.24859 | 5.23E-08 | -0.27451 | 1.61E-09 |
| 0.01036  | -0.02493 | 0.59096  | -0.08142 | 0.07881  | -0.05082 | 0.27304  | -0.05644 | 0.2235   |
| 0.1314   | -0.21927 | 1.72E-06 | -0.06189 | 0.18181  | -0.11168 | 0.01576  | -0.23654 | 2.32E-07 |
| 3.74E-09 | -0.14596 | 0.00156  | -0.06065 | 0.19075  | -0.11359 | 0.01405  | -0.16576 | 0.00032  |
| 0.01469  | -0.04948 | 0.28595  | -0.09409 | 0.04212  | -0.1163  | 0.0119   | -0.10862 | 0.01887  |
| 0.00327  | 0.096607 | 0.03689  | 0.050847 | 0.27282  | 0.140347 | 0.00237  | 0.145507 | 0.00162  |
| 0.15681  | 0.119794 | 0.00956  | 0.103381 | 0.02548  | 0.289184 | 1.90E-10 | 0.340906 | 3.58E-14 |
| 5.70E-08 | 0.073742 | 0.1115   | -0.17961 | 9.51E-05 | -0.14305 | 0.00194  | -0.06008 | 0.19494  |
| 0.64547  | 0.05412  | 0.2431   | 0.070126 | 0.13022  | 0.078854 | 0.08873  | 0.151193 | 0.00105  |
| 0.00046  | 0.150777 | 0.00108  | -0.07293 | 0.11552  | 0.032319 | 0.48597  | 0.144544 | 0.00174  |
| 0.91651  | 0.318094 | 1.93E-12 | 0.155566 | 0.00074  | 0.214865 | 2.79E-06 | 0.373368 | 6.78E-17 |
| 0.00058  | 0.018849 | 0.68455  | -0.13934 | 0.00255  | -0.15721 | 0.00065  | -0.1219  | 0.00836  |
| 0.30449  | 0.050943 | 0.27192  | 0.162979 | 0.00041  | 0.119931 | 0.00948  | 0.181413 | 8.06E-05 |
| 0.18682  | -0.04646 | 0.31643  | -0.08579 | 0.06396  | -0.09861 | 0.03313  | -0.10263 | 0.02657  |
| 0.00017  | 0.107358 | 0.02031  | -0.03617 | 0.43554  | 0.021327 | 0.64574  | 0.046045 | 0.32075  |
| 0.81536  | 0.220611 | 1.48E-06 | 0.08811  | 0.05708  | 0.208407 | 5.58E-06 | 0.296228 | 6.51E-11 |
| 0.30841  | 0.055712 | 0.2295   | 0.042765 | 0.35648  | 0.130907 | 0.0046   | 0.124559 | 0.00704  |
| 0.28591  | -0.0197  | 0.67105  | -0.068   | 0.14232  | 0.143855 | 0.00183  | 0.195872 | 2.02E-05 |
| 0.08549  | 0.084806 | 0.06709  | -0.09888 | 0.03265  | -0.07789 | 0.0927   | -0.02727 | 0.55661  |
| 0.39727  | 0.041803 | 0.36741  | -0.0015  | 0.97426  | -0.03624 | 0.43464  | -0.00152 | 0.97387  |
| 0.01482  | 0.095357 | 0.03941  | -0.11898 | 0.01007  | -0.03513 | 0.44879  | 0.049583 | 0.28494  |
| 0.11385  | -0.13241 | 0.00415  | -0.26502 | 6.02E-09 | -0.1652  | 0.00034  | -0.18709 | 4.74E-05 |
| 0.01437  | -0.11295 | 0.0146   | -0.08745 | 0.05899  | -0.19099 | 3.26E-05 | -0.26956 | 3.23E-09 |
| 2.02E-07 | -0.07774 | 0.09335  | -0.07337 | 0.11333  | -0.15252 | 0.00094  | -0.17355 | 0.00016  |
| 7.35E-07 | 0.140461 | 0.00235  | 0.099729 | 0.03118  | 0.195276 | 2.14E-05 | 0.30214  | 2.59E-11 |
| 0.37765  | -0.0174  | 0.70766  | -0.15157 | 0.00102  | -0.08149 | 0.07853  | -0.04639 | 0.31713  |
| 0.82324  | -0.00062 | 0.98934  | -0.16282 | 0.00041  | -0.1004  | 0.03006  | -0.12554 | 0.0066   |
| 0.89354  | 0.035119 | 0.44897  | -0.13763 | 0.00288  | -0.12754 | 0.00578  | -0.07447 | 0.10801  |
| 0.74292  | -0.17879 | 0.0001   | -0.00286 | 0.95078  | -0.11723 | 0.01123  | -0.2499  | 4.43E-08 |
| 0.26604  | 0.021022 | 0.65047  | -0.03212 | 0.48867  | -0.01417 | 0.76012  | -0.0649  | 0.16146  |
| 0.00018  | 0.029585 | 0.52363  | -0.17517 | 0.00014  | -0.14536 | 0.00164  | -0.03425 | 0.46026  |
| 0.05686  | 0.154645 | 0.0008   | 0.208206 | 5.70E-06 | 0.237604 | 2.04E-07 | 0.33113  | 2.06E-13 |
| 0.91846  | -0.12808 | 0.00557  | -0.09271 | 0.04524  | -0.18512 | 5.71E-05 | -0.21982 | 1.62E-06 |
| 0.00019  | 0.032784 | 0.47972  | -0.12938 | 0.00511  | -0.09786 | 0.0345   | -0.05863 | 0.206    |
| 0.72312  | 0.04742  | 0.3065   | -0.1907  | 3.35E-05 | -0.09757 | 0.03504  | -0.06023 | 0.19388  |
| 7.78E-07 | 0.077031 | 0.09638  | -0.08184 | 0.07727  | -0.02579 | 0.5783   | -0.00053 | 0.99089  |
| 0.25395  | 0.035562 | 0.44327  | 0.034229 | 0.46056  | 0.0252   | 0.587    | 0.046334 | 0.31772  |
| 0.00039  | 0.060589 | 0.1912   | 0.06006  | 0.19511  | 0.116176 | 0.01199  | 0.151704 | 0.00101  |
| 0.85621  | 0.02817  | 0.54368  | -0.00905 | 0.84542  | -0.05848 | 0.20712  | -0.02589 | 0.57679  |
| 0.23175  | -0.04616 | 0.31955  | -0.11337 | 0.01423  | -0.23276 | 3.65E-07 | -0.15481 | 0.00079  |

|          |          |          |          |          |          |          |          |          |
|----------|----------|----------|----------|----------|----------|----------|----------|----------|
| 4.91E-12 | 0.094315 | 0.04163  | 0.17623  | 0.00013  | 0.214159 | 3.01E-06 | 0.283071 | 4.70E-10 |
| 0.01288  | -0.16483 | 0.00035  | 0.296951 | 5.82E-11 | 0.085147 | 0.066    | -0.10506 | 0.02317  |
| 0.5752   | 0.093088 | 0.04436  | 0.058664 | 0.20572  | 0.226103 | 7.93E-07 | 0.27323  | 1.93E-09 |
| 0.29659  | 0.029025 | 0.53152  | -0.05703 | 0.21862  | -0.0366  | 0.43005  | -0.02255 | 0.62696  |
| 0.98005  | 0.02887  | 0.53372  | 0.096518 | 0.03706  | 0.080297 | 0.08303  | 0.036898 | 0.42632  |
| 0.30873  | 0.058068 | 0.21037  | 0.14422  | 0.00178  | 0.179363 | 9.73E-05 | 0.204985 | 7.99E-06 |
| 0.02285  | -0.05841 | 0.2077   | -0.04333 | 0.35015  | -0.17016 | 0.00022  | -0.18483 | 5.86E-05 |
| 0.00732  | 0.023944 | 0.60577  | -0.00479 | 0.91781  | 0.133844 | 0.00376  | 0.123112 | 0.00773  |
| 0.71132  | -0.0014  | 0.97587  | 0.027548 | 0.55263  | -0.0337  | 0.46757  | -0.02314 | 0.61797  |
| 0.10798  | 0.00984  | 0.83204  | -0.09657 | 0.03696  | -0.03529 | 0.44681  | -0.08635 | 0.06225  |
| 0.31791  | -0.03758 | 0.41785  | 0.020971 | 0.65125  | -0.17498 | 0.00014  | -0.05809 | 0.21023  |
| 0.20781  | 0.115512 | 0.01249  | 0.188279 | 4.23E-05 | 0.238677 | 1.79E-07 | 0.303691 | 2.03E-11 |
| 0.00185  | 0.079868 | 0.08469  | 0.147158 | 0.00143  | 0.199151 | 1.45E-05 | 0.188914 | 3.98E-05 |
| 3.13E-05 | 0.213019 | 3.41E-06 | -0.09023 | 0.05133  | 0.065255 | 0.15916  | 0.150871 | 0.00107  |
| 0.85735  | -0.13367 | 0.0038   | -0.00321 | 0.94481  | -0.07674 | 0.09763  | -0.22898 | 5.68E-07 |
| 0.6073   | -0.08589 | 0.06367  | -0.06013 | 0.19459  | 0.099919 | 0.03086  | -0.0333  | 0.47284  |
| 0.68201  | -0.11153 | 0.0159   | -0.20114 | 1.19E-05 | -0.1908  | 3.32E-05 | -0.24219 | 1.17E-07 |
| 0.01257  | 0.065613 | 0.15688  | 0.156898 | 0.00067  | 0.14341  | 0.00189  | 0.213761 | 3.15E-06 |
| 0.17535  | -0.14817 | 0.00132  | -0.11475 | 0.01309  | -0.21331 | 3.30E-06 | -0.25846 | 1.45E-08 |
| 1.21E-07 | -0.01065 | 0.81843  | -0.11397 | 0.01373  | -0.07779 | 0.09314  | -0.06409 | 0.16674  |
| 0.82565  | -0.0385  | 0.40655  | -0.15994 | 0.00052  | -0.16164 | 0.00045  | -0.19263 | 2.78E-05 |
| 0.00057  | 0.041364 | 0.37247  | -0.04736 | 0.30713  | -0.02297 | 0.62046  | -0.00481 | 0.91742  |
| 0.40982  | -0.08401 | 0.0697   | -0.15003 | 0.00115  | -0.20483 | 8.12E-06 | -0.23729 | 2.12E-07 |
| 1.50E-08 | 0.008149 | 0.86058  | -0.0028  | 0.95182  | 0.0246   | 0.59592  | -0.04282 | 0.35586  |
| 0.01267  | 0.163752 | 0.00038  | 0.133184 | 0.00394  | 0.160939 | 0.00048  | 0.257333 | 1.69E-08 |
| 4.93E-08 | -0.13146 | 0.00443  | 0.055205 | 0.23377  | -0.16775 | 0.00027  | -0.21091 | 4.28E-06 |
| 0.0346   | 0.09542  | 0.03928  | 0.012593 | 0.78607  | 0.05567  | 0.22985  | 0.135392 | 0.00337  |
| 1.97E-09 | 0.09057  | 0.05046  | -0.11524 | 0.01271  | -0.14762 | 0.00138  | 0.000559 | 0.99039  |
| 0.44808  | 0.053909 | 0.24495  | 0.179963 | 9.21E-05 | 0.266931 | 4.64E-09 | 0.222991 | 1.13E-06 |
| 0.09929  | 0.043072 | 0.35302  | 0.185389 | 5.56E-05 | 0.269663 | 3.18E-09 | 0.200533 | 1.26E-05 |
| 0.81803  | 0.18852  | 4.13E-05 | -0.08018 | 0.08346  | 0.038809 | 0.40274  | -0.07713 | 0.09596  |
| 0.0001   | -0.17586 | 0.00013  | -0.04943 | 0.28641  | 0.021155 | 0.64839  | -0.10854 | 0.01896  |
| 2.18E-08 | 0.126665 | 0.00613  | 0.14455  | 0.00174  | 0.139317 | 0.00255  | 0.235368 | 2.67E-07 |
| 0.00099  | 0.207763 | 5.98E-06 | 0.193707 | 2.50E-05 | 0.239491 | 1.62E-07 | 0.349279 | 7.61E-15 |
| 0.86997  | 0.010365 | 0.82323  | -0.03709 | 0.42389  | -0.04125 | 0.37373  | -0.02453 | 0.59704  |
| 0.70697  | -0.01751 | 0.7059   | 0.229922 | 5.09E-07 | -0.03926 | 0.39725  | -0.08421 | 0.06904  |
| 0.99905  | -0.04404 | 0.34226  | 0.013539 | 0.77044  | 0.092871 | 0.04486  | 0.063038 | 0.17384  |
| 3.08E-10 | 0.193718 | 2.50E-05 | -0.12042 | 0.00919  | -0.10027 | 0.03027  | 0.091151 | 0.049    |
| 0.02915  | 0.017598 | 0.70446  | -0.07212 | 0.11961  | -0.06388 | 0.16812  | -0.04868 | 0.29383  |
| 1.88E-12 | 0.147298 | 0.00141  | 0.095917 | 0.03827  | 0.053957 | 0.24452  | 0.23009  | 4.99E-07 |
| 0.00639  | 0.049566 | 0.28511  | 0.062765 | 0.17572  | 0.087856 | 0.05781  | 0.149912 | 0.00116  |
| 0.00021  | -0.22441 | 9.63E-07 | -0.09484 | 0.04049  | -0.19452 | 2.31E-05 | -0.36031 | 9.21E-16 |
| 0.12556  | 0.092612 | 0.04547  | 0.012703 | 0.78425  | -0.04085 | 0.3784   | 0.014919 | 0.74778  |
| 0.14348  | -0.08424 | 0.06895  | 0.202855 | 9.96E-06 | 0.14503  | 0.00168  | 0.046608 | 0.31487  |
| 0.00989  | 0.056952 | 0.21928  | 0.179455 | 9.64E-05 | 0.146245 | 0.00153  | 0.140761 | 0.0023   |

|          |          |          |          |          |          |          |          |          |
|----------|----------|----------|----------|----------|----------|----------|----------|----------|
| 0.00127  | 0.03645  | 0.43196  | -0.02375 | 0.60863  | 0.003839 | 0.93406  | -0.01821 | 0.69473  |
| 0.17461  | 0.254056 | 2.59E-08 | 0.163137 | 0.0004   | 0.205997 | 7.19E-06 | 0.365488 | 3.32E-16 |
| 0.00013  | 0.066517 | 0.15123  | -0.08107 | 0.0801   | -0.02605 | 0.57442  | -0.00431 | 0.92597  |
| 0.05223  | 0.120947 | 0.00889  | 0.093057 | 0.04444  | 0.134556 | 0.00358  | 0.196401 | 1.91E-05 |
| 0.01054  | -0.09625 | 0.0376   | -0.1561  | 0.00071  | -0.01772 | 0.70254  | -0.09765 | 0.0349   |
| 0.40629  | -0.01156 | 0.8033   | -0.21734 | 2.13E-06 | -0.1487  | 0.00127  | -0.14508 | 0.00167  |
| 1.48E-05 | 0.033156 | 0.47475  | -0.203   | 9.81E-06 | -0.16754 | 0.00028  | -0.11501 | 0.01289  |
| 5.64E-08 | 0.010674 | 0.81805  | -0.00761 | 0.86972  | 0.038508 | 0.4064   | 0.058941 | 0.20358  |
| 0.88373  | 0.061295 | 0.18607  | 0.141312 | 0.00221  | 0.122749 | 0.00792  | 0.074058 | 0.10997  |
| 3.43E-06 | 0.141712 | 0.00214  | 0.083459 | 0.07156  | 0.203769 | 9.07E-06 | 0.301578 | 2.83E-11 |
| 0.45849  | 0.063918 | 0.1679   | -0.06665 | 0.15041  | -0.03485 | 0.45242  | -0.05593 | 0.22764  |
| 0.39451  | -0.15465 | 0.0008   | 0.106214 | 0.0217   | 0.103787 | 0.0249   | 0.001    | 0.98281  |
| 0.00085  | 0.14354  | 0.00187  | 0.002651 | 0.95443  | -0.08839 | 0.05629  | 0.037939 | 0.41337  |
| 0.47068  | -0.13553 | 0.00334  | 0.005799 | 0.90054  | -0.20779 | 5.96E-06 | -0.26397 | 6.95E-09 |
| 0.35635  | 0.142339 | 0.00205  | 0.090921 | 0.04957  | 0.219877 | 1.61E-06 | 0.274977 | 1.51E-09 |
| 0.00536  | -0.13678 | 0.00306  | -0.18975 | 3.68E-05 | -0.31014 | 7.18E-12 | -0.32909 | 2.94E-13 |
| 0.69962  | -0.0954  | 0.03931  | 0.068436 | 0.13976  | -0.10849 | 0.01902  | -0.13657 | 0.0031   |
| 0.42107  | -0.14958 | 0.00119  | -0.03637 | 0.43296  | -0.14374 | 0.00185  | -0.11711 | 0.01132  |
| 0.42648  | -0.10874 | 0.01874  | -0.0698  | 0.13201  | -0.0186  | 0.68849  | -0.09594 | 0.03821  |
| 0.91064  | -0.00973 | 0.83388  | -0.08993 | 0.05212  | -0.13759 | 0.00289  | -0.10815 | 0.0194   |
| 0.14576  | 0.076255 | 0.09979  | -0.06249 | 0.17763  | -0.01193 | 0.79702  | 0.086811 | 0.06086  |
| 0.00094  | 0.106536 | 0.0213   | -0.18062 | 8.67E-05 | -0.11758 | 0.011    | 0.039377 | 0.39588  |
| 2.72E-11 | 0.101446 | 0.02838  | 0.253876 | 2.65E-08 | 0.246564 | 6.76E-08 | 0.295318 | 7.49E-11 |
| 0.02949  | 0.0273   | 0.5562   | -0.17526 | 0.00014  | -0.04468 | 0.33529  | 0.01005  | 0.82852  |
| 0.35969  | 0.005963 | 0.89773  | 0.054802 | 0.23721  | -0.05018 | 0.27915  | -0.04129 | 0.37332  |
| 0.00013  | 0.185857 | 5.32E-05 | 0.021953 | 0.63607  | -0.08595 | 0.06347  | 0.077071 | 0.0962   |
| 0.93698  | 0.040399 | 0.38373  | -0.11112 | 0.01629  | -0.00045 | 0.99231  | 0.025323 | 0.58516  |
| 0.05202  | 0.084216 | 0.06902  | 0.217002 | 2.21E-06 | 0.16991  | 0.00023  | 0.225834 | 8.18E-07 |
| 0.00919  | 0.051691 | 0.26493  | -0.14471 | 0.00172  | -0.12439 | 0.00712  | 0.00727  | 0.8755   |
| 0.24455  | 0.016621 | 0.72016  | -0.05962 | 0.19838  | -0.05005 | 0.28044  | -0.02673 | 0.56447  |
| 0.45991  | -0.01579 | 0.73361  | -0.04091 | 0.37773  | -0.16356 | 0.00039  | -0.04036 | 0.38422  |
| 0.70678  | -0.00598 | 0.89746  | 0.053844 | 0.24551  | -0.10372 | 0.02499  | -0.05981 | 0.19698  |
| 0.13325  | 0.132923 | 0.00401  | 0.043169 | 0.35194  | -0.02117 | 0.64815  | 0.046373 | 0.31732  |
| 0.00122  | 0.05958  | 0.19871  | 0.007017 | 0.87979  | -0.0043  | 0.92615  | 0.114761 | 0.01308  |
| 0.16033  | -0.10952 | 0.01791  | 0.135693 | 0.0033   | -0.13679 | 0.00306  | -0.1369  | 0.00303  |
| 0.06331  | 0.109306 | 0.01813  | 0.013246 | 0.77526  | 0.052111 | 0.26107  | 0.1475   | 0.00139  |
| 4.21E-11 | 0.126551 | 0.00617  | 0.312781 | 4.67E-12 | 0.105757 | 0.02227  | 0.113575 | 0.01406  |
| 5.82E-10 | 0.037368 | 0.42045  | -0.07588 | 0.10146  | -0.07774 | 0.09333  | -0.07548 | 0.10328  |
| 0.00054  | 0.034133 | 0.46181  | 0.046779 | 0.3131   | -0.07482 | 0.10635  | -0.03143 | 0.49801  |
| 0.73361  | 0.204829 | 8.12E-06 | 0.177067 | 0.00012  | -0.00089 | 0.98476  | 0.076184 | 0.10011  |
| 0.93651  | 0.001881 | 0.96766  | 0.044186 | 0.3407   | -0.08129 | 0.07929  | -0.03009 | 0.5166   |
| 0.35479  | 0.00293  | 0.94964  | 0.06941  | 0.1342   | -0.06945 | 0.13398  | 0.006144 | 0.89465  |
| 0.96628  | 0.008034 | 0.86253  | -0.07746 | 0.09455  | -0.09747 | 0.03523  | -0.07485 | 0.10622  |
| 0.86398  | -0.02862 | 0.53733  | -0.10914 | 0.01831  | -0.06434 | 0.16512  | -0.12615 | 0.00634  |
| 0.8613   | 0.048756 | 0.29306  | -0.07221 | 0.11917  | -0.02012 | 0.66449  | 0.027615 | 0.55165  |

|          |          |          |          |          |          |          |          |          |
|----------|----------|----------|----------|----------|----------|----------|----------|----------|
| 0.45635  | 0.05057  | 0.27545  | 0.075737 | 0.10212  | 0.079274 | 0.08704  | 0.13411  | 0.00369  |
| 0.46221  | 0.436822 | 3.51E-23 | 0.192795 | 2.73E-05 | 0.106359 | 0.02152  | 0.239114 | 1.70E-07 |
| 0.65615  | -0.00687 | 0.88233  | -0.23216 | 3.91E-07 | -0.21137 | 4.07E-06 | -0.12602 | 0.0064   |
| 0.21508  | -0.01013 | 0.82721  | -0.00403 | 0.9308   | -0.10624 | 0.02166  | -0.10396 | 0.02466  |
| 1.12E-08 | 0.118225 | 0.01056  | 0.351975 | 4.58E-15 | 0.300652 | 3.27E-11 | 0.31294  | 4.54E-12 |
| 0.71915  | 0.140612 | 0.00232  | 0.132952 | 0.004    | 0.190256 | 3.50E-05 | 0.271939 | 2.32E-09 |
| 0.2207   | 0.024417 | 0.59867  | 0.003864 | 0.93363  | -0.1153  | 0.01266  | -0.03283 | 0.47914  |
| 0.21632  | -0.03992 | 0.38942  | -0.08786 | 0.0578   | -0.0632  | 0.17274  | -0.18019 | 9.02E-05 |
| 0.00626  | -0.14249 | 0.00202  | -0.05608 | 0.22646  | -0.19288 | 2.71E-05 | -0.27701 | 1.13E-09 |
| 0.8015   | -0.1237  | 0.00744  | -0.12003 | 0.00942  | -0.27245 | 2.16E-09 | -0.31621 | 2.65E-12 |
| 0.19551  | -0.08999 | 0.05197  | -0.07186 | 0.12097  | -0.0758  | 0.10183  | -0.16135 | 0.00046  |
| 0.88555  | -0.15186 | 0.00099  | -0.16119 | 0.00047  | -0.17004 | 0.00022  | -0.31437 | 3.59E-12 |
| 0.00554  | -0.06074 | 0.19007  | -0.03586 | 0.43945  | -0.05657 | 0.22243  | -0.10803 | 0.01953  |
| 0.7156   | 0.130061 | 0.00488  | 0.025142 | 0.58785  | 0.127812 | 0.00567  | 0.187105 | 4.73E-05 |
| 0.76065  | -0.07995 | 0.08438  | -0.03231 | 0.48613  | -0.0479  | 0.30163  | -0.16443 | 0.00036  |
| 0.00034  | -0.02843 | 0.53997  | 0.152771 | 0.00093  | 0.059948 | 0.19595  | -0.00613 | 0.89484  |
| 0.30476  | 0.006656 | 0.88594  | -0.03305 | 0.4761   | 0.000459 | 0.9921   | 0.0282   | 0.54325  |
| 0.00029  | -0.17118 | 0.0002   | 0.049842 | 0.28243  | 0.052192 | 0.26032  | -0.11783 | 0.01082  |
| 0.02946  | -0.04028 | 0.38512  | -0.15717 | 0.00065  | -0.14475 | 0.00171  | -0.174   | 0.00016  |
| 0.0566   | -0.02722 | 0.55735  | 0.157743 | 0.00062  | 0.370985 | 1.10E-16 | 0.244025 | 9.28E-08 |
| 0.00261  | 0.032968 | 0.47725  | -0.1158  | 0.01227  | -0.04001 | 0.38839  | 0.018573 | 0.68891  |
| 0.95093  | 0.040501 | 0.38253  | -0.08124 | 0.07945  | -0.0706  | 0.12766  | -0.03318 | 0.47438  |
| 0.3227   | 0.257945 | 1.56E-08 | 0.031223 | 0.50089  | 0.077422 | 0.0947   | 0.211091 | 4.20E-06 |
| 0.84366  | -0.09817 | 0.03393  | -0.09227 | 0.04626  | -0.25191 | 3.42E-08 | -0.1861  | 5.20E-05 |
| 0.41344  | -0.00272 | 0.95323  | -0.00493 | 0.9154   | -0.04787 | 0.3019   | -0.07487 | 0.10611  |
| 0.81618  | 0.088729 | 0.05535  | -0.06531 | 0.1588   | -0.06247 | 0.17776  | 0.033893 | 0.46498  |
| 0.71739  | 0.046626 | 0.31468  | 0.092924 | 0.04474  | 0.071082 | 0.12505  | 0.140359 | 0.00236  |
| 0.0098   | 0.101497 | 0.0283   | -0.00057 | 0.99016  | -0.03739 | 0.4202   | 0.027309 | 0.55608  |
| 0.01702  | -0.18947 | 3.77E-05 | -0.02011 | 0.66466  | -0.04789 | 0.30172  | -0.08821 | 0.0568   |
| 0.07525  | -0.06494 | 0.16121  | -0.32901 | 2.99E-13 | -0.15837 | 0.00059  | -0.17374 | 0.00016  |
| 1.37E-08 | -0.03858 | 0.40558  | -0.06952 | 0.13355  | 0.030673 | 0.50847  | -0.05597 | 0.22733  |
| 3.25E-13 | 0.043465 | 0.34864  | -0.12507 | 0.00681  | -0.11516 | 0.01277  | -0.04958 | 0.28496  |
| 0.74158  | 0.005344 | 0.9083   | 0.118809 | 0.01018  | 0.002039 | 0.96495  | 0.056703 | 0.22131  |
| 0.20975  | 0.246045 | 7.21E-08 | 0.047104 | 0.30975  | 0.195849 | 2.02E-05 | 0.314512 | 3.51E-12 |
| 0.00484  | -0.00595 | 0.89803  | -0.0903  | 0.05115  | -0.05307 | 0.25238  | -0.0617  | 0.18315  |
| 0.19722  | 0.127443 | 0.00582  | -0.01026 | 0.82494  | 0.232578 | 3.73E-07 | 0.185459 | 5.53E-05 |
| 0.00219  | -0.03747 | 0.41917  | -0.13064 | 0.00469  | -0.22626 | 7.79E-07 | -0.31741 | 2.17E-12 |
| 0.00176  | 0.118692 | 0.01025  | -0.05819 | 0.20942  | 0.00041  | 0.99295  | 0.141515 | 0.00217  |
| 0.06386  | -0.13063 | 0.00469  | -0.12101 | 0.00885  | -0.21626 | 2.39E-06 | -0.35095 | 5.56E-15 |
| 0.29388  | 0.084106 | 0.06939  | -0.01054 | 0.82024  | 0.042517 | 0.35927  | 0.08984  | 0.05236  |
| 3.06E-07 | 0.066561 | 0.15096  | 0.216571 | 2.32E-06 | 0.273346 | 1.90E-09 | 0.331321 | 1.99E-13 |
| 0.21012  | 0.034785 | 0.4533   | 0.031056 | 0.50318  | 0.147279 | 0.00141  | 0.126823 | 0.00606  |
| 4.08E-07 | 0.227769 | 6.54E-07 | -0.04072 | 0.37994  | 0.043795 | 0.345    | 0.206683 | 6.69E-06 |
| 0.38109  | 0.165906 | 0.00032  | 0.037191 | 0.42265  | 0.150955 | 0.00107  | 0.154727 | 0.00079  |
| 0.39722  | 0.189447 | 3.78E-05 | 0.034933 | 0.45138  | 0.136259 | 0.00317  | 0.302067 | 2.62E-11 |

|          |          |          |          |          |          |          |          |          |
|----------|----------|----------|----------|----------|----------|----------|----------|----------|
| 0.05345  | 0.128275 | 0.0055   | 0.051841 | 0.26355  | -0.0054  | 0.90738  | 0.081682 | 0.07784  |
| 0.57473  | -0.03995 | 0.38905  | -0.15261 | 0.00094  | -0.07238 | 0.11827  | -0.12268 | 0.00795  |
| 0.24845  | 0.032418 | 0.48464  | -0.17365 | 0.00016  | -0.13267 | 0.00408  | -0.11138 | 0.01604  |
| 0.20937  | 0.067599 | 0.14468  | -0.10626 | 0.02164  | -0.12967 | 0.00501  | -0.09697 | 0.03618  |
| 0.63122  | 0.019583 | 0.67296  | -0.07595 | 0.10116  | -0.08524 | 0.0657   | -0.05426 | 0.24192  |
| 1.57E-12 | 0.006023 | 0.89672  | 0.095043 | 0.04007  | 0.026274 | 0.57114  | 0.130743 | 0.00466  |
| 0.07457  | 0.100713 | 0.02955  | 0.053724 | 0.24658  | 0.139511 | 0.00251  | 0.192338 | 2.86E-05 |
| 0.04401  | 0.232989 | 3.55E-07 | 0.102929 | 0.02613  | 0.16355  | 0.00039  | 0.255913 | 2.03E-08 |
| 0.38188  | 0.026434 | 0.5688   | -0.15735 | 0.00064  | -0.15892 | 0.00057  | -0.12419 | 0.00721  |
| 0.81745  | 0.000176 | 0.99697  | -0.02772 | 0.55014  | -0.07647 | 0.09885  | -0.05285 | 0.25436  |
| 0.30392  | 0.07526  | 0.10431  | -0.08361 | 0.07106  | -0.03633 | 0.43347  | 0.012871 | 0.78146  |
| 0.60862  | 0.082722 | 0.07411  | 0.114868 | 0.013    | 0.25945  | 1.27E-08 | 0.242914 | 1.07E-07 |
| 0.37984  | 0.181019 | 8.36E-05 | 0.047398 | 0.30673  | 0.052642 | 0.25623  | 0.238659 | 1.80E-07 |
| 0.00024  | 0.014183 | 0.75983  | 0.280062 | 7.29E-10 | 0.236225 | 2.41E-07 | 0.169318 | 0.00024  |
| 0.39488  | 0.081277 | 0.07933  | -0.02163 | 0.64105  | -0.05752 | 0.21475  | 0.025552 | 0.58178  |
| 0.926    | -0.01458 | 0.75338  | 0.122829 | 0.00788  | -0.05126 | 0.26892  | 0.003897 | 0.93307  |
| 0.39233  | -0.01727 | 0.70964  | 0.311737 | 5.54E-12 | 0.241706 | 1.24E-07 | 0.195386 | 2.12E-05 |
| 0.02444  | -0.10883 | 0.01865  | 0.118622 | 0.0103   | 0.125873 | 0.00646  | -0.09533 | 0.03946  |
| 0.91823  | 0.477819 | 5.20E-28 | 0.109697 | 0.01772  | 0.136175 | 0.00319  | 0.24896  | 4.99E-08 |
| 0.71668  | 0.05208  | 0.26135  | 0.03422  | 0.46068  | 0.02349  | 0.61262  | 0.09015  | 0.05155  |
| 4.14E-05 | -0.04911 | 0.28957  | -0.23221 | 3.89E-07 | -0.18703 | 4.76E-05 | -0.16414 | 0.00037  |
| 2.08E-11 | 0.020552 | 0.65777  | -0.15117 | 0.00105  | -0.21321 | 3.34E-06 | -0.12285 | 0.00787  |
| 0.44871  | -0.18835 | 4.20E-05 | 0.204418 | 8.48E-06 | -0.04059 | 0.38147  | -0.08481 | 0.06707  |
| 0.0003   | 0.066888 | 0.14896  | -0.00853 | 0.85418  | 0.203432 | 9.39E-06 | 0.186516 | 5.00E-05 |
| 0.01266  | 0.002306 | 0.96036  | -0.14695 | 0.00145  | -0.10518 | 0.02302  | -0.07841 | 0.09057  |
| 0.47806  | 0.010646 | 0.81851  | 0.071991 | 0.12028  | -0.18806 | 4.32E-05 | -0.14234 | 0.00205  |
| 0.28257  | 0.172148 | 0.00019  | 0.113216 | 0.01437  | 0.273724 | 1.80E-09 | 0.284803 | 3.65E-10 |
| 1.26E-05 | 0.064886 | 0.16154  | 0.023564 | 0.6115   | 0.091536 | 0.04805  | 0.082076 | 0.07641  |
| 0.7796   | -0.01389 | 0.76468  | 0.006433 | 0.88973  | 0.003413 | 0.94136  | -0.0505  | 0.2761   |
| 0.45785  | -0.06876 | 0.1379   | -0.02137 | 0.64505  | 0.019969 | 0.66689  | -0.11039 | 0.01701  |
| 0.89882  | -0.06234 | 0.17866  | -0.01415 | 0.76045  | 0.030446 | 0.51161  | -0.03898 | 0.40063  |
| 0.05683  | 0.428078 | 3.11E-22 | -0.004   | 0.93136  | 0.151276 | 0.00104  | 0.335973 | 8.73E-14 |
| 7.72E-06 | -0.16365 | 0.00038  | 0.141943 | 0.00211  | -0.22622 | 7.82E-07 | -0.33283 | 1.53E-13 |
| 2.96E-06 | -0.03507 | 0.44955  | -0.07219 | 0.11926  | -0.07504 | 0.10532  | -0.07016 | 0.13004  |
| 0.36857  | -0.08558 | 0.06462  | 0.313981 | 3.83E-12 | 0.336185 | 8.40E-14 | 0.236831 | 2.24E-07 |
| 0.10201  | -0.01016 | 0.82667  | 0.122245 | 0.00818  | 0.114686 | 0.01314  | 0.069788 | 0.13208  |
| 0.00516  | -0.18405 | 6.31E-05 | 0.03385  | 0.46553  | 0.018938 | 0.68313  | -0.12858 | 0.00539  |
| 0.26512  | 0.006975 | 0.88051  | -0.1031  | 0.02588  | 0.027846 | 0.54833  | -0.0456  | 0.32551  |
| 0.12237  | 0.128945 | 0.00526  | 0.004911 | 0.91571  | 0.081146 | 0.07981  | 0.07478  | 0.10654  |
| 1.02E-06 | 0.137751 | 0.00285  | 0.273167 | 1.95E-09 | 0.327865 | 3.65E-13 | 0.292776 | 1.10E-10 |
| 0.00245  | -0.10325 | 0.02566  | 0.165896 | 0.00032  | 0.26007  | 1.17E-08 | 0.086797 | 0.0609   |
| 0.20363  | 0.170289 | 0.00022  | -0.08822 | 0.05676  | -0.16092 | 0.00048  | -0.01457 | 0.7535   |
| 1.21E-08 | 0.066923 | 0.14875  | 0.215283 | 2.67E-06 | 0.221283 | 1.37E-06 | 0.184341 | 6.14E-05 |
| 0.09011  | 0.167717 | 0.00027  | 0.032282 | 0.48647  | 0.129095 | 0.00521  | 0.26486  | 6.16E-09 |
| 2.79E-05 | 0.082231 | 0.07585  | 0.142477 | 0.00203  | 0.041512 | 0.37075  | 0.121942 | 0.00834  |

|          |           |          |          |          |          |          |          |          |
|----------|-----------|----------|----------|----------|----------|----------|----------|----------|
| 0.00106  | 0.088458  | 0.05611  | -0.09707 | 0.03599  | 0.026315 | 0.57055  | 0.136852 | 0.00304  |
| 0.7858   | -2.05E-05 | 0.99965  | -0.203   | 9.82E-06 | -0.12939 | 0.0051   | -0.17388 | 0.00016  |
| 0.77456  | -0.05223  | 0.25995  | -0.11145 | 0.01598  | -0.05759 | 0.21416  | -0.06249 | 0.17764  |
| 0.00125  | 0.016619  | 0.7202   | 0.002707 | 0.95348  | 0.014758 | 0.75041  | 0.031742 | 0.49379  |
| 0.00699  | -0.02213  | 0.6334   | -0.06945 | 0.13398  | -0.09657 | 0.03695  | -0.07795 | 0.09248  |
| 3.13E-06 | 0.177896  | 0.00011  | 0.02295  | 0.62082  | 0.122428 | 0.00808  | 0.2334   | 3.38E-07 |
| 0.16756  | 0.078024  | 0.09215  | 0.27931  | 8.13E-10 | 0.056631 | 0.22189  | 0.196051 | 1.98E-05 |
| 0.06306  | 0.073229  | 0.11402  | 0.033374 | 0.47184  | -0.02869 | 0.53623  | 0.05812  | 0.20996  |
| 0.66003  | 0.080898  | 0.08074  | -0.0801  | 0.08381  | -0.02262 | 0.62583  | 0.108512 | 0.019    |
| 4.90E-09 | 0.000726  | 0.98752  | -0.07102 | 0.12537  | 0.054133 | 0.24299  | -0.02416 | 0.60251  |
| 0.14815  | 0.002382  | 0.95905  | 0.108881 | 0.01859  | -0.14296 | 0.00195  | -0.08623 | 0.06261  |
| 0.06794  | 0.270827  | 2.71E-09 | 0.003917 | 0.93272  | 0.092889 | 0.04482  | 0.23778  | 2.00E-07 |
| 0.00332  | -0.01229  | 0.7911   | -0.01218 | 0.79286  | -0.09094 | 0.04954  | 0.028705 | 0.53606  |
| 0.7921   | -0.05178  | 0.26412  | 0.061271 | 0.18625  | 0.014317 | 0.75765  | -0.03597 | 0.43805  |
| 4.20E-05 | 0.013954  | 0.7636   | -0.0514  | 0.26759  | -0.0454  | 0.3276   | -0.04073 | 0.37989  |
| 6.20E-11 | 0.167444  | 0.00028  | 0.051643 | 0.26538  | 0.152931 | 0.00091  | 0.21519  | 2.69E-06 |
| 0.51897  | -0.0682   | 0.14114  | -0.12995 | 0.00491  | -0.06964 | 0.13289  | -0.10125 | 0.02868  |
| 3.18E-11 | -0.06966  | 0.1328   | 0.009515 | 0.83751  | 0.003175 | 0.94545  | -0.03838 | 0.40799  |
| 0.02621  | -0.03782  | 0.41489  | -0.22305 | 1.12E-06 | -0.27046 | 2.85E-09 | -0.29923 | 4.08E-11 |
| 0.02796  | -0.02395  | 0.60572  | -0.05119 | 0.26961  | -0.07562 | 0.10268  | -0.01479 | 0.74984  |
| 0.42585  | 0.075246  | 0.10437  | 0.067478 | 0.1454   | -0.02876 | 0.53521  | 0.027753 | 0.54967  |
| 0.03949  | 0.197251  | 1.76E-05 | 0.121364 | 0.00866  | 0.119377 | 0.00982  | 0.253264 | 2.87E-08 |
| 3.98E-07 | -0.0424   | 0.36059  | 0.15493  | 0.00078  | 0.04414  | 0.34121  | 0.00663  | 0.88637  |
| 0.07303  | 0.160583  | 0.00049  | -0.04169 | 0.36865  | 0.107771 | 0.01983  | 0.157399 | 0.00064  |
| 0.0009   | -0.04405  | 0.34221  | -0.03652 | 0.43106  | -0.07812 | 0.09173  | -0.12392 | 0.00734  |
| 0.10744  | 0.011918  | 0.79728  | 0.358416 | 1.33E-15 | 0.209702 | 4.87E-06 | 0.179423 | 9.67E-05 |
| 0.28976  | 0.003729  | 0.93595  | -0.04392 | 0.34361  | -0.03888 | 0.40189  | -0.02939 | 0.5264   |
| 0.88733  | -0.00507  | 0.91291  | 0.030274 | 0.51399  | 0.035144 | 0.44865  | 0.063477 | 0.17086  |
| 0.68033  | 0.062776  | 0.17564  | -0.09395 | 0.04242  | -0.03544 | 0.44488  | 0.044406 | 0.33831  |
| 0.31078  | -0.01765  | 0.70355  | 0.044816 | 0.33386  | 0.02711  | 0.55896  | -0.05113 | 0.27012  |
| 0.24658  | -0.09064  | 0.0503   | 0.036329 | 0.43349  | -0.00209 | 0.964    | -0.1491  | 0.00123  |
| 0.53759  | -0.09525  | 0.03963  | -0.02793 | 0.5471   | -0.04442 | 0.33817  | -0.16418 | 0.00037  |
| 0.69157  | -0.0657   | 0.15631  | -0.05263 | 0.25635  | 0.039024 | 0.40013  | -0.10851 | 0.019    |
| 0.85347  | 0.015961  | 0.73083  | -0.17239 | 0.00018  | 0.02365  | 0.61021  | 0.043508 | 0.34817  |
| 0.39686  | 0.021499  | 0.64307  | -0.08581 | 0.06392  | 0.014677 | 0.75174  | -0.02097 | 0.65127  |
| 0.87378  | 0.11132   | 0.0161   | 0.087623 | 0.05848  | 0.179237 | 9.84E-05 | 0.153382 | 0.00088  |
| 0.72884  | -0.01465  | 0.75224  | 0.00913  | 0.844    | -0.02754 | 0.55275  | -0.04592 | 0.32207  |
| 0.52486  | -0.02992  | 0.51892  | -0.05951 | 0.19925  | -0.07176 | 0.1215   | -0.13598 | 0.00324  |
| 0.32777  | 0.009778  | 0.83308  | -0.07194 | 0.12055  | -0.05806 | 0.21041  | -0.11487 | 0.013    |
| 0.00216  | 0.074959  | 0.1057   | -0.02044 | 0.65955  | -0.10654 | 0.0213   | 0.003986 | 0.93155  |
| 0.26219  | 0.401041  | 1.80E-19 | -0.10182 | 0.02779  | -0.0562  | 0.22542  | 0.179499 | 9.61E-05 |
| 0.49049  | 0.032467  | 0.48397  | 0.138491 | 0.00271  | 0.129489 | 0.00507  | 0.135491 | 0.00335  |
| 0.59779  | 0.163033  | 0.0004   | 0.019941 | 0.66733  | 0.071662 | 0.12199  | 0.21449  | 2.91E-06 |
| 0.46735  | -0.06104  | 0.18795  | -0.13399 | 0.00372  | -0.23447 | 2.97E-07 | -0.26548 | 5.66E-09 |
| 1.59E-07 | 0.061429  | 0.18511  | 0.07206  | 0.11993  | 0.039501 | 0.3944   | 0.101837 | 0.02777  |

|          |           |          |          |          |          |          |          |          |
|----------|-----------|----------|----------|----------|----------|----------|----------|----------|
| 0.09975  | -0.01278  | 0.78302  | -0.23348 | 3.35E-07 | -0.13811 | 0.00278  | -0.15589 | 0.00072  |
| 0.00128  | 0.132495  | 0.00413  | 0.044709 | 0.33502  | 0.038813 | 0.40269  | 0.185254 | 5.64E-05 |
| 0.8308   | -0.0883   | 0.05656  | 0.161461 | 0.00046  | 0.277495 | 1.05E-09 | 0.024689 | 0.5946   |
| 0.80772  | 0.028699  | 0.53614  | 0.011708 | 0.80078  | 0.081153 | 0.07979  | 0.084491 | 0.06812  |
| 0.58008  | 0.049359  | 0.28712  | 0.028717 | 0.53589  | 0.143425 | 0.00189  | 0.153111 | 0.0009   |
| 0.54527  | 0.149983  | 0.00115  | 0.273838 | 1.77E-09 | 0.25577  | 2.07E-08 | 0.189826 | 3.65E-05 |
| 0.04419  | 0.065184  | 0.15962  | 0.078608 | 0.08973  | 0.090319 | 0.05111  | 0.098341 | 0.03362  |
| 0.93204  | 2.88E-05  | 0.9995   | 0.052415 | 0.2583   | 0.108264 | 0.01927  | 0.073849 | 0.11098  |
| 4.18E-12 | 0.062946  | 0.17447  | 0.006533 | 0.88802  | -0.04066 | 0.38066  | 0.020906 | 0.65226  |
| 4.91E-05 | 0.049515  | 0.2856   | 0.092366 | 0.04605  | 0.07745  | 0.09458  | 0.055288 | 0.23307  |
| 0.02377  | -0.04743  | 0.30639  | -0.01165 | 0.80175  | -0.00941 | 0.83923  | -0.04662 | 0.31477  |
| 0.92259  | 0.021919  | 0.6366   | 0.046345 | 0.31761  | 0.003124 | 0.94632  | -0.01019 | 0.82617  |
| 0.97085  | -0.01987  | 0.66847  | -0.02198 | 0.63571  | -0.03321 | 0.47406  | -0.05799 | 0.21099  |
| 0.84475  | 0.030365  | 0.51274  | -0.08726 | 0.05953  | -0.09009 | 0.05171  | -0.04237 | 0.36098  |
| 0.8656   | 0.025966  | 0.57566  | -0.114   | 0.0137   | -0.10495 | 0.02332  | -0.06745 | 0.1456   |
| 0.92071  | -0.04356  | 0.34763  | 0.073348 | 0.11343  | -0.00968 | 0.83476  | -0.0543  | 0.24152  |
| 0.73551  | -0.02877  | 0.53513  | 0.067794 | 0.14352  | -0.00041 | 0.99288  | -0.03329 | 0.47298  |
| 0.20361  | 0.123369  | 0.00761  | -0.03028 | 0.51396  | 0.013723 | 0.7674   | 0.114594 | 0.01321  |
| 0.07702  | -1.15E-05 | 0.9998   | 0.073458 | 0.11289  | 0.047652 | 0.30414  | 0.078158 | 0.09159  |
| 0.81788  | 0.321784  | 1.04E-12 | -0.00393 | 0.93257  | 0.016913 | 0.71545  | 0.150522 | 0.0011   |
| 0.88373  | 0.007963  | 0.86374  | -0.00571 | 0.90203  | -0.02097 | 0.6512   | -0.00686 | 0.8824   |
| 0.10909  | 0.231966  | 4.01E-07 | 0.25606  | 1.99E-08 | 0.245324 | 7.89E-08 | 0.329641 | 2.68E-13 |
| 0.72882  | -0.02267  | 0.6251   | -0.02528 | 0.5858   | -0.03881 | 0.40274  | -0.02535 | 0.58479  |
| 0.03004  | -0.08654  | 0.06166  | -0.00299 | 0.94864  | -0.05996 | 0.1959   | -0.08174 | 0.07764  |
| 0.28913  | 0.01621   | 0.72681  | -0.00484 | 0.91693  | -0.05462 | 0.23875  | -0.00174 | 0.97007  |
| 0.4362   | -0.09672  | 0.03667  | -0.03233 | 0.48588  | -0.12368 | 0.00745  | -0.0632  | 0.17275  |
| 0.00401  | -0.04254  | 0.35896  | -0.1472  | 0.00142  | -0.01291 | 0.78083  | -0.01556 | 0.73741  |
| 0.00219  | -0.19885  | 1.50E-05 | -0.16869 | 0.00025  | -0.24225 | 1.16E-07 | -0.31621 | 2.65E-12 |
| 2.79E-07 | 0.201633  | 1.13E-05 | -0.04579 | 0.32346  | -0.02174 | 0.6393   | 0.0606   | 0.19112  |
| 0.63086  | 0.021802  | 0.63839  | -0.00535 | 0.90816  | -0.03657 | 0.43042  | -0.03353 | 0.46971  |
| 0.00255  | -0.02101  | 0.65059  | -0.05783 | 0.21228  | -0.0077  | 0.86816  | -0.02769 | 0.55056  |
| 0.24713  | -0.03056  | 0.50999  | 0.099797 | 0.03107  | 0.091493 | 0.04815  | 0.125004 | 0.00684  |
| 0.00017  | 0.148369  | 0.0013   | 0.076629 | 0.09814  | 0.087936 | 0.05758  | 0.171535 | 0.0002   |
| 0.04728  | -0.17375  | 0.00016  | 0.019846 | 0.66882  | -0.09727 | 0.0356   | -0.22699 | 7.16E-07 |
| 0.93919  | 0.297136  | 5.66E-11 | 0.137984 | 0.00281  | 0.111832 | 0.01561  | 0.285351 | 3.36E-10 |
| 0.77294  | -0.12806  | 0.00558  | -0.13906 | 0.0026   | -0.11647 | 0.01177  | -0.19978 | 1.36E-05 |
| 0.12695  | -0.03233  | 0.48579  | -0.05268 | 0.25593  | 0.043504 | 0.34821  | -0.06416 | 0.1663   |
| 0.33039  | -0.1494   | 0.0012   | -0.08948 | 0.05332  | -0.14159 | 0.00216  | -0.19942 | 1.41E-05 |
| 6.38E-05 | 0.158495  | 0.00059  | 0.030778 | 0.50702  | -0.00801 | 0.86298  | 0.13282  | 0.00404  |
| 1.48E-15 | -0.0278   | 0.549    | -0.01309 | 0.77791  | 0.074542 | 0.10766  | 0.00997  | 0.82986  |
| 0.03941  | 0.048929  | 0.29135  | -0.09288 | 0.04485  | -0.12257 | 0.00801  | -0.03821 | 0.41006  |
| 0.78593  | -0.0187   | 0.68692  | -0.12586 | 0.00646  | -0.04804 | 0.30017  | -0.08025 | 0.08322  |
| 1.06E-05 | 0.067069  | 0.14787  | 0.087724 | 0.05819  | 0.046959 | 0.31124  | 0.143581 | 0.00187  |
| 0.28167  | 0.044503  | 0.33725  | -0.10952 | 0.0179   | 0.023093 | 0.61864  | 0.043121 | 0.35248  |
| 0.00842  | 0.029903  | 0.51918  | 0.101072 | 0.02897  | 0.110521 | 0.01688  | 0.125358 | 0.00668  |

|          |          |          |          |          |          |          |          |          |
|----------|----------|----------|----------|----------|----------|----------|----------|----------|
| 0.01133  | 0.141418 | 0.00219  | 0.166461 | 0.0003   | 0.121869 | 0.00838  | 0.190002 | 3.59E-05 |
| 0.86212  | -0.00665 | 0.88599  | 0.075996 | 0.10095  | -0.08299 | 0.07317  | -0.12433 | 0.00714  |
| 0.24247  | -0.0442  | 0.34056  | -0.0776  | 0.09395  | -0.00583 | 0.89996  | -0.08035 | 0.08283  |
| 0.23883  | 0.043227 | 0.3513   | 0.019427 | 0.67541  | 0.031304 | 0.49978  | 0.029913 | 0.51903  |
| 0.39377  | 0.093599 | 0.04321  | -0.14387 | 0.00183  | -0.0762  | 0.10003  | 0.115838 | 0.01225  |
| 2.40E-07 | 0.027282 | 0.55646  | 0.080037 | 0.08403  | 0.086566 | 0.06159  | 0.087477 | 0.0589   |
| 0.00024  | 0.162695 | 0.00042  | 0.110404 | 0.017    | 0.064151 | 0.16635  | 0.182079 | 7.58E-05 |
| 0.51969  | 0.018555 | 0.68921  | -0.05182 | 0.26374  | -0.09203 | 0.04685  | -0.07936 | 0.08671  |
| 0.59513  | 0.026664 | 0.56545  | 0.016589 | 0.72067  | -0.01774 | 0.7022   | 0.013144 | 0.77696  |
| 4.46E-06 | 0.080365 | 0.08277  | 0.156497 | 0.00069  | -0.00071 | 0.98775  | 0.068137 | 0.1415   |
| 0.68355  | 0.066055 | 0.1541   | 0.006335 | 0.89139  | 0.025566 | 0.58156  | 0.074166 | 0.10946  |
| 0.00765  | 0.080911 | 0.08069  | -0.00947 | 0.83821  | -0.04207 | 0.36435  | -0.01732 | 0.70891  |
| 0.65767  | 0.078302 | 0.09099  | 0.091027 | 0.04931  | 0.143029 | 0.00194  | 0.144071 | 0.0018   |
| 0.03425  | 0.058455 | 0.20734  | 0.10593  | 0.02205  | 0.120506 | 0.00914  | 0.067711 | 0.14402  |
| 0.05973  | 0.060851 | 0.18929  | 0.040034 | 0.38805  | 0.008807 | 0.84945  | 0.121398 | 0.00864  |
| 0.80695  | 0.038071 | 0.41176  | -0.16808 | 0.00026  | -0.08518 | 0.0659   | -0.0686  | 0.1388   |
| 1.04E-10 | 0.081823 | 0.07732  | 0.302663 | 2.38E-11 | 0.18292  | 7.01E-05 | 0.253338 | 2.84E-08 |
| 0.0008   | 0.172119 | 0.00019  | 0.2941   | 9.03E-11 | 0.119934 | 0.00948  | 0.2057   | 7.42E-06 |
| 0.07642  | -0.05754 | 0.21455  | 0.163024 | 0.0004   | 0.084265 | 0.06886  | -0.03071 | 0.50793  |
| 0.77085  | 0.146685 | 0.00148  | 0.307878 | 1.04E-11 | 0.263813 | 7.10E-09 | 0.291085 | 1.43E-10 |
| 0.17228  | 0.307877 | 1.04E-11 | 0.33705  | 7.19E-14 | 0.301618 | 2.81E-11 | 0.340061 | 4.18E-14 |
| 0.91283  | 0.210184 | 4.62E-06 | -0.01243 | 0.78874  | 0.109805 | 0.01761  | 0.202355 | 1.05E-05 |
| 0.02706  | 0.104233 | 0.02428  | 0.167897 | 0.00027  | 0.125435 | 0.00664  | 0.246845 | 6.52E-08 |
| 0.05283  | -0.01268 | 0.78458  | -0.19151 | 3.10E-05 | -0.2133  | 3.31E-06 | -0.13378 | 0.00378  |
| 0.00258  | 0.049966 | 0.28124  | 0.047435 | 0.30635  | -0.04036 | 0.38418  | 0.04779  | 0.30274  |
| 0.51045  | 0.085649 | 0.06441  | 0.023323 | 0.61515  | 0.065524 | 0.15745  | 0.113905 | 0.01378  |
| 0.43388  | 0.033946 | 0.46428  | 0.019598 | 0.67271  | 0.036745 | 0.42824  | 0.036546 | 0.43075  |
| 0.00022  | -0.13586 | 0.00326  | 0.061261 | 0.18632  | -0.16677 | 0.0003   | -0.22256 | 1.19E-06 |
| 4.14E-05 | 0.013056 | 0.7784   | 0.01204  | 0.79526  | 0.042934 | 0.35457  | 0.089364 | 0.05362  |
| 0.80973  | 0.008453 | 0.85544  | -0.09262 | 0.04544  | -0.10987 | 0.01755  | -0.13987 | 0.00245  |
| 0.03063  | -0.13562 | 0.00332  | -0.31805 | 1.95E-12 | -0.24865 | 5.19E-08 | -0.33184 | 1.82E-13 |
| 0.11136  | -0.14907 | 0.00123  | -0.34816 | 9.39E-15 | -0.26252 | 8.45E-09 | -0.35284 | 3.88E-15 |
| 0.00013  | 0.143554 | 0.00187  | 0.098246 | 0.03379  | 0.137243 | 0.00296  | 0.234079 | 3.12E-07 |
| 0.01694  | 0.047045 | 0.31034  | -0.03038 | 0.51253  | 0.034448 | 0.45769  | -0.00029 | 0.99494  |
| 0.04607  | -0.06986 | 0.1317   | 0.071478 | 0.12295  | 0.014095 | 0.76128  | -0.07394 | 0.11056  |
| 0.0965   | -0.08625 | 0.06254  | 0.100375 | 0.0301   | 0.062807 | 0.17543  | 0.08683  | 0.0608   |
| 2.10E-05 | 0.085063 | 0.06626  | -0.07057 | 0.12781  | -0.11494 | 0.01293  | 0.039071 | 0.39958  |
| 0.00923  | 0.093074 | 0.0444   | -0.1498  | 0.00117  | -0.06107 | 0.18767  | 0.027279 | 0.55651  |
| 0.25906  | 0.106227 | 0.02168  | -0.1524  | 0.00095  | -0.09542 | 0.03928  | 0.050806 | 0.27321  |
| 0.00877  | -0.01892 | 0.68341  | 0.165046 | 0.00034  | 0.186245 | 5.13E-05 | 0.25456  | 2.43E-08 |
| 0.24999  | -0.09324 | 0.04402  | 0.086028 | 0.06323  | 0.081122 | 0.0799   | 0.034355 | 0.45891  |
| 0.59679  | -0.05425 | 0.24198  | -0.07315 | 0.11441  | -0.07746 | 0.09452  | -0.17435 | 0.00015  |
| 0.00644  | -0.01103 | 0.81216  | -0.14243 | 0.00203  | -0.1051  | 0.02312  | -0.06065 | 0.19074  |
| 0.85489  | -0.02817 | 0.54371  | 0.107207 | 0.02049  | -0.03716 | 0.42303  | -0.05107 | 0.27077  |
| 0.00163  | 0.060712 | 0.1903   | -0.04383 | 0.34461  | -0.1187  | 0.01025  | -0.00238 | 0.95909  |



|          |          |          |          |          |          |          |          |          |
|----------|----------|----------|----------|----------|----------|----------|----------|----------|
| 0.6873   | -0.00339 | 0.94176  | 0.104969 | 0.02329  | 0.010657 | 0.81833  | -0.01456 | 0.75358  |
| 0.94299  | -0.05438 | 0.24087  | 0.012384 | 0.78954  | -0.07735 | 0.095    | -0.13204 | 0.00426  |
| 1.21E-09 | 0.005619 | 0.90361  | -0.01091 | 0.81407  | -0.02859 | 0.53763  | 0.026233 | 0.57175  |
| 2.03E-05 | 0.012458 | 0.7883   | -0.01266 | 0.7849   | -0.01409 | 0.76134  | 0.043221 | 0.35136  |
| 0.84081  | -0.04883 | 0.29237  | -0.20736 | 6.23E-06 | -0.22902 | 5.66E-07 | -0.16364 | 0.00038  |
| 0.00888  | 0.11436  | 0.0134   | -0.02881 | 0.5345   | -0.03301 | 0.47672  | 0.007467 | 0.87215  |
| 0.14602  | 0.020981 | 0.65109  | 0.027608 | 0.55176  | -0.09786 | 0.0345   | -0.06489 | 0.16149  |
| 0.33574  | 0.08131  | 0.0792   | -0.09519 | 0.03977  | -0.07666 | 0.09799  | -0.04263 | 0.35803  |
| 0.21616  | 0.008334 | 0.85746  | 0.026691 | 0.56505  | -0.00466 | 0.92002  | -0.00135 | 0.97674  |
| 0.05876  | 0.055203 | 0.23379  | 0.049911 | 0.28177  | 0.043763 | 0.34535  | 0.068579 | 0.13893  |
| 0.71651  | 0.015289 | 0.74176  | 0.080766 | 0.08124  | 0.041077 | 0.3758   | 0.064026 | 0.16718  |
| 0.02822  | -0.03375 | 0.46693  | -0.0159  | 0.73189  | -0.00345 | 0.94074  | -0.01629 | 0.7255   |
| 7.74E-05 | -0.18232 | 7.41E-05 | 0.014288 | 0.75812  | -0.04351 | 0.34819  | -0.20201 | 1.09E-05 |
| 0.1602   | -0.06112 | 0.18733  | -0.02673 | 0.56442  | 0.021772 | 0.63887  | 0.000525 | 0.99097  |
| 0.99633  | -0.06379 | 0.16876  | -0.1198  | 0.00956  | -0.17936 | 9.73E-05 | -0.15934 | 0.00055  |
| 0.12443  | -0.02405 | 0.60424  | -0.02577 | 0.57849  | -0.05689 | 0.21974  | -0.06468 | 0.16288  |
| 2.08E-06 | 0.009819 | 0.83239  | -0.03731 | 0.42114  | 0.048849 | 0.29214  | -0.01595 | 0.73101  |
| 0.02749  | 0.035576 | 0.44309  | -0.06864 | 0.13858  | -0.07419 | 0.10935  | -0.10222 | 0.02719  |
| 0.55293  | -0.06204 | 0.18076  | -0.07651 | 0.09865  | -0.1221  | 0.00825  | -0.20489 | 8.07E-06 |
| 0.67538  | -0.06472 | 0.16259  | -0.1382  | 0.00276  | -0.16457 | 0.00036  | -0.22862 | 5.93E-07 |
| 2.60E-16 | -0.09428 | 0.0417   | -0.02357 | 0.61148  | -0.1537  | 0.00086  | -0.2178  | 2.02E-06 |
| 0.77098  | -0.07372 | 0.11161  | -0.08491 | 0.06677  | -0.06769 | 0.14415  | -0.15145 | 0.00103  |
| 0.00031  | -0.00371 | 0.93635  | 0.136632 | 0.00309  | 0.080937 | 0.0806   | 0.098472 | 0.03338  |
| 0.05599  | 0.011036 | 0.81199  | 0.149025 | 0.00124  | -0.00671 | 0.88497  | 0.019312 | 0.67722  |
| 0.00044  | 0.123833 | 0.00738  | 0.048537 | 0.29524  | -0.00226 | 0.96109  | 0.108678 | 0.01881  |
| 0.81931  | -0.02843 | 0.53996  | -0.08494 | 0.06665  | -0.23307 | 3.51E-07 | -0.15017 | 0.00113  |
| 0.47592  | 0.022343 | 0.63009  | -0.23981 | 1.56E-07 | -0.00215 | 0.96312  | 0.005734 | 0.90164  |
| 0.1651   | 0.104012 | 0.02459  | -0.08597 | 0.06342  | -0.0595  | 0.19934  | 0.003947 | 0.93221  |
| 0.46778  | -0.02492 | 0.59123  | 0.052387 | 0.25854  | 0.049788 | 0.28295  | 0.011498 | 0.80428  |
| 7.30E-05 | -0.03706 | 0.42431  | -0.02375 | 0.60874  | 0.057447 | 0.2153   | -0.0682  | 0.14111  |
| 0.02074  | -0.27586 | 1.33E-09 | -0.0356  | 0.44277  | -0.17109 | 0.0002   | -0.28703 | 2.62E-10 |
| 0.01152  | -0.29998 | 3.64E-11 | -0.07122 | 0.12434  | -0.18728 | 4.65E-05 | -0.29537 | 7.43E-11 |
| 2.56E-07 | -0.02447 | 0.5979   | -0.06659 | 0.15079  | -0.00042 | 0.99269  | -0.0055  | 0.90572  |
| 0.77404  | 0.017831 | 0.70073  | -0.04298 | 0.35409  | -0.08536 | 0.06532  | -0.02021 | 0.66315  |
| 0.00521  | 0.008957 | 0.84692  | -0.12277 | 0.00791  | -0.05334 | 0.24999  | -0.10514 | 0.02307  |
| 2.65E-08 | 0.146585 | 0.00149  | 0.040092 | 0.38736  | 0.128853 | 0.00529  | 0.303582 | 2.06E-11 |
| 0.03769  | 0.081364 | 0.079    | 0.403075 | 1.14E-19 | 0.190976 | 3.26E-05 | 0.125081 | 0.0068   |
| 0.00012  | 0.087478 | 0.05889  | 0.174678 | 0.00015  | 0.082161 | 0.0761   | 0.165818 | 0.00032  |
| 0.21527  | 0.046477 | 0.31624  | 0.018353 | 0.69241  | -0.04209 | 0.36409  | -0.01759 | 0.70456  |
| 0.00012  | 0.175577 | 0.00014  | 0.054807 | 0.23716  | 0.1758   | 0.00013  | 0.261647 | 9.50E-09 |
| 0.75363  | -0.04533 | 0.32832  | -0.20626 | 7.00E-06 | -0.15656 | 0.00069  | -0.19848 | 1.56E-05 |
| 0.90343  | 0.170129 | 0.00022  | 0.072911 | 0.11561  | 0.098328 | 0.03364  | 0.296504 | 6.24E-11 |
| 1.07E-06 | 0.108828 | 0.01865  | 0.188432 | 4.17E-05 | 0.145874 | 0.00157  | 0.184444 | 6.08E-05 |
| 0.20049  | 0.004203 | 0.92783  | 0.064311 | 0.1653   | -0.11216 | 0.01531  | -0.0472  | 0.30879  |
| 1.83E-09 | 0.07448  | 0.10795  | 0.116944 | 0.01144  | -0.02627 | 0.57119  | 0.088634 | 0.05562  |

|          |          |          |          |          |          |          |          |          |
|----------|----------|----------|----------|----------|----------|----------|----------|----------|
| 2.70E-06 | 0.017918 | 0.69934  | 0.080466 | 0.08238  | 0.1033   | 0.02559  | 0.176659 | 0.00012  |
| 0.67069  | -0.02834 | 0.54132  | 6.89E-05 | 0.99882  | -0.16527 | 0.00034  | -0.1794  | 9.69E-05 |
| 0.06176  | -0.01584 | 0.73278  | 0.103797 | 0.02489  | 0.058557 | 0.20654  | 0.024103 | 0.60338  |
| 0.01227  | 0.059927 | 0.19611  | 0.331547 | 1.91E-13 | 0.030863 | 0.50584  | 0.089186 | 0.05411  |
| 0.00958  | 0.050617 | 0.275    | 0.006166 | 0.89428  | -0.08525 | 0.06566  | 0.038006 | 0.41256  |
| 0.86645  | -0.001   | 0.98275  | 0.094508 | 0.04121  | 0.045295 | 0.32872  | 0.051247 | 0.26906  |
| 0.17976  | -0.1144  | 0.01337  | 0.126022 | 0.00639  | -0.02923 | 0.52868  | -0.14225 | 0.00206  |
| 0.00952  | -0.00072 | 0.98756  | 0.06912  | 0.13583  | -0.15463 | 0.0008   | -0.11132 | 0.01609  |
| 2.86E-11 | 0.179542 | 9.57E-05 | 0.087013 | 0.06026  | 0.031585 | 0.49593  | 0.113297 | 0.0143   |
| 3.48E-05 | 0.062486 | 0.17765  | 0.130268 | 0.00481  | 0.074336 | 0.10864  | 0.159779 | 0.00053  |
| 0.48895  | -0.04211 | 0.36388  | -0.13883 | 0.00264  | -0.14355 | 0.00187  | -0.0436  | 0.34715  |
| 0.00191  | 0.018414 | 0.69145  | -0.00013 | 0.99771  | -0.09558 | 0.03895  | -0.02076 | 0.65456  |
| 0.46671  | -0.05703 | 0.21862  | -0.01154 | 0.80352  | -0.17815 | 0.00011  | -0.15007 | 0.00114  |
| 0.00258  | 0.051846 | 0.26351  | 0.106739 | 0.02105  | 0.147783 | 0.00136  | 0.191248 | 3.18E-05 |
| 0.39932  | 0.014416 | 0.75601  | 0.038295 | 0.409    | -0.03353 | 0.46979  | -0.02956 | 0.52402  |
| 2.96E-15 | 0.198351 | 1.58E-05 | 0.047032 | 0.31048  | 0.030954 | 0.50458  | 0.112221 | 0.01525  |
| 1.13E-07 | 0.180003 | 9.17E-05 | 0.119708 | 0.00962  | 0.139389 | 0.00254  | 0.222276 | 1.23E-06 |
| 5.47E-05 | 0.008638 | 0.8523   | 0.415229 | 6.87E-21 | 0.10183  | 0.02778  | 0.116878 | 0.01148  |
| 0.24428  | 0.183167 | 6.85E-05 | 0.269367 | 3.32E-09 | 0.183855 | 6.43E-05 | 0.353454 | 3.45E-15 |
| 0.00558  | -0.01115 | 0.81007  | -0.08567 | 0.06436  | -0.11065 | 0.01675  | -0.02276 | 0.62369  |
| 0.59266  | -0.13901 | 0.00261  | -0.12442 | 0.0071   | -0.21258 | 3.57E-06 | -0.20394 | 8.91E-06 |
| 0.40911  | 0.060957 | 0.18851  | 0.068428 | 0.13981  | -0.07654 | 0.09851  | 0.07437  | 0.10848  |
| 0.00024  | -0.00135 | 0.97679  | 0.058627 | 0.206    | -0.01137 | 0.80644  | -0.01245 | 0.78837  |
| 0.55763  | 0.259763 | 1.22E-08 | 0.125656 | 0.00655  | 0.127964 | 0.00562  | 0.131374 | 0.00446  |
| 0.67605  | 0.026414 | 0.56909  | 0.023937 | 0.60587  | 0.052797 | 0.25483  | 0.078231 | 0.09129  |
| 0.72369  | -0.0148  | 0.74966  | -0.0604  | 0.19256  | -0.04283 | 0.35569  | -0.00815 | 0.8605   |
| 0.78107  | -0.01019 | 0.82624  | 0.275651 | 1.37E-09 | 0.032297 | 0.48626  | 0.044614 | 0.33604  |
| 2.17E-05 | -0.08414 | 0.06929  | -0.26613 | 5.18E-09 | -0.24881 | 5.08E-08 | -0.24518 | 8.03E-08 |
| 0.72041  | -0.14118 | 0.00223  | -0.2549  | 2.32E-08 | -0.25202 | 3.37E-08 | -0.30962 | 7.82E-12 |
| 0.32705  | 0.027115 | 0.55888  | -0.02189 | 0.63706  | 0.059129 | 0.20214  | 0.058764 | 0.20494  |
| 0.01314  | -0.01656 | 0.72115  | -0.01674 | 0.7182   | 0.078198 | 0.09142  | 0.002122 | 0.96352  |
| 0.19052  | 0.004312 | 0.92596  | -0.11219 | 0.01528  | -0.15318 | 0.0009   | -0.08005 | 0.08398  |
| 0.78864  | 0.055601 | 0.23043  | -0.07702 | 0.09642  | -0.04705 | 0.31026  | 0.045372 | 0.32789  |
| 0.03312  | -0.00616 | 0.89431  | -0.05763 | 0.21387  | -0.11122 | 0.0162   | -0.09496 | 0.04025  |
| 0.03435  | 0.000261 | 0.99552  | -0.11693 | 0.01144  | -0.07492 | 0.1059   | -0.06827 | 0.14072  |
| 0.04128  | -0.00375 | 0.93553  | -0.09044 | 0.05081  | -0.05785 | 0.21207  | -0.04737 | 0.30699  |
| 0.07311  | -0.15754 | 0.00063  | -0.17646 | 0.00013  | -0.12676 | 0.00609  | -0.22228 | 1.23E-06 |
| 0.1816   | 0.124997 | 0.00684  | 0.03744  | 0.41955  | 0.031256 | 0.50043  | 0.143169 | 0.00192  |
| 0.0304   | 0.090739 | 0.05003  | -0.00942 | 0.83913  | -0.03703 | 0.42464  | 0.036181 | 0.43536  |
| 0.67253  | -0.02278 | 0.62338  | 0.042305 | 0.36167  | -0.07058 | 0.12772  | -0.10334 | 0.02553  |
| 0.83199  | -0.0113  | 0.80764  | 0.086354 | 0.06224  | 0.016592 | 0.72063  | -0.06708 | 0.14782  |
| 0.43644  | -0.0152  | 0.74325  | 0.053192 | 0.25129  | -0.04825 | 0.29809  | -0.00934 | 0.8405   |
| 0.01907  | 0.018301 | 0.69325  | -0.05711 | 0.21803  | -0.01209 | 0.79444  | 0.048129 | 0.29932  |
| 1.06E-11 | 0.012043 | 0.7952   | -0.04332 | 0.35029  | -0.04282 | 0.35582  | -0.03748 | 0.41899  |
| 0.012    | 0.021261 | 0.64675  | 0.013337 | 0.77376  | 0.150521 | 0.0011   | 0.131206 | 0.00451  |

|          |          |         |          |          |          |          |          |          |
|----------|----------|---------|----------|----------|----------|----------|----------|----------|
| 0.37103  | -0.01585 | 0.7327  | 0.066626 | 0.15056  | -0.09908 | 0.03231  | -0.09818 | 0.03391  |
| 0.77512  | -0.0124  | 0.7892  | -0.03755 | 0.41815  | 0.011134 | 0.81035  | -0.04196 | 0.36555  |
| 0.35921  | 0.004925 | 0.91546 | 0.032957 | 0.4774   | -0.05215 | 0.26072  | -0.0867  | 0.06118  |
| 0.00051  | 0.03881  | 0.40272 | -0.00374 | 0.93574  | -0.03997 | 0.38878  | 0.000132 | 0.99773  |
| 0.1379   | -0.10624 | 0.02167 | -0.19852 | 1.55E-05 | -0.10206 | 0.02743  | -0.2119  | 3.85E-06 |
| 2.91E-05 | 0.074812 | 0.10639 | 0.014104 | 0.76113  | 0.079157 | 0.08751  | 0.148137 | 0.00133  |
| 0.08733  | -0.01102 | 0.81231 | 0.084789 | 0.06715  | 0.068379 | 0.14009  | 0.006227 | 0.89323  |
| 0.00251  | 0.138981 | 0.00261 | 0.098243 | 0.0338   | 0.057049 | 0.21849  | 0.15506  | 0.00077  |
| 1.06E-07 | 0.031145 | 0.50196 | -0.08134 | 0.0791   | -0.0764  | 0.09913  | -0.05021 | 0.27886  |
| 0.44221  | 0.052667 | 0.256   | 0.079938 | 0.08442  | 0.19825  | 1.59E-05 | 0.183799 | 6.46E-05 |
| 0.50253  | -0.16799 | 0.00027 | -0.18245 | 7.32E-05 | -0.1863  | 5.11E-05 | -0.30258 | 2.41E-11 |
| 0.68747  | 0.125532 | 0.0066  | 0.158049 | 0.00061  | 0.179514 | 9.59E-05 | 0.272003 | 2.30E-09 |
| 0.77208  | 0.080328 | 0.08291 | 0.190617 | 3.38E-05 | 0.257182 | 1.72E-08 | 0.313938 | 3.86E-12 |
| 0.02533  | -0.02218 | 0.63257 | 0.022465 | 0.62822  | -0.01885 | 0.68449  | 0.008899 | 0.8479   |
| 0.5673   | -0.00431 | 0.92595 | -0.13122 | 0.0045   | -0.21919 | 1.73E-06 | -0.16066 | 0.00049  |
| 0.02922  | -0.11348 | 0.01414 | 0.056357 | 0.22414  | -0.04955 | 0.28528  | 0.018648 | 0.68773  |
| 0.00077  | 0.132696 | 0.00407 | 0.124139 | 0.00723  | 0.158322 | 0.00059  | 0.140604 | 0.00232  |
| 1.15E-08 | -0.01121 | 0.80909 | 0.202427 | 1.04E-05 | 0.14491  | 0.00169  | 0.024501 | 0.5974   |
| 0.04676  | 0.128481 | 0.00543 | 0.006586 | 0.88713  | 0.13153  | 0.00441  | 0.284534 | 3.79E-10 |
| 0.03297  | -0.0195  | 0.67424 | 0.071062 | 0.12515  | -0.1009  | 0.02924  | -0.05285 | 0.25434  |
| 1.75E-07 | -0.0647  | 0.16272 | -0.02394 | 0.60583  | -0.00789 | 0.86499  | -0.01917 | 0.67939  |
| 0.61317  | 0.003416 | 0.94131 | 0.12511  | 0.00679  | 0.035105 | 0.44915  | 0.011779 | 0.79959  |
| 0.84186  | 0.1031   | 0.02588 | 0.137442 | 0.00292  | 0.230155 | 4.96E-07 | 0.364027 | 4.43E-16 |
| 0.16911  | 0.04143  | 0.3717  | -0.13273 | 0.00406  | -0.11971 | 0.00962  | -0.03506 | 0.44974  |
| 0.02981  | 0.035228 | 0.44757 | -0.03025 | 0.51433  | -0.01389 | 0.76465  | 0.020192 | 0.66339  |
| 0.58851  | 0.015956 | 0.73091 | 0.027317 | 0.55596  | 0.032621 | 0.48191  | 0.042014 | 0.36499  |
| 0.45282  | 0.019172 | 0.67944 | -0.06545 | 0.15794  | 0.054543 | 0.23943  | 0.017559 | 0.70509  |
| 0.21029  | 0.108265 | 0.01927 | -0.03233 | 0.48578  | -0.00654 | 0.88795  | 0.196357 | 1.92E-05 |
| 0.15078  | 0.029479 | 0.52511 | -0.02988 | 0.51945  | -0.04805 | 0.30017  | 0.035576 | 0.44309  |
| 2.14E-10 | -0.01893 | 0.68329 | -0.12966 | 0.00501  | -0.10332 | 0.02557  | -0.13086 | 0.00462  |
| 0.35305  | 0.118031 | 0.01069 | 0.210432 | 4.50E-06 | 0.246009 | 7.24E-08 | 0.329008 | 2.99E-13 |
| 0.70841  | 0.047596 | 0.30471 | 0.043372 | 0.34968  | 0.020171 | 0.66373  | 0.008671 | 0.85175  |
| 0.73148  | -0.05162 | 0.2656  | -0.0847  | 0.06742  | -0.02535 | 0.5847   | -0.10744 | 0.02021  |
| 0.52276  | 0.008958 | 0.84691 | -0.08371 | 0.0707   | -0.0791  | 0.08772  | -0.04257 | 0.35869  |
| 0.67517  | -0.00172 | 0.97048 | -0.09107 | 0.04919  | -0.07605 | 0.10069  | -0.06038 | 0.19275  |
| 0.00214  | 0.068125 | 0.14157 | 0.356445 | 1.95E-15 | 0.28221  | 5.33E-10 | 0.311149 | 6.09E-12 |
| 0.02059  | -0.02948 | 0.52515 | -0.04287 | 0.35529  | 0.028338 | 0.54129  | 0.005286 | 0.9093   |
| 0.40205  | -0.05089 | 0.27238 | -0.01825 | 0.69402  | -0.03605 | 0.43706  | -0.08623 | 0.06263  |
| 0.93752  | 0.031967 | 0.49074 | -0.03868 | 0.40431  | -0.04381 | 0.34484  | -0.03418 | 0.46123  |
| 0.8206   | -0.0515  | 0.2667  | 0.139359 | 0.00254  | 0.072985 | 0.11524  | -0.02262 | 0.6258   |
| 0.50112  | -0.06514 | 0.15991 | 0.127953 | 0.00562  | 0.121224 | 0.00873  | 0.015466 | 0.73887  |
| 0.89838  | 0.006307 | 0.89187 | -0.05492 | 0.23624  | -0.0082  | 0.85974  | -0.05505 | 0.23509  |
| 0.97764  | 0.001738 | 0.97013 | -0.09189 | 0.04718  | -0.0143  | 0.75788  | -0.06456 | 0.16364  |
| 0.38273  | 0.021178 | 0.64804 | -0.01154 | 0.80366  | -0.00924 | 0.84211  | -0.00327 | 0.94379  |
| 0.84549  | -0.01627 | 0.72583 | 0.117366 | 0.01114  | 0.028135 | 0.54419  | -0.00607 | 0.89587  |

|          |          |          |          |          |          |          |          |          |
|----------|----------|----------|----------|----------|----------|----------|----------|----------|
| 0.06476  | 0.038495 | 0.40657  | 0.079682 | 0.08542  | 0.011751 | 0.80006  | 0.017097 | 0.71249  |
| 0.64932  | -0.0331  | 0.47553  | 0.109369 | 0.01807  | -0.00713 | 0.8779   | 0.018059 | 0.6971   |
| 0.47046  | 0.039103 | 0.39919  | -0.04256 | 0.35874  | -0.10074 | 0.02951  | 0.058926 | 0.20369  |
| 1.93E-13 | 0.03803  | 0.41226  | 0.009296 | 0.84121  | -0.08281 | 0.07381  | -0.01092 | 0.81397  |
| 0.07324  | -0.10467 | 0.02369  | -0.05941 | 0.2      | -0.11042 | 0.01698  | -0.18858 | 4.11E-05 |
| 0.01119  | 0.026837 | 0.56293  | -0.04021 | 0.38591  | -0.06546 | 0.15783  | -0.05328 | 0.25053  |
| 0.03896  | 0.026859 | 0.56261  | 0.034128 | 0.46188  | 0.006541 | 0.88789  | 0.041201 | 0.37436  |
| 0.873    | 0.037749 | 0.41572  | -0.17122 | 0.0002   | -0.06923 | 0.13521  | -0.06697 | 0.14845  |
| 0.65787  | -0.01481 | 0.74953  | -0.13237 | 0.00416  | -0.08553 | 0.06478  | -0.10494 | 0.02333  |
| 0.26265  | 0.056417 | 0.22364  | -0.15424 | 0.00083  | -0.08778 | 0.05801  | -0.06124 | 0.1865   |
| 0.78455  | 0.00057  | 0.9902   | -0.08953 | 0.05317  | -0.04529 | 0.32873  | -0.05447 | 0.24008  |
| 0.76402  | 0.023381 | 0.61428  | -0.05603 | 0.22686  | -0.01451 | 0.75441  | -0.03886 | 0.4021   |
| 0.97578  | -0.01    | 0.82942  | -0.06328 | 0.1722   | -0.0595  | 0.19933  | -0.02154 | 0.64247  |
| 0.00235  | 0.11055  | 0.01685  | -0.09404 | 0.04222  | -0.06667 | 0.15027  | -0.00957 | 0.83655  |
| 0.75985  | -0.01654 | 0.7214   | 0.06857  | 0.13899  | 0.004614 | 0.92079  | -0.03373 | 0.46708  |
| 0.80889  | 0.081434 | 0.07874  | -0.07156 | 0.12252  | -0.04885 | 0.29209  | 0.00673  | 0.88467  |
| 0.99114  | 0.012669 | 0.7848   | -0.08909 | 0.05436  | -0.05855 | 0.20661  | -0.03493 | 0.45139  |
| 0.97596  | 0.03404  | 0.46304  | -0.02572 | 0.57932  | -0.02705 | 0.55976  | 0.044556 | 0.33667  |
| 0.86587  | -0.08772 | 0.05818  | -0.09919 | 0.0321   | -0.05578 | 0.22893  | -0.13074 | 0.00466  |
| 0.77806  | -0.07614 | 0.1003   | -0.12367 | 0.00746  | -0.05039 | 0.27719  | -0.16572 | 0.00032  |
| 0.71572  | -0.02657 | 0.56689  | -0.04757 | 0.30495  | -0.03663 | 0.42966  | -0.03461 | 0.45563  |
| 3.89E-09 | 0.255755 | 2.08E-08 | -0.10961 | 0.01781  | -0.03024 | 0.51441  | 0.022536 | 0.62714  |
| 0.13488  | -0.04702 | 0.31061  | -0.08134 | 0.0791   | -0.07715 | 0.09588  | -0.09879 | 0.03281  |
| 0.9026   | 0.032041 | 0.48973  | -0.03384 | 0.46568  | 0.000902 | 0.9845   | -0.00122 | 0.97901  |
| 0.74048  | -0.00179 | 0.9692   | -0.02039 | 0.66037  | 7.51E-05 | 0.99871  | -0.01471 | 0.75128  |
| 0.78184  | -0.0367  | 0.42882  | -0.27789 | 9.97E-10 | -0.24279 | 1.08E-07 | -0.19677 | 1.85E-05 |
| 0.7633   | -0.02407 | 0.60387  | -0.06365 | 0.16971  | -0.03508 | 0.44944  | -0.05004 | 0.28051  |
| 0.79884  | -0.01895 | 0.68293  | -0.04294 | 0.35452  | -0.04115 | 0.37494  | -0.03807 | 0.41182  |
| 0.12287  | 0.030029 | 0.51742  | 0.020617 | 0.65677  | -0.02412 | 0.60306  | 0.01904  | 0.68152  |
| 0.60719  | -0.01873 | 0.68647  | 0.052913 | 0.25379  | -0.03087 | 0.50578  | -0.00294 | 0.94952  |
| 0.00969  | -0.00623 | 0.8932   | -0.07956 | 0.0859   | -0.10199 | 0.02754  | -0.08286 | 0.07362  |
| 0.02014  | 0.106282 | 0.02161  | 0.125209 | 0.00674  | 0.207805 | 5.95E-06 | 0.212565 | 3.58E-06 |
| 0.54053  | -0.00344 | 0.94095  | 0.050371 | 0.27735  | -0.0187  | 0.68691  | -0.01521 | 0.743    |
| 0.80806  | -0.01069 | 0.81778  | 0.017426 | 0.70722  | -0.03501 | 0.45043  | -0.02166 | 0.64059  |
| 0.31361  | 0.019639 | 0.67207  | 0.102301 | 0.02706  | 0.132402 | 0.00415  | 0.093112 | 0.04431  |
| 0.04079  | 0.048081 | 0.29981  | -0.11373 | 0.01392  | -0.1327  | 0.00407  | -0.02618 | 0.57258  |
| 0.42547  | 0.059733 | 0.19756  | -0.11368 | 0.01397  | -0.09585 | 0.03839  | -0.09953 | 0.03152  |
| 6.45E-16 | 0.19293  | 2.70E-05 | 0.037811 | 0.41496  | 0.050781 | 0.27345  | 0.17521  | 0.00014  |
| 0.32759  | -0.01    | 0.82928  | -0.09372 | 0.04295  | -0.07498 | 0.10562  | -0.07495 | 0.10574  |
| 0.36384  | -0.02481 | 0.59281  | 0.068175 | 0.14128  | 0.053032 | 0.25272  | 0.017194 | 0.71093  |
| 0.02524  | 0.003013 | 0.94822  | 0.02821  | 0.54312  | 0.035681 | 0.44174  | 0.109365 | 0.01807  |
| 0.65685  | 0.009225 | 0.84241  | 0.128366 | 0.00547  | 0.117324 | 0.01117  | 0.096838 | 0.03644  |
| 0.01536  | -0.05068 | 0.27437  | -0.04767 | 0.30393  | -0.06572 | 0.15623  | -0.11108 | 0.01633  |
| 0.22643  | -0.05372 | 0.24662  | -0.0306  | 0.50944  | -0.12104 | 0.00884  | -0.09891 | 0.0326   |
| 0.34996  | -0.02556 | 0.58164  | -0.05025 | 0.27846  | -0.01085 | 0.81506  | -0.01842 | 0.69136  |

|          |          |          |           |          |          |          |          |          |
|----------|----------|----------|-----------|----------|----------|----------|----------|----------|
| 0.78944  | 0.065748 | 0.15603  | 0.044451  | 0.33782  | -0.03913 | 0.39881  | 0.050237 | 0.27863  |
| 0.99765  | -0.00525 | 0.90983  | -0.02441  | 0.59876  | -0.03263 | 0.48178  | 0.006181 | 0.89402  |
| 0.06321  | 0.111264 | 0.01615  | 0.126097  | 0.00636  | 0.166588 | 0.0003   | 0.175749 | 0.00013  |
| 0.4097   | -0.00526 | 0.90975  | -0.1291   | 0.00521  | -0.15655 | 0.00069  | -0.10123 | 0.02872  |
| 0.39415  | -0.01328 | 0.77475  | -0.10399  | 0.02461  | -0.09574 | 0.03863  | -0.09673 | 0.03664  |
| 0.27753  | 0.010468 | 0.8215   | -0.02347  | 0.61297  | -0.06549 | 0.15764  | 0.005536 | 0.90503  |
| 0.89271  | -0.01984 | 0.66895  | 0.018554  | 0.68922  | -0.00927 | 0.84168  | -0.02234 | 0.63015  |
| 0.58927  | -0.0311  | 0.50257  | -0.02027  | 0.66221  | -0.07086 | 0.12626  | -0.05659 | 0.22225  |
| 0.99488  | -0.01332 | 0.77402  | -4.16E-06 | 0.99993  | 0.018065 | 0.69701  | -0.0022  | 0.96221  |
| 0.03278  | 0.226249 | 7.80E-07 | 0.015084  | 0.7451   | -0.03939 | 0.39569  | 0.094183 | 0.04191  |
| 0.05223  | -0.03688 | 0.42648  | -0.07715  | 0.09586  | -0.08567 | 0.06433  | -0.00969 | 0.83458  |
| 0.38184  | -0.01183 | 0.79873  | -0.14296  | 0.00195  | -0.06226 | 0.17925  | -0.08222 | 0.07591  |
| 0.0422   | 0.073206 | 0.11413  | 0.051914  | 0.26287  | 0.153452 | 0.00088  | 0.146971 | 0.00145  |
| 0.19465  | -0.00199 | 0.96571  | 0.069957  | 0.13115  | -0.04382 | 0.34473  | 0.006802 | 0.88345  |
| 0.66649  | -0.02988 | 0.51956  | -0.05292  | 0.2537   | -0.05453 | 0.23956  | -0.06024 | 0.19378  |
| 0.5854   | -0.01227 | 0.79151  | 0.038944  | 0.4011   | -0.01182 | 0.79883  | -0.03749 | 0.41893  |
| 2.16E-07 | -0.0266  | 0.56636  | -0.1122   | 0.01528  | -0.11083 | 0.01658  | -0.08503 | 0.06637  |
| 0.00012  | -0.22284 | 1.15E-06 | -0.02141  | 0.6444   | -0.14476 | 0.00171  | -0.22541 | 8.58E-07 |
| 0.06864  | 0.091022 | 0.04932  | 0.098598  | 0.03315  | 0.124288 | 0.00716  | 0.147894 | 0.00135  |
| 0.90598  | 0.001922 | 0.96695  | -0.09811  | 0.03403  | -0.20517 | 7.84E-06 | -0.19624 | 1.95E-05 |
| 0.09975  | -0.08654 | 0.06168  | 0.291204  | 1.40E-10 | -0.03943 | 0.39529  | -0.05611 | 0.22621  |
| 0.5591   | 0.004785 | 0.91787  | 0.018197  | 0.6949   | -0.11612 | 0.01203  | -0.09419 | 0.0419   |
| 0.97572  | 0.037401 | 0.42004  | 0.067976  | 0.14245  | 0.029182 | 0.5293   | -0.02532 | 0.58525  |
| 0.36774  | 0.011829 | 0.79877  | -0.02332  | 0.61518  | -0.05034 | 0.27762  | -0.0373  | 0.4213   |
| 0.02569  | 0.065405 | 0.15821  | -0.04674  | 0.31348  | -0.0469  | 0.31184  | -0.03513 | 0.44882  |
| 4.72E-06 | -0.15442 | 0.00081  | -0.11717  | 0.01127  | -0.15132 | 0.00104  | -0.33329 | 1.41E-13 |
| 0.6178   | -0.07487 | 0.10613  | -0.01006  | 0.82835  | 0.034312 | 0.45947  | -0.10698 | 0.02076  |
| 0.00241  | -0.09235 | 0.04609  | 0.035567  | 0.44321  | 0.106881 | 0.02088  | -0.05513 | 0.23444  |
| 0.0894   | -0.21848 | 1.88E-06 | -0.23923  | 1.67E-07 | -0.27491 | 1.52E-09 | -0.41155 | 1.63E-20 |
| 0.10446  | -0.08851 | 0.05595  | -0.00759  | 0.87013  | -0.07922 | 0.08727  | -0.17347 | 0.00017  |
| 0.00032  | 0.057281 | 0.21663  | 0.11712   | 0.01131  | 0.150574 | 0.0011   | 0.229325 | 5.46E-07 |
| 0.03633  | 0.011688 | 0.80111  | -0.03209  | 0.48908  | 0.016402 | 0.72369  | -0.0119  | 0.79756  |
| 0.26323  | -0.03187 | 0.492    | -0.127    | 0.00599  | -0.09753 | 0.03511  | -0.10602 | 0.02194  |
| 0.0437   | 0.02537  | 0.58446  | 0.124316  | 0.00715  | -0.01244 | 0.78866  | 0.0625   | 0.17755  |
| 1.42E-05 | 0.134041 | 0.00371  | 0.070318  | 0.12917  | 0.07039  | 0.12878  | 0.176498 | 0.00013  |
| 0.05446  | 0.053249 | 0.25078  | -0.03072  | 0.50778  | 0.088771 | 0.05524  | 0.133317 | 0.0039   |
| 0.00198  | -0.17958 | 9.53E-05 | 0.221361  | 1.36E-06 | 0.218722 | 1.83E-06 | 0.029642 | 0.52283  |
| 0.00109  | -0.01229 | 0.79102  | 0.118813  | 0.01018  | 0.035297 | 0.44667  | 0.015849 | 0.73265  |
| 0.00011  | -0.10496 | 0.0233   | 0.099201  | 0.03209  | -0.03139 | 0.49854  | -0.15728 | 0.00065  |
| 0.04703  | -0.0271  | 0.55917  | 0.075294  | 0.10415  | 0.13667  | 0.00308  | -0.01814 | 0.69575  |
| 0.09714  | -0.20284 | 9.97E-06 | 0.149346  | 0.00121  | -0.05696 | 0.21924  | -0.12975 | 0.00498  |
| 0.07623  | -0.0084  | 0.85632  | -0.23053  | 4.74E-07 | -0.14798 | 0.00134  | -0.12913 | 0.00519  |
| 0.53705  | -0.00917 | 0.8434   | -0.05985  | 0.19671  | -0.05065 | 0.27469  | -0.03039 | 0.51237  |
| 0.47529  | -0.02042 | 0.6599   | -0.0258   | 0.57816  | -0.058   | 0.21092  | -0.0448  | 0.33408  |
| 0.6032   | 0.062704 | 0.17613  | -0.09598  | 0.03813  | -0.04681 | 0.31275  | -0.00446 | 0.9235   |

|          |          |          |          |          |          |          |          |          |
|----------|----------|----------|----------|----------|----------|----------|----------|----------|
| 0.9165   | -0.20842 | 5.58E-06 | -0.13178 | 0.00434  | -0.17837 | 0.00011  | -0.15664 | 0.00068  |
| 0.14463  | 0.211502 | 4.02E-06 | 0.074743 | 0.10671  | 0.070769 | 0.12672  | 0.200451 | 1.27E-05 |
| 0.68363  | 0.106096 | 0.02184  | -0.18608 | 5.21E-05 | -0.20881 | 5.35E-06 | -0.18531 | 5.61E-05 |
| 0.55441  | -0.12658 | 0.00616  | 0.074728 | 0.10678  | -0.06019 | 0.19413  | -0.11096 | 0.01645  |
| 0.03797  | 0.073633 | 0.11203  | -0.00755 | 0.8708   | -0.02391 | 0.60626  | -0.02113 | 0.64874  |
| 4.00E-14 | 0.111714 | 0.01572  | 0.317313 | 2.20E-12 | 0.31344  | 4.19E-12 | 0.262046 | 9.01E-09 |
| 0.37202  | 0.036945 | 0.42574  | 0.040947 | 0.37731  | 0.021122 | 0.64891  | 0.124991 | 0.00684  |
| 0.94891  | 0.321346 | 1.12E-12 | 0.06263  | 0.17665  | -0.00275 | 0.95276  | 0.075608 | 0.10271  |
| 0.82345  | 0.001764 | 0.96967  | -0.06839 | 0.14001  | -0.06016 | 0.19437  | -0.0805  | 0.08225  |
| 0.11431  | 0.072885 | 0.11574  | -0.14849 | 0.00129  | -0.09246 | 0.04583  | 0.002634 | 0.95473  |
| 0.92255  | 0.037948 | 0.41326  | -0.07661 | 0.09822  | 0.055834 | 0.22848  | 0.041361 | 0.3725   |
| 0.15016  | -0.04855 | 0.29515  | 0.271709 | 2.39E-09 | 0.115378 | 0.0126   | 0.079583 | 0.08581  |
| 0.57763  | -0.01886 | 0.6844   | 0.016116 | 0.72832  | -0.0824  | 0.07526  | -0.06065 | 0.19077  |
| 0.67614  | 0.209584 | 4.93E-06 | 0.295388 | 7.41E-11 | 0.194589 | 2.29E-05 | 0.291959 | 1.25E-10 |
| 0.23679  | 0.033641 | 0.4683   | -0.03589 | 0.43905  | -0.04813 | 0.29932  | 0.012218 | 0.79229  |
| 0.58741  | -0.07589 | 0.10142  | -0.06327 | 0.17226  | -0.11679 | 0.01154  | -0.22677 | 7.34E-07 |
| 0.00379  | 0.050637 | 0.27481  | 0.261731 | 9.40E-09 | 0.185997 | 5.25E-05 | 0.243697 | 9.67E-08 |
| 0.00033  | 0.189224 | 3.86E-05 | -0.00944 | 0.83875  | 0.096479 | 0.03714  | 0.158533 | 0.00058  |
| 0.48151  | -0.05111 | 0.27037  | -0.05082 | 0.27312  | -0.05894 | 0.20357  | -0.13385 | 0.00376  |
| 0.02443  | -0.0498  | 0.28282  | -0.14805 | 0.00133  | -0.07506 | 0.10525  | -0.15593 | 0.00072  |
| 0.11729  | -0.03197 | 0.49068  | -0.12528 | 0.00671  | -0.03452 | 0.45681  | -0.11224 | 0.01524  |
| 0.32667  | -0.12002 | 0.00943  | -0.18406 | 6.30E-05 | -0.17088 | 0.00021  | -0.3006  | 3.30E-11 |
| 0.0001   | 0.017182 | 0.71112  | -0.07416 | 0.10946  | -0.02681 | 0.56337  | -0.01559 | 0.73692  |
| 9.49E-05 | 0.065706 | 0.1563   | -0.11729 | 0.01119  | -0.0449  | 0.33299  | 0.077726 | 0.0934   |
| 0.36788  | -0.04398 | 0.34292  | -0.20664 | 6.72E-06 | -0.08007 | 0.0839   | -0.067   | 0.14826  |
| 0.27739  | 0.133764 | 0.00378  | -0.09241 | 0.04594  | -0.1023  | 0.02706  | -0.00706 | 0.8791   |
| 5.54E-05 | 0.031798 | 0.49303  | 0.115024 | 0.01287  | 0.163835 | 0.00038  | 0.171217 | 0.0002   |
| 4.74E-12 | 0.041204 | 0.37432  | 0.121597 | 0.00853  | 0.043564 | 0.34755  | 0.069214 | 0.1353   |
| 0.05211  | 0.004811 | 0.91742  | -0.01151 | 0.804    | -0.02152 | 0.64275  | -0.02866 | 0.53664  |
| 0.16649  | -0.14082 | 0.00229  | -0.20474 | 8.20E-06 | -0.21391 | 3.10E-06 | -0.27519 | 1.46E-09 |
| 0.35521  | 0.085555 | 0.0647   | 0.003548 | 0.93905  | 0.180225 | 8.99E-05 | 0.234651 | 2.91E-07 |
| 0.74409  | -0.05891 | 0.20381  | -0.14346 | 0.00188  | -0.11854 | 0.01035  | -0.14373 | 0.00185  |
| 0.00233  | 0.009691 | 0.83455  | -0.05629 | 0.22467  | -0.03949 | 0.39453  | -0.00334 | 0.94263  |
| 0.00052  | -0.00351 | 0.93969  | -0.01561 | 0.7366   | -0.06997 | 0.13107  | -0.03131 | 0.49969  |
| 0.00732  | 0.145199 | 0.00165  | 0.149059 | 0.00124  | 0.298119 | 4.86E-11 | 0.310281 | 7.02E-12 |
| 0.01328  | -0.14143 | 0.00219  | -0.19233 | 2.86E-05 | -0.24932 | 4.76E-08 | -0.32029 | 1.34E-12 |
| 0.25172  | -0.19891 | 1.49E-05 | -0.08886 | 0.055    | -0.18632 | 5.10E-05 | -0.2936  | 9.74E-11 |
| 0.67266  | 0.211529 | 4.00E-06 | 0.152116 | 0.00097  | -0.03727 | 0.42166  | 0.164564 | 0.00036  |
| 0.00257  | 0.09943  | 0.03169  | 0.111618 | 0.01581  | 0.05659  | 0.22223  | 0.187237 | 4.67E-05 |
| 0.00473  | 0.097405 | 0.03535  | 0.254443 | 2.46E-08 | 0.236956 | 2.21E-07 | 0.290748 | 1.50E-10 |
| 0.20431  | 0.080552 | 0.08205  | -0.04586 | 0.32275  | 0.057587 | 0.21418  | 0.190075 | 3.56E-05 |
| 0.00698  | -0.01899 | 0.68233  | 0.177254 | 0.00012  | -0.00214 | 0.96328  | -0.06833 | 0.14038  |
| 0.00325  | 0.116455 | 0.01179  | 0.053505 | 0.24851  | 0.10554  | 0.02255  | 0.080698 | 0.0815   |
| 0.49594  | -0.13081 | 0.00463  | -0.03496 | 0.45105  | -0.064   | 0.16732  | -0.18542 | 5.55E-05 |
| 0.1692   | -0.04631 | 0.31802  | -0.18    | 9.18E-05 | -0.13923 | 0.00257  | -0.08715 | 0.05986  |

|          |          |          |          |          |          |          |          |          |
|----------|----------|----------|----------|----------|----------|----------|----------|----------|
| 0.98637  | -0.01612 | 0.72824  | -0.0591  | 0.20235  | -0.01005 | 0.82848  | -0.01312 | 0.77733  |
| 0.99673  | -0.01355 | 0.7703   | -0.05724 | 0.21697  | -0.0076  | 0.86989  | -0.01287 | 0.78148  |
| 3.03E-05 | 0.141551 | 0.00217  | -0.25016 | 4.28E-08 | -0.05371 | 0.24667  | 0.027925 | 0.5472   |
| 0.47096  | 0.055884 | 0.22806  | 0.005308 | 0.90892  | -0.05569 | 0.22967  | 0.011059 | 0.81161  |
| 0.0002   | 0.053372 | 0.24969  | -0.03005 | 0.51711  | -0.00261 | 0.95511  | 0.049883 | 0.28204  |
| 0.04697  | 0.033974 | 0.46391  | -0.03892 | 0.40139  | -0.05235 | 0.2589   | 0.096935 | 0.03625  |
| 0.82021  | 0.073251 | 0.11391  | -0.14701 | 0.00144  | -0.16534 | 0.00033  | -0.0073  | 0.87507  |
| 0.06262  | 0.021933 | 0.63638  | -0.1278  | 0.00568  | -0.08496 | 0.06661  | -0.06242 | 0.1781   |
| 9.01E-05 | 0.080178 | 0.08349  | -0.02529 | 0.58565  | -0.03661 | 0.42991  | 0.027457 | 0.55394  |
| 0.95006  | -0.01764 | 0.70372  | -0.01705 | 0.7133   | 0.063981 | 0.16748  | -0.02011 | 0.66468  |
| 0.00169  | -0.2089  | 5.30E-06 | 0.254275 | 2.52E-08 | -0.05641 | 0.22371  | -0.15879 | 0.00057  |
| 0.00021  | 0.121686 | 0.00848  | 0.103369 | 0.02549  | 0.060754 | 0.18999  | 0.113441 | 0.01417  |
| 0.18002  | 0.045841 | 0.3229   | -0.13045 | 0.00475  | -0.04636 | 0.31748  | -0.04593 | 0.32193  |
| 0.0104   | 0.028631 | 0.53711  | 0.100306 | 0.03021  | 0.059941 | 0.196    | 0.061647 | 0.18355  |
| 7.98E-10 | -0.15326 | 0.00089  | -0.1836  | 6.58E-05 | -0.1618  | 0.00045  | -0.31712 | 2.27E-12 |
| 0.00035  | 0.197845 | 1.66E-05 | 0.079904 | 0.08455  | 0.169318 | 0.00024  | 0.334946 | 1.05E-13 |
| 0.00252  | -0.04319 | 0.35167  | 0.127814 | 0.00567  | -0.00916 | 0.84343  | -0.00203 | 0.96502  |
| 4.27E-09 | 0.049403 | 0.28669  | -0.10568 | 0.02237  | -0.0505  | 0.27609  | 0.098683 | 0.033    |
| 0.4329   | 0.056447 | 0.2234   | 0.251575 | 3.57E-08 | 0.258209 | 1.50E-08 | 0.327704 | 3.75E-13 |
| 5.01E-05 | -0.13701 | 0.00301  | -0.15586 | 0.00073  | -0.24816 | 5.52E-08 | -0.29943 | 3.96E-11 |
| 0.00091  | 0.009247 | 0.84202  | -0.00721 | 0.87656  | 0.055621 | 0.23026  | 0.014058 | 0.7619   |
| 0.11141  | 0.036452 | 0.43193  | -0.07602 | 0.10086  | -0.09297 | 0.04464  | -0.06922 | 0.13524  |
| 0.00027  | -0.02523 | 0.58662  | -0.22423 | 9.82E-07 | -0.17325 | 0.00017  | -0.15041 | 0.00111  |
| 3.84E-05 | -0.04875 | 0.29316  | 0.040334 | 0.3845   | -0.06978 | 0.13213  | -0.17213 | 0.00019  |
| 0.35588  | 0.017145 | 0.71172  | 0.189773 | 3.67E-05 | -0.04457 | 0.33649  | -0.04763 | 0.30433  |
| 0.47516  | -0.03206 | 0.48941  | -0.1908  | 3.32E-05 | -0.24627 | 7.01E-08 | -0.17602 | 0.00013  |
| 0.00039  | 0.027259 | 0.5568   | -0.25266 | 3.10E-08 | -0.16549 | 0.00033  | -0.1021  | 0.02737  |
| 0.00329  | -0.07039 | 0.12876  | 0.051905 | 0.26296  | 0.042838 | 0.35566  | -0.02564 | 0.5805   |
| 2.88E-05 | 0.13827  | 0.00275  | -0.00838 | 0.85669  | 0.002832 | 0.95133  | 0.206287 | 6.98E-06 |
| 8.71E-06 | 0.065634 | 0.15675  | 0.008185 | 0.85997  | 0.051457 | 0.26711  | 0.059273 | 0.20104  |
| 6.00E-08 | 0.096466 | 0.03717  | 0.240706 | 1.40E-07 | 0.238923 | 1.74E-07 | 0.281047 | 6.32E-10 |
| 6.15E-11 | -0.01662 | 0.72011  | -0.21632 | 2.38E-06 | -0.13324 | 0.00392  | -0.19634 | 1.93E-05 |
| 0.06601  | 0.088395 | 0.05628  | 0.111162 | 0.01625  | 0.147611 | 0.00138  | 0.125209 | 0.00674  |
| 0.67368  | -0.01463 | 0.75247  | 0.094216 | 0.04184  | 0.112228 | 0.01525  | 0.003664 | 0.93706  |
| 0.40708  | -0.00785 | 0.86561  | 0.086331 | 0.0623   | 0.121091 | 0.00881  | 0.022187 | 0.63248  |
| 0.01926  | -0.17937 | 9.72E-05 | -0.15005 | 0.00114  | -0.06127 | 0.18624  | -0.23724 | 2.13E-07 |
| 0.63482  | 0.00246  | 0.95771  | 0.084975 | 0.06655  | -0.01414 | 0.7606   | 0.000159 | 0.99726  |
| 0.70422  | -0.00445 | 0.92352  | 0.040085 | 0.38744  | -0.01404 | 0.76217  | 0.015194 | 0.74329  |
| 0.89378  | -0.02341 | 0.61377  | -0.0154  | 0.74     | -0.05029 | 0.27814  | -0.04236 | 0.36101  |
| 0.99322  | -0.00633 | 0.89151  | 0.039221 | 0.39776  | 0.06568  | 0.15646  | 0.078302 | 0.09099  |
| 0.95027  | -0.01684 | 0.71657  | -0.01031 | 0.82418  | -0.00425 | 0.92695  | -0.01924 | 0.6784   |
| 0.94165  | -0.00947 | 0.83828  | -0.02039 | 0.66023  | 0.01511  | 0.74468  | -0.0271  | 0.55916  |
| 0.98544  | -0.01481 | 0.74963  | 0.017725 | 0.70243  | -0.03047 | 0.51132  | -0.01772 | 0.70255  |
| 0.7218   | -0.01709 | 0.71255  | -0.06187 | 0.18196  | -0.0551  | 0.23469  | -0.05724 | 0.21696  |
| 0.1943   | -0.02407 | 0.60391  | -0.22756 | 6.70E-07 | -0.16814 | 0.00026  | -0.16685 | 0.00029  |

|          |          |          |          |          |          |          |          |          |
|----------|----------|----------|----------|----------|----------|----------|----------|----------|
| 0.00071  | 0.038098 | 0.41141  | -0.03467 | 0.4548   | -0.03964 | 0.39273  | -0.00769 | 0.86836  |
| 1.60E-05 | 0.012104 | 0.79418  | -0.0004  | 0.99306  | -0.01577 | 0.73389  | -0.00666 | 0.8859   |
| 0.02941  | -0.12014 | 0.00936  | 0.052277 | 0.25955  | -0.02533 | 0.58511  | -0.18773 | 4.46E-05 |
| 0.59068  | -0.02611 | 0.57352  | 0.066699 | 0.15012  | -0.03017 | 0.51543  | -0.07567 | 0.10245  |
| 0.00126  | -0.16919 | 0.00024  | -0.2336  | 3.30E-07 | -0.11335 | 0.01425  | -0.2473  | 6.16E-08 |
| 0.78335  | 0.113279 | 0.01431  | 0.073552 | 0.11243  | 0.024937 | 0.59089  | 0.131579 | 0.0044   |
| 0.34621  | 0.004075 | 0.93002  | 0.004221 | 0.92751  | -0.09335 | 0.04377  | -0.07097 | 0.12566  |
| 0.6669   | -0.10321 | 0.02573  | 0.00368  | 0.93679  | -0.09114 | 0.04902  | -0.19586 | 2.02E-05 |
| 0.05078  | -0.07327 | 0.11381  | -0.19815 | 1.61E-05 | -0.21216 | 3.74E-06 | -0.20273 | 1.01E-05 |
| 0.1156   | 0.021696 | 0.64003  | 0.128851 | 0.00529  | -0.03022 | 0.51477  | 0.040398 | 0.38374  |
| 0.61867  | -0.06252 | 0.17739  | 0.184434 | 6.09E-05 | 0.210688 | 4.38E-06 | 0.029192 | 0.52916  |
| 0.0037   | 0.176133 | 0.00013  | -0.06941 | 0.13419  | 0.12187  | 0.00838  | 0.227463 | 6.78E-07 |
| 8.24E-05 | 0.037369 | 0.42043  | 0.029019 | 0.5316   | -0.08043 | 0.08253  | -0.02351 | 0.61239  |
| 0.00277  | -0.12866 | 0.00536  | 0.053761 | 0.24625  | -0.04132 | 0.37292  | -0.17283 | 0.00017  |
| 0.79017  | -0.06248 | 0.17767  | -0.06482 | 0.16196  | -0.13743 | 0.00292  | -0.16879 | 0.00025  |
| 0.17208  | -0.00147 | 0.97478  | -0.28588 | 3.11E-10 | -0.27454 | 1.61E-09 | -0.24243 | 1.13E-07 |
| 0.02981  | -0.0378  | 0.41509  | -0.15074 | 0.00108  | -0.09333 | 0.04382  | -0.10072 | 0.02953  |
| 0.03578  | -0.10172 | 0.02794  | -0.22273 | 1.16E-06 | -0.20018 | 1.31E-05 | -0.21313 | 3.37E-06 |
| 0.34887  | 0.059545 | 0.19898  | -0.033   | 0.47678  | -0.0867  | 0.06118  | -0.09094 | 0.04952  |
| 1.41E-05 | -0.01224 | 0.79191  | 0.211593 | 3.98E-06 | 0.124515 | 0.00706  | 0.085225 | 0.06575  |
| 0.57423  | -0.02388 | 0.60674  | -0.03024 | 0.5144   | 0.12411  | 0.00725  | -0.00052 | 0.99111  |
| 0.00045  | -0.07552 | 0.1031   | 0.043155 | 0.35211  | -0.08794 | 0.05756  | -0.19038 | 3.46E-05 |
| 1.13E-05 | -0.03682 | 0.42725  | -0.05271 | 0.2556   | -0.1359  | 0.00325  | -0.0888  | 0.05515  |
| 0.84677  | 0.229786 | 5.17E-07 | 0.194039 | 2.42E-05 | 0.009736 | 0.83379  | 0.129268 | 0.00515  |
| 1.88E-12 | 0.254982 | 2.30E-08 | 0.145051 | 0.00167  | 0.129645 | 0.00502  | 0.343018 | 2.43E-14 |
| 0.62716  | 0.137275 | 0.00295  | 0.061424 | 0.18514  | 0.038963 | 0.40087  | 0.103686 | 0.02504  |
| 2.12E-13 | 0.055163 | 0.23412  | -0.03834 | 0.40849  | -0.06938 | 0.13438  | -0.00708 | 0.8788   |
| 0.0864   | 0.104526 | 0.02389  | 0.329407 | 2.79E-13 | 0.266164 | 5.15E-09 | 0.267319 | 4.40E-09 |
| 0.9459   | -0.01113 | 0.81046  | -0.12946 | 0.00508  | -0.12588 | 0.00645  | -0.06392 | 0.16787  |
| 0.01499  | -0.11474 | 0.01309  | -0.19589 | 2.01E-05 | -0.29262 | 1.13E-10 | -0.31043 | 6.85E-12 |
| 0.00194  | 0.027452 | 0.55401  | 0.095342 | 0.03944  | -0.05655 | 0.22259  | 0.063974 | 0.16753  |
| 0.02056  | 0.190679 | 3.36E-05 | 0.135745 | 0.00329  | 0.167067 | 0.00029  | 0.208022 | 5.81E-06 |
| 0.02186  | 0.045341 | 0.32823  | -0.15416 | 0.00083  | -0.14061 | 0.00232  | -0.03363 | 0.46848  |
| 0.03184  | 0.001987 | 0.96584  | 0.154443 | 0.00081  | 0.024111 | 0.60326  | 0.063005 | 0.17407  |
| 0.93453  | 0.431263 | 1.42E-22 | 0.014813 | 0.74953  | -0.02866 | 0.53672  | 0.142001 | 0.0021   |
| 0.66465  | 0.161651 | 0.00045  | -0.00777 | 0.867    | -0.00078 | 0.9866   | 0.089707 | 0.05271  |
| 0.86681  | 0.063883 | 0.16813  | -0.12636 | 0.00625  | -0.14399 | 0.00181  | -0.06857 | 0.13898  |
| 0.87318  | 0.046978 | 0.31104  | 0.094928 | 0.04031  | -0.05729 | 0.21652  | 0.010678 | 0.81799  |
| 0.89345  | 0.042935 | 0.35457  | 0.091595 | 0.0479   | -0.06147 | 0.18482  | 0.006789 | 0.88366  |
| 0.90664  | -0.01078 | 0.81627  | -0.11762 | 0.01097  | -0.23916 | 1.69E-07 | -0.12804 | 0.00559  |
| 0.00608  | -0.23142 | 4.27E-07 | 0.167563 | 0.00028  | -0.12137 | 0.00865  | -0.23595 | 2.49E-07 |
| 0.04809  | -0.22621 | 7.83E-07 | 0.103728 | 0.02499  | -0.18215 | 7.53E-05 | -0.25336 | 2.84E-08 |
| 0.93079  | -0.06665 | 0.15043  | -0.12212 | 0.00824  | -0.2439  | 9.43E-08 | -0.21088 | 4.29E-06 |
| 0.08703  | 0.053352 | 0.24986  | -0.03761 | 0.41749  | -0.00246 | 0.95772  | 0.030128 | 0.51603  |
| 1.41E-09 | 0.25948  | 1.27E-08 | 0.161303 | 0.00047  | 0.250746 | 3.97E-08 | 0.391429 | 1.50E-18 |



|          |          |          |          |          |          |          |          |          |
|----------|----------|----------|----------|----------|----------|----------|----------|----------|
| 0.33836  | -0.04154 | 0.37039  | -0.23007 | 5.00E-07 | -0.23599 | 2.48E-07 | -0.18945 | 3.78E-05 |
| 0.00191  | -0.01268 | 0.78458  | -0.13138 | 0.00446  | -0.21588 | 2.50E-06 | -0.1317  | 0.00436  |
| 0.99407  | 0.041145 | 0.375    | -0.11313 | 0.01444  | -0.11641 | 0.01182  | -0.0605  | 0.19184  |
| 0.61029  | -0.01658 | 0.72086  | -0.16199 | 0.00044  | -0.17602 | 0.00013  | -0.12068 | 0.00904  |
| 0.02519  | -0.03026 | 0.51419  | -0.11198 | 0.01547  | -0.08252 | 0.07481  | -0.06991 | 0.13139  |
| 0.18018  | -0.04807 | 0.29988  | -0.10658 | 0.02124  | -0.16976 | 0.00023  | -0.21403 | 3.06E-06 |
| 0.33348  | 0.012958 | 0.78002  | -0.0084  | 0.85636  | -0.05279 | 0.25487  | -0.03144 | 0.49793  |
| 0.32103  | 0.178687 | 0.0001   | -0.00155 | 0.97331  | -0.04647 | 0.31631  | 0.025141 | 0.58787  |
| 0.8964   | 0.208255 | 5.67E-06 | 0.046447 | 0.31654  | 0.07834  | 0.09084  | 0.246104 | 7.16E-08 |
| 0.00019  | -0.2267  | 7.41E-07 | -0.0251  | 0.58844  | -0.03834 | 0.40848  | -0.12442 | 0.0071   |
| 0.50744  | 0.142781 | 0.00198  | 0.182726 | 7.14E-05 | 0.127373 | 0.00584  | 0.262532 | 8.44E-09 |
| 6.87E-10 | 0.006946 | 0.881    | -0.05064 | 0.27479  | 0.057678 | 0.21345  | 0.043216 | 0.35142  |
| 0.02834  | 0.020577 | 0.65739  | 0.098743 | 0.0329   | -0.09389 | 0.04256  | -0.00711 | 0.87825  |
| 0.00387  | 0.001071 | 0.98158  | -0.1277  | 0.00572  | -0.21475 | 2.82E-06 | -0.18625 | 5.13E-05 |
| 0.00015  | -0.12509 | 0.0068   | -0.17448 | 0.00015  | -0.07769 | 0.09357  | -0.1772  | 0.00012  |
| 0.00377  | -0.04934 | 0.28727  | 0.026059 | 0.5743   | 0.045466 | 0.32689  | -0.03779 | 0.41516  |
| 0.38901  | 0.160498 | 0.0005   | 0.231344 | 4.31E-07 | 0.261856 | 9.24E-09 | 0.332769 | 1.54E-13 |
| 0.41581  | -0.15505 | 0.00077  | 0.077695 | 0.09354  | 0.013702 | 0.76774  | -0.11354 | 0.01409  |
| 0.90632  | 0.019137 | 0.67998  | -0.01883 | 0.6848   | -0.0051  | 0.91239  | 0.023105 | 0.61847  |
| 1.06E-06 | -0.00749 | 0.87174  | -0.18178 | 7.79E-05 | -0.10209 | 0.02739  | -0.11017 | 0.01724  |
| 2.53E-05 | -0.00799 | 0.86326  | -0.0615  | 0.1846   | -0.07158 | 0.12242  | -0.09114 | 0.04902  |
| 0.00922  | 0.070188 | 0.12988  | 0.056912 | 0.2196   | 0.011108 | 0.81079  | 0.101078 | 0.02896  |
| 0.00192  | 0.00775  | 0.86735  | -0.11843 | 0.01042  | -0.09792 | 0.03439  | -0.03343 | 0.47113  |
| 0.00489  | 0.052118 | 0.261    | 0.303102 | 2.22E-11 | 0.220402 | 1.51E-06 | 0.327664 | 3.78E-13 |
| 0.12194  | 0.003011 | 0.94826  | 0.190202 | 3.52E-05 | 0.108036 | 0.01953  | 0.105011 | 0.02324  |
| 0.33355  | -0.00704 | 0.87937  | 0.014964 | 0.74705  | 0.183405 | 6.70E-05 | 0.176586 | 0.00013  |
| 5.14E-08 | 0.07485  | 0.10621  | -0.04465 | 0.33565  | -0.03627 | 0.43421  | 0.094839 | 0.0405   |
| 0.1867   | 0.042096 | 0.36406  | 0.37967  | 1.84E-17 | 0.331089 | 2.08E-13 | 0.282382 | 5.20E-10 |
| 0.01367  | 0.008461 | 0.85531  | 0.134845 | 0.00351  | 0.063545 | 0.1704   | 0.051617 | 0.26562  |
| 0.05684  | 0.066163 | 0.15343  | 0.046683 | 0.3141   | 0.099795 | 0.03107  | 0.265684 | 5.50E-09 |
| 0.29989  | -0.10699 | 0.02075  | -0.19591 | 2.01E-05 | -0.14902 | 0.00124  | -0.11858 | 0.01033  |
| 6.54E-07 | 0.072758 | 0.11637  | 0.010822 | 0.81557  | 0.031951 | 0.49095  | 0.025478 | 0.58287  |
| 0.80368  | 0.035655 | 0.44208  | -0.0706  | 0.12764  | 0.000997 | 0.98286  | -0.01967 | 0.67162  |
| 0.04864  | -0.0316  | 0.49573  | 0.141211 | 0.00222  | 0.104242 | 0.02427  | 0.077734 | 0.09337  |
| 0.81702  | -0.01041 | 0.82253  | -0.08817 | 0.05692  | -0.06758 | 0.14482  | -0.11184 | 0.0156   |
| 0.02614  | 0.053898 | 0.24504  | -0.04806 | 0.30003  | -0.00809 | 0.8615   | -0.01563 | 0.73627  |
| 0.00606  | 0.046528 | 0.3157   | -0.00823 | 0.85928  | 0.014644 | 0.75229  | -0.011   | 0.81252  |
| 0.09918  | 0.035203 | 0.44788  | -0.10186 | 0.02773  | -0.01672 | 0.71851  | -0.01013 | 0.82721  |
| 0.02477  | 0.030747 | 0.50745  | -0.05047 | 0.27636  | -0.00976 | 0.83339  | 0.014225 | 0.75915  |
| 1.83E-05 | 0.158549 | 0.00058  | -0.04382 | 0.34472  | 0.068478 | 0.13952  | 0.099817 | 0.03103  |
| 0.0409   | 0.145136 | 0.00166  | 0.010906 | 0.81416  | -0.05647 | 0.22322  | 0.056482 | 0.22311  |
| 0.54377  | -0.0605  | 0.19182  | -0.24627 | 7.01E-08 | -0.14222 | 0.00206  | -0.19869 | 1.52E-05 |
| 0.01486  | 0.139366 | 0.00254  | 0.191387 | 3.14E-05 | 0.152036 | 0.00098  | 0.246643 | 6.69E-08 |
| 0.77288  | 0.070555 | 0.12788  | 0.18989  | 3.62E-05 | 0.24227  | 1.15E-07 | 0.320406 | 1.31E-12 |
| 0.23036  | 0.084334 | 0.06863  | -0.04627 | 0.31845  | -0.07896 | 0.08832  | 0.029768 | 0.52106  |

|          |          |          |          |          |          |          |          |          |
|----------|----------|----------|----------|----------|----------|----------|----------|----------|
| 0.3469   | 0.036922 | 0.42602  | 0.179256 | 9.82E-05 | 0.132736 | 0.00406  | 0.164212 | 0.00037  |
| 0.00063  | 0.071402 | 0.12335  | 0.013703 | 0.76772  | -0.02665 | 0.56568  | 0.025667 | 0.58008  |
| 0.39233  | 0.034556 | 0.45628  | 0.096005 | 0.03809  | -0.03404 | 0.46305  | 0.033671 | 0.4679   |
| 6.05E-12 | 0.046232 | 0.31879  | -0.00281 | 0.95162  | -0.08791 | 0.05764  | -0.02955 | 0.52418  |
| 0.07873  | -0.01124 | 0.8086   | -0.08094 | 0.0806   | -0.12094 | 0.00889  | -0.10081 | 0.02939  |
| 0.0458   | -0.04251 | 0.35935  | -0.11514 | 0.01278  | -0.02805 | 0.54537  | -0.05175 | 0.26434  |
| 0.50944  | -0.05441 | 0.24059  | 0.267306 | 4.41E-09 | 0.290527 | 1.55E-10 | 0.217772 | 2.03E-06 |
| 0.1843   | 0.162464 | 0.00042  | 0.119995 | 0.00944  | 0.195973 | 2.00E-05 | 0.325384 | 5.60E-13 |
| 0.07461  | 0.090392 | 0.05092  | 0.054889 | 0.23647  | 0.027738 | 0.54989  | 0.039702 | 0.392    |
| 0.37075  | 0.066217 | 0.15309  | -0.03875 | 0.40349  | 0.022681 | 0.62492  | 0.000315 | 0.99458  |
| 0.09855  | -0.13797 | 0.00281  | 0.013159 | 0.77669  | -0.03214 | 0.48836  | -0.14564 | 0.0016   |
| 0.30751  | 0.007217 | 0.8764   | -0.13251 | 0.00412  | -0.09183 | 0.04732  | -0.10408 | 0.0245   |
| 0.88077  | 0.138691 | 0.00267  | -0.01996 | 0.66697  | -0.01127 | 0.80812  | 0.12493  | 0.00687  |
| 0.21668  | -0.00567 | 0.9027   | 0.062823 | 0.17532  | 0.037275 | 0.42161  | 0.07443  | 0.1082   |
| 0.00012  | 0.090439 | 0.0508   | 0.162578 | 0.00042  | 0.323367 | 7.91E-13 | 0.355907 | 2.16E-15 |
| 0.81995  | -0.01761 | 0.70435  | 0.018479 | 0.69042  | -0.01401 | 0.76267  | -0.05031 | 0.27796  |
| 1.22E-06 | -0.04878 | 0.29285  | -0.23064 | 4.68E-07 | -0.24808 | 5.58E-08 | -0.17098 | 0.00021  |
| 0.38237  | -0.14963 | 0.00118  | 0.160881 | 0.00048  | 0.01294  | 0.78032  | -0.09171 | 0.04761  |
| 0.9939   | -0.19562 | 2.07E-05 | 0.207805 | 5.95E-06 | 0.065704 | 0.15631  | -0.05367 | 0.24706  |
| 0.01385  | -0.18824 | 4.25E-05 | 0.176461 | 0.00013  | 0.131152 | 0.00453  | 0.091954 | 0.04703  |
| 7.58E-08 | -0.01681 | 0.71717  | 0.08358  | 0.07115  | -0.0568  | 0.22054  | -0.02745 | 0.55411  |
| 0.00859  | 0.020364 | 0.66071  | 0.03556  | 0.4433   | -0.05669 | 0.22144  | 0.021191 | 0.64785  |
| 2.18E-05 | -0.1068  | 0.02097  | -0.15902 | 0.00056  | -0.18653 | 5.00E-05 | -0.19889 | 1.49E-05 |
| 9.02E-08 | -0.02486 | 0.5921   | 0.059778 | 0.19722  | 0.022771 | 0.62355  | -0.03005 | 0.51709  |
| 0.00061  | -0.00115 | 0.98028  | 0.253307 | 2.85E-08 | 0.151187 | 0.00105  | 0.016376 | 0.72411  |
| 0.10699  | 0.097818 | 0.03458  | -0.15361 | 0.00087  | 0.001837 | 0.96842  | 0.065352 | 0.15854  |
| 0.29132  | 0.025684 | 0.57983  | 0.016181 | 0.72726  | -0.04404 | 0.34225  | 0.001348 | 0.97682  |
| 0.98595  | 0.002287 | 0.96068  | -0.03486 | 0.45237  | -0.08197 | 0.0768   | -0.04655 | 0.31552  |
| 0.36375  | 0.063588 | 0.17011  | -0.12651 | 0.00619  | -0.19256 | 2.80E-05 | -0.10422 | 0.02431  |
| 3.94E-10 | 0.053411 | 0.24934  | 0.031254 | 0.50047  | 0.001111 | 0.9809   | 0.04153  | 0.37055  |
| 0.10349  | -0.13102 | 0.00457  | -0.07039 | 0.12876  | -0.27042 | 2.87E-09 | -0.22797 | 6.39E-07 |
| 0.5859   | 0.031089 | 0.50273  | -0.11926 | 0.0099   | -0.06183 | 0.18226  | -0.0493  | 0.28769  |
| 0.77951  | 0.127732 | 0.00571  | 0.085288 | 0.06555  | 0.151781 | 0.001    | 0.210432 | 4.50E-06 |
| 0.35441  | 0.037034 | 0.42461  | -0.03533 | 0.44631  | -0.11468 | 0.01315  | -0.03568 | 0.44175  |
| 0.02202  | -0.00208 | 0.96427  | -0.05018 | 0.27921  | -0.13281 | 0.00404  | -0.10741 | 0.02025  |
| 0.13795  | 0.067358 | 0.14612  | 0.09635  | 0.0374   | -0.01157 | 0.80313  | 0.142949 | 0.00196  |
| 1.24E-05 | 0.014713 | 0.75115  | 0.270711 | 2.75E-09 | 0.2412   | 1.32E-07 | 0.338878 | 5.17E-14 |
| 0.84052  | 0.067358 | 0.14612  | 0.183419 | 6.69E-05 | 0.083232 | 0.07234  | 0.280252 | 7.09E-10 |
| 0.04248  | 0.031083 | 0.50282  | 0.167252 | 0.00028  | -0.04166 | 0.36904  | 0.040303 | 0.38486  |
| 1.20E-05 | -0.02025 | 0.66244  | -0.10546 | 0.02265  | -0.05989 | 0.1964   | -0.08646 | 0.06193  |
| 0.02428  | -0.0622  | 0.17966  | -0.02158 | 0.64179  | -0.18944 | 3.78E-05 | -0.09192 | 0.04711  |
| 0.00054  | 0.376764 | 3.37E-17 | 0.405692 | 6.27E-20 | 0.311304 | 5.94E-12 | 0.369446 | 1.50E-16 |
| 0.11891  | 0.185162 | 5.68E-05 | 0.228565 | 5.97E-07 | 0.214059 | 3.05E-06 | 0.273864 | 1.77E-09 |
| 0.74912  | -0.00153 | 0.97367  | 0.032379 | 0.48516  | -0.03061 | 0.50939  | -0.00434 | 0.92555  |
| 0.14599  | 0.058926 | 0.2037   | 0.39859  | 3.11E-19 | 0.314768 | 3.36E-12 | 0.344843 | 1.74E-14 |

|          |          |          |          |          |          |          |          |          |
|----------|----------|----------|----------|----------|----------|----------|----------|----------|
| 0.00567  | -0.16624 | 0.00031  | 0.309927 | 7.44E-12 | 0.307654 | 1.07E-11 | 0.15259  | 0.00094  |
| 5.71E-09 | 0.05233  | 0.25907  | 0.062604 | 0.17683  | -0.01797 | 0.69848  | 0.004908 | 0.91576  |
| 0.71999  | 0.051106 | 0.27038  | -0.007   | 0.88011  | 0.101622 | 0.0281   | 0.116665 | 0.01164  |
| 0.99775  | -0.01431 | 0.75771  | -0.02364 | 0.61036  | -0.01357 | 0.76989  | -0.00639 | 0.89045  |
| 3.74E-06 | 0.200549 | 1.26E-05 | 0.282426 | 5.17E-10 | 0.273753 | 1.80E-09 | 0.368147 | 1.95E-16 |
| 0.0124   | -0.10757 | 0.02006  | -0.15283 | 0.00092  | -0.1596  | 0.00054  | -0.23189 | 4.04E-07 |
| 3.62E-05 | -0.14432 | 0.00177  | -0.07994 | 0.08439  | -0.21994 | 1.59E-06 | -0.31561 | 2.92E-12 |
| 0.7097   | 0.104992 | 0.02326  | 0.183129 | 6.88E-05 | 0.227847 | 6.48E-07 | 0.223813 | 1.03E-06 |
| 0.00393  | 0.183003 | 6.96E-05 | 0.04911  | 0.28956  | 0.054002 | 0.24413  | 0.134869 | 0.0035   |
| 0.05355  | 0.128933 | 0.00526  | 0.036063 | 0.43687  | 0.008242 | 0.85902  | 0.084632 | 0.06766  |
| 0.00355  | 0.082297 | 0.07562  | 0.084621 | 0.06769  | 0.026956 | 0.56119  | 0.069012 | 0.13645  |
| 0.95305  | 0.090053 | 0.0518   | -0.0108  | 0.81602  | 0.016581 | 0.72081  | 0.064642 | 0.16312  |
| 0.55164  | -0.08165 | 0.07795  | -0.03989 | 0.38976  | -0.12104 | 0.00884  | -0.22599 | 8.03E-07 |
| 0.8811   | -0.01554 | 0.73768  | -0.01347 | 0.7716   | -0.05627 | 0.22488  | -0.04914 | 0.28923  |
| 1.17E-05 | 0.049897 | 0.2819   | -0.08474 | 0.06729  | -0.01742 | 0.70729  | 0.018987 | 0.68235  |
| 3.07E-08 | 0.139237 | 0.00256  | 0.107841 | 0.01975  | 0.066992 | 0.14833  | 0.171877 | 0.00019  |
| 0.38553  | 0.006869 | 0.8823   | -0.14156 | 0.00217  | -0.15039 | 0.00111  | -0.12374 | 0.00743  |
| 3.53E-05 | 0.200963 | 1.21E-05 | 0.249742 | 4.52E-08 | 0.22764  | 6.64E-07 | 0.376265 | 3.74E-17 |
| 0.00184  | 0.076708 | 0.09779  | 0.011681 | 0.80123  | -0.03911 | 0.39908  | 0.031006 | 0.50388  |
| 4.54E-08 | -0.0689  | 0.13709  | -0.00222 | 0.96186  | -0.04904 | 0.2903   | -0.03697 | 0.42541  |
| 5.96E-08 | -0.1125  | 0.015    | -0.02174 | 0.63939  | 0.007196 | 0.87676  | -0.11342 | 0.01419  |
| 0.16995  | -0.09926 | 0.03198  | -0.14419 | 0.00178  | -0.15245 | 0.00095  | -0.25011 | 4.31E-08 |
| 0.06724  | -0.10571 | 0.02233  | -0.0192  | 0.67898  | -0.14005 | 0.00242  | -0.11519 | 0.01274  |
| 0.78503  | 0.057484 | 0.215    | 0.186305 | 5.10E-05 | 0.231683 | 4.14E-07 | 0.187523 | 4.55E-05 |
| 8.73E-06 | -0.19326 | 2.61E-05 | -0.20679 | 6.62E-06 | -0.09169 | 0.04768  | -0.2747  | 1.57E-09 |
| 4.44E-08 | 0.120684 | 0.00904  | 0.127468 | 0.00581  | 0.295787 | 6.97E-11 | 0.20217  | 1.07E-05 |
| 0.61262  | 0.06705  | 0.14798  | -0.03746 | 0.41926  | 0.027176 | 0.55801  | -0.01651 | 0.72197  |
| 0.26735  | 0.054854 | 0.23676  | -0.07175 | 0.12152  | -0.0567  | 0.22135  | -0.01508 | 0.7452   |
| 0.38333  | -0.04698 | 0.31098  | 0.161419 | 0.00046  | 0.097011 | 0.0361   | 0.186634 | 4.95E-05 |
| 0.87679  | 0.032873 | 0.47853  | 0.002869 | 0.9507   | -0.04688 | 0.31204  | -0.00324 | 0.94438  |
| 0.91309  | -0.04607 | 0.32054  | 0.131185 | 0.00452  | 0.024528 | 0.597    | -0.05968 | 0.19796  |
| 0.18428  | -0.08486 | 0.06692  | 0.184899 | 5.83E-05 | -0.17156 | 0.0002   | -0.17246 | 0.00018  |
| 0.28664  | 0.115223 | 0.01272  | 0.010692 | 0.81775  | 0.148189 | 0.00132  | 0.218847 | 1.80E-06 |
| 0.89477  | 0.044842 | 0.33358  | -0.0873  | 0.0594   | -0.01885 | 0.68453  | -0.00827 | 0.85847  |
| 0.54262  | 0.067412 | 0.1458   | -0.18545 | 5.53E-05 | -0.16301 | 0.0004   | 0.021853 | 0.63762  |
| 0.01194  | -0.12848 | 0.00543  | -0.00645 | 0.88946  | -0.21539 | 2.63E-06 | -0.16404 | 0.00037  |
| 0.34484  | -0.03922 | 0.3978   | 0.178692 | 0.0001   | 0.123591 | 0.0075   | 0.044655 | 0.3356   |
| 8.86E-08 | 0.061408 | 0.18526  | -0.11004 | 0.01737  | -0.01596 | 0.73084  | -0.03604 | 0.43714  |
| 0.00034  | 0.053198 | 0.25124  | 0.068479 | 0.13951  | 0.034219 | 0.46068  | 0.016148 | 0.7278   |
| 0.06549  | -0.1159  | 0.0122   | -0.07151 | 0.12279  | -0.12489 | 0.00689  | -0.23227 | 3.86E-07 |
| 0.16877  | 0.142068 | 0.00209  | -0.03739 | 0.42023  | 0.100415 | 0.03003  | 0.217325 | 2.13E-06 |
| 0.08155  | 0.028013 | 0.54594  | -0.13452 | 0.00359  | -0.0649  | 0.16146  | -0.00921 | 0.84263  |
| 0.29262  | -0.118   | 0.01071  | 0.244265 | 9.01E-08 | 0.005493 | 0.90577  | 0.028232 | 0.5428   |
| 0.79812  | -0.01007 | 0.82826  | -0.07084 | 0.12634  | -0.14235 | 0.00204  | -0.09997 | 0.03076  |
| 0.00941  | 0.12359  | 0.0075   | 0.105437 | 0.02268  | 0.103945 | 0.02468  | 0.252946 | 2.99E-08 |

|          |          |          |          |          |          |          |          |          |
|----------|----------|----------|----------|----------|----------|----------|----------|----------|
| 0.00261  | -0.01229 | 0.79106  | 0.130524 | 0.00473  | 0.001291 | 0.97781  | -0.01344 | 0.77207  |
| 3.04E-05 | 0.070431 | 0.12855  | 0.399437 | 2.58E-19 | 0.267222 | 4.46E-09 | 0.310475 | 6.80E-12 |
| 0.79899  | -0.00949 | 0.83799  | -0.0305  | 0.51086  | -0.03311 | 0.47531  | -0.02522 | 0.58665  |
| 0.01929  | -0.00932 | 0.84085  | -0.05861 | 0.20615  | -0.13371 | 0.00379  | -0.04781 | 0.30256  |
| 0.0601   | -0.03842 | 0.40743  | -0.10928 | 0.01816  | -0.12947 | 0.00508  | -0.09138 | 0.04844  |
| 1.84E-06 | -0.07873 | 0.08925  | -0.15526 | 0.00076  | -0.24717 | 6.26E-08 | -0.16269 | 0.00042  |
| 0.36704  | -0.10555 | 0.02253  | -0.03728 | 0.42155  | -0.04067 | 0.38051  | -0.19244 | 2.83E-05 |
| 0.02905  | -0.00122 | 0.97898  | 0.349429 | 7.40E-15 | 0.053322 | 0.25013  | 0.058722 | 0.20527  |
| 0.04808  | 0.078927 | 0.08844  | -0.0257  | 0.5796   | 0.112896 | 0.01465  | 0.060312 | 0.19324  |
| 0.2493   | 0.016886 | 0.71589  | -0.09348 | 0.04347  | -0.06173 | 0.18299  | -0.00897 | 0.84678  |
| 0.40643  | -0.08645 | 0.06195  | -0.1662  | 0.00031  | -0.24757 | 5.95E-08 | -0.19934 | 1.43E-05 |
| 0.0012   | -0.03015 | 0.51578  | 0.095165 | 0.03981  | -0.08406 | 0.06955  | -0.0787  | 0.08935  |
| 0.07113  | 0.056866 | 0.21998  | -0.02756 | 0.55243  | 0.158646 | 0.00058  | 0.193936 | 2.44E-05 |
| 0.31129  | -0.08658 | 0.06155  | -0.08635 | 0.06224  | -0.07859 | 0.08982  | -0.17966 | 9.46E-05 |
| 3.19E-10 | 0.187742 | 4.45E-05 | 0.156939 | 0.00067  | 0.272968 | 2.01E-09 | 0.353379 | 3.50E-15 |
| 2.44E-05 | 0.033532 | 0.46974  | -0.10155 | 0.02822  | -0.09306 | 0.04443  | -0.08476 | 0.06723  |
| 0.3006   | 0.184076 | 6.29E-05 | 0.035177 | 0.44822  | 0.111749 | 0.01569  | 0.238601 | 1.81E-07 |
| 0.09069  | 0.019193 | 0.6791   | -0.11502 | 0.01288  | -0.1208  | 0.00897  | -0.06956 | 0.13336  |
| 0.04639  | 0.132259 | 0.0042   | 0.052906 | 0.25385  | 0.02971  | 0.52187  | 0.112742 | 0.01478  |
| 0.24192  | 0.228819 | 5.79E-07 | -0.00405 | 0.93051  | 0.003448 | 0.94076  | 0.16563  | 0.00032  |
| 0.34525  | -0.03141 | 0.49829  | -0.07178 | 0.12139  | -0.06525 | 0.15922  | -0.07083 | 0.12638  |
| 0.29473  | -0.02971 | 0.52192  | 0.366146 | 2.91E-16 | 0.265716 | 5.48E-09 | 0.236135 | 2.44E-07 |
| 0.05914  | -0.13553 | 0.00334  | 0.107483 | 0.02017  | -0.04572 | 0.32421  | -0.07386 | 0.11091  |
| 3.84E-08 | -0.01631 | 0.72521  | 0.135202 | 0.00342  | 0.143424 | 0.00189  | 0.065194 | 0.15955  |
| 0.72379  | 0.007626 | 0.86945  | 0.186184 | 5.16E-05 | 0.167934 | 0.00027  | 0.1536   | 0.00087  |
| 0.22057  | 0.005955 | 0.89788  | -0.19818 | 1.60E-05 | -0.13809 | 0.00278  | -0.07384 | 0.11105  |
| 0.00305  | 0.067325 | 0.14632  | -0.02003 | 0.66598  | 0.050739 | 0.27384  | 0.078113 | 0.09178  |
| 0.70538  | -0.05303 | 0.25275  | -0.24759 | 5.93E-08 | -0.07932 | 0.08687  | -0.14916 | 0.00123  |
| 0.02773  | 0.115199 | 0.01273  | 0.081961 | 0.07682  | 0.084775 | 0.06719  | 0.169956 | 0.00022  |
| 0.10251  | -0.01681 | 0.71715  | 0.310358 | 6.93E-12 | 0.059901 | 0.1963   | 0.041157 | 0.37486  |
| 0.34304  | -0.00151 | 0.97406  | 0.023521 | 0.61216  | -0.12074 | 0.00901  | -0.07198 | 0.12032  |
| 0.00332  | 0.139417 | 0.00253  | -0.15253 | 0.00094  | -0.06943 | 0.13406  | 0.141326 | 0.0022   |
| 0.00964  | -0.0117  | 0.80097  | 0.450907 | 9.10E-25 | 0.271162 | 2.58E-09 | 0.22981  | 5.16E-07 |
| 0.15977  | -0.1159  | 0.01219  | 0.098711 | 0.03295  | 0.117519 | 0.01103  | -0.07468 | 0.10702  |
| 0.03139  | 0.071702 | 0.12178  | 0.172707 | 0.00018  | 0.14423  | 0.00178  | 0.108721 | 0.01877  |
| 0.12477  | -0.00135 | 0.97682  | 0.023611 | 0.61079  | 0.045665 | 0.32477  | 0.00188  | 0.96767  |
| 4.91E-05 | -0.0699  | 0.13145  | -0.00504 | 0.91348  | 0.014323 | 0.75754  | -0.06269 | 0.17623  |
| 0.42759  | -0.02601 | 0.57504  | 0.014068 | 0.76173  | -0.01036 | 0.82339  | -0.00563 | 0.90345  |
| 0.68032  | 0.027964 | 0.54664  | -0.03161 | 0.49563  | -0.02476 | 0.59357  | -0.04115 | 0.375    |
| 0.00234  | -0.18936 | 3.82E-05 | -0.13145 | 0.00444  | -0.19443 | 2.33E-05 | -0.35543 | 2.37E-15 |
| 0.14846  | 0.042676 | 0.35748  | -0.06299 | 0.1742   | 0.001738 | 0.97012  | 0.007488 | 0.87179  |
| 2.84E-05 | 0.010945 | 0.81351  | -0.03341 | 0.4714   | -0.06096 | 0.18851  | -0.03285 | 0.4788   |
| 0.36195  | 0.128548 | 0.0054   | -0.07479 | 0.10649  | 0.179462 | 9.64E-05 | 0.268612 | 3.68E-09 |
| 0.93898  | 0.052392 | 0.2585   | 0.063816 | 0.16858  | -0.01333 | 0.77394  | -0.0037  | 0.9364   |
| 0.00259  | -0.00721 | 0.87646  | -0.13564 | 0.00332  | -0.12098 | 0.00887  | -0.13191 | 0.0043   |

|          |           |          |          |          |          |          |          |          |
|----------|-----------|----------|----------|----------|----------|----------|----------|----------|
| 0.85999  | 0.050906  | 0.27227  | -0.04094 | 0.37738  | -0.13596 | 0.00324  | -0.0806  | 0.08186  |
| 0.00026  | 0.053144  | 0.25172  | -0.192   | 2.96E-05 | -0.20588 | 7.28E-06 | -0.14573 | 0.00159  |
| 0.00042  | -0.15488  | 0.00078  | -0.09423 | 0.04181  | -0.22669 | 7.41E-07 | -0.28777 | 2.35E-10 |
| 0.28415  | 0.065379  | 0.15837  | -0.05505 | 0.23508  | -0.08072 | 0.08142  | 0.011756 | 0.79998  |
| 0.16103  | 0.202451  | 1.04E-05 | 0.024177 | 0.60226  | 0.110193 | 0.01721  | 0.258544 | 1.44E-08 |
| 0.09915  | -0.00876  | 0.85032  | 0.106274 | 0.02162  | 0.201357 | 1.16E-05 | 0.095208 | 0.03972  |
| 0.44763  | 0.083476  | 0.07151  | -0.05078 | 0.27348  | 0.160638 | 0.00049  | 0.283236 | 4.59E-10 |
| 6.43E-08 | 0.040472  | 0.38287  | 0.031771 | 0.4934   | 0.010873 | 0.81472  | -0.05036 | 0.27743  |
| 0.01412  | -0.01781  | 0.70099  | 0.256647 | 1.85E-08 | 0.281425 | 5.98E-10 | 0.208136 | 5.74E-06 |
| 0.00874  | 0.096935  | 0.03625  | 0.052143 | 0.26077  | 0.214719 | 2.84E-06 | 0.23927  | 1.67E-07 |
| 0.13433  | -0.00773  | 0.86761  | 0.057137 | 0.21778  | 0.100543 | 0.02982  | 0.167825 | 0.00027  |
| 0.03683  | 0.075297  | 0.10414  | 0.083454 | 0.07158  | 0.1409   | 0.00227  | 0.173651 | 0.00016  |
| 0.85443  | 0.027099  | 0.55912  | -0.23393 | 3.17E-07 | -0.2192  | 1.73E-06 | -0.09759 | 0.035    |
| 0.41049  | -0.03444  | 0.45783  | -0.2435  | 9.91E-08 | -0.20422 | 8.65E-06 | -0.17038 | 0.00022  |
| 1.18E-06 | 0.11104   | 0.01637  | -0.0714  | 0.12338  | -0.02566 | 0.58011  | 0.053204 | 0.25118  |
| 3.58E-12 | 0.055468  | 0.23155  | -0.02047 | 0.65911  | -0.09787 | 0.03447  | -0.01206 | 0.79484  |
| 1.36E-08 | 0.05712   | 0.21793  | -0.03616 | 0.43561  | -0.05331 | 0.25021  | 0.098846 | 0.03271  |
| 0.00027  | -0.01333  | 0.77391  | -0.00868 | 0.85167  | 0.066239 | 0.15296  | -0.04522 | 0.32953  |
| 1.37E-08 | 0.108791  | 0.01869  | 0.053232 | 0.25093  | 0.032211 | 0.48743  | 0.091071 | 0.0492   |
| 0.01437  | 0.090395  | 0.05091  | -0.03443 | 0.45791  | 0.031793 | 0.49309  | 0.106343 | 0.02154  |
| 3.02E-05 | 0.305125  | 1.61E-11 | -0.02186 | 0.63749  | 0.102682 | 0.02649  | 0.235604 | 2.60E-07 |
| 0.34355  | -0.05743  | 0.2154   | 0.266641 | 4.83E-09 | 0.204434 | 8.46E-06 | 0.127749 | 0.0057   |
| 0.11885  | -0.07765  | 0.09371  | -0.01408 | 0.76145  | -0.14038 | 0.00236  | -0.13188 | 0.00431  |
| 0.08183  | -0.00551  | 0.90544  | -0.03801 | 0.4125   | -0.0792  | 0.08734  | -0.03733 | 0.42097  |
| 0.00039  | -0.06543  | 0.15803  | 0.03593  | 0.43856  | 0.073909 | 0.11069  | -0.04716 | 0.30916  |
| 0.01387  | -0.02907  | 0.53089  | -0.19044 | 3.44E-05 | -0.14013 | 0.0024   | -0.18905 | 3.93E-05 |
| 0.28238  | -0.06045  | 0.19223  | 0.028046 | 0.54547  | -0.14753 | 0.00139  | -0.09072 | 0.05009  |
| 0.00433  | 0.061213  | 0.18666  | 0.004402 | 0.92442  | 0.125981 | 0.00641  | 0.122602 | 0.00799  |
| 0.93142  | -0.02247  | 0.62811  | 0.049861 | 0.28225  | 0.048867 | 0.29197  | 0.100184 | 0.03042  |
| 0.00099  | -0.03983  | 0.39051  | -0.01664 | 0.71986  | -0.17373 | 0.00016  | -0.14577 | 0.00159  |
| 0.07398  | -6.40E-05 | 0.9989   | -0.04058 | 0.38156  | 0.028236 | 0.54274  | -0.04474 | 0.33467  |
| 0.07569  | -0.03276  | 0.48     | -0.14836 | 0.0013   | -0.09684 | 0.03644  | -0.10055 | 0.02982  |
| 0.23601  | -0.01462  | 0.75266  | 0.027032 | 0.56009  | -0.05891 | 0.20385  | -0.03776 | 0.41553  |
| 0.30753  | -0.10829  | 0.01924  | -0.03594 | 0.43841  | -0.08064 | 0.08173  | -0.13086 | 0.00462  |
| 0.00168  | 0.116737  | 0.01158  | 0.148446 | 0.00129  | 0.223565 | 1.06E-06 | 0.306902 | 1.21E-11 |
| 0.13596  | 0.329839  | 2.58E-13 | -0.08461 | 0.06773  | -0.00847 | 0.85516  | 0.163534 | 0.00039  |
| 0.19516  | 0.314431  | 3.55E-12 | -0.06455 | 0.1637   | -0.07503 | 0.10537  | 0.040424 | 0.38344  |
| 0.06775  | 0.06578   | 0.15583  | -0.08658 | 0.06157  | 0.039469 | 0.39478  | 0.044779 | 0.33426  |
| 0.07275  | 0.02891   | 0.53314  | -0.0874  | 0.05911  | -0.02087 | 0.65281  | -0.03161 | 0.49561  |
| 0.01835  | 0.060218  | 0.19394  | 0.08511  | 0.06611  | 0.15121  | 0.00105  | 0.120783 | 0.00898  |
| 0.09767  | 0.05342   | 0.24926  | 0.123886 | 0.00735  | 0.052712 | 0.2556   | 0.10904  | 0.01842  |
| 0.35431  | 0.129212  | 0.00517  | 0.133519 | 0.00385  | 0.096522 | 0.03706  | 0.118109 | 0.01064  |
| 0.54538  | -0.0387   | 0.40401  | -0.11852 | 0.01037  | -0.12834 | 0.00548  | -0.08107 | 0.08011  |
| 2.60E-07 | -0.18612  | 5.19E-05 | -0.281   | 6.36E-10 | -0.21608 | 2.44E-06 | -0.28108 | 6.29E-10 |
| 0.0299   | -0.01139  | 0.80609  | 0.270661 | 2.77E-09 | 0.162406 | 0.00043  | 0.016688 | 0.71908  |

|          |          |          |          |          |          |          |          |          |
|----------|----------|----------|----------|----------|----------|----------|----------|----------|
| 0.3441   | 0.021157 | 0.64836  | -0.07628 | 0.09967  | -0.00814 | 0.86079  | -0.03072 | 0.50787  |
| 1.58E-17 | 0.224601 | 9.42E-07 | -0.08773 | 0.05818  | 0.018904 | 0.68366  | 0.240006 | 1.52E-07 |
| 4.31E-08 | 0.308661 | 9.13E-12 | 0.214885 | 2.78E-06 | 0.227189 | 7.00E-07 | 0.35384  | 3.21E-15 |
| 0.65322  | -0.0048  | 0.9176   | 0.035236 | 0.44746  | 0.029632 | 0.52297  | 0.041071 | 0.37586  |
| 0.57314  | 0.030417 | 0.51201  | 0.033011 | 0.47668  | 0.074348 | 0.10859  | 0.050978 | 0.2716   |
| 0.00896  | -0.02271 | 0.62442  | -0.07639 | 0.09919  | -0.0302  | 0.51506  | -0.03098 | 0.50425  |
| 0.01231  | 0.089286 | 0.05383  | -0.04295 | 0.35444  | -0.02792 | 0.54729  | 0.080443 | 0.08247  |
| 0.97423  | -0.00461 | 0.92091  | -0.02486 | 0.59211  | 0.071917 | 0.12067  | 0.018184 | 0.6951   |
| 0.99611  | -0.04856 | 0.29497  | -0.2516  | 3.56E-08 | -0.16475 | 0.00035  | -0.14898 | 0.00124  |
| 0.15275  | -0.10051 | 0.02988  | -0.00267 | 0.95408  | -0.02501 | 0.58976  | -0.16833 | 0.00026  |
| 0.20785  | 0.015033 | 0.74592  | 0.187224 | 4.68E-05 | 0.198829 | 1.50E-05 | 0.195849 | 2.02E-05 |
| 1.91E-11 | 0.226414 | 7.65E-07 | 0.200149 | 1.31E-05 | 0.299777 | 3.75E-11 | 0.347664 | 1.03E-14 |
| 0.39158  | -0.02486 | 0.59207  | 0.053927 | 0.24479  | 0.029842 | 0.52003  | 0.020086 | 0.66506  |
| 0.36075  | 0.165712 | 0.00032  | 0.038485 | 0.40668  | 0.207674 | 6.03E-06 | 0.306492 | 1.30E-11 |
| 0.02372  | 0.15911  | 0.00056  | -0.01861 | 0.68834  | 0.184509 | 6.04E-05 | 0.285562 | 3.26E-10 |
| 0.34652  | 0.008672 | 0.85173  | -0.1521  | 0.00098  | -0.1601  | 0.00051  | -0.07514 | 0.10484  |
| 0.61107  | 0.218396 | 1.89E-06 | 0.105883 | 0.02211  | 0.215984 | 2.47E-06 | 0.320798 | 1.23E-12 |
| 0.00353  | -0.19659 | 1.88E-05 | 0.006059 | 0.8961   | -0.23319 | 3.47E-07 | -0.32816 | 3.46E-13 |
| 0.09411  | 0.076419 | 0.09906  | 0.017964 | 0.69861  | -0.08024 | 0.08324  | -0.02107 | 0.64965  |
| 0.00211  | -0.10888 | 0.01859  | -0.0287  | 0.53613  | -0.08951 | 0.05324  | -0.03255 | 0.48287  |
| 0.7414   | 0.009594 | 0.83618  | 0.178947 | 0.0001   | 0.061321 | 0.18589  | 0.064236 | 0.16579  |
| 0.00049  | 0.052373 | 0.25868  | -0.03353 | 0.46981  | -0.04599 | 0.32138  | -0.01222 | 0.79224  |
| 9.93E-05 | 0.023757 | 0.60859  | -0.12591 | 0.00644  | -0.08246 | 0.07503  | -0.11043 | 0.01697  |
| 3.98E-09 | 0.029389 | 0.52638  | -0.05119 | 0.26961  | -0.03538 | 0.44564  | -0.03499 | 0.45061  |
| 0.25686  | -0.04405 | 0.34216  | -0.13609 | 0.00321  | -0.10171 | 0.02797  | -0.15135 | 0.00103  |
| 0.18252  | -0.08574 | 0.06412  | -0.10879 | 0.01869  | -0.23757 | 2.05E-07 | -0.27053 | 2.82E-09 |
| 0.00121  | -0.16262 | 0.00042  | -0.12665 | 0.00613  | -0.24493 | 8.29E-08 | -0.28616 | 2.98E-10 |
| 0.9041   | 0.00966  | 0.83508  | -0.2206  | 1.48E-06 | -0.16678 | 0.00029  | -0.10768 | 0.01994  |
| 2.57E-05 | 0.098537 | 0.03326  | -0.0863  | 0.06239  | -0.0438  | 0.34492  | 0.049216 | 0.28852  |
| 0.00015  | 0.015392 | 0.74007  | -0.28444 | 3.85E-10 | -0.09915 | 0.03218  | -0.11166 | 0.01577  |
| 0.6217   | 0.023803 | 0.6079   | -0.06052 | 0.19173  | -0.03118 | 0.50147  | -0.02665 | 0.5657   |
| 0.00427  | -0.05553 | 0.23101  | 0.026876 | 0.56235  | -0.18288 | 7.04E-05 | -0.13591 | 0.00325  |
| 0.98412  | 0.052251 | 0.25979  | 0.033002 | 0.4768   | -0.04445 | 0.33779  | -0.04283 | 0.35578  |
| 0.00095  | 0.081943 | 0.07689  | 0.083114 | 0.07275  | 0.071124 | 0.12483  | 0.164659 | 0.00035  |
| 0.03439  | -0.06017 | 0.19428  | 0.490818 | 1.10E-29 | 0.275175 | 1.47E-09 | 0.223025 | 1.13E-06 |
| 0.12958  | 0.0479   | 0.30163  | 0.078359 | 0.09076  | 0.009623 | 0.83569  | 0.055438 | 0.2318   |
| 0.48489  | 0.034509 | 0.45689  | 0.398564 | 3.13E-19 | 0.310232 | 7.08E-12 | 0.340174 | 4.09E-14 |
| 0.8793   | 0.029717 | 0.52178  | 0.275808 | 1.34E-09 | 0.341912 | 2.98E-14 | 0.324483 | 6.54E-13 |
| 0.0529   | 0.023994 | 0.60502  | -0.04886 | 0.29205  | -0.1643  | 0.00036  | 0.005355 | 0.90812  |
| 1.69E-05 | 0.012242 | 0.7919   | 0.006436 | 0.88967  | -0.04628 | 0.3183   | -0.06317 | 0.17295  |
| 0.62598  | -0.0008  | 0.98616  | -0.04036 | 0.38416  | -0.05286 | 0.25428  | -0.016   | 0.73013  |
| 0.89622  | -0.03166 | 0.49496  | -0.20629 | 6.97E-06 | -0.08882 | 0.0551   | -0.02712 | 0.55882  |
| 0.23322  | 0.00392  | 0.93267  | 0.135335 | 0.00339  | 0.053766 | 0.2462   | 0.051411 | 0.26754  |
| 0.50698  | 0.000643 | 0.98895  | -0.29097 | 1.45E-10 | -0.22579 | 8.22E-07 | -0.16442 | 0.00036  |
| 0.00233  | 0.120366 | 0.00922  | -0.10557 | 0.02251  | 0.087266 | 0.05951  | 0.122744 | 0.00792  |

|          |          |          |          |          |          |          |          |          |
|----------|----------|----------|----------|----------|----------|----------|----------|----------|
| 0.56537  | 0.162634 | 0.00042  | -0.13476 | 0.00353  | -0.09023 | 0.05134  | 0.039935 | 0.38922  |
| 6.39E-05 | -0.05151 | 0.26664  | -0.09778 | 0.03465  | -0.19946 | 1.41E-05 | -0.15277 | 0.00093  |
| 3.94E-09 | -0.00935 | 0.8403   | 0.063375 | 0.17155  | 0.12142  | 0.00862  | -0.0158  | 0.73342  |
| 1.21E-08 | 0.042498 | 0.35949  | 0.077221 | 0.09556  | 0.210137 | 4.65E-06 | 0.140815 | 0.00229  |
| 0.30941  | 0.11971  | 0.00962  | -0.02451 | 0.59727  | 0.079023 | 0.08805  | 0.108797 | 0.01868  |
| 0.36841  | 0.115999 | 0.01212  | -0.00945 | 0.83862  | 0.050569 | 0.27546  | 0.072922 | 0.11555  |
| 0.01339  | -0.1002  | 0.03039  | 0.188065 | 4.32E-05 | 0.235438 | 2.65E-07 | -0.0573  | 0.21643  |
| 0.28423  | -0.06026 | 0.19366  | -0.01156 | 0.80317  | 0.113876 | 0.01381  | -0.08779 | 0.058    |
| 0.12268  | 0.243253 | 1.02E-07 | 0.035599 | 0.4428   | 0.12959  | 0.00503  | 0.244762 | 8.47E-08 |
| 0.13594  | 0.007401 | 0.87327  | 0.187857 | 4.40E-05 | 0.179987 | 9.19E-05 | 0.143684 | 0.00185  |
| 0.71997  | -0.07307 | 0.11483  | -0.13699 | 0.00301  | -0.16823 | 0.00026  | -0.13345 | 0.00386  |
| 0.69673  | 0.048215 | 0.29846  | 0.086819 | 0.06083  | 0.045785 | 0.3235   | 0.08033  | 0.0829   |
| 1.30E-13 | 0.096729 | 0.03665  | -0.07519 | 0.10461  | -0.09371 | 0.04296  | 0.036724 | 0.4285   |
| 0.8834   | -0.00295 | 0.94937  | -0.04024 | 0.38566  | -0.0253  | 0.58545  | -0.01209 | 0.79442  |
| 0.08232  | 0.030827 | 0.50634  | 0.200963 | 1.21E-05 | -0.0211  | 0.6492   | 0.03859  | 0.4054   |
| 1.84E-08 | 0.017295 | 0.70931  | -0.04832 | 0.29744  | -0.01406 | 0.76192  | -0.07228 | 0.11879  |
| 0.42045  | 0.14531  | 0.00164  | 0.089201 | 0.05406  | 0.178942 | 0.0001   | 0.24136  | 1.29E-07 |
| 0.58651  | -0.04815 | 0.29913  | -0.0485  | 0.29556  | -0.02838 | 0.54063  | -0.08306 | 0.07292  |
| 3.37E-07 | 0.023387 | 0.61418  | 0.001853 | 0.96815  | -0.04038 | 0.3839   | -0.00853 | 0.85406  |
| 4.76E-05 | 0.495021 | 3.07E-30 | -0.07788 | 0.09277  | -0.0242  | 0.60196  | 0.215673 | 2.55E-06 |
| 0.87164  | 0.064392 | 0.16476  | 0.2147   | 2.84E-06 | -0.02537 | 0.58447  | 0.096761 | 0.03659  |
| 0.01044  | 0.052496 | 0.25756  | -0.03616 | 0.43558  | -0.0559  | 0.22795  | 0.036487 | 0.4315   |
| 0.00016  | 0.09368  | 0.04302  | 0.03783  | 0.41473  | 0.024638 | 0.59536  | 0.154705 | 0.0008   |
| 0.8839   | 0.10509  | 0.02313  | 0.043399 | 0.34939  | 0.180786 | 8.54E-05 | 0.277325 | 1.08E-09 |
| 0.6433   | 0.062159 | 0.17993  | 0.056191 | 0.22551  | -0.0075  | 0.87152  | 0.042238 | 0.36244  |
| 0.10415  | -0.20627 | 6.99E-06 | -0.0168  | 0.71723  | -0.26038 | 1.13E-08 | -0.3029  | 2.30E-11 |
| 0.16237  | 0.047011 | 0.3107   | -0.05475 | 0.23766  | -0.07393 | 0.11058  | -0.07067 | 0.12726  |
| 0.89015  | 0.228448 | 6.05E-07 | 0.148068 | 0.00133  | 0.039221 | 0.39777  | 0.080555 | 0.08204  |
| 0.12815  | 0.066404 | 0.15193  | 0.063567 | 0.17025  | -0.02631 | 0.57058  | 0.020028 | 0.66597  |
| 0.0002   | 0.053803 | 0.24588  | 0.113797 | 0.01387  | 0.082051 | 0.0765   | 0.110934 | 0.01647  |
| 0.01489  | -0.03655 | 0.43066  | 0.156277 | 0.0007   | -0.01602 | 0.72993  | 0.054358 | 0.24104  |
| 0.81286  | 0.044902 | 0.33293  | 0.081509 | 0.07847  | 0.127853 | 0.00566  | 0.086623 | 0.06142  |
| 0.65633  | 0.044548 | 0.33676  | 0.094693 | 0.04081  | 0.022405 | 0.62913  | 0.07559  | 0.10279  |
| 0.44584  | 0.08206  | 0.07647  | 0.142686 | 0.00199  | -0.00835 | 0.85717  | 0.111005 | 0.0164   |
| 0.03755  | 0.016209 | 0.72682  | -0.01031 | 0.8241   | 0.022388 | 0.62941  | 0.128014 | 0.0056   |
| 0.05712  | -0.06525 | 0.1592   | -0.07324 | 0.11397  | -0.0744  | 0.10832  | -0.05232 | 0.25917  |
| 0.3106   | 0.029379 | 0.52652  | -0.11213 | 0.01533  | -0.18625 | 5.13E-05 | -0.20878 | 5.37E-06 |
| 0.53148  | -0.04251 | 0.3593   | 0.024223 | 0.60157  | -0.2165  | 2.33E-06 | -0.17752 | 0.00011  |
| 0.622    | -0.05425 | 0.24201  | 0.115218 | 0.01272  | 0.117461 | 0.01107  | 0.001989 | 0.96581  |
| 0.01809  | -0.1539  | 0.00085  | -0.11404 | 0.01367  | -0.20631 | 6.96E-06 | -0.22236 | 1.21E-06 |
| 0.5532   | 0.194566 | 2.30E-05 | 0.390506 | 1.84E-18 | 0.282936 | 4.80E-10 | 0.260507 | 1.11E-08 |
| 0.00078  | 0.031162 | 0.50173  | 0.177623 | 0.00011  | 0.146535 | 0.0015   | -0.01043 | 0.82219  |
| 0.21561  | -0.04458 | 0.33646  | 0.112005 | 0.01545  | -0.06672 | 0.15002  | -0.10625 | 0.02165  |
| 0.96832  | 0.00599  | 0.89728  | 0.10757  | 0.02007  | 0.116273 | 0.01192  | 0.024878 | 0.59178  |
| 0.14     | -0.02317 | 0.61746  | -0.10207 | 0.02741  | -0.04937 | 0.28697  | -0.09451 | 0.0412   |

|          |          |          |          |          |          |          |          |          |
|----------|----------|----------|----------|----------|----------|----------|----------|----------|
| 0.89549  | -0.04707 | 0.31011  | 0.1821   | 7.56E-05 | 0.116611 | 0.01167  | 0.161876 | 0.00044  |
| 0.00951  | 0.02103  | 0.65034  | 0.228601 | 5.94E-07 | 0.029369 | 0.52666  | 0.106964 | 0.02078  |
| 0.77721  | -0.12504 | 0.00682  | -0.0433  | 0.3505   | -0.00708 | 0.87868  | -0.16809 | 0.00026  |
| 0.26139  | 0.028437 | 0.53987  | 0.036669 | 0.4292   | -0.04326 | 0.3509   | 0.019109 | 0.68043  |
| 0.38352  | 0.000205 | 0.99648  | -0.04119 | 0.37443  | 0.023632 | 0.61048  | 0.043266 | 0.35087  |
| 0.02973  | 0.315439 | 3.01E-12 | 0.238043 | 1.94E-07 | 0.266691 | 4.79E-09 | 0.32402  | 7.08E-13 |
| 0.5196   | 0.03627  | 0.43424  | 0.184069 | 6.30E-05 | 0.120796 | 0.00898  | 0.163099 | 0.0004   |
| 0.05105  | -0.02047 | 0.65913  | -0.16737 | 0.00028  | -0.11757 | 0.011    | -0.1232  | 0.00769  |
| 7.53E-08 | 0.023926 | 0.60604  | -0.13342 | 0.00387  | -0.08211 | 0.07627  | -0.01756 | 0.705    |
| 5.70E-05 | 0.026664 | 0.56544  | -0.14804 | 0.00134  | -0.08046 | 0.08242  | -0.04749 | 0.3058   |
| 1.85E-14 | 0.018956 | 0.68285  | -0.07062 | 0.12751  | -0.03317 | 0.47457  | -0.01018 | 0.82626  |
| 0.01366  | 0.018749 | 0.68613  | 0.052429 | 0.25816  | 0.010869 | 0.81479  | 0.03929  | 0.39693  |
| 2.46E-06 | -0.00171 | 0.97067  | -0.08941 | 0.05351  | -0.07144 | 0.12316  | -0.04152 | 0.37064  |
| 0.00071  | -0.00667 | 0.88565  | -0.12823 | 0.00552  | -0.051   | 0.27138  | -0.03814 | 0.41095  |
| 7.70E-11 | 0.03201  | 0.49015  | -0.04937 | 0.28704  | -0.06824 | 0.14089  | 0.000401 | 0.99311  |
| 0.0013   | 0.066042 | 0.15419  | 0.040853 | 0.3784   | -0.02332 | 0.6152   | 0.084778 | 0.06718  |
| 0.03981  | 0.05146  | 0.26708  | 0.158173 | 0.0006   | 0.119421 | 0.00979  | 0.258682 | 1.41E-08 |
| 3.27E-08 | 0.21422  | 2.99E-06 | 0.122913 | 0.00783  | 0.013512 | 0.77088  | 0.161132 | 0.00047  |
| 0.00051  | 0.172007 | 0.00019  | 0.176432 | 0.00013  | 0.306987 | 1.20E-11 | 0.286076 | 3.02E-10 |
| 0.18507  | 0.200885 | 1.22E-05 | 0.105761 | 0.02227  | 0.186005 | 5.25E-05 | 0.236335 | 2.38E-07 |
| 0.01888  | 0.030551 | 0.51016  | -0.04265 | 0.35781  | 0.057817 | 0.21235  | 0.026641 | 0.56577  |
| 0.00142  | 0.059687 | 0.19791  | -0.04747 | 0.30599  | -0.06029 | 0.1934   | 0.001514 | 0.97398  |
| 3.63E-10 | -0.04246 | 0.35993  | -0.20242 | 1.04E-05 | -0.15962 | 0.00054  | -0.24234 | 1.14E-07 |
| 0.65423  | 0.328499 | 3.27E-13 | 0.361548 | 7.22E-16 | 0.249122 | 4.89E-08 | 0.355529 | 2.32E-15 |
| 0.13845  | 0.030837 | 0.50621  | -0.02072 | 0.65509  | -0.04111 | 0.3754   | 0.086405 | 0.06208  |
| 0.0001   | -0.10665 | 0.02116  | -0.14458 | 0.00173  | -0.15036 | 0.00112  | -0.17719 | 0.00012  |
| 0.00086  | -0.00174 | 0.9701   | -0.01948 | 0.67461  | -0.02531 | 0.5854   | 0.011816 | 0.79898  |
| 0.80302  | 0.057133 | 0.21782  | -0.02228 | 0.63103  | -0.07737 | 0.09494  | -0.01977 | 0.67     |
| 0.22216  | -0.14939 | 0.0012   | -0.31573 | 2.86E-12 | -0.21025 | 4.59E-06 | -0.24994 | 4.40E-08 |
| 0.95895  | -0.01221 | 0.79238  | -0.2155  | 2.60E-06 | -0.11524 | 0.0127   | -0.1184  | 0.01045  |
| 0.44055  | -0.05377 | 0.24618  | -0.08642 | 0.06204  | -0.10155 | 0.02821  | -0.13662 | 0.00309  |
| 0.23867  | -0.01399 | 0.76306  | -0.03448 | 0.45734  | -0.02443 | 0.59854  | -0.04279 | 0.35621  |
| 0.25986  | 0.031757 | 0.49359  | 0.26224  | 8.78E-09 | 0.168723 | 0.00025  | 0.153242 | 0.00089  |
| 0.55768  | 0.056531 | 0.22272  | 0.040164 | 0.38651  | 0.008364 | 0.85695  | 0.0211   | 0.64926  |
| 0.88095  | 0.038501 | 0.40648  | 0.019319 | 0.67711  | 0.107626 | 0.02     | 0.100641 | 0.02966  |
| 0.43002  | 0.057588 | 0.21417  | -0.11872 | 0.01024  | -0.09749 | 0.03519  | -0.0154  | 0.7399   |
| 0.37549  | -0.11628 | 0.01191  | -0.11358 | 0.01406  | -0.18454 | 6.03E-05 | -0.20736 | 6.24E-06 |
| 0.17877  | -0.04368 | 0.34628  | -0.11964 | 0.00966  | -0.1478  | 0.00136  | -0.17005 | 0.00022  |
| 0.84695  | -0.02961 | 0.52329  | 0.038435 | 0.40729  | -0.02149 | 0.64322  | -0.04203 | 0.36483  |
| 0.23365  | -0.03827 | 0.40927  | -0.08813 | 0.05703  | -0.06696 | 0.14854  | -0.08524 | 0.06572  |
| 0.01116  | 0.039686 | 0.39219  | 0.006106 | 0.8953   | -0.03339 | 0.47162  | -0.00194 | 0.96665  |
| 0.37753  | -0.05619 | 0.22549  | 0.185682 | 5.41E-05 | -0.04173 | 0.36821  | -0.10605 | 0.02189  |
| 0.26324  | -0.03458 | 0.45601  | -0.09268 | 0.04531  | -0.16103 | 0.00048  | -0.16203 | 0.00044  |
| 0.4598   | -0.00069 | 0.98809  | -0.14946 | 0.0012   | -0.20181 | 1.11E-05 | -0.14717 | 0.00143  |
| 0.35631  | -0.01241 | 0.78905  | -0.01956 | 0.67325  | -0.07508 | 0.10513  | -0.09481 | 0.04056  |



|          |          |          |          |          |          |          |          |          |
|----------|----------|----------|----------|----------|----------|----------|----------|----------|
| 0.681    | 0.039402 | 0.39558  | -0.15105 | 0.00106  | -0.17584 | 0.00013  | -0.07392 | 0.11064  |
| 0.81142  | 0.015442 | 0.73926  | -0.10003 | 0.03068  | -0.09488 | 0.04041  | -0.02118 | 0.64798  |
| 0.26118  | 0.165303 | 0.00033  | -0.07143 | 0.12322  | -0.07307 | 0.11483  | 0.107738 | 0.01987  |
| 0.28025  | -0.15637 | 0.0007   | 0.096658 | 0.03679  | -0.11352 | 0.01411  | -0.1448  | 0.0017   |
| 0.79081  | 0.047242 | 0.30832  | -0.09354 | 0.04334  | -0.04714 | 0.30936  | -0.01693 | 0.71511  |
| 3.40E-05 | 0.023112 | 0.61836  | -0.00995 | 0.83016  | -0.07629 | 0.09965  | 0.005189 | 0.91095  |
| 0.21313  | -0.00214 | 0.96327  | 0.008355 | 0.85709  | -0.07766 | 0.09369  | -0.05321 | 0.25112  |
| 0.20805  | 0.020996 | 0.65087  | 0.027136 | 0.55857  | -0.0263  | 0.57076  | -0.01203 | 0.79536  |
| 0.02114  | 0.072926 | 0.11553  | -0.0527  | 0.25569  | 0.032088 | 0.48909  | 0.072669 | 0.11682  |
| 2.06E-08 | 0.08169  | 0.07781  | 0.052834 | 0.2545   | 0.087558 | 0.05866  | 0.132343 | 0.00417  |
| 6.97E-05 | 0.020753 | 0.65464  | 0.090736 | 0.05004  | -0.16346 | 0.00039  | -0.04862 | 0.29437  |
| 6.45E-05 | 0.069471 | 0.13385  | -0.04598 | 0.32142  | -0.0013  | 0.97771  | 0.03095  | 0.50465  |
| 0.00307  | 0.333865 | 1.27E-13 | 0.126026 | 0.00639  | 0.188677 | 4.07E-05 | 0.327962 | 3.58E-13 |
| 2.69E-05 | 0.083312 | 0.07207  | -0.06357 | 0.1702   | -0.02035 | 0.66094  | 0.085819 | 0.06388  |
| 0.60684  | 0.112785 | 0.01475  | 0.292443 | 1.16E-10 | 0.354722 | 2.71E-15 | 0.352363 | 4.25E-15 |
| 0.00035  | 0.086846 | 0.06076  | 0.324639 | 6.36E-13 | 0.078967 | 0.08827  | 0.117927 | 0.01076  |
| 0.72696  | -0.02398 | 0.60527  | -0.06489 | 0.16154  | -0.09629 | 0.03752  | -0.07922 | 0.08726  |
| 7.44E-07 | 0.088279 | 0.05661  | 0.092519 | 0.04569  | 0.055768 | 0.22903  | 0.113694 | 0.01396  |
| 0.52665  | 0.032028 | 0.48991  | -0.04323 | 0.35125  | -0.11055 | 0.01686  | -0.03468 | 0.45473  |
| 1.11E-11 | 0.062449 | 0.17791  | 0.057355 | 0.21603  | -0.01724 | 0.71012  | 0.024627 | 0.59553  |
| 0.05889  | 0.159981 | 0.00052  | -0.06368 | 0.16948  | -0.06948 | 0.13382  | 0.027521 | 0.55301  |
| 0.00011  | -0.03914 | 0.39871  | -0.27262 | 2.11E-09 | -0.20969 | 4.87E-06 | -0.17023 | 0.00022  |
| 0.78278  | -0.00801 | 0.86296  | -0.08768 | 0.05832  | -0.05876 | 0.20494  | -0.06082 | 0.18948  |
| 0.13929  | 0.005725 | 0.9018   | -0.05481 | 0.23712  | -0.04437 | 0.33866  | -0.05926 | 0.20118  |
| 7.48E-06 | -0.17356 | 0.00016  | 0.138856 | 0.00264  | -0.03932 | 0.39659  | -0.18106 | 8.33E-05 |
| 0.53118  | -0.09445 | 0.04133  | -0.1239  | 0.00735  | -0.13046 | 0.00475  | -0.0885  | 0.05598  |
| 0.16965  | -0.16172 | 0.00045  | -0.15073 | 0.00109  | -0.11588 | 0.01221  | -0.30832 | 9.66E-12 |
| 0.00029  | 0.074197 | 0.1093   | 0.130843 | 0.00462  | 0.159287 | 0.00055  | 0.166902 | 0.00029  |
| 0.39959  | 0.004425 | 0.92402  | -0.10833 | 0.0192   | -0.06627 | 0.15274  | -0.09558 | 0.03896  |
| 0.40591  | -0.09648 | 0.03713  | -0.07684 | 0.09721  | 0.00597  | 0.89763  | -0.16368 | 0.00038  |
| 0.17518  | 0.031365 | 0.49894  | -0.02095 | 0.65152  | -0.00749 | 0.8718   | -0.02726 | 0.55672  |
| 0.81919  | -0.08939 | 0.05355  | -0.21728 | 2.14E-06 | -0.13516 | 0.00343  | -0.1911  | 3.22E-05 |
| 0.03985  | 0.143546 | 0.00187  | -0.05701 | 0.21885  | 0.043641 | 0.3467   | 0.16254  | 0.00042  |
| 2.42E-06 | -0.07478 | 0.10654  | 0.122182 | 0.00821  | -0.08241 | 0.07521  | -0.0955  | 0.03912  |
| 0.03691  | -0.10649 | 0.02135  | 0.174982 | 0.00014  | -0.04729 | 0.30781  | -0.10163 | 0.02809  |
| 0.06903  | -0.01108 | 0.8112   | -0.10717 | 0.02053  | -0.13144 | 0.00444  | -0.11783 | 0.01082  |
| 0.17998  | 0.056772 | 0.22074  | 0.060983 | 0.18833  | 0.097598 | 0.03499  | -0.03054 | 0.51036  |
| 2.23E-09 | -0.12108 | 0.00881  | -0.11929 | 0.00988  | -0.23173 | 4.12E-07 | -0.33769 | 6.42E-14 |
| 5.71E-06 | -0.16447 | 0.00036  | -0.02372 | 0.60914  | -0.01688 | 0.71601  | -0.11341 | 0.0142   |
| 0.97708  | 0.032102 | 0.48891  | 0.026105 | 0.57362  | 0.022859 | 0.62221  | 0.033891 | 0.46499  |
| 0.18354  | 0.095904 | 0.03829  | 0.120212 | 0.00932  | 0.072096 | 0.11974  | 0.15065  | 0.00109  |
| 0.05076  | 0.035951 | 0.43829  | 0.08597  | 0.06341  | -0.01762 | 0.70412  | 0.028036 | 0.5456   |
| 0.02364  | 0.090135 | 0.05159  | -0.02408 | 0.60376  | -0.06538 | 0.15835  | 0.012672 | 0.78476  |
| 0.00343  | -0.11238 | 0.01511  | 0.221189 | 1.39E-06 | 0.146302 | 0.00152  | -0.05591 | 0.22783  |
| 3.57E-06 | 0.073597 | 0.11221  | 0.148593 | 0.00128  | 0.134689 | 0.00354  | 0.223049 | 1.12E-06 |

|          |          |          |          |          |          |          |          |          |
|----------|----------|----------|----------|----------|----------|----------|----------|----------|
| 0.03241  | 0.374078 | 5.86E-17 | -0.03801 | 0.41248  | 0.027468 | 0.55378  | 0.162948 | 0.00041  |
| 0.00216  | 0.111139 | 0.01627  | 0.023782 | 0.60821  | -0.0784  | 0.09058  | 0.038626 | 0.40497  |
| 0.13636  | 0.006216 | 0.89343  | 0.03778  | 0.41533  | -0.14051 | 0.00234  | -0.01281 | 0.78242  |
| 9.30E-06 | 0.075978 | 0.10103  | 0.218966 | 1.78E-06 | 0.14366  | 0.00186  | 0.292275 | 1.19E-10 |
| 2.11E-09 | 0.078766 | 0.08909  | 0.04926  | 0.2881   | -0.02535 | 0.58473  | 0.000272 | 0.99532  |
| 0.45065  | 0.058931 | 0.20366  | 0.07686  | 0.09713  | 0.009879 | 0.83139  | 0.032063 | 0.48944  |
| 0.03609  | -0.04409 | 0.34176  | 0.303331 | 2.14E-11 | 0.199823 | 1.36E-05 | 0.172114 | 0.00019  |
| 0.00035  | 0.100606 | 0.02972  | 0.09486  | 0.04045  | -0.00344 | 0.94086  | 0.069812 | 0.13195  |
| 1.14E-11 | 0.114913 | 0.01296  | 0.003982 | 0.93161  | -0.04564 | 0.32504  | 0.060472 | 0.19206  |
| 0.91967  | -0.02015 | 0.66408  | -0.10858 | 0.01892  | -0.09517 | 0.03979  | -0.05098 | 0.27158  |
| 0.55529  | -0.01574 | 0.73448  | -0.09453 | 0.04117  | -0.06256 | 0.17712  | -0.06871 | 0.13819  |
| 0.18766  | 0.06156  | 0.18417  | -0.11252 | 0.01498  | -0.12011 | 0.00937  | -0.03265 | 0.48152  |
| 0.00241  | -0.15242 | 0.00095  | -0.05843 | 0.20753  | -0.10851 | 0.019    | -0.25533 | 2.19E-08 |
| 0.30442  | -0.03279 | 0.47968  | -0.08143 | 0.07876  | -0.17974 | 9.40E-05 | -0.11954 | 0.00972  |
| 0.42173  | -0.0793  | 0.08694  | -0.06869 | 0.1383   | -0.04517 | 0.33008  | -0.10916 | 0.01829  |
| 0.84699  | -0.04774 | 0.30324  | -0.05657 | 0.2224   | -0.07068 | 0.1272   | -0.0699  | 0.13149  |
| 0.13694  | 0.072443 | 0.11797  | 0.045482 | 0.32672  | 0.085806 | 0.06392  | 0.273581 | 1.84E-09 |
| 0.00015  | 0.146181 | 0.00154  | 0.164826 | 0.00035  | 0.19381  | 2.47E-05 | 0.333038 | 1.47E-13 |
| 0.71374  | -0.0919  | 0.04715  | -0.08646 | 0.06191  | -0.17312 | 0.00017  | -0.22414 | 9.93E-07 |
| 0.27194  | -0.02625 | 0.57157  | 0.206601 | 6.75E-06 | 0.096967 | 0.03619  | 0.069564 | 0.13333  |
| 0.03182  | -0.08073 | 0.08139  | 0.063967 | 0.16757  | -0.02928 | 0.52798  | -0.11275 | 0.01478  |
| 0.00041  | 0.162756 | 0.00041  | 0.074451 | 0.10809  | 0.021554 | 0.64223  | 0.161082 | 0.00047  |
| 0.7791   | 0.052208 | 0.26018  | -0.03096 | 0.50451  | 0.040462 | 0.38299  | 0.119864 | 0.00952  |
| 0.42267  | -0.04154 | 0.37045  | -0.04032 | 0.38472  | -0.09505 | 0.04006  | -0.08416 | 0.06922  |
| 0.00042  | 0.083659 | 0.07088  | -0.01741 | 0.70747  | -0.04139 | 0.37219  | 0.083646 | 0.07093  |
| 0.83947  | -0.01364 | 0.76883  | -0.11153 | 0.0159   | -0.12105 | 0.00883  | -0.15313 | 0.0009   |
| 3.82E-05 | 0.046944 | 0.31139  | -0.23513 | 2.75E-07 | -0.00816 | 0.86048  | 0.009733 | 0.83385  |
| 0.00044  | 0.135089 | 0.00345  | -0.01698 | 0.71435  | 0.087091 | 0.06003  | 0.11877  | 0.0102   |
| 0.04356  | 0.119498 | 0.00975  | 0.233153 | 3.48E-07 | 0.085836 | 0.06383  | 0.166396 | 0.0003   |
| 0.46361  | 0.063923 | 0.16786  | 0.032335 | 0.48575  | -0.07822 | 0.09134  | 0.019871 | 0.66843  |
| 0.0028   | 0.193859 | 2.46E-05 | 0.107234 | 0.02046  | 0.091376 | 0.04844  | 0.240307 | 1.47E-07 |
| 1.62E-11 | -0.11306 | 0.01451  | 0.021766 | 0.63895  | 0.070209 | 0.12976  | -0.09563 | 0.03886  |
| 0.62606  | -0.01935 | 0.6767   | -0.00357 | 0.93865  | -0.03002 | 0.51756  | -0.04929 | 0.28782  |
| 0.38376  | -0.06647 | 0.15152  | 0.210713 | 4.37E-06 | 0.248559 | 5.25E-08 | 0.26465  | 6.33E-09 |
| 0.03668  | -0.0014  | 0.97587  | 0.105685 | 0.02236  | 0.119617 | 0.00967  | 0.058192 | 0.2094   |
| 0.27937  | 0.076376 | 0.09925  | -0.02919 | 0.52921  | 0.199639 | 1.38E-05 | 0.294015 | 9.14E-11 |
| 0.0401   | 0.347788 | 1.01E-14 | 0.060712 | 0.1903   | 0.10581  | 0.0222   | 0.178741 | 0.0001   |
| 0.28555  | 0.057744 | 0.21293  | -0.0113  | 0.80766  | 0.017405 | 0.70756  | 0.060614 | 0.19102  |
| 0.14659  | 0.23552  | 2.62E-07 | 0.137888 | 0.00283  | 0.247386 | 6.09E-08 | 0.293741 | 9.53E-11 |
| 1.42E-05 | 0.104691 | 0.02366  | 0.109272 | 0.01817  | 0.041602 | 0.36972  | 0.103857 | 0.02481  |
| 0.02925  | 0.041525 | 0.37061  | -0.06763 | 0.1445   | -0.08513 | 0.06605  | -0.02101 | 0.65059  |
| 0.0043   | 0.035972 | 0.43802  | 0.022148 | 0.63307  | 0.007939 | 0.86414  | 0.005059 | 0.91317  |
| 0.05387  | 0.027621 | 0.55158  | -0.09561 | 0.0389   | -0.11477 | 0.01307  | -0.02075 | 0.65468  |
| 0.19269  | 0.189661 | 3.71E-05 | 0.059461 | 0.19962  | 0.02144  | 0.64399  | 0.2016   | 1.13E-05 |
| 0.00258  | 0.060069 | 0.19504  | -0.15501 | 0.00078  | -0.03888 | 0.40186  | -0.08403 | 0.06964  |

|          |          |          |          |          |          |          |          |          |
|----------|----------|----------|----------|----------|----------|----------|----------|----------|
| 3.87E-08 | 0.145352 | 0.00164  | 0.108836 | 0.01864  | 0.249227 | 4.82E-08 | 0.330274 | 2.39E-13 |
| 0.04322  | -0.148   | 0.00134  | -0.08875 | 0.05529  | -0.14605 | 0.00155  | -0.24787 | 5.73E-08 |
| 0.04434  | -0.06645 | 0.15164  | 0.052269 | 0.25963  | -0.10604 | 0.02191  | -0.06485 | 0.16175  |
| 0.85232  | -0.01205 | 0.79516  | 0.016924 | 0.71528  | 0.130644 | 0.00469  | 0.032537 | 0.48304  |
| 0.28219  | -0.02108 | 0.64962  | -0.12248 | 0.00806  | -0.08008 | 0.08387  | -0.11487 | 0.01299  |
| 0.38061  | 0.120162 | 0.00934  | 0.198235 | 1.59E-05 | 0.189963 | 3.60E-05 | 0.329012 | 2.99E-13 |
| 0.00546  | 0.022954 | 0.62076  | -0.17283 | 0.00017  | -0.22719 | 7.00E-07 | -0.11324 | 0.01435  |
| 0.2656   | 0.052479 | 0.25771  | -0.15215 | 0.00097  | -0.12373 | 0.00743  | -0.00689 | 0.88189  |
| 0.73823  | 0.012279 | 0.79129  | 0.004053 | 0.93039  | 0.09836  | 0.03358  | 0.083024 | 0.07306  |
| 0.96155  | 0.044891 | 0.33305  | 0.179572 | 9.54E-05 | 0.188516 | 4.14E-05 | 0.223645 | 1.05E-06 |
| 0.20946  | -0.12185 | 0.00839  | -0.20303 | 9.78E-06 | -0.20474 | 8.19E-06 | -0.33636 | 8.14E-14 |
| 0.63029  | 0.043746 | 0.34554  | 0.052565 | 0.25693  | -0.04555 | 0.32596  | 0.028785 | 0.53492  |
| 0.00022  | 0.024214 | 0.60171  | -0.00626 | 0.89267  | 0.105917 | 0.02207  | 0.147464 | 0.0014   |
| 0.86641  | 0.078421 | 0.0905   | 0.168287 | 0.00026  | 0.219974 | 1.59E-06 | 0.326391 | 4.71E-13 |
| 0.15438  | -0.03901 | 0.40034  | -0.04826 | 0.29802  | -0.11445 | 0.01333  | -0.15476 | 0.00079  |
| 0.73839  | 0.006568 | 0.88743  | -0.12153 | 0.00856  | -0.11114 | 0.01627  | -0.06626 | 0.1528   |
| 0.35379  | -0.0197  | 0.67119  | -0.08713 | 0.05991  | -0.11942 | 0.00979  | -0.12559 | 0.00658  |
| 0.11642  | 0.069473 | 0.13384  | -0.12069 | 0.00904  | -0.17848 | 0.00011  | -0.1497  | 0.00118  |
| 0.41693  | 0.042806 | 0.35601  | -0.02329 | 0.61567  | -0.08404 | 0.0696   | -0.00652 | 0.88824  |
| 0.08487  | -0.12417 | 0.00722  | -0.01587 | 0.73237  | -0.16241 | 0.00043  | -0.19514 | 2.17E-05 |
| 0.07597  | -0.03556 | 0.44331  | 0.116424 | 0.01181  | -0.0531  | 0.25209  | -0.02569 | 0.57969  |
| 0.08664  | -0.18186 | 7.73E-05 | -0.13084 | 0.00462  | -0.10482 | 0.02349  | -0.33899 | 5.07E-14 |
| 0.56801  | -0.02048 | 0.65882  | -0.04689 | 0.31199  | -0.03132 | 0.49956  | -0.09299 | 0.04459  |
| 0.06982  | 0.052317 | 0.25918  | -0.02069 | 0.6556   | -0.06674 | 0.14988  | 0.052586 | 0.25674  |
| 0.7633   | -0.03156 | 0.49623  | -0.04502 | 0.3317   | 0.000796 | 0.98632  | -0.07303 | 0.11502  |
| 0.31747  | 0.105995 | 0.02197  | 0.012377 | 0.78965  | 0.178775 | 0.0001   | 0.233395 | 3.38E-07 |
| 0.32045  | 0.013964 | 0.76344  | -0.06606 | 0.15406  | -0.00781 | 0.86636  | -0.03766 | 0.41681  |
| 0.05947  | 0.08144  | 0.07872  | -0.02995 | 0.51852  | -0.05014 | 0.27954  | -0.0037  | 0.93641  |
| 0.00146  | 0.063601 | 0.17002  | -0.02892 | 0.53301  | -0.03129 | 0.49997  | -0.00787 | 0.86527  |
| 0.87518  | 0.166801 | 0.00029  | 0.034725 | 0.45409  | 0.204366 | 8.52E-06 | 0.29218  | 1.21E-10 |
| 0.65497  | -0.00164 | 0.97179  | 0.119073 | 0.01001  | 0.104711 | 0.02364  | 0.078954 | 0.08833  |
| 0.00028  | 0.153392 | 0.00088  | 0.121425 | 0.00862  | 0.27535  | 1.43E-09 | 0.316652 | 2.46E-12 |
| 1.43E-11 | -0.02854 | 0.53837  | -0.03724 | 0.42209  | -0.0789  | 0.08855  | -0.05796 | 0.21119  |
| 0.08927  | 0.079825 | 0.08486  | 0.169474 | 0.00023  | 0.149807 | 0.00117  | 0.175498 | 0.00014  |
| 0.00925  | -0.20836 | 5.61E-06 | -0.12771 | 0.00571  | -0.08758 | 0.05861  | -0.26664 | 4.83E-09 |
| 0.14687  | -0.1595  | 0.00054  | -0.04772 | 0.30343  | -0.15476 | 0.00079  | -0.21909 | 1.75E-06 |
| 0.50402  | -0.07944 | 0.08639  | 0.036307 | 0.43377  | -0.0524  | 0.25841  | -0.13115 | 0.00453  |
| 0.21088  | -0.09538 | 0.03937  | -0.04393 | 0.34352  | -0.06512 | 0.16001  | -0.16162 | 0.00045  |
| 0.07986  | 0.111376 | 0.01604  | 0.19704  | 1.80E-05 | 0.136249 | 0.00318  | 0.227778 | 6.54E-07 |
| 0.01791  | -0.20821 | 5.70E-06 | -0.00609 | 0.89558  | -0.26649 | 4.93E-09 | -0.3598  | 1.02E-15 |
| 0.04321  | -0.00183 | 0.96859  | -0.04552 | 0.32626  | -0.0683  | 0.14057  | -0.00312 | 0.94647  |
| 0.15825  | -0.03657 | 0.4305   | -0.27075 | 2.73E-09 | -0.16664 | 0.0003   | -0.14913 | 0.00123  |
| 0.01516  | -0.00015 | 0.99743  | -0.03924 | 0.39756  | -0.11337 | 0.01424  | -0.04765 | 0.30414  |
| 0.20197  | -0.08561 | 0.06454  | -0.00089 | 0.98474  | 0.037011 | 0.4249   | -0.14784 | 0.00136  |
| 2.65E-07 | 0.097804 | 0.0346   | -0.07326 | 0.11385  | -0.0954  | 0.03931  | 0.071506 | 0.12281  |

|          |          |          |          |          |          |          |          |          |
|----------|----------|----------|----------|----------|----------|----------|----------|----------|
| 0.00265  | -0.21283 | 3.48E-06 | -0.09045 | 0.05076  | -0.18343 | 6.68E-05 | -0.30743 | 1.11E-11 |
| 0.2919   | 0.106628 | 0.02119  | -0.01266 | 0.78491  | 0.120415 | 0.0092   | 0.18455  | 6.02E-05 |
| 0.65743  | -0.06795 | 0.14258  | -0.00545 | 0.90649  | -0.06825 | 0.14086  | -0.1322  | 0.00421  |
| 7.56E-05 | 0.054322 | 0.24135  | 0.139578 | 0.0025   | 0.060163 | 0.19435  | 0.081782 | 0.07747  |
| 0.00036  | -0.14141 | 0.00219  | 0.027203 | 0.55761  | -0.13559 | 0.00333  | -0.17758 | 0.00011  |
| 0.71967  | -0.02498 | 0.59029  | 0.017563 | 0.70501  | 0.017429 | 0.70716  | -0.01339 | 0.77291  |
| 0.00129  | 0.295863 | 6.89E-11 | 0.19425  | 2.37E-05 | 0.205341 | 7.70E-06 | 0.34539  | 1.57E-14 |
| 3.30E-12 | 0.029072 | 0.53085  | -0.07052 | 0.12809  | -0.21296 | 3.43E-06 | -0.11826 | 0.01054  |
| 0.97809  | 0.26602  | 5.26E-09 | 0.351021 | 5.48E-15 | 0.242357 | 1.14E-07 | 0.334763 | 1.08E-13 |
| 0.17053  | 0.082781 | 0.07391  | 0.246464 | 6.84E-08 | 0.292177 | 1.21E-10 | 0.275754 | 1.35E-09 |
| 3.61E-05 | -0.02827 | 0.54226  | -0.11577 | 0.0123   | -0.23864 | 1.80E-07 | -0.18544 | 5.54E-05 |
| 0.00103  | 0.076563 | 0.09843  | -0.06768 | 0.14421  | -0.09518 | 0.03977  | -0.08966 | 0.05284  |
| 0.28231  | 0.028511 | 0.53882  | -0.04268 | 0.35738  | -0.04927 | 0.28799  | -0.02378 | 0.6082   |
| 0.76591  | -0.00104 | 0.9821   | -0.04234 | 0.36125  | -0.03318 | 0.47449  | -0.0429  | 0.35491  |
| 5.90E-06 | 0.087079 | 0.06006  | 0.043595 | 0.34721  | -0.03683 | 0.42712  | 0.049689 | 0.28391  |
| 0.81884  | -0.00889 | 0.84806  | -0.09627 | 0.03755  | -0.07849 | 0.09024  | -0.08298 | 0.07321  |
| 0.03049  | 0.09331  | 0.04386  | 0.101166 | 0.02882  | 0.127675 | 0.00573  | 0.16651  | 0.0003   |
| 0.0488   | 0.256624 | 1.85E-08 | -0.04622 | 0.31896  | 0.114855 | 0.01301  | 0.186278 | 5.12E-05 |
| 0.00077  | 0.047669 | 0.30397  | 0.077961 | 0.09241  | 0.071227 | 0.12428  | 0.109377 | 0.01806  |
| 5.30E-06 | -0.15589 | 0.00072  | -0.03434 | 0.45909  | -0.12784 | 0.00567  | -0.2323  | 3.85E-07 |
| 0.00151  | 0.238679 | 1.79E-07 | 0.050588 | 0.27528  | 0.138296 | 0.00274  | 0.31547  | 2.99E-12 |
| 0.70026  | 0.034283 | 0.45986  | -0.10865 | 0.01885  | -0.02191 | 0.63669  | -0.02882 | 0.53445  |
| 0.78462  | -0.03393 | 0.46447  | -0.00064 | 0.98899  | 0.018785 | 0.68555  | -0.08348 | 0.07149  |
| 0.85     | 0.038561 | 0.40576  | 0.085331 | 0.06541  | 0.103464 | 0.02536  | 0.097592 | 0.035    |
| 0.92977  | 0.087558 | 0.05866  | 0.030943 | 0.50474  | 0.132754 | 0.00405  | 0.069814 | 0.13194  |
| 0.3363   | 0.182897 | 7.03E-05 | 0.113589 | 0.01405  | 0.17876  | 0.0001   | 0.285112 | 3.48E-10 |
| 0.11364  | -0.02792 | 0.54729  | 0.058756 | 0.205    | -0.02037 | 0.66065  | -0.06097 | 0.18839  |
| 0.26971  | -0.00711 | 0.87824  | -0.15346 | 0.00088  | -0.13977 | 0.00247  | -0.13683 | 0.00305  |
| 0.95065  | 0.219452 | 1.68E-06 | -0.1613  | 0.00047  | -0.08808 | 0.05717  | -0.02256 | 0.62673  |
| 0.50505  | 0.028094 | 0.54478  | 0.001976 | 0.96604  | -0.02178 | 0.63874  | -0.0274  | 0.55469  |
| 0.06645  | -0.0795  | 0.08614  | -0.07971 | 0.08532  | -0.16309 | 0.0004   | -0.17834 | 0.00011  |
| 3.40E-05 | -0.04513 | 0.33045  | -0.04903 | 0.29034  | -0.05587 | 0.22815  | -0.11306 | 0.0145   |
| 0.00097  | -0.01816 | 0.69552  | -0.01298 | 0.77966  | -0.0648  | 0.16206  | -0.08071 | 0.08144  |
| 0.01585  | -0.04023 | 0.38576  | 0.010806 | 0.81583  | -0.01286 | 0.78162  | -0.07123 | 0.12426  |
| 0.0005   | -0.15635 | 0.0007   | 0.079413 | 0.08649  | -0.01181 | 0.79911  | -0.19914 | 1.45E-05 |
| 1.40E-05 | 0.080075 | 0.08389  | 0.143111 | 0.00193  | 0.217796 | 2.02E-06 | 0.295956 | 6.79E-11 |
| 0.00323  | 0.110302 | 0.0171   | 0.011616 | 0.8023   | 0.044994 | 0.33194  | 0.117601 | 0.01098  |
| 0.76072  | -0.0265  | 0.56784  | -0.07492 | 0.10588  | -0.1402  | 0.00239  | -0.12491 | 0.00688  |
| 3.24E-10 | 0.015297 | 0.74162  | 0.11462  | 0.01319  | 0.126279 | 0.00628  | 0.034731 | 0.45401  |
| 1.39E-07 | 0.067146 | 0.1474   | 0.061405 | 0.18528  | -0.02144 | 0.64392  | 0.028129 | 0.54428  |
| 1.49E-06 | 0.116131 | 0.01203  | -0.15515 | 0.00077  | -0.09031 | 0.05113  | 0.086223 | 0.06264  |
| 0.23026  | -0.11355 | 0.01408  | -0.07193 | 0.12061  | -0.24839 | 5.37E-08 | -0.29432 | 8.73E-11 |
| 3.95E-07 | 0.029698 | 0.52204  | -0.06751 | 0.14524  | -0.11563 | 0.0124   | -0.04437 | 0.33866  |
| 4.46E-06 | -0.18448 | 6.06E-05 | -0.17742 | 0.00012  | -0.20933 | 5.06E-06 | -0.27121 | 2.57E-09 |
| 0.10296  | 0.082831 | 0.07373  | -0.04378 | 0.34516  | 0.006456 | 0.88934  | 0.18401  | 6.33E-05 |

|          |          |          |          |          |          |          |          |          |
|----------|----------|----------|----------|----------|----------|----------|----------|----------|
| 0.04185  | -0.01849 | 0.69024  | -0.04773 | 0.30334  | 0.067351 | 0.14617  | 0.046631 | 0.31463  |
| 0.55469  | -0.12159 | 0.00853  | -0.12028 | 0.00927  | -0.08577 | 0.06403  | -0.24634 | 6.95E-08 |
| 0.28051  | -0.12028 | 0.00928  | 0.107666 | 0.01995  | 0.026981 | 0.56084  | -0.04205 | 0.36458  |
| 0.05248  | 0.002119 | 0.96357  | -0.1869  | 4.82E-05 | -0.12216 | 0.00822  | -0.10033 | 0.03018  |
| 0.00086  | 0.009968 | 0.82989  | -0.05296 | 0.2534   | -0.07073 | 0.12691  | -0.03598 | 0.43796  |
| 0.67497  | -0.00017 | 0.99703  | 0.090655 | 0.05025  | -0.01703 | 0.71359  | 0.011647 | 0.8018   |
| 0.85498  | -0.02186 | 0.6375   | -0.0444  | 0.33842  | 0.0322   | 0.48757  | -0.07378 | 0.11131  |
| 0.82941  | 0.046185 | 0.31929  | 0.063828 | 0.1685   | 0.015531 | 0.73781  | 0.019561 | 0.6733   |
| 0.23306  | 0.246497 | 6.81E-08 | -0.07589 | 0.10144  | 0.045046 | 0.33138  | 0.176882 | 0.00012  |
| 9.27E-05 | 0.038929 | 0.40128  | -0.0206  | 0.65705  | -0.07463 | 0.10726  | 0.008822 | 0.8492   |
| 0.00044  | 0.030187 | 0.51521  | 0.15703  | 0.00066  | -0.0122  | 0.79253  | 0.128938 | 0.00526  |
| 2.68E-12 | -0.09208 | 0.04672  | -0.2905  | 1.56E-10 | -0.27592 | 1.32E-09 | -0.31141 | 5.84E-12 |
| 3.55E-17 | -0.04394 | 0.34337  | -0.2635  | 7.40E-09 | -0.19571 | 2.05E-05 | -0.19709 | 1.79E-05 |
| 1.26E-09 | -0.02016 | 0.66388  | -0.0405  | 0.38259  | -0.16664 | 0.0003   | -0.14871 | 0.00127  |
| 0.84297  | -0.05893 | 0.20369  | 0.07381  | 0.11117  | -0.12921 | 0.00517  | -0.19292 | 2.70E-05 |
| 0.67138  | 0.172283 | 0.00018  | 0.023279 | 0.61582  | 0.101356 | 0.02852  | 0.214522 | 2.90E-06 |
| 0.16696  | -0.06972 | 0.13248  | -0.17619 | 0.00013  | -0.15142 | 0.00103  | -0.21347 | 3.25E-06 |
| 0.28094  | 0.011482 | 0.80455  | -0.17303 | 0.00017  | -0.17843 | 0.00011  | -0.05561 | 0.23037  |
| 0.56099  | 0.022796 | 0.62317  | 0.032213 | 0.4874   | 0.06017  | 0.19429  | 0.051197 | 0.26954  |
| 0.13768  | 0.207205 | 6.34E-06 | 0.232747 | 3.65E-07 | 0.151311 | 0.00104  | 0.314468 | 3.53E-12 |
| 0.17784  | 0.043799 | 0.34496  | -0.00937 | 0.84     | 0.0917   | 0.04765  | 0.06228  | 0.17909  |
| 0.28925  | -0.04786 | 0.30203  | 0.143615 | 0.00186  | -0.10249 | 0.02677  | -0.05642 | 0.22363  |
| 6.04E-06 | -0.03795 | 0.41329  | 0.033639 | 0.46833  | -0.06954 | 0.13349  | -0.12897 | 0.00525  |
| 0.00091  | 0.310251 | 7.06E-12 | -0.04452 | 0.33704  | 0.002998 | 0.94848  | 0.122652 | 0.00797  |
| 0.37589  | -0.12669 | 0.00612  | -0.04315 | 0.35216  | -0.13417 | 0.00368  | -0.20588 | 7.28E-06 |
| 0.85317  | 0.005193 | 0.91089  | 0.178705 | 0.0001   | 0.298378 | 4.67E-11 | 0.274117 | 1.71E-09 |
| 0.20054  | -0.02764 | 0.55123  | -0.08942 | 0.05349  | -0.15148 | 0.00102  | -0.21212 | 3.76E-06 |
| 0.89095  | -0.18859 | 4.11E-05 | -0.19861 | 1.54E-05 | -0.31296 | 4.53E-12 | -0.29293 | 1.08E-10 |
| 3.43E-06 | -0.17642 | 0.00013  | -0.08944 | 0.05342  | -0.25274 | 3.07E-08 | -0.3184  | 1.84E-12 |
| 0.19097  | 0.216597 | 2.31E-06 | 0.236092 | 2.45E-07 | 0.263834 | 7.08E-09 | 0.367357 | 2.29E-16 |
| 1.32E-08 | 0.364806 | 3.80E-16 | -0.00396 | 0.93196  | -0.02317 | 0.61742  | 0.15213  | 0.00097  |
| 1.26E-07 | 0.045736 | 0.32402  | -0.15337 | 0.00088  | -0.19496 | 2.21E-05 | -0.06326 | 0.17234  |
| 0.02636  | -0.04148 | 0.37111  | -0.06663 | 0.15056  | -0.07909 | 0.08779  | -0.07565 | 0.1025   |
| 0.80721  | -0.01855 | 0.68927  | 0.062923 | 0.17463  | 0.000378 | 0.9935   | -0.05088 | 0.27252  |
| 0.0093   | 0.16526  | 0.00034  | 0.059802 | 0.19704  | 0.138501 | 0.0027   | 0.331222 | 2.03E-13 |
| 0.00115  | 0.125853 | 0.00646  | 0.033011 | 0.47667  | 0.179539 | 9.57E-05 | 0.331102 | 2.07E-13 |
| 0.14232  | 0.053021 | 0.25282  | -0.08426 | 0.06888  | -0.06291 | 0.17474  | -0.00611 | 0.8952   |
| 0.0463   | -0.15196 | 0.00099  | -0.15928 | 0.00055  | -0.1696  | 0.00023  | -0.36236 | 6.16E-16 |
| 4.08E-05 | 0.079356 | 0.08671  | 0.06496  | 0.16106  | 0.155307 | 0.00076  | 0.162842 | 0.00041  |
| 0.12915  | -0.02979 | 0.52069  | -0.01671 | 0.7188   | -0.09482 | 0.04053  | -0.07396 | 0.11046  |
| 0.00637  | 0.096096 | 0.0379   | 0.008371 | 0.85682  | -0.06513 | 0.15995  | 0.05771  | 0.2132   |
| 3.03E-08 | 0.215612 | 2.57E-06 | 0.076226 | 0.09992  | -0.0149  | 0.74803  | 0.118152 | 0.01061  |
| 0.00014  | 0.076892 | 0.09698  | -0.0527  | 0.25573  | -0.0592  | 0.20159  | 0.018332 | 0.69274  |
| 0.39013  | -0.00277 | 0.95245  | 0.129319 | 0.00513  | 0.0123   | 0.79093  | -0.04594 | 0.32189  |
| 0.03184  | 0.04321  | 0.35149  | -0.05793 | 0.21147  | -0.12595 | 0.00642  | -0.0251  | 0.58851  |

|          |          |          |          |          |          |          |          |          |
|----------|----------|----------|----------|----------|----------|----------|----------|----------|
| 6.02E-10 | 0.083989 | 0.06978  | 0.00969  | 0.83457  | 0.069164 | 0.13559  | 0.111452 | 0.01597  |
| 0.79987  | -0.06989 | 0.13151  | 0.34291  | 2.48E-14 | 0.019442 | 0.67517  | -0.05519 | 0.23393  |
| 0.00326  | -0.02438 | 0.59921  | 0.109151 | 0.0183   | -0.01428 | 0.75821  | -0.02262 | 0.62592  |
| 0.78946  | -0.11171 | 0.01573  | -0.30886 | 8.84E-12 | -0.29913 | 4.15E-11 | -0.31751 | 2.13E-12 |
| 0.02777  | -0.0773  | 0.09523  | -0.12243 | 0.00808  | -0.13129 | 0.00449  | -0.19551 | 2.09E-05 |
| 0.00011  | -0.06015 | 0.19446  | -0.1611  | 0.00047  | -0.08145 | 0.07868  | -0.12853 | 0.00541  |
| 0.00327  | -0.05537 | 0.23239  | -0.1281  | 0.00557  | -0.07452 | 0.10777  | -0.17927 | 9.80E-05 |
| 0.71034  | 0.067998 | 0.14232  | -0.01494 | 0.74741  | -0.02736 | 0.55529  | 0.077714 | 0.09345  |
| 0.07195  | -0.15544 | 0.00075  | -0.14812 | 0.00133  | -0.24966 | 4.56E-08 | -0.39151 | 1.48E-18 |
| 0.32989  | 0.090432 | 0.05082  | -0.07797 | 0.09239  | -0.00461 | 0.92083  | 0.010993 | 0.81271  |
| 0.17045  | 0.082244 | 0.07581  | 0.012741 | 0.78362  | 0.134498 | 0.00359  | 0.151563 | 0.00102  |
| 0.09426  | 0.17867  | 0.0001   | -0.03941 | 0.39553  | 0.074883 | 0.10606  | 0.130274 | 0.00481  |
| 0.05045  | 0.153514 | 0.00087  | -0.16356 | 0.00039  | 0.036986 | 0.42521  | 0.101492 | 0.0283   |
| 0.03125  | -0.04232 | 0.36155  | -0.16656 | 0.0003   | -0.1764  | 0.00013  | -0.17146 | 0.0002   |
| 0.01535  | 0.013244 | 0.77531  | 0.026568 | 0.56684  | -0.02509 | 0.58856  | 0.043001 | 0.35382  |
| 0.98536  | 0.003801 | 0.9347   | 0.061615 | 0.18378  | -0.01715 | 0.71159  | -0.00877 | 0.85016  |
| 0.34699  | 0.050844 | 0.27286  | -0.03314 | 0.47491  | -0.05054 | 0.27569  | -0.00146 | 0.97492  |
| 5.28E-12 | 0.20911  | 5.18E-06 | 0.138207 | 0.00276  | 0.201151 | 1.19E-05 | 0.287268 | 2.53E-10 |
| 0.61674  | -0.07232 | 0.1186   | -0.06106 | 0.1878   | -0.11669 | 0.01161  | -0.08018 | 0.08347  |
| 0.55942  | 0.034784 | 0.45331  | -0.11375 | 0.01391  | -0.00882 | 0.84925  | -0.04153 | 0.37055  |
| 0.21426  | -0.02092 | 0.65199  | -0.12793 | 0.00563  | -0.05865 | 0.2058   | -0.13138 | 0.00446  |
| 0.01312  | 0.141356 | 0.0022   | 0.057855 | 0.21205  | 0.169367 | 0.00024  | 0.273186 | 1.95E-09 |
| 0.36074  | 0.026222 | 0.57191  | -0.01916 | 0.67961  | -0.06488 | 0.16157  | -0.04077 | 0.37938  |
| 0.23676  | 0.054535 | 0.2395   | -0.03843 | 0.40734  | -0.03969 | 0.39211  | -0.00938 | 0.83975  |
| 0.83016  | 0.002237 | 0.96154  | -0.12469 | 0.00698  | -0.05232 | 0.25913  | -0.08587 | 0.06371  |
| 0.00018  | -0.1049  | 0.02338  | -0.02468 | 0.59481  | -0.11195 | 0.01551  | -0.19207 | 2.93E-05 |
| 0.25671  | 0.05765  | 0.21368  | -0.13515 | 0.00343  | -0.09461 | 0.04099  | -0.03674 | 0.42835  |
| 1.20E-09 | -0.10996 | 0.01745  | -0.06116 | 0.18707  | -0.10756 | 0.02008  | -0.17411 | 0.00016  |
| 0.93088  | 0.01699  | 0.71422  | -0.03123 | 0.50085  | -0.13969 | 0.00248  | -0.07861 | 0.08973  |
| 9.93E-11 | 0.079369 | 0.08666  | 0.114445 | 0.01334  | 0.067769 | 0.14367  | 0.152719 | 0.00093  |
| 0.00139  | -0.02187 | 0.63735  | -0.04461 | 0.33614  | -0.09856 | 0.03322  | -0.04073 | 0.37979  |
| 0.94425  | 0.003695 | 0.93652  | -0.01952 | 0.67393  | -0.03255 | 0.48281  | -0.0089  | 0.84787  |
| 0.81276  | -0.00447 | 0.9233   | 0.018201 | 0.69484  | 0.036794 | 0.42763  | 0.002395 | 0.95884  |
| 0.58713  | -0.0238  | 0.60789  | -0.09224 | 0.04635  | -0.04986 | 0.28224  | -0.05869 | 0.20552  |
| 0.00279  | 0.019959 | 0.66705  | 0.018564 | 0.68906  | 0.161028 | 0.00048  | 0.079975 | 0.08427  |
| 0.02943  | -0.05053 | 0.27583  | 0.015261 | 0.74221  | -0.14348 | 0.00188  | -0.06291 | 0.1747   |
| 0.00014  | 0.048698 | 0.29363  | -0.0488  | 0.29267  | -0.11615 | 0.01201  | -0.00549 | 0.90587  |
| 0.59298  | -0.02493 | 0.59106  | -0.10484 | 0.02346  | -0.0557  | 0.22958  | -0.08306 | 0.07294  |
| 0.41405  | 0.010351 | 0.82346  | -0.09707 | 0.036    | -0.11962 | 0.00967  | -0.04222 | 0.36264  |
| 0.8272   | 0.133069 | 0.00397  | -0.05309 | 0.2522   | -0.10518 | 0.02301  | -0.0302  | 0.51498  |
| 4.99E-11 | 0.000879 | 0.98489  | -0.04209 | 0.36411  | -0.02035 | 0.66094  | -0.01581 | 0.73323  |
| 0.00081  | -0.01642 | 0.72343  | -0.03929 | 0.39694  | -0.05112 | 0.27024  | -0.06739 | 0.14591  |
| 0.87875  | -0.00919 | 0.84295  | -0.03701 | 0.42491  | -0.06078 | 0.18979  | -0.06222 | 0.17953  |
| 0.07243  | -0.0047  | 0.91925  | 0.048593 | 0.29468  | 0.014298 | 0.75796  | -0.01047 | 0.82146  |
| 0.24973  | 0.062543 | 0.17725  | 0.059543 | 0.19899  | 0.117292 | 0.01119  | 0.170413 | 0.00022  |

|          |          |          |          |          |          |          |          |          |
|----------|----------|----------|----------|----------|----------|----------|----------|----------|
| 0.016    | -0.23253 | 3.75E-07 | 0.016815 | 0.71703  | -0.17471 | 0.00015  | -0.30638 | 1.32E-11 |
| 0.55371  | 0.027221 | 0.55734  | 0.131013 | 0.00457  | 0.059313 | 0.20074  | 0.145465 | 0.00162  |
| 7.27E-11 | -0.12302 | 0.00778  | -0.02941 | 0.5261   | -0.09737 | 0.03542  | -0.13397 | 0.00373  |
| 0.0009   | 0.048116 | 0.29946  | 0.433807 | 7.50E-23 | 0.166083 | 0.00031  | 0.24046  | 1.44E-07 |
| 0.42903  | -0.08356 | 0.07121  | 0.216982 | 2.21E-06 | -0.0404  | 0.38376  | -0.12366 | 0.00746  |
| 0.00108  | -0.01026 | 0.82504  | -0.00738 | 0.87355  | -0.03763 | 0.41714  | -0.11647 | 0.01177  |
| 0.28205  | 0.010965 | 0.81319  | 0.062294 | 0.17899  | 0.115411 | 0.01257  | 0.012996 | 0.7794   |
| 0.01029  | 0.019684 | 0.67136  | 0.038711 | 0.40393  | 0.227848 | 6.48E-07 | 0.137934 | 0.00282  |
| 0.78042  | 0.056292 | 0.22468  | 0.114427 | 0.01335  | 0.273588 | 1.84E-09 | 0.200548 | 1.26E-05 |
| 0.74611  | 0.077122 | 0.09598  | -0.04411 | 0.34153  | 0.110469 | 0.01693  | 0.193036 | 2.67E-05 |
| 0.40933  | 0.102875 | 0.02621  | -0.10293 | 0.02613  | -0.01531 | 0.74144  | 0.048441 | 0.2962   |
| 0.47252  | 0.042198 | 0.36289  | -0.11392 | 0.01377  | 0.002986 | 0.94869  | 0.034943 | 0.45125  |
| 0.09888  | -0.02629 | 0.57087  | -0.1145  | 0.01329  | -0.14329 | 0.00191  | -0.16063 | 0.00049  |
| 0.61272  | 0.051195 | 0.26956  | -0.01707 | 0.71294  | 0.051394 | 0.26769  | 0.076859 | 0.09713  |
| 0.03089  | 0.074666 | 0.10708  | -0.09192 | 0.04711  | -0.03856 | 0.40581  | 0.100884 | 0.02927  |
| 0.22208  | -0.05703 | 0.21865  | -0.04685 | 0.3124   | 0.006409 | 0.89014  | -0.1039  | 0.02475  |
| 0.00073  | -0.00294 | 0.94942  | 0.029675 | 0.52237  | 0.047538 | 0.3053   | -0.06237 | 0.17842  |
| 5.81E-07 | 0.066502 | 0.15133  | -0.08968 | 0.05277  | 0.0876   | 0.05854  | 0.095045 | 0.04006  |
| 0.07422  | 0.02256  | 0.62677  | 0.34109  | 3.46E-14 | 0.204383 | 8.51E-06 | 0.209117 | 5.18E-06 |
| 0.51253  | -0.03234 | 0.48571  | 0.128286 | 0.0055   | -0.05087 | 0.27257  | -0.08845 | 0.05614  |
| 0.97161  | 0.024767 | 0.59343  | 0.015549 | 0.73752  | -0.10331 | 0.02557  | -0.08839 | 0.05631  |
| 0.00117  | 0.127932 | 0.00563  | 0.014277 | 0.7583   | -0.01447 | 0.75517  | 0.056433 | 0.22352  |
| 0.00304  | 0.031157 | 0.50179  | -0.19374 | 2.49E-05 | -0.08494 | 0.06664  | -0.04211 | 0.36384  |
| 0.00035  | 0.038852 | 0.40221  | 0.030383 | 0.51249  | -0.13018 | 0.00484  | -0.02996 | 0.51832  |
| 0.29462  | 0.027572 | 0.55227  | 0.024336 | 0.59988  | 0.074716 | 0.10684  | 0.140254 | 0.00238  |
| 0.00097  | 0.040653 | 0.38075  | 0.170007 | 0.00022  | 0.150158 | 0.00114  | 0.184293 | 6.17E-05 |
| 6.10E-08 | -0.03893 | 0.40125  | -0.23635 | 2.38E-07 | -0.18992 | 3.62E-05 | -0.19213 | 2.92E-05 |
| 0.43839  | 0.073028 | 0.11502  | 0.049807 | 0.28276  | -0.02305 | 0.61925  | 0.006363 | 0.89092  |
| 0.03218  | -0.03942 | 0.39533  | -0.23326 | 3.44E-07 | -0.138   | 0.0028   | -0.20096 | 1.21E-05 |
| 0.00602  | -0.10774 | 0.01987  | 0.053506 | 0.2485   | -0.17525 | 0.00014  | -0.20236 | 1.05E-05 |
| 0.00507  | 0.259783 | 1.22E-08 | 0.095658 | 0.03879  | 0.186242 | 5.13E-05 | 0.348335 | 9.08E-15 |
| 9.14E-13 | -0.04438 | 0.33859  | 0.05647  | 0.22321  | -0.00755 | 0.87066  | -0.10858 | 0.01892  |
| 3.84E-08 | 0.031499 | 0.49711  | 0.154359 | 0.00082  | 0.019724 | 0.67073  | 0.019229 | 0.67853  |
| 0.01406  | 0.085374 | 0.06527  | -0.0968  | 0.03652  | -0.09617 | 0.03775  | -0.01169 | 0.80115  |
| 0.03668  | 0.129187 | 0.00517  | -0.14859 | 0.00128  | -0.02523 | 0.58655  | 0.025631 | 0.5806   |
| 0.01226  | -0.05226 | 0.25973  | 0.088823 | 0.05509  | -0.03241 | 0.48469  | -0.06047 | 0.19206  |
| 0.21999  | -0.17093 | 0.00021  | -0.14816 | 0.00132  | -0.1946  | 2.29E-05 | -0.3109  | 6.35E-12 |
| 0.28707  | 0.124195 | 0.00721  | -0.0161  | 0.72864  | 0.030522 | 0.51055  | 0.072298 | 0.1187   |
| 0.03487  | -0.15882 | 0.00057  | -0.04461 | 0.33614  | -0.04713 | 0.30952  | -0.20966 | 4.89E-06 |
| 0.04181  | -0.07221 | 0.11915  | -0.09133 | 0.04855  | -0.08278 | 0.07392  | -0.1309  | 0.00461  |
| 0.28489  | -0.02055 | 0.65784  | -0.17274 | 0.00018  | -0.09395 | 0.04242  | -0.09798 | 0.03427  |
| 0.11396  | -0.07084 | 0.12637  | 0.131622 | 0.00438  | 0.024515 | 0.59719  | -0.06165 | 0.18356  |
| 0.64047  | -0.06626 | 0.15284  | -0.18358 | 6.59E-05 | -0.16312 | 0.0004   | -0.19189 | 2.99E-05 |
| 0.00019  | -0.00081 | 0.98607  | 0.331073 | 2.08E-13 | 0.191804 | 3.01E-05 | 0.140332 | 0.00237  |
| 2.67E-09 | 0.107457 | 0.0202   | -0.09578 | 0.03854  | 0.006718 | 0.88488  | 0.10903  | 0.01843  |

|          |          |          |          |          |          |          |          |          |
|----------|----------|----------|----------|----------|----------|----------|----------|----------|
| 0.00239  | -0.07497 | 0.10566  | 0.025532 | 0.58207  | -0.08705 | 0.06014  | -0.12104 | 0.00884  |
| 0.25618  | -0.074   | 0.11025  | -0.12931 | 0.00513  | -0.04698 | 0.31104  | -0.14642 | 0.00151  |
| 0.0002   | -0.01121 | 0.80916  | -0.04986 | 0.28223  | -0.0616  | 0.18387  | -0.04916 | 0.28909  |
| 0.4293   | 0.008443 | 0.8556   | -0.01981 | 0.66945  | -0.00484 | 0.91692  | -0.01564 | 0.73602  |
| 0.92279  | -0.00903 | 0.84576  | -0.04045 | 0.38312  | 0.018571 | 0.68895  | 0.02307  | 0.619    |
| 0.49181  | -0.04551 | 0.32637  | -0.22967 | 5.24E-07 | -0.11157 | 0.01586  | -0.16657 | 0.0003   |
| 0.00097  | 0.078396 | 0.0906   | -0.03439 | 0.45844  | -0.02522 | 0.58673  | 0.027828 | 0.54859  |
| 0.03928  | -0.05244 | 0.2581   | -0.16937 | 0.00024  | -0.19595 | 2.00E-05 | -0.27338 | 1.89E-09 |
| 1.18E-05 | -0.18689 | 4.83E-05 | 0.044552 | 0.33672  | -0.06281 | 0.1754   | -0.15094 | 0.00107  |
| 0.55698  | -0.16334 | 0.00039  | -0.04592 | 0.32211  | -0.15713 | 0.00066  | -0.23026 | 4.90E-07 |
| 0.00283  | -0.12558 | 0.00658  | -0.1107  | 0.01671  | -0.27496 | 1.51E-09 | -0.27754 | 1.05E-09 |
| 1.98E-06 | 0.138563 | 0.00269  | 0.058393 | 0.20782  | 0.169262 | 0.00024  | 0.296842 | 5.92E-11 |
| 0.97839  | -0.00427 | 0.92673  | -0.09731 | 0.03552  | -0.02219 | 0.63247  | -0.08206 | 0.07648  |
| 0.90253  | 0.03987  | 0.38999  | -0.02706 | 0.55965  | 0.019747 | 0.67038  | 0.096424 | 0.03725  |
| 6.54E-05 | 0.023033 | 0.61956  | -0.03668 | 0.42901  | 0.052122 | 0.26096  | -0.00301 | 0.94827  |
| 0.26358  | 0.06107  | 0.1877   | 0.073766 | 0.11139  | 0.01832  | 0.69293  | 0.025369 | 0.58448  |
| 0.26846  | 0.073152 | 0.1144   | -0.00982 | 0.83239  | -0.00821 | 0.85953  | -0.00069 | 0.98806  |
| 0.70419  | 0.03952  | 0.39418  | -0.02828 | 0.54206  | -0.0824  | 0.07525  | -0.01254 | 0.78698  |
| 0.1726   | -0.01613 | 0.72817  | 0.036344 | 0.4333   | -0.0449  | 0.33298  | -0.09812 | 0.03402  |
| 0.34244  | -0.00048 | 0.99174  | 0.06475  | 0.16242  | -0.02934 | 0.52711  | -0.04882 | 0.29242  |
| 0.47064  | -0.14877 | 0.00126  | 0.025945 | 0.57598  | -0.03001 | 0.51764  | -0.12606 | 0.00638  |
| 0.37956  | -0.01751 | 0.70584  | -0.06864 | 0.1386   | -0.05649 | 0.22303  | -0.09461 | 0.04099  |
| 0.09205  | -0.0052  | 0.91075  | -0.06139 | 0.18539  | -0.1104  | 0.017    | -0.05856 | 0.20655  |
| 0.50912  | -0.02225 | 0.63155  | -0.10349 | 0.02532  | -0.03065 | 0.50883  | -0.01052 | 0.82068  |
| 0.00433  | -0.02261 | 0.62605  | -0.15279 | 0.00093  | -0.13059 | 0.0047   | -0.08006 | 0.08394  |
| 0.00026  | -0.10233 | 0.02702  | 0.096648 | 0.03681  | -0.10022 | 0.03035  | -0.14239 | 0.00204  |
| 0.60791  | -0.0287  | 0.53608  | -0.13213 | 0.00423  | -0.21587 | 2.50E-06 | -0.25678 | 1.81E-08 |
| 1.33E-08 | 0.002073 | 0.96436  | -0.11094 | 0.01646  | -0.09118 | 0.04892  | -0.09278 | 0.04507  |
| 0.01067  | 0.11857  | 0.01033  | -0.00635 | 0.89115  | -0.06124 | 0.1865   | -0.01311 | 0.77751  |
| 0.07816  | -0.04118 | 0.37463  | 0.150402 | 0.00111  | 0.009746 | 0.83362  | 0.030997 | 0.50399  |
| 0.00217  | 0.036791 | 0.42766  | -0.00749 | 0.87178  | 0.026247 | 0.57154  | 0.115412 | 0.01257  |
| 0.04963  | 0.031094 | 0.50266  | 0.054613 | 0.23883  | 0.082483 | 0.07496  | 0.166065 | 0.00031  |
| 0.13255  | 0.028899 | 0.5333   | 0.099854 | 0.03097  | 0.131262 | 0.00449  | 0.210655 | 4.40E-06 |
| 0.01544  | 0.036617 | 0.42985  | 0.210421 | 4.51E-06 | 0.179299 | 9.78E-05 | 0.267708 | 4.17E-09 |
| 0.81102  | 0.033925 | 0.46455  | 0.146703 | 0.00148  | 0.05103  | 0.2711   | 0.120767 | 0.00899  |
| 0.22804  | -0.05038 | 0.27724  | 0.145837 | 0.00158  | 0.040319 | 0.38467  | 0.046345 | 0.31761  |
| 0.6268   | -0.08958 | 0.05304  | -0.18636 | 5.08E-05 | -0.20589 | 7.27E-06 | -0.25843 | 1.46E-08 |
| 0.08745  | -0.18932 | 3.83E-05 | -0.21769 | 2.05E-06 | -0.13063 | 0.00469  | -0.21262 | 3.56E-06 |
| 0.25899  | -0.18154 | 7.97E-05 | -0.11621 | 0.01197  | -0.16368 | 0.00038  | -0.22756 | 6.71E-07 |
| 0.97963  | -0.13667 | 0.00308  | -0.11603 | 0.0121   | -0.23268 | 3.68E-07 | -0.26379 | 7.12E-09 |
| 0.11465  | 0.067241 | 0.14682  | -0.06057 | 0.19137  | -0.09853 | 0.03327  | -0.09303 | 0.0445   |
| 0.21419  | -0.00335 | 0.94247  | -0.03041 | 0.51205  | -0.08929 | 0.05383  | -0.10662 | 0.02119  |
| 0.90258  | 0.051286 | 0.2687   | 0.006761 | 0.88414  | -0.04173 | 0.36822  | -0.00333 | 0.94286  |
| 0.45066  | 0.013936 | 0.7639   | -0.02751 | 0.55313  | -0.11013 | 0.01728  | -0.06215 | 0.17998  |
| 0.69823  | 0.102655 | 0.02653  | -0.28734 | 2.50E-10 | -0.12653 | 0.00618  | -0.01007 | 0.82813  |



|          |          |          |          |          |          |          |          |          |
|----------|----------|----------|----------|----------|----------|----------|----------|----------|
| 0.39106  | 0.218805 | 1.81E-06 | -0.06469 | 0.16281  | -0.00672 | 0.88478  | 0.10673  | 0.02106  |
| 0.52311  | 0.239904 | 1.54E-07 | -0.08478 | 0.06718  | -0.00893 | 0.84735  | 0.108743 | 0.01874  |
| 0.19865  | 0.101152 | 0.02884  | -0.09865 | 0.03307  | -0.0933  | 0.04388  | -0.06108 | 0.18765  |
| 0.29426  | 0.04442  | 0.33815  | 0.017911 | 0.69946  | -0.00812 | 0.86114  | -0.00395 | 0.93209  |
| 0.08504  | 0.078323 | 0.09091  | 0.039218 | 0.3978   | -0.06611 | 0.15377  | -0.01491 | 0.74786  |
| 0.10325  | -0.08731 | 0.05938  | -0.004   | 0.93136  | 0.033929 | 0.4645   | -0.12121 | 0.00874  |
| 0.96179  | 0.25959  | 1.25E-08 | -0.05376 | 0.24629  | 0.09438  | 0.04148  | 0.196175 | 1.96E-05 |
| 0.33742  | -0.03154 | 0.49657  | 0.048793 | 0.2927   | 0.116981 | 0.01141  | 0.122715 | 0.00793  |
| 0.93607  | -0.1374  | 0.00293  | -0.21655 | 2.32E-06 | -0.13233 | 0.00417  | -0.19098 | 3.26E-05 |
| 0.00049  | 0.118744 | 0.01022  | 0.046893 | 0.31192  | 0.08738  | 0.05918  | 0.058151 | 0.20971  |
| 3.46E-11 | -0.08662 | 0.06144  | 0.038315 | 0.40876  | 0.061595 | 0.18392  | -0.06503 | 0.16063  |
| 8.15E-16 | -0.10974 | 0.01768  | -0.09035 | 0.05103  | -0.09808 | 0.0341   | -0.18101 | 8.36E-05 |
| 0.02197  | 0.154902 | 0.00078  | 0.039535 | 0.39399  | 0.200072 | 1.32E-05 | 0.246184 | 7.09E-08 |
| 0.68561  | -0.01887 | 0.68425  | 0.122001 | 0.00831  | 0.034122 | 0.46196  | 0.087489 | 0.05886  |
| 0.53817  | -0.04435 | 0.33887  | -0.26553 | 5.62E-09 | -0.23623 | 2.41E-07 | -0.154   | 0.00084  |
| 0.15909  | 0.196519 | 1.89E-05 | -0.02292 | 0.62126  | 0.126552 | 0.00617  | 0.234781 | 2.87E-07 |
| 0.01939  | 0.064166 | 0.16625  | 0.258991 | 1.35E-08 | 0.218379 | 1.90E-06 | 0.229761 | 5.19E-07 |
| 0.96415  | 0.048446 | 0.29614  | 0.072849 | 0.11591  | -0.01736 | 0.70832  | 0.005595 | 0.90402  |
| 1.20E-05 | 0.051264 | 0.26891  | -0.09151 | 0.04811  | -0.12419 | 0.00721  | -0.01931 | 0.67727  |
| 1.18E-05 | 0.011148 | 0.81013  | -0.0219  | 0.63682  | 0.063815 | 0.16858  | 0.014043 | 0.76215  |
| 0.96184  | 0.107831 | 0.01976  | 0.191471 | 3.11E-05 | 0.042664 | 0.35761  | 0.0113   | 0.80758  |
| 0.76625  | 0.078954 | 0.08833  | 0.038254 | 0.4095   | -0.02911 | 0.53035  | -0.03329 | 0.47298  |
| 0.3135   | 0.139119 | 0.00259  | 0.197447 | 1.72E-05 | 0.036383 | 0.43281  | 0.084282 | 0.0688   |
| 0.13645  | 0.125646 | 0.00655  | 0.109803 | 0.01761  | 0.025034 | 0.58946  | 0.061417 | 0.1852   |
| 0.00022  | 0.012059 | 0.79494  | -0.04601 | 0.32118  | -0.07785 | 0.09287  | -0.02859 | 0.53773  |
| 0.73843  | -0.172   | 0.00019  | -0.28625 | 2.94E-10 | -0.20651 | 6.82E-06 | -0.27581 | 1.34E-09 |
| 9.41E-06 | -0.12928 | 0.00514  | 0.029137 | 0.52993  | -0.1087  | 0.01878  | -0.17788 | 0.00011  |
| 0.14689  | 0.059139 | 0.20207  | -0.1835  | 6.64E-05 | -0.05634 | 0.22429  | -0.05702 | 0.21871  |
| 0.11734  | 0.216011 | 2.46E-06 | 0.061097 | 0.1875   | 0.25264  | 3.11E-08 | 0.307929 | 1.03E-11 |
| 0.7063   | -0.05947 | 0.19955  | 0.042409 | 0.36049  | -0.04297 | 0.35422  | -0.14489 | 0.00169  |
| 0.0002   | 0.512832 | 1.10E-32 | 0.067658 | 0.14433  | 0.044774 | 0.33431  | 0.185644 | 5.43E-05 |
| 0.12525  | 0.098577 | 0.03319  | 0.145328 | 0.00164  | -0.01808 | 0.69675  | 0.072248 | 0.11896  |
| 0.39797  | -0.00954 | 0.83706  | -0.15517 | 0.00077  | -0.07114 | 0.12475  | -0.14885 | 0.00126  |
| 0.13134  | 0.073463 | 0.11287  | 0.067766 | 0.14369  | 0.107182 | 0.02052  | 0.144907 | 0.00169  |
| 0.63262  | 0.294386 | 8.64E-11 | 0.051629 | 0.26551  | 0.106329 | 0.02155  | 0.193036 | 2.67E-05 |
| 0.99896  | -0.02459 | 0.59613  | -0.01448 | 0.75498  | -0.06636 | 0.1522   | -0.03654 | 0.43088  |
| 0.87281  | -0.00382 | 0.93441  | 0.000924 | 0.98411  | 0.051145 | 0.27002  | 0.0591   | 0.20236  |
| 0.33537  | 0.087    | 0.0603   | 0.026187 | 0.57243  | 0.175946 | 0.00013  | 0.205144 | 7.86E-06 |
| 0.38509  | -0.04785 | 0.30213  | -0.24348 | 9.93E-08 | -0.20582 | 7.32E-06 | -0.19386 | 2.46E-05 |
| 0.22776  | -0.03786 | 0.41436  | 0.370607 | 1.19E-16 | 0.3558   | 2.20E-15 | 0.291317 | 1.38E-10 |
| 0.45824  | -0.06188 | 0.18187  | -0.06864 | 0.1386   | -0.14628 | 0.00153  | -0.19794 | 1.64E-05 |
| 0.29961  | 0.227193 | 6.99E-07 | -0.21076 | 4.35E-06 | -0.07689 | 0.09701  | -0.03561 | 0.4426   |
| 0.12162  | -0.1031  | 0.02588  | -0.23662 | 2.30E-07 | -0.18375 | 6.49E-05 | -0.30605 | 1.39E-11 |
| 0.38495  | 0.007587 | 0.87011  | 0.030417 | 0.51202  | 0.036846 | 0.42697  | -0.0016  | 0.97248  |
| 0.00378  | 0.023314 | 0.61529  | 0.045764 | 0.32372  | 0.051798 | 0.26395  | 0.011776 | 0.79965  |

|          |          |         |          |          |          |          |          |          |
|----------|----------|---------|----------|----------|----------|----------|----------|----------|
| 0.81291  | -0.01279 | 0.78278 | 0.171888 | 0.00019  | 0.008082 | 0.86172  | -0.0374  | 0.4201   |
| 2.38E-08 | 0.038697 | 0.4041  | 0.056653 | 0.22172  | -0.07888 | 0.08862  | 0.011231 | 0.80874  |
| 0.67649  | -0.05225 | 0.25979 | -0.14054 | 0.00233  | -0.14081 | 0.00229  | -0.1652  | 0.00034  |
| 0.00104  | 0.038094 | 0.41147 | -0.07932 | 0.08686  | -0.07254 | 0.11745  | -0.06129 | 0.1861   |
| 0.19467  | 0.041646 | 0.36921 | 0.020009 | 0.66626  | 0.019241 | 0.67834  | 0.012812 | 0.78244  |
| 0.73762  | 0.018141 | 0.69579 | -0.02162 | 0.64125  | -0.09357 | 0.04327  | -0.03161 | 0.4956   |
| 0.00027  | 0.029919 | 0.51894 | 0.137339 | 0.00294  | 0.124047 | 0.00728  | 0.137197 | 0.00297  |
| 7.04E-07 | -0.00645 | 0.88937 | -0.0891  | 0.05433  | -0.07154 | 0.12262  | -0.09062 | 0.05034  |
| 0.00064  | -0.14635 | 0.00152 | -0.14549 | 0.00162  | -0.30404 | 1.92E-11 | -0.30576 | 1.46E-11 |
| 0.00329  | 0.030613 | 0.50929 | -0.06197 | 0.18124  | -0.05763 | 0.2138   | -0.03173 | 0.49397  |
| 0.00121  | 0.167712 | 0.00027 | 0.023432 | 0.6135   | 0.151397 | 0.00103  | 0.220125 | 1.56E-06 |
| 0.0505   | 0.178201 | 0.00011 | -0.05794 | 0.21137  | 0.038351 | 0.40832  | 0.096723 | 0.03666  |
| 4.84E-16 | 0.030672 | 0.50848 | -0.05615 | 0.22581  | -0.03465 | 0.45507  | -0.02416 | 0.60252  |
| 0.22846  | 0.021779 | 0.63875 | 0.006955 | 0.88084  | 0.020439 | 0.65954  | 0.030774 | 0.50708  |
| 0.62848  | -0.00712 | 0.8781  | -0.04988 | 0.28203  | -0.03534 | 0.44614  | -0.05585 | 0.22834  |
| 2.31E-09 | 0.131275 | 0.00449 | -0.05743 | 0.2154   | -0.01392 | 0.7641   | 0.099046 | 0.03236  |
| 0.0146   | -0.02971 | 0.52191 | 0.062611 | 0.17678  | -0.08621 | 0.06269  | -0.13524 | 0.00341  |
| 0.5959   | 0.146833 | 0.00146 | -0.15994 | 0.00052  | -0.15763 | 0.00063  | -0.08605 | 0.06318  |
| 0.4599   | -0.10215 | 0.02729 | -0.17789 | 0.00011  | -0.16373 | 0.00038  | -0.15597 | 0.00072  |
| 4.69E-05 | -0.02944 | 0.52564 | 0.224233 | 9.82E-07 | 0.144603 | 0.00173  | 0.073855 | 0.11095  |
| 0.44637  | 0.081552 | 0.07831 | 0.326593 | 4.55E-13 | 0.206412 | 6.89E-06 | 0.22271  | 1.17E-06 |
| 1.96E-05 | 0.075069 | 0.10519 | 0.408402 | 3.37E-20 | 0.314666 | 3.42E-12 | 0.289049 | 1.94E-10 |
| 0.58576  | 0.002541 | 0.95633 | 0.147609 | 0.00138  | 0.165912 | 0.00032  | 0.260222 | 1.15E-08 |
| 0.01318  | -0.02578 | 0.57839 | -0.0402  | 0.38605  | 0.005475 | 0.90607  | -0.03459 | 0.45583  |
| 0.00109  | 0.113003 | 0.01455 | -0.06213 | 0.18015  | -0.01072 | 0.8172   | 0.045803 | 0.32331  |
| 0.0015   | -0.16797 | 0.00027 | 0.165086 | 0.00034  | -0.02579 | 0.57825  | -0.16488 | 0.00035  |
| 0.02919  | -0.12869 | 0.00535 | 0.143495 | 0.00188  | 0.165277 | 0.00033  | 0.039812 | 0.39068  |
| 7.28E-06 | -0.12463 | 0.00701 | -0.03716 | 0.42303  | -0.17287 | 0.00017  | -0.27329 | 1.92E-09 |
| 0.27788  | -0.00297 | 0.94894 | 0.157651 | 0.00063  | 0.166415 | 0.0003   | 0.144403 | 0.00176  |
| 0.02795  | -0.05198 | 0.26223 | -0.14653 | 0.0015   | -0.09987 | 0.03094  | -0.16526 | 0.00034  |
| 4.44E-07 | 0.020537 | 0.658   | 0.025625 | 0.5807   | -0.05256 | 0.25696  | -0.00555 | 0.90475  |
| 2.36E-08 | 0.013848 | 0.76535 | 0.034401 | 0.4583   | -0.03661 | 0.42999  | -0.00912 | 0.84425  |
| 1.55E-05 | -0.03682 | 0.42734 | 0.027891 | 0.54769  | -0.00085 | 0.98543  | -0.00105 | 0.98187  |
| 0.22723  | -0.12842 | 0.00545 | 0.038452 | 0.40709  | -0.05802 | 0.21078  | -0.16555 | 0.00033  |
| 0.02414  | -0.05976 | 0.19732 | 0.061174 | 0.18694  | -0.22052 | 1.49E-06 | -0.1551  | 0.00077  |
| 0.00117  | 0.149245 | 0.00122 | 0.114219 | 0.01352  | 0.017277 | 0.7096   | 0.173337 | 0.00017  |
| 0.69495  | -0.00117 | 0.97992 | 0.179626 | 9.50E-05 | 0.21491  | 2.78E-06 | 0.206114 | 7.10E-06 |
| 8.16E-05 | 0.07819  | 0.09146 | -0.01932 | 0.67702  | -0.09611 | 0.03787  | -0.01083 | 0.8155   |
| 0.90836  | 0.005871 | 0.89931 | -0.24747 | 6.03E-08 | -0.13134 | 0.00447  | -0.10754 | 0.0201   |
| 0.77366  | 0.059032 | 0.20288 | 0.123163 | 0.00771  | 0.230565 | 4.72E-07 | 0.1819   | 7.71E-05 |
| 0.03054  | 0.008399 | 0.85635 | 0.005228 | 0.91028  | -0.19745 | 1.72E-05 | -0.1158  | 0.01227  |
| 0.31401  | -0.04172 | 0.36841 | 0.297872 | 5.05E-11 | 0.32509  | 5.89E-13 | 0.212938 | 3.44E-06 |
| 0.96945  | -0.05281 | 0.25471 | 0.089085 | 0.05438  | -0.11811 | 0.01064  | -0.09772 | 0.03476  |
| 0.74759  | -0.01719 | 0.71105 | 0.194313 | 2.36E-05 | -0.01434 | 0.75732  | -0.05708 | 0.21826  |
| 0.94147  | -0.01884 | 0.6847  | 0.233485 | 3.35E-07 | -0.01025 | 0.82514  | -0.00771 | 0.8681   |

|          |          |          |          |          |          |          |          |          |
|----------|----------|----------|----------|----------|----------|----------|----------|----------|
| 0.48516  | -0.03869 | 0.40418  | 0.026844 | 0.56282  | 0.04787  | 0.30193  | 0.055548 | 0.23088  |
| 0.06035  | 0.077273 | 0.09534  | 0.114021 | 0.01368  | -0.0183  | 0.69333  | 0.092176 | 0.0465   |
| 0.00274  | 0.089028 | 0.05453  | 0.031706 | 0.49428  | 0.029678 | 0.52232  | 0.165287 | 0.00033  |
| 1.09E-07 | 0.500076 | 6.42E-31 | 0.066791 | 0.14955  | 0.133026 | 0.00398  | 0.341293 | 3.34E-14 |
| 8.02E-06 | 0.475739 | 9.49E-28 | 0.016356 | 0.72444  | -0.04303 | 0.35352  | 0.120405 | 0.0092   |
| 0.0183   | 0.148369 | 0.0013   | -0.03014 | 0.51585  | 0.056177 | 0.22563  | 0.042389 | 0.36073  |
| 0.15914  | -0.00979 | 0.83284  | -0.14301 | 0.00195  | -0.13679 | 0.00306  | -0.13929 | 0.00256  |
| 1.66E-09 | 0.026454 | 0.56851  | -0.00273 | 0.95308  | 0.096981 | 0.03616  | 0.143235 | 0.00192  |
| 2.61E-05 | 0.009616 | 0.83581  | -0.06511 | 0.16008  | 0.122454 | 0.00807  | 0.082172 | 0.07606  |
| 0.00321  | -0.02803 | 0.54576  | 0.216201 | 2.41E-06 | -0.05746 | 0.21516  | 0.010891 | 0.81442  |
| 0.00096  | 0.011489 | 0.80443  | 0.000989 | 0.983    | -0.01915 | 0.67975  | -0.05826 | 0.20885  |
| 0.36358  | 0.044336 | 0.33907  | 0.079547 | 0.08596  | 0.024098 | 0.60346  | 0.030787 | 0.50689  |
| 0.01427  | 0.025117 | 0.58822  | -0.06969 | 0.13266  | 0.008838 | 0.84892  | -0.01646 | 0.72274  |
| 0.54365  | 0.059429 | 0.19986  | 0.19238  | 2.85E-05 | 0.309816 | 7.57E-12 | 0.26951  | 3.25E-09 |
| 0.37181  | -0.06497 | 0.16097  | 0.096293 | 0.03751  | 0.010635 | 0.8187   | -0.06977 | 0.13217  |
| 0.35417  | 0.033192 | 0.47426  | 0.15044  | 0.00111  | 0.161121 | 0.00047  | 0.088718 | 0.05538  |
| 0.0121   | -0.06336 | 0.17166  | -0.07272 | 0.11654  | -0.05427 | 0.2418   | -0.07775 | 0.09331  |
| 6.95E-07 | 0.015934 | 0.73127  | -0.07004 | 0.13069  | 0.061335 | 0.18578  | -0.03378 | 0.46648  |
| 0.03568  | -0.1297  | 0.005    | -0.27376 | 1.79E-09 | -0.23022 | 4.92E-07 | -0.30521 | 1.59E-11 |
| 5.85E-08 | 0.084227 | 0.06898  | 0.048583 | 0.29478  | 0.022785 | 0.62333  | 0.047543 | 0.30525  |
| 0.46162  | -0.10143 | 0.0284   | 0.022029 | 0.6349   | 0.01997  | 0.66688  | -0.14507 | 0.00167  |
| 6.80E-05 | -0.03853 | 0.40609  | 0.12344  | 0.00757  | -0.00658 | 0.88718  | -0.05584 | 0.22841  |
| 0.12238  | -0.0345  | 0.45697  | -0.10783 | 0.01977  | -0.03302 | 0.47661  | 0.004141 | 0.92889  |
| 0.00117  | 0.04027  | 0.38525  | 0.110084 | 0.01732  | 0.153833 | 0.00085  | 0.142737 | 0.00199  |
| 0.05456  | -0.04678 | 0.31311  | -0.0762  | 0.10006  | -0.02892 | 0.53299  | -0.1508  | 0.00108  |
| 0.99206  | 0.0133   | 0.77437  | -0.1406  | 0.00232  | -0.1558  | 0.00073  | -0.079   | 0.08816  |
| 0.05176  | 0.001753 | 0.96986  | 0.12861  | 0.00538  | 0.088003 | 0.05739  | 0.026911 | 0.56185  |
| 0.01623  | -0.12308 | 0.00775  | -0.1087  | 0.01878  | 0.032297 | 0.48627  | -0.04698 | 0.31103  |
| 0.18914  | 0.027574 | 0.55225  | 0.059731 | 0.19757  | -0.02073 | 0.65504  | -0.02565 | 0.58026  |
| 0.42391  | 0.055941 | 0.22758  | -0.00654 | 0.88799  | -0.04965 | 0.28429  | -0.00143 | 0.97533  |
| 0.00797  | 0.034049 | 0.46292  | 0.149183 | 0.00122  | 0.166531 | 0.0003   | 0.155425 | 0.00075  |
| 0.00065  | 0.10655  | 0.02128  | 0.062949 | 0.17445  | 0.235301 | 2.69E-07 | 0.264785 | 6.22E-09 |
| 1.20E-06 | 0.07577  | 0.10197  | 0.136245 | 0.00318  | 0.053765 | 0.24621  | 0.113074 | 0.01449  |
| 2.61E-05 | 0.096937 | 0.03625  | -0.12444 | 0.00709  | 0.012066 | 0.79481  | 0.155728 | 0.00073  |
| 0.04145  | 0.243461 | 9.96E-08 | 0.189941 | 3.61E-05 | 0.197568 | 1.70E-05 | 0.405978 | 5.87E-20 |
| 0.00019  | -0.17528 | 0.00014  | -0.14955 | 0.00119  | -0.03648 | 0.43158  | -0.171   | 0.0002   |
| 0.5014   | 0.115695 | 0.01235  | 0.136218 | 0.00318  | -0.01973 | 0.67058  | 0.09026  | 0.05126  |
| 0.00022  | 0.057869 | 0.21194  | -0.0585  | 0.20702  | -0.03218 | 0.48785  | 0.089601 | 0.05299  |
| 0.1479   | 0.185221 | 5.65E-05 | -0.04501 | 0.33177  | -0.07041 | 0.12865  | 0.140968 | 0.00226  |
| 0.20305  | -0.1103  | 0.0171   | 0.061968 | 0.18128  | 0.038174 | 0.41049  | -0.0105  | 0.82101  |
| 0.7177   | 0.008303 | 0.85798  | 0.016805 | 0.7172   | -0.0201  | 0.66488  | -0.00272 | 0.9532   |
| 0.02784  | 0.048222 | 0.29839  | -0.06764 | 0.14441  | -0.13445 | 0.0036   | -0.10008 | 0.03058  |
| 0.00039  | -0.03393 | 0.46452  | -0.108   | 0.01957  | -0.09254 | 0.04563  | -0.1065  | 0.02134  |
| 0.20005  | 0.028394 | 0.54048  | 0.205345 | 7.70E-06 | 0.3465   | 1.28E-14 | 0.328406 | 3.32E-13 |
| 0.05796  | -0.18614 | 5.19E-05 | -0.12814 | 0.00555  | -0.1813  | 8.15E-05 | -0.22136 | 1.36E-06 |

|          |          |          |          |          |          |          |          |          |
|----------|----------|----------|----------|----------|----------|----------|----------|----------|
| 2.35E-09 | -0.02253 | 0.62727  | 0.100865 | 0.0293   | 0.223671 | 1.05E-06 | 0.04577  | 0.32366  |
| 0.09478  | -0.04326 | 0.35098  | -0.08461 | 0.06772  | -0.22603 | 8.00E-07 | -0.17653 | 0.00013  |
| 0.55457  | 0.088559 | 0.05582  | 0.000952 | 0.98364  | 0.026864 | 0.56252  | 0.079456 | 0.08631  |
| 0.54817  | 0.050946 | 0.2719   | -0.00638 | 0.89068  | -0.03172 | 0.49412  | 0.032625 | 0.48185  |
| 0.74342  | -0.0176  | 0.70436  | 0.138623 | 0.00268  | -0.03968 | 0.39221  | -0.04293 | 0.35457  |
| 0.69438  | -0.04519 | 0.32985  | 0.052044 | 0.26168  | 0.009557 | 0.83681  | -0.06466 | 0.16298  |
| 0.83417  | 0.039028 | 0.40009  | 0.044007 | 0.34266  | 0.005203 | 0.91072  | 0.015343 | 0.74087  |
| 0.00661  | 0.077251 | 0.09543  | 0.068447 | 0.1397   | 0.038144 | 0.41085  | 0.045626 | 0.32519  |
| 0.00197  | 0.062157 | 0.17995  | 0.093693 | 0.043    | 0.034068 | 0.46267  | 0.09785  | 0.03452  |
| 5.87E-17 | -0.07665 | 0.09802  | -0.15977 | 0.00053  | -0.20926 | 5.10E-06 | -0.24651 | 6.80E-08 |
| 0.46824  | -0.06564 | 0.15669  | 0.005507 | 0.90552  | -0.12034 | 0.00924  | -0.0833  | 0.07211  |
| 0.04584  | 0.093019 | 0.04452  | 0.115636 | 0.0124   | 0.166149 | 0.00031  | 0.231322 | 4.32E-07 |
| 0.00579  | 0.090952 | 0.0495   | 0.006928 | 0.8813   | 0.001719 | 0.97044  | 0.168089 | 0.00026  |
| 0.00732  | 0.011077 | 0.8113   | 0.01341  | 0.77255  | -0.05264 | 0.25622  | -0.02959 | 0.5236   |
| 0.01085  | -0.04724 | 0.30837  | -0.01342 | 0.77236  | 0.04352  | 0.34804  | 0.014749 | 0.75057  |
| 0.03139  | 0.012849 | 0.78183  | 0.099674 | 0.03127  | 0.159676 | 0.00053  | 0.09133  | 0.04855  |
| 1.41E-06 | 0.00748  | 0.87193  | 0.253474 | 2.79E-08 | -0.07442 | 0.10825  | -0.01857 | 0.68902  |
| 0.46531  | 0.004854 | 0.91668  | 0.050114 | 0.2798   | -0.00808 | 0.86181  | -0.01222 | 0.7923   |
| 0.74518  | 0.054497 | 0.23983  | -0.0868  | 0.06088  | -0.03416 | 0.46149  | -0.02512 | 0.58815  |
| 0.56189  | -0.05586 | 0.22823  | -0.14847 | 0.00129  | -0.15931 | 0.00055  | -0.17021 | 0.00022  |
| 0.45471  | -0.01565 | 0.73592  | -0.15813 | 0.0006   | -0.08549 | 0.06492  | -0.13294 | 0.004    |
| 0.90994  | 0.068208 | 0.14109  | 0.125648 | 0.00655  | 0.086156 | 0.06284  | 0.121876 | 0.00838  |
| 0.94287  | -0.00602 | 0.89675  | -0.10567 | 0.02238  | -0.10086 | 0.02931  | -0.11096 | 0.01644  |
| 0.24481  | -0.04531 | 0.32859  | 0.288511 | 2.10E-10 | 0.177305 | 0.00012  | 0.161491 | 0.00046  |
| 0.04729  | -0.01115 | 0.81013  | 0.495196 | 2.91E-30 | 0.147928 | 0.00135  | 0.117898 | 0.01078  |
| 0.63592  | 0.10192  | 0.02764  | 0.086065 | 0.06312  | 0.161774 | 0.00045  | 0.294057 | 9.09E-11 |
| 0.37817  | 0.037728 | 0.41598  | 0.063036 | 0.17385  | 0.089114 | 0.0543   | 0.140562 | 0.00233  |
| 0.95978  | 0.112587 | 0.01492  | 0.042123 | 0.36375  | 0.117021 | 0.01138  | 0.213865 | 3.11E-06 |
| 0.00707  | 0.058414 | 0.20766  | 0.174448 | 0.00015  | 0.325971 | 5.06E-13 | 0.307597 | 1.08E-11 |
| 0.72556  | 0.037414 | 0.41988  | -0.21495 | 2.77E-06 | -0.13049 | 0.00474  | -0.10087 | 0.02929  |
| 0.00682  | 0.064819 | 0.16197  | 0.148381 | 0.0013   | 0.211113 | 4.19E-06 | 0.166582 | 0.0003   |
| 0.00281  | 0.043181 | 0.35181  | 0.293067 | 1.06E-10 | 0.335731 | 9.11E-14 | 0.322328 | 9.45E-13 |
| 0.00043  | -0.20291 | 9.91E-06 | 0.055273 | 0.2332   | 0.011827 | 0.7988   | -0.06424 | 0.16577  |
| 0.00148  | -0.08533 | 0.06542  | 0.233972 | 3.16E-07 | 0.146729 | 0.00147  | 0.121657 | 0.00849  |
| 6.85E-05 | -0.15763 | 0.00063  | 0.110525 | 0.01688  | -0.15209 | 0.00098  | -0.21623 | 2.40E-06 |
| 0.86181  | 0.114269 | 0.01348  | 0.162165 | 0.00043  | 0.308971 | 8.69E-12 | 0.313378 | 4.23E-12 |
| 0.67678  | 0.282092 | 5.43E-10 | -0.01304 | 0.77859  | 0.06171  | 0.1831   | 0.140881 | 0.00228  |
| 0.73105  | 0.132703 | 0.00407  | -0.01165 | 0.80178  | -0.03724 | 0.42203  | -0.0561  | 0.22625  |
| 0.03639  | 0.037139 | 0.4233   | 0.01269  | 0.78446  | -0.10262 | 0.02658  | -0.04562 | 0.3253   |
| 0.03375  | -0.07985 | 0.08477  | -0.05372 | 0.24665  | 0.038651 | 0.40465  | -0.02341 | 0.61381  |
| 0.08566  | 0.0541   | 0.24328  | 0.049708 | 0.28373  | 3.19E-05 | 0.99945  | 0.046068 | 0.32052  |
| 1.53E-08 | 0.02745  | 0.55404  | -0.26201 | 9.05E-09 | -0.14737 | 0.0014   | -0.14208 | 0.00209  |
| 0.05872  | -0.05954 | 0.19904  | -0.06891 | 0.13704  | -0.05363 | 0.24742  | -0.12973 | 0.00499  |
| 0.04848  | 0.062774 | 0.17565  | -0.0835  | 0.07144  | -0.07412 | 0.1097   | -0.03393 | 0.46446  |
| 3.26E-09 | 0.19466  | 2.28E-05 | -0.10566 | 0.02239  | 0.001884 | 0.9676   | 0.151042 | 0.00106  |

|          |          |          |          |          |          |          |          |          |
|----------|----------|----------|----------|----------|----------|----------|----------|----------|
| 0.00042  | -0.19546 | 2.10E-05 | 0.010614 | 0.81906  | 0.012573 | 0.78641  | -0.09223 | 0.04637  |
| 0.00039  | 0.111159 | 0.01625  | 0.224189 | 9.87E-07 | 0.184494 | 6.05E-05 | 0.292913 | 1.08E-10 |
| 0.00067  | 0.240657 | 1.41E-07 | 0.066252 | 0.15288  | 0.122561 | 0.00801  | 0.203619 | 9.21E-06 |
| 0.09539  | 0.010177 | 0.82639  | 0.09769  | 0.03482  | 0.014739 | 0.75074  | 0.082892 | 0.07352  |
| 7.90E-06 | 0.084691 | 0.06746  | -0.05278 | 0.25499  | -0.07513 | 0.1049   | -0.0752  | 0.10458  |
| 8.50E-05 | 0.010177 | 0.82638  | 0.073225 | 0.11404  | -0.01901 | 0.68206  | 0.127665 | 0.00573  |
| 0.00201  | 0.048332 | 0.29728  | 0.039565 | 0.39363  | -0.0197  | 0.67107  | 0.08268  | 0.07426  |
| 0.12888  | 0.18181  | 7.77E-05 | 0.218426 | 1.89E-06 | 0.215857 | 2.50E-06 | 0.365672 | 3.20E-16 |
| 0.00031  | 0.22014  | 1.56E-06 | 0.128565 | 0.0054   | 0.189361 | 3.81E-05 | 0.218667 | 1.84E-06 |
| 0.01049  | -0.0857  | 0.06425  | -0.14492 | 0.00169  | -0.20558 | 7.51E-06 | -0.22395 | 1.01E-06 |
| 7.52E-05 | 0.017762 | 0.70184  | 0.141006 | 0.00226  | -0.06103 | 0.18797  | -0.01134 | 0.80685  |
| 0.80113  | -0.05359 | 0.24776  | 0.083168 | 0.07256  | -0.17331 | 0.00017  | -0.15158 | 0.00102  |
| 4.03E-11 | -0.16487 | 0.00035  | -0.15337 | 0.00088  | -0.22361 | 1.05E-06 | -0.317   | 2.32E-12 |
| 0.43447  | 0.151169 | 0.00105  | -0.09836 | 0.03358  | 0.003084 | 0.94701  | 0.131292 | 0.00448  |
| 0.01033  | -0.19709 | 1.79E-05 | -0.17209 | 0.00019  | -0.13995 | 0.00244  | -0.26416 | 6.77E-09 |
| 0.0612   | 0.029761 | 0.52116  | -0.17769 | 0.00011  | -0.20399 | 8.86E-06 | -0.13248 | 0.00413  |
| 0.20587  | 0.165114 | 0.00034  | 0.160406 | 0.0005   | 0.225454 | 8.54E-07 | 0.362809 | 5.64E-16 |
| 0.04015  | 0.009747 | 0.83361  | -0.11511 | 0.01281  | -0.01689 | 0.71578  | 0.007384 | 0.87356  |
| 0.0033   | 0.130159 | 0.00484  | 0.104476 | 0.02395  | 0.04229  | 0.36184  | 0.156243 | 0.0007   |
| 0.01486  | 0.033097 | 0.47553  | 0.119146 | 0.00996  | 0.114807 | 0.01304  | 0.126394 | 0.00624  |
| 0.11615  | 0.186625 | 4.95E-05 | 0.206388 | 6.90E-06 | 0.26377  | 7.14E-09 | 0.380044 | 1.71E-17 |
| 0.25248  | 0.057426 | 0.21546  | -0.14505 | 0.00167  | -0.11619 | 0.01198  | 0.014391 | 0.75642  |
| 0.26774  | 0.027714 | 0.55023  | -0.05605 | 0.2267   | 0.017802 | 0.7012   | -0.05561 | 0.23034  |
| 0.70051  | 0.116995 | 0.0114   | 0.050297 | 0.27805  | -0.02617 | 0.57267  | 0.005324 | 0.90865  |
| 0.40416  | -0.0051  | 0.9124   | 0.064714 | 0.16266  | 0.003952 | 0.93212  | 0.069536 | 0.13349  |
| 0.48495  | 0.045104 | 0.33076  | 0.116163 | 0.012    | 0.190715 | 3.35E-05 | 0.307409 | 1.12E-11 |
| 0.00043  | 0.065092 | 0.16021  | 0.102108 | 0.02735  | 0.056619 | 0.222    | 0.096967 | 0.03619  |
| 0.06327  | 0.105679 | 0.02237  | 0.170654 | 0.00021  | 0.136206 | 0.00318  | 0.267508 | 4.29E-09 |
| 3.84E-14 | 0.328336 | 3.36E-13 | 0.004652 | 0.92013  | 0.061867 | 0.18199  | 0.246118 | 7.14E-08 |
| 0.58117  | 0.256432 | 1.90E-08 | -0.02224 | 0.6317   | 0.06088  | 0.18907  | 0.282996 | 4.76E-10 |
| 0.01141  | -0.00351 | 0.93978  | -0.08764 | 0.05842  | -0.03283 | 0.47909  | -0.06601 | 0.1544   |
| 0.00119  | -0.13841 | 0.00272  | -0.20766 | 6.04E-06 | -0.27012 | 2.99E-09 | -0.28161 | 5.82E-10 |
| 0.73077  | 0.071583 | 0.12241  | -0.11258 | 0.01493  | -0.07388 | 0.11083  | 0.094641 | 0.04092  |
| 0.0091   | 0.010198 | 0.82603  | -0.14943 | 0.0012   | -0.09717 | 0.0358   | -0.11482 | 0.01303  |
| 0.01155  | -0.02789 | 0.54768  | 0.046004 | 0.32119  | -0.01099 | 0.81271  | -0.08052 | 0.08219  |
| 2.02E-06 | 0.052904 | 0.25387  | -0.01514 | 0.74419  | -0.08474 | 0.06731  | 0.007939 | 0.86414  |
| 0.95553  | 0.044107 | 0.34157  | -0.01587 | 0.73227  | -0.03494 | 0.45129  | -0.04478 | 0.33426  |
| 3.61E-08 | 0.070582 | 0.12774  | 0.171702 | 0.00019  | 0.181071 | 8.32E-05 | 0.194132 | 2.40E-05 |
| 0.13415  | 0.069245 | 0.13513  | 0.030364 | 0.51275  | 0.038482 | 0.40671  | 0.108143 | 0.01941  |
| 0.14233  | 0.07524  | 0.1044   | -0.09472 | 0.04075  | -0.072   | 0.12026  | 0.107574 | 0.02006  |
| 0.91121  | 0.151011 | 0.00106  | 0.048769 | 0.29293  | -0.00503 | 0.91372  | 0.044857 | 0.33342  |
| 0.2342   | -0.22649 | 7.58E-07 | 0.003794 | 0.93482  | -0.18019 | 9.02E-05 | -0.26481 | 6.20E-09 |
| 2.36E-09 | 0.049756 | 0.28326  | 0.108282 | 0.01925  | -0.02524 | 0.58644  | 0.018227 | 0.69442  |
| 0.05091  | -0.04335 | 0.34996  | -0.13333 | 0.00389  | -0.13352 | 0.00384  | -0.09716 | 0.03581  |
| 0.33908  | -0.01339 | 0.77296  | 0.010248 | 0.82519  | 0.00388  | 0.93336  | -0.0474  | 0.30676  |

|          |          |          |          |          |          |          |          |          |
|----------|----------|----------|----------|----------|----------|----------|----------|----------|
| 0.81933  | 0.028587 | 0.53773  | 0.127485 | 0.0058   | 0.18649  | 5.02E-05 | 0.162471 | 0.00042  |
| 3.77E-12 | 0.03316  | 0.47469  | -0.00655 | 0.88773  | -0.03537 | 0.44572  | 0.020466 | 0.65912  |
| 0.13323  | 0.146404 | 0.00151  | 0.063073 | 0.1736   | -0.03797 | 0.41298  | 0.06631  | 0.15252  |
| 0.10276  | -0.07492 | 0.1059   | -0.15992 | 0.00052  | -0.21686 | 2.24E-06 | -0.27672 | 1.18E-09 |
| 0.27528  | -0.00355 | 0.93907  | -0.10203 | 0.02747  | -0.01625 | 0.72613  | -0.03162 | 0.4954   |
| 0.60406  | 0.002355 | 0.95952  | -0.09938 | 0.03179  | -0.14217 | 0.00207  | -0.06765 | 0.14438  |
| 0.76054  | 0.114082 | 0.01363  | 0.262783 | 8.16E-09 | 0.138683 | 0.00267  | 0.228965 | 5.69E-07 |
| 0.30467  | -0.00557 | 0.90445  | 0.020334 | 0.66117  | -0.13271 | 0.00407  | -0.08118 | 0.07969  |
| 0.002    | -0.18673 | 4.90E-05 | 0.097477 | 0.03522  | 0.025059 | 0.58908  | -0.14887 | 0.00125  |
| 0.01333  | -0.11239 | 0.0151   | -0.03918 | 0.39826  | 0.051499 | 0.26672  | -0.03592 | 0.43874  |
| 0.65271  | 0.015155 | 0.74394  | -0.09772 | 0.03475  | -0.09605 | 0.03799  | -0.08759 | 0.05857  |
| 3.45E-11 | 0.001385 | 0.97618  | 0.142708 | 0.00199  | -0.01619 | 0.72711  | 0.032179 | 0.48787  |
| 0.36585  | 0.059437 | 0.19979  | -0.07384 | 0.11101  | 0.202415 | 1.04E-05 | 0.289971 | 1.69E-10 |
| 0.43315  | -0.01775 | 0.70207  | -0.14025 | 0.00238  | -0.17183 | 0.00019  | -0.12459 | 0.00703  |
| 0.71133  | -0.04761 | 0.30456  | 0.149689 | 0.00118  | 0.155665 | 0.00074  | 0.164991 | 0.00034  |
| 0.10827  | 0.365539 | 3.28E-16 | -0.16289 | 0.00041  | -0.14037 | 0.00236  | 0.035751 | 0.44085  |
| 0.00382  | 0.043258 | 0.35095  | -0.01707 | 0.71294  | -0.04606 | 0.32059  | -0.00102 | 0.9825   |
| 1.06E-07 | 0.051353 | 0.26807  | 0.012492 | 0.78775  | -0.05816 | 0.20967  | 0.00072  | 0.98762  |
| 0.05405  | -0.0793  | 0.08694  | -0.16175 | 0.00045  | -0.15034 | 0.00112  | -0.16936 | 0.00024  |
| 1.58E-07 | -0.01293 | 0.78053  | 0.240101 | 1.51E-07 | 0.106269 | 0.02163  | 0.123784 | 0.0074   |
| 0.65975  | -0.09006 | 0.05178  | -0.01465 | 0.75211  | -0.16097 | 0.00048  | -0.21233 | 3.67E-06 |
| 0.00123  | -0.1767  | 0.00012  | -0.03268 | 0.4811   | -0.20163 | 1.13E-05 | -0.23657 | 2.31E-07 |
| 9.69E-09 | 0.154988 | 0.00078  | 0.155574 | 0.00074  | 0.231365 | 4.30E-07 | 0.347553 | 1.05E-14 |
| 0.19865  | 0.319654 | 1.49E-12 | 0.154836 | 0.00079  | 0.188536 | 4.13E-05 | 0.357604 | 1.56E-15 |
| 0.15116  | 0.260827 | 1.06E-08 | 0.0679   | 0.1429   | 0.117838 | 0.01082  | 0.182902 | 7.02E-05 |
| 0.36505  | -0.19224 | 2.89E-05 | 0.029155 | 0.52969  | -0.05964 | 0.19829  | -0.18801 | 4.34E-05 |
| 7.19E-06 | 0.061211 | 0.18668  | 0.083232 | 0.07234  | 0.00521  | 0.9106   | 0.047222 | 0.30853  |
| 0.28042  | 0.12113  | 0.00879  | 0.058911 | 0.20381  | 0.203355 | 9.46E-06 | 0.239362 | 1.65E-07 |
| 7.41E-13 | -0.05698 | 0.21902  | -0.10894 | 0.01853  | -0.14561 | 0.0016   | -0.12233 | 0.00814  |
| 0.00106  | 0.050389 | 0.27718  | -0.12548 | 0.00662  | 0.037332 | 0.4209   | 0.048478 | 0.29583  |
| 0.07392  | 0.027522 | 0.55301  | 0.192492 | 2.82E-05 | 0.110192 | 0.01721  | 0.162381 | 0.00043  |
| 0.01351  | 0.132008 | 0.00427  | -0.07659 | 0.0983   | -0.00862 | 0.85269  | 0.150561 | 0.0011   |
| 1.93E-05 | 0.00477  | 0.91812  | 0.110644 | 0.01676  | 0.059789 | 0.19714  | 0.150223 | 0.00113  |
| 0.00278  | 0.009598 | 0.83612  | 0.014255 | 0.75866  | -0.13084 | 0.00462  | -0.01067 | 0.81812  |
| 0.69063  | -0.06401 | 0.16729  | 0.127776 | 0.00569  | 0.099856 | 0.03097  | 0.080973 | 0.08046  |
| 0.44134  | -0.12815 | 0.00555  | -0.18917 | 3.88E-05 | -0.21495 | 2.76E-06 | -0.26857 | 3.70E-09 |
| 0.91278  | -0.00815 | 0.86064  | 0.034738 | 0.45391  | -0.09344 | 0.04357  | -0.10014 | 0.0305   |
| 0.00033  | -0.10448 | 0.02394  | 0.139876 | 0.00245  | 0.070267 | 0.12945  | -0.07078 | 0.12669  |
| 0.76435  | 0.035671 | 0.44187  | 0.058721 | 0.20528  | 0.085094 | 0.06617  | 0.143995 | 0.00181  |
| 0.37628  | -0.01956 | 0.67333  | 0.009261 | 0.84179  | 0.038031 | 0.41224  | 0.054455 | 0.2402   |
| 0.0293   | 0.031752 | 0.49367  | 0.052685 | 0.25584  | -0.14341 | 0.00189  | -0.02659 | 0.56649  |
| 6.65E-05 | 0.132737 | 0.00406  | 0.029813 | 0.52043  | 0.081897 | 0.07706  | 0.172472 | 0.00018  |
| 0.38053  | -0.16446 | 0.00036  | -0.10448 | 0.02394  | -0.02784 | 0.54844  | -0.14665 | 0.00148  |
| 0.00012  | -0.04267 | 0.35755  | 0.277478 | 1.06E-09 | 0.162899 | 0.00041  | 0.120748 | 0.009    |
| 0.05719  | 0.0647   | 0.16274  | -0.01139 | 0.80612  | 0.031079 | 0.50287  | 0.076371 | 0.09928  |

|          |          |          |          |          |          |          |          |          |
|----------|----------|----------|----------|----------|----------|----------|----------|----------|
| 1.45E-05 | 0.10934  | 0.0181   | 0.220063 | 1.57E-06 | 0.176166 | 0.00013  | 0.335507 | 9.48E-14 |
| 0.00015  | 0.074436 | 0.10816  | 0.152076 | 0.00098  | -0.04497 | 0.3322   | 0.082996 | 0.07316  |
| 0.46949  | 0.185018 | 5.76E-05 | 0.240427 | 1.45E-07 | 0.186629 | 4.95E-05 | 0.380756 | 1.47E-17 |
| 0.24621  | 0.063941 | 0.16774  | 0.275194 | 1.46E-09 | 0.234334 | 3.02E-07 | 0.167112 | 0.00029  |
| 0.82979  | -0.00637 | 0.89087  | 0.180966 | 8.40E-05 | 0.158928 | 0.00057  | 0.132359 | 0.00417  |
| 0.67624  | 0.021158 | 0.64835  | 0.168062 | 0.00026  | 0.164551 | 0.00036  | 0.143275 | 0.00191  |
| 0.70278  | -0.01556 | 0.7373   | 0.149329 | 0.00121  | 0.107298 | 0.02038  | 0.079879 | 0.08465  |
| 0.98364  | -0.00457 | 0.92162  | 0.069116 | 0.13586  | 0.125618 | 0.00657  | 0.021092 | 0.64938  |
| 0.00546  | 0.11636  | 0.01186  | -0.05161 | 0.2657   | -0.09238 | 0.04601  | 0.020941 | 0.65172  |
| 0.46077  | 0.068215 | 0.14105  | 0.073414 | 0.11311  | 0.018584 | 0.68875  | 0.031069 | 0.50301  |
| 0.10801  | -0.12131 | 0.00868  | -0.16326 | 0.0004   | -0.14237 | 0.00204  | -0.2646  | 6.38E-09 |
| 0.02354  | -0.1044  | 0.02406  | -0.10375 | 0.02496  | -0.23688 | 2.23E-07 | -0.28069 | 6.66E-10 |
| 1.29E-07 | -0.08001 | 0.08412  | 0.089271 | 0.05388  | -0.03907 | 0.39953  | -0.08757 | 0.05863  |
| 1.60E-05 | -0.00295 | 0.94929  | -0.09086 | 0.04974  | -0.07463 | 0.10723  | -0.00843 | 0.85587  |
| 0.30776  | -0.03082 | 0.50643  | -0.24114 | 1.33E-07 | -0.20297 | 9.85E-06 | -0.21842 | 1.89E-06 |
| 0.51422  | 0.178855 | 0.0001   | 0.097065 | 0.036    | 0.086937 | 0.06048  | 0.212816 | 3.49E-06 |
| 0.40526  | 0.356653 | 1.87E-15 | -0.02196 | 0.6359   | 0.179935 | 9.23E-05 | 0.367249 | 2.34E-16 |
| 0.01476  | -0.15823 | 0.0006   | -0.1242  | 0.0072   | -0.15967 | 0.00053  | -0.29643 | 6.31E-11 |
| 0.91376  | 0.450924 | 9.06E-25 | -0.04355 | 0.34775  | -0.01469 | 0.75158  | 0.17226  | 0.00018  |
| 0.04379  | 0.336938 | 7.34E-14 | 0.021854 | 0.63759  | 0.251322 | 3.69E-08 | 0.343811 | 2.10E-14 |
| 0.32738  | 0.010809 | 0.81579  | -0.03875 | 0.40343  | -0.04646 | 0.31645  | 0.008539 | 0.85398  |
| 0.06426  | -0.22758 | 6.69E-07 | -0.13093 | 0.0046   | -0.21584 | 2.51E-06 | -0.32672 | 4.44E-13 |
| 0.02548  | 0.038671 | 0.40442  | 0.141525 | 0.00217  | 0.059598 | 0.19857  | 0.061394 | 0.18536  |
| 0.01447  | -0.14236 | 0.00204  | 0.04897  | 0.29095  | -0.15541 | 0.00075  | -0.20309 | 9.73E-06 |
| 4.23E-05 | 0.110821 | 0.01658  | 0.379618 | 1.86E-17 | 0.249021 | 4.95E-08 | 0.348417 | 8.94E-15 |
| 0.12938  | -0.05674 | 0.22098  | -0.01076 | 0.81659  | 0.052008 | 0.26201  | 0.033913 | 0.46471  |
| 0.04891  | 0.034184 | 0.46115  | -0.01475 | 0.75061  | 0.017196 | 0.7109   | 0.037729 | 0.41597  |
| 0.26433  | -0.05229 | 0.2594   | -0.27877 | 8.78E-10 | -0.23052 | 4.75E-07 | -0.22402 | 1.01E-06 |
| 0.34745  | 0.114261 | 0.01349  | 0.045067 | 0.33115  | 0.06052  | 0.19171  | 0.148751 | 0.00126  |
| 0.68839  | 0.032289 | 0.48638  | 0.094125 | 0.04204  | 0.178689 | 0.0001   | 0.232709 | 3.67E-07 |
| 0.07695  | -0.01127 | 0.80804  | -0.19129 | 3.17E-05 | -0.06209 | 0.18041  | -0.09674 | 0.03663  |
| 0.54118  | -0.06987 | 0.13161  | -0.00785 | 0.8657   | -0.03811 | 0.41124  | -0.12667 | 0.00613  |
| 0.97702  | -0.07466 | 0.1071   | -0.09639 | 0.03731  | -0.05695 | 0.21926  | -0.10851 | 0.01899  |
| 0.26388  | -0.09121 | 0.04886  | -0.04064 | 0.38092  | -0.04281 | 0.35599  | -0.14438 | 0.00176  |
| 0.00274  | 0.050823 | 0.27305  | 0.032471 | 0.48392  | -0.02681 | 0.56327  | -0.01729 | 0.70932  |
| 0.53718  | 0.013221 | 0.77567  | 0.090144 | 0.05156  | 0.143172 | 0.00192  | 0.139689 | 0.00248  |
| 0.17157  | 0.015167 | 0.74374  | 0.067112 | 0.1476   | 0.06875  | 0.13795  | 0.093765 | 0.04284  |
| 0.46449  | 0.015198 | 0.74323  | -0.09    | 0.05194  | -0.10306 | 0.02593  | -0.00204 | 0.96485  |
| 0.86021  | 0.002513 | 0.9568   | -0.01374 | 0.7671   | -0.02185 | 0.63759  | 0.052987 | 0.25313  |
| 0.92581  | -0.00286 | 0.95084  | -0.1617  | 0.00045  | -0.1135  | 0.01412  | -0.00455 | 0.92194  |
| 0.82484  | -0.02108 | 0.64954  | -0.24152 | 1.27E-07 | -0.13275 | 0.00406  | -0.05813 | 0.20987  |
| 0.76893  | 0.008008 | 0.86296  | -0.01429 | 0.75809  | -0.06597 | 0.15463  | -0.0458  | 0.32333  |
| 0.03192  | -0.00558 | 0.90435  | -0.06211 | 0.18027  | 0.085011 | 0.06643  | 0.03228  | 0.4865   |
| 5.25E-05 | 0.038845 | 0.4023   | 0.047829 | 0.30234  | 0.157055 | 0.00066  | 0.225422 | 8.57E-07 |
| 0.00039  | -0.05742 | 0.21553  | 0.051989 | 0.26218  | 0.101831 | 0.02778  | 0.025327 | 0.5851   |

|          |          |          |          |          |          |          |          |          |
|----------|----------|----------|----------|----------|----------|----------|----------|----------|
| 0.1109   | 0.116952 | 0.01143  | -0.07197 | 0.1204   | -0.04881 | 0.29255  | 0.072094 | 0.11975  |
| 0.40172  | -0.02039 | 0.66032  | -0.14393 | 0.00182  | -0.19885 | 1.50E-05 | -0.15335 | 0.00089  |
| 0.01055  | -0.01748 | 0.70638  | -0.05741 | 0.21557  | -0.02194 | 0.63623  | -0.04331 | 0.35032  |
| 0.21461  | -0.07898 | 0.08822  | -0.06206 | 0.18064  | -0.14694 | 0.00145  | -0.16406 | 0.00037  |
| 0.26469  | 0.001761 | 0.96972  | -0.05491 | 0.23624  | -0.05215 | 0.26072  | -0.04679 | 0.31296  |
| 0.54922  | -0.22816 | 6.26E-07 | 0.050199 | 0.27899  | -0.11844 | 0.01042  | -0.26566 | 5.52E-09 |
| 0.58682  | -0.04454 | 0.33683  | 0.01379  | 0.76629  | 0.108245 | 0.01929  | 0.005526 | 0.90519  |
| 0.09546  | 0.022251 | 0.6315   | 0.093301 | 0.04388  | 0.083063 | 0.07292  | 0.039942 | 0.38913  |
| 0.1445   | 0.069999 | 0.13092  | -0.01573 | 0.73454  | -0.06571 | 0.15626  | -0.045   | 0.33184  |
| 0.76852  | -0.0143  | 0.75786  | -0.09943 | 0.0317   | -0.06936 | 0.13448  | -0.07149 | 0.12287  |
| 0.09543  | -0.01677 | 0.71772  | 0.031407 | 0.49836  | -0.00516 | 0.91142  | -0.04838 | 0.29685  |
| 0.54545  | 0.03789  | 0.41398  | 0.064807 | 0.16205  | 0.048694 | 0.29368  | 0.019074 | 0.68098  |
| 0.24849  | 0.038114 | 0.41123  | 0.06951  | 0.13364  | 0.077262 | 0.09538  | 0.033567 | 0.46929  |
| 0.33652  | -0.03697 | 0.42548  | 0.067969 | 0.14249  | -0.1321  | 0.00424  | -0.1003  | 0.03022  |
| 0.10771  | 0.010138 | 0.82703  | -0.06615 | 0.15348  | -0.05378 | 0.24604  | -0.03918 | 0.39831  |
| 0.62095  | 0.0102   | 0.826    | -0.04067 | 0.38057  | -0.08333 | 0.07201  | -0.09106 | 0.04924  |
| 0.20842  | -0.03551 | 0.44393  | 0.002214 | 0.96195  | -0.0383  | 0.40896  | -0.0947  | 0.04079  |
| 0.10241  | -0.11644 | 0.0118   | -0.1835  | 6.64E-05 | -0.14006 | 0.00242  | -0.2229  | 1.14E-06 |
| 0.0003   | 0.037059 | 0.4243   | -0.03128 | 0.50008  | -0.00429 | 0.92636  | 0.032401 | 0.48487  |
| 0.17206  | -0.02838 | 0.54071  | 0.103904 | 0.02474  | -0.12203 | 0.00829  | -0.06449 | 0.16414  |
| 0.87324  | -0.01374 | 0.76719  | 0.029067 | 0.53093  | -0.01315 | 0.77687  | -0.0155  | 0.73833  |
| 0.19867  | 0.032386 | 0.48507  | -0.03933 | 0.39647  | 0.002298 | 0.96049  | -0.00691 | 0.88157  |
| 1.75E-06 | 0.032612 | 0.48202  | 0.020201 | 0.66326  | -0.05222 | 0.26005  | 0.022397 | 0.62926  |
| 0.00561  | 0.032693 | 0.48094  | -0.01513 | 0.74429  | -0.0298  | 0.52061  | -0.01702 | 0.71374  |
| 0.44037  | -0.12044 | 0.00918  | -0.00485 | 0.91676  | -0.0695  | 0.13367  | -0.17284 | 0.00017  |
| 0.25531  | -0.04504 | 0.33144  | -0.26165 | 9.50E-09 | -0.16302 | 0.0004   | -0.18167 | 7.87E-05 |
| 0.74865  | 0.013393 | 0.77284  | -0.09623 | 0.03764  | -0.07939 | 0.08657  | -0.03261 | 0.48204  |
| 0.23529  | -0.07665 | 0.09803  | -0.19547 | 2.10E-05 | -0.11315 | 0.01442  | -0.16016 | 0.00051  |
| 0.21833  | 0.018868 | 0.68424  | -0.05122 | 0.26931  | -0.0862  | 0.06271  | -0.03213 | 0.48859  |
| 2.88E-13 | 0.033148 | 0.47485  | -0.07656 | 0.09843  | -0.18831 | 4.22E-05 | -0.05995 | 0.19596  |
| 0.12351  | 0.073377 | 0.11329  | 0.087388 | 0.05916  | 0.045403 | 0.32756  | 0.068404 | 0.13995  |
| 0.73662  | -0.00341 | 0.94143  | 0.002226 | 0.96174  | 0.024695 | 0.5945   | 0.04847  | 0.2959   |
| 5.22E-08 | -0.07693 | 0.09681  | -0.04433 | 0.33915  | -0.0974  | 0.03537  | -0.17002 | 0.00022  |
| 0.49242  | 0.237947 | 1.96E-07 | 0.010705 | 0.81753  | 0.184731 | 5.92E-05 | 0.332718 | 1.56E-13 |
| 0.00051  | -0.06915 | 0.13568  | -0.02751 | 0.55323  | -0.18419 | 6.23E-05 | -0.1661  | 0.00031  |
| 0.07805  | -0.06269 | 0.17626  | 0.152924 | 0.00092  | 0.08933  | 0.05372  | 0.077277 | 0.09532  |
| 0.90997  | -0.25353 | 2.77E-08 | 0.006688 | 0.88539  | -0.16468 | 0.00035  | -0.17877 | 0.0001   |
| 0.00203  | 0.186177 | 5.17E-05 | 0.225368 | 8.63E-07 | 0.272119 | 2.26E-09 | 0.324401 | 6.63E-13 |
| 0.79131  | -0.04423 | 0.34026  | 0.318194 | 1.90E-12 | 0.226293 | 7.76E-07 | 0.131575 | 0.0044   |
| 2.02E-07 | -0.18446 | 6.07E-05 | 0.127619 | 0.00575  | -0.04607 | 0.32051  | -0.11982 | 0.00955  |
| 0.06399  | 0.120043 | 0.00942  | 0.130519 | 0.00473  | 0.120318 | 0.00925  | 0.265597 | 5.57E-09 |
| 0.00713  | 0.161829 | 0.00045  | 0.217694 | 2.05E-06 | 0.171988 | 0.00019  | 0.287222 | 2.55E-10 |
| 0.92949  | -0.04456 | 0.33659  | -0.08932 | 0.05374  | -0.03131 | 0.49967  | -0.11624 | 0.01194  |
| 0.50011  | -0.01025 | 0.82521  | -0.12017 | 0.00934  | -0.10157 | 0.02818  | -0.08139 | 0.07889  |
| 0.51852  | -0.09542 | 0.03927  | -0.04163 | 0.36939  | -0.17183 | 0.00019  | -0.24167 | 1.24E-07 |



|          |          |         |          |          |          |          |          |          |
|----------|----------|---------|----------|----------|----------|----------|----------|----------|
| 9.96E-07 | 0.032821 | 0.47922 | -0.00212 | 0.96349  | -0.04546 | 0.32692  | -0.02448 | 0.59765  |
| 0.57518  | -0.01268 | 0.7846  | 0.117789 | 0.01085  | 0.055745 | 0.22922  | 0.039044 | 0.3999   |
| 0.03544  | 0.054509 | 0.23973 | -0.066   | 0.15447  | -0.07151 | 0.12276  | -0.04739 | 0.30683  |
| 0.09347  | -0.00041 | 0.99303 | 0.024925 | 0.59108  | -0.05215 | 0.26067  | -0.03131 | 0.49973  |
| 6.54E-06 | 0.058876 | 0.20408 | 0.038042 | 0.41211  | -0.0136  | 0.76944  | 0.039964 | 0.38888  |
| 0.006    | 0.031715 | 0.49416 | 0.013103 | 0.77763  | -0.01133 | 0.80705  | 0.011647 | 0.8018   |
| 0.44104  | 0.015643 | 0.736   | -0.02545 | 0.58322  | -0.04416 | 0.34096  | -0.02237 | 0.62972  |
| 0.00028  | 0.069649 | 0.13286 | -0.0315  | 0.4971   | -0.07874 | 0.08921  | 0.032438 | 0.48436  |
| 0.79219  | 0.004862 | 0.91655 | -0.00544 | 0.9067   | -0.07215 | 0.11946  | 0.020049 | 0.66564  |
| 0.76682  | 0.063702 | 0.16934 | -0.04082 | 0.37878  | 0.013257 | 0.77509  | 0.093858 | 0.04263  |
| 0.61668  | -0.04775 | 0.30311 | -0.2124  | 3.65E-06 | -0.12364 | 0.00747  | -0.13225 | 0.0042   |
| 0.30777  | -0.02928 | 0.52786 | 0.094358 | 0.04153  | -0.05178 | 0.26413  | -0.10102 | 0.02905  |
| 0.91088  | -0.00427 | 0.92661 | -0.02997 | 0.5182   | -0.05146 | 0.26708  | -0.06552 | 0.15745  |
| 0.11379  | 0.031644 | 0.49513 | -0.06698 | 0.14841  | 0.002834 | 0.95129  | -0.02057 | 0.65749  |
| 0.00529  | 0.052119 | 0.26099 | 0.043392 | 0.34946  | 0.040901 | 0.37785  | 0.11479  | 0.01306  |
| 0.28235  | 0.019917 | 0.66771 | -0.19331 | 2.60E-05 | -0.14848 | 0.00129  | -0.09341 | 0.04363  |
| 0.00025  | 0.047355 | 0.30717 | -0.22191 | 1.28E-06 | -0.03881 | 0.40278  | -0.15398 | 0.00084  |
| 0.00092  | -0.05831 | 0.20847 | -0.20875 | 5.38E-06 | -0.11068 | 0.01673  | -0.19781 | 1.66E-05 |
| 0.20862  | 0.117372 | 0.01114 | 0.151503 | 0.00102  | 0.15686  | 0.00067  | 0.253515 | 2.78E-08 |
| 6.23E-08 | -0.00428 | 0.92646 | -0.1132  | 0.01438  | -0.07642 | 0.09904  | -0.04399 | 0.34286  |
| 0.02974  | 0.114038 | 0.01367 | 0.095085 | 0.03998  | -0.01082 | 0.81566  | 0.088984 | 0.05465  |
| 0.3705   | -0.11345 | 0.01417 | -0.09318 | 0.04416  | -0.10601 | 0.02195  | -0.24682 | 6.54E-08 |
| 0.67764  | -0.03732 | 0.4211  | 0.001254 | 0.97844  | -0.18974 | 3.68E-05 | -0.17372 | 0.00016  |
| 1.30E-12 | -0.01743 | 0.70713 | -0.02911 | 0.53033  | -0.04702 | 0.31062  | -0.04707 | 0.31008  |
| 0.03028  | 0.155354 | 0.00076 | -0.12403 | 0.00729  | 0.051289 | 0.26868  | 0.193523 | 2.55E-05 |
| 0.01239  | -0.17586 | 0.00013 | 0.143384 | 0.00189  | 0.037269 | 0.42167  | -0.08695 | 0.06044  |
| 0.92168  | -0.01385 | 0.76525 | -0.04699 | 0.31092  | -0.00119 | 0.97961  | -0.06592 | 0.15494  |
| 0.13567  | 0.030313 | 0.51345 | -0.02656 | 0.56693  | -0.04294 | 0.35454  | -0.03042 | 0.51199  |
| 0.00194  | 0.035906 | 0.43887 | 0.061991 | 0.18112  | 0.155009 | 0.00078  | 0.074024 | 0.11014  |
| 0.3754   | 0.045409 | 0.3275  | -0.0814  | 0.07888  | -0.00562 | 0.90352  | 0.005791 | 0.90068  |
| 0.30596  | -0.04374 | 0.34562 | -0.01688 | 0.71594  | -0.14191 | 0.00211  | -0.10139 | 0.02846  |
| 0.11564  | -0.09989 | 0.03092 | -0.13649 | 0.00312  | -0.25151 | 3.60E-08 | -0.25188 | 3.43E-08 |
| 0.55994  | -0.05481 | 0.23716 | -0.09549 | 0.03914  | -0.01107 | 0.81144  | -0.09128 | 0.04867  |
| 0.67541  | -0.04022 | 0.38582 | -0.09969 | 0.03124  | -0.00642 | 0.8899   | -0.07428 | 0.10893  |
| 0.0026   | 0.10216  | 0.02728 | 0.025315 | 0.58529  | 0.076789 | 0.09743  | 0.144387 | 0.00176  |
| 0.01433  | -0.11827 | 0.01053 | -0.14135 | 0.0022   | -0.19051 | 3.41E-05 | -0.16786 | 0.00027  |
| 0.39171  | -0.00399 | 0.93142 | -0.05938 | 0.2002   | -0.12119 | 0.00875  | 0.020796 | 0.65398  |
| 0.81074  | 0.019471 | 0.67472 | 0.021916 | 0.63665  | -0.10317 | 0.02578  | -0.08183 | 0.07729  |
| 1.06E-06 | 0.040604 | 0.38132 | 0.05118  | 0.26969  | 0.013603 | 0.76937  | 0.067181 | 0.14719  |
| 0.02545  | 0.044732 | 0.33477 | -0.09007 | 0.05177  | -0.04697 | 0.3111   | -0.01209 | 0.79437  |
| 2.03E-05 | 0.055025 | 0.23531 | -0.03666 | 0.42934  | -0.10955 | 0.01788  | 0.004428 | 0.92397  |
| 0.66896  | 0.005447 | 0.90654 | -0.08662 | 0.06145  | -0.12201 | 0.00831  | -0.11614 | 0.01202  |
| 0.93852  | 0.011994 | 0.79601 | -0.06311 | 0.17334  | -0.07214 | 0.11951  | -0.01895 | 0.68287  |
| 0.97094  | 0.015707 | 0.73496 | -0.06837 | 0.14013  | -0.0703  | 0.12924  | -0.07337 | 0.11334  |
| 0.05376  | 0.078991 | 0.08818 | 0.059702 | 0.19779  | -0.0163  | 0.7253   | 0.063162 | 0.173    |

|          |          |          |          |          |           |          |          |          |
|----------|----------|----------|----------|----------|-----------|----------|----------|----------|
| 0.41383  | 0.167182 | 0.00028  | -0.05388 | 0.2452   | -0.03421  | 0.4608   | -0.00846 | 0.85536  |
| 0.09725  | -0.13561 | 0.00332  | 0.23659  | 2.31E-07 | -0.01134  | 0.80692  | -0.0663  | 0.15256  |
| 0.11317  | 0.127722 | 0.00571  | 0.003407 | 0.94147  | -0.01557  | 0.73725  | 0.069111 | 0.13589  |
| 0.50809  | -0.05289 | 0.25403  | -0.17498 | 0.00014  | -0.15492  | 0.00078  | -0.20649 | 6.83E-06 |
| 0.7604   | -0.07129 | 0.12396  | -0.02795 | 0.54688  | -0.12299  | 0.00779  | -0.12561 | 0.00657  |
| 0.50547  | 0.025969 | 0.57563  | 0.009098 | 0.84453  | 0.063679  | 0.16949  | 0.041499 | 0.3709   |
| 0.43978  | -0.02826 | 0.54238  | -0.02989 | 0.51937  | 0.006197  | 0.89374  | -0.01626 | 0.72604  |
| 0.00431  | 0.10742  | 0.02024  | 0.023489 | 0.61265  | 0.005152  | 0.91159  | 0.023683 | 0.6097   |
| 0.47009  | 0.096855 | 0.03641  | -0.08791 | 0.05766  | 0.023447  | 0.61327  | 0.092051 | 0.0468   |
| 0.04187  | -0.05261 | 0.25656  | -0.04507 | 0.33115  | 0.081444  | 0.07871  | -0.02781 | 0.5489   |
| 0.06447  | -0.02571 | 0.5795   | 0.18153  | 7.97E-05 | 0.036992  | 0.42514  | 0.075109 | 0.105    |
| 0.37007  | -0.01362 | 0.76912  | -0.10975 | 0.01767  | -0.04469  | 0.3352   | -0.08897 | 0.0547   |
| 0.91704  | -0.05313 | 0.25181  | -0.08853 | 0.0559   | -0.03523  | 0.44754  | -0.06549 | 0.15768  |
| 0.11882  | 0.082916 | 0.07344  | 0.001791 | 0.9692   | 0.079407  | 0.08651  | 0.057405 | 0.21563  |
| 0.79603  | 0.082818 | 0.07378  | 0.074506 | 0.10783  | 0.171897  | 0.00019  | 0.258438 | 1.46E-08 |
| 0.01232  | 0.091513 | 0.0481   | -0.07211 | 0.11967  | -0.03653  | 0.43089  | 0.045578 | 0.32569  |
| 0.58137  | -0.01452 | 0.75428  | -0.12579 | 0.00649  | -0.11186  | 0.01559  | -0.15729 | 0.00065  |
| 0.25245  | -0.14304 | 0.00194  | -0.01969 | 0.67126  | -0.09171  | 0.04762  | -0.26874 | 3.62E-09 |
| 0.01864  | 0.029868 | 0.51967  | 0.126575 | 0.00616  | -0.06016  | 0.19439  | 0.058004 | 0.21087  |
| 0.62347  | -0.02794 | 0.54694  | -0.05585 | 0.22837  | -0.07004  | 0.13069  | -0.05443 | 0.24041  |
| 0.12051  | 0.003684 | 0.93671  | -0.04949 | 0.28582  | -0.07719  | 0.0957   | -0.07855 | 0.08999  |
| 0.59723  | 0.074163 | 0.10947  | -0.01811 | 0.69634  | -0.12712  | 0.00594  | 0.018901 | 0.68372  |
| 0.31434  | 0.057363 | 0.21597  | 0.176368 | 0.00013  | 0.136199  | 0.00319  | 0.135994 | 0.00323  |
| 6.67E-09 | 0.026367 | 0.56979  | 0.180199 | 9.01E-05 | 0.253077  | 2.94E-08 | 0.207604 | 6.08E-06 |
| 0.028    | -0.16125 | 0.00047  | -0.25066 | 4.01E-08 | -0.23744  | 2.08E-07 | -0.2901  | 1.66E-10 |
| 0.45085  | -0.01821 | 0.69461  | -0.11563 | 0.0124   | -0.18606  | 5.22E-05 | -0.12218 | 0.00821  |
| 0.06777  | -0.07255 | 0.11745  | 0.340301 | 4.00E-14 | 0.384787  | 6.27E-18 | 0.248084 | 5.58E-08 |
| 0.0016   | 0.164036 | 0.00037  | 0.060573 | 0.19132  | 0.142123  | 0.00208  | 0.249165 | 4.86E-08 |
| 0.62451  | -0.03482 | 0.4528   | 0.034616 | 0.4555   | -0.01688  | 0.71597  | -0.01781 | 0.70108  |
| 0.00335  | 0.142927 | 0.00196  | 0.088044 | 0.05727  | 0.096494  | 0.03711  | 0.180727 | 8.58E-05 |
| 0.01851  | -0.19069 | 3.35E-05 | -0.27388 | 1.76E-09 | -0.24148  | 1.27E-07 | -0.36792 | 2.04E-16 |
| 0.85843  | 0.042172 | 0.36319  | -0.0585  | 0.20702  | -0.0975   | 0.03518  | -0.01655 | 0.72132  |
| 0.00594  | -0.04252 | 0.35928  | -0.06687 | 0.14908  | -0.16485  | 0.00035  | -0.15294 | 0.00091  |
| 0.00313  | 0.065579 | 0.1571   | 0.396213 | 5.27E-19 | 0.143945  | 0.00182  | 0.178993 | 0.0001   |
| 0.07591  | -0.01611 | 0.72846  | 0.263126 | 7.79E-09 | -7.55E-05 | 0.9987   | 0.008028 | 0.86262  |
| 0.11089  | 0.087066 | 0.0601   | 0.29749  | 5.36E-11 | 0.203236  | 9.58E-06 | 0.315018 | 3.23E-12 |
| 8.19E-08 | -0.02456 | 0.5966   | 0.003726 | 0.936    | 0.123055  | 0.00776  | 0.10824  | 0.0193   |
| 0.96072  | 0.043427 | 0.34907  | -0.04922 | 0.28848  | 0.015428  | 0.73948  | 0.123338 | 0.00762  |
| 5.60E-05 | 0.039993 | 0.38853  | 0.308892 | 8.80E-12 | 0.133802  | 0.00377  | 0.264996 | 6.04E-09 |
| 0.62468  | 0.042259 | 0.3622   | -0.11821 | 0.01057  | -0.14447  | 0.00175  | -0.0608  | 0.18964  |
| 0.03107  | 0.315765 | 2.85E-12 | 0.269729 | 3.15E-09 | 0.321324  | 1.12E-12 | 0.280793 | 6.56E-10 |
| 0.3247   | 0.003198 | 0.94505  | -0.07778 | 0.09319  | -0.09276  | 0.04513  | -0.06059 | 0.19122  |
| 0.00021  | 0.039527 | 0.39409  | 0.124327 | 0.00715  | 0.130167  | 0.00484  | 0.080576 | 0.08196  |
| 2.77E-05 | -0.0339  | 0.46488  | 0.455583 | 2.61E-25 | 0.239327  | 1.66E-07 | 0.151348 | 0.00104  |
| 0.02253  | 0.086859 | 0.06072  | 0.235073 | 2.77E-07 | 0.051058  | 0.27084  | 0.134321 | 0.00364  |

|          |           |          |          |          |          |          |          |          |
|----------|-----------|----------|----------|----------|----------|----------|----------|----------|
| 4.74E-05 | 0.021169  | 0.64818  | -0.15644 | 0.00069  | -0.17001 | 0.00022  | -0.07546 | 0.10339  |
| 0.92618  | 0.008376  | 0.85674  | 0.052185 | 0.26039  | 0.08139  | 0.07891  | 0.084156 | 0.06922  |
| 0.3891   | 0.054363  | 0.24099  | -0.17235 | 0.00018  | -0.07141 | 0.12329  | 0.044008 | 0.34266  |
| 0.62397  | 0.333012  | 1.48E-13 | 0.046095 | 0.32023  | 0.003308 | 0.94317  | 0.116872 | 0.01149  |
| 0.36341  | -0.01605  | 0.72942  | 0.016489 | 0.72229  | 0.022845 | 0.62242  | 0.015288 | 0.74177  |
| 0.00438  | 0.027277  | 0.55653  | -0.08071 | 0.08145  | -0.10105 | 0.029    | -0.07064 | 0.12742  |
| 1.37E-06 | -0.05198  | 0.26231  | 0.041631 | 0.36939  | -0.1015  | 0.02829  | -0.09335 | 0.04377  |
| 0.00026  | 0.036744  | 0.42825  | -0.0095  | 0.83781  | -0.09469 | 0.04081  | -0.03795 | 0.41319  |
| 0.22754  | 0.069623  | 0.13301  | 0.013183 | 0.77631  | 0.033238 | 0.47365  | 0.078371 | 0.09071  |
| 0.00249  | 0.073033  | 0.115    | 0.165496 | 0.00033  | 0.130064 | 0.00488  | 0.157881 | 0.00062  |
| 0.0129   | -0.08945  | 0.0534   | -0.09188 | 0.04721  | -0.08672 | 0.06113  | -0.16417 | 0.00037  |
| 4.80E-06 | 0.022964  | 0.6206   | -0.06772 | 0.14396  | -0.05221 | 0.26013  | 0.035715 | 0.44131  |
| 0.35825  | 0.131027  | 0.00457  | 0.014289 | 0.7581   | 0.076002 | 0.10092  | 0.17569  | 0.00014  |
| 0.09227  | 0.008606  | 0.85285  | 0.187178 | 4.70E-05 | 0.038787 | 0.40301  | 0.035517 | 0.44385  |
| 0.01039  | 0.045032  | 0.33153  | 0.048773 | 0.29289  | -0.04148 | 0.37113  | 0.035352 | 0.44597  |
| 0.02089  | -0.00904  | 0.84547  | 0.182062 | 7.59E-05 | 0.019446 | 0.67511  | 0.077319 | 0.09514  |
| 0.49685  | 0.003298  | 0.94334  | -0.10532 | 0.02283  | -0.11216 | 0.01531  | -0.0855  | 0.06486  |
| 0.0013   | 0.05867   | 0.20567  | -0.00457 | 0.92148  | 0.026919 | 0.56173  | 0.009545 | 0.83701  |
| 0.79666  | 0.007001  | 0.88006  | 0.09317  | 0.04418  | 0.120944 | 0.00889  | 0.14429  | 0.00177  |
| 1.01E-05 | -0.07647  | 0.09882  | -0.06496 | 0.16107  | -0.23314 | 3.49E-07 | -0.28005 | 7.31E-10 |
| 0.04065  | -0.02324  | 0.61648  | -0.04002 | 0.38821  | 0.00118  | 0.97971  | -0.02689 | 0.5621   |
| 2.60E-09 | 0.040096  | 0.38731  | -0.14442 | 0.00175  | -0.1025  | 0.02676  | -0.08287 | 0.07361  |
| 0.01056  | 0.125496  | 0.00662  | 0.14052  | 0.00234  | 0.260581 | 1.10E-08 | 0.326011 | 5.03E-13 |
| 0.00011  | 0.153827  | 0.00085  | 0.204161 | 8.71E-06 | 0.084711 | 0.0674   | 0.245624 | 7.60E-08 |
| 0.7369   | -0.03118  | 0.50154  | -0.13255 | 0.00411  | -0.16193 | 0.00044  | -0.02823 | 0.54286  |
| 0.66421  | -0.00634  | 0.89132  | 0.152642 | 0.00094  | -0.04828 | 0.29784  | -0.01749 | 0.70624  |
| 0.51565  | -0.08579  | 0.06397  | 0.070838 | 0.12635  | -0.15035 | 0.00112  | -0.08043 | 0.0825   |
| 1.88E-12 | 0.051091  | 0.27053  | 0.139965 | 0.00243  | 0.031916 | 0.49143  | 0.054981 | 0.23568  |
| 0.53944  | -0.0312   | 0.50123  | -0.01078 | 0.81621  | -0.06888 | 0.13718  | -0.09331 | 0.04385  |
| 0.10053  | 0.056102  | 0.22625  | -0.12924 | 0.00516  | 0.005403 | 0.9073   | -0.05774 | 0.21298  |
| 0.04186  | 0.162352  | 0.00043  | 0.243799 | 9.55E-08 | 0.203095 | 9.72E-06 | 0.343148 | 2.38E-14 |
| 1.96E-06 | -0.21061  | 4.42E-06 | -0.10165 | 0.02806  | -0.16131 | 0.00047  | -0.30726 | 1.14E-11 |
| 0.43015  | -0.0557   | 0.22963  | 0.017504 | 0.70597  | -0.07438 | 0.10841  | -0.11871 | 0.01024  |
| 0.86324  | -0.00027  | 0.99529  | -0.06629 | 0.15266  | -0.06351 | 0.17066  | -0.01829 | 0.69335  |
| 0.12498  | -0.01266  | 0.78502  | 0.160088 | 0.00052  | 0.124073 | 0.00727  | 0.050338 | 0.27767  |
| 0.04621  | 0.030212  | 0.51486  | 0.020938 | 0.65176  | -0.01979 | 0.66966  | 0.038547 | 0.40593  |
| 0.0008   | 0.096644  | 0.03682  | 0.197447 | 1.72E-05 | 0.246161 | 7.11E-08 | 0.22425  | 9.80E-07 |
| 0.45037  | 0.122055  | 0.00828  | -0.01457 | 0.75343  | 0.088532 | 0.0559   | 0.198003 | 1.63E-05 |
| 0.16508  | -0.05627  | 0.22483  | -0.15224 | 0.00097  | -0.19951 | 1.40E-05 | -0.18278 | 7.11E-05 |
| 0.36267  | -0.06265  | 0.17653  | -0.10969 | 0.01773  | -0.06908 | 0.13606  | -0.10536 | 0.02278  |
| 0.00269  | -0.04425  | 0.33997  | -0.13301 | 0.00398  | -0.14674 | 0.00147  | -0.17454 | 0.00015  |
| 0.39371  | -0.05831  | 0.20845  | 0.077447 | 0.09459  | -0.12729 | 0.00588  | -0.06017 | 0.19427  |
| 0.4772   | -5.47E-05 | 0.99906  | -0.08666 | 0.06132  | -0.0562  | 0.22543  | -0.01805 | 0.69724  |
| 0.12999  | -0.05412  | 0.24307  | 0.000857 | 0.98527  | 0.114449 | 0.01333  | -0.01511 | 0.74461  |
| 0.30634  | -0.05118  | 0.26968  | -0.24811 | 5.55E-08 | -0.23638 | 2.37E-07 | -0.13536 | 0.00338  |

|          |          |          |          |          |          |          |          |          |
|----------|----------|----------|----------|----------|----------|----------|----------|----------|
| 0.03046  | 0.050028 | 0.28064  | -0.12196 | 0.00833  | -0.11228 | 0.0152   | -0.05827 | 0.20876  |
| 0.05641  | 0.150124 | 0.00114  | -0.00385 | 0.93385  | 0.17126  | 0.0002   | 0.254142 | 2.56E-08 |
| 0.59813  | 0.026877 | 0.56234  | -0.03322 | 0.47392  | -0.06707 | 0.14788  | -0.06535 | 0.15853  |
| 0.02252  | 0.009786 | 0.83295  | 0.121491 | 0.00859  | 0.112779 | 0.01475  | 0.069002 | 0.13651  |
| 0.29348  | 0.028424 | 0.54005  | 0.326918 | 4.30E-13 | 0.169474 | 0.00023  | 0.100732 | 0.02952  |
| 0.76893  | -0.13974 | 0.00247  | -0.1692  | 0.00024  | -0.18025 | 8.97E-05 | -0.23884 | 1.76E-07 |
| 9.84E-10 | 0.034652 | 0.45503  | -0.01582 | 0.73305  | 0.023946 | 0.60574  | 0.083237 | 0.07233  |
| 0.56572  | 0.041037 | 0.37626  | 0.106665 | 0.02114  | 0.187957 | 4.36E-05 | 0.060814 | 0.18956  |
| 0.83032  | 0.088161 | 0.05694  | 0.168406 | 0.00026  | 0.16641  | 0.0003   | 0.144388 | 0.00176  |
| 0.33321  | 0.007075 | 0.87881  | 0.01178  | 0.79958  | -0.00732 | 0.8746   | -0.0035  | 0.9399   |
| 0.982    | 0.026976 | 0.5609   | -0.15292 | 0.00092  | -0.16494 | 0.00034  | -0.0835  | 0.07142  |
| 0.65248  | 0.015055 | 0.74557  | 0.21072  | 4.37E-06 | 0.20412  | 8.74E-06 | 0.167097 | 0.00029  |
| 0.1841   | 0.47112  | 3.55E-27 | -0.11644 | 0.0118   | -0.0299  | 0.51922  | 0.230616 | 4.70E-07 |
| 0.01204  | 0.060879 | 0.18909  | -0.08417 | 0.06918  | -0.04971 | 0.28368  | -0.02798 | 0.54635  |
| 0.05115  | 0.03047  | 0.51128  | -0.06178 | 0.18258  | -0.07894 | 0.08836  | -0.02054 | 0.658    |
| 0.00017  | 0.030225 | 0.51468  | -0.11939 | 0.00982  | -0.1474  | 0.0014   | -0.06354 | 0.17045  |
| 0.91035  | 0.039424 | 0.39532  | -0.01948 | 0.67458  | -0.03419 | 0.46113  | -0.02002 | 0.66603  |
| 0.09203  | 0.034703 | 0.45437  | 0.007783 | 0.86678  | -0.03589 | 0.43906  | -0.04998 | 0.28114  |
| 0.94783  | 0.00548  | 0.90599  | -0.08856 | 0.05581  | -0.09932 | 0.03188  | -0.05021 | 0.27891  |
| 0.18485  | 0.045509 | 0.32643  | 0.015379 | 0.74029  | -0.03451 | 0.45692  | -0.04089 | 0.37795  |
| 0.48369  | 0.054497 | 0.23983  | -0.09646 | 0.03719  | -0.04702 | 0.3106   | -0.03344 | 0.47098  |
| 0.00719  | 0.025414 | 0.58382  | -0.00297 | 0.94902  | -0.03381 | 0.46611  | -0.00757 | 0.87042  |
| 0.61648  | -0.02366 | 0.60998  | 0.007848 | 0.86569  | -0.03814 | 0.41088  | -0.05452 | 0.23967  |
| 0.00013  | 0.095816 | 0.03847  | -0.01633 | 0.72489  | -0.06813 | 0.14154  | 0.023472 | 0.61289  |
| 0.20547  | 0.311857 | 5.43E-12 | 0.080217 | 0.08334  | 0.006906 | 0.88167  | 0.07621  | 0.09999  |
| 0.05261  | -0.01632 | 0.72501  | -0.08527 | 0.06559  | -0.08166 | 0.07793  | -0.06463 | 0.16321  |
| 3.78E-05 | 0.101169 | 0.02881  | -0.08214 | 0.0762   | -0.03226 | 0.48677  | -0.00802 | 0.8627   |
| 0.18164  | 0.05368  | 0.24696  | -0.0411  | 0.37555  | -0.00225 | 0.96134  | -0.01454 | 0.75393  |
| 0.21163  | 0.022831 | 0.62264  | -0.05258 | 0.25675  | -0.05009 | 0.27999  | -0.03975 | 0.39138  |
| 0.02983  | 0.011809 | 0.7991   | -0.07746 | 0.09452  | -0.0619  | 0.18179  | -0.05507 | 0.23488  |
| 0.51766  | 0.054774 | 0.23745  | -0.12508 | 0.0068   | -0.05657 | 0.2224   | -0.03459 | 0.45578  |
| 0.70102  | 0.046444 | 0.31658  | -0.09667 | 0.03676  | -0.09571 | 0.03869  | -0.05273 | 0.25545  |
| 0.00653  | 0.04579  | 0.32345  | 0.025023 | 0.58962  | 0.027062 | 0.55965  | 0.047661 | 0.30405  |
| 0.16422  | 0.012821 | 0.78229  | 0.031811 | 0.49285  | -0.08848 | 0.05605  | -0.0254  | 0.58402  |
| 0.00843  | 0.193183 | 2.63E-05 | 0.11515  | 0.01277  | 0.103007 | 0.02602  | 0.256213 | 1.95E-08 |
| 0.85776  | -0.00032 | 0.99446  | 0.154338 | 0.00082  | 0.028399 | 0.54042  | 0.100156 | 0.03046  |
| 0.94966  | 0.065926 | 0.15491  | 0.034417 | 0.4581   | 0.014134 | 0.76064  | 0.099767 | 0.03112  |
| 0.05526  | -0.1039  | 0.02475  | -0.30379 | 1.99E-11 | -0.2723  | 2.20E-09 | -0.34638 | 1.31E-14 |
| 0.5581   | -0.08647 | 0.06189  | -0.14651 | 0.0015   | -0.19807 | 1.62E-05 | -0.25217 | 3.31E-08 |
| 0.38507  | 0.300047 | 3.60E-11 | -0.05587 | 0.2282   | 0.152612 | 0.00094  | 0.35273  | 3.96E-15 |
| 0.00036  | -0.17675 | 0.00012  | -0.0127  | 0.78423  | -0.15532 | 0.00076  | -0.30764 | 1.08E-11 |
| 0.00763  | -0.00307 | 0.94718  | 0.136768 | 0.00306  | 0.037779 | 0.41535  | -0.03282 | 0.47924  |
| 0.85518  | 0.062342 | 0.17865  | 0.121906 | 0.00836  | 0.152116 | 0.00097  | 0.185791 | 5.36E-05 |
| 1.63E-12 | 0.101308 | 0.02859  | 0.033618 | 0.4686   | 0.156184 | 0.00071  | 0.21486  | 2.79E-06 |
| 0.25729  | -0.05684 | 0.22017  | -0.00414 | 0.92884  | -0.06496 | 0.16107  | -0.07947 | 0.08626  |

|          |          |          |          |          |          |          |          |          |
|----------|----------|----------|----------|----------|----------|----------|----------|----------|
| 0.1933   | 0.232471 | 3.77E-07 | 0.0192   | 0.67899  | 0.252266 | 3.27E-08 | 0.311145 | 6.10E-12 |
| 0.00955  | 0.131025 | 0.00457  | -0.03069 | 0.50818  | 0.063849 | 0.16836  | 0.138247 | 0.00275  |
| 0.04599  | 0.10902  | 0.01844  | -0.01382 | 0.76577  | -0.05808 | 0.21024  | 0.020049 | 0.66564  |
| 1.61E-08 | 0.057048 | 0.2185   | 0.009344 | 0.8404   | 0.127915 | 0.00564  | 0.154211 | 0.00083  |
| 0.02186  | 0.025734 | 0.57908  | 0.098946 | 0.03254  | 0.032339 | 0.48571  | 0.042179 | 0.36311  |
| 0.6574   | 0.092984 | 0.0446   | 0.113923 | 0.01377  | 0.280058 | 7.29E-10 | 0.271439 | 2.49E-09 |
| 1.92E-06 | 0.199922 | 1.34E-05 | -0.06592 | 0.15497  | -0.07413 | 0.10964  | 0.084593 | 0.06778  |
| 3.09E-05 | -0.1066  | 0.02122  | 0.076467 | 0.09885  | 0.166302 | 0.00031  | 0.0406   | 0.38137  |
| 3.99E-08 | -0.02254 | 0.62713  | 0.172102 | 0.00019  | 0.202723 | 1.01E-05 | 0.188039 | 4.33E-05 |
| 0.13546  | 0.278495 | 9.14E-10 | 0.174896 | 0.00015  | 0.084914 | 0.06674  | 0.259329 | 1.30E-08 |
| 0.05815  | 0.228512 | 6.00E-07 | -0.038   | 0.41264  | 0.058455 | 0.20734  | 0.104324 | 0.02416  |
| 0.54207  | 0.019869 | 0.66846  | 0.004981 | 0.91452  | 0.017497 | 0.70607  | -0.03659 | 0.43024  |
| 0.02993  | -0.10674 | 0.02105  | 0.098349 | 0.0336   | 0.000328 | 0.99436  | -0.11991 | 0.0095   |
| 0.01831  | 0.161644 | 0.00045  | 0.11534  | 0.01263  | 0.228117 | 6.28E-07 | 0.315955 | 2.76E-12 |
| 0.62961  | 0.10812  | 0.01944  | -0.0843  | 0.06873  | 0.026817 | 0.56322  | 0.055738 | 0.22928  |
| 0.15183  | 0.075503 | 0.10319  | -0.04366 | 0.34647  | -0.05562 | 0.23025  | 0.032029 | 0.48989  |
| 0.29317  | 0.042839 | 0.35565  | 0.081826 | 0.07731  | 0.126047 | 0.00638  | 0.08746  | 0.05895  |
| 0.18105  | 0.124616 | 0.00701  | 0.009961 | 0.83001  | 0.060589 | 0.1912   | 0.12102  | 0.00885  |
| 0.41211  | 0.121132 | 0.00878  | -0.27564 | 1.37E-09 | -0.23608 | 2.45E-07 | -0.17918 | 9.89E-05 |
| 0.97543  | -0.01131 | 0.80745  | -0.01363 | 0.76895  | 0.008595 | 0.85303  | 0.001937 | 0.9667   |
| 0.34096  | 0.061403 | 0.18529  | 0.295225 | 7.60E-11 | 0.140493 | 0.00234  | 0.162696 | 0.00042  |
| 0.91836  | 0.059353 | 0.20043  | -0.15625 | 0.0007   | -0.17307 | 0.00017  | -0.07012 | 0.13028  |
| 1.88E-07 | 0.188046 | 4.33E-05 | 0.028601 | 0.53754  | -0.04162 | 0.36956  | 0.084649 | 0.0676   |
| 0.00371  | -0.05993 | 0.19608  | -0.11677 | 0.01156  | -0.11937 | 0.00982  | -0.17643 | 0.00013  |
| 0.70206  | 0.049876 | 0.2821   | -0.12131 | 0.00869  | -0.06756 | 0.14491  | 0.036333 | 0.43344  |
| 0.00033  | 0.060744 | 0.19007  | -0.01292 | 0.7806   | -0.07347 | 0.11284  | 0.001326 | 0.97721  |
| 0.22831  | -0.03652 | 0.43105  | -0.13984 | 0.00246  | -0.05094 | 0.27199  | -0.1091  | 0.01835  |
| 8.03E-13 | 0.129168 | 0.00518  | 0.202812 | 1.00E-05 | 0.139079 | 0.00259  | 0.330692 | 2.23E-13 |
| 9.99E-09 | 0.052199 | 0.26026  | 0.0498   | 0.28284  | 0.078522 | 0.09009  | 0.124803 | 0.00693  |
| 0.03882  | 0.039847 | 0.39027  | 0.246923 | 6.46E-08 | 0.048463 | 0.29598  | 0.026443 | 0.56867  |
| 7.98E-05 | 0.093351 | 0.04376  | 0.036694 | 0.42888  | 0.030643 | 0.50889  | 0.11795  | 0.01074  |
| 0.0013   | 0.192155 | 2.91E-05 | 0.068672 | 0.1384   | 0.087656 | 0.05838  | 0.188261 | 4.24E-05 |
| 0.25119  | 0.156239 | 0.0007   | 0.105723 | 0.02231  | 0.220995 | 1.42E-06 | 0.265786 | 5.43E-09 |
| 0.00021  | -0.13368 | 0.0038   | -0.20104 | 1.20E-05 | -0.20375 | 9.08E-06 | -0.21038 | 4.53E-06 |
| 0.01783  | 0.029201 | 0.52903  | -0.02117 | 0.64818  | -0.04673 | 0.31361  | 0.030996 | 0.50401  |
| 3.83E-07 | 0.060897 | 0.18895  | -0.05545 | 0.2317   | -0.09257 | 0.04558  | -0.00596 | 0.89772  |
| 1.11E-07 | -0.14471 | 0.00172  | -0.26096 | 1.04E-08 | -0.26582 | 5.40E-09 | -0.33225 | 1.69E-13 |
| 3.49E-06 | 0.087965 | 0.05749  | -0.11211 | 0.01535  | -0.05657 | 0.22236  | 0.001894 | 0.96744  |
| 0.0144   | -0.008   | 0.86316  | -0.03212 | 0.48863  | -0.00467 | 0.91991  | 0.018756 | 0.68601  |
| 0.82917  | -0.00202 | 0.96535  | -0.11908 | 0.01001  | 0.021163 | 0.64827  | -0.0301  | 0.51648  |
| 0.10717  | 0.105809 | 0.0222   | -0.01266 | 0.78491  | 0.030179 | 0.51532  | 0.152216 | 0.00097  |
| 0.02606  | 0.095181 | 0.03978  | 0.258288 | 1.49E-08 | 0.247309 | 6.15E-08 | 0.347394 | 1.08E-14 |
| 0.0015   | -0.01593 | 0.73133  | 0.016545 | 0.72138  | -0.06801 | 0.14224  | -0.04722 | 0.30853  |
| 0.74547  | 0.050472 | 0.27639  | -0.00816 | 0.86044  | -0.02423 | 0.60147  | 0.102007 | 0.02751  |
| 0.46191  | 0.068731 | 0.13806  | 0.196945 | 1.81E-05 | 0.003291 | 0.94345  | 0.108362 | 0.01916  |

|          |          |          |          |          |          |          |          |          |
|----------|----------|----------|----------|----------|----------|----------|----------|----------|
| 1.19E-15 | 0.096026 | 0.03805  | -0.08034 | 0.08285  | -0.08083 | 0.08099  | 0.0402   | 0.38608  |
| 1.58E-09 | 0.102504 | 0.02676  | -0.18039 | 8.86E-05 | -0.06507 | 0.16033  | 0.043252 | 0.35102  |
| 0.09546  | -0.066   | 0.15444  | 0.318997 | 1.66E-12 | 0.185244 | 5.64E-05 | 0.086481 | 0.06185  |
| 0.71488  | -0.06134 | 0.18573  | -0.30597 | 1.41E-11 | -0.18661 | 4.96E-05 | -0.25875 | 1.40E-08 |
| 0.00273  | -0.16592 | 0.00032  | 0.073164 | 0.11435  | -0.0298  | 0.52067  | -0.08936 | 0.05363  |
| 0.03932  | -0.06644 | 0.1517   | -0.24937 | 4.73E-08 | -0.0308  | 0.50672  | -0.08854 | 0.05589  |
| 0.2123   | -0.0129  | 0.78098  | -0.00762 | 0.8695   | 0.022593 | 0.62626  | 0.07352  | 0.11259  |
| 0.23057  | 0.203999 | 8.85E-06 | 0.139944 | 0.00244  | 0.170512 | 0.00021  | 0.286571 | 2.81E-10 |
| 0.00028  | 0.056692 | 0.2214   | 0.03142  | 0.49819  | 0.003519 | 0.93955  | 0.05301  | 0.25292  |
| 0.10559  | -0.12902 | 0.00523  | -0.28892 | 1.98E-10 | -0.23352 | 3.33E-07 | -0.2828  | 4.90E-10 |
| 0.00182  | -0.06395 | 0.16765  | 0.273906 | 1.76E-09 | -0.09147 | 0.04821  | -0.01559 | 0.73682  |
| 0.01812  | 0.078949 | 0.08834  | 0.346297 | 1.33E-14 | 0.199399 | 1.42E-05 | 0.265308 | 5.79E-09 |
| 0.17158  | -0.02012 | 0.66446  | -0.18825 | 4.24E-05 | -0.1128  | 0.01473  | -0.09412 | 0.04205  |
| 0.27939  | -0.02068 | 0.65583  | 0.202455 | 1.04E-05 | 0.188512 | 4.14E-05 | 0.129096 | 0.00521  |
| 0.50194  | -0.14362 | 0.00186  | 0.147946 | 0.00134  | -0.01047 | 0.8215   | -0.09435 | 0.04155  |
| 0.00388  | -0.0057  | 0.90228  | -0.0532  | 0.25123  | 0.05856  | 0.20652  | -0.01526 | 0.74222  |
| 0.57973  | -0.15402 | 0.00084  | -0.25712 | 1.73E-08 | -0.30687 | 1.22E-11 | -0.26906 | 3.46E-09 |
| 0.22667  | -0.1271  | 0.00595  | 0.006901 | 0.88177  | 0.080003 | 0.08416  | -0.09143 | 0.04831  |
| 6.20E-11 | -0.03912 | 0.39898  | -0.00464 | 0.92027  | 0.024739 | 0.59386  | -0.08463 | 0.06765  |
| 0.16383  | -0.02311 | 0.61839  | 0.008364 | 0.85695  | 0.047071 | 0.31008  | 0.091038 | 0.04928  |
| 0.74354  | 0.058622 | 0.20604  | 0.17552  | 0.00014  | -0.00369 | 0.93667  | 0.055097 | 0.23469  |
| 0.57496  | -0.12696 | 0.00601  | -0.16432 | 0.00036  | -0.17735 | 0.00012  | -0.24063 | 1.41E-07 |
| 0.01534  | -0.04196 | 0.36564  | -0.14967 | 0.00118  | -0.14825 | 0.00131  | -0.17082 | 0.00021  |
| 0.53194  | -0.02339 | 0.61421  | -0.08851 | 0.05597  | -0.04392 | 0.34358  | -0.11908 | 0.01001  |
| 0.27309  | -0.00389 | 0.93318  | -0.02784 | 0.54844  | -0.03807 | 0.4118   | -0.07021 | 0.12976  |
| 0.00564  | 0.104586 | 0.0238   | 0.082167 | 0.07608  | 0.174232 | 0.00015  | 0.184288 | 6.17E-05 |
| 0.00792  | -0.142   | 0.0021   | 0.159665 | 0.00053  | 0.071248 | 0.12417  | 0.034898 | 0.45184  |
| 0.04862  | -0.08128 | 0.07932  | 0.072284 | 0.11878  | -0.12953 | 0.00506  | -0.2194  | 1.69E-06 |
| 0.00143  | 0.100782 | 0.02943  | -0.05569 | 0.22964  | 0.001698 | 0.97081  | 0.068388 | 0.14004  |
| 3.48E-10 | -0.03749 | 0.41892  | 0.068345 | 0.14029  | 0.116421 | 0.01181  | 0.044265 | 0.33984  |
| 8.42E-05 | 0.079613 | 0.08569  | -0.01322 | 0.77566  | -0.00309 | 0.94699  | 0.051166 | 0.26982  |
| 0.42541  | -0.03739 | 0.42022  | -0.12862 | 0.00538  | -0.09903 | 0.03238  | -0.1949  | 2.22E-05 |
| 0.82441  | 0.051727 | 0.2646   | 0.03773  | 0.41595  | 0.030573 | 0.50986  | -0.01444 | 0.75567  |
| 0.00023  | -0.02648 | 0.56816  | -0.0882  | 0.05684  | -0.07924 | 0.08716  | -0.12476 | 0.00695  |
| 1.14E-05 | -0.15534 | 0.00076  | -0.06062 | 0.19099  | -0.18123 | 8.20E-05 | -0.32057 | 1.27E-12 |
| 0.00643  | -0.11641 | 0.01182  | -0.15339 | 0.00088  | -0.15693 | 0.00067  | -0.26035 | 1.13E-08 |
| 3.27E-09 | 0.054632 | 0.23866  | -0.04075 | 0.3796   | -0.11505 | 0.01285  | -0.00171 | 0.97059  |
| 0.48417  | 0.07218  | 0.11931  | -0.05129 | 0.26865  | 0.083052 | 0.07296  | 0.15365  | 0.00086  |
| 0.79247  | -0.07761 | 0.0939   | -0.04307 | 0.35309  | -0.29658 | 6.17E-11 | -0.29524 | 7.58E-11 |
| 0.00564  | 0.077741 | 0.09334  | -0.17738 | 0.00012  | -0.09008 | 0.05173  | 0.057766 | 0.21275  |
| 0.02574  | 0.101914 | 0.02765  | 0.094323 | 0.04161  | 0.146145 | 0.00154  | 0.225923 | 8.09E-07 |
| 7.96E-09 | 0.153062 | 0.00091  | 0.139108 | 0.00259  | 0.129022 | 0.00523  | 0.252476 | 3.18E-08 |
| 0.00366  | 0.000194 | 0.99667  | 0.172369 | 0.00018  | 0.060454 | 0.19219  | 0.090375 | 0.05096  |
| 0.96435  | 0.157301 | 0.00065  | 0.099638 | 0.03134  | 0.128423 | 0.00545  | 0.231363 | 4.30E-07 |
| 0.14448  | -0.01414 | 0.76063  | -0.02277 | 0.62354  | -0.05557 | 0.23066  | -0.10335 | 0.02552  |

|          |          |          |          |          |          |          |          |          |
|----------|----------|----------|----------|----------|----------|----------|----------|----------|
| 0.45908  | 0.156657 | 0.00068  | 0.175626 | 0.00014  | 0.158416 | 0.00059  | 0.242504 | 1.12E-07 |
| 0.83885  | -0.00647 | 0.88914  | -0.3036  | 2.06E-11 | -0.22361 | 1.05E-06 | -0.16662 | 0.0003   |
| 0.00638  | -0.184   | 6.34E-05 | -0.33053 | 2.29E-13 | -0.18894 | 3.97E-05 | -0.29314 | 1.05E-10 |
| 0.80676  | -0.0969  | 0.03631  | 0.231383 | 4.29E-07 | 0.023394 | 0.61408  | -0.03293 | 0.4777   |
| 1.89E-12 | 0.014962 | 0.74709  | 0.240811 | 1.38E-07 | 0.005708 | 0.90209  | 0.021295 | 0.64623  |
| 0.03178  | 0.188905 | 3.98E-05 | 0.15994  | 0.00052  | 0.101888 | 0.02769  | 0.12979  | 0.00497  |
| 1.66E-09 | 0.013851 | 0.76529  | 0.03884  | 0.40236  | -0.03078 | 0.50705  | 0.015686 | 0.73529  |
| 0.28242  | 0.29493  | 7.95E-11 | 0.074753 | 0.10667  | 0.158938 | 0.00057  | 0.233613 | 3.30E-07 |
| 0.03922  | 0.023751 | 0.60868  | 0.06315  | 0.17308  | 0.086881 | 0.06065  | 0.082036 | 0.07655  |
| 0.11961  | -0.07577 | 0.10196  | 0.294362 | 8.67E-11 | -0.01795 | 0.69877  | -0.04224 | 0.36245  |
| 0.54739  | -0.16374 | 0.00038  | 0.194505 | 2.31E-05 | 0.024431 | 0.59846  | -0.02717 | 0.55815  |
| 3.13E-05 | 0.0358   | 0.44022  | 0.048042 | 0.30019  | 0.020111 | 0.66466  | 0.022764 | 0.62365  |
| 0.25654  | -0.16212 | 0.00044  | -0.11052 | 0.01688  | -0.15978 | 0.00053  | -0.33797 | 6.09E-14 |
| 0.2792   | -0.01808 | 0.69677  | -0.08711 | 0.05996  | -0.15275 | 0.00093  | -0.24668 | 6.65E-08 |
| 0.01787  | 0.029991 | 0.51794  | 0.02846  | 0.53954  | 0.03486  | 0.45233  | 0.059178 | 0.20176  |
| 1.11E-09 | -0.10682 | 0.02096  | -0.06562 | 0.15681  | -0.12744 | 0.00582  | -0.19262 | 2.78E-05 |
| 0.98571  | -0.02722 | 0.55738  | -0.07972 | 0.08529  | -0.00272 | 0.95328  | -0.07219 | 0.11926  |
| 0.18243  | -0.08915 | 0.05421  | 0.159707 | 0.00053  | 0.050463 | 0.27647  | -0.0749  | 0.106    |
| 0.93257  | 0.112306 | 0.01518  | 0.267987 | 4.01E-09 | 0.123745 | 0.00742  | 0.215686 | 2.55E-06 |
| 0.22211  | 0.063794 | 0.16873  | -0.04195 | 0.36575  | -0.04922 | 0.28848  | -0.01861 | 0.68827  |
| 0.0011   | 0.114184 | 0.01355  | 0.220222 | 1.54E-06 | 0.30123  | 2.99E-11 | 0.291449 | 1.35E-10 |
| 0.22367  | 0.040447 | 0.38317  | -0.17317 | 0.00017  | 0.086852 | 0.06074  | 0.059085 | 0.20248  |
| 7.54E-07 | -0.03617 | 0.43554  | -0.18132 | 8.13E-05 | -0.22322 | 1.10E-06 | -0.23361 | 3.30E-07 |
| 0.12633  | 0.088448 | 0.05613  | 0.015731 | 0.73456  | -0.04172 | 0.36831  | 0.002314 | 0.96023  |
| 0.55375  | 0.17076  | 0.00021  | 0.180385 | 8.86E-05 | 0.142701 | 0.00199  | 0.304493 | 1.78E-11 |
| 9.34E-06 | 0.152212 | 0.00097  | -0.0335  | 0.4702   | 0.115504 | 0.0125   | 0.275922 | 1.32E-09 |
| 0.01088  | 0.267035 | 4.57E-09 | 0.138931 | 0.00262  | 0.178251 | 0.00011  | 0.305046 | 1.63E-11 |
| 0.00026  | -0.05405 | 0.24372  | 0.071752 | 0.12152  | 0.023623 | 0.61062  | -0.0415  | 0.37084  |
| 0.06663  | 0.241381 | 1.29E-07 | -0.05555 | 0.2309   | 0.193224 | 2.62E-05 | 0.312429 | 4.94E-12 |
| 0.1294   | 0.240752 | 1.39E-07 | 0.079257 | 0.08711  | 0.224    | 1.01E-06 | 0.324385 | 6.65E-13 |
| 0.09909  | 0.069623 | 0.133    | 0.097224 | 0.03569  | 0.113729 | 0.01393  | 0.238043 | 1.94E-07 |
| 0.9637   | 0.011717 | 0.80063  | 0.043681 | 0.34626  | -0.04534 | 0.32823  | -0.02021 | 0.6631   |
| 0.80889  | -0.01337 | 0.7732   | -0.14148 | 0.00218  | -0.19557 | 2.08E-05 | -0.14276 | 0.00198  |
| 7.45E-06 | -0.03097 | 0.50431  | -0.17774 | 0.00011  | -0.14922 | 0.00122  | -0.1836  | 6.58E-05 |
| 1.38E-09 | 0.505709 | 1.09E-31 | 0.010638 | 0.81865  | -0.05979 | 0.19717  | 0.080028 | 0.08407  |
| 0.0751   | -0.0066  | 0.88683  | -0.12924 | 0.00515  | -0.09741 | 0.03535  | -0.09454 | 0.04115  |
| 0.03786  | -0.09749 | 0.0352   | -0.25837 | 1.47E-08 | -0.23108 | 4.45E-07 | -0.28602 | 3.05E-10 |
| 6.24E-06 | 0.173416 | 0.00017  | -0.02805 | 0.54545  | 0.086088 | 0.06305  | 0.22149  | 1.34E-06 |
| 0.00436  | 0.204114 | 8.75E-06 | 0.168078 | 0.00026  | 0.20248  | 1.04E-05 | 0.393686 | 9.19E-19 |
| 0.01374  | -0.05453 | 0.23953  | -0.17432 | 0.00015  | -0.18121 | 8.21E-05 | -0.15033 | 0.00112  |
| 0.37185  | 0.061691 | 0.18324  | -0.14004 | 0.00242  | -0.11381 | 0.01386  | -0.07144 | 0.12315  |
| 7.78E-12 | 0.06375  | 0.16902  | 0.030926 | 0.50497  | 0.013612 | 0.76923  | 0.028479 | 0.53928  |
| 0.12578  | 0.004425 | 0.92402  | -0.00839 | 0.85657  | -0.05524 | 0.23346  | -0.05138 | 0.26784  |
| 1.48E-06 | 0.072937 | 0.11547  | -0.01572 | 0.73477  | -0.05429 | 0.24163  | 0.012309 | 0.79078  |
| 0.54761  | -0.07543 | 0.10355  | -0.19532 | 2.13E-05 | -0.06738 | 0.14601  | -0.07283 | 0.11601  |

|          |          |          |          |          |          |          |          |          |
|----------|----------|----------|----------|----------|----------|----------|----------|----------|
| 0.137    | -0.03353 | 0.46972  | -0.23954 | 1.61E-07 | -0.14156 | 0.00217  | -0.11876 | 0.01021  |
| 0.02667  | -0.01679 | 0.71745  | 0.180222 | 8.99E-05 | 0.273097 | 1.97E-09 | 0.166463 | 0.0003   |
| 0.42788  | -0.05824 | 0.20905  | -0.22347 | 1.07E-06 | -0.18526 | 5.63E-05 | -0.20536 | 7.69E-06 |
| 0.0796   | -0.20907 | 5.20E-06 | -0.14179 | 0.00213  | -0.22023 | 1.54E-06 | -0.39344 | 9.70E-19 |
| 0.02255  | 0.095646 | 0.03882  | 0.09154  | 0.04804  | 0.20986  | 4.79E-06 | 0.284149 | 4.02E-10 |
| 0.16268  | -0.03828 | 0.40914  | -0.15182 | 0.001    | -0.11589 | 0.01221  | -0.09974 | 0.03117  |
| 0.7308   | -0.06401 | 0.16728  | -0.16262 | 0.00042  | -0.12994 | 0.00492  | -0.17037 | 0.00022  |
| 0.02683  | 0.01988  | 0.66829  | 0.038228 | 0.40982  | 0.04898  | 0.29085  | 0.00961  | 0.83591  |
| 0.00349  | -0.16729 | 0.00028  | -0.18474 | 5.91E-05 | -0.29871 | 4.43E-11 | -0.37948 | 1.92E-17 |
| 0.12775  | -0.09598 | 0.03814  | -0.152   | 0.00098  | -0.19732 | 1.75E-05 | -0.25873 | 1.40E-08 |
| 0.13859  | 0.019379 | 0.67616  | 0.064431 | 0.1645   | 0.019541 | 0.67362  | -0.00803 | 0.86267  |
| 0.00815  | -0.00737 | 0.87375  | 0.015903 | 0.73178  | 0.031778 | 0.49331  | 0.025876 | 0.577    |
| 0.01121  | -0.04112 | 0.37531  | -0.09393 | 0.04246  | -0.19727 | 1.76E-05 | -0.21974 | 1.63E-06 |
| 0.00053  | -0.04532 | 0.32848  | -0.05982 | 0.19691  | -0.20091 | 1.22E-05 | -0.12736 | 0.00585  |
| 0.11741  | -0.00945 | 0.83867  | 0.184464 | 6.07E-05 | 0.048233 | 0.29827  | 0.080137 | 0.08365  |
| 0.02712  | 0.208093 | 5.77E-06 | -0.02197 | 0.63583  | 0.180082 | 9.11E-05 | 0.281385 | 6.02E-10 |
| 0.09533  | 0.24563  | 7.60E-08 | 0.031323 | 0.49952  | 0.093638 | 0.04312  | 0.177535 | 0.00011  |
| 0.04623  | -0.02247 | 0.62812  | -0.07254 | 0.11745  | 0.024231 | 0.60145  | -0.01048 | 0.82137  |
| 0.02934  | 0.027085 | 0.55932  | -0.06496 | 0.16105  | 0.055302 | 0.23295  | 0.024532 | 0.59694  |
| 0.00326  | 0.007053 | 0.87918  | -0.07444 | 0.10814  | 0.023728 | 0.60902  | -0.03395 | 0.46416  |
| 0.71212  | -0.0204  | 0.6602   | -0.02048 | 0.65896  | 0.099686 | 0.03125  | 0.03099  | 0.5041   |
| 0.32224  | -0.0309  | 0.5053   | -0.032   | 0.49027  | 0.051756 | 0.26433  | -0.00695 | 0.88101  |
| 1.74E-05 | 0.006008 | 0.89696  | -0.14013 | 0.0024   | -0.00237 | 0.95928  | -0.0511  | 0.27046  |
| 0.23417  | -0.00449 | 0.92291  | -0.00513 | 0.91189  | 0.046823 | 0.31264  | 0.023357 | 0.61464  |
| 0.02076  | 0.015253 | 0.74234  | -0.04352 | 0.34802  | 0.108186 | 0.01936  | 0.085255 | 0.06565  |
| 3.31E-06 | 0.151252 | 0.00104  | 0.167344 | 0.00028  | 0.058047 | 0.21053  | 0.201395 | 1.16E-05 |
| 0.00196  | 0.03784  | 0.4146   | 0.340531 | 3.83E-14 | 0.273226 | 1.93E-09 | 0.293362 | 1.01E-10 |
| 0.71703  | 0.010977 | 0.81298  | -0.01409 | 0.7614   | 0.09369  | 0.043    | 0.043836 | 0.34455  |
| 5.30E-06 | 0.033571 | 0.46923  | 0.059626 | 0.19837  | -0.04564 | 0.32501  | 0.052126 | 0.26093  |
| 2.22E-06 | -0.11417 | 0.01356  | -0.13853 | 0.0027   | -0.11299 | 0.01457  | -0.18344 | 6.68E-05 |
| 0.9023   | -0.02964 | 0.52289  | -0.01387 | 0.76495  | 0.025714 | 0.57938  | -0.06118 | 0.18693  |
| 0.14384  | 0.032956 | 0.47742  | -0.07241 | 0.11814  | 0.019226 | 0.67858  | -0.03851 | 0.40641  |
| 0.58787  | -0.02987 | 0.5196   | 0.013181 | 0.77633  | 0.03637  | 0.43297  | -0.0061  | 0.89532  |
| 0.6635   | -0.0215  | 0.64298  | 0.120847 | 0.00895  | 0.042024 | 0.36488  | -0.00566 | 0.90292  |
| 0.00011  | -0.02343 | 0.61354  | 0.000205 | 0.99648  | -0.02056 | 0.65772  | 0.036159 | 0.43565  |
| 6.35E-07 | -0.00231 | 0.96021  | 0.127575 | 0.00577  | 0.188257 | 4.24E-05 | 0.142819 | 0.00198  |
| 0.00024  | 0.044987 | 0.33201  | 0.292442 | 1.16E-10 | 0.116794 | 0.01154  | 0.145545 | 0.00161  |
| 0.84105  | -0.01728 | 0.70958  | -0.01225 | 0.79177  | -0.11512 | 0.0128   | -0.12193 | 0.00835  |
| 0.0041   | 0.120347 | 0.00924  | 0.022093 | 0.63392  | 0.056484 | 0.2231   | 0.081138 | 0.07984  |
| 0.61094  | -0.03354 | 0.4696   | -0.04645 | 0.3165   | -0.08938 | 0.05359  | -0.09406 | 0.04219  |
| 0.06842  | 0.001675 | 0.97121  | -0.04048 | 0.38283  | -0.03671 | 0.42864  | -0.08108 | 0.08006  |
| 0.03725  | 0.051009 | 0.2713   | -0.07809 | 0.09189  | -0.06116 | 0.18707  | -0.01292 | 0.78065  |
| 7.95E-09 | 0.04491  | 0.33284  | -0.18014 | 9.06E-05 | -0.13754 | 0.0029   | -0.05782 | 0.21235  |
| 0.62232  | -0.01133 | 0.80716  | -0.01389 | 0.76469  | -0.14315 | 0.00193  | -0.18738 | 4.61E-05 |
| 0.03119  | -0.14111 | 0.00224  | -0.01482 | 0.74938  | -0.13822 | 0.00276  | -0.26357 | 7.34E-09 |



|          |          |          |          |          |          |          |          |          |
|----------|----------|----------|----------|----------|----------|----------|----------|----------|
| 0.42699  | 0.030737 | 0.50758  | 0.074893 | 0.10601  | 0.022231 | 0.63181  | 0.02182  | 0.63812  |
| 7.96E-06 | 0.022047 | 0.63463  | -0.14482 | 0.0017   | -0.17098 | 0.00021  | -0.08561 | 0.06454  |
| 0.00201  | 0.16445  | 0.00036  | 0.112279 | 0.0152   | 0.259576 | 1.25E-08 | 0.354859 | 2.64E-15 |
| 0.4173   | 0.048053 | 0.30009  | -0.05177 | 0.26418  | -0.05738 | 0.21584  | 0.001791 | 0.96922  |
| 0.3462   | 0.018113 | 0.69624  | -0.06193 | 0.18156  | -0.07122 | 0.1243   | -0.05002 | 0.28076  |
| 5.94E-12 | 0.179705 | 9.43E-05 | 0.066969 | 0.14847  | 0.027524 | 0.55297  | 0.115753 | 0.01231  |
| 0.00945  | 0.153117 | 0.0009   | 0.041891 | 0.36639  | 0.004462 | 0.92339  | 0.075627 | 0.10262  |
| 0.42336  | 0.061487 | 0.18469  | 0.114207 | 0.01353  | 0.061498 | 0.18461  | 0.098841 | 0.03272  |
| 0.00015  | -0.19209 | 2.93E-05 | 0.126377 | 0.00624  | -0.0009  | 0.98449  | -0.10299 | 0.02604  |
| 2.30E-05 | -0.18682 | 4.86E-05 | -0.11208 | 0.01538  | -0.1251  | 0.00679  | -0.23349 | 3.35E-07 |
| 0.17197  | 0.02696  | 0.56114  | -0.03703 | 0.42467  | -0.02715 | 0.55838  | -0.02734 | 0.55568  |
| 0.44285  | 0.063997 | 0.16737  | 0.136648 | 0.00309  | 0.144264 | 0.00177  | 0.081294 | 0.07926  |
| 0.95905  | -0.02533 | 0.58501  | -0.0041  | 0.92958  | -0.04914 | 0.28926  | -0.06616 | 0.15342  |
| 7.78E-08 | 0.051616 | 0.26563  | -0.01723 | 0.7103   | 0.062332 | 0.17872  | 0.095719 | 0.03867  |
| 0.00044  | 0.179945 | 9.22E-05 | -0.04929 | 0.28782  | 0.04123  | 0.37401  | 0.156357 | 0.0007   |
| 0.09753  | 0.045837 | 0.32295  | -0.02358 | 0.61121  | 0.016814 | 0.71705  | -0.01203 | 0.79534  |
| 0.06001  | 0.009547 | 0.83698  | -0.06544 | 0.15798  | -0.01933 | 0.67691  | -0.04621 | 0.31906  |
| 0.00031  | -0.03218 | 0.4878   | 0.218648 | 1.84E-06 | 0.311324 | 5.92E-12 | 0.167602 | 0.00027  |
| 0.06554  | 0.085988 | 0.06336  | 0.004177 | 0.92827  | 0.01436  | 0.75694  | 0.123276 | 0.00765  |
| 6.03E-07 | -0.07644 | 0.09897  | 0.056249 | 0.22504  | -0.11691 | 0.01146  | -0.10609 | 0.02185  |
| 0.03175  | 0.000843 | 0.9855   | -0.07128 | 0.12397  | -0.03368 | 0.46783  | -0.00512 | 0.91215  |
| 0.13793  | 0.125653 | 0.00655  | 0.171954 | 0.00019  | 0.326576 | 4.56E-13 | 0.34381  | 2.10E-14 |
| 0.93119  | 0.02758  | 0.55216  | -0.0658  | 0.15571  | -0.14383 | 0.00183  | -0.04128 | 0.37339  |
| 0.00114  | 0.15619  | 0.00071  | 0.004774 | 0.91806  | -0.02432 | 0.60009  | 0.061803 | 0.18245  |
| 0.00078  | 0.040787 | 0.37917  | 0.04012  | 0.38703  | -0.01617 | 0.72738  | 0.058246 | 0.20897  |
| 6.68E-12 | 0.178024 | 0.00011  | 0.17005  | 0.00022  | 0.270023 | 3.03E-09 | 0.371432 | 1.01E-16 |
| 0.58593  | 0.093839 | 0.04267  | 0.026304 | 0.5707   | 0.004386 | 0.92469  | 0.132095 | 0.00424  |
| 9.98E-08 | -0.06462 | 0.16325  | -0.11349 | 0.01413  | -0.11581 | 0.01226  | -0.15514 | 0.00077  |
| 0.78789  | 0.055902 | 0.22791  | -0.08801 | 0.05738  | -0.01723 | 0.71029  | 0.009215 | 0.84257  |
| 5.92E-11 | 0.017237 | 0.71025  | -0.03664 | 0.42962  | -0.05398 | 0.24429  | -0.03407 | 0.46269  |
| 0.00121  | 0.060064 | 0.19508  | -0.05529 | 0.23303  | -0.11846 | 0.0104   | 0.015081 | 0.74514  |
| 0.00047  | 0.100678 | 0.0296   | 0.115122 | 0.01279  | 0.121203 | 0.00874  | 0.133657 | 0.00381  |
| 0.03334  | 0.173865 | 0.00016  | 0.170985 | 0.00021  | 0.164657 | 0.00035  | 0.342382 | 2.73E-14 |
| 0.05169  | 0.001308 | 0.9775   | -0.08514 | 0.066    | -0.10091 | 0.02923  | -0.11313 | 0.01445  |
| 2.93E-05 | -0.0767  | 0.09782  | 0.099731 | 0.03118  | 0.038517 | 0.4063   | -0.094   | 0.04232  |
| 0.96478  | -0.09293 | 0.04473  | 0.046012 | 0.32111  | 0.034712 | 0.45426  | -0.01007 | 0.82822  |
| 2.98E-10 | -0.03365 | 0.46824  | -0.04111 | 0.37535  | -0.01896 | 0.68271  | -0.07864 | 0.08962  |
| 0.00349  | 0.462479 | 3.98E-26 | 0.002057 | 0.96464  | 0.098662 | 0.03304  | 0.184321 | 6.15E-05 |
| 0.00273  | 0.03222  | 0.4873   | 0.11409  | 0.01363  | -0.02299 | 0.62028  | 0.056073 | 0.22649  |
| 0.07599  | -0.07208 | 0.11984  | -0.08719 | 0.05974  | -0.22134 | 1.36E-06 | -0.21682 | 2.25E-06 |
| 0.05474  | 0.101276 | 0.02864  | 0.027945 | 0.54692  | 0.106948 | 0.0208   | 0.189373 | 3.81E-05 |
| 0.02962  | -0.00802 | 0.86284  | -0.07835 | 0.09079  | -0.01851 | 0.68985  | -0.05801 | 0.21081  |
| 0.63829  | -0.11326 | 0.01433  | -0.0655  | 0.15759  | -0.01565 | 0.73581  | -0.1057  | 0.02235  |
| 3.90E-08 | 0.101623 | 0.0281   | -0.01867 | 0.68741  | 0.071881 | 0.12085  | 0.145779 | 0.00158  |
| 0.41955  | 0.004023 | 0.9309   | -0.05828 | 0.20873  | -0.0749  | 0.10599  | -0.01961 | 0.6726   |

|          |          |          |          |          |          |          |          |          |
|----------|----------|----------|----------|----------|----------|----------|----------|----------|
| 0.1933   | 0.014294 | 0.75802  | -0.09522 | 0.03969  | -0.09026 | 0.05126  | -0.02893 | 0.53291  |
| 0.33529  | -0.04383 | 0.34466  | -0.01794 | 0.69904  | -0.15061 | 0.0011   | -0.17274 | 0.00018  |
| 0.0005   | 0.089925 | 0.05213  | 0.225975 | 8.05E-07 | 0.174179 | 0.00016  | 0.266204 | 5.12E-09 |
| 0.07559  | 0.06214  | 0.18007  | -0.07143 | 0.1232   | -0.08421 | 0.06906  | -0.01766 | 0.70348  |
| 0.00179  | 0.008291 | 0.85819  | -0.10191 | 0.02766  | -0.10695 | 0.0208   | -0.07529 | 0.10418  |
| 0.00214  | -0.18547 | 5.52E-05 | -0.0666  | 0.1507   | -0.13278 | 0.00405  | -0.20232 | 1.05E-05 |
| 1.16E-11 | 0.037581 | 0.4178   | -0.1028  | 0.02632  | -0.189   | 3.95E-05 | -0.18206 | 7.59E-05 |
| 0.23908  | 0.02987  | 0.51964  | -0.08874 | 0.05532  | -0.02814 | 0.54418  | -0.0539  | 0.245    |
| 0.23861  | 0.143615 | 0.00186  | -0.06127 | 0.18627  | 0.029374 | 0.5266   | 0.165022 | 0.00034  |
| 5.39E-06 | 0.246017 | 7.24E-08 | 0.120278 | 0.00928  | 0.161807 | 0.00045  | 0.247735 | 5.83E-08 |
| 0.80574  | -0.06881 | 0.13758  | -0.27625 | 1.26E-09 | -0.38369 | 7.91E-18 | -0.29871 | 4.43E-11 |
| 0.00405  | -0.05592 | 0.22778  | 0.015865 | 0.73238  | -0.0561  | 0.22626  | -0.09618 | 0.03773  |
| 3.83E-07 | 0.083544 | 0.07128  | 0.090555 | 0.0505   | 0.020956 | 0.65149  | 0.072911 | 0.1156   |
| 0.329    | 0.059996 | 0.19559  | -0.05219 | 0.26034  | -0.02227 | 0.63122  | 0.050676 | 0.27444  |
| 3.43E-06 | -0.14857 | 0.00128  | -0.1103  | 0.0171   | -0.25568 | 2.10E-08 | -0.21413 | 3.02E-06 |
| 0.0186   | -0.05987 | 0.19657  | -0.04186 | 0.36671  | -0.09072 | 0.05008  | -0.11849 | 0.01038  |
| 0.41394  | 0.195997 | 1.99E-05 | 0.01864  | 0.68785  | -0.06483 | 0.16188  | 0.035176 | 0.44823  |
| 0.18605  | 0.104403 | 0.02405  | 0.100827 | 0.02936  | 0.051268 | 0.26887  | 0.092015 | 0.04688  |
| 0.02519  | -0.16483 | 0.00035  | -0.22699 | 7.16E-07 | -0.23593 | 2.50E-07 | -0.33117 | 2.05E-13 |
| 0.91366  | 0.033376 | 0.47182  | 0.017661 | 0.70345  | -0.02265 | 0.62539  | 0.056675 | 0.22154  |
| 0.21363  | 0.026885 | 0.56223  | 0.130807 | 0.00464  | 0.057925 | 0.2115   | 0.127711 | 0.00571  |
| 0.0009   | 0.022197 | 0.63232  | 0.259356 | 1.29E-08 | 0.051174 | 0.26975  | 0.050715 | 0.27407  |
| 0.98778  | 0.031985 | 0.49049  | -0.13254 | 0.00412  | -0.06092 | 0.18878  | 0.030448 | 0.51158  |
| 0.36964  | 0.045722 | 0.32417  | -0.04162 | 0.36945  | -0.05221 | 0.2602   | 0.006487 | 0.88881  |
| 0.10723  | 0.059013 | 0.20303  | -0.00093 | 0.98402  | -0.01495 | 0.74728  | 0.018908 | 0.68361  |
| 0.87124  | -0.00534 | 0.90834  | -0.09626 | 0.03758  | -0.09074 | 0.05003  | -0.09767 | 0.03485  |
| 0.76934  | -0.03966 | 0.3925   | -0.08031 | 0.08299  | -0.06581 | 0.15561  | -0.11726 | 0.01122  |
| 0.99809  | -0.01327 | 0.77486  | -0.07168 | 0.12188  | -0.06003 | 0.19537  | -0.05316 | 0.25158  |
| 0.44377  | -0.05018 | 0.27913  | 0.028421 | 0.5401   | -0.15742 | 0.00064  | -0.14025 | 0.00238  |
| 0.32566  | 0.093867 | 0.04261  | 0.102187 | 0.02723  | 0.274729 | 1.56E-09 | 0.293003 | 1.07E-10 |
| 0.36567  | -0.09144 | 0.04829  | -0.0915  | 0.04814  | -0.15238 | 0.00096  | -0.23442 | 2.99E-07 |
| 0.00097  | -0.12804 | 0.00559  | 0.095551 | 0.03901  | -0.17055 | 0.00021  | -0.17781 | 0.00011  |
| 0.00502  | 0.095798 | 0.03851  | 0.047051 | 0.31029  | 0.079312 | 0.08689  | 0.160229 | 0.00051  |
| 0.60243  | 0.112949 | 0.0146   | 0.161523 | 0.00046  | 0.187752 | 4.45E-05 | 0.315505 | 2.98E-12 |
| 0.73259  | 0.125552 | 0.00659  | 0.070773 | 0.1267   | 0.179851 | 9.30E-05 | 0.150115 | 0.00114  |
| 0.00029  | 0.012336 | 0.79033  | -0.14074 | 0.0023   | -0.0471  | 0.30975  | -0.03508 | 0.44948  |
| 2.11E-08 | 0.03818  | 0.41041  | 0.101886 | 0.02769  | 0.106324 | 0.02156  | 0.076369 | 0.09928  |
| 0.33974  | -0.02013 | 0.66437  | -0.39262 | 1.16E-18 | -0.24382 | 9.52E-08 | -0.24618 | 7.09E-08 |
| 0.00737  | -0.07624 | 0.09986  | -0.11407 | 0.01364  | -0.07325 | 0.11392  | -0.0372  | 0.4225   |
| 0.03443  | 0.143497 | 0.00188  | -0.00083 | 0.98567  | -0.07097 | 0.12562  | 0.104771 | 0.02356  |
| 0.06543  | 0.027325 | 0.55585  | -0.07467 | 0.10705  | -0.11223 | 0.01525  | -0.07678 | 0.09748  |
| 0.16379  | 0.0956   | 0.03891  | 0.092775 | 0.04509  | 0.01724  | 0.71019  | 0.050889 | 0.27243  |
| 0.75931  | 0.030604 | 0.50942  | -0.10775 | 0.01986  | -0.07232 | 0.11862  | -0.01625 | 0.7262   |
| 0.07037  | 0.058817 | 0.20454  | 0.015831 | 0.73294  | 0.007002 | 0.88005  | 0.029207 | 0.52895  |
| 0.04998  | -0.1088  | 0.01868  | 0.056398 | 0.22381  | 0.124819 | 0.00692  | -0.05432 | 0.24138  |

|          |          |          |          |          |          |          |          |          |
|----------|----------|----------|----------|----------|----------|----------|----------|----------|
| 0.20028  | -0.08535 | 0.06534  | 0.093984 | 0.04235  | -0.05197 | 0.26234  | -0.10421 | 0.02432  |
| 9.63E-10 | 0.033376 | 0.47182  | 0.298497 | 4.58E-11 | 0.226845 | 7.28E-07 | 0.234295 | 3.04E-07 |
| 4.82E-06 | -0.05993 | 0.19606  | -0.16247 | 0.00042  | -0.13759 | 0.00289  | -0.19894 | 1.48E-05 |
| 0.80452  | 0.010621 | 0.81893  | -0.02111 | 0.64904  | -0.12694 | 0.00602  | -0.0478  | 0.30262  |
| 0.09156  | 0.076471 | 0.09883  | 0.023078 | 0.61887  | -0.01691 | 0.71554  | 0.082076 | 0.07641  |
| 0.2973   | 0.041075 | 0.37581  | -0.0166  | 0.72055  | -0.08132 | 0.07915  | -0.02089 | 0.65251  |
| 0.06256  | 0.012771 | 0.78312  | -0.01197 | 0.79639  | -0.07901 | 0.08811  | -0.01835 | 0.69245  |
| 0.53215  | -0.03478 | 0.45343  | -0.10146 | 0.02836  | -0.18724 | 4.67E-05 | -0.14332 | 0.0019   |
| 0.0679   | 0.05465  | 0.23851  | -0.0349  | 0.45176  | -0.01356 | 0.77007  | -0.02754 | 0.55275  |
| 0.14393  | -0.02035 | 0.66094  | -0.05876 | 0.20494  | -0.1512  | 0.00105  | -0.13595 | 0.00324  |
| 0.65208  | 0.000483 | 0.99169  | 0.076174 | 0.10015  | -0.00876 | 0.85025  | -0.02504 | 0.58931  |
| 0.42828  | -0.02859 | 0.53774  | -0.08413 | 0.06932  | -0.05198 | 0.26227  | -0.09373 | 0.0429   |
| 0.6655   | 0.019097 | 0.68062  | -0.12599 | 0.00641  | -0.0595  | 0.19931  | -0.06008 | 0.19493  |
| 0.37222  | 0.107749 | 0.01986  | -0.00709 | 0.87861  | -0.01049 | 0.82118  | 0.051573 | 0.26603  |
| 0.71174  | 0.020073 | 0.66525  | -0.06367 | 0.16953  | -0.10619 | 0.02173  | -0.06821 | 0.1411   |
| 0.24381  | -0.02538 | 0.58433  | -0.05353 | 0.24827  | -0.12689 | 0.00603  | -0.11906 | 0.01002  |
| 0.16537  | 0.104828 | 0.02348  | 0.020515 | 0.65835  | 0.092123 | 0.04663  | 0.097442 | 0.03528  |
| 0.78518  | 0.198976 | 1.48E-05 | 0.149674 | 0.00118  | -0.00812 | 0.86109  | 0.090213 | 0.05138  |
| 0.7035   | 0.001874 | 0.96778  | -0.07275 | 0.11641  | -0.12438 | 0.00712  | -0.05337 | 0.24969  |
| 0.22114  | 0.022464 | 0.62823  | 0.183373 | 6.72E-05 | 0.057573 | 0.21429  | 0.064633 | 0.16318  |
| 0.38243  | -0.01231 | 0.79073  | -0.08125 | 0.07945  | -0.09355 | 0.04332  | -0.11161 | 0.01582  |
| 6.03E-08 | -0.00081 | 0.98602  | -0.09416 | 0.04196  | -0.18794 | 4.37E-05 | -0.13632 | 0.00316  |
| 0.00763  | 0.108574 | 0.01893  | 0.055261 | 0.23329  | 0.00444  | 0.92377  | 0.082752 | 0.07401  |
| 0.39779  | 0.013096 | 0.77775  | 0.060381 | 0.19274  | 0.021669 | 0.64045  | -0.00136 | 0.97658  |
| 0.02288  | 0.198188 | 1.60E-05 | -0.05045 | 0.27657  | -0.04025 | 0.38552  | 0.024515 | 0.59721  |
| 0.87227  | -0.09328 | 0.04392  | -0.1868  | 4.87E-05 | -0.20161 | 1.13E-05 | -0.22643 | 7.64E-07 |
| 0.38108  | 0.045908 | 0.3222   | -0.12817 | 0.00554  | -0.06141 | 0.18528  | -0.03502 | 0.45025  |
| 0.29065  | 0.000409 | 0.99297  | -0.10403 | 0.02457  | -0.08238 | 0.07531  | -0.08624 | 0.06259  |
| 3.43E-07 | -0.10775 | 0.01986  | 0.064833 | 0.16189  | 0.062139 | 0.18007  | -0.03003 | 0.51735  |
| 6.89E-05 | -0.10063 | 0.02968  | -0.28537 | 3.35E-10 | -0.31598 | 2.75E-12 | -0.32033 | 1.33E-12 |
| 8.00E-05 | -0.11958 | 0.00969  | -0.11573 | 0.01233  | -0.21768 | 2.05E-06 | -0.23057 | 4.72E-07 |
| 1.01E-06 | 0.042541 | 0.359    | -0.12601 | 0.0064   | -0.11359 | 0.01404  | -0.08307 | 0.07289  |
| 0.17509  | 0.006903 | 0.88173  | 0.097911 | 0.03441  | 0.084629 | 0.06767  | 0.107229 | 0.02046  |
| 0.22777  | 0.259863 | 1.21E-08 | 0.048671 | 0.2939   | 0.129771 | 0.00497  | 0.350696 | 5.83E-15 |
| 0.11238  | 0.009743 | 0.83368  | -0.08526 | 0.06564  | 0.067259 | 0.14672  | -0.02462 | 0.59567  |
| 0.11364  | -0.0614  | 0.1853   | 0.14273  | 0.00199  | 0.070193 | 0.12985  | -0.05162 | 0.26557  |
| 0.13477  | -0.02299 | 0.62016  | 0.347905 | 9.84E-15 | 0.350552 | 5.99E-15 | 0.171994 | 0.00019  |
| 0.21136  | -0.09187 | 0.04724  | 0.132279 | 0.00419  | -0.05468 | 0.23828  | -0.10947 | 0.01796  |
| 0.00376  | -0.10444 | 0.024    | -0.12727 | 0.00588  | -0.1549  | 0.00078  | -0.23869 | 1.79E-07 |
| 0.00268  | 0.03737  | 0.42043  | 0.016177 | 0.72733  | -0.10833 | 0.0192   | 0.002859 | 0.95086  |
| 0.0004   | -0.00657 | 0.88731  | 0.039078 | 0.39948  | -0.02204 | 0.63472  | 0.091811 | 0.04738  |
| 0.09016  | 0.051669 | 0.26514  | -0.02042 | 0.65983  | 0.004018 | 0.93099  | 0.065155 | 0.1598   |
| 0.89851  | 0.041002 | 0.37666  | -0.01248 | 0.78802  | 0.069359 | 0.13448  | 0.025793 | 0.57821  |
| 0.40988  | -0.0795  | 0.08616  | 0.089669 | 0.05281  | 0.100105 | 0.03055  | 0.115572 | 0.01245  |
| 1.35E-07 | -0.01123 | 0.80868  | 0.313228 | 4.33E-12 | 0.258045 | 1.54E-08 | 0.217122 | 2.18E-06 |

|          |          |          |          |          |          |          |           |          |
|----------|----------|----------|----------|----------|----------|----------|-----------|----------|
| 0.20552  | -0.01481 | 0.74955  | -0.03753 | 0.41845  | -0.07596 | 0.10112  | -0.08581  | 0.0639   |
| 0.59105  | -0.00222 | 0.96185  | -0.14968 | 0.00118  | -0.15609 | 0.00071  | -0.14676  | 0.00147  |
| 0.97724  | 0.056252 | 0.22501  | -0.03288 | 0.47842  | 0.048752 | 0.2931   | 0.092237  | 0.04635  |
| 0.78937  | 0.00054  | 0.99072  | 0.009242 | 0.84211  | -0.04447 | 0.33761  | -0.02779  | 0.54912  |
| 0.15705  | 0.024264 | 0.60096  | -0.03499 | 0.45064  | -0.01489 | 0.74823  | -0.04222  | 0.36265  |
| 0.49441  | 0.050344 | 0.27761  | -0.01252 | 0.78728  | -0.04626 | 0.31848  | 0.03055   | 0.51017  |
| 0.26503  | 0.08108  | 0.08006  | -0.07396 | 0.11044  | 0.045213 | 0.32959  | 0.117952  | 0.01074  |
| 0.89257  | -0.00836 | 0.85693  | -0.0008  | 0.98622  | 0.067724 | 0.14394  | -0.00786  | 0.86556  |
| 0.4598   | 0.062482 | 0.17768  | -0.09902 | 0.0324   | -0.011   | 0.81267  | 0.011804  | 0.79919  |
| 0.41754  | 0.084305 | 0.06873  | -0.00398 | 0.93157  | 0.088763 | 0.05526  | 0.110285  | 0.01712  |
| 0.97296  | -0.00562 | 0.90357  | -0.02193 | 0.63636  | -0.0128  | 0.78258  | 0.002296  | 0.96054  |
| 0.7425   | -0.01981 | 0.66935  | -0.01474 | 0.75079  | -0.02689 | 0.56212  | -0.01678  | 0.71758  |
| 0.01151  | -0.02511 | 0.58839  | -0.06031 | 0.19326  | -0.01611 | 0.72843  | -0.06209  | 0.18045  |
| 0.44355  | -0.02805 | 0.54536  | -0.04381 | 0.34488  | 0.042623 | 0.35807  | -0.0275   | 0.55326  |
| 0.08934  | 0.043206 | 0.35154  | -0.18879 | 4.03E-05 | -0.08283 | 0.07374  | -0.04879  | 0.29269  |
| 0.159    | 0.008737 | 0.85064  | -0.0573  | 0.21644  | -0.02137 | 0.64507  | 0.004657  | 0.92006  |
| 0.00026  | 0.073297 | 0.11368  | -0.11043 | 0.01697  | -0.08654 | 0.06166  | 0.002529  | 0.95653  |
| 0.06994  | 0.011117 | 0.81063  | 0.058905 | 0.20386  | 0.113057 | 0.01451  | 0.102824  | 0.02628  |
| 0.21612  | 0.055108 | 0.2346   | 0.300482 | 3.36E-11 | 0.272481 | 2.15E-09 | 0.321472  | 1.09E-12 |
| 0.00196  | 0.043481 | 0.34847  | 0.058557 | 0.20655  | 0.075192 | 0.10462  | 0.092432  | 0.04589  |
| 0.69314  | 0.03608  | 0.43665  | 0.029532 | 0.52437  | -0.07778 | 0.09319  | -0.05413  | 0.24297  |
| 0.14906  | -0.01867 | 0.68732  | -0.08271 | 0.07417  | -0.07618 | 0.10013  | -0.05841  | 0.20768  |
| 0.00233  | 0.014565 | 0.75358  | 0.001592 | 0.97262  | -0.01017 | 0.82647  | -9.26E-05 | 0.99841  |
| 0.02605  | 0.033985 | 0.46376  | 0.013848 | 0.76534  | -0.01983 | 0.66907  | -0.03695  | 0.42572  |
| 0.71696  | 0.03911  | 0.39909  | 0.370416 | 1.24E-16 | 0.292225 | 1.20E-10 | 0.261589  | 9.58E-09 |
| 0.99196  | 0.016209 | 0.72681  | -0.00394 | 0.93236  | -0.0462  | 0.31917  | -0.02016  | 0.66384  |
| 0.31791  | 0.165575 | 0.00033  | 0.088361 | 0.05638  | 0.181888 | 7.71E-05 | 0.314417  | 3.56E-12 |
| 0.12124  | 0.017489 | 0.7062   | -0.02106 | 0.64987  | -0.03826 | 0.40948  | -0.00127  | 0.9782   |
| 0.11153  | -0.03125 | 0.50047  | -0.14721 | 0.00142  | -0.12253 | 0.00803  | -0.08374  | 0.0706   |
| 0.10368  | 0.080678 | 0.08157  | 0.069393 | 0.13429  | -0.00226 | 0.96119  | 0.117916  | 0.01076  |
| 0.37196  | 0.083461 | 0.07156  | -0.10236 | 0.02697  | 0.020637 | 0.65644  | -0.01705  | 0.71329  |
| 0.29805  | 0.224944 | 9.06E-07 | -0.04272 | 0.35695  | -0.05253 | 0.2572   | 0.032081  | 0.48918  |
| 0.76952  | 0.017197 | 0.71089  | -0.08028 | 0.08308  | -0.07504 | 0.10532  | -0.08933  | 0.05371  |
| 0.45658  | 0.399897 | 2.32E-19 | -0.03879 | 0.40299  | 0.009289 | 0.84133  | 0.057168  | 0.21753  |
| 0.00367  | 0.101935 | 0.02762  | -0.0519  | 0.26303  | -0.03409 | 0.46233  | -0.01399  | 0.763    |
| 0.05045  | -0.01119 | 0.8095   | 0.164177 | 0.00037  | 0.300501 | 3.35E-11 | 0.236316  | 2.39E-07 |
| 0.58644  | -0.03615 | 0.43576  | 0.054717 | 0.23794  | -0.01279 | 0.78285  | -0.02054  | 0.65798  |
| 0.24707  | -0.10158 | 0.02816  | 0.146968 | 0.00145  | 0.066286 | 0.15266  | 0.035535  | 0.44362  |
| 4.70E-10 | -0.03115 | 0.50186  | 0.243818 | 9.52E-08 | 0.050229 | 0.2787   | 0.032442  | 0.48431  |
| 0.0064   | 0.032518 | 0.48329  | -0.02058 | 0.65729  | -0.10051 | 0.02987  | 0.053519  | 0.24839  |
| 0.00096  | -0.09292 | 0.04475  | 0.011471 | 0.80473  | -0.20443 | 8.46E-06 | -0.1518   | 0.001    |
| 9.90E-10 | 0.170007 | 0.00022  | 0.318892 | 1.69E-12 | 0.185957 | 5.27E-05 | 0.263917  | 7.00E-09 |
| 0.68725  | 0.34335  | 2.29E-14 | 0.078612 | 0.08972  | 0.228002 | 6.37E-07 | 0.347733  | 1.02E-14 |
| 0.08208  | 0.062284 | 0.17905  | -0.11679 | 0.01154  | -0.02508 | 0.58883  | 0.129206  | 0.00517  |
| 7.02E-05 | -0.01451 | 0.7545   | 0.105342 | 0.0228   | 0.290929 | 1.46E-10 | 0.242835  | 1.08E-07 |

|          |          |          |          |          |          |          |          |          |
|----------|----------|----------|----------|----------|----------|----------|----------|----------|
| 1.40E-07 | 0.08874  | 0.05532  | 0.148089 | 0.00133  | 0.135257 | 0.00341  | 0.266422 | 4.97E-09 |
| 0.12715  | 0.071576 | 0.12244  | -0.16206 | 0.00044  | -0.08672 | 0.06114  | -0.0819  | 0.07705  |
| 0.05544  | -0.04695 | 0.31128  | 0.127032 | 0.00598  | 0.157781 | 0.00062  | 0.113397 | 0.01421  |
| 1.34E-08 | 0.073766 | 0.11138  | -0.02662 | 0.56612  | -0.01425 | 0.75882  | 0.046658 | 0.31435  |
| 0.09151  | 0.15602  | 0.00072  | 0.16584  | 0.00032  | 0.157454 | 0.00064  | 0.263782 | 7.13E-09 |
| 0.00317  | 0.045263 | 0.32905  | 0.088118 | 0.05706  | 0.031399 | 0.49847  | 0.1375   | 0.00291  |
| 0.01905  | -0.04107 | 0.37588  | -0.1734  | 0.00017  | -0.16555 | 0.00033  | -0.19002 | 3.58E-05 |
| 0.01508  | -0.03799 | 0.41278  | 0.024395 | 0.59899  | -0.13619 | 0.00319  | -0.0206  | 0.65702  |
| 0.68923  | -0.0023  | 0.9605   | 0.002103 | 0.96384  | -0.0099  | 0.83099  | -0.01147 | 0.80468  |
| 5.47E-09 | -0.02818 | 0.54352  | -0.04421 | 0.34043  | -0.09052 | 0.0506   | -0.08314 | 0.07265  |
| 0.02415  | 0.138772 | 0.00265  | -0.12204 | 0.00829  | 0.012491 | 0.78776  | 0.132309 | 0.00418  |
| 0.15896  | 0.288292 | 2.17E-10 | 0.091892 | 0.04718  | 0.09021  | 0.05139  | 0.26321  | 7.70E-09 |
| 0.04914  | 0.039531 | 0.39404  | -0.12146 | 0.0086   | -0.07881 | 0.08891  | 0.058815 | 0.20455  |
| 9.33E-07 | 0.048117 | 0.29944  | 0.093443 | 0.04356  | -0.00829 | 0.85814  | 0.139095 | 0.00259  |
| 0.61321  | 0.103802 | 0.02488  | 0.006547 | 0.8878   | 0.109359 | 0.01808  | 0.204744 | 8.20E-06 |
| 4.54E-08 | 0.115063 | 0.01284  | 0.121851 | 0.00839  | -0.0046  | 0.92103  | 0.149231 | 0.00122  |
| 0.02936  | 0.074076 | 0.10989  | 0.134664 | 0.00355  | 0.134602 | 0.00357  | 0.164117 | 0.00037  |
| 0.13683  | 0.155577 | 0.00074  | 0.181712 | 7.84E-05 | 0.149154 | 0.00123  | 0.184302 | 6.16E-05 |
| 0.91968  | 0.018786 | 0.68554  | -0.03068 | 0.50838  | -0.02716 | 0.55818  | 0.02951  | 0.52468  |
| 0.01711  | 0.049172 | 0.28896  | 0.005327 | 0.90859  | -0.0722  | 0.11921  | -0.01413 | 0.76069  |
| 1.61E-09 | -0.03449 | 0.45716  | -0.05788 | 0.21181  | 0.027114 | 0.55891  | -0.05041 | 0.27702  |
| 0.0086   | 0.182963 | 6.98E-05 | 0.160828 | 0.00048  | 0.201261 | 1.17E-05 | 0.30011  | 3.56E-11 |
| 0.61111  | 0.220482 | 1.50E-06 | -0.13632 | 0.00316  | 0.085409 | 0.06517  | 0.150226 | 0.00113  |
| 0.04023  | 0.05703  | 0.21865  | -0.16375 | 0.00038  | -0.08088 | 0.0808   | -0.01257 | 0.78641  |
| 2.91E-10 | 0.109893 | 0.01752  | -0.09136 | 0.04848  | -0.05337 | 0.24969  | 0.112983 | 0.01457  |
| 0.03457  | -0.0067  | 0.88522  | -0.17952 | 9.58E-05 | -0.16856 | 0.00025  | -0.08859 | 0.05575  |
| 2.23E-06 | 0.017988 | 0.69823  | -0.03413 | 0.46181  | -0.09121 | 0.04885  | -0.00424 | 0.92727  |
| 2.07E-11 | 0.121899 | 0.00836  | 0.01965  | 0.6719   | 0.049909 | 0.28178  | 0.184461 | 6.07E-05 |
| 0.2033   | 0.00187  | 0.96785  | -0.08919 | 0.0541   | -0.05163 | 0.26548  | -0.02444 | 0.59829  |
| 0.13639  | 0.025796 | 0.57818  | 0.004472 | 0.92322  | 0.007398 | 0.87332  | 0.077567 | 0.09408  |
| 0.00767  | -0.00559 | 0.90404  | 0.042205 | 0.36282  | 0.002611 | 0.95513  | -0.01559 | 0.73681  |
| 0.00359  | -0.00422 | 0.92757  | 0.130815 | 0.00463  | 0.060096 | 0.19484  | 0.055811 | 0.22867  |
| 0.02798  | -0.00412 | 0.92922  | 0.083206 | 0.07243  | 0.026444 | 0.56867  | 0.042212 | 0.36273  |
| 0.05553  | 0.007826 | 0.86606  | 0.384868 | 6.17E-18 | 0.247819 | 5.77E-08 | 0.312777 | 4.67E-12 |
| 0.13334  | -0.02643 | 0.5689   | 0.117719 | 0.0109   | 0.032935 | 0.47769  | -0.00248 | 0.95744  |
| 0.01356  | 0.039588 | 0.39336  | 0.004657 | 0.92006  | -0.04879 | 0.29276  | -0.02125 | 0.64687  |
| 1.70E-07 | 0.005576 | 0.90435  | 0.074133 | 0.10961  | 0.001658 | 0.97149  | -0.00577 | 0.90097  |
| 0.47509  | 0.230745 | 4.62E-07 | 0.203707 | 9.12E-06 | 0.172873 | 0.00017  | 0.376404 | 3.63E-17 |
| 0.2402   | 0.02984  | 0.52005  | -0.11985 | 0.00953  | -0.07311 | 0.1146   | -0.09498 | 0.0402   |
| 0.06318  | 0.058304 | 0.20852  | 0.151821 | 0.001    | 0.229258 | 5.50E-07 | 0.271938 | 2.32E-09 |
| 0.92165  | -0.15136 | 0.00103  | -0.16029 | 0.00051  | -0.13843 | 0.00272  | -0.33351 | 1.35E-13 |
| 1.04E-06 | 0.004664 | 0.91994  | 0.141225 | 0.00222  | 0.113831 | 0.01384  | 0.045197 | 0.32976  |
| 0.59357  | -0.00303 | 0.94787  | -0.04493 | 0.33262  | 0.013527 | 0.77063  | 0.017017 | 0.71378  |
| 0.48001  | -0.03171 | 0.49428  | 0.049517 | 0.28558  | -0.00114 | 0.98033  | -0.04663 | 0.31466  |
| 6.28E-05 | 0.097234 | 0.03568  | -0.132   | 0.00427  | -0.09761 | 0.03496  | 0.047335 | 0.30737  |

|          |           |          |          |          |          |          |          |          |
|----------|-----------|----------|----------|----------|----------|----------|----------|----------|
| 0.05357  | 0.157657  | 0.00063  | 0.021035 | 0.65026  | -0.10492 | 0.02336  | 0.021105 | 0.64917  |
| 0.0019   | 0.015507  | 0.7382   | 0.057656 | 0.21362  | -0.00333 | 0.94272  | 0.01294  | 0.78033  |
| 0.05941  | 0.038421  | 0.40746  | -0.06041 | 0.19251  | -0.17113 | 0.0002   | -0.03426 | 0.46011  |
| 0.69686  | -0.04898  | 0.29085  | 0.216333 | 2.38E-06 | 0.069511 | 0.13363  | -0.02314 | 0.61795  |
| 0.5437   | 0.014341  | 0.75725  | -0.15029 | 0.00112  | -0.08911 | 0.0543   | -0.09852 | 0.0333   |
| 0.22323  | -0.08669  | 0.06121  | -0.12227 | 0.00816  | -0.20801 | 5.82E-06 | -0.20622 | 7.03E-06 |
| 0.94967  | 0.118434  | 0.01042  | 0.271629 | 2.42E-09 | 0.164348 | 0.00036  | 0.277926 | 9.92E-10 |
| 0.14553  | 0.052227  | 0.26     | 0.122454 | 0.00807  | 0.046543 | 0.31554  | 0.098399 | 0.03351  |
| 0.8176   | 0.005962  | 0.89777  | -0.12016 | 0.00934  | -0.08126 | 0.07938  | -0.07627 | 0.09973  |
| 0.96656  | -0.01934  | 0.67686  | 0.00034  | 0.99415  | -0.03464 | 0.45519  | -0.07492 | 0.1059   |
| 0.02728  | -0.02539  | 0.5842   | -0.06949 | 0.13373  | -0.08339 | 0.07178  | -0.07384 | 0.11104  |
| 0.28887  | -0.00156  | 0.97313  | -0.00245 | 0.95789  | 0.029897 | 0.51926  | -0.06333 | 0.17188  |
| 2.02E-06 | 0.016591  | 0.72065  | 0.008433 | 0.85577  | -0.10535 | 0.0228   | -0.04603 | 0.3209   |
| 0.48605  | -0.05568  | 0.22973  | -0.00502 | 0.91382  | -0.07524 | 0.1044   | -0.16246 | 0.00042  |
| 0.30939  | -0.0088   | 0.84963  | -0.07769 | 0.09357  | -0.02697 | 0.56097  | -0.0493  | 0.28772  |
| 0.01472  | -0.04087  | 0.37815  | -0.07004 | 0.1307   | -0.04736 | 0.30709  | -0.05996 | 0.19583  |
| 0.03346  | 0.01892   | 0.68342  | 0.016998 | 0.71409  | -0.03615 | 0.43572  | -0.01948 | 0.67456  |
| 0.00099  | -3.75E-05 | 0.99936  | -0.04167 | 0.36891  | -0.06035 | 0.19299  | -0.05599 | 0.22716  |
| 0.33042  | -0.04856  | 0.295    | 0.017582 | 0.70472  | -0.15206 | 0.00098  | -0.14128 | 0.00221  |
| 0.83996  | 0.059997  | 0.19558  | -0.01934 | 0.6768   | 0.055673 | 0.22983  | 0.102074 | 0.02741  |
| 8.97E-07 | 0.069388  | 0.13432  | 0.049555 | 0.28522  | 0.091991 | 0.04694  | 0.07828  | 0.09108  |
| 2.45E-05 | 0.050029  | 0.28063  | 0.021001 | 0.65079  | -0.02422 | 0.60165  | 0.056339 | 0.22429  |
| 0.97767  | 0.036215  | 0.43493  | 0.076584 | 0.09833  | 0.086609 | 0.06147  | 0.116202 | 0.01197  |
| 0.30742  | 0.32014   | 1.37E-12 | 0.047048 | 0.31032  | -0.01937 | 0.67635  | 0.08587  | 0.06372  |
| 0.03015  | -0.00878  | 0.84989  | -0.01603 | 0.72974  | -0.08352 | 0.07135  | -0.09693 | 0.03626  |
| 0.36481  | -0.01095  | 0.8135   | -0.00614 | 0.8948   | 0.050202 | 0.27896  | -0.01517 | 0.74372  |
| 0.08444  | 0.007998  | 0.86313  | 0.103009 | 0.02601  | 0.015204 | 0.74314  | 0.037612 | 0.41742  |
| 0.00412  | 0.064682  | 0.16286  | 0.015159 | 0.74387  | -0.04798 | 0.30085  | 0.013406 | 0.77263  |
| 8.85E-11 | 0.066031  | 0.15425  | -0.04216 | 0.36335  | -0.05465 | 0.2385   | 0.051781 | 0.2641   |
| 3.75E-11 | 0.017691  | 0.70297  | -0.03395 | 0.46425  | -0.04439 | 0.3385   | -0.01408 | 0.76161  |
| 0.36629  | -0.01853  | 0.68962  | -0.00797 | 0.86355  | -0.0556  | 0.23044  | -0.0331  | 0.4755   |
| 0.00013  | 0.04097   | 0.37704  | 0.058754 | 0.20502  | 0.023844 | 0.60728  | 0.071634 | 0.12214  |
| 0.34024  | -0.04939  | 0.28682  | -0.1397  | 0.00248  | -0.13434 | 0.00363  | -0.18437 | 6.13E-05 |
| 0.04094  | 0.003615  | 0.9379   | -0.01994 | 0.66734  | 0.049782 | 0.28302  | -0.02307 | 0.61897  |
| 3.14E-06 | 0.01624   | 0.72632  | -0.00339 | 0.94183  | 0.042323 | 0.36147  | -0.01155 | 0.80348  |
| 1.97E-05 | -0.01456  | 0.7537   | 0.065291 | 0.15893  | 0.0711   | 0.12496  | 0.093886 | 0.04257  |
| 0.00979  | 0.164078  | 0.00037  | -0.04877 | 0.2929   | 0.074478 | 0.10797  | 0.250343 | 4.18E-08 |
| 0.02628  | 0.024324  | 0.60006  | -0.00151 | 0.97403  | 0.018714 | 0.68668  | 0.012073 | 0.7947   |
| 0.42495  | 0.031093  | 0.50267  | 0.053781 | 0.24607  | 0.020659 | 0.65611  | 0.016721 | 0.71855  |
| 1.13E-05 | 0.048226  | 0.29834  | -0.07103 | 0.12533  | -0.05849 | 0.20709  | 0.037205 | 0.42247  |
| 0.96202  | 0.02378   | 0.60824  | -0.12705 | 0.00597  | -0.04291 | 0.35481  | 0.025429 | 0.5836   |
| 0.19512  | 0.018692  | 0.68702  | -0.0687  | 0.13822  | -0.07879 | 0.08897  | 0.031494 | 0.49718  |
| 0.54875  | 0.06103   | 0.18799  | -0.08022 | 0.08333  | 0.014903 | 0.74804  | 0.104445 | 0.024    |
| 0.00101  | 0.126974  | 0.006    | -0.01595 | 0.73109  | 0.023963 | 0.60548  | 0.077635 | 0.09379  |
| 0.3482   | 0.056659  | 0.22166  | -0.03748 | 0.41908  | 0.020036 | 0.66584  | 0.063511 | 0.17063  |

|          |          |          |          |         |          |          |          |          |
|----------|----------|----------|----------|---------|----------|----------|----------|----------|
| 0.00137  | 0.138694 | 0.00267  | -0.0514  | 0.2676  | -0.03346 | 0.47065  | -0.00299 | 0.94869  |
| 0.04908  | -0.00441 | 0.92434  | 0.102117 | 0.02734 | 0.043788 | 0.34508  | -0.00961 | 0.83587  |
| 0.53998  | -0.00363 | 0.9377   | -0.05609 | 0.22637 | -0.07034 | 0.12904  | -0.02535 | 0.5847   |
| 0.9226   | -0.01122 | 0.80884  | -0.07901 | 0.08811 | -0.05893 | 0.20364  | -0.02635 | 0.57004  |
| 0.01889  | 0.041258 | 0.37369  | 0.083571 | 0.07118 | 0.017893 | 0.69975  | 0.031835 | 0.49252  |
| 8.95E-06 | 0.016209 | 0.72682  | 0.040961 | 0.37714 | -0.0014  | 0.97591  | 0.029335 | 0.52715  |
| 0.42372  | 0.053163 | 0.25155  | 0.041035 | 0.37628 | 0.009575 | 0.83651  | 0.022524 | 0.62732  |
| 0.31164  | 0.033188 | 0.47432  | -0.0289  | 0.53326 | 0.047903 | 0.30159  | 0.078189 | 0.09146  |
| 3.73E-06 | 0.050704 | 0.27418  | 0.004486 | 0.92298 | -0.0557  | 0.22962  | 0.009617 | 0.8358   |
| 5.23E-05 | 0.038396 | 0.40777  | 0.130348 | 0.00478 | 0.074079 | 0.10987  | 0.113922 | 0.01377  |
| 0.80739  | -0.03584 | 0.43974  | -0.03103 | 0.50355 | -0.05363 | 0.24738  | -0.09249 | 0.04575  |
| 0.00078  | 0.063853 | 0.16833  | 0.04756  | 0.30508 | 0.024144 | 0.60276  | 0.064269 | 0.16557  |
| 0.52203  | 0.005538 | 0.90499  | -0.05998 | 0.1957  | -0.03878 | 0.40313  | -0.04336 | 0.34985  |
| 0.0394   | 0.019733 | 0.6706   | -0.00018 | 0.99687 | -0.02056 | 0.65772  | 0.006455 | 0.88936  |
| 0.12244  | 0.015859 | 0.73249  | -0.01147 | 0.80476 | -0.01221 | 0.79239  | -0.03427 | 0.46002  |
| 0.05349  | 0.036114 | 0.43622  | -0.02059 | 0.65715 | -0.01184 | 0.79863  | -0.04401 | 0.34261  |
| 0.14578  | 0.007446 | 0.87249  | -0.05924 | 0.20133 | -0.02213 | 0.63343  | -0.01386 | 0.76514  |
| 0.87632  | -0.02835 | 0.54109  | -0.00708 | 0.87875 | -0.00386 | 0.93372  | -0.02601 | 0.57503  |
| 0.00102  | 0.041639 | 0.3693   | -0.01996 | 0.66704 | -0.01702 | 0.71369  | -0.00717 | 0.87725  |
| 0.07895  | -0.11163 | 0.0158   | 0.131631 | 0.00438 | -0.0666  | 0.15071  | -0.07856 | 0.08995  |
| 0.00022  | 0.006781 | 0.8838   | -0.10698 | 0.02076 | -0.12788 | 0.00565  | -0.03873 | 0.40376  |
| 0.20083  | -0.09435 | 0.04155  | -0.08663 | 0.06139 | 0.055206 | 0.23376  | -0.11275 | 0.01478  |
| 0.18765  | -0.11036 | 0.01704  | -0.08442 | 0.06834 | 0.04836  | 0.297    | -0.13191 | 0.0043   |
| 0.0177   | -0.02498 | 0.59029  | 0.02525  | 0.58625 | -0.04144 | 0.37162  | -0.05064 | 0.27482  |
| 0.24229  | -0.11692 | 0.01146  | -0.06139 | 0.18539 | -0.26297 | 7.96E-09 | -0.19396 | 2.44E-05 |
| 0.00033  | -0.01133 | 0.8071   | -0.0713  | 0.12387 | -0.14848 | 0.00129  | -0.08999 | 0.05196  |
| 0.18348  | 0.069336 | 0.13462  | 0.099527 | 0.03153 | 0.147512 | 0.00139  | 0.140833 | 0.00228  |
| 0.00477  | -0.09885 | 0.0327   | -0.08244 | 0.07512 | -0.10888 | 0.01859  | -0.17051 | 0.00021  |
| 0.00052  | -0.07193 | 0.1206   | -0.10811 | 0.01945 | -0.08937 | 0.05361  | -0.23996 | 1.53E-07 |
| 0.00198  | -0.22849 | 6.02E-07 | -0.00827 | 0.85859 | -0.03596 | 0.43816  | -0.24135 | 1.29E-07 |
| 0.00072  | 0.130621 | 0.00469  | -0.01695 | 0.7148  | 0.064037 | 0.16711  | 0.215394 | 2.63E-06 |
| 0.82009  | -0.00518 | 0.91113  | -0.04061 | 0.38122 | -0.07587 | 0.10152  | -0.0799  | 0.08455  |
| 0.39271  | 0.0137   | 0.76778  | -0.0108  | 0.81588 | -0.06341 | 0.17131  | -0.03705 | 0.42436  |
| 0.23942  | 0.034181 | 0.46119  | 0.094161 | 0.04196 | -0.03492 | 0.45149  | -0.00894 | 0.84722  |
| 0.87874  | -0.02032 | 0.66138  | 0.053743 | 0.24641 | -0.09181 | 0.04737  | -0.05086 | 0.27275  |
| 0.50584  | 0.027902 | 0.54753  | 0.040213 | 0.38593 | -0.04436 | 0.33885  | 0.019345 | 0.6767   |
| 0.33609  | -0.02892 | 0.53296  | -0.01525 | 0.7424  | -0.07935 | 0.08675  | -0.08913 | 0.05427  |
| 0.00291  | 0.119588 | 0.00969  | -0.07553 | 0.10306 | -0.07095 | 0.12576  | -0.00138 | 0.97626  |
| 0.0003   | 0.098942 | 0.03254  | -0.01848 | 0.69045 | -0.00418 | 0.92825  | 0.059105 | 0.20232  |
| 0.86044  | 0.083236 | 0.07233  | -0.04422 | 0.34035 | -0.05497 | 0.23578  | -0.01347 | 0.77164  |
| 1.49E-08 | 0.051454 | 0.26713  | 0.02994  | 0.51866 | 0.001509 | 0.97405  | 0.05343  | 0.24917  |
| 1.18E-08 | 0.029969 | 0.51825  | -0.05739 | 0.21575 | -0.10057 | 0.02978  | -0.09158 | 0.04794  |
| 2.27E-12 | -0.01006 | 0.82841  | -0.12434 | 0.00714 | -0.03194 | 0.49117  | -0.06721 | 0.14701  |
| 0.56267  | 0.289016 | 1.95E-10 | -0.02289 | 0.62171 | 0.068737 | 0.13803  | 0.172535 | 0.00018  |
| 2.55E-07 | -0.006   | 0.89715  | -0.08008 | 0.08385 | -0.1192  | 0.00993  | -0.02767 | 0.55081  |

|          |          |          |          |          |          |          |          |          |
|----------|----------|----------|----------|----------|----------|----------|----------|----------|
| 0.49769  | 0.071442 | 0.12315  | 0.070205 | 0.12978  | 0.148505 | 0.00129  | 0.149831 | 0.00116  |
| 0.00263  | 0.063229 | 0.17254  | 0.030887 | 0.50551  | -0.0471  | 0.30981  | 0.048605 | 0.29456  |
| 0.9865   | -0.13672 | 0.00307  | -0.2505  | 4.10E-08 | -0.24781 | 5.77E-08 | -0.30267 | 2.38E-11 |
| 7.62E-05 | -0.0698  | 0.13199  | 0.324303 | 6.74E-13 | 0.026251 | 0.57148  | -0.05209 | 0.26122  |
| 1.08E-09 | -0.12558 | 0.00658  | -0.01714 | 0.71187  | -0.21658 | 2.31E-06 | -0.25064 | 4.03E-08 |
| 0.00022  | -0.25501 | 2.29E-08 | 0.125829 | 0.00647  | -0.03422 | 0.46063  | -0.11389 | 0.01379  |
| 0.25246  | 0.004907 | 0.91577  | -0.13316 | 0.00394  | -0.23692 | 2.22E-07 | -0.15564 | 0.00074  |
| 0.00107  | -0.09061 | 0.05036  | -0.17828 | 0.00011  | -0.2918  | 1.28E-10 | -0.27849 | 9.14E-10 |
| 7.48E-05 | 0.084545 | 0.06794  | 0.033742 | 0.46696  | 0.025133 | 0.58799  | 0.09205  | 0.0468   |
| 0.00233  | 0.078437 | 0.09044  | 0.011076 | 0.81132  | 0.036075 | 0.43671  | 0.085901 | 0.06363  |
| 0.47192  | -0.0084  | 0.85636  | -0.01817 | 0.69527  | -0.11022 | 0.01719  | -0.10024 | 0.03032  |
| 0.97801  | 0.068537 | 0.13918  | -0.06057 | 0.19136  | -0.1695  | 0.00023  | -0.05275 | 0.25522  |
| 0.00131  | 0.083259 | 0.07225  | -0.02131 | 0.64599  | 0.091112 | 0.04909  | 0.100044 | 0.03065  |
| 0.03327  | 0.032215 | 0.48737  | 0.066067 | 0.15403  | 0.074608 | 0.10735  | 0.013727 | 0.76734  |
| 0.2022   | -0.04189 | 0.36637  | 0.049444 | 0.2863   | 0.007328 | 0.8745   | -0.03824 | 0.40967  |
| 1.59E-10 | -0.06403 | 0.16716  | -0.10771 | 0.0199   | -0.12801 | 0.0056   | -0.12119 | 0.00875  |
| 0.57979  | -0.07821 | 0.09137  | 0.061528 | 0.1844   | -0.01719 | 0.71103  | -0.12745 | 0.00582  |
| 0.74111  | -0.11136 | 0.01606  | -0.21028 | 4.58E-06 | -0.14102 | 0.00225  | -0.22997 | 5.07E-07 |
| 0.32903  | -0.01921 | 0.67875  | -0.10661 | 0.02121  | -0.1267  | 0.00611  | -0.11492 | 0.01295  |
| 0.53521  | -0.0122  | 0.79256  | 0.112862 | 0.01468  | 0.166869 | 0.00029  | 0.167659 | 0.00027  |
| 1.59E-20 | -0.04331 | 0.3504   | -0.14462 | 0.00173  | -0.12802 | 0.00559  | -0.14872 | 0.00127  |
| 0.0077   | 0.006211 | 0.89351  | -0.1376  | 0.00288  | -0.09192 | 0.0471   | -0.09332 | 0.04384  |
| 0.09943  | 0.029417 | 0.52599  | -0.15827 | 0.0006   | -0.12256 | 0.00802  | -0.07806 | 0.09201  |
| 0.00121  | 0.020823 | 0.65356  | -0.09441 | 0.04141  | -0.08182 | 0.07733  | -0.05084 | 0.27288  |
| 1.30E-05 | 0.148423 | 0.0013   | -0.01891 | 0.68359  | -0.02489 | 0.59155  | 0.046931 | 0.31153  |
| 0.17477  | 0.036089 | 0.43653  | -0.14857 | 0.00128  | -0.07467 | 0.10704  | -0.02604 | 0.57461  |
| 9.38E-05 | 0.141865 | 0.00212  | -0.09711 | 0.03592  | -0.08289 | 0.07352  | 0.024259 | 0.60104  |
| 0.6659   | -0.14278 | 0.00198  | -0.09396 | 0.04239  | -0.23373 | 3.25E-07 | -0.25964 | 1.24E-08 |
| 1.78E-09 | -0.08218 | 0.07604  | -0.155   | 0.00078  | -0.26472 | 6.28E-09 | -0.26313 | 7.78E-09 |
| 0.16277  | -0.00459 | 0.92117  | 0.241107 | 1.33E-07 | 0.156068 | 0.00071  | 0.181829 | 7.76E-05 |
| 0.42313  | -0.08301 | 0.0731   | -0.23117 | 4.40E-07 | -0.12465 | 0.00699  | -0.15438 | 0.00082  |
| 0.00245  | 0.111436 | 0.01599  | -0.05042 | 0.27684  | -0.06872 | 0.13811  | 0.070405 | 0.12869  |
| 0.00038  | -0.01327 | 0.77479  | -0.02866 | 0.53663  | -0.04161 | 0.36963  | 0.006011 | 0.89692  |
| 0.03647  | 0.012497 | 0.78766  | -0.15348 | 0.00088  | -0.10098 | 0.02912  | -0.10051 | 0.02988  |
| 0.00024  | 0.022534 | 0.62716  | -0.083   | 0.07314  | 0.030993 | 0.50405  | -0.01332 | 0.77406  |
| 0.30452  | 0.016359 | 0.72439  | -0.03233 | 0.4858   | -0.10443 | 0.02402  | -0.05852 | 0.20685  |
| 0.29158  | 0.058423 | 0.20759  | 0.039168 | 0.3984   | 0.075712 | 0.10224  | 0.154199 | 0.00083  |
| 0.00086  | 0.229058 | 5.63E-07 | 0.279294 | 8.15E-10 | 0.241546 | 1.26E-07 | 0.214966 | 2.76E-06 |
| 2.30E-08 | -0.02182 | 0.63811  | -0.04004 | 0.38794  | -0.176   | 0.00013  | -0.08076 | 0.08128  |
| 0.68067  | -0.16374 | 0.00038  | -0.23104 | 4.47E-07 | -0.24838 | 5.37E-08 | -0.35815 | 1.40E-15 |
| 0.09479  | 0.178083 | 0.00011  | 0.017064 | 0.71303  | 0.091101 | 0.04912  | 0.11029  | 0.01711  |
| 0.04191  | 0.298904 | 4.30E-11 | 0.276273 | 1.26E-09 | 0.272642 | 2.10E-09 | 0.365911 | 3.05E-16 |
| 0.60103  | -0.03391 | 0.46481  | -0.0201  | 0.66484  | -0.11563 | 0.0124   | -0.09879 | 0.03282  |
| 0.00236  | 0.011001 | 0.81258  | -0.01857 | 0.68889  | 0.099877 | 0.03093  | 0.049548 | 0.28528  |
| 0.00091  | 0.038485 | 0.40669  | -0.01594 | 0.73109  | -0.04506 | 0.33119  | -0.00848 | 0.85494  |



|          |          |          |          |          |          |          |          |          |
|----------|----------|----------|----------|----------|----------|----------|----------|----------|
| 0.00138  | 0.148141 | 0.00133  | 0.046451 | 0.31651  | 0.214047 | 3.05E-06 | 0.186478 | 5.02E-05 |
| 0.6916   | -0.00103 | 0.98225  | -0.05983 | 0.19684  | -0.03716 | 0.42309  | -0.04185 | 0.3669   |
| 3.34E-06 | -0.08767 | 0.05835  | -0.11387 | 0.01381  | -0.25526 | 2.21E-08 | -0.19225 | 2.88E-05 |
| 0.05183  | 0.015875 | 0.73222  | 0.000224 | 0.99615  | 0.012539 | 0.78696  | 0.098054 | 0.03414  |
| 0.02848  | 0.12566  | 0.00655  | 0.051998 | 0.26211  | -0.02395 | 0.60566  | 0.089994 | 0.05195  |
| 0.35005  | 0.018246 | 0.69412  | -0.01627 | 0.72586  | -0.02248 | 0.62792  | -0.00415 | 0.9287   |
| 0.89909  | 0.024405 | 0.59885  | 0.039842 | 0.39032  | 0.066107 | 0.15378  | 0.01093  | 0.81376  |
| 0.05591  | -0.02936 | 0.52676  | -0.13709 | 0.00299  | -0.10382 | 0.02486  | -0.12271 | 0.00794  |
| 0.30927  | 0.038425 | 0.40741  | -0.009   | 0.84616  | -0.047   | 0.31077  | -0.00899 | 0.8463   |
| 0.08991  | -0.07795 | 0.09246  | -0.00972 | 0.83404  | -0.04825 | 0.29808  | -0.15049 | 0.00111  |
| 0.34222  | -0.00135 | 0.97671  | -0.22016 | 1.56E-06 | -0.19156 | 3.08E-05 | -0.19052 | 3.41E-05 |
| 0.00042  | -0.00021 | 0.99642  | -0.2408  | 1.38E-07 | -0.31235 | 5.00E-12 | -0.31045 | 6.83E-12 |
| 0.02544  | -0.0226  | 0.62614  | 0.165515 | 0.00033  | -0.02391 | 0.6063   | -0.00721 | 0.87646  |
| 0.31579  | -0.17217 | 0.00018  | -0.01132 | 0.80727  | 0.041444 | 0.37154  | -0.06623 | 0.153    |
| 0.08109  | 0.069762 | 0.13223  | 0.099446 | 0.03167  | 0.10279  | 0.02633  | 0.245006 | 8.21E-08 |
| 5.42E-12 | 0.204988 | 7.99E-06 | 0.011389 | 0.80609  | -0.02185 | 0.63762  | 0.111792 | 0.01565  |
| 1.05E-08 | 0.11357  | 0.01406  | -0.00142 | 0.97562  | -0.02213 | 0.63328  | 0.058949 | 0.20352  |
| 0.00356  | 0.06707  | 0.14786  | -0.03582 | 0.43993  | -0.02627 | 0.57122  | 0.038532 | 0.40611  |
| 0.03262  | -0.07261 | 0.11712  | 0.173424 | 0.00017  | -0.13696 | 0.00302  | -0.08536 | 0.06531  |
| 0.88671  | 0.065375 | 0.1584   | 0.083041 | 0.073    | 0.0187   | 0.6869   | 0.100129 | 0.03051  |
| 0.3849   | 0.006922 | 0.8814   | 0.036669 | 0.42919  | -0.06639 | 0.15199  | -0.03736 | 0.42057  |
| 3.71E-08 | 0.034137 | 0.46176  | 0.131845 | 0.00432  | -0.00444 | 0.92378  | 0.093731 | 0.04291  |
| 0.00301  | 0.048561 | 0.295    | 0.056496 | 0.223    | -0.01315 | 0.77686  | 0.071383 | 0.12345  |
| 1.79E-07 | 0.042205 | 0.36282  | 0.170758 | 0.00021  | 0.113948 | 0.01374  | 0.168192 | 0.00026  |
| 0.08641  | 0.110813 | 0.01659  | 0.129731 | 0.00499  | 0.019138 | 0.67997  | 0.11322  | 0.01436  |
| 0.00894  | 0.228639 | 5.91E-07 | 0.195082 | 2.18E-05 | 0.229294 | 5.48E-07 | 0.337946 | 6.12E-14 |
| 6.90E-05 | -0.01699 | 0.71419  | 0.070763 | 0.12676  | -0.07279 | 0.1162   | -0.06238 | 0.17838  |
| 0.00033  | 0.029201 | 0.52903  | 0.149998 | 0.00115  | 0.058548 | 0.20662  | 0.085968 | 0.06342  |
| 0.00037  | 0.072946 | 0.11543  | 0.147754 | 0.00136  | 0.094845 | 0.04049  | 0.105902 | 0.02209  |
| 4.84E-09 | 0.043957 | 0.34321  | 0.211256 | 4.12E-06 | 0.143203 | 0.00192  | 0.16426  | 0.00036  |
| 0.01996  | 0.127676 | 0.00573  | 0.246624 | 6.70E-08 | 0.26427  | 6.67E-09 | 0.319752 | 1.46E-12 |
| 0.04101  | 0.004669 | 0.91984  | 0.147707 | 0.00137  | -0.02382 | 0.60758  | 0.018777 | 0.68568  |
| 2.69E-05 | 0.050513 | 0.276    | 0.134304 | 0.00364  | 0.017942 | 0.69896  | 0.121721 | 0.00846  |
| 0.0058   | 0.15415  | 0.00083  | 0.107387 | 0.02028  | 0.171692 | 0.00019  | 0.331421 | 1.96E-13 |
| 0.12543  | 0.013942 | 0.7638   | 0.10943  | 0.018    | -0.00222 | 0.96176  | 0.029294 | 0.52773  |
| 0.0002   | 0.101066 | 0.02898  | 0.114408 | 0.01337  | 0.039755 | 0.39136  | 0.129269 | 0.00515  |
| 3.49E-05 | 0.014063 | 0.76181  | 0.130354 | 0.00478  | 0.002221 | 0.96181  | 0.051054 | 0.27088  |
| 0.00082  | 0.058626 | 0.20601  | 0.131719 | 0.00435  | -0.03002 | 0.51759  | 0.048504 | 0.29557  |
| 0.01917  | 0.144091 | 0.0018   | 0.167591 | 0.00028  | 0.170296 | 0.00022  | 0.240651 | 1.41E-07 |
| 0.47501  | 0.125546 | 0.0066   | 0.181182 | 8.23E-05 | 0.180689 | 8.61E-05 | 0.232424 | 3.79E-07 |
| 1.66E-08 | -0.07126 | 0.12412  | 0.058204 | 0.2093   | -0.058   | 0.21094  | -0.09859 | 0.03318  |
| 0.95641  | 0.029668 | 0.52247  | -0.13634 | 0.00316  | -0.09547 | 0.03918  | -0.01071 | 0.81746  |
| 0.04222  | 0.268004 | 4.00E-09 | 0.088484 | 0.05603  | 0.171995 | 0.00019  | 0.326537 | 4.59E-13 |
| 0.23635  | 0.066425 | 0.15181  | 0.161132 | 0.00047  | 0.222825 | 1.15E-06 | 0.317759 | 2.04E-12 |
| 0.83858  | 0.048492 | 0.29568  | 0.076926 | 0.09683  | 0.111631 | 0.0158   | 0.094193 | 0.04189  |

|          |          |          |          |          |          |          |          |          |
|----------|----------|----------|----------|----------|----------|----------|----------|----------|
| 0.00459  | 0.047312 | 0.30761  | 0.12358  | 0.0075   | -0.00468 | 0.91973  | 0.014433 | 0.75574  |
| 0.35921  | -0.01066 | 0.81821  | 0.052338 | 0.259    | 0.013715 | 0.76753  | 0.057896 | 0.21173  |
| 4.15E-05 | 0.178407 | 0.00011  | 0.329884 | 2.56E-13 | 0.256907 | 1.78E-08 | 0.353814 | 3.22E-15 |
| 0.06729  | 0.068531 | 0.13921  | 0.158898 | 0.00057  | -0.00168 | 0.97108  | 0.006932 | 0.88124  |
| 0.01144  | -0.17025 | 0.00022  | 0.007091 | 0.87853  | -0.13195 | 0.00429  | -0.26968 | 3.17E-09 |
| 0.43924  | -0.0565  | 0.22294  | -0.06089 | 0.189    | -0.04806 | 0.30005  | -0.12601 | 0.0064   |
| 0.1029   | 0.018691 | 0.68705  | -0.1826  | 7.22E-05 | -0.14944 | 0.0012   | -0.08828 | 0.05659  |
| 0.0113   | 0.113524 | 0.0141   | 0.001712 | 0.97057  | 0.041536 | 0.37048  | 0.112939 | 0.01461  |
| 6.15E-13 | 0.100322 | 0.03019  | 0.077999 | 0.09226  | -0.03504 | 0.45005  | 0.084147 | 0.06925  |
| 0.71772  | 0.009289 | 0.84132  | 0.10484  | 0.02346  | 0.305444 | 1.53E-11 | 0.282533 | 5.09E-10 |
| 0.26541  | -0.0418  | 0.36741  | -0.09072 | 0.05008  | 0.138692 | 0.00267  | 0.065874 | 0.15524  |
| 0.01909  | 0.045343 | 0.3282   | -0.09789 | 0.03445  | -0.09673 | 0.03665  | -0.11247 | 0.01503  |
| 0.33594  | 0.071556 | 0.12255  | -0.15221 | 0.00097  | -0.0963  | 0.0375   | 0.072696 | 0.11668  |
| 0.26314  | -0.07878 | 0.08904  | 0.058016 | 0.21078  | -0.00563 | 0.90347  | -0.00689 | 0.88194  |
| 0.65125  | 0.024954 | 0.59064  | -0.0802  | 0.08341  | -0.03503 | 0.45013  | -0.04096 | 0.37714  |
| 0.4707   | -0.15763 | 0.00063  | -0.08004 | 0.08403  | -0.13743 | 0.00292  | -0.1385  | 0.0027   |
| 0.33096  | -0.03758 | 0.41784  | 0.28886  | 2.00E-10 | 0.143377 | 0.0019   | 0.170072 | 0.00022  |
| 0.24919  | -0.09648 | 0.03714  | -0.11571 | 0.01234  | -0.12876 | 0.00533  | -0.20209 | 1.08E-05 |
| 0.0003   | -0.17098 | 0.00021  | -0.02798 | 0.54645  | -0.19419 | 2.38E-05 | -0.25318 | 2.90E-08 |
| 0.02598  | 0.030353 | 0.5129   | -0.06242 | 0.17808  | -0.06401 | 0.16728  | -0.01471 | 0.75127  |
| 0.36637  | -0.03364 | 0.46827  | -0.06362 | 0.16988  | -0.07144 | 0.12318  | -0.11897 | 0.01008  |
| 0.05925  | 0.073083 | 0.11475  | -0.07725 | 0.09545  | -0.05866 | 0.20574  | 0.007317 | 0.87469  |
| 0.18394  | 0.081157 | 0.07977  | -0.10906 | 0.0184   | -0.00232 | 0.96006  | 0.070379 | 0.12884  |
| 0.00015  | -0.01053 | 0.82054  | -0.01156 | 0.80324  | -0.05865 | 0.20581  | -0.04008 | 0.38756  |
| 0.04489  | 0.007383 | 0.87357  | 0.057255 | 0.21683  | 0.126428 | 0.00622  | 0.104145 | 0.02441  |
| 0.87138  | 0.163514 | 0.00039  | -0.0808  | 0.08113  | 0.119533 | 0.00972  | 0.163061 | 0.0004   |
| 0.2023   | -0.0164  | 0.7238   | -0.17465 | 0.00015  | -0.16393 | 0.00037  | -0.1278  | 0.00568  |
| 0.00203  | 0.035107 | 0.44913  | 0.032105 | 0.48886  | 0.009783 | 0.83301  | 0.056132 | 0.226    |
| 0.42819  | 0.026568 | 0.56684  | -0.0279  | 0.54758  | 0.012324 | 0.79053  | -0.0344  | 0.45829  |
| 0.1615   | -0.02422 | 0.60166  | 0.041473 | 0.3712   | -0.04259 | 0.35845  | -0.02838 | 0.54067  |
| 1.54E-05 | -0.20936 | 5.05E-06 | -0.05801 | 0.2108   | -0.12504 | 0.00682  | -0.20768 | 6.03E-06 |
| 0.62204  | 0.026186 | 0.57244  | -0.05543 | 0.2319   | -0.08035 | 0.08284  | -0.00964 | 0.83543  |
| 0.81479  | 0.020528 | 0.65814  | -0.07671 | 0.09779  | -0.01294 | 0.78031  | 0.080875 | 0.08083  |
| 0.51472  | 0.091954 | 0.04703  | -0.13932 | 0.00255  | -0.04234 | 0.36132  | 0.117395 | 0.01112  |
| 0.0011   | -0.05141 | 0.26755  | -0.09579 | 0.03853  | -0.04872 | 0.29343  | -0.05547 | 0.23154  |
| 0.03973  | 0.034103 | 0.46222  | 0.163244 | 0.0004   | 0.157641 | 0.00063  | 0.184757 | 5.91E-05 |
| 0.47715  | 0.090892 | 0.04965  | 0.248564 | 5.25E-08 | 0.264888 | 6.13E-09 | 0.274255 | 1.67E-09 |
| 0.049    | -0.03068 | 0.50838  | -0.03155 | 0.49641  | -0.00358 | 0.93857  | -0.0778  | 0.0931   |
| 0.68667  | 0.058701 | 0.20543  | -0.02356 | 0.61153  | 0.024001 | 0.60491  | 0.021152 | 0.64844  |
| 0.00164  | 0.083357 | 0.07191  | -0.04257 | 0.35866  | 0.030416 | 0.51203  | 0.06853  | 0.13921  |
| 1.38E-05 | 0.022473 | 0.6281   | 0.109949 | 0.01746  | -0.05038 | 0.27731  | 0.029733 | 0.52155  |
| 5.07E-06 | 0.366745 | 2.58E-16 | 0.12435  | 0.00713  | 0.103442 | 0.02539  | 0.261462 | 9.74E-09 |
| 1.94E-06 | -0.00644 | 0.88965  | 0.289437 | 1.83E-10 | 0.159277 | 0.00055  | 0.138211 | 0.00276  |
| 0.05061  | 0.07275  | 0.11641  | 0.133368 | 0.00389  | 0.229479 | 5.36E-07 | 0.232115 | 3.94E-07 |
| 0.02807  | -0.05441 | 0.24058  | -0.06352 | 0.17057  | 0.138243 | 0.00275  | 0.020145 | 0.66413  |

|          |          |          |          |          |          |          |          |          |
|----------|----------|----------|----------|----------|----------|----------|----------|----------|
| 0.03045  | 0.054401 | 0.24066  | 0.010229 | 0.82551  | -0.02719 | 0.55779  | 0.005894 | 0.89892  |
| 0.00123  | 0.16346  | 0.00039  | -0.136   | 0.00323  | -0.07031 | 0.12919  | 0.081441 | 0.07872  |
| 2.28E-08 | -0.09029 | 0.05117  | 0.091861 | 0.04725  | 0.080088 | 0.08383  | -0.04045 | 0.38312  |
| 0.0002   | -0.03772 | 0.41608  | -0.00095 | 0.98368  | -0.0439  | 0.3438   | -0.07204 | 0.12001  |
| 0.62912  | 0.017892 | 0.69976  | 0.069945 | 0.13121  | -0.04712 | 0.30958  | 0.011508 | 0.80412  |
| 0.08814  | 0.001774 | 0.96951  | -0.09324 | 0.04401  | -0.0049  | 0.91582  | 0.01925  | 0.67819  |
| 0.36648  | 0.062387 | 0.17833  | -0.12827 | 0.0055   | -0.11829 | 0.01052  | -0.02927 | 0.52813  |
| 0.1559   | 0.039348 | 0.39623  | -0.05519 | 0.23393  | -0.05095 | 0.27181  | -0.00652 | 0.88819  |
| 0.59392  | 0.066825 | 0.14935  | -0.12197 | 0.00833  | -0.07889 | 0.0886   | -0.04206 | 0.36448  |
| 0.00884  | -0.0094  | 0.83945  | 0.029562 | 0.52395  | 0.146354 | 0.00152  | 0.032095 | 0.489    |
| 0.12255  | -0.05581 | 0.22872  | 0.133252 | 0.00392  | 0.078583 | 0.08984  | -0.01733 | 0.70882  |
| 0.51444  | -0.00449 | 0.92288  | 0.224539 | 9.48E-07 | 0.30768  | 1.07E-11 | 0.237249 | 2.13E-07 |
| 6.38E-06 | -0.00776 | 0.86713  | -0.13518 | 0.00342  | 0.039519 | 0.39419  | -0.01444 | 0.75555  |
| 0.02935  | 0.089378 | 0.05359  | -0.05013 | 0.27963  | -0.02183 | 0.63795  | 0.041554 | 0.37027  |
| 0.41609  | -0.05784 | 0.21213  | -0.12318 | 0.0077   | 0.023285 | 0.61573  | -0.03301 | 0.47675  |
| 0.00153  | 0.023839 | 0.60735  | -0.03931 | 0.39672  | -0.00092 | 0.98416  | 0.046434 | 0.31668  |
| 4.58E-07 | -0.00716 | 0.87743  | -0.1502  | 0.00113  | -0.10842 | 0.0191   | -0.0912  | 0.04887  |
| 0.92529  | 0.171721 | 0.00019  | 0.32248  | 9.21E-13 | 0.310601 | 6.66E-12 | 0.371258 | 1.04E-16 |
| 5.08E-10 | -0.15172 | 0.00101  | -0.00821 | 0.85955  | 0.012222 | 0.79222  | -0.11091 | 0.01649  |
| 0.6064   | -0.02713 | 0.55873  | -0.03678 | 0.42785  | 0.122839 | 0.00787  | 0.011435 | 0.80533  |
| 0.37727  | 0.237953 | 1.96E-07 | 0.242973 | 1.06E-07 | 0.240698 | 1.40E-07 | 0.404578 | 8.08E-20 |
| 0.86037  | 0.019102 | 0.68053  | -0.18915 | 3.89E-05 | -0.15411 | 0.00083  | -0.02448 | 0.59779  |
| 0.31385  | 0.100419 | 0.03003  | -0.09225 | 0.04632  | 0.132343 | 0.00417  | 0.254726 | 2.37E-08 |
| 0.00383  | -0.05326 | 0.2507   | -0.11846 | 0.0104   | -0.09158 | 0.04794  | -0.15526 | 0.00076  |
| 0.37748  | -0.08692 | 0.06053  | -0.11015 | 0.01726  | -0.16925 | 0.00024  | -0.14293 | 0.00196  |
| 0.33205  | -0.03016 | 0.51565  | 0.113605 | 0.01403  | -0.04163 | 0.36941  | -0.07424 | 0.10912  |
| 0.22841  | 0.253493 | 2.79E-08 | 0.184206 | 6.22E-05 | 0.25544  | 2.16E-08 | 0.285794 | 3.15E-10 |
| 0.4428   | -0.11279 | 0.01474  | -0.20558 | 7.51E-06 | -0.2378  | 2.00E-07 | -0.29984 | 3.71E-11 |
| 0.0792   | -0.02079 | 0.65404  | -0.08331 | 0.07207  | -0.14949 | 0.0012   | -0.12023 | 0.00931  |
| 0.82131  | 0.092443 | 0.04587  | -0.04127 | 0.37353  | -0.07992 | 0.08448  | -0.03601 | 0.43756  |
| 0.17072  | -0.00282 | 0.95161  | -0.0011  | 0.98111  | -0.06066 | 0.19068  | -0.04607 | 0.32046  |
| 2.01E-07 | 0.160202 | 0.00051  | 0.120347 | 0.00924  | 0.254634 | 2.40E-08 | 0.316067 | 2.71E-12 |
| 0.00349  | -0.01628 | 0.72575  | -0.03777 | 0.41543  | -0.02281 | 0.62293  | -0.06752 | 0.14513  |
| 0.00977  | 0.073357 | 0.11339  | 0.185868 | 5.32E-05 | 0.189778 | 3.66E-05 | 0.150566 | 0.0011   |
| 6.70E-13 | 0.237169 | 2.15E-07 | -0.0339  | 0.46482  | -0.01259 | 0.78608  | 0.123829 | 0.00738  |
| 0.0006   | 0.233537 | 3.33E-07 | 0.167855 | 0.00027  | 0.131094 | 0.00455  | 0.360084 | 9.62E-16 |
| 0.04916  | -0.0278  | 0.54903  | -0.02388 | 0.6068   | 0.135212 | 0.00342  | 0.113392 | 0.01422  |
| 0.00013  | 0.121019 | 0.00885  | -0.02952 | 0.52454  | -0.0142  | 0.75951  | 0.130754 | 0.00465  |
| 0.81019  | -0.05087 | 0.27261  | 0.175953 | 0.00013  | 0.329554 | 2.72E-13 | 0.202724 | 1.01E-05 |
| 0.00139  | -0.07046 | 0.12837  | -0.14406 | 0.0018   | -0.16826 | 0.00026  | -0.26411 | 6.81E-09 |
| 0.11651  | 0.134742 | 0.00353  | -0.15389 | 0.00085  | 0.097004 | 0.03612  | 0.071622 | 0.1222   |
| 0.52716  | 0.30943  | 8.06E-12 | 0.17757  | 0.00011  | 0.229508 | 5.35E-07 | 0.306766 | 1.24E-11 |
| 0.0056   | -0.03032 | 0.51342  | -0.01437 | 0.75683  | 0.05151  | 0.26662  | -0.03714 | 0.42331  |
| 0.34511  | -0.03987 | 0.39     | 0.264444 | 6.51E-09 | 0.082742 | 0.07404  | 0.058399 | 0.20778  |
| 0.51069  | -0.08097 | 0.08046  | -0.07918 | 0.08741  | -0.17605 | 0.00013  | -0.1981  | 1.62E-05 |

|          |          |          |          |          |          |          |          |          |
|----------|----------|----------|----------|----------|----------|----------|----------|----------|
| 0.51061  | -0.03373 | 0.46717  | -0.06626 | 0.15283  | -0.01591 | 0.73171  | -0.04445 | 0.33786  |
| 0.03168  | 0.108805 | 0.01867  | -0.09744 | 0.03529  | -0.13633 | 0.00316  | -0.03747 | 0.4192   |
| 0.16203  | -0.04545 | 0.32702  | -0.17766 | 0.00011  | -0.13501 | 0.00347  | -0.10191 | 0.02765  |
| 0.30326  | -0.19845 | 1.56E-05 | 0.454034 | 3.95E-25 | 0.138563 | 0.00269  | -0.03563 | 0.44237  |
| 0.00968  | -0.22744 | 6.80E-07 | 0.202317 | 1.05E-05 | -0.01265 | 0.7852   | -0.25887 | 1.38E-08 |
| 1.62E-05 | 0.027202 | 0.55762  | 0.098382 | 0.03354  | 0.061077 | 0.18764  | 0.022046 | 0.63464  |
| 0.27059  | 0.005512 | 0.90543  | 0.080008 | 0.08414  | 0.125172 | 0.00676  | 0.101277 | 0.02864  |
| 0.01057  | 0.119535 | 0.00972  | 0.126077 | 0.00637  | 0.062295 | 0.17898  | 0.167066 | 0.00029  |
| 7.13E-07 | 0.158119 | 0.0006   | 0.117513 | 0.01104  | 0.08013  | 0.08367  | 0.220209 | 1.55E-06 |
| 0.03626  | -0.01218 | 0.79295  | 0.242463 | 1.13E-07 | 0.329756 | 2.62E-13 | 0.274003 | 1.73E-09 |
| 0.53925  | -0.03515 | 0.44859  | -0.18103 | 8.35E-05 | -0.08187 | 0.07717  | -0.04913 | 0.28935  |
| 7.29E-10 | -0.00773 | 0.86762  | 0.062332 | 0.17872  | -0.04115 | 0.3749   | -0.06726 | 0.14671  |
| 2.13E-06 | 0.002    | 0.96562  | 0.003229 | 0.94452  | -0.07814 | 0.09166  | -0.08657 | 0.06159  |
| 0.0045   | 0.114852 | 0.01301  | 0.135883 | 0.00326  | 0.192639 | 2.78E-05 | 0.241482 | 1.27E-07 |
| 0.08596  | 0.124449 | 0.00709  | -0.18848 | 4.15E-05 | -0.12157 | 0.00854  | -0.03548 | 0.44432  |
| 0.01199  | -0.20032 | 1.29E-05 | -0.12187 | 0.00838  | -0.2438  | 9.55E-08 | -0.34317 | 2.36E-14 |
| 0.0451   | 0.113453 | 0.01416  | 0.088069 | 0.0572   | 0.125376 | 0.00667  | 0.201872 | 1.10E-05 |
| 0.42957  | -0.07089 | 0.12608  | -0.04291 | 0.35479  | 0.003007 | 0.94832  | -0.08872 | 0.05538  |
| 0.57514  | -0.0653  | 0.15887  | -0.14034 | 0.00237  | -0.15792 | 0.00061  | -0.20743 | 6.19E-06 |
| 0.16534  | -0.04147 | 0.3712   | 0.255318 | 2.20E-08 | 0.012766 | 0.78321  | 0.02658  | 0.56667  |
| 0.51084  | -0.00129 | 0.97785  | 0.176543 | 0.00013  | 0.060115 | 0.1947   | 0.18082  | 8.51E-05 |
| 0.61552  | 0.088744 | 0.05531  | -0.09931 | 0.0319   | -0.15757 | 0.00063  | -0.03462 | 0.45541  |
| 0.20782  | -0.07868 | 0.08945  | -0.07302 | 0.11507  | -0.22901 | 5.67E-07 | -0.15363 | 0.00087  |
| 0.08722  | -0.14891 | 0.00125  | 0.042463 | 0.35988  | -0.11347 | 0.01415  | -0.1625  | 0.00042  |
| 1.93E-10 | 0.031209 | 0.50108  | 0.086752 | 0.06104  | 0.059871 | 0.19653  | 0.054968 | 0.23579  |
| 0.06899  | 0.00832  | 0.85768  | 0.010329 | 0.82384  | 0.095589 | 0.03893  | -0.03414 | 0.46179  |
| 0.64748  | -0.17936 | 9.72E-05 | -0.07009 | 0.1304   | -0.19987 | 1.35E-05 | -0.28636 | 2.90E-10 |
| 1.87E-16 | 0.026995 | 0.56062  | -0.00573 | 0.90166  | 0.023264 | 0.61604  | 0.102431 | 0.02687  |
| 1.78E-10 | 0.012474 | 0.78804  | 0.010177 | 0.82638  | -0.02057 | 0.65742  | 0.02932  | 0.52735  |
| 0.11575  | 0.104002 | 0.0246   | -0.07254 | 0.11748  | 0.04131  | 0.37309  | 0.07774  | 0.09334  |
| 5.63E-09 | -0.06958 | 0.13324  | 0.069906 | 0.13143  | -0.07262 | 0.11705  | -0.21427 | 2.98E-06 |
| 0.36198  | 0.215782 | 2.52E-06 | -0.2793  | 8.14E-10 | -0.05678 | 0.22065  | -0.04755 | 0.30522  |
| 0.43293  | 0.025599 | 0.58108  | 0.326413 | 4.69E-13 | 0.300603 | 3.30E-11 | 0.2572   | 1.72E-08 |
| 1.42E-05 | 0.029384 | 0.52646  | -0.08872 | 0.05537  | -0.06326 | 0.17231  | -0.052   | 0.26208  |
| 0.00723  | 0.033445 | 0.4709   | -0.05954 | 0.19898  | 0.015141 | 0.74416  | 0.039494 | 0.39448  |
| 0.25603  | 0.176012 | 0.00013  | 0.073113 | 0.1146   | 0.108987 | 0.01848  | 0.090634 | 0.0503   |
| 0.05111  | 0.106621 | 0.02119  | 0.012478 | 0.78797  | -0.09209 | 0.0467   | 0.034627 | 0.45536  |
| 0.66715  | -0.02152 | 0.64272  | 0.189176 | 3.88E-05 | 0.225089 | 8.91E-07 | 0.166545 | 0.0003   |
| 0.39748  | -0.16691 | 0.00029  | 0.115409 | 0.01257  | -0.0874  | 0.05912  | -0.14062 | 0.00232  |
| 0.78135  | 0.083477 | 0.0715   | 0.100557 | 0.0298   | 0.118165 | 0.0106   | 0.157384 | 0.00064  |
| 2.66E-14 | 0.020958 | 0.65146  | -0.04848 | 0.2958   | -0.10533 | 0.02282  | -0.09303 | 0.04449  |
| 0.52302  | 0.026486 | 0.56804  | -0.0922  | 0.04643  | -0.02428 | 0.60073  | 0.047112 | 0.30966  |
| 0.06367  | 0.12983  | 0.00495  | 0.152127 | 0.00097  | 0.105019 | 0.02323  | 0.292556 | 1.14E-10 |
| 0.01338  | 0.062379 | 0.1784   | -0.1175  | 0.01105  | -0.16177 | 0.00045  | 0.034176 | 0.46126  |
| 0.37724  | 0.083164 | 0.07258  | -0.13139 | 0.00445  | -0.04928 | 0.28788  | 0.045413 | 0.32745  |

|          |          |          |          |          |          |          |          |          |
|----------|----------|----------|----------|----------|----------|----------|----------|----------|
| 0.18742  | 0.185234 | 5.65E-05 | 0.048109 | 0.29952  | 0.069406 | 0.13422  | 0.273918 | 1.75E-09 |
| 0.99938  | 0.095226 | 0.03969  | -0.00658 | 0.88715  | -0.06234 | 0.17867  | 0.0319   | 0.49164  |
| 0.30431  | 0.055013 | 0.2354   | -0.05769 | 0.21338  | -0.05318 | 0.25144  | 0.055154 | 0.2342   |
| 0.04     | -0.11803 | 0.01069  | -0.11153 | 0.01589  | -0.26177 | 9.34E-09 | -0.27643 | 1.23E-09 |
| 0.08967  | 0.098775 | 0.03284  | -0.01318 | 0.77643  | 0.022506 | 0.6276   | 0.072338 | 0.1185   |
| 0.20783  | -0.03277 | 0.47993  | -0.14582 | 0.00158  | -0.20124 | 1.18E-05 | -0.13432 | 0.00364  |
| 0.41926  | 0.037677 | 0.41662  | 0.22051  | 1.50E-06 | 0.035711 | 0.44137  | 0.007161 | 0.87734  |
| 0.00064  | -0.03162 | 0.49549  | -0.00735 | 0.87412  | -0.04587 | 0.32258  | -0.01886 | 0.68437  |
| 0.12141  | 0.008691 | 0.85141  | -0.19043 | 3.44E-05 | -0.1464  | 0.00151  | -0.10315 | 0.02581  |
| 1.33E-10 | 0.043654 | 0.34655  | -0.03097 | 0.50436  | -0.06689 | 0.14898  | -0.0489  | 0.29164  |
| 0.00994  | 0.221993 | 1.27E-06 | 0.098808 | 0.03278  | 0.162748 | 0.00041  | 0.282947 | 4.79E-10 |
| 0.62866  | -0.04787 | 0.30192  | 0.055212 | 0.23371  | 0.064191 | 0.16609  | 0.046662 | 0.31431  |
| 1.72E-06 | 0.011281 | 0.8079   | -0.05826 | 0.20883  | -0.06256 | 0.17713  | -0.04257 | 0.35862  |
| 0.71715  | 0.033821 | 0.46593  | 0.005998 | 0.89714  | 0.063005 | 0.17406  | 0.049159 | 0.28909  |
| 0.09869  | 0.000933 | 0.98396  | -0.063   | 0.17411  | -0.04833 | 0.29732  | -0.06782 | 0.14339  |
| 0.03833  | -0.00117 | 0.97983  | -0.02697 | 0.56101  | -0.01491 | 0.74798  | -0.01429 | 0.75801  |
| 0.05791  | 0.01753  | 0.70555  | 0.120465 | 0.00917  | 0.033893 | 0.46497  | -0.01904 | 0.68145  |
| 0.00652  | -0.166   | 0.00031  | -0.15706 | 0.00066  | -0.2934  | 1.00E-10 | -0.29772 | 5.17E-11 |
| 0.00022  | -0.0228  | 0.62312  | -0.14465 | 0.00172  | -0.15412 | 0.00083  | -0.15031 | 0.00112  |
| 0.8026   | 0.033937 | 0.4644   | 0.009008 | 0.84605  | 0.063661 | 0.16962  | 0.076869 | 0.09709  |
| 0.00061  | 0.100403 | 0.03005  | 0.106604 | 0.02122  | 0.080501 | 0.08225  | 0.073496 | 0.1127   |
| 0.53413  | 0.031362 | 0.49898  | 0.019551 | 0.67345  | 0.081565 | 0.07826  | 0.082893 | 0.07352  |
| 0.91318  | -0.00653 | 0.88812  | -0.00718 | 0.87703  | -0.02419 | 0.60212  | -0.02454 | 0.5968   |
| 0.37797  | 0.049888 | 0.28199  | 0.056298 | 0.22463  | -0.05858 | 0.20636  | 0.012459 | 0.78829  |
| 0.32366  | -0.02085 | 0.65313  | -0.01222 | 0.79234  | -0.13863 | 0.00268  | -0.08725 | 0.05956  |
| 0.0022   | 0.510064 | 2.70E-32 | -0.00713 | 0.87785  | -0.03748 | 0.41902  | 0.118275 | 0.01053  |
| 0.01387  | 0.036208 | 0.43502  | -0.01427 | 0.7584   | 0.009503 | 0.83771  | 0.017833 | 0.70071  |
| 0.36642  | 0.059958 | 0.19587  | 0.03642  | 0.43234  | -0.00628 | 0.89238  | 0.037334 | 0.42087  |
| 0.00764  | -0.12398 | 0.00731  | -0.08263 | 0.07443  | -0.0693  | 0.13483  | -0.1097  | 0.01772  |
| 0.08161  | -0.08809 | 0.05715  | 0.063953 | 0.16767  | 0.030511 | 0.51071  | -0.03009 | 0.51651  |
| 0.79523  | 0.012848 | 0.78184  | -0.09114 | 0.04902  | -0.06679 | 0.14953  | -0.03554 | 0.44351  |
| 0.80611  | -0.04325 | 0.35105  | 0.075622 | 0.10264  | -0.10052 | 0.02987  | -0.06251 | 0.17749  |
| 0.18449  | 0.07861  | 0.08972  | -0.01443 | 0.75586  | 0.070901 | 0.12602  | 0.059164 | 0.20187  |
| 4.15E-08 | 0.100463 | 0.02995  | 0.031027 | 0.50359  | 0.052381 | 0.2586   | 0.192945 | 2.69E-05 |
| 2.03E-09 | 0.110188 | 0.01722  | -0.2208  | 1.45E-06 | 0.063659 | 0.16963  | 0.183234 | 6.81E-05 |
| 0.29634  | -0.01593 | 0.7313   | 0.01018  | 0.82633  | 0.008788 | 0.84977  | -0.0542  | 0.24245  |
| 0.00417  | 0.073533 | 0.11252  | 0.123962 | 0.00732  | 0.112567 | 0.01494  | 0.212368 | 3.66E-06 |
| 0.95695  | -0.04074 | 0.37967  | -0.09746 | 0.03525  | -0.18313 | 6.88E-05 | -0.18536 | 5.58E-05 |
| 0.45636  | -0.03457 | 0.45616  | -0.10982 | 0.0176   | -0.14072 | 0.0023   | -0.13731 | 0.00294  |
| 0.12406  | -0.00165 | 0.97167  | -0.14761 | 0.00138  | -0.03664 | 0.42957  | -0.05156 | 0.26619  |
| 0.01579  | -0.01257 | 0.78642  | -0.08416 | 0.06922  | -0.04424 | 0.34012  | -0.042   | 0.3652   |
| 0.34321  | -0.04239 | 0.36075  | -0.12173 | 0.00845  | -0.09019 | 0.05145  | -0.09149 | 0.04817  |
| 0.05001  | -0.17518 | 0.00014  | 0.108681 | 0.01881  | -0.01475 | 0.75063  | -0.14029 | 0.00238  |
| 0.0675   | 0.119686 | 0.00963  | 0.098872 | 0.03267  | 0.010942 | 0.81357  | 0.130366 | 0.00478  |
| 0.38995  | -0.05006 | 0.28031  | -0.27217 | 2.24E-09 | -0.15154 | 0.00102  | -0.17136 | 0.0002   |

|          |          |          |          |          |          |          |          |          |
|----------|----------|----------|----------|----------|----------|----------|----------|----------|
| 0.74782  | 0.003724 | 0.93602  | -0.20554 | 7.54E-06 | -0.0972  | 0.03574  | -0.13717 | 0.00297  |
| 0.02156  | -0.14743 | 0.0014   | -0.00383 | 0.93422  | -0.28027 | 7.07E-10 | -0.30377 | 2.00E-11 |
| 0.0005   | -0.03838 | 0.40798  | 0.109404 | 0.01803  | 0.021413 | 0.6444   | -0.00417 | 0.92835  |
| 4.24E-05 | -0.02847 | 0.53942  | -0.02433 | 0.60002  | 0.047823 | 0.30241  | 0.045236 | 0.32935  |
| 0.76032  | -0.0059  | 0.89885  | -0.20964 | 4.90E-06 | -0.11792 | 0.01076  | -0.1664  | 0.0003   |
| 0.00062  | 0.072822 | 0.11605  | 0.204628 | 8.29E-06 | 0.252296 | 3.25E-08 | 0.307161 | 1.16E-11 |
| 0.00286  | 0.080202 | 0.08339  | 0.113041 | 0.01452  | 0.114112 | 0.01361  | 0.177574 | 0.00011  |
| 0.95379  | 0.134101 | 0.00369  | -0.12669 | 0.00611  | -0.09112 | 0.04907  | -0.00828 | 0.85829  |
| 0.05576  | 0.017543 | 0.70535  | -0.18583 | 5.34E-05 | -0.11688 | 0.01148  | -0.16887 | 0.00025  |
| 3.15E-06 | 0.0076   | 0.86989  | -0.04302 | 0.35364  | -0.08702 | 0.06023  | -0.07577 | 0.10196  |
| 0.00268  | -0.04518 | 0.32999  | -0.09527 | 0.03959  | -0.22801 | 6.36E-07 | -0.13759 | 0.00289  |
| 1.06E-10 | -0.16134 | 0.00046  | -0.14019 | 0.00239  | -0.26011 | 1.17E-08 | -0.34365 | 2.17E-14 |
| 0.00117  | 0.265455 | 5.68E-09 | -0.02716 | 0.55823  | 0.159977 | 0.00052  | 0.301546 | 2.84E-11 |
| 0.02866  | 0.249982 | 4.38E-08 | 0.090094 | 0.05169  | 0.177014 | 0.00012  | 0.326937 | 4.28E-13 |
| 0.86511  | 0.132863 | 0.00402  | -0.04736 | 0.30713  | 0.044852 | 0.33347  | 0.108742 | 0.01874  |
| 9.88E-12 | 0.024559 | 0.59655  | 0.232443 | 3.79E-07 | 0.192952 | 2.69E-05 | 0.109018 | 0.01844  |
| 0.40861  | 0.051159 | 0.26989  | -0.0273  | 0.55616  | 0.041301 | 0.37319  | 0.189421 | 3.79E-05 |
| 0.28566  | -0.03689 | 0.42645  | 0.290676 | 1.52E-10 | 0.331486 | 1.94E-13 | 0.288611 | 2.07E-10 |
| 0.00214  | 0.086636 | 0.06138  | -0.07884 | 0.08881  | -0.16258 | 0.00042  | -0.06229 | 0.17904  |
| 0.02794  | -0.06581 | 0.15561  | 0.285473 | 3.30E-10 | 0.158459 | 0.00059  | 0.067938 | 0.14267  |
| 1.13E-05 | 0.467619 | 9.53E-27 | 0.002613 | 0.95509  | 0.083839 | 0.07028  | 0.292858 | 1.09E-10 |
| 0.00073  | -0.08128 | 0.07932  | -0.00138 | 0.97627  | -0.051   | 0.27143  | -0.11804 | 0.01068  |
| 1.82E-13 | 0.224417 | 9.62E-07 | 0.063094 | 0.17346  | -0.01813 | 0.69589  | 0.165359 | 0.00033  |
| 0.56489  | 0.024129 | 0.60299  | -0.00272 | 0.95329  | -0.02733 | 0.55582  | 0.006041 | 0.8964   |
| 0.0073   | -0.01329 | 0.77457  | -0.08441 | 0.06839  | -0.07847 | 0.09031  | -0.07345 | 0.11294  |
| 0.71448  | 0.076046 | 0.10073  | 0.024654 | 0.59513  | -0.0368  | 0.4275   | 0.021897 | 0.63694  |
| 0.49443  | -0.07189 | 0.12081  | -0.13821 | 0.00276  | -0.17461 | 0.00015  | -0.19883 | 1.50E-05 |
| 0.90038  | 0.005063 | 0.9131   | -0.06051 | 0.19176  | -0.03701 | 0.42496  | -0.01062 | 0.81897  |
| 0.43168  | -0.01267 | 0.78488  | -0.23923 | 1.68E-07 | -0.16768 | 0.00027  | -0.1438  | 0.00184  |
| 0.03552  | 0.092597 | 0.0455   | 0.128347 | 0.00548  | 0.15281  | 0.00092  | 0.206727 | 6.66E-06 |
| 0.10437  | 0.0701   | 0.13036  | -0.1405  | 0.00234  | -0.12139 | 0.00864  | -0.07918 | 0.0874   |
| 0.87221  | -0.03374 | 0.467    | -0.00065 | 0.98877  | -0.07144 | 0.12318  | -0.09998 | 0.03076  |
| 3.71E-07 | -0.05782 | 0.21236  | -0.14013 | 0.0024   | -0.22839 | 6.09E-07 | -0.13613 | 0.0032   |
| 0.86264  | 0.145548 | 0.00161  | -0.02926 | 0.52823  | 0.070219 | 0.12971  | 0.154992 | 0.00078  |
| 3.01E-06 | 0.177852 | 0.00011  | 0.185467 | 5.52E-05 | 0.200363 | 1.29E-05 | 0.294452 | 8.55E-11 |
| 0.06348  | 0.040523 | 0.38227  | 0.057219 | 0.21713  | 0.066571 | 0.1509   | 0.080571 | 0.08198  |
| 0.00321  | 0.127056 | 0.00597  | 0.098887 | 0.03264  | 0.201963 | 1.09E-05 | 0.249115 | 4.89E-08 |
| 0.58211  | 0.032603 | 0.48214  | 0.031025 | 0.50361  | 0.051248 | 0.26905  | 0.158118 | 0.0006   |
| 0.08259  | 0.026592 | 0.56649  | 0.020651 | 0.65622  | 0.186743 | 4.90E-05 | 0.281103 | 6.27E-10 |
| 0.68093  | -0.14386 | 0.00183  | -0.04169 | 0.36876  | -0.02236 | 0.62985  | -0.15491 | 0.00078  |
| 0.00041  | 0.211328 | 4.09E-06 | 0.021569 | 0.64199  | 0.047711 | 0.30354  | 0.136064 | 0.00322  |
| 6.96E-07 | 0.176297 | 0.00013  | -0.01208 | 0.79466  | 0.068774 | 0.13781  | 0.202219 | 1.06E-05 |
| 0.04288  | -0.00469 | 0.91941  | -0.06687 | 0.14904  | -0.0725  | 0.11767  | -0.01267 | 0.78485  |
| 0.3386   | -0.03639 | 0.43278  | 0.127932 | 0.00563  | 0.030022 | 0.51751  | 0.075493 | 0.10324  |
| 4.59E-07 | -0.01112 | 0.81066  | -0.03054 | 0.51028  | -0.06501 | 0.16074  | 0.023035 | 0.61953  |

|          |          |          |          |          |          |          |          |          |
|----------|----------|----------|----------|----------|----------|----------|----------|----------|
| 0.66199  | -0.13568 | 0.00331  | -0.13693 | 0.00303  | -0.27503 | 1.50E-09 | -0.25482 | 2.35E-08 |
| 0.38916  | 0.053445 | 0.24904  | 0.239669 | 1.59E-07 | 0.257391 | 1.67E-08 | 0.27001  | 3.03E-09 |
| 0.17257  | -0.06198 | 0.18122  | -0.21057 | 4.44E-06 | -0.08428 | 0.06881  | -0.20502 | 7.97E-06 |
| 1.15E-05 | 0.08071  | 0.08145  | 0.143728 | 0.00185  | 0.138511 | 0.0027   | 0.171817 | 0.00019  |
| 0.03004  | 0.117285 | 0.0112   | 0.162819 | 0.00041  | 0.157132 | 0.00066  | 0.207535 | 6.12E-06 |
| 0.06267  | 0.160777 | 0.00049  | -0.10164 | 0.02808  | -0.0654  | 0.15824  | 0.059515 | 0.19921  |
| 0.13379  | -0.08123 | 0.0795   | -0.0752  | 0.10456  | -0.11287 | 0.01467  | -0.16894 | 0.00024  |
| 0.05728  | 0.01368  | 0.76812  | -0.07107 | 0.12514  | -0.09114 | 0.04903  | -0.02374 | 0.60882  |
| 0.0001   | 0.073086 | 0.11473  | -0.04187 | 0.36669  | -0.0639  | 0.16805  | 0.002363 | 0.95939  |
| 0.74771  | 0.008698 | 0.8513   | -0.02838 | 0.54063  | -0.09104 | 0.04927  | -0.0333  | 0.47279  |
| 0.39376  | 0.008647 | 0.85216  | 0.003828 | 0.93425  | -0.04216 | 0.36334  | -0.03824 | 0.40974  |
| 0.07792  | -0.17231 | 0.00018  | 0.076059 | 0.10067  | -0.1159  | 0.0122   | -0.17034 | 0.00022  |
| 0.92139  | 0.008528 | 0.85417  | -0.01475 | 0.75059  | 0.005052 | 0.9133   | 0.005278 | 0.90942  |
| 3.49E-06 | -0.00681 | 0.88337  | -0.08492 | 0.06672  | -0.05354 | 0.2482   | -0.1013  | 0.02861  |
| 0.81015  | -0.00753 | 0.87112  | -0.00699 | 0.88022  | -0.08233 | 0.07548  | -0.04611 | 0.32012  |
| 0.36835  | 0.075519 | 0.10311  | -0.03936 | 0.39613  | -0.06512 | 0.16005  | -0.01623 | 0.72645  |
| 1.59E-07 | -0.01333 | 0.7738   | -0.03136 | 0.49903  | -0.02679 | 0.56361  | -0.00387 | 0.93348  |
| 0.73109  | 0.004602 | 0.921    | 0.043809 | 0.34484  | 0.071293 | 0.12393  | 0.081125 | 0.07989  |
| 0.7306   | -0.00514 | 0.91171  | -0.02969 | 0.52211  | -0.01903 | 0.68164  | -0.00659 | 0.88706  |
| 0.31889  | 0.016782 | 0.71757  | 0.044931 | 0.33262  | -0.03632 | 0.43358  | -0.0082  | 0.85979  |
| 0.76342  | 0.01516  | 0.74385  | -0.10552 | 0.02258  | -0.09134 | 0.04853  | -0.04364 | 0.34668  |
| 0.22089  | -0.05849 | 0.20709  | 0.023979 | 0.60524  | -0.01371 | 0.76757  | -0.09314 | 0.04424  |
| 0.139    | -0.02766 | 0.55103  | -0.17356 | 0.00016  | -0.20598 | 7.20E-06 | -0.10511 | 0.02311  |
| 0.68701  | 0.233883 | 3.19E-07 | 0.071807 | 0.12124  | 0.064081 | 0.16681  | 0.194616 | 2.29E-05 |
| 0.45889  | -0.03245 | 0.48424  | -0.2145  | 2.90E-06 | -0.20817 | 5.73E-06 | -0.14567 | 0.0016   |
| 0.15263  | -0.02859 | 0.53765  | -0.21497 | 2.76E-06 | -0.18658 | 4.97E-05 | -0.19892 | 1.49E-05 |
| 0.69283  | -0.02737 | 0.55516  | -0.14343 | 0.00189  | -0.15857 | 0.00058  | -0.09396 | 0.0424   |
| 0.32657  | 0.029488 | 0.525    | -0.01905 | 0.68134  | -0.03836 | 0.40822  | -0.02593 | 0.57624  |
| 0.46214  | -0.03256 | 0.48269  | -0.06025 | 0.19369  | -0.05567 | 0.22987  | -0.04164 | 0.36928  |
| 0.18012  | -0.04854 | 0.2952   | -0.29468 | 8.26E-11 | -0.19466 | 2.27E-05 | -0.26423 | 6.71E-09 |
| 1.46E-05 | 0.026896 | 0.56206  | -0.2036  | 9.23E-06 | -0.13898 | 0.00261  | -0.07089 | 0.12606  |
| 0.20452  | 0.027421 | 0.55445  | -0.18922 | 3.86E-05 | -0.1602  | 0.00051  | -0.07711 | 0.09603  |
| 5.81E-15 | 0.079927 | 0.08446  | 0.087075 | 0.06008  | -0.0313  | 0.49979  | 0.046027 | 0.32094  |
| 0.16442  | -0.07655 | 0.09846  | 0.088801 | 0.05515  | -0.00667 | 0.8857   | -0.11203 | 0.01543  |
| 0.18609  | 0.285013 | 3.54E-10 | -0.02731 | 0.5561   | 0.09675  | 0.03661  | 0.223267 | 1.10E-06 |
| 0.90177  | 0.035663 | 0.44197  | -0.03312 | 0.47527  | -0.00053 | 0.99095  | 0.015095 | 0.74491  |
| 0.80683  | 0.001268 | 0.9782   | -0.04084 | 0.37861  | -0.02696 | 0.5612   | -0.02942 | 0.52596  |
| 2.65E-06 | -0.00594 | 0.8981   | 0.063424 | 0.17122  | 0.071736 | 0.12161  | -0.01526 | 0.74223  |
| 2.77E-06 | 0.062131 | 0.18013  | 0.002231 | 0.96165  | -0.06068 | 0.19053  | 0.008849 | 0.84874  |
| 0.14615  | -0.08554 | 0.06476  | -0.05948 | 0.1995   | -0.04886 | 0.29204  | -0.18122 | 8.21E-05 |
| 0.01432  | 0.073739 | 0.11152  | 0.014144 | 0.76048  | -0.05789 | 0.21178  | 0.040894 | 0.37792  |
| 3.72E-05 | -0.00269 | 0.95381  | 0.05659  | 0.22223  | 0.090662 | 0.05023  | 0.035079 | 0.44949  |
| 0.00015  | 0.011082 | 0.81122  | -0.09235 | 0.04609  | -0.07334 | 0.1135   | -0.07426 | 0.10901  |
| 2.18E-07 | 0.002746 | 0.9528   | -0.11529 | 0.01266  | -0.14471 | 0.00172  | -0.11113 | 0.01628  |
| 0.85508  | 0.011162 | 0.80988  | -0.03347 | 0.47058  | -0.01264 | 0.78525  | 0.027903 | 0.54751  |

|          |          |          |          |          |          |          |          |          |
|----------|----------|----------|----------|----------|----------|----------|----------|----------|
| 0.01547  | 0.101651 | 0.02806  | 0.037035 | 0.4246   | 0.030297 | 0.51368  | 0.107471 | 0.02018  |
| 4.96E-15 | 0.036189 | 0.43527  | -0.15279 | 0.00092  | -0.14861 | 0.00128  | -0.01059 | 0.81945  |
| 0.00557  | -0.06155 | 0.18424  | 0.085231 | 0.06573  | -0.06869 | 0.13832  | -0.12505 | 0.00682  |
| 0.24621  | -0.04345 | 0.34877  | 0.011013 | 0.81237  | -0.10673 | 0.02107  | -0.12339 | 0.00759  |
| 0.52136  | 0.036391 | 0.43271  | 0.220164 | 1.55E-06 | 0.15333  | 0.00089  | 0.152184 | 0.00097  |
| 0.90262  | -0.00981 | 0.83247  | 0.007284 | 0.87526  | -0.02677 | 0.56385  | -0.00652 | 0.8883   |
| 0.40264  | -0.01216 | 0.79322  | -0.17247 | 0.00018  | -0.11525 | 0.01269  | -0.04819 | 0.29866  |
| 0.98236  | 0.015165 | 0.74378  | 0.109653 | 0.01777  | 0.157797 | 0.00062  | 0.140561 | 0.00233  |
| 0.5587   | -0.00308 | 0.9471   | 0.138538 | 0.0027   | 0.2302   | 4.93E-07 | 0.278201 | 9.53E-10 |
| 0.06185  | -0.10171 | 0.02797  | -0.12236 | 0.00812  | -0.18842 | 4.17E-05 | -0.15195 | 0.00099  |
| 0.66555  | -0.02    | 0.66643  | -0.24878 | 5.11E-08 | -0.13309 | 0.00396  | -0.06126 | 0.18633  |
| 0.41443  | -0.00802 | 0.86271  | 0.246184 | 7.09E-08 | 0.044329 | 0.33914  | 0.053647 | 0.24725  |
| 3.71E-10 | -0.01041 | 0.82244  | -0.07683 | 0.09727  | -0.05312 | 0.25195  | -0.10256 | 0.02668  |
| 0.45377  | -0.00105 | 0.98203  | -0.09896 | 0.03251  | -0.06464 | 0.16316  | -0.06713 | 0.14749  |
| 1.53E-05 | -0.01657 | 0.72096  | -0.05668 | 0.22149  | -0.06712 | 0.14757  | -0.08182 | 0.07732  |
| 0.66146  | -0.04223 | 0.36252  | 0.459299 | 9.52E-26 | 0.262727 | 8.22E-09 | 0.17502  | 0.00014  |
| 0.93164  | -0.10659 | 0.02123  | -0.18482 | 5.87E-05 | -0.11875 | 0.01021  | -0.2595  | 1.27E-08 |
| 0.00895  | -0.01094 | 0.81352  | 0.383055 | 9.06E-18 | 0.028492 | 0.53908  | 0.132314 | 0.00418  |
| 0.10002  | -0.06774 | 0.14383  | 0.033716 | 0.4673   | 0.090793 | 0.0499   | 0.089512 | 0.05323  |
| 0.0638   | 0.096783 | 0.03654  | 0.172296 | 0.00018  | 0.254343 | 2.50E-08 | 0.323899 | 7.23E-13 |
| 2.09E-05 | -0.16745 | 0.00028  | -0.20327 | 9.55E-06 | -0.0207  | 0.65552  | -0.19613 | 1.97E-05 |
| 2.76E-06 | 0.253561 | 2.76E-08 | 0.025432 | 0.58356  | 0.068959 | 0.13675  | 0.195889 | 2.02E-05 |
| 0.40133  | 0.208804 | 5.35E-06 | 0.079716 | 0.08529  | 0.127605 | 0.00575  | 0.201811 | 1.11E-05 |
| 0.55142  | -0.08892 | 0.05484  | -0.05593 | 0.22768  | 0.008408 | 0.85619  | -0.14787 | 0.00135  |
| 0.0002   | 0.101216 | 0.02874  | 0.202876 | 9.94E-06 | 0.319781 | 1.45E-12 | 0.319415 | 1.55E-12 |
| 0.23427  | -0.00557 | 0.90446  | 0.235456 | 2.64E-07 | -0.119   | 0.01006  | -0.03854 | 0.406    |
| 0.90045  | 0.021578 | 0.64185  | -0.00907 | 0.84508  | -0.13351 | 0.00385  | -0.03337 | 0.47191  |
| 0.97893  | 0.067755 | 0.14375  | 0.052044 | 0.26168  | -0.01471 | 0.75128  | 0.053337 | 0.25     |
| 0.88919  | 0.05496  | 0.23585  | 0.118089 | 0.01065  | 0.01727  | 0.70972  | 0.04571  | 0.32429  |
| 0.12647  | 0.113009 | 0.01455  | -0.00506 | 0.91313  | 0.031653 | 0.495    | 0.122395 | 0.0081   |
| 0.10068  | -0.08678 | 0.06096  | 0.145682 | 0.0016   | 0.100585 | 0.02975  | 0.06711  | 0.14762  |
| 0.02161  | 0.123541 | 0.00752  | 0.034761 | 0.45361  | 0.028407 | 0.5403   | 0.214788 | 2.81E-06 |
| 0.88038  | 0.04905  | 0.29015  | -0.05875 | 0.20505  | -0.05642 | 0.22362  | 0.003322 | 0.94292  |
| 0.83249  | -0.00741 | 0.87316  | -0.10362 | 0.02513  | -0.09962 | 0.03137  | -0.10528 | 0.02289  |
| 0.22765  | 0.14044  | 0.00235  | 0.164132 | 0.00037  | 0.260242 | 1.15E-08 | 0.36391  | 4.54E-16 |
| 2.97E-09 | 0.0763   | 0.09959  | 0.032959 | 0.47737  | -0.07494 | 0.10579  | -0.01444 | 0.75562  |
| 0.9434   | 0.100103 | 0.03055  | -0.05222 | 0.26006  | 0.06804  | 0.14207  | 0.068274 | 0.1407   |
| 0.0663   | -0.00827 | 0.85857  | 0.051966 | 0.2624   | 0.227011 | 7.14E-07 | 0.254741 | 2.37E-08 |
| 7.79E-08 | -0.11332 | 0.01428  | -0.2943  | 8.75E-11 | -0.14573 | 0.00159  | -0.21955 | 1.66E-06 |
| 0.2816   | 0.051898 | 0.26303  | -0.1289  | 0.00528  | -0.0583  | 0.20855  | -0.03822 | 0.40987  |
| 8.64E-05 | -0.08056 | 0.08201  | -0.07065 | 0.12735  | -0.0379  | 0.4138   | -0.14001 | 0.00243  |
| 0.15426  | -0.0596  | 0.19854  | -0.06447 | 0.16428  | -0.1472  | 0.00142  | -0.14561 | 0.0016   |
| 0.88942  | 0.062485 | 0.17766  | -0.00756 | 0.87052  | 0.050135 | 0.27961  | 0.096459 | 0.03718  |
| 4.18E-05 | 0.003487 | 0.94009  | -0.08303 | 0.07305  | -0.08014 | 0.08362  | -0.03412 | 0.46194  |
| 0.75406  | -0.05302 | 0.25282  | 0.393504 | 9.57E-19 | 0.190383 | 3.46E-05 | 0.155507 | 0.00075  |



|          |          |          |          |          |          |          |          |          |
|----------|----------|----------|----------|----------|----------|----------|----------|----------|
| 0.90244  | 0.004011 | 0.93112  | -0.08238 | 0.07531  | 0.033761 | 0.46672  | -0.01402 | 0.76249  |
| 0.2084   | 0.036654 | 0.42938  | 0.013193 | 0.77615  | -0.0009  | 0.98456  | 0.080341 | 0.08286  |
| 0.00017  | -0.06179 | 0.18253  | -0.09616 | 0.03778  | -0.25319 | 2.90E-08 | -0.30224 | 2.55E-11 |
| 0.56787  | -0.05139 | 0.26773  | 8.44E-05 | 0.99855  | -0.20059 | 1.26E-05 | -0.08393 | 0.06996  |
| 0.02397  | 0.026866 | 0.56251  | 0.081842 | 0.07725  | 0.027931 | 0.54712  | 0.011777 | 0.79963  |
| 1.83E-10 | -0.03798 | 0.4129   | -0.05011 | 0.27987  | -0.11292 | 0.01462  | -0.10557 | 0.0225   |
| 0.39065  | -0.06073 | 0.19017  | 0.054412 | 0.24056  | -0.10639 | 0.02148  | -0.03318 | 0.4744   |
| 0.00014  | 0.173564 | 0.00016  | -0.09664 | 0.03683  | -0.12176 | 0.00844  | -0.01181 | 0.79912  |
| 0.00479  | 0.105108 | 0.02311  | 0.119089 | 0.01     | -0.1509  | 0.00107  | -0.06874 | 0.13803  |
| 0.66212  | 0.042175 | 0.36315  | -0.13193 | 0.00429  | -0.05635 | 0.22422  | 0.005402 | 0.90731  |
| 0.13273  | -0.07135 | 0.12363  | 0.014769 | 0.75024  | -0.00803 | 0.86258  | -0.07188 | 0.12085  |
| 0.56472  | 0.079737 | 0.08521  | -0.11172 | 0.01572  | 0.008982 | 0.8465   | 0.167102 | 0.00029  |
| 0.96278  | 0.0763   | 0.09959  | 0.199994 | 1.33E-05 | 0.299187 | 4.11E-11 | 0.235342 | 2.68E-07 |
| 0.00014  | 0.073101 | 0.11466  | -0.07979 | 0.085    | -0.06712 | 0.14755  | 0.047927 | 0.30136  |
| 0.00909  | -0.06119 | 0.18682  | 0.013086 | 0.77791  | 0.043408 | 0.34928  | -0.02707 | 0.55959  |
| 0.00298  | 0.063293 | 0.1721   | 0.04639  | 0.31714  | -0.00286 | 0.95083  | 0.030867 | 0.50578  |
| 0.33881  | -0.01332 | 0.77396  | 0.098363 | 0.03358  | 0.058887 | 0.204    | 0.020259 | 0.66235  |
| 0.66875  | 0.032078 | 0.48923  | -0.02343 | 0.6135   | 0.016576 | 0.72089  | 0.033788 | 0.46636  |
| 0.06318  | 0.00303  | 0.94793  | -0.05575 | 0.22917  | 0.0421   | 0.36401  | -0.02849 | 0.53908  |
| 4.92E-10 | 0.042861 | 0.35539  | -0.03842 | 0.40751  | -0.03298 | 0.4771   | 0.009    | 0.84619  |
| 0.79121  | 0.094331 | 0.04159  | 0.077901 | 0.09267  | 0.221974 | 1.27E-06 | 0.302401 | 2.48E-11 |
| 0.00916  | 0.002772 | 0.95236  | 0.097446 | 0.03527  | 0.022092 | 0.63394  | 0.010132 | 0.82713  |
| 0.00733  | 0.048644 | 0.29418  | -0.04835 | 0.29712  | -0.08541 | 0.06517  | 0.062082 | 0.18047  |
| 0.13446  | -0.01028 | 0.82467  | 0.020419 | 0.65986  | -0.05973 | 0.19761  | -0.02061 | 0.6568   |
| 0.53247  | 0.145202 | 0.00165  | -0.04484 | 0.33364  | 0.118505 | 0.01037  | 0.137071 | 0.003    |
| 0.2609   | -0.16814 | 0.00026  | -0.12849 | 0.00542  | -0.17143 | 0.0002   | -0.26148 | 9.72E-09 |
| 0.03327  | 0.065121 | 0.16002  | -0.10243 | 0.02687  | -0.09376 | 0.04284  | -0.04276 | 0.35653  |
| 0.16964  | 0.06556  | 0.15722  | 0.014384 | 0.75655  | 0.038665 | 0.40449  | 0.148003 | 0.00134  |
| 0.01049  | 0.083644 | 0.07094  | 0.070538 | 0.12797  | 0.13735  | 0.00294  | 0.142978 | 0.00195  |
| 0.32091  | -0.14295 | 0.00196  | -0.23085 | 4.57E-07 | -0.25163 | 3.55E-08 | -0.275   | 1.51E-09 |
| 2.69E-13 | -0.0592  | 0.20163  | -0.0743  | 0.1088   | -0.05608 | 0.22646  | -0.06054 | 0.19153  |
| 0.68593  | 0.019504 | 0.6742   | -0.11046 | 0.01694  | -0.08512 | 0.06608  | -0.0272  | 0.55766  |
| 0.69826  | -0.01315 | 0.77685  | -0.08597 | 0.06342  | -0.00524 | 0.91014  | -0.06593 | 0.15489  |
| 0.766    | 0.183779 | 6.47E-05 | 0.07912  | 0.08766  | -0.02361 | 0.61088  | 0.170501 | 0.00021  |
| 4.80E-06 | -0.0339  | 0.46494  | 0.004303 | 0.9261   | 0.148038 | 0.00134  | 0.053365 | 0.24975  |
| 0.26783  | -0.02997 | 0.51828  | -0.11034 | 0.01706  | -0.13695 | 0.00302  | -0.02764 | 0.5513   |
| 0.3791   | 0.069839 | 0.1318   | -0.03439 | 0.45841  | -0.0953  | 0.03952  | -0.01085 | 0.81512  |
| 0.75151  | 0.078551 | 0.08997  | -0.08775 | 0.05811  | 0.106405 | 0.02146  | 0.187329 | 4.63E-05 |
| 0.12663  | 0.142579 | 0.00201  | 0.067311 | 0.1464   | 0.175928 | 0.00013  | 0.276828 | 1.16E-09 |
| 0.11882  | -0.15186 | 0.00099  | -0.06852 | 0.1393   | -0.12156 | 0.00855  | -0.15426 | 0.00082  |
| 3.70E-06 | 0.27791  | 9.94E-10 | 0.006187 | 0.89392  | 0.124563 | 0.00704  | 0.364897 | 3.73E-16 |
| 0.55961  | -0.02917 | 0.52951  | 0.025933 | 0.57615  | -0.1065  | 0.02134  | -0.08881 | 0.05513  |
| 0.24682  | -0.03755 | 0.41818  | 0.033451 | 0.47081  | -0.00485 | 0.91674  | -0.04572 | 0.32422  |
| 0.08569  | 0.119546 | 0.00972  | 0.134383 | 0.00362  | 0.033684 | 0.46773  | 0.180465 | 8.79E-05 |
| 0.00057  | 0.11197  | 0.01549  | 0.110639 | 0.01676  | -0.00125 | 0.97844  | 0.083523 | 0.07135  |

|          |          |          |          |          |          |          |          |          |
|----------|----------|----------|----------|----------|----------|----------|----------|----------|
| 1.96E-13 | 0.108841 | 0.01863  | -0.08037 | 0.08275  | -0.12141 | 0.00863  | 0.00407  | 0.93011  |
| 0.81832  | 0.080688 | 0.08153  | -0.11607 | 0.01207  | -0.04421 | 0.34048  | -0.03782 | 0.41484  |
| 0.52321  | -0.03273 | 0.48044  | 0.181429 | 8.05E-05 | 0.203047 | 9.77E-06 | 0.113217 | 0.01437  |
| 0.30045  | 0.061333 | 0.1858   | 0.196382 | 1.92E-05 | 0.221522 | 1.33E-06 | 0.277593 | 1.04E-09 |
| 0.00557  | 0.041168 | 0.37474  | -0.09496 | 0.04025  | -0.10261 | 0.0266   | -0.06498 | 0.16094  |
| 0.00142  | -0.18206 | 7.59E-05 | -0.00354 | 0.93922  | -0.19995 | 1.34E-05 | -0.32569 | 5.31E-13 |
| 0.36271  | -0.11827 | 0.01053  | 0.022273 | 0.63116  | -0.08843 | 0.05619  | -0.14963 | 0.00118  |
| 0.48425  | -0.07557 | 0.10288  | -0.26925 | 3.37E-09 | -0.19883 | 1.50E-05 | -0.20343 | 9.39E-06 |
| 5.89E-07 | 0.123275 | 0.00765  | -0.01362 | 0.76903  | 0.057894 | 0.21174  | 0.165897 | 0.00032  |
| 0.02837  | -0.01105 | 0.81171  | -0.10577 | 0.02225  | 0.050296 | 0.27806  | 0.045505 | 0.32647  |
| 0.26887  | -0.13437 | 0.00362  | -0.10159 | 0.02815  | -0.20465 | 8.27E-06 | -0.23265 | 3.70E-07 |
| 0.6698   | -0.03762 | 0.41727  | -0.24042 | 1.45E-07 | -0.23382 | 3.22E-07 | -0.21637 | 2.37E-06 |
| 0.2219   | 0.127889 | 0.00565  | -0.01118 | 0.8096   | -0.03664 | 0.42959  | 0.133872 | 0.00375  |
| 0.19546  | -0.00421 | 0.92772  | -0.12603 | 0.00639  | -0.03607 | 0.43673  | -0.02382 | 0.60756  |
| 0.02625  | 0.040311 | 0.38477  | -0.02752 | 0.55307  | -0.04205 | 0.3646   | -0.01223 | 0.79203  |
| 0.41813  | 0.020746 | 0.65475  | -0.06874 | 0.13798  | -0.01163 | 0.80203  | -0.00954 | 0.83702  |
| 0.55425  | 0.018113 | 0.69623  | -0.09043 | 0.05083  | -0.04835 | 0.29706  | -0.00184 | 0.96843  |
| 0.57691  | 0.028484 | 0.5392   | -0.01412 | 0.76092  | 0.023817 | 0.60768  | -0.0082  | 0.85968  |
| 5.25E-10 | -0.06749 | 0.14532  | -0.04596 | 0.32161  | -0.02083 | 0.65344  | -0.05101 | 0.27129  |
| 0.33632  | -0.03218 | 0.48785  | 0.076292 | 0.09963  | -0.03122 | 0.50092  | -0.06885 | 0.1374   |
| 0.13713  | 0.120175 | 0.00934  | 0.097554 | 0.03507  | 0.171425 | 0.0002   | 0.264921 | 6.11E-09 |
| 0.03833  | 0.029894 | 0.5193   | 0.040487 | 0.38269  | 0.223547 | 1.06E-06 | 0.058441 | 0.20744  |
| 7.46E-10 | 0.090143 | 0.05157  | 0.024115 | 0.6032   | 0.020345 | 0.66101  | 0.090966 | 0.04946  |
| 1.36E-09 | -0.15825 | 0.0006   | -0.11977 | 0.00958  | -0.29249 | 1.15E-10 | -0.3832  | 8.79E-18 |
| 0.92759  | 0.027911 | 0.5474   | -0.10852 | 0.01899  | -0.02142 | 0.64433  | 0.005886 | 0.89905  |
| 3.48E-08 | -0.03342 | 0.47126  | 0.163435 | 0.00039  | 0.065067 | 0.16037  | -0.00851 | 0.85443  |
| 0.10288  | 0.009209 | 0.84267  | -0.159   | 0.00056  | -0.0985  | 0.03333  | -0.09552 | 0.03908  |
| 0.00014  | 0.076853 | 0.09715  | -0.04013 | 0.38686  | 0.04943  | 0.28643  | 0.062969 | 0.17432  |
| 0.0686   | 0.0272   | 0.55766  | -0.14591 | 0.00157  | -0.08187 | 0.07714  | -0.05422 | 0.24222  |
| 0.00394  | 0.077548 | 0.09416  | 0.009698 | 0.83443  | -0.06789 | 0.14296  | 0.005595 | 0.90402  |
| 1.77E-11 | 0.198045 | 1.62E-05 | 0.18398  | 6.35E-05 | 0.055664 | 0.2299   | 0.139097 | 0.00259  |
| 0.89247  | -0.12317 | 0.0077   | -0.13108 | 0.00455  | -0.17201 | 0.00019  | -0.24275 | 1.09E-07 |
| 0.18497  | -0.20737 | 6.23E-06 | -0.15644 | 0.00069  | -0.28072 | 6.62E-10 | -0.32701 | 4.23E-13 |
| 4.94E-07 | 0.02245  | 0.62845  | -0.00108 | 0.9815   | 0.002826 | 0.95144  | 0.021875 | 0.63727  |
| 0.00037  | -0.00823 | 0.85929  | 0.068232 | 0.14095  | -0.03607 | 0.43682  | -0.03253 | 0.48309  |
| 0.02091  | 0.031195 | 0.50128  | 0.088689 | 0.05546  | -0.02866 | 0.53676  | 0.019977 | 0.66677  |
| 0.27634  | -0.02549 | 0.58262  | -0.09445 | 0.04134  | -0.08309 | 0.07283  | -0.12418 | 0.00721  |
| 0.0121   | -0.21489 | 2.78E-06 | -0.29246 | 1.16E-10 | -0.16401 | 0.00037  | -0.2916  | 1.32E-10 |
| 0.80995  | -0.0029  | 0.95016  | -0.12762 | 0.00575  | 0.061832 | 0.18224  | 0.036862 | 0.42677  |
| 3.85E-05 | -0.19821 | 1.60E-05 | -0.23535 | 2.68E-07 | -0.16143 | 0.00046  | -0.2775  | 1.05E-09 |
| 0.07878  | -0.02413 | 0.60293  | 0.122305 | 0.00815  | 0.094074 | 0.04215  | 0.037781 | 0.41532  |
| 1.87E-07 | -0.0192  | 0.67905  | 0.02606  | 0.57429  | -0.03475 | 0.4538   | -0.05569 | 0.22971  |
| 0.0041   | -0.24735 | 6.12E-08 | 0.127702 | 0.00572  | 0.106281 | 0.02161  | -0.10279 | 0.02634  |
| 0.18945  | 0.0814   | 0.07887  | 0.101945 | 0.0276   | 0.075409 | 0.10362  | 0.107246 | 0.02044  |
| 0.00675  | 0.150066 | 0.00114  | -0.00444 | 0.92384  | -0.00699 | 0.88017  | 0.020539 | 0.65798  |

|          |          |          |          |          |          |          |          |          |
|----------|----------|----------|----------|----------|----------|----------|----------|----------|
| 0.00628  | 0.047536 | 0.30532  | -0.15406 | 0.00084  | -0.13822 | 0.00276  | -0.08085 | 0.08093  |
| 0.00057  | -0.02076 | 0.65453  | 0.259183 | 1.32E-08 | 0.118602 | 0.01031  | 0.034649 | 0.45508  |
| 0.00486  | -0.13329 | 0.00391  | -0.07278 | 0.11629  | -0.18113 | 8.27E-05 | -0.29557 | 7.21E-11 |
| 0.00014  | -0.14939 | 0.0012   | -0.14236 | 0.00204  | -0.1432  | 0.00192  | -0.25154 | 3.59E-08 |
| 0.97664  | 0.222513 | 1.19E-06 | 0.092009 | 0.0469   | 0.080766 | 0.08124  | 0.195832 | 2.03E-05 |
| 3.77E-06 | 0.453841 | 4.16E-25 | -0.10631 | 0.02158  | -0.11858 | 0.01033  | 0.006179 | 0.89406  |
| 0.00046  | 0.036322 | 0.43359  | -0.24828 | 5.44E-08 | -0.18987 | 3.63E-05 | -0.12199 | 0.00832  |
| 0.00262  | 0.063224 | 0.17257  | -0.07725 | 0.09544  | -0.04803 | 0.30036  | 0.009608 | 0.83594  |
| 5.02E-08 | -0.12411 | 0.00725  | -0.19835 | 1.58E-05 | -0.18742 | 4.59E-05 | -0.27914 | 8.33E-10 |
| 0.11564  | -0.05127 | 0.26882  | -0.10194 | 0.02762  | -0.08433 | 0.06864  | -0.09257 | 0.04557  |
| 0.00019  | 0.092064 | 0.04677  | -0.07908 | 0.08783  | 0.006792 | 0.88361  | 0.045705 | 0.32434  |
| 0.29707  | 0.060215 | 0.19396  | -0.02419 | 0.60202  | -0.04391 | 0.34378  | -0.01837 | 0.69218  |
| 0.03379  | 0.117548 | 0.01101  | -0.03353 | 0.46983  | -0.02467 | 0.59486  | 0.018208 | 0.69471  |
| 3.17E-13 | -0.00859 | 0.85307  | 0.139247 | 0.00256  | -0.00901 | 0.84596  | 0.010056 | 0.82842  |
| 0.35689  | 0.043749 | 0.3455   | 0.035818 | 0.43999  | 0.09398  | 0.04236  | 0.126231 | 0.0063   |
| 0.2708   | 0.072131 | 0.11956  | 0.093203 | 0.0441   | 0.066314 | 0.15249  | 0.084558 | 0.0679   |
| 0.04153  | 0.105545 | 0.02254  | 0.070001 | 0.13091  | 0.077152 | 0.09586  | 0.102953 | 0.0261   |
| 0.88844  | 0.032545 | 0.48292  | -0.00275 | 0.95271  | 0.056995 | 0.21894  | 0.016022 | 0.72985  |
| 0.64858  | -0.09333 | 0.04382  | -0.08463 | 0.06765  | -0.25097 | 3.86E-08 | -0.26757 | 4.25E-09 |
| 9.43E-07 | 0.091586 | 0.04792  | 0.116161 | 0.012    | 0.100378 | 0.03009  | 0.176048 | 0.00013  |
| 0.00321  | 0.061129 | 0.18727  | 0.05062  | 0.27497  | -0.06315 | 0.17309  | -0.00316 | 0.94563  |
| 0.50379  | 0.188282 | 4.23E-05 | 0.009473 | 0.83821  | -0.11452 | 0.01328  | 0.083362 | 0.07189  |
| 0.19381  | -0.01856 | 0.6891   | -0.22799 | 6.38E-07 | -0.10264 | 0.02656  | -0.07714 | 0.09592  |
| 0.12788  | -0.23473 | 2.88E-07 | 0.039444 | 0.39508  | -0.09074 | 0.05002  | -0.27101 | 2.64E-09 |
| 0.29478  | -0.18309 | 6.90E-05 | -0.11134 | 0.01608  | 0.011698 | 0.80095  | -0.1501  | 0.00114  |
| 0.1998   | 0.105084 | 0.02314  | -0.00748 | 0.87197  | -0.01327 | 0.77479  | 0.041299 | 0.37322  |
| 0.77954  | 0.183644 | 6.55E-05 | 0.10482  | 0.02349  | 0.16212  | 0.00044  | 0.288265 | 2.18E-10 |
| 0.3084   | -0.11403 | 0.01368  | -0.15319 | 0.0009   | -0.18698 | 4.79E-05 | -0.25627 | 1.94E-08 |
| 0.02796  | 0.049802 | 0.28281  | 0.122811 | 0.00789  | -0.04376 | 0.34535  | -0.03712 | 0.42353  |
| 0.00064  | 0.060707 | 0.19034  | -0.11583 | 0.01225  | -0.09478 | 0.04064  | 0.004843 | 0.91687  |
| 0.08569  | 0.010663 | 0.81824  | -0.07694 | 0.09677  | -0.08725 | 0.05957  | 0.034863 | 0.45229  |
| 0.00266  | -0.0389  | 0.4016   | -0.1461  | 0.00155  | -0.16003 | 0.00052  | -0.11802 | 0.01069  |
| 0.0025   | 0.101655 | 0.02805  | 0.111999 | 0.01546  | 0.306743 | 1.24E-11 | 0.22271  | 1.17E-06 |
| 0.70589  | -0.03268 | 0.48106  | -0.03163 | 0.49535  | -0.11287 | 0.01467  | -0.11154 | 0.01589  |
| 0.02397  | 0.098385 | 0.03354  | 0.050074 | 0.28019  | 0.122288 | 0.00816  | 0.188937 | 3.97E-05 |
| 2.55E-08 | -0.11081 | 0.0166   | -0.11751 | 0.01104  | -0.04209 | 0.36408  | -0.18385 | 6.43E-05 |
| 2.56E-07 | -0.02762 | 0.55155  | 0.077158 | 0.09583  | 0.068956 | 0.13677  | -0.05087 | 0.27262  |
| 0.04149  | -0.07912 | 0.08767  | -0.05162 | 0.26555  | 0.029601 | 0.52341  | -0.06653 | 0.15113  |
| 0.6114   | 0.155014 | 0.00078  | -0.06663 | 0.15056  | 0.00415  | 0.92873  | 0.11414  | 0.01358  |
| 1.58E-06 | -0.14961 | 0.00118  | -0.06294 | 0.17451  | -0.10614 | 0.02179  | -0.19246 | 2.83E-05 |
| 5.38E-06 | 0.022106 | 0.63373  | -0.02807 | 0.54513  | -0.08442 | 0.06835  | -0.03329 | 0.47293  |
| 0.03763  | 0.067186 | 0.14715  | -0.02066 | 0.65611  | -0.02665 | 0.56564  | -0.02444 | 0.59832  |
| 0.231    | 0.07627  | 0.09972  | 0.083536 | 0.0713   | 0.222726 | 1.17E-06 | 0.235894 | 2.51E-07 |
| 0.0012   | -0.21083 | 4.31E-06 | 0.076049 | 0.10071  | -0.05754 | 0.21454  | -0.10325 | 0.02567  |
| 2.92E-06 | 0.00761  | 0.86973  | -0.03777 | 0.41546  | -0.08475 | 0.06729  | -0.06641 | 0.15188  |

|          |          |          |          |          |          |          |          |          |
|----------|----------|----------|----------|----------|----------|----------|----------|----------|
| 0.04163  | 0.06426  | 0.16563  | -0.035   | 0.45052  | -0.07538 | 0.10375  | 0.00042  | 0.99279  |
| 7.14E-07 | 0.093525 | 0.04337  | 0.035611 | 0.44264  | -0.01625 | 0.72618  | 0.146402 | 0.00151  |
| 0.003    | 0.046469 | 0.31632  | 0.084898 | 0.06679  | 0.021227 | 0.64728  | 0.05764  | 0.21375  |
| 4.02E-05 | -0.0095  | 0.83775  | -0.17131 | 0.0002   | -0.15178 | 0.001    | -0.12426 | 0.00718  |
| 0.02175  | 0.005662 | 0.90288  | 0.0368   | 0.42756  | -0.0154  | 0.74001  | 0.037089 | 0.42393  |
| 0.65227  | 0.030567 | 0.50993  | -0.05109 | 0.27054  | -0.02631 | 0.57058  | -0.07311 | 0.11459  |
| 4.95E-06 | -0.06659 | 0.15076  | -0.12669 | 0.00611  | -0.02998 | 0.51811  | -0.04348 | 0.34846  |
| 0.17456  | 0.113087 | 0.01448  | -0.06584 | 0.15546  | -0.08369 | 0.07079  | 0.086344 | 0.06227  |
| 0.44475  | -0.07235 | 0.11842  | -0.00365 | 0.93726  | -0.09687 | 0.03637  | -0.06995 | 0.13119  |
| 0.04144  | -0.22217 | 1.24E-06 | -0.15594 | 0.00072  | -0.20918 | 5.14E-06 | -0.37982 | 1.79E-17 |
| 0.72255  | -0.04739 | 0.30686  | -0.23683 | 2.24E-07 | -0.19071 | 3.35E-05 | -0.1491  | 0.00123  |
| 0.94788  | -0.03098 | 0.50421  | 0.027389 | 0.55491  | -0.06563 | 0.15677  | -0.06539 | 0.15832  |
| 3.15E-05 | -0.01145 | 0.80506  | 0.22462  | 9.40E-07 | -0.05642 | 0.22361  | 0.022963 | 0.62062  |
| 0.93351  | -0.00718 | 0.87696  | -0.02511 | 0.58835  | -0.00049 | 0.99163  | -0.02343 | 0.61356  |
| 0.00239  | 0.140203 | 0.00239  | 0.053144 | 0.25172  | 0.149747 | 0.00117  | 0.263636 | 7.27E-09 |
| 0.52973  | 0.369306 | 1.55E-16 | 0.002122 | 0.96352  | 0.14575  | 0.00159  | 0.372263 | 8.49E-17 |
| 0.00345  | 0.222544 | 1.19E-06 | 0.000781 | 0.98657  | 0.245008 | 8.21E-08 | 0.297311 | 5.51E-11 |
| 0.35416  | 0.01288  | 0.78132  | -0.02516 | 0.58757  | -0.01307 | 0.77817  | -0.03857 | 0.40569  |
| 0.79142  | 0.110503 | 0.0169   | 0.345698 | 1.48E-14 | 0.265691 | 5.50E-09 | 0.34729  | 1.10E-14 |
| 0.9676   | -0.15457 | 0.0008   | -0.2202  | 1.55E-06 | -0.09809 | 0.03407  | -0.16058 | 0.0005   |
| 0.03231  | 0.007437 | 0.87265  | 0.017413 | 0.70742  | -0.03045 | 0.51154  | -0.0382  | 0.41021  |
| 0.81666  | 0.037747 | 0.41574  | 0.01436  | 0.75694  | 0.052485 | 0.25765  | 0.135166 | 0.00343  |
| 0.35038  | -0.00574 | 0.90156  | 0.008618 | 0.85264  | -0.04022 | 0.38579  | 0.002433 | 0.95818  |
| 0.52967  | -0.00239 | 0.95898  | 0.03421  | 0.46081  | -0.00053 | 0.99083  | -0.0101  | 0.82766  |
| 0.34485  | -0.02889 | 0.53339  | 0.044192 | 0.34064  | -0.02825 | 0.54247  | -0.02471 | 0.59427  |
| 0.37516  | -0.03723 | 0.42218  | 0.088417 | 0.05622  | -0.02278 | 0.62346  | -0.00967 | 0.83496  |
| 0.53971  | 0.024936 | 0.59091  | 0.093941 | 0.04244  | 0.046373 | 0.31731  | 0.037747 | 0.41574  |
| 0.80399  | 0.014931 | 0.74759  | 0.035442 | 0.44481  | 0.045363 | 0.32799  | 0.061021 | 0.18805  |
| 0.02751  | 0.138693 | 0.00267  | 0.077748 | 0.09331  | 0.1166   | 0.01168  | 0.14791  | 0.00135  |
| 0.42488  | -0.0692  | 0.13539  | -0.07273 | 0.11654  | -0.05334 | 0.24998  | -0.14185 | 0.00212  |
| 0.49085  | -0.00672 | 0.88483  | 0.027264 | 0.55672  | 0.039893 | 0.38972  | 0.016268 | 0.72587  |
| 0.64429  | -0.02875 | 0.53535  | 0.025565 | 0.58159  | -0.05854 | 0.20671  | -0.04689 | 0.3119   |
| 0.88617  | 0.086851 | 0.06074  | -0.03685 | 0.42695  | 0.019826 | 0.66913  | 0.080428 | 0.08252  |
| 5.37E-06 | 0.062474 | 0.17773  | 0.033854 | 0.46548  | 0.019039 | 0.68153  | 0.030878 | 0.50564  |
| 0.52872  | -0.06815 | 0.14141  | -0.12328 | 0.00765  | -0.11161 | 0.01583  | -0.15855 | 0.00058  |
| 0.08026  | -0.02163 | 0.64097  | 0.05222  | 0.26007  | 0.001289 | 0.97784  | -0.0039  | 0.93294  |
| 0.98252  | -0.02607 | 0.57418  | -0.03169 | 0.49444  | -0.02714 | 0.55853  | -0.05048 | 0.27634  |
| 0.39677  | 0.022589 | 0.62633  | -0.01377 | 0.76663  | -0.00722 | 0.87634  | 0.007126 | 0.87794  |
| 0.21076  | -0.03616 | 0.43558  | 0.11089  | 0.01652  | 0.003136 | 0.94612  | 0.000113 | 0.99806  |
| 0.76537  | -0.00601 | 0.897    | -0.02398 | 0.60525  | -0.00652 | 0.88833  | -0.01062 | 0.81902  |
| 0.18082  | -0.00018 | 0.99683  | -0.04207 | 0.36441  | -0.01494 | 0.74738  | -0.04044 | 0.3833   |
| 0.32572  | 0.083549 | 0.07126  | -0.06754 | 0.145    | -0.033   | 0.47684  | 0.026442 | 0.56869  |
| 0.62656  | -0.00278 | 0.95222  | -0.06173 | 0.18294  | -0.00709 | 0.87863  | 0.037918 | 0.41363  |
| 4.99E-09 | 0.151188 | 0.00105  | -0.10339 | 0.02547  | 0.023653 | 0.61016  | 0.171791 | 0.00019  |
| 0.63659  | -0.03302 | 0.47661  | -0.06526 | 0.15916  | -0.10494 | 0.02333  | -0.09504 | 0.04007  |

|          |          |         |          |         |          |          |          |          |
|----------|----------|---------|----------|---------|----------|----------|----------|----------|
| 0.05184  | -0.02334 | 0.61496 | -0.053   | 0.25301 | -0.0906  | 0.05038  | -0.09162 | 0.04784  |
| 0.43814  | -0.04302 | 0.35361 | -0.13475 | 0.00353 | -0.13722 | 0.00296  | -0.15017 | 0.00113  |
| 0.11842  | 0.151291 | 0.00104 | 0.143405 | 0.00189 | 0.259582 | 1.25E-08 | 0.337159 | 7.05E-14 |
| 0.00959  | 0.131216 | 0.00451 | 0.006139 | 0.89473 | -0.00116 | 0.98008  | 0.092395 | 0.04598  |
| 0.08229  | -0.0404  | 0.38373 | 0.159469 | 0.00054 | 0.047021 | 0.31059  | 0.051577 | 0.26599  |
| 0.39834  | -0.04819 | 0.2987  | -0.11375 | 0.01391 | -0.09457 | 0.04108  | -0.12023 | 0.0093   |
| 0.98783  | -0.05208 | 0.26134 | -0.12341 | 0.00759 | -0.10164 | 0.02807  | -0.11605 | 0.01209  |
| 0.20211  | -0.03232 | 0.48601 | -0.04924 | 0.28831 | -0.06187 | 0.18194  | -0.09512 | 0.03991  |
| 1.01E-06 | -0.00431 | 0.92597 | 0.051978 | 0.26228 | 0.001721 | 0.97042  | 0.033337 | 0.47234  |
| 0.03029  | -0.08016 | 0.08355 | -0.09407 | 0.04217 | -0.13069 | 0.00467  | -0.12752 | 0.00579  |
| 0.5061   | 0.056744 | 0.22097 | 0.013798 | 0.76616 | 0.043748 | 0.34552  | 0.084555 | 0.06791  |
| 0.01133  | 0.021853 | 0.63761 | 0.019388 | 0.67602 | 0.063803 | 0.16867  | 0.101295 | 0.02861  |
| 0.2429   | -0.01229 | 0.79108 | 0.002771 | 0.95238 | -0.02183 | 0.63802  | -0.05079 | 0.27336  |
| 0.54149  | -0.01764 | 0.70373 | -0.16214 | 0.00044 | -0.0906  | 0.05038  | -0.08547 | 0.06499  |
| 0.69744  | 0.042248 | 0.36232 | 0.0596   | 0.19856 | -0.01769 | 0.70302  | 0.021926 | 0.6365   |
| 0.96956  | -0.05515 | 0.23426 | -0.01692 | 0.71541 | -0.13906 | 0.0026   | -0.13448 | 0.0036   |
| 0.87528  | 0.003733 | 0.93587 | -0.0804  | 0.08265 | -0.10034 | 0.03016  | -0.06805 | 0.14203  |
| 2.97E-07 | -0.04188 | 0.36653 | -0.11052 | 0.01688 | -0.17235 | 0.00018  | -0.14803 | 0.00134  |
| 0.54621  | -0.03497 | 0.45085 | 0.040795 | 0.37908 | 0.059508 | 0.19926  | 0.024811 | 0.59277  |
| 0.0458   | -0.03691 | 0.42615 | -0.02258 | 0.62649 | -0.05123 | 0.26924  | -0.0666  | 0.15072  |
| 0.76823  | -0.0045  | 0.92273 | 0.062171 | 0.17985 | 0.052665 | 0.25602  | 0.025286 | 0.58572  |
| 0.7456   | 0.003997 | 0.93135 | -0.03543 | 0.44499 | -0.07457 | 0.10755  | -0.00622 | 0.89336  |
| 0.99965  | -0.01208 | 0.79455 | 0.053214 | 0.2511  | -0.04656 | 0.3154   | -0.00103 | 0.98221  |
| 0.28299  | 0.047643 | 0.30423 | -0.03036 | 0.51277 | -0.03772 | 0.41613  | -0.01837 | 0.69216  |
| 0.68974  | -0.02153 | 0.64256 | 0.046442 | 0.3166  | 0.027875 | 0.54791  | -0.00443 | 0.9239   |
| 0.03895  | -0.0694  | 0.13428 | -0.09978 | 0.03109 | -0.1377  | 0.00286  | -0.14978 | 0.00117  |
| 0.807    | 0.030026 | 0.51745 | 0.093379 | 0.0437  | 0.031585 | 0.49593  | 0.10431  | 0.02418  |
| 0.34173  | -0.01845 | 0.69086 | 0.121202 | 0.00875 | 0.10056  | 0.0298   | 0.11466  | 0.01316  |
| 0.50509  | -0.0393  | 0.39682 | -0.06434 | 0.1651  | -0.06323 | 0.17252  | -0.0397  | 0.39198  |
| 0.90595  | 0.043612 | 0.34702 | -0.04036 | 0.38413 | -0.01559 | 0.73686  | 0.015375 | 0.74035  |
| 0.23292  | -0.03353 | 0.46974 | -0.1624  | 0.00043 | -0.04091 | 0.37778  | -0.01491 | 0.74785  |
| 0.54901  | -0.01597 | 0.73073 | -0.04627 | 0.31841 | -0.04369 | 0.3462   | -0.05399 | 0.24428  |
| 0.51748  | 0.020544 | 0.6579  | 0.127397 | 0.00583 | 0.00648  | 0.88894  | 0.027191 | 0.55779  |
| 5.41E-12 | 0.02049  | 0.65874 | -0.06001 | 0.19548 | -0.08315 | 0.07262  | -0.04686 | 0.31225  |
| 0.69196  | -0.01492 | 0.74785 | -0.11488 | 0.01299 | 0.014616 | 0.75274  | -0.01233 | 0.79049  |
| 5.23E-12 | 0.068299 | 0.14056 | 0.07132  | 0.12379 | 0.068054 | 0.14199  | 0.045689 | 0.32452  |
| 0.48812  | -0.03331 | 0.47275 | 0.028344 | 0.5412  | 0.042561 | 0.35877  | 0.015039 | 0.74583  |
| 0.00013  | -0.03413 | 0.46185 | 0.023062 | 0.61911 | -0.01658 | 0.72075  | -0.02295 | 0.62082  |
| 4.99E-07 | -0.01236 | 0.78986 | -0.0104  | 0.82259 | -0.04654 | 0.31558  | -0.00267 | 0.95404  |
| 0.72772  | -0.04489 | 0.33301 | -0.13121 | 0.00451 | -0.11656 | 0.01171  | -0.11768 | 0.01092  |
| 0.07453  | -0.00158 | 0.97286 | -0.06517 | 0.15974 | -0.06048 | 0.19203  | -0.0246  | 0.59587  |
| 0.79196  | 0.006526 | 0.88815 | 0.034221 | 0.46067 | 0.042583 | 0.35853  | 0.063658 | 0.16964  |
| 0.82275  | 0.079667 | 0.08548 | 0.026338 | 0.57021 | -0.01    | 0.82941  | 0.041309 | 0.3731   |
| 0.00175  | 0.131201 | 0.00451 | 0.089271 | 0.05387 | 0.147063 | 0.00144  | 0.200167 | 1.31E-05 |
| 0.75401  | 0.006    | 0.8971  | -0.04716 | 0.30917 | 0.02927  | 0.52806  | 0.011103 | 0.81086  |

|          |          |          |          |          |          |          |          |         |
|----------|----------|----------|----------|----------|----------|----------|----------|---------|
| 0.12338  | 0.017464 | 0.70661  | -0.01029 | 0.82452  | 0.033859 | 0.46542  | 0.041861 | 0.36674 |
| 6.16E-14 | 0.034343 | 0.45907  | -0.06073 | 0.1902   | -0.05145 | 0.26713  | 0.030817 | 0.50648 |
| 0.06439  | -0.00277 | 0.95241  | 0.005985 | 0.89737  | 0.011611 | 0.8024   | -0.01978 | 0.66988 |
| 0.71475  | 0.027849 | 0.54829  | 0.066789 | 0.14956  | -0.03389 | 0.46507  | -0.06195 | 0.18142 |
| 0.79502  | -0.01716 | 0.71153  | -0.0177  | 0.70288  | 0.029014 | 0.53168  | -0.00251 | 0.95683 |
| 0.50108  | -0.02524 | 0.58638  | -0.02196 | 0.63604  | -0.06972 | 0.13249  | -0.06171 | 0.18307 |
| 0.00993  | 0.057723 | 0.21309  | 0.100444 | 0.02999  | 0.109936 | 0.01747  | 0.170288 | 0.00022 |
| 0.32364  | 0.091423 | 0.04832  | 0.083182 | 0.07251  | 0.043579 | 0.34739  | 0.054496 | 0.23984 |
| 0.94655  | 0.000587 | 0.9899   | 0.007395 | 0.87337  | 0.033719 | 0.46727  | -0.01035 | 0.82345 |
| 0.66994  | -0.01894 | 0.68305  | 0.053096 | 0.25214  | 0.021757 | 0.63909  | 0.032303 | 0.48619 |
| 0.35545  | -0.04459 | 0.33634  | -0.00455 | 0.92195  | -0.10047 | 0.02994  | -0.09289 | 0.04481 |
| 0.8773   | -0.0594  | 0.20007  | -0.14527 | 0.00165  | -0.11672 | 0.01159  | -0.11708 | 0.01134 |
| 0.73602  | -0.0167  | 0.71881  | 0.027051 | 0.55982  | -0.03749 | 0.41892  | -0.01848 | 0.69039 |
| 0.23827  | 0.191125 | 3.22E-05 | -0.19756 | 1.71E-05 | -0.01097 | 0.81312  | 0.102721 | 0.02644 |
| 0.06201  | -0.00421 | 0.92763  | 0.011297 | 0.80763  | -0.03544 | 0.44489  | -0.0465  | 0.31604 |
| 0.7729   | -0.02043 | 0.65968  | 0.01957  | 0.67316  | -0.06032 | 0.19316  | -0.04667 | 0.31419 |
| 0.00021  | 0.135679 | 0.00331  | -0.06272 | 0.17605  | 0.033596 | 0.4689   | 0.122711 | 0.00794 |
| 0.06525  | -0.04    | 0.38849  | 0.029749 | 0.52133  | -0.02265 | 0.62536  | -0.02267 | 0.62503 |
| 0.96702  | -0.02091 | 0.65215  | -0.02015 | 0.66403  | 0.019274 | 0.67782  | -0.02213 | 0.6333  |
| 0.67491  | -0.02652 | 0.56751  | -0.03274 | 0.48032  | -0.06848 | 0.13953  | -0.03303 | 0.47645 |
| 0.02559  | -0.00491 | 0.91568  | 0.021135 | 0.64871  | -0.06482 | 0.162    | 0.01479  | 0.74989 |
| 0.34122  | 0.010346 | 0.82355  | 0.010599 | 0.81931  | 0.000872 | 0.985    | 0.057259 | 0.2168  |
| 0.31729  | -0.0319  | 0.49167  | -0.07059 | 0.12771  | -0.03899 | 0.40059  | -0.0156  | 0.7367  |
| 0.14495  | 0.176296 | 0.00013  | -0.06272 | 0.176    | 0.079144 | 0.08756  | 0.164341 | 0.00036 |
| 0.90538  | -0.02199 | 0.63555  | -0.17311 | 0.00017  | -0.17528 | 0.00014  | -0.15376 | 0.00086 |
| 0.59135  | -0.01729 | 0.70936  | -0.00701 | 0.87992  | -0.01193 | 0.79708  | -0.04444 | 0.33797 |
| 0.39532  | -0.04605 | 0.32068  | 0.104509 | 0.02391  | -0.03215 | 0.48822  | -0.00531 | 0.90889 |
| 0.60328  | 0.076708 | 0.09779  | -0.00751 | 0.87136  | 0.029806 | 0.52053  | 0.047118 | 0.3096  |
| 5.51E-10 | -0.00447 | 0.92332  | -0.16147 | 0.00046  | -0.18944 | 3.78E-05 | -0.15919 | 0.00055 |
| 0.17459  | -0.02926 | 0.52818  | -0.09549 | 0.03913  | -0.08256 | 0.07469  | -0.08201 | 0.07664 |
| 0.27286  | 0.05075  | 0.27374  | 0.053374 | 0.24967  | 0.173235 | 0.00017  | 0.089143 | 0.05422 |
| 0.00674  | 0.14386  | 0.00183  | -0.06902 | 0.1364   | 0.0509   | 0.27232  | 0.178327 | 0.00011 |
| 0.77679  | -0.01319 | 0.77626  | -0.01793 | 0.69916  | -0.05537 | 0.2324   | -0.02955 | 0.52417 |
| 0.63083  | 0.012208 | 0.79246  | -0.11771 | 0.01091  | -0.0684  | 0.13999  | -0.04759 | 0.30476 |
| 0.00333  | -0.03101 | 0.50377  | -0.03404 | 0.46298  | 0.082357 | 0.0754   | -0.02256 | 0.62683 |
| 0.01663  | 0.001942 | 0.96662  | 0.044343 | 0.33899  | 0.007124 | 0.87798  | 0.047152 | 0.30925 |
| 7.17E-07 | 0.009212 | 0.84262  | -0.17217 | 0.00019  | -0.10286 | 0.02624  | -0.11684 | 0.01151 |
| 0.54776  | -0.04089 | 0.37797  | -0.06233 | 0.17871  | -0.12182 | 0.00841  | -0.09706 | 0.03601 |
| 0.85035  | -0.03359 | 0.46892  | 0.048468 | 0.29593  | 0.056514 | 0.22285  | 0.031998 | 0.49031 |
| 0.98577  | 0.035686 | 0.44168  | 0.035077 | 0.44952  | 0.092565 | 0.04558  | 0.149568 | 0.00119 |
| 0.40755  | 0.006334 | 0.89142  | 0.030789 | 0.50687  | -0.01883 | 0.68479  | -0.0463  | 0.3181  |
| 0.70558  | -0.09643 | 0.03725  | -0.02599 | 0.57525  | -0.14909 | 0.00123  | -0.15344 | 0.00088 |
| 0.90423  | -0.00054 | 0.99079  | 0.044397 | 0.3384   | 0.051359 | 0.26802  | 0.057342 | 0.21613 |
| 0.0243   | -0.04397 | 0.34311  | -0.17993 | 9.23E-05 | -0.17548 | 0.00014  | -0.16571 | 0.00032 |
| 4.29E-07 | 0.043589 | 0.34727  | -0.02342 | 0.61365  | 0.076794 | 0.09741  | 0.080223 | 0.08331 |

|          |          |          |          |          |          |          |          |          |
|----------|----------|----------|----------|----------|----------|----------|----------|----------|
| 0.82376  | -0.02274 | 0.62403  | -0.02094 | 0.65166  | -0.02893 | 0.53282  | -0.01358 | 0.76971  |
| 0.43424  | 0.082827 | 0.07375  | 0.05503  | 0.23526  | 0.085158 | 0.06596  | 0.161311 | 0.00047  |
| 6.72E-05 | 0.008316 | 0.85776  | 0.019646 | 0.67196  | 0.011013 | 0.81237  | 0.012714 | 0.78407  |
| 0.93307  | 0.004563 | 0.92166  | 0.037041 | 0.42452  | 0.059686 | 0.19792  | 0.040255 | 0.38542  |
| 0.98667  | 0.00924  | 0.84215  | -0.09376 | 0.04285  | -0.12826 | 0.00551  | -0.08566 | 0.06437  |
| 0.0935   | -0.05411 | 0.2432   | 0.032325 | 0.4859   | -0.09082 | 0.04983  | -0.0875  | 0.05885  |
| 0.15601  | 0.052509 | 0.25743  | -0.02922 | 0.52879  | 0.024721 | 0.59411  | 0.122781 | 0.0079   |
| 0.49619  | -0.04303 | 0.35344  | -0.04595 | 0.32177  | -0.01585 | 0.73261  | -0.0269  | 0.562    |
| 0.00347  | 0.048021 | 0.3004   | -0.07017 | 0.12996  | -0.09808 | 0.03409  | -0.06209 | 0.18043  |
| 5.79E-05 | 0.009627 | 0.83563  | 0.038135 | 0.41097  | -0.0477  | 0.3037   | 0.061041 | 0.18791  |
| 0.80305  | -0.00525 | 0.90983  | -0.07381 | 0.11116  | -0.00124 | 0.97864  | -0.02794 | 0.547    |
| 3.03E-05 | 0.064364 | 0.16494  | -0.01297 | 0.77984  | 0.056078 | 0.22644  | 0.043128 | 0.3524   |
| 0.36869  | 0.063102 | 0.1734   | -0.04724 | 0.30834  | -0.01991 | 0.66775  | -0.04312 | 0.35253  |
| 0.04148  | 0.042794 | 0.35615  | -0.08469 | 0.06746  | -0.03766 | 0.41686  | -0.05182 | 0.26372  |
| 0.50368  | 0.043507 | 0.34818  | 0.065936 | 0.15485  | 0.0738   | 0.11122  | 0.127263 | 0.00589  |
| 0.92634  | 0.03955  | 0.39381  | -0.07409 | 0.10983  | -0.03785 | 0.41444  | 0.026602 | 0.56636  |
| 0.13511  | 0.002096 | 0.96397  | -0.13969 | 0.00248  | -0.13241 | 0.00415  | -0.05674 | 0.22099  |
| 0.74795  | -0.03192 | 0.4914   | -0.05708 | 0.21826  | -0.04605 | 0.32069  | -0.05262 | 0.25645  |
| 0.93536  | 0.01735  | 0.70843  | 0.01396  | 0.7635   | -0.0161  | 0.72852  | -0.01364 | 0.76882  |
| 0.91243  | -0.06081 | 0.1896   | -0.1432  | 0.00192  | -0.06783 | 0.14331  | -0.11359 | 0.01404  |
| 0.00197  | 0.118176 | 0.01059  | 0.237687 | 2.02E-07 | 0.29674  | 6.01E-11 | 0.339859 | 4.33E-14 |
| 2.88E-05 | 0.010269 | 0.82485  | -0.19561 | 2.07E-05 | -0.16674 | 0.0003   | -0.0985  | 0.03333  |
| 6.07E-06 | -0.25932 | 1.30E-08 | 0.011487 | 0.80445  | -0.16138 | 0.00046  | -0.31303 | 4.48E-12 |
| 1.79E-06 | -0.01519 | 0.7433   | -0.22375 | 1.04E-06 | -0.11089 | 0.01651  | -0.12374 | 0.00742  |
| 0.81945  | 0.025934 | 0.57614  | -0.14439 | 0.00176  | 0.037482 | 0.41903  | 0.081459 | 0.07865  |
| 0.04758  | 0.058608 | 0.20615  | 0.011112 | 0.81072  | -0.0007  | 0.98793  | 0.021372 | 0.64504  |
| 0.0056   | 0.131335 | 0.00447  | -0.02443 | 0.59851  | 0.015877 | 0.7322   | 0.062417 | 0.17813  |
| 0.60898  | 0.043376 | 0.34964  | 0.08888  | 0.05494  | 0.008386 | 0.85658  | 0.02993  | 0.5188   |
| 0.2786   | 0.032804 | 0.47945  | -0.07921 | 0.0873   | -0.112   | 0.01546  | -0.08257 | 0.07466  |
| 5.58E-13 | 0.025797 | 0.57815  | 0.013853 | 0.76527  | -0.01597 | 0.73067  | 0.012822 | 0.78227  |
| 0.1721   | 0.053155 | 0.25162  | 0.146566 | 0.00149  | 0.001069 | 0.98162  | 0.035509 | 0.44395  |
| 0.05974  | -0.02447 | 0.59791  | 0.103699 | 0.02503  | 0.178918 | 0.0001   | 0.17004  | 0.00022  |
| 4.92E-06 | -0.08323 | 0.07236  | 0.077121 | 0.09599  | -0.00017 | 0.99704  | 0.052668 | 0.25599  |
| 0.16653  | 0.085047 | 0.06631  | 0.022771 | 0.62354  | 0.096012 | 0.03807  | 0.152312 | 0.00096  |
| 0.22824  | -0.02699 | 0.56074  | 0.043734 | 0.34567  | 0.016541 | 0.72146  | -0.06224 | 0.1794   |
| 0.31389  | 0.006045 | 0.89634  | -0.05689 | 0.21976  | -0.04898 | 0.29088  | -0.05257 | 0.25684  |
| 0.52803  | 0.00325  | 0.94415  | -0.00217 | 0.96263  | -0.03985 | 0.39025  | -0.03185 | 0.4923   |
| 0.92047  | 0.091897 | 0.04717  | 0.036777 | 0.42784  | 0.021905 | 0.63682  | 0.07319  | 0.11422  |
| 8.48E-06 | -0.09539 | 0.03935  | 0.224124 | 9.94E-07 | -0.0829  | 0.07348  | -0.18875 | 4.04E-05 |
| 0.39414  | -0.112   | 0.01545  | -0.01513 | 0.74441  | 0.013943 | 0.76379  | -0.12245 | 0.00807  |
| 1.18E-05 | -0.12519 | 0.00675  | -0.09471 | 0.04076  | -0.13515 | 0.00343  | -0.22544 | 8.55E-07 |
| 0.00035  | -0.09526 | 0.03961  | -0.04556 | 0.32588  | -0.01868 | 0.68724  | -0.00252 | 0.95667  |
| 0.0308   | -0.07008 | 0.13046  | 0.22044  | 1.51E-06 | 0.199639 | 1.38E-05 | 0.101534 | 0.02824  |
| 0.35981  | 0.019667 | 0.67163  | 0.07335  | 0.11342  | -0.0274  | 0.55482  | -0.00948 | 0.83807  |
| 0.78608  | 0.013376 | 0.77312  | -0.07643 | 0.09901  | -0.09799 | 0.03426  | -0.11826 | 0.01054  |

|          |          |          |          |          |          |          |          |          |
|----------|----------|----------|----------|----------|----------|----------|----------|----------|
| 0.00602  | 0.182293 | 7.43E-05 | 0.030194 | 0.51511  | 0.21343  | 3.26E-06 | 0.310898 | 6.35E-12 |
| 0.00024  | 0.126147 | 0.00634  | 0.020819 | 0.65361  | 0.083062 | 0.07293  | 0.222524 | 1.19E-06 |
| 0.65346  | 0.020181 | 0.66358  | 0.038311 | 0.40881  | 0.037354 | 0.42062  | 0.072017 | 0.12015  |
| 0.11054  | 0.086602 | 0.06148  | -0.17355 | 0.00016  | -0.12757 | 0.00577  | -0.02973 | 0.52159  |
| 0.04694  | -0.05832 | 0.20836  | 0.061386 | 0.18542  | -0.05611 | 0.22617  | -0.10806 | 0.0195   |
| 0.06857  | -0.2132  | 3.34E-06 | -0.23641 | 2.36E-07 | -0.26241 | 8.58E-09 | -0.30553 | 1.51E-11 |
| 0.00514  | -0.08593 | 0.06352  | 0.020328 | 0.66128  | 0.025761 | 0.5787   | -0.07837 | 0.0907   |
| 0.00016  | -0.15572 | 0.00073  | -0.04457 | 0.33651  | 0.03624  | 0.43462  | -0.07198 | 0.12035  |
| 0.96108  | 2.45E-05 | 0.99958  | -0.20066 | 1.25E-05 | -0.13536 | 0.00338  | -0.07743 | 0.09468  |
| 7.32E-07 | -0.08403 | 0.06962  | -0.06101 | 0.18811  | 0.013749 | 0.76698  | -0.09674 | 0.03663  |
| 0.03159  | -0.08994 | 0.05209  | 0.124938 | 0.00687  | -0.06437 | 0.16494  | -0.10892 | 0.01854  |
| 0.82575  | 0.079287 | 0.08699  | 0.077583 | 0.09401  | 0.069656 | 0.13282  | 0.06363  | 0.16982  |
| 0.07909  | -0.17295 | 0.00017  | -0.18398 | 6.35E-05 | -0.08924 | 0.05397  | -0.29228 | 1.19E-10 |
| 0.91532  | -0.1359  | 0.00325  | -0.14952 | 0.00119  | -0.07387 | 0.11089  | -0.25146 | 3.63E-08 |
| 0.11424  | -0.1063  | 0.02159  | -0.14751 | 0.00139  | -0.04166 | 0.36904  | -0.19896 | 1.48E-05 |
| 0.30506  | -0.08609 | 0.06305  | -0.15074 | 0.00109  | -0.02718 | 0.55799  | -0.17335 | 0.00017  |
| 7.90E-08 | -0.06237 | 0.17845  | -0.04593 | 0.322    | -0.10881 | 0.01867  | -0.07176 | 0.12147  |
| 0.00015  | 0.10248  | 0.02679  | -0.00243 | 0.9582   | 0.086689 | 0.06122  | 0.114021 | 0.01368  |
| 0.14616  | 0.003691 | 0.93659  | -0.12647 | 0.00621  | -0.10409 | 0.02448  | -0.08842 | 0.05621  |
| 0.96744  | 0.006453 | 0.88938  | -0.0018  | 0.96909  | -0.02656 | 0.567    | -0.00717 | 0.87711  |
| 0.00195  | 0.035677 | 0.44179  | 0.023163 | 0.61758  | -0.07712 | 0.09598  | -0.01634 | 0.72473  |
| 0.38281  | -0.01355 | 0.77027  | 0.13307  | 0.00397  | 0.089553 | 0.05312  | 0.18154  | 7.97E-05 |
| 0.01389  | -0.01018 | 0.82627  | -0.05638 | 0.22395  | 0.042945 | 0.35445  | 0.175484 | 0.00014  |
| 0.80853  | 0.044724 | 0.33485  | 0.489536 | 1.63E-29 | 0.350856 | 5.65E-15 | 0.305551 | 1.51E-11 |
| 0.59942  | 0.117304 | 0.01118  | 0.092874 | 0.04486  | -0.08464 | 0.06762  | 0.062173 | 0.17983  |
| 3.57E-06 | -0.17215 | 0.00019  | -0.14822 | 0.00132  | -0.2475  | 6.00E-08 | -0.31465 | 3.43E-12 |
| 0.01248  | -0.03491 | 0.45162  | -0.07674 | 0.09766  | -0.12131 | 0.00868  | -0.08109 | 0.08002  |
| 0.88196  | -0.03226 | 0.48683  | -0.16446 | 0.00036  | -0.13728 | 0.00295  | -0.136   | 0.00323  |
| 0.18     | 0.154274 | 0.00082  | 0.162464 | 0.00042  | 0.225575 | 8.42E-07 | 0.218803 | 1.81E-06 |
| 0.00387  | 0.034221 | 0.46067  | 0.083944 | 0.06993  | -0.00779 | 0.8666   | -0.02071 | 0.65533  |
| 0.50955  | -0.09004 | 0.05183  | -0.2388  | 1.77E-07 | -0.14909 | 0.00123  | -0.15716 | 0.00065  |
| 0.37675  | 0.119487 | 0.00975  | 0.058695 | 0.20548  | 0.124427 | 0.0071   | 0.172584 | 0.00018  |
| 0.00127  | -0.17386 | 0.00016  | 0.092197 | 0.04645  | -0.00742 | 0.87292  | -0.20912 | 5.18E-06 |
| 0.52014  | -0.07051 | 0.1281   | 0.208232 | 5.69E-06 | -0.01916 | 0.67969  | 0.021393 | 0.64471  |
| 1.02E-14 | -0.20606 | 7.14E-06 | -0.11162 | 0.01581  | -0.09156 | 0.04798  | -0.28691 | 2.67E-10 |
| 0.78836  | 0.079659 | 0.08551  | -0.08694 | 0.06048  | -0.08146 | 0.07867  | -0.00891 | 0.8478   |
| 3.46E-05 | 0.073326 | 0.11354  | -0.09176 | 0.0475   | -0.0563  | 0.2246   | -0.12594 | 0.00643  |
| 0.86559  | 0.145329 | 0.00164  | 0.127298 | 0.00587  | 0.007457 | 0.87232  | 0.113474 | 0.01415  |
| 1.49E-06 | -0.06653 | 0.15118  | 0.026275 | 0.57114  | -0.08799 | 0.05743  | -0.12155 | 0.00855  |
| 0.31238  | 0.08726  | 0.05953  | 0.290263 | 1.62E-10 | 0.179622 | 9.50E-05 | 0.208734 | 5.39E-06 |
| 0.19205  | 0.050472 | 0.27638  | 0.123323 | 0.00763  | 0.038954 | 0.40098  | 0.063142 | 0.17313  |
| 0.25602  | 0.025798 | 0.57814  | 0.190747 | 3.34E-05 | 0.132644 | 0.00409  | 0.185528 | 5.49E-05 |
| 0.61399  | 0.018251 | 0.69403  | -0.16903 | 0.00024  | -0.10171 | 0.02797  | -0.06994 | 0.13125  |
| 0.77976  | 0.003724 | 0.93603  | -0.16819 | 0.00026  | -0.10309 | 0.0259   | -0.06706 | 0.14793  |
| 0.34284  | -0.06982 | 0.1319   | -0.19411 | 2.40E-05 | -0.11726 | 0.01122  | -0.15531 | 0.00076  |



|          |          |          |           |          |          |          |          |          |
|----------|----------|----------|-----------|----------|----------|----------|----------|----------|
| 0.06182  | 0.013019 | 0.77902  | 0.023803  | 0.6079   | -0.05074 | 0.27387  | -0.03839 | 0.40788  |
| 0.21097  | 0.109247 | 0.0182   | 0.077694  | 0.09354  | 0.03352  | 0.4699   | 0.044736 | 0.33472  |
| 2.93E-06 | -0.0118  | 0.79922  | 0.083536  | 0.0713   | 0.125866 | 0.00646  | 0.042266 | 0.36211  |
| 0.08986  | 0.144649 | 0.00172  | 0.126762  | 0.00609  | 0.171843 | 0.00019  | 0.229137 | 5.58E-07 |
| 0.09267  | 0.13364  | 0.00381  | -4.75E-06 | 0.99992  | -0.03462 | 0.45546  | 0.071749 | 0.12154  |
| 0.0023   | 0.174543 | 0.00015  | 0.224034  | 1.00E-06 | 0.123599 | 0.00749  | 0.265255 | 5.83E-09 |
| 2.54E-15 | 0.138987 | 0.00261  | -0.0091   | 0.84445  | -0.04131 | 0.37313  | 0.109632 | 0.01779  |
| 3.14E-07 | 0.062475 | 0.17773  | 0.089139  | 0.05423  | 0.005727 | 0.90177  | 0.081838 | 0.07727  |
| 0.7578   | 0.102262 | 0.02712  | -0.26052  | 1.10E-08 | -0.07482 | 0.10635  | 0.020121 | 0.66451  |
| 0.86391  | 0.029571 | 0.52383  | -0.05101  | 0.27133  | 0.051871 | 0.26327  | 0.040883 | 0.37805  |
| 0.00366  | 0.088535 | 0.05589  | -0.02481  | 0.59276  | -0.04531 | 0.32852  | 0.034211 | 0.4608   |
| 3.78E-05 | 0.1171   | 0.01133  | 0.012112  | 0.79405  | -0.03662 | 0.4298   | 0.023156 | 0.61769  |
| 0.01494  | 0.047328 | 0.30744  | 0.020604  | 0.65697  | -0.04264 | 0.35792  | -0.02882 | 0.53437  |
| 0.75451  | -0.03399 | 0.46365  | 0.251753  | 3.49E-08 | 0.20986  | 4.79E-06 | 0.232885 | 3.59E-07 |
| 1.29E-11 | 0.032207 | 0.48749  | 0.008022  | 0.86274  | -0.1288  | 0.00531  | -0.02948 | 0.52507  |
| 0.47341  | -0.09662 | 0.03686  | -0.11424  | 0.0135   | -0.25825 | 1.49E-08 | -0.2138  | 3.13E-06 |
| 0.53985  | -0.19132 | 3.16E-05 | -0.28755  | 2.43E-10 | -0.19516 | 2.17E-05 | -0.27969 | 7.70E-10 |
| 0.05553  | -0.15123 | 0.00104  | -0.02422  | 0.60165  | -0.07329 | 0.11372  | -0.20657 | 6.77E-06 |
| 1.19E-08 | -0.08607 | 0.0631   | -0.04321  | 0.35144  | -0.13864 | 0.00268  | -0.14965 | 0.00118  |
| 0.07518  | 0.032672 | 0.48121  | 0.225051  | 8.95E-07 | -0.0086  | 0.85287  | 0.102927 | 0.02613  |
| 0.16216  | 0.033171 | 0.47454  | 0.090284  | 0.0512   | 0.04238  | 0.36082  | 0.127091 | 0.00595  |
| 0.29581  | 0.011831 | 0.79872  | 0.023845  | 0.60726  | -0.07683 | 0.09724  | -0.02049 | 0.65871  |
| 1.61E-05 | 0.000547 | 0.99059  | 0.036927  | 0.42595  | 0.007452 | 0.8724   | 0.116418 | 0.01181  |
| 0.01945  | -0.13506 | 0.00345  | -0.1657   | 0.00032  | -0.08049 | 0.08227  | -0.20092 | 1.21E-05 |
| 0.5536   | -0.1993  | 1.43E-05 | 0.07303   | 0.11501  | -0.13419 | 0.00367  | -0.22015 | 1.56E-06 |
| 0.47623  | -0.00301 | 0.94823  | -0.06348  | 0.17083  | -0.0968  | 0.03651  | -0.08121 | 0.07958  |
| 0.08537  | 0.192489 | 2.82E-05 | 0.110246  | 0.01716  | 0.234565 | 2.94E-07 | 0.272226 | 2.23E-09 |
| 0.0058   | 0.061352 | 0.18566  | 0.078623  | 0.08967  | 0.118562 | 0.01034  | 0.107201 | 0.0205   |
| 9.42E-05 | 0.114871 | 0.01299  | -0.07612  | 0.1004   | -0.09602 | 0.03807  | 0.02896  | 0.53244  |
| 0.28406  | -0.05243 | 0.25819  | 0.153412  | 0.00088  | -0.02741 | 0.55459  | -0.02759 | 0.55198  |
| 0.01301  | 0.023087 | 0.61874  | 0.06178   | 0.18261  | 0.110847 | 0.01656  | 0.146536 | 0.0015   |
| 0.02369  | -0.2492  | 4.84E-08 | 0.055963  | 0.22741  | -0.06028 | 0.1935   | -0.15507 | 0.00077  |
| 0.44047  | 0.018618 | 0.68821  | -0.09404  | 0.04222  | -0.18881 | 4.02E-05 | -0.07674 | 0.09763  |
| 0.18601  | 0.095698 | 0.03871  | -0.0877   | 0.05826  | -0.16908 | 0.00024  | -0.09304 | 0.04447  |
| 0.48056  | 0.010864 | 0.81487  | 0.190393  | 3.45E-05 | 0.028885 | 0.53351  | 0.045802 | 0.32332  |
| 7.35E-06 | 0.057451 | 0.21526  | 0.197042  | 1.80E-05 | 0.113869 | 0.01381  | 0.203112 | 9.70E-06 |
| 0.81786  | 0.162593 | 0.00042  | 0.123139  | 0.00772  | 0.166592 | 0.0003   | 0.312    | 5.30E-12 |
| 0.00177  | 0.43869  | 2.18E-23 | -0.01868  | 0.68723  | 0.093488 | 0.04346  | 0.300345 | 3.43E-11 |
| 0.44798  | 0.021362 | 0.6452   | 0.335601  | 9.33E-14 | 0.051054 | 0.27088  | -0.03923 | 0.39769  |
| 0.00044  | 0.041096 | 0.37557  | -0.01037  | 0.82308  | -0.01808 | 0.69675  | -0.01515 | 0.74401  |
| 0.28192  | -0.00917 | 0.84329  | -0.05192  | 0.26279  | -0.08798 | 0.05746  | -0.08202 | 0.07661  |
| 4.63E-08 | -0.03482 | 0.4529   | -0.04818  | 0.29878  | -0.17481 | 0.00015  | -0.15482 | 0.00079  |
| 6.21E-05 | -0.00829 | 0.85812  | 0.201493  | 1.15E-05 | 0.092173 | 0.04651  | 0.045866 | 0.32265  |
| 1.50E-05 | 0.047709 | 0.30357  | -0.03411  | 0.46206  | -0.05443 | 0.24042  | -0.02799 | 0.54629  |
| 0.32401  | 0.198009 | 1.63E-05 | 0.23745   | 2.08E-07 | 0.218495 | 1.87E-06 | 0.380242 | 1.64E-17 |

|          |          |          |          |          |          |          |          |          |
|----------|----------|----------|----------|----------|----------|----------|----------|----------|
| 0.42842  | 0.02196  | 0.63597  | 0.1228   | 0.00789  | 0.109086 | 0.01837  | 0.071446 | 0.12312  |
| 0.63827  | -0.01284 | 0.78202  | 0.00194  | 0.96664  | -0.01894 | 0.68315  | 0.034905 | 0.45174  |
| 0.00037  | 0.221657 | 1.31E-06 | -0.09982 | 0.03103  | -0.03926 | 0.39728  | 0.05728  | 0.21663  |
| 0.66133  | -0.0242  | 0.60195  | -0.05292 | 0.25373  | -0.03496 | 0.45103  | -0.03607 | 0.43677  |
| 0.04228  | -0.20298 | 9.84E-06 | 0.092889 | 0.04482  | 0.07121  | 0.12437  | -0.18967 | 3.70E-05 |
| 0.03668  | 0.070131 | 0.13019  | 0.070179 | 0.12993  | 0.023371 | 0.61442  | 0.035553 | 0.44338  |
| 0.6368   | -0.02195 | 0.63615  | 0.054495 | 0.23985  | 0.065247 | 0.15921  | -0.03661 | 0.42989  |
| 0.13249  | -0.00499 | 0.91441  | 0.114289 | 0.01346  | 0.069449 | 0.13398  | 0.002868 | 0.95071  |
| 0.14093  | 0.016234 | 0.72641  | 0.162672 | 0.00042  | 0.109109 | 0.01834  | 0.069368 | 0.13443  |
| 0.14768  | -0.14558 | 0.00161  | -0.09717 | 0.0358   | -0.01766 | 0.70354  | -0.20845 | 5.56E-06 |
| 0.00027  | 0.02867  | 0.53655  | -0.00889 | 0.84814  | 0.02121  | 0.64754  | 0.018032 | 0.69752  |
| 0.8857   | -0.0557  | 0.22956  | -0.00902 | 0.84586  | -0.0408  | 0.37902  | -0.09183 | 0.04734  |
| 0.66936  | -0.03604 | 0.43719  | -0.03357 | 0.46918  | -0.0546  | 0.23897  | -0.08242 | 0.07518  |
| 0.15256  | -0.01855 | 0.68933  | 0.043685 | 0.34621  | -0.04182 | 0.36722  | -0.03759 | 0.41764  |
| 0.05142  | -0.03597 | 0.43804  | 0.320271 | 1.34E-12 | 0.17394  | 0.00016  | 0.090201 | 0.05141  |
| 0.11135  | 0.082568 | 0.07465  | 0.053712 | 0.24668  | 0.114186 | 0.01355  | 0.030719 | 0.50782  |
| 0.4457   | 0.124853 | 0.0069   | 0.203051 | 9.76E-06 | 0.259347 | 1.29E-08 | 0.33433  | 1.17E-13 |
| 0.01306  | 0.044952 | 0.33239  | -0.06806 | 0.14196  | 0.040326 | 0.38459  | 0.029684 | 0.52224  |
| 0.09979  | 0.062871 | 0.17498  | -0.11693 | 0.01144  | -0.15463 | 0.0008   | -0.20036 | 1.29E-05 |
| 4.35E-05 | -0.12283 | 0.00788  | -0.11543 | 0.01255  | -0.21723 | 2.15E-06 | -0.18269 | 7.16E-05 |
| 6.52E-08 | 0.092876 | 0.04485  | 0.076504 | 0.09869  | 0.006801 | 0.88347  | 0.052831 | 0.25453  |
| 0.07135  | -0.1491  | 0.00123  | 0.061018 | 0.18807  | -0.06538 | 0.15835  | -0.1124  | 0.01509  |
| 2.83E-11 | -0.09586 | 0.03838  | -0.16201 | 0.00044  | -0.20021 | 1.31E-05 | -0.23418 | 3.08E-07 |
| 0.39733  | 0.00958  | 0.83642  | 0.3158   | 2.83E-12 | 0.037925 | 0.41355  | 0.092386 | 0.046    |
| 0.54462  | 0.104482 | 0.02395  | 0.266599 | 4.85E-09 | 0.223404 | 1.08E-06 | 0.320378 | 1.32E-12 |
| 0.0075   | 0.075578 | 0.10285  | -0.06699 | 0.14835  | -0.02312 | 0.61817  | 0.064916 | 0.16134  |
| 0.10064  | -0.1427  | 0.00199  | -0.08277 | 0.07394  | -0.01871 | 0.6867   | -0.22513 | 8.86E-07 |
| 0.92168  | 0.011746 | 0.80014  | 0.067308 | 0.14642  | 0.002597 | 0.95537  | -0.01231 | 0.79069  |
| 1.76E-07 | 0.008009 | 0.86296  | 0.016084 | 0.72883  | -0.04875 | 0.2931   | -0.01642 | 0.7234   |
| 0.05417  | -0.02265 | 0.62533  | -0.02646 | 0.56838  | -0.03747 | 0.41917  | -0.08538 | 0.06527  |
| 0.4413   | -0.00053 | 0.9909   | -0.00294 | 0.94955  | -0.01099 | 0.81276  | -0.04636 | 0.31747  |
| 0.01367  | 0.036035 | 0.43722  | -0.00615 | 0.8946   | -0.04852 | 0.29538  | 0.005209 | 0.91061  |
| 0.51568  | -0.02153 | 0.64261  | -0.17038 | 0.00022  | -0.07751 | 0.0943   | -0.03894 | 0.40112  |
| 0.06071  | -0.0191  | 0.68054  | -0.1585  | 0.00059  | -0.21481 | 2.81E-06 | -0.15669 | 0.00068  |
| 0.00967  | 0.116852 | 0.0115   | 0.144346 | 0.00176  | 0.184207 | 6.22E-05 | 0.241781 | 1.23E-07 |
| 0.00073  | 0.109508 | 0.01792  | -0.03909 | 0.39934  | 0.006337 | 0.89136  | 0.18329  | 6.77E-05 |
| 0.00034  | 0.233991 | 3.15E-07 | 0.256345 | 1.92E-08 | 0.283077 | 4.70E-10 | 0.26164  | 9.51E-09 |
| 0.00349  | -0.07322 | 0.11407  | -0.17135 | 0.0002   | -0.12577 | 0.0065   | -0.20838 | 5.60E-06 |
| 0.11313  | -0.14527 | 0.00165  | 0.170227 | 0.00022  | -0.0387  | 0.40407  | -0.05826 | 0.20886  |
| 8.83E-06 | -0.14084 | 0.00228  | 0.014827 | 0.74929  | 0.029193 | 0.52915  | -0.13643 | 0.00314  |
| 0.00016  | 0.190561 | 3.40E-05 | 0.005716 | 0.90195  | 0.110672 | 0.01673  | 0.316218 | 2.64E-12 |
| 0.32167  | -0.01791 | 0.69947  | 0.071089 | 0.12501  | 0.056565 | 0.22244  | -0.00404 | 0.93063  |
| 0.00631  | 0.102055 | 0.02743  | -0.04824 | 0.29823  | 0.019857 | 0.66864  | 0.092452 | 0.04584  |
| 0.0006   | -0.13697 | 0.00302  | -0.02648 | 0.56818  | -0.1777  | 0.00011  | -0.19226 | 2.88E-05 |
| 0.02844  | -0.0326  | 0.48213  | -0.03453 | 0.45658  | -0.2208  | 1.45E-06 | -0.19466 | 2.28E-05 |

|          |          |          |          |          |          |          |          |          |
|----------|----------|----------|----------|----------|----------|----------|----------|----------|
| 0.81539  | 0.197724 | 1.68E-05 | 0.040451 | 0.38312  | 0.151562 | 0.00102  | 0.288802 | 2.01E-10 |
| 0.18605  | -0.00933 | 0.84062  | 0.103809 | 0.02487  | 0.021144 | 0.64857  | 0.037351 | 0.42065  |
| 0.49844  | -0.13928 | 0.00256  | -0.00061 | 0.98948  | -0.01046 | 0.82156  | -0.16386 | 0.00038  |
| 0.00036  | 0.032689 | 0.48099  | 0.073044 | 0.11494  | 0.183257 | 6.79E-05 | 0.139519 | 0.00251  |
| 0.09492  | 0.011547 | 0.80346  | 0.056756 | 0.22088  | 0.026591 | 0.56651  | 0.101062 | 0.02898  |
| 0.00011  | 0.226336 | 7.72E-07 | 0.013859 | 0.76516  | 0.008065 | 0.86201  | 0.089156 | 0.05419  |
| 0.0219   | 0.035162 | 0.44842  | 0.227684 | 6.61E-07 | 0.228004 | 6.37E-07 | 0.240953 | 1.36E-07 |
| 0.10829  | 0.075301 | 0.10412  | 0.171813 | 0.00019  | 0.096686 | 0.03673  | 0.173489 | 0.00016  |
| 0.56104  | 0.044317 | 0.33927  | 0.001394 | 0.97603  | -0.05111 | 0.27039  | -0.01562 | 0.73639  |
| 0.66146  | -0.10428 | 0.02422  | 0.031064 | 0.50308  | 0.002734 | 0.95302  | -0.13729 | 0.00295  |
| 0.0558   | 0.019944 | 0.66729  | 0.266246 | 5.10E-09 | 0.05965  | 0.19818  | 0.07956  | 0.0859   |
| 0.50135  | 0.054552 | 0.23935  | 0.102679 | 0.0265   | 0.03332  | 0.47255  | 0.10137  | 0.0285   |
| 0.00027  | 0.108807 | 0.01867  | 0.069746 | 0.13232  | 0.031969 | 0.49071  | 0.121071 | 0.00882  |
| 5.16E-06 | 0.017935 | 0.69907  | -0.04638 | 0.31724  | -0.18427 | 6.18E-05 | -0.10743 | 0.02023  |
| 0.00014  | 0.071563 | 0.12251  | 0.164743 | 0.00035  | 0.01691  | 0.7155   | 0.068883 | 0.13719  |
| 0.06763  | -0.06823 | 0.14098  | -0.12118 | 0.00876  | -0.10359 | 0.02518  | -0.18729 | 4.65E-05 |
| 0.03109  | -0.02198 | 0.63567  | 0.080125 | 0.08369  | 0.268982 | 3.50E-09 | 0.177496 | 0.00012  |
| 0.13433  | 0.143646 | 0.00186  | 0.158627 | 0.00058  | -0.05135 | 0.26808  | -0.00825 | 0.85894  |
| 0.06167  | 0.030338 | 0.51311  | -0.07585 | 0.10163  | 0.010562 | 0.81993  | 0.019902 | 0.66794  |
| 0.79145  | -0.10677 | 0.02102  | 0.099208 | 0.03208  | -0.10219 | 0.02723  | -0.15962 | 0.00054  |
| 0.5803   | 0.186634 | 4.95E-05 | 0.086235 | 0.0626   | 0.127616 | 0.00575  | 0.212344 | 3.67E-06 |
| 0.08423  | 0.005654 | 0.90302  | 0.016947 | 0.7149   | -0.00578 | 0.9009   | -0.02595 | 0.5759   |
| 0.0094   | -0.04765 | 0.30413  | -0.05104 | 0.27104  | -0.20052 | 1.27E-05 | -0.16338 | 0.00039  |
| 2.97E-06 | 0.208344 | 5.62E-06 | -0.05213 | 0.26091  | 0.176917 | 0.00012  | 0.213749 | 3.15E-06 |
| 0.00027  | 0.090522 | 0.05059  | -0.07765 | 0.09373  | -0.02189 | 0.63709  | 0.056365 | 0.22407  |
| 0.0997   | 0.130872 | 0.00461  | -0.13394 | 0.00374  | 0.074839 | 0.10626  | 0.14567  | 0.0016   |
| 0.24146  | -0.04746 | 0.30607  | -0.16881 | 0.00025  | -0.25226 | 3.27E-08 | -0.22251 | 1.19E-06 |
| 0.28963  | 0.002646 | 0.95453  | -0.0555  | 0.23129  | -0.07439 | 0.10839  | -0.05721 | 0.21721  |
| 0.25909  | 0.008762 | 0.85022  | -0.11078 | 0.01662  | -0.12873 | 0.00534  | -0.09862 | 0.03312  |
| 0.51528  | -0.117   | 0.0114   | -0.13056 | 0.00472  | 0.095693 | 0.03872  | -0.00235 | 0.95964  |
| 0.025    | 0.361457 | 7.36E-16 | 0.022124 | 0.63344  | 0.049845 | 0.2824   | 0.22941  | 5.41E-07 |
| 0.27721  | 0.237898 | 1.97E-07 | 0.08806  | 0.05723  | 0.159274 | 0.00055  | 0.24395  | 9.37E-08 |
| 0.78362  | -0.04264 | 0.35787  | -0.07154 | 0.12265  | -0.187   | 4.78E-05 | -0.20419 | 8.68E-06 |
| 0.019    | 0.025962 | 0.57572  | -0.02533 | 0.58512  | -0.00794 | 0.86406  | -0.01937 | 0.67637  |
| 0.97331  | -0.06394 | 0.16773  | -0.08389 | 0.07012  | -0.16998 | 0.00022  | -0.14418 | 0.00179  |
| 0.00739  | 0.025142 | 0.58785  | -0.1233  | 0.00764  | -0.09728 | 0.0356   | -0.04792 | 0.30141  |
| 0.04068  | 0.024381 | 0.59921  | -0.1165  | 0.01175  | -0.10274 | 0.02641  | -0.0702  | 0.12979  |
| 0.85329  | -0.01596 | 0.73079  | -0.15352 | 0.00087  | -0.15299 | 0.00091  | -0.14459 | 0.00173  |
| 1.76E-09 | -0.11635 | 0.01186  | -0.149   | 0.00124  | -0.1217  | 0.00847  | -0.19846 | 1.56E-05 |
| 0.81587  | -0.02542 | 0.58368  | -0.13    | 0.0049   | -0.06806 | 0.14194  | -0.12274 | 0.00792  |
| 0.02225  | 0.109456 | 0.01798  | 0.049604 | 0.28474  | 0.005544 | 0.9049   | 0.064331 | 0.16516  |
| 0.12997  | 0.116493 | 0.01176  | 0.036082 | 0.43662  | 0.053715 | 0.24666  | 0.210151 | 4.64E-06 |
| 0.0159   | -0.00696 | 0.88076  | 0.096123 | 0.03785  | -0.06733 | 0.14632  | -0.02052 | 0.65834  |
| 0.0001   | 0.036446 | 0.43201  | 0.019164 | 0.67955  | -0.059   | 0.20315  | -0.02348 | 0.61279  |
| 0.07266  | -0.10309 | 0.02589  | -0.10681 | 0.02096  | -0.06612 | 0.15369  | -0.1571  | 0.00066  |

|          |          |          |          |          |          |          |          |          |
|----------|----------|----------|----------|----------|----------|----------|----------|----------|
| 0.72784  | 0.032118 | 0.48869  | 0.195596 | 2.07E-05 | 0.026544 | 0.56719  | 0.044943 | 0.33249  |
| 0.03548  | -0.07843 | 0.09048  | 0.02518  | 0.58729  | -0.02663 | 0.56589  | -0.04468 | 0.33528  |
| 0.47651  | 0.022916 | 0.62134  | -0.06514 | 0.1599   | 0.007668 | 0.86873  | 0.015123 | 0.74446  |
| 3.26E-08 | 0.03252  | 0.48326  | 0.002613 | 0.95509  | 0.05606  | 0.2266   | 0.054236 | 0.24209  |
| 0.17248  | -0.04209 | 0.3641   | -0.10851 | 0.019    | -0.10549 | 0.02262  | -0.10335 | 0.02553  |
| 0.40534  | 0.20313  | 9.68E-06 | 0.003814 | 0.93448  | 0.159048 | 0.00056  | 0.314734 | 3.38E-12 |
| 3.98E-05 | 0.216082 | 2.44E-06 | 0.017489 | 0.70621  | 0.062779 | 0.17562  | 0.100683 | 0.02959  |
| 0.00303  | 0.033588 | 0.469    | -0.01641 | 0.7236   | 0.000316 | 0.99457  | 0.01631  | 0.72518  |
| 0.80842  | 0.018212 | 0.69465  | -0.06792 | 0.14276  | -0.00465 | 0.92009  | 0.032677 | 0.48115  |
| 0.58449  | -0.03552 | 0.44381  | -0.05475 | 0.23764  | -0.04023 | 0.38568  | -0.10462 | 0.02376  |
| 0.27711  | 0.057381 | 0.21582  | 0.067054 | 0.14796  | -0.0055  | 0.90567  | -0.00085 | 0.98532  |
| 0.0462   | 0.164431 | 0.00036  | 0.18234  | 7.40E-05 | 0.031243 | 0.50061  | 0.103651 | 0.02509  |
| 0.90221  | 0.015821 | 0.73311  | 0.047638 | 0.30428  | -0.08503 | 0.06636  | -0.04427 | 0.33975  |
| 0.00113  | 0.105841 | 0.02216  | -0.13056 | 0.00471  | -0.03093 | 0.50486  | -0.00294 | 0.94946  |
| 0.01667  | -0.10701 | 0.02072  | 0.155295 | 0.00076  | 0.116919 | 0.01145  | 0.08728  | 0.05947  |
| 0.0007   | 0.131922 | 0.00429  | -0.00915 | 0.84362  | -0.10913 | 0.01832  | -0.01486 | 0.74877  |
| 0.80295  | 0.134723 | 0.00354  | 0.199253 | 1.44E-05 | 0.192302 | 2.87E-05 | 0.141139 | 0.00223  |
| 6.35E-05 | -0.02763 | 0.55141  | 0.012291 | 0.79108  | -0.03819 | 0.41033  | -0.14118 | 0.00223  |
| 0.4066   | 0.030485 | 0.51107  | -0.02702 | 0.56031  | -0.03138 | 0.4988   | -0.02928 | 0.52797  |
| 0.00429  | -0.07645 | 0.09891  | 0.195089 | 2.18E-05 | -0.00458 | 0.92143  | 0.026399 | 0.56932  |
| 4.19E-13 | -0.00141 | 0.9757   | -0.03372 | 0.46723  | -0.03822 | 0.40991  | -0.07528 | 0.10422  |
| 1.37E-05 | -0.00568 | 0.90249  | -0.07143 | 0.1232   | -0.10531 | 0.02284  | -0.12585 | 0.00647  |
| 0.02299  | -0.01354 | 0.77046  | -0.10082 | 0.02937  | -0.11971 | 0.00962  | -0.07636 | 0.09932  |
| 3.51E-05 | -0.19067 | 3.36E-05 | -0.15832 | 0.0006   | -0.16736 | 0.00028  | -0.31998 | 1.41E-12 |
| 0.80039  | 0.009308 | 0.84099  | -0.21795 | 1.99E-06 | -0.12795 | 0.00562  | -0.18662 | 4.95E-05 |
| 0.00047  | 0.101067 | 0.02898  | 0.035366 | 0.44579  | 0.011871 | 0.79805  | 0.037225 | 0.42222  |
| 3.39E-08 | -0.01731 | 0.70908  | -0.00617 | 0.89424  | -0.04248 | 0.35972  | -0.04057 | 0.38169  |
| 0.00738  | 0.122675 | 0.00796  | 0.156432 | 0.00069  | 0.206846 | 6.58E-06 | 0.302541 | 2.43E-11 |
| 0.00192  | 0.202511 | 1.03E-05 | -0.01546 | 0.73894  | 0.117202 | 0.01125  | 0.141228 | 0.00222  |
| 0.00803  | -0.04585 | 0.32286  | -0.01026 | 0.82498  | 0.16501  | 0.00034  | 0.035452 | 0.44468  |
| 0.41108  | 0.181816 | 7.76E-05 | 0.185656 | 5.43E-05 | 0.164676 | 0.00035  | 0.284258 | 3.95E-10 |
| 0.00135  | 0.110945 | 0.01646  | -0.0492  | 0.28865  | 0.0307   | 0.50809  | 0.191754 | 3.03E-05 |
| 0.01603  | 0.116174 | 0.01199  | -0.05025 | 0.2785   | -0.06796 | 0.14256  | 0.062989 | 0.17418  |
| 0.32068  | -0.09615 | 0.0378   | -0.16718 | 0.00028  | -0.15819 | 0.0006   | -0.17429 | 0.00015  |
| 0.01202  | 0.124863 | 0.0069   | -0.05206 | 0.26149  | 0.116147 | 0.01201  | 0.141939 | 0.00211  |
| 0.00017  | 0.04257  | 0.35868  | 0.009598 | 0.83612  | 0.003707 | 0.93632  | 0.008712 | 0.85106  |
| 0.01379  | -0.02481 | 0.59286  | -0.30282 | 2.33E-11 | -0.17628 | 0.00013  | -0.22028 | 1.53E-06 |
| 0.57242  | 0.042589 | 0.35846  | -0.15432 | 0.00082  | -0.03831 | 0.40885  | -0.00612 | 0.89499  |
| 0.17241  | -0.06975 | 0.13232  | -0.11233 | 0.01515  | -0.03353 | 0.46971  | -0.20196 | 1.09E-05 |
| 0.76317  | 0.018737 | 0.68631  | -0.15398 | 0.00084  | -0.06557 | 0.15717  | -0.12169 | 0.00848  |
| 0.54356  | -0.02875 | 0.53537  | -0.04978 | 0.28303  | -0.10668 | 0.02112  | -0.13444 | 0.00361  |
| 0.0017   | -0.03021 | 0.51483  | -0.07177 | 0.12143  | -0.07201 | 0.12019  | -0.10228 | 0.02709  |
| 0.42342  | 0.07528  | 0.10421  | -0.02907 | 0.53085  | -0.05443 | 0.24041  | 0.034858 | 0.45235  |
| 0.00476  | 0.093866 | 0.04261  | -0.01569 | 0.7353   | 0.016953 | 0.7148   | 0.039758 | 0.39132  |
| 0.01816  | 0.123273 | 0.00765  | 0.098288 | 0.03371  | 0.258595 | 1.43E-08 | 0.20609  | 7.12E-06 |

|          |          |          |          |          |          |          |          |          |
|----------|----------|----------|----------|----------|----------|----------|----------|----------|
| 4.17E-07 | -0.01063 | 0.81883  | 0.023583 | 0.61122  | -0.03416 | 0.46148  | 0.0483   | 0.2976   |
| 0.09429  | -0.05647 | 0.22323  | -0.04163 | 0.3694   | -0.06762 | 0.14454  | -0.15057 | 0.0011   |
| 1.51E-05 | 0.039559 | 0.39371  | -0.15468 | 0.0008   | 0.011303 | 0.80753  | 0.028276 | 0.54217  |
| 0.00051  | -0.02111 | 0.64906  | -0.04767 | 0.30398  | -0.05997 | 0.19582  | -0.06148 | 0.18477  |
| 0.00422  | 0.152586 | 0.00094  | 0.008658 | 0.85197  | 0.139405 | 0.00253  | 0.158732 | 0.00058  |
| 0.11799  | -0.13152 | 0.00441  | 0.032998 | 0.47685  | -0.18692 | 4.82E-05 | -0.20341 | 9.41E-06 |
| 8.97E-05 | 0.130395 | 0.00477  | 0.282658 | 5.00E-10 | 0.145992 | 0.00156  | 0.257129 | 1.73E-08 |
| 3.01E-07 | 0.077476 | 0.09447  | 0.080666 | 0.08162  | 0.00521  | 0.91059  | 0.087948 | 0.05754  |
| 5.41E-07 | 0.169308 | 0.00024  | 0.016057 | 0.72927  | -0.06507 | 0.16036  | -0.02785 | 0.54823  |
| 0.07994  | 0.005099 | 0.91249  | -0.06417 | 0.16624  | -0.0349  | 0.45176  | 0.023139 | 0.61794  |
| 0.57368  | -0.06051 | 0.19181  | -0.20496 | 8.02E-06 | -0.15603 | 0.00072  | -0.2094  | 5.03E-06 |
| 0.0165   | 0.165536 | 0.00033  | 0.038436 | 0.40728  | -0.01759 | 0.70463  | 0.079325 | 0.08684  |
| 3.13E-06 | 0.093338 | 0.04379  | 0.097706 | 0.03479  | 0.212221 | 3.72E-06 | 0.280857 | 6.50E-10 |
| 0.01386  | 0.018493 | 0.69018  | -0.1588  | 0.00057  | -0.14238 | 0.00204  | -0.08606 | 0.06313  |
| 3.22E-07 | -0.19533 | 2.13E-05 | 0.052152 | 0.26069  | -0.11101 | 0.01639  | -0.2773  | 1.08E-09 |
| 0.97725  | -0.02293 | 0.62109  | -0.07868 | 0.08942  | -0.04911 | 0.28958  | -0.0975  | 0.03518  |
| 0.15917  | -0.04725 | 0.30828  | -0.10036 | 0.03012  | -0.12108 | 0.00881  | -0.16127 | 0.00047  |
| 0.03913  | -0.03286 | 0.47875  | 0.031014 | 0.50376  | -0.04207 | 0.36432  | -0.02862 | 0.53733  |
| 0.0691   | -0.16245 | 0.00042  | -0.00021 | 0.99634  | -0.13115 | 0.00453  | -0.14258 | 0.00201  |
| 0.00116  | -0.16532 | 0.00033  | 0.062718 | 0.17604  | -0.08693 | 0.06051  | -0.24595 | 7.30E-08 |
| 1.58E-05 | -0.00425 | 0.92696  | -0.04622 | 0.31887  | -0.01105 | 0.81171  | -0.05444 | 0.24034  |
| 3.55E-13 | 0.043005 | 0.35378  | -0.01815 | 0.69568  | -0.06546 | 0.15785  | -0.01397 | 0.76327  |
| 1.50E-11 | -0.07076 | 0.12675  | -0.04551 | 0.32639  | -0.07224 | 0.11899  | -0.19867 | 1.52E-05 |
| 0.0013   | 0.047827 | 0.30237  | 0.301701 | 2.77E-11 | 0.220495 | 1.50E-06 | 0.177706 | 0.00011  |
| 0.36432  | 0.111177 | 0.01624  | 0.124206 | 0.0072   | 0.197453 | 1.72E-05 | 0.188303 | 4.22E-05 |
| 0.6426   | 0.010024 | 0.82896  | -0.20072 | 1.24E-05 | -0.17437 | 0.00015  | -0.16137 | 0.00046  |
| 3.14E-08 | 0.07189  | 0.12081  | 0.224267 | 9.78E-07 | 0.229996 | 5.05E-07 | 0.241602 | 1.25E-07 |
| 0.22449  | -0.08064 | 0.08173  | -0.01205 | 0.79515  | -0.02724 | 0.55705  | -0.0754  | 0.10368  |
| 0.30377  | 0.006025 | 0.89668  | -0.14445 | 0.00175  | -0.11306 | 0.0145   | -0.09409 | 0.04212  |
| 0.02457  | -0.02388 | 0.60678  | 0.098942 | 0.03254  | -0.00717 | 0.87712  | -0.05263 | 0.25636  |
| 0.04094  | -0.06269 | 0.17623  | -0.08521 | 0.0658   | -0.06945 | 0.13396  | -0.1292  | 0.00517  |
| 3.33E-05 | 0.122895 | 0.00784  | 0.045839 | 0.32293  | 0.166434 | 0.0003   | 0.249002 | 4.96E-08 |
| 0.00012  | -0.17029 | 0.00022  | -0.0827  | 0.07419  | -0.07122 | 0.1243   | -0.24827 | 5.44E-08 |
| 0.92201  | 0.083969 | 0.06984  | 0.019385 | 0.67607  | 0.10628  | 0.02161  | 0.115353 | 0.01262  |
| 7.07E-05 | 0.024428 | 0.59851  | -0.05308 | 0.25226  | -0.05952 | 0.19919  | 0.031521 | 0.49682  |
| 3.15E-07 | 0.050728 | 0.27395  | 0.05669  | 0.22141  | 0.010659 | 0.81831  | 0.002996 | 0.94852  |
| 0.98007  | 0.092753 | 0.04514  | 0.004123 | 0.9292   | -0.01832 | 0.69295  | 0.014463 | 0.75525  |
| 0.43024  | -0.15979 | 0.00053  | -0.21862 | 1.85E-06 | -0.20537 | 7.68E-06 | -0.31091 | 6.34E-12 |
| 0.67747  | 0.351845 | 4.69E-15 | 0.086825 | 0.06082  | 0.039458 | 0.39491  | 0.235944 | 2.49E-07 |
| 0.11759  | 0.019642 | 0.67203  | -0.1968  | 1.84E-05 | -0.12791 | 0.00564  | -0.07889 | 0.08858  |
| 0.94728  | -0.02207 | 0.63421  | -0.09122 | 0.04882  | 0.050274 | 0.27828  | -0.0676  | 0.14469  |
| 0.00735  | 0.067019 | 0.14817  | -0.03    | 0.51776  | 0.070817 | 0.12647  | 0.103191 | 0.02575  |
| 0.5373   | 0.062996 | 0.17413  | -0.09999 | 0.03074  | -0.04884 | 0.29222  | -0.04569 | 0.32448  |
| 0.05682  | 0.06751  | 0.14521  | -0.14014 | 0.0024   | -0.07374 | 0.11152  | 0.059662 | 0.1981   |
| 0.03487  | 0.057463 | 0.21517  | -0.16311 | 0.0004   | -0.12201 | 0.0083   | 0.008956 | 0.84694  |

|          |          |          |          |          |          |          |          |          |
|----------|----------|----------|----------|----------|----------|----------|----------|----------|
| 7.32E-06 | 0.063378 | 0.17152  | -0.00079 | 0.98638  | -0.10617 | 0.02175  | 0.064551 | 0.16372  |
| 0.00225  | 0.039655 | 0.39256  | -0.04295 | 0.35443  | -0.06121 | 0.18671  | -0.02966 | 0.52261  |
| 0.23373  | -0.1059  | 0.02208  | 0.026211 | 0.57206  | -0.06818 | 0.14125  | -0.1504  | 0.00111  |
| 0.22551  | 0.213873 | 3.11E-06 | -0.00685 | 0.88256  | 0.067542 | 0.14502  | 0.153304 | 0.00089  |
| 0.0004   | 0.065877 | 0.15521  | -0.06924 | 0.13515  | -0.01178 | 0.79954  | 0.093254 | 0.04399  |
| 0.02901  | -0.16394 | 0.00037  | -0.08548 | 0.06494  | -0.25764 | 1.62E-08 | -0.25535 | 2.19E-08 |
| 0.32261  | -0.09765 | 0.03488  | -0.10245 | 0.02684  | -0.04176 | 0.36792  | -0.02655 | 0.56704  |
| 0.00606  | 0.09831  | 0.03367  | -0.03396 | 0.46404  | -0.08073 | 0.08138  | 0.033595 | 0.46891  |
| 0.01811  | -0.1154  | 0.01258  | 0.080402 | 0.08262  | -0.17667 | 0.00012  | -0.17762 | 0.00011  |
| 0.03018  | 0.089622 | 0.05294  | -0.00712 | 0.87806  | -0.02888 | 0.53359  | 0.010257 | 0.82505  |
| 3.50E-05 | 0.204014 | 8.84E-06 | 0.060415 | 0.19248  | 0.165996 | 0.00032  | 0.276648 | 1.19E-09 |
| 0.79492  | -0.00934 | 0.84046  | -0.06147 | 0.18482  | -0.07294 | 0.11546  | -0.04541 | 0.32747  |
| 7.85E-15 | -0.02928 | 0.52789  | 0.185244 | 5.64E-05 | 0.037777 | 0.41537  | 0.020786 | 0.65413  |
| 0.67468  | 0.207963 | 5.85E-06 | 0.158428 | 0.00059  | 0.12973  | 0.00499  | 0.283041 | 4.72E-10 |
| 4.07E-10 | 0.067302 | 0.14645  | -0.08274 | 0.07404  | -0.03286 | 0.47865  | 0.014129 | 0.76073  |
| 0.06947  | 0.150391 | 0.00111  | -0.1787  | 0.0001   | -0.03115 | 0.50195  | -0.11828 | 0.01052  |
| 6.44E-05 | -0.0997  | 0.03123  | -0.06269 | 0.17621  | -0.21364 | 3.19E-06 | -0.19931 | 1.43E-05 |
| 0.01631  | 0.077566 | 0.09408  | 0.006894 | 0.88189  | -0.06798 | 0.14242  | 0.035051 | 0.44985  |
| 0.0161   | -0.06786 | 0.1431   | 0.03235  | 0.48555  | -0.12397 | 0.00731  | -0.1267  | 0.00611  |
| 0.00025  | 0.127476 | 0.0058   | 0.014776 | 0.75013  | -0.04408 | 0.34191  | 0.008998 | 0.84624  |
| 6.38E-06 | -0.01919 | 0.67915  | -0.03879 | 0.40299  | 0.021208 | 0.64757  | -0.0027  | 0.95355  |
| 0.71532  | -0.03741 | 0.41992  | 0.014612 | 0.75281  | -0.02636 | 0.56996  | -0.05452 | 0.23965  |
| 0.00079  | 0.02417  | 0.60238  | 0.150246 | 0.00113  | 0.054403 | 0.24064  | 0.034871 | 0.45219  |
| 9.67E-08 | 0.029011 | 0.53172  | -0.02676 | 0.56402  | -0.11908 | 0.01001  | -0.03501 | 0.45035  |
| 0.00083  | 0.127192 | 0.00591  | 0.140662 | 0.00231  | 0.18307  | 6.91E-05 | 0.245901 | 7.34E-08 |
| 0.04846  | -0.02442 | 0.59855  | -0.07182 | 0.12115  | -0.03595 | 0.43833  | 0.013014 | 0.7791   |
| 0.60116  | 0.051241 | 0.26912  | -0.06058 | 0.19127  | -0.09521 | 0.03972  | -0.0211  | 0.64927  |
| 0.00097  | 0.070145 | 0.13011  | -0.04876 | 0.29307  | -0.04361 | 0.34701  | 0.09678  | 0.03655  |
| 0.01453  | 0.077789 | 0.09314  | 0.086087 | 0.06305  | 0.056795 | 0.22055  | 0.104295 | 0.0242   |
| 0.69326  | -0.05378 | 0.24605  | 0.198805 | 1.50E-05 | 0.042962 | 0.35426  | 0.014211 | 0.75938  |
| 0.6011   | 0.033917 | 0.46465  | -0.06069 | 0.19048  | -0.10206 | 0.02743  | -0.0555  | 0.23131  |
| 0.84768  | -0.03838 | 0.40801  | -0.08642 | 0.06202  | -0.08746 | 0.05896  | -0.09308 | 0.04439  |
| 6.04E-12 | 0.014361 | 0.75691  | 0.030913 | 0.50515  | -0.06717 | 0.14722  | 0.012464 | 0.78822  |
| 0.00461  | 0.066133 | 0.15361  | 0.267335 | 4.39E-09 | 0.060522 | 0.19169  | 0.148513 | 0.00129  |
| 0.2072   | 0.018587 | 0.6887   | -0.04698 | 0.31102  | -0.1042  | 0.02433  | -0.13061 | 0.0047   |
| 0.6075   | 0.179026 | 0.0001   | -0.0101  | 0.82775  | 0.110202 | 0.0172   | 0.25207  | 3.35E-08 |
| 4.95E-05 | -0.00932 | 0.84079  | -0.00225 | 0.96136  | -0.07059 | 0.1277   | -0.08649 | 0.06182  |
| 0.82226  | 0.024385 | 0.59915  | -0.08146 | 0.07864  | 0.007016 | 0.8798   | 0.031638 | 0.49521  |
| 0.51425  | -0.00807 | 0.86192  | -0.16484 | 0.00035  | -0.10529 | 0.02287  | -0.04525 | 0.32914  |
| 5.69E-09 | 0.031152 | 0.50187  | 0.01971  | 0.67096  | -0.05603 | 0.22682  | 0.00621  | 0.89353  |
| 0.5793   | -0.05585 | 0.22838  | -0.12337 | 0.0076   | -0.07299 | 0.11523  | -0.11152 | 0.01591  |
| 0.19815  | -0.0815  | 0.07852  | -0.13874 | 0.00266  | -0.24704 | 6.36E-08 | -0.23701 | 2.19E-07 |
| 0.4979   | 0.172094 | 0.00019  | 0.465331 | 1.81E-26 | 0.269368 | 3.32E-09 | 0.351313 | 5.19E-15 |
| 0.08824  | -0.03925 | 0.3974   | -0.038   | 0.41259  | -0.03326 | 0.47339  | 0.000224 | 0.99615  |
| 0.12505  | 0.108058 | 0.0195   | 0.267408 | 4.34E-09 | 0.058314 | 0.20844  | 0.223597 | 1.06E-06 |

|          |          |          |          |          |           |          |          |          |
|----------|----------|----------|----------|----------|-----------|----------|----------|----------|
| 4.45E-11 | -0.0044  | 0.9245   | 0.193924 | 2.45E-05 | 0.171778  | 0.00019  | 0.086766 | 0.06099  |
| 0.59788  | -0.01464 | 0.7523   | 0.05311  | 0.25203  | 0.031183  | 0.50144  | -0.02941 | 0.52603  |
| 0.71816  | 0.077787 | 0.09315  | 0.067548 | 0.14498  | -0.02302  | 0.61971  | 0.02915  | 0.52976  |
| 0.89705  | 0.08539  | 0.06523  | 0.008047 | 0.86231  | -0.00512  | 0.91208  | 0.03217  | 0.48798  |
| 1.34E-05 | 0.170924 | 0.00021  | 0.068494 | 0.13943  | 0.024871  | 0.59188  | 0.056565 | 0.22244  |
| 1.09E-09 | -0.08053 | 0.08214  | -0.12754 | 0.00578  | -0.25971  | 1.23E-08 | -0.22899 | 5.68E-07 |
| 0.55959  | 0.08457  | 0.06786  | 0.39437  | 7.91E-19 | 0.349612  | 7.15E-15 | 0.337931 | 6.14E-14 |
| 0.04027  | 0.021916 | 0.63664  | 0.045004 | 0.33183  | 0.104761  | 0.02357  | 0.10029  | 0.03024  |
| 0.05557  | 0.231682 | 4.14E-07 | 0.223769 | 1.04E-06 | 0.164891  | 0.00035  | 0.292269 | 1.19E-10 |
| 0.07687  | -0.00715 | 0.8775   | -0.1641  | 0.00037  | 0.04636   | 0.31745  | 0.021896 | 0.63696  |
| 0.94298  | 0.008077 | 0.8618   | -0.09731 | 0.03553  | -0.10331  | 0.02558  | -0.07167 | 0.12194  |
| 0.04147  | 0.176711 | 0.00012  | -0.06577 | 0.15588  | 0.268258  | 3.87E-09 | 0.314579 | 3.47E-12 |
| 3.21E-09 | -0.05405 | 0.24369  | -0.0021  | 0.96394  | -0.11     | 0.01741  | -0.14951 | 0.00119  |
| 0.138    | 0.053943 | 0.24465  | 0.059669 | 0.19804  | 0.079702  | 0.08534  | 0.089816 | 0.05242  |
| 4.05E-05 | 0.160774 | 0.00049  | -0.11957 | 0.0097   | -0.01424  | 0.75884  | 0.09475  | 0.04069  |
| 1.22E-05 | -0.11297 | 0.01458  | 0.074766 | 0.10661  | -0.16762  | 0.00027  | -0.17042 | 0.00022  |
| 0.00133  | 0.101552 | 0.02821  | -0.01823 | 0.69444  | -0.05069  | 0.27435  | 0.018886 | 0.68395  |
| 2.43E-06 | -0.14438 | 0.00176  | -0.15189 | 0.00099  | -0.11529  | 0.01266  | -0.27251 | 2.14E-09 |
| 6.54E-12 | 0.133973 | 0.00373  | 0.01629  | 0.72551  | 0.030026  | 0.51745  | 0.228186 | 6.23E-07 |
| 0.29311  | 0.011166 | 0.80982  | 0.153935 | 0.00085  | 0.1572    | 0.00065  | 0.150178 | 0.00113  |
| 0.35533  | 0.051798 | 0.26395  | -0.05585 | 0.22838  | -0.08978  | 0.05253  | -0.03378 | 0.46649  |
| 2.38E-07 | 0.013548 | 0.77028  | -0.02179 | 0.63857  | -0.00689  | 0.88193  | 0.032934 | 0.47771  |
| 0.27389  | 0.193221 | 2.62E-05 | 0.214216 | 2.99E-06 | 0.1955    | 2.09E-05 | 0.312171 | 5.16E-12 |
| 4.31E-13 | 0.476512 | 7.59E-28 | 0.212205 | 3.72E-06 | 0.115456  | 0.01254  | 0.308566 | 9.27E-12 |
| 0.0312   | -0.207   | 6.47E-06 | -0.16428 | 0.00036  | -0.24152  | 1.27E-07 | -0.32782 | 3.68E-13 |
| 0.25683  | 0.128518 | 0.00541  | 0.061763 | 0.18273  | -0.00455  | 0.92184  | 0.082122 | 0.07624  |
| 0.06882  | -0.00351 | 0.93962  | 0.02923  | 0.52862  | -0.0988   | 0.0328   | 0.003389 | 0.94177  |
| 0.06206  | 0.100456 | 0.02996  | -0.03113 | 0.50211  | -0.03499  | 0.45062  | 0.020988 | 0.65099  |
| 0.05155  | 0.067049 | 0.14799  | -0.02479 | 0.59308  | -0.10993  | 0.01748  | 0.038565 | 0.4057   |
| 0.1261   | -0.06585 | 0.15542  | 0.053201 | 0.25121  | 0.036717  | 0.42859  | 0.031783 | 0.49324  |
| 0.74656  | 0.024952 | 0.59068  | -0.05221 | 0.26018  | -0.0905   | 0.05065  | -0.04063 | 0.38106  |
| 0.15111  | -0.00607 | 0.89596  | -0.07234 | 0.11848  | -0.09302  | 0.04451  | -0.09497 | 0.04023  |
| 0.65207  | 0.069375 | 0.1344   | 0.133055 | 0.00397  | 0.207401  | 6.21E-06 | 0.227458 | 6.78E-07 |
| 0.3977   | -0.17528 | 0.00014  | 0.063908 | 0.16797  | -0.12762  | 0.00575  | -0.1572  | 0.00065  |
| 0.0481   | 0.006408 | 0.89015  | -0.04409 | 0.34173  | -0.13036  | 0.00478  | -0.08971 | 0.0527   |
| 0.34941  | -0.03174 | 0.49376  | 0.137314 | 0.00294  | -0.05807  | 0.21034  | -0.01702 | 0.71378  |
| 0.19669  | 0.027604 | 0.55182  | 0.006469 | 0.88912  | 0.061515  | 0.18449  | 0.064775 | 0.16226  |
| 0.72796  | -0.0125  | 0.78756  | 0.072773 | 0.1163   | -0.02916  | 0.52967  | -0.0467  | 0.31389  |
| 0.6095   | -0.01833 | 0.69274  | 0.069886 | 0.13154  | -0.02585  | 0.57743  | -0.04197 | 0.36549  |
| 0.88527  | -0.0153  | 0.74164  | -0.04266 | 0.35771  | -0.04739  | 0.30682  | -0.02111 | 0.64908  |
| 0.19467  | -0.00435 | 0.92529  | -0.04656 | 0.31536  | -0.04161  | 0.36961  | -0.02576 | 0.57877  |
| 0.04034  | 0.024949 | 0.59073  | 0.085495 | 0.06489  | 0.01304   | 0.77866  | 0.015347 | 0.7408   |
| 0.00031  | 0.070788 | 0.12662  | -0.0154  | 0.74     | -0.04936  | 0.2871   | 0.003411 | 0.94139  |
| 0.10701  | 0.016616 | 0.72025  | -0.01035 | 0.82347  | -0.06186  | 0.18205  | -0.02079 | 0.65407  |
| 0.00096  | 0.028798 | 0.53473  | 0.070864 | 0.12622  | -5.98E-05 | 0.99897  | 0.012584 | 0.78622  |

|          |          |          |          |          |          |          |          |          |
|----------|----------|----------|----------|----------|----------|----------|----------|----------|
| 0.00073  | 0.026589 | 0.56654  | -0.00134 | 0.977    | -0.06673 | 0.1499   | -0.01936 | 0.67648  |
| 3.23E-10 | -0.02704 | 0.55997  | -0.04966 | 0.28417  | -0.01234 | 0.79023  | -0.06103 | 0.18801  |
| 0.02036  | 0.070449 | 0.12846  | -0.00776 | 0.86713  | 0.004903 | 0.91584  | 0.051478 | 0.26691  |
| 6.38E-07 | 0.307295 | 1.14E-11 | 0.036555 | 0.43064  | 0.091435 | 0.04829  | 0.325395 | 5.59E-13 |
| 6.36E-06 | 0.104254 | 0.02426  | -0.08374 | 0.07061  | -0.05475 | 0.23764  | -0.00779 | 0.86669  |
| 0.8901   | -0.00707 | 0.87893  | 0.080126 | 0.08369  | 0.08278  | 0.07391  | 0.067584 | 0.14477  |
| 0.00118  | 0.059698 | 0.19783  | -0.06149 | 0.18468  | -0.03545 | 0.4447   | -0.00674 | 0.88442  |
| 0.44813  | 0.092849 | 0.04492  | -0.08343 | 0.07167  | -0.06421 | 0.16599  | -0.01131 | 0.80737  |
| 2.49E-05 | 0.040321 | 0.38464  | -0.07804 | 0.09207  | -0.04769 | 0.30374  | -0.03056 | 0.51005  |
| 0.00024  | 0.09327  | 0.04395  | 0.14027  | 0.00238  | 0.112531 | 0.01497  | 0.089973 | 0.05201  |
| 1.87E-05 | 0.013146 | 0.77692  | -0.03835 | 0.4083   | -0.13009 | 0.00487  | -0.10532 | 0.02284  |
| 0.03552  | 0.082742 | 0.07404  | 0.054808 | 0.23716  | 0.132937 | 0.004    | 0.145182 | 0.00166  |
| 0.62226  | -0.04469 | 0.33525  | -0.22101 | 1.41E-06 | -0.15633 | 0.0007   | -0.22109 | 1.40E-06 |
| 5.43E-08 | 0.023414 | 0.61377  | -0.13265 | 0.00408  | -0.1349  | 0.00349  | -0.06464 | 0.16315  |
| 0.0001   | 0.002147 | 0.96309  | -0.03993 | 0.38926  | -0.01635 | 0.72454  | -0.00911 | 0.84431  |
| 0.15669  | 0.13361  | 0.00382  | 0.269103 | 3.44E-09 | 0.173877 | 0.00016  | 0.276732 | 1.18E-09 |
| 0.17077  | 0.046862 | 0.31223  | -0.04519 | 0.32988  | -0.07424 | 0.10909  | -0.03416 | 0.46148  |
| 0.68348  | -0.03045 | 0.51149  | -0.0909  | 0.04962  | -0.09399 | 0.04235  | -0.06445 | 0.16441  |
| 0.1478   | 0.143062 | 0.00194  | 0.022926 | 0.62118  | 0.094165 | 0.04195  | 0.153921 | 0.00085  |
| 7.68E-05 | -0.0734  | 0.11318  | -0.02019 | 0.66344  | -0.20875 | 5.39E-06 | -0.21207 | 3.78E-06 |
| 0.00062  | 0.019702 | 0.67108  | 0.121809 | 0.00841  | 0.035902 | 0.43893  | 0.079736 | 0.08521  |
| 0.42372  | -0.04132 | 0.37296  | -0.07118 | 0.12453  | -0.06524 | 0.15929  | -0.12574 | 0.00651  |
| 0.60797  | 0.026407 | 0.56919  | -0.08057 | 0.08198  | -0.02842 | 0.54007  | -0.00974 | 0.83372  |
| 2.38E-05 | -0.01629 | 0.72557  | -0.09252 | 0.04568  | -0.01748 | 0.70636  | -0.07403 | 0.11011  |
| 0.24924  | -0.07102 | 0.12538  | 0.231915 | 4.03E-07 | 0.237309 | 2.12E-07 | 0.137241 | 0.00296  |
| 0.11306  | -0.00667 | 0.88564  | 0.285353 | 3.36E-10 | 0.057001 | 0.21888  | 0.035409 | 0.44523  |
| 0.01543  | 0.130866 | 0.00462  | 0.153936 | 0.00085  | 0.142762 | 0.00198  | 0.295518 | 7.26E-11 |
| 0.08236  | 0.045653 | 0.3249   | 0.092351 | 0.04608  | 0.092213 | 0.04641  | 0.199921 | 1.34E-05 |
| 0.00302  | 0.035266 | 0.44708  | -0.08089 | 0.08079  | -0.0145  | 0.75457  | 0.023422 | 0.61365  |
| 8.64E-08 | -0.06597 | 0.15463  | -0.26541 | 5.72E-09 | -0.06634 | 0.15234  | -0.17378 | 0.00016  |
| 5.12E-09 | -0.02745 | 0.55411  | 0.201581 | 1.14E-05 | -0.08293 | 0.07337  | -0.02658 | 0.56669  |
| 0.97986  | -0.13934 | 0.00255  | 0.414163 | 8.82E-21 | 0.08038  | 0.08271  | 0.036106 | 0.43632  |
| 4.66E-05 | 0.009234 | 0.84224  | -0.23418 | 3.08E-07 | -0.20898 | 5.25E-06 | -0.12614 | 0.00634  |
| 0.06559  | 0.120751 | 0.009    | 0.065792 | 0.15575  | -0.08625 | 0.06257  | 0.070964 | 0.12568  |
| 0.22694  | -0.04634 | 0.31764  | -0.10354 | 0.02525  | -0.14577 | 0.00159  | -0.17965 | 9.47E-05 |
| 0.04327  | -0.04864 | 0.29418  | 0.03593  | 0.43856  | -0.02796 | 0.5467   | -0.01366 | 0.76845  |
| 0.00018  | -0.00538 | 0.90768  | -0.04724 | 0.30834  | 0.035581 | 0.44302  | -0.00355 | 0.93896  |
| 0.00881  | -0.02458 | 0.59622  | 0.170857 | 0.00021  | 0.094188 | 0.0419   | 0.046363 | 0.31742  |
| 0.19279  | -0.10701 | 0.02072  | -0.11791 | 0.01077  | -0.15556 | 0.00074  | -0.2537  | 2.71E-08 |
| 0.69055  | -0.0397  | 0.39204  | -0.11585 | 0.01224  | 0.017615 | 0.70419  | -0.08038 | 0.0827   |
| 0.40071  | 0.037163 | 0.42301  | 0.186635 | 4.95E-05 | 0.152566 | 0.00094  | 0.19514  | 2.17E-05 |
| 0.34224  | 0.230184 | 4.94E-07 | 0.223769 | 1.04E-06 | 0.222    | 1.26E-06 | 0.300861 | 3.17E-11 |
| 0.00064  | 0.066217 | 0.15309  | 0.103196 | 0.02574  | 0.115235 | 0.01271  | 0.200754 | 1.24E-05 |
| 0.10896  | 0.000995 | 0.98289  | -0.02475 | 0.59363  | -0.08543 | 0.0651   | -0.06736 | 0.14613  |
| 0.40681  | 0.070013 | 0.13084  | 0.034206 | 0.46086  | -0.00087 | 0.98508  | 0.035812 | 0.44007  |



|          |          |          |          |          |          |          |          |          |
|----------|----------|----------|----------|----------|----------|----------|----------|----------|
| 0.12295  | 0.155114 | 0.00077  | 0.016262 | 0.72596  | -0.02618 | 0.57255  | 0.156474 | 0.00069  |
| 0.56281  | 0.02486  | 0.59205  | -0.13591 | 0.00325  | -0.19489 | 2.22E-05 | -0.09795 | 0.03434  |
| 1.61E-07 | -0.04944 | 0.28631  | -0.08498 | 0.06653  | -0.053   | 0.253    | -0.13785 | 0.00283  |
| 0.00076  | 0.057579 | 0.21424  | -0.07757 | 0.09406  | 0.015554 | 0.73744  | 0.073444 | 0.11296  |
| 0.77237  | 0.010243 | 0.82528  | -0.15564 | 0.00074  | -0.13467 | 0.00355  | -0.10805 | 0.01951  |
| 0.95329  | 0.027547 | 0.55264  | 0.110612 | 0.01679  | 0.063431 | 0.17117  | 0.09933  | 0.03187  |
| 0.78553  | -0.01155 | 0.80343  | -0.05849 | 0.20708  | -0.05251 | 0.2574   | -0.06503 | 0.16061  |
| 0.71577  | -0.00539 | 0.90744  | -0.07497 | 0.10563  | -0.06524 | 0.15926  | -0.03208 | 0.48925  |
| 2.19E-06 | 0.049356 | 0.28715  | -0.0707  | 0.1271   | -0.06992 | 0.13135  | 0.004426 | 0.92401  |
| 0.00119  | 0.055789 | 0.22886  | -0.11714 | 0.01129  | -0.07093 | 0.12587  | -0.03212 | 0.48865  |
| 0.10627  | 0.074257 | 0.10902  | -0.05032 | 0.27784  | -0.03875 | 0.4035   | 0.009089 | 0.84469  |
| 0.54675  | -0.01722 | 0.71049  | 0.033998 | 0.46359  | -0.03488 | 0.45202  | 0.020182 | 0.66356  |
| 0.06546  | 0.087383 | 0.05917  | 0.152707 | 0.00093  | 0.14702  | 0.00144  | 0.136154 | 0.0032   |
| 0.02658  | 0.270505 | 2.83E-09 | 0.093804 | 0.04275  | 0.114467 | 0.01332  | 0.159388 | 0.00055  |
| 0.36054  | -0.05543 | 0.23183  | -0.05014 | 0.27959  | 0.100286 | 0.03025  | 0.054226 | 0.24218  |
| 7.61E-09 | 0.055491 | 0.23135  | -0.11992 | 0.00949  | 0.036005 | 0.43761  | -0.00807 | 0.86192  |
| 0.05069  | 0.126555 | 0.00617  | 0.082177 | 0.07605  | -0.04881 | 0.29254  | 0.084114 | 0.06936  |
| 0.21316  | -0.01302 | 0.77901  | -0.11798 | 0.01072  | -0.06008 | 0.19496  | -0.05806 | 0.2104   |
| 0.47959  | -0.00888 | 0.84829  | 0.189332 | 3.82E-05 | -0.03896 | 0.40093  | 0.01454  | 0.75399  |
| 0.00584  | 0.05745  | 0.21527  | -0.12976 | 0.00498  | -0.16294 | 0.00041  | -0.05109 | 0.2705   |
| 0.02485  | 0.006992 | 0.88022  | 0.093758 | 0.04285  | 0.035066 | 0.44965  | 0.02959  | 0.52356  |
| 0.05461  | 0.169684 | 0.00023  | 0.072063 | 0.11991  | 0.177703 | 0.00011  | 0.300149 | 3.54E-11 |
| 0.63919  | 0.074753 | 0.10667  | 0.001456 | 0.97497  | -0.0206  | 0.65702  | 0.072381 | 0.11828  |
| 0.00017  | -0.01814 | 0.69574  | -0.16675 | 0.0003   | -0.06197 | 0.18126  | -0.08457 | 0.06787  |
| 0.00025  | -0.03466 | 0.45497  | 0.0144   | 0.75629  | -0.03717 | 0.42297  | -0.05851 | 0.20688  |
| 1.13E-05 | 0.054846 | 0.23683  | -0.01014 | 0.82695  | -0.10687 | 0.0209   | -0.01281 | 0.78249  |
| 0.11432  | 0.055353 | 0.23252  | 0.068536 | 0.13918  | 0.181004 | 8.37E-05 | 0.148526 | 0.00129  |
| 0.03064  | 0.023885 | 0.60666  | 0.035152 | 0.44854  | 0.013837 | 0.76552  | 0.014101 | 0.76118  |
| 0.8087   | -0.16951 | 0.00023  | 0.170386 | 0.00022  | -0.05938 | 0.20023  | -0.12678 | 0.00608  |
| 0.00136  | 0.071052 | 0.12521  | -0.09053 | 0.05056  | -0.06964 | 0.13289  | -0.0395  | 0.39443  |
| 0.00804  | -0.1491  | 0.00123  | -0.10939 | 0.01804  | -0.15818 | 0.0006   | -0.26514 | 5.93E-09 |
| 0.00272  | 0.054413 | 0.24056  | -0.12726 | 0.00589  | -0.25034 | 4.18E-08 | -0.22137 | 1.36E-06 |
| 1.02E-14 | -0.12355 | 0.00752  | -0.08099 | 0.08038  | -0.19591 | 2.01E-05 | -0.24621 | 7.06E-08 |
| 6.12E-10 | -0.1405  | 0.00234  | -0.03712 | 0.4235   | -0.24899 | 4.97E-08 | -0.23458 | 2.94E-07 |
| 0.11964  | 0.129599 | 0.00503  | 0.254095 | 2.58E-08 | 0.076263 | 0.09976  | 0.113327 | 0.01427  |
| 0.99716  | -0.01597 | 0.73077  | 0.20105  | 1.20E-05 | 0.086446 | 0.06196  | 0.104278 | 0.02422  |
| 0.06233  | -0.01993 | 0.66756  | -0.2651  | 5.96E-09 | -0.17094 | 0.00021  | -0.11517 | 0.01276  |
| 0.02627  | -0.05088 | 0.27255  | 0.054003 | 0.24412  | -0.08476 | 0.06725  | -0.1283  | 0.00549  |
| 8.90E-13 | 0.140237 | 0.00239  | -0.03686 | 0.42674  | -0.02228 | 0.63105  | 0.103645 | 0.0251   |
| 0.50604  | 0.003425 | 0.94116  | 0.424231 | 7.97E-22 | 0.142237 | 0.00206  | 0.10139  | 0.02846  |
| 0.53741  | 0.07829  | 0.09104  | 0.078387 | 0.09064  | 0.063143 | 0.17312  | 0.14262  | 0.002    |
| 9.99E-06 | -0.00078 | 0.98656  | 0.002774 | 0.95232  | 0.135201 | 0.00342  | -0.01852 | 0.68984  |
| 7.53E-06 | -0.09854 | 0.03326  | -0.186   | 5.25E-05 | -0.31158 | 5.68E-12 | -0.21772 | 2.04E-06 |
| 0.49546  | -0.14285 | 0.00197  | 0.254325 | 2.50E-08 | 0.002311 | 0.96028  | -0.08194 | 0.07689  |
| 0.00341  | -0.00798 | 0.86353  | -0.06672 | 0.15002  | -0.05777 | 0.21269  | -0.09678 | 0.03656  |

|          |          |          |          |          |          |          |          |          |
|----------|----------|----------|----------|----------|----------|----------|----------|----------|
| 0.00702  | -0.02216 | 0.63287  | -0.24456 | 8.69E-08 | -0.16781 | 0.00027  | -0.15202 | 0.00098  |
| 1.25E-11 | 0.023068 | 0.61903  | 0.044432 | 0.33802  | -0.06142 | 0.18517  | -0.0088  | 0.84965  |
| 0.42711  | -0.00449 | 0.92287  | -0.03953 | 0.39408  | -0.17069 | 0.00021  | -0.12196 | 0.00833  |
| 0.00012  | -0.09697 | 0.03619  | -0.08798 | 0.05744  | -0.0816  | 0.07814  | -0.1641  | 0.00037  |
| 0.58643  | -0.06472 | 0.16259  | -0.23186 | 4.06E-07 | -0.12443 | 0.0071   | -0.1846  | 5.99E-05 |
| 0.00021  | -0.01403 | 0.76241  | -0.08624 | 0.06259  | -0.07391 | 0.11068  | -0.03654 | 0.43085  |
| 0.41191  | -0.03722 | 0.42233  | -0.07593 | 0.10127  | -0.04956 | 0.28514  | -0.08086 | 0.08088  |
| 6.18E-09 | -0.03898 | 0.40067  | -0.09078 | 0.04992  | -0.05313 | 0.25184  | -0.06014 | 0.19452  |
| 0.16152  | 0.096285 | 0.03753  | 0.061973 | 0.18124  | -0.03943 | 0.39522  | 0.053932 | 0.24475  |
| 0.00388  | -0.18617 | 5.17E-05 | -0.03891 | 0.40154  | -0.09659 | 0.03692  | -0.31031 | 6.99E-12 |
| 0.17423  | 0.000467 | 0.99197  | -0.11984 | 0.00954  | -0.16568 | 0.00032  | -0.10523 | 0.02294  |
| 0.30314  | -0.12033 | 0.00924  | -0.03708 | 0.42404  | -0.11862 | 0.0103   | -0.14915 | 0.00123  |
| 2.78E-06 | 0.164622 | 0.00035  | -0.03701 | 0.42492  | -0.06777 | 0.14369  | 0.102114 | 0.02734  |
| 2.18E-09 | -0.02395 | 0.60575  | -0.12387 | 0.00736  | -0.19115 | 3.21E-05 | -0.19431 | 2.36E-05 |
| 0.01416  | -0.12039 | 0.00921  | -0.00481 | 0.91745  | 0.026268 | 0.57123  | -0.06606 | 0.15409  |
| 0.19722  | 0.239998 | 1.53E-07 | -0.04971 | 0.28375  | 0.258965 | 1.36E-08 | 0.34435  | 1.90E-14 |
| 0.99391  | 0.141473 | 0.00218  | -0.19601 | 1.99E-05 | -0.20728 | 6.28E-06 | -0.123   | 0.00779  |
| 0.28795  | 0.077224 | 0.09554  | 0.378891 | 2.17E-17 | 0.243067 | 1.05E-07 | 0.372482 | 8.12E-17 |
| 0.00639  | 0.117595 | 0.01098  | 0.069951 | 0.13118  | 0.237869 | 1.98E-07 | 0.310305 | 6.99E-12 |
| 3.75E-07 | 0.068182 | 0.14124  | 0.052004 | 0.26205  | -0.0542  | 0.24237  | 0.069319 | 0.13471  |
| 0.35681  | 0.054201 | 0.2424   | -0.12223 | 0.00819  | -0.07932 | 0.08685  | -0.05606 | 0.22661  |
| 0.21402  | 0.054073 | 0.24352  | -0.02075 | 0.6547   | 0.004034 | 0.93072  | 0.0439   | 0.34384  |
| 0.01031  | -0.12944 | 0.00509  | -0.21573 | 2.54E-06 | -0.20406 | 8.80E-06 | -0.29317 | 1.04E-10 |
| 0.10784  | 0.294989 | 7.88E-11 | 0.141872 | 0.00212  | 0.139232 | 0.00257  | 0.254187 | 2.55E-08 |
| 0.801    | 0.113402 | 0.01421  | 0.172957 | 0.00017  | 0.205452 | 7.61E-06 | 0.255261 | 2.21E-08 |
| 0.68053  | 0.047932 | 0.3013   | 0.073913 | 0.11067  | 0.092913 | 0.04477  | 0.258371 | 1.47E-08 |
| 0.46891  | 0.011662 | 0.80155  | -0.06584 | 0.15542  | -0.00813 | 0.86083  | -0.00543 | 0.90687  |
| 0.2613   | 0.269607 | 3.21E-09 | 0.091692 | 0.04767  | 0.206957 | 6.50E-06 | 0.319416 | 1.55E-12 |
| 0.71572  | 0.007071 | 0.87888  | -0.11574 | 0.01232  | -0.1297  | 0.005    | -0.13894 | 0.00262  |
| 0.47721  | 0.101466 | 0.02834  | 0.067654 | 0.14435  | 0.084812 | 0.06707  | 0.170712 | 0.00021  |
| 0.54157  | 0.148903 | 0.00125  | 0.02326  | 0.61611  | 0.079735 | 0.08521  | 0.157349 | 0.00064  |
| 0.00066  | 0.055601 | 0.23043  | 0.005739 | 0.90157  | -0.0034  | 0.94161  | 0.139987 | 0.00243  |
| 0.0986   | -0.00558 | 0.90431  | -0.22368 | 1.05E-06 | -0.16423 | 0.00037  | -0.12223 | 0.00819  |
| 1.27E-11 | -0.00567 | 0.90278  | 0.051689 | 0.26496  | -0.01331 | 0.77424  | 0.016751 | 0.71807  |
| 0.1515   | -0.16379 | 0.00038  | -0.05015 | 0.27949  | -0.26513 | 5.93E-09 | -0.30088 | 3.16E-11 |
| 0.00595  | 0.089028 | 0.05453  | -0.04213 | 0.36364  | -0.05684 | 0.22016  | 0.006858 | 0.88249  |
| 0.81367  | 0.009975 | 0.82978  | -0.04434 | 0.33897  | -0.03093 | 0.50487  | 0.013042 | 0.77864  |
| 0.38497  | 0.154542 | 0.00081  | 0.114497 | 0.01329  | 0.068929 | 0.13692  | 0.122195 | 0.00821  |
| 0.22862  | -0.0541  | 0.24329  | 0.026281 | 0.57104  | 0.003117 | 0.94644  | -0.05027 | 0.27828  |
| 6.05E-05 | -0.05914 | 0.20209  | -0.03792 | 0.41358  | -0.01861 | 0.68829  | -0.16435 | 0.00036  |
| 0.553    | 0.062442 | 0.17796  | 0.109524 | 0.0179   | 0.025489 | 0.5827   | 0.032945 | 0.47756  |
| 0.01733  | -0.00278 | 0.95221  | -0.06204 | 0.18079  | -0.07136 | 0.12357  | -0.05297 | 0.25329  |
| 0.00586  | -0.02212 | 0.63343  | 0.171317 | 0.0002   | 0.062136 | 0.18009  | 0.021694 | 0.64007  |
| 0.94428  | 0.007301 | 0.87497  | 0.065443 | 0.15796  | 0.003793 | 0.93485  | -0.04821 | 0.2985   |
| 0.6561   | -0.01592 | 0.73144  | -0.09601 | 0.03807  | -0.11705 | 0.01136  | -0.05011 | 0.27985  |

|          |          |          |          |          |          |          |          |          |
|----------|----------|----------|----------|----------|----------|----------|----------|----------|
| 3.30E-05 | -0.11993 | 0.00948  | 0.058242 | 0.209    | -0.04144 | 0.37154  | -0.08163 | 0.07803  |
| 0.0213   | 0.086279 | 0.06246  | 0.024767 | 0.59343  | 0.086509 | 0.06177  | 0.059544 | 0.19898  |
| 3.73E-06 | -0.05991 | 0.19621  | -0.08674 | 0.06107  | -0.12538 | 0.00667  | -0.15392 | 0.00085  |
| 0.01302  | 0.036283 | 0.43408  | 0.023662 | 0.61002  | -0.02015 | 0.66412  | 0.048282 | 0.29779  |
| 0.61401  | 0.060585 | 0.19123  | 0.069724 | 0.13244  | -0.02799 | 0.54633  | 0.023207 | 0.61691  |
| 0.00012  | 0.145991 | 0.00156  | 0.008238 | 0.85908  | -0.00117 | 0.9799   | 0.057765 | 0.21276  |
| 1.14E-13 | 0.10189  | 0.02769  | -0.14669 | 0.00148  | -0.1786  | 0.0001   | -0.07363 | 0.11206  |
| 0.48166  | -0.026   | 0.57516  | -0.1888  | 4.02E-05 | -0.13968 | 0.00248  | -0.19105 | 3.24E-05 |
| 0.12879  | 0.039403 | 0.39557  | -0.08342 | 0.07169  | 0.009922 | 0.83067  | -0.08276 | 0.07397  |
| 0.18394  | -0.00422 | 0.92745  | 0.012845 | 0.78189  | -0.02145 | 0.6438   | -0.05133 | 0.26829  |
| 0.90767  | 0.126849 | 0.00605  | 0.045579 | 0.32568  | 0.044409 | 0.33827  | 0.116446 | 0.01179  |
| 1.82E-06 | -0.08244 | 0.07512  | -0.0437  | 0.34603  | -0.15949 | 0.00054  | -0.1932  | 2.63E-05 |
| 0.0055   | 0.218448 | 1.88E-06 | 0.004229 | 0.92738  | 0.100841 | 0.02934  | 0.208021 | 5.82E-06 |
| 0.19103  | -0.05681 | 0.2204   | 0.144162 | 0.00179  | -0.11376 | 0.0139   | -0.07335 | 0.11341  |
| 0.00147  | -0.1688  | 0.00025  | 0.030196 | 0.51508  | -0.00204 | 0.96501  | -0.21481 | 2.81E-06 |
| 0.06538  | 0.16957  | 0.00023  | 0.243155 | 1.03E-07 | 0.209929 | 4.75E-06 | 0.285408 | 3.34E-10 |
| 5.70E-06 | -0.02367 | 0.60996  | 0.004387 | 0.92468  | 0.072895 | 0.11569  | -0.0089  | 0.84786  |
| 0.06871  | -0.17105 | 0.0002   | -0.2247  | 9.31E-07 | -0.31784 | 2.02E-12 | -0.32765 | 3.79E-13 |
| 0.11684  | 0.107638 | 0.01999  | 0.081484 | 0.07856  | 0.176621 | 0.00012  | 0.209373 | 5.04E-06 |
| 2.51E-07 | 0.043136 | 0.35231  | -0.04327 | 0.35082  | -0.11185 | 0.01559  | -0.03093 | 0.50488  |
| 1.92E-05 | 0.061057 | 0.18779  | 0.005253 | 0.90985  | 0.000876 | 0.98493  | 0.016691 | 0.71902  |
| 0.73753  | -0.03628 | 0.43406  | -0.10272 | 0.02644  | -0.02926 | 0.52817  | -0.03541 | 0.44518  |
| 0.49448  | -0.00159 | 0.97275  | -0.02327 | 0.61588  | 0.00897  | 0.8467   | -0.00424 | 0.92726  |
| 0.55498  | -0.01403 | 0.76229  | -0.05973 | 0.19759  | 0.01603  | 0.72972  | 0.007239 | 0.87602  |
| 0.83686  | -0.02382 | 0.60766  | -0.0947  | 0.0408   | -0.0412  | 0.37433  | -0.03594 | 0.43841  |
| 0.87944  | -0.0426  | 0.35833  | -0.12435 | 0.00714  | -0.08348 | 0.07149  | -0.07497 | 0.10567  |
| 6.27E-05 | 0.014934 | 0.74755  | 0.015563 | 0.73729  | -0.05685 | 0.2201   | -0.00294 | 0.94947  |
| 0.78781  | -0.0138  | 0.76611  | -0.0003  | 0.99486  | -0.0394  | 0.39564  | -0.03612 | 0.4362   |
| 0.35627  | 0.030215 | 0.51481  | 0.026954 | 0.56122  | -0.02234 | 0.63011  | -0.00431 | 0.92593  |
| 0.84438  | -0.01424 | 0.75888  | -0.05442 | 0.24049  | -0.05949 | 0.19938  | -0.06303 | 0.17393  |
| 0.74157  | -0.0233  | 0.61549  | -0.01093 | 0.81379  | -0.00557 | 0.90439  | -0.00916 | 0.84357  |
| 0.659    | 0.014747 | 0.7506   | -0.05499 | 0.2356   | -0.02637 | 0.56976  | 0.027024 | 0.56021  |
| 7.74E-07 | -0.13329 | 0.00391  | -0.20821 | 5.70E-06 | -0.17454 | 0.00015  | -0.18992 | 3.61E-05 |
| 0.45541  | 0.241918 | 1.21E-07 | 0.101072 | 0.02897  | 0.207755 | 5.98E-06 | 0.314698 | 3.40E-12 |
| 0.08513  | 0.030308 | 0.51353  | -0.0458  | 0.32333  | -0.03051 | 0.51071  | -0.00974 | 0.8337   |
| 0.53002  | 0.059253 | 0.2012   | 0.143936 | 0.00182  | 0.176492 | 0.00013  | 0.242618 | 1.11E-07 |
| 0.98781  | -0.0372  | 0.42255  | -0.07577 | 0.10196  | -0.07641 | 0.09908  | -0.12014 | 0.00935  |
| 0.51836  | -0.03525 | 0.44723  | 0.151703 | 0.00101  | -0.09857 | 0.03321  | -0.10137 | 0.02849  |
| 0.25414  | -0.0351  | 0.44928  | 0.010515 | 0.82072  | -0.12384 | 0.00738  | -0.13184 | 0.00432  |
| 0.00197  | 0.035618 | 0.44256  | -0.02754 | 0.5528   | 0.095424 | 0.03927  | 0.118558 | 0.01034  |
| 0.00014  | -0.01135 | 0.80678  | -0.01573 | 0.73464  | -0.15578 | 0.00073  | -0.08778 | 0.05803  |
| 0.02359  | 0.010223 | 0.82562  | -0.03862 | 0.40505  | -0.08789 | 0.0577   | -0.01989 | 0.66811  |
| 0.26207  | 0.089211 | 0.05404  | -0.0146  | 0.75293  | -0.09178 | 0.04746  | 0.014864 | 0.74869  |
| 0.95444  | 0.065222 | 0.15937  | 0.061762 | 0.18274  | -0.0412  | 0.37433  | -0.00014 | 0.99767  |
| 0.81966  | 0.065002 | 0.16079  | -0.092   | 0.04691  | -0.09382 | 0.04272  | -0.07921 | 0.0873   |

|          |          |          |          |          |          |          |          |          |
|----------|----------|----------|----------|----------|----------|----------|----------|----------|
| 0.10644  | 0.108397 | 0.01912  | -0.00038 | 0.9934   | 0.015836 | 0.73286  | 0.103597 | 0.02517  |
| 0.33119  | 0.160081 | 0.00052  | -0.15763 | 0.00063  | 0.069248 | 0.13511  | 0.118093 | 0.01065  |
| 0.01401  | -0.00738 | 0.87359  | 0.001132 | 0.98054  | -0.03001 | 0.51768  | -0.02065 | 0.65629  |
| 0.14111  | 0.314611 | 3.45E-12 | 0.054579 | 0.23913  | -0.00456 | 0.92165  | 0.119832 | 0.00954  |
| 8.19E-08 | 0.022196 | 0.63234  | -0.10956 | 0.01787  | -0.17003 | 0.00022  | -0.11007 | 0.01734  |
| 0.11468  | 0.064517 | 0.16394  | 0.220908 | 1.43E-06 | 0.005977 | 0.89751  | 0.125865 | 0.00646  |
| 0.53167  | -0.00243 | 0.95817  | -0.11228 | 0.0152   | -0.06262 | 0.17675  | -0.07196 | 0.12045  |
| 0.96852  | -0.08796 | 0.05751  | 0.064886 | 0.16154  | 0.120436 | 0.00918  | -0.0712  | 0.12442  |
| 0.01158  | -0.06248 | 0.1777   | 0.153217 | 0.00089  | 0.124765 | 0.00694  | 0.03975  | 0.39142  |
| 6.27E-06 | 0.073596 | 0.11222  | -0.05271 | 0.25563  | -0.00505 | 0.91328  | 0.060597 | 0.19114  |
| 0.00557  | 0.181876 | 7.72E-05 | -0.06249 | 0.17761  | -0.02887 | 0.53378  | 0.065746 | 0.15604  |
| 4.56E-08 | 0.009476 | 0.83817  | 0.110452 | 0.01695  | 0.020901 | 0.65234  | 0.071564 | 0.1225   |
| 3.01E-05 | -0.00495 | 0.91507  | -0.07601 | 0.10091  | -0.00583 | 0.90007  | -0.08953 | 0.05317  |
| 0.04084  | -0.06057 | 0.19131  | 0.189959 | 3.60E-05 | 0.027196 | 0.55772  | -0.04921 | 0.28855  |
| 6.28E-06 | 0.051858 | 0.26339  | 0.01131  | 0.80741  | -0.01763 | 0.70389  | 0.052301 | 0.25933  |
| 1.11E-05 | -0.0032  | 0.94502  | -0.19413 | 2.40E-05 | -0.19537 | 2.12E-05 | -0.09813 | 0.03399  |
| 0.07997  | 0.009236 | 0.84221  | -0.02142 | 0.6443   | -0.01377 | 0.76661  | -0.0106  | 0.81925  |
| 6.19E-06 | -0.14039 | 0.00236  | -0.13881 | 0.00264  | -0.20521 | 7.81E-06 | -0.23214 | 3.92E-07 |
| 0.00011  | -0.12389 | 0.00735  | -0.02253 | 0.62722  | 0.103075 | 0.02592  | -0.11444 | 0.01334  |
| 8.63E-14 | 0.118871 | 0.01014  | 0.058934 | 0.20364  | 0.003092 | 0.94687  | 0.166869 | 0.00029  |
| 0.14261  | 0.02083  | 0.65344  | 0.046203 | 0.3191   | 0.037414 | 0.41988  | 0.015236 | 0.74262  |
| 0.39757  | -0.09556 | 0.039    | -0.16389 | 0.00038  | -0.13473 | 0.00353  | -0.23984 | 1.56E-07 |
| 3.83E-13 | 0.050103 | 0.27992  | -0.13667 | 0.00308  | -0.10191 | 0.02765  | -0.06014 | 0.19451  |
| 0.16404  | -0.03157 | 0.49609  | -0.0719  | 0.12074  | -0.09269 | 0.04528  | -0.02738 | 0.55511  |
| 3.20E-07 | 0.042334 | 0.36135  | -0.00582 | 0.9002   | 0.008508 | 0.85451  | 0.093288 | 0.04391  |
| 0.2688   | 0.08974  | 0.05262  | 0.065696 | 0.15636  | -0.00624 | 0.893    | 0.052555 | 0.25702  |
| 0.00688  | 0.107221 | 0.02047  | 0.286093 | 3.01E-10 | 0.144277 | 0.00177  | 0.255692 | 2.09E-08 |
| 0.00022  | 0.243694 | 9.67E-08 | 0.148175 | 0.00132  | 0.000758 | 0.98697  | 0.194851 | 2.23E-05 |
| 0.00926  | 0.295659 | 7.11E-11 | -0.01416 | 0.76022  | 0.151273 | 0.00104  | 0.293408 | 1.00E-10 |
| 0.00264  | -0.009   | 0.84625  | 0.140692 | 0.00231  | 0.150065 | 0.00114  | -0.00262 | 0.95496  |
| 3.19E-13 | -0.05057 | 0.27545  | 0.085237 | 0.06571  | 0.044148 | 0.34112  | -0.01185 | 0.79835  |
| 0.01322  | 0.269043 | 3.47E-09 | -0.03643 | 0.43218  | 0.028563 | 0.53808  | 0.18889  | 3.99E-05 |
| 1.25E-05 | 0.059157 | 0.20193  | 0.020427 | 0.65972  | -0.04533 | 0.32834  | -0.00132 | 0.97732  |
| 0.65108  | -0.01576 | 0.73403  | -0.13455 | 0.00358  | -0.09287 | 0.04486  | -0.12776 | 0.0057   |
| 0.00295  | 0.054809 | 0.23715  | -0.2065  | 6.82E-06 | -0.17316 | 0.00017  | -0.11865 | 0.01028  |
| 0.23518  | -0.01627 | 0.72584  | 0.001911 | 0.96714  | -0.01967 | 0.67153  | -0.05013 | 0.27964  |
| 0.00014  | 0.03602  | 0.43742  | -0.00194 | 0.96667  | 0.028337 | 0.54129  | 0.032114 | 0.48875  |
| 0.15141  | -0.01529 | 0.7417   | 0.070976 | 0.12562  | -0.01906 | 0.68118  | -0.025   | 0.58996  |
| 2.14E-11 | 0.060527 | 0.19166  | -0.05289 | 0.25395  | -0.0398  | 0.39085  | 0.022487 | 0.62788  |
| 0.00398  | -0.14046 | 0.00235  | -0.05352 | 0.2484   | -0.04161 | 0.36968  | -0.06583 | 0.15551  |
| 0.12128  | 0.049314 | 0.28757  | -0.22999 | 5.05E-07 | -0.09976 | 0.03113  | -0.0679  | 0.14291  |
| 0.25344  | -0.12632 | 0.00627  | -0.14646 | 0.0015   | -0.1929  | 2.71E-05 | -0.2746  | 1.59E-09 |
| 0.00013  | -0.14243 | 0.00203  | -0.13099 | 0.00458  | -0.27605 | 1.30E-09 | -0.31191 | 5.38E-12 |
| 0.87738  | -0.01843 | 0.69118  | -0.09463 | 0.04095  | -0.08129 | 0.07928  | -0.10243 | 0.02687  |
| 0.30517  | -0.01203 | 0.79544  | 0.091135 | 0.04904  | 0.045893 | 0.32236  | -0.07109 | 0.12501  |

|          |          |          |          |          |          |          |          |          |
|----------|----------|----------|----------|----------|----------|----------|----------|----------|
| 0.19138  | 0.011348 | 0.80678  | 0.080029 | 0.08407  | 0.027159 | 0.55824  | 0.033305 | 0.47276  |
| 0.75072  | -0.165   | 0.00034  | 0.127199 | 0.00591  | -0.17261 | 0.00018  | -0.22324 | 1.10E-06 |
| 0.15741  | 0.003143 | 0.946    | -0.08711 | 0.05998  | 0.064274 | 0.16554  | 0.072942 | 0.11545  |
| 0.27632  | -0.12413 | 0.00724  | 0.141475 | 0.00218  | -0.08729 | 0.05943  | -0.08855 | 0.05584  |
| 0.924    | 0.025615 | 0.58085  | -0.08601 | 0.06328  | -0.08485 | 0.06696  | 0.078026 | 0.09214  |
| 0.57668  | 0.044295 | 0.33952  | -0.01906 | 0.68117  | -0.09375 | 0.04287  | 0.05468  | 0.23826  |
| 0.88921  | 0.00125  | 0.9785   | -0.01499 | 0.74656  | -0.01694 | 0.71499  | 0.003913 | 0.93279  |
| 0.41128  | 0.01077  | 0.81645  | -0.10812 | 0.01943  | -0.0538  | 0.24594  | 0.035264 | 0.4471   |
| 0.41561  | -0.05861 | 0.20612  | -0.02435 | 0.59972  | -0.12467 | 0.00699  | -0.18296 | 6.98E-05 |
| 0.48519  | -0.07459 | 0.10745  | -0.07941 | 0.0865   | -0.17803 | 0.00011  | -0.20286 | 9.95E-06 |
| 0.98154  | 0.18246  | 7.32E-05 | -0.03651 | 0.43123  | -0.01541 | 0.73979  | 0.092349 | 0.04609  |
| 4.47E-12 | 0.062963 | 0.17435  | -0.05559 | 0.23056  | 0.012338 | 0.7903   | 0.10598  | 0.02199  |
| 0.06399  | 0.055789 | 0.22885  | 0.125027 | 0.00683  | 0.096794 | 0.03652  | 0.206503 | 6.82E-06 |
| 0.0829   | 0.033527 | 0.46981  | 0.178632 | 0.0001   | 0.233536 | 3.33E-07 | 0.28401  | 4.10E-10 |
| 0.00017  | 0.034455 | 0.4576   | -0.13494 | 0.00348  | -0.04855 | 0.29511  | 0.005135 | 0.91188  |
| 0.33183  | -0.02588 | 0.57698  | -0.10686 | 0.0209   | -0.04407 | 0.34193  | -0.06602 | 0.15434  |
| 0.80071  | 0.083847 | 0.07025  | 0.005855 | 0.89958  | 0.057009 | 0.21882  | 0.132302 | 0.00418  |
| 0.44974  | -0.02329 | 0.61569  | -0.24405 | 9.26E-08 | -0.13732 | 0.00294  | -0.12156 | 0.00854  |
| 4.40E-07 | 0.023446 | 0.61329  | 0.092799 | 0.04503  | 0.005915 | 0.89856  | 0.102903 | 0.02617  |
| 2.74E-15 | -0.12459 | 0.00702  | 0.03847  | 0.40686  | -0.01982 | 0.66916  | -0.15629 | 0.0007   |
| 0.11982  | -0.00627 | 0.89247  | -0.00522 | 0.91045  | -0.04597 | 0.32151  | -0.04616 | 0.31955  |
| 0.46807  | 0.248931 | 5.01E-08 | 0.050846 | 0.27284  | 0.243849 | 9.49E-08 | 0.357712 | 1.53E-15 |
| 0.09424  | 0.001606 | 0.97239  | 0.021026 | 0.65039  | -0.0305  | 0.51086  | -0.03438 | 0.45852  |
| 0.01334  | -0.14268 | 0.00199  | 0.160239 | 0.00051  | 0.271161 | 2.58E-09 | 0.06346  | 0.17097  |
| 0.86065  | 0.135947 | 0.00324  | -0.01996 | 0.66706  | 0.022095 | 0.63389  | 0.153727 | 0.00086  |
| 0.71155  | 0.020882 | 0.65263  | -0.10644 | 0.02142  | -0.067   | 0.1483   | -0.04605 | 0.32071  |
| 0.09032  | 0.098886 | 0.03264  | -0.07154 | 0.12262  | -0.00794 | 0.86408  | 0.059889 | 0.19639  |
| 0.0006   | 0.092715 | 0.04523  | 0.169083 | 0.00024  | 0.112493 | 0.01501  | 0.136153 | 0.0032   |
| 1.59E-13 | 0.034106 | 0.46217  | -0.19145 | 3.12E-05 | -0.0791  | 0.08774  | -0.01885 | 0.68447  |
| 0.30914  | -0.1575  | 0.00064  | 0.02891  | 0.53314  | -0.02697 | 0.56101  | -0.08481 | 0.06707  |
| 0.04266  | -0.08169 | 0.0778   | 0.095442 | 0.03924  | -0.15598 | 0.00072  | -0.22369 | 1.04E-06 |
| 0.00794  | -0.14332 | 0.0019   | -0.04181 | 0.36734  | -0.152   | 0.00098  | -0.26626 | 5.08E-09 |
| 0.97692  | -0.02009 | 0.66507  | -0.02338 | 0.61423  | -0.09628 | 0.03754  | -0.05458 | 0.2391   |
| 0.00242  | 0.038956 | 0.40096  | 0.039237 | 0.39756  | -0.02582 | 0.57775  | 0.030565 | 0.50996  |
| 0.04465  | 0.198704 | 1.52E-05 | -0.0844  | 0.06842  | 0.064877 | 0.1616   | 0.059175 | 0.20179  |
| 0.43632  | -0.02075 | 0.65465  | 0.012806 | 0.78254  | -0.03186 | 0.49215  | -0.05421 | 0.24229  |
| 0.57267  | 0.011383 | 0.80619  | -0.06007 | 0.195    | -0.06066 | 0.19067  | -0.0381  | 0.41135  |
| 0.81647  | 0.01262  | 0.78562  | -0.14587 | 0.00157  | -0.13577 | 0.00328  | -0.10704 | 0.02069  |
| 0.22526  | -0.03246 | 0.48412  | -0.10937 | 0.01806  | -0.15815 | 0.0006   | -0.17237 | 0.00018  |
| 0.44786  | -0.00573 | 0.90173  | 0.182033 | 7.61E-05 | 0.338857 | 5.19E-14 | 0.229027 | 5.65E-07 |
| 8.70E-07 | 0.080467 | 0.08238  | -0.05675 | 0.22095  | -0.04694 | 0.31142  | -0.07284 | 0.11598  |
| 0.04834  | 0.000307 | 0.99473  | -0.07202 | 0.12012  | -0.02226 | 0.6313   | -0.01378 | 0.76646  |
| 0.34551  | -0.01919 | 0.6791   | -0.03344 | 0.471    | 0.014188 | 0.75976  | -0.04321 | 0.35149  |
| 0.29398  | 0.023235 | 0.61649  | 0.150653 | 0.00109  | 0.055243 | 0.23345  | 0.091551 | 0.04801  |
| 0.16187  | 0.036275 | 0.43418  | 0.089294 | 0.05381  | 0.135074 | 0.00345  | 0.128224 | 0.00552  |

|          |          |          |          |          |          |          |          |          |
|----------|----------|----------|----------|----------|----------|----------|----------|----------|
| 7.17E-08 | -0.02433 | 0.59995  | 0.103238 | 0.02568  | 0.062831 | 0.17526  | 0.030243 | 0.51444  |
| 0.88979  | 0.277624 | 1.04E-09 | 0.129353 | 0.00512  | 0.192495 | 2.82E-05 | 0.379675 | 1.84E-17 |
| 0.67008  | 0.027959 | 0.54671  | 0.080413 | 0.08258  | 0.075843 | 0.10164  | 0.115922 | 0.01218  |
| 0.03463  | -0.08926 | 0.0539   | -0.16758 | 0.00028  | -0.04573 | 0.32404  | -0.14187 | 0.00212  |
| 0.00128  | 0.007179 | 0.87703  | -0.23719 | 2.15E-07 | -0.15679 | 0.00067  | -0.0872  | 0.05971  |
| 0.35575  | 0.303769 | 2.00E-11 | 0.184767 | 5.90E-05 | 0.22401  | 1.01E-06 | 0.376641 | 3.46E-17 |
| 0.73331  | -0.05015 | 0.27951  | -0.09233 | 0.04614  | -0.15266 | 0.00093  | -0.15344 | 0.00088  |
| 0.10069  | 0.071331 | 0.12373  | 0.08331  | 0.07208  | 0.019256 | 0.67811  | 0.186023 | 5.24E-05 |
| 0.18493  | -0.07803 | 0.09211  | 0.163444 | 0.00039  | 0.078726 | 0.08925  | -0.10283 | 0.02627  |
| 0.00012  | 0.053312 | 0.25023  | -0.17465 | 0.00015  | -0.13566 | 0.00331  | -0.0817  | 0.07776  |
| 0.12038  | 0.139726 | 0.00248  | 0.049946 | 0.28143  | 0.110584 | 0.01682  | 0.233321 | 3.41E-07 |
| 5.85E-15 | -0.03302 | 0.47652  | -0.08107 | 0.08011  | -0.0633  | 0.17208  | -0.05983 | 0.19681  |
| 0.33047  | 0.075883 | 0.10146  | 0.226865 | 7.26E-07 | 0.221079 | 1.40E-06 | 0.262953 | 7.97E-09 |
| 3.59E-09 | 0.096219 | 0.03766  | 0.074518 | 0.10777  | 0.077744 | 0.09333  | 0.178167 | 0.00011  |
| 0.12635  | 0.05416  | 0.24276  | 0.18906  | 3.93E-05 | 0.118622 | 0.0103   | 0.188188 | 4.27E-05 |
| 0.85426  | 0.023519 | 0.61219  | 0.176873 | 0.00012  | 0.078457 | 0.09035  | 0.051476 | 0.26693  |
| 0.0018   | -0.00418 | 0.92823  | -0.05882 | 0.20453  | -0.02147 | 0.64352  | -0.02712 | 0.55878  |
| 0.84488  | 0.055557 | 0.2308   | -0.08576 | 0.06406  | -0.05256 | 0.25695  | -0.05142 | 0.26746  |
| 1.77E-05 | 0.049058 | 0.29008  | 0.07789  | 0.09271  | 0.053195 | 0.25126  | 0.054314 | 0.24142  |
| 0.5961   | 0.164894 | 0.00035  | 0.219232 | 1.72E-06 | 0.237995 | 1.95E-07 | 0.235263 | 2.71E-07 |
| 0.82197  | 0.08525  | 0.06567  | -0.05458 | 0.23915  | -0.05565 | 0.23     | -0.00874 | 0.8506   |
| 0.02822  | 0.111708 | 0.01573  | 0.055469 | 0.23154  | -0.01511 | 0.74469  | 0.0973   | 0.03555  |
| 0.44467  | 0.022604 | 0.62609  | -0.06525 | 0.15916  | 0.001217 | 0.97907  | -0.03084 | 0.50612  |
| 0.2778   | 0.215404 | 2.63E-06 | 0.139723 | 0.00248  | 0.253436 | 2.81E-08 | 0.28902  | 1.95E-10 |
| 4.57E-05 | 0.017011 | 0.71388  | 0.08755  | 0.05869  | -0.07672 | 0.09773  | 0.020055 | 0.66554  |
| 0.51667  | 0.125777 | 0.0065   | 0.004519 | 0.92241  | 0.09204  | 0.04682  | 0.049287 | 0.28783  |
| 2.94E-07 | 0.087007 | 0.06028  | 0.195176 | 2.16E-05 | 0.233206 | 3.46E-07 | 0.273041 | 1.99E-09 |
| 0.64332  | 0.021646 | 0.6408   | 0.051511 | 0.26661  | -0.02363 | 0.6105   | 0.010085 | 0.82793  |
| 0.05698  | -0.05688 | 0.2199   | -0.15776 | 0.00062  | -0.15695 | 0.00066  | -0.18252 | 7.28E-05 |
| 0.17633  | 0.217674 | 2.05E-06 | 0.166559 | 0.0003   | -0.00808 | 0.8617   | 0.117357 | 0.01115  |
| 3.46E-12 | 0.021202 | 0.64768  | -0.13433 | 0.00363  | -0.08858 | 0.05577  | -0.00546 | 0.9064   |
| 0.06185  | 0.07269  | 0.11671  | -0.00577 | 0.90099  | -0.03713 | 0.42341  | 0.008859 | 0.84857  |
| 0.91587  | -0.08203 | 0.07656  | -0.06525 | 0.15922  | -0.04206 | 0.36444  | -0.15367 | 0.00086  |
| 3.02E-05 | 0.109197 | 0.01825  | -0.02385 | 0.60716  | -0.02775 | 0.54966  | 0.059065 | 0.20263  |
| 0.00124  | -0.06184 | 0.18219  | -0.01588 | 0.7322   | -0.09756 | 0.03505  | -0.11771 | 0.01091  |
| 0.04741  | 0.314137 | 3.73E-12 | -0.08594 | 0.06351  | 0.021045 | 0.65011  | 0.258739 | 1.40E-08 |
| 0.13795  | 0.274076 | 1.72E-09 | 0.128483 | 0.00543  | 0.215462 | 2.61E-06 | 0.343916 | 2.06E-14 |
| 0.02415  | -0.0981  | 0.03406  | -0.02266 | 0.6252   | 0.131694 | 0.00436  | -0.0758  | 0.10183  |
| 0.06722  | 0.015697 | 0.73512  | 0.231364 | 4.30E-07 | 0.091084 | 0.04917  | 0.055927 | 0.2277   |
| 3.11E-09 | 0.086544 | 0.06166  | 0.101727 | 0.02794  | 0.168431 | 0.00026  | 0.140795 | 0.00229  |
| 0.08862  | 0.140595 | 0.00232  | 0.066366 | 0.15217  | 0.005693 | 0.90234  | 0.14349  | 0.00188  |
| 0.20202  | 0.022995 | 0.62013  | 0.136764 | 0.00306  | 0.272289 | 2.21E-09 | 0.279935 | 7.43E-10 |
| 1.64E-06 | 0.083247 | 0.07229  | 0.008653 | 0.85206  | 0.014267 | 0.75846  | 0.115118 | 0.0128   |
| 0.07281  | 0.005214 | 0.91053  | 0.24637  | 6.92E-08 | 0.18582  | 5.34E-05 | 0.195578 | 2.08E-05 |
| 2.22E-05 | -0.01956 | 0.67337  | -0.12837 | 0.00547  | -0.15096 | 0.00107  | -0.11943 | 0.00979  |

|          |          |          |          |          |          |          |          |          |
|----------|----------|----------|----------|----------|----------|----------|----------|----------|
| 9.55E-09 | 0.001011 | 0.98262  | -0.11191 | 0.01554  | -0.1184  | 0.01044  | -0.10284 | 0.02627  |
| 0.56259  | 0.065042 | 0.16053  | -0.10108 | 0.02896  | -0.06348 | 0.17086  | -0.02191 | 0.63672  |
| 0.1454   | 0.013343 | 0.77367  | -0.06409 | 0.16678  | -0.03178 | 0.49325  | -0.15791 | 0.00062  |
| 0.05336  | 0.109063 | 0.01839  | -0.15261 | 0.00094  | -0.00087 | 0.98506  | 0.083964 | 0.06986  |
| 0.46939  | -0.04707 | 0.31006  | 0.083144 | 0.07264  | 0.049182 | 0.28886  | 0.037713 | 0.41617  |
| 0.16512  | 0.038202 | 0.41014  | -0.15915 | 0.00056  | -0.17111 | 0.0002   | -0.2588  | 1.39E-08 |
| 0.31678  | 0.051614 | 0.26564  | 0.202249 | 1.06E-05 | 0.106043 | 0.02191  | 0.179179 | 9.89E-05 |
| 0.06232  | -0.03098 | 0.50428  | -0.14354 | 0.00187  | -0.14343 | 0.00189  | -0.09493 | 0.0403   |
| 0.16427  | 0.000675 | 0.98838  | -0.16916 | 0.00024  | -0.12864 | 0.00537  | -0.09072 | 0.05009  |
| 0.90548  | -0.09512 | 0.0399   | -0.07852 | 0.0901   | -0.1414  | 0.00219  | -0.19008 | 3.56E-05 |
| 0.25233  | 0.062411 | 0.17817  | 0.097688 | 0.03482  | 0.047326 | 0.30747  | 0.108849 | 0.01863  |
| 0.10634  | -0.02721 | 0.55748  | -0.11569 | 0.01235  | -0.09649 | 0.03712  | -0.09182 | 0.04736  |
| 0.35609  | -0.13812 | 0.00278  | -0.08786 | 0.05778  | -0.25386 | 2.66E-08 | -0.28681 | 2.71E-10 |
| 0.24599  | 0.068951 | 0.1368   | -0.07134 | 0.12368  | 0.046753 | 0.31336  | 0.129637 | 0.00502  |
| 0.51076  | -0.02783 | 0.54851  | -0.04927 | 0.28799  | -0.17388 | 0.00016  | -0.16235 | 0.00043  |
| 0.50115  | 0.001497 | 0.97427  | -0.10596 | 0.02201  | -0.05633 | 0.22437  | -0.09954 | 0.03149  |
| 0.11195  | 0.024827 | 0.59254  | -0.0819  | 0.07706  | -0.0966  | 0.03691  | -0.00277 | 0.95233  |
| 0.94187  | 0.06331  | 0.17199  | 0.066768 | 0.1497   | -0.05163 | 0.26554  | 0.000506 | 0.9913   |
| 0.06038  | -0.11295 | 0.0146   | -0.1758  | 0.00013  | -0.12045 | 0.00918  | -0.21544 | 2.62E-06 |
| 0.02992  | 0.15772  | 0.00062  | 0.333929 | 1.26E-13 | 0.225524 | 8.47E-07 | 0.372457 | 8.16E-17 |
| 0.04055  | 0.012408 | 0.78913  | -0.09329 | 0.04391  | -0.07151 | 0.12279  | -0.01491 | 0.74799  |
| 0.64762  | 0.124937 | 0.00687  | -0.13326 | 0.00391  | -0.0005  | 0.99145  | 0.067643 | 0.14442  |
| 0.00043  | 0.058074 | 0.21032  | -0.0513  | 0.26859  | -0.02775 | 0.54977  | -0.00483 | 0.91702  |
| 0.91338  | 0.001665 | 0.97138  | 0.024236 | 0.60139  | 0.034796 | 0.45315  | 0.074179 | 0.10939  |
| 0.17086  | 0.000687 | 0.98818  | 0.095629 | 0.03885  | 0.127128 | 0.00594  | 0.073898 | 0.11075  |
| 0.01133  | -0.0207  | 0.65553  | -0.00435 | 0.92533  | -0.03893 | 0.40125  | -0.01951 | 0.67413  |
| 0.26337  | 0.055596 | 0.23047  | -0.13582 | 0.00327  | -0.03815 | 0.41079  | 0.049777 | 0.28306  |
| 4.71E-08 | -0.13361 | 0.00382  | 0.146118 | 0.00154  | 0.089502 | 0.05325  | -0.06098 | 0.18835  |
| 0.09667  | -0.02127 | 0.64657  | -0.04729 | 0.3078   | 0.005353 | 0.90816  | -0.01212 | 0.79386  |
| 2.54E-07 | -0.01343 | 0.77223  | 0.099672 | 0.03128  | 0.123752 | 0.00742  | 0.048394 | 0.29667  |
| 0.07679  | 0.103267 | 0.02564  | 0.081484 | 0.07856  | 0.136721 | 0.00307  | 0.249821 | 4.47E-08 |
| 0.35215  | -0.1008  | 0.0294   | -0.0327  | 0.48086  | -0.10107 | 0.02898  | -0.17659 | 0.00013  |
| 0.79467  | -0.23431 | 3.03E-07 | -0.17311 | 0.00017  | -0.14074 | 0.0023   | -0.27853 | 9.09E-10 |
| 0.00236  | 0.153431 | 0.00088  | 0.223859 | 1.02E-06 | 0.225146 | 8.85E-07 | 0.195461 | 2.10E-05 |
| 9.66E-08 | -0.04071 | 0.38003  | 0.301262 | 2.97E-11 | 0.085068 | 0.06625  | 0.006929 | 0.88129  |
| 0.33766  | -0.08504 | 0.06635  | 0.015243 | 0.7425   | 0.000208 | 0.99642  | -0.12954 | 0.00505  |
| 0.00041  | 0.127038 | 0.00598  | 0.229487 | 5.36E-07 | 0.052742 | 0.25533  | 0.167985 | 0.00027  |
| 6.24E-05 | -0.05156 | 0.26612  | -0.02142 | 0.64423  | 0.069216 | 0.13529  | 0.010776 | 0.81634  |
| 0.00238  | 0.007381 | 0.87361  | 0.318166 | 1.91E-12 | 0.139306 | 0.00255  | 0.151309 | 0.00104  |
| 0.03312  | -0.30394 | 1.95E-11 | 0.025292 | 0.58563  | -0.18146 | 8.03E-05 | -0.28663 | 2.78E-10 |
| 0.03306  | -0.03364 | 0.46827  | -0.06385 | 0.16837  | -0.08775 | 0.0581   | -0.11705 | 0.01136  |
| 0.00052  | -0.19715 | 1.78E-05 | -0.12825 | 0.00551  | -0.10688 | 0.02088  | -0.33741 | 6.75E-14 |
| 8.69E-07 | -0.04522 | 0.32955  | 0.176939 | 0.00012  | 0.283704 | 4.29E-10 | 0.149721 | 0.00117  |
| 0.95341  | -0.18643 | 5.04E-05 | 0.199111 | 1.46E-05 | -0.06605 | 0.15412  | -0.19408 | 2.41E-05 |
| 0.77911  | -0.15739 | 0.00064  | -0.23097 | 4.51E-07 | -0.19991 | 1.35E-05 | -0.29702 | 5.76E-11 |

|          |          |          |          |          |          |          |          |          |
|----------|----------|----------|----------|----------|----------|----------|----------|----------|
| 0.9539   | -0.08188 | 0.07712  | 0.128073 | 0.00558  | -0.06386 | 0.16827  | -0.12922 | 0.00516  |
| 0.14572  | 0.020541 | 0.65794  | 0.069823 | 0.13189  | 0.077769 | 0.09322  | 0.074278 | 0.10892  |
| 2.82E-08 | -0.11475 | 0.01309  | -0.0397  | 0.39197  | -0.04116 | 0.37478  | -0.14896 | 0.00124  |
| 0.00015  | -0.00928 | 0.84156  | 0.045579 | 0.32569  | -0.05221 | 0.26014  | -0.07676 | 0.09755  |
| 2.49E-06 | 0.039822 | 0.39056  | 0.177437 | 0.00012  | 0.075474 | 0.10332  | 0.089489 | 0.05329  |
| 0.01524  | -0.09396 | 0.04241  | -0.08929 | 0.05382  | -0.11713 | 0.0113   | -0.19016 | 3.53E-05 |
| 4.09E-07 | 0.081981 | 0.07675  | 0.133868 | 0.00375  | 0.145273 | 0.00165  | 0.234333 | 3.02E-07 |
| 1.01E-13 | -0.18781 | 4.42E-05 | -0.08513 | 0.06605  | -0.06829 | 0.14064  | -0.26988 | 3.09E-09 |
| 0.10767  | 0.137979 | 0.00281  | -0.11375 | 0.01391  | 0.052714 | 0.25558  | 0.139065 | 0.0026   |
| 4.93E-09 | -0.02618 | 0.57248  | 0.074442 | 0.10814  | 0.044736 | 0.33473  | 0.023478 | 0.6128   |
| 0.00064  | 0.246358 | 6.93E-08 | 0.014837 | 0.74914  | 0.069465 | 0.13389  | 0.202485 | 1.03E-05 |
| 0.02207  | 0.088215 | 0.05679  | 0.295779 | 6.98E-11 | 0.181437 | 8.04E-05 | 0.190741 | 3.34E-05 |
| 0.17791  | -0.1527  | 0.00093  | -0.22359 | 1.06E-06 | -0.21335 | 3.29E-06 | -0.29643 | 6.31E-11 |
| 0.07528  | -0.04302 | 0.35363  | 0.001523 | 0.97382  | -0.13044 | 0.00475  | -0.09701 | 0.03611  |
| 3.61E-09 | 0.145567 | 0.00161  | -0.00364 | 0.9374   | 0.155988 | 0.00072  | 0.227938 | 6.42E-07 |
| 0.39763  | -0.03015 | 0.51572  | -0.08878 | 0.05522  | -0.06825 | 0.14083  | -0.09559 | 0.03893  |
| 0.03949  | 0.145194 | 0.00166  | 0.033255 | 0.47342  | 0.193203 | 2.63E-05 | 0.356305 | 2.00E-15 |
| 0.89754  | 0.006171 | 0.89419  | -0.08991 | 0.05218  | 0.03652  | 0.43108  | 0.025137 | 0.58792  |
| 0.01354  | -0.02591 | 0.5765   | 0.12336  | 0.00761  | 0.062877 | 0.17495  | -0.00334 | 0.94258  |
| 0.27204  | 0.09524  | 0.03966  | 0.0616   | 0.18389  | 0.028828 | 0.53431  | 0.048591 | 0.2947   |
| 0.58479  | 0.036016 | 0.43746  | 0.090311 | 0.05113  | 0.195494 | 2.10E-05 | 0.18402  | 6.33E-05 |
| 0.02651  | -0.07551 | 0.10314  | 0.100707 | 0.02956  | -0.02927 | 0.52809  | -0.10237 | 0.02695  |
| 2.29E-06 | -0.10517 | 0.02302  | 0.064277 | 0.16552  | -0.12166 | 0.00849  | -0.15194 | 0.00099  |
| 2.61E-06 | -0.28597 | 3.07E-10 | 0.016713 | 0.71867  | -0.20723 | 6.32E-06 | -0.32685 | 4.35E-13 |
| 8.33E-09 | 0.055631 | 0.23017  | 0.093399 | 0.04366  | 0.041728 | 0.36827  | 0.15988  | 0.00052  |
| 0.79573  | 0.008429 | 0.85585  | -0.0065  | 0.88854  | -0.02459 | 0.59609  | 0.000927 | 0.98406  |
| 0.00798  | 0.106931 | 0.02082  | 0.012579 | 0.78629  | 0.023261 | 0.6161   | 0.201271 | 1.17E-05 |
| 0.5245   | -0.01679 | 0.71746  | 0.149752 | 0.00117  | 0.01159  | 0.80274  | -0.01119 | 0.80945  |
| 0.01971  | -0.15404 | 0.00084  | 0.299324 | 4.03E-11 | 0.085212 | 0.06579  | 0.030458 | 0.51145  |
| 0.13883  | -0.0464  | 0.31705  | -0.05785 | 0.21208  | -0.01971 | 0.67103  | -0.03922 | 0.39775  |
| 0.10384  | -0.16421 | 0.00037  | -0.21414 | 3.02E-06 | -0.19665 | 1.87E-05 | -0.2094  | 5.03E-06 |
| 0.06837  | 0.003879 | 0.93337  | -0.1221  | 0.00826  | -0.10098 | 0.02911  | -0.05768 | 0.21346  |
| 0.00691  | -0.02983 | 0.52018  | -0.09029 | 0.05118  | -0.02573 | 0.57915  | -0.05101 | 0.27131  |
| 0.00099  | 0.110282 | 0.01712  | 0.077507 | 0.09433  | 0.085612 | 0.06453  | 0.176779 | 0.00012  |
| 0.00286  | 0.040032 | 0.38807  | -0.10227 | 0.02711  | 0.028165 | 0.54377  | 0.06488  | 0.16158  |
| 3.63E-09 | 0.110983 | 0.01642  | -0.04301 | 0.35376  | -0.05169 | 0.26496  | 0.008906 | 0.84779  |
| 4.44E-06 | 0.021565 | 0.64205  | -0.06648 | 0.15149  | -0.03785 | 0.41448  | -0.03659 | 0.43015  |
| 0.13011  | 0.436781 | 3.54E-23 | 0.007153 | 0.87748  | 0.012193 | 0.79271  | 0.051501 | 0.26669  |
| 0.97969  | 0.030223 | 0.51471  | 0.177689 | 0.00011  | 0.135296 | 0.0034   | 0.143101 | 0.00193  |
| 0.04271  | 0.050673 | 0.27447  | -0.01622 | 0.72671  | -0.0158  | 0.73352  | 0.04569  | 0.32451  |
| 0.53596  | 0.048011 | 0.3005   | -0.01172 | 0.80061  | -0.01132 | 0.80726  | 0.013541 | 0.7704   |
| 0.02363  | -0.06699 | 0.14834  | 0.074537 | 0.10769  | -0.02453 | 0.59694  | -0.14086 | 0.00228  |
| 0.01337  | 0.001888 | 0.96754  | 0.004601 | 0.92101  | -0.07059 | 0.12766  | -0.0259  | 0.57661  |
| 5.03E-14 | 0.007191 | 0.87683  | -0.06024 | 0.1938   | -0.12706 | 0.00597  | -0.05197 | 0.26239  |
| 0.11495  | -0.0253  | 0.58546  | -0.15859 | 0.00058  | -0.09501 | 0.04013  | -0.09653 | 0.03705  |



|          |          |          |          |          |          |          |          |          |
|----------|----------|----------|----------|----------|----------|----------|----------|----------|
| 1.16E-06 | 0.146913 | 0.00145  | -0.00642 | 0.89002  | 0.047078 | 0.31001  | 0.154087 | 0.00084  |
| 0.00024  | -0.12841 | 0.00545  | 0.184839 | 5.86E-05 | 0.059682 | 0.19794  | 0.079831 | 0.08483  |
| 0.43915  | 0.144289 | 0.00177  | 0.414632 | 7.90E-21 | 0.277383 | 1.07E-09 | 0.354681 | 2.73E-15 |
| 0.91503  | 0.082098 | 0.07633  | 0.264378 | 6.57E-09 | 0.137756 | 0.00285  | 0.255314 | 2.20E-08 |
| 0.94779  | -0.16584 | 0.00032  | -0.30724 | 1.15E-11 | -0.28908 | 1.93E-10 | -0.40582 | 6.09E-20 |
| 0.39069  | -0.11632 | 0.01188  | 0.055649 | 0.23003  | -0.11958 | 0.00969  | -0.17947 | 9.63E-05 |
| 0.3121   | -0.03326 | 0.47342  | -0.15287 | 0.00092  | -0.14809 | 0.00133  | -0.14273 | 0.00199  |
| 0.03     | -0.06107 | 0.18773  | -0.16083 | 0.00048  | -0.14987 | 0.00116  | -0.17541 | 0.00014  |
| 0.00203  | -0.00139 | 0.9761   | -0.14543 | 0.00163  | -0.11099 | 0.01642  | -0.04204 | 0.3647   |
| 3.22E-06 | -0.22405 | 1.00E-06 | -0.16414 | 0.00037  | -0.14696 | 0.00145  | -0.26825 | 3.87E-09 |
| 0.0055   | -0.08445 | 0.06825  | -0.15206 | 0.00098  | -0.224   | 1.01E-06 | -0.21196 | 3.82E-06 |
| 0.01602  | -0.04456 | 0.33665  | -0.03228 | 0.48649  | -0.18622 | 5.14E-05 | -0.17829 | 0.00011  |
| 0.21727  | 0.167941 | 0.00027  | -0.03634 | 0.43332  | 0.182725 | 7.14E-05 | 0.324822 | 6.17E-13 |
| 0.17293  | -0.02133 | 0.64572  | -0.10867 | 0.01882  | -0.1067  | 0.02109  | -0.10039 | 0.03007  |
| 0.00718  | 0.016335 | 0.72479  | -0.03378 | 0.46649  | -0.09005 | 0.05179  | 0.035842 | 0.43968  |
| 4.70E-07 | -0.12016 | 0.00935  | 0.004024 | 0.93089  | 0.136268 | 0.00317  | 0.032333 | 0.48578  |
| 0.08787  | 0.060931 | 0.18871  | 0.050684 | 0.27437  | 0.002531 | 0.9565   | 0.040921 | 0.37761  |
| 0.54121  | 0.052704 | 0.25568  | -0.2356  | 2.60E-07 | -0.05712 | 0.21791  | -0.02642 | 0.56905  |
| 0.66226  | 0.003265 | 0.9439   | -0.052   | 0.26205  | -0.04026 | 0.38534  | -0.06224 | 0.1794   |
| 0.54091  | 0.02553  | 0.5821   | -0.06784 | 0.14325  | -0.02267 | 0.62507  | 0.077166 | 0.0958   |
| 0.00056  | 0.017909 | 0.6995   | 0.087311 | 0.05938  | 0.104873 | 0.02342  | 0.162324 | 0.00043  |
| 0.1055   | 0.027487 | 0.5535   | 0.092505 | 0.04572  | -0.12048 | 0.00916  | -0.06073 | 0.19017  |
| 0.84812  | 0.02224  | 0.63167  | 0.054726 | 0.23786  | 0.009136 | 0.8439   | 0.006884 | 0.88205  |
| 1.53E-05 | -0.00507 | 0.91304  | -0.11289 | 0.01465  | -0.11676 | 0.01156  | -0.08316 | 0.0726   |
| 0.5073   | 0.033627 | 0.46849  | -0.01198 | 0.79617  | 0.045106 | 0.33073  | 0.068135 | 0.14151  |
| 8.88E-06 | -0.03366 | 0.46807  | 0.113165 | 0.01441  | 0.125555 | 0.00659  | 0.118966 | 0.01008  |
| 2.02E-09 | 0.029363 | 0.52674  | 0.050332 | 0.27772  | 0.128988 | 0.00524  | 0.076349 | 0.09937  |
| 1.12E-08 | 0.0043   | 0.92616  | 0.049936 | 0.28152  | 0.099735 | 0.03117  | 0.145321 | 0.00164  |
| 0.03891  | 0.14138  | 0.0022   | 0.020074 | 0.66524  | -0.0004  | 0.99305  | 0.107842 | 0.01975  |
| 0.5507   | -0.08168 | 0.07785  | -0.14256 | 0.00201  | -0.01811 | 0.69621  | -0.05397 | 0.24441  |
| 0.09831  | 0.119626 | 0.00967  | 0.245062 | 8.16E-08 | 0.18486  | 5.85E-05 | 0.256188 | 1.96E-08 |
| 1.14E-07 | 0.021408 | 0.64448  | 0.287407 | 2.48E-10 | 0.273809 | 1.78E-09 | 0.31255  | 4.85E-12 |
| 0.22436  | 0.032475 | 0.48387  | -0.01666 | 0.7196   | -0.08387 | 0.07016  | -0.05784 | 0.21218  |
| 0.12985  | 0.028969 | 0.53231  | 0.043223 | 0.35135  | -0.04979 | 0.28294  | 0.027824 | 0.54865  |
| 0.00013  | -0.00779 | 0.86661  | 0.079078 | 0.08783  | 0.054359 | 0.24103  | 0.041412 | 0.3719   |
| 0.50402  | -0.01632 | 0.72503  | 0.030243 | 0.51443  | 0.014774 | 0.75016  | -0.07155 | 0.12255  |
| 4.52E-11 | 0.179947 | 9.22E-05 | 0.051111 | 0.27035  | -0.02647 | 0.56835  | 0.040967 | 0.37707  |
| 0.11371  | -0.15694 | 0.00067  | -0.06316 | 0.17299  | -0.13283 | 0.00403  | -0.26185 | 9.24E-09 |
| 0.14858  | -0.06719 | 0.14713  | -0.10176 | 0.02789  | -0.17521 | 0.00014  | -0.11358 | 0.01405  |
| 4.42E-12 | 0.009466 | 0.83834  | -0.09389 | 0.04256  | 0.043791 | 0.34504  | -0.01285 | 0.78184  |
| 1.36E-11 | 0.091858 | 0.04726  | 0.056969 | 0.21914  | 0.058134 | 0.20985  | 0.13294  | 0.004    |
| 0.26211  | 0.118886 | 0.01013  | -0.04873 | 0.29331  | 0.112157 | 0.01531  | 0.126763 | 0.00609  |
| 0.31053  | -0.08737 | 0.05922  | -0.15762 | 0.00063  | -0.13899 | 0.00261  | -0.13857 | 0.00269  |
| 0.01119  | -0.0773  | 0.09523  | 0.082979 | 0.07322  | 0.067203 | 0.14705  | 0.104259 | 0.02425  |
| 0.201    | -0.15519 | 0.00077  | -0.05127 | 0.26887  | -0.18962 | 3.72E-05 | -0.2817  | 5.75E-10 |

|          |          |          |          |          |          |          |          |          |
|----------|----------|----------|----------|----------|----------|----------|----------|----------|
| 0.00036  | 0.104097 | 0.02447  | 0.004719 | 0.919    | -0.0624  | 0.17822  | 0.085779 | 0.064    |
| 0.87988  | -0.01642 | 0.72343  | -0.03387 | 0.4653   | 0.010551 | 0.82011  | -0.03944 | 0.39514  |
| 0.84584  | -0.01642 | 0.72333  | 0.025772 | 0.57852  | -0.01086 | 0.81488  | -0.02389 | 0.60651  |
| 4.82E-07 | 0.005197 | 0.91082  | -0.15856 | 0.00058  | -0.06802 | 0.14218  | -0.03734 | 0.42077  |
| 0.5468   | 0.01742  | 0.70731  | -0.05352 | 0.24842  | -0.04294 | 0.3545   | -0.01743 | 0.70713  |
| 0.88148  | -0.10451 | 0.0239   | -0.26921 | 3.39E-09 | -0.12857 | 0.00539  | -0.13555 | 0.00334  |
| 0.58331  | 0.139069 | 0.0026   | 0.245434 | 7.79E-08 | 0.242821 | 1.08E-07 | 0.304661 | 1.74E-11 |
| 0.00411  | 0.040683 | 0.38039  | -0.01463 | 0.75247  | -0.04728 | 0.30793  | 0.059545 | 0.19897  |
| 9.32E-07 | -0.08845 | 0.05612  | -0.07232 | 0.11857  | -0.07474 | 0.10674  | -0.22316 | 1.11E-06 |
| 0.3559   | -0.1821  | 7.56E-05 | -0.23    | 5.04E-07 | -0.23039 | 4.82E-07 | -0.35212 | 4.45E-15 |
| 0.0359   | -0.13434 | 0.00363  | -0.12062 | 0.00907  | -0.1125  | 0.015    | -0.25135 | 3.67E-08 |
| 0.6475   | 0.011755 | 0.79999  | -0.07436 | 0.10853  | -0.08635 | 0.06225  | -0.13281 | 0.00404  |
| 0.49427  | 0.160331 | 0.00051  | 0.176261 | 0.00013  | 0.256695 | 1.83E-08 | 0.326922 | 4.29E-13 |
| 0.02044  | 0.014484 | 0.75491  | 0.057888 | 0.21179  | 0.001028 | 0.98233  | 0.048289 | 0.29772  |
| 1.76E-05 | 0.04005  | 0.38785  | -0.01094 | 0.81365  | -0.08473 | 0.06735  | -0.03436 | 0.45882  |
| 0.01727  | 0.151943 | 0.00099  | -0.01818 | 0.69522  | 0.111314 | 0.0161   | 0.256926 | 1.78E-08 |
| 0.00056  | 0.058884 | 0.20402  | 0.365791 | 3.12E-16 | 0.218121 | 1.95E-06 | 0.309487 | 7.99E-12 |
| 0.6236   | 0.01539  | 0.74011  | -0.0678  | 0.1435   | -0.02503 | 0.58954  | -0.02946 | 0.52533  |
| 0.39011  | 0.017538 | 0.70542  | 0.006587 | 0.88711  | 0.113746 | 0.01391  | 0.078927 | 0.08844  |
| 0.70805  | 0.091119 | 0.04908  | 0.335564 | 9.39E-14 | 0.289023 | 1.95E-10 | 0.348239 | 9.25E-15 |
| 0.11023  | 0.031076 | 0.50292  | 0.184446 | 6.08E-05 | -0.01014 | 0.82705  | 0.112834 | 0.0147   |
| 0.82837  | -0.04892 | 0.29149  | -0.12644 | 0.00622  | -0.09669 | 0.03673  | -0.11771 | 0.0109   |
| 0.74696  | 0.015365 | 0.74051  | 0.145597 | 0.00161  | 0.138117 | 0.00278  | 0.06564  | 0.15671  |
| 9.29E-05 | 0.111709 | 0.01573  | 0.047225 | 0.3085   | 0.017379 | 0.70797  | 0.158309 | 0.0006   |
| 0.11324  | 0.058243 | 0.20899  | 0.196642 | 1.87E-05 | 0.071505 | 0.12281  | 0.150174 | 0.00113  |
| 0.0005   | -0.11941 | 0.0098   | -0.20566 | 7.45E-06 | -0.05076 | 0.27364  | -0.2698  | 3.12E-09 |
| 0.00082  | 0.029542 | 0.52424  | -0.05439 | 0.24077  | -0.10564 | 0.02241  | -0.1255  | 0.00662  |
| 0.00054  | 0.072332 | 0.11853  | -0.0693  | 0.13481  | -0.081   | 0.08036  | 0.043824 | 0.34467  |
| 0.71927  | 0.462009 | 4.53E-26 | 0.123482 | 0.00755  | 0.129399 | 0.0051   | 0.361667 | 7.06E-16 |
| 0.00201  | -0.00717 | 0.87722  | 0.009415 | 0.83919  | -0.0874  | 0.05913  | -0.05662 | 0.22195  |
| 0.0028   | 0.010986 | 0.81282  | 0.071974 | 0.12037  | 0.04649  | 0.3161   | 0.038378 | 0.40799  |
| 0.02249  | -0.16852 | 0.00025  | -0.06302 | 0.17396  | -0.15144 | 0.00103  | -0.24961 | 4.59E-08 |
| 4.22E-09 | -0.01553 | 0.73785  | -0.23203 | 3.97E-07 | -0.13658 | 0.0031   | -0.11322 | 0.01436  |
| 0.00472  | -0.19522 | 2.15E-05 | -0.1583  | 0.0006   | -0.23924 | 1.67E-07 | -0.33777 | 6.32E-14 |
| 0.01541  | -0.07638 | 0.09922  | 0.155567 | 0.00074  | -0.0027  | 0.95358  | -0.07452 | 0.10775  |
| 0.00077  | -0.0359  | 0.43895  | 0.13405  | 0.00371  | 0.168026 | 0.00026  | 0.056658 | 0.22167  |
| 5.22E-05 | -0.07873 | 0.08923  | 0.09895  | 0.03253  | 0.081282 | 0.07931  | -0.05466 | 0.23845  |
| 2.03E-12 | -0.06418 | 0.16618  | 0.055898 | 0.22794  | 0.012195 | 0.79267  | -0.08664 | 0.06137  |
| 0.3298   | -0.11867 | 0.01027  | -0.12019 | 0.00933  | -0.18309 | 6.90E-05 | -0.21259 | 3.57E-06 |
| 0.25022  | -0.0192  | 0.67898  | -0.23323 | 3.45E-07 | -0.10499 | 0.02326  | -0.09894 | 0.03254  |
| 0.01167  | 0.121383 | 0.00864  | 0.069821 | 0.13191  | 0.148567 | 0.00128  | 0.249396 | 4.72E-08 |
| 2.41E-13 | 0.091437 | 0.04829  | 0.094749 | 0.04069  | 0.041727 | 0.36828  | 0.114484 | 0.0133   |
| 1.46E-08 | -0.15784 | 0.00062  | -0.09429 | 0.04169  | -0.15831 | 0.0006   | -0.25332 | 2.85E-08 |
| 2.89E-05 | 0.066802 | 0.14949  | -0.06496 | 0.16108  | -0.03181 | 0.49289  | 0.024444 | 0.59826  |
| 0.00105  | -0.00644 | 0.88963  | -0.08132 | 0.07916  | -0.12188 | 0.00838  | -0.02654 | 0.56731  |

|          |          |          |          |          |          |          |          |          |
|----------|----------|----------|----------|----------|----------|----------|----------|----------|
| 7.43E-06 | -0.0109  | 0.81422  | -0.0195  | 0.67426  | -0.10655 | 0.02129  | -0.03747 | 0.41913  |
| 0.45541  | 0.150844 | 0.00108  | -0.07942 | 0.08645  | 0.026404 | 0.56925  | 0.129053 | 0.00522  |
| 0.0064   | 0.041032 | 0.37631  | -0.00287 | 0.95066  | 0.095155 | 0.03983  | 0.058053 | 0.21049  |
| 0.16498  | 0.036575 | 0.43038  | -0.10066 | 0.02963  | -0.04742 | 0.3065   | -0.06327 | 0.17226  |
| 5.61E-06 | -0.01069 | 0.81785  | 0.379793 | 1.80E-17 | 0.052338 | 0.259    | 0.056065 | 0.22655  |
| 0.0003   | 0.050408 | 0.27699  | -0.02871 | 0.53596  | -0.1183  | 0.01051  | -0.02099 | 0.65094  |
| 0.00029  | 0.011543 | 0.80352  | -0.07662 | 0.09817  | -0.01229 | 0.79103  | 0.002305 | 0.96038  |
| 0.55876  | 0.010344 | 0.82358  | -0.00267 | 0.95415  | 0.01697  | 0.71454  | 0.010546 | 0.8202   |
| 0.95051  | -0.03854 | 0.40602  | -0.0138  | 0.76608  | -0.03379 | 0.46637  | -0.07953 | 0.08601  |
| 0.44153  | 0.011962 | 0.79655  | 0.012252 | 0.79173  | 0.023961 | 0.60551  | 0.01977  | 0.67001  |
| 0.00126  | 0.031184 | 0.50143  | 0.027434 | 0.55427  | -0.00738 | 0.87362  | 0.01351  | 0.7709   |
| 0.95904  | 0.010899 | 0.81429  | -0.05323 | 0.251    | -0.02525 | 0.58619  | -0.01942 | 0.67556  |
| 0.02717  | 0.040166 | 0.38648  | -0.0306  | 0.50954  | -0.04848 | 0.29583  | -0.03563 | 0.44238  |
| 0.00128  | 0.051681 | 0.26503  | -0.04682 | 0.31266  | 0.052568 | 0.25691  | 0.135694 | 0.0033   |
| 0.00052  | -0.01613 | 0.72806  | -0.04199 | 0.36531  | -0.01903 | 0.68172  | -0.03342 | 0.47124  |
| 0.00247  | -0.03106 | 0.50316  | -0.06653 | 0.15114  | -0.03468 | 0.45464  | -0.04782 | 0.30245  |
| 0.04231  | 0.015223 | 0.74284  | 0.094171 | 0.04194  | 0.010382 | 0.82294  | 0.020521 | 0.65825  |
| 3.14E-08 | 0.04705  | 0.3103   | -0.02377 | 0.60837  | -0.07924 | 0.08718  | -0.02522 | 0.58663  |
| 0.31864  | 0.025293 | 0.58561  | -0.00013 | 0.99778  | -0.14307 | 0.00194  | -0.05629 | 0.22468  |
| 0.01419  | -0.15025 | 0.00113  | -0.07204 | 0.12004  | -0.19163 | 3.06E-05 | -0.2082  | 5.71E-06 |
| 1.19E-05 | -0.16307 | 0.0004   | -0.21453 | 2.89E-06 | -0.24646 | 6.85E-08 | -0.32122 | 1.14E-12 |
| 0.0913   | 0.063181 | 0.17287  | 0.007574 | 0.87033  | -0.02394 | 0.60576  | -0.01992 | 0.66761  |
| 0.12606  | 0.117089 | 0.01133  | 0.035602 | 0.44275  | 0.085018 | 0.06641  | 0.077327 | 0.0951   |
| 0.31866  | -0.03896 | 0.40093  | -0.13138 | 0.00446  | -0.00323 | 0.94453  | -0.03476 | 0.45359  |
| 1.75E-07 | 0.079648 | 0.08555  | 0.109398 | 0.01804  | 0.139478 | 0.00252  | 0.212755 | 3.51E-06 |
| 0.06773  | -0.04486 | 0.33333  | 0.055065 | 0.23496  | -0.05059 | 0.27529  | -0.06633 | 0.15241  |
| 2.16E-12 | 0.364648 | 3.92E-16 | 0.203855 | 8.99E-06 | 0.194858 | 2.23E-05 | 0.40199  | 1.45E-19 |
| 0.26556  | -0.07396 | 0.11046  | 0.107132 | 0.02058  | -0.08551 | 0.06485  | -0.10925 | 0.01819  |
| 0.95371  | 0.02358  | 0.61126  | -0.02653 | 0.56736  | -0.03511 | 0.44905  | 0.003837 | 0.93409  |
| 0.08427  | 0.120006 | 0.00944  | 0.085297 | 0.06552  | 0.009508 | 0.83763  | 0.157632 | 0.00063  |
| 0.37089  | 0.004547 | 0.92194  | -0.01334 | 0.77379  | -0.0915  | 0.04812  | -0.04727 | 0.30802  |
| 0.12357  | -0.03231 | 0.48615  | -0.0226  | 0.62616  | -0.15749 | 0.00064  | -0.08556 | 0.06468  |
| 0.85645  | 0.039341 | 0.39632  | -0.14229 | 0.00205  | -0.04815 | 0.29916  | -0.06827 | 0.14074  |
| 0.99529  | 0.007362 | 0.87394  | -0.23655 | 2.32E-07 | -0.13726 | 0.00295  | -0.06861 | 0.13874  |
| 0.39279  | -0.05453 | 0.23957  | -0.03842 | 0.40745  | -0.02653 | 0.56742  | -0.0645  | 0.16404  |
| 0.94326  | -0.13826 | 0.00275  | 0.025869 | 0.57709  | -0.02581 | 0.57801  | -0.21411 | 3.03E-06 |
| 4.44E-05 | -0.01594 | 0.73115  | -0.21764 | 2.06E-06 | -0.20767 | 6.03E-06 | -0.11335 | 0.01425  |
| 0.12713  | -0.05714 | 0.21772  | -0.09531 | 0.0395   | -0.12221 | 0.0082   | -0.15045 | 0.00111  |
| 0.01582  | -0.07335 | 0.11341  | -0.16494 | 0.00034  | -0.20578 | 7.35E-06 | -0.21511 | 2.72E-06 |
| 0.00877  | 0.058321 | 0.20838  | 0.043639 | 0.34672  | 0.034754 | 0.4537   | 0.075338 | 0.10395  |
| 0.07252  | 0.132154 | 0.00423  | -0.01577 | 0.73389  | 0.084751 | 0.06727  | 0.145128 | 0.00166  |
| 0.00894  | -0.01579 | 0.73357  | -0.08214 | 0.07618  | -0.0953  | 0.03953  | -0.07741 | 0.09477  |
| 0.00043  | -0.19871 | 1.52E-05 | 0.139942 | 0.00244  | -0.08438 | 0.06848  | -0.25784 | 1.58E-08 |
| 3.35E-05 | 0.030919 | 0.50507  | -0.05657 | 0.22242  | -0.04668 | 0.31412  | -0.02679 | 0.56357  |
| 0.57404  | 0.189285 | 3.84E-05 | 0.198892 | 1.49E-05 | 0.148051 | 0.00133  | 0.314902 | 3.29E-12 |

|          |          |          |          |          |          |          |          |          |
|----------|----------|----------|----------|----------|----------|----------|----------|----------|
| 0.97734  | -0.00429 | 0.92628  | 0.016392 | 0.72386  | 0.012628 | 0.78549  | -0.00726 | 0.87568  |
| 0.68795  | -0.02179 | 0.63853  | -0.03084 | 0.50623  | -0.0474  | 0.30674  | -0.03437 | 0.45877  |
| 0.19747  | -0.00282 | 0.95156  | 0.050215 | 0.27884  | -0.00542 | 0.90702  | 0.007308 | 0.87485  |
| 3.69E-08 | 0.034479 | 0.45729  | 0.016891 | 0.7158   | 0.001306 | 0.97754  | 0.048323 | 0.29737  |
| 2.68E-08 | 0.075732 | 0.10214  | 0.095697 | 0.03871  | 0.17258  | 0.00018  | 0.157981 | 0.00061  |
| 0.04567  | 0.101171 | 0.02881  | 0.060815 | 0.18955  | 0.030135 | 0.51593  | 0.104635 | 0.02374  |
| 2.39E-09 | 0.119496 | 0.00975  | 0.125739 | 0.00651  | 0.068179 | 0.14126  | 0.187115 | 4.73E-05 |
| 5.29E-13 | 0.150377 | 0.00112  | -0.01473 | 0.75094  | -0.039   | 0.40042  | 0.120157 | 0.00935  |
| 0.64177  | 0.144208 | 0.00178  | -0.12061 | 0.00908  | -0.03908 | 0.39949  | 0.042193 | 0.36295  |
| 0.36988  | -0.01107 | 0.81145  | 0.000467 | 0.99197  | 0.086421 | 0.06203  | 0.019776 | 0.66992  |
| 0.86124  | 0.023367 | 0.61448  | 0.027145 | 0.55845  | -0.02933 | 0.52719  | -0.01304 | 0.77872  |
| 0.00027  | 0.054272 | 0.24179  | -0.11125 | 0.01616  | 0.095016 | 0.04013  | 0.152469 | 0.00095  |
| 0.70134  | -0.07308 | 0.11474  | 0.020237 | 0.66269  | -0.22123 | 1.38E-06 | -0.14557 | 0.00161  |
| 0.00374  | 0.046327 | 0.3178   | 0.11263  | 0.01488  | 0.037847 | 0.41451  | 0.09419  | 0.0419   |
| 2.07E-07 | -0.18787 | 4.40E-05 | 0.064627 | 0.16322  | 0.106938 | 0.02081  | -0.04525 | 0.3292   |
| 1.42E-07 | 0.218423 | 1.89E-06 | 0.291933 | 1.26E-10 | 0.302715 | 2.36E-11 | 0.322466 | 9.23E-13 |
| 0.05557  | -0.21213 | 3.75E-06 | -0.00137 | 0.97644  | -0.15332 | 0.00089  | -0.1805  | 8.76E-05 |
| 0.51997  | 0.004356 | 0.9252   | -0.11235 | 0.01514  | -0.09724 | 0.03566  | -0.0961  | 0.03789  |
| 0.85092  | -0.01294 | 0.78026  | -0.08761 | 0.05852  | -0.04532 | 0.32849  | -0.03733 | 0.42092  |
| 0.84193  | -0.00827 | 0.85852  | -0.04065 | 0.38082  | -0.0563  | 0.22463  | -0.02682 | 0.56316  |
| 0.10628  | -0.21558 | 2.58E-06 | 0.070315 | 0.12918  | -0.12312 | 0.00773  | -0.32242 | 9.30E-13 |
| 0.10024  | -0.17311 | 0.00017  | 0.046194 | 0.31919  | -0.14727 | 0.00142  | -0.10461 | 0.02377  |
| 0.61836  | -0.06944 | 0.13403  | -0.11482 | 0.01303  | -0.11582 | 0.01226  | -0.11642 | 0.01182  |
| 0.15477  | 0.208227 | 5.69E-06 | -0.04632 | 0.31788  | -0.03012 | 0.51613  | 0.052815 | 0.25467  |
| 0.32788  | -0.07342 | 0.11306  | -0.08568 | 0.0643   | -0.13218 | 0.00422  | -0.16331 | 0.00039  |
| 0.55926  | 0.072123 | 0.1196   | 0.05934  | 0.20053  | 0.215989 | 2.47E-06 | 0.214912 | 2.78E-06 |
| 8.25E-06 | -0.11919 | 0.00994  | -0.00606 | 0.89609  | -0.04852 | 0.29538  | -0.18252 | 7.28E-05 |
| 0.14041  | -0.07949 | 0.08618  | -0.05685 | 0.22013  | -0.09444 | 0.04136  | -0.15799 | 0.00061  |
| 0.18467  | 0.118764 | 0.01021  | 0.203729 | 9.10E-06 | 0.03817  | 0.41053  | 0.082175 | 0.07605  |
| 0.28591  | -0.09491 | 0.04034  | -0.0492  | 0.28871  | 0.047787 | 0.30277  | -0.1062  | 0.02172  |
| 0.5106   | -0.1278  | 0.00568  | -0.03588 | 0.43921  | -0.09256 | 0.04559  | -0.18133 | 8.12E-05 |
| 0.61067  | 0.028012 | 0.54595  | 0.065964 | 0.15467  | 0.100934 | 0.02919  | -0.00686 | 0.88248  |
| 6.66E-05 | 0.019008 | 0.68202  | 0.036677 | 0.4291   | 0.006421 | 0.88994  | -0.01728 | 0.70961  |
| 0.08645  | -0.06107 | 0.18771  | -0.12475 | 0.00695  | -0.1479  | 0.00135  | -0.12604 | 0.00638  |
| 2.89E-06 | -0.06239 | 0.1783   | -0.19348 | 2.56E-05 | -0.22012 | 1.56E-06 | -0.19608 | 1.98E-05 |
| 0.81898  | 0.010604 | 0.81921  | 0.199455 | 1.41E-05 | 0.149433 | 0.0012   | 0.150376 | 0.00112  |
| 0.01932  | -0.03777 | 0.41549  | 0.085229 | 0.06574  | -0.06169 | 0.18326  | -0.14586 | 0.00157  |
| 0.02272  | -0.04535 | 0.32809  | -0.00615 | 0.89452  | -0.05514 | 0.23429  | -0.07077 | 0.12673  |
| 0.07183  | 0.006951 | 0.88091  | -0.10886 | 0.01861  | -0.07732 | 0.09512  | -0.04117 | 0.37474  |
| 0.03815  | 0.033087 | 0.47566  | -0.03361 | 0.46877  | 0.008838 | 0.84893  | 0.013782 | 0.76642  |
| 0.26534  | 0.010972 | 0.81306  | -0.00316 | 0.94571  | -0.05088 | 0.27253  | -0.02172 | 0.63973  |
| 0.64665  | 0.031705 | 0.4943   | -0.03813 | 0.41099  | -0.06822 | 0.14104  | 0.007812 | 0.86628  |
| 0.96052  | 0.107009 | 0.02073  | 0.027325 | 0.55584  | 0.151132 | 0.00105  | 0.257873 | 1.57E-08 |
| 0.0241   | 0.084143 | 0.06926  | 0.030059 | 0.517    | 0.075018 | 0.10543  | 0.153091 | 0.0009   |
| 0.03345  | 0.418889 | 2.88E-21 | 0.015905 | 0.73175  | 0.156031 | 0.00072  | 0.288021 | 2.26E-10 |

|          |          |          |          |          |          |          |          |          |
|----------|----------|----------|----------|----------|----------|----------|----------|----------|
| 0.30325  | 0.040029 | 0.3881   | -0.06245 | 0.17791  | -0.01927 | 0.67786  | -0.0211  | 0.64931  |
| 0.16066  | 0.026105 | 0.57363  | 0.195256 | 2.15E-05 | 0.232879 | 3.60E-07 | 0.195258 | 2.15E-05 |
| 0.90362  | 0.227613 | 6.66E-07 | -0.03833 | 0.40853  | -0.05918 | 0.20174  | 0.122544 | 0.00802  |
| 0.26041  | -0.00517 | 0.91127  | -0.04582 | 0.32318  | -0.09875 | 0.03288  | -0.01585 | 0.73268  |
| 0.00734  | -0.0474  | 0.30668  | -0.18573 | 5.39E-05 | -0.07942 | 0.08646  | -0.1183  | 0.01051  |
| 0.38101  | 0.042027 | 0.36484  | 0.049807 | 0.28277  | 0.015594 | 0.73679  | 0.051487 | 0.26683  |
| 0.09742  | -0.06938 | 0.13436  | -0.02373 | 0.60905  | -0.06901 | 0.13648  | -0.06466 | 0.16298  |
| 0.55628  | 0.029346 | 0.52698  | 0.230922 | 4.53E-07 | 0.118333 | 0.01049  | 0.196185 | 1.96E-05 |
| 0.06185  | -0.03796 | 0.41315  | -0.04851 | 0.29551  | -0.11837 | 0.01046  | -0.13548 | 0.00335  |
| 0.77157  | -0.01661 | 0.72029  | -0.0426  | 0.35833  | 0.004759 | 0.91831  | -0.06912 | 0.13584  |
| 0.82879  | 0.025015 | 0.58974  | -0.04117 | 0.37473  | -0.0223  | 0.63073  | -0.0471  | 0.30978  |
| 0.96077  | -0.10928 | 0.01816  | 0.278841 | 8.69E-10 | 0.030323 | 0.51332  | -0.09037 | 0.05098  |
| 0.1144   | -0.01651 | 0.722    | -0.05356 | 0.24805  | -0.13057 | 0.00471  | -0.0669  | 0.14889  |
| 0.17404  | 0.039637 | 0.39277  | -0.11822 | 0.01056  | -0.02392 | 0.60609  | 0.021835 | 0.63788  |
| 0.66929  | -0.15359 | 0.00087  | -0.08351 | 0.0714   | -0.12661 | 0.00615  | -0.12561 | 0.00657  |
| 0.25043  | 0.188353 | 4.20E-05 | -0.04484 | 0.33363  | -0.00864 | 0.85235  | 0.037255 | 0.42185  |
| 0.53559  | 0.045025 | 0.3316   | -0.06801 | 0.14223  | -0.01023 | 0.82542  | -0.01379 | 0.76631  |
| 0.65209  | -0.04031 | 0.38478  | -0.00225 | 0.96126  | -0.10435 | 0.02413  | -0.05178 | 0.26409  |
| 0.29801  | 0.022478 | 0.62803  | -0.08414 | 0.06928  | 0.00266  | 0.95428  | -0.02093 | 0.65187  |
| 0.55885  | 0.027448 | 0.55407  | 0.098426 | 0.03346  | -0.10612 | 0.02181  | -0.00646 | 0.88921  |
| 0.06193  | 0.113716 | 0.01394  | 0.085819 | 0.06388  | -0.01868 | 0.68715  | 0.088186 | 0.05687  |
| 0.42143  | -0.0532  | 0.25123  | -0.21893 | 1.78E-06 | -0.11748 | 0.01106  | -0.14221 | 0.00207  |
| 0.68799  | 0.124183 | 0.00721  | 0.118278 | 0.01052  | 0.13925  | 0.00256  | 0.232686 | 3.68E-07 |
| 0.60018  | -0.09317 | 0.04418  | -0.02896 | 0.53239  | -0.13185 | 0.00432  | -0.11172 | 0.01572  |
| 0.17084  | -0.11369 | 0.01396  | -0.05568 | 0.22981  | -0.09666 | 0.03678  | -0.19397 | 2.44E-05 |
| 3.26E-05 | -0.00819 | 0.85985  | -0.08855 | 0.05584  | -0.22003 | 1.58E-06 | -0.1055  | 0.0226   |
| 0.82288  | 0.078595 | 0.08979  | 0.172468 | 0.00018  | 0.278251 | 9.46E-10 | 0.330473 | 2.31E-13 |
| 0.0367   | 0.234531 | 2.95E-07 | 0.1442   | 0.00178  | 0.187923 | 4.38E-05 | 0.376299 | 3.71E-17 |
| 0.08356  | 0.154683 | 0.0008   | 0.181773 | 7.80E-05 | 0.230021 | 5.03E-07 | 0.335854 | 8.91E-14 |
| 0.19727  | 0.000951 | 0.98365  | -0.08339 | 0.0718   | -0.06397 | 0.16757  | -0.02071 | 0.65539  |
| 0.75248  | -0.00565 | 0.90313  | -0.12344 | 0.00757  | -0.06956 | 0.13338  | -0.04938 | 0.28688  |
| 0.00278  | 0.02084  | 0.65329  | -0.06728 | 0.14661  | -0.11864 | 0.01029  | -0.0367  | 0.42885  |
| 0.29006  | 0.005501 | 0.90562  | -0.06628 | 0.15268  | -0.04433 | 0.33918  | -0.05155 | 0.26626  |
| 0.09339  | 0.102487 | 0.02678  | -0.09412 | 0.04206  | -0.06758 | 0.14477  | 0.009757 | 0.83345  |
| 0.06793  | -0.0458  | 0.32339  | -0.03164 | 0.49519  | 0.019247 | 0.67825  | -0.0355  | 0.44403  |
| 0.02116  | -0.10334 | 0.02553  | -0.01469 | 0.75151  | -0.07316 | 0.11437  | -0.2103  | 4.57E-06 |
| 0.1558   | -0.01194 | 0.79699  | 0.251925 | 3.41E-08 | 0.133134 | 0.00395  | 0.065864 | 0.1553   |
| 1.38E-07 | 0.061019 | 0.18806  | -0.1994  | 1.42E-05 | -0.10846 | 0.01906  | -0.012   | 0.79586  |
| 0.00459  | 0.01034  | 0.82365  | 0.113252 | 0.01434  | -0.09008 | 0.05172  | -0.00608 | 0.89579  |
| 0.00174  | 0.058473 | 0.2072   | 0.125041 | 0.00682  | -0.00743 | 0.87276  | 0.086477 | 0.06186  |
| 2.80E-07 | 0.004669 | 0.91985  | 0.015592 | 0.73682  | 0.042868 | 0.35531  | -0.0238  | 0.60795  |
| 2.64E-08 | 0.057813 | 0.21238  | -0.14935 | 0.00121  | -0.19577 | 2.04E-05 | -0.09471 | 0.04078  |
| 0.02084  | -0.12006 | 0.0094   | -0.14642 | 0.00151  | -0.17605 | 0.00013  | -0.21313 | 3.37E-06 |
| 0.90794  | -0.03339 | 0.47164  | 0.013385 | 0.77297  | -0.03129 | 0.49996  | -0.05114 | 0.27007  |
| 0.04324  | -0.12382 | 0.00738  | 0.015546 | 0.73757  | 0.002747 | 0.95279  | -0.15339 | 0.00088  |

|          |          |          |          |          |          |          |          |          |
|----------|----------|----------|----------|----------|----------|----------|----------|----------|
| 0.40391  | 0.015191 | 0.74335  | -0.01345 | 0.77183  | 0.01244  | 0.7886   | 0.029965 | 0.51831  |
| 0.19219  | -0.0337  | 0.46746  | -0.01374 | 0.76714  | 0.032008 | 0.49019  | 0.012292 | 0.79107  |
| 2.48E-10 | -0.00504 | 0.91355  | -0.12504 | 0.00682  | -0.15804 | 0.00061  | -0.14604 | 0.00155  |
| 0.17361  | 0.034867 | 0.45224  | 0.144792 | 0.00171  | 0.121851 | 0.00839  | 0.184263 | 6.19E-05 |
| 4.51E-12 | 0.132573 | 0.00411  | 0.081702 | 0.07776  | 0.139771 | 0.00247  | 0.23478  | 2.87E-07 |
| 0.12751  | -0.03773 | 0.416    | -0.20016 | 1.31E-05 | -0.13199 | 0.00427  | -0.12433 | 0.00714  |
| 0.01708  | 0.049946 | 0.28142  | 0.097425 | 0.03531  | -0.13939 | 0.00254  | 0.01819  | 0.695    |
| 0.00036  | -0.15133 | 0.00104  | 0.041495 | 0.37095  | 0.006586 | 0.88712  | -0.11954 | 0.00972  |
| 0.08226  | -0.00177 | 0.96951  | -0.06037 | 0.19281  | -0.06885 | 0.13738  | -0.05921 | 0.2015   |
| 0.00117  | -0.08416 | 0.0692   | 0.098224 | 0.03383  | 0.020896 | 0.65242  | -0.08569 | 0.06428  |
| 0.17822  | 0.041922 | 0.36605  | 0.094015 | 0.04228  | -0.09039 | 0.05092  | -0.04149 | 0.37098  |
| 0.00102  | 0.00926  | 0.84181  | 0.055445 | 0.23174  | -0.12388 | 0.00736  | 0.017827 | 0.7008   |
| 1.86E-05 | 0.110943 | 0.01646  | 0.147455 | 0.0014   | 0.162519 | 0.00042  | 0.301224 | 2.99E-11 |
| 0.47835  | 0.022444 | 0.62854  | -0.08029 | 0.08307  | -0.05467 | 0.23833  | -0.01509 | 0.74496  |
| 0.26568  | 0.099071 | 0.03232  | -0.09408 | 0.04213  | -0.09261 | 0.04548  | -0.00885 | 0.84869  |
| 1.65E-06 | 0.107523 | 0.02012  | 0.07346  | 0.11288  | -0.06638 | 0.15207  | 0.10128  | 0.02864  |
| 0.25413  | 0.138682 | 0.00267  | 0.010124 | 0.82728  | 0.05771  | 0.2132   | 0.21763  | 2.06E-06 |
| 0.37229  | -0.12343 | 0.00757  | 0.058202 | 0.20932  | -0.02243 | 0.62873  | -0.18638 | 5.07E-05 |
| 0.27833  | 0.135583 | 0.00333  | 0.191021 | 3.25E-05 | 0.185019 | 5.76E-05 | 0.333993 | 1.24E-13 |
| 0.66882  | 0.252286 | 3.26E-08 | -0.20919 | 5.14E-06 | -0.14302 | 0.00195  | -0.02912 | 0.53018  |
| 0.16653  | -0.17321 | 0.00017  | 0.055404 | 0.23209  | -0.20398 | 8.87E-06 | -0.26158 | 9.59E-09 |
| 0.01567  | -0.08309 | 0.07282  | -0.04004 | 0.38802  | -0.0137  | 0.76786  | -0.09589 | 0.03833  |
| 4.43E-08 | 0.214907 | 2.78E-06 | 0.152416 | 0.00095  | 0.022167 | 0.63279  | 0.200535 | 1.26E-05 |
| 0.54361  | 0.158154 | 0.0006   | 0.249059 | 4.93E-08 | 0.333447 | 1.37E-13 | 0.372944 | 7.39E-17 |
| 0.5562   | -0.01968 | 0.67142  | 0.012453 | 0.78839  | -0.10166 | 0.02805  | -0.03479 | 0.45325  |
| 0.05308  | 0.228334 | 6.13E-07 | 0.026194 | 0.57231  | 0.068446 | 0.1397   | 0.255749 | 2.08E-08 |
| 0.68077  | 0.059651 | 0.19817  | -0.1537  | 0.00086  | -0.11032 | 0.01708  | -0.02581 | 0.5779   |
| 8.84E-10 | 0.0703   | 0.12927  | 0.02867  | 0.53656  | -0.03295 | 0.47755  | 0.032966 | 0.47728  |
| 0.18318  | -0.02948 | 0.52511  | -0.0963  | 0.03749  | -0.07904 | 0.08797  | -0.04543 | 0.32727  |
| 0.6148   | -0.03305 | 0.4762   | -0.00234 | 0.95974  | -0.14741 | 0.0014   | -0.14021 | 0.00239  |
| 0.22489  | -0.0381  | 0.41139  | -0.00616 | 0.8943   | -0.139   | 0.00261  | -0.14673 | 0.00147  |
| 0.04074  | 0.051749 | 0.2644   | -0.03686 | 0.42678  | -0.04602 | 0.32097  | -0.00522 | 0.91036  |
| 4.23E-06 | 0.009991 | 0.82951  | -0.01002 | 0.82904  | -0.10128 | 0.02864  | -0.07013 | 0.13018  |
| 0.65231  | -0.00969 | 0.8346   | -0.00785 | 0.86567  | -0.11825 | 0.01054  | -0.09125 | 0.04876  |
| 0.00216  | 0.244223 | 9.06E-08 | 0.091971 | 0.04699  | 0.21147  | 4.03E-06 | 0.376826 | 3.33E-17 |
| 5.62E-05 | 0.213067 | 3.39E-06 | 0.176052 | 0.00013  | 0.03988  | 0.38987  | 0.264682 | 6.31E-09 |
| 0.00417  | -0.16081 | 0.00049  | -0.00363 | 0.93763  | -0.23634 | 2.38E-07 | -0.32364 | 7.55E-13 |
| 0.00188  | -0.11817 | 0.0106   | -0.13322 | 0.00393  | -0.22823 | 6.21E-07 | -0.28066 | 6.69E-10 |
| 0.21012  | -0.01509 | 0.74507  | -0.06186 | 0.18203  | -0.1198  | 0.00956  | -0.07402 | 0.11014  |
| 6.13E-08 | 0.031287 | 0.50002  | -0.11718 | 0.01127  | -0.07895 | 0.08836  | -0.00889 | 0.84807  |
| 0.04718  | 0.192036 | 2.94E-05 | 0.091898 | 0.04716  | 0.200466 | 1.27E-05 | 0.369746 | 1.41E-16 |
| 0.69752  | 0.031148 | 0.50192  | 0.079102 | 0.08773  | 0.147561 | 0.00138  | 0.261216 | 1.01E-08 |
| 0.00134  | -0.01444 | 0.7557   | -0.16418 | 0.00037  | -0.07089 | 0.12606  | -0.04153 | 0.37055  |
| 5.54E-08 | 0.061551 | 0.18424  | 0.137088 | 0.00299  | 0.116032 | 0.0121   | 0.154519 | 0.00081  |
| 8.86E-05 | 0.099077 | 0.03231  | 0.200261 | 1.30E-05 | 0.104746 | 0.02359  | 0.262291 | 8.71E-09 |

|          |          |          |          |          |          |          |          |          |
|----------|----------|----------|----------|----------|----------|----------|----------|----------|
| 0.47798  | 0.03035  | 0.51295  | -0.05694 | 0.21938  | -0.12332 | 0.00763  | -0.04635 | 0.31759  |
| 0.00028  | 0.087756 | 0.05809  | -0.02002 | 0.66603  | -0.01374 | 0.76715  | 0.059652 | 0.19817  |
| 0.8752   | 0.119609 | 0.00968  | -0.06365 | 0.16969  | 0.024098 | 0.60346  | 0.120807 | 0.00897  |
| 0.87341  | -0.01084 | 0.81535  | -0.01303 | 0.77886  | 0.008161 | 0.86037  | -0.03378 | 0.46644  |
| 0.51442  | -0.07463 | 0.10723  | 0.047528 | 0.3054   | -0.19829 | 1.59E-05 | -0.18941 | 3.80E-05 |
| 3.96E-12 | -0.12493 | 0.00687  | -0.14135 | 0.0022   | -0.1006  | 0.02973  | -0.19727 | 1.76E-05 |
| 0.04192  | 0.219991 | 1.58E-06 | -0.03523 | 0.44753  | 0.096142 | 0.03781  | 0.265448 | 5.68E-09 |
| 4.62E-05 | 0.114199 | 0.01354  | 0.131947 | 0.00429  | 0.116721 | 0.0116   | 0.258618 | 1.42E-08 |
| 0.83216  | 0.118695 | 0.01025  | 0.005009 | 0.91404  | 0.015413 | 0.73974  | 0.085588 | 0.0646   |
| 0.98342  | 0.00762  | 0.86954  | -0.03607 | 0.43673  | -0.09216 | 0.04654  | -0.01628 | 0.72564  |
| 0.23329  | 0.035836 | 0.43977  | -0.0006  | 0.98962  | -0.02316 | 0.61768  | 0.063494 | 0.17074  |
| 0.96208  | -0.02139 | 0.64472  | -0.0452  | 0.32968  | -0.01665 | 0.71977  | -0.07071 | 0.12703  |
| 0.76204  | 0.116231 | 0.01195  | -0.03809 | 0.41148  | -0.11245 | 0.01505  | 0.04565  | 0.32493  |
| 0.18562  | 0.086227 | 0.06262  | 0.218516 | 1.87E-06 | 0.112214 | 0.01526  | 0.254579 | 2.42E-08 |
| 8.58E-13 | 0.055177 | 0.23401  | 0.333368 | 1.39E-13 | 0.085144 | 0.06601  | 0.110051 | 0.01736  |
| 0.00015  | -0.14788 | 0.00135  | -0.04203 | 0.36476  | -0.08051 | 0.0822   | -0.17504 | 0.00014  |
| 0.72021  | 0.095188 | 0.03977  | 0.15578  | 0.00073  | 0.014337 | 0.75732  | 0.030237 | 0.51452  |
| 0.888    | 0.134979 | 0.00347  | -0.06076 | 0.18997  | -0.00028 | 0.99522  | 0.121653 | 0.0085   |
| 0.48166  | 0.056406 | 0.22374  | -0.1332  | 0.00393  | 0.092599 | 0.0455   | 0.102145 | 0.0273   |
| 3.37E-07 | 0.155912 | 0.00072  | -0.00825 | 0.85892  | 0.149987 | 0.00115  | 0.265357 | 5.75E-09 |
| 0.26576  | 0.162475 | 0.00042  | 0.225024 | 8.97E-07 | 0.137972 | 0.00281  | 0.270256 | 2.93E-09 |
| 0.0024   | -0.08148 | 0.07858  | -0.2195  | 1.67E-06 | -0.06153 | 0.18441  | -0.13546 | 0.00336  |
| 0.02388  | 0.13988  | 0.00245  | 0.079781 | 0.08503  | 0.217785 | 2.02E-06 | 0.273039 | 1.99E-09 |
| 0.75208  | 0.126152 | 0.00634  | 0.137    | 0.00301  | 0.044792 | 0.33412  | 0.127343 | 0.00586  |
| 0.07047  | 0.126    | 0.0064   | 0.083234 | 0.07233  | 0.082144 | 0.07616  | 0.19561  | 2.07E-05 |
| 8.69E-05 | -0.18816 | 4.28E-05 | -0.05661 | 0.22209  | -0.176   | 0.00013  | -0.25286 | 3.03E-08 |
| 0.00014  | -0.00996 | 0.82995  | -0.01973 | 0.67066  | -0.12634 | 0.00626  | -0.1073  | 0.02038  |
| 0.00022  | 0.15145  | 0.00103  | 0.121712 | 0.00846  | 0.054468 | 0.24008  | 0.186971 | 4.79E-05 |
| 0.12934  | 0.164312 | 0.00036  | -0.1173  | 0.01118  | -0.03871 | 0.40389  | -0.00616 | 0.8944   |
| 9.54E-05 | -0.02139 | 0.64473  | -0.14465 | 0.00172  | -0.11041 | 0.01699  | -0.0566  | 0.22216  |
| 1.18E-06 | -0.14726 | 0.00142  | -0.13302 | 0.00398  | -0.16547 | 0.00033  | -0.24887 | 5.05E-08 |
| 0.00192  | 0.200536 | 1.26E-05 | -0.06898 | 0.13665  | -0.01016 | 0.82673  | 0.161395 | 0.00046  |
| 0.39157  | 0.188623 | 4.09E-05 | -0.19008 | 3.56E-05 | -0.16114 | 0.00047  | -0.02034 | 0.66103  |
| 9.10E-06 | 0.158626 | 0.00058  | -0.14326 | 0.00191  | 0.004457 | 0.92347  | 0.159202 | 0.00055  |
| 5.42E-13 | -0.04362 | 0.34697  | -0.05675 | 0.22092  | -0.11512 | 0.0128   | -0.10158 | 0.02817  |
| 2.55E-07 | 0.045023 | 0.33162  | -0.067   | 0.14829  | -0.07827 | 0.09113  | -0.01517 | 0.7437   |
| 1.20E-07 | 0.009827 | 0.83227  | -0.0413  | 0.37323  | -0.01592 | 0.73152  | -0.01412 | 0.76091  |
| 0.00018  | 0.018301 | 0.69324  | -0.07189 | 0.12079  | -0.10934 | 0.0181   | -0.09811 | 0.03404  |
| 0.54645  | 0.035334 | 0.44621  | -0.01531 | 0.74143  | -0.09723 | 0.03568  | -0.0005  | 0.99133  |
| 1.96E-05 | 0.195198 | 2.16E-05 | 0.002078 | 0.96428  | 0.19184  | 3.00E-05 | 0.256555 | 1.87E-08 |
| 7.98E-10 | 0.081555 | 0.0783   | -0.07975 | 0.08516  | -0.0866  | 0.0615   | -0.00617 | 0.89426  |
| 5.55E-11 | 0.069491 | 0.13374  | -0.00531 | 0.90894  | -0.10996 | 0.01745  | 0.01916  | 0.67963  |
| 0.00121  | 0.05928  | 0.20099  | 0.214368 | 2.95E-06 | 0.148414 | 0.0013   | 0.166418 | 0.0003   |
| 0.27205  | 0.052507 | 0.25746  | 0.196959 | 1.81E-05 | 0.035164 | 0.44839  | 0.103435 | 0.0254   |
| 0.44677  | 0.063631 | 0.16982  | 0.003285 | 0.94355  | 0.038249 | 0.40957  | 0.115166 | 0.01276  |

|          |          |          |          |          |          |          |          |          |
|----------|----------|----------|----------|----------|----------|----------|----------|----------|
| 0.01797  | -0.12021 | 0.00932  | -0.11808 | 0.01066  | -0.1854  | 5.56E-05 | -0.25339 | 2.82E-08 |
| 0.16014  | 0.105649 | 0.02241  | 0.056534 | 0.22269  | -0.02197 | 0.63582  | 0.087016 | 0.06025  |
| 2.34E-08 | -0.05031 | 0.27791  | -0.15003 | 0.00115  | -0.2061  | 7.11E-06 | -0.15467 | 0.0008   |
| 0.16556  | -0.00606 | 0.89607  | -0.05589 | 0.22803  | -0.16742 | 0.00028  | -0.12698 | 0.006    |
| 0.24597  | 0.127276 | 0.00588  | -0.0071  | 0.87845  | 0.015887 | 0.73204  | 0.137475 | 0.00291  |
| 0.02454  | 0.096672 | 0.03676  | -0.14795 | 0.00134  | -0.06421 | 0.16599  | 0.035498 | 0.44409  |
| 5.12E-07 | 0.127709 | 0.00571  | 0.088056 | 0.05724  | 0.015007 | 0.74636  | 0.173509 | 0.00016  |
| 3.89E-06 | 0.174986 | 0.00014  | 0.022158 | 0.63293  | 0.049127 | 0.28941  | 0.191581 | 3.08E-05 |
| 0.01442  | 0.058792 | 0.20473  | 0.061155 | 0.18708  | -0.00742 | 0.87294  | 0.05933  | 0.2006   |
| 0.10907  | 0.1903   | 3.48E-05 | 0.261075 | 1.03E-08 | 0.169646 | 0.00023  | 0.386601 | 4.26E-18 |
| 4.01E-06 | 0.021523 | 0.6427   | -0.06369 | 0.16939  | -0.0616  | 0.18392  | 0.000548 | 0.99058  |
| 0.00016  | -0.20198 | 1.09E-05 | -0.11244 | 0.01506  | -0.20262 | 1.02E-05 | -0.32906 | 2.96E-13 |
| 0.00026  | 0.165301 | 0.00033  | 0.152342 | 0.00096  | 0.25025  | 4.23E-08 | 0.301237 | 2.98E-11 |
| 0.03455  | 0.080761 | 0.08126  | -0.05184 | 0.2636   | -0.04618 | 0.3193   | -0.02906 | 0.53101  |
| 0.57106  | -0.02743 | 0.55438  | -0.1537  | 0.00086  | -0.09502 | 0.04011  | -0.07047 | 0.12835  |
| 0.40077  | 0.036436 | 0.43213  | -0.10548 | 0.02263  | -0.09414 | 0.04201  | -0.06993 | 0.13132  |
| 0.27798  | 0.006178 | 0.89407  | 0.148989 | 0.00124  | -0.06267 | 0.17637  | 0.011017 | 0.8123   |
| 0.01117  | 0.020306 | 0.66161  | -0.03368 | 0.46773  | 0.001031 | 0.98227  | 0.046381 | 0.31724  |
| 0.34802  | 0.054524 | 0.2396   | -0.05726 | 0.2168   | -0.05273 | 0.25541  | -0.03744 | 0.41951  |
| 0.20437  | 0.07993  | 0.08445  | -0.0598  | 0.19708  | -0.00353 | 0.9394   | 0.049559 | 0.28517  |
| 0.69007  | -0.16688 | 0.00029  | 0.051586 | 0.26591  | -0.17591 | 0.00013  | -0.18704 | 4.76E-05 |
| 0.50586  | 0.171028 | 0.0002   | 0.277096 | 1.12E-09 | 0.228133 | 6.27E-07 | 0.26856  | 3.71E-09 |
| 0.68119  | 0.002484 | 0.9573   | 0.07787  | 0.0928   | 0.30994  | 7.42E-12 | 0.085002 | 0.06646  |
| 0.47995  | -0.03103 | 0.50359  | 0.296319 | 6.42E-11 | 0.373466 | 6.64E-17 | 0.114186 | 0.01355  |
| 0.32496  | 0.049392 | 0.2868   | 0.231682 | 4.14E-07 | 0.213851 | 3.12E-06 | 0.219419 | 1.69E-06 |
| 0.00231  | 0.127679 | 0.00573  | 0.059809 | 0.19699  | 0.23179  | 4.09E-07 | 0.10146  | 0.02835  |
| 0.24974  | -0.19914 | 1.45E-05 | -0.08222 | 0.07591  | -0.10312 | 0.02585  | -0.35697 | 1.76E-15 |
| 0.04509  | 0.189054 | 3.93E-05 | 0.263782 | 7.13E-09 | 0.403921 | 9.38E-20 | 0.381879 | 1.16E-17 |
| 0.31164  | 0.078222 | 0.09133  | 0.047517 | 0.30552  | 0.283601 | 4.35E-10 | 0.144524 | 0.00174  |
| 0.06882  | 0.127046 | 0.00597  | 0.095408 | 0.03931  | 0.310953 | 6.29E-12 | 0.231149 | 4.41E-07 |
| 0.42844  | -0.05472 | 0.23794  | -0.00195 | 0.96649  | 0.156041 | 0.00071  | -0.03743 | 0.41969  |
| 3.06E-05 | 0.011562 | 0.8032   | 0.129917 | 0.00492  | 0.435346 | 5.09E-23 | 0.212616 | 3.56E-06 |
| 0.52621  | -0.09525 | 0.03963  | 0.073914 | 0.11067  | 0.264548 | 6.42E-09 | -0.01891 | 0.68363  |
| 0.04066  | -0.08763 | 0.05844  | 0.240791 | 1.38E-07 | 0.486072 | 4.60E-29 | 0.180712 | 8.60E-05 |
| 9.92E-09 | -0.10518 | 0.02302  | -0.00864 | 0.85221  | 0.094595 | 0.04102  | -0.06049 | 0.19195  |
| 0.00321  | 0.01196  | 0.79658  | -0.016   | 0.73012  | 0.112821 | 0.01471  | -0.0917  | 0.04764  |
| 0.00223  | -0.08222 | 0.07588  | 0.158435 | 0.00059  | 0.236459 | 2.34E-07 | 0.023685 | 0.60968  |
| 0.00618  | -0.16519 | 0.00034  | 0.01144  | 0.80524  | 0.137456 | 0.00291  | -0.17953 | 9.58E-05 |
| 0.00046  | 0.060041 | 0.19526  | 0.197043 | 1.80E-05 | 0.210524 | 4.46E-06 | 0.126602 | 0.00615  |
| 0.03719  | -0.00661 | 0.88676  | -0.16294 | 0.00041  | -0.00069 | 0.9881   | -0.09091 | 0.04959  |
| 0.3746   | -0.06028 | 0.19351  | 0.106339 | 0.02154  | 0.308738 | 9.02E-12 | 0.052172 | 0.26051  |
| 0.83444  | -0.02503 | 0.58957  | 0.070317 | 0.12917  | 0.18973  | 3.68E-05 | 0.016087 | 0.72879  |
| 0.67739  | 0.012514 | 0.78739  | 0.083315 | 0.07206  | 0.27639  | 1.24E-09 | 0.182394 | 7.36E-05 |
| 0.21275  | -0.02766 | 0.55103  | 0.14607  | 0.00155  | 0.369905 | 1.37E-16 | 0.11549  | 0.01251  |
| 0.40905  | -0.07078 | 0.12666  | -0.04782 | 0.30243  | 0.135076 | 0.00345  | -0.08184 | 0.07726  |



|          |          |          |          |          |          |          |          |          |
|----------|----------|----------|----------|----------|----------|----------|----------|----------|
| 0.11109  | -0.00604 | 0.89643  | 0.213105 | 3.38E-06 | 0.489807 | 1.50E-29 | 0.312492 | 4.89E-12 |
| 0.00021  | -0.10469 | 0.02367  | 0.041082 | 0.37573  | 0.250804 | 3.94E-08 | 0.009337 | 0.84052  |
| 0.44492  | 0.007876 | 0.8652   | 0.172878 | 0.00017  | 0.40361  | 1.01E-19 | 0.199595 | 1.39E-05 |
| 0.81329  | -0.07392 | 0.11062  | 0.12212  | 0.00825  | 0.284081 | 4.06E-10 | 0.040818 | 0.37881  |
| 0.25795  | -0.08511 | 0.06613  | 0.214339 | 2.96E-06 | 0.282539 | 5.09E-10 | 0.013919 | 0.76418  |
| 0.1331   | -0.10677 | 0.02102  | -0.04086 | 0.37833  | -0.06877 | 0.13781  | -0.21393 | 3.09E-06 |
| 0.65439  | 0.035733 | 0.44107  | -0.1003  | 0.03022  | 0.094886 | 0.0404   | -0.05186 | 0.26339  |
| 0.1191   | -0.11999 | 0.00944  | 0.098525 | 0.03329  | 0.280363 | 6.98E-10 | 0.002276 | 0.96087  |
| 0.25252  | 0.186321 | 5.10E-05 | 0.026659 | 0.56553  | 0.225254 | 8.74E-07 | 0.091485 | 0.04817  |
| 0.14383  | -0.08702 | 0.06025  | 0.117647 | 0.01095  | 0.316449 | 2.54E-12 | 0.048811 | 0.29252  |
| 0.01171  | -0.09512 | 0.03991  | 0.090745 | 0.05002  | 0.24069  | 1.40E-07 | -0.06342 | 0.17123  |
| 1.75E-08 | -0.0168  | 0.7173   | 0.154699 | 0.0008   | 0.273569 | 1.84E-09 | 0.066559 | 0.15097  |
| 0.42104  | -0.07455 | 0.10761  | 0.170757 | 0.00021  | 0.323031 | 8.38E-13 | 0.054025 | 0.24394  |
| 0.05201  | -0.05021 | 0.2789   | -0.02081 | 0.65382  | 0.153457 | 0.00088  | -0.03485 | 0.45249  |
| 0.00307  | -0.14918 | 0.00122  | 0.07063  | 0.12747  | 0.221036 | 1.41E-06 | -0.08028 | 0.08309  |
| 0.01023  | -0.10659 | 0.02123  | 0.143301 | 0.00191  | 0.317525 | 2.13E-12 | 0.033351 | 0.47215  |
| 0.85776  | -0.06177 | 0.18269  | 0.103263 | 0.02565  | 0.25686  | 1.80E-08 | 0.014679 | 0.75172  |
| 0.49287  | -0.02178 | 0.63872  | 0.246489 | 6.82E-08 | 0.466769 | 1.21E-26 | 0.210533 | 4.45E-06 |
| 0.69355  | -0.08493 | 0.06671  | 0.108568 | 0.01893  | 0.336826 | 7.49E-14 | 0.065427 | 0.15806  |
| 0.57402  | -0.07582 | 0.10174  | 0.218181 | 1.94E-06 | 0.290393 | 1.58E-10 | 0.02334  | 0.61489  |
| 0.0007   | -0.12522 | 0.00674  | 0.082452 | 0.07506  | 0.273877 | 1.76E-09 | -0.01031 | 0.82421  |
| 0.58784  | -0.05475 | 0.23767  | 0.009936 | 0.83043  | 0.228143 | 6.26E-07 | -0.03115 | 0.5019   |
| 0.00044  | -0.12299 | 0.00779  | 0.059668 | 0.19805  | 0.181942 | 7.68E-05 | -0.07192 | 0.12067  |
| 0.09304  | -0.04715 | 0.30928  | -0.05266 | 0.25611  | 0.035867 | 0.43936  | -0.09922 | 0.03206  |
| 0.03251  | -0.04868 | 0.29378  | 0.092466 | 0.04581  | 0.235316 | 2.69E-07 | -0.02399 | 0.60502  |
| 0.02765  | 0.025755 | 0.57878  | 0.143127 | 0.00193  | 0.519855 | 1.09E-33 | 0.321639 | 1.06E-12 |
| 0.06905  | -0.06919 | 0.13544  | 0.103244 | 0.02567  | 0.277475 | 1.06E-09 | 0.065844 | 0.15542  |
| 0.02931  | -0.07691 | 0.09689  | 0.105307 | 0.02285  | 0.124898 | 0.00688  | -0.04556 | 0.32584  |
| 0.04889  | -0.07353 | 0.11255  | 0.089883 | 0.05224  | 0.275124 | 1.48E-09 | 0.040816 | 0.37883  |
| 7.06E-15 | 0.109209 | 0.01824  | 0.139437 | 0.00253  | 0.323144 | 8.22E-13 | 0.281608 | 5.82E-10 |
| 8.84E-05 | 0.057844 | 0.21213  | 0.101239 | 0.0287   | 0.210664 | 4.39E-06 | 0.078807 | 0.08892  |
| 7.07E-05 | -0.12351 | 0.00753  | 0.094229 | 0.04181  | 0.246402 | 6.89E-08 | -0.03923 | 0.39764  |
| 0.78692  | 0.17535  | 0.00014  | 0.234453 | 2.98E-07 | 0.485455 | 5.52E-29 | 0.391662 | 1.43E-18 |
| 0.9044   | -0.03905 | 0.3998   | 0.077368 | 0.09493  | 0.257625 | 1.62E-08 | 0.081611 | 0.07809  |
| 0.00104  | -0.10288 | 0.0262   | 0.225744 | 8.26E-07 | 0.316859 | 2.38E-12 | 0.056629 | 0.22191  |
| 0.87601  | -0.10389 | 0.02476  | 0.104579 | 0.02381  | 0.133648 | 0.00381  | -0.12188 | 0.00837  |
| 0.00973  | -0.06176 | 0.18272  | 0.0554   | 0.23212  | 0.24025  | 1.48E-07 | 0.027483 | 0.55356  |
| 0.23642  | -0.09607 | 0.03795  | 0.072664 | 0.11684  | 0.123126 | 0.00773  | -0.06731 | 0.14639  |
| 0.51722  | -0.11188 | 0.01557  | 0.057229 | 0.21704  | 0.093557 | 0.0433   | -0.11239 | 0.0151   |
| 0.0061   | -0.10003 | 0.03067  | 0.105792 | 0.02223  | 0.250852 | 3.92E-08 | -0.02332 | 0.61518  |
| 0.84811  | -0.0073  | 0.87503  | 0.085591 | 0.06459  | 0.164262 | 0.00036  | 0.032532 | 0.4831   |
| 0.01824  | -0.05858 | 0.20633  | 0.130977 | 0.00458  | 0.248683 | 5.17E-08 | 0.035405 | 0.44528  |
| 0.10272  | -0.02579 | 0.57821  | -0.03777 | 0.41551  | 0.135604 | 0.00332  | -0.05908 | 0.2025   |
| 0.00132  | -0.08184 | 0.07727  | 0.19116  | 3.21E-05 | 0.30519  | 1.60E-11 | 0.051832 | 0.26363  |
| 1.06E-05 | -0.19754 | 1.71E-05 | -0.18842 | 4.18E-05 | -0.07018 | 0.12995  | -0.32313 | 8.24E-13 |

|          |          |          |          |          |          |          |          |          |
|----------|----------|----------|----------|----------|----------|----------|----------|----------|
| 0.08188  | -0.27097 | 2.65E-09 | -0.13954 | 0.00251  | -0.1601  | 0.00051  | -0.32622 | 4.84E-13 |
| 0.08091  | -0.10031 | 0.0302   | -0.05657 | 0.22243  | 0.016817 | 0.717    | -0.17849 | 0.00011  |
| 0.0004   | -0.08091 | 0.08071  | 0.069978 | 0.13103  | 0.034981 | 0.45076  | -0.18879 | 4.03E-05 |
| 0.32396  | -0.1281  | 0.00557  | -0.21009 | 4.67E-06 | -0.10609 | 0.02185  | -0.28695 | 2.65E-10 |
| 0.4775   | -0.01377 | 0.76669  | 0.169871 | 0.00023  | 0.289658 | 1.77E-10 | 0.126162 | 0.00633  |
| 0.09819  | -0.0812  | 0.07959  | 0.206793 | 6.62E-06 | 0.388513 | 2.83E-18 | 0.114548 | 0.01325  |
| 0.3401   | -0.00141 | 0.97574  | 0.037406 | 0.41998  | 0.19789  | 1.65E-05 | 0.065351 | 0.15855  |
| 0.3289   | 0.001202 | 0.97933  | 0.167494 | 0.00028  | 0.415035 | 7.19E-21 | 0.169618 | 0.00023  |
| 0.41375  | -0.06963 | 0.13299  | 0.100635 | 0.02967  | 0.179357 | 9.73E-05 | -0.01427 | 0.75844  |
| 1.88E-06 | -0.18924 | 3.86E-05 | -0.27081 | 2.71E-09 | -0.15171 | 0.00101  | -0.38312 | 8.93E-18 |
| 0.49879  | 0.055016 | 0.23538  | 0.122983 | 0.0078   | 0.299236 | 4.08E-11 | 0.13955  | 0.00251  |
| 0.0107   | 0.01722  | 0.71051  | 0.123479 | 0.00755  | 0.261079 | 1.03E-08 | 0.068889 | 0.13715  |
| 0.09604  | -0.04394 | 0.34344  | 0.108423 | 0.01909  | 0.243414 | 1.00E-07 | 0.004482 | 0.92305  |
| 0.00396  | -0.00015 | 0.9975   | 0.075587 | 0.1028   | 0.161725 | 0.00045  | 0.012412 | 0.78907  |
| 0.05941  | -0.01586 | 0.73242  | 0.059934 | 0.19605  | 0.193764 | 2.49E-05 | -0.02604 | 0.57455  |
| 0.37042  | -0.00133 | 0.97713  | 0.177179 | 0.00012  | 0.317286 | 2.21E-12 | 0.172385 | 0.00018  |
| 0.98454  | -0.0279  | 0.54749  | 0.119479 | 0.00976  | 0.267086 | 4.54E-09 | 0.042453 | 0.36     |
| 0.09705  | -0.13204 | 0.00426  | 0.040781 | 0.37925  | 0.161282 | 0.00047  | -0.07066 | 0.12732  |
| 0.46608  | -0.13769 | 0.00287  | 0.072205 | 0.11918  | 0.052361 | 0.25878  | -0.22242 | 1.21E-06 |
| 0.05638  | -0.09311 | 0.04432  | -0.00341 | 0.94137  | 0.035524 | 0.44375  | -0.15243 | 0.00095  |
| 0.43333  | -0.05724 | 0.21693  | 0.146294 | 0.00152  | 0.252534 | 3.16E-08 | 0.041451 | 0.37146  |
| 0.00472  | -0.05902 | 0.20299  | 0.154841 | 0.00079  | 0.480782 | 2.19E-28 | 0.189767 | 3.67E-05 |
| 0.03472  | -0.00305 | 0.94763  | 0.049679 | 0.28401  | 0.365036 | 3.63E-16 | 0.129159 | 0.00518  |
| 0.04779  | -0.09526 | 0.03961  | 0.105111 | 0.02311  | 0.16706  | 0.00029  | 0.005689 | 0.90241  |
| 0.29812  | -0.10263 | 0.02657  | -0.07379 | 0.11128  | 0.013308 | 0.77424  | -0.20534 | 7.70E-06 |
| 3.85E-06 | -0.00668 | 0.88559  | 0.112159 | 0.01531  | 0.280484 | 6.86E-10 | 0.115824 | 0.01226  |
| 1.18E-12 | 0.001568 | 0.97304  | 0.114911 | 0.01296  | 0.235861 | 2.52E-07 | 0.085575 | 0.06464  |
| 0.02144  | -0.08135 | 0.07906  | -0.05193 | 0.26274  | 0.064372 | 0.16489  | -0.11224 | 0.01524  |
| 0.13431  | -0.08014 | 0.08364  | 0.317161 | 2.26E-12 | 0.289861 | 1.72E-10 | 0.055419 | 0.23196  |
| 0.01607  | -0.106   | 0.02197  | 0.056374 | 0.224    | 0.249662 | 4.56E-08 | -0.03185 | 0.49237  |
| 0.25181  | -0.01027 | 0.82487  | 0.185358 | 5.58E-05 | 0.398723 | 3.02E-19 | 0.182163 | 7.52E-05 |
| 0.10309  | -0.09777 | 0.03467  | 0.121659 | 0.00849  | 0.26295  | 7.97E-09 | 0.040963 | 0.37712  |
| 0.02693  | -0.12675 | 0.00609  | 0.115333 | 0.01263  | 0.085592 | 0.06459  | -0.12507 | 0.00681  |
| 0.01858  | -0.05983 | 0.19685  | 0.068175 | 0.14128  | 0.242816 | 1.08E-07 | 0.052594 | 0.25667  |
| 0.50619  | -0.01386 | 0.76512  | 0.246901 | 6.47E-08 | 0.428341 | 2.92E-22 | 0.227833 | 6.49E-07 |
| 0.00274  | -0.03621 | 0.43498  | 0.158894 | 0.00057  | 0.36136  | 7.50E-16 | 0.130761 | 0.00465  |
| 4.16E-06 | -0.07149 | 0.12289  | -0.0212  | 0.64771  | 0.215218 | 2.69E-06 | -0.01912 | 0.68023  |
| 0.5575   | -0.07222 | 0.11911  | -0.04388 | 0.34408  | 0.107215 | 0.02048  | -0.05337 | 0.24968  |
| 0.4306   | -0.02449 | 0.5976   | 0.082648 | 0.07437  | 0.267293 | 4.41E-09 | 0.009798 | 0.83276  |
| 0.00388  | -0.06711 | 0.14763  | 0.083842 | 0.07027  | 0.194743 | 2.26E-05 | -0.03657 | 0.43039  |
| 0.56629  | -0.07494 | 0.1058   | -0.01637 | 0.72427  | 0.053847 | 0.2455   | -0.12988 | 0.00494  |
| 0.30279  | 0.027738 | 0.54989  | 0.101437 | 0.02839  | 0.292454 | 1.16E-10 | 0.083462 | 0.07155  |
| 0.42704  | -0.02229 | 0.6309   | 0.014867 | 0.74864  | 0.133054 | 0.00397  | -0.03871 | 0.40389  |
| 0.06735  | -0.04659 | 0.31506  | 0.079859 | 0.08473  | 0.178736 | 0.0001   | -0.07307 | 0.11483  |
| 0.00143  | -0.07436 | 0.10852  | 0.086058 | 0.06314  | 0.126389 | 0.00624  | -0.03933 | 0.39647  |

|          |          |          |          |          |          |          |          |          |
|----------|----------|----------|----------|----------|----------|----------|----------|----------|
| 0.29363  | -0.08198 | 0.07676  | 0.04926  | 0.28809  | 0.183937 | 6.38E-05 | -0.08887 | 0.05496  |
| 0.68283  | 0.091108 | 0.04911  | 0.276194 | 1.27E-09 | 0.543531 | 2.97E-37 | 0.344317 | 1.92E-14 |
| 0.39105  | -0.02991 | 0.51902  | 0.175438 | 0.00014  | 0.347857 | 9.93E-15 | 0.127522 | 0.00579  |
| 0.00042  | -0.03478 | 0.45333  | 0.048599 | 0.29462  | 0.220755 | 1.45E-06 | 0.005203 | 0.91072  |
| 0.8343   | -0.08146 | 0.07866  | 0.092544 | 0.04563  | 0.162321 | 0.00043  | -0.09468 | 0.04084  |
| 0.05842  | -0.11757 | 0.011    | 0.266547 | 4.89E-09 | 0.315513 | 2.97E-12 | 0.063037 | 0.17385  |
| 0.01762  | -0.13713 | 0.00298  | 0.031256 | 0.50043  | 0.215752 | 2.53E-06 | -0.07948 | 0.08623  |
| 0.01234  | -0.04724 | 0.30833  | 0.100468 | 0.02995  | 0.100268 | 0.03028  | -0.06559 | 0.157    |
| 0.16118  | 0.010655 | 0.81836  | 0.172392 | 0.00018  | 0.332657 | 1.57E-13 | 0.108336 | 0.01919  |
| 0.02842  | -0.18384 | 6.44E-05 | -0.14957 | 0.00119  | -0.13105 | 0.00456  | -0.38721 | 3.74E-18 |
| 0.03306  | -0.10628 | 0.02161  | -0.11998 | 0.00945  | -0.09848 | 0.03336  | -0.26126 | 1.00E-08 |
| 0.6808   | -0.08636 | 0.06222  | 0.075984 | 0.10101  | 0.300688 | 3.25E-11 | 0.02775  | 0.54971  |
| 2.73E-06 | -0.0186  | 0.68855  | 0.264475 | 6.49E-09 | 0.373918 | 6.06E-17 | 0.170873 | 0.00021  |
| 0.47758  | -0.00495 | 0.91507  | -0.05679 | 0.22056  | 0.007338 | 0.87433  | -0.10421 | 0.02432  |
| 0.02834  | 0.028035 | 0.54562  | 0.147819 | 0.00136  | 0.154394 | 0.00082  | 0.058536 | 0.20671  |
| 0.2867   | -0.07256 | 0.11738  | 0.048989 | 0.29076  | 0.111958 | 0.0155   | -0.03998 | 0.38865  |
| 0.06078  | -0.02683 | 0.56304  | 0.177618 | 0.00011  | 0.455901 | 2.39E-25 | 0.231237 | 4.36E-07 |
| 0.06091  | 0.011908 | 0.79745  | 0.104392 | 0.02407  | 0.206055 | 7.15E-06 | 0.124533 | 0.00705  |
| 0.00282  | -0.01031 | 0.82414  | 0.07408  | 0.10987  | 0.165438 | 0.00033  | 0.056391 | 0.22386  |
| 8.66E-05 | 0.018404 | 0.69159  | 0.086419 | 0.06204  | 0.247538 | 5.97E-08 | 0.11557  | 0.01245  |
| 0.00143  | 0.026595 | 0.56645  | 0.104678 | 0.02368  | 0.10952  | 0.01791  | 0.10523  | 0.02295  |
| 0.00252  | 0.125398 | 0.00666  | 0.08445  | 0.06825  | 0.227902 | 6.44E-07 | 0.101662 | 0.02804  |
| 0.92168  | -0.05835 | 0.20819  | -0.00883 | 0.84915  | 0.053825 | 0.24568  | -0.09724 | 0.03567  |
| 5.11E-12 | 0.06345  | 0.17104  | -0.04762 | 0.30444  | 0.015386 | 0.74018  | -0.02031 | 0.66154  |
| 0.02062  | -0.01277 | 0.78318  | 0.105192 | 0.023    | 0.252595 | 3.13E-08 | 0.028629 | 0.53714  |
| 0.0452   | -0.11992 | 0.00949  | 0.146267 | 0.00153  | 0.220735 | 1.46E-06 | -0.04698 | 0.31098  |
| 0.44337  | 0.037385 | 0.42024  | 0.121521 | 0.00857  | 0.329615 | 2.69E-13 | 0.134886 | 0.0035   |
| 0.04311  | -0.09419 | 0.04189  | -0.00069 | 0.98819  | 0.13281  | 0.00404  | -0.1168  | 0.01154  |
| 0.26491  | 0.012206 | 0.79249  | 0.04836  | 0.297    | 0.279103 | 8.37E-10 | 0.046258 | 0.31852  |
| 0.57906  | -0.04162 | 0.36946  | -0.13299 | 0.00399  | 0.047018 | 0.31063  | -0.0906  | 0.05039  |
| 0.16627  | -0.00659 | 0.88697  | -0.08715 | 0.05985  | 0.15029  | 0.00112  | 0.082566 | 0.07466  |
| 0.60007  | 0.0085   | 0.85465  | 0.013057 | 0.77839  | 0.19754  | 1.71E-05 | 0.004199 | 0.9279   |
| 0.99551  | 0.072091 | 0.11977  | 0.338359 | 5.68E-14 | 0.405879 | 6.01E-20 | 0.330087 | 2.47E-13 |
| 0.60142  | -0.11798 | 0.01072  | 0.077951 | 0.09246  | 0.325402 | 5.58E-13 | 0.05791  | 0.21161  |
| 0.42289  | -0.03073 | 0.50763  | 0.153789 | 0.00085  | 0.330568 | 2.27E-13 | 0.11068  | 0.01672  |
| 0.81604  | -0.09297 | 0.04464  | 0.107062 | 0.02066  | 0.182464 | 7.31E-05 | -0.07305 | 0.11493  |
| 0.36953  | 0.097217 | 0.03571  | -0.01171 | 0.80074  | 0.050724 | 0.27399  | -0.02658 | 0.56665  |
| 0.06446  | -0.07288 | 0.11576  | -0.00535 | 0.90828  | 0.170038 | 0.00022  | -0.1076  | 0.02003  |
| 0.21061  | -0.00737 | 0.87373  | 0.072938 | 0.11547  | 0.188507 | 4.14E-05 | 0.053712 | 0.24668  |
| 0.03992  | -0.04466 | 0.33555  | 0.008775 | 0.85     | 0.211326 | 4.09E-06 | -0.02824 | 0.54269  |
| 0.00011  | -0.11192 | 0.01553  | 0.119885 | 0.00951  | 0.259476 | 1.27E-08 | 0.020145 | 0.66413  |
| 1.87E-08 | 0.061518 | 0.18448  | 0.201865 | 1.10E-05 | 0.441791 | 9.86E-24 | 0.278721 | 8.85E-10 |
| 0.37318  | -0.00974 | 0.83372  | -0.05667 | 0.22157  | 0.023379 | 0.6143   | -0.07092 | 0.12591  |
| 0.80952  | 0.066597 | 0.15074  | -0.03154 | 0.49657  | 0.144767 | 0.00171  | -0.03252 | 0.4832   |
| 0.50592  | 0.103289 | 0.02561  | 0.285671 | 3.21E-10 | 0.579573 | 2.96E-43 | 0.436523 | 3.78E-23 |

|          |          |         |          |          |          |          |          |          |
|----------|----------|---------|----------|----------|----------|----------|----------|----------|
| 0.77332  | -0.0377  | 0.41634 | -0.0914  | 0.04838  | -0.00869 | 0.85136  | -0.11754 | 0.01102  |
| 0.00278  | -0.03636 | 0.43309 | 0.166849 | 0.00029  | 0.298341 | 4.69E-11 | 0.069804 | 0.132    |
| 0.42527  | 0.05576  | 0.2291  | 0.201292 | 1.17E-05 | 0.415425 | 6.56E-21 | 0.16239  | 0.00043  |
| 2.96E-10 | 0.031163 | 0.50171 | 0.157278 | 0.00065  | 0.375142 | 4.71E-17 | 0.194742 | 2.26E-05 |
| 0.02167  | 0.047824 | 0.3024  | 0.067217 | 0.14697  | 0.236036 | 2.47E-07 | 0.048071 | 0.29991  |
| 0.01174  | -0.10693 | 0.02082 | 0.051379 | 0.26783  | 0.110573 | 0.01683  | -0.12471 | 0.00697  |
| 0.96713  | -0.02099 | 0.65094 | -0.13578 | 0.00328  | -0.01853 | 0.68964  | -0.19781 | 1.66E-05 |
| 0.08402  | -0.05148 | 0.26693 | -0.04362 | 0.34695  | 0.123705 | 0.00744  | -0.09847 | 0.03339  |
| 0.77342  | -0.02692 | 0.56173 | 0.054108 | 0.24321  | 0.219577 | 1.66E-06 | -0.01442 | 0.75589  |
| 0.01848  | -0.0895  | 0.05326 | 0.193158 | 2.64E-05 | 0.287975 | 2.28E-10 | 0.060557 | 0.19144  |
| 0.38031  | -0.06483 | 0.16193 | 0.043033 | 0.35346  | 0.211513 | 4.01E-06 | -0.04049 | 0.38261  |
| 0.70897  | -0.08363 | 0.07097 | 0.012892 | 0.78111  | 0.206327 | 6.95E-06 | -0.06694 | 0.14862  |
| 0.08682  | -0.01903 | 0.68171 | 0.119061 | 0.01002  | 0.317658 | 2.08E-12 | 0.098532 | 0.03327  |
| 0.06717  | 0.143026 | 0.00195 | 0.136506 | 0.00312  | 0.233431 | 3.37E-07 | 0.227603 | 6.67E-07 |
| 0.69197  | 0.042166 | 0.36326 | 0.040088 | 0.38741  | 0.343944 | 2.05E-14 | 0.183689 | 6.53E-05 |
| 0.01267  | -0.1103  | 0.0171  | 0.10454  | 0.02387  | 0.241461 | 1.28E-07 | -0.00739 | 0.87351  |
| 0.02705  | -0.08771 | 0.05822 | 0.135762 | 0.00329  | 0.357114 | 1.71E-15 | 0.040656 | 0.38071  |
| 0.00936  | -0.02423 | 0.6014  | 0.204847 | 8.11E-06 | 0.33605  | 8.61E-14 | 0.079296 | 0.08695  |
| 0.64585  | -0.05208 | 0.26133 | -0.0008  | 0.98617  | 0.058922 | 0.20373  | -0.08517 | 0.06592  |
| 0.93218  | -0.03955 | 0.39379 | 0.069639 | 0.13292  | 0.175636 | 0.00014  | -0.01344 | 0.77207  |
| 0.24271  | 0.02964  | 0.52285 | 0.006615 | 0.88663  | 0.154851 | 0.00079  | 0.017067 | 0.71298  |
| 0.00186  | -0.08782 | 0.05792 | 0.107398 | 0.02027  | 0.338533 | 5.51E-14 | 0.022504 | 0.62763  |
| 0.13577  | -0.10593 | 0.02206 | 0.140064 | 0.00242  | 0.315401 | 3.03E-12 | 0.014677 | 0.75175  |
| 7.88E-06 | 0.056764 | 0.22081 | 0.047455 | 0.30615  | 0.239428 | 1.64E-07 | 0.089283 | 0.05384  |
| 0.18437  | -0.05358 | 0.24789 | 0.189018 | 3.94E-05 | 0.352547 | 4.10E-15 | 0.089541 | 0.05315  |
| 0.00273  | -0.11446 | 0.01333 | 0.078249 | 0.09121  | 0.28502  | 3.53E-10 | -0.02778 | 0.54934  |
| 0.34663  | 0.083847 | 0.07025 | 0.122064 | 0.00827  | 0.361049 | 7.97E-16 | 0.191019 | 3.25E-05 |
| 0.44786  | -0.05465 | 0.23854 | 0.145201 | 0.00165  | 0.313955 | 3.85E-12 | 0.090008 | 0.05192  |
| 0.00038  | -0.01488 | 0.74841 | 0.195546 | 2.08E-05 | 0.26722  | 4.46E-09 | 0.165392 | 0.00033  |
| 0.30897  | -0.10939 | 0.01805 | -0.15337 | 0.00088  | -0.10915 | 0.0183   | -0.22228 | 1.23E-06 |
| 0.03872  | -0.10753 | 0.02012 | 0.025536 | 0.58201  | 0.165312 | 0.00033  | -0.10656 | 0.02127  |
| 0.02072  | -0.08453 | 0.06798 | 0.058591 | 0.20628  | 0.22198  | 1.27E-06 | -0.04567 | 0.3247   |
| 0.71518  | -0.05745 | 0.21528 | 0.105601 | 0.02247  | 0.258739 | 1.40E-08 | 0.033363 | 0.47199  |
| 0.09691  | -0.05009 | 0.28    | 0.117395 | 0.01112  | 0.28943  | 1.83E-10 | 0.019731 | 0.67062  |
| 0.57856  | -0.04602 | 0.32106 | 0.128296 | 0.00549  | 0.316637 | 2.46E-12 | 0.067402 | 0.14586  |
| 0.83763  | -0.06915 | 0.13568 | 0.046695 | 0.31396  | 0.19922  | 1.44E-05 | -0.0544  | 0.24069  |
| 0.12251  | 0.042018 | 0.36494 | -0.03505 | 0.44985  | 0.191863 | 2.99E-05 | 0.074609 | 0.10735  |
| 0.30874  | -0.10129 | 0.02862 | 0.053272 | 0.25058  | 0.227867 | 6.47E-07 | -0.06712 | 0.14756  |
| 0.00064  | 0.114658 | 0.01316 | 0.14138  | 0.0022   | 0.209375 | 5.04E-06 | 0.051087 | 0.27056  |
| 0.06863  | -0.05096 | 0.27173 | 0.004685 | 0.91958  | 0.167818 | 0.00027  | -0.06523 | 0.15932  |
| 0.36398  | -0.04636 | 0.3175  | 0.130823 | 0.00463  | 0.321501 | 1.09E-12 | 0.087101 | 0.06     |
| 0.04159  | -0.07584 | 0.10166 | -0.00298 | 0.94876  | 0.066181 | 0.15332  | -0.02494 | 0.59089  |
| 3.76E-09 | 0.024913 | 0.59126 | 0.178994 | 0.0001   | 0.327386 | 3.96E-13 | 0.159849 | 0.00053  |
| 0.7061   | -0.10653 | 0.0213  | -0.03205 | 0.48965  | 0.153779 | 0.00086  | -0.06584 | 0.15544  |
| 0.44072  | -0.02829 | 0.54196 | 0.023816 | 0.6077   | 0.24509  | 8.13E-08 | 0.026949 | 0.5613   |

|          |          |          |          |          |          |          |          |          |
|----------|----------|----------|----------|----------|----------|----------|----------|----------|
| 0.88212  | 0.02198  | 0.63567  | 0.10291  | 0.02616  | 0.175683 | 0.00014  | 0.058249 | 0.20894  |
| 0.13311  | 0.357776 | 1.51E-15 | 0.258755 | 1.40E-08 | 0.532737 | 1.36E-35 | 0.401454 | 1.64E-19 |
| 3.13E-06 | 0.007616 | 0.86962  | 0.174421 | 0.00015  | 0.30106  | 3.07E-11 | 0.153099 | 0.0009   |
| 0.94256  | -0.10042 | 0.03002  | 0.061237 | 0.18649  | 0.175946 | 0.00013  | -0.07309 | 0.11472  |
| 0.23712  | -0.10394 | 0.02469  | 0.036792 | 0.42765  | 0.236367 | 2.37E-07 | -0.02736 | 0.55534  |
| 0.00791  | -0.02446 | 0.59804  | 0.049388 | 0.28685  | 0.285637 | 3.22E-10 | 0.04359  | 0.34726  |
| 0.42711  | -0.0434  | 0.34941  | 0.049943 | 0.28146  | 0.193339 | 2.59E-05 | 0.043046 | 0.35332  |
| 0.97547  | 0.013668 | 0.76831  | 0.054225 | 0.24219  | 0.216001 | 2.46E-06 | 0.011264 | 0.80818  |
| 0.74558  | -0.04332 | 0.35027  | 0.033246 | 0.47355  | 0.204395 | 8.50E-06 | -0.03538 | 0.44563  |
| 0.82036  | 0.057677 | 0.21346  | 0.292503 | 1.15E-10 | 0.402175 | 1.39E-19 | 0.33929  | 4.80E-14 |
| 9.53E-05 | -0.08766 | 0.05837  | 0.051381 | 0.26782  | 0.094488 | 0.04125  | -0.11485 | 0.01301  |
| 0.19149  | 0.068169 | 0.14131  | 0.207782 | 5.96E-06 | 0.351779 | 4.75E-15 | 0.190514 | 3.41E-05 |
| 7.44E-05 | -0.04199 | 0.36522  | 0.11106  | 0.01635  | 0.300068 | 3.58E-11 | 0.067887 | 0.14297  |
| 0.00025  | -0.03133 | 0.49936  | 0.15256  | 0.00094  | 0.317406 | 2.17E-12 | 0.108029 | 0.01954  |
| 0.18982  | 0.157453 | 0.00064  | 0.092997 | 0.04457  | 0.320391 | 1.31E-12 | 0.333757 | 1.30E-13 |
| 0.07241  | -0.02862 | 0.53723  | -0.01476 | 0.75043  | 0.065728 | 0.15616  | -0.07395 | 0.11048  |
| 0.53083  | -0.0598  | 0.19708  | 0.084099 | 0.06941  | 0.289082 | 1.93E-10 | 0.030098 | 0.51645  |
| 0.12556  | -0.08624 | 0.06257  | -0.01225 | 0.79171  | 0.064522 | 0.16391  | -0.1168  | 0.01154  |
| 0.00412  | -0.12425 | 0.00718  | 0.040895 | 0.37791  | 0.222211 | 1.24E-06 | -0.07838 | 0.09069  |
| 0.00068  | -0.0043  | 0.92622  | 0.136563 | 0.00311  | 0.333206 | 1.43E-13 | 0.188164 | 4.28E-05 |
| 0.06929  | -0.08954 | 0.05316  | 0.183739 | 6.50E-05 | 0.226052 | 7.98E-07 | -0.0147  | 0.75144  |
| 0.5464   | -0.07275 | 0.11644  | -0.1036  | 0.02516  | -0.06666 | 0.15038  | -0.09643 | 0.03723  |
| 0.95081  | -0.05411 | 0.24322  | -0.07053 | 0.12801  | 0.07252  | 0.11757  | -0.10734 | 0.02034  |
| 1.62E-08 | 0.060664 | 0.19065  | -0.01696 | 0.71474  | 0.070485 | 0.12826  | 0.004341 | 0.92546  |
| 3.11E-05 | -0.01547 | 0.73888  | 0.130916 | 0.0046   | 0.283943 | 4.14E-10 | 0.087593 | 0.05856  |
| 0.02052  | -0.09661 | 0.03688  | -0.02059 | 0.65726  | 0.138811 | 0.00264  | -0.05078 | 0.27347  |
| 0.01037  | -0.01358 | 0.7697   | 0.177047 | 0.00012  | 0.353727 | 3.28E-15 | 0.152402 | 0.00095  |
| 0.09525  | 0.074764 | 0.10662  | -0.14187 | 0.00212  | -0.02828 | 0.54208  | 0.036428 | 0.43224  |
| 0.12543  | 0.254084 | 2.58E-08 | 0.054365 | 0.24097  | 0.05524  | 0.23347  | 0.177517 | 0.00011  |
| 0.00327  | 0.303568 | 2.06E-11 | 0.305471 | 1.53E-11 | 0.370862 | 1.13E-16 | 0.557593 | 1.65E-39 |
| 0.57291  | 0.163597 | 0.00039  | 0.064187 | 0.16611  | 0.095373 | 0.03938  | 0.163334 | 0.00039  |
| 0.22825  | 0.057788 | 0.21258  | 0.217212 | 2.16E-06 | 0.222967 | 1.13E-06 | 0.302154 | 2.58E-11 |
| 0.01662  | 0.129993 | 0.0049   | -0.02396 | 0.60552  | 0.007078 | 0.87875  | 0.073432 | 0.11302  |
| 1.62E-13 | 0.154501 | 0.00081  | 0.023785 | 0.60817  | -0.01362 | 0.76915  | 0.081914 | 0.07699  |
| 7.88E-16 | 0.393176 | 1.03E-18 | 0.206705 | 6.68E-06 | 0.139623 | 0.00249  | 0.289626 | 1.78E-10 |
| 0.18581  | 0.103036 | 0.02598  | 0.029221 | 0.52875  | -0.03467 | 0.4548   | 0.066041 | 0.15419  |
| 3.63E-30 | 0.456683 | 1.94E-25 | 0.179053 | 0.0001   | 0.026196 | 0.5723   | 0.181927 | 7.69E-05 |
| 4.50E-28 | 0.144163 | 0.00179  | 0.03965  | 0.39261  | -0.04001 | 0.38833  | 0.072818 | 0.11607  |
| 0.8449   | 0.001035 | 0.98221  | -0.04754 | 0.30528  | -0.05126 | 0.26891  | -0.04296 | 0.35429  |
| 0.63209  | 0.038457 | 0.40702  | 0.053714 | 0.24667  | -0.04208 | 0.36424  | -0.01605 | 0.7294   |
| 1.36E-14 | 0.091939 | 0.04707  | -0.00282 | 0.95154  | 0.004352 | 0.92527  | 0.050261 | 0.2784   |
| 5.30E-06 | 0.123395 | 0.00759  | 0.064292 | 0.16542  | 0.031047 | 0.50331  | 0.119775 | 0.00958  |
| 0.06801  | 0.047917 | 0.30146  | -0.05586 | 0.22824  | -0.08903 | 0.05452  | -0.04894 | 0.29119  |
| 0.00751  | 0.07198  | 0.12034  | 0.004148 | 0.92876  | -0.05123 | 0.26918  | 0.048069 | 0.29992  |
| 8.87E-05 | 0.10174  | 0.02792  | 0.075361 | 0.10384  | 0.01015  | 0.82684  | 0.058636 | 0.20593  |

|          |          |          |          |          |          |          |          |          |
|----------|----------|----------|----------|----------|----------|----------|----------|----------|
| 0.01381  | 0.119726 | 0.00961  | -0.02685 | 0.56275  | -0.02126 | 0.64682  | 0.011307 | 0.80746  |
| 0.58225  | 0.035437 | 0.44488  | -0.03564 | 0.44226  | -0.05726 | 0.21683  | -0.02367 | 0.60995  |
| 0.72939  | 0.028026 | 0.54574  | -0.04175 | 0.36805  | -0.05433 | 0.24128  | -0.0213  | 0.64608  |
| 0.00019  | 0.02837  | 0.54083  | -0.01089 | 0.81435  | 0.033881 | 0.46513  | 0.057958 | 0.21124  |
| 0.93913  | 0.022197 | 0.63232  | 0.082791 | 0.07387  | 0.031103 | 0.50254  | 0.016665 | 0.71945  |
| 0.60783  | 0.040727 | 0.37987  | 0.020295 | 0.66178  | -0.01769 | 0.70301  | 0.028034 | 0.54564  |
| 1.03E-11 | 0.070742 | 0.12687  | -0.05465 | 0.23852  | -0.05785 | 0.21209  | 0.050272 | 0.27829  |
| 0.54545  | 0.055089 | 0.23475  | -0.0067  | 0.88517  | -0.04937 | 0.28706  | 0.006115 | 0.89514  |
| 7.42E-10 | 0.112631 | 0.01488  | 0.060133 | 0.19457  | 0.064442 | 0.16443  | 0.174613 | 0.00015  |
| 0.17305  | 0.038535 | 0.40607  | 0.004663 | 0.91995  | -0.03466 | 0.45495  | 0.028171 | 0.54367  |
| 0.54614  | 0.018522 | 0.68973  | -0.08826 | 0.05665  | -0.05772 | 0.21312  | -0.03365 | 0.46813  |
| 7.39E-07 | 0.058465 | 0.20726  | -0.05677 | 0.22079  | -0.03307 | 0.47583  | -0.00499 | 0.91443  |
| 0.33025  | 0.031528 | 0.49671  | -0.00226 | 0.96119  | -0.03325 | 0.47352  | 0.000784 | 0.98652  |
| 0.0251   | 0.057471 | 0.21511  | -0.01187 | 0.79806  | -0.0244  | 0.59894  | 0.003675 | 0.93688  |
| 0.2501   | 0.035698 | 0.44153  | -0.01174 | 0.80023  | -0.0441  | 0.34167  | 0.005558 | 0.90465  |
| 0.05864  | 0.036908 | 0.42619  | -0.10605 | 0.02191  | -0.05578 | 0.2289   | -0.0409  | 0.37788  |
| 0.70268  | 0.011244 | 0.80852  | -0.0674  | 0.14586  | -0.05761 | 0.21399  | -0.03003 | 0.51741  |
| 0.22731  | 0.036017 | 0.43745  | -0.1415  | 0.00218  | -0.08179 | 0.07743  | -0.06579 | 0.15576  |
| 0.71664  | 0.021759 | 0.63906  | -0.05688 | 0.21989  | -0.03208 | 0.48926  | -0.00442 | 0.92405  |
| 0.08239  | 0.042206 | 0.3628   | -0.01195 | 0.79676  | -0.03389 | 0.46506  | 0.02309  | 0.61869  |
| 0.18811  | 0.034883 | 0.45203  | -0.04225 | 0.36235  | -0.03232 | 0.486    | -0.01175 | 0.80002  |
| 0.00156  | 0.048476 | 0.29584  | -0.02226 | 0.63135  | 0.003506 | 0.93977  | 0.038593 | 0.40536  |
| 0.16046  | 0.061957 | 0.18135  | 0.041179 | 0.37461  | -0.00243 | 0.95828  | 0.041428 | 0.37173  |
| 0.0636   | 0.08029  | 0.08306  | 0.056643 | 0.2218   | -0.01075 | 0.81685  | 0.069989 | 0.13097  |
| 0.01603  | 0.117219 | 0.01124  | 0.050356 | 0.27749  | -0.00483 | 0.91709  | 0.083136 | 0.07267  |
| 7.44E-19 | 0.142914 | 0.00196  | 0.057097 | 0.21811  | 0.041514 | 0.37073  | 0.123681 | 0.00745  |
| 0.04983  | 0.02011  | 0.66469  | -0.09565 | 0.0388   | -0.13235 | 0.00417  | -0.06553 | 0.15743  |
| 0.80294  | 0.026828 | 0.56306  | 0.068582 | 0.13891  | -0.00252 | 0.9566   | 0.02617  | 0.57268  |
| 0.74456  | 0.023394 | 0.61408  | -0.02566 | 0.58017  | -0.05015 | 0.27942  | -0.01351 | 0.77086  |
| 0.10733  | 0.066006 | 0.15441  | 0.029337 | 0.52712  | -0.0315  | 0.49707  | 0.023948 | 0.60572  |
| 0.26147  | 0.049168 | 0.289    | 0.004567 | 0.92158  | -0.04231 | 0.36156  | 0.00788  | 0.86515  |
| 0.00026  | 0.070757 | 0.12679  | 0.076712 | 0.09777  | -0.01463 | 0.75253  | 0.053905 | 0.24499  |
| 0.00735  | 0.059117 | 0.20223  | 0.030597 | 0.50952  | -0.02123 | 0.64718  | 0.039133 | 0.39882  |
| 0.64705  | 0.056376 | 0.22398  | 0.011038 | 0.81196  | -0.04136 | 0.37249  | 0.022823 | 0.62275  |
| 0.08048  | 0.047351 | 0.30721  | -0.07226 | 0.11888  | -0.05543 | 0.2319   | -0.01015 | 0.82681  |
| 0.38347  | 0.106414 | 0.02145  | 0.105666 | 0.02239  | 0.03389  | 0.46502  | 0.113436 | 0.01418  |
| 5.46E-10 | 0.078046 | 0.09206  | 0.01441  | 0.75611  | 0.006944 | 0.88103  | 0.015833 | 0.73292  |
| 4.01E-07 | 0.109338 | 0.0181   | -0.004   | 0.93127  | -0.03678 | 0.42775  | 0.050009 | 0.28082  |
| 0.00211  | 0.203411 | 9.41E-06 | 0.035859 | 0.43946  | 0.318482 | 1.81E-12 | 0.332368 | 1.66E-13 |
| 0.01946  | 0.029999 | 0.51783  | 0.570565 | 1.10E-41 | 0.338272 | 5.77E-14 | 0.241947 | 1.20E-07 |
| 0.00553  | -0.095   | 0.04017  | 0.010447 | 0.82185  | 0.015849 | 0.73265  | -0.15938 | 0.00055  |
| 3.80E-23 | 0.048122 | 0.29939  | 0.005744 | 0.90147  | 0.041612 | 0.3696   | 0.011729 | 0.80043  |
| 0.24789  | -0.04873 | 0.29328  | -0.01298 | 0.77959  | 0.110131 | 0.01727  | -0.08286 | 0.07362  |
| 2.60E-22 | 0.189678 | 3.70E-05 | 0.303556 | 2.07E-11 | 0.569347 | 1.78E-41 | 0.529474 | 4.20E-35 |
| 0.004    | 0.033526 | 0.46983  | 0.104988 | 0.02327  | 0.29406  | 9.08E-11 | 0.119017 | 0.01005  |

|          |          |          |          |          |          |          |          |          |
|----------|----------|----------|----------|----------|----------|----------|----------|----------|
| 0.19316  | -0.04066 | 0.3807   | 0.107702 | 0.01991  | 0.328569 | 3.23E-13 | 0.093582 | 0.04324  |
| 0.27956  | 0.070293 | 0.1293   | 0.202617 | 1.02E-05 | 0.578695 | 4.23E-43 | 0.4338   | 7.51E-23 |
| 0.00013  | -0.02512 | 0.58817  | 0.062565 | 0.1771   | 0.043801 | 0.34493  | -0.01275 | 0.78346  |
| 0.10794  | 0.192173 | 2.91E-05 | 0.359858 | 1.01E-15 | 0.618812 | 1.07E-50 | 0.448104 | 1.91E-24 |
| 0.28864  | -0.07775 | 0.09332  | 0.094705 | 0.04078  | 0.259861 | 1.21E-08 | 0.001909 | 0.96718  |
| 0.0468   | -0.03894 | 0.40113  | -0.0756  | 0.10273  | 0.072156 | 0.11943  | -0.06712 | 0.14755  |
| 2.60E-07 | -0.1005  | 0.0299   | -0.20332 | 9.49E-06 | -0.07229 | 0.11873  | -0.24117 | 1.32E-07 |
| 6.50E-06 | -0.03368 | 0.4678   | 0.05327  | 0.25059  | 0.161086 | 0.00047  | 0.05991  | 0.19623  |
| 0.02371  | -0.01911 | 0.68045  | 0.071483 | 0.12293  | 0.301871 | 2.70E-11 | 0.085193 | 0.06585  |
| 5.87E-10 | -0.01382 | 0.76582  | 0.04103  | 0.37634  | 0.086044 | 0.06319  | 0.05602  | 0.22693  |
| 0.32158  | 0.002266 | 0.96105  | 0.155975 | 0.00072  | 0.289692 | 1.76E-10 | 0.10143  | 0.0284   |
| 1.50E-22 | 0.125712 | 0.00652  | -0.01824 | 0.69426  | 0.241215 | 1.31E-07 | 0.254971 | 2.30E-08 |
| 8.14E-17 | 0.01012  | 0.82734  | -0.01901 | 0.68198  | -0.01166 | 0.80164  | -0.0723  | 0.11868  |
| 1.76E-07 | 0.003076 | 0.94715  | 0.099269 | 0.03197  | 0.314912 | 3.28E-12 | 0.236744 | 2.27E-07 |
| 0.39     | -0.03385 | 0.46559  | 0.063009 | 0.17404  | 0.129665 | 0.00501  | -0.00621 | 0.8936   |
| 0.03398  | -0.06575 | 0.156    | 0.032077 | 0.48925  | 0.062089 | 0.18043  | -0.10823 | 0.01932  |
| 2.12E-05 | 0.16335  | 0.00039  | 0.183909 | 6.39E-05 | 0.275767 | 1.35E-09 | 0.215344 | 2.65E-06 |
| 0.05899  | -0.07561 | 0.10269  | -0.00583 | 0.90005  | 0.033476 | 0.47049  | -0.07352 | 0.11257  |
| 0.00143  | -0.04166 | 0.36906  | 0.113715 | 0.01394  | 0.156628 | 0.00068  | -0.0052  | 0.91081  |
| 0.00461  | -0.04831 | 0.2975   | 0.224899 | 9.10E-07 | 0.307247 | 1.15E-11 | 0.08377  | 0.07051  |
| 8.64E-05 | -0.03879 | 0.40296  | 0.05162  | 0.26559  | 0.05009  | 0.28004  | -0.0771  | 0.09608  |
| 0.09784  | -0.01806 | 0.6971   | 0.185159 | 5.69E-05 | 0.478612 | 4.13E-28 | 0.226604 | 7.48E-07 |
| 0.00065  | 0.002709 | 0.95343  | 0.11509  | 0.01282  | 0.11008  | 0.01733  | -0.001   | 0.98275  |
| 4.07E-09 | 0.069739 | 0.13236  | 0.145773 | 0.00159  | 0.137877 | 0.00283  | 0.069103 | 0.13593  |
| 0.14649  | -0.0877  | 0.05825  | 0.077877 | 0.09277  | 0.219549 | 1.66E-06 | -0.0077  | 0.86828  |
| 0.79078  | -0.05498 | 0.23567  | 0.100198 | 0.03039  | 0.328305 | 3.38E-13 | 0.121554 | 0.00855  |
| 5.23E-38 | 0.091114 | 0.04909  | 0.124094 | 0.00726  | 0.268822 | 3.58E-09 | 0.18703  | 4.76E-05 |
| 0.1323   | 0.055897 | 0.22795  | 0.175176 | 0.00014  | 0.22211  | 1.25E-06 | 0.10978  | 0.01763  |
| 1.50E-36 | 0.072773 | 0.1163   | 0.165746 | 0.00032  | 0.261775 | 9.34E-09 | 0.174386 | 0.00015  |
| 0.00014  | 0.064782 | 0.16221  | 0.076566 | 0.09841  | 0.249736 | 4.52E-08 | 0.157042 | 0.00066  |
| 0.62115  | -0.03193 | 0.4912   | 0.094782 | 0.04062  | 0.271818 | 2.36E-09 | 0.027755 | 0.54963  |
| 0.18445  | -0.09304 | 0.04448  | 0.229441 | 5.39E-07 | 0.387479 | 3.53E-18 | 0.092316 | 0.04617  |
| 0.03832  | -0.05498 | 0.23565  | 0.256784 | 1.81E-08 | 0.206924 | 6.53E-06 | 0.092784 | 0.04507  |
| 6.79E-17 | -0.00065 | 0.98875  | 0.048673 | 0.29389  | 0.074367 | 0.10849  | -0.04272 | 0.35693  |
| 6.64E-13 | -0.01622 | 0.72662  | 0.074326 | 0.10869  | 0.199185 | 1.45E-05 | 0.021888 | 0.63708  |
| 0.10107  | -0.07698 | 0.0966   | 0.055572 | 0.23067  | 0.167933 | 0.00027  | -0.052   | 0.26205  |
| 0.19166  | -0.07184 | 0.12106  | 0.087    | 0.0603   | 0.179458 | 9.64E-05 | 0.082243 | 0.07581  |
| 0.06467  | 0.023136 | 0.61799  | 0.031372 | 0.49885  | 0.2247   | 9.31E-07 | 0.082642 | 0.0744   |
| 9.96E-31 | 0.123161 | 0.00771  | 0.06421  | 0.16596  | 0.159939 | 0.00052  | 0.118197 | 0.01058  |
| 7.56E-05 | 0.052618 | 0.25645  | 0.124955 | 0.00686  | 0.280765 | 6.58E-10 | 0.140565 | 0.00233  |
| 4.84E-08 | -0.0478  | 0.30269  | -0.05671 | 0.22129  | 0.029306 | 0.52756  | -0.06623 | 0.15303  |
| 2.59E-07 | -0.07007 | 0.13054  | -0.04074 | 0.37972  | -0.06097 | 0.18841  | -0.16724 | 0.00028  |
| 6.30E-14 | 0.01077  | 0.81643  | -0.00303 | 0.94792  | 0.085002 | 0.06646  | -0.01363 | 0.7689   |
| 7.01E-09 | 0.012558 | 0.78664  | 0.07139  | 0.12342  | 0.121371 | 0.00865  | -0.01404 | 0.76211  |
| 0.00035  | -0.00897 | 0.84674  | -0.05469 | 0.23816  | 0.188711 | 4.06E-05 | -0.00546 | 0.90628  |

|          |          |          |          |          |          |          |          |          |
|----------|----------|----------|----------|----------|----------|----------|----------|----------|
| 0.33311  | 0.049769 | 0.28314  | 0.314197 | 3.69E-12 | 0.603345 | 1.22E-47 | 0.431983 | 1.18E-22 |
| 1.35E-19 | 0.037267 | 0.42171  | 0.132379 | 0.00416  | 0.163798 | 0.00038  | 0.075114 | 0.10498  |
| 0.04194  | -0.02098 | 0.65106  | 0.058211 | 0.20925  | 0.238514 | 1.83E-07 | 0.050408 | 0.277    |
| 0.00055  | -0.02289 | 0.62169  | 0.356258 | 2.02E-15 | 0.512224 | 1.34E-32 | 0.26372  | 7.19E-09 |
| 0.75971  | -0.20895 | 5.27E-06 | 0.03048  | 0.51113  | -0.02267 | 0.62501  | -0.21615 | 2.42E-06 |
| 0.00787  | 0.117349 | 0.01115  | 0.090719 | 0.05008  | 0.265946 | 5.31E-09 | 0.26862  | 3.68E-09 |
| 0.28757  | -0.1578  | 0.00062  | -0.02171 | 0.63983  | 0.139657 | 0.00249  | -0.11103 | 0.01638  |
| 0.90859  | -0.15566 | 0.00074  | -0.06758 | 0.14477  | -0.04334 | 0.35009  | -0.20318 | 9.64E-06 |
| 0.85416  | -0.12223 | 0.00819  | -0.01684 | 0.71656  | 0.023416 | 0.61375  | -0.13159 | 0.00439  |
| 6.54E-05 | -0.02058 | 0.65736  | 0.133123 | 0.00395  | 0.292527 | 1.15E-10 | 0.1212   | 0.00875  |
| 5.87E-05 | -0.01084 | 0.81531  | 0.090858 | 0.04973  | 0.215429 | 2.62E-06 | 0.055355 | 0.2325   |
| 4.93E-10 | 0.159265 | 0.00055  | 0.283296 | 4.55E-10 | 0.429377 | 2.26E-22 | 0.390548 | 1.82E-18 |
| 8.68E-10 | 0.069921 | 0.13135  | 0.124913 | 0.00688  | 0.353739 | 3.27E-15 | 0.262401 | 8.59E-09 |
| 5.14E-06 | -0.06028 | 0.19349  | 0.045518 | 0.32633  | 0.221107 | 1.40E-06 | 0.116436 | 0.0118   |
| 3.44E-11 | 0.103857 | 0.0248   | 0.130041 | 0.00488  | 0.344836 | 1.74E-14 | 0.264093 | 6.83E-09 |
| 0.33941  | -0.02572 | 0.57928  | 0.053492 | 0.24862  | 0.024046 | 0.60423  | -0.05648 | 0.22309  |
| 3.27E-18 | 0.336814 | 7.50E-14 | 0.330199 | 2.43E-13 | 0.365965 | 3.02E-16 | 0.355547 | 2.31E-15 |
| 4.73E-06 | -0.00169 | 0.97098  | 0.186687 | 4.92E-05 | 0.311087 | 6.16E-12 | 0.107769 | 0.01984  |
| 3.26E-09 | -0.00636 | 0.89097  | 0.081208 | 0.07958  | 0.162828 | 0.00041  | 0.043827 | 0.34464  |
| 0.46773  | -0.04665 | 0.31447  | 0.187457 | 4.58E-05 | 0.260025 | 1.18E-08 | 0.067635 | 0.14447  |
| 8.80E-05 | 0.032721 | 0.48056  | 0.136509 | 0.00312  | 0.180408 | 8.84E-05 | 0.138345 | 0.00273  |
| 1.27E-14 | -0.0269  | 0.56203  | 0.236567 | 2.31E-07 | 0.169893 | 0.00023  | 0.005015 | 0.91394  |
| 2.04E-19 | 0.066614 | 0.15064  | 0.061181 | 0.18689  | 0.077781 | 0.09317  | 0.002997 | 0.94849  |
| 2.53E-15 | 0.004914 | 0.91566  | 0.202139 | 1.07E-05 | 0.35982  | 1.01E-15 | 0.191131 | 3.21E-05 |
| 7.92E-05 | 0.004637 | 0.9204   | 0.174975 | 0.00014  | 0.379251 | 2.01E-17 | 0.165215 | 0.00034  |
| 0.00051  | 0.143447 | 0.00189  | 0.265912 | 5.33E-09 | 0.294091 | 9.04E-11 | 0.29688  | 5.89E-11 |
| 2.14E-19 | 0.073891 | 0.11078  | 0.077243 | 0.09546  | 0.067973 | 0.14247  | -0.00169 | 0.97099  |
| 0.00121  | -0.02854 | 0.5384   | 0.185686 | 5.41E-05 | 0.187682 | 4.48E-05 | 0.003176 | 0.94543  |
| 0.16505  | -0.09522 | 0.03969  | 0.077211 | 0.0956   | 0.049531 | 0.28545  | -0.11967 | 0.00964  |
| 0.00232  | -0.00108 | 0.9814   | -0.03981 | 0.39066  | 0.175438 | 0.00014  | 0.025862 | 0.5772   |
| 1.77E-05 | 0.115551 | 0.01246  | 0.284006 | 4.10E-10 | 0.477176 | 6.26E-28 | 0.432329 | 1.09E-22 |
| 0.63291  | -0.01465 | 0.75218  | 0.262824 | 8.11E-09 | 0.570552 | 1.11E-41 | 0.333438 | 1.37E-13 |
| 5.90E-06 | 0.091595 | 0.0479   | 0.04212  | 0.36378  | 0.220166 | 1.55E-06 | 0.174388 | 0.00015  |
| 0.00094  | 0.117289 | 0.01119  | 0.102666 | 0.02652  | 0.08889  | 0.05491  | 0.02015  | 0.66405  |
| 8.09E-18 | 0.050856 | 0.27275  | 0.096489 | 0.03712  | 0.099387 | 0.03177  | -0.01845 | 0.69091  |
| 0.00042  | -0.07125 | 0.12416  | 0.15063  | 0.00109  | 0.146038 | 0.00155  | -0.01751 | 0.70594  |
| 3.20E-08 | -0.0259  | 0.57659  | 0.164159 | 0.00037  | 0.312406 | 4.96E-12 | 0.111369 | 0.01605  |
| 2.48E-08 | 0.077048 | 0.09631  | 0.260312 | 1.14E-08 | 0.571051 | 9.08E-42 | 0.408495 | 3.30E-20 |
| 0.0001   | -0.00193 | 0.96678  | 0.130669 | 0.00468  | 0.388393 | 2.90E-18 | 0.237139 | 2.16E-07 |
| 0.16819  | -0.03207 | 0.48929  | 0.096074 | 0.03795  | 0.20464  | 8.28E-06 | 0.138126 | 0.00278  |
| 0.34396  | 0.083495 | 0.07144  | 0.253571 | 2.76E-08 | 0.489572 | 1.61E-29 | 0.358703 | 1.26E-15 |
| 0.85828  | 0.02452  | 0.59712  | 0.193315 | 2.60E-05 | 0.388763 | 2.68E-18 | 0.219259 | 1.72E-06 |
| 2.90E-14 | 0.108538 | 0.01897  | 0.267898 | 4.06E-09 | 0.375661 | 4.24E-17 | 0.334946 | 1.05E-13 |
| 0.0065   | 0.119091 | 0.01     | 0.344778 | 1.76E-14 | 0.327054 | 4.20E-13 | 0.328358 | 3.35E-13 |
| 1.88E-12 | 0.026528 | 0.56743  | 0.288117 | 2.23E-10 | 0.373374 | 6.77E-17 | 0.251957 | 3.40E-08 |



|          |          |          |          |          |          |          |          |          |
|----------|----------|----------|----------|----------|----------|----------|----------|----------|
| 2.08E-22 | 0.140881 | 0.00228  | 0.262409 | 8.58E-09 | 0.426861 | 4.20E-22 | 0.394726 | 7.32E-19 |
| 1.64E-07 | -0.01881 | 0.68517  | 0.112721 | 0.0148   | 0.301785 | 2.74E-11 | 0.094361 | 0.04153  |
| 5.13E-16 | 0.068567 | 0.139    | 0.139889 | 0.00245  | 0.127278 | 0.00588  | 0.058944 | 0.20355  |
| 0.20692  | -0.05995 | 0.19593  | -0.04073 | 0.37984  | 0.145416 | 0.00163  | -0.0502  | 0.27901  |
| 2.69E-08 | 0.101578 | 0.02817  | 0.349002 | 8.01E-15 | 0.327636 | 3.79E-13 | 0.313814 | 3.94E-12 |
| 0.24356  | 0.32814  | 3.48E-13 | 0.268614 | 3.68E-09 | 0.331572 | 1.91E-13 | 0.304013 | 1.92E-11 |
| 1.98E-06 | -0.01275 | 0.78346  | 0.005354 | 0.90813  | 0.148387 | 0.0013   | -0.0337  | 0.46755  |
| 0.87521  | -0.07154 | 0.12261  | 0.197746 | 1.67E-05 | 0.169287 | 0.00024  | 0.018509 | 0.68994  |
| 8.72E-05 | -0.0291  | 0.53046  | 0.1937   | 2.50E-05 | 0.35885  | 1.22E-15 | 0.13406  | 0.0037   |
| 0.08672  | -0.04658 | 0.3152   | 0.137576 | 0.00289  | 0.341904 | 2.98E-14 | 0.090994 | 0.04939  |
| 2.91E-06 | 0.004608 | 0.92089  | 0.138525 | 0.0027   | 0.240217 | 1.49E-07 | 0.107948 | 0.01963  |
| 1.50E-14 | 0.025524 | 0.58219  | 0.055676 | 0.2298   | 0.189553 | 3.74E-05 | 0.184411 | 6.10E-05 |
| 0.01398  | -0.08698 | 0.06035  | 0.131837 | 0.00432  | 0.38946  | 2.30E-18 | 0.225805 | 8.21E-07 |
| 0.00149  | -0.06902 | 0.1364   | 0.094624 | 0.04096  | 0.046803 | 0.31285  | -0.06224 | 0.17939  |
| 1.81E-10 | 0.013577 | 0.76981  | 0.041578 | 0.36999  | 0.03662  | 0.42981  | -0.02958 | 0.52371  |
| 0.00613  | -0.02707 | 0.55958  | 0.221617 | 1.32E-06 | 0.178244 | 0.00011  | 0.095964 | 0.03817  |
| 0.00785  | -0.08666 | 0.06132  | 0.123201 | 0.00769  | 0.104264 | 0.02424  | -0.10915 | 0.01831  |
| 0.77509  | -0.10038 | 0.03009  | 0.228794 | 5.81E-07 | 0.385728 | 5.14E-18 | 0.167813 | 0.00027  |
| 1.88E-07 | -0.04015 | 0.38667  | 0.337724 | 6.37E-14 | 0.356124 | 2.07E-15 | 0.148028 | 0.00134  |
| 0.9943   | -0.02528 | 0.58583  | 0.213773 | 3.14E-06 | 0.498105 | 1.19E-30 | 0.256948 | 1.77E-08 |
| 0.4067   | -0.03266 | 0.48143  | 0.224639 | 9.38E-07 | 0.313097 | 4.43E-12 | 0.190276 | 3.49E-05 |
| 8.50E-13 | 0.025941 | 0.57603  | -0.0155  | 0.73833  | 0.031694 | 0.49445  | -0.03547 | 0.4444   |
| 0.17047  | -0.14809 | 0.00133  | 0.009461 | 0.83842  | 0.069632 | 0.13296  | -0.15353 | 0.00087  |
| 1.08E-24 | 0.064136 | 0.16645  | 0.019378 | 0.67619  | 0.021638 | 0.64093  | 0.008562 | 0.85359  |
| 5.69E-08 | 0.081049 | 0.08018  | 0.250941 | 3.87E-08 | 0.307739 | 1.06E-11 | 0.139935 | 0.00244  |
| 0.00528  | 0.003835 | 0.93414  | -0.01867 | 0.68744  | 0.027185 | 0.55787  | -0.07302 | 0.11508  |
| 0.17287  | 0.036462 | 0.43181  | 0.177196 | 0.00012  | 0.382761 | 9.64E-18 | 0.203101 | 9.71E-06 |
| 4.41E-09 | 0.072824 | 0.11604  | 0.06501  | 0.16073  | 0.12073  | 0.00901  | 0.053584 | 0.24781  |
| 9.62E-24 | 0.056923 | 0.21951  | 0.095298 | 0.03953  | 0.154931 | 0.00078  | 0.104168 | 0.02437  |
| 4.80E-28 | 0.10162  | 0.0281   | 0.095346 | 0.03943  | 0.18639  | 5.06E-05 | 0.17738  | 0.00012  |
| 6.15E-10 | 0.049712 | 0.28369  | 0.075031 | 0.10537  | 0.199321 | 1.43E-05 | 0.200542 | 1.26E-05 |
| 2.33E-08 | 0.037148 | 0.42319  | 0.105521 | 0.02257  | 0.25675  | 1.82E-08 | 0.159201 | 0.00055  |
| 1.85E-05 | -0.06261 | 0.17677  | 0.022967 | 0.62056  | 0.099915 | 0.03087  | -0.07883 | 0.08883  |
| 0.08268  | -0.07299 | 0.11519  | 0.005525 | 0.90522  | 0.053975 | 0.24437  | -0.0909  | 0.04962  |
| 0.08681  | -0.10781 | 0.01978  | 0.198246 | 1.59E-05 | 0.218508 | 1.87E-06 | 0.02417  | 0.60237  |
| 0.00058  | -0.0556  | 0.23042  | 0.233774 | 3.23E-07 | 0.36595  | 3.03E-16 | 0.109172 | 0.01828  |
| 0.4467   | 0.115669 | 0.01237  | 0.051305 | 0.26852  | 0.176612 | 0.00012  | 0.103093 | 0.02589  |
| 0.19278  | 0.093504 | 0.04342  | 0.153869 | 0.00085  | 0.338292 | 5.75E-14 | 0.289468 | 1.82E-10 |
| 0.06487  | 0.188547 | 4.12E-05 | 0.223317 | 1.09E-06 | 0.505824 | 1.05E-31 | 0.363929 | 4.52E-16 |
| 0.00354  | -0.19146 | 3.11E-05 | -0.11861 | 0.01031  | -0.07049 | 0.12821  | -0.25674 | 1.82E-08 |
| 0.9605   | 0.152735 | 0.00093  | 0.087096 | 0.06001  | 0.380934 | 1.42E-17 | 0.376166 | 3.82E-17 |
| 0.42884  | -0.1146  | 0.01321  | 0.172256 | 0.00018  | 0.220987 | 1.42E-06 | 0.012664 | 0.7849   |
| 0.02046  | 0.036671 | 0.42918  | 0.157475 | 0.00064  | 0.18011  | 9.08E-05 | 0.165388 | 0.00033  |
| 5.27E-57 | 0.045955 | 0.32171  | 0.080307 | 0.08299  | 0.153267 | 0.00089  | 0.123486 | 0.00755  |
| 0.00075  | -0.06096 | 0.18848  | -0.1612  | 0.00047  | 0.020472 | 0.65903  | -0.0132  | 0.77596  |

|          |          |          |          |          |          |          |          |          |
|----------|----------|----------|----------|----------|----------|----------|----------|----------|
| 2.06E-10 | 0.0327   | 0.48084  | 0.074232 | 0.10914  | 0.079717 | 0.08528  | -0.04745 | 0.30624  |
| 0.00263  | -0.12255 | 0.00802  | 0.021547 | 0.64233  | -0.19775 | 1.67E-05 | -0.27675 | 1.17E-09 |
| 0.02473  | -0.0375  | 0.4188   | 0.123853 | 0.00737  | 0.276837 | 1.16E-09 | 0.071084 | 0.12504  |
| 0.0034   | -0.02213 | 0.63329  | 0.239873 | 1.55E-07 | 0.406644 | 5.04E-20 | 0.202351 | 1.05E-05 |
| 0.32911  | 0.160896 | 0.00048  | 0.215597 | 2.58E-06 | 0.388971 | 2.56E-18 | 0.380675 | 1.49E-17 |
| 1.78E-07 | 0.176234 | 0.00013  | 0.329328 | 2.83E-13 | 0.52154  | 6.21E-34 | 0.483279 | 1.05E-28 |
| 4.16E-17 | 0.039682 | 0.39223  | 0.077315 | 0.09516  | 0.193091 | 2.66E-05 | 0.068912 | 0.13702  |
| 0.03359  | 0.016408 | 0.7236   | 0.170278 | 0.00022  | 0.269047 | 3.47E-09 | 0.099978 | 0.03076  |
| 0.01552  | -0.01714 | 0.71183  | 0.154772 | 0.00079  | 0.336458 | 8.00E-14 | 0.118544 | 0.01035  |
| 6.18E-13 | 0.026844 | 0.56283  | 0.227276 | 6.93E-07 | 0.321446 | 1.10E-12 | 0.181613 | 7.91E-05 |
| 4.82E-11 | -0.00746 | 0.8722   | 0.054511 | 0.23971  | 0.097813 | 0.03459  | -0.00387 | 0.93348  |
| 0.06874  | -0.09837 | 0.03356  | 0.043034 | 0.35346  | 0.105622 | 0.02244  | -0.12989 | 0.00493  |
| 0.01788  | -0.05224 | 0.25984  | 0.113552 | 0.01408  | 0.278912 | 8.61E-10 | 0.028475 | 0.53933  |
| 0.0067   | 0.079706 | 0.08533  | 0.028967 | 0.53235  | 0.054799 | 0.23724  | 0.009759 | 0.83342  |
| 2.26E-15 | 0.039237 | 0.39757  | 0.029921 | 0.51892  | 0.135902 | 0.00325  | 0.067444 | 0.1456   |
| 2.10E-09 | 0.095314 | 0.0395   | 0.258881 | 1.37E-08 | 0.429764 | 2.05E-22 | 0.30688  | 1.22E-11 |
| 0.14438  | -0.12068 | 0.00904  | 0.000863 | 0.98515  | 0.022769 | 0.62358  | -0.16541 | 0.00033  |
| 2.89E-08 | -0.04865 | 0.29414  | -0.03819 | 0.41028  | 0.078686 | 0.08941  | -0.09466 | 0.04089  |
| 0.02045  | 0.042619 | 0.35812  | 0.244591 | 8.65E-08 | 0.444107 | 5.42E-24 | 0.339852 | 4.34E-14 |
| 0.13485  | 0.068913 | 0.13701  | -0.04091 | 0.37778  | 0.158741 | 0.00058  | 0.127218 | 0.0059   |
| 3.28E-07 | -0.05677 | 0.2208   | 0.026115 | 0.57349  | 0.059228 | 0.20138  | -0.03499 | 0.45067  |
| 5.11E-07 | 0.193891 | 2.46E-05 | 0.138558 | 0.00269  | 0.434464 | 6.36E-23 | 0.467717 | 9.27E-27 |
| 0.00021  | 0.082547 | 0.07473  | 0.14223  | 0.00206  | 0.416855 | 4.68E-21 | 0.243248 | 1.02E-07 |
| 1.80E-21 | -0.00481 | 0.91742  | 0.378334 | 2.44E-17 | 0.304037 | 1.92E-11 | 0.192357 | 2.85E-05 |
| 9.98E-08 | -0.00287 | 0.9507   | -0.17532 | 0.00014  | 0.03059  | 0.50962  | -0.06163 | 0.18369  |
| 1.67E-06 | 0.150459 | 0.00111  | 0.269801 | 3.12E-09 | 0.421112 | 1.69E-21 | 0.334634 | 1.11E-13 |
| 3.89E-06 | 0.004472 | 0.92321  | 0.559163 | 9.13E-40 | 0.419894 | 2.27E-21 | 0.294226 | 8.85E-11 |
| 1.51E-06 | 0.000312 | 0.99463  | 0.054512 | 0.2397   | 0.004186 | 0.92811  | -0.09    | 0.05194  |
| 0.30363  | 0.140097 | 0.00241  | 0.211359 | 4.08E-06 | 0.381571 | 1.24E-17 | 0.287842 | 2.32E-10 |
| 0.00774  | -0.0034  | 0.94153  | 0.082615 | 0.07449  | 0.239129 | 1.70E-07 | 0.039334 | 0.3964   |
| 0.04767  | 0.001576 | 0.97291  | 0.205101 | 7.90E-06 | 0.136265 | 0.00317  | 0.085927 | 0.06355  |
| 0.01227  | -0.05799 | 0.21099  | 0.116624 | 0.01166  | 0.238264 | 1.88E-07 | 0.02606  | 0.57429  |
| 2.30E-15 | 0.283564 | 4.38E-10 | 0.480623 | 2.30E-28 | 0.503747 | 2.03E-31 | 0.504271 | 1.72E-31 |
| 0.32561  | -0.08437 | 0.06853  | 0.181288 | 8.15E-05 | 0.141459 | 0.00218  | 0.028758 | 0.53531  |
| 0.00267  | 0.070141 | 0.13014  | 0.274618 | 1.59E-09 | 0.534719 | 6.81E-36 | 0.434501 | 6.30E-23 |
| 0.06468  | 0.076995 | 0.09654  | 0.224907 | 9.09E-07 | 0.479064 | 3.62E-28 | 0.440362 | 1.42E-23 |
| 0.00037  | 0.089579 | 0.05305  | 0.212532 | 3.59E-06 | 0.351367 | 5.13E-15 | 0.362324 | 6.20E-16 |
| 2.04E-07 | -0.0554  | 0.2321   | 0.144805 | 0.0017   | 0.193617 | 2.52E-05 | 0.018181 | 0.69516  |
| 8.18E-08 | -0.0395  | 0.39441  | 0.263828 | 7.08E-09 | 0.37351  | 6.59E-17 | 0.17011  | 0.00022  |
| 2.90E-05 | 0.03872  | 0.40382  | 0.233879 | 3.19E-07 | 0.37313  | 7.12E-17 | 0.298962 | 4.26E-11 |
| 8.65E-15 | -0.03833 | 0.40856  | 0.109281 | 0.01816  | 0.095738 | 0.03863  | 0.054086 | 0.2434   |
| 2.21E-12 | 0.021158 | 0.64834  | 0.264124 | 6.80E-09 | 0.455291 | 2.82E-25 | 0.325047 | 5.93E-13 |
| 0.01305  | 0.020048 | 0.66565  | 0.084785 | 0.06716  | 0.296591 | 6.15E-11 | 0.161431 | 0.00046  |
| 0.03578  | 0.006665 | 0.88578  | 0.426547 | 4.53E-22 | 0.62271  | 1.70E-51 | 0.388028 | 3.14E-18 |
| 5.20E-06 | -0.05348 | 0.24871  | 0.129269 | 0.00515  | 0.168687 | 0.00025  | 0.058241 | 0.20901  |

|          |          |          |          |          |          |          |          |          |
|----------|----------|----------|----------|----------|----------|----------|----------|----------|
| 1.64E-17 | 0.050189 | 0.27909  | 0.225574 | 8.43E-07 | 0.4068   | 4.87E-20 | 0.262395 | 8.59E-09 |
| 6.97E-20 | 0.164003 | 0.00037  | 0.386143 | 4.70E-18 | 0.538876 | 1.57E-36 | 0.509161 | 3.61E-32 |
| 4.50E-09 | -0.03762 | 0.41728  | 0.177279 | 0.00012  | 0.286621 | 2.79E-10 | 0.099413 | 0.03172  |
| 0.00042  | -0.01715 | 0.71161  | 0.070211 | 0.12975  | 0.237262 | 2.13E-07 | 0.041368 | 0.37242  |
| 9.58E-08 | 0.065496 | 0.15762  | 0.216172 | 2.42E-06 | 0.202854 | 9.96E-06 | 0.14885  | 0.00126  |
| 0.04187  | -0.03073 | 0.50764  | -0.0035  | 0.93979  | 0.080253 | 0.0832   | -0.08243 | 0.07515  |
| 0.00013  | -0.02601 | 0.57509  | 0.144871 | 0.0017   | 0.221001 | 1.42E-06 | 0.013927 | 0.76405  |
| 1.74E-19 | 0.045479 | 0.32675  | -0.03202 | 0.49005  | 0.083486 | 0.07147  | 0.010894 | 0.81436  |
| 2.51E-05 | -0.03872 | 0.40387  | 0.231842 | 4.06E-07 | 0.369733 | 1.42E-16 | 0.1353   | 0.00339  |
| 0.0003   | 0.142038 | 0.00209  | 0.44073  | 1.30E-23 | 0.445219 | 4.06E-24 | 0.381109 | 1.36E-17 |
| 0.2003   | 0.037959 | 0.41313  | 0.101609 | 0.02812  | 0.1405   | 0.00234  | 0.040572 | 0.3817   |
| 8.58E-06 | 0.067837 | 0.14327  | 0.302664 | 2.38E-11 | 0.390807 | 1.72E-18 | 0.27411  | 1.71E-09 |
| 0.00179  | 0.083002 | 0.07314  | 0.303785 | 1.99E-11 | 0.520918 | 7.65E-34 | 0.380499 | 1.55E-17 |
| 3.02E-22 | 0.028002 | 0.54609  | 0.085881 | 0.06369  | 0.247347 | 6.12E-08 | 0.134043 | 0.00371  |
| 0.0365   | -0.10069 | 0.02958  | 0.011084 | 0.81119  | 0.076081 | 0.10057  | -0.10957 | 0.01785  |
| 9.62E-05 | -0.02909 | 0.53065  | 0.139358 | 0.00254  | 0.121966 | 0.00833  | 0.081245 | 0.07945  |
| 0.00132  | -0.04291 | 0.35483  | 0.031841 | 0.49244  | 0.08244  | 0.07511  | -0.0374  | 0.42008  |
| 0.00699  | -0.01938 | 0.67616  | 0.275991 | 1.31E-09 | 0.513484 | 8.91E-33 | 0.318947 | 1.67E-12 |
| 2.61E-08 | -0.00736 | 0.874    | 0.176973 | 0.00012  | 0.225719 | 8.29E-07 | 0.151095 | 0.00106  |
| 7.06E-11 | 0.258148 | 1.51E-08 | 0.317211 | 2.24E-12 | 0.282876 | 4.84E-10 | 0.283717 | 4.28E-10 |
| 0.00059  | 0.028232 | 0.5428   | 0.140926 | 0.00227  | 0.290465 | 1.57E-10 | 0.117822 | 0.01083  |
| 0.97837  | -0.07688 | 0.09703  | 0.199529 | 1.40E-05 | 0.299925 | 3.67E-11 | 0.07141  | 0.12332  |
| 1.85E-12 | -0.03354 | 0.4697   | 0.192885 | 2.71E-05 | 0.199568 | 1.39E-05 | 0.101163 | 0.02882  |
| 0.16737  | -0.01542 | 0.73957  | 0.200294 | 1.29E-05 | 0.350316 | 6.26E-15 | 0.168882 | 0.00025  |
| 2.33E-08 | 0.029908 | 0.5191   | 0.010993 | 0.81271  | 0.073848 | 0.11099  | 0.001602 | 0.97246  |
| 3.10E-20 | 0.001695 | 0.97085  | 0.041494 | 0.37096  | 0.149367 | 0.00121  | 0.014335 | 0.75735  |
| 1.80E-17 | 0.161223 | 0.00047  | 0.152313 | 0.00096  | 0.314402 | 3.57E-12 | 0.304133 | 1.89E-11 |
| 3.69E-06 | -0.00223 | 0.96165  | 0.103768 | 0.02493  | 0.33217  | 1.72E-13 | 0.134447 | 0.0036   |
| 1.26E-08 | -0.09943 | 0.0317   | -0.02498 | 0.59025  | 0.011526 | 0.8038   | -0.12697 | 0.006    |
| 1.31E-19 | 0.075124 | 0.10494  | 0.083388 | 0.07181  | 0.179721 | 9.41E-05 | 0.123596 | 0.00749  |
| 6.33E-15 | 0.047021 | 0.31059  | 0.108477 | 0.01903  | 0.250116 | 4.30E-08 | 0.149447 | 0.0012   |
| 7.00E-12 | 0.017144 | 0.71175  | 0.083269 | 0.07221  | 0.164271 | 0.00036  | 0.025271 | 0.58593  |
| 1.38E-21 | 0.131706 | 0.00436  | 0.378494 | 2.36E-17 | 0.587701 | 1.03E-44 | 0.523256 | 3.49E-34 |
| 3.41E-06 | 0.255969 | 2.02E-08 | 0.158906 | 0.00057  | 0.36252  | 5.97E-16 | 0.292911 | 1.08E-10 |
| 0.17405  | 0.116671 | 0.01163  | 0.317158 | 2.26E-12 | 0.481187 | 1.95E-28 | 0.390224 | 1.95E-18 |
| 6.30E-14 | 0.055528 | 0.23104  | 0.170373 | 0.00022  | 0.34641  | 1.30E-14 | 0.222371 | 1.21E-06 |
| 0.00012  | -0.01105 | 0.81179  | 0.086489 | 0.06183  | 0.310318 | 6.98E-12 | 0.2577   | 1.61E-08 |
| 1.36E-05 | -0.03764 | 0.41708  | 0.071771 | 0.12143  | 0.183423 | 6.69E-05 | 0.005844 | 0.89978  |
| 0.11343  | -0.01643 | 0.72319  | 0.226232 | 7.81E-07 | 0.215803 | 2.52E-06 | 0.071708 | 0.12175  |
| 0.00353  | -0.05216 | 0.26065  | 0.013824 | 0.76574  | 0.01606  | 0.72923  | -0.1108  | 0.01661  |
| 0.09953  | 0.258602 | 1.43E-08 | 0.469784 | 5.18E-27 | 0.495581 | 2.58E-30 | 0.466824 | 1.19E-26 |
| 0.00029  | -0.04755 | 0.30521  | -0.12149 | 0.00859  | 0.062177 | 0.17981  | -0.08152 | 0.07843  |
| 0.71723  | -0.00424 | 0.92717  | 0.116352 | 0.01186  | 0.185736 | 5.39E-05 | 0.047775 | 0.30289  |
| 0.00238  | -0.03055 | 0.51015  | 0.148521 | 0.00129  | 0.192219 | 2.89E-05 | -0.00246 | 0.95769  |
| 3.75E-05 | 0.153697 | 0.00086  | 0.544358 | 2.21E-37 | 0.648429 | 4.70E-57 | 0.52949  | 4.18E-35 |

|          |          |          |          |          |          |          |          |          |
|----------|----------|----------|----------|----------|----------|----------|----------|----------|
| 0.23157  | 0.031414 | 0.49827  | 0.169281 | 0.00024  | 0.355898 | 2.16E-15 | 0.218501 | 1.87E-06 |
| 6.06E-06 | 0.017208 | 0.71071  | 0.126883 | 0.00604  | 0.166335 | 0.00031  | 0.061705 | 0.18314  |
| 1.94E-06 | 0.046169 | 0.31946  | -0.04054 | 0.38209  | 0.05428  | 0.24171  | 0.022281 | 0.63104  |
| 3.60E-07 | 0.079485 | 0.0862   | 0.04825  | 0.29811  | 0.06128  | 0.18618  | 0.069337 | 0.13461  |
| 0.19347  | 0.074412 | 0.10828  | -0.03057 | 0.50989  | 0.023425 | 0.6136   | -0.01198 | 0.79624  |
| 0.31617  | 0.029117 | 0.53022  | -0.05874 | 0.20515  | 0.065959 | 0.15471  | 0.02596  | 0.57576  |
| 0.07011  | 0.019829 | 0.66908  | -0.01901 | 0.68191  | 0.072378 | 0.1183   | 0.099848 | 0.03098  |
| 0.08258  | 0.049622 | 0.28456  | -0.03048 | 0.51118  | 0.078966 | 0.08828  | 0.04346  | 0.3487   |
| 0.09539  | 0.058807 | 0.20461  | -0.022   | 0.63533  | 0.052062 | 0.26151  | 0.017551 | 0.70522  |
| 0.14623  | 0.048281 | 0.29779  | -0.0092  | 0.8428   | 0.11152  | 0.01591  | 0.061608 | 0.18383  |
| 0.48585  | 0.048715 | 0.29346  | -0.05233 | 0.2591   | 0.086604 | 0.06148  | 0.06214  | 0.18006  |
| 0.96301  | 0.00147  | 0.97473  | 0.003572 | 0.93864  | 0.07477  | 0.10659  | 0.04963  | 0.28448  |
| 0.00137  | 0.008757 | 0.8503   | -0.03558 | 0.44307  | 0.003243 | 0.94428  | -0.07168 | 0.1219   |
| 0.2459   | -0.00716 | 0.87739  | -0.07574 | 0.10212  | 0.050544 | 0.2757   | -0.03338 | 0.47174  |
| 0.34585  | 0.044615 | 0.33604  | -0.00517 | 0.9112   | 0.095409 | 0.03931  | 0.038746 | 0.4035   |
| 0.03281  | 0.058528 | 0.20677  | -0.07307 | 0.11481  | 0.055703 | 0.22957  | -0.00602 | 0.89674  |
| 5.98E-06 | 0.050896 | 0.27236  | 0.021308 | 0.64603  | 0.031241 | 0.50064  | 0.089308 | 0.05378  |
| 1.17E-10 | -0.00425 | 0.92698  | 0.111132 | 0.01628  | 0.037825 | 0.41478  | -0.04778 | 0.30287  |
| 6.41E-07 | 0.06741  | 0.14581  | -0.00331 | 0.9432   | 0.117648 | 0.01095  | 0.060208 | 0.19401  |
| 5.55E-09 | 0.126654 | 0.00613  | -0.02818 | 0.54351  | 0.089844 | 0.05235  | 0.064882 | 0.16156  |
| 0.34291  | 0.021523 | 0.6427   | -0.03063 | 0.50907  | 0.01385  | 0.76531  | -0.05601 | 0.227    |
| 0.20076  | 0.024266 | 0.60093  | -0.03037 | 0.51263  | 0.087709 | 0.05823  | -0.0086  | 0.853    |
| 0.00805  | 0.087637 | 0.05843  | 0.077493 | 0.09439  | 0.277175 | 1.10E-09 | 0.264808 | 6.20E-09 |
| 0.30181  | 0.005805 | 0.90044  | -0.04034 | 0.38442  | 0.044992 | 0.33196  | -0.00396 | 0.93196  |
| 0.44002  | -0.01844 | 0.691    | -0.04234 | 0.36132  | -0.01338 | 0.77311  | -0.05965 | 0.19818  |
| 0.1174   | 0.103056 | 0.02595  | -0.02134 | 0.64548  | 0.067538 | 0.14505  | 0.058582 | 0.20635  |
| 0.01186  | 0.371149 | 1.06E-16 | -0.02402 | 0.60457  | 0.040143 | 0.38676  | 0.089059 | 0.05445  |
| 4.15E-07 | 0.123452 | 0.00756  | 0.103834 | 0.02484  | 0.174002 | 0.00016  | 0.180642 | 8.65E-05 |
| 0.54559  | 0.056864 | 0.21999  | -0.00485 | 0.91677  | 0.043823 | 0.34469  | 0.017601 | 0.70441  |
| 0.17105  | 0.052004 | 0.26205  | -0.07471 | 0.10687  | 0.064339 | 0.16511  | 0.030673 | 0.50847  |
| 0.00065  | 0.119871 | 0.00952  | 0.007179 | 0.87704  | 0.154763 | 0.00079  | 0.158523 | 0.00059  |
| 0.03374  | 0.023012 | 0.61988  | -0.10529 | 0.02288  | 0.084303 | 0.06873  | 0.006192 | 0.89384  |
| 7.60E-06 | 0.06098  | 0.18835  | -0.02018 | 0.66366  | 0.053986 | 0.24428  | 0.012133 | 0.7937   |
| 0.31441  | 0.02705  | 0.55983  | -0.04982 | 0.28267  | 0.116504 | 0.01175  | 0.044772 | 0.33433  |
| 0.38279  | 0.117014 | 0.01139  | 0.266974 | 4.61E-09 | 0.516025 | 3.88E-33 | 0.441179 | 1.15E-23 |
| 0.00711  | 0.040581 | 0.38159  | -0.07822 | 0.09134  | 0.026852 | 0.56271  | 0.002825 | 0.95145  |
| 8.01E-11 | 0.090573 | 0.05046  | 0.082454 | 0.07506  | 0.008767 | 0.85013  | 0.099752 | 0.03114  |
| 1.02E-05 | 0.242707 | 1.09E-07 | -0.08764 | 0.05842  | 0.01406  | 0.76186  | 0.049412 | 0.2866   |
| 0.00196  | 0.184739 | 5.92E-05 | -0.0734  | 0.11319  | 0.072557 | 0.11739  | 0.067506 | 0.14523  |
| 0.0003   | 0.068331 | 0.14037  | -0.03775 | 0.4157   | 0.007494 | 0.87169  | -0.0411  | 0.3755   |
| 0.00064  | 0.085198 | 0.06583  | 0.0099   | 0.83104  | 0.10627  | 0.02163  | 0.067866 | 0.1431   |
| 0.10217  | 0.020607 | 0.65692  | -0.0269  | 0.56205  | 0.025507 | 0.58244  | -0.03545 | 0.44464  |
| 0.17779  | 0.015418 | 0.73965  | -0.0413  | 0.37322  | 0.010401 | 0.82262  | -0.03893 | 0.40123  |
| 4.62E-08 | 0.112048 | 0.01541  | -0.05752 | 0.21467  | 0.026293 | 0.57087  | 0.019172 | 0.67943  |
| 5.37E-09 | 0.122233 | 0.00819  | -0.06092 | 0.1888   | 0.099056 | 0.03234  | 0.029696 | 0.52207  |

|          |          |          |          |          |          |          |          |          |
|----------|----------|----------|----------|----------|----------|----------|----------|----------|
| 1.15E-12 | 0.111072 | 0.01634  | -0.08005 | 0.08398  | 0.03161  | 0.4956   | 0.036964 | 0.42549  |
| 1.94E-21 | 0.200367 | 1.28E-05 | -0.00632 | 0.8917   | 0.091808 | 0.04738  | 0.128401 | 0.00546  |
| 0.0005   | 0.229283 | 5.49E-07 | -0.00661 | 0.8867   | 0.013779 | 0.76649  | 0.110876 | 0.01653  |
| 0.00852  | 0.015215 | 0.74295  | -0.06038 | 0.19275  | 0.046388 | 0.31716  | 0.030171 | 0.51544  |
| 1.04E-06 | 0.207336 | 6.25E-06 | 0.154041 | 0.00084  | 0.302965 | 2.27E-11 | 0.312062 | 5.25E-12 |
| 0.00158  | 0.050908 | 0.27225  | -0.05162 | 0.26559  | 0.001579 | 0.97285  | 0.010257 | 0.82504  |
| 1.74E-15 | 0.096272 | 0.03755  | 0.028223 | 0.54293  | 0.077027 | 0.0964   | 0.075795 | 0.10186  |
| 0.22635  | 0.067013 | 0.1482   | -0.02509 | 0.5886   | -0.00429 | 0.92631  | 0.003682 | 0.93675  |
| 3.57E-36 | 0.183601 | 6.58E-05 | -0.02372 | 0.60919  | 0.061313 | 0.18594  | 0.068469 | 0.13957  |
| 0.0002   | 0.151013 | 0.00106  | -0.01716 | 0.71147  | 0.060856 | 0.18925  | 0.069684 | 0.13266  |
| 0.46321  | 0.064042 | 0.16708  | 0.003623 | 0.93776  | 0.062711 | 0.17609  | 0.038447 | 0.40715  |
| 0.91648  | -0.03977 | 0.39119  | -0.20816 | 5.73E-06 | -0.15218 | 0.00097  | -0.20338 | 9.43E-06 |
| 0.88161  | 0.029162 | 0.52959  | -0.14805 | 0.00133  | -0.00043 | 0.99258  | -0.04136 | 0.37256  |
| 0.47928  | 0.037318 | 0.42106  | 0.000196 | 0.99662  | 0.126681 | 0.00612  | 0.084667 | 0.06754  |
| 0.63998  | -0.00495 | 0.91498  | -0.07099 | 0.12556  | 0.001247 | 0.97856  | -0.0196  | 0.67263  |
| 0.00786  | 0.014121 | 0.76086  | 0.032887 | 0.47834  | 0.012218 | 0.79229  | 0.027787 | 0.54918  |
| 0.2642   | 0.005489 | 0.90583  | -0.09324 | 0.04402  | -0.05828 | 0.20868  | -0.04425 | 0.33999  |
| 0.83221  | -0.00407 | 0.93014  | -0.11    | 0.01741  | -0.04466 | 0.3355   | -0.04737 | 0.307    |
| 0.77958  | 0.024666 | 0.59494  | -0.133   | 0.00399  | -0.00651 | 0.88841  | -0.0446  | 0.33622  |
| 0.00052  | 0.203377 | 9.44E-06 | 0.105315 | 0.02284  | 0.298678 | 4.45E-11 | 0.347346 | 1.09E-14 |
| 7.44E-21 | -0.03607 | 0.43681  | -0.14218 | 0.00207  | -0.24987 | 4.44E-08 | -0.19852 | 1.55E-05 |
| 1.65E-07 | 0.068345 | 0.14029  | -0.06076 | 0.18993  | -0.011   | 0.81253  | 0.095773 | 0.03856  |
| 5.48E-07 | -0.10249 | 0.02677  | -0.04963 | 0.28447  | -0.12634 | 0.00626  | -0.16273 | 0.00041  |
| 5.19E-05 | -0.1181  | 0.01064  | -0.14158 | 0.00216  | -0.23463 | 2.92E-07 | -0.19979 | 1.36E-05 |
| 2.18E-05 | -0.17005 | 0.00022  | -0.01548 | 0.73859  | -0.22511 | 8.88E-07 | -0.25826 | 1.49E-08 |
| 8.79E-09 | -0.06283 | 0.17526  | -0.0913  | 0.04863  | -0.14212 | 0.00208  | -0.11055 | 0.01685  |
| 9.93E-05 | -0.11547 | 0.01253  | -0.03321 | 0.47408  | -0.2225  | 1.20E-06 | -0.21339 | 3.27E-06 |
| 0.2795   | -0.03857 | 0.4056   | -0.16806 | 0.00026  | -0.34535 | 1.58E-14 | -0.1947  | 2.27E-05 |
| 3.24E-11 | 0.120443 | 0.00918  | 0.167451 | 0.00028  | 0.086487 | 0.06183  | 0.205852 | 7.30E-06 |
| 4.21E-18 | -0.14908 | 0.00123  | -0.23664 | 2.29E-07 | -0.26817 | 3.91E-09 | -0.2796  | 7.79E-10 |
| 1.37E-07 | -0.23014 | 4.97E-07 | -0.14342 | 0.00189  | -0.34318 | 2.36E-14 | -0.3444  | 1.89E-14 |
| 0.00358  | -0.19571 | 2.05E-05 | -0.14604 | 0.00155  | -0.27313 | 1.96E-09 | -0.39168 | 1.42E-18 |
| 1.42E-07 | -0.16372 | 0.00038  | -0.09489 | 0.04039  | -0.15197 | 0.00099  | -0.25254 | 3.15E-08 |
| 0.00035  | 0.067182 | 0.14718  | -0.03911 | 0.39905  | 0.087045 | 0.06017  | 0.084017 | 0.06968  |
| 6.05E-16 | 0.010105 | 0.8276   | -0.08362 | 0.07103  | -0.11134 | 0.01608  | -0.05117 | 0.26983  |
| 1.97E-13 | -0.0891  | 0.05433  | -0.01026 | 0.82493  | -0.23731 | 2.12E-07 | -0.18624 | 5.13E-05 |
| 0.00144  | -0.11622 | 0.01196  | -0.12003 | 0.00942  | -0.23456 | 2.94E-07 | -0.20482 | 8.13E-06 |
| 0.86292  | -0.04459 | 0.33627  | 0.15161  | 0.00101  | -0.03257 | 0.48266  | -0.0583  | 0.20854  |
| 2.43E-10 | -0.10477 | 0.02356  | -0.13396 | 0.00373  | -0.25359 | 2.75E-08 | -0.22475 | 9.26E-07 |
| 4.51E-10 | -0.13095 | 0.00459  | -0.27468 | 1.58E-09 | -0.34864 | 8.58E-15 | -0.31942 | 1.55E-12 |
| 0.00708  | -0.13117 | 0.00452  | -0.27713 | 1.11E-09 | -0.29732 | 5.50E-11 | -0.23371 | 3.26E-07 |
| 7.38E-07 | -0.18548 | 5.52E-05 | -0.21222 | 3.72E-06 | -0.31759 | 2.10E-12 | -0.32802 | 3.55E-13 |
| 1.34E-18 | -0.13229 | 0.00419  | 0.027099 | 0.55912  | -0.05988 | 0.19645  | -0.09799 | 0.03425  |
| 0.00437  | -0.10481 | 0.02351  | -0.18358 | 6.59E-05 | -0.33676 | 7.58E-14 | -0.24232 | 1.15E-07 |
| 1.31E-16 | -0.10805 | 0.01952  | -0.20987 | 4.78E-06 | -0.22887 | 5.76E-07 | -0.24264 | 1.10E-07 |

|          |          |          |          |          |          |          |          |          |
|----------|----------|----------|----------|----------|----------|----------|----------|----------|
| 1.84E-09 | -0.19649 | 1.90E-05 | -0.18824 | 4.24E-05 | -0.32519 | 5.79E-13 | -0.35167 | 4.85E-15 |
| 0.8789   | -0.1111  | 0.01631  | -0.15361 | 0.00087  | -0.28499 | 3.55E-10 | -0.20436 | 8.53E-06 |
| 0.99908  | 0.039518 | 0.39419  | -0.04435 | 0.33895  | -0.08578 | 0.064    | -0.04529 | 0.32876  |
| 2.04E-08 | -0.00091 | 0.98433  | 0.04754  | 0.30529  | 0.022241 | 0.63166  | 0.047639 | 0.30427  |
| 0.50987  | 0.034763 | 0.45358  | -0.1473  | 0.00141  | -0.25457 | 2.42E-08 | -0.14882 | 0.00126  |
| 5.59E-19 | 0.02125  | 0.64693  | 0.026007 | 0.57507  | 0.013794 | 0.76623  | -0.00953 | 0.83721  |
| 1.12E-12 | -0.12303 | 0.00778  | -0.24647 | 6.84E-08 | -0.23484 | 2.85E-07 | -0.28013 | 7.22E-10 |
| 7.68E-08 | -0.16194 | 0.00044  | -0.28341 | 4.48E-10 | -0.34787 | 9.91E-15 | -0.35335 | 3.52E-15 |
| 4.73E-11 | -0.11097 | 0.01643  | -0.06204 | 0.18075  | -0.22718 | 7.00E-07 | -0.16065 | 0.00049  |
| 0.02079  | -0.15188 | 0.00099  | -0.08936 | 0.05363  | -0.3488  | 8.33E-15 | -0.2882  | 2.20E-10 |
| 0.02553  | -0.17833 | 0.00011  | -0.10432 | 0.02416  | -0.37636 | 3.67E-17 | -0.3383  | 5.74E-14 |
| 1.63E-23 | -0.11544 | 0.01254  | -0.19799 | 1.63E-05 | -0.33599 | 8.70E-14 | -0.31874 | 1.73E-12 |
| 9.31E-05 | 0.021135 | 0.64871  | 0.087061 | 0.06012  | -0.11466 | 0.01316  | 0.000627 | 0.98922  |
| 1.45E-07 | -0.1015  | 0.02829  | -0.11186 | 0.01559  | -0.28585 | 3.12E-10 | -0.26231 | 8.69E-09 |
| 5.58E-12 | -0.13459 | 0.00357  | -0.25186 | 3.44E-08 | -0.32653 | 4.59E-13 | -0.36632 | 2.81E-16 |
| 0.33138  | -0.0532  | 0.2512   | -0.06418 | 0.16613  | -0.18225 | 7.46E-05 | -0.08857 | 0.0558   |
| 0.00038  | -0.25269 | 3.09E-08 | -0.04874 | 0.29317  | -0.3022  | 2.56E-11 | -0.39719 | 4.24E-19 |
| 0.01301  | -0.06278 | 0.1756   | -0.02475 | 0.59365  | -0.14065 | 0.00231  | -0.08977 | 0.05254  |
| 9.73E-14 | -0.1245  | 0.00707  | 0.008152 | 0.86054  | -0.13366 | 0.00381  | -0.22772 | 6.58E-07 |
| 0.00026  | -0.14659 | 0.00149  | -0.25607 | 1.99E-08 | -0.36284 | 5.60E-16 | -0.41523 | 6.87E-21 |
| 0.49792  | 0.014131 | 0.76069  | -0.15307 | 0.0009   | -0.27016 | 2.97E-09 | -0.13223 | 0.0042   |
| 0.04594  | 0.001458 | 0.97493  | 0.029551 | 0.52411  | 0.14243  | 0.00203  | 0.143549 | 0.00187  |
| 2.66E-05 | -0.09339 | 0.04368  | -0.17219 | 0.00018  | -0.14948 | 0.0012   | -0.20146 | 1.15E-05 |
| 0.00676  | -0.05486 | 0.23668  | -0.08177 | 0.07753  | -0.16099 | 0.00048  | -0.15484 | 0.00079  |
| 1.06E-06 | -0.05866 | 0.20576  | -0.21821 | 1.93E-06 | -0.28078 | 6.57E-10 | -0.27196 | 2.31E-09 |
| 2.82E-15 | -0.00477 | 0.91808  | 0.098604 | 0.03314  | 0.029747 | 0.52136  | 0.098067 | 0.03412  |
| 6.27E-19 | 0.039577 | 0.39349  | -0.0735  | 0.1127   | -0.033   | 0.47684  | 0.013161 | 0.77668  |
| 2.57E-06 | -0.15114 | 0.00105  | -0.21808 | 1.96E-06 | -0.33548 | 9.53E-14 | -0.32876 | 3.12E-13 |
| 1.09E-10 | -0.19282 | 2.73E-05 | -0.09127 | 0.04871  | -0.34306 | 2.41E-14 | -0.38514 | 5.82E-18 |
| 4.67E-08 | -0.06395 | 0.16767  | -0.03693 | 0.42589  | -0.1727  | 0.00018  | -0.13731 | 0.00294  |
| 0.00011  | -0.16217 | 0.00043  | -0.17186 | 0.00019  | -0.36592 | 3.05E-16 | -0.38281 | 9.53E-18 |
| 0.00088  | -0.07027 | 0.12941  | -0.08006 | 0.08396  | -0.18821 | 4.26E-05 | -0.15486 | 0.00079  |
| 0.03588  | -0.08637 | 0.06217  | -0.18621 | 5.15E-05 | -0.38211 | 1.11E-17 | -0.27166 | 2.41E-09 |
| 4.88E-19 | -0.19079 | 3.32E-05 | -0.04109 | 0.37563  | -0.16792 | 0.00027  | -0.2808  | 6.55E-10 |
| 1.30E-10 | -0.20566 | 7.45E-06 | -0.14691 | 0.00146  | -0.33848 | 5.56E-14 | -0.44432 | 5.13E-24 |
| 1.99E-11 | -0.14058 | 0.00233  | -0.02192 | 0.63654  | -0.11413 | 0.01359  | -0.16569 | 0.00032  |
| 5.76E-06 | -0.06467 | 0.16294  | -0.12395 | 0.00732  | -0.13606 | 0.00322  | -0.10452 | 0.0239   |
| 2.46E-06 | -0.13617 | 0.00319  | -0.02887 | 0.53372  | -0.1976  | 1.70E-05 | -0.21822 | 1.93E-06 |
| 0.01795  | -0.03326 | 0.47339  | -0.21013 | 4.65E-06 | -0.18581 | 5.35E-05 | -0.15328 | 0.00089  |
| 0.00063  | -0.03873 | 0.4037   | -0.04645 | 0.31649  | -0.26124 | 1.00E-08 | -0.18722 | 4.68E-05 |
| 0.01004  | -0.16723 | 0.00028  | -0.12293 | 0.00783  | -0.32193 | 1.01E-12 | -0.3195  | 1.52E-12 |
| 3.47E-11 | -0.14648 | 0.0015   | -0.06683 | 0.1493   | -0.16634 | 0.00031  | -0.21447 | 2.91E-06 |
| 6.20E-06 | -0.21676 | 2.27E-06 | -0.06108 | 0.18761  | -0.2424  | 1.14E-07 | -0.32973 | 2.64E-13 |
| 0.00431  | 0.063493 | 0.17075  | 0.080544 | 0.08208  | -0.00165 | 0.97168  | 0.107159 | 0.02055  |
| 0.58927  | -0.11161 | 0.01583  | -0.13839 | 0.00273  | -0.21414 | 3.02E-06 | -0.25219 | 3.30E-08 |

|          |          |          |          |          |          |          |          |          |
|----------|----------|----------|----------|----------|----------|----------|----------|----------|
| 5.41E-08 | -0.09445 | 0.04133  | -0.05669 | 0.22138  | -0.13409 | 0.0037   | -0.14866 | 0.00127  |
| 0.42328  | -0.07685 | 0.09717  | -0.1389  | 0.00263  | -0.12094 | 0.00889  | -0.07598 | 0.10102  |
| 3.26E-05 | -0.18262 | 7.21E-05 | -0.18256 | 7.25E-05 | -0.29846 | 4.61E-11 | -0.30407 | 1.91E-11 |
| 1.03E-05 | 0.057922 | 0.21152  | 0.013571 | 0.7699   | 0.001044 | 0.98205  | 0.108243 | 0.0193   |
| 0.00022  | -0.11086 | 0.01655  | -0.09683 | 0.03645  | -0.16553 | 0.00033  | -0.21016 | 4.63E-06 |
| 8.09E-07 | -0.01542 | 0.7396   | -0.05306 | 0.25251  | -0.11284 | 0.0147   | -0.06256 | 0.17715  |
| 4.97E-05 | 0.031357 | 0.49905  | 0.128344 | 0.00548  | -0.02296 | 0.62066  | 0.033228 | 0.47379  |
| 3.42E-05 | -0.07644 | 0.09898  | 0.059669 | 0.19804  | -0.22957 | 5.31E-07 | -0.1551  | 0.00077  |
| 0.67174  | -0.04028 | 0.38517  | -0.10795 | 0.01963  | -0.20372 | 9.12E-06 | -0.15034 | 0.00112  |
| 0.00364  | 0.093982 | 0.04235  | 0.168344 | 0.00026  | 0.099303 | 0.03191  | 0.148816 | 0.00126  |
| 0.0025   | -0.11546 | 0.01254  | -0.19594 | 2.00E-05 | -0.28888 | 1.99E-10 | -0.26306 | 7.86E-09 |
| 8.91E-07 | -0.05223 | 0.25999  | -0.12742 | 0.00583  | -0.08143 | 0.07876  | -0.09879 | 0.03281  |
| 0.91407  | -0.07182 | 0.12116  | -0.16289 | 0.00041  | -0.31325 | 4.32E-12 | -0.20275 | 1.01E-05 |
| 3.55E-17 | -0.02622 | 0.57195  | -0.097   | 0.03612  | -0.14146 | 0.00218  | -0.14168 | 0.00215  |
| 0.05412  | -0.12258 | 0.00801  | -0.24785 | 5.75E-08 | -0.27183 | 2.35E-09 | -0.27274 | 2.07E-09 |
| 9.31E-05 | 0.009029 | 0.8457   | -0.07224 | 0.11902  | -0.21734 | 2.13E-06 | -0.09099 | 0.04941  |
| 3.61E-12 | -0.13281 | 0.00404  | -0.18256 | 7.25E-05 | -0.20897 | 5.26E-06 | -0.24656 | 6.76E-08 |
| 0.03228  | -0.03939 | 0.39567  | -0.02376 | 0.60857  | -0.17521 | 0.00014  | -0.10692 | 0.02083  |
| 0.00388  | -0.00113 | 0.98049  | -0.10563 | 0.02244  | -0.15852 | 0.00059  | -0.04788 | 0.30187  |
| 6.58E-07 | -0.01664 | 0.7198   | 0.033213 | 0.47398  | -0.13381 | 0.00377  | -0.06593 | 0.1549   |
| 2.05E-08 | 0.080512 | 0.0822   | -0.07282 | 0.11607  | -0.16427 | 0.00036  | -0.02002 | 0.66609  |
| 2.06E-09 | -0.19619 | 1.96E-05 | -0.1248  | 0.00693  | -0.32973 | 2.64E-13 | -0.37282 | 7.59E-17 |
| 0.46646  | -0.00617 | 0.89415  | 0.008846 | 0.8488   | -0.15066 | 0.00109  | -0.09597 | 0.03817  |
| 9.08E-13 | 0.039742 | 0.39152  | -0.01497 | 0.747    | -0.06117 | 0.18697  | 0.049283 | 0.28787  |
| 0.16155  | -0.10837 | 0.01915  | -0.14755 | 0.00139  | -0.27631 | 1.25E-09 | -0.18764 | 4.50E-05 |
| 0.0003   | 0.114356 | 0.01341  | -0.08252 | 0.07484  | -0.12199 | 0.00831  | -0.0432  | 0.35162  |
| 0.00253  | 0.011783 | 0.79952  | -0.07015 | 0.13007  | -0.21863 | 1.84E-06 | -0.10868 | 0.01881  |
| 0.21905  | -0.13529 | 0.0034   | -0.02126 | 0.64674  | -0.17176 | 0.00019  | -0.23676 | 2.26E-07 |
| 0.0196   | -0.05985 | 0.19667  | -0.04737 | 0.30706  | -0.26598 | 5.29E-09 | -0.12751 | 0.00579  |
| 7.16E-10 | 0.068737 | 0.13802  | -0.16986 | 0.00023  | -0.15673 | 0.00068  | -0.04013 | 0.38685  |
| 9.46E-09 | -0.16843 | 0.00026  | -0.23796 | 1.96E-07 | -0.33115 | 2.05E-13 | -0.36224 | 6.31E-16 |
| 1.30E-10 | -0.02162 | 0.64121  | 0.283098 | 4.69E-10 | 0.16757  | 0.00028  | 0.174594 | 0.00015  |
| 0.00678  | -0.1113  | 0.01612  | -0.16397 | 0.00037  | -0.29399 | 9.17E-11 | -0.20383 | 9.01E-06 |
| 3.18E-19 | -0.15535 | 0.00076  | -0.25092 | 3.88E-08 | -0.33659 | 7.81E-14 | -0.37265 | 7.85E-17 |
| 0.0164   | 0.116921 | 0.01145  | 0.039676 | 0.3923   | 0.038988 | 0.40058  | 0.132608 | 0.0041   |
| 0.03029  | -0.10952 | 0.01791  | -0.0294  | 0.52623  | -0.14499 | 0.00168  | -0.18744 | 4.58E-05 |
| 0.29701  | 0.015592 | 0.73683  | -0.11313 | 0.01445  | -0.22859 | 5.95E-07 | -0.09297 | 0.04463  |
| 5.26E-16 | -0.0777  | 0.0935   | -0.25755 | 1.64E-08 | -0.31489 | 3.29E-12 | -0.30796 | 1.02E-11 |
| 1.12E-05 | -0.10579 | 0.02223  | -0.11906 | 0.01002  | -0.22122 | 1.38E-06 | -0.18974 | 3.68E-05 |
| 4.57E-05 | -0.01069 | 0.81786  | -0.08787 | 0.05775  | -0.13503 | 0.00346  | -0.04502 | 0.33168  |
| 9.99E-05 | 0.032198 | 0.4876   | -0.03058 | 0.50976  | -0.10158 | 0.02816  | -0.02627 | 0.57125  |
| 4.34E-11 | -0.13272 | 0.00406  | -0.16606 | 0.00031  | -0.19251 | 2.81E-05 | -0.19144 | 3.12E-05 |
| 2.77E-15 | -0.00111 | 0.98084  | -0.32088 | 1.21E-12 | -0.23629 | 2.39E-07 | -0.16584 | 0.00032  |
| 6.11E-10 | -0.07369 | 0.11177  | -0.08993 | 0.05212  | -0.11638 | 0.01184  | -0.14523 | 0.00165  |
| 0.00106  | -0.00358 | 0.93844  | 0.072547 | 0.11744  | 0.182753 | 7.12E-05 | 0.067215 | 0.14698  |

|          |          |         |          |          |          |          |          |          |
|----------|----------|---------|----------|----------|----------|----------|----------|----------|
| 0.18632  | 0.023668 | 0.60993 | 0.119879 | 0.00951  | 0.194323 | 2.35E-05 | 0.140252 | 0.00238  |
| 0.68889  | 0.002025 | 0.96518 | 0.116515 | 0.01174  | 0.246533 | 6.78E-08 | 0.141997 | 0.0021   |
| 0.00311  | -0.08274 | 0.07406 | -0.03064 | 0.50893  | 0.089998 | 0.05194  | -0.07396 | 0.11044  |
| 0.24538  | -0.03547 | 0.44445 | 0.038859 | 0.40213  | 0.166964 | 0.00029  | 0.042833 | 0.35571  |
| 0.23901  | 0.018314 | 0.69303 | 0.132537 | 0.00412  | 0.248658 | 5.18E-08 | 0.152892 | 0.00092  |
| 0.07656  | -0.01057 | 0.81981 | 0.060364 | 0.19286  | 0.177215 | 0.00012  | 0.08154  | 0.07836  |
| 0.00132  | 0.009723 | 0.83401 | 0.0243   | 0.60042  | 0.163618 | 0.00038  | 0.077962 | 0.09241  |
| 0.00199  | 0.021611 | 0.64135 | -0.00264 | 0.95456  | 0.190218 | 3.51E-05 | 0.115079 | 0.01283  |
| 0.01901  | -0.01084 | 0.81527 | 0.096926 | 0.03627  | 0.191977 | 2.96E-05 | 0.081931 | 0.07693  |
| 0.66407  | -0.00942 | 0.83917 | 0.152235 | 0.00097  | 0.174863 | 0.00015  | 0.082204 | 0.07595  |
| 0.30456  | 0.056043 | 0.22674 | 0.161437 | 0.00046  | 0.288346 | 2.15E-10 | 0.225697 | 8.31E-07 |
| 0.04388  | 0.086166 | 0.06281 | 0.102888 | 0.02619  | 0.31283  | 4.63E-12 | 0.271688 | 2.40E-09 |
| 4.91E-05 | 0.039805 | 0.39077 | -0.12929 | 0.00514  | -0.14903 | 0.00124  | -0.0361  | 0.43642  |
| 0.00205  | -0.09567 | 0.03877 | -0.15292 | 0.00092  | -0.1957  | 2.05E-05 | -0.17884 | 0.0001   |
| 0.00566  | -0.0511  | 0.27043 | -0.14798 | 0.00134  | -0.1163  | 0.0119   | -0.20161 | 1.13E-05 |
| 3.31E-07 | -0.0272  | 0.55766 | -0.0473  | 0.30773  | -0.25213 | 3.32E-08 | -0.0883  | 0.05655  |
| 8.82E-16 | -0.10412 | 0.02444 | -0.25696 | 1.77E-08 | -0.3048  | 1.70E-11 | -0.23653 | 2.32E-07 |
| 2.94E-12 | -0.01924 | 0.67831 | 0.03295  | 0.4775   | -0.07421 | 0.10922  | -0.04883 | 0.29228  |
| 4.68E-14 | -0.15868 | 0.00058 | -0.19932 | 1.43E-05 | -0.30441 | 1.81E-11 | -0.29163 | 1.31E-10 |
| 0.95555  | -0.0904  | 0.05089 | -0.10216 | 0.02728  | -0.29918 | 4.12E-11 | -0.19663 | 1.87E-05 |
| 0.00102  | -0.0151  | 0.74477 | -0.07463 | 0.10726  | -0.2664  | 4.99E-09 | -0.20173 | 1.12E-05 |
| 2.04E-11 | -0.14176 | 0.00213 | -0.13173 | 0.00435  | -0.24802 | 5.62E-08 | -0.29602 | 6.72E-11 |
| 0.03628  | -0.12791 | 0.00564 | -0.23584 | 2.52E-07 | -0.31723 | 2.23E-12 | -0.27562 | 1.38E-09 |
| 0.91014  | -0.02651 | 0.56768 | -0.12773 | 0.00571  | -0.22285 | 1.15E-06 | -0.19195 | 2.97E-05 |
| 1.09E-12 | -0.00631 | 0.8918  | 0.083639 | 0.07095  | 0.006709 | 0.88503  | 0.015618 | 0.7364   |
| 0.01791  | -0.02923 | 0.52856 | -0.20165 | 1.13E-05 | -0.31556 | 2.95E-12 | -0.2039  | 8.94E-06 |
| 0.44684  | -0.04078 | 0.37921 | -0.13567 | 0.00331  | -0.30161 | 2.81E-11 | -0.20021 | 1.31E-05 |
| 1.14E-06 | -0.16624 | 0.00031 | -0.10788 | 0.0197   | -0.25474 | 2.37E-08 | -0.30024 | 3.49E-11 |
| 0.04665  | -0.13539 | 0.00337 | 0.012873 | 0.78142  | -0.23144 | 4.26E-07 | -0.20361 | 9.21E-06 |
| 0.00581  | -0.04278 | 0.35634 | 0.07766  | 0.09368  | -0.14469 | 0.00172  | -0.10491 | 0.02337  |
| 3.51E-13 | -0.11482 | 0.01303 | -0.131   | 0.00458  | -0.24303 | 1.05E-07 | -0.23948 | 1.62E-07 |
| 0.0018   | -0.0281  | 0.54462 | -0.02149 | 0.64314  | -0.14877 | 0.00126  | -0.11167 | 0.01576  |
| 0.0452   | -0.03068 | 0.50836 | 0.064899 | 0.16146  | -0.13214 | 0.00423  | -0.09108 | 0.04917  |
| 0.31031  | -0.12311 | 0.00773 | -0.1121  | 0.01537  | -0.32524 | 5.74E-13 | -0.29842 | 4.64E-11 |
| 0.00329  | 0.040954 | 0.37723 | -0.04004 | 0.38803  | -0.16466 | 0.00035  | -0.15746 | 0.00064  |
| 4.20E-20 | -0.15392 | 0.00085 | -0.19295 | 2.69E-05 | -0.26754 | 4.27E-09 | -0.31362 | 4.07E-12 |
| 2.90E-11 | -0.15848 | 0.00059 | -0.02403 | 0.60446  | -0.23208 | 3.95E-07 | -0.28584 | 3.13E-10 |
| 0.00023  | -0.06766 | 0.14429 | -0.05542 | 0.23196  | -0.18408 | 6.29E-05 | -0.19018 | 3.53E-05 |
| 5.50E-10 | -0.16151 | 0.00046 | -0.0841  | 0.0694   | -0.19515 | 2.17E-05 | -0.23208 | 3.95E-07 |
| 0.12045  | -0.1251  | 0.00679 | -0.12392 | 0.00734  | -0.30605 | 1.39E-11 | -0.20663 | 6.73E-06 |
| 0.00123  | -0.00365 | 0.93734 | -0.03379 | 0.46638  | -0.24363 | 9.75E-08 | -0.15051 | 0.0011   |
| 0.96906  | -0.06409 | 0.16678 | -0.13594 | 0.00325  | -0.3038  | 1.99E-11 | -0.21583 | 2.51E-06 |
| 3.25E-06 | 0.019611 | 0.67251 | 0.032528 | 0.48316  | -0.15892 | 0.00057  | -0.04489 | 0.33306  |
| 0.00294  | -0.07825 | 0.09122 | -0.03504 | 0.44996  | -0.17612 | 0.00013  | -0.12289 | 0.00784  |
| 2.04E-10 | -0.14617 | 0.00154 | -0.23842 | 1.85E-07 | -0.29949 | 3.92E-11 | -0.35864 | 1.27E-15 |



|          |           |          |          |          |          |          |          |          |
|----------|-----------|----------|----------|----------|----------|----------|----------|----------|
| 6.36E-05 | -0.11545  | 0.01254  | -0.13901 | 0.00261  | -0.18807 | 4.32E-05 | -0.16169 | 0.00045  |
| 2.38E-19 | -0.25103  | 3.83E-08 | -0.179   | 0.0001   | -0.34783 | 9.99E-15 | -0.44999 | 1.16E-24 |
| 0.9949   | -0.12359  | 0.0075   | 0.035076 | 0.44952  | -0.1856  | 5.45E-05 | -0.15417 | 0.00083  |
| 3.58E-05 | -0.11062  | 0.01678  | -0.05844 | 0.20747  | -0.21839 | 1.89E-06 | -0.19916 | 1.45E-05 |
| 0.0036   | -0.17089  | 0.00021  | -0.0078  | 0.86656  | -0.11837 | 0.01046  | -0.20516 | 7.85E-06 |
| 6.36E-05 | -0.0579   | 0.21168  | -0.12979 | 0.00497  | -0.13918 | 0.00257  | -0.14422 | 0.00178  |
| 1.48E-12 | -0.13742  | 0.00292  | -0.13791 | 0.00282  | -0.21339 | 3.28E-06 | -0.24361 | 9.77E-08 |
| 0.00027  | -0.14845  | 0.00129  | -0.12804 | 0.00559  | -0.35672 | 1.85E-15 | -0.30704 | 1.19E-11 |
| 0.04633  | -0.05481  | 0.23717  | 0.126756 | 0.00609  | -0.16619 | 0.00031  | -0.06352 | 0.17059  |
| 0.91354  | -0.0057   | 0.9023   | -0.0223  | 0.63074  | -0.15583 | 0.00073  | -0.08056 | 0.08203  |
| 1.30E-06 | 0.016382  | 0.72402  | 0.011707 | 0.80079  | -0.15124 | 0.00104  | -0.01841 | 0.69148  |
| 0.14864  | -0.09665  | 0.03681  | -0.04334 | 0.35002  | -0.21678 | 2.26E-06 | -0.13927 | 0.00256  |
| 0.00423  | -0.19062  | 3.38E-05 | -0.12559 | 0.00658  | -0.37678 | 3.36E-17 | -0.42777 | 3.36E-22 |
| 0.38038  | 0.053631  | 0.24739  | 0.021638 | 0.64093  | -0.08025 | 0.08319  | 0.030109 | 0.5163   |
| 1.65E-05 | -0.20575  | 7.38E-06 | -0.26837 | 3.81E-09 | -0.39291 | 1.09E-18 | -0.43719 | 3.20E-23 |
| 7.25E-07 | -0.06538  | 0.15837  | 0.019234 | 0.67845  | -0.1112  | 0.01621  | -0.11293 | 0.01461  |
| 0.00193  | -0.06462  | 0.16325  | -0.00297 | 0.949    | -0.17153 | 0.0002   | -0.12419 | 0.00721  |
| 0.12486  | -0.02114  | 0.64867  | -0.04952 | 0.28552  | -0.13609 | 0.00321  | -0.10817 | 0.01937  |
| 6.13E-16 | -0.03155  | 0.49646  | 0.002534 | 0.95645  | -0.05893 | 0.20363  | -0.03045 | 0.51159  |
| 6.46E-05 | -0.08812  | 0.05706  | -0.18858 | 4.11E-05 | -0.23038 | 4.83E-07 | -0.26995 | 3.06E-09 |
| 7.19E-07 | -0.17635  | 0.00013  | -0.3229  | 8.58E-13 | -0.29932 | 4.03E-11 | -0.32503 | 5.95E-13 |
| 1.10E-05 | -0.01496  | 0.74704  | -0.12438 | 0.00712  | -0.1747  | 0.00015  | -0.08288 | 0.07355  |
| 0.01394  | 0.040841  | 0.37854  | -0.07125 | 0.12418  | -0.15192 | 0.00099  | 0.02142  | 0.64429  |
| 6.82E-10 | 0.042356  | 0.3611   | -0.08318 | 0.07252  | -0.15393 | 0.00085  | -0.03719 | 0.42262  |
| 2.08E-06 | 0.002244  | 0.96142  | -0.15562 | 0.00074  | -0.18113 | 8.27E-05 | -0.07692 | 0.09684  |
| 1.02E-06 | -0.00177  | 0.96965  | -0.20973 | 4.85E-06 | -0.16575 | 0.00032  | -0.12476 | 0.00695  |
| 1.42E-06 | -0.18762  | 4.51E-05 | -0.16948 | 0.00023  | -0.31168 | 5.59E-12 | -0.34237 | 2.74E-14 |
| 0.00075  | -2.86E-05 | 0.99951  | 0.112275 | 0.0152   | 0.075956 | 0.10113  | 0.1371   | 0.00299  |
| 8.65E-11 | -0.20124  | 1.18E-05 | 0.011412 | 0.80572  | -0.23913 | 1.70E-07 | -0.28399 | 4.11E-10 |
| 3.55E-11 | -0.22898  | 5.69E-07 | -0.07208 | 0.11985  | -0.23069 | 4.65E-07 | -0.34448 | 1.86E-14 |
| 2.31E-05 | -0.04823  | 0.29829  | 0.073131 | 0.11451  | -0.04489 | 0.3331   | -0.00185 | 0.96814  |
| 0.22181  | 0.070353  | 0.12898  | 0.106079 | 0.02186  | -0.04446 | 0.33777  | 0.064039 | 0.16709  |
| 1.52E-16 | -0.12607  | 0.00637  | 0.07158  | 0.12242  | -0.20026 | 1.30E-05 | -0.1995  | 1.40E-05 |
| 1.95E-09 | -0.16259  | 0.00042  | -0.21712 | 2.18E-06 | -0.34899 | 8.03E-15 | -0.36921 | 1.58E-16 |
| 0.01331  | -0.14044  | 0.00235  | -0.19953 | 1.40E-05 | -0.18663 | 4.95E-05 | -0.23014 | 4.97E-07 |
| 0.43017  | -0.03614  | 0.43592  | -0.06731 | 0.14644  | -0.23287 | 3.60E-07 | -0.11795 | 0.01074  |
| 0.98168  | 0.032936  | 0.47768  | -0.0449  | 0.33292  | -0.0721  | 0.11975  | 0.014804 | 0.74967  |
| 0.00014  | 0.059824  | 0.19688  | 0.013097 | 0.77773  | 0.067424 | 0.14573  | 0.113338 | 0.01426  |
| 8.16E-05 | 0.006216  | 0.89343  | -0.04209 | 0.36408  | -0.12486 | 0.0069   | -0.08191 | 0.077    |
| 1.17E-06 | -0.11966  | 0.00965  | -0.07001 | 0.13088  | -0.29646 | 6.28E-11 | -0.27921 | 8.24E-10 |
| 1.30E-07 | -0.02506  | 0.58908  | -0.01866 | 0.68753  | -0.23108 | 4.45E-07 | -0.09668 | 0.03675  |
| 0.01736  | -0.02879  | 0.53482  | -0.1514  | 0.00103  | -0.21902 | 1.77E-06 | -0.09998 | 0.03076  |
| 0.0021   | 0.012033  | 0.79537  | -0.04433 | 0.33908  | -0.09487 | 0.04044  | -0.0248  | 0.59288  |
| 3.79E-20 | -0.14378  | 0.00184  | -0.31892 | 1.68E-12 | -0.39513 | 6.69E-19 | -0.40075 | 1.92E-19 |
| 1.14E-06 | -0.08393  | 0.06999  | 0.159541 | 0.00054  | -0.03154 | 0.49649  | -0.10815 | 0.0194   |

|          |          |          |          |          |          |          |          |          |
|----------|----------|----------|----------|----------|----------|----------|----------|----------|
| 4.56E-06 | -0.05971 | 0.19775  | -0.11213 | 0.01534  | -0.19886 | 1.50E-05 | -0.20191 | 1.10E-05 |
| 1.22E-12 | 0.066124 | 0.15367  | 0.12961  | 0.00503  | 0.084452 | 0.06824  | 0.113828 | 0.01385  |
| 8.32E-10 | -0.01835 | 0.69254  | -0.04538 | 0.32785  | -0.14276 | 0.00198  | -0.07832 | 0.09094  |
| 4.23E-08 | -0.06827 | 0.14072  | -0.26462 | 6.36E-09 | -0.2477  | 5.85E-08 | -0.18889 | 3.99E-05 |
| 0.11384  | -0.02217 | 0.63272  | -0.1688  | 0.00025  | -0.18883 | 4.01E-05 | -0.0972  | 0.03575  |
| 1.10E-06 | 0.0062   | 0.89371  | -0.1419  | 0.00211  | -0.12552 | 0.00661  | -0.09119 | 0.04891  |
| 0.00082  | -0.01075 | 0.81685  | 0.032136 | 0.48845  | 0.004323 | 0.92577  | -0.00387 | 0.93361  |
| 0.00285  | -0.06196 | 0.18135  | 0.058429 | 0.20754  | -0.17528 | 0.00014  | -0.12555 | 0.00659  |
| 0.52518  | -0.06071 | 0.19029  | -0.08604 | 0.06319  | -0.08801 | 0.05736  | -0.09221 | 0.04643  |
| 1.11E-16 | -0.07078 | 0.12665  | -0.03832 | 0.4087   | -0.09688 | 0.03635  | -0.04889 | 0.29177  |
| 0.34516  | -0.04968 | 0.28401  | -0.30734 | 1.13E-11 | -0.29203 | 1.24E-10 | -0.21065 | 4.40E-06 |
| 5.68E-13 | -0.12703 | 0.00598  | -0.13417 | 0.00367  | -0.27985 | 7.52E-10 | -0.28931 | 1.87E-10 |
| 1.24E-11 | -0.16944 | 0.00023  | -0.0252  | 0.58699  | -0.18137 | 8.09E-05 | -0.27361 | 1.83E-09 |
| 5.31E-05 | -0.02043 | 0.65967  | -0.15904 | 0.00056  | -0.25801 | 1.54E-08 | -0.14613 | 0.00154  |
| 0.086    | -0.05659 | 0.22225  | -0.0652  | 0.1595   | -0.14414 | 0.00179  | -0.12155 | 0.00856  |
| 9.34E-10 | -0.04919 | 0.28878  | -0.0588  | 0.20467  | -0.15774 | 0.00062  | -0.12623 | 0.00631  |
| 0.01342  | 0.006587 | 0.88711  | -0.00582 | 0.90021  | -0.13699 | 0.00301  | -0.06104 | 0.1879   |
| 1.39E-09 | -0.06488 | 0.1616   | -0.0501  | 0.27992  | -0.17673 | 0.00012  | -0.16067 | 0.00049  |
| 9.02E-07 | 0.020966 | 0.65133  | -0.08704 | 0.06019  | -0.023   | 0.62006  | 0.063484 | 0.17081  |
| 1.27E-10 | -0.03499 | 0.45059  | -0.14482 | 0.0017   | -0.15682 | 0.00067  | -0.12293 | 0.00782  |
| 0.06624  | -0.06049 | 0.19193  | -0.09394 | 0.04246  | -0.03391 | 0.4647   | -0.1256  | 0.00657  |
| 0.00389  | 0.031101 | 0.50256  | -0.23789 | 1.97E-07 | -0.14581 | 0.00158  | -0.16468 | 0.00035  |
| 0.08356  | 0.101512 | 0.02827  | 0.025999 | 0.57519  | 0.233688 | 3.27E-07 | 0.192507 | 2.81E-05 |
| 0.07793  | 0.013667 | 0.76833  | -0.08608 | 0.06306  | 0.026219 | 0.57195  | 0.011053 | 0.8117   |
| 0.02254  | -0.02965 | 0.52271  | -0.06336 | 0.17167  | -0.0285  | 0.53903  | -0.00343 | 0.94108  |
| 3.48E-07 | 0.080368 | 0.08275  | 0.036565 | 0.43051  | 0.096745 | 0.03662  | 0.14034  | 0.00237  |
| 3.68E-19 | 0.052263 | 0.25967  | 0.07861  | 0.08972  | 0.109803 | 0.01761  | 0.108211 | 0.01933  |
| 0.00184  | -0.07378 | 0.11132  | -0.07888 | 0.08864  | -0.05579 | 0.22887  | -0.09331 | 0.04385  |
| 1.88E-11 | 0.076513 | 0.09865  | 0.05602  | 0.22693  | -0.02544 | 0.58337  | 0.116948 | 0.01143  |
| 0.09091  | -0.03873 | 0.40371  | 0.122068 | 0.00827  | 0.112204 | 0.01527  | 0.018263 | 0.69385  |
| 0.02427  | 0.08286  | 0.07363  | -0.00371 | 0.93619  | 0.036562 | 0.43054  | 0.078846 | 0.08876  |
| 0.43974  | -0.05661 | 0.2221   | -0.10143 | 0.0284   | -0.09948 | 0.0316   | -0.1219  | 0.00836  |
| 0.03264  | 0.175646 | 0.00014  | 0.006176 | 0.8941   | 0.201258 | 1.17E-05 | 0.296065 | 6.68E-11 |
| 0.09137  | 0.005172 | 0.91125  | -0.13105 | 0.00456  | -0.0287  | 0.53616  | -0.02034 | 0.66104  |
| 0.16875  | -0.21563 | 2.57E-06 | -0.32383 | 7.32E-13 | -0.15847 | 0.00059  | -0.35156 | 4.95E-15 |
| 0.15933  | 0.100486 | 0.02992  | 0.208037 | 5.81E-06 | 0.395119 | 6.71E-19 | 0.370465 | 1.22E-16 |
| 0.00211  | -0.15662 | 0.00068  | -0.17627 | 0.00013  | -0.06768 | 0.14418  | -0.19418 | 2.39E-05 |
| 0.13567  | -0.02203 | 0.63495  | -0.10705 | 0.02068  | -0.04083 | 0.37872  | -0.038   | 0.41259  |
| 0.00206  | -0.0085  | 0.85472  | -0.11097 | 0.01644  | -0.01702 | 0.71366  | -0.00183 | 0.9686   |
| 0.01008  | -0.11355 | 0.01408  | -0.20761 | 6.07E-06 | -0.13197 | 0.00428  | -0.2233  | 1.09E-06 |
| 0.2971   | -0.01632 | 0.72496  | -0.06445 | 0.16437  | 0.02261  | 0.62601  | 0.004943 | 0.91517  |
| 0.61521  | 0.026125 | 0.57333  | -0.11065 | 0.01675  | -0.01493 | 0.74757  | 0.025762 | 0.57867  |
| 0.04767  | 0.063966 | 0.16758  | -0.03447 | 0.45745  | 0.109176 | 0.01827  | 0.12391  | 0.00734  |
| 0.71382  | 0.011873 | 0.79803  | -0.03841 | 0.4076   | 0.079954 | 0.08436  | 0.050769 | 0.27356  |
| 0.00069  | 0.086596 | 0.06151  | 0.02951  | 0.52468  | 0.131775 | 0.00434  | 0.206406 | 6.89E-06 |

|          |          |          |          |          |          |          |          |          |
|----------|----------|----------|----------|----------|----------|----------|----------|----------|
| 0.00169  | 0.021453 | 0.64379  | -0.10196 | 0.02758  | -0.0723  | 0.1187   | -0.05849 | 0.20704  |
| 0.00029  | -0.2021  | 1.08E-05 | -0.25151 | 3.60E-08 | -0.18191 | 7.70E-05 | -0.35033 | 6.25E-15 |
| 0.00458  | -0.07118 | 0.12455  | -0.13092 | 0.0046   | -0.09057 | 0.05046  | -0.10968 | 0.01774  |
| 2.68E-08 | -0.25304 | 2.96E-08 | -0.252   | 3.38E-08 | -0.21843 | 1.89E-06 | -0.40317 | 1.11E-19 |
| 0.66578  | -0.09078 | 0.04992  | -0.13799 | 0.00281  | -0.11491 | 0.01296  | -0.18883 | 4.01E-05 |
| 0.20953  | -0.111   | 0.0164   | -0.06035 | 0.19293  | -0.0223  | 0.63079  | -0.09849 | 0.03334  |
| 1.92E-05 | -0.04594 | 0.32183  | -0.10933 | 0.0181   | -0.06743 | 0.14572  | -0.09618 | 0.03774  |
| 0.36611  | -0.02813 | 0.54425  | -0.19198 | 2.96E-05 | -0.08104 | 0.08022  | -0.10832 | 0.01921  |
| 0.0046   | 0.01963  | 0.67221  | 0.014654 | 0.75212  | -0.00419 | 0.92811  | 0.01437  | 0.75676  |
| 0.87189  | -0.09611 | 0.03787  | -0.20028 | 1.30E-05 | -0.09984 | 0.03099  | -0.17372 | 0.00016  |
| 0.24573  | -0.06354 | 0.17043  | -0.15181 | 0.001    | -0.07063 | 0.12746  | -0.15102 | 0.00106  |
| 0.78575  | -0.12743 | 0.00582  | -0.11086 | 0.01654  | 0.016895 | 0.71575  | -0.13603 | 0.00323  |
| 0.86978  | -0.11399 | 0.01371  | -0.07228 | 0.11879  | -0.11181 | 0.01563  | -0.1849  | 5.83E-05 |
| 0.11789  | -0.12005 | 0.00941  | -0.20646 | 6.86E-06 | -0.12582 | 0.00648  | -0.24411 | 9.19E-08 |
| 0.62704  | 0.180759 | 8.56E-05 | -0.09602 | 0.03807  | 0.166699 | 0.0003   | 0.18005  | 9.13E-05 |
| 0.82944  | -0.12023 | 0.0093   | -0.2325  | 3.76E-07 | -0.09911 | 0.03224  | -0.24112 | 1.33E-07 |
| 8.61E-09 | -0.07968 | 0.08542  | -0.12112 | 0.00879  | -0.07783 | 0.09295  | -0.1359  | 0.00325  |
| 0.03503  | -0.09309 | 0.04436  | -0.04057 | 0.38175  | 0.021452 | 0.64379  | -0.06258 | 0.17703  |
| 0.00042  | -0.00419 | 0.92812  | -0.06235 | 0.17858  | 0.008026 | 0.86267  | 0.027993 | 0.54622  |
| 1.85E-08 | -0.0447  | 0.3351   | -0.07234 | 0.11848  | -0.04778 | 0.30284  | -0.10604 | 0.02191  |
| 0.04864  | 0.011023 | 0.8122   | -0.06847 | 0.13958  | -0.0017  | 0.97079  | 0.020726 | 0.65506  |
| 0.41646  | -0.00916 | 0.84349  | -0.21592 | 2.49E-06 | 0.079243 | 0.08716  | 0.015276 | 0.74197  |
| 0.69362  | -0.03922 | 0.39782  | -0.26747 | 4.31E-09 | -0.09373 | 0.04291  | -0.15123 | 0.00104  |
| 1.85E-06 | 0.076436 | 0.09899  | 0.049093 | 0.28974  | 0.129027 | 0.00523  | 0.148162 | 0.00132  |
| 1.53E-06 | 0.063964 | 0.16759  | 0.049062 | 0.29004  | 0.250717 | 3.99E-08 | 0.187574 | 4.52E-05 |
| 0.00111  | 0.017301 | 0.70922  | -0.14677 | 0.00147  | -0.04929 | 0.28781  | -0.03194 | 0.49106  |
| 0.00127  | 0.086485 | 0.06184  | 0.033338 | 0.47232  | 0.224597 | 9.42E-07 | 0.220498 | 1.50E-06 |
| 0.00586  | 0.05947  | 0.19954  | -0.11146 | 0.01596  | 0.08989  | 0.05223  | 0.054765 | 0.23753  |
| 0.01338  | 0.061062 | 0.18776  | -0.07868 | 0.08943  | 0.133268 | 0.00391  | 0.077165 | 0.0958   |
| 0.00145  | -0.07686 | 0.09711  | -0.01789 | 0.69985  | -0.09629 | 0.03751  | -0.12556 | 0.00659  |
| 0.00051  | 0.045271 | 0.32897  | 0.046684 | 0.31408  | 0.015917 | 0.73154  | -0.00612 | 0.895    |
| 0.24853  | -0.1617  | 0.00045  | -0.17018 | 0.00022  | -0.15799 | 0.00061  | -0.26488 | 6.14E-09 |
| 0.7143   | -0.10593 | 0.02205  | -0.05909 | 0.20243  | 0.084549 | 0.06793  | 0.017418 | 0.70735  |
| 0.87809  | -0.14257 | 0.00201  | -0.18097 | 8.39E-05 | -0.01674 | 0.71824  | -0.15357 | 0.00087  |
| 2.11E-08 | 0.00419  | 0.92804  | -0.00578 | 0.90091  | 0.133295 | 0.00391  | 0.049366 | 0.28706  |
| 1.76E-10 | -0.09136 | 0.04847  | -0.03355 | 0.46949  | 0.046469 | 0.31632  | 0.007441 | 0.87259  |
| 0.79516  | 0.033829 | 0.46582  | 0.101179 | 0.0288   | 0.21588  | 2.50E-06 | 0.17174  | 0.00019  |
| 0.01793  | -0.00119 | 0.97948  | -0.0528  | 0.25483  | 0.098879 | 0.03265  | 0.013828 | 0.76568  |
| 0.01076  | -0.14105 | 0.00225  | -0.17046 | 0.00021  | -0.2606  | 1.09E-08 | -0.2926  | 1.13E-10 |
| 4.04E-06 | 0.100562 | 0.02979  | 0.07119  | 0.12447  | 0.157378 | 0.00064  | 0.164584 | 0.00035  |
| 0.00023  | 0.051201 | 0.2695   | 0.067345 | 0.1462   | 0.213499 | 3.24E-06 | 0.159309 | 0.00055  |
| 2.12E-08 | 0.099099 | 0.03227  | 0.131073 | 0.00455  | 0.043838 | 0.34452  | 0.224012 | 1.01E-06 |
| 0.21488  | -0.20745 | 6.18E-06 | -0.13071 | 0.00467  | -0.10446 | 0.02398  | -0.35057 | 5.97E-15 |
| 4.55E-10 | -0.1024  | 0.02691  | -0.05653 | 0.22272  | -0.15397 | 0.00084  | -0.15413 | 0.00083  |
| 1.68E-10 | 0.005675 | 0.90265  | 0.011049 | 0.81177  | -0.09099 | 0.04939  | 0.036915 | 0.4261   |

|          |          |          |          |          |          |          |          |          |
|----------|----------|----------|----------|----------|----------|----------|----------|----------|
| 5.04E-20 | 0.113026 | 0.01453  | 0.221662 | 1.31E-06 | 0.180497 | 8.77E-05 | 0.316617 | 2.47E-12 |
| 2.84E-12 | -0.04663 | 0.31465  | -0.23531 | 2.69E-07 | -0.10193 | 0.02763  | -0.22572 | 8.29E-07 |
| 0.00353  | -0.18958 | 3.74E-05 | 0.032225 | 0.48724  | -0.17227 | 0.00018  | -0.26471 | 6.28E-09 |
| 1.70E-05 | 0.00117  | 0.97988  | 0.127899 | 0.00564  | 0.047146 | 0.30931  | 0.082291 | 0.07564  |
| 0.00336  | 0.137262 | 0.00295  | -0.00971 | 0.83425  | 0.020315 | 0.66148  | 0.184199 | 6.22E-05 |
| 0.19999  | 0.153866 | 0.00085  | -0.02026 | 0.66232  | 0.125115 | 0.00679  | 0.201009 | 1.20E-05 |
| 0.00255  | -0.03327 | 0.47316  | 0.018129 | 0.69598  | -0.04113 | 0.37513  | -0.05654 | 0.22263  |
| 0.62232  | -0.17608 | 0.00013  | -0.11086 | 0.01654  | -0.26832 | 3.83E-09 | -0.27144 | 2.48E-09 |
| 0.00538  | -0.06784 | 0.14325  | 0.04134  | 0.37274  | -0.09017 | 0.05148  | -0.07113 | 0.1248   |
| 1.60E-06 | -0.06182 | 0.1823   | 0.08819  | 0.05686  | -0.07811 | 0.09181  | -0.00338 | 0.94189  |
| 1.23E-05 | -0.09829 | 0.03371  | 0.133476 | 0.00386  | -0.08742 | 0.05905  | -0.05834 | 0.20821  |
| 0.03493  | 0.016371 | 0.7242   | -0.13521 | 0.00342  | -0.12082 | 0.00896  | -0.0359  | 0.43888  |
| 4.11E-11 | -0.03859 | 0.40542  | 0.192519 | 2.81E-05 | 0.032304 | 0.48618  | 0.052464 | 0.25785  |
| 0.08789  | 0.029012 | 0.5317   | 0.258246 | 1.50E-08 | 0.162779 | 0.00041  | 0.190149 | 3.54E-05 |
| 0.14475  | 0.113608 | 0.01403  | 0.032558 | 0.48276  | -0.04468 | 0.33535  | 0.098549 | 0.03324  |
| 0.79106  | -0.20142 | 1.15E-05 | -0.1966  | 1.88E-05 | -0.31257 | 4.83E-12 | -0.32622 | 4.85E-13 |
| 0.015    | 0.126314 | 0.00627  | 0.141122 | 0.00224  | 0.090948 | 0.04951  | 0.246296 | 6.99E-08 |
| 0.00013  | -0.14533 | 0.00164  | -0.14058 | 0.00233  | -0.24826 | 5.45E-08 | -0.30056 | 3.32E-11 |
| 2.31E-19 | 0.213841 | 3.12E-06 | 0.159887 | 0.00052  | 0.173996 | 0.00016  | 0.392334 | 1.24E-18 |
| 0.11207  | 0.006694 | 0.88528  | -0.16392 | 0.00038  | -0.24118 | 1.32E-07 | -0.09567 | 0.03876  |
| 5.10E-13 | 0.009398 | 0.83948  | -0.13046 | 0.00475  | -0.0084  | 0.85638  | 0.025525 | 0.58218  |
| 0.00014  | 0.024032 | 0.60444  | 0.088104 | 0.0571   | -0.06615 | 0.1535   | 0.057279 | 0.21664  |
| 5.70E-12 | -0.02385 | 0.60714  | -0.00542 | 0.90703  | -0.0955  | 0.03912  | 0.039276 | 0.3971   |
| 4.64E-08 | -0.03313 | 0.47515  | 0.079269 | 0.08706  | 0.023025 | 0.61967  | 0.037065 | 0.42423  |
| 1.79E-08 | 0.108145 | 0.01941  | 0.220152 | 1.56E-06 | 0.100799 | 0.02941  | 0.236082 | 2.45E-07 |
| 0.08493  | -0.08866 | 0.05553  | -0.13284 | 0.00403  | -0.19074 | 3.34E-05 | -0.14253 | 0.00202  |
| 3.02E-06 | 0.016103 | 0.72853  | 0.056297 | 0.22464  | -0.12439 | 0.00712  | 0.037291 | 0.4214   |
| 0.04339  | 0.039374 | 0.39592  | 0.11112  | 0.01629  | -0.07743 | 0.09467  | 0.064385 | 0.16481  |
| 4.49E-05 | 0.188753 | 4.04E-05 | 0.239269 | 1.67E-07 | 0.284221 | 3.97E-10 | 0.401174 | 1.74E-19 |
| 0.3856   | 0.051435 | 0.26731  | -0.31873 | 1.74E-12 | -0.15129 | 0.00104  | -0.01151 | 0.80403  |
| 0.00013  | -0.11797 | 0.01073  | -0.30553 | 1.51E-11 | -0.31115 | 6.10E-12 | -0.28924 | 1.89E-10 |
| 0.01638  | 0.042248 | 0.36232  | -0.03993 | 0.38928  | -0.07018 | 0.12992  | 0.072076 | 0.11984  |
| 2.52E-08 | -0.01803 | 0.69749  | -0.07537 | 0.10379  | -0.18185 | 7.74E-05 | -0.10358 | 0.02519  |
| 7.04E-11 | -0.02059 | 0.65719  | -0.119   | 0.01006  | -0.29143 | 1.36E-10 | -0.25687 | 1.79E-08 |
| 0.27976  | 0.070668 | 0.12727  | -0.12237 | 0.00811  | -0.04349 | 0.34834  | 0.061221 | 0.1866   |
| 3.26E-07 | -0.04691 | 0.31178  | -0.12733 | 0.00586  | -0.31257 | 4.83E-12 | -0.24688 | 6.49E-08 |
| 0.01732  | -0.13994 | 0.00244  | -0.16165 | 0.00045  | -0.17437 | 0.00015  | -0.33549 | 9.51E-14 |
| 1.84E-13 | 0.025875 | 0.577    | -0.03068 | 0.50844  | -0.15888 | 0.00057  | -0.02921 | 0.5289   |
| 0.99884  | 0.045829 | 0.32303  | 0.113255 | 0.01433  | 0.107642 | 0.01998  | 0.123845 | 0.00737  |
| 2.59E-10 | 0.020628 | 0.65658  | 0.106115 | 0.02182  | -0.00902 | 0.84594  | 0.088674 | 0.05551  |
| 0.00017  | -0.10168 | 0.02801  | 0.075611 | 0.1027   | 0.075702 | 0.10228  | 0.093026 | 0.04451  |
| 0.00066  | -0.17659 | 0.00012  | -0.02472 | 0.59416  | -0.26974 | 3.15E-09 | -0.32025 | 1.34E-12 |
| 0.01516  | -0.07615 | 0.10027  | 0.105085 | 0.02314  | -0.03236 | 0.48541  | 0.020392 | 0.66028  |
| 9.88E-05 | 0.020118 | 0.66456  | 0.09029  | 0.05118  | -0.03101 | 0.50385  | 0.075596 | 0.10277  |
| 7.74E-17 | -0.00416 | 0.92858  | 0.082158 | 0.07611  | -0.02978 | 0.5209   | 0.080198 | 0.08341  |

|          |          |          |          |          |          |          |          |          |
|----------|----------|----------|----------|----------|----------|----------|----------|----------|
| 0.00026  | 0.009502 | 0.83774  | 0.033878 | 0.46517  | -0.03829 | 0.40912  | 0.085097 | 0.06615  |
| 0.918    | -0.04074 | 0.37972  | -0.0677  | 0.14407  | -0.07002 | 0.13081  | 0.018586 | 0.68872  |
| 0.02159  | 0.038114 | 0.41123  | 0.214615 | 2.87E-06 | 0.037612 | 0.41742  | 0.110567 | 0.01683  |
| 0.08087  | -0.04904 | 0.29023  | 0.115134 | 0.01279  | -0.02629 | 0.57095  | -0.03856 | 0.40572  |
| 0.17337  | -0.10628 | 0.02161  | -0.08066 | 0.08162  | -0.13353 | 0.00384  | -0.10691 | 0.02084  |
| 0.00062  | 0.196732 | 1.85E-05 | 0.084409 | 0.06839  | 0.011799 | 0.79926  | 0.184297 | 6.17E-05 |
| 7.59E-23 | 0.101543 | 0.02822  | 0.17824  | 0.00011  | 0.074265 | 0.10898  | 0.228883 | 5.75E-07 |
| 9.11E-20 | 0.031054 | 0.5032   | 0.197972 | 1.64E-05 | -0.04995 | 0.28142  | 0.070335 | 0.12908  |
| 0.01307  | -0.04783 | 0.30235  | -0.10841 | 0.0191   | -0.16539 | 0.00033  | -0.10032 | 0.03019  |
| 2.22E-06 | 0.074158 | 0.10949  | 0.133586 | 0.00383  | 0.011526 | 0.80381  | 0.156122 | 0.00071  |
| 0.34544  | -0.00168 | 0.97119  | 0.107565 | 0.02007  | 0.014923 | 0.74772  | 0.119314 | 0.00986  |
| 0.00784  | 0.092779 | 0.04508  | 0.027644 | 0.55124  | -0.0789  | 0.08855  | 0.070028 | 0.13076  |
| 3.21E-06 | 0.012798 | 0.78268  | -0.05016 | 0.27937  | -0.10687 | 0.0209   | -0.06023 | 0.19384  |
| 0.06782  | 0.007315 | 0.87472  | 0.009304 | 0.84107  | -0.14995 | 0.00115  | -0.03042 | 0.51198  |
| 0.01593  | 0.136295 | 0.00316  | 0.115892 | 0.0122   | 0.065469 | 0.1578   | 0.259771 | 1.22E-08 |
| 7.29E-08 | 0.037013 | 0.42488  | 0.121348 | 0.00866  | -0.01383 | 0.76572  | 0.064551 | 0.16372  |
| 0.09531  | -0.10346 | 0.02536  | -0.12013 | 0.00936  | -0.29357 | 9.78E-11 | -0.19194 | 2.97E-05 |
| 2.82E-06 | 0.058073 | 0.21033  | 0.125584 | 0.00658  | 0.036459 | 0.43185  | 0.169541 | 0.00023  |
| 3.29E-06 | 0.147991 | 0.00134  | 0.035043 | 0.44996  | 0.069193 | 0.13542  | 0.238028 | 1.94E-07 |
| 0.32489  | -0.07598 | 0.10102  | -0.07912 | 0.08764  | -0.14584 | 0.00158  | -0.16778 | 0.00027  |
| 6.12E-07 | 0.022439 | 0.62861  | -0.02993 | 0.51873  | -0.03913 | 0.39884  | 0.036566 | 0.43049  |
| 0.0007   | 0.07416  | 0.10948  | 0.256731 | 1.83E-08 | 0.087838 | 0.05786  | 0.164026 | 0.00037  |
| 0.00012  | -0.10252 | 0.02673  | -0.00331 | 0.94318  | -0.16757 | 0.00028  | -0.1506  | 0.0011   |
| 0.0971   | -0.01566 | 0.73569  | -0.01369 | 0.76787  | 0.019333 | 0.67689  | 0.066044 | 0.15417  |
| 2.61E-07 | -0.07075 | 0.12682  | -0.06687 | 0.14907  | -0.13475 | 0.00353  | -0.12695 | 0.00601  |
| 0.74934  | -0.12946 | 0.00508  | -0.03138 | 0.49869  | -0.11124 | 0.01618  | -0.11107 | 0.01633  |
| 0.00116  | 0.035715 | 0.44131  | -0.0727  | 0.11665  | -0.05804 | 0.21063  | 0.037062 | 0.42427  |
| 4.86E-18 | -0.0706  | 0.12761  | -0.0246  | 0.596    | -0.25843 | 1.46E-08 | -0.17479 | 0.00015  |
| 4.62E-08 | 0.103594 | 0.02518  | 0.115279 | 0.01267  | 0.023089 | 0.6187   | 0.187157 | 4.71E-05 |
| 0.001    | 0.052544 | 0.25712  | -0.09592 | 0.03826  | -0.03135 | 0.49912  | 0.029664 | 0.52252  |
| 1.78E-06 | -0.06846 | 0.13964  | 0.195943 | 2.00E-05 | 0.140167 | 0.0024   | 0.145222 | 0.00165  |
| 2.92E-06 | -0.18691 | 4.82E-05 | -0.00916 | 0.84356  | -0.14765 | 0.00138  | -0.24731 | 6.15E-08 |
| 4.06E-07 | 0.166411 | 0.0003   | 0.163438 | 0.00039  | 0.148535 | 0.00129  | 0.321451 | 1.10E-12 |
| 0.44051  | -0.00368 | 0.93677  | -0.08496 | 0.06658  | -0.16447 | 0.00036  | -0.04762 | 0.30451  |
| 1.89E-09 | 0.098177 | 0.03392  | -0.02438 | 0.59923  | -0.11167 | 0.01576  | 0.063    | 0.1741   |
| 9.92E-07 | -0.0731  | 0.11468  | 0.074137 | 0.10959  | -0.03081 | 0.50662  | -0.01022 | 0.82562  |
| 0.05003  | -0.01162 | 0.80233  | 0.09113  | 0.04905  | -0.02158 | 0.64185  | 0.039861 | 0.3901   |
| 3.89E-14 | -0.03224 | 0.48703  | -0.08639 | 0.06214  | -0.1964  | 1.91E-05 | -0.14084 | 0.00228  |
| 1.49E-06 | -0.25478 | 2.36E-08 | -0.00382 | 0.93445  | -0.02203 | 0.63483  | -0.26847 | 3.75E-09 |
| 4.92E-15 | 0.101756 | 0.02789  | 0.087122 | 0.05994  | 0.027111 | 0.55894  | 0.195992 | 1.99E-05 |
| 0.03506  | -0.08571 | 0.06422  | 0.004794 | 0.9177   | -0.10415 | 0.02439  | -0.09646 | 0.03717  |
| 1.13E-12 | 0.073994 | 0.11028  | 0.199765 | 1.37E-05 | 0.091407 | 0.04836  | 0.216876 | 2.24E-06 |
| 1.96E-07 | 0.123217 | 0.00768  | 0.098231 | 0.03382  | 0.04497  | 0.3322   | 0.233813 | 3.22E-07 |
| 9.52E-05 | 0.016248 | 0.72618  | 0.083072 | 0.07289  | 0.085789 | 0.06397  | 0.196332 | 1.93E-05 |
| 0.59951  | -0.06156 | 0.1842   | -0.07973 | 0.08525  | -0.22374 | 1.04E-06 | -0.14974 | 0.00117  |

|          |          |          |          |          |          |          |          |          |
|----------|----------|----------|----------|----------|----------|----------|----------|----------|
| 0.25361  | 0.111356 | 0.01606  | 0.014686 | 0.75159  | -0.09589 | 0.03833  | 0.126494 | 0.0062   |
| 0.5194   | -0.16278 | 0.00041  | -0.06672 | 0.14998  | -0.17187 | 0.00019  | -0.25668 | 1.84E-08 |
| 0.01389  | -0.16831 | 0.00026  | -0.06586 | 0.15531  | -0.23435 | 3.02E-07 | -0.2451  | 8.12E-08 |
| 0.35031  | -0.04477 | 0.33439  | 0.105604 | 0.02247  | -0.01014 | 0.82699  | 0.027928 | 0.54715  |
| 8.90E-07 | 0.199935 | 1.34E-05 | 0.132993 | 0.00399  | 0.146943 | 0.00145  | 0.368294 | 1.89E-16 |
| 0.9304   | 0.085895 | 0.06364  | 0.161681 | 0.00045  | 0.036577 | 0.43036  | 0.143062 | 0.00194  |
| 5.75E-06 | 0.071285 | 0.12397  | 0.068408 | 0.13992  | 0.031939 | 0.49112  | 0.147489 | 0.00139  |
| 0.03344  | -0.01699 | 0.71416  | 0.197877 | 1.65E-05 | 0.055693 | 0.22965  | 0.125003 | 0.00684  |
| 0.43141  | -0.0495  | 0.28574  | -0.04378 | 0.34514  | -0.02425 | 0.60115  | 0.095996 | 0.03811  |
| 0.00508  | 0.042055 | 0.36452  | -0.01087 | 0.81484  | -0.10106 | 0.02899  | 0.042203 | 0.36283  |
| 6.52E-07 | 0.004633 | 0.92046  | 0.194445 | 2.32E-05 | -0.05922 | 0.20143  | 0.072203 | 0.11919  |
| 0.0064   | 0.024367 | 0.59941  | 0.06615  | 0.15351  | 0.065419 | 0.15812  | 0.061448 | 0.18497  |
| 8.80E-06 | 0.076671 | 0.09795  | 0.018855 | 0.68444  | -0.03426 | 0.46017  | 0.109071 | 0.01839  |
| 2.15E-06 | 0.099397 | 0.03175  | 0.091838 | 0.04731  | 0.013357 | 0.77344  | 0.215879 | 2.50E-06 |
| 0.00132  | 0.108072 | 0.01949  | 0.157871 | 0.00062  | 0.100949 | 0.02916  | 0.264783 | 6.22E-09 |
| 6.78E-14 | 0.011229 | 0.80877  | 0.004323 | 0.92576  | -0.02602 | 0.57483  | 0.041357 | 0.37254  |
| 0.00613  | -0.13007 | 0.00487  | 0.022146 | 0.63311  | -0.18063 | 8.66E-05 | -0.21101 | 4.23E-06 |
| 2.67E-09 | 0.09254  | 0.04564  | -0.06145 | 0.18492  | -0.11322 | 0.01437  | 0.049039 | 0.29027  |
| 1.84E-19 | 0.064069 | 0.16689  | 0.160324 | 0.00051  | 0.016528 | 0.72166  | 0.130638 | 0.00469  |
| 7.29E-08 | -0.02017 | 0.66379  | 0.135562 | 0.00333  | -0.04015 | 0.38672  | 0.034208 | 0.46083  |
| 0.83594  | 0.093626 | 0.04315  | -0.05806 | 0.21042  | -0.09819 | 0.0339   | 0.068325 | 0.14041  |
| 0.12449  | 0.204228 | 8.65E-06 | 0.175932 | 0.00013  | 0.211412 | 4.05E-06 | 0.326845 | 4.35E-13 |
| 6.94E-05 | 0.075295 | 0.10414  | -0.04524 | 0.32935  | -0.01838 | 0.69197  | 0.116066 | 0.01207  |
| 1.43E-14 | -0.0602  | 0.19407  | -0.09385 | 0.04264  | -0.18035 | 8.88E-05 | -0.11758 | 0.011    |
| 0.02071  | -0.1457  | 0.00159  | -0.03083 | 0.50634  | -0.04535 | 0.32813  | -0.10011 | 0.03054  |
| 0.45693  | -0.13064 | 0.00469  | -0.1294  | 0.0051   | -0.28569 | 3.20E-10 | -0.22575 | 8.26E-07 |
| 4.97E-05 | 0.05855  | 0.2066   | -0.08115 | 0.07981  | 0.073992 | 0.11029  | 0.0991   | 0.03227  |
| 5.45E-17 | 0.194213 | 2.38E-05 | 0.142625 | 0.002    | 0.066682 | 0.15022  | 0.313988 | 3.82E-12 |
| 4.44E-16 | 0.043991 | 0.34284  | 0.08916  | 0.05418  | -0.03814 | 0.41096  | 0.093725 | 0.04292  |
| 0.50046  | 0.155812 | 0.00073  | -0.16859 | 0.00025  | 0.011618 | 0.80228  | 0.130114 | 0.00486  |
| 2.89E-11 | 0.069174 | 0.13553  | 0.060109 | 0.19475  | -0.01259 | 0.78614  | 0.099809 | 0.03105  |
| 0.79275  | 0.131492 | 0.00442  | 0.112297 | 0.01518  | 0.181747 | 7.82E-05 | 0.26049  | 1.11E-08 |
| 0.01149  | -0.04865 | 0.29411  | -0.02714 | 0.55848  | -0.14354 | 0.00187  | -0.09983 | 0.03102  |
| 2.56E-06 | -0.06209 | 0.18042  | -0.05162 | 0.26558  | -0.19625 | 1.94E-05 | -0.09104 | 0.04928  |
| 5.27E-13 | 0.142701 | 0.00199  | 0.132823 | 0.00404  | 0.0173   | 0.70924  | 0.196103 | 1.97E-05 |
| 0.00128  | -0.04082 | 0.37877  | 0.008508 | 0.8545   | -0.10483 | 0.02347  | -0.06515 | 0.15983  |
| 0.42633  | -0.01627 | 0.72578  | -0.01459 | 0.75321  | -0.07005 | 0.13066  | -0.05421 | 0.24233  |
| 3.90E-10 | 0.014616 | 0.75274  | -0.02176 | 0.63909  | -0.00781 | 0.86639  | 0.058501 | 0.20698  |
| 0.3388   | 0.145225 | 0.00165  | 0.156545 | 0.00069  | 0.16576  | 0.00032  | 0.301088 | 3.05E-11 |
| 1.08E-07 | 0.097664 | 0.03486  | 0.227619 | 6.66E-07 | 0.194848 | 2.23E-05 | 0.29731  | 5.51E-11 |
| 7.07E-22 | -0.06594 | 0.15483  | 0.002214 | 0.96195  | -0.11852 | 0.01037  | -0.01671 | 0.71874  |
| 0.0035   | 0.045705 | 0.32435  | 0.371825 | 9.28E-17 | 0.179336 | 9.75E-05 | 0.272696 | 2.08E-09 |
| 0.00204  | 0.007278 | 0.87535  | 0.049734 | 0.28347  | -0.0478  | 0.30265  | 0.050792 | 0.27335  |
| 0.10554  | -0.03975 | 0.39148  | 0.258682 | 1.41E-08 | 0.183716 | 6.51E-05 | 0.17231  | 0.00018  |
| 7.16E-07 | -0.16078 | 0.00049  | -0.03117 | 0.50168  | -0.16484 | 0.00035  | -0.18535 | 5.58E-05 |

|          |          |          |          |          |          |          |          |          |
|----------|----------|----------|----------|----------|----------|----------|----------|----------|
| 0.00022  | 0.041051 | 0.3761   | 0.099453 | 0.03165  | 0.15755  | 0.00063  | 0.205424 | 7.63E-06 |
| 0.0604   | 0.125841 | 0.00647  | 0.127772 | 0.00569  | 0.143203 | 0.00192  | 0.251901 | 3.42E-08 |
| 0.00276  | -0.17118 | 0.0002   | -0.04573 | 0.32409  | -0.23878 | 1.77E-07 | -0.31021 | 7.11E-12 |
| 3.85E-07 | -0.13943 | 0.00253  | -0.02593 | 0.57619  | -0.11711 | 0.01132  | -0.15728 | 0.00065  |
| 0.00446  | 0.094237 | 0.04179  | 0.14856  | 0.00128  | 0.221106 | 1.40E-06 | 0.292446 | 1.16E-10 |
| 4.03E-05 | -0.06006 | 0.19509  | 0.103691 | 0.02504  | -0.06793 | 0.14269  | -0.06663 | 0.15052  |
| 2.46E-11 | 0.015585 | 0.73693  | -0.05997 | 0.19581  | -0.20046 | 1.27E-05 | -0.03981 | 0.3907   |
| 2.31E-23 | 0.010153 | 0.82679  | -0.11147 | 0.01595  | -0.16632 | 0.00031  | -0.07847 | 0.09031  |
| 0.20325  | 0.069417 | 0.13416  | 0.145799 | 0.00158  | -0.03401 | 0.46338  | 0.147258 | 0.00142  |
| 0.28209  | 0.041288 | 0.37335  | -0.02845 | 0.53964  | -0.01031 | 0.82412  | 0.046941 | 0.31142  |
| 0.01463  | 0.164103 | 0.00037  | 0.067534 | 0.14507  | 0.170652 | 0.00021  | 0.305811 | 1.44E-11 |
| 1.01E-09 | 0.079063 | 0.08789  | 0.138646 | 0.00268  | 0.105808 | 0.02221  | 0.178057 | 0.00011  |
| 1.50E-07 | 0.052511 | 0.25742  | -0.04184 | 0.36693  | -0.11016 | 0.01724  | 0.036251 | 0.43448  |
| 0.13967  | -0.03457 | 0.45612  | -0.04945 | 0.28624  | -0.09745 | 0.03527  | -0.02956 | 0.52392  |
| 7.57E-16 | -0.11392 | 0.01377  | -0.11421 | 0.01353  | -0.22087 | 1.44E-06 | -0.18235 | 7.39E-05 |
| 0.471    | 0.127032 | 0.00598  | 0.076531 | 0.09857  | 0.035044 | 0.44994  | 0.186172 | 5.17E-05 |
| 3.80E-10 | -0.12308 | 0.00775  | 0.136799 | 0.00305  | -0.18762 | 4.50E-05 | -0.1431  | 0.00193  |
| 0.00677  | 0.070796 | 0.12658  | 0.008547 | 0.85385  | -0.02749 | 0.55344  | 0.142234 | 0.00206  |
| 3.71E-18 | -0.02798 | 0.54635  | 0.086923 | 0.06053  | -0.06896 | 0.13675  | -0.00376 | 0.93545  |
| 0.01286  | 0.047835 | 0.30229  | -0.104   | 0.02461  | -0.18266 | 7.18E-05 | -0.02296 | 0.62072  |
| 0.00023  | -0.01554 | 0.73763  | -0.04937 | 0.28705  | -0.13185 | 0.00432  | -0.0582  | 0.20934  |
| 1.08E-13 | -0.03942 | 0.39534  | 0.016148 | 0.7278   | -0.13704 | 0.003    | -0.0668  | 0.14952  |
| 9.45E-09 | 0.007218 | 0.87637  | -0.05926 | 0.20115  | -0.05618 | 0.2256   | 0.001827 | 0.96859  |
| 4.03E-10 | -0.15519 | 0.00077  | -0.07358 | 0.11229  | -0.14488 | 0.00169  | -0.15051 | 0.0011   |
| 0.00355  | 0.149745 | 0.00117  | 0.037928 | 0.41351  | 0.117246 | 0.01122  | 0.271415 | 2.49E-09 |
| 4.20E-11 | 0.074892 | 0.10602  | 0.145989 | 0.00156  | 0.116868 | 0.01149  | 0.226985 | 7.16E-07 |
| 3.96E-06 | 0.053401 | 0.24943  | 0.154086 | 0.00084  | 0.301145 | 3.03E-11 | 0.238962 | 1.73E-07 |
| 0.00013  | 0.074967 | 0.10566  | 0.082084 | 0.07638  | -0.06778 | 0.1436   | 0.119806 | 0.00956  |
| 0.00375  | 0.07929  | 0.08698  | -0.05852 | 0.2068   | -0.20271 | 1.01E-05 | 0.004825 | 0.91718  |
| 0.05333  | -0.1591  | 0.00056  | 0.184304 | 6.16E-05 | -0.01459 | 0.7532   | -0.04571 | 0.32435  |
| 6.64E-08 | -0.07715 | 0.09587  | 0.180613 | 8.67E-05 | -0.13341 | 0.00387  | -0.04319 | 0.35175  |
| 3.35E-10 | 0.04895  | 0.29114  | -0.03983 | 0.39046  | 0.010921 | 0.81392  | -0.04106 | 0.37595  |
| 0.48976  | 0.204594 | 8.32E-06 | 0.097944 | 0.03434  | 0.186803 | 4.87E-05 | 0.344939 | 1.71E-14 |
| 3.36E-06 | 0.102033 | 0.02747  | 0.086787 | 0.06093  | 0.04103  | 0.37634  | 0.19899  | 1.48E-05 |
| 0.04373  | 0.06844  | 0.13974  | 0.240401 | 1.45E-07 | 0.173892 | 0.00016  | 0.19817  | 1.60E-05 |
| 5.07E-06 | 0.071608 | 0.12228  | 0.036149 | 0.43578  | -0.03748 | 0.419    | 0.09229  | 0.04623  |
| 6.10E-09 | 0.050667 | 0.27453  | 0.091061 | 0.04922  | -0.00395 | 0.93217  | 0.163026 | 0.0004   |
| 0.00065  | 0.115919 | 0.01218  | 0.03173  | 0.49396  | -0.04709 | 0.30989  | 0.154402 | 0.00081  |
| 2.32E-18 | 0.038913 | 0.40148  | -0.02309 | 0.61869  | -0.11324 | 0.01434  | 0.044424 | 0.3381   |
| 0.01312  | -0.06016 | 0.19435  | -0.06218 | 0.17982  | -0.13787 | 0.00283  | -0.12294 | 0.00782  |
| 7.67E-13 | 0.147787 | 0.00136  | 0.113972 | 0.01372  | 0.038954 | 0.40098  | 0.267577 | 4.25E-09 |
| 8.32E-07 | 0.192357 | 2.85E-05 | 0.043617 | 0.34696  | 0.085415 | 0.06515  | 0.283503 | 4.42E-10 |
| 1.57E-08 | -0.03776 | 0.41558  | -0.17676 | 0.00012  | -0.19852 | 1.55E-05 | -0.09523 | 0.03967  |
| 1.08E-09 | -0.03931 | 0.3967   | -0.02479 | 0.59314  | -0.23108 | 4.45E-07 | -0.13084 | 0.00462  |
| 4.91E-11 | 0.028965 | 0.53237  | -0.01657 | 0.72094  | -0.17531 | 0.00014  | -0.03052 | 0.51053  |

|          |          |          |          |          |          |          |          |          |
|----------|----------|----------|----------|----------|----------|----------|----------|----------|
| 2.86E-10 | 0.095955 | 0.03819  | 0.199817 | 1.36E-05 | -0.08502 | 0.06639  | 0.069508 | 0.13365  |
| 0.00056  | 0.017276 | 0.70962  | 0.104703 | 0.02365  | 0.015849 | 0.73264  | 0.080177 | 0.08349  |
| 0.00035  | -0.02647 | 0.56826  | 0.114493 | 0.0133   | 0.075236 | 0.10442  | 0.088358 | 0.05638  |
| 4.40E-13 | 0.086548 | 0.06165  | 0.073298 | 0.11368  | -0.09974 | 0.03116  | 0.06626  | 0.15283  |
| 7.24E-08 | 0.084361 | 0.06854  | 0.125966 | 0.00642  | 0.12453  | 0.00705  | 0.244107 | 9.19E-08 |
| 0.03554  | 0.055988 | 0.2272   | 0.251507 | 3.60E-08 | 0.250906 | 3.89E-08 | 0.344364 | 1.90E-14 |
| 0.3014   | -0.00272 | 0.95318  | -0.00316 | 0.94562  | 0.010565 | 0.81987  | 0.07365  | 0.11195  |
| 0.0596   | 0.039584 | 0.39341  | 0.249569 | 4.62E-08 | 0.305685 | 1.47E-11 | 0.219666 | 1.64E-06 |
| 1.12E-13 | -0.02113 | 0.64873  | 0.088323 | 0.05648  | -0.01053 | 0.82047  | 0.025426 | 0.58363  |
| 0.00524  | -0.0079  | 0.86481  | -0.00824 | 0.85911  | -0.08802 | 0.05734  | -0.02067 | 0.65592  |
| 2.25E-07 | 0.057468 | 0.21513  | 0.34469  | 1.79E-14 | 0.368416 | 1.85E-16 | 0.303974 | 1.94E-11 |
| 5.35E-05 | -0.05198 | 0.26227  | -0.01695 | 0.7148   | -0.09587 | 0.03836  | -0.0526  | 0.25657  |
| 0.22696  | 0.101916 | 0.02765  | 0.04757  | 0.30498  | 0.076639 | 0.09809  | 0.19262  | 2.78E-05 |
| 0.25057  | 0.014452 | 0.75544  | -0.18826 | 4.24E-05 | -0.30535 | 1.55E-11 | -0.1444  | 0.00176  |
| 0.07219  | 0.069031 | 0.13634  | 0.017272 | 0.70969  | -0.02098 | 0.65113  | 0.119938 | 0.00948  |
| 0.95961  | 0.042407 | 0.36052  | -0.02919 | 0.5292   | 0.003077 | 0.94712  | 0.093676 | 0.04303  |
| 0.39186  | 0.173067 | 0.00017  | -0.01136 | 0.80651  | 0.0942   | 0.04188  | 0.31221  | 5.12E-12 |
| 1.44E-09 | 0.037094 | 0.42386  | 0.196374 | 1.92E-05 | 0.127723 | 0.00571  | 0.124723 | 0.00696  |
| 0.02156  | 0.051263 | 0.26892  | 0.116304 | 0.0119   | 0.123819 | 0.00739  | 0.24475  | 8.48E-08 |
| 0.01141  | -0.24109 | 1.34E-07 | -0.13326 | 0.00392  | -0.28059 | 6.75E-10 | -0.37877 | 2.22E-17 |
| 4.29E-15 | -0.07009 | 0.13041  | 0.045943 | 0.32183  | -0.1948  | 2.25E-05 | -0.10384 | 0.02483  |
| 0.10031  | -0.06822 | 0.14103  | 0.043593 | 0.34723  | -0.07322 | 0.11408  | 0.000375 | 0.99355  |
| 1.49E-15 | 0.00092  | 0.98418  | -0.18798 | 4.35E-05 | -0.29495 | 7.93E-11 | -0.17092 | 0.00021  |
| 0.17459  | -0.0861  | 0.06302  | -0.15501 | 0.00078  | -0.29242 | 1.17E-10 | -0.1649  | 0.00035  |
| 0.92207  | 0.11077  | 0.01663  | 0.116432 | 0.0118   | 0.011599 | 0.80258  | 0.106219 | 0.02169  |
| 0.22454  | -0.00688 | 0.88213  | -0.09604 | 0.03802  | -0.12325 | 0.00766  | -0.00881 | 0.84933  |
| 0.04851  | -0.0665  | 0.15131  | -0.12204 | 0.00829  | -0.10258 | 0.02665  | -0.09182 | 0.04735  |
| 0.01201  | -0.03298 | 0.47711  | 0.067334 | 0.14627  | -0.0637  | 0.16933  | 0.003527 | 0.9394   |
| 0.04345  | -0.13318 | 0.00394  | -0.04093 | 0.37747  | -0.19353 | 2.54E-05 | -0.22383 | 1.03E-06 |
| 0.55446  | 0.117066 | 0.01135  | 0.052373 | 0.25867  | -0.0862  | 0.06272  | 0.043837 | 0.34454  |
| 0.6714   | 0.092407 | 0.04595  | 0.122837 | 0.00787  | 0.076666 | 0.09797  | 0.205093 | 7.90E-06 |
| 0.00285  | 0.113961 | 0.01373  | 0.159542 | 0.00054  | 0.034449 | 0.45768  | 0.236618 | 2.30E-07 |
| 0.00018  | -0.00452 | 0.92233  | 0.156261 | 0.0007   | 0.11748  | 0.01106  | 0.090966 | 0.04946  |
| 0.81549  | -0.08518 | 0.06589  | -0.0893  | 0.05381  | -0.2055  | 7.57E-06 | -0.20615 | 7.08E-06 |
| 0.00012  | 0.064092 | 0.16674  | 0.02992  | 0.51893  | -0.04489 | 0.33302  | 0.106802 | 0.02098  |
| 0.1216   | -0.00177 | 0.96962  | -0.13812 | 0.00278  | -0.15294 | 0.00091  | -0.10438 | 0.02409  |
| 6.99E-06 | 0.041603 | 0.3697   | -0.01    | 0.82929  | -0.05886 | 0.20418  | 0.001742 | 0.97005  |
| 1.45E-08 | -0.02685 | 0.56274  | 0.030722 | 0.50778  | -0.1386  | 0.00269  | -0.05265 | 0.2562   |
| 0.59875  | 0.013734 | 0.76723  | -0.12294 | 0.00782  | -0.14607 | 0.00155  | -0.08073 | 0.08136  |
| 9.16E-09 | 0.091005 | 0.04936  | 0.245909 | 7.34E-08 | 0.261563 | 9.61E-09 | 0.322225 | 9.62E-13 |
| 1.53E-05 | 0.063955 | 0.16765  | -0.06263 | 0.17668  | -0.06651 | 0.15125  | 0.062611 | 0.17678  |
| 4.21E-09 | 0.041758 | 0.36792  | 0.150743 | 0.00108  | 0.087288 | 0.05945  | 0.274432 | 1.63E-09 |
| 6.12E-06 | 0.050091 | 0.28002  | -0.00544 | 0.90669  | -0.19783 | 1.66E-05 | 0.014456 | 0.75536  |
| 9.88E-07 | 0.067535 | 0.14506  | 0.222701 | 1.17E-06 | 0.057964 | 0.21118  | 0.13665  | 0.00309  |
| 5.53E-15 | -0.06146 | 0.18487  | -0.0554  | 0.23216  | 0.032942 | 0.4776   | -0.13477 | 0.00352  |



|          |          |          |          |          |          |          |          |          |
|----------|----------|----------|----------|----------|----------|----------|----------|----------|
| 0.803    | 0.076645 | 0.09807  | 0.149884 | 0.00116  | 0.094597 | 0.04102  | 0.179355 | 9.73E-05 |
| 2.77E-07 | -0.03267 | 0.48124  | -0.11237 | 0.01512  | -0.13679 | 0.00306  | -0.07664 | 0.0981   |
| 0.18713  | 0.259781 | 1.22E-08 | 0.159776 | 0.00053  | 0.13495  | 0.00348  | 0.30498  | 1.65E-11 |
| 0.00072  | -0.02341 | 0.61389  | -0.09961 | 0.03138  | -0.27279 | 2.06E-09 | -0.19009 | 3.55E-05 |
| 0.14802  | 0.099286 | 0.03194  | 0.173106 | 0.00017  | 0.104258 | 0.02425  | 0.239997 | 1.53E-07 |
| 0.00054  | -0.07092 | 0.12589  | 0.050772 | 0.27354  | -0.08211 | 0.0763   | -0.03206 | 0.4895   |
| 0.00152  | -0.0438  | 0.34499  | -0.04037 | 0.38407  | -0.164   | 0.00037  | -0.05651 | 0.22291  |
| 2.47E-19 | 0.145783 | 0.00158  | 0.131675 | 0.00437  | 0.09915  | 0.03218  | 0.29806  | 4.90E-11 |
| 0.00049  | 0.104233 | 0.02429  | 0.100709 | 0.02955  | 0.051015 | 0.27124  | 0.232248 | 3.87E-07 |
| 0.58721  | 0.033115 | 0.47529  | 0.003693 | 0.93655  | -0.06262 | 0.17672  | 0.075434 | 0.10351  |
| 0.00039  | -0.26643 | 4.97E-09 | -0.08339 | 0.07179  | -0.37279 | 7.62E-17 | -0.37401 | 5.95E-17 |
| 0.28541  | 0.111162 | 0.01625  | 0.016681 | 0.7192   | -0.03725 | 0.42189  | 0.144385 | 0.00176  |
| 7.60E-09 | -0.05897 | 0.20337  | 0.121883 | 0.00837  | 0.035067 | 0.44965  | -0.00267 | 0.95419  |
| 0.00041  | -0.07058 | 0.12775  | -0.17421 | 0.00015  | -0.1859  | 5.30E-05 | -0.21348 | 3.24E-06 |
| 3.97E-09 | 0.04969  | 0.28391  | -0.07076 | 0.1268   | -0.13411 | 0.00369  | 0.01422  | 0.75923  |
| 0.10564  | -0.09116 | 0.04898  | -0.05861 | 0.20616  | -0.26017 | 1.16E-08 | -0.21366 | 3.18E-06 |
| 0.00017  | -0.0013  | 0.97766  | 0.072718 | 0.11657  | -0.02209 | 0.63392  | 0.066838 | 0.14927  |
| 3.15E-07 | 0.005697 | 0.90228  | -0.06606 | 0.15406  | -0.24988 | 4.44E-08 | -0.11718 | 0.01127  |
| 0.78139  | -0.0003  | 0.99477  | -0.00401 | 0.93105  | -0.15146 | 0.00103  | -0.04378 | 0.34522  |
| 0.00278  | 0.065591 | 0.15702  | 0.020862 | 0.65294  | -0.09732 | 0.03552  | 0.10125  | 0.02869  |
| 1.66E-05 | 0.06192  | 0.18162  | 0.089419 | 0.05348  | -0.0065  | 0.88855  | 0.162139 | 0.00044  |
| 0.3446   | 0.066061 | 0.15407  | 0.103698 | 0.02503  | 0.052219 | 0.26008  | 0.131654 | 0.00437  |
| 5.55E-06 | -0.04996 | 0.28131  | 0.067755 | 0.14376  | -0.1214  | 0.00864  | -0.02856 | 0.53805  |
| 9.70E-10 | 0.11287  | 0.01467  | 0.197793 | 1.67E-05 | 0.12305  | 0.00776  | 0.256286 | 1.94E-08 |
| 1.64E-05 | 0.04434  | 0.33902  | 0.027894 | 0.54764  | -0.10143 | 0.0284   | 0.06128  | 0.18618  |
| 0.70966  | 0.154158 | 0.00083  | 0.0904   | 0.0509   | 0.092204 | 0.04643  | 0.285184 | 3.45E-10 |
| 2.39E-05 | -0.07587 | 0.10153  | -0.03363 | 0.46847  | -0.19719 | 1.77E-05 | -0.15736 | 0.00064  |
| 0.0001   | 0.059465 | 0.19958  | 0.016615 | 0.72026  | -0.06415 | 0.16635  | 0.123762 | 0.00741  |
| 0.16191  | -0.15642 | 0.00069  | -0.03447 | 0.45744  | -0.09334 | 0.0438   | -0.09753 | 0.03513  |
| 0.11667  | -0.07263 | 0.11701  | -0.10128 | 0.02864  | -0.17626 | 0.00013  | -0.17728 | 0.00012  |
| 0.07511  | -0.08134 | 0.0791   | -0.09913 | 0.03222  | -0.27145 | 2.48E-09 | -0.28939 | 1.84E-10 |
| 0.00053  | 0.011732 | 0.80038  | 0.162917 | 0.00041  | 0.054694 | 0.23814  | 0.150571 | 0.0011   |
| 0.01602  | -0.00074 | 0.98729  | 0.076005 | 0.10091  | -0.19259 | 2.79E-05 | -0.16506 | 0.00034  |
| 1.29E-14 | 0.100557 | 0.0298   | 0.147461 | 0.0014   | 0.035681 | 0.44175  | 0.184484 | 6.06E-05 |
| 0.00032  | -0.0308  | 0.50664  | -0.06926 | 0.13507  | -0.20529 | 7.74E-06 | -0.09997 | 0.03077  |
| 0.0251   | -0.03842 | 0.40748  | -0.06265 | 0.17652  | -0.10151 | 0.02827  | -0.03804 | 0.41211  |
| 0.95819  | -0.09209 | 0.0467   | -0.04611 | 0.32003  | -0.19775 | 1.67E-05 | -0.10742 | 0.02024  |
| 0.17598  | -0.05381 | 0.24585  | -0.14764 | 0.00138  | -0.17642 | 0.00013  | -0.12293 | 0.00782  |
| 0.24459  | 0.005829 | 0.90002  | 0.025025 | 0.58959  | 0.072623 | 0.11705  | 0.102666 | 0.02652  |
| 5.30E-06 | 0.074801 | 0.10644  | 0.061663 | 0.18344  | 0.024485 | 0.59764  | 0.182414 | 7.35E-05 |
| 0.00027  | -0.00879 | 0.8497   | -0.08004 | 0.08404  | -0.14418 | 0.00179  | -0.07345 | 0.11293  |
| 1.85E-16 | 0.010302 | 0.82428  | 0.011446 | 0.80514  | -0.13845 | 0.00271  | 0.016004 | 0.73013  |
| 9.57E-06 | 0.082662 | 0.07433  | 0.152807 | 0.00092  | 0.164442 | 0.00036  | 0.278073 | 9.71E-10 |
| 0.02589  | 0.033252 | 0.47347  | -0.06612 | 0.15369  | -0.10001 | 0.0307   | 0.032267 | 0.48668  |
| 0.00076  | 0.004872 | 0.91637  | 0.363113 | 5.31E-16 | 0.214487 | 2.91E-06 | 0.262971 | 7.95E-09 |

|          |          |         |          |          |          |          |          |          |
|----------|----------|---------|----------|----------|----------|----------|----------|----------|
| 6.35E-15 | 0.093348 | 0.04377 | 0.205077 | 7.92E-06 | 0.141047 | 0.00225  | 0.322111 | 9.81E-13 |
| 0.53249  | 0.092401 | 0.04596 | -0.0066  | 0.88689  | 0.078312 | 0.09095  | 0.116608 | 0.01168  |
| 0.09494  | -0.15327 | 0.00089 | 0.033298 | 0.47285  | -0.27286 | 2.04E-09 | -0.25636 | 1.92E-08 |
| 0.03581  | -0.12027 | 0.00928 | -0.02627 | 0.57126  | -0.37249 | 8.11E-17 | -0.32919 | 2.89E-13 |
| 0.00183  | 0.024864 | 0.59198 | -0.03527 | 0.44705  | -0.04036 | 0.38421  | 0.049206 | 0.28863  |
| 1.26E-16 | 0.070254 | 0.12952 | -0.02376 | 0.60857  | -0.12153 | 0.00856  | 0.037384 | 0.42025  |
| 2.41E-09 | -0.1404  | 0.00236 | -0.04083 | 0.37862  | 0.012984 | 0.77959  | -0.16804 | 0.00026  |
| 0.00869  | -0.05049 | 0.27618 | -0.02785 | 0.54832  | -0.05755 | 0.2145   | -0.06863 | 0.13866  |
| 6.02E-10 | -0.1495  | 0.00119 | -0.10766 | 0.01996  | -0.08821 | 0.05679  | -0.22508 | 8.92E-07 |
| 0.00086  | -0.04484 | 0.33363 | 0.049487 | 0.28587  | -0.12859 | 0.00539  | -0.07265 | 0.11692  |
| 0.00244  | -0.04608 | 0.32042 | 0.055113 | 0.23455  | -0.08315 | 0.07264  | -0.01379 | 0.76626  |
| 7.74E-06 | -0.01845 | 0.69094 | -0.0153  | 0.74164  | -0.02509 | 0.58857  | 0.018622 | 0.68814  |
| 0.4187   | -0.07365 | 0.11193 | 0.02321  | 0.61686  | -0.14671 | 0.00148  | -0.11038 | 0.01702  |
| 0.01683  | -0.13855 | 0.00269 | -0.06321 | 0.17267  | -0.19849 | 1.55E-05 | -0.20181 | 1.11E-05 |
| 4.02E-14 | 0.014978 | 0.74682 | 0.066654 | 0.15039  | -0.08799 | 0.05742  | -0.01158 | 0.80292  |
| 0.04823  | -0.01907 | 0.68107 | 0.035997 | 0.43771  | -0.13548 | 0.00335  | -0.02081 | 0.65369  |
| 0.04916  | 0.096706 | 0.0367  | -0.09003 | 0.05185  | -0.10554 | 0.02255  | 0.032777 | 0.47981  |
| 0.00234  | -0.10293 | 0.02613 | -0.012   | 0.79592  | -0.1612  | 0.00047  | -0.09057 | 0.05046  |
| 1.68E-11 | -0.01255 | 0.78674 | 0.039079 | 0.39947  | -0.09191 | 0.04713  | -0.01211 | 0.79413  |
| 2.84E-05 | 0.168721 | 0.00025 | 0.105296 | 0.02286  | -0.00595 | 0.89792  | 0.158279 | 0.0006   |
| 0.00764  | 0.042535 | 0.35907 | 0.284676 | 3.72E-10 | 0.089178 | 0.05413  | 0.18942  | 3.79E-05 |
| 2.40E-09 | 0.021888 | 0.63708 | -0.00837 | 0.85683  | -0.06242 | 0.17812  | 0.085218 | 0.06577  |
| 0.50783  | -0.00275 | 0.95282 | -0.07585 | 0.10163  | -0.13299 | 0.00399  | -0.04637 | 0.31737  |
| 0.59286  | -0.12861 | 0.00538 | -0.0054  | 0.90735  | -0.21257 | 3.58E-06 | -0.23979 | 1.57E-07 |
| 0.03111  | -0.00733 | 0.87442 | -0.28625 | 2.95E-10 | -0.36759 | 2.18E-16 | -0.35073 | 5.79E-15 |
| 2.98E-16 | -0.01132 | 0.80721 | 0.09783  | 0.03456  | -0.07773 | 0.09339  | 0.050963 | 0.27173  |
| 3.76E-08 | -0.01202 | 0.79553 | -0.04834 | 0.29724  | -0.08965 | 0.05287  | -0.02818 | 0.5436   |
| 7.98E-05 | -0.07711 | 0.09604 | 0.057291 | 0.21654  | -0.1451  | 0.00167  | -0.14036 | 0.00236  |
| 3.62E-11 | -0.04746 | 0.30606 | -0.11616 | 0.01201  | -0.2237  | 1.04E-06 | -0.12754 | 0.00578  |
| 0.51719  | 0.007075 | 0.87881 | 0.069646 | 0.13288  | -0.01832 | 0.69292  | 0.018861 | 0.68435  |
| 0.00611  | -0.05969 | 0.1979  | -0.02497 | 0.59043  | -0.1248  | 0.00693  | -0.0311  | 0.50261  |
| 2.58E-06 | 0.078792 | 0.08898 | 0.289798 | 1.73E-10 | 0.308176 | 9.88E-12 | 0.21818  | 1.94E-06 |
| 0.18799  | 0.041006 | 0.37661 | 0.095735 | 0.03864  | -0.01737 | 0.70818  | 0.162513 | 0.00042  |
| 0.00507  | -0.08047 | 0.08238 | -0.06516 | 0.15978  | -0.03839 | 0.40784  | -0.1311  | 0.00454  |
| 9.15E-15 | 0.068072 | 0.14189 | 0.158528 | 0.00059  | 0.027519 | 0.55304  | 0.167142 | 0.00029  |
| 1.23E-07 | -0.09226 | 0.04629 | 0.059259 | 0.20114  | 0.079621 | 0.08566  | 0.037565 | 0.418    |
| 0.96518  | 0.066213 | 0.15312 | 0.250479 | 4.11E-08 | 0.138735 | 0.00266  | 0.263601 | 7.30E-09 |
| 0.00348  | 0.031846 | 0.49238 | 0.068011 | 0.14224  | -0.11692 | 0.01145  | 0.033214 | 0.47397  |
| 4.99E-08 | -0.03545 | 0.4447  | 0.024149 | 0.60269  | -0.26328 | 7.63E-09 | -0.12595 | 0.00642  |
| 0.00808  | -0.09919 | 0.03211 | 0.140078 | 0.00241  | -0.08997 | 0.05201  | -0.05698 | 0.21907  |
| 0.96047  | 0.008059 | 0.8621  | 0.055345 | 0.23259  | 0.007049 | 0.87924  | 0.072498 | 0.11769  |
| 3.14E-14 | 0.115844 | 0.01224 | 0.212015 | 3.80E-06 | 0.193406 | 2.57E-05 | 0.234093 | 3.11E-07 |
| 9.27E-12 | 0.050003 | 0.28088 | 0.075349 | 0.1039   | -0.05642 | 0.22365  | 0.086647 | 0.06135  |
| 2.54E-13 | -0.0389  | 0.40164 | -0.01226 | 0.79156  | -0.13334 | 0.00389  | -0.05744 | 0.21537  |
| 1.00E-07 | 0.042423 | 0.36034 | 0.042161 | 0.36332  | -0.02296 | 0.62066  | 0.137449 | 0.00292  |

|          |          |          |          |          |          |          |          |          |
|----------|----------|----------|----------|----------|----------|----------|----------|----------|
| 0.22703  | -0.08648 | 0.06186  | 0.104539 | 0.02387  | 0.056613 | 0.22204  | 0.010064 | 0.82827  |
| 3.20E-11 | -0.04969 | 0.28394  | -0.02722 | 0.55738  | -0.10772 | 0.01989  | -0.04668 | 0.31412  |
| 1.22E-15 | 0.07783  | 0.09297  | 0.045915 | 0.32212  | -0.06945 | 0.13397  | 0.059228 | 0.20139  |
| 0.14043  | 0.095149 | 0.03985  | 0.021485 | 0.64329  | -0.03072 | 0.50781  | 0.085927 | 0.06354  |
| 0.00015  | 0.074587 | 0.10745  | -0.01718 | 0.71124  | -0.04968 | 0.28401  | 0.058817 | 0.20453  |
| 2.34E-06 | 0.038683 | 0.40427  | -0.00957 | 0.83653  | -0.03166 | 0.49491  | 0.107387 | 0.02028  |
| 9.29E-09 | 0.058912 | 0.2038   | -0.04231 | 0.36167  | -0.20187 | 1.10E-05 | -0.03499 | 0.45068  |
| 0.28673  | 0.105511 | 0.02259  | -0.00665 | 0.88601  | 0.126961 | 0.00601  | 0.180588 | 8.70E-05 |
| 0.0123   | 0.100698 | 0.02957  | 0.061818 | 0.18233  | 0.14649  | 0.0015   | 0.217529 | 2.08E-06 |
| 0.08199  | 0.06982  | 0.13191  | 0.112399 | 0.01509  | 0.011652 | 0.8017   | 0.167168 | 0.00029  |
| 1.59E-07 | -0.0156  | 0.73663  | -0.0789  | 0.08853  | -0.0809  | 0.08074  | -0.01744 | 0.70703  |
| 0.01151  | -0.03108 | 0.50283  | 0.143686 | 0.00185  | 0.082461 | 0.07504  | 0.079129 | 0.08762  |
| 3.93E-06 | 0.068408 | 0.13992  | -0.08316 | 0.07258  | -0.13747 | 0.00291  | -0.0478  | 0.30265  |
| 5.06E-07 | -0.09444 | 0.04135  | -0.09806 | 0.03413  | -0.25679 | 1.81E-08 | -0.20487 | 8.09E-06 |
| 0.0685   | -0.15131 | 0.00104  | -0.22411 | 9.96E-07 | -0.27405 | 1.72E-09 | -0.28795 | 2.28E-10 |
| 0.56182  | -0.02494 | 0.5908   | -0.01677 | 0.71769  | -0.06845 | 0.1397   | -0.08669 | 0.06122  |
| 7.39E-05 | 0.027329 | 0.55578  | 0.107715 | 0.0199   | -0.00339 | 0.94178  | 0.152366 | 0.00096  |
| 8.84E-13 | 0.057102 | 0.21807  | 0.065001 | 0.16079  | 0.061826 | 0.18228  | 0.163616 | 0.00038  |
| 0.00148  | -0.03728 | 0.4216   | -0.13375 | 0.00378  | -0.22072 | 1.46E-06 | -0.16557 | 0.00033  |
| 2.33E-09 | -0.09363 | 0.04314  | -0.05254 | 0.25711  | -0.23727 | 2.12E-07 | -0.22456 | 9.46E-07 |
| 5.01E-09 | 0.018146 | 0.69572  | 0.036817 | 0.42733  | -0.03224 | 0.48699  | 0.076742 | 0.09764  |
| 0.00011  | -0.05613 | 0.22604  | -0.00187 | 0.96791  | -0.09662 | 0.03687  | -0.03715 | 0.42311  |
| 0.00976  | -0.02562 | 0.58078  | -0.15135 | 0.00103  | -0.1396  | 0.0025   | -0.13796 | 0.00281  |
| 0.31445  | -0.03731 | 0.4212   | -0.07117 | 0.12456  | -0.13349 | 0.00385  | -0.08181 | 0.07736  |
| 2.53E-17 | 0.29485  | 8.05E-11 | 0.151545 | 0.00102  | 0.222278 | 1.23E-06 | 0.416114 | 5.57E-21 |
| 0.00161  | -0.07085 | 0.12628  | -0.09124 | 0.04878  | -0.1833  | 6.77E-05 | -0.13645 | 0.00313  |
| 0.38533  | 0.005756 | 0.90126  | -0.03773 | 0.41599  | 6.50E-05 | 0.99888  | -0.04756 | 0.30509  |
| 1.91E-08 | -0.14786 | 0.00135  | 0.111598 | 0.01583  | -0.20671 | 6.68E-06 | -0.13354 | 0.00384  |
| 8.85E-05 | -0.06724 | 0.14681  | 0.244712 | 8.52E-08 | -0.1058  | 0.02222  | -0.05853 | 0.20672  |
| 1.07E-10 | 0.016825 | 0.71687  | -0.05121 | 0.26946  | -0.23384 | 3.21E-07 | -0.14551 | 0.00162  |
| 3.12E-08 | -0.01325 | 0.77515  | -0.0025  | 0.9571   | -0.161   | 0.00048  | -0.02713 | 0.55867  |
| 3.05E-06 | 0.007466 | 0.87216  | 0.143627 | 0.00186  | -0.01026 | 0.82506  | 0.102148 | 0.02729  |
| 4.06E-12 | 0.170915 | 0.00021  | 0.198944 | 1.48E-05 | 0.253136 | 2.92E-08 | 0.456187 | 2.21E-25 |
| 3.54E-16 | 0.131249 | 0.0045   | 0.188413 | 4.18E-05 | 0.134388 | 0.00362  | 0.332095 | 1.74E-13 |
| 0.00992  | -0.09002 | 0.05189  | 0.092321 | 0.04615  | -0.10654 | 0.02129  | -0.10188 | 0.0277   |
| 0.16795  | -0.07497 | 0.10564  | -0.1407  | 0.00231  | -0.31566 | 2.90E-12 | -0.20594 | 7.24E-06 |
| 1.20E-05 | -0.01777 | 0.70163  | -0.09525 | 0.03964  | -0.10641 | 0.02146  | 0.00522  | 0.91042  |
| 0.06779  | -0.02419 | 0.60213  | 0.157713 | 0.00063  | 0.016968 | 0.71458  | 0.054454 | 0.24021  |
| 0.00611  | -0.10187 | 0.02772  | -0.05609 | 0.22632  | -0.11762 | 0.01097  | -0.1482  | 0.00132  |
| 0.00362  | -0.17956 | 9.55E-05 | -0.0328  | 0.47948  | -0.08282 | 0.07376  | -0.21374 | 3.15E-06 |
| 8.73E-06 | -0.03311 | 0.47534  | -0.14964 | 0.00118  | -0.12543 | 0.00665  | -0.09177 | 0.04749  |
| 0.59532  | -0.17634 | 0.00013  | -0.01259 | 0.78609  | -0.28689 | 2.68E-10 | -0.28598 | 3.06E-10 |
| 0.13137  | -0.0734  | 0.1132   | -0.00952 | 0.83736  | -0.15381 | 0.00085  | -0.10286 | 0.02624  |
| 0.00012  | 0.001413 | 0.9757   | -0.07384 | 0.11101  | -0.13989 | 0.00245  | -0.08286 | 0.07364  |
| 0.07542  | -0.0714  | 0.12337  | -0.08862 | 0.05564  | -0.18184 | 7.75E-05 | -0.11422 | 0.01352  |

|          |          |          |          |          |          |          |          |          |
|----------|----------|----------|----------|----------|----------|----------|----------|----------|
| 1.56E-09 | 0.085603 | 0.06455  | 0.130768 | 0.00465  | 0.059423 | 0.1999   | 0.163479 | 0.00039  |
| 0.38276  | -0.00315 | 0.94585  | -0.05524 | 0.23344  | -0.04317 | 0.35189  | -0.00851 | 0.85447  |
| 0.01817  | 0.170145 | 0.00022  | 0.091438 | 0.04829  | 0.211011 | 4.23E-06 | 0.357274 | 1.66E-15 |
| 0.49571  | 0.151037 | 0.00106  | 0.015411 | 0.73976  | 0.178463 | 0.00011  | 0.264963 | 6.07E-09 |
| 1.40E-11 | 0.029813 | 0.52043  | -0.03759 | 0.41767  | -0.16685 | 0.00029  | -0.02755 | 0.55256  |
| 4.88E-15 | -0.00257 | 0.95585  | 0.034634 | 0.45527  | -0.12398 | 0.00731  | 0.01154  | 0.80358  |
| 0.32874  | 0.060399 | 0.1926   | 0.137507 | 0.0029   | 0.135397 | 0.00337  | 0.235905 | 2.51E-07 |
| 0.03752  | -0.13653 | 0.00311  | -0.10352 | 0.02528  | -0.2273  | 6.90E-07 | -0.28021 | 7.14E-10 |
| 7.77E-16 | 0.076482 | 0.09878  | 0.094957 | 0.04025  | 0.014373 | 0.75672  | 0.141913 | 0.00211  |
| 0.02115  | -0.0283  | 0.54186  | 0.034475 | 0.45734  | -0.01201 | 0.79573  | 0.035626 | 0.44245  |
| 0.00522  | 0.063898 | 0.16803  | 0.127705 | 0.00572  | 0.048069 | 0.29992  | 0.189295 | 3.84E-05 |
| 0.00034  | 0.048503 | 0.29557  | 0.062432 | 0.17803  | -0.00127 | 0.97813  | 0.057728 | 0.21305  |
| 2.57E-08 | 0.010065 | 0.82826  | 0.067599 | 0.14468  | -0.02754 | 0.55272  | 0.061155 | 0.18708  |
| 1.10E-16 | 0.139541 | 0.00251  | 0.210557 | 4.44E-06 | 0.119931 | 0.00948  | 0.334667 | 1.10E-13 |
| 1.22E-08 | 0.088846 | 0.05503  | 0.11936  | 0.00983  | -0.10797 | 0.0196   | 0.076025 | 0.10082  |
| 1.47E-08 | -0.03653 | 0.43096  | -0.09634 | 0.03742  | -0.18838 | 4.19E-05 | -0.0919  | 0.04716  |
| 0.67116  | 0.099291 | 0.03193  | -0.05732 | 0.21628  | -0.09847 | 0.03338  | 0.071446 | 0.12312  |
| 1.05E-23 | 0.008461 | 0.8553   | 0.006546 | 0.8878   | -0.13898 | 0.00261  | -0.05968 | 0.19799  |
| 6.87E-07 | 0.004697 | 0.91937  | -0.03128 | 0.50004  | -0.16105 | 0.00048  | -0.01443 | 0.75582  |
| 0.09056  | -0.10551 | 0.02259  | -0.18891 | 3.98E-05 | -0.30756 | 1.09E-11 | -0.24723 | 6.21E-08 |
| 0.00035  | -0.18959 | 3.73E-05 | -0.04415 | 0.34106  | -0.19417 | 2.39E-05 | -0.2626  | 8.36E-09 |
| 0.00023  | -0.03834 | 0.40845  | -0.02858 | 0.53786  | -0.18512 | 5.71E-05 | -0.13305 | 0.00397  |
| 0.25671  | 0.151299 | 0.00104  | 0.096495 | 0.03711  | 0.027348 | 0.55551  | 0.161979 | 0.00044  |
| 5.56E-12 | 0.119339 | 0.00984  | 0.212305 | 3.68E-06 | 0.105494 | 0.02261  | 0.253338 | 2.84E-08 |
| 0.0005   | -0.04838 | 0.29684  | 0.090718 | 0.05009  | -0.13603 | 0.00323  | -0.0732  | 0.11417  |
| 6.26E-10 | 0.070777 | 0.12668  | 0.082524 | 0.07481  | 0.065756 | 0.15598  | 0.193412 | 2.57E-05 |
| 0.01208  | 0.012447 | 0.78849  | -0.04215 | 0.36344  | -0.15976 | 0.00053  | -0.01418 | 0.7599   |
| 5.14E-13 | 0.097406 | 0.03535  | 0.032361 | 0.4854   | 0.04504  | 0.33144  | 0.198588 | 1.54E-05 |
| 5.66E-08 | 0.020806 | 0.65382  | -0.1171  | 0.01133  | -0.17993 | 9.24E-05 | -0.03884 | 0.40231  |
| 8.36E-07 | -0.06634 | 0.15233  | -0.14851 | 0.00129  | -0.25119 | 3.75E-08 | -0.15704 | 0.00066  |
| 0.36546  | 0.112032 | 0.01543  | 0.030388 | 0.51242  | 0.216969 | 2.22E-06 | 0.243328 | 1.01E-07 |
| 0.01122  | -0.00011 | 0.9981   | -0.08779 | 0.05801  | -0.0327  | 0.48088  | -0.01696 | 0.7147   |
| 0.13131  | -0.0232  | 0.61697  | -0.06868 | 0.13838  | -0.05495 | 0.2359   | -0.04072 | 0.38     |
| 0.07483  | 0.007426 | 0.87284  | -0.00977 | 0.83324  | -0.18162 | 7.91E-05 | -0.05025 | 0.27851  |
| 0.00128  | 0.046584 | 0.31512  | 0.177928 | 0.00011  | 0.015953 | 0.73097  | 0.118569 | 0.01033  |
| 0.01509  | 0.177017 | 0.00012  | -0.01408 | 0.76158  | 0.064207 | 0.16598  | 0.155443 | 0.00075  |
| 5.27E-10 | 0.040916 | 0.37767  | 0.004741 | 0.91861  | -0.176   | 0.00013  | 0.00396  | 0.93198  |
| 6.98E-14 | 0.026096 | 0.57377  | 0.021512 | 0.64287  | -0.12288 | 0.00785  | 0.033875 | 0.46521  |
| 0.05674  | -0.0771  | 0.09607  | -0.01357 | 0.76991  | -0.26858 | 3.70E-09 | -0.12837 | 0.00547  |
| 4.89E-06 | 0.159704 | 0.00053  | 0.234453 | 2.98E-07 | 0.206869 | 6.56E-06 | 0.386009 | 4.84E-18 |
| 0.82783  | -0.22615 | 7.89E-07 | -0.1004  | 0.03006  | -0.24779 | 5.79E-08 | -0.34536 | 1.58E-14 |
| 1.08E-06 | 0.255764 | 2.07E-08 | 0.088987 | 0.05464  | 0.221593 | 1.32E-06 | 0.392782 | 1.12E-18 |
| 0.00284  | -0.11137 | 0.01605  | 0.092211 | 0.04641  | -0.01417 | 0.76013  | -0.08603 | 0.06322  |
| 2.57E-06 | -0.00617 | 0.8942   | -0.18621 | 5.15E-05 | -0.04423 | 0.34026  | -0.12637 | 0.00625  |
| 1.71E-07 | 0.108999 | 0.01846  | 0.21718  | 2.16E-06 | 0.150989 | 0.00106  | 0.303443 | 2.11E-11 |

|          |          |          |          |          |          |          |          |          |
|----------|----------|----------|----------|----------|----------|----------|----------|----------|
| 0.13107  | 0.060291 | 0.1934   | -0.026   | 0.57523  | 0.094203 | 0.04187  | 0.156652 | 0.00068  |
| 1.98E-12 | -0.05688 | 0.21985  | -0.16459 | 0.00035  | -0.15505 | 0.00077  | -0.0795  | 0.08615  |
| 0.00028  | -0.06244 | 0.178    | -0.11454 | 0.01326  | -0.12123 | 0.00873  | -0.0883  | 0.05654  |
| 5.23E-05 | -0.03513 | 0.44884  | -0.05533 | 0.23272  | -0.03322 | 0.47394  | 0.008954 | 0.84698  |
| 0.01605  | 0.024607 | 0.59582  | 0.212643 | 3.55E-06 | 0.335265 | 9.90E-14 | 0.138269 | 0.00275  |
| 0.05071  | -0.18501 | 5.76E-05 | -0.05577 | 0.22899  | -0.18374 | 6.50E-05 | -0.27484 | 1.54E-09 |
| 3.76E-06 | -0.01504 | 0.74581  | 0.039502 | 0.39438  | -0.18423 | 6.20E-05 | -0.07773 | 0.09337  |
| 0.00581  | 0.037772 | 0.41543  | 0.048498 | 0.29563  | -0.06152 | 0.18449  | 0.095695 | 0.03872  |
| 0.044    | 0.179443 | 9.65E-05 | 0.101614 | 0.02811  | 0.066704 | 0.15009  | 0.242954 | 1.06E-07 |
| 0.31193  | -0.00142 | 0.97567  | 0.146992 | 0.00145  | 0.074265 | 0.10898  | 0.168496 | 0.00025  |
| 0.23238  | 0.139588 | 0.0025   | 0.148095 | 0.00133  | 0.056213 | 0.22533  | 0.274754 | 1.56E-09 |
| 4.57E-14 | 0.085382 | 0.06525  | 0.169808 | 0.00023  | -0.00943 | 0.83903  | 0.186581 | 4.97E-05 |
| 2.63E-07 | 0.069564 | 0.13334  | 0.113134 | 0.01444  | -0.05471 | 0.23796  | 0.127716 | 0.00571  |
| 0.00025  | 0.013857 | 0.7652   | -0.05177 | 0.26419  | -0.21827 | 1.92E-06 | -0.06884 | 0.13743  |
| 2.48E-13 | -0.03111 | 0.50243  | 0.23098  | 4.50E-07 | -0.03277 | 0.47992  | 0.090494 | 0.05066  |
| 1.24E-11 | -0.18511 | 5.71E-05 | -0.23327 | 3.43E-07 | -0.40453 | 8.17E-20 | -0.38978 | 2.15E-18 |
| 2.90E-09 | 0.064773 | 0.16227  | 0.187167 | 4.70E-05 | -0.05502 | 0.23535  | 0.097237 | 0.03567  |
| 6.23E-07 | 0.031315 | 0.49962  | 0.115461 | 0.01253  | 0.046345 | 0.31761  | 0.140211 | 0.00239  |
| 0.00014  | 0.134781 | 0.00352  | 0.083281 | 0.07217  | 0.084909 | 0.06676  | 0.296425 | 6.31E-11 |
| 0.32941  | -0.09775 | 0.0347   | -0.19459 | 2.29E-05 | -0.30847 | 9.42E-12 | -0.27761 | 1.04E-09 |
| 3.86E-08 | 0.105227 | 0.02295  | 0.338293 | 5.75E-14 | 0.172163 | 0.00019  | 0.312971 | 4.52E-12 |
| 1.62E-06 | 0.051928 | 0.26275  | -0.1048  | 0.02351  | -0.15311 | 0.0009   | -0.07085 | 0.12627  |
| 0.00029  | -0.07627 | 0.09971  | -0.05055 | 0.27568  | -0.17613 | 0.00013  | -0.10684 | 0.02093  |
| 0.17384  | 0.149105 | 0.00123  | 0.083764 | 0.07053  | 0.028654 | 0.53678  | 0.211956 | 3.82E-06 |
| 2.06E-11 | -0.08956 | 0.0531   | -0.04788 | 0.30183  | -0.22018 | 1.55E-06 | -0.20382 | 9.02E-06 |
| 2.45E-06 | -0.15052 | 0.0011   | -0.00661 | 0.88674  | -0.13984 | 0.00246  | -0.20617 | 7.06E-06 |
| 1.61E-20 | -0.14716 | 0.00143  | -0.07211 | 0.11969  | -0.09168 | 0.04768  | -0.28018 | 7.16E-10 |
| 0.17255  | -0.0131  | 0.7776   | -0.05332 | 0.25012  | -0.11959 | 0.00969  | -0.08401 | 0.0697   |
| 0.00028  | -0.07496 | 0.10569  | -0.01132 | 0.80725  | 0.051381 | 0.26781  | -0.05217 | 0.2605   |
| 7.46E-11 | 0.027908 | 0.54744  | 0.03505  | 0.44987  | -0.08589 | 0.06367  | 0.007411 | 0.8731   |
| 0.21131  | -0.05217 | 0.26048  | -0.05993 | 0.1961   | -0.03372 | 0.46725  | -0.01517 | 0.74366  |
| 0.2764   | 0.138281 | 0.00275  | 0.062172 | 0.17984  | -0.02291 | 0.62135  | 0.19828  | 1.59E-05 |
| 1.90E-08 | 0.08496  | 0.06659  | 0.097805 | 0.0346   | -0.03542 | 0.44503  | 0.160366 | 0.0005   |
| 0.04567  | 0.060595 | 0.19115  | 0.299589 | 3.86E-11 | 0.231128 | 4.42E-07 | 0.286285 | 2.93E-10 |
| 0.01025  | 0.066475 | 0.15149  | 0.121559 | 0.00855  | 0.12733  | 0.00586  | 0.187773 | 4.44E-05 |
| 1.76E-10 | 0.157807 | 0.00062  | -0.03108 | 0.50284  | 0.054471 | 0.24006  | 0.279413 | 8.01E-10 |
| 0.00011  | 0.099223 | 0.03205  | 0.146151 | 0.00154  | 0.103378 | 0.02548  | 0.25247  | 3.18E-08 |
| 0.86657  | 0.179364 | 9.73E-05 | -0.15105 | 0.00106  | -0.33469 | 1.10E-13 | -0.20142 | 1.15E-05 |
| 0.61213  | -0.03841 | 0.40757  | 0.073579 | 0.1123   | -0.01287 | 0.78145  | -0.01639 | 0.72381  |
| 0.00024  | 0.030955 | 0.50457  | 0.194707 | 2.27E-05 | 0.026823 | 0.56312  | 0.16548  | 0.00033  |
| 0.54253  | -0.07136 | 0.12356  | 0.122249 | 0.00818  | 0.00875  | 0.85042  | 0.049852 | 0.28233  |
| 6.87E-05 | 0.003348 | 0.94248  | -0.0265  | 0.56789  | -0.16604 | 0.00031  | -0.07267 | 0.11682  |
| 9.01E-15 | -0.06756 | 0.14488  | -0.01862 | 0.68818  | -0.12162 | 0.00852  | -0.10491 | 0.02338  |
| 3.62E-12 | 0.051697 | 0.26488  | 0.106718 | 0.02108  | 0.050095 | 0.27999  | 0.141296 | 0.00221  |
| 0.0017   | 0.136589 | 0.0031   | 0.114707 | 0.01312  | -0.02294 | 0.62103  | 0.175475 | 0.00014  |

|          |          |          |          |          |          |          |          |          |
|----------|----------|----------|----------|----------|----------|----------|----------|----------|
| 0.00027  | 0.012669 | 0.78481  | 0.149029 | 0.00124  | 0.015386 | 0.74017  | 0.127975 | 0.00561  |
| 2.15E-08 | 0.106879 | 0.02088  | 0.141174 | 0.00223  | 0.090265 | 0.05125  | 0.23583  | 2.53E-07 |
| 1.52E-15 | 0.110933 | 0.01647  | 0.1496   | 0.00118  | -0.01412 | 0.76083  | 0.139129 | 0.00258  |
| 2.06E-05 | 0.07086  | 0.12623  | 0.213883 | 3.11E-06 | 0.156937 | 0.00067  | 0.216762 | 2.27E-06 |
| 0.11272  | -0.13965 | 0.00249  | 0.056608 | 0.22208  | -0.13347 | 0.00386  | -0.07952 | 0.08605  |
| 0.01462  | 0.035001 | 0.45051  | 0.112922 | 0.01462  | 0.060385 | 0.1927   | 0.130804 | 0.00464  |
| 0.00194  | 0.051797 | 0.26395  | 0.02539  | 0.58418  | -0.04466 | 0.33555  | 0.094904 | 0.04036  |
| 0.20103  | 0.149595 | 0.00119  | -0.03447 | 0.4574   | -0.02421 | 0.60184  | 0.171422 | 0.0002   |
| 0.0077   | -0.11107 | 0.01634  | 0.009191 | 0.84297  | -0.25613 | 1.98E-08 | -0.18366 | 6.55E-05 |
| 0.20553  | 0.118999 | 0.01006  | 0.391379 | 1.52E-18 | 0.211261 | 4.12E-06 | 0.346677 | 1.24E-14 |
| 0.00242  | 0.193762 | 2.49E-05 | 0.268626 | 3.67E-09 | 0.244655 | 8.58E-08 | 0.435013 | 5.54E-23 |
| 0.12889  | 0.07569  | 0.10234  | 0.037631 | 0.41719  | -0.0938  | 0.04276  | 0.108645 | 0.01885  |
| 0.00506  | -0.0717  | 0.12181  | -0.08987 | 0.05228  | -0.27364 | 1.82E-09 | -0.19666 | 1.87E-05 |
| 1.86E-06 | 0.189351 | 3.82E-05 | 0.198434 | 1.56E-05 | 0.207768 | 5.97E-06 | 0.381686 | 1.21E-17 |
| 0.55765  | 0.137001 | 0.00301  | 0.112809 | 0.01472  | 0.013243 | 0.77531  | 0.168369 | 0.00026  |
| 0.48917  | 0.059946 | 0.19597  | 0.110517 | 0.01688  | 0.000223 | 0.99617  | 0.099712 | 0.03121  |
| 1.47E-14 | 0.197598 | 1.70E-05 | 0.225652 | 8.35E-07 | 0.134695 | 0.00354  | 0.335478 | 9.53E-14 |
| 3.48E-06 | -0.1254  | 0.00666  | -0.20864 | 5.45E-06 | -0.29009 | 1.66E-10 | -0.3257  | 5.30E-13 |
| 1.05E-10 | 0.090738 | 0.05004  | 0.192118 | 2.92E-05 | 0.042099 | 0.36402  | 0.149884 | 0.00116  |
| 4.42E-07 | -0.03416 | 0.46142  | 0.244149 | 9.14E-08 | 0.12296  | 0.00781  | 0.18043  | 8.82E-05 |
| 5.81E-06 | 0.143343 | 0.0019   | 0.225051 | 8.94E-07 | 0.132285 | 0.00419  | 0.332108 | 1.73E-13 |
| 3.02E-07 | 0.064205 | 0.166    | 0.208798 | 5.36E-06 | 0.025987 | 0.57537  | 0.172093 | 0.00019  |
| 1.91E-07 | 0.009341 | 0.84044  | 0.092022 | 0.04687  | 0.011239 | 0.80861  | 0.092008 | 0.0469   |
| 1.51E-10 | -0.02816 | 0.54376  | 0.17142  | 0.0002   | 0.022475 | 0.62806  | 0.11927  | 0.00989  |
| 0.49195  | -0.00454 | 0.92213  | 0.016794 | 0.71738  | -0.19031 | 3.48E-05 | -0.11012 | 0.01728  |
| 1.05E-13 | -0.01639 | 0.72387  | 0.076609 | 0.09822  | -0.1052  | 0.02299  | -0.00113 | 0.98049  |
| 0.05153  | 0.061977 | 0.18121  | 0.099981 | 0.03075  | 0.15856  | 0.00058  | 0.2631   | 7.81E-09 |
| 7.16E-15 | 0.162477 | 0.00042  | 0.082235 | 0.07584  | 0.060941 | 0.18863  | 0.283189 | 4.62E-10 |
| 7.99E-08 | 0.053898 | 0.24504  | 0.104032 | 0.02456  | 0.00145  | 0.97507  | 0.15889  | 0.00057  |
| 0.00265  | -0.01967 | 0.6716   | 0.03837  | 0.40808  | -0.072   | 0.12026  | -0.03492 | 0.45151  |
| 2.11E-22 | -0.04315 | 0.35219  | -0.09417 | 0.04194  | -0.15933 | 0.00055  | -0.10453 | 0.02388  |
| 0.13767  | -0.02564 | 0.5805   | -0.05043 | 0.27683  | -0.14793 | 0.00135  | -0.00838 | 0.85668  |
| 8.31E-09 | 0.088423 | 0.0562   | 0.135977 | 0.00324  | 0.135076 | 0.00345  | 0.26819  | 3.90E-09 |
| 0.36075  | 0.146676 | 0.00148  | 0.216306 | 2.38E-06 | 0.3067   | 1.25E-11 | 0.302351 | 2.50E-11 |
| 0.1216   | -0.14438 | 0.00176  | 0.042862 | 0.35538  | -0.13955 | 0.00251  | -0.16987 | 0.00023  |
| 0.02273  | 0.02569  | 0.57974  | 0.200449 | 1.27E-05 | 0.006109 | 0.89525  | 0.094717 | 0.04076  |
| 5.56E-07 | -0.01071 | 0.81739  | -0.04595 | 0.32173  | -0.16377 | 0.00038  | -0.10926 | 0.01818  |
| 0.78924  | -0.06862 | 0.13872  | -0.19155 | 3.09E-05 | -0.0896  | 0.05301  | -0.19215 | 2.91E-05 |
| 0.00021  | -0.08363 | 0.07098  | -0.14708 | 0.00144  | -0.03872 | 0.40377  | -0.12094 | 0.00889  |
| 0.00162  | 0.155912 | 0.00072  | 0.094667 | 0.04087  | 0.031279 | 0.50012  | 0.20385  | 8.99E-06 |
| 1.37E-16 | -0.01521 | 0.74298  | -0.02707 | 0.55951  | -0.14112 | 0.00224  | -0.05608 | 0.22639  |
| 2.47E-14 | 0.043706 | 0.34598  | 0.221894 | 1.28E-06 | 0.020967 | 0.65131  | 0.135677 | 0.00331  |
| 0.00462  | 0.034355 | 0.45891  | 0.098953 | 0.03252  | 0.195953 | 2.00E-05 | 0.06937  | 0.13442  |
| 0.00022  | 0.139458 | 0.00252  | 0.01103  | 0.81209  | 0.025708 | 0.57947  | 0.136128 | 0.0032   |
| 6.07E-05 | 0.021646 | 0.64081  | -0.08762 | 0.05849  | -0.21035 | 4.54E-06 | -0.04034 | 0.38445  |

|          |          |          |          |          |          |          |          |          |
|----------|----------|----------|----------|----------|----------|----------|----------|----------|
| 5.77E-10 | 0.03995  | 0.38905  | 0.141683 | 0.00215  | -0.0005  | 0.99146  | 0.1372   | 0.00297  |
| 9.59E-05 | 0.061628 | 0.18369  | 0.151052 | 0.00106  | 0.022467 | 0.62819  | 0.126246 | 0.0063   |
| 0.00898  | -0.00256 | 0.95604  | -0.03235 | 0.48553  | -0.0193  | 0.67739  | -0.08481 | 0.06708  |
| 9.22E-14 | -0.13125 | 0.0045   | -0.09289 | 0.04482  | -0.29409 | 9.04E-11 | -0.26789 | 4.07E-09 |
| 1.32E-06 | 0.1307   | 0.00467  | 0.13892  | 0.00262  | 0.041735 | 0.36819  | 0.225126 | 8.87E-07 |
| 6.44E-07 | -0.00146 | 0.97488  | -0.04087 | 0.37826  | -0.00587 | 0.89926  | -0.03764 | 0.41709  |
| 0.2398   | 0.153751 | 0.00086  | -0.16099 | 0.00048  | -0.10419 | 0.02434  | 0.083087 | 0.07284  |
| 1.92E-06 | 0.032472 | 0.48391  | -0.09263 | 0.04543  | -0.08856 | 0.05582  | 0.036839 | 0.42706  |
| 0.00037  | 0.102058 | 0.02743  | -0.02452 | 0.59713  | -0.06329 | 0.17212  | 0.101731 | 0.02793  |
| 2.49E-05 | -0.01347 | 0.77155  | 0.062697 | 0.17618  | -0.0614  | 0.18535  | 0.016934 | 0.71512  |
| 0.09248  | 0.049707 | 0.28373  | 0.033846 | 0.4656   | -0.04047 | 0.3829   | 0.004424 | 0.92404  |
| 0.98015  | 0.016983 | 0.71433  | 0.112001 | 0.01546  | -0.00525 | 0.90995  | 0.03328  | 0.47309  |
| 3.22E-07 | 0.023958 | 0.60555  | 0.082303 | 0.0756   | -0.05415 | 0.24285  | 0.040554 | 0.3819   |
| 4.23E-05 | 0.005625 | 0.90352  | 0.128912 | 0.00527  | 0.0351   | 0.44922  | 0.114529 | 0.01327  |
| 0.14044  | 0.028742 | 0.53554  | 0.051236 | 0.26917  | -0.02409 | 0.60357  | 0.099035 | 0.03238  |
| 0.0041   | -0.08296 | 0.07329  | -0.00885 | 0.84871  | -0.19003 | 3.57E-05 | -0.13368 | 0.0038   |
| 3.04E-20 | 0.120414 | 0.0092   | 0.15461  | 0.0008   | 0.075399 | 0.10367  | 0.255834 | 2.05E-08 |
| 0.00039  | 0.085785 | 0.06399  | 0.262226 | 8.79E-09 | 0.13252  | 0.00412  | 0.217194 | 2.16E-06 |
| 0.40022  | 0.112746 | 0.01478  | 0.121299 | 0.00869  | 0.147646 | 0.00138  | 0.24963  | 4.58E-08 |
| 0.02857  | 0.2031   | 9.71E-06 | 0.076653 | 0.09803  | 0.302108 | 2.60E-11 | 0.400751 | 1.92E-19 |
| 0.00254  | -0.00641 | 0.89006  | -0.17613 | 0.00013  | -0.07959 | 0.08577  | -0.04091 | 0.37779  |
| 0.00117  | 0.098109 | 0.03404  | 0.122959 | 0.00781  | 0.07504  | 0.10533  | 0.195998 | 1.99E-05 |
| 0.4766   | 0.00928  | 0.84147  | 0.052843 | 0.25442  | 0.020326 | 0.6613   | -0.04499 | 0.33203  |
| 0.0006   | 0.239117 | 1.70E-07 | 0.243538 | 9.86E-08 | 0.203142 | 9.67E-06 | 0.392757 | 1.13E-18 |
| 7.46E-10 | 0.006246 | 0.89292  | 0.170389 | 0.00022  | 0.135233 | 0.00341  | 0.169785 | 0.00023  |
| 1.11E-12 | -0.05221 | 0.26017  | 0.066789 | 0.14957  | 0.060953 | 0.18855  | -0.06004 | 0.19529  |
| 0.00022  | -0.15045 | 0.00111  | -0.01292 | 0.78069  | -0.07753 | 0.09424  | -0.10644 | 0.02141  |
| 0.00091  | -0.0532  | 0.25121  | 0.029925 | 0.51887  | -0.08996 | 0.05205  | -0.07461 | 0.10732  |
| 7.81E-10 | 0.094139 | 0.04201  | 0.193827 | 2.47E-05 | 0.003451 | 0.94071  | 0.178679 | 0.0001   |
| 1.69E-06 | 0.138975 | 0.00261  | 0.040919 | 0.37763  | 0.014162 | 0.76018  | 0.201232 | 1.18E-05 |
| 0.14086  | -0.05951 | 0.19923  | -0.05095 | 0.27181  | -0.21611 | 2.44E-06 | -0.24349 | 9.92E-08 |
| 0.25527  | 0.031151 | 0.50188  | -0.0086  | 0.8529   | -0.09226 | 0.0463   | 0.031689 | 0.49451  |
| 6.83E-14 | 0.12348  | 0.00755  | -0.08212 | 0.07625  | -0.0323  | 0.48627  | 0.148233 | 0.00132  |
| 2.37E-07 | 0.178196 | 0.00011  | 0.159281 | 0.00055  | 0.196881 | 1.83E-05 | 0.385937 | 4.91E-18 |
| 1.09E-10 | -0.05964 | 0.19823  | -0.04428 | 0.33963  | -0.22633 | 7.73E-07 | -0.13959 | 0.0025   |
| 0.90124  | -0.09427 | 0.04172  | -0.24059 | 1.42E-07 | -0.36049 | 8.89E-16 | -0.30766 | 1.07E-11 |
| 7.06E-07 | 0.089399 | 0.05353  | -0.06491 | 0.16137  | -0.17951 | 9.60E-05 | -0.00354 | 0.93922  |
| 1.83E-15 | 0.048411 | 0.29649  | 0.075698 | 0.1023   | -0.0821  | 0.07634  | 0.075212 | 0.10453  |
| 0.00056  | -0.00279 | 0.9521   | 0.138217 | 0.00276  | -0.00452 | 0.92246  | 0.080525 | 0.08215  |
| 0.00461  | 0.038584 | 0.40548  | -0.01215 | 0.79346  | -0.07571 | 0.10224  | 0.017331 | 0.70874  |
| 0.00026  | -0.1564  | 0.00069  | 0.006675 | 0.88561  | -0.17391 | 0.00016  | -0.18005 | 9.13E-05 |
| 4.26E-05 | 0.057037 | 0.21859  | 0.058338 | 0.20825  | 0.182035 | 7.61E-05 | 0.164451 | 0.00036  |
| 0.00342  | 0.016243 | 0.72627  | 0.17383  | 0.00016  | 0.109487 | 0.01794  | 0.103296 | 0.0256   |
| 0.00031  | 0.039156 | 0.39855  | -0.00966 | 0.83501  | 0.033776 | 0.46651  | 0.046194 | 0.3192   |
| 0.36943  | -0.2447  | 8.53E-08 | -0.15316 | 0.0009   | -0.08466 | 0.06756  | -0.28317 | 4.64E-10 |

|          |          |          |          |          |          |          |          |          |
|----------|----------|----------|----------|----------|----------|----------|----------|----------|
| 0.4552   | 0.068605 | 0.13878  | 0.065643 | 0.1567   | 0.096488 | 0.03712  | 0.150233 | 0.00113  |
| 1.48E-06 | 0.051616 | 0.26563  | -0.13958 | 0.0025   | -0.03974 | 0.39156  | 0.067309 | 0.14642  |
| 0.22965  | -0.01524 | 0.74249  | 0.088901 | 0.05488  | -0.0822  | 0.07596  | -0.03676 | 0.42801  |
| 8.17E-12 | -0.00756 | 0.87052  | 0.057158 | 0.21761  | -0.16327 | 0.0004   | -0.06483 | 0.16193  |
| 0.00014  | 0.098185 | 0.0339   | 0.067351 | 0.14617  | 0.062835 | 0.17524  | 0.20874  | 5.39E-06 |
| 0.0003   | 0.157421 | 0.00064  | 0.147759 | 0.00136  | 0.079039 | 0.08798  | 0.266905 | 4.66E-09 |
| 9.14E-05 | 0.075954 | 0.10114  | 0.355451 | 2.36E-15 | 0.148233 | 0.00132  | 0.293482 | 9.92E-11 |
| 0.32489  | -0.00775 | 0.86737  | 0.044606 | 0.33613  | -0.06084 | 0.18936  | 0.049448 | 0.28626  |
| 8.43E-06 | -0.02828 | 0.54216  | 0.178675 | 0.0001   | 0.021052 | 0.64999  | 0.075095 | 0.10507  |
| 4.37E-12 | 0.042929 | 0.35463  | 0.086448 | 0.06195  | 0.025861 | 0.57721  | 0.12719  | 0.00592  |
| 0.11267  | -0.05541 | 0.23201  | 0.079339 | 0.08678  | 0.037086 | 0.42397  | 0.057857 | 0.21203  |
| 2.08E-20 | -0.00015 | 0.99749  | -0.02439 | 0.59908  | -0.15592 | 0.00072  | -0.08363 | 0.071    |
| 1.29E-15 | 0.021452 | 0.64379  | 0.018683 | 0.68718  | -0.1102  | 0.0172   | 0.029152 | 0.52972  |
| 5.86E-08 | 0.006855 | 0.88254  | 0.086579 | 0.06156  | -0.01098 | 0.8129   | 0.08792  | 0.05762  |
| 1.58E-05 | -0.17459 | 0.00015  | -0.14285 | 0.00197  | -0.32322 | 8.12E-13 | -0.28224 | 5.31E-10 |
| 0.13189  | -0.06415 | 0.16638  | -0.12208 | 0.00827  | -0.25589 | 2.04E-08 | -0.17545 | 0.00014  |
| 5.45E-15 | -0.0121  | 0.79427  | -0.0754  | 0.10364  | -0.18296 | 6.98E-05 | -0.03374 | 0.46705  |
| 0.00086  | -0.03469 | 0.45457  | -0.18706 | 4.75E-05 | -0.25776 | 1.59E-08 | -0.17129 | 0.0002   |
| 0.00146  | 0.011553 | 0.80336  | -0.02232 | 0.63048  | -0.07355 | 0.11246  | 0.01633  | 0.72487  |
| 3.78E-13 | 0.037041 | 0.42453  | -0.10936 | 0.01808  | -0.21487 | 2.79E-06 | -0.06389 | 0.16811  |
| 0.66855  | -0.12169 | 0.00848  | -0.29675 | 6.01E-11 | -0.31422 | 3.68E-12 | -0.28401 | 4.10E-10 |
| 3.20E-07 | -0.08168 | 0.07784  | -0.23643 | 2.35E-07 | -0.36132 | 7.56E-16 | -0.2594  | 1.28E-08 |
| 2.74E-08 | -0.00474 | 0.91863  | 0.060668 | 0.19062  | -0.05394 | 0.24469  | 0.083805 | 0.07039  |
| 0.00158  | 0.239913 | 1.54E-07 | 0.049931 | 0.28157  | -0.03664 | 0.42961  | 0.228185 | 6.23E-07 |
| 0.03809  | 0.083696 | 0.07076  | 0.069979 | 0.13103  | 0.003821 | 0.93436  | 0.133372 | 0.00388  |
| 0.00194  | -0.11903 | 0.01004  | -0.05032 | 0.27782  | -0.14986 | 0.00116  | -0.14176 | 0.00213  |
| 0.28687  | -0.02318 | 0.6174   | -0.05134 | 0.26824  | -0.14772 | 0.00137  | -0.10504 | 0.02319  |
| 3.51E-12 | 0.068648 | 0.13853  | 0.007344 | 0.87424  | -0.09788 | 0.03446  | 0.074265 | 0.10898  |
| 0.45594  | 0.09127  | 0.0487   | -0.02724 | 0.55702  | 0.007213 | 0.87646  | 0.117194 | 0.01126  |
| 2.72E-19 | -0.06976 | 0.13226  | -0.15194 | 0.00099  | -0.24667 | 6.67E-08 | -0.18584 | 5.33E-05 |
| 4.71E-09 | 0.031836 | 0.49252  | 0.187022 | 4.77E-05 | 0.013355 | 0.77347  | 0.132611 | 0.00409  |
| 1.52E-06 | 0.131938 | 0.00429  | -0.00916 | 0.84351  | 0.039174 | 0.39833  | 0.149045 | 0.00124  |
| 2.54E-06 | 0.115658 | 0.01238  | 0.25288  | 3.02E-08 | 0.143533 | 0.00187  | 0.293622 | 9.71E-11 |
| 6.15E-18 | 0.045979 | 0.32145  | -0.00331 | 0.94313  | -0.02123 | 0.64729  | 0.075537 | 0.10303  |
| 0.07687  | -0.09708 | 0.03597  | -0.13856 | 0.00269  | -0.26192 | 9.16E-09 | -0.21477 | 2.82E-06 |
| 0.31093  | 0.133254 | 0.00392  | 0.071664 | 0.12198  | 0.055823 | 0.22857  | 0.177645 | 0.00011  |
| 1.93E-08 | -0.04078 | 0.3792   | 0.322405 | 9.33E-13 | 0.00159  | 0.97266  | 0.050634 | 0.27484  |
| 0.15568  | -0.00759 | 0.87011  | -0.03327 | 0.47329  | -0.03675 | 0.42814  | -0.04537 | 0.32791  |
| 2.03E-16 | -0.03111 | 0.50242  | -0.00466 | 0.92006  | -0.15037 | 0.00112  | -0.03798 | 0.41291  |
| 1.33E-14 | 0.210792 | 4.33E-06 | 0.164058 | 0.00037  | 0.061693 | 0.18322  | 0.285774 | 3.16E-10 |
| 4.84E-07 | -0.02211 | 0.63361  | -0.1159  | 0.01219  | -0.21244 | 3.63E-06 | -0.11742 | 0.01111  |
| 1.11E-10 | 0.190234 | 3.51E-05 | -0.0382  | 0.41011  | -0.03343 | 0.47112  | 0.19139  | 3.14E-05 |
| 0.20841  | -0.19856 | 1.54E-05 | -0.16838 | 0.00026  | -0.2147  | 2.84E-06 | -0.39674 | 4.69E-19 |
| 0.00423  | 0.015813 | 0.73323  | 0.033059 | 0.47604  | -0.11584 | 0.01224  | -0.01514 | 0.74412  |
| 2.32E-14 | 0.122223 | 0.00819  | 0.097949 | 0.03434  | 0.019781 | 0.66984  | 0.225473 | 8.52E-07 |



|          |          |          |          |          |          |          |          |          |
|----------|----------|----------|----------|----------|----------|----------|----------|----------|
| 1.07E-12 | 0.064696 | 0.16277  | 0.160525 | 0.0005   | 0.099239 | 0.03202  | 0.136489 | 0.00312  |
| 0.12209  | -0.12622 | 0.00631  | -0.10302 | 0.026    | -0.23303 | 3.53E-07 | -0.18715 | 4.71E-05 |
| 0.00091  | 0.016331 | 0.72485  | -0.06838 | 0.14011  | -0.21062 | 4.41E-06 | -0.03449 | 0.45715  |
| 9.30E-05 | 0.044064 | 0.34204  | 0.080685 | 0.08155  | 0.120189 | 0.00933  | 0.170291 | 0.00022  |
| 0.03186  | 0.062683 | 0.17628  | -0.04792 | 0.30146  | -0.1091  | 0.01836  | 0.023747 | 0.60874  |
| 1.46E-08 | -0.08862 | 0.05566  | 0.041953 | 0.36569  | -0.1529  | 0.00092  | -0.07907 | 0.08787  |
| 0.01659  | -0.00435 | 0.92537  | 0.061721 | 0.18303  | 0.009759 | 0.83341  | 0.091573 | 0.04795  |
| 0.00831  | 0.133185 | 0.00394  | 0.087651 | 0.05839  | 0.100879 | 0.02928  | 0.187735 | 4.46E-05 |
| 2.49E-11 | 0.086064 | 0.06312  | 0.196681 | 1.86E-05 | 0.064661 | 0.163    | 0.249077 | 4.91E-08 |
| 0.8949   | -0.06076 | 0.18999  | 0.247261 | 6.19E-08 | 0.110285 | 0.01712  | 0.138364 | 0.00273  |
| 0.01686  | 0.171833 | 0.00019  | 0.202489 | 1.03E-05 | 0.181981 | 7.65E-05 | 0.329133 | 2.92E-13 |
| 1.82E-06 | -0.03381 | 0.46613  | -0.16494 | 0.00034  | -0.2236  | 1.06E-06 | -0.17046 | 0.00021  |
| 0.12694  | 0.152828 | 0.00092  | 0.244801 | 8.43E-08 | 0.160586 | 0.00049  | 0.327738 | 3.73E-13 |
| 1.31E-13 | -0.06347 | 0.17087  | 0.069026 | 0.13637  | 0.142276 | 0.00206  | -0.00715 | 0.87747  |
| 0.97159  | -0.13656 | 0.00311  | -0.0393  | 0.39678  | -0.15512 | 0.00077  | -0.13459 | 0.00357  |
| 1.23E-08 | 0.250308 | 4.20E-08 | 0.020656 | 0.65615  | 0.13988  | 0.00245  | 0.347576 | 1.05E-14 |
| 7.87E-06 | -0.00223 | 0.96164  | -0.13145 | 0.00444  | -0.21842 | 1.89E-06 | -0.12883 | 0.0053   |
| 4.86E-11 | -0.10478 | 0.02355  | 0.020957 | 0.65146  | -0.13323 | 0.00392  | -0.10787 | 0.01972  |
| 0.50305  | -0.1948  | 2.25E-05 | 0.018799 | 0.68534  | -0.28579 | 3.15E-10 | -0.25864 | 1.42E-08 |
| 8.25E-07 | 0.031171 | 0.5016   | -0.06174 | 0.18288  | -0.0182  | 0.69489  | 0.06209  | 0.18042  |
| 0.69025  | -0.11148 | 0.01595  | -0.03121 | 0.50104  | -0.07698 | 0.0966   | -0.06038 | 0.19271  |
| 2.45E-06 | -0.03543 | 0.44496  | 0.009316 | 0.84086  | -0.09919 | 0.0321   | -0.02562 | 0.58076  |
| 2.36E-10 | 0.054809 | 0.23715  | -0.00527 | 0.90965  | -0.08124 | 0.07945  | 0.093886 | 0.04257  |
| 0.01109  | -0.01764 | 0.70385  | -0.08063 | 0.08174  | -0.19575 | 2.04E-05 | -0.06832 | 0.14042  |
| 2.15E-07 | 0.120375 | 0.00922  | 0.082337 | 0.07547  | -0.00434 | 0.92542  | 0.135865 | 0.00326  |
| 0.10469  | -0.05759 | 0.21412  | -0.03344 | 0.47099  | -0.00238 | 0.95917  | -0.07246 | 0.11786  |
| 0.58061  | -0.08485 | 0.06695  | -0.04754 | 0.3053   | 0.016396 | 0.7238   | -0.11089 | 0.01652  |
| 2.18E-22 | -0.03985 | 0.39027  | -0.02628 | 0.57104  | 0.184472 | 6.07E-05 | 0.03048  | 0.51114  |
| 1.08E-10 | -0.0696  | 0.13311  | 0.002034 | 0.96503  | -0.21664 | 2.30E-06 | -0.14335 | 0.0019   |
| 0.03784  | -0.01138 | 0.80625  | 0.065165 | 0.15974  | 0.049403 | 0.2867   | 0.108208 | 0.01934  |
| 3.84E-05 | 0.117359 | 0.01114  | 0.141818 | 0.00213  | 0.210413 | 4.51E-06 | 0.337516 | 6.61E-14 |
| 0.00036  | 0.01418  | 0.75988  | -0.15465 | 0.0008   | -0.08577 | 0.06403  | 0.010803 | 0.81588  |
| 1.35E-06 | 0.129398 | 0.0051   | 0.171572 | 0.00019  | 0.029394 | 0.52632  | 0.211997 | 3.81E-06 |
| 3.85E-08 | 0.238489 | 1.83E-07 | 0.184957 | 5.80E-05 | 0.018151 | 0.69563  | 0.182011 | 7.63E-05 |
| 0.00156  | -0.01314 | 0.777    | 0.08354  | 0.07129  | -0.08745 | 0.05898  | 0.060349 | 0.19297  |
| 1.25E-07 | -0.01785 | 0.70051  | -0.05069 | 0.27431  | -0.14196 | 0.0021   | -0.08286 | 0.07363  |
| 1.17E-06 | 0.091266 | 0.04871  | 0.061712 | 0.18309  | 0.003944 | 0.93226  | 0.187674 | 4.48E-05 |
| 2.14E-25 | 0.067374 | 0.14603  | 0.100437 | 0.03     | -0.07674 | 0.09765  | 0.068184 | 0.14123  |
| 2.57E-12 | 0.04717  | 0.30907  | 0.021831 | 0.63796  | -0.00954 | 0.83712  | 0.106606 | 0.02121  |
| 1.71E-06 | -0.03324 | 0.47366  | -0.13042 | 0.00476  | -0.21651 | 2.33E-06 | -0.16899 | 0.00024  |
| 0.92625  | -0.06912 | 0.13581  | 0.195227 | 2.15E-05 | -0.00426 | 0.92688  | 1.46E-05 | 0.99975  |
| 0.66407  | -0.14859 | 0.00128  | -0.09615 | 0.0378   | -0.35474 | 2.70E-15 | -0.23094 | 4.52E-07 |
| 0.01356  | -0.06764 | 0.14443  | -0.09267 | 0.04534  | -0.18585 | 5.33E-05 | -0.1261  | 0.00636  |
| 0.02313  | 0.02863  | 0.53713  | 0.057237 | 0.21698  | 0.03274  | 0.48031  | 0.079376 | 0.08663  |
| 0.00038  | -0.10383 | 0.02484  | -0.05256 | 0.25699  | -0.17547 | 0.00014  | -0.18982 | 3.65E-05 |

|          |          |          |          |          |          |          |          |          |
|----------|----------|----------|----------|----------|----------|----------|----------|----------|
| 0.08717  | 0.068401 | 0.13996  | 0.110729 | 0.01667  | 0.032157 | 0.48816  | 0.165541 | 0.00033  |
| 5.55E-08 | 0.023005 | 0.61999  | 0.075036 | 0.10535  | -0.124   | 0.0073   | 0.02426  | 0.60101  |
| 0.00237  | -0.13849 | 0.00271  | -0.14265 | 0.002    | -0.12875 | 0.00533  | -0.35376 | 3.26E-15 |
| 0.03831  | -0.03545 | 0.44468  | -0.05975 | 0.19742  | -0.31196 | 5.33E-12 | -0.17329 | 0.00017  |
| 4.94E-19 | 0.044262 | 0.33987  | 0.030346 | 0.513    | -0.07203 | 0.12009  | 0.099295 | 0.03193  |
| 3.04E-06 | 0.020983 | 0.65106  | 0.036758 | 0.42807  | -0.09459 | 0.04103  | 0.005832 | 0.89997  |
| 4.22E-05 | 0.005031 | 0.91365  | 0.028193 | 0.54335  | -0.10407 | 0.02451  | 0.036036 | 0.43722  |
| 0.91459  | 0.124871 | 0.0069   | 0.176383 | 0.00013  | 0.125207 | 0.00675  | 0.276433 | 1.23E-09 |
| 0.00189  | -0.04504 | 0.33142  | -0.10729 | 0.02039  | -0.33113 | 2.06E-13 | -0.2513  | 3.70E-08 |
| 1.50E-21 | 0.065391 | 0.1583   | 0.119026 | 0.01004  | -0.01805 | 0.69721  | 0.136867 | 0.00304  |
| 7.32E-07 | 0.010233 | 0.82544  | 0.119211 | 0.00992  | -0.09552 | 0.03908  | 0.010341 | 0.82364  |
| 1.72E-11 | 0.071946 | 0.12052  | 0.083069 | 0.0729   | 0.104228 | 0.02429  | 0.146805 | 0.00147  |
| 8.80E-13 | 0.029792 | 0.52072  | -0.05351 | 0.24845  | -0.11716 | 0.01129  | -0.00527 | 0.90958  |
| 0.0323   | 0.215519 | 2.60E-06 | 0.0859   | 0.06363  | 0.179777 | 9.37E-05 | 0.329078 | 2.95E-13 |
| 1.44E-17 | 0.154772 | 0.00079  | 0.233286 | 3.43E-07 | 0.102982 | 0.02605  | 0.267905 | 4.06E-09 |
| 3.81E-05 | 0.003599 | 0.93817  | 0.077746 | 0.09332  | -0.00185 | 0.96812  | 0.105162 | 0.02304  |
| 0.00205  | 0.109552 | 0.01787  | -0.00459 | 0.92117  | -0.02642 | 0.56902  | 0.15212  | 0.00097  |
| 0.88092  | 0.009939 | 0.83038  | -0.07504 | 0.10534  | -0.10776 | 0.01984  | -0.01887 | 0.68419  |
| 3.13E-05 | 0.000418 | 0.9928   | -0.06292 | 0.17463  | -0.12171 | 0.00846  | -0.0211  | 0.64928  |
| 0.09746  | 0.164767 | 0.00035  | 0.13213  | 0.00423  | 0.117868 | 0.0108   | 0.312539 | 4.85E-12 |
| 1.74E-12 | 0.013399 | 0.77275  | 0.076002 | 0.10093  | -0.07263 | 0.117    | 0.007125 | 0.87796  |
| 0.02189  | -0.15117 | 0.00105  | -0.08666 | 0.06131  | -0.28947 | 1.82E-10 | -0.26644 | 4.96E-09 |
| 1.10E-10 | 0.074879 | 0.10607  | -0.02912 | 0.53022  | -0.05406 | 0.24359  | 0.073159 | 0.11437  |
| 8.30E-12 | -0.04955 | 0.28527  | -0.12064 | 0.00906  | -0.3158  | 2.83E-12 | -0.23355 | 3.32E-07 |
| 2.39E-11 | 0.01966  | 0.67175  | 0.056611 | 0.22206  | -0.10147 | 0.02834  | 0.002914 | 0.94992  |
| 0.08025  | -0.07029 | 0.1293   | -0.13728 | 0.00295  | -0.18063 | 8.66E-05 | -0.17759 | 0.00011  |
| 0.03764  | -0.17518 | 0.00014  | -0.16556 | 0.00033  | -0.24558 | 7.64E-08 | -0.32174 | 1.04E-12 |
| 5.00E-06 | -0.05434 | 0.24118  | 0.221892 | 1.28E-06 | -0.06929 | 0.13489  | -0.02932 | 0.52731  |
| 6.96E-11 | -0.07133 | 0.12375  | -0.04309 | 0.35288  | -0.18348 | 6.65E-05 | -0.15403 | 0.00084  |
| 1.86E-08 | 0.118671 | 0.01027  | -0.03423 | 0.4606   | 0.011413 | 0.80569  | 0.160965 | 0.00048  |
| 0.00331  | 0.049995 | 0.28095  | -0.07482 | 0.10638  | -0.12835 | 0.00547  | 0.038582 | 0.4055   |
| 0.00029  | 0.005901 | 0.8988   | 0.145332 | 0.00164  | 0.053148 | 0.25168  | 0.103499 | 0.02531  |
| 1.51E-11 | -0.05527 | 0.23325  | 0.001383 | 0.97622  | -0.17941 | 9.68E-05 | -0.19171 | 3.04E-05 |
| 0.04159  | 0.042965 | 0.35422  | 0.134477 | 0.0036   | 0.107088 | 0.02063  | 0.240385 | 1.46E-07 |
| 0.00758  | 0.054203 | 0.24238  | -0.01925 | 0.67828  | 0.015967 | 0.73074  | 0.102284 | 0.02709  |
| 0.74233  | 0.102145 | 0.0273   | 0.089913 | 0.05217  | 0.036272 | 0.43421  | 0.18744  | 4.58E-05 |
| 1.63E-14 | 0.199683 | 1.38E-05 | 0.087599 | 0.05855  | -0.00214 | 0.96324  | 0.256275 | 1.94E-08 |
| 0.49818  | 0.109554 | 0.01787  | 0.211204 | 4.15E-06 | 0.061131 | 0.18726  | 0.247726 | 5.83E-08 |
| 1.08E-09 | 0.015432 | 0.73942  | 0.002901 | 0.95015  | -0.08875 | 0.05528  | -0.00613 | 0.89494  |
| 2.73E-12 | 0.116312 | 0.01189  | 0.067326 | 0.14631  | 0.023696 | 0.60951  | 0.201798 | 1.11E-05 |
| 1.96E-16 | 0.058401 | 0.20776  | -0.06075 | 0.19002  | -0.11479 | 0.01306  | 0.065091 | 0.16022  |
| 3.08E-13 | 0.111509 | 0.01592  | 0.146796 | 0.00147  | 0.065329 | 0.15869  | 0.199207 | 1.44E-05 |
| 3.56E-05 | -0.08303 | 0.07305  | -0.09912 | 0.03222  | -0.13723 | 0.00296  | -0.1311  | 0.00454  |
| 4.96E-11 | -0.00776 | 0.86722  | -0.04782 | 0.3024   | -0.1342  | 0.00367  | -0.07974 | 0.08519  |
| 5.34E-07 | -0.06753 | 0.14512  | -0.11723 | 0.01124  | -0.3107  | 6.56E-12 | -0.23335 | 3.40E-07 |

|          |          |          |           |          |          |          |          |          |
|----------|----------|----------|-----------|----------|----------|----------|----------|----------|
| 5.47E-06 | 0.082109 | 0.07629  | 0.165771  | 0.00032  | 0.120724 | 0.00902  | 0.258918 | 1.37E-08 |
| 5.85E-08 | -0.04558 | 0.32573  | 0.092593  | 0.04551  | -0.12944 | 0.00509  | -0.05343 | 0.24916  |
| 4.43E-08 | -0.06585 | 0.1554   | 0.011726  | 0.80048  | -0.18037 | 8.87E-05 | -0.11021 | 0.01719  |
| 2.94E-12 | 0.008013 | 0.86288  | -0.13427  | 0.00365  | -0.08427 | 0.06883  | -0.03822 | 0.40993  |
| 3.27E-07 | -0.03351 | 0.47004  | 0.145311  | 0.00164  | 0.049579 | 0.28498  | 0.096138 | 0.03782  |
| 8.11E-07 | -0.00026 | 0.99553  | -0.10101  | 0.02907  | -0.17341 | 0.00017  | -0.06191 | 0.18169  |
| 0.09511  | -0.10339 | 0.02547  | -0.00178  | 0.96934  | -0.14631 | 0.00152  | -0.10109 | 0.02894  |
| 1.02E-31 | -0.00523 | 0.91025  | 0.163341  | 0.00039  | -0.18041 | 8.84E-05 | -0.0809  | 0.08072  |
| 0.00026  | -0.03029 | 0.51383  | 0.006946  | 0.881    | -0.14767 | 0.00137  | -0.084   | 0.06973  |
| 0.02047  | 0.005055 | 0.91325  | 0.047     | 0.31082  | -0.02276 | 0.62374  | 0.102017 | 0.02749  |
| 0.00076  | -0.2479  | 5.70E-08 | -0.17277  | 0.00018  | -0.34927 | 7.62E-15 | -0.43359 | 7.93E-23 |
| 0.26803  | 0.121701 | 0.00847  | 0.367209  | 2.35E-16 | 0.324176 | 6.89E-13 | 0.372224 | 8.56E-17 |
| 3.94E-18 | -0.09121 | 0.04884  | 0.011632  | 0.80203  | -0.14847 | 0.00129  | -0.17483 | 0.00015  |
| 0.30565  | 0.006465 | 0.88919  | -0.08914  | 0.05422  | -0.0899  | 0.0522   | -0.02027 | 0.66221  |
| 0.00916  | 0.015255 | 0.7423   | -0.01174  | 0.80018  | -0.11567 | 0.01237  | 0.016938 | 0.71505  |
| 2.05E-12 | -0.02324 | 0.61644  | -0.12246  | 0.00807  | -0.07711 | 0.09604  | -0.09421 | 0.04185  |
| 3.86E-11 | -0.08378 | 0.07048  | 0.024017  | 0.60468  | 0.056054 | 0.22665  | -0.10241 | 0.0269   |
| 9.88E-06 | -0.09658 | 0.03695  | -0.16563  | 0.00033  | -0.2586  | 1.43E-08 | -0.16765 | 0.00027  |
| 9.40E-07 | 0.079678 | 0.08544  | 0.069098  | 0.13596  | 0.098916 | 0.03259  | 0.243051 | 1.05E-07 |
| 0.00184  | -0.09923 | 0.03204  | -0.1153   | 0.01265  | -0.24145 | 1.28E-07 | -0.19717 | 1.77E-05 |
| 0.00534  | 0.054889 | 0.23646  | 0.100653  | 0.02964  | 0.003734 | 0.93586  | 0.085638 | 0.06445  |
| 3.33E-10 | 0.113294 | 0.0143   | -0.03106  | 0.50316  | -0.05831 | 0.20848  | 0.13744  | 0.00292  |
| 0.00031  | -0.0131  | 0.77762  | -0.1681   | 0.00026  | -0.18492 | 5.82E-05 | -0.12015 | 0.00935  |
| 0.1466   | -0.15235 | 0.00096  | 0.101913  | 0.02765  | -0.08782 | 0.05792  | -0.12586 | 0.00646  |
| 1.73E-07 | 0.163111 | 0.0004   | 0.13852   | 0.0027   | 0.139935 | 0.00244  | 0.333471 | 1.36E-13 |
| 0.02264  | -0.26218 | 8.85E-09 | -0.16541  | 0.00033  | -0.26488 | 6.14E-09 | -0.32833 | 3.36E-13 |
| 5.95E-05 | -0.01952 | 0.67391  | 0.040013  | 0.3883   | -0.1311  | 0.00454  | -0.05856 | 0.20652  |
| 6.77E-09 | 0.002503 | 0.95699  | -0.07525  | 0.10433  | -0.3019  | 2.69E-11 | -0.15289 | 0.00092  |
| 0.27665  | -0.10452 | 0.02389  | -0.04321  | 0.35146  | -0.1242  | 0.00721  | -0.06659 | 0.15076  |
| 3.48E-07 | 0.058334 | 0.20828  | 0.061031  | 0.18798  | -0.01389 | 0.7646   | 0.146259 | 0.00153  |
| 1.41E-07 | 0.091762 | 0.04749  | 0.106363  | 0.02151  | 0.027944 | 0.54693  | 0.196485 | 1.90E-05 |
| 1.70E-07 | 0.025928 | 0.57623  | 0.132066  | 0.00425  | 0.012877 | 0.78136  | 0.065572 | 0.15714  |
| 4.18E-09 | 0.035661 | 0.442    | 0.071523  | 0.12272  | 0.046434 | 0.31668  | 0.149962 | 0.00115  |
| 4.98E-05 | 0.034762 | 0.4536   | 0.107772  | 0.01983  | 0.094452 | 0.04133  | 0.193062 | 2.66E-05 |
| 3.16E-06 | -0.06522 | 0.15939  | 0.034244  | 0.46036  | -0.16061 | 0.00049  | -0.21838 | 1.90E-06 |
| 6.36E-08 | 0.091101 | 0.04912  | 0.083978  | 0.06981  | 0.057566 | 0.21434  | 0.188098 | 4.30E-05 |
| 6.55E-11 | 0.053005 | 0.25296  | 0.114099  | 0.01362  | 0.016891 | 0.71581  | 0.154871 | 0.00078  |
| 6.16E-06 | 0.057962 | 0.2112   | 0.102184  | 0.02724  | 0.023811 | 0.60777  | 0.164006 | 0.00037  |
| 7.14E-11 | 0.111601 | 0.01583  | 0.1111171 | 0.01624  | 0.129078 | 0.00521  | 0.27421  | 1.68E-09 |
| 0.39185  | 0.088473 | 0.05606  | 0.205279  | 7.75E-06 | 0.250124 | 4.30E-08 | 0.331525 | 1.92E-13 |
| 0.27751  | -0.10275 | 0.0264   | -0.06806  | 0.14197  | -0.1402  | 0.00239  | -0.1232  | 0.00769  |
| 2.08E-06 | 0.061189 | 0.18684  | -0.04225  | 0.36231  | -0.0771  | 0.09606  | 0.010182 | 0.82629  |
| 1.07E-10 | 0.019095 | 0.68065  | -0.0143   | 0.75794  | -0.15961 | 0.00054  | 0.014478 | 0.75501  |
| 0.07013  | 0.017433 | 0.70711  | 0.013433  | 0.77218  | -0.15735 | 0.00064  | 0.023689 | 0.60961  |
| 0.00745  | -0.01799 | 0.69816  | -0.06747  | 0.14546  | -0.06982 | 0.13192  | 0.009211 | 0.84264  |

|          |          |          |          |          |          |          |          |          |
|----------|----------|----------|----------|----------|----------|----------|----------|----------|
| 0.02296  | 0.072896 | 0.11568  | -0.08046 | 0.08241  | -0.13753 | 0.0029   | 0.081444 | 0.07871  |
| 1.66E-11 | 0.004613 | 0.92081  | 0.056538 | 0.22266  | -0.16337 | 0.00039  | 0.003326 | 0.94286  |
| 0.38931  | 0.197523 | 1.71E-05 | 0.048687 | 0.29374  | -0.00596 | 0.89777  | 0.130105 | 0.00486  |
| 0.22171  | 0.050947 | 0.27188  | -0.03167 | 0.49484  | -0.16848 | 0.00025  | -0.02896 | 0.53249  |
| 1.82E-08 | -0.05815 | 0.20972  | 0.085072 | 0.06624  | -0.09185 | 0.04729  | -0.05566 | 0.22996  |
| 0.00258  | -0.06147 | 0.18483  | -0.06172 | 0.18306  | -0.14584 | 0.00158  | -0.09837 | 0.03357  |
| 0.79666  | -0.00335 | 0.94244  | -0.02795 | 0.54682  | -0.07109 | 0.12499  | 0.042883 | 0.35515  |
| 3.42E-06 | -0.07497 | 0.10565  | -0.04849 | 0.2957   | -0.20021 | 1.31E-05 | -0.1511  | 0.00106  |
| 7.77E-15 | -0.16331 | 0.00039  | 0.017176 | 0.71122  | -0.16323 | 0.0004   | -0.13167 | 0.00437  |
| 0.0259   | -0.03531 | 0.44645  | -0.16377 | 0.00038  | -0.0888  | 0.05517  | -0.13693 | 0.00303  |
| 0.11702  | -0.07838 | 0.09068  | -0.01904 | 0.68156  | -0.17186 | 0.00019  | -0.1217  | 0.00847  |
| 0.94757  | -0.01936 | 0.67649  | -0.14795 | 0.00134  | -0.31417 | 3.71E-12 | -0.22137 | 1.36E-06 |
| 4.11E-12 | -0.10021 | 0.03036  | 0.080098 | 0.0838   | -0.11729 | 0.01119  | -0.09773 | 0.03474  |
| 7.66E-06 | 0.109571 | 0.01785  | 0.02789  | 0.5477   | -0.08376 | 0.07053  | 0.139608 | 0.0025   |
| 2.59E-06 | -0.07366 | 0.11189  | -0.09044 | 0.05081  | -0.02201 | 0.63515  | -0.04537 | 0.32788  |
| 0.19152  | 0.061921 | 0.18161  | -0.18035 | 8.89E-05 | -0.15196 | 0.00099  | -0.01316 | 0.77668  |
| 6.66E-11 | 0.006601 | 0.88686  | 0.061213 | 0.18666  | -0.03842 | 0.40741  | 0.02609  | 0.57384  |
| 5.32E-07 | 0.033207 | 0.47406  | -0.09975 | 0.03115  | -0.08713 | 0.05992  | -0.03813 | 0.41102  |
| 1.27E-06 | -0.0196  | 0.67269  | 0.007763 | 0.86712  | -0.13198 | 0.00428  | -0.03452 | 0.45678  |
| 1.90E-07 | 0.076435 | 0.09899  | 0.276835 | 1.16E-09 | 0.157334 | 0.00064  | 0.297558 | 5.30E-11 |
| 0.2381   | 0.019416 | 0.67559  | -0.02043 | 0.6597   | -0.10029 | 0.03023  | 0.008458 | 0.85535  |
| 0.0034   | 0.015455 | 0.73905  | 0.155562 | 0.00074  | -0.04926 | 0.28809  | 0.068512 | 0.13932  |
| 1.20E-06 | -0.09339 | 0.04367  | -0.12405 | 0.00728  | 0.041008 | 0.37659  | -0.15518 | 0.00077  |
| 3.89E-06 | -0.11462 | 0.0132   | -0.20182 | 1.11E-05 | -0.2662  | 5.13E-09 | -0.26093 | 1.05E-08 |
| 2.72E-12 | 0.011241 | 0.80856  | 0.015778 | 0.73381  | -0.05093 | 0.272    | 0.045778 | 0.32357  |
| 0.00336  | -0.06852 | 0.1393   | 0.023357 | 0.61463  | -0.13801 | 0.0028   | -0.07717 | 0.09578  |
| 3.62E-05 | 0.214193 | 3.00E-06 | 0.209338 | 5.06E-06 | 0.334111 | 1.22E-13 | 0.512955 | 1.06E-32 |
| 1.65E-08 | 0.108954 | 0.01851  | 0.247247 | 6.20E-08 | 0.206341 | 6.94E-06 | 0.305123 | 1.61E-11 |
| 0.06419  | -0.05397 | 0.24439  | 0.074201 | 0.10928  | -0.05068 | 0.27438  | -0.00185 | 0.96813  |
| 4.20E-14 | 0.139779 | 0.00247  | 0.115274 | 0.01268  | 0.192162 | 2.91E-05 | 0.317434 | 2.16E-12 |
| 0.00239  | -0.09101 | 0.04935  | 0.093716 | 0.04294  | -0.06955 | 0.1334   | -0.06884 | 0.13741  |
| 2.24E-08 | 0.163176 | 0.0004   | 0.073969 | 0.1104   | 0.081459 | 0.07866  | 0.278141 | 9.62E-10 |
| 0.79114  | 0.033902 | 0.46485  | 0.10524  | 0.02294  | 0.137576 | 0.00289  | 0.192328 | 2.86E-05 |
| 4.29E-14 | -0.13903 | 0.0026   | -0.1082  | 0.01934  | -0.33977 | 4.40E-14 | -0.29563 | 7.13E-11 |
| 0.83751  | 0.115491 | 0.01251  | 0.059319 | 0.20069  | 0.099969 | 0.03078  | 0.234974 | 2.80E-07 |
| 0.00373  | 0.030774 | 0.50707  | 0.217116 | 2.18E-06 | 0.050038 | 0.28054  | 0.164029 | 0.00037  |
| 0.00281  | 0.037055 | 0.42435  | 0.050135 | 0.27961  | 0.07755  | 0.09415  | 0.098276 | 0.03374  |
| 0.45205  | 0.006903 | 0.88172  | 0.01967  | 0.67158  | -0.00105 | 0.9819   | 0.011912 | 0.79739  |
| 8.69E-16 | 0.013857 | 0.76519  | -0.17618 | 0.00013  | -0.18569 | 5.41E-05 | -0.08599 | 0.06334  |
| 2.94E-05 | 0.090157 | 0.05153  | 0.009739 | 0.83375  | 0.029796 | 0.52066  | 0.136064 | 0.00322  |
| 1.81E-06 | 0.065484 | 0.1577   | 0.050854 | 0.27276  | -0.11978 | 0.00957  | 0.03313  | 0.47509  |
| 0.9436   | 0.040914 | 0.3777   | -0.08813 | 0.05704  | -0.15548 | 0.00075  | -0.03668 | 0.429    |
| 0.05911  | -0.03917 | 0.39835  | -0.0288  | 0.53465  | -0.21388 | 3.11E-06 | -0.09248 | 0.04577  |
| 0.10146  | 0.032848 | 0.47886  | 0.239572 | 1.61E-07 | 0.262625 | 8.33E-09 | 0.316162 | 2.67E-12 |
| 8.04E-09 | 0.046084 | 0.32034  | 0.179837 | 9.31E-05 | 0.052628 | 0.25636  | 0.159365 | 0.00055  |

|          |          |          |          |          |          |          |          |          |
|----------|----------|----------|----------|----------|----------|----------|----------|----------|
| 8.08E-06 | 0.153114 | 0.0009   | 0.183335 | 6.75E-05 | 0.366778 | 2.57E-16 | 0.462483 | 3.98E-26 |
| 0.11056  | -0.10859 | 0.01891  | 0.062987 | 0.17419  | -0.13639 | 0.00314  | -0.13256 | 0.00411  |
| 6.51E-14 | 0.05767  | 0.21352  | 0.358276 | 1.37E-15 | 0.163607 | 0.00039  | 0.292273 | 1.19E-10 |
| 3.41E-07 | -0.04476 | 0.33442  | 0.018577 | 0.68885  | -0.09835 | 0.0336   | 0.002861 | 0.95084  |
| 0.00098  | -0.16833 | 0.00026  | 0.044201 | 0.34054  | -0.1483  | 0.00131  | -0.07908 | 0.0878   |
| 1.35E-05 | -0.00706 | 0.87909  | 0.155673 | 0.00074  | -0.05311 | 0.25205  | 0.026061 | 0.57428  |
| 0.13994  | 0.095444 | 0.03923  | -0.07565 | 0.10254  | -0.03612 | 0.43614  | 0.114382 | 0.01339  |
| 6.21E-11 | 0.128535 | 0.00541  | 0.054692 | 0.23815  | 0.051432 | 0.26734  | 0.248181 | 5.51E-08 |
| 5.88E-11 | 0.004166 | 0.92846  | 0.011895 | 0.79766  | -0.13448 | 0.0036   | 0.006567 | 0.88745  |
| 5.68E-05 | -0.016   | 0.73023  | -0.04407 | 0.342    | -0.10921 | 0.01824  | -0.03483 | 0.45278  |
| 4.85E-07 | 0.062397 | 0.17827  | 0.167205 | 0.00028  | 0.097154 | 0.03583  | 0.189193 | 3.88E-05 |
| 0.00016  | 0.204583 | 8.33E-06 | 0.05067  | 0.2745   | -0.06801 | 0.14227  | 0.204859 | 8.10E-06 |
| 0.06477  | 0.105619 | 0.02245  | -0.06204 | 0.18075  | -0.12381 | 0.00739  | 0.049731 | 0.2835   |
| 0.03242  | -0.03466 | 0.45497  | 0.0644   | 0.16471  | -0.17572 | 0.00014  | -0.0499  | 0.28191  |
| 2.23E-07 | 0.164569 | 0.00036  | 0.185061 | 5.74E-05 | 0.124136 | 0.00724  | 0.249011 | 4.96E-08 |
| 4.51E-07 | -0.00086 | 0.98523  | 0.183994 | 6.34E-05 | 0.179796 | 9.35E-05 | 0.204812 | 8.14E-06 |
| 0.04902  | 0.054778 | 0.23741  | 0.277844 | 1.00E-09 | 0.178328 | 0.00011  | 0.192806 | 2.73E-05 |
| 0.04474  | -0.04038 | 0.38392  | 0.106775 | 0.02101  | -0.02191 | 0.63666  | -0.0024  | 0.95871  |
| 0.00343  | -0.17172 | 0.00019  | -0.06324 | 0.17245  | -0.11661 | 0.01167  | -0.10061 | 0.02971  |
| 1.98E-06 | 0.176309 | 0.00013  | 0.078849 | 0.08875  | 0.080853 | 0.08091  | 0.286066 | 3.03E-10 |
| 0.01481  | 0.133825 | 0.00376  | -0.00673 | 0.88471  | 0.019334 | 0.67688  | 0.151013 | 0.00106  |
| 0.28602  | -0.0062  | 0.89362  | 0.071225 | 0.12429  | 0.0103   | 0.82431  | 0.078294 | 0.09103  |
| 0.00764  | 0.051011 | 0.27128  | 0.092604 | 0.04549  | 0.087133 | 0.0599   | 0.099332 | 0.03186  |
| 6.16E-07 | 0.121718 | 0.00846  | 0.178544 | 0.0001   | 0.091304 | 0.04862  | 0.228271 | 6.17E-07 |
| 0.15084  | 0.030391 | 0.51238  | -0.05614 | 0.2259   | -0.09982 | 0.03103  | 0.052579 | 0.2568   |
| 2.25E-09 | 0.0119   | 0.79757  | -0.04506 | 0.33119  | -0.04956 | 0.28518  | 0.036203 | 0.43509  |
| 0.00107  | -0.10015 | 0.03048  | -0.07286 | 0.11584  | -0.28041 | 6.93E-10 | -0.21496 | 2.76E-06 |
| 3.95E-10 | 0.068098 | 0.14173  | -0.00116 | 0.98009  | -0.05475 | 0.23767  | 0.122837 | 0.00787  |
| 0.7356   | -0.03331 | 0.47263  | 0.19573  | 2.05E-05 | -0.08955 | 0.05312  | -0.08564 | 0.06442  |
| 2.92E-13 | -0.07907 | 0.08785  | -0.04286 | 0.35537  | -0.13549 | 0.00335  | -0.14302 | 0.00195  |
| 0.27087  | 0.125147 | 0.00677  | 0.130524 | 0.00473  | 0.161956 | 0.00044  | 0.256099 | 1.98E-08 |
| 4.30E-08 | 0.106761 | 0.02102  | 0.113105 | 0.01446  | 0.036378 | 0.43288  | 0.216819 | 2.25E-06 |
| 1.53E-05 | -0.0329  | 0.4781   | 0.032331 | 0.4858   | -0.10339 | 0.02546  | -0.10753 | 0.02011  |
| 1.41E-12 | 0.069084 | 0.13604  | 0.117908 | 0.01077  | -0.00582 | 0.90012  | 0.155436 | 0.00075  |
| 8.98E-09 | -0.15519 | 0.00077  | -0.18603 | 5.24E-05 | -0.17573 | 0.00013  | -0.2901  | 1.66E-10 |
| 0.97662  | -0.06215 | 0.18     | -0.05107 | 0.27076  | 0.03488  | 0.45207  | -0.08195 | 0.07686  |
| 0.13952  | 0.007143 | 0.87764  | 0.030878 | 0.50563  | -0.0443  | 0.33943  | 0.020231 | 0.66278  |
| 2.25E-06 | 0.065605 | 0.15693  | -0.12643 | 0.00622  | -0.16155 | 0.00046  | 0.006818 | 0.88317  |
| 2.00E-14 | 0.003155 | 0.94579  | 0.023854 | 0.60712  | -0.11921 | 0.00993  | 0.014402 | 0.75625  |
| 0.47418  | -0.01427 | 0.75845  | -0.10201 | 0.0275   | -0.25439 | 2.48E-08 | -0.09734 | 0.03548  |
| 2.05E-08 | -0.0198  | 0.66962  | 0.026723 | 0.56459  | -0.14238 | 0.00204  | 0.034178 | 0.46123  |
| 1.12E-11 | 0.102573 | 0.02665  | 0.098696 | 0.03298  | 0.059264 | 0.20111  | 0.21453  | 2.89E-06 |
| 9.84E-05 | 0.146617 | 0.00149  | 0.027524 | 0.55297  | 0.02545  | 0.58329  | 0.149421 | 0.0012   |
| 8.86E-11 | 0.110344 | 0.01706  | 0.165685 | 0.00032  | 0.424892 | 6.79E-22 | 0.380894 | 1.43E-17 |
| 2.23E-07 | 0.031154 | 0.50183  | 0.024168 | 0.6024   | -0.07691 | 0.09689  | 0.085635 | 0.06446  |

|          |          |          |          |          |          |          |          |          |
|----------|----------|----------|----------|----------|----------|----------|----------|----------|
| 1.15E-08 | 0.04972  | 0.28361  | 0.049915 | 0.28173  | -0.01582 | 0.73311  | 0.075223 | 0.10448  |
| 0.01026  | 0.056226 | 0.22522  | 0.036267 | 0.43428  | -0.05858 | 0.2064   | 0.083733 | 0.07064  |
| 0.12887  | 0.066403 | 0.15194  | -0.01797 | 0.69849  | -0.19978 | 1.36E-05 | -0.01244 | 0.78864  |
| 0.08348  | 0.039528 | 0.39408  | 0.35707  | 1.73E-15 | 0.342895 | 2.49E-14 | 0.318926 | 1.68E-12 |
| 0.02297  | -0.16791 | 0.00027  | -0.18764 | 4.50E-05 | -0.31425 | 3.66E-12 | -0.33346 | 1.36E-13 |
| 0.5652   | 0.021937 | 0.63632  | 0.154664 | 0.0008   | 0.047822 | 0.30242  | 0.112909 | 0.01464  |
| 0.61968  | -0.10554 | 0.02255  | -0.24    | 1.53E-07 | -0.29606 | 6.68E-11 | -0.18809 | 4.31E-05 |
| 0.02683  | 0.026264 | 0.5713   | 0.040155 | 0.38661  | 0.005326 | 0.90861  | 0.112335 | 0.01515  |
| 1.11E-08 | 0.050392 | 0.27714  | -0.01595 | 0.73106  | 0.015848 | 0.73266  | 0.151854 | 0.001    |
| 4.92E-05 | 0.069153 | 0.13565  | 0.022049 | 0.6346   | 0.003677 | 0.93683  | 0.085284 | 0.06556  |
| 0.00011  | 0.161319 | 0.00047  | 0.192171 | 2.91E-05 | 0.148968 | 0.00124  | 0.331231 | 2.02E-13 |
| 0.31904  | 0.19758  | 1.70E-05 | 0.255279 | 2.21E-08 | 0.370185 | 1.29E-16 | 0.488862 | 1.99E-29 |
| 2.92E-06 | 0.044258 | 0.33992  | -0.0591  | 0.20233  | -0.17231 | 0.00018  | -0.0218  | 0.63844  |
| 0.00963  | 0.089324 | 0.05373  | 0.290981 | 1.45E-10 | 0.193948 | 2.44E-05 | 0.282922 | 4.81E-10 |
| 5.14E-07 | 0.020702 | 0.65543  | 0.002578 | 0.95569  | -0.00808 | 0.86171  | 0.072247 | 0.11897  |
| 0.00215  | -0.02726 | 0.55682  | -0.04864 | 0.29426  | -0.08342 | 0.07171  | -0.04929 | 0.28776  |
| 5.52E-14 | -0.05835 | 0.20819  | 0.12352  | 0.00753  | -0.03381 | 0.466    | 0.024182 | 0.6022   |
| 8.77E-06 | 0.006121 | 0.89504  | 0.117881 | 0.01079  | 0.141099 | 0.00224  | 0.172962 | 0.00017  |
| 9.65E-10 | 0.018965 | 0.6827   | 0.07233  | 0.11854  | -0.02825 | 0.54249  | 0.037987 | 0.41279  |
| 2.34E-05 | 0.206817 | 6.60E-06 | 0.254211 | 2.54E-08 | 0.199049 | 1.47E-05 | 0.360037 | 9.71E-16 |
| 1.02E-07 | 0.017132 | 0.71193  | 0.07624  | 0.09986  | -0.0355  | 0.44403  | 0.061202 | 0.18674  |
| 9.02E-06 | 0.132261 | 0.00419  | 0.038489 | 0.40663  | 0.199776 | 1.36E-05 | 0.296824 | 5.94E-11 |
| 1.62E-06 | 0.189876 | 3.63E-05 | 0.083791 | 0.07044  | 0.068296 | 0.14058  | 0.243333 | 1.01E-07 |
| 4.08E-05 | -0.051   | 0.27135  | -0.09951 | 0.03156  | -0.22129 | 1.37E-06 | -0.10123 | 0.02871  |
| 2.50E-12 | -0.13187 | 0.00431  | -0.14524 | 0.00165  | -0.08504 | 0.06635  | -0.24399 | 9.32E-08 |
| 0.00059  | 0.023698 | 0.60947  | -0.03566 | 0.44207  | 0.024481 | 0.59771  | 0.043286 | 0.35064  |
| 1.84E-06 | 0.212356 | 3.66E-06 | 0.318379 | 1.84E-12 | 0.308713 | 9.06E-12 | 0.488757 | 2.06E-29 |
| 0.02288  | -0.06089 | 0.18899  | -0.09833 | 0.03363  | -0.2571  | 1.74E-08 | -0.10251 | 0.02674  |
| 0.05657  | 0.033336 | 0.47235  | 0.168678 | 0.00025  | 0.092551 | 0.04561  | 0.199996 | 1.33E-05 |
| 0.007    | -0.03895 | 0.40107  | -0.3369  | 7.39E-14 | -0.22014 | 1.56E-06 | -0.24131 | 1.30E-07 |
| 0.98524  | -0.04737 | 0.30702  | -0.01409 | 0.76133  | -0.21143 | 4.05E-06 | -0.0806  | 0.08189  |
| 0.02182  | 0.041071 | 0.37586  | -0.02383 | 0.60754  | 0.095426 | 0.03927  | 0.206417 | 6.88E-06 |
| 0.09969  | -0.08722 | 0.05966  | 0.032671 | 0.48123  | -0.11561 | 0.01242  | -0.08467 | 0.06753  |
| 3.23E-05 | -0.06542 | 0.15812  | -0.10727 | 0.02042  | -0.06831 | 0.14052  | -0.15525 | 0.00076  |
| 3.22E-07 | -0.02801 | 0.54593  | -0.04358 | 0.34739  | -0.1538  | 0.00085  | -0.05256 | 0.25698  |
| 1.26E-05 | -0.1415  | 0.00218  | -0.21323 | 3.33E-06 | -0.38483 | 6.22E-18 | -0.36577 | 3.14E-16 |
| 0.00039  | 0.12032  | 0.00925  | 0.038636 | 0.40484  | 0.0456   | 0.32546  | 0.097394 | 0.03537  |
| 4.66E-05 | 0.057955 | 0.21126  | 0.126468 | 0.00621  | 0.039641 | 0.39272  | 0.201387 | 1.16E-05 |
| 0.0031   | -0.11582 | 0.01225  | 0.06118  | 0.1869   | -0.08908 | 0.0544   | -0.09889 | 0.03264  |
| 0.00137  | -0.18064 | 8.65E-05 | -0.04875 | 0.29312  | -0.33267 | 1.57E-13 | -0.31874 | 1.73E-12 |
| 0.15265  | 0.145313 | 0.00164  | -0.01022 | 0.8256   | -0.07805 | 0.09205  | 0.022652 | 0.62536  |
| 2.66E-08 | 0.018363 | 0.69226  | 0.097237 | 0.03567  | -0.03377 | 0.46654  | 0.075721 | 0.10219  |
| 7.43E-07 | 0.105439 | 0.02268  | 0.02515  | 0.58773  | 0.029941 | 0.51864  | 0.140917 | 0.00227  |
| 1.10E-08 | 0.002861 | 0.95083  | 0.022626 | 0.62576  | -0.10438 | 0.02409  | 0.028577 | 0.53788  |
| 2.49E-09 | 0.018955 | 0.68286  | -0.09829 | 0.03371  | -0.06612 | 0.15369  | -0.00949 | 0.83797  |

|          |          |          |          |          |          |          |          |          |
|----------|----------|----------|----------|----------|----------|----------|----------|----------|
| 2.07E-07 | 0.124657 | 0.00699  | 0.229834 | 5.15E-07 | 0.200371 | 1.28E-05 | 0.335322 | 9.80E-14 |
| 1.27E-05 | -0.07747 | 0.09447  | -0.01536 | 0.74066  | -0.02923 | 0.52859  | 0.014545 | 0.7539   |
| 0.00247  | 0.106927 | 0.02082  | 0.059912 | 0.19622  | -0.11099 | 0.01642  | 0.002504 | 0.95696  |
| 3.47E-05 | -0.03963 | 0.3928   | 0.059633 | 0.19831  | -0.08393 | 0.06998  | -0.05235 | 0.25893  |
| 0.41816  | 0.027514 | 0.55311  | -0.04673 | 0.31364  | -0.12496 | 0.00686  | 0.007187 | 0.87691  |
| 4.45E-18 | -0.1446  | 0.00173  | -0.05597 | 0.22736  | 0.157884 | 0.00062  | -0.04934 | 0.28727  |
| 3.32E-05 | -0.08843 | 0.0562   | -0.15542 | 0.00075  | -0.29847 | 4.60E-11 | -0.21955 | 1.67E-06 |
| 0.00051  | -0.00525 | 0.9099   | 0.10625  | 0.02165  | -0.01075 | 0.81684  | 0.033317 | 0.4726   |
| 0.00113  | 0.247464 | 6.03E-08 | 0.26554  | 5.61E-09 | 0.090572 | 0.05046  | 0.304836 | 1.69E-11 |
| 2.41E-09 | 0.030733 | 0.50764  | 0.151103 | 0.00105  | -0.04181 | 0.36738  | 0.09565  | 0.03881  |
| 0.10178  | 0.068471 | 0.13956  | 0.225647 | 8.35E-07 | 0.202943 | 9.87E-06 | 0.299668 | 3.82E-11 |
| 5.34E-14 | 0.069691 | 0.13263  | -0.02736 | 0.55534  | -0.02995 | 0.51855  | 0.109031 | 0.01843  |
| 6.23E-12 | 0.048847 | 0.29217  | 0.005988 | 0.89731  | -0.04635 | 0.31752  | 0.113833 | 0.01384  |
| 0.00122  | 0.088074 | 0.05718  | -0.1992  | 1.45E-05 | -0.12787 | 0.00565  | -0.11699 | 0.01141  |
| 1.14E-06 | 0.062976 | 0.17426  | 0.080456 | 0.08242  | -0.03679 | 0.4277   | 0.144101 | 0.0018   |
| 0.73357  | 0.098318 | 0.03366  | -0.05716 | 0.21761  | -0.06376 | 0.16893  | 0.102255 | 0.02713  |
| 1.90E-10 | -0.00488 | 0.91619  | 0.049791 | 0.28292  | -0.04775 | 0.30315  | 0.03932  | 0.39657  |
| 7.23E-15 | 0.108648 | 0.01885  | 0.096243 | 0.03761  | -0.01919 | 0.67918  | 0.171513 | 0.0002   |
| 4.96E-11 | -0.00251 | 0.95681  | -0.10099 | 0.02911  | -0.11557 | 0.01245  | -0.07317 | 0.1143   |
| 0.04039  | 0.083287 | 0.07215  | -0.05357 | 0.24796  | -0.04285 | 0.35556  | 0.07902  | 0.08806  |
| 1.64E-07 | -0.08358 | 0.07117  | -0.09742 | 0.03532  | -0.21517 | 2.70E-06 | -0.1731  | 0.00017  |
| 0.00015  | 0.036054 | 0.43698  | 0.133811 | 0.00377  | 0.067264 | 0.14669  | 0.131441 | 0.00444  |
| 0.86215  | 0.124766 | 0.00694  | 0.048045 | 0.30017  | 0.170701 | 0.00021  | 0.235523 | 2.62E-07 |
| 2.21E-06 | 0.020077 | 0.6652   | -0.05723 | 0.21701  | -0.10913 | 0.01833  | -0.02535 | 0.5848   |
| 2.86E-11 | 0.07506  | 0.10523  | -0.14368 | 0.00185  | -0.18139 | 8.08E-05 | -0.06409 | 0.16677  |
| 0.00107  | 0.020588 | 0.65721  | 0.082957 | 0.07329  | 0.017158 | 0.71152  | 0.119822 | 0.00955  |
| 0.25425  | 0.019889 | 0.66815  | 0.138335 | 0.00274  | 0.070611 | 0.12758  | 0.160575 | 0.0005   |
| 7.41E-28 | -0.00207 | 0.96445  | 0.116471 | 0.01178  | -0.02124 | 0.64713  | 0.096303 | 0.03749  |
| 0.00328  | -0.35297 | 3.79E-15 | -0.15888 | 0.00057  | -0.28041 | 6.93E-10 | -0.33695 | 7.32E-14 |
| 0.00265  | -0.09632 | 0.03746  | 0.22519  | 8.80E-07 | -0.17772 | 0.00011  | -0.15445 | 0.00081  |
| 0.9993   | -0.05789 | 0.21177  | -0.09474 | 0.0407   | -0.1801  | 9.10E-05 | -0.1593  | 0.00055  |
| 0.13405  | -0.19116 | 3.21E-05 | 0.020206 | 0.66318  | -0.22995 | 5.07E-07 | -0.27401 | 1.73E-09 |
| 0.81716  | -0.05754 | 0.21454  | -0.00328 | 0.94359  | -0.13152 | 0.00441  | -0.05728 | 0.21664  |
| 2.06E-07 | 0.045123 | 0.33056  | 0.119742 | 0.0096   | -0.0193  | 0.67734  | 0.071815 | 0.1212   |
| 0.53579  | 0.148123 | 0.00133  | 0.150688 | 0.00109  | 0.330643 | 2.24E-13 | 0.449397 | 1.36E-24 |
| 0.69145  | 0.120672 | 0.00905  | -0.01142 | 0.80565  | -0.00033 | 0.99438  | 0.139228 | 0.00257  |
| 0.00047  | -0.03942 | 0.39541  | -0.05349 | 0.24862  | -0.07189 | 0.12081  | -0.03908 | 0.39945  |
| 0.21924  | -0.0292  | 0.52909  | 0.010786 | 0.81618  | -0.05619 | 0.2255   | -0.01811 | 0.69622  |
| 4.27E-08 | 0.089161 | 0.05417  | 0.072111 | 0.11966  | -0.02224 | 0.63161  | 0.103458 | 0.02537  |
| 1.37E-08 | 0.006881 | 0.88211  | 0.192637 | 2.78E-05 | 0.031863 | 0.49214  | 0.117036 | 0.01137  |
| 8.77E-12 | -0.02044 | 0.65951  | 0.071665 | 0.12197  | -0.06322 | 0.1726   | 0.034782 | 0.45334  |
| 0.00601  | -0.00154 | 0.9736   | -0.05617 | 0.22566  | -0.02935 | 0.52687  | 0.047569 | 0.30498  |
| 0.76862  | -0.06088 | 0.18908  | 0.007277 | 0.87537  | -0.12623 | 0.0063   | -0.09716 | 0.03583  |
| 0.0001   | 0.026394 | 0.56939  | 0.08731  | 0.05939  | -0.01571 | 0.73487  | 0.070097 | 0.13038  |
| 3.64E-08 | -0.12297 | 0.00781  | -0.06763 | 0.14447  | -0.31729 | 2.21E-12 | -0.2393  | 1.66E-07 |

|          |           |          |          |          |          |          |          |          |
|----------|-----------|----------|----------|----------|----------|----------|----------|----------|
| 3.22E-06 | 0.001431  | 0.9754   | 0.096194 | 0.03771  | -0.06752 | 0.14516  | 0.020583 | 0.65729  |
| 2.57E-08 | 0.072933  | 0.11549  | 0.088227 | 0.05675  | -0.08334 | 0.07196  | 0.104492 | 0.02393  |
| 0.94221  | 0.089778  | 0.05252  | 0.139402 | 0.00253  | 0.12938  | 0.00511  | 0.2213   | 1.37E-06 |
| 5.24E-05 | -0.0111   | 0.81088  | -0.04456 | 0.33658  | -0.11835 | 0.01048  | -0.07429 | 0.10885  |
| 0.00114  | 0.105906  | 0.02208  | -0.00522 | 0.91035  | 0.024084 | 0.60366  | 0.074148 | 0.10954  |
| 1.15E-32 | 0.120882  | 0.00893  | -0.04501 | 0.33181  | -0.07207 | 0.11986  | 0.129788 | 0.00497  |
| 7.98E-08 | 0.075671  | 0.10242  | 0.194783 | 2.25E-05 | 0.058958 | 0.20345  | 0.170512 | 0.00021  |
| 1.62E-05 | 0.035837  | 0.43975  | 0.132241 | 0.0042   | 0.045852 | 0.3228   | 0.155473 | 0.00075  |
| 2.44E-11 | -9.98E-05 | 0.99828  | 0.235692 | 2.57E-07 | 0.048385 | 0.29676  | 0.083534 | 0.07131  |
| 0.00624  | -0.03582  | 0.43992  | 0.008952 | 0.84701  | -0.10195 | 0.0276   | -0.00293 | 0.94971  |
| 4.54E-11 | 0.013659  | 0.76846  | 0.086092 | 0.06304  | -0.08561 | 0.06453  | -0.05841 | 0.20768  |
| 3.32E-10 | 0.004413  | 0.92423  | 0.21596  | 2.48E-06 | 0.163692 | 0.00038  | 0.309081 | 8.53E-12 |
| 2.28E-09 | 0.048567  | 0.29494  | -0.03179 | 0.49317  | -0.09514 | 0.03987  | -0.01945 | 0.67511  |
| 0.40975  | -0.06531  | 0.1588   | -0.01319 | 0.77617  | -0.21801 | 1.97E-06 | -0.10905 | 0.01841  |
| 3.50E-06 | -0.2413   | 1.30E-07 | -0.25707 | 1.75E-08 | -0.45786 | 1.41E-25 | -0.44933 | 1.38E-24 |
| 8.44E-05 | 0.151504  | 0.00102  | 0.102379 | 0.02695  | -0.05524 | 0.23346  | 0.089172 | 0.05414  |
| 2.81E-06 | -0.13144  | 0.00444  | -0.05017 | 0.27926  | -0.25847 | 1.45E-08 | -0.31299 | 4.51E-12 |
| 4.24E-14 | 0.098589  | 0.03317  | 0.062489 | 0.17763  | 0.136851 | 0.00304  | 0.290071 | 1.66E-10 |
| 4.65E-14 | 0.091336  | 0.04854  | 0.087926 | 0.05761  | 0.014199 | 0.75958  | 0.10034  | 0.03016  |
| 0.01673  | 0.016541  | 0.72145  | 0.109211 | 0.01824  | 0.01539  | 0.74011  | 0.108981 | 0.01848  |
| 4.73E-07 | -0.02636  | 0.56993  | -0.04176 | 0.36793  | -0.13635 | 0.00315  | -0.03755 | 0.41822  |
| 2.13E-07 | 0.047066  | 0.31014  | -0.0427  | 0.3572   | -0.21025 | 4.59E-06 | -0.04637 | 0.31739  |
| 1.85E-15 | 0.138315  | 0.00274  | 0.044885 | 0.33311  | 0.026023 | 0.57483  | 0.19525  | 2.15E-05 |
| 1.32E-09 | 0.022076  | 0.63418  | 0.044904 | 0.3329   | 0.039301 | 0.39679  | 0.070458 | 0.12841  |
| 4.76E-10 | 0.00099   | 0.98299  | -0.00953 | 0.83727  | -0.09111 | 0.0491   | 0.020665 | 0.65601  |
| 3.11E-09 | -0.03456  | 0.45628  | 0.003489 | 0.94006  | -0.15021 | 0.00113  | -0.01546 | 0.73897  |
| 0.07163  | 0.10246   | 0.02682  | 0.128181 | 0.00554  | 0.233455 | 3.36E-07 | 0.34626  | 1.34E-14 |
| 0.00045  | -0.17952  | 9.59E-05 | -0.11621 | 0.01197  | -0.19024 | 3.50E-05 | -0.25586 | 2.05E-08 |
| 2.14E-11 | 0.158468  | 0.00059  | 0.156411 | 0.00069  | -0.01952 | 0.67393  | 0.165124 | 0.00034  |
| 7.04E-21 | 0.042286  | 0.36189  | -0.16089 | 0.00048  | -0.14008 | 0.00241  | -0.0066  | 0.88684  |
| 0.55169  | 0.198763  | 1.51E-05 | 0.168789 | 0.00025  | 0.261314 | 9.94E-09 | 0.351842 | 4.69E-15 |
| 0.08607  | 0.118922  | 0.01011  | 0.086338 | 0.06229  | 0.102134 | 0.02732  | 0.250263 | 4.22E-08 |
| 0.48326  | -0.08656  | 0.06163  | -0.04163 | 0.3694   | 0.019296 | 0.67748  | -0.12417 | 0.00722  |
| 0.0003   | 0.031761  | 0.49354  | 0.002194 | 0.96229  | 0.014267 | 0.75846  | 0.087889 | 0.05771  |
| 2.35E-07 | 0.11382   | 0.01385  | 0.011589 | 0.80276  | 0.184384 | 6.12E-05 | 0.170483 | 0.00021  |
| 3.67E-09 | 0.028862  | 0.53383  | 0.028974 | 0.53225  | 0.073392 | 0.11322  | 0.143687 | 0.00185  |
| 0.0024   | 0.089207  | 0.05405  | -0.01874 | 0.68633  | -0.06175 | 0.18281  | 0.106534 | 0.0213   |
| 1.64E-05 | 0.032659  | 0.4814   | -0.05486 | 0.23672  | -0.06884 | 0.13743  | 0.112939 | 0.01461  |
| 0.11606  | 0.112052  | 0.01541  | 0.170172 | 0.00022  | 0.15866  | 0.00058  | 0.282643 | 5.01E-10 |
| 0.01098  | -0.02388  | 0.60676  | -0.06161 | 0.18379  | -0.16761 | 0.00027  | -0.09626 | 0.03758  |
| 1.69E-08 | -0.16582  | 0.00032  | -0.11208 | 0.01539  | 0.05028  | 0.27822  | -0.23127 | 4.35E-07 |
| 0.94717  | -0.02304  | 0.61944  | -0.11742 | 0.0111   | -0.19272 | 2.75E-05 | -0.11701 | 0.01139  |
| 0.24129  | -0.05672  | 0.2212   | 0.085633 | 0.06446  | -0.11425 | 0.01349  | -0.06765 | 0.1444   |
| 4.83E-08 | -0.13183  | 0.00432  | 0.010673 | 0.81807  | -0.25394 | 2.63E-08 | -0.24197 | 1.20E-07 |
| 3.78E-09 | 0.014622  | 0.75264  | -0.11372 | 0.01393  | -0.18081 | 8.52E-05 | -0.07261 | 0.1171   |



|          |          |          |          |          |           |          |          |          |
|----------|----------|----------|----------|----------|-----------|----------|----------|----------|
| 3.87E-06 | 0.104157 | 0.02439  | 0.110244 | 0.01716  | -0.07341  | 0.11315  | 0.139405 | 0.00253  |
| 0.08295  | 0.043573 | 0.34746  | 0.172779 | 0.00018  | 0.085341  | 0.06538  | 0.159055 | 0.00056  |
| 0.18952  | -0.28639 | 2.89E-10 | 0.234423 | 2.99E-07 | 0.183846  | 6.43E-05 | 0.119411 | 0.0098   |
| 1.34E-06 | 0.027701 | 0.55042  | 0.042006 | 0.36508  | -0.14911  | 0.00123  | 0.045789 | 0.32346  |
| 5.16E-05 | 0.01349  | 0.77124  | -0.08271 | 0.07417  | -0.17012  | 0.00022  | -0.00588 | 0.89915  |
| 0.01715  | 0.002058 | 0.96463  | 0.01168  | 0.80125  | -0.02242  | 0.62886  | 0.037287 | 0.42145  |
| 3.35E-07 | 0.077039 | 0.09635  | -0.01196 | 0.7966   | -0.07507  | 0.10519  | 0.100154 | 0.03046  |
| 0.00073  | 0.102073 | 0.02741  | 0.026807 | 0.56336  | 0.043406  | 0.34931  | 0.204834 | 8.12E-06 |
| 0.00011  | 0.133146 | 0.00395  | 0.069119 | 0.13584  | -0.00871  | 0.85105  | 0.183364 | 6.73E-05 |
| 8.54E-12 | 0.229782 | 5.18E-07 | 0.185464 | 5.53E-05 | 0.213175  | 3.35E-06 | 0.381244 | 1.33E-17 |
| 0.07932  | 0.074685 | 0.10699  | -0.10136 | 0.02851  | -0.11257  | 0.01494  | 0.045896 | 0.32232  |
| 0.00011  | -0.08493 | 0.06669  | -0.10168 | 0.02801  | -0.26329  | 7.62E-09 | -0.21657 | 2.32E-06 |
| 1.40E-13 | 0.039524 | 0.39412  | -0.05106 | 0.27084  | -0.14719  | 0.00142  | 0.028788 | 0.53488  |
| 0.12558  | -0.07425 | 0.10906  | -0.05251 | 0.25747  | -0.12813  | 0.00556  | -0.15825 | 0.0006   |
| 0.00152  | -0.11877 | 0.01021  | -0.12084 | 0.00895  | -0.18631  | 5.10E-05 | -0.22981 | 5.16E-07 |
| 0.0035   | 0.124054 | 0.00727  | 0.063378 | 0.17153  | 0.142034  | 0.00209  | 0.267417 | 4.34E-09 |
| 0.88178  | 0.025821 | 0.5778   | -0.07012 | 0.13024  | -0.14969  | 0.00118  | 0.00141  | 0.97575  |
| 5.66E-23 | 0.099185 | 0.03212  | 0.107381 | 0.02029  | 0.023428  | 0.61356  | 0.179137 | 9.93E-05 |
| 1.50E-07 | 0.098475 | 0.03337  | 0.051549 | 0.26625  | -0.02477  | 0.59333  | 0.159195 | 0.00055  |
| 6.00E-18 | 0.177957 | 0.00011  | 0.072158 | 0.11942  | 0.069216  | 0.13529  | 0.267809 | 4.11E-09 |
| 0.92849  | 0.094299 | 0.04166  | 0.156081 | 0.00071  | 0.15264   | 0.00094  | 0.182536 | 7.26E-05 |
| 0.33347  | -0.04343 | 0.34903  | -0.08907 | 0.05441  | -0.18243  | 7.34E-05 | -0.16363 | 0.00038  |
| 0.0049   | -0.03394 | 0.46435  | 0.023516 | 0.61223  | -0.04847  | 0.29593  | 0.022576 | 0.62653  |
| 1.02E-05 | 0.029556 | 0.52404  | 0.073488 | 0.11275  | 0.05909   | 0.20244  | 0.13164  | 0.00438  |
| 0.14941  | -0.06992 | 0.13135  | -0.07048 | 0.12826  | -0.17692  | 0.00012  | -0.15464 | 0.0008   |
| 2.09E-13 | 0.008097 | 0.86147  | -0.00997 | 0.82989  | -0.05948  | 0.19945  | -0.02734 | 0.55562  |
| 6.45E-07 | -0.00729 | 0.87523  | 0.038308 | 0.40884  | -0.00742  | 0.87296  | 0.008168 | 0.86026  |
| 4.43E-05 | -0.00471 | 0.91912  | 0.181486 | 8.01E-05 | 0.124493  | 0.00707  | 0.234743 | 2.88E-07 |
| 0.01292  | -0.00892 | 0.84752  | -0.04153 | 0.37052  | 0.005541  | 0.90494  | 0.060883 | 0.18905  |
| 0.97151  | 0.097273 | 0.0356   | 0.078623 | 0.08967  | 0.022746  | 0.62393  | 0.174738 | 0.00015  |
| 1.05E-19 | 0.049294 | 0.28776  | 0.011668 | 0.80144  | 0.039107  | 0.39913  | 0.11238  | 0.01511  |
| 0.96293  | 0.09341  | 0.04363  | -0.09668 | 0.03674  | -0.08507  | 0.06624  | 0.055105 | 0.23462  |
| 2.06E-07 | -0.05746 | 0.21523  | 0.084204 | 0.06906  | -0.08146  | 0.07866  | -0.04366 | 0.34651  |
| 3.31E-07 | -0.13166 | 0.00437  | -0.01053 | 0.82052  | 0.025554  | 0.58175  | -0.14637 | 0.00152  |
| 5.78E-18 | 0.025592 | 0.58118  | -0.07666 | 0.09799  | -0.22713  | 7.04E-07 | -0.11757 | 0.011    |
| 5.50E-10 | 0.050217 | 0.27882  | 0.158835 | 0.00057  | -7.46E-05 | 0.99872  | 0.136222 | 0.00318  |
| 2.96E-05 | -0.05139 | 0.26775  | -0.01679 | 0.71749  | -0.0122   | 0.79251  | 0.021285 | 0.64638  |
| 0.47151  | 0.053454 | 0.24896  | 0.018869 | 0.68423  | 0.078769  | 0.08908  | 0.177048 | 0.00012  |
| 0.00179  | 0.085863 | 0.06374  | 0.039312 | 0.39666  | 0.108769  | 0.01871  | 0.170169 | 0.00022  |
| 0.44481  | -0.06858 | 0.13891  | -0.22127 | 1.37E-06 | -0.20178  | 1.11E-05 | -0.1949  | 2.22E-05 |
| 5.07E-10 | 0.13501  | 0.00346  | 0.192857 | 2.72E-05 | 0.146642  | 0.00148  | 0.253589 | 2.75E-08 |
| 1.09E-11 | -0.08557 | 0.06465  | -0.02109 | 0.64948  | -0.21486  | 2.79E-06 | -0.175   | 0.00014  |
| 0.00054  | 0.262545 | 8.42E-09 | 0.098818 | 0.03276  | 0.169783  | 0.00023  | 0.310542 | 6.73E-12 |
| 0.01827  | 0.072322 | 0.11858  | -0.15054 | 0.0011   | -0.12724  | 0.0059   | 0.017551 | 0.70522  |
| 0.00225  | 0.189096 | 3.91E-05 | -0.03158 | 0.49596  | 0.056773  | 0.22074  | 0.19522  | 2.15E-05 |

|          |          |         |          |          |          |          |          |          |
|----------|----------|---------|----------|----------|----------|----------|----------|----------|
| 0.00136  | 0.08457  | 0.06786 | 0.053953 | 0.24456  | -0.08388 | 0.07015  | 0.001023 | 0.98241  |
| 0.18696  | -0.01535 | 0.74073 | -0.22596 | 8.06E-07 | -0.26276 | 8.18E-09 | -0.15684 | 0.00067  |
| 0.00574  | -0.09155 | 0.048   | 0.056082 | 0.22642  | -0.15141 | 0.00103  | -0.14201 | 0.0021   |
| 2.69E-21 | 0.04125  | 0.37379 | 0.156693 | 0.00068  | 0.021333 | 0.64565  | 0.124561 | 0.00704  |
| 0.01462  | -0.13707 | 0.003   | 0.043054 | 0.35323  | -0.16753 | 0.00028  | -0.10112 | 0.02888  |
| 0.00105  | 0.000213 | 0.99634 | 0.016802 | 0.71724  | -0.06031 | 0.19325  | 0.012709 | 0.78415  |
| 3.72E-13 | 0.066469 | 0.15153 | 0.149814 | 0.00117  | -0.00412 | 0.92916  | 0.138001 | 0.0028   |
| 6.80E-05 | 0.119485 | 0.00975 | -0.09964 | 0.03134  | 0.000886 | 0.98477  | 0.145857 | 0.00158  |
| 0.01646  | -0.10176 | 0.02789 | 0.037356 | 0.4206   | -0.1728  | 0.00018  | -0.12811 | 0.00556  |
| 3.62E-07 | 0.05778  | 0.21264 | 0.112563 | 0.01494  | -0.05343 | 0.24913  | 0.134653 | 0.00355  |
| 0.34293  | 0.07616  | 0.10022 | 0.36355  | 4.87E-16 | 0.228964 | 5.69E-07 | 0.339605 | 4.54E-14 |
| 3.82E-09 | 0.025312 | 0.58532 | 0.023613 | 0.61077  | 0.040799 | 0.37903  | 0.121738 | 0.00845  |
| 0.73425  | -0.03096 | 0.50447 | -0.02513 | 0.58803  | -0.00225 | 0.96131  | -0.09761 | 0.03496  |
| 2.78E-08 | -0.06276 | 0.17577 | 0.033095 | 0.47556  | -0.02827 | 0.54225  | 0.042775 | 0.35637  |
| 2.53E-06 | 0.074932 | 0.10583 | 0.002786 | 0.95211  | -0.0494  | 0.28674  | 0.036953 | 0.42563  |
| 2.08E-07 | 0.028786 | 0.53491 | 0.074136 | 0.1096   | 0.035469 | 0.44446  | 0.111607 | 0.01582  |
| 1.39E-06 | 0.132551 | 0.00411 | 0.076948 | 0.09674  | -0.14552 | 0.00162  | -0.07289 | 0.11572  |
| 0.60095  | -0.10086 | 0.0293  | -0.04663 | 0.31466  | -0.04938 | 0.28695  | -0.0973  | 0.03556  |
| 0.00067  | -0.097   | 0.03613 | -0.16263 | 0.00042  | -0.23738 | 2.10E-07 | -0.20144 | 1.15E-05 |
| 1.38E-05 | 0.139534 | 0.00251 | 0.00403  | 0.93079  | 0.045716 | 0.32423  | 0.177303 | 0.00012  |
| 5.02E-05 | 0.014045 | 0.7621  | -0.11724 | 0.01123  | -0.18133 | 8.12E-05 | -0.17803 | 0.00011  |
| 0.02824  | -0.04342 | 0.34918 | -0.1031  | 0.02588  | -0.2748  | 1.55E-09 | -0.15606 | 0.00071  |
| 1.59E-09 | 0.059061 | 0.20266 | 0.067557 | 0.14493  | -0.06691 | 0.14886  | 0.087673 | 0.05833  |
| 0.011    | -0.02949 | 0.52491 | -0.01207 | 0.79477  | -0.06936 | 0.13448  | -0.01844 | 0.6911   |
| 0.00802  | 0.021551 | 0.64228 | 0.04307  | 0.35305  | -0.14711 | 0.00143  | 0.030596 | 0.50952  |
| 0.37861  | 0.149962 | 0.00115 | 0.166606 | 0.0003   | 0.259506 | 1.27E-08 | 0.395893 | 5.66E-19 |
| 0.08104  | 0.025887 | 0.57683 | -0.06042 | 0.19244  | -0.24986 | 4.45E-08 | -0.13015 | 0.00485  |
| 0.00792  | -0.06696 | 0.14852 | 0.002196 | 0.96225  | -0.13462 | 0.00356  | -0.07624 | 0.09986  |
| 0.14837  | 0.003283 | 0.9436  | -0.13618 | 0.00319  | -0.12775 | 0.0057   | -0.00928 | 0.84142  |
| 1.31E-06 | 0.091986 | 0.04695 | -0.09317 | 0.04418  | -0.00437 | 0.92498  | 0.143515 | 0.00188  |
| 0.06927  | 0.07671  | 0.09778 | 0.006502 | 0.88856  | -0.03554 | 0.44354  | 0.142135 | 0.00208  |
| 0.00696  | 0.097193 | 0.03576 | 0.019018 | 0.68187  | -0.06502 | 0.16065  | 0.080512 | 0.0822   |
| 8.59E-05 | -0.00605 | 0.89619 | 0.014015 | 0.7626   | -0.1837  | 6.52E-05 | -0.0825  | 0.07489  |
| 0.02282  | 0.056521 | 0.2228  | 0.11634  | 0.01187  | 0.03422  | 0.46068  | 0.112396 | 0.01509  |
| 6.94E-10 | 0.081314 | 0.07919 | 0.221921 | 1.28E-06 | 0.167642 | 0.00027  | 0.293005 | 1.07E-10 |
| 1.54E-05 | 0.158815 | 0.00057 | -0.04894 | 0.29125  | -0.07399 | 0.11029  | 0.090217 | 0.05137  |
| 5.78E-08 | 0.09803  | 0.03419 | 0.012609 | 0.7858   | -0.05115 | 0.26999  | 0.105744 | 0.02229  |
| 0.06907  | -0.01332 | 0.77404 | -0.05301 | 0.25295  | -0.05509 | 0.23479  | -0.03266 | 0.48134  |
| 2.42E-05 | 0.08684  | 0.06077 | 0.090616 | 0.05035  | 0.006265 | 0.89259  | 0.176279 | 0.00013  |
| 0.00706  | 0.140925 | 0.00227 | 0.043329 | 0.35016  | 0.087602 | 0.05854  | 0.239548 | 1.61E-07 |
| 5.63E-17 | 0.055891 | 0.228   | -0.08418 | 0.06915  | -0.09894 | 0.03255  | -0.00981 | 0.83263  |
| 0.05957  | 0.00079  | 0.98642 | 0.068122 | 0.14159  | -0.01582 | 0.73311  | 0.025289 | 0.58567  |
| 0.00194  | -0.10009 | 0.03057 | 0.041643 | 0.36924  | -0.04608 | 0.32044  | -0.0595  | 0.19931  |
| 2.78E-06 | 0.011363 | 0.80653 | 0.111916 | 0.01554  | 0.078084 | 0.0919   | 0.111835 | 0.01561  |
| 1.12E-09 | 0.081391 | 0.0789  | 0.039799 | 0.39084  | 0.023168 | 0.6175   | 0.151809 | 0.001    |

|          |          |          |          |          |          |          |          |          |
|----------|----------|----------|----------|----------|----------|----------|----------|----------|
| 0.00609  | -0.03181 | 0.49288  | -0.06615 | 0.15351  | -0.14132 | 0.00221  | -0.02313 | 0.61809  |
| 0.01422  | -0.10209 | 0.02739  | 0.032786 | 0.47969  | -0.2345  | 2.96E-07 | -0.17484 | 0.00015  |
| 7.82E-05 | 0.003741 | 0.93574  | 0.153021 | 0.00091  | 0.028608 | 0.53744  | 0.081604 | 0.07812  |
| 0.04119  | -0.09789 | 0.03445  | -0.01086 | 0.81495  | -0.12493 | 0.00687  | -0.11392 | 0.01377  |
| 5.97E-09 | -0.10329 | 0.0256   | -0.04169 | 0.36867  | -0.2189  | 1.79E-06 | -0.18    | 9.17E-05 |
| 0.50707  | -0.11809 | 0.01065  | -0.04679 | 0.31299  | -0.18815 | 4.28E-05 | -0.12783 | 0.00567  |
| 1.34E-06 | 0.091645 | 0.04778  | 0.206471 | 6.84E-06 | 0.194505 | 2.31E-05 | 0.254311 | 2.51E-08 |
| 0.00426  | 0.056481 | 0.22312  | 0.017002 | 0.71402  | -0.08244 | 0.07513  | 0.037685 | 0.41651  |
| 5.38E-12 | 0.074291 | 0.10886  | 0.114342 | 0.01342  | -0.00207 | 0.96438  | 0.161978 | 0.00044  |
| 0.72635  | 0.063501 | 0.17069  | 0.048409 | 0.29651  | -0.01248 | 0.78795  | 0.071612 | 0.12225  |
| 4.42E-06 | 0.105319 | 0.02283  | 0.244178 | 9.11E-08 | 0.046182 | 0.31932  | 0.244391 | 8.87E-08 |
| 1.51E-05 | 0.040435 | 0.3833   | 0.135122 | 0.00344  | -0.0256  | 0.58109  | 0.126483 | 0.0062   |
| 0.99519  | 0.187234 | 4.67E-05 | 0.183084 | 6.90E-05 | 0.201664 | 1.13E-05 | 0.338739 | 5.30E-14 |
| 0.13793  | 0.035685 | 0.44169  | 0.016359 | 0.72439  | -0.01574 | 0.73443  | 0.098137 | 0.03399  |
| 9.75E-07 | 0.06745  | 0.14557  | 0.076203 | 0.10002  | 0.069999 | 0.13092  | 0.178081 | 0.00011  |
| 5.90E-06 | 0.036356 | 0.43314  | 0.080889 | 0.08077  | 0.052796 | 0.25484  | 0.11573  | 0.01233  |
| 3.98E-05 | 0.091655 | 0.04775  | 0.01269  | 0.78447  | -0.10293 | 0.02613  | 0.096603 | 0.0369   |
| 7.87E-08 | -0.02495 | 0.59071  | 0.006108 | 0.89527  | -0.14434 | 0.00176  | -0.0523  | 0.2593   |
| 1.93E-06 | 0.091091 | 0.04915  | 0.04747  | 0.306    | 0.10308  | 0.02591  | 0.242007 | 1.19E-07 |
| 1.39E-09 | 0.026538 | 0.56728  | -0.01801 | 0.69795  | -0.12814 | 0.00555  | -0.02596 | 0.57577  |
| 1.69E-19 | 0.023263 | 0.61607  | 0.205171 | 7.84E-06 | 0.066728 | 0.14994  | 0.17362  | 0.00016  |
| 1.54E-09 | 0.045007 | 0.3318   | 0.002447 | 0.95794  | -0.10528 | 0.02288  | 0.028644 | 0.53692  |
| 0.09787  | -0.06154 | 0.18428  | 0.062466 | 0.17779  | -0.08831 | 0.05651  | -0.03286 | 0.47867  |
| 3.64E-08 | -0.06249 | 0.17763  | -0.02124 | 0.64713  | -0.16706 | 0.00029  | -0.08076 | 0.08125  |
| 0.80911  | 0.028445 | 0.53976  | -0.12559 | 0.00658  | -0.20119 | 1.18E-05 | -0.08394 | 0.06993  |
| 0.0354   | -0.03667 | 0.42923  | 0.018289 | 0.69343  | -0.04827 | 0.29793  | 0.036218 | 0.43489  |
| 0.57116  | -0.066   | 0.15446  | -0.12411 | 0.00725  | -0.1778  | 0.00011  | -0.14772 | 0.00137  |
| 0.14026  | -0.08078 | 0.08118  | 0.060386 | 0.1927   | -0.13532 | 0.00339  | -0.09252 | 0.04569  |
| 6.09E-07 | 0.067809 | 0.14343  | 0.203772 | 9.06E-06 | 0.142922 | 0.00196  | 0.213434 | 3.26E-06 |
| 1.04E-10 | 0.155158 | 0.00077  | 0.060618 | 0.19099  | -0.0118  | 0.79922  | 0.147574 | 0.00138  |
| 1.66E-07 | -0.00654 | 0.88793  | 0.232017 | 3.98E-07 | -0.01794 | 0.69907  | 0.099628 | 0.03135  |
| 0.11822  | -0.0125  | 0.78759  | -0.15144 | 0.00103  | -0.24831 | 5.42E-08 | -0.11224 | 0.01524  |
| 3.46E-12 | 0.051199 | 0.26951  | 0.244235 | 9.04E-08 | 0.077252 | 0.09542  | 0.18825  | 4.24E-05 |
| 0.94141  | 0.086788 | 0.06093  | 0.104253 | 0.02426  | -0.01916 | 0.6796   | 0.099015 | 0.03241  |
| 0.00023  | 0.09829  | 0.03371  | 0.064381 | 0.16483  | -0.10876 | 0.01872  | 0.053491 | 0.24863  |
| 1.06E-17 | 0.074903 | 0.10596  | -0.00128 | 0.97796  | -0.06681 | 0.14941  | 0.072571 | 0.11732  |
| 0.00133  | 0.030045 | 0.51719  | 0.000723 | 0.98757  | -0.07842 | 0.09053  | 0.04282  | 0.35586  |
| 0.00092  | 0.004727 | 0.91886  | 0.101204 | 0.02876  | 0.00018  | 0.99691  | 0.057743 | 0.21293  |
| 6.09E-05 | 0.026625 | 0.56602  | 0.144995 | 0.00168  | 0.078953 | 0.08833  | 0.174189 | 0.00015  |
| 0.00036  | -0.05284 | 0.25443  | -0.11141 | 0.01601  | 0.036682 | 0.42903  | -0.13608 | 0.00321  |
| 2.08E-09 | -0.01717 | 0.71139  | 0.108849 | 0.01863  | -0.02389 | 0.60663  | 0.07695  | 0.09673  |
| 1.32E-07 | -0.03718 | 0.42284  | -0.03307 | 0.47589  | -0.18012 | 9.08E-05 | -0.04615 | 0.31961  |
| 2.01E-17 | -0.07307 | 0.11482  | 0.024999 | 0.58998  | -0.20652 | 6.81E-06 | -0.12791 | 0.00564  |
| 0.89752  | -0.02272 | 0.62439  | -0.01023 | 0.82544  | -0.05551 | 0.23123  | 0.003901 | 0.933    |
| 0.0001   | -0.19189 | 2.99E-05 | -0.04985 | 0.28238  | 0.021892 | 0.63701  | -0.17941 | 9.69E-05 |

|          |          |          |          |          |          |          |          |          |
|----------|----------|----------|----------|----------|----------|----------|----------|----------|
| 0.24592  | -0.08711 | 0.05997  | -0.07594 | 0.10122  | -0.21123 | 4.13E-06 | -0.16622 | 0.00031  |
| 1.13E-07 | 0.101826 | 0.02778  | 0.200231 | 1.30E-05 | 0.106033 | 0.02192  | 0.262391 | 8.60E-09 |
| 7.11E-14 | 0.011885 | 0.79783  | 0.049532 | 0.28544  | -0.0636  | 0.17     | 0.047823 | 0.3024   |
| 0.00242  | -0.13539 | 0.00337  | -0.10777 | 0.01983  | -0.21942 | 1.69E-06 | -0.15275 | 0.00093  |
| 0.01251  | 0.077469 | 0.0945   | 0.261046 | 1.03E-08 | 0.286424 | 2.87E-10 | 0.385127 | 5.84E-18 |
| 0.43418  | 0.191834 | 3.00E-05 | 0.185221 | 5.65E-05 | 0.105613 | 0.02245  | 0.278547 | 9.07E-10 |
| 0.00193  | -0.10134 | 0.02855  | -0.08694 | 0.06049  | -0.32533 | 5.66E-13 | -0.23257 | 3.73E-07 |
| 0.0006   | 0.04539  | 0.32769  | -0.11795 | 0.01074  | 0.012002 | 0.79589  | -0.03003 | 0.51742  |
| 5.38E-09 | -0.06713 | 0.14749  | -0.16422 | 0.00037  | -0.13051 | 0.00473  | -0.25408 | 2.58E-08 |
| 0.00113  | -0.00637 | 0.89088  | -0.07847 | 0.09029  | -0.23111 | 4.43E-07 | -0.05365 | 0.24723  |
| 5.84E-05 | -0.01149 | 0.8044   | 0.142798 | 0.00198  | 0.020236 | 0.66271  | 0.11799  | 0.01071  |
| 3.94E-10 | 0.014152 | 0.76035  | -0.00717 | 0.87721  | -0.18789 | 4.39E-05 | 0.01115  | 0.81009  |
| 1.68E-08 | 0.056975 | 0.21909  | 0.011591 | 0.80273  | -0.03839 | 0.40785  | 0.074206 | 0.10926  |
| 0.3749   | 0.094722 | 0.04075  | -0.10542 | 0.0227   | -0.26099 | 1.04E-08 | -0.0822  | 0.07595  |
| 1.88E-07 | -0.02151 | 0.6429   | 0.156648 | 0.00068  | 0.003576 | 0.93856  | 0.118522 | 0.01036  |
| 0.75224  | -0.21276 | 3.51E-06 | 0.02389  | 0.60658  | -0.24108 | 1.34E-07 | -0.32001 | 1.40E-12 |
| 7.11E-14 | 0.112831 | 0.01471  | -0.01205 | 0.79509  | 0.015033 | 0.74593  | 0.157583 | 0.00063  |
| 1.79E-22 | -0.00147 | 0.97477  | -0.09525 | 0.03963  | 0.009899 | 0.83106  | -0.05351 | 0.24848  |
| 0.7953   | -0.12957 | 0.00504  | -0.03041 | 0.51209  | -0.25252 | 3.16E-08 | -0.26645 | 4.96E-09 |
| 1.94E-05 | -0.06535 | 0.15855  | -0.08946 | 0.05337  | -0.24391 | 9.41E-08 | -0.14451 | 0.00174  |
| 0.07679  | -0.11118 | 0.01623  | -0.08936 | 0.05364  | -0.18538 | 5.57E-05 | -0.12109 | 0.00881  |
| 0.23312  | -0.06101 | 0.18814  | 0.073793 | 0.11126  | -0.22079 | 1.45E-06 | -0.07632 | 0.09951  |
| 0.68975  | -0.05252 | 0.25732  | -0.10381 | 0.02487  | -0.20262 | 1.02E-05 | -0.09501 | 0.04013  |
| 1.10E-11 | -0.05181 | 0.26382  | 0.084252 | 0.0689   | -0.10626 | 0.02164  | 0.007248 | 0.87587  |
| 4.02E-14 | 0.147436 | 0.0014   | 0.01224  | 0.79193  | 0.09701  | 0.03611  | 0.276688 | 1.18E-09 |
| 0.01119  | 0.089499 | 0.05326  | 0.172869 | 0.00017  | 0.124374 | 0.00712  | 0.244334 | 8.93E-08 |
| 1.08E-10 | 0.032938 | 0.47765  | 0.07491  | 0.10593  | 0.032664 | 0.48132  | 0.129982 | 0.0049   |
| 0.00167  | 0.037282 | 0.42151  | 0.097826 | 0.03456  | -0.02876 | 0.53533  | 0.082611 | 0.0745   |
| 0.00023  | 0.074434 | 0.10818  | 0.05636  | 0.22412  | 0.227259 | 6.94E-07 | 0.18527  | 5.63E-05 |
| 0.00078  | -0.1217  | 0.00847  | -0.08881 | 0.05512  | -0.29694 | 5.83E-11 | -0.23329 | 3.43E-07 |
| 0.00114  | -0.04245 | 0.36007  | 0.01228  | 0.79126  | -0.11244 | 0.01506  | -0.02237 | 0.6297   |
| 0.01807  | 0.009615 | 0.83582  | 0.046673 | 0.31419  | -0.07704 | 0.09633  | 0.004947 | 0.91508  |
| 0.00043  | 0.060187 | 0.19417  | 0.086024 | 0.06325  | -0.06261 | 0.17676  | 0.077547 | 0.09416  |
| 0.00018  | -0.06807 | 0.14192  | -0.01353 | 0.77051  | -0.18772 | 4.46E-05 | -0.06994 | 0.13125  |
| 3.16E-12 | -0.07909 | 0.08779  | 0.169571 | 0.00023  | -0.02406 | 0.60406  | 0.026073 | 0.5741   |
| 0.00482  | -0.0434  | 0.34936  | 0.007568 | 0.87043  | -0.13531 | 0.00339  | -0.10146 | 0.02836  |
| 8.78E-07 | 0.097209 | 0.03572  | 0.175084 | 0.00014  | 0.077546 | 0.09417  | 0.228673 | 5.89E-07 |
| 0.00978  | 0.032635 | 0.48171  | 0.109319 | 0.01812  | 0.091625 | 0.04783  | 0.059945 | 0.19597  |
| 2.38E-06 | 0.017623 | 0.70407  | 0.041442 | 0.37156  | 0.025314 | 0.5853   | 0.133442 | 0.00387  |
| 0.00797  | 0.0978   | 0.03461  | 0.166715 | 0.0003   | 0.280081 | 7.27E-10 | 0.376584 | 3.50E-17 |
| 1.12E-06 | 0.140338 | 0.00237  | 0.289106 | 1.92E-10 | 0.262647 | 8.31E-09 | 0.435556 | 4.83E-23 |
| 0.00017  | -0.07893 | 0.0884   | -0.07373 | 0.11155  | -0.08038 | 0.0827   | -0.16923 | 0.00024  |
| 3.37E-06 | 0.125926 | 0.00643  | 0.011941 | 0.7969   | 0.031811 | 0.49285  | 0.216746 | 2.27E-06 |
| 0.00049  | 0.093703 | 0.04297  | 0.057549 | 0.21448  | 0.126396 | 0.00624  | 0.2244   | 9.63E-07 |
| 2.74E-06 | 0.046375 | 0.3173   | 0.147932 | 0.00135  | -0.04492 | 0.33269  | 0.114637 | 0.01318  |

|          |          |          |          |          |          |          |          |          |
|----------|----------|----------|----------|----------|----------|----------|----------|----------|
| 3.47E-05 | 0.056437 | 0.22349  | 0.15094  | 0.00107  | 0.116925 | 0.01145  | 0.204561 | 8.35E-06 |
| 4.92E-10 | 0.069562 | 0.13334  | 0.124903 | 0.00688  | -0.16133 | 0.00047  | -0.03799 | 0.41276  |
| 8.41E-18 | 0.138492 | 0.00271  | 0.166123 | 0.00031  | 0.045313 | 0.32852  | 0.247521 | 5.99E-08 |
| 0.26764  | 0.060203 | 0.19405  | 0.102575 | 0.02665  | 0.134474 | 0.0036   | 0.252922 | 3.00E-08 |
| 0.06876  | -0.10895 | 0.01851  | -0.20526 | 7.77E-06 | -0.17056 | 0.00021  | -0.30071 | 3.24E-11 |
| 1.44E-09 | -0.1278  | 0.00568  | 0.021536 | 0.6425   | -0.1511  | 0.00106  | -0.1198  | 0.00956  |
| 1.12E-10 | -0.07796 | 0.0924   | -0.09558 | 0.03894  | -0.2035  | 9.32E-06 | -0.18159 | 7.93E-05 |
| 0.00042  | -0.02033 | 0.66131  | -0.13198 | 0.00428  | -0.21124 | 4.13E-06 | -0.16649 | 0.0003   |
| 1.88E-05 | -0.11735 | 0.01115  | -0.07692 | 0.09684  | -0.27733 | 1.08E-09 | -0.17134 | 0.0002   |
| 1.81E-16 | 0.015944 | 0.73111  | 0.034974 | 0.45085  | -0.09218 | 0.04649  | 0.023483 | 0.61272  |
| 0.03427  | 0.096262 | 0.03757  | 0.116137 | 0.01202  | 0.117981 | 0.01072  | 0.254264 | 2.52E-08 |
| 4.32E-06 | -0.0704  | 0.12872  | -0.08551 | 0.06483  | -0.05806 | 0.21043  | -0.12134 | 0.00867  |
| 0.50945  | -0.00028 | 0.99527  | -0.06699 | 0.14834  | -0.14244 | 0.00203  | -0.07793 | 0.09256  |
| 4.55E-13 | 0.14634  | 0.00152  | 0.186945 | 4.80E-05 | 0.103893 | 0.02475  | 0.324999 | 5.98E-13 |
| 9.68E-11 | -0.1045  | 0.02392  | -0.11234 | 0.01515  | -0.1118  | 0.01564  | -0.11762 | 0.01097  |
| 1.83E-25 | 0.056695 | 0.22137  | 0.044324 | 0.3392   | -0.19041 | 3.45E-05 | 0.003693 | 0.93656  |
| 1.76E-13 | -0.09985 | 0.03098  | -0.07077 | 0.12674  | -0.20398 | 8.87E-06 | -0.15019 | 0.00113  |
| 0.00082  | -0.02408 | 0.60371  | -0.00995 | 0.83019  | -0.20976 | 4.83E-06 | -0.08206 | 0.07646  |
| 0.57285  | -0.08102 | 0.08028  | 0.023296 | 0.61556  | -0.17007 | 0.00022  | -0.23318 | 3.47E-07 |
| 0.00084  | -0.09499 | 0.04017  | -0.03617 | 0.43547  | -0.27945 | 7.96E-10 | -0.2535  | 2.79E-08 |
| 0.27799  | -0.18166 | 7.88E-05 | 0.101091 | 0.02894  | -0.10606 | 0.02189  | -0.18314 | 6.87E-05 |
| 0.00069  | -0.09129 | 0.04865  | 0.033007 | 0.47673  | -0.08746 | 0.05895  | -0.10745 | 0.02021  |
| 1.55E-11 | 0.001632 | 0.97195  | -0.0131  | 0.77763  | 0.016423 | 0.72335  | 0.001659 | 0.97147  |
| 0.22683  | -0.0912  | 0.04888  | -0.14097 | 0.00226  | -0.20831 | 5.64E-06 | -0.18662 | 4.95E-05 |
| 0.08838  | 0.076078 | 0.10058  | 0.107876 | 0.01971  | -0.04807 | 0.29993  | -0.0731  | 0.11467  |
| 0.77101  | 0.27628  | 1.25E-09 | 0.42819  | 3.03E-22 | 0.421336 | 1.60E-21 | 0.531467 | 2.11E-35 |
| 8.35E-07 | 0.058063 | 0.2104   | 0.195456 | 2.10E-05 | -0.02741 | 0.55461  | 0.152626 | 0.00094  |
| 0.00041  | -0.06323 | 0.17256  | -0.0089  | 0.84783  | -0.09878 | 0.03283  | -0.07883 | 0.08883  |
| 6.08E-05 | -0.16575 | 0.00032  | -0.02909 | 0.53055  | -0.18979 | 3.66E-05 | -0.2516  | 3.56E-08 |
| 0.00329  | 0.039453 | 0.39497  | 0.147577 | 0.00138  | 0.008005 | 0.86303  | 0.096377 | 0.03734  |
| 0.29085  | 0.115221 | 0.01272  | 0.355536 | 2.32E-15 | 0.284473 | 3.83E-10 | 0.329855 | 2.58E-13 |
| 0.00039  | 0.107734 | 0.01988  | 0.231292 | 4.34E-07 | 0.116912 | 0.01146  | 0.194399 | 2.34E-05 |
| 0.17779  | 0.097988 | 0.03426  | 0.291046 | 1.44E-10 | 0.166474 | 0.0003   | 0.186121 | 5.19E-05 |
| 0.00281  | -0.01142 | 0.80552  | 0.104573 | 0.02382  | -0.17605 | 0.00013  | -0.1113  | 0.01612  |
| 6.73E-09 | 0.067763 | 0.14371  | 0.200564 | 1.26E-05 | 0.090527 | 0.05057  | 0.106939 | 0.02081  |
| 0.63052  | 0.016708 | 0.71876  | 0.13888  | 0.00263  | -0.02585 | 0.57736  | -0.01622 | 0.72661  |
| 0.04702  | -0.07742 | 0.0947   | 0.333833 | 1.28E-13 | 0.062307 | 0.1789   | 0.086371 | 0.06218  |
| 0.00019  | 0.146637 | 0.00149  | 0.132958 | 0.004    | 0.006292 | 0.89214  | 0.175712 | 0.00014  |
| 0.13663  | -0.00177 | 0.96955  | 0.172357 | 0.00018  | 0.052728 | 0.25546  | 0.065277 | 0.15902  |
| 0.02459  | 0.026914 | 0.56181  | 0.118025 | 0.01069  | -0.05366 | 0.24718  | 0.024722 | 0.59411  |
| 0.00124  | -0.03275 | 0.48012  | -0.25907 | 1.34E-08 | -0.13849 | 0.00271  | -0.18544 | 5.54E-05 |
| 2.66E-08 | -0.03814 | 0.41093  | -0.01601 | 0.73007  | -0.092   | 0.04691  | -0.03702 | 0.42477  |
| 7.01E-05 | 0.049796 | 0.28287  | 0.000584 | 0.98996  | -0.05855 | 0.20662  | -0.04269 | 0.35737  |
| 4.44E-12 | 0.112572 | 0.01494  | 0.089004 | 0.0546   | 0.046556 | 0.31541  | 0.12049  | 0.00915  |
| 0.00509  | -0.09951 | 0.03155  | 0.119079 | 0.01001  | 0.040167 | 0.38647  | -0.04625 | 0.31856  |

|          |          |          |          |          |          |          |          |          |
|----------|----------|----------|----------|----------|----------|----------|----------|----------|
| 0.01275  | -0.088   | 0.05739  | 0.104453 | 0.02398  | -0.05616 | 0.22579  | -0.08028 | 0.08308  |
| 0.00066  | 0.069014 | 0.13644  | 0.090803 | 0.04987  | 0.015651 | 0.73586  | 0.111884 | 0.01557  |
| 0.275    | 0.028639 | 0.53699  | 0.110566 | 0.01684  | -0.03016 | 0.51561  | 0.087426 | 0.05905  |
| 1.59E-06 | 0.135202 | 0.00342  | 0.379161 | 2.05E-17 | 0.284938 | 3.58E-10 | 0.389525 | 2.27E-18 |
| 3.00E-16 | 0.058391 | 0.20784  | 0.114992 | 0.0129   | -0.01424 | 0.75893  | 0.061337 | 0.18577  |
| 0.18427  | -0.09562 | 0.03886  | 0.052678 | 0.25591  | -0.21755 | 2.08E-06 | -0.19229 | 2.87E-05 |
| 0.01983  | -0.07382 | 0.1111   | 0.095811 | 0.03848  | -0.12352 | 0.00753  | -0.11528 | 0.01267  |
| 0.09741  | 0.000255 | 0.99561  | 0.069479 | 0.13381  | -0.06075 | 0.19     | -0.06441 | 0.16462  |
| 3.87E-06 | -0.03242 | 0.4846   | -0.05406 | 0.24366  | -0.13096 | 0.00459  | -0.11515 | 0.01277  |
| 0.00298  | 0.092816 | 0.04499  | 0.098916 | 0.03259  | -0.01347 | 0.77157  | 0.098098 | 0.03406  |
| 0.08644  | 0.162563 | 0.00042  | 0.203302 | 9.51E-06 | 0.150054 | 0.00114  | 0.296702 | 6.05E-11 |
| 0.01259  | 0.019259 | 0.67805  | -0.05728 | 0.21667  | -0.07972 | 0.08528  | 0.011458 | 0.80494  |
| 7.18E-07 | 0.019135 | 0.68001  | -0.19277 | 2.74E-05 | -0.10971 | 0.0177   | -0.09485 | 0.04047  |
| 0.55624  | 0.104049 | 0.02454  | 0.257073 | 1.75E-08 | 0.142277 | 0.00206  | 0.220003 | 1.58E-06 |
| 0.71317  | -0.03144 | 0.49792  | 0.159406 | 0.00054  | 0.081736 | 0.07764  | 0.070186 | 0.12989  |
| 0.1413   | 0.029172 | 0.52945  | 0.069026 | 0.13637  | -0.03586 | 0.43944  | 0.064208 | 0.16598  |
| 0.30605  | 0.058742 | 0.20512  | 0.29398  | 9.19E-11 | 0.084923 | 0.06671  | 0.218163 | 1.94E-06 |
| 0.03939  | 0.078766 | 0.08909  | 0.138295 | 0.00274  | 0.04113  | 0.37517  | 0.110184 | 0.01722  |
| 0.63549  | 0.064745 | 0.16246  | 0.188953 | 3.97E-05 | 0.033585 | 0.46905  | 0.125584 | 0.00658  |
| 0.00394  | 0.103633 | 0.02512  | 0.212199 | 3.73E-06 | 0.084546 | 0.06794  | 0.208885 | 5.31E-06 |
| 0.5072   | 0.057083 | 0.21822  | 0.181092 | 8.30E-05 | 0.190725 | 3.34E-05 | 0.257381 | 1.68E-08 |
| 0.00146  | 0.085267 | 0.06561  | -0.07727 | 0.09533  | -0.08168 | 0.07784  | -0.06605 | 0.15415  |
| 0.3105   | 0.084641 | 0.06763  | 0.189588 | 3.73E-05 | 0.082445 | 0.07509  | 0.166884 | 0.00029  |
| 0.11094  | 0.028897 | 0.53333  | 0.119488 | 0.00975  | 0.016178 | 0.72732  | 0.027641 | 0.55129  |
| 0.31907  | 0.046024 | 0.32098  | 0.117037 | 0.01137  | 0.037572 | 0.41792  | 0.10709  | 0.02063  |
| 0.60179  | 0.02574  | 0.57899  | 0.018683 | 0.68718  | -0.21378 | 3.14E-06 | -0.0849  | 0.0668   |
| 0.04461  | 0.27085  | 2.70E-09 | 0.212163 | 3.74E-06 | 0.364595 | 3.96E-16 | 0.473007 | 2.08E-27 |
| 0.00264  | 0.127153 | 0.00593  | 0.22621  | 7.83E-07 | 0.325224 | 5.76E-13 | 0.29645  | 6.29E-11 |
| 0.0066   | -0.07506 | 0.10524  | 0.087779 | 0.05803  | -0.13732 | 0.00294  | -0.10129 | 0.02862  |
| 1.82E-14 | -0.03014 | 0.51582  | -0.04532 | 0.32841  | -0.09541 | 0.03931  | -0.09647 | 0.03716  |
| 0.0018   | 0.057355 | 0.21603  | -0.04419 | 0.34067  | -0.09839 | 0.03352  | 0.067396 | 0.1459   |
| 0.25201  | 0.059095 | 0.2024   | 0.249873 | 4.44E-08 | 0.125735 | 0.00651  | 0.18502  | 5.76E-05 |
| 0.62004  | 0.132723 | 0.00406  | 0.139555 | 0.00251  | 0.082294 | 0.07563  | 0.193694 | 2.50E-05 |
| 0.04293  | -0.22067 | 1.47E-06 | -0.04758 | 0.30486  | -0.21571 | 2.55E-06 | -0.24327 | 1.02E-07 |
| 0.00499  | 0.063975 | 0.16752  | 0.212561 | 3.58E-06 | 0.21996  | 1.59E-06 | 0.219604 | 1.65E-06 |
| 0.0002   | 0.061573 | 0.18408  | 0.148893 | 0.00125  | -0.03689 | 0.42648  | 0.090062 | 0.05177  |
| 0.86706  | -0.05579 | 0.22883  | -0.1135  | 0.01412  | 0.00579  | 0.9007   | -0.08975 | 0.0526   |
| 0.00817  | 0.054689 | 0.23818  | 0.093556 | 0.0433   | 0.032406 | 0.4848   | 0.087797 | 0.05798  |
| 0.0036   | 0.115584 | 0.01244  | 0.166099 | 0.00031  | 0.074865 | 0.10614  | 0.224012 | 1.01E-06 |
| 2.95E-12 | 0.101231 | 0.02871  | 0.133371 | 0.00388  | 0.067896 | 0.14292  | 0.158812 | 0.00057  |
| 0.20768  | 0.058599 | 0.20622  | 0.157378 | 0.00064  | 0.050509 | 0.27603  | 0.122667 | 0.00796  |
| 0.00012  | -0.14392 | 0.00182  | 0.045692 | 0.32448  | -0.06689 | 0.14892  | -0.19046 | 3.43E-05 |
| 0.16513  | 0.172372 | 0.00018  | -0.1621  | 0.00044  | 0.015135 | 0.74427  | 0.030528 | 0.51048  |
| 0.0744   | 0.050423 | 0.27685  | 0.337192 | 7.01E-14 | 0.261891 | 9.20E-09 | 0.23601  | 2.47E-07 |
| 6.00E-09 | 0.10421  | 0.02432  | 0.247869 | 5.73E-08 | 0.079531 | 0.08602  | 0.15771  | 0.00063  |

|          |          |          |          |          |          |          |          |          |
|----------|----------|----------|----------|----------|----------|----------|----------|----------|
| 0.00243  | 0.02188  | 0.6372   | 0.076442 | 0.09896  | -0.04109 | 0.37568  | 0.005956 | 0.89786  |
| 3.72E-08 | -0.10464 | 0.02373  | 0.020322 | 0.66136  | -0.18298 | 6.97E-05 | -0.18178 | 7.79E-05 |
| 0.00029  | 0.146907 | 0.00146  | 0.329159 | 2.91E-13 | 0.238484 | 1.84E-07 | 0.34668  | 1.24E-14 |
| 6.54E-05 | 0.148787 | 0.00126  | 0.236603 | 2.30E-07 | 0.094575 | 0.04106  | 0.272448 | 2.16E-09 |
| 0.00049  | -0.03533 | 0.44626  | 0.001115 | 0.98083  | -0.07124 | 0.12423  | -0.05704 | 0.21859  |
| 0.00014  | -0.06296 | 0.17441  | 0.255228 | 2.22E-08 | 0.013239 | 0.77537  | 0.014524 | 0.75424  |
| 1.02E-06 | -0.11102 | 0.01639  | 0.043447 | 0.34885  | -0.08589 | 0.06367  | -0.1243  | 0.00716  |
| 0.00201  | 0.02378  | 0.60825  | 0.057349 | 0.21608  | -0.12683 | 0.00606  | -0.02753 | 0.55285  |
| 0.08755  | 0.214134 | 3.02E-06 | 0.31244  | 4.93E-12 | 0.25712  | 1.73E-08 | 0.445275 | 4.00E-24 |
| 0.04466  | -0.11699 | 0.0114   | 0.104032 | 0.02456  | -0.15201 | 0.00098  | -0.14405 | 0.0018   |
| 0.09723  | 0.057477 | 0.21506  | 0.023292 | 0.61562  | -0.07715 | 0.09586  | 0.020506 | 0.65849  |
| 0.01402  | 0.114848 | 0.01301  | 0.165235 | 0.00034  | 0.155565 | 0.00074  | 0.118871 | 0.01014  |
| 0.58568  | 0.017271 | 0.7097   | 0.045762 | 0.32374  | 0.032984 | 0.47703  | 0.136044 | 0.00322  |
| 0.64368  | -0.10239 | 0.02692  | 0.231396 | 4.28E-07 | 0.01163  | 0.80207  | -0.04278 | 0.35632  |
| 0.37876  | 0.043501 | 0.34825  | 0.122782 | 0.0079   | -0.06986 | 0.13169  | -0.00602 | 0.89682  |
| 0.47797  | -0.0592  | 0.20159  | 0.015186 | 0.74342  | -0.16802 | 0.00027  | -0.11948 | 0.00976  |
| 8.48E-06 | -0.00109 | 0.98117  | -0.13092 | 0.0046   | -0.17654 | 0.00013  | -0.12132 | 0.00868  |
| 5.90E-06 | -0.07624 | 0.09986  | 0.075366 | 0.10382  | -0.14752 | 0.00139  | -0.11922 | 0.00992  |
| 0.0788   | 0.105376 | 0.02276  | 0.025273 | 0.58591  | -0.15062 | 0.00109  | -0.0065  | 0.88853  |
| 0.00315  | 0.171455 | 0.0002   | 0.123699 | 0.00744  | 0.160608 | 0.00049  | 0.283206 | 4.61E-10 |
| 1.35E-09 | -0.03637 | 0.43293  | 0.10746  | 0.02019  | -0.08062 | 0.08178  | -0.07274 | 0.11648  |
| 1.10E-05 | -0.08437 | 0.06852  | -0.00641 | 0.89005  | -0.1506  | 0.0011   | -0.1506  | 0.0011   |
| 7.25E-05 | 0.038956 | 0.40096  | 0.262334 | 8.67E-09 | 0.160882 | 0.00048  | 0.171105 | 0.0002   |
| 0.54508  | -0.07373 | 0.11157  | 0.148631 | 0.00128  | -0.02817 | 0.54367  | -0.03907 | 0.39962  |
| 4.11E-09 | 0.034687 | 0.45457  | 0.15664  | 0.00068  | 0.01876  | 0.68595  | 0.071742 | 0.12157  |
| 0.22436  | 0.021508 | 0.64293  | 0.255039 | 2.28E-08 | 0.045841 | 0.32291  | 0.108812 | 0.01867  |
| 0.19244  | 0.018637 | 0.68791  | 0.051371 | 0.26791  | -0.01896 | 0.68281  | 0.069667 | 0.13276  |
| 0.00683  | -0.11643 | 0.0118   | -0.05399 | 0.2442   | -0.2562  | 1.96E-08 | -0.22136 | 1.36E-06 |
| 0.00431  | -0.0718  | 0.12127  | -0.12898 | 0.00525  | -0.21689 | 2.23E-06 | -0.21304 | 3.40E-06 |
| 0.00181  | -0.01223 | 0.79215  | 0.146979 | 0.00145  | 0.143112 | 0.00193  | 0.102331 | 0.02702  |
| 0.52036  | -0.11948 | 0.00976  | -0.02683 | 0.56308  | -0.18034 | 8.90E-05 | -0.21854 | 1.86E-06 |
| 1.85E-06 | 0.138478 | 0.00271  | 0.164906 | 0.00035  | 0.063308 | 0.172    | 0.226606 | 7.48E-07 |
| 0.00233  | 0.055072 | 0.2349   | 0.069502 | 0.13368  | 0.043146 | 0.3522   | 0.095878 | 0.03834  |
| 0.04184  | 0.002479 | 0.95739  | 0.050116 | 0.27979  | 0.042586 | 0.35849  | 0.001189 | 0.97956  |
| 0.00344  | -0.00693 | 0.88119  | 0.295845 | 6.91E-11 | 0.011224 | 0.80885  | 0.030236 | 0.51452  |
| 0.90634  | -0.11124 | 0.01617  | -0.18063 | 8.66E-05 | -0.30715 | 1.16E-11 | -0.27762 | 1.04E-09 |
| 0.06683  | 0.016633 | 0.71996  | 0.197748 | 1.67E-05 | 0.009587 | 0.83631  | 0.028795 | 0.53477  |
| 0.00341  | 0.06864  | 0.13858  | 0.143296 | 0.00191  | 0.09509  | 0.03997  | 0.214098 | 3.03E-06 |
| 0.10904  | -0.01087 | 0.81477  | -0.161   | 0.00048  | -0.04573 | 0.32404  | -0.04259 | 0.3584   |
| 0.00096  | -0.14404 | 0.0018   | -0.11657 | 0.01171  | -0.33193 | 1.79E-13 | -0.35136 | 5.14E-15 |
| 0.53768  | 0.017613 | 0.70422  | -0.16369 | 0.00038  | -0.02416 | 0.60253  | -0.05564 | 0.2301   |
| 0.06843  | 0.042122 | 0.36376  | 0.067434 | 0.14567  | -0.07448 | 0.10797  | 0.024706 | 0.59434  |
| 0.43084  | 0.145658 | 0.0016   | 0.281787 | 5.67E-10 | 0.17113  | 0.0002   | 0.302738 | 2.35E-11 |
| 0.19348  | 0.228511 | 6.00E-07 | 0.110403 | 0.017    | 0.165464 | 0.00033  | 0.36814  | 1.95E-16 |
| 0.04781  | 0.131545 | 0.00441  | 0.199452 | 1.41E-05 | 0.121877 | 0.00838  | 0.28638  | 2.89E-10 |

|          |          |          |          |          |          |          |          |          |
|----------|----------|----------|----------|----------|----------|----------|----------|----------|
| 0.06322  | 0.051352 | 0.26809  | 0.13882  | 0.00264  | 0.030179 | 0.51532  | 0.149038 | 0.00124  |
| 0.45319  | 0.009954 | 0.83013  | 0.08793  | 0.05759  | 0.101407 | 0.02844  | 0.103268 | 0.02564  |
| 3.54E-06 | 0.152336 | 0.00096  | 0.279332 | 8.10E-10 | 0.164781 | 0.00035  | 0.320278 | 1.34E-12 |
| 2.66E-07 | 0.080388 | 0.08268  | 0.308143 | 9.93E-12 | 0.109582 | 0.01784  | 0.186849 | 4.85E-05 |
| 9.38E-06 | 0.124725 | 0.00696  | 0.170433 | 0.00022  | 0.053811 | 0.24581  | 0.195963 | 2.00E-05 |
| 6.04E-05 | -0.04644 | 0.31667  | 0.128453 | 0.00544  | 0.002755 | 0.95266  | 0.128548 | 0.0054   |
| 0.13895  | 0.108498 | 0.01901  | 0.228371 | 6.10E-07 | 0.123806 | 0.00739  | 0.233793 | 3.23E-07 |
| 0.00013  | 0.210162 | 4.63E-06 | 0.267082 | 4.54E-09 | 0.140862 | 0.00228  | 0.385202 | 5.74E-18 |
| 0.02598  | 0.130554 | 0.00472  | 0.208673 | 5.43E-06 | 0.110185 | 0.01722  | 0.237891 | 1.97E-07 |
| 0.14714  | 0.12817  | 0.00554  | 0.162344 | 0.00043  | 0.142898 | 0.00196  | 0.238578 | 1.81E-07 |
| 0.1122   | -0.00169 | 0.97098  | 0.109702 | 0.01772  | -0.02707 | 0.5595   | 0.012366 | 0.78984  |
| 1.39E-07 | 0.013959 | 0.76352  | 0.10998  | 0.01743  | -0.13774 | 0.00286  | -0.0779  | 0.09267  |
| 0.36397  | 0.094254 | 0.04176  | 0.254544 | 2.43E-08 | 0.189188 | 3.88E-05 | 0.300693 | 3.25E-11 |
| 0.04586  | 0.097523 | 0.03513  | 0.141734 | 0.00214  | 0.013659 | 0.76845  | 0.175758 | 0.00013  |
| 0.69653  | 0.195252 | 2.15E-05 | 0.064972 | 0.16098  | 0.067123 | 0.14753  | 0.208314 | 5.64E-06 |
| 9.47E-08 | -0.11009 | 0.01732  | 0.137035 | 0.003    | 0.020814 | 0.65369  | -0.08455 | 0.06791  |
| 0.02967  | 0.025068 | 0.58895  | -0.14679 | 0.00147  | -0.02396 | 0.60557  | 0.006554 | 0.88766  |
| 0.00013  | 0.217706 | 2.04E-06 | 0.268072 | 3.97E-09 | 0.210219 | 4.61E-06 | 0.41862  | 3.07E-21 |
| 0.00023  | -0.03428 | 0.45986  | -0.00454 | 0.92208  | -0.08538 | 0.06526  | -0.00917 | 0.84326  |
| 3.78E-05 | -0.14473 | 0.00171  | -0.00886 | 0.84852  | -0.0967  | 0.0367   | -0.14789 | 0.00135  |
| 0.00574  | 0.19046  | 3.43E-05 | 0.448535 | 1.70E-24 | 0.381498 | 1.26E-17 | 0.480546 | 2.35E-28 |
| 1.36E-05 | 0.126083 | 0.00637  | 0.302507 | 2.44E-11 | 0.081324 | 0.07915  | 0.178518 | 0.00011  |
| 0.02752  | -0.06625 | 0.15291  | -0.09599 | 0.03813  | -0.09619 | 0.03771  | -0.07604 | 0.10073  |
| 0.85516  | -0.01687 | 0.71609  | 0.165312 | 0.00033  | 0.041872 | 0.36662  | -0.00108 | 0.98142  |
| 0.10038  | 0.034194 | 0.46102  | 0.124139 | 0.00723  | -0.01434 | 0.75731  | 0.046591 | 0.31504  |
| 0.68171  | -0.00586 | 0.89946  | -0.07701 | 0.09649  | -0.17473 | 0.00015  | -0.10336 | 0.02551  |
| 0.25068  | 0.131689 | 0.00436  | 0.375477 | 4.40E-17 | 0.206409 | 6.89E-06 | 0.263988 | 6.93E-09 |
| 0.00021  | -0.04222 | 0.36259  | 0.076993 | 0.09654  | 0.02547  | 0.58299  | -0.01162 | 0.80221  |
| 0.69687  | -0.0613  | 0.18606  | 0.020091 | 0.66497  | -0.06275 | 0.1758   | -0.01833 | 0.69278  |
| 0.00041  | 0.052809 | 0.25472  | -0.00358 | 0.93851  | 0.00461  | 0.92086  | 0.084666 | 0.06754  |
| 1.94E-06 | 0.12392  | 0.00734  | 0.226061 | 7.97E-07 | 0.251215 | 3.74E-08 | 0.290721 | 1.51E-10 |
| 0.92709  | 0.225329 | 8.66E-07 | 0.437175 | 3.21E-23 | 0.301224 | 2.99E-11 | 0.400971 | 1.83E-19 |
| 1.11E-07 | -0.01314 | 0.77707  | 0.130327 | 0.00479  | -0.09372 | 0.04293  | -0.06569 | 0.15642  |
| 0.01034  | -0.12324 | 0.00767  | 0.157166 | 0.00065  | -0.13943 | 0.00253  | -0.15695 | 0.00066  |
| 0.04609  | 0.075742 | 0.1021   | 0.080206 | 0.08338  | -0.08261 | 0.07449  | -0.01142 | 0.80566  |
| 0.82579  | -0.00852 | 0.85429  | 0.107533 | 0.02011  | -0.10712 | 0.0206   | -0.04933 | 0.28737  |
| 0.51904  | -0.1367  | 0.00308  | -0.07568 | 0.10238  | -0.22222 | 1.23E-06 | -0.295   | 7.86E-11 |
| 0.26517  | -0.05823 | 0.20908  | -0.21414 | 3.02E-06 | -0.12948 | 0.00507  | -0.17255 | 0.00018  |
| 0.27487  | 0.014744 | 0.75065  | 0.08782  | 0.05791  | -0.08691 | 0.06058  | -0.023   | 0.62002  |
| 7.96E-21 | 0.083678 | 0.07082  | 0.208744 | 5.39E-06 | 0.079178 | 0.08742  | 0.185033 | 5.75E-05 |
| 4.69E-05 | 0.101637 | 0.02808  | 0.243214 | 1.03E-07 | 0.074138 | 0.10959  | 0.191899 | 2.98E-05 |
| 0.00036  | -0.07035 | 0.12899  | 0.038864 | 0.40208  | -0.12444 | 0.0071   | -0.11677 | 0.01156  |
| 1.45E-06 | 0.133833 | 0.00376  | 0.078929 | 0.08843  | -0.09097 | 0.04946  | 0.106043 | 0.02191  |
| 0.15129  | -0.06152 | 0.18449  | 0.056996 | 0.21893  | -0.06403 | 0.16719  | 0.003006 | 0.94835  |
| 4.85E-11 | 0.11869  | 0.01025  | 0.174119 | 0.00016  | -0.03403 | 0.46315  | 0.102974 | 0.02606  |



|          |          |          |          |          |          |          |          |          |
|----------|----------|----------|----------|----------|----------|----------|----------|----------|
| 3.69E-05 | -0.01747 | 0.70656  | 0.283696 | 4.29E-10 | 0.03438  | 0.45858  | 0.03521  | 0.4478   |
| 0.07211  | 0.048913 | 0.29151  | 0.172602 | 0.00018  | 0.177952 | 0.00011  | 0.220119 | 1.56E-06 |
| 0.07526  | 0.133463 | 0.00386  | 0.439935 | 1.59E-23 | 0.490049 | 1.39E-29 | 0.583825 | 5.17E-44 |
| 1.65E-06 | 0.097268 | 0.03561  | 0.165267 | 0.00034  | 0.116229 | 0.01195  | 0.211658 | 3.95E-06 |
| 0.35106  | 0.178426 | 0.00011  | 0.204103 | 8.76E-06 | 0.19646  | 1.90E-05 | 0.304283 | 1.84E-11 |
| 0.00021  | -0.01339 | 0.77289  | 0.125649 | 0.00655  | -0.05114 | 0.27008  | -0.00596 | 0.8978   |
| 0.2512   | 0.041836 | 0.36703  | 0.15597  | 0.00072  | 0.268531 | 3.72E-09 | 0.19262  | 2.78E-05 |
| 0.79066  | 0.194551 | 2.30E-05 | 0.098167 | 0.03394  | -0.01267 | 0.78485  | 0.179949 | 9.22E-05 |
| 0.0011   | 0.072606 | 0.11714  | 0.13641  | 0.00314  | 0.127188 | 0.00592  | 0.220672 | 1.47E-06 |
| 0.69078  | 0.062948 | 0.17445  | 0.189685 | 3.70E-05 | 0.08211  | 0.07629  | 0.181547 | 7.96E-05 |
| 1.73E-05 | -0.15869 | 0.00058  | 0.058658 | 0.20576  | -0.17829 | 0.00011  | -0.2157  | 2.55E-06 |
| 0.2827   | -0.05285 | 0.25437  | 0.111881 | 0.01557  | -0.16699 | 0.00029  | -0.13275 | 0.00406  |
| 0.00101  | 0.186335 | 5.09E-05 | 0.149661 | 0.00118  | 0.073458 | 0.11289  | 0.219755 | 1.63E-06 |
| 0.00055  | -0.01574 | 0.73437  | 0.055311 | 0.23287  | -0.09899 | 0.03245  | -0.06082 | 0.18954  |
| 0.12501  | 0.033264 | 0.47331  | 0.254899 | 2.32E-08 | 0.131978 | 0.00428  | 0.252537 | 3.15E-08 |
| 0.00233  | 0.174421 | 0.00015  | 0.193375 | 2.58E-05 | 0.171914 | 0.00019  | 0.318291 | 1.87E-12 |
| 0.0001   | 0.053069 | 0.25239  | -0.06324 | 0.17243  | -0.06761 | 0.14463  | 0.048445 | 0.29615  |
| 0.00131  | 0.190298 | 3.48E-05 | 0.269914 | 3.07E-09 | 0.212463 | 3.62E-06 | 0.284295 | 3.93E-10 |
| 0.84731  | 0.063848 | 0.16837  | 0.075795 | 0.10186  | -0.03818 | 0.41047  | 0.023425 | 0.6136   |
| 8.55E-09 | 0.082758 | 0.07399  | 0.235586 | 2.60E-07 | 0.097786 | 0.03464  | 0.19002  | 3.58E-05 |
| 0.26861  | -0.08051 | 0.08223  | 0.024063 | 0.60397  | -0.19086 | 3.30E-05 | -0.15512 | 0.00077  |
| 0.09544  | 0.115578 | 0.01244  | 0.217957 | 1.99E-06 | 0.063658 | 0.16964  | 0.201399 | 1.16E-05 |
| 0.89676  | 0.11637  | 0.01185  | 0.341847 | 3.02E-14 | 0.107854 | 0.01974  | 0.276723 | 1.18E-09 |
| 0.58539  | -0.04175 | 0.36803  | -0.0075  | 0.87162  | -0.13877 | 0.00265  | -0.06472 | 0.16264  |
| 0.05716  | 0.108527 | 0.01898  | 0.250284 | 4.21E-08 | 0.057106 | 0.21804  | 0.19445  | 2.32E-05 |
| 0.24952  | -0.06881 | 0.13763  | 0.063852 | 0.16834  | -0.10216 | 0.02727  | -0.09514 | 0.03986  |
| 0.49336  | 0.086976 | 0.06037  | 0.110925 | 0.01648  | 0.036142 | 0.43586  | 0.063058 | 0.1737   |
| 0.00025  | 0.099437 | 0.03168  | 0.172139 | 0.00019  | 0.019107 | 0.68046  | 0.082335 | 0.07548  |
| 4.65E-06 | 0.202147 | 1.07E-05 | 0.141045 | 0.00225  | 0.069579 | 0.13325  | 0.1645   | 0.00036  |
| 0.0001   | -0.05802 | 0.21077  | 0.152334 | 0.00096  | 0.004207 | 0.92776  | -0.01459 | 0.75314  |
| 0.0004   | -0.30362 | 2.05E-11 | -0.0868  | 0.0609   | -0.32167 | 1.06E-12 | -0.4724  | 2.47E-27 |
| 0.37331  | 0.026786 | 0.56367  | 0.1555   | 0.00075  | 0.011011 | 0.81241  | 0.086206 | 0.06269  |
| 0.00088  | -0.07355 | 0.11245  | 0.041645 | 0.36922  | -0.13592 | 0.00325  | -0.11517 | 0.01275  |
| 0.02056  | 0.137684 | 0.00287  | 0.327179 | 4.11E-13 | 0.196617 | 1.87E-05 | 0.300131 | 3.55E-11 |
| 0.22848  | 0.001209 | 0.97921  | 0.09421  | 0.04186  | -0.04182 | 0.36718  | 0.004799 | 0.91763  |
| 6.20E-05 | 0.131132 | 0.00453  | 0.321621 | 1.07E-12 | 0.126513 | 0.00619  | 0.181093 | 8.30E-05 |
| 0.00344  | -0.05333 | 0.25002  | 0.06374  | 0.16909  | -0.15631 | 0.0007   | -0.1215  | 0.00858  |
| 0.83844  | 0.05796  | 0.21122  | 0.123588 | 0.0075   | -0.00754 | 0.87083  | 0.112696 | 0.01483  |
| 0.69314  | 0.059291 | 0.2009   | 0.266055 | 5.23E-09 | 0.153997 | 0.00084  | 0.200398 | 1.28E-05 |
| 0.0007   | 0.083565 | 0.0712   | 0.087045 | 0.06016  | 0.022919 | 0.62129  | 0.137224 | 0.00296  |
| 0.56565  | 0.099294 | 0.03193  | 0.215998 | 2.47E-06 | 0.081223 | 0.07953  | 0.172777 | 0.00018  |
| 0.00779  | 0.026285 | 0.57098  | 0.183469 | 6.66E-05 | 0.072447 | 0.11795  | 0.117639 | 0.01095  |
| 0.0002   | 0.049227 | 0.28842  | 0.148323 | 0.00131  | -0.12477 | 0.00694  | 0.012704 | 0.78422  |
| 0.00539  | 0.172619 | 0.00018  | 0.167901 | 0.00027  | 0.106727 | 0.02107  | 0.114537 | 0.01326  |
| 2.11E-08 | -0.12871 | 0.00534  | 0.000392 | 0.99326  | -0.06552 | 0.15748  | -0.18692 | 4.82E-05 |

|          |          |          |          |          |          |          |          |          |
|----------|----------|----------|----------|----------|----------|----------|----------|----------|
| 0.00012  | 0.156098 | 0.00071  | 0.069814 | 0.13194  | 0.147473 | 0.00139  | 0.174106 | 0.00016  |
| 7.07E-05 | 0.144051 | 0.0018   | 0.194306 | 2.36E-05 | 0.152933 | 0.00091  | 0.312923 | 4.56E-12 |
| 0.34114  | 0.156017 | 0.00072  | 0.281536 | 5.89E-10 | 0.134051 | 0.00371  | 0.210534 | 4.45E-06 |
| 0.06529  | -0.07375 | 0.11147  | 0.027443 | 0.55415  | 0.0039   | 0.93302  | -0.04976 | 0.28323  |
| 2.27E-06 | 0.084367 | 0.06852  | 0.056441 | 0.22345  | 0.093154 | 0.04421  | 0.164621 | 0.00035  |
| 0.16083  | -0.1404  | 0.00236  | 0.161182 | 0.00047  | -0.00965 | 0.83531  | -0.15046 | 0.00111  |
| 0.98942  | 0.084218 | 0.06902  | 0.179995 | 9.18E-05 | 0.234853 | 2.84E-07 | 0.262318 | 8.68E-09 |
| 0.89725  | 0.040611 | 0.38124  | 0.177443 | 0.00012  | 0.004333 | 0.9256   | 0.034987 | 0.45068  |
| 1.20E-05 | 0.161041 | 0.00048  | 0.363924 | 4.53E-16 | 0.348907 | 8.16E-15 | 0.367149 | 2.38E-16 |
| 1.27E-08 | -0.07465 | 0.10716  | 0.090781 | 0.04993  | 0.110133 | 0.01727  | 0.005765 | 0.90113  |
| 0.23294  | -0.0108  | 0.81594  | 0.333376 | 1.39E-13 | 0.05427  | 0.2418   | 0.124888 | 0.00689  |
| 0.51216  | 0.107217 | 0.02048  | 0.324496 | 6.52E-13 | 0.139325 | 0.00255  | 0.242684 | 1.10E-07 |
| 5.98E-08 | -0.07882 | 0.08885  | -0.0108  | 0.81601  | -0.22899 | 5.68E-07 | -0.16843 | 0.00026  |
| 0.02829  | 0.03     | 0.51782  | 0.076641 | 0.09808  | 0.013728 | 0.76732  | 0.052155 | 0.26067  |
| 1.30E-07 | 0.125309 | 0.0067   | 0.302066 | 2.62E-11 | 0.348039 | 9.60E-15 | 0.407462 | 4.18E-20 |
| 0.02304  | -0.04165 | 0.36915  | -0.07428 | 0.10891  | -0.08922 | 0.054    | -0.05147 | 0.26702  |
| 0.38955  | 0.150993 | 0.00106  | 0.135634 | 0.00332  | 0.0669   | 0.14889  | 0.155737 | 0.00073  |
| 1.16E-05 | -0.01443 | 0.75582  | 0.006286 | 0.89223  | 0.00898  | 0.84653  | -0.02439 | 0.5991   |
| 0.00493  | -0.08627 | 0.06248  | -0.04576 | 0.32375  | -0.12598 | 0.00641  | -0.0794  | 0.08653  |
| 0.04804  | -0.00772 | 0.8679   | 0.130568 | 0.00471  | -0.05334 | 0.24993  | -0.00557 | 0.90451  |
| 0.00053  | 0.014287 | 0.75813  | 0.089694 | 0.05274  | -0.04655 | 0.31543  | 0.012782 | 0.78294  |
| 0.22565  | 0.060546 | 0.19152  | 0.09687  | 0.03638  | -0.04536 | 0.32804  | 0.064781 | 0.16222  |
| 0.1575   | -0.08378 | 0.07047  | 0.280033 | 7.32E-10 | 0.133775 | 0.00378  | 0.108004 | 0.01957  |
| 0.93199  | -0.15702 | 0.00066  | 0.003765 | 0.93533  | -0.09613 | 0.03783  | -0.2087  | 5.41E-06 |
| 0.09309  | 0.106022 | 0.02194  | 0.238041 | 1.94E-07 | 0.189184 | 3.88E-05 | 0.313962 | 3.84E-12 |
| 0.00625  | -0.07574 | 0.1021   | 0.056423 | 0.2236   | 0.022599 | 0.62617  | -0.02962 | 0.52316  |
| 0.2593   | 0.25433  | 2.50E-08 | 0.171114 | 0.0002   | 0.106412 | 0.02145  | 0.290092 | 1.66E-10 |
| 0.04654  | 0.010524 | 0.82056  | 0.16722  | 0.00028  | -0.04678 | 0.31311  | 0.048659 | 0.29402  |
| 2.14E-06 | 0.16803  | 0.00026  | 0.324095 | 6.99E-13 | 0.267906 | 4.06E-09 | 0.379195 | 2.04E-17 |
| 3.44E-08 | -0.052   | 0.26206  | 0.159548 | 0.00054  | 0.014986 | 0.74669  | 0.032654 | 0.48145  |
| 1.70E-10 | 0.13117  | 0.00452  | 0.138245 | 0.00275  | 0.140707 | 0.00231  | 0.28765  | 2.39E-10 |
| 0.55611  | 0.009088 | 0.84472  | 0.342657 | 2.60E-14 | 0.250416 | 4.14E-08 | 0.279154 | 8.31E-10 |
| 0.00934  | 0.071442 | 0.12314  | 0.244085 | 9.21E-08 | 0.116303 | 0.0119   | 0.175613 | 0.00014  |
| 0.00236  | 0.087632 | 0.05845  | 0.299886 | 3.69E-11 | 0.282238 | 5.31E-10 | 0.300258 | 3.48E-11 |
| 0.07965  | 0.165346 | 0.00033  | 0.131868 | 0.00431  | -0.00757 | 0.87043  | 0.17827  | 0.00011  |
| 0.00977  | 0.076571 | 0.09839  | 0.210838 | 4.31E-06 | 0.170644 | 0.00021  | 0.204095 | 8.77E-06 |
| 5.87E-08 | -0.0093  | 0.8412   | 0.116726 | 0.01159  | 0.03062  | 0.5092   | 0.017566 | 0.70497  |
| 0.86166  | 0.016181 | 0.72727  | 0.013831 | 0.76563  | -0.23258 | 3.72E-07 | -0.15797 | 0.00061  |
| 0.44828  | -0.09567 | 0.03877  | -0.10781 | 0.01979  | -0.25579 | 2.07E-08 | -0.24284 | 1.08E-07 |
| 0.00023  | 0.181108 | 8.29E-05 | 0.163685 | 0.00038  | 0.089353 | 0.05365  | 0.216048 | 2.45E-06 |
| 0.97458  | -0.028   | 0.54614  | 0.160989 | 0.00048  | 0.013355 | 0.77346  | 0.028637 | 0.53702  |
| 0.14617  | -0.04409 | 0.34174  | 0.108318 | 0.01921  | -0.13488 | 0.0035   | -0.03143 | 0.49812  |
| 0.10557  | 0.01999  | 0.66656  | 0.20404  | 8.81E-06 | -0.00253 | 0.95643  | 0.060842 | 0.18935  |
| 0.00594  | -0.05712 | 0.21791  | -0.0196  | 0.6727   | -0.18777 | 4.44E-05 | -0.12482 | 0.00692  |
| 0.02651  | 0.079647 | 0.08556  | 0.179252 | 9.82E-05 | -0.05308 | 0.25227  | 0.083582 | 0.07115  |

|          |          |          |          |          |          |          |          |          |
|----------|----------|----------|----------|----------|----------|----------|----------|----------|
| 0.92333  | 0.02466  | 0.59503  | 0.093346 | 0.04378  | -0.15521 | 0.00076  | -0.05744 | 0.21535  |
| 0.04787  | -0.15804 | 0.00061  | -0.00861 | 0.85279  | -0.14464 | 0.00173  | -0.21271 | 3.53E-06 |
| 1.30E-05 | -0.14965 | 0.00118  | -0.01608 | 0.72897  | -0.11886 | 0.01015  | -0.2056  | 7.50E-06 |
| 0.00265  | 0.036017 | 0.43745  | 0.240931 | 1.36E-07 | -0.01834 | 0.6927   | 0.123569 | 0.00751  |
| 0.03163  | 0.021815 | 0.6382   | 0.033267 | 0.47326  | -0.14805 | 0.00133  | -0.0154  | 0.73998  |
| 0.37175  | 0.09177  | 0.04747  | 0.213216 | 3.34E-06 | 0.068767 | 0.13785  | 0.12347  | 0.00756  |
| 0.02505  | 0.133428 | 0.00387  | 0.068875 | 0.13723  | 0.012585 | 0.78621  | 0.164961 | 0.00034  |
| 0.00053  | 0.069112 | 0.13588  | 0.128571 | 0.00539  | 0.032437 | 0.48439  | 0.083925 | 0.06999  |
| 0.03226  | 0.120451 | 0.00917  | 0.225896 | 8.12E-07 | 0.062079 | 0.1805   | 0.214009 | 3.06E-06 |
| 0.02643  | 0.136139 | 0.0032   | 0.274475 | 1.62E-09 | 0.159898 | 0.00052  | 0.245683 | 7.55E-08 |
| 0.04308  | -0.18033 | 8.90E-05 | -0.00131 | 0.97751  | -0.18419 | 6.23E-05 | -0.26818 | 3.91E-09 |
| 0.39471  | -0.03472 | 0.4541   | 0.284945 | 3.57E-10 | 0.111758 | 0.01568  | 0.155894 | 0.00072  |
| 1.57E-05 | -0.03321 | 0.47407  | 0.047394 | 0.30677  | -0.09041 | 0.05086  | -0.12585 | 0.00647  |
| 0.93765  | 0.057578 | 0.21425  | 0.317167 | 2.26E-12 | 0.134918 | 0.00349  | 0.196559 | 1.88E-05 |
| 0.07968  | 0.064881 | 0.16157  | 0.127408 | 0.00583  | -0.02955 | 0.52417  | 0.085491 | 0.06491  |
| 0.80224  | -0.15776 | 0.00062  | -0.02721 | 0.55757  | -0.13075 | 0.00465  | -0.27787 | 9.99E-10 |
| 3.91E-10 | -0.02462 | 0.59556  | 0.108424 | 0.01909  | 0.117572 | 0.011    | 0.052827 | 0.25456  |
| 0.19835  | 0.013143 | 0.77697  | 0.166211 | 0.00031  | 0.051589 | 0.26588  | 0.054224 | 0.2422   |
| 1.29E-07 | -0.00734 | 0.87426  | 0.143136 | 0.00193  | 0.114442 | 0.01334  | 0.076342 | 0.0994   |
| 0.97139  | 0.001066 | 0.98168  | 0.215773 | 2.53E-06 | 0.023058 | 0.61918  | 0.096985 | 0.03615  |
| 0.35068  | 0.029433 | 0.52577  | 0.186786 | 4.88E-05 | 0.151518 | 0.00102  | 0.149346 | 0.00121  |
| 0.79337  | 0.081327 | 0.07914  | 0.274251 | 1.67E-09 | 0.287441 | 2.47E-10 | 0.30834  | 9.62E-12 |
| 0.01367  | 0.008374 | 0.85677  | 0.129223 | 0.00516  | -0.07679 | 0.09741  | -0.0039  | 0.93294  |
| 0.3725   | -0.00305 | 0.94765  | -0.12211 | 0.00825  | -0.30546 | 1.53E-11 | -0.20173 | 1.12E-05 |
| 0.38116  | 0.095693 | 0.03872  | 0.128234 | 0.00552  | 0.095963 | 0.03817  | 0.205319 | 7.72E-06 |
| 0.00021  | 0.08906  | 0.05445  | 0.342644 | 2.61E-14 | 0.169421 | 0.00024  | 0.283729 | 4.27E-10 |
| 0.00066  | -0.0761  | 0.10047  | 0.173767 | 0.00016  | 0.03812  | 0.41115  | -0.05583 | 0.22853  |
| 0.00564  | -0.04488 | 0.33319  | 0.172616 | 0.00018  | 0.014418 | 0.75598  | 0.004095 | 0.92967  |
| 0.0005   | 0.017777 | 0.70159  | 0.080919 | 0.08066  | -0.00854 | 0.8539   | 0.031189 | 0.50136  |
| 0.07061  | 0.124886 | 0.00689  | 0.193749 | 2.49E-05 | 0.077864 | 0.09282  | 0.243619 | 9.76E-08 |
| 0.79711  | -0.07286 | 0.11586  | 0.1124   | 0.01509  | -0.05806 | 0.21044  | -0.05107 | 0.27073  |
| 0.50224  | 0.003954 | 0.93208  | 0.084286 | 0.06879  | 0.096851 | 0.03641  | 0.087171 | 0.05979  |
| 0.01759  | 0.190087 | 3.56E-05 | 0.235655 | 2.58E-07 | 0.205212 | 7.81E-06 | 0.36526  | 3.47E-16 |
| 0.68521  | 0.05661  | 0.22207  | 0.106065 | 0.02188  | -0.00487 | 0.91645  | 0.074279 | 0.10891  |
| 0.49186  | 0.01454  | 0.75398  | 0.18662  | 4.95E-05 | -0.04661 | 0.3148   | 0.05661  | 0.22207  |
| 0.71367  | -0.04857 | 0.29491  | 0.075529 | 0.10307  | -0.1093  | 0.01814  | -0.04899 | 0.2907   |
| 7.52E-05 | -0.02035 | 0.66097  | 0.036553 | 0.43066  | -0.14489 | 0.00169  | -0.09664 | 0.03683  |
| 0.27331  | 0.105908 | 0.02208  | 0.17101  | 0.0002   | 0.100974 | 0.02912  | 0.196908 | 1.82E-05 |
| 0.99474  | -0.00504 | 0.91344  | 0.178194 | 0.00011  | -0.12335 | 0.00762  | -0.0278  | 0.54902  |
| 0.18456  | 0.058485 | 0.20711  | 0.253509 | 2.78E-08 | 0.102865 | 0.02622  | 0.125555 | 0.00659  |
| 3.22E-07 | -0.02972 | 0.52177  | -0.04384 | 0.34448  | -0.13199 | 0.00428  | -0.15214 | 0.00097  |
| 0.00056  | 0.141292 | 0.00221  | 0.093716 | 0.04294  | 0.032705 | 0.48077  | 0.226757 | 7.35E-07 |
| 0.66763  | -0.0696  | 0.13316  | 0.226764 | 7.35E-07 | 0.122584 | 0.008    | 0.028064 | 0.54521  |
| 0.04057  | 0.042763 | 0.3565   | 0.222828 | 1.15E-06 | 0.03301  | 0.47669  | 0.098944 | 0.03254  |
| 0.04847  | 0.064496 | 0.16408  | 0.355447 | 2.36E-15 | 0.198281 | 1.59E-05 | 0.297141 | 5.65E-11 |

|          |          |          |          |          |          |          |          |          |
|----------|----------|----------|----------|----------|----------|----------|----------|----------|
| 0.08309  | 0.033374 | 0.47185  | 0.238925 | 1.74E-07 | -0.02037 | 0.66064  | 0.064417 | 0.1646   |
| 1.61E-08 | -0.13127 | 0.00449  | 0.099353 | 0.03183  | -0.104   | 0.0246   | -0.16723 | 0.00028  |
| 0.00084  | 0.033943 | 0.46432  | 0.000581 | 0.99     | -0.07122 | 0.12434  | 0.000719 | 0.98764  |
| 0.83096  | 0.088062 | 0.05722  | 0.118044 | 0.01068  | 0.137624 | 0.00288  | 0.201151 | 1.19E-05 |
| 0.19812  | 0.126063 | 0.00638  | 0.09703  | 0.03607  | -0.02024 | 0.66263  | 0.136427 | 0.00314  |
| 0.12417  | 0.102096 | 0.02737  | 0.205415 | 7.64E-06 | 0.047958 | 0.30105  | 0.194567 | 2.30E-05 |
| 3.97E-09 | 0.169895 | 0.00023  | 0.155378 | 0.00075  | 0.136287 | 0.00317  | 0.255265 | 2.21E-08 |
| 0.8268   | 0.223667 | 1.05E-06 | 0.387986 | 3.17E-18 | 0.40643  | 5.30E-20 | 0.528582 | 5.71E-35 |
| 3.01E-07 | -0.27117 | 2.58E-09 | -0.16326 | 0.0004   | -0.32871 | 3.15E-13 | -0.48267 | 1.26E-28 |
| 0.51557  | -0.02875 | 0.53538  | 0.263087 | 7.83E-09 | -0.03011 | 0.51633  | -0.09246 | 0.04582  |
| 0.34737  | 0.100677 | 0.0296   | 0.231683 | 4.14E-07 | 0.082274 | 0.0757   | 0.204612 | 8.31E-06 |
| 4.27E-05 | 0.230071 | 5.00E-07 | 0.426717 | 4.35E-22 | 0.315354 | 3.05E-12 | 0.452837 | 5.45E-25 |
| 7.57E-05 | 0.203415 | 9.40E-06 | 0.201132 | 1.19E-05 | 0.1848   | 5.88E-05 | 0.320496 | 1.29E-12 |
| 0.50044  | 0.04309  | 0.35282  | 0.142615 | 0.00201  | -0.08537 | 0.06529  | 0.03075  | 0.5074   |
| 0.04186  | 0.107023 | 0.02071  | 0.163409 | 0.00039  | 0.162167 | 0.00043  | 0.291732 | 1.29E-10 |
| 6.64E-05 | 0.149183 | 0.00122  | 0.177685 | 0.00011  | 0.022289 | 0.63092  | 0.251123 | 3.78E-08 |
| 0.00061  | 0.143287 | 0.00191  | 0.104696 | 0.02366  | 0.025087 | 0.58867  | 0.205618 | 7.48E-06 |
| 0.00011  | 0.056204 | 0.22541  | 0.206739 | 6.65E-06 | 0.10267  | 0.02651  | 0.155743 | 0.00073  |
| 2.58E-08 | 0.148408 | 0.0013   | 0.192476 | 2.82E-05 | 0.086134 | 0.06291  | 0.239093 | 1.70E-07 |
| 0.08722  | -0.00476 | 0.91825  | 0.080795 | 0.08113  | -0.11412 | 0.0136   | -0.05567 | 0.22984  |
| 0.50376  | 0.14211  | 0.00208  | 0.360667 | 8.59E-16 | 0.300177 | 3.52E-11 | 0.393141 | 1.04E-18 |
| 0.1033   | 0.060124 | 0.19464  | 0.274919 | 1.52E-09 | 0.099653 | 0.03131  | 0.187051 | 4.76E-05 |
| 0.00384  | 0.102937 | 0.02612  | 0.146381 | 0.00151  | 0.029057 | 0.53107  | 0.130058 | 0.00488  |
| 0.0126   | 0.109056 | 0.0184   | 0.190878 | 3.29E-05 | 0.091367 | 0.04846  | 0.230594 | 4.71E-07 |
| 7.54E-13 | -0.16033 | 0.00051  | 0.023027 | 0.61965  | -0.14399 | 0.00181  | -0.22343 | 1.08E-06 |
| 7.29E-05 | 0.163439 | 0.00039  | 0.350514 | 6.03E-15 | 0.333433 | 1.37E-13 | 0.355596 | 2.29E-15 |
| 0.99013  | 0.082887 | 0.07354  | 0.042677 | 0.35747  | -0.10779 | 0.01981  | 0.093846 | 0.04265  |
| 0.30442  | -0.04803 | 0.30035  | 0.264439 | 6.52E-09 | 0.13264  | 0.00409  | 0.062603 | 0.17684  |
| 6.11E-07 | -0.00995 | 0.83026  | 0.063286 | 0.17215  | -0.04591 | 0.32219  | -0.03694 | 0.42579  |
| 0.00272  | 0.024204 | 0.60186  | 0.229024 | 5.66E-07 | 0.07692  | 0.09686  | 0.126774 | 0.00608  |
| 0.13736  | 0.00465  | 0.92017  | 0.268303 | 3.84E-09 | 0.178074 | 0.00011  | 0.13336  | 0.00389  |
| 0.00012  | -0.01814 | 0.69577  | 0.106836 | 0.02093  | 0.004222 | 0.92749  | 0.02434  | 0.59982  |
| 0.94112  | 0.009989 | 0.82954  | 0.172144 | 0.00019  | 0.04255  | 0.3589   | 0.095001 | 0.04016  |
| 0.00816  | 0.07001  | 0.13086  | 0.091757 | 0.04751  | 0.07798  | 0.09233  | 0.160429 | 0.0005   |
| 1.27E-13 | 0.079653 | 0.08553  | 0.032575 | 0.48252  | 0.150268 | 0.00113  | 0.206965 | 6.50E-06 |
| 1.07E-05 | 0.04285  | 0.35552  | 0.204916 | 8.05E-06 | 0.208875 | 5.31E-06 | 0.248866 | 5.05E-08 |
| 0.02387  | -0.08084 | 0.08097  | 0.037145 | 0.42323  | -0.09612 | 0.03785  | -0.11386 | 0.01382  |
| 2.04E-12 | 0.145593 | 0.00161  | 0.224597 | 9.42E-07 | 0.342068 | 2.90E-14 | 0.364424 | 4.10E-16 |
| 0.03337  | 0.022968 | 0.62055  | 0.214749 | 2.83E-06 | 0.121412 | 0.00863  | 0.07517  | 0.10472  |
| 0.00136  | -0.01199 | 0.79601  | 0.045881 | 0.32249  | -0.057   | 0.21893  | -0.03743 | 0.41962  |
| 1.51E-05 | -0.05401 | 0.2441   | -0.01341 | 0.77248  | -0.03179 | 0.49318  | -0.13664 | 0.00309  |
| 0.48561  | 0.036098 | 0.43642  | 0.246197 | 7.07E-08 | 0.067666 | 0.14428  | 0.133987 | 0.00372  |
| 0.00358  | 0.113842 | 0.01383  | 0.212076 | 3.77E-06 | 0.152849 | 0.00092  | 0.153207 | 0.0009   |
| 0.07597  | -0.20385 | 8.99E-06 | -0.1043  | 0.0242   | -0.27697 | 1.14E-09 | -0.28543 | 3.32E-10 |
| 0.48364  | 0.086689 | 0.06122  | 0.123473 | 0.00755  | 0.015184 | 0.74347  | 0.144105 | 0.0018   |

|          |          |          |          |          |          |          |          |          |
|----------|----------|----------|----------|----------|----------|----------|----------|----------|
| 0.00423  | -0.11397 | 0.01372  | 0.046247 | 0.31864  | -0.06958 | 0.13327  | -0.05628 | 0.2248   |
| 2.05E-06 | 0.026046 | 0.5745   | 0.051263 | 0.26891  | -0.00655 | 0.88776  | 0.091685 | 0.04768  |
| 9.19E-08 | -0.21954 | 1.67E-06 | -0.01635 | 0.72455  | -0.21924 | 1.72E-06 | -0.31289 | 4.58E-12 |
| 1.72E-05 | 0.191554 | 3.09E-05 | 0.476457 | 7.71E-28 | 0.302054 | 2.62E-11 | 0.423802 | 8.84E-22 |
| 3.90E-05 | -0.12612 | 0.00635  | -0.08272 | 0.07411  | -0.2256  | 8.40E-07 | -0.23377 | 3.23E-07 |
| 0.02138  | -0.04485 | 0.33354  | -0.14757 | 0.00138  | -0.21239 | 3.65E-06 | -0.20616 | 7.07E-06 |
| 0.48793  | 0.019942 | 0.66731  | 0.234416 | 2.99E-07 | 0.038769 | 0.40322  | 0.021779 | 0.63876  |
| 0.00381  | -0.11523 | 0.01271  | -0.07682 | 0.09729  | -0.15092 | 0.00107  | -0.24603 | 7.23E-08 |
| 0.00029  | 0.068313 | 0.14047  | 0.053973 | 0.24439  | 0.03189  | 0.49178  | 0.106782 | 0.021    |
| 0.09516  | -0.04459 | 0.33626  | 0.070993 | 0.12552  | -0.13404 | 0.00371  | -0.09769 | 0.03482  |
| 0.00069  | 0.124279 | 0.00717  | 0.13101  | 0.00457  | 0.093495 | 0.04344  | 0.176478 | 0.00013  |
| 0.01238  | 0.251606 | 3.56E-08 | 0.144717 | 0.00172  | 0.14905  | 0.00124  | 0.378554 | 2.33E-17 |
| 0.24059  | -0.00393 | 0.93256  | -0.04161 | 0.36962  | -0.06737 | 0.14605  | -0.00143 | 0.97535  |
| 0.00619  | 0.083765 | 0.07053  | 0.200285 | 1.30E-05 | 0.203998 | 8.85E-06 | 0.2825   | 5.11E-10 |
| 0.00109  | 0.035026 | 0.45018  | -0.01    | 0.82938  | -0.00895 | 0.84708  | 0.078368 | 0.09072  |
| 0.26057  | 0.12044  | 0.00918  | 0.320056 | 1.39E-12 | 0.141741 | 0.00214  | 0.281928 | 5.56E-10 |
| 7.41E-15 | -0.013   | 0.77941  | -0.10126 | 0.02867  | -0.05256 | 0.25701  | -0.08208 | 0.07641  |
| 0.00225  | 0.010131 | 0.82715  | 0.098196 | 0.03388  | -0.07811 | 0.09178  | 0.021112 | 0.64906  |
| 3.40E-05 | -0.11958 | 0.00969  | -0.06464 | 0.16315  | -0.08749 | 0.05885  | -0.16029 | 0.00051  |
| 1.65E-11 | 0.138441 | 0.00272  | 0.145442 | 0.00162  | 0.155984 | 0.00072  | 0.214411 | 2.93E-06 |
| 0.01381  | -0.03239 | 0.48497  | 0.040173 | 0.38639  | -0.07155 | 0.12259  | -0.0135  | 0.77112  |
| 0.06846  | 0.224271 | 9.78E-07 | 0.335078 | 1.02E-13 | 0.297308 | 5.51E-11 | 0.453796 | 4.21E-25 |
| 0.01794  | -0.01715 | 0.71163  | -0.17363 | 0.00016  | -0.07002 | 0.13079  | -0.0441  | 0.34167  |
| 1.68E-07 | -0.06561 | 0.15689  | 0.257301 | 1.69E-08 | 0.167864 | 0.00027  | 0.102102 | 0.02736  |
| 0.0013   | 0.060008 | 0.1955   | 0.133276 | 0.00391  | -0.02075 | 0.65467  | 0.069844 | 0.13178  |
| 0.00027  | 0.164901 | 0.00035  | 0.256739 | 1.82E-08 | 0.333471 | 1.36E-13 | 0.295965 | 6.78E-11 |
| 0.07818  | 0.050453 | 0.27656  | 0.12923  | 0.00516  | 0.133488 | 0.00385  | 0.167603 | 0.00027  |
| 0.00493  | 0.017021 | 0.71372  | 0.132412 | 0.00415  | 0.180834 | 8.50E-05 | 0.120768 | 0.00899  |
| 0.89746  | 0.188845 | 4.01E-05 | 0.283627 | 4.34E-10 | 0.234244 | 3.06E-07 | 0.380686 | 1.49E-17 |
| 0.6862   | -0.12818 | 0.00554  | -0.08248 | 0.07497  | -0.21415 | 3.02E-06 | -0.29041 | 1.58E-10 |
| 8.19E-08 | 0.14346  | 0.00188  | 0.174744 | 0.00015  | -0.01434 | 0.75735  | 0.212996 | 3.42E-06 |
| 0.09603  | 0.035879 | 0.43922  | 0.135359 | 0.00338  | 0.041634 | 0.36935  | 0.079808 | 0.08492  |
| 0.14265  | 0.126374 | 0.00625  | 0.321727 | 1.05E-12 | 0.17599  | 0.00013  | 0.264382 | 6.57E-09 |
| 5.75E-07 | 0.192596 | 2.79E-05 | 0.452626 | 5.76E-25 | 0.266385 | 5.00E-09 | 0.427454 | 3.63E-22 |
| 0.00012  | 0.034933 | 0.45138  | 0.246721 | 6.62E-08 | 0.105568 | 0.02251  | 0.149172 | 0.00122  |
| 0.56853  | 0.005089 | 0.91266  | 0.226327 | 7.73E-07 | 0.020847 | 0.65318  | 0.086036 | 0.06321  |
| 0.44442  | 0.017428 | 0.70718  | 0.005071 | 0.91296  | -0.15968 | 0.00053  | -0.04828 | 0.29777  |
| 0.00248  | 0.090185 | 0.05146  | 0.326484 | 4.63E-13 | 0.255631 | 2.11E-08 | 0.280621 | 6.72E-10 |
| 0.75082  | 0.055492 | 0.23134  | 0.17588  | 0.00013  | 0.028519 | 0.5387   | 0.142147 | 0.00208  |
| 0.11161  | 0.091003 | 0.04937  | 0.101205 | 0.02876  | -0.00723 | 0.87616  | 0.155837 | 0.00073  |
| 0.01949  | 0.126929 | 0.00602  | 0.016807 | 0.71715  | 0.031823 | 0.49269  | 0.127151 | 0.00593  |
| 0.45533  | 0.086921 | 0.06053  | 0.110294 | 0.01711  | 0.0211   | 0.64926  | 0.069415 | 0.13417  |
| 0.01447  | 0.039378 | 0.39587  | 0.125012 | 0.00683  | -0.0741  | 0.10979  | 0.048911 | 0.29153  |
| 0.01106  | -0.11788 | 0.01079  | 0.15256  | 0.00094  | -0.10676 | 0.02103  | -0.12898 | 0.00525  |
| 0.84576  | -0.11675 | 0.01157  | 0.111792 | 0.01565  | -0.08414 | 0.06926  | -0.18015 | 9.05E-05 |

|          |          |          |          |          |          |          |          |          |
|----------|----------|----------|----------|----------|----------|----------|----------|----------|
| 0.35589  | -0.05221 | 0.26012  | 0.108092 | 0.01947  | -0.20487 | 8.09E-06 | -0.1317  | 0.00436  |
| 0.0016   | 0.131763 | 0.00434  | -0.03705 | 0.42436  | -0.0648  | 0.16207  | 0.151696 | 0.00101  |
| 2.05E-17 | -0.00961 | 0.83591  | 0.047982 | 0.3008   | -0.03223 | 0.48713  | -0.02686 | 0.56261  |
| 0.30533  | 0.019054 | 0.68129  | 0.242366 | 1.14E-07 | 0.118525 | 0.01036  | 0.115503 | 0.0125   |
| 1.08E-07 | 0.131422 | 0.00444  | 0.273089 | 1.97E-09 | 0.261006 | 1.04E-08 | 0.267075 | 4.55E-09 |
| 3.95E-10 | 0.094045 | 0.04222  | 0.63337  | 9.77E-54 | 0.265629 | 5.54E-09 | 0.189665 | 3.70E-05 |
| 1.47E-12 | 0.150203 | 0.00113  | 0.616031 | 3.89E-50 | 0.310505 | 6.77E-12 | 0.380471 | 1.56E-17 |
| 0.06842  | 0.044205 | 0.3405   | 0.861779 | #####    | 0.547138 | 8.04E-38 | 0.423278 | 1.00E-21 |
| 0.16645  | 0.238993 | 1.72E-07 | 0.769556 | 1.28E-92 | 0.578075 | 5.45E-43 | 0.616411 | 3.26E-50 |
| 0.91019  | 0.225511 | 8.49E-07 | 0.704572 | 2.82E-71 | 0.557429 | 1.76E-39 | 0.587427 | 1.16E-44 |
| 0.0016   | 0.207732 | 5.99E-06 | 0.772057 | 1.40E-93 | 0.512067 | 1.41E-32 | 0.623673 | 1.08E-51 |
| 0.00032  | -0.05105 | 0.27089  | 0.689073 | 5.01E-67 | 0.420769 | 1.84E-21 | 0.310539 | 6.73E-12 |
| 0.03572  | 0.022899 | 0.6216   | 0.459121 | 9.99E-26 | 0.308602 | 9.22E-12 | 0.259435 | 1.28E-08 |
| 0.00595  | 0.150795 | 0.00108  | 0.708763 | 1.79E-72 | 0.585776 | 2.30E-44 | 0.543353 | 3.17E-37 |
| 8.58E-05 | 0.297113 | 5.68E-11 | 0.82504  | #####    | 0.58467  | 3.64E-44 | 0.621884 | 2.51E-51 |
| 0.06771  | 0.057877 | 0.21187  | 0.548542 | 4.81E-38 | 0.331437 | 1.95E-13 | 0.30533  | 1.56E-11 |
| 4.33E-12 | 0.017987 | 0.69825  | 0.474316 | 1.43E-27 | 0.121552 | 0.00855  | 0.103711 | 0.02501  |
| 0.04567  | 0.173221 | 0.00017  | 0.804502 | #####    | 0.755078 | 2.74E-87 | 0.642789 | 8.64E-56 |
| 0.3446   | 0.031446 | 0.49784  | 0.858977 | #####    | 0.41884  | 2.92E-21 | 0.308232 | 9.79E-12 |
| 0.7696   | 0.084568 | 0.06787  | 0.841008 | #####    | 0.454401 | 3.58E-25 | 0.403023 | 1.15E-19 |
| 0.0437   | 0.068724 | 0.1381   | 0.90606  | #####    | 0.580736 | 1.84E-43 | 0.515149 | 5.17E-33 |
| 0.00078  | -0.10476 | 0.02357  | 0.644466 | 3.66E-56 | 0.385593 | 5.28E-18 | 0.214163 | 3.01E-06 |
| 0.77616  | -0.07732 | 0.09513  | 0.634741 | 4.96E-54 | 0.429554 | 2.16E-22 | 0.300283 | 3.47E-11 |
| 0.13606  | 0.153078 | 0.0009   | 0.897781 | #####    | 0.558321 | 1.26E-39 | 0.567322 | 3.93E-41 |
| 4.20E-05 | 0.052204 | 0.26022  | 0.789578 | #####    | 0.380784 | 1.46E-17 | 0.333839 | 1.28E-13 |
| 0.12806  | 0.197547 | 1.71E-05 | 0.591848 | 1.79E-45 | 0.454883 | 3.15E-25 | 0.489266 | 1.77E-29 |
| 0.0144   | 0.189971 | 3.60E-05 | 0.713043 | 1.02E-73 | 0.563309 | 1.87E-40 | 0.558937 | 9.94E-40 |
| 0.002    | 0.238323 | 1.87E-07 | 0.898125 | #####    | 0.59915  | 7.70E-47 | 0.644094 | 4.43E-56 |
| 0.0008   | 0.075026 | 0.10539  | 0.62704  | 2.14E-52 | 0.258538 | 1.44E-08 | 0.244716 | 8.52E-08 |
| 0.00705  | -0.11814 | 0.01062  | 0.592058 | 1.63E-45 | 0.27393  | 1.75E-09 | 0.118568 | 0.01033  |
| 0.84597  | 0.230975 | 4.50E-07 | 0.720478 | 6.16E-76 | 0.520527 | 8.72E-34 | 0.578318 | 4.93E-43 |
| 0.19847  | -0.05994 | 0.19603  | 0.615162 | 5.82E-50 | 0.509057 | 3.74E-32 | 0.39254  | 1.18E-18 |
| 0.00133  | 0.0035   | 0.93986  | 0.560975 | 4.57E-40 | 0.309535 | 7.93E-12 | 0.308959 | 8.70E-12 |
| 0.01149  | -0.02965 | 0.52267  | 0.725446 | 1.85E-77 | 0.511635 | 1.63E-32 | 0.406098 | 5.72E-20 |
| 1.70E-07 | 0.055757 | 0.22912  | 0.801932 | #####    | 0.674462 | 2.94E-63 | 0.671296 | 1.81E-62 |
| 0.00011  | 0.345087 | 1.66E-14 | 0.823709 | #####    | 0.644954 | 2.84E-56 | 0.72064  | 5.50E-76 |
| 0.00435  | 0.1129   | 0.01464  | 0.648023 | 5.80E-57 | 0.378685 | 2.26E-17 | 0.372662 | 7.83E-17 |
| 0.09708  | -0.04032 | 0.38471  | 0.653076 | 4.07E-58 | 0.378367 | 2.42E-17 | 0.239333 | 1.65E-07 |
| 0.18439  | -0.00812 | 0.861    | 0.472266 | 2.56E-27 | 0.247334 | 6.13E-08 | 0.260454 | 1.11E-08 |
| 1.20E-06 | 0.089967 | 0.05203  | 0.729518 | 9.86E-79 | 0.420895 | 1.78E-21 | 0.364907 | 3.72E-16 |
| 0.00296  | 0.161836 | 0.00045  | 0.731705 | 2.00E-79 | 0.596898 | 2.05E-46 | 0.547506 | 7.03E-38 |
| 0.14195  | -0.07266 | 0.11685  | 0.539213 | 1.40E-36 | 0.234084 | 3.12E-07 | 0.157456 | 0.00064  |
| 0.23136  | -0.06643 | 0.15179  | 0.606511 | 2.97E-48 | 0.160022 | 0.00052  | 0.039805 | 0.39076  |
| 0.10245  | 0.077531 | 0.09423  | 0.831793 | #####    | 0.607275 | 2.11E-48 | 0.54963  | 3.23E-38 |
| 0.0521   | -0.19055 | 3.40E-05 | 0.506141 | 9.49E-32 | 0.12469  | 0.00698  | -0.07535 | 0.10388  |

|          |          |          |          |          |          |          |          |          |
|----------|----------|----------|----------|----------|----------|----------|----------|----------|
| 0.00841  | 0.005301 | 0.90904  | 0.62783  | 1.46E-52 | 0.273932 | 1.75E-09 | 0.248941 | 5.00E-08 |
| 0.15991  | 0.067755 | 0.14375  | 0.783232 | 4.99E-98 | 0.431631 | 1.29E-22 | 0.40701  | 4.64E-20 |
| 0.95897  | -0.07557 | 0.10289  | 0.513383 | 9.21E-33 | 0.347774 | 1.01E-14 | 0.304633 | 1.74E-11 |
| 0.8717   | 0.220767 | 1.45E-06 | 0.607232 | 2.15E-48 | 0.53326  | 1.13E-35 | 0.578391 | 4.79E-43 |
| 0.026    | 0.19862  | 1.53E-05 | 0.828593 | #####    | 0.631224 | 2.81E-53 | 0.603437 | 1.17E-47 |
| 0.01564  | 0.232261 | 3.87E-07 | 0.638468 | 7.72E-55 | 0.405366 | 6.75E-20 | 0.398623 | 3.09E-19 |
| 0.06454  | -0.04198 | 0.36536  | 0.508091 | 5.09E-32 | 0.093002 | 0.04456  | 0.047216 | 0.3086   |
| 0.89189  | -0.06939 | 0.13431  | 0.777081 | 1.51E-95 | 0.657615 | 3.58E-59 | 0.421265 | 1.63E-21 |
| 0.00016  | 0.03539  | 0.44548  | 0.442692 | 7.82E-24 | 0.210072 | 4.68E-06 | 0.23389  | 3.19E-07 |
| 0.90815  | -0.00749 | 0.87168  | 0.632426 | 1.56E-53 | 0.658721 | 1.97E-59 | 0.568057 | 2.95E-41 |
| 0.00084  | 0.060446 | 0.19225  | 0.539348 | 1.33E-36 | 0.361677 | 7.04E-16 | 0.353087 | 3.70E-15 |
| 0.25657  | -0.06443 | 0.1645   | 0.52155  | 6.19E-34 | 0.34366  | 2.16E-14 | 0.267241 | 4.45E-09 |
| 0.08006  | 0.241614 | 1.25E-07 | 0.877304 | #####    | 0.742825 | 4.63E-83 | 0.683401 | 1.55E-65 |
| 0.75784  | 0.003068 | 0.94727  | 0.614621 | 7.47E-50 | 0.394099 | 8.40E-19 | 0.364788 | 3.81E-16 |
| 1.19E-05 | 0.030739 | 0.50755  | 0.663435 | 1.49E-60 | 0.503556 | 2.15E-31 | 0.39431  | 8.02E-19 |
| 0.00701  | 0.112952 | 0.0146   | 0.527791 | 7.48E-35 | 0.251101 | 3.79E-08 | 0.342032 | 2.91E-14 |
| 0.47464  | 0.118423 | 0.01043  | 0.872863 | #####    | 0.653775 | 2.81E-58 | 0.543414 | 3.10E-37 |
| 0.71914  | 0.030168 | 0.51548  | 0.536554 | 3.57E-36 | 0.347532 | 1.06E-14 | 0.331228 | 2.03E-13 |
| 0.06492  | -0.01893 | 0.68329  | 0.73264  | 1.00E-79 | 0.596956 | 2.00E-46 | 0.443244 | 6.78E-24 |
| 0.01753  | 0.113575 | 0.01406  | 0.758221 | 2.05E-88 | 0.422712 | 1.15E-21 | 0.311556 | 5.70E-12 |
| 0.00298  | -0.01861 | 0.68832  | 0.670361 | 3.07E-62 | 0.341584 | 3.16E-14 | 0.241988 | 1.19E-07 |
| 0.16945  | 0.33141  | 1.96E-13 | 0.684579 | 7.64E-66 | 0.686473 | 2.44E-66 | 0.764869 | 7.48E-91 |
| 0.25873  | -0.11435 | 0.01342  | 0.5405   | 8.82E-37 | 0.211141 | 4.17E-06 | 0.11188  | 0.01557  |
| 0.00057  | 0.163248 | 0.0004   | 0.784409 | 1.64E-98 | 0.6839   | 1.15E-65 | 0.661529 | 4.25E-60 |
| 0.01543  | 0.195195 | 2.16E-05 | 0.806092 | #####    | 0.562166 | 2.90E-40 | 0.582681 | 8.29E-44 |
| 0.17963  | -0.06635 | 0.15226  | 0.508529 | 4.43E-32 | 0.388233 | 3.00E-18 | 0.300258 | 3.48E-11 |
| 0.77609  | -0.14036 | 0.00237  | 0.54997  | 2.85E-38 | 0.267835 | 4.10E-09 | 0.179326 | 9.76E-05 |
| 6.41E-07 | -0.07051 | 0.12813  | 0.66066  | 6.83E-60 | 0.256296 | 1.93E-08 | 0.205934 | 7.24E-06 |
| 3.02E-08 | 0.205404 | 7.65E-06 | 0.781282 | 3.11E-97 | 0.588549 | 7.21E-45 | 0.629814 | 5.59E-53 |
| 0.29603  | -0.06817 | 0.14131  | 0.666253 | 3.11E-61 | 0.544328 | 2.23E-37 | 0.408761 | 3.10E-20 |
| 3.26E-06 | 0.031547 | 0.49645  | 0.595209 | 4.25E-46 | 0.33031  | 2.38E-13 | 0.333934 | 1.26E-13 |
| 0.0052   | 0.162611 | 0.00042  | 0.761361 | 1.48E-89 | 0.470344 | 4.42E-27 | 0.440521 | 1.37E-23 |
| 2.30E-05 | -0.05965 | 0.19817  | 0.269165 | 3.41E-09 | 0.58716  | 1.29E-44 | 0.276309 | 1.25E-09 |
| 0.00627  | -0.01971 | 0.67097  | 0.068374 | 0.14012  | 0.125476 | 0.00663  | -0.06739 | 0.14593  |
| 0.58803  | -0.15482 | 0.00079  | -0.11909 | 0.01     | -0.09743 | 0.03531  | -0.28371 | 4.28E-10 |
| 0.00983  | -0.06936 | 0.13447  | -0.01944 | 0.67526  | 0.149937 | 0.00115  | -0.08562 | 0.06449  |
| 0.55666  | 0.002259 | 0.96117  | -0.10668 | 0.02112  | 0.080419 | 0.08256  | -0.02654 | 0.56722  |
| 0.1432   | -0.03579 | 0.44036  | 0.072429 | 0.11804  | 0.274508 | 1.61E-09 | 0.068049 | 0.14202  |
| 0.16667  | 0.045713 | 0.32427  | -0.08914 | 0.05424  | -0.00979 | 0.83289  | -0.0348  | 0.45314  |
| 0.81716  | -0.07676 | 0.09758  | 0.065417 | 0.15813  | 0.101248 | 0.02869  | -0.0085  | 0.85468  |
| 0.70286  | -0.04334 | 0.34999  | 0.097848 | 0.03452  | 0.25344  | 2.81E-08 | 0.037588 | 0.41772  |
| 0.14127  | -0.03034 | 0.51307  | 0.091049 | 0.04925  | 0.357203 | 1.68E-15 | 0.100788 | 0.02942  |
| 0.00104  | -0.17357 | 0.00016  | -0.04442 | 0.33815  | 0.143451 | 0.00188  | -0.15959 | 0.00054  |
| 0.02246  | -0.02355 | 0.61177  | -0.26468 | 6.31E-09 | -0.12317 | 0.0077   | -0.28863 | 2.07E-10 |
| 0.89321  | -0.01751 | 0.70593  | -0.15809 | 0.00061  | 0.045802 | 0.32333  | -0.10087 | 0.02929  |

|          |          |          |          |          |          |          |          |          |
|----------|----------|----------|----------|----------|----------|----------|----------|----------|
| 0.00017  | 0.078787 | 0.089    | -0.14026 | 0.00238  | 0.039927 | 0.38931  | -0.05361 | 0.24757  |
| 7.05E-05 | 0.088102 | 0.05711  | -0.05059 | 0.27525  | 0.004975 | 0.91461  | -0.10738 | 0.02029  |
| 0.12003  | -0.0442  | 0.3406   | -0.14111 | 0.00224  | 0.024988 | 0.59014  | -0.10087 | 0.02929  |
| 0.00012  | -0.02625 | 0.57148  | -0.09987 | 0.03095  | 0.013888 | 0.76468  | -0.09964 | 0.03133  |
| 0.24205  | -0.0462  | 0.31914  | -0.0055  | 0.90564  | 0.307129 | 1.17E-11 | 0.180856 | 8.48E-05 |
| 0.61232  | -0.00048 | 0.99173  | -0.14722 | 0.00142  | -0.01475 | 0.75058  | -0.06738 | 0.14596  |
| 0.02517  | -0.12558 | 0.00658  | 0.045361 | 0.328    | 0.108192 | 0.01935  | -0.15956 | 0.00054  |
| 0.58877  | -0.16353 | 0.00039  | -0.1429  | 0.00196  | -0.10079 | 0.02943  | -0.28625 | 2.94E-10 |
| 0.06686  | 0.033145 | 0.47489  | 0.186402 | 5.06E-05 | 0.315942 | 2.77E-12 | 0.127209 | 0.00591  |
| 0.40236  | 0.057769 | 0.21273  | -0.15134 | 0.00104  | 0.100346 | 0.03015  | -0.00502 | 0.91379  |
| 0.31427  | 0.022931 | 0.6211   | 0.001659 | 0.97147  | 0.263667 | 7.24E-09 | 0.112781 | 0.01475  |
| 0.28424  | -0.03236 | 0.48546  | 0.23581  | 2.53E-07 | 0.424534 | 7.40E-22 | 0.286861 | 2.69E-10 |
| 0.00039  | -0.06125 | 0.18642  | 0.016678 | 0.71925  | 0.160561 | 0.0005   | -0.0569  | 0.21969  |
| 0.0064   | -0.07631 | 0.09953  | 0.044369 | 0.33871  | 0.118594 | 0.01032  | -0.11032 | 0.01709  |
| 0.0012   | -0.08882 | 0.0551   | 0.068993 | 0.13656  | 0.127233 | 0.0059   | -0.10266 | 0.02653  |
| 0.12885  | -0.09349 | 0.04345  | -0.16838 | 0.00026  | -0.02041 | 0.66002  | -0.16817 | 0.00026  |
| 0.34989  | -0.08705 | 0.06016  | -0.05555 | 0.23087  | 0.119507 | 0.00974  | -0.02793 | 0.54708  |
| 0.00823  | -0.01054 | 0.82028  | -0.00149 | 0.97445  | 0.119026 | 0.01004  | -0.00939 | 0.83955  |
| 0.03685  | 0.145151 | 0.00166  | 0.01035  | 0.82347  | 0.201869 | 1.10E-05 | 0.141873 | 0.00212  |
| 3.04E-07 | -0.25022 | 4.25E-08 | -0.17982 | 9.33E-05 | -0.17536 | 0.00014  | -0.32131 | 1.12E-12 |
| 0.52331  | -0.02119 | 0.64793  | -0.02116 | 0.64836  | 0.107599 | 0.02003  | 0.035003 | 0.45047  |
| 0.02828  | -0.0399  | 0.38958  | 0.009373 | 0.8399   | 0.276379 | 1.24E-09 | 0.05116  | 0.26988  |
| 0.0825   | -0.10023 | 0.03035  | -0.16244 | 0.00042  | -0.05825 | 0.20891  | -0.14876 | 0.00126  |
| 0.6976   | -0.02569 | 0.5797   | 0.021996 | 0.63541  | 0.233203 | 3.46E-07 | 0.056082 | 0.22641  |
| 0.01222  | -0.12826 | 0.00551  | -0.22659 | 7.50E-07 | 0.000838 | 0.98559  | -0.23011 | 4.98E-07 |
| 0.30956  | -0.01432 | 0.75764  | 0.028131 | 0.54425  | 0.042741 | 0.35674  | -0.04055 | 0.38199  |
| 0.9012   | -0.11065 | 0.01675  | -0.03212 | 0.48871  | -0.06473 | 0.16258  | -0.22458 | 9.44E-07 |
| 0.94988  | -0.04583 | 0.32298  | 0.197494 | 1.72E-05 | 0.231923 | 4.03E-07 | 0.163559 | 0.00039  |
| 0.43786  | -0.03325 | 0.47353  | -0.2094  | 5.02E-06 | -0.07349 | 0.11272  | -0.14229 | 0.00205  |
| 0.03551  | -0.06524 | 0.15928  | -0.06901 | 0.13645  | 0.00276  | 0.95257  | -0.16124 | 0.00047  |
| 0.95254  | 0.006149 | 0.89457  | -0.01715 | 0.71166  | 0.099194 | 0.0321   | -0.06022 | 0.19391  |
| 0.38526  | -0.06669 | 0.15015  | 0.063745 | 0.16905  | 0.190133 | 3.54E-05 | -0.00452 | 0.92234  |
| 0.92943  | -0.02193 | 0.63645  | 0.018816 | 0.68506  | 0.129442 | 0.00509  | -0.06194 | 0.18144  |
| 0.7743   | -0.05556 | 0.23081  | -0.01376 | 0.7668   | -0.10267 | 0.0265   | -0.14647 | 0.0015   |
| 0.38673  | -0.05046 | 0.27648  | -0.07187 | 0.12089  | -0.06007 | 0.19508  | -0.12439 | 0.00712  |
| 7.93E-05 | -0.06979 | 0.13207  | 0.064688 | 0.16282  | 0.177636 | 0.00011  | -0.05882 | 0.20454  |
| 0.50219  | -0.03961 | 0.39304  | -0.01394 | 0.76386  | 0.15937  | 0.00055  | 0.006161 | 0.89436  |
| 0.21295  | -0.03518 | 0.44825  | 0.114292 | 0.01346  | 0.415146 | 7.00E-21 | 0.245582 | 7.64E-08 |
| 0.98454  | -0.03253 | 0.48313  | 0.068308 | 0.1405   | 0.272346 | 2.19E-09 | 0.146465 | 0.0015   |
| 0.7265   | -0.08692 | 0.06053  | 0.066173 | 0.15336  | 0.151194 | 0.00105  | -0.07026 | 0.1295   |
| 0.48866  | -0.04513 | 0.33051  | 0.037654 | 0.41689  | 0.106482 | 0.02136  | -0.07235 | 0.11843  |
| 0.16797  | -0.03988 | 0.3899   | 0.111045 | 0.01636  | 0.061767 | 0.1827   | -0.02488 | 0.59169  |
| 0.00246  | 0.019403 | 0.67579  | 0.103318 | 0.02557  | 0.244953 | 8.27E-08 | 0.070783 | 0.12665  |
| 0.6711   | -0.08656 | 0.0616   | -0.02833 | 0.54146  | 0.121598 | 0.00853  | -0.1406  | 0.00232  |
| 0.13967  | 0.042286 | 0.3619   | 0.021523 | 0.64271  | 0.245177 | 8.04E-08 | 0.078932 | 0.08841  |



|          |          |          |          |          |          |          |          |          |
|----------|----------|----------|----------|----------|----------|----------|----------|----------|
| 0.89518  | 0.141247 | 0.00222  | 0.125477 | 0.00663  | 0.263068 | 7.85E-09 | 0.245284 | 7.93E-08 |
| 0.06642  | -0.0634  | 0.17139  | -0.07668 | 0.09792  | -0.00505 | 0.91337  | -0.12976 | 0.00498  |
| 0.18285  | -0.09721 | 0.03573  | -0.04404 | 0.34236  | 0.058385 | 0.20788  | -0.12341 | 0.00759  |
| 2.56E-07 | -0.17424 | 0.00015  | -0.05999 | 0.19564  | 0.184666 | 5.96E-05 | -0.06787 | 0.1431   |
| 0.11711  | -0.05056 | 0.27558  | 0.024971 | 0.5904   | 0.059878 | 0.19647  | -0.11444 | 0.01334  |
| 0.12559  | -0.00249 | 0.95716  | 0.119728 | 0.00961  | 0.177332 | 0.00012  | -0.02566 | 0.58017  |
| 5.24E-05 | 0.079586 | 0.0858   | 0.035196 | 0.44798  | 0.247007 | 6.39E-08 | 0.157694 | 0.00063  |
| 0.93961  | -0.02864 | 0.53696  | -0.09183 | 0.04733  | 0.037748 | 0.41573  | -0.07202 | 0.12015  |
| 0.04566  | -0.08939 | 0.05356  | -0.10266 | 0.02653  | 0.135209 | 0.00342  | -0.01608 | 0.72889  |
| 0.25679  | 0.021633 | 0.641    | 0.135517 | 0.00334  | 0.448947 | 1.53E-24 | 0.263438 | 7.47E-09 |
| 0.15387  | -0.03336 | 0.47202  | 0.021272 | 0.64659  | 0.151919 | 0.00099  | -0.01616 | 0.72765  |
| 0.36709  | -0.06163 | 0.18365  | -0.17474 | 0.00015  | -0.0617  | 0.18318  | -0.20856 | 5.49E-06 |
| 0.00011  | -0.18236 | 7.38E-05 | 0.14388  | 0.00183  | 0.050551 | 0.27564  | -0.12369 | 0.00745  |
| 0.10654  | 0.004723 | 0.91892  | 0.044009 | 0.34264  | 0.191983 | 2.96E-05 | 0.126311 | 0.00627  |
| 0.63125  | 0.006251 | 0.89283  | 0.218277 | 1.92E-06 | 0.356315 | 2.00E-15 | 0.149089 | 0.00123  |
| 0.00129  | -0.01111 | 0.81068  | -0.03805 | 0.41203  | 0.108422 | 0.0191   | -0.07706 | 0.09626  |
| 0.92004  | 0.067199 | 0.14708  | -0.05632 | 0.22446  | 0.061334 | 0.18579  | -0.08532 | 0.06545  |
| 0.00037  | -0.01313 | 0.77724  | -0.14313 | 0.00193  | 0.007198 | 0.87671  | -0.12576 | 0.0065   |
| 0.00024  | -0.21527 | 2.67E-06 | 0.070382 | 0.12882  | -0.0857  | 0.06427  | -0.28278 | 4.91E-10 |
| 2.97E-18 | -0.17086 | 0.00021  | -0.21738 | 2.12E-06 | -0.12225 | 0.00818  | -0.30886 | 8.84E-12 |
| 9.90E-10 | -0.20883 | 5.34E-06 | -0.03964 | 0.39269  | -0.06559 | 0.15703  | -0.29785 | 5.06E-11 |
| 0.01065  | -0.14001 | 0.00242  | -0.16775 | 0.00027  | -0.09859 | 0.03318  | -0.23181 | 4.08E-07 |
| 0.8159   | -0.04987 | 0.28212  | 0.099923 | 0.03085  | 0.281913 | 5.57E-10 | 0.007453 | 0.87238  |
| 0.00555  | -0.0755  | 0.10319  | 0.078981 | 0.08821  | 0.244897 | 8.33E-08 | -0.00635 | 0.8912   |
| 0.10684  | -0.17133 | 0.0002   | 0.010094 | 0.82777  | 0.054176 | 0.24262  | -0.23233 | 3.84E-07 |
| 0.70528  | 0.019028 | 0.68171  | 0.122085 | 0.00826  | 0.474797 | 1.24E-27 | 0.25389  | 2.65E-08 |
| 0.01395  | -0.0679  | 0.14289  | 0.005807 | 0.9004   | 0.130507 | 0.00473  | -0.093   | 0.04457  |
| 1.06E-12 | -0.16421 | 0.00037  | -0.15541 | 0.00075  | -0.06264 | 0.17659  | -0.26975 | 3.15E-09 |
| 0.04291  | 0.001055 | 0.98186  | -0.03706 | 0.42433  | 0.072283 | 0.11878  | -0.04877 | 0.29295  |
| 0.27356  | -0.03821 | 0.41001  | -0.09248 | 0.04577  | 0.046722 | 0.31369  | -0.1206  | 0.00909  |
| 0.00049  | -0.19093 | 3.28E-05 | -0.09121 | 0.04885  | 0.043424 | 0.34911  | -0.21217 | 3.74E-06 |
| 0.94237  | 0.053075 | 0.25234  | 0.2094   | 5.03E-06 | 0.504227 | 1.74E-31 | 0.452712 | 5.63E-25 |
| 0.02024  | -0.1404  | 0.00236  | 0.027903 | 0.54752  | 0.136498 | 0.00312  | -0.11751 | 0.01104  |
| 0.9954   | -0.09074 | 0.05004  | -0.05427 | 0.24177  | 0.038727 | 0.40374  | -0.18592 | 5.29E-05 |
| 0.18763  | -0.04028 | 0.38519  | -0.04512 | 0.33063  | 0.063548 | 0.17038  | -0.12524 | 0.00673  |
| 0.42194  | -0.06572 | 0.15619  | 0.002728 | 0.95312  | 0.128368 | 0.00547  | -0.05888 | 0.20403  |
| 0.63116  | -0.03369 | 0.4677   | 0.061542 | 0.1843   | 0.264541 | 6.43E-09 | 0.079505 | 0.08612  |
| 0.00528  | -0.13209 | 0.00424  | 0.083986 | 0.06979  | 0.254847 | 2.34E-08 | -0.05006 | 0.28034  |
| 0.10526  | -0.04327 | 0.35078  | -0.05757 | 0.21433  | 0.054321 | 0.24136  | -0.12843 | 0.00544  |
| 0.02526  | -0.13955 | 0.00251  | -0.01386 | 0.76514  | 0.031442 | 0.49789  | -0.22846 | 6.04E-07 |
| 0.09116  | 0.175125 | 0.00014  | 0.087904 | 0.05767  | 0.388523 | 2.82E-18 | 0.374366 | 5.53E-17 |
| 0.03986  | 0.120661 | 0.00905  | 0.260962 | 1.04E-08 | 0.414377 | 8.39E-21 | 0.307597 | 1.08E-11 |
| 0.08735  | -0.06222 | 0.17953  | 0.17516  | 0.00014  | 0.153038 | 0.00091  | -0.05899 | 0.20324  |
| 0.00361  | -0.01347 | 0.77163  | -0.18173 | 7.83E-05 | -0.0975  | 0.03518  | -0.20009 | 1.32E-05 |
| 0.01256  | -0.1005  | 0.02989  | -0.0732  | 0.11418  | 0.066721 | 0.14998  | -0.16638 | 0.0003   |

|          |          |          |          |          |          |          |          |          |
|----------|----------|----------|----------|----------|----------|----------|----------|----------|
| 0.00104  | -0.04288 | 0.35515  | 0.185574 | 5.47E-05 | 0.430686 | 1.63E-22 | 0.273814 | 1.78E-09 |
| 0.37462  | 0.165556 | 0.00033  | 0.358595 | 1.29E-15 | 0.386169 | 4.67E-18 | 0.373401 | 6.73E-17 |
| 0.57152  | -0.04411 | 0.34151  | -0.28587 | 3.12E-10 | -0.08525 | 0.06568  | -0.16792 | 0.00027  |
| 0.01255  | -0.03222 | 0.4873   | -0.01794 | 0.69892  | -0.0149  | 0.74803  | -0.13332 | 0.0039   |
| 0.0111   | -0.18943 | 3.79E-05 | 0.006426 | 0.88985  | 0.023092 | 0.61866  | -0.25178 | 3.48E-08 |
| 0.15777  | -0.14529 | 0.00164  | -0.00388 | 0.93342  | 0.001585 | 0.97276  | -0.23016 | 4.96E-07 |
| 0.02999  | -0.02609 | 0.57388  | -0.03804 | 0.41216  | 0.062911 | 0.17471  | -0.08347 | 0.07153  |
| 0.44722  | -0.11021 | 0.01719  | 0.017934 | 0.69909  | 0.124188 | 0.00721  | -0.11191 | 0.01554  |
| 0.72694  | -0.07812 | 0.09177  | 0.027536 | 0.55279  | 0.122014 | 0.0083   | -0.0917  | 0.04765  |
| 0.30852  | -0.11656 | 0.01171  | -0.08406 | 0.06954  | -0.04754 | 0.30531  | -0.25802 | 1.54E-08 |
| 0.00032  | -0.17675 | 0.00012  | -0.12931 | 0.00513  | 0.148166 | 0.00132  | -0.0907  | 0.05012  |
| 0.09891  | -0.20684 | 6.58E-06 | -0.04999 | 0.28102  | 0.004153 | 0.92868  | -0.20378 | 9.05E-06 |
| 0.71618  | -0.01332 | 0.77405  | 0.034997 | 0.45055  | 0.235103 | 2.76E-07 | 0.173908 | 0.00016  |
| 0.08347  | -0.04626 | 0.31854  | 0.070556 | 0.12788  | 0.326171 | 4.89E-13 | 0.137223 | 0.00296  |
| 0.00174  | -0.07491 | 0.10595  | 0.053336 | 0.25001  | 0.308074 | 1.00E-11 | 0.092117 | 0.04664  |
| 0.05431  | -0.08409 | 0.06945  | 0.030742 | 0.50752  | 0.265259 | 5.83E-09 | 0.053549 | 0.24812  |
| 0.93035  | -0.01959 | 0.6729   | 0.072998 | 0.11517  | 0.17797  | 0.00011  | 0.089764 | 0.05256  |
| 8.43E-05 | -0.14471 | 0.00172  | -0.06366 | 0.16964  | 0.129925 | 0.00492  | -0.09069 | 0.05016  |
| 0.06273  | -0.06956 | 0.13338  | 0.019428 | 0.67539  | 0.141997 | 0.0021   | -0.01516 | 0.74392  |
| 0.03829  | -0.10941 | 0.01802  | 0.019258 | 0.67808  | 0.239292 | 1.66E-07 | 0.041464 | 0.37131  |
| 2.35E-05 | -0.12566 | 0.00655  | -0.05983 | 0.19685  | 0.212257 | 3.70E-06 | -0.0017  | 0.97086  |
| 0.00108  | -0.10079 | 0.02942  | 0.012835 | 0.78207  | 0.186249 | 5.13E-05 | 0.022311 | 0.63057  |
| 1.34E-05 | -0.15046 | 0.00111  | -0.0758  | 0.10185  | 0.095901 | 0.0383   | -0.20201 | 1.09E-05 |
| 0.13731  | 0.177763 | 0.00011  | 0.016861 | 0.71629  | 0.041918 | 0.36609  | -0.08985 | 0.05233  |
| 0.01381  | 0.050648 | 0.27471  | 0.023733 | 0.60895  | 0.1767   | 0.00012  | 0.066824 | 0.14935  |
| 0.48045  | -0.12615 | 0.00634  | -0.23581 | 2.54E-07 | -0.13429 | 0.00364  | -0.31492 | 3.28E-12 |
| 0.42497  | -0.09732 | 0.03551  | -0.22095 | 1.42E-06 | -0.06775 | 0.14378  | -0.26563 | 5.54E-09 |
| 2.96E-07 | -0.05578 | 0.22894  | 0.007542 | 0.87088  | 0.199675 | 1.38E-05 | -0.0493  | 0.28769  |
| 0.18022  | -0.16023 | 0.00051  | -0.1049  | 0.02338  | -0.01343 | 0.77219  | -0.21214 | 3.75E-06 |
| 0.82778  | -0.02697 | 0.56105  | -0.15064 | 0.00109  | -0.03257 | 0.48258  | -0.17511 | 0.00014  |
| 0.00011  | -0.21111 | 4.19E-06 | 0.004253 | 0.92697  | 0.066546 | 0.15106  | -0.2101  | 4.66E-06 |
| 0.02271  | -0.20713 | 6.39E-06 | -0.20322 | 9.60E-06 | -0.14669 | 0.00148  | -0.32155 | 1.08E-12 |
| 0.05521  | 0.20975  | 4.84E-06 | -0.0321  | 0.48887  | -0.06406 | 0.16694  | -0.03758 | 0.41779  |
| 0.35375  | -0.1306  | 0.0047   | -0.0395  | 0.39446  | 0.115421 | 0.01256  | -0.08459 | 0.06779  |
| 0.54264  | -0.10914 | 0.01831  | -0.29404 | 9.11E-11 | -0.08888 | 0.05494  | -0.21039 | 4.52E-06 |
| 0.31181  | -0.01953 | 0.67372  | 0.090655 | 0.05025  | 0.230451 | 4.79E-07 | 0.046054 | 0.32067  |
| 0.00808  | -0.10691 | 0.02084  | 0.053617 | 0.24752  | 0.167628 | 0.00027  | -0.07645 | 0.09892  |
| 0.03539  | -0.11548 | 0.01251  | 0.084395 | 0.06843  | 0.200652 | 1.25E-05 | -0.05958 | 0.19872  |
| 0.00219  | 0.182423 | 7.34E-05 | 0.122963 | 0.00781  | 0.154937 | 0.00078  | 0.038734 | 0.40364  |
| 0.57343  | 0.034861 | 0.45232  | 0.007487 | 0.87181  | 0.255235 | 2.22E-08 | 0.13679  | 0.00306  |
| 0.95322  | -0.03871 | 0.40399  | -0.00453 | 0.92227  | 0.000608 | 0.98955  | -0.08918 | 0.05412  |
| 0.13455  | -0.0942  | 0.04188  | -0.0854  | 0.06519  | -0.03059 | 0.5096   | -0.18949 | 3.77E-05 |
| 0.34349  | -0.05642 | 0.22364  | 0.095342 | 0.03944  | 0.232368 | 3.82E-07 | -0.0128  | 0.7827   |
| 0.84511  | -0.15468 | 0.0008   | 0.071521 | 0.12273  | 0.218599 | 1.85E-06 | -0.07515 | 0.10483  |
| 0.83602  | -0.07355 | 0.11245  | 0.052637 | 0.25628  | 0.247888 | 5.72E-08 | -0.00849 | 0.85485  |

|          |          |          |          |          |          |          |          |          |
|----------|----------|----------|----------|----------|----------|----------|----------|----------|
| 0.41406  | -0.02699 | 0.56065  | 0.065436 | 0.15801  | 0.289745 | 1.75E-10 | 0.119758 | 0.00959  |
| 0.05294  | -0.00333 | 0.94275  | 0.148659 | 0.00127  | 0.298164 | 4.82E-11 | 0.095323 | 0.03948  |
| 0.78595  | 0.020814 | 0.6537   | 0.025351 | 0.58475  | 0.226057 | 7.97E-07 | 0.051256 | 0.26898  |
| 0.89298  | -0.03072 | 0.50778  | 0.069109 | 0.1359   | 0.149282 | 0.00121  | -0.01756 | 0.70508  |
| 0.78516  | -0.06173 | 0.18296  | 0.086573 | 0.06157  | 0.129341 | 0.00512  | -0.07391 | 0.11071  |
| 0.09649  | -0.05032 | 0.2778   | -0.00853 | 0.85406  | 0.025504 | 0.58249  | -0.13639 | 0.00314  |
| 0.18134  | -0.07657 | 0.09839  | 0.094809 | 0.04056  | 0.174916 | 0.00015  | -0.08473 | 0.06735  |
| 0.64718  | -0.08679 | 0.06093  | 0.144829 | 0.0017   | 0.168127 | 0.00026  | -0.07436 | 0.10855  |
| 0.00342  | -0.03606 | 0.43686  | 0.018398 | 0.6917   | 0.101537 | 0.02823  | -0.09971 | 0.03121  |
| 0.4458   | -0.12239 | 0.0081   | -0.05151 | 0.26665  | 0.03086  | 0.50589  | -0.19384 | 2.47E-05 |
| 0.00015  | -0.1353  | 0.00339  | 0.103807 | 0.02487  | 0.009782 | 0.83303  | -0.15936 | 0.00055  |
| 0.35462  | -0.01658 | 0.72084  | -0.00316 | 0.94575  | 0.101492 | 0.0283   | -0.01119 | 0.80945  |
| 0.45652  | -0.02684 | 0.56292  | 0.072142 | 0.11951  | 0.170215 | 0.00022  | -0.05852 | 0.20682  |
| 0.00041  | -0.0697  | 0.13258  | 0.151322 | 0.00104  | 0.422504 | 1.21E-21 | 0.180528 | 8.74E-05 |
| 0.01804  | -0.07565 | 0.1025   | 0.010289 | 0.82451  | 0.255163 | 2.24E-08 | -0.02404 | 0.60426  |
| 0.00194  | -0.1602  | 0.00051  | -0.13713 | 0.00298  | 0.040595 | 0.38143  | -0.19689 | 1.82E-05 |
| 0.97202  | -0.02286 | 0.6222   | 0.032749 | 0.48019  | 0.28861  | 2.07E-10 | 0.08901  | 0.05458  |
| 0.16862  | 0.12391  | 0.00734  | -0.0672  | 0.14704  | -0.05778 | 0.21265  | -0.0963  | 0.0375   |
| 0.66811  | -0.06743 | 0.14571  | 0.068408 | 0.13992  | 0.010859 | 0.81496  | -0.15585 | 0.00073  |
| 0.05886  | -0.03597 | 0.43806  | 0.018779 | 0.68565  | 0.156032 | 0.00072  | -0.06646 | 0.15162  |
| 0.5042   | -0.07709 | 0.09614  | -0.0343  | 0.45965  | 0.121719 | 0.00846  | -0.09754 | 0.0351   |
| 0.00643  | -0.18329 | 6.77E-05 | -0.03822 | 0.40991  | -0.09075 | 0.05002  | -0.32364 | 7.55E-13 |
| 0.67876  | -0.09082 | 0.04983  | 0.114879 | 0.01299  | 0.27191  | 2.33E-09 | -0.03317 | 0.47449  |
| 0.08556  | -0.00262 | 0.9549   | 0.017153 | 0.71159  | 0.01418  | 0.75989  | -0.08539 | 0.06523  |
| 0.0181   | -0.10296 | 0.02609  | -0.02511 | 0.58826  | 0.133248 | 0.00392  | -0.13068 | 0.00468  |
| 0.01049  | -0.11692 | 0.01145  | 0.035071 | 0.4496   | 0.216143 | 2.43E-06 | -0.09189 | 0.04718  |
| 0.36207  | -0.12762 | 0.00575  | -0.1135  | 0.01413  | -0.13247 | 0.00413  | -0.24604 | 7.22E-08 |
| 0.10759  | -0.13114 | 0.00453  | 0.020626 | 0.65662  | 0.080884 | 0.0808   | -0.14872 | 0.00127  |
| 5.48E-05 | -0.24815 | 5.53E-08 | -0.22024 | 1.54E-06 | -0.15654 | 0.00069  | -0.36834 | 1.88E-16 |
| 0.00635  | -0.04401 | 0.34261  | -0.05562 | 0.23028  | 0.144131 | 0.00179  | -0.02281 | 0.62293  |
| 0.07822  | -0.0439  | 0.34386  | -0.06504 | 0.16055  | 0.08422  | 0.06901  | -0.10848 | 0.01903  |
| 0.86599  | -0.09837 | 0.03356  | 0.056103 | 0.22624  | 0.024307 | 0.60032  | -0.12204 | 0.00829  |
| 0.52244  | -0.12228 | 0.00816  | 0.01841  | 0.6915   | 0.025623 | 0.58072  | -0.18873 | 4.05E-05 |
| 0.03307  | -0.2046  | 8.32E-06 | -0.0382  | 0.41014  | -0.05724 | 0.21695  | -0.25805 | 1.53E-08 |
| 0.41831  | -0.02525 | 0.58629  | 0.200842 | 1.22E-05 | 0.36453  | 4.01E-16 | 0.134945 | 0.00348  |
| 0.58948  | -0.02102 | 0.65054  | -0.21344 | 3.26E-06 | -0.03099 | 0.50414  | -0.13254 | 0.00411  |
| 0.01614  | 0.02424  | 0.60132  | -0.21883 | 1.80E-06 | -0.06635 | 0.15229  | -0.17039 | 0.00022  |
| 0.55708  | -0.03348 | 0.4704   | -0.02063 | 0.65653  | 0.210805 | 4.33E-06 | 0.001035 | 0.9822   |
| 0.50783  | 0.038256 | 0.40949  | 0.080436 | 0.0825   | 0.342551 | 2.65E-14 | 0.234475 | 2.97E-07 |
| 0.00255  | 0.017283 | 0.70951  | 0.212224 | 3.71E-06 | 0.286995 | 2.64E-10 | 0.207416 | 6.20E-06 |
| 0.05106  | 0.089404 | 0.05352  | 0.276662 | 1.19E-09 | 0.528878 | 5.16E-35 | 0.380874 | 1.43E-17 |
| 0.0519   | 0.017255 | 0.70996  | 0.119089 | 0.01     | 0.23527  | 2.70E-07 | 0.051883 | 0.26316  |
| 0.32146  | -0.01    | 0.82938  | -0.0617  | 0.18321  | 0.212627 | 3.56E-06 | 0.025507 | 0.58245  |
| 6.77E-10 | -0.17449 | 0.00015  | -0.11013 | 0.01727  | 0.071483 | 0.12293  | -0.19727 | 1.76E-05 |
| 9.53E-20 | -0.1592  | 0.00055  | -0.27987 | 7.50E-10 | -0.09781 | 0.03459  | -0.24563 | 7.60E-08 |

|          |          |          |          |          |          |          |          |          |
|----------|----------|----------|----------|----------|----------|----------|----------|----------|
| 8.65E-10 | -0.24209 | 1.18E-07 | -0.35443 | 2.87E-15 | -0.22972 | 5.21E-07 | -0.4558  | 2.46E-25 |
| 0.84817  | -0.10764 | 0.01998  | -0.02102 | 0.65051  | 0.038433 | 0.40732  | -0.16416 | 0.00037  |
| 0.42459  | 0.016059 | 0.72925  | -0.06876 | 0.13791  | 0.047247 | 0.30827  | -0.10608 | 0.02186  |
| 0.07819  | -0.0763  | 0.09959  | 0.026805 | 0.56339  | 0.304781 | 1.70E-11 | 0.119227 | 0.00991  |
| 0.38732  | -0.06053 | 0.19162  | -0.04311 | 0.35258  | -0.01641 | 0.7235   | -0.08752 | 0.05878  |
| 0.00075  | -0.0775  | 0.09437  | -0.18063 | 8.66E-05 | 0.10889  | 0.01858  | -0.09686 | 0.03639  |
| 0.0006   | 0.107884 | 0.0197   | 0.234583 | 2.94E-07 | 0.41851  | 3.16E-21 | 0.303898 | 1.96E-11 |
| 0.26335  | -0.10192 | 0.02764  | -0.03891 | 0.40156  | 0.032335 | 0.48576  | -0.19671 | 1.86E-05 |
| 0.0008   | -0.17592 | 0.00013  | -0.01712 | 0.71211  | 0.034679 | 0.45468  | -0.08574 | 0.06414  |
| 0.04256  | -0.08958 | 0.05305  | -0.15996 | 0.00052  | -0.05864 | 0.20586  | -0.16869 | 0.00025  |
| 0.23077  | -0.04254 | 0.35898  | 0.114522 | 0.01327  | 0.092833 | 0.04495  | -0.04678 | 0.31304  |
| 0.00494  | -0.20356 | 9.26E-06 | -0.09278 | 0.04506  | -0.06443 | 0.16454  | -0.21678 | 2.26E-06 |
| 0.11341  | 0.036014 | 0.4375   | 0.254731 | 2.37E-08 | 0.400268 | 2.14E-19 | 0.23834  | 1.87E-07 |
| 1.31E-06 | -0.09725 | 0.03564  | 0.070916 | 0.12593  | 0.037694 | 0.4164   | -0.13534 | 0.00339  |
| 0.27243  | -0.05444 | 0.24031  | 0.103329 | 0.02555  | 0.305605 | 1.49E-11 | 0.053048 | 0.25258  |
| 4.33E-06 | -0.01409 | 0.76142  | 0.085384 | 0.06524  | 0.215093 | 2.72E-06 | 0.078741 | 0.08919  |
| 0.10823  | 0.022134 | 0.63329  | 0.087444 | 0.059    | 0.172904 | 0.00017  | 0.046429 | 0.31674  |
| 0.98027  | -0.02507 | 0.58898  | -0.21965 | 1.65E-06 | -0.06514 | 0.15987  | -0.16833 | 0.00026  |
| 0.4384   | -0.15057 | 0.0011   | -0.05516 | 0.23416  | -0.08217 | 0.07609  | -0.27554 | 1.39E-09 |
| 0.28287  | -0.0532  | 0.25121  | -0.10898 | 0.01849  | 0.004307 | 0.92605  | -0.15147 | 0.00103  |
| 0.75229  | -0.09084 | 0.04978  | 0.134745 | 0.00353  | 0.160324 | 0.00051  | -0.07378 | 0.11133  |
| 0.28588  | -0.06724 | 0.14686  | 0.117443 | 0.01109  | 0.091234 | 0.04879  | -0.09248 | 0.04578  |
| 0.32416  | -0.07357 | 0.11233  | 0.06924  | 0.13516  | 0.160831 | 0.00048  | -0.05032 | 0.2778   |
| 0.00508  | 0.010355 | 0.8234   | 0.097425 | 0.03531  | 0.233474 | 3.35E-07 | 0.080045 | 0.084    |
| 0.38804  | -0.04926 | 0.28807  | 0.039368 | 0.39599  | 0.106133 | 0.0218   | -0.08245 | 0.07509  |
| 0.89426  | -0.01412 | 0.76095  | 0.030126 | 0.51606  | 0.208373 | 5.60E-06 | 0.059343 | 0.20051  |
| 0.38545  | 0.110796 | 0.01661  | -0.01449 | 0.75473  | 0.055456 | 0.23165  | -0.11467 | 0.01315  |
| 0.8166   | 0.119881 | 0.00951  | 0.118474 | 0.01039  | 0.240618 | 1.41E-07 | 0.184728 | 5.92E-05 |
| 0.16761  | -0.12479 | 0.00693  | 0.048578 | 0.29483  | 0.111388 | 0.01603  | -0.16301 | 0.0004   |
| 0.10153  | -0.09674 | 0.03663  | -0.09215 | 0.04657  | -0.15853 | 0.00058  | -0.30472 | 1.72E-11 |
| 0.02953  | 0.080766 | 0.08124  | -0.0276  | 0.55191  | 0.187073 | 4.75E-05 | 0.058573 | 0.20642  |
| 0.7056   | -0.00577 | 0.90109  | -0.00836 | 0.85694  | -0.02548 | 0.58279  | -0.11528 | 0.01267  |
| 0.20723  | -0.05169 | 0.26498  | -0.05065 | 0.27465  | 0.07814  | 0.09166  | -0.11033 | 0.01707  |
| 0.40284  | -0.03234 | 0.4857   | 0.071767 | 0.12144  | 0.176635 | 0.00012  | 0.02059  | 0.65718  |
| 0.00906  | 0.129592 | 0.00503  | -0.08373 | 0.07064  | 0.116127 | 0.01203  | 0.097202 | 0.03574  |
| 0.0035   | -0.03199 | 0.49042  | -0.18513 | 5.70E-05 | -0.05459 | 0.23907  | -0.23628 | 2.40E-07 |
| 0.01517  | -0.01859 | 0.6886   | -0.05455 | 0.23938  | -0.01657 | 0.72099  | -0.16914 | 0.00024  |
| 0.28407  | 0.005098 | 0.91252  | 0.300643 | 3.28E-11 | 0.196705 | 1.86E-05 | 0.124981 | 0.00685  |
| 0.00067  | -0.14055 | 0.00233  | 0.066162 | 0.15344  | 0.186345 | 5.08E-05 | -0.1148  | 0.01305  |
| 0.54015  | -0.01752 | 0.70565  | -0.07509 | 0.1051   | 0.083399 | 0.07177  | -0.02868 | 0.53647  |
| 1.16E-05 | -0.19452 | 2.31E-05 | -0.10047 | 0.02995  | 0.083889 | 0.07011  | -0.19747 | 1.72E-05 |
| 0.13448  | -0.04127 | 0.3735   | 0.289756 | 1.74E-10 | 0.454796 | 3.22E-25 | 0.196493 | 1.90E-05 |
| 0.38276  | -0.13629 | 0.00317  | -0.24462 | 8.62E-08 | -0.11176 | 0.01569  | -0.31015 | 7.17E-12 |
| 0.03957  | 0.165389 | 0.00033  | 0.051339 | 0.26821  | 0.385907 | 4.94E-18 | 0.312834 | 4.63E-12 |
| 0.19253  | -0.09185 | 0.04727  | 0.041141 | 0.37505  | 0.081473 | 0.0786   | -0.11205 | 0.01541  |

|          |          |          |          |          |          |          |          |          |
|----------|----------|----------|----------|----------|----------|----------|----------|----------|
| 5.12E-05 | -0.03637 | 0.43292  | 0.031222 | 0.50091  | 0.269753 | 3.14E-09 | 0.131154 | 0.00453  |
| 0.58753  | -0.02887 | 0.53372  | 9.62E-05 | 0.99835  | 0.151161 | 0.00105  | -0.05017 | 0.27932  |
| 0.57508  | -0.01465 | 0.75218  | -0.13161 | 0.00439  | 0.042774 | 0.35638  | -0.1021  | 0.02736  |
| 0.32734  | -0.02578 | 0.57841  | -0.03805 | 0.41207  | 0.024703 | 0.59439  | -0.15779 | 0.00062  |
| 0.22299  | 0.119019 | 0.01004  | 0.058255 | 0.2089   | 0.15253  | 0.00094  | 0.084844 | 0.06697  |
| 0.88033  | 0.194496 | 2.31E-05 | 0.083104 | 0.07278  | 0.150864 | 0.00107  | 0.060374 | 0.19278  |
| 0.32225  | -0.05938 | 0.20019  | 0.004309 | 0.92602  | 0.233491 | 3.34E-07 | -0.03735 | 0.42073  |
| 0.00081  | -0.05661 | 0.22206  | -0.13469 | 0.00354  | 0.158762 | 0.00057  | -0.04829 | 0.2977   |
| 0.03511  | 0.033687 | 0.4677   | 0.240493 | 1.44E-07 | 0.49996  | 6.66E-31 | 0.294777 | 8.14E-11 |
| 2.66E-05 | -0.13554 | 0.00334  | 0.141133 | 0.00224  | 0.197314 | 1.75E-05 | -0.08965 | 0.05287  |
| 0.47827  | -0.05857 | 0.20646  | 0.030276 | 0.51397  | 0.193963 | 2.44E-05 | -0.02357 | 0.6114   |
| 0.00946  | -0.10052 | 0.02986  | -0.15732 | 0.00065  | -0.01433 | 0.75736  | -0.19092 | 3.28E-05 |
| 3.92E-06 | 0.022882 | 0.62186  | -0.05427 | 0.2418   | 0.134613 | 0.00356  | 0.022527 | 0.62727  |
| 0.08786  | 0.10822  | 0.01932  | 0.246291 | 6.99E-08 | 0.370037 | 1.33E-16 | 0.141493 | 0.00218  |
| 0.00201  | -0.25593 | 2.03E-08 | -0.14872 | 0.00127  | -0.05835 | 0.20819  | -0.34417 | 1.97E-14 |
| 7.10E-08 | -0.1302  | 0.00483  | 0.008556 | 0.8537   | 0.160474 | 0.0005   | -0.11378 | 0.01388  |
| 0.60374  | -0.12736 | 0.00585  | -0.13993 | 0.00244  | 0.016862 | 0.71628  | -0.15594 | 0.00072  |
| 0.89508  | 0.012191 | 0.79274  | -0.05677 | 0.22073  | 0.012395 | 0.78935  | -0.07295 | 0.11539  |
| 6.24E-11 | 0.106686 | 0.02112  | 0.285332 | 3.37E-10 | 0.581287 | 1.47E-43 | 0.387142 | 3.80E-18 |
| 0.84435  | -0.0988  | 0.0328   | -0.12806 | 0.00558  | 0.060805 | 0.18962  | -0.14631 | 0.00152  |
| 0.35976  | 0.21624  | 2.40E-06 | 0.110536 | 0.01687  | 0.316215 | 2.64E-12 | 0.286011 | 3.05E-10 |
| 0.00069  | -0.04591 | 0.3222   | -0.12889 | 0.00528  | 0.004361 | 0.92511  | -0.1249  | 0.00688  |
| 0.50178  | 0.076855 | 0.09715  | 0.062959 | 0.17438  | 0.244673 | 8.56E-08 | 0.161124 | 0.00047  |
| 0.65879  | -0.04064 | 0.38085  | -0.1972  | 1.77E-05 | -0.01212 | 0.7939   | -0.10501 | 0.02324  |
| 0.17552  | 0.164033 | 0.00037  | 0.094592 | 0.04103  | 0.139915 | 0.00244  | 0.300045 | 3.60E-11 |
| 0.48067  | 0.018888 | 0.68392  | -0.17889 | 0.0001   | -0.07268 | 0.11674  | 0.006025 | 0.89668  |
| 1.03E-05 | 0.144369 | 0.00176  | 0.132369 | 0.00416  | 0.150214 | 0.00113  | 0.293868 | 9.35E-11 |
| 0.19939  | -0.11162 | 0.01581  | -0.05791 | 0.21164  | -0.03405 | 0.46294  | -0.0931  | 0.04434  |
| 1.27E-17 | 0.056928 | 0.21947  | 0.08059  | 0.08191  | 0.066689 | 0.15018  | 0.187283 | 4.65E-05 |
| 0.92655  | 0.036793 | 0.42764  | -0.02324 | 0.61646  | 0.038201 | 0.41016  | 0.112768 | 0.01476  |
| 0.19307  | 0.070987 | 0.12556  | -0.13569 | 0.0033   | 0.060127 | 0.19461  | 0.107823 | 0.01977  |
| 0.17816  | 0.081968 | 0.0768   | 0.083501 | 0.07142  | 0.092993 | 0.04458  | 0.195296 | 2.14E-05 |
| 8.47E-05 | 0.150292 | 0.00112  | 0.054908 | 0.2363   | 0.13521  | 0.00342  | 0.329381 | 2.80E-13 |
| 1.07E-06 | 0.070728 | 0.12694  | 0.012063 | 0.79487  | 0.007051 | 0.87921  | 0.107422 | 0.02024  |
| 6.70E-10 | 0.072029 | 0.12009  | 0.066518 | 0.15123  | 0.072527 | 0.11754  | 0.174278 | 0.00015  |
| 6.22E-06 | 0.110261 | 0.01714  | 0.030713 | 0.50791  | 0.114968 | 0.01292  | 0.265289 | 5.81E-09 |
| 0.44471  | -0.02877 | 0.53513  | 0.05172  | 0.26467  | -0.00116 | 0.98005  | -0.00922 | 0.84245  |
| 0.68079  | -0.00056 | 0.99043  | -0.14326 | 0.00191  | -0.11275 | 0.01477  | -0.03444 | 0.45786  |
| 0.37393  | 0.022253 | 0.63147  | 0.060432 | 0.19236  | 0.054828 | 0.23698  | 0.120794 | 0.00898  |
| 0.00856  | 0.016683 | 0.71917  | -0.07844 | 0.09041  | 0.010044 | 0.82862  | 0.0219   | 0.63689  |
| 1.54E-11 | 0.064564 | 0.16363  | -0.06224 | 0.17933  | -0.01929 | 0.67763  | 0.101743 | 0.02791  |
| 0.17636  | -0.00018 | 0.99695  | -0.07938 | 0.0866   | -0.02285 | 0.62234  | 0.059908 | 0.19625  |
| 1.04E-05 | -0.08457 | 0.06787  | -0.06783 | 0.14329  | -0.11195 | 0.0155   | -0.03061 | 0.50934  |
| 0.0377   | 0.081036 | 0.08022  | -0.03066 | 0.5087   | 0.1121   | 0.01536  | 0.222054 | 1.26E-06 |
| 0.06848  | 0.197197 | 1.77E-05 | 0.022381 | 0.6295   | 0.205447 | 7.62E-06 | 0.390638 | 1.79E-18 |

|          |          |          |          |         |          |          |          |          |
|----------|----------|----------|----------|---------|----------|----------|----------|----------|
| 6.42E-10 | 0.017379 | 0.70798  | 0.050119 | 0.27976 | -0.01989 | 0.66817  | 0.057734 | 0.213    |
| 0.00674  | -0.04446 | 0.33774  | -0.01255 | 0.78674 | -0.09133 | 0.04854  | 0.033177 | 0.47447  |
| 6.92E-05 | 0.080326 | 0.08292  | 0.161539 | 0.00046 | 0.071698 | 0.12181  | 0.20121  | 1.18E-05 |
| 5.14E-09 | -0.03027 | 0.51402  | 0.02575  | 0.57886 | -0.03203 | 0.48988  | 0.02493  | 0.591    |
| 0.0004   | 0.111958 | 0.0155   | 0.051844 | 0.26352 | 0.108309 | 0.01922  | 0.227431 | 6.80E-07 |
| 0.00181  | -0.02929 | 0.52774  | -0.01982 | 0.6693  | -0.0147  | 0.75134  | 0.034042 | 0.46301  |
| 0.07308  | 0.084664 | 0.06755  | -0.06689 | 0.14896 | -0.03124 | 0.50069  | 0.101178 | 0.0288   |
| 0.00095  | 0.189905 | 3.62E-05 | 0.121808 | 0.00841 | 0.223978 | 1.01E-06 | 0.428648 | 2.70E-22 |
| 0.47466  | 0.095994 | 0.03811  | -0.04221 | 0.36279 | 0.147203 | 0.00142  | 0.237784 | 2.00E-07 |
| 0.01313  | -0.01244 | 0.78863  | 0.001685 | 0.97103 | -0.02278 | 0.62346  | 0.060836 | 0.1894   |
| 6.31E-05 | 0.108081 | 0.01948  | 0.142614 | 0.00201 | 0.126407 | 0.00623  | 0.266401 | 4.99E-09 |
| 0.0348   | 0.113642 | 0.014    | -0.15494 | 0.00078 | 0.056578 | 0.22233  | 0.193618 | 2.52E-05 |
| 1.45E-06 | 0.095323 | 0.03948  | -0.01699 | 0.71427 | 0.095224 | 0.03969  | 0.258843 | 1.38E-08 |
| 0.03643  | 0.007562 | 0.87054  | 0.02124  | 0.64708 | -0.08131 | 0.07919  | 0.061104 | 0.18745  |
| 0.37978  | -0.01828 | 0.69364  | -0.11146 | 0.01596 | -0.08849 | 0.05602  | -0.10078 | 0.02944  |
| 0.03271  | -0.00769 | 0.8684   | -0.09352 | 0.04339 | -0.08336 | 0.07191  | 0.004434 | 0.92386  |
| 0.12353  | 0.126442 | 0.00622  | -0.09151 | 0.04812 | -0.05087 | 0.27262  | 0.101268 | 0.02866  |
| 0.00322  | 0.127376 | 0.00584  | -0.03794 | 0.41334 | 0.060126 | 0.19462  | 0.234292 | 3.04E-07 |
| 0.10381  | 0.036968 | 0.42544  | -0.11598 | 0.01214 | -0.09681 | 0.0365   | 0.011431 | 0.80539  |
| 7.18E-05 | 0.093578 | 0.04325  | -0.0487  | 0.29366 | 0.059273 | 0.20104  | 0.188579 | 4.11E-05 |
| 0.00359  | 0.112137 | 0.01533  | 0.062493 | 0.1776  | 0.038716 | 0.40387  | 0.202084 | 1.08E-05 |
| 0.14393  | 0.230259 | 4.90E-07 | 0.027791 | 0.54912 | 0.114935 | 0.01294  | 0.353371 | 3.51E-15 |
| 0.00083  | 0.115947 | 0.01216  | -0.01768 | 0.70308 | 0.066485 | 0.15143  | 0.223591 | 1.06E-06 |
| 0.09412  | 0.100632 | 0.02968  | -0.02332 | 0.61524 | 0.024416 | 0.59869  | 0.1913   | 3.16E-05 |
| 3.40E-11 | -0.03385 | 0.46553  | 0.047684 | 0.30381 | -0.04735 | 0.30727  | 0.030923 | 0.50501  |
| 0.92531  | -0.01711 | 0.71227  | 0.007003 | 0.88003 | -0.00768 | 0.86853  | 0.070198 | 0.12982  |
| 0.08528  | -0.17417 | 0.00016  | -0.05156 | 0.26614 | -0.09313 | 0.04426  | -0.16648 | 0.0003   |
| 0.80834  | 0.162724 | 0.00041  | 0.106161 | 0.02176 | 0.244722 | 8.51E-08 | 0.391559 | 1.46E-18 |
| 0.03035  | 0.069733 | 0.13239  | -0.06666 | 0.15036 | -0.07485 | 0.1062   | 0.071509 | 0.1228   |
| 6.85E-07 | 0.109938 | 0.01747  | -0.04941 | 0.28665 | -0.00159 | 0.97263  | 0.136707 | 0.00307  |
| 0.00046  | 0.031258 | 0.50041  | -0.12446 | 0.00708 | -0.10632 | 0.02156  | -0.08754 | 0.05871  |
| 0.01724  | 0.170558 | 0.00021  | -0.05769 | 0.21334 | 0.066963 | 0.14851  | 0.253606 | 2.75E-08 |
| 7.05E-07 | 0.154558 | 0.0008   | -0.02159 | 0.6417  | -0.00687 | 0.88226  | 0.200955 | 1.21E-05 |
| 0.6135   | 0.006454 | 0.88938  | -0.06051 | 0.19178 | -0.02693 | 0.5616   | 0.021848 | 0.63769  |
| 0.16619  | -0.05321 | 0.25111  | -0.10663 | 0.02119 | -0.11286 | 0.01468  | -0.09896 | 0.03252  |
| 0.00045  | 0.140952 | 0.00227  | 0.032216 | 0.48736 | 0.113302 | 0.01429  | 0.270711 | 2.75E-09 |
| 0.1052   | 0.026656 | 0.56556  | -0.03324 | 0.47369 | -0.00365 | 0.93731  | 0.086322 | 0.06233  |
| 0.56445  | 0.17153  | 0.0002   | -0.17556 | 0.00014 | -0.00682 | 0.88318  | 0.146815 | 0.00147  |
| 0.00118  | 0.011623 | 0.80219  | -0.03314 | 0.47502 | -0.02112 | 0.64891  | 0.044799 | 0.33405  |
| 0.01159  | -0.09674 | 0.03664  | -0.01203 | 0.79544 | -0.11836 | 0.01047  | -0.12139 | 0.00864  |
| 0.02543  | 0.051    | 0.27138  | -0.07173 | 0.12164 | -0.0387  | 0.40403  | 0.074402 | 0.10833  |
| 0.90483  | -0.03826 | 0.40942  | -0.03587 | 0.43927 | -0.0782  | 0.09143  | -0.07246 | 0.11789  |
| 0.02373  | 0.090562 | 0.05049  | -0.10448 | 0.02395 | 0.052179 | 0.26045  | 0.132862 | 0.00402  |
| 2.71E-05 | 0.049272 | 0.28798  | 0.021944 | 0.63622 | -0.02176 | 0.63903  | 0.137384 | 0.00293  |
| 0.00049  | 0.005741 | 0.90152  | 0.022347 | 0.63003 | -0.01867 | 0.68744  | 0.086584 | 0.06154  |

|          |          |          |          |          |          |          |          |          |
|----------|----------|----------|----------|----------|----------|----------|----------|----------|
| 3.37E-07 | 0.117344 | 0.01115  | 0.169196 | 0.00024  | 0.189721 | 3.68E-05 | 0.333707 | 1.31E-13 |
| 0.01578  | 0.164971 | 0.00034  | 0.209951 | 4.74E-06 | 0.202429 | 1.04E-05 | 0.350142 | 6.47E-15 |
| 0.01236  | 0.148154 | 0.00132  | 0.07484  | 0.10626  | 0.018183 | 0.69512  | 0.198654 | 1.53E-05 |
| 0.25472  | 0.033269 | 0.47324  | -0.00867 | 0.85178  | -0.02311 | 0.61834  | 0.052763 | 0.25514  |
| 0.00093  | -0.11372 | 0.01394  | -0.15074 | 0.00109  | -0.10429 | 0.02421  | -0.15608 | 0.00071  |
| 0.60194  | -0.0711  | 0.12495  | 0.176942 | 0.00012  | -0.02365 | 0.61022  | -0.00286 | 0.95092  |
| 0.02876  | 0.234638 | 2.92E-07 | 0.071424 | 0.12324  | 0.112551 | 0.01495  | 0.322826 | 8.68E-13 |
| 0.16919  | 0.089745 | 0.05261  | -0.00727 | 0.87549  | 0.030116 | 0.51619  | 0.122832 | 0.00788  |
| 0.05938  | 0.114108 | 0.01361  | 0.154017 | 0.00084  | 0.209609 | 4.91E-06 | 0.289548 | 1.80E-10 |
| 0.00261  | 0.020091 | 0.66498  | -0.10978 | 0.01763  | 0.016497 | 0.72216  | 0.099663 | 0.03129  |
| 3.70E-07 | -0.07206 | 0.11991  | -0.1559  | 0.00072  | -0.08794 | 0.05758  | -0.16216 | 0.00043  |
| 3.11E-05 | 0.070456 | 0.12841  | -0.04271 | 0.35705  | 0.006078 | 0.89578  | 0.110525 | 0.01688  |
| 0.00789  | 0.089537 | 0.05316  | 0.11414  | 0.01359  | 0.126533 | 0.00618  | 0.307056 | 1.18E-11 |
| 0.445    | 0.189378 | 3.81E-05 | 0.002875 | 0.9506   | 0.069194 | 0.13542  | 0.24651  | 6.80E-08 |
| 5.33E-06 | 0.060542 | 0.19155  | 0.028649 | 0.53685  | -0.00427 | 0.92673  | 0.14364  | 0.00186  |
| 0.01133  | 0.072533 | 0.11751  | -0.06631 | 0.15253  | -0.06834 | 0.14031  | 0.087056 | 0.06013  |
| 0.00089  | 0.120358 | 0.00923  | 0.008843 | 0.84884  | 0.068351 | 0.14025  | 0.170571 | 0.00021  |
| 0.00024  | 0.013955 | 0.76358  | -0.13399 | 0.00372  | -0.04021 | 0.38597  | 0.004301 | 0.92614  |
| 0.70007  | 0.024489 | 0.59759  | -0.08382 | 0.07035  | -0.12157 | 0.00854  | 0.028233 | 0.54279  |
| 0.24566  | 0.011652 | 0.8017   | -0.05352 | 0.24838  | -0.01363 | 0.76901  | 0.065927 | 0.15491  |
| 0.6393   | -0.13741 | 0.00292  | -0.05185 | 0.26345  | -0.16064 | 0.00049  | -0.17405 | 0.00016  |
| 2.95E-08 | 0.16593  | 0.00032  | 0.041153 | 0.37491  | 0.124469 | 0.00708  | 0.33182  | 1.82E-13 |
| 8.37E-12 | -0.10966 | 0.01776  | -0.04584 | 0.32297  | -0.03286 | 0.47871  | -0.02347 | 0.61292  |
| 0.91017  | 0.0362   | 0.43512  | -0.06419 | 0.16611  | -0.00692 | 0.88138  | 0.071992 | 0.12028  |
| 2.35E-06 | 0.094415 | 0.04141  | 0.04281  | 0.35597  | 0.259955 | 1.19E-08 | 0.251204 | 3.74E-08 |
| 3.11E-13 | 0.055339 | 0.23264  | -0.01661 | 0.72032  | -0.08265 | 0.07438  | 0.061503 | 0.18458  |
| 0.00031  | 0.107388 | 0.02028  | -0.05375 | 0.24636  | -0.06898 | 0.13664  | 0.095488 | 0.03914  |
| 0.28108  | -0.09361 | 0.04318  | 0.027862 | 0.5481   | -0.00586 | 0.89957  | 0.04112  | 0.37529  |
| 0.00033  | 0.135066 | 0.00345  | 0.083734 | 0.07063  | 0.136412 | 0.00314  | 0.212697 | 3.53E-06 |
| 1.08E-14 | 0.035517 | 0.44385  | 0.016366 | 0.72427  | -0.04991 | 0.28179  | 0.065625 | 0.15681  |
| 0.01582  | 0.158807 | 0.00057  | 0.045584 | 0.32563  | 0.054977 | 0.23571  | 0.230461 | 4.78E-07 |
| 0.00133  | 0.209279 | 5.09E-06 | 0.023516 | 0.61223  | 0.072942 | 0.11545  | 0.321361 | 1.11E-12 |
| 0.79236  | -0.08352 | 0.07136  | -0.06319 | 0.17282  | -0.05762 | 0.21393  | -0.05311 | 0.252    |
| 1.80E-09 | -0.00897 | 0.84668  | 0.0807   | 0.08149  | 0.039702 | 0.39199  | 0.083348 | 0.07194  |
| 0.00439  | 0.053387 | 0.24955  | 0.052693 | 0.25577  | -0.00528 | 0.90939  | 0.143486 | 0.00188  |
| 2.79E-06 | 0.214009 | 3.06E-06 | -0.08343 | 0.07165  | 0.056957 | 0.21924  | 0.22188  | 1.28E-06 |
| 0.20922  | 0.101078 | 0.02896  | -0.01096 | 0.8133   | 0.035079 | 0.44949  | 0.176259 | 0.00013  |
| 0.09201  | 0.066746 | 0.14983  | 0.041266 | 0.3736   | 0.099086 | 0.03229  | 0.162703 | 0.00042  |
| 0.0228   | -0.01344 | 0.77212  | 0.010561 | 0.81994  | 0.126541 | 0.00618  | 0.039938 | 0.38919  |
| 0.00887  | 0.117052 | 0.01136  | -0.19106 | 3.24E-05 | -0.11869 | 0.01025  | 0.030711 | 0.50794  |
| 0.84515  | 0.140331 | 0.00237  | 0.050613 | 0.27505  | 0.132137 | 0.00423  | 0.284036 | 4.08E-10 |
| 1.30E-06 | 0.154144 | 0.00083  | -0.02149 | 0.64327  | -0.0955  | 0.03911  | 0.048791 | 0.29271  |
| 7.02E-09 | -0.00771 | 0.86803  | 0.015823 | 0.73308  | -0.00785 | 0.86567  | 0.064366 | 0.16493  |
| 0.00644  | 0.08774  | 0.05814  | -0.07864 | 0.08962  | 0.058004 | 0.21087  | 0.213223 | 3.34E-06 |
| 4.08E-05 | -0.06943 | 0.1341   | -0.07282 | 0.11607  | -0.15898 | 0.00056  | -0.16051 | 0.0005   |

|          |          |          |          |          |          |          |          |          |
|----------|----------|----------|----------|----------|----------|----------|----------|----------|
| 0.14961  | 0.006908 | 0.88165  | 0.003418 | 0.94128  | 0.005985 | 0.89736  | 0.080681 | 0.08156  |
| 0.0322   | 0.118507 | 0.01037  | -0.01186 | 0.79823  | -0.00104 | 0.98214  | 0.121945 | 0.00834  |
| 3.27E-15 | 0.097283 | 0.03558  | 0.166503 | 0.0003   | 0.188579 | 4.11E-05 | 0.340718 | 3.71E-14 |
| 0.30901  | 0.145384 | 0.00163  | 0.01285  | 0.78182  | 0.047862 | 0.30202  | 0.209076 | 5.20E-06 |
| 0.20373  | 0.101937 | 0.02762  | 0.03465  | 0.45506  | 0.093741 | 0.04289  | 0.246367 | 6.92E-08 |
| 0.02229  | 0.005559 | 0.90464  | -0.1988  | 1.51E-05 | -0.12312 | 0.00773  | -0.09284 | 0.04495  |
| 0.37231  | 0.01431  | 0.75776  | -0.07276 | 0.11635  | -0.0474  | 0.30674  | 0.049981 | 0.28109  |
| 0.05694  | 0.036152 | 0.43574  | 0.01001  | 0.8292   | -0.02162 | 0.64126  | 0.120242 | 0.0093   |
| 0.94015  | -0.06878 | 0.13778  | -0.12031 | 0.00926  | -0.08405 | 0.06958  | -0.06453 | 0.16388  |
| 6.81E-06 | 0.074343 | 0.10861  | 0.00374  | 0.93575  | 0.099734 | 0.03117  | 0.122635 | 0.00798  |
| 2.01E-07 | -0.08248 | 0.07497  | -0.0204  | 0.66008  | 0.014198 | 0.75959  | -0.0298  | 0.52063  |
| 0.60221  | 0.261091 | 1.02E-08 | 0.163494 | 0.00039  | 0.203387 | 9.43E-06 | 0.389267 | 2.40E-18 |
| 0.02158  | 0.116382 | 0.01184  | -0.08304 | 0.073    | 0.090591 | 0.05041  | 0.189038 | 3.93E-05 |
| 0.15696  | -0.05085 | 0.27284  | -0.00903 | 0.84576  | -0.03717 | 0.42291  | -0.04242 | 0.36034  |
| 0.01686  | -0.10893 | 0.01853  | -0.12806 | 0.00558  | -0.18942 | 3.79E-05 | -0.18149 | 8.00E-05 |
| 3.68E-10 | 0.035676 | 0.4418   | -0.08421 | 0.06903  | -0.06989 | 0.13151  | -0.03358 | 0.46915  |
| 0.00011  | 0.027187 | 0.55783  | 0.001515 | 0.97396  | 0.005999 | 0.89713  | 0.12929  | 0.00514  |
| 0.07965  | 0.048897 | 0.29166  | -0.05657 | 0.22238  | 0.168203 | 0.00026  | 0.201281 | 1.17E-05 |
| 0.00567  | 0.072183 | 0.1193   | 0.008205 | 0.85963  | 0.061006 | 0.18816  | 0.168822 | 0.00025  |
| 0.00107  | 0.12167  | 0.00849  | -0.07247 | 0.11784  | -0.11261 | 0.0149   | 0.115356 | 0.01261  |
| 2.93E-15 | -0.00476 | 0.91828  | 0.015597 | 0.73673  | -0.0608  | 0.18965  | 0.054979 | 0.23569  |
| 0.48258  | -0.02237 | 0.62974  | -0.02637 | 0.56971  | -0.07288 | 0.11576  | -0.03586 | 0.43941  |
| 3.07E-06 | -0.03523 | 0.44754  | 0.031693 | 0.49446  | -0.06817 | 0.14129  | 0.002055 | 0.96468  |
| 0.00254  | 0.127806 | 0.00568  | 0.076935 | 0.0968   | 0.181326 | 8.12E-05 | 0.306682 | 1.26E-11 |
| 0.00704  | 0.053529 | 0.2483   | 0.196252 | 1.94E-05 | 0.144557 | 0.00174  | 0.272521 | 2.14E-09 |
| 6.26E-08 | 0.031924 | 0.49132  | 0.085666 | 0.06436  | 0.09125  | 0.04875  | 0.156449 | 0.00069  |
| 5.71E-05 | 0.076554 | 0.09847  | 0.040771 | 0.37936  | 0.102778 | 0.02635  | 0.198381 | 1.57E-05 |
| 0.00064  | 0.119478 | 0.00976  | 0.147811 | 0.00136  | 0.120063 | 0.0094   | 0.283842 | 4.20E-10 |
| 2.88E-06 | 0.142309 | 0.00205  | -0.00094 | 0.98391  | 0.030658 | 0.50867  | 0.172397 | 0.00018  |
| 0.00346  | 0.022944 | 0.62092  | -0.10964 | 0.01779  | -0.03891 | 0.40157  | 0.074622 | 0.10728  |
| 0.00927  | 0.157211 | 0.00065  | 0.022871 | 0.62202  | 0.183028 | 6.94E-05 | 0.31165  | 5.62E-12 |
| 0.0306   | -0.02355 | 0.61167  | -0.01785 | 0.70037  | 0.031982 | 0.49054  | 0.080563 | 0.08201  |
| 3.60E-08 | 0.110442 | 0.01696  | -0.01068 | 0.818    | -0.01727 | 0.7097   | 0.156248 | 0.0007   |
| 0.01392  | 0.101533 | 0.02824  | 0.024845 | 0.59228  | 0.055658 | 0.22995  | 0.187971 | 4.36E-05 |
| 0.1554   | -0.0028  | 0.95191  | -0.19279 | 2.74E-05 | -0.10106 | 0.02899  | -0.02481 | 0.59277  |
| 1.12E-07 | 0.043765 | 0.34533  | 0.082311 | 0.07557  | 0.092925 | 0.04474  | 0.176512 | 0.00013  |
| 0.25805  | 0.073742 | 0.1115   | 0.058207 | 0.20927  | 0.064123 | 0.16654  | 0.211886 | 3.85E-06 |
| 0.00029  | 0.068121 | 0.1416   | 0.100921 | 0.02921  | -0.01443 | 0.75574  | 0.015386 | 0.74017  |
| 0.91051  | -0.0292  | 0.52908  | 0.105462 | 0.02265  | 0.033147 | 0.47487  | -0.0258  | 0.57811  |
| 0.01175  | 0.053149 | 0.25168  | 0.028788 | 0.53488  | -0.01577 | 0.73393  | 0.038732 | 0.40367  |
| 0.00165  | -0.04182 | 0.36721  | 0.047928 | 0.30135  | -0.11836 | 0.01047  | -0.17259 | 0.00018  |
| 0.00986  | 0.059057 | 0.20269  | 0.124534 | 0.00705  | -0.0082  | 0.85979  | 0.00565  | 0.90308  |
| 0.55939  | -0.01968 | 0.67139  | 0.098309 | 0.03368  | -0.03022 | 0.51474  | -0.04584 | 0.32294  |
| 0.56399  | -0.0246  | 0.59588  | 0.060967 | 0.18844  | -0.04836 | 0.29697  | -0.05812 | 0.20996  |
| 0.79645  | -0.00493 | 0.91544  | 0.141803 | 0.00213  | 0.031552 | 0.49639  | -0.00114 | 0.98033  |



|          |           |         |          |          |          |          |          |          |
|----------|-----------|---------|----------|----------|----------|----------|----------|----------|
| 0.00013  | 0.037178  | 0.42281 | 0.231211 | 4.38E-07 | 0.067278 | 0.1466   | 0.062549 | 0.17721  |
| 0.6994   | -0.01056  | 0.81989 | 0.1936   | 2.53E-05 | 0.068502 | 0.13938  | 0.01634  | 0.72469  |
| 0.82099  | 0.016408  | 0.7236  | 0.273059 | 1.98E-09 | 0.207569 | 6.10E-06 | 0.204302 | 8.58E-06 |
| 0.83187  | -0.01245  | 0.78847 | 0.076206 | 0.10001  | -0.03072 | 0.5078   | -0.04037 | 0.38409  |
| 0.03463  | 0.005421  | 0.90698 | 0.156454 | 0.00069  | 0.050015 | 0.28076  | 0.006587 | 0.8871   |
| 0.23603  | 0.007297  | 0.87504 | 0.114466 | 0.01332  | 0.025395 | 0.5841   | -0.00154 | 0.97348  |
| 0.4252   | -0.02322  | 0.61673 | 0.016225 | 0.72655  | -0.07895 | 0.08834  | -0.09283 | 0.04496  |
| 0.63671  | 0.004928  | 0.91541 | 0.107978 | 0.0196   | -0.00561 | 0.90368  | 0.000397 | 0.99317  |
| 0.77994  | -0.01324  | 0.77539 | 0.145154 | 0.00166  | 0.024891 | 0.59159  | 0.004034 | 0.93072  |
| 0.04079  | 0.059532  | 0.19908 | 0.09115  | 0.049    | 0.00405  | 0.93045  | 0.004887 | 0.91612  |
| 0.95179  | -0.02422  | 0.60158 | 0.095651 | 0.03881  | -0.0224  | 0.62919  | -0.04885 | 0.29218  |
| 0.03821  | -0.00638  | 0.89061 | 0.244959 | 8.26E-08 | 0.080973 | 0.08046  | 0.041229 | 0.37402  |
| 6.67E-05 | 0.099106  | 0.03226 | 0.056532 | 0.22271  | 0.00804  | 0.86242  | 0.044121 | 0.34142  |
| 0.04927  | 0.030827  | 0.50634 | -0.01479 | 0.74992  | -0.05325 | 0.25075  | 0.014471 | 0.75512  |
| 0.01252  | 0.037096  | 0.42384 | 0.092912 | 0.04477  | 0.009505 | 0.83768  | 0.021453 | 0.64379  |
| 1.68E-08 | 0.111134  | 0.01628 | 0.057216 | 0.21715  | 0.036055 | 0.43697  | 0.042881 | 0.35517  |
| 1.44E-07 | 0.059268  | 0.20108 | 0.039535 | 0.39399  | -0.00832 | 0.85765  | 0.01493  | 0.7476   |
| 0.93713  | -0.0157   | 0.73499 | 0.134881 | 0.0035   | 0.013186 | 0.77626  | -0.01544 | 0.73935  |
| 0.15478  | 0.039954  | 0.38899 | 0.063991 | 0.16741  | 0.015829 | 0.73297  | 0.002166 | 0.96276  |
| 0.50462  | 0.010235  | 0.8254  | 0.099287 | 0.03194  | 0.028862 | 0.53383  | 0.008636 | 0.85234  |
| 0.08371  | 0.052457  | 0.25791 | 0.076072 | 0.10061  | -0.00383 | 0.93418  | -0.00581 | 0.9003   |
| 0.23791  | 0.032618  | 0.48195 | 0.197717 | 1.68E-05 | 0.189586 | 3.73E-05 | 0.210115 | 4.66E-06 |
| 0.52067  | -0.00376  | 0.93538 | 0.086029 | 0.06323  | -0.01997 | 0.6669   | -0.01052 | 0.82071  |
| 0.01838  | 0.039431  | 0.39524 | 0.073503 | 0.11267  | 0.008611 | 0.85276  | 0.002559 | 0.95601  |
| 0.89092  | 0.002604  | 0.95524 | 0.104905 | 0.02338  | 0.019044 | 0.68145  | 0.009996 | 0.82942  |
| 0.27149  | 0.015236  | 0.74261 | 0.085482 | 0.06493  | 0.025456 | 0.58319  | 0.01558  | 0.73702  |
| 0.82213  | -0.00364  | 0.93743 | 0.093061 | 0.04443  | 0.008187 | 0.85994  | -0.00476 | 0.91827  |
| 0.13058  | 0.004909  | 0.91574 | 0.111622 | 0.01581  | -0.00358 | 0.93849  | -0.00464 | 0.9204   |
| 0.43163  | -0.0036   | 0.9381  | 0.100685 | 0.02959  | 0.005351 | 0.90818  | -0.00921 | 0.84258  |
| 0.08931  | 0.004156  | 0.92863 | 0.101659 | 0.02804  | 0.018083 | 0.69671  | 0.010716 | 0.81735  |
| 0.92753  | 0.013131  | 0.77717 | 0.06212  | 0.18021  | 0.006568 | 0.88742  | 0.010246 | 0.82523  |
| 0.14855  | 0.05983   | 0.19683 | -0.01014 | 0.827    | 0.00877  | 0.85007  | -0.03069 | 0.50823  |
| 0.82002  | -0.01469  | 0.75158 | 0.141072 | 0.00225  | 0.004294 | 0.92627  | -0.01097 | 0.81303  |
| 0.59374  | -0.03404  | 0.46302 | 0.129075 | 0.00521  | -0.00302 | 0.94812  | -0.04128 | 0.37347  |
| 0.91021  | -0.01654  | 0.72142 | 0.014346 | 0.75716  | -0.07027 | 0.12945  | -0.08456 | 0.06789  |
| 0.4852   | 0.022031  | 0.63487 | 0.049053 | 0.29013  | -0.03604 | 0.43715  | -0.02813 | 0.54422  |
| 0.50997  | 0.00997   | 0.82986 | 0.083988 | 0.06978  | -0.00503 | 0.9137   | -0.00958 | 0.83639  |
| 0.82698  | -0.00718  | 0.87708 | 0.081977 | 0.07677  | -0.00039 | 0.99336  | -0.01267 | 0.78481  |
| 0.63949  | -9.70E-05 | 0.99833 | 0.064262 | 0.16562  | -0.00337 | 0.94204  | -0.01121 | 0.80906  |
| 0.87406  | -0.00242  | 0.95843 | 0.095787 | 0.03853  | -0.00236 | 0.95947  | -0.01338 | 0.77307  |
| 0.87341  | -0.0038   | 0.93466 | 0.082263 | 0.07574  | 0.011159 | 0.80994  | -0.00357 | 0.93872  |
| 0.8923   | -0.00059  | 0.98978 | 0.110989 | 0.01642  | 0.000105 | 0.99819  | -0.01355 | 0.77024  |
| 0.65913  | -0.02081  | 0.65379 | 0.128967 | 0.00525  | -0.02636 | 0.56996  | -0.03064 | 0.50888  |
| 0.79667  | -0.01976  | 0.67017 | 0.10292  | 0.02614  | -0.02148 | 0.64341  | -0.0319  | 0.49169  |
| 0.92975  | -0.02299  | 0.62021 | 0.126455 | 0.00621  | -0.04701 | 0.31069  | -0.04473 | 0.33479  |

|          |          |          |          |          |          |          |          |          |
|----------|----------|----------|----------|----------|----------|----------|----------|----------|
| 0.00028  | -0.00292 | 0.94977  | 0.034227 | 0.46058  | 0.026779 | 0.56377  | -0.01968 | 0.67136  |
| 0.1545   | 0.035869 | 0.43934  | 0.026022 | 0.57485  | -0.00984 | 0.83203  | -0.01027 | 0.82475  |
| 1.00E-27 | 0.079148 | 0.08754  | 0.025315 | 0.58529  | -0.028   | 0.54612  | 0.014626 | 0.75258  |
| 0.8567   | -0.01101 | 0.81246  | 0.083541 | 0.07129  | 0.009312 | 0.84093  | -0.01015 | 0.82691  |
| 0.85336  | -0.0143  | 0.75787  | 0.090074 | 0.05174  | -0.00765 | 0.86901  | -0.0166  | 0.72051  |
| 0.80307  | -0.01337 | 0.77327  | 0.11278  | 0.01475  | 0.009482 | 0.83808  | -0.00643 | 0.88974  |
| 0.06004  | 0.056219 | 0.22528  | 0.083089 | 0.07284  | 0.003241 | 0.94431  | 0.000959 | 0.9835   |
| 0.98575  | -0.00136 | 0.9766   | 0.08999  | 0.05196  | -0.00255 | 0.95611  | -0.01306 | 0.77833  |
| 0.07867  | 0.060512 | 0.19177  | 0.083453 | 0.07159  | -0.00156 | 0.97315  | -0.00314 | 0.94607  |
| 0.49703  | 6.67E-05 | 0.99885  | -0.01583 | 0.73301  | -0.02608 | 0.57402  | -0.03232 | 0.48593  |
| 0.88622  | -0.01161 | 0.80248  | 0.071954 | 0.12047  | 0.009261 | 0.8418   | -0.01152 | 0.80395  |
| 0.29073  | 0.054938 | 0.23604  | 0.076526 | 0.09859  | -0.01103 | 0.81211  | -0.0141  | 0.76121  |
| 0.62928  | 0.015398 | 0.73997  | 0.054902 | 0.23635  | -0.00597 | 0.89769  | -0.0122  | 0.79253  |
| 0.41039  | 0.119145 | 0.00997  | 0.118549 | 0.01035  | -0.01394 | 0.76377  | 0.036528 | 0.43098  |
| 0.16876  | 0.014596 | 0.75307  | 0.103197 | 0.02574  | 0.010981 | 0.81292  | -0.00437 | 0.92501  |
| 0.06131  | 0.062629 | 0.17665  | 0.074173 | 0.10942  | -0.02461 | 0.59572  | 0.016622 | 0.72014  |
| 0.00993  | 0.036189 | 0.43527  | 0.080194 | 0.08342  | -0.02348 | 0.6127   | 0.007522 | 0.87122  |
| 0.54155  | -0.00858 | 0.85322  | 0.101045 | 0.02901  | -0.04377 | 0.34523  | -0.01626 | 0.726    |
| 1.12E-08 | 0.042644 | 0.35784  | 0.060259 | 0.19364  | -0.03071 | 0.50794  | 0.00546  | 0.90632  |
| 8.59E-08 | -0.12045 | 0.00918  | -0.11458 | 0.01323  | -0.08156 | 0.07829  | -0.22771 | 6.59E-07 |
| 4.59E-10 | -0.06046 | 0.19216  | 0.117164 | 0.01128  | 0.119749 | 0.00959  | -0.03368 | 0.46783  |
| 5.00E-15 | -0.11937 | 0.00982  | -0.29017 | 1.64E-10 | -0.10454 | 0.02386  | -0.27399 | 1.74E-09 |
| 2.68E-16 | 0.099017 | 0.03241  | 0.115642 | 0.01239  | 0.104247 | 0.02426  | 0.129829 | 0.00495  |
| 0.08986  | -0.03886 | 0.40211  | -0.1302  | 0.00483  | -0.03117 | 0.50155  | -0.11471 | 0.01312  |
| 2.88E-05 | -0.15557 | 0.00074  | -0.05476 | 0.23756  | -0.13872 | 0.00266  | -0.273   | 2.00E-09 |
| 4.15E-12 | -0.1659  | 0.00032  | -0.00319 | 0.94512  | -0.06002 | 0.19542  | -0.21489 | 2.78E-06 |
| 1.41E-18 | -0.28071 | 6.64E-10 | -0.23489 | 2.83E-07 | -0.30484 | 1.69E-11 | -0.51975 | 1.13E-33 |
| 1.57E-32 | -0.03179 | 0.49317  | -0.23143 | 4.27E-07 | -0.07507 | 0.1052   | -0.16479 | 0.00035  |
| 3.04E-10 | -0.07828 | 0.09108  | -0.05331 | 0.25025  | -0.05543 | 0.23187  | -0.13732 | 0.00294  |
| 0.00015  | -0.11578 | 0.01229  | 0.076373 | 0.09926  | -0.11709 | 0.01133  | -0.21856 | 1.86E-06 |
| 3.10E-08 | -0.05283 | 0.25457  | 0.092541 | 0.04563  | 0.024517 | 0.59717  | -0.12044 | 0.00918  |
| 7.41E-28 | -0.2447  | 8.54E-08 | -0.33531 | 9.83E-14 | -0.25781 | 1.58E-08 | -0.43861 | 2.23E-23 |
| 3.03E-24 | -0.14699 | 0.00145  | -0.22978 | 5.18E-07 | -0.12748 | 0.0058   | -0.30656 | 1.28E-11 |
| 0.01055  | -0.17705 | 0.00012  | -0.19006 | 3.56E-05 | -0.24413 | 9.16E-08 | -0.39621 | 5.27E-19 |
| 1.39E-26 | -0.2101  | 4.66E-06 | -0.08972 | 0.05266  | -0.20641 | 6.88E-06 | -0.36312 | 5.30E-16 |
| 1.02E-18 | -0.0402  | 0.38606  | -0.0115  | 0.8043   | -0.14045 | 0.00235  | -0.16819 | 0.00026  |
| 3.17E-14 | -0.09905 | 0.03236  | -0.02171 | 0.63975  | 0.122944 | 0.00782  | -0.07873 | 0.08924  |
| 1.88E-25 | -0.20773 | 6.00E-06 | -0.25165 | 3.53E-08 | -0.1992  | 1.45E-05 | -0.44381 | 5.86E-24 |
| 1.05E-09 | -0.0721  | 0.11974  | -0.08879 | 0.0552   | -0.05297 | 0.2533   | -0.16548 | 0.00033  |
| 3.39E-29 | -0.11644 | 0.0118   | -0.25525 | 2.22E-08 | -0.06756 | 0.14494  | -0.23296 | 3.56E-07 |
| 8.55E-16 | -0.08037 | 0.08273  | -0.13441 | 0.00361  | -0.20162 | 1.13E-05 | -0.24101 | 1.35E-07 |
| 1.72E-14 | -0.12351 | 0.00754  | -0.13462 | 0.00356  | -0.16778 | 0.00027  | -0.26048 | 1.11E-08 |
| 2.03E-13 | 0.03913  | 0.39886  | 0.06299  | 0.17417  | 0.036846 | 0.42697  | -0.00661 | 0.88679  |
| 4.15E-27 | -0.05441 | 0.24059  | -0.15389 | 0.00085  | 0.014319 | 0.75761  | -0.12173 | 0.00845  |
| 6.05E-23 | -0.17414 | 0.00016  | -0.15907 | 0.00056  | -0.16913 | 0.00024  | -0.274   | 1.73E-09 |

|          |          |          |          |          |          |          |          |          |
|----------|----------|----------|----------|----------|----------|----------|----------|----------|
| 1.21E-17 | -0.10167 | 0.02802  | -0.05109 | 0.27052  | -0.18937 | 3.81E-05 | -0.273   | 2.00E-09 |
| 4.67E-27 | -0.18227 | 7.45E-05 | -0.05299 | 0.25311  | -0.09278 | 0.04508  | -0.28937 | 1.85E-10 |
| 5.51E-35 | -0.16413 | 0.00037  | -0.14503 | 0.00168  | -0.19368 | 2.51E-05 | -0.3465  | 1.28E-14 |
| 2.77E-06 | -0.10314 | 0.02582  | -0.1001  | 0.03056  | -0.13416 | 0.00368  | -0.23992 | 1.54E-07 |
| 6.89E-25 | -0.1519  | 0.00099  | -0.28901 | 1.95E-10 | -0.13771 | 0.00286  | -0.31548 | 2.99E-12 |
| 1.65E-14 | -0.25739 | 1.67E-08 | -0.08635 | 0.06225  | -0.19288 | 2.71E-05 | -0.40487 | 7.57E-20 |
| 3.98E-15 | -0.22556 | 8.44E-07 | -0.13162 | 0.00438  | -0.225   | 9.00E-07 | -0.4241  | 8.23E-22 |
| 1.57E-11 | -0.14604 | 0.00155  | 0.045434 | 0.32723  | -0.17085 | 0.00021  | -0.26379 | 7.12E-09 |
| 1.61E-26 | -0.00318 | 0.94538  | 0.037254 | 0.42186  | 0.02683  | 0.56303  | -0.03274 | 0.48031  |
| 2.06E-18 | -0.15229 | 0.00096  | -0.0809  | 0.08075  | -0.12262 | 0.00798  | -0.27558 | 1.39E-09 |
| 1.59E-15 | -0.20038 | 1.28E-05 | -0.22302 | 1.13E-06 | -0.32263 | 8.98E-13 | -0.43465 | 6.07E-23 |
| 1.01E-18 | -0.03526 | 0.44716  | 0.295507 | 7.27E-11 | 0.280581 | 6.76E-10 | 0.166504 | 0.0003   |
| 1.43E-10 | -0.09694 | 0.03623  | -0.17894 | 0.0001   | -0.20536 | 7.69E-06 | -0.22758 | 6.68E-07 |
| 3.49E-27 | -0.20325 | 9.56E-06 | -0.09558 | 0.03895  | -0.17249 | 0.00018  | -0.33969 | 4.47E-14 |
| 2.41E-11 | -0.13475 | 0.00353  | -0.12346 | 0.00756  | -0.07005 | 0.13063  | -0.21629 | 2.39E-06 |
| 0.50771  | -0.14382 | 0.00183  | 0.025622 | 0.58074  | -0.23012 | 4.98E-07 | -0.29897 | 4.25E-11 |
| 3.18E-05 | -0.16791 | 0.00027  | -0.14731 | 0.00141  | -0.20316 | 9.66E-06 | -0.33738 | 6.78E-14 |
| 1.27E-13 | -0.10695 | 0.02079  | -0.1289  | 0.00528  | -0.09379 | 0.04278  | -0.18708 | 4.74E-05 |
| 5.71E-07 | -0.00146 | 0.97498  | -0.072   | 0.12021  | -0.04435 | 0.33893  | -0.0496  | 0.28481  |
| 1.88E-24 | -0.15752 | 0.00063  | -0.09315 | 0.04421  | -0.12668 | 0.00612  | -0.31908 | 1.64E-12 |
| 1.13E-19 | -0.14585 | 0.00158  | -0.26578 | 5.43E-09 | -0.19302 | 2.67E-05 | -0.39264 | 1.16E-18 |
| 3.05E-10 | 0.055001 | 0.23551  | -0.22858 | 5.95E-07 | -0.20391 | 8.93E-06 | -0.23552 | 2.62E-07 |
| 3.91E-06 | -0.1642  | 0.00037  | -0.17872 | 0.0001   | -0.1338  | 0.00377  | -0.31098 | 6.26E-12 |
| 7.60E-14 | -0.07212 | 0.11964  | 0.034574 | 0.45605  | -0.08827 | 0.05662  | -0.18257 | 7.24E-05 |
| 1.32E-07 | -0.11    | 0.01741  | -0.20648 | 6.84E-06 | -0.25605 | 2.00E-08 | -0.36354 | 4.88E-16 |
| 7.15E-13 | -0.227   | 7.15E-07 | -0.20193 | 1.10E-05 | -0.22095 | 1.42E-06 | -0.43292 | 9.37E-23 |
| 4.24E-05 | -0.20179 | 1.11E-05 | -0.14615 | 0.00154  | -0.23749 | 2.07E-07 | -0.41735 | 4.16E-21 |
| 2.10E-19 | -0.16055 | 0.0005   | -0.2319  | 4.04E-07 | -0.21508 | 2.73E-06 | -0.44648 | 2.92E-24 |
| 2.11E-33 | -0.02395 | 0.60572  | 0.046071 | 0.32048  | 0.011997 | 0.79596  | -0.02542 | 0.5838   |
| 2.22E-16 | -0.20978 | 4.83E-06 | -0.141   | 0.00226  | -0.11512 | 0.0128   | -0.30198 | 2.66E-11 |
| 1.20E-08 | -0.17444 | 0.00015  | -0.18483 | 5.86E-05 | -0.15729 | 0.00065  | -0.31692 | 2.35E-12 |
| 2.80E-10 | -0.24456 | 8.69E-08 | -0.09366 | 0.04306  | -0.1862  | 5.15E-05 | -0.3159  | 2.79E-12 |
| 0.21338  | -0.11621 | 0.01197  | -0.15242 | 0.00095  | -0.14562 | 0.0016   | -0.24082 | 1.38E-07 |
| 1.58E-16 | -0.19594 | 2.00E-05 | -0.19849 | 1.55E-05 | -0.32329 | 8.02E-13 | -0.45008 | 1.13E-24 |
| 8.03E-23 | -0.22911 | 5.60E-07 | -0.17071 | 0.00021  | -0.24057 | 1.42E-07 | -0.43412 | 6.94E-23 |
| 2.42E-25 | -0.12872 | 0.00534  | -0.1475  | 0.00139  | -0.13903 | 0.0026   | -0.32294 | 8.51E-13 |
| 2.17E-15 | -0.04904 | 0.29027  | -0.0711  | 0.12494  | -0.08002 | 0.08411  | -0.1718  | 0.00019  |
| 1.11E-09 | -0.16846 | 0.00026  | -0.32031 | 1.33E-12 | -0.30047 | 3.37E-11 | -0.40602 | 5.82E-20 |
| 1.44E-20 | -0.04128 | 0.37342  | -0.00169 | 0.97092  | -0.03851 | 0.4064   | -0.15035 | 0.00112  |
| 3.83E-08 | -0.27421 | 1.68E-09 | -0.08908 | 0.0544   | -0.21468 | 2.85E-06 | -0.44517 | 4.11E-24 |
| 1.82E-09 | 0.019257 | 0.67809  | 0.204086 | 8.77E-06 | 0.226867 | 7.26E-07 | 0.112377 | 0.01511  |
| 4.63E-13 | 0.04956  | 0.28517  | 0.206441 | 6.87E-06 | 0.27768  | 1.03E-09 | 0.128909 | 0.00527  |
| 1.43E-17 | -0.17323 | 0.00017  | -0.14649 | 0.0015   | -0.16964 | 0.00023  | -0.34721 | 1.12E-14 |
| 3.71E-20 | -0.10251 | 0.02674  | -0.21045 | 4.49E-06 | -0.00649 | 0.88879  | -0.16723 | 0.00028  |
| 8.14E-15 | -0.20419 | 8.68E-06 | -0.11207 | 0.0154   | -0.17716 | 0.00012  | -0.37297 | 7.35E-17 |

|          |          |          |          |          |          |          |          |          |
|----------|----------|----------|----------|----------|----------|----------|----------|----------|
| 1.86E-19 | -0.20631 | 6.96E-06 | -0.13645 | 0.00313  | -0.17329 | 0.00017  | -0.3999  | 2.32E-19 |
| 2.10E-18 | -0.24378 | 9.57E-08 | -0.16128 | 0.00047  | -0.29873 | 4.42E-11 | -0.48207 | 1.50E-28 |
| 1.14E-14 | -0.1724  | 0.00018  | -0.26487 | 6.15E-09 | -0.14794 | 0.00135  | -0.33315 | 1.44E-13 |
| 1.51E-21 | -0.12687 | 0.00604  | -0.20827 | 5.67E-06 | -0.11179 | 0.01565  | -0.27337 | 1.89E-09 |
| 8.91E-28 | -0.06308 | 0.17355  | -0.03191 | 0.49146  | -0.13187 | 0.00431  | -0.1587  | 0.00058  |
| 1.22E-23 | -0.14114 | 0.00223  | -0.1725  | 0.00018  | -0.14252 | 0.00202  | -0.27835 | 9.33E-10 |
| 7.29E-11 | -0.25731 | 1.69E-08 | -0.14324 | 0.00192  | -0.11372 | 0.01394  | -0.35981 | 1.01E-15 |
| 8.87E-14 | -0.26303 | 7.89E-09 | -0.09836 | 0.03358  | -0.24411 | 9.19E-08 | -0.42792 | 3.24E-22 |
| 9.76E-18 | -0.14797 | 0.00134  | -0.19851 | 1.55E-05 | -0.12904 | 0.00523  | -0.30391 | 1.96E-11 |
| 2.86E-08 | -0.07984 | 0.08479  | -0.04545 | 0.32704  | -0.14247 | 0.00203  | -0.23097 | 4.50E-07 |
| 9.24E-08 | -0.0162  | 0.72704  | -0.14478 | 0.00171  | -0.1471  | 0.00143  | -0.14492 | 0.00169  |
| 3.00E-07 | -0.1142  | 0.01354  | -0.08986 | 0.05231  | -0.07867 | 0.0895   | -0.22368 | 1.05E-06 |
| 1.31E-13 | -0.07841 | 0.09053  | -0.00113 | 0.98059  | -0.10071 | 0.02954  | -0.20693 | 6.52E-06 |
| 1.05E-13 | -0.14739 | 0.0014   | -0.20282 | 9.99E-06 | -0.35077 | 5.74E-15 | -0.46488 | 2.05E-26 |
| 2.56E-33 | -0.1447  | 0.00172  | -0.13009 | 0.00487  | -0.19172 | 3.04E-05 | -0.31247 | 4.91E-12 |
| 5.69E-06 | 0.063207 | 0.17269  | -0.06299 | 0.17416  | -0.11756 | 0.01101  | -0.11599 | 0.01213  |
| 2.22E-19 | -0.10887 | 0.0186   | -0.10895 | 0.01852  | -0.1503  | 0.00112  | -0.26184 | 9.26E-09 |
| 3.16E-20 | -0.18775 | 4.45E-05 | -0.10263 | 0.02657  | -0.08979 | 0.05249  | -0.27184 | 2.35E-09 |
| 6.21E-14 | -0.11373 | 0.01393  | -0.03724 | 0.42209  | -0.05687 | 0.21995  | -0.1155  | 0.0125   |
| 0.00184  | -0.06344 | 0.17114  | -0.16925 | 0.00024  | -0.13864 | 0.00268  | -0.22376 | 1.04E-06 |
| 9.75E-13 | 0.033782 | 0.46643  | 0.023282 | 0.61577  | 0.099153 | 0.03217  | 0.076158 | 0.10023  |
| 6.89E-18 | -0.29013 | 1.65E-10 | -0.03631 | 0.43378  | -0.07998 | 0.08424  | -0.3558  | 2.20E-15 |
| 3.35E-25 | -0.07697 | 0.09664  | 0.08447  | 0.06818  | 0.021687 | 0.64018  | -0.07335 | 0.11343  |
| 2.54E-10 | -0.0146  | 0.75303  | 0.123536 | 0.00752  | 0.112425 | 0.01507  | 0.040494 | 0.38261  |
| 1.76E-18 | -0.15769 | 0.00063  | -0.07779 | 0.09315  | -0.1914  | 3.13E-05 | -0.31733 | 2.20E-12 |
| 5.86E-30 | -0.05591 | 0.22787  | -0.18572 | 5.39E-05 | -0.10294 | 0.02612  | -0.22758 | 6.69E-07 |
| 1.77E-10 | -0.12824 | 0.00552  | -0.1979  | 1.65E-05 | -0.14818 | 0.00132  | -0.28454 | 3.79E-10 |
| 4.94E-19 | -0.32687 | 4.34E-13 | -0.17383 | 0.00016  | -0.25884 | 1.38E-08 | -0.52869 | 5.50E-35 |
| 4.79E-26 | 0.000157 | 0.9973   | -0.01895 | 0.68291  | -0.00472 | 0.91894  | -0.04961 | 0.28469  |
| 1.72E-11 | -0.23462 | 2.92E-07 | -0.15375 | 0.00086  | -0.16245 | 0.00042  | -0.36116 | 7.79E-16 |
| 1.43E-26 | -0.09346 | 0.04351  | -0.09308 | 0.04439  | -0.14957 | 0.00119  | -0.26329 | 7.62E-09 |
| 3.10E-27 | -0.13107 | 0.00455  | 0.061465 | 0.18485  | -0.10925 | 0.01819  | -0.25869 | 1.41E-08 |
| 4.01E-12 | -0.21526 | 2.67E-06 | -0.2052  | 7.82E-06 | -0.12915 | 0.00519  | -0.36601 | 2.99E-16 |
| 1.20E-23 | -0.23165 | 4.16E-07 | -0.14341 | 0.00189  | -0.11878 | 0.01019  | -0.3704  | 1.24E-16 |
| 4.61E-08 | -0.09096 | 0.04947  | -0.05958 | 0.19873  | -0.13679 | 0.00305  | -0.17853 | 0.0001   |
| 1.01E-16 | -0.18571 | 5.40E-05 | -0.06751 | 0.1452   | -0.10825 | 0.01929  | -0.28127 | 6.12E-10 |
| 1.94E-14 | -0.24344 | 9.98E-08 | -0.08715 | 0.05985  | -0.17045 | 0.00022  | -0.34808 | 9.52E-15 |
| 4.24E-18 | -0.27388 | 1.76E-09 | -0.16239 | 0.00043  | -0.16971 | 0.00023  | -0.44095 | 1.22E-23 |
| 2.93E-14 | -0.08291 | 0.07345  | 0.013025 | 0.77892  | -0.04065 | 0.38072  | -0.1069  | 0.02086  |
| 0.00167  | -0.13208 | 0.00425  | -0.06842 | 0.13987  | -0.2208  | 1.45E-06 | -0.31469 | 3.40E-12 |
| 1.80E-11 | -0.03269 | 0.48097  | 0.024329 | 0.59998  | 0.044463 | 0.33769  | -0.06217 | 0.17983  |
| 5.49E-20 | -0.14349 | 0.00188  | -0.28783 | 2.33E-10 | -0.15537 | 0.00075  | -0.33513 | 1.01E-13 |
| 1.34E-11 | -0.19498 | 2.21E-05 | -0.16116 | 0.00047  | -0.34472 | 1.78E-14 | -0.46509 | 1.93E-26 |
| 1.17E-21 | -0.19199 | 2.96E-05 | -0.24648 | 6.83E-08 | -0.33193 | 1.79E-13 | -0.47361 | 1.75E-27 |
| 3.71E-06 | -0.23289 | 3.59E-07 | -0.18653 | 5.00E-05 | -0.28944 | 1.83E-10 | -0.47095 | 3.72E-27 |

|          |          |          |          |          |          |          |          |          |
|----------|----------|----------|----------|----------|----------|----------|----------|----------|
| 1.53E-21 | -0.23883 | 1.76E-07 | -0.20392 | 8.93E-06 | -0.14621 | 0.00153  | -0.39697 | 4.46E-19 |
| 3.79E-18 | -0.1379  | 0.00282  | 0.024692 | 0.59456  | -0.04148 | 0.37109  | -0.16744 | 0.00028  |
| 1.48E-31 | -0.23386 | 3.20E-07 | -0.23125 | 4.36E-07 | -0.29072 | 1.51E-10 | -0.48481 | 6.69E-29 |
| 9.71E-18 | -0.0831  | 0.07279  | -0.0459  | 0.32223  | -0.05219 | 0.26031  | -0.17476 | 0.00015  |
| 0.01601  | 0.014314 | 0.7577   | 0.06905  | 0.13624  | 0.042136 | 0.36359  | 0.017332 | 0.70872  |
| 2.64E-16 | -0.08409 | 0.06945  | -0.1943  | 2.36E-05 | -0.07913 | 0.08763  | -0.23243 | 3.79E-07 |
| 4.18E-08 | -0.11614 | 0.01202  | -0.10737 | 0.0203   | -0.21848 | 1.87E-06 | -0.28732 | 2.51E-10 |
| 2.26E-15 | -0.27008 | 3.00E-09 | -0.079   | 0.08814  | -0.27827 | 9.44E-10 | -0.46397 | 2.63E-26 |
| 9.48E-09 | -0.04928 | 0.28787  | -0.13251 | 0.00412  | -0.17166 | 0.00019  | -0.18425 | 6.19E-05 |
| 1.76E-34 | -0.08051 | 0.0822   | -0.27205 | 2.28E-09 | -0.20122 | 1.18E-05 | -0.3084  | 9.53E-12 |
| 1.98E-29 | -0.00909 | 0.84476  | -0.04335 | 0.34998  | 0.044855 | 0.33344  | -0.05298 | 0.2532   |
| 6.94E-19 | -0.1877  | 4.47E-05 | -0.23217 | 3.91E-07 | -0.13978 | 0.00247  | -0.32002 | 1.40E-12 |
| 2.11E-07 | -0.13154 | 0.00441  | -0.04865 | 0.29414  | -0.13319 | 0.00393  | -0.25394 | 2.63E-08 |
| 6.12E-05 | 0.004358 | 0.92516  | -0.03582 | 0.43999  | 0.008393 | 0.85646  | -0.04655 | 0.3155   |
| 3.65E-21 | -0.23886 | 1.75E-07 | -0.16431 | 0.00036  | -0.28343 | 4.46E-10 | -0.43357 | 7.97E-23 |
| 5.13E-21 | -0.01146 | 0.8049   | -0.00191 | 0.96714  | 0.016197 | 0.72701  | -0.04147 | 0.37124  |
| 1.69E-20 | -0.04513 | 0.33043  | -0.05179 | 0.26406  | -0.03669 | 0.42894  | -0.0948  | 0.04058  |
| 1.26E-23 | -0.11957 | 0.0097   | -0.17841 | 0.00011  | 0.030566 | 0.50995  | -0.16147 | 0.00046  |
| 0.00036  | -0.05005 | 0.28043  | 0.007059 | 0.87908  | 0.016591 | 0.72064  | -0.06156 | 0.18419  |
| 1.22E-11 | 0.121287 | 0.0087   | -0.10356 | 0.02522  | -0.03426 | 0.46021  | -0.03337 | 0.47191  |
| 7.10E-13 | 0.145102 | 0.00167  | -0.10202 | 0.02749  | -0.00258 | 0.95564  | 0.113021 | 0.01454  |
| 1.23E-30 | 0.160197 | 0.00051  | 0.029991 | 0.51795  | -0.02572 | 0.57932  | 0.032675 | 0.48118  |
| 0.00714  | 0.083097 | 0.07281  | -0.05354 | 0.24824  | -0.03136 | 0.49899  | -0.00126 | 0.97831  |
| 2.35E-05 | 0.093045 | 0.04446  | -0.06469 | 0.1628   | -0.01831 | 0.6931   | 0.016502 | 0.72209  |
| 0.03661  | 0.067564 | 0.14489  | -0.05594 | 0.2276   | -0.04217 | 0.3632   | 0.001173 | 0.97982  |
| 0.13409  | 0.020768 | 0.6544   | -0.01317 | 0.77647  | -0.0783  | 0.09099  | -0.11061 | 0.01679  |
| 1.26E-11 | 0.123509 | 0.00754  | 0.05429  | 0.24163  | 0.013721 | 0.76743  | 0.028396 | 0.54045  |
| 4.10E-15 | 0.097363 | 0.03543  | -0.05969 | 0.19787  | -0.07262 | 0.11708  | -0.01921 | 0.67888  |
| 2.86E-16 | 0.243058 | 1.05E-07 | -0.00743 | 0.87272  | 0.032623 | 0.48188  | 0.11448  | 0.01331  |
| 0.01968  | 0.276575 | 1.20E-09 | 0.0901   | 0.05168  | 0.176717 | 0.00012  | 0.237704 | 2.02E-07 |
| 2.21E-42 | 0.206574 | 6.77E-06 | -0.01428 | 0.75817  | 0.004224 | 0.92745  | 0.106327 | 0.02156  |
| 0.01079  | 0.127271 | 0.00588  | 0.040216 | 0.38589  | 0.018756 | 0.68602  | 0.046228 | 0.31884  |
| 2.09E-24 | 0.107788 | 0.01981  | -0.01292 | 0.78058  | -0.06508 | 0.16032  | 0.001426 | 0.97549  |
| 7.35E-14 | 0.187508 | 4.55E-05 | -0.03493 | 0.45141  | -0.01246 | 0.78825  | -0.00125 | 0.97859  |
| 3.67E-12 | 0.14346  | 0.00188  | 0.005326 | 0.90861  | 0.032615 | 0.48198  | 0.050513 | 0.27599  |
| 0.00094  | 0.181468 | 8.02E-05 | -0.01698 | 0.71432  | 0.036517 | 0.43111  | 0.11543  | 0.01256  |
| 4.17E-11 | 0.142258 | 0.00206  | -0.01536 | 0.74055  | -0.00413 | 0.92902  | 0.022954 | 0.62075  |
| 1.12E-11 | 0.123771 | 0.00741  | -0.04141 | 0.37188  | 0.011205 | 0.80916  | -0.01023 | 0.82545  |
| 0.02186  | 0.110358 | 0.01704  | -0.08322 | 0.07239  | -0.03255 | 0.48282  | -0.01576 | 0.73404  |
| 1.77E-12 | 0.163012 | 0.0004   | -0.00333 | 0.94281  | 0.070764 | 0.12675  | 0.062911 | 0.17471  |
| 3.13E-14 | 0.114057 | 0.01365  | -0.04143 | 0.37172  | -0.04518 | 0.3299   | -0.01061 | 0.81916  |
| 3.85E-05 | 0.051133 | 0.27013  | -0.0028  | 0.95187  | -0.01264 | 0.78524  | -0.0224  | 0.62929  |
| 3.37E-08 | 0.147306 | 0.00141  | -0.02964 | 0.52291  | -0.00315 | 0.94594  | 0.019537 | 0.67367  |
| 6.39E-07 | 0.076604 | 0.09825  | -0.05042 | 0.27693  | 0.004741 | 0.91861  | 0.014931 | 0.74759  |
| 0.00753  | 0.055677 | 0.22979  | -0.11165 | 0.01578  | -0.05184 | 0.26357  | -0.10346 | 0.02536  |

|          |          |          |          |         |          |          |          |          |
|----------|----------|----------|----------|---------|----------|----------|----------|----------|
| 1.05E-06 | 0.182642 | 7.19E-05 | 0.073005 | 0.11514 | 0.118526 | 0.01036  | 0.232068 | 3.96E-07 |
| 0.00711  | 0.048622 | 0.29439  | -0.06566 | 0.15656 | -0.02806 | 0.54523  | -0.01358 | 0.76977  |
| 0.04514  | 0.013467 | 0.77162  | -0.02238 | 0.62957 | -0.04236 | 0.36101  | -0.08752 | 0.05877  |
| 1.61E-06 | 0.131486 | 0.00442  | -0.03924 | 0.39752 | -0.01408 | 0.76158  | 0.010982 | 0.8129   |
| 3.24E-15 | 0.149667 | 0.00118  | -0.04276 | 0.35654 | -0.00143 | 0.97547  | 0.034517 | 0.45679  |
| 6.16E-05 | 0.145646 | 0.0016   | 0.005091 | 0.91263 | 0.052126 | 0.26093  | 0.065407 | 0.15819  |
| 2.05E-64 | 0.150762 | 0.00108  | 0.05908  | 0.20252 | -0.00925 | 0.84194  | 0.091577 | 0.04794  |
| 3.23E-09 | 0.143274 | 0.00191  | -0.01244 | 0.78859 | 0.035354 | 0.44594  | 0.074556 | 0.1076   |
| 0.39576  | 0.061461 | 0.18488  | 0.008875 | 0.84831 | 0.127084 | 0.00596  | -0.01073 | 0.8171   |
| 0.00076  | 0.103652 | 0.02509  | -0.0242  | 0.60196 | -0.00587 | 0.89936  | 0.08776  | 0.05808  |
| 7.14E-07 | 0.084095 | 0.06942  | -0.06282 | 0.17534 | -0.08237 | 0.07537  | -0.04157 | 0.37006  |
| 0.00018  | 0.13272  | 0.00406  | -0.05881 | 0.20457 | 0.009802 | 0.83269  | 0.07467  | 0.10706  |
| 2.35E-06 | 0.090744 | 0.05002  | -0.01877 | 0.68587 | -0.02668 | 0.56518  | 0.014177 | 0.75995  |
| 0.02515  | 0.055799 | 0.22877  | -0.13881 | 0.00265 | -0.09274 | 0.04516  | -0.084   | 0.06973  |
| 1.75E-05 | 0.126829 | 0.00606  | -0.02308 | 0.61879 | 0.008552 | 0.85376  | 0.01717  | 0.71133  |
| 8.62E-10 | 0.167762 | 0.00027  | -0.04787 | 0.30191 | -0.01311 | 0.77758  | 0.028629 | 0.53714  |
| 1.67E-13 | 0.226218 | 7.82E-07 | 0.078619 | 0.08969 | 0.117912 | 0.01077  | 0.149186 | 0.00122  |
| 6.27E-15 | 0.412424 | 1.33E-20 | 0.167624 | 0.00027 | 0.229267 | 5.50E-07 | 0.455408 | 2.73E-25 |
| 8.61E-09 | 0.115311 | 0.01265  | -0.08748 | 0.05888 | -0.02235 | 0.63     | -0.00099 | 0.9829   |
| 4.56E-18 | 0.115451 | 0.01254  | -0.08903 | 0.05453 | -0.05853 | 0.20678  | -0.01392 | 0.7641   |
| 4.45E-12 | 0.114213 | 0.01352  | -0.07738 | 0.09486 | -0.00921 | 0.84258  | -0.00311 | 0.9466   |
| 7.33E-08 | 0.104565 | 0.02383  | -0.02577 | 0.57857 | 0.026584 | 0.56662  | 0.060253 | 0.19368  |
| 3.62E-07 | 0.08084  | 0.08096  | -0.03165 | 0.49506 | 0.012266 | 0.7915   | 0.029267 | 0.52811  |
| 3.53E-15 | 0.145538 | 0.00161  | -0.05664 | 0.22181 | 0.023923 | 0.60609  | -0.01124 | 0.80864  |
| 1.33E-14 | 0.142119 | 0.00208  | 0.027457 | 0.55394 | 0.02205  | 0.63458  | 0.050085 | 0.28008  |
| 1.73E-06 | 0.253729 | 2.70E-08 | 0.040734 | 0.37979 | 0.131794 | 0.00433  | 0.272281 | 2.21E-09 |
| 6.35E-15 | 0.164532 | 0.00036  | -0.02365 | 0.61024 | 0.024786 | 0.59315  | 0.048462 | 0.29599  |
| 0.02708  | 0.096288 | 0.03752  | -0.08405 | 0.06957 | -0.05007 | 0.28028  | -0.01823 | 0.69443  |
| 0.0222   | 0.065028 | 0.16062  | -0.07938 | 0.0866  | -0.05557 | 0.23067  | -0.0691  | 0.13596  |
| 0.00013  | 0.097642 | 0.03491  | -0.08677 | 0.06098 | -0.03625 | 0.43453  | 0.030712 | 0.50792  |
| 6.80E-22 | 0.202915 | 9.90E-06 | 0.077686 | 0.09357 | 0.145485 | 0.00162  | 0.228464 | 6.04E-07 |
| 3.30E-06 | 0.07451  | 0.10781  | -0.0991  | 0.03227 | 0.025401 | 0.58401  | 0.02696  | 0.56113  |
| 1.36E-12 | 0.158797 | 0.00057  | -0.0586  | 0.20625 | -0.04114 | 0.37511  | 0.014809 | 0.74959  |
| 1.49E-24 | 0.227375 | 6.85E-07 | -0.02972 | 0.52169 | -0.00893 | 0.84733  | 0.049245 | 0.28824  |
| 1.22E-07 | 0.117123 | 0.01131  | -0.04924 | 0.2883  | -0.00851 | 0.85453  | 0.038528 | 0.40616  |
| 5.21E-25 | 0.118514 | 0.01037  | -0.00887 | 0.84832 | -0.03198 | 0.49055  | 0.018464 | 0.69065  |
| 7.25E-07 | 0.072473 | 0.11781  | -0.05212 | 0.26096 | -0.0034  | 0.94161  | -0.03533 | 0.44621  |
| 1.92E-16 | 0.104932 | 0.02334  | -0.00368 | 0.93677 | -0.02455 | 0.59673  | 0.020623 | 0.65666  |
| 1.48E-26 | 0.199508 | 1.40E-05 | 0.054453 | 0.24021 | -0.0155  | 0.7383   | 0.088134 | 0.05701  |
| 3.69E-13 | 0.117605 | 0.01098  | -0.13524 | 0.00341 | -0.09622 | 0.03766  | 0.002974 | 0.9489   |
| 2.51E-28 | 0.155564 | 0.00074  | -0.01949 | 0.67438 | 0.005836 | 0.89991  | 0.052362 | 0.25877  |
| 4.08E-06 | 0.143432 | 0.00189  | -0.08932 | 0.05374 | 0.006804 | 0.88342  | -0.02112 | 0.64896  |
| 0.00543  | 0.063054 | 0.17373  | -0.06513 | 0.15999 | -0.07128 | 0.12402  | -0.08154 | 0.07834  |
| 2.20E-06 | 0.063847 | 0.16837  | 0.013641 | 0.76876 | 0.021833 | 0.63792  | -0.00655 | 0.8878   |
| 8.93E-07 | 0.103265 | 0.02564  | -0.07692 | 0.09687 | -0.01553 | 0.73782  | -0.02935 | 0.52688  |

|          |          |          |          |          |          |          |          |          |
|----------|----------|----------|----------|----------|----------|----------|----------|----------|
| 7.67E-05 | 0.142043 | 0.00209  | -0.06097 | 0.18841  | -0.00657 | 0.88737  | 0.046642 | 0.31452  |
| 7.04E-06 | 0.169602 | 0.00023  | -0.04125 | 0.37377  | -0.01303 | 0.77888  | 0.023328 | 0.61508  |
| 1.04E-07 | 0.12715  | 0.00593  | 0.087741 | 0.05813  | 0.004211 | 0.92768  | 0.050116 | 0.27979  |
|          | 0.01266  | 0.084862 | 0.06691  | 0.052428 | 0.25817  | -0.00726 | 0.8757   | 0.048802 |
| 2.23E-06 | 0.078901 | 0.08854  | -0.10646 | 0.02139  | -0.07691 | 0.09691  | -0.02964 | 0.52281  |
|          | 0.22458  | 0.005287 | 0.90929  | -0.03954 | 0.39398  | -0.0087  | 0.8513   | -0.0841  |
| 4.94E-06 | 0.117836 | 0.01082  | -0.09653 | 0.03704  | -0.04729 | 0.3078   | -0.02248 | 0.62801  |
|          | 0.02371  | 0.052755 | 0.25521  | -0.05715 | 0.21769  | -0.03244 | 0.48434  | -0.01783 |
| 1.09E-06 | 0.119553 | 0.00971  | -0.00871 | 0.85108  | 0.006399 | 0.8903   | 0.036559 | 0.43058  |
| 3.70E-11 | 0.462512 | 3.94E-26 | 0.015567 | 0.73724  | 0.049191 | 0.28877  | 0.252847 | 3.03E-08 |
|          | 0.00307  | 0.145256 | 0.00165  | -0.07059 | 0.12768  | -0.02465 | 0.59524  | 0.014095 |
| 2.84E-60 | 0.176547 | 0.00013  | 0.029031 | 0.53143  | 0.001086 | 0.98132  | 0.073575 | 0.11232  |
|          | 0.00521  | 0.164387 | 0.00036  | 0.111735 | 0.0157   | 0.074205 | 0.10927  | 0.138014 |
| 9.14E-09 | 0.178737 | 0.0001   | -0.06345 | 0.17102  | -0.03971 | 0.39191  | 0.013867 | 0.76503  |
|          | 0.02619  | 0.055069 | 0.23492  | -0.00556 | 0.9047   | 0.020303 | 0.66166  | 0.00674  |
| 2.05E-05 | 0.106324 | 0.02156  | 0.056421 | 0.22362  | 0.139646 | 0.00249  | 0.140498 | 0.00234  |
|          | 0.00015  | 0.051412 | 0.26752  | -0.08587 | 0.06374  | -0.03799 | 0.41273  | -0.04547 |
| 4.02E-10 | 0.143835 | 0.00183  | -0.02083 | 0.6535   | 0.016088 | 0.72877  | 0.054    | 0.24415  |
|          | 0.60608  | 0.065782 | 0.15581  | 0.079461 | 0.0863   | 0.093101 | 0.04434  | 0.033699 |
|          | 0.00811  | 0.050017 | 0.28074  | -0.10518 | 0.02301  | -0.02508 | 0.58876  | -0.02916 |
| 3.56E-08 | 0.113548 | 0.01408  | -0.05849 | 0.20704  | -0.01085 | 0.81507  | 0.044568 | 0.33654  |
|          | 0.00243  | 0.045861 | 0.3227   | -0.07504 | 0.10535  | -0.03463 | 0.45532  | -0.06518 |
|          | 0.00433  | 0.046304 | 0.31804  | -0.15847 | 0.00059  | -0.07047 | 0.12836  | -0.09723 |
| 6.03E-16 | 0.124019 | 0.00729  | -0.01946 | 0.67494  | -0.00145 | 0.97506  | 0.079336 | 0.08679  |
|          | 0.2058   | 0.12095  | 0.00889  | 0.039713 | 0.39186  | 0.155878 | 0.00072  | 0.200798 |
|          | 0.00031  | 0.147104 | 0.00143  | 0.015306 | 0.74148  | 0.0987   | 0.03297  | 0.204054 |
|          | 0.0005   | 0.102399 | 0.02692  | -0.02241 | 0.62913  | 0.111697 | 0.01574  | 0.044474 |
| 7.60E-12 | 0.150384 | 0.00112  | -0.02479 | 0.59302  | -0.02109 | 0.64947  | 0.025811 | 0.57796  |
| 3.50E-09 | 0.114543 | 0.01326  | -0.07751 | 0.09432  | -0.08055 | 0.08207  | 0.024215 | 0.60169  |
| 1.91E-06 | 0.152188 | 0.00097  | -0.16835 | 0.00026  | -0.1259  | 0.00644  | -0.05726 | 0.21679  |
| 2.23E-10 | 0.121812 | 0.00841  | -0.07301 | 0.11513  | -0.03442 | 0.45811  | 0.05686  | 0.22003  |
| 1.38E-20 | 0.107929 | 0.01965  | -0.02473 | 0.59393  | -0.06472 | 0.16264  | 0.029643 | 0.52282  |
| 1.98E-07 | 0.121685 | 0.00848  | -0.03615 | 0.43578  | -0.05671 | 0.22124  | -0.00552 | 0.90531  |
| 4.42E-18 | 0.140086 | 0.00241  | 0.065866 | 0.15529  | 0.133645 | 0.00381  | 0.131514 | 0.00442  |
| 4.01E-06 | 0.132384 | 0.00416  | -0.04557 | 0.32573  | -0.00655 | 0.88781  | 0.015395 | 0.74002  |
|          | 0.00038  | 0.096739 | 0.03663  | -0.03268 | 0.48116  | 0.01008  | 0.82801  | 0.040453 |
|          | 0.00091  | 0.134172 | 0.00367  | 0.010148 | 0.82687  | 0.016271 | 0.72582  | 0.049765 |
|          | 0.00142  | 0.120491 | 0.00915  | -0.05115 | 0.27001  | -0.02447 | 0.59783  | -0.01399 |
|          | 0.00312  | 0.04589  | 0.32239  | -0.11967 | 0.00964  | -0.05277 | 0.25511  | -0.08037 |
|          | 0.03092  | 0.07683  | 0.09725  | -0.07178 | 0.1214   | -0.06294 | 0.1745   | -0.011   |
| 1.42E-06 | 0.049762 | 0.2832   | -0.10389 | 0.02476  | 0.020354 | 0.66086  | -0.04724 | 0.30835  |
| 4.80E-44 | 0.123888 | 0.00735  | 0.015892 | 0.73196  | -0.02608 | 0.57395  | 0.052804 | 0.25477  |
| 4.12E-05 | 0.074764 | 0.10661  | -0.08574 | 0.06412  | -0.02128 | 0.64642  | -0.02238 | 0.62959  |
| 7.79E-08 | 0.208953 | 5.27E-06 | -0.02163 | 0.64099  | -0.0176  | 0.70436  | 0.025678 | 0.57992  |
| 1.13E-12 | 0.232119 | 3.93E-07 | -0.03075 | 0.50746  | -0.01413 | 0.76069  | 0.050396 | 0.2771   |

|          |           |          |          |          |          |          |          |          |
|----------|-----------|----------|----------|----------|----------|----------|----------|----------|
| 1.46E-12 | 0.131198  | 0.00451  | 0.063028 | 0.17391  | 0.016423 | 0.72335  | 0.052231 | 0.25996  |
| 0.05013  | 0.113817  | 0.01385  | -0.13771 | 0.00286  | -0.08132 | 0.07917  | -0.02165 | 0.6407   |
| 0.34555  | 0.043448  | 0.34884  | -0.11262 | 0.01489  | -0.09904 | 0.03237  | -0.04139 | 0.37211  |
| 4.42E-09 | 0.303073  | 2.23E-11 | 0.177864 | 0.00011  | 0.306215 | 1.35E-11 | 0.441388 | 1.09E-23 |
| 0.00576  | 0.112425  | 0.01507  | -0.05927 | 0.20107  | -0.01243 | 0.78884  | 0.035224 | 0.44762  |
| 0.07539  | 0.047172  | 0.30904  | -0.08904 | 0.05449  | -0.07311 | 0.1146   | -0.0467  | 0.31393  |
| 0.0091   | 0.068575  | 0.13896  | -0.02334 | 0.61486  | -0.02946 | 0.5254   | -0.00046 | 0.99208  |
| 0.00023  | -7.85E-05 | 0.99865  | -0.15725 | 0.00065  | -0.10814 | 0.01941  | -0.1323  | 0.00418  |
| 0.75903  | -0.02899  | 0.53197  | -0.1717  | 0.00019  | -0.06152 | 0.18449  | -0.15121 | 0.00105  |
| 8.88E-13 | 0.129089  | 0.00521  | -0.05625 | 0.22501  | -0.00669 | 0.88533  | 0.032239 | 0.48706  |
| 6.70E-13 | 0.136244  | 0.00318  | -0.05981 | 0.19697  | -0.03051 | 0.51074  | -0.00278 | 0.95219  |
| 1.80E-07 | 0.10423   | 0.02429  | -0.00873 | 0.85084  | 0.021524 | 0.64269  | 0.034314 | 0.45944  |
| 5.81E-10 | 0.167805  | 0.00027  | 0.004925 | 0.91547  | 0.027005 | 0.56048  | 0.055431 | 0.23186  |
| 3.35E-23 | 0.182151  | 7.53E-05 | 0.018707 | 0.68678  | 0.005906 | 0.8987   | 0.047008 | 0.31073  |
| 0.01343  | 0.08552   | 0.06482  | -0.09641 | 0.03728  | -0.06846 | 0.13961  | -0.03958 | 0.39351  |
| 5.13E-15 | 0.124785  | 0.00693  | -0.02642 | 0.56906  | -0.00425 | 0.92694  | 0.033215 | 0.47396  |
| 0.00102  | 0.089481  | 0.05331  | -0.08556 | 0.06469  | -0.01045 | 0.82187  | -0.01837 | 0.69221  |
| 4.97E-23 | 0.072526  | 0.11755  | -0.10425 | 0.02426  | -0.11777 | 0.01086  | -0.01987 | 0.66838  |
| 2.15E-14 | 0.22061   | 1.48E-06 | 0.034397 | 0.45836  | 0.121236 | 0.00873  | 0.213276 | 3.32E-06 |
| 0.00011  | 0.067309  | 0.14642  | -0.1521  | 0.00098  | -0.11047 | 0.01693  | -0.05927 | 0.20104  |
| 0.03249  | 0.064686  | 0.16283  | 0.005847 | 0.89972  | -0.01192 | 0.79719  | 0.045784 | 0.32351  |
| 0.00235  | 0.096289  | 0.03752  | -0.01804 | 0.69746  | -0.01718 | 0.71118  | 0.001565 | 0.9731   |
| 0.10918  | 0.045213  | 0.32959  | -0.09203 | 0.04685  | -0.04826 | 0.298    | -0.04825 | 0.29813  |
| 2.50E-14 | 0.074724  | 0.1068   | -0.00225 | 0.96139  | -0.03796 | 0.41308  | -0.02063 | 0.65658  |
| 4.46E-51 | 0.173613  | 0.00016  | 0.01624  | 0.72631  | -0.01289 | 0.7812   | 0.079137 | 0.08759  |
| 4.73E-08 | 0.061141  | 0.18718  | -0.13062 | 0.0047   | -0.11129 | 0.01613  | -0.03749 | 0.41896  |
| 0.00495  | 0.129022  | 0.00523  | -0.03602 | 0.43744  | -0.00535 | 0.90827  | 0.028305 | 0.54176  |
| 0.00246  | 0.09036   | 0.051    | -0.04196 | 0.36563  | 0.083786 | 0.07046  | 0.035034 | 0.45007  |
| 7.89E-12 | 0.193951  | 2.44E-05 | -0.0435  | 0.34826  | -0.09373 | 0.04292  | -0.00655 | 0.88777  |
| 0.00195  | 0.087528  | 0.05875  | 0.002668 | 0.95414  | 0.120395 | 0.00921  | 0.13451  | 0.00359  |
| 7.24E-60 | 0.188268  | 4.24E-05 | 0.008098 | 0.86145  | 0.003604 | 0.93809  | 0.10653  | 0.02131  |
| 0.00919  | 0.019444  | 0.67514  | -0.17983 | 9.32E-05 | -0.04209 | 0.36409  | -0.07882 | 0.08887  |
| 2.81E-14 | 0.140068  | 0.00242  | -0.03926 | 0.39724  | -0.00859 | 0.85315  | 0.023642 | 0.61032  |
| 1.56E-07 | 0.156634  | 0.00068  | -0.08001 | 0.08412  | -0.0398  | 0.39078  | 0.003794 | 0.93484  |
| 2.08E-30 | 0.131732  | 0.00435  | -0.00357 | 0.93874  | 0.000841 | 0.98553  | 0.057779 | 0.21265  |
| 5.38E-32 | 0.063195  | 0.17277  | -0.12293 | 0.00783  | -0.13322 | 0.00393  | -0.06543 | 0.15806  |
| 0.12474  | 0.033082  | 0.47572  | -0.12244 | 0.00808  | 0.010882 | 0.81456  | -0.03493 | 0.45136  |
| 0.513    | 0.064488  | 0.16413  | 0.061453 | 0.18494  | 0.111292 | 0.01613  | 0.049019 | 0.29046  |
| 7.00E-17 | 0.158054  | 0.00061  | -0.04477 | 0.33437  | -0.03899 | 0.40053  | 0.011585 | 0.80282  |
| 1.56E-13 | 0.167842  | 0.00027  | -0.04799 | 0.30076  | -0.06274 | 0.17587  | 0.00707  | 0.87888  |
| 9.31E-05 | 0.200975  | 1.21E-05 | 0.015352 | 0.74073  | 0.052042 | 0.2617   | 0.087665 | 0.05835  |
| 2.34E-08 | 0.063103  | 0.1734   | 0.040413 | 0.38356  | -0.04457 | 0.33648  | 0.006209 | 0.89355  |
| 3.54E-62 | 0.164661  | 0.00035  | 0.018166 | 0.69539  | 0.030618 | 0.50922  | 0.128369 | 0.00547  |
| 8.02E-05 | 0.128389  | 0.00546  | -0.04667 | 0.31421  | 0.080349 | 0.08283  | 0.054924 | 0.23617  |
| 2.47E-07 | 0.124705  | 0.00697  | 0.049985 | 0.28105  | 0.078838 | 0.0888   | 0.149292 | 0.00121  |



|          |          |          |          |          |          |          |          |          |
|----------|----------|----------|----------|----------|----------|----------|----------|----------|
| 4.08E-06 | 0.296045 | 6.70E-11 | -0.00385 | 0.93388  | 0.026547 | 0.56716  | 0.143693 | 0.00185  |
| 4.48E-16 | 0.16078  | 0.00049  | 0.092703 | 0.04525  | 0.154479 | 0.00081  | 0.233283 | 3.43E-07 |
| 3.51E-06 | 0.111048 | 0.01636  | -0.00722 | 0.87634  | 0.011416 | 0.80564  | 0.017682 | 0.70311  |
| 0.02429  | 0.037112 | 0.42363  | -0.0728  | 0.11614  | -0.02122 | 0.64736  | -0.09027 | 0.05123  |
| 0.18689  | 0.009308 | 0.841    | -0.08597 | 0.06342  | -0.03768 | 0.41653  | -0.05618 | 0.22561  |
| 0.00241  | 0.078643 | 0.08959  | -0.06732 | 0.14635  | -0.0475  | 0.3057   | -0.0162  | 0.72695  |
| 0.0001   | 0.15828  | 0.0006   | -0.03555 | 0.44339  | 0.007581 | 0.87021  | 0.01806  | 0.69708  |
| 0.00222  | 0.077155 | 0.09584  | -0.04306 | 0.35321  | -0.04515 | 0.33027  | 0.012567 | 0.7865   |
| 0.00427  | 0.111919 | 0.01553  | 0.024746 | 0.59375  | -0.01077 | 0.81652  | 0.025813 | 0.57793  |
| 1.90E-05 | 0.19953  | 1.40E-05 | -0.03045 | 0.51157  | -0.00658 | 0.88726  | 0.012505 | 0.78753  |
| 0.00638  | 0.0702   | 0.12981  | -0.05575 | 0.22919  | -0.08341 | 0.07173  | -0.02572 | 0.57929  |
| 1.07E-05 | 0.074071 | 0.10991  | -0.03132 | 0.49959  | -0.01546 | 0.73892  | -0.00305 | 0.94758  |
| 1.20E-05 | 0.086571 | 0.06158  | 0.010311 | 0.82413  | -0.00709 | 0.87861  | 0.018774 | 0.68572  |
| 9.84E-05 | 0.124298 | 0.00716  | -0.05144 | 0.26723  | -0.03107 | 0.50304  | -0.01902 | 0.68189  |
| 0.00422  | 0.032624 | 0.48186  | -0.03736 | 0.42056  | -0.0377  | 0.41629  | -0.0072  | 0.87674  |
| 3.78E-10 | 0.297691 | 5.19E-11 | -0.03587 | 0.43935  | 0.006579 | 0.88724  | 0.098858 | 0.03269  |
| 8.26E-20 | 0.149238 | 0.00122  | 0.017802 | 0.70119  | -0.01651 | 0.72187  | 0.037501 | 0.41879  |
| 1.20E-05 | 0.122086 | 0.00826  | 0.007995 | 0.86319  | 0.017434 | 0.70709  | 0.017876 | 0.70001  |
| 4.06E-09 | 0.13505  | 0.00346  | -0.13746 | 0.00291  | -0.09178 | 0.04746  | -0.04486 | 0.33334  |
| 0.00753  | 0.180147 | 9.05E-05 | -0.03531 | 0.44657  | -0.00934 | 0.84039  | 0.0375   | 0.41881  |
| 1.40E-07 | 0.127301 | 0.00587  | -0.0363  | 0.4338   | -0.00207 | 0.9644   | 0.012936 | 0.78039  |
| 0.00369  | 0.109707 | 0.01771  | -0.06058 | 0.19128  | -0.03232 | 0.48593  | -0.01732 | 0.70894  |
| 1.14E-07 | 0.071408 | 0.12332  | -0.01842 | 0.69138  | 0.015108 | 0.7447   | 0.019192 | 0.67912  |
| 6.70E-13 | 0.153746 | 0.00086  | 0.030559 | 0.51004  | 0.052555 | 0.25702  | 0.0344   | 0.45832  |
| 7.10E-06 | 0.150557 | 0.0011   | 0.066065 | 0.15404  | 0.023085 | 0.61876  | 0.035349 | 0.44601  |
| 3.56E-16 | 0.192374 | 2.85E-05 | -0.05378 | 0.24608  | -0.00798 | 0.86348  | 0.048172 | 0.29889  |
| 1.42E-12 | 0.140804 | 0.00229  | -0.05504 | 0.2352   | -0.02142 | 0.6443   | 0.009182 | 0.84313  |
| 1.03E-47 | 0.169488 | 0.00023  | 0.008138 | 0.86077  | -0.01344 | 0.7721   | 0.067479 | 0.1454   |
| 9.24E-11 | 0.307012 | 1.19E-11 | 0.109769 | 0.01765  | 0.169387 | 0.00024  | 0.289513 | 1.81E-10 |
| 8.85E-24 | 0.188189 | 4.27E-05 | -0.10093 | 0.0292   | -0.01453 | 0.75417  | 0.105779 | 0.02224  |
| 0.05621  | 0.044858 | 0.33341  | -0.14078 | 0.00229  | -0.05942 | 0.19993  | -0.08176 | 0.07754  |
| 0.01072  | 0.201955 | 1.09E-05 | 0.185671 | 5.42E-05 | 0.315333 | 3.06E-12 | 0.435066 | 5.47E-23 |
| 4.88E-13 | 0.165733 | 0.00032  | -0.00242 | 0.95838  | 0.058708 | 0.20537  | 0.106222 | 0.02169  |
| 1.93E-06 | 0.276898 | 1.15E-09 | -0.03081 | 0.50656  | -0.04939 | 0.28679  | 0.023724 | 0.60909  |
| 0.0025   | 0.077955 | 0.09244  | 0.057323 | 0.21629  | 0.026863 | 0.56254  | 0.010188 | 0.8262   |
| 1.17E-23 | 0.109348 | 0.01809  | -0.01176 | 0.79984  | -0.05203 | 0.26184  | 0.03998  | 0.38868  |
| 3.49E-15 | 0.088809 | 0.05513  | 0.023263 | 0.61607  | 0.016945 | 0.71494  | 0.059558 | 0.19888  |
| 0.21943  | 0.054454 | 0.24021  | -0.09423 | 0.04182  | -0.05316 | 0.25158  | -0.04863 | 0.29435  |
| 0.02717  | 0.067761 | 0.14372  | -0.12905 | 0.00522  | -0.08742 | 0.05908  | -0.0613  | 0.18604  |
| 0.03987  | 0.081195 | 0.07963  | -0.0624  | 0.17826  | -0.0754  | 0.10365  | -0.04098 | 0.37688  |
| 1.71E-25 | 0.164723 | 0.00035  | 0.108906 | 0.01856  | 0.027601 | 0.55185  | 0.12992  | 0.00492  |
| 1.06E-08 | 0.107356 | 0.02032  | -0.04115 | 0.37497  | 0.036421 | 0.43233  | 0.00405  | 0.93044  |
| 1.27E-08 | 0.147333 | 0.00141  | 0.038822 | 0.40258  | -0.01589 | 0.73197  | 0.020314 | 0.66148  |
| 2.33E-07 | 0.135906 | 0.00325  | -0.05571 | 0.22951  | -0.07984 | 0.08481  | 0.05252  | 0.25734  |
| 0.06665  | 0.023075 | 0.61892  | -0.04313 | 0.3524   | -0.09686 | 0.03639  | -0.08266 | 0.07433  |

|          |          |          |          |         |          |          |          |          |
|----------|----------|----------|----------|---------|----------|----------|----------|----------|
| 5.75E-08 | 0.111872 | 0.01558  | -0.07502 | 0.10543 | -0.01969 | 0.67121  | 0.008369 | 0.85686  |
| 0.0532   | 0.068634 | 0.13862  | -0.02972 | 0.52173 | -0.09508 | 0.04     | -0.1022  | 0.02721  |
| 0.00197  | 0.077938 | 0.09251  | -0.04689 | 0.312   | 0.009116 | 0.84424  | 0.005854 | 0.8996   |
| 1.44E-08 | 0.126473 | 0.0062   | -0.04578 | 0.32357 | -0.02674 | 0.56437  | -0.02547 | 0.58299  |
| 9.15E-08 | 0.170435 | 0.00022  | 0.021255 | 0.64685 | 0.077762 | 0.09325  | 0.112343 | 0.01514  |
| 8.03E-10 | 0.153721 | 0.00086  | -0.01979 | 0.66967 | 0.015974 | 0.73063  | 0.032509 | 0.48342  |
| 0.00186  | 0.114294 | 0.01346  | 0.056765 | 0.2208  | 0.171777 | 0.00019  | 0.127335 | 0.00586  |
| 0.00684  | 0.050351 | 0.27754  | -0.03855 | 0.40593 | -0.07228 | 0.11879  | -0.02124 | 0.64712  |
| 1.40E-10 | 0.114035 | 0.01367  | 0.141202 | 0.00222 | -0.01584 | 0.73279  | 0.050435 | 0.27674  |
| 0.00049  | 0.145035 | 0.00168  | 0.071644 | 0.12208 | 0.014271 | 0.7584   | 0.074607 | 0.10735  |
| 7.11E-24 | 0.205261 | 7.77E-06 | 0.050664 | 0.27456 | 0.076166 | 0.10019  | 0.198683 | 1.52E-05 |
| 1.96E-05 | 0.075216 | 0.10451  | -0.09603 | 0.03804 | -0.04552 | 0.32633  | 0.031185 | 0.50141  |
| 0.00147  | 0.106442 | 0.02141  | -0.0454  | 0.3276  | -0.02143 | 0.64411  | -0.0087  | 0.85133  |
| 1.39E-11 | 0.122328 | 0.00814  | -0.00638 | 0.89057 | -0.0001  | 0.99822  | 0.004195 | 0.92796  |
| 1.89E-06 | 0.112714 | 0.01481  | 0.052987 | 0.25313 | 0.114813 | 0.01304  | 0.06933  | 0.13465  |
| 1.57E-10 | 0.396856 | 4.57E-19 | 0.130521 | 0.00473 | 0.308126 | 9.96E-12 | 0.457129 | 1.72E-25 |
| 0.31984  | 0.089943 | 0.05209  | 0.129073 | 0.00521 | 0.006407 | 0.89018  | 0.017875 | 0.70004  |
| 0.30393  | 0.071182 | 0.12452  | 0.061672 | 0.18337 | 0.000176 | 0.99697  | 0.003162 | 0.94567  |
| 0.00949  | 0.098257 | 0.03377  | -0.00998 | 0.82967 | -0.02259 | 0.62631  | -0.01733 | 0.70871  |
| 0.00014  | 0.125767 | 0.0065   | -0.05675 | 0.22093 | -0.03376 | 0.46674  | -0.00325 | 0.94411  |
| 1.36E-05 | 0.121934 | 0.00834  | -0.0086  | 0.85287 | -0.00811 | 0.86128  | 0.020725 | 0.65508  |
| 1.64E-05 | 0.126506 | 0.00619  | -0.03851 | 0.40636 | -0.04586 | 0.32269  | -0.00359 | 0.93832  |
| 0.0014   | 0.107116 | 0.0206   | -0.00934 | 0.84046 | -0.0114  | 0.80598  | 0.007893 | 0.86492  |
| 2.19E-09 | 0.184885 | 5.83E-05 | 0.011878 | 0.79794 | -0.01109 | 0.81106  | 0.029899 | 0.51923  |
| 2.95E-05 | 0.100412 | 0.03004  | -0.00108 | 0.98139 | -0.02401 | 0.6048   | -0.00079 | 0.98634  |
| 0.00211  | 0.084425 | 0.06833  | -0.02613 | 0.57327 | -0.02003 | 0.66593  | 0.005617 | 0.90365  |
| 3.97E-12 | 0.16717  | 0.00029  | 0.042011 | 0.36502 | 0.01263  | 0.78546  | 0.053527 | 0.24831  |
| 1.32E-06 | 0.079361 | 0.08669  | -0.02813 | 0.54423 | -0.0346  | 0.45572  | 0.018852 | 0.68449  |
| 0.16713  | 0.056073 | 0.22649  | -0.06195 | 0.18141 | 0.017284 | 0.70949  | 0.042129 | 0.36368  |
| 1.00E-08 | 0.134783 | 0.00352  | -0.01513 | 0.74439 | 0.007199 | 0.87669  | 0.017813 | 0.70103  |
| 1.81E-11 | 0.126492 | 0.0062   | -0.01085 | 0.81517 | -0.0301  | 0.51638  | -0.00103 | 0.98231  |
| 5.88E-12 | 0.113051 | 0.01451  | -0.01682 | 0.71701 | 0.012664 | 0.78489  | 0.046619 | 0.31476  |
| 0.01688  | 0.080121 | 0.08371  | -0.07906 | 0.08789 | -0.03889 | 0.40172  | -0.02789 | 0.54775  |
| 3.09E-07 | 0.037578 | 0.41784  | -0.10535 | 0.0228  | -0.03198 | 0.4905   | -0.05255 | 0.25702  |
| 6.38E-05 | 0.117159 | 0.01128  | -0.00734 | 0.87429 | -0.00296 | 0.94917  | 0.010012 | 0.82916  |
| 3.43E-06 | 0.118372 | 0.01046  | -0.03732 | 0.42109 | -0.02277 | 0.62353  | -0.00667 | 0.88571  |
| 0.01635  | 0.085171 | 0.06592  | -0.04527 | 0.32902 | -0.02994 | 0.51866  | -0.02432 | 0.60016  |
| 6.01E-15 | 0.119669 | 0.00964  | -0.07701 | 0.09648 | -0.0634  | 0.1714   | -0.02273 | 0.62414  |
| 0.00324  | 0.060954 | 0.18854  | -0.03719 | 0.42262 | -0.02099 | 0.65094  | -0.01935 | 0.6767   |
| 0.13711  | 0.209316 | 5.07E-06 | -0.04198 | 0.3654  | -0.05338 | 0.24957  | -0.00634 | 0.89136  |
| 0.14496  | 0.045797 | 0.32337  | -0.0015  | 0.97426 | 0.00658  | 0.88723  | 0.024372 | 0.59934  |
| 1.56E-13 | 0.163933 | 0.00037  | -0.06286 | 0.17506 | -0.04819 | 0.29875  | 0.00116  | 0.98006  |
| 0.21384  | 0.05257  | 0.25688  | -0.06399 | 0.16741 | 0.002445 | 0.95797  | 0.010453 | 0.82175  |
| 2.71E-06 | 0.096011 | 0.03808  | -0.00411 | 0.92935 | 0.014381 | 0.75659  | 0.03677  | 0.42793  |
| 0.1131   | 0.062933 | 0.17456  | 0.007195 | 0.87677 | 0.013746 | 0.76703  | -0.01424 | 0.75888  |

|          |          |          |          |         |          |         |          |          |
|----------|----------|----------|----------|---------|----------|---------|----------|----------|
| 0.00188  | 0.042926 | 0.35466  | -0.00222 | 0.96184 | -0.0599  | 0.19629 | -0.07932 | 0.08687  |
| 7.64E-20 | 0.137791 | 0.00285  | -0.00457 | 0.92153 | -0.00891 | 0.84772 | 0.027458 | 0.55392  |
| 8.31E-26 | 0.10862  | 0.01888  | -0.04333 | 0.35011 | -0.01333 | 0.77382 | -0.01823 | 0.69441  |
| 8.23E-17 | 0.137907 | 0.00282  | 0.004786 | 0.91784 | -0.01075 | 0.81675 | 0.11113  | 0.01628  |
| 3.18E-12 | 0.178438 | 0.00011  | -0.01598 | 0.73054 | -0.00504 | 0.91346 | 0.027265 | 0.55672  |
| 6.01E-07 | 0.137985 | 0.00281  | -0.02669 | 0.56506 | -0.00267 | 0.95416 | 0.008583 | 0.85324  |
| 1.50E-06 | 0.149311 | 0.00121  | 0.007092 | 0.87852 | -0.02292 | 0.62129 | 0.049101 | 0.28966  |
| 6.78E-06 | 0.109855 | 0.01756  | 0.108022 | 0.01955 | -0.02436 | 0.59955 | 0.026825 | 0.56311  |
| 0.00113  | 0.059072 | 0.20258  | 0.142094 | 0.00208 | 0.021879 | 0.63721 | 0.050056 | 0.28036  |
| 0.00222  | 0.100495 | 0.0299   | -0.06306 | 0.17367 | -0.02327 | 0.61593 | -0.01525 | 0.74232  |
| 3.70E-10 | 0.081365 | 0.079    | -0.09362 | 0.04317 | -0.02486 | 0.59206 | -0.04279 | 0.35616  |
| 2.85E-22 | 0.182868 | 7.04E-05 | 0.033163 | 0.47465 | 0.032388 | 0.48504 | 0.08718  | 0.05977  |
| 1.87E-17 | 0.099982 | 0.03075  | 0.000887 | 0.98475 | -0.02119 | 0.6479  | -0.00049 | 0.99157  |
| 6.09E-10 | 0.166574 | 0.0003   | -0.03593 | 0.43852 | -0.00551 | 0.90544 | 0.022398 | 0.62925  |
| 2.03E-12 | 0.156157 | 0.00071  | -0.05668 | 0.22147 | -0.01901 | 0.68196 | 0.020353 | 0.66088  |
| 0.00019  | 0.098767 | 0.03285  | -0.02376 | 0.60857 | 0.073353 | 0.11341 | 0.036133 | 0.43598  |
| 0.00991  | 0.049601 | 0.28476  | -0.06839 | 0.14001 | 0.015963 | 0.7308  | -0.05136 | 0.26804  |
| 0.00186  | 0.085324 | 0.06543  | 0.045513 | 0.32638 | -0.06562 | 0.15683 | 0.025389 | 0.58418  |
| 0.00133  | 0.355788 | 2.21E-15 | -0.01729 | 0.70947 | -0.01209 | 0.79444 | 0.071842 | 0.12106  |
| 3.40E-05 | 0.190145 | 3.54E-05 | 0.050221 | 0.27878 | 0.047187 | 0.30889 | 0.094755 | 0.04068  |
| 0.01347  | 0.063058 | 0.1737   | -0.07619 | 0.10008 | 0.01278  | 0.78296 | -0.00115 | 0.98021  |
| 4.84E-06 | 0.595749 | 3.36E-46 | 0.114767 | 0.01308 | 0.162113 | 0.00044 | 0.407391 | 4.25E-20 |
| 1.48E-20 | 0.101924 | 0.02763  | 0.149863 | 0.00116 | 0.016926 | 0.71524 | 0.075894 | 0.10141  |
| 0.00017  | 0.105854 | 0.02215  | -0.00136 | 0.97669 | 0.08144  | 0.07872 | 0.118675 | 0.01026  |
| 3.35E-17 | 0.145701 | 0.00159  | -0.00952 | 0.83746 | 0.013009 | 0.77918 | 0.024198 | 0.60195  |
| 0.0221   | 0.070202 | 0.1298   | 0.002115 | 0.96364 | 0.072448 | 0.11794 | 0.068991 | 0.13657  |
| 1.71E-08 | 0.149239 | 0.00122  | -0.02458 | 0.59616 | -0.00756 | 0.87059 | 0.005643 | 0.9032   |
| 6.27E-20 | 0.236358 | 2.37E-07 | -0.04913 | 0.28934 | 0.069355 | 0.13451 | 0.226512 | 7.56E-07 |
| 1.70E-07 | 0.130734 | 0.00466  | -0.00326 | 0.94392 | 0.011896 | 0.79765 | 0.054728 | 0.23784  |
| 3.14E-12 | 0.152075 | 0.00098  | 0.016343 | 0.72465 | 0.029711 | 0.52187 | 0.051107 | 0.27038  |
| 8.67E-08 | 0.158992 | 0.00056  | -0.01999 | 0.6666  | -0.01359 | 0.76954 | 0.033004 | 0.47678  |
| 0.00849  | 0.173449 | 0.00017  | 0.006636 | 0.88627 | -0.02945 | 0.52559 | 0.08491  | 0.06676  |
| 8.36E-17 | 0.124545 | 0.00704  | 0.028322 | 0.54151 | -0.0269  | 0.56206 | 0.092493 | 0.04575  |
| 1.15E-09 | 0.08742  | 0.05906  | -0.06805 | 0.142   | -0.04822 | 0.29844 | -0.03193 | 0.49127  |
| 2.18E-06 | 0.150875 | 0.00107  | -0.03133 | 0.49938 | 0.016769 | 0.71778 | 0.037078 | 0.42407  |
| 8.82E-11 | 0.126863 | 0.00605  | -0.02146 | 0.64365 | -0.00749 | 0.87181 | 0.018957 | 0.68284  |
| 0.01458  | 0.105585 | 0.02249  | -0.08483 | 0.06702 | -0.05288 | 0.25405 | -0.01631 | 0.72526  |
| 0.08718  | 0.090225 | 0.05135  | 0.002063 | 0.96453 | -0.01478 | 0.75    | -0.01046 | 0.8216   |
| 4.61E-11 | 0.145374 | 0.00163  | -0.03567 | 0.44186 | -0.04434 | 0.33905 | 0.004964 | 0.9148   |
| 9.73E-08 | 0.126181 | 0.00633  | -0.02866 | 0.53673 | 0.06627  | 0.15276 | 0.02914  | 0.52989  |
| 3.12E-06 | 0.126401 | 0.00623  | -0.07543 | 0.10352 | -0.01747 | 0.70643 | -0.00448 | 0.9231   |
| 0.00836  | 0.051603 | 0.26575  | -0.02147 | 0.64347 | -0.04294 | 0.35446 | -0.02405 | 0.6042   |
| 1.31E-08 | 0.128021 | 0.0056   | -0.04879 | 0.2927  | -0.00907 | 0.845   | 0.007581 | 0.87021  |
| 8.09E-11 | 0.166238 | 0.00031  | -0.0239  | 0.6065  | 0.071363 | 0.12356 | 0.127199 | 0.00591  |
| 0.0084   | 0.134402 | 0.00362  | 0.027262 | 0.55676 | 0.154408 | 0.00081 | 0.225271 | 8.72E-07 |

|          |          |          |          |         |          |         |          |          |
|----------|----------|----------|----------|---------|----------|---------|----------|----------|
| 2.76E-07 | 0.158381 | 0.00059  | -0.03171 | 0.49419 | -0.0315  | 0.49704 | 0.021529 | 0.64261  |
| 0.00017  | 0.183547 | 6.61E-05 | -0.04631 | 0.31803 | -0.02725 | 0.55688 | 0.057662 | 0.21358  |
| 0.03375  | 0.08686  | 0.06071  | 0.018292 | 0.69338 | 0.029094 | 0.53055 | 0.033471 | 0.47055  |
| 1.17E-07 | 0.140126 | 0.00241  | -0.15523 | 0.00076 | -0.10894 | 0.01853 | 0.026406 | 0.56922  |
| 3.73E-15 | 0.206475 | 6.84E-06 | -0.05603 | 0.22684 | 0.075082 | 0.10513 | 0.195858 | 2.02E-05 |
| 4.70E-06 | 0.066678 | 0.15024  | -0.07578 | 0.10191 | -0.03309 | 0.47569 | -0.07478 | 0.10655  |
| 3.87E-12 | 0.147196 | 0.00142  | -0.09054 | 0.05054 | -0.04876 | 0.293   | -0.00506 | 0.91311  |
| 0.07056  | 0.02454  | 0.59683  | -0.07521 | 0.10451 | 0.063734 | 0.16913 | 0.070453 | 0.12843  |
| 0.00688  | 0.075769 | 0.10198  | -0.02356 | 0.61155 | -0.00928 | 0.8415  | 0.024948 | 0.59074  |
| 2.39E-07 | 0.120187 | 0.00933  | -0.06639 | 0.15199 | -0.02112 | 0.64892 | 0.037983 | 0.41283  |
| 0.00232  | 0.072872 | 0.1158   | -0.04012 | 0.38698 | 0.007007 | 0.87995 | 0.027633 | 0.55139  |
| 6.36E-12 | 0.113146 | 0.01443  | -0.12792 | 0.00563 | 0.006906 | 0.88168 | 0.035214 | 0.44774  |
| 0.00032  | 0.087885 | 0.05772  | -0.07955 | 0.08593 | -0.0428  | 0.35605 | 0.008874 | 0.84833  |
| 0.04188  | 0.054096 | 0.24332  | 0.012768 | 0.78317 | 0.010609 | 0.81914 | 0.037085 | 0.42398  |
| 0.00246  | 0.089558 | 0.0531   | 0.058901 | 0.20389 | -0.05327 | 0.25063 | -0.02668 | 0.5652   |
| 2.96E-52 | 0.130249 | 0.00481  | 0.037418 | 0.41982 | -0.00021 | 0.99635 | 0.070328 | 0.12912  |
| 2.89E-68 | 0.172237 | 0.00018  | 0.077845 | 0.0929  | 0.022431 | 0.62874 | 0.106766 | 0.02102  |
| 0.00742  | 0.099181 | 0.03212  | -0.02306 | 0.61917 | -0.02976 | 0.52123 | -0.01829 | 0.69345  |
| 4.88E-05 | 0.113351 | 0.01425  | -0.02592 | 0.57635 | -0.00027 | 0.99538 | 0.02075  | 0.65468  |
| 0.00099  | 0.074279 | 0.10891  | 0.016673 | 0.71933 | -0.01165 | 0.80174 | -0.00204 | 0.965    |
| 0.00099  | 0.08595  | 0.06347  | -0.01895 | 0.68301 | -0.00813 | 0.86094 | 0.007075 | 0.87881  |
| 6.02E-13 | 0.104445 | 0.024    | -0.03204 | 0.4897  | -0.02485 | 0.59224 | 0.028384 | 0.54063  |
| 1.29E-05 | 0.126002 | 0.0064   | -0.0418  | 0.36742 | -0.02116 | 0.64838 | 0.01078  | 0.81628  |
| 4.37E-05 | 0.121137 | 0.00878  | -0.04094 | 0.37737 | -0.0202  | 0.66321 | -0.00541 | 0.90713  |
| 5.76E-14 | 0.14816  | 0.00132  | -0.00946 | 0.8384  | -0.01114 | 0.81029 | 0.015601 | 0.73668  |
| 1.06E-08 | 0.124686 | 0.00698  | -0.00983 | 0.83229 | 0.000847 | 0.98543 | 0.017346 | 0.7085   |
| 0.00066  | 0.118609 | 0.01031  | -0.02171 | 0.63981 | -0.00482 | 0.91725 | 0.029885 | 0.51942  |
| 1.30E-11 | 0.114672 | 0.01315  | -0.02986 | 0.51979 | -0.00397 | 0.93189 | 0.024383 | 0.59918  |
| 2.86E-05 | 0.1266   | 0.00615  | 0.006372 | 0.89077 | 0.010789 | 0.81613 | 0.020454 | 0.6593   |
| 7.37E-14 | 0.135846 | 0.00327  | -0.01555 | 0.73753 | -0.00871 | 0.85118 | 0.024904 | 0.5914   |
| 3.96E-09 | 0.147774 | 0.00136  | -0.00822 | 0.85938 | 0.013843 | 0.76543 | 0.038089 | 0.41153  |
| 2.21E-08 | 0.163239 | 0.0004   | -0.02524 | 0.58642 | 0.013119 | 0.77736 | 0.033882 | 0.46512  |
| 7.46E-08 | 0.142418 | 0.00203  | -0.00196 | 0.96623 | 0.015961 | 0.73083 | 0.033087 | 0.47566  |
| 3.89E-25 | 0.133604 | 0.00382  | -0.0634  | 0.17141 | -0.02033 | 0.66116 | 0.020142 | 0.66418  |
| 4.62E-22 | 0.151224 | 0.00105  | -0.03204 | 0.48975 | -0.0256  | 0.58099 | 0.005725 | 0.9018   |
| 2.18E-11 | 0.174027 | 0.00016  | 0.001629 | 0.972   | 0.029841 | 0.52005 | 0.042621 | 0.35809  |
| 0.00022  | 0.056679 | 0.2215   | -0.1563  | 0.0007  | -0.06863 | 0.13863 | -0.0092  | 0.84286  |
| 1.21E-09 | 0.112429 | 0.01507  | -0.0337  | 0.46753 | -0.04998 | 0.28111 | -0.00246 | 0.95766  |
| 1.17E-10 | 0.238359 | 1.86E-07 | -0.0122  | 0.79258 | -0.01595 | 0.73098 | 0.036865 | 0.42673  |
| 3.02E-05 | 0.105293 | 0.02287  | -0.05557 | 0.2307  | -0.01997 | 0.66685 | -0.00167 | 0.97122  |
| 0.00089  | 0.109031 | 0.01843  | -0.00905 | 0.84534 | -0.00418 | 0.92821 | 0.001327 | 0.97718  |
| 6.27E-10 | 0.133003 | 0.00399  | -0.0522  | 0.26027 | -0.00675 | 0.88425 | 0.020278 | 0.66206  |
| 0.00403  | 0.113623 | 0.01402  | -0.05864 | 0.20591 | -0.01905 | 0.6814  | 0.019992 | 0.66654  |
| 1.18E-09 | 0.104399 | 0.02406  | -0.04833 | 0.29731 | -0.03959 | 0.39328 | 0.001633 | 0.97193  |
| 8.33E-06 | 0.110346 | 0.01706  | -0.03541 | 0.44521 | -0.00298 | 0.94871 | 0.017235 | 0.71028  |

|          |          |          |          |         |           |         |          |         |
|----------|----------|----------|----------|---------|-----------|---------|----------|---------|
| 0.14397  | 0.047289 | 0.30784  | 0.003673 | 0.9369  | -0.03684  | 0.42705 | -0.02362 | 0.61064 |
| 3.65E-15 | 0.11053  | 0.01687  | -0.03928 | 0.397   | -0.031    | 0.50399 | 0.006568 | 0.88743 |
| 0.00054  | 0.123463 | 0.00756  | -0.02087 | 0.6528  | 0.000543  | 0.99066 | 0.035459 | 0.44459 |
| 0.01526  | 0.106618 | 0.0212   | -0.0357  | 0.44144 | -0.01704  | 0.71334 | 0.006395 | 0.89038 |
| 1.05E-07 | 0.12797  | 0.00562  | -0.02498 | 0.59028 | -0.01967  | 0.67165 | -0.00063 | 0.98914 |
| 6.72E-06 | 0.106506 | 0.02134  | -0.05997 | 0.19575 | -0.02731  | 0.55612 | -0.01127 | 0.80816 |
| 5.20E-09 | 0.123712 | 0.00744  | 0.007023 | 0.87969 | 0.01386   | 0.76515 | 0.036286 | 0.43404 |
| 8.88E-15 | 0.137865 | 0.00283  | -0.04756 | 0.30508 | -0.03791  | 0.41369 | 0.078263 | 0.09116 |
| 0.07145  | 0.091094 | 0.04914  | -0.07559 | 0.10278 | -0.03253  | 0.48306 | 0.027529 | 0.5529  |
| 2.12E-17 | 0.095726 | 0.03865  | 0.002671 | 0.9541  | 0.008768  | 0.85011 | 0.052997 | 0.25303 |
| 3.32E-16 | 0.141722 | 0.00214  | -0.05042 | 0.27688 | -0.0261   | 0.57376 | 0.016277 | 0.72571 |
| 0.00113  | 0.128565 | 0.0054   | -0.05028 | 0.27822 | -0.02382  | 0.60764 | 0.01224  | 0.79193 |
| 7.57E-06 | 0.180202 | 9.01E-05 | 0.023575 | 0.61134 | 0.011762  | 0.79987 | 0.033099 | 0.4755  |
| 0.00043  | 0.08282  | 0.07377  | -0.03103 | 0.50358 | -0.02084  | 0.65332 | -0.00307 | 0.94727 |
| 0.03594  | 0.055456 | 0.23165  | -0.06587 | 0.15529 | -0.04155  | 0.37034 | -0.01737 | 0.70809 |
| 0.01753  | 0.052899 | 0.25391  | -0.03161 | 0.4956  | -0.01446  | 0.75528 | 0.008056 | 0.86216 |
| 0.20339  | 0.061329 | 0.18583  | -0.02202 | 0.63505 | -0.00796  | 0.86373 | -0.00162 | 0.97223 |
| 1.94E-06 | 0.082422 | 0.07517  | -0.0373  | 0.42135 | -0.02812  | 0.5444  | -0.00309 | 0.94698 |
| 0.01342  | 0.119415 | 0.0098   | -0.04549 | 0.32662 | 0.001698  | 0.97081 | 0.020051 | 0.6656  |
| 0.0004   | 0.100214 | 0.03037  | -0.04886 | 0.29203 | -0.01044  | 0.8219  | 0.011123 | 0.81054 |
| 3.11E-05 | 0.087134 | 0.0599   | -0.05082 | 0.27306 | -0.02479  | 0.59315 | 0.038624 | 0.40499 |
| 0.0421   | 0.074133 | 0.10961  | -0.01794 | 0.69903 | -0.02968  | 0.52235 | -0.0025  | 0.95706 |
| 2.37E-08 | 0.054129 | 0.24302  | 0.009654 | 0.83517 | -1.42E-05 | 0.99976 | 0.009609 | 0.83593 |
| 1.50E-13 | 0.192741 | 2.75E-05 | -0.02249 | 0.62789 | -0.00798  | 0.86337 | 0.028649 | 0.53685 |
| 6.63E-07 | 0.121832 | 0.0084   | 0.027142 | 0.5585  | 0.020563  | 0.6576  | 0.029441 | 0.52565 |
| 9.33E-12 | 0.138246 | 0.00275  | -0.05038 | 0.27726 | -0.03465  | 0.45506 | 0.000565 | 0.99029 |
| 1.42E-19 | 0.110841 | 0.01656  | -0.02399 | 0.60515 | -0.04202  | 0.36489 | 0.035774 | 0.44056 |
| 0.00051  | 0.148809 | 0.00126  | -0.01939 | 0.67596 | 0.002867  | 0.95074 | 0.025401 | 0.584   |
| 1.22E-05 | 0.151683 | 0.00101  | -0.03657 | 0.43043 | -0.00965  | 0.83529 | 0.019383 | 0.6761  |
| 1.20E-11 | 0.142286 | 0.00205  | -0.03866 | 0.40453 | -0.01314  | 0.77703 | 0.016335 | 0.72478 |
| 0.00964  | 0.093039 | 0.04448  | -0.03934 | 0.39632 | 0.02627   | 0.5712  | 0.042056 | 0.36451 |
| 5.31E-24 | 0.165882 | 0.00032  | 0.006025 | 0.89668 | -0.00401  | 0.9311  | 0.034104 | 0.46219 |
| 2.31E-05 | 0.11231  | 0.01517  | -0.06115 | 0.1871  | -0.02445  | 0.59812 | 0.004294 | 0.92626 |
| 1.78E-09 | 0.137369 | 0.00293  | -0.00358 | 0.93846 | 0.005311  | 0.90887 | 0.026537 | 0.5673  |
| 4.77E-08 | 0.116989 | 0.0114   | 0.01848  | 0.69039 | -0.02051  | 0.6585  | 0.007113 | 0.87816 |
| 7.29E-18 | 0.154744 | 0.00079  | -0.03578 | 0.44043 | -0.0125   | 0.78753 | 0.018372 | 0.69211 |
| 6.32E-10 | 0.140105 | 0.00241  | -0.03535 | 0.44597 | -0.01635  | 0.72459 | 0.004249 | 0.92704 |
| 4.09E-09 | 0.073313 | 0.11361  | -0.00817 | 0.86026 | -0.00939  | 0.83962 | 0.013198 | 0.77606 |
| 0.00016  | 0.11776  | 0.01087  | -0.00654 | 0.88787 | -0.00305  | 0.94752 | 0.015163 | 0.7438  |
| 1.56E-06 | 0.152572 | 0.00094  | -0.04566 | 0.32484 | -0.01409  | 0.76131 | 0.011979 | 0.79627 |
| 5.27E-06 | 0.086122 | 0.06295  | -0.0471  | 0.30974 | -0.02522  | 0.58669 | -0.00313 | 0.94625 |
| 1.10E-05 | 0.229064 | 5.63E-07 | 0.000203 | 0.99651 | -0.00651  | 0.88847 | 0.038903 | 0.4016  |
| 6.11E-05 | 0.132649 | 0.00408  | -0.01989 | 0.6681  | 0.017025  | 0.71366 | 0.037395 | 0.42011 |
| 8.74E-09 | 0.194001 | 2.43E-05 | -0.02598 | 0.57548 | -0.01603  | 0.72965 | 0.017591 | 0.70457 |
| 1.10E-08 | 0.067125 | 0.14753  | -0.0017  | 0.97082 | -0.01291  | 0.78088 | 0.01787  | 0.70011 |

|          |          |          |          |         |          |         |           |          |
|----------|----------|----------|----------|---------|----------|---------|-----------|----------|
| 9.62E-21 | 0.230457 | 4.78E-07 | 0.043032 | 0.35348 | 0.015705 | 0.73499 | 0.080433  | 0.0825   |
| 1.48E-06 | 0.108642 | 0.01885  | -0.05241 | 0.25833 | -0.03082 | 0.50646 | -0.01682  | 0.71688  |
| 2.07E-44 | 0.155382 | 0.00075  | 0.007869 | 0.86533 | -0.0347  | 0.45436 | 0.068194  | 0.14117  |
| 4.16E-17 | 0.084544 | 0.06794  | 0.002681 | 0.95393 | -0.02615 | 0.57297 | 0.053593  | 0.24773  |
| 1.04E-09 | 0.121406 | 0.00863  | -0.04212 | 0.3638  | -0.02615 | 0.57295 | -0.0072   | 0.87672  |
| 4.84E-10 | 0.134352 | 0.00363  | -0.01031 | 0.82412 | 0.055258 | 0.23332 | 0.069422  | 0.13413  |
| 1.70E-09 | 0.1755   | 0.00014  | 0.011253 | 0.80837 | 0.018964 | 0.68273 | 0.038843  | 0.40233  |
| 0.00046  | 0.084801 | 0.06711  | -0.02965 | 0.52274 | -0.01784 | 0.70051 | -0.01756  | 0.70515  |
| 3.41E-12 | 0.11239  | 0.0151   | 0.001919 | 0.96701 | -0.01997 | 0.66683 | 0.011506  | 0.80414  |
| 1.21E-16 | 0.097137 | 0.03586  | 0.014695 | 0.75145 | -0.01434 | 0.75719 | 0.035744  | 0.44094  |
| 4.80E-12 | 0.126529 | 0.00618  | 0.021867 | 0.6374  | 0.030539 | 0.51033 | 0.062464  | 0.1778   |
| 9.08E-08 | 0.12636  | 0.00625  | -0.03837 | 0.40808 | -0.0086  | 0.85293 | 0.021328  | 0.64571  |
| 1.22E-13 | 0.11748  | 0.01106  | 0.017203 | 0.7108  | 0.01026  | 0.825   | 0.033253  | 0.47345  |
| 1.83E-08 | 0.151292 | 0.00104  | 0.024208 | 0.6018  | 0.05365  | 0.24723 | 0.078551  | 0.08997  |
| 0.27617  | 0.049529 | 0.28546  | 0.01222  | 0.79226 | -0.00402 | 0.931   | 0.00992   | 0.83069  |
| 0.00025  | 0.123262 | 0.00766  | -0.03447 | 0.45738 | -0.03078 | 0.50694 | -6.35E-05 | 0.99891  |
| 0.00036  | 0.091374 | 0.04845  | 0.021875 | 0.63728 | 0.029414 | 0.52603 | 0.028993  | 0.53198  |
| 8.91E-07 | 0.105101 | 0.02312  | -0.08328 | 0.07216 | -0.0609  | 0.18895 | -0.03615  | 0.43581  |
| 1.46E-07 | 0.094872 | 0.04043  | -0.07373 | 0.11156 | -0.05831 | 0.20844 | -0.02664  | 0.5658   |
| 4.69E-11 | 0.17687  | 0.00012  | 0.065512 | 0.15752 | 0.02051  | 0.65842 | 0.062075  | 0.18052  |
| 8.22E-10 | 0.14857  | 0.00128  | -0.02546 | 0.58307 | 0.00056  | 0.99036 | 0.027823  | 0.54866  |
| 0.06611  | 0.073633 | 0.11203  | -0.00541 | 0.90709 | -0.01223 | 0.79208 | 0.02849   | 0.53912  |
| 3.12E-13 | 0.146761 | 0.00147  | -0.02536 | 0.58467 | -0.00144 | 0.97518 | 0.025789  | 0.57827  |
| 0.00231  | 0.078707 | 0.08933  | -0.02202 | 0.63501 | -0.01083 | 0.81536 | 0.015375  | 0.74036  |
| 1.60E-05 | 0.094313 | 0.04163  | 0.00353  | 0.93935 | -0.02533 | 0.58512 | 0.002717  | 0.95331  |
| 0.00388  | 0.06396  | 0.16762  | -0.04868 | 0.29386 | -0.0489  | 0.29162 | -0.01096  | 0.81332  |
| 0.00015  | 0.075483 | 0.10328  | -0.01522 | 0.74288 | 0.000122 | 0.99791 | 0.019873  | 0.66839  |
| 2.44E-07 | 0.112298 | 0.01518  | -0.04479 | 0.33419 | -0.00244 | 0.95801 | -0.00704  | 0.87933  |
| 1.32E-05 | 0.124258 | 0.00718  | -0.00899 | 0.84644 | 0.005985 | 0.89736 | 0.013404  | 0.77266  |
| 3.96E-08 | 0.337221 | 6.98E-14 | 0.036149 | 0.43578 | 0.024836 | 0.5924  | 0.130665  | 0.00468  |
| 1.19E-34 | 0.144312 | 0.00177  | 0.014581 | 0.75331 | -0.00819 | 0.85984 | 0.058228  | 0.20911  |
| 1.57E-05 | 0.11348  | 0.01414  | -0.0193  | 0.67739 | -0.0154  | 0.73993 | 0.02257   | 0.62661  |
| 0.01274  | 0.105421 | 0.0227   | -0.04602 | 0.321   | -0.03901 | 0.40033 | -0.02017  | 0.66378  |
| 8.56E-18 | 0.108351 | 0.01918  | 0.078441 | 0.09042 | -0.01058 | 0.81963 | 0.083132  | 0.07269  |
| 9.57E-12 | 0.308855 | 8.85E-12 | 0.026834 | 0.56297 | 0.132619 | 0.00409 | 0.252274  | 3.26E-08 |
| 3.89E-05 | 0.107523 | 0.02012  | 0.033713 | 0.46734 | 0.020618 | 0.65675 | 0.033534  | 0.46971  |
| 8.98E-11 | 0.147375 | 0.0014   | -0.05406 | 0.24362 | -0.01902 | 0.68178 | 0.006718  | 0.88488  |
| 1.07E-09 | 0.136023 | 0.00323  | -0.03746 | 0.41925 | -0.06833 | 0.14038 | -0.01303  | 0.77891  |
| 0.00211  | 0.093995 | 0.04233  | -0.15394 | 0.00085 | -0.03965 | 0.39258 | 0.086434  | 0.06199  |
| 8.04E-14 | 0.179275 | 9.80E-05 | 0.086207 | 0.06268 | 0.044347 | 0.33894 | 0.125888  | 0.00645  |
| 0.0047   | 0.015116 | 0.74457  | -0.06303 | 0.1739  | -0.1496  | 0.00118 | -0.08261  | 0.0745   |
| 1.27E-16 | 0.107954 | 0.01962  | -0.01065 | 0.81847 | -0.02404 | 0.60431 | 0.007826  | 0.86606  |
| 0.00303  | 0.116236 | 0.01195  | -0.05752 | 0.21473 | 0.032611 | 0.48204 | 0.041137  | 0.37509  |
| 1.18E-08 | 0.128923 | 0.00527  | -0.03265 | 0.48157 | -0.00775 | 0.86742 | 0.013755  | 0.76687  |
| 2.43E-05 | 0.142426 | 0.00203  | -0.04675 | 0.3134  | -0.00849 | 0.85475 | 0.002286  | 0.96071  |

|          |          |         |          |         |          |         |          |         |
|----------|----------|---------|----------|---------|----------|---------|----------|---------|
| 0.02243  | 0.028074 | 0.54506 | -0.02    | 0.6664  | -0.05207 | 0.26146 | -0.07686 | 0.09713 |
| 1.47E-11 | 0.160796 | 0.00049 | -0.07785 | 0.09288 | -0.0351  | 0.44926 | 0.012647 | 0.78517 |
| 1.20E-07 | 0.108846 | 0.01863 | -0.05919 | 0.20169 | -0.02426 | 0.60103 | -0.00924 | 0.84223 |
| 1.25E-12 | 0.16014  | 0.00051 | -0.00773 | 0.86761 | 0.056225 | 0.22523 | 0.070679 | 0.12721 |
| 3.95E-10 | 0.116471 | 0.01178 | -0.07752 | 0.09427 | -0.02113 | 0.64871 | 0.007938 | 0.86416 |
| 1.41E-20 | 0.151528 | 0.00102 | -0.00359 | 0.9384  | 0.013889 | 0.76466 | 0.08002  | 0.0841  |
| 4.30E-06 | 0.119138 | 0.00997 | -0.06125 | 0.18639 | -0.03411 | 0.46216 | -0.00825 | 0.85885 |
| 0.00021  | 0.125412 | 0.00665 | -0.05701 | 0.2188  | -0.01382 | 0.76577 | 0.000825 | 0.98581 |
| 0.00703  | 0.075538 | 0.10303 | -0.06816 | 0.14139 | -0.0622  | 0.17966 | -0.02636 | 0.56996 |
| 3.49E-05 | 0.139037 | 0.0026  | -0.05133 | 0.26829 | -0.03382 | 0.46593 | 0.000245 | 0.9958  |
| 3.67E-06 | 0.155898 | 0.00072 | -0.04627 | 0.31839 | -0.01802 | 0.69774 | 0.020458 | 0.65924 |
| 0.01132  | 0.099232 | 0.03204 | 0.021014 | 0.65059 | 0.030189 | 0.51518 | 0.017942 | 0.69897 |
| 0.00249  | 0.075431 | 0.10352 | -0.02097 | 0.6512  | -0.00433 | 0.92557 | 0.012517 | 0.78733 |
| 6.17E-17 | 0.153556 | 0.00087 | -0.04394 | 0.34338 | -0.06421 | 0.16596 | -0.00331 | 0.94317 |
| 4.35E-08 | 0.123008 | 0.00779 | -0.02614 | 0.57319 | -0.02586 | 0.57726 | 0.000976 | 0.98322 |
| 0.02783  | 0.07857  | 0.08989 | -0.04223 | 0.36255 | 0.000868 | 0.98508 | -0.00189 | 0.96751 |
| 4.63E-06 | 0.100642 | 0.02966 | -0.06387 | 0.16824 | -0.05161 | 0.2657  | -0.00949 | 0.83796 |
| 0.09182  | 0.063974 | 0.16752 | -0.08483 | 0.06702 | -0.07187 | 0.1209  | -0.03166 | 0.49492 |
| 0.00771  | 0.118175 | 0.01059 | 0.000552 | 0.99051 | 0.049551 | 0.28525 | 0.059333 | 0.20058 |
| 6.71E-05 | 0.085738 | 0.06413 | -0.00255 | 0.95621 | 0.009943 | 0.83031 | 0.022364 | 0.62977 |
| 5.50E-10 | 0.098124 | 0.03401 | -0.01766 | 0.70352 | 0.009058 | 0.84522 | 0.032221 | 0.48729 |
| 0.00137  | 0.116282 | 0.01191 | -0.04863 | 0.29429 | -0.01534 | 0.74098 | 0.014798 | 0.74977 |
| 0.00684  | 0.074545 | 0.10765 | -0.0522  | 0.26029 | -0.00548 | 0.906   | -0.00301 | 0.94827 |
| 6.30E-17 | 0.125617 | 0.00657 | -0.0789  | 0.08855 | -0.02404 | 0.60433 | 0.002875 | 0.95059 |
| 3.98E-22 | 0.172523 | 0.00018 | -0.02752 | 0.553   | -0.01539 | 0.74014 | 0.03342  | 0.47123 |
| 2.64E-30 | 0.154936 | 0.00078 | -0.00077 | 0.9868  | 0.005811 | 0.90034 | 0.068629 | 0.13864 |
| 0.00298  | 0.110903 | 0.0165  | -0.03937 | 0.39597 | -0.02146 | 0.64368 | -0.00947 | 0.83829 |
| 3.67E-11 | 0.156206 | 0.00071 | -0.03816 | 0.41069 | 0.061105 | 0.18744 | 0.081298 | 0.07925 |
| 0.24023  | 0.101503 | 0.02829 | 0.065273 | 0.15905 | 0.015089 | 0.74501 | 0.021202 | 0.64767 |
| 0.07316  | 0.075284 | 0.10419 | -0.00963 | 0.83552 | 0.014009 | 0.7627  | 0.050269 | 0.27832 |
| 0.00631  | 0.123909 | 0.00734 | -0.11352 | 0.01411 | -0.08623 | 0.06263 | -0.00565 | 0.90313 |
| 2.97E-14 | 0.118929 | 0.0101  | 0.060833 | 0.18942 | 0.065913 | 0.15499 | 0.096569 | 0.03696 |
| 3.74E-06 | 0.121299 | 0.00869 | -0.01535 | 0.74078 | -0.00515 | 0.91155 | 0.014166 | 0.76012 |
| 3.74E-05 | 0.114627 | 0.01319 | -0.02019 | 0.66341 | -0.00137 | 0.97652 | -0.01454 | 0.75405 |
| 0.00289  | 0.081888 | 0.07709 | -0.01158 | 0.80297 | 0.025003 | 0.58992 | 0.008864 | 0.8485  |
| 0.00962  | 0.145968 | 0.00156 | 0.012488 | 0.78781 | 0.024123 | 0.60308 | 0.040583 | 0.38157 |
| 5.16E-07 | 0.147572 | 0.00138 | 0.008274 | 0.85846 | 0.11532  | 0.01264 | 0.129263 | 0.00515 |
| 6.42E-16 | 0.08546  | 0.065   | 0.096983 | 0.03616 | -0.01092 | 0.81397 | 0.011671 | 0.80139 |
| 1.30E-09 | 0.169914 | 0.00023 | 0.01424  | 0.75891 | -0.0169  | 0.71564 | 0.0267   | 0.56492 |
| 2.14E-31 | 0.129892 | 0.00493 | 0.039464 | 0.39484 | -0.00752 | 0.87118 | 0.050222 | 0.27877 |
| 4.01E-11 | 0.132993 | 0.00399 | -0.0375  | 0.41886 | 0.033289 | 0.47297 | 0.093336 | 0.0438  |
| 2.74E-06 | 0.132272 | 0.00419 | -0.02003 | 0.66586 | 0.004144 | 0.92883 | 0.017319 | 0.70893 |
| 2.06E-05 | 0.037984 | 0.41282 | 0.054653 | 0.23849 | 0.00958  | 0.83643 | 0.004607 | 0.92091 |
| 0.09125  | 0.066407 | 0.15191 | -0.03545 | 0.44464 | -0.03686 | 0.42678 | -0.01471 | 0.75117 |
| 0.02948  | 0.053996 | 0.24418 | -0.01533 | 0.74104 | -0.01324 | 0.77529 | 0.012278 | 0.7913  |

|          |          |          |          |          |          |          |          |          |
|----------|----------|----------|----------|----------|----------|----------|----------|----------|
| 0.17386  | 0.042431 | 0.36025  | -0.04218 | 0.36313  | -0.01645 | 0.72291  | -0.01311 | 0.77746  |
| 2.79E-08 | 0.18661  | 4.96E-05 | 0.001964 | 0.96624  | -0.01214 | 0.79367  | 0.048127 | 0.29934  |
| 0.14729  | 0.101908 | 0.02766  | -0.16391 | 0.00038  | -0.14067 | 0.00231  | -0.09641 | 0.03728  |
| 0.12705  | 0.061755 | 0.18278  | -0.11205 | 0.01541  | -0.06688 | 0.14899  | -0.08228 | 0.07569  |
| 2.68E-07 | 0.163843 | 0.00038  | -0.01302 | 0.77895  | -0.00113 | 0.98058  | 0.049911 | 0.28176  |
| 1.78E-05 | 0.074181 | 0.10938  | -0.04393 | 0.34348  | -0.00209 | 0.96409  | 0.025543 | 0.58192  |
| 3.43E-05 | 0.13775  | 0.00285  | 0.066352 | 0.15225  | 0.181233 | 8.19E-05 | 0.246789 | 6.57E-08 |
| 2.45E-05 | 0.099635 | 0.03134  | -0.02946 | 0.52532  | -0.04212 | 0.36379  | 0.036456 | 0.43189  |
| 0.00177  | 0.079061 | 0.08789  | 0.024153 | 0.60263  | 0.070867 | 0.1262   | 0.078224 | 0.09132  |
| 8.95E-11 | 0.172226 | 0.00018  | -0.02836 | 0.54097  | 0.016089 | 0.72877  | 0.039639 | 0.39275  |
| 0.05471  | 0.028557 | 0.53816  | -0.20124 | 1.18E-05 | -0.08279 | 0.07387  | -0.11666 | 0.01164  |
| 4.72E-40 | 0.163447 | 0.00039  | 0.037992 | 0.41273  | 0.015456 | 0.73904  | 0.122562 | 0.00801  |
| 1.25E-08 | 0.13712  | 0.00298  | -0.01434 | 0.75733  | -0.014   | 0.76287  | 0.048251 | 0.2981   |
| 1.71E-14 | 0.138283 | 0.00275  | 0.045234 | 0.32936  | 4.48E-05 | 0.99923  | 0.112949 | 0.0146   |
| 1.13E-21 | 0.17711  | 0.00012  | -0.0131  | 0.77772  | 0.002477 | 0.95742  | 0.073743 | 0.1115   |
| 3.00E-16 | 0.151214 | 0.00105  | 0.056285 | 0.22474  | 0.144619 | 0.00173  | 0.19144  | 3.12E-05 |
| 0.00037  | 0.062715 | 0.17606  | 0.156375 | 0.0007   | 0.097619 | 0.03495  | 0.100174 | 0.03043  |
| 0.00231  | 0.087025 | 0.06022  | -0.05448 | 0.23997  | -0.03202 | 0.48999  | 0.007448 | 0.87247  |
| 4.53E-26 | 0.104063 | 0.02452  | -0.01918 | 0.67936  | -0.05866 | 0.20574  | -0.01375 | 0.76697  |
| 2.92E-05 | 0.123442 | 0.00757  | -0.04384 | 0.34448  | -0.01373 | 0.7673   | 0.007715 | 0.86793  |
| 7.43E-08 | 0.102744 | 0.0264   | -0.08342 | 0.07171  | 0.030029 | 0.51741  | 0.0229   | 0.62158  |
| 8.90E-06 | 0.10982  | 0.01759  | 0.013182 | 0.77632  | -0.00655 | 0.88766  | 0.011398 | 0.80594  |
| 8.63E-32 | 0.069896 | 0.13149  | -0.06878 | 0.1378   | -0.02534 | 0.58497  | -0.01744 | 0.70706  |
| 0.00105  | 0.043922 | 0.3436   | -0.09419 | 0.04189  | -0.03411 | 0.46211  | -0.01289 | 0.78117  |
| 9.36E-05 | 0.106907 | 0.02085  | -0.01947 | 0.67476  | -0.00235 | 0.95965  | 0.035462 | 0.44456  |
| 0.00107  | 0.097574 | 0.03503  | -0.08094 | 0.08058  | -0.04717 | 0.30908  | -0.01986 | 0.66866  |
| 0.01259  | 0.052594 | 0.25667  | -0.04097 | 0.37699  | -0.01006 | 0.8283   | -0.02447 | 0.59788  |
| 1.09E-13 | 0.171944 | 0.00019  | -0.01176 | 0.79995  | 0.012578 | 0.78632  | 0.036079 | 0.43666  |
| 6.80E-05 | 0.136898 | 0.00303  | -0.02551 | 0.58245  | 0.015297 | 0.74162  | 0.029715 | 0.52181  |
| 4.20E-16 | 0.154388 | 0.00082  | -0.09166 | 0.04774  | -0.06194 | 0.18149  | -0.00184 | 0.96834  |
| 2.16E-06 | 0.126055 | 0.00638  | -0.10807 | 0.01949  | -0.02453 | 0.59703  | 0.001536 | 0.97359  |
| 4.62E-15 | 0.102163 | 0.02727  | -0.02719 | 0.5578   | 0.13081  | 0.00463  | 0.140356 | 0.00237  |
| 2.04E-17 | 0.154375 | 0.00082  | -0.07157 | 0.12249  | -0.02609 | 0.57387  | 0.021516 | 0.6428   |
| 0.10441  | 0.219873 | 1.61E-06 | -0.07045 | 0.12846  | -0.0614  | 0.18532  | 0.018532 | 0.68957  |
| 2.38E-18 | 0.17184  | 0.00019  | -0.01577 | 0.73392  | -0.0073  | 0.87491  | 0.035883 | 0.43916  |
| 0.02346  | 0.163137 | 0.0004   | 0.077003 | 0.0965   | 0.220315 | 1.53E-06 | 0.23037  | 4.83E-07 |
| 0.0012   | 0.148313 | 0.00131  | -0.05652 | 0.22283  | 0.001318 | 0.97733  | 0.091932 | 0.04708  |
| 7.39E-05 | 0.078595 | 0.08979  | -0.02306 | 0.61918  | -0.01917 | 0.67951  | -0.03089 | 0.50541  |
| 4.50E-09 | 0.15597  | 0.00072  | -0.05207 | 0.26146  | 0.000455 | 0.99217  | 0.032353 | 0.48551  |
| 1.45E-06 | 0.099725 | 0.03119  | -0.09533 | 0.03947  | 0.051368 | 0.26794  | -0.01381 | 0.76603  |
| 2.67E-06 | 0.135215 | 0.00342  | -0.01428 | 0.75821  | 0.006548 | 0.88777  | 0.016614 | 0.72027  |
| 2.32E-16 | 0.154982 | 0.00078  | 0.05918  | 0.20175  | 0.166713 | 0.0003   | 0.205694 | 7.42E-06 |
| 1.12E-06 | 0.148027 | 0.00134  | -0.03668 | 0.42906  | -0.00351 | 0.93971  | 0.066425 | 0.1518   |
| 0.02453  | 0.085538 | 0.06476  | -0.10297 | 0.02607  | -0.03898 | 0.40071  | -0.0113  | 0.8075   |
| 0.00015  | 0.107327 | 0.02035  | -0.05301 | 0.25294  | -0.01516 | 0.74384  | 0.002854 | 0.95096  |



|          |          |          |          |         |          |         |          |          |
|----------|----------|----------|----------|---------|----------|---------|----------|----------|
| 0.00037  | 0.145149 | 0.00166  | -0.02802 | 0.54584 | -0.00923 | 0.84226 | 0.042887 | 0.3551   |
| 1.32E-08 | 0.112676 | 0.01484  | 0.039905 | 0.38958 | 0.094685 | 0.04083 | 0.119453 | 0.00977  |
| 1.66E-07 | 0.135591 | 0.00333  | -0.02313 | 0.61804 | -0.02594 | 0.57604 | 0.004243 | 0.92713  |
| 8.05E-06 | 0.132458 | 0.00414  | -0.0398  | 0.39089 | -0.01727 | 0.70969 | 0.008874 | 0.84832  |
| 9.70E-10 | 0.128142 | 0.00555  | -0.00164 | 0.97181 | 0.035678 | 0.44178 | 0.035023 | 0.45021  |
| 8.79E-14 | 0.152505 | 0.00095  | -0.06298 | 0.17423 | -0.01911 | 0.68036 | 0.017043 | 0.71337  |
| 1.25E-07 | 0.073221 | 0.11406  | 0.000965 | 0.9834  | -0.08742 | 0.05908 | -0.00336 | 0.9422   |
| 3.79E-08 | 0.117473 | 0.01107  | -0.08335 | 0.07193 | -0.04177 | 0.36776 | 0.011461 | 0.80489  |
| 1.28E-07 | 0.104883 | 0.02341  | -0.0695  | 0.13371 | -0.0398  | 0.39079 | -0.02398 | 0.60519  |
| 1.30E-05 | 0.193907 | 2.45E-05 | -0.02558 | 0.58139 | 0.003026 | 0.94799 | 0.041336 | 0.37278  |
| 8.00E-05 | 0.127238 | 0.0059   | -0.07485 | 0.10623 | -0.0225  | 0.62775 | -0.01546 | 0.73892  |
| 0.01146  | 0.061008 | 0.18815  | -0.11136 | 0.01606 | -0.09515 | 0.03984 | -0.08685 | 0.06073  |
| 4.63E-12 | 0.073857 | 0.11095  | -0.0438  | 0.34499 | -0.08243 | 0.07515 | -0.05216 | 0.26064  |
| 3.09E-14 | 0.185427 | 5.54E-05 | 0.049406 | 0.28666 | 0.075577 | 0.10285 | 0.165784 | 0.00032  |
| 7.00E-18 | 0.146007 | 0.00156  | -0.02795 | 0.54677 | -0.00846 | 0.85537 | 0.014878 | 0.74846  |
| 2.85E-30 | 0.135341 | 0.00339  | 0.042813 | 0.35593 | 0.040179 | 0.38633 | 0.124724 | 0.00696  |
| 2.21E-21 | 0.21728  | 2.14E-06 | -0.02967 | 0.52246 | 0.019708 | 0.67099 | 0.16403  | 0.00037  |
| 2.98E-05 | 0.047684 | 0.30382  | -0.10004 | 0.03065 | -0.07404 | 0.11005 | -0.06451 | 0.16398  |
| 1.83E-13 | 0.124412 | 0.00711  | -0.06751 | 0.14523 | -0.04237 | 0.36096 | 0.007678 | 0.86857  |
| 2.05E-07 | 0.23952  | 1.62E-07 | -0.06403 | 0.16715 | -0.00096 | 0.98351 | 0.077056 | 0.09627  |
| 0.00048  | 0.1303   | 0.0048   | -0.04593 | 0.32201 | -0.02619 | 0.57237 | -0.00221 | 0.96193  |
| 4.39E-13 | 0.113291 | 0.0143   | 0.02692  | 0.56172 | 0.01343  | 0.77224 | 0.023096 | 0.6186   |
| 1.86E-20 | 0.249025 | 4.95E-08 | -0.01344 | 0.772   | 0.043697 | 0.34608 | 0.174199 | 0.00015  |
| 0.00521  | 0.131092 | 0.00455  | -0.07852 | 0.09009 | -0.05492 | 0.2362  | -0.00038 | 0.99353  |
| 3.96E-05 | 0.090714 | 0.0501   | -0.05615 | 0.22583 | -0.02533 | 0.58501 | -0.03534 | 0.44609  |
| 2.44E-12 | 0.147549 | 0.00139  | -0.06322 | 0.17263 | -0.04177 | 0.36779 | -0.00641 | 0.8901   |
| 5.55E-23 | 0.209212 | 5.13E-06 | -0.03482 | 0.45285 | -0.01636 | 0.72432 | 0.032979 | 0.47711  |
| 5.91E-09 | 0.163944 | 0.00037  | -0.00382 | 0.93447 | -0.00451 | 0.92261 | 0.041734 | 0.3682   |
| 1.29E-05 | 0.131751 | 0.00434  | -0.03572 | 0.44119 | -0.02055 | 0.65783 | -0.00399 | 0.93149  |
| 7.67E-05 | 0.099626 | 0.03136  | -0.00668 | 0.88561 | 0.012889 | 0.78117 | 0.007267 | 0.87555  |
| 3.21E-12 | 0.150769 | 0.00108  | -0.03238 | 0.48518 | -0.031   | 0.50397 | 0.025332 | 0.58503  |
| 0.10684  | 0.070346 | 0.12902  | -0.06484 | 0.16185 | -0.01803 | 0.69762 | -0.06883 | 0.13747  |
| 8.04E-13 | 0.147166 | 0.00143  | -0.048   | 0.30059 | -0.03541 | 0.44522 | 0.006305 | 0.8919   |
| 1.74E-40 | 0.12115  | 0.00877  | -0.0292  | 0.5291  | -0.03756 | 0.41809 | 0.016849 | 0.71649  |
| 0.47852  | 0.029701 | 0.522    | -0.03216 | 0.48808 | -0.01417 | 0.76003 | -0.04399 | 0.3429   |
| 2.58E-07 | 0.407298 | 4.34E-20 | 0.024315 | 0.60019 | 0.117964 | 0.01073 | 0.250281 | 4.21E-08 |
| 0.06965  | 0.114787 | 0.01306  | 0.025515 | 0.58232 | 0.111354 | 0.01607 | 0.145905 | 0.00157  |
| 3.98E-08 | 0.158513 | 0.00059  | 0.11401  | 0.01369 | 0.155827 | 0.00073 | 0.17849  | 0.00011  |
| 0.04432  | 0.147114 | 0.00143  | -0.0148  | 0.74976 | 0.106023 | 0.02193 | 0.190264 | 3.50E-05 |
| 0.03573  | 0.040502 | 0.38252  | -0.09218 | 0.04648 | 0.004973 | 0.91464 | -0.03343 | 0.47111  |
| 0.01785  | 0.045155 | 0.33021  | -0.10522 | 0.02297 | -0.01864 | 0.68778 | -0.0262  | 0.5722   |
| 0.0053   | 0.035878 | 0.43923  | -0.04824 | 0.29818 | -0.02162 | 0.64125 | -0.0219  | 0.63687  |
| 4.12E-09 | 0.142592 | 0.00201  | 0.024577 | 0.59627 | 0.080476 | 0.08234 | 0.078682 | 0.08943  |
| 0.00442  | 0.071908 | 0.12071  | -0.04711 | 0.30968 | -0.05536 | 0.23247 | -0.00272 | 0.9532   |
| 0.10315  | 0.082448 | 0.07508  | -0.05598 | 0.22724 | -0.05801 | 0.21086 | 0.008665 | 0.85186  |

|          |          |          |          |          |          |          |          |          |
|----------|----------|----------|----------|----------|----------|----------|----------|----------|
| 0.00021  | 0.043572 | 0.34747  | -0.08194 | 0.0769   | -0.06876 | 0.13787  | -0.06523 | 0.15933  |
| 0.06033  | 0.026383 | 0.56955  | -0.11148 | 0.01595  | -0.12157 | 0.00854  | -0.10702 | 0.02072  |
| 0.01952  | 0.029236 | 0.52854  | -0.03422 | 0.46063  | -0.09809 | 0.03408  | -0.06642 | 0.15186  |
| 2.34E-30 | 0.137641 | 0.00288  | 0.004158 | 0.92859  | -0.00996 | 0.83004  | 0.058043 | 0.21056  |
| 9.25E-06 | 0.099086 | 0.03229  | -0.05754 | 0.21457  | -0.00795 | 0.86389  | 0.032734 | 0.48039  |
| 1.27E-09 | 0.115836 | 0.01225  | -0.02862 | 0.5372   | -0.02684 | 0.56294  | -0.00062 | 0.98938  |
| 0.57535  | 0.033444 | 0.47092  | 0.000407 | 0.993    | 0.044262 | 0.33988  | 0.040369 | 0.38408  |
| 0.20379  | 0.044683 | 0.33529  | 0.090939 | 0.04953  | -0.01056 | 0.81988  | 0.03116  | 0.50175  |
| 1.83E-05 | 0.127408 | 0.00583  | -0.05581 | 0.22865  | -0.01193 | 0.79709  | 0.000588 | 0.98989  |
| 7.17E-08 | 0.122893 | 0.00784  | -0.01403 | 0.76241  | -0.0142  | 0.75954  | 0.011448 | 0.80511  |
| 6.78E-05 | 0.098949 | 0.03253  | -0.08611 | 0.06297  | -0.04752 | 0.30551  | -0.03669 | 0.42887  |
| 5.40E-25 | 0.448369 | 1.78E-24 | 0.010768 | 0.81647  | 0.058299 | 0.20856  | 0.236621 | 2.30E-07 |
| 8.44E-11 | 0.19769  | 1.68E-05 | -0.03215 | 0.48831  | -0.01116 | 0.80996  | 0.019477 | 0.67461  |
| 5.29E-26 | 0.435697 | 4.66E-23 | 0.18653  | 5.00E-05 | 0.329053 | 2.96E-13 | 0.525054 | 1.90E-34 |
| 1.44E-30 | 0.157451 | 0.00064  | -0.03124 | 0.50072  | -0.05671 | 0.22125  | 0.048814 | 0.29249  |
| 0.00016  | 0.112055 | 0.01541  | -0.04403 | 0.34242  | -0.01681 | 0.71709  | -0.00683 | 0.88291  |
| 4.85E-07 | 0.068921 | 0.13697  | 0.040958 | 0.37718  | -0.05287 | 0.25414  | -0.01487 | 0.74863  |
| 1.11E-09 | 0.121572 | 0.00854  | 0.023267 | 0.616    | 0.027517 | 0.55307  | 0.050811 | 0.27316  |
| 3.75E-05 | 0.084891 | 0.06682  | -0.04744 | 0.30626  | -0.01071 | 0.81739  | -0.00872 | 0.85095  |
| 1.87E-08 | 0.204373 | 8.52E-06 | 0.108769 | 0.01871  | 0.121584 | 0.00853  | 0.335676 | 9.20E-14 |
| 8.60E-20 | -0.02187 | 0.63728  | 0.027561 | 0.55243  | -0.12307 | 0.00776  | -0.04055 | 0.38196  |
| 1.84E-10 | 0.080613 | 0.08182  | 0.053952 | 0.24457  | -0.04029 | 0.38498  | 0.13541  | 0.00337  |
| 4.99E-13 | 0.076714 | 0.09776  | 0.073177 | 0.11428  | 0.025396 | 0.58409  | 0.115837 | 0.01225  |
| 0.97655  | -0.08483 | 0.06702  | -0.07636 | 0.09934  | -0.19191 | 2.98E-05 | -0.19034 | 3.47E-05 |
| 8.18E-08 | -0.0349  | 0.45175  | 0.042091 | 0.36411  | -0.10839 | 0.01913  | -0.03107 | 0.50298  |
| 0.03346  | -0.10067 | 0.02962  | -0.27159 | 2.43E-09 | -0.30833 | 9.64E-12 | -0.28001 | 7.34E-10 |
| 2.06E-17 | -0.13302 | 0.00398  | -0.06009 | 0.19487  | -0.29591 | 6.83E-11 | -0.21917 | 1.74E-06 |
| 0.00139  | -0.10764 | 0.01998  | -0.18622 | 5.14E-05 | -0.32601 | 5.02E-13 | -0.25921 | 1.32E-08 |
| 1.32E-12 | 0.124687 | 0.00698  | 0.144958 | 0.00168  | 0.074574 | 0.10751  | 0.234188 | 3.08E-07 |
| 3.47E-05 | -0.1245  | 0.00706  | -0.15932 | 0.00055  | -0.34188 | 3.00E-14 | -0.26775 | 4.15E-09 |
| 0.00086  | 0.052076 | 0.26139  | -0.08048 | 0.08232  | -0.07964 | 0.08557  | 0.020727 | 0.65505  |
| 3.63E-19 | 0.16802  | 0.00027  | 0.139691 | 0.00248  | 0.066344 | 0.1523   | 0.276346 | 1.24E-09 |
| 4.22E-12 | -0.0541  | 0.24332  | -0.04943 | 0.28645  | -0.25561 | 2.12E-08 | -0.14433 | 0.00177  |
| 0.0162   | 0.013681 | 0.7681   | -0.12124 | 0.00873  | -0.04716 | 0.30917  | 0.027969 | 0.54657  |
| 0.00081  | 0.046994 | 0.31087  | -0.03383 | 0.46579  | -0.06432 | 0.16522  | 0.068173 | 0.14129  |
| 3.80E-06 | 0.01315  | 0.77686  | -0.00305 | 0.94758  | -0.0132  | 0.77605  | 0.069384 | 0.13435  |
| 0.23978  | -0.06688 | 0.14898  | -0.14285 | 0.00197  | -0.18907 | 3.92E-05 | -0.11916 | 0.00996  |
| 0.00034  | -0.01501 | 0.74635  | 0.193376 | 2.58E-05 | -0.00501 | 0.91401  | 0.075246 | 0.10437  |
| 4.50E-05 | -0.12373 | 0.00743  | -0.02166 | 0.6406   | -0.1604  | 0.0005   | -0.08382 | 0.07036  |
| 5.06E-18 | 0.065512 | 0.15752  | 0.032559 | 0.48274  | -0.06782 | 0.14336  | 0.069402 | 0.13424  |
| 1.75E-08 | -0.04365 | 0.34656  | -0.08973 | 0.05266  | -0.11611 | 0.01204  | -0.0587  | 0.20542  |
| 4.27E-13 | 0.115167 | 0.01276  | 0.06999  | 0.13097  | 0.053872 | 0.24527  | 0.17791  | 0.00011  |
| 4.88E-11 | -0.02611 | 0.57361  | 0.092371 | 0.04604  | -0.08626 | 0.06251  | 0.038508 | 0.4064   |
| 2.02E-11 | 0.167822 | 0.00027  | 0.125716 | 0.00652  | 0.042951 | 0.35438  | 0.251115 | 3.79E-08 |
| 0.00443  | -0.06654 | 0.1511   | -0.2071  | 6.41E-06 | -0.23728 | 2.12E-07 | -0.20045 | 1.27E-05 |

|          |          |          |          |          |          |          |          |          |
|----------|----------|----------|----------|----------|----------|----------|----------|----------|
| 1.05E-10 | -0.13027 | 0.00481  | -0.13025 | 0.00481  | -0.22705 | 7.11E-07 | -0.22376 | 1.04E-06 |
| 0.6075   | 0.092418 | 0.04593  | -0.07709 | 0.0961   | -0.0493  | 0.28771  | 0.141152 | 0.00223  |
| 0.67405  | -0.17509 | 0.00014  | -0.28759 | 2.41E-10 | -0.4062  | 5.59E-20 | -0.39731 | 4.14E-19 |
| 0.53722  | -0.06948 | 0.1338   | -0.21725 | 2.15E-06 | -0.19737 | 1.74E-05 | -0.13828 | 0.00275  |
| 4.99E-08 | 0.047831 | 0.30233  | 0.059277 | 0.20101  | -0.02419 | 0.60203  | 0.081616 | 0.07808  |
| 0.06616  | -0.06416 | 0.16631  | -0.17471 | 0.00015  | -0.21001 | 4.71E-06 | -0.1209  | 0.00892  |
| 9.76E-09 | -0.07411 | 0.10973  | 0.007148 | 0.87757  | -0.18308 | 6.90E-05 | -0.12998 | 0.0049   |
| 2.14E-11 | 0.035182 | 0.44816  | 0.093307 | 0.04387  | 0.056211 | 0.22535  | 0.132311 | 0.00418  |
| 6.52E-21 | 0.096967 | 0.03619  | 0.131438 | 0.00444  | -0.0171  | 0.71252  | 0.132498 | 0.00413  |
| 1.47E-09 | 0.029002 | 0.53184  | -0.23852 | 1.83E-07 | -0.245   | 8.22E-08 | -0.14291 | 0.00196  |
| 2.35E-05 | 0.005177 | 0.91116  | -0.09491 | 0.04035  | -0.17921 | 9.86E-05 | -0.06469 | 0.16281  |
| 9.12E-06 | -0.03317 | 0.47454  | -0.06823 | 0.14096  | -0.17555 | 0.00014  | -0.08219 | 0.076    |
| 8.04E-08 | 0.105093 | 0.02313  | 0.201697 | 1.12E-05 | 0.125594 | 0.00658  | 0.201996 | 1.09E-05 |
| 1.14E-26 | 0.071953 | 0.12048  | 0.030971 | 0.50435  | -0.08036 | 0.08278  | 0.102416 | 0.02689  |
| 0.93407  | -0.05904 | 0.20284  | -0.01611 | 0.72838  | -0.19637 | 1.92E-05 | -0.16032 | 0.00051  |
| 0.00193  | 0.001461 | 0.97488  | -0.01197 | 0.79649  | -0.05368 | 0.24699  | 0.082852 | 0.07366  |
| 1.07E-10 | 0.004014 | 0.93106  | 0.006105 | 0.89532  | -0.04162 | 0.36953  | 0.020652 | 0.65621  |
| 0.00351  | -0.0376  | 0.41755  | -0.13698 | 0.00301  | -0.12103 | 0.00884  | -0.08573 | 0.06414  |
| 3.52E-18 | 0.025941 | 0.57603  | 0.147634 | 0.00138  | -0.01339 | 0.77285  | 0.114009 | 0.01369  |
| 1.24E-05 | -0.02336 | 0.61463  | -0.03403 | 0.46317  | -0.04102 | 0.37649  | 0.009389 | 0.83964  |
| 0.00012  | 0.023587 | 0.61115  | 0.015111 | 0.74465  | -0.13988 | 0.00245  | 0.029996 | 0.51787  |
| 4.86E-20 | 0.128543 | 0.0054   | 0.105723 | 0.02231  | 0.060618 | 0.19099  | 0.244642 | 8.60E-08 |
| 7.26E-06 | -0.01015 | 0.82687  | -0.08574 | 0.06413  | -0.08387 | 0.07018  | -0.00014 | 0.99756  |
| 3.97E-05 | 0.169547 | 0.00023  | 0.120082 | 0.00939  | 0.123576 | 0.0075   | 0.303059 | 2.24E-11 |
| 2.85E-14 | 0.098892 | 0.03263  | 0.159729 | 0.00053  | 0.073438 | 0.11299  | 0.216935 | 2.22E-06 |
| 0.02413  | -0.10541 | 0.02272  | -0.09989 | 0.03091  | -0.28489 | 3.60E-10 | -0.20997 | 4.73E-06 |
| 1.32E-16 | -0.03272 | 0.48057  | -0.00527 | 0.90962  | -0.20532 | 7.72E-06 | -0.06358 | 0.17014  |
| 9.50E-23 | 0.171129 | 0.0002   | 0.163581 | 0.00039  | 0.130597 | 0.0047   | 0.309472 | 8.01E-12 |
| 3.15E-14 | 0.036561 | 0.43055  | 0.116693 | 0.01162  | -0.05281 | 0.25475  | 0.101208 | 0.02875  |
| 1.14E-05 | 0.079169 | 0.08746  | -0.10915 | 0.0183   | -0.14778 | 0.00136  | 0.065775 | 0.15586  |
| 2.56E-08 | 0.046419 | 0.31683  | -0.00206 | 0.96462  | -0.08278 | 0.0739   | 0.076523 | 0.0986   |
| 0.44196  | -0.15277 | 0.00093  | -0.28654 | 2.82E-10 | -0.36619 | 2.89E-16 | -0.37897 | 2.14E-17 |
| 2.91E-18 | 0.07104  | 0.12527  | 0.015441 | 0.73928  | -0.09547 | 0.03917  | 0.055425 | 0.23191  |
| 5.67E-10 | -0.00148 | 0.97455  | -0.1374  | 0.00293  | -0.21507 | 2.73E-06 | -0.08653 | 0.06171  |
| 0.61929  | 0.033397 | 0.47154  | -0.15354 | 0.00087  | -0.11366 | 0.01398  | -0.0222  | 0.63228  |
| 4.91E-05 | -0.23561 | 2.60E-07 | -0.27418 | 1.69E-09 | -0.38359 | 8.09E-18 | -0.41373 | 9.76E-21 |
| 0.55964  | -0.05288 | 0.25413  | -0.11178 | 0.01566  | -0.13692 | 0.00303  | -0.0638  | 0.16872  |
| 3.13E-05 | -0.02601 | 0.57499  | -0.0589  | 0.20392  | -0.13835 | 0.00273  | -0.01309 | 0.77788  |
| 2.72E-28 | 0.102294 | 0.02707  | 0.053241 | 0.25085  | 0.001133 | 0.98052  | 0.162098 | 0.00044  |
| 1.67E-22 | 0.08593  | 0.06354  | 0.142743 | 0.00199  | -0.00393 | 0.93249  | 0.155412 | 0.00075  |
| 7.91E-11 | 0.193437 | 2.57E-05 | 0.098256 | 0.03377  | 0.094529 | 0.04116  | 0.312567 | 4.83E-12 |
| 7.19E-05 | -0.06298 | 0.17423  | -0.03798 | 0.41293  | -0.17859 | 0.0001   | -0.08361 | 0.07105  |
| 1.69E-17 | 0.10685  | 0.02092  | 0.028057 | 0.5453   | 0.000715 | 0.9877   | 0.191223 | 3.19E-05 |
| 1.35E-12 | 0.154605 | 0.0008   | 0.02765  | 0.55115  | 0.036736 | 0.42836  | 0.251897 | 3.43E-08 |
| 0.79262  | 0.108538 | 0.01897  | -0.08849 | 0.05601  | -0.10967 | 0.01775  | 0.081086 | 0.08004  |

|          |          |          |          |          |          |          |          |          |
|----------|----------|----------|----------|----------|----------|----------|----------|----------|
| 7.13E-09 | 0.066686 | 0.1502   | 0.120514 | 0.00914  | -0.05361 | 0.24754  | 0.140819 | 0.00229  |
| 3.97E-07 | 0.089767 | 0.05255  | 0.023076 | 0.6189   | -0.07226 | 0.11888  | 0.114045 | 0.01366  |
| 3.25E-09 | 0.107829 | 0.01977  | 0.126319 | 0.00627  | -0.05405 | 0.24372  | 0.148678 | 0.00127  |
| 4.43E-12 | 0.054086 | 0.2434   | -0.09422 | 0.04184  | -0.13319 | 0.00394  | 0.022912 | 0.6214   |
| 2.88E-07 | -0.01933 | 0.67691  | -0.09964 | 0.03133  | -0.09828 | 0.03372  | -0.02741 | 0.55463  |
| 0.02235  | -0.13431 | 0.00364  | -0.04654 | 0.31555  | 0.071802 | 0.12126  | -0.12227 | 0.00816  |
| 0.14618  | -0.13147 | 0.00443  | -0.02044 | 0.65945  | 0.086612 | 0.06146  | -0.09318 | 0.04415  |
| 0.00063  | 0.048902 | 0.29162  | 0.069209 | 0.13533  | 0.21085  | 4.31E-06 | 0.085712 | 0.06421  |
| 0.18061  | -0.07385 | 0.111    | 0.074212 | 0.10923  | 0.256758 | 1.82E-08 | 0.080412 | 0.08259  |
| 0.0096   | -0.04658 | 0.31512  | -0.07681 | 0.09735  | 0.014214 | 0.75933  | -0.14958 | 0.00119  |
| 0.72793  | -0.01969 | 0.67132  | 0.060327 | 0.19313  | 0.101292 | 0.02862  | 0.05591  | 0.22785  |
| 0.09211  | 0.03977  | 0.39118  | 0.037062 | 0.42427  | 0.243049 | 1.05E-07 | 0.15922  | 0.00055  |
| 0.70685  | -0.02043 | 0.65972  | -0.07032 | 0.12916  | 0.199574 | 1.39E-05 | 0.064454 | 0.16435  |
| 0.39466  | 0.018366 | 0.69221  | 0.050969 | 0.27168  | 0.290547 | 1.55E-10 | 0.224577 | 9.44E-07 |
| 0.61887  | -0.13045 | 0.00475  | -0.24245 | 1.13E-07 | -0.12209 | 0.00826  | -0.21475 | 2.83E-06 |
| 0.00027  | -0.01614 | 0.72787  | -0.12314 | 0.00772  | 0.10672  | 0.02107  | -0.0364  | 0.43258  |
| 0.08702  | -0.0889  | 0.05487  | -0.19296 | 2.69E-05 | -0.05023 | 0.27873  | -0.21777 | 2.03E-06 |
| 0.12408  | -0.09171 | 0.04762  | -0.02175 | 0.63917  | 0.088065 | 0.05721  | -0.03733 | 0.42098  |
| 7.59E-08 | -0.15027 | 0.00112  | -0.06981 | 0.13194  | 0.057549 | 0.21448  | -0.15189 | 0.00099  |
| 4.05E-05 | -0.16629 | 0.00031  | -0.08354 | 0.07129  | 0.116617 | 0.01167  | -0.09379 | 0.04278  |
| 1.19E-09 | -0.16603 | 0.00031  | -0.08245 | 0.07506  | 0.057967 | 0.21116  | -0.13851 | 0.0027   |
| 4.24E-05 | -0.02711 | 0.5589   | 0.082599 | 0.07455  | 0.437013 | 3.34E-23 | 0.233808 | 3.22E-07 |
| 0.00344  | -0.06756 | 0.1449   | -0.01035 | 0.82346  | 0.196867 | 1.83E-05 | 0.031746 | 0.49374  |
| 0.00214  | -0.08455 | 0.06792  | -0.03723 | 0.4222   | 0.063421 | 0.17124  | -0.09586 | 0.03839  |
| 0.41157  | -0.21349 | 3.24E-06 | -0.06835 | 0.14029  | -0.038   | 0.41268  | -0.25644 | 1.90E-08 |
| 2.19E-07 | 0.001194 | 0.97947  | -0.16738 | 0.00028  | 0.082978 | 0.07322  | -0.0601  | 0.19482  |
| 3.94E-07 | -0.04258 | 0.35862  | 0.054559 | 0.2393   | 0.041585 | 0.36991  | -0.05944 | 0.1998   |
| 1.37E-09 | 0.013713 | 0.76757  | 0.249481 | 4.67E-08 | 0.354488 | 2.84E-15 | 0.225303 | 8.69E-07 |
| 6.58E-11 | -0.03972 | 0.39183  | 0.040995 | 0.37674  | 0.166862 | 0.00029  | 0.06056  | 0.19141  |
| 4.81E-12 | -0.11665 | 0.01165  | -0.16216 | 0.00043  | -0.13518 | 0.00342  | -0.24115 | 1.33E-07 |
| 1.43E-07 | -0.25836 | 1.47E-08 | -0.11938 | 0.00982  | -0.00502 | 0.91379  | -0.26568 | 5.51E-09 |
| 1.62E-06 | -0.04408 | 0.34189  | -0.00155 | 0.97334  | 0.11266  | 0.01486  | -0.06555 | 0.15727  |
| 0.18974  | -0.1153  | 0.01266  | 0.012878 | 0.78134  | 0.124413 | 0.00711  | -0.07915 | 0.08753  |
| 0.00103  | -0.03069 | 0.50822  | 0.013719 | 0.76747  | 0.13076  | 0.00465  | 0.013167 | 0.77657  |
| 2.48E-07 | -0.1773  | 0.00012  | -0.2027  | 1.01E-05 | -0.00138 | 0.97624  | -0.2197  | 1.64E-06 |
| 1.47E-05 | -0.11265 | 0.01486  | -0.11013 | 0.01727  | 0.095152 | 0.03984  | -0.11258 | 0.01493  |
| 0.00054  | -0.12664 | 0.00614  | -0.15303 | 0.00091  | 0.095109 | 0.03993  | -0.09259 | 0.04552  |
| 0.00039  | -0.16096 | 0.00048  | -0.04642 | 0.31682  | 0.005861 | 0.89948  | -0.17672 | 0.00012  |
| 0.60143  | -0.10172 | 0.02794  | -0.12621 | 0.00631  | 0.045228 | 0.32942  | -0.07652 | 0.09859  |
| 0.0001   | -0.24716 | 6.27E-08 | -0.21507 | 2.73E-06 | -0.12913 | 0.00519  | -0.38307 | 9.04E-18 |
| 0.00065  | -0.07025 | 0.12954  | -0.11954 | 0.00972  | 0.096551 | 0.037    | -0.04708 | 0.30998  |
| 0.01382  | 0.066499 | 0.15135  | 0.176315 | 0.00013  | 0.351723 | 4.80E-15 | 0.266771 | 4.74E-09 |
| 0.03317  | 0.008461 | 0.8553   | -0.13954 | 0.00251  | 0.149828 | 0.00116  | 0.011259 | 0.80827  |
| 0.04861  | -0.18358 | 6.59E-05 | -0.06229 | 0.179    | -0.02613 | 0.57333  | -0.2027  | 1.01E-05 |
| 3.87E-06 | -0.16637 | 0.00031  | -0.32583 | 5.18E-13 | -0.37351 | 6.58E-17 | -0.52568 | 1.54E-34 |

|          |          |          |          |          |          |          |          |          |
|----------|----------|----------|----------|----------|----------|----------|----------|----------|
| 3.65E-07 | -0.19883 | 1.50E-05 | -0.17793 | 0.00011  | -0.15675 | 0.00068  | -0.32935 | 2.82E-13 |
| 0.00071  | -0.221   | 1.42E-06 | -0.2775  | 1.05E-09 | -0.22234 | 1.22E-06 | -0.39856 | 3.13E-19 |
| 3.05E-15 | -0.17371 | 0.00016  | -0.36729 | 2.32E-16 | -0.33053 | 2.29E-13 | -0.3834  | 8.41E-18 |
| 0.16905  | 0.118953 | 0.01009  | 0.28199  | 5.51E-10 | 0.267262 | 4.43E-09 | 0.422096 | 1.34E-21 |
| 0.01123  | -0.1156  | 0.01243  | -0.17208 | 0.00019  | -0.16725 | 0.00028  | -0.24071 | 1.40E-07 |
| 3.53E-10 | -0.19453 | 2.31E-05 | -0.12909 | 0.00521  | -0.21607 | 2.45E-06 | -0.28014 | 7.21E-10 |
| 3.18E-16 | -0.18066 | 8.63E-05 | -0.33887 | 5.18E-14 | -0.37557 | 4.32E-17 | -0.4099  | 2.38E-20 |
| 0.00011  | -0.04258 | 0.35859  | -0.17702 | 0.00012  | -0.21034 | 4.55E-06 | -0.15991 | 0.00052  |
| 1.23E-08 | -0.31471 | 3.40E-12 | -0.27135 | 2.52E-09 | -0.36653 | 2.70E-16 | -0.56234 | 2.71E-40 |
| 0.69459  | -0.13557 | 0.00333  | -0.31361 | 4.07E-12 | -0.33967 | 4.49E-14 | -0.38037 | 1.59E-17 |
| 2.38E-11 | -0.18364 | 6.56E-05 | -0.28479 | 3.65E-10 | -0.2192  | 1.73E-06 | -0.40644 | 5.29E-20 |
| 4.07E-06 | -0.20832 | 5.63E-06 | -0.35523 | 2.46E-15 | -0.28239 | 5.20E-10 | -0.40006 | 2.24E-19 |
| 7.79E-19 | -0.21537 | 2.64E-06 | -0.43701 | 3.34E-23 | -0.33605 | 8.60E-14 | -0.44889 | 1.55E-24 |
| 1.39E-09 | -0.19829 | 1.59E-05 | -0.312   | 5.30E-12 | -0.24446 | 8.80E-08 | -0.33322 | 1.42E-13 |
| 4.26E-10 | -0.14989 | 0.00116  | -0.35716 | 1.70E-15 | -0.25054 | 4.08E-08 | -0.33654 | 7.89E-14 |
| 4.35E-13 | -0.29286 | 1.09E-10 | -0.40949 | 2.62E-20 | -0.40066 | 1.96E-19 | -0.59879 | 8.99E-47 |
| 2.24E-11 | -0.12684 | 0.00605  | -0.35889 | 1.21E-15 | -0.26296 | 7.96E-09 | -0.32853 | 3.25E-13 |
| 1.89E-08 | -0.07265 | 0.11692  | -0.36923 | 1.57E-16 | -0.23958 | 1.61E-07 | -0.21292 | 3.45E-06 |
| 6.07E-05 | -0.22137 | 1.36E-06 | -0.35554 | 2.32E-15 | -0.2904  | 1.58E-10 | -0.4641  | 2.54E-26 |
| 1.19E-26 | -0.23172 | 4.12E-07 | -0.42462 | 7.25E-22 | -0.33934 | 4.76E-14 | -0.49148 | 9.04E-30 |
| 0.00011  | -0.14762 | 0.00138  | -0.33217 | 1.72E-13 | -0.32891 | 3.04E-13 | -0.36221 | 6.34E-16 |
| 7.34E-17 | -0.07276 | 0.11638  | -0.19886 | 1.50E-05 | -0.08752 | 0.05877  | -0.14897 | 0.00124  |
| 6.33E-19 | -0.27467 | 1.58E-09 | -0.11852 | 0.01037  | -0.2579  | 1.57E-08 | -0.41571 | 6.14E-21 |
| 6.75E-11 | -0.05314 | 0.25177  | -0.41509 | 7.09E-21 | -0.26835 | 3.82E-09 | -0.34536 | 1.58E-14 |
| 6.75E-08 | -0.07918 | 0.08741  | -0.26208 | 8.97E-09 | -0.26177 | 9.35E-09 | -0.24907 | 4.92E-08 |
| 2.31E-07 | -0.16144 | 0.00046  | -0.24314 | 1.04E-07 | -0.21823 | 1.93E-06 | -0.35266 | 4.01E-15 |
| 5.15E-19 | -0.08422 | 0.069    | -0.11372 | 0.01394  | -0.16987 | 0.00023  | -0.22793 | 6.42E-07 |
| 0.1071   | -0.06876 | 0.13791  | -0.22903 | 5.65E-07 | -0.1987  | 1.52E-05 | -0.2278  | 6.52E-07 |
| 0.1021   | -0.13107 | 0.00455  | -0.14431 | 0.00177  | -0.18758 | 4.52E-05 | -0.27078 | 2.72E-09 |
| 1.05E-19 | -0.26422 | 6.71E-09 | -0.36368 | 4.75E-16 | -0.35721 | 1.68E-15 | -0.52005 | 1.02E-33 |
| 1.45E-07 | -0.13852 | 0.0027   | -0.18195 | 7.67E-05 | -0.1953  | 2.14E-05 | -0.30389 | 1.96E-11 |
| 1.31E-12 | -0.14818 | 0.00132  | -0.32682 | 4.37E-13 | -0.34781 | 1.00E-14 | -0.41051 | 2.07E-20 |
| 0.00471  | -0.23415 | 3.09E-07 | -0.27969 | 7.70E-10 | -0.29123 | 1.40E-10 | -0.44724 | 2.40E-24 |
| 5.13E-06 | -0.1846  | 5.99E-05 | -0.45316 | 5.00E-25 | -0.36682 | 2.54E-16 | -0.50426 | 1.73E-31 |
| 3.61E-20 | -0.14146 | 0.00218  | -0.31521 | 3.12E-12 | -0.22047 | 1.50E-06 | -0.37462 | 5.25E-17 |
| 0.18852  | 0.013369 | 0.77324  | -0.21866 | 1.84E-06 | -0.22734 | 6.87E-07 | -0.22843 | 6.06E-07 |
| 3.48E-06 | -0.16305 | 0.0004   | -0.32204 | 9.92E-13 | -0.33601 | 8.67E-14 | -0.41656 | 5.01E-21 |
| 2.12E-06 | -0.23259 | 3.72E-07 | -0.15618 | 0.00071  | -0.20133 | 1.16E-05 | -0.35891 | 1.21E-15 |
| 6.45E-11 | -0.12723 | 0.0059   | -0.28266 | 5.00E-10 | -0.26341 | 7.49E-09 | -0.35967 | 1.04E-15 |
| 4.70E-12 | -0.08292 | 0.07341  | -0.27891 | 8.61E-10 | -0.22465 | 9.37E-07 | -0.26419 | 6.74E-09 |
| 6.06E-05 | -0.10288 | 0.0262   | -0.17248 | 0.00018  | -0.2229  | 1.14E-06 | -0.30016 | 3.54E-11 |
| 2.72E-08 | -0.19398 | 2.43E-05 | -0.4688  | 6.84E-27 | -0.36306 | 5.36E-16 | -0.45066 | 9.72E-25 |
| 6.67E-09 | 0.028202 | 0.54323  | -0.06776 | 0.14372  | -0.04223 | 0.36248  | -0.01097 | 0.81307  |
| 1.82E-14 | -0.06401 | 0.16726  | -0.26197 | 9.10E-09 | -0.21618 | 2.42E-06 | -0.26469 | 6.30E-09 |
| 8.00E-15 | -0.20472 | 8.21E-06 | -0.26304 | 7.88E-09 | -0.17164 | 0.00019  | -0.34214 | 2.86E-14 |

|          |          |          |          |          |          |          |          |          |
|----------|----------|----------|----------|----------|----------|----------|----------|----------|
| 1.63E-08 | -0.04227 | 0.36208  | -0.11287 | 0.01467  | -0.12841 | 0.00545  | -0.17373 | 0.00016  |
| 0.01962  | -0.18701 | 4.77E-05 | -0.24029 | 1.47E-07 | -0.25364 | 2.74E-08 | -0.38843 | 2.88E-18 |
| 4.47E-09 | -0.15868 | 0.00058  | -0.35799 | 1.45E-15 | -0.29608 | 6.66E-11 | -0.39681 | 4.62E-19 |
| 1.96E-10 | -0.19733 | 1.74E-05 | -0.31364 | 4.05E-12 | -0.37764 | 2.81E-17 | -0.48055 | 2.35E-28 |
| 1.68E-09 | -0.34345 | 2.25E-14 | -0.34864 | 8.58E-15 | -0.47124 | 3.43E-27 | -0.63041 | 4.17E-53 |
| 0.00106  | -0.06459 | 0.16348  | -0.29242 | 1.17E-10 | -0.25077 | 3.96E-08 | -0.24164 | 1.25E-07 |
| 1.90E-16 | -0.31979 | 1.45E-12 | -0.20182 | 1.11E-05 | -0.36116 | 7.80E-16 | -0.52744 | 8.43E-35 |
| 1.59E-05 | -0.09818 | 0.0339   | -0.24386 | 9.47E-08 | -0.29735 | 5.48E-11 | -0.28035 | 7.00E-10 |
| 0.00011  | -0.05498 | 0.23567  | -0.17387 | 0.00016  | -0.13626 | 0.00317  | -0.19246 | 2.83E-05 |
| 5.64E-05 | -0.02797 | 0.5465   | -0.0756  | 0.10274  | -0.04995 | 0.28137  | -0.08491 | 0.06676  |
| 1.25E-08 | -0.22196 | 1.27E-06 | -0.41221 | 1.39E-20 | -0.3868  | 4.08E-18 | -0.50828 | 4.79E-32 |
| 1.60E-08 | -0.00639 | 0.89053  | -0.35039 | 6.17E-15 | -0.31329 | 4.29E-12 | -0.22631 | 7.74E-07 |
| 1.20E-30 | -0.23548 | 2.64E-07 | -0.25627 | 1.94E-08 | -0.1339  | 0.00375  | -0.36266 | 5.81E-16 |
| 6.49E-14 | -0.12024 | 0.0093   | -0.28625 | 2.94E-10 | -0.21371 | 3.16E-06 | -0.33232 | 1.67E-13 |
| 2.97E-16 | -0.06605 | 0.15416  | -0.29696 | 5.81E-11 | -0.12129 | 0.0087   | -0.20131 | 1.17E-05 |
| 4.28E-11 | -0.22987 | 5.13E-07 | -0.18581 | 5.35E-05 | -0.1316  | 0.00439  | -0.36753 | 2.21E-16 |
| 1.92E-08 | -0.18873 | 4.05E-05 | -0.35256 | 4.10E-15 | -0.24612 | 7.14E-08 | -0.411   | 1.85E-20 |
| 2.99E-11 | -0.27315 | 1.96E-09 | -0.33303 | 1.47E-13 | -0.33447 | 1.14E-13 | -0.51136 | 1.78E-32 |
| 4.76E-17 | -0.14194 | 0.00211  | -0.3467  | 1.23E-14 | -0.29406 | 9.09E-11 | -0.43056 | 1.69E-22 |
| 1.50E-09 | -0.16189 | 0.00044  | -0.22176 | 1.30E-06 | -0.11084 | 0.01657  | -0.29298 | 1.07E-10 |
| 1.25E-09 | -0.24128 | 1.30E-07 | -0.33863 | 5.41E-14 | -0.41016 | 2.24E-20 | -0.4949  | 3.19E-30 |
| 3.12E-19 | -0.21049 | 4.47E-06 | -0.2672  | 4.47E-09 | -0.27334 | 1.90E-09 | -0.45242 | 6.08E-25 |
| 5.36E-06 | -0.14112 | 0.00224  | -0.2738  | 1.78E-09 | -0.20806 | 5.79E-06 | -0.26067 | 1.08E-08 |
| 7.59E-16 | -0.19969 | 1.38E-05 | -0.29161 | 1.32E-10 | -0.26332 | 7.58E-09 | -0.44013 | 1.51E-23 |
| 0.00013  | -0.13076 | 0.00465  | -0.28848 | 2.11E-10 | -0.17649 | 0.00013  | -0.25303 | 2.96E-08 |
| 0.00013  | -0.2068  | 6.61E-06 | -0.16    | 0.00052  | -0.2841  | 4.04E-10 | -0.417   | 4.51E-21 |
| 4.67E-10 | -0.025   | 0.5899   | -0.27064 | 2.78E-09 | -0.2004  | 1.28E-05 | -0.21264 | 3.55E-06 |
| 1.56E-18 | -0.10303 | 0.02599  | -0.36655 | 2.69E-16 | -0.18508 | 5.73E-05 | -0.29794 | 4.99E-11 |
| 8.54E-14 | -0.20091 | 1.22E-05 | -0.43257 | 1.02E-22 | -0.3148  | 3.35E-12 | -0.47114 | 3.53E-27 |
| 5.55E-22 | -0.26331 | 7.60E-09 | -0.35754 | 1.58E-15 | -0.297   | 5.78E-11 | -0.4764  | 7.84E-28 |
| 2.39E-12 | -0.19906 | 1.47E-05 | -0.42036 | 2.03E-21 | -0.32467 | 6.33E-13 | -0.46437 | 2.36E-26 |
| 7.61E-07 | -0.2371  | 2.17E-07 | -0.38089 | 1.43E-17 | -0.34443 | 1.88E-14 | -0.46486 | 2.06E-26 |
| 6.50E-08 | -0.25821 | 1.50E-08 | -0.44681 | 2.68E-24 | -0.30922 | 8.34E-12 | -0.44986 | 1.20E-24 |
| 2.18E-11 | -0.12125 | 0.00872  | -0.38562 | 5.25E-18 | -0.23703 | 2.19E-07 | -0.28595 | 3.08E-10 |
| 0.00033  | -0.26881 | 3.58E-09 | -0.29339 | 1.01E-10 | -0.23544 | 2.65E-07 | -0.46024 | 7.36E-26 |
| 0.02483  | -0.19599 | 2.00E-05 | -0.23892 | 1.74E-07 | -0.12629 | 0.00628  | -0.26449 | 6.47E-09 |
| 2.46E-10 | -0.13214 | 0.00423  | -0.34512 | 1.65E-14 | -0.27264 | 2.10E-09 | -0.33259 | 1.59E-13 |
| 0.00029  | -0.18176 | 7.80E-05 | -0.33595 | 8.77E-14 | -0.26242 | 8.57E-09 | -0.37155 | 9.81E-17 |
| 1.48E-06 | 0.039292 | 0.3969   | -0.25237 | 3.22E-08 | -0.17358 | 0.00016  | -0.11434 | 0.01342  |
| 0.0135   | -0.14956 | 0.00119  | -0.34287 | 2.50E-14 | -0.34832 | 9.10E-15 | -0.40048 | 2.04E-19 |
| 6.43E-12 | -0.14909 | 0.00123  | -0.18022 | 8.99E-05 | -0.22192 | 1.28E-06 | -0.24434 | 8.92E-08 |
| 0.15845  | -0.07066 | 0.1273   | -0.18892 | 3.98E-05 | -0.21778 | 2.03E-06 | -0.22421 | 9.85E-07 |
| 3.54E-21 | -0.16868 | 0.00025  | -0.26061 | 1.09E-08 | -0.28479 | 3.65E-10 | -0.4243  | 7.84E-22 |
| 1.12E-08 | -0.0995  | 0.03158  | -0.3371  | 7.12E-14 | -0.27469 | 1.57E-09 | -0.29897 | 4.25E-11 |
| 2.29E-13 | -0.23775 | 2.01E-07 | -0.41355 | 1.02E-20 | -0.40647 | 5.25E-20 | -0.55975 | 7.31E-40 |

|          |          |          |          |          |          |          |          |          |
|----------|----------|----------|----------|----------|----------|----------|----------|----------|
| 9.32E-16 | -0.23443 | 2.99E-07 | -0.32955 | 2.72E-13 | -0.20903 | 5.22E-06 | -0.40021 | 2.17E-19 |
| 7.69E-32 | -0.14075 | 0.0023   | -0.26434 | 6.61E-09 | -0.13943 | 0.00253  | -0.30334 | 2.14E-11 |
| 8.79E-31 | -0.20181 | 1.11E-05 | -0.2978  | 5.11E-11 | -0.36155 | 7.22E-16 | -0.46081 | 6.29E-26 |
| 2.03E-10 | -0.24498 | 8.24E-08 | -0.22222 | 1.23E-06 | -0.3774  | 2.95E-17 | -0.47642 | 7.79E-28 |
| 3.97E-23 | -0.27995 | 7.41E-10 | -0.23594 | 2.49E-07 | -0.32193 | 1.01E-12 | -0.50342 | 2.25E-31 |
| 8.93E-09 | -0.07044 | 0.12853  | -0.16068 | 0.00049  | -0.22722 | 6.97E-07 | -0.29519 | 7.64E-11 |
| 5.68E-14 | -0.19428 | 2.36E-05 | -0.25447 | 2.45E-08 | -0.3081  | 9.99E-12 | -0.40292 | 1.18E-19 |
| 0.15385  | -0.03179 | 0.49319  | -0.18972 | 3.68E-05 | -0.20931 | 5.08E-06 | -0.21476 | 2.82E-06 |
| 0.22236  | -0.1019  | 0.02768  | -0.14114 | 0.00223  | -0.09738 | 0.03539  | -0.17582 | 0.00013  |
| 5.34E-16 | 0.215203 | 2.69E-06 | 0.349737 | 6.98E-15 | 0.236978 | 2.20E-07 | 0.467848 | 8.94E-27 |
| 2.12E-20 | -0.15876 | 0.00057  | -0.39918 | 2.73E-19 | -0.37109 | 1.08E-16 | -0.3974  | 4.06E-19 |
| 0.00012  | -0.12601 | 0.0064   | -0.26833 | 3.83E-09 | -0.33611 | 8.51E-14 | -0.36066 | 8.60E-16 |
| 2.51E-05 | -0.27113 | 2.60E-09 | -0.33748 | 6.66E-14 | -0.30519 | 1.59E-11 | -0.45726 | 1.66E-25 |
| 2.89E-06 | -0.07658 | 0.09837  | -0.46812 | 8.28E-27 | -0.38127 | 1.32E-17 | -0.36639 | 2.77E-16 |
| 5.42E-13 | -0.22546 | 8.54E-07 | -0.27389 | 1.76E-09 | -0.18988 | 3.63E-05 | -0.40074 | 1.92E-19 |
| 4.06E-07 | -0.19638 | 1.92E-05 | -0.49531 | 2.81E-30 | -0.40793 | 3.75E-20 | -0.58699 | 1.39E-44 |
| 1.87E-22 | -0.21613 | 2.43E-06 | -0.20166 | 1.13E-05 | -0.17916 | 9.91E-05 | -0.38807 | 3.11E-18 |
| 0.00049  | -0.00291 | 0.95001  | -0.27195 | 2.31E-09 | -0.14673 | 0.00148  | -0.16858 | 0.00025  |
| 0.00027  | -0.09347 | 0.04349  | -0.31963 | 1.49E-12 | -0.23684 | 2.24E-07 | -0.29863 | 4.49E-11 |
| 6.25E-08 | -0.14395 | 0.00182  | -0.36298 | 5.45E-16 | -0.37448 | 5.40E-17 | -0.39094 | 1.67E-18 |
| 0.00151  | -0.05986 | 0.19659  | -0.28752 | 2.44E-10 | -0.24325 | 1.02E-07 | -0.26641 | 4.98E-09 |
| 2.87E-16 | -0.15847 | 0.00059  | -0.32067 | 1.25E-12 | -0.22453 | 9.50E-07 | -0.33741 | 6.75E-14 |
| 2.06E-08 | -0.18767 | 4.48E-05 | -0.25042 | 4.14E-08 | -0.32056 | 1.28E-12 | -0.39687 | 4.56E-19 |
| 0.00133  | -0.18015 | 9.05E-05 | -0.38718 | 3.76E-18 | -0.3812  | 1.34E-17 | -0.44936 | 1.37E-24 |
| 0.00144  | -0.10559 | 0.02249  | -0.05965 | 0.19818  | -0.15701 | 0.00066  | -0.24367 | 9.71E-08 |
| 9.66E-09 | -0.01653 | 0.72159  | -0.15929 | 0.00055  | -0.08844 | 0.05616  | -0.08607 | 0.06311  |
| 4.55E-06 | -0.21899 | 1.77E-06 | -0.17785 | 0.00011  | -0.16012 | 0.00051  | -0.33298 | 1.49E-13 |
| 0.01589  | -0.23726 | 2.13E-07 | -0.25381 | 2.68E-08 | -0.25183 | 3.46E-08 | -0.36405 | 4.41E-16 |
| 8.10E-23 | -0.05153 | 0.26645  | -0.08661 | 0.06147  | -0.11786 | 0.0108   | -0.11681 | 0.01153  |
| 3.14E-07 | -0.18559 | 5.46E-05 | -0.37365 | 6.39E-17 | -0.25685 | 1.80E-08 | -0.47207 | 2.71E-27 |
| 0.88143  | -0.17073 | 0.00021  | -0.26469 | 6.30E-09 | -0.21494 | 2.77E-06 | -0.33302 | 1.48E-13 |
| 4.96E-05 | -0.23279 | 3.63E-07 | -0.04782 | 0.30245  | -0.06454 | 0.1638   | -0.22465 | 9.37E-07 |
| 0.00103  | 0.087589 | 0.05857  | 0.25417  | 2.55E-08 | 0.209458 | 4.99E-06 | 0.268158 | 3.92E-09 |
| 3.91E-16 | -0.14267 | 0.002    | -0.40558 | 6.43E-20 | -0.2356  | 2.60E-07 | -0.32761 | 3.81E-13 |
| 1.48E-16 | -0.1821  | 7.57E-05 | -0.41323 | 1.10E-20 | -0.26184 | 9.26E-09 | -0.35198 | 4.57E-15 |
| 7.00E-18 | -0.17511 | 0.00014  | -0.3026  | 2.41E-11 | -0.37915 | 2.06E-17 | -0.47891 | 3.79E-28 |
| 5.39E-11 | -0.21705 | 2.20E-06 | -0.32379 | 7.37E-13 | -0.31779 | 2.03E-12 | -0.43792 | 2.65E-23 |
| 0.00124  | 0.117383 | 0.01113  | 0.170699 | 0.00021  | 0.149719 | 0.00117  | 0.251951 | 3.40E-08 |
| 1.69E-16 | -0.11439 | 0.01338  | -0.36528 | 3.46E-16 | -0.28616 | 2.99E-10 | -0.37668 | 3.43E-17 |
| 0.00097  | -0.21112 | 4.18E-06 | -0.36323 | 5.19E-16 | -0.39327 | 1.01E-18 | -0.42885 | 2.57E-22 |
| 1.78E-05 | -0.01223 | 0.79214  | -0.24893 | 5.01E-08 | -0.13312 | 0.00395  | -0.18094 | 8.42E-05 |
| 0.00084  | -0.18609 | 5.21E-05 | -0.20725 | 6.31E-06 | -0.24655 | 6.76E-08 | -0.42595 | 5.25E-22 |
| 1.78E-05 | -0.03787 | 0.41423  | -0.26629 | 5.07E-09 | -0.21609 | 2.44E-06 | -0.20754 | 6.11E-06 |
| 1.39E-05 | 0.237348 | 2.11E-07 | 0.436622 | 3.69E-23 | 0.310128 | 7.20E-12 | 0.501247 | 4.45E-31 |
| 6.56E-10 | -0.10003 | 0.03068  | -0.37263 | 7.87E-17 | -0.34723 | 1.12E-14 | -0.41732 | 4.19E-21 |

|          |          |          |          |          |          |          |          |          |
|----------|----------|----------|----------|----------|----------|----------|----------|----------|
| 2.36E-15 | -0.30634 | 1.33E-11 | -0.35603 | 2.11E-15 | -0.32951 | 2.73E-13 | -0.56696 | 4.54E-41 |
| 9.41E-11 | -0.06998 | 0.13102  | -0.26727 | 4.43E-09 | -0.28937 | 1.85E-10 | -0.26418 | 6.75E-09 |
| 8.20E-10 | -0.24683 | 6.53E-08 | -0.17314 | 0.00017  | -0.26623 | 5.11E-09 | -0.4118  | 1.53E-20 |
| 1.27E-38 | 0.172685 | 0.00018  | 0.30967  | 7.75E-12 | 0.120624 | 0.00907  | 0.331497 | 1.93E-13 |
| 3.04E-20 | -0.21224 | 3.71E-06 | -0.28864 | 2.06E-10 | -0.3408  | 3.65E-14 | -0.44004 | 1.55E-23 |
| 2.49E-22 | -0.12623 | 0.00631  | -0.24523 | 7.99E-08 | -0.24504 | 8.18E-08 | -0.30185 | 2.71E-11 |
| 1.13E-16 | -0.17945 | 9.65E-05 | -0.15892 | 0.00057  | -0.05588 | 0.22808  | -0.24986 | 4.45E-08 |
| 1.47E-06 | -0.11749 | 0.01105  | -0.13998 | 0.00243  | -0.21837 | 1.90E-06 | -0.22379 | 1.03E-06 |
| 2.01E-10 | -0.11332 | 0.01427  | -0.02868 | 0.53647  | -0.12445 | 0.00709  | -0.14522 | 0.00165  |
| 9.00E-10 | 0.22189  | 1.28E-06 | 0.410582 | 2.04E-20 | 0.461798 | 4.80E-26 | 0.592053 | 1.64E-45 |
| 0.41797  | -0.16901 | 0.00024  | -0.33019 | 2.43E-13 | -0.28936 | 1.85E-10 | -0.38123 | 1.33E-17 |
| 0.06723  | -0.12948 | 0.00507  | -0.30851 | 9.35E-12 | -0.20078 | 1.23E-05 | -0.36127 | 7.63E-16 |
| 7.33E-09 | -0.19978 | 1.36E-05 | -0.30654 | 1.29E-11 | -0.28731 | 2.51E-10 | -0.35699 | 1.75E-15 |
| 3.99E-10 | 0.003124 | 0.94633  | -0.3475  | 1.06E-14 | -0.2176  | 2.07E-06 | -0.21381 | 3.13E-06 |
| 1.42E-12 | -0.32702 | 4.22E-13 | -0.24883 | 5.07E-08 | -0.32571 | 5.29E-13 | -0.52923 | 4.57E-35 |
| 1.57E-14 | -0.18312 | 6.88E-05 | -0.22122 | 1.38E-06 | -0.28594 | 3.08E-10 | -0.42344 | 9.65E-22 |
| 7.71E-19 | -0.22353 | 1.06E-06 | -0.38586 | 5.00E-18 | -0.35442 | 2.87E-15 | -0.45995 | 7.97E-26 |
| 4.51E-14 | -0.30332 | 2.15E-11 | -0.43109 | 1.48E-22 | -0.4182  | 3.40E-21 | -0.5643  | 1.27E-40 |
| 6.92E-11 | -0.13739 | 0.00293  | -0.27817 | 9.57E-10 | -0.2059  | 7.26E-06 | -0.27958 | 7.81E-10 |
| 2.51E-11 | -0.17754 | 0.00011  | -0.36188 | 6.77E-16 | -0.28837 | 2.15E-10 | -0.36641 | 2.76E-16 |
| 2.89E-07 | -0.09925 | 0.032    | -0.36089 | 8.22E-16 | -0.29583 | 6.92E-11 | -0.33237 | 1.66E-13 |
| 3.98E-05 | -0.2076  | 6.08E-06 | -0.35912 | 1.16E-15 | -0.35941 | 1.10E-15 | -0.44179 | 9.86E-24 |
| 2.53E-21 | -0.18808 | 4.31E-05 | -0.34377 | 2.12E-14 | -0.28248 | 5.13E-10 | -0.45539 | 2.74E-25 |
| 1.10E-16 | -0.15352 | 0.00087  | -0.39275 | 1.13E-18 | -0.2551  | 2.26E-08 | -0.36682 | 2.54E-16 |
| 3.14E-12 | -0.1729  | 0.00017  | -0.33063 | 2.25E-13 | -0.25673 | 1.83E-08 | -0.40055 | 2.01E-19 |
| 5.16E-11 | -0.1115  | 0.01592  | -0.28926 | 1.88E-10 | -0.18723 | 4.67E-05 | -0.23464 | 2.92E-07 |
| 1.77E-10 | -0.08852 | 0.05594  | -0.24972 | 4.53E-08 | -0.25949 | 1.27E-08 | -0.29897 | 4.26E-11 |
| 2.83E-20 | -0.12886 | 0.00529  | -0.23575 | 2.55E-07 | -0.12114 | 0.00878  | -0.32925 | 2.87E-13 |
| 1.56E-06 | -0.20004 | 1.33E-05 | -0.31547 | 2.99E-12 | -0.29589 | 6.86E-11 | -0.40061 | 1.98E-19 |
| 0.17853  | -0.0542  | 0.24243  | -0.26978 | 3.13E-09 | -0.27373 | 1.80E-09 | -0.28175 | 5.71E-10 |
| 5.35E-11 | -0.1771  | 0.00012  | -0.25424 | 2.53E-08 | -0.25303 | 2.96E-08 | -0.38676 | 4.12E-18 |
| 2.07E-06 | -0.24663 | 6.70E-08 | -0.37415 | 5.78E-17 | -0.31637 | 2.58E-12 | -0.46804 | 8.47E-27 |
| 0.19117  | -0.09416 | 0.04196  | -0.3791  | 2.08E-17 | -0.33237 | 1.66E-13 | -0.33904 | 5.02E-14 |
| 0.1944   | -0.08371 | 0.07072  | -0.36345 | 4.97E-16 | -0.30891 | 8.77E-12 | -0.29717 | 5.63E-11 |
| 0.32251  | 0.034393 | 0.45841  | 0.390683 | 1.77E-18 | 0.371146 | 1.07E-16 | 0.33878  | 5.27E-14 |
| 3.77E-05 | -0.09468 | 0.04083  | -0.29855 | 4.54E-11 | -0.25039 | 4.16E-08 | -0.26614 | 5.17E-09 |
| 0.00174  | -0.10184 | 0.02777  | -0.25545 | 2.16E-08 | -0.1548  | 0.00079  | -0.29415 | 8.96E-11 |
| 0.00011  | -0.03672 | 0.42854  | -0.17024 | 0.00022  | -0.17182 | 0.00019  | -0.18545 | 5.53E-05 |
| 1.04E-09 | -0.09424 | 0.04178  | -0.29754 | 5.32E-11 | -0.32497 | 6.01E-13 | -0.4073  | 4.34E-20 |
| 4.54E-11 | -0.14358 | 0.00187  | -0.28715 | 2.58E-10 | -0.25346 | 2.80E-08 | -0.33517 | 1.01E-13 |
| 2.21E-13 | -0.11482 | 0.01303  | -0.25234 | 3.23E-08 | -0.30767 | 1.07E-11 | -0.31263 | 4.78E-12 |
| 4.46E-12 | -0.22233 | 1.22E-06 | -0.27754 | 1.05E-09 | -0.25094 | 3.87E-08 | -0.42249 | 1.22E-21 |
| 6.68E-17 | -0.21971 | 1.63E-06 | -0.35352 | 3.41E-15 | -0.29237 | 1.18E-10 | -0.44808 | 1.92E-24 |
| 2.57E-20 | -0.12706 | 0.00597  | -0.29226 | 1.20E-10 | -0.31531 | 3.07E-12 | -0.36041 | 9.03E-16 |
| 1.09E-08 | -0.23919 | 1.68E-07 | -0.25342 | 2.81E-08 | -0.1668  | 0.00029  | -0.41316 | 1.12E-20 |



|          |          |          |          |          |          |          |          |          |
|----------|----------|----------|----------|----------|----------|----------|----------|----------|
| 4.25E-06 | -0.1049  | 0.02339  | -0.20157 | 1.14E-05 | -0.25498 | 2.30E-08 | -0.31249 | 4.89E-12 |
| 2.43E-10 | -0.15384 | 0.00085  | -0.43574 | 4.62E-23 | -0.20368 | 9.15E-06 | -0.32861 | 3.20E-13 |
| 1.10E-12 | -0.22744 | 6.79E-07 | -0.25545 | 2.16E-08 | -0.23723 | 2.14E-07 | -0.36271 | 5.74E-16 |
| 4.15E-13 | -0.19049 | 3.42E-05 | -0.34701 | 1.16E-14 | -0.24807 | 5.59E-08 | -0.41068 | 1.99E-20 |
| 1.12E-28 | -0.20651 | 6.81E-06 | -0.43393 | 7.28E-23 | -0.29115 | 1.41E-10 | -0.47356 | 1.77E-27 |
| 3.36E-16 | -0.20634 | 6.94E-06 | -0.33372 | 1.30E-13 | -0.22912 | 5.59E-07 | -0.4327  | 9.89E-23 |
| 1.43E-09 | -0.23084 | 4.57E-07 | -0.18519 | 5.67E-05 | -0.20298 | 9.83E-06 | -0.36789 | 2.05E-16 |
| 2.33E-23 | -0.24362 | 9.76E-08 | -0.35506 | 2.54E-15 | -0.27764 | 1.03E-09 | -0.40003 | 2.25E-19 |
| 0.01646  | -0.18306 | 6.92E-05 | -0.34633 | 1.32E-14 | -0.35257 | 4.09E-15 | -0.43013 | 1.88E-22 |
| 4.63E-14 | -0.21074 | 4.36E-06 | -0.34323 | 2.34E-14 | -0.33662 | 7.77E-14 | -0.45879 | 1.09E-25 |
| 1.10E-08 | -0.16704 | 0.00029  | -0.32516 | 5.82E-13 | -0.23372 | 3.25E-07 | -0.32255 | 9.10E-13 |
| 3.79E-08 | -0.22021 | 1.55E-06 | -0.24256 | 1.11E-07 | -0.24499 | 8.23E-08 | -0.37862 | 2.30E-17 |
| 1.76E-25 | -0.13837 | 0.00273  | -0.35346 | 3.45E-15 | -0.21278 | 3.50E-06 | -0.319   | 1.66E-12 |
| 1.80E-08 | -0.15175 | 0.001    | -0.40582 | 6.09E-20 | -0.33707 | 7.16E-14 | -0.35043 | 6.12E-15 |
| 0.00144  | -0.09328 | 0.04394  | -0.3162  | 2.65E-12 | -0.1527  | 0.00093  | -0.23623 | 2.41E-07 |
| 5.80E-18 | -0.22834 | 6.13E-07 | -0.30183 | 2.72E-11 | -0.27583 | 1.34E-09 | -0.43481 | 5.83E-23 |
| 4.51E-16 | -0.20613 | 7.09E-06 | -0.3864  | 4.45E-18 | -0.3488  | 8.32E-15 | -0.45043 | 1.03E-24 |
| 3.12E-19 | -0.24751 | 5.99E-08 | -0.34534 | 1.59E-14 | -0.31755 | 2.11E-12 | -0.50845 | 4.54E-32 |
| 7.35E-09 | -0.10101 | 0.02907  | -0.36656 | 2.68E-16 | -0.27402 | 1.73E-09 | -0.36032 | 9.19E-16 |
| 6.93E-18 | -0.09583 | 0.03843  | -0.31629 | 2.61E-12 | -0.25147 | 3.62E-08 | -0.26068 | 1.08E-08 |
| 3.60E-11 | -0.32218 | 9.69E-13 | -0.34552 | 1.53E-14 | -0.46143 | 5.32E-26 | -0.62228 | 2.08E-51 |
| 0.44215  | -0.11254 | 0.01496  | -0.14496 | 0.00169  | -0.10393 | 0.0247   | -0.18434 | 6.14E-05 |
| 2.74E-16 | -0.2844  | 3.87E-10 | -0.24838 | 5.37E-08 | -0.2571  | 1.74E-08 | -0.47936 | 3.32E-28 |
| 7.27E-07 | -0.25723 | 1.71E-08 | -0.3849  | 6.12E-18 | -0.44542 | 3.85E-24 | -0.52906 | 4.84E-35 |
| 6.05E-13 | -0.08536 | 0.06533  | -0.34792 | 9.81E-15 | -0.24276 | 1.09E-07 | -0.33144 | 1.95E-13 |
| 6.76E-20 | -0.20623 | 7.02E-06 | -0.35704 | 1.74E-15 | -0.35594 | 2.15E-15 | -0.42664 | 4.42E-22 |
| 0.00028  | 0.217508 | 2.09E-06 | 0.15649  | 0.00069  | 0.262476 | 8.50E-09 | 0.33047  | 2.31E-13 |
| 1.46E-20 | -0.15389 | 0.00085  | -0.34069 | 3.72E-14 | -0.25621 | 1.96E-08 | -0.31838 | 1.84E-12 |
| 4.74E-09 | -0.18703 | 4.76E-05 | -0.26068 | 1.08E-08 | -0.33469 | 1.10E-13 | -0.39775 | 3.75E-19 |
| 2.48E-05 | 0.020762 | 0.65451  | 0.312297 | 5.05E-12 | 0.284684 | 3.71E-10 | 0.22751  | 6.74E-07 |
| 0.75201  | -0.12119 | 0.00875  | -0.28803 | 2.26E-10 | -0.22359 | 1.06E-06 | -0.24264 | 1.10E-07 |
| 0.25863  | -0.10611 | 0.02183  | -0.04641 | 0.3169   | -0.13201 | 0.00427  | -0.21196 | 3.82E-06 |
| 1.77E-24 | -0.15135 | 0.00103  | -0.26533 | 5.77E-09 | -0.22205 | 1.26E-06 | -0.31636 | 2.58E-12 |
| 1.23E-19 | -0.17638 | 0.00013  | -0.1558  | 0.00073  | -0.26003 | 1.18E-08 | -0.29708 | 5.71E-11 |
| 1.65E-13 | -0.20783 | 5.93E-06 | -0.2158  | 2.52E-06 | -0.19819 | 1.60E-05 | -0.30601 | 1.40E-11 |
| 2.43E-19 | -0.05748 | 0.21503  | -0.19908 | 1.46E-05 | -0.21255 | 3.58E-06 | -0.24203 | 1.19E-07 |
| 8.23E-08 | -0.18421 | 6.21E-05 | -0.35702 | 1.74E-15 | -0.26701 | 4.59E-09 | -0.37418 | 5.75E-17 |
| 2.95E-25 | -0.19615 | 1.96E-05 | -0.25648 | 1.89E-08 | -0.25119 | 3.75E-08 | -0.40754 | 4.10E-20 |
| 8.35E-08 | -0.14697 | 0.00145  | -0.11023 | 0.01717  | -0.21802 | 1.97E-06 | -0.32504 | 5.95E-13 |
| 9.15E-07 | -0.11588 | 0.01221  | -0.2092  | 5.13E-06 | -0.2414  | 1.28E-07 | -0.31893 | 1.68E-12 |
| 8.51E-08 | -0.10247 | 0.02681  | -0.22701 | 7.14E-07 | -0.27751 | 1.05E-09 | -0.28986 | 1.72E-10 |
| 0.01017  | -0.08038 | 0.08271  | -0.24163 | 1.25E-07 | -0.18988 | 3.63E-05 | -0.1959  | 2.01E-05 |
| 0.00015  | -0.10044 | 0.02999  | -0.30171 | 2.77E-11 | -0.25516 | 2.24E-08 | -0.31041 | 6.88E-12 |
| 5.36E-13 | -0.14849 | 0.00129  | -0.25589 | 2.04E-08 | -0.3368  | 7.53E-14 | -0.38988 | 2.10E-18 |
| 1.48E-18 | -0.09388 | 0.04258  | -0.29325 | 1.03E-10 | -0.18304 | 6.93E-05 | -0.26931 | 3.34E-09 |

|          |          |          |          |          |          |          |          |          |
|----------|----------|----------|----------|----------|----------|----------|----------|----------|
| 0.00049  | -0.00747 | 0.87211  | -0.28567 | 3.21E-10 | -0.09198 | 0.04698  | -0.11939 | 0.00982  |
| 0.00035  | -0.21634 | 2.37E-06 | -0.41582 | 5.97E-21 | -0.4307  | 1.63E-22 | -0.46027 | 7.31E-26 |
| 8.42E-21 | -0.15888 | 0.00057  | -0.30628 | 1.34E-11 | -0.23523 | 2.72E-07 | -0.38571 | 5.15E-18 |
| 1.97E-08 | -0.23077 | 4.61E-07 | -0.40036 | 2.10E-19 | -0.3291  | 2.94E-13 | -0.4769  | 6.78E-28 |
| 4.42E-24 | -0.24802 | 5.62E-08 | -0.36999 | 1.35E-16 | -0.36759 | 2.18E-16 | -0.4894  | 1.70E-29 |
| 0.00243  | -0.06849 | 0.13942  | -0.31003 | 7.31E-12 | -0.24646 | 6.84E-08 | -0.22777 | 6.54E-07 |
| 0.24093  | -0.16502 | 0.00034  | -0.27508 | 1.49E-09 | -0.21252 | 3.60E-06 | -0.36237 | 6.14E-16 |
| 5.16E-05 | -0.19171 | 3.04E-05 | -0.21017 | 4.63E-06 | -0.20826 | 5.67E-06 | -0.32063 | 1.26E-12 |
| 0.01111  | -0.02094 | 0.65168  | -0.26761 | 4.22E-09 | -0.22272 | 1.17E-06 | -0.20595 | 7.23E-06 |
| 3.33E-07 | -0.29912 | 4.15E-11 | -0.27336 | 1.90E-09 | -0.43019 | 1.85E-22 | -0.54077 | 8.00E-37 |
| 1.85E-17 | -0.1706  | 0.00021  | -0.28414 | 4.02E-10 | -0.22788 | 6.46E-07 | -0.37045 | 1.23E-16 |
| 6.25E-19 | -0.2008  | 1.23E-05 | -0.29852 | 4.56E-11 | -0.22327 | 1.10E-06 | -0.37461 | 5.26E-17 |
| 1.40E-08 | -0.08958 | 0.05306  | -0.29718 | 5.62E-11 | -0.13847 | 0.00271  | -0.28381 | 4.22E-10 |
| 0.02776  | -0.08902 | 0.05456  | -0.19099 | 3.26E-05 | -0.1616  | 0.00046  | -0.18366 | 6.55E-05 |
| 1.06E-09 | -0.18545 | 5.54E-05 | -0.33201 | 1.77E-13 | -0.25397 | 2.62E-08 | -0.36464 | 3.93E-16 |
| 1.20E-20 | -0.29543 | 7.36E-11 | -0.31735 | 2.19E-12 | -0.28347 | 4.44E-10 | -0.49177 | 8.29E-30 |
| 1.00E-25 | -0.23458 | 2.94E-07 | -0.15437 | 0.00082  | -0.17574 | 0.00013  | -0.35031 | 6.27E-15 |
| 2.86E-18 | -0.21003 | 4.70E-06 | -0.27609 | 1.29E-09 | -0.3166  | 2.48E-12 | -0.42535 | 6.07E-22 |
| 4.98E-11 | -0.22151 | 1.34E-06 | -0.21623 | 2.40E-06 | -0.29604 | 6.70E-11 | -0.41967 | 2.39E-21 |
| 1.67E-22 | -0.19159 | 3.07E-05 | -0.22723 | 6.97E-07 | -0.20767 | 6.03E-06 | -0.31088 | 6.37E-12 |
| 1.86E-16 | -0.21956 | 1.66E-06 | -0.21675 | 2.27E-06 | -0.23916 | 1.69E-07 | -0.34522 | 1.62E-14 |
| 4.54E-11 | -0.27688 | 1.15E-09 | -0.3762  | 3.79E-17 | -0.36952 | 1.48E-16 | -0.54843 | 5.02E-38 |
| 2.58E-07 | -0.21731 | 2.13E-06 | -0.22494 | 9.06E-07 | -0.26032 | 1.13E-08 | -0.35876 | 1.24E-15 |
| 0.05696  | -0.18512 | 5.71E-05 | -0.27338 | 1.89E-09 | -0.30413 | 1.89E-11 | -0.37849 | 2.36E-17 |
| 4.10E-11 | -0.16661 | 0.0003   | -0.31966 | 1.48E-12 | -0.42164 | 1.49E-21 | -0.50118 | 4.55E-31 |
| 0.71849  | -0.14567 | 0.0016   | -0.29337 | 1.01E-10 | -0.26668 | 4.80E-09 | -0.38002 | 1.71E-17 |
| 1.33E-05 | -0.2769  | 1.15E-09 | -0.17903 | 0.0001   | -0.21733 | 2.13E-06 | -0.40699 | 4.66E-20 |
| 2.04E-13 | -0.20325 | 9.57E-06 | -0.20551 | 7.57E-06 | -0.33158 | 1.90E-13 | -0.44623 | 3.12E-24 |
| 0.23265  | -0.1045  | 0.02392  | -0.35659 | 1.89E-15 | -0.26701 | 4.59E-09 | -0.27836 | 9.31E-10 |
| 1.13E-08 | -0.3312  | 2.04E-13 | -0.38532 | 5.61E-18 | -0.37238 | 8.29E-17 | -0.54315 | 3.41E-37 |
| 3.26E-09 | 0.101239 | 0.0287   | 0.378109 | 2.55E-17 | 0.350176 | 6.43E-15 | 0.43643  | 3.87E-23 |
| 4.04E-05 | -0.21511 | 2.72E-06 | -0.22097 | 1.42E-06 | -0.20374 | 9.09E-06 | -0.33658 | 7.83E-14 |
| 4.15E-18 | -0.03146 | 0.49769  | -0.18583 | 5.34E-05 | -0.17687 | 0.00012  | -0.18684 | 4.85E-05 |
| 0.08791  | -0.11105 | 0.01636  | -0.25172 | 3.50E-08 | -0.22469 | 9.32E-07 | -0.32608 | 4.97E-13 |
| 1.93E-14 | -0.21211 | 3.76E-06 | -0.26576 | 5.45E-09 | -0.26647 | 4.94E-09 | -0.40364 | 9.99E-20 |
| 2.81E-22 | -0.21412 | 3.03E-06 | -0.35192 | 4.62E-15 | -0.32071 | 1.24E-12 | -0.49303 | 5.64E-30 |
| 8.63E-11 | -0.15131 | 0.00104  | -0.21917 | 1.74E-06 | -0.20776 | 5.98E-06 | -0.30779 | 1.05E-11 |
| 7.35E-21 | -0.23927 | 1.67E-07 | -0.3801  | 1.68E-17 | -0.32209 | 9.85E-13 | -0.50842 | 4.58E-32 |
| 0.20309  | -0.02017 | 0.66379  | -0.17154 | 0.0002   | -0.10982 | 0.01759  | -0.10438 | 0.02409  |
| 0.31204  | -0.01286 | 0.78172  | -0.07526 | 0.10431  | -0.15948 | 0.00054  | -0.09653 | 0.03704  |
| 8.15E-15 | -0.24194 | 1.20E-07 | -0.20822 | 5.69E-06 | -0.3501  | 6.52E-15 | -0.43859 | 2.24E-23 |
| 1.49E-10 | -0.12485 | 0.0069   | -0.30473 | 1.72E-11 | -0.20368 | 9.15E-06 | -0.24032 | 1.47E-07 |
| 0.0001   | 0.036271 | 0.43422  | -0.34539 | 1.57E-14 | -0.26711 | 4.53E-09 | -0.33299 | 1.48E-13 |
| 1.16E-18 | -0.19369 | 2.50E-05 | -0.2359  | 2.51E-07 | -0.17221 | 0.00018  | -0.36826 | 1.91E-16 |
| 6.84E-17 | -0.13989 | 0.00245  | -0.1661  | 0.00031  | -0.23435 | 3.02E-07 | -0.29833 | 4.70E-11 |

|          |          |          |          |          |          |          |          |          |
|----------|----------|----------|----------|----------|----------|----------|----------|----------|
| 5.32E-08 | -0.11482 | 0.01304  | -0.24936 | 4.74E-08 | -0.25098 | 3.85E-08 | -0.34152 | 3.20E-14 |
| 6.92E-09 | -0.16465 | 0.00035  | -0.36849 | 1.82E-16 | -0.37734 | 2.99E-17 | -0.40416 | 8.88E-20 |
| 5.55E-06 | -0.10023 | 0.03034  | -0.11641 | 0.01182  | -0.04895 | 0.2911   | -0.10544 | 0.02268  |
| 3.81E-13 | 0.002984 | 0.94872  | -0.25759 | 1.63E-08 | -0.11978 | 0.00958  | -0.1226  | 0.008    |
| 0.00113  | -0.11535 | 0.01262  | -0.34174 | 3.08E-14 | -0.24586 | 7.38E-08 | -0.3916  | 1.45E-18 |
| 1.54E-10 | -0.19278 | 2.74E-05 | -0.21869 | 1.83E-06 | -0.1695  | 0.00023  | -0.35065 | 5.88E-15 |
| 1.11E-21 | -0.22902 | 5.66E-07 | -0.27323 | 1.93E-09 | -0.17472 | 0.00015  | -0.42725 | 3.81E-22 |
| 7.57E-07 | -0.18379 | 6.46E-05 | -0.26968 | 3.18E-09 | -0.28082 | 6.53E-10 | -0.41156 | 1.62E-20 |
| 0.00054  | -0.20175 | 1.12E-05 | -0.40146 | 1.64E-19 | -0.33603 | 8.64E-14 | -0.43881 | 2.12E-23 |
| 1.96E-05 | 0.253059 | 2.95E-08 | 0.349911 | 6.76E-15 | 0.338749 | 5.30E-14 | 0.47062  | 4.09E-27 |
| 1.57E-06 | -0.24369 | 9.68E-08 | -0.07434 | 0.10864  | -0.1419  | 0.00211  | -0.33796 | 6.10E-14 |
| 0.53865  | -0.0245  | 0.59739  | -0.30774 | 1.06E-11 | -0.29166 | 1.31E-10 | -0.34769 | 1.02E-14 |
| 0.01745  | -0.11262 | 0.01489  | -0.47681 | 6.97E-28 | -0.41227 | 1.37E-20 | -0.43407 | 7.02E-23 |
| 2.01E-05 | -0.12621 | 0.00631  | -0.20037 | 1.28E-05 | -0.21977 | 1.62E-06 | -0.30747 | 1.11E-11 |
| 2.35E-20 | -0.11546 | 0.01254  | -0.30803 | 1.01E-11 | -0.29402 | 9.14E-11 | -0.31943 | 1.54E-12 |
| 1.44E-11 | -0.26398 | 6.94E-09 | -0.33358 | 1.34E-13 | -0.42074 | 1.85E-21 | -0.51936 | 1.28E-33 |
| 2.61E-15 | -0.05404 | 0.24379  | -0.37551 | 4.37E-17 | -0.24996 | 4.39E-08 | -0.27552 | 1.40E-09 |
| 9.63E-10 | -0.27207 | 2.27E-09 | -0.29669 | 6.06E-11 | -0.27717 | 1.11E-09 | -0.4743  | 1.43E-27 |
| 0.03159  | -0.17232 | 0.00018  | -0.36811 | 1.96E-16 | -0.40284 | 1.20E-19 | -0.47976 | 2.95E-28 |
| 2.45E-32 | -0.23769 | 2.02E-07 | -0.26998 | 3.05E-09 | -0.2575  | 1.65E-08 | -0.45559 | 2.60E-25 |
| 4.20E-12 | -0.10389 | 0.02476  | -0.16232 | 0.00043  | -0.23359 | 3.30E-07 | -0.31862 | 1.77E-12 |
| 2.55E-20 | -0.14116 | 0.00223  | -0.33403 | 1.23E-13 | -0.25124 | 3.73E-08 | -0.35635 | 1.98E-15 |
| 6.39E-07 | -0.16469 | 0.00035  | -0.40082 | 1.89E-19 | -0.30652 | 1.29E-11 | -0.40289 | 1.19E-19 |
| 2.00E-12 | -0.18018 | 9.02E-05 | -0.24686 | 6.51E-08 | -0.25962 | 1.25E-08 | -0.39116 | 1.59E-18 |
| 6.23E-06 | -0.18102 | 8.36E-05 | -0.31843 | 1.83E-12 | -0.34328 | 2.32E-14 | -0.44989 | 1.19E-24 |
| 1.11E-18 | -0.11057 | 0.01683  | -0.24128 | 1.30E-07 | -0.11402 | 0.01369  | -0.24692 | 6.46E-08 |
| 1.62E-17 | -0.17623 | 0.00013  | -0.34751 | 1.06E-14 | -0.27262 | 2.11E-09 | -0.3912  | 1.58E-18 |
| 2.45E-13 | -0.0166  | 0.72055  | -0.16123 | 0.00047  | -0.10741 | 0.02026  | -0.06598 | 0.15459  |
| 1.14E-15 | -0.14201 | 0.0021   | -0.3042  | 1.87E-11 | -0.27378 | 1.79E-09 | -0.33525 | 9.93E-14 |
| 9.09E-09 | -0.22012 | 1.56E-06 | -0.26815 | 3.92E-09 | -0.23809 | 1.93E-07 | -0.42431 | 7.82E-22 |
| 1.09E-25 | -0.19684 | 1.83E-05 | -0.27258 | 2.12E-09 | -0.1872  | 4.69E-05 | -0.36812 | 1.96E-16 |
| 2.47E-20 | -0.22257 | 1.19E-06 | -0.33802 | 6.04E-14 | -0.23776 | 2.00E-07 | -0.43126 | 1.42E-22 |
| 1.38E-09 | -0.14062 | 0.00232  | -0.29399 | 9.18E-11 | -0.30894 | 8.73E-12 | -0.40838 | 3.39E-20 |
| 4.75E-10 | -0.06835 | 0.14023  | -0.05944 | 0.19976  | -0.11985 | 0.00953  | -0.15586 | 0.00073  |
| 2.06E-15 | -0.16148 | 0.00046  | -0.20904 | 5.22E-06 | -0.19412 | 2.40E-05 | -0.26954 | 3.24E-09 |
| 1.95E-06 | -0.10381 | 0.02487  | -0.32722 | 4.08E-13 | -0.36551 | 3.30E-16 | -0.36464 | 3.93E-16 |
| 5.20E-09 | -0.29745 | 5.39E-11 | -0.31512 | 3.17E-12 | -0.42263 | 1.17E-21 | -0.57246 | 5.19E-42 |
| 2.47E-09 | -0.25017 | 4.28E-08 | -0.28699 | 2.64E-10 | -0.35498 | 2.58E-15 | -0.48455 | 7.22E-29 |
| 1.86E-05 | -0.1409  | 0.00227  | -0.34938 | 7.47E-15 | -0.28273 | 4.95E-10 | -0.34341 | 2.26E-14 |
| 1.10E-22 | -0.18535 | 5.59E-05 | -0.25163 | 3.54E-08 | -0.29336 | 1.01E-10 | -0.42344 | 9.64E-22 |
| 0.00257  | -0.04692 | 0.31168  | -0.29539 | 7.40E-11 | -0.29328 | 1.02E-10 | -0.3351  | 1.02E-13 |
| 8.29E-06 | -0.20293 | 9.88E-06 | -0.3148  | 3.34E-12 | -0.27239 | 2.18E-09 | -0.34312 | 2.39E-14 |
| 8.08E-12 | -0.15418 | 0.00083  | -0.26292 | 8.01E-09 | -0.26521 | 5.87E-09 | -0.37258 | 7.96E-17 |
| 0.96054  | -0.10378 | 0.02491  | -0.21261 | 3.56E-06 | -0.18946 | 3.78E-05 | -0.28886 | 1.99E-10 |
| 2.03E-05 | -0.1961  | 1.97E-05 | -0.35918 | 1.15E-15 | -0.38535 | 5.57E-18 | -0.42595 | 5.24E-22 |

|          |          |          |          |          |          |          |          |          |
|----------|----------|----------|----------|----------|----------|----------|----------|----------|
| 7.03E-34 | -0.09215 | 0.04656  | -0.21443 | 2.92E-06 | -0.12713 | 0.00594  | -0.20744 | 6.18E-06 |
| 7.14E-15 | -0.26312 | 7.79E-09 | -0.32754 | 3.86E-13 | -0.37961 | 1.87E-17 | -0.50149 | 4.13E-31 |
| 1.00E-07 | -0.09644 | 0.03722  | -0.34362 | 2.18E-14 | -0.23795 | 1.96E-07 | -0.32059 | 1.27E-12 |
| 1.18E-12 | -0.12097 | 0.00887  | -0.30863 | 9.17E-12 | -0.19803 | 1.63E-05 | -0.28083 | 6.53E-10 |
| 9.80E-09 | -0.25559 | 2.12E-08 | -0.23954 | 1.61E-07 | -0.20018 | 1.31E-05 | -0.36919 | 1.58E-16 |
| 4.31E-08 | -0.31427 | 3.65E-12 | -0.2721  | 2.27E-09 | -0.41776 | 3.77E-21 | -0.62058 | 4.66E-51 |
| 0.30208  | -0.21618 | 2.42E-06 | -0.13941 | 0.00253  | -0.2197  | 1.64E-06 | -0.29457 | 8.39E-11 |
| 0.00064  | -0.10847 | 0.01904  | -0.32619 | 4.87E-13 | -0.27588 | 1.33E-09 | -0.29389 | 9.32E-11 |
| 6.26E-10 | -0.13846 | 0.00271  | -0.32264 | 8.96E-13 | -0.24646 | 6.84E-08 | -0.34459 | 1.82E-14 |
| 4.16E-26 | -0.12864 | 0.00537  | -0.19322 | 2.62E-05 | -0.21767 | 2.05E-06 | -0.27969 | 7.69E-10 |
| 0.29947  | -0.27276 | 2.07E-09 | -0.25337 | 2.83E-08 | -0.31955 | 1.51E-12 | -0.46171 | 4.92E-26 |
| 1.09E-11 | -0.0046  | 0.92098  | -0.12691 | 0.00603  | -0.06509 | 0.16021  | -0.10902 | 0.01844  |
| 0.0001   | -0.17773 | 0.00011  | -0.28656 | 2.81E-10 | -0.2352  | 2.73E-07 | -0.32152 | 1.08E-12 |
| 3.03E-14 | -0.18361 | 6.57E-05 | -0.4134  | 1.05E-20 | -0.36011 | 9.56E-16 | -0.47829 | 4.53E-28 |
| 3.40E-19 | -0.2998  | 3.74E-11 | -0.40635 | 5.39E-20 | -0.36976 | 1.41E-16 | -0.58073 | 1.85E-43 |
| 6.32E-22 | -0.11291 | 0.01464  | -0.14753 | 0.00139  | -0.15259 | 0.00094  | -0.24322 | 1.03E-07 |
| 0.00407  | -0.14451 | 0.00174  | -0.29731 | 5.50E-11 | -0.34355 | 2.21E-14 | -0.41798 | 3.58E-21 |
| 0.00241  | -0.10675 | 0.02104  | -0.30888 | 8.81E-12 | -0.3372  | 7.00E-14 | -0.37801 | 2.61E-17 |
| 3.51E-15 | -0.17811 | 0.00011  | -0.16514 | 0.00034  | -0.2371  | 2.17E-07 | -0.37636 | 3.66E-17 |
| 1.03E-07 | -0.2389  | 1.75E-07 | -0.38439 | 6.82E-18 | -0.3699  | 1.37E-16 | -0.46645 | 1.32E-26 |
| 8.70E-19 | -0.23943 | 1.64E-07 | -0.27953 | 7.87E-10 | -0.33095 | 2.13E-13 | -0.47945 | 3.24E-28 |
| 6.85E-14 | -0.11356 | 0.01407  | -0.22914 | 5.58E-07 | -0.24031 | 1.47E-07 | -0.26091 | 1.05E-08 |
| 0.00017  | -0.05519 | 0.23391  | -0.29359 | 9.76E-11 | -0.29565 | 7.11E-11 | -0.25313 | 2.92E-08 |
| 1.88E-07 | -0.23133 | 4.32E-07 | -0.37075 | 1.15E-16 | -0.29051 | 1.56E-10 | -0.42094 | 1.76E-21 |
| 2.48E-07 | -0.18596 | 5.28E-05 | -0.2514  | 3.65E-08 | -0.30397 | 1.94E-11 | -0.36379 | 4.65E-16 |
| 6.53E-13 | 0.203753 | 9.08E-06 | 0.479847 | 2.88E-28 | 0.560781 | 4.93E-40 | 0.664185 | 9.82E-61 |
| 0.03526  | -0.12911 | 0.0052   | -0.26417 | 6.76E-09 | -0.24572 | 7.51E-08 | -0.31895 | 1.67E-12 |
| 8.35E-10 | -0.11686 | 0.0115   | -0.18365 | 6.55E-05 | -0.1587  | 0.00058  | -0.29637 | 6.37E-11 |
| 2.14E-08 | -0.18655 | 4.99E-05 | -0.2838  | 4.23E-10 | -0.41683 | 4.71E-21 | -0.46867 | 7.10E-27 |
| 1.66E-06 | -0.20508 | 7.91E-06 | -0.38854 | 2.81E-18 | -0.32342 | 7.84E-13 | -0.4389  | 2.07E-23 |
| 6.30E-05 | -0.02771 | 0.55036  | -0.08329 | 0.07213  | -0.12143 | 0.00862  | -0.08594 | 0.0635   |
| 4.90E-06 | -0.16847 | 0.00026  | -0.31648 | 2.53E-12 | -0.23905 | 1.71E-07 | -0.37792 | 2.65E-17 |
| 4.73E-12 | -0.17473 | 0.00015  | -0.28613 | 3.00E-10 | -0.13907 | 0.0026   | -0.31282 | 4.63E-12 |
| 1.08E-64 | 0.177477 | 0.00012  | 0.077328 | 0.0951   | 0.094943 | 0.04028  | 0.152914 | 0.00092  |
| 2.02E-84 | 0.114586 | 0.01322  | -0.00048 | 0.99179  | 0.015612 | 0.73651  | 0.107089 | 0.02063  |
| 2.88E-11 | -0.0303  | 0.51369  | 0.042046 | 0.36463  | -0.09985 | 0.03097  | -0.12114 | 0.00878  |
| 9.67E-29 | 0.029229 | 0.52864  | -0.02552 | 0.5822   | -0.03444 | 0.45781  | 0.003032 | 0.94791  |
| 4.75E-28 | 0.163234 | 0.0004   | 0.176954 | 0.00012  | 0.323676 | 7.51E-13 | 0.438753 | 2.15E-23 |
| #####    | 0.118859 | 0.01015  | 0.081972 | 0.07678  | 0.020656 | 0.65615  | 0.112599 | 0.01491  |
| #####    | 0.120064 | 0.0094   | 0.01259  | 0.78612  | -0.03877 | 0.40326  | 0.052358 | 0.25881  |
| 3.22E-35 | 0.116781 | 0.01155  | -0.11006 | 0.01734  | -0.07214 | 0.11954  | 0.00911  | 0.84435  |
| 2.55E-36 | 0.077102 | 0.09607  | -0.04195 | 0.36573  | -0.01316 | 0.77661  | 0.057826 | 0.21227  |
| 5.96E-39 | 0.106254 | 0.02165  | -0.07766 | 0.09368  | -0.055   | 0.23549  | 0.018817 | 0.68504  |
| #####    | 0.133488 | 0.00385  | 0.032667 | 0.48128  | -0.00192 | 0.96707  | 0.084897 | 0.0668   |
| #####    | 0.104104 | 0.02446  | 0.07799  | 0.09229  | 0.005009 | 0.91403  | 0.103326 | 0.02556  |

|          |          |         |          |          |          |          |          |          |
|----------|----------|---------|----------|----------|----------|----------|----------|----------|
| 7.46E-31 | 0.0412   | 0.37437 | -0.01107 | 0.8114   | 0.020148 | 0.66408  | 0.082245 | 0.0758   |
| 1.25E-29 | 0.043571 | 0.34747 | 0.117021 | 0.01138  | 0.000213 | 0.99634  | 0.085656 | 0.06439  |
| 5.17E-17 | 0.011992 | 0.79604 | 0.006606 | 0.88679  | -0.01452 | 0.75431  | 0.037397 | 0.42009  |
| #####    | 0.097974 | 0.03429 | 0.048969 | 0.29096  | -0.01884 | 0.68471  | 0.072528 | 0.11754  |
| 2.33E-81 | 0.075095 | 0.10507 | 0.070726 | 0.12695  | -0.05074 | 0.2738   | 0.0742   | 0.10929  |
| 3.53E-94 | 0.131169 | 0.00452 | 0.008364 | 0.85695  | -0.05648 | 0.22309  | 0.040611 | 0.38124  |
| 8.91E-71 | 0.085657 | 0.06439 | 0.055294 | 0.23302  | 0.006688 | 0.88539  | 0.101241 | 0.0287   |
| #####    | 0.126395 | 0.00624 | 0.037981 | 0.41286  | -0.01538 | 0.74024  | 0.094359 | 0.04153  |
| #####    | 0.119173 | 0.00995 | 0.094217 | 0.04184  | -0.00119 | 0.97949  | 0.10681  | 0.02097  |
| 1.77E-77 | 0.076467 | 0.09885 | 0.019251 | 0.67818  | -0.04494 | 0.33255  | 0.058017 | 0.21077  |
| 1.00E-34 | 0.062095 | 0.18038 | 0.049657 | 0.28422  | -0.0094  | 0.83939  | 0.048919 | 0.29145  |
| 4.74E-54 | 0.0843   | 0.06874 | 0.121612 | 0.00852  | 0.034443 | 0.45775  | 0.126612 | 0.00615  |
| 1.68E-48 | 0.054916 | 0.23624 | 0.140521 | 0.00234  | 0.057567 | 0.21434  | 0.128136 | 0.00555  |
| #####    | 0.101524 | 0.02825 | 0.077338 | 0.09505  | 0.030342 | 0.51305  | 0.100548 | 0.02982  |
| #####    | 0.104839 | 0.02347 | 0.055489 | 0.23137  | -0.01879 | 0.68546  | 0.086464 | 0.0619   |
| #####    | 0.101011 | 0.02907 | 0.101217 | 0.02874  | 0.012928 | 0.78052  | 0.099776 | 0.0311   |
| 7.90E-14 | 0.017013 | 0.71385 | 0.130067 | 0.00487  | -0.00084 | 0.98547  | 0.054351 | 0.24109  |
| #####    | 0.104193 | 0.02434 | 0.064867 | 0.16166  | 0.002603 | 0.95527  | 0.110656 | 0.01675  |
| #####    | 0.123616 | 0.00748 | 0.077776 | 0.09319  | -0.00021 | 0.99632  | 0.110339 | 0.01706  |
| 6.82E-38 | 0.132089 | 0.00424 | 0.180482 | 8.78E-05 | 0.074906 | 0.10595  | 0.193346 | 2.59E-05 |
| 2.35E-74 | 0.070136 | 0.13016 | 0.081361 | 0.07902  | -0.00408 | 0.92995  | 0.083983 | 0.0698   |
| 9.34E-55 | 0.148129 | 0.00133 | 0.092183 | 0.04648  | -0.01924 | 0.67836  | 0.077085 | 0.09615  |
| 1.08E-44 | 0.097299 | 0.03555 | 0.018878 | 0.68407  | 0.00987  | 0.83155  | 0.072476 | 0.1178   |
| 1.42E-58 | 0.17419  | 0.00015 | 0.137817 | 0.00284  | 0.136057 | 0.00322  | 0.249068 | 4.92E-08 |
| 1.86E-63 | 0.115656 | 0.01238 | 0.219341 | 1.70E-06 | 0.083921 | 0.07     | 0.239588 | 1.60E-07 |
| #####    | 0.126945 | 0.00601 | 0.090117 | 0.05163  | 0.004838 | 0.91696  | 0.118715 | 0.01024  |
| #####    | 0.106578 | 0.02125 | 0.02419  | 0.60207  | -0.04883 | 0.29233  | 0.064733 | 0.16253  |
| 1.73E-36 | 0.050685 | 0.27436 | 0.037299 | 0.42131  | -0.00633 | 0.8915   | -0.014   | 0.76285  |
| 7.90E-83 | 0.071528 | 0.12269 | 0.067262 | 0.1467   | -0.02961 | 0.52328  | 0.06303  | 0.1739   |
| #####    | 0.121298 | 0.00869 | 0.022647 | 0.62545  | -0.01446 | 0.75534  | 0.058738 | 0.20514  |
| 2.61E-58 | 0.135143 | 0.00343 | 0.081327 | 0.07914  | 0.071025 | 0.12535  | 0.142937 | 0.00196  |
| #####    | 0.091841 | 0.0473  | 0.114433 | 0.01335  | 0.02166  | 0.64059  | 0.132083 | 0.00425  |
| 2.17E-53 | 0.111145 | 0.01627 | 0.067031 | 0.1481   | 0.074824 | 0.10634  | 0.164046 | 0.00037  |
| 2.52E-72 | 0.10126  | 0.02867 | 0.068134 | 0.14152  | -0.04858 | 0.29484  | 0.067768 | 0.14368  |
| 8.51E-91 | 0.14135  | 0.0022  | 0.084201 | 0.06907  | 0.050006 | 0.28085  | 0.193655 | 2.51E-05 |
| 0.00211  | -0.09194 | 0.04707 | -0.08819 | 0.05686  | -0.06027 | 0.19352  | -0.16093 | 0.00048  |
| 6.03E-40 | 0.087615 | 0.0585  | 0.051707 | 0.26479  | -0.02404 | 0.6043   | 0.031084 | 0.5028   |
| 4.71E-27 | 0.073867 | 0.11089 | -0.00626 | 0.89266  | -0.0732  | 0.11416  | 0.028163 | 0.54379  |
| 5.12E-27 | 0.055643 | 0.23008 | -0.11099 | 0.01642  | -0.20755 | 6.11E-06 | -0.08449 | 0.06812  |
| #####    | 0.160858 | 0.00048 | 0.051721 | 0.26466  | -0.00565 | 0.90313  | 0.11221  | 0.01526  |
| 9.15E-25 | -0.03352 | 0.46985 | -0.1001  | 0.03056  | -0.15079 | 0.00108  | -0.15436 | 0.00082  |
| #####    | 0.143868 | 0.00183 | 0.088701 | 0.05543  | 0.026602 | 0.56636  | 0.145851 | 0.00158  |
| 6.53E-40 | 0.017529 | 0.70556 | 0.018763 | 0.6859   | -0.07782 | 0.093    | -0.01617 | 0.72738  |
| 6.25E-52 | 0.14507  | 0.00167 | -0.0602  | 0.19406  | -0.02542 | 0.58377  | 0.007911 | 0.86461  |
| 2.76E-73 | 0.172724 | 0.00018 | 0.150702 | 0.00109  | 0.235185 | 2.73E-07 | 0.326593 | 4.55E-13 |

|          |          |          |          |          |          |          |          |          |
|----------|----------|----------|----------|----------|----------|----------|----------|----------|
| 4.74E-37 | 0.012146 | 0.79349  | 0.089498 | 0.05327  | 0.054065 | 0.24359  | 0.025586 | 0.58128  |
| 5.72E-22 | 0.100876 | 0.02928  | 0.173518 | 0.00016  | 0.200005 | 1.33E-05 | 0.186421 | 5.05E-05 |
| 1.01E-28 | 0.024681 | 0.59471  | 0.039625 | 0.39292  | -0.02523 | 0.5866   | 0.009931 | 0.83052  |
| 1.95E-36 | 0.173947 | 0.00016  | -0.02007 | 0.66538  | 0.110211 | 0.01719  | 0.280882 | 6.47E-10 |
| 2.31E-41 | 0.129099 | 0.0052   | -0.06415 | 0.16636  | -0.06775 | 0.14376  | 0.11501  | 0.01288  |
| #####    | 0.127928 | 0.00563  | 0.119545 | 0.00972  | 0.049467 | 0.28607  | 0.154523 | 0.00081  |
| #####    | 0.180281 | 8.94E-05 | 0.013109 | 0.77754  | -0.01982 | 0.6693   | 0.075523 | 0.1031   |
| 7.30E-81 | 0.072375 | 0.11831  | 0.101885 | 0.02769  | 0.011292 | 0.80772  | 0.128695 | 0.00535  |
| 2.67E-86 | 0.141579 | 0.00216  | -0.00636 | 0.89106  | -0.05086 | 0.27269  | 0.070205 | 0.12979  |
| #####    | 0.144875 | 0.0017   | 0.022599 | 0.62618  | -0.0139  | 0.76454  | 0.071624 | 0.12219  |
| 7.14E-52 | 0.02895  | 0.53259  | 0.132688 | 0.00407  | 0.01935  | 0.67662  | 0.074843 | 0.10625  |
| 3.41E-95 | 0.079749 | 0.08516  | 0.044701 | 0.3351   | -0.02284 | 0.62244  | 0.060935 | 0.18867  |
| #####    | 0.106338 | 0.02154  | 0.079312 | 0.08689  | -0.01417 | 0.76004  | 0.07571  | 0.10224  |
| 5.70E-23 | 0.04708  | 0.30999  | 0.080077 | 0.08388  | 0.050945 | 0.2719   | 0.105025 | 0.02322  |
| 5.24E-57 | 0.137692 | 0.00287  | 0.037817 | 0.41488  | -0.00876 | 0.85029  | 0.114985 | 0.0129   |
| #####    | 0.115035 | 0.01286  | 0.088428 | 0.05619  | 0.004045 | 0.93052  | 0.114834 | 0.01302  |
| 3.44E-51 | 0.091471 | 0.04821  | 0.083954 | 0.06989  | 0.049672 | 0.28408  | 0.13383  | 0.00376  |
| #####    | 0.123375 | 0.0076   | 0.051279 | 0.26876  | -0.03474 | 0.45387  | 0.073899 | 0.11074  |
| 1.55E-33 | 0.131762 | 0.00434  | 0.254146 | 2.56E-08 | 0.251951 | 3.40E-08 | 0.393005 | 1.07E-18 |
| #####    | 0.133535 | 0.00384  | 0.075015 | 0.10544  | -0.0003  | 0.99491  | 0.11507  | 0.01284  |
| 2.14E-28 | 0.199677 | 1.38E-05 | 0.159944 | 0.00052  | 0.192487 | 2.82E-05 | 0.316371 | 2.58E-12 |
| #####    | 0.207939 | 5.87E-06 | 0.130725 | 0.00466  | 0.186746 | 4.89E-05 | 0.343827 | 2.10E-14 |
| 8.91E-50 | 0.03476  | 0.45363  | -0.04934 | 0.28732  | -0.0534  | 0.24944  | -0.0211  | 0.64932  |
| 1.56E-12 | 0.019689 | 0.67128  | 0.034402 | 0.4583   | 0.076413 | 0.09909  | 0.020574 | 0.65742  |
| 2.02E-57 | 0.086635 | 0.06139  | 0.035995 | 0.43774  | 0.003727 | 0.93599  | 0.095042 | 0.04007  |
| 6.64E-28 | 0.186084 | 5.21E-05 | 0.090854 | 0.04974  | 0.080086 | 0.08384  | 0.208183 | 5.72E-06 |
| #####    | 0.169306 | 0.00024  | 0.115155 | 0.01277  | 0.054132 | 0.243    | 0.207072 | 6.43E-06 |
| #####    | 0.114449 | 0.01333  | 0.121416 | 0.00863  | 0.025676 | 0.57994  | 0.148628 | 0.00128  |
| #####    | 0.145755 | 0.00159  | 0.084029 | 0.06964  | 0.036263 | 0.43432  | 0.157232 | 0.00065  |
| 1.08E-20 | 0.141161 | 0.00223  | 0.140532 | 0.00234  | 0.2151   | 2.72E-06 | 0.226329 | 7.73E-07 |
| #####    | 0.100363 | 0.03012  | 0.075033 | 0.10536  | -0.03189 | 0.49174  | 0.07617  | 0.10017  |
| 4.24E-89 | 0.134266 | 0.00365  | 0.006454 | 0.88938  | -0.04308 | 0.35296  | 0.043493 | 0.34834  |
| 8.24E-25 | 0.026749 | 0.56421  | -0.06819 | 0.1412   | -0.03179 | 0.49317  | -0.03273 | 0.48048  |
| 2.54E-86 | 0.132325 | 0.00418  | 0.026291 | 0.57089  | 0.006712 | 0.88498  | 0.153931 | 0.00085  |
| 1.07E-46 | 0.070775 | 0.12669  | 0.146529 | 0.0015   | 0.012303 | 0.79088  | 0.18072  | 8.59E-05 |
| 1.56E-37 | 0.182332 | 7.40E-05 | 0.063111 | 0.17334  | 0.033247 | 0.47353  | 0.161904 | 0.00044  |
| 4.12E-56 | 0.153232 | 0.00089  | 0.074585 | 0.10746  | 0.092632 | 0.04542  | 0.184008 | 6.33E-05 |
| 1.13E-16 | 0.063245 | 0.17243  | 0.006329 | 0.8915   | -0.08835 | 0.05642  | -0.00764 | 0.86922  |
| 1.51E-23 | -0.12518 | 0.00676  | -0.06611 | 0.15374  | -0.18541 | 5.55E-05 | -0.21168 | 3.94E-06 |
| 1.85E-48 | -0.13914 | 0.00258  | 0.04943  | 0.28643  | -0.04405 | 0.34217  | -0.16393 | 0.00037  |
| #####    | 0.175408 | 0.00014  | 0.08137  | 0.07898  | 0.05321  | 0.25113  | 0.192099 | 2.93E-05 |
| 3.38E-54 | 0.157803 | 0.00062  | 0.033514 | 0.46998  | 0.011077 | 0.8113   | 0.139831 | 0.00246  |
| 1.84E-08 | 0.14549  | 0.00162  | 0.099193 | 0.0321   | 0.205968 | 7.21E-06 | 0.295542 | 7.23E-11 |
| 2.55E-75 | 0.118177 | 0.01059  | -0.00739 | 0.87348  | 0.063039 | 0.17383  | 0.156952 | 0.00066  |
| 7.51E-30 | 0.178994 | 0.0001   | 0.116021 | 0.01211  | 0.102552 | 0.02669  | 0.188913 | 3.98E-05 |

|          |          |          |          |         |          |          |          |          |
|----------|----------|----------|----------|---------|----------|----------|----------|----------|
| 1.07E-67 | 0.148748 | 0.00126  | 0.069746 | 0.13232 | 0.032017 | 0.49006  | 0.083182 | 0.07251  |
| 3.26E-20 | 0.033929 | 0.4645   | -0.10163 | 0.02809 | -0.1893  | 3.84E-05 | -0.13126 | 0.00449  |
| 7.73E-59 | 0.082157 | 0.07612  | -0.03666 | 0.42926 | -0.10252 | 0.02673  | -0.02387 | 0.60686  |
| 6.04E-46 | 0.1444   | 0.00176  | 0.074557 | 0.10759 | -0.07426 | 0.109    | 0.089389 | 0.05356  |
| 2.11E-52 | 0.396916 | 4.51E-19 | 0.166594 | 0.0003  | 0.061307 | 0.18598  | 0.215894 | 2.49E-06 |
| 1.50E-45 | 0.116315 | 0.01189  | 0.103183 | 0.02576 | -0.01977 | 0.66998  | 0.14362  | 0.00186  |
| 2.22E-37 | 0.115589 | 0.01243  | 0.098833 | 0.03274 | 0.047197 | 0.30878  | 0.2096   | 4.92E-06 |
| 3.43E-19 | -0.13168 | 0.00437  | -0.06598 | 0.1546  | 0.009663 | 0.83503  | -0.1007  | 0.02957  |
| #####    | 0.119561 | 0.00971  | 0.093325 | 0.04382 | 0.000188 | 0.99677  | 0.123262 | 0.00766  |
| 1.56E-77 | 0.099476 | 0.03161  | 0.032444 | 0.48429 | -0.02047 | 0.65905  | 0.051509 | 0.26662  |
| #####    | 0.148545 | 0.00128  | 0.065971 | 0.15463 | -0.00432 | 0.92583  | 0.088251 | 0.05669  |
| #####    | 0.158572 | 0.00058  | 0.091389 | 0.04841 | 0.016137 | 0.72798  | 0.139284 | 0.00256  |
| 3.59E-52 | 0.179486 | 9.62E-05 | 0.05575  | 0.22918 | 0.109533 | 0.01789  | 0.236486 | 2.34E-07 |
| #####    | 0.151039 | 0.00106  | 0.060709 | 0.19032 | -0.00749 | 0.87174  | 0.094426 | 0.04139  |
| 4.50E-58 | 0.131885 | 0.00431  | 0.104707 | 0.02364 | 0.083788 | 0.07045  | 0.190632 | 3.37E-05 |
| 4.22E-49 | 0.154911 | 0.00078  | 0.099329 | 0.03187 | 0.060736 | 0.19013  | 0.177245 | 0.00012  |
| 1.76E-76 | 0.054895 | 0.23641  | -0.1196  | 0.00968 | -0.12691 | 0.00603  | -0.01903 | 0.68171  |
| 5.62E-28 | 0.171252 | 0.0002   | 0.155795 | 0.00073 | 0.315368 | 3.04E-12 | 0.358311 | 1.36E-15 |
| #####    | 0.143866 | 0.00183  | 0.057262 | 0.21678 | -0.00138 | 0.97632  | 0.095063 | 0.04003  |
| 2.33E-80 | 0.113674 | 0.01398  | 0.097844 | 0.03453 | 0.055226 | 0.23359  | 0.146322 | 0.00152  |
| 3.81E-33 | 0.095938 | 0.03822  | 0.057017 | 0.21876 | 0.140858 | 0.00228  | 0.148061 | 0.00133  |
| 6.26E-83 | 0.068417 | 0.13987  | 0.000221 | 0.9962  | -0.01852 | 0.68977  | 0.038935 | 0.40122  |
| 2.70E-24 | 0.204065 | 8.79E-06 | 0.014279 | 0.75827 | -0.01022 | 0.82571  | 0.121969 | 0.00833  |
| #####    | 0.175261 | 0.00014  | 0.027212 | 0.55749 | -0.02056 | 0.65765  | 0.10423  | 0.02429  |
| 1.39E-55 | 0.147354 | 0.00141  | 0.037266 | 0.42172 | -0.02936 | 0.52683  | 0.071962 | 0.12043  |
| 6.15E-15 | 0.008314 | 0.85779  | -0.15519 | 0.00077 | -0.11577 | 0.0123   | -0.07964 | 0.08557  |
| 3.91E-44 | 0.092649 | 0.04538  | -0.09734 | 0.03547 | -0.05387 | 0.24526  | -0.01456 | 0.75358  |
| 2.30E-69 | 0.185512 | 5.50E-05 | 0.067947 | 0.14262 | -0.00236 | 0.95941  | 0.09108  | 0.04917  |
| #####    | 0.089842 | 0.05235  | 0.115974 | 0.01214 | -0.00028 | 0.99519  | 0.085996 | 0.06333  |
| 4.67E-47 | 0.172455 | 0.00018  | 0.033324 | 0.4725  | 0.053842 | 0.24554  | 0.168798 | 0.00025  |
| #####    | 0.140107 | 0.00241  | 0.046334 | 0.31772 | -0.02619 | 0.57231  | 0.081986 | 0.07673  |
| 1.75E-36 | 0.094324 | 0.04161  | -0.04728 | 0.30796 | -0.04585 | 0.32285  | 0.058371 | 0.20799  |
| 3.59E-38 | 0.04606  | 0.3206   | -0.01279 | 0.78276 | -0.1543  | 0.00082  | -0.09934 | 0.03186  |
| 1.28E-18 | 0.046202 | 0.31911  | -0.01726 | 0.70996 | -0.06802 | 0.1422   | -0.00546 | 0.90632  |
| #####    | 0.186996 | 4.78E-05 | 0.161366 | 0.00046 | 0.149638 | 0.00118  | 0.314397 | 3.57E-12 |
| #####    | 0.186161 | 5.17E-05 | 0.091716 | 0.04761 | 0.050173 | 0.27924  | 0.187472 | 4.57E-05 |
| 2.72E-31 | 0.088377 | 0.05633  | -0.04508 | 0.33096 | -0.08557 | 0.06466  | -0.02297 | 0.62053  |
| 2.61E-69 | 0.081682 | 0.07784  | 0.094458 | 0.04131 | -0.01017 | 0.82644  | 0.080642 | 0.08171  |
| 1.04E-46 | 0.063447 | 0.17106  | -0.04751 | 0.3056  | 0.024616 | 0.59569  | 0.061815 | 0.18236  |
| 2.68E-47 | 0.191783 | 3.02E-05 | 0.035421 | 0.44509 | -0.01796 | 0.69871  | 0.141494 | 0.00218  |
| 1.59E-85 | 0.145683 | 0.0016   | 0.032493 | 0.48363 | 0.024714 | 0.59423  | 0.165008 | 0.00034  |
| #####    | 0.154303 | 0.00082  | 0.038788 | 0.40299 | -0.00636 | 0.89101  | 0.10503  | 0.02321  |
| #####    | 0.128163 | 0.00554  | 0.029853 | 0.51988 | -0.0278  | 0.54899  | 0.083419 | 0.0717   |
| 5.36E-63 | 0.149404 | 0.0012   | 0.166577 | 0.0003  | 0.20064  | 1.25E-05 | 0.315769 | 2.85E-12 |
| #####    | 0.101871 | 0.02772  | 0.079307 | 0.08691 | 0.023258 | 0.61613  | 0.105534 | 0.02256  |

|          |          |          |          |          |          |          |          |          |
|----------|----------|----------|----------|----------|----------|----------|----------|----------|
| #####    | 0.102899 | 0.02617  | 0.09398  | 0.04236  | -0.00365 | 0.93731  | 0.113426 | 0.01419  |
| 2.89E-49 | 0.095209 | 0.03972  | 0.15064  | 0.00109  | 0.061866 | 0.182    | 0.159703 | 0.00053  |
| 3.12E-17 | 0.076649 | 0.09805  | 0.071322 | 0.12378  | -0.0153  | 0.74159  | 0.022705 | 0.62455  |
| 3.66E-20 | -0.06892 | 0.13698  | 0.11916  | 0.00996  | 0.084293 | 0.06877  | -0.01962 | 0.67239  |
| 6.42E-21 | 0.044852 | 0.33347  | -0.03781 | 0.41494  | -0.10754 | 0.0201   | -0.03924 | 0.39753  |
| #####    | 0.208281 | 5.66E-06 | 0.090077 | 0.05174  | 0.062776 | 0.17564  | 0.221056 | 1.41E-06 |
| 2.78E-77 | 0.100077 | 0.03059  | -0.05243 | 0.25817  | -0.07919 | 0.08737  | 0.063327 | 0.17187  |
| #####    | 0.158941 | 0.00057  | 0.208294 | 5.65E-06 | 0.237473 | 2.07E-07 | 0.352017 | 4.54E-15 |
| 1.59E-51 | 0.118446 | 0.01041  | 0.033766 | 0.46666  | 0.031377 | 0.49878  | 0.110937 | 0.01647  |
| 1.55E-32 | 0.113224 | 0.01436  | 0.049211 | 0.28857  | 0.080256 | 0.08319  | 0.250841 | 3.92E-08 |
| 7.82E-46 | 0.06563  | 0.15678  | -0.0401  | 0.38726  | -0.03843 | 0.40733  | 0.047186 | 0.3089   |
| #####    | 0.116771 | 0.01156  | 0.057986 | 0.21101  | 0.004588 | 0.92124  | 0.103294 | 0.0256   |
| #####    | 0.164888 | 0.00035  | 0.084942 | 0.06665  | 0.052754 | 0.25522  | 0.216474 | 2.34E-06 |
| 3.76E-34 | 0.312933 | 4.55E-12 | 0.063115 | 0.17332  | -0.0101  | 0.82767  | 0.164147 | 0.00037  |
| 1.79E-74 | 0.11316  | 0.01442  | 0.078335 | 0.09086  | -0.01567 | 0.73548  | 0.071245 | 0.12419  |
| 4.16E-66 | 0.02902  | 0.53159  | -0.0299  | 0.51927  | -0.05474 | 0.23772  | -0.01907 | 0.68104  |
| 2.64E-62 | 0.135936 | 0.00325  | 0.055411 | 0.23203  | 0.026119 | 0.57342  | 0.099499 | 0.03157  |
| 4.43E-46 | 0.134517 | 0.00359  | -0.09193 | 0.0471   | -0.06102 | 0.18802  | 0.011978 | 0.79627  |
| 3.98E-16 | -0.03735 | 0.42065  | -0.06682 | 0.1494   | 0.002722 | 0.95322  | -0.01445 | 0.75539  |
| 5.97E-41 | 0.092004 | 0.04691  | 0.112538 | 0.01497  | 0.151891 | 0.00099  | 0.136399 | 0.00314  |
| 5.90E-76 | 0.048862 | 0.29201  | 0.09026  | 0.05126  | -0.06201 | 0.18096  | 0.063724 | 0.1692   |
| #####    | 0.12958  | 0.00504  | 0.096219 | 0.03766  | 0.131294 | 0.00448  | 0.21299  | 3.42E-06 |
| #####    | 0.136427 | 0.00314  | 0.055837 | 0.22845  | -0.00131 | 0.97744  | 0.079794 | 0.08498  |
| 6.24E-26 | -0.11792 | 0.01076  | -0.07464 | 0.10722  | -0.0657  | 0.15635  | -0.14245 | 0.00203  |
| 5.02E-31 | 0.10254  | 0.0267   | 0.100725 | 0.02953  | -0.00875 | 0.85034  | 0.04201  | 0.36504  |
| 2.31E-29 | 0.116231 | 0.01195  | -0.08822 | 0.05678  | -0.03235 | 0.48556  | 0.107774 | 0.01983  |
| 2.38E-24 | 0.045739 | 0.32398  | -0.06507 | 0.16032  | -0.10311 | 0.02586  | -0.04445 | 0.33787  |
| 1.20E-48 | 0.135303 | 0.00339  | 0.162986 | 0.00041  | 0.008257 | 0.85876  | 0.139138 | 0.00258  |
| 7.78E-37 | 0.048078 | 0.29984  | 0.095674 | 0.03876  | -0.00342 | 0.94118  | 0.077127 | 0.09596  |
| 1.96E-48 | 0.062656 | 0.17647  | 0.040207 | 0.386    | 0.084518 | 0.06803  | 0.130236 | 0.00482  |
| 1.18E-45 | 0.165266 | 0.00034  | -0.01118 | 0.80964  | -0.01838 | 0.69204  | 0.06134  | 0.18575  |
| 2.71E-18 | 0.196594 | 1.88E-05 | 0.191412 | 3.13E-05 | 0.131553 | 0.0044   | 0.305409 | 1.54E-11 |
| 4.02E-45 | 0.150328 | 0.00112  | 0.028738 | 0.53558  | 0.000954 | 0.98359  | 0.127256 | 0.00589  |
| 6.39E-15 | 0.13671  | 0.00307  | -0.001   | 0.98288  | 0.034842 | 0.45256  | 0.111243 | 0.01617  |
| #####    | 0.130621 | 0.00469  | 0.066768 | 0.14969  | -0.01203 | 0.79534  | 0.074007 | 0.11022  |
| 1.22E-37 | 0.107223 | 0.02047  | 0.042301 | 0.36172  | -0.01356 | 0.77012  | 0.049345 | 0.28727  |
| 1.77E-16 | 0.048437 | 0.29623  | -0.00396 | 0.932    | -0.06151 | 0.18455  | -0.03368 | 0.46778  |
| 1.58E-07 | 0.058076 | 0.2103   | 0.050721 | 0.27402  | 0.034481 | 0.45726  | 0.068893 | 0.13713  |
| 4.63E-28 | 0.093677 | 0.04303  | 0.064392 | 0.16476  | 0.042356 | 0.3611   | 0.104552 | 0.02385  |
| #####    | 0.126901 | 0.00603  | 0.244777 | 8.45E-08 | 0.188919 | 3.98E-05 | 0.274207 | 1.68E-09 |
| 3.77E-28 | -0.04726 | 0.3081   | -0.10774 | 0.01987  | -0.18937 | 3.81E-05 | -0.25239 | 3.21E-08 |
| 8.02E-28 | 0.219038 | 1.76E-06 | 0.242124 | 1.17E-07 | 0.083924 | 0.07     | 0.184186 | 6.23E-05 |
| 2.89E-39 | 0.250952 | 3.87E-08 | 0.314624 | 3.44E-12 | 0.373277 | 6.91E-17 | 0.53178  | 1.90E-35 |
| 3.10E-17 | -0.0785  | 0.09019  | -0.09486 | 0.04046  | -0.04112 | 0.37526  | -0.09691 | 0.0363   |
| 5.59E-22 | 0.064977 | 0.16095  | -0.04001 | 0.38837  | 0.029526 | 0.52446  | 0.069414 | 0.13418  |



|          |          |          |          |          |           |          |          |          |
|----------|----------|----------|----------|----------|-----------|----------|----------|----------|
| 4.10E-22 | -0.10267 | 0.02651  | -0.05762 | 0.21388  | 0.009934  | 0.83047  | -0.09799 | 0.03425  |
| 1.20E-85 | 0.094072 | 0.04216  | 0.010338 | 0.82369  | -0.0356   | 0.4428   | 0.046698 | 0.31394  |
| 1.13E-19 | 0.040086 | 0.38743  | 0.191005 | 3.25E-05 | -0.01891  | 0.6836   | 0.023762 | 0.60851  |
| 1.53E-58 | 0.105166 | 0.02303  | 0.090798 | 0.04989  | 0.028418  | 0.54014  | 0.165199 | 0.00034  |
| 1.66E-23 | 0.082856 | 0.07364  | 0.02546  | 0.58314  | -0.00819  | 0.85997  | 0.051814 | 0.26379  |
| 3.96E-64 | 0.085752 | 0.06409  | 0.064769 | 0.1623   | 0.000145  | 0.99751  | 0.090405 | 0.05089  |
| 5.05E-44 | 0.121779 | 0.00843  | 0.101576 | 0.02817  | 0.05598   | 0.22726  | 0.178796 | 0.0001   |
| #####    | 0.082093 | 0.07635  | 0.048902 | 0.29162  | -0.06114  | 0.1872   | 0.019474 | 0.67466  |
| 1.29E-68 | 0.083866 | 0.07019  | 0.095736 | 0.03863  | 0.062304  | 0.17892  | 0.205571 | 7.52E-06 |
| #####    | 0.100851 | 0.02932  | 0.115971 | 0.01214  | 0.028429  | 0.53999  | 0.128457 | 0.00543  |
| 3.10E-18 | 0.054158 | 0.24278  | 0.055597 | 0.23046  | 0.03742   | 0.4198   | 0.059939 | 0.19601  |
| #####    | 0.118246 | 0.01054  | 0.082471 | 0.075    | -0.00054  | 0.99067  | 0.111833 | 0.01561  |
| 6.16E-13 | 0.114023 | 0.01368  | 0.075895 | 0.10141  | 0.188036  | 4.33E-05 | 0.237328 | 2.11E-07 |
| 2.82E-29 | 0.09266  | 0.04536  | -0.05197 | 0.2624   | -8.12E-05 | 0.9986   | 0.040555 | 0.3819   |
| 8.18E-57 | 0.237961 | 1.96E-07 | 0.093805 | 0.04275  | 0.000311  | 0.99466  | 0.109524 | 0.0179   |
| 4.59E-39 | 0.343976 | 2.04E-14 | 0.046024 | 0.32097  | 0.120792  | 0.00898  | 0.246661 | 6.67E-08 |
| 8.53E-41 | 0.051627 | 0.26553  | -0.04165 | 0.36918  | -0.02494  | 0.59082  | -0.00119 | 0.97962  |
| 1.37E-49 | 0.074868 | 0.10613  | -0.01695 | 0.71487  | -0.06439  | 0.16478  | 0.015696 | 0.73513  |
| 4.64E-32 | 0.185781 | 5.36E-05 | 0.396388 | 5.07E-19 | 0.365057  | 3.62E-16 | 0.458872 | 1.07E-25 |
| 3.38E-32 | 0.026845 | 0.5628   | -0.03958 | 0.39347  | -0.02724  | 0.55709  | -0.029   | 0.53185  |
| 3.77E-33 | 0.015321 | 0.74124  | -0.08883 | 0.05507  | -0.1093   | 0.01814  | -0.07241 | 0.11812  |
| 4.30E-53 | 0.236015 | 2.47E-07 | 0.152286 | 0.00096  | 0.130524  | 0.00473  | 0.244194 | 9.09E-08 |
| 1.89E-18 | -0.00427 | 0.92663  | -0.14408 | 0.0018   | -0.13158  | 0.0044   | -0.1063  | 0.02159  |
| #####    | 0.080979 | 0.08044  | 0.047395 | 0.30676  | -0.00923  | 0.84237  | 0.086633 | 0.06139  |
| #####    | 0.103297 | 0.0256   | 0.074643 | 0.10719  | 0.020762  | 0.6545   | 0.099961 | 0.03079  |
| 6.00E-11 | 0.017925 | 0.69924  | 0.10237  | 0.02696  | 0.041194  | 0.37444  | 0.050348 | 0.27756  |
| 2.33E-42 | 0.106518 | 0.02132  | 0.05422  | 0.24223  | -0.01636  | 0.72443  | 0.028989 | 0.53204  |
| 5.82E-12 | 0.031275 | 0.50017  | -0.00469 | 0.91943  | -0.0599   | 0.1963   | 0.015311 | 0.74139  |
| 6.46E-49 | 0.071566 | 0.1225   | 0.238799 | 1.77E-07 | 0.289899  | 1.71E-10 | 0.362338 | 6.19E-16 |
| 1.11E-36 | 0.103865 | 0.02479  | 0.310022 | 7.32E-12 | 0.138912  | 0.00263  | 0.172803 | 0.00018  |
| 5.18E-35 | 0.114111 | 0.01361  | -0.03534 | 0.44618  | -0.02711  | 0.559    | 0.020413 | 0.65994  |
| 5.93E-87 | 0.017225 | 0.71044  | -0.02393 | 0.60603  | -0.13067  | 0.00468  | -0.02307 | 0.61906  |
| 6.98E-81 | 0.055179 | 0.23399  | 0.078171 | 0.09154  | 0.002837  | 0.95125  | 0.049976 | 0.28113  |
| #####    | 0.154479 | 0.00081  | 0.008894 | 0.84798  | -0.01825  | 0.69401  | 0.055546 | 0.23089  |
| 7.57E-73 | 0.032477 | 0.48384  | -0.08804 | 0.05728  | -0.18448  | 6.06E-05 | -0.10744 | 0.02022  |
| #####    | 0.156105 | 0.00071  | 0.069917 | 0.13137  | 0.029298  | 0.52767  | 0.158457 | 0.00059  |
| 5.48E-18 | 0.102939 | 0.02612  | -0.05599 | 0.22721  | 0.043385  | 0.34954  | 0.114865 | 0.013    |
| 3.44E-33 | 0.139725 | 0.00248  | 0.28945  | 1.83E-10 | 0.223654  | 1.05E-06 | 0.357588 | 1.56E-15 |
| 2.68E-29 | 0.095159 | 0.03982  | 0.077    | 0.09652  | -0.00418  | 0.92829  | 0.051278 | 0.26878  |
| 1.97E-79 | 0.13972  | 0.00248  | 0.05614  | 0.22594  | -0.00346  | 0.94061  | 0.060442 | 0.19228  |
| 1.96E-99 | 0.090161 | 0.05152  | 0.140057 | 0.00242  | 0.029109  | 0.53033  | 0.127283 | 0.00588  |
| 5.97E-24 | 0.084001 | 0.06974  | 0.001909 | 0.96719  | -0.03148  | 0.49731  | 0.038946 | 0.40108  |
| 5.41E-71 | 0.123558 | 0.00751  | 0.103124 | 0.02585  | 0.083801  | 0.07041  | 0.18699  | 4.78E-05 |
| 1.59E-28 | -0.00808 | 0.86178  | -0.04422 | 0.3403   | -0.11201  | 0.01545  | -0.10027 | 0.03027  |
| 9.39E-28 | 0.048595 | 0.29466  | -0.08951 | 0.05323  | -0.03826  | 0.40945  | 0.010341 | 0.82363  |

|          |          |          |          |          |          |          |          |          |
|----------|----------|----------|----------|----------|----------|----------|----------|----------|
| 4.57E-29 | 0.051382 | 0.26781  | 0.046051 | 0.3207   | -0.04446 | 0.3377   | 0.032772 | 0.47988  |
| 3.06E-23 | 0.113441 | 0.01417  | 0.12356  | 0.00751  | 0.168022 | 0.00027  | 0.246503 | 6.81E-08 |
| 5.88E-62 | 0.205212 | 7.81E-06 | 0.011104 | 0.81085  | 0.035426 | 0.44501  | 0.100148 | 0.03047  |
| 3.76E-37 | 0.103508 | 0.0253   | 0.105471 | 0.02264  | 0.036481 | 0.43157  | 0.114993 | 0.0129   |
| 5.67E-41 | 0.067934 | 0.14269  | -0.00403 | 0.9307   | -0.01414 | 0.7605   | 0.0514   | 0.26764  |
| 2.89E-24 | 0.206723 | 6.67E-06 | -0.07714 | 0.09593  | -0.02643 | 0.56887  | 0.088924 | 0.05482  |
| 1.16E-33 | 0.18038  | 8.86E-05 | 0.044282 | 0.33966  | -0.1337  | 0.0038   | 0.025407 | 0.58393  |
| 1.43E-39 | 0.123175 | 0.0077   | 0.087635 | 0.05844  | 0.081114 | 0.07993  | 0.1675   | 0.00028  |
| #####    | 0.20982  | 4.81E-06 | 0.12893  | 0.00526  | 0.132038 | 0.00426  | 0.261599 | 9.56E-09 |
| 6.38E-18 | 0.041125 | 0.37523  | 0.000904 | 0.98445  | -0.04759 | 0.30477  | -0.02819 | 0.54334  |
| 6.97E-19 | 0.060387 | 0.19269  | 0.04272  | 0.35699  | -0.01086 | 0.81495  | 0.03764  | 0.41707  |
| 5.06E-37 | 0.297741 | 5.15E-11 | 0.117805 | 0.01084  | 0.118929 | 0.0101   | 0.107797 | 0.0198   |
| 1.93E-28 | 0.060671 | 0.1906   | 0.053962 | 0.24448  | 0.054815 | 0.2371   | 0.186292 | 5.11E-05 |
| #####    | 0.176887 | 0.00012  | 0.05795  | 0.2113   | 0.032424 | 0.48455  | 0.15589  | 0.00072  |
| 1.94E-35 | 0.020855 | 0.65306  | 0.061655 | 0.1835   | -0.06723 | 0.14689  | 0.013189 | 0.77621  |
| #####    | 0.116006 | 0.01212  | 0.169132 | 0.00024  | 0.105149 | 0.02306  | 0.190418 | 3.44E-05 |
| 8.40E-26 | -0.03663 | 0.42975  | 0.037838 | 0.41462  | -0.03844 | 0.4072   | -0.07788 | 0.09277  |
| 2.36E-50 | 0.27098  | 2.65E-09 | 0.076912 | 0.0969   | 0.101212 | 0.02874  | 0.306772 | 1.24E-11 |
| 8.99E-86 | 0.1542   | 0.00083  | -0.04199 | 0.36523  | -0.07527 | 0.10427  | 0.069861 | 0.13168  |
| #####    | 0.11701  | 0.01139  | 0.054441 | 0.24032  | -0.05343 | 0.24916  | 0.057633 | 0.21381  |
| 8.35E-63 | 0.061253 | 0.18637  | 0.044693 | 0.33518  | 0.061478 | 0.18476  | 0.079183 | 0.0874   |
| 7.60E-82 | 0.126701 | 0.00611  | 0.055386 | 0.23224  | -0.00046 | 0.99213  | 0.070129 | 0.1302   |
| 8.65E-41 | 0.069377 | 0.13439  | 0.001162 | 0.98002  | -0.13386 | 0.00375  | -0.0182  | 0.69488  |
| 5.62E-73 | 0.077758 | 0.09327  | -0.09218 | 0.04648  | -0.11922 | 0.00992  | -0.05713 | 0.21783  |
| 9.39E-35 | 0.119545 | 0.00972  | 0.222658 | 1.17E-06 | 0.106318 | 0.02157  | 0.252701 | 3.09E-08 |
| 1.38E-72 | 0.338429 | 5.61E-14 | 0.112924 | 0.01462  | 0.165794 | 0.00032  | 0.323849 | 7.29E-13 |
| 8.55E-14 | 0.01888  | 0.68405  | -0.0625  | 0.17753  | -0.03581 | 0.44013  | 0.018431 | 0.69117  |
| 2.24E-85 | 0.090274 | 0.05122  | 0.024505 | 0.59735  | -0.00997 | 0.82988  | 0.077518 | 0.09429  |
| 6.03E-21 | 0.052964 | 0.25333  | -0.05706 | 0.21837  | -0.06246 | 0.17786  | 0.021397 | 0.64466  |
| 1.21E-35 | 0.065782 | 0.15581  | 0.137509 | 0.0029   | 0.028171 | 0.54368  | 0.112372 | 0.01512  |
| #####    | 0.138585 | 0.00269  | 0.087639 | 0.05843  | 0.037301 | 0.42129  | 0.106094 | 0.02185  |
| 2.34E-17 | 0.058616 | 0.20609  | -0.00213 | 0.96331  | -0.022   | 0.63535  | 0.019561 | 0.6733   |
| 4.93E-17 | 0.049105 | 0.28962  | -0.02135 | 0.64532  | -0.02425 | 0.6011   | 0.023616 | 0.61072  |
| #####    | 0.043251 | 0.35103  | 0.108789 | 0.01869  | -0.02632 | 0.5705   | 0.033947 | 0.46426  |
| 2.28E-47 | 0.198941 | 1.48E-05 | 0.084903 | 0.06678  | 0.23788  | 1.97E-07 | 0.383683 | 7.93E-18 |
| #####    | 0.098817 | 0.03276  | 0.042687 | 0.35735  | -0.03237 | 0.48535  | 0.085643 | 0.06443  |
| #####    | 0.116604 | 0.01168  | 0.086688 | 0.06123  | -0.01248 | 0.78799  | 0.118283 | 0.01052  |
| 1.22E-18 | 0.048857 | 0.29207  | 0.173488 | 0.00016  | 0.072944 | 0.11544  | 0.166929 | 0.00029  |
| 3.62E-15 | 0.112084 | 0.01538  | 0.047582 | 0.30486  | -0.03088 | 0.50563  | 0.131201 | 0.00451  |
| 7.75E-44 | 0.111717 | 0.01572  | 0.112626 | 0.01489  | 0.054905 | 0.23633  | 0.142134 | 0.00208  |
| 1.07E-36 | 0.105058 | 0.02318  | 0.069753 | 0.13228  | -0.01858 | 0.68873  | 0.060439 | 0.1923   |
| 2.04E-97 | 0.101768 | 0.02787  | 0.068169 | 0.14132  | -0.02568 | 0.57987  | 0.083175 | 0.07254  |
| 1.07E-55 | 0.044604 | 0.33616  | -0.02298 | 0.62037  | -0.06067 | 0.19064  | -0.03913 | 0.39882  |
| #####    | 0.183734 | 6.50E-05 | 0.0967   | 0.03671  | 0.021924 | 0.63652  | 0.153241 | 0.00089  |
| #####    | 0.129759 | 0.00498  | 0.092728 | 0.0452   | -0.00134 | 0.97704  | 0.113282 | 0.01431  |

|          |          |          |          |          |          |          |          |          |
|----------|----------|----------|----------|----------|----------|----------|----------|----------|
| 8.82E-47 | 0.027292 | 0.55633  | 0.180962 | 8.40E-05 | 0.200653 | 1.25E-05 | 0.164838 | 0.00035  |
| 2.58E-13 | 0.084262 | 0.06887  | 0.063141 | 0.17314  | 0.043229 | 0.35128  | 0.052252 | 0.25978  |
| 9.95E-24 | 0.122899 | 0.00784  | 0.093819 | 0.04272  | 0.005198 | 0.9108   | 0.070819 | 0.12646  |
| 5.57E-16 | 0.044928 | 0.33265  | -0.10069 | 0.02958  | 0.00462  | 0.92068  | -0.0065  | 0.88851  |
| 2.12E-24 | 0.094838 | 0.0405   | 0.024687 | 0.59462  | -0.04566 | 0.32478  | -0.01068 | 0.8179   |
| 1.31E-82 | 0.173717 | 0.00016  | 0.039195 | 0.39807  | -0.01613 | 0.72811  | 0.074686 | 0.10698  |
| #####    | 0.102592 | 0.02663  | 0.067893 | 0.14294  | -0.01719 | 0.71095  | 0.076596 | 0.09828  |
| 7.86E-76 | 0.142965 | 0.00195  | 0.051796 | 0.26396  | 0.010181 | 0.82631  | 0.080111 | 0.08375  |
| #####    | 0.249768 | 4.50E-08 | 0.169175 | 0.00024  | 0.19423  | 2.37E-05 | 0.349857 | 6.83E-15 |
| 5.10E-33 | -0.14995 | 0.00115  | -0.07245 | 0.11794  | -0.13669 | 0.00308  | -0.25464 | 2.40E-08 |
| #####    | 0.095132 | 0.03988  | 0.087019 | 0.06024  | -0.00369 | 0.9367   | 0.105627 | 0.02244  |
| 7.37E-13 | 0.068196 | 0.14116  | 0.014562 | 0.75363  | 0.052196 | 0.26029  | 0.132196 | 0.00421  |
| 2.87E-44 | 0.129391 | 0.0051   | 0.076102 | 0.10047  | -0.07198 | 0.12032  | 0.096862 | 0.03639  |
| 3.10E-16 | 0.050411 | 0.27697  | -0.08336 | 0.07189  | -0.12135 | 0.00866  | -0.05382 | 0.2457   |
| 9.05E-73 | 0.041517 | 0.37069  | 0.108879 | 0.01859  | 0.13733  | 0.00294  | 0.088939 | 0.05478  |
| #####    | 0.099774 | 0.0311   | 0.125361 | 0.00668  | 0.13198  | 0.00428  | 0.22169  | 1.31E-06 |
| 1.95E-53 | 0.144528 | 0.00174  | 0.315921 | 2.78E-12 | 0.432911 | 9.39E-23 | 0.524549 | 2.26E-34 |
| #####    | 0.104335 | 0.02414  | 0.091465 | 0.04822  | -0.00187 | 0.9679   | 0.105207 | 0.02298  |
| 1.12E-26 | 0.111751 | 0.01569  | -0.08011 | 0.08377  | -0.08961 | 0.05298  | 0.059979 | 0.19572  |
| #####    | 0.06851  | 0.13933  | 0.060952 | 0.18855  | 0.087603 | 0.05853  | 0.090587 | 0.05042  |
| 2.20E-21 | 0.26133  | 9.92E-09 | 0.033973 | 0.46392  | -0.05737 | 0.21593  | 0.049828 | 0.28257  |
| 6.73E-42 | 0.11058  | 0.01682  | 0.0775   | 0.09436  | 0.051412 | 0.26753  | 0.148885 | 0.00125  |
| 6.79E-27 | 0.096946 | 0.03623  | 0.010787 | 0.81616  | 0.026721 | 0.56462  | 0.11023  | 0.01717  |
| 2.77E-22 | 0.099053 | 0.03235  | 0.008789 | 0.84976  | -0.11718 | 0.01127  | 0.034647 | 0.45509  |
| 1.87E-20 | 0.019854 | 0.66869  | -0.01554 | 0.73762  | -0.01992 | 0.66758  | 0.005867 | 0.89937  |
| 1.36E-97 | 0.072993 | 0.11519  | -0.02996 | 0.51842  | -0.06601 | 0.15439  | 0.008463 | 0.85526  |
| 6.26E-18 | -0.10239 | 0.02692  | -0.14233 | 0.00205  | -0.21328 | 3.32E-06 | -0.22677 | 7.34E-07 |
| 5.29E-45 | 0.11764  | 0.01095  | 0.053111 | 0.25201  | 0.071454 | 0.12308  | 0.138549 | 0.0027   |
| 1.02E-49 | 0.073005 | 0.11513  | 0.036488 | 0.43148  | -0.02115 | 0.64849  | 0.074888 | 0.10603  |
| 1.71E-77 | 0.089301 | 0.05379  | 0.035138 | 0.44873  | -0.01566 | 0.73569  | 0.078633 | 0.08963  |
| 9.44E-38 | 0.079818 | 0.08489  | 0.142403 | 0.00204  | 0.152321 | 0.00096  | 0.210103 | 4.66E-06 |
| 1.38E-25 | 0.018699 | 0.68691  | -0.14494 | 0.00169  | -0.09123 | 0.0488   | -0.07164 | 0.12213  |
| 9.09E-68 | 0.142284 | 0.00205  | 0.053315 | 0.25019  | 0.04473  | 0.33479  | 0.164504 | 0.00036  |
| 9.05E-27 | 0.044526 | 0.33699  | 0.139951 | 0.00244  | -0.04313 | 0.35237  | 0.021596 | 0.64157  |
| #####    | 0.151634 | 0.00101  | 0.088792 | 0.05518  | 0.049489 | 0.28586  | 0.154719 | 0.00079  |
| 2.99E-14 | 0.061228 | 0.18656  | 0.007512 | 0.87139  | -0.00622 | 0.89344  | 0.021013 | 0.6506   |
| 1.73E-53 | 0.097464 | 0.03524  | 0.014483 | 0.75492  | -0.04265 | 0.35781  | -0.00239 | 0.95884  |
| 3.22E-31 | 0.081304 | 0.07923  | -0.05671 | 0.22124  | -0.07046 | 0.1284   | 0.002489 | 0.95721  |
| 1.87E-76 | 0.087222 | 0.05964  | 0.049716 | 0.28365  | -0.0342  | 0.46097  | 0.056541 | 0.22263  |
| #####    | 0.161099 | 0.00047  | 0.105766 | 0.02226  | 0.018065 | 0.69699  | 0.121407 | 0.00863  |
| 3.83E-56 | 0.188703 | 4.06E-05 | 0.071049 | 0.12523  | 0.063737 | 0.16911  | 0.172282 | 0.00018  |
| 5.69E-42 | 0.119742 | 0.0096   | 0.101378 | 0.02848  | -0.00034 | 0.99409  | 0.144756 | 0.00171  |
| 8.23E-09 | 0.192692 | 2.76E-05 | 0.195422 | 2.11E-05 | 0.198347 | 1.58E-05 | 0.357037 | 1.74E-15 |
| 3.73E-19 | 0.049751 | 0.28331  | 0.158202 | 0.0006   | 0.113011 | 0.01455  | 0.140045 | 0.00242  |
| 2.29E-80 | 0.129828 | 0.00495  | 0.030041 | 0.51724  | -0.01868 | 0.68718  | 0.068543 | 0.13914  |

|          |          |          |          |          |          |          |          |          |
|----------|----------|----------|----------|----------|----------|----------|----------|----------|
| #####    | 0.126489 | 0.0062   | 0.096886 | 0.03635  | 0.016134 | 0.72802  | 0.119844 | 0.00953  |
| 5.84E-43 | 0.084416 | 0.06836  | 0.060019 | 0.19542  | 0.01237  | 0.78977  | 0.078796 | 0.08896  |
| #####    | 0.144344 | 0.00176  | 0.035547 | 0.44347  | -0.00569 | 0.90235  | 0.097698 | 0.0348   |
| 2.30E-56 | 0.140812 | 0.00229  | 0.044851 | 0.33348  | -0.01102 | 0.8122   | 0.09461  | 0.04099  |
| 1.09E-36 | 0.077732 | 0.09338  | 0.130815 | 0.00463  | -0.05874 | 0.20514  | 0.064951 | 0.16112  |
| 3.15E-18 | 0.048514 | 0.29546  | 0.226175 | 7.86E-07 | 0.196589 | 1.88E-05 | 0.188836 | 4.01E-05 |
| #####    | 0.173219 | 0.00017  | 0.062599 | 0.17686  | 0.050775 | 0.27351  | 0.158724 | 0.00058  |
| #####    | 0.084638 | 0.06764  | 0.121592 | 0.00853  | -0.00862 | 0.85256  | 0.102902 | 0.02617  |
| 2.23E-21 | 0.06734  | 0.14623  | -0.01833 | 0.69278  | -0.03041 | 0.51214  | -0.00527 | 0.90955  |
| 4.11E-19 | 0.026888 | 0.56218  | -0.07233 | 0.11854  | -0.04608 | 0.32041  | 0.017519 | 0.70573  |
| 7.02E-26 | 0.089217 | 0.05402  | 0.143425 | 0.00189  | 0.064342 | 0.16509  | 0.102821 | 0.02629  |
| 1.05E-37 | 0.105731 | 0.0223   | 0.122421 | 0.00809  | 0.098205 | 0.03387  | 0.225683 | 8.32E-07 |
| 6.23E-54 | 0.047749 | 0.30316  | 0.039765 | 0.39125  | -0.06153 | 0.1844   | -0.00858 | 0.85326  |
| 5.61E-25 | 0.100239 | 0.03032  | 0.000131 | 0.99775  | -0.04445 | 0.33782  | 0.018281 | 0.69355  |
| 6.79E-19 | 0.022676 | 0.625    | -0.08392 | 0.07     | -0.13289 | 0.00402  | -0.09248 | 0.04578  |
| 9.14E-18 | 0.081788 | 0.07745  | 0.207442 | 6.18E-06 | 0.080627 | 0.08177  | 0.225654 | 8.35E-07 |
| 4.77E-69 | 0.088566 | 0.0558   | 0.024601 | 0.59591  | -0.04907 | 0.28995  | 0.061054 | 0.18781  |
| 1.76E-24 | 0.034579 | 0.45598  | -0.07683 | 0.09726  | -0.05754 | 0.21459  | 0.005454 | 0.90642  |
| 6.99E-72 | 0.433485 | 8.13E-23 | 0.289415 | 1.84E-10 | 0.235932 | 2.50E-07 | 0.442323 | 8.60E-24 |
| #####    | 0.131607 | 0.00439  | 0.085828 | 0.06385  | 0.018831 | 0.68483  | 0.138492 | 0.00271  |
| #####    | 0.135505 | 0.00335  | 0.087119 | 0.05995  | 0.005461 | 0.90631  | 0.112687 | 0.01483  |
| 1.20E-21 | -0.07154 | 0.12263  | -0.08523 | 0.06573  | -0.20928 | 5.09E-06 | -0.27586 | 1.33E-09 |
| #####    | 0.167086 | 0.00029  | 0.193568 | 2.53E-05 | 0.221349 | 1.36E-06 | 0.346292 | 1.33E-14 |
| #####    | 0.123288 | 0.00765  | 0.132209 | 0.00421  | 0.068344 | 0.1403   | 0.16439  | 0.00036  |
| 5.04E-40 | -0.06671 | 0.15004  | 0.041322 | 0.37295  | -0.13062 | 0.00469  | -0.09066 | 0.05023  |
| 2.47E-17 | 0.087828 | 0.05789  | 0.08612  | 0.06295  | 0.08983  | 0.05238  | 0.164362 | 0.00036  |
| 5.53E-15 | 0.154229 | 0.00083  | 0.066907 | 0.14884  | 0.008777 | 0.84997  | 0.091402 | 0.04838  |
| 9.33E-63 | 0.052545 | 0.25711  | -0.01096 | 0.81319  | 0.007405 | 0.87321  | 0.011975 | 0.79632  |
| 9.52E-28 | 0.128308 | 0.00549  | 0.042222 | 0.36261  | -0.08141 | 0.07883  | 0.052209 | 0.26017  |
| 2.20E-73 | 0.253625 | 2.74E-08 | 0.079163 | 0.08748  | 0.041439 | 0.3716   | 0.175485 | 0.00014  |
| #####    | 0.101716 | 0.02795  | 0.122    | 0.00831  | 0.0322   | 0.48758  | 0.133517 | 0.00385  |
| 1.23E-46 | 0.100203 | 0.03038  | -0.06758 | 0.14481  | -0.08007 | 0.08392  | 0.018225 | 0.69445  |
| 2.24E-17 | 0.02847  | 0.5394   | -0.07055 | 0.12792  | -0.088   | 0.05738  | -0.06025 | 0.19373  |
| 8.63E-52 | 0.62616  | 3.27E-52 | 0.13024  | 0.00482  | 0.074376 | 0.10845  | 0.301005 | 3.09E-11 |
| 3.18E-54 | 0.065924 | 0.15492  | 0.032811 | 0.47936  | -0.05102 | 0.27115  | 0.034103 | 0.4622   |
| #####    | 0.200167 | 1.31E-05 | 0.240552 | 1.43E-07 | 0.252392 | 3.21E-08 | 0.418217 | 3.38E-21 |
| 4.72E-42 | 0.068309 | 0.1405   | 0.144216 | 0.00178  | 0.028254 | 0.54249  | 0.084747 | 0.06728  |
| 4.37E-16 | 0.050626 | 0.27491  | 0.002501 | 0.95701  | 0.033431 | 0.47109  | 0.095272 | 0.03959  |
| 2.77E-53 | 0.115833 | 0.01225  | 0.046805 | 0.31283  | -0.02919 | 0.52916  | 0.09458  | 0.04105  |
| 3.02E-39 | 0.055284 | 0.23311  | -0.00062 | 0.98938  | -0.02056 | 0.65764  | 0.007011 | 0.87989  |
| 2.42E-34 | 0.097183 | 0.03577  | 0.006934 | 0.88121  | 0.006872 | 0.88226  | 0.103026 | 0.02599  |
| 2.28E-14 | 0.171363 | 0.0002   | 0.036076 | 0.4367   | 0.058204 | 0.2093   | 0.192444 | 2.83E-05 |
| 2.71E-53 | 0.029831 | 0.52018  | -0.04081 | 0.37895  | -0.04917 | 0.289    | -0.04559 | 0.32556  |
| 4.69E-40 | 0.112749 | 0.01478  | 0.116576 | 0.0117   | 0.082159 | 0.07611  | 0.205309 | 7.73E-06 |
| 1.68E-18 | 0.183287 | 6.77E-05 | 0.27038  | 2.88E-09 | 0.18135  | 8.11E-05 | 0.343879 | 2.08E-14 |

|          |          |          |          |          |          |          |          |          |
|----------|----------|----------|----------|----------|----------|----------|----------|----------|
| 1.87E-48 | 0.140505 | 0.00234  | 0.003029 | 0.94795  | -0.04269 | 0.35737  | 0.127489 | 0.0058   |
| 3.70E-51 | 0.14305  | 0.00194  | -0.02183 | 0.63796  | 0.011018 | 0.81229  | 0.086915 | 0.06055  |
| 1.39E-22 | 0.218955 | 1.78E-06 | 0.179296 | 9.79E-05 | 0.076987 | 0.09657  | 0.174906 | 0.00015  |
| #####    | 0.141081 | 0.00224  | 0.152468 | 0.00095  | 0.070024 | 0.13078  | 0.186772 | 4.88E-05 |
| 1.42E-35 | 0.116312 | 0.01189  | 0.075275 | 0.10424  | 0.052776 | 0.25502  | 0.152432 | 0.00095  |
| 8.29E-24 | -0.01536 | 0.74064  | -0.04279 | 0.35622  | -0.04058 | 0.38159  | -0.03977 | 0.39117  |
| 2.82E-19 | 0.015346 | 0.74083  | -0.09506 | 0.04003  | -0.106   | 0.02196  | -0.10796 | 0.01961  |
| 1.69E-13 | -0.00135 | 0.97672  | 0.001451 | 0.97506  | 0.012005 | 0.79583  | 0.056565 | 0.22244  |
| 8.40E-32 | 0.441286 | 1.12E-23 | 0.204989 | 7.99E-06 | 0.107002 | 0.02074  | 0.337829 | 6.25E-14 |
| #####    | 0.121777 | 0.00843  | 0.106846 | 0.02092  | 0.021371 | 0.64505  | 0.127588 | 0.00576  |
| 2.65E-19 | 0.00166  | 0.97146  | 0.098535 | 0.03327  | -0.07472 | 0.10684  | -0.0795  | 0.08616  |
| 5.57E-27 | 0.232448 | 3.78E-07 | 0.133344 | 0.00389  | 0.108031 | 0.01954  | 0.256746 | 1.82E-08 |
| 1.14E-46 | 0.246094 | 7.17E-08 | 0.10814  | 0.01941  | 0.132124 | 0.00423  | 0.324007 | 7.09E-13 |
| #####    | 0.122645 | 0.00797  | 0.082799 | 0.07385  | -0.002   | 0.96565  | 0.174679 | 0.00015  |
| 4.17E-38 | 0.184798 | 5.88E-05 | 0.076739 | 0.09765  | 0.129137 | 0.00519  | 0.200051 | 1.33E-05 |
| 2.12E-32 | 0.150975 | 0.00107  | -0.07146 | 0.12305  | 0.001178 | 0.97975  | 0.169012 | 0.00024  |
| 3.36E-15 | 0.019906 | 0.66788  | 0.336281 | 8.26E-14 | 0.305786 | 1.45E-11 | 0.270906 | 2.68E-09 |
| 3.44E-40 | 0.158269 | 0.0006   | 0.155309 | 0.00076  | 0.058522 | 0.20682  | 0.160431 | 0.0005   |
| 2.47E-88 | 0.149974 | 0.00115  | 0.086055 | 0.06315  | 0.010952 | 0.8134   | 0.163154 | 0.0004   |
| 3.83E-48 | 0.077466 | 0.09451  | 0.102622 | 0.02658  | 0.006583 | 0.88717  | 0.062074 | 0.18053  |
| 7.08E-35 | 0.19747  | 1.72E-05 | 0.282653 | 5.00E-10 | 0.392444 | 1.21E-18 | 0.506623 | 8.14E-32 |
| 2.64E-24 | 0.075529 | 0.10307  | 0.117962 | 0.01073  | 0.00975  | 0.83356  | 0.077454 | 0.09456  |
| 1.11E-19 | -0.0023  | 0.9604   | 0.03623  | 0.43474  | -0.01689 | 0.71579  | 0.016286 | 0.72557  |
| 3.39E-75 | 0.093074 | 0.0444   | 0.137842 | 0.00284  | 0.018923 | 0.68337  | 0.126579 | 0.00616  |
| 5.94E-34 | -0.20662 | 6.74E-06 | -0.28097 | 6.39E-10 | -0.35215 | 4.43E-15 | -0.41328 | 1.09E-20 |
| 2.67E-27 | 0.117514 | 0.01104  | 0.110325 | 0.01708  | 0.011012 | 0.8124   | 0.127154 | 0.00593  |
| 5.16E-56 | 0.524179 | 2.56E-34 | 0.101759 | 0.02789  | 0.07115  | 0.12469  | 0.262253 | 8.76E-09 |
| 3.36E-19 | -0.09203 | 0.04684  | -0.06449 | 0.16409  | -0.10425 | 0.02426  | -0.17619 | 0.00013  |
| 8.98E-38 | -0.1286  | 0.00538  | -0.03286 | 0.4787   | -0.06133 | 0.18583  | -0.20134 | 1.16E-05 |
| #####    | 0.182478 | 7.30E-05 | 0.063666 | 0.16958  | -0.01275 | 0.78345  | 0.133058 | 0.00397  |
| 4.52E-14 | 0.066643 | 0.15046  | 0.10546  | 0.02265  | 0.050077 | 0.28016  | 0.09351  | 0.04341  |
| 6.50E-17 | 0.084766 | 0.06722  | -0.00013 | 0.99769  | 0.041304 | 0.37316  | 0.080836 | 0.08098  |
| 2.34E-25 | 0.085445 | 0.06505  | 0.023202 | 0.61699  | 0.008518 | 0.85434  | 0.05944  | 0.19977  |
| 2.88E-60 | 0.142291 | 0.00205  | 0.028657 | 0.53674  | -0.01075 | 0.81676  | 0.097808 | 0.0346   |
| 1.77E-44 | 0.120008 | 0.00944  | 0.119281 | 0.00988  | 0.258006 | 1.54E-08 | 0.265476 | 5.66E-09 |
| 1.00E-43 | 0.121077 | 0.00882  | 0.015196 | 0.74327  | -0.00396 | 0.93193  | 0.044358 | 0.33883  |
| 2.48E-20 | 0.043219 | 0.35139  | -0.05171 | 0.26479  | -0.09895 | 0.03252  | -0.03702 | 0.42473  |
| 1.13E-75 | 0.218374 | 1.90E-06 | 0.097961 | 0.03431  | 0.07739  | 0.09483  | 0.254705 | 2.38E-08 |
| 2.63E-10 | 0.046901 | 0.31184  | 0.043744 | 0.34556  | -0.05292 | 0.25374  | 0.020552 | 0.65778  |
| 2.57E-25 | 0.033632 | 0.46842  | -0.01808 | 0.69674  | 0.017992 | 0.69817  | 0.004639 | 0.92036  |
| 5.15E-56 | 0.199798 | 1.36E-05 | 0.013453 | 0.77184  | 0.010646 | 0.81851  | 0.10674  | 0.02105  |
| 6.11E-86 | 0.191956 | 2.97E-05 | 0.00614  | 0.89472  | -0.0185  | 0.69004  | 0.064835 | 0.16187  |
| 3.38E-38 | 0.181586 | 7.93E-05 | 0.068788 | 0.13773  | 0.052802 | 0.25479  | 0.131559 | 0.0044   |
| 3.26E-53 | 0.179894 | 9.27E-05 | 0.086333 | 0.0623   | 0.021267 | 0.64666  | 0.11096  | 0.01645  |
| 7.04E-09 | 0.125935 | 0.00643  | 0.135312 | 0.00339  | 0.196707 | 1.86E-05 | 0.28659  | 2.80E-10 |

|          |          |          |          |          |          |          |          |          |
|----------|----------|----------|----------|----------|----------|----------|----------|----------|
| 6.93E-64 | 0.141868 | 0.00212  | 0.080894 | 0.08076  | 0.030388 | 0.51242  | 0.124212 | 0.0072   |
| 3.29E-25 | 0.077372 | 0.09491  | -0.03951 | 0.39429  | -0.01111 | 0.81068  | 0.000849 | 0.98541  |
| 5.84E-20 | 0.101024 | 0.02904  | -0.06322 | 0.17258  | -0.04855 | 0.29507  | 0.010732 | 0.81707  |
| 6.13E-26 | -0.01408 | 0.76155  | 0.040934 | 0.37745  | -0.03937 | 0.39591  | -0.0261  | 0.57368  |
| 2.21E-35 | 0.096598 | 0.03691  | 0.140583 | 0.00233  | 0.121932 | 0.00835  | 0.137472 | 0.00291  |
| #####    | 0.078359 | 0.09076  | 0.068204 | 0.14111  | 0.009357 | 0.84017  | 0.086474 | 0.06187  |
| 1.53E-51 | 0.206663 | 6.71E-06 | 0.101229 | 0.02872  | 0.072789 | 0.11622  | 0.230311 | 4.87E-07 |
| 1.56E-59 | 0.092341 | 0.04611  | 0.027617 | 0.55162  | -0.06707 | 0.14786  | -0.00676 | 0.88417  |
| 5.31E-24 | -0.14047 | 0.00235  | -0.21936 | 1.70E-06 | -0.222   | 1.27E-06 | -0.24475 | 8.48E-08 |
| #####    | 0.173839 | 0.00016  | 0.081635 | 0.07801  | 0.053926 | 0.2448   | 0.184087 | 6.29E-05 |
| 2.97E-43 | 0.311237 | 6.01E-12 | 0.096463 | 0.03717  | 0.068729 | 0.13807  | 0.263043 | 7.87E-09 |
| 2.72E-60 | 0.150829 | 0.00108  | 0.02023  | 0.6628   | -0.03212 | 0.4886   | 0.072054 | 0.11996  |
| 9.36E-22 | 0.103528 | 0.02527  | 0.059966 | 0.19582  | -0.03381 | 0.46609  | 0.053632 | 0.24738  |
| 3.74E-84 | 0.14248  | 0.00203  | 0.072641 | 0.11696  | 0.024838 | 0.59238  | 0.14319  | 0.00192  |
| 3.71E-55 | 0.03557  | 0.44316  | 0.043052 | 0.35325  | 0.039479 | 0.39466  | 0.074197 | 0.1093   |
| 5.85E-98 | 0.12177  | 0.00843  | 0.041214 | 0.3742   | -0.00524 | 0.91005  | 0.084838 | 0.06699  |
| 6.89E-64 | 0.100477 | 0.02993  | 0.020527 | 0.65817  | -0.02863 | 0.53716  | 0.038603 | 0.40524  |
| 1.27E-34 | -0.09163 | 0.0478   | -0.04879 | 0.29275  | 0.020008 | 0.66627  | -0.10893 | 0.01854  |
| 3.59E-37 | 0.058805 | 0.20463  | 0.076875 | 0.09706  | 0.0223   | 0.63074  | 0.092066 | 0.04676  |
| 1.51E-68 | 0.138521 | 0.0027   | -0.03045 | 0.51152  | -0.02738 | 0.55512  | 0.073388 | 0.11324  |
| 7.33E-37 | 0.033139 | 0.47497  | 0.076704 | 0.09781  | -0.01566 | 0.7358   | 0.073247 | 0.11393  |
| 1.33E-90 | 0.102729 | 0.02642  | 0.04379  | 0.34505  | 0.0189   | 0.68373  | 0.089075 | 0.0544   |
| 5.60E-23 | 0.066044 | 0.15417  | 0.031623 | 0.49542  | -0.06348 | 0.17085  | 0.054406 | 0.24062  |
| 1.72E-13 | 0.192379 | 2.85E-05 | -0.03744 | 0.41957  | 0.036611 | 0.42993  | 0.17025  | 0.00022  |
| #####    | 0.162852 | 0.00041  | 0.093853 | 0.04264  | 0.047161 | 0.30915  | 0.136652 | 0.00309  |
| 4.49E-24 | 0.038004 | 0.41258  | 0.131573 | 0.0044   | 0.132703 | 0.00407  | 0.087638 | 0.05843  |
| #####    | 0.076497 | 0.09872  | 0.053338 | 0.24999  | -0.04237 | 0.36089  | 0.062614 | 0.17676  |
| #####    | 0.135608 | 0.00332  | 0.086202 | 0.0627   | -0.00589 | 0.89899  | 0.119523 | 0.00973  |
| 5.35E-15 | 0.075258 | 0.10431  | -0.02823 | 0.54278  | -0.04636 | 0.31741  | -0.01471 | 0.7512   |
| 6.17E-16 | 0.173644 | 0.00016  | -0.01693 | 0.71523  | -0.01785 | 0.70048  | -0.00617 | 0.89417  |
| #####    | 0.143507 | 0.00188  | 0.097404 | 0.03535  | 0.004448 | 0.92363  | 0.101028 | 0.02904  |
| 5.62E-37 | 0.135378 | 0.00338  | -0.00442 | 0.92405  | 0.011738 | 0.80028  | 0.081168 | 0.07973  |
| 4.99E-82 | 0.119596 | 0.00969  | 0.028175 | 0.54362  | 0.011589 | 0.80276  | 0.078204 | 0.0914   |
| 1.21E-94 | 0.105228 | 0.02295  | 0.034077 | 0.46256  | -0.01082 | 0.81552  | 0.07771  | 0.09347  |
| 1.57E-98 | 0.151331 | 0.00104  | 0.007481 | 0.8719   | -0.02565 | 0.58027  | 0.060992 | 0.18826  |
| #####    | 0.13016  | 0.00484  | 0.086943 | 0.06047  | 0.001258 | 0.97836  | 0.103075 | 0.02592  |
| 5.06E-84 | 0.083423 | 0.07169  | 0.037223 | 0.42225  | -0.01474 | 0.75079  | 0.067274 | 0.14663  |
| 1.54E-90 | 0.193186 | 2.63E-05 | 0.038072 | 0.41174  | 0.010702 | 0.81757  | 0.085545 | 0.06474  |
| #####    | 0.12973  | 0.00499  | 0.060193 | 0.19413  | 0.009392 | 0.83958  | 0.086518 | 0.06174  |
| 3.33E-17 | 0.037474 | 0.41913  | 0.109057 | 0.0184   | 0.046722 | 0.31369  | 0.101089 | 0.02894  |
| 7.47E-34 | 0.10507  | 0.02316  | 0.005309 | 0.90891  | 0.005024 | 0.91378  | 0.054881 | 0.23653  |
| 7.69E-52 | 0.129421 | 0.00509  | 0.112858 | 0.01468  | 0.057424 | 0.21548  | 0.14454  | 0.00174  |
| 4.91E-51 | 0.123473 | 0.00755  | 0.1033   | 0.02559  | 0.016748 | 0.71812  | 0.122755 | 0.00791  |
| 2.18E-51 | 0.087499 | 0.05883  | -0.0134  | 0.77273  | -0.04194 | 0.36585  | 0.02615  | 0.57297  |
| 5.67E-98 | 0.10009  | 0.03057  | 0.101792 | 0.02784  | 0.017371 | 0.7081   | 0.125174 | 0.00676  |

|          |          |         |          |          |          |          |          |          |
|----------|----------|---------|----------|----------|----------|----------|----------|----------|
| #####    | 0.105621 | 0.02245 | 0.0979   | 0.03443  | 0.010649 | 0.81847  | 0.10979  | 0.01762  |
| 8.65E-19 | 0.119287 | 0.00988 | -0.0393  | 0.39687  | 0.003752 | 0.93556  | 0.137355 | 0.00294  |
| 4.51E-22 | 0.022831 | 0.62263 | -0.00987 | 0.8316   | -0.01842 | 0.69134  | 0.04109  | 0.37564  |
| 4.92E-28 | 0.044614 | 0.33604 | -0.02962 | 0.52319  | -0.01915 | 0.67973  | 0.033502 | 0.47015  |
| 1.26E-24 | 0.08231  | 0.07557 | -0.01367 | 0.76828  | -0.04372 | 0.34586  | 0.023642 | 0.61033  |
| 3.30E-21 | 0.06904  | 0.13629 | 0.053154 | 0.25163  | -0.00825 | 0.85892  | 0.055785 | 0.22889  |
| 3.69E-16 | 0.070119 | 0.13026 | -0.03177 | 0.49344  | 0.015431 | 0.73945  | 0.06051  | 0.19178  |
| #####    | 0.120606 | 0.00908 | 0.074271 | 0.10895  | 0.004763 | 0.91824  | 0.105193 | 0.023    |
| 1.50E-54 | 0.121157 | 0.00877 | 0.074677 | 0.10702  | 0.044536 | 0.3369   | 0.107502 | 0.02014  |
| 6.78E-86 | 0.15183  | 0.001   | 0.000967 | 0.98337  | -0.02404 | 0.6043   | 0.079258 | 0.0871   |
| 5.52E-87 | 0.091763 | 0.04749 | 0.075536 | 0.10304  | 0.023907 | 0.60633  | 0.115269 | 0.01268  |
| 2.84E-89 | 0.07808  | 0.09191 | 0.09494  | 0.04029  | 0.012596 | 0.78601  | 0.114835 | 0.01302  |
| 1.24E-48 | 0.142883 | 0.00197 | 0.020114 | 0.66461  | 0.002782 | 0.95219  | 0.076923 | 0.09685  |
| #####    | 0.173766 | 0.00016 | 0.046284 | 0.31825  | 0.006264 | 0.8926   | 0.098002 | 0.03424  |
| #####    | 0.109196 | 0.01825 | 0.077104 | 0.09606  | 0.02407  | 0.60387  | 0.119892 | 0.00951  |
| 3.35E-79 | 0.10774  | 0.01987 | 0.058416 | 0.20764  | -0.01512 | 0.74456  | 0.079003 | 0.08813  |
| #####    | 0.140639 | 0.00232 | 0.051225 | 0.26927  | -0.00271 | 0.9534   | 0.086151 | 0.06286  |
| 2.50E-92 | 0.128504 | 0.00542 | 0.046276 | 0.31833  | -0.00497 | 0.91463  | 0.084754 | 0.06726  |
| 3.88E-42 | 0.092477 | 0.04578 | -0.00204 | 0.96489  | -0.02726 | 0.55686  | 0.037202 | 0.42251  |
| #####    | 0.152812 | 0.00092 | 0.067969 | 0.14249  | 0.017679 | 0.70316  | 0.104046 | 0.02454  |
| 9.78E-67 | 0.06597  | 0.15464 | 0.023381 | 0.61428  | -0.02733 | 0.55573  | 0.040428 | 0.38339  |
| #####    | 0.131816 | 0.00433 | 0.097174 | 0.03579  | 0.048055 | 0.30006  | 0.135027 | 0.00346  |
| 2.34E-14 | 0.054259 | 0.2419  | 0.063513 | 0.17061  | 0.021496 | 0.64311  | 0.06289  | 0.17486  |
| 4.70E-79 | 0.150015 | 0.00115 | 0.079369 | 0.08666  | 0.083784 | 0.07046  | 0.169778 | 0.00023  |
| 1.46E-22 | 0.085783 | 0.06399 | 0.071063 | 0.12515  | -0.02388 | 0.6068   | 0.057658 | 0.21361  |
| 4.21E-85 | 0.13405  | 0.00371 | 0.031438 | 0.49795  | 0.023167 | 0.61753  | 0.101462 | 0.02835  |
| 4.51E-91 | 0.113759 | 0.0139  | 0.112966 | 0.01459  | 0.02194  | 0.63627  | 0.108581 | 0.01892  |
| 1.87E-29 | 0.075972 | 0.10106 | 0.035933 | 0.43852  | -0.01622 | 0.72659  | 0.02134  | 0.64554  |
| 2.95E-44 | 0.107128 | 0.02058 | 0.005122 | 0.9121   | -0.01611 | 0.72842  | 0.047738 | 0.30327  |
| #####    | 0.172662 | 0.00018 | 0.073885 | 0.11081  | -0.00554 | 0.90493  | 0.115624 | 0.01241  |
| 3.79E-60 | 0.1007   | 0.02957 | -0.01596 | 0.73081  | -0.0362  | 0.43507  | 0.037767 | 0.4155   |
| 5.64E-19 | 0.07361  | 0.11215 | -0.01955 | 0.67345  | -0.00966 | 0.83503  | 0.02545  | 0.58329  |
| 5.44E-40 | 0.15985  | 0.00053 | 0.057278 | 0.21665  | 0.034506 | 0.45693  | 0.117465 | 0.01107  |
| 4.13E-33 | 0.147481 | 0.00139 | 0.117668 | 0.01093  | 0.037364 | 0.42049  | 0.117633 | 0.01096  |
| 3.24E-22 | 0.023476 | 0.61283 | -0.13839 | 0.00273  | -0.23646 | 2.34E-07 | -0.15561 | 0.00074  |
| 1.19E-94 | 0.110376 | 0.01703 | 0.16215  | 0.00043  | 0.035185 | 0.44812  | 0.140994 | 0.00226  |
| #####    | 0.133451 | 0.00386 | 0.082942 | 0.07335  | 0.046669 | 0.31424  | 0.168952 | 0.00024  |
| #####    | 0.111954 | 0.0155  | 0.098304 | 0.03368  | 0.003712 | 0.93623  | 0.105688 | 0.02236  |
| 4.21E-86 | 0.129191 | 0.00517 | 0.0644   | 0.16471  | -0.00019 | 0.99667  | 0.116503 | 0.01175  |
| #####    | 0.15089  | 0.00107 | 0.087155 | 0.05984  | 0.004607 | 0.92091  | 0.104906 | 0.02338  |
| #####    | 0.13463  | 0.00356 | 0.094409 | 0.04142  | 0.012118 | 0.79395  | 0.121393 | 0.00864  |
| #####    | 0.112914 | 0.01463 | 0.039487 | 0.39456  | -0.00944 | 0.83882  | 0.076254 | 0.09979  |
| 6.20E-27 | 0.145757 | 0.00159 | 0.179612 | 9.51E-05 | -0.00619 | 0.89386  | 0.149613 | 0.00118  |
| 1.83E-24 | 0.163012 | 0.0004  | 0.143028 | 0.00194  | 0.185536 | 5.49E-05 | 0.301846 | 2.71E-11 |
| 1.50E-15 | 0.077356 | 0.09498 | -0.0182  | 0.69485  | -0.04529 | 0.32879  | 0.013728 | 0.76731  |

|          |          |          |          |          |          |          |          |          |
|----------|----------|----------|----------|----------|----------|----------|----------|----------|
| 1.67E-14 | 0.13537  | 0.00338  | 0.072966 | 0.11533  | -0.01408 | 0.76151  | 0.10754  | 0.0201   |
| #####    | 0.153335 | 0.00089  | 0.068453 | 0.13966  | 0.0105   | 0.82097  | 0.112542 | 0.01496  |
| 1.36E-68 | 0.242934 | 1.06E-07 | 0.288402 | 2.14E-10 | 0.316394 | 2.57E-12 | 0.436801 | 3.53E-23 |
| #####    | 0.162182 | 0.00043  | 0.077627 | 0.09382  | 0.037329 | 0.42094  | 0.13721  | 0.00297  |
| 6.39E-34 | 0.135839 | 0.00327  | 0.349588 | 7.18E-15 | 0.304823 | 1.69E-11 | 0.424205 | 8.02E-22 |
| #####    | 0.138604 | 0.00268  | 0.093142 | 0.04424  | -0.00236 | 0.9595   | 0.101015 | 0.02906  |
| 3.43E-55 | 0.123447 | 0.00757  | -0.03779 | 0.41525  | 0.011111 | 0.81074  | 0.110288 | 0.01711  |
| #####    | 0.193712 | 2.50E-05 | 0.081921 | 0.07697  | 0.133226 | 0.00392  | 0.25906  | 1.34E-08 |
| 9.06E-17 | -0.03208 | 0.48918  | -0.10582 | 0.02219  | 0.052036 | 0.26175  | 0.016354 | 0.72447  |
| 5.04E-13 | -0.05641 | 0.22374  | -0.04605 | 0.32068  | -0.15282 | 0.00092  | -0.20887 | 5.32E-06 |
| 1.04E-50 | 0.099021 | 0.0324   | 0.049604 | 0.28474  | 0.043896 | 0.34388  | 0.128995 | 0.00524  |
| 1.10E-24 | 0.126479 | 0.0062   | 0.010677 | 0.818    | 0.075596 | 0.10277  | 0.129161 | 0.00518  |
| #####    | 0.176324 | 0.00013  | 0.051961 | 0.26245  | 0.020795 | 0.65398  | 0.142612 | 0.00201  |
| 1.84E-26 | 0.007373 | 0.87375  | 0.018654 | 0.68763  | -0.05513 | 0.23439  | -0.01842 | 0.69137  |
| #####    | 0.156174 | 0.00071  | 0.097946 | 0.03434  | 0.025276 | 0.58586  | 0.141309 | 0.00221  |
| 1.12E-41 | 0.064608 | 0.16335  | -0.10211 | 0.02735  | -0.12387 | 0.00736  | -0.02377 | 0.60845  |
| #####    | 0.071778 | 0.12139  | 0.107087 | 0.02063  | -0.02533 | 0.58513  | 0.081042 | 0.0802   |
| #####    | 0.07487  | 0.10612  | 0.084975 | 0.06655  | -0.04096 | 0.37721  | 0.031184 | 0.50142  |
| 9.39E-26 | 0.10935  | 0.01809  | 0.025659 | 0.5802   | 0.017717 | 0.70255  | 0.068532 | 0.1392   |
| 7.85E-31 | 0.120766 | 0.00899  | 0.061565 | 0.18414  | 0.077313 | 0.09516  | 0.14462  | 0.00173  |
| #####    | 0.14091  | 0.00227  | 0.039022 | 0.40016  | 0.000873 | 0.98498  | 0.093524 | 0.04337  |
| 2.13E-15 | 0.119815 | 0.00955  | 0.085315 | 0.06546  | -0.04204 | 0.36465  | 0.058772 | 0.20488  |
| #####    | 0.130783 | 0.00464  | 0.090569 | 0.05047  | 0.024442 | 0.59829  | 0.132838 | 0.00403  |
| 8.52E-74 | 0.115939 | 0.01217  | 0.073676 | 0.11182  | -0.01369 | 0.76788  | 0.091033 | 0.04929  |
| 1.89E-15 | 0.053945 | 0.24464  | 0.075115 | 0.10498  | 0.001665 | 0.97137  | 0.058939 | 0.2036   |
| 6.11E-16 | 0.028502 | 0.53895  | -0.08764 | 0.05843  | -0.09728 | 0.03559  | -0.04527 | 0.329    |
| 3.38E-27 | 0.065994 | 0.15448  | 0.078254 | 0.09119  | 0.014597 | 0.75305  | 0.059477 | 0.19949  |
| 1.71E-76 | 0.133699 | 0.0038   | 0.055779 | 0.22894  | -0.03788 | 0.4141   | 0.059    | 0.20313  |
| 2.72E-17 | -0.02364 | 0.61031  | -0.13114 | 0.00453  | -0.19809 | 1.62E-05 | -0.23576 | 2.55E-07 |
| 3.02E-93 | 0.100711 | 0.02955  | -0.00134 | 0.97688  | 0.018642 | 0.68783  | 0.125453 | 0.00664  |
| #####    | 0.097843 | 0.03453  | 0.020553 | 0.65776  | -0.04223 | 0.36253  | 0.059218 | 0.20146  |
| #####    | 0.174994 | 0.00014  | 0.095801 | 0.0385   | 0.08074  | 0.08134  | 0.209631 | 4.90E-06 |
| 1.44E-37 | 0.057795 | 0.21252  | 0.147496 | 0.00139  | 0.237977 | 1.95E-07 | 0.240926 | 1.36E-07 |
| 3.59E-30 | 0.215146 | 2.71E-06 | 0.252021 | 3.37E-08 | 0.320626 | 1.26E-12 | 0.408415 | 3.36E-20 |
| #####    | 0.113855 | 0.01382  | 0.062544 | 0.17725  | 0.042916 | 0.35477  | 0.140157 | 0.0024   |
| 9.68E-35 | -0.03777 | 0.41543  | -0.06818 | 0.14126  | -0.12704 | 0.00597  | -0.08919 | 0.0541   |
| #####    | 0.171221 | 0.0002   | 0.082015 | 0.07663  | 0.000603 | 0.98964  | 0.13318  | 0.00394  |
| 1.08E-44 | 0.151623 | 0.00101  | 0.021288 | 0.64633  | -0.00547 | 0.90618  | 0.12757  | 0.00577  |
| 6.42E-26 | 0.103547 | 0.02524  | -0.03025 | 0.51434  | -0.06441 | 0.16467  | 0.043332 | 0.35013  |
| #####    | 0.128131 | 0.00555  | 0.08696  | 0.06041  | -0.01152 | 0.80395  | 0.107606 | 0.02002  |
| 5.00E-57 | 0.168226 | 0.00026  | 0.086139 | 0.06289  | 0.003261 | 0.94397  | 0.091462 | 0.04823  |
| 1.24E-63 | 0.150052 | 0.00114  | 0.057719 | 0.21313  | -0.0058  | 0.90051  | 0.075913 | 0.10133  |
| 2.13E-42 | 0.103674 | 0.02506  | -0.06358 | 0.17015  | -0.06805 | 0.14203  | -0.00754 | 0.87082  |
| 2.61E-91 | 0.14853  | 0.00129  | 0.022964 | 0.62061  | -0.00208 | 0.9643   | 0.10116  | 0.02883  |
| 1.67E-66 | 0.185021 | 5.76E-05 | 0.040733 | 0.3798   | 0.000404 | 0.99305  | 0.091847 | 0.04729  |



|          |          |          |          |          |          |          |          |          |
|----------|----------|----------|----------|----------|----------|----------|----------|----------|
| 3.85E-71 | 0.124666 | 0.00699  | 0.080488 | 0.0823   | 0.006015 | 0.89686  | 0.093639 | 0.04312  |
| 7.79E-31 | -0.01202 | 0.79555  | 0.046924 | 0.3116   | -0.02369 | 0.60958  | 0.026562 | 0.56693  |
| 4.60E-13 | 0.087462 | 0.05894  | 0.066655 | 0.15039  | 0.26949  | 3.26E-09 | 0.275569 | 1.39E-09 |
| #####    | 0.122632 | 0.00798  | 0.109839 | 0.01757  | 0.036749 | 0.42819  | 0.154356 | 0.00082  |
| 3.06E-26 | 0.070748 | 0.12683  | 0.100425 | 0.03002  | 0.006876 | 0.8822   | 0.068594 | 0.13884  |
| 3.88E-36 | -0.13946 | 0.00252  | -0.07924 | 0.08717  | -0.07774 | 0.09335  | -0.21241 | 3.64E-06 |
| 8.61E-44 | 0.080551 | 0.08206  | 0.09691  | 0.0363   | 0.045488 | 0.32666  | 0.05578  | 0.22893  |
| 2.42E-43 | 0.206148 | 7.08E-06 | 0.134047 | 0.00371  | 0.088595 | 0.05572  | 0.276648 | 1.19E-09 |
| #####    | 0.112578 | 0.01493  | 0.074414 | 0.10827  | -0.01052 | 0.82056  | 0.107036 | 0.02069  |
| 1.41E-58 | 0.144125 | 0.00179  | 0.090008 | 0.05192  | 0.031156 | 0.50181  | 0.110664 | 0.01674  |
| 9.93E-32 | 0.284989 | 3.55E-10 | 0.200742 | 1.24E-05 | 0.227485 | 6.76E-07 | 0.423464 | 9.60E-22 |
| 1.76E-49 | -0.01133 | 0.80706  | 0.165938 | 0.00032  | -0.02589 | 0.57674  | -0.00271 | 0.95334  |
| 2.09E-66 | 0.051907 | 0.26294  | 0.00636  | 0.89097  | -0.11961 | 0.00968  | 0.016366 | 0.72428  |
| 2.04E-81 | 0.085175 | 0.06591  | 0.158836 | 0.00057  | 0.088686 | 0.05547  | 0.204874 | 8.08E-06 |
| 1.27E-54 | 0.091579 | 0.04794  | 0.095267 | 0.0396   | -0.00466 | 0.91993  | 0.088984 | 0.05465  |
| #####    | 0.134182 | 0.00367  | 0.021797 | 0.63848  | -0.006   | 0.8971   | 0.094337 | 0.04158  |
| 2.75E-28 | 0.093948 | 0.04243  | 0.018749 | 0.68612  | -0.02574 | 0.57896  | 0.065922 | 0.15494  |
| 1.28E-17 | 0.071859 | 0.12097  | -0.02476 | 0.59358  | -0.07402 | 0.11013  | 0.006503 | 0.88854  |
| 2.82E-50 | 0.076945 | 0.09675  | 0.135166 | 0.00343  | 0.208647 | 5.44E-06 | 0.135176 | 0.00342  |
| 8.62E-30 | 0.030969 | 0.50439  | 0.043508 | 0.34817  | -0.01927 | 0.67795  | 0.008043 | 0.86238  |
| 7.65E-35 | 0.06109  | 0.18755  | 0.065462 | 0.15784  | 0.017811 | 0.70105  | 0.090781 | 0.04993  |
| 2.82E-20 | 0.073385 | 0.11325  | 0.042676 | 0.35748  | 0.021934 | 0.63637  | 0.066709 | 0.15005  |
| 4.10E-57 | 0.236919 | 2.22E-07 | 0.163153 | 0.0004   | 0.21249  | 3.61E-06 | 0.410585 | 2.03E-20 |
| 1.16E-40 | 0.129045 | 0.00522  | 0.123704 | 0.00744  | 0.060056 | 0.19514  | 0.16656  | 0.0003   |
| 3.96E-34 | 0.120136 | 0.00936  | 0.05624  | 0.22511  | 0.156477 | 0.00069  | 0.245035 | 8.18E-08 |
| 7.18E-20 | -0.00396 | 0.93197  | 0.050035 | 0.28057  | 0.068925 | 0.13695  | 0.024242 | 0.60129  |
| #####    | 0.113549 | 0.01408  | 0.079343 | 0.08676  | -0.014   | 0.76284  | 0.093344 | 0.04378  |
| 4.79E-71 | 0.115701 | 0.01235  | 0.063705 | 0.16932  | 0.066699 | 0.15012  | 0.141943 | 0.00211  |
| 1.65E-46 | 0.079909 | 0.08453  | 0.063086 | 0.17351  | 0.052171 | 0.26051  | 0.043831 | 0.3446   |
| 1.06E-21 | -0.03485 | 0.4524   | -0.08811 | 0.05708  | -0.0524  | 0.2584   | -0.07365 | 0.11195  |
| 3.28E-75 | 0.117836 | 0.01082  | 0.009671 | 0.83489  | -0.02371 | 0.60924  | 0.069733 | 0.13239  |
| 1.21E-30 | 0.007414 | 0.87305  | 0.076774 | 0.0975   | 0.141144 | 0.00223  | 0.085027 | 0.06638  |
| 6.33E-75 | 0.119452 | 0.00977  | 0.096967 | 0.03619  | 0.068293 | 0.14059  | 0.221295 | 1.37E-06 |
| 1.60E-67 | 0.11792  | 0.01076  | 0.027314 | 0.556    | 0.048589 | 0.29472  | 0.175112 | 0.00014  |
| 1.25E-27 | 0.102818 | 0.02629  | 0.028964 | 0.53239  | 0.049338 | 0.28733  | 0.118225 | 0.01056  |
| 1.10E-25 | 0.079673 | 0.08546  | 0.036816 | 0.42735  | 0.028106 | 0.5446   | 0.034262 | 0.46012  |
| #####    | 0.131362 | 0.00446  | 0.174925 | 0.00015  | 0.156704 | 0.00068  | 0.257827 | 1.58E-08 |
| 1.44E-32 | 0.146624 | 0.00149  | 0.242535 | 1.12E-07 | 0.33339  | 1.38E-13 | 0.416589 | 4.98E-21 |
| #####    | 0.149989 | 0.00115  | 0.033752 | 0.46683  | -0.02628 | 0.5711   | 0.091674 | 0.04771  |
| 1.21E-61 | 0.117105 | 0.01132  | 0.058322 | 0.20838  | 0.013567 | 0.76998  | 0.148642 | 0.00128  |
| 9.84E-10 | 0.023047 | 0.61935  | 0.106905 | 0.02085  | 0.072873 | 0.1158   | 0.137945 | 0.00281  |
| 1.71E-70 | 0.171709 | 0.00019  | 0.091939 | 0.04707  | 0.166563 | 0.0003   | 0.299854 | 3.71E-11 |
| 1.32E-85 | 0.110024 | 0.01738  | 0.15975  | 0.00053  | 0.084648 | 0.0676   | 0.180663 | 8.63E-05 |
| 7.68E-74 | 0.052108 | 0.26109  | 0.02557  | 0.58151  | -0.05145 | 0.2672   | 0.018618 | 0.6882   |
| 1.05E-38 | 0.062918 | 0.17466  | 0.179721 | 9.41E-05 | -0.02596 | 0.57576  | 0.058726 | 0.20524  |

|          |          |          |           |          |          |          |          |          |
|----------|----------|----------|-----------|----------|----------|----------|----------|----------|
| 2.96E-85 | 0.132117 | 0.00424  | 0.059747  | 0.19746  | 0.029434 | 0.52574  | 0.129789 | 0.00497  |
| 3.23E-16 | 0.00072  | 0.98762  | 0.005759  | 0.90121  | -0.02193 | 0.63638  | 0.009911 | 0.83085  |
| 1.83E-45 | 0.088035 | 0.0573   | 0.145715  | 0.00159  | 0.074905 | 0.10595  | 0.212996 | 3.42E-06 |
| #####    | 0.121589 | 0.00853  | 0.070831  | 0.12639  | -0.02028 | 0.66201  | 0.081625 | 0.07804  |
| 3.34E-76 | 0.094062 | 0.04218  | 0.124546  | 0.00704  | 0.009278 | 0.84151  | 0.099031 | 0.03239  |
| 4.53E-48 | 0.007846 | 0.86571  | 0.067827  | 0.14333  | -0.12319 | 0.00769  | -0.06333 | 0.17186  |
| 7.59E-09 | -0.00177 | 0.96956  | -0.01351  | 0.77091  | -0.03907 | 0.39963  | -0.00709 | 0.87853  |
| 1.05E-57 | 0.213502 | 3.24E-06 | 0.110687  | 0.01672  | 0.122245 | 0.00818  | 0.252418 | 3.20E-08 |
| 9.05E-40 | 0.142378 | 0.00204  | 0.135206  | 0.00342  | -0.00254 | 0.95639  | 0.123411 | 0.00759  |
| 8.93E-69 | 0.218622 | 1.85E-06 | 0.020601  | 0.657    | -0.01956 | 0.67339  | 0.153699 | 0.00086  |
| 3.19E-31 | 0.052921 | 0.25372  | 0.085062  | 0.06627  | 0.004414 | 0.92421  | 0.079239 | 0.08718  |
| 3.53E-18 | 0.037093 | 0.42388  | 0.037773  | 0.41542  | 0.003845 | 0.93396  | 0.044104 | 0.34161  |
| #####    | 0.132695 | 0.00407  | 0.065602  | 0.15695  | 0.017614 | 0.7042   | 0.123087 | 0.00775  |
| #####    | 0.118819 | 0.01017  | 0.075935  | 0.10122  | 0.034146 | 0.46164  | 0.141762 | 0.00213  |
| #####    | 0.136697 | 0.00308  | 0.242722  | 1.09E-07 | 0.261223 | 1.01E-08 | 0.355309 | 2.42E-15 |
| #####    | 0.091838 | 0.04731  | 0.134101  | 0.00369  | 0.062066 | 0.18059  | 0.14781  | 0.00136  |
| 5.26E-32 | 0.073494 | 0.11272  | -0.05837  | 0.20803  | -0.08778 | 0.05803  | 0.004091 | 0.92975  |
| 5.09E-43 | 0.115493 | 0.01251  | -0.07961  | 0.08571  | -0.11388 | 0.01381  | 0.05147  | 0.26698  |
| 3.51E-24 | 0.238243 | 1.89E-07 | 0.088669  | 0.05552  | 0.184686 | 5.94E-05 | 0.331673 | 1.87E-13 |
| 1.45E-61 | 0.043712 | 0.34592  | -0.05918  | 0.20174  | -0.14773 | 0.00137  | -0.05027 | 0.27833  |
| 3.94E-33 | 0.195546 | 2.08E-05 | 0.016422  | 0.72337  | -0.02127 | 0.64665  | 0.095951 | 0.0382   |
| 9.30E-96 | 0.105395 | 0.02274  | 0.044139  | 0.34122  | -0.04029 | 0.38496  | 0.096076 | 0.03794  |
| 3.26E-67 | 0.069854 | 0.13172  | -0.00878  | 0.84984  | -0.04799 | 0.30069  | 0.034646 | 0.45511  |
| #####    | 0.136592 | 0.0031   | 0.10361   | 0.02515  | 0.046104 | 0.32014  | 0.151297 | 0.00104  |
| #####    | 0.086003 | 0.06331  | -4.32E-05 | 0.99926  | -0.03736 | 0.42052  | 0.044025 | 0.34247  |
| 1.39E-78 | 0.095407 | 0.03931  | 0.016633  | 0.71996  | -0.04924 | 0.28831  | 0.032046 | 0.48967  |
| 2.89E-21 | 0.12801  | 0.0056   | 0.25898   | 1.36E-08 | 0.225955 | 8.07E-07 | 0.355666 | 2.26E-15 |
| 1.30E-73 | 0.120167 | 0.00934  | -0.01239  | 0.78944  | -0.08661 | 0.06146  | -0.00023 | 0.99609  |
| 1.15E-30 | 0.089195 | 0.05408  | 0.000482  | 0.99172  | -0.04352 | 0.34808  | 0.045254 | 0.32915  |
| 2.29E-17 | 0.034384 | 0.45852  | 0.005148  | 0.91166  | -0.05393 | 0.24479  | -0.05406 | 0.24365  |
| 3.22E-44 | 0.113212 | 0.01437  | -0.001    | 0.98273  | 0.041906 | 0.36623  | 0.049405 | 0.28668  |
| 2.16E-29 | 0.114089 | 0.01363  | -0.10447  | 0.02396  | -0.0209  | 0.65237  | 0.073878 | 0.11084  |
| 7.04E-30 | -0.0767  | 0.09783  | -0.09195  | 0.04705  | -0.15235 | 0.00096  | -0.18329 | 6.77E-05 |
| 1.55E-34 | 0.147822 | 0.00136  | -0.00084  | 0.98558  | -0.01934 | 0.67671  | 0.137008 | 0.00301  |
| 1.14E-40 | 0.115184 | 0.01275  | 0.172046  | 0.00019  | 0.19484  | 2.24E-05 | 0.307692 | 1.07E-11 |
| 7.15E-21 | -0.00684 | 0.88275  | -0.06364  | 0.16975  | -0.23378 | 3.23E-07 | -0.18051 | 8.76E-05 |
| 3.40E-22 | 0.133638 | 0.00381  | 0.053976  | 0.24436  | 0.048198 | 0.29862  | 0.174988 | 0.00014  |
| 1.96E-30 | 0.128849 | 0.00529  | 0.064436  | 0.16447  | 0.07138  | 0.12347  | 0.143256 | 0.00191  |
| 6.29E-31 | 0.112661 | 0.01486  | 0.094017  | 0.04228  | 0.059815 | 0.19695  | 0.120697 | 0.00903  |
| 5.24E-27 | -0.20009 | 1.32E-05 | -0.06523  | 0.15932  | -0.17811 | 0.00011  | -0.32988 | 2.57E-13 |
| 1.20E-55 | 0.062871 | 0.17498  | 0.054836  | 0.23692  | -0.02265 | 0.62535  | 0.060122 | 0.19466  |
| 1.34E-19 | 0.040045 | 0.38791  | 0.035315  | 0.44644  | 0.075744 | 0.10209  | 0.075868 | 0.10153  |
| 3.40E-32 | 0.118491 | 0.01038  | -0.10795  | 0.01962  | -0.079   | 0.08814  | -0.00689 | 0.88192  |
| 9.40E-53 | 0.140899 | 0.00227  | 0.074095  | 0.10979  | -0.00038 | 0.99347  | 0.097434 | 0.0353   |
| #####    | 0.17211  | 0.00019  | -0.00011  | 0.9981   | 0.011437 | 0.80529  | 0.129084 | 0.00521  |

|          |          |          |          |          |          |          |          |          |
|----------|----------|----------|----------|----------|----------|----------|----------|----------|
| 1.05E-21 | 0.085639 | 0.06444  | 0.007602 | 0.86986  | 0.037991 | 0.41273  | 0.023165 | 0.61755  |
| 6.13E-47 | 0.114409 | 0.01336  | -0.00739 | 0.87352  | -0.01575 | 0.73427  | 0.103669 | 0.02507  |
| 1.53E-87 | 0.173335 | 0.00017  | 0.087218 | 0.05966  | 0.026874 | 0.56238  | 0.135404 | 0.00337  |
| 3.43E-13 | 0.110727 | 0.01668  | 0.060746 | 0.19005  | -0.02771 | 0.55033  | 0.027284 | 0.55644  |
| 7.96E-14 | -0.00744 | 0.87255  | 0.188552 | 4.12E-05 | 0.135814 | 0.00327  | 0.13385  | 0.00376  |
| 2.57E-30 | 0.107318 | 0.02036  | -0.04345 | 0.34887  | -0.05401 | 0.24405  | 0.079303 | 0.08692  |
| 8.40E-95 | 0.110287 | 0.01712  | -0.01622 | 0.72666  | -0.07345 | 0.11293  | 0.049786 | 0.28297  |
| 5.39E-48 | 0.028732 | 0.53568  | -0.00331 | 0.94312  | -0.05234 | 0.25901  | -0.02795 | 0.54688  |
| 3.28E-17 | 0.030797 | 0.50675  | -0.00262 | 0.95498  | -0.05784 | 0.21218  | -0.01983 | 0.669    |
| 3.85E-32 | 0.092145 | 0.04657  | 0.028409 | 0.54028  | -0.02225 | 0.63146  | 0.004451 | 0.92358  |
| 3.40E-11 | 0.105686 | 0.02236  | -0.03037 | 0.51271  | -0.03992 | 0.38938  | -0.00548 | 0.90591  |
| 9.47E-30 | -0.19304 | 2.67E-05 | -0.11893 | 0.0101   | -0.16991 | 0.00023  | -0.33655 | 7.87E-14 |
| 8.95E-63 | 0.194091 | 2.41E-05 | 0.244373 | 8.89E-08 | 0.245651 | 7.58E-08 | 0.406406 | 5.33E-20 |
| 2.43E-15 | 0.100595 | 0.02974  | 0.139692 | 0.00248  | 0.163009 | 0.0004   | 0.250375 | 4.16E-08 |
| 1.15E-29 | 0.078338 | 0.09085  | -0.13803 | 0.0028   | -0.05949 | 0.19942  | -0.03044 | 0.51166  |
| 8.70E-17 | 0.058879 | 0.20405  | -0.03897 | 0.40074  | -0.0272  | 0.55768  | 0.057483 | 0.21501  |
| 8.61E-20 | 0.058884 | 0.20402  | 0.090723 | 0.05007  | -0.08486 | 0.0669   | -0.02362 | 0.61072  |
| 2.31E-26 | 0.085631 | 0.06447  | 0.196021 | 1.99E-05 | 0.352069 | 4.49E-15 | 0.352309 | 4.29E-15 |
| 3.73E-18 | 0.079507 | 0.08611  | 0.05848  | 0.20714  | 0.097439 | 0.03529  | 0.132684 | 0.00407  |
| 6.36E-23 | 0.102717 | 0.02644  | 0.14369  | 0.00185  | 0.112468 | 0.01503  | 0.117308 | 0.01118  |
| #####    | 0.098459 | 0.0334   | 0.033935 | 0.46441  | -0.01957 | 0.67308  | 0.085307 | 0.06549  |
| 3.84E-22 | 0.085387 | 0.06523  | 0.015807 | 0.73333  | -0.04917 | 0.28899  | 0.034383 | 0.45854  |
| 1.82E-17 | 0.024114 | 0.60322  | 0.044283 | 0.33964  | -0.01621 | 0.72672  | 0.019955 | 0.6671   |
| 6.47E-33 | 0.015686 | 0.73529  | -0.04694 | 0.31139  | -0.07647 | 0.09882  | -0.03147 | 0.49745  |
| #####    | 0.18622  | 5.15E-05 | 0.118213 | 0.01057  | 0.082139 | 0.07618  | 0.248876 | 5.04E-08 |
| 8.54E-23 | 0.057277 | 0.21666  | 0.030297 | 0.51368  | -0.05594 | 0.22762  | -0.01122 | 0.80895  |
| 1.69E-33 | 0.105315 | 0.02284  | 0.278266 | 9.44E-10 | 0.271497 | 2.46E-09 | 0.390787 | 1.73E-18 |
| #####    | 0.136949 | 0.00302  | 0.059536 | 0.19905  | -0.02323 | 0.61663  | 0.089107 | 0.05432  |
| 6.99E-23 | 0.009664 | 0.83501  | 0.125483 | 0.00662  | 0.277429 | 1.07E-09 | 0.238758 | 1.77E-07 |
| 1.18E-48 | 0.058588 | 0.20631  | 0.003283 | 0.9436   | -0.07377 | 0.11137  | 0.027736 | 0.54991  |
| 4.23E-21 | 0.029985 | 0.51803  | -0.03182 | 0.49274  | 0.00608  | 0.89575  | 0.007551 | 0.87073  |
| 1.74E-75 | 0.236853 | 2.24E-07 | 0.223799 | 1.03E-06 | 0.18783  | 4.42E-05 | 0.361732 | 6.97E-16 |
| 4.45E-72 | 0.145331 | 0.00164  | 0.046677 | 0.31415  | 0.000368 | 0.99367  | 0.076044 | 0.10074  |
| 4.97E-52 | -0.01108 | 0.81118  | 0.020474 | 0.659    | -0.154   | 0.00084  | -0.12626 | 0.00629  |
| 2.18E-22 | 0.002249 | 0.96134  | -0.07583 | 0.1017   | -0.08624 | 0.06258  | -0.07117 | 0.1246   |
| 6.31E-94 | 0.068079 | 0.14184  | -0.01452 | 0.75439  | -0.04948 | 0.28597  | 0.026898 | 0.56203  |
| #####    | 0.123406 | 0.00759  | 0.053958 | 0.24452  | -0.01582 | 0.73319  | 0.084256 | 0.06889  |
| #####    | 0.092368 | 0.04604  | 0.070143 | 0.13013  | 0.001744 | 0.97002  | 0.09236  | 0.04606  |
| 1.47E-19 | -0.00833 | 0.85759  | 0.095948 | 0.0382   | 0.029256 | 0.52826  | 0.039369 | 0.39598  |
| #####    | 0.095375 | 0.03938  | 0.071818 | 0.12118  | 0.001003 | 0.98275  | 0.079806 | 0.08493  |
| 2.06E-16 | -0.04959 | 0.2849   | -0.076   | 0.10092  | -0.11595 | 0.01216  | -0.12148 | 0.00859  |
| 1.07E-20 | 0.106441 | 0.02141  | 0.130574 | 0.00471  | 0.075253 | 0.10434  | 0.164362 | 0.00036  |
| #####    | 0.158024 | 0.00061  | 0.151433 | 0.00103  | 0.109549 | 0.01788  | 0.233637 | 3.29E-07 |
| 3.47E-25 | 0.053204 | 0.25118  | 0.103873 | 0.02478  | 0.063663 | 0.1696   | 0.010451 | 0.82179  |
| #####    | 0.168108 | 0.00026  | 0.072034 | 0.12006  | 0.022535 | 0.62715  | 0.113072 | 0.01449  |

|          |          |          |          |          |          |          |          |          |
|----------|----------|----------|----------|----------|----------|----------|----------|----------|
| #####    | 0.149882 | 0.00116  | 0.036447 | 0.432    | -0.00966 | 0.83499  | 0.090836 | 0.04979  |
| 2.43E-69 | 0.069119 | 0.13584  | 0.079572 | 0.08585  | -0.02454 | 0.59688  | 0.070634 | 0.12745  |
| 5.80E-16 | 0.014758 | 0.75042  | -0.13527 | 0.0034   | -0.11231 | 0.01517  | -0.10302 | 0.026    |
| #####    | 0.116418 | 0.01181  | 0.046168 | 0.31947  | -0.01445 | 0.75545  | 0.114995 | 0.0129   |
| 5.13E-32 | -0.04455 | 0.33672  | -0.06076 | 0.18998  | -0.02142 | 0.64424  | -0.06671 | 0.15003  |
| #####    | 0.136114 | 0.00321  | 0.065251 | 0.15919  | 0.008692 | 0.8514   | 0.098543 | 0.03325  |
| #####    | 0.092314 | 0.04617  | 0.070592 | 0.12768  | -0.03059 | 0.50958  | 0.056007 | 0.22703  |
| 8.34E-22 | 0.097333 | 0.03549  | -0.00942 | 0.83904  | -0.00049 | 0.99166  | 0.115695 | 0.01235  |
| 7.05E-23 | 0.122865 | 0.00786  | 0.026477 | 0.56818  | -0.04434 | 0.33897  | 0.100091 | 0.03057  |
| #####    | 0.168839 | 0.00025  | 0.016048 | 0.72942  | 0.022855 | 0.62226  | 0.142833 | 0.00197  |
| 1.41E-15 | 0.106255 | 0.02164  | 0.140754 | 0.0023   | 0.072655 | 0.11689  | 0.157379 | 0.00064  |
| 1.44E-17 | 0.088346 | 0.05642  | 0.080321 | 0.08293  | 0.008095 | 0.86149  | 0.093477 | 0.04348  |
| 5.39E-34 | 0.068484 | 0.13948  | 0.250235 | 4.24E-08 | 0.085545 | 0.06474  | 0.222201 | 1.24E-06 |
| 1.21E-24 | 0.125044 | 0.00682  | -0.0586  | 0.20618  | -0.05013 | 0.27963  | -0.00066 | 0.98867  |
| 6.94E-36 | 0.094479 | 0.04127  | -0.03526 | 0.44721  | -0.03542 | 0.44506  | 0.026168 | 0.5727   |
| 1.44E-15 | 0.02321  | 0.61686  | 0.060464 | 0.19212  | 0.05797  | 0.21114  | 0.05393  | 0.24476  |
| 1.89E-33 | 0.133485 | 0.00385  | 0.052231 | 0.25997  | 0.073997 | 0.11027  | 0.112403 | 0.01509  |
| 4.71E-14 | 0.051885 | 0.26315  | 0.05432  | 0.24136  | -0.00217 | 0.96276  | 0.03854  | 0.40602  |
| 2.34E-74 | 0.091328 | 0.04856  | 0.046099 | 0.32019  | 0.024198 | 0.60196  | 0.115262 | 0.01269  |
| #####    | 0.12191  | 0.00836  | 0.068556 | 0.13906  | -0.00643 | 0.88976  | 0.101911 | 0.02765  |
| 1.28E-78 | 0.181485 | 8.01E-05 | 0.100357 | 0.03013  | 0.138655 | 0.00267  | 0.290843 | 1.48E-10 |
| #####    | 0.179419 | 9.68E-05 | 0.097364 | 0.03543  | 0.011113 | 0.8107   | 0.18853  | 4.13E-05 |
| #####    | 0.168469 | 0.00026  | 0.094144 | 0.042    | 0.074998 | 0.10552  | 0.247605 | 5.92E-08 |
| #####    | 0.129105 | 0.0052   | 0.101925 | 0.02763  | 0.010724 | 0.81721  | 0.137464 | 0.00291  |
| #####    | 0.120082 | 0.00939  | 0.0833   | 0.07211  | -0.00443 | 0.92397  | 0.111387 | 0.01603  |
| #####    | 0.15632  | 0.0007   | 0.106109 | 0.02183  | 0.02226  | 0.63136  | 0.187249 | 4.67E-05 |
| #####    | 0.191074 | 3.23E-05 | 0.056392 | 0.22385  | 0.08619  | 0.06274  | 0.259252 | 1.31E-08 |
| #####    | 0.152657 | 0.00093  | 0.047868 | 0.30195  | 0.011238 | 0.80862  | 0.079909 | 0.08453  |
| 1.44E-88 | 0.062464 | 0.1778   | 0.091809 | 0.04738  | -0.00907 | 0.84509  | 0.09802  | 0.03421  |
| #####    | 0.162485 | 0.00042  | 0.043822 | 0.3447   | 0.033057 | 0.47606  | 0.112506 | 0.015    |
| #####    | 0.096954 | 0.03621  | 0.144321 | 0.00177  | 0.019308 | 0.67729  | 0.145421 | 0.00163  |
| #####    | 0.116678 | 0.01163  | 0.08254  | 0.07476  | 0.005316 | 0.90878  | 0.118932 | 0.0101   |
| #####    | 0.118125 | 0.01062  | 0.078129 | 0.09171  | 0.005848 | 0.8997   | 0.1216   | 0.00853  |
| 2.42E-56 | 0.120544 | 0.00912  | 0.064984 | 0.16091  | 0.035977 | 0.43797  | 0.075833 | 0.10169  |
| 1.21E-54 | 0.074355 | 0.10855  | 0.05932  | 0.20069  | -0.04197 | 0.36548  | 0.052712 | 0.2556   |
| 1.25E-85 | 0.167237 | 0.00028  | 0.113309 | 0.01429  | 0.073652 | 0.11194  | 0.175018 | 0.00014  |
| 3.03E-72 | 0.099991 | 0.03074  | 0.053479 | 0.24874  | -0.01896 | 0.68281  | 0.075781 | 0.10192  |
| 6.90E-13 | 0.003209 | 0.94486  | -0.0231  | 0.6185   | 0.007115 | 0.87812  | 0.023035 | 0.61953  |
| 1.82E-53 | 0.086006 | 0.0633   | 0.074571 | 0.10752  | 0.004045 | 0.93053  | 0.06761  | 0.14461  |
| 9.27E-36 | 0.144754 | 0.00171  | 0.09437  | 0.04151  | 0.16354  | 0.00039  | 0.280794 | 6.56E-10 |
| 4.82E-76 | 0.170383 | 0.00022  | 0.020299 | 0.66172  | 0.047994 | 0.30068  | 0.154222 | 0.00083  |
| 1.77E-83 | 0.167562 | 0.00028  | -0.03179 | 0.4931   | -0.01162 | 0.80226  | 0.115271 | 0.01268  |
| 6.95E-17 | 0.043365 | 0.34976  | -0.01435 | 0.75713  | -0.06953 | 0.13355  | -0.00853 | 0.8541   |
| 5.79E-32 | 0.165462 | 0.00033  | 0.196632 | 1.87E-05 | 0.207369 | 6.23E-06 | 0.2866   | 2.80E-10 |
| 1.72E-11 | 0.000912 | 0.98432  | -0.09847 | 0.03338  | -0.08483 | 0.06703  | -0.04196 | 0.36564  |

|          |          |          |          |          |          |          |          |          |
|----------|----------|----------|----------|----------|----------|----------|----------|----------|
| 1.31E-15 | 0.142226 | 0.00206  | 0.216348 | 2.37E-06 | 0.029725 | 0.52167  | 0.17085  | 0.00021  |
| 4.36E-28 | -0.02268 | 0.62493  | -0.15594 | 0.00072  | -0.05239 | 0.25853  | -0.06564 | 0.15672  |
| #####    | 0.106845 | 0.02092  | 0.08496  | 0.06659  | 0.006528 | 0.88812  | 0.111855 | 0.01559  |
| 1.10E-21 | -0.19079 | 3.32E-05 | -0.15753 | 0.00063  | -0.1877  | 4.47E-05 | -0.26214 | 8.90E-09 |
| 5.26E-19 | -0.15809 | 0.00061  | 0.054336 | 0.24122  | -0.05986 | 0.19663  | -0.25287 | 3.02E-08 |
| #####    | 0.187123 | 4.72E-05 | 0.043066 | 0.3531   | -0.00058 | 0.98995  | 0.106194 | 0.02172  |
| 8.07E-16 | 0.116409 | 0.01182  | -0.00756 | 0.87054  | -0.02549 | 0.58269  | 0.115917 | 0.01219  |
| 6.33E-55 | 0.066628 | 0.15055  | -0.04011 | 0.38716  | -0.04919 | 0.28875  | 0.041649 | 0.36917  |
| 4.42E-14 | 0.030424 | 0.51192  | 0.030968 | 0.5044   | -0.04631 | 0.318    | -0.03825 | 0.40953  |
| #####    | 0.074048 | 0.11002  | 0.134038 | 0.00371  | 0.025026 | 0.58957  | 0.1068   | 0.02098  |
| 1.70E-46 | 0.042555 | 0.35885  | 0.172051 | 0.00019  | 0.053398 | 0.24946  | 0.078341 | 0.09083  |
| 5.66E-85 | 0.220045 | 1.58E-06 | 0.085731 | 0.06416  | 0.011304 | 0.80751  | 0.122395 | 0.0081   |
| 7.79E-75 | 0.145922 | 0.00157  | -0.038   | 0.41267  | -0.05197 | 0.26236  | 0.057085 | 0.2182   |
| 6.27E-20 | 0.078711 | 0.08931  | 0.121333 | 0.00867  | -0.0296  | 0.5234   | 0.061874 | 0.18194  |
| 4.71E-39 | 0.128824 | 0.0053   | 0.059819 | 0.19692  | -0.01228 | 0.79126  | 0.062629 | 0.17665  |
| 5.24E-13 | 0.042714 | 0.35705  | 0.071102 | 0.12494  | 0.069841 | 0.13179  | 0.017563 | 0.70501  |
| 5.91E-24 | 0.142485 | 0.00202  | -0.00045 | 0.99234  | 0.07294  | 0.11546  | 0.202485 | 1.03E-05 |
| 6.40E-65 | 0.07002  | 0.1308   | 0.145833 | 0.00158  | -0.03964 | 0.39276  | 0.105913 | 0.02207  |
| 6.79E-80 | 0.146791 | 0.00147  | 0.124028 | 0.00729  | 0.018026 | 0.69763  | 0.215597 | 2.58E-06 |
| 2.36E-70 | 0.149514 | 0.00119  | 0.05728  | 0.21664  | 0.02746  | 0.55389  | 0.064311 | 0.16529  |
| #####    | 0.160416 | 0.0005   | 0.045025 | 0.33161  | -0.01013 | 0.8272   | 0.088976 | 0.05468  |
| 4.60E-19 | 0.158837 | 0.00057  | 0.090335 | 0.05107  | 0.24019  | 1.49E-07 | 0.270847 | 2.70E-09 |
| 5.57E-23 | 0.44634  | 3.03E-24 | 0.048286 | 0.29774  | 0.188302 | 4.22E-05 | 0.406552 | 5.15E-20 |
| 3.59E-20 | 0.123965 | 0.00732  | 0.044676 | 0.33537  | -0.03796 | 0.41317  | 0.091759 | 0.0475   |
| 2.93E-63 | 0.085962 | 0.06344  | 0.090824 | 0.04982  | 0.017462 | 0.70664  | 0.101948 | 0.0276   |
| 3.88E-30 | 0.098138 | 0.03399  | 0.190594 | 3.39E-05 | 0.005987 | 0.89733  | 0.074186 | 0.10936  |
| 2.35E-88 | 0.150268 | 0.00113  | 0.052796 | 0.25484  | -0.01378 | 0.76654  | 0.110839 | 0.01657  |
| 6.62E-66 | 0.168568 | 0.00025  | 0.054035 | 0.24384  | 0.007523 | 0.8712   | 0.097885 | 0.03445  |
| 7.08E-21 | -0.08134 | 0.07908  | -0.13208 | 0.00425  | -0.23168 | 4.14E-07 | -0.20739 | 6.21E-06 |
| 1.62E-18 | 0.074499 | 0.10786  | -0.0201  | 0.66483  | -0.03555 | 0.44345  | 0.034369 | 0.45872  |
| 9.74E-41 | 0.072225 | 0.11908  | 0.021461 | 0.64367  | 0.010232 | 0.82545  | 0.031301 | 0.49982  |
| #####    | 0.151003 | 0.00106  | 0.069924 | 0.13133  | -0.01049 | 0.82115  | 0.112886 | 0.01466  |
| 4.62E-16 | 0.011078 | 0.81129  | -0.04726 | 0.30817  | -0.02106 | 0.64981  | -0.01492 | 0.74783  |
| 4.90E-52 | 0.232964 | 3.56E-07 | 0.108427 | 0.01909  | 0.100343 | 0.03015  | 0.290465 | 1.57E-10 |
| 3.74E-65 | 0.201155 | 1.19E-05 | 0.197483 | 1.72E-05 | 0.14325  | 0.00191  | 0.282968 | 4.78E-10 |
| #####    | 0.137334 | 0.00294  | 0.086635 | 0.06139  | 0.03998  | 0.38869  | 0.161313 | 0.00047  |
| 1.19E-15 | 0.056082 | 0.22641  | -0.15778 | 0.00062  | -0.14676 | 0.00147  | -0.0234  | 0.61395  |
| 3.20E-45 | 0.084964 | 0.06658  | 0.133264 | 0.00391  | 0.051037 | 0.27104  | 0.098232 | 0.03382  |
| 2.32E-60 | 0.083947 | 0.06992  | 0.045924 | 0.32204  | 0.044128 | 0.34134  | 0.065562 | 0.15721  |
| #####    | 0.158681 | 0.00058  | 0.03443  | 0.45792  | 0.011201 | 0.80924  | 0.087294 | 0.05943  |
| 1.70E-34 | 0.038553 | 0.40586  | 0.043299 | 0.3505   | 0.003058 | 0.94745  | 0.079686 | 0.0854   |
| 2.26E-90 | 0.082943 | 0.07334  | 0.08438  | 0.06848  | 0.001709 | 0.97062  | 0.146276 | 0.00153  |
| #####    | 0.093278 | 0.04393  | 0.093359 | 0.04375  | 0.019789 | 0.66972  | 0.130276 | 0.00481  |
| 1.84E-29 | 0.254742 | 2.37E-08 | 0.185712 | 5.40E-05 | 0.280261 | 7.08E-10 | 0.410935 | 1.88E-20 |
| #####    | 0.101102 | 0.02892  | 0.092846 | 0.04492  | 0.006156 | 0.89445  | 0.113518 | 0.01411  |

|          |          |          |          |          |          |          |          |          |
|----------|----------|----------|----------|----------|----------|----------|----------|----------|
| 2.05E-39 | 0.142029 | 0.00209  | 0.096042 | 0.03801  | -0.00664 | 0.88612  | 0.100794 | 0.02941  |
| 2.72E-19 | 0.035296 | 0.44669  | 0.12563  | 0.00656  | 0.088901 | 0.05488  | 0.095224 | 0.03969  |
| 1.67E-78 | 0.165933 | 0.00032  | 0.039411 | 0.39548  | 0.007824 | 0.86608  | 0.074371 | 0.10848  |
| 4.76E-21 | 0.031198 | 0.50123  | 0.062716 | 0.17606  | -0.03472 | 0.45416  | 0.048707 | 0.29355  |
| 8.96E-67 | 0.12267  | 0.00796  | 0.040086 | 0.38743  | -0.0111  | 0.81088  | 0.086929 | 0.06051  |
| 2.85E-42 | 0.034967 | 0.45094  | 0.079773 | 0.08506  | -0.0091  | 0.84449  | 0.078578 | 0.08986  |
| 9.83E-60 | 0.191791 | 3.01E-05 | 0.019266 | 0.67795  | -0.04127 | 0.3735   | 0.057152 | 0.21767  |
| 1.04E-33 | 0.412696 | 1.24E-20 | 0.040105 | 0.38721  | 0.220785 | 1.45E-06 | 0.390671 | 1.77E-18 |
| 1.05E-24 | 0.039248 | 0.39744  | 0.124004 | 0.0073   | -0.00361 | 0.93795  | 0.073699 | 0.11171  |
| 3.43E-31 | 0.135692 | 0.0033   | -0.02403 | 0.60455  | 0.001601 | 0.97248  | 0.15035  | 0.00112  |
| #####    | 0.170631 | 0.00021  | 0.071484 | 0.12292  | 0.022327 | 0.63034  | 0.149566 | 0.00119  |
| 1.71E-16 | 0.077323 | 0.09512  | -0.14479 | 0.00171  | 0.020658 | 0.65612  | -0.00997 | 0.82983  |
| 2.90E-29 | 0.135074 | 0.00345  | -0.10192 | 0.02764  | -0.03391 | 0.4647   | 0.086935 | 0.06049  |
| 8.24E-78 | 0.097574 | 0.03503  | 0.005407 | 0.90723  | -0.04681 | 0.31282  | 0.127445 | 0.00582  |
| 9.34E-58 | 0.209925 | 4.75E-06 | -0.00784 | 0.86576  | 0.043213 | 0.35145  | 0.129588 | 0.00504  |
| 1.54E-19 | 0.088214 | 0.05679  | -0.01936 | 0.67652  | -0.03109 | 0.50269  | 0.030609 | 0.50935  |
| 7.02E-87 | 0.128217 | 0.00552  | 0.027873 | 0.54795  | -0.00642 | 0.88998  | 0.139256 | 0.00256  |
| 2.96E-82 | 0.097584 | 0.03501  | -0.01107 | 0.81142  | -0.03159 | 0.49585  | 0.059913 | 0.19621  |
| 1.94E-41 | 0.340937 | 3.56E-14 | 0.011188 | 0.80945  | -0.07685 | 0.09715  | 0.164917 | 0.00035  |
| 7.42E-32 | 0.066915 | 0.1488   | 0.072542 | 0.11746  | 0.007641 | 0.86919  | 0.133439 | 0.00387  |
| 2.71E-17 | -0.06896 | 0.13675  | -0.03327 | 0.47322  | -0.15442 | 0.00081  | -0.11462 | 0.01319  |
| 2.60E-15 | 0.034745 | 0.45382  | -0.02662 | 0.56607  | -0.05267 | 0.25597  | -0.02586 | 0.57728  |
| 8.92E-31 | -0.15941 | 0.00054  | -0.03562 | 0.44249  | -0.13872 | 0.00266  | -0.23642 | 2.35E-07 |
| 7.84E-20 | 0.044772 | 0.33433  | -0.1144  | 0.01337  | -0.08195 | 0.07688  | -0.03795 | 0.41322  |
| #####    | 0.124276 | 0.00717  | 0.170894 | 0.00021  | 0.078306 | 0.09098  | 0.163442 | 0.00039  |
| 1.48E-53 | 0.106076 | 0.02187  | 0.001298 | 0.97768  | -0.00859 | 0.8532   | 0.050331 | 0.27773  |
| 1.40E-25 | 0.122169 | 0.00822  | 0.074763 | 0.10662  | 0.025789 | 0.57828  | 0.124474 | 0.00708  |
| 6.71E-83 | 0.183182 | 6.84E-05 | 0.174952 | 0.00014  | 0.302659 | 2.38E-11 | 0.387589 | 3.45E-18 |
| 1.42E-19 | 0.037807 | 0.415    | 0.084612 | 0.06772  | 0.071932 | 0.12059  | 0.144236 | 0.00178  |
| 8.55E-15 | 0.027526 | 0.55294  | -0.1324  | 0.00416  | -0.08815 | 0.05696  | 0.010056 | 0.82842  |
| 1.51E-35 | 0.166386 | 0.0003   | -0.04956 | 0.28513  | -0.04104 | 0.37626  | 0.128089 | 0.00557  |
| #####    | 0.174767 | 0.00015  | 0.103019 | 0.026    | 0.030804 | 0.50666  | 0.202535 | 1.03E-05 |
| 1.16E-63 | 0.389806 | 2.14E-18 | 0.212669 | 3.54E-06 | 0.338334 | 5.71E-14 | 0.567397 | 3.82E-41 |
| 3.48E-17 | 0.164458 | 0.00036  | 0.085391 | 0.06522  | 0.187064 | 4.75E-05 | 0.294143 | 8.97E-11 |
| 9.62E-96 | 0.186253 | 5.13E-05 | 0.107475 | 0.02018  | 0.114889 | 0.01298  | 0.304521 | 1.77E-11 |
| 2.73E-74 | 0.086309 | 0.06237  | -0.03305 | 0.47621  | -0.08636 | 0.0622   | 0.043045 | 0.35333  |
| 1.87E-69 | 0.171085 | 0.0002   | 0.083153 | 0.07261  | 0.037168 | 0.42294  | 0.192084 | 2.93E-05 |
| 1.73E-23 | 0.209761 | 4.84E-06 | 0.055593 | 0.2305   | 0.093954 | 0.04242  | 0.252789 | 3.05E-08 |
| 9.16E-22 | -0.11013 | 0.01727  | -0.14304 | 0.00194  | -0.17951 | 9.60E-05 | -0.21147 | 4.03E-06 |
| 2.28E-30 | 0.098381 | 0.03355  | 0.041912 | 0.36616  | -0.08602 | 0.06325  | 0.056047 | 0.22671  |
| 1.68E-30 | 0.211681 | 3.94E-06 | 0.067303 | 0.14645  | 0.135591 | 0.00333  | 0.263616 | 7.29E-09 |
| 4.82E-73 | 0.114123 | 0.0136   | 0.195977 | 2.00E-05 | 0.040259 | 0.38538  | 0.153128 | 0.0009   |
| 8.24E-69 | 0.115024 | 0.01287  | 0.096458 | 0.03718  | -0.02014 | 0.66428  | 0.108023 | 0.01954  |
| 4.33E-37 | 0.059424 | 0.19989  | -0.08267 | 0.0743   | -0.17308 | 0.00017  | -0.07082 | 0.12647  |
| 8.35E-73 | 0.205602 | 7.49E-06 | 0.097893 | 0.03444  | 0.074772 | 0.10658  | 0.279654 | 7.73E-10 |

|          |          |          |          |          |          |          |          |          |
|----------|----------|----------|----------|----------|----------|----------|----------|----------|
| 2.04E-45 | 0.229379 | 5.43E-07 | 0.040375 | 0.38401  | 0.003904 | 0.93294  | 0.1931   | 2.65E-05 |
| 7.82E-55 | 0.1519   | 0.00099  | 0.074941 | 0.10579  | 0.039817 | 0.39062  | 0.181564 | 7.95E-05 |
| 3.80E-36 | 0.166236 | 0.00031  | 0.056595 | 0.22219  | 0.101107 | 0.02891  | 0.278163 | 9.59E-10 |
| 2.21E-47 | 0.102644 | 0.02655  | 0.068407 | 0.13993  | 0.021468 | 0.64355  | 0.088023 | 0.05733  |
| 8.59E-59 | 0.132257 | 0.0042   | 0.249167 | 4.86E-08 | 0.142419 | 0.00203  | 0.307471 | 1.11E-11 |
| 3.29E-24 | 0.018762 | 0.68592  | -0.10398 | 0.02464  | -0.09739 | 0.03537  | -0.07346 | 0.11288  |
| 3.48E-12 | 0.053918 | 0.24487  | -0.14358 | 0.00187  | 0.148898 | 0.00125  | 0.054405 | 0.24062  |
| 0.00402  | -0.17876 | 0.0001   | -0.18775 | 4.45E-05 | -0.08554 | 0.06475  | -0.29454 | 8.44E-11 |
| 1.25E-28 | -0.02233 | 0.63033  | 0.031054 | 0.50321  | 0.164586 | 0.00035  | 0.050619 | 0.27498  |
| 2.68E-29 | 0.029328 | 0.52724  | -0.0791  | 0.08772  | -0.20019 | 1.31E-05 | -0.04176 | 0.36785  |
| 1.79E-07 | 0.019317 | 0.67714  | 0.063634 | 0.1698   | -0.09116 | 0.04898  | 0.047277 | 0.30797  |
| 3.79E-05 | 0.063933 | 0.1678   | -0.04026 | 0.38535  | -0.11882 | 0.01017  | 0.057034 | 0.21862  |
| 0.00024  | 0.041249 | 0.37379  | 0.031772 | 0.49338  | -0.09816 | 0.03395  | 0.072932 | 0.1155   |
| 4.46E-15 | 0.12077  | 0.00899  | 0.198015 | 1.63E-05 | 0.083644 | 0.07094  | 0.240484 | 1.44E-07 |
| 0.00062  | 0.110138 | 0.01727  | 0.151565 | 0.00102  | -0.04134 | 0.37272  | 0.168003 | 0.00027  |
| 2.98E-25 | 0.140708 | 0.00231  | 0.005259 | 0.90976  | 0.016176 | 0.72736  | 0.197872 | 1.65E-05 |
| 2.88E-11 | -0.18065 | 8.64E-05 | -0.01407 | 0.76165  | -0.04894 | 0.29125  | -0.26099 | 1.04E-08 |
| 1.21E-07 | 0.192314 | 2.87E-05 | 0.031639 | 0.4952   | 0.093237 | 0.04402  | 0.278107 | 9.66E-10 |
| 8.66E-11 | 0.143836 | 0.00183  | 0.058336 | 0.20827  | 0.053908 | 0.24496  | 0.224154 | 9.91E-07 |
| 2.68E-19 | -0.03511 | 0.44913  | 0.017743 | 0.70214  | -0.05218 | 0.26045  | 0.020678 | 0.65581  |
| 6.06E-19 | -0.01229 | 0.7911   | 0.056484 | 0.2231   | -0.082   | 0.07667  | 0.052647 | 0.25619  |
| 4.84E-05 | -0.07211 | 0.11969  | 0.088527 | 0.05591  | 0.112711 | 0.01481  | 0.051827 | 0.26368  |
| 0.00128  | -0.0056  | 0.90387  | -0.09454 | 0.04115  | -0.18061 | 8.68E-05 | -0.07457 | 0.10752  |
| 5.95E-19 | 0.087288 | 0.05945  | -0.05386 | 0.24537  | -0.12264 | 0.00797  | -0.01146 | 0.80487  |
| 0.03908  | 0.066619 | 0.1506   | -0.05093 | 0.27207  | -0.15181 | 0.001    | 0.003238 | 0.94436  |
| 7.72E-11 | 0.060581 | 0.19126  | 0.020543 | 0.65792  | -0.02696 | 0.56118  | 0.168848 | 0.00025  |
| 0.00138  | 0.002378 | 0.95912  | -0.22111 | 1.40E-06 | -0.27824 | 9.48E-10 | -0.114   | 0.0137   |
| 2.38E-07 | 0.065283 | 0.15898  | -0.06461 | 0.16334  | -0.03835 | 0.40831  | 0.0717   | 0.1218   |
| 1.38E-07 | 0.080414 | 0.08258  | -0.04411 | 0.34151  | -0.16172 | 0.00045  | -0.04565 | 0.32492  |
| 0.02072  | -0.10513 | 0.02308  | -0.17695 | 0.00012  | -0.21394 | 3.09E-06 | -0.1458  | 0.00158  |
| 9.12E-07 | 0.000422 | 0.99275  | -0.19248 | 2.82E-05 | -0.14261 | 0.00201  | -0.04561 | 0.32537  |
| 8.99E-12 | 0.05253  | 0.25725  | -0.00075 | 0.98707  | -0.09161 | 0.04786  | 0.033553 | 0.46946  |
| 0.00012  | -0.10644 | 0.02141  | -0.16291 | 0.00041  | -0.18015 | 9.06E-05 | -0.07112 | 0.12485  |
| 0.00398  | 0.099387 | 0.03177  | 0.369061 | 1.62E-16 | 0.167064 | 0.00029  | 0.281498 | 5.92E-10 |
| 0.17417  | 0.084005 | 0.06972  | -0.03137 | 0.49888  | -0.056   | 0.2271   | 0.083367 | 0.07188  |
| 1.19E-06 | 0.084917 | 0.06673  | 0.076295 | 0.09961  | 0.004784 | 0.91788  | 0.169198 | 0.00024  |
| 9.59E-20 | 0.056046 | 0.22671  | 0.007382 | 0.8736   | -0.05822 | 0.20917  | 0.096195 | 0.03771  |
| 0.00787  | -0.01791 | 0.69952  | -0.15707 | 0.00066  | -0.22048 | 1.50E-06 | -0.1153  | 0.01266  |
| 0.06608  | 0.063845 | 0.16839  | 0.080424 | 0.08254  | 0.119513 | 0.00974  | 0.174546 | 0.00015  |
| 1.34E-20 | 0.056788 | 0.22061  | -0.13603 | 0.00322  | -0.25298 | 2.98E-08 | -0.09027 | 0.05123  |
| 1.08E-20 | 0.119946 | 0.00947  | 0.172399 | 0.00018  | 0.06973  | 0.13241  | 0.263298 | 7.61E-09 |
| 1.80E-08 | 0.054683 | 0.23823  | 0.009444 | 0.83871  | -0.1213  | 0.00869  | 0.040798 | 0.37905  |
| 6.60E-05 | -0.08438 | 0.06848  | -0.14423 | 0.00178  | -0.23099 | 4.49E-07 | -0.207   | 6.47E-06 |
| 5.14E-19 | 0.046621 | 0.31473  | 0.006584 | 0.88716  | -0.09312 | 0.04429  | 0.036048 | 0.43706  |
| 5.34E-12 | 0.120484 | 0.00916  | 0.040802 | 0.379    | -0.02114 | 0.64866  | 0.119312 | 0.00986  |

|          |          |          |          |          |          |          |          |          |
|----------|----------|----------|----------|----------|----------|----------|----------|----------|
| 0.00585  | -0.01096 | 0.81326  | 0.101849 | 0.02775  | -0.08091 | 0.08071  | -0.02565 | 0.58029  |
| 9.73E-23 | -0.00845 | 0.85555  | 0.027101 | 0.55908  | -0.08817 | 0.05692  | 0.031337 | 0.49933  |
| 4.38E-11 | 0.065113 | 0.16008  | 0.027758 | 0.5496   | -0.05011 | 0.27982  | 0.126303 | 0.00627  |
| 4.28E-14 | -0.00944 | 0.8387   | -0.12516 | 0.00677  | -0.15526 | 0.00076  | -0.07427 | 0.10895  |
| 0.00273  | 0.020514 | 0.65837  | -0.09618 | 0.03774  | -0.00484 | 0.91688  | 0.07045  | 0.12845  |
| 8.16E-08 | -0.04574 | 0.32394  | -0.06289 | 0.17486  | -0.08605 | 0.06315  | -0.00819 | 0.8599   |
| 9.24E-13 | -0.06077 | 0.18989  | -0.19488 | 2.23E-05 | -0.21829 | 1.92E-06 | -0.12651 | 0.00619  |
| 6.20E-20 | 0.037561 | 0.41804  | -0.03306 | 0.476    | -0.13144 | 0.00444  | 0.016529 | 0.72164  |
| 0.22176  | 0.001549 | 0.97337  | 0.057499 | 0.21488  | -0.01242 | 0.78897  | 0.108491 | 0.01902  |
| 0.83303  | 0.124436 | 0.0071   | -0.00557 | 0.90452  | 0.060706 | 0.19035  | 0.179498 | 9.61E-05 |
| 0.00094  | 0.185835 | 5.34E-05 | 0.02026  | 0.66233  | 0.071329 | 0.12374  | 0.297151 | 5.64E-11 |
| 5.89E-08 | -0.01689 | 0.71589  | 0.092374 | 0.04603  | -0.06819 | 0.14122  | 0.114259 | 0.01349  |
| 8.68E-36 | 0.10196  | 0.02758  | 0.059484 | 0.19944  | -0.07659 | 0.0983   | 0.09448  | 0.04127  |
| 3.08E-08 | -0.02238 | 0.6295   | -0.00342 | 0.94116  | 0.028845 | 0.53407  | 0.058034 | 0.21063  |
| 4.04E-12 | 0.047274 | 0.308    | 0.000187 | 0.99678  | -0.1412  | 0.00222  | 0.034072 | 0.46261  |
| 0.02032  | -0.11853 | 0.01036  | -0.09211 | 0.04665  | -0.03454 | 0.45652  | -0.20299 | 9.83E-06 |
| 5.95E-08 | -0.08819 | 0.05685  | -0.10188 | 0.0277   | -0.08348 | 0.0715   | -0.18018 | 9.02E-05 |
| 8.16E-22 | 0.170439 | 0.00022  | 0.10884  | 0.01864  | -0.1324  | 0.00416  | 0.039743 | 0.39151  |
| 6.87E-16 | 0.089379 | 0.05358  | 0.004462 | 0.92339  | -0.03141 | 0.49839  | 0.130842 | 0.00462  |
| 4.53E-06 | 0.06696  | 0.14852  | 0.072864 | 0.11584  | 0.052218 | 0.26008  | 0.179088 | 9.97E-05 |
| 5.83E-05 | 0.104379 | 0.02409  | -0.09307 | 0.0444   | -0.10006 | 0.03062  | 0.095751 | 0.0386   |
| 1.07E-07 | 0.100439 | 0.02999  | 0.116815 | 0.01153  | 0.086649 | 0.06134  | 0.23653  | 2.32E-07 |
| 7.80E-25 | 0.062354 | 0.17857  | 0.045376 | 0.32785  | -0.08248 | 0.07496  | 0.100903 | 0.02924  |
| 9.97E-10 | 0.007397 | 0.87333  | -0.04824 | 0.2982   | -0.06829 | 0.14059  | 0.031293 | 0.49993  |
| 1.45E-16 | -0.0258  | 0.57808  | 0.05669  | 0.22141  | 0.150512 | 0.0011   | 0.026423 | 0.56897  |
| 0.00041  | 0.12461  | 0.00701  | -0.11117 | 0.01624  | -0.10487 | 0.02343  | 0.067952 | 0.14259  |
| 9.99E-11 | -0.01977 | 0.67005  | -0.01158 | 0.80292  | -0.09445 | 0.04133  | 0.054776 | 0.23743  |
| 3.29E-16 | -0.06209 | 0.18042  | -0.02464 | 0.59535  | 0.133851 | 0.00376  | -0.02468 | 0.59475  |
| 2.56E-20 | -0.0295  | 0.52485  | -0.00768 | 0.86853  | -0.17501 | 0.00014  | -0.0821  | 0.07634  |
| 2.61E-14 | 0.015388 | 0.74015  | 0.13048  | 0.00474  | -0.07804 | 0.09207  | 0.051611 | 0.26568  |
| 2.57E-16 | 0.151836 | 0.001    | 0.050079 | 0.28015  | -0.05417 | 0.24266  | 0.132825 | 0.00403  |
| 1.44E-08 | 0.113162 | 0.01441  | -0.10086 | 0.02932  | -0.13524 | 0.00341  | 0.050873 | 0.27258  |
| 5.67E-07 | 0.057607 | 0.21402  | -0.01687 | 0.71614  | -0.06536 | 0.15852  | 0.042755 | 0.35659  |
| 0.12583  | 0.009783 | 0.83301  | -0.14259 | 0.00201  | -0.11469 | 0.01314  | -0.04456 | 0.33668  |
| 1.42E-19 | 0.178672 | 0.0001   | 0.185711 | 5.40E-05 | 0.057348 | 0.21609  | 0.311524 | 5.73E-12 |
| 7.54E-09 | -0.09603 | 0.03803  | -0.09167 | 0.04773  | 0.107469 | 0.02018  | -0.04237 | 0.3609   |
| 0.00234  | 0.117249 | 0.01122  | -0.0871  | 0.06     | -0.07717 | 0.09578  | -0.14216 | 0.00207  |
| 4.24E-15 | 0.177877 | 0.00011  | 0.178012 | 0.00011  | -0.0319  | 0.49166  | 0.171468 | 0.0002   |
| 0.03295  | 0.089256 | 0.05392  | -0.03809 | 0.41147  | -0.04958 | 0.28495  | -0.00508 | 0.91281  |
| 5.73E-16 | 0.074669 | 0.10706  | 0.069672 | 0.13273  | 0.004654 | 0.9201   | 0.137896 | 0.00282  |
| 2.88E-26 | 0.074821 | 0.10635  | 0.05103  | 0.2711   | 0.042135 | 0.36361  | 0.159068 | 0.00056  |
| 3.99E-16 | 0.051864 | 0.26334  | 0.066335 | 0.15236  | -0.01437 | 0.75678  | 0.139931 | 0.00244  |
| 5.69E-20 | -0.01008 | 0.82803  | -0.02281 | 0.62293  | -0.16556 | 0.00033  | -0.014   | 0.76288  |
| 5.45E-07 | -0.16254 | 0.00042  | -0.18467 | 5.96E-05 | -0.03859 | 0.40536  | -0.21658 | 2.31E-06 |
| 3.18E-13 | 0.0312   | 0.5012   | 0.388543 | 2.81E-18 | 0.340806 | 3.65E-14 | 0.212921 | 3.45E-06 |



|          |          |          |          |          |          |          |          |          |
|----------|----------|----------|----------|----------|----------|----------|----------|----------|
| 6.52E-16 | 0.024806 | 0.59286  | 0.05833  | 0.20831  | -0.10292 | 0.02614  | -0.0341  | 0.46222  |
| 4.67E-22 | -0.07446 | 0.10805  | 0.063966 | 0.16758  | 0.050727 | 0.27396  | -0.10871 | 0.01878  |
| 0.00053  | 0.10165  | 0.02806  | 0.047364 | 0.30708  | -0.01442 | 0.75599  | 0.125816 | 0.00648  |
| 3.01E-19 | 0.147373 | 0.0014   | 0.112289 | 0.01519  | 0.009493 | 0.83789  | 0.185116 | 5.71E-05 |
| 5.20E-06 | 0.14128  | 0.00221  | 0.147204 | 0.00142  | 0.039741 | 0.39153  | 0.242651 | 1.10E-07 |
| 0.07863  | -0.0713  | 0.1239   | -0.07763 | 0.0938   | -0.2104  | 4.52E-06 | -0.08147 | 0.07861  |
| 8.55E-05 | 0.059869 | 0.19654  | -0.12921 | 0.00517  | -0.03256 | 0.48269  | 0.051183 | 0.26967  |
| 4.91E-14 | 0.013986 | 0.76307  | -0.08953 | 0.05319  | -0.2477  | 5.85E-08 | -0.11899 | 0.01006  |
| 4.10E-13 | -0.15052 | 0.0011   | 0.097732 | 0.03474  | 0.233042 | 3.53E-07 | -0.00166 | 0.97148  |
| 0.00037  | -0.02231 | 0.63054  | 0.01934  | 0.67678  | 0.005066 | 0.91305  | -0.01049 | 0.82115  |
| 5.68E-05 | 0.17437  | 0.00015  | 0.193866 | 2.46E-05 | 0.196356 | 1.92E-05 | 0.373059 | 7.22E-17 |
| 6.69E-06 | 0.125268 | 0.00672  | 0.147752 | 0.00136  | 0.002966 | 0.94903  | 0.207934 | 5.87E-06 |
| 1.06E-17 | 0.102961 | 0.02608  | 0.056426 | 0.22357  | -0.0544  | 0.24069  | 0.153483 | 0.00088  |
| 0.02725  | 0.029209 | 0.52892  | -0.31713 | 2.27E-12 | -0.30365 | 2.04E-11 | -0.18656 | 4.98E-05 |
| 0.01168  | -0.0888  | 0.05515  | -0.00823 | 0.85924  | -0.20408 | 8.78E-06 | -0.10858 | 0.01892  |
| 6.40E-19 | 0.087953 | 0.05753  | 0.032487 | 0.48371  | 0.013302 | 0.77434  | 0.163592 | 0.00039  |
| 7.65E-14 | 0.016064 | 0.72917  | -0.10305 | 0.02596  | -0.14188 | 0.00212  | -0.01699 | 0.71427  |
| 2.59E-11 | -0.00827 | 0.85854  | -0.00366 | 0.93716  | 0.061302 | 0.18602  | 0.048609 | 0.29452  |
| 6.81E-15 | 0.120389 | 0.00921  | 0.078347 | 0.09081  | -0.00483 | 0.91703  | 0.180551 | 8.72E-05 |
| 5.21E-11 | -0.09    | 0.05195  | -0.09548 | 0.03915  | -0.29653 | 6.21E-11 | -0.17299 | 0.00017  |
| 5.96E-17 | 0.213361 | 3.29E-06 | -0.06149 | 0.18465  | -0.17598 | 0.00013  | 0.027537 | 0.55279  |
| 1.45E-16 | 0.141827 | 0.00212  | 0.072439 | 0.11798  | 0.048992 | 0.29072  | 0.268077 | 3.96E-09 |
| 0.00033  | 0.058318 | 0.20841  | -0.15544 | 0.00075  | -0.19322 | 2.62E-05 | -0.12555 | 0.00659  |
| 2.85E-07 | 0.002964 | 0.94907  | -0.08238 | 0.0753   | -0.19497 | 2.21E-05 | -0.03357 | 0.46922  |
| 3.23E-07 | -0.0128  | 0.78265  | 0.133649 | 0.00381  | -0.16359 | 0.00039  | 0.023858 | 0.60706  |
| 2.27E-12 | 0.097846 | 0.03453  | -0.09381 | 0.04273  | -0.0128  | 0.78256  | 0.16633  | 0.00031  |
| 1.45E-27 | 0.074121 | 0.10967  | -0.04658 | 0.31521  | -0.12489 | 0.00689  | 0.05384  | 0.24555  |
| 4.10E-10 | -0.0042  | 0.92792  | -0.10096 | 0.02915  | -0.11037 | 0.01703  | -0.01165 | 0.80172  |
| 0.01155  | 0.126724 | 0.0061   | 0.109424 | 0.01801  | -0.1376  | 0.00289  | 0.032804 | 0.47945  |
| 0.00125  | 0.004144 | 0.92884  | 0.355175 | 2.49E-15 | 0.055878 | 0.22811  | 0.197409 | 1.73E-05 |
| 3.75E-08 | 0.018049 | 0.69725  | -0.04182 | 0.36719  | -0.1391  | 0.00259  | -0.0128  | 0.78263  |
| 2.69E-12 | 0.028609 | 0.53743  | -0.02419 | 0.60207  | -0.10864 | 0.01886  | 0.054409 | 0.24059  |
| 4.40E-13 | 0.011901 | 0.79756  | 0.003169 | 0.94555  | -0.19617 | 1.96E-05 | -0.03907 | 0.39956  |
| 2.73E-18 | 0.061037 | 0.18794  | -0.04992 | 0.28166  | -0.17333 | 0.00017  | 0.036576 | 0.43036  |
| 2.82E-12 | 0.020373 | 0.66057  | 0.000439 | 0.99245  | -0.01864 | 0.68779  | 0.078701 | 0.08935  |
| 0.49766  | 0.076758 | 0.09757  | -0.05868 | 0.20562  | -0.04236 | 0.36108  | 0.118856 | 0.01015  |
| 4.25E-08 | 0.007325 | 0.87456  | 0.035842 | 0.43969  | -0.0677  | 0.14406  | 0.027101 | 0.55909  |
| 1.52E-13 | 0.075447 | 0.10345  | -0.03704 | 0.42456  | -0.14762 | 0.00138  | 0.00182  | 0.96872  |
| 1.84E-11 | 0.221795 | 1.29E-06 | 0.137768 | 0.00285  | 0.036993 | 0.42513  | 0.278339 | 9.35E-10 |
| 8.04E-20 | 0.003416 | 0.9413   | -0.1892  | 3.87E-05 | -0.19787 | 1.65E-05 | -0.07838 | 0.09069  |
| 0.69584  | 0.09134  | 0.04853  | 0.043315 | 0.35032  | 0.003154 | 0.94581  | 0.196568 | 1.88E-05 |
| 0.00023  | 0.085303 | 0.0655   | -0.00815 | 0.86054  | 0.090552 | 0.05051  | 0.138897 | 0.00263  |
| 1.88E-14 | -0.12042 | 0.00919  | -0.06673 | 0.14991  | -0.08127 | 0.07937  | -0.18919 | 3.88E-05 |
| 0.00515  | 0.097595 | 0.03499  | 0.10124  | 0.0287   | -0.01976 | 0.67022  | 0.19314  | 2.64E-05 |
| 4.24E-12 | 0.132815 | 0.00404  | 0.069744 | 0.13233  | -0.16736 | 0.00028  | 0.017535 | 0.70548  |

|          |          |          |          |          |          |          |          |          |
|----------|----------|----------|----------|----------|----------|----------|----------|----------|
| 1.84E-20 | 0.130737 | 0.00466  | 0.120776 | 0.00899  | 0.107148 | 0.02056  | 0.28369  | 4.30E-10 |
| 1.42E-18 | 0.231341 | 4.31E-07 | 0.03642  | 0.43234  | 0.007691 | 0.86835  | 0.224058 | 1.00E-06 |
| 3.36E-06 | 0.009103 | 0.84446  | 0.002797 | 0.95193  | 0.09657  | 0.03696  | -0.04041 | 0.38354  |
| 0.0671   | 0.066471 | 0.15152  | -0.01153 | 0.80372  | 0.04238  | 0.36083  | 0.175342 | 0.00014  |
| 3.12E-14 | 0.061199 | 0.18677  | -0.08872 | 0.05538  | -0.21118 | 4.16E-06 | -0.03637 | 0.43296  |
| 3.53E-12 | 0.014146 | 0.76045  | -0.18404 | 6.32E-05 | -0.20485 | 8.11E-06 | -0.04574 | 0.32394  |
| 6.44E-06 | -0.00704 | 0.87936  | 0.092988 | 0.0446   | -0.1137  | 0.01396  | 0.035726 | 0.44116  |
| 0.00282  | 0.147388 | 0.0014   | 0.190325 | 3.48E-05 | 0.073498 | 0.1127   | 0.246773 | 6.58E-08 |
| 7.54E-12 | -0.04566 | 0.32487  | -0.12484 | 0.00691  | -0.31188 | 5.41E-12 | -0.20148 | 1.15E-05 |
| 6.47E-11 | 0.018983 | 0.68241  | -0.17932 | 9.76E-05 | -0.1616  | 0.00045  | -0.058   | 0.21094  |
| 1.96E-23 | 0.100058 | 0.03063  | 0.043526 | 0.34797  | -0.04201 | 0.36504  | 0.156648 | 0.00068  |
| 1.23E-08 | 0.033116 | 0.47528  | -0.09456 | 0.0411   | -0.1321  | 0.00424  | -0.01143 | 0.80547  |
| 4.04E-11 | -0.02796 | 0.54666  | -0.0039  | 0.93297  | -0.15652 | 0.00069  | -0.01126 | 0.80824  |
| 3.32E-21 | 0.092529 | 0.04566  | 0.113428 | 0.01418  | -0.00795 | 0.86396  | 0.15698  | 0.00066  |
| 4.46E-06 | 0.051247 | 0.26907  | -0.00193 | 0.96683  | -0.08054 | 0.08211  | 0.060223 | 0.1939   |
| 1.21E-24 | 0.095303 | 0.03952  | 0.10308  | 0.02591  | 0.015564 | 0.73727  | 0.175403 | 0.00014  |
| 0.00315  | 0.027444 | 0.55412  | -0.13439 | 0.00362  | 0.041279 | 0.37345  | -0.04804 | 0.30019  |
| 4.11E-21 | 0.062405 | 0.17821  | 0.112871 | 0.01467  | -0.03598 | 0.43793  | 0.125762 | 0.0065   |
| 0.00029  | -0.01884 | 0.6847   | 0.074977 | 0.10562  | 0.156373 | 0.0007   | 0.049847 | 0.28239  |
| 0.15384  | -0.01562 | 0.73641  | -0.16214 | 0.00044  | -0.18546 | 5.53E-05 | -0.13761 | 0.00288  |
| 4.71E-07 | 0.068046 | 0.14203  | 0.065938 | 0.15483  | -0.09568 | 0.03875  | 0.030239 | 0.51449  |
| 0.00027  | 0.067704 | 0.14406  | 0.002829 | 0.95138  | -0.02777 | 0.54936  | 0.089275 | 0.05386  |
| 1.74E-05 | 0.262479 | 8.50E-09 | -0.00461 | 0.92089  | 0.01451  | 0.75448  | 0.268329 | 3.83E-09 |
| 1.76E-12 | 0.135746 | 0.00329  | -0.09768 | 0.03484  | 0.011221 | 0.8089   | 0.147883 | 0.00135  |
| 3.69E-06 | 0.217244 | 2.15E-06 | -0.03054 | 0.51033  | -0.00807 | 0.86187  | 0.220394 | 1.52E-06 |
| 6.55E-22 | 0.10581  | 0.0222   | 0.002544 | 0.95628  | -0.06506 | 0.16044  | 0.072375 | 0.11831  |
| 2.63E-19 | 0.043531 | 0.34792  | 0.098742 | 0.0329   | -0.1132  | 0.01438  | 0.084527 | 0.068    |
| 0.0074   | 0.092258 | 0.0463   | -0.17031 | 0.00022  | -0.1505  | 0.00111  | 0.039375 | 0.39591  |
| 0.06308  | 0.078799 | 0.08895  | 0.100397 | 0.03006  | 0.002667 | 0.95415  | 0.18381  | 6.45E-05 |
| 0.01768  | 0.0959   | 0.0383   | -0.02978 | 0.52093  | 0.081112 | 0.07994  | 0.144252 | 0.00178  |
| 8.75E-08 | 0.039304 | 0.39676  | 0.137048 | 0.003    | -0.05233 | 0.25908  | 0.037953 | 0.4132   |
| 7.96E-16 | 0.042708 | 0.35712  | 0.007771 | 0.867    | -0.12702 | 0.00598  | 0.039119 | 0.39899  |
| 7.33E-07 | -0.02724 | 0.55701  | -0.12254 | 0.00802  | -0.22075 | 1.46E-06 | -0.09651 | 0.03707  |
| 1.64E-13 | 0.165405 | 0.00033  | -0.01527 | 0.74204  | -0.20964 | 4.90E-06 | -0.0785  | 0.09018  |
| 7.88E-10 | 0.011361 | 0.80657  | 0.072434 | 0.11801  | -0.10546 | 0.02265  | 0.051468 | 0.26701  |
| 1.26E-14 | 0.101668 | 0.02803  | 0.103522 | 0.02528  | -0.00179 | 0.96928  | 0.203261 | 9.55E-06 |
| 1.58E-05 | 0.154535 | 0.00081  | 0.090823 | 0.04982  | 0.064705 | 0.16272  | 0.264235 | 6.70E-09 |
| 5.78E-11 | 0.055279 | 0.23315  | 0.06621  | 0.15313  | -0.11092 | 0.01649  | 0.06414  | 0.16643  |
| 4.95E-14 | 0.075553 | 0.10296  | 0.027709 | 0.55031  | -0.17709 | 0.00012  | 0.014433 | 0.75574  |
| 7.97E-12 | -0.08831 | 0.05652  | -0.00492 | 0.91563  | -0.15979 | 0.00053  | 0.008188 | 0.85993  |
| 0.01884  | -0.11812 | 0.01063  | -0.06759 | 0.14474  | -0.11359 | 0.01405  | -0.11925 | 0.0099   |
| 0.00502  | 0.005234 | 0.91019  | 0.098312 | 0.03367  | 0.04664  | 0.31454  | -0.00321 | 0.94484  |
| 6.49E-18 | 0.045289 | 0.32878  | 0.006154 | 0.89448  | -0.0575  | 0.21485  | 0.116579 | 0.0117   |
| 3.24E-07 | 0.134959 | 0.00348  | -0.09725 | 0.03565  | -0.07329 | 0.11374  | 0.120729 | 0.00901  |
| 0.00185  | -0.06814 | 0.1415   | -0.14587 | 0.00157  | -0.16822 | 0.00026  | -0.11164 | 0.0158   |

|          |          |          |          |          |          |          |          |          |
|----------|----------|----------|----------|----------|----------|----------|----------|----------|
| 0.01152  | -0.02047 | 0.65905  | 0.063197 | 0.17276  | -0.10537 | 0.02277  | 0.000821 | 0.98588  |
| 3.27E-20 | 0.036715 | 0.42862  | -0.06291 | 0.17474  | -0.11371 | 0.01395  | 0.026338 | 0.57021  |
| 6.19E-05 | 0.177246 | 0.00012  | -0.01168 | 0.8013   | 0.004118 | 0.92928  | 0.236892 | 2.23E-07 |
| 1.98E-10 | 0.225877 | 8.14E-07 | 0.043216 | 0.35142  | -0.03261 | 0.48201  | 0.20548  | 7.59E-06 |
| 0.00025  | -0.00497 | 0.91469  | 0.178828 | 0.0001   | 0.141371 | 0.0022   | 0.146937 | 0.00145  |
| 2.34E-05 | 0.224622 | 9.39E-07 | 0.146148 | 0.00154  | 0.143604 | 0.00186  | 0.413659 | 9.93E-21 |
| 9.18E-21 | 0.022967 | 0.62056  | 0.129871 | 0.00494  | -0.03757 | 0.41791  | 0.095616 | 0.03888  |
| 1.76E-08 | 0.161418 | 0.00046  | 0.082619 | 0.07448  | -0.08208 | 0.07641  | 0.186221 | 5.14E-05 |
| 4.23E-14 | 0.176859 | 0.00012  | 0.231042 | 4.47E-07 | 0.041795 | 0.3675   | 0.23824  | 1.89E-07 |
| 1.01E-09 | -0.12013 | 0.00936  | 0.028029 | 0.5457   | 0.02379  | 0.6081   | -0.20038 | 1.28E-05 |
| 1.21E-08 | -0.12673 | 0.0061   | -0.04494 | 0.3325   | 0.11076  | 0.01664  | -0.11248 | 0.01502  |
| 0.0006   | 0.096802 | 0.03651  | -0.02738 | 0.55512  | -0.01617 | 0.72746  | 0.190294 | 3.49E-05 |
| 0.99511  | 0.048811 | 0.29252  | -0.08067 | 0.08162  | -0.15276 | 0.00093  | -0.05972 | 0.19766  |
| 3.94E-09 | -0.01334 | 0.77369  | 0.019011 | 0.68198  | -0.23398 | 3.15E-07 | -0.08975 | 0.05261  |
| 3.05E-05 | 0.090445 | 0.05079  | 0.040904 | 0.3778   | -0.08456 | 0.06787  | 0.111965 | 0.01549  |
| 9.86E-05 | 0.106203 | 0.02171  | -0.06849 | 0.13943  | 0.027635 | 0.55137  | 0.213622 | 3.19E-06 |
| 1.70E-46 | 0.03689  | 0.42642  | 0.054979 | 0.23569  | -0.06699 | 0.14837  | 0.065863 | 0.1553   |
| 1.21E-21 | 0.170983 | 0.00021  | 0.16868  | 0.00025  | 0.054359 | 0.24102  | 0.290593 | 1.54E-10 |
| 1.17E-05 | 0.104209 | 0.02432  | -0.14362 | 0.00186  | -0.15212 | 0.00097  | 0.043463 | 0.34867  |
| 0.01465  | 0.09389  | 0.04256  | -0.0032  | 0.94495  | -0.14374 | 0.00184  | 0.039987 | 0.3886   |
| 8.82E-15 | 0.079216 | 0.08727  | -0.03558 | 0.44299  | -0.13466 | 0.00355  | 0.051999 | 0.26209  |
| 3.87E-10 | 0.107411 | 0.02025  | -0.07678 | 0.09748  | -0.0993  | 0.03192  | 0.077669 | 0.09365  |
| 1.05E-12 | 0.062478 | 0.1777   | -0.11461 | 0.0132   | -0.21482 | 2.81E-06 | -0.00419 | 0.928    |
| 6.19E-07 | 0.034659 | 0.45494  | -0.03039 | 0.51241  | -0.24432 | 8.95E-08 | -0.08429 | 0.06878  |
| 1.19E-09 | 0.055801 | 0.22875  | 0.017852 | 0.70039  | -0.03002 | 0.5176   | 0.127713 | 0.00571  |
| 1.09E-08 | 0.117658 | 0.01094  | 0.041081 | 0.37574  | -0.03077 | 0.50709  | 0.197872 | 1.65E-05 |
| 1.17E-12 | 0.043694 | 0.34611  | 0.000371 | 0.99362  | -0.15697 | 0.00066  | -0.01543 | 0.73939  |
| 7.13E-12 | 0.128686 | 0.00535  | -0.06076 | 0.18996  | -0.08265 | 0.07436  | 0.161339 | 0.00046  |
| 0.6142   | 0.131371 | 0.00446  | -0.0121  | 0.79424  | -0.07571 | 0.10224  | 0.137063 | 0.003    |
| 2.25E-08 | -0.12136 | 0.00866  | -0.12038 | 0.00922  | -0.28055 | 6.79E-10 | -0.1845  | 6.05E-05 |
| 9.06E-16 | -0.13407 | 0.0037   | -0.21433 | 2.96E-06 | -0.31466 | 3.42E-12 | -0.26386 | 7.05E-09 |
| 2.90E-10 | 0.136154 | 0.0032   | 0.10016  | 0.03046  | 0.086767 | 0.06099  | 0.254609 | 2.41E-08 |
| 0.01267  | 0.054886 | 0.23649  | 0.068919 | 0.13698  | -0.02365 | 0.61013  | 0.154707 | 0.0008   |
| 0.00015  | 0.09438  | 0.04149  | 0.068976 | 0.13665  | -0.07061 | 0.12761  | 0.073259 | 0.11387  |
| 8.69E-10 | 0.062651 | 0.17651  | 0.026468 | 0.56831  | -0.12648 | 0.0062   | 0.084854 | 0.06694  |
| 0.00521  | 0.008971 | 0.84668  | -0.134   | 0.00372  | -0.10317 | 0.02578  | 0.035982 | 0.4379   |
| 8.87E-05 | 0.1004   | 0.03006  | -0.00992 | 0.83064  | -0.03463 | 0.45527  | 0.162474 | 0.00042  |
| 0.0015   | 0.029604 | 0.52337  | -0.2366  | 2.30E-07 | -0.19623 | 1.95E-05 | -0.07756 | 0.0941   |
| 0.00752  | 0.182334 | 7.40E-05 | 0.118822 | 0.01017  | 0.133539 | 0.00384  | 0.345722 | 1.48E-14 |
| 4.96E-06 | 0.09544  | 0.03924  | -0.04165 | 0.3692   | -0.02623 | 0.57182  | 0.158848 | 0.00057  |
| 1.87E-18 | 0.062136 | 0.18009  | -0.02458 | 0.59619  | -0.21219 | 3.73E-06 | -0.11133 | 0.01609  |
| 0.02719  | -0.17975 | 9.38E-05 | -0.10646 | 0.02139  | -0.20305 | 9.76E-06 | -0.32178 | 1.04E-12 |
| 2.80E-10 | -0.11065 | 0.01675  | -0.03301 | 0.47669  | -0.07206 | 0.11991  | -0.19461 | 2.29E-05 |
| 0.85708  | 0.113203 | 0.01438  | 0.133036 | 0.00398  | 0.03783  | 0.41472  | 0.161913 | 0.00044  |
| 0.38753  | -0.08325 | 0.07227  | 0.140773 | 0.00229  | 0.167672 | 0.00027  | 0.048535 | 0.29526  |

|          |          |          |          |          |          |          |          |          |
|----------|----------|----------|----------|----------|----------|----------|----------|----------|
| 0.26977  | -0.15472 | 0.00079  | 0.166735 | 0.0003   | 0.063909 | 0.16796  | -0.07171 | 0.12174  |
| 0.94574  | -0.12573 | 0.00652  | 0.11377  | 0.01389  | 0.193975 | 2.43E-05 | 0.093328 | 0.04382  |
| 0.00635  | -0.21841 | 1.89E-06 | -0.10125 | 0.02869  | -0.14968 | 0.00118  | -0.34177 | 3.06E-14 |
| 1.67E-12 | -0.1755  | 0.00014  | -0.06263 | 0.17663  | -0.09872 | 0.03294  | -0.29887 | 4.32E-11 |
| 4.96E-10 | -0.18281 | 7.08E-05 | -0.20957 | 4.93E-06 | -0.24664 | 6.69E-08 | -0.34568 | 1.49E-14 |
| 0.01643  | -0.08502 | 0.0664   | -0.04681 | 0.31274  | -0.12463 | 0.00701  | -0.21942 | 1.69E-06 |
| 0.175    | -0.1805  | 8.76E-05 | -0.16649 | 0.0003   | -0.16405 | 0.00037  | -0.30677 | 1.24E-11 |
| 0.00813  | -0.28883 | 2.00E-10 | -0.11572 | 0.01233  | -0.14434 | 0.00176  | -0.3436  | 2.19E-14 |
| 0.2583   | -0.19058 | 3.39E-05 | -0.13553 | 0.00334  | -0.1556  | 0.00074  | -0.33864 | 5.40E-14 |
| 0.18939  | -0.23214 | 3.92E-07 | 0.09252  | 0.04568  | -0.02462 | 0.59555  | -0.12358 | 0.0075   |
| 0.33584  | 0.110362 | 0.01704  | -0.13318 | 0.00394  | 0.018989 | 0.68233  | 0.107326 | 0.02035  |
| 0.1158   | -0.09247 | 0.04581  | 0.024222 | 0.60159  | 0.053585 | 0.2478   | -0.0699  | 0.13148  |
| 0.90205  | -0.08092 | 0.08068  | 0.019624 | 0.6723   | 0.098945 | 0.03254  | -0.06532 | 0.15872  |
| 0.72471  | -0.08171 | 0.07772  | 0.02027  | 0.66218  | 0.075545 | 0.103    | -0.10627 | 0.02163  |
| 0.09817  | -0.19442 | 2.33E-05 | -0.02429 | 0.6005   | -0.06236 | 0.17852  | -0.22054 | 1.49E-06 |
| 0.09244  | -0.16078 | 0.00049  | -0.00393 | 0.93251  | -0.10042 | 0.03003  | -0.18748 | 4.57E-05 |
| 0.15956  | -0.05876 | 0.20497  | 0.235997 | 2.48E-07 | 0.200035 | 1.33E-05 | 0.105323 | 0.02283  |
| 0.23646  | -0.0565  | 0.22297  | 0.019191 | 0.67913  | -0.00187 | 0.96792  | -0.08599 | 0.06337  |
| 0.47053  | -0.18167 | 7.87E-05 | 0.043793 | 0.34502  | 0.04932  | 0.2875   | -0.16902 | 0.00024  |
| 0.26806  | -0.13706 | 0.003    | -0.13813 | 0.00278  | -0.12924 | 0.00515  | -0.23043 | 4.80E-07 |
| 0.19248  | -0.10793 | 0.01965  | -0.10831 | 0.01922  | -0.0425  | 0.35941  | -0.154   | 0.00084  |
| 0.00967  | -0.12336 | 0.00761  | -0.01694 | 0.715    | -0.00477 | 0.91812  | -0.18244 | 7.33E-05 |
| 0.03345  | -0.00909 | 0.84465  | -0.04242 | 0.36037  | -0.16096 | 0.00048  | -0.06782 | 0.14338  |
| 0.11661  | 0.135633 | 0.00332  | 0.039199 | 0.39802  | 0.150215 | 0.00113  | 0.24586  | 7.38E-08 |
| 0.03547  | -0.08498 | 0.06654  | 0.29448  | 8.52E-11 | 0.23801  | 1.94E-07 | 0.070318 | 0.12917  |
| 0.00544  | -0.15548 | 0.00075  | -0.20278 | 1.00E-05 | -0.18887 | 4.00E-05 | -0.31601 | 2.74E-12 |
| 0.0001   | -0.07193 | 0.12058  | 0.029839 | 0.52007  | 0.170002 | 0.00022  | 0.046736 | 0.31355  |
| 7.97E-07 | -0.17672 | 0.00012  | -0.03835 | 0.40829  | -0.2095  | 4.97E-06 | -0.34532 | 1.59E-14 |
| 1.37E-06 | -0.32211 | 9.80E-13 | -0.26352 | 7.38E-09 | -0.32001 | 1.40E-12 | -0.49395 | 4.26E-30 |
| 0.00048  | -0.0463  | 0.31807  | 0.016986 | 0.71428  | 0.03868  | 0.40431  | -0.06794 | 0.14267  |
| 0.74216  | -0.1796  | 9.52E-05 | -0.12718 | 0.00592  | -0.10513 | 0.02308  | -0.2355  | 2.63E-07 |
| 0.98368  | -0.15066 | 0.00109  | -0.03773 | 0.4159   | -0.13725 | 0.00296  | -0.18922 | 3.87E-05 |
| 0.04422  | -0.20337 | 9.44E-06 | 0.054749 | 0.23767  | -0.01888 | 0.68399  | -0.12155 | 0.00855  |
| 0.36636  | -0.13319 | 0.00393  | -0.22206 | 1.26E-06 | -0.15815 | 0.0006   | -0.25986 | 1.21E-08 |
| 0.6943   | -0.21242 | 3.64E-06 | -0.04981 | 0.28275  | -0.18446 | 6.07E-05 | -0.28732 | 2.51E-10 |
| 0.00139  | 0.016648 | 0.71973  | 0.148868 | 0.00125  | 0.1502   | 0.00113  | 0.042798 | 0.3561   |
| 0.45702  | -0.16335 | 0.00039  | 0.077184 | 0.09572  | -0.03202 | 0.48999  | -0.1715  | 0.0002   |
| 0.25803  | 0.074231 | 0.10914  | -0.10181 | 0.02781  | -0.212   | 3.81E-06 | -0.09088 | 0.04968  |
| 3.48E-08 | -0.05386 | 0.24541  | -0.20432 | 8.56E-06 | -0.12022 | 0.00931  | -0.2361  | 2.45E-07 |
| 0.0004   | -0.17854 | 0.0001   | -0.0425  | 0.35941  | -0.11472 | 0.01312  | -0.24011 | 1.51E-07 |
| 0.9741   | -0.1278  | 0.00568  | -0.02692 | 0.56167  | -0.09902 | 0.0324   | -0.22133 | 1.36E-06 |
| 0.13086  | -0.1225  | 0.00804  | 0.044026 | 0.34246  | 0.157202 | 0.00065  | 0.099461 | 0.03164  |
| 0.02015  | -0.16263 | 0.00042  | -0.1468  | 0.00147  | -0.1732  | 0.00017  | -0.31249 | 4.89E-12 |
| 0.13576  | 0.087521 | 0.05877  | 0.074978 | 0.10562  | 0.164922 | 0.00034  | 0.139276 | 0.00256  |
| 0.53061  | 0.071296 | 0.12392  | 0.039581 | 0.39344  | 0.086103 | 0.063    | -0.04498 | 0.33212  |

|          |          |          |          |          |          |          |          |          |
|----------|----------|----------|----------|----------|----------|----------|----------|----------|
| 0.00034  | -0.05971 | 0.19774  | 0.1945   | 2.31E-05 | 0.125079 | 0.0068   | 0.042631 | 0.35798  |
| 0.63354  | -0.01856 | 0.68915  | -0.23849 | 1.83E-07 | -0.20514 | 7.86E-06 | -0.17243 | 0.00018  |
| 0.61673  | -0.17173 | 0.00019  | -0.02051 | 0.65837  | -0.0678  | 0.1435   | -0.21612 | 2.43E-06 |
| 0.01237  | -0.17984 | 9.31E-05 | 0.020908 | 0.65223  | -0.06711 | 0.14763  | -0.19386 | 2.46E-05 |
| 0.04304  | 0.051579 | 0.26598  | 0.107864 | 0.01973  | -0.10071 | 0.02955  | -0.18555 | 5.48E-05 |
| 0.4258   | -0.2185  | 1.87E-06 | -0.12428 | 0.00717  | -0.15847 | 0.00059  | -0.2473  | 6.16E-08 |
| 0.33326  | -0.20223 | 1.06E-05 | 0.102679 | 0.0265   | -0.07808 | 0.0919   | -0.18829 | 4.23E-05 |
| 0.02792  | -0.21621 | 2.41E-06 | -0.20787 | 5.91E-06 | -0.18227 | 7.45E-05 | -0.34305 | 2.42E-14 |
| 0.8458   | -0.14641 | 0.00151  | -0.03601 | 0.43757  | -0.03168 | 0.49468  | -0.20018 | 1.31E-05 |
| 0.13613  | -0.1179  | 0.01078  | -0.15947 | 0.00054  | -0.12128 | 0.0087   | -0.23267 | 3.68E-07 |
| 0.60503  | 0.185056 | 5.74E-05 | 0.225496 | 8.50E-07 | 0.167457 | 0.00028  | 0.340785 | 3.66E-14 |
| 0.19372  | -0.15658 | 0.00068  | -0.06781 | 0.14343  | -0.08848 | 0.05605  | -0.25689 | 1.79E-08 |
| 0.81593  | 0.144677 | 0.00172  | 0.13354  | 0.00384  | 0.26164  | 9.51E-09 | 0.234503 | 2.96E-07 |
| 0.35571  | 0.218931 | 1.78E-06 | 0.223591 | 1.06E-06 | 0.22128  | 1.37E-06 | 0.279398 | 8.02E-10 |
| 0.24896  | -0.11101 | 0.0164   | -0.14857 | 0.00128  | -0.13377 | 0.00378  | -0.25618 | 1.96E-08 |
| 0.00171  | -0.01217 | 0.79308  | -0.08608 | 0.06306  | -0.01709 | 0.71265  | -0.00358 | 0.93845  |
| 0.67612  | -0.24161 | 1.25E-07 | -0.09246 | 0.04582  | -0.13677 | 0.00306  | -0.37293 | 7.42E-17 |
| 0.00017  | -0.37261 | 7.91E-17 | -0.14332 | 0.0019   | -0.15462 | 0.0008   | -0.38349 | 8.26E-18 |
| 0.0037   | 0.26235  | 8.65E-09 | -0.02195 | 0.63616  | 0.051699 | 0.26486  | 0.281561 | 5.86E-10 |
| 2.58E-06 | -0.00101 | 0.98272  | 0.073605 | 0.11217  | -0.17703 | 0.00012  | -0.0384  | 0.40778  |
| 0.63787  | 0.108869 | 0.0186   | -0.04307 | 0.35309  | 0.023577 | 0.6113   | 0.138593 | 0.00269  |
| 0.49147  | -0.04358 | 0.34734  | -0.12216 | 0.00822  | 0.021744 | 0.6393   | -0.08753 | 0.05876  |
| 0.04616  | 0.019541 | 0.67361  | 0.015142 | 0.74415  | -0.06137 | 0.18554  | 0.053932 | 0.24474  |
| 0.05305  | -0.1245  | 0.00707  | 0.13117  | 0.00452  | 0.148539 | 0.00129  | 0.013447 | 0.77196  |
| 0.12873  | -0.048   | 0.30058  | 0.092603 | 0.04549  | 0.11722  | 0.01124  | 0.030423 | 0.51192  |
| 0.05831  | 0.068203 | 0.14112  | 0.279425 | 7.99E-10 | 0.262575 | 8.39E-09 | 0.353153 | 3.66E-15 |
| 0.4215   | 0.036748 | 0.42821  | 0.055904 | 0.22789  | -0.01777 | 0.70164  | 0.08173  | 0.07766  |
| 0.01987  | -0.10368 | 0.02506  | 0.043933 | 0.34348  | -0.07279 | 0.11623  | -0.15181 | 0.001    |
| 0.05263  | -0.18232 | 7.41E-05 | -0.02224 | 0.63169  | -0.00898 | 0.84656  | -0.17822 | 0.00011  |
| 0.00408  | 0.028435 | 0.53991  | -0.0808  | 0.0811   | -0.1205  | 0.00915  | -0.01234 | 0.79032  |
| 0.02375  | -0.13035 | 0.00478  | 0.050998 | 0.27141  | -0.02366 | 0.61003  | -0.13171 | 0.00436  |
| 0.02026  | -0.13789 | 0.00283  | -0.10613 | 0.0218   | -0.07483 | 0.1063   | -0.24159 | 1.25E-07 |
| 0.62115  | 0.294873 | 8.02E-11 | 0.060847 | 0.18932  | 0.040349 | 0.38432  | 0.255389 | 2.18E-08 |
| 0.9319   | -0.07262 | 0.11708  | -0.22517 | 8.83E-07 | -0.21852 | 1.87E-06 | -0.21476 | 2.82E-06 |
| 0.00108  | -0.16152 | 0.00046  | -0.02117 | 0.64815  | -0.01037 | 0.82318  | -0.16038 | 0.0005   |
| 0.19731  | -0.20729 | 6.28E-06 | -0.00295 | 0.94932  | -0.21004 | 4.69E-06 | -0.33675 | 7.59E-14 |
| 0.50573  | -0.16215 | 0.00043  | 0.105618 | 0.02245  | 0.019995 | 0.66649  | -0.07015 | 0.13011  |
| 0.06622  | -0.13932 | 0.00255  | -0.10554 | 0.02254  | -0.04596 | 0.32163  | -0.21538 | 2.64E-06 |
| 0.90515  | -0.04465 | 0.33565  | 0.130761 | 0.00465  | 0.116908 | 0.01146  | 0.092573 | 0.04556  |
| 0.25226  | -0.07726 | 0.09539  | -0.01191 | 0.79736  | 0.013376 | 0.77312  | -0.12655 | 0.00617  |
| 0.07032  | -0.12194 | 0.00834  | -0.00748 | 0.87198  | 0.029881 | 0.51948  | -0.16141 | 0.00046  |
| 0.94416  | -0.07072 | 0.12697  | -0.02981 | 0.52042  | 0.130884 | 0.00461  | 0.015351 | 0.74074  |
| 0.37775  | -0.21925 | 1.72E-06 | 0.058366 | 0.20804  | -0.10411 | 0.02445  | -0.30958 | 7.87E-12 |
| 0.16928  | -0.00817 | 0.86026  | 0.186997 | 4.78E-05 | 0.300529 | 3.33E-11 | 0.267165 | 4.49E-09 |
| 0.31337  | -0.1786  | 0.0001   | -0.13223 | 0.0042   | 0.016466 | 0.72267  | -0.22966 | 5.25E-07 |

|          |          |          |          |          |          |          |          |          |
|----------|----------|----------|----------|----------|----------|----------|----------|----------|
| 0.86392  | -0.21941 | 1.69E-06 | -0.06142 | 0.18514  | -0.09877 | 0.03284  | -0.25931 | 1.30E-08 |
| 0.00558  | -0.24547 | 7.75E-08 | -0.19767 | 1.69E-05 | -0.13972 | 0.00248  | -0.31794 | 1.98E-12 |
| 0.00022  | -0.09072 | 0.05008  | 0.032309 | 0.4861   | -0.06225 | 0.17931  | -0.10485 | 0.02344  |
| 0.25697  | -0.13708 | 0.00299  | -0.09794 | 0.03435  | -0.06105 | 0.18785  | -0.19777 | 1.67E-05 |
| 0.00011  | -0.28928 | 1.87E-10 | -0.06384 | 0.16842  | -0.14958 | 0.00119  | -0.36025 | 9.31E-16 |
| 0.01822  | -0.05907 | 0.20256  | -0.15363 | 0.00087  | -0.18112 | 8.28E-05 | -0.24796 | 5.66E-08 |
| 0.65236  | -0.20771 | 6.01E-06 | -0.20448 | 8.42E-06 | -0.22941 | 5.41E-07 | -0.39587 | 5.68E-19 |
| 0.04342  | 0.040033 | 0.38806  | -0.12356 | 0.00751  | -0.16698 | 0.00029  | -0.03045 | 0.51162  |
| 0.17086  | -0.10584 | 0.02216  | -0.01344 | 0.77205  | 0.002368 | 0.95929  | -0.16405 | 0.00037  |
| 2.11E-05 | -0.06982 | 0.13189  | -0.19828 | 1.59E-05 | -0.09502 | 0.04011  | -0.14299 | 0.00195  |
| 2.83E-06 | -0.38814 | 3.06E-18 | -0.13048 | 0.00474  | -0.22487 | 9.14E-07 | -0.48821 | 2.42E-29 |
| 0.21916  | -0.04606 | 0.32063  | -0.17723 | 0.00012  | -0.27822 | 9.51E-10 | -0.36734 | 2.29E-16 |
| 0.03332  | -0.13845 | 0.00271  | 0.044696 | 0.33515  | 0.088032 | 0.0573   | -0.10825 | 0.01929  |
| 0.03714  | 0.019514 | 0.67404  | 0.018057 | 0.69712  | 0.137541 | 0.0029   | 0.005833 | 0.89995  |
| 0.52016  | -0.21784 | 2.01E-06 | 0.005551 | 0.90476  | -0.09907 | 0.03231  | -0.21435 | 2.95E-06 |
| 0.09525  | -0.0688  | 0.13768  | 0.151637 | 0.00101  | 0.117392 | 0.01112  | -0.00104 | 0.98204  |
| 0.16334  | -0.12526 | 0.00672  | 0.037506 | 0.41874  | -0.00633 | 0.89156  | -0.15706 | 0.00066  |
| 0.10706  | 0.004368 | 0.92501  | -0.11928 | 0.00988  | -0.04914 | 0.28931  | -0.01497 | 0.74698  |
| 0.00735  | 0.08596  | 0.06344  | 0.068639 | 0.13859  | 0.08491  | 0.06675  | 0.178654 | 0.0001   |
| 0.00199  | -0.22739 | 6.83E-07 | -0.09035 | 0.05103  | -0.07241 | 0.11812  | -0.27225 | 2.22E-09 |
| 0.65295  | -0.0942  | 0.04188  | -0.20299 | 9.82E-06 | -0.0726  | 0.11719  | -0.21871 | 1.83E-06 |
| 0.04559  | -0.24346 | 9.96E-08 | -0.11043 | 0.01697  | -0.08499 | 0.06651  | -0.33712 | 7.11E-14 |
| 0.16215  | -0.20383 | 9.01E-06 | -0.13489 | 0.00349  | -0.05796 | 0.21118  | -0.25166 | 3.53E-08 |
| 0.14381  | -0.11354 | 0.01409  | 0.060932 | 0.1887   | -0.04393 | 0.34353  | -0.15129 | 0.00104  |
| 0.00311  | -0.18241 | 7.35E-05 | -0.05314 | 0.25176  | -0.11116 | 0.01625  | -0.23174 | 4.11E-07 |
| 0.99924  | -0.18607 | 5.22E-05 | -0.1538  | 0.00085  | -0.2546  | 2.41E-08 | -0.32425 | 6.81E-13 |
| 0.04779  | -0.1758  | 0.00013  | -0.06171 | 0.18307  | -0.06696 | 0.14853  | -0.20945 | 5.00E-06 |
| 0.00111  | -0.15447 | 0.00081  | -0.06937 | 0.1344   | -0.0215  | 0.64309  | -0.22459 | 9.43E-07 |
| 0.47721  | -0.19143 | 3.12E-05 | -0.07693 | 0.09684  | -0.09771 | 0.03477  | -0.28884 | 2.00E-10 |
| 0.42064  | -0.09134 | 0.04853  | -0.11835 | 0.01047  | -0.09906 | 0.03234  | -0.23094 | 4.52E-07 |
| 0.02598  | -0.14028 | 0.00238  | 0.044316 | 0.33929  | -0.03391 | 0.46477  | -0.1801  | 9.10E-05 |
| 0.95775  | -0.23274 | 3.65E-07 | -0.07638 | 0.09922  | -0.14183 | 0.00212  | -0.3408  | 3.65E-14 |
| 0.07414  | -0.19037 | 3.46E-05 | -0.15537 | 0.00075  | -0.15095 | 0.00107  | -0.33825 | 5.80E-14 |
| 0.11397  | -0.21903 | 1.76E-06 | -0.11526 | 0.01269  | -0.22604 | 7.98E-07 | -0.40684 | 4.83E-20 |
| 0.79016  | -0.05794 | 0.2114   | -0.26268 | 8.27E-09 | -0.26951 | 3.25E-09 | -0.19835 | 1.58E-05 |
| 0.05384  | -0.0047  | 0.91934  | 0.121933 | 0.00835  | 0.206155 | 7.07E-06 | 0.107672 | 0.01995  |
| 0.00153  | -0.31622 | 2.64E-12 | -0.10997 | 0.01744  | -0.0982  | 0.03387  | -0.33996 | 4.25E-14 |
| 6.72E-05 | -0.08024 | 0.08324  | 0.205017 | 7.97E-06 | 0.072275 | 0.11883  | -0.07344 | 0.113    |
| 0.97859  | 0.05008  | 0.28014  | 0.037999 | 0.41263  | 0.052962 | 0.25334  | -0.0128  | 0.78264  |
| 0.85371  | 0.015474 | 0.73875  | 0.033306 | 0.47275  | 0.125045 | 0.00682  | 0.099034 | 0.03238  |
| 0.35618  | 0.098008 | 0.03423  | -0.07702 | 0.09641  | -0.14051 | 0.00234  | 0.007365 | 0.87388  |
| 0.0169   | 0.093226 | 0.04405  | 0.322238 | 9.60E-13 | 0.258501 | 1.45E-08 | 0.223871 | 1.02E-06 |
| 0.63653  | -0.09845 | 0.03343  | -0.05902 | 0.20298  | 0.015263 | 0.74218  | -0.1654  | 0.00033  |
| 0.04063  | -0.12352 | 0.00753  | -0.00907 | 0.84503  | 0.041844 | 0.36694  | -0.12835 | 0.00547  |
| 0.1733   | 0.076183 | 0.10011  | 0.282381 | 5.20E-10 | 0.273626 | 1.83E-09 | 0.32322  | 8.12E-13 |

|          |          |          |          |          |          |          |          |          |
|----------|----------|----------|----------|----------|----------|----------|----------|----------|
| 1.93E-12 | -0.11431 | 0.01344  | -0.24568 | 7.55E-08 | -0.29244 | 1.16E-10 | -0.28983 | 1.73E-10 |
| 4.42E-36 | 0.125079 | 0.0068   | 0.211668 | 3.94E-06 | 0.164549 | 0.00036  | 0.306085 | 1.38E-11 |
| 7.67E-23 | 0.069067 | 0.13614  | 0.139104 | 0.00259  | 0.100201 | 0.03039  | 0.100509 | 0.02988  |
| 1.99E-12 | 0.072964 | 0.11534  | 0.17008  | 0.00022  | 0.11411  | 0.01361  | 0.23512  | 2.75E-07 |
| 4.73E-14 | 0.099754 | 0.03114  | 0.038138 | 0.41093  | -0.06406 | 0.16696  | 0.034702 | 0.45438  |
| 3.98E-56 | 0.134242 | 0.00366  | 0.049119 | 0.28948  | 0.002913 | 0.94993  | 0.171498 | 0.0002   |
| 5.94E-15 | 0.062776 | 0.17564  | 0.039719 | 0.39179  | -0.0595  | 0.19934  | 0.031404 | 0.4984   |
| 2.77E-15 | 0.125125 | 0.00678  | 0.192815 | 2.73E-05 | 0.049042 | 0.29024  | 0.190125 | 3.54E-05 |
| 7.06E-25 | 0.096344 | 0.03741  | 0.161212 | 0.00047  | -0.04533 | 0.32829  | 0.127738 | 0.0057   |
| 2.32E-66 | 0.223335 | 1.09E-06 | 0.193118 | 2.65E-05 | 0.107019 | 0.02071  | 0.34263  | 2.61E-14 |
| 1.64E-07 | 0.087148 | 0.05986  | -0.26724 | 4.44E-09 | -0.03986 | 0.39007  | -0.03555 | 0.44338  |
| 1.02E-11 | 0.144321 | 0.00177  | 0.595385 | 3.93E-46 | 0.559443 | 8.21E-40 | 0.599604 | 6.31E-47 |
| 6.78E-23 | -0.07087 | 0.12619  | -0.18016 | 9.04E-05 | -0.17175 | 0.00019  | -0.17988 | 9.28E-05 |
| 8.50E-13 | 0.237235 | 2.13E-07 | -0.02196 | 0.63595  | 0.042898 | 0.35497  | 0.2535   | 2.78E-08 |
| 9.05E-40 | -0.2748  | 1.55E-09 | -0.15395 | 0.00084  | -0.23551 | 2.63E-07 | -0.37252 | 8.05E-17 |
| 1.65E-20 | 0.027729 | 0.55001  | 0.101601 | 0.02813  | 0.023578 | 0.6113   | 0.088369 | 0.05636  |
| 8.74E-11 | 0.039611 | 0.39308  | 0.154059 | 0.00084  | 0.01722  | 0.71053  | 0.089522 | 0.0532   |
| 2.54E-13 | -0.16384 | 0.00038  | -0.2048  | 8.15E-06 | -0.14535 | 0.00164  | -0.319   | 1.66E-12 |
| 1.12E-09 | 0.140303 | 0.00237  | 0.043169 | 0.35194  | 0.01618  | 0.72728  | 0.200295 | 1.29E-05 |
| 3.70E-24 | 0.066349 | 0.15228  | 0.187588 | 4.52E-05 | 0.083284 | 0.07216  | 0.21187  | 3.86E-06 |
| 8.09E-32 | -0.15027 | 0.00113  | -0.3615  | 7.29E-16 | -0.22603 | 8.00E-07 | -0.34698 | 1.17E-14 |
| 1.96E-40 | -0.22618 | 7.86E-07 | -0.25107 | 3.81E-08 | -0.22516 | 8.84E-07 | -0.41443 | 8.29E-21 |
| 2.12E-12 | 0.119035 | 0.01003  | 0.278873 | 8.66E-10 | 0.178326 | 0.00011  | 0.231423 | 4.27E-07 |
| 9.89E-15 | -0.023   | 0.62005  | -0.16299 | 0.00041  | -0.14916 | 0.00123  | -0.13209 | 0.00424  |
| 1.84E-18 | 0.00768  | 0.86854  | 0.221484 | 1.34E-06 | -0.02293 | 0.62111  | 0.066668 | 0.1503   |
| 8.47E-06 | -0.10933 | 0.01811  | -0.1944  | 2.34E-05 | -0.21381 | 3.13E-06 | -0.2018  | 1.11E-05 |
| 1.71E-28 | -0.11447 | 0.01332  | -0.31552 | 2.97E-12 | -0.20639 | 6.90E-06 | -0.23152 | 4.22E-07 |
| 6.41E-37 | 0.092096 | 0.04669  | 0.202477 | 1.04E-05 | 0.033052 | 0.47613  | 0.155796 | 0.00073  |
| 2.65E-39 | 0.004599 | 0.92104  | 0.144682 | 0.00172  | -0.01715 | 0.71165  | 0.033086 | 0.47568  |
| 2.01E-19 | 0.186402 | 5.06E-05 | 0.347249 | 1.11E-14 | 0.22447  | 9.56E-07 | 0.407762 | 3.90E-20 |
| 1.84E-33 | 0.041992 | 0.36524  | 0.108218 | 0.01932  | -0.11911 | 0.00999  | -0.02992 | 0.51898  |
| 8.83E-23 | -0.05234 | 0.259    | -0.25721 | 1.71E-08 | -0.113   | 0.01456  | -0.14957 | 0.00119  |
| 3.34E-13 | -0.14158 | 0.00216  | -0.20294 | 9.88E-06 | -0.29146 | 1.35E-10 | -0.32295 | 8.50E-13 |
| 4.81E-18 | -0.15528 | 0.00076  | -0.32926 | 2.86E-13 | -0.25225 | 3.27E-08 | -0.38084 | 1.44E-17 |
| 1.98E-24 | 0.06995  | 0.13119  | 0.020021 | 0.66608  | 0.080845 | 0.08094  | 0.149913 | 0.00116  |
| 1.32E-33 | 0.118023 | 0.01069  | 0.058786 | 0.20477  | -0.0263  | 0.57077  | 0.142179 | 0.00207  |
| 2.85E-60 | 0.179365 | 9.72E-05 | 0.116034 | 0.0121   | 0.0313   | 0.49983  | 0.239472 | 1.63E-07 |
| 1.01E-10 | -0.05148 | 0.26694  | -0.21507 | 2.73E-06 | -0.12311 | 0.00774  | -0.17359 | 0.00016  |
| 4.74E-20 | 0.100449 | 0.02998  | 0.352341 | 4.27E-15 | 0.19194  | 2.97E-05 | 0.359374 | 1.10E-15 |
| 2.81E-17 | -0.0992  | 0.03209  | -0.06837 | 0.14016  | 0.12884  | 0.0053   | 0.045039 | 0.33146  |
| 4.53E-06 | -0.15354 | 0.00087  | 0.104772 | 0.02355  | -0.17001 | 0.00022  | -0.22625 | 7.79E-07 |
| 2.64E-33 | -0.18171 | 7.84E-05 | -0.06606 | 0.15405  | 0.0195   | 0.67426  | -0.16547 | 0.00033  |
| 0.00051  | -0.06694 | 0.14867  | -0.25919 | 1.32E-08 | -0.19079 | 3.32E-05 | -0.2412  | 1.32E-07 |
| 7.92E-14 | 0.167498 | 0.00028  | 0.370252 | 1.28E-16 | 0.212633 | 3.55E-06 | 0.351458 | 5.05E-15 |
| 6.38E-14 | 0.202043 | 1.08E-05 | -0.04579 | 0.32343  | -0.06296 | 0.17436  | 0.10356  | 0.02522  |

|          |          |          |          |          |          |          |          |          |
|----------|----------|----------|----------|----------|----------|----------|----------|----------|
| 2.98E-23 | 0.291596 | 1.32E-10 | 0.337209 | 6.99E-14 | 0.235517 | 2.63E-07 | 0.444574 | 4.80E-24 |
| 2.77E-12 | 0.019791 | 0.66968  | -0.09242 | 0.04592  | 0.080254 | 0.08319  | 0.01357  | 0.76992  |
| 3.74E-14 | 0.14764  | 0.00138  | 0.270813 | 2.71E-09 | 0.235655 | 2.58E-07 | 0.310822 | 6.43E-12 |
| 9.58E-17 | 0.135046 | 0.00346  | 0.381255 | 1.32E-17 | 0.118133 | 0.01062  | 0.293651 | 9.67E-11 |
| 9.82E-24 | -0.17146 | 0.0002   | -0.2411  | 1.33E-07 | -0.23472 | 2.89E-07 | -0.34541 | 1.57E-14 |
| 3.25E-17 | 0.155182 | 0.00077  | 0.102809 | 0.02631  | 0.062511 | 0.17747  | 0.09088  | 0.04968  |
| 5.48E-27 | -0.10169 | 0.028    | -0.20041 | 1.28E-05 | -0.14067 | 0.00231  | -0.21559 | 2.58E-06 |
| 1.14E-32 | 0.172252 | 0.00018  | 0.335116 | 1.02E-13 | 0.408045 | 3.66E-20 | 0.524814 | 2.06E-34 |
| 1.94E-07 | 0.049422 | 0.28651  | 0.052914 | 0.25378  | -0.04518 | 0.32989  | 0.055955 | 0.22747  |
| 6.96E-12 | 0.122245 | 0.00818  | 0.043738 | 0.34562  | -0.03335 | 0.47213  | 0.128566 | 0.0054   |
| 6.81E-11 | -0.06588 | 0.15518  | -0.06653 | 0.15112  | -0.0204  | 0.6601   | -0.08367 | 0.07085  |
| 1.02E-31 | -0.09561 | 0.03889  | -0.17862 | 0.0001   | -0.10626 | 0.02164  | -0.17908 | 9.98E-05 |
| 7.95E-10 | -0.03818 | 0.4104   | -0.21347 | 3.25E-06 | -0.09899 | 0.03246  | -0.15027 | 0.00113  |
| 2.01E-06 | -0.09128 | 0.04867  | -0.13967 | 0.00249  | -0.07032 | 0.12916  | -0.16963 | 0.00023  |
| 1.13E-38 | 0.287752 | 2.35E-10 | 0.360401 | 9.04E-16 | 0.493451 | 4.96E-30 | 0.595767 | 3.34E-46 |
| 1.39E-23 | -0.13848 | 0.00271  | -0.18218 | 7.51E-05 | -0.11583 | 0.01225  | -0.22278 | 1.16E-06 |
| 1.62E-24 | 0.26264  | 8.32E-09 | 0.426907 | 4.15E-22 | 0.339141 | 4.93E-14 | 0.457901 | 1.39E-25 |
| 5.82E-25 | -0.13626 | 0.00317  | -0.23508 | 2.77E-07 | -0.09283 | 0.04496  | -0.24581 | 7.43E-08 |
| 2.94E-24 | -0.10382 | 0.02485  | -0.27814 | 9.61E-10 | -0.10355 | 0.02523  | -0.21606 | 2.45E-06 |
| 4.21E-15 | -0.01897 | 0.6826   | 0.135611 | 0.00332  | 0.024717 | 0.59419  | 0.114865 | 0.013    |
| 6.38E-23 | 0.167069 | 0.00029  | 0.25382  | 2.67E-08 | 0.099621 | 0.03137  | 0.25668  | 1.84E-08 |
| 1.37E-16 | 0.362255 | 6.29E-16 | 0.081038 | 0.08022  | 0.046225 | 0.31887  | 0.27124  | 2.56E-09 |
| 4.96E-07 | -0.01759 | 0.70459  | -0.17845 | 0.00011  | -0.13816 | 0.00277  | -0.10969 | 0.01773  |
| 2.27E-23 | -0.22318 | 1.11E-06 | -0.21886 | 1.80E-06 | -0.25012 | 4.30E-08 | -0.38382 | 7.71E-18 |
| 6.56E-22 | 0.025909 | 0.57651  | 0.017367 | 0.70816  | -0.13942 | 0.00253  | -0.0542  | 0.24242  |
| 1.25E-16 | 0.073374 | 0.11331  | 0.195811 | 2.03E-05 | -0.03351 | 0.46998  | 0.14321  | 0.00192  |
| 8.92E-14 | -0.07495 | 0.10576  | 0.01513  | 0.74434  | -0.15633 | 0.0007   | -0.11679 | 0.01155  |
| 3.61E-14 | -0.0614  | 0.18529  | -0.00036 | 0.99383  | 0.004596 | 0.92109  | -0.07254 | 0.11747  |
| 4.17E-35 | -0.0188  | 0.68538  | -0.24245 | 1.13E-07 | -0.03834 | 0.40844  | -0.1113  | 0.01612  |
| 8.77E-20 | -0.12197 | 0.00833  | -0.13007 | 0.00487  | -0.2022  | 1.07E-05 | -0.20359 | 9.24E-06 |
| 2.62E-13 | 0.105143 | 0.02306  | 0.16645  | 0.0003   | 0.150116 | 0.00114  | 0.221815 | 1.29E-06 |
| 7.91E-38 | 0.125358 | 0.00668  | 0.203681 | 9.15E-06 | 0.049367 | 0.28705  | 0.182995 | 6.96E-05 |
| 3.49E-28 | 0.21269  | 3.53E-06 | 0.346506 | 1.28E-14 | 0.336925 | 7.36E-14 | 0.419511 | 2.48E-21 |
| 2.86E-10 | 0.00949  | 0.83793  | 0.035724 | 0.44119  | -0.09265 | 0.04537  | -0.05644 | 0.22347  |
| 7.27E-16 | -0.11478 | 0.01307  | -0.06195 | 0.18138  | 0.056594 | 0.2222   | -0.1077  | 0.01991  |
| 0.02681  | 0.058496 | 0.20702  | 0.154307 | 0.00082  | 0.063042 | 0.17381  | 0.045717 | 0.32422  |
| 7.95E-56 | 0.198982 | 1.48E-05 | 0.309135 | 8.46E-12 | 0.171912 | 0.00019  | 0.403663 | 9.95E-20 |
| 3.09E-08 | 0.249233 | 4.82E-08 | 0.111124 | 0.01629  | 0.192973 | 2.69E-05 | 0.375831 | 4.09E-17 |
| 3.64E-39 | 0.193106 | 2.65E-05 | 0.070129 | 0.13021  | 0.048122 | 0.29939  | 0.203624 | 9.20E-06 |
| 1.59E-09 | -0.25203 | 3.37E-08 | -0.22624 | 7.81E-07 | -0.03937 | 0.39592  | -0.28533 | 3.37E-10 |
| 2.02E-14 | 0.099358 | 0.03182  | 0.312584 | 4.82E-12 | 0.383195 | 8.79E-18 | 0.396255 | 5.22E-19 |
| 1.56E-41 | 0.018964 | 0.68271  | 0.011116 | 0.81065  | -0.07314 | 0.11446  | -0.03659 | 0.43018  |
| 3.06E-21 | 0.269442 | 3.28E-09 | 0.414666 | 7.84E-21 | 0.477009 | 6.57E-28 | 0.583359 | 6.27E-44 |
| 4.42E-08 | -0.04905 | 0.29016  | -0.14503 | 0.00168  | -0.04013 | 0.38691  | -0.13661 | 0.00309  |
| 2.35E-12 | 0.009654 | 0.83517  | 0.134038 | 0.00371  | -0.08243 | 0.07515  | -0.00214 | 0.96322  |



|          |          |          |          |          |          |          |          |          |
|----------|----------|----------|----------|----------|----------|----------|----------|----------|
| 4.65E-25 | 0.079667 | 0.08548  | 0.233952 | 3.17E-07 | 0.080098 | 0.0838   | 0.175024 | 0.00014  |
| 2.26E-18 | 0.106758 | 0.02103  | 0.09835  | 0.0336   | 0.090446 | 0.05078  | 0.177632 | 0.00011  |
| 6.92E-07 | 0.011657 | 0.80163  | 0.413622 | 1.00E-20 | 0.105439 | 0.02268  | 0.149964 | 0.00115  |
| 0.00331  | -0.02054 | 0.65789  | -0.21295 | 3.43E-06 | -0.2294  | 5.41E-07 | -0.2615  | 9.70E-09 |
| 0.00014  | 0.139626 | 0.00249  | 0.026263 | 0.57131  | 0.213424 | 3.26E-06 | 0.245002 | 8.22E-08 |
| 8.00E-09 | 0.037305 | 0.42123  | 0.186885 | 4.83E-05 | 0.246955 | 6.43E-08 | 0.24362  | 9.76E-08 |
| 3.43E-11 | -0.00182 | 0.96876  | -0.03773 | 0.41598  | -0.19118 | 3.20E-05 | -0.0949  | 0.04038  |
| 5.31E-21 | 0.104004 | 0.0246   | 0.196963 | 1.81E-05 | 0.151062 | 0.00106  | 0.261323 | 9.93E-09 |
| 3.36E-17 | -0.0073  | 0.87497  | 0.407416 | 4.23E-20 | 0.241891 | 1.21E-07 | 0.140357 | 0.00237  |
| 2.20E-14 | -0.07795 | 0.09246  | -0.28739 | 2.49E-10 | -0.24567 | 7.55E-08 | -0.2643  | 6.64E-09 |
| 2.87E-10 | 0.254349 | 2.49E-08 | 0.147671 | 0.00137  | 0.059816 | 0.19694  | 0.271442 | 2.48E-09 |
| 5.76E-28 | 0.114291 | 0.01346  | 0.314728 | 3.38E-12 | 0.315795 | 2.84E-12 | 0.474246 | 1.46E-27 |
| 3.28E-14 | 0.136398 | 0.00314  | 0.262552 | 8.41E-09 | 0.120806 | 0.00897  | 0.258445 | 1.46E-08 |
| 3.64E-22 | 0.111332 | 0.01609  | 0.148752 | 0.00126  | 0.023126 | 0.61815  | 0.163087 | 0.0004   |
| 1.68E-10 | 0.171189 | 0.0002   | 0.476249 | 8.19E-28 | 0.462494 | 3.96E-26 | 0.542567 | 4.21E-37 |
| 5.24E-26 | 0.107909 | 0.01967  | 0.135974 | 0.00324  | 0.077192 | 0.09568  | 0.187186 | 4.69E-05 |
| 8.13E-05 | -0.02408 | 0.60366  | -0.07563 | 0.10262  | -0.13445 | 0.0036   | -0.12774 | 0.0057   |
| 8.53E-20 | 0.125324 | 0.00669  | 0.211656 | 3.95E-06 | 0.049619 | 0.2846   | 0.162921 | 0.00041  |
| 3.79E-30 | 0.294652 | 8.29E-11 | 0.357827 | 1.49E-15 | 0.317424 | 2.16E-12 | 0.511251 | 1.84E-32 |
| 1.12E-14 | 0.138888 | 0.00263  | 0.314443 | 3.55E-12 | 0.211958 | 3.82E-06 | 0.313429 | 4.19E-12 |
| 7.65E-24 | -0.12343 | 0.00758  | -0.30802 | 1.01E-11 | -0.19679 | 1.84E-05 | -0.30024 | 3.49E-11 |
| 6.67E-10 | -0.1408  | 0.00229  | -0.16906 | 0.00024  | -0.25948 | 1.27E-08 | -0.30023 | 3.50E-11 |
| 5.76E-14 | 0.032745 | 0.48024  | -0.14938 | 0.00121  | 0.096801 | 0.03651  | 0.050595 | 0.27521  |
| 3.36E-15 | 0.016245 | 0.72624  | 0.061139 | 0.18719  | 0.001642 | 0.97177  | 0.04716  | 0.30917  |
| 6.84E-20 | 0.118002 | 0.01071  | -0.0182  | 0.69477  | -0.02808 | 0.54494  | 0.040967 | 0.37707  |
| 2.90E-21 | 0.149039 | 0.00124  | 0.094129 | 0.04203  | 0.027094 | 0.55919  | 0.16766  | 0.00027  |
| 3.06E-21 | -0.04704 | 0.31036  | -0.0354  | 0.44533  | -0.12942 | 0.00509  | -0.07643 | 0.09902  |
| 6.09E-19 | 0.230827 | 4.58E-07 | 0.513546 | 8.73E-33 | 0.4607   | 6.49E-26 | 0.607326 | 2.06E-48 |
| 3.29E-10 | -0.11387 | 0.01381  | 0.062707 | 0.17612  | -0.3138  | 3.95E-12 | -0.28354 | 4.39E-10 |
| 2.25E-21 | 0.150257 | 0.00113  | 0.222499 | 1.20E-06 | 0.172412 | 0.00018  | 0.401683 | 1.56E-19 |
| 9.65E-06 | -0.04225 | 0.36233  | 0.025552 | 0.58177  | -0.14236 | 0.00204  | -0.13911 | 0.00259  |
| 1.17E-06 | 0.22053  | 1.49E-06 | 0.282555 | 5.07E-10 | 0.373379 | 6.76E-17 | 0.499538 | 7.60E-31 |
| 5.60E-06 | -0.20095 | 1.21E-05 | -0.24495 | 8.28E-08 | -0.25107 | 3.81E-08 | -0.356   | 2.12E-15 |
| 1.60E-18 | 0.096326 | 0.03744  | 0.338754 | 5.29E-14 | 0.360667 | 8.58E-16 | 0.473998 | 1.56E-27 |
| 5.73E-12 | -0.0735  | 0.11267  | -0.2402  | 1.49E-07 | -0.10701 | 0.02073  | -0.20736 | 6.23E-06 |
| 2.69E-09 | 0.013574 | 0.76985  | -0.2583  | 1.48E-08 | -0.15548 | 0.00075  | -0.17364 | 0.00016  |
| 3.22E-25 | 0.2298   | 5.17E-07 | 0.311819 | 5.46E-12 | 0.28663  | 2.78E-10 | 0.440126 | 1.51E-23 |
| 6.85E-21 | -0.12835 | 0.00547  | -0.08244 | 0.07512  | 0.066713 | 0.15003  | 0.003769 | 0.93526  |
| 3.03E-15 | 0.209213 | 5.13E-06 | 0.380839 | 1.44E-17 | 0.377444 | 2.93E-17 | 0.437511 | 2.95E-23 |
| 2.75E-12 | -0.02639 | 0.56944  | -0.15543 | 0.00075  | -0.12981 | 0.00496  | -0.13203 | 0.00426  |
| 2.85E-29 | -0.08151 | 0.07847  | -0.23473 | 2.88E-07 | -0.15072 | 0.00109  | -0.22237 | 1.21E-06 |
| 2.00E-34 | 0.188551 | 4.12E-05 | 0.213996 | 3.07E-06 | 0.164141 | 0.00037  | 0.3348   | 1.08E-13 |
| 9.52E-12 | -0.09515 | 0.03983  | -0.21356 | 3.21E-06 | -0.20547 | 7.60E-06 | -0.26394 | 6.98E-09 |
| 5.07E-35 | 0.090279 | 0.05121  | 0.301379 | 2.92E-11 | 0.219861 | 1.61E-06 | 0.311459 | 5.79E-12 |
| 1.92E-20 | 0.038884 | 0.40183  | -0.25263 | 3.11E-08 | -0.13742 | 0.00292  | -0.06083 | 0.18941  |

|          |          |          |          |          |          |          |          |          |
|----------|----------|----------|----------|----------|----------|----------|----------|----------|
| 5.24E-17 | 0.157166 | 0.00065  | 0.289123 | 1.92E-10 | 0.282851 | 4.86E-10 | 0.354545 | 2.80E-15 |
| 3.47E-12 | 0.233156 | 3.48E-07 | 0.239332 | 1.66E-07 | 0.363178 | 5.24E-16 | 0.42275  | 1.14E-21 |
| 7.52E-16 | -0.01108 | 0.81131  | 0.037029 | 0.42468  | -0.11753 | 0.01103  | -0.08197 | 0.07679  |
| 9.45E-06 | -0.17505 | 0.00014  | -0.27919 | 8.27E-10 | -0.25525 | 2.22E-08 | -0.36443 | 4.10E-16 |
| 5.24E-10 | -0.08937 | 0.05362  | -0.15466 | 0.0008   | -0.14417 | 0.00179  | -0.24299 | 1.06E-07 |
| 3.82E-17 | -0.08364 | 0.07095  | -0.21544 | 2.62E-06 | -0.1478  | 0.00136  | -0.20499 | 7.99E-06 |
| 4.35E-32 | 0.039067 | 0.39961  | 0.056265 | 0.2249   | -0.12525 | 0.00673  | -0.05506 | 0.23503  |
| 6.70E-18 | 0.037412 | 0.4199   | 0.084998 | 0.06647  | -0.04579 | 0.32341  | 0.019108 | 0.68044  |
| 1.34E-23 | 0.268148 | 3.92E-09 | 0.363724 | 4.71E-16 | 0.338444 | 5.60E-14 | 0.498246 | 1.14E-30 |
| 6.88E-21 | 0.206945 | 6.51E-06 | 0.260423 | 1.12E-08 | 0.283981 | 4.12E-10 | 0.421274 | 1.63E-21 |
| 2.09E-16 | 0.104531 | 0.02388  | 0.141124 | 0.00224  | -0.05122 | 0.26934  | 0.07405  | 0.11001  |
| 1.53E-12 | 0.055821 | 0.22859  | 0.112625 | 0.01489  | -0.02971 | 0.52186  | 0.078987 | 0.08819  |
| 2.73E-26 | 0.290212 | 1.63E-10 | 0.325465 | 5.52E-13 | 0.257363 | 1.68E-08 | 0.472699 | 2.27E-27 |
| 1.48E-07 | 0.057527 | 0.21466  | 0.440747 | 1.29E-23 | 0.406487 | 5.23E-20 | 0.405453 | 6.62E-20 |
| 1.56E-05 | -0.24638 | 6.91E-08 | -0.20384 | 9.00E-06 | -0.28481 | 3.65E-10 | -0.39668 | 4.75E-19 |
| 2.13E-08 | 0.365549 | 3.28E-16 | 0.226698 | 7.40E-07 | 0.239312 | 1.66E-07 | 0.399594 | 2.49E-19 |
| 2.45E-17 | 0.176639 | 0.00012  | 0.473838 | 1.64E-27 | 0.444305 | 5.15E-24 | 0.527646 | 7.87E-35 |
| 1.95E-18 | -0.08284 | 0.07369  | -0.26473 | 6.27E-09 | -0.18945 | 3.78E-05 | -0.25106 | 3.81E-08 |
| 9.99E-05 | 0.133719 | 0.00379  | 0.201043 | 1.20E-05 | 0.282725 | 4.95E-10 | 0.356253 | 2.02E-15 |
| 4.44E-23 | -0.25826 | 1.49E-08 | -0.27114 | 2.59E-09 | -0.2914  | 1.36E-10 | -0.45244 | 6.06E-25 |
| 1.06E-11 | -0.15616 | 0.00071  | -0.29827 | 4.75E-11 | -0.25153 | 3.59E-08 | -0.38182 | 1.18E-17 |
| 4.22E-48 | 0.199278 | 1.43E-05 | 0.097625 | 0.03494  | 0.121917 | 0.00835  | 0.280512 | 6.83E-10 |
| 1.13E-28 | 0.296682 | 6.07E-11 | 0.277778 | 1.01E-09 | 0.2846   | 3.76E-10 | 0.462973 | 3.47E-26 |
| 6.97E-64 | 0.210794 | 4.33E-06 | 0.225796 | 8.21E-07 | 0.122553 | 0.00802  | 0.259262 | 1.31E-08 |
| 4.04E-05 | -0.02593 | 0.57615  | -0.19101 | 3.25E-05 | -0.14783 | 0.00136  | -0.08308 | 0.07286  |
| 1.22E-17 | 0.006333 | 0.89144  | 0.138674 | 0.00267  | -0.1211  | 0.0088   | -0.06112 | 0.18737  |
| 1.03E-05 | 0.226401 | 7.66E-07 | 0.133496 | 0.00385  | 0.112791 | 0.01474  | 0.232077 | 3.95E-07 |
| 9.77E-20 | -0.21121 | 4.14E-06 | -0.10098 | 0.02912  | -0.17308 | 0.00017  | -0.33238 | 1.65E-13 |
| 1.15E-35 | -0.13194 | 0.00429  | -0.36674 | 2.59E-16 | -0.24032 | 1.47E-07 | -0.34084 | 3.63E-14 |
| 2.50E-21 | 0.130122 | 0.00486  | 0.005187 | 0.91099  | 0.1466   | 0.00149  | 0.307434 | 1.11E-11 |
| 5.34E-09 | -0.18017 | 9.04E-05 | -0.4035  | 1.03E-19 | -0.29523 | 7.59E-11 | -0.44153 | 1.05E-23 |
| 1.41E-16 | -0.00078 | 0.98664  | 0.154561 | 0.0008   | -0.01314 | 0.77694  | 0.027271 | 0.55662  |
| 7.27E-15 | -0.20415 | 8.72E-06 | -0.34815 | 9.39E-15 | -0.32981 | 2.60E-13 | -0.44292 | 7.38E-24 |
| 1.24E-13 | -0.18526 | 5.63E-05 | -0.31737 | 2.18E-12 | -0.30253 | 2.43E-11 | -0.3998  | 2.37E-19 |
| 1.21E-27 | 0.169458 | 0.00023  | 0.332356 | 1.66E-13 | 0.268714 | 3.63E-09 | 0.414336 | 8.47E-21 |
| 3.55E-14 | -0.19813 | 1.61E-05 | -0.3297  | 2.65E-13 | -0.32983 | 2.59E-13 | -0.41611 | 5.58E-21 |
| 1.21E-12 | -0.10427 | 0.02424  | -0.10178 | 0.02785  | -0.05331 | 0.25025  | -0.1553  | 0.00076  |
| 2.82E-06 | -0.01418 | 0.75985  | -0.10011 | 0.03054  | -0.05455 | 0.23936  | -0.06716 | 0.14733  |
| 1.67E-18 | 0.140406 | 0.00236  | 0.197661 | 1.69E-05 | 0.032219 | 0.48732  | 0.145636 | 0.0016   |
| 4.87E-10 | -0.0827  | 0.07418  | 0.101821 | 0.02779  | 0.012513 | 0.78739  | -0.06186 | 0.18206  |
| 1.97E-39 | 0.13146  | 0.00443  | 0.176647 | 0.00012  | 0.041236 | 0.37394  | 0.19187  | 2.99E-05 |
| 4.77E-66 | 0.06144  | 0.18503  | 0.185985 | 5.26E-05 | 0.07565  | 0.10252  | 0.127351 | 0.00585  |
| 2.36E-10 | 0.082009 | 0.07665  | 0.342883 | 2.49E-14 | 0.224802 | 9.20E-07 | 0.239348 | 1.65E-07 |
| 2.57E-20 | -0.0867  | 0.0612   | 0.020002 | 0.66637  | 0.067686 | 0.14416  | -0.0918  | 0.04739  |
| 1.55E-07 | 0.061877 | 0.18192  | -0.10907 | 0.01838  | 0.042225 | 0.36259  | 0.101457 | 0.02836  |

|          |          |          |          |          |          |          |          |          |
|----------|----------|----------|----------|----------|----------|----------|----------|----------|
| 4.39E-08 | 0.002421 | 0.95839  | 0.277128 | 1.11E-09 | 0.212399 | 3.65E-06 | 0.277308 | 1.08E-09 |
| 1.71E-30 | 0.153707 | 0.00086  | 0.252864 | 3.02E-08 | 0.157369 | 0.00064  | 0.330248 | 2.41E-13 |
| 1.50E-17 | -0.09716 | 0.03582  | -0.1142  | 0.01354  | -0.15493 | 0.00078  | -0.17996 | 9.21E-05 |
| 1.20E-13 | -0.00597 | 0.89757  | 0.129005 | 0.00524  | 0.024209 | 0.60179  | 0.037083 | 0.424    |
| 3.00E-09 | 0.035684 | 0.44171  | 0.113878 | 0.0138   | 0.029204 | 0.52899  | 0.114094 | 0.01362  |
| 1.84E-18 | 0.066918 | 0.14878  | 0.216301 | 2.38E-06 | -0.00105 | 0.98197  | 0.10426  | 0.02425  |
| 5.11E-26 | -0.10018 | 0.03042  | -0.28806 | 2.25E-10 | -0.18138 | 8.08E-05 | -0.23473 | 2.88E-07 |
| 4.42E-30 | 0.005074 | 0.91292  | -0.22933 | 5.46E-07 | -0.11    | 0.0174   | -0.12036 | 0.00923  |
| 1.19E-19 | 0.057022 | 0.21871  | 0.10887  | 0.0186   | -0.049   | 0.29068  | 0.06926  | 0.13505  |
| 5.99E-25 | -0.02441 | 0.59881  | -0.06113 | 0.18728  | -0.10487 | 0.02342  | -0.00591 | 0.8987   |
| 6.44E-11 | 0.089171 | 0.05414  | -0.0415  | 0.37088  | 0.046178 | 0.31936  | 0.007909 | 0.86465  |
| 8.26E-05 | -0.11883 | 0.01017  | -0.3363  | 8.23E-14 | -0.26529 | 5.81E-09 | -0.31396 | 3.84E-12 |
| 4.24E-14 | -0.05909 | 0.20245  | -0.09461 | 0.04099  | -0.02895 | 0.53252  | -0.07365 | 0.11195  |
| 1.34E-08 | 0.015092 | 0.74497  | -0.04928 | 0.28789  | 0.191861 | 2.99E-05 | 0.08575  | 0.06409  |
| 7.69E-24 | -0.25384 | 2.67E-08 | -0.10131 | 0.02859  | -0.09531 | 0.03951  | -0.39162 | 1.44E-18 |
| 9.46E-79 | 0.207157 | 6.37E-06 | 0.206314 | 6.96E-06 | 0.122552 | 0.00802  | 0.308057 | 1.01E-11 |
| 2.41E-14 | 0.04855  | 0.29511  | 0.475486 | 1.02E-27 | 0.382043 | 1.12E-17 | 0.440147 | 1.50E-23 |
| 8.49E-10 | 0.226484 | 7.59E-07 | 0.340322 | 3.98E-14 | 0.210246 | 4.59E-06 | 0.366949 | 2.48E-16 |
| 2.22E-08 | 0.120436 | 0.00918  | 0.157562 | 0.00063  | 0.170714 | 0.00021  | 0.255449 | 2.16E-08 |
| 9.62E-10 | 0.10201  | 0.0275   | 0.159702 | 0.00053  | -0.01803 | 0.69757  | 0.092919 | 0.04475  |
| 8.42E-07 | 0.094563 | 0.04109  | 0.208958 | 5.27E-06 | 0.268817 | 3.58E-09 | 0.378446 | 2.38E-17 |
| 3.19E-23 | -0.01548 | 0.73861  | -0.03273 | 0.48047  | -0.11544 | 0.01255  | -0.03624 | 0.4346   |
| 9.25E-19 | -0.05182 | 0.26377  | -0.01416 | 0.7602   | 0.077197 | 0.09566  | 0.045951 | 0.32175  |
| 1.23E-08 | 0.122137 | 0.00824  | 0.131555 | 0.0044   | 0.070982 | 0.12558  | 0.1951   | 2.18E-05 |
| 4.60E-14 | 0.083483 | 0.07148  | -0.00479 | 0.91782  | -0.08437 | 0.0685   | -0.002   | 0.96558  |
| 4.56E-22 | 0.187307 | 4.64E-05 | 0.210641 | 4.40E-06 | 0.148404 | 0.0013   | 0.307424 | 1.11E-11 |
| 2.50E-08 | -0.00794 | 0.86414  | -0.08869 | 0.05546  | -0.0137  | 0.76777  | -0.01217 | 0.79311  |
| 0.0013   | 0.001112 | 0.98088  | -0.00233 | 0.96     | 0.07558  | 0.10284  | 0.032867 | 0.47861  |
| 0.00053  | -0.05502 | 0.23537  | -0.32847 | 3.28E-13 | -0.20262 | 1.02E-05 | -0.2428  | 1.08E-07 |
| 2.26E-47 | 0.200385 | 1.28E-05 | 0.124814 | 0.00692  | 0.121003 | 0.00886  | 0.327118 | 4.15E-13 |
| 4.77E-15 | 0.120811 | 0.00897  | 0.18059  | 8.69E-05 | 0.09839  | 0.03353  | 0.167492 | 0.00028  |
| 1.57E-05 | 0.253381 | 2.83E-08 | 0.196338 | 1.93E-05 | 0.24098  | 1.35E-07 | 0.455833 | 2.44E-25 |
| 8.28E-10 | -0.01378 | 0.76641  | 0.161444 | 0.00046  | 0.222558 | 1.19E-06 | 0.226379 | 7.68E-07 |
| 2.16E-10 | 0.171215 | 0.0002   | 0.150137 | 0.00114  | 0.190157 | 3.53E-05 | 0.285004 | 3.54E-10 |
| 8.24E-23 | -0.0261  | 0.57371  | -0.09028 | 0.0512   | -0.07785 | 0.09289  | -0.12862 | 0.00538  |
| 1.27E-18 | 0.044767 | 0.33439  | 0.426003 | 5.18E-22 | 0.27515  | 1.47E-09 | 0.362675 | 5.79E-16 |
| 1.01E-14 | 0.123945 | 0.00733  | 0.188408 | 4.18E-05 | 0.058949 | 0.20352  | 0.247316 | 6.14E-08 |
| 4.68E-15 | 0.131694 | 0.00436  | 0.195722 | 2.05E-05 | 0.07751  | 0.09432  | 0.136181 | 0.00319  |
| 6.85E-10 | 0.207523 | 6.13E-06 | 0.370084 | 1.32E-16 | 0.293099 | 1.05E-10 | 0.389171 | 2.45E-18 |
| 2.43E-22 | 0.128711 | 0.00534  | 0.160421 | 0.0005   | 0.131554 | 0.0044   | 0.248013 | 5.63E-08 |
| 4.82E-06 | -0.0385  | 0.40649  | 0.236467 | 2.34E-07 | 0.202849 | 9.97E-06 | 0.092251 | 0.04632  |
| 2.58E-31 | 0.08837  | 0.05635  | 0.120352 | 0.00923  | -0.12371 | 0.00744  | 0.08714  | 0.05988  |
| 6.10E-11 | 0.005141 | 0.91178  | -0.17248 | 0.00018  | 0.010601 | 0.81928  | -0.01436 | 0.75695  |
| 5.64E-21 | 0.057031 | 0.21864  | -0.09777 | 0.03467  | 0.054871 | 0.23662  | 0.00712  | 0.87803  |
| 1.70E-15 | -0.14577 | 0.00159  | -0.28224 | 5.31E-10 | -0.24468 | 8.55E-08 | -0.34759 | 1.04E-14 |

|          |          |          |          |          |          |          |          |          |
|----------|----------|----------|----------|----------|----------|----------|----------|----------|
| 8.83E-09 | -0.05996 | 0.19586  | -0.19684 | 1.83E-05 | -0.11779 | 0.01085  | -0.1709  | 0.00021  |
| 1.11E-48 | 0.033448 | 0.47086  | 0.035583 | 0.443    | -0.104   | 0.02461  | -0.05813 | 0.20986  |
| 2.61E-37 | 0.144677 | 0.00172  | 0.239604 | 1.60E-07 | 0.088677 | 0.0555   | 0.250063 | 4.33E-08 |
| 1.40E-40 | -0.18651 | 5.01E-05 | -0.10916 | 0.01829  | -0.08207 | 0.07643  | -0.28296 | 4.78E-10 |
| 6.41E-22 | -0.19877 | 1.51E-05 | -0.25607 | 1.99E-08 | -0.2074  | 6.21E-06 | -0.30203 | 2.63E-11 |
| 3.69E-23 | 0.193214 | 2.62E-05 | 0.369159 | 1.59E-16 | 0.166673 | 0.0003   | 0.338012 | 6.05E-14 |
| 4.27E-16 | -0.02489 | 0.59159  | -0.27066 | 2.77E-09 | -0.16877 | 0.00025  | -0.18095 | 8.41E-05 |
| 7.62E-05 | 0.20438  | 8.51E-06 | 0.270368 | 2.89E-09 | 0.26868  | 3.65E-09 | 0.389514 | 2.28E-18 |
| 1.15E-28 | -0.00754 | 0.87084  | 0.194785 | 2.25E-05 | -0.03774 | 0.41583  | 0.026034 | 0.57467  |
| 5.36E-40 | -0.02569 | 0.57974  | -0.14228 | 0.00206  | 0.010972 | 0.81306  | -0.04384 | 0.34455  |
| 5.76E-08 | -0.06456 | 0.16367  | -0.26042 | 1.12E-08 | -0.14348 | 0.00188  | -0.16238 | 0.00043  |
| 5.38E-27 | 0.091237 | 0.04878  | -0.01999 | 0.66652  | -0.10035 | 0.03014  | 0.059345 | 0.20049  |
| 1.89E-31 | 0.111569 | 0.01586  | 0.278348 | 9.33E-10 | 0.324212 | 6.85E-13 | 0.45898  | 1.04E-25 |
| 3.12E-29 | 0.137185 | 0.00297  | 0.295207 | 7.62E-11 | 0.114808 | 0.01304  | 0.272194 | 2.24E-09 |
| 1.93E-41 | 0.134547 | 0.00358  | 0.167559 | 0.00028  | -0.04291 | 0.35485  | 0.111532 | 0.0159   |
| 2.79E-47 | 0.223107 | 1.12E-06 | 0.341072 | 3.47E-14 | 0.274579 | 1.60E-09 | 0.453792 | 4.22E-25 |
| 3.15E-25 | 0.113682 | 0.01397  | 0.23968  | 1.59E-07 | 0.20893  | 5.28E-06 | 0.303293 | 2.16E-11 |
| 4.81E-44 | 0.118815 | 0.01017  | 0.245814 | 7.42E-08 | 0.099332 | 0.03186  | 0.199568 | 1.39E-05 |
| 2.13E-17 | 0.133141 | 0.00395  | 0.11988  | 0.00951  | 0.003035 | 0.94785  | 0.11834  | 0.01048  |
| 2.57E-31 | 0.151771 | 0.001    | 0.265827 | 5.40E-09 | 0.083971 | 0.06984  | 0.287982 | 2.28E-10 |
| 3.38E-10 | -0.07158 | 0.1224   | 0.175873 | 0.00013  | -0.04984 | 0.28245  | -0.00638 | 0.8906   |
| 5.30E-09 | 0.109068 | 0.01839  | 0.152031 | 0.00098  | 0.03672  | 0.42855  | 0.118329 | 0.01049  |
| 0.00033  | 0.28438  | 3.88E-10 | 0.252156 | 3.31E-08 | 0.225948 | 8.07E-07 | 0.359749 | 1.03E-15 |
| 1.11E-14 | -0.08571 | 0.06421  | -0.14239 | 0.00204  | -0.02798 | 0.54635  | -0.11306 | 0.0145   |
| 7.95E-27 | 0.136077 | 0.00321  | 0.135167 | 0.00343  | 0.053798 | 0.24593  | 0.167926 | 0.00027  |
| 5.84E-19 | 0.110551 | 0.01685  | 0.195945 | 2.00E-05 | 0.024229 | 0.60149  | 0.189506 | 3.76E-05 |
| 4.52E-13 | 0.125591 | 0.00658  | 0.182916 | 7.01E-05 | 0.151497 | 0.00102  | 0.250679 | 4.01E-08 |
| 9.26E-06 | 0.348496 | 8.81E-15 | 0.304482 | 1.79E-11 | 0.192557 | 2.80E-05 | 0.348118 | 9.46E-15 |
| 3.10E-32 | 0.24625  | 7.03E-08 | 0.283088 | 4.69E-10 | 0.217697 | 2.04E-06 | 0.41639  | 5.22E-21 |
| 2.07E-28 | 0.170343 | 0.00022  | 0.099341 | 0.03185  | 0.104145 | 0.02441  | 0.204076 | 8.78E-06 |
| 9.03E-73 | 0.117629 | 0.01096  | 0.139523 | 0.00251  | -0.00963 | 0.83551  | 0.112045 | 0.01542  |
| 3.47E-11 | 0.163113 | 0.0004   | 0.275851 | 1.33E-09 | 0.12691  | 0.00603  | 0.309938 | 7.42E-12 |
| 2.86E-47 | 0.091573 | 0.04796  | 0.099764 | 0.03112  | -0.07872 | 0.08929  | 0.031456 | 0.49769  |
| 1.70E-15 | 0.18616  | 5.17E-05 | 0.110199 | 0.0172   | -0.0149  | 0.74816  | 0.167003 | 0.00029  |
| 1.41E-19 | 0.072568 | 0.11733  | 0.028331 | 0.54138  | -0.0859  | 0.06364  | 0.098533 | 0.03327  |
| 1.44E-11 | 0.094357 | 0.04153  | 0.092386 | 0.046    | 0.007409 | 0.87313  | 0.101221 | 0.02873  |
| 3.46E-18 | -0.02819 | 0.54342  | 0.027153 | 0.55833  | -0.14426 | 0.00177  | -0.10241 | 0.0269   |
| 6.65E-31 | 0.061828 | 0.18226  | 0.084317 | 0.06869  | -0.03306 | 0.47606  | 0.109323 | 0.01812  |
| 1.55E-15 | 0.030207 | 0.51492  | 0.031818 | 0.49276  | -0.1632  | 0.0004   | -0.01361 | 0.76934  |
| 1.36E-26 | 0.257722 | 1.60E-08 | 0.371972 | 9.01E-17 | 0.279871 | 7.49E-10 | 0.467102 | 1.10E-26 |
| 1.43E-05 | 0.292701 | 1.12E-10 | 0.26776  | 4.14E-09 | 0.174712 | 0.00015  | 0.3515   | 5.01E-15 |
| 3.79E-34 | -0.00421 | 0.92771  | 0.057133 | 0.21782  | -0.2266  | 7.48E-07 | -0.11712 | 0.01131  |
| 2.11E-27 | 0.300594 | 3.30E-11 | 0.192201 | 2.90E-05 | 0.246202 | 7.07E-08 | 0.48713  | 3.35E-29 |
| 1.58E-10 | -0.04966 | 0.28421  | 0.016482 | 0.7224   | -0.19538 | 2.12E-05 | -0.09147 | 0.04821  |
| 3.10E-20 | 0.16739  | 0.00028  | 0.009805 | 0.83263  | -0.14919 | 0.00122  | -0.00899 | 0.84638  |

|          |          |          |          |          |          |          |          |          |
|----------|----------|----------|----------|----------|----------|----------|----------|----------|
| 2.07E-11 | 0.05584  | 0.22843  | -0.00165 | 0.97158  | -0.02654 | 0.56724  | 0.052581 | 0.25679  |
| 4.06E-12 | 0.029312 | 0.52747  | 0.120554 | 0.00911  | -0.09274 | 0.04517  | 0.056038 | 0.22678  |
| 2.62E-38 | 0.130294 | 0.0048   | 0.178525 | 0.0001   | 0.035573 | 0.44313  | 0.169556 | 0.00023  |
| 1.23E-47 | 0.116747 | 0.01158  | -0.02607 | 0.57415  | -0.05205 | 0.26163  | 0.078613 | 0.08971  |
| 3.40E-07 | 0.000705 | 0.98788  | -0.11061 | 0.01679  | -0.22783 | 6.50E-07 | -0.12943 | 0.00509  |
| 1.66E-17 | 0.093525 | 0.04337  | 0.327352 | 3.99E-13 | 0.14663  | 0.00149  | 0.291664 | 1.31E-10 |
| 3.40E-17 | 0.109985 | 0.01742  | 0.061545 | 0.18428  | -0.03936 | 0.39605  | 0.102689 | 0.02648  |
| 1.50E-12 | -0.12525 | 0.00673  | -0.22212 | 1.25E-06 | -0.20044 | 1.28E-05 | -0.24181 | 1.22E-07 |
| 1.17E-14 | 0.013352 | 0.77351  | 0.217987 | 1.98E-06 | -0.07804 | 0.0921   | -0.0011  | 0.98107  |
| 6.93E-33 | 0.173303 | 0.00017  | 0.132402 | 0.00415  | 0.025351 | 0.58475  | 0.218818 | 1.81E-06 |
| 1.78E-12 | 0.170368 | 0.00022  | -0.02598 | 0.57542  | 0.137771 | 0.00285  | 0.177883 | 0.00011  |
| 0.10093  | -0.00219 | 0.96236  | -0.19892 | 1.49E-05 | -0.09129 | 0.04866  | -0.11708 | 0.01134  |
| 0.06405  | 0.245957 | 7.29E-08 | 0.174066 | 0.00016  | 0.394002 | 8.58E-19 | 0.474458 | 1.37E-27 |
| 0.09595  | 0.063071 | 0.17361  | -0.00113 | 0.98062  | 0.065828 | 0.15552  | 0.050724 | 0.27399  |
| 0.7822   | 0.025312 | 0.58532  | -0.06093 | 0.18871  | -0.12707 | 0.00596  | -0.04442 | 0.33819  |
| 3.88E-12 | 0.066556 | 0.15099  | -0.03102 | 0.50366  | 0.006272 | 0.89247  | 0.027834 | 0.54851  |
| 0.24051  | 0.037232 | 0.42214  | -0.09213 | 0.04662  | -0.05574 | 0.2293   | -0.07544 | 0.10347  |
| 0.00079  | 0.11368  | 0.01397  | -0.03878 | 0.40305  | -0.02812 | 0.54446  | 0.02896  | 0.53244  |
| 8.16E-06 | 0.159142 | 0.00056  | -0.04446 | 0.33772  | 0.131754 | 0.00434  | 0.124328 | 0.00715  |
| 7.21E-05 | 0.13153  | 0.00441  | 0.175622 | 0.00014  | 0.191981 | 2.96E-05 | 0.295651 | 7.11E-11 |
| 3.90E-12 | 0.080837 | 0.08097  | 0.023151 | 0.61776  | 0.027745 | 0.54979  | 0.091523 | 0.04808  |
| 0.87566  | -0.00555 | 0.90485  | -0.06587 | 0.15529  | -0.06946 | 0.13391  | -0.07922 | 0.08726  |
| 0.09271  | 0.101735 | 0.02793  | -0.1554  | 0.00075  | -0.07697 | 0.09664  | -0.01159 | 0.80278  |
| 0.6643   | 0.092881 | 0.04484  | 0.099082 | 0.0323   | 0.13283  | 0.00403  | 0.146972 | 0.00145  |
| 0.18819  | 0.131075 | 0.00455  | -0.12218 | 0.00821  | -0.01985 | 0.66881  | 0.095222 | 0.03969  |
| 0.02974  | 0.10487  | 0.02342  | -0.15373 | 0.00086  | -0.03258 | 0.48248  | -0.01283 | 0.78212  |
| 5.60E-20 | 0.093244 | 0.04401  | -0.00067 | 0.98852  | 0.050875 | 0.27256  | 0.060613 | 0.19103  |
| 0.17109  | 0.073357 | 0.11339  | -0.01354 | 0.77035  | 0.031849 | 0.49234  | 0.032697 | 0.48088  |
| 0.74003  | 0.104544 | 0.02386  | -0.06493 | 0.16122  | -0.06617 | 0.15337  | 0.024518 | 0.59716  |
| 0.06102  | 0.026983 | 0.5608   | 0.060703 | 0.19036  | -0.01155 | 0.80338  | 0.037597 | 0.4176   |
| 0.0797   | 0.045035 | 0.3315   | -0.01802 | 0.6977   | -0.01214 | 0.7936   | 0.016754 | 0.71802  |
| 8.72E-05 | 0.074267 | 0.10897  | -0.03252 | 0.48331  | -0.02602 | 0.57488  | -0.01357 | 0.76992  |
| 0.00053  | 0.115509 | 0.01249  | 0.054883 | 0.23651  | 0.197913 | 1.65E-05 | 0.238973 | 1.73E-07 |
| 0.17321  | 0.125371 | 0.00667  | 0.183782 | 6.47E-05 | 0.086015 | 0.06327  | 0.142154 | 0.00207  |
| 0.23473  | 0.075794 | 0.10186  | -0.08024 | 0.08325  | 0.014315 | 0.75768  | 0.028196 | 0.54331  |
| 1.19E-09 | 0.159661 | 0.00053  | -0.01105 | 0.81175  | 0.053881 | 0.24519  | 0.151034 | 0.00106  |
| 6.69E-06 | 0.120607 | 0.00908  | 0.056111 | 0.22617  | 0.165627 | 0.00033  | 0.265577 | 5.58E-09 |
| 0.8702   | 0.020589 | 0.6572   | -0.05308 | 0.25231  | -0.01519 | 0.74333  | -0.03316 | 0.47464  |
| 8.50E-16 | 0.122025 | 0.0083   | 0.29924  | 4.08E-11 | 0.339499 | 4.62E-14 | 0.352362 | 4.25E-15 |
| 0.00027  | 0.297478 | 5.37E-11 | 0.139812 | 0.00246  | 0.273437 | 1.88E-09 | 0.425358 | 6.06E-22 |
| 0.00196  | 0.071176 | 0.12455  | -0.05488 | 0.23658  | -0.03496 | 0.451    | -0.01275 | 0.7835   |
| 0.97069  | 0.015194 | 0.74331  | 0.084143 | 0.06926  | 0.065477 | 0.15775  | 0.052297 | 0.25936  |
| 0.01721  | 0.030031 | 0.51738  | -0.17134 | 0.0002   | -0.10467 | 0.02369  | -0.08043 | 0.08251  |
| 0.95352  | 0.065269 | 0.15908  | -0.15225 | 0.00096  | -0.07504 | 0.10534  | -0.06018 | 0.19422  |
| 0.20191  | 0.072907 | 0.11563  | -0.06678 | 0.14962  | 0.016306 | 0.72525  | 0.02833  | 0.5414   |

|          |          |          |          |          |          |          |          |          |
|----------|----------|----------|----------|----------|----------|----------|----------|----------|
| 1.25E-07 | 0.246433 | 6.87E-08 | 0.116162 | 0.012    | 0.244995 | 8.22E-08 | 0.36095  | 8.12E-16 |
| 0.07523  | 0.032702 | 0.48082  | -0.11912 | 0.00998  | -0.09137 | 0.04845  | -0.07692 | 0.09686  |
| 0.01394  | 0.085244 | 0.06569  | -0.12877 | 0.00532  | -0.01862 | 0.68818  | 0.091352 | 0.0485   |
| 0.00012  | 0.051096 | 0.27048  | -0.01134 | 0.80698  | -0.04159 | 0.36983  | 0.022482 | 0.62796  |
| 0.39275  | 0.063951 | 0.16768  | -0.01693 | 0.71515  | -0.00133 | 0.97713  | 0.009873 | 0.83149  |
| 0.01566  | 0.088296 | 0.05656  | -0.04099 | 0.37686  | -0.08501 | 0.06642  | -0.04572 | 0.32421  |
| 0.84739  | 0.244739 | 8.49E-08 | -0.16359 | 0.00039  | -0.06033 | 0.19314  | 0.098568 | 0.03321  |
| 0.39766  | 0.20026  | 1.30E-05 | 0.062223 | 0.17948  | 0.173365 | 0.00017  | 0.319569 | 1.51E-12 |
| 0.15334  | 0.109837 | 0.01758  | -0.03403 | 0.46319  | 0.019858 | 0.66863  | 0.027671 | 0.55086  |
| 0.00087  | 0.105879 | 0.02212  | -0.06601 | 0.1544   | -0.02189 | 0.63706  | 0.00151  | 0.97404  |
| 0.98433  | 0.109995 | 0.01741  | 0.111267 | 0.01615  | 0.184487 | 6.06E-05 | 0.191822 | 3.01E-05 |
| 1.69E-23 | 0.112257 | 0.01522  | -0.05793 | 0.21149  | 0.0006   | 0.98968  | 0.020294 | 0.6618   |
| 0.19799  | 0.084048 | 0.06958  | -0.06634 | 0.15234  | 0.031973 | 0.49065  | 0.066113 | 0.15374  |
| 0.00524  | 0.003321 | 0.94294  | -0.05296 | 0.25333  | -0.05579 | 0.22888  | -0.08405 | 0.06958  |
| 0.7544   | 0.064526 | 0.16388  | -0.04891 | 0.29151  | -0.05136 | 0.26801  | -0.00766 | 0.86889  |
| 0.42172  | 0.083263 | 0.07223  | -0.06137 | 0.18553  | -0.02369 | 0.60965  | 0.034035 | 0.4631   |
| 0.00014  | 0.076777 | 0.09748  | 0.06743  | 0.14569  | 0.060644 | 0.1908   | 0.140573 | 0.00233  |
| 0.10511  | 0.154973 | 0.00078  | -0.02133 | 0.64576  | 0.063206 | 0.1727   | 0.168    | 0.00027  |
| 0.58962  | 0.024951 | 0.5907   | -0.04553 | 0.32623  | -0.0017  | 0.97084  | -0.05889 | 0.20401  |
| 1.70E-07 | 0.069018 | 0.13642  | 0.096391 | 0.03732  | 0.087056 | 0.06013  | 0.120521 | 0.00913  |
| 1.14E-13 | 0.117081 | 0.01134  | -0.10459 | 0.0238   | 0.007675 | 0.86862  | 0.122724 | 0.00793  |
| 5.86E-06 | 0.13664  | 0.00309  | 0.042537 | 0.35905  | 0.284275 | 3.94E-10 | 0.209201 | 5.13E-06 |
| 0.82782  | 0.015527 | 0.73788  | -0.02353 | 0.61196  | -0.04555 | 0.326    | -0.04734 | 0.30733  |
| 0.985    | 0.029249 | 0.52836  | -0.0551  | 0.23469  | -0.0526  | 0.25657  | -0.02951 | 0.52471  |
| 5.18E-07 | 0.126303 | 0.00627  | -0.14187 | 0.00212  | -0.06843 | 0.13978  | -0.02743 | 0.55434  |
| 0.00996  | 0.126314 | 0.00627  | -0.01117 | 0.80968  | -0.01969 | 0.67125  | 0.008797 | 0.84962  |
| 0.75969  | 0.27202  | 2.29E-09 | -0.15313 | 0.0009   | -0.1021  | 0.02737  | 0.014068 | 0.76172  |
| 1.89E-11 | 0.059203 | 0.20157  | -0.01963 | 0.67225  | -0.0231  | 0.61849  | 0.036201 | 0.43512  |
| 0.38731  | 0.026068 | 0.57417  | -0.10312 | 0.02586  | -0.06401 | 0.16727  | -0.03719 | 0.42262  |
| 1.29E-13 | 0.091185 | 0.04891  | 0.182585 | 7.23E-05 | 0.328572 | 3.22E-13 | 0.220763 | 1.45E-06 |
| 0.00222  | 0.099095 | 0.03227  | -0.08288 | 0.07355  | -0.03005 | 0.51705  | 0.008494 | 0.85475  |
| 0.48249  | 0.026479 | 0.56814  | -0.04725 | 0.30827  | -0.02525 | 0.58626  | -0.01349 | 0.77121  |
| 0.00026  | 0.074749 | 0.10669  | 0.005471 | 0.90614  | -0.01342 | 0.77243  | -0.01303 | 0.77876  |
| 0.30057  | 0.024423 | 0.59857  | -0.15684 | 0.00067  | -0.12009 | 0.00939  | -0.04559 | 0.32554  |
| 0.62353  | 0.092942 | 0.0447   | 0.151864 | 0.00099  | 0.084484 | 0.06814  | 0.092445 | 0.04586  |
| 0.27767  | 0.065945 | 0.15479  | 0.016587 | 0.72071  | -0.04336 | 0.34979  | -0.02934 | 0.52708  |
| 0.05745  | 0.074851 | 0.10621  | 0.14057  | 0.00233  | 0.014845 | 0.749    | 0.026191 | 0.57237  |
| 6.93E-16 | 0.094157 | 0.04197  | -0.08243 | 0.07516  | -0.06059 | 0.19117  | -0.00972 | 0.83402  |
| 0.14994  | 0.055422 | 0.23193  | -0.06002 | 0.19543  | -0.01806 | 0.69707  | -0.00011 | 0.99805  |
| 4.95E-06 | 0.194102 | 2.40E-05 | 0.051568 | 0.26608  | 0.132985 | 0.00399  | 0.220295 | 1.53E-06 |
| 3.69E-11 | 0.107361 | 0.02031  | 0.024302 | 0.60039  | 0.115706 | 0.01234  | 0.150218 | 0.00113  |
| 1.30E-05 | 0.086517 | 0.06174  | -0.04702 | 0.31064  | -0.01127 | 0.8081   | 0.017759 | 0.70188  |
| 0.00347  | 0.064242 | 0.16575  | -0.1559  | 0.00072  | -0.10016 | 0.03045  | -0.04628 | 0.31831  |
| 0.11354  | 0.047573 | 0.30495  | -0.09108 | 0.04919  | -0.09139 | 0.0484   | -0.0908  | 0.04989  |
| 0.00036  | 0.116514 | 0.01174  | -0.00495 | 0.91496  | 0.005031 | 0.91366  | 0.078246 | 0.09122  |

|          |           |          |          |          |          |          |          |          |
|----------|-----------|----------|----------|----------|----------|----------|----------|----------|
| 0.00042  | 0.071804  | 0.12125  | -0.03237 | 0.48533  | -0.00979 | 0.83281  | -0.0091  | 0.84443  |
| 1.15E-10 | 0.149362  | 0.00121  | -0.09127 | 0.04871  | -0.02758 | 0.55219  | 0.030894 | 0.50541  |
| 4.02E-05 | 0.104053  | 0.02453  | 0.010472 | 0.82143  | 0.045769 | 0.32368  | 0.100539 | 0.02983  |
| 0.47491  | 0.069482  | 0.13379  | 0.073308 | 0.11363  | 0.057577 | 0.21426  | 0.052947 | 0.25348  |
| 0.19398  | 0.033871  | 0.46527  | 0.06829  | 0.14061  | 0.00913  | 0.84401  | 0.016648 | 0.71972  |
| 0.19501  | 0.008714  | 0.85102  | 0.085335 | 0.0654   | 0.022025 | 0.63497  | 0.027898 | 0.54759  |
| 0.00032  | 0.097622  | 0.03494  | 0.068631 | 0.13863  | 0.055776 | 0.22896  | 0.115017 | 0.01288  |
| 0.93364  | 0.05875   | 0.20505  | -0.09321 | 0.04409  | -0.05521 | 0.23375  | -0.02889 | 0.53337  |
| 1.19E-14 | 0.106276  | 0.02162  | 0.017244 | 0.71014  | -0.0088  | 0.84963  | 0.044835 | 0.33365  |
| 0.03788  | 0.056598  | 0.22217  | 0.011041 | 0.81191  | 0.003808 | 0.93459  | 0.010175 | 0.82641  |
| 0.00097  | 0.073383  | 0.11326  | -0.07464 | 0.10718  | -0.04313 | 0.35233  | -0.03922 | 0.39776  |
| 0.83669  | -0.02713  | 0.55873  | -0.04864 | 0.29422  | -0.06948 | 0.13383  | -0.10702 | 0.02071  |
| 0.65914  | 0.072167  | 0.11938  | -0.00217 | 0.96267  | -0.01865 | 0.68772  | 0.011635 | 0.802    |
| 0.00751  | 0.078256  | 0.09119  | -0.02934 | 0.52708  | 0.051967 | 0.26239  | -0.00409 | 0.92983  |
| 0.47525  | 0.033571  | 0.46923  | -0.15183 | 0.001    | -0.10348 | 0.02533  | -0.05486 | 0.23671  |
| 0.71067  | 0.00937   | 0.83995  | -0.07092 | 0.1259   | -0.12004 | 0.00942  | -0.1271  | 0.00595  |
| 0.2691   | -9.44E-05 | 0.99838  | -0.02244 | 0.6286   | -0.01706 | 0.71305  | -0.00818 | 0.86004  |
| 0.01754  | 0.044995  | 0.33193  | -0.07144 | 0.12318  | -0.07293 | 0.11552  | -0.00572 | 0.90197  |
| 0.00082  | 0.185147  | 5.69E-05 | 0.122244 | 0.00818  | 0.060682 | 0.19052  | 0.181491 | 8.00E-05 |
| 0.05353  | 0.081027  | 0.08026  | -0.05381 | 0.24586  | -0.0019  | 0.96736  | 0.023165 | 0.61755  |
| 1.19E-06 | 0.121779  | 0.00843  | 0.0005   | 0.99141  | -0.01265 | 0.78504  | 0.032739 | 0.48032  |
| 2.33E-05 | 0.039494  | 0.39448  | -0.08049 | 0.0823   | 0.041367 | 0.37243  | 0.079275 | 0.08703  |
| 0.93355  | -0.05025  | 0.27853  | -0.02529 | 0.58572  | -0.01869 | 0.68708  | -0.09429 | 0.04168  |
| 0.55385  | 0.126333  | 0.00626  | 0.152882 | 0.00092  | 0.257601 | 1.63E-08 | 0.325826 | 5.19E-13 |
| 4.90E-09 | -0.04337  | 0.34968  | -0.25964 | 1.24E-08 | -0.20214 | 1.07E-05 | -0.11842 | 0.01043  |
| 0.00335  | -0.00253  | 0.95648  | -0.02638 | 0.56961  | -0.07846 | 0.09035  | -0.01823 | 0.69443  |
| 0.0025   | -0.07217  | 0.11936  | 0.011745 | 0.80015  | -0.07493 | 0.10584  | -0.11244 | 0.01505  |
| 0.00083  | 0.141732  | 0.00214  | -0.02019 | 0.66339  | 0.069364 | 0.13446  | 0.202016 | 1.09E-05 |
| 0.92594  | 0.111611  | 0.01582  | -0.02426 | 0.60106  | -0.13797 | 0.00281  | 0.051953 | 0.26252  |
| 7.96E-06 | -0.11846  | 0.0104   | -0.0881  | 0.05712  | -0.14658 | 0.00149  | -0.18219 | 7.50E-05 |
| 0.00118  | 0.127106  | 0.00595  | -0.07325 | 0.11394  | 0.097923 | 0.03438  | 0.190266 | 3.50E-05 |
| 3.91E-21 | -0.07845  | 0.09039  | -0.11271 | 0.01481  | -0.15255 | 0.00094  | -0.13977 | 0.00247  |
| 0.00143  | 0.125982  | 0.00641  | 0.009157 | 0.84354  | 0.114971 | 0.01291  | 0.231329 | 4.32E-07 |
| 0.4327   | -0.11157  | 0.01586  | -0.125   | 0.00684  | -0.20318 | 9.63E-06 | -0.20309 | 9.72E-06 |
| 0.00309  | 0.022962  | 0.62064  | -0.03564 | 0.44224  | 0.049256 | 0.28813  | 0.045789 | 0.32346  |
| 2.22E-10 | 0.033875  | 0.46521  | -0.02334 | 0.61495  | -0.04238 | 0.36083  | 0.037114 | 0.42361  |
| 0.00616  | 0.111275  | 0.01614  | -0.10347 | 0.02535  | -0.04001 | 0.38831  | 0.097299 | 0.03555  |
| 1.04E-12 | 0.119964  | 0.00946  | -0.02086 | 0.65299  | 0.123425 | 0.00758  | 0.131796 | 0.00433  |
| 2.16E-13 | -0.02351  | 0.61226  | -0.05607 | 0.22648  | -0.06295 | 0.17445  | -0.03248 | 0.48383  |
| 3.50E-11 | 0.093203  | 0.0441   | 0.056521 | 0.2228   | 0.030165 | 0.51552  | 0.126309 | 0.00627  |
| 6.26E-19 | 0.095767  | 0.03857  | -0.06172 | 0.18303  | 0.168966 | 0.00024  | 0.178861 | 0.0001   |
| 3.20E-17 | -0.02576  | 0.57873  | -0.1259  | 0.00645  | -0.12401 | 0.00729  | -0.13158 | 0.0044   |
| 2.30E-05 | 0.080911  | 0.08069  | 0.008965 | 0.84679  | -0.09307 | 0.0444   | 0.039733 | 0.39163  |
| 0.00595  | -0.07262  | 0.11705  | -0.11584 | 0.01224  | -0.08641 | 0.06207  | -0.13997 | 0.00243  |
| 1.23E-07 | 0.157847  | 0.00062  | 0.041818 | 0.36723  | 0.161041 | 0.00048  | 0.267973 | 4.02E-09 |

|          |          |          |          |          |          |          |          |          |
|----------|----------|----------|----------|----------|----------|----------|----------|----------|
| 1.49E-08 | 0.10198  | 0.02755  | -0.20693 | 6.53E-06 | -0.1513  | 0.00104  | -0.05098 | 0.27159  |
| 0.06812  | 0.052269 | 0.25962  | -0.15865 | 0.00058  | -0.11084 | 0.01656  | 0.015557 | 0.73739  |
| 0.17163  | -0.07989 | 0.0846   | 0.191022 | 3.25E-05 | 0.108453 | 0.01906  | -0.00529 | 0.90921  |
| 0.90218  | -0.00959 | 0.83619  | -0.32253 | 9.12E-13 | -0.25906 | 1.34E-08 | -0.2169  | 2.23E-06 |
| 0.00029  | -0.0597  | 0.19782  | -0.15042 | 0.00111  | 0.0392   | 0.39801  | -0.04047 | 0.38287  |
| 2.28E-11 | 0.044054 | 0.34215  | -0.21629 | 2.39E-06 | -0.09578 | 0.03854  | 0.00063  | 0.98917  |
| 6.71E-06 | -0.01316 | 0.77663  | -0.15846 | 0.00059  | -0.06092 | 0.18875  | -0.04688 | 0.31201  |
| 0.01377  | -0.11722 | 0.01124  | 0.045573 | 0.32575  | -0.0196  | 0.67274  | -0.11352 | 0.01411  |
| 1.65E-07 | 0.043077 | 0.35298  | 0.197001 | 1.80E-05 | 0.052156 | 0.26066  | 0.052151 | 0.2607   |
| 4.97E-07 | 0.100413 | 0.03004  | -0.06585 | 0.15537  | 0.083907 | 0.07005  | 0.106334 | 0.02155  |
| 7.42E-13 | 0.03409  | 0.46239  | -0.2015  | 1.14E-05 | 0.062268 | 0.17917  | 0.02884  | 0.53414  |
| 6.67E-24 | -0.0077  | 0.86826  | -0.29122 | 1.40E-10 | -0.27393 | 1.75E-09 | -0.20503 | 7.96E-06 |
| 3.98E-06 | 0.115473 | 0.01252  | 0.237221 | 2.14E-07 | 0.096363 | 0.03737  | 0.045104 | 0.33076  |
| 0.85356  | 0.002732 | 0.95305  | 0.146782 | 0.00147  | -0.1565  | 0.00069  | -0.12268 | 0.00795  |
| 0.00101  | 0.023646 | 0.61027  | -0.18804 | 4.33E-05 | -0.11934 | 0.00984  | -0.08781 | 0.05793  |
| 0.00293  | -0.04689 | 0.31199  | -0.16851 | 0.00025  | -0.17155 | 0.0002   | -0.16208 | 0.00044  |
| 2.95E-05 | 0.173918 | 0.00016  | 0.00194  | 0.96665  | 0.098629 | 0.0331   | 0.289622 | 1.78E-10 |
| 0.00016  | -0.03407 | 0.46264  | 0.162061 | 0.00044  | -0.04448 | 0.33748  | -0.0899  | 0.05219  |
| 4.01E-12 | -0.03517 | 0.44834  | -0.23512 | 2.75E-07 | -0.10419 | 0.02435  | -0.1626  | 0.00042  |
| 1.48E-08 | -0.02379 | 0.60805  | -0.03286 | 0.47863  | 0.026412 | 0.56912  | -0.00855 | 0.8538   |
| 0.80458  | 0.122712 | 0.00794  | -0.08878 | 0.0552   | -0.11902 | 0.01004  | 0.060695 | 0.19043  |
| 0.93061  | -0.08586 | 0.06374  | 0.058658 | 0.20576  | -0.0855  | 0.06489  | -0.08723 | 0.05961  |
| 2.01E-22 | -0.05894 | 0.20362  | -0.15611 | 0.00071  | -0.03558 | 0.44302  | -0.1348  | 0.00352  |
| 1.04E-18 | 0.090212 | 0.05138  | -0.05141 | 0.26751  | 0.07771  | 0.09347  | 0.107356 | 0.02031  |
| 2.00E-11 | 0.077952 | 0.09245  | -0.12079 | 0.00898  | -0.0493  | 0.28773  | 0.060479 | 0.19201  |
| 7.13E-09 | 0.064582 | 0.16352  | -0.21229 | 3.69E-06 | -0.05858 | 0.20634  | 0.006285 | 0.89224  |
| 1.46E-09 | -0.04919 | 0.28876  | -0.23441 | 3.00E-07 | -0.15113 | 0.00105  | -0.17578 | 0.00013  |
| 2.68E-18 | -0.00307 | 0.94717  | -0.15871 | 0.00058  | -0.00896 | 0.84687  | -0.08503 | 0.06636  |
| 2.81E-18 | 0.013713 | 0.76756  | -0.21656 | 2.32E-06 | -0.08875 | 0.05529  | -0.07415 | 0.10954  |
| 3.04E-08 | 0.0338   | 0.4662   | -0.24351 | 9.89E-08 | -0.08739 | 0.05914  | -0.05353 | 0.24829  |
| 7.99E-08 | 0.132599 | 0.0041   | -0.0542  | 0.24244  | 0.118572 | 0.01033  | 0.216021 | 2.46E-06 |
| 0.72634  | 0.113826 | 0.01385  | -0.09029 | 0.05118  | -0.07042 | 0.12859  | 0.086703 | 0.06118  |
| 5.89E-22 | -0.02094 | 0.65175  | -0.2595  | 1.27E-08 | -0.09758 | 0.03503  | -0.18304 | 6.93E-05 |
| 4.13E-13 | -0.01157 | 0.8031   | -0.27181 | 2.36E-09 | -0.16214 | 0.00044  | -0.16024 | 0.00051  |
| 4.13E-19 | -0.03099 | 0.50407  | -0.23457 | 2.94E-07 | -0.08641 | 0.06207  | -0.13276 | 0.00405  |
| 0.35171  | 0.184511 | 6.04E-05 | -0.12504 | 0.00682  | 0.0537   | 0.24678  | 0.190633 | 3.37E-05 |
| 0.47609  | 0.123293 | 0.00764  | -0.12325 | 0.00767  | 0.038336 | 0.4085   | 0.200497 | 1.27E-05 |
| 0.01494  | -0.10925 | 0.01819  | -0.23645 | 2.35E-07 | -0.22123 | 1.38E-06 | -0.28117 | 6.21E-10 |
| 7.55E-09 | 0.060257 | 0.19365  | -0.17792 | 0.00011  | -0.05739 | 0.21574  | -0.00117 | 0.97983  |
| 5.51E-16 | -0.00423 | 0.92733  | -0.22961 | 5.28E-07 | -0.14295 | 0.00196  | -0.10708 | 0.02064  |
| 1.28E-06 | 0.031911 | 0.4915   | -0.27505 | 1.50E-09 | -0.09677 | 0.03656  | -0.04143 | 0.37169  |
| 6.96E-05 | 0.051904 | 0.26297  | -0.10099 | 0.0291   | -0.02792 | 0.5472   | 0.04068  | 0.38043  |
| 6.22E-18 | 0.007578 | 0.87026  | -0.18595 | 5.28E-05 | -0.01492 | 0.74784  | -0.05113 | 0.27017  |
| 3.53E-11 | -0.04232 | 0.36149  | -0.26887 | 3.55E-09 | -0.11156 | 0.01587  | -0.13336 | 0.00389  |
| 5.09E-22 | -0.14673 | 0.00147  | -0.28473 | 3.69E-10 | -0.2219  | 1.28E-06 | -0.36972 | 1.42E-16 |



|          |          |         |          |          |          |          |          |          |
|----------|----------|---------|----------|----------|----------|----------|----------|----------|
| 1.23E-22 | -0.03784 | 0.41461 | -0.28094 | 6.42E-10 | -0.17307 | 0.00017  | -0.21158 | 3.98E-06 |
| 1.26E-21 | -0.00409 | 0.9297  | -0.06842 | 0.13988  | -0.03558 | 0.44304  | -0.0444  | 0.33834  |
| 4.62E-05 | 0.068648 | 0.13854 | -0.20436 | 8.53E-06 | -0.10725 | 0.02044  | -0.0004  | 0.99307  |
| 0.0008   | 0.051015 | 0.27125 | -0.21252 | 3.60E-06 | -0.08461 | 0.06772  | -0.00183 | 0.96856  |
| 5.25E-10 | 0.029567 | 0.52388 | -0.27061 | 2.79E-09 | -0.09206 | 0.04678  | -0.0715  | 0.12282  |
| 1.12E-05 | 0.03731  | 0.42117 | -0.20816 | 5.73E-06 | -0.02036 | 0.66075  | 0.009363 | 0.84007  |
| 5.74E-17 | -0.0347  | 0.45442 | -0.28107 | 6.30E-10 | -0.11981 | 0.00956  | -0.17189 | 0.00019  |
| 1.72E-05 | 0.046817 | 0.3127  | -0.337   | 7.26E-14 | -0.16772 | 0.00027  | -0.08402 | 0.06967  |
| 5.23E-23 | -0.05268 | 0.25591 | -0.30146 | 2.88E-11 | -0.16719 | 0.00028  | -0.2435  | 9.91E-08 |
| 0.06868  | 0.018553 | 0.68923 | -0.27329 | 1.92E-09 | -0.13052 | 0.00473  | -0.0873  | 0.05941  |
| 0.13241  | 0.044684 | 0.33529 | -0.12316 | 0.00771  | -0.00167 | 0.97133  | 0.056759 | 0.22085  |
| 9.11E-19 | 0.056006 | 0.22704 | -0.15575 | 0.00073  | 0.054309 | 0.24146  | 0.005463 | 0.90627  |
| 4.41E-11 | -0.00416 | 0.92856 | -0.29618 | 6.56E-11 | -0.17618 | 0.00013  | -0.15176 | 0.001    |
| 2.14E-09 | 0.024476 | 0.59778 | -0.24446 | 8.79E-08 | -0.19371 | 2.50E-05 | -0.1208  | 0.00897  |
| 3.36E-10 | 0.011083 | 0.8112  | -0.28374 | 4.27E-10 | -0.12932 | 0.00513  | -0.12429 | 0.00716  |
| 0.81017  | 0.018755 | 0.68603 | -0.15791 | 0.00062  | -0.03159 | 0.49587  | 0.026181 | 0.57251  |
| 4.65E-08 | 0.05089  | 0.27242 | -0.14062 | 0.00232  | -0.03074 | 0.50753  | 0.031975 | 0.49062  |
| 3.10E-07 | 0.036501 | 0.43131 | -0.16719 | 0.00028  | -0.08117 | 0.07971  | -0.00485 | 0.91675  |
| 2.34E-06 | 0.136949 | 0.00302 | -0.11    | 0.01741  | -0.00784 | 0.86583  | 0.161202 | 0.00047  |
| 1.85E-05 | 0.034225 | 0.46061 | -0.20688 | 6.55E-06 | -0.10066 | 0.02964  | -0.0072  | 0.87671  |
| 0.02634  | 0.060013 | 0.19546 | -0.17888 | 0.0001   | -0.19073 | 3.34E-05 | -0.01582 | 0.73311  |
| 9.50E-20 | -0.00758 | 0.87025 | -0.13556 | 0.00333  | -0.09412 | 0.04206  | -0.10039 | 0.03007  |
| 0.03318  | 0.105734 | 0.0223  | -0.17964 | 9.49E-05 | 0.025779 | 0.57843  | 0.10469  | 0.02367  |
| 2.20E-21 | -0.07355 | 0.11243 | -0.19666 | 1.87E-05 | -0.22309 | 1.12E-06 | -0.25747 | 1.66E-08 |
| 4.78E-33 | -0.04351 | 0.34815 | -0.18968 | 3.70E-05 | -0.05997 | 0.19577  | -0.15894 | 0.00057  |
| 1.14E-27 | -0.04887 | 0.29194 | -0.29312 | 1.05E-10 | -0.15691 | 0.00067  | -0.2264  | 7.66E-07 |
| 1.94E-07 | -0.02115 | 0.64848 | -0.3378  | 6.29E-14 | -0.15687 | 0.00067  | -0.14198 | 0.0021   |
| 2.22E-20 | -0.036   | 0.43772 | -0.21143 | 4.05E-06 | -0.08219 | 0.07601  | -0.12728 | 0.00588  |
| 1.44E-07 | 0.055185 | 0.23394 | -0.20193 | 1.10E-05 | -0.11124 | 0.01617  | -0.01601 | 0.73009  |
| 2.91E-10 | 0.062887 | 0.17488 | -0.18187 | 7.73E-05 | -0.00529 | 0.90918  | 0.051737 | 0.26451  |
| 6.70E-25 | -0.04096 | 0.37714 | -0.21132 | 4.09E-06 | -0.10416 | 0.02438  | -0.12124 | 0.00872  |
| 0.00394  | 0.050527 | 0.27586 | -0.16708 | 0.00029  | -0.04332 | 0.35026  | 0.051725 | 0.26462  |
| 9.18E-07 | 0.042086 | 0.36417 | -0.2433  | 1.02E-07 | -0.10553 | 0.02256  | -0.05371 | 0.2467   |
| 3.54E-15 | -0.03475 | 0.45373 | -0.26599 | 5.28E-09 | -0.17929 | 9.79E-05 | -0.15667 | 0.00068  |
| 1.75E-14 | -0.08574 | 0.06414 | -0.3708  | 1.14E-16 | -0.23171 | 4.13E-07 | -0.27075 | 2.74E-09 |
| 9.79E-23 | -0.11449 | 0.0133  | -0.20188 | 1.10E-05 | -0.26854 | 3.72E-09 | -0.3568  | 1.82E-15 |
| 0.01969  | 0.057472 | 0.21509 | -0.27368 | 1.81E-09 | -0.12744 | 0.00582  | -0.05773 | 0.21301  |
| 1.00E-06 | 0.09459  | 0.04103 | -0.09152 | 0.04809  | 0.033285 | 0.47302  | 0.162716 | 0.00041  |
| 0.0007   | 0.012    | 0.79591 | -0.25186 | 3.44E-08 | -0.13785 | 0.00283  | -0.08032 | 0.08294  |
| 0.00943  | 0.094904 | 0.04036 | -0.16898 | 0.00024  | -0.02191 | 0.63667  | 0.081677 | 0.07786  |
| 1.13E-12 | -0.1583  | 0.0006  | -0.3204  | 1.31E-12 | -0.19542 | 2.11E-05 | -0.31197 | 5.33E-12 |
| 0.04907  | 0.125534 | 0.0066  | -0.22216 | 1.24E-06 | -0.03318 | 0.47446  | 0.056673 | 0.22155  |
| 1.94E-06 | 0.111301 | 0.01612 | -0.25462 | 2.41E-08 | -0.07358 | 0.1123   | 0.029554 | 0.52406  |
| 1.98E-22 | -0.07256 | 0.11739 | -0.17908 | 9.98E-05 | -0.10113 | 0.02887  | -0.22354 | 1.06E-06 |
| 6.02E-07 | -0.00145 | 0.97516 | -0.26047 | 1.11E-08 | -0.1485  | 0.00129  | -0.09643 | 0.03724  |

|          |          |          |          |          |          |          |          |          |
|----------|----------|----------|----------|----------|----------|----------|----------|----------|
| 2.44E-20 | 0.036103 | 0.43636  | -0.24398 | 9.34E-08 | -0.1544  | 0.00081  | -0.11455 | 0.01325  |
| 0.08637  | 0.114943 | 0.01294  | -0.07548 | 0.10327  | 0.03299  | 0.47696  | 0.180734 | 8.58E-05 |
| 1.21E-14 | 0.04506  | 0.33123  | -0.08133 | 0.07913  | -0.01323 | 0.7755   | 0.021032 | 0.65031  |
| 7.13E-22 | 0.014557 | 0.7537   | -0.19239 | 2.84E-05 | -0.12393 | 0.00733  | -0.10791 | 0.01968  |
| 3.09E-12 | 0.023005 | 0.61998  | -0.17622 | 0.00013  | -0.06695 | 0.14856  | -0.02435 | 0.59964  |
| 0.00774  | 0.007443 | 0.87255  | -0.26541 | 5.71E-09 | -0.19811 | 1.61E-05 | -0.12286 | 0.00786  |
| 8.48E-13 | 0.088458 | 0.0561   | -0.24523 | 7.99E-08 | -0.06873 | 0.13808  | 0.007638 | 0.86925  |
| 7.74E-31 | -0.02055 | 0.65778  | -0.25436 | 2.49E-08 | -0.07913 | 0.08763  | -0.13632 | 0.00316  |
| 2.52E-11 | -0.05263 | 0.25634  | -0.32226 | 9.56E-13 | -0.22732 | 6.89E-07 | -0.26786 | 4.08E-09 |
| 3.29E-06 | -0.00627 | 0.89255  | -0.16428 | 0.00036  | -0.1228  | 0.00789  | -0.10225 | 0.02714  |
| 0.84344  | -0.17491 | 0.00015  | -0.07922 | 0.08726  | -0.20334 | 9.48E-06 | -0.30684 | 1.23E-11 |
| 7.74E-08 | -0.16089 | 0.00048  | 0.005683 | 0.90252  | -0.0573  | 0.21647  | -0.24146 | 1.28E-07 |
| 9.76E-07 | 0.022179 | 0.6326   | 0.054694 | 0.23814  | 0.080213 | 0.08335  | 0.15585  | 0.00073  |
| 2.22E-08 | 0.042612 | 0.3582   | -0.06839 | 0.14     | -0.00885 | 0.84874  | 0.034793 | 0.4532   |
| 6.34E-05 | 0.125233 | 0.00673  | -0.02219 | 0.63246  | 0.077099 | 0.09609  | 0.186147 | 5.18E-05 |
| 7.11E-05 | -0.22834 | 6.13E-07 | 0.144239 | 0.00178  | -0.10968 | 0.01774  | -0.23989 | 1.55E-07 |
| 1.05E-10 | 0.147993 | 0.00134  | -0.15513 | 0.00077  | 0.12091  | 0.00891  | 0.178053 | 0.00011  |
| 0.00759  | 0.044274 | 0.33974  | 0.036418 | 0.43237  | 0.184438 | 6.08E-05 | 0.148051 | 0.00133  |
| 3.92E-22 | -0.05452 | 0.23967  | -0.29311 | 1.05E-10 | -0.21503 | 2.74E-06 | -0.2784  | 9.27E-10 |
| 3.54E-06 | 0.027018 | 0.5603   | -0.25588 | 2.04E-08 | -0.10219 | 0.02723  | -0.14125 | 0.00222  |
| 0.27413  | 0.000701 | 0.98795  | -0.15825 | 0.0006   | 0.00137  | 0.97644  | -0.03263 | 0.48184  |
| 2.42E-05 | -0.02754 | 0.55271  | -0.11099 | 0.01641  | -0.03064 | 0.5089   | -0.09874 | 0.03289  |
| 5.76E-07 | 0.075248 | 0.10436  | -0.04797 | 0.30097  | 0.09563  | 0.03885  | 0.155577 | 0.00074  |
| 8.05E-22 | -0.07765 | 0.09373  | -0.24711 | 6.31E-08 | -0.27149 | 2.47E-09 | -0.277   | 1.13E-09 |
| 0.00755  | 0.028114 | 0.54449  | -0.17016 | 0.00022  | -0.06724 | 0.14686  | 0.030578 | 0.50979  |
| 9.43E-07 | -0.10628 | 0.02161  | -0.33088 | 2.15E-13 | -0.32229 | 9.52E-13 | -0.34435 | 1.90E-14 |
| 5.08E-05 | -0.15391 | 0.00085  | -0.27563 | 1.38E-09 | -0.29404 | 9.11E-11 | -0.40433 | 8.55E-20 |
| 4.67E-12 | -0.23544 | 2.65E-07 | -0.35283 | 3.89E-15 | -0.37437 | 5.52E-17 | -0.51505 | 5.33E-33 |
| 5.22E-18 | -0.06622 | 0.15307  | -0.09062 | 0.05035  | -0.10248 | 0.0268   | -0.1448  | 0.00171  |
| 0.70855  | -0.17768 | 0.00011  | -0.20132 | 1.17E-05 | -0.36499 | 3.66E-16 | -0.33513 | 1.01E-13 |
| 7.18E-14 | -0.26723 | 4.45E-09 | -0.32999 | 2.52E-13 | -0.44948 | 1.33E-24 | -0.58453 | 3.86E-44 |
| 3.20E-11 | -0.26454 | 6.43E-09 | -0.26834 | 3.82E-09 | -0.43004 | 1.92E-22 | -0.51202 | 1.44E-32 |
| 6.01E-09 | -0.04406 | 0.34209  | -0.21694 | 2.22E-06 | -0.24795 | 5.67E-08 | -0.23195 | 4.01E-07 |
| 3.47E-08 | 0.223287 | 1.09E-06 | 0.277329 | 1.08E-09 | 0.33452  | 1.13E-13 | 0.42084  | 1.81E-21 |
| 7.62E-12 | -0.225   | 9.00E-07 | -0.27647 | 1.22E-09 | -0.34771 | 1.02E-14 | -0.46379 | 2.77E-26 |
| 1.23E-11 | -0.23601 | 2.48E-07 | -0.22653 | 7.55E-07 | -0.2934  | 1.00E-10 | -0.43462 | 6.11E-23 |
| 2.65E-05 | -0.11929 | 0.00987  | -0.15796 | 0.00061  | -0.2832  | 4.62E-10 | -0.31676 | 2.41E-12 |
| 5.97E-15 | -0.18183 | 7.76E-05 | -0.36174 | 6.95E-16 | -0.40585 | 6.05E-20 | -0.44621 | 3.14E-24 |
| 4.76E-07 | -0.08326 | 0.07226  | -0.24734 | 6.12E-08 | -0.24934 | 4.75E-08 | -0.25085 | 3.92E-08 |
| 4.58E-09 | -0.25682 | 1.81E-08 | -0.23045 | 4.79E-07 | -0.2694  | 3.30E-09 | -0.414   | 9.18E-21 |
| 5.83E-16 | -0.11747 | 0.01107  | -0.20461 | 8.31E-06 | -0.19943 | 1.41E-05 | -0.25418 | 2.55E-08 |
| 5.07E-06 | -0.2381  | 1.92E-07 | -0.37301 | 7.29E-17 | -0.4769  | 6.78E-28 | -0.60527 | 5.19E-48 |
| 0.00071  | -0.16288 | 0.00041  | -0.34452 | 1.84E-14 | -0.35512 | 2.51E-15 | -0.41604 | 5.67E-21 |
| 7.20E-06 | -0.10486 | 0.02344  | -0.25238 | 3.22E-08 | -0.32148 | 1.09E-12 | -0.32924 | 2.87E-13 |
| 3.27E-15 | -0.21994 | 1.59E-06 | -0.12573 | 0.00652  | -0.2012  | 1.18E-05 | -0.35679 | 1.82E-15 |

|          |          |          |          |          |          |          |          |          |
|----------|----------|----------|----------|----------|----------|----------|----------|----------|
| 8.58E-20 | -0.24694 | 6.44E-08 | -0.3396  | 4.54E-14 | -0.38708 | 3.84E-18 | -0.55077 | 2.12E-38 |
| 0.22679  | 0.181041 | 8.34E-05 | -0.07849 | 0.09022  | 0.057303 | 0.21645  | 0.087344 | 0.05929  |
| 0.00011  | -0.0277  | 0.5504   | -0.1223  | 0.00815  | -0.22544 | 8.56E-07 | -0.1665  | 0.0003   |
| 9.59E-11 | -0.30411 | 1.89E-11 | -0.33667 | 7.70E-14 | -0.39789 | 3.63E-19 | -0.56854 | 2.44E-41 |
| 0.00489  | -0.00567 | 0.90277  | -0.21534 | 2.65E-06 | -0.09887 | 0.03267  | -0.10918 | 0.01827  |
| 5.53E-17 | -0.10579 | 0.02223  | -0.20434 | 8.55E-06 | -0.27696 | 1.14E-09 | -0.32293 | 8.52E-13 |
| 7.76E-14 | -0.13353 | 0.00384  | -0.14115 | 0.00223  | -0.15089 | 0.00107  | -0.25406 | 2.59E-08 |
| 0.38108  | -0.06509 | 0.16021  | -0.3398  | 4.38E-14 | -0.24499 | 8.23E-08 | -0.23527 | 2.70E-07 |
| 1.25E-11 | -0.13539 | 0.00337  | -0.15054 | 0.0011   | -0.24936 | 4.74E-08 | -0.35414 | 3.03E-15 |
| 3.05E-10 | -0.11997 | 0.00946  | -0.24833 | 5.40E-08 | -0.26033 | 1.13E-08 | -0.29902 | 4.22E-11 |
| 2.35E-15 | -0.22001 | 1.58E-06 | -0.3104  | 6.88E-12 | -0.3775  | 2.90E-17 | -0.52038 | 9.14E-34 |
| 3.77E-12 | -0.07786 | 0.09286  | -0.16297 | 0.00041  | -0.23483 | 2.85E-07 | -0.22909 | 5.62E-07 |
| 1.44E-09 | -0.04231 | 0.36167  | -0.23859 | 1.81E-07 | -0.22652 | 7.56E-07 | -0.18651 | 5.00E-05 |
| 9.05E-17 | -0.22678 | 7.34E-07 | -0.27377 | 1.79E-09 | -0.32005 | 1.39E-12 | -0.4443  | 5.16E-24 |
| 1.72E-06 | -0.06068 | 0.19056  | -0.02105 | 0.65008  | -0.14747 | 0.00139  | -0.18723 | 4.67E-05 |
| 2.07E-06 | -0.11078 | 0.01662  | -0.0761  | 0.10046  | -0.16064 | 0.00049  | -0.19248 | 2.82E-05 |
| 0.11446  | -0.14314 | 0.00193  | -0.20502 | 7.97E-06 | -0.32575 | 5.26E-13 | -0.3273  | 4.02E-13 |
| 3.18E-10 | -0.21756 | 2.08E-06 | -0.21486 | 2.79E-06 | -0.359   | 1.19E-15 | -0.39391 | 8.76E-19 |
| 0.01129  | -0.02966 | 0.52263  | -0.10658 | 0.02124  | -0.17878 | 0.0001   | -0.14495 | 0.00169  |
| 6.10E-23 | -0.01828 | 0.69357  | -0.14786 | 0.00135  | -0.0492  | 0.28865  | -0.06795 | 0.14259  |
| 2.53E-11 | -0.22234 | 1.22E-06 | -0.15173 | 0.001    | -0.02509 | 0.58861  | -0.22106 | 1.41E-06 |
| 5.40E-16 | -0.14026 | 0.00238  | -0.20557 | 7.52E-06 | -0.41303 | 1.15E-20 | -0.39026 | 1.94E-18 |
| 3.13E-12 | -0.27851 | 9.12E-10 | -0.37915 | 2.05E-17 | -0.51968 | 1.16E-33 | -0.62123 | 3.43E-51 |
| 0.29168  | -0.22581 | 8.20E-07 | -0.17895 | 0.0001   | -0.35528 | 2.44E-15 | -0.43376 | 7.60E-23 |
| 5.06E-09 | -0.12726 | 0.00589  | -0.12583 | 0.00647  | -0.28522 | 3.43E-10 | -0.25972 | 1.23E-08 |
| 1.05E-06 | -0.12262 | 0.00798  | -0.24418 | 9.11E-08 | -0.16688 | 0.00029  | -0.28206 | 5.45E-10 |
| 0.69101  | -0.04472 | 0.33493  | -0.19191 | 2.98E-05 | -0.3257  | 5.31E-13 | -0.21867 | 1.84E-06 |
| 2.22E-13 | -0.09305 | 0.04446  | -0.36199 | 6.62E-16 | -0.28884 | 2.00E-10 | -0.3222  | 9.66E-13 |
| 0.00105  | -0.13856 | 0.00269  | -0.19304 | 2.67E-05 | -0.30617 | 1.36E-11 | -0.37007 | 1.32E-16 |
| 5.41E-25 | -0.20796 | 5.85E-06 | -0.27124 | 2.55E-09 | -0.38499 | 6.01E-18 | -0.46437 | 2.36E-26 |
| 1.16E-15 | -0.11371 | 0.01395  | -0.32989 | 2.56E-13 | -0.45797 | 1.37E-25 | -0.42651 | 4.57E-22 |
| 2.51E-07 | -0.23251 | 3.76E-07 | -0.45404 | 3.95E-25 | -0.47701 | 6.58E-28 | -0.57076 | 1.02E-41 |
| 3.90E-08 | -0.1136  | 0.01403  | -0.37496 | 4.90E-17 | -0.35996 | 9.85E-16 | -0.41512 | 7.05E-21 |
| 3.23E-26 | -0.10478 | 0.02355  | -0.24875 | 5.13E-08 | -0.33323 | 1.42E-13 | -0.32315 | 8.21E-13 |
| 1.00E-12 | -0.15583 | 0.00073  | -0.22912 | 5.59E-07 | -0.31188 | 5.41E-12 | -0.31123 | 6.01E-12 |
| 1.22E-08 | -0.21285 | 3.47E-06 | -0.343   | 2.44E-14 | -0.42219 | 1.31E-21 | -0.52134 | 6.64E-34 |
| 8.81E-13 | -0.23793 | 1.96E-07 | -0.23506 | 2.77E-07 | -0.42529 | 6.16E-22 | -0.54667 | 9.52E-38 |
| 0.00361  | -0.02321 | 0.61691  | -0.30543 | 1.53E-11 | -0.21006 | 4.68E-06 | -0.17434 | 0.00015  |
| 0.00029  | -0.3393  | 4.79E-14 | -0.3368  | 7.52E-14 | -0.44879 | 1.60E-24 | -0.59326 | 9.79E-46 |
| 1.93E-11 | -0.05193 | 0.26273  | -0.19927 | 1.44E-05 | -0.17796 | 0.00011  | -0.12141 | 0.00863  |
| 4.74E-06 | -0.16308 | 0.0004   | -0.17449 | 0.00015  | -0.37334 | 6.82E-17 | -0.3487  | 8.47E-15 |
| 7.65E-22 | -0.05505 | 0.23506  | -0.1104  | 0.017    | -0.15857 | 0.00058  | -0.24183 | 1.22E-07 |
| 9.69E-23 | -0.16029 | 0.00051  | -0.25454 | 2.43E-08 | -0.23527 | 2.71E-07 | -0.35863 | 1.28E-15 |
| 0.01101  | -0.14277 | 0.00198  | -0.23309 | 3.51E-07 | -0.30794 | 1.03E-11 | -0.32881 | 3.09E-13 |
| 0.06039  | -0.21142 | 4.05E-06 | -0.23699 | 2.20E-07 | -0.48883 | 2.01E-29 | -0.52115 | 7.09E-34 |

|          |          |          |          |          |          |          |          |          |
|----------|----------|----------|----------|----------|----------|----------|----------|----------|
| 1.07E-07 | -0.17324 | 0.00017  | -0.28485 | 3.62E-10 | -0.38649 | 4.36E-18 | -0.49157 | 8.80E-30 |
| 0.01657  | -0.11327 | 0.01432  | -0.25452 | 2.44E-08 | -0.16977 | 0.00023  | -0.17555 | 0.00014  |
| 1.02E-16 | -0.32999 | 2.51E-13 | -0.21081 | 4.32E-06 | -0.42691 | 4.15E-22 | -0.62595 | 3.61E-52 |
| 2.97E-06 | 0.069715 | 0.13249  | -0.27773 | 1.02E-09 | -0.24896 | 4.99E-08 | -0.14082 | 0.00229  |
| 2.70E-06 | -0.18185 | 7.74E-05 | -0.37271 | 7.75E-17 | -0.47119 | 3.48E-27 | -0.51368 | 8.37E-33 |
| 1.92E-10 | -0.25298 | 2.98E-08 | -0.18137 | 8.09E-05 | -0.26274 | 8.20E-09 | -0.39747 | 3.99E-19 |
| 9.96E-05 | 0.0685   | 0.13939  | -0.0962  | 0.03769  | -0.1464  | 0.00151  | -0.06918 | 0.13551  |
| 0.42499  | -0.01985 | 0.66868  | -0.11911 | 0.00999  | -0.18997 | 3.60E-05 | -0.14495 | 0.00169  |
| 0.06692  | -0.00905 | 0.84533  | -0.05521 | 0.23376  | -0.18831 | 4.22E-05 | -0.13519 | 0.00342  |
| 0.52641  | 0.052494 | 0.25757  | -0.13864 | 0.00268  | -0.12235 | 0.00812  | -0.03198 | 0.4905   |
| 3.16E-13 | -0.35875 | 1.25E-15 | -0.29805 | 4.91E-11 | -0.44046 | 1.39E-23 | -0.64332 | 6.59E-56 |
| 1.16E-09 | -0.09285 | 0.04492  | -0.11378 | 0.01389  | -0.30614 | 1.37E-11 | -0.31695 | 2.34E-12 |
| 1.48E-12 | -0.23316 | 3.48E-07 | -0.16726 | 0.00028  | -0.33928 | 4.81E-14 | -0.45845 | 1.20E-25 |
| 2.63E-26 | -0.09343 | 0.04359  | -0.20651 | 6.82E-06 | -0.11733 | 0.01117  | -0.22512 | 8.87E-07 |
| 0.66586  | -0.19008 | 3.56E-05 | -0.17734 | 0.00012  | -0.39171 | 1.42E-18 | -0.44289 | 7.43E-24 |
| 9.63E-05 | -0.11687 | 0.01149  | -0.09208 | 0.04673  | -0.2064  | 6.89E-06 | -0.25911 | 1.33E-08 |
| 0.12161  | 0.034809 | 0.45299  | -0.04919 | 0.28882  | -0.10814 | 0.01942  | -0.01598 | 0.73054  |
| 0.07909  | 0.144359 | 0.00176  | -0.02173 | 0.63948  | -0.00763 | 0.86936  | 0.142551 | 0.00201  |
| 0.5443   | 0.053481 | 0.24872  | -0.07081 | 0.1265   | -0.15628 | 0.0007   | 0.004782 | 0.9179   |
| 0.56616  | -0.07114 | 0.12474  | -0.14687 | 0.00146  | -0.25079 | 3.95E-08 | -0.17439 | 0.00015  |
| 2.22E-15 | -0.12545 | 0.00664  | -0.22417 | 9.89E-07 | -0.20385 | 8.99E-06 | -0.29862 | 4.49E-11 |
| 1.50E-16 | -0.20632 | 6.95E-06 | -0.16478 | 0.00035  | -0.11989 | 0.00951  | -0.27784 | 1.00E-09 |
| 5.78E-24 | -0.2327  | 3.67E-07 | -0.24337 | 1.01E-07 | -0.31292 | 4.56E-12 | -0.49588 | 2.36E-30 |
| 4.39E-12 | -0.20464 | 8.28E-06 | -0.21303 | 3.41E-06 | -0.24598 | 7.27E-08 | -0.3106  | 6.67E-12 |
| 8.65E-18 | -0.25723 | 1.71E-08 | -0.28855 | 2.09E-10 | -0.35311 | 3.69E-15 | -0.57221 | 5.74E-42 |
| 3.98E-11 | -0.20186 | 1.10E-05 | -0.1955  | 2.09E-05 | -0.3243  | 6.74E-13 | -0.37961 | 1.87E-17 |
| 7.48E-09 | -0.21669 | 2.29E-06 | -0.06518 | 0.15964  | -0.17356 | 0.00016  | -0.33852 | 5.52E-14 |
| 0.00195  | -0.14969 | 0.00118  | -0.10158 | 0.02816  | -0.19178 | 3.02E-05 | -0.2961  | 6.64E-11 |
| 5.78E-17 | -0.28327 | 4.57E-10 | -0.3258  | 5.21E-13 | -0.36921 | 1.58E-16 | -0.53384 | 9.25E-36 |
| 5.49E-19 | -0.21204 | 3.79E-06 | -0.23008 | 5.00E-07 | -0.31441 | 3.57E-12 | -0.44435 | 5.09E-24 |
| 1.54E-15 | -0.14572 | 0.00159  | -0.09229 | 0.04623  | -0.2348  | 2.86E-07 | -0.27207 | 2.27E-09 |
| 8.39E-11 | -0.12086 | 0.00894  | -0.0997  | 0.03123  | -0.21292 | 3.45E-06 | -0.27094 | 2.67E-09 |
| 1.76E-06 | -0.24914 | 4.88E-08 | -0.34232 | 2.77E-14 | -0.413   | 1.16E-20 | -0.53173 | 1.93E-35 |
| 4.89E-06 | -0.17665 | 0.00012  | -0.11995 | 0.00947  | -0.14482 | 0.0017   | -0.39221 | 1.27E-18 |
| 4.17E-09 | -0.1873  | 4.64E-05 | -0.08989 | 0.05224  | -0.2178  | 2.02E-06 | -0.31622 | 2.64E-12 |
| 3.57E-09 | -0.15644 | 0.00069  | -0.30276 | 2.35E-11 | -0.43783 | 2.72E-23 | -0.46899 | 6.49E-27 |
| 7.53E-12 | -0.11514 | 0.01278  | -0.22334 | 1.09E-06 | -0.15737 | 0.00064  | -0.28508 | 3.50E-10 |
| 1.49E-15 | -0.11157 | 0.01586  | -0.11118 | 0.01623  | -0.06288 | 0.1749   | -0.19988 | 1.35E-05 |
| 8.88E-15 | -0.10438 | 0.02408  | -0.20398 | 8.87E-06 | -0.176   | 0.00013  | -0.24641 | 6.89E-08 |
| 1.71E-06 | -0.33896 | 5.10E-14 | -0.34075 | 3.68E-14 | -0.51098 | 2.01E-32 | -0.68296 | 2.01E-65 |
| 1.34E-11 | -0.16782 | 0.00027  | -0.21692 | 2.23E-06 | -0.34916 | 7.78E-15 | -0.35995 | 9.87E-16 |
| 3.09E-33 | -0.30436 | 1.82E-11 | -0.10185 | 0.02775  | -0.2613  | 9.96E-09 | -0.42922 | 2.35E-22 |
| 2.85E-08 | -0.21806 | 1.97E-06 | -0.38789 | 3.23E-18 | -0.26307 | 7.85E-09 | -0.40316 | 1.11E-19 |
| 0.00032  | -0.19422 | 2.38E-05 | -0.29724 | 5.57E-11 | -0.40903 | 2.91E-20 | -0.46026 | 7.32E-26 |
| 1.44E-12 | -0.17252 | 0.00018  | -0.33614 | 8.47E-14 | -0.29816 | 4.83E-11 | -0.46959 | 5.47E-27 |

|          |          |          |          |          |          |          |          |          |
|----------|----------|----------|----------|----------|----------|----------|----------|----------|
| 1.27E-20 | -0.17934 | 9.75E-05 | -0.39951 | 2.53E-19 | -0.39107 | 1.63E-18 | -0.52119 | 6.99E-34 |
| 1.90E-06 | 0.024629 | 0.5955   | -0.26484 | 6.17E-09 | -0.18237 | 7.38E-05 | -0.17864 | 0.0001   |
| 2.67E-17 | -0.08966 | 0.05283  | -0.37517 | 4.69E-17 | -0.29748 | 5.37E-11 | -0.41648 | 5.11E-21 |
| 2.71E-08 | -0.2727  | 2.08E-09 | -0.30791 | 1.03E-11 | -0.41606 | 5.65E-21 | -0.54125 | 6.76E-37 |
| 0.03654  | -0.10267 | 0.02651  | -0.24467 | 8.57E-08 | -0.30909 | 8.52E-12 | -0.35295 | 3.80E-15 |
| 5.73E-18 | -0.18744 | 4.58E-05 | -0.38359 | 8.10E-18 | -0.27472 | 1.57E-09 | -0.40205 | 1.43E-19 |
| 2.18E-11 | -0.2949  | 7.99E-11 | -0.34428 | 1.93E-14 | -0.36432 | 4.18E-16 | -0.59188 | 1.77E-45 |
| 2.45E-09 | -0.17407 | 0.00016  | -0.23932 | 1.66E-07 | -0.34914 | 7.80E-15 | -0.477   | 6.58E-28 |
| 4.42E-14 | -0.19348 | 2.56E-05 | -0.31363 | 4.06E-12 | -0.36331 | 5.11E-16 | -0.49526 | 2.86E-30 |
| 9.29E-08 | -0.12089 | 0.00892  | -0.31226 | 5.08E-12 | -0.40386 | 9.52E-20 | -0.35386 | 3.20E-15 |
| 1.64E-17 | -0.02481 | 0.59276  | -0.1158  | 0.01228  | -0.06674 | 0.14986  | -0.11981 | 0.00956  |
| 4.58E-21 | -0.25888 | 1.37E-08 | -0.31334 | 4.25E-12 | -0.39992 | 2.31E-19 | -0.50391 | 1.92E-31 |
| 8.07E-16 | -0.13386 | 0.00375  | -0.17847 | 0.00011  | -0.09517 | 0.0398   | -0.22729 | 6.91E-07 |
| 0.00053  | -0.1654  | 0.00033  | -0.25472 | 2.38E-08 | -0.36595 | 3.03E-16 | -0.41219 | 1.40E-20 |
| 2.45E-18 | -0.13625 | 0.00318  | -0.23758 | 2.05E-07 | -0.20803 | 5.81E-06 | -0.343   | 2.44E-14 |
| 6.11E-21 | -0.26323 | 7.68E-09 | -0.26235 | 8.65E-09 | -0.25469 | 2.39E-08 | -0.43628 | 4.03E-23 |
| 6.58E-18 | -0.16592 | 0.00032  | -0.23209 | 3.95E-07 | -0.29685 | 5.91E-11 | -0.39696 | 4.47E-19 |
| 1.01E-15 | -0.20172 | 1.12E-05 | -0.21127 | 4.12E-06 | -0.16592 | 0.00032  | -0.36264 | 5.83E-16 |
| 6.93E-11 | -0.35576 | 2.22E-15 | -0.29264 | 1.13E-10 | -0.47529 | 1.08E-27 | -0.61342 | 1.30E-49 |
| 1.53E-18 | -0.25671 | 1.83E-08 | -0.12445 | 0.00709  | -0.16914 | 0.00024  | -0.40931 | 2.73E-20 |
| 2.20E-17 | -0.19874 | 1.51E-05 | -0.19096 | 3.27E-05 | -0.24463 | 8.61E-08 | -0.3899  | 2.09E-18 |
| 6.35E-23 | -0.17748 | 0.00012  | -0.33417 | 1.20E-13 | -0.2441  | 9.19E-08 | -0.35605 | 2.10E-15 |
| 3.89E-09 | -0.10717 | 0.02053  | -0.28088 | 6.48E-10 | -0.19858 | 1.54E-05 | -0.29525 | 7.57E-11 |
| 5.73E-20 | -0.20696 | 6.50E-06 | -0.39956 | 2.50E-19 | -0.30148 | 2.87E-11 | -0.43789 | 2.68E-23 |
| 1.69E-07 | -0.20709 | 6.42E-06 | -0.36703 | 2.44E-16 | -0.36057 | 8.75E-16 | -0.43366 | 7.77E-23 |
| 4.07E-05 | -0.18489 | 5.83E-05 | -0.27702 | 1.13E-09 | -0.26289 | 8.04E-09 | -0.3503  | 6.27E-15 |
| 2.02E-24 | -0.15892 | 0.00057  | -0.1687  | 0.00025  | -0.17298 | 0.00017  | -0.32206 | 9.90E-13 |
| 2.50E-12 | -0.26761 | 4.22E-09 | -0.28903 | 1.94E-10 | -0.33469 | 1.10E-13 | -0.48879 | 2.04E-29 |
| 2.49E-33 | -0.13775 | 0.00285  | -0.20718 | 6.35E-06 | -0.18875 | 4.04E-05 | -0.34887 | 8.22E-15 |
| 3.62E-28 | -0.15169 | 0.00101  | -0.2454  | 7.82E-08 | -0.30329 | 2.16E-11 | -0.39358 | 9.41E-19 |
| 3.89E-22 | -0.25877 | 1.39E-08 | -0.28846 | 2.12E-10 | -0.33125 | 2.02E-13 | -0.50011 | 6.36E-31 |
| 1.92E-29 | -0.2199  | 1.60E-06 | -0.30939 | 8.11E-12 | -0.25092 | 3.88E-08 | -0.40448 | 8.27E-20 |
| 3.53E-07 | -0.22259 | 1.18E-06 | -0.22364 | 1.05E-06 | -0.30035 | 3.43E-11 | -0.41339 | 1.06E-20 |
| 9.50E-19 | -0.19932 | 1.43E-05 | -0.39395 | 8.68E-19 | -0.40791 | 3.77E-20 | -0.50071 | 5.27E-31 |
| 1.83E-19 | -0.1983  | 1.58E-05 | -0.40231 | 1.35E-19 | -0.38975 | 2.16E-18 | -0.49551 | 2.64E-30 |
| 5.50E-29 | -0.2407  | 1.40E-07 | -0.34261 | 2.62E-14 | -0.3495  | 7.30E-15 | -0.53432 | 7.83E-36 |
| 0.0002   | -0.19298 | 2.68E-05 | -0.29199 | 1.24E-10 | -0.37085 | 1.13E-16 | -0.43528 | 5.18E-23 |
| 1.75E-05 | -0.20526 | 7.77E-06 | -0.21317 | 3.35E-06 | -0.39659 | 4.85E-19 | -0.52105 | 7.32E-34 |
| 2.35E-09 | -0.18297 | 6.98E-05 | -0.34344 | 2.25E-14 | -0.18989 | 3.62E-05 | -0.3357  | 9.15E-14 |
| 1.55E-08 | -0.0994  | 0.03175  | -0.15162 | 0.00101  | -0.18324 | 6.80E-05 | -0.18163 | 7.90E-05 |
| 2.12E-15 | -0.0284  | 0.54041  | -0.12629 | 0.00628  | -0.11672 | 0.01159  | -0.14864 | 0.00128  |
| 5.10E-30 | -0.19995 | 1.34E-05 | -0.27803 | 9.78E-10 | -0.18148 | 8.01E-05 | -0.34272 | 2.57E-14 |
| 1.01E-18 | -0.1911  | 3.22E-05 | -0.41157 | 1.62E-20 | -0.35928 | 1.13E-15 | -0.45352 | 4.53E-25 |
| 9.27E-13 | -0.15725 | 0.00065  | -0.25004 | 4.35E-08 | -0.2408  | 1.38E-07 | -0.39381 | 8.94E-19 |
| 2.16E-31 | -0.15046 | 0.00111  | -0.32305 | 8.36E-13 | -0.33198 | 1.77E-13 | -0.44153 | 1.06E-23 |

|          |          |          |          |          |          |          |          |          |
|----------|----------|----------|----------|----------|----------|----------|----------|----------|
| 1.01E-18 | -0.13627 | 0.00317  | -0.15898 | 0.00056  | -0.13975 | 0.00247  | -0.26616 | 5.16E-09 |
| 1.66E-18 | -0.10914 | 0.01832  | -0.34813 | 9.44E-15 | -0.2528  | 3.05E-08 | -0.33866 | 5.38E-14 |
| 3.62E-32 | -0.18356 | 6.60E-05 | -0.23255 | 3.74E-07 | -0.24911 | 4.89E-08 | -0.4008  | 1.90E-19 |
| 3.89E-19 | -0.15833 | 0.00059  | -0.29244 | 1.16E-10 | -0.35153 | 4.98E-15 | -0.40338 | 1.06E-19 |
| 1.66E-13 | -0.19257 | 2.79E-05 | -0.27525 | 1.45E-09 | -0.26304 | 7.88E-09 | -0.40375 | 9.76E-20 |
| 2.58E-18 | -0.31008 | 7.26E-12 | -0.26776 | 4.14E-09 | -0.45081 | 9.34E-25 | -0.61402 | 9.83E-50 |
| 6.18E-17 | 0.268139 | 3.93E-09 | 0.291859 | 1.27E-10 | 0.305121 | 1.61E-11 | 0.547939 | 6.00E-38 |
| 9.21E-13 | -0.24414 | 9.15E-08 | -0.27719 | 1.10E-09 | -0.35467 | 2.74E-15 | -0.4739  | 1.61E-27 |
| 1.53E-09 | -0.11668 | 0.01162  | -0.36769 | 2.14E-16 | -0.28371 | 4.28E-10 | -0.37365 | 6.40E-17 |
| 1.91E-08 | -0.30046 | 3.37E-11 | -0.27589 | 1.33E-09 | -0.3694  | 1.52E-16 | -0.56038 | 5.75E-40 |
| 6.00E-20 | -0.22066 | 1.47E-06 | -0.34169 | 3.10E-14 | -0.35566 | 2.26E-15 | -0.43616 | 4.15E-23 |
| 4.60E-06 | -0.19931 | 1.43E-05 | -0.25539 | 2.18E-08 | -0.30521 | 1.59E-11 | -0.45337 | 4.72E-25 |
| 1.77E-22 | -0.19773 | 1.68E-05 | -0.12883 | 0.0053   | -0.27444 | 1.63E-09 | -0.38801 | 3.15E-18 |
| 1.13E-13 | -0.14731 | 0.00141  | -0.28322 | 4.61E-10 | -0.26426 | 6.68E-09 | -0.37305 | 7.23E-17 |
| 1.46E-32 | -0.23583 | 2.53E-07 | -0.28598 | 3.07E-10 | -0.30108 | 3.06E-11 | -0.45801 | 1.35E-25 |
| 1.30E-12 | -0.18928 | 3.84E-05 | -0.27311 | 1.97E-09 | -0.3381  | 5.96E-14 | -0.4633  | 3.17E-26 |
| 2.12E-20 | -0.38834 | 2.93E-18 | -0.30695 | 1.20E-11 | -0.45628 | 2.16E-25 | -0.65766 | 3.50E-59 |
| 1.39E-15 | -0.2933  | 1.02E-10 | -0.25607 | 1.99E-08 | -0.40055 | 2.01E-19 | -0.58422 | 4.40E-44 |
| 8.54E-13 | -0.24539 | 7.83E-08 | -0.15167 | 0.00101  | -0.25854 | 1.44E-08 | -0.45017 | 1.11E-24 |
| 6.65E-24 | -0.18269 | 7.16E-05 | -0.29327 | 1.02E-10 | -0.26902 | 3.48E-09 | -0.36122 | 7.70E-16 |
| 2.55E-26 | -0.19458 | 2.29E-05 | -0.20424 | 8.63E-06 | -0.19689 | 1.82E-05 | -0.32181 | 1.03E-12 |
| 7.55E-12 | -0.15198 | 0.00099  | -0.17637 | 0.00013  | -0.31043 | 6.85E-12 | -0.35886 | 1.22E-15 |
| 9.52E-19 | -0.26893 | 3.52E-09 | -0.24595 | 7.30E-08 | -0.32242 | 9.30E-13 | -0.46644 | 1.32E-26 |
| 8.81E-15 | -0.10727 | 0.02042  | -0.19342 | 2.57E-05 | -0.22948 | 5.36E-07 | -0.29429 | 8.76E-11 |
| 8.65E-14 | -0.17401 | 0.00016  | -0.1986  | 1.54E-05 | -0.25503 | 2.28E-08 | -0.39889 | 2.91E-19 |
| 1.67E-17 | -0.01892 | 0.68335  | -0.23376 | 3.24E-07 | -0.16012 | 0.00051  | -0.19679 | 1.84E-05 |
| 6.55E-15 | -0.26497 | 6.07E-09 | -0.17292 | 0.00017  | -0.30025 | 3.48E-11 | -0.48597 | 4.73E-29 |
| 3.35E-10 | -0.20381 | 9.03E-06 | -0.27488 | 1.53E-09 | -0.34979 | 6.91E-15 | -0.47718 | 6.26E-28 |
| 8.38E-17 | -0.2174  | 2.11E-06 | -0.32327 | 8.05E-13 | -0.339   | 5.06E-14 | -0.47677 | 7.04E-28 |
| 3.64E-18 | -0.2387  | 1.79E-07 | -0.33681 | 7.52E-14 | -0.35181 | 4.72E-15 | -0.48047 | 2.40E-28 |
| 1.12E-17 | -0.18421 | 6.22E-05 | -0.33146 | 1.94E-13 | -0.4159  | 5.87E-21 | -0.5046  | 1.55E-31 |
| 1.25E-09 | -0.15929 | 0.00055  | -0.32897 | 3.01E-13 | -0.39642 | 5.03E-19 | -0.43839 | 2.35E-23 |
| 4.12E-31 | -0.18145 | 8.03E-05 | -0.21312 | 3.37E-06 | -0.17717 | 0.00012  | -0.33727 | 6.92E-14 |
| 1.03E-07 | -0.22284 | 1.15E-06 | -0.08157 | 0.07823  | -0.24086 | 1.37E-07 | -0.40398 | 9.26E-20 |
| 3.67E-34 | -0.17719 | 0.00012  | -0.27175 | 2.38E-09 | -0.24941 | 4.71E-08 | -0.40861 | 3.21E-20 |
| 0.08155  | -0.23327 | 3.43E-07 | -0.31654 | 2.51E-12 | -0.3175  | 2.14E-12 | -0.48512 | 6.10E-29 |
| 1.55E-14 | -0.0624  | 0.17822  | -0.18094 | 8.42E-05 | -0.19312 | 2.65E-05 | -0.24693 | 6.45E-08 |
| 6.14E-08 | -0.31739 | 2.17E-12 | -0.3982  | 3.39E-19 | -0.48429 | 7.79E-29 | -0.68623 | 2.82E-66 |
| 8.57E-23 | -0.33062 | 2.25E-13 | -0.37374 | 6.29E-17 | -0.46275 | 3.70E-26 | -0.6672  | 1.83E-61 |
| 9.72E-16 | -0.24886 | 5.05E-08 | -0.0865  | 0.0618   | -0.28365 | 4.32E-10 | -0.46143 | 5.32E-26 |
| 8.30E-06 | -0.21107 | 4.21E-06 | -0.28494 | 3.57E-10 | -0.46027 | 7.30E-26 | -0.49254 | 6.55E-30 |
| 2.36E-19 | -0.21513 | 2.71E-06 | -0.26904 | 3.47E-09 | -0.33566 | 9.23E-14 | -0.49683 | 1.76E-30 |
| 1.96E-06 | -0.08565 | 0.06441  | -0.1943  | 2.36E-05 | -0.21295 | 3.44E-06 | -0.2376  | 2.04E-07 |
| 4.35E-28 | -0.13955 | 0.00251  | -0.30284 | 2.32E-11 | -0.33717 | 7.04E-14 | -0.38754 | 3.49E-18 |
| 2.90E-22 | -0.14647 | 0.0015   | -0.15738 | 0.00064  | -0.17923 | 9.84E-05 | -0.32759 | 3.83E-13 |

|          |          |          |          |          |          |          |          |          |
|----------|----------|----------|----------|----------|----------|----------|----------|----------|
| 8.42E-17 | -0.22509 | 8.91E-07 | -0.20842 | 5.57E-06 | -0.2929  | 1.08E-10 | -0.46295 | 3.50E-26 |
| 0.05084  | -0.12846 | 0.00543  | -0.23435 | 3.02E-07 | -0.30993 | 7.43E-12 | -0.28127 | 6.12E-10 |
| 5.64E-22 | -0.17831 | 0.00011  | -0.22024 | 1.54E-06 | -0.22201 | 1.26E-06 | -0.33743 | 6.72E-14 |
| 1.90E-19 | -0.2013  | 1.17E-05 | -0.18646 | 5.03E-05 | -0.25039 | 4.16E-08 | -0.38286 | 9.44E-18 |
| 1.13E-16 | -0.28458 | 3.77E-10 | -0.27069 | 2.76E-09 | -0.28023 | 7.12E-10 | -0.41106 | 1.82E-20 |
| 8.14E-24 | -0.23112 | 4.43E-07 | -0.27085 | 2.70E-09 | -0.31244 | 4.93E-12 | -0.44931 | 1.39E-24 |
| 3.66E-20 | -0.23755 | 2.05E-07 | -0.15405 | 0.00084  | -0.16616 | 0.00031  | -0.34944 | 7.38E-15 |
| 3.40E-18 | -0.16604 | 0.00031  | -0.26465 | 6.34E-09 | -0.32332 | 7.98E-13 | -0.40937 | 2.69E-20 |
| 6.31E-15 | -0.20106 | 1.20E-05 | -0.23946 | 1.63E-07 | -0.21963 | 1.65E-06 | -0.37335 | 6.81E-17 |
| 0.25826  | -0.15269 | 0.00093  | -0.25664 | 1.85E-08 | -0.37097 | 1.10E-16 | -0.43545 | 4.96E-23 |
| 8.88E-29 | -0.2476  | 5.92E-08 | -0.30769 | 1.07E-11 | -0.36148 | 7.32E-16 | -0.46552 | 1.71E-26 |
| 1.39E-24 | -0.1613  | 0.00047  | -0.26803 | 3.99E-09 | -0.28765 | 2.39E-10 | -0.38227 | 1.07E-17 |
| 6.23E-15 | -0.24194 | 1.20E-07 | -0.35036 | 6.21E-15 | -0.32951 | 2.74E-13 | -0.53006 | 3.44E-35 |
| 4.88E-14 | -0.11618 | 0.01199  | -0.17121 | 0.0002   | -0.20114 | 1.19E-05 | -0.30447 | 1.79E-11 |
| 2.94E-15 | -0.24021 | 1.49E-07 | -0.352   | 4.55E-15 | -0.37762 | 2.82E-17 | -0.49719 | 1.57E-30 |
| 4.47E-30 | -0.19086 | 3.30E-05 | -0.16176 | 0.00045  | -0.20984 | 4.80E-06 | -0.3802  | 1.65E-17 |
| 7.05E-14 | -0.20992 | 4.75E-06 | -0.21571 | 2.54E-06 | -0.37618 | 3.80E-17 | -0.49528 | 2.83E-30 |
| 1.69E-22 | -0.15878 | 0.00057  | -0.11018 | 0.01722  | -0.1753  | 0.00014  | -0.25575 | 2.08E-08 |
| 2.93E-07 | -0.08829 | 0.05658  | -0.27126 | 2.55E-09 | -0.18072 | 8.59E-05 | -0.22828 | 6.17E-07 |
| 2.00E-16 | -0.1344  | 0.00362  | -0.05274 | 0.25536  | -0.17572 | 0.00014  | -0.21274 | 3.51E-06 |
| 3.17E-09 | 0.053674 | 0.24701  | -0.23759 | 2.04E-07 | -0.15515 | 0.00077  | -0.11338 | 0.01423  |
| 2.51E-13 | -0.18186 | 7.73E-05 | -0.32849 | 3.27E-13 | -0.24604 | 7.22E-08 | -0.30217 | 2.58E-11 |
| 4.97E-18 | -0.18008 | 9.11E-05 | -0.38543 | 5.47E-18 | -0.28744 | 2.47E-10 | -0.40227 | 1.36E-19 |
| 0.01733  | 0.014178 | 0.75992  | -0.13267 | 0.00408  | -0.03684 | 0.42708  | -0.00913 | 0.84398  |
| 0.64627  | -0.15978 | 0.00053  | -0.18479 | 5.89E-05 | -0.17916 | 9.91E-05 | -0.27888 | 8.65E-10 |
| 0.36964  | 0.010851 | 0.81509  | -0.05815 | 0.2097   | -0.08003 | 0.08406  | -0.03306 | 0.47603  |
| 0.0157   | -0.0691  | 0.13597  | 0.169968 | 0.00022  | 0.011915 | 0.79734  | -0.05167 | 0.26515  |
| 0.01747  | -0.15304 | 0.00091  | -0.21417 | 3.01E-06 | -0.34294 | 2.47E-14 | -0.30246 | 2.46E-11 |
| 0.96333  | -0.07475 | 0.10667  | -0.3186  | 1.78E-12 | -0.243   | 1.05E-07 | -0.22805 | 6.33E-07 |
| 0.95642  | -0.05771 | 0.21319  | -0.23306 | 3.52E-07 | -0.22518 | 8.81E-07 | -0.18415 | 6.25E-05 |
| 0.00072  | -0.24393 | 9.40E-08 | -0.27655 | 1.21E-09 | -0.1932  | 2.63E-05 | -0.35731 | 1.65E-15 |
| 7.52E-06 | -0.08242 | 0.07519  | -0.30063 | 3.28E-11 | -0.21731 | 2.13E-06 | -0.17393 | 0.00016  |
| 1.73E-09 | -0.10228 | 0.0271   | 0.326482 | 4.63E-13 | 0.21631  | 2.38E-06 | 0.054515 | 0.23968  |
| 0.81611  | -0.05777 | 0.21273  | -0.25155 | 3.58E-08 | -0.33385 | 1.27E-13 | -0.24343 | 9.99E-08 |
| 0.29062  | -0.07398 | 0.11035  | -0.1876  | 4.52E-05 | -0.2231  | 1.12E-06 | -0.24163 | 1.25E-07 |
| 0.06327  | 0.045917 | 0.32211  | -0.07609 | 0.10054  | 0.025923 | 0.5763   | 0.125223 | 0.00674  |
| 0.01382  | -0.02143 | 0.64411  | -0.1788  | 0.0001   | -0.23748 | 2.07E-07 | -0.11048 | 0.01692  |
| 1.04E-08 | -0.00376 | 0.93538  | -0.14018 | 0.0024   | -0.07334 | 0.11348  | -0.07368 | 0.11181  |
| 2.21E-05 | 0.055258 | 0.23332  | -0.13589 | 0.00326  | -0.1813  | 8.14E-05 | -0.02905 | 0.53117  |
| 7.44E-06 | -0.09938 | 0.03178  | -0.23314 | 3.48E-07 | -0.18231 | 7.42E-05 | -0.1933  | 2.60E-05 |
| 0.15311  | 0.020064 | 0.66541  | -0.09796 | 0.03432  | -0.12667 | 0.00612  | -0.01856 | 0.68907  |
| 0.00012  | -0.08665 | 0.06135  | -0.21137 | 4.07E-06 | -0.18647 | 5.03E-05 | -0.20839 | 5.59E-06 |
| 0.00126  | -0.0971  | 0.03594  | -0.17029 | 0.00022  | -0.21441 | 2.93E-06 | -0.23675 | 2.26E-07 |
| 0.22775  | -0.00636 | 0.89094  | -0.16516 | 0.00034  | -0.13366 | 0.00381  | -0.06943 | 0.13406  |
| 0.02169  | 0.046798 | 0.3129   | -0.03336 | 0.47203  | 0.001305 | 0.97757  | 0.089525 | 0.05319  |

|          |          |          |          |          |          |          |          |          |
|----------|----------|----------|----------|----------|----------|----------|----------|----------|
| 0.02231  | -0.04844 | 0.29619  | -0.30366 | 2.03E-11 | -0.11723 | 0.01123  | -0.11652 | 0.01174  |
| 0.12088  | -0.14353 | 0.00187  | -0.20531 | 7.72E-06 | -0.30602 | 1.40E-11 | -0.31233 | 5.02E-12 |
| 0.3844   | 0.003256 | 0.94405  | -0.18437 | 6.12E-05 | -0.12325 | 0.00767  | -0.03553 | 0.44372  |
| 0.00656  | -0.0357  | 0.44145  | -0.16303 | 0.0004   | -0.14888 | 0.00125  | -0.06655 | 0.15103  |
| 5.72E-14 | -0.01419 | 0.75967  | -0.15171 | 0.00101  | -0.22277 | 1.16E-06 | -0.11998 | 0.00945  |
| 0.00561  | -0.03915 | 0.39858  | -0.09635 | 0.03739  | -0.26934 | 3.33E-09 | -0.15198 | 0.00099  |
| 0.02594  | 0.090413 | 0.05087  | -0.08878 | 0.05522  | -0.05331 | 0.25025  | 0.080596 | 0.08188  |
| 0.07842  | -0.09728 | 0.03558  | -0.102   | 0.02752  | -0.20405 | 8.80E-06 | -0.17524 | 0.00014  |
| 0.22331  | -0.13718 | 0.00297  | -0.35658 | 1.90E-15 | -0.37742 | 2.94E-17 | -0.34791 | 9.84E-15 |
| 0.30657  | 0.049877 | 0.28209  | -0.13013 | 0.00485  | -0.13467 | 0.00355  | 0.007279 | 0.87534  |
| 3.73E-05 | -0.09295 | 0.04468  | -0.19368 | 2.51E-05 | -0.32164 | 1.06E-12 | -0.25855 | 1.44E-08 |
| 0.00686  | -0.02034 | 0.66105  | -0.0688  | 0.13769  | -0.06181 | 0.18238  | -0.023   | 0.62013  |
| 9.94E-06 | 0.081816 | 0.07735  | -0.02175 | 0.63913  | -0.09344 | 0.04357  | 0.069441 | 0.13403  |
| 0.00534  | 0.080345 | 0.08284  | -0.02581 | 0.57793  | 0.041714 | 0.36843  | 0.125314 | 0.0067   |
| 3.50E-05 | -0.03218 | 0.48791  | -0.26119 | 1.01E-08 | -0.21527 | 2.67E-06 | -0.19058 | 3.39E-05 |
| 0.00561  | 0.106785 | 0.021    | -0.24184 | 1.22E-07 | -0.24394 | 9.38E-08 | -0.12541 | 0.00666  |
| 0.22822  | -0.10215 | 0.0273   | -0.31298 | 4.51E-12 | -0.24442 | 8.84E-08 | -0.26882 | 3.58E-09 |
| 0.7413   | -0.13321 | 0.00393  | -0.20146 | 1.15E-05 | -0.26535 | 5.76E-09 | -0.28424 | 3.96E-10 |
| 0.39445  | -0.03999 | 0.38853  | -0.11196 | 0.01549  | -0.03373 | 0.46714  | -0.12033 | 0.00924  |
| 4.17E-05 | -0.0842  | 0.06908  | -0.18852 | 4.14E-05 | -0.21433 | 2.96E-06 | -0.19642 | 1.91E-05 |
| 0.25865  | 0.004498 | 0.92278  | -0.21912 | 1.75E-06 | -0.2559  | 2.04E-08 | -0.09869 | 0.03299  |
| 2.54E-05 | 0.062675 | 0.17634  | -0.17114 | 0.0002   | -0.09415 | 0.04198  | 0.03978  | 0.39106  |
| 0.05153  | -0.18695 | 4.80E-05 | -0.39225 | 1.26E-18 | -0.31235 | 5.01E-12 | -0.40404 | 9.14E-20 |
| 0.5937   | -0.08316 | 0.07258  | -0.20441 | 8.48E-06 | -0.12592 | 0.00644  | -0.12531 | 0.0067   |
| 0.00022  | -0.10938 | 0.01805  | -0.23041 | 4.81E-07 | -0.21072 | 4.37E-06 | -0.21373 | 3.16E-06 |
| 0.08993  | -0.14287 | 0.00197  | -0.28632 | 2.91E-10 | -0.12681 | 0.00607  | -0.2292  | 5.54E-07 |
| 0.00014  | -0.09228 | 0.04626  | -0.33154 | 1.92E-13 | -0.15555 | 0.00074  | -0.20723 | 6.32E-06 |
| 0.32947  | 0.091967 | 0.047    | -0.14379 | 0.00184  | -0.09657 | 0.03695  | 0.026221 | 0.57193  |
| 0.0309   | 0.007449 | 0.87246  | 0.089775 | 0.05253  | 0.017712 | 0.70264  | -0.02139 | 0.64478  |
| 5.18E-05 | 0.036152 | 0.43573  | -0.17755 | 0.00011  | -0.14443 | 0.00175  | -0.02067 | 0.65599  |
| 3.94E-06 | -0.07613 | 0.10034  | -0.11514 | 0.01278  | -0.26015 | 1.16E-08 | -0.20405 | 8.81E-06 |
| 0.00018  | -0.08458 | 0.06782  | -0.20004 | 1.33E-05 | -0.29073 | 1.51E-10 | -0.19115 | 3.21E-05 |
| 0.00013  | 0.046718 | 0.31373  | -0.11352 | 0.0141   | -0.01435 | 0.75706  | 0.056451 | 0.22337  |
| 0.11573  | -0.00547 | 0.90611  | -0.0637  | 0.16935  | 0.057571 | 0.21431  | 0.114106 | 0.01361  |
| 0.25965  | -0.0286  | 0.5375   | -0.21181 | 3.88E-06 | -0.10997 | 0.01744  | -0.07742 | 0.09469  |
| 0.06607  | -0.12475 | 0.00695  | -0.3023  | 2.52E-11 | -0.29273 | 1.11E-10 | -0.25543 | 2.17E-08 |
| 3.02E-13 | -0.09076 | 0.04998  | -0.16482 | 0.00035  | -0.13466 | 0.00355  | -0.16265 | 0.00042  |
| 1.66E-07 | -0.07139 | 0.12343  | -0.30279 | 2.33E-11 | -0.23758 | 2.05E-07 | -0.22541 | 8.59E-07 |
| 0.09724  | -0.14125 | 0.00222  | -0.11998 | 0.00945  | -0.18389 | 6.40E-05 | -0.26274 | 8.20E-09 |
| 0.00303  | -0.07794 | 0.09252  | -0.10962 | 0.0178   | -0.23396 | 3.16E-07 | -0.13381 | 0.00377  |
| 1.11E-07 | -0.10396 | 0.02466  | -0.2031  | 9.71E-06 | -0.25059 | 4.05E-08 | -0.2689  | 3.54E-09 |
| 0.00057  | -0.01903 | 0.68172  | -0.10581 | 0.0222   | -0.15219 | 0.00097  | -0.06779 | 0.14356  |
| 0.2312   | -0.1154  | 0.01258  | -0.15079 | 0.00108  | -0.24596 | 7.29E-08 | -0.28114 | 6.23E-10 |
| 0.00019  | 0.016343 | 0.72465  | 0.073195 | 0.11419  | 0.048366 | 0.29695  | 0.099062 | 0.03233  |
| 0.33036  | -0.02119 | 0.64792  | -0.15756 | 0.00063  | -0.17215 | 0.00019  | -0.06234 | 0.17868  |



|          |          |          |          |          |          |          |          |          |
|----------|----------|----------|----------|----------|----------|----------|----------|----------|
| 0.42906  | -0.1678  | 0.00027  | -0.36592 | 3.04E-16 | -0.35864 | 1.27E-15 | -0.36273 | 5.73E-16 |
| 2.59E-06 | -0.15375 | 0.00086  | -0.32872 | 3.14E-13 | -0.37647 | 3.59E-17 | -0.32545 | 5.54E-13 |
| 0.16676  | -0.08437 | 0.0685   | -0.30772 | 1.06E-11 | -0.26181 | 9.30E-09 | -0.25926 | 1.31E-08 |
| 0.01556  | -0.13104 | 0.00456  | -0.25647 | 1.89E-08 | -0.312   | 5.31E-12 | -0.30635 | 1.32E-11 |
| 7.55E-12 | 0.01812  | 0.69613  | 0.163869 | 0.00038  | 0.085676 | 0.06433  | 0.040308 | 0.3848   |
| 0.15483  | -0.00659 | 0.88702  | -0.04476 | 0.33451  | -0.08318 | 0.07253  | -0.00884 | 0.84889  |
| 0.29071  | 0.097086 | 0.03596  | -0.21867 | 1.84E-06 | -0.09581 | 0.03848  | 0.072746 | 0.11643  |
| 0.70483  | -0.06288 | 0.17493  | -0.1556  | 0.00074  | -0.15839 | 0.00059  | -0.1309  | 0.0046   |
| 0.00798  | -0.12335 | 0.00761  | -0.21949 | 1.68E-06 | -0.15245 | 0.00095  | -0.24633 | 6.95E-08 |
| 0.00159  | -0.03547 | 0.44444  | -0.12046 | 0.00917  | -0.17207 | 0.00019  | -0.1202  | 0.00932  |
| 0.21776  | -0.03602 | 0.43738  | -0.15586 | 0.00073  | -0.17751 | 0.00012  | -0.09567 | 0.03877  |
| 0.84729  | -0.08136 | 0.07902  | -0.14744 | 0.0014   | -0.17693 | 0.00012  | -0.18365 | 6.55E-05 |
| 0.79883  | -0.10096 | 0.02915  | -0.09374 | 0.04288  | -0.01518 | 0.7435   | -0.05669 | 0.22144  |
| 0.02545  | -0.10905 | 0.01841  | -0.12826 | 0.00551  | -0.23662 | 2.30E-07 | -0.19376 | 2.49E-05 |
| 0.05047  | 0.016668 | 0.7194   | -0.10977 | 0.01765  | -0.02136 | 0.64519  | 0.047539 | 0.30529  |
| 0.00159  | 0.01601  | 0.73004  | -0.1433  | 0.00191  | -0.19366 | 2.51E-05 | -0.09775 | 0.0347   |
| 0.6936   | -0.10224 | 0.02715  | -0.19101 | 3.25E-05 | -0.20912 | 5.17E-06 | -0.2919  | 1.26E-10 |
| 0.1092   | -0.02502 | 0.58962  | -0.19469 | 2.27E-05 | -0.18264 | 7.20E-05 | -0.12791 | 0.00564  |
| 0.10748  | 0.247795 | 5.78E-08 | -0.06314 | 0.17311  | 0.108376 | 0.01915  | 0.245738 | 7.49E-08 |
| 8.70E-06 | 0.036218 | 0.43489  | -0.0164  | 0.72378  | 0.077264 | 0.09538  | 0.112154 | 0.01532  |
| 0.00129  | -0.17135 | 0.0002   | -0.29834 | 4.69E-11 | -0.37384 | 6.15E-17 | -0.374   | 5.95E-17 |
| 0.59941  | -0.02033 | 0.66117  | -0.14309 | 0.00194  | -0.16866 | 0.00025  | -0.07545 | 0.10341  |
| 0.00697  | -0.01049 | 0.82113  | -0.30102 | 3.09E-11 | -0.19553 | 2.09E-05 | -0.14732 | 0.00141  |
| 0.13094  | -0.24631 | 6.98E-08 | -0.3206  | 1.27E-12 | -0.40022 | 2.16E-19 | -0.47711 | 6.39E-28 |
| 0.1051   | 0.072925 | 0.11554  | -0.13676 | 0.00306  | -0.1955  | 2.09E-05 | -0.00596 | 0.89775  |
| 0.0266   | -0.09227 | 0.04628  | -0.09173 | 0.04756  | -0.28476 | 3.67E-10 | -0.21733 | 2.13E-06 |
| 0.02492  | -0.0153  | 0.74165  | -0.29865 | 4.48E-11 | -0.32908 | 2.95E-13 | -0.24991 | 4.42E-08 |
| 0.08598  | -0.18647 | 5.03E-05 | -0.21337 | 3.28E-06 | -0.26576 | 5.45E-09 | -0.31224 | 5.10E-12 |
| 0.88121  | -0.12766 | 0.00573  | -0.26976 | 3.14E-09 | -0.32033 | 1.33E-12 | -0.27146 | 2.48E-09 |
| 0.71294  | -0.12077 | 0.00899  | -0.18703 | 4.76E-05 | -0.3295  | 2.74E-13 | -0.27735 | 1.08E-09 |
| 4.68E-08 | 0.075918 | 0.1013   | -0.16859 | 0.00025  | -0.06397 | 0.16758  | 0.040879 | 0.3781   |
| 6.24E-06 | -0.12149 | 0.00858  | -0.2869  | 2.67E-10 | -0.34604 | 1.39E-14 | -0.34428 | 1.93E-14 |
| 0.2207   | -0.05847 | 0.20719  | -0.11779 | 0.01085  | -0.10027 | 0.03027  | -0.1166  | 0.01168  |
| 0.12682  | -0.06551 | 0.15754  | 0.003297 | 0.94335  | -0.13441 | 0.00361  | -0.07219 | 0.11925  |
| 0.25619  | -0.03878 | 0.40312  | -0.11384 | 0.01384  | -0.12746 | 0.00581  | -0.05023 | 0.2787   |
| 0.08632  | -0.04123 | 0.37403  | -0.32151 | 1.09E-12 | -0.13962 | 0.0025   | -0.17147 | 0.0002   |
| 0.00429  | -0.24087 | 1.37E-07 | -0.34633 | 1.32E-14 | -0.34829 | 9.16E-15 | -0.47437 | 1.41E-27 |
| 0.0015   | -0.0451  | 0.33084  | -0.08001 | 0.08412  | -0.09593 | 0.03824  | -0.03296 | 0.4773   |
| 0.02961  | 0.166285 | 0.00031  | 0.039747 | 0.39146  | 0.017681 | 0.70313  | 0.161017 | 0.00048  |
| 0.00277  | -0.09053 | 0.05057  | -0.14118 | 0.00223  | -0.20665 | 6.71E-06 | -0.15813 | 0.0006   |
| 0.24222  | 0.00647  | 0.8891   | 0.023796 | 0.60799  | -0.14117 | 0.00223  | -0.05267 | 0.25601  |
| 0.97923  | -0.08367 | 0.07085  | -0.24019 | 1.49E-07 | -0.29843 | 4.63E-11 | -0.25953 | 1.26E-08 |
| 1.15E-07 | 0.057243 | 0.21693  | -0.18333 | 6.75E-05 | -0.16303 | 0.0004   | -0.05794 | 0.21136  |
| 0.15102  | -0.01831 | 0.69316  | -0.00297 | 0.9489   | -0.02577 | 0.57857  | 0.100555 | 0.0298   |
| 0.05632  | -0.13438 | 0.00362  | -0.23523 | 2.72E-07 | -0.38123 | 1.33E-17 | -0.29692 | 5.85E-11 |

|          |          |          |          |          |          |          |          |          |
|----------|----------|----------|----------|----------|----------|----------|----------|----------|
| 0.4538   | -0.01171 | 0.80068  | -0.31043 | 6.85E-12 | -0.19637 | 1.92E-05 | -0.12413 | 0.00724  |
| 0.18362  | -0.06876 | 0.1379   | -0.06099 | 0.18831  | -0.24556 | 7.66E-08 | -0.16007 | 0.00052  |
| 0.86373  | -0.01299 | 0.77948  | -0.06264 | 0.17656  | -0.16862 | 0.00025  | -0.03054 | 0.51026  |
| 0.2758   | -0.02179 | 0.63858  | -0.0577  | 0.21332  | -0.17827 | 0.00011  | -0.06087 | 0.18912  |
| 0.53516  | -0.08742 | 0.05908  | -0.11218 | 0.01529  | -0.27943 | 7.99E-10 | -0.17968 | 9.45E-05 |
| 0.43116  | -0.01743 | 0.70723  | -0.05421 | 0.24232  | -0.02224 | 0.63166  | 0.048989 | 0.29076  |
| 0.15009  | -0.03466 | 0.45489  | -0.27445 | 1.63E-09 | -0.31153 | 5.73E-12 | -0.2944  | 8.62E-11 |
| 0.02659  | -0.11176 | 0.01568  | -0.16654 | 0.0003   | -0.30805 | 1.01E-11 | -0.28358 | 4.37E-10 |
| 0.38319  | -0.1922  | 2.90E-05 | -0.2382  | 1.90E-07 | -0.38764 | 3.41E-18 | -0.38892 | 2.59E-18 |
| 0.04793  | 0.009575 | 0.8365   | -0.26853 | 3.72E-09 | -0.21507 | 2.73E-06 | -0.09972 | 0.0312   |
| 0.00181  | -0.21995 | 1.59E-06 | -0.36038 | 9.08E-16 | -0.42828 | 2.96E-22 | -0.48852 | 2.21E-29 |
| 0.34128  | -0.06051 | 0.1918   | -0.102   | 0.02753  | -0.14302 | 0.00195  | -0.10648 | 0.02137  |
| 2.11E-07 | -0.06566 | 0.15657  | -0.17877 | 0.0001   | -0.22425 | 9.80E-07 | -0.14915 | 0.00123  |
| 0.18188  | -0.10529 | 0.02288  | -0.2371  | 2.17E-07 | -0.18564 | 5.43E-05 | -0.14228 | 0.00206  |
| 0.00498  | 0.018439 | 0.69104  | -0.35801 | 1.44E-15 | -0.30017 | 3.53E-11 | -0.21299 | 3.42E-06 |
| 0.57215  | 0.068771 | 0.13783  | 0.023305 | 0.61542  | 0.160842 | 0.00048  | 0.237479 | 2.07E-07 |
| 1.34E-08 | -0.00425 | 0.92695  | -0.19199 | 2.96E-05 | -0.23033 | 4.85E-07 | -0.1453  | 0.00164  |
| 0.00164  | -0.00484 | 0.91694  | -0.28777 | 2.35E-10 | -0.14629 | 0.00152  | -0.13381 | 0.00377  |
| 0.56023  | 0.030237 | 0.51452  | -0.1583  | 0.0006   | -0.20617 | 7.06E-06 | -0.0977  | 0.0348   |
| 0.02594  | -0.10978 | 0.01764  | -0.07582 | 0.10176  | -0.20625 | 7.01E-06 | -0.17544 | 0.00014  |
| 0.05314  | -0.07928 | 0.08701  | -0.29051 | 1.56E-10 | -0.26434 | 6.60E-09 | -0.2335  | 3.34E-07 |
| 0.02189  | -0.0496  | 0.28478  | -0.26635 | 5.02E-09 | -0.32305 | 8.35E-13 | -0.22086 | 1.44E-06 |
| 0.04291  | 0.035948 | 0.43833  | -0.0944  | 0.04143  | -0.06539 | 0.15828  | 0.040353 | 0.38427  |
| 0.80172  | -0.0404  | 0.38367  | -0.10519 | 0.023    | -0.11408 | 0.01364  | -0.02751 | 0.55321  |
| 0.12223  | -0.05158 | 0.266    | -0.1677  | 0.00027  | -0.25272 | 3.08E-08 | -0.15798 | 0.00061  |
| 4.40E-05 | -0.06098 | 0.18832  | -0.17721 | 0.00012  | -0.20945 | 5.00E-06 | -0.20141 | 1.16E-05 |
| 0.19832  | -0.18813 | 4.29E-05 | -0.26642 | 4.97E-09 | -0.30911 | 8.49E-12 | -0.36205 | 6.55E-16 |
| 0.00248  | -0.11212 | 0.01534  | 0.130758 | 0.00465  | 0.062978 | 0.17425  | -0.06528 | 0.15901  |
| 0.00447  | -0.00914 | 0.84389  | 0.055838 | 0.22844  | 0.039711 | 0.39189  | 0.134731 | 0.00353  |
| 2.09E-05 | 0.07889  | 0.08859  | -0.04874 | 0.29319  | -0.08706 | 0.06012  | 0.079628 | 0.08563  |
| 0.09254  | -0.03833 | 0.40854  | -0.19614 | 1.97E-05 | -0.11138 | 0.01604  | -0.11544 | 0.01255  |
| 0.12332  | -0.17739 | 0.00012  | -0.21623 | 2.40E-06 | -0.3527  | 3.98E-15 | -0.33103 | 2.10E-13 |
| 5.70E-05 | -0.06964 | 0.13293  | 0.134195 | 0.00367  | 0.026289 | 0.57092  | -0.06284 | 0.17523  |
| 0.78333  | 0.032337 | 0.48573  | -0.20682 | 6.60E-06 | -0.162   | 0.00044  | -0.05047 | 0.27643  |
| 0.04965  | 0.010002 | 0.82932  | 0.276699 | 1.18E-09 | 0.221973 | 1.27E-06 | 0.132303 | 0.00418  |
| 0.0001   | -0.07464 | 0.10721  | -0.19254 | 2.80E-05 | -0.264   | 6.92E-09 | -0.20435 | 8.54E-06 |
| 0.72929  | 0.000429 | 0.99262  | -0.07241 | 0.11812  | -0.09203 | 0.04685  | -0.00198 | 0.96591  |
| 0.0003   | -0.0334  | 0.47153  | -0.17658 | 0.00013  | -0.2617  | 9.44E-09 | -0.14855 | 0.00128  |
| 0.27276  | -0.05579 | 0.22883  | -0.21742 | 2.11E-06 | -0.19019 | 3.52E-05 | -0.12854 | 0.0054   |
| 1.00E-07 | -0.13846 | 0.00271  | -0.29647 | 6.27E-11 | -0.16453 | 0.00036  | -0.24346 | 9.96E-08 |
| 0.77829  | -0.03441 | 0.45822  | -0.15574 | 0.00073  | -0.1467  | 0.00148  | -0.08973 | 0.05265  |
| 0.59538  | -0.00625 | 0.89286  | -0.21057 | 4.44E-06 | -0.13338 | 0.00388  | -0.05157 | 0.26607  |
| 0.26201  | -0.08269 | 0.07423  | -0.18895 | 3.97E-05 | -0.20068 | 1.24E-05 | -0.12673 | 0.0061   |
| 0.0636   | -0.15637 | 0.0007   | -0.21731 | 2.13E-06 | -0.31926 | 1.59E-12 | -0.29269 | 1.12E-10 |
| 0.02108  | 0.022347 | 0.63003  | -0.24322 | 1.03E-07 | -0.13692 | 0.00303  | -0.08077 | 0.08122  |

|          |          |          |          |          |          |          |          |          |
|----------|----------|----------|----------|----------|----------|----------|----------|----------|
| 9.60E-09 | -0.15305 | 0.00091  | -0.31534 | 3.06E-12 | -0.29848 | 4.59E-11 | -0.31281 | 4.64E-12 |
| 0.13596  | -0.09941 | 0.03173  | -0.15984 | 0.00053  | -0.20853 | 5.51E-06 | -0.15849 | 0.00059  |
| 0.15233  | -0.03135 | 0.49918  | -0.2969  | 5.87E-11 | -0.29204 | 1.24E-10 | -0.19382 | 2.47E-05 |
| 0.05793  | -0.02699 | 0.56072  | -0.17423 | 0.00015  | -0.14958 | 0.00119  | -0.08952 | 0.05321  |
| 0.11961  | -0.03136 | 0.49901  | -0.2336  | 3.30E-07 | -0.19796 | 1.64E-05 | -0.08215 | 0.07616  |
| 0.00953  | 0.072239 | 0.11901  | -0.0995  | 0.03157  | 0.012016 | 0.79565  | 0.110654 | 0.01675  |
| 0.00101  | -0.03921 | 0.39793  | -0.15663 | 0.00068  | -0.14509 | 0.00167  | -0.13794 | 0.00281  |
| 0.15548  | 0.037422 | 0.41978  | -0.10251 | 0.02674  | -0.1055  | 0.02261  | 0.017469 | 0.70652  |
| 0.02487  | -0.06251 | 0.17751  | -0.24275 | 1.09E-07 | -0.24688 | 6.49E-08 | -0.16914 | 0.00024  |
| 0.00339  | -0.06594 | 0.15483  | -0.08581 | 0.0639   | -0.22167 | 1.31E-06 | -0.13728 | 0.00295  |
| 0.52136  | -0.08087 | 0.08085  | -0.1739  | 0.00016  | -0.0879  | 0.05768  | -0.07062 | 0.12752  |
| 0.00073  | 0.040295 | 0.38496  | 0.27987  | 7.50E-10 | 0.116952 | 0.01143  | 0.130095 | 0.00487  |
| 8.06E-05 | -0.06266 | 0.17646  | -0.22397 | 1.01E-06 | -0.099   | 0.03244  | -0.10991 | 0.0175   |
| 8.85E-07 | -0.15198 | 0.00098  | -0.36451 | 4.03E-16 | -0.33113 | 2.06E-13 | -0.36014 | 9.51E-16 |
| 0.52607  | -0.00285 | 0.95104  | -0.25281 | 3.04E-08 | -0.19547 | 2.10E-05 | -0.10764 | 0.01999  |
| 0.00158  | -0.18234 | 7.40E-05 | -0.2744  | 1.64E-09 | -0.3045  | 1.78E-11 | -0.3575  | 1.59E-15 |
| 1.82E-08 | -0.10176 | 0.02788  | -0.24505 | 8.16E-08 | -0.16769 | 0.00027  | -0.15567 | 0.00074  |
| 0.06238  | -0.06593 | 0.15489  | -0.30166 | 2.79E-11 | -0.20243 | 1.04E-05 | -0.18674 | 4.90E-05 |
| 2.82E-05 | -0.02499 | 0.59012  | -0.07216 | 0.1194   | -0.02972 | 0.52179  | -0.02079 | 0.65414  |
| 0.03805  | 0.056303 | 0.22458  | -0.13981 | 0.00246  | -0.09226 | 0.04631  | 0.04069  | 0.38031  |
| 0.45263  | -0.01641 | 0.72357  | -0.1244  | 0.00711  | -0.21585 | 2.51E-06 | -0.08833 | 0.05646  |
| 0.02395  | -0.0936  | 0.04321  | -0.37188 | 9.19E-17 | -0.29408 | 9.05E-11 | -0.27404 | 1.72E-09 |
| 0.00313  | -0.09855 | 0.03324  | -0.23078 | 4.61E-07 | -0.35006 | 6.56E-15 | -0.26927 | 3.36E-09 |
| 0.00928  | -0.03594 | 0.4384   | -0.24235 | 1.14E-07 | -0.18447 | 6.07E-05 | -0.12385 | 0.00737  |
| 0.36166  | -0.08793 | 0.05758  | -0.25726 | 1.70E-08 | -0.34365 | 2.16E-14 | -0.25534 | 2.19E-08 |
| 0.55071  | -0.00447 | 0.92319  | -0.14439 | 0.00176  | -0.04979 | 0.28293  | -0.05935 | 0.20045  |
| 0.31838  | 0.003799 | 0.93475  | -0.12037 | 0.00922  | -0.07182 | 0.12119  | 0.001096 | 0.98115  |
| 0.42892  | 0.08886  | 0.05499  | -0.15493 | 0.00078  | -0.06212 | 0.18022  | 0.076791 | 0.09743  |
| 7.14E-06 | -0.11979 | 0.00957  | -0.17771 | 0.00011  | -0.12404 | 0.00728  | -0.16881 | 0.00025  |
| 0.05307  | 0.096337 | 0.03742  | -0.13092 | 0.0046   | -0.11059 | 0.01681  | 0.061897 | 0.18178  |
| 0.00078  | -0.07855 | 0.08996  | -0.25122 | 3.74E-08 | -0.27483 | 1.54E-09 | -0.19464 | 2.28E-05 |
| 3.29E-07 | -0.18165 | 7.89E-05 | -0.13353 | 0.00384  | -0.2079  | 5.89E-06 | -0.24091 | 1.36E-07 |
| 0.00014  | -0.17759 | 0.00011  | -0.16262 | 0.00042  | -0.15294 | 0.00091  | -0.20691 | 6.54E-06 |
| 0.66836  | -0.06412 | 0.16656  | -0.26979 | 3.13E-09 | -0.20311 | 9.70E-06 | -0.19144 | 3.12E-05 |
| 0.11791  | 0.037662 | 0.4168   | -0.10163 | 0.0281   | -0.04155 | 0.37027  | 0.060226 | 0.19388  |
| 0.0124   | -0.09733 | 0.0355   | -0.12869 | 0.00535  | -0.15611 | 0.00071  | -0.18013 | 9.07E-05 |
| 2.80E-10 | 0.055344 | 0.23259  | 0.368312 | 1.89E-16 | 0.401577 | 1.59E-19 | 0.308462 | 9.43E-12 |
| 0.07592  | -0.02554 | 0.58188  | -0.14356 | 0.00187  | -0.18707 | 4.75E-05 | -0.07283 | 0.11601  |
| 0.43592  | 0.038499 | 0.40651  | 0.208105 | 5.76E-06 | 0.175275 | 0.00014  | 0.154336 | 0.00082  |
| 0.10821  | -0.10905 | 0.01841  | -0.19521 | 2.16E-05 | -0.18241 | 7.35E-05 | -0.1701  | 0.00022  |
| 1.41E-06 | -0.12112 | 0.00879  | -0.03241 | 0.48479  | -0.13323 | 0.00392  | -0.23915 | 1.69E-07 |
| 0.00019  | -0.03813 | 0.41106  | -0.15081 | 0.00108  | -0.25646 | 1.89E-08 | -0.18092 | 8.44E-05 |
| 0.0019   | -0.21458 | 2.88E-06 | -0.20016 | 1.31E-05 | -0.21949 | 1.68E-06 | -0.3288  | 3.10E-13 |
| 0.29162  | -0.17957 | 9.54E-05 | -0.21655 | 2.32E-06 | -0.26919 | 3.40E-09 | -0.3177  | 2.07E-12 |
| 0.09019  | -0.13404 | 0.00371  | -0.22003 | 1.58E-06 | -0.22338 | 1.08E-06 | -0.21973 | 1.63E-06 |

|          |          |          |          |          |          |          |          |          |
|----------|----------|----------|----------|----------|----------|----------|----------|----------|
| 0.60392  | 0.205217 | 7.80E-06 | 0.091006 | 0.04936  | 0.102799 | 0.02632  | 0.252254 | 3.27E-08 |
| 3.09E-07 | -0.17483 | 0.00015  | -0.30371 | 2.02E-11 | -0.30509 | 1.62E-11 | -0.41225 | 1.38E-20 |
| 0.00672  | 0.001436 | 0.9753   | -0.3273  | 4.02E-13 | -0.24235 | 1.14E-07 | -0.12648 | 0.0062   |
| 0.93733  | -0.10096 | 0.02915  | -0.17128 | 0.0002   | -0.20352 | 9.30E-06 | -0.16644 | 0.0003   |
| 0.00467  | -0.00975 | 0.83359  | -0.21278 | 3.50E-06 | -0.16533 | 0.00033  | -0.11072 | 0.01668  |
| 0.85088  | -0.23518 | 2.73E-07 | -0.22985 | 5.13E-07 | -0.29211 | 1.22E-10 | -0.38601 | 4.83E-18 |
| 0.00032  | -0.18742 | 4.59E-05 | -0.25332 | 2.85E-08 | -0.27823 | 9.49E-10 | -0.35078 | 5.73E-15 |
| 0.00126  | -0.0448  | 0.33408  | -0.06649 | 0.1514   | -0.12818 | 0.00554  | -0.0575  | 0.21487  |
| 0.00176  | -0.09844 | 0.03343  | -0.12924 | 0.00516  | -0.22387 | 1.02E-06 | -0.20291 | 9.90E-06 |
| 0.03068  | -0.15829 | 0.0006   | -0.33071 | 2.22E-13 | -0.38528 | 5.65E-18 | -0.3754  | 4.46E-17 |
| 0.21581  | -0.03027 | 0.51408  | -0.16962 | 0.00023  | -0.08391 | 0.07003  | -0.08282 | 0.07376  |
| 0.00892  | -0.15131 | 0.00104  | -0.16676 | 0.0003   | -0.21343 | 3.26E-06 | -0.26887 | 3.55E-09 |
| 0.03509  | 0.040322 | 0.38464  | -0.13779 | 0.00285  | 0.020515 | 0.65834  | 0.088767 | 0.05525  |
| 0.64728  | -0.15603 | 0.00072  | -0.23948 | 1.63E-07 | -0.32066 | 1.25E-12 | -0.2987  | 4.44E-11 |
| 0.56497  | -0.06151 | 0.18453  | -0.16386 | 0.00038  | -0.14559 | 0.00161  | -0.0448  | 0.33399  |
| 0.03681  | -0.13465 | 0.00355  | -0.2314  | 4.28E-07 | -0.31214 | 5.18E-12 | -0.26899 | 3.49E-09 |
| 0.27458  | 0.039345 | 0.39627  | -0.07829 | 0.09105  | 0.011861 | 0.79823  | 0.072383 | 0.11827  |
| 0.3958   | -0.03513 | 0.4488   | -0.15911 | 0.00056  | -0.0805  | 0.08226  | 0.019439 | 0.67521  |
| 0.17148  | -0.02678 | 0.56371  | -0.14892 | 0.00125  | -0.22995 | 5.08E-07 | -0.13306 | 0.00397  |
| 1.04E-06 | 0.105361 | 0.02278  | 0.029319 | 0.52737  | 0.133178 | 0.00394  | 0.252962 | 2.99E-08 |
| 1.98E-12 | -0.0174  | 0.70757  | -0.15641 | 0.00069  | -0.17979 | 9.35E-05 | -0.08715 | 0.05987  |
| 0.0024   | -0.08591 | 0.06361  | -0.13571 | 0.0033   | -0.15156 | 0.00102  | -0.19386 | 2.46E-05 |
| 0.00969  | 0.081304 | 0.07923  | -0.11431 | 0.01345  | -0.10092 | 0.02922  | 0.037155 | 0.4231   |
| 0.67933  | -0.02598 | 0.57543  | -0.11791 | 0.01077  | -0.12632 | 0.00627  | -0.0021  | 0.96383  |
| 0.4406   | -0.04456 | 0.33664  | -0.27367 | 1.82E-09 | -0.22771 | 6.59E-07 | -0.1508  | 0.00108  |
| 0.55764  | -0.02113 | 0.64877  | -0.16249 | 0.00042  | -0.13372 | 0.00379  | -0.07048 | 0.12826  |
| 8.35E-06 | 0.078025 | 0.09215  | -0.10397 | 0.02464  | -0.06276 | 0.17574  | 0.065634 | 0.15675  |
| 0.00073  | 0.100445 | 0.02998  | -0.05397 | 0.24445  | 0.03404  | 0.46304  | 0.190564 | 3.40E-05 |
| 0.39706  | 0.084754 | 0.06726  | -0.03108 | 0.50286  | 0.117645 | 0.01095  | 0.17355  | 0.00016  |
| 0.61597  | -0.06505 | 0.16049  | -0.06617 | 0.15339  | -0.24819 | 5.50E-08 | -0.1921  | 2.92E-05 |
| 0.00203  | -0.19693 | 1.82E-05 | -0.26105 | 1.03E-08 | -0.30373 | 2.01E-11 | -0.39073 | 1.75E-18 |
| 0.00052  | -0.13174 | 0.00435  | -0.27846 | 9.18E-10 | -0.31853 | 1.80E-12 | -0.27858 | 9.02E-10 |
| 1.78E-11 | -0.05784 | 0.21216  | -0.08968 | 0.05278  | -0.30095 | 3.12E-11 | -0.1738  | 0.00016  |
| 0.22368  | -0.14071 | 0.0023   | -0.3753  | 4.56E-17 | -0.3118  | 5.48E-12 | -0.34884 | 8.27E-15 |
| 0.32584  | -0.02556 | 0.5817   | -0.08497 | 0.06657  | -0.13465 | 0.00355  | -0.04292 | 0.35477  |
| 0.74327  | 0.021866 | 0.63742  | -0.22645 | 7.62E-07 | -0.09856 | 0.03323  | -0.0374  | 0.4201   |
| 0.75864  | -0.06713 | 0.14752  | -0.1078  | 0.0198   | -0.12702 | 0.00598  | -0.09365 | 0.04308  |
| 0.33045  | -0.04813 | 0.29926  | -0.1907  | 3.35E-05 | -0.28833 | 2.16E-10 | -0.28394 | 4.14E-10 |
| 0.00236  | 0.063869 | 0.16822  | 0.009984 | 0.82963  | -0.02844 | 0.53987  | 0.121372 | 0.00865  |
| 0.78124  | 0.020315 | 0.66147  | -0.13441 | 0.00361  | -0.1387  | 0.00267  | -0.02341 | 0.61385  |
| 0.2033   | -0.07821 | 0.09137  | -0.25585 | 2.05E-08 | -0.28808 | 2.24E-10 | -0.23184 | 4.07E-07 |
| 0.02201  | -0.20779 | 5.96E-06 | -0.26979 | 3.13E-09 | -0.35503 | 2.56E-15 | -0.39307 | 1.05E-18 |
| 0.00075  | 0.021174 | 0.64811  | -0.21057 | 4.44E-06 | -0.08963 | 0.05291  | -0.07639 | 0.09919  |
| 1.53E-05 | -0.11478 | 0.01306  | -0.18786 | 4.40E-05 | -0.19765 | 1.69E-05 | -0.23088 | 4.55E-07 |
| 0.40604  | -0.14654 | 0.0015   | -0.24194 | 1.20E-07 | -0.19882 | 1.50E-05 | -0.23862 | 1.81E-07 |

|          |          |          |          |          |          |          |          |          |
|----------|----------|----------|----------|----------|----------|----------|----------|----------|
| 4.97E-05 | -0.10288 | 0.0262   | -0.10127 | 0.02865  | -0.28587 | 3.12E-10 | -0.175   | 0.00014  |
| 0.06206  | -0.09201 | 0.0469   | -0.17535 | 0.00014  | -0.2971  | 5.69E-11 | -0.18939 | 3.80E-05 |
| 0.05972  | 0.039487 | 0.39457  | -0.14187 | 0.00212  | -0.19769 | 1.68E-05 | -0.026   | 0.57511  |
| 0.35451  | -0.03918 | 0.39825  | -0.15922 | 0.00055  | -0.2801  | 7.25E-10 | -0.15437 | 0.00082  |
| 0.94085  | -0.02548 | 0.58283  | -0.10821 | 0.01934  | -0.17441 | 0.00015  | -0.05642 | 0.2236   |
| 0.00176  | -0.17647 | 0.00013  | -0.29363 | 9.70E-11 | -0.33803 | 6.03E-14 | -0.39081 | 1.72E-18 |
| 0.00477  | -0.02332 | 0.61521  | -0.12359 | 0.0075   | -0.05119 | 0.2696   | -0.01283 | 0.78218  |
| 3.84E-06 | -0.10225 | 0.02714  | -0.40039 | 2.08E-19 | -0.2699  | 3.08E-09 | -0.23791 | 1.97E-07 |
| 0.13317  | -0.04596 | 0.3216   | -0.14513 | 0.00166  | -0.19614 | 1.97E-05 | -0.09454 | 0.04114  |
| 0.57682  | 0.032229 | 0.48719  | -0.06003 | 0.19531  | -0.08205 | 0.07649  | 0.04813  | 0.29931  |
| 0.32847  | -0.03355 | 0.46954  | -0.27857 | 9.04E-10 | -0.29238 | 1.17E-10 | -0.20607 | 7.14E-06 |
| 0.6652   | -0.02216 | 0.63289  | -0.14815 | 0.00132  | -0.23179 | 4.09E-07 | -0.08819 | 0.05686  |
| 0.00031  | 0.006989 | 0.88027  | -0.17463 | 0.00015  | -0.13513 | 0.00344  | -0.05562 | 0.23023  |
| 0.00063  | 0.020553 | 0.65775  | -0.1614  | 0.00046  | -0.08826 | 0.05666  | -0.01451 | 0.75442  |
| 0.95439  | 0.096423 | 0.03725  | 0.2957   | 7.06E-11 | 0.203727 | 9.11E-06 | 0.235567 | 2.61E-07 |
| 0.08583  | 0.008586 | 0.8532   | -0.12446 | 0.00708  | -0.13326 | 0.00391  | -0.03902 | 0.40019  |
| 0.39392  | -0.12584 | 0.00647  | -0.22049 | 1.50E-06 | -0.13251 | 0.00412  | -0.15528 | 0.00076  |
| 0.1296   | 0.057403 | 0.21565  | -0.21215 | 3.75E-06 | -0.07289 | 0.11569  | 0.025208 | 0.58687  |
| 0.09218  | -0.06838 | 0.14009  | -0.21133 | 4.09E-06 | -0.20235 | 1.05E-05 | -0.18169 | 7.86E-05 |
| 0.00895  | -0.06272 | 0.17605  | -0.23073 | 4.63E-07 | -0.15205 | 0.00098  | -0.17584 | 0.00013  |
| 0.43204  | -0.09126 | 0.04873  | -0.2603  | 1.14E-08 | -0.18812 | 4.30E-05 | -0.19929 | 1.43E-05 |
| 0.4942   | -0.04186 | 0.36672  | -0.3519  | 4.64E-15 | -0.29634 | 6.39E-11 | -0.19367 | 2.51E-05 |
| 2.87E-05 | 0.010252 | 0.82512  | -0.10244 | 0.02685  | -0.05003 | 0.28061  | 0.052476 | 0.25774  |
| 0.78098  | -0.09506 | 0.04004  | -0.10796 | 0.01962  | -0.18274 | 7.13E-05 | -0.15173 | 0.001    |
| 0.35754  | 0.011626 | 0.80214  | -0.01927 | 0.6779   | 0.095569 | 0.03897  | 0.157806 | 0.00062  |
| 0.00141  | -0.0504  | 0.27703  | -0.08793 | 0.0576   | -0.07205 | 0.12     | -0.08246 | 0.07503  |
| 2.62E-06 | -0.1206  | 0.00909  | -0.28054 | 6.80E-10 | -0.32666 | 4.49E-13 | -0.32055 | 1.28E-12 |
| 0.01881  | -0.01492 | 0.74777  | -0.12285 | 0.00786  | -0.19903 | 1.47E-05 | -0.12101 | 0.00885  |
| 0.57831  | 0.02294  | 0.62096  | -0.23196 | 4.01E-07 | -0.15021 | 0.00113  | -0.01786 | 0.70028  |
| 0.00013  | -0.20392 | 8.92E-06 | -0.27413 | 1.70E-09 | -0.33835 | 5.69E-14 | -0.35485 | 2.64E-15 |
| 6.49E-05 | -0.02286 | 0.62215  | -0.1746  | 0.00015  | -0.19345 | 2.56E-05 | -0.00263 | 0.95483  |
| 0.16507  | -0.03328 | 0.47313  | -0.27564 | 1.37E-09 | -0.23184 | 4.07E-07 | -0.11529 | 0.01266  |
| 0.0282   | -0.06048 | 0.192    | -0.09285 | 0.04491  | -0.16419 | 0.00037  | -0.19074 | 3.34E-05 |
| 4.45E-06 | -0.21939 | 1.70E-06 | -0.41343 | 1.05E-20 | -0.38288 | 9.40E-18 | -0.42526 | 6.20E-22 |
| 4.78E-11 | -0.06277 | 0.17571  | -0.20068 | 1.24E-05 | -0.11184 | 0.0156   | -0.11258 | 0.01493  |
| 0.02869  | 0.123411 | 0.00758  | -0.16789 | 0.00027  | -0.08241 | 0.07522  | 0.080477 | 0.08234  |
| 0.03846  | -0.14908 | 0.00123  | -0.20078 | 1.23E-05 | -0.31147 | 5.78E-12 | -0.34692 | 1.18E-14 |
| 1.25E-06 | -0.07786 | 0.09284  | -0.06494 | 0.16117  | -0.10902 | 0.01844  | -0.05475 | 0.23762  |
| 0.00098  | -0.04392 | 0.34367  | -0.09936 | 0.03181  | -0.21553 | 2.59E-06 | -0.10092 | 0.02921  |
| 0.01437  | 0.02288  | 0.62188  | -0.21521 | 2.69E-06 | -0.05698 | 0.21909  | -0.00077 | 0.98679  |
| 0.95207  | -0.05486 | 0.2367   | -0.09273 | 0.04519  | -0.10956 | 0.01787  | -0.03296 | 0.47735  |
| 0.29655  | -0.03912 | 0.39894  | -0.16649 | 0.0003   | -0.19085 | 3.30E-05 | -0.07458 | 0.10748  |
| 0.05379  | 0.003888 | 0.93322  | -0.05434 | 0.24116  | -0.16502 | 0.00034  | -0.04966 | 0.28415  |
| 0.00562  | -0.02388 | 0.60675  | -0.17045 | 0.00021  | -0.10096 | 0.02915  | -0.0558  | 0.22874  |
| 0.47554  | 0.037127 | 0.42345  | -0.15142 | 0.00103  | -0.08275 | 0.07401  | -0.01364 | 0.7687   |

|          |          |          |          |          |          |          |          |          |
|----------|----------|----------|----------|----------|----------|----------|----------|----------|
| 0.01623  | 0.041299 | 0.37321  | -0.04032 | 0.38463  | -0.07377 | 0.11138  | 0.022087 | 0.63401  |
| 3.07E-08 | -0.07673 | 0.09769  | 0.041482 | 0.3711   | -0.0402  | 0.38604  | -0.15587 | 0.00072  |
| 9.13E-08 | 0.359965 | 9.85E-16 | 0.382023 | 1.13E-17 | 0.435941 | 4.38E-23 | 0.619177 | 8.99E-51 |
| 4.61E-12 | 0.454593 | 3.40E-25 | 0.123405 | 0.00759  | 0.347002 | 1.16E-14 | 0.485626 | 5.25E-29 |
| 1.57E-13 | 0.650885 | 1.30E-57 | 0.396444 | 5.01E-19 | 0.547949 | 5.98E-38 | 0.695859 | 7.46E-69 |
| 0.00396  | 0.517919 | 2.07E-33 | 0.422665 | 1.16E-21 | 0.671312 | 1.79E-62 | 0.840249 | #####    |
| 0.00138  | 0.478537 | 4.22E-28 | 0.402551 | 1.28E-19 | 0.657205 | 4.46E-59 | 0.760436 | 3.22E-89 |
| 0.4366   | -0.2089  | 5.30E-06 | 0.017995 | 0.69811  | -0.31469 | 3.41E-12 | -0.35985 | 1.01E-15 |
| 3.89E-06 | 0.352266 | 4.33E-15 | 0.49943  | 7.85E-31 | 0.816126 | #####    | 0.907296 | #####    |
| 0.00011  | 0.116154 | 0.01201  | 0.271017 | 2.64E-09 | 0.601346 | 2.94E-47 | 0.677149 | 6.19E-64 |
| 2.31E-05 | -0.37223 | 8.56E-17 | -0.38171 | 1.20E-17 | -0.43675 | 3.58E-23 | -0.61446 | 8.06E-50 |
| 0.6731   | -0.2548  | 2.35E-08 | -0.14745 | 0.0014   | -0.28189 | 5.59E-10 | -0.4337  | 7.71E-23 |
| 9.30E-05 | 0.352945 | 3.81E-15 | 0.361463 | 7.35E-16 | 0.624694 | 6.61E-52 | 0.76491  | 7.22E-91 |
| 0.10338  | 0.168344 | 0.00026  | 0.40489  | 7.53E-20 | 0.621599 | 2.88E-51 | 0.654    | 2.49E-58 |
| 0.42766  | -0.41829 | 3.33E-21 | -0.17034 | 0.00022  | -0.36096 | 8.11E-16 | -0.52397 | 2.74E-34 |
| 0.0321   | 0.350277 | 6.31E-15 | 0.242134 | 1.17E-07 | 0.528703 | 5.48E-35 | 0.710406 | 5.99E-73 |
| 1.33E-19 | 0.111249 | 0.01617  | 0.180881 | 8.46E-05 | 0.393952 | 8.67E-19 | 0.442243 | 8.78E-24 |
| 0.32365  | 0.218054 | 1.97E-06 | 0.26378  | 7.13E-09 | 0.400084 | 2.23E-19 | 0.468917 | 6.62E-27 |
| 0.00803  | 0.235194 | 2.73E-07 | 0.322978 | 8.46E-13 | 0.297858 | 5.06E-11 | 0.457848 | 1.41E-25 |
| 0.04718  | 0.167852 | 0.00027  | 0.672446 | 9.37E-63 | 0.773262 | 4.77E-94 | 0.755021 | 2.87E-87 |
| 0.97469  | 0.136179 | 0.00319  | 0.297569 | 5.29E-11 | 0.329597 | 2.70E-13 | 0.417388 | 4.12E-21 |
| 0.14591  | 0.112227 | 0.01525  | 0.564926 | 1.00E-40 | 0.724954 | 2.63E-77 | 0.723247 | 8.81E-77 |
| 0.05577  | 0.006275 | 0.89242  | 0.559595 | 7.75E-40 | 0.479307 | 3.37E-28 | 0.543985 | 2.53E-37 |
| 0.32391  | -0.11499 | 0.0129   | -0.23988 | 1.55E-07 | -0.38026 | 1.63E-17 | -0.33381 | 1.28E-13 |
| 0.06196  | -0.16188 | 0.00044  | -0.27299 | 2.00E-09 | -0.29101 | 1.44E-10 | -0.36497 | 3.68E-16 |
| 0.53651  | 0.184671 | 5.95E-05 | 0.193065 | 2.66E-05 | 0.325643 | 5.36E-13 | 0.478874 | 3.83E-28 |
| 4.91E-07 | 0.226398 | 7.66E-07 | 0.425008 | 6.60E-22 | 0.462869 | 3.57E-26 | 0.637621 | 1.18E-54 |
| 0.11533  | 0.263499 | 7.40E-09 | 0.312525 | 4.87E-12 | 0.476448 | 7.73E-28 | 0.612553 | 1.93E-49 |
| 0.00193  | 0.237312 | 2.12E-07 | 0.308552 | 9.29E-12 | 0.313631 | 4.06E-12 | 0.45383  | 4.18E-25 |
| 0.23232  | 0.171602 | 0.00019  | 0.573    | 4.19E-42 | 0.530511 | 2.94E-35 | 0.57539  | 1.61E-42 |
| 1.94E-05 | 0.307177 | 1.16E-11 | 0.474793 | 1.24E-27 | 0.60102  | 3.39E-47 | 0.720467 | 6.21E-76 |
| 0.68167  | 0.064644 | 0.16311  | 0.288433 | 2.13E-10 | 0.567079 | 4.33E-41 | 0.533713 | 9.68E-36 |
| 0.14075  | 0.108042 | 0.01952  | 0.231332 | 4.32E-07 | 0.458194 | 1.29E-25 | 0.504566 | 1.57E-31 |
| 1.87E-06 | 0.265457 | 5.68E-09 | 0.29296  | 1.07E-10 | 0.500966 | 4.86E-31 | 0.64582  | 1.82E-56 |
| 0.99498  | 0.113322 | 0.01428  | 0.312551 | 4.84E-12 | 0.555157 | 4.14E-39 | 0.605899 | 3.91E-48 |
| 8.07E-05 | 0.230678 | 4.66E-07 | 0.265777 | 5.43E-09 | 0.492471 | 6.69E-30 | 0.669838 | 4.14E-62 |
| 0.17671  | 0.361544 | 7.23E-16 | 0.277923 | 9.92E-10 | 0.422545 | 1.20E-21 | 0.600052 | 5.19E-47 |
| 0.46622  | 0.28284  | 4.87E-10 | 0.397026 | 4.40E-19 | 0.394383 | 7.89E-19 | 0.505048 | 1.34E-31 |
| 0.3096   | 0.205353 | 7.69E-06 | 0.035089 | 0.44937  | 0.24951  | 4.65E-08 | 0.358001 | 1.44E-15 |
| 0.17373  | 0.256814 | 1.81E-08 | 0.155866 | 0.00073  | 0.379171 | 2.05E-17 | 0.45815  | 1.30E-25 |
| 0.09964  | 0.126292 | 0.00628  | 0.156122 | 0.00071  | 0.32472  | 6.28E-13 | 0.394687 | 7.38E-19 |
| 0.98727  | 0.341233 | 3.37E-14 | 0.324533 | 6.48E-13 | 0.698509 | 1.40E-69 | 0.824494 | #####    |
| 0.00385  | 0.336103 | 8.52E-14 | 0.008999 | 0.84621  | 0.285795 | 3.15E-10 | 0.457451 | 1.57E-25 |
| 0.11511  | -0.20242 | 1.04E-05 | -0.11963 | 0.00966  | -0.23843 | 1.85E-07 | -0.39928 | 2.66E-19 |
| 0.03264  | 0.318364 | 1.85E-12 | 0.23701  | 2.19E-07 | 0.412941 | 1.18E-20 | 0.63079  | 3.47E-53 |

|          |          |          |          |          |          |          |          |          |
|----------|----------|----------|----------|----------|----------|----------|----------|----------|
| 0.07003  | 0.166275 | 0.00031  | 0.361695 | 7.02E-16 | 0.339024 | 5.04E-14 | 0.276777 | 1.17E-09 |
| 0.05111  | -0.03603 | 0.43723  | 0.332553 | 1.60E-13 | 0.344756 | 1.77E-14 | 0.354424 | 2.87E-15 |
| 0.0489   | 0.160746 | 0.00049  | 0.465757 | 1.60E-26 | 0.697918 | 2.03E-69 | 0.689679 | 3.46E-67 |
| 0.41441  | 0.188071 | 4.32E-05 | 0.471065 | 3.61E-27 | 0.509531 | 3.21E-32 | 0.588823 | 6.43E-45 |
| 0.05009  | 0.202393 | 1.04E-05 | 0.378451 | 2.38E-17 | 0.407372 | 4.27E-20 | 0.456195 | 2.21E-25 |
| 0.39533  | -0.23534 | 2.68E-07 | -0.30896 | 8.70E-12 | -0.305   | 1.64E-11 | -0.46079 | 6.34E-26 |
| 0.00499  | -0.33564 | 9.26E-14 | -0.12714 | 0.00594  | -0.29818 | 4.81E-11 | -0.38687 | 4.03E-18 |
| 2.94E-11 | -0.13911 | 0.00259  | -0.32345 | 7.80E-13 | -0.49438 | 3.73E-30 | -0.52809 | 6.77E-35 |
| 1.08E-05 | 0.25844  | 1.46E-08 | 0.310029 | 7.32E-12 | 0.469355 | 5.85E-27 | 0.623609 | 1.11E-51 |
| 0.00076  | -0.27452 | 1.61E-09 | -0.41763 | 3.89E-21 | -0.38032 | 1.61E-17 | -0.48231 | 1.40E-28 |
| 8.93E-35 | 0.227235 | 6.96E-07 | 0.365523 | 3.30E-16 | 0.517336 | 2.52E-33 | 0.609198 | 8.88E-49 |
| 6.10E-14 | 0.206786 | 6.62E-06 | 0.182945 | 6.99E-05 | 0.346071 | 1.38E-14 | 0.44892  | 1.54E-24 |
| 4.80E-07 | 0.394918 | 7.01E-19 | 0.618085 | 1.50E-50 | 0.789201 | #####    | 0.888748 | #####    |
| 0.45751  | -0.26393 | 6.98E-09 | -0.0997  | 0.03122  | -0.35145 | 5.05E-15 | -0.4736  | 1.75E-27 |
| 0.65185  | 0.168213 | 0.00026  | 0.297593 | 5.27E-11 | 0.347094 | 1.14E-14 | 0.397712 | 3.78E-19 |
| 0.0149   | 0.27097  | 2.65E-09 | 0.444463 | 4.94E-24 | 0.605371 | 4.95E-48 | 0.731602 | 2.15E-79 |
| 0.03236  | 0.054984 | 0.23565  | 0.468543 | 7.35E-27 | 0.475308 | 1.07E-27 | 0.449376 | 1.37E-24 |
| 0.00037  | 0.078116 | 0.09177  | 0.268383 | 3.80E-09 | 0.272389 | 2.18E-09 | 0.413459 | 1.04E-20 |
| 5.10E-17 | -0.19269 | 2.76E-05 | -0.30361 | 2.05E-11 | -0.44546 | 3.81E-24 | -0.51946 | 1.25E-33 |
| 0.42673  | 0.299731 | 3.78E-11 | 0.080347 | 0.08284  | 0.265474 | 5.66E-09 | 0.442868 | 7.47E-24 |
| 0.16266  | 0.073774 | 0.11135  | 0.30285  | 2.31E-11 | 0.424929 | 6.72E-22 | 0.480353 | 2.49E-28 |
| 0.00091  | 0.153913 | 0.00085  | 0.039445 | 0.39507  | 0.231163 | 4.40E-07 | 0.196866 | 1.83E-05 |
| 5.93E-11 | 0.250544 | 4.08E-08 | 0.337875 | 6.20E-14 | 0.406196 | 5.59E-20 | 0.508122 | 5.04E-32 |
| 8.04E-05 | 0.360598 | 8.70E-16 | 0.423955 | 8.52E-22 | 0.50589  | 1.03E-31 | 0.673351 | 5.58E-63 |
| 5.26E-06 | 0.271208 | 2.57E-09 | 0.262057 | 8.99E-09 | 0.388367 | 2.92E-18 | 0.533811 | 9.35E-36 |
| 2.49E-10 | 0.328047 | 3.53E-13 | 0.159867 | 0.00052  | 0.372531 | 8.04E-17 | 0.560271 | 5.99E-40 |
| 0.04512  | 0.337815 | 6.27E-14 | 0.352499 | 4.14E-15 | 0.615233 | 5.63E-50 | 0.759074 | 1.01E-88 |
| 0.01849  | 0.141452 | 0.00218  | 0.075598 | 0.10275  | 0.275906 | 1.32E-09 | 0.444766 | 4.57E-24 |
| 0.23026  | 0.194894 | 2.22E-05 | 0.278589 | 9.02E-10 | 0.399674 | 2.44E-19 | 0.421125 | 1.69E-21 |
| 0.03222  | -0.14854 | 0.00128  | -0.3745  | 5.38E-17 | -0.4457  | 3.58E-24 | -0.44365 | 6.11E-24 |
| 8.69E-05 | 0.273299 | 1.91E-09 | 0.503235 | 2.38E-31 | 0.484393 | 7.57E-29 | 0.546172 | 1.14E-37 |
| 1.90E-10 | 0.216071 | 2.45E-06 | 0.22294  | 1.14E-06 | 0.366239 | 2.86E-16 | 0.554173 | 5.99E-39 |
| 0.23105  | -0.30354 | 2.07E-11 | -0.31966 | 1.48E-12 | -0.38604 | 4.81E-18 | -0.52692 | 1.01E-34 |
| 0.05513  | 0.283254 | 4.58E-10 | 0.671515 | 1.59E-62 | 0.775235 | 8.07E-95 | 0.81427  | #####    |
| 0.00823  | 0.224515 | 9.51E-07 | 0.353511 | 3.42E-15 | 0.472322 | 2.52E-27 | 0.511185 | 1.88E-32 |
| 0.63447  | 0.170953 | 0.00021  | 0.533151 | 1.18E-35 | 0.787957 | #####    | 0.798094 | #####    |
| 0.11183  | 0.581413 | 1.40E-43 | 0.276471 | 1.22E-09 | 0.483662 | 9.40E-29 | 0.718609 | 2.26E-75 |
| 3.02E-15 | -0.26332 | 7.58E-09 | -0.18404 | 6.31E-05 | -0.38536 | 5.55E-18 | -0.52396 | 2.75E-34 |
| 6.42E-07 | 0.290877 | 1.47E-10 | 0.142113 | 0.00208  | 0.304547 | 1.77E-11 | 0.487679 | 2.84E-29 |
| 0.00045  | 0.338699 | 5.34E-14 | 0.462212 | 4.28E-26 | 0.528693 | 5.50E-35 | 0.606994 | 2.40E-48 |
| 0.36071  | 0.321349 | 1.12E-12 | 0.333596 | 1.33E-13 | 0.483082 | 1.12E-28 | 0.688568 | 6.82E-67 |
| 7.62E-11 | -0.19548 | 2.10E-05 | -0.2139  | 3.10E-06 | -0.38816 | 3.05E-18 | -0.4664  | 1.34E-26 |
| 4.02E-08 | -0.14995 | 0.00115  | -0.22837 | 6.10E-07 | -0.34785 | 9.94E-15 | -0.45532 | 2.80E-25 |
| 0.08539  | 0.158506 | 0.00059  | 0.359925 | 9.92E-16 | 0.584327 | 4.20E-44 | 0.552201 | 1.25E-38 |
| 0.00045  | 0.165817 | 0.00032  | 0.352217 | 4.37E-15 | 0.578326 | 4.92E-43 | 0.657029 | 4.91E-59 |

|          |          |          |          |          |          |          |          |          |
|----------|----------|----------|----------|----------|----------|----------|----------|----------|
| 0.11617  | 0.098331 | 0.03364  | 0.181072 | 8.32E-05 | 0.323958 | 7.15E-13 | 0.392624 | 1.16E-18 |
| 0.06479  | 0.117719 | 0.0109   | 0.109032 | 0.01843  | 0.278429 | 9.23E-10 | 0.38082  | 1.45E-17 |
| 8.52E-07 | 0.310481 | 6.80E-12 | 0.255032 | 2.28E-08 | 0.391657 | 1.43E-18 | 0.456978 | 1.79E-25 |
| 0.00014  | 0.216423 | 2.35E-06 | 0.449079 | 1.48E-24 | 0.676551 | 8.78E-64 | 0.819328 | #####    |
| 0.47001  | 0.197956 | 1.64E-05 | 0.345858 | 1.44E-14 | 0.451355 | 8.08E-25 | 0.552592 | 1.08E-38 |
| 3.93E-08 | 0.179088 | 9.97E-05 | 0.456446 | 2.07E-25 | 0.471877 | 2.86E-27 | 0.535428 | 5.31E-36 |
| 0.00719  | 0.40263  | 1.26E-19 | 0.419066 | 2.76E-21 | 0.659189 | 1.52E-59 | 0.843503 | #####    |
| 9.77E-05 | 0.178376 | 0.00011  | 0.387904 | 3.22E-18 | 0.412881 | 1.19E-20 | 0.551687 | 1.51E-38 |
| 0.02509  | 0.196888 | 1.82E-05 | 0.381742 | 1.19E-17 | 0.402546 | 1.28E-19 | 0.550939 | 1.99E-38 |
| 0.00011  | -0.22432 | 9.72E-07 | -0.15017 | 0.00113  | -0.3643  | 4.20E-16 | -0.39559 | 6.04E-19 |
| 0.77598  | 0.267795 | 4.12E-09 | 0.46448  | 2.29E-26 | 0.5563   | 2.70E-39 | 0.74481  | 9.94E-84 |
| 3.68E-07 | 0.304263 | 1.85E-11 | 0.192322 | 2.86E-05 | 0.302721 | 2.36E-11 | 0.535247 | 5.66E-36 |
| 0.41987  | 0.256734 | 1.83E-08 | 0.450416 | 1.04E-24 | 0.363752 | 4.68E-16 | 0.489959 | 1.43E-29 |
| 0.0206   | -0.22002 | 1.58E-06 | -0.18572 | 5.39E-05 | -0.37107 | 1.08E-16 | -0.43182 | 1.23E-22 |
| 2.51E-10 | 0.295339 | 7.46E-11 | 0.347169 | 1.13E-14 | 0.243895 | 9.43E-08 | 0.516967 | 2.84E-33 |
| 7.69E-05 | 0.186677 | 4.93E-05 | 0.370033 | 1.33E-16 | 0.275344 | 1.43E-09 | 0.417071 | 4.44E-21 |
| 0.00514  | 0.303004 | 2.26E-11 | 0.345123 | 1.65E-14 | 0.436774 | 3.55E-23 | 0.644055 | 4.52E-56 |
| 1.62E-07 | 0.420025 | 2.20E-21 | 0.323249 | 8.08E-13 | 0.404279 | 8.65E-20 | 0.662497 | 2.50E-60 |
| 0.39276  | 0.251633 | 3.54E-08 | 0.200945 | 1.21E-05 | 0.49126  | 9.67E-30 | 0.450747 | 9.50E-25 |
| 0.96451  | 0.10525  | 0.02292  | 0.524929 | 1.98E-34 | 0.426285 | 4.83E-22 | 0.509658 | 3.08E-32 |
| 6.46E-33 | 0.208928 | 5.28E-06 | 0.221971 | 1.27E-06 | 0.463891 | 2.69E-26 | 0.575231 | 1.72E-42 |
| 0.01039  | -0.19964 | 1.38E-05 | -0.18029 | 8.94E-05 | -0.28108 | 6.29E-10 | -0.40239 | 1.33E-19 |
| 0.00282  | -0.20639 | 6.90E-06 | -0.05222 | 0.26011  | -0.31213 | 5.19E-12 | -0.35119 | 5.31E-15 |
| 0.00168  | 0.285946 | 3.08E-10 | 0.257923 | 1.56E-08 | 0.199592 | 1.39E-05 | 0.463937 | 2.66E-26 |
| 0.05449  | 0.085    | 0.06647  | 0.323927 | 7.19E-13 | 0.678394 | 2.99E-64 | 0.652748 | 4.84E-58 |
| 1.61E-05 | 0.185121 | 5.71E-05 | 0.274821 | 1.54E-09 | 0.457234 | 1.67E-25 | 0.54123  | 6.80E-37 |
| 0.16668  | 0.405024 | 7.30E-20 | 0.307071 | 1.18E-11 | 0.663551 | 1.39E-60 | 0.847576 | #####    |
| 0.00378  | 0.191108 | 3.22E-05 | 0.632748 | 1.33E-53 | 0.804141 | #####    | 0.759914 | 4.99E-89 |
| 8.88E-07 | -0.20011 | 1.32E-05 | -0.20121 | 1.18E-05 | -0.42597 | 5.22E-22 | -0.44886 | 1.56E-24 |
| 0.07722  | 0.261176 | 1.01E-08 | 0.425013 | 6.59E-22 | 0.416107 | 5.58E-21 | 0.56489  | 1.01E-40 |
| 0.75122  | 0.281054 | 6.31E-10 | 0.391803 | 1.39E-18 | 0.561714 | 3.45E-40 | 0.692679 | 5.43E-68 |
| 1.35E-10 | -0.18342 | 6.69E-05 | -0.2047  | 8.24E-06 | -0.31861 | 1.77E-12 | -0.46103 | 5.93E-26 |
| 1.69E-10 | -0.25573 | 2.08E-08 | -0.03384 | 0.46571  | -0.27035 | 2.89E-09 | -0.43937 | 1.83E-23 |
| 0.82503  | 0.412958 | 1.17E-20 | 0.392933 | 1.08E-18 | 0.581663 | 1.26E-43 | 0.714349 | 4.20E-74 |
| 5.47E-15 | -0.23419 | 3.08E-07 | -0.0801  | 0.0838   | -0.26002 | 1.18E-08 | -0.41598 | 5.75E-21 |
| 6.31E-15 | -0.33008 | 2.48E-13 | -0.31556 | 2.95E-12 | -0.40597 | 5.89E-20 | -0.62465 | 6.74E-52 |
| 0.05154  | 0.392183 | 1.28E-18 | 0.192897 | 2.71E-05 | 0.270574 | 2.80E-09 | 0.536672 | 3.43E-36 |
| 0.00366  | 0.313027 | 4.48E-12 | 0.489422 | 1.68E-29 | 0.503476 | 2.21E-31 | 0.667241 | 1.79E-61 |
| 6.38E-24 | 0.262309 | 8.69E-09 | 0.306081 | 1.38E-11 | 0.605259 | 5.20E-48 | 0.704443 | 3.06E-71 |
| 8.10E-07 | 0.278194 | 9.54E-10 | 0.339156 | 4.92E-14 | 0.41143  | 1.67E-20 | 0.531973 | 1.77E-35 |
| 6.98E-07 | 0.152493 | 0.00095  | 0.503141 | 2.46E-31 | 0.695093 | 1.21E-68 | 0.751389 | 5.45E-86 |
| 0.3034   | 0.116619 | 0.01167  | 0.10847  | 0.01904  | 0.40584  | 6.06E-20 | 0.444293 | 5.17E-24 |
| 2.59E-11 | -0.19973 | 1.37E-05 | -0.07117 | 0.12458  | -0.26631 | 5.05E-09 | -0.35063 | 5.90E-15 |
| 0.03992  | 0.237802 | 1.99E-07 | 0.643716 | 5.37E-56 | 0.724386 | 3.93E-77 | 0.733809 | 4.24E-80 |
| 0.00529  | 0.12956  | 0.00505  | 0.276616 | 1.20E-09 | 0.437111 | 3.26E-23 | 0.516112 | 3.77E-33 |



|          |          |          |          |          |          |          |          |          |
|----------|----------|----------|----------|----------|----------|----------|----------|----------|
| 0.95298  | -0.1195  | 0.00975  | -0.20867 | 5.43E-06 | -0.33233 | 1.67E-13 | -0.36275 | 5.70E-16 |
| 1.12E-07 | 0.273323 | 1.91E-09 | 0.22348  | 1.07E-06 | 0.278357 | 9.32E-10 | 0.470251 | 4.54E-27 |
| 6.64E-07 | 0.306972 | 1.20E-11 | 0.38077  | 1.46E-17 | 0.434145 | 6.89E-23 | 0.638776 | 6.61E-55 |
| 0.02724  | 0.13744  | 0.00292  | 0.38153  | 1.25E-17 | 0.390544 | 1.82E-18 | 0.483362 | 1.03E-28 |
| 0.00435  | 0.222169 | 1.24E-06 | 0.326466 | 4.65E-13 | 0.507368 | 6.42E-32 | 0.669959 | 3.86E-62 |
| 0.18371  | -0.36272 | 5.74E-16 | -0.33906 | 5.00E-14 | -0.46004 | 7.77E-26 | -0.64347 | 6.11E-56 |
| 0.65529  | 0.06722  | 0.14695  | 0.191563 | 3.08E-05 | 0.394135 | 8.33E-19 | 0.442513 | 8.19E-24 |
| 0.09786  | 0.194571 | 2.30E-05 | 0.353717 | 3.29E-15 | 0.65715  | 4.60E-59 | 0.823232 | #####    |
| 0.05678  | 0.199363 | 1.42E-05 | 0.338895 | 5.16E-14 | 0.37681  | 3.34E-17 | 0.517133 | 2.69E-33 |
| 0.29211  | -0.15973 | 0.00053  | -0.43831 | 2.40E-23 | -0.41414 | 8.87E-21 | -0.46976 | 5.22E-27 |
| 0.27787  | 0.303697 | 2.02E-11 | 0.151376 | 0.00103  | 0.263187 | 7.72E-09 | 0.428015 | 3.16E-22 |
| 3.09E-10 | 0.209397 | 5.03E-06 | 0.402883 | 1.19E-19 | 0.366358 | 2.79E-16 | 0.551558 | 1.58E-38 |
| 5.39E-06 | 0.337492 | 6.64E-14 | 0.253227 | 2.88E-08 | 0.380883 | 1.43E-17 | 0.496007 | 2.27E-30 |
| 0.20157  | 0.086904 | 0.06058  | 0.030294 | 0.51372  | 0.093508 | 0.04341  | 0.156178 | 0.00071  |
| 4.30E-06 | 0.216444 | 2.35E-06 | 0.242311 | 1.15E-07 | 0.342919 | 2.48E-14 | 0.436685 | 3.63E-23 |
| 0.03986  | -0.26587 | 5.37E-09 | -0.31683 | 2.39E-12 | -0.2635  | 7.41E-09 | -0.43311 | 8.92E-23 |
| 0.49178  | 0.24088  | 1.37E-07 | 0.335295 | 9.85E-14 | 0.427427 | 3.65E-22 | 0.446415 | 2.97E-24 |
| 0.00082  | 0.424359 | 7.72E-22 | 0.476271 | 8.14E-28 | 0.695472 | 9.51E-69 | 0.899755 | #####    |
| 0.05397  | 0.247514 | 5.99E-08 | 0.208187 | 5.71E-06 | 0.315384 | 3.04E-12 | 0.518142 | 1.93E-33 |
| 0.06331  | 0.486015 | 4.67E-29 | 0.235638 | 2.59E-07 | 0.38709  | 3.84E-18 | 0.482571 | 1.30E-28 |
| 0.10329  | 0.235834 | 2.53E-07 | 0.271163 | 2.58E-09 | 0.44852  | 1.71E-24 | 0.480009 | 2.75E-28 |
| 2.01E-08 | 0.28863  | 2.07E-10 | 0.430705 | 1.63E-22 | 0.446219 | 3.13E-24 | 0.573793 | 3.05E-42 |
| 0.08415  | 0.172121 | 0.00019  | 0.29904  | 4.21E-11 | 0.48166  | 1.70E-28 | 0.512509 | 1.22E-32 |
| 0.09054  | 0.166199 | 0.00031  | 0.307167 | 1.16E-11 | 0.395043 | 6.82E-19 | 0.488646 | 2.13E-29 |
| 0.00054  | 0.309438 | 8.05E-12 | 0.41253  | 1.29E-20 | 0.346478 | 1.28E-14 | 0.599537 | 6.50E-47 |
| 0.12928  | 0.327324 | 4.00E-13 | 0.548748 | 4.46E-38 | 0.68663  | 2.22E-66 | 0.710946 | 4.17E-73 |
| 0.0033   | 0.308676 | 9.11E-12 | 0.301306 | 2.95E-11 | 0.568107 | 2.89E-41 | 0.667346 | 1.69E-61 |
| 0.1886   | 0.070284 | 0.12935  | 0.236812 | 2.25E-07 | 0.382061 | 1.12E-17 | 0.440532 | 1.36E-23 |
| 0.3045   | 0.33433  | 1.17E-13 | 0.588142 | 8.56E-45 | 0.71355  | 7.22E-74 | 0.798172 | #####    |
| 0.02048  | 0.238003 | 1.95E-07 | 0.118523 | 0.01036  | 0.330381 | 2.35E-13 | 0.384911 | 6.11E-18 |
| 9.43E-05 | 0.282945 | 4.79E-10 | 0.336278 | 8.26E-14 | 0.356972 | 1.76E-15 | 0.566074 | 6.40E-41 |
| 0.67378  | 0.226225 | 7.82E-07 | 0.234132 | 3.10E-07 | 0.285342 | 3.37E-10 | 0.407099 | 4.55E-20 |
| 1.28E-08 | -0.21851 | 1.87E-06 | -0.16241 | 0.00043  | -0.30028 | 3.47E-11 | -0.41333 | 1.07E-20 |
| 0.04793  | -0.24371 | 9.66E-08 | -0.29141 | 1.36E-10 | -0.36469 | 3.89E-16 | -0.46999 | 4.89E-27 |
| 0.18241  | 0.237673 | 2.02E-07 | 0.216368 | 2.37E-06 | 0.472366 | 2.49E-27 | 0.565935 | 6.76E-41 |
| 0.06112  | -0.14286 | 0.00197  | -0.2499  | 4.43E-08 | -0.26727 | 4.43E-09 | -0.37699 | 3.22E-17 |
| 0.17089  | 0.340995 | 3.52E-14 | 0.653766 | 2.82E-58 | 0.687351 | 1.43E-66 | 0.690491 | 2.10E-67 |
| 0.84042  | 0.189603 | 3.73E-05 | 0.490533 | 1.20E-29 | 0.726774 | 7.15E-78 | 0.779738 | 1.31E-96 |
| 0.13357  | 0.326308 | 4.77E-13 | 0.379765 | 1.81E-17 | 0.511209 | 1.87E-32 | 0.601187 | 3.15E-47 |
| 1.42E-06 | 0.379591 | 1.87E-17 | 0.560131 | 6.31E-40 | 0.774491 | 1.58E-94 | 0.863309 | #####    |
| 0.00045  | 0.209986 | 4.72E-06 | 0.428527 | 2.79E-22 | 0.478993 | 3.70E-28 | 0.464098 | 2.54E-26 |
| 0.99159  | 0.245161 | 8.06E-08 | 0.497748 | 1.32E-30 | 0.573511 | 3.42E-42 | 0.536719 | 3.37E-36 |
| 0.77792  | 0.084115 | 0.06936  | 0.186364 | 5.08E-05 | 0.308428 | 9.48E-12 | 0.385431 | 5.47E-18 |
| 5.04E-07 | -0.17315 | 0.00017  | -0.24955 | 4.63E-08 | -0.45245 | 6.05E-25 | -0.38662 | 4.25E-18 |
| 0.44031  | 0.127983 | 0.00561  | 0.100718 | 0.02954  | 0.242011 | 1.19E-07 | 0.395599 | 6.04E-19 |

|          |          |          |          |          |          |          |          |          |
|----------|----------|----------|----------|----------|----------|----------|----------|----------|
| 0.04418  | 0.243162 | 1.03E-07 | 0.130713 | 0.00466  | 0.324668 | 6.33E-13 | 0.489022 | 1.90E-29 |
| 0.87495  | 0.292782 | 1.10E-10 | 0.075387 | 0.10372  | 0.292865 | 1.09E-10 | 0.484888 | 6.54E-29 |
| 0.01729  | 0.277563 | 1.04E-09 | 0.509637 | 3.10E-32 | 0.771163 | 3.09E-93 | 0.863395 | #####    |
| 0.04963  | 0.128004 | 0.0056   | 0.347382 | 1.09E-14 | 0.556532 | 2.47E-39 | 0.534942 | 6.30E-36 |
| 0.85594  | 0.449936 | 1.18E-24 | 0.378168 | 2.52E-17 | 0.69918  | 9.11E-70 | 0.844193 | #####    |
| 0.0898   | 0.275591 | 1.38E-09 | 0.134499 | 0.00359  | 0.290663 | 1.52E-10 | 0.479638 | 3.06E-28 |
| 5.90E-07 | 0.455107 | 2.96E-25 | 0.09447  | 0.04129  | 0.296174 | 6.56E-11 | 0.498493 | 1.05E-30 |
| 0.0087   | 0.382764 | 9.63E-18 | 0.397566 | 3.91E-19 | 0.571844 | 6.63E-42 | 0.780324 | 7.60E-97 |
| 1.87E-07 | 0.209441 | 5.00E-06 | 0.41884  | 2.92E-21 | 0.548696 | 4.55E-38 | 0.670583 | 2.71E-62 |
| 0.03143  | 0.243747 | 9.61E-08 | 0.163458 | 0.00039  | 0.352305 | 4.30E-15 | 0.468608 | 7.22E-27 |
| 3.04E-05 | 0.165933 | 0.00032  | 0.143551 | 0.00187  | 0.376573 | 3.51E-17 | 0.588712 | 6.73E-45 |
| 0.02416  | 0.285861 | 3.12E-10 | 0.206834 | 6.59E-06 | 0.44531  | 3.97E-24 | 0.568326 | 2.66E-41 |
| 0.67816  | 0.166987 | 0.00029  | 0.325509 | 5.48E-13 | 0.564135 | 1.36E-40 | 0.570462 | 1.15E-41 |
| 0.00117  | 0.126118 | 0.00635  | 0.542785 | 3.89E-37 | 0.734455 | 2.62E-80 | 0.78092  | 4.36E-97 |
| 0.10609  | 0.272879 | 2.03E-09 | 0.482688 | 1.25E-28 | 0.394749 | 7.28E-19 | 0.546323 | 1.08E-37 |
| 0.81261  | 0.393808 | 8.95E-19 | 0.543098 | 3.48E-37 | 0.731091 | 3.13E-79 | 0.804137 | #####    |
| 1.95E-06 | 0.337004 | 7.25E-14 | 0.415364 | 6.65E-21 | 0.571238 | 8.43E-42 | 0.742271 | 7.11E-83 |
| 1.78E-15 | 0.529199 | 4.62E-35 | 0.376696 | 3.42E-17 | 0.608808 | 1.06E-48 | 0.84116  | #####    |
| 0.31922  | 0.116522 | 0.01174  | 0.23537  | 2.67E-07 | 0.374305 | 5.60E-17 | 0.451438 | 7.91E-25 |
| 0.85579  | 0.24422  | 9.06E-08 | 0.333464 | 1.36E-13 | 0.462656 | 3.79E-26 | 0.626946 | 2.24E-52 |
| 0.00293  | 0.290699 | 1.51E-10 | 0.726992 | 6.12E-78 | 0.731284 | 2.72E-79 | 0.816185 | #####    |
| 0.01396  | 0.296694 | 6.06E-11 | 0.442425 | 8.38E-24 | 0.683769 | 1.24E-65 | 0.70994  | 8.17E-73 |
| 8.12E-15 | -0.28984 | 1.72E-10 | -0.28375 | 4.26E-10 | -0.45966 | 8.62E-26 | -0.58855 | 7.20E-45 |
| 0.16073  | 0.24618  | 7.09E-08 | 0.380818 | 1.45E-17 | 0.681001 | 6.45E-65 | 0.841125 | #####    |
| 0.08392  | 0.084918 | 0.06673  | 0.20058  | 1.26E-05 | 0.35681  | 1.82E-15 | 0.476285 | 8.10E-28 |
| 1.43E-06 | -0.19084 | 3.31E-05 | -0.28173 | 5.72E-10 | -0.38554 | 5.35E-18 | -0.38414 | 7.20E-18 |
| 0.44704  | 0.213506 | 3.23E-06 | 0.089734 | 0.05264  | 0.230262 | 4.89E-07 | 0.40609  | 5.73E-20 |
| 0.00071  | -0.1823  | 7.42E-05 | -0.10557 | 0.02251  | -0.23473 | 2.88E-07 | -0.35466 | 2.74E-15 |
| 0.00031  | 0.082939 | 0.07336  | 0.230933 | 4.52E-07 | 0.280976 | 6.39E-10 | 0.366431 | 2.75E-16 |
| 0.19561  | -0.26086 | 1.06E-08 | -0.1548  | 0.00079  | -0.37164 | 9.65E-17 | -0.49657 | 1.91E-30 |
| 0.31018  | 0.178288 | 0.00011  | 0.336551 | 7.87E-14 | 0.654793 | 1.63E-58 | 0.76141  | 1.42E-89 |
| 0.09541  | 0.287654 | 2.39E-10 | 0.557685 | 1.60E-39 | 0.772088 | 1.36E-93 | 0.798941 | #####    |
| 0.00468  | 0.268307 | 3.84E-09 | 0.460697 | 6.49E-26 | 0.637958 | 9.97E-55 | 0.652854 | 4.58E-58 |
| 0.83853  | 0.082533 | 0.07478  | 0.386245 | 4.60E-18 | 0.466194 | 1.42E-26 | 0.481472 | 1.79E-28 |
| 0.20711  | 0.323059 | 8.34E-13 | 0.35129  | 5.21E-15 | 0.517266 | 2.57E-33 | 0.638013 | 9.70E-55 |
| 0.24154  | 0.278038 | 9.76E-10 | 0.309046 | 8.58E-12 | 0.369027 | 1.63E-16 | 0.532943 | 1.27E-35 |
| 0.83405  | 0.364619 | 3.94E-16 | 0.300247 | 3.49E-11 | 0.705212 | 1.85E-71 | 0.805823 | #####    |
| 0.00052  | -0.16633 | 0.00031  | -0.29329 | 1.02E-10 | -0.39829 | 3.32E-19 | -0.42997 | 1.95E-22 |
| 0.43089  | 0.454285 | 3.70E-25 | 0.356526 | 1.92E-15 | 0.474875 | 1.22E-27 | 0.666545 | 2.64E-61 |
| 0.89003  | -0.18567 | 5.42E-05 | -0.21659 | 2.31E-06 | -0.35002 | 6.62E-15 | -0.44369 | 6.04E-24 |
| 0.00766  | 0.239383 | 1.64E-07 | 0.318668 | 1.75E-12 | 0.530111 | 3.38E-35 | 0.67908  | 2.00E-64 |
| 6.55E-22 | 0.305455 | 1.53E-11 | 0.170793 | 0.00021  | 0.357059 | 1.73E-15 | 0.473232 | 1.95E-27 |
| 0.0932   | 0.135053 | 0.00345  | 0.081657 | 0.07793  | 0.286161 | 2.98E-10 | 0.31772  | 2.06E-12 |
| 2.24E-10 | 0.378169 | 2.52E-17 | 0.067697 | 0.1441   | 0.292845 | 1.09E-10 | 0.454098 | 3.89E-25 |
| 1.90E-05 | 0.306512 | 1.29E-11 | 0.091431 | 0.0483   | 0.18086  | 8.48E-05 | 0.42614  | 5.00E-22 |

|          |          |          |          |          |          |          |          |          |
|----------|----------|----------|----------|----------|----------|----------|----------|----------|
| 0.93086  | 0.362533 | 5.95E-16 | 0.494218 | 3.93E-30 | 0.579588 | 2.94E-43 | 0.660207 | 8.75E-60 |
| 0.25423  | 0.27084  | 2.70E-09 | 0.223808 | 1.03E-06 | 0.452364 | 6.18E-25 | 0.485261 | 5.85E-29 |
| 6.77E-34 | 0.565255 | 8.80E-41 | 0.237455 | 2.08E-07 | 0.345639 | 1.50E-14 | 0.54596  | 1.23E-37 |
| 0.23376  | -0.21123 | 4.13E-06 | -0.13439 | 0.00362  | -0.17756 | 0.00011  | -0.38811 | 3.08E-18 |
| 0.05933  | 0.218171 | 1.94E-06 | 0.660406 | 7.85E-60 | 0.712387 | 1.58E-73 | 0.785962 | 3.73E-99 |
| 0.51285  | 0.089938 | 0.0521   | 0.243907 | 9.42E-08 | 0.449391 | 1.36E-24 | 0.524368 | 2.40E-34 |
| 0.00427  | 0.174026 | 0.00016  | 0.307874 | 1.04E-11 | 0.402953 | 1.17E-19 | 0.49938  | 7.98E-31 |
| 0.81533  | 0.154228 | 0.00083  | 0.3607   | 8.53E-16 | 0.757162 | 4.93E-88 | 0.818438 | #####    |
| 0.00355  | 0.168423 | 0.00026  | 0.292122 | 1.22E-10 | 0.616177 | 3.64E-50 | 0.655743 | 9.80E-59 |
| 0.14191  | 0.09805  | 0.03415  | 0.464548 | 2.25E-26 | 0.672849 | 7.44E-63 | 0.595897 | 3.16E-46 |
| 0.65463  | 0.126264 | 0.00629  | 0.316474 | 2.53E-12 | 0.704112 | 3.80E-71 | 0.686162 | 2.94E-66 |
| 0.00043  | 0.197563 | 1.71E-05 | 0.505817 | 1.05E-31 | 0.601714 | 2.50E-47 | 0.645447 | 2.21E-56 |
| 0.07331  | 0.039534 | 0.39401  | 0.240692 | 1.40E-07 | 0.368155 | 1.95E-16 | 0.369707 | 1.43E-16 |
| 0.16527  | 0.215874 | 2.50E-06 | 0.239796 | 1.56E-07 | 0.588874 | 6.29E-45 | 0.667431 | 1.61E-61 |
| 6.07E-22 | 0.411376 | 1.69E-20 | 0.375513 | 4.37E-17 | 0.587691 | 1.03E-44 | 0.726387 | 9.44E-78 |
| 0.23802  | 0.307079 | 1.18E-11 | 0.238027 | 1.94E-07 | 0.475482 | 1.02E-27 | 0.601029 | 3.38E-47 |
| 0.01482  | 0.208149 | 5.74E-06 | 0.5703   | 1.22E-41 | 0.585713 | 2.36E-44 | 0.73816  | 1.63E-81 |
| 0.0027   | 0.100481 | 0.02992  | 0.317021 | 2.31E-12 | 0.452756 | 5.57E-25 | 0.427542 | 3.55E-22 |
| 0.26459  | 0.145289 | 0.00164  | 0.619409 | 8.06E-51 | 0.781385 | 2.83E-97 | 0.781341 | 2.94E-97 |
| 0.05267  | 0.474438 | 1.38E-27 | 0.078447 | 0.0904   | 0.203718 | 9.11E-06 | 0.396315 | 5.15E-19 |
| 0.39489  | 0.280529 | 6.81E-10 | 0.18723  | 4.68E-05 | 0.359717 | 1.03E-15 | 0.487585 | 2.92E-29 |
| 0.22488  | 0.321742 | 1.04E-12 | 0.269068 | 3.46E-09 | 0.453103 | 5.07E-25 | 0.620069 | 5.91E-51 |
| 1.37E-05 | 0.434695 | 6.00E-23 | 0.283793 | 4.23E-10 | 0.36387  | 4.57E-16 | 0.672293 | 1.02E-62 |
| 0.01387  | 0.273555 | 1.85E-09 | 0.380582 | 1.52E-17 | 0.468368 | 7.72E-27 | 0.502344 | 3.16E-31 |
| 1.84E-10 | 0.260757 | 1.07E-08 | 0.365678 | 3.20E-16 | 0.411846 | 1.52E-20 | 0.593321 | 9.54E-46 |
| 0.30608  | 0.125885 | 0.00645  | 0.192448 | 2.83E-05 | 0.353298 | 3.56E-15 | 0.406845 | 4.82E-20 |
| 0.01643  | 0.311795 | 5.48E-12 | 0.282012 | 5.49E-10 | 0.562525 | 2.53E-40 | 0.74722  | 1.50E-84 |
| 0.42108  | 0.098868 | 0.03267  | 0.360442 | 8.97E-16 | 0.475673 | 9.67E-28 | 0.465904 | 1.54E-26 |
| 0.00085  | -0.07864 | 0.08962  | -0.2038  | 9.03E-06 | -0.32616 | 4.90E-13 | -0.35419 | 3.00E-15 |
| 7.69E-06 | -0.2124  | 3.65E-06 | 0.092199 | 0.04644  | -0.16176 | 0.00045  | -0.3581  | 1.42E-15 |
| 0.0259   | 0.236307 | 2.39E-07 | 0.107095 | 0.02062  | 0.273639 | 1.82E-09 | 0.437203 | 3.19E-23 |
| 0.79471  | 0.168741 | 0.00025  | 0.423404 | 9.74E-22 | 0.566543 | 5.33E-41 | 0.508344 | 4.70E-32 |
| 0.89638  | 0.176346 | 0.00013  | 0.397393 | 4.06E-19 | 0.675998 | 1.21E-63 | 0.799732 | #####    |
| 0.81371  | 0.088018 | 0.05734  | 0.504038 | 1.85E-31 | 0.69622  | 5.94E-69 | 0.744181 | 1.62E-83 |
| 5.24E-05 | 0.073222 | 0.11405  | 0.598602 | 9.77E-47 | 0.461909 | 4.66E-26 | 0.495425 | 2.71E-30 |
| 0.76197  | 0.308204 | 9.83E-12 | 0.124776 | 0.00694  | 0.295521 | 7.26E-11 | 0.422254 | 1.29E-21 |
| 0.92369  | 0.165066 | 0.00034  | 0.222755 | 1.16E-06 | 0.344634 | 1.81E-14 | 0.449998 | 1.16E-24 |
| 0.43215  | 0.537654 | 2.42E-36 | 0.267161 | 4.49E-09 | 0.217893 | 2.00E-06 | 0.41914  | 2.72E-21 |
| 0.58342  | 0.194336 | 2.35E-05 | 0.139506 | 0.00252  | 0.344154 | 1.97E-14 | 0.375901 | 4.03E-17 |
| 0.20856  | 0.466812 | 1.19E-26 | 0.191494 | 3.10E-05 | 0.414221 | 8.71E-21 | 0.591118 | 2.44E-45 |
| 0.87262  | 0.207337 | 6.25E-06 | 0.426928 | 4.13E-22 | 0.340535 | 3.83E-14 | 0.395473 | 6.21E-19 |
| 0.54595  | 0.337178 | 7.03E-14 | 0.563791 | 1.55E-40 | 0.657755 | 3.31E-59 | 0.789119 | #####    |
| 0.00889  | 0.250447 | 4.13E-08 | 0.724425 | 3.83E-77 | 0.776683 | 2.17E-95 | 0.878866 | #####    |
| 0.00023  | 0.458836 | 1.08E-25 | 0.337803 | 6.28E-14 | 0.258581 | 1.43E-08 | 0.475895 | 9.07E-28 |
| 0.23163  | 0.092187 | 0.04647  | 0.140109 | 0.00241  | 0.352111 | 4.46E-15 | 0.39503  | 6.84E-19 |

|          |          |          |          |          |          |          |          |          |
|----------|----------|----------|----------|----------|----------|----------|----------|----------|
| 7.43E-05 | 0.160158 | 0.00051  | 0.213352 | 3.29E-06 | 0.45325  | 4.88E-25 | 0.54281  | 3.86E-37 |
| 0.34418  | 0.126792 | 0.00607  | 0.466287 | 1.38E-26 | 0.313275 | 4.30E-12 | 0.329172 | 2.90E-13 |
| 0.61645  | 0.207364 | 6.23E-06 | 0.208385 | 5.60E-06 | 0.438717 | 2.17E-23 | 0.553468 | 7.78E-39 |
| 4.52E-19 | 0.459936 | 8.00E-26 | 0.240039 | 1.52E-07 | 0.447841 | 2.05E-24 | 0.626512 | 2.76E-52 |
| 0.33573  | 0.190952 | 3.27E-05 | 0.547386 | 7.35E-38 | 0.747001 | 1.79E-84 | 0.794162 | #####    |
| 0.00092  | 0.398985 | 2.85E-19 | 0.182262 | 7.45E-05 | 0.276015 | 1.30E-09 | 0.471615 | 3.09E-27 |
| 0.00167  | 0.127136 | 0.00594  | 0.408575 | 3.24E-20 | 0.312092 | 5.22E-12 | 0.353262 | 3.58E-15 |
| 0.11461  | 0.389037 | 2.53E-18 | 0.649537 | 2.63E-57 | 0.878575 | #####    | 0.903153 | #####    |
| 0.00392  | 0.224649 | 9.37E-07 | 0.486627 | 3.90E-29 | 0.342496 | 2.68E-14 | 0.403932 | 9.36E-20 |
| 0.00456  | 0.093932 | 0.04246  | 0.625869 | 3.76E-52 | 0.736592 | 5.32E-81 | 0.749977 | 1.69E-85 |
| 0.22598  | 0.205888 | 7.27E-06 | 0.465621 | 1.67E-26 | 0.503896 | 1.93E-31 | 0.592657 | 1.27E-45 |
| 0.00257  | 0.109537 | 0.01789  | 0.501462 | 4.16E-31 | 0.329373 | 2.80E-13 | 0.351102 | 5.40E-15 |
| 0.12596  | 0.256301 | 1.93E-08 | 0.45931  | 9.49E-26 | 0.558385 | 1.23E-39 | 0.590703 | 2.91E-45 |
| 0.14989  | 0.342705 | 2.58E-14 | 0.537158 | 2.89E-36 | 0.504149 | 1.79E-31 | 0.629192 | 7.56E-53 |
| 0.40925  | 0.376518 | 3.55E-17 | 0.400161 | 2.19E-19 | 0.616281 | 3.47E-50 | 0.817977 | #####    |
| 0.20538  | 0.180494 | 8.77E-05 | 0.48545  | 5.53E-29 | 0.517273 | 2.57E-33 | 0.672042 | 1.18E-62 |
| 1.14E-07 | -0.23202 | 3.98E-07 | -0.12267 | 0.00796  | -0.26743 | 4.33E-09 | -0.43525 | 5.23E-23 |
| 9.71E-07 | -0.18121 | 8.21E-05 | -0.37607 | 3.89E-17 | -0.3441  | 2.00E-14 | -0.41481 | 7.58E-21 |
| 0.86911  | 0.216499 | 2.33E-06 | 0.486722 | 3.79E-29 | 0.612894 | 1.65E-49 | 0.636314 | 2.27E-54 |
| 4.82E-06 | -0.2513  | 3.70E-08 | -0.20087 | 1.22E-05 | -0.30266 | 2.38E-11 | -0.453   | 5.21E-25 |
| 0.60654  | 0.340517 | 3.84E-14 | 0.236672 | 2.28E-07 | 0.395074 | 6.78E-19 | 0.591298 | 2.26E-45 |
| 0.47405  | 0.14433  | 0.00177  | 0.223777 | 1.03E-06 | 0.368139 | 1.95E-16 | 0.409049 | 2.90E-20 |
| 7.30E-11 | -0.34926 | 7.64E-15 | -0.44599 | 3.32E-24 | -0.45605 | 2.30E-25 | -0.63637 | 2.20E-54 |
| 0.57365  | 0.265297 | 5.80E-09 | 0.508808 | 4.05E-32 | 0.706631 | 7.31E-72 | 0.677244 | 5.86E-64 |
| 0.00221  | 0.101882 | 0.0277   | 0.427495 | 3.59E-22 | 0.649549 | 2.61E-57 | 0.592151 | 1.57E-45 |
| 0.2533   | 0.236493 | 2.33E-07 | 0.389054 | 2.52E-18 | 0.477694 | 5.39E-28 | 0.613363 | 1.33E-49 |
| 0.00015  | 0.595365 | 3.97E-46 | 0.200009 | 1.33E-05 | 0.393796 | 8.97E-19 | 0.680148 | 1.07E-64 |
| 1.29E-05 | 0.425307 | 6.13E-22 | 0.597782 | 1.40E-46 | 0.771588 | 2.12E-93 | 0.875418 | #####    |
| 0.26512  | 0.305279 | 1.57E-11 | 0.366153 | 2.91E-16 | 0.580171 | 2.32E-43 | 0.655755 | 9.74E-59 |
| 0.23365  | 0.037219 | 0.4223   | 0.537271 | 2.78E-36 | 0.410945 | 1.87E-20 | 0.392707 | 1.14E-18 |
| 0.31741  | 0.465839 | 1.57E-26 | 0.421012 | 1.73E-21 | 0.360091 | 9.61E-16 | 0.475757 | 9.44E-28 |
| 2.32E-17 | 0.359184 | 1.15E-15 | 0.30263  | 2.40E-11 | 0.552209 | 1.24E-38 | 0.713052 | 1.01E-73 |
| 0.00701  | 0.248132 | 5.54E-08 | 0.334183 | 1.20E-13 | 0.65144  | 9.67E-58 | 0.77247  | 9.67E-94 |
| 6.69E-06 | 0.213122 | 3.37E-06 | 0.404874 | 7.56E-20 | 0.515458 | 4.67E-33 | 0.609608 | 7.38E-49 |
| 0.02074  | 0.178236 | 0.00011  | 0.668252 | 1.01E-61 | 0.747991 | 8.18E-85 | 0.744222 | 1.57E-83 |
| 0.16117  | 0.197794 | 1.67E-05 | 0.486841 | 3.65E-29 | 0.436849 | 3.48E-23 | 0.596484 | 2.45E-46 |
| 0.01995  | 0.223434 | 1.08E-06 | 0.402999 | 1.16E-19 | 0.496722 | 1.82E-30 | 0.59703  | 1.93E-46 |
| 0.73124  | 0.44162  | 1.03E-23 | 0.575972 | 1.27E-42 | 0.71895  | 1.78E-75 | 0.844585 | #####    |
| 0.00065  | 0.378337 | 2.43E-17 | 0.367488 | 2.23E-16 | 0.466823 | 1.19E-26 | 0.50663  | 8.13E-32 |
| 0.81967  | 0.125883 | 0.00645  | 0.158871 | 0.00057  | 0.315667 | 2.90E-12 | 0.343168 | 2.37E-14 |
| 0.02269  | 0.175911 | 0.00013  | 0.423699 | 9.07E-22 | 0.675174 | 1.95E-63 | 0.740503 | 2.76E-82 |
| 3.36E-13 | -0.2343  | 3.04E-07 | -0.31993 | 1.42E-12 | -0.3183  | 1.87E-12 | -0.54752 | 6.98E-38 |
| 4.35E-07 | 0.153074 | 0.0009   | 0.391498 | 1.48E-18 | 0.690933 | 1.60E-67 | 0.717991 | 3.46E-75 |
| 0.66232  | 0.067607 | 0.14463  | 0.297657 | 5.22E-11 | 0.562574 | 2.48E-40 | 0.613013 | 1.56E-49 |
| 0.0003   | 0.182845 | 7.06E-05 | 0.187006 | 4.78E-05 | 0.269273 | 3.36E-09 | 0.345464 | 1.55E-14 |

|          |          |          |          |          |          |          |          |          |
|----------|----------|----------|----------|----------|----------|----------|----------|----------|
| 0.05548  | 0.06535  | 0.15856  | 0.592437 | 1.39E-45 | 0.588837 | 6.39E-45 | 0.59166  | 1.94E-45 |
| 0.17748  | 0.358028 | 1.43E-15 | 0.46971  | 5.29E-27 | 0.474243 | 1.46E-27 | 0.5801   | 2.39E-43 |
| 0.00014  | 0.412649 | 1.26E-20 | 0.354361 | 2.91E-15 | 0.603191 | 1.30E-47 | 0.812209 | #####    |
| 0.04731  | 0.241057 | 1.34E-07 | 0.101399 | 0.02845  | 0.276778 | 1.17E-09 | 0.457925 | 1.38E-25 |
| 0.54156  | 0.152823 | 0.00092  | 0.276941 | 1.14E-09 | 0.566109 | 6.31E-41 | 0.613379 | 1.32E-49 |
| 0.45974  | 0.181883 | 7.72E-05 | 0.733618 | 4.88E-80 | 0.745404 | 6.25E-84 | 0.692148 | 7.55E-68 |
| 0.12493  | 0.110449 | 0.01695  | 0.389747 | 2.17E-18 | 0.495805 | 2.41E-30 | 0.529591 | 4.04E-35 |
| 0.03047  | 0.152804 | 0.00092  | 0.446974 | 2.57E-24 | 0.438313 | 2.40E-23 | 0.5289   | 5.12E-35 |
| 0.17976  | 0.208248 | 5.68E-06 | 0.590645 | 2.98E-45 | 0.83443  | #####    | 0.835476 | #####    |
| 0.00067  | 0.435642 | 4.73E-23 | 0.175587 | 0.00014  | 0.343775 | 2.12E-14 | 0.564464 | 1.20E-40 |
| 0.00021  | 0.358685 | 1.26E-15 | 0.446033 | 3.28E-24 | 0.612996 | 1.58E-49 | 0.786421 | 2.40E-99 |
| 0.00022  | 0.233502 | 3.34E-07 | 0.414976 | 7.29E-21 | 0.652156 | 6.63E-58 | 0.714347 | 4.21E-74 |
| 0.00315  | 0.33073  | 2.21E-13 | 0.264595 | 6.38E-09 | 0.478332 | 4.48E-28 | 0.66426  | 9.42E-61 |
| 0.73442  | 0.143088 | 0.00194  | 0.539123 | 1.44E-36 | 0.510773 | 2.15E-32 | 0.612342 | 2.13E-49 |
| 0.12496  | 0.202608 | 1.02E-05 | 0.257568 | 1.64E-08 | 0.352403 | 4.22E-15 | 0.401119 | 1.77E-19 |
| 0.29431  | 0.115739 | 0.01232  | 0.354137 | 3.03E-15 | 0.318614 | 1.77E-12 | 0.44196  | 9.44E-24 |
| 0.32674  | 0.159858 | 0.00053  | 0.408611 | 3.21E-20 | 0.337193 | 7.01E-14 | 0.469044 | 6.39E-27 |
| 2.95E-07 | 0.2786   | 9.00E-10 | 0.485556 | 5.36E-29 | 0.621431 | 3.11E-51 | 0.597    | 1.96E-46 |
| 0.06526  | 0.271203 | 2.57E-09 | 0.677445 | 5.21E-64 | 0.537078 | 2.97E-36 | 0.567262 | 4.03E-41 |
| 0.5855   | 0.272334 | 2.19E-09 | 0.60653  | 2.95E-48 | 0.762492 | 5.68E-90 | 0.885499 | #####    |
| 0.19218  | -0.10541 | 0.02272  | -0.20908 | 5.20E-06 | -0.29889 | 4.31E-11 | -0.38127 | 1.32E-17 |
| 1.33E-05 | -0.2292  | 5.54E-07 | -0.24503 | 8.19E-08 | -0.35912 | 1.16E-15 | -0.50055 | 5.54E-31 |
| 2.91E-05 | -0.22895 | 5.71E-07 | -0.19245 | 2.83E-05 | -0.4552  | 2.89E-25 | -0.58015 | 2.34E-43 |
| 0.28412  | 0.077192 | 0.09568  | 0.133803 | 0.00377  | 0.298872 | 4.32E-11 | 0.425094 | 6.46E-22 |
| 0.35806  | 0.24679  | 6.57E-08 | 0.16773  | 0.00027  | 0.357855 | 1.48E-15 | 0.533177 | 1.17E-35 |
| 0.10854  | 0.199256 | 1.44E-05 | 0.709921 | 8.27E-73 | 0.653529 | 3.20E-58 | 0.730342 | 5.41E-79 |
| 2.00E-05 | 0.25459  | 2.42E-08 | 0.259615 | 1.25E-08 | 0.225405 | 8.59E-07 | 0.406018 | 5.82E-20 |
| 6.58E-07 | 0.279454 | 7.96E-10 | 0.31795  | 1.98E-12 | 0.380404 | 1.58E-17 | 0.543277 | 3.26E-37 |
| 0.31585  | 0.311808 | 5.47E-12 | 0.729978 | 7.06E-79 | 0.766058 | 2.69E-91 | 0.8199   | #####    |
| 0.79787  | 0.141764 | 0.00213  | 0.180399 | 8.85E-05 | 0.296965 | 5.81E-11 | 0.446925 | 2.60E-24 |
| 4.60E-06 | 0.374233 | 5.68E-17 | 0.683668 | 1.32E-65 | 0.701174 | 2.54E-70 | 0.85471  | #####    |
| 2.06E-29 | -0.15759 | 0.00063  | -0.21461 | 2.87E-06 | -0.23372 | 3.25E-07 | -0.29807 | 4.90E-11 |
| 0.02978  | 0.085633 | 0.06446  | 0.097207 | 0.03573  | 0.284917 | 3.59E-10 | 0.382374 | 1.05E-17 |
| 0.12298  | 0.316395 | 2.57E-12 | 0.538135 | 2.05E-36 | 0.61757  | 1.90E-50 | 0.712832 | 1.17E-73 |
| 0.10799  | -0.19527 | 2.14E-05 | -0.41775 | 3.78E-21 | -0.28828 | 2.18E-10 | -0.4643  | 2.41E-26 |
| 0.25308  | 0.19427  | 2.37E-05 | 0.454018 | 3.97E-25 | 0.645204 | 2.50E-56 | 0.718765 | 2.03E-75 |
| 0.15568  | 0.273919 | 1.75E-09 | 0.239238 | 1.67E-07 | 0.362597 | 5.88E-16 | 0.533935 | 8.95E-36 |
| 0.00012  | 0.27004  | 3.02E-09 | 0.491841 | 8.10E-30 | 0.541653 | 5.84E-37 | 0.672727 | 7.98E-63 |
| 0.00301  | 0.194973 | 2.21E-05 | 0.338259 | 5.79E-14 | 0.664212 | 9.68E-61 | 0.779223 | 2.11E-96 |
| 0.39193  | 0.428099 | 3.10E-22 | 0.386678 | 4.19E-18 | 0.546182 | 1.14E-37 | 0.649285 | 3.00E-57 |
| 0.00037  | 0.221625 | 1.32E-06 | 0.403916 | 9.39E-20 | 0.313887 | 3.89E-12 | 0.517283 | 2.56E-33 |
| 0.40929  | 0.261425 | 9.79E-09 | 0.357845 | 1.49E-15 | 0.587656 | 1.05E-44 | 0.701581 | 1.96E-70 |
| 1.17E-06 | 0.324281 | 6.77E-13 | 0.456872 | 1.84E-25 | 0.664684 | 7.45E-61 | 0.854827 | #####    |
| 1.94E-07 | 0.140169 | 0.0024   | 0.678586 | 2.67E-64 | 0.684549 | 7.77E-66 | 0.672807 | 7.62E-63 |
| 0.85964  | 0.165239 | 0.00034  | 0.395113 | 6.72E-19 | 0.345377 | 1.58E-14 | 0.463332 | 3.14E-26 |

|          |          |          |          |          |          |          |          |          |
|----------|----------|----------|----------|----------|----------|----------|----------|----------|
| 0.41296  | 0.06008  | 0.19496  | 0.434785 | 5.87E-23 | 0.475201 | 1.11E-27 | 0.470892 | 3.79E-27 |
| 1.84E-11 | 0.300182 | 3.52E-11 | 0.368925 | 1.67E-16 | 0.536458 | 3.70E-36 | 0.714326 | 4.26E-74 |
| 0.31739  | 0.150032 | 0.00115  | 0.284719 | 3.69E-10 | 0.394918 | 7.01E-19 | 0.483268 | 1.06E-28 |
| 0.69355  | 0.090209 | 0.05139  | 0.388737 | 2.69E-18 | 0.432624 | 1.01E-22 | 0.520944 | 7.58E-34 |
| 0.06126  | 0.348604 | 8.64E-15 | 0.351787 | 4.74E-15 | 0.389605 | 2.23E-18 | 0.660167 | 8.95E-60 |
| 0.25261  | 0.158684 | 0.00058  | 0.247024 | 6.37E-08 | 0.54755  | 6.92E-38 | 0.534654 | 6.96E-36 |
| 3.18E-15 | 0.159815 | 0.00053  | 0.323149 | 8.22E-13 | 0.317212 | 2.24E-12 | 0.401145 | 1.76E-19 |
| 2.59E-05 | -0.37539 | 4.48E-17 | -0.22052 | 1.49E-06 | -0.51075 | 2.16E-32 | -0.66115 | 5.23E-60 |
| 0.7253   | 0.088153 | 0.05696  | 0.517474 | 2.40E-33 | 0.752034 | 3.24E-86 | 0.774355 | 1.79E-94 |
| 0.95377  | 0.269273 | 3.36E-09 | 0.456475 | 2.05E-25 | 0.717137 | 6.24E-75 | 0.816796 | #####    |
| 2.62E-05 | 0.302109 | 2.60E-11 | 0.399258 | 2.68E-19 | 0.585426 | 2.66E-44 | 0.646842 | 1.07E-56 |
| 0.02488  | 0.327904 | 3.62E-13 | 0.468253 | 7.98E-27 | 0.4869   | 3.59E-29 | 0.601384 | 2.89E-47 |
| 0.76428  | 0.213353 | 3.29E-06 | 0.53963  | 1.20E-36 | 0.510257 | 2.54E-32 | 0.567761 | 3.31E-41 |
| 0.89188  | 0.071206 | 0.12439  | 0.421717 | 1.46E-21 | 0.298245 | 4.76E-11 | 0.337309 | 6.87E-14 |
| 8.66E-16 | 0.328027 | 3.54E-13 | 0.368687 | 1.75E-16 | 0.388868 | 2.62E-18 | 0.543599 | 2.90E-37 |
| 0.01899  | 0.344306 | 1.92E-14 | 0.057877 | 0.21187  | 0.228374 | 6.10E-07 | 0.395522 | 6.14E-19 |
| 3.22E-09 | 0.248175 | 5.51E-08 | 0.202168 | 1.07E-05 | 0.235337 | 2.68E-07 | 0.44292  | 7.37E-24 |
| 0.0218   | -0.30044 | 3.38E-11 | -0.08566 | 0.06436  | -0.39744 | 4.02E-19 | -0.45024 | 1.09E-24 |
| 0.67261  | 0.159676 | 0.00053  | 0.315802 | 2.83E-12 | 0.513808 | 8.01E-33 | 0.617544 | 1.93E-50 |
| 6.73E-07 | 0.254631 | 2.40E-08 | 0.198879 | 1.49E-05 | 0.247726 | 5.83E-08 | 0.482822 | 1.20E-28 |
| 0.09316  | -0.19237 | 2.85E-05 | -0.28717 | 2.57E-10 | -0.37838 | 2.41E-17 | -0.54273 | 3.98E-37 |
| 0.91656  | 0.266848 | 4.69E-09 | 0.356801 | 1.82E-15 | 0.532317 | 1.57E-35 | 0.595357 | 3.98E-46 |
| 0.01588  | 0.024531 | 0.59695  | 0.280685 | 6.66E-10 | 0.416257 | 5.39E-21 | 0.402181 | 1.39E-19 |
| 1.12E-07 | 0.323216 | 8.12E-13 | 0.326594 | 4.54E-13 | 0.378329 | 2.44E-17 | 0.613857 | 1.06E-49 |
| 0.00504  | 0.254332 | 2.50E-08 | 0.388353 | 2.93E-18 | 0.569996 | 1.38E-41 | 0.632453 | 1.54E-53 |
| 0.00011  | 0.218474 | 1.88E-06 | 0.159358 | 0.00055  | 0.291489 | 1.34E-10 | 0.385098 | 5.87E-18 |
| 1.66E-06 | 0.173504 | 0.00016  | 0.147927 | 0.00135  | 0.271099 | 2.61E-09 | 0.409548 | 2.59E-20 |
| 0.26064  | 0.235585 | 2.60E-07 | 0.296442 | 6.30E-11 | 0.379306 | 1.99E-17 | 0.543065 | 3.52E-37 |
| 1.12E-07 | 0.421215 | 1.65E-21 | 0.61524  | 5.61E-50 | 0.804555 | #####    | 0.887666 | #####    |
| 0.00597  | 0.23213  | 3.93E-07 | 0.335181 | 1.01E-13 | 0.350493 | 6.05E-15 | 0.498747 | 9.71E-31 |
| 7.97E-07 | -0.30649 | 1.29E-11 | -0.24099 | 1.35E-07 | -0.32355 | 7.67E-13 | -0.51932 | 1.31E-33 |
| 0.00032  | 0.159043 | 0.00056  | 0.687766 | 1.11E-66 | 0.707257 | 4.84E-72 | 0.710872 | 4.38E-73 |
| 6.51E-05 | 0.307538 | 1.09E-11 | 0.786407 | 2.43E-99 | 0.760426 | 3.25E-89 | 0.829539 | #####    |
| 0.00021  | 0.157034 | 0.00066  | 0.484737 | 6.84E-29 | 0.665495 | 4.74E-61 | 0.687572 | 1.25E-66 |
| 0.32183  | 0.246038 | 7.22E-08 | 0.266423 | 4.97E-09 | 0.522851 | 4.00E-34 | 0.521171 | 7.03E-34 |
| 0.1416   | 0.323246 | 8.08E-13 | 0.480744 | 2.22E-28 | 0.671725 | 1.41E-62 | 0.727737 | 3.58E-78 |
| 0.12063  | 0.161499 | 0.00046  | 0.414093 | 8.97E-21 | 0.321531 | 1.08E-12 | 0.435312 | 5.14E-23 |
| 0.20672  | 0.217213 | 2.16E-06 | 0.451727 | 7.32E-25 | 0.489374 | 1.71E-29 | 0.513326 | 9.38E-33 |
| 0.10739  | -0.13047 | 0.00474  | -0.22585 | 8.16E-07 | -0.35542 | 2.37E-15 | -0.33991 | 4.29E-14 |
| 0.00024  | -0.20076 | 1.23E-05 | -0.15534 | 0.00076  | -0.3985  | 3.17E-19 | -0.45934 | 9.42E-26 |
| 0.19791  | 0.277842 | 1.00E-09 | 0.356464 | 1.94E-15 | 0.326829 | 4.36E-13 | 0.499799 | 7.00E-31 |
| 0.69658  | 0.248063 | 5.59E-08 | 0.331462 | 1.94E-13 | 0.32258  | 9.05E-13 | 0.467237 | 1.06E-26 |
| 0.21576  | 0.143207 | 0.00192  | 0.543669 | 2.83E-37 | 0.488355 | 2.32E-29 | 0.535032 | 6.10E-36 |
| 0.10265  | 0.012317 | 0.79065  | 0.305896 | 1.42E-11 | 0.465216 | 1.86E-26 | 0.417547 | 3.97E-21 |
| 0.01263  | 0.259417 | 1.28E-08 | 0.671537 | 1.58E-62 | 0.771986 | 1.49E-93 | 0.742728 | 4.99E-83 |

|          |          |          |          |          |          |          |          |          |
|----------|----------|----------|----------|----------|----------|----------|----------|----------|
| 1.55E-13 | 0.289126 | 1.92E-10 | 0.116147 | 0.01201  | 0.316355 | 2.58E-12 | 0.473157 | 1.99E-27 |
| 2.74E-05 | 0.088093 | 0.05713  | 0.597147 | 1.84E-46 | 0.614678 | 7.27E-50 | 0.647349 | 8.24E-57 |
| 0.32539  | 0.146625 | 0.00149  | 0.373939 | 6.03E-17 | 0.350192 | 6.41E-15 | 0.407814 | 3.86E-20 |
| 0.0172   | 0.258455 | 1.45E-08 | 0.799696 | #####    | 0.709562 | 1.05E-72 | 0.741601 | 1.19E-82 |
| 0.82881  | 0.391371 | 1.52E-18 | 0.351919 | 4.62E-15 | 0.332382 | 1.65E-13 | 0.508781 | 4.08E-32 |
| 0.0011   | 0.10381  | 0.02487  | 0.294218 | 8.86E-11 | 0.348341 | 9.07E-15 | 0.48422  | 7.97E-29 |
| 1.02E-06 | 0.209434 | 5.01E-06 | 0.391055 | 1.63E-18 | 0.56408  | 1.39E-40 | 0.496238 | 2.11E-30 |
| 5.58E-11 | -0.3084  | 9.53E-12 | -0.30738 | 1.12E-11 | -0.54995 | 2.87E-38 | -0.63381 | 7.86E-54 |
| 0.02027  | 0.394122 | 8.36E-19 | 0.38958  | 2.25E-18 | 0.432913 | 9.38E-23 | 0.633324 | 1.00E-53 |
| 1.91E-05 | 0.105481 | 0.02262  | 0.555861 | 3.18E-39 | 0.735572 | 1.14E-80 | 0.748521 | 5.38E-85 |
| 0.00024  | 0.281799 | 5.66E-10 | 0.388361 | 2.92E-18 | 0.518791 | 1.55E-33 | 0.636103 | 2.52E-54 |
| 1.34E-05 | -0.1864  | 5.06E-05 | -0.34383 | 2.09E-14 | -0.42941 | 2.24E-22 | -0.57439 | 2.40E-42 |
| 3.11E-06 | 0.340335 | 3.97E-14 | 0.402746 | 1.22E-19 | 0.647718 | 6.80E-57 | 0.663681 | 1.30E-60 |
| 0.13701  | 0.196838 | 1.83E-05 | 0.30746  | 1.11E-11 | 0.411758 | 1.55E-20 | 0.490231 | 1.32E-29 |
| 0.09131  | 0.080945 | 0.08057  | 0.37111  | 1.07E-16 | 0.485667 | 5.18E-29 | 0.466106 | 1.46E-26 |
| 0.00296  | 0.306025 | 1.40E-11 | 0.289111 | 1.92E-10 | 0.270831 | 2.71E-09 | 0.411849 | 1.52E-20 |
| 0.56567  | 0.194321 | 2.35E-05 | 0.092529 | 0.04566  | 0.235696 | 2.57E-07 | 0.419238 | 2.65E-21 |
| 2.49E-09 | 0.348613 | 8.62E-15 | 0.238903 | 1.74E-07 | 0.447563 | 2.20E-24 | 0.695828 | 7.60E-69 |
| 0.43485  | 0.07001  | 0.13086  | 0.100269 | 0.03027  | 0.33622  | 8.35E-14 | 0.356371 | 1.98E-15 |
| 0.00081  | -0.25687 | 1.79E-08 | -0.34385 | 2.09E-14 | -0.35672 | 1.85E-15 | -0.50285 | 2.69E-31 |
| 1.64E-07 | -0.33509 | 1.02E-13 | -0.3446  | 1.82E-14 | -0.32456 | 6.45E-13 | -0.4779  | 5.08E-28 |
| 0.00141  | 0.30387  | 1.97E-11 | 0.308641 | 9.16E-12 | 0.321929 | 1.01E-12 | 0.552828 | 9.88E-39 |
| 0.03597  | 0.318459 | 1.82E-12 | 0.397241 | 4.20E-19 | 0.46576  | 1.60E-26 | 0.632347 | 1.62E-53 |
| 0.00711  | 0.397698 | 3.79E-19 | 0.215375 | 2.64E-06 | 0.534456 | 7.46E-36 | 0.675626 | 1.50E-63 |
| 0.8216   | -0.19057 | 3.39E-05 | -0.24874 | 5.13E-08 | -0.35955 | 1.07E-15 | -0.47969 | 3.02E-28 |
| 0.8365   | 0.386465 | 4.39E-18 | 0.293888 | 9.32E-11 | 0.574299 | 2.49E-42 | 0.70292  | 8.24E-71 |
| 0.00026  | -0.15773 | 0.00062  | -0.21803 | 1.97E-06 | -0.27417 | 1.69E-09 | -0.36305 | 5.38E-16 |
| 9.41E-05 | 0.054411 | 0.24058  | 0.532599 | 1.43E-35 | 0.429715 | 2.08E-22 | 0.375809 | 4.11E-17 |
| 4.87E-05 | 0.423187 | 1.03E-21 | 0.328776 | 3.11E-13 | 0.623466 | 1.19E-51 | 0.764743 | 8.34E-91 |
| 0.08371  | -0.24944 | 4.69E-08 | -0.31654 | 2.51E-12 | -0.34169 | 3.10E-14 | -0.4171  | 4.41E-21 |
| 0.88168  | 0.213786 | 3.14E-06 | 0.440618 | 1.33E-23 | 0.344804 | 1.75E-14 | 0.373114 | 7.14E-17 |
| 2.91E-07 | -0.28891 | 1.98E-10 | -0.22368 | 1.05E-06 | -0.3604  | 9.04E-16 | -0.60023 | 4.80E-47 |
| 5.26E-05 | 0.209523 | 4.96E-06 | 0.191065 | 3.24E-05 | 0.194141 | 2.40E-05 | 0.449931 | 1.18E-24 |
| 0.03902  | 0.222401 | 1.21E-06 | 0.42872  | 2.66E-22 | 0.409056 | 2.90E-20 | 0.428967 | 2.50E-22 |
| 0.1119   | 0.248704 | 5.15E-08 | 0.093067 | 0.04441  | 0.329579 | 2.70E-13 | 0.486291 | 4.31E-29 |
| 0.08706  | 0.048226 | 0.29834  | 0.270014 | 3.03E-09 | 0.448266 | 1.83E-24 | 0.411064 | 1.82E-20 |
| 0.23459  | 0.097747 | 0.03471  | 0.620945 | 3.92E-51 | 0.716518 | 9.55E-75 | 0.743197 | 3.48E-83 |
| 0.01012  | 0.253257 | 2.87E-08 | 0.262918 | 8.01E-09 | 0.441892 | 9.61E-24 | 0.552318 | 1.19E-38 |
| 0.00942  | 0.28907  | 1.93E-10 | 0.378568 | 2.32E-17 | 0.57078  | 1.01E-41 | 0.623033 | 1.46E-51 |
| 0.1545   | 0.407156 | 4.49E-20 | 0.450178 | 1.10E-24 | 0.559852 | 7.02E-40 | 0.713335 | 8.35E-74 |
| 0.00431  | 0.179691 | 9.44E-05 | 0.127369 | 0.00585  | 0.36322  | 5.20E-16 | 0.452074 | 6.68E-25 |
| 0.00473  | 0.175119 | 0.00014  | 0.030578 | 0.50979  | 0.28047  | 6.87E-10 | 0.408563 | 3.25E-20 |
| 0.00216  | 0.231337 | 4.31E-07 | 0.576861 | 8.90E-43 | 0.626188 | 3.23E-52 | 0.590484 | 3.19E-45 |
| 0.44709  | 0.103748 | 0.02496  | 0.456163 | 2.23E-25 | 0.378676 | 2.27E-17 | 0.410501 | 2.07E-20 |
| 0.60322  | 0.272901 | 2.02E-09 | 0.194133 | 2.40E-05 | 0.422129 | 1.33E-21 | 0.53137  | 2.18E-35 |

|          |          |          |          |          |          |          |          |          |
|----------|----------|----------|----------|----------|----------|----------|----------|----------|
| 0.6629   | 0.200547 | 1.26E-05 | 0.335035 | 1.03E-13 | 0.371882 | 9.18E-17 | 0.436501 | 3.81E-23 |
| 2.81E-07 | 0.297576 | 5.28E-11 | 0.086661 | 0.06131  | 0.275438 | 1.41E-09 | 0.430647 | 1.65E-22 |
| 0.00337  | 0.191667 | 3.05E-05 | 0.57477  | 2.06E-42 | 0.739317 | 6.80E-82 | 0.735457 | 1.24E-80 |
| 0.10441  | 0.091992 | 0.04694  | 0.408416 | 3.36E-20 | 0.42412  | 8.19E-22 | 0.434558 | 6.21E-23 |
| 1.33E-05 | 0.353183 | 3.64E-15 | 0.248049 | 5.60E-08 | 0.516174 | 3.69E-33 | 0.60526  | 5.20E-48 |
| 0.00163  | 0.133636 | 0.00381  | 0.461531 | 5.17E-26 | 0.508279 | 4.80E-32 | 0.468371 | 7.72E-27 |
| 0.00045  | 0.145699 | 0.00159  | 0.334254 | 1.19E-13 | 0.703868 | 4.45E-71 | 0.71707  | 6.54E-75 |
| 2.21E-07 | 0.270101 | 2.99E-09 | 0.437837 | 2.71E-23 | 0.497807 | 1.30E-30 | 0.683527 | 1.43E-65 |
| 0.00053  | 0.272733 | 2.07E-09 | 0.394886 | 7.06E-19 | 0.565115 | 9.29E-41 | 0.7026   | 1.01E-70 |
| 0.00787  | -0.06131 | 0.18598  | -0.33609 | 8.55E-14 | -0.38047 | 1.56E-17 | -0.34311 | 2.39E-14 |
| 0.20056  | 0.152324 | 0.00096  | 0.37337  | 6.78E-17 | 0.478011 | 4.92E-28 | 0.499758 | 7.09E-31 |
| 0.30689  | -0.20801 | 5.82E-06 | -0.07764 | 0.09376  | -0.28204 | 5.47E-10 | -0.36147 | 7.33E-16 |
| 0.40399  | 0.183281 | 6.78E-05 | 0.397089 | 4.34E-19 | 0.494518 | 3.58E-30 | 0.54577  | 1.32E-37 |
| 5.91E-11 | 0.26126  | 1.00E-08 | 0.486092 | 4.57E-29 | 0.502436 | 3.07E-31 | 0.614807 | 6.86E-50 |
| 0.04803  | 0.370695 | 1.17E-16 | 0.260661 | 1.08E-08 | 0.541045 | 7.26E-37 | 0.733578 | 5.02E-80 |
| 0.80217  | 0.221476 | 1.34E-06 | 0.550225 | 2.59E-38 | 0.621203 | 3.47E-51 | 0.660483 | 7.53E-60 |
| 0.94146  | 0.17239  | 0.00018  | 0.424968 | 6.66E-22 | 0.727132 | 5.53E-78 | 0.81671  | #####    |
| 0.11625  | 0.283696 | 4.29E-10 | 0.489167 | 1.82E-29 | 0.639113 | 5.58E-55 | 0.708053 | 2.86E-72 |
| 0.08016  | 0.276612 | 1.20E-09 | 0.199554 | 1.40E-05 | 0.304325 | 1.83E-11 | 0.478664 | 4.07E-28 |
| 0.12071  | 0.239081 | 1.71E-07 | 0.402921 | 1.18E-19 | 0.638479 | 7.68E-55 | 0.738073 | 1.74E-81 |
| 6.89E-05 | 0.258904 | 1.37E-08 | 0.554359 | 5.58E-39 | 0.589927 | 4.04E-45 | 0.744629 | 1.14E-83 |
| 0.009    | 0.106618 | 0.0212   | 0.151844 | 0.001    | 0.367805 | 2.09E-16 | 0.353463 | 3.45E-15 |
| 0.67695  | 0.313763 | 3.97E-12 | 0.47603  | 8.72E-28 | 0.58692  | 1.43E-44 | 0.650952 | 1.25E-57 |
| 7.79E-06 | -0.01315 | 0.77677  | 0.487736 | 2.80E-29 | 0.426877 | 4.18E-22 | 0.34883  | 8.28E-15 |
| 0.00145  | 0.528272 | 6.35E-35 | 0.360076 | 9.63E-16 | 0.490779 | 1.12E-29 | 0.707732 | 3.54E-72 |
| 0.00386  | 0.218073 | 1.96E-06 | 0.38369  | 7.92E-18 | 0.393584 | 9.40E-19 | 0.516995 | 2.82E-33 |
| 1.26E-05 | 0.344371 | 1.90E-14 | 0.443123 | 6.99E-24 | 0.663421 | 1.50E-60 | 0.828885 | #####    |
| 0.01286  | 0.265113 | 5.95E-09 | 0.482429 | 1.35E-28 | 0.714683 | 3.34E-74 | 0.834973 | #####    |
| 0.267    | 0.289432 | 1.83E-10 | 0.505303 | 1.24E-31 | 0.752043 | 3.22E-86 | 0.87366  | #####    |
| 2.04E-06 | 0.089355 | 0.05365  | 0.500461 | 5.69E-31 | 0.441994 | 9.36E-24 | 0.470217 | 4.59E-27 |
| 0.07945  | 0.355949 | 2.14E-15 | 0.441036 | 1.20E-23 | 0.781703 | 2.10E-97 | 0.835076 | #####    |
| 0.32322  | 0.278289 | 9.41E-10 | 0.473116 | 2.01E-27 | 0.486684 | 3.83E-29 | 0.560236 | 6.07E-40 |
| 0.40403  | 0.382054 | 1.12E-17 | 0.171614 | 0.00019  | 0.449381 | 1.36E-24 | 0.588397 | 7.69E-45 |
| 0.02823  | 0.063442 | 0.17109  | 0.256615 | 1.85E-08 | 0.456397 | 2.09E-25 | 0.549074 | 3.96E-38 |
| 0.00026  | 0.251814 | 3.46E-08 | 0.756048 | 1.23E-87 | 0.75858  | 1.52E-88 | 0.798879 | #####    |
| 0.21088  | 0.316239 | 2.63E-12 | 0.609487 | 7.79E-49 | 0.55571  | 3.36E-39 | 0.718185 | 3.03E-75 |
| 2.38E-07 | -0.34547 | 1.55E-14 | -0.35433 | 2.92E-15 | -0.48983 | 1.49E-29 | -0.65486 | 1.57E-58 |
| 0.2215   | 0.163779 | 0.00038  | 0.554351 | 5.60E-39 | 0.523265 | 3.48E-34 | 0.630713 | 3.60E-53 |
| 0.27136  | 0.25236  | 3.23E-08 | 0.507941 | 5.34E-32 | 0.68618  | 2.91E-66 | 0.82951  | #####    |
| 0.00056  | 0.4336   | 7.90E-23 | 0.547157 | 7.98E-38 | 0.604582 | 7.04E-48 | 0.766162 | 2.46E-91 |
| 4.31E-05 | 0.251783 | 3.48E-08 | 0.395999 | 5.53E-19 | 0.410992 | 1.85E-20 | 0.479638 | 3.06E-28 |
| 0.00325  | 0.310278 | 7.02E-12 | 0.285116 | 3.48E-10 | 0.290366 | 1.59E-10 | 0.40147  | 1.63E-19 |
| 0.58342  | 0.170226 | 0.00022  | 0.348649 | 8.56E-15 | 0.354802 | 2.67E-15 | 0.423871 | 8.70E-22 |
| 0.02615  | 0.143578 | 0.00187  | 0.146003 | 0.00156  | 0.393178 | 1.03E-18 | 0.466167 | 1.43E-26 |
| 0.39053  | 0.40046  | 2.05E-19 | 0.189404 | 3.80E-05 | 0.33507  | 1.03E-13 | 0.577595 | 6.61E-43 |



|          |          |          |          |          |          |          |          |          |
|----------|----------|----------|----------|----------|----------|----------|----------|----------|
| 0.88632  | 0.198112 | 1.61E-05 | 0.221413 | 1.35E-06 | 0.283838 | 4.20E-10 | 0.378628 | 2.29E-17 |
| 0.29934  | 0.258006 | 1.54E-08 | 0.218937 | 1.78E-06 | 0.294388 | 8.64E-11 | 0.445229 | 4.05E-24 |
| 0.01079  | 0.130969 | 0.00458  | 0.305123 | 1.61E-11 | 0.298622 | 4.49E-11 | 0.37972  | 1.82E-17 |
| 0.22492  | 0.120849 | 0.00894  | 0.136531 | 0.00311  | 0.30363  | 2.04E-11 | 0.367508 | 2.22E-16 |
| 0.71508  | 0.262185 | 8.84E-09 | 0.379321 | 1.98E-17 | 0.452949 | 5.29E-25 | 0.587054 | 1.35E-44 |
| 0.91768  | 0.368025 | 2.00E-16 | 0.503483 | 2.20E-31 | 0.589247 | 5.38E-45 | 0.678    | 3.77E-64 |
| 0.00256  | 0.424447 | 7.56E-22 | 0.554984 | 4.42E-39 | 0.617403 | 2.06E-50 | 0.751661 | 4.38E-86 |
| 8.71E-09 | 0.360289 | 9.24E-16 | 0.366037 | 2.98E-16 | 0.509712 | 3.03E-32 | 0.672015 | 1.20E-62 |
| 1.15E-05 | 0.265974 | 5.29E-09 | 0.396178 | 5.31E-19 | 0.467179 | 1.08E-26 | 0.530013 | 3.49E-35 |
| 0.31756  | 0.338802 | 5.25E-14 | 0.162365 | 0.00043  | 0.423479 | 9.56E-22 | 0.595043 | 4.56E-46 |
| 2.59E-05 | 0.270362 | 2.89E-09 | 0.303944 | 1.95E-11 | 0.473177 | 1.98E-27 | 0.499747 | 7.12E-31 |
| 0.11057  | 0.374262 | 5.65E-17 | 0.299356 | 4.01E-11 | 0.597917 | 1.32E-46 | 0.745078 | 8.07E-84 |
| 0.0014   | -0.2467  | 6.64E-08 | -0.37378 | 6.22E-17 | -0.42835 | 2.91E-22 | -0.49149 | 9.01E-30 |
| 8.90E-09 | 0.085919 | 0.06357  | 0.448587 | 1.68E-24 | 0.562461 | 2.59E-40 | 0.625978 | 3.57E-52 |
| 9.03E-09 | 0.13412  | 0.00369  | 0.214312 | 2.96E-06 | 0.442995 | 7.23E-24 | 0.494243 | 3.90E-30 |
| 0.00074  | 0.294651 | 8.30E-11 | 0.691548 | 1.09E-67 | 0.67648  | 9.15E-64 | 0.797441 | #####    |
| 0.06924  | 0.146384 | 0.00151  | 0.309344 | 8.18E-12 | 0.620446 | 4.95E-51 | 0.695889 | 7.32E-69 |
| 7.87E-15 | 0.191737 | 3.03E-05 | 0.440056 | 1.54E-23 | 0.632227 | 1.72E-53 | 0.707166 | 5.14E-72 |
| 0.00879  | 0.143901 | 0.00182  | 0.668777 | 7.53E-62 | 0.426436 | 4.66E-22 | 0.515024 | 5.38E-33 |
| 0.05044  | 0.16279  | 0.00041  | 0.247369 | 6.10E-08 | 0.266254 | 5.09E-09 | 0.339621 | 4.52E-14 |
| 0.83632  | 0.362297 | 6.24E-16 | 0.218058 | 1.96E-06 | 0.559725 | 7.37E-40 | 0.754276 | 5.27E-87 |
| 0.62348  | 0.344907 | 1.72E-14 | 0.367072 | 2.42E-16 | 0.491466 | 9.08E-30 | 0.691894 | 8.84E-68 |
| 0.02616  | 0.254969 | 2.30E-08 | 0.460039 | 7.78E-26 | 0.582522 | 8.85E-44 | 0.664882 | 6.67E-61 |
| 0.08716  | 0.1898   | 3.66E-05 | 0.45528  | 2.83E-25 | 0.447107 | 2.48E-24 | 0.55391  | 6.60E-39 |
| 1.70E-05 | 0.313812 | 3.94E-12 | 0.297746 | 5.15E-11 | 0.570616 | 1.08E-41 | 0.666952 | 2.10E-61 |
| 0.3212   | 0.283632 | 4.33E-10 | 0.251899 | 3.42E-08 | 0.191877 | 2.99E-05 | 0.404055 | 9.10E-20 |
| 0.17707  | 0.228249 | 6.19E-07 | 0.31449  | 3.52E-12 | 0.359931 | 9.91E-16 | 0.521246 | 6.85E-34 |
| 0.01068  | 0.171574 | 0.00019  | 0.308687 | 9.09E-12 | 0.381436 | 1.27E-17 | 0.411134 | 1.79E-20 |
| 2.90E-06 | 0.234682 | 2.90E-07 | 0.221251 | 1.38E-06 | 0.303481 | 2.09E-11 | 0.507591 | 5.98E-32 |
| 0.0006   | 0.232096 | 3.94E-07 | 0.151746 | 0.001    | 0.228568 | 5.96E-07 | 0.395482 | 6.19E-19 |
| 1.07E-06 | -0.35069 | 5.83E-15 | -0.25373 | 2.70E-08 | -0.40732 | 4.32E-20 | -0.62412 | 8.67E-52 |
| 0.22371  | 0.409202 | 2.80E-20 | 0.403608 | 1.01E-19 | 0.540514 | 8.78E-37 | 0.627642 | 1.60E-52 |
| 0.08079  | 0.022037 | 0.63478  | 0.247042 | 6.36E-08 | 0.354086 | 3.06E-15 | 0.3326   | 1.59E-13 |
| 0.36853  | -0.1712  | 0.0002   | -0.22452 | 9.51E-07 | -0.21456 | 2.89E-06 | -0.39953 | 2.52E-19 |
| 2.45E-19 | -0.30558 | 1.50E-11 | -0.28661 | 2.79E-10 | -0.53262 | 1.42E-35 | -0.6507  | 1.43E-57 |
| 5.01E-08 | 0.302213 | 2.56E-11 | 0.266096 | 5.20E-09 | 0.489131 | 1.84E-29 | 0.740128 | 3.67E-82 |
| 0.32073  | 0.291545 | 1.33E-10 | 0.477595 | 5.55E-28 | 0.607206 | 2.18E-48 | 0.77321  | 4.99E-94 |
| 0.09687  | 0.209244 | 5.11E-06 | 0.220235 | 1.54E-06 | 0.483353 | 1.03E-28 | 0.578558 | 4.48E-43 |
| 0.00555  | 0.148805 | 0.00126  | 0.353715 | 3.29E-15 | 0.402509 | 1.29E-19 | 0.478816 | 3.89E-28 |
| 0.34127  | 0.422509 | 1.21E-21 | 0.232853 | 3.61E-07 | 0.461166 | 5.71E-26 | 0.669653 | 4.59E-62 |
| 2.03E-10 | 0.214256 | 2.98E-06 | 0.208726 | 5.40E-06 | 0.384087 | 7.28E-18 | 0.487396 | 3.10E-29 |
| 2.57E-23 | 0.198091 | 1.62E-05 | 0.306268 | 1.34E-11 | 0.546084 | 1.18E-37 | 0.624533 | 7.13E-52 |
| 5.09E-09 | 0.40582  | 6.09E-20 | 0.196826 | 1.84E-05 | 0.266318 | 5.05E-09 | 0.435782 | 4.56E-23 |
| 0.90644  | 0.121068 | 0.00882  | 0.28731  | 2.52E-10 | 0.351116 | 5.38E-15 | 0.404731 | 7.81E-20 |
| 0.00047  | -0.24187 | 1.21E-07 | -0.11329 | 0.0143   | -0.25581 | 2.06E-08 | -0.45318 | 4.97E-25 |

|          |          |          |          |          |          |          |          |          |
|----------|----------|----------|----------|----------|----------|----------|----------|----------|
| 0.00064  | 0.051088 | 0.27055  | 0.532525 | 1.46E-35 | 0.566403 | 5.63E-41 | 0.586121 | 1.99E-44 |
| 0.00225  | 0.102468 | 0.02681  | 0.698265 | 1.63E-69 | 0.706994 | 5.76E-72 | 0.702902 | 8.33E-71 |
| 0.27357  | 0.322453 | 9.25E-13 | 0.424562 | 7.35E-22 | 0.427066 | 3.99E-22 | 0.548783 | 4.40E-38 |
| 0.27076  | 0.215291 | 2.66E-06 | 0.230266 | 4.89E-07 | 0.318476 | 1.81E-12 | 0.48836  | 2.32E-29 |
| 0.00753  | 0.010455 | 0.82172  | 0.630186 | 4.66E-53 | 0.658075 | 2.79E-59 | 0.472585 | 2.34E-27 |
| 2.37E-06 | 0.3367   | 7.66E-14 | 0.384849 | 6.19E-18 | 0.614725 | 7.12E-50 | 0.801682 | #####    |
| 2.47E-10 | -0.26872 | 3.63E-09 | -0.30851 | 9.36E-12 | -0.39308 | 1.05E-18 | -0.54048 | 8.90E-37 |
| 0.00081  | 0.127096 | 0.00595  | 0.610402 | 5.15E-49 | 0.719494 | 1.22E-75 | 0.748497 | 5.48E-85 |
| 0.08908  | 0.134235 | 0.00366  | 0.228547 | 5.98E-07 | 0.324667 | 6.33E-13 | 0.406055 | 5.77E-20 |
| 0.79248  | 0.044292 | 0.33955  | 0.536238 | 3.99E-36 | 0.586901 | 1.44E-44 | 0.570049 | 1.35E-41 |
| 0.28222  | 0.464841 | 2.07E-26 | 0.483319 | 1.04E-28 | 0.52112  | 7.15E-34 | 0.728725 | 1.75E-78 |
| 0.004    | 0.358873 | 1.22E-15 | 0.405357 | 6.77E-20 | 0.418461 | 3.19E-21 | 0.669054 | 6.44E-62 |
| 4.64E-08 | 0.204999 | 7.98E-06 | 0.648791 | 3.89E-57 | 0.694996 | 1.28E-68 | 0.71178  | 2.38E-73 |
| 0.3616   | 0.379892 | 1.76E-17 | 0.087495 | 0.05885  | 0.341957 | 2.96E-14 | 0.529093 | 4.79E-35 |
| 0.19793  | 0.052613 | 0.2565   | 0.196498 | 1.90E-05 | 0.411357 | 1.70E-20 | 0.394543 | 7.62E-19 |
| 0.22985  | 0.187995 | 4.35E-05 | 0.399883 | 2.33E-19 | 0.365278 | 3.46E-16 | 0.483293 | 1.05E-28 |
| 0.00018  | 0.323547 | 7.67E-13 | 0.181563 | 7.95E-05 | 0.373467 | 6.64E-17 | 0.500655 | 5.36E-31 |
| 0.13346  | 0.262883 | 8.05E-09 | 0.22608  | 7.95E-07 | 0.435017 | 5.53E-23 | 0.580429 | 2.09E-43 |
| 0.0433   | 0.113027 | 0.01453  | 0.304206 | 1.87E-11 | 0.453593 | 4.45E-25 | 0.542429 | 4.42E-37 |
| 0.00194  | 0.368842 | 1.70E-16 | 0.70256  | 1.04E-70 | 0.657754 | 3.32E-59 | 0.81143  | #####    |
| 0.00038  | -0.27809 | 9.69E-10 | -0.29729 | 5.53E-11 | -0.34413 | 1.98E-14 | -0.49617 | 2.16E-30 |
| 0.00036  | -0.3181  | 1.93E-12 | -0.10727 | 0.02042  | -0.27793 | 9.91E-10 | -0.5349  | 6.39E-36 |
| 0.12648  | 0.202609 | 1.02E-05 | 0.487046 | 3.44E-29 | 0.707836 | 3.30E-72 | 0.687465 | 1.34E-66 |
| 0.0049   | 0.257923 | 1.56E-08 | 0.325051 | 5.93E-13 | 0.507061 | 7.08E-32 | 0.657296 | 4.25E-59 |
| 0.08343  | 0.209541 | 4.95E-06 | 0.342791 | 2.54E-14 | 0.509758 | 2.98E-32 | 0.636547 | 2.02E-54 |
| 0.40285  | 0.323953 | 7.16E-13 | 0.098372 | 0.03356  | 0.229735 | 5.21E-07 | 0.49211  | 7.47E-30 |
| 0.92905  | 0.250465 | 4.12E-08 | 0.367218 | 2.35E-16 | 0.588685 | 6.81E-45 | 0.589464 | 4.91E-45 |
| 3.11E-05 | 0.245642 | 7.59E-08 | 0.554326 | 5.65E-39 | 0.546495 | 1.02E-37 | 0.543055 | 3.53E-37 |
| 0.6235   | 0.372311 | 8.41E-17 | 0.177133 | 0.00012  | 0.511494 | 1.70E-32 | 0.639432 | 4.75E-55 |
| 0.08525  | -0.19305 | 2.67E-05 | -0.26078 | 1.07E-08 | -0.23077 | 4.61E-07 | -0.38988 | 2.10E-18 |
| 4.32E-09 | -0.1974  | 1.73E-05 | -0.33392 | 1.26E-13 | -0.38609 | 4.76E-18 | -0.47956 | 3.13E-28 |
| 9.51E-08 | -0.21789 | 2.00E-06 | -0.31012 | 7.20E-12 | -0.51631 | 3.53E-33 | -0.56697 | 4.52E-41 |
| 0.88035  | 0.24419  | 9.09E-08 | 0.279567 | 7.83E-10 | 0.704203 | 3.58E-71 | 0.769144 | 1.83E-92 |
| 0.24665  | 0.218223 | 1.93E-06 | 0.250029 | 4.35E-08 | 0.513958 | 7.63E-33 | 0.656392 | 6.91E-59 |
| 5.94E-25 | 0.349335 | 7.53E-15 | 0.393791 | 8.98E-19 | 0.481001 | 2.06E-28 | 0.636334 | 2.25E-54 |
| 0.88398  | 0.271466 | 2.48E-09 | 0.74599  | 3.95E-84 | 0.786783 | 1.70E-99 | 0.80755  | #####    |
| 0.16018  | 0.43963  | 1.72E-23 | 0.370335 | 1.26E-16 | 0.592397 | 1.42E-45 | 0.76079  | 2.39E-89 |
| 2.23E-08 | 0.163839 | 0.00038  | 0.389739 | 2.17E-18 | 0.453094 | 5.08E-25 | 0.43898  | 2.03E-23 |
| 0.00681  | 0.189788 | 3.66E-05 | 0.343985 | 2.04E-14 | 0.523327 | 3.41E-34 | 0.546545 | 9.98E-38 |
| 0.74584  | 0.16592  | 0.00032  | 0.401894 | 1.48E-19 | 0.320542 | 1.28E-12 | 0.41209  | 1.43E-20 |
| 0.115    | 0.183806 | 6.45E-05 | 0.488137 | 2.48E-29 | 0.432777 | 9.71E-23 | 0.628884 | 8.78E-53 |
| 6.32E-11 | 0.127823 | 0.00567  | 0.179777 | 9.37E-05 | 0.392375 | 1.22E-18 | 0.474577 | 1.32E-27 |
| 0.00075  | 0.151257 | 0.00104  | 0.069573 | 0.13329  | -0.06149 | 0.18466  | 0.186223 | 5.14E-05 |
| 0.00692  | 0.087901 | 0.05768  | 0.530781 | 2.68E-35 | 0.473803 | 1.65E-27 | 0.501862 | 3.67E-31 |
| 1.87E-11 | 0.188265 | 4.24E-05 | 0.369882 | 1.38E-16 | 0.61927  | 8.61E-51 | 0.715925 | 1.43E-74 |

|          |          |          |          |          |          |          |          |          |
|----------|----------|----------|----------|----------|----------|----------|----------|----------|
| 0.00879  | 0.120575 | 0.0091   | 0.264505 | 6.46E-09 | 0.408859 | 3.03E-20 | 0.480402 | 2.45E-28 |
| 5.66E-12 | 0.404202 | 8.80E-20 | 0.234154 | 3.09E-07 | 0.249691 | 4.54E-08 | 0.373294 | 6.88E-17 |
| 9.81E-07 | 0.451349 | 8.09E-25 | 0.463939 | 2.66E-26 | 0.745229 | 7.17E-84 | 0.922443 | #####    |
| 0.0019   | 0.437445 | 3.00E-23 | 0.443651 | 6.10E-24 | 0.577068 | 8.19E-43 | 0.825654 | #####    |
| 0.00023  | -0.31658 | 2.49E-12 | -0.21558 | 2.58E-06 | -0.43199 | 1.18E-22 | -0.56957 | 1.63E-41 |
| 0.87044  | 0.214408 | 2.93E-06 | 0.344808 | 1.75E-14 | 0.492547 | 6.54E-30 | 0.56228  | 2.77E-40 |
| 2.46E-05 | 0.057264 | 0.21676  | 0.573454 | 3.49E-42 | 0.485633 | 5.24E-29 | 0.522056 | 5.22E-34 |
| 1.84E-21 | 0.47335  | 1.88E-27 | 0.287078 | 2.60E-10 | 0.320889 | 1.21E-12 | 0.566173 | 6.16E-41 |
| 0.2955   | 0.172692 | 0.00018  | 0.550447 | 2.39E-38 | 0.707153 | 5.19E-72 | 0.773332 | 4.47E-94 |
| 0.81897  | 0.37726  | 3.04E-17 | 0.477084 | 6.43E-28 | 0.709671 | 9.77E-73 | 0.717749 | 4.09E-75 |
| 5.53E-10 | 0.129596 | 0.00503  | 0.389725 | 2.18E-18 | 0.436824 | 3.51E-23 | 0.515753 | 4.24E-33 |
| 0.82368  | 0.105409 | 0.02272  | 0.138367 | 0.00273  | 0.225833 | 8.18E-07 | 0.392723 | 1.13E-18 |
| 4.49E-06 | 0.126826 | 0.00606  | 0.380751 | 1.47E-17 | 0.544723 | 1.93E-37 | 0.546112 | 1.17E-37 |
| 0.00136  | 0.285116 | 3.48E-10 | 0.27639  | 1.24E-09 | 0.404421 | 8.38E-20 | 0.549347 | 3.58E-38 |
| 2.28E-13 | -0.29461 | 8.34E-11 | -0.254   | 2.61E-08 | -0.36013 | 9.53E-16 | -0.53145 | 2.13E-35 |
| 0.10267  | 0.354485 | 2.84E-15 | -0.01135 | 0.80671  | 0.174789 | 0.00015  | 0.403769 | 9.71E-20 |
| 0.7366   | 0.564569 | 1.15E-40 | 0.375247 | 4.61E-17 | 0.660447 | 7.68E-60 | 0.840918 | #####    |
| 0.04586  | 0.222668 | 1.17E-06 | 0.087304 | 0.0594   | 0.275732 | 1.36E-09 | 0.413039 | 1.15E-20 |
| 1.78E-13 | 0.145021 | 0.00168  | 0.548672 | 4.59E-38 | 0.774304 | 1.87E-94 | 0.828075 | #####    |
| 0.00112  | -0.0004  | 0.99308  | 0.273903 | 1.76E-09 | 0.392927 | 1.09E-18 | 0.379105 | 2.07E-17 |
| 3.57E-08 | -0.15159 | 0.00102  | -0.21054 | 4.45E-06 | -0.34289 | 2.49E-14 | -0.41083 | 1.92E-20 |
| 0.88534  | 0.220943 | 1.42E-06 | 0.306219 | 1.35E-11 | 0.335228 | 9.97E-14 | 0.442826 | 7.55E-24 |
| 0.30549  | 0.289101 | 1.92E-10 | 0.444906 | 4.41E-24 | 0.605702 | 4.27E-48 | 0.633605 | 8.70E-54 |
| 0.83439  | 0.205734 | 7.39E-06 | 0.325497 | 5.49E-13 | 0.258149 | 1.51E-08 | 0.394232 | 8.15E-19 |
| 0.92982  | 0.29106  | 1.43E-10 | 0.576079 | 1.22E-42 | 0.750759 | 9.04E-86 | 0.844858 | #####    |
| 0.62251  | 0.167078 | 0.00029  | 0.158222 | 0.0006   | 0.421645 | 1.49E-21 | 0.530893 | 2.58E-35 |
| 0.07091  | 0.343135 | 2.38E-14 | 0.323842 | 7.30E-13 | 0.357195 | 1.69E-15 | 0.482286 | 1.41E-28 |
| 0.85511  | 0.022696 | 0.62468  | 0.332819 | 1.53E-13 | 0.506834 | 7.61E-32 | 0.465245 | 1.85E-26 |
| 0.00078  | 0.236476 | 2.34E-07 | 0.228562 | 5.97E-07 | 0.408873 | 3.02E-20 | 0.512603 | 1.19E-32 |
| 0.18054  | 0.17686  | 0.00012  | 0.702785 | 8.99E-71 | 0.636496 | 2.07E-54 | 0.64624  | 1.46E-56 |
| 4.75E-05 | -0.27373 | 1.80E-09 | -0.19687 | 1.83E-05 | -0.32186 | 1.02E-12 | -0.45762 | 1.50E-25 |
| 6.95E-16 | 0.14319  | 0.00192  | 0.417105 | 4.41E-21 | 0.546578 | 9.86E-38 | 0.634062 | 6.94E-54 |
| 0.32952  | 0.165306 | 0.00033  | 0.252875 | 3.02E-08 | 0.329129 | 2.93E-13 | 0.389566 | 2.25E-18 |
| 0.60028  | 0.288639 | 2.06E-10 | 0.680755 | 7.46E-65 | 0.755583 | 1.81E-87 | 0.745001 | 8.57E-84 |
| 0.0141   | -0.10878 | 0.0187   | -0.14314 | 0.00193  | -0.38693 | 3.97E-18 | -0.39957 | 2.50E-19 |
| 0.03506  | -0.32434 | 6.70E-13 | -0.09092 | 0.04957  | -0.26566 | 5.52E-09 | -0.4591  | 1.01E-25 |
| 0.35708  | -0.11337 | 0.01423  | -0.20973 | 4.85E-06 | -0.55449 | 5.31E-39 | -0.55616 | 2.85E-39 |
| 0.10772  | 0.451674 | 7.42E-25 | 0.319991 | 1.40E-12 | 0.57379  | 3.05E-42 | 0.772306 | 1.12E-93 |
| 0.6232   | 0.091473 | 0.0482   | 0.362096 | 6.49E-16 | 0.630085 | 4.89E-53 | 0.646306 | 1.42E-56 |
| 0.20086  | -0.23758 | 2.05E-07 | -0.27613 | 1.28E-09 | -0.38841 | 2.89E-18 | -0.5039  | 1.93E-31 |
| 0.05715  | 0.192875 | 2.71E-05 | 0.24601  | 7.24E-08 | 0.518625 | 1.64E-33 | 0.474792 | 1.25E-27 |
| 0.44798  | -0.15956 | 0.00054  | -0.30139 | 2.91E-11 | -0.40964 | 2.53E-20 | -0.41842 | 3.23E-21 |
| 0.69951  | 0.066127 | 0.15365  | 0.584163 | 4.50E-44 | 0.592024 | 1.66E-45 | 0.494618 | 3.47E-30 |
| 0.23767  | -0.06134 | 0.18575  | 0.372724 | 7.73E-17 | 0.292151 | 1.21E-10 | 0.251994 | 3.38E-08 |
| 0.52866  | -0.07987 | 0.08467  | 0.519269 | 1.33E-33 | 0.47552  | 1.01E-27 | 0.363458 | 4.96E-16 |

|          |          |          |          |          |          |          |          |          |
|----------|----------|----------|----------|----------|----------|----------|----------|----------|
| 0.08244  | 0.081749 | 0.07759  | 0.27138  | 2.51E-09 | 0.353503 | 3.42E-15 | 0.399078 | 2.79E-19 |
| 0.00024  | 0.131727 | 0.00435  | 0.141761 | 0.00213  | 0.4758   | 9.32E-28 | 0.475874 | 9.12E-28 |
| 0.01659  | 0.131392 | 0.00445  | 0.277586 | 1.04E-09 | 0.474702 | 1.28E-27 | 0.597539 | 1.55E-46 |
| 0.9204   | 0.128887 | 0.00528  | 0.217745 | 2.03E-06 | 0.476156 | 8.41E-28 | 0.455885 | 2.40E-25 |
| 0.03093  | 0.151407 | 0.00103  | 0.078853 | 0.08874  | 0.327829 | 3.67E-13 | 0.366622 | 2.65E-16 |
| 0.12641  | -0.10979 | 0.01762  | -0.13461 | 0.00356  | -0.32267 | 8.92E-13 | -0.31879 | 1.72E-12 |
| 2.50E-06 | 0.069172 | 0.13554  | 0.218658 | 1.84E-06 | 0.366194 | 2.88E-16 | 0.403718 | 9.83E-20 |
| 0.18092  | 0.181894 | 7.71E-05 | 0.243109 | 1.04E-07 | 0.379644 | 1.85E-17 | 0.471933 | 2.82E-27 |
| 0.23582  | 0.171257 | 0.0002   | 0.291788 | 1.28E-10 | 0.575355 | 1.63E-42 | 0.665183 | 5.64E-61 |
| 0.34455  | 0.343265 | 2.33E-14 | 0.433792 | 7.53E-23 | 0.640362 | 2.97E-55 | 0.78222  | 1.29E-97 |
| 0.22763  | 0.268329 | 3.83E-09 | 0.533254 | 1.14E-35 | 0.806321 | #####    | 0.799915 | #####    |
| 0.49155  | 0.292694 | 1.12E-10 | 0.352255 | 4.34E-15 | 0.55252  | 1.11E-38 | 0.687736 | 1.13E-66 |
| 0.47269  | 0.234699 | 2.90E-07 | 0.208323 | 5.63E-06 | 0.439705 | 1.68E-23 | 0.542735 | 3.96E-37 |
| 0.56896  | 0.132985 | 0.00399  | 0.394737 | 7.30E-19 | 0.620071 | 5.91E-51 | 0.695938 | 7.09E-69 |
| 0.07261  | 0.335108 | 1.02E-13 | 0.29779  | 5.11E-11 | 0.521036 | 7.35E-34 | 0.651265 | 1.06E-57 |
| 0.85523  | 0.312185 | 5.14E-12 | 0.488252 | 2.39E-29 | 0.74549  | 5.85E-84 | 0.873858 | #####    |
| 0.33271  | 0.119821 | 0.00955  | 0.299444 | 3.95E-11 | 0.491857 | 8.06E-30 | 0.518873 | 1.51E-33 |
| 0.25057  | 0.099417 | 0.03171  | 0.401392 | 1.66E-19 | 0.335082 | 1.02E-13 | 0.351394 | 5.11E-15 |
| 0.00368  | 0.16206  | 0.00044  | 0.357367 | 1.63E-15 | 0.510514 | 2.34E-32 | 0.578371 | 4.83E-43 |
| 2.87E-07 | 0.06717  | 0.14726  | 0.617837 | 1.68E-50 | 0.725246 | 2.13E-77 | 0.698258 | 1.64E-69 |
| 0.02018  | 0.168408 | 0.00026  | 0.580432 | 2.09E-43 | 0.399861 | 2.34E-19 | 0.401669 | 1.56E-19 |
| 0.00393  | 0.164373 | 0.00036  | 0.644089 | 4.44E-56 | 0.59516  | 4.34E-46 | 0.522713 | 4.19E-34 |
| 1.62E-05 | -0.31074 | 6.51E-12 | -0.22054 | 1.49E-06 | -0.36289 | 5.55E-16 | -0.57861 | 4.39E-43 |
| 2.55E-08 | 0.491633 | 8.63E-30 | 0.517847 | 2.12E-33 | 0.348887 | 8.19E-15 | 0.545681 | 1.37E-37 |
| 0.01759  | 0.161096 | 0.00047  | 0.310952 | 6.29E-12 | 0.293414 | 1.00E-10 | 0.377427 | 2.94E-17 |
| 0.64066  | 0.303431 | 2.11E-11 | 0.44708  | 2.50E-24 | 0.38494  | 6.07E-18 | 0.5457   | 1.36E-37 |
| 0.08533  | 0.27465  | 1.58E-09 | 0.337786 | 6.30E-14 | 0.459927 | 8.02E-26 | 0.575332 | 1.65E-42 |
| 0.06579  | 0.078228 | 0.0913   | 0.321868 | 1.02E-12 | 0.347165 | 1.13E-14 | 0.407547 | 4.10E-20 |
| 1.28E-08 | 0.291903 | 1.26E-10 | 0.369042 | 1.63E-16 | 0.593112 | 1.04E-45 | 0.678852 | 2.29E-64 |
| 7.76E-14 | -0.16719 | 0.00028  | -0.09509 | 0.03998  | -0.28186 | 5.61E-10 | -0.34968 | 7.05E-15 |
| 0.23822  | -0.17467 | 0.00015  | -0.15143 | 0.00103  | -0.37171 | 9.50E-17 | -0.33689 | 7.40E-14 |
| 0.00092  | 0.209344 | 5.06E-06 | 0.179413 | 9.68E-05 | 0.442501 | 8.21E-24 | 0.615552 | 4.86E-50 |
| 0.09045  | -0.27243 | 2.16E-09 | -0.31785 | 2.01E-12 | -0.26839 | 3.80E-09 | -0.52641 | 1.20E-34 |
| 0.56277  | 0.293868 | 9.35E-11 | 0.134441 | 0.00361  | 0.341319 | 3.32E-14 | 0.541351 | 6.51E-37 |
| 0.3078   | 0.316116 | 2.69E-12 | 0.239749 | 1.57E-07 | 0.270203 | 2.95E-09 | 0.483337 | 1.03E-28 |
| 0.74608  | 0.241817 | 1.22E-07 | 0.484661 | 6.99E-29 | 0.672029 | 1.19E-62 | 0.683216 | 1.73E-65 |
| 1.99E-05 | 0.163389 | 0.00039  | 0.23457  | 2.94E-07 | 0.456591 | 1.99E-25 | 0.543422 | 3.09E-37 |
| 0.00565  | 0.218474 | 1.88E-06 | 0.319717 | 1.47E-12 | 0.411424 | 1.67E-20 | 0.624023 | 9.10E-52 |
| 0.19784  | 0.241114 | 1.33E-07 | 0.320318 | 1.33E-12 | 0.465511 | 1.72E-26 | 0.472424 | 2.45E-27 |
| 0.10385  | 0.261511 | 9.68E-09 | 0.137828 | 0.00284  | 0.300509 | 3.34E-11 | 0.503509 | 2.19E-31 |
| 0.0207   | 0.201855 | 1.10E-05 | 0.568449 | 2.53E-41 | 0.423954 | 8.52E-22 | 0.578562 | 4.47E-43 |
| 0.01182  | 0.27034  | 2.90E-09 | 0.191227 | 3.18E-05 | 0.255805 | 2.06E-08 | 0.445932 | 3.37E-24 |
| 0.29936  | 0.651867 | 7.72E-58 | 0.298694 | 4.44E-11 | 0.443908 | 5.71E-24 | 0.651657 | 8.63E-58 |
| 0.1939   | 0.276213 | 1.27E-09 | 0.13855  | 0.00269  | 0.440054 | 1.54E-23 | 0.50162  | 3.96E-31 |
| 0.9518   | 0.061149 | 0.18712  | 0.741251 | 1.55E-82 | 0.730293 | 5.61E-79 | 0.668182 | 1.05E-61 |

|          |          |          |          |          |          |          |          |          |
|----------|----------|----------|----------|----------|----------|----------|----------|----------|
| 0.08815  | 0.149478 | 0.0012   | 0.290272 | 1.61E-10 | 0.460596 | 6.68E-26 | 0.5958   | 3.29E-46 |
| 0.00941  | 0.236636 | 2.30E-07 | 0.581253 | 1.49E-43 | 0.830323 | #####    | 0.852339 | #####    |
| 0.02824  | 0.098614 | 0.03313  | 0.380275 | 1.62E-17 | 0.497846 | 1.28E-30 | 0.460145 | 7.55E-26 |
| 0.00193  | 0.193226 | 2.62E-05 | 0.371629 | 9.66E-17 | 0.605923 | 3.87E-48 | 0.684622 | 7.44E-66 |
| 0.89649  | 0.229204 | 5.54E-07 | 0.409873 | 2.40E-20 | 0.295696 | 7.07E-11 | 0.316949 | 2.34E-12 |
| 0.48522  | 0.371941 | 9.07E-17 | 0.379062 | 2.09E-17 | 0.709131 | 1.40E-72 | 0.743712 | 2.33E-83 |
| 0.40693  | 0.099848 | 0.03098  | 0.310486 | 6.79E-12 | 0.474624 | 1.31E-27 | 0.507539 | 6.08E-32 |
| 1.88E-06 | 0.356205 | 2.04E-15 | 0.364218 | 4.27E-16 | 0.645719 | 1.92E-56 | 0.757751 | 3.03E-88 |
| 0.79628  | 0.127846 | 0.00566  | 0.578459 | 4.66E-43 | 0.493442 | 4.98E-30 | 0.485803 | 4.98E-29 |
| 0.50643  | 0.244544 | 8.70E-08 | 0.149499 | 0.00119  | 0.35806  | 1.43E-15 | 0.389406 | 2.33E-18 |
| 0.36072  | 0.274942 | 1.52E-09 | 0.50015  | 6.28E-31 | 0.737598 | 2.50E-81 | 0.792156 | #####    |
| 0.04404  | 0.385298 | 5.63E-18 | 0.609216 | 8.81E-49 | 0.748458 | 5.65E-85 | 0.862271 | #####    |
| 0.00023  | 0.234122 | 3.10E-07 | 0.338284 | 5.76E-14 | 0.591835 | 1.80E-45 | 0.682592 | 2.51E-65 |
| 0.88592  | 0.155234 | 0.00076  | 0.466704 | 1.23E-26 | 0.734918 | 1.86E-80 | 0.835866 | #####    |
| 0.67561  | 0.311209 | 6.04E-12 | 0.482654 | 1.27E-28 | 0.77605  | 3.85E-95 | 0.905821 | #####    |
| 0.8508   | 0.313491 | 4.15E-12 | 0.616513 | 3.11E-50 | 0.683046 | 1.91E-65 | 0.810258 | #####    |
| 4.07E-10 | 0.259273 | 1.30E-08 | 0.487465 | 3.03E-29 | 0.583478 | 5.97E-44 | 0.7702   | 7.24E-93 |
| 0.10536  | 0.183746 | 6.49E-05 | 0.148498 | 0.00129  | 0.371603 | 9.71E-17 | 0.472044 | 2.73E-27 |
| 1.43E-22 | 0.258042 | 1.54E-08 | 0.270818 | 2.71E-09 | 0.37806  | 2.58E-17 | 0.533971 | 8.84E-36 |
| 0.0543   | 0.145582 | 0.00161  | 0.259897 | 1.20E-08 | 0.434132 | 6.91E-23 | 0.506236 | 9.21E-32 |
| 0.12187  | 0.337599 | 6.52E-14 | 0.321428 | 1.10E-12 | 0.39667  | 4.76E-19 | 0.488352 | 2.32E-29 |
| 1.07E-24 | 0.285597 | 3.24E-10 | 0.326341 | 4.75E-13 | 0.542383 | 4.50E-37 | 0.69235  | 6.67E-68 |
| 0.05496  | 0.066784 | 0.1496   | 0.434175 | 6.84E-23 | 0.569207 | 1.88E-41 | 0.615808 | 4.32E-50 |
| 0.28648  | 0.213783 | 3.14E-06 | 0.246926 | 6.45E-08 | 0.61305  | 1.54E-49 | 0.766333 | 2.12E-91 |
| 9.72E-08 | 0.318064 | 1.94E-12 | 0.340656 | 3.75E-14 | 0.435077 | 5.45E-23 | 0.578656 | 4.30E-43 |
| 0.07316  | 0.095687 | 0.03873  | 0.378855 | 2.19E-17 | 0.592169 | 1.56E-45 | 0.62181  | 2.60E-51 |
| 0.88732  | 0.184256 | 6.19E-05 | 0.63602  | 2.63E-54 | 0.76957  | 1.26E-92 | 0.775736 | 5.13E-95 |
| 0.72572  | 0.1662   | 0.00031  | 0.028053 | 0.54537  | 0.219751 | 1.63E-06 | 0.370104 | 1.32E-16 |
| 0.85436  | 0.375911 | 4.02E-17 | 0.563054 | 2.06E-40 | 0.722252 | 1.78E-76 | 0.779416 | 1.76E-96 |
| 0.93074  | 0.117768 | 0.01086  | 0.318436 | 1.82E-12 | 0.406993 | 4.66E-20 | 0.455181 | 2.91E-25 |
| 0.52626  | 0.187769 | 4.44E-05 | 0.399395 | 2.60E-19 | 0.660842 | 6.19E-60 | 0.730195 | 6.03E-79 |
| 0.75998  | 0.133353 | 0.00389  | 0.54575  | 1.33E-37 | 0.784873 | 1.05E-98 | 0.81499  | #####    |
| 0.96098  | 0.053181 | 0.25139  | 0.259827 | 1.21E-08 | 0.322675 | 8.91E-13 | 0.377582 | 2.85E-17 |
| 0.00385  | 0.118652 | 0.01028  | 0.608618 | 1.15E-48 | 0.531078 | 2.42E-35 | 0.607492 | 1.92E-48 |
| 1.05E-05 | 0.253894 | 2.65E-08 | 0.339125 | 4.95E-14 | 0.546754 | 9.25E-38 | 0.675789 | 1.37E-63 |
| 0.38536  | 0.181661 | 7.88E-05 | 0.334906 | 1.06E-13 | 0.325119 | 5.86E-13 | 0.478593 | 4.15E-28 |
| 0.00447  | 0.152357 | 0.00096  | 0.326436 | 4.67E-13 | 0.293012 | 1.07E-10 | 0.36357  | 4.85E-16 |
| 1.64E-06 | 0.400063 | 2.24E-19 | 0.349356 | 7.50E-15 | 0.47248  | 2.41E-27 | 0.682197 | 3.17E-65 |
| 3.34E-05 | 0.369741 | 1.42E-16 | 0.385938 | 4.91E-18 | 0.529366 | 4.36E-35 | 0.678114 | 3.53E-64 |
| 0.02853  | 0.169758 | 0.00023  | 0.292374 | 1.17E-10 | 0.4175   | 4.01E-21 | 0.528141 | 6.64E-35 |
| 0.14739  | 0.317604 | 2.10E-12 | 0.576983 | 8.47E-43 | 0.798686 | #####    | 0.877681 | #####    |
| 3.64E-05 | 0.240668 | 1.41E-07 | 0.327489 | 3.89E-13 | 0.389143 | 2.47E-18 | 0.465648 | 1.65E-26 |
| 0.19913  | 0.116001 | 0.01212  | 0.525607 | 1.58E-34 | 0.748218 | 6.84E-85 | 0.805639 | #####    |
| 0.25772  | 0.274215 | 1.68E-09 | 0.654782 | 1.64E-58 | 0.723452 | 7.62E-77 | 0.705123 | 1.97E-71 |
| 0.61627  | 0.327875 | 3.64E-13 | 0.385149 | 5.81E-18 | 0.463459 | 3.04E-26 | 0.586813 | 1.49E-44 |

|          |          |          |          |          |          |          |          |          |
|----------|----------|----------|----------|----------|----------|----------|----------|----------|
| 0.00646  | 0.369411 | 1.51E-16 | 0.372935 | 7.41E-17 | 0.311596 | 5.67E-12 | 0.428465 | 2.83E-22 |
| 0.00944  | 0.177025 | 0.00012  | 0.307918 | 1.03E-11 | 0.606747 | 2.68E-48 | 0.692142 | 7.58E-68 |
| 0.06285  | 0.367203 | 2.36E-16 | 0.425345 | 6.08E-22 | 0.769517 | 1.32E-92 | 0.739022 | 8.51E-82 |
| 0.58433  | 0.218493 | 1.87E-06 | 0.343766 | 2.12E-14 | 0.40365  | 9.98E-20 | 0.495571 | 2.59E-30 |
| 2.02E-09 | 0.25228  | 3.26E-08 | 0.575845 | 1.34E-42 | 0.54471  | 1.94E-37 | 0.677349 | 5.51E-64 |
| 0.0007   | 0.284675 | 3.72E-10 | 0.468833 | 6.78E-27 | 0.660697 | 6.70E-60 | 0.756637 | 7.61E-88 |
| 2.92E-11 | 0.408266 | 3.48E-20 | 0.315062 | 3.20E-12 | 0.563846 | 1.52E-40 | 0.775944 | 4.24E-95 |
| 0.00023  | 0.098569 | 0.03321  | 0.252608 | 3.13E-08 | 0.377693 | 2.78E-17 | 0.451595 | 7.58E-25 |
| 0.49617  | 0.205255 | 7.77E-06 | 0.193829 | 2.47E-05 | 0.302859 | 2.31E-11 | 0.373777 | 6.24E-17 |
| 0.07621  | 0.500139 | 6.30E-31 | 0.266594 | 4.86E-09 | 0.534384 | 7.65E-36 | 0.692186 | 7.38E-68 |
| 0.69498  | 0.211628 | 3.96E-06 | 0.38795  | 3.19E-18 | 0.728789 | 1.67E-78 | 0.789658 | #####    |
| 0.42066  | 0.536839 | 3.23E-36 | 0.3559   | 2.16E-15 | 0.657999 | 2.91E-59 | 0.857818 | #####    |
| 0.12957  | 0.094427 | 0.04138  | 0.219107 | 1.75E-06 | 0.454079 | 3.91E-25 | 0.459725 | 8.47E-26 |
| 0.02045  | -0.23014 | 4.97E-07 | -0.30766 | 1.07E-11 | -0.35219 | 4.39E-15 | -0.39988 | 2.33E-19 |
| 3.34E-07 | 0.161851 | 0.00045  | 0.26785  | 4.09E-09 | 0.331742 | 1.85E-13 | 0.4225   | 1.21E-21 |
| 0.00011  | 0.281558 | 5.87E-10 | 0.049425 | 0.28648  | 0.235555 | 2.61E-07 | 0.440155 | 1.50E-23 |
| 5.14E-07 | 0.453506 | 4.55E-25 | 0.558263 | 1.28E-39 | 0.515544 | 4.54E-33 | 0.681544 | 4.67E-65 |
| 0.00486  | 0.171396 | 0.0002   | 0.714308 | 4.32E-74 | 0.768565 | 3.04E-92 | 0.748395 | 5.94E-85 |
| 2.33E-05 | -0.19716 | 1.78E-05 | -0.36163 | 7.11E-16 | -0.39747 | 3.99E-19 | -0.51715 | 2.67E-33 |
| 2.45E-08 | 0.22131  | 1.37E-06 | 0.552944 | 9.47E-39 | 0.54081  | 7.90E-37 | 0.645535 | 2.11E-56 |
| 0.28486  | 0.377642 | 2.81E-17 | 0.447737 | 2.10E-24 | 0.669652 | 4.60E-62 | 0.770873 | 4.00E-93 |
| 0.12295  | 0.108985 | 0.01848  | 0.517536 | 2.35E-33 | 0.466377 | 1.35E-26 | 0.464592 | 2.22E-26 |
| 0.44768  | 0.135641 | 0.00331  | 0.261546 | 9.63E-09 | 0.529646 | 3.96E-35 | 0.609166 | 9.01E-49 |
| 0.80801  | 0.161568 | 0.00046  | 0.309017 | 8.62E-12 | 0.619825 | 6.63E-51 | 0.671505 | 1.60E-62 |
| 0.00156  | 0.173322 | 0.00017  | 0.645445 | 2.21E-56 | 0.849514 | #####    | 0.833717 | #####    |
| 0.54537  | 0.112501 | 0.015    | 0.191876 | 2.99E-05 | 0.414751 | 7.69E-21 | 0.488847 | 2.00E-29 |
| 0.02743  | 0.072723 | 0.11655  | 0.33959  | 4.55E-14 | 0.555879 | 3.16E-39 | 0.583873 | 5.07E-44 |
| 7.12E-07 | 0.080987 | 0.08041  | 0.4992   | 8.44E-31 | 0.565409 | 8.29E-41 | 0.591514 | 2.06E-45 |
| 0.36078  | 0.185647 | 5.43E-05 | 0.421164 | 1.67E-21 | 0.566998 | 4.46E-41 | 0.592483 | 1.36E-45 |
| 0.00041  | 0.305588 | 1.50E-11 | 0.433689 | 7.72E-23 | 0.716434 | 1.01E-74 | 0.813922 | #####    |
| 0.11487  | 0.160743 | 0.00049  | 0.328616 | 3.20E-13 | 0.540029 | 1.04E-36 | 0.643453 | 6.15E-56 |
| 0.22439  | 0.15049  | 0.00111  | 0.087214 | 0.05967  | 0.276622 | 1.20E-09 | 0.430236 | 1.83E-22 |
| 0.8812   | 0.254197 | 2.54E-08 | 0.404177 | 8.85E-20 | 0.755868 | 1.43E-87 | 0.815479 | #####    |
| 0.3324   | 0.236451 | 2.35E-07 | 0.721295 | 3.48E-76 | 0.773144 | 5.30E-94 | 0.793777 | #####    |
| 5.82E-12 | 0.275257 | 1.45E-09 | 0.285206 | 3.44E-10 | 0.568498 | 2.48E-41 | 0.763596 | 2.22E-90 |
| 0.01266  | 0.080879 | 0.08081  | 0.383627 | 8.02E-18 | 0.712751 | 1.24E-73 | 0.696492 | 5.01E-69 |
| 5.52E-05 | 0.222513 | 1.19E-06 | 0.461486 | 5.23E-26 | 0.484752 | 6.80E-29 | 0.567899 | 3.14E-41 |
| 0.39579  | 0.125543 | 0.0066   | 0.268987 | 3.49E-09 | 0.485065 | 6.20E-29 | 0.617072 | 2.40E-50 |
| 0.31483  | 0.323709 | 7.46E-13 | 0.441827 | 9.77E-24 | 0.61003  | 6.09E-49 | 0.682272 | 3.03E-65 |
| 0.03002  | 0.329334 | 2.82E-13 | 0.399304 | 2.65E-19 | 0.588982 | 6.01E-45 | 0.665654 | 4.34E-61 |
| 0.66726  | 0.278478 | 9.16E-10 | 0.57227  | 5.60E-42 | 0.805377 | #####    | 0.862583 | #####    |
| 0.06245  | 0.23721  | 2.14E-07 | 0.004291 | 0.92632  | 0.196151 | 1.96E-05 | 0.400139 | 2.20E-19 |
| 2.75E-08 | 0.220035 | 1.58E-06 | 0.256612 | 1.85E-08 | 0.477216 | 6.19E-28 | 0.686796 | 2.00E-66 |
| 0.33524  | 0.178856 | 0.0001   | 0.310003 | 7.35E-12 | 0.323089 | 8.30E-13 | 0.441518 | 1.06E-23 |
| 0.14904  | 0.073453 | 0.11292  | 0.387975 | 3.17E-18 | 0.281404 | 6.00E-10 | 0.327824 | 3.67E-13 |

|          |          |          |          |          |          |          |          |          |
|----------|----------|----------|----------|----------|----------|----------|----------|----------|
| 7.32E-06 | -0.23308 | 3.51E-07 | -0.22781 | 6.51E-07 | -0.42554 | 5.80E-22 | -0.55079 | 2.10E-38 |
| 6.68E-11 | 0.469709 | 5.29E-27 | 0.367815 | 2.09E-16 | 0.341455 | 3.24E-14 | 0.546388 | 1.06E-37 |
| 2.21E-08 | 0.103651 | 0.02509  | 0.446422 | 2.97E-24 | 0.557441 | 1.75E-39 | 0.515995 | 3.91E-33 |
| 1.24E-14 | 0.192224 | 2.89E-05 | 0.472189 | 2.62E-27 | 0.614956 | 6.40E-50 | 0.72961  | 9.22E-79 |
| 5.92E-13 | 0.33127  | 2.01E-13 | 0.371765 | 9.40E-17 | 0.452361 | 6.18E-25 | 0.657045 | 4.86E-59 |
| 1.41E-08 | 0.172836 | 0.00017  | 0.204702 | 8.23E-06 | 0.22525  | 8.74E-07 | 0.420138 | 2.14E-21 |
| 0.03202  | 0.331045 | 2.09E-13 | 0.645615 | 2.02E-56 | 0.548072 | 5.72E-38 | 0.66812  | 1.09E-61 |
| 0.91191  | 0.314058 | 3.78E-12 | 0.307213 | 1.15E-11 | 0.515787 | 4.19E-33 | 0.605065 | 5.67E-48 |
| 0.6958   | 0.120915 | 0.00891  | 0.632776 | 1.31E-53 | 0.676875 | 7.27E-64 | 0.645665 | 1.97E-56 |
| 0.65899  | 0.138897 | 0.00263  | 0.512477 | 1.24E-32 | 0.626917 | 2.27E-52 | 0.651188 | 1.10E-57 |
| 8.98E-29 | 0.198705 | 1.52E-05 | 0.380098 | 1.69E-17 | 0.636247 | 2.35E-54 | 0.715734 | 1.63E-74 |
| 2.74E-08 | 0.284058 | 4.07E-10 | 0.499973 | 6.63E-31 | 0.680606 | 8.14E-65 | 0.691186 | 1.37E-67 |
| 7.93E-23 | 0.313104 | 4.42E-12 | 0.277528 | 1.05E-09 | 0.515312 | 4.90E-33 | 0.627635 | 1.61E-52 |
| 0.55201  | 0.309436 | 8.05E-12 | 0.60167  | 2.55E-47 | 0.735358 | 1.34E-80 | 0.803019 | #####    |
| 0.00011  | 0.287277 | 2.53E-10 | 0.427031 | 4.02E-22 | 0.33799  | 6.07E-14 | 0.499072 | 8.78E-31 |
| 1.65E-07 | 0.22779  | 6.53E-07 | 0.095314 | 0.0395   | 0.243783 | 9.57E-08 | 0.379444 | 1.93E-17 |
| 0.59956  | 0.256776 | 1.82E-08 | 0.638071 | 9.42E-55 | 0.433806 | 7.50E-23 | 0.506907 | 7.44E-32 |
| 0.15665  | 0.280702 | 6.64E-10 | 0.420359 | 2.03E-21 | 0.608193 | 1.40E-48 | 0.692131 | 7.63E-68 |
| 0.60208  | 0.187483 | 4.56E-05 | 0.056996 | 0.21892  | 0.334439 | 1.15E-13 | 0.480949 | 2.09E-28 |
| 0.00054  | 0.298185 | 4.81E-11 | 0.119255 | 0.0099   | 0.251038 | 3.83E-08 | 0.405035 | 7.28E-20 |
| 6.88E-14 | -0.32743 | 3.93E-13 | -0.29535 | 7.45E-11 | -0.44049 | 1.38E-23 | -0.59858 | 9.87E-47 |
| 0.00108  | 0.205736 | 7.39E-06 | 0.206048 | 7.15E-06 | 0.404432 | 8.35E-20 | 0.447563 | 2.20E-24 |
| 0.07985  | 0.229015 | 5.66E-07 | 0.192239 | 2.89E-05 | 0.29083  | 1.48E-10 | 0.429192 | 2.36E-22 |
| 9.46E-06 | 0.411253 | 1.74E-20 | 0.393865 | 8.84E-19 | 0.669292 | 5.64E-62 | 0.751596 | 4.61E-86 |
| 0.00754  | 0.404763 | 7.75E-20 | 0.571849 | 6.62E-42 | 0.693645 | 2.98E-68 | 0.76473  | 8.43E-91 |
| 0.74792  | 0.269959 | 3.05E-09 | 0.279988 | 7.37E-10 | 0.30978  | 7.62E-12 | 0.529056 | 4.85E-35 |
| 6.77E-15 | 0.16577  | 0.00032  | 0.168432 | 0.00026  | 0.306142 | 1.37E-11 | 0.459502 | 9.01E-26 |
| 0.04693  | 0.279959 | 7.40E-10 | 0.379281 | 2.00E-17 | 0.502852 | 2.69E-31 | 0.650903 | 1.28E-57 |
| 0.01697  | 0.336619 | 7.77E-14 | 0.337731 | 6.36E-14 | 0.320455 | 1.30E-12 | 0.523824 | 2.88E-34 |
| 1.07E-10 | 0.441535 | 1.05E-23 | 0.225297 | 8.70E-07 | 0.401991 | 1.45E-19 | 0.694931 | 1.33E-68 |
| 0.00498  | 0.421776 | 1.44E-21 | 0.443736 | 5.97E-24 | 0.757547 | 3.59E-88 | 0.924691 | #####    |
| 0.00049  | 0.334794 | 1.08E-13 | 0.231197 | 4.39E-07 | 0.297792 | 5.11E-11 | 0.508788 | 4.07E-32 |
| 1.53E-06 | 0.108889 | 0.01858  | 0.4615   | 5.21E-26 | 0.432761 | 9.75E-23 | 0.42714  | 3.92E-22 |
| 0.23921  | 0.320758 | 1.23E-12 | 0.381089 | 1.37E-17 | 0.566867 | 4.70E-41 | 0.624264 | 8.11E-52 |
| 5.79E-06 | -0.24397 | 9.35E-08 | -0.21713 | 2.18E-06 | -0.32613 | 4.92E-13 | -0.45176 | 7.26E-25 |
| 0.33516  | 0.279367 | 8.06E-10 | 0.383161 | 8.86E-18 | 0.592118 | 1.59E-45 | 0.656595 | 6.20E-59 |
| 0.01476  | 0.247959 | 5.66E-08 | 0.193867 | 2.46E-05 | 0.337359 | 6.80E-14 | 0.468691 | 7.05E-27 |
| 0.00197  | 0.163706 | 0.00038  | 0.397824 | 3.69E-19 | 0.289424 | 1.83E-10 | 0.389709 | 2.18E-18 |
| 8.96E-07 | -0.28606 | 3.03E-10 | -0.15607 | 0.00071  | -0.25963 | 1.24E-08 | -0.43088 | 1.56E-22 |
| 5.43E-08 | 0.255578 | 2.12E-08 | 0.307725 | 1.06E-11 | 0.354444 | 2.86E-15 | 0.517351 | 2.50E-33 |
| 0.42312  | 0.291241 | 1.39E-10 | 0.40905  | 2.90E-20 | 0.588398 | 7.68E-45 | 0.68675  | 2.06E-66 |
| 9.90E-05 | 0.216446 | 2.35E-06 | 0.429876 | 2.00E-22 | 0.615721 | 4.49E-50 | 0.596041 | 2.97E-46 |
| 0.00028  | 0.394352 | 7.94E-19 | 0.169999 | 0.00022  | 0.336399 | 8.09E-14 | 0.582303 | 9.69E-44 |
| 3.30E-10 | 0.236371 | 2.37E-07 | 0.24687  | 6.50E-08 | 0.459421 | 9.21E-26 | 0.618288 | 1.36E-50 |
| 6.88E-09 | 0.154877 | 0.00078  | 0.095735 | 0.03864  | 0.283778 | 4.24E-10 | 0.334006 | 1.24E-13 |

|          |          |          |          |          |          |          |          |          |
|----------|----------|----------|----------|----------|----------|----------|----------|----------|
| 2.68E-05 | -0.14413 | 0.00179  | -0.19365 | 2.51E-05 | -0.33184 | 1.82E-13 | -0.40117 | 1.75E-19 |
| 0.00199  | 0.280184 | 7.16E-10 | 0.304813 | 1.69E-11 | 0.339246 | 4.84E-14 | 0.479006 | 3.68E-28 |
| 0.3087   | 0.212608 | 3.56E-06 | 0.441767 | 9.92E-24 | 0.417633 | 3.89E-21 | 0.447877 | 2.03E-24 |
| 1.72E-08 | -0.06192 | 0.18161  | -0.04004 | 0.38797  | -0.36348 | 4.94E-16 | -0.39027 | 1.94E-18 |
| 0.02237  | 0.201864 | 1.10E-05 | 0.47537  | 1.05E-27 | 0.423916 | 8.60E-22 | 0.522951 | 3.87E-34 |
| 4.48E-08 | 0.364652 | 3.92E-16 | 0.182591 | 7.23E-05 | 0.467321 | 1.04E-26 | 0.596702 | 2.23E-46 |
| 3.61E-06 | 0.17973  | 9.41E-05 | 0.206916 | 6.53E-06 | 0.498197 | 1.15E-30 | 0.590686 | 2.93E-45 |
| 0.60414  | 0.174544 | 0.00015  | 0.466466 | 1.32E-26 | 0.80122  | #####    | 0.856996 | #####    |
| 0.00213  | 0.164706 | 0.00035  | 0.196749 | 1.85E-05 | 0.349449 | 7.37E-15 | 0.378767 | 2.23E-17 |
| 0.80799  | 0.213594 | 3.20E-06 | 0.285264 | 3.41E-10 | 0.407362 | 4.28E-20 | 0.484204 | 8.01E-29 |
| 3.11E-09 | -0.22131 | 1.37E-06 | -0.18531 | 5.61E-05 | -0.39295 | 1.08E-18 | -0.48181 | 1.62E-28 |
| 0.49688  | 0.445048 | 4.25E-24 | 0.268932 | 3.52E-09 | 0.310809 | 6.44E-12 | 0.446248 | 3.10E-24 |
| 0.00124  | 0.208873 | 5.31E-06 | 0.454637 | 3.36E-25 | 0.677852 | 4.11E-64 | 0.681121 | 6.00E-65 |
| 0.09408  | 0.400717 | 1.93E-19 | 0.322441 | 9.27E-13 | 0.419157 | 2.70E-21 | 0.569699 | 1.55E-41 |
| 1.81E-09 | 0.358412 | 1.33E-15 | 0.297061 | 5.72E-11 | 0.442019 | 9.30E-24 | 0.651954 | 7.37E-58 |
| 0.0742   | 0.342862 | 2.50E-14 | 0.594828 | 5.00E-46 | 0.677687 | 4.53E-64 | 0.756998 | 5.65E-88 |
| 6.28E-06 | 0.339211 | 4.87E-14 | 0.568531 | 2.45E-41 | 0.863602 | #####    | 0.877688 | #####    |
| 0.43744  | 0.223681 | 1.05E-06 | 0.416079 | 5.62E-21 | 0.546918 | 8.71E-38 | 0.572891 | 4.37E-42 |
| 0.09391  | 0.173124 | 0.00017  | 0.187097 | 4.73E-05 | 0.43284  | 9.55E-23 | 0.492974 | 5.74E-30 |
| 0.82132  | 0.181533 | 7.97E-05 | 0.653069 | 4.08E-58 | 0.783824 | 2.85E-98 | 0.813756 | #####    |
| 0.83918  | 0.073961 | 0.11044  | 0.165292 | 0.00033  | 0.323187 | 8.16E-13 | 0.392568 | 1.17E-18 |
| 0.76265  | 0.297497 | 5.35E-11 | 0.273875 | 1.76E-09 | 0.441308 | 1.12E-23 | 0.564065 | 1.39E-40 |
| 0.48581  | 0.238115 | 1.92E-07 | 0.088802 | 0.05515  | 0.310444 | 6.84E-12 | 0.387457 | 3.55E-18 |
| 0.12377  | 0.152488 | 0.00095  | 0.57769  | 6.36E-43 | 0.403794 | 9.66E-20 | 0.467659 | 9.43E-27 |
| 0.99787  | 0.291394 | 1.36E-10 | 0.655096 | 1.39E-58 | 0.640256 | 3.13E-55 | 0.756328 | 9.81E-88 |
| 0.07155  | 0.00864  | 0.85227  | 0.245529 | 7.69E-08 | 0.434458 | 6.37E-23 | 0.425305 | 6.14E-22 |
| 0.46966  | 0.547373 | 7.38E-38 | 0.376299 | 3.71E-17 | 0.526565 | 1.14E-34 | 0.674981 | 2.18E-63 |
| 0.001    | -0.19386 | 2.46E-05 | -0.18058 | 8.70E-05 | -0.40073 | 1.93E-19 | -0.45374 | 4.27E-25 |
| 0.50332  | 0.174695 | 0.00015  | 0.642829 | 8.46E-56 | 0.670063 | 3.64E-62 | 0.618328 | 1.34E-50 |
| 0.03677  | 0.0754   | 0.10366  | 0.517636 | 2.28E-33 | 0.460134 | 7.58E-26 | 0.453492 | 4.57E-25 |
| 2.31E-17 | 0.26546  | 5.67E-09 | 0.416333 | 5.29E-21 | 0.46225  | 4.24E-26 | 0.615539 | 4.89E-50 |
| 1.40E-08 | 0.193331 | 2.59E-05 | 0.517434 | 2.44E-33 | 0.603207 | 1.29E-47 | 0.647017 | 9.79E-57 |
| 5.28E-05 | 0.055801 | 0.22875  | 0.478403 | 4.39E-28 | 0.350813 | 5.70E-15 | 0.390213 | 1.96E-18 |
| 3.68E-05 | -0.35636 | 1.98E-15 | -0.1394  | 0.00254  | -0.24415 | 9.14E-08 | -0.45366 | 4.37E-25 |
| 1.36E-14 | 0.158712 | 0.00058  | 0.541611 | 5.93E-37 | 0.439128 | 1.95E-23 | 0.540075 | 1.03E-36 |
| 3.49E-05 | 0.181308 | 8.14E-05 | 0.67754  | 4.93E-64 | 0.626581 | 2.67E-52 | 0.596721 | 2.21E-46 |
| 2.42E-05 | 0.065987 | 0.15453  | 0.222558 | 1.19E-06 | 0.331476 | 1.94E-13 | 0.394668 | 7.41E-19 |
| 0.43232  | 0.140342 | 0.00237  | 0.364459 | 4.07E-16 | 0.694349 | 1.92E-68 | 0.713577 | 7.09E-74 |
| 0.67718  | 0.301918 | 2.68E-11 | 0.264356 | 6.59E-09 | 0.279721 | 7.66E-10 | 0.430303 | 1.80E-22 |
| 0.18257  | 0.267772 | 4.13E-09 | 0.061768 | 0.18269  | 0.313069 | 4.45E-12 | 0.392788 | 1.12E-18 |
| 1.92E-13 | -0.30323 | 2.18E-11 | -0.23459 | 2.93E-07 | -0.41782 | 3.72E-21 | -0.58697 | 1.40E-44 |
| 0.02521  | -0.17206 | 0.00019  | -0.25679 | 1.81E-08 | -0.29854 | 4.55E-11 | -0.4082  | 3.53E-20 |
| 0.00083  | 0.235282 | 2.70E-07 | 0.544065 | 2.45E-37 | 0.592446 | 1.39E-45 | 0.706134 | 1.01E-71 |
| 0.02097  | 0.267511 | 4.28E-09 | 0.354514 | 2.82E-15 | 0.375675 | 4.22E-17 | 0.482819 | 1.21E-28 |
| 0.17425  | 0.225226 | 8.77E-07 | 0.598044 | 1.25E-46 | 0.409497 | 2.62E-20 | 0.506358 | 8.86E-32 |



|          |          |          |          |          |          |          |          |          |
|----------|----------|----------|----------|----------|----------|----------|----------|----------|
| 0.01094  | -0.28061 | 6.73E-10 | -0.14159 | 0.00216  | -0.38813 | 3.07E-18 | -0.48991 | 1.45E-29 |
| 0.31802  | 0.132907 | 0.00401  | 0.257735 | 1.60E-08 | 0.460048 | 7.76E-26 | 0.539031 | 1.49E-36 |
| 0.28305  | 0.253567 | 2.76E-08 | 0.607982 | 1.54E-48 | 0.789136 | #####    | 0.847573 | #####    |
| 0.03098  | 0.22732  | 6.89E-07 | 0.718784 | 2.00E-75 | 0.843207 | #####    | 0.853217 | #####    |
| 7.99E-10 | 0.166914 | 0.00029  | 0.374011 | 5.94E-17 | 0.664802 | 6.98E-61 | 0.71413  | 4.87E-74 |
| 0.25188  | 0.102595 | 0.02662  | 0.568556 | 2.43E-41 | 0.52815  | 6.62E-35 | 0.399035 | 2.82E-19 |
| 0.15068  | 0.235767 | 2.55E-07 | 0.692633 | 5.59E-68 | 0.787651 | #####    | 0.871158 | #####    |
| 0.00219  | -0.15557 | 0.00074  | -0.28811 | 2.23E-10 | -0.32223 | 9.61E-13 | -0.41731 | 4.20E-21 |
| 1.36E-05 | -0.26963 | 3.20E-09 | -0.19384 | 2.47E-05 | -0.32439 | 6.65E-13 | -0.44621 | 3.14E-24 |
| 2.23E-08 | -0.30092 | 3.14E-11 | -0.28969 | 1.76E-10 | -0.41853 | 3.14E-21 | -0.60162 | 2.61E-47 |
| 0.22343  | -0.13892 | 0.00262  | -0.29174 | 1.29E-10 | -0.42918 | 2.37E-22 | -0.35865 | 1.27E-15 |
| 0.00014  | 0.304027 | 1.92E-11 | 0.380988 | 1.40E-17 | 0.412406 | 1.33E-20 | 0.543879 | 2.62E-37 |
| 0.03269  | 0.339589 | 4.55E-14 | 0.253939 | 2.63E-08 | 0.276146 | 1.28E-09 | 0.453273 | 4.85E-25 |
| 6.92E-05 | -0.20873 | 5.40E-06 | -0.29126 | 1.39E-10 | -0.34648 | 1.28E-14 | -0.42171 | 1.47E-21 |
| 0.97155  | 0.223984 | 1.01E-06 | 0.16856  | 0.00025  | 0.273637 | 1.83E-09 | 0.362832 | 5.61E-16 |
| 3.93E-07 | 0.544747 | 1.92E-37 | 0.509165 | 3.61E-32 | 0.511695 | 1.59E-32 | 0.719805 | 9.85E-76 |
| 0.6049   | 0.117948 | 0.01074  | 0.106757 | 0.02103  | 0.286478 | 2.85E-10 | 0.355446 | 2.36E-15 |
| 0.84177  | 0.249677 | 4.55E-08 | 0.158648 | 0.00058  | 0.314255 | 3.66E-12 | 0.45181  | 7.16E-25 |
| 0.57895  | 0.230751 | 4.62E-07 | 0.41734  | 4.17E-21 | 0.480715 | 2.24E-28 | 0.620889 | 4.02E-51 |
| 0.05256  | 0.173297 | 0.00017  | 0.46538  | 1.78E-26 | 0.520686 | 8.27E-34 | 0.587429 | 1.15E-44 |
| 0.67028  | 0.227443 | 6.79E-07 | 0.545007 | 1.75E-37 | 0.780878 | 4.54E-97 | 0.818488 | #####    |
| 0.61284  | 0.195586 | 2.08E-05 | 0.19012  | 3.55E-05 | 0.177206 | 0.00012  | 0.27665  | 1.19E-09 |
| 0.00462  | 0.230357 | 4.84E-07 | 0.508772 | 4.09E-32 | 0.647312 | 8.40E-57 | 0.700031 | 5.29E-70 |
| 0.04588  | 0.266368 | 5.01E-09 | 0.609051 | 9.49E-49 | 0.803876 | #####    | 0.893625 | #####    |
| 0.0006   | -0.1028  | 0.02631  | 0.031119 | 0.50232  | -0.3512  | 5.30E-15 | -0.37829 | 2.46E-17 |
| 0.53854  | 0.305278 | 1.57E-11 | 0.447491 | 2.24E-24 | 0.766899 | 1.30E-91 | 0.889764 | #####    |
| 0.22141  | 0.246821 | 6.54E-08 | 0.193334 | 2.59E-05 | 0.520662 | 8.33E-34 | 0.663858 | 1.18E-60 |
| 0.39488  | 0.139781 | 0.00247  | 0.212889 | 3.46E-06 | 0.393    | 1.07E-18 | 0.40082  | 1.89E-19 |
| 0.0087   | 0.221218 | 1.38E-06 | 0.310387 | 6.90E-12 | 0.543729 | 2.77E-37 | 0.654421 | 1.99E-58 |
| 0.02011  | 0.224808 | 9.20E-07 | 0.248036 | 5.61E-08 | 0.311143 | 6.10E-12 | 0.50159  | 4.00E-31 |
| 0.65515  | 0.288736 | 2.03E-10 | 0.279982 | 7.37E-10 | 0.605647 | 4.38E-48 | 0.698532 | 1.38E-69 |
| 1.00E-06 | 0.34565  | 1.50E-14 | 0.175495 | 0.00014  | 0.481765 | 1.64E-28 | 0.624921 | 5.93E-52 |
| 1.13E-20 | 0.387682 | 3.38E-18 | 0.357181 | 1.69E-15 | 0.480858 | 2.14E-28 | 0.711751 | 2.43E-73 |
| 0.99636  | 0.284549 | 3.79E-10 | 0.304917 | 1.67E-11 | 0.534192 | 8.19E-36 | 0.595298 | 4.09E-46 |
| 0.41728  | 0.310006 | 7.34E-12 | 0.274415 | 1.64E-09 | 0.308293 | 9.69E-12 | 0.5298   | 3.76E-35 |
| 8.91E-06 | -0.29705 | 5.73E-11 | -0.24894 | 5.00E-08 | -0.46137 | 5.39E-26 | -0.56104 | 4.47E-40 |
| 0.6849   | 0.157359 | 0.00064  | 0.303591 | 2.06E-11 | 0.403061 | 1.14E-19 | 0.4493   | 1.39E-24 |
| 0.34102  | 0.321558 | 1.08E-12 | 0.136246 | 0.00318  | 0.413704 | 9.83E-21 | 0.612017 | 2.47E-49 |
| 0.02621  | 0.371319 | 1.03E-16 | 0.45371  | 4.31E-25 | 0.559703 | 7.43E-40 | 0.788291 | #####    |
| 6.88E-05 | 0.29069  | 1.52E-10 | 0.247187 | 6.25E-08 | 0.430248 | 1.82E-22 | 0.5732   | 3.87E-42 |
| 0.0758   | 0.182804 | 7.09E-05 | 0.18922  | 3.87E-05 | 0.340834 | 3.63E-14 | 0.450477 | 1.02E-24 |
| 9.91E-12 | 0.580865 | 1.75E-43 | 0.388482 | 2.85E-18 | 0.39885  | 2.94E-19 | 0.613866 | 1.06E-49 |
| 8.85E-18 | 0.320146 | 1.37E-12 | 0.341323 | 3.32E-14 | 0.434211 | 6.78E-23 | 0.656199 | 7.67E-59 |
| 0.40956  | -0.27117 | 2.58E-09 | -0.11615 | 0.01201  | -0.24247 | 1.13E-07 | -0.40964 | 2.53E-20 |
| 0.00052  | 0.23295  | 3.57E-07 | 0.398083 | 3.48E-19 | 0.449438 | 1.34E-24 | 0.464411 | 2.33E-26 |

|          |          |          |          |          |          |          |          |          |
|----------|----------|----------|----------|----------|----------|----------|----------|----------|
| 0.49556  | 0.392227 | 1.26E-18 | 0.324145 | 6.93E-13 | 0.498229 | 1.14E-30 | 0.702274 | 1.25E-70 |
| 0.14437  | 0.098745 | 0.03289  | 0.183295 | 6.77E-05 | 0.242942 | 1.06E-07 | 0.413004 | 1.16E-20 |
| 0.26647  | 0.293452 | 9.96E-11 | 0.639844 | 3.86E-55 | 0.788713 | #####    | 0.804124 | #####    |
| 0.001    | 0.322902 | 8.57E-13 | 0.281012 | 6.35E-10 | 0.346766 | 1.22E-14 | 0.495909 | 2.34E-30 |
| 0.12257  | 0.166524 | 0.0003   | 0.136196 | 0.00319  | 0.307623 | 1.08E-11 | 0.345698 | 1.48E-14 |
| 0.00421  | 0.057138 | 0.21778  | 0.387207 | 3.74E-18 | 0.346315 | 1.32E-14 | 0.466862 | 1.18E-26 |
| 0.00164  | 0.437686 | 2.82E-23 | 0.372391 | 8.27E-17 | 0.586163 | 1.96E-44 | 0.810936 | #####    |
| 0.02928  | 0.051397 | 0.26767  | -0.40512 | 7.15E-20 | -0.36866 | 1.76E-16 | -0.33701 | 7.24E-14 |
| 1.90E-12 | 0.234796 | 2.86E-07 | 0.514095 | 7.30E-33 | 0.654465 | 1.94E-58 | 0.726817 | 6.93E-78 |
| 0.06522  | 0.213667 | 3.18E-06 | 0.402584 | 1.27E-19 | 0.523462 | 3.26E-34 | 0.641387 | 1.76E-55 |
| 0.10493  | 0.255127 | 2.25E-08 | 0.365416 | 3.37E-16 | 0.605344 | 5.01E-48 | 0.690283 | 2.39E-67 |
| 0.79854  | -0.28104 | 6.32E-10 | -0.06396 | 0.16765  | -0.2687  | 3.64E-09 | -0.44641 | 2.98E-24 |
| 0.44318  | 0.076179 | 0.10013  | 0.531802 | 1.88E-35 | 0.537576 | 2.49E-36 | 0.56991  | 1.42E-41 |
| 7.80E-08 | -0.22536 | 8.63E-07 | -0.21714 | 2.17E-06 | -0.34637 | 1.31E-14 | -0.48347 | 9.95E-29 |
| 0.72755  | 0.187649 | 4.49E-05 | 0.101882 | 0.0277   | 0.279904 | 7.46E-10 | 0.404696 | 7.87E-20 |
| 0.88239  | 0.157619 | 0.00063  | 0.307636 | 1.08E-11 | 0.46988  | 5.04E-27 | 0.559006 | 9.69E-40 |
| 0.02729  | 0.257425 | 1.67E-08 | 0.56222  | 2.84E-40 | 0.749818 | 1.92E-85 | 0.850519 | #####    |
| 0.21255  | 0.230799 | 4.60E-07 | 0.293748 | 9.52E-11 | 0.619574 | 7.46E-51 | 0.677738 | 4.39E-64 |
| 9.84E-10 | 0.125493 | 0.00662  | 0.299088 | 4.18E-11 | 0.438477 | 2.30E-23 | 0.459252 | 9.64E-26 |
| 0.64999  | 0.241823 | 1.22E-07 | 0.269946 | 3.06E-09 | 0.305259 | 1.58E-11 | 0.448486 | 1.73E-24 |
| 0.93809  | 0.414809 | 7.58E-21 | 0.43158  | 1.31E-22 | 0.577263 | 7.57E-43 | 0.690966 | 1.57E-67 |
| 0.43473  | 0.16069  | 0.00049  | 0.293935 | 9.26E-11 | 0.404999 | 7.34E-20 | 0.489984 | 1.42E-29 |
| 2.60E-06 | 0.232314 | 3.84E-07 | 0.083966 | 0.06985  | 0.333043 | 1.47E-13 | 0.398292 | 3.32E-19 |
| 0.2436   | 0.454547 | 3.44E-25 | 0.397664 | 3.82E-19 | 0.700114 | 5.02E-70 | 0.822748 | #####    |
| 8.50E-10 | 0.19167  | 3.05E-05 | 0.172858 | 0.00017  | 0.222605 | 1.18E-06 | 0.43201  | 1.18E-22 |
| 0.99813  | 0.200178 | 1.31E-05 | 0.350221 | 6.37E-15 | 0.316582 | 2.49E-12 | 0.468812 | 6.82E-27 |
| 0.28572  | 0.434915 | 5.68E-23 | 0.340861 | 3.61E-14 | 0.494701 | 3.39E-30 | 0.706761 | 6.72E-72 |
| 0.09713  | 0.300644 | 3.28E-11 | 0.357647 | 1.54E-15 | 0.532967 | 1.25E-35 | 0.638862 | 6.33E-55 |
| 1.31E-05 | 0.27683  | 1.16E-09 | 0.192484 | 2.82E-05 | 0.349356 | 7.50E-15 | 0.558651 | 1.11E-39 |
| 0.70724  | 0.114533 | 0.01326  | 0.171302 | 0.0002   | 0.402863 | 1.19E-19 | 0.444288 | 5.17E-24 |
| 2.60E-20 | 0.12787  | 0.00565  | 0.523821 | 2.88E-34 | 0.477515 | 5.68E-28 | 0.563863 | 1.51E-40 |
| 3.15E-06 | 0.250447 | 4.13E-08 | 0.351583 | 4.93E-15 | 0.664616 | 7.73E-61 | 0.666998 | 2.05E-61 |
| 1.79E-07 | 0.275929 | 1.32E-09 | 0.282849 | 4.86E-10 | 0.43128  | 1.41E-22 | 0.642983 | 7.82E-56 |
| 0.13306  | 0.177005 | 0.00012  | 0.333184 | 1.43E-13 | 0.598541 | 1.00E-46 | 0.70358  | 5.37E-71 |
| 0.4098   | 0.203087 | 9.73E-06 | 0.007199 | 0.8767   | 0.281239 | 6.15E-10 | 0.397479 | 3.98E-19 |
| 0.10491  | 0.239321 | 1.66E-07 | 0.404155 | 8.90E-20 | 0.53699  | 3.07E-36 | 0.704573 | 2.82E-71 |
| 0.00267  | 0.093253 | 0.04399  | 0.308469 | 9.42E-12 | 0.358231 | 1.38E-15 | 0.411348 | 1.70E-20 |
| 0.09316  | 0.119112 | 0.00999  | 0.271444 | 2.48E-09 | 0.498721 | 9.79E-31 | 0.577456 | 7.00E-43 |
| 0.02999  | 0.12498  | 0.00685  | 0.167059 | 0.00029  | 0.329877 | 2.57E-13 | 0.41961  | 2.43E-21 |
| 0.91575  | 0.319873 | 1.43E-12 | 0.46968  | 5.34E-27 | 0.460127 | 7.59E-26 | 0.611397 | 3.27E-49 |
| 0.61342  | 0.324042 | 7.05E-13 | 0.488094 | 2.51E-29 | 0.613878 | 1.05E-49 | 0.664221 | 9.63E-61 |
| 0.04222  | -0.23784 | 1.98E-07 | -0.36931 | 1.54E-16 | -0.43454 | 6.24E-23 | -0.5027  | 2.82E-31 |
| 3.75E-07 | 0.328193 | 3.44E-13 | 0.26633  | 5.04E-09 | 0.57192  | 6.43E-42 | 0.696156 | 6.19E-69 |
| 1.01E-13 | 0.359805 | 1.02E-15 | 0.203996 | 8.86E-06 | 0.378948 | 2.14E-17 | 0.566522 | 5.38E-41 |
| 0.81002  | 0.263429 | 7.48E-09 | 0.2755   | 1.40E-09 | 0.298273 | 4.74E-11 | 0.42048  | 1.97E-21 |

|          |          |          |          |          |          |          |          |          |
|----------|----------|----------|----------|----------|----------|----------|----------|----------|
| 0.18386  | 0.264312 | 6.63E-09 | 0.137078 | 0.00299  | 0.174055 | 0.00016  | 0.261472 | 9.73E-09 |
| 1.22E-06 | 0.24802  | 5.62E-08 | 0.314908 | 3.28E-12 | 0.378971 | 2.13E-17 | 0.477591 | 5.55E-28 |
| 9.58E-05 | 0.231398 | 4.28E-07 | 0.542999 | 3.60E-37 | 0.75551  | 1.92E-87 | 0.733338 | 6.00E-80 |
| 0.46622  | 0.17305  | 0.00017  | 0.543957 | 2.55E-37 | 0.384935 | 6.08E-18 | 0.459629 | 8.70E-26 |
| 0.90032  | 0.234328 | 3.03E-07 | 0.537882 | 2.24E-36 | 0.616444 | 3.22E-50 | 0.675709 | 1.43E-63 |
| 9.96E-07 | 0.068055 | 0.14199  | 0.273416 | 1.88E-09 | 0.325836 | 5.18E-13 | 0.427203 | 3.86E-22 |
| 0.90279  | 0.051011 | 0.27128  | 0.382062 | 1.12E-17 | 0.350257 | 6.33E-15 | 0.294585 | 8.38E-11 |
| 0.27745  | 0.17456  | 0.00015  | 0.393629 | 9.31E-19 | 0.389167 | 2.46E-18 | 0.432496 | 1.04E-22 |
| 1.60E-06 | 0.190014 | 3.58E-05 | 0.381692 | 1.21E-17 | 0.61405  | 9.71E-50 | 0.733358 | 5.91E-80 |
| 0.01661  | 0.177325 | 0.00012  | 0.458764 | 1.10E-25 | 0.428149 | 3.06E-22 | 0.537558 | 2.51E-36 |
| 0.9305   | -0.16367 | 0.00038  | -0.20976 | 4.84E-06 | -0.32697 | 4.25E-13 | -0.33662 | 7.77E-14 |
| 0.05384  | 0.438956 | 2.04E-23 | 0.474957 | 1.19E-27 | 0.516483 | 3.33E-33 | 0.693385 | 3.50E-68 |
| 0.00149  | 0.355601 | 2.29E-15 | 0.343056 | 2.42E-14 | 0.354683 | 2.73E-15 | 0.604917 | 6.06E-48 |
| 0.53228  | 0.113911 | 0.01378  | 0.038761 | 0.40333  | 0.311216 | 6.03E-12 | 0.356189 | 2.05E-15 |
| 0.10691  | 0.192688 | 2.76E-05 | 0.282232 | 5.32E-10 | 0.342176 | 2.84E-14 | 0.443397 | 6.52E-24 |
| 0.00032  | 0.313069 | 4.45E-12 | 0.280512 | 6.83E-10 | 0.525003 | 1.93E-34 | 0.678274 | 3.21E-64 |
| 0.66208  | 0.323929 | 7.19E-13 | 0.486425 | 4.14E-29 | 0.69799  | 1.94E-69 | 0.798151 | #####    |
| 0.11176  | 0.372876 | 7.50E-17 | 0.087793 | 0.05799  | 0.219582 | 1.66E-06 | 0.482401 | 1.36E-28 |
| 0.00011  | 0.100361 | 0.03012  | 0.350685 | 5.84E-15 | 0.417956 | 3.60E-21 | 0.419717 | 2.37E-21 |
| 9.81E-05 | -0.353   | 3.77E-15 | -0.18275 | 7.12E-05 | -0.36338 | 5.04E-16 | -0.54683 | 9.01E-38 |
| 0.00069  | 0.362466 | 6.03E-16 | 0.460246 | 7.35E-26 | 0.75213  | 3.00E-86 | 0.879995 | #####    |
| 0.59823  | 0.176434 | 0.00013  | 0.397756 | 3.74E-19 | 0.510476 | 2.37E-32 | 0.571606 | 7.29E-42 |
| 0.08419  | 0.402223 | 1.38E-19 | 0.709489 | 1.10E-72 | 0.740719 | 2.34E-82 | 0.815619 | #####    |
| 0.58365  | 0.261247 | 1.00E-08 | 0.671909 | 1.27E-62 | 0.763598 | 2.22E-90 | 0.783313 | 4.62E-98 |
| 0.02162  | 0.223911 | 1.02E-06 | 0.502903 | 2.65E-31 | 0.572687 | 4.74E-42 | 0.576252 | 1.14E-42 |
| 1.13E-11 | 0.445451 | 3.82E-24 | 0.444989 | 4.31E-24 | 0.694304 | 1.98E-68 | 0.849795 | #####    |
| 0.41928  | 0.149605 | 0.00118  | 0.324007 | 7.09E-13 | 0.538089 | 2.08E-36 | 0.591349 | 2.21E-45 |
| 1.42E-05 | 0.202424 | 1.04E-05 | 0.385589 | 5.29E-18 | 0.359184 | 1.15E-15 | 0.499795 | 7.01E-31 |
| 2.46E-06 | 0.304672 | 1.73E-11 | 0.230206 | 4.93E-07 | 0.435921 | 4.41E-23 | 0.587652 | 1.05E-44 |
| 5.55E-09 | -0.30462 | 1.75E-11 | -0.30921 | 8.35E-12 | -0.3587  | 1.26E-15 | -0.56802 | 3.00E-41 |
| 0.00017  | 0.253197 | 2.90E-08 | 0.280238 | 7.11E-10 | 0.443036 | 7.15E-24 | 0.664436 | 8.55E-61 |
| 0.0211   | 0.117217 | 0.01124  | 0.471489 | 3.20E-27 | 0.512383 | 1.28E-32 | 0.544262 | 2.28E-37 |
| 0.36883  | 0.226204 | 7.84E-07 | 0.240172 | 1.49E-07 | 0.416844 | 4.69E-21 | 0.529629 | 3.98E-35 |
| 0.68223  | 0.29491  | 7.97E-11 | 0.488768 | 2.05E-29 | 0.648933 | 3.61E-57 | 0.775216 | 8.21E-95 |
| 0.32764  | 0.121218 | 0.00874  | 0.160109 | 0.00051  | 0.433556 | 7.99E-23 | 0.505986 | 9.98E-32 |
| 0.04067  | 0.118945 | 0.01009  | 0.23463  | 2.92E-07 | 0.3281   | 3.50E-13 | 0.40306  | 1.14E-19 |
| 0.00594  | 0.30638  | 1.32E-11 | 0.288791 | 2.02E-10 | 0.413687 | 9.87E-21 | 0.607477 | 1.93E-48 |
| 0.80057  | -0.16096 | 0.00048  | -0.09922 | 0.03206  | -0.3321  | 1.74E-13 | -0.32506 | 5.92E-13 |
| 0.13051  | 0.28918  | 1.90E-10 | 0.304513 | 1.78E-11 | 0.338241 | 5.80E-14 | 0.426959 | 4.10E-22 |
| 0.04679  | -0.18621 | 5.15E-05 | -0.40684 | 4.82E-20 | -0.3275  | 3.89E-13 | -0.42202 | 1.36E-21 |
| 4.14E-07 | 0.290074 | 1.66E-10 | 0.355426 | 2.37E-15 | 0.509024 | 3.78E-32 | 0.588634 | 6.96E-45 |
| 8.49E-05 | 0.079365 | 0.08668  | 0.469399 | 5.78E-27 | 0.570618 | 1.08E-41 | 0.476437 | 7.76E-28 |
| 0.057    | 0.170315 | 0.00022  | 0.411212 | 1.76E-20 | 0.329222 | 2.88E-13 | 0.455668 | 2.55E-25 |
| 0.07139  | 0.185057 | 5.74E-05 | 0.397234 | 4.20E-19 | 0.34092  | 3.57E-14 | 0.445291 | 3.98E-24 |
| 0.00103  | 0.511939 | 1.47E-32 | 0.465033 | 1.96E-26 | 0.701963 | 1.53E-70 | 0.875856 | #####    |

|          |          |          |          |          |          |          |          |          |
|----------|----------|----------|----------|----------|----------|----------|----------|----------|
| 0.04129  | -0.17702 | 0.00012  | -0.22224 | 1.23E-06 | -0.28093 | 6.42E-10 | -0.3688  | 1.71E-16 |
| 0.86734  | 0.113488 | 0.01413  | 0.363842 | 4.60E-16 | 0.598225 | 1.15E-46 | 0.641032 | 2.11E-55 |
| 5.50E-05 | 0.421666 | 1.48E-21 | 0.187725 | 4.46E-05 | 0.324622 | 6.38E-13 | 0.597892 | 1.33E-46 |
| 0.02449  | 0.098413 | 0.03349  | 0.56042  | 5.66E-40 | 0.513423 | 9.09E-33 | 0.545764 | 1.33E-37 |
| 0.57827  | 0.220491 | 1.50E-06 | 0.103489 | 0.02532  | 0.261212 | 1.01E-08 | 0.401675 | 1.56E-19 |
| 3.91E-05 | 0.097437 | 0.03529  | 0.521834 | 5.63E-34 | 0.592492 | 1.36E-45 | 0.667115 | 1.92E-61 |
| 0.00283  | 0.14772  | 0.00137  | 0.300663 | 3.27E-11 | 0.333805 | 1.28E-13 | 0.40759  | 4.06E-20 |
| 1.30E-11 | 0.263661 | 7.24E-09 | 0.549356 | 3.57E-38 | 0.650811 | 1.35E-57 | 0.768955 | 2.16E-92 |
| 4.08E-05 | -0.29427 | 8.79E-11 | -0.1212  | 0.00875  | -0.304   | 1.93E-11 | -0.47401 | 1.56E-27 |
| 0.09303  | 0.282449 | 5.15E-10 | 0.120582 | 0.0091   | 0.299418 | 3.97E-11 | 0.413881 | 9.43E-21 |
| 0.30399  | 0.161893 | 0.00044  | 0.448978 | 1.52E-24 | 0.510519 | 2.33E-32 | 0.504584 | 1.56E-31 |
| 0.22162  | 0.130897 | 0.00461  | 0.452726 | 5.61E-25 | 0.523942 | 2.77E-34 | 0.597556 | 1.54E-46 |
| 0.3998   | -0.27504 | 1.50E-09 | -0.22174 | 1.30E-06 | -0.33912 | 4.95E-14 | -0.41825 | 3.36E-21 |
| 0.00546  | 0.451721 | 7.33E-25 | 0.329885 | 2.56E-13 | 0.413295 | 1.08E-20 | 0.574736 | 2.09E-42 |
| 2.43E-11 | -0.1786  | 0.0001   | -0.31053 | 6.74E-12 | -0.32817 | 3.46E-13 | -0.41258 | 1.28E-20 |
| 0.38333  | 0.24573  | 7.50E-08 | 0.348879 | 8.20E-15 | 0.525285 | 1.76E-34 | 0.622157 | 2.21E-51 |
| 0.0006   | 0.212785 | 3.50E-06 | 0.714548 | 3.67E-74 | 0.632822 | 1.28E-53 | 0.677241 | 5.87E-64 |
| 0.38032  | 0.059667 | 0.19806  | 0.204814 | 8.14E-06 | 0.329966 | 2.53E-13 | 0.414947 | 7.34E-21 |
| 0.00262  | 0.093925 | 0.04248  | 0.477343 | 5.97E-28 | 0.409153 | 2.83E-20 | 0.468479 | 7.49E-27 |
| 0.03703  | 0.043869 | 0.34418  | 0.270217 | 2.95E-09 | 0.081878 | 0.07712  | 0.11244  | 0.01505  |
| 6.40E-12 | 0.232371 | 3.82E-07 | 0.440212 | 1.48E-23 | 0.435837 | 4.50E-23 | 0.567664 | 3.44E-41 |
| 0.00075  | 0.088968 | 0.0547   | 0.377666 | 2.80E-17 | 0.309357 | 8.16E-12 | 0.369996 | 1.34E-16 |
| 0.0003   | 0.294205 | 8.88E-11 | 0.47259  | 2.34E-27 | 0.595201 | 4.26E-46 | 0.725061 | 2.43E-77 |
| 9.87E-06 | 0.247236 | 6.21E-08 | 0.464657 | 2.18E-26 | 0.604994 | 5.86E-48 | 0.715495 | 1.92E-74 |
| 0.07596  | 0.203349 | 9.47E-06 | 0.306603 | 1.27E-11 | 0.427657 | 3.45E-22 | 0.497607 | 1.38E-30 |
| 0.02053  | 0.180426 | 8.82E-05 | 0.387307 | 3.66E-18 | 0.461313 | 5.48E-26 | 0.558164 | 1.33E-39 |
| 0.00521  | 0.086319 | 0.06234  | 0.23209  | 3.95E-07 | 0.164856 | 0.00035  | 0.238077 | 1.93E-07 |
| 2.52E-05 | 0.362015 | 6.59E-16 | 0.567844 | 3.21E-41 | 0.660448 | 7.68E-60 | 0.737138 | 3.53E-81 |
| 2.34E-05 | 0.421235 | 1.64E-21 | 0.449151 | 1.45E-24 | 0.652216 | 6.42E-58 | 0.826714 | #####    |
| 6.55E-06 | 0.476494 | 7.63E-28 | 0.491031 | 1.04E-29 | 0.602213 | 2.01E-47 | 0.775769 | 4.97E-95 |
| 3.21E-17 | 0.342075 | 2.89E-14 | 0.463335 | 3.14E-26 | 0.592839 | 1.17E-45 | 0.728298 | 2.39E-78 |
| 5.30E-18 | 0.317914 | 1.99E-12 | 0.343279 | 2.32E-14 | 0.46544  | 1.75E-26 | 0.60873  | 1.10E-48 |
| 1.28E-15 | 0.206007 | 7.18E-06 | 0.163507 | 0.00039  | 0.250862 | 3.91E-08 | 0.395423 | 6.28E-19 |
| 7.91E-05 | 0.181631 | 7.90E-05 | 0.351326 | 5.17E-15 | 0.375349 | 4.52E-17 | 0.471399 | 3.28E-27 |
| 0.00024  | 0.248248 | 5.46E-08 | 0.284597 | 3.76E-10 | 0.357736 | 1.52E-15 | 0.428454 | 2.84E-22 |
| 0.0223   | 0.209906 | 4.76E-06 | 0.422913 | 1.10E-21 | 0.411995 | 1.47E-20 | 0.497268 | 1.54E-30 |
| 0.40247  | -0.15713 | 0.00065  | -0.24837 | 5.37E-08 | -0.3051  | 1.62E-11 | -0.36074 | 8.46E-16 |
| 2.44E-16 | 0.321514 | 1.09E-12 | 0.35925  | 1.13E-15 | 0.45282  | 5.47E-25 | 0.547799 | 6.32E-38 |
| 0.00019  | 0.203975 | 8.87E-06 | 0.315191 | 3.13E-12 | 0.516789 | 3.01E-33 | 0.602451 | 1.81E-47 |
| 0.30057  | 0.424149 | 8.13E-22 | 0.28112  | 6.25E-10 | 0.543811 | 2.69E-37 | 0.618693 | 1.13E-50 |
| 0.1482   | 0.338999 | 5.06E-14 | 0.168735 | 0.00025  | 0.425928 | 5.27E-22 | 0.582424 | 9.22E-44 |
| 0.94741  | 0.22379  | 1.03E-06 | 0.470061 | 4.79E-27 | 0.839032 | #####    | 0.880485 | #####    |
| 3.00E-16 | 0.186585 | 4.97E-05 | 0.523785 | 2.92E-34 | 0.570613 | 1.08E-41 | 0.687303 | 1.47E-66 |
| 4.49E-07 | 0.392398 | 1.22E-18 | 0.463944 | 2.65E-26 | 0.61346  | 1.27E-49 | 0.73777  | 2.19E-81 |
| 0.00213  | 0.223309 | 1.09E-06 | 0.413642 | 9.97E-21 | 0.657735 | 3.35E-59 | 0.801001 | #####    |

|          |          |          |          |          |          |          |          |          |
|----------|----------|----------|----------|----------|----------|----------|----------|----------|
| 0.00074  | 0.303532 | 2.08E-11 | 0.275338 | 1.43E-09 | 0.362028 | 6.58E-16 | 0.474105 | 1.52E-27 |
| 0.00119  | 0.3826   | 9.97E-18 | 0.665674 | 4.29E-61 | 0.592291 | 1.48E-45 | 0.697637 | 2.43E-69 |
| 0.81943  | 0.229211 | 5.53E-07 | 0.216452 | 2.35E-06 | 0.280013 | 7.34E-10 | 0.424019 | 8.39E-22 |
| 3.54E-06 | -0.29294 | 1.08E-10 | -0.15703 | 0.00066  | -0.42148 | 1.55E-21 | -0.52939 | 4.33E-35 |
| 0.00044  | 0.339886 | 4.31E-14 | 0.250769 | 3.96E-08 | 0.468619 | 7.20E-27 | 0.587043 | 1.36E-44 |
| 0.01609  | 0.152277 | 0.00096  | 0.437585 | 2.89E-23 | 0.436961 | 3.39E-23 | 0.421375 | 1.59E-21 |
| 0.56423  | 0.237896 | 1.97E-07 | 0.553072 | 9.02E-39 | 0.755345 | 2.20E-87 | 0.836883 | #####    |
| 1.35E-05 | 0.085015 | 0.06642  | 0.411464 | 1.66E-20 | 0.422057 | 1.35E-21 | 0.486383 | 4.19E-29 |
| 0.0772   | 0.22479  | 9.22E-07 | 0.475836 | 9.22E-28 | 0.330522 | 2.29E-13 | 0.454604 | 3.39E-25 |
| 0.81627  | 0.173705 | 0.00016  | 0.27926  | 8.19E-10 | 0.480796 | 2.18E-28 | 0.613947 | 1.02E-49 |
| 0.95588  | 0.214997 | 2.75E-06 | 0.42003  | 2.19E-21 | 0.367142 | 2.39E-16 | 0.480901 | 2.12E-28 |
| 0.38758  | 0.524661 | 2.17E-34 | 0.269824 | 3.11E-09 | 0.519201 | 1.36E-33 | 0.728706 | 1.78E-78 |
| 0.32548  | 0.314018 | 3.81E-12 | 0.557571 | 1.67E-39 | 0.804661 | #####    | 0.786455 | 2.32E-99 |
| 0.67505  | 0.112737 | 0.01479  | 0.039218 | 0.39779  | -0.10371 | 0.02501  | 0.042916 | 0.35478  |
| 0.01074  | 0.565847 | 6.99E-41 | 0.359441 | 1.09E-15 | 0.606912 | 2.48E-48 | 0.814034 | #####    |
| 0.00203  | 0.239311 | 1.66E-07 | 0.077462 | 0.09453  | 0.223161 | 1.11E-06 | 0.366934 | 2.49E-16 |
| 0.60563  | 0.395556 | 6.09E-19 | 0.189964 | 3.60E-05 | 0.192564 | 2.80E-05 | 0.36157  | 7.19E-16 |
| 0.70471  | 0.31846  | 1.82E-12 | 0.321969 | 1.00E-12 | 0.47291  | 2.13E-27 | 0.590231 | 3.55E-45 |
| 0.00036  | 0.264346 | 6.60E-09 | 0.171309 | 0.0002   | 0.372711 | 7.75E-17 | 0.568409 | 2.57E-41 |
| 0.70287  | -0.13211 | 0.00424  | -0.16334 | 0.00039  | -0.4531  | 5.08E-25 | -0.43926 | 1.89E-23 |
| 7.77E-08 | -0.21708 | 2.19E-06 | -0.23514 | 2.75E-07 | -0.35888 | 1.22E-15 | -0.41015 | 2.25E-20 |
| 2.50E-07 | -0.28451 | 3.81E-10 | -0.172   | 0.00019  | -0.44239 | 8.46E-24 | -0.59291 | 1.14E-45 |
| 0.87932  | 0.228421 | 6.07E-07 | 0.39545  | 6.24E-19 | 0.651105 | 1.15E-57 | 0.781375 | 2.85E-97 |
| 0.00167  | 0.312203 | 5.13E-12 | 0.141758 | 0.00214  | 0.394135 | 8.33E-19 | 0.507124 | 6.94E-32 |
| 0.00203  | 0.207329 | 6.26E-06 | 0.316732 | 2.43E-12 | 0.332121 | 1.73E-13 | 0.442633 | 7.94E-24 |
| 2.03E-05 | -0.25116 | 3.76E-08 | -0.04438 | 0.33864  | -0.24022 | 1.48E-07 | -0.42    | 2.21E-21 |
| 1.89E-07 | 0.172672 | 0.00018  | 0.572866 | 4.42E-42 | 0.535743 | 4.75E-36 | 0.602104 | 2.11E-47 |
| 0.87037  | 0.248441 | 5.33E-08 | 0.472126 | 2.67E-27 | 0.722168 | 1.89E-76 | 0.815423 | #####    |
| 2.49E-09 | 0.256471 | 1.89E-08 | 0.399193 | 2.72E-19 | 0.559769 | 7.25E-40 | 0.705497 | 1.54E-71 |
| 0.87041  | 0.208854 | 5.32E-06 | 0.272927 | 2.02E-09 | 0.57757  | 6.68E-43 | 0.669321 | 5.54E-62 |
| 0.93443  | 0.110448 | 0.01695  | 0.487247 | 3.24E-29 | 0.561668 | 3.51E-40 | 0.63808  | 9.38E-55 |
| 0.42503  | 0.446497 | 2.91E-24 | 0.438635 | 2.21E-23 | 0.666339 | 2.96E-61 | 0.812876 | #####    |
| 5.41E-13 | 0.174029 | 0.00016  | 0.538315 | 1.92E-36 | 0.540529 | 8.73E-37 | 0.548141 | 5.57E-38 |
| 0.06071  | 0.089154 | 0.05419  | 0.267528 | 4.27E-09 | 0.440225 | 1.47E-23 | 0.425566 | 5.76E-22 |
| 0.01029  | 0.315964 | 2.76E-12 | 0.238502 | 1.83E-07 | 0.446361 | 3.01E-24 | 0.565158 | 9.14E-41 |
| 0.01071  | -0.15851 | 0.00059  | -0.22973 | 5.21E-07 | -0.30367 | 2.03E-11 | -0.39343 | 9.72E-19 |
| 5.92E-05 | 0.287159 | 2.57E-10 | 0.210061 | 4.68E-06 | 0.317027 | 2.31E-12 | 0.424934 | 6.72E-22 |
| 0.00068  | 0.270244 | 2.94E-09 | 0.462299 | 4.18E-26 | 0.522917 | 3.91E-34 | 0.714245 | 4.51E-74 |
| 0.94747  | 0.251642 | 3.54E-08 | 0.265313 | 5.79E-09 | 0.410351 | 2.15E-20 | 0.526056 | 1.35E-34 |
| 6.67E-10 | 0.280245 | 7.10E-10 | 0.540646 | 8.38E-37 | 0.594989 | 4.67E-46 | 0.747916 | 8.68E-85 |
| 0.01352  | 0.090531 | 0.05056  | 0.327928 | 3.61E-13 | 0.510941 | 2.04E-32 | 0.509593 | 3.14E-32 |
| 1.03E-10 | -0.28709 | 2.60E-10 | -0.22489 | 9.11E-07 | -0.47366 | 1.72E-27 | -0.59949 | 6.64E-47 |
| 0.63149  | 0.387676 | 3.38E-18 | 0.21433  | 2.96E-06 | 0.33962  | 4.52E-14 | 0.530284 | 3.18E-35 |
| 6.78E-11 | 0.246869 | 6.50E-08 | 0.211469 | 4.03E-06 | 0.426592 | 4.48E-22 | 0.517321 | 2.53E-33 |
| 0.00043  | 0.225665 | 8.34E-07 | 0.413369 | 1.06E-20 | 0.672157 | 1.11E-62 | 0.744816 | 9.90E-84 |

|          |          |          |          |          |          |          |          |          |
|----------|----------|----------|----------|----------|----------|----------|----------|----------|
| 0.99492  | 0.081378 | 0.07895  | 0.641867 | 1.38E-55 | 0.544495 | 2.10E-37 | 0.561719 | 3.44E-40 |
| 0.00454  | 0.376176 | 3.81E-17 | 0.383792 | 7.75E-18 | 0.602575 | 1.71E-47 | 0.758018 | 2.43E-88 |
| 0.58147  | -0.18088 | 8.46E-05 | -0.22961 | 5.28E-07 | -0.35774 | 1.52E-15 | -0.37119 | 1.06E-16 |
| 4.98E-09 | 0.262143 | 8.89E-09 | 0.358616 | 1.28E-15 | 0.412884 | 1.19E-20 | 0.567112 | 4.27E-41 |
| 0.22054  | 0.242031 | 1.19E-07 | 0.118566 | 0.01034  | 0.511057 | 1.96E-32 | 0.604566 | 7.09E-48 |
| 0.32117  | 0.179285 | 9.80E-05 | 0.229974 | 5.06E-07 | 0.508405 | 4.61E-32 | 0.606546 | 2.93E-48 |
| 0.00942  | 0.1849   | 5.83E-05 | 0.546021 | 1.21E-37 | 0.804002 | #####    | 0.86026  | #####    |
| 1.27E-11 | -0.23755 | 2.05E-07 | 0.017852 | 0.7004   | -0.26194 | 9.13E-09 | -0.37016 | 1.30E-16 |
| 0.0137   | 0.354454 | 2.85E-15 | 0.248194 | 5.50E-08 | 0.444227 | 5.25E-24 | 0.621063 | 3.70E-51 |
| 4.31E-05 | 0.346338 | 1.32E-14 | 0.440042 | 1.55E-23 | 0.675225 | 1.89E-63 | 0.845987 | #####    |
| 0.00011  | 0.375524 | 4.36E-17 | 0.683739 | 1.26E-65 | 0.761532 | 1.28E-89 | 0.745292 | 6.82E-84 |
| 1.92E-08 | 0.160988 | 0.00048  | 0.36253  | 5.96E-16 | 0.413377 | 1.06E-20 | 0.488457 | 2.25E-29 |
| 0.82461  | 0.29709  | 5.70E-11 | 0.644882 | 2.95E-56 | 0.695798 | 7.75E-69 | 0.754253 | 5.37E-87 |
| 1.80E-06 | -0.20522 | 7.80E-06 | -0.34839 | 8.99E-15 | -0.301   | 3.09E-11 | -0.45667 | 1.94E-25 |
| 0.95686  | 0.445634 | 3.64E-24 | 0.141747 | 0.00214  | 0.266792 | 4.73E-09 | 0.468137 | 8.24E-27 |
| 0.98206  | 0.381277 | 1.32E-17 | 0.612026 | 2.46E-49 | 0.654082 | 2.38E-58 | 0.790924 | #####    |
| 0.00056  | -0.17748 | 0.00012  | -0.12381 | 0.00739  | -0.3605  | 8.87E-16 | -0.41294 | 1.17E-20 |
| 8.32E-17 | -0.19312 | 2.65E-05 | -0.30494 | 1.66E-11 | -0.38386 | 7.63E-18 | -0.45811 | 1.31E-25 |
| 0.00098  | 0.164093 | 0.00037  | 0.092227 | 0.04638  | 0.23407  | 3.12E-07 | 0.370266 | 1.27E-16 |
| 0.18231  | 0.202866 | 9.95E-06 | 0.40463  | 7.99E-20 | 0.65347  | 3.30E-58 | 0.700334 | 4.36E-70 |
| 1.37E-13 | -0.14576 | 0.00159  | -0.15423 | 0.00083  | -0.26714 | 4.51E-09 | -0.40471 | 7.84E-20 |
| 0.00111  | 0.068938 | 0.13687  | 0.585722 | 2.35E-44 | 0.5059   | 1.03E-31 | 0.54445  | 2.14E-37 |
| 0.4297   | 0.369763 | 1.41E-16 | 0.310162 | 7.16E-12 | 0.495675 | 2.51E-30 | 0.646113 | 1.56E-56 |
| 0.41616  | 0.451142 | 8.55E-25 | 0.493629 | 4.70E-30 | 0.657632 | 3.54E-59 | 0.772462 | 9.74E-94 |
| 0.00093  | -0.08329 | 0.07214  | -0.18314 | 6.87E-05 | -0.35814 | 1.40E-15 | -0.27481 | 1.55E-09 |
| 0.34182  | 0.229058 | 5.63E-07 | 0.510437 | 2.39E-32 | 0.666009 | 3.56E-61 | 0.70574  | 1.31E-71 |
| 7.68E-05 | 0.396065 | 5.45E-19 | 0.206827 | 6.59E-06 | 0.513417 | 9.11E-33 | 0.661716 | 3.83E-60 |
| 0.0006   | 0.265301 | 5.80E-09 | 0.520524 | 8.73E-34 | 0.797997 | #####    | 0.894508 | #####    |
| 0.02797  | 0.180812 | 8.52E-05 | 0.196287 | 1.94E-05 | 0.469274 | 5.98E-27 | 0.552415 | 1.15E-38 |
| 0.00486  | 0.188465 | 4.16E-05 | 0.207083 | 6.42E-06 | 0.400675 | 1.95E-19 | 0.386256 | 4.59E-18 |
| 0.00112  | 0.143237 | 0.00192  | 0.573239 | 3.81E-42 | 0.514966 | 5.49E-33 | 0.441708 | 1.01E-23 |
| 0.02958  | 0.332052 | 1.75E-13 | 0.387508 | 3.51E-18 | 0.585704 | 2.37E-44 | 0.736405 | 6.12E-81 |
| 0.19427  | -0.27803 | 9.77E-10 | -0.15117 | 0.00105  | -0.39938 | 2.61E-19 | -0.52456 | 2.25E-34 |
| 8.00E-06 | 0.280984 | 6.38E-10 | 0.180398 | 8.85E-05 | 0.212363 | 3.66E-06 | 0.490486 | 1.22E-29 |
| 3.03E-10 | 0.365768 | 3.14E-16 | 0.259033 | 1.35E-08 | 0.417919 | 3.63E-21 | 0.670872 | 2.30E-62 |
| 0.55009  | 0.395708 | 5.89E-19 | 0.444793 | 4.54E-24 | 0.696109 | 6.37E-69 | 0.808921 | #####    |
| 0.54416  | 0.362971 | 5.46E-16 | 0.487928 | 2.64E-29 | 0.675423 | 1.69E-63 | 0.786645 | 1.94E-99 |
| 0.00627  | 0.255986 | 2.01E-08 | 0.438343 | 2.38E-23 | 0.421155 | 1.68E-21 | 0.577226 | 7.68E-43 |
| 4.82E-06 | 0.233112 | 3.50E-07 | 0.477176 | 6.26E-28 | 0.527933 | 7.13E-35 | 0.674967 | 2.20E-63 |
| 0.75914  | 0.198625 | 1.53E-05 | -0.0223  | 0.63068  | 0.137218 | 0.00296  | 0.359124 | 1.16E-15 |
| 0.00053  | 0.396038 | 5.48E-19 | 0.324975 | 6.01E-13 | 0.440206 | 1.48E-23 | 0.612558 | 1.93E-49 |
| 0.00051  | 0.27899  | 8.51E-10 | 0.367892 | 2.05E-16 | 0.422931 | 1.09E-21 | 0.53315  | 1.18E-35 |
| 0.00026  | -0.19544 | 2.11E-05 | -0.30219 | 2.57E-11 | -0.27395 | 1.75E-09 | -0.4173  | 4.21E-21 |
| 0.00084  | 0.185282 | 5.62E-05 | 0.478411 | 4.38E-28 | 0.555025 | 4.35E-39 | 0.52957  | 4.07E-35 |
| 0.12767  | -0.24188 | 1.21E-07 | -0.14831 | 0.00131  | -0.41696 | 4.56E-21 | -0.46321 | 3.25E-26 |

|          |          |          |          |          |          |          |          |          |
|----------|----------|----------|----------|----------|----------|----------|----------|----------|
| 5.39E-05 | 0.320323 | 1.33E-12 | 0.455572 | 2.61E-25 | 0.389736 | 2.17E-18 | 0.608249 | 1.36E-48 |
| 0.00064  | 0.261239 | 1.00E-08 | 0.572686 | 4.74E-42 | 0.78638  | 2.50E-99 | 0.8858   | #####    |
| 0.94043  | 0.094672 | 0.04085  | 0.318892 | 1.69E-12 | 0.605283 | 5.15E-48 | 0.66298  | 1.91E-60 |
| 6.45E-09 | 0.113233 | 0.01435  | 0.232208 | 3.89E-07 | 0.402456 | 1.31E-19 | 0.424264 | 7.91E-22 |
| 0.34947  | 0.136707 | 0.00307  | 0.392609 | 1.16E-18 | 0.4994   | 7.93E-31 | 0.581037 | 1.63E-43 |
| 0.02345  | 0.286818 | 2.71E-10 | 0.400806 | 1.90E-19 | 0.434734 | 5.94E-23 | 0.630144 | 4.76E-53 |
| 0.25659  | 0.021546 | 0.64235  | 0.16672  | 0.0003   | 0.379428 | 1.94E-17 | 0.41446  | 8.23E-21 |
| 0.16571  | 0.135653 | 0.00331  | 0.5031   | 2.49E-31 | 0.713312 | 8.48E-74 | 0.645565 | 2.08E-56 |
| 8.29E-05 | 0.326513 | 4.61E-13 | 0.517808 | 2.15E-33 | 0.650337 | 1.73E-57 | 0.757148 | 4.99E-88 |
| 0.09015  | -0.27543 | 1.42E-09 | -0.28976 | 1.74E-10 | -0.32265 | 8.94E-13 | -0.46785 | 8.92E-27 |
| 7.80E-06 | 0.318488 | 1.81E-12 | 0.30233  | 2.51E-11 | 0.376867 | 3.30E-17 | 0.50745  | 6.25E-32 |
| 0.30315  | 0.047411 | 0.30659  | 0.337018 | 7.23E-14 | 0.444093 | 5.44E-24 | 0.426951 | 4.10E-22 |
| 6.65E-06 | -0.24084 | 1.38E-07 | -0.07871 | 0.08933  | -0.35325 | 3.59E-15 | -0.44746 | 2.26E-24 |
| 4.11E-05 | -0.24758 | 5.94E-08 | -0.26694 | 4.63E-09 | -0.3843  | 6.95E-18 | -0.45642 | 2.08E-25 |
| 0.00054  | 0.28087  | 6.48E-10 | 0.274513 | 1.61E-09 | 0.329439 | 2.77E-13 | 0.522349 | 4.74E-34 |
| 0.16181  | 0.464293 | 2.41E-26 | 0.093034 | 0.04449  | 0.234311 | 3.03E-07 | 0.391765 | 1.40E-18 |
| 0.02621  | 0.445144 | 4.14E-24 | 0.22055  | 1.49E-06 | 0.383038 | 9.09E-18 | 0.561144 | 4.29E-40 |
| 0.02053  | 0.131978 | 0.00428  | 0.564199 | 1.32E-40 | 0.463154 | 3.30E-26 | 0.495295 | 2.82E-30 |
| 0.62125  | 0.077747 | 0.09332  | 0.626758 | 2.45E-52 | 0.492813 | 6.03E-30 | 0.469715 | 5.28E-27 |
| 0.02411  | 0.36267  | 5.80E-16 | 0.321388 | 1.11E-12 | 0.280249 | 7.10E-10 | 0.458449 | 1.20E-25 |
| 0.00016  | 0.175556 | 0.00014  | 0.233803 | 3.22E-07 | 0.550584 | 2.27E-38 | 0.698381 | 1.51E-69 |
| 0.58657  | 0.378798 | 2.21E-17 | 0.230717 | 4.64E-07 | 0.44395  | 5.65E-24 | 0.639639 | 4.28E-55 |
| 0.49144  | 0.239664 | 1.59E-07 | 0.433046 | 9.08E-23 | 0.642899 | 8.16E-56 | 0.765908 | 3.06E-91 |
| 0.05437  | 0.064655 | 0.16304  | 0.410066 | 2.29E-20 | 0.321122 | 1.16E-12 | 0.370646 | 1.18E-16 |
| 0.60529  | 0.22177  | 1.30E-06 | 0.287772 | 2.35E-10 | 0.35544  | 2.36E-15 | 0.39002  | 2.04E-18 |
| 0.00503  | 0.098748 | 0.03289  | 0.360571 | 8.75E-16 | 0.529177 | 4.65E-35 | 0.606325 | 3.23E-48 |
| 5.29E-15 | 0.178874 | 0.0001   | 0.437269 | 3.13E-23 | 0.591756 | 1.86E-45 | 0.618184 | 1.43E-50 |
| 0.18525  | 0.134586 | 0.00357  | 0.163945 | 0.00037  | 0.358195 | 1.39E-15 | 0.400869 | 1.87E-19 |
| 0.04785  | 0.079571 | 0.08586  | 0.191431 | 3.12E-05 | 0.368841 | 1.70E-16 | 0.310894 | 6.35E-12 |
| 0.04165  | 0.191859 | 3.00E-05 | 0.420576 | 1.93E-21 | 0.519031 | 1.43E-33 | 0.519685 | 1.15E-33 |
| 0.17481  | 0.141995 | 0.0021   | 0.461324 | 5.47E-26 | 0.748856 | 4.12E-85 | 0.809092 | #####    |
| 0.26893  | 0.068625 | 0.13867  | 0.176309 | 0.00013  | 0.335374 | 9.71E-14 | 0.385148 | 5.81E-18 |
| 0.29836  | 0.318829 | 1.71E-12 | 0.413    | 1.16E-20 | 0.725555 | 1.71E-77 | 0.86062  | #####    |
| 0.69697  | 0.372843 | 7.55E-17 | 0.483393 | 1.02E-28 | 0.665188 | 5.63E-61 | 0.851187 | #####    |
| 0.16378  | 0.222858 | 1.15E-06 | 0.35741  | 1.62E-15 | 0.432337 | 1.08E-22 | 0.47785  | 5.15E-28 |
| 0.9823   | 0.091721 | 0.04759  | 0.362083 | 6.50E-16 | 0.394235 | 8.15E-19 | 0.43594  | 4.38E-23 |
| 1.29E-07 | 0.296881 | 5.89E-11 | 0.468624 | 7.19E-27 | 0.44238  | 8.48E-24 | 0.637901 | 1.03E-54 |
| 4.26E-10 | -0.36874 | 1.73E-16 | -0.30221 | 2.56E-11 | -0.25024 | 4.24E-08 | -0.56337 | 1.82E-40 |
| 4.57E-05 | 0.330848 | 2.17E-13 | 0.358866 | 1.22E-15 | 0.197411 | 1.73E-05 | 0.383197 | 8.79E-18 |
| 0.61413  | 0.326991 | 4.24E-13 | 0.285009 | 3.54E-10 | 0.566937 | 4.57E-41 | 0.660422 | 7.78E-60 |
| 0.00026  | 0.06473  | 0.16255  | 0.267797 | 4.12E-09 | 0.393434 | 9.71E-19 | 0.401047 | 1.80E-19 |
| 0.15266  | 0.026598 | 0.56641  | 0.186111 | 5.20E-05 | 0.36215  | 6.42E-16 | 0.347851 | 9.94E-15 |
| 0.01881  | 0.264863 | 6.15E-09 | 0.602106 | 2.11E-47 | 0.744675 | 1.10E-83 | 0.782928 | 6.65E-98 |
| 3.17E-06 | 0.192132 | 2.92E-05 | 0.439611 | 1.73E-23 | 0.576236 | 1.15E-42 | 0.730466 | 4.94E-79 |
| 1.03E-07 | -0.32658 | 4.56E-13 | -0.1024  | 0.02691  | -0.37377 | 6.24E-17 | -0.51645 | 3.37E-33 |

|          |          |          |          |          |          |          |          |          |
|----------|----------|----------|----------|----------|----------|----------|----------|----------|
| 0.74169  | 0.191349 | 3.15E-05 | 0.235411 | 2.66E-07 | 0.471208 | 3.46E-27 | 0.578015 | 5.58E-43 |
| 0.88507  | -0.16155 | 0.00046  | -0.35008 | 6.54E-15 | -0.46635 | 1.36E-26 | -0.46842 | 7.61E-27 |
| 0.59549  | 0.222233 | 1.23E-06 | 0.30526  | 1.58E-11 | 0.409875 | 2.40E-20 | 0.519057 | 1.42E-33 |
| 0.0228   | -0.26468 | 6.31E-09 | -0.38863 | 2.76E-18 | -0.37794 | 2.64E-17 | -0.49696 | 1.69E-30 |
| 1.62E-05 | -0.17152 | 0.0002   | -0.30031 | 3.45E-11 | -0.23075 | 4.62E-07 | -0.4363  | 4.01E-23 |
| 2.84E-06 | 0.154298 | 0.00082  | 0.561928 | 3.18E-40 | 0.584081 | 4.65E-44 | 0.714376 | 4.12E-74 |
| 0.00017  | 0.24181  | 1.22E-07 | 0.67828  | 3.20E-64 | 0.654723 | 1.69E-58 | 0.656716 | 5.81E-59 |
| 0.00769  | 0.090039 | 0.05183  | 0.321335 | 1.12E-12 | 0.382977 | 9.21E-18 | 0.445527 | 3.75E-24 |
| 0.00081  | 0.249175 | 4.85E-08 | 0.396163 | 5.33E-19 | 0.549965 | 2.85E-38 | 0.582202 | 1.01E-43 |
| 6.95E-18 | 0.316715 | 2.43E-12 | 0.102002 | 0.02752  | 0.208027 | 5.81E-06 | 0.413057 | 1.14E-20 |
| 2.73E-06 | 0.097259 | 0.03563  | 0.313979 | 3.83E-12 | 0.324778 | 6.21E-13 | 0.436233 | 4.07E-23 |
| 9.18E-09 | 0.435948 | 4.38E-23 | 0.340804 | 3.65E-14 | 0.481882 | 1.59E-28 | 0.745338 | 6.59E-84 |
| 0.61964  | 0.230669 | 4.67E-07 | 0.157101 | 0.00066  | 0.329427 | 2.78E-13 | 0.528071 | 6.80E-35 |
| 0.00097  | 0.077736 | 0.09336  | 0.468112 | 8.30E-27 | 0.658234 | 2.56E-59 | 0.617941 | 1.60E-50 |
| 2.41E-07 | 0.315387 | 3.03E-12 | 0.469839 | 5.10E-27 | 0.645453 | 2.20E-56 | 0.733258 | 6.37E-80 |
| 0.00096  | 0.187814 | 4.42E-05 | 0.421403 | 1.58E-21 | 0.390002 | 2.05E-18 | 0.41475  | 7.69E-21 |
| 0.07786  | 0.132346 | 0.00417  | 0.502245 | 3.26E-31 | 0.551982 | 1.35E-38 | 0.595214 | 4.24E-46 |
| 5.59E-05 | 0.296085 | 6.65E-11 | 0.336474 | 7.98E-14 | 0.5973   | 1.72E-46 | 0.71509  | 2.54E-74 |
| 0.41451  | 0.153711 | 0.00086  | 0.230765 | 4.61E-07 | 0.491036 | 1.03E-29 | 0.55048  | 2.36E-38 |
| 0.20243  | 0.117349 | 0.01115  | 0.404423 | 8.37E-20 | 0.558059 | 1.39E-39 | 0.541492 | 6.19E-37 |
| 8.81E-08 | 0.501157 | 4.58E-31 | 0.464078 | 2.56E-26 | 0.52445  | 2.33E-34 | 0.591486 | 2.08E-45 |
| 0.09119  | 0.154948 | 0.00078  | 0.203093 | 9.72E-06 | 0.445658 | 3.62E-24 | 0.435471 | 4.94E-23 |
| 0.88586  | 0.197647 | 1.69E-05 | 0.586203 | 1.93E-44 | 0.813135 | #####    | 0.823365 | #####    |
| 0.01047  | 0.184982 | 5.78E-05 | 0.486037 | 4.64E-29 | 0.617732 | 1.77E-50 | 0.619234 | 8.75E-51 |
| 2.36E-10 | 0.368405 | 1.85E-16 | 0.524785 | 2.08E-34 | 0.561169 | 4.25E-40 | 0.776379 | 2.86E-95 |
| 7.86E-06 | 0.282332 | 5.24E-10 | 0.610309 | 5.37E-49 | 0.519855 | 1.09E-33 | 0.707429 | 4.32E-72 |
| 0.49157  | 0.107808 | 0.01979  | 0.335309 | 9.83E-14 | 0.532365 | 1.55E-35 | 0.629414 | 6.79E-53 |
| 0.00889  | 0.172962 | 0.00017  | 0.13413  | 0.00369  | 0.293082 | 1.05E-10 | 0.396246 | 5.23E-19 |
| 0.03199  | 0.112392 | 0.0151   | 0.246844 | 6.52E-08 | 0.502049 | 3.46E-31 | 0.577394 | 7.17E-43 |
| 0.01348  | -0.25133 | 3.68E-08 | -0.35127 | 5.23E-15 | -0.36576 | 3.15E-16 | -0.53783 | 2.28E-36 |
| 1.37E-11 | 0.404271 | 8.67E-20 | 0.416863 | 4.67E-21 | 0.582143 | 1.03E-43 | 0.737126 | 3.56E-81 |
| 0.42027  | 0.146806 | 0.00147  | 0.092456 | 0.04583  | 0.385476 | 5.42E-18 | 0.419496 | 2.49E-21 |
| 0.03161  | 0.107483 | 0.02017  | 0.248847 | 5.06E-08 | 0.38048  | 1.56E-17 | 0.451033 | 8.80E-25 |
| 0.02376  | 0.300254 | 3.48E-11 | 0.500361 | 5.88E-31 | 0.525783 | 1.48E-34 | 0.625809 | 3.87E-52 |
| 3.94E-06 | 0.248748 | 5.12E-08 | 0.352092 | 4.48E-15 | 0.389782 | 2.15E-18 | 0.586163 | 1.96E-44 |
| 0.00037  | 0.36477  | 3.83E-16 | 0.527688 | 7.75E-35 | 0.70081  | 3.21E-70 | 0.874091 | #####    |
| 0.23129  | 0.098521 | 0.03329  | 0.224454 | 9.58E-07 | 0.428126 | 3.08E-22 | 0.58223  | 9.98E-44 |
| 0.47932  | 0.17115  | 0.0002   | 0.443781 | 5.90E-24 | 0.687199 | 1.57E-66 | 0.727704 | 3.66E-78 |
| 0.00337  | -0.15153 | 0.00102  | -0.29254 | 1.15E-10 | -0.27699 | 1.13E-09 | -0.40519 | 7.03E-20 |
| 0.02103  | 0.319576 | 1.51E-12 | 0.458459 | 1.20E-25 | 0.748857 | 4.12E-85 | 0.888775 | #####    |
| 0.71723  | 0.259106 | 1.33E-08 | 0.331437 | 1.95E-13 | 0.672297 | 1.02E-62 | 0.794158 | #####    |
| 2.09E-17 | 0.448985 | 1.51E-24 | 0.548033 | 5.80E-38 | 0.689938 | 2.95E-67 | 0.791276 | #####    |
| 0.05727  | 0.304902 | 1.67E-11 | 0.304146 | 1.88E-11 | 0.402388 | 1.33E-19 | 0.614339 | 8.50E-50 |
| 0.00249  | 0.17012  | 0.00022  | 0.438946 | 2.05E-23 | 0.497895 | 1.27E-30 | 0.486271 | 4.33E-29 |
| 0.17329  | 0.224834 | 9.17E-07 | 0.311046 | 6.20E-12 | 0.451051 | 8.76E-25 | 0.576339 | 1.10E-42 |



|          |          |          |          |          |          |          |          |          |
|----------|----------|----------|----------|----------|----------|----------|----------|----------|
| 0.00013  | 0.42157  | 1.52E-21 | 0.18762  | 4.51E-05 | 0.335978 | 8.72E-14 | 0.501914 | 3.61E-31 |
| 0.21605  | 0.308703 | 9.07E-12 | 0.42469  | 7.13E-22 | 0.594601 | 5.51E-46 | 0.678305 | 3.15E-64 |
| 3.61E-06 | 0.055718 | 0.22945  | 0.648174 | 5.36E-57 | 0.449931 | 1.18E-24 | 0.46451  | 2.27E-26 |
| 0.24011  | 0.302597 | 2.41E-11 | -0.01331 | 0.77427  | 0.221532 | 1.33E-06 | 0.411452 | 1.66E-20 |
| 0.5951   | 0.196749 | 1.85E-05 | 0.399799 | 2.37E-19 | 0.391222 | 1.57E-18 | 0.434139 | 6.90E-23 |
| 0.00359  | 0.295761 | 7.00E-11 | 0.302197 | 2.56E-11 | 0.278331 | 9.36E-10 | 0.385457 | 5.44E-18 |
| 0.00084  | -0.23596 | 2.49E-07 | -0.2274  | 6.83E-07 | -0.26118 | 1.01E-08 | -0.46085 | 6.23E-26 |
| 0.03786  | -0.25733 | 1.69E-08 | -0.19451 | 2.31E-05 | -0.35256 | 4.09E-15 | -0.42672 | 4.34E-22 |
| 4.85E-07 | 0.46233  | 4.15E-26 | 0.163387 | 0.00039  | 0.390666 | 1.78E-18 | 0.66743  | 1.61E-61 |
| 0.01046  | 0.17859  | 0.0001   | 0.311809 | 5.47E-12 | 0.324335 | 6.71E-13 | 0.448128 | 1.90E-24 |
| 0.01052  | 0.280846 | 6.51E-10 | 0.317138 | 2.27E-12 | 0.322238 | 9.60E-13 | 0.552946 | 9.46E-39 |
| 1.74E-10 | -0.11938 | 0.00982  | -0.42861 | 2.73E-22 | -0.41104 | 1.83E-20 | -0.43835 | 2.38E-23 |
| 0.51735  | 0.308353 | 9.60E-12 | 0.118601 | 0.01031  | 0.403779 | 9.69E-20 | 0.480302 | 2.52E-28 |
| 0.01302  | 0.19973  | 1.37E-05 | 0.193657 | 2.51E-05 | 0.328942 | 3.02E-13 | 0.463172 | 3.29E-26 |
| 0.00021  | 0.203542 | 9.28E-06 | 0.466642 | 1.25E-26 | 0.418087 | 3.49E-21 | 0.603826 | 9.84E-48 |
| 1.90E-07 | 0.059477 | 0.19949  | 0.464651 | 2.18E-26 | 0.489186 | 1.81E-29 | 0.518774 | 1.56E-33 |
| 1.22E-07 | 0.274669 | 1.58E-09 | 0.014679 | 0.75172  | 0.228636 | 5.92E-07 | 0.404479 | 8.27E-20 |
| 0.09377  | 0.124768 | 0.00694  | 0.286264 | 2.94E-10 | 0.432501 | 1.04E-22 | 0.513462 | 8.97E-33 |
| 0.82925  | 0.070553 | 0.12789  | 0.214961 | 2.76E-06 | 0.465968 | 1.51E-26 | 0.459855 | 8.18E-26 |
| 4.26E-09 | 0.191182 | 3.20E-05 | 0.160377 | 0.0005   | 0.263869 | 7.04E-09 | 0.381742 | 1.19E-17 |
| 0.50927  | 0.282678 | 4.98E-10 | 0.12151  | 0.00857  | 0.391461 | 1.49E-18 | 0.506535 | 8.37E-32 |
| 0.90443  | 0.546811 | 9.06E-38 | 0.176332 | 0.00013  | 0.327518 | 3.87E-13 | 0.547639 | 6.70E-38 |
| 2.56E-08 | -0.25222 | 3.29E-08 | -0.28876 | 2.03E-10 | -0.39126 | 1.56E-18 | -0.50572 | 1.09E-31 |
| 0.67976  | 0.355893 | 2.17E-15 | 0.319186 | 1.61E-12 | 0.484348 | 7.67E-29 | 0.637357 | 1.35E-54 |
| 0.00074  | -0.4426  | 8.01E-24 | -0.2631  | 7.81E-09 | -0.37807 | 2.57E-17 | -0.64187 | 1.38E-55 |
| 0.37042  | 0.185973 | 5.27E-05 | 0.328755 | 3.12E-13 | 0.45304  | 5.16E-25 | 0.50863  | 4.28E-32 |
| 6.23E-05 | 0.268306 | 3.84E-09 | 0.095669 | 0.03877  | 0.229146 | 5.58E-07 | 0.450724 | 9.55E-25 |
| 0.95952  | 0.217352 | 2.12E-06 | 0.393944 | 8.69E-19 | 0.700681 | 3.49E-70 | 0.821673 | #####    |
| 0.4344   | 0.082034 | 0.07656  | 0.398595 | 3.11E-19 | 0.517583 | 2.32E-33 | 0.637439 | 1.29E-54 |
| 0.01132  | -0.35023 | 6.36E-15 | -0.25918 | 1.32E-08 | -0.51597 | 3.94E-33 | -0.61752 | 1.95E-50 |
| 0.15047  | -0.23157 | 4.20E-07 | -0.33559 | 9.35E-14 | -0.34684 | 1.20E-14 | -0.48287 | 1.19E-28 |
| 0.00315  | 0.123253 | 0.00766  | 0.240822 | 1.38E-07 | 0.545047 | 1.72E-37 | 0.54788  | 6.13E-38 |
| 2.23E-07 | 0.288798 | 2.01E-10 | 0.575212 | 1.73E-42 | 0.734143 | 3.31E-80 | 0.83466  | #####    |
| 0.8454   | 0.280026 | 7.33E-10 | 0.485047 | 6.23E-29 | 0.618556 | 1.20E-50 | 0.719163 | 1.54E-75 |
| 7.45E-13 | 0.387485 | 3.53E-18 | 0.178322 | 0.00011  | 0.334128 | 1.21E-13 | 0.385435 | 5.47E-18 |
| 8.77E-08 | 0.186139 | 5.18E-05 | 0.252845 | 3.03E-08 | 0.555989 | 3.03E-39 | 0.707168 | 5.13E-72 |
| 3.45E-08 | -0.35338 | 3.50E-15 | -0.19785 | 1.66E-05 | -0.24308 | 1.04E-07 | -0.5294  | 4.31E-35 |
| 0.03341  | 0.070524 | 0.12805  | 0.602705 | 1.62E-47 | 0.618143 | 1.46E-50 | 0.63261  | 1.42E-53 |
| 7.36E-07 | -0.34832 | 9.11E-15 | -0.39228 | 1.25E-18 | -0.4527  | 5.65E-25 | -0.60026 | 4.74E-47 |
| 3.27E-11 | 0.160859 | 0.00048  | 0.490585 | 1.19E-29 | 0.602174 | 2.04E-47 | 0.709333 | 1.22E-72 |
| 6.81E-14 | 0.134975 | 0.00347  | 0.305977 | 1.41E-11 | 0.414134 | 8.88E-21 | 0.515098 | 5.25E-33 |
| 0.13344  | 0.329371 | 2.80E-13 | 0.312146 | 5.18E-12 | 0.458244 | 1.27E-25 | 0.663451 | 1.47E-60 |
| 4.13E-07 | 0.174642 | 0.00015  | 0.277836 | 1.00E-09 | 0.373488 | 6.61E-17 | 0.446471 | 2.93E-24 |
| 0.04353  | -0.24585 | 7.39E-08 | -0.01299 | 0.77951  | -0.41576 | 6.05E-21 | -0.43158 | 1.31E-22 |
| 0.06631  | 0.074141 | 0.10957  | 0.189019 | 3.94E-05 | 0.329684 | 2.65E-13 | 0.403151 | 1.12E-19 |

|          |          |          |          |          |          |          |          |          |
|----------|----------|----------|----------|----------|----------|----------|----------|----------|
| 0.88417  | 0.494972 | 3.12E-30 | 0.20114  | 1.19E-05 | 0.386706 | 4.17E-18 | 0.53652  | 3.62E-36 |
| 0.03963  | 0.203789 | 9.05E-06 | 0.505236 | 1.27E-31 | 0.356672 | 1.86E-15 | 0.475108 | 1.14E-27 |
| 0.67755  | 0.261491 | 9.70E-09 | 0.191406 | 3.13E-05 | 0.488576 | 2.17E-29 | 0.464104 | 2.54E-26 |
| 0.09874  | 0.292898 | 1.08E-10 | 0.240115 | 1.50E-07 | 0.441712 | 1.01E-23 | 0.673598 | 4.84E-63 |
| 0.03099  | 0.225058 | 8.94E-07 | 0.350244 | 6.35E-15 | 0.415845 | 5.94E-21 | 0.525693 | 1.53E-34 |
| 0.03929  | 0.140735 | 0.0023   | 0.19105  | 3.24E-05 | 0.487379 | 3.11E-29 | 0.616718 | 2.83E-50 |
| 0.20056  | 0.557932 | 1.46E-39 | 0.254429 | 2.47E-08 | 0.513849 | 7.91E-33 | 0.670054 | 3.66E-62 |
| 7.80E-31 | 0.252194 | 3.30E-08 | 0.337788 | 6.30E-14 | 0.458824 | 1.08E-25 | 0.581397 | 1.41E-43 |
| 0.00158  | -0.2892  | 1.90E-10 | -0.0465  | 0.31603  | -0.35295 | 3.80E-15 | -0.53839 | 1.87E-36 |
| 0.08835  | 0.356249 | 2.02E-15 | 0.458045 | 1.34E-25 | 0.743745 | 2.27E-83 | 0.843764 | #####    |
| 4.73E-07 | -0.2388  | 1.77E-07 | -0.14317 | 0.00192  | -0.34858 | 8.67E-15 | -0.51997 | 1.05E-33 |
| 0.05104  | 0.252066 | 3.35E-08 | 0.295516 | 7.26E-11 | 0.551697 | 1.50E-38 | 0.689113 | 4.89E-67 |
| 0.00086  | 0.104305 | 0.02419  | 0.338894 | 5.16E-14 | 0.489218 | 1.79E-29 | 0.472388 | 2.48E-27 |
| 1.04E-05 | 0.141218 | 0.00222  | 0.150075 | 0.00114  | 0.433251 | 8.62E-23 | 0.390965 | 1.66E-18 |
| 0.61112  | -0.19756 | 1.71E-05 | -0.29123 | 1.40E-10 | -0.22784 | 6.49E-07 | -0.38134 | 1.30E-17 |
| 5.71E-05 | 0.027641 | 0.55128  | 0.555819 | 3.23E-39 | 0.329133 | 2.92E-13 | 0.390481 | 1.85E-18 |
| 0.19876  | -0.23669 | 2.28E-07 | -0.22947 | 5.37E-07 | -0.28852 | 2.10E-10 | -0.42241 | 1.24E-21 |
| 0.71378  | 0.218189 | 1.94E-06 | 0.419033 | 2.79E-21 | 0.48893  | 1.95E-29 | 0.409913 | 2.38E-20 |
| 0.00395  | 0.284028 | 4.09E-10 | 0.309373 | 8.14E-12 | 0.373729 | 6.30E-17 | 0.565268 | 8.75E-41 |
| 0.47893  | 0.29269  | 1.12E-10 | 0.565469 | 8.09E-41 | 0.619837 | 6.60E-51 | 0.62     | 6.11E-51 |
| 0.00275  | 0.173744 | 0.00016  | 0.311025 | 6.22E-12 | 0.412812 | 1.21E-20 | 0.405583 | 6.43E-20 |
| 0.01629  | 0.081992 | 0.07671  | 0.237308 | 2.12E-07 | 0.284129 | 4.03E-10 | 0.349947 | 6.71E-15 |
| 0.89455  | 0.144484 | 0.00175  | 0.22965  | 5.26E-07 | 0.426204 | 4.93E-22 | 0.546755 | 9.25E-38 |
| 1.82E-12 | 0.317621 | 2.09E-12 | 0.416166 | 5.50E-21 | 0.487854 | 2.70E-29 | 0.679505 | 1.56E-64 |
| 1.22E-05 | 0.220714 | 1.46E-06 | 0.50454  | 1.58E-31 | 0.585294 | 2.81E-44 | 0.662392 | 2.64E-60 |
| 1.37E-06 | -0.32748 | 3.90E-13 | -0.0435  | 0.3483   | -0.27062 | 2.79E-09 | -0.5509  | 2.02E-38 |
| 0.05644  | 0.241072 | 1.34E-07 | 0.534572 | 7.17E-36 | 0.573042 | 4.12E-42 | 0.668964 | 6.78E-62 |
| 0.62838  | 0.104253 | 0.02426  | 0.526175 | 1.30E-34 | 0.613338 | 1.35E-49 | 0.578584 | 4.43E-43 |
| 0.45714  | 0.124107 | 0.00725  | 0.469554 | 5.53E-27 | 0.71529  | 2.21E-74 | 0.75488  | 3.22E-87 |
| 0.31725  | 0.279844 | 7.52E-10 | 0.37144  | 1.00E-16 | 0.371694 | 9.53E-17 | 0.563589 | 1.68E-40 |
| 2.01E-24 | 0.077592 | 0.09397  | 0.517818 | 2.14E-33 | 0.499556 | 7.55E-31 | 0.491251 | 9.69E-30 |
| 0.01107  | 0.168633 | 0.00025  | 0.331147 | 2.05E-13 | 0.51476  | 5.87E-33 | 0.586705 | 1.56E-44 |
| 0.74971  | 0.303133 | 2.21E-11 | 0.353744 | 3.27E-15 | 0.517469 | 2.41E-33 | 0.656443 | 6.73E-59 |
| 6.29E-05 | 0.260138 | 1.16E-08 | 0.56951  | 1.67E-41 | 0.522686 | 4.23E-34 | 0.645468 | 2.18E-56 |
| 0.24958  | 0.145243 | 0.00165  | 0.323624 | 7.57E-13 | 0.43793  | 2.65E-23 | 0.45947  | 9.09E-26 |
| 0.54167  | 0.254747 | 2.37E-08 | 0.301878 | 2.70E-11 | 0.277376 | 1.07E-09 | 0.430112 | 1.88E-22 |
| 0.18292  | -0.13321 | 0.00393  | -0.32139 | 1.11E-12 | -0.38786 | 3.25E-18 | -0.38172 | 1.20E-17 |
| 0.40555  | 0.279459 | 7.95E-10 | 0.245903 | 7.34E-08 | 0.32442  | 6.61E-13 | 0.395864 | 5.69E-19 |
| 4.62E-11 | 0.140826 | 0.00229  | 0.25375  | 2.70E-08 | 0.436    | 4.32E-23 | 0.456275 | 2.16E-25 |
| 2.58E-08 | 0.129601 | 0.00503  | 0.322479 | 9.21E-13 | 0.434909 | 5.69E-23 | 0.469959 | 4.93E-27 |
| 0.43237  | 0.172818 | 0.00017  | 0.567823 | 3.23E-41 | 0.508248 | 4.84E-32 | 0.539508 | 1.26E-36 |
| 0.08182  | -0.24071 | 1.40E-07 | -0.16892 | 0.00025  | -0.31583 | 2.82E-12 | -0.43052 | 1.70E-22 |
| 0.77008  | 0.300325 | 3.44E-11 | 0.451493 | 7.79E-25 | 0.46997  | 4.92E-27 | 0.619622 | 7.30E-51 |
| 0.00485  | -0.25246 | 3.18E-08 | -0.13411 | 0.00369  | -0.287   | 2.63E-10 | -0.45047 | 1.02E-24 |
| 3.31E-15 | 0.266987 | 4.60E-09 | 0.472662 | 2.29E-27 | 0.638909 | 6.18E-55 | 0.722811 | 1.20E-76 |

|          |          |          |          |          |          |          |          |          |
|----------|----------|----------|----------|----------|----------|----------|----------|----------|
| 0.03331  | 0.516526 | 3.29E-33 | 0.318376 | 1.84E-12 | 0.512224 | 1.34E-32 | 0.691855 | 9.05E-68 |
| 0.45437  | 0.24933  | 4.76E-08 | 0.27787  | 1.00E-09 | 0.319985 | 1.41E-12 | 0.478481 | 4.29E-28 |
| 0.56116  | 0.368762 | 1.72E-16 | 0.400245 | 2.15E-19 | 0.656004 | 8.52E-59 | 0.802645 | #####    |
| 8.66E-06 | 0.396377 | 5.08E-19 | 0.32602  | 5.02E-13 | 0.410012 | 2.32E-20 | 0.616406 | 3.27E-50 |
| 0.94757  | 0.272717 | 2.08E-09 | 0.532253 | 1.61E-35 | 0.721458 | 3.10E-76 | 0.814357 | #####    |
| 3.08E-13 | -0.21314 | 3.36E-06 | -0.29786 | 5.06E-11 | -0.4258  | 5.44E-22 | -0.52882 | 5.27E-35 |
| 0.1921   | 0.310969 | 6.28E-12 | 0.001159 | 0.98006  | 0.245373 | 7.84E-08 | 0.389405 | 2.33E-18 |
| 0.03086  | 0.167752 | 0.00027  | 0.283132 | 4.66E-10 | 0.21382  | 3.13E-06 | 0.376668 | 3.44E-17 |
| 0.13456  | -0.18142 | 8.05E-05 | -0.10441 | 0.02404  | -0.26283 | 8.11E-09 | -0.39583 | 5.74E-19 |
| 0.2261   | 0.301404 | 2.91E-11 | 0.266826 | 4.71E-09 | 0.532086 | 1.70E-35 | 0.769111 | 1.89E-92 |
| 0.00046  | -0.20814 | 5.74E-06 | -0.12315 | 0.00772  | -0.16594 | 0.00032  | -0.37832 | 2.44E-17 |
| 0.00106  | 0.162561 | 0.00042  | 0.341229 | 3.38E-14 | 0.481089 | 2.00E-28 | 0.610055 | 6.02E-49 |
| 5.31E-10 | 0.248129 | 5.54E-08 | 0.317615 | 2.09E-12 | 0.428707 | 2.67E-22 | 0.495425 | 2.71E-30 |
| 0.02949  | -0.25206 | 3.36E-08 | 0.083254 | 0.07227  | -0.18909 | 3.91E-05 | -0.39619 | 5.30E-19 |
| 0.99594  | -0.26573 | 5.47E-09 | -0.1873  | 4.64E-05 | -0.25595 | 2.02E-08 | -0.44111 | 1.18E-23 |
| 0.17711  | 0.267192 | 4.48E-09 | 0.38665  | 4.22E-18 | 0.58029  | 2.21E-43 | 0.699696 | 6.55E-70 |
| 2.17E-07 | -0.31394 | 3.86E-12 | -0.41807 | 3.50E-21 | -0.36669 | 2.61E-16 | -0.57499 | 1.89E-42 |
| 0.49726  | 0.084899 | 0.06679  | 0.094687 | 0.04082  | 0.371001 | 1.10E-16 | 0.353285 | 3.57E-15 |
| 2.39E-05 | 0.309855 | 7.52E-12 | 0.392351 | 1.23E-18 | 0.479638 | 3.06E-28 | 0.475065 | 1.15E-27 |
| 0.82225  | 0.141501 | 0.00218  | 0.478629 | 4.11E-28 | 0.574445 | 2.35E-42 | 0.628618 | 9.99E-53 |
| 0.00551  | -0.2488  | 5.09E-08 | -0.0674  | 0.14589  | -0.30616 | 1.36E-11 | -0.50493 | 1.40E-31 |
| 4.37E-06 | 0.114146 | 0.01358  | 0.249207 | 4.83E-08 | 0.476961 | 6.67E-28 | 0.559697 | 7.45E-40 |
| 0.88435  | 0.124234 | 0.00719  | 0.281448 | 5.96E-10 | 0.570396 | 1.18E-41 | 0.6516   | 8.89E-58 |
| 0.03452  | 0.226076 | 7.95E-07 | 0.328753 | 3.12E-13 | 0.449602 | 1.29E-24 | 0.581367 | 1.42E-43 |
| 0.80289  | 0.166958 | 0.00029  | 0.376904 | 3.28E-17 | 0.506708 | 7.92E-32 | 0.584077 | 4.66E-44 |
| 0.64666  | 0.214196 | 3.00E-06 | 0.186445 | 5.04E-05 | 0.508154 | 4.99E-32 | 0.675523 | 1.59E-63 |
| 0.01461  | 0.12025  | 0.00929  | 0.315368 | 3.04E-12 | 0.331463 | 1.94E-13 | 0.369581 | 1.46E-16 |
| 0.01188  | -0.23654 | 2.32E-07 | -0.06504 | 0.16053  | -0.39514 | 6.67E-19 | -0.43219 | 1.12E-22 |
| 0.59783  | 0.309583 | 7.86E-12 | 0.305242 | 1.58E-11 | 0.531695 | 1.95E-35 | 0.710728 | 4.83E-73 |
| 0.61701  | 0.24777  | 5.80E-08 | 0.4314   | 1.37E-22 | 0.606346 | 3.20E-48 | 0.650195 | 1.86E-57 |
| 7.98E-05 | 0.17125  | 0.0002   | 0.350831 | 5.68E-15 | 0.524559 | 2.25E-34 | 0.483983 | 8.55E-29 |
| 0.07245  | 0.110965 | 0.01644  | 0.52591  | 1.42E-34 | 0.659093 | 1.61E-59 | 0.700246 | 4.61E-70 |
| 0.04225  | 0.324165 | 6.90E-13 | 0.708172 | 2.65E-72 | 0.630179 | 4.68E-53 | 0.717942 | 3.58E-75 |
| 0.00014  | 0.316495 | 2.52E-12 | 0.299396 | 3.98E-11 | 0.412911 | 1.18E-20 | 0.614947 | 6.42E-50 |
| 0.06734  | 0.328645 | 3.18E-13 | 0.405929 | 5.94E-20 | 0.585958 | 2.13E-44 | 0.752446 | 2.33E-86 |
| 0.00585  | 0.31064  | 6.62E-12 | 0.616037 | 3.88E-50 | 0.617965 | 1.58E-50 | 0.693458 | 3.35E-68 |
| 0.00812  | 0.346158 | 1.36E-14 | 0.474942 | 1.19E-27 | 0.560225 | 6.09E-40 | 0.711175 | 2.43E-73 |
| 0.38669  | 0.155757 | 0.00073  | 0.273629 | 1.83E-09 | 0.385991 | 4.86E-18 | 0.432029 | 1.17E-22 |
| 0.00016  | 0.182852 | 7.05E-05 | 0.278557 | 9.06E-10 | 0.458675 | 1.13E-25 | 0.565547 | 7.85E-41 |
| 0.03529  | 0.282803 | 4.89E-10 | 0.145468 | 0.00162  | 0.383421 | 8.38E-18 | 0.502146 | 3.36E-31 |
| 0.73587  | 0.226277 | 7.77E-07 | 0.39784  | 3.68E-19 | 0.437747 | 2.77E-23 | 0.467816 | 9.02E-27 |
| 0.13012  | 0.331097 | 2.07E-13 | 0.238512 | 1.83E-07 | 0.329844 | 2.58E-13 | 0.471322 | 3.35E-27 |
| 0.01648  | 0.165506 | 0.00033  | 0.569574 | 1.63E-41 | 0.738975 | 8.82E-82 | 0.80708  | #####    |
| 0.02618  | 0.205201 | 7.81E-06 | 0.557373 | 1.80E-39 | 0.731328 | 2.63E-79 | 0.834177 | #####    |
| 7.19E-06 | 0.145255 | 0.00165  | 0.273315 | 1.91E-09 | 0.31882  | 1.71E-12 | 0.3344   | 1.16E-13 |

|          |          |          |          |          |          |          |          |          |
|----------|----------|----------|----------|----------|----------|----------|----------|----------|
| 0.01904  | 0.217911 | 2.00E-06 | 0.161811 | 0.00045  | 0.30914  | 8.45E-12 | 0.430579 | 1.68E-22 |
| 0.62191  | 0.363168 | 5.25E-16 | 0.29009  | 1.66E-10 | 0.483533 | 9.76E-29 | 0.638461 | 7.75E-55 |
| 0.44438  | 0.090518 | 0.0506   | 0.416289 | 5.35E-21 | 0.632714 | 1.35E-53 | 0.635737 | 3.02E-54 |
| 0.02445  | -0.14746 | 0.0014   | -0.30396 | 1.94E-11 | -0.30211 | 2.60E-11 | -0.46426 | 2.43E-26 |
| 0.5677   | 0.221505 | 1.34E-06 | 0.538043 | 2.11E-36 | 0.822993 | #####    | 0.831244 | #####    |
| 0.221    | 0.195919 | 2.01E-05 | 0.28279  | 4.90E-10 | 0.479768 | 2.95E-28 | 0.680137 | 1.07E-64 |
| 0.27646  | -0.2565  | 1.88E-08 | -0.05619 | 0.22551  | -0.2322  | 3.90E-07 | -0.38716 | 3.78E-18 |
| 0.36195  | 0.015884 | 0.73208  | 0.354097 | 3.06E-15 | 0.382303 | 1.06E-17 | 0.332877 | 1.51E-13 |
| 0.52903  | -0.22442 | 9.61E-07 | -0.10928 | 0.01816  | -0.40865 | 3.18E-20 | -0.41416 | 8.84E-21 |
| 0.14921  | 0.414171 | 8.81E-21 | 0.002056 | 0.96465  | 0.211918 | 3.84E-06 | 0.40331  | 1.08E-19 |
| 6.49E-08 | -0.1713  | 0.0002   | -0.15829 | 0.0006   | -0.24856 | 5.25E-08 | -0.43475 | 5.92E-23 |
| 0.0003   | 0.150506 | 0.0011   | 0.347363 | 1.09E-14 | 0.395903 | 5.65E-19 | 0.519417 | 1.26E-33 |
| 0.43233  | 0.20415  | 8.72E-06 | 0.278448 | 9.20E-10 | 0.606879 | 2.52E-48 | 0.681007 | 6.42E-65 |
| 0.00501  | -0.23154 | 4.21E-07 | -0.32395 | 7.16E-13 | -0.35939 | 1.10E-15 | -0.51141 | 1.75E-32 |
| 0.85573  | 0.199534 | 1.40E-05 | 0.494145 | 4.01E-30 | 0.554353 | 5.60E-39 | 0.725473 | 1.81E-77 |
| 0.0004   | 0.247882 | 5.72E-08 | 0.161015 | 0.00048  | 0.367712 | 2.13E-16 | 0.538654 | 1.70E-36 |
| 0.81805  | 0.227295 | 6.91E-07 | 0.670322 | 3.14E-62 | 0.651117 | 1.15E-57 | 0.697086 | 3.44E-69 |
| 0.00426  | 0.321493 | 1.09E-12 | 0.376355 | 3.67E-17 | 0.581344 | 1.44E-43 | 0.73021  | 5.96E-79 |
| 0.25511  | 0.088461 | 0.0561   | 0.275993 | 1.31E-09 | 0.346592 | 1.26E-14 | 0.407391 | 4.25E-20 |
| 0.69048  | 0.531674 | 1.97E-35 | 0.127804 | 0.00568  | 0.29968  | 3.81E-11 | 0.468177 | 8.15E-27 |
| 0.50272  | 0.157007 | 0.00066  | 0.396123 | 5.38E-19 | 0.383898 | 7.58E-18 | 0.459833 | 8.23E-26 |
| 0.68675  | 0.282317 | 5.25E-10 | 0.195047 | 2.19E-05 | 0.374463 | 5.42E-17 | 0.49997  | 6.64E-31 |
| 0.20943  | 0.274782 | 1.55E-09 | 0.272771 | 2.06E-09 | 0.415721 | 6.11E-21 | 0.491246 | 9.71E-30 |
| 0.45183  | 0.214571 | 2.88E-06 | 0.439717 | 1.68E-23 | 0.535289 | 5.58E-36 | 0.665136 | 5.79E-61 |
| 0.00022  | 0.045251 | 0.32918  | 0.500889 | 4.98E-31 | 0.298993 | 4.24E-11 | 0.374564 | 5.31E-17 |
| 0.00328  | 0.198786 | 1.51E-05 | 0.37062  | 1.19E-16 | 0.524749 | 2.11E-34 | 0.630107 | 4.84E-53 |
| 0.00271  | 0.304927 | 1.66E-11 | 0.150387 | 0.00112  | 0.412777 | 1.22E-20 | 0.524847 | 2.04E-34 |
| 2.18E-05 | 0.209191 | 5.14E-06 | 0.3379   | 6.17E-14 | 0.514218 | 7.01E-33 | 0.631302 | 2.70E-53 |
| 2.24E-08 | 0.207664 | 6.04E-06 | 0.236825 | 2.24E-07 | 0.461882 | 4.69E-26 | 0.548101 | 5.66E-38 |
| 1.01E-08 | 0.154108 | 0.00083  | 0.473472 | 1.82E-27 | 0.623525 | 1.15E-51 | 0.648743 | 3.99E-57 |
| 0.38832  | 0.141606 | 0.00216  | 0.408413 | 3.36E-20 | 0.637714 | 1.13E-54 | 0.61216  | 2.31E-49 |
| 2.55E-12 | 0.441183 | 1.15E-23 | 0.453646 | 4.39E-25 | 0.665296 | 5.30E-61 | 0.851371 | #####    |
| 0.63036  | 0.304808 | 1.70E-11 | 0.424133 | 8.16E-22 | 0.651261 | 1.06E-57 | 0.750338 | 1.27E-85 |
| 0.02836  | -0.24213 | 1.17E-07 | -0.08807 | 0.0572   | -0.32345 | 7.80E-13 | -0.39906 | 2.80E-19 |
| 8.18E-05 | 0.130226 | 0.00482  | 0.258181 | 1.51E-08 | 0.509596 | 3.14E-32 | 0.510636 | 2.25E-32 |
| 0.01574  | 0.180183 | 9.02E-05 | 0.295988 | 6.75E-11 | 0.295767 | 6.99E-11 | 0.38506  | 5.92E-18 |
| 0.00062  | 0.346422 | 1.30E-14 | 0.391191 | 1.58E-18 | 0.546182 | 1.14E-37 | 0.770061 | 8.19E-93 |
| 0.11246  | 0.220952 | 1.42E-06 | 0.217353 | 2.12E-06 | 0.384307 | 6.95E-18 | 0.508732 | 4.15E-32 |
| 0.00211  | 0.169728 | 0.00023  | 0.123536 | 0.00752  | 0.295429 | 7.36E-11 | 0.398255 | 3.35E-19 |
| 8.36E-05 | 0.230933 | 4.52E-07 | 0.290341 | 1.60E-10 | 0.39048  | 1.85E-18 | 0.514796 | 5.80E-33 |
| 0.95608  | 0.28366  | 4.31E-10 | 0.210653 | 4.40E-06 | 0.339684 | 4.47E-14 | 0.534323 | 7.82E-36 |
| 0.72468  | 0.152479 | 0.00095  | 0.463758 | 2.80E-26 | 0.409242 | 2.78E-20 | 0.435209 | 5.27E-23 |
| 0.00392  | 0.113807 | 0.01386  | 0.373815 | 6.19E-17 | 0.358409 | 1.33E-15 | 0.483203 | 1.08E-28 |
| 0.00013  | 0.110942 | 0.01646  | 0.684736 | 6.95E-66 | 0.707021 | 5.66E-72 | 0.683651 | 1.33E-65 |
| 0.00208  | 0.265619 | 5.55E-09 | 0.495419 | 2.72E-30 | 0.558162 | 1.33E-39 | 0.699208 | 8.95E-70 |

|          |          |          |          |          |          |          |          |          |
|----------|----------|----------|----------|----------|----------|----------|----------|----------|
| 0.73763  | -0.2841  | 4.04E-10 | -0.15851 | 0.00059  | -0.29506 | 7.79E-11 | -0.38343 | 8.36E-18 |
| 0.35361  | 0.213858 | 3.11E-06 | 0.447733 | 2.10E-24 | 0.59718  | 1.81E-46 | 0.734176 | 3.23E-80 |
| 2.05E-19 | 0.420804 | 1.82E-21 | 0.441679 | 1.02E-23 | 0.645588 | 2.05E-56 | 0.802464 | #####    |
| 0.00038  | 0.49879  | 9.59E-31 | 0.313681 | 4.02E-12 | 0.55991  | 6.87E-40 | 0.696468 | 5.08E-69 |
| 0.4207   | 0.363237 | 5.18E-16 | 0.336202 | 8.38E-14 | 0.62828  | 1.18E-52 | 0.749987 | 1.67E-85 |
| 0.11785  | 0.210704 | 4.37E-06 | 0.548987 | 4.09E-38 | 0.674098 | 3.63E-63 | 0.658914 | 1.77E-59 |
| 0.01275  | 0.263676 | 7.23E-09 | 0.619631 | 7.27E-51 | 0.849056 | #####    | 0.893781 | #####    |
| 0.01154  | 0.180841 | 8.50E-05 | 0.422987 | 1.08E-21 | 0.568993 | 2.04E-41 | 0.586217 | 1.91E-44 |
| 8.88E-05 | 0.122348 | 0.00813  | 0.432116 | 1.14E-22 | 0.38769  | 3.37E-18 | 0.466451 | 1.32E-26 |
| 0.02549  | 0.319237 | 1.59E-12 | 0.318219 | 1.89E-12 | 0.697365 | 2.88E-69 | 0.806573 | #####    |
| 0.00014  | 0.145708 | 0.00159  | 0.265474 | 5.66E-09 | 0.405662 | 6.31E-20 | 0.565126 | 9.25E-41 |
| 0.00078  | 0.410178 | 2.24E-20 | 0.445221 | 4.06E-24 | 0.656925 | 5.19E-59 | 0.777206 | 1.34E-95 |
| 0.00638  | 0.052772 | 0.25506  | 0.366809 | 2.55E-16 | 0.395459 | 6.23E-19 | 0.448051 | 1.94E-24 |
| 6.26E-07 | 0.285694 | 3.20E-10 | 0.489874 | 1.47E-29 | 0.70995  | 8.12E-73 | 0.800449 | #####    |
| 0.94856  | 0.160695 | 0.00049  | 0.165699 | 0.00032  | 0.498893 | 9.28E-31 | 0.618124 | 1.47E-50 |
| 0.02952  | 0.178678 | 0.0001   | 0.662192 | 2.95E-60 | 0.730287 | 5.63E-79 | 0.755977 | 1.31E-87 |
| 0.05547  | 0.193048 | 2.67E-05 | 0.459323 | 9.46E-26 | 0.850541 | #####    | 0.849097 | #####    |
| 3.28E-17 | -0.25665 | 1.84E-08 | -0.35779 | 1.50E-15 | -0.35764 | 1.55E-15 | -0.5615  | 3.74E-40 |
| 1.97E-07 | -0.22374 | 1.04E-06 | -0.36326 | 5.16E-16 | -0.42767 | 3.44E-22 | -0.49024 | 1.31E-29 |
| 0.56922  | 0.038988 | 0.40057  | 0.269963 | 3.05E-09 | 0.49232  | 7.01E-30 | 0.497434 | 1.46E-30 |
| 0.00389  | 0.433761 | 7.59E-23 | 0.525724 | 1.51E-34 | 0.670046 | 3.68E-62 | 0.765136 | 5.95E-91 |
| 0.73359  | -0.27778 | 1.01E-09 | -0.18619 | 5.16E-05 | -0.51748 | 2.40E-33 | -0.60475 | 6.53E-48 |
| 0.29495  | 0.189705 | 3.69E-05 | 0.36168  | 7.04E-16 | 0.462541 | 3.91E-26 | 0.609878 | 6.52E-49 |
| 0.46359  | 0.107455 | 0.0202   | 0.358756 | 1.25E-15 | 0.411646 | 1.59E-20 | 0.468632 | 7.17E-27 |
| 0.01816  | 0.273031 | 1.99E-09 | 0.597803 | 1.38E-46 | 0.566149 | 6.22E-41 | 0.675211 | 1.91E-63 |
| 0.00086  | 0.145914 | 0.00157  | 0.323106 | 8.28E-13 | 0.497557 | 1.41E-30 | 0.464173 | 2.49E-26 |
| 0.47468  | 0.354736 | 2.70E-15 | 0.30143  | 2.89E-11 | 0.497567 | 1.40E-30 | 0.691862 | 9.02E-68 |
| 0.64275  | 0.302813 | 2.33E-11 | 0.259272 | 1.30E-08 | 0.368487 | 1.82E-16 | 0.567222 | 4.09E-41 |
| 0.01338  | 0.278325 | 9.37E-10 | 0.26114  | 1.02E-08 | 0.456968 | 1.79E-25 | 0.589466 | 4.90E-45 |
| 0.00011  | 0.294064 | 9.07E-11 | 0.255085 | 2.27E-08 | 0.430181 | 1.85E-22 | 0.58842  | 7.61E-45 |
| 0.20038  | 0.172235 | 0.00018  | 0.30265  | 2.39E-11 | 0.334395 | 1.16E-13 | 0.520054 | 1.02E-33 |
| 0.97363  | 0.428523 | 2.79E-22 | 0.26418  | 6.75E-09 | 0.603678 | 1.05E-47 | 0.779704 | 1.35E-96 |
| 0.093    | 0.313366 | 4.24E-12 | 0.638536 | 7.46E-55 | 0.789727 | #####    | 0.864976 | #####    |
| 0.75076  | 0.573966 | 2.85E-42 | 0.413589 | 1.01E-20 | 0.535525 | 5.13E-36 | 0.65909  | 1.61E-59 |
| 0.94296  | 0.4243   | 7.84E-22 | 0.353279 | 3.57E-15 | 0.696382 | 5.37E-69 | 0.863856 | #####    |
| 1.51E-11 | 0.238191 | 1.90E-07 | 0.62265  | 1.75E-51 | 0.607198 | 2.19E-48 | 0.672329 | 1.00E-62 |
| 0.00024  | 0.17511  | 0.00014  | 0.29355  | 9.82E-11 | 0.25436  | 2.49E-08 | 0.401752 | 1.53E-19 |
| 0.03328  | 0.360319 | 9.19E-16 | 0.137043 | 0.003    | 0.443824 | 5.83E-24 | 0.531453 | 2.12E-35 |
| 0.21958  | 0.059489 | 0.1994   | 0.255384 | 2.18E-08 | 0.298022 | 4.93E-11 | 0.391694 | 1.42E-18 |
| 0.11106  | 0.37855  | 2.33E-17 | 0.237182 | 2.15E-07 | 0.482    | 1.53E-28 | 0.646217 | 1.48E-56 |
| 9.65E-11 | 0.16935  | 0.00024  | 0.27264  | 2.10E-09 | 0.498169 | 1.16E-30 | 0.620655 | 4.49E-51 |
| 0.70919  | -0.18926 | 3.85E-05 | -0.08875 | 0.0553   | -0.30162 | 2.81E-11 | -0.40111 | 1.77E-19 |
| 2.86E-05 | 0.174123 | 0.00016  | 0.380071 | 1.70E-17 | 0.485995 | 4.70E-29 | 0.463209 | 3.25E-26 |
| 0.04129  | 0.260146 | 1.16E-08 | 0.646746 | 1.13E-56 | 0.735788 | 9.71E-81 | 0.806536 | #####    |
| 0.75621  | 0.089113 | 0.0543   | 0.604948 | 5.98E-48 | 0.549297 | 3.65E-38 | 0.552489 | 1.12E-38 |

|          |          |          |          |          |          |          |          |          |
|----------|----------|----------|----------|----------|----------|----------|----------|----------|
| 0.00026  | 0.399729 | 2.41E-19 | 0.18789  | 4.39E-05 | 0.545389 | 1.52E-37 | 0.721579 | 2.85E-76 |
| 0.31997  | 0.081244 | 0.07945  | 0.483203 | 1.08E-28 | 0.605412 | 4.86E-48 | 0.515285 | 4.94E-33 |
| 0.67171  | 0.081609 | 0.0781   | 0.335561 | 9.39E-14 | 0.267883 | 4.07E-09 | 0.345261 | 1.61E-14 |
| 0.57155  | 0.127477 | 0.0058   | 0.05312  | 0.25194  | 0.140978 | 0.00226  | 0.156618 | 0.00068  |
| 0.18557  | 0.253459 | 2.80E-08 | 0.305113 | 1.61E-11 | 0.346671 | 1.24E-14 | 0.522934 | 3.89E-34 |
| 0.00021  | 0.093506 | 0.04341  | 0.05086  | 0.2727   | 0.290613 | 1.53E-10 | 0.400583 | 1.99E-19 |
| 0.00059  | 0.057016 | 0.21876  | 0.299828 | 3.72E-11 | 0.45053  | 1.01E-24 | 0.533656 | 9.87E-36 |
| 0.6309   | 0.325561 | 5.43E-13 | 0.662402 | 2.63E-60 | 0.645365 | 2.30E-56 | 0.741737 | 1.07E-82 |
| 0.75684  | 0.193148 | 2.64E-05 | 0.538713 | 1.67E-36 | 0.697996 | 1.93E-69 | 0.785989 | 3.63E-99 |
| 0.09377  | 0.180362 | 8.88E-05 | 0.257376 | 1.68E-08 | 0.350749 | 5.77E-15 | 0.330876 | 2.15E-13 |
| 3.07E-09 | -0.18297 | 6.98E-05 | -0.20496 | 8.02E-06 | -0.36096 | 8.11E-16 | -0.4947  | 3.39E-30 |
| 0.00029  | -0.31987 | 1.43E-12 | -0.39817 | 3.41E-19 | -0.43004 | 1.92E-22 | -0.62064 | 4.52E-51 |
| 2.88E-05 | 0.3289   | 3.04E-13 | 0.368501 | 1.82E-16 | 0.519234 | 1.34E-33 | 0.640487 | 2.79E-55 |
| 0.00315  | 0.105922 | 0.02206  | 0.356632 | 1.88E-15 | 0.484486 | 7.36E-29 | 0.539338 | 1.33E-36 |
| 0.11982  | 0.167758 | 0.00027  | 0.46722  | 1.07E-26 | 0.526501 | 1.16E-34 | 0.568418 | 2.56E-41 |
| 4.32E-05 | -0.08512 | 0.06608  | -0.3294  | 2.79E-13 | -0.47759 | 5.56E-28 | -0.52814 | 6.63E-35 |
| 0.02657  | -0.26716 | 4.49E-09 | -0.17157 | 0.0002   | -0.21153 | 4.00E-06 | -0.37983 | 1.78E-17 |
| 0.76935  | 0.061075 | 0.18766  | 0.553001 | 9.27E-39 | 0.615286 | 5.49E-50 | 0.583628 | 5.61E-44 |
| 5.98E-05 | -0.28154 | 5.88E-10 | -0.06687 | 0.14907  | -0.35362 | 3.35E-15 | -0.52097 | 7.52E-34 |
| 0.86373  | 0.36676  | 2.58E-16 | 0.254291 | 2.51E-08 | 0.4579   | 1.39E-25 | 0.662969 | 1.92E-60 |
| 0.14569  | -0.00113 | 0.98052  | 0.559129 | 9.25E-40 | 0.390873 | 1.70E-18 | 0.365747 | 3.15E-16 |
| 1.21E-05 | -0.20234 | 1.05E-05 | -0.28262 | 5.02E-10 | -0.469   | 6.46E-27 | -0.46625 | 1.40E-26 |
| 6.17E-05 | 0.104583 | 0.02381  | 0.219375 | 1.70E-06 | 0.295499 | 7.28E-11 | 0.416199 | 5.46E-21 |
| 7.51E-05 | 0.235662 | 2.58E-07 | 0.658636 | 2.06E-59 | 0.706358 | 8.75E-72 | 0.74874  | 4.52E-85 |
| 0.89612  | 0.304196 | 1.87E-11 | 0.555763 | 3.30E-39 | 0.75677  | 6.81E-88 | 0.83778  | #####    |
| 1.73E-06 | 0.012566 | 0.78652  | 0.611068 | 3.80E-49 | 0.386626 | 4.24E-18 | 0.384973 | 6.03E-18 |
| 0.02996  | 0.137811 | 0.00284  | 0.093677 | 0.04303  | 0.333363 | 1.39E-13 | 0.358087 | 1.42E-15 |
| 3.04E-07 | -0.27845 | 9.20E-10 | -0.33341 | 1.38E-13 | -0.37433 | 5.57E-17 | -0.51554 | 4.55E-33 |
| 0.40632  | 0.308363 | 9.58E-12 | 0.399111 | 2.77E-19 | 0.548903 | 4.21E-38 | 0.686841 | 1.95E-66 |
| 0.27447  | 0.297833 | 5.08E-11 | 0.14452  | 0.00174  | 0.292168 | 1.21E-10 | 0.506017 | 9.88E-32 |
| 0.0171   | 0.642835 | 8.44E-56 | 0.18037  | 8.87E-05 | 0.393051 | 1.06E-18 | 0.560281 | 5.96E-40 |
| 0.75362  | 0.194258 | 2.37E-05 | 0.311868 | 5.42E-12 | 0.326158 | 4.90E-13 | 0.470131 | 4.70E-27 |
| 0.56747  | 0.247464 | 6.03E-08 | 0.515326 | 4.88E-33 | 0.50213  | 3.38E-31 | 0.665124 | 5.83E-61 |
| 0.00042  | 0.138931 | 0.00262  | 0.24713  | 6.29E-08 | 0.431594 | 1.30E-22 | 0.505641 | 1.11E-31 |
| 2.30E-06 | 0.279114 | 8.36E-10 | 0.396148 | 5.35E-19 | 0.521596 | 6.10E-34 | 0.657316 | 4.20E-59 |
| 2.96E-07 | -0.28383 | 4.21E-10 | -0.15033 | 0.00112  | -0.42283 | 1.12E-21 | -0.56153 | 3.70E-40 |
| 0.05451  | 0.091746 | 0.04753  | 0.311585 | 5.68E-12 | 0.584177 | 4.47E-44 | 0.535586 | 5.03E-36 |
| 3.73E-09 | -0.35224 | 4.35E-15 | -0.09364 | 0.04311  | -0.34464 | 1.81E-14 | -0.57568 | 1.43E-42 |
| 0.00413  | 0.255255 | 2.22E-08 | 0.139578 | 0.0025   | 0.230511 | 4.75E-07 | 0.393421 | 9.74E-19 |
| 0.92271  | 0.138598 | 0.00269  | 0.163117 | 0.0004   | 0.287232 | 2.54E-10 | 0.366411 | 2.76E-16 |
| 6.94E-11 | 0.442421 | 8.39E-24 | 0.410763 | 1.95E-20 | 0.611165 | 3.64E-49 | 0.796752 | #####    |
| 0.87953  | -0.27819 | 9.55E-10 | -0.19215 | 2.91E-05 | -0.32601 | 5.03E-13 | -0.50348 | 2.21E-31 |
| 0.47311  | 0.244535 | 8.71E-08 | 0.387474 | 3.53E-18 | 0.706497 | 7.99E-72 | 0.811883 | #####    |
| 0.00013  | 0.275323 | 1.44E-09 | 0.162898 | 0.00041  | 0.295135 | 7.70E-11 | 0.451193 | 8.44E-25 |
| 0.01377  | 0.345505 | 1.54E-14 | 0.561222 | 4.16E-40 | 0.749481 | 2.51E-85 | 0.868859 | #####    |

|          |          |          |          |          |          |          |          |          |
|----------|----------|----------|----------|----------|----------|----------|----------|----------|
| 0.42529  | 0.349489 | 7.31E-15 | 0.417356 | 4.15E-21 | 0.717267 | 5.70E-75 | 0.739996 | 4.06E-82 |
| 0.36799  | 0.36716  | 2.38E-16 | 0.496588 | 1.90E-30 | 0.806377 | #####    | 0.883548 | #####    |
| 2.88E-17 | -0.30221 | 2.56E-11 | -0.34726 | 1.11E-14 | -0.53941 | 1.30E-36 | -0.6583  | 2.47E-59 |
| 0.16222  | 0.22292  | 1.14E-06 | 0.512866 | 1.09E-32 | 0.61214  | 2.33E-49 | 0.720237 | 7.29E-76 |
| 6.61E-06 | 0.133604 | 0.00382  | 0.348238 | 9.25E-15 | 0.509546 | 3.19E-32 | 0.547747 | 6.44E-38 |
| 1.74E-06 | 0.529274 | 4.50E-35 | 0.097214 | 0.03572  | 0.194889 | 2.22E-05 | 0.380206 | 1.65E-17 |
| 3.10E-09 | -0.1236  | 0.00749  | -0.40705 | 4.60E-20 | -0.41272 | 1.24E-20 | -0.45607 | 2.29E-25 |
| 0.29809  | 0.031067 | 0.50304  | 0.372863 | 7.52E-17 | 0.566457 | 5.51E-41 | 0.460047 | 7.76E-26 |
| 0.40857  | 0.059348 | 0.20047  | 0.364137 | 4.34E-16 | 0.572694 | 4.73E-42 | 0.508962 | 3.85E-32 |
| 0.96398  | 0.070371 | 0.12888  | 0.248567 | 5.24E-08 | 0.384827 | 6.22E-18 | 0.338024 | 6.04E-14 |
| 0.09075  | 0.581425 | 1.39E-43 | 0.301922 | 2.68E-11 | 0.511021 | 1.98E-32 | 0.682314 | 2.96E-65 |
| 0.00037  | -0.38666 | 4.21E-18 | -0.25083 | 3.93E-08 | -0.52158 | 6.13E-34 | -0.66806 | 1.13E-61 |
| 0.00012  | 0.22557  | 8.43E-07 | 0.295367 | 7.43E-11 | 0.489109 | 1.85E-29 | 0.504953 | 1.38E-31 |
| 0.03503  | 0.192779 | 2.74E-05 | 0.056974 | 0.21911  | 0.292147 | 1.22E-10 | 0.437428 | 3.01E-23 |
| 8.13E-06 | 0.280559 | 6.78E-10 | 0.261652 | 9.50E-09 | 0.387884 | 3.24E-18 | 0.540177 | 9.90E-37 |
| 0.80733  | 0.179205 | 9.87E-05 | 0.159825 | 0.00053  | 0.269644 | 3.19E-09 | 0.340203 | 4.07E-14 |
| 0.1126   | 0.232866 | 3.60E-07 | 0.312166 | 5.16E-12 | 0.381944 | 1.14E-17 | 0.495051 | 3.04E-30 |
| 0.00072  | 0.253766 | 2.69E-08 | 0.117221 | 0.01124  | 0.316522 | 2.51E-12 | 0.416248 | 5.40E-21 |
| 0.00322  | 0.144408 | 0.00176  | 0.307456 | 1.11E-11 | 0.504697 | 1.50E-31 | 0.573019 | 4.15E-42 |
| 0.07834  | 0.190516 | 3.41E-05 | 0.290922 | 1.46E-10 | 0.372121 | 8.74E-17 | 0.500236 | 6.11E-31 |
| 0.44325  | 0.128864 | 0.00529  | 0.166503 | 0.0003   | 0.300319 | 3.45E-11 | 0.331893 | 1.80E-13 |
| 0.08015  | 0.187967 | 4.36E-05 | 0.231478 | 4.24E-07 | 0.16434  | 0.00036  | 0.361807 | 6.87E-16 |
| 1.17E-09 | 0.403026 | 1.15E-19 | 0.311326 | 5.92E-12 | 0.527841 | 7.36E-35 | 0.770121 | 7.76E-93 |
| 0.01007  | 0.176204 | 0.00013  | 0.559924 | 6.83E-40 | 0.745662 | 5.11E-84 | 0.770436 | 5.88E-93 |
| 0.00317  | -0.25758 | 1.63E-08 | -0.28929 | 1.87E-10 | -0.27214 | 2.25E-09 | -0.53054 | 2.91E-35 |
| 3.54E-09 | 0.539921 | 1.08E-36 | 0.214004 | 3.06E-06 | 0.150658 | 0.00109  | 0.365553 | 3.28E-16 |
| 2.04E-10 | -0.2067  | 6.68E-06 | -0.29348 | 9.93E-11 | -0.4118  | 1.53E-20 | -0.46497 | 2.00E-26 |
| 5.04E-08 | -0.10762 | 0.02001  | -0.31482 | 3.34E-12 | -0.32017 | 1.36E-12 | -0.34785 | 9.94E-15 |
| 0.5119   | 0.28043  | 6.91E-10 | 0.300022 | 3.61E-11 | 0.433057 | 9.05E-23 | 0.499084 | 8.75E-31 |
| 5.67E-09 | 0.16837  | 0.00026  | 0.299093 | 4.17E-11 | 0.598405 | 1.06E-46 | 0.712484 | 1.48E-73 |
| 7.61E-17 | 0.348033 | 9.61E-15 | 0.377248 | 3.05E-17 | 0.296842 | 5.92E-11 | 0.456882 | 1.84E-25 |
| 0.00292  | 0.398785 | 2.98E-19 | 0.679488 | 1.57E-64 | 0.776911 | 1.76E-95 | 0.877234 | #####    |
| 0.00821  | 0.067506 | 0.14523  | 0.293817 | 9.42E-11 | 0.41796  | 3.60E-21 | 0.469593 | 5.47E-27 |
| 0.00037  | -0.26889 | 3.54E-09 | -0.25134 | 3.68E-08 | -0.41691 | 4.61E-21 | -0.50496 | 1.38E-31 |
| 0.17576  | 0.260876 | 1.05E-08 | 0.530504 | 2.95E-35 | 0.711915 | 2.18E-73 | 0.800112 | #####    |
| 0.01291  | 0.175592 | 0.00014  | 0.420077 | 2.17E-21 | 0.691434 | 1.17E-67 | 0.839447 | #####    |
| 0.03963  | -0.18846 | 4.16E-05 | -0.21133 | 4.09E-06 | -0.20973 | 4.85E-06 | -0.35743 | 1.61E-15 |
| 0.00121  | 0.191919 | 2.98E-05 | 0.271068 | 2.62E-09 | 0.40124  | 1.72E-19 | 0.418067 | 3.51E-21 |
| 0.2756   | 0.258763 | 1.40E-08 | 0.517245 | 2.59E-33 | 0.443255 | 6.76E-24 | 0.469594 | 5.47E-27 |
| 0.87831  | 0.084878 | 0.06686  | 0.186356 | 5.08E-05 | 0.328122 | 3.49E-13 | 0.426196 | 4.94E-22 |
| 0.02926  | 0.155434 | 0.00075  | 0.444083 | 5.45E-24 | 0.391289 | 1.55E-18 | 0.40122  | 1.73E-19 |
| 0.50487  | 0.379424 | 1.94E-17 | 0.266535 | 4.90E-09 | 0.392886 | 1.10E-18 | 0.532879 | 1.29E-35 |
| 0.00131  | 0.289342 | 1.86E-10 | 0.318358 | 1.85E-12 | 0.441956 | 9.45E-24 | 0.578703 | 4.22E-43 |
| 0.0032   | -0.32067 | 1.25E-12 | -0.24335 | 1.01E-07 | -0.46687 | 1.17E-26 | -0.58061 | 1.94E-43 |
| 0.14255  | 0.463701 | 2.84E-26 | 0.20916  | 5.15E-06 | 0.365565 | 3.27E-16 | 0.591029 | 2.53E-45 |

|          |          |          |          |          |          |          |          |          |
|----------|----------|----------|----------|----------|----------|----------|----------|----------|
| 0.00449  | 0.370225 | 1.28E-16 | 0.298533 | 4.55E-11 | 0.470716 | 3.98E-27 | 0.746643 | 2.37E-84 |
| 0.35695  | 0.170242 | 0.00022  | 0.43665  | 3.66E-23 | 0.474981 | 1.18E-27 | 0.527956 | 7.07E-35 |
| 0.03993  | 0.177578 | 0.00011  | 0.206958 | 6.50E-06 | 0.306395 | 1.32E-11 | 0.362439 | 6.06E-16 |
| 0.38302  | 0.190092 | 3.55E-05 | 0.150465 | 0.00111  | 0.273409 | 1.89E-09 | 0.39378  | 9.01E-19 |
| 1.86E-10 | 0.470917 | 3.76E-27 | 0.085513 | 0.06484  | 0.265933 | 5.32E-09 | 0.388663 | 2.74E-18 |
| 0.97287  | 0.09527  | 0.03959  | 0.462543 | 3.91E-26 | 0.250552 | 4.07E-08 | 0.333953 | 1.25E-13 |
| 0.78539  | 0.199223 | 1.44E-05 | 0.565089 | 9.38E-41 | 0.504155 | 1.78E-31 | 0.58868  | 6.82E-45 |
| 0.00039  | 0.468119 | 8.28E-27 | 0.180603 | 8.68E-05 | 0.490199 | 1.33E-29 | 0.628858 | 8.89E-53 |
| 0.68779  | 0.191268 | 3.17E-05 | 0.296035 | 6.71E-11 | 0.460855 | 6.22E-26 | 0.533415 | 1.07E-35 |
| 0.56389  | 0.148019 | 0.00134  | 0.220029 | 1.58E-06 | 0.543645 | 2.86E-37 | 0.525041 | 1.91E-34 |
| 0.00073  | -0.28605 | 3.03E-10 | -0.33622 | 8.35E-14 | -0.44826 | 1.83E-24 | -0.52929 | 4.48E-35 |
| 5.07E-06 | -0.1406  | 0.00232  | -0.33645 | 8.01E-14 | -0.32012 | 1.37E-12 | -0.36315 | 5.27E-16 |
| 0.96876  | 0.294842 | 8.06E-11 | 0.402737 | 1.23E-19 | 0.334084 | 1.22E-13 | 0.427913 | 3.24E-22 |
| 6.40E-06 | -0.38396 | 7.47E-18 | -0.27551 | 1.40E-09 | -0.30452 | 1.77E-11 | -0.53565 | 4.91E-36 |
| 4.63E-10 | -0.28479 | 3.66E-10 | -0.34516 | 1.64E-14 | -0.33157 | 1.91E-13 | -0.49691 | 1.72E-30 |
| 2.46E-08 | -0.17088 | 0.00021  | -0.25766 | 1.62E-08 | -0.19408 | 2.41E-05 | -0.35171 | 4.81E-15 |
| 0.00152  | 0.296121 | 6.62E-11 | 0.307986 | 1.02E-11 | 0.345985 | 1.41E-14 | 0.576246 | 1.14E-42 |
| 7.88E-05 | 0.311794 | 5.48E-12 | 0.15969  | 0.00053  | 0.237789 | 2.00E-07 | 0.531595 | 2.02E-35 |
| 0.00185  | 0.334365 | 1.16E-13 | 0.297692 | 5.19E-11 | 0.369872 | 1.38E-16 | 0.630038 | 5.01E-53 |
| 0.06067  | 0.306621 | 1.27E-11 | 0.199623 | 1.39E-05 | 0.4352   | 5.29E-23 | 0.506834 | 7.61E-32 |
| 0.07603  | 0.230392 | 4.82E-07 | 0.559269 | 8.77E-40 | 0.564841 | 1.03E-40 | 0.538089 | 2.08E-36 |
| 0.72171  | 0.09262  | 0.04545  | 0.412524 | 1.30E-20 | 0.399488 | 2.55E-19 | 0.440786 | 1.28E-23 |
| 0.06446  | -0.24476 | 8.47E-08 | -0.1617  | 0.00045  | -0.29871 | 4.43E-11 | -0.40173 | 1.54E-19 |
| 2.40E-09 | 0.390345 | 1.90E-18 | 0.605535 | 4.60E-48 | 0.663305 | 1.60E-60 | 0.804288 | #####    |
| 0.0112   | 0.169101 | 0.00024  | 0.382368 | 1.05E-17 | 0.725082 | 2.40E-77 | 0.765034 | 6.49E-91 |
| 0.77883  | 0.385992 | 4.85E-18 | 0.484317 | 7.74E-29 | 0.631124 | 2.95E-53 | 0.653803 | 2.76E-58 |
| 4.22E-05 | -0.29526 | 7.56E-11 | -0.17407 | 0.00016  | -0.29166 | 1.31E-10 | -0.45409 | 3.90E-25 |
| 0.24582  | 0.424936 | 6.71E-22 | 0.595384 | 3.94E-46 | 0.738549 | 1.22E-81 | 0.801755 | #####    |
| 0.33927  | 0.66272  | 2.21E-60 | 0.316246 | 2.63E-12 | 0.387492 | 3.52E-18 | 0.612879 | 1.66E-49 |
| 0.85699  | 0.359154 | 1.15E-15 | 0.184212 | 6.21E-05 | 0.297491 | 5.35E-11 | 0.521872 | 5.56E-34 |
| 1.81E-21 | 0.282804 | 4.89E-10 | 0.146609 | 0.00149  | 0.257789 | 1.59E-08 | 0.51871  | 1.60E-33 |
| 0.23972  | -0.23584 | 2.53E-07 | -0.18801 | 4.34E-05 | -0.2891  | 1.93E-10 | -0.41111 | 1.80E-20 |
| 0.39495  | 0.495803 | 2.41E-30 | 0.096881 | 0.03636  | 0.237788 | 2.00E-07 | 0.469338 | 5.88E-27 |
| 0.6728   | 0.525406 | 1.69E-34 | 0.254928 | 2.31E-08 | 0.43189  | 1.21E-22 | 0.580577 | 1.97E-43 |
| 5.12E-14 | 0.520206 | 9.70E-34 | 0.210945 | 4.26E-06 | 0.289479 | 1.82E-10 | 0.537899 | 2.22E-36 |
| 0.38846  | 0.299716 | 3.79E-11 | 0.364639 | 3.93E-16 | 0.436033 | 4.28E-23 | 0.53563  | 4.95E-36 |
| 6.73E-07 | 0.113949 | 0.01374  | 0.34086  | 3.61E-14 | 0.480585 | 2.32E-28 | 0.541582 | 5.99E-37 |
| 0.19078  | 0.129906 | 0.00493  | 0.316289 | 2.61E-12 | 0.540187 | 9.87E-37 | 0.667494 | 1.55E-61 |
| 0.24958  | 0.256237 | 1.95E-08 | 0.195212 | 2.16E-05 | 0.456958 | 1.80E-25 | 0.638774 | 6.62E-55 |
| 0.049    | 0.233352 | 3.40E-07 | 0.437654 | 2.84E-23 | 0.368367 | 1.87E-16 | 0.445313 | 3.96E-24 |
| 2.02E-05 | 0.173807 | 0.00016  | 0.370388 | 1.24E-16 | 0.39781  | 3.70E-19 | 0.473897 | 1.61E-27 |
| 0.01327  | 0.031875 | 0.49198  | 0.350625 | 5.91E-15 | 0.29291  | 1.08E-10 | 0.374021 | 5.93E-17 |
| 0.38861  | 0.21148  | 4.02E-06 | 0.265624 | 5.55E-09 | 0.397118 | 4.31E-19 | 0.435999 | 4.32E-23 |
| 0.00193  | 0.404646 | 7.96E-20 | 0.497477 | 1.44E-30 | 0.492199 | 7.27E-30 | 0.648445 | 4.66E-57 |
| 0.00499  | -0.21668 | 2.29E-06 | -0.21603 | 2.46E-06 | -0.23221 | 3.89E-07 | -0.40084 | 1.88E-19 |



|          |          |          |          |          |          |          |          |          |
|----------|----------|----------|----------|----------|----------|----------|----------|----------|
| 1.38E-16 | 0.337482 | 6.66E-14 | 0.42488  | 6.81E-22 | 0.557119 | 1.98E-39 | 0.687365 | 1.42E-66 |
| 4.52E-11 | -0.18059 | 8.69E-05 | -0.1425  | 0.00202  | -0.34976 | 6.95E-15 | -0.39482 | 7.17E-19 |
| 0.03793  | 0.471698 | 3.01E-27 | 0.296139 | 6.60E-11 | 0.646888 | 1.05E-56 | 0.787912 | #####    |
| 0.63066  | 0.283624 | 4.34E-10 | 0.336052 | 8.60E-14 | 0.514963 | 5.49E-33 | 0.61613  | 3.72E-50 |
| 0.01149  | 0.245772 | 7.46E-08 | 0.256208 | 1.96E-08 | 0.383304 | 8.59E-18 | 0.523548 | 3.16E-34 |
| 0.60143  | 0.220364 | 1.52E-06 | 0.408759 | 3.10E-20 | 0.437864 | 2.69E-23 | 0.55164  | 1.54E-38 |
| 6.18E-23 | 0.347106 | 1.14E-14 | 0.281382 | 6.02E-10 | 0.373685 | 6.35E-17 | 0.63673  | 1.84E-54 |
| 0.5436   | 0.136016 | 0.00323  | 0.361519 | 7.27E-16 | 0.536966 | 3.09E-36 | 0.67634  | 9.92E-64 |
| 0.00145  | 0.304679 | 1.73E-11 | 0.328368 | 3.34E-13 | 0.224279 | 9.77E-07 | 0.434612 | 6.13E-23 |
| 0.32003  | 0.379733 | 1.82E-17 | 0.66703  | 2.01E-61 | 0.765356 | 4.92E-91 | 0.891383 | #####    |
| 0.0882   | 0.149647 | 0.00118  | 0.313017 | 4.49E-12 | 0.520613 | 8.47E-34 | 0.56718  | 4.16E-41 |
| 5.10E-27 | 0.313    | 4.50E-12 | 0.242283 | 1.15E-07 | 0.334516 | 1.13E-13 | 0.524878 | 2.02E-34 |
| 0.00125  | 0.053312 | 0.25022  | 0.278612 | 8.99E-10 | 0.458294 | 1.25E-25 | 0.486088 | 4.57E-29 |
| 4.69E-07 | 0.293004 | 1.07E-10 | 0.270939 | 2.66E-09 | 0.372716 | 7.74E-17 | 0.586236 | 1.90E-44 |
| 0.01605  | -0.26219 | 8.84E-09 | -0.152   | 0.00098  | -0.3772  | 3.08E-17 | -0.52165 | 5.99E-34 |
| 1.72E-07 | 0.23074  | 4.63E-07 | 0.728553 | 1.99E-78 | 0.807535 | #####    | 0.860751 | #####    |
| 3.73E-19 | 0.439257 | 1.89E-23 | 0.60026  | 4.74E-47 | 0.730639 | 4.36E-79 | 0.792907 | #####    |
| 3.40E-14 | 0.506127 | 9.54E-32 | 0.329648 | 2.67E-13 | 0.522064 | 5.21E-34 | 0.79579  | #####    |
| 0.00569  | 0.117303 | 0.01118  | 0.220452 | 1.51E-06 | 0.354473 | 2.84E-15 | 0.383093 | 8.98E-18 |
| 0.00164  | -0.17272 | 0.00018  | -0.31739 | 2.17E-12 | -0.37531 | 4.55E-17 | -0.37283 | 7.56E-17 |
| 2.81E-05 | 0.232577 | 3.73E-07 | 0.17113  | 0.0002   | 0.37962  | 1.86E-17 | 0.528792 | 5.31E-35 |
| 3.64E-06 | 0.294888 | 8.00E-11 | 0.074937 | 0.1058   | 0.194705 | 2.27E-05 | 0.424571 | 7.34E-22 |
| 1.01E-09 | 0.319803 | 1.45E-12 | 0.386894 | 4.00E-18 | 0.527442 | 8.43E-35 | 0.722232 | 1.80E-76 |
| 0.17984  | 0.263751 | 7.16E-09 | 0.206273 | 6.99E-06 | 0.319879 | 1.43E-12 | 0.519786 | 1.12E-33 |
| 6.34E-13 | 0.189281 | 3.84E-05 | 0.36258  | 5.90E-16 | 0.553573 | 7.49E-39 | 0.59799  | 1.28E-46 |
| 0.91554  | 0.149185 | 0.00122  | 0.297127 | 5.67E-11 | 0.502923 | 2.63E-31 | 0.551643 | 1.53E-38 |
| 1.58E-25 | 0.290542 | 1.55E-10 | 0.261783 | 9.33E-09 | 0.377122 | 3.13E-17 | 0.574936 | 1.93E-42 |
| 8.21E-06 | 0.226369 | 7.69E-07 | 0.27877  | 8.78E-10 | 0.340515 | 3.84E-14 | 0.525797 | 1.48E-34 |
| 0.00011  | 0.252044 | 3.36E-08 | 0.263701 | 7.20E-09 | 0.365235 | 3.49E-16 | 0.517142 | 2.68E-33 |
| 0.00169  | 0.288113 | 2.23E-10 | 0.466606 | 1.27E-26 | 0.503039 | 2.54E-31 | 0.625618 | 4.24E-52 |
| 1.63E-12 | 0.460907 | 6.13E-26 | 0.215891 | 2.49E-06 | 0.509194 | 3.57E-32 | 0.688605 | 6.67E-67 |
| 1.32E-09 | 0.286592 | 2.80E-10 | 0.179357 | 9.73E-05 | 0.324778 | 6.22E-13 | 0.51594  | 3.99E-33 |
| 0.68662  | 0.30595  | 1.41E-11 | 0.235588 | 2.60E-07 | 0.389982 | 2.06E-18 | 0.474341 | 1.42E-27 |
| 0.00674  | 0.198936 | 1.49E-05 | 0.079022 | 0.08805  | 0.260256 | 1.14E-08 | 0.397393 | 4.06E-19 |
| 3.38E-16 | 0.300667 | 3.26E-11 | 0.190219 | 3.51E-05 | 0.308673 | 9.11E-12 | 0.505161 | 1.30E-31 |
| 1.54E-10 | -0.25557 | 2.13E-08 | -0.23366 | 3.28E-07 | -0.26821 | 3.89E-09 | -0.43004 | 1.92E-22 |
| 2.54E-07 | 0.257518 | 1.65E-08 | 0.214714 | 2.84E-06 | 0.406142 | 5.66E-20 | 0.552056 | 1.32E-38 |
| 1.04E-06 | 0.259315 | 1.30E-08 | 0.161123 | 0.00047  | 0.321491 | 1.09E-12 | 0.502809 | 2.73E-31 |
| 1.43E-08 | 0.391266 | 1.56E-18 | 0.235227 | 2.72E-07 | 0.443798 | 5.87E-24 | 0.668102 | 1.10E-61 |
| 0.85693  | 0.407641 | 4.01E-20 | 0.182782 | 7.10E-05 | 0.435822 | 4.52E-23 | 0.622578 | 1.81E-51 |
| 0.07072  | 0.35184  | 4.69E-15 | 0.150679 | 0.00109  | 0.220841 | 1.44E-06 | 0.452244 | 6.38E-25 |
| 3.21E-10 | 0.063538 | 0.17044  | 0.507069 | 7.06E-32 | 0.551159 | 1.84E-38 | 0.514073 | 7.35E-33 |
| 2.49E-29 | 0.182092 | 7.57E-05 | -0.03802 | 0.41236  | -0.02367 | 0.60989  | 0.063782 | 0.16881  |
| 5.67E-23 | 0.162682 | 0.00042  | -0.0544  | 0.24066  | 0.00293  | 0.94965  | 0.044337 | 0.33906  |
| 3.92E-61 | 0.206815 | 6.60E-06 | 0.031663 | 0.49487  | -0.0046  | 0.92109  | 0.088462 | 0.05609  |

|          |          |          |          |         |          |          |          |          |
|----------|----------|----------|----------|---------|----------|----------|----------|----------|
| 2.92E-52 | 0.193523 | 2.55E-05 | 0.020678 | 0.65582 | 0.01819  | 0.695    | 0.082765 | 0.07396  |
| 4.76E-12 | 0.078011 | 0.0922   | -0.01185 | 0.79836 | -0.02378 | 0.60828  | 0.026492 | 0.56796  |
| 9.88E-20 | 0.131682 | 0.00437  | 0.009502 | 0.83773 | -0.01373 | 0.76734  | 0.032619 | 0.48193  |
| 2.57E-29 | 0.171426 | 0.0002   | 0.023228 | 0.61659 | -0.01052 | 0.82056  | 0.03617  | 0.43551  |
| 1.55E-25 | 0.123969 | 0.00731  | -0.0315  | 0.49713 | -0.00823 | 0.85919  | 0.046404 | 0.31699  |
| 1.53E-35 | 0.162676 | 0.00042  | 0.040804 | 0.37897 | 0.024502 | 0.5974   | 0.065831 | 0.15551  |
| 1.04E-08 | 0.10155  | 0.02821  | -0.04983 | 0.28257 | -0.04092 | 0.37762  | -0.00191 | 0.96718  |
| 0.05182  | 0.396946 | 4.48E-19 | 0.044763 | 0.33443 | 0.096585 | 0.03693  | 0.242974 | 1.06E-07 |
| 3.10E-33 | 0.165567 | 0.00033  | 0.013326 | 0.77394 | 0.017591 | 0.70458  | 0.058921 | 0.20373  |
| 2.31E-11 | 0.122161 | 0.00822  | -0.11345 | 0.01417 | -0.0665  | 0.15134  | -0.01415 | 0.76032  |
| 5.76E-09 | 0.166743 | 0.0003   | -0.04027 | 0.38528 | -0.05241 | 0.25829  | 0.01259  | 0.78612  |
| 1.28E-52 | 0.211658 | 3.95E-06 | 0.022118 | 0.63354 | -0.01133 | 0.80703  | 0.065581 | 0.15709  |
| 4.97E-26 | 0.102838 | 0.02626  | -0.07507 | 0.10517 | -0.02356 | 0.61162  | -0.00587 | 0.89932  |
| 1.02E-45 | 0.194116 | 2.40E-05 | 0.033044 | 0.47624 | 0.02338  | 0.61429  | 0.097266 | 0.03562  |
| 2.15E-08 | 0.309837 | 7.55E-12 | 0.009303 | 0.84108 | 0.021131 | 0.64878  | 0.158053 | 0.00061  |
| 0.11308  | 0.097559 | 0.03506  | 0.048727 | 0.29335 | 0.006349 | 0.89115  | 0.029069 | 0.5309   |
| 1.77E-26 | 0.152025 | 0.00098  | -0.03945 | 0.39496 | -0.0316  | 0.49571  | 0.019687 | 0.67132  |
| 8.89E-13 | 0.115257 | 0.01269  | 0.085697 | 0.06426 | 0.170376 | 0.00022  | 0.208012 | 5.82E-06 |
| 2.53E-24 | 0.185495 | 5.51E-05 | -0.01311 | 0.77758 | 0.002814 | 0.95163  | 0.046226 | 0.31886  |
| 8.02E-07 | 0.112255 | 0.01522  | 0.000288 | 0.99504 | -0.01825 | 0.69412  | 0.036276 | 0.43416  |
| 1.25E-16 | 0.111336 | 0.01608  | -0.0077  | 0.86824 | -0.04126 | 0.3737   | 0.003796 | 0.93479  |
| 6.01E-20 | 0.183713 | 6.51E-05 | 0.058229 | 0.2091  | 0.033077 | 0.4758   | 0.07551  | 0.10316  |
| 9.42E-25 | 0.160285 | 0.00051  | 0.061682 | 0.1833  | 0.039092 | 0.39932  | 0.064245 | 0.16573  |
| 3.37E-20 | 0.15579  | 0.00073  | 0.044752 | 0.33455 | 0.039305 | 0.39676  | 0.068604 | 0.13879  |
| 1.26E-51 | 0.19681  | 1.84E-05 | 0.072417 | 0.1181  | 0.021685 | 0.6402   | 0.091442 | 0.04828  |
| 9.51E-16 | 0.120112 | 0.00937  | -0.04406 | 0.34204 | -0.05144 | 0.26722  | 0.006692 | 0.88532  |
| 4.42E-39 | 0.241597 | 1.25E-07 | 0.072988 | 0.11522 | 0.096321 | 0.03745  | 0.181119 | 8.28E-05 |
| 3.78E-27 | 0.157369 | 0.00064  | 0.031903 | 0.49161 | 0.026181 | 0.57251  | 0.055953 | 0.22748  |
| 4.24E-22 | 0.145178 | 0.00166  | 0.025845 | 0.57745 | 0.001479 | 0.97457  | 0.04423  | 0.34023  |
| 6.65E-22 | 0.115976 | 0.01214  | -0.00756 | 0.87055 | -0.01671 | 0.71868  | 0.021811 | 0.63826  |
| 1.89E-08 | 0.208063 | 5.79E-06 | 0.084847 | 0.06696 | 0.245801 | 7.43E-08 | 0.346343 | 1.32E-14 |
| 1.24E-18 | -0.01832 | 0.69287  | 0.053335 | 0.25002 | 0.047378 | 0.30693  | -0.05131 | 0.26844  |
| 1.58E-16 | 0.206586 | 6.76E-06 | -0.00199 | 0.96588 | 0.010395 | 0.82272  | 0.060142 | 0.1945   |
| 1.34E-19 | 0.216973 | 2.21E-06 | 0.07767  | 0.09364 | 0.099847 | 0.03098  | 0.173397 | 0.00017  |
| 1.50E-14 | 0.103942 | 0.02469  | -0.0853  | 0.06552 | -0.05606 | 0.22659  | -0.03058 | 0.50975  |
| 2.05E-09 | 0.096253 | 0.03759  | -0.01932 | 0.67713 | -0.03792 | 0.41359  | 0.016086 | 0.7288   |
| 1.48E-16 | 0.132393 | 0.00416  | -0.07108 | 0.12506 | -0.06163 | 0.18364  | -0.0302  | 0.51502  |
| 2.15E-38 | 0.195748 | 2.04E-05 | 0.134012 | 0.00372 | 0.17945  | 9.65E-05 | 0.196805 | 1.84E-05 |
| 4.32E-08 | 0.098714 | 0.03295  | 0.056752 | 0.22091 | 0.080374 | 0.08273  | 0.089757 | 0.05258  |
| 6.52E-24 | 0.126925 | 0.00602  | 0.060789 | 0.18974 | -0.00575 | 0.90138  | 0.066307 | 0.15253  |
| 4.94E-33 | 0.157581 | 0.00063  | 0.03967  | 0.39238 | 0.019192 | 0.67912  | 0.062486 | 0.17765  |
| 3.47E-05 | 0.113023 | 0.01454  | -0.0554  | 0.23212 | 0.007201 | 0.87666  | -0.02572 | 0.57934  |
| 3.52E-21 | 0.060344 | 0.19301  | 0.005069 | 0.91301 | 0.060364 | 0.19286  | 0.009717 | 0.83412  |
| 5.69E-42 | 0.146329 | 0.00152  | 0.016318 | 0.72505 | 0.002257 | 0.9612   | 0.044204 | 0.34051  |
| 1.88E-21 | 0.173203 | 0.00017  | -0.01957 | 0.67315 | -0.02901 | 0.53178  | -0.00179 | 0.96926  |

|          |          |          |          |         |          |          |          |          |
|----------|----------|----------|----------|---------|----------|----------|----------|----------|
| 3.75E-59 | 0.170761 | 0.00021  | 0.051514 | 0.26658 | 0.01906  | 0.6812   | 0.080805 | 0.08109  |
| 2.57E-21 | 0.155733 | 0.00073  | 0.065898 | 0.15508 | 0.03126  | 0.50038  | 0.055198 | 0.23383  |
| 5.26E-40 | 0.153502 | 0.00087  | 0.009176 | 0.84323 | 0.025398 | 0.58406  | 0.073912 | 0.11068  |
| 9.48E-43 | 0.186517 | 5.00E-05 | -0.02157 | 0.64204 | 0.015399 | 0.73996  | 0.117603 | 0.01098  |
| 2.26E-13 | 0.114048 | 0.01366  | 0.025836 | 0.57759 | 0.082505 | 0.07488  | 0.147722 | 0.00137  |
| 1.90E-33 | 0.287397 | 2.48E-10 | 0.076082 | 0.10057 | 0.143977 | 0.00181  | 0.217827 | 2.02E-06 |
| 7.10E-26 | 0.393626 | 9.31E-19 | 0.047434 | 0.30636 | 0.073266 | 0.11384  | 0.31121  | 6.03E-12 |
| 9.21E-14 | 0.063487 | 0.17079  | -0.00328 | 0.94365 | 0.1132   | 0.01438  | 0.032481 | 0.48378  |
| 2.08E-10 | 0.163382 | 0.00039  | -0.07608 | 0.10056 | -0.04529 | 0.32879  | 0.000282 | 0.99514  |
| 5.74E-24 | 0.137837 | 0.00284  | -0.04067 | 0.38058 | -0.03085 | 0.50601  | 0.037947 | 0.41328  |
| 1.87E-27 | 0.151579 | 0.00102  | -0.05705 | 0.2185  | -0.01948 | 0.67455  | 0.013949 | 0.76369  |
| 6.27E-19 | 0.149133 | 0.00123  | -0.02053 | 0.65809 | -0.00464 | 0.92041  | 0.008478 | 0.85501  |
| 2.70E-40 | 0.149868 | 0.00116  | -0.04503 | 0.33156 | -0.06877 | 0.13786  | 0.032346 | 0.48561  |
| 3.05E-33 | 0.154502 | 0.00081  | -0.06351 | 0.17066 | -0.0198  | 0.66957  | 0.033674 | 0.46787  |
| 8.15E-22 | 0.113624 | 0.01402  | -0.07894 | 0.0884  | -0.03897 | 0.40082  | 0.023233 | 0.61652  |
| 5.93E-25 | 0.129855 | 0.00495  | 0.144957 | 0.00169 | 0.188515 | 4.14E-05 | 0.21919  | 1.73E-06 |
| 2.23E-17 | 0.12884  | 0.0053   | 0.028118 | 0.54443 | 0.004871 | 0.91639  | 0.040315 | 0.38472  |
| 2.93E-80 | 0.168643 | 0.00025  | 0.083196 | 0.07247 | 0.03775  | 0.4157   | 0.11369  | 0.01396  |
| 8.58E-21 | 0.130682 | 0.00467  | -0.01224 | 0.79191 | -0.01564 | 0.73611  | 0.032478 | 0.48382  |
| 1.89E-32 | 0.151247 | 0.00104  | 0.011531 | 0.80372 | 0.026586 | 0.56659  | 0.044545 | 0.3368   |
| 1.33E-12 | 0.130982 | 0.00458  | 0.067821 | 0.14336 | 0.003144 | 0.94597  | 0.04477  | 0.33435  |
| 4.58E-47 | 0.157472 | 0.00064  | -0.00599 | 0.89727 | -0.0061  | 0.89546  | 0.063221 | 0.17259  |
| 1.91E-25 | 0.172858 | 0.00017  | 0.043854 | 0.34435 | 0.018567 | 0.68901  | 0.059263 | 0.20111  |
| 3.52E-14 | 0.170316 | 0.00022  | 0.045087 | 0.33094 | 0.03126  | 0.50038  | 0.051212 | 0.26939  |
| 4.31E-26 | 0.180734 | 8.58E-05 | 0.015364 | 0.74053 | 0.036955 | 0.42561  | 0.078457 | 0.09035  |
| 8.09E-26 | 0.166387 | 0.0003   | 0.01604  | 0.72954 | 0.027808 | 0.54888  | 0.053826 | 0.24568  |
| 7.52E-26 | 0.201009 | 1.20E-05 | 0.023963 | 0.60548 | -0.00149 | 0.97446  | 0.057876 | 0.21188  |
| 1.18E-16 | 0.16218  | 0.00043  | 0.005061 | 0.91314 | 0.009331 | 0.84062  | 0.037687 | 0.41648  |
| 6.15E-26 | 0.180441 | 8.81E-05 | -0.02323 | 0.61663 | -0.01828 | 0.69353  | 0.01763  | 0.70395  |
| 1.49E-31 | 0.172989 | 0.00017  | 0.016044 | 0.72949 | 0.023154 | 0.61772  | 0.04779  | 0.30274  |
| 3.73E-28 | 0.149407 | 0.0012   | -0.01741 | 0.70749 | 0.013516 | 0.77081  | 0.022642 | 0.62551  |
| 3.14E-30 | 0.265852 | 5.38E-09 | -0.03376 | 0.46677 | -0.03056 | 0.51002  | 0.029494 | 0.5249   |
| 3.28E-33 | 0.158916 | 0.00057  | 0.039367 | 0.39601 | 0.024496 | 0.59749  | 0.055962 | 0.22741  |
| 2.27E-63 | 0.185578 | 5.47E-05 | 0.022718 | 0.62435 | 0.006611 | 0.8867   | 0.067811 | 0.14342  |
| 3.78E-24 | 0.136566 | 0.0031   | 0.098635 | 0.03309 | 0.143606 | 0.00186  | 0.232526 | 3.75E-07 |
| 4.31E-07 | 0.066028 | 0.15427  | -0.02332 | 0.61514 | -0.11356 | 0.01407  | -0.05193 | 0.26269  |
| 7.36E-21 | 0.090073 | 0.05175  | -0.04484 | 0.33358 | -0.04647 | 0.31636  | 0.025691 | 0.57972  |
| 8.71E-11 | 0.089173 | 0.05414  | 0.023332 | 0.61502 | -0.00384 | 0.93411  | 0.022931 | 0.62111  |
| 2.52E-12 | 0.096316 | 0.03746  | -0.06685 | 0.14919 | -0.06319 | 0.17282  | -0.00504 | 0.91354  |
| 2.51E-08 | 0.054846 | 0.23683  | -0.12325 | 0.00766 | -0.06827 | 0.14075  | -0.03654 | 0.43078  |
| 6.32E-12 | 0.054117 | 0.24313  | -0.12926 | 0.00515 | -0.05002 | 0.28076  | -0.0503  | 0.27798  |
| 2.51E-15 | 0.074254 | 0.10903  | 0.064165 | 0.16626 | 0.051165 | 0.26983  | 0.077966 | 0.09239  |
| 1.95E-15 | 0.095145 | 0.03985  | -0.09539 | 0.03934 | -0.01138 | 0.80632  | -0.02464 | 0.59536  |
| 1.58E-30 | 0.178616 | 0.0001   | -0.04036 | 0.38425 | -0.05072 | 0.27398  | 0.030149 | 0.51573  |
| 4.93E-10 | 0.295389 | 7.41E-11 | 0.001028 | 0.98233 | 0.077752 | 0.09329  | 0.194748 | 2.26E-05 |

|          |          |          |          |         |          |          |          |          |
|----------|----------|----------|----------|---------|----------|----------|----------|----------|
| 1.19E-05 | 0.106844 | 0.02092  | -0.02461 | 0.59577 | -0.01336 | 0.77341  | -0.00234 | 0.95986  |
| 1.15E-23 | 0.159712 | 0.00053  | -0.01311 | 0.77757 | 0.014102 | 0.76116  | 0.047369 | 0.30703  |
| 9.81E-33 | 0.143586 | 0.00187  | 0.094329 | 0.04159 | 0.032743 | 0.48027  | 0.079167 | 0.08747  |
| 2.01E-23 | 0.155178 | 0.00077  | 0.031496 | 0.49715 | 0.010526 | 0.82054  | 0.05224  | 0.25988  |
| 1.87E-37 | 0.156205 | 0.00071  | 0.016345 | 0.72462 | 0.02638  | 0.56959  | 0.067967 | 0.1425   |
| 1.28E-15 | 0.10549  | 0.02261  | 0.011724 | 0.80052 | 0.025101 | 0.58846  | 0.011006 | 0.81248  |
| 1.07E-07 | 0.185852 | 5.33E-05 | 0.130927 | 0.0046  | 0.264155 | 6.77E-09 | 0.327265 | 4.05E-13 |
| 1.20E-26 | 0.154414 | 0.00081  | -0.05866 | 0.20575 | -0.04541 | 0.32745  | 0.026284 | 0.571    |
| 2.39E-16 | 0.127229 | 0.0059   | 0.070371 | 0.12888 | 0.092222 | 0.04639  | 0.122759 | 0.00791  |
| 2.06E-39 | 0.191346 | 3.15E-05 | 0.051167 | 0.26981 | -0.0214  | 0.64459  | 0.06695  | 0.14859  |
| 6.65E-09 | 0.086205 | 0.06269  | 0.045054 | 0.33129 | 0.061878 | 0.18191  | 0.101478 | 0.02833  |
| 1.39E-48 | 0.199382 | 1.42E-05 | 0.033895 | 0.46495 | 0.02477  | 0.59339  | 0.074738 | 0.10674  |
| 7.51E-28 | 0.129225 | 0.00516  | -0.05418 | 0.24255 | -0.04962 | 0.28457  | 0.004817 | 0.91731  |
| 7.73E-37 | 0.170732 | 0.00021  | -0.00613 | 0.89497 | -0.00834 | 0.85734  | 0.041698 | 0.36861  |
| 1.46E-16 | 0.141311 | 0.00221  | 0.015851 | 0.73261 | 0.018785 | 0.68556  | 0.060057 | 0.19514  |
| 5.08E-39 | 0.201887 | 1.10E-05 | 0.002597 | 0.95537 | -0.04378 | 0.3452   | 0.048369 | 0.29691  |
| 6.36E-29 | 0.198834 | 1.50E-05 | 0.034708 | 0.4543  | 0.023642 | 0.61032  | 0.066425 | 0.1518   |
| 1.27E-30 | 0.426433 | 4.66E-22 | 0.175588 | 0.00014 | 0.210741 | 4.36E-06 | 0.335197 | 1.00E-13 |
| 8.67E-65 | 0.179007 | 0.0001   | 0.05839  | 0.20785 | 0.022512 | 0.6275   | 0.081931 | 0.07693  |
| 7.43E-11 | 0.069099 | 0.13596  | -0.09432 | 0.04162 | -0.06228 | 0.17909  | -0.03718 | 0.42276  |
| 7.48E-30 | 0.164792 | 0.00035  | -0.03654 | 0.43088 | -0.029   | 0.53182  | 0.071953 | 0.12048  |
| 3.68E-69 | 0.182356 | 7.39E-05 | 0.028338 | 0.54128 | 0.001189 | 0.97955  | 0.067613 | 0.1446   |
| 4.59E-44 | 0.122554 | 0.00802  | 0.006613 | 0.88667 | -0.00395 | 0.93223  | 0.027031 | 0.56011  |
| 9.76E-22 | 0.168331 | 0.00026  | 0.022505 | 0.6276  | 0.018816 | 0.68507  | 0.096352 | 0.03739  |
| 2.03E-32 | 0.132766 | 0.00405  | -0.05539 | 0.23218 | -0.0417  | 0.36859  | 0.019069 | 0.68106  |
| 1.20E-14 | 0.111471 | 0.01595  | 0.016205 | 0.72688 | -0.0177  | 0.70288  | 0.049798 | 0.28285  |
| 9.85E-17 | 0.17888  | 0.0001   | -0.0801  | 0.08381 | -0.02719 | 0.55785  | 0.072206 | 0.11918  |
| 1.12E-34 | 0.180354 | 8.88E-05 | -0.00682 | 0.88307 | -0.0062  | 0.89378  | 0.041299 | 0.37322  |
| 7.71E-12 | 0.144536 | 0.00174  | 0.09173  | 0.04757 | 0.030909 | 0.5052   | 0.073088 | 0.11472  |
| 3.33E-34 | 0.168271 | 0.00026  | -0.00265 | 0.95452 | 0.005203 | 0.91071  | 0.043123 | 0.35246  |
| 2.09E-35 | 0.144504 | 0.00174  | -0.07183 | 0.12113 | -0.04962 | 0.28459  | 0.005776 | 0.90092  |
| 5.42E-36 | 0.187109 | 4.73E-05 | 0.055734 | 0.22931 | 0.029518 | 0.52456  | 0.069375 | 0.13439  |
| 1.35E-28 | 0.110317 | 0.01709  | -0.00431 | 0.92599 | -0.00793 | 0.86424  | 0.029282 | 0.52789  |
| 6.12E-10 | 0.081232 | 0.07949  | -0.04642 | 0.31682 | -0.02455 | 0.59671  | -0.01219 | 0.79279  |
| 1.03E-09 | 0.083753 | 0.07057  | -0.03578 | 0.44053 | -0.05754 | 0.21455  | -0.04083 | 0.37867  |
| 4.10E-12 | 0.10057  | 0.02978  | 0.05341  | 0.24935 | 0.010259 | 0.82501  | 0.020987 | 0.651    |
| 2.60E-25 | 0.034161 | 0.46145  | 0.092654 | 0.04537 | -0.02081 | 0.65383  | -0.00361 | 0.93797  |
| 8.17E-27 | 0.16958  | 0.00023  | 0.006812 | 0.88328 | 0.001338 | 0.977    | 0.194496 | 2.31E-05 |
| 3.61E-25 | 0.175    | 0.00014  | 0.048531 | 0.2953  | 0.009395 | 0.83953  | 0.090844 | 0.04977  |
| 0.0043   | 0.099896 | 0.0309   | 0.008925 | 0.84746 | 0.012411 | 0.78909  | 0.011626 | 0.80214  |
| 0.09309  | 0.035395 | 0.44542  | -0.00579 | 0.90066 | -0.00964 | 0.83534  | 0.015637 | 0.73609  |
| 8.16E-19 | 0.106127 | 0.0218   | 0.045884 | 0.32245 | 0.028228 | 0.54285  | 0.05928  | 0.20099  |
| 0.12446  | 0.05419  | 0.24249  | -0.04377 | 0.34532 | 0.001915 | 0.96707  | 0.012244 | 0.79186  |
| 1.28E-12 | 0.110709 | 0.01669  | 0.071876 | 0.12088 | 0.033315 | 0.47263  | 0.0694   | 0.13425  |
| 2.03E-14 | 0.113553 | 0.01408  | -0.05551 | 0.23118 | -0.00478 | 0.9179   | 0.001055 | 0.98187  |

|          |          |          |           |          |          |          |          |          |
|----------|----------|----------|-----------|----------|----------|----------|----------|----------|
| 4.62E-08 | 0.136571 | 0.0031   | 0.011357  | 0.80662  | 0.043971 | 0.34306  | 0.099278 | 0.03196  |
| 8.60E-10 | 0.130719 | 0.00466  | 0.002556  | 0.95606  | 0.056374 | 0.224    | 0.121077 | 0.00882  |
| 8.43E-11 | 0.148733 | 0.00127  | 0.017964  | 0.69861  | 0.005872 | 0.89929  | 0.022473 | 0.62809  |
| 0.00013  | 0.099916 | 0.03086  | 0.062247  | 0.17932  | 0.076129 | 0.10035  | 0.112599 | 0.01491  |
| 8.56E-05 | 0.113626 | 0.01402  | 0.005018  | 0.91388  | 0.080097 | 0.0838   | 0.096887 | 0.03634  |
| 0.23277  | 0.055285 | 0.23309  | -0.07228  | 0.11882  | -0.0627  | 0.17616  | -0.05587 | 0.22816  |
| 9.86E-06 | 0.089712 | 0.0527   | -0.02841  | 0.5403   | -0.0043  | 0.92617  | 0.009927 | 0.83058  |
| 1.83E-06 | 0.101078 | 0.02896  | 0.198287  | 1.59E-05 | 0.31237  | 4.99E-12 | 0.302765 | 2.34E-11 |
| 2.30E-26 | 0.165287 | 0.00033  | 0.009153  | 0.84361  | 0.020141 | 0.6642   | 0.06593  | 0.15488  |
| 6.75E-21 | 0.231795 | 4.09E-07 | -0.01427  | 0.7584   | 0.028676 | 0.53647  | 0.074265 | 0.10898  |
| 1.75E-12 | 0.129229 | 0.00516  | -0.01868  | 0.68724  | -0.04545 | 0.32705  | 0.012713 | 0.78408  |
| 1.11E-07 | 0.140925 | 0.00227  | 0.004513  | 0.92252  | 0.036338 | 0.43337  | 0.05313  | 0.25184  |
| 5.33E-31 | 0.116105 | 0.01205  | -0.0524   | 0.25847  | -0.08379 | 0.07045  | 0.011368 | 0.80644  |
| 3.48E-18 | 0.119003 | 0.01005  | 0.123441  | 0.00757  | 0.032564 | 0.48267  | 0.080115 | 0.08373  |
| 6.16E-28 | 0.174987 | 0.00014  | -0.01611  | 0.72844  | 0.000873 | 0.98499  | 0.054834 | 0.23693  |
| 7.87E-31 | 0.142685 | 0.00199  | -0.03518  | 0.44819  | -0.01986 | 0.66857  | 0.008182 | 0.86003  |
| 2.62E-15 | 0.150716 | 0.00109  | -0.0408   | 0.37906  | -0.01733 | 0.70872  | 0.012808 | 0.78251  |
| 6.58E-05 | 0.054744 | 0.2377   | -0.05477  | 0.23746  | -0.03808 | 0.41163  | 0.004126 | 0.92914  |
| 6.84E-23 | 0.175089 | 0.00014  | -0.00373  | 0.9359   | 0.053837 | 0.24558  | 0.066559 | 0.15098  |
| 2.55E-12 | 0.319403 | 1.55E-12 | -0.0629   | 0.17481  | -0.00428 | 0.92645  | 0.164599 | 0.00035  |
| 6.04E-10 | 0.088399 | 0.05627  | 0.090414  | 0.05086  | -0.00132 | 0.97736  | 0.060847 | 0.18932  |
| 4.03E-14 | 0.110923 | 0.01648  | -0.00088  | 0.98486  | -0.01344 | 0.772    | -0.01181 | 0.79909  |
| 0.32026  | 0.01134  | 0.80691  | 0.024161  | 0.60251  | -0.05745 | 0.21526  | -0.03407 | 0.46271  |
| 6.37E-22 | 0.160466 | 0.0005   | 0.00148   | 0.97456  | 0.008448 | 0.85553  | 0.042067 | 0.36438  |
| 3.41E-11 | 0.104772 | 0.02355  | 0.032259  | 0.48678  | 0.014315 | 0.75768  | 0.056364 | 0.22408  |
| 2.26E-21 | 0.150988 | 0.00106  | 0.083471  | 0.07152  | 0.102367 | 0.02696  | 0.092072 | 0.04675  |
| 4.19E-08 | 0.132537 | 0.00412  | -0.02382  | 0.60767  | 0.003501 | 0.93985  | 0.029624 | 0.52308  |
| 8.05E-11 | 0.150935 | 0.00107  | 0.009407  | 0.83933  | 0.017196 | 0.71091  | 0.041321 | 0.37296  |
| 0.00018  | 0.096505 | 0.03709  | -0.13429  | 0.00364  | -0.04279 | 0.35614  | -0.01559 | 0.73681  |
| 4.78E-29 | 0.086324 | 0.06233  | -0.12239  | 0.0081   | -0.0173  | 0.70923  | -0.01554 | 0.7377   |
| 1.49E-08 | 0.06676  | 0.14974  | -0.08463  | 0.06765  | -0.03115 | 0.50188  | -0.01971 | 0.67102  |
| 0.00011  | 0.057427 | 0.21546  | -0.08623  | 0.06261  | -0.01453 | 0.7542   | -0.03712 | 0.42357  |
| 1.17E-16 | 0.07895  | 0.08834  | -0.05367  | 0.24707  | 0.003588 | 0.93836  | -0.00278 | 0.95229  |
| 8.93E-10 | 0.119199 | 0.00993  | 0.007762  | 0.86715  | -0.01171 | 0.80073  | 0.016903 | 0.71562  |
| 7.64E-16 | 0.101652 | 0.02805  | -0.09603  | 0.03804  | -0.05497 | 0.23579  | -0.02185 | 0.6377   |
| 2.02E-15 | 0.136143 | 0.0032   | 0.07548   | 0.10329  | 0.039454 | 0.39496  | 0.070949 | 0.12576  |
| 6.19E-15 | 0.190149 | 3.54E-05 | 0.016362  | 0.72434  | -0.00958 | 0.83636  | 0.0762   | 0.10004  |
| 3.57E-13 | 0.163125 | 0.0004   | 0.016828  | 0.71682  | 0.008301 | 0.85801  | 0.058159 | 0.20965  |
| 6.14E-15 | 0.147782 | 0.00136  | 0.048975  | 0.2909   | 0.033982 | 0.4638   | 0.045479 | 0.32675  |
| 4.93E-10 | 0.107134 | 0.02058  | 0.027051  | 0.55981  | 0.040703 | 0.38016  | 0.042309 | 0.36164  |
| 5.39E-06 | 0.109108 | 0.01834  | 0.028663  | 0.53666  | -0.03822 | 0.40989  | 0.00987  | 0.83154  |
| 3.93E-18 | 0.153738 | 0.00086  | -6.76E-05 | 0.99884  | -0.00371 | 0.93624  | 0.04041  | 0.3836   |
| 1.32E-06 | 0.081511 | 0.07846  | 0.030883  | 0.50557  | 0.001041 | 0.9821   | 0.013164 | 0.77663  |
| 2.63E-19 | 0.198972 | 1.48E-05 | -0.00536  | 0.90802  | 0.053909 | 0.24494  | 0.129111 | 0.0052   |
| 0.00339  | 0.133711 | 0.00379  | -0.03564  | 0.44223  | -0.01196 | 0.79664  | 0.007314 | 0.87475  |

|          |          |          |          |         |          |         |          |          |
|----------|----------|----------|----------|---------|----------|---------|----------|----------|
| 0.00486  | 0.122321 | 0.00814  | 0.095126 | 0.03989 | -0.01977 | 0.66999 | 0.032672 | 0.48123  |
| 6.69E-13 | 0.12095  | 0.00889  | -0.00515 | 0.91157 | 0.100806 | 0.0294  | 0.135366 | 0.00338  |
| 0.12058  | 0.072921 | 0.11555  | 0.00326  | 0.94398 | 0.017133 | 0.71192 | 0.00187  | 0.96785  |
| 0.00032  | 0.114298 | 0.01345  | 0.064609 | 0.16334 | 0.045568 | 0.3258  | 0.049708 | 0.28373  |
| 0.00448  | 0.055498 | 0.2313   | 0.038182 | 0.41039 | -0.00913 | 0.84403 | -0.00676 | 0.8842   |
| 0.02567  | 0.04456  | 0.33663  | -0.06916 | 0.13562 | -0.07232 | 0.1186  | -0.03819 | 0.41023  |
| 3.87E-17 | 0.211557 | 3.99E-06 | 0.070622 | 0.12752 | 0.174944 | 0.00014 | 0.302614 | 2.40E-11 |
| 2.39E-06 | 0.118656 | 0.01028  | 0.036933 | 0.42588 | 0.026301 | 0.57075 | 0.039792 | 0.39092  |
| 0.00018  | 0.1081   | 0.01946  | 0.013473 | 0.77152 | 0.018379 | 0.692   | 0.050486 | 0.27625  |
| 0.00012  | 0.056777 | 0.2207   | 0.025966 | 0.57567 | 0.105756 | 0.02227 | 0.078044 | 0.09207  |
| 6.60E-16 | 0.089395 | 0.05354  | -0.07563 | 0.1026  | 0.000149 | 0.99744 | 0.091279 | 0.04868  |
| 2.56E-06 | 0.131767 | 0.00434  | -0.0433  | 0.35045 | -0.01647 | 0.72265 | -0.00439 | 0.92461  |
| 7.35E-14 | 0.122611 | 0.00799  | 0.134136 | 0.00368 | 0.115553 | 0.01246 | 0.168923 | 0.00025  |
| 0.00427  | 0.077532 | 0.09423  | 0.162658 | 0.00042 | 0.159361 | 0.00055 | 0.15547  | 0.00075  |
| 0.00012  | 0.144453 | 0.00175  | 0.00427  | 0.92668 | -0.00424 | 0.9272  | 0.043621 | 0.34692  |
| 0.02245  | 0.074947 | 0.10576  | 0.040607 | 0.38129 | 0.046983 | 0.31099 | 0.0621   | 0.18035  |
| 1.01E-08 | 0.132916 | 0.00401  | -0.01497 | 0.74702 | 0.005633 | 0.90338 | 0.023492 | 0.61259  |
| 1.14E-11 | 0.109186 | 0.01826  | -0.00259 | 0.95547 | -0.00581 | 0.9004  | -0.01612 | 0.72819  |
| 1.80E-37 | 0.095831 | 0.03844  | 0.036766 | 0.42797 | -0.0712  | 0.12441 | -0.01857 | 0.68894  |
| 1.28E-18 | 0.155996 | 0.00072  | -0.01376 | 0.76686 | 0.025815 | 0.5779  | 0.036052 | 0.43701  |
| 1.60E-08 | 0.102411 | 0.0269   | -0.01002 | 0.82903 | 0.017893 | 0.69974 | 0.005488 | 0.90584  |
| 4.58E-08 | 0.091766 | 0.04749  | 0.026793 | 0.56356 | 0.015144 | 0.74412 | 0.009365 | 0.84005  |
| 9.61E-18 | 0.088854 | 0.05501  | 0.030941 | 0.50477 | 0.06711  | 0.14761 | 0.118868 | 0.01014  |
| 2.72E-08 | 0.117017 | 0.01138  | -0.03217 | 0.48803 | -0.01832 | 0.69298 | 0.042947 | 0.35442  |
| 1.40E-06 | 0.110887 | 0.01652  | -0.01062 | 0.81898 | 0.02659  | 0.56652 | 0.015731 | 0.73456  |
| 5.20E-10 | 0.141342 | 0.0022   | -0.01727 | 0.70972 | 0.002214 | 0.96194 | 0.015855 | 0.73255  |
| 0.00302  | 0.126547 | 0.00617  | 0.065991 | 0.1545  | 0.012782 | 0.78294 | 0.038607 | 0.40519  |
| 4.03E-10 | 0.130983 | 0.00458  | 0.097125 | 0.03589 | 0.042123 | 0.36374 | 0.073139 | 0.11447  |
| 7.81E-05 | 0.096424 | 0.03725  | 0.07863  | 0.08964 | 0.018927 | 0.6833  | 0.035872 | 0.4393   |
| 4.02E-25 | 0.222726 | 1.17E-06 | 0.044342 | 0.339   | 0.025888 | 0.57682 | 0.089048 | 0.05448  |
| 3.19E-07 | 0.121639 | 0.0085   | 0.04387  | 0.34418 | 0.023557 | 0.61161 | 0.021198 | 0.64773  |
| 3.78E-17 | 0.166867 | 0.00029  | 0.011659 | 0.80159 | -0.01227 | 0.79142 | 0.054306 | 0.24148  |
| 0.0003   | 0.078006 | 0.09222  | -0.03389 | 0.46504 | -0.01477 | 0.75025 | -0.01949 | 0.67437  |
| 6.04E-18 | 0.113199 | 0.01438  | 0.055456 | 0.23165 | 0.076107 | 0.10045 | 0.114155 | 0.01357  |
| 2.42E-21 | 0.15108  | 0.00106  | -0.00543 | 0.90679 | 0.009129 | 0.84402 | 0.031689 | 0.49452  |
| 6.29E-07 | 0.099084 | 0.03229  | 0.016001 | 0.73019 | 0.005451 | 0.90649 | 0.022369 | 0.62969  |
| 1.20E-20 | 0.157139 | 0.00065  | 0.04585  | 0.32282 | 0.00656  | 0.88757 | 0.041521 | 0.37065  |
| 2.97E-10 | 0.137786 | 0.00285  | 0.011455 | 0.805   | 0.025616 | 0.58082 | 0.033514 | 0.46998  |
| 7.05E-07 | 0.140442 | 0.00235  | -0.02171 | 0.63977 | 0.006488 | 0.88879 | 0.022566 | 0.62667  |
| 2.12E-19 | 0.159934 | 0.00052  | 0.016965 | 0.71463 | 0.005352 | 0.90816 | 0.032061 | 0.48946  |
| 0.0012   | 0.107581 | 0.02005  | 0.068373 | 0.14013 | 0.035872 | 0.4393  | 0.056151 | 0.22584  |
| 1.63E-14 | 0.112111 | 0.01536  | 0.056272 | 0.22484 | -0.00403 | 0.93085 | 0.041525 | 0.37061  |
| 2.23E-16 | 0.138418 | 0.00272  | -0.02831 | 0.54171 | -0.00523 | 0.91033 | 0.019973 | 0.66683  |
| 4.43E-24 | 0.148052 | 0.00133  | 0.028913 | 0.53311 | 0.019648 | 0.67193 | 0.052363 | 0.25877  |
| 6.14E-31 | 0.162744 | 0.00041  | 0.01004  | 0.82868 | 0.019703 | 0.67106 | 0.053236 | 0.2509   |

|          |          |          |          |          |          |          |          |          |
|----------|----------|----------|----------|----------|----------|----------|----------|----------|
| 0.00991  | 0.095572 | 0.03897  | 0.010106 | 0.82758  | 0.018238 | 0.69425  | 0.010181 | 0.82632  |
| 3.36E-09 | 0.126922 | 0.00602  | 0.025722 | 0.57926  | 0.029383 | 0.52647  | 0.042701 | 0.3572   |
| 3.86E-17 | 0.160621 | 0.00049  | 0.027983 | 0.54637  | 0.023203 | 0.61698  | 0.04355  | 0.3477   |
| 7.21E-43 | 0.151412 | 0.00103  | 0.057136 | 0.2178   | 0.004203 | 0.92783  | 0.06121  | 0.18668  |
| 1.51E-15 | 0.161035 | 0.00048  | 0.037879 | 0.41411  | 0.034099 | 0.46226  | 0.048306 | 0.29755  |
| 2.47E-09 | 0.145911 | 0.00157  | 0.002061 | 0.96457  | 0.019982 | 0.66669  | 0.03334  | 0.4723   |
| 0.00509  | 0.071672 | 0.12194  | 0.0093   | 0.84114  | -0.03112 | 0.50225  | -0.01537 | 0.74047  |
| 0.05127  | 0.07442  | 0.10824  | 0.009767 | 0.83327  | 0.003951 | 0.93213  | 0.004611 | 0.92084  |
| 2.72E-08 | 0.139348 | 0.00254  | -0.01391 | 0.7644   | 0.008837 | 0.84895  | 0.061087 | 0.18757  |
| 4.67E-09 | 0.075748 | 0.10207  | 0.064237 | 0.16578  | -0.02962 | 0.52317  | 0.000833 | 0.98567  |
| 3.15E-08 | 0.105877 | 0.02212  | -0.00984 | 0.83208  | 0.02275  | 0.62387  | 0.010516 | 0.8207   |
| 3.72E-08 | 0.068331 | 0.14037  | -0.18707 | 4.75E-05 | -0.15817 | 0.0006   | -0.13156 | 0.0044   |
| 4.23E-11 | 0.265837 | 5.39E-09 | 0.060035 | 0.1953   | 0.22308  | 1.12E-06 | 0.385975 | 4.87E-18 |
| 7.29E-11 | 0.176098 | 0.00013  | 0.015857 | 0.73252  | 0.022232 | 0.63178  | 0.042072 | 0.36433  |
| 3.06E-13 | 0.085274 | 0.06559  | -0.0479  | 0.30164  | -0.04449 | 0.33736  | 0.003661 | 0.9371   |
| 2.53E-11 | 0.163641 | 0.00038  | 0.089101 | 0.05434  | 0.166191 | 0.00031  | 0.219175 | 1.74E-06 |
| 0.41323  | 0.161735 | 0.00045  | 0.080924 | 0.08064  | 0.169246 | 0.00024  | 0.212289 | 3.69E-06 |
| 1.36E-12 | 0.144663 | 0.00172  | -0.00836 | 0.85704  | 0.008647 | 0.85215  | 0.023035 | 0.61952  |
| 2.72E-11 | 0.04864  | 0.29421  | 0.064485 | 0.16415  | -0.02118 | 0.64798  | -0.02844 | 0.5399   |
| 0.44268  | -0.02401 | 0.60471  | 0.038663 | 0.40452  | 0.026329 | 0.57034  | -0.00396 | 0.93199  |
| 0.00797  | 0.090061 | 0.05178  | -0.06341 | 0.1713   | -0.05638 | 0.22392  | -0.04442 | 0.33812  |
| 0.16888  | 0.101075 | 0.02896  | 0.016437 | 0.72314  | 0.056675 | 0.22153  | 0.068549 | 0.13911  |
| 0.00036  | 0.122786 | 0.0079   | -0.0021  | 0.96395  | -0.01754 | 0.70533  | -0.00015 | 0.99737  |
| 2.51E-06 | 0.10487  | 0.02343  | 0.016548 | 0.72133  | -0.0101  | 0.82773  | 0.022985 | 0.62029  |
| 2.49E-19 | 0.137932 | 0.00282  | 0.069326 | 0.13467  | 0.044209 | 0.34045  | 0.07719  | 0.09569  |
| 7.59E-09 | 0.095251 | 0.03963  | 0.091162 | 0.04897  | 0.197606 | 1.70E-05 | 0.159259 | 0.00055  |
| 2.93E-05 | 0.04124  | 0.3739   | 0.040844 | 0.37851  | 0.010962 | 0.81323  | 0.001495 | 0.97429  |
| 1.74E-13 | 0.1308   | 0.00464  | 0.028344 | 0.5412   | 0.055522 | 0.23109  | 0.083716 | 0.07069  |
| 6.54E-06 | 0.148833 | 0.00126  | 0.016733 | 0.71836  | 0.056347 | 0.22423  | 0.147636 | 0.00138  |
| 4.64E-21 | 0.142463 | 0.00203  | 0.108046 | 0.01952  | 0.069698 | 0.13258  | 0.101118 | 0.02889  |
| 1.76E-06 | 0.535579 | 5.04E-36 | 0.022581 | 0.62645  | 0.032142 | 0.48837  | 0.207428 | 6.19E-06 |
| 1.63E-14 | 0.188763 | 4.04E-05 | 0.01552  | 0.73799  | 0.017995 | 0.69812  | 0.042064 | 0.36442  |
| 9.77E-11 | 0.159347 | 0.00055  | -0.06697 | 0.14847  | -0.03401 | 0.46345  | 0.014633 | 0.75246  |
| 1.44E-11 | 0.128337 | 0.00548  | -0.03423 | 0.46051  | -0.05375 | 0.24635  | 0.023294 | 0.61559  |
| 0.0001   | 0.110253 | 0.01715  | -0.02682 | 0.56314  | 0.108868 | 0.0186   | 0.139163 | 0.00258  |
| 0.13689  | 0.172248 | 0.00018  | 0.05445  | 0.24023  | 0.008691 | 0.85141  | 0.051496 | 0.26675  |
| 0.22257  | 0.014776 | 0.75012  | 0.000795 | 0.98633  | -0.0223  | 0.63076  | -0.07336 | 0.11338  |
| 3.04E-12 | 0.144801 | 0.0017   | -0.03399 | 0.46376  | -0.01229 | 0.79114  | 0.005863 | 0.89945  |
| 0.00088  | 0.107192 | 0.02051  | 0.041397 | 0.37208  | 0.084802 | 0.0671   | 0.110617 | 0.01678  |
| 6.65E-15 | 0.169224 | 0.00024  | 0.01429  | 0.75808  | 0.00239  | 0.95891  | 0.029295 | 0.52771  |
| 1.51E-08 | 0.164456 | 0.00036  | 0.058052 | 0.21049  | 0.043089 | 0.35284  | 0.12914  | 0.00519  |
| 1.80E-15 | 0.162477 | 0.00042  | -0.03926 | 0.39729  | -0.02201 | 0.63524  | 0.02771  | 0.55029  |
| 4.49E-11 | 0.161671 | 0.00045  | -0.00772 | 0.86792  | 0.017509 | 0.70589  | 0.041431 | 0.37169  |
| 4.72E-11 | 0.200295 | 1.29E-05 | 0.017769 | 0.70172  | 0.012843 | 0.78193  | 0.052347 | 0.25891  |
| 5.28E-05 | 0.097073 | 0.03599  | -0.10103 | 0.02903  | -0.07594 | 0.1012   | -0.08677 | 0.06097  |

|          |          |          |          |          |          |          |          |          |
|----------|----------|----------|----------|----------|----------|----------|----------|----------|
| 8.29E-10 | 0.179838 | 9.31E-05 | 0.017271 | 0.70969  | 0.025128 | 0.58805  | 0.051166 | 0.26983  |
| 5.15E-16 | 0.217136 | 2.18E-06 | -0.05441 | 0.24062  | -0.00297 | 0.94901  | 0.140784 | 0.00229  |
| 5.01E-09 | 0.148789 | 0.00126  | 0.008131 | 0.86089  | 0.047022 | 0.31059  | 0.067485 | 0.14536  |
| 0.00411  | -0.04705 | 0.31028  | -0.03966 | 0.39255  | -0.12211 | 0.00825  | -0.06576 | 0.15598  |
| 3.26E-17 | 0.11449  | 0.0133   | 0.01922  | 0.67867  | -0.03752 | 0.41857  | 0.106646 | 0.02116  |
| 0.00046  | -0.05598 | 0.22728  | -0.08605 | 0.06316  | -0.18836 | 4.20E-05 | -0.13428 | 0.00365  |
| 0.15518  | -0.10933 | 0.01811  | 0.010181 | 0.82631  | 0.042336 | 0.36132  | 0.005058 | 0.91319  |
| 0.99311  | -0.0879  | 0.05769  | -0.21182 | 3.88E-06 | -0.15434 | 0.00082  | -0.16641 | 0.0003   |
| 1.25E-07 | -0.13709 | 0.00299  | -0.19138 | 3.14E-05 | -0.32346 | 7.79E-13 | -0.39688 | 4.55E-19 |
| 0.30757  | -0.12398 | 0.00731  | -0.17768 | 0.00011  | -0.2879  | 2.30E-10 | -0.34174 | 3.07E-14 |
| 0.04241  | -0.0912  | 0.04888  | -0.12746 | 0.00581  | -0.20579 | 7.35E-06 | -0.18281 | 7.08E-05 |
| 0.01931  | -0.15888 | 0.00057  | -0.23233 | 3.84E-07 | -0.3049  | 1.67E-11 | -0.34536 | 1.58E-14 |
| 0.0007   | -0.10186 | 0.02774  | -0.03382 | 0.46587  | -0.263   | 7.92E-09 | -0.20199 | 1.09E-05 |
| 0.13474  | -0.06042 | 0.19241  | -0.23261 | 3.71E-07 | -0.2971  | 5.69E-11 | -0.26846 | 3.76E-09 |
| 2.13E-12 | 0.063697 | 0.16938  | -0.05696 | 0.21921  | -0.21617 | 2.42E-06 | -0.12321 | 0.00768  |
| 0.03844  | -0.09318 | 0.04415  | -0.11223 | 0.01524  | -0.15295 | 0.00091  | -0.09726 | 0.03563  |
| 0.09084  | -0.07839 | 0.09062  | -0.32479 | 6.21E-13 | -0.33994 | 4.27E-14 | -0.24507 | 8.15E-08 |
| 0.89208  | -0.02741 | 0.55461  | -0.00292 | 0.94981  | -0.10641 | 0.02145  | -0.16421 | 0.00037  |
| 0.00017  | -0.03813 | 0.41105  | -0.20218 | 1.07E-05 | -0.18499 | 5.78E-05 | -0.1423  | 0.00205  |
| 2.23E-06 | 0.028074 | 0.54507  | -0.09157 | 0.04797  | -0.11144 | 0.01599  | -0.0179  | 0.69968  |
| 0.01127  | 0.101555 | 0.02821  | -0.13604 | 0.00322  | 0.009643 | 0.83536  | 0.084541 | 0.06795  |
| 0.01313  | -0.20819 | 5.71E-06 | -0.26923 | 3.38E-09 | -0.32799 | 3.57E-13 | -0.36606 | 2.96E-16 |
| 0.02412  | -0.01738 | 0.70794  | -0.10727 | 0.02042  | -0.05291 | 0.25385  | -0.06708 | 0.14781  |
| 0.78509  | 0.034926 | 0.45147  | -0.04597 | 0.32157  | -0.09401 | 0.04229  | 0.005996 | 0.89717  |
| 0.70968  | -0.07702 | 0.09643  | -0.22732 | 6.89E-07 | -0.12641 | 0.00623  | -0.12826 | 0.00551  |
| 0.04782  | -0.01699 | 0.71419  | -0.06812 | 0.14159  | -0.20474 | 8.20E-06 | -0.13509 | 0.00345  |
| 1.45E-06 | -0.08751 | 0.05881  | -0.15758 | 0.00063  | -0.26541 | 5.71E-09 | -0.23119 | 4.39E-07 |
| 2.34E-06 | -0.21733 | 2.13E-06 | -0.27598 | 1.31E-09 | -0.30537 | 1.55E-11 | -0.40542 | 6.67E-20 |
| 1.57E-09 | -0.11106 | 0.01634  | -0.19351 | 2.55E-05 | -0.33689 | 7.40E-14 | -0.32585 | 5.17E-13 |
| 0.01872  | 0.018268 | 0.69377  | 0.031318 | 0.49959  | -0.11462 | 0.01319  | -0.10275 | 0.0264   |
| 0.00034  | -0.13571 | 0.0033   | 0.011106 | 0.81082  | -0.13281 | 0.00404  | -0.22149 | 1.34E-06 |
| 0.00613  | -0.03854 | 0.406    | -0.0486  | 0.29457  | -0.03714 | 0.42323  | -0.04076 | 0.37943  |
| 0.01132  | -0.0481  | 0.29957  | -0.04177 | 0.36783  | -0.16357 | 0.00039  | -0.15005 | 0.00114  |
| 0.30548  | -0.13932 | 0.00255  | -0.17909 | 9.97E-05 | -0.17234 | 0.00018  | -0.25698 | 1.77E-08 |
| 0.21625  | -0.07937 | 0.08667  | -0.15999 | 0.00052  | -0.16867 | 0.00025  | -0.1507  | 0.00109  |
| 3.85E-08 | -0.01668 | 0.7192   | -0.32014 | 1.37E-12 | -0.16993 | 0.00022  | -0.20287 | 9.95E-06 |
| 0.19976  | -0.08594 | 0.06351  | -0.2088  | 5.36E-06 | -0.26144 | 9.77E-09 | -0.3175  | 2.13E-12 |
| 0.25448  | -0.01335 | 0.77355  | -0.03591 | 0.43876  | -0.12516 | 0.00677  | -0.06797 | 0.14246  |
| 6.95E-05 | -0.16069 | 0.00049  | -0.14504 | 0.00168  | -0.32415 | 6.93E-13 | -0.34296 | 2.46E-14 |
| 0.50159  | -0.0626  | 0.17683  | -0.15583 | 0.00073  | -0.34611 | 1.38E-14 | -0.26862 | 3.68E-09 |
| 2.08E-05 | -0.18398 | 6.35E-05 | -0.43381 | 7.50E-23 | -0.35072 | 5.80E-15 | -0.46457 | 2.23E-26 |
| 0.09919  | -0.05368 | 0.24697  | -0.18185 | 7.74E-05 | -0.23672 | 2.27E-07 | -0.20006 | 1.33E-05 |
| 5.82E-08 | 0.029783 | 0.52085  | -0.09125 | 0.04875  | -0.24531 | 7.90E-08 | -0.10471 | 0.02364  |
| 0.50691  | -0.11185 | 0.0156   | -0.26203 | 9.03E-09 | -0.34832 | 9.11E-15 | -0.36386 | 4.58E-16 |
| 0.00525  | -0.08145 | 0.07869  | -0.09871 | 0.03295  | -0.22287 | 1.15E-06 | -0.22877 | 5.83E-07 |



|          |          |          |          |          |          |          |          |          |
|----------|----------|----------|----------|----------|----------|----------|----------|----------|
| 0.20425  | 0.060418 | 0.19246  | -0.15877 | 0.00057  | -0.08307 | 0.07289  | 0.010836 | 0.81533  |
| 0.35515  | -0.08056 | 0.08204  | -0.23114 | 4.41E-07 | -0.13701 | 0.00301  | -0.2015  | 1.14E-05 |
| 0.00349  | -0.06849 | 0.13942  | -0.18887 | 4.00E-05 | -0.25985 | 1.21E-08 | -0.19877 | 1.51E-05 |
| 0.86851  | 0.006564 | 0.88749  | -0.12109 | 0.00881  | -0.05834 | 0.20823  | 0.004428 | 0.92397  |
| 1.55E-13 | -0.11018 | 0.01723  | -0.32332 | 7.98E-13 | -0.28188 | 5.60E-10 | -0.35638 | 1.97E-15 |
| 0.0001   | 0.053139 | 0.25177  | -0.02059 | 0.65722  | -0.04567 | 0.32469  | 0.0759   | 0.10138  |
| 0.10879  | -0.08115 | 0.07981  | -0.00854 | 0.85399  | -0.08055 | 0.08207  | -0.10893 | 0.01853  |
| 7.87E-05 | 0.07694  | 0.09677  | -0.0203  | 0.66178  | -0.10084 | 0.02935  | 0.040629 | 0.38102  |
| 2.46E-05 | -0.02488 | 0.59174  | -0.13148 | 0.00443  | -0.21606 | 2.45E-06 | -0.16125 | 0.00047  |
| 0.98375  | -0.14813 | 0.00133  | -0.16562 | 0.00033  | -0.24045 | 1.44E-07 | -0.26756 | 4.25E-09 |
| 0.13659  | -0.12313 | 0.00773  | -0.10687 | 0.02089  | -0.30921 | 8.35E-12 | -0.28297 | 4.77E-10 |
| 0.00402  | -0.07115 | 0.12468  | -0.13306 | 0.00397  | -0.09479 | 0.0406   | -0.10571 | 0.02233  |
| 0.17633  | 0.119726 | 0.00961  | -0.08839 | 0.0563   | -0.05666 | 0.22167  | 0.095593 | 0.03892  |
| 0.69798  | -0.03202 | 0.49008  | -0.07009 | 0.13044  | -0.14844 | 0.00129  | -0.09665 | 0.03681  |
| 0.00175  | -0.08831 | 0.05652  | -0.11993 | 0.00948  | -0.24867 | 5.18E-08 | -0.20504 | 7.95E-06 |
| 0.29771  | -0.02691 | 0.56186  | -0.17708 | 0.00012  | -0.20758 | 6.09E-06 | -0.12984 | 0.00495  |
| 5.58E-05 | -0.11031 | 0.01709  | -0.24951 | 4.65E-08 | -0.31026 | 7.05E-12 | -0.28008 | 7.27E-10 |
| 0.00065  | 0.032048 | 0.48964  | -0.205   | 7.98E-06 | -0.16101 | 0.00048  | -0.08248 | 0.07495  |
| 2.90E-06 | -0.0042  | 0.92779  | -0.21203 | 3.79E-06 | -0.26319 | 7.72E-09 | -0.23463 | 2.92E-07 |
| 0.02331  | -0.02853 | 0.5386   | -0.19776 | 1.67E-05 | -0.18261 | 7.21E-05 | -0.14908 | 0.00123  |
| 0.02191  | -0.26564 | 5.53E-09 | -0.12916 | 0.00518  | -0.28542 | 3.33E-10 | -0.45024 | 1.09E-24 |
| 1.67E-16 | -0.01292 | 0.78068  | -0.13412 | 0.00369  | -0.11263 | 0.01489  | -0.10718 | 0.02052  |
| 9.24E-06 | -0.13792 | 0.00282  | -0.15811 | 0.00061  | -0.28065 | 6.69E-10 | -0.23018 | 4.94E-07 |
| 7.32E-07 | -0.20745 | 6.17E-06 | -0.27071 | 2.75E-09 | -0.31241 | 4.96E-12 | -0.42502 | 6.58E-22 |
| 6.47E-08 | 0.068541 | 0.13915  | 0.003048 | 0.94763  | -0.08003 | 0.08405  | 0.05821  | 0.20925  |
| 7.42E-19 | -0.16134 | 0.00046  | -0.2744  | 1.64E-09 | -0.30208 | 2.61E-11 | -0.40944 | 2.65E-20 |
| 0.206    | -0.06096 | 0.18852  | -0.12571 | 0.00653  | -0.1139  | 0.01379  | -0.08553 | 0.06478  |
| 0.03826  | 0.02068  | 0.65578  | -0.14794 | 0.00135  | -0.15113 | 0.00105  | -0.046   | 0.32123  |
| 0.00036  | -0.13527 | 0.0034   | -0.06912 | 0.13584  | -0.14508 | 0.00167  | -0.21929 | 1.71E-06 |
| 0.07301  | -0.07032 | 0.12918  | -0.07405 | 0.11002  | -0.18866 | 4.08E-05 | -0.20433 | 8.55E-06 |
| 0.42663  | -0.14994 | 0.00115  | 0.00579  | 0.90069  | -0.2515  | 3.60E-08 | -0.2911  | 1.42E-10 |
| 0.45663  | 0.189752 | 3.67E-05 | 0.032793 | 0.47959  | 0.126045 | 0.00638  | 0.203337 | 9.48E-06 |
| 0.01191  | -0.0351  | 0.44924  | -0.18994 | 3.61E-05 | -0.12468 | 0.00698  | -0.10491 | 0.02337  |
| 0.00087  | -0.0709  | 0.12602  | -0.09111 | 0.0491   | -0.21743 | 2.10E-06 | -0.1878  | 4.43E-05 |
| 0.01037  | -0.16501 | 0.00034  | -0.07424 | 0.10908  | -0.23726 | 2.13E-07 | -0.31941 | 1.55E-12 |
| 0.08697  | -0.13951 | 0.00251  | -0.3614  | 7.43E-16 | -0.40473 | 7.81E-20 | -0.39574 | 5.85E-19 |
| 0.0316   | 0.00281  | 0.95171  | -0.16622 | 0.00031  | -0.04518 | 0.3299   | -0.0617  | 0.18315  |
| 0.00018  | -0.06704 | 0.14803  | -0.10619 | 0.02173  | -0.22103 | 1.41E-06 | -0.1725  | 0.00018  |
| 0.65657  | -0.08858 | 0.05575  | -0.211   | 4.24E-06 | -0.26955 | 3.23E-09 | -0.23519 | 2.73E-07 |
| 0.88967  | -0.14469 | 0.00172  | -0.24954 | 4.63E-08 | -0.34078 | 3.66E-14 | -0.34376 | 2.12E-14 |
| 0.0062   | -0.01451 | 0.75445  | -0.04672 | 0.31368  | -0.02697 | 0.56103  | 0.040854 | 0.37839  |
| 0.3357   | -0.10452 | 0.02389  | -0.09863 | 0.0331   | -0.23723 | 2.14E-07 | -0.19672 | 1.85E-05 |
| 0.02549  | 0.066541 | 0.15109  | -0.13458 | 0.00357  | -0.12171 | 0.00847  | 0.019935 | 0.66742  |
| 1.93E-05 | -0.19415 | 2.39E-05 | -0.22631 | 7.74E-07 | -0.22227 | 1.23E-06 | -0.3667  | 2.61E-16 |
| 0.70488  | -0.26459 | 6.38E-09 | -0.16339 | 0.00039  | -0.33751 | 6.62E-14 | -0.40945 | 2.64E-20 |

|          |          |         |          |          |          |          |          |          |
|----------|----------|---------|----------|----------|----------|----------|----------|----------|
| 0.00838  | -0.10443 | 0.02401 | -0.10634 | 0.02154  | -0.18376 | 6.48E-05 | -0.13933 | 0.00255  |
| 4.68E-07 | 0.063209 | 0.17267 | -0.07539 | 0.10372  | -0.03172 | 0.49412  | 0.074868 | 0.10613  |
| 2.90E-08 | -0.12176 | 0.00844 | -0.12856 | 0.0054   | -0.22273 | 1.16E-06 | -0.20981 | 4.81E-06 |
| 0.03703  | -0.0782  | 0.09142 | -0.12511 | 0.00679  | -0.1533  | 0.00089  | -0.15401 | 0.00084  |
| 0.46435  | -0.03097 | 0.50436 | -0.02234 | 0.63013  | -0.19735 | 1.74E-05 | -0.08468 | 0.06749  |
| 6.03E-08 | -0.03296 | 0.47739 | -0.06838 | 0.14009  | -0.19862 | 1.53E-05 | -0.13016 | 0.00484  |
| 0.03092  | 0.050346 | 0.27758 | -0.12185 | 0.00839  | -0.13727 | 0.00295  | -0.02913 | 0.52997  |
| 0.00053  | -0.07542 | 0.10357 | -0.16517 | 0.00034  | -0.15391 | 0.00085  | -0.14435 | 0.00176  |
| 7.21E-08 | -0.13565 | 0.00331 | -0.2001  | 1.32E-05 | -0.29414 | 8.98E-11 | -0.26253 | 8.44E-09 |

| MMlightcyp | MMligh   | MMgrey6(p | MMgrey  | MMlightcyp | MMligh  | MMmidni  | p        | MMmid    | MMlightst |
|------------|----------|-----------|---------|------------|---------|----------|----------|----------|-----------|
| 0.183626   | 6.56E-05 | -0.00618  | 0.8941  | 0.12465    | 0.007   | -0.07457 | 0.10751  | 0.136989 |           |
| 0.036812   | 0.4274   | -0.04602  | 0.32102 | 0.020305   | 0.66162 | -0.07087 | 0.12621  | -0.07186 |           |
| 0.127753   | 0.0057   | -0.04547  | 0.32689 | -0.03841   | 0.40757 | -0.04553 | 0.32618  | -0.04361 |           |
| 0.060819   | 0.18952  | -0.04645  | 0.31648 | 0.023773   | 0.60835 | -0.07928 | 0.087    | -0.06129 |           |
| 0.071946   | 0.12052  | 0.058562  | 0.20651 | 0.067598   | 0.14469 | 0.000124 | 0.99787  | -0.01732 |           |
| 0.106855   | 0.02091  | -0.09088  | 0.04967 | 0.012096   | 0.79432 | -0.08314 | 0.07267  | 0.006053 |           |
| 0.078813   | 0.0889   | -0.04962  | 0.28463 | 0.03964    | 0.39274 | -0.05734 | 0.21619  | 0.025679 |           |
| 0.05499    | 0.2356   | -0.06607  | 0.15399 | 0.015265   | 0.74214 | -0.09476 | 0.04066  | -0.04656 |           |
| 0.03238    | 0.48515  | -0.06339  | 0.17143 | -0.0324    | 0.48494 | -0.08863 | 0.05563  | -0.03005 |           |
| 0.056577   | 0.22234  | -0.08667  | 0.06127 | -0.0598    | 0.19702 | -0.09528 | 0.03957  | 0.10261  |           |
| 0.129697   | 0.005    | -0.04233  | 0.36138 | 0.031983   | 0.49052 | -0.05148 | 0.26687  | 0.006523 |           |
| 0.059307   | 0.20078  | -0.01571  | 0.73486 | 0.004883   | 0.91618 | -0.04854 | 0.29523  | 0.057538 |           |
| 0.055969   | 0.22735  | 0.000302  | 0.9948  | -0.02687   | 0.56238 | -0.05632 | 0.22441  | -0.01768 |           |
| 0.059485   | 0.19944  | -0.06757  | 0.14484 | 0.052306   | 0.25928 | -0.12249 | 0.00805  | -0.03424 |           |
| 0.204388   | 8.50E-06 | 0.039543  | 0.39389 | 0.127246   | 0.00589 | 0.051652 | 0.2653   | 0.043814 |           |
| 0.031087   | 0.50275  | 0.006574  | 0.88733 | 0.042708   | 0.35711 | 0.007389 | 0.87347  | 0.064217 |           |
| 0.107939   | 0.01964  | -0.00303  | 0.94786 | 0.025667   | 0.58007 | -0.03471 | 0.4543   | -0.05524 |           |
| 0.155606   | 0.00074  | -0.00417  | 0.92836 | 0.082798   | 0.07385 | -0.04442 | 0.33815  | -0.00726 |           |
| 0.18865    | 4.08E-05 | -0.05317  | 0.25153 | -0.00978   | 0.83305 | -0.00173 | 0.97021  | -0.00901 |           |
| 0.056415   | 0.22366  | 0.006878  | 0.88215 | 0.054898   | 0.23638 | -0.02499 | 0.59016  | -0.00394 |           |
| 0.079781   | 0.08503  | -0.08655  | 0.06165 | -0.04223   | 0.36248 | -0.07739 | 0.09481  | 0.060642 |           |
| 0.09123    | 0.0488   | -0.09422  | 0.04184 | -0.13271   | 0.00407 | -0.08345 | 0.07161  | -0.06218 |           |
| 0.070153   | 0.13007  | -0.07594  | 0.10118 | 0.054998   | 0.23553 | -0.08596 | 0.06345  | -0.04607 |           |
| 0.061067   | 0.18772  | -0.08129  | 0.07927 | -0.01851   | 0.68993 | -0.08488 | 0.06685  | -0.05318 |           |
| 0.125247   | 0.00673  | -0.01056  | 0.81997 | -0.01431   | 0.75781 | 0.012333 | 0.79039  | -0.04705 |           |
| 0.067835   | 0.14328  | -0.08612  | 0.06295 | 0.036122   | 0.43611 | -0.14774 | 0.00137  | -0.09009 |           |
| 0.121652   | 0.0085   | -0.02389  | 0.60661 | 0.067485   | 0.14536 | -0.03018 | 0.51537  | -0.00511 |           |
| 0.034765   | 0.45356  | -0.11712  | 0.01131 | -0.06497   | 0.16098 | -0.13493 | 0.00349  | -0.02641 |           |
| 0.070939   | 0.12581  | -0.0764   | 0.09915 | -0.02752   | 0.55296 | -0.03497 | 0.45084  | -0.03986 |           |
| 0.127137   | 0.00594  | 0.115473  | 0.01252 | 0.065188   | 0.15959 | 0.12224  | 0.00818  | -0.01628 |           |
| 0.066941   | 0.14864  | -0.03865  | 0.40469 | 0.025597   | 0.58111 | -0.04262 | 0.35809  | -0.09357 |           |
| 0.025185   | 0.58721  | -0.11671  | 0.0116  | -0.01987   | 0.66847 | -0.15096 | 0.00107  | -0.02452 |           |
| 0.087223   | 0.05964  | -0.02196  | 0.63594 | 0.059054   | 0.20271 | -0.08083 | 0.081    | -0.05447 |           |
| 0.00336    | 0.94226  | 0.053641  | 0.24731 | 0.031508   | 0.49698 | 0.010623 | 0.8189   | 0.030431 |           |
| 0.046423   | 0.3168   | -0.1108   | 0.0166  | -0.03024   | 0.51454 | -0.13682 | 0.00305  | -0.03633 |           |
| 0.022757   | 0.62377  | -0.02977  | 0.52108 | -0.07288   | 0.11578 | -0.12641 | 0.00623  | -0.14775 |           |
| 0.105142   | 0.02307  | -0.03092  | 0.50504 | 0.036238   | 0.43465 | -0.09301 | 0.04454  | -0.0478  |           |
| 0.076336   | 0.09943  | 0.131472  | 0.00443 | 0.141349   | 0.0022  | 0.195784 | 2.04E-05 | 0.044965 |           |
| 0.033724   | 0.4672   | -0.04336  | 0.34982 | -0.03419   | 0.46106 | -0.07154 | 0.12263  | -0.08117 |           |
| 0.118331   | 0.01049  | -0.09401  | 0.04229 | 0.074002   | 0.11024 | -0.16392 | 0.00038  | -0.02675 |           |
| 0.057481   | 0.21502  | -0.05978  | 0.19717 | -0.00568   | 0.90255 | -0.08362 | 0.071    | -0.06519 |           |
| 0.02988    | 0.51949  | -0.11018  | 0.01722 | -0.07611   | 0.10046 | -0.13992 | 0.00244  | 0.019332 |           |
| 0.010885   | 0.81451  | -0.06584  | 0.15544 | 0.165021   | 0.00034 | -0.04539 | 0.32773  | 0.2457   |           |
| -0.01658   | 0.72078  | -0.0473   | 0.30771 | 0.104492   | 0.02393 | -0.07727 | 0.09536  | 0.342521 |           |

|          |         |          |          |          |          |          |          |          |
|----------|---------|----------|----------|----------|----------|----------|----------|----------|
| 0.049744 | 0.28338 | -0.00716 | 0.87733  | 0.175334 | 0.00014  | -0.06342 | 0.17121  | -0.08914 |
| -0.07408 | 0.10987 | -0.04205 | 0.36458  | -0.02045 | 0.65944  | -0.19798 | 1.64E-05 | -0.13269 |
| -0.02613 | 0.57329 | -0.12494 | 0.00686  | -0.01707 | 0.71297  | -0.14206 | 0.00209  | 0.043592 |
| 0.010604 | 0.81922 | -0.02871 | 0.53602  | 0.089855 | 0.05232  | -0.12974 | 0.00498  | 0.040638 |
| 0.106474 | 0.02137 | -0.07854 | 0.09001  | 0.083456 | 0.07157  | -0.16023 | 0.00051  | -0.00711 |
| -0.07813 | 0.09173 | -0.1012  | 0.02877  | -0.02163 | 0.64099  | -0.12868 | 0.00535  | -0.04128 |
| -0.09431 | 0.04163 | -0.14382 | 0.00183  | 0.024512 | 0.59725  | -0.08464 | 0.06762  | 0.272193 |
| -0.03441 | 0.45819 | -0.11711 | 0.01132  | 0.112698 | 0.01482  | -0.12609 | 0.00636  | 0.053597 |
| 0.167266 | 0.00028 | 0.027183 | 0.5579   | 0.198672 | 1.53E-05 | -0.02632 | 0.57051  | -0.02871 |
| 0.048831 | 0.29232 | -0.08335 | 0.07193  | 0.053014 | 0.25288  | -0.13618 | 0.00319  | -0.01497 |
| -0.01196 | 0.79652 | -0.08769 | 0.05827  | 0.047921 | 0.30141  | -0.111   | 0.01641  | 0.082825 |
| -0.04421 | 0.34043 | -0.13567 | 0.00331  | 0.096909 | 0.0363   | -0.19963 | 1.38E-05 | -0.02856 |
| -0.01202 | 0.79563 | -0.1748  | 0.00015  | 0.147461 | 0.0014   | -0.13702 | 0.00301  | 0.316996 |
| 0.020097 | 0.66488 | -0.05951 | 0.19921  | 0.218484 | 1.87E-06 | -0.08047 | 0.08238  | 0.076814 |
| 0.016388 | 0.72391 | -0.0474  | 0.30675  | 0.159415 | 0.00054  | 0.017083 | 0.71272  | 0.581292 |
| 0.005628 | 0.90345 | 0.005532 | 0.9051   | 0.132882 | 0.00402  | -0.06871 | 0.13815  | -0.01014 |
| -0.05451 | 0.23974 | -0.13121 | 0.00451  | -0.05247 | 0.25778  | -0.16798 | 0.00027  | -0.08924 |
| -0.03616 | 0.43561 | -0.25929 | 1.30E-08 | 0.018167 | 0.69537  | -0.28014 | 7.21E-10 | 0.252227 |
| -0.09667 | 0.03678 | -0.14528 | 0.00165  | 0.010137 | 0.82705  | -0.23199 | 3.99E-07 | -0.02451 |
| 0.012229 | 0.79212 | 0.091466 | 0.04822  | -0.0955  | 0.03912  | 0.057767 | 0.21275  | 0.025465 |
| 0.113088 | 0.01448 | -0.04155 | 0.37026  | 0.299821 | 3.73E-11 | -0.04606 | 0.32057  | 0.252959 |
| -0.02339 | 0.61415 | -0.06988 | 0.13157  | 0.085766 | 0.06405  | -0.09203 | 0.04684  | 0.041998 |
| 0.068566 | 0.13901 | -0.10782 | 0.01977  | 0.111732 | 0.01571  | -0.22266 | 1.17E-06 | 0.034341 |
| 0.102121 | 0.02733 | 0.041692 | 0.36868  | -0.07682 | 0.09729  | 0.076274 | 0.09971  | -0.00311 |
| -0.01152 | 0.80389 | -0.13865 | 0.00268  | 0.035116 | 0.44901  | -0.09606 | 0.03798  | 0.207139 |
| -0.05653 | 0.22276 | -0.12586 | 0.00646  | 0.052582 | 0.25678  | -0.1869  | 4.82E-05 | 0.017413 |
| -0.0809  | 0.08073 | -0.04021 | 0.38596  | -0.0113  | 0.80752  | -0.09522 | 0.0397   | -0.04752 |
| -0.07499 | 0.10557 | -0.13275 | 0.00406  | 0.039597 | 0.39325  | -0.14873 | 0.00127  | 0.098093 |
| -0.07635 | 0.09938 | -0.20831 | 5.64E-06 | -0.01089 | 0.81443  | -0.29659 | 6.16E-11 | 0.061187 |
| -0.09037 | 0.05097 | -0.15777 | 0.00062  | 0.000376 | 0.99354  | -0.23618 | 2.42E-07 | -0.05559 |
| 0.05933  | 0.2006  | -0.11975 | 0.00959  | -0.01847 | 0.6905   | -0.15094 | 0.00107  | 0.07767  |
| -0.02452 | 0.59714 | -0.167   | 0.00029  | 0.098712 | 0.03295  | -0.24233 | 1.15E-07 | 0.076968 |
| -0.05004 | 0.28048 | -0.25439 | 2.48E-08 | -0.01901 | 0.682    | -0.23064 | 4.68E-07 | 0.162847 |
| -0.03073 | 0.50768 | 0.117555 | 0.01101  | -0.14833 | 0.00131  | 0.072492 | 0.11772  | -0.18844 |
| 0.074387 | 0.1084  | -0.04958 | 0.28495  | 0.234187 | 3.08E-07 | -0.15418 | 0.00083  | 0.048428 |
| 0.065591 | 0.15702 | -0.1033  | 0.0256   | 0.167384 | 0.00028  | -0.2136  | 3.20E-06 | 0.128596 |
| -0.00479 | 0.9178  | -0.10699 | 0.02075  | 0.047646 | 0.3042   | -0.10013 | 0.03051  | 0.083816 |
| -0.08509 | 0.06618 | -0.02875 | 0.53545  | -0.21765 | 2.06E-06 | -0.03693 | 0.42593  | -0.16067 |
| -0.01286 | 0.78171 | -0.15676 | 0.00067  | 0.010006 | 0.82925  | -0.14318 | 0.00192  | 0.230158 |
| 0.036314 | 0.43369 | 0.079035 | 0.088    | 0.147053 | 0.00144  | -0.00499 | 0.91437  | -0.00489 |
| -0.04138 | 0.37226 | -0.17648 | 0.00013  | 0.083012 | 0.0731   | -0.22065 | 1.47E-06 | 0.120624 |
| 0.084603 | 0.06775 | -0.02878 | 0.53498  | 0.048629 | 0.29432  | -0.06395 | 0.16769  | 0.041055 |
| 0.009349 | 0.84032 | -0.07712 | 0.09599  | 0.159677 | 0.00053  | -0.1793  | 9.78E-05 | 0.069957 |
| 0.065189 | 0.15959 | -0.12419 | 0.00721  | 0.117301 | 0.01118  | -0.2094  | 5.02E-06 | 0.075342 |
| -0.11811 | 0.01063 | -0.2769  | 1.15E-09 | -0.1821  | 7.57E-05 | -0.27224 | 2.22E-09 | -0.07289 |

|          |          |          |          |          |          |          |          |          |
|----------|----------|----------|----------|----------|----------|----------|----------|----------|
| 0.032936 | 0.47767  | -0.02557 | 0.58157  | 0.107465 | 0.02019  | -0.06363 | 0.16985  | 0.078598 |
| 0.166143 | 0.00031  | 0.043897 | 0.34387  | 0.209651 | 4.89E-06 | -0.00061 | 0.98947  | 0.021342 |
| 0.093583 | 0.04324  | -0.09846 | 0.0334   | 0.229835 | 5.14E-07 | -0.11845 | 0.01041  | 0.259492 |
| -0.01468 | 0.7517   | -0.14895 | 0.00125  | 0.087995 | 0.05741  | -0.17187 | 0.00019  | 0.169021 |
| 0.06098  | 0.18835  | 0.008801 | 0.84955  | 0.308884 | 8.81E-12 | -0.03609 | 0.43655  | 0.186396 |
| 0.034966 | 0.45095  | -0.19707 | 1.79E-05 | 0.133854 | 0.00376  | -0.28062 | 6.72E-10 | 0.121735 |
| -0.00803 | 0.86268  | -0.00183 | 0.96846  | 0.090842 | 0.04977  | -0.0974  | 0.03536  | 0.138295 |
| 0.124627 | 0.00701  | 0.06072  | 0.19024  | 0.38419  | 7.12E-18 | 0.035775 | 0.44054  | 0.271072 |
| -0.009   | 0.84613  | -0.20071 | 1.24E-05 | 0.060768 | 0.18989  | -0.16749 | 0.00028  | 0.154261 |
| -0.05651 | 0.2229   | -0.26737 | 4.37E-09 | -0.08658 | 0.06156  | -0.32967 | 2.66E-13 | 0.104332 |
| -0.09343 | 0.0436   | -0.04919 | 0.28876  | -0.02274 | 0.62399  | -0.115   | 0.01289  | 0.010656 |
| -0.05119 | 0.26962  | -0.16251 | 0.00042  | 0.076486 | 0.09876  | -0.07203 | 0.12007  | 0.294118 |
| -0.04089 | 0.37794  | -0.18964 | 3.71E-05 | 0.025779 | 0.57843  | -0.20093 | 1.21E-05 | 0.086891 |
| -0.05813 | 0.2099   | -0.19602 | 1.99E-05 | -0.00182 | 0.96874  | -0.24082 | 1.38E-07 | 0.066774 |
| -0.03704 | 0.42452  | -0.08812 | 0.05704  | -0.15599 | 0.00072  | -0.00032 | 0.99456  | 0.152886 |
| -0.06408 | 0.16681  | -0.11442 | 0.01336  | -0.0553  | 0.233    | -0.13481 | 0.00351  | -0.02946 |
| 0.05994  | 0.19601  | -0.10585 | 0.02216  | 0.081106 | 0.07996  | -0.11872 | 0.01024  | 0.188511 |
| -0.01137 | 0.80643  | -0.10301 | 0.02601  | 0.136554 | 0.00311  | -0.15745 | 0.00064  | 0.041265 |
| -0.16889 | 0.00025  | -0.2992  | 4.10E-11 | -0.14005 | 0.00242  | -0.31102 | 6.23E-12 | 0.09663  |
| -0.01876 | 0.68601  | -0.23194 | 4.02E-07 | -0.08116 | 0.07978  | -0.14251 | 0.00202  | 0.211871 |
| 0.002496 | 0.9571   | -0.01009 | 0.82777  | -0.19538 | 2.12E-05 | -0.0219  | 0.63683  | -0.11385 |
| 0.021534 | 0.64253  | -0.0578  | 0.2125   | 0.080362 | 0.08278  | -0.17279 | 0.00018  | -0.15245 |
| 0.000643 | 0.98895  | 0.213637 | 3.19E-06 | -0.13459 | 0.00357  | 0.230512 | 4.75E-07 | -0.11677 |
| 0.015881 | 0.73213  | -0.14476 | 0.00171  | 0.158425 | 0.00059  | -0.20612 | 7.10E-06 | 0.208062 |
| -0.08295 | 0.07331  | -0.10259 | 0.02663  | -0.05774 | 0.21292  | -0.23596 | 2.49E-07 | -0.11594 |
| -0.0601  | 0.19483  | -0.09147 | 0.04821  | -0.09994 | 0.03082  | -0.09944 | 0.03168  | 0.089804 |
| 0.047502 | 0.30567  | -0.02445 | 0.5981   | 0.125234 | 0.00673  | -0.0239  | 0.60637  | -0.01082 |
| -0.04012 | 0.38707  | -0.1376  | 0.00288  | 0.02027  | 0.66218  | -0.2366  | 2.30E-07 | -0.08099 |
| 0.034085 | 0.46245  | -0.10868 | 0.01881  | 0.099596 | 0.03141  | -0.06885 | 0.13737  | 0.088738 |
| -0.10047 | 0.02994  | 0.104893 | 0.02339  | -0.21301 | 3.41E-06 | 0.126426 | 0.00622  | -0.12618 |
| 0.006855 | 0.88254  | 0.003379 | 0.94195  | 0.032635 | 0.48171  | -0.07078 | 0.12667  | -0.0678  |
| -0.01515 | 0.74394  | 0.064825 | 0.16193  | -0.04875 | 0.29309  | 0.008709 | 0.85111  | -0.06177 |
| 0.020834 | 0.65338  | 0.018054 | 0.69718  | -0.12747 | 0.00581  | 0.065781 | 0.15582  | -0.03773 |
| -0.09155 | 0.048    | -0.00049 | 0.9916   | -0.24379 | 9.56E-08 | 0.063203 | 0.17272  | -0.07472 |
| -0.01337 | 0.77324  | -0.0913  | 0.04862  | 0.08669  | 0.06122  | -0.1329  | 0.00402  | 0.186998 |
| 0.050514 | 0.27599  | 0.106944 | 0.0208   | -0.04369 | 0.3462   | 0.05028  | 0.27822  | -0.02529 |
| -0.04073 | 0.37989  | -0.16937 | 0.00024  | -0.003   | 0.94851  | -0.15475 | 0.00079  | 0.048456 |
| -0.00262 | 0.95505  | 0.017621 | 0.70409  | -0.09535 | 0.03943  | 0.060506 | 0.19181  | 0.078536 |
| 0.258356 | 1.47E-08 | 0.229704 | 5.22E-07 | 0.121486 | 0.00859  | 0.311502 | 5.75E-12 | 0.054543 |
| -0.0761  | 0.10049  | 0.135556 | 0.00333  | -0.16836 | 0.00026  | 0.156622 | 0.00068  | -0.11335 |
| -0.08015 | 0.08361  | -0.20252 | 1.03E-05 | 0.023918 | 0.60616  | -0.17313 | 0.00017  | 0.117398 |
| -0.06425 | 0.1657   | -0.02478 | 0.59328  | 0.024785 | 0.59317  | -0.10848 | 0.01903  | 0.009887 |
| -0.08164 | 0.078    | -0.23862 | 1.81E-07 | -0.01356 | 0.77016  | -0.28002 | 7.34E-10 | 0.114977 |
| -0.08702 | 0.06024  | -0.08636 | 0.0622   | -0.02982 | 0.52034  | -0.19991 | 1.35E-05 | 0.037167 |
| -0.00022 | 0.99628  | -0.10869 | 0.01879  | 0.14965  | 0.00118  | -0.18331 | 6.76E-05 | 0.136486 |

|          |         |          |          |          |          |          |          |          |
|----------|---------|----------|----------|----------|----------|----------|----------|----------|
| -0.08996 | 0.05205 | 0.044766 | 0.33439  | -0.24487 | 8.36E-08 | 0.024123 | 0.60308  | -0.09212 |
| 0.069922 | 0.13134 | -0.0944  | 0.04143  | 0.183347 | 6.74E-05 | -0.15254 | 0.00094  | 0.127466 |
| -0.07303 | 0.11499 | 0.116192 | 0.01198  | -0.2092  | 5.13E-06 | 0.176066 | 0.00013  | -0.13912 |
| -0.05947 | 0.19954 | 0.037351 | 0.42065  | -0.19747 | 1.72E-05 | 0.012923 | 0.78061  | -0.1027  |
| -0.02304 | 0.6195  | 0.092867 | 0.04487  | -0.12409 | 0.00726  | 0.027281 | 0.55648  | -0.25569 |
| -0.05567 | 0.22985 | 0.031142 | 0.502    | -0.0839  | 0.07006  | 0.110151 | 0.01725  | 0.102826 |
| -0.07488 | 0.10607 | 0.127719 | 0.00571  | -0.10198 | 0.02756  | 0.1588   | 0.00057  | -0.15644 |
| 0.109441 | 0.01799 | -0.04557 | 0.3258   | 0.219559 | 1.66E-06 | -0.09409 | 0.04211  | 0.121899 |
| 0.056728 | 0.2211  | -0.06502 | 0.16069  | -0.24783 | 5.76E-08 | -0.05139 | 0.26769  | -0.10522 |
| -0.04756 | 0.30509 | -0.18087 | 8.48E-05 | 0.092279 | 0.04625  | -0.20296 | 9.85E-06 | -0.05461 |
| 0.010695 | 0.8177  | -0.12887 | 0.00529  | 0.14845  | 0.00129  | -0.21756 | 2.08E-06 | 0.233495 |
| -0.08633 | 0.06232 | 0.03505  | 0.44986  | -0.2181  | 1.96E-06 | 0.125536 | 0.0066   | -0.09088 |
| -0.05056 | 0.27553 | 0.144754 | 0.00171  | -0.13576 | 0.00329  | 0.098371 | 0.03356  | -0.19627 |
| 0.046004 | 0.32119 | -0.1172  | 0.01126  | 0.154565 | 0.0008   | -0.15819 | 0.0006   | 0.201516 |
| -0.04381 | 0.34483 | -0.05645 | 0.22335  | -0.01748 | 0.70641  | -0.16264 | 0.00042  | -0.03602 |
| -0.01816 | 0.69551 | -0.19208 | 2.93E-05 | -0.13059 | 0.0047   | -0.22833 | 6.13E-07 | -0.17257 |
| 0.045777 | 0.32359 | -0.11519 | 0.01274  | 0.072578 | 0.11728  | -0.12944 | 0.00508  | 0.145408 |
| -0.06831 | 0.1405  | 0.017378 | 0.70798  | -0.21839 | 1.89E-06 | 0.001272 | 0.97813  | -0.19714 |
| -0.08913 | 0.05427 | -0.12082 | 0.00896  | 0.062433 | 0.17801  | -0.11597 | 0.01214  | 0.23078  |
| -0.01234 | 0.79023 | 0.123946 | 0.00733  | -0.02291 | 0.62141  | 0.119683 | 0.00963  | -0.0272  |
| -0.08223 | 0.07584 | -0.19909 | 1.46E-05 | 0.030885 | 0.50553  | -0.22905 | 5.64E-07 | 0.095086 |
| -0.00681 | 0.88327 | 0.012489 | 0.7878   | 0.069619 | 0.13302  | -0.04687 | 0.31216  | 0.029957 |
| 0.077299 | 0.09522 | -0.02948 | 0.52508  | 0.173186 | 0.00017  | -0.02333 | 0.61498  | 0.102674 |
| -0.08245 | 0.07507 | 0.034015 | 0.46337  | -0.26226 | 8.75E-09 | 0.006937 | 0.88116  | -0.07005 |
| -0.06415 | 0.16634 | -0.18166 | 7.88E-05 | -0.0433  | 0.35054  | -0.2422  | 1.16E-07 | -0.17118 |
| -0.11176 | 0.01568 | -0.07193 | 0.12059  | 0.136043 | 0.00322  | -0.12354 | 0.00752  | 0.138549 |
| 0.012433 | 0.78872 | -0.04646 | 0.3164   | 0.108795 | 0.01868  | 0.001087 | 0.98131  | 0.315993 |
| 0.013251 | 0.77519 | -0.07409 | 0.1098   | 0.196392 | 1.92E-05 | -0.08596 | 0.06344  | 0.101546 |
| -0.09409 | 0.04212 | -0.02243 | 0.62881  | -0.16252 | 0.00042  | 0.044505 | 0.33723  | -0.02074 |
| 0.066544 | 0.15107 | 0.151865 | 0.00099  | 0.325588 | 5.41E-13 | 0.051137 | 0.27009  | 0.050225 |
| 0.093135 | 0.04426 | 0.467884 | 8.85E-27 | 0.194278 | 2.36E-05 | 0.499406 | 7.91E-31 | -0.08884 |
| -0.02758 | 0.5521  | -0.13519 | 0.00342  | -0.05058 | 0.2754   | -0.2134  | 3.27E-06 | 0.185444 |
| 0.03951  | 0.39429 | 0.053333 | 0.25003  | 0.172116 | 0.00019  | -0.02716 | 0.55817  | -0.0012  |
| 0.051748 | 0.26441 | 0.067131 | 0.14749  | 0.249653 | 4.57E-08 | -0.08874 | 0.05533  | -0.07319 |
| -0.09815 | 0.03397 | -0.21401 | 3.06E-06 | -0.06195 | 0.1814   | -0.20976 | 4.84E-06 | 0.01398  |
| 0.016194 | 0.72705 | -0.05527 | 0.23321  | 0.091808 | 0.04738  | -0.16581 | 0.00032  | -0.04881 |
| 0.006688 | 0.88538 | 0.076981 | 0.0966   | -0.0454  | 0.32754  | 0.118317 | 0.0105   | -0.02444 |
| -0.00091 | 0.98439 | -0.2211  | 1.40E-06 | 0.106404 | 0.02146  | -0.22516 | 8.83E-07 | 0.158518 |
| -0.03415 | 0.46155 | -0.13779 | 0.00285  | 0.141573 | 0.00216  | -0.17475 | 0.00015  | 0.113464 |
| -0.03148 | 0.49731 | -0.08387 | 0.07018  | 0.146799 | 0.00147  | -0.09519 | 0.03976  | 0.127816 |
| 0.011245 | 0.80849 | -0.13399 | 0.00372  | 0.064954 | 0.1611   | -0.11531 | 0.01265  | 0.152488 |
| -0.05654 | 0.22265 | -0.1162  | 0.01197  | -0.20017 | 1.31E-05 | -0.05323 | 0.25098  | -0.07389 |
| -0.14803 | 0.00134 | -0.22143 | 1.35E-06 | -0.05233 | 0.2591   | -0.21272 | 3.52E-06 | 0.027494 |
| -0.06388 | 0.16817 | -0.15835 | 0.00059  | 0.09717  | 0.0358   | -0.14126 | 0.00221  | 0.064908 |
| -0.06217 | 0.17988 | -0.16466 | 0.00035  | 0.075835 | 0.10168  | -0.24105 | 1.34E-07 | 0.152078 |

|          |         |          |          |          |          |          |          |          |
|----------|---------|----------|----------|----------|----------|----------|----------|----------|
| -0.07382 | 0.11113 | -0.08836 | 0.05638  | 0.098437 | 0.03345  | -0.14022 | 0.00239  | 0.061289 |
| 0.096799 | 0.03651 | -0.02587 | 0.57702  | 0.052894 | 0.25396  | -0.02428 | 0.60079  | 0.211642 |
| 0.021195 | 0.64778 | 0.059936 | 0.19604  | 0.21033  | 4.55E-06 | 0.047721 | 0.30344  | 0.160391 |
| 0.046828 | 0.31259 | -0.13973 | 0.00247  | 0.125614 | 0.00657  | -0.17356 | 0.00016  | 0.065922 |
| -0.08849 | 0.056   | -0.18677 | 4.88E-05 | -0.11463 | 0.01319  | -0.06344 | 0.17113  | 0.003433 |
| -0.03028 | 0.51391 | -0.1348  | 0.00352  | 0.026341 | 0.57016  | -0.18858 | 4.11E-05 | 0.112245 |
| 0.029962 | 0.51835 | -0.0326  | 0.48219  | 0.179918 | 9.25E-05 | -0.10572 | 0.02232  | 0.019983 |
| 0.01916  | 0.67962 | -0.04422 | 0.34033  | 0.046194 | 0.31919  | -0.08308 | 0.07288  | 0.075574 |
| 0.016171 | 0.72743 | -0.09439 | 0.04146  | -0.07432 | 0.10873  | -0.19828 | 1.59E-05 | -0.11565 |
| 0.03136  | 0.49901 | -0.12255 | 0.00802  | 0.023348 | 0.61477  | -0.16318 | 0.0004   | 0.239982 |
| 0.030691 | 0.50821 | 0.060312 | 0.19325  | 0.177739 | 0.00011  | 0.066452 | 0.15163  | 0.29071  |
| -0.01275 | 0.78339 | -0.12582 | 0.00648  | 0.094009 | 0.04229  | -0.16879 | 0.00025  | 0.19376  |
| 0.039977 | 0.38872 | -0.12723 | 0.0059   | 0.117691 | 0.01092  | -0.2223  | 1.22E-06 | 0.063287 |
| -0.04729 | 0.30784 | 0.00541  | 0.90718  | -0.17243 | 0.00018  | 0.114744 | 0.01309  | 0.033527 |
| -0.01166 | 0.80156 | -0.1132  | 0.01439  | 0.083579 | 0.07116  | -0.20646 | 6.85E-06 | -0.07291 |
| -0.01948 | 0.67461 | -0.22482 | 9.19E-07 | 0.139421 | 0.00253  | -0.23465 | 2.91E-07 | 0.117715 |
| -0.02542 | 0.58366 | -0.08074 | 0.08134  | 0.169145 | 0.00024  | -0.15583 | 0.00073  | 0.077244 |
| 0.079757 | 0.08513 | 0.046818 | 0.3127   | 0.146343 | 0.00152  | -0.0423  | 0.36175  | 0.081385 |
| -0.08774 | 0.05814 | -0.04251 | 0.35938  | -0.04433 | 0.33908  | -0.00369 | 0.93666  | 0.036376 |
| -0.03942 | 0.39538 | -0.1094  | 0.01803  | 0.077272 | 0.09534  | -0.16561 | 0.00033  | 0.142512 |
| -0.01709 | 0.71263 | 0.0693   | 0.13482  | 0.103627 | 0.02513  | -0.03467 | 0.45479  | 0.067542 |
| -0.10101 | 0.02907 | -0.16498 | 0.00034  | -0.17256 | 0.00018  | -0.21261 | 3.56E-06 | -0.03564 |
| -0.0405  | 0.3825  | -0.17935 | 9.74E-05 | 0.026965 | 0.56107  | -0.22996 | 5.07E-07 | -0.08382 |
| -0.06395 | 0.16767 | -0.18941 | 3.80E-05 | 0.090795 | 0.04989  | -0.19945 | 1.41E-05 | 0.091841 |
| -0.01586 | 0.7325  | -0.12341 | 0.00759  | 0.17586  | 0.00013  | -0.25087 | 3.91E-08 | 0.032183 |
| 0.161987 | 0.00044 | 0.210588 | 4.43E-06 | 0.456305 | 2.15E-25 | 0.105528 | 0.02256  | 0.14773  |
| 0.00853  | 0.85413 | -0.02858 | 0.53779  | 0.126847 | 0.00605  | -0.05722 | 0.21709  | 0.160802 |
| -0.06673 | 0.14991 | -0.11521 | 0.01273  | 0.103825 | 0.02485  | -0.12521 | 0.00674  | 0.02225  |
| -0.13427 | 0.00365 | -0.08363 | 0.07097  | 0.085122 | 0.06607  | -0.07326 | 0.11389  | 0.110247 |
| -0.0803  | 0.08302 | -0.01721 | 0.71063  | -0.0191  | 0.68059  | -0.10696 | 0.02079  | -0.09576 |
| 0.070567 | 0.12781 | -0.0808  | 0.0811   | 0.02671  | 0.56478  | -0.09451 | 0.0412   | -0.00358 |
| 0.045581 | 0.32567 | 0.033391 | 0.47161  | 0.302395 | 2.49E-11 | -0.07242 | 0.11806  | 0.157122 |
| -0.03904 | 0.39992 | -0.07841 | 0.09053  | 0.022051 | 0.63457  | -0.14781 | 0.00136  | 0.193846 |
| 0.053129 | 0.25185 | -0.02846 | 0.53957  | 0.105404 | 0.02272  | -0.11191 | 0.01554  | 0.210108 |
| -0.02903 | 0.53139 | 0.049223 | 0.28846  | -0.09142 | 0.04833  | 0.125924 | 0.00643  | 0.014598 |
| -0.07641 | 0.09909 | -0.06207 | 0.18059  | 0.104836 | 0.02347  | -0.12164 | 0.0085   | 0.136446 |
| -0.06111 | 0.18739 | -0.10904 | 0.01842  | 0.063654 | 0.16967  | -0.13168 | 0.00437  | 0.073193 |
| 0.038126 | 0.41107 | -0.03843 | 0.4074   | 0.223381 | 1.08E-06 | -0.11701 | 0.01139  | 0.231838 |
| -0.01205 | 0.79507 | -0.11787 | 0.0108   | 0.072534 | 0.11751  | -0.1529  | 0.00092  | 0.016073 |
| -0.05221 | 0.26013 | -0.23221 | 3.89E-07 | -0.04794 | 0.30118  | -0.19154 | 3.09E-05 | 0.138623 |
| -0.13572 | 0.0033  | -0.16477 | 0.00035  | -0.09887 | 0.03267  | -0.19153 | 3.09E-05 | -0.06784 |
| 0.034409 | 0.4582  | 0.095237 | 0.03966  | 0.346894 | 1.19E-14 | 0.120222 | 0.00931  | 0.401017 |
| -0.02405 | 0.60424 | -0.18513 | 5.70E-05 | 0.028835 | 0.53421  | -0.20667 | 6.70E-06 | 0.073541 |
| -0.04423 | 0.34026 | -0.13723 | 0.00296  | 0.02063  | 0.65656  | -0.12334 | 0.00762  | 0.222481 |
| 0.014193 | 0.75967 | 0.174593 | 0.00015  | 0.076943 | 0.09676  | 0.11334  | 0.01426  | -0.01084 |

|          |         |          |          |          |          |          |          |          |
|----------|---------|----------|----------|----------|----------|----------|----------|----------|
| 0.021058 | 0.6499  | -0.12485 | 0.00691  | 0.051067 | 0.27076  | -0.09821 | 0.03386  | 0.138279 |
| -0.0535  | 0.24856 | -0.1022  | 0.02722  | 0.084158 | 0.06921  | -0.08743 | 0.05904  | 0.161866 |
| -0.01091 | 0.81417 | -0.0372  | 0.4225   | 0.26865  | 3.66E-09 | -0.07438 | 0.10842  | 0.204334 |
| -0.02655 | 0.56708 | -0.00519 | 0.91085  | -0.26394 | 6.98E-09 | -0.01675 | 0.71804  | -0.23238 |
| 0.012295 | 0.79102 | -0.19913 | 1.46E-05 | 0.094683 | 0.04083  | -0.26267 | 8.29E-09 | 0.165818 |
| -0.00881 | 0.84934 | -0.1396  | 0.0025   | 0.05739  | 0.21575  | -0.17043 | 0.00022  | 0.123688 |
| 0.041837 | 0.36702 | 0.02371  | 0.60929  | 0.163504 | 0.00039  | -0.10555 | 0.02253  | 0.145047 |
| -0.02933 | 0.52728 | -0.1734  | 0.00017  | 0.007477 | 0.87197  | -0.12828 | 0.0055   | -0.09953 |
| -0.01184 | 0.7986  | -0.21978 | 1.62E-06 | 0.081919 | 0.07698  | -0.30369 | 2.02E-11 | 0.076821 |
| -0.024   | 0.60487 | 0.044613 | 0.33605  | -0.13031 | 0.00479  | 0.010637 | 0.81866  | -0.16325 |
| 0.053958 | 0.24452 | -0.10287 | 0.02622  | 0.119996 | 0.00944  | -0.12197 | 0.00832  | 0.099883 |
| -0.07893 | 0.08843 | -0.23872 | 1.78E-07 | -0.06834 | 0.14033  | -0.28789 | 2.31E-10 | 0.065897 |
| -0.07677 | 0.09753 | -0.08483 | 0.06703  | -0.10692 | 0.02083  | -0.14727 | 0.00142  | -0.04331 |
| -0.01097 | 0.81307 | 0.093467 | 0.0435   | -0.15034 | 0.00112  | 0.024554 | 0.59662  | -0.06109 |
| -0.04111 | 0.37545 | -0.11408 | 0.01364  | -0.12282 | 0.00788  | -0.16927 | 0.00024  | 0.047454 |
| -0.01847 | 0.69052 | -0.20991 | 4.76E-06 | 0.035865 | 0.4394   | -0.30816 | 9.91E-12 | 0.050198 |
| -0.00069 | 0.98812 | -0.21612 | 2.43E-06 | -0.0243  | 0.60038  | -0.21958 | 1.66E-06 | -0.06191 |
| -0.01364 | 0.76883 | -0.11848 | 0.01039  | 0.114687 | 0.01314  | -0.17962 | 9.50E-05 | 0.120774 |
| -0.0211  | 0.64923 | 0.022843 | 0.62245  | 0.141902 | 0.00211  | -0.04038 | 0.38398  | -0.09386 |
| -0.01008 | 0.82803 | 0.124726 | 0.00696  | -0.11158 | 0.01585  | 0.102077 | 0.0274   | -0.08753 |
| 0.019218 | 0.67871 | -0.08482 | 0.06706  | 0.038672 | 0.4044   | -0.16976 | 0.00023  | -0.03837 |
| 0.009169 | 0.84335 | -0.17833 | 0.00011  | 0.165934 | 0.00032  | -0.26904 | 3.47E-09 | 0.191584 |
| -0.08137 | 0.07899 | -0.21098 | 4.25E-06 | -0.05427 | 0.24183  | -0.23459 | 2.93E-07 | 0.063562 |
| 0.030956 | 0.50455 | 0.133369 | 0.00389  | 0.252278 | 3.26E-08 | 0.127146 | 0.00593  | 0.159998 |
| 0.063204 | 0.17271 | -0.12015 | 0.00935  | 0.198345 | 1.58E-05 | -0.17139 | 0.0002   | 0.093356 |
| 0.164773 | 0.00035 | 0.281239 | 6.15E-10 | 0.428093 | 3.10E-22 | 0.23916  | 1.69E-07 | 0.116533 |
| -0.07442 | 0.10825 | 0.10684  | 0.02093  | -0.12053 | 0.00913  | 0.17089  | 0.00021  | -0.05966 |
| -0.12712 | 0.00594 | -0.34849 | 8.81E-15 | -0.17321 | 0.00017  | -0.30822 | 9.80E-12 | 0.093926 |
| 0.012334 | 0.79036 | 0.02391  | 0.60628  | 0.140129 | 0.0024   | -0.05117 | 0.26981  | 0.015137 |
| -0.04986 | 0.28227 | -0.09269 | 0.04528  | -0.00555 | 0.90482  | -0.07241 | 0.11815  | -0.07825 |
| -0.08404 | 0.06962 | -0.189   | 3.95E-05 | 0.006888 | 0.88198  | -0.18957 | 3.74E-05 | -0.04682 |
| -0.01512 | 0.74448 | -0.16545 | 0.00033  | 0.075387 | 0.10372  | -0.27162 | 2.42E-09 | 0.111588 |
| -0.0898  | 0.05246 | -0.24838 | 5.37E-08 | -0.09958 | 0.03144  | -0.24473 | 8.50E-08 | -0.05716 |
| 0.053335 | 0.25001 | -0.01811 | 0.69636  | 0.144498 | 0.00174  | -0.054   | 0.24413  | 0.181274 |
| 0.032447 | 0.48424 | -0.15202 | 0.00098  | 0.073464 | 0.11286  | -0.16478 | 0.00035  | 0.039539 |
| -0.06588 | 0.15519 | -0.15371 | 0.00086  | -0.06523 | 0.15934  | -0.22679 | 7.33E-07 | -0.26817 |
| 0.049108 | 0.28959 | -0.02629 | 0.57085  | 0.087488 | 0.05887  | -0.02255 | 0.62697  | 0.199873 |
| 0.082379 | 0.07533 | -0.00222 | 0.9618   | 0.215691 | 2.55E-06 | -0.07747 | 0.09449  | -0.04462 |
| -0.07103 | 0.12535 | -0.05067 | 0.27451  | 0.011626 | 0.80214  | -0.09804 | 0.03417  | -0.0935  |
| 0.002278 | 0.96085 | -0.23607 | 2.46E-07 | -0.05339 | 0.24949  | -0.322   | 9.99E-13 | 0.058711 |
| 0.121176 | 0.00876 | -0.12251 | 0.00804  | 0.108751 | 0.01873  | -0.05251 | 0.25743  | 0.239241 |
| -0.02978 | 0.52084 | -0.07992 | 0.08448  | 0.047494 | 0.30575  | -0.21742 | 2.11E-06 | -0.09693 |
| -0.02262 | 0.62586 | -0.17237 | 0.00018  | 0.103721 | 0.025    | -0.2309  | 4.54E-07 | 0.184585 |
| -0.01975 | 0.67025 | -0.20446 | 8.44E-06 | 0.011937 | 0.79696  | -0.25523 | 2.22E-08 | -0.01895 |
| 0.04724  | 0.30835 | -0.04507 | 0.33114  | 0.192758 | 2.74E-05 | -0.19994 | 1.34E-05 | 0.04726  |



|          |          |          |          |          |          |          |          |          |
|----------|----------|----------|----------|----------|----------|----------|----------|----------|
| 0.125934 | 0.00643  | -0.12072 | 0.00902  | 0.028309 | 0.5417   | -0.17362 | 0.00016  | 0.098871 |
| -0.0713  | 0.1239   | -0.08485 | 0.06696  | -0.01741 | 0.70748  | -0.12838 | 0.00546  | 0.005151 |
| -0.05739 | 0.21575  | -0.04608 | 0.32038  | 0.03803  | 0.41225  | -0.06024 | 0.19381  | -0.01348 |
| 0.082603 | 0.07453  | 0.157567 | 0.00063  | 0.292165 | 1.21E-10 | 0.075371 | 0.10379  | 0.072533 |
| 0.185746 | 5.38E-05 | -0.04713 | 0.30946  | 0.271348 | 2.52E-09 | 0.018734 | 0.68636  | 0.079068 |
| -0.0805  | 0.08226  | -0.04557 | 0.32575  | -0.03643 | 0.43221  | -0.19053 | 3.41E-05 | -0.11572 |
| 0.052834 | 0.2545   | -0.10175 | 0.02791  | 0.097847 | 0.03452  | -0.24253 | 1.12E-07 | 0.057105 |
| -0.02812 | 0.54442  | -0.09023 | 0.05134  | -0.01886 | 0.68433  | -0.22031 | 1.53E-06 | -0.11158 |
| -0.00755 | 0.87074  | -0.23268 | 3.68E-07 | -0.05224 | 0.2599   | -0.27692 | 1.15E-09 | -0.09822 |
| 0.040663 | 0.38062  | 0.190309 | 3.48E-05 | 0.06434  | 0.16511  | 0.228307 | 6.15E-07 | -0.03055 |
| -0.04373 | 0.3457   | -0.21699 | 2.21E-06 | 0.092636 | 0.04541  | -0.22765 | 6.63E-07 | 0.194083 |
| -0.01708 | 0.71269  | 0.063955 | 0.16765  | 0.063657 | 0.16964  | 0.010139 | 0.82702  | 0.136353 |
| 0.03351  | 0.47003  | 0.108008 | 0.01956  | -0.07329 | 0.11371  | 0.172261 | 0.00018  | -0.00338 |
| 0.017023 | 0.71368  | -0.1302  | 0.00483  | 0.197714 | 1.68E-05 | -0.18831 | 4.22E-05 | 0.094145 |
| -0.0802  | 0.08339  | 0.12264  | 0.00797  | -0.18432 | 6.15E-05 | 0.097121 | 0.03589  | -0.15526 |
| 0.05763  | 0.21384  | 0.281658 | 5.78E-10 | -0.01093 | 0.81379  | 0.24992  | 4.41E-08 | -0.16554 |
| -0.03063 | 0.50911  | -0.16736 | 0.00028  | -0.03366 | 0.468    | -0.2206  | 1.48E-06 | -0.05101 |
| 0.007443 | 0.87255  | -0.17895 | 0.0001   | 0.08542  | 0.06513  | -0.23403 | 3.14E-07 | 0.080741 |
| 0.057375 | 0.21587  | -0.13694 | 0.00302  | 0.177154 | 0.00012  | -0.16889 | 0.00025  | 0.27725  |
| -0.04226 | 0.36218  | -0.16909 | 0.00024  | 0.134893 | 0.00349  | -0.2386  | 1.81E-07 | 0.06645  |
| 0.044973 | 0.33217  | -0.10408 | 0.0245   | 0.083511 | 0.07139  | -0.11938 | 0.00982  | -0.04652 |
| -0.05912 | 0.20219  | -0.11643 | 0.0118   | 0.041147 | 0.37498  | -0.1265  | 0.00619  | 0.135393 |
| 0.028278 | 0.54214  | -0.04818 | 0.29885  | 0.192354 | 2.85E-05 | -0.1407  | 0.00231  | 0.060537 |
| 0.044999 | 0.33188  | 0.066317 | 0.15247  | -0.00875 | 0.85043  | 0.086954 | 0.06043  | -0.10269 |
| -0.00086 | 0.98522  | -0.14781 | 0.00136  | 0.13653  | 0.00311  | -0.2426  | 1.11E-07 | 0.125813 |
| -0.02925 | 0.52839  | -0.11297 | 0.01458  | -0.28234 | 5.23E-10 | -0.08241 | 0.07523  | -0.27469 |
| 0.08123  | 0.0795   | 0.26843  | 3.77E-09 | 0.132408 | 0.00415  | 0.326368 | 4.73E-13 | 0.224908 |
| -0.0413  | 0.37322  | -0.08846 | 0.05611  | 0.077256 | 0.09541  | -0.10814 | 0.01942  | 0.032807 |
| -0.06586 | 0.15531  | -0.13565 | 0.00331  | 0.041016 | 0.3765   | -0.05044 | 0.27669  | 0.188953 |
| -0.09863 | 0.0331   | -0.0731  | 0.11465  | 0.014364 | 0.75688  | -0.09741 | 0.03534  | 0.034471 |
| -0.03644 | 0.43212  | -0.29986 | 3.70E-11 | -0.12295 | 0.00781  | -0.22913 | 5.59E-07 | 0.132926 |
| -0.09357 | 0.04327  | 0.165102 | 0.00034  | -0.14827 | 0.00131  | 0.141121 | 0.00224  | -0.17133 |
| -0.05681 | 0.2204   | 0.018496 | 0.69015  | -0.20783 | 5.93E-06 | 0.067131 | 0.14749  | -0.07484 |
| 0.085794 | 0.06396  | 0.03913  | 0.39885  | 0.219086 | 1.75E-06 | 0.015682 | 0.73536  | 0.120077 |
| -0.06492 | 0.16131  | -0.24288 | 1.07E-07 | -0.0762  | 0.10002  | -0.25745 | 1.66E-08 | 0.133904 |
| -0.02054 | 0.65793  | -0.20506 | 7.93E-06 | 0.003845 | 0.93396  | -0.26899 | 3.49E-09 | 0.009464 |
| 0.042526 | 0.35917  | 0.008713 | 0.85104  | 0.296143 | 6.60E-11 | -0.09527 | 0.03959  | 0.093385 |
| -0.04792 | 0.30144  | -0.01147 | 0.8047   | -0.12005 | 0.00941  | 0.043439 | 0.34894  | 0.119703 |
| -0.0361  | 0.43634  | -0.06228 | 0.17908  | 0.104231 | 0.02429  | -0.18978 | 3.66E-05 | 0.002797 |
| -0.05554 | 0.23091  | -0.0816  | 0.07815  | 0.087217 | 0.05966  | -0.17902 | 0.0001   | -0.0951  |
| -0.03286 | 0.47873  | -0.13215 | 0.00423  | 0.182478 | 7.30E-05 | -0.20098 | 1.21E-05 | 0.058331 |
| -0.1049  | 0.02339  | -0.08167 | 0.07787  | -0.02043 | 0.65963  | -0.0896  | 0.05299  | 0.128906 |
| 0.030743 | 0.5075   | -0.00336 | 0.94223  | 0.256848 | 1.80E-08 | -0.03541 | 0.44528  | 0.195066 |
| -0.0416  | 0.36978  | 0.027147 | 0.55842  | 0.122091 | 0.00826  | -0.06366 | 0.16963  | -0.07693 |
| 0.060757 | 0.18997  | 0.06224  | 0.17936  | 0.338944 | 5.11E-14 | 0.063129 | 0.17322  | 0.358807 |

|          |         |          |          |          |          |          |          |          |
|----------|---------|----------|----------|----------|----------|----------|----------|----------|
| -0.04769 | 0.3038  | -0.18792 | 4.38E-05 | -0.04762 | 0.3045   | -0.23247 | 3.78E-07 | 0.136348 |
| -0.01436 | 0.75692 | -0.05404 | 0.24376  | 0.105649 | 0.02241  | -0.09586 | 0.03838  | 0.103184 |
| -0.08658 | 0.06154 | 0.020182 | 0.66356  | -0.17392 | 0.00016  | 0.005372 | 0.90783  | -0.07739 |
| -0.04621 | 0.319   | -0.17678 | 0.00012  | -0.00377 | 0.93525  | -0.2106  | 4.42E-06 | 0.023563 |
| 0.027007 | 0.56046 | -0.09392 | 0.0425   | 0.074375 | 0.10845  | -0.23613 | 2.44E-07 | 0.023423 |
| -0.04907 | 0.29    | -0.24733 | 6.14E-08 | -0.05674 | 0.22099  | -0.34689 | 1.19E-14 | 0.043596 |
| 0.045262 | 0.32907 | -0.11533 | 0.01263  | 0.120265 | 0.00928  | -0.2094  | 5.02E-06 | 0.091224 |
| -0.00687 | 0.8823  | -0.1541  | 0.00083  | 0.096632 | 0.03684  | -0.20945 | 5.00E-06 | 0.094735 |
| 0.086553 | 0.06163 | -0.08624 | 0.06257  | 0.218962 | 1.78E-06 | -0.15149 | 0.00102  | 0.113955 |
| -0.06202 | 0.18092 | -0.06658 | 0.15088  | 0.091147 | 0.04901  | -0.07517 | 0.10471  | 0.32589  |
| -0.08539 | 0.06523 | -0.08356 | 0.07123  | -0.06177 | 0.1827   | -0.12078 | 0.00898  | 0.050588 |
| -0.12482 | 0.00692 | -0.23039 | 4.82E-07 | -0.0268  | 0.56345  | -0.15504 | 0.00077  | 0.183814 |
| 0.015828 | 0.73299 | -0.11311 | 0.01446  | 0.202967 | 9.85E-06 | -0.15142 | 0.00103  | 0.211129 |
| -0.10443 | 0.02401 | -0.09936 | 0.03182  | -0.12783 | 0.00567  | -0.21889 | 1.79E-06 | -0.19143 |
| -0.00051 | 0.99123 | -0.11231 | 0.01517  | 0.081745 | 0.07761  | -0.03249 | 0.4837   | 0.137053 |
| 0.049967 | 0.28122 | 0.140064 | 0.00242  | 0.308667 | 9.12E-12 | 0.097706 | 0.03479  | 0.139475 |
| -0.03761 | 0.41739 | -0.16101 | 0.00048  | 0.082524 | 0.07481  | -0.17342 | 0.00017  | 0.005289 |
| -0.04172 | 0.36837 | -0.18987 | 3.63E-05 | 0.034396 | 0.45837  | -0.21856 | 1.86E-06 | -0.0321  |
| -0.16544 | 0.00033 | -0.21683 | 2.25E-06 | -0.11732 | 0.01117  | -0.23981 | 1.56E-07 | 0.146729 |
| -0.05256 | 0.25695 | -0.18081 | 8.52E-05 | -0.05995 | 0.19595  | -0.23252 | 3.75E-07 | 0.022343 |
| -0.06954 | 0.13349 | -0.28086 | 6.50E-10 | -0.09897 | 0.0325   | -0.27632 | 1.25E-09 | -0.07645 |
| -0.02294 | 0.62104 | -0.03605 | 0.437    | 0.168111 | 0.00026  | -0.08619 | 0.06272  | 0.104686 |
| -0.0059  | 0.89881 | -0.19595 | 2.00E-05 | 0.007539 | 0.87092  | -0.28141 | 6.00E-10 | -0.05577 |
| -0.03059 | 0.50964 | -0.22521 | 8.78E-07 | 0.066631 | 0.15054  | -0.33226 | 1.69E-13 | 0.126936 |
| -0.00556 | 0.90453 | -0.14121 | 0.00222  | 0.165425 | 0.00033  | -0.1722  | 0.00018  | 0.115139 |
| -0.00854 | 0.85403 | 0.035268 | 0.44705  | 0.082215 | 0.07591  | -0.03903 | 0.40006  | -0.1708  |
| 0.035797 | 0.44026 | -0.18751 | 4.55E-05 | 0.122621 | 0.00798  | -0.2146  | 2.87E-06 | 0.181273 |
| -0.07109 | 0.12498 | -0.18624 | 5.14E-05 | -0.0416  | 0.36976  | -0.14688 | 0.00146  | 0.210847 |
| -0.08318 | 0.07251 | -0.07035 | 0.12901  | 0.164099 | 0.00037  | -0.12212 | 0.00825  | 0.092794 |
| 0.042933 | 0.35458 | -0.16818 | 0.00026  | 0.103447 | 0.02538  | -0.20713 | 6.39E-06 | 0.189471 |
| 0.034018 | 0.46333 | -0.00093 | 0.98401  | 0.097128 | 0.03588  | -0.06528 | 0.15898  | -0.04508 |
| 0.018083 | 0.69672 | -0.14305 | 0.00194  | 0.125003 | 0.00684  | -0.25401 | 2.61E-08 | 0.077438 |
| 0.02171  | 0.63982 | -0.06937 | 0.13442  | 0.11842  | 0.01043  | -0.24739 | 6.09E-08 | 0.045006 |
| -0.03211 | 0.48875 | 0.034689 | 0.45455  | -0.18401 | 6.33E-05 | 0.055868 | 0.2282   | -0.02951 |
| -0.06479 | 0.16219 | -0.18618 | 5.17E-05 | -0.01001 | 0.82915  | -0.17172 | 0.00019  | 0.17945  |
| 0.023467 | 0.61297 | -0.18336 | 6.73E-05 | 0.117723 | 0.01089  | -0.27237 | 2.18E-09 | 0.105104 |
| -0.06652 | 0.15122 | -0.09421 | 0.04185  | 0.03104  | 0.50341  | -0.16177 | 0.00045  | -0.05649 |
| 0.026476 | 0.56818 | 0.01556  | 0.73734  | 0.083843 | 0.07027  | 0.005874 | 0.89927  | 0.184845 |
| -0.05598 | 0.22729 | 0.007752 | 0.8673   | 0.063235 | 0.17249  | -0.07679 | 0.09743  | -0.02872 |
| 0.041595 | 0.36979 | 0.014459 | 0.75531  | 0.011397 | 0.80597  | -0.08897 | 0.05468  | -0.00316 |
| 0.079219 | 0.08726 | 0.008395 | 0.85642  | 0.120402 | 0.0092   | -0.08819 | 0.05686  | 0.011201 |
| -0.05149 | 0.26683 | 0.169013 | 0.00024  | -0.11584 | 0.01224  | 0.077946 | 0.09248  | -0.23185 |
| -0.01974 | 0.67053 | -0.00848 | 0.85498  | 0.073966 | 0.11042  | -0.08778 | 0.05802  | 0.146524 |
| 0.103009 | 0.02601 | -0.10419 | 0.02434  | 0.132798 | 0.00404  | -0.12898 | 0.00525  | 0.171071 |
| -0.02476 | 0.59359 | -0.14413 | 0.00179  | 0.09376  | 0.04285  | -0.18306 | 6.92E-05 | 0.053792 |

|          |         |          |          |          |          |          |          |          |
|----------|---------|----------|----------|----------|----------|----------|----------|----------|
| 0.058563 | 0.2065  | -0.04066 | 0.38065  | 0.185171 | 5.68E-05 | -0.02258 | 0.62647  | 0.262712 |
| -0.03243 | 0.48451 | -0.10917 | 0.01828  | 0.093161 | 0.0442   | -0.18515 | 5.69E-05 | -0.07535 |
| 0.013572 | 0.7699  | -0.17394 | 0.00016  | 0.050975 | 0.27162  | -0.18113 | 8.27E-05 | 0.061419 |
| -0.05817 | 0.20957 | 0.018072 | 0.69689  | 0.073831 | 0.11107  | 0.108328 | 0.0192   | 0.011476 |
| -0.06691 | 0.14885 | -0.04092 | 0.37757  | 0.102294 | 0.02707  | -0.06408 | 0.1668   | 0.235099 |
| -0.10204 | 0.02745 | -0.00047 | 0.99185  | -0.02723 | 0.55723  | -0.11446 | 0.01333  | -0.15317 |
| -0.07956 | 0.08588 | -0.12621 | 0.00631  | -0.05487 | 0.23664  | -0.10897 | 0.0185   | 0.02616  |
| -0.13291 | 0.00401 | -0.17724 | 0.00012  | -0.02979 | 0.52078  | -0.20811 | 5.76E-06 | -0.02019 |
| -0.0732  | 0.11418 | 0.036006 | 0.43759  | -0.11335 | 0.01426  | -0.03459 | 0.45585  | -0.11327 |
| 0.015078 | 0.7452  | -0.09466 | 0.04087  | 0.168453 | 0.00026  | -0.17585 | 0.00013  | 0.102476 |
| -0.0351  | 0.44922 | -0.24822 | 5.48E-08 | -0.12323 | 0.00767  | -0.21787 | 2.01E-06 | 0.095895 |
| 0.006655 | 0.88594 | 0.024987 | 0.59016  | 0.118651 | 0.01028  | -0.04459 | 0.33633  | 0.009138 |
| -0.02585 | 0.57742 | 0.073138 | 0.11447  | -0.13031 | 0.00479  | 0.081319 | 0.07917  | -0.02179 |
| -0.0286  | 0.53759 | -0.03337 | 0.47187  | 0.239889 | 1.55E-07 | -0.05541 | 0.23203  | 0.230399 |
| -0.06581 | 0.15565 | -0.1832  | 6.83E-05 | -0.06609 | 0.1539   | -0.28425 | 3.96E-10 | -0.21607 |
| -0.06856 | 0.13904 | 0.042288 | 0.36187  | -0.16727 | 0.00028  | 0.003494 | 0.93998  | -0.15672 |
| -0.05691 | 0.21962 | -0.2281  | 6.30E-07 | -0.08178 | 0.07747  | -0.24455 | 8.69E-08 | 0.034597 |
| -0.00503 | 0.91376 | -0.11868 | 0.01026  | 0.039162 | 0.39847  | -0.06513 | 0.15998  | -0.03469 |
| -0.01336 | 0.77331 | -0.05557 | 0.23068  | 0.06908  | 0.13606  | -0.07951 | 0.08609  | 0.000372 |
| -0.05468 | 0.23827 | -0.10046 | 0.02996  | 0.034452 | 0.45763  | -0.15675 | 0.00068  | 0.007597 |
| 0.047008 | 0.31073 | -0.05533 | 0.23269  | 0.200222 | 1.30E-05 | -0.15859 | 0.00058  | 0.027863 |
| 0.085404 | 0.06518 | 0.013593 | 0.76954  | 0.192744 | 2.75E-05 | -0.03158 | 0.49598  | 0.199281 |
| -0.07386 | 0.11093 | -0.06747 | 0.14545  | -0.05266 | 0.25609  | -0.03548 | 0.44432  | 0.187393 |
| -0.02042 | 0.65991 | -0.02987 | 0.51962  | 0.010408 | 0.82251  | -0.12572 | 0.00652  | 0.055806 |
| 0.03868  | 0.40431 | -0.01241 | 0.78902  | -0.22234 | 1.22E-06 | 0.027123 | 0.55877  | -0.16663 |
| -0.03403 | 0.46318 | -0.03608 | 0.43663  | 0.093918 | 0.04249  | -0.08277 | 0.07396  | 0.126698 |
| 0.041331 | 0.37285 | 0.055207 | 0.23375  | 0.19146  | 3.11E-05 | 0.0299   | 0.51921  | 0.097611 |
| -0.00551 | 0.90551 | -0.14313 | 0.00193  | 0.095177 | 0.03979  | -0.19409 | 2.41E-05 | 0.122388 |
| 0.011259 | 0.80827 | -0.06759 | 0.14476  | 0.15145  | 0.00103  | -0.16036 | 0.0005   | 0.187939 |
| -0.03025 | 0.5144  | -0.14896 | 0.00124  | 0.009956 | 0.8301   | -0.11788 | 0.01079  | 0.206546 |
| -0.04784 | 0.30225 | -0.10405 | 0.02454  | -0.02796 | 0.54665  | -0.1616  | 0.00045  | 0.080391 |
| 0.052545 | 0.25711 | -0.11467 | 0.01316  | 0.228061 | 6.32E-07 | -0.16495 | 0.00034  | 0.174075 |
| 0.009169 | 0.84334 | -0.04146 | 0.3714   | 0.078404 | 0.09057  | -0.07402 | 0.11013  | 0.162774 |
| 0.034896 | 0.45187 | 0.036115 | 0.43621  | 0.004053 | 0.9304   | 0.171402 | 0.0002   | 0.135713 |
| -0.04062 | 0.38117 | -0.07867 | 0.0895   | 0.082421 | 0.07518  | -0.07038 | 0.12886  | 0.147292 |
| -0.0658  | 0.15569 | 0.048416 | 0.29645  | -0.14216 | 0.00207  | 0.120452 | 0.00917  | -0.1892  |
| -0.04638 | 0.3172  | 0.13477  | 0.00352  | -0.17071 | 0.00021  | 0.181169 | 8.24E-05 | -0.01295 |
| -0.0661  | 0.15383 | 0.001675 | 0.9712   | -0.06863 | 0.13865  | 0.018985 | 0.68238  | -0.03937 |
| -0.03543 | 0.44499 | -0.13725 | 0.00296  | -0.09641 | 0.03728  | -0.133   | 0.00399  | -0.11638 |
| -0.06543 | 0.15804 | -0.12492 | 0.00687  | -0.01439 | 0.75642  | -0.11576 | 0.0123   | 0.057544 |
| -0.03221 | 0.4874  | -0.06702 | 0.14815  | -0.1931  | 2.65E-05 | -0.04227 | 0.36204  | -0.02446 |
| -0.10245 | 0.02684 | 0.00075  | 0.9871   | -0.18764 | 4.49E-05 | 0.037224 | 0.42224  | -0.17825 |
| 0.005037 | 0.91356 | -0.11298 | 0.01458  | -0.0223  | 0.63079  | -0.15499 | 0.00078  | 0.053009 |
| 0.095029 | 0.0401  | -0.04697 | 0.31114  | 0.253369 | 2.83E-08 | -0.00644 | 0.88953  | 0.242964 |
| -0.01823 | 0.6944  | 0.007788 | 0.8667   | -0.0611  | 0.18745  | 0.031934 | 0.49118  | 0.077022 |

|          |         |          |          |          |          |          |          |          |
|----------|---------|----------|----------|----------|----------|----------|----------|----------|
| 0.026641 | 0.56578 | -0.05659 | 0.22223  | 0.122288 | 0.00816  | -0.07561 | 0.1027   | 0.231887 |
| 0.00341  | 0.94142 | -0.18987 | 3.63E-05 | 0.089562 | 0.05309  | -0.19707 | 1.79E-05 | 0.155695 |
| -0.0255  | 0.58253 | -0.14758 | 0.00138  | 0.004982 | 0.91449  | -0.14355 | 0.00187  | 0.031848 |
| -0.03317 | 0.47459 | -0.07522 | 0.10448  | 0.078841 | 0.08878  | -0.04422 | 0.34036  | 0.156517 |
| -0.11768 | 0.01093 | -0.20873 | 5.39E-06 | -0.02307 | 0.61894  | -0.22942 | 5.40E-07 | -0.00031 |
| -0.03107 | 0.50304 | 0.042655 | 0.35771  | 0.134541 | 0.00358  | -0.00459 | 0.92113  | 0.017193 |
| 0.033435 | 0.47104 | 0.08554  | 0.06475  | -0.09841 | 0.03349  | 0.082079 | 0.0764   | -0.10069 |
| 0.000705 | 0.98788 | 0.090433 | 0.05082  | 0.227699 | 6.60E-07 | -0.03431 | 0.45955  | -0.05423 |
| 0.031315 | 0.49963 | 0.097451 | 0.03527  | 0.293648 | 9.67E-11 | 0.039456 | 0.39494  | 0.000117 |
| -0.00901 | 0.84602 | -0.02596 | 0.57573  | 0.036377 | 0.43288  | -0.043   | 0.35387  | -0.09058 |
| -0.10978 | 0.01764 | -0.21018 | 4.62E-06 | -0.09661 | 0.03689  | -0.19318 | 2.63E-05 | 0.058879 |
| -0.03678 | 0.42782 | -0.13994 | 0.00244  | 0.069405 | 0.13423  | -0.14444 | 0.00175  | -0.09054 |
| -0.08216 | 0.07611 | -0.1488  | 0.00126  | 0.082777 | 0.07392  | -0.14758 | 0.00138  | 0.113562 |
| 0.054793 | 0.23728 | -0.07033 | 0.1291   | 0.178008 | 0.00011  | -0.1422  | 0.00207  | 0.15517  |
| 0.112359 | 0.01513 | -0.06438 | 0.16485  | 0.245119 | 8.10E-08 | -0.08975 | 0.05261  | 0.124523 |
| -0.05355 | 0.24812 | -0.13401 | 0.00372  | 0.021253 | 0.64687  | -0.19107 | 3.24E-05 | 0.212543 |
| 0.018091 | 0.69659 | 0.030738 | 0.50757  | 0.216247 | 2.40E-06 | -0.0901  | 0.05167  | -0.05302 |
| -0.00071 | 0.98771 | 0.006653 | 0.88598  | 0.146137 | 0.00154  | -0.11214 | 0.01532  | -0.09057 |
| -0.01884 | 0.68472 | 0.079993 | 0.0842   | -0.14148 | 0.00218  | 0.045913 | 0.32215  | -0.15547 |
| -0.03703 | 0.42461 | 0.137205 | 0.00297  | -0.12391 | 0.00734  | 0.105209 | 0.02298  | -0.12136 |
| -0.0263  | 0.57073 | 0.104505 | 0.02391  | -0.16309 | 0.0004   | 0.102367 | 0.02696  | -0.18969 |
| 0.017708 | 0.70269 | 0.087842 | 0.05785  | 0.033166 | 0.47461  | 0.094183 | 0.04191  | 0.060624 |
| -0.02218 | 0.63261 | -0.14695 | 0.00145  | -0.01721 | 0.71066  | -0.18797 | 4.36E-05 | 0.10798  |
| -0.0526  | 0.25666 | 0.022724 | 0.62427  | -0.17589 | 0.00013  | 0.023543 | 0.61182  | -0.14333 |
| -0.07727 | 0.09535 | -0.20582 | 7.33E-06 | -0.03576 | 0.4407   | -0.13441 | 0.00361  | 0.21363  |
| 0.040811 | 0.3789  | 0.030694 | 0.50817  | 0.2025   | 1.03E-05 | -0.04814 | 0.29926  | -0.0007  |
| 0.031125 | 0.50223 | 0.117756 | 0.01087  | 0.38806  | 3.12E-18 | 0.152156 | 0.00097  | 0.193793 |
| -0.08364 | 0.07095 | -0.14206 | 0.00209  | -0.10333 | 0.02555  | -0.16394 | 0.00037  | -0.02144 |
| 0.014603 | 0.75296 | -0.04428 | 0.3397   | 0.071554 | 0.12256  | -0.14957 | 0.00119  | 0.162234 |
| 0.056098 | 0.22628 | -0.09957 | 0.03146  | 0.099889 | 0.03091  | -0.15497 | 0.00078  | 0.060921 |
| -0.01209 | 0.79443 | -0.04169 | 0.36871  | 0.111675 | 0.01576  | -0.04916 | 0.28909  | 0.065973 |
| -0.07787 | 0.09281 | 0.232925 | 3.58E-07 | -0.08044 | 0.08247  | 0.20114  | 1.19E-05 | -0.17582 |
| -0.02839 | 0.54052 | 0.015948 | 0.73104  | -0.00133 | 0.97707  | 0.00126  | 0.97834  | 0.188248 |
| 0.008758 | 0.85029 | -0.09778 | 0.03465  | 0.059888 | 0.1964   | -0.1131  | 0.01447  | 0.089714 |
| 0.040506 | 0.38247 | -0.11076 | 0.01664  | 0.208883 | 5.31E-06 | -0.08731 | 0.05938  | 0.18371  |
| -0.08421 | 0.06904 | -0.14902 | 0.00124  | -0.09658 | 0.03694  | -0.12786 | 0.00566  | 0.086735 |
| 0.031851 | 0.49232 | 0.16053  | 0.0005   | -0.07494 | 0.10581  | 0.162334 | 0.00043  | -0.01934 |
| 0.004011 | 0.93112 | -0.04145 | 0.37152  | 0.181637 | 7.89E-05 | -0.13424 | 0.00366  | 0.020641 |
| 0.043267 | 0.35085 | -0.15679 | 0.00067  | 0.07798  | 0.09233  | -0.20222 | 1.06E-05 | 0.18514  |
| 0.012395 | 0.78935 | -0.16465 | 0.00035  | 0.136397 | 0.00314  | -0.21224 | 3.71E-06 | 0.110483 |
| 0.064026 | 0.16718 | 0.033365 | 0.47196  | 0.15604  | 0.00071  | -0.09925 | 0.03201  | -0.03947 |
| 0.045841 | 0.32291 | -0.10982 | 0.01759  | 0.213805 | 3.13E-06 | -0.13386 | 0.00376  | 0.326593 |
| -0.01523 | 0.74279 | -0.12813 | 0.00556  | 0.137822 | 0.00284  | -0.20461 | 8.31E-06 | 0.181436 |
| -0.02781 | 0.54882 | 0.003563 | 0.9388   | -0.09144 | 0.04827  | -0.10033 | 0.03017  | -0.16746 |
| 0.026296 | 0.57082 | -0.0146  | 0.75299  | 0.012162 | 0.79323  | -0.05348 | 0.24874  | 0.108927 |

|          |         |          |          |          |          |          |          |          |
|----------|---------|----------|----------|----------|----------|----------|----------|----------|
| 0.02505  | 0.58921 | -0.07481 | 0.10641  | 0.160392 | 0.0005   | -0.13147 | 0.00443  | 0.182232 |
| 0.031605 | 0.49566 | 0.17081  | 0.00021  | 0.029855 | 0.51984  | 0.175413 | 0.00014  | -0.01967 |
| -0.04493 | 0.3326  | 0.056775 | 0.22072  | -0.14084 | 0.00228  | 0.090889 | 0.04966  | 0.001076 |
| -0.06593 | 0.15486 | -0.11073 | 0.01667  | 0.059824 | 0.19688  | -0.10878 | 0.0187   | 0.130702 |
| 0.020123 | 0.66447 | 0.331635 | 1.89E-13 | 0.1025   | 0.02676  | 0.402636 | 1.26E-19 | 0.41175  |
| 0.014931 | 0.74759 | 0.043    | 0.35383  | -0.12431 | 0.00716  | 0.054216 | 0.24227  | -0.03804 |
| 0.001759 | 0.96975 | -0.03777 | 0.41551  | 0.147613 | 0.00138  | -0.01773 | 0.70235  | 0.163655 |
| -0.01503 | 0.74597 | 0.143635 | 0.00186  | -0.13679 | 0.00306  | 0.092841 | 0.04494  | -0.163   |
| -0.06421 | 0.16594 | -0.00547 | 0.90623  | -0.14139 | 0.00219  | -0.02886 | 0.53387  | 0.046591 |
| -0.02229 | 0.63083 | -0.20444 | 8.46E-06 | 0.031856 | 0.49225  | -0.14143 | 0.00219  | 0.132468 |
| 0.019713 | 0.67091 | -0.00744 | 0.87253  | 0.253674 | 2.72E-08 | -0.0074  | 0.87334  | 0.250224 |
| 0.031944 | 0.49106 | 0.018307 | 0.69315  | 0.170595 | 0.00021  | -0.04904 | 0.29025  | 0.265024 |
| -0.14943 | 0.0012  | -0.14045 | 0.00235  | -0.04242 | 0.36039  | -0.19823 | 1.60E-05 | -0.04947 |
| 0.040072 | 0.38759 | -0.02615 | 0.57296  | 0.079978 | 0.08426  | -0.04684 | 0.31247  | 0.096575 |
| 0.002066 | 0.96448 | -0.07969 | 0.08541  | 0.079125 | 0.08764  | -0.08643 | 0.062    | 0.010893 |
| -0.04313 | 0.35234 | -0.11093 | 0.01648  | 0.069243 | 0.13514  | -0.18554 | 5.49E-05 | -0.00061 |
| -0.0894  | 0.05352 | -0.09546 | 0.0392   | -0.1297  | 0.005    | -0.20736 | 6.23E-06 | -0.12296 |
| -0.04794 | 0.30126 | 0.028862 | 0.53383  | -0.17198 | 0.00019  | 0.009982 | 0.82966  | -0.18607 |
| -0.0433  | 0.35053 | -0.09567 | 0.03876  | -0.05651 | 0.22287  | -0.08858 | 0.05577  | 0.056248 |
| 0.020675 | 0.65586 | -0.06282 | 0.17536  | 0.065954 | 0.15474  | -0.18099 | 8.38E-05 | -0.08934 |
| -0.0349  | 0.45181 | 0.122691 | 0.00795  | -0.03318 | 0.47444  | 0.110545 | 0.01686  | 0.090689 |
| -0.07078 | 0.12668 | 0.071875 | 0.12088  | -0.15091 | 0.00107  | 0.091075 | 0.04919  | -0.12823 |
| -0.02581 | 0.578   | -0.04068 | 0.38043  | 0.05699  | 0.21898  | -0.03108 | 0.50287  | 0.056188 |
| -0.13357 | 0.00383 | -0.22145 | 1.35E-06 | -0.10892 | 0.01855  | -0.17291 | 0.00017  | 0.013759 |
| -0.04382 | 0.34478 | -0.09139 | 0.04841  | -0.08019 | 0.08343  | -0.13456 | 0.00358  | -0.05557 |
| 0.001052 | 0.98192 | -0.19286 | 2.72E-05 | 0.001421 | 0.97556  | -0.12883 | 0.0053   | 0.150114 |
| 0.038076 | 0.41169 | -0.06786 | 0.14316  | 0.029272 | 0.52803  | -0.02067 | 0.65599  | 0.2498   |
| -0.10324 | 0.02568 | -0.16196 | 0.00044  | -0.01471 | 0.75128  | -0.16786 | 0.00027  | 0.160427 |
| -0.07533 | 0.10398 | -0.23516 | 2.74E-07 | -0.11229 | 0.01519  | -0.31014 | 7.18E-12 | -0.01121 |
| -0.0574  | 0.2157  | -0.09237 | 0.04603  | -0.05028 | 0.27826  | -0.19522 | 2.15E-05 | 0.14634  |
| -0.07893 | 0.08842 | -0.09928 | 0.03195  | -0.04272 | 0.35696  | -0.28463 | 3.74E-10 | -0.13222 |
| 0.002361 | 0.95941 | -0.08881 | 0.05514  | 0.014048 | 0.76206  | -0.14083 | 0.00229  | 0.088617 |
| -0.03124 | 0.50065 | -0.12807 | 0.00558  | 0.026202 | 0.5722   | -0.1413  | 0.00221  | 0.063044 |
| -0.03033 | 0.51326 | 0.118352 | 0.01047  | -0.13004 | 0.00488  | 0.14454  | 0.00174  | 0.015319 |
| -0.0752  | 0.10457 | -0.18144 | 8.04E-05 | -0.0075  | 0.87167  | -0.21058 | 4.43E-06 | 0.132594 |
| -0.13129 | 0.00448 | -0.0309  | 0.50535  | -0.08516 | 0.06595  | -0.08119 | 0.07964  | 0.07619  |
| -0.0435  | 0.34828 | -0.16381 | 0.00038  | -0.0677  | 0.14409  | -0.05882 | 0.2045   | 0.170352 |
| -0.11217 | 0.01531 | -0.17187 | 0.00019  | -0.08581 | 0.06391  | -0.23877 | 1.77E-07 | 0.022708 |
| -0.00571 | 0.90211 | -0.08439 | 0.06845  | -0.00724 | 0.87606  | -0.10448 | 0.02395  | 0.010008 |
| -0.08755 | 0.0587  | -0.14023 | 0.00239  | -0.06081 | 0.18957  | -0.08376 | 0.07054  | 0.138203 |
| 0.009248 | 0.84202 | 0.034995 | 0.45058  | 0.168644 | 0.00025  | 0.039691 | 0.39212  | 0.164137 |
| -0.04862 | 0.2944  | 0.014682 | 0.75166  | -0.20988 | 4.78E-06 | 0.041527 | 0.37058  | -0.09936 |
| 0.043807 | 0.34487 | -0.1342  | 0.00367  | 0.197044 | 1.80E-05 | -0.14836 | 0.0013   | 0.312355 |
| -0.03107 | 0.50302 | -0.06196 | 0.18136  | 0.079983 | 0.08424  | -0.08903 | 0.05453  | 0.245019 |
| -0.0328  | 0.47947 | -0.07183 | 0.1211   | 0.019113 | 0.68036  | -0.16746 | 0.00028  | -0.13614 |

|          |         |          |          |          |          |          |          |          |
|----------|---------|----------|----------|----------|----------|----------|----------|----------|
| -0.0706  | 0.12762 | -0.11216 | 0.01531  | -0.0745  | 0.10786  | -0.14093 | 0.00227  | -0.11646 |
| -0.08541 | 0.06517 | -0.156   | 0.00072  | -0.10795 | 0.01963  | -0.22363 | 1.05E-06 | -0.1003  |
| -0.10973 | 0.01769 | -0.12146 | 0.0086   | -0.00201 | 0.9655   | -0.14364 | 0.00186  | 0.1133   |
| -0.05252 | 0.2573  | -0.24523 | 7.99E-08 | -0.08003 | 0.08407  | -0.15638 | 0.0007   | 0.292507 |
| -0.0818  | 0.07742 | -0.15385 | 0.00085  | -0.15592 | 0.00072  | -0.25501 | 2.29E-08 | -0.12498 |
| -0.03796 | 0.41315 | -0.04649 | 0.31606  | 0.103955 | 0.02467  | -0.04834 | 0.29722  | 0.15021  |
| 0.102862 | 0.02623 | 0.094611 | 0.04099  | 0.315215 | 3.12E-12 | 0.127277 | 0.00588  | 0.185171 |
| -0.08598 | 0.0634  | -0.11016 | 0.01725  | 0.012678 | 0.78465  | -0.14866 | 0.00127  | 0.043226 |
| -0.03061 | 0.50935 | -0.1361  | 0.00321  | 0.022852 | 0.62231  | -0.10303 | 0.02599  | 0.113583 |
| -0.06621 | 0.15316 | -0.22304 | 1.12E-06 | -0.06154 | 0.18432  | -0.1416  | 0.00216  | 0.257217 |
| 0.041436 | 0.37163 | 0.339507 | 4.62E-14 | 0.194235 | 2.37E-05 | 0.364718 | 3.87E-16 | 0.045707 |
| -0.01086 | 0.81487 | -0.06749 | 0.14534  | 0.109219 | 0.01823  | -0.10887 | 0.01861  | 0.223739 |
| -0.02019 | 0.66341 | -0.1576  | 0.00063  | 0.068211 | 0.14107  | -0.1521  | 0.00098  | 0.198455 |
| 0.047783 | 0.30281 | -0.0504  | 0.27711  | 0.177483 | 0.00012  | -0.15065 | 0.00109  | 0.199822 |
| -0.09633 | 0.03744 | -0.15721 | 0.00065  | -0.12058 | 0.0091   | -0.14101 | 0.00226  | -0.02323 |
| -0.01846 | 0.69077 | -0.14703 | 0.00144  | 0.114828 | 0.01303  | -0.2448  | 8.43E-08 | 0.064618 |
| -0.06921 | 0.13533 | -0.13152 | 0.00441  | -0.10349 | 0.02532  | -0.21567 | 2.55E-06 | -0.0203  |
| -0.04278 | 0.35633 | -0.09292 | 0.04476  | 0.012612 | 0.78575  | -0.13811 | 0.00278  | 0.112485 |
| 0.012095 | 0.79433 | -0.11803 | 0.01069  | -0.04068 | 0.3804   | -0.14026 | 0.00238  | 0.139012 |
| -0.06766 | 0.14432 | -0.21876 | 1.82E-06 | -0.12054 | 0.00912  | -0.24792 | 5.70E-08 | 0.121543 |
| 0.007489 | 0.87177 | -0.12716 | 0.00593  | 0.091062 | 0.04922  | -0.19096 | 3.27E-05 | 0.118259 |
| -0.00736 | 0.87401 | 0.037445 | 0.41949  | -0.21039 | 4.52E-06 | 0.009353 | 0.84024  | -0.20562 |
| -0.01372 | 0.76751 | 0.151419 | 0.00103  | -0.12457 | 0.00703  | 0.092731 | 0.04519  | -0.1479  |
| -0.0601  | 0.19481 | -0.14972 | 0.00117  | -0.15753 | 0.00063  | -0.1685  | 0.00025  | 0.136705 |
| -0.05443 | 0.24042 | -0.24481 | 8.42E-08 | -0.08702 | 0.06025  | -0.23518 | 2.73E-07 | 0.196366 |
| -0.02863 | 0.53712 | -0.07502 | 0.10542  | 0.112932 | 0.01462  | -0.07762 | 0.09384  | 0.076494 |
| 0.152032 | 0.00098 | 0.197553 | 1.71E-05 | 0.351039 | 5.46E-15 | 0.116306 | 0.0119   | 0.273406 |
| -0.02691 | 0.56186 | -0.12313 | 0.00773  | 0.006172 | 0.89418  | -0.14865 | 0.00127  | 0.107957 |
| 0.127443 | 0.00582 | 0.119362 | 0.00983  | 0.301175 | 3.01E-11 | 0.161873 | 0.00044  | 0.10686  |
| -0.03767 | 0.41674 | -0.08403 | 0.06964  | 0.164878 | 0.00035  | -0.08837 | 0.05634  | 0.234239 |
| -0.02222 | 0.63204 | -0.17787 | 0.00011  | 0.009979 | 0.82971  | -0.25208 | 3.34E-08 | 0.065436 |
| 0.018224 | 0.69447 | -0.03196 | 0.4908   | 0.145156 | 0.00166  | -0.06209 | 0.18045  | 0.05024  |
| 0.032006 | 0.4902  | 0.382171 | 1.09E-17 | 0.093162 | 0.0442   | 0.352119 | 4.45E-15 | 0.005939 |
| 0.006865 | 0.88237 | -0.09581 | 0.03849  | 0.042502 | 0.35944  | -0.16428 | 0.00036  | 0.082462 |
| -0.07421 | 0.10922 | 0.061763 | 0.18273  | -0.11522 | 0.01272  | 0.045837 | 0.32295  | -0.27336 |
| 0.105767 | 0.02226 | 0.158443 | 0.00059  | 0.330222 | 2.42E-13 | 0.174288 | 0.00015  | 0.23625  |
| -0.00703 | 0.87952 | -0.14319 | 0.00192  | 0.18743  | 4.59E-05 | -0.22039 | 1.52E-06 | 0.111425 |
| 0.054171 | 0.24266 | -0.05691 | 0.2196   | 0.223705 | 1.04E-06 | -0.18453 | 6.03E-05 | 0.064759 |
| 0.025451 | 0.58327 | -0.13488 | 0.0035   | 0.059444 | 0.19974  | -0.21179 | 3.89E-06 | 0.054412 |
| 0.01842  | 0.69135 | -0.07199 | 0.12031  | 0.228709 | 5.87E-07 | -0.14437 | 0.00176  | 0.113012 |
| -0.03125 | 0.50045 | 0.166336 | 0.00031  | -0.00359 | 0.93833  | 0.151808 | 0.001    | -0.0635  |
| -0.04162 | 0.36955 | -0.17227 | 0.00018  | 0.033047 | 0.4762   | -0.24488 | 8.34E-08 | 0.155497 |
| -0.01484 | 0.74907 | -0.20004 | 1.33E-05 | 0.057457 | 0.21522  | -0.23723 | 2.14E-07 | 0.027638 |
| -0.02816 | 0.54386 | -0.21294 | 3.44E-06 | -0.07713 | 0.09593  | -0.26144 | 9.77E-09 | 0.063088 |
| 0.05048  | 0.27631 | 0.07094  | 0.12581  | 0.231249 | 4.36E-07 | -0.02877 | 0.53519  | 0.228385 |

|          |          |          |          |          |          |          |          |          |
|----------|----------|----------|----------|----------|----------|----------|----------|----------|
| 0.134192 | 0.00367  | 0.288667 | 2.05E-10 | 0.151687 | 0.00101  | 0.360112 | 9.57E-16 | 0.134213 |
| 0.035556 | 0.44335  | -0.08794 | 0.05757  | 0.180672 | 8.63E-05 | -0.05672 | 0.22114  | 0.259963 |
| 0.058168 | 0.20958  | 0.136061 | 0.00322  | 0.288818 | 2.01E-10 | 0.144434 | 0.00175  | 0.336896 |
| -0.04227 | 0.3621   | 0.073296 | 0.11369  | -0.14411 | 0.00179  | 0.157037 | 0.00066  | 0.016733 |
| -0.02739 | 0.55486  | 0.180843 | 8.49E-05 | 0.096022 | 0.03805  | 0.269841 | 3.10E-09 | 0.189727 |
| 0.082513 | 0.07485  | -0.04678 | 0.3131   | 0.239462 | 1.63E-07 | -0.12107 | 0.00882  | 0.076608 |
| -0.05784 | 0.2122   | -0.12677 | 0.00608  | 0.024821 | 0.59263  | -0.18466 | 5.96E-05 | 0.122274 |
| 0.049725 | 0.28357  | -0.08304 | 0.07301  | 0.190322 | 3.48E-05 | -0.21092 | 4.27E-06 | 0.17484  |
| -0.0036  | 0.93821  | -0.18104 | 8.34E-05 | 0.093648 | 0.0431   | -0.23423 | 3.06E-07 | 0.219194 |
| -0.02133 | 0.64566  | -0.07274 | 0.11646  | 0.094214 | 0.04184  | -0.10454 | 0.02387  | -0.04218 |
| -0.03939 | 0.39577  | 0.233872 | 3.20E-07 | 0.081522 | 0.07842  | 0.287729 | 2.36E-10 | 0.03096  |
| -0.03613 | 0.43603  | -0.15205 | 0.00098  | -0.04016 | 0.38649  | -0.15267 | 0.00093  | 0.114399 |
| -0.00337 | 0.94208  | -0.11149 | 0.01594  | 0.056126 | 0.22605  | -0.11246 | 0.01504  | 0.095241 |
| -0.0134  | 0.77279  | -0.19548 | 2.10E-05 | -0.01662 | 0.72017  | -0.25816 | 1.51E-08 | 0.174004 |
| -0.01304 | 0.77869  | -0.08965 | 0.05287  | -0.00215 | 0.96296  | -0.199   | 1.48E-05 | -0.07249 |
| 0.003894 | 0.93311  | -0.00538 | 0.90769  | -0.02642 | 0.56906  | 0.093816 | 0.04272  | 0.190971 |
| -0.08083 | 0.08101  | 0.025745 | 0.57893  | -0.10871 | 0.01878  | 0.102122 | 0.02733  | 0.118943 |
| -0.11909 | 0.01     | -0.14999 | 0.00115  | -0.09675 | 0.0366   | -0.27837 | 9.31E-10 | -0.17077 |
| -0.09767 | 0.03486  | -0.2819  | 5.59E-10 | -0.12747 | 0.00581  | -0.21758 | 2.07E-06 | 0.136667 |
| 0.080372 | 0.08274  | 0.161483 | 0.00046  | 0.016268 | 0.72587  | 0.16678  | 0.00029  | 0.06722  |
| 0.04251  | 0.35935  | -0.10716 | 0.02055  | 0.025574 | 0.58145  | -0.1324  | 0.00415  | 0.101839 |
| -0.03255 | 0.4829   | -0.02614 | 0.57314  | -0.21558 | 2.58E-06 | 0.027359 | 0.55535  | 0.028223 |
| 0.022049 | 0.6346   | -0.14849 | 0.00129  | 0.120784 | 0.00898  | -0.21933 | 1.71E-06 | 0.065178 |
| -0.09367 | 0.04304  | -0.1057  | 0.02235  | -0.0266  | 0.56641  | -0.17784 | 0.00011  | 0.247217 |
| -0.01311 | 0.77759  | -0.04518 | 0.32993  | 0.032362 | 0.48539  | -0.08691 | 0.06055  | -0.01623 |
| 0.035228 | 0.44757  | 0.085807 | 0.06392  | -0.05211 | 0.2611   | 0.115942 | 0.01217  | -0.0354  |
| -0.05346 | 0.2489   | -0.0029  | 0.95024  | -0.02394 | 0.60576  | -0.08852 | 0.05594  | -0.17884 |
| -0.00783 | 0.86601  | -0.03533 | 0.44629  | 0.110877 | 0.01653  | -0.01381 | 0.76599  | 0.078114 |
| 0.015158 | 0.74389  | -0.08326 | 0.07224  | 0.199988 | 1.34E-05 | -0.21236 | 3.66E-06 | 0.049756 |
| 0.044199 | 0.34056  | 0.020473 | 0.659    | 0.257976 | 1.55E-08 | -0.04808 | 0.29979  | 0.065867 |
| 0.046941 | 0.31142  | 0.219475 | 1.68E-06 | 0.026991 | 0.56069  | 0.069035 | 0.13632  | -0.09105 |
| -0.02814 | 0.54415  | -0.00248 | 0.95733  | -0.13688 | 0.00304  | -0.05766 | 0.21358  | -0.31936 |
| 0.018816 | 0.68506  | -0.15183 | 0.001    | 0.113858 | 0.01382  | -0.25742 | 1.67E-08 | 0.104943 |
| -0.04398 | 0.34291  | -0.18764 | 4.50E-05 | 0.019784 | 0.6698   | -0.27254 | 2.13E-09 | 0.132211 |
| -0.02671 | 0.56481  | -0.21659 | 2.31E-06 | -0.05424 | 0.24204  | -0.1888  | 4.03E-05 | 0.214243 |
| -0.02141 | 0.6444   | -0.0926  | 0.0455   | -0.03894 | 0.4012   | -0.13807 | 0.00279  | -0.03853 |
| -0.07866 | 0.08954  | -0.08036 | 0.08279  | -0.01794 | 0.69899  | -0.10331 | 0.02558  | 0.098954 |
| 0.004779 | 0.91796  | -0.03551 | 0.44399  | -0.13199 | 0.00427  | -0.00724 | 0.87608  | -0.0351  |
| -0.05917 | 0.20182  | -0.08442 | 0.06836  | 0.013699 | 0.76779  | -0.10209 | 0.02739  | 0.076682 |
| -0.18703 | 4.76E-05 | -0.21689 | 2.24E-06 | -0.18953 | 3.75E-05 | -0.27261 | 2.11E-09 | -0.18947 |
| 0.003622 | 0.93777  | -0.21792 | 1.99E-06 | -0.10114 | 0.02885  | -0.2733  | 1.91E-09 | -0.21514 |
| -0.0772  | 0.09565  | -0.17822 | 0.00011  | 0.03592  | 0.43869  | -0.1835  | 6.64E-05 | 0.029951 |
| -0.14028 | 0.00238  | -0.09812 | 0.03402  | 0.062297 | 0.17897  | -0.05788 | 0.21189  | 0.123519 |
| -0.03325 | 0.47348  | -0.08916 | 0.05417  | 0.120585 | 0.0091   | -0.16586 | 0.00032  | 0.097368 |
| -0.05943 | 0.19985  | -0.0866  | 0.06149  | -0.08928 | 0.05384  | -0.1603  | 0.00051  | 0.031269 |

|          |          |          |          |          |          |          |          |          |
|----------|----------|----------|----------|----------|----------|----------|----------|----------|
| -0.05856 | 0.20649  | -0.08249 | 0.07493  | -0.04091 | 0.37768  | -0.08815 | 0.05698  | 0.087508 |
| -0.07697 | 0.09665  | -0.14199 | 0.0021   | -0.02781 | 0.54878  | -0.26344 | 7.46E-09 | 0.037915 |
| -0.00032 | 0.99452  | -0.12158 | 0.00854  | 0.057499 | 0.21488  | -0.17741 | 0.00012  | -0.12058 |
| 0.082775 | 0.07393  | -0.00597 | 0.8977   | 0.211912 | 3.84E-06 | -0.13217 | 0.00422  | -0.00904 |
| 0.010179 | 0.82634  | -0.06745 | 0.14558  | 0.099523 | 0.03153  | -0.13135 | 0.00447  | -0.03616 |
| -0.03589 | 0.43912  | -0.12381 | 0.00739  | -0.00515 | 0.9116   | -0.17034 | 0.00022  | -0.05345 |
| -0.00705 | 0.87923  | 0.281728 | 5.72E-10 | -0.01437 | 0.75674  | 0.189964 | 3.60E-05 | 0.024081 |
| 0.020946 | 0.65164  | -0.09302 | 0.04451  | 0.056077 | 0.22645  | -0.14858 | 0.00128  | 0.171888 |
| -0.08593 | 0.06354  | -0.1458  | 0.00158  | -0.01764 | 0.70371  | -0.18977 | 3.67E-05 | 0.070652 |
| 0.004299 | 0.92617  | 0.006423 | 0.8899   | -0.13229 | 0.00419  | 0.092984 | 0.0446   | 0.131854 |
| -0.00932 | 0.84074  | -0.11904 | 0.01003  | 0.049212 | 0.28856  | -0.06759 | 0.14471  | 0.168764 |
| -0.08817 | 0.05691  | -0.17034 | 0.00022  | -0.07589 | 0.10144  | -0.26835 | 3.82E-09 | -0.02808 |
| 0.210813 | 4.32E-06 | 0.05415  | 0.24284  | 0.244013 | 9.30E-08 | 0.080274 | 0.08312  | 0.180498 |
| -0.03796 | 0.41315  | -0.10045 | 0.02998  | -0.00691 | 0.88161  | 0.015164 | 0.74379  | 0.129651 |
| 0.080662 | 0.08163  | -0.0661  | 0.15383  | 0.171857 | 0.00019  | -0.03717 | 0.42296  | 0.184315 |
| -0.08666 | 0.0613   | -0.18872 | 4.05E-05 | -0.01363 | 0.76888  | -0.2359  | 2.51E-07 | -0.11717 |
| -0.04031 | 0.38481  | -0.2271  | 7.07E-07 | -0.04209 | 0.36415  | -0.22455 | 9.47E-07 | 0.127237 |
| -0.08473 | 0.06732  | -0.09129 | 0.04866  | -0.01768 | 0.70307  | -0.12469 | 0.00698  | -0.03472 |
| 0.039498 | 0.39444  | -0.02233 | 0.63031  | 0.176295 | 0.00013  | -0.02689 | 0.56221  | 0.115695 |
| -0.07149 | 0.12291  | -0.10224 | 0.02715  | 0.201634 | 1.13E-05 | -0.13707 | 0.003    | 0.181198 |
| -0.04705 | 0.31033  | -0.11562 | 0.01241  | -0.0019  | 0.9674   | -0.1821  | 7.56E-05 | 0.029506 |
| -0.07086 | 0.12621  | -0.29603 | 6.71E-11 | -0.0841  | 0.06942  | -0.28928 | 1.87E-10 | 0.04364  |
| 0.061247 | 0.18642  | -0.02789 | 0.54768  | 0.219393 | 1.69E-06 | -0.02067 | 0.65601  | 0.112015 |
| -0.03187 | 0.49209  | 0.099519 | 0.03154  | -0.13927 | 0.00256  | 0.006355 | 0.89106  | -0.3872  |
| -0.10329 | 0.02561  | 0.042375 | 0.36088  | -0.12716 | 0.00593  | 0.068245 | 0.14087  | -0.05226 |
| 0.083649 | 0.07092  | -0.03031 | 0.51355  | 0.247611 | 5.92E-08 | 0.002929 | 0.94967  | 0.257066 |
| -0.02762 | 0.55153  | -0.16726 | 0.00028  | -0.04486 | 0.33343  | -0.12352 | 0.00753  | 0.151859 |
| -0.09044 | 0.0508   | 0.080532 | 0.08213  | -0.15541 | 0.00075  | 0.093216 | 0.04407  | -0.09776 |
| 0.011409 | 0.80576  | -0.01852 | 0.68972  | 0.172229 | 0.00018  | -0.09073 | 0.05005  | 0.050908 |
| 0.05986  | 0.19661  | -0.05668 | 0.22151  | 0.187818 | 4.42E-05 | -0.13373 | 0.00379  | 0.045738 |
| -0.00954 | 0.8371   | -0.06143 | 0.18512  | 0.196176 | 1.96E-05 | -0.09997 | 0.03078  | 0.126588 |
| 0.000796 | 0.98632  | 0.145732 | 0.00159  | -0.05107 | 0.27073  | 0.115534 | 0.01248  | -0.06821 |
| 0.12898  | 0.00525  | -0.03958 | 0.39347  | 0.168827 | 0.00025  | -0.10568 | 0.02236  | 0.139132 |
| 0.147464 | 0.0014   | -0.03839 | 0.40781  | 0.183537 | 6.62E-05 | -0.02382 | 0.6076   | 0.056717 |
| 0.101054 | 0.029    | -0.00227 | 0.96092  | 0.238274 | 1.88E-07 | -0.12166 | 0.00849  | -0.04928 |
| 0.045033 | 0.33152  | -0.09669 | 0.03674  | 0.198635 | 1.53E-05 | -0.14938 | 0.0012   | 0.192508 |
| -0.07329 | 0.11371  | -0.18637 | 5.07E-05 | 0.005741 | 0.90152  | -0.09907 | 0.03232  | 0.131107 |
| -0.0822  | 0.07597  | -0.1931  | 2.65E-05 | -0.0373  | 0.42124  | -0.12851 | 0.00541  | 0.155374 |
| 0.048295 | 0.29765  | -0.00965 | 0.83521  | 0.183453 | 6.67E-05 | -0.12349 | 0.00755  | -0.01158 |
| -0.04573 | 0.32413  | 0.120666 | 0.00905  | -0.09951 | 0.03155  | 0.059505 | 0.19928  | -0.27083 |
| -0.06996 | 0.13115  | -0.16559 | 0.00033  | 0.063555 | 0.17033  | -0.17481 | 0.00015  | 0.061977 |
| -0.01389 | 0.76467  | -0.20426 | 8.62E-06 | -0.01796 | 0.6987   | -0.33034 | 2.37E-13 | 0.064088 |
| -0.03274 | 0.4803   | 0.071458 | 0.12306  | -0.13591 | 0.00325  | 0.106654 | 0.02115  | -0.09702 |
| -0.06943 | 0.13407  | -0.04874 | 0.29323  | 0.047296 | 0.30778  | -0.15089 | 0.00107  | -0.07415 |
| -0.07779 | 0.09311  | -0.06674 | 0.1499   | -0.05656 | 0.22244  | -0.20867 | 5.43E-06 | -0.23575 |



|          |         |          |          |          |          |          |          |          |
|----------|---------|----------|----------|----------|----------|----------|----------|----------|
| -0.03626 | 0.43433 | 0.186717 | 4.91E-05 | -0.00318 | 0.94541  | 0.232494 | 3.76E-07 | 0.041961 |
| 0.071558 | 0.12254 | -0.00431 | 0.92597  | 0.187577 | 4.52E-05 | -0.12754 | 0.00578  | -0.03957 |
| -0.03731 | 0.42113 | -0.05636 | 0.22409  | -0.02132 | 0.64584  | -0.03587 | 0.43936  | 0.106054 |
| -0.01953 | 0.67374 | -0.05901 | 0.20306  | -0.06355 | 0.17034  | -0.11471 | 0.01312  | -0.16075 |
| -0.06425 | 0.16567 | 0.054493 | 0.23986  | 0.028279 | 0.54213  | 0.006765 | 0.88408  | 0.003575 |
| 0.047029 | 0.31051 | -0.00447 | 0.92332  | 0.214168 | 3.01E-06 | -0.07752 | 0.09428  | 0.13246  |
| 0.018898 | 0.68376 | 0.05757  | 0.21431  | 0.003296 | 0.94337  | 0.045747 | 0.3239   | 0.027193 |
| 0.025222 | 0.58666 | -0.13393 | 0.00374  | 0.170239 | 0.00022  | -0.23368 | 3.27E-07 | 0.229973 |
| 0.005736 | 0.90162 | 0.074287 | 0.10888  | 0.260263 | 1.14E-08 | 0.121611 | 0.00852  | 0.275539 |
| -0.02763 | 0.55147 | 0.07083  | 0.1264   | 0.086134 | 0.06291  | -0.02478 | 0.59325  | -0.11281 |
| -0.05133 | 0.26826 | -0.14603 | 0.00155  | -0.05086 | 0.27274  | -0.16673 | 0.0003   | 0.149215 |
| 0.00465  | 0.92016 | -0.02325 | 0.61624  | 0.047862 | 0.30201  | 0.055291 | 0.23304  | 0.058355 |
| 0.030671 | 0.50849 | -0.02515 | 0.58776  | 0.115677 | 0.01237  | -0.10087 | 0.02929  | 0.150047 |
| -0.12378 | 0.00741 | -0.14209 | 0.00208  | -0.03137 | 0.49893  | -0.13857 | 0.00269  | -0.02786 |
| 0.006418 | 0.88998 | -0.15586 | 0.00073  | -0.11667 | 0.01163  | -0.22234 | 1.22E-06 | -0.15211 |
| -0.07437 | 0.1085  | -0.12554 | 0.0066   | -0.01091 | 0.81404  | -0.08056 | 0.08203  | -0.00614 |
| -0.0184  | 0.69164 | -0.03443 | 0.45788  | -0.01144 | 0.80533  | 0.012931 | 0.78047  | 0.102516 |
| 0.083913 | 0.07003 | -0.02174 | 0.6394   | 0.199447 | 1.41E-05 | 0.018096 | 0.6965   | 0.17845  |
| 0.084532 | 0.06798 | 0.050979 | 0.27158  | 0.225708 | 8.30E-07 | -0.03769 | 0.4164   | 0.15312  |
| 0.02957  | 0.52384 | -0.04552 | 0.32627  | 0.193787 | 2.48E-05 | -0.00761 | 0.86979  | 0.198743 |
| -0.07203 | 0.12009 | -0.12152 | 0.00857  | -0.00561 | 0.90378  | -0.16419 | 0.00037  | -0.1142  |
| 0.008372 | 0.8568  | -0.17907 | 9.99E-05 | 0.103415 | 0.02543  | -0.28903 | 1.94E-10 | 0.14873  |
| 0.00479  | 0.91778 | -0.04761 | 0.30455  | 0.078614 | 0.08971  | -0.01058 | 0.81961  | 0.333796 |
| 0.053493 | 0.24862 | 0.11227  | 0.01521  | 0.223337 | 1.09E-06 | 0.03666  | 0.42931  | -0.09238 |
| -0.09863 | 0.0331  | 0.126148 | 0.00634  | 0.070878 | 0.12614  | 0.164172 | 0.00037  | 0.100707 |
| 0.027044 | 0.55992 | 0.17988  | 9.28E-05 | -0.0909  | 0.04962  | 0.12488  | 0.00689  | -0.0905  |
| 0.009763 | 0.83334 | -0.18427 | 6.18E-05 | 0.076426 | 0.09903  | -0.20893 | 5.28E-06 | 0.097105 |
| 0.093198 | 0.04411 | -0.07859 | 0.08979  | 0.158472 | 0.00059  | -0.18932 | 3.83E-05 | 0.031071 |
| 0.00479  | 0.91778 | -0.1424  | 0.00204  | -0.22157 | 1.33E-06 | -0.0893  | 0.0538   | 0.051038 |
| -0.04119 | 0.37444 | -0.05845 | 0.20739  | 0.112215 | 0.01526  | -0.09363 | 0.04313  | 0.181313 |
| -0.02093 | 0.65185 | -0.0118  | 0.79918  | 0.040652 | 0.38076  | -0.14335 | 0.0019   | 0.101456 |
| -0.01588 | 0.73211 | -0.19286 | 2.72E-05 | 0.001804 | 0.96899  | -0.24606 | 7.19E-08 | 0.13603  |
| 0.047946 | 0.30116 | -0.1096  | 0.01782  | 0.14179  | 0.00213  | -0.10532 | 0.02283  | 0.258299 |
| -0.01582 | 0.7331  | -0.12388 | 0.00736  | -0.04263 | 0.35797  | -0.10072 | 0.02953  | 0.036274 |
| 0.033636 | 0.46837 | 0.00989  | 0.83121  | 0.170249 | 0.00022  | 0.058217 | 0.2092   | 0.198619 |
| -0.05158 | 0.26593 | -0.10297 | 0.02607  | 0.055416 | 0.23198  | -0.16334 | 0.00039  | -0.01879 |
| 0.035587 | 0.44295 | -0.12145 | 0.00861  | 0.115362 | 0.01261  | -0.10361 | 0.02516  | 0.113116 |
| 0.092562 | 0.04558 | -0.07207 | 0.11988  | 0.252627 | 3.12E-08 | -0.06224 | 0.17934  | 0.165737 |
| 0.021597 | 0.64156 | -0.18666 | 4.93E-05 | 0.086081 | 0.06307  | -0.26301 | 7.91E-09 | 0.083468 |
| -0.0068  | 0.88342 | 0.299934 | 3.66E-11 | 0.132013 | 0.00427  | 0.336109 | 8.52E-14 | -0.02374 |
| 0.005111 | 0.91228 | 0.02864  | 0.53698  | 0.102782 | 0.02635  | -0.10169 | 0.028    | -0.11771 |
| -0.06374 | 0.16906 | -0.10938 | 0.01805  | 0.10552  | 0.02257  | -0.22976 | 5.19E-07 | 0.058418 |
| -0.08478 | 0.06719 | -0.00625 | 0.89284  | 0.102946 | 0.02611  | -0.05874 | 0.20512  | 0.100784 |
| -0.03865 | 0.40461 | -0.16247 | 0.00042  | -0.05779 | 0.21256  | -0.12318 | 0.0077   | 0.251622 |
| 0.021564 | 0.64208 | -0.03048 | 0.51108  | 0.182495 | 7.29E-05 | -0.00987 | 0.83158  | 0.006054 |

|          |         |          |          |          |          |          |          |          |
|----------|---------|----------|----------|----------|----------|----------|----------|----------|
| -0.0467  | 0.31396 | -0.28466 | 3.73E-10 | -0.13496 | 0.00348  | -0.23206 | 3.96E-07 | 0.092782 |
| -0.0629  | 0.17481 | -0.24314 | 1.04E-07 | -0.13941 | 0.00253  | -0.24003 | 1.52E-07 | 0.075349 |
| -0.00041 | 0.99302 | -0.0893  | 0.05379  | 0.11351  | 0.01411  | -0.183   | 6.96E-05 | 0.028882 |
| -0.07366 | 0.11192 | -0.19675 | 1.85E-05 | -0.01054 | 0.82028  | -0.15836 | 0.00059  | 0.099184 |
| -0.01416 | 0.76025 | -0.13476 | 0.00353  | 0.054886 | 0.23648  | -0.07975 | 0.08515  | 0.352806 |
| -0.0388  | 0.40284 | 0.189673 | 3.70E-05 | -0.06427 | 0.16558  | 0.237113 | 2.17E-07 | -0.14799 |
| -0.06391 | 0.16797 | -0.18932 | 3.83E-05 | -0.07657 | 0.09841  | -0.17059 | 0.00021  | -0.03477 |
| 0.021708 | 0.63985 | -0.10062 | 0.0297   | 0.090534 | 0.05055  | -0.14596 | 0.00156  | 0.053185 |
| 0.007055 | 0.87914 | 0.166272 | 0.00031  | -0.09495 | 0.04026  | 0.183028 | 6.94E-05 | -0.06962 |
| 0.024022 | 0.60459 | 0.121484 | 0.00859  | -0.07495 | 0.10574  | 0.115444 | 0.01254  | -0.19662 |
| -0.07468 | 0.10701 | 0.185193 | 5.67E-05 | -0.01973 | 0.67057  | 0.271837 | 2.35E-09 | 0.02367  |
| -0.09603 | 0.03803 | -0.05974 | 0.19754  | 0.037806 | 0.41502  | -0.02153 | 0.64262  | 0.225784 |
| -0.06408 | 0.16682 | 0.060079 | 0.19498  | 0.147496 | 0.00139  | 0.039438 | 0.39516  | 0.122691 |
| 0.000915 | 0.98427 | 0.049533 | 0.28543  | -0.06987 | 0.1316   | 0.139443 | 0.00253  | 0.16897  |
| -0.11723 | 0.01124 | -0.12154 | 0.00856  | -0.04318 | 0.35187  | -0.20844 | 5.56E-06 | -0.10609 |
| -0.06349 | 0.17079 | -0.16791 | 0.00027  | 0.114489 | 0.0133   | -0.19915 | 1.45E-05 | 0.0628   |
| 0.144924 | 0.00169 | 0.274912 | 1.52E-09 | 0.351577 | 4.93E-15 | 0.217814 | 2.02E-06 | 0.126822 |
| -0.01373 | 0.76734 | -0.15752 | 0.00064  | 0.085794 | 0.06396  | -0.23072 | 4.64E-07 | 0.174232 |
| -0.0343  | 0.45966 | -0.12956 | 0.00505  | -0.01686 | 0.71637  | -0.11516 | 0.01277  | 0.121073 |
| 0.081192 | 0.07964 | -0.04009 | 0.38732  | 0.20807  | 5.79E-06 | -0.0668  | 0.14951  | 0.234925 |
| -0.00925 | 0.84194 | 0.033017 | 0.4766   | -0.05393 | 0.24474  | 0.037645 | 0.41701  | 0.032915 |
| 0.014212 | 0.75936 | 0.015724 | 0.73467  | 0.104561 | 0.02384  | -0.09098 | 0.04941  | -0.00178 |
| -0.04664 | 0.31457 | -0.06138 | 0.18549  | 0.007749 | 0.86736  | -0.12334 | 0.00762  | -0.03917 |
| 0.045757 | 0.32379 | -0.10883 | 0.01865  | 0.24729  | 6.16E-08 | -0.08795 | 0.05754  | 0.246601 |
| 0.057725 | 0.21308 | -0.0933  | 0.04387  | 0.117567 | 0.011    | -0.13792 | 0.00282  | 0.146604 |
| -0.12239 | 0.00811 | -0.22139 | 1.35E-06 | -0.02765 | 0.5511   | -0.22552 | 8.48E-07 | -0.04479 |
| -0.01891 | 0.68351 | -0.1531  | 0.0009   | -0.11042 | 0.01698  | -0.28242 | 5.18E-10 | -0.06744 |
| -0.03805 | 0.41204 | -0.11676 | 0.01156  | 0.13394  | 0.00373  | -0.13914 | 0.00258  | 0.11373  |
| -0.00554 | 0.90493 | -0.13208 | 0.00425  | 0.123344 | 0.00762  | -0.21833 | 1.91E-06 | 0.036011 |
| -0.06785 | 0.1432  | -0.1325  | 0.00413  | 0.050832 | 0.27296  | -0.18602 | 5.24E-05 | 0.052119 |
| 0.10371  | 0.02501 | -0.09973 | 0.03118  | 0.013167 | 0.77657  | -0.14483 | 0.0017   | 0.043941 |
| -0.00701 | 0.87991 | -0.01606 | 0.72923  | 0.074694 | 0.10695  | -0.14024 | 0.00239  | -0.02314 |
| -0.15095 | 0.00107 | -0.14118 | 0.00223  | -0.10954 | 0.01788  | -0.20936 | 5.05E-06 | -0.08831 |
| 0.022782 | 0.62338 | 0.032782 | 0.47975  | 0.067499 | 0.14528  | 0.023216 | 0.61678  | 0.109205 |
| 0.15815  | 0.0006  | 0.213974 | 3.07E-06 | 0.050777 | 0.27349  | 0.252199 | 3.29E-08 | 0.115592 |
| -0.09758 | 0.03503 | -0.15662 | 0.00068  | -0.08128 | 0.0793   | -0.18967 | 3.70E-05 | 0.112924 |
| -0.08258 | 0.07463 | -0.29778 | 5.12E-11 | -0.02438 | 0.59919  | -0.33068 | 2.23E-13 | 0.072732 |
| -0.00089 | 0.98465 | -0.09187 | 0.04722  | 0.165268 | 0.00034  | -0.16833 | 0.00026  | 0.165126 |
| 0.047749 | 0.30316 | -0.07453 | 0.10773  | 0.192128 | 2.92E-05 | -0.10409 | 0.02448  | 0.168902 |
| 0.0047   | 0.91931 | 0.132625 | 0.00409  | -0.10602 | 0.02193  | 0.063018 | 0.17398  | -0.19578 |
| 0.014556 | 0.75372 | -0.14962 | 0.00118  | 0.074515 | 0.10779  | -0.10286 | 0.02623  | 0.07065  |
| 0.085076 | 0.06622 | -0.01122 | 0.80895  | 0.232264 | 3.87E-07 | -0.02169 | 0.64011  | 0.329417 |
| -0.11635 | 0.01186 | -0.12423 | 0.00719  | -0.05504 | 0.23514  | -0.14252 | 0.00202  | 0.072271 |
| -0.06056 | 0.19139 | -0.153   | 0.00091  | -0.07168 | 0.12187  | -0.19088 | 3.29E-05 | -0.1132  |
| -0.12459 | 0.00703 | -0.21157 | 3.99E-06 | -0.13191 | 0.0043   | -0.21357 | 3.21E-06 | -0.12889 |

|          |         |          |          |          |          |          |          |          |
|----------|---------|----------|----------|----------|----------|----------|----------|----------|
| 0.022444 | 0.62855 | -0.07246 | 0.11789  | 0.016626 | 0.72008  | -0.11183 | 0.01561  | 0.069775 |
| -0.10433 | 0.02415 | -0.06439 | 0.1648   | -0.13427 | 0.00365  | -0.12147 | 0.0086   | 0.018884 |
| -0.03578 | 0.44053 | -0.17529 | 0.00014  | 0.01807  | 0.69692  | -0.16479 | 0.00035  | 0.172039 |
| -0.00482 | 0.91723 | 0.016651 | 0.71968  | -0.06896 | 0.13676  | 0.031214 | 0.50102  | -0.02762 |
| -0.03762 | 0.41735 | -0.03499 | 0.45061  | 0.155191 | 0.00077  | -0.07663 | 0.09811  | 0.113674 |
| -0.0208  | 0.65391 | -0.15794 | 0.00061  | -0.02304 | 0.61948  | -0.24842 | 5.34E-08 | 0.061761 |
| 0.034702 | 0.45437 | -0.04533 | 0.32832  | 0.017894 | 0.69973  | -0.11325 | 0.01434  | 0.084152 |
| -0.12296 | 0.00781 | -0.2008  | 1.23E-05 | -0.1086  | 0.0189   | -0.2702  | 2.95E-09 | -0.15718 |
| -0.07227 | 0.11884 | -0.14971 | 0.00118  | 0.021828 | 0.638    | -0.26072 | 1.08E-08 | -0.02962 |
| 0.037464 | 0.41926 | -0.03981 | 0.3907   | 0.246196 | 7.07E-08 | -0.08269 | 0.07422  | 0.254188 |
| -0.01782 | 0.70094 | -0.14353 | 0.00187  | 0.16727  | 0.00028  | -0.1999  | 1.35E-05 | 0.13319  |
| -0.13546 | 0.00336 | -0.1811  | 8.29E-05 | -0.0145  | 0.7546   | -0.15411 | 0.00083  | 0.214525 |
| -0.08956 | 0.05311 | -0.13229 | 0.00419  | 0.095052 | 0.04005  | -0.23739 | 2.09E-07 | 0.087872 |
| -0.06267 | 0.17637 | -0.1816  | 7.92E-05 | 0.040491 | 0.38265  | -0.23261 | 3.71E-07 | 0.039559 |
| -0.09373 | 0.04291 | -0.20381 | 9.03E-06 | 0.046377 | 0.31727  | -0.23515 | 2.74E-07 | 0.067432 |
| -0.00781 | 0.86626 | -0.11638 | 0.01184  | 0.0686   | 0.13881  | -0.15482 | 0.00079  | 0.065357 |
| -0.01333 | 0.77385 | 0.04792  | 0.30143  | 0.019973 | 0.66682  | -0.02    | 0.66647  | -0.00078 |
| 0.07055  | 0.12791 | -0.02033 | 0.66122  | 0.135294 | 0.0034   | -0.09381 | 0.04273  | 0.094185 |
| -0.11333 | 0.01427 | -0.12587 | 0.00646  | -0.02784 | 0.54836  | -0.10329 | 0.0256   | 0.134536 |
| -0.04372 | 0.34588 | -0.13525 | 0.00341  | -0.04014 | 0.38681  | -0.25958 | 1.25E-08 | -0.08052 |
| -0.03534 | 0.44607 | 0.075827 | 0.10171  | -0.21132 | 4.09E-06 | 0.120224 | 0.00931  | -0.10022 |
| 0.001117 | 0.9808  | -0.02739 | 0.55484  | 0.045848 | 0.32283  | -0.12129 | 0.0087   | 0.037943 |
| -0.12718 | 0.00592 | -0.34521 | 1.62E-14 | -0.22504 | 8.96E-07 | -0.3402  | 4.07E-14 | 0.018685 |
| 0.088807 | 0.05514 | 0.022953 | 0.62077  | 0.276061 | 1.29E-09 | -0.07436 | 0.10855  | 0.150807 |
| -0.04623 | 0.31885 | -0.23904 | 1.72E-07 | 0.014852 | 0.74888  | -0.28327 | 4.57E-10 | 0.081278 |
| -0.10862 | 0.01887 | -0.14317 | 0.00192  | -0.08226 | 0.07575  | -0.18224 | 7.47E-05 | -0.00043 |
| -0.05225 | 0.25982 | -0.14477 | 0.00171  | -0.08586 | 0.06374  | -0.21601 | 2.46E-06 | -0.10309 |
| 0.025103 | 0.58843 | -0.06287 | 0.175    | 0.063559 | 0.17031  | -0.17832 | 0.00011  | -0.09821 |
| -0.02018 | 0.66366 | 0.043225 | 0.35132  | -0.22494 | 9.06E-07 | 0.057462 | 0.21517  | -0.11841 |
| -0.02851 | 0.5388  | -0.08003 | 0.08407  | 0.03346  | 0.4707   | -0.11917 | 0.00995  | 0.139127 |
| 0.02513  | 0.58803 | 0.020345 | 0.66101  | -0.08555 | 0.06473  | 0.103875 | 0.02478  | -0.01402 |
| -0.07327 | 0.11383 | -0.1428  | 0.00198  | 0.019761 | 0.67015  | -0.25523 | 2.22E-08 | 0.045818 |
| 0.154864 | 0.00079 | 0.009503 | 0.83771  | 0.276227 | 1.26E-09 | -0.02147 | 0.64347  | 0.412038 |
| 0.025374 | 0.58441 | -0.05031 | 0.27796  | 0.08237  | 0.07536  | -0.0302  | 0.51507  | 0.06419  |
| -0.02445 | 0.59821 | -0.01233 | 0.79041  | 0.074497 | 0.10787  | -0.02161 | 0.64142  | 0.215823 |
| 0.050604 | 0.27513 | 0.175617 | 0.00014  | 0.23727  | 2.13E-07 | 0.109885 | 0.01753  | -0.06814 |
| 0.019205 | 0.6789  | -0.08342 | 0.0717   | 0.054872 | 0.23661  | -0.04931 | 0.28759  | 0.302137 |
| -0.06065 | 0.19076 | -0.08759 | 0.05856  | 0.072008 | 0.1202   | -0.14474 | 0.00171  | 0.075207 |
| 0.006127 | 0.89494 | -0.19919 | 1.45E-05 | 0.109137 | 0.01831  | -0.29451 | 8.48E-11 | 0.182104 |
| -0.05739 | 0.21572 | -0.04729 | 0.30784  | 0.00053  | 0.99088  | -0.07165 | 0.12207  | 0.004761 |
| -0.05695 | 0.21928 | -0.27315 | 1.95E-09 | 0.028964 | 0.53239  | -0.28616 | 2.98E-10 | 0.141897 |
| 0.059443 | 0.19975 | 0.140002 | 0.00243  | -0.07807 | 0.09198  | 0.136195 | 0.00319  | -0.03705 |
| 0.041707 | 0.36851 | 0.080462 | 0.0824   | -0.03688 | 0.42655  | 0.108821 | 0.01866  | 0.088348 |
| 0.015292 | 0.74171 | -0.09765 | 0.03488  | 0.043253 | 0.351    | -0.11539 | 0.01258  | 0.112222 |
| -0.01283 | 0.7822  | -0.15585 | 0.00073  | -0.02068 | 0.65582  | -0.247   | 6.39E-08 | 0.021372 |

|          |          |          |          |          |          |          |          |          |
|----------|----------|----------|----------|----------|----------|----------|----------|----------|
| -0.06108 | 0.18765  | -0.24071 | 1.40E-07 | -0.16193 | 0.00044  | -0.20446 | 8.44E-06 | 0.195118 |
| -0.06748 | 0.1454   | -0.06408 | 0.16684  | -0.13246 | 0.00414  | -0.12672 | 0.0061   | 0.000733 |
| 0.005892 | 0.89895  | -0.07092 | 0.12592  | 0.152969 | 0.00091  | -0.14966 | 0.00118  | 0.028705 |
| -0.00263 | 0.95487  | -0.11926 | 0.0099   | 0.113226 | 0.01436  | -0.15503 | 0.00078  | 0.162863 |
| -0.03715 | 0.42321  | -0.06158 | 0.18405  | -0.00325 | 0.94407  | -0.13978 | 0.00247  | -0.00189 |
| 0.071671 | 0.12194  | -0.09391 | 0.04252  | 0.15889  | 0.00057  | -0.15434 | 0.00082  | 0.221661 |
| -0.08317 | 0.07257  | -0.12871 | 0.00534  | 0.004461 | 0.92341  | -0.19434 | 2.35E-05 | -0.09096 |
| -0.07632 | 0.09951  | -0.24269 | 1.10E-07 | -0.15036 | 0.00112  | -0.27332 | 1.91E-09 | -0.05752 |
| -0.00069 | 0.98821  | -0.05468 | 0.23827  | 0.106794 | 0.02099  | -0.11769 | 0.01091  | 0.116214 |
| -0.10845 | 0.01907  | 0.013622 | 0.76906  | -0.27396 | 1.74E-09 | -0.008   | 0.86309  | -0.19554 |
| -0.06869 | 0.13831  | -0.14109 | 0.00224  | -0.09574 | 0.03863  | -0.13441 | 0.00361  | 0.203471 |
| -0.06464 | 0.16312  | -0.13391 | 0.00374  | 0.093417 | 0.04362  | -0.20699 | 6.48E-06 | 0.104687 |
| -0.06251 | 0.17747  | -0.18674 | 4.90E-05 | -0.00092 | 0.9842   | -0.13209 | 0.00425  | 0.234233 |
| 0.003128 | 0.94625  | -0.12005 | 0.00941  | 0.074843 | 0.10624  | -0.21868 | 1.83E-06 | -0.02771 |
| -0.05604 | 0.22679  | -0.14126 | 0.00221  | -0.03813 | 0.41109  | -0.12459 | 0.00702  | 0.160881 |
| 0.02027  | 0.66218  | -0.11485 | 0.01301  | 0.128194 | 0.00553  | -0.12954 | 0.00505  | 0.192363 |
| -0.06334 | 0.17176  | -0.21897 | 1.77E-06 | -0.12283 | 0.00788  | -0.17032 | 0.00022  | 0.193889 |
| -0.01871 | 0.6867   | 0.17403  | 0.00016  | -0.09556 | 0.03899  | 0.143263 | 0.00191  | -0.14383 |
| 0.032117 | 0.4887   | -0.0584  | 0.20778  | 0.038634 | 0.40487  | -0.09046 | 0.05075  | 0.07481  |
| -0.03336 | 0.47207  | -0.01882 | 0.68503  | -0.22906 | 5.63E-07 | -0.01497 | 0.74698  | -0.10814 |
| 0.01295  | 0.78016  | -0.03026 | 0.51413  | 0.075003 | 0.1055   | -0.1     | 0.03073  | -0.03213 |
| 0.00064  | 0.98899  | -0.2028  | 1.00E-05 | 0.123085 | 0.00775  | -0.277   | 1.13E-09 | 0.147307 |
| -0.01548 | 0.73858  | 0.175692 | 0.00014  | -0.06607 | 0.15401  | 0.12351  | 0.00754  | -0.19597 |
| -0.11893 | 0.0101   | -0.15532 | 0.00076  | -0.11433 | 0.01343  | -0.17086 | 0.00021  | 0.020869 |
| -0.00375 | 0.9356   | 0.110651 | 0.01675  | 0.121735 | 0.00845  | -0.00536 | 0.90812  | -0.02987 |
| 0.162695 | 0.00042  | -0.10358 | 0.0252   | 0.153695 | 0.00086  | -0.09902 | 0.0324   | 0.136832 |
| -0.06821 | 0.14109  | -0.11917 | 0.00995  | -0.009   | 0.84628  | -0.16193 | 0.00044  | 0.061484 |
| 0.016711 | 0.71871  | -0.03703 | 0.42461  | 0.120454 | 0.00917  | -0.06856 | 0.13905  | 0.127205 |
| -0.01593 | 0.73136  | -0.21056 | 4.44E-06 | 0.104022 | 0.02458  | -0.26742 | 4.34E-09 | 0.098649 |
| -0.03134 | 0.49926  | 0.198031 | 1.63E-05 | 0.023951 | 0.60566  | 0.070434 | 0.12853  | -0.02947 |
| -0.05082 | 0.27307  | -0.04663 | 0.31468  | -0.04171 | 0.36845  | -0.09048 | 0.05069  | 0.00716  |
| 0.06911  | 0.13589  | -0.10774 | 0.01987  | 0.059754 | 0.1974   | -0.18177 | 7.80E-05 | 0.169004 |
| 0.019733 | 0.67059  | -0.19527 | 2.14E-05 | -0.01731 | 0.70907  | -0.18523 | 5.65E-05 | 0.287515 |
| 0.103117 | 0.02586  | 0.126132 | 0.00635  | 0.320378 | 1.32E-12 | 0.104232 | 0.02429  | 0.153636 |
| -0.00126 | 0.97839  | -0.18368 | 6.53E-05 | 0.112189 | 0.01528  | -0.1984  | 1.57E-05 | 0.092799 |
| 0.032296 | 0.48628  | -0.04727 | 0.30809  | 0.058273 | 0.20876  | -0.16356 | 0.00039  | 0.005927 |
| -0.04288 | 0.35521  | -0.23033 | 4.86E-07 | 0.057043 | 0.21854  | -0.28177 | 5.69E-10 | 0.147472 |
| 0.033731 | 0.46712  | -0.10216 | 0.02727  | 0.08572  | 0.06419  | -0.18755 | 4.54E-05 | 0.017558 |
| 0.036486 | 0.4315   | -0.15974 | 0.00053  | 0.146754 | 0.00147  | -0.21403 | 3.06E-06 | 0.167347 |
| 0.142774 | 0.00198  | -0.08002 | 0.08411  | 0.10936  | 0.01808  | -0.21247 | 3.62E-06 | -0.03642 |
| 0.10123  | 0.02872  | -0.08345 | 0.07159  | 0.254745 | 2.37E-08 | -0.17539 | 0.00014  | 0.245076 |
| 0.061735 | 0.18293  | 0.071338 | 0.12369  | 0.213559 | 3.22E-06 | 0.003386 | 0.94183  | 0.077531 |
| -0.00802 | 0.86278  | 0.04259  | 0.35844  | -0.13925 | 0.00256  | 0.171161 | 0.0002   | 0.072339 |
| 0.062098 | 0.18036  | 0.238509 | 1.83E-07 | 0.144808 | 0.0017   | 0.398622 | 3.09E-19 | 0.205811 |
| 0.229166 | 5.56E-07 | 0.049426 | 0.28647  | 0.263806 | 7.10E-09 | 0.017602 | 0.7044   | 0.056082 |

|          |         |          |          |          |          |          |          |          |
|----------|---------|----------|----------|----------|----------|----------|----------|----------|
| 0.071814 | 0.1212  | 4.08E-06 | 0.99993  | 0.202554 | 1.03E-05 | -0.02042 | 0.6598   | 0.154681 |
| -0.0214  | 0.64459 | 0.057337 | 0.21618  | -0.06936 | 0.13449  | 0.168311 | 0.00026  | 0.104939 |
| 0.046336 | 0.31771 | -0.24655 | 6.76E-08 | 0.029232 | 0.5286   | -0.28523 | 3.42E-10 | 0.100989 |
| 0.033893 | 0.46497 | -0.23891 | 1.74E-07 | -0.00994 | 0.8304   | -0.25335 | 2.84E-08 | 0.046249 |
| 0.048658 | 0.29404 | -0.13996 | 0.00243  | 0.060365 | 0.19285  | -0.16463 | 0.00035  | 0.001031 |
| -0.08646 | 0.06193 | 0.022936 | 0.62104  | -0.17367 | 0.00016  | 0.051368 | 0.26794  | -0.08605 |
| 0.010847 | 0.81515 | -0.11663 | 0.01166  | 0.123046 | 0.00777  | -0.15982 | 0.00053  | 0.008725 |
| 0.134514 | 0.00359 | 0.117833 | 0.01082  | 0.332859 | 1.52E-13 | 0.15242  | 0.00095  | 0.230429 |
| -0.07938 | 0.0866  | 0.099094 | 0.03228  | -0.14881 | 0.00126  | 0.21723  | 2.15E-06 | 0.137139 |
| 0.082523 | 0.07481 | -0.08824 | 0.05672  | 0.182525 | 7.27E-05 | -0.20033 | 1.29E-05 | 0.028721 |
| 0.029515 | 0.52461 | -0.15945 | 0.00054  | 0.183395 | 6.71E-05 | -0.26656 | 4.88E-09 | 0.108128 |
| -0.03725 | 0.42197 | 0.132287 | 0.00419  | -0.05385 | 0.24542  | 0.202597 | 1.02E-05 | -0.06522 |
| 0.016785 | 0.71751 | -0.03187 | 0.4921   | 0.095087 | 0.03998  | -0.17937 | 9.72E-05 | 0.079015 |
| 0.095198 | 0.03974 | -0.02316 | 0.61756  | 0.201951 | 1.09E-05 | -0.12059 | 0.0091   | 0.088275 |
| -0.09777 | 0.03467 | 0.013627 | 0.76898  | -0.23815 | 1.91E-07 | 0.061491 | 0.18467  | -0.12422 |
| 0.072215 | 0.11913 | -0.09081 | 0.04984  | 0.169958 | 0.00022  | -0.15258 | 0.00094  | 0.012545 |
| -0.04076 | 0.37953 | 0.181417 | 8.06E-05 | 0.016301 | 0.72532  | 0.337702 | 6.40E-14 | 0.157263 |
| 0.04259  | 0.35844 | 0.151753 | 0.001    | 0.365701 | 3.18E-16 | 0.099383 | 0.03177  | 0.28063  |
| -0.05652 | 0.22279 | 0.16702  | 0.00029  | -0.12873 | 0.00534  | 0.210056 | 4.69E-06 | -0.07338 |
| 0.077586 | 0.094   | -0.00147 | 0.97481  | 0.26867  | 3.65E-09 | -0.08282 | 0.07376  | 0.118317 |
| 0.072107 | 0.11968 | -0.04016 | 0.38654  | 0.28668  | 2.76E-10 | -0.17504 | 0.00014  | 0.095685 |
| 0.176601 | 0.00012 | 0.387625 | 3.42E-18 | 0.496941 | 1.70E-30 | 0.170507 | 0.00021  | 0.260317 |
| 0.071273 | 0.12404 | -0.09212 | 0.04662  | 0.22488  | 9.12E-07 | -0.19408 | 2.41E-05 | 0.103114 |
| 0.085546 | 0.06473 | -0.14356 | 0.00187  | 0.023536 | 0.61193  | -0.18292 | 7.01E-05 | 0.037577 |
| 0.036066 | 0.43683 | -0.12723 | 0.0059   | 0.110217 | 0.01719  | -0.22354 | 1.06E-06 | 0.101137 |
| 0.061362 | 0.18559 | -0.06809 | 0.14176  | 0.239444 | 1.63E-07 | -0.1211  | 0.0088   | 0.127382 |
| -0.02124 | 0.64707 | -0.20949 | 4.98E-06 | -0.06567 | 0.15651  | -0.35179 | 4.73E-15 | -0.13909 |
| 0.039999 | 0.38846 | -0.01835 | 0.69253  | 0.205963 | 7.22E-06 | -0.13569 | 0.0033   | 0.113523 |
| -0.00678 | 0.88389 | -0.17288 | 0.00017  | 0.140275 | 0.00238  | -0.23108 | 4.45E-07 | 0.152772 |
| 0.006455 | 0.88935 | -0.21177 | 3.90E-06 | 0.077436 | 0.09463  | -0.26463 | 6.35E-09 | 0.161918 |
| 0.032036 | 0.4898  | 0.144006 | 0.00181  | -0.02581 | 0.57799  | 0.260043 | 1.18E-08 | -0.01154 |
| -0.04933 | 0.28745 | -0.11713 | 0.0113   | 0.027761 | 0.54956  | -0.11819 | 0.01058  | 0.144968 |
| -0.09219 | 0.04647 | -0.1657  | 0.00032  | -0.01654 | 0.7215   | -0.26634 | 5.03E-09 | -0.0361  |
| 0.014489 | 0.75483 | -0.10732 | 0.02036  | 0.160757 | 0.00049  | -0.2168  | 2.26E-06 | 0.229103 |
| 0.013954 | 0.7636  | -0.05248 | 0.25773  | 0.132239 | 0.0042   | -0.15063 | 0.00109  | 0.065231 |
| 0.089172 | 0.05414 | 0.053666 | 0.24709  | 0.305324 | 1.56E-11 | -0.11749 | 0.01106  | 0.087833 |
| 0.130897 | 0.00461 | 0.192173 | 2.90E-05 | 0.36151  | 7.28E-16 | 0.15187  | 0.00099  | 0.37708  |
| 0.027815 | 0.54878 | -0.09622 | 0.03765  | 0.186202 | 5.15E-05 | -0.24774 | 5.83E-08 | 0.158995 |
| 0.018472 | 0.69053 | -0.15114 | 0.00105  | 0.182894 | 7.03E-05 | -0.18832 | 4.21E-05 | 0.247751 |
| 0.082457 | 0.07505 | -0.02281 | 0.62297  | 0.191208 | 3.19E-05 | -0.14514 | 0.00166  | 0.135964 |
| -0.04621 | 0.31904 | -0.15243 | 0.00095  | 0.133122 | 0.00395  | -0.23892 | 1.74E-07 | 0.049091 |
| 0.043315 | 0.35032 | -0.13064 | 0.00469  | 0.05597  | 0.22734  | -0.13843 | 0.00272  | 0.04094  |
| 0.131269 | 0.00449 | 0.069889 | 0.13153  | 0.32678  | 4.40E-13 | -0.07738 | 0.09488  | 0.072793 |
| -0.01842 | 0.69139 | 0.158708 | 0.00058  | -0.05374 | 0.2464   | 0.215909 | 2.49E-06 | -0.03575 |
| -0.02946 | 0.52544 | -0.19209 | 2.93E-05 | -0.05016 | 0.27933  | -0.31951 | 1.52E-12 | -0.00525 |

|          |         |          |          |          |          |          |          |          |
|----------|---------|----------|----------|----------|----------|----------|----------|----------|
| 0.078364 | 0.09074 | -0.12137 | 0.00865  | 0.21269  | 3.53E-06 | -0.23119 | 4.39E-07 | 0.123798 |
| 0.145297 | 0.00164 | 0.017928 | 0.69918  | 0.198423 | 1.56E-05 | -0.02471 | 0.59423  | 0.062693 |
| 0.026911 | 0.56185 | -0.16375 | 0.00038  | 0.137001 | 0.00301  | -0.24525 | 7.97E-08 | 0.14032  |
| 0.026294 | 0.57085 | -0.1515  | 0.00102  | 0.147396 | 0.0014   | -0.24318 | 1.03E-07 | 0.16496  |
| 0.027146 | 0.55844 | -0.15499 | 0.00078  | 0.128233 | 0.00552  | -0.28562 | 3.23E-10 | 0.070452 |
| -0.01484 | 0.74908 | -0.09128 | 0.04869  | 0.140216 | 0.00239  | -0.12714 | 0.00593  | 0.13123  |
| 0.00248  | 0.95737 | -0.07887 | 0.08866  | 0.114782 | 0.01306  | -0.23312 | 3.49E-07 | 0.015389 |
| 0.161385 | 0.00046 | 0.227445 | 6.79E-07 | 0.456312 | 2.14E-25 | 0.147681 | 0.00137  | 0.298825 |
| -0.0212  | 0.64763 | 0.153838 | 0.00085  | -0.12677 | 0.00609  | 0.230567 | 4.72E-07 | -0.00384 |
| 0.022253 | 0.63147 | 0.153725 | 0.00086  | 0.012548 | 0.78682  | 0.279797 | 7.57E-10 | 0.064786 |
| 0.010131 | 0.82715 | -0.06432 | 0.16525  | 0.172752 | 0.00018  | -0.20526 | 7.76E-06 | 0.099172 |
| 0.001439 | 0.97526 | -0.04393 | 0.34354  | 0.231609 | 4.18E-07 | -0.16535 | 0.00033  | 0.096775 |
| 0.061115 | 0.18737 | -0.19024 | 3.50E-05 | -0.00329 | 0.94346  | -0.25215 | 3.32E-08 | 0.0991   |
| 0.027189 | 0.55781 | -0.05818 | 0.20945  | 0.205964 | 7.22E-06 | -0.1562  | 0.00071  | 0.055383 |
| -0.01211 | 0.79402 | -0.1732  | 0.00017  | 0.144281 | 0.00177  | -0.29983 | 3.72E-11 | 0.157099 |
| -0.03118 | 0.50154 | -0.13966 | 0.00249  | 0.161691 | 0.00045  | -0.25694 | 1.78E-08 | 0.086537 |
| 0.019562 | 0.67328 | -0.0125  | 0.78755  | 0.070262 | 0.12947  | -0.18638 | 5.07E-05 | -0.0634  |
| -0.02306 | 0.61908 | -0.12309 | 0.00775  | -0.04848 | 0.2958   | -0.24554 | 7.68E-08 | -0.1069  |
| 0.009917 | 0.83075 | -0.14917 | 0.00122  | 0.101918 | 0.02764  | -0.26584 | 5.39E-09 | 0.070676 |
| 0.081805 | 0.07739 | -0.0276  | 0.55184  | 0.210307 | 4.56E-06 | -0.21028 | 4.57E-06 | 0.067217 |
| 0.006945 | 0.88102 | -0.06412 | 0.16657  | 0.179142 | 9.92E-05 | -0.14187 | 0.00212  | 0.175275 |
| 0.042287 | 0.36188 | -0.13202 | 0.00426  | 0.192098 | 2.93E-05 | -0.25176 | 3.49E-08 | 0.033261 |
| 0.022856 | 0.62225 | -0.04548 | 0.32673  | 0.214342 | 2.95E-06 | -0.14603 | 0.00155  | 0.171238 |
| -0.07684 | 0.09722 | 0.040784 | 0.37921  | -0.19347 | 2.56E-05 | 0.122813 | 0.00788  | -0.04363 |
| 0.078456 | 0.09036 | -0.01283 | 0.78211  | 0.240526 | 1.43E-07 | -0.10461 | 0.02378  | 0.07044  |
| -0.07128 | 0.124   | 0.068821 | 0.13754  | -0.16113 | 0.00047  | 0.122827 | 0.00788  | -0.07686 |
| -0.01346 | 0.77176 | -0.08106 | 0.08015  | 0.138903 | 0.00263  | -0.15392 | 0.00085  | 0.020853 |
| 0.101247 | 0.02869 | 0.161124 | 0.00047  | 0.364516 | 4.02E-16 | 0.067013 | 0.14821  | 0.159651 |
| 0.055681 | 0.22975 | 0.297287 | 5.53E-11 | 0.236528 | 2.32E-07 | 0.465472 | 1.74E-26 | 0.265474 |
| 0.059542 | 0.199   | -0.02491 | 0.59137  | 0.071655 | 0.12203  | -0.1663  | 0.00031  | -0.08216 |
| 0.031163 | 0.50172 | -0.04274 | 0.35671  | 0.196018 | 1.99E-05 | -0.2067  | 6.68E-06 | 0.03564  |
| -0.08949 | 0.05329 | 0.166928 | 0.00029  | -0.13904 | 0.0026   | 0.163951 | 0.00037  | -0.08653 |
| 0.008386 | 0.85658 | -0.10629 | 0.0216   | 0.151136 | 0.00105  | -0.17286 | 0.00017  | 0.132283 |
| 0.042224 | 0.36259 | -0.08929 | 0.05383  | 0.166892 | 0.00029  | -0.16172 | 0.00045  | 0.212339 |
| 0.029152 | 0.52973 | -0.0083  | 0.85805  | 0.173032 | 0.00017  | -0.06079 | 0.18974  | 0.184528 |
| 0.029208 | 0.52893 | -0.11937 | 0.00983  | 0.172036 | 0.00019  | -0.24085 | 1.37E-07 | 0.153372 |
| 0.085868 | 0.06373 | -0.09544 | 0.03925  | 0.170995 | 0.00021  | -0.21974 | 1.63E-06 | 0.006205 |
| 0.046718 | 0.31373 | -0.12032 | 0.00925  | 0.156227 | 0.0007   | -0.25468 | 2.39E-08 | 0.107274 |
| 0.011464 | 0.80484 | -0.11702 | 0.01138  | 0.009391 | 0.83961  | -0.29343 | 1.00E-10 | -0.15376 |
| 0.038466 | 0.40692 | -0.10062 | 0.02969  | 0.138552 | 0.00269  | -0.18375 | 6.49E-05 | 0.176019 |
| 0.091068 | 0.04921 | -0.05204 | 0.26173  | 0.192238 | 2.89E-05 | -0.2249  | 9.10E-07 | 0.034433 |
| -0.08049 | 0.08231 | 0.028859 | 0.53387  | -0.20019 | 1.31E-05 | 0.084567 | 0.06787  | -0.01717 |
| 0.075424 | 0.10355 | -0.02039 | 0.66037  | 0.229436 | 5.39E-07 | -0.12064 | 0.00906  | 0.104695 |
| 0.156089 | 0.00071 | 0.023382 | 0.61426  | 0.325458 | 5.53E-13 | -0.11628 | 0.01191  | 0.106318 |
| 0.119208 | 0.00993 | 0.011354 | 0.80668  | 0.262048 | 9.00E-09 | -0.0523  | 0.25933  | 0.2179   |

|          |         |          |          |          |          |          |          |          |
|----------|---------|----------|----------|----------|----------|----------|----------|----------|
| 0.052513 | 0.2574  | -0.08019 | 0.08345  | 0.266385 | 5.00E-09 | -0.11495 | 0.01293  | 0.213668 |
| 0.036783 | 0.42777 | -0.13182 | 0.00432  | 0.10517  | 0.02303  | -0.23556 | 2.61E-07 | 0.132105 |
| -0.07079 | 0.1266  | -0.23603 | 2.47E-07 | -0.02863 | 0.53716  | -0.25979 | 1.22E-08 | -0.01543 |
| 0.07462  | 0.10729 | -0.11646 | 0.01178  | 0.184182 | 6.23E-05 | -0.22369 | 1.04E-06 | 0.080734 |
| 0.103226 | 0.0257  | 0.086896 | 0.06061  | 0.195375 | 2.12E-05 | -0.07709 | 0.09614  | 0.009832 |
| 0.065061 | 0.16041 | -0.04172 | 0.36839  | 0.233219 | 3.45E-07 | -0.09476 | 0.04067  | 0.250093 |
| 0.035903 | 0.43891 | -0.12086 | 0.00894  | 0.191806 | 3.01E-05 | -0.25277 | 3.06E-08 | 0.079957 |
| 0.09785  | 0.03452 | -0.03694 | 0.42574  | 0.225227 | 8.77E-07 | -0.16603 | 0.00031  | -0.02774 |
| 0.093049 | 0.04445 | 0.027071 | 0.55953  | 0.283301 | 4.55E-10 | -0.11434 | 0.01342  | 0.169757 |
| -0.01806 | 0.69706 | -0.18732 | 4.64E-05 | 0.084061 | 0.06954  | -0.19031 | 3.48E-05 | 0.153    |
| 0.084042 | 0.0696  | -0.19529 | 2.14E-05 | 0.002667 | 0.95417  | -0.24787 | 5.72E-08 | 0.036611 |
| -0.08069 | 0.08154 | 0.048512 | 0.29549  | -0.22844 | 6.05E-07 | 0.16125  | 0.00047  | -0.12728 |
| 0.139166 | 0.00258 | 0.053771 | 0.24616  | 0.37008  | 1.32E-16 | -0.06184 | 0.1822   | 0.24098  |
| 0.011665 | 0.80149 | -0.12501 | 0.00684  | 0.159766 | 0.00053  | -0.25684 | 1.80E-08 | 0.037727 |
| 0.075647 | 0.10253 | 0.005809 | 0.90037  | 0.164286 | 0.00036  | -0.14625 | 0.00153  | -0.08604 |
| 0.033438 | 0.47099 | -0.1292  | 0.00517  | 0.118162 | 0.0106   | -0.23593 | 2.50E-07 | 0.199991 |
| -0.00922 | 0.84242 | -0.19932 | 1.43E-05 | 0.060997 | 0.18823  | -0.22076 | 1.45E-06 | 0.029251 |
| 0.060228 | 0.19387 | -0.10875 | 0.01873  | 0.21948  | 1.68E-06 | -0.21131 | 4.10E-06 | 0.201279 |
| 0.000422 | 0.99275 | 0.040962 | 0.37714  | 0.178525 | 0.0001   | -0.10076 | 0.02947  | -0.02842 |
| -0.03445 | 0.45772 | 0.061098 | 0.18749  | -0.14643 | 0.00151  | 0.187685 | 4.48E-05 | 0.069241 |
| 0.070588 | 0.1277  | -0.08022 | 0.08333  | 0.246446 | 6.86E-08 | -0.22046 | 1.50E-06 | 0.136077 |
| 0.037193 | 0.42262 | -0.06296 | 0.17436  | 0.131233 | 0.0045   | -0.00696 | 0.88081  | 0.253731 |
| -0.00565 | 0.90306 | -0.24413 | 9.16E-08 | 0.032468 | 0.48396  | -0.27248 | 2.15E-09 | 0.148774 |
| -0.00743 | 0.87281 | -0.08625 | 0.06256  | 0.084699 | 0.06744  | -0.13697 | 0.00302  | 0.177993 |
| 0.065241 | 0.15925 | 0.032047 | 0.48966  | 0.117456 | 0.01108  | -0.075   | 0.10553  | -0.00966 |
| 0.069438 | 0.13404 | -0.05215 | 0.26068  | 0.232433 | 3.79E-07 | -0.17971 | 9.42E-05 | 0.047816 |
| 0.058971 | 0.20335 | 0.171361 | 0.0002   | -0.00594 | 0.89809  | 0.251075 | 3.81E-08 | 0.019819 |
| -0.10844 | 0.01908 | -0.27118 | 2.58E-09 | -0.06749 | 0.14533  | -0.37293 | 7.42E-17 | -0.09482 |
| -0.0105  | 0.82102 | -0.12057 | 0.0091   | 0.213796 | 3.13E-06 | -0.22713 | 7.05E-07 | 0.148559 |
| 0.063459 | 0.17098 | -0.04698 | 0.311    | 0.24292  | 1.06E-07 | -0.16907 | 0.00024  | 0.047512 |
| -0.02976 | 0.52112 | 0.181558 | 7.95E-05 | -0.10734 | 0.02033  | 0.206279 | 6.98E-06 | -0.05973 |
| 0.054633 | 0.23866 | -0.16937 | 0.00024  | 0.178207 | 0.00011  | -0.24403 | 9.28E-08 | 0.09257  |
| 0.095667 | 0.03877 | 0.192408 | 2.84E-05 | 0.112973 | 0.01458  | 0.351778 | 4.75E-15 | 0.086948 |
| 0.023219 | 0.61674 | -0.15825 | 0.0006   | 0.155737 | 0.00073  | -0.22525 | 8.74E-07 | 0.1845   |
| 0.095823 | 0.03846 | -0.01065 | 0.81845  | 0.215948 | 2.48E-06 | -0.18729 | 4.65E-05 | 0.050749 |
| -0.01013 | 0.82714 | -0.02696 | 0.5612   | 0.136304 | 0.00316  | -0.13088 | 0.00461  | 0.13725  |
| -0.02905 | 0.53111 | -0.16973 | 0.00023  | 0.043819 | 0.34474  | -0.3237  | 7.47E-13 | 0.012634 |
| -0.03425 | 0.46027 | -0.04307 | 0.35307  | 0.140125 | 0.00241  | -0.04414 | 0.34124  | 0.369095 |
| -0.01486 | 0.7488  | -0.08418 | 0.06913  | 0.016308 | 0.72522  | -0.15542 | 0.00075  | -0.09445 |
| -0.0875  | 0.05885 | 0.097392 | 0.03538  | -0.13742 | 0.00292  | 0.050121 | 0.27974  | -0.11578 |
| -0.03135 | 0.49912 | -0.14304 | 0.00194  | 0.080974 | 0.08046  | -0.25655 | 1.87E-08 | 0.077251 |
| 0.107385 | 0.02028 | -0.05399 | 0.24426  | 0.15133  | 0.00104  | -0.13485 | 0.0035   | 0.069201 |
| -0.09182 | 0.04735 | 0.093495 | 0.04344  | -0.18011 | 9.08E-05 | 0.139864 | 0.00245  | -0.26799 |
| -0.06202 | 0.18089 | -0.21188 | 3.85E-06 | -0.02055 | 0.65786  | -0.21849 | 1.87E-06 | 0.139035 |
| 0.015767 | 0.73398 | -0.11888 | 0.01013  | 0.058152 | 0.20971  | -0.21714 | 2.18E-06 | 0.044694 |

|           |         |          |          |          |          |          |          |          |
|-----------|---------|----------|----------|----------|----------|----------|----------|----------|
| 0.047866  | 0.30197 | 0.143843 | 0.00183  | 0.114354 | 0.01341  | 0.049925 | 0.28163  | 0.02912  |
| 0.000649  | 0.98885 | -0.12689 | 0.00603  | 0.011655 | 0.80166  | -0.1804  | 8.84E-05 | 0.153987 |
| -0.04326  | 0.35095 | -0.06935 | 0.13456  | 0.033696 | 0.46757  | -0.22141 | 1.35E-06 | -0.09894 |
| 0.021861  | 0.63749 | -0.06257 | 0.17709  | 0.208421 | 5.57E-06 | -0.13302 | 0.00398  | 0.240328 |
| 0.144151  | 0.00179 | -0.01994 | 0.66728  | 0.189947 | 3.60E-05 | -0.10938 | 0.01805  | -0.01878 |
| 0.008095  | 0.86149 | -0.05201 | 0.26201  | 0.210385 | 4.52E-06 | -0.11698 | 0.01141  | 0.316477 |
| 0.012128  | 0.79379 | -0.09464 | 0.04092  | 0.093022 | 0.04452  | -0.07998 | 0.08425  | 0.208605 |
| -1.31E-05 | 0.99977 | -0.12369 | 0.00745  | 0.068997 | 0.13654  | -0.16593 | 0.00032  | 0.16578  |
| 0.101453  | 0.02836 | 0.036826 | 0.42722  | 0.195528 | 2.09E-05 | -0.10478 | 0.02354  | 0.037953 |
| -0.09491  | 0.04035 | 0.092534 | 0.04565  | -0.187   | 4.78E-05 | 0.183712 | 6.51E-05 | -0.09595 |
| 0.022886  | 0.62179 | -0.13556 | 0.00333  | 0.118284 | 0.01052  | -0.30493 | 1.66E-11 | 0.094233 |
| -0.0501   | 0.27996 | 0.176747 | 0.00012  | -0.10747 | 0.02018  | 0.186634 | 4.95E-05 | -0.1069  |
| 0.097447  | 0.03527 | -0.06721 | 0.14698  | 0.187399 | 4.60E-05 | -0.12059 | 0.0091   | 0.182154 |
| 0.072146  | 0.11949 | -0.09831 | 0.03367  | 0.185662 | 5.42E-05 | -0.18809 | 4.31E-05 | 0.046278 |
| -0.00778  | 0.86689 | -0.16063 | 0.00049  | -0.00794 | 0.86405  | -0.29754 | 5.32E-11 | 0.017634 |
| 0.044889  | 0.33307 | -0.08438 | 0.06848  | 0.130702 | 0.00467  | -0.19312 | 2.65E-05 | 0.03295  |
| 0.007112  | 0.87817 | 0.149197 | 0.00122  | -0.03305 | 0.47618  | 0.163932 | 0.00037  | -0.07201 |
| -0.03078  | 0.507   | -0.19587 | 2.02E-05 | -0.01287 | 0.78142  | -0.2143  | 2.97E-06 | 0.064754 |
| -0.17074  | 0.00021 | -0.0832  | 0.07245  | -0.30939 | 8.12E-12 | 0.016298 | 0.72538  | -0.05581 |
| 0.120384  | 0.00921 | 0.206714 | 6.67E-06 | 0.363036 | 5.39E-16 | 0.10396  | 0.02466  | 0.221169 |
| 0.064639  | 0.16314 | 0.003307 | 0.94317  | 0.163257 | 0.0004   | -0.16028 | 0.00051  | -0.10396 |
| -0.02233  | 0.6303  | -0.1128  | 0.01473  | 0.099385 | 0.03177  | -0.17433 | 0.00015  | 0.096493 |
| -0.0109   | 0.81425 | 0.071012 | 0.12542  | 0.168484 | 0.00025  | -0.02232 | 0.63041  | -0.08347 |
| 0.054453  | 0.24021 | -0.11645 | 0.01179  | 0.189271 | 3.85E-05 | -0.23037 | 4.83E-07 | 0.137333 |
| -0.0801   | 0.0838  | 0.15594  | 0.00072  | -0.17389 | 0.00016  | 0.155864 | 0.00073  | -0.15879 |
| 0.052091  | 0.26125 | -0.15934 | 0.00055  | 0.114007 | 0.0137   | -0.261   | 1.04E-08 | 0.073683 |
| 0.038004  | 0.41258 | -0.06423 | 0.1658   | 0.149112 | 0.00123  | -0.24024 | 1.48E-07 | -0.02892 |
| 0.060184  | 0.19419 | -0.14309 | 0.00194  | 0.160907 | 0.00048  | -0.26519 | 5.88E-09 | 0.228203 |
| 0.022592  | 0.62628 | -0.01168 | 0.8012   | 0.172693 | 0.00018  | -0.11847 | 0.0104   | 0.067002 |
| -0.05545  | 0.23167 | -0.25481 | 2.35E-08 | -0.01837 | 0.6921   | -0.33788 | 6.20E-14 | 0.035215 |
| 0.008755  | 0.85034 | -0.11203 | 0.01543  | 0.123357 | 0.00761  | -0.1821  | 7.56E-05 | 0.068388 |
| -0.17045  | 0.00022 | 0.04538  | 0.32781  | -0.28351 | 4.41E-10 | 0.110123 | 0.01728  | -0.06261 |
| 0.070437  | 0.12852 | -0.07501 | 0.10545  | 0.222973 | 1.13E-06 | -0.15475 | 0.00079  | 0.174081 |
| 0.010649  | 0.81847 | -0.17546 | 0.00014  | 0.046244 | 0.31867  | -0.18859 | 4.11E-05 | 0.057773 |
| 0.017159  | 0.7115  | -0.14414 | 0.00179  | 0.067656 | 0.14434  | -0.21126 | 4.12E-06 | 0.025905 |
| 0.009395  | 0.83954 | -0.12932 | 0.00513  | 0.182451 | 7.32E-05 | -0.22911 | 5.60E-07 | 0.06654  |
| 0.115202  | 0.01273 | -0.01463 | 0.75258  | 0.238618 | 1.81E-07 | -0.11136 | 0.01606  | 0.175136 |
| 0.044454  | 0.33778 | 0.058743 | 0.20511  | 0.179691 | 9.44E-05 | -0.02341 | 0.61379  | 0.130384 |
| -0.03902  | 0.40018 | 0.085153 | 0.06598  | 0.28164  | 5.80E-10 | 0.0256   | 0.58106  | 0.214661 |
| 0.036006  | 0.43759 | 0.00036  | 0.99382  | 0.249998 | 4.37E-08 | -0.12152 | 0.00857  | 0.16141  |
| -0.09415  | 0.04199 | 0.044487 | 0.33742  | -0.17877 | 0.0001   | 0.094495 | 0.04124  | -0.10819 |
| 0.175327  | 0.00014 | 0.087757 | 0.05809  | 0.340492 | 3.86E-14 | 0.069297 | 0.13483  | 0.180729 |
| 0.066359  | 0.15221 | -0.11098 | 0.01643  | 0.170649 | 0.00021  | -0.17791 | 0.00011  | 0.132286 |
| -0.01342  | 0.77243 | 0.244542 | 8.70E-08 | 0.028912 | 0.53312  | 0.311446 | 5.81E-12 | 0.081412 |
| -0.00533  | 0.90846 | -0.13557 | 0.00333  | 0.120262 | 0.00929  | -0.2392  | 1.68E-07 | 0.107451 |



|          |          |          |          |          |          |          |          |           |
|----------|----------|----------|----------|----------|----------|----------|----------|-----------|
| 0.041609 | 0.36963  | -0.17749 | 0.00012  | 0.151418 | 0.00103  | -0.24904 | 4.94E-08 | 0.215159  |
| -0.00494 | 0.91519  | -0.12895 | 0.00526  | 0.121076 | 0.00882  | -0.20314 | 9.67E-06 | 0.082039  |
| 0.040453 | 0.3831   | -0.02978 | 0.52085  | 0.150343 | 0.00112  | -0.23533 | 2.69E-07 | -0.17564  |
| -0.02429 | 0.6006   | -0.02904 | 0.53132  | 0.150049 | 0.00114  | -0.05123 | 0.26926  | 0.011416  |
| -0.17796 | 0.00011  | -0.02049 | 0.6588   | -0.21636 | 2.37E-06 | 0.072867 | 0.11583  | -0.15033  |
| -0.01776 | 0.70194  | -0.08771 | 0.05821  | 0.097994 | 0.03425  | -0.21249 | 3.61E-06 | -0.07895  |
| 0.024298 | 0.60045  | -0.08132 | 0.07916  | 0.170172 | 0.00022  | -0.11946 | 0.00977  | 0.092604  |
| 0.034845 | 0.45252  | -0.11752 | 0.01103  | 0.150551 | 0.0011   | -0.21351 | 3.23E-06 | 0.195378  |
| 0.039912 | 0.38949  | -0.08643 | 0.06201  | 0.08362  | 0.07102  | -0.14805 | 0.00133  | -0.01851  |
| 0.079692 | 0.08538  | 0.014639 | 0.75236  | 0.29133  | 1.38E-10 | -0.15886 | 0.00057  | 0.167983  |
| -0.01092 | 0.81394  | -0.20823 | 5.69E-06 | 0.024679 | 0.59474  | -0.30116 | 3.02E-11 | 0.069209  |
| -0.10387 | 0.02478  | 0.183589 | 6.59E-05 | -0.10729 | 0.0204   | 0.23134  | 4.31E-07 | -0.02238  |
| 0.199735 | 1.37E-05 | 0.063567 | 0.17025  | 0.280983 | 6.38E-10 | -0.00625 | 0.89287  | 0.069279  |
| -0.07038 | 0.12884  | 0.010057 | 0.82839  | -0.23352 | 3.33E-07 | 0.055317 | 0.23282  | -0.1256   |
| 0.044835 | 0.33365  | -0.08719 | 0.05975  | 0.189447 | 3.78E-05 | -0.22331 | 1.09E-06 | 0.080924  |
| 0.072531 | 0.11752  | -0.02659 | 0.5666   | 0.202397 | 1.04E-05 | -0.15562 | 0.00074  | -0.01461  |
| 0.094451 | 0.04133  | -0.02625 | 0.57157  | 0.208799 | 5.36E-06 | -0.09663 | 0.03685  | 0.182915  |
| 0.045603 | 0.32543  | -0.05275 | 0.25523  | 0.205457 | 7.61E-06 | -0.18458 | 6.00E-05 | 0.157699  |
| 0.039845 | 0.39029  | -0.01491 | 0.74791  | 0.0843   | 0.06874  | -0.10681 | 0.02096  | -0.00157  |
| 0.054408 | 0.2406   | -0.10475 | 0.02358  | 0.193848 | 2.47E-05 | -0.17253 | 0.00018  | 0.229528  |
| 0.041457 | 0.37139  | -0.0832  | 0.07245  | 0.198159 | 1.61E-05 | -0.1847  | 5.94E-05 | 0.240663  |
| 0.08458  | 0.06783  | 0.028983 | 0.53212  | 0.132266 | 0.00419  | -0.07852 | 0.0901   | 0.05538   |
| -0.03352 | 0.46985  | -0.27466 | 1.58E-09 | -0.00662 | 0.88662  | -0.33051 | 2.30E-13 | 0.006425  |
| 0.097852 | 0.03452  | -0.04463 | 0.33587  | 0.204448 | 8.45E-06 | -0.15203 | 0.00098  | 0.039034  |
| 0.035874 | 0.43927  | -0.12318 | 0.0077   | 0.122797 | 0.00789  | -0.2302  | 4.93E-07 | 0.094924  |
| 0.097548 | 0.03508  | -0.06534 | 0.1586   | 0.30319  | 2.19E-11 | -0.11382 | 0.01385  | 0.202711  |
| 0.04326  | 0.35093  | -0.0789  | 0.08854  | 0.189672 | 3.70E-05 | -0.23049 | 4.77E-07 | 0.018019  |
| 0.186027 | 5.24E-05 | 0.289263 | 1.88E-10 | 0.516198 | 3.66E-33 | 0.266822 | 4.71E-09 | 0.304176  |
| 0.025627 | 0.58066  | -0.09137 | 0.04845  | 0.173418 | 0.00017  | -0.20352 | 9.30E-06 | 0.155238  |
| 0.07847  | 0.0903   | -0.00831 | 0.85777  | 0.207679 | 6.03E-06 | -0.18514 | 5.69E-05 | 0.108168  |
| 0.045065 | 0.33117  | -0.02247 | 0.62821  | 0.187833 | 4.41E-05 | -0.18046 | 8.80E-05 | 0.018627  |
| -0.01226 | 0.79167  | -0.18781 | 4.42E-05 | 0.02752  | 0.55303  | -0.32397 | 7.14E-13 | 0.10167   |
| 0.076496 | 0.09872  | 0.000461 | 0.99207  | 0.300366 | 3.42E-11 | -0.14324 | 0.00191  | -7.36E-05 |
| 0.018597 | 0.68853  | -0.08994 | 0.05211  | 0.176571 | 0.00013  | -0.19336 | 2.59E-05 | 0.172083  |
| -0.1517  | 0.00101  | -0.10774 | 0.01987  | -0.24929 | 4.78E-08 | 0.029434 | 0.52575  | -0.10701  |
| 0.0766   | 0.09826  | -0.07461 | 0.10736  | 0.274441 | 1.63E-09 | -0.13937 | 0.00254  | 0.247016  |
| -0.12985 | 0.00495  | 0.058104 | 0.21009  | -0.04717 | 0.30911  | 0.205144 | 7.86E-06 | 0.225625  |
| 0.051525 | 0.26648  | 0.031092 | 0.50269  | 0.247379 | 6.10E-08 | -0.07665 | 0.09803  | 0.179956  |
| -0.15672 | 0.00068  | -0.06823 | 0.14094  | -0.25319 | 2.90E-08 | -0.04165 | 0.3692   | -0.20353  |
| 0.002996 | 0.94852  | -0.12765 | 0.00574  | 0.095585 | 0.03894  | -0.23887 | 1.75E-07 | 0.058807  |
| 0.005886 | 0.89906  | -0.09008 | 0.05173  | 0.149955 | 0.00115  | -0.18336 | 6.73E-05 | -0.00299  |
| -0.08089 | 0.08077  | 0.192416 | 2.84E-05 | -0.05185 | 0.2635   | 0.209106 | 5.18E-06 | -0.18724  |
| 0.062366 | 0.17849  | -0.1253  | 0.0067   | 0.146916 | 0.00145  | -0.28714 | 2.58E-10 | -0.03623  |
| 0.060943 | 0.18862  | -0.15038 | 0.00112  | 0.027031 | 0.56011  | -0.25726 | 1.70E-08 | 0.052131  |
| 0.025661 | 0.58017  | -0.03598 | 0.43789  | 0.088452 | 0.05612  | -0.11578 | 0.01229  | 0.109133  |

|          |          |          |          |          |          |          |          |          |
|----------|----------|----------|----------|----------|----------|----------|----------|----------|
| 0.01407  | 0.76169  | -0.17891 | 0.0001   | 0.076067 | 0.10063  | -0.19528 | 2.14E-05 | 0.071459 |
| 0.059665 | 0.19808  | -0.03602 | 0.43738  | 0.176974 | 0.00012  | -0.20958 | 4.93E-06 | 0.092471 |
| 0.023905 | 0.60635  | -0.06263 | 0.17668  | 0.241172 | 1.32E-07 | -0.1545  | 0.00081  | 0.161929 |
| 0.073601 | 0.11219  | 0.040284 | 0.38508  | 0.300183 | 3.52E-11 | -0.09598 | 0.03814  | 0.069114 |
| 0.121227 | 0.00873  | 0.048541 | 0.2952   | 0.291461 | 1.35E-10 | 0.049636 | 0.28443  | 0.261156 |
| 0.029619 | 0.52315  | -0.11818 | 0.01059  | 0.232452 | 3.78E-07 | -0.19729 | 1.75E-05 | 0.108409 |
| -0.0893  | 0.05381  | 0.188664 | 4.08E-05 | -0.14916 | 0.00123  | 0.213077 | 3.39E-06 | -0.17347 |
| 0.029904 | 0.51916  | -0.01137 | 0.80635  | 0.227543 | 6.72E-07 | -0.10998 | 0.01743  | 0.135761 |
| -0.09354 | 0.04333  | -0.11932 | 0.00986  | -0.29844 | 4.62E-11 | -0.08913 | 0.05427  | -0.08159 |
| -0.03668 | 0.4291   | -0.10319 | 0.02575  | 0.06772  | 0.14396  | -0.16809 | 0.00026  | 0.025652 |
| 0.034125 | 0.46193  | -0.10757 | 0.02006  | 0.127122 | 0.00594  | -0.17856 | 0.0001   | 0.127803 |
| 0.035291 | 0.44675  | -0.00839 | 0.85648  | 0.237684 | 2.02E-07 | -0.12626 | 0.00629  | 0.168049 |
| 0.098956 | 0.03252  | 0.049337 | 0.28734  | 0.316465 | 2.54E-12 | -0.09272 | 0.04521  | 0.074104 |
| 0.063349 | 0.17172  | -0.03984 | 0.39031  | 0.138619 | 0.00268  | -0.14532 | 0.00164  | 0.103242 |
| -0.00957 | 0.83651  | 0.026366 | 0.56979  | 0.195256 | 2.15E-05 | -0.06289 | 0.17485  | 0.066147 |
| 0.016386 | 0.72396  | -0.13522 | 0.00341  | 0.199286 | 1.43E-05 | -0.23429 | 3.04E-07 | 0.078717 |
| 0.00349  | 0.94004  | -0.01218 | 0.79298  | 0.191681 | 3.05E-05 | -0.06241 | 0.17816  | 0.132166 |
| -0.08893 | 0.0548   | -0.27885 | 8.68E-10 | -0.14189 | 0.00211  | -0.3719  | 9.14E-17 | -0.10326 |
| -0.05615 | 0.22589  | 0.141264 | 0.00221  | -0.07209 | 0.11976  | 0.164445 | 0.00036  | -0.17703 |
| -0.11051 | 0.01689  | 0.145208 | 0.00165  | -0.22796 | 6.40E-07 | 0.165485 | 0.00033  | -0.14887 |
| -0.06383 | 0.16848  | 0.13085  | 0.00462  | -0.13041 | 0.00476  | 0.146565 | 0.00149  | -0.06527 |
| 0.10811  | 0.01945  | 0.015189 | 0.74339  | 0.229545 | 5.32E-07 | -0.15053 | 0.0011   | 0.025995 |
| 0.071893 | 0.12079  | 0.019762 | 0.67014  | 0.161029 | 0.00048  | -0.09207 | 0.04675  | 0.004382 |
| 0.179546 | 9.56E-05 | 0.095951 | 0.0382   | 0.355037 | 2.55E-15 | -0.04878 | 0.29285  | 0.024222 |
| 0.137358 | 0.00293  | 0.040707 | 0.38011  | 0.228524 | 5.99E-07 | 0.023485 | 0.6127   | 0.191737 |
| -0.09188 | 0.0472   | 0.055617 | 0.23029  | -0.26736 | 4.37E-09 | 0.052717 | 0.25556  | -0.18901 |
| -0.08246 | 0.07505  | 0.105194 | 0.023    | -0.201   | 1.20E-05 | 0.078149 | 0.09163  | -0.02992 |
| -0.04879 | 0.29274  | -0.09863 | 0.0331   | -0.01157 | 0.80315  | -0.17992 | 9.24E-05 | 0.017658 |
| 0.085439 | 0.06507  | -0.04573 | 0.32408  | 0.187077 | 4.74E-05 | -0.17242 | 0.00018  | 0.115076 |
| 0.034073 | 0.46261  | -0.14488 | 0.00169  | 0.239999 | 1.53E-07 | -0.2108  | 4.33E-06 | 0.239347 |
| -0.01356 | 0.77011  | -0.16413 | 0.00037  | -0.00521 | 0.91067  | -0.25741 | 1.67E-08 | -0.07636 |
| 0.173195 | 0.00017  | 0.199371 | 1.42E-05 | 0.457355 | 1.61E-25 | 0.138325 | 0.00274  | 0.097915 |
| 0.020842 | 0.65326  | -0.12321 | 0.00768  | 0.131105 | 0.00454  | -0.2387  | 1.79E-07 | 0.190369 |
| -0.20742 | 6.20E-06 | -0.12792 | 0.00564  | -0.31608 | 2.70E-12 | -0.04563 | 0.32513  | -0.11235 |
| -0.02598 | 0.57545  | -0.04328 | 0.35071  | 0.056813 | 0.22041  | -0.1136  | 0.01403  | -0.06333 |
| 0.165103 | 0.00034  | 0.207831 | 5.93E-06 | 0.380679 | 1.49E-17 | 0.038089 | 0.41153  | 0.189489 |
| -0.00333 | 0.94281  | -0.14236 | 0.00204  | 0.017438 | 0.70702  | -0.22546 | 8.53E-07 | 0.021306 |
| 0.087427 | 0.05904  | -0.02659 | 0.5665   | 0.2683   | 3.84E-09 | -0.1142  | 0.01353  | 0.140791 |
| 0.022643 | 0.6255   | -0.16083 | 0.00048  | 0.108113 | 0.01944  | -0.28076 | 6.59E-10 | 0.06977  |
| -0.01533 | 0.74114  | -0.16263 | 0.00042  | -0.0031  | 0.94671  | -0.2434  | 1.00E-07 | 0.156679 |
| 0.006854 | 0.88256  | -0.18505 | 5.75E-05 | 0.0679   | 0.1429   | -0.25785 | 1.58E-08 | -0.01477 |
| 0.129752 | 0.00498  | 0.065483 | 0.1577   | 0.280335 | 7.01E-10 | 0.001418 | 0.97562  | 0.162018 |
| 0.037808 | 0.41499  | -0.1078  | 0.0198   | 0.038689 | 0.4042   | -0.1542  | 0.00083  | -0.03266 |
| 0.018253 | 0.694    | -0.13347 | 0.00386  | 0.133323 | 0.0039   | -0.29393 | 9.26E-11 | 0.103133 |
| 0.022182 | 0.63255  | -0.13213 | 0.00423  | 0.203668 | 9.16E-06 | -0.16151 | 0.00046  | 0.278093 |

|          |         |          |          |          |          |          |          |          |
|----------|---------|----------|----------|----------|----------|----------|----------|----------|
| 0.027166 | 0.55815 | -0.17099 | 0.00021  | 0.104034 | 0.02456  | -0.25266 | 3.11E-08 | 0.17293  |
| -0.13769 | 0.00287 | -0.12477 | 0.00694  | -0.32727 | 4.04E-13 | 6.13E-05 | 0.99895  | -0.06449 |
| -0.00516 | 0.91142 | -0.09496 | 0.04024  | 0.16957  | 0.00023  | -0.13676 | 0.00306  | 0.155619 |
| -0.13091 | 0.0046  | 0.000689 | 0.98816  | -0.28979 | 1.74E-10 | 0.041047 | 0.37614  | -0.18018 |
| -0.012   | 0.79591 | 0.182503 | 7.29E-05 | 0.003434 | 0.94101  | 0.282212 | 5.33E-10 | -0.0181  |
| -0.02541 | 0.58382 | 0.344508 | 1.85E-14 | 0.101289 | 0.02862  | 0.43103  | 1.50E-22 | 0.067028 |
| 0.037817 | 0.41488 | -0.08098 | 0.08043  | 0.018767 | 0.68584  | -0.18719 | 4.69E-05 | -0.15176 |
| -0.04741 | 0.30656 | -0.1845  | 6.05E-05 | -0.04115 | 0.37499  | -0.22426 | 9.79E-07 | -0.00437 |
| -0.09574 | 0.03863 | -0.19693 | 1.82E-05 | -0.02209 | 0.63402  | -0.32154 | 1.08E-12 | -0.04365 |
| -0.06655 | 0.15101 | -0.1611  | 0.00047  | -0.01271 | 0.78412  | -0.16397 | 0.00037  | -0.01899 |
| -0.00847 | 0.85515 | -0.13697 | 0.00302  | 0.11722  | 0.01124  | -0.24871 | 5.15E-08 | 0.208881 |
| -0.00271 | 0.95351 | -0.18089 | 8.46E-05 | 0.004408 | 0.92431  | -0.29586 | 6.89E-11 | 0.014944 |
| 0.042403 | 0.36056 | -0.18847 | 4.16E-05 | 0.132779 | 0.00405  | -0.29911 | 4.16E-11 | 0.154446 |
| -0.03851 | 0.4064  | -0.11079 | 0.01662  | 0.016097 | 0.72863  | -0.23161 | 4.18E-07 | 0.05597  |
| -0.07164 | 0.12212 | -0.10979 | 0.01762  | 0.012067 | 0.79481  | -0.14529 | 0.00164  | 0.004776 |
| 0.090234 | 0.05133 | -0.06611 | 0.15373  | 0.202587 | 1.02E-05 | -0.14706 | 0.00144  | 0.113666 |
| 0.066687 | 0.15019 | -0.16527 | 0.00033  | 0.036044 | 0.43711  | -0.31667 | 2.45E-12 | -0.01412 |
| 0.088764 | 0.05526 | -0.00078 | 0.98652  | 0.177791 | 0.00011  | -0.10035 | 0.03014  | -0.03327 |
| 0.01137  | 0.80642 | -0.21557 | 2.58E-06 | 0.029539 | 0.52428  | -0.31835 | 1.85E-12 | -0.02663 |
| -0.13059 | 0.0047  | -0.06658 | 0.15085  | -0.26593 | 5.32E-09 | -0.03757 | 0.4179   | -0.00889 |
| 0.112766 | 0.01476 | 0.042717 | 0.35701  | 0.224267 | 9.78E-07 | -0.16567 | 0.00032  | 0.036059 |
| 0.064467 | 0.16427 | -0.11586 | 0.01223  | 0.134848 | 0.0035   | -0.21041 | 4.51E-06 | 0.115339 |
| -0.10741 | 0.02025 | 0.04976  | 0.28323  | -0.06302 | 0.17395  | 0.21348  | 3.24E-06 | 0.107682 |
| -0.09686 | 0.0364  | 0.012463 | 0.78823  | -0.28148 | 5.93E-10 | 0.079256 | 0.08711  | -0.09328 |
| -0.11618 | 0.01199 | 0.014378 | 0.75664  | -0.28518 | 3.45E-10 | 0.041411 | 0.37192  | -0.04196 |
| -0.02668 | 0.56518 | 0.031675 | 0.49471  | 0.188994 | 3.95E-05 | -0.07166 | 0.122    | 0.19282  |
| -0.01293 | 0.78041 | -0.17492 | 0.00015  | 0.113405 | 0.0142   | -0.28806 | 2.25E-10 | 0.096253 |
| -0.14829 | 0.00131 | 0.000585 | 0.98993  | -0.20817 | 5.72E-06 | 0.042789 | 0.35621  | -0.11087 |
| -0.06791 | 0.14284 | 0.09722  | 0.0357   | -0.2182  | 1.93E-06 | 0.059108 | 0.2023   | -0.26862 |
| 0.043973 | 0.34304 | -0.13625 | 0.00317  | 0.060802 | 0.18964  | -0.22121 | 1.38E-06 | 0.053943 |
| 0.142082 | 0.00209 | 0.106187 | 0.02173  | 0.369976 | 1.35E-16 | -0.03847 | 0.40681  | -0.02028 |
| 0.081845 | 0.07724 | -0.07494 | 0.10577  | 0.26871  | 3.63E-09 | -0.14814 | 0.00132  | 0.166916 |
| 0.129747 | 0.00498 | -0.02394 | 0.60588  | 0.175967 | 0.00013  | -0.08337 | 0.07186  | 0.146269 |
| 0.067993 | 0.14235 | -0.10934 | 0.0181   | 0.129497 | 0.00507  | -0.23767 | 2.03E-07 | 0.029849 |
| 0.045451 | 0.32705 | 0.045217 | 0.32955  | 0.148046 | 0.00133  | -0.09399 | 0.04234  | -0.08625 |
| -0.03564 | 0.44221 | 0.194824 | 2.24E-05 | -0.02173 | 0.63957  | 0.233565 | 3.31E-07 | 0.055659 |
| 0.003607 | 0.93803 | -0.07071 | 0.12706  | 0.085517 | 0.06482  | -0.18364 | 6.56E-05 | -0.02712 |
| -0.13201 | 0.00427 | 0.002703 | 0.95354  | -0.25353 | 2.77E-08 | -0.01039 | 0.82277  | -0.14553 |
| -0.09319 | 0.04412 | 0.025551 | 0.58179  | -0.16953 | 0.00023  | 0.052855 | 0.25431  | -0.1173  |
| -0.04106 | 0.37604 | 0.063271 | 0.17225  | -0.10817 | 0.01938  | 0.090953 | 0.04949  | -0.11861 |
| -0.06172 | 0.18304 | -0.20742 | 6.19E-06 | -0.07633 | 0.09945  | -0.25153 | 3.59E-08 | 0.02707  |
| 0.11345  | 0.01417 | -0.04664 | 0.31451  | 0.214511 | 2.90E-06 | -0.07126 | 0.1241   | 0.092425 |
| 0.110699 | 0.0167  | -0.06601 | 0.1544   | 0.219769 | 1.62E-06 | -0.20468 | 8.25E-06 | 0.161057 |
| -0.05169 | 0.26496 | -0.0795  | 0.08612  | 0.007923 | 0.86441  | -0.22213 | 1.25E-06 | -0.042   |
| 0.139658 | 0.00249 | -0.06386 | 0.16828  | 0.254002 | 2.61E-08 | -0.20032 | 1.29E-05 | 0.08302  |

|          |          |          |          |          |          |          |          |          |
|----------|----------|----------|----------|----------|----------|----------|----------|----------|
| 0.107966 | 0.01961  | 0.008881 | 0.84821  | 0.320488 | 1.29E-12 | -0.15449 | 0.00081  | 0.089312 |
| -0.11423 | 0.01351  | -0.05158 | 0.26595  | -0.23896 | 1.73E-07 | 0.039967 | 0.38884  | -0.11589 |
| 0.079043 | 0.08797  | -0.01112 | 0.81059  | 0.222837 | 1.15E-06 | -0.12778 | 0.00569  | 0.084028 |
| 0.022871 | 0.62203  | -0.00339 | 0.94176  | 0.275269 | 1.45E-09 | 0.01188  | 0.79791  | 0.172492 |
| 0.106425 | 0.02143  | -0.04315 | 0.35212  | 0.300042 | 3.60E-11 | -0.11035 | 0.01705  | 0.30206  |
| -0.04132 | 0.37292  | -0.16958 | 0.00023  | 0.063349 | 0.17172  | -0.23028 | 4.88E-07 | 0.093472 |
| 0.072712 | 0.11661  | -0.09712 | 0.03589  | 0.194047 | 2.42E-05 | -0.20743 | 6.19E-06 | 0.134593 |
| 0.022907 | 0.62148  | -0.15205 | 0.00098  | 0.12669  | 0.00612  | -0.27243 | 2.16E-09 | 0.070216 |
| -0.08486 | 0.06692  | 0.042786 | 0.35623  | -0.26244 | 8.54E-09 | 0.040188 | 0.38622  | -0.2676  |
| -0.03945 | 0.39498  | 0.053275 | 0.25055  | -0.15306 | 0.00091  | 0.051536 | 0.26637  | -0.17649 |
| 0.200505 | 1.27E-05 | 0.215389 | 2.64E-06 | 0.45462  | 3.38E-25 | 0.172511 | 0.00018  | 0.133672 |
| 0.022787 | 0.62331  | -0.12826 | 0.00551  | 0.148547 | 0.00128  | -0.25397 | 2.62E-08 | 0.13221  |
| 0.075732 | 0.10214  | 0.046334 | 0.31773  | 0.176883 | 0.00012  | -0.11522 | 0.01272  | 0.024969 |
| -0.08954 | 0.05314  | 0.050495 | 0.27616  | -0.31208 | 5.23E-12 | 0.03164  | 0.49518  | -0.31281 |
| -0.00449 | 0.92283  | 0.090606 | 0.05037  | -0.15332 | 0.00089  | 0.121345 | 0.00867  | -0.22036 |
| 0.111035 | 0.01637  | -0.00132 | 0.9773   | 0.285476 | 3.30E-10 | -0.16389 | 0.00038  | 0.054322 |
| 0.008949 | 0.84706  | -0.06917 | 0.13553  | 0.134705 | 0.00354  | -0.14935 | 0.00121  | -0.01988 |
| -0.00856 | 0.8536   | -0.20829 | 5.65E-06 | 0.044306 | 0.3394   | -0.26331 | 7.59E-09 | 0.099469 |
| -0.00488 | 0.9163   | -0.05438 | 0.24083  | 0.070478 | 0.1283   | -0.23004 | 5.02E-07 | -0.17107 |
| 0.033269 | 0.47324  | -0.10546 | 0.02265  | 0.134474 | 0.0036   | -0.18274 | 7.13E-05 | 0.137851 |
| -0.03538 | 0.4456   | 0.224832 | 9.17E-07 | 0.043449 | 0.34882  | 0.294996 | 7.87E-11 | 0.015789 |
| -0.14007 | 0.00242  | -0.0252  | 0.58693  | -0.27289 | 2.03E-09 | -0.04817 | 0.2989   | -0.09389 |
| -0.00656 | 0.8876   | -0.12092 | 0.0089   | 0.118951 | 0.01009  | -0.23794 | 1.96E-07 | 0.222176 |
| -0.10346 | 0.02536  | -0.00789 | 0.86502  | -0.22211 | 1.25E-06 | 0.033894 | 0.46496  | -0.09309 |
| 0.006813 | 0.88325  | -0.1701  | 0.00022  | -0.01786 | 0.7002   | -0.26156 | 9.62E-09 | -0.0486  |
| 0.113226 | 0.01436  | -0.01189 | 0.79778  | 0.299428 | 3.96E-11 | -0.15614 | 0.00071  | 0.126711 |
| -0.04739 | 0.30676  | -0.00408 | 0.92997  | -0.2159  | 2.49E-06 | 0.062448 | 0.17791  | 0.046156 |
| 0.036328 | 0.43351  | -0.05697 | 0.21916  | 0.21186  | 3.86E-06 | -0.16898 | 0.00024  | 0.155224 |
| -0.01651 | 0.72195  | -0.14872 | 0.00127  | 0.091808 | 0.04738  | -0.24224 | 1.16E-07 | 0.125563 |
| 0.07701  | 0.09647  | -0.00411 | 0.92944  | 0.277602 | 1.04E-09 | -0.06554 | 0.15733  | 0.273806 |
| -0.00214 | 0.96315  | -0.12134 | 0.00867  | 0.143546 | 0.00187  | -0.25053 | 4.08E-08 | 0.08339  |
| -0.03733 | 0.42086  | -0.08719 | 0.05975  | 0.0459   | 0.32229  | -0.23917 | 1.69E-07 | -0.06224 |
| 0.018248 | 0.69408  | -0.12222 | 0.00819  | 0.07388  | 0.11083  | -0.21299 | 3.42E-06 | -0.03669 |
| -0.12127 | 0.00871  | 0.007423 | 0.8729   | -0.27077 | 2.73E-09 | 0.028832 | 0.53426  | -0.12907 |
| -0.05241 | 0.2583   | 0.052109 | 0.26108  | -0.15137 | 0.00103  | 0.131742 | 0.00435  | -0.01977 |
| 0.020194 | 0.66337  | 0.04556  | 0.32589  | -0.12727 | 0.00589  | 0.17852  | 0.00011  | 0.001273 |
| 0.058344 | 0.20821  | -0.07196 | 0.12044  | 0.138927 | 0.00262  | -0.13649 | 0.00312  | 0.094811 |
| 0.021372 | 0.64504  | -0.13239 | 0.00416  | 0.081233 | 0.07949  | -0.20823 | 5.69E-06 | 0.131785 |
| 0.07745  | 0.09457  | 0.039019 | 0.4002   | 0.232622 | 3.71E-07 | -0.02155 | 0.64234  | 0.183475 |
| 0.004223 | 0.92748  | -0.14861 | 0.00128  | 0.126684 | 0.00612  | -0.21201 | 3.80E-06 | 0.135154 |
| -0.05543 | 0.23183  | 0.063524 | 0.17054  | -0.13884 | 0.00264  | 0.246338 | 6.95E-08 | 0.134991 |
| 0.009446 | 0.83868  | -0.08673 | 0.0611   | 0.167424 | 0.00028  | -0.22969 | 5.23E-07 | 0.059695 |
| 0.125687 | 0.00654  | 0.032403 | 0.48484  | 0.307989 | 1.02E-11 | -0.10871 | 0.01878  | 0.215402 |
| -0.10599 | 0.02197  | 0.068199 | 0.14114  | -0.26137 | 9.87E-09 | 0.076209 | 0.1      | -0.08329 |
| -0.04579 | 0.32345  | -0.15379 | 0.00086  | -0.01781 | 0.70107  | -0.20718 | 6.36E-06 | -0.14286 |

|          |         |          |          |          |          |          |          |          |
|----------|---------|----------|----------|----------|----------|----------|----------|----------|
| -0.17051 | 0.00021 | -0.10975 | 0.01766  | -0.29474 | 8.18E-11 | -0.03668 | 0.42907  | -0.13015 |
| 0.099707 | 0.03122 | -0.02391 | 0.60635  | 0.217746 | 2.03E-06 | -0.02298 | 0.62035  | 0.290971 |
| 0.073464 | 0.11286 | -0.04795 | 0.30117  | 0.073895 | 0.11076  | -0.15756 | 0.00063  | 0.070192 |
| 0.081537 | 0.07837 | 0.025295 | 0.58559  | 0.219441 | 1.69E-06 | -0.08256 | 0.07469  | -0.08623 |
| 0.026041 | 0.57457 | 0.003385 | 0.94185  | 0.198978 | 1.48E-05 | 0.016569 | 0.721    | 0.071305 |
| 0.039887 | 0.38979 | -0.15229 | 0.00096  | 0.096924 | 0.03627  | -0.20015 | 1.31E-05 | 0.119803 |
| 0.00054  | 0.99072 | -0.1277  | 0.00572  | 0.081235 | 0.07948  | -0.26458 | 6.39E-09 | 0.072901 |
| 0.058329 | 0.20832 | -0.06238 | 0.17836  | 0.081443 | 0.07871  | -0.09664 | 0.03683  | 0.146642 |
| -0.06177 | 0.18269 | 0.066041 | 0.15419  | -0.18995 | 3.60E-05 | 0.158302 | 0.0006   | -0.01233 |
| 0.130421 | 0.00476 | 0.067694 | 0.14412  | 0.369425 | 1.51E-16 | -0.07575 | 0.10205  | 0.26481  |
| -0.01681 | 0.71717 | -0.01127 | 0.80816  | 0.184568 | 6.01E-05 | -0.13634 | 0.00315  | -0.04898 |
| -0.11833 | 0.01049 | -0.01871 | 0.68676  | -0.23326 | 3.44E-07 | 0.021015 | 0.65057  | -0.14737 |
| 0.051143 | 0.27004 | -0.08505 | 0.06631  | 0.199713 | 1.37E-05 | -0.14336 | 0.0019   | 0.204468 |
| 0.036528 | 0.43097 | -0.11996 | 0.00946  | 0.165654 | 0.00032  | -0.17607 | 0.00013  | 0.104401 |
| 0.072773 | 0.1163  | -0.04741 | 0.30664  | 0.250859 | 3.91E-08 | -0.16996 | 0.00022  | -0.01365 |
| -0.13215 | 0.00423 | -0.12929 | 0.00514  | -0.29565 | 7.12E-11 | 0.051666 | 0.26517  | -0.09906 |
| -0.04816 | 0.29906 | -0.19178 | 3.02E-05 | 0.020734 | 0.65493  | -0.18899 | 3.95E-05 | 0.099006 |
| 0.088829 | 0.05508 | 0.095795 | 0.03851  | 0.217878 | 2.00E-06 | -0.06837 | 0.14014  | -0.11103 |
| 0.047884 | 0.30179 | -0.10674 | 0.02105  | 0.039163 | 0.39846  | -0.21391 | 3.10E-06 | -0.11042 |
| -0.03932 | 0.39655 | -0.24986 | 4.45E-08 | -0.02967 | 0.5225   | -0.2419  | 1.21E-07 | 0.025428 |
| 0.000911 | 0.98433 | -0.06682 | 0.14935  | 0.096766 | 0.03658  | -0.18266 | 7.18E-05 | 0.036522 |
| 0.017364 | 0.70821 | 0.15475  | 0.00079  | -0.11463 | 0.01319  | 0.236189 | 2.42E-07 | -0.15075 |
| 0.083707 | 0.07072 | -0.05794 | 0.21136  | 0.274117 | 1.71E-09 | -0.14745 | 0.0014   | 0.063485 |
| 0.016306 | 0.72525 | -0.06522 | 0.15941  | 0.174876 | 0.00015  | -0.14401 | 0.00181  | 0.127535 |
| -0.08017 | 0.08352 | -0.10336 | 0.0255   | 0.003473 | 0.94033  | -0.19842 | 1.56E-05 | -0.06907 |
| -0.03539 | 0.44551 | -0.21799 | 1.98E-06 | -0.01671 | 0.71875  | -0.29865 | 4.47E-11 | -0.01259 |
| 0.051698 | 0.26487 | -0.09133 | 0.04855  | 0.161368 | 0.00046  | -0.18309 | 6.90E-05 | 0.070162 |
| -0.00995 | 0.83016 | -0.11845 | 0.01041  | 0.111119 | 0.01629  | -0.20368 | 9.15E-06 | 0.057566 |
| 0.025583 | 0.58131 | -0.13849 | 0.00271  | 0.052887 | 0.25402  | -0.17591 | 0.00013  | 0.202775 |
| 0.012612 | 0.78575 | 0.003971 | 0.9318   | 0.15122  | 0.00105  | -0.16412 | 0.00037  | -0.05964 |
| 0.063218 | 0.17261 | -0.00855 | 0.85386  | 0.172439 | 0.00018  | -0.09627 | 0.03755  | 0.221507 |
| 0.08647  | 0.06188 | 0.029885 | 0.51943  | 0.149739 | 0.00117  | -0.02911 | 0.53027  | 0.187066 |
| 0.106381 | 0.02149 | -0.02675 | 0.56418  | 0.226778 | 7.34E-07 | -0.17809 | 0.00011  | -0.02289 |
| 0.076305 | 0.09957 | 0.020697 | 0.65552  | 0.308591 | 9.24E-12 | -0.07433 | 0.10868  | 0.240585 |
| 0.006768 | 0.88402 | -0.10258 | 0.02664  | 0.055888 | 0.22802  | -0.20932 | 5.07E-06 | -0.06356 |
| 0.018045 | 0.69732 | -0.10432 | 0.02417  | 0.145269 | 0.00165  | -0.2294  | 5.41E-07 | 0.098812 |
| 0.073805 | 0.1112  | -0.02457 | 0.59634  | 0.156362 | 0.0007   | -0.19902 | 1.47E-05 | -0.03346 |
| -0.07164 | 0.12213 | -0.22407 | 1.00E-06 | -0.05192 | 0.26279  | -0.28725 | 2.54E-10 | 0.139585 |
| -0.02389 | 0.60666 | -0.16192 | 0.00044  | 0.026258 | 0.57138  | -0.21816 | 1.94E-06 | -0.0062  |
| -0.02133 | 0.64571 | -0.17067 | 0.00021  | 0.062772 | 0.17567  | -0.26005 | 1.18E-08 | -0.04695 |
| 0.055934 | 0.22764 | -0.10445 | 0.02399  | 0.126415 | 0.00623  | -0.21984 | 1.61E-06 | -0.05024 |
| 0.062157 | 0.17995 | -0.08146 | 0.07865  | 0.145903 | 0.00157  | -0.20394 | 8.90E-06 | 0.001816 |
| 0.10948  | 0.01795 | -0.04536 | 0.32797  | 0.117389 | 0.01112  | -0.10441 | 0.02404  | 0.150138 |
| 0.043821 | 0.34471 | -0.00512 | 0.91219  | 0.19911  | 1.46E-05 | -0.17364 | 0.00016  | 0.018451 |
| 0.031475 | 0.49744 | -0.05402 | 0.24396  | 0.078971 | 0.08826  | -0.13151 | 0.00442  | -0.05501 |

|          |         |          |         |          |          |          |          |          |
|----------|---------|----------|---------|----------|----------|----------|----------|----------|
| -0.08703 | 0.06021 | 0.035486 | 0.44425 | -0.15115 | 0.00105  | 0.199623 | 1.39E-05 | 0.108563 |
| 0.080436 | 0.08249 | -0.10933 | 0.01811 | 0.173961 | 0.00016  | -0.24538 | 7.84E-08 | 0.183114 |
| 0.004495 | 0.92282 | -0.1148  | 0.01305 | 0.200367 | 1.28E-05 | -0.20199 | 1.09E-05 | 0.263726 |
| 0.030471 | 0.51127 | 0.035611 | 0.44264 | 0.183636 | 6.56E-05 | -0.12064 | 0.00906  | -0.0936  |
| 0.10777  | 0.01983 | -0.05612 | 0.22606 | 0.168349 | 0.00026  | -0.12678 | 0.00608  | 0.165024 |
| 0.019012 | 0.68195 | -0.08106 | 0.08012 | 0.070311 | 0.12921  | -0.18656 | 4.98E-05 | -0.08715 |
| -0.10128 | 0.02864 | -0.02506 | 0.58907 | -0.25586 | 2.05E-08 | 0.052985 | 0.25314  | -0.04059 |
| -0.06437 | 0.16492 | 0.128724 | 0.00534 | -0.1364  | 0.00314  | 0.199072 | 1.46E-05 | 0.045427 |
| 0.10568  | 0.02237 | 0.05101  | 0.27129 | 0.304041 | 1.92E-11 | -0.12136 | 0.00865  | 0.086753 |
| 0.108597 | 0.0189  | -0.06937 | 0.13442 | 0.222844 | 1.15E-06 | -0.17243 | 0.00018  | 0.155323 |
| 0.009719 | 0.83407 | -0.0964  | 0.0373  | 0.075485 | 0.10327  | -0.22561 | 8.39E-07 | 0.046252 |
| 0.087477 | 0.0589  | -0.01293 | 0.78042 | 0.211472 | 4.03E-06 | -0.19108 | 3.23E-05 | 0.066998 |
| 0.000987 | 0.98303 | 0.115023 | 0.01287 | 0.280879 | 6.48E-10 | 0.039947 | 0.38907  | 0.138065 |
| -0.08417 | 0.06918 | -0.05977 | 0.19732 | -0.24844 | 5.33E-08 | 0.03389  | 0.46501  | -0.06219 |
| -0.07214 | 0.11953 | 0.137987 | 0.00281 | -0.1661  | 0.00031  | 0.221984 | 1.27E-06 | -0.22369 |
| 0.080151 | 0.08359 | -0.10349 | 0.02532 | 0.17384  | 0.00016  | -0.17861 | 0.0001   | 0.040273 |
| 0.073473 | 0.11282 | -0.05135 | 0.2681  | 0.240938 | 1.36E-07 | -0.13549 | 0.00335  | 0.126512 |
| 0.049995 | 0.28095 | -0.0882  | 0.05684 | 0.20193  | 1.10E-05 | -0.18219 | 7.50E-05 | 0.096688 |
| 0.050366 | 0.2774  | 0.017794 | 0.70132 | 0.235129 | 2.75E-07 | -0.10875 | 0.01874  | 0.013178 |
| 0.016245 | 0.72624 | -0.08448 | 0.06815 | 0.16455  | 0.00036  | -0.22768 | 6.61E-07 | 0.042735 |
| 0.091793 | 0.04742 | -0.10427 | 0.02423 | 0.220558 | 1.49E-06 | -0.24433 | 8.94E-08 | 0.113789 |
| 0.061588 | 0.18397 | -0.08106 | 0.08015 | 0.199981 | 1.34E-05 | -0.1914  | 3.13E-05 | 0.119604 |
| -0.1036  | 0.02517 | -0.17418 | 0.00015 | -0.0607  | 0.1904   | -0.18135 | 8.11E-05 | 0.011658 |
| -0.05406 | 0.24362 | 0.038962 | 0.40088 | -0.1232  | 0.00769  | 0.121584 | 0.00853  | 0.071295 |
| 0.071554 | 0.12255 | 0.058879 | 0.20406 | 0.185855 | 5.33E-05 | -0.05006 | 0.28034  | 0.20857  |
| 0.075755 | 0.10204 | 0.108037 | 0.01953 | 0.234529 | 2.95E-07 | -0.0016  | 0.9725   | 0.077753 |
| 0.054884 | 0.23651 | -0.04221 | 0.36281 | 0.149641 | 0.00118  | -0.10961 | 0.01781  | 0.121795 |
| -0.07123 | 0.12424 | 0.171101 | 0.0002  | -0.04025 | 0.38549  | 0.246113 | 7.15E-08 | -0.13033 |
| 0.163782 | 0.00038 | 0.102128 | 0.02732 | 0.355549 | 2.31E-15 | -0.03979 | 0.39093  | 0.099807 |
| 0.045657 | 0.32485 | 0.118664 | 0.01027 | 0.326766 | 4.41E-13 | 0.053211 | 0.25112  | 0.280624 |
| 0.093352 | 0.04376 | -0.06495 | 0.1611  | 0.219371 | 1.70E-06 | -0.20744 | 6.18E-06 | 0.052095 |
| 0.022432 | 0.62873 | -0.08573 | 0.06417 | 0.158683 | 0.00058  | -0.23049 | 4.76E-07 | 0.064406 |
| 0.064991 | 0.16086 | -0.13319 | 0.00393 | 0.174821 | 0.00015  | -0.23502 | 2.79E-07 | 0.048187 |
| 0.075977 | 0.10103 | 0.02457  | 0.59637 | 0.338403 | 5.64E-14 | -0.00887 | 0.84844  | 0.20427  |
| 0.074112 | 0.10971 | -0.06022 | 0.19392 | 0.140508 | 0.00234  | -0.1591  | 0.00056  | 0.134972 |
| 0.088918 | 0.05483 | 0.108258 | 0.01928 | 0.321435 | 1.10E-12 | -0.03808 | 0.41168  | 0.099366 |
| -0.03781 | 0.41492 | 0.013494 | 0.77118 | -0.14655 | 0.0015   | 0.171759 | 0.00019  | -0.11533 |
| -0.13186 | 0.00431 | -0.07244 | 0.11796 | -0.32554 | 5.45E-13 | -0.05629 | 0.22469  | -0.08816 |
| 0.008638 | 0.85231 | -0.11391 | 0.01377 | 0.062246 | 0.17932  | -0.23921 | 1.68E-07 | -0.10335 |
| -0.10183 | 0.02777 | 0.070111 | 0.1303  | -0.27498 | 1.51E-09 | 0.110023 | 0.01738  | -0.09875 |
| 0.005857 | 0.89954 | -0.16997 | 0.00022 | 0.110362 | 0.01704  | -0.25606 | 1.99E-08 | 0.068885 |
| -0.09831 | 0.03367 | -0.01581 | 0.73324 | -0.16495 | 0.00034  | 0.151987 | 0.00098  | 0.169034 |
| -0.0567  | 0.22131 | 0.05986  | 0.19661 | -0.10137 | 0.02849  | 0.166454 | 0.0003   | 0.106124 |
| 0.047606 | 0.30461 | -0.04379 | 0.34502 | 0.150519 | 0.0011   | -0.12157 | 0.00854  | 0.119752 |
| 0.012071 | 0.79474 | -0.07194 | 0.12057 | 0.145665 | 0.0016   | -0.20715 | 6.37E-06 | -0.04557 |

|          |          |          |          |          |          |          |          |          |
|----------|----------|----------|----------|----------|----------|----------|----------|----------|
| 0.055259 | 0.23331  | -0.1036  | 0.02516  | 0.185925 | 5.29E-05 | -0.0873  | 0.05943  | 0.121009 |
| 0.087445 | 0.05899  | -0.08958 | 0.05303  | 0.238829 | 1.76E-07 | -0.20477 | 8.17E-06 | 0.089291 |
| 0.227232 | 6.96E-07 | 0.010794 | 0.81605  | 0.265194 | 5.88E-09 | -0.11132 | 0.0161   | -0.05464 |
| 0.150798 | 0.00108  | 0.01155  | 0.80341  | 0.322165 | 9.72E-13 | -0.12536 | 0.00668  | 0.219202 |
| -0.02018 | 0.66353  | -0.20239 | 1.05E-05 | 0.063857 | 0.16831  | -0.28784 | 2.32E-10 | 0.147028 |
| -0.11933 | 0.00985  | 0.062636 | 0.1766   | -0.18422 | 6.21E-05 | 0.149119 | 0.00123  | -0.09406 |
| 0.003349 | 0.94246  | -0.09598 | 0.03814  | 0.108824 | 0.01865  | -0.14907 | 0.00123  | 0.106418 |
| 0.013457 | 0.77178  | -0.17243 | 0.00018  | 0.130581 | 0.00471  | -0.29832 | 4.70E-11 | 0.122823 |
| 0.045393 | 0.32766  | -0.0029  | 0.95013  | 0.216076 | 2.44E-06 | -0.13923 | 0.00257  | 0.056599 |
| 0.013311 | 0.77419  | -0.05677 | 0.22074  | 0.039406 | 0.39554  | -0.13408 | 0.0037   | -0.09022 |
| -0.11456 | 0.01324  | -0.26331 | 7.60E-09 | -0.02322 | 0.61673  | -0.26907 | 3.46E-09 | 0.133235 |
| -0.11733 | 0.01117  | 0.055955 | 0.22747  | -0.25856 | 1.43E-08 | 0.041573 | 0.37005  | -0.20874 |
| 0.044864 | 0.33334  | -0.12452 | 0.00706  | 0.13276  | 0.00405  | -0.2727  | 2.08E-09 | -0.05041 |
| 0.070993 | 0.12553  | -0.03699 | 0.42516  | 0.054563 | 0.23926  | -0.18767 | 4.48E-05 | 0.012573 |
| 0.010245 | 0.82524  | -0.12378 | 0.00741  | 0.032402 | 0.48485  | -0.18768 | 4.48E-05 | -0.07746 |
| 0.086711 | 0.06116  | 0.169217 | 0.00024  | 0.272251 | 2.22E-09 | 0.003645 | 0.93738  | -0.00166 |
| 0.080783 | 0.08118  | 0.013704 | 0.76772  | 0.266059 | 5.23E-09 | -0.08444 | 0.0683   | 0.055135 |
| -0.01849 | 0.69023  | -0.11673 | 0.01159  | 0.03631  | 0.43373  | -0.15371 | 0.00086  | 0.053257 |
| 0.038939 | 0.40117  | -0.06537 | 0.15843  | 0.047181 | 0.30895  | -0.21037 | 4.53E-06 | -0.00446 |
| 0.072156 | 0.11943  | -0.08218 | 0.07603  | 0.262148 | 8.88E-09 | -0.15441 | 0.00081  | 0.174726 |
| 0.077869 | 0.0928   | -0.0575  | 0.21483  | 0.114882 | 0.01298  | -0.06246 | 0.17784  | -0.00995 |
| 0.066086 | 0.15391  | -0.15645 | 0.00069  | 0.011583 | 0.80285  | -0.18922 | 3.87E-05 | 0.128435 |
| 0.098694 | 0.03298  | -0.06124 | 0.18645  | 0.292189 | 1.21E-10 | -0.09903 | 0.0324   | 0.220653 |
| 0.018708 | 0.68677  | -0.06157 | 0.18409  | 0.0807   | 0.08149  | -0.19658 | 1.88E-05 | 0.040298 |
| 0.124696 | 0.00698  | 0.065267 | 0.15909  | 0.180184 | 9.02E-05 | -0.04297 | 0.35415  | 0.059391 |
| 0.125198 | 0.00675  | 0.075269 | 0.10426  | 0.311112 | 6.13E-12 | -0.01276 | 0.78335  | 0.214541 |
| 0.128735 | 0.00533  | 0.002852 | 0.95098  | 0.320772 | 1.23E-12 | -0.04958 | 0.28502  | 0.280307 |
| 0.010605 | 0.81921  | -0.07668 | 0.0979   | 0.053129 | 0.25185  | -0.18281 | 7.08E-05 | -0.04197 |
| 0.01806  | 0.69708  | -0.03237 | 0.48522  | 0.164314 | 0.00036  | -0.13118 | 0.00452  | -0.01654 |
| -0.0833  | 0.07212  | 0.072521 | 0.11757  | -0.12794 | 0.00563  | 0.077399 | 0.0948   | -0.10336 |
| -0.00905 | 0.84527  | -0.16251 | 0.00042  | 0.101104 | 0.02892  | -0.26765 | 4.20E-09 | -0.01512 |
| 0.026617 | 0.56614  | -0.16055 | 0.0005   | 0.053854 | 0.24544  | -0.30215 | 2.58E-11 | 0.038754 |
| 0.132517 | 0.00412  | 0.130014 | 0.00489  | 0.294979 | 7.89E-11 | 0.067845 | 0.14322  | 0.056675 |
| 0.034684 | 0.45462  | 0.064    | 0.16735  | 0.104121 | 0.02444  | -0.10114 | 0.02887  | -0.07022 |
| 0.051576 | 0.266    | -0.00829 | 0.85819  | 0.132603 | 0.0041   | -0.08893 | 0.0548   | 0.0279   |
| -0.02282 | 0.6228   | -0.08251 | 0.07488  | 0.029422 | 0.52592  | -0.14699 | 0.00145  | 0.005924 |
| 0.005694 | 0.90233  | -0.11455 | 0.01325  | 0.155523 | 0.00075  | -0.16833 | 0.00026  | 0.129446 |
| -0.01586 | 0.73244  | -0.14566 | 0.0016   | -0.01492 | 0.74777  | -0.23542 | 2.65E-07 | -0.02063 |
| 0.015463 | 0.73892  | -0.024   | 0.60486  | 0.200663 | 1.25E-05 | -0.09397 | 0.04237  | 0.202092 |
| 0.068788 | 0.13773  | 0.027359 | 0.55536  | 0.21634  | 2.37E-06 | -0.11775 | 0.01088  | 0.008947 |
| 0.027976 | 0.54647  | -0.20839 | 5.59E-06 | -0.0364  | 0.43259  | -0.24441 | 8.85E-08 | -0.09416 |
| 0.021544 | 0.64238  | -0.10607 | 0.02187  | 0.05471  | 0.238    | -0.15639 | 0.0007   | -0.04376 |
| -0.11399 | 0.01371  | -0.25941 | 1.28E-08 | -0.10394 | 0.02469  | -0.26577 | 5.44E-09 | 0.020566 |
| -0.10676 | 0.02103  | -0.28851 | 2.10E-10 | -0.07767 | 0.09366  | -0.28902 | 1.95E-10 | 0.062465 |
| 0.128005 | 0.0056   | -0.01033 | 0.82383  | 0.197085 | 1.79E-05 | -0.02785 | 0.54825  | 0.147076 |

|          |         |          |          |          |          |          |          |          |
|----------|---------|----------|----------|----------|----------|----------|----------|----------|
| 0.00528  | 0.9094  | 0.284817 | 3.64E-10 | 0.082927 | 0.0734   | 0.4292   | 2.36E-22 | 0.043264 |
| -0.07462 | 0.10731 | -0.03649 | 0.43145  | 0.128599 | 0.00538  | -0.04312 | 0.35247  | 0.164588 |
| -0.05648 | 0.22313 | -0.21089 | 4.28E-06 | -0.01615 | 0.72782  | -0.2163  | 2.39E-06 | -0.01079 |
| 0.037376 | 0.42035 | 0.09734  | 0.03548  | 0.044709 | 0.33502  | 0.298379 | 4.67E-11 | 0.124585 |
| -0.02546 | 0.58318 | 0.254002 | 2.61E-08 | 0.02552  | 0.58225  | 0.359591 | 1.06E-15 | 0.247623 |
| -0.14641 | 0.00151 | 0.054103 | 0.24325  | -0.17102 | 0.0002   | 0.178365 | 0.00011  | 0.070909 |
| -0.00404 | 0.9306  | -0.15525 | 0.00076  | 0.112927 | 0.01462  | -0.16403 | 0.00037  | 0.152665 |
| -0.14738 | 0.0014  | -0.05058 | 0.27537  | -0.25736 | 1.68E-08 | 0.013772 | 0.76659  | -0.13656 |
| -0.1322  | 0.00421 | 0.058998 | 0.20314  | -0.19217 | 2.91E-05 | 0.082764 | 0.07397  | -0.19696 |
| -0.10931 | 0.01813 | 0.153495 | 0.00087  | -0.15419 | 0.00083  | 0.22551  | 8.49E-07 | -0.02649 |
| 0.009291 | 0.84129 | -0.02255 | 0.6269   | 0.16537  | 0.00033  | -0.15503 | 0.00078  | -0.12679 |
| -0.02457 | 0.59644 | -0.08402 | 0.06967  | 0.061314 | 0.18593  | -0.12009 | 0.00939  | 0.220566 |
| 0.0033   | 0.9433  | -0.18373 | 6.50E-05 | 0.006454 | 0.88937  | -0.2042  | 8.67E-06 | 0.043691 |
| 0.010339 | 0.82367 | -0.13955 | 0.00251  | 0.079273 | 0.08704  | -0.17813 | 0.00011  | 0.093774 |
| 0.073962 | 0.11044 | -0.09835 | 0.03361  | 0.17384  | 0.00016  | -0.24015 | 1.50E-07 | 0.076711 |
| 0.119327 | 0.00985 | 0.022761 | 0.6237   | 0.292852 | 1.09E-10 | -0.11946 | 0.00977  | 0.050096 |
| -0.02754 | 0.55275 | -0.02864 | 0.53698  | 0.245975 | 7.27E-08 | -0.00331 | 0.94305  | 0.199189 |
| 0.039857 | 0.39015 | -0.11338 | 0.01422  | 0.109932 | 0.01748  | -0.12731 | 0.00587  | 0.270519 |
| 0.028506 | 0.53889 | -0.04732 | 0.30756  | 0.230548 | 4.73E-07 | -0.09263 | 0.04543  | 0.116782 |
| 0.023714 | 0.60924 | -0.07066 | 0.12732  | 0.170761 | 0.00021  | -0.2045  | 8.41E-06 | 0.05035  |
| 0.004183 | 0.92816 | -0.11381 | 0.01386  | 0.000638 | 0.98903  | -0.21221 | 3.72E-06 | 0.194941 |
| 0.073206 | 0.11414 | 0.046163 | 0.31952  | 0.329618 | 2.69E-13 | -0.06463 | 0.16319  | 0.160765 |
| 0.056366 | 0.22407 | -0.15379 | 0.00085  | 0.075507 | 0.10317  | -0.28445 | 3.84E-10 | -0.01644 |
| 0.098288 | 0.03371 | -0.07673 | 0.09771  | 0.224448 | 9.58E-07 | -0.21522 | 2.69E-06 | 0.125791 |
| 0.090429 | 0.05083 | 0.030574 | 0.50983  | 0.23431  | 3.03E-07 | -0.1505  | 0.00111  | 0.01867  |
| 0.053909 | 0.24495 | -0.0692  | 0.13541  | 0.217114 | 2.18E-06 | -0.1769  | 0.00012  | 0.091797 |
| 0.081505 | 0.07849 | -0.01987 | 0.66845  | 0.200996 | 1.21E-05 | -0.14062 | 0.00232  | 0.151398 |
| 0.122771 | 0.00791 | -0.13774 | 0.00286  | 0.030014 | 0.51762  | -0.17952 | 9.59E-05 | 0.130456 |
| 0.055871 | 0.22817 | -0.05448 | 0.23998  | 0.11677  | 0.01156  | -0.13475 | 0.00353  | -0.09643 |
| 0.090391 | 0.05092 | 0.030709 | 0.50797  | 0.304293 | 1.84E-11 | -0.09392 | 0.04249  | 0.105188 |
| -0.01754 | 0.70543 | 0.087643 | 0.05842  | -0.04319 | 0.35173  | 0.260893 | 1.05E-08 | 0.1051   |
| 0.084461 | 0.06821 | -0.09426 | 0.04174  | 0.1159   | 0.0122   | -0.23194 | 4.02E-07 | -0.11084 |
| -0.01849 | 0.69031 | -0.16403 | 0.00037  | 0.061975 | 0.18123  | -0.31043 | 6.85E-12 | 0.1273   |
| 0.174039 | 0.00016 | 0.198453 | 1.56E-05 | 0.440626 | 1.33E-23 | 0.069257 | 0.13506  | 0.23604  |
| 0.066428 | 0.15178 | -0.0488  | 0.29262  | 0.065359 | 0.1585   | -0.15181 | 0.001    | 0.021915 |
| -0.06226 | 0.1792  | 0.020523 | 0.65823  | -0.17942 | 9.67E-05 | 0.038086 | 0.41157  | -0.00451 |
| -0.1068  | 0.02097 | 0.069248 | 0.13511  | -0.14827 | 0.00131  | 0.161215 | 0.00047  | -0.15366 |
| -0.13581 | 0.00327 | 0.001599 | 0.9725   | -0.16266 | 0.00042  | 0.027515 | 0.5531   | -0.13258 |
| 0.108545 | 0.01896 | 0.025556 | 0.58172  | 0.267395 | 4.35E-09 | -0.11503 | 0.01287  | 0.042495 |
| -0.00173 | 0.97019 | -0.11122 | 0.01619  | 0.102511 | 0.02675  | -0.26048 | 1.11E-08 | -0.03262 |
| 0.005712 | 0.90202 | -0.1143  | 0.01345  | 0.118047 | 0.01068  | -0.25228 | 3.26E-08 | 0.009528 |
| 0.101173 | 0.02881 | -0.04131 | 0.37307  | 0.200022 | 1.33E-05 | -0.1458  | 0.00158  | 0.145165 |
| 0.156935 | 0.00067 | 0.108492 | 0.01902  | 0.348175 | 9.36E-15 | 0.105252 | 0.02292  | 0.295367 |
| 0.127488 | 0.0058  | 0.181325 | 8.13E-05 | 0.449392 | 1.36E-24 | 0.145643 | 0.0016   | 0.244515 |
| 0.040631 | 0.381   | -0.03752 | 0.41861  | 0.225068 | 8.93E-07 | -0.0993  | 0.03193  | 0.185746 |



|          |          |          |          |           |          |          |          |          |
|----------|----------|----------|----------|-----------|----------|----------|----------|----------|
| 0.004701 | 0.91929  | -0.07103 | 0.12533  | -0.00638  | 0.89063  | -0.21554 | 2.59E-06 | 0.10925  |
| 0.057931 | 0.21145  | -0.08603 | 0.06323  | 0.159703  | 0.00053  | -0.24582 | 7.41E-08 | 0.010382 |
| 0.007945 | 0.86404  | 0.006749 | 0.88435  | 0.171404  | 0.0002   | -0.01767 | 0.70338  | 0.112959 |
| 0.021843 | 0.63776  | -0.08507 | 0.06624  | 0.20121   | 1.18E-05 | -0.0688  | 0.13767  | 0.300645 |
| 0.084904 | 0.06678  | 0.046917 | 0.31167  | 0.297826  | 5.08E-11 | -0.08442 | 0.06836  | 0.063327 |
| -0.03973 | 0.39166  | 0.09522  | 0.0397   | -0.07554  | 0.10304  | 0.115679 | 0.01236  | -0.02765 |
| -0.07047 | 0.12832  | -0.2039  | 8.95E-06 | 0.008666  | 0.85184  | -0.21754 | 2.08E-06 | 0.048188 |
| -0.00412 | 0.92932  | -0.0703  | 0.12928  | 0.167106  | 0.00029  | -0.19283 | 2.72E-05 | 0.143613 |
| 0.094903 | 0.04036  | -0.03157 | 0.49612  | 0.282442  | 5.16E-10 | -0.17696 | 0.00012  | 0.112829 |
| 0.112125 | 0.01534  | 0.191133 | 3.21E-05 | 0.41052   | 2.06E-20 | 0.103917 | 0.02472  | 0.176862 |
| 0.015046 | 0.74572  | -0.08679 | 0.06093  | 0.107956  | 0.01962  | -0.26407 | 6.86E-09 | -0.07029 |
| 0.083403 | 0.07176  | -0.09526 | 0.03961  | 0.208448  | 5.56E-06 | -0.19214 | 2.91E-05 | 0.102093 |
| 0.066105 | 0.15379  | 0.005977 | 0.8975   | 0.194113  | 2.40E-05 | -0.10481 | 0.02351  | 0.026166 |
| -0.03628 | 0.43412  | -0.26058 | 1.10E-08 | -0.03005  | 0.51711  | -0.29245 | 1.16E-10 | -0.00924 |
| 0.067764 | 0.1437   | 0.148873 | 0.00125  | 0.233374  | 3.39E-07 | 0.038643 | 0.40475  | 0.054384 |
| 0.07177  | 0.12143  | -0.06232 | 0.1788   | 0.276345  | 1.24E-09 | -0.12979 | 0.00497  | 0.279818 |
| -0.16882 | 0.00025  | 0.003486 | 0.94011  | -0.31824  | 1.89E-12 | 0.063677 | 0.16951  | -0.15795 |
| 0.028776 | 0.53506  | -0.04751 | 0.30557  | 0.313539  | 4.12E-12 | -0.07935 | 0.08673  | 0.185522 |
| -0.06393 | 0.1678   | -0.09108 | 0.04916  | 0.15206   | 0.00098  | -0.08663 | 0.06139  | 0.263192 |
| 0.169172 | 0.00024  | 0.089683 | 0.05277  | 0.295061  | 7.79E-11 | -0.00095 | 0.98374  | 0.071903 |
| 0.04155  | 0.37031  | -0.17278 | 0.00018  | 0.072284  | 0.11878  | -0.26366 | 7.24E-09 | 0.114967 |
| 0.094141 | 0.042    | 0.08441  | 0.06838  | 0.353224  | 3.61E-15 | 0.037284 | 0.42149  | 0.254781 |
| 0.185201 | 5.66E-05 | 0.323346 | 7.94E-13 | 0.553319  | 8.23E-39 | 0.147303 | 0.00141  | 0.247005 |
| 0.036084 | 0.43661  | -0.12022 | 0.00931  | 0.189205  | 3.87E-05 | -0.2695  | 3.25E-09 | 0.071725 |
| -0.02172 | 0.6397   | -0.13667 | 0.00308  | -0.11102  | 0.01639  | -0.29301 | 1.07E-10 | -0.13289 |
| -0.20897 | 5.26E-06 | -0.03414 | 0.46172  | -0.26805  | 3.98E-09 | 0.024691 | 0.59457  | -0.15171 |
| 0.032876 | 0.47848  | -0.10605 | 0.0219   | 0.171226  | 0.0002   | -0.19365 | 2.51E-05 | 0.141389 |
| -0.00207 | 0.96435  | 0.158036 | 0.00061  | -0.06332  | 0.17195  | 0.240957 | 1.36E-07 | -0.13339 |
| -0.05525 | 0.23339  | -0.11265 | 0.01487  | 0.111927  | 0.01552  | -0.24923 | 4.82E-08 | 0.15059  |
| 0.079137 | 0.08759  | -0.09332 | 0.04384  | 0.218125  | 1.95E-06 | -0.21332 | 3.30E-06 | 0.123462 |
| 0.039882 | 0.38985  | -0.08952 | 0.05321  | 0.061293  | 0.18608  | -0.13784 | 0.00283  | 0.187705 |
| 0.133161 | 0.00394  | 0.113508 | 0.01412  | 0.304053  | 1.91E-11 | -0.00884 | 0.84885  | 0.105229 |
| 0.063827 | 0.16851  | -0.09526 | 0.03962  | 0.161879  | 0.00044  | -0.1825  | 7.29E-05 | 0.183919 |
| 0.027837 | 0.54846  | -0.07689 | 0.097    | 0.102357  | 0.02698  | -0.1691  | 0.00024  | -0.05899 |
| -0.02559 | 0.5812   | -0.09184 | 0.04731  | -0.06945  | 0.13395  | -0.22171 | 1.31E-06 | -0.19522 |
| -0.02696 | 0.56117  | -0.1559  | 0.00072  | -0.00503  | 0.91366  | -0.25936 | 1.29E-08 | -0.1078  |
| 0.061025 | 0.18802  | -0.1587  | 0.00058  | 0.049503  | 0.28572  | -0.2464  | 6.90E-08 | -0.0189  |
| 0.078691 | 0.08939  | -0.10202 | 0.02749  | 0.118935  | 0.0101   | -0.10187 | 0.02772  | 0.138533 |
| 0.108951 | 0.01851  | -0.03374 | 0.46697  | 0.110708  | 0.01669  | -0.08218 | 0.07602  | 0.158003 |
| -0.02819 | 0.54333  | -0.06546 | 0.15785  | 0.112031  | 0.01543  | -0.1946  | 2.29E-05 | -0.01536 |
| -0.03869 | 0.40418  | -0.26197 | 9.10E-09 | -2.81E-05 | 0.99952  | -0.30141 | 2.90E-11 | 0.087509 |
| 0.024468 | 0.5979   | 0.030032 | 0.51737  | 0.204729  | 8.21E-06 | -0.08366 | 0.07089  | 0.09958  |
| -0.01608 | 0.72886  | -0.03492 | 0.45157  | 0.119889  | 0.00951  | -0.19286 | 2.72E-05 | -0.08058 |
| -0.01912 | 0.68026  | -0.16088 | 0.00048  | 0.081401  | 0.07887  | -0.23863 | 1.80E-07 | -0.02485 |
| 0.001453 | 0.97502  | -0.08696 | 0.0604   | 0.068724  | 0.1381   | -0.20422 | 8.65E-06 | -0.07632 |

|          |          |          |          |          |          |          |          |          |
|----------|----------|----------|----------|----------|----------|----------|----------|----------|
| 0.034578 | 0.45599  | -0.05916 | 0.20189  | 0.168455 | 0.00026  | -0.14448 | 0.00175  | 0.067534 |
| 0.032584 | 0.4824   | -0.06993 | 0.13131  | 0.126959 | 0.00601  | -0.22211 | 1.25E-06 | -0.01235 |
| -0.08869 | 0.05547  | -0.12353 | 0.00753  | 0.054433 | 0.24038  | -0.19024 | 3.50E-05 | 0.11295  |
| -0.02673 | 0.56452  | -0.22058 | 1.48E-06 | -0.0075  | 0.87163  | -0.24506 | 8.16E-08 | 0.115872 |
| 0.052813 | 0.25469  | -0.04829 | 0.29771  | 0.046021 | 0.32102  | -0.16561 | 0.00033  | 0.03877  |
| 0.157107 | 0.00066  | 0.051354 | 0.26806  | 0.341234 | 3.37E-14 | -0.10853 | 0.01897  | 0.205498 |
| 0.054805 | 0.23719  | -0.08306 | 0.07295  | 0.249803 | 4.48E-08 | -0.19732 | 1.75E-05 | 0.070686 |
| 0.018673 | 0.68732  | -0.18261 | 7.22E-05 | -0.00311 | 0.9466   | -0.18837 | 4.20E-05 | 0.007289 |
| 0.03399  | 0.46369  | -0.16324 | 0.0004   | 0.060523 | 0.19169  | -0.2182  | 1.93E-06 | 0.070377 |
| 0.005409 | 0.9072   | -0.07866 | 0.08953  | 0.132744 | 0.00406  | -0.1872  | 4.69E-05 | 0.110902 |
| 0.017496 | 0.7061   | 0.026454 | 0.56851  | 0.239927 | 1.54E-07 | 0.029257 | 0.52824  | 0.301299 |
| -0.15427 | 0.00082  | -0.03137 | 0.49882  | -0.23173 | 4.12E-07 | 0.049149 | 0.28919  | -0.04906 |
| 0.028906 | 0.53321  | -0.0704  | 0.1287   | 0.18875  | 4.04E-05 | -0.22784 | 6.49E-07 | 0.10367  |
| 0.141117 | 0.00224  | -0.01696 | 0.71472  | 0.224334 | 9.71E-07 | -0.13136 | 0.00446  | 0.046973 |
| 0.035634 | 0.44234  | -0.02946 | 0.52532  | 0.175542 | 0.00014  | -0.10341 | 0.02544  | 0.070586 |
| 0.016947 | 0.71492  | -0.12864 | 0.00537  | 0.084104 | 0.06939  | -0.22629 | 7.76E-07 | 0.037068 |
| 0.039119 | 0.39899  | -0.00521 | 0.91067  | 0.172146 | 0.00019  | -0.13332 | 0.0039   | 0.047479 |
| 0.05159  | 0.26587  | -0.12458 | 0.00703  | 0.102488 | 0.02678  | -0.17719 | 0.00012  | 0.128294 |
| 0.009434 | 0.83888  | -0.0515  | 0.2667   | 0.17723  | 0.00012  | -0.20233 | 1.05E-05 | 0.003718 |
| 0.071369 | 0.12353  | 0.01998  | 0.66672  | 0.258181 | 1.51E-08 | -0.03185 | 0.49236  | 0.088205 |
| 0.06827  | 0.14073  | -0.04818 | 0.29884  | 0.128669 | 0.00536  | -0.11925 | 0.0099   | 0.209767 |
| -0.06302 | 0.17398  | -0.13112 | 0.00454  | 0.00149  | 0.97437  | -0.26522 | 5.86E-09 | -0.01377 |
| -0.09219 | 0.04646  | -0.0964  | 0.0373   | -0.28477 | 3.66E-10 | 0.050741 | 0.27383  | 0.055171 |
| 0.042933 | 0.35459  | -0.19521 | 2.16E-05 | 0.076549 | 0.09849  | -0.30136 | 2.93E-11 | 0.117146 |
| 0.056269 | 0.22487  | -0.08907 | 0.05443  | 0.215129 | 2.71E-06 | -0.23639 | 2.36E-07 | 0.055051 |
| 0.01874  | 0.68627  | -0.08844 | 0.05616  | 0.106349 | 0.02153  | -0.23137 | 4.30E-07 | 0.024715 |
| 0.141835 | 0.00212  | 0.094053 | 0.0422   | 0.441204 | 1.15E-23 | 0.146428 | 0.00151  | 0.370331 |
| -0.03383 | 0.4658   | -0.10933 | 0.01811  | 0.152377 | 0.00096  | -0.21792 | 1.99E-06 | 0.159262 |
| 0.029088 | 0.53063  | -0.09549 | 0.03914  | 0.206222 | 7.02E-06 | -0.18526 | 5.63E-05 | 0.025343 |
| 0.071207 | 0.12439  | -0.07414 | 0.10957  | 0.139221 | 0.00257  | -0.21547 | 2.61E-06 | 0.03395  |
| 0.073639 | 0.112    | -0.05229 | 0.25946  | 0.136805 | 0.00305  | -0.09683 | 0.03646  | 0.166082 |
| 0.037157 | 0.42308  | -0.15055 | 0.0011   | 0.13295  | 0.004    | -0.27082 | 2.71E-09 | 0.180164 |
| 0.022957 | 0.62071  | -0.03588 | 0.43919  | 0.123752 | 0.00742  | -0.13545 | 0.00336  | 0.027598 |
| 0.015238 | 0.74258  | -0.11449 | 0.0133   | 0.021536 | 0.6425   | -0.13398 | 0.00372  | 0.169106 |
| 0.163872 | 0.00038  | -0.00876 | 0.85024  | 0.195074 | 2.18E-05 | -0.08713 | 0.0599   | 0.153539 |
| -0.09549 | 0.03914  | -0.14959 | 0.00119  | 0.013616 | 0.76916  | -0.18984 | 3.64E-05 | 0.067876 |
| 0.122861 | 0.00786  | -0.02228 | 0.63103  | 0.303916 | 1.95E-11 | -0.07893 | 0.08841  | 0.274988 |
| 0.054776 | 0.23743  | -0.11593 | 0.01218  | 0.192989 | 2.68E-05 | -0.26571 | 5.48E-09 | 0.095524 |
| -0.11773 | 0.01089  | -0.06744 | 0.14561  | -0.23288 | 3.60E-07 | 0.002953 | 0.94925  | -0.11911 |
| 0.069611 | 0.13307  | -0.12721 | 0.00591  | 0.178968 | 0.0001   | -0.19237 | 2.85E-05 | 0.164223 |
| -0.07789 | 0.09272  | -0.2985  | 4.58E-11 | -0.11633 | 0.01188  | -0.32528 | 5.70E-13 | 0.054324 |
| 0.006944 | 0.88104  | -0.17412 | 0.00016  | 0.080666 | 0.08162  | -0.33081 | 2.18E-13 | 0.076353 |
| 0.049078 | 0.28988  | 0.032188 | 0.48774  | 0.291614 | 1.32E-10 | -0.06167 | 0.18337  | 0.121383 |
| 0.189833 | 3.64E-05 | 0.185511 | 5.50E-05 | 0.480581 | 2.33E-28 | 0.17663  | 0.00012  | 0.125545 |
| 0.099359 | 0.03182  | 0.08275  | 0.07402  | 0.273805 | 1.78E-09 | -0.0672  | 0.14705  | 0.066109 |

|          |          |          |          |          |          |          |          |          |
|----------|----------|----------|----------|----------|----------|----------|----------|----------|
| -0.03186 | 0.49223  | 0.024776 | 0.5933   | 0.242421 | 1.13E-07 | -0.08109 | 0.08003  | 0.083542 |
| -0.07858 | 0.08984  | -0.29525 | 7.56E-11 | -0.0649  | 0.16142  | -0.28637 | 2.89E-10 | 0.054399 |
| 0.036677 | 0.42909  | -0.02754 | 0.55273  | 0.184915 | 5.82E-05 | -0.10484 | 0.02347  | -0.0305  |
| 0.099453 | 0.03165  | 0.167549 | 0.00028  | 0.291923 | 1.26E-10 | 0.038797 | 0.40289  | 0.139372 |
| -0.08774 | 0.05815  | 0.005485 | 0.9059   | -0.20516 | 7.85E-06 | 0.151843 | 0.001    | -0.01225 |
| 0.127988 | 0.00561  | -0.07156 | 0.12253  | 0.224688 | 9.32E-07 | -0.18193 | 7.69E-05 | 0.132507 |
| 0.104856 | 0.02344  | 0.054367 | 0.24096  | 0.307273 | 1.14E-11 | -0.07234 | 0.11851  | 0.193336 |
| 0.023452 | 0.6132   | -0.00467 | 0.91986  | 0.166012 | 0.00031  | -0.12982 | 0.00496  | -0.01781 |
| 0.057445 | 0.21531  | 0.017688 | 0.70302  | 0.161137 | 0.00047  | -0.10763 | 0.01999  | 0.103927 |
| 0.100691 | 0.02958  | 0.019768 | 0.67005  | 0.260863 | 1.06E-08 | -0.13487 | 0.0035   | -0.03896 |
| 0.046026 | 0.32095  | -0.08021 | 0.08336  | 0.102619 | 0.02659  | -0.14559 | 0.00161  | 0.200587 |
| 0.040458 | 0.38304  | -0.1631  | 0.0004   | 0.042774 | 0.35637  | -0.28824 | 2.19E-10 | 0.107365 |
| 0.053683 | 0.24693  | -0.19774 | 1.67E-05 | 0.087175 | 0.05978  | -0.28137 | 6.03E-10 | 0.008513 |
| -0.04282 | 0.35591  | -0.23366 | 3.28E-07 | 0.071622 | 0.1222   | -0.29254 | 1.15E-10 | 0.127101 |
| 0.040276 | 0.38518  | -0.03542 | 0.4451   | 0.083974 | 0.06983  | -0.1317  | 0.00436  | 0.152554 |
| 0.03864  | 0.40479  | 0.055248 | 0.23341  | 0.264498 | 6.47E-09 | -0.03337 | 0.47195  | 0.061141 |
| 0.039341 | 0.39632  | 0.019449 | 0.67507  | 0.179076 | 9.98E-05 | -0.10429 | 0.02421  | 0.040921 |
| 0.033681 | 0.46777  | -0.06097 | 0.18845  | 0.103961 | 0.02466  | -0.21029 | 4.57E-06 | 0.013149 |
| 0.090856 | 0.04974  | -0.10948 | 0.01795  | 0.24409  | 9.21E-08 | -0.20418 | 8.69E-06 | 0.189631 |
| 0.097786 | 0.03464  | -0.11361 | 0.01403  | 0.054036 | 0.24384  | -0.26706 | 4.56E-09 | -0.14234 |
| 0.075791 | 0.10188  | 0.014246 | 0.75881  | 0.274101 | 1.71E-09 | -0.14754 | 0.00139  | 0.073531 |
| 0.1826   | 7.22E-05 | 0.104566 | 0.02383  | 0.356546 | 1.91E-15 | -0.06461 | 0.16331  | 0.03454  |
| -0.16999 | 0.00022  | 0.015025 | 0.74605  | -0.25607 | 1.99E-08 | -0.00466 | 0.92     | -0.24772 |
| -0.04067 | 0.38052  | 0.096098 | 0.0379   | -0.12755 | 0.00577  | 0.141239 | 0.00222  | -0.02387 |
| 0.003755 | 0.93549  | -0.19635 | 1.92E-05 | 0.101922 | 0.02764  | -0.28097 | 6.39E-10 | 0.098968 |
| 0.007439 | 0.87262  | -0.04172 | 0.36838  | 0.134005 | 0.00372  | -0.10866 | 0.01883  | 0.104689 |
| 0.044946 | 0.33246  | -0.15891 | 0.00057  | 0.16237  | 0.00043  | -0.2493  | 4.78E-08 | 0.075761 |
| -0.12436 | 0.00713  | -0.02807 | 0.54505  | -0.1867  | 4.92E-05 | 0.109819 | 0.0176   | -0.14325 |
| 0.074138 | 0.10959  | -0.00957 | 0.83663  | 0.193259 | 2.61E-05 | -0.14998 | 0.00115  | -0.07317 |
| 0.139054 | 0.0026   | -0.00324 | 0.94436  | 0.29127  | 1.39E-10 | -0.15676 | 0.00068  | 0.159535 |
| -0.11385 | 0.01383  | 0.024715 | 0.59422  | -0.16718 | 0.00028  | 0.067059 | 0.14792  | 0.087082 |
| 0.006571 | 0.88737  | -0.02337 | 0.61447  | 0.158846 | 0.00057  | -0.1784  | 0.00011  | -0.09384 |
| 0.030869 | 0.50576  | 0.012136 | 0.79366  | 0.215206 | 2.69E-06 | -0.04626 | 0.3185   | 0.180929 |
| 0.095277 | 0.03958  | -0.02053 | 0.65809  | 0.344544 | 1.84E-14 | -0.10768 | 0.01994  | 0.202291 |
| -0.01824 | 0.69425  | -0.11726 | 0.01122  | 0.036469 | 0.43172  | -0.19582 | 2.03E-05 | -0.08882 |
| 0.086624 | 0.06142  | 0.191233 | 3.18E-05 | 0.365448 | 3.35E-16 | 0.15462  | 0.0008   | 0.207202 |
| 0.079043 | 0.08796  | -0.02511 | 0.58835  | 0.202813 | 1.00E-05 | -0.11666 | 0.01164  | 0.226624 |
| 0.050292 | 0.27811  | -0.17042 | 0.00022  | 0.123708 | 0.00744  | -0.28067 | 6.67E-10 | 0.167074 |
| -0.01708 | 0.71283  | -0.08724 | 0.05958  | 0.144993 | 0.00168  | -0.28194 | 5.55E-10 | 0.057107 |
| -0.01181 | 0.79903  | -0.17679 | 0.00012  | 0.090267 | 0.05124  | -0.23572 | 2.56E-07 | 0.057193 |
| 0.100174 | 0.03043  | -0.07917 | 0.08744  | 0.239868 | 1.55E-07 | -0.10804 | 0.01953  | 0.259867 |
| -0.06498 | 0.16096  | -0.23838 | 1.86E-07 | -0.03216 | 0.48809  | -0.35946 | 1.09E-15 | -0.03912 |
| 0.045109 | 0.3307   | -0.10051 | 0.02987  | 0.086745 | 0.06106  | -0.27074 | 2.74E-09 | -0.03838 |
| 0.156364 | 0.0007   | 0.198887 | 1.49E-05 | 0.450066 | 1.14E-24 | 0.01892  | 0.68341  | 0.193922 |
| 0.083004 | 0.07313  | 0.039767 | 0.39122  | 0.282656 | 5.00E-10 | -0.06974 | 0.13234  | 0.0943   |

|          |         |          |          |          |          |          |          |          |
|----------|---------|----------|----------|----------|----------|----------|----------|----------|
| 0.111674 | 0.01576 | -0.08692 | 0.06054  | 0.184184 | 6.23E-05 | -0.13146 | 0.00443  | 0.204858 |
| 0.065592 | 0.15702 | -0.17204 | 0.00019  | 0.13941  | 0.00253  | -0.22829 | 6.16E-07 | 0.196102 |
| -0.00978 | 0.83312 | -0.1243  | 0.00716  | -0.02086 | 0.65296  | -0.27002 | 3.03E-09 | -0.1321  |
| 0.035623 | 0.44249 | -0.089   | 0.0546   | 0.167924 | 0.00027  | -0.16764 | 0.00027  | 0.194117 |
| -0.16534 | 0.00033 | -0.04216 | 0.36329  | -0.17503 | 0.00014  | 0.103354 | 0.02552  | 0.142997 |
| 0.076611 | 0.09822 | -0.14523 | 0.00165  | 0.128822 | 0.0053   | -0.24631 | 6.97E-08 | 0.106627 |
| -0.14358 | 0.00187 | -0.2013  | 1.17E-05 | -0.06493 | 0.16127  | -0.14956 | 0.00119  | 0.157314 |
| 0.060688 | 0.19048 | -0.08714 | 0.0599   | 0.226256 | 7.79E-07 | -0.18912 | 3.90E-05 | 0.201167 |
| 0.065133 | 0.15995 | -0.06227 | 0.17913  | 0.225998 | 8.03E-07 | -0.1759  | 0.00013  | 0.099915 |
| 0.029981 | 0.51808 | -0.10304 | 0.02597  | 0.144775 | 0.00171  | -0.23748 | 2.07E-07 | 0.093099 |
| -0.03408 | 0.46249 | -0.23695 | 2.21E-07 | -0.0445  | 0.33728  | -0.28082 | 6.53E-10 | 0.060534 |
| 0.029301 | 0.52763 | -0.08241 | 0.07523  | 0.117304 | 0.01118  | -0.08743 | 0.05903  | 0.067155 |
| 0.035119 | 0.44897 | -0.01291 | 0.78083  | 0.206526 | 6.80E-06 | -0.09561 | 0.03889  | 0.004296 |
| 0.068025 | 0.14216 | -0.05127 | 0.26885  | 0.120381 | 0.00922  | -0.14434 | 0.00176  | -0.03984 |
| 0.011762 | 0.79987 | -0.01063 | 0.81872  | 0.193234 | 2.62E-05 | -0.06683 | 0.14934  | 0.170869 |
| -0.03836 | 0.40822 | -0.14459 | 0.00173  | 0.106715 | 0.02108  | -0.25508 | 2.27E-08 | 0.15759  |
| -0.14301 | 0.00195 | -0.01192 | 0.79719  | -0.25813 | 1.52E-08 | 0.08934  | 0.05369  | -0.09182 |
| -0.03567 | 0.4419  | 0.083248 | 0.07229  | -0.09468 | 0.04084  | 0.238138 | 1.91E-07 | 0.080658 |
| 0.070992 | 0.12553 | 0.030977 | 0.50427  | 0.258181 | 1.51E-08 | -0.09207 | 0.04675  | 0.195656 |
| 0.058586 | 0.20632 | -0.16839 | 0.00026  | 0.181052 | 8.33E-05 | -0.23259 | 3.72E-07 | 0.149344 |
| 0.023645 | 0.61028 | -0.08116 | 0.07974  | 0.063744 | 0.16906  | -0.21411 | 3.03E-06 | 0.021915 |
| -0.00157 | 0.97302 | -0.19026 | 3.50E-05 | 0.138643 | 0.00268  | -0.28972 | 1.75E-10 | 0.127426 |
| -0.05652 | 0.22284 | -0.21271 | 3.52E-06 | -0.04528 | 0.32889  | -0.30911 | 8.49E-12 | 0.005893 |
| 0.022719 | 0.62434 | -0.02768 | 0.5507   | 0.23777  | 2.00E-07 | -0.16614 | 0.00031  | 0.215121 |
| 0.012349 | 0.79012 | -0.10053 | 0.02984  | 0.168024 | 0.00027  | -0.22465 | 9.36E-07 | 0.10493  |
| -0.1763  | 0.00013 | -0.01923 | 0.67851  | -0.24149 | 1.27E-07 | 0.079267 | 0.08707  | -0.06778 |
| 0.047379 | 0.30692 | -0.06854 | 0.13914  | 0.283394 | 4.49E-10 | -0.11586 | 0.01223  | 0.202975 |
| 0.015884 | 0.73208 | -0.19138 | 3.14E-05 | 0.029533 | 0.52436  | -0.28708 | 2.60E-10 | 0.1012   |
| 0.083599 | 0.07109 | -0.05321 | 0.25116  | 0.21452  | 2.90E-06 | -0.1547  | 0.0008   | 0.09726  |
| -0.00628 | 0.89233 | -0.17583 | 0.00013  | 0.019066 | 0.68111  | -0.24532 | 7.89E-08 | -0.00931 |
| 0.056305 | 0.22457 | -0.04565 | 0.32495  | 0.217402 | 2.11E-06 | -0.13805 | 0.00279  | 0.086957 |
| -0.13669 | 0.00308 | 0.076663 | 0.09799  | -0.12328 | 0.00765  | 0.14498  | 0.00168  | -0.15428 |
| -0.0041  | 0.92956 | -0.0931  | 0.04434  | 0.082017 | 0.07662  | -0.13426 | 0.00365  | 0.145042 |
| -0.06815 | 0.14144 | 0.09747  | 0.03523  | -0.1611  | 0.00047  | 0.09314  | 0.04425  | -0.15382 |
| 0.097531 | 0.03511 | -0.04661 | 0.31484  | 0.213458 | 3.25E-06 | -0.21827 | 1.92E-06 | 0.038864 |
| 0.093387 | 0.04368 | 0.001553 | 0.9733   | 0.295108 | 7.73E-11 | -0.16513 | 0.00034  | 0.185856 |
| 0.052423 | 0.25822 | -0.05883 | 0.20443  | 0.128026 | 0.00559  | -0.12809 | 0.00557  | 0.018666 |
| 0.094536 | 0.04115 | -0.04689 | 0.31194  | 0.188482 | 4.15E-05 | -0.17219 | 0.00018  | 0.026352 |
| 0.019906 | 0.66788 | -0.16503 | 0.00034  | 0.099349 | 0.03183  | -0.26644 | 4.96E-09 | -0.00442 |
| -0.0052  | 0.91084 | 0.052689 | 0.25581  | 0.136986 | 0.00301  | -0.10132 | 0.02857  | -0.09935 |
| -0.02225 | 0.63144 | -0.06959 | 0.1332   | 0.120621 | 0.00908  | -0.0712  | 0.12441  | 0.134955 |
| -0.04312 | 0.35251 | 0.133891 | 0.00375  | -0.17697 | 0.00012  | 0.143854 | 0.00183  | -0.33126 |
| -0.03256 | 0.48275 | 0.070104 | 0.13034  | -0.17793 | 0.00011  | 0.183452 | 6.67E-05 | 0.128878 |
| -0.10897 | 0.01849 | 0.028453 | 0.53964  | -0.24889 | 5.03E-08 | 0.012616 | 0.78569  | -0.27583 |
| -0.08337 | 0.07187 | 0.072828 | 0.11602  | -0.29372 | 9.57E-11 | 0.106446 | 0.02141  | -0.16729 |

|          |         |          |          |          |          |          |          |          |
|----------|---------|----------|----------|----------|----------|----------|----------|----------|
| -0.12903 | 0.00523 | 0.010801 | 0.81592  | -0.24549 | 7.73E-08 | 0.087598 | 0.05855  | -0.1748  |
| 0.022336 | 0.63019 | -0.03567 | 0.44191  | 0.138529 | 0.0027   | -0.09683 | 0.03645  | 0.053584 |
| 0.029141 | 0.52988 | -0.12964 | 0.00502  | 0.103012 | 0.02601  | -0.18035 | 8.88E-05 | 0.070514 |
| -0.02527 | 0.58602 | -0.11393 | 0.01376  | 0.076114 | 0.10042  | -0.21164 | 3.96E-06 | 0.039146 |
| 0.030609 | 0.50935 | -0.11214 | 0.01532  | 0.161094 | 0.00047  | -0.18456 | 6.02E-05 | 0.231279 |
| 0.005049 | 0.91335 | 0.239995 | 1.53E-07 | 0.02847  | 0.53941  | 0.292076 | 1.23E-10 | 0.102902 |
| -0.04764 | 0.30431 | -0.04025 | 0.3855   | -0.11034 | 0.01706  | 0.020402 | 0.66011  | 0.050308 |
| -0.00718 | 0.87694 | 0.203899 | 8.94E-06 | 0.060976 | 0.18838  | 0.264471 | 6.49E-09 | 0.15252  |
| 0.077181 | 0.09573 | 0.047719 | 0.30346  | 0.162124 | 0.00044  | -0.02649 | 0.56802  | 0.248115 |
| 0.079905 | 0.08455 | 0.007124 | 0.87797  | 0.329854 | 2.58E-13 | -0.00406 | 0.93022  | 0.273231 |
| 0.088159 | 0.05695 | 0.041924 | 0.36601  | 0.168007 | 0.00027  | -0.06416 | 0.16629  | -0.00988 |
| 0.000263 | 0.99547 | -0.0786  | 0.08977  | 0.068462 | 0.13961  | -0.1685  | 0.00025  | -0.07918 |
| 0.109286 | 0.01815 | 0.057616 | 0.21395  | 0.320649 | 1.26E-12 | -0.08424 | 0.06894  | 0.000591 |
| 0.074928 | 0.10585 | -0.07897 | 0.08825  | 0.142311 | 0.00205  | -0.2266  | 7.49E-07 | 0.063214 |
| 0.157128 | 0.00066 | -0.0453  | 0.32866  | 0.23705  | 2.18E-07 | -0.11394 | 0.01376  | 0.201437 |
| -0.05527 | 0.2332  | -0.2773  | 1.08E-09 | -0.13646 | 0.00313  | -0.32353 | 7.69E-13 | -0.191   |
| -0.01292 | 0.78058 | -0.10979 | 0.01763  | 0.060304 | 0.19331  | -0.22848 | 6.02E-07 | -0.07678 |
| 0.060484 | 0.19197 | -0.15049 | 0.00111  | 0.127266 | 0.00589  | -0.22971 | 5.22E-07 | 0.135222 |
| 0.04682  | 0.31268 | -0.00799 | 0.86328  | 0.189314 | 3.83E-05 | -0.07421 | 0.10925  | 0.119372 |
| -0.01165 | 0.80176 | -0.2361  | 2.45E-07 | -0.06333 | 0.17185  | -0.33256 | 1.60E-13 | -0.09708 |
| -0.04198 | 0.36538 | -0.23938 | 1.64E-07 | -0.01982 | 0.66928  | -0.23601 | 2.47E-07 | 0.046713 |
| -0.02177 | 0.63884 | -0.08741 | 0.0591   | 0.089976 | 0.052    | -0.17162 | 0.00019  | 0.051579 |
| -0.06574 | 0.15607 | -0.13207 | 0.00425  | 0.052986 | 0.25313  | -0.17727 | 0.00012  | 0.081195 |
| 0.097626 | 0.03493 | -0.05231 | 0.25924  | 0.256039 | 2.00E-08 | -0.16488 | 0.00035  | 0.093186 |
| 0.018591 | 0.68863 | -0.1026  | 0.02661  | 0.035006 | 0.45044  | -0.14206 | 0.00209  | -0.03909 |
| 0.06721  | 0.14701 | -0.1039  | 0.02474  | 0.196608 | 1.88E-05 | -0.19675 | 1.85E-05 | 0.078148 |
| -0.04581 | 0.32321 | -0.10999 | 0.01742  | -0.0206  | 0.657    | -0.17468 | 0.00015  | -0.02819 |
| -0.06172 | 0.183   | 0.210744 | 4.35E-06 | -0.09947 | 0.03162  | 0.215875 | 2.50E-06 | -0.17168 |
| -0.06496 | 0.16104 | -0.15546 | 0.00075  | 0.041094 | 0.37559  | -0.23925 | 1.67E-07 | 0.017966 |
| 0.020932 | 0.65185 | -0.1149  | 0.01297  | 0.132141 | 0.00423  | -0.17195 | 0.00019  | 0.20947  |
| -0.00607 | 0.89586 | 0.089607 | 0.05297  | -0.08556 | 0.06467  | 0.184087 | 6.29E-05 | -0.12017 |
| 0.08344  | 0.07163 | 0.252374 | 3.22E-08 | 0.046551 | 0.31547  | 0.320339 | 1.32E-12 | -0.01957 |
| -0.01726 | 0.70993 | -0.07004 | 0.13071  | 0.15175  | 0.001    | -0.1627  | 0.00042  | 0.066478 |
| 0.076323 | 0.09949 | -0.04955 | 0.28523  | 0.189391 | 3.80E-05 | -0.18146 | 8.03E-05 | 0.137634 |
| 0.039397 | 0.39565 | -0.09027 | 0.05123  | 0.157998 | 0.00061  | -0.14437 | 0.00176  | 0.063617 |
| -0.00779 | 0.86667 | -0.12974 | 0.00498  | 0.123428 | 0.00758  | -0.13297 | 0.00399  | 0.097491 |
| 0.012123 | 0.79387 | -0.10941 | 0.01802  | -0.01477 | 0.75029  | -0.20257 | 1.03E-05 | 0.058251 |
| 0.07224  | 0.119   | -0.11586 | 0.01223  | 0.114753 | 0.01309  | -0.20574 | 7.39E-06 | 0.132576 |
| -0.00403 | 0.93085 | -0.04602 | 0.32104  | 0.131667 | 0.00437  | 0.016135 | 0.72801  | 0.179195 |
| 0.025833 | 0.57763 | -0.02966 | 0.52255  | 0.053186 | 0.25135  | -0.16332 | 0.00039  | -0.11705 |
| 0.100955 | 0.02915 | -0.03298 | 0.47704  | 0.218694 | 1.83E-06 | -0.1038  | 0.02488  | 0.092493 |
| 0.074823 | 0.10634 | -0.0269  | 0.56202  | 0.156317 | 0.0007   | -0.07871 | 0.08933  | 0.121398 |
| 0.060291 | 0.1934  | 0.032826 | 0.47915  | 0.211171 | 4.16E-06 | -0.08843 | 0.05618  | 0.009846 |
| -0.05095 | 0.27188 | -0.19584 | 2.02E-05 | 0.129513 | 0.00506  | -0.27333 | 1.91E-09 | 0.145597 |
| 0.006781 | 0.88381 | -0.15985 | 0.00053  | 0.03675  | 0.42818  | -0.1668  | 0.00029  | 0.03016  |

|          |         |          |          |          |          |          |          |          |
|----------|---------|----------|----------|----------|----------|----------|----------|----------|
| 0.079186 | 0.08739 | 0.010788 | 0.81615  | 0.288812 | 2.01E-10 | -0.03006 | 0.51698  | 0.266321 |
| 0.023552 | 0.61169 | 0.028398 | 0.54044  | 0.247451 | 6.04E-08 | 0.09267  | 0.04533  | 0.335331 |
| -0.03803 | 0.4122  | 0.188685 | 4.07E-05 | -0.14449 | 0.00174  | 0.142807 | 0.00198  | -0.19178 |
| 0.029815 | 0.5204  | -0.10614 | 0.02179  | 0.17964  | 9.48E-05 | -0.19857 | 1.54E-05 | -0.03683 |
| 0.091598 | 0.04789 | 0.004633 | 0.92046  | 0.280792 | 6.56E-10 | -0.13713 | 0.00298  | 0.127905 |
| 0.05786  | 0.21201 | 0.011147 | 0.81013  | 0.106469 | 0.02138  | -0.13506 | 0.00345  | 0.045476 |
| 0.018746 | 0.68618 | -0.10449 | 0.02393  | 0.182663 | 7.18E-05 | -0.2145  | 2.90E-06 | 0.176314 |
| 0.076873 | 0.09706 | 0.028205 | 0.54318  | 0.133342 | 0.00389  | -0.01149 | 0.8044   | 0.175797 |
| 0.042214 | 0.36271 | -0.14209 | 0.00208  | 0.173771 | 0.00016  | -0.20008 | 1.32E-05 | 0.172388 |
| 0.037614 | 0.4174  | -0.06815 | 0.14142  | 0.25755  | 1.64E-08 | -0.08918 | 0.05411  | 0.212361 |
| -0.07274 | 0.11645 | -0.18722 | 4.68E-05 | -0.10624 | 0.02166  | -0.26328 | 7.63E-09 | -0.13544 |
| 0.039554 | 0.39376 | 0.360291 | 9.24E-16 | 0.208175 | 5.72E-06 | 0.452221 | 6.42E-25 | 0.169007 |
| 0.003236 | 0.94439 | 0.234199 | 3.07E-07 | -0.02196 | 0.63595  | 0.307918 | 1.03E-11 | 0.004344 |
| 0.007535 | 0.871   | -0.13807 | 0.00279  | 0.076108 | 0.10045  | -0.21132 | 4.09E-06 | 0.063405 |
| 0.036813 | 0.42739 | -0.14035 | 0.00237  | 0.089969 | 0.05202  | -0.32798 | 3.57E-13 | -0.03757 |
| 0.154096 | 0.00083 | 0.02021  | 0.66312  | 0.299248 | 4.07E-11 | -0.02392 | 0.6062   | 0.154077 |
| -0.06066 | 0.19072 | -0.04506 | 0.3312   | 0.019829 | 0.66909  | -0.1812  | 8.22E-05 | -0.04513 |
| 0.070953 | 0.12574 | 0.066557 | 0.15099  | 0.290281 | 1.61E-10 | -0.08503 | 0.06636  | 0.027231 |
| -0.0086  | 0.85287 | -0.17607 | 0.00013  | 0.024641 | 0.59532  | -0.2218  | 1.29E-06 | 0.07758  |
| 0.035784 | 0.44042 | -0.19293 | 2.70E-05 | 0.150234 | 0.00113  | -0.25626 | 1.94E-08 | 0.196944 |
| -0.12039 | 0.00921 | -0.06603 | 0.15423  | -0.29684 | 5.92E-11 | -0.06098 | 0.18835  | -0.31066 |
| 0.074612 | 0.10733 | -0.05859 | 0.2063   | 0.272928 | 2.02E-09 | -0.1816  | 7.92E-05 | 0.204648 |
| -0.15045 | 0.00111 | -0.07472 | 0.10683  | -0.27576 | 1.35E-09 | 0.001605 | 0.97241  | -0.15822 |
| -0.12205 | 0.00828 | 0.020339 | 0.66109  | -0.23215 | 3.92E-07 | 0.013997 | 0.7629   | -0.14882 |
| 0.023219 | 0.61674 | -0.11    | 0.0174   | 0.1411   | 0.00224  | -0.20242 | 1.04E-05 | 0.094498 |
| 0.063204 | 0.17271 | -0.13265 | 0.00408  | 0.119544 | 0.00972  | -0.27867 | 8.91E-10 | 0.110449 |
| 0.012727 | 0.78385 | -0.08874 | 0.05534  | 0.058931 | 0.20366  | -0.14925 | 0.00122  | 0.101705 |
| 0.020606 | 0.65694 | -0.09555 | 0.03901  | 0.175072 | 0.00014  | -0.19042 | 3.44E-05 | 0.033969 |
| -0.16603 | 0.00031 | -0.01813 | 0.696    | -0.16975 | 0.00023  | 0.09161  | 0.04787  | 0.049415 |
| 0.033947 | 0.46427 | -0.00495 | 0.91511  | 0.174162 | 0.00016  | -0.11561 | 0.01242  | 0.072495 |
| -0.07796 | 0.0924  | 0.009134 | 0.84393  | -0.26229 | 8.71E-09 | 0.089122 | 0.05428  | -0.18979 |
| 0.077806 | 0.09306 | -0.03564 | 0.44225  | 0.288446 | 2.12E-10 | -0.11205 | 0.01541  | 0.219022 |
| -0.01146 | 0.80491 | -0.17647 | 0.00013  | 0.05026  | 0.27841  | -0.21955 | 1.67E-06 | 0.008015 |
| -0.12426 | 0.00718 | 0.051732 | 0.26455  | -0.23084 | 4.57E-07 | 0.130498 | 0.00473  | -0.02364 |
| -0.10559 | 0.02249 | 0.09455  | 0.04112  | -0.10398 | 0.02463  | 0.219964 | 1.59E-06 | -0.00538 |
| -0.11355 | 0.01408 | 0.12621  | 0.00631  | -0.17618 | 0.00013  | 0.121126 | 0.00879  | -0.12065 |
| 0.055762 | 0.22908 | -0.05261 | 0.25656  | 0.246468 | 6.84E-08 | -0.10468 | 0.02368  | 0.262748 |
| 0.002698 | 0.95363 | -0.18386 | 6.42E-05 | 0.023954 | 0.60562  | -0.21728 | 2.14E-06 | 0.054663 |
| -0.03087 | 0.5058  | -0.23852 | 1.83E-07 | 0.05442  | 0.2405   | -0.29027 | 1.61E-10 | 0.10167  |
| -0.11544 | 0.01255 | 0.028217 | 0.54302  | -0.18735 | 4.62E-05 | 0.094458 | 0.04132  | -0.04637 |
| 0.165089 | 0.00034 | 0.103984 | 0.02463  | 0.373909 | 6.07E-17 | 0.024441 | 0.59831  | 0.089627 |
| -0.01113 | 0.81037 | -0.17124 | 0.0002   | 0.083064 | 0.07292  | -0.2535  | 2.78E-08 | 0.024668 |
| 0.00951  | 0.8376  | -0.04927 | 0.28804  | 0.120214 | 0.00931  | -0.07716 | 0.09583  | 0.146399 |
| 0.093636 | 0.04312 | -0.01474 | 0.75073  | 0.304523 | 1.77E-11 | -0.18254 | 7.26E-05 | 0.108778 |
| 0.064752 | 0.16241 | -0.09513 | 0.03989  | 0.177388 | 0.00012  | -0.18732 | 4.64E-05 | 0.259565 |

|          |          |          |          |          |          |          |          |          |
|----------|----------|----------|----------|----------|----------|----------|----------|----------|
| -0.0693  | 0.1348   | -0.00062 | 0.98936  | -0.20316 | 9.66E-06 | 0.07087  | 0.12618  | -0.04967 |
| 0.218368 | 1.90E-06 | 0.210405 | 4.51E-06 | 0.432469 | 1.05E-22 | 0.092288 | 0.04623  | 0.082095 |
| 0.137091 | 0.00299  | 0.061582 | 0.18401  | 0.256914 | 1.78E-08 | 0.019164 | 0.67957  | 0.186871 |
| 0.039132 | 0.39883  | -0.26024 | 1.15E-08 | -0.04235 | 0.36113  | -0.36062 | 8.66E-16 | -0.02201 |
| 0.05635  | 0.2242   | 0.030516 | 0.51064  | 0.332264 | 1.69E-13 | -0.06676 | 0.14973  | 0.274633 |
| 0.00099  | 0.98297  | -0.1427  | 0.00199  | 0.130281 | 0.0048   | -0.21803 | 1.97E-06 | 0.017086 |
| -0.08182 | 0.07732  | -0.00617 | 0.89419  | -0.13805 | 0.00279  | 0.091388 | 0.04841  | 0.04473  |
| -0.04038 | 0.38392  | -0.06447 | 0.16427  | 0.109412 | 0.01802  | -0.1047  | 0.02365  | 0.18646  |
| -0.02597 | 0.57566  | -0.28125 | 6.14E-10 | -0.07848 | 0.09026  | -0.25618 | 1.96E-08 | 0.140219 |
| 0.104947 | 0.02332  | 0.011948 | 0.79678  | 0.256839 | 1.80E-08 | -0.11753 | 0.01103  | 0.091922 |
| 0.053676 | 0.24699  | -0.09312 | 0.04429  | 0.208362 | 5.61E-06 | -0.21872 | 1.83E-06 | 0.224093 |
| 0.040635 | 0.38095  | -0.13194 | 0.00429  | 0.149724 | 0.00117  | -0.27064 | 2.78E-09 | 0.025325 |
| -0.14418 | 0.00179  | -0.2267  | 7.41E-07 | -0.12279 | 0.0079   | -0.29443 | 8.59E-11 | -0.06905 |
| -0.02853 | 0.5386   | 0.196972 | 1.81E-05 | 0.019006 | 0.68206  | 0.287428 | 2.47E-10 | 0.462016 |
| 0.119917 | 0.00949  | 0.092986 | 0.0446   | 0.279254 | 8.19E-10 | 0.02844  | 0.53983  | 0.196711 |
| 0.037484 | 0.419    | 0.162699 | 0.00042  | 0.346123 | 1.37E-14 | 0.165793 | 0.00032  | 0.308539 |
| -0.06025 | 0.19367  | -0.13709 | 0.00299  | 0.102401 | 0.02691  | -0.30173 | 2.76E-11 | 0.104686 |
| -0.09159 | 0.04791  | -0.29814 | 4.84E-11 | -0.04796 | 0.301    | -0.33715 | 7.06E-14 | 0.035191 |
| 0.070807 | 0.12652  | -0.04593 | 0.32199  | 0.061034 | 0.18796  | -0.12493 | 0.00687  | 0.017539 |
| -0.10379 | 0.0249   | -0.0903  | 0.05116  | -0.23585 | 2.52E-07 | -0.01478 | 0.75002  | -0.09992 |
| 0.088986 | 0.05465  | 0.116548 | 0.01172  | 0.311532 | 5.72E-12 | -0.02531 | 0.58532  | 0.238803 |
| -0.00568 | 0.90261  | -0.15552 | 0.00075  | 0.076011 | 0.10088  | -0.31344 | 4.19E-12 | 0.000889 |
| -0.0491  | 0.28962  | -0.31526 | 3.10E-12 | -0.02809 | 0.54485  | -0.36268 | 5.78E-16 | 0.085303 |
| -0.00725 | 0.87582  | -0.0749  | 0.10598  | 0.091949 | 0.04704  | -0.12    | 0.00944  | -0.07908 |
| 0.055694 | 0.22965  | -0.043   | 0.3538   | 0.214234 | 2.99E-06 | -0.14626 | 0.00153  | 0.069583 |
| -0.03898 | 0.40064  | -0.11249 | 0.01501  | 0.01472  | 0.75104  | -0.16018 | 0.00051  | 0.097098 |
| 0.083848 | 0.07025  | 0.060049 | 0.19519  | 0.194578 | 2.29E-05 | -0.10006 | 0.03063  | -0.07789 |
| 0.085586 | 0.06461  | 0.037777 | 0.41538  | 0.152052 | 0.00098  | -0.10894 | 0.01853  | -0.03074 |
| -0.02202 | 0.63512  | -0.15613 | 0.00071  | 0.105184 | 0.02301  | -0.17733 | 0.00012  | 0.049525 |
| 0.02292  | 0.62127  | 0.064247 | 0.16572  | 0.207685 | 6.02E-06 | -0.09128 | 0.04867  | -0.07546 |
| -0.04611 | 0.32006  | -0.13659 | 0.0031   | 0.076258 | 0.09978  | -0.1663  | 0.00031  | 0.083908 |
| 0.069896 | 0.13149  | -0.04862 | 0.29438  | 0.16495  | 0.00034  | -0.19046 | 3.43E-05 | 0.000451 |
| 0.106912 | 0.02084  | -0.02478 | 0.59329  | 0.065351 | 0.15855  | -0.125   | 0.00684  | -0.03213 |
| 0.027277 | 0.55654  | -0.08906 | 0.05446  | 0.224806 | 9.20E-07 | -0.19249 | 2.82E-05 | 0.093105 |
| 0.020587 | 0.65723  | 0.121899 | 0.00836  | 0.025972 | 0.57558  | 0.239737 | 1.58E-07 | 0.11926  |
| 0.008318 | 0.85772  | -0.07346 | 0.1129   | 0.131027 | 0.00457  | -0.20152 | 1.14E-05 | 0.12423  |
| 0.024444 | 0.59826  | -0.14727 | 0.00142  | 0.070489 | 0.12824  | -0.15148 | 0.00102  | 0.230902 |
| 0.006664 | 0.8858   | -0.12103 | 0.00884  | 0.113887 | 0.0138   | -0.23042 | 4.80E-07 | 0.064226 |
| 0.055061 | 0.235    | -0.02306 | 0.61915  | 0.111666 | 0.01577  | -0.13205 | 0.00426  | 0.030874 |
| -0.11408 | 0.01363  | 0.065224 | 0.15936  | -0.1832  | 6.83E-05 | 0.106862 | 0.0209   | -0.01099 |
| -0.05874 | 0.20512  | 0.193115 | 2.65E-05 | -0.12249 | 0.00805  | 0.274371 | 1.65E-09 | -0.09476 |
| -0.08866 | 0.05555  | -0.02148 | 0.64338  | -0.21567 | 2.55E-06 | 0.053928 | 0.24478  | -0.09396 |
| -0.08666 | 0.06131  | 0.251243 | 3.73E-08 | -0.0397  | 0.39202  | 0.322035 | 9.93E-13 | -0.04181 |
| 0.016449 | 0.72293  | -0.23842 | 1.85E-07 | 0.009545 | 0.837    | -0.28787 | 2.31E-10 | -0.01345 |
| 0.064896 | 0.16148  | 0.057154 | 0.21765  | 0.095763 | 0.03858  | -0.06579 | 0.15577  | -0.08973 |

|          |          |          |          |          |          |          |          |          |
|----------|----------|----------|----------|----------|----------|----------|----------|----------|
| -0.05503 | 0.23529  | -0.13798 | 0.00281  | 0.08475  | 0.06727  | -0.16054 | 0.0005   | 0.059069 |
| 0.129838 | 0.00495  | 0.056517 | 0.22282  | 0.334697 | 1.10E-13 | -0.081   | 0.08036  | 0.164955 |
| 0.04972  | 0.28361  | -0.12551 | 0.00661  | 0.176739 | 0.00012  | -0.1975  | 1.72E-05 | 0.191709 |
| 0.025263 | 0.58606  | -0.03538 | 0.44555  | 0.124489 | 0.00707  | -0.06803 | 0.14213  | 0.055808 |
| 0.064431 | 0.16451  | -0.1204  | 0.0092   | 0.221031 | 1.41E-06 | -0.22414 | 9.93E-07 | 0.238715 |
| 0.044252 | 0.33998  | -0.12156 | 0.00855  | 0.172748 | 0.00018  | -0.20802 | 5.82E-06 | 0.135583 |
| 0.000773 | 0.98672  | -0.02186 | 0.63747  | 0.140906 | 0.00227  | -0.12651 | 0.00619  | -0.17888 |
| 0.130576 | 0.00471  | 0.029796 | 0.52067  | 0.28776  | 2.35E-10 | -0.08557 | 0.06465  | 0.142899 |
| 0.066325 | 0.15242  | 0.051548 | 0.26626  | 0.344773 | 1.76E-14 | -0.07243 | 0.11803  | 0.165717 |
| -0.16921 | 0.00024  | -0.03283 | 0.4791   | -0.30611 | 1.38E-11 | 0.034588 | 0.45587  | -0.18672 |
| 0.031956 | 0.49089  | -0.10581 | 0.02221  | 0.211618 | 3.97E-06 | -0.23748 | 2.07E-07 | 0.106486 |
| 0.052395 | 0.25847  | -0.12727 | 0.00589  | 0.188518 | 4.13E-05 | -0.17173 | 0.00019  | 0.142406 |
| 0.112927 | 0.01462  | -0.09206 | 0.04677  | 0.206512 | 6.81E-06 | -0.25665 | 1.85E-08 | 0.107178 |
| -0.08719 | 0.05973  | 0.058889 | 0.20398  | -0.12278 | 0.0079   | 0.078414 | 0.09053  | -0.06357 |
| 0.075204 | 0.10456  | -0.04063 | 0.38097  | 0.244007 | 9.30E-08 | -0.19194 | 2.97E-05 | 0.016798 |
| 0.005966 | 0.89769  | -0.13384 | 0.00376  | 0.166963 | 0.00029  | -0.25294 | 2.99E-08 | 0.236786 |
| 0.008702 | 0.85122  | -0.06802 | 0.14218  | -0.04801 | 0.30055  | -0.17427 | 0.00015  | -0.0893  |
| 0.130463 | 0.00475  | 0.003404 | 0.94151  | 0.201298 | 1.17E-05 | -0.09165 | 0.04778  | 0.198255 |
| -0.02319 | 0.61712  | -0.11122 | 0.0162   | 0.074661 | 0.1071   | -0.14519 | 0.00166  | -0.03776 |
| -0.07175 | 0.12153  | -0.14434 | 0.00176  | -0.01794 | 0.69906  | -0.21293 | 3.44E-06 | -0.13282 |
| -0.0198  | 0.66956  | -0.04142 | 0.3718   | 0.038134 | 0.41098  | -0.15971 | 0.00053  | -0.14529 |
| 0.137305 | 0.00295  | 0.066915 | 0.1488   | 0.192291 | 2.87E-05 | -0.00866 | 0.85199  | 0.016931 |
| 0.276747 | 1.17E-09 | 0.100397 | 0.03006  | 0.328668 | 3.17E-13 | 0.079009 | 0.0881   | 0.117481 |
| -0.01907 | 0.68111  | -0.16544 | 0.00033  | 0.036348 | 0.43325  | -0.29534 | 7.47E-11 | -0.05391 |
| 0.083063 | 0.07293  | -0.08862 | 0.05565  | 0.247143 | 6.28E-08 | -0.20632 | 6.96E-06 | 0.163114 |
| -0.06347 | 0.17089  | -0.09222 | 0.0464   | 0.019024 | 0.68177  | -0.2662  | 5.13E-09 | -0.10966 |
| -0.02493 | 0.59101  | 0.228248 | 6.19E-07 | 0.113728 | 0.01393  | 0.359666 | 1.04E-15 | 0.268737 |
| -0.12787 | 0.00565  | -0.17297 | 0.00017  | 0.050093 | 0.28001  | -0.17233 | 0.00018  | 0.169794 |
| 0.044368 | 0.33872  | 0.013025 | 0.77892  | -0.07916 | 0.08751  | 0.099786 | 0.03108  | -0.04074 |
| 0.039888 | 0.38978  | -0.10321 | 0.02572  | 0.156986 | 0.00066  | -0.10971 | 0.01771  | 0.238501 |
| 0.090333 | 0.05107  | 0.02637  | 0.56975  | 0.298034 | 4.92E-11 | 0.008712 | 0.85107  | 0.221587 |
| 0.015307 | 0.74146  | -0.16454 | 0.00036  | 0.02656  | 0.56696  | -0.22377 | 1.04E-06 | 0.171024 |
| 0.084406 | 0.0684   | -0.01785 | 0.70043  | 0.274964 | 1.51E-09 | -0.14824 | 0.00132  | 0.105282 |
| 0.053115 | 0.25198  | 8.57E-05 | 0.99853  | 0.200193 | 1.31E-05 | -0.15627 | 0.0007   | 0.020229 |
| 0.035307 | 0.44655  | -0.1275  | 0.00579  | 0.120546 | 0.00912  | -0.20456 | 8.35E-06 | 0.195574 |
| -0.11652 | 0.01174  | 0.001032 | 0.98225  | -0.32903 | 2.98E-13 | -0.00199 | 0.9658   | -0.11774 |
| -0.00131 | 0.97742  | -0.16181 | 0.00045  | 0.087928 | 0.0576   | -0.16583 | 0.00032  | 0.214288 |
| 0.094215 | 0.04184  | -0.11205 | 0.01541  | 0.167911 | 0.00027  | -0.25243 | 3.20E-08 | 0.064131 |
| 0.009738 | 0.83376  | -0.14296 | 0.00196  | 0.155434 | 0.00075  | -0.27273 | 2.07E-09 | 0.073153 |
| 0.007972 | 0.86358  | -0.06584 | 0.15548  | 0.121031 | 0.00884  | -0.18975 | 3.67E-05 | 0.130221 |
| 0.024253 | 0.60112  | -0.16643 | 0.0003   | -0.01572 | 0.73476  | -0.26666 | 4.82E-09 | -0.12843 |
| 0.051509 | 0.26663  | -0.01745 | 0.70677  | 0.269803 | 3.12E-09 | -0.18939 | 3.80E-05 | 0.12424  |
| 0.02963  | 0.52299  | -0.11978 | 0.00957  | 0.127604 | 0.00575  | -0.18589 | 5.31E-05 | 0.171053 |
| -0.05319 | 0.25131  | -0.09967 | 0.03128  | -0.04955 | 0.28526  | -0.26324 | 7.67E-09 | -0.16415 |
| 0.086046 | 0.06318  | -0.00739 | 0.87345  | 0.200527 | 1.26E-05 | -0.10324 | 0.02569  | 0.099774 |



|          |          |          |          |          |          |          |          |          |
|----------|----------|----------|----------|----------|----------|----------|----------|----------|
| -0.04657 | 0.31526  | -0.16585 | 0.00032  | 0.038321 | 0.40868  | -0.22391 | 1.02E-06 | -0.02562 |
| -0.18887 | 4.00E-05 | -0.08747 | 0.05892  | -0.34618 | 1.36E-14 | -0.01359 | 0.76966  | -0.21533 |
| -0.04064 | 0.38093  | -0.21384 | 3.12E-06 | 0.074884 | 0.10605  | -0.23977 | 1.57E-07 | 0.198729 |
| -0.07616 | 0.1002   | 0.058156 | 0.20968  | -0.18702 | 4.77E-05 | 0.08208  | 0.07639  | -0.07716 |
| 0.001348 | 0.97682  | -0.15429 | 0.00082  | 0.092458 | 0.04583  | -0.24971 | 4.53E-08 | -0.00595 |
| 0.009227 | 0.84237  | -0.11628 | 0.01191  | 0.103545 | 0.02524  | -0.23525 | 2.71E-07 | 0.018555 |
| -0.06777 | 0.14365  | -0.0457  | 0.32445  | 0.180248 | 8.97E-05 | -0.04543 | 0.32724  | 0.253971 |
| 0.016122 | 0.72822  | -0.0542  | 0.24244  | 0.155488 | 0.00075  | -0.13945 | 0.00253  | 0.078612 |
| 0.076325 | 0.09948  | 0.156512 | 0.00069  | 0.291882 | 1.27E-10 | 0.137129 | 0.00298  | 0.203446 |
| 0.005535 | 0.90504  | -0.11792 | 0.01076  | 0.169822 | 0.00023  | -0.20188 | 1.10E-05 | 0.148382 |
| -0.00082 | 0.98595  | -0.16752 | 0.00028  | 0.120611 | 0.00908  | -0.26189 | 9.20E-09 | 0.161873 |
| 0.000928 | 0.98404  | 0.050855 | 0.27275  | 0.198425 | 1.56E-05 | 0.022026 | 0.63495  | 0.121149 |
| 0.082408 | 0.07522  | -0.02932 | 0.5273   | 0.27071  | 2.75E-09 | -0.15377 | 0.00086  | 0.198386 |
| 0.051072 | 0.27071  | -0.19228 | 2.87E-05 | 0.062466 | 0.17779  | -0.23153 | 4.21E-07 | 0.120611 |
| 0.103764 | 0.02493  | -0.16479 | 0.00035  | 0.076004 | 0.10092  | -0.25913 | 1.33E-08 | 0.03266  |
| 0.11737  | 0.01114  | 0.086891 | 0.06062  | 0.315077 | 3.19E-12 | -0.04401 | 0.3426   | 0.088205 |
| 0.068146 | 0.14145  | -0.03054 | 0.51034  | 0.253268 | 2.87E-08 | -0.12474 | 0.00695  | 0.12966  |
| -0.15743 | 0.00064  | -0.15738 | 0.00064  | -0.37176 | 9.40E-17 | -0.07757 | 0.09407  | -0.02157 |
| -0.07063 | 0.12748  | 0.226302 | 7.75E-07 | 0.020024 | 0.66603  | 0.254783 | 2.36E-08 | 0.230333 |
| 0.069122 | 0.13582  | -0.10357 | 0.02521  | 0.218984 | 1.77E-06 | -0.16219 | 0.00043  | 0.212393 |
| -0.01429 | 0.75809  | -0.1556  | 0.00074  | 0.06103  | 0.18799  | -0.19615 | 1.96E-05 | 0.172108 |
| -0.16053 | 0.0005   | -0.01193 | 0.79703  | -0.22629 | 7.76E-07 | 0.065548 | 0.1573   | -0.08876 |
| 0.015576 | 0.73708  | -0.01023 | 0.82557  | 0.177775 | 0.00011  | -0.14243 | 0.00203  | 0.073343 |
| 0.051923 | 0.26279  | -0.13493 | 0.00348  | 0.152855 | 0.00092  | -0.23613 | 2.44E-07 | 0.181171 |
| -0.08322 | 0.07239  | -0.05312 | 0.25192  | -0.20444 | 8.46E-06 | 0.094334 | 0.04158  | 0.048134 |
| 0.055293 | 0.23303  | -0.05559 | 0.23055  | 0.205246 | 7.78E-06 | -0.07748 | 0.09446  | 0.271339 |
| 0.121807 | 0.00841  | -0.09246 | 0.04583  | 0.153244 | 0.00089  | -0.15446 | 0.00081  | -0.0566  |
| -0.00081 | 0.98609  | -0.21019 | 4.62E-06 | 0.021992 | 0.63548  | -0.24426 | 9.02E-08 | 0.019843 |
| 0.077523 | 0.09426  | -0.04723 | 0.3084   | 0.248496 | 5.29E-08 | -0.20941 | 5.02E-06 | 0.042457 |
| -0.00883 | 0.84907  | 0.08891  | 0.05486  | -0.17613 | 0.00013  | 0.125567 | 0.00659  | -0.09487 |
| -0.13622 | 0.00318  | 0.014283 | 0.75819  | -0.22816 | 6.26E-07 | 0.099426 | 0.0317   | -0.21436 |
| 0.047494 | 0.30575  | -0.04041 | 0.38361  | 0.175503 | 0.00014  | -0.12866 | 0.00536  | -0.05238 |
| 0.062228 | 0.17945  | -0.15691 | 0.00067  | 0.063021 | 0.17396  | -0.23683 | 2.24E-07 | 0.021283 |
| 0.012051 | 0.79506  | -0.0565  | 0.22297  | 0.197164 | 1.77E-05 | -0.15582 | 0.00073  | 0.146865 |
| 0.00277  | 0.95239  | -0.07123 | 0.12427  | 0.156117 | 0.00071  | -0.11993 | 0.00948  | 0.180947 |
| 0.030496 | 0.51092  | -0.11889 | 0.01013  | 0.169227 | 0.00024  | -0.23559 | 2.60E-07 | 0.065867 |
| -0.03907 | 0.39955  | -0.25879 | 1.39E-08 | 0.010457 | 0.82168  | -0.31126 | 5.98E-12 | 0.019405 |
| 0.009635 | 0.83549  | -0.16407 | 0.00037  | 0.114193 | 0.01354  | -0.29341 | 1.00E-10 | 0.131    |
| 0.123265 | 0.00766  | 0.009138 | 0.84386  | 0.240402 | 1.45E-07 | -0.16645 | 0.0003   | 0.059536 |
| -0.07195 | 0.12052  | 0.06265  | 0.17651  | -0.21904 | 1.76E-06 | 0.131992 | 0.00427  | -0.04191 |
| 0.073914 | 0.11067  | -0.10269 | 0.02648  | 0.200182 | 1.31E-05 | -0.20819 | 5.71E-06 | 0.176253 |
| -0.07852 | 0.09009  | 0.146782 | 0.00147  | -0.13278 | 0.00405  | 0.169208 | 0.00024  | -0.04409 |
| -0.08617 | 0.0628   | -0.00623 | 0.89322  | -0.09867 | 0.03303  | 0.152647 | 0.00094  | 0.179253 |
| 0.046413 | 0.3169   | -0.09293 | 0.04474  | 0.148121 | 0.00133  | -0.22387 | 1.02E-06 | 0.14681  |
| -0.14859 | 0.00128  | -0.09628 | 0.03753  | -0.25767 | 1.61E-08 | 0.024579 | 0.59624  | -0.09628 |

|          |          |          |          |          |          |          |          |          |
|----------|----------|----------|----------|----------|----------|----------|----------|----------|
| 0.102784 | 0.02634  | -0.00178 | 0.96943  | 0.208065 | 5.79E-06 | -0.13034 | 0.00479  | 0.053798 |
| -0.00296 | 0.94912  | -0.1921  | 2.93E-05 | 0.044625 | 0.33593  | -0.25224 | 3.28E-08 | -0.02182 |
| -0.05127 | 0.26881  | -0.02914 | 0.52982  | -0.23751 | 2.07E-07 | 0.060292 | 0.19339  | -0.21256 |
| 0.147857 | 0.00135  | 0.049961 | 0.28128  | 0.396226 | 5.26E-19 | -0.01734 | 0.70853  | 0.171714 |
| -0.01071 | 0.81748  | -0.17492 | 0.00015  | 0.134453 | 0.0036   | -0.23739 | 2.10E-07 | 0.122652 |
| -0.06433 | 0.16515  | 0.017282 | 0.70953  | -0.28961 | 1.78E-10 | 0.058544 | 0.20665  | -0.12901 |
| -0.00048 | 0.99174  | -0.07319 | 0.1142   | 0.038579 | 0.40553  | -0.2187  | 1.83E-06 | 0.105614 |
| 0.009467 | 0.83832  | -0.21948 | 1.68E-06 | 0.047814 | 0.3025   | -0.3041  | 1.90E-11 | 0.015971 |
| 0.073917 | 0.11065  | 0.017011 | 0.71387  | 0.140516 | 0.00234  | -0.17356 | 0.00016  | 0.082753 |
| 0.103364 | 0.0255   | 0.009465 | 0.83836  | 0.206161 | 7.07E-06 | -0.16185 | 0.00045  | -0.03571 |
| 0.068947 | 0.13682  | -0.02251 | 0.62751  | 0.220634 | 1.47E-06 | -0.18349 | 6.65E-05 | -0.03114 |
| 0.010966 | 0.81316  | -0.07509 | 0.1051   | 0.226279 | 7.77E-07 | -0.1557  | 0.00073  | 0.212458 |
| 0.21674  | 2.27E-06 | 0.24323  | 1.02E-07 | 0.49475  | 3.34E-30 | 0.085952 | 0.06347  | 0.12595  |
| -0.05985 | 0.19672  | 0.150652 | 0.00109  | -0.12035 | 0.00924  | 0.21131  | 4.10E-06 | -0.09161 |
| 0.063307 | 0.17201  | 0.013446 | 0.77196  | 0.198291 | 1.58E-05 | -0.12732 | 0.00586  | -0.05754 |
| -0.06646 | 0.15158  | -0.19575 | 2.04E-05 | -0.01773 | 0.70236  | -0.30573 | 1.46E-11 | -0.09707 |
| -0.06182 | 0.18234  | 0.155147 | 0.00077  | -0.1669  | 0.00029  | 0.189024 | 3.94E-05 | -0.06886 |
| 0.008251 | 0.85885  | -0.13883 | 0.00264  | 0.117924 | 0.01076  | -0.18983 | 3.64E-05 | 0.120885 |
| 0.098103 | 0.03405  | -0.09788 | 0.03447  | 0.083694 | 0.07077  | -0.21103 | 4.22E-06 | -0.03779 |
| 0.151224 | 0.00105  | -0.01755 | 0.70521  | 0.128247 | 0.00551  | -0.05303 | 0.25273  | 0.212226 |
| 0.120007 | 0.00944  | -0.07815 | 0.09164  | 0.179772 | 9.37E-05 | -0.07084 | 0.12635  | 0.104955 |
| -0.04536 | 0.32801  | -0.07892 | 0.08845  | 0.154806 | 0.00079  | -0.09097 | 0.04944  | 0.128406 |
| 0.041607 | 0.36966  | -0.12149 | 0.00859  | 0.134439 | 0.00361  | -0.28951 | 1.81E-10 | 0.001404 |
| 0.129751 | 0.00498  | 0.066354 | 0.15224  | 0.189019 | 3.94E-05 | -0.05559 | 0.23049  | 0.121616 |
| -0.12147 | 0.0086   | 0.069239 | 0.13516  | -0.22623 | 7.82E-07 | 0.124698 | 0.00697  | -0.01711 |
| -0.01007 | 0.8281   | -0.1831  | 6.89E-05 | 0.105723 | 0.02231  | -0.2676  | 4.23E-09 | 0.036886 |
| 0.028127 | 0.5443   | -0.03237 | 0.48526  | 0.207808 | 5.95E-06 | -0.18594 | 5.28E-05 | 0.098849 |
| 0.158194 | 0.0006   | 0.089456 | 0.05338  | 0.404139 | 8.93E-20 | 0.011916 | 0.79731  | 0.177084 |
| 0.130936 | 0.00459  | 0.053713 | 0.24667  | 0.315719 | 2.87E-12 | -0.07747 | 0.09449  | 0.245628 |
| 0.109597 | 0.01783  | -0.07354 | 0.11249  | 0.20651  | 6.82E-06 | -0.21899 | 1.77E-06 | -0.00632 |
| 0.098369 | 0.03357  | -0.04692 | 0.31159  | 0.233226 | 3.45E-07 | -0.0906  | 0.0504   | 0.238103 |
| 0.125564 | 0.00659  | 0.078608 | 0.08973  | 0.254474 | 2.45E-08 | -0.09485 | 0.04048  | 0.165619 |
| -0.00079 | 0.98645  | -0.05192 | 0.26286  | 0.130982 | 0.00458  | -0.10764 | 0.01998  | 0.052713 |
| 0.155805 | 0.00073  | 0.135578 | 0.00333  | 0.310369 | 6.92E-12 | 0.005446 | 0.90656  | 0.08448  |
| -0.04982 | 0.28261  | -0.03504 | 0.45     | 0.18505  | 5.75E-05 | -0.00089 | 0.98469  | 0.274812 |
| -0.12092 | 0.0089   | -0.20611 | 7.11E-06 | -0.1093  | 0.01814  | -0.36258 | 5.90E-16 | -0.09345 |
| -0.0081  | 0.86136  | -0.1768  | 0.00012  | 0.09463  | 0.04095  | -0.27283 | 2.05E-09 | 0.156732 |
| -0.00152 | 0.97391  | 0.233779 | 3.23E-07 | -0.00723 | 0.87615  | 0.305985 | 1.40E-11 | 0.260558 |
| -0.19284 | 2.72E-05 | -0.04301 | 0.35374  | -0.28311 | 4.68E-10 | 0.057319 | 0.21632  | -0.00957 |
| 0.03725  | 0.42192  | -0.13065 | 0.00468  | 0.157873 | 0.00062  | -0.22799 | 6.38E-07 | 0.262072 |
| 0.049834 | 0.28251  | -0.01069 | 0.81784  | 0.110774 | 0.01663  | -0.18459 | 6.00E-05 | -0.01532 |
| 0.04322  | 0.35137  | -0.06884 | 0.13744  | 0.227536 | 6.72E-07 | -0.16414 | 0.00037  | 0.217573 |
| -0.00293 | 0.94965  | 0.089032 | 0.05452  | -0.17851 | 0.00011  | 0.187162 | 4.71E-05 | 0.066958 |
| 0.027535 | 0.55281  | -0.04722 | 0.30852  | 0.17957  | 9.54E-05 | -0.11186 | 0.01559  | 0.289845 |
| 0.052063 | 0.2615   | -0.10783 | 0.01976  | 0.111136 | 0.01627  | -0.17206 | 0.00019  | 0.157525 |

|          |          |          |          |          |          |          |          |          |
|----------|----------|----------|----------|----------|----------|----------|----------|----------|
| 0.095508 | 0.0391   | 0.024732 | 0.59395  | 0.283321 | 4.53E-10 | -0.02659 | 0.56647  | 0.222604 |
| -0.0117  | 0.80098  | -0.08627 | 0.06251  | 0.175948 | 0.00013  | -0.14814 | 0.00132  | 0.307781 |
| 0.06603  | 0.15426  | 0.048465 | 0.29596  | 0.150458 | 0.00111  | -0.1158  | 0.01228  | -0.12064 |
| 0.011235 | 0.80866  | -0.06615 | 0.15349  | 0.113312 | 0.01428  | -0.20078 | 1.23E-05 | -0.02442 |
| 0.022293 | 0.63085  | -0.11663 | 0.01166  | 0.145679 | 0.0016   | -0.21026 | 4.58E-06 | 0.050313 |
| 0.002748 | 0.95277  | -0.15055 | 0.0011   | 0.156506 | 0.00069  | -0.25204 | 3.36E-08 | 0.094683 |
| -0.04158 | 0.36993  | -0.19344 | 2.57E-05 | 0.093743 | 0.04288  | -0.31295 | 4.54E-12 | 0.051288 |
| 0.044968 | 0.33222  | -0.05396 | 0.24453  | 0.218192 | 1.94E-06 | -0.14125 | 0.00222  | 0.07314  |
| -0.18854 | 4.13E-05 | -0.02416 | 0.60251  | -0.25871 | 1.41E-08 | 0.134979 | 0.00347  | 0.071335 |
| -0.12569 | 0.00654  | -0.02673 | 0.5645   | -0.24026 | 1.48E-07 | 0.070081 | 0.13046  | -0.06718 |
| -0.08254 | 0.07476  | -0.1877  | 4.47E-05 | -0.0313  | 0.49983  | -0.24232 | 1.15E-07 | -0.08711 |
| 0.110765 | 0.01664  | -0.12293 | 0.00782  | 0.056293 | 0.22467  | -0.20855 | 5.50E-06 | 0.025617 |
| 0.041377 | 0.37231  | 0.459151 | 9.91E-26 | 0.21001  | 4.71E-06 | 0.541354 | 6.50E-37 | 0.042393 |
| 0.096014 | 0.03807  | -0.01764 | 0.70384  | 0.293119 | 1.05E-10 | 0.00585  | 0.89966  | 0.279341 |
| 0.013421 | 0.77238  | -0.06032 | 0.19321  | 0.112792 | 0.01474  | -0.08862 | 0.05567  | 0.10799  |
| 0.121307 | 0.00869  | -0.02518 | 0.58732  | 0.32228  | 9.53E-13 | -0.13407 | 0.0037   | 0.202977 |
| 0.036442 | 0.43206  | -0.05131 | 0.26845  | 0.140504 | 0.00234  | -0.18591 | 5.30E-05 | 0.079142 |
| 0.124949 | 0.00686  | -0.04557 | 0.32577  | 0.266091 | 5.20E-09 | -0.16761 | 0.00027  | 0.211816 |
| 0.058763 | 0.20495  | -0.15471 | 0.0008   | 0.213726 | 3.16E-06 | -0.22593 | 8.09E-07 | 0.248593 |
| 0.027141 | 0.55851  | 0.012331 | 0.79042  | 0.156883 | 0.00067  | -0.11321 | 0.01438  | 0.058426 |
| -0.01428 | 0.75818  | -0.17375 | 0.00016  | 0.143568 | 0.00187  | -0.22627 | 7.78E-07 | 0.201346 |
| 0.018415 | 0.69143  | -0.14397 | 0.00181  | 0.194857 | 2.23E-05 | -0.21621 | 2.41E-06 | 0.235933 |
| 0.149804 | 0.00117  | -0.05945 | 0.19967  | 0.212415 | 3.64E-06 | -0.12782 | 0.00567  | 0.148521 |
| -0.00709 | 0.87862  | -0.21696 | 2.22E-06 | 0.023105 | 0.61846  | -0.31457 | 3.48E-12 | 0.081957 |
| 0.132159 | 0.00422  | 0.037848 | 0.4145   | 0.229394 | 5.42E-07 | -0.03184 | 0.49244  | 0.119411 |
| -0.10348 | 0.02533  | -0.08444 | 0.06829  | 0.125657 | 0.00655  | -0.1065  | 0.02135  | 0.188001 |
| 0.025169 | 0.58746  | -0.05016 | 0.2794   | 0.124255 | 0.00718  | -0.1913  | 3.16E-05 | -0.01083 |
| 0.003162 | 0.94567  | -0.11923 | 0.00991  | 0.172135 | 0.00019  | -0.23903 | 1.72E-07 | 0.133343 |
| 0.113422 | 0.01419  | 0.136158 | 0.0032   | 0.262729 | 8.22E-09 | -0.00176 | 0.96981  | 0.046082 |
| 0.210548 | 4.45E-06 | 0.074903 | 0.10597  | 0.365235 | 3.49E-16 | -0.0287  | 0.53618  | 0.165086 |
| -0.02613 | 0.57323  | -0.05232 | 0.25917  | 0.18712  | 4.72E-05 | -0.12204 | 0.00829  | 0.073182 |
| -0.03369 | 0.46764  | -0.10519 | 0.023    | 0.109908 | 0.0175   | -0.21628 | 2.39E-06 | 0.133589 |
| -0.06695 | 0.14856  | -0.09957 | 0.03145  | 0.106897 | 0.02086  | -0.05057 | 0.27544  | 0.197436 |
| 0.052312 | 0.25923  | -0.11139 | 0.01603  | 0.082616 | 0.07449  | -0.17309 | 0.00017  | 0.063599 |
| -0.04941 | 0.28667  | -0.14699 | 0.00145  | 0.016857 | 0.71635  | -0.1631  | 0.0004   | 0.033971 |
| -0.10708 | 0.02064  | -0.13608 | 0.00321  | -0.26446 | 6.50E-09 | -0.00732 | 0.87467  | 0.015263 |
| 0.069373 | 0.13441  | 0.039173 | 0.39833  | 0.303544 | 2.07E-11 | -0.06659 | 0.15081  | 0.258938 |
| -0.14296 | 0.00196  | -0.02961 | 0.52324  | -0.32956 | 2.71E-13 | -0.00122 | 0.97904  | -0.21399 |
| 0.039366 | 0.39601  | -0.04872 | 0.29345  | 0.181472 | 8.02E-05 | -0.11644 | 0.0118   | 0.200292 |
| -0.00102 | 0.9825   | 0.247352 | 6.12E-08 | -0.03324 | 0.47363  | 0.264363 | 6.59E-09 | -0.14742 |
| 0.074629 | 0.10725  | -0.10942 | 0.01801  | 0.233578 | 3.31E-07 | -0.21759 | 2.07E-06 | 0.180628 |
| -0.00458 | 0.92138  | -0.15106 | 0.00106  | 0.17948  | 9.62E-05 | -0.26018 | 1.16E-08 | 0.134543 |
| -0.03394 | 0.46442  | -0.11057 | 0.01683  | 0.058272 | 0.20876  | -0.15648 | 0.00069  | -0.10349 |
| 0.139842 | 0.00246  | 0.025991 | 0.5753   | 0.2453   | 7.92E-08 | -0.10152 | 0.02826  | -0.08121 |
| -0.00915 | 0.84361  | -0.1863  | 5.10E-05 | -0.07683 | 0.09726  | -0.24356 | 9.84E-08 | -0.00017 |

|          |         |          |          |          |          |          |          |          |
|----------|---------|----------|----------|----------|----------|----------|----------|----------|
| 0.097511 | 0.03515 | 0.037594 | 0.41764  | 0.322812 | 8.70E-13 | -0.08308 | 0.07286  | 0.18491  |
| 0.0038   | 0.93472 | -0.14598 | 0.00156  | 0.123578 | 0.0075   | -0.2389  | 1.74E-07 | 0.162527 |
| -0.12859 | 0.00539 | -0.09904 | 0.03238  | -0.35759 | 1.56E-15 | -0.00064 | 0.98892  | -0.23332 |
| 0.076295 | 0.09962 | -0.14892 | 0.00125  | 0.043599 | 0.34716  | -0.24742 | 6.07E-08 | 0.031688 |
| 0.030547 | 0.51021 | -0.18825 | 4.24E-05 | 0.105031 | 0.02321  | -0.18952 | 3.75E-05 | 0.266984 |
| -0.05421 | 0.24229 | -0.06038 | 0.19273  | -0.26092 | 1.05E-08 | 0.064764 | 0.16233  | -0.11931 |
| 0.160304 | 0.00051 | 0.080804 | 0.0811   | 0.365589 | 3.25E-16 | -0.04749 | 0.30584  | 0.181972 |
| -0.06394 | 0.16778 | 0.184025 | 6.32E-05 | 0.03     | 0.51781  | 0.262721 | 8.22E-09 | 0.115751 |
| -0.00417 | 0.92834 | -0.08315 | 0.07263  | 0.046742 | 0.31348  | -0.20793 | 5.87E-06 | -0.14685 |
| -0.0222  | 0.63226 | -0.2212  | 1.38E-06 | -0.01969 | 0.67124  | -0.25764 | 1.62E-08 | 0.083407 |
| -0.08673 | 0.06109 | 0.012858 | 0.78168  | -0.24213 | 1.17E-07 | 0.072721 | 0.11656  | -0.07958 |
| 0.00721  | 0.87652 | -0.1715  | 0.0002   | 0.126169 | 0.00633  | -0.31169 | 5.58E-12 | 0.128667 |
| 0.019794 | 0.66963 | -0.04885 | 0.29216  | 0.178392 | 0.00011  | -0.16181 | 0.00045  | 0.155134 |
| -0.04907 | 0.28995 | -0.2036  | 9.23E-06 | 0.093286 | 0.04391  | -0.289   | 1.95E-10 | 0.191197 |
| -0.02232 | 0.63043 | -0.0227  | 0.62457  | 0.150639 | 0.00109  | -0.18849 | 4.15E-05 | -0.06471 |
| 0.07634  | 0.09941 | 0.006785 | 0.88373  | 0.232945 | 3.57E-07 | -0.05627 | 0.22482  | 0.05461  |
| -0.02    | 0.66636 | -0.15619 | 0.00071  | 0.053883 | 0.24517  | -0.2396  | 1.60E-07 | 0.018715 |
| 0.056219 | 0.22528 | -0.10019 | 0.0304   | 0.158368 | 0.00059  | -0.25703 | 1.76E-08 | -0.03251 |
| 0.111981 | 0.01547 | -0.03071 | 0.50798  | 0.230837 | 4.57E-07 | -0.06803 | 0.14213  | 0.185885 |
| -0.03919 | 0.3981  | -0.23166 | 4.15E-07 | 0.033164 | 0.47464  | -0.35241 | 4.21E-15 | 0.046139 |
| -0.07718 | 0.09574 | -0.28848 | 2.11E-10 | 0.041951 | 0.36571  | -0.31953 | 1.52E-12 | 0.136879 |
| 0.09498  | 0.0402  | -0.07233 | 0.11852  | 0.163946 | 0.00037  | -0.1959  | 2.01E-05 | 0.158997 |
| 0.114626 | 0.01319 | -0.03339 | 0.47159  | 0.245447 | 7.77E-08 | -0.17814 | 0.00011  | 0.077238 |
| 0.058244 | 0.20899 | -0.08634 | 0.06228  | 0.169159 | 0.00024  | -0.19745 | 1.72E-05 | 0.082776 |
| 0.060188 | 0.19416 | -0.11898 | 0.01007  | 0.146725 | 0.00148  | -0.25351 | 2.78E-08 | 0.082799 |
| -0.10133 | 0.02856 | 0.133792 | 0.00377  | -0.15511 | 0.00077  | 0.206487 | 6.83E-06 | 0.035967 |
| 0.068271 | 0.14072 | -0.0593  | 0.20081  | 0.217872 | 2.01E-06 | -0.11084 | 0.01656  | 0.224757 |
| 0.023665 | 0.60998 | -0.083   | 0.07316  | 0.212479 | 3.61E-06 | -0.22339 | 1.08E-06 | 0.049372 |
| 0.07231  | 0.11865 | -0.07098 | 0.1256   | 0.278689 | 8.89E-10 | -0.15253 | 0.00094  | 0.232354 |
| 0.037564 | 0.41801 | -0.16477 | 0.00035  | 0.158927 | 0.00057  | -0.26941 | 3.30E-09 | 0.234651 |
| 0.050978 | 0.27159 | -0.16717 | 0.00029  | 0.089151 | 0.0542   | -0.27639 | 1.23E-09 | 0.05665  |
| 0.001485 | 0.97446 | -0.15684 | 0.00067  | 0.085789 | 0.06397  | -0.25882 | 1.39E-08 | 0.030652 |
| 0.060212 | 0.19398 | -0.13666 | 0.00309  | 0.150974 | 0.00107  | -0.2239  | 1.02E-06 | 0.050116 |
| -0.02032 | 0.66135 | 0.322624 | 8.98E-13 | 0.0274   | 0.55475  | 0.41235  | 1.35E-20 | 0.04774  |
| 0.057259 | 0.2168  | -0.05774 | 0.21293  | 0.170847 | 0.00021  | -0.18972 | 3.69E-05 | 0.016561 |
| 0.035992 | 0.43777 | -0.20083 | 1.23E-05 | -0.0493  | 0.28771  | -0.24984 | 4.46E-08 | -0.02876 |
| 0.009756 | 0.83345 | 0.187771 | 4.44E-05 | 0.015509 | 0.73817  | 0.315869 | 2.80E-12 | 0.08661  |
| 0.059346 | 0.20049 | -0.02104 | 0.65025  | 0.217215 | 2.16E-06 | -0.1574  | 0.00064  | 0.007156 |
| 0.152031 | 0.00098 | 0.058632 | 0.20596  | 0.337079 | 7.16E-14 | -0.04648 | 0.31617  | 0.160312 |
| -0.00217 | 0.9627  | -0.04694 | 0.31139  | 0.119522 | 0.00973  | -0.17079 | 0.00021  | -0.03016 |
| 0.010746 | 0.81684 | -0.08775 | 0.0581   | 0.109241 | 0.0182   | -0.15229 | 0.00096  | -0.02926 |
| 0.035208 | 0.44782 | -0.05605 | 0.22666  | 0.174187 | 0.00015  | -0.24307 | 1.04E-07 | -0.03725 |
| 0.129918 | 0.00492 | 0.04472  | 0.3349   | 0.352112 | 4.46E-15 | -0.07033 | 0.12909  | 0.196446 |
| -0.10127 | 0.02865 | -0.19698 | 1.81E-05 | -0.03022 | 0.51472  | -0.24877 | 5.11E-08 | -0.05955 |
| 0.003252 | 0.94413 | -0.10865 | 0.01884  | 0.085012 | 0.06643  | -0.16294 | 0.00041  | 0.138807 |

|          |          |          |          |          |          |          |          |          |
|----------|----------|----------|----------|----------|----------|----------|----------|----------|
| 0.113896 | 0.01379  | -0.10432 | 0.02417  | 0.182818 | 7.08E-05 | -0.10163 | 0.02809  | 0.155612 |
| 0.023932 | 0.60596  | -0.09553 | 0.03905  | 0.172783 | 0.00018  | -0.20904 | 5.22E-06 | 0.07127  |
| 0.029587 | 0.5236   | -0.08029 | 0.08306  | 0.169342 | 0.00024  | -0.17659 | 0.00013  | 0.071308 |
| -0.00958 | 0.83643  | -0.0893  | 0.05379  | 0.167019 | 0.00029  | -0.19461 | 2.29E-05 | 0.120164 |
| 0.003536 | 0.93924  | -0.10236 | 0.02698  | 0.103567 | 0.02521  | -0.21563 | 2.57E-06 | 0.037076 |
| 0.087441 | 0.059    | -0.0147  | 0.75134  | 0.257362 | 1.68E-08 | -0.1308  | 0.00464  | 0.115797 |
| 0.074638 | 0.10721  | -0.0115  | 0.80422  | 0.223069 | 1.12E-06 | -0.09386 | 0.04263  | 0.082588 |
| -0.07272 | 0.11654  | 0.173183 | 0.00017  | 0.049574 | 0.28503  | 0.241013 | 1.35E-07 | 0.061894 |
| -0.00625 | 0.89293  | -0.26264 | 8.31E-09 | -0.01464 | 0.75227  | -0.27262 | 2.11E-09 | 0.162634 |
| 0.075994 | 0.10096  | -0.01231 | 0.79073  | 0.11638  | 0.01184  | -0.15893 | 0.00057  | -0.18929 |
| -0.01423 | 0.7591   | -0.18214 | 7.54E-05 | 0.008196 | 0.85978  | -0.31111 | 6.14E-12 | -0.12849 |
| -0.05767 | 0.21352  | -0.13961 | 0.0025   | 0.0833   | 0.07211  | -0.22263 | 1.18E-06 | 0.028379 |
| 0.164028 | 0.00037  | 0.206087 | 7.13E-06 | 0.337661 | 6.44E-14 | 0.009825 | 0.8323   | 0.029621 |
| -0.10811 | 0.01945  | -0.21205 | 3.78E-06 | -0.11843 | 0.01042  | -0.27406 | 1.72E-09 | -0.11694 |
| 0.115517 | 0.01249  | 0.049866 | 0.2822   | 0.353328 | 3.54E-15 | -0.04609 | 0.32031  | 0.125778 |
| 0.000761 | 0.98691  | -0.15206 | 0.00098  | 0.096971 | 0.03618  | -0.25013 | 4.30E-08 | 0.111211 |
| 0.043122 | 0.35247  | -0.10888 | 0.01859  | 0.189542 | 3.75E-05 | -0.12346 | 0.00756  | 0.2295   |
| 0.066062 | 0.15406  | -0.03079 | 0.5069   | 0.06594  | 0.15482  | -0.09305 | 0.04446  | 0.180862 |
| 0.028018 | 0.54586  | -0.07381 | 0.11119  | 0.205169 | 7.84E-06 | -0.04638 | 0.31725  | 0.180262 |
| 0.010874 | 0.8147   | 0.058606 | 0.20617  | 0.321439 | 1.10E-12 | -0.00861 | 0.85282  | 0.151463 |
| 0.214364 | 2.95E-06 | 0.176496 | 0.00013  | 0.329146 | 2.92E-13 | 0.049016 | 0.29049  | 0.060245 |
| 0.256741 | 1.82E-08 | 0.07657  | 0.09839  | 0.347301 | 1.10E-14 | -0.02618 | 0.57252  | 0.107354 |
| -0.00703 | 0.87955  | 0.068993 | 0.13656  | -0.06885 | 0.13736  | 0.157055 | 0.00066  | 0.160452 |
| 0.056094 | 0.22632  | -0.08345 | 0.0716   | 0.108845 | 0.01863  | -0.14721 | 0.00142  | 0.0215   |
| -0.00722 | 0.87637  | -0.06506 | 0.16044  | 0.183529 | 6.62E-05 | -0.2038  | 9.03E-06 | 0.031973 |
| -0.10209 | 0.02738  | 0.038123 | 0.41111  | -0.14873 | 0.00127  | 0.067966 | 0.14251  | -0.08155 |
| -0.10499 | 0.02327  | 0.085355 | 0.06533  | -0.03595 | 0.43837  | 0.199203 | 1.45E-05 | 0.269668 |
| 0.036308 | 0.43375  | 0.137779 | 0.00285  | -0.01148 | 0.80466  | 0.245645 | 7.58E-08 | 0.198953 |
| 0.054791 | 0.2373   | -0.05801 | 0.21085  | 0.182368 | 7.38E-05 | -0.20008 | 1.32E-05 | -0.02343 |
| -0.13073 | 0.00466  | 0.202109 | 1.08E-05 | -0.09467 | 0.04087  | 0.229878 | 5.12E-07 | -0.01071 |
| 0.056676 | 0.22153  | -0.08135 | 0.07905  | 0.001106 | 0.98098  | -0.14343 | 0.00189  | 0.15579  |
| 0.019594 | 0.67278  | 0.257026 | 1.76E-08 | 0.010083 | 0.82795  | 0.328682 | 3.16E-13 | 0.019421 |
| -0.00768 | 0.8685   | -0.17579 | 0.00013  | 0.101114 | 0.0289   | -0.31376 | 3.97E-12 | 0.052937 |
| 0.028342 | 0.54123  | -0.08639 | 0.06214  | 0.167617 | 0.00027  | -0.13088 | 0.00461  | 0.24744  |
| -0.00605 | 0.89622  | -0.04699 | 0.31088  | 0.175409 | 0.00014  | -0.19995 | 1.34E-05 | 1.19E-05 |
| 0.102096 | 0.02737  | 0.044639 | 0.33577  | 0.296526 | 6.22E-11 | -0.10671 | 0.02109  | 0.096334 |
| 0.087663 | 0.05836  | 0.040218 | 0.38586  | 0.190794 | 3.32E-05 | -0.08149 | 0.07855  | 0.013774 |
| 0.089587 | 0.05303  | 0.050841 | 0.27289  | 0.23631  | 2.39E-07 | -0.0065  | 0.88867  | 0.180881 |
| 0.061956 | 0.18136  | -0.15619 | 0.00071  | 0.092081 | 0.04672  | -0.26304 | 7.88E-09 | 0.0591   |
| -0.10261 | 0.02659  | 0.066992 | 0.14833  | -0.23553 | 2.62E-07 | 0.044479 | 0.33751  | -0.19521 |
| -0.08394 | 0.06994  | 0.049248 | 0.28822  | -0.19776 | 1.67E-05 | 0.114363 | 0.0134   | -0.13541 |
| 0.060663 | 0.19066  | -0.06777 | 0.14368  | 0.110915 | 0.01649  | -0.07797 | 0.09238  | 0.239614 |
| 0.118982 | 0.01007  | 0.015525 | 0.73791  | 0.107533 | 0.02011  | -0.13664 | 0.00309  | -0.09492 |
| 0.082645 | 0.07438  | -0.00333 | 0.94273  | 0.229986 | 5.05E-07 | -0.15148 | 0.00102  | 0.096926 |
| 0.125061 | 0.00681  | -0.00314 | 0.94601  | 0.255536 | 2.14E-08 | -0.08477 | 0.0672   | 0.168969 |

|          |         |          |          |          |          |          |          |          |
|----------|---------|----------|----------|----------|----------|----------|----------|----------|
| -0.15061 | 0.0011  | -0.04003 | 0.38811  | -0.21961 | 1.65E-06 | 0.022188 | 0.63246  | -0.23389 |
| -0.02904 | 0.53127 | 0.019089 | 0.68075  | -0.19076 | 3.33E-05 | 0.050645 | 0.27474  | -0.22356 |
| 0.135238 | 0.00341 | 0.076569 | 0.0984   | 0.297702 | 5.18E-11 | -0.07554 | 0.10304  | 0.061076 |
| -0.07949 | 0.08618 | 0.015036 | 0.74587  | -0.26782 | 4.11E-09 | -0.01893 | 0.68329  | -0.03088 |
| 0.075118 | 0.10496 | -0.02869 | 0.53623  | 0.22807  | 6.32E-07 | -0.14263 | 0.002    | 0.083028 |
| 0.129253 | 0.00515 | 0.042998 | 0.35386  | 0.337901 | 6.17E-14 | -0.04987 | 0.28216  | 0.22316  |
| 0.094217 | 0.04184 | -0.08982 | 0.05241  | 0.101307 | 0.02859  | -0.14548 | 0.00162  | 0.010588 |
| 0.111716 | 0.01572 | -0.06196 | 0.18136  | 0.234227 | 3.06E-07 | -0.14632 | 0.00152  | 0.155257 |
| 0.069806 | 0.13199 | -0.05809 | 0.21016  | 0.177758 | 0.00011  | -0.10574 | 0.02229  | 0.236017 |
| 0.112936 | 0.01461 | -0.03105 | 0.50333  | 0.167459 | 0.00028  | -0.11028 | 0.01712  | 0.14307  |
| -0.09468 | 0.04085 | -0.05681 | 0.2204   | 0.099348 | 0.03183  | -0.18497 | 5.79E-05 | -0.03666 |
| 0.017166 | 0.71139 | -0.04761 | 0.30453  | 0.1786   | 0.0001   | -0.113   | 0.01456  | 0.275786 |
| 0.105432 | 0.02269 | -0.03779 | 0.41516  | 0.215923 | 2.49E-06 | -0.06268 | 0.17632  | 0.306668 |
| -0.01848 | 0.69034 | -0.18712 | 4.72E-05 | 0.075879 | 0.10148  | -0.23562 | 2.59E-07 | 0.135836 |
| 0.045548 | 0.32602 | -0.03712 | 0.42355  | 0.224645 | 9.37E-07 | -0.1557  | 0.00073  | 0.074818 |
| 0.054862 | 0.23669 | -0.05175 | 0.26437  | 0.209833 | 4.80E-06 | -0.11764 | 0.01095  | 0.244486 |
| 0.023083 | 0.61879 | -0.1073  | 0.02038  | 0.111835 | 0.01561  | -0.20473 | 8.21E-06 | 0.20753  |
| 0.141717 | 0.00214 | -0.0037  | 0.93652  | 0.106795 | 0.02098  | -0.14737 | 0.00141  | -0.16307 |
| -0.02599 | 0.57536 | -0.02143 | 0.64408  | 0.202213 | 1.06E-05 | -0.0321  | 0.48899  | 0.359055 |
| 0.020898 | 0.65239 | -0.06149 | 0.18469  | 0.178488 | 0.00011  | -0.21664 | 2.30E-06 | -0.0125  |
| 0.017695 | 0.70291 | -0.05015 | 0.27949  | 0.240617 | 1.41E-07 | -0.18923 | 3.86E-05 | 0.052658 |
| -0.009   | 0.84627 | -0.01958 | 0.67299  | 0.163145 | 0.0004   | -0.12971 | 0.005    | 0.144191 |
| 0.031818 | 0.49277 | -0.19348 | 2.56E-05 | 0.117892 | 0.01078  | -0.26908 | 3.45E-09 | 0.081686 |
| -0.01285 | 0.78179 | -0.21936 | 1.70E-06 | 0.053225 | 0.25099  | -0.28383 | 4.21E-10 | -0.02253 |
| 0.009183 | 0.84311 | -0.17928 | 9.80E-05 | 0.059826 | 0.19686  | -0.36292 | 5.51E-16 | -0.01801 |
| 0.050601 | 0.27515 | 0.028378 | 0.54072  | 0.191423 | 3.13E-05 | -0.07108 | 0.12505  | 0.064795 |
| 0.002973 | 0.94891 | -0.1349  | 0.00349  | 0.130896 | 0.00461  | -0.27108 | 2.61E-09 | 0.087481 |
| 0.044856 | 0.33343 | -0.06488 | 0.16155  | 0.230557 | 4.73E-07 | -0.16169 | 0.00045  | 0.113671 |
| 0.075119 | 0.10496 | -0.0079  | 0.86475  | 0.306815 | 1.23E-11 | -0.14316 | 0.00193  | 0.300795 |
| 0.089246 | 0.05394 | -0.04486 | 0.33342  | 0.280804 | 6.55E-10 | -0.12761 | 0.00575  | 0.296163 |
| 0.01405  | 0.76203 | -0.13872 | 0.00266  | 0.032375 | 0.48521  | -0.21207 | 3.78E-06 | 0.082253 |
| -0.05473 | 0.23781 | -0.0796  | 0.08575  | 0.166336 | 0.00031  | -0.18543 | 5.54E-05 | 0.130701 |
| 0.093109 | 0.04432 | 0.03781  | 0.41497  | 0.267303 | 4.41E-09 | -0.12423 | 0.00719  | -0.0319  |
| 0.036819 | 0.42731 | 0.086389 | 0.06213  | 0.328478 | 3.28E-13 | -0.04187 | 0.36664  | 0.153451 |
| 0.066109 | 0.15376 | -0.07931 | 0.0869   | 0.24869  | 5.16E-08 | -0.18962 | 3.72E-05 | 0.108054 |
| -0.01295 | 0.78012 | -0.14122 | 0.00222  | 0.099598 | 0.0314   | -0.26548 | 5.66E-09 | 0.116778 |
| 0.051352 | 0.26809 | 0.206061 | 7.14E-06 | 0.062049 | 0.18071  | 0.265448 | 5.68E-09 | -0.01501 |
| 0.034954 | 0.4511  | -0.00999 | 0.82953  | 0.161266 | 0.00047  | -0.16008 | 0.00052  | 0.076705 |
| 0.015032 | 0.74594 | -0.1741  | 0.00016  | 0.165292 | 0.00033  | -0.25711 | 1.74E-08 | 0.16163  |
| -0.0381  | 0.41136 | -0.11677 | 0.01156  | 0.118209 | 0.01057  | -0.22737 | 6.85E-07 | -0.01528 |
| 0.062483 | 0.17767 | -0.07186 | 0.12096  | 0.227761 | 6.55E-07 | -0.17175 | 0.00019  | 0.282118 |
| 0.01719  | 0.711   | -0.09036 | 0.05099  | 0.234042 | 3.13E-07 | -0.18567 | 5.42E-05 | 0.16318  |
| 0.057256 | 0.21682 | -0.13893 | 0.00262  | 0.086292 | 0.06242  | -0.17619 | 0.00013  | 0.142485 |
| -0.04941 | 0.28662 | -0.11774 | 0.01089  | 0.056102 | 0.22625  | -0.1631  | 0.0004   | 0.004689 |
| 0.041771 | 0.36778 | -0.02347 | 0.613    | 0.229975 | 5.06E-07 | -0.11799 | 0.01072  | 0.165542 |

|          |          |          |          |          |          |          |          |          |
|----------|----------|----------|----------|----------|----------|----------|----------|----------|
| 0.027092 | 0.55922  | -0.15998 | 0.00052  | 0.178817 | 0.0001   | -0.2596  | 1.25E-08 | 0.230166 |
| 0.055843 | 0.2284   | -0.16438 | 0.00036  | 0.12241  | 0.00809  | -0.26914 | 3.42E-09 | 0.130807 |
| 0.081775 | 0.0775   | -0.01383 | 0.76571  | 0.253748 | 2.70E-08 | -0.15891 | 0.00057  | -0.01875 |
| 0.085384 | 0.06524  | 0.159971 | 0.00052  | 0.321666 | 1.06E-12 | 0.04934  | 0.28731  | 0.120294 |
| 0.098252 | 0.03378  | -0.06618 | 0.1533   | 0.218068 | 1.96E-06 | -0.15143 | 0.00103  | 0.154652 |
| 0.049613 | 0.28465  | -0.09615 | 0.0378   | 0.169457 | 0.00023  | -0.1104  | 0.01701  | 0.071457 |
| -0.00267 | 0.95408  | -0.19814 | 1.61E-05 | 0.068239 | 0.14091  | -0.26516 | 5.91E-09 | 0.156696 |
| -0.08466 | 0.06758  | -0.16349 | 0.00039  | 0.036423 | 0.4323   | -0.27514 | 1.48E-09 | 0.028444 |
| 0.023784 | 0.60818  | -0.20374 | 9.10E-06 | -0.01813 | 0.69592  | -0.27894 | 8.57E-10 | 0.093539 |
| 0.063453 | 0.17102  | -0.07629 | 0.09963  | 0.276556 | 1.21E-09 | -0.14785 | 0.00135  | 0.262844 |
| 0.083459 | 0.07156  | 0.006567 | 0.88744  | 0.269723 | 3.16E-09 | -0.12689 | 0.00604  | -0.00091 |
| -0.04512 | 0.3306   | -0.0663  | 0.15257  | 0.12087  | 0.00893  | -0.06186 | 0.18204  | 0.374961 |
| 0.076073 | 0.10061  | -0.07613 | 0.10037  | 0.187364 | 4.62E-05 | -0.16533 | 0.00033  | 0.171649 |
| -0.10145 | 0.02837  | -0.10384 | 0.02482  | -0.08836 | 0.05637  | -0.22275 | 1.16E-06 | -0.11661 |
| -0.04672 | 0.31374  | -0.13381 | 0.00377  | 0.052443 | 0.25804  | -0.14745 | 0.0014   | 0.184971 |
| -0.01112 | 0.81057  | -0.13178 | 0.00434  | -0.05323 | 0.25092  | -0.22458 | 9.44E-07 | 0.09442  |
| -0.00803 | 0.86268  | -0.05671 | 0.22121  | 0.118818 | 0.01017  | -0.19293 | 2.70E-05 | -0.02792 |
| 0.108793 | 0.01869  | 0.129828 | 0.00495  | 0.308448 | 9.45E-12 | 0.082705 | 0.07417  | 0.220727 |
| 0.014007 | 0.76273  | -0.11863 | 0.01029  | 0.164974 | 0.00034  | -0.23823 | 1.89E-07 | 0.130276 |
| -0.13977 | 0.00247  | 0.033032 | 0.4764   | -0.17733 | 0.00012  | 0.063181 | 0.17287  | -0.16122 |
| -0.05938 | 0.2002   | 0.074912 | 0.10592  | -0.20312 | 9.70E-06 | 0.078463 | 0.09033  | -0.16799 |
| -0.0078  | 0.86645  | -0.0115  | 0.8043   | 0.055497 | 0.2313   | -0.15332 | 0.00089  | -0.02767 |
| 0.025607 | 0.58097  | -0.0848  | 0.06711  | 0.123051 | 0.00776  | -0.17396 | 0.00016  | 0.087215 |
| 0.215358 | 2.64E-06 | 0.173825 | 0.00016  | 0.414356 | 8.43E-21 | 0.067445 | 0.1456   | 0.34126  |
| 0.025552 | 0.58177  | -0.22907 | 5.63E-07 | 0.041511 | 0.37077  | -0.19233 | 2.86E-05 | 0.108296 |
| 0.062267 | 0.17918  | -0.00769 | 0.86838  | 0.294874 | 8.02E-11 | -0.14287 | 0.00197  | 0.214015 |
| -0.01722 | 0.71048  | -0.09566 | 0.03878  | 0.186651 | 4.94E-05 | -0.20391 | 8.93E-06 | 0.147742 |
| 0.008668 | 0.8518   | -0.04684 | 0.31243  | 0.21923  | 1.73E-06 | -0.15368 | 0.00086  | 0.229316 |
| 0.000717 | 0.98767  | 0.255494 | 2.15E-08 | 0.063319 | 0.17193  | 0.330933 | 2.13E-13 | 0.088128 |
| -0.08309 | 0.07285  | 0.076091 | 0.10053  | -0.03792 | 0.41361  | 0.195618 | 2.07E-05 | -0.05497 |
| 0.129571 | 0.00504  | 0.000581 | 0.99001  | 0.259559 | 1.26E-08 | -0.11489 | 0.01298  | 0.080991 |
| 0.09178  | 0.04745  | -0.13131 | 0.00448  | 0.120051 | 0.00941  | -0.21903 | 1.76E-06 | 0.012502 |
| 0.028997 | 0.53191  | -0.09526 | 0.03962  | 0.148865 | 0.00125  | -0.19058 | 3.39E-05 | 0.017263 |
| -0.13603 | 0.00323  | 0.030723 | 0.50778  | -0.2449  | 8.32E-08 | 0.095613 | 0.03888  | 0.017808 |
| -0.00087 | 0.98511  | -0.17037 | 0.00022  | 0.003119 | 0.9464   | -0.22498 | 9.02E-07 | 0.03035  |
| -0.13608 | 0.00321  | -0.21828 | 1.92E-06 | -0.04283 | 0.35578  | -0.31039 | 6.90E-12 | -0.0066  |
| -0.03121 | 0.50111  | -0.10861 | 0.01889  | 0.082698 | 0.0742   | -0.20005 | 1.33E-05 | 0.085088 |
| 0.035289 | 0.44679  | 0.013134 | 0.77712  | 0.264004 | 6.91E-09 | -0.04229 | 0.36185  | 0.008492 |
| -0.09099 | 0.04941  | -0.10101 | 0.02907  | -0.25546 | 2.16E-08 | -0.00591 | 0.89857  | -0.15036 |
| -0.03677 | 0.42798  | 0.081408 | 0.07884  | -0.14363 | 0.00186  | 0.14482  | 0.0017   | -0.05406 |
| 0.200657 | 1.25E-05 | 0.136457 | 0.00313  | 0.375508 | 4.37E-17 | -0.02667 | 0.5654   | 0.167123 |
| 0.027447 | 0.55409  | -0.05011 | 0.27987  | 0.185707 | 5.40E-05 | -0.17005 | 0.00022  | 0.127319 |
| 0.068932 | 0.13691  | 0.042509 | 0.35936  | 0.23894  | 1.74E-07 | -0.03681 | 0.42745  | 0.075086 |
| 0.021336 | 0.64559  | -0.09497 | 0.04023  | 0.240854 | 1.37E-07 | -0.13831 | 0.00274  | 0.306397 |
| 0.057018 | 0.21874  | -0.08851 | 0.05595  | 0.216941 | 2.22E-06 | -0.21642 | 2.35E-06 | 0.120544 |

|          |          |          |          |          |          |          |          |          |
|----------|----------|----------|----------|----------|----------|----------|----------|----------|
| 0.020053 | 0.66558  | -0.05821 | 0.20926  | 0.070976 | 0.12562  | -0.13381 | 0.00377  | 0.30286  |
| -0.01916 | 0.67966  | -0.09481 | 0.04055  | 0.074435 | 0.10817  | -0.23255 | 3.74E-07 | 0.039418 |
| 0.067395 | 0.1459   | -0.12394 | 0.00733  | 0.202421 | 1.04E-05 | -0.24573 | 7.50E-08 | 0.131691 |
| 0.188972 | 3.96E-05 | 0.225896 | 8.12E-07 | 0.420217 | 2.10E-21 | 0.149662 | 0.00118  | 0.172865 |
| -0.00411 | 0.92946  | -0.05305 | 0.25259  | 0.048155 | 0.29906  | -0.16213 | 0.00044  | -0.07347 |
| 0.072112 | 0.11966  | -0.06991 | 0.13139  | 0.040259 | 0.38538  | -0.19516 | 2.17E-05 | -0.04927 |
| 0.057679 | 0.21345  | -0.04758 | 0.30488  | 0.105074 | 0.02315  | -0.12749 | 0.0058   | 0.064704 |
| 0.032762 | 0.48001  | -0.13583 | 0.00327  | 0.154305 | 0.00082  | -0.16892 | 0.00025  | 0.141992 |
| 0.027746 | 0.54978  | -0.10393 | 0.0247   | 0.130611 | 0.0047   | -0.25713 | 1.73E-08 | -0.09233 |
| 0.128327 | 0.00548  | -0.01268 | 0.78456  | 0.288146 | 2.22E-10 | -0.08532 | 0.06546  | 0.194761 |
| -0.03694 | 0.42577  | -0.16971 | 0.00023  | 0.119398 | 0.00981  | -0.2485  | 5.29E-08 | 0.088695 |
| 0.061329 | 0.18583  | -0.07577 | 0.10198  | 0.216162 | 2.42E-06 | -0.17318 | 0.00017  | 0.231148 |
| 0.074241 | 0.10909  | 0.047187 | 0.30889  | 0.18876  | 4.04E-05 | -0.09522 | 0.0397   | -0.05011 |
| 0.111732 | 0.01571  | -0.07273 | 0.11651  | 0.154983 | 0.00078  | -0.15245 | 0.00095  | 0.039408 |
| -0.08624 | 0.06257  | 0.035823 | 0.43993  | -0.23091 | 4.54E-07 | 0.082285 | 0.07566  | -0.05442 |
| 0.06795  | 0.1426   | -0.10685 | 0.02092  | 0.230493 | 4.76E-07 | -0.17299 | 0.00017  | 0.224136 |
| -0.01956 | 0.67326  | -0.20304 | 9.78E-06 | 0.03417  | 0.46133  | -0.28416 | 4.01E-10 | 0.040062 |
| -0.06244 | 0.17796  | -0.09957 | 0.03145  | 0.090462 | 0.05074  | -0.23716 | 2.16E-07 | 0.01472  |
| 0.056976 | 0.21909  | -0.09122 | 0.04883  | -0.00044 | 0.99242  | -0.19833 | 1.58E-05 | 0.059884 |
| 0.00377  | 0.93525  | -0.1008  | 0.02941  | 0.051032 | 0.27109  | -0.12758 | 0.00576  | 0.027832 |
| -0.04449 | 0.33738  | -0.18869 | 4.07E-05 | 0.025684 | 0.57983  | -0.31331 | 4.28E-12 | -0.089   |
| 0.124947 | 0.00686  | 0.007394 | 0.87339  | 0.080958 | 0.08051  | -0.13605 | 0.00322  | -0.17267 |
| 0.072064 | 0.11991  | 0.176431 | 0.00013  | 0.349103 | 7.86E-15 | 0.170352 | 0.00022  | 0.510774 |
| -0.04118 | 0.37456  | -0.13647 | 0.00312  | 0.165748 | 0.00032  | -0.22515 | 8.85E-07 | 0.185517 |
| -0.11796 | 0.01074  | -0.00133 | 0.97717  | -0.28356 | 4.38E-10 | 0.039575 | 0.39352  | -0.04774 |
| 0.007664 | 0.86881  | -0.08921 | 0.05404  | 0.171758 | 0.00019  | -0.23512 | 2.75E-07 | -0.01137 |
| 0.087755 | 0.0581   | -0.06783 | 0.14332  | 0.22974  | 5.20E-07 | -0.15943 | 0.00054  | 0.062118 |
| 0.031736 | 0.49387  | -0.16059 | 0.00049  | 0.05638  | 0.22395  | -0.23402 | 3.14E-07 | 0.131145 |
| -0.17912 | 9.94E-05 | -0.04139 | 0.37212  | -0.23345 | 3.36E-07 | 0.06517  | 0.15971  | 0.021218 |
| 0.107321 | 0.02036  | 0.017433 | 0.7071   | 0.238738 | 1.78E-07 | -0.15467 | 0.0008   | 0.055382 |
| -0.03759 | 0.41769  | -0.07164 | 0.12211  | -0.17984 | 9.31E-05 | -0.02866 | 0.53663  | 0.068349 |
| 0.030607 | 0.50938  | -0.08632 | 0.06234  | 0.156576 | 0.00068  | -0.08495 | 0.06663  | 0.097454 |
| -0.00056 | 0.99037  | -0.06506 | 0.1604   | 0.124474 | 0.00708  | -0.20611 | 7.11E-06 | 0.071974 |
| 0.110418 | 0.01698  | -0.02768 | 0.5507   | 0.133707 | 0.0038   | -0.07593 | 0.10127  | 0.19132  |
| 0.104889 | 0.0234   | -0.02431 | 0.60022  | 0.255099 | 2.26E-08 | -0.12455 | 0.00704  | 0.06585  |
| -0.03174 | 0.49386  | -0.21135 | 4.08E-06 | 0.038129 | 0.41104  | -0.23955 | 1.61E-07 | 0.185687 |
| 0.014536 | 0.75405  | -0.12019 | 0.00933  | 0.093434 | 0.04358  | -0.10573 | 0.0223   | 0.245686 |
| 0.080586 | 0.08192  | -0.08886 | 0.05499  | 0.151097 | 0.00106  | -0.25404 | 2.60E-08 | 0.071981 |
| -0.08108 | 0.08005  | -0.01032 | 0.824    | -0.16694 | 0.00029  | 0.119313 | 0.00986  | 0.035462 |
| 0.033044 | 0.47624  | -0.11911 | 0.00999  | 0.1966   | 1.88E-05 | -0.19469 | 2.27E-05 | 0.204597 |
| -0.07912 | 0.08764  | 0.111596 | 0.01584  | -0.10844 | 0.01908  | 0.159919 | 0.00052  | -0.13658 |
| 0.006427 | 0.88984  | -0.00126 | 0.97829  | 0.176624 | 0.00012  | -0.14695 | 0.00145  | 0.004714 |
| -0.17915 | 9.92E-05 | -0.10042 | 0.03002  | -0.34488 | 1.73E-14 | -0.03296 | 0.47737  | -0.15325 |
| 0.109326 | 0.01811  | -0.12673 | 0.0061   | 0.160516 | 0.0005   | -0.24541 | 7.80E-08 | 0.128819 |
| -0.01021 | 0.82578  | -0.12099 | 0.00887  | 0.114925 | 0.01295  | -0.24433 | 8.94E-08 | -0.0637  |



|          |          |          |          |          |          |          |          |           |
|----------|----------|----------|----------|----------|----------|----------|----------|-----------|
| 0.161453 | 0.00046  | -0.1727  | 0.00018  | 0.110711 | 0.01669  | -0.22277 | 1.16E-06 | 0.160934  |
| 0.042611 | 0.35821  | -0.11162 | 0.01582  | 0.096547 | 0.03701  | -0.1993  | 1.43E-05 | -3.04E-05 |
| -0.10475 | 0.02358  | -0.0822  | 0.07597  | -0.19676 | 1.85E-05 | 0.024914 | 0.59125  | -0.06839  |
| 0.074548 | 0.10763  | -0.05297 | 0.25326  | 0.117172 | 0.01128  | -0.13222 | 0.00421  | 0.003641  |
| -0.12931 | 0.00513  | -0.01617 | 0.72748  | -0.24872 | 5.14E-08 | 0.093082 | 0.04438  | -0.07677  |
| -0.10942 | 0.01802  | 0.097362 | 0.03543  | -0.20029 | 1.29E-05 | 0.119963 | 0.00946  | -0.24086  |
| 0.078242 | 0.09124  | -0.09756 | 0.03506  | 0.184599 | 5.99E-05 | -0.17569 | 0.00014  | 0.066645  |
| 0.034532 | 0.4566   | -0.05021 | 0.27889  | 0.20793  | 5.87E-06 | -0.1367  | 0.00308  | 0.079106  |
| 0.025615 | 0.58085  | -0.08836 | 0.05639  | 0.139357 | 0.00254  | -0.16285 | 0.00041  | 0.158508  |
| -0.04893 | 0.29134  | -0.15608 | 0.00071  | 0.014061 | 0.76184  | -0.15018 | 0.00113  | 0.110537  |
| -0.05248 | 0.25774  | 0.009659 | 0.83508  | -0.11753 | 0.01103  | 0.125704 | 0.00653  | 0.030355  |
| -0.08676 | 0.061    | -0.01097 | 0.81304  | -0.17562 | 0.00014  | 0.019607 | 0.67257  | -0.0767   |
| 0.048258 | 0.29803  | -0.10302 | 0.026    | 0.069459 | 0.13392  | -0.20544 | 7.62E-06 | -0.11783  |
| 0.053248 | 0.25079  | -0.08246 | 0.07504  | 0.198777 | 1.51E-05 | -0.14237 | 0.00204  | 0.141801  |
| 0.130906 | 0.0046   | -0.0681  | 0.14171  | 0.172163 | 0.00019  | -0.16771 | 0.00027  | 0.029263  |
| -0.21538 | 2.64E-06 | -0.21702 | 2.20E-06 | -0.40058 | 2.00E-19 | -0.12985 | 0.00495  | -0.21044  |
| 0.032687 | 0.48102  | -0.03492 | 0.45159  | 0.23197  | 4.00E-07 | -0.1713  | 0.0002   | 0.11793   |
| 0.019591 | 0.67283  | -0.07026 | 0.12949  | 0.119408 | 0.0098   | -0.05918 | 0.20178  | 0.288439  |
| -0.10633 | 0.02155  | -0.22536 | 8.63E-07 | -0.02234 | 0.63011  | -0.25452 | 2.44E-08 | 0.023159  |
| 0.049997 | 0.28093  | 0.018994 | 0.68225  | 0.245322 | 7.90E-08 | -0.12736 | 0.00585  | 0.031593  |
| -0.08514 | 0.06602  | 0.115951 | 0.01216  | -0.10314 | 0.02582  | 0.17054  | 0.00021  | -0.00828  |
| 0.024602 | 0.59589  | -0.12043 | 0.00918  | 0.15015  | 0.00114  | -0.2509  | 3.89E-08 | 0.02937   |
| 0.054239 | 0.24207  | -0.02254 | 0.62706  | 0.112087 | 0.01538  | -0.16853 | 0.00025  | 0.035485  |
| -0.12548 | 0.00663  | -0.1648  | 0.00035  | -0.26631 | 5.05E-09 | -0.06338 | 0.17151  | -0.05148  |
| -0.0377  | 0.41631  | -0.11458 | 0.01323  | 0.14049  | 0.00234  | -0.22887 | 5.76E-07 | 0.253505  |
| -0.07477 | 0.10658  | 0.107305 | 0.02038  | -0.1524  | 0.00095  | 0.133802 | 0.00377  | -0.07121  |
| 0.124294 | 0.00716  | 0.104272 | 0.02423  | 0.237587 | 2.05E-07 | -0.06452 | 0.16393  | 0.067835  |
| 0.074888 | 0.10604  | 0.012055 | 0.795    | 0.254471 | 2.45E-08 | -0.11257 | 0.01493  | 0.121479  |
| -0.1006  | 0.02972  | 0.024401 | 0.59891  | -0.2265  | 7.58E-07 | 0.125546 | 0.0066   | 0.000766  |
| 0.042413 | 0.36046  | -0.04818 | 0.29882  | 0.153246 | 0.00089  | -0.03007 | 0.51687  | 0.204171  |
| -0.06528 | 0.159    | 0.178006 | 0.00011  | -0.13666 | 0.00308  | 0.196696 | 1.86E-05 | -0.12717  |
| -0.02031 | 0.66158  | 0.235578 | 2.61E-07 | 0.028598 | 0.53758  | 0.379391 | 1.95E-17 | 0.066155  |
| 0.050365 | 0.2774   | -0.05936 | 0.20036  | 0.220935 | 1.43E-06 | -0.17471 | 0.00015  | 0.082209  |
| 0.066578 | 0.15086  | 0.003216 | 0.94474  | 0.216707 | 2.28E-06 | -0.10574 | 0.02229  | 0.099218  |
| 0.051987 | 0.2622   | -0.08277 | 0.07396  | 0.224696 | 9.32E-07 | -0.20484 | 8.12E-06 | 0.104499  |
| 0.056665 | 0.22162  | -0.06783 | 0.14328  | 0.228227 | 6.20E-07 | -0.19987 | 1.35E-05 | 0.106823  |
| -0.02461 | 0.5957   | -0.1232  | 0.00769  | 0.076233 | 0.09989  | -0.17532 | 0.00014  | -0.04305  |
| -0.02184 | 0.63783  | -0.0789  | 0.08853  | 0.072008 | 0.1202   | -0.21864 | 1.84E-06 | -0.15775  |
| 0.080554 | 0.08204  | -0.08522 | 0.06576  | 0.190136 | 3.54E-05 | -0.21984 | 1.61E-06 | 0.028335  |
| -0.1557  | 0.00073  | -0.05842 | 0.20761  | -0.27109 | 2.61E-09 | 0.021646 | 0.64081  | -0.04258  |
| -0.00831 | 0.8578   | -0.19226 | 2.88E-05 | 0.111453 | 0.01597  | -0.26931 | 3.34E-09 | 0.122834  |
| 0.036337 | 0.43339  | -0.06601 | 0.15437  | 0.231653 | 4.16E-07 | -0.04021 | 0.38596  | 0.326019  |
| -0.05746 | 0.2152   | 0.009634 | 0.83552  | 0.191061 | 3.24E-05 | -0.00774 | 0.86758  | 0.416277  |
| 0.078853 | 0.08873  | -0.0706  | 0.12763  | 0.161309 | 0.00047  | -0.04724 | 0.30833  | 0.236621  |
| 0.094533 | 0.04115  | 0.004164 | 0.92848  | 0.123397 | 0.00759  | -0.05299 | 0.25313  | 0.009894  |

|          |         |          |          |          |          |          |          |          |
|----------|---------|----------|----------|----------|----------|----------|----------|----------|
| 0.019636 | 0.67213 | -0.16362 | 0.00038  | 0.178706 | 0.0001   | -0.21709 | 2.19E-06 | 0.145288 |
| 0.072864 | 0.11584 | -0.11647 | 0.01178  | 0.073825 | 0.1111   | -0.24561 | 7.61E-08 | -0.05943 |
| -0.03919 | 0.3981  | 0.070077 | 0.13049  | -0.16775 | 0.00027  | 0.098491 | 0.03335  | 0.032007 |
| 0.028378 | 0.54071 | -0.11606 | 0.01208  | 0.11875  | 0.01022  | -0.19616 | 1.96E-05 | 0.19717  |
| -0.0712  | 0.12443 | 0.026137 | 0.57316  | -0.21656 | 2.32E-06 | 0.090722 | 0.05008  | -0.05392 |
| 0.07192  | 0.12065 | -0.05936 | 0.20037  | 0.235242 | 2.71E-07 | -0.20794 | 5.86E-06 | 0.043026 |
| -0.07318 | 0.11429 | -0.18687 | 4.84E-05 | 0.009097 | 0.84456  | -0.24521 | 8.01E-08 | 0.005901 |
| -0.13174 | 0.00435 | 0.060147 | 0.19447  | -0.26707 | 4.55E-09 | 0.085124 | 0.06607  | -0.16098 |
| 0.035564 | 0.44324 | -0.02457 | 0.59637  | 0.060349 | 0.19297  | -0.17444 | 0.00015  | -0.09913 |
| 0.074572 | 0.10752 | -0.12327 | 0.00765  | 0.14248  | 0.00203  | -0.23405 | 3.13E-07 | 0.204849 |
| -0.07217 | 0.11935 | 0.193261 | 2.61E-05 | -0.05917 | 0.20185  | 0.270462 | 2.85E-09 | -0.09707 |
| -0.01971 | 0.67099 | -0.23585 | 2.52E-07 | -0.00405 | 0.93047  | -0.31082 | 6.43E-12 | 0.077338 |
| -0.11607 | 0.01207 | 0.061231 | 0.18653  | -0.22659 | 7.49E-07 | 0.163908 | 0.00038  | -0.07272 |
| -0.03457 | 0.45611 | 0.086854 | 0.06073  | -0.12804 | 0.00559  | 0.171187 | 0.0002   | -0.1136  |
| 0.092014 | 0.04689 | -0.01236 | 0.78999  | 0.23834  | 1.87E-07 | -0.14783 | 0.00136  | -0.03197 |
| 0.026393 | 0.5694  | -0.09564 | 0.03883  | 0.103679 | 0.02505  | -0.14824 | 0.00132  | 0.142757 |
| 0.005378 | 0.90773 | -0.1876  | 4.51E-05 | 0.084326 | 0.06866  | -0.25464 | 2.40E-08 | 0.012057 |
| -0.05841 | 0.20766 | -0.2424  | 1.14E-07 | -0.0225  | 0.62774  | -0.31964 | 1.49E-12 | -0.05235 |
| 0.045742 | 0.32395 | -0.09838 | 0.03354  | 0.177461 | 0.00012  | -0.22779 | 6.53E-07 | 0.091664 |
| 0.045117 | 0.33062 | -0.1651  | 0.00034  | 0.130716 | 0.00466  | -0.24098 | 1.35E-07 | 0.094936 |
| 0.040541 | 0.38206 | 0.094069 | 0.04216  | 0.220725 | 1.46E-06 | 0.008087 | 0.86164  | 0.197284 |
| 0.055458 | 0.23163 | -0.01084 | 0.81533  | 0.159058 | 0.00056  | -0.14245 | 0.00203  | 0.071968 |
| -0.04778 | 0.30289 | 0.074802 | 0.10644  | -0.09368 | 0.04303  | 0.218533 | 1.86E-06 | 0.014336 |
| -0.05177 | 0.26417 | -0.14086 | 0.00228  | 0.108412 | 0.01911  | -0.18052 | 8.75E-05 | 0.156647 |
| 0.086441 | 0.06197 | 0.109268 | 0.01817  | -0.11169 | 0.01574  | 0.189876 | 3.63E-05 | -0.18669 |
| -0.0506  | 0.27512 | -0.05489 | 0.23642  | 0.065393 | 0.15828  | -0.15098 | 0.00106  | 0.077896 |
| 0.031792 | 0.49311 | 0.0056   | 0.90394  | 0.266217 | 5.12E-09 | -0.09856 | 0.03322  | 0.205696 |
| -0.10296 | 0.02609 | 0.088469 | 0.05607  | -0.22246 | 1.20E-06 | 0.073437 | 0.11299  | -0.14828 |
| -0.0415  | 0.37093 | 0.134819 | 0.00351  | -0.08013 | 0.08365  | 0.265701 | 5.49E-09 | 0.157479 |
| 0.048639 | 0.29422 | -0.01178 | 0.79951  | 0.102135 | 0.02731  | -0.07342 | 0.11309  | 0.075188 |
| 0.014316 | 0.75765 | -0.11701 | 0.01139  | 0.161571 | 0.00046  | -0.23395 | 3.16E-07 | 0.037261 |
| 0.069534 | 0.1335  | -0.13073 | 0.00466  | 0.158061 | 0.00061  | -0.1894  | 3.80E-05 | 0.100124 |
| 0.059204 | 0.20157 | -0.02783 | 0.54853  | 0.223736 | 1.04E-06 | -0.14845 | 0.00129  | -0.01447 |
| 0.069182 | 0.13549 | -0.02125 | 0.6469   | 0.258372 | 1.47E-08 | -0.18413 | 6.26E-05 | -0.01736 |
| 0.127672 | 0.00573 | 0.0383   | 0.40895  | 0.328362 | 3.34E-13 | -0.07333 | 0.1135   | 0.358172 |
| 0.038623 | 0.405   | -0.18366 | 6.55E-05 | 0.15095  | 0.00107  | -0.2931  | 1.05E-10 | 0.108483 |
| -0.11298 | 0.01457 | 0.011467 | 0.8048   | -0.12339 | 0.00759  | 0.136648 | 0.00309  | 0.005178 |
| 0.046902 | 0.31183 | 0.023307 | 0.6154   | 0.291085 | 1.43E-10 | -0.06717 | 0.14723  | 0.110786 |
| -0.01531 | 0.74145 | 0.028562 | 0.5381   | -0.13829 | 0.00275  | 0.110256 | 0.01715  | -0.01016 |
| 0.044665 | 0.33549 | -0.12606 | 0.00638  | 0.121698 | 0.00847  | -0.20751 | 6.14E-06 | 0.088221 |
| 0.0842   | 0.06907 | -0.06948 | 0.13382  | 0.209816 | 4.81E-06 | -0.1873  | 4.65E-05 | 0.027743 |
| 0.040496 | 0.38259 | -0.09665 | 0.0368   | 0.196572 | 1.88E-05 | -0.18826 | 4.24E-05 | 0.170784 |
| 0.025931 | 0.57618 | -0.13357 | 0.00383  | -0.00702 | 0.87974  | -0.21092 | 4.27E-06 | -0.08576 |
| -0.07685 | 0.09718 | 0.043499 | 0.34827  | -0.25682 | 1.80E-08 | 0.129554 | 0.00505  | -0.13791 |
| -0.02729 | 0.55639 | 0.086209 | 0.06268  | -0.13383 | 0.00376  | 0.198454 | 1.56E-05 | -0.03139 |

|          |          |          |          |          |          |          |          |          |
|----------|----------|----------|----------|----------|----------|----------|----------|----------|
| 0.049023 | 0.29043  | 0.079016 | 0.08807  | -0.11338 | 0.01422  | 0.16658  | 0.0003   | 0.037651 |
| 0.149428 | 0.0012   | 0.040923 | 0.37759  | 0.347367 | 1.09E-14 | -0.05497 | 0.23579  | 0.17271  |
| 0.006504 | 0.88853  | -0.13524 | 0.00341  | 0.039764 | 0.39125  | -0.12975 | 0.00498  | 0.045359 |
| 0.197988 | 1.63E-05 | 0.178244 | 0.00011  | 0.442407 | 8.42E-24 | 0.040822 | 0.37877  | 0.288454 |
| 0.08224  | 0.07582  | -0.01826 | 0.69397  | 0.271355 | 2.51E-09 | -0.13822 | 0.00276  | 0.252606 |
| 0.064207 | 0.16598  | -0.0624  | 0.17826  | 0.11367  | 0.01398  | -0.14136 | 0.0022   | -0.11205 |
| 0.021078 | 0.6496   | -0.05731 | 0.21638  | 0.220987 | 1.42E-06 | -0.17202 | 0.00019  | 0.273144 |
| 0.098533 | 0.03327  | 0.06285  | 0.17513  | 0.187652 | 4.49E-05 | 0.057466 | 0.21514  | 0.146901 |
| -0.0223  | 0.63073  | -0.1943  | 2.36E-05 | 0.099376 | 0.03179  | -0.24053 | 1.43E-07 | 0.140257 |
| -0.02588 | 0.57691  | -0.07519 | 0.10462  | 0.15362  | 0.00087  | -0.22072 | 1.46E-06 | 0.069002 |
| 0.020986 | 0.65102  | -0.20922 | 5.12E-06 | 0.011698 | 0.80094  | -0.25838 | 1.47E-08 | 0.145436 |
| -0.02049 | 0.65879  | -0.09266 | 0.04535  | 0.086455 | 0.06193  | -0.22815 | 6.26E-07 | -0.07259 |
| 0.051047 | 0.27094  | -0.07609 | 0.10054  | 0.223238 | 1.10E-06 | -0.18521 | 5.66E-05 | 0.044018 |
| -0.03929 | 0.39697  | -0.05932 | 0.20066  | 0.128148 | 0.00555  | -0.12325 | 0.00766  | 0.082223 |
| 0.111328 | 0.01609  | 0.038984 | 0.40062  | 0.305545 | 1.51E-11 | -0.09782 | 0.03458  | 0.014016 |
| 0.119567 | 0.0097   | -0.00595 | 0.89796  | 0.217461 | 2.10E-06 | -0.01012 | 0.82734  | 0.32553  |
| 0.096668 | 0.03677  | 0.043781 | 0.34515  | 0.063407 | 0.17133  | -0.07989 | 0.08459  | -0.03598 |
| 0.077219 | 0.09557  | 0.115988 | 0.01213  | 0.346016 | 1.40E-14 | 0.064506 | 0.16401  | 0.2083   |
| -0.08532 | 0.06546  | -0.12405 | 0.00728  | -0.29374 | 9.54E-11 | -0.05961 | 0.19849  | -0.03443 |
| 0.146064 | 0.00155  | 0.033666 | 0.46797  | 0.358511 | 1.31E-15 | -0.05757 | 0.21433  | 0.248017 |
| -0.0257  | 0.57955  | 0.019315 | 0.67718  | -0.0911  | 0.04912  | 0.142624 | 0.002    | -0.01451 |
| 0.113706 | 0.01395  | 0.124992 | 0.00684  | 0.268102 | 3.95E-09 | 0.094963 | 0.04024  | 0.222959 |
| 0.100108 | 0.03054  | 0.034609 | 0.45559  | 0.277148 | 1.11E-09 | -0.12809 | 0.00557  | 0.113815 |
| 0.085722 | 0.06418  | 0.032648 | 0.48155  | 0.327927 | 3.61E-13 | -0.06225 | 0.17927  | 0.078142 |
| 0.052204 | 0.26022  | -0.06114 | 0.18716  | 0.213078 | 3.39E-06 | -0.1262  | 0.00632  | 0.122202 |
| -0.01236 | 0.78997  | 0.115536 | 0.01247  | -0.08217 | 0.07606  | 0.158682 | 0.00058  | 0.032856 |
| 0.06622  | 0.15308  | 0.0105   | 0.82097  | 0.209486 | 4.98E-06 | -0.16035 | 0.0005   | -0.03003 |
| 0.05702  | 0.21873  | -0.12667 | 0.00612  | 0.171916 | 0.00019  | -0.16101 | 0.00048  | 0.058473 |
| 0.036909 | 0.42618  | -0.10609 | 0.02185  | 0.168285 | 0.00026  | -0.20488 | 8.08E-06 | 0.128786 |
| 0.057362 | 0.21598  | -0.12394 | 0.00733  | 0.092842 | 0.04493  | -0.18912 | 3.90E-05 | 0.150923 |
| 0.019774 | 0.66994  | -0.0117  | 0.80084  | 0.129265 | 0.00515  | -0.14857 | 0.00128  | -0.11151 |
| 0.026391 | 0.56944  | -0.16183 | 0.00045  | 0.017086 | 0.71267  | -0.13445 | 0.0036   | 0.194458 |
| 0.091478 | 0.04819  | -0.13516 | 0.00343  | 0.01343  | 0.77223  | -0.22855 | 5.98E-07 | -0.05547 |
| -0.05281 | 0.2547   | -0.10743 | 0.02023  | 0.140813 | 0.00229  | -0.24673 | 6.61E-08 | 0.03297  |
| 0.038434 | 0.4073   | 0.112258 | 0.01522  | 0.370643 | 1.18E-16 | -0.01813 | 0.69596  | 0.289729 |
| 0.038782 | 0.40307  | -0.01766 | 0.7034   | 0.073133 | 0.1145   | -0.12012 | 0.00937  | -0.17823 |
| 0.045653 | 0.3249   | -0.13191 | 0.0043   | 0.149602 | 0.00118  | -0.24407 | 9.23E-08 | 0.034663 |
| 0.046203 | 0.3191   | -0.15201 | 0.00098  | 0.126057 | 0.00638  | -0.23463 | 2.92E-07 | 0.085282 |
| 0.007758 | 0.86721  | -0.02843 | 0.53991  | 0.166862 | 0.00029  | -0.12772 | 0.00571  | 0.121304 |
| -0.03232 | 0.4859   | -0.15919 | 0.00055  | 0.05222  | 0.26007  | -0.21948 | 1.68E-06 | 0.056606 |
| 0.095176 | 0.03979  | -0.06449 | 0.16413  | 0.221087 | 1.40E-06 | -0.1946  | 2.29E-05 | 0.157838 |
| 0.091471 | 0.0482   | -0.01335 | 0.77354  | 0.326629 | 4.52E-13 | -0.09616 | 0.03778  | 0.186655 |
| 0.026141 | 0.5731   | -0.12403 | 0.00729  | 0.158224 | 0.0006   | -0.19468 | 2.27E-05 | 0.06626  |
| 0.040917 | 0.37766  | -0.05864 | 0.20587  | 0.169023 | 0.00024  | -0.09048 | 0.0507   | 0.112092 |
| -0.02976 | 0.52118  | -0.15213 | 0.00097  | 0.052298 | 0.25936  | -0.21458 | 2.88E-06 | 0.079392 |

|          |          |          |          |          |          |          |          |          |
|----------|----------|----------|----------|----------|----------|----------|----------|----------|
| -0.12477 | 0.00694  | -0.02782 | 0.54866  | -0.25845 | 1.46E-08 | 0.062448 | 0.17791  | -0.12135 |
| 0.062238 | 0.17938  | 0.189538 | 3.75E-05 | 0.208292 | 5.65E-06 | 0.061447 | 0.18498  | 0.029513 |
| 0.020701 | 0.65546  | -0.15461 | 0.0008   | 0.132597 | 0.0041   | -0.26522 | 5.86E-09 | 0.049875 |
| 0.062338 | 0.17868  | -0.07871 | 0.08931  | 0.19629  | 1.94E-05 | -0.11821 | 0.01057  | 0.140703 |
| 0.052858 | 0.25428  | -0.15791 | 0.00062  | 0.134657 | 0.00355  | -0.25584 | 2.05E-08 | 0.087409 |
| 0.056846 | 0.22015  | 0.020981 | 0.65109  | 0.23359  | 3.30E-07 | -0.10856 | 0.01895  | 0.110511 |
| 0.111148 | 0.01626  | -0.05332 | 0.25014  | 0.263963 | 6.95E-09 | -0.14208 | 0.00209  | 0.158278 |
| 0.15642  | 0.00069  | 0.11926  | 0.00989  | 0.423313 | 9.96E-22 | -0.03177 | 0.49341  | 0.350571 |
| -0.10129 | 0.02862  | -0.24149 | 1.27E-07 | 0.054743 | 0.23771  | -0.31273 | 4.70E-12 | 0.126975 |
| 0.110961 | 0.01645  | 0.003915 | 0.93276  | 0.222177 | 1.24E-06 | -0.07299 | 0.11523  | 0.143879 |
| 0.016025 | 0.7298   | -0.00437 | 0.92493  | 0.224776 | 9.23E-07 | -0.0169  | 0.71559  | 0.178335 |
| -0.05082 | 0.27307  | -0.11655 | 0.01172  | 0.094738 | 0.04071  | -0.25562 | 2.11E-08 | 0.118638 |
| 0.031805 | 0.49294  | -0.06008 | 0.19499  | 0.107652 | 0.01997  | -0.21838 | 1.89E-06 | 0.005511 |
| 0.059189 | 0.20168  | -0.13855 | 0.00269  | 0.192041 | 2.94E-05 | -0.21726 | 2.15E-06 | 0.180215 |
| 0.038825 | 0.40254  | -0.10737 | 0.0203   | 0.043675 | 0.34632  | -0.17765 | 0.00011  | -0.00474 |
| 0.057016 | 0.21877  | -0.04159 | 0.36987  | 0.227223 | 6.97E-07 | -0.17993 | 9.24E-05 | 0.149988 |
| 0.079884 | 0.08463  | -0.07518 | 0.1047   | 0.239808 | 1.56E-07 | -0.20198 | 1.09E-05 | 0.187791 |
| -0.00466 | 0.91999  | -0.07785 | 0.09287  | 0.131749 | 0.00435  | -0.17371 | 0.00016  | 0.189708 |
| -0.16004 | 0.00052  | 0.038589 | 0.40541  | -0.2084  | 5.59E-06 | 0.062486 | 0.17765  | -0.14631 |
| 0.009923 | 0.83066  | -0.16829 | 0.00026  | 0.127389 | 0.00584  | -0.27295 | 2.01E-09 | 0.088522 |
| 0.013624 | 0.76903  | -0.14554 | 0.00161  | 0.097435 | 0.0353   | -0.26264 | 8.31E-09 | 0.028506 |
| 0.077857 | 0.09285  | -0.11331 | 0.01428  | 0.107238 | 0.02045  | -0.23798 | 1.95E-07 | 0.080907 |
| 0.075209 | 0.10454  | -0.09455 | 0.04112  | 0.124778 | 0.00694  | -0.25434 | 2.50E-08 | 0.087902 |
| 0.013996 | 0.76292  | -0.10154 | 0.02822  | 0.18534  | 5.59E-05 | -0.17729 | 0.00012  | 0.205149 |
| -0.18378 | 6.47E-05 | -0.05669 | 0.22141  | -0.27297 | 2.01E-09 | -0.0569  | 0.21973  | -0.14608 |
| -0.05381 | 0.24578  | -0.12624 | 0.0063   | -0.03024 | 0.51453  | -0.30224 | 2.55E-11 | -0.15346 |
| -0.00194 | 0.96672  | -0.15549 | 0.00075  | 0.066439 | 0.15172  | -0.28373 | 4.27E-10 | -0.00036 |
| 0.120755 | 0.009    | -0.04466 | 0.33557  | 0.252412 | 3.21E-08 | -0.09685 | 0.03642  | 0.129077 |
| 0.005869 | 0.89934  | -0.07315 | 0.11439  | 0.13396  | 0.00373  | -0.2038  | 9.03E-06 | 0.060871 |
| 0.079295 | 0.08696  | -0.0823  | 0.0756   | 0.153686 | 0.00086  | -0.20763 | 6.06E-06 | 0.025544 |
| 0.064579 | 0.16354  | -0.02193 | 0.63641  | 0.239828 | 1.56E-07 | -0.141   | 0.00226  | 0.139423 |
| 0.038544 | 0.40597  | 0.061421 | 0.18517  | 0.298783 | 4.38E-11 | 0.020725 | 0.65508  | 0.329842 |
| 0.056248 | 0.22504  | -0.00981 | 0.83249  | 0.153572 | 0.00087  | -0.20304 | 9.78E-06 | 0.007108 |
| 0.107617 | 0.02001  | 0.049594 | 0.28484  | 0.271312 | 2.53E-09 | -0.04855 | 0.2951   | 0.060122 |
| 0.087946 | 0.05755  | -0.14744 | 0.0014   | 0.063399 | 0.17138  | -0.24203 | 1.19E-07 | -0.08269 |
| -0.08688 | 0.06065  | 0.135794 | 0.00328  | -0.19086 | 3.30E-05 | 0.16663  | 0.0003   | -0.08744 |
| 0.021732 | 0.63947  | -0.07694 | 0.09676  | 0.103474 | 0.02535  | -0.09248 | 0.04578  | -0.06042 |
| 0.051474 | 0.26695  | -0.05302 | 0.25287  | 0.240685 | 1.40E-07 | -0.16631 | 0.00031  | 0.2025   |
| -0.01745 | 0.70689  | 0.189408 | 3.80E-05 | -0.07074 | 0.1269   | 0.234532 | 2.95E-07 | -0.08732 |
| -0.08048 | 0.08233  | 0.079666 | 0.08548  | -0.18811 | 4.30E-05 | 0.131736 | 0.00435  | -0.09834 |
| 0.099775 | 0.0311   | -0.04216 | 0.36332  | 0.152711 | 0.00093  | -0.09087 | 0.0497   | 0.161753 |
| 0.035253 | 0.44725  | 0.003389 | 0.94178  | 0.175638 | 0.00014  | -0.16497 | 0.00034  | 0.021617 |
| -0.0238  | 0.60796  | -0.12282 | 0.00788  | 0.078775 | 0.08905  | -0.24858 | 5.23E-08 | -0.00099 |
| 0.009584 | 0.83635  | -0.15451 | 0.00081  | -0.08344 | 0.07164  | -0.27757 | 1.04E-09 | -0.16382 |
| 0.016159 | 0.72762  | -0.11136 | 0.01606  | 0.025279 | 0.58582  | -0.12732 | 0.00586  | 0.191999 |

|          |         |          |          |          |          |          |          |          |
|----------|---------|----------|----------|----------|----------|----------|----------|----------|
| 0.015022 | 0.7461  | -0.04958 | 0.28499  | 0.094433 | 0.04137  | -0.07985 | 0.08477  | 0.099872 |
| -0.01812 | 0.6961  | -0.14314 | 0.00193  | -0.0197  | 0.67109  | -0.30729 | 1.14E-11 | -0.08588 |
| -0.04167 | 0.36888 | -0.04766 | 0.30404  | 0.03197  | 0.49069  | -0.18872 | 4.06E-05 | -0.10207 |
| 0.043678 | 0.34628 | -0.07593 | 0.10127  | 0.232618 | 3.71E-07 | -0.17919 | 9.88E-05 | 0.190724 |
| 0.140814 | 0.00229 | -0.04253 | 0.35909  | 0.234061 | 3.12E-07 | -0.18076 | 8.56E-05 | 0.039405 |
| 0.072477 | 0.11779 | -0.09458 | 0.04105  | 0.189805 | 3.65E-05 | -0.18061 | 8.68E-05 | 0.174232 |
| 0.036377 | 0.43288 | -0.14732 | 0.00141  | 0.024531 | 0.59696  | -0.26501 | 6.03E-09 | -0.0173  |
| 0.054407 | 0.24061 | -0.16025 | 0.00051  | -0.00427 | 0.92669  | -0.22432 | 9.72E-07 | 0.111249 |
| 0.029318 | 0.52739 | -0.12872 | 0.00534  | 0.006385 | 0.89055  | -0.16277 | 0.00041  | 0.149164 |
| 0.026649 | 0.56567 | -0.18093 | 8.43E-05 | 0.078795 | 0.08897  | -0.29286 | 1.09E-10 | 0.189728 |
| 0.129352 | 0.00512 | 0.02661  | 0.56623  | 0.28303  | 4.73E-10 | -0.03969 | 0.39212  | -0.07266 |
| 0.037731 | 0.41594 | -0.14689 | 0.00146  | 0.114495 | 0.01329  | -0.24188 | 1.21E-07 | 0.225461 |
| -0.02591 | 0.57643 | -0.18164 | 7.90E-05 | 0.055769 | 0.22902  | -0.2817  | 5.74E-10 | 0.020505 |
| -0.04086 | 0.37835 | -0.2021  | 1.08E-05 | 0.091469 | 0.04821  | -0.22084 | 1.44E-06 | 0.244442 |
| 0.091257 | 0.04874 | -0.05211 | 0.26107  | 0.255417 | 2.17E-08 | -0.13927 | 0.00256  | 0.001048 |
| 0.036521 | 0.43106 | -0.06771 | 0.14403  | 0.142066 | 0.00209  | -0.17411 | 0.00016  | 0.228757 |
| 0.021835 | 0.63789 | -0.16216 | 0.00043  | -0.03962 | 0.39292  | -0.21899 | 1.77E-06 | 0.028997 |
| 0.043136 | 0.35231 | -0.16101 | 0.00048  | 0.137452 | 0.00292  | -0.26032 | 1.14E-08 | 0.162176 |
| 0.00421  | 0.9277  | -0.05098 | 0.27156  | 0.019128 | 0.68013  | -0.17805 | 0.00011  | 0.016484 |
| 0.012496 | 0.78767 | -0.17133 | 0.0002   | 0.069337 | 0.13461  | -0.27142 | 2.49E-09 | 0.137486 |
| 0.010374 | 0.82308 | -0.16611 | 0.00031  | 0.072302 | 0.11869  | -0.25107 | 3.81E-08 | 0.173673 |
| 0.040516 | 0.38236 | -0.15071 | 0.00109  | 0.220721 | 1.46E-06 | -0.20245 | 1.04E-05 | 0.24004  |
| 0.003343 | 0.94257 | -0.05683 | 0.2203   | 0.067569 | 0.14486  | -0.19895 | 1.48E-05 | 0.022888 |
| 0.092271 | 0.04627 | -0.0639  | 0.16803  | 0.056912 | 0.2196   | -0.13419 | 0.00367  | 0.022221 |
| 0.016366 | 0.72428 | -0.0102  | 0.82604  | 0.131799 | 0.00433  | -0.10944 | 0.01799  | 0.073788 |
| 0.036056 | 0.43695 | -0.07248 | 0.11777  | 0.11531  | 0.01265  | -0.16051 | 0.0005   | 0.160323 |
| 0.012997 | 0.77939 | -0.08542 | 0.06511  | 0.095055 | 0.04004  | -0.22228 | 1.23E-06 | 0.029375 |
| -0.01445 | 0.75542 | -0.1902  | 3.52E-05 | 0.014276 | 0.75831  | -0.3015  | 2.86E-11 | 0.05626  |
| -0.06433 | 0.16518 | -0.1477  | 0.00137  | -0.04217 | 0.36326  | -0.19405 | 2.42E-05 | 0.095102 |
| 0.036897 | 0.42633 | -0.07059 | 0.1277   | 0.117482 | 0.01106  | -0.09547 | 0.03918  | 0.143796 |
| -0.1595  | 0.00054 | -0.05201 | 0.26201  | -0.38971 | 2.18E-18 | -0.0197  | 0.67104  | -0.22457 |
| -0.00169 | 0.97094 | -0.05278 | 0.25499  | 0.04783  | 0.30233  | -0.13579 | 0.00328  | 0.148021 |
| 0.001923 | 0.96695 | -0.0219  | 0.63695  | 0.188653 | 4.08E-05 | -0.06151 | 0.18454  | 0.296115 |
| 0.057556 | 0.21442 | -0.0286  | 0.53748  | 0.147524 | 0.00139  | -0.17576 | 0.00013  | 0.024291 |
| 0.006073 | 0.89586 | -0.13512 | 0.00344  | 0.117342 | 0.01116  | -0.22816 | 6.25E-07 | 0.091437 |
| 0.004356 | 0.9252  | -0.13183 | 0.00432  | 0.04218  | 0.3631   | -0.17213 | 0.00019  | 0.143478 |
| 0.144604 | 0.00173 | 0.175971 | 0.00013  | 0.439369 | 1.84E-23 | 0.077056 | 0.09627  | 0.317702 |
| 0.079854 | 0.08475 | 0.0386   | 0.40527  | 0.154139 | 0.00083  | -0.02746 | 0.55395  | 0.172467 |
| -0.02198 | 0.63562 | -0.13512 | 0.00344  | 0.122011 | 0.0083   | -0.23031 | 4.87E-07 | 0.188217 |
| 0.037984 | 0.41283 | -0.07322 | 0.11408  | 0.154346 | 0.00082  | -0.23373 | 3.25E-07 | -0.05774 |
| -0.06089 | 0.18899 | -0.21493 | 2.77E-06 | -0.00737 | 0.87378  | -0.25447 | 2.46E-08 | 0.044258 |
| -0.02278 | 0.62341 | -0.19559 | 2.08E-05 | -0.05911 | 0.2023   | -0.27454 | 1.61E-09 | -0.01581 |
| -0.06265 | 0.17654 | -0.14878 | 0.00126  | -0.00477 | 0.91813  | -0.22194 | 1.27E-06 | -0.00776 |
| 0.032872 | 0.47854 | -0.16208 | 0.00044  | 0.140585 | 0.00233  | -0.27427 | 1.67E-09 | 0.085503 |
| 0.00669  | 0.88535 | -0.09056 | 0.05048  | -0.00371 | 0.93635  | -0.11885 | 0.01015  | 0.045293 |

|          |         |          |          |          |          |          |          |          |
|----------|---------|----------|----------|----------|----------|----------|----------|----------|
| 0.009431 | 0.83894 | -0.10513 | 0.02308  | 0.017345 | 0.70851  | -0.20636 | 6.92E-06 | 0.028501 |
| 0.028983 | 0.53211 | -0.11858 | 0.01032  | 0.018215 | 0.69461  | -0.23518 | 2.73E-07 | 0.096991 |
| -0.04608 | 0.32038 | -0.23902 | 1.72E-07 | 0.045416 | 0.32743  | -0.27374 | 1.80E-09 | 0.142078 |
| -0.05812 | 0.20994 | -0.17316 | 0.00017  | 0.03306  | 0.47603  | -0.22109 | 1.40E-06 | -0.00991 |
| 0.037168 | 0.42294 | -0.21502 | 2.74E-06 | 0.031412 | 0.49829  | -0.2433  | 1.02E-07 | 0.211142 |
| 0.022783 | 0.62336 | -0.12362 | 0.00748  | 0.13296  | 0.004    | -0.2531  | 2.93E-08 | 0.155111 |
| 0.012119 | 0.79394 | -0.19802 | 1.63E-05 | -0.02474 | 0.59386  | -0.29658 | 6.17E-11 | -0.05901 |
| -0.09923 | 0.03204 | 0.03985  | 0.39023  | -0.20632 | 6.96E-06 | 0.144983 | 0.00168  | -0.05739 |
| 0.033625 | 0.46851 | -0.11214 | 0.01533  | 0.176899 | 0.00012  | -0.20786 | 5.92E-06 | 0.218311 |
| -0.02107 | 0.64976 | -0.17106 | 0.0002   | 0.044166 | 0.34093  | -0.23865 | 1.80E-07 | 0.027161 |
| -0.09795 | 0.03433 | -0.152   | 0.00098  | -0.00115 | 0.98023  | -0.28155 | 5.87E-10 | 0.01477  |
| 0.048461 | 0.29599 | -0.05728 | 0.21667  | 0.108786 | 0.01869  | -0.2245  | 9.53E-07 | 0.091777 |
| 0.105245 | 0.02293 | -0.07771 | 0.09346  | 0.049339 | 0.28732  | -0.18472 | 5.93E-05 | -0.03862 |
| -0.00461 | 0.92085 | -0.16581 | 0.00032  | 0.021524 | 0.64269  | -0.27448 | 1.62E-09 | -0.0198  |
| 0.09317  | 0.04418 | -0.06761 | 0.14463  | 0.227734 | 6.57E-07 | -0.2044  | 8.49E-06 | 0.175123 |
| 0.060036 | 0.19529 | -0.05453 | 0.23953  | 0.203482 | 9.34E-06 | -0.17585 | 0.00013  | 0.082308 |
| -0.00758 | 0.87021 | -0.12902 | 0.00523  | -0.03263 | 0.48177  | -0.26745 | 4.32E-09 | -0.13822 |
| 0.033283 | 0.47306 | -0.09074 | 0.05004  | 0.131968 | 0.00428  | -0.26813 | 3.94E-09 | -0.03614 |
| 0.050541 | 0.27572 | -0.07139 | 0.12344  | 0.148319 | 0.00131  | -0.20884 | 5.33E-06 | -0.00055 |
| 0.035646 | 0.44219 | -0.18915 | 3.89E-05 | 0.088067 | 0.0572   | -0.2316  | 4.18E-07 | 0.167635 |
| 0.064412 | 0.16463 | -0.15489 | 0.00078  | 0.100621 | 0.0297   | -0.23258 | 3.72E-07 | 0.152641 |
| 0.018216 | 0.6946  | -0.14417 | 0.00179  | 0.005528 | 0.90516  | -0.209   | 5.24E-06 | 0.156778 |
| 0.011217 | 0.80896 | -0.14533 | 0.00164  | 0.050863 | 0.27268  | -0.27804 | 9.76E-10 | -0.12328 |
| -0.01765 | 0.70364 | -0.07498 | 0.10559  | 0.016277 | 0.72572  | -0.20611 | 7.11E-06 | 0.078638 |
| -0.06117 | 0.18697 | -0.14408 | 0.0018   | -0.0007  | 0.98792  | -0.25683 | 1.80E-08 | -0.00556 |
| 0.010295 | 0.8244  | -0.08581 | 0.06391  | 0.082902 | 0.07349  | -0.14512 | 0.00166  | 0.033046 |
| -0.11305 | 0.01452 | -0.01137 | 0.80644  | -0.28526 | 3.41E-10 | 0.075032 | 0.10536  | -0.0378  |
| -0.11442 | 0.01336 | 0.059444 | 0.19974  | -0.25732 | 1.69E-08 | 0.052853 | 0.25433  | -0.26024 |
| -0.01728 | 0.70956 | -0.14724 | 0.00142  | 0.017455 | 0.70676  | -0.25646 | 1.89E-08 | 0.135327 |
| 0.038985 | 0.40061 | -0.09993 | 0.03084  | 0.036282 | 0.43409  | -0.19289 | 2.71E-05 | 0.11325  |
| 0.023035 | 0.61953 | 0.034071 | 0.46264  | 0.162098 | 0.00044  | -0.02482 | 0.59265  | 0.093075 |
| 0.045282 | 0.32885 | -0.07278 | 0.11629  | 0.097018 | 0.03609  | -0.22826 | 6.18E-07 | -0.04727 |
| 0.01912  | 0.68025 | 0.006421 | 0.88993  | 0.133317 | 0.0039   | -0.19643 | 1.91E-05 | -0.04779 |
| -0.08104 | 0.0802  | -0.24828 | 5.44E-08 | -0.05236 | 0.25876  | -0.32395 | 7.17E-13 | 0.127121 |
| -0.08622 | 0.06266 | 0.005355 | 0.90813  | -0.22578 | 8.23E-07 | 0.08302  | 0.07307  | 0.01158  |
| 0.065671 | 0.15651 | -0.06503 | 0.16059  | 0.092902 | 0.04479  | -0.1561  | 0.00071  | 0.006846 |
| 0.03201  | 0.49015 | -0.11824 | 0.01055  | 0.126815 | 0.00607  | -0.2022  | 1.07E-05 | 0.077413 |
| 0.012683 | 0.78458 | -0.16918 | 0.00024  | 0.180088 | 9.10E-05 | -0.24096 | 1.36E-07 | 0.283679 |
| 0.045595 | 0.32552 | -0.0063  | 0.89202  | 0.096619 | 0.03687  | -0.13813 | 0.00278  | -0.03817 |
| -0.16758 | 0.00028 | -0.04158 | 0.36998  | -0.30798 | 1.02E-11 | -0.02743 | 0.55432  | -0.15257 |
| 0.048408 | 0.29653 | -0.09851 | 0.03332  | 0.199066 | 1.47E-05 | -0.21232 | 3.68E-06 | 0.101762 |
| 0.109605 | 0.01782 | 0.003367 | 0.94214  | 0.207319 | 6.26E-06 | -0.06507 | 0.16034  | 0.109967 |
| -0.01072 | 0.81724 | -0.10744 | 0.02022  | 0.026242 | 0.57162  | -0.19308 | 2.66E-05 | 0.00129  |
| 0.033384 | 0.47171 | -0.2127  | 3.53E-06 | -0.0382  | 0.41014  | -0.24485 | 8.38E-08 | 0.107978 |
| 0.117732 | 0.01089 | -0.0382  | 0.41013  | 0.233005 | 3.54E-07 | -0.10383 | 0.02484  | 0.194317 |

|          |          |          |          |          |          |          |          |          |
|----------|----------|----------|----------|----------|----------|----------|----------|----------|
| 0.148119 | 0.00133  | -0.17539 | 0.00014  | 0.082988 | 0.07318  | -0.24343 | 1.00E-07 | -0.05142 |
| 0.041682 | 0.36879  | -0.04173 | 0.36829  | 0.145853 | 0.00158  | -0.11597 | 0.01214  | 0.198348 |
| -0.09179 | 0.04742  | -0.26994 | 3.06E-09 | -0.13816 | 0.00277  | -0.3691  | 1.61E-16 | -0.18994 |
| -0.02282 | 0.62287  | -0.23942 | 1.64E-07 | -0.06756 | 0.14494  | -0.30688 | 1.22E-11 | 0.073679 |
| -0.02998 | 0.51803  | -0.18621 | 5.15E-05 | -0.0298  | 0.52058  | -0.23659 | 2.31E-07 | -0.06843 |
| 0.116426 | 0.01181  | -0.06665 | 0.1504   | 0.134429 | 0.00361  | -0.0651  | 0.16017  | 0.195002 |
| 0.108914 | 0.01856  | -0.04183 | 0.36705  | 0.215683 | 2.55E-06 | -0.07143 | 0.12322  | 0.210389 |
| 0.040134 | 0.38686  | -0.1029  | 0.02617  | 0.173146 | 0.00017  | -0.22317 | 1.11E-06 | 0.129003 |
| 0.040107 | 0.38718  | -0.11373 | 0.01392  | 0.01411  | 0.76104  | -0.17588 | 0.00013  | 0.082159 |
| -0.01214 | 0.79359  | -0.11282 | 0.01472  | 0.070973 | 0.12563  | -0.17341 | 0.00017  | 0.078544 |
| 0.004802 | 0.91758  | -0.04403 | 0.34243  | 0.118518 | 0.01037  | -0.13872 | 0.00266  | 0.135253 |
| 0.037168 | 0.42293  | -0.03955 | 0.39375  | 0.057991 | 0.21097  | -0.17502 | 0.00014  | 0.084275 |
| 0.048769 | 0.29293  | -0.08122 | 0.07956  | 0.114733 | 0.0131   | -0.08287 | 0.07359  | 0.170882 |
| -0.03861 | 0.40512  | -0.1504  | 0.00111  | 0.032221 | 0.48729  | -0.14412 | 0.00179  | 0.163049 |
| 0.029067 | 0.53093  | -0.09411 | 0.04207  | 0.046429 | 0.31673  | -0.23328 | 3.43E-07 | 0.025564 |
| 0.088037 | 0.05729  | 0.018993 | 0.68226  | 0.286806 | 2.71E-10 | -0.1513  | 0.00104  | 0.115192 |
| -0.00589 | 0.89902  | -0.02213 | 0.63339  | 0.02333  | 0.61505  | -0.13239 | 0.00416  | -0.09442 |
| -0.04122 | 0.37413  | -0.08534 | 0.06539  | 0.002799 | 0.9519   | -0.17242 | 0.00018  | 0.140285 |
| 0.123459 | 0.00756  | 0.076098 | 0.10049  | 0.135418 | 0.00337  | -0.09236 | 0.04606  | -0.06139 |
| -0.01708 | 0.71279  | -0.199   | 1.48E-05 | -0.05215 | 0.26069  | -0.26479 | 6.22E-09 | 0.035078 |
| 0.094187 | 0.0419   | -0.0514  | 0.26762  | 0.078501 | 0.09017  | -0.14344 | 0.00189  | -0.01294 |
| -0.07974 | 0.08519  | 0.062823 | 0.17532  | -0.23276 | 3.65E-07 | 0.068262 | 0.14077  | -0.09544 |
| 0.048758 | 0.29304  | -0.10941 | 0.01802  | 0.147009 | 0.00144  | -0.2114  | 4.06E-06 | 0.042328 |
| -0.0558  | 0.2288   | -0.07569 | 0.10233  | -0.15176 | 0.001    | 0.04995  | 0.28139  | 0.027025 |
| 0.066573 | 0.15089  | -0.11464 | 0.01318  | 0.128889 | 0.00528  | -0.16688 | 0.00029  | 0.21291  |
| 0.005855 | 0.89959  | -0.14209 | 0.00208  | -0.05373 | 0.24654  | -0.2204  | 1.51E-06 | 0.006084 |
| -0.02699 | 0.56077  | -0.14777 | 0.00136  | -0.01523 | 0.74277  | -0.23396 | 3.16E-07 | 0.133203 |
| 0.007129 | 0.87789  | -0.10207 | 0.02741  | 0.054441 | 0.24031  | -0.23931 | 1.66E-07 | 0.011394 |
| 0.011785 | 0.79949  | -0.08176 | 0.07754  | 0.169032 | 0.00024  | -0.15068 | 0.00109  | 0.100754 |
| -0.02474 | 0.5939   | -0.08822 | 0.05676  | 0.096865 | 0.03639  | -0.17576 | 0.00013  | 0.028023 |
| 0.04895  | 0.29114  | -0.12143 | 0.00862  | 0.165232 | 0.00034  | -0.18235 | 7.39E-05 | 0.158215 |
| 0.006889 | 0.88197  | -0.16965 | 0.00023  | 0.132263 | 0.00419  | -0.26359 | 7.31E-09 | 0.131997 |
| 0.07253  | 0.11753  | -0.1467  | 0.00148  | 0.20237  | 1.05E-05 | -0.22295 | 1.14E-06 | 0.21327  |
| 0.042926 | 0.35467  | -0.18689 | 4.83E-05 | 0.133427 | 0.00387  | -0.26887 | 3.55E-09 | 0.200289 |
| 0.090254 | 0.05128  | -0.01442 | 0.7559   | 0.04121  | 0.37425  | -0.04388 | 0.34409  | -0.01844 |
| 0.092668 | 0.04534  | 0.037854 | 0.41443  | 0.149405 | 0.0012   | 0.049402 | 0.28671  | 0.0353   |
| 0.215214 | 2.69E-06 | 0.016856 | 0.71636  | 0.115243 | 0.0127   | 0.054105 | 0.24324  | -0.00846 |
| 0.165854 | 0.00032  | 0.014577 | 0.75338  | 0.027325 | 0.55585  | 0.120605 | 0.00908  | 0.107783 |
| 0.117562 | 0.011    | 0.196571 | 1.88E-05 | 0.097183 | 0.03577  | 0.250571 | 4.06E-08 | 0.292385 |
| 0.070168 | 0.12999  | 0.025098 | 0.5885   | 0.077889 | 0.09272  | -0.02579 | 0.57823  | -0.18666 |
| -0.0472  | 0.30871  | -0.02324 | 0.61637  | -0.00985 | 0.83181  | 0.07967  | 0.08547  | 0.091313 |
| -0.04094 | 0.37744  | -0.04292 | 0.35475  | -0.01877 | 0.68578  | 0.02765  | 0.55115  | -0.01609 |
| -0.03214 | 0.48839  | 0.052402 | 0.25841  | -0.01233 | 0.79041  | 0.094547 | 0.04112  | -0.09835 |
| 0.056606 | 0.2221   | -0.0595  | 0.1993   | -0.00077 | 0.9868   | -0.10897 | 0.01849  | -0.10004 |
| -0.00308 | 0.94703  | 0.053408 | 0.24937  | 0.092979 | 0.04462  | -0.00925 | 0.84206  | 0.038792 |

|          |         |          |          |          |          |          |          |          |
|----------|---------|----------|----------|----------|----------|----------|----------|----------|
| 0.12219  | 0.00821 | 0.021851 | 0.63765  | 0.103954 | 0.02467  | -0.0229  | 0.62154  | -0.05277 |
| -0.07599 | 0.10097 | 0.086393 | 0.06212  | 0.021148 | 0.6485   | 0.122286 | 0.00816  | -0.09893 |
| -0.0367  | 0.42884 | 0.025762 | 0.57867  | 0.004227 | 0.92741  | 0.065679 | 0.15646  | -0.10125 |
| -0.05998 | 0.19573 | -0.02267 | 0.62501  | 0.016239 | 0.72634  | -0.00603 | 0.89666  | 0.00249  |
| -0.06754 | 0.14502 | 0.03641  | 0.43247  | -0.03835 | 0.40838  | 0.190538 | 3.40E-05 | 0.143874 |
| -0.00361 | 0.93801 | -0.02817 | 0.54374  | -0.11149 | 0.01593  | -0.00778 | 0.86687  | -0.08877 |
| 0.019389 | 0.67601 | -0.11053 | 0.01687  | -0.06523 | 0.15933  | -0.20079 | 1.23E-05 | -0.13627 |
| 0.07207  | 0.11988 | 0.041979 | 0.36539  | -0.02954 | 0.5242   | 0.04437  | 0.33869  | -0.10022 |
| -0.01157 | 0.80309 | 0.104766 | 0.02356  | -0.03688 | 0.42653  | 0.106321 | 0.02156  | 0.075492 |
| 0.069343 | 0.13458 | -0.01796 | 0.69863  | -0.01822 | 0.69455  | -0.02466 | 0.59501  | -0.03689 |
| 0.049794 | 0.28289 | 0.048805 | 0.29258  | 0.078652 | 0.08956  | -0.01515 | 0.74408  | -0.12457 |
| 0.080432 | 0.08251 | 0.11434  | 0.01342  | 0.124552 | 0.00704  | 0.21692  | 2.23E-06 | 0.223433 |
| 0.024494 | 0.59752 | 0.029071 | 0.53088  | 0.048718 | 0.29344  | 0.006426 | 0.88986  | 0.007259 |
| -0.03737 | 0.42043 | 0.014448 | 0.7555   | 0.01918  | 0.6793   | -0.00641 | 0.89004  | -0.06292 |
| -0.06501 | 0.16075 | 0.055672 | 0.22984  | 0.018303 | 0.69321  | 0.005035 | 0.91358  | -0.13543 |
| -0.09215 | 0.04657 | -0.07451 | 0.1078   | 0.000887 | 0.98475  | -0.01105 | 0.81169  | -0.06163 |
| -0.01053 | 0.82038 | 0.019576 | 0.67307  | 0.073776 | 0.11134  | 0.021142 | 0.6486   | -0.07664 |
| -0.04015 | 0.38664 | -0.01996 | 0.66706  | -0.00376 | 0.93544  | 0.023273 | 0.61591  | -0.0059  |
| 0.039799 | 0.39083 | 0.036225 | 0.43481  | 0.053862 | 0.24536  | 0.001007 | 0.98269  | -0.14411 |
| -0.00632 | 0.89163 | 0.005551 | 0.90476  | 0.008919 | 0.84757  | 0.003421 | 0.94122  | -0.05283 |
| 0.021685 | 0.6402  | -0.01659 | 0.72066  | -0.08194 | 0.0769   | -0.02287 | 0.62202  | -0.0614  |
| 0.003527 | 0.93941 | 0.032977 | 0.47713  | 0.038318 | 0.40872  | 0.039241 | 0.39752  | -0.03186 |
| -0.06985 | 0.13172 | -0.14589 | 0.00157  | -0.00658 | 0.88715  | -0.09781 | 0.0346   | 0.05183  |
| -0.00348 | 0.94014 | -0.07363 | 0.11205  | -0.06425 | 0.16571  | 0.002366 | 0.95934  | -0.0364  |
| -0.10128 | 0.02864 | 0.062003 | 0.18103  | 0.007569 | 0.87042  | 0.055115 | 0.23454  | -0.05177 |
| -0.08633 | 0.06231 | -0.00222 | 0.96176  | 0.031716 | 0.49414  | 0.062355 | 0.17856  | 0.040748 |
| -0.04221 | 0.36273 | -0.00966 | 0.83513  | 0.020542 | 0.65793  | -0.00744 | 0.87255  | -0.07139 |
| -0.03059 | 0.50961 | 0.026474 | 0.56823  | -0.01809 | 0.69654  | 0.055058 | 0.23502  | -0.12673 |
| -0.00761 | 0.86977 | -0.06195 | 0.18138  | 0.066868 | 0.14908  | -0.12355 | 0.00752  | -0.05925 |
| -0.0469  | 0.31185 | 0.013847 | 0.76536  | 0.021846 | 0.63772  | 0.056321 | 0.22444  | -0.06603 |
| 0.10923  | 0.01821 | 0.473651 | 1.73E-27 | 0.422088 | 1.34E-21 | 0.322985 | 8.45E-13 | 0.04291  |
| -0.02608 | 0.57401 | -0.04597 | 0.32156  | 0.023126 | 0.61814  | 0.013002 | 0.77929  | 0.002323 |
| 0.16369  | 0.00038 | 0.121197 | 0.00875  | 0.159758 | 0.00053  | 0.129629 | 0.00502  | 0.02796  |
| -0.02814 | 0.54417 | 0.03176  | 0.49355  | -0.06358 | 0.17018  | 0.074605 | 0.10737  | -0.07333 |
| 0.092159 | 0.04654 | 0.260237 | 1.15E-08 | 0.233054 | 3.52E-07 | 0.348297 | 9.15E-15 | 0.238941 |
| -0.0026  | 0.95534 | 0.011348 | 0.80678  | -0.00857 | 0.85354  | 0.04457  | 0.33652  | 0.021199 |
| -0.01247 | 0.78807 | 0.004388 | 0.92466  | 0.001638 | 0.97184  | -0.01126 | 0.80828  | -0.07821 |
| -0.05903 | 0.20291 | -0.01521 | 0.74304  | -0.08328 | 0.07217  | 0.065817 | 0.15559  | 0.031911 |
| -0.00921 | 0.84269 | 0.012399 | 0.78929  | -0.03684 | 0.42698  | -0.0267  | 0.56488  | -0.04653 |
| 0.076803 | 0.09737 | 0.130435 | 0.00475  | 0.247654 | 5.89E-08 | 0.079758 | 0.08512  | 0.199212 |
| -0.08362 | 0.071   | 0.028123 | 0.54436  | 0.002988 | 0.94865  | 0.117292 | 0.01119  | 0.08867  |
| 0.018719 | 0.6866  | 0.024011 | 0.60476  | 0.124008 | 0.0073   | 0.009189 | 0.84301  | 0.045346 |
| 0.140882 | 0.00228 | 0.251536 | 3.59E-08 | 0.420393 | 2.01E-21 | 0.294287 | 8.77E-11 | 0.177207 |
| 0.015146 | 0.74409 | 0.024854 | 0.59214  | -0.0238  | 0.60787  | -0.00221 | 0.96197  | -0.10497 |
| -0.00184 | 0.96838 | 0.063208 | 0.17268  | 0.058757 | 0.205    | -0.00522 | 0.91043  | -0.14908 |



|          |         |          |          |          |          |          |          |          |
|----------|---------|----------|----------|----------|----------|----------|----------|----------|
| 0.019463 | 0.67485 | 0.024543 | 0.59678  | 0.099073 | 0.03231  | 0.021823 | 0.63808  | -0.03923 |
| -0.01081 | 0.81581 | 0.043019 | 0.35362  | 0.021471 | 0.64351  | -0.00958 | 0.83645  | -0.18843 |
| -0.00437 | 0.92502 | 0.076065 | 0.10064  | -0.02441 | 0.59878  | 0.069029 | 0.13636  | -0.12212 |
| -0.06258 | 0.17696 | -0.02901 | 0.53168  | -0.05546 | 0.23159  | 0.015546 | 0.73757  | -0.09322 |
| 0.08651  | 0.06176 | -0.09349 | 0.04346  | 0.098027 | 0.03419  | -0.12368 | 0.00745  | 0.163858 |
| -0.06623 | 0.15304 | 0.007569 | 0.87042  | -0.07009 | 0.13039  | -0.0843  | 0.06875  | -0.17341 |
| -0.06358 | 0.17016 | -0.0454  | 0.32756  | -0.0417  | 0.36855  | -0.08215 | 0.07614  | -0.21067 |
| -0.01867 | 0.6874  | -0.01085 | 0.81504  | 0.114457 | 0.01333  | -0.06815 | 0.1414   | 0.018097 |
| -0.05162 | 0.26563 | -0.18648 | 5.02E-05 | -0.03798 | 0.41283  | -0.14513 | 0.00166  | 0.090847 |
| 0.010951 | 0.81342 | -0.03022 | 0.5148   | -0.02275 | 0.6239   | 0.015595 | 0.73677  | 0.025821 |
| -0.07298 | 0.11527 | 0.093543 | 0.04333  | -0.145   | 0.00168  | 0.082708 | 0.07416  | -0.19586 |
| -0.08134 | 0.07911 | -0.09709 | 0.03595  | -0.08927 | 0.05389  | 0.045469 | 0.32686  | 0.101313 |
| -0.03609 | 0.43658 | 0.01035  | 0.82348  | 0.02935  | 0.52693  | 0.040827 | 0.37871  | -0.08927 |
| 0.166003 | 0.00031 | 0.176787 | 0.00012  | 0.148061 | 0.00133  | 0.142406 | 0.00204  | 0.058118 |
| 0.023426 | 0.61359 | 0.002007 | 0.96551  | 0.083487 | 0.07147  | 0.005166 | 0.91135  | -0.07071 |
| 0.067167 | 0.14727 | 0.039312 | 0.39666  | 0.086536 | 0.06169  | 0.043197 | 0.35163  | -0.02665 |
| -0.05306 | 0.25246 | 0.020243 | 0.6626   | 0.039223 | 0.39774  | 0.089407 | 0.05351  | 0.000863 |
| -0.02276 | 0.62378 | 0.021663 | 0.64054  | 0.04873  | 0.29332  | 0.064472 | 0.16424  | 0.025899 |
| -0.03771 | 0.41626 | -0.22174 | 1.30E-06 | -0.16749 | 0.00028  | -0.22064 | 1.47E-06 | -0.04664 |
| -0.02567 | 0.58007 | 0.015231 | 0.74271  | 0.043246 | 0.35108  | 0.024915 | 0.59122  | -0.10738 |
| -0.04799 | 0.30076 | 0.022272 | 0.63118  | -0.06434 | 0.16509  | -0.01164 | 0.80196  | -0.01775 |
| 0.040584 | 0.38155 | 0.036787 | 0.42772  | 0.078351 | 0.09079  | 0.013976 | 0.76324  | -0.06192 |
| -0.00182 | 0.96878 | 0.043171 | 0.35192  | -0.00927 | 0.84169  | 0.017854 | 0.70036  | -0.05917 |
| 0.026205 | 0.57215 | 0.054386 | 0.24079  | 0.072419 | 0.11809  | 0.084635 | 0.06764  | -0.03646 |
| 0.098631 | 0.0331  | 0.22664  | 7.45E-07 | 0.423121 | 1.04E-21 | 0.164119 | 0.00037  | 0.022819 |
| -0.0259  | 0.5766  | 0.134745 | 0.00353  | 0.188287 | 4.23E-05 | 0.117724 | 0.01089  | 0.03822  |
| -0.01515 | 0.74399 | -0.10837 | 0.01915  | -0.02658 | 0.56664  | -0.126   | 0.0064   | -0.03665 |
| 0.079851 | 0.08476 | 0.004486 | 0.92298  | 0.079338 | 0.08678  | -0.03829 | 0.40905  | 0.060386 |
| -0.013   | 0.77926 | 0.035121 | 0.44895  | 0.109169 | 0.01828  | -0.00107 | 0.98155  | -0.07534 |
| -0.16059 | 0.00049 | -0.21033 | 4.55E-06 | -0.19008 | 3.56E-05 | -0.16135 | 0.00046  | -0.17851 |
| 0.00165  | 0.97164 | -0.08075 | 0.08128  | 0.136867 | 0.00304  | -0.11688 | 0.01148  | 0.099979 |
| -0.00577 | 0.90108 | -0.03224 | 0.48709  | 0.071345 | 0.12366  | -0.02207 | 0.63432  | 0.038844 |
| -0.08158 | 0.0782  | -0.04663 | 0.31467  | 0.003604 | 0.93809  | 0.008005 | 0.86302  | -0.02924 |
| -0.05565 | 0.23    | -0.05253 | 0.25725  | 0.021962 | 0.63594  | -0.03138 | 0.49878  | -0.09323 |
| -0.01841 | 0.69158 | 0.024748 | 0.59371  | 0.063002 | 0.17409  | 0.003261 | 0.94397  | -0.00341 |
| -0.02734 | 0.55566 | 0.017208 | 0.71071  | -0.02393 | 0.60593  | 0.056144 | 0.2259   | -0.07534 |
| -0.11287 | 0.01467 | 0.033302 | 0.4728   | -0.03835 | 0.40833  | 0.027289 | 0.55636  | -0.0338  |
| -0.03246 | 0.48403 | -0.04671 | 0.31376  | -0.04326 | 0.35098  | -0.05681 | 0.22043  | -0.21479 |
| 0.090128 | 0.0516  | 0.028093 | 0.54479  | 0.081206 | 0.07959  | 0.038213 | 0.41001  | 0.076517 |
| -0.02379 | 0.60808 | 0.018863 | 0.68432  | -0.09882 | 0.03276  | -0.00943 | 0.83896  | -0.02061 |
| -0.01256 | 0.78663 | -0.10454 | 0.02387  | -0.07416 | 0.10949  | -0.01961 | 0.67252  | -0.02198 |
| -0.00978 | 0.83307 | -0.04261 | 0.35818  | 0.000903 | 0.98447  | -0.05214 | 0.26085  | -0.06616 |
| 0.051075 | 0.27068 | -0.00213 | 0.96332  | 0.09626  | 0.03758  | -0.14604 | 0.00155  | -0.0487  |
| -0.0013  | 0.9776  | -0.07173 | 0.12161  | -0.10316 | 0.0258   | -0.12316 | 0.00771  | -0.12421 |
| 0.009961 | 0.83001 | 0.036334 | 0.43343  | 0.148056 | 0.00133  | -0.01644 | 0.72313  | 0.006153 |

|          |         |          |         |          |          |          |          |          |
|----------|---------|----------|---------|----------|----------|----------|----------|----------|
| 0.067087 | 0.14775 | 0.136503 | 0.00312 | 0.070284 | 0.12935  | 0.125069 | 0.00681  | 0.020195 |
| 0.067776 | 0.14363 | 0.039882 | 0.38985 | 0.078863 | 0.08869  | 0.039868 | 0.39002  | 0.021097 |
| -0.03294 | 0.47758 | 0.074127 | 0.10964 | 0.027137 | 0.55857  | 0.157465 | 0.00064  | -0.11121 |
| 0.003312 | 0.94309 | 0.099201 | 0.03209 | 0.117344 | 0.01116  | 0.108547 | 0.01896  | 0.011703 |
| 0.017309 | 0.7091  | 0.047469 | 0.306   | -0.04764 | 0.30427  | 0.04078  | 0.37926  | -0.0685  |
| -0.07893 | 0.08844 | 0.04448  | 0.3375  | -0.10544 | 0.02268  | 0.081414 | 0.07882  | -0.119   |
| -0.1295  | 0.00506 | 0.08152  | 0.07843 | -0.09882 | 0.03276  | 0.186689 | 4.92E-05 | -0.07421 |
| -0.08404 | 0.06962 | 0.004767 | 0.91816 | -0.05873 | 0.20523  | 0.038619 | 0.40505  | -0.133   |
| -0.00786 | 0.86543 | -0.01272 | 0.784   | -0.07749 | 0.09442  | -0.00409 | 0.92979  | 0.029777 |
| -0.02256 | 0.62677 | -0.07697 | 0.09666 | 0.056303 | 0.22459  | 0.010526 | 0.82053  | 0.11132  |
| -0.02478 | 0.59319 | -0.01241 | 0.78903 | 0.152076 | 0.00098  | -0.06868 | 0.13837  | 0.062824 |
| 0.004965 | 0.91479 | -0.0342  | 0.4609  | 0.031759 | 0.49356  | -0.15952 | 0.00054  | -0.16485 |
| -0.06945 | 0.13396 | -0.06931 | 0.13475 | -0.06133 | 0.18585  | -0.08062 | 0.08181  | -0.02243 |
| 0.03018  | 0.51531 | 0.106901 | 0.02086 | 0.095147 | 0.03985  | 0.060246 | 0.19373  | -0.02856 |
| 0.037456 | 0.41936 | -0.00537 | 0.90784 | 0.098553 | 0.03324  | 0.000825 | 0.98581  | -0.01182 |
| 0.050657 | 0.27463 | 0.074357 | 0.10854 | 0.172802 | 0.00018  | 0.037964 | 0.41306  | -0.00437 |
| -0.02279 | 0.62325 | 0.004894 | 0.91599 | -0.06343 | 0.17115  | 0.047708 | 0.30357  | -0.09238 |
| 0.047644 | 0.30423 | 0.062153 | 0.17997 | 0.02853  | 0.53855  | 0.101369 | 0.0285   | 0.194321 |
| 0.019124 | 0.68019 | -0.05989 | 0.19641 | 0.057284 | 0.2166   | -0.03474 | 0.45392  | -0.08723 |
| 0.01663  | 0.72001 | -0.06888 | 0.1372  | -0.00901 | 0.84605  | -0.12565 | 0.00655  | -0.04058 |
| -0.07438 | 0.10842 | -0.08913 | 0.05426 | -0.03963 | 0.39281  | -0.10984 | 0.01757  | -0.13697 |
| 0.005394 | 0.90744 | -0.11395 | 0.01375 | 0.047396 | 0.30675  | -0.12308 | 0.00775  | 0.087692 |
| -0.00402 | 0.93095 | -0.00955 | 0.83689 | 0.017882 | 0.69992  | -0.0189  | 0.68373  | -0.10046 |
| -0.04617 | 0.31942 | -0.04315 | 0.35219 | -0.02428 | 0.60066  | -0.06473 | 0.16255  | -0.08073 |
| 0.108558 | 0.01895 | 0.032259 | 0.48679 | 0.017086 | 0.71267  | 0.021795 | 0.63851  | 0.011825 |
| 0.064438 | 0.16446 | 0.032056 | 0.48954 | 0.07411  | 0.10972  | 0.030693 | 0.50819  | -0.0068  |
| -0.03179 | 0.4931  | 0.06117  | 0.18697 | 0.055625 | 0.23023  | 0.114021 | 0.01368  | -0.06115 |
| -0.1652  | 0.00034 | -0.15166 | 0.00101 | -0.21752 | 2.09E-06 | -0.10181 | 0.02782  | -0.11632 |
| -0.039   | 0.40043 | 0.006785 | 0.88373 | 0.032999 | 0.47684  | 0.023423 | 0.61364  | 0.011765 |
| -0.014   | 0.76285 | -0.03147 | 0.49746 | 0.013289 | 0.77455  | -0.08747 | 0.05891  | -0.0583  |
| -0.05358 | 0.24782 | -0.07921 | 0.08728 | -0.00746 | 0.87222  | -0.04241 | 0.36045  | 0.005697 |
| -0.08305 | 0.07298 | -0.07636 | 0.0993  | -0.03795 | 0.41321  | -0.03639 | 0.43268  | -0.01018 |
| -0.01904 | 0.68146 | 0.014689 | 0.75156 | 0.008489 | 0.85483  | -0.00493 | 0.91537  | -0.07759 |
| -0.00366 | 0.93712 | 0.008709 | 0.85111 | 0.022326 | 0.63036  | 0.054005 | 0.24411  | 0.054917 |
| -0.00103 | 0.98237 | 0.002255 | 0.96124 | 0.043013 | 0.35369  | -0.01995 | 0.66716  | 0.086363 |
| 0.020233 | 0.66276 | 0.024063 | 0.60398 | 0.181795 | 7.78E-05 | 0.001538 | 0.97355  | 0.048273 |
| -0.02763 | 0.55138 | -0.12909 | 0.00521 | -0.04952 | 0.28557  | -0.17127 | 0.0002   | -0.0638  |
| 0.109788 | 0.01763 | 0.157676 | 0.00063 | 0.211614 | 3.97E-06 | 0.141246 | 0.00222  | 0.144197 |
| -0.01157 | 0.80308 | 0.093684 | 0.04302 | 0.115775 | 0.01229  | 0.077764 | 0.09324  | 0.05712  |
| -0.0561  | 0.22624 | 0.069365 | 0.13445 | 0.012485 | 0.78786  | 0.039616 | 0.39303  | -0.02682 |
| -0.12316 | 0.00771 | -0.09426 | 0.04174 | -0.22653 | 7.55E-07 | -0.07842 | 0.0905   | -0.02796 |
| -0.0861  | 0.063   | -0.1418  | 0.00213 | -0.24791 | 5.70E-08 | -0.14421 | 0.00178  | -0.13464 |
| -0.03384 | 0.46573 | 0.018471 | 0.69054 | 0.039295 | 0.39688  | 0.045403 | 0.32756  | -0.10106 |
| -0.06495 | 0.1611  | 0.054032 | 0.24387 | 0.002269 | 0.961    | -0.00528 | 0.90933  | -0.12833 |
| -0.10282 | 0.02629 | -0.07369 | 0.11174 | 0.043105 | 0.35266  | -0.07676 | 0.09755  | -0.0341  |

|          |         |          |         |          |          |          |         |          |
|----------|---------|----------|---------|----------|----------|----------|---------|----------|
| -0.03356 | 0.46938 | 0.029778 | 0.52092 | -0.02161 | 0.64134  | 0.035713 | 0.44134 | -0.09351 |
| -0.06033 | 0.19312 | 0.014448 | 0.75549 | -0.11266 | 0.01486  | 0.023851 | 0.60717 | -0.05767 |
| -0.00111 | 0.98086 | 0.055614 | 0.23032 | -0.01319 | 0.77616  | 0.068871 | 0.13726 | -0.06072 |
| -0.11481 | 0.01305 | -0.02423 | 0.60149 | -0.1293  | 0.00513  | -0.05002 | 0.28068 | -0.08934 |
| -0.01275 | 0.78343 | -0.10194 | 0.02761 | -0.06496 | 0.16109  | -0.16242 | 0.00043 | -0.20509 |
| 0.01749  | 0.7062  | 0.070166 | 0.13    | -0.08091 | 0.08068  | 0.001134 | 0.9805  | -0.19149 |
| -0.02323 | 0.61656 | -0.00364 | 0.93751 | -0.12243 | 0.00808  | -0.09722 | 0.03571 | -0.19252 |
| -0.07622 | 0.09993 | -0.14924 | 0.00122 | -0.21678 | 2.26E-06 | -0.08969 | 0.05276 | -0.00261 |
| 0.08158  | 0.07821 | -0.03111 | 0.50245 | 0.112228 | 0.01525  | -0.09702 | 0.03608 | 0.04243  |
| 0.014301 | 0.75791 | 0.051022 | 0.27118 | 0.070766 | 0.12674  | 0.053895 | 0.24507 | 0.021499 |
| 0.057174 | 0.21748 | 0.012751 | 0.78345 | -0.0066  | 0.88684  | 0.021949 | 0.63614 | -0.04217 |
| -0.0362  | 0.43519 | 0.021777 | 0.63878 | -0.01098 | 0.81292  | 0.052852 | 0.25434 | -0.08609 |
| -0.02311 | 0.61845 | -0.04593 | 0.32201 | 0.062762 | 0.17574  | -0.05895 | 0.20347 | 0.050872 |
| -0.04608 | 0.32038 | 0.131028 | 0.00457 | 0.102507 | 0.02675  | 0.17145  | 0.0002  | 0.130296 |
| -0.02848 | 0.53933 | 0.002258 | 0.96119 | 0.003433 | 0.94103  | 0.025197 | 0.58703 | -0.10747 |
| -0.04616 | 0.31951 | 0.017845 | 0.70051 | -0.03645 | 0.43195  | 0.029936 | 0.51871 | -0.13385 |
| 0.021195 | 0.64778 | 0.176318 | 0.00013 | 0.022247 | 0.63155  | 0.173023 | 0.00017 | -0.09535 |
| -0.02511 | 0.58828 | 0.01439  | 0.75644 | 0.049655 | 0.28424  | 0.023304 | 0.61543 | -0.06062 |
| -0.0059  | 0.89875 | -0.10551 | 0.02258 | -0.13892 | 0.00262  | -0.06165 | 0.18355 | 0.028926 |
| -0.01401 | 0.76267 | 0.012871 | 0.78146 | -0.03707 | 0.42422  | 0.02985  | 0.51992 | -0.13662 |
| -0.01325 | 0.77516 | -0.02458 | 0.59618 | -0.0543  | 0.24155  | 0.005147 | 0.91167 | 0.065719 |
| -0.06577 | 0.15587 | 0.015268 | 0.7421  | -0.02741 | 0.55456  | 0.043821 | 0.34472 | -0.10236 |
| -0.13591 | 0.00325 | -0.16792 | 0.00027 | -0.22189 | 1.28E-06 | -0.1265  | 0.00619 | -0.04503 |
| -0.07127 | 0.12406 | -0.03599 | 0.43774 | -0.12246 | 0.00807  | 0.001918 | 0.96702 | -0.04849 |
| -0.08925 | 0.05393 | 0.034393 | 0.45841 | -0.08653 | 0.06171  | 0.013569 | 0.76994 | 0.023297 |
| -0.01916 | 0.67963 | 0.04558  | 0.32567 | 0.008757 | 0.8503   | 0.082249 | 0.07579 | -0.13479 |
| -0.06813 | 0.14155 | -0.0743  | 0.10881 | 0.029748 | 0.52134  | -0.1068  | 0.02098 | -0.07847 |
| 0.017301 | 0.70923 | 0.036974 | 0.42537 | 0.018257 | 0.69394  | -0.00286 | 0.9509  | 0.040735 |
| 0.010639 | 0.81863 | 0.134318 | 0.00364 | 0.058277 | 0.20873  | 0.137012 | 0.00301 | 0.00625  |
| -0.06141 | 0.18526 | -0.00104 | 0.98211 | 0.003666 | 0.93702  | 0.065469 | 0.1578  | 0.035266 |
| -0.03911 | 0.3991  | -0.05719 | 0.21737 | -0.09511 | 0.03994  | 0.043953 | 0.34326 | 0.02445  |
| -0.00612 | 0.89498 | 0.009836 | 0.83211 | 0.020854 | 0.65308  | -0.00148 | 0.97458 | -0.07291 |
| -0.11134 | 0.01608 | -0.06555 | 0.15729 | -0.19581 | 2.03E-05 | -0.0238  | 0.60789 | -0.12011 |
| -0.05329 | 0.25046 | 0.120966 | 0.00888 | 0.167965 | 0.00027  | 0.118476 | 0.01039 | 0.066282 |
| -0.01442 | 0.75591 | 0.017147 | 0.71169 | 0.06376  | 0.16895  | 0.0266   | 0.56638 | -0.0497  |
| 0.009276 | 0.84154 | 0.067595 | 0.1447  | 0.170855 | 0.00021  | 0.03177  | 0.49341 | 0.178254 |
| -0.03075 | 0.50742 | -0.01544 | 0.73927 | -0.00238 | 0.95913  | -0.00743 | 0.87283 | -0.08571 |
| -0.0508  | 0.27327 | -0.0149  | 0.74812 | -0.02853 | 0.53856  | 0.054686 | 0.2382  | -0.04487 |
| 0.062087 | 0.18044 | 0.036084 | 0.4366  | 0.060275 | 0.19351  | 0.03136  | 0.49901 | -0.01806 |
| -0.00315 | 0.94588 | -0.00402 | 0.93097 | 0.04788  | 0.30183  | 0.012532 | 0.78708 | -0.07448 |
| -0.05418 | 0.24258 | -0.03279 | 0.47963 | -0.00488 | 0.91622  | 0.00473  | 0.91881 | -0.07288 |
| 0.023358 | 0.61463 | -0.04138 | 0.37223 | 0.095786 | 0.03853  | -0.02957 | 0.52384 | 0.01995  |
| 0.066747 | 0.14983 | 0.046937 | 0.31146 | 0.157633 | 0.00063  | -0.03284 | 0.47901 | -0.05322 |
| -0.05277 | 0.25511 | -0.08976 | 0.05257 | -0.12143 | 0.00862  | -0.07259 | 0.11724 | 0.109882 |
| 0.03822  | 0.40993 | 0.077212 | 0.0956  | 0.114168 | 0.01356  | 0.040998 | 0.37671 | 0.02776  |

|          |          |          |         |          |          |          |         |          |
|----------|----------|----------|---------|----------|----------|----------|---------|----------|
| -0.06983 | 0.13184  | -0.07451 | 0.10783 | -0.14528 | 0.00164  | -0.063   | 0.17409 | -0.09988 |
| -0.07411 | 0.10974  | -0.05083 | 0.27301 | -0.09703 | 0.03608  | -0.04784 | 0.30224 | -0.04168 |
| -0.03367 | 0.46787  | -0.01358 | 0.76981 | 0.031109 | 0.50246  | 0.016716 | 0.71864 | -0.03479 |
| 0.278731 | 8.83E-10 | 0.085573 | 0.06465 | 0.145343 | 0.00164  | 0.119399 | 0.00981 | -0.02886 |
| -0.00195 | 0.96641  | -0.06346 | 0.171   | 0.060521 | 0.1917   | -0.11478 | 0.01307 | -0.01532 |
| -0.0126  | 0.78591  | -0.06757 | 0.14485 | -0.00023 | 0.996    | -0.09197 | 0.04699 | -0.0052  |
| -0.12256 | 0.00801  | 0.028361 | 0.54096 | -0.09353 | 0.04336  | 0.060404 | 0.19257 | -0.12863 |
| -0.05306 | 0.25248  | 0.013575 | 0.76984 | -0.03872 | 0.40388  | 0.032835 | 0.47903 | -0.08799 |
| -0.0345  | 0.45696  | -0.0219  | 0.63694 | -0.00802 | 0.86276  | -0.01622 | 0.72668 | 0.012163 |
| -0.05409 | 0.24332  | 0.007589 | 0.87008 | -0.02488 | 0.59178  | 0.052633 | 0.25632 | -0.10933 |
| -0.05469 | 0.2382   | 0.025595 | 0.58115 | -0.02181 | 0.63826  | 0.079    | 0.08814 | -0.08734 |
| 0.040723 | 0.37992  | -0.04838 | 0.2968  | -0.06317 | 0.17293  | -0.06194 | 0.18149 | -0.05194 |
| 0.013854 | 0.76524  | -0.01403 | 0.76234 | -0.03986 | 0.39013  | 0.092614 | 0.04546 | 0.025365 |
| -0.06919 | 0.13543  | 0.015593 | 0.73681 | -0.07117 | 0.12459  | 0.003223 | 0.94461 | -0.21519 |
| -0.06515 | 0.15985  | -0.08442 | 0.06835 | -0.06849 | 0.13943  | -0.05142 | 0.26746 | 0.114572 |
| 0.03564  | 0.44227  | -0.16374 | 0.00038 | -0.13692 | 0.00303  | -0.12768 | 0.00573 | 0.048529 |
| -0.02149 | 0.64323  | -0.09742 | 0.03532 | -0.04567 | 0.32471  | -0.03894 | 0.4012  | 0.139557 |
| -0.03176 | 0.49361  | 0.033561 | 0.46936 | 0.062979 | 0.17424  | -0.0192  | 0.67903 | -0.04411 |
| -0.06533 | 0.1587   | 0.02309  | 0.6187  | 0.036893 | 0.42638  | 0.039851 | 0.39021 | 0.012257 |
| -0.03472 | 0.4541   | -0.03709 | 0.42386 | -0.01231 | 0.79082  | -0.0098  | 0.83267 | -0.03339 |
| -0.06114 | 0.18722  | -0.03217 | 0.48793 | -0.09099 | 0.04941  | -0.02238 | 0.62953 | -0.0236  |
| -0.1192  | 0.00993  | -0.00901 | 0.84595 | -0.17844 | 0.00011  | -0.00879 | 0.84977 | -0.22561 |
| 0.037046 | 0.42446  | -0.03151 | 0.49692 | 0.128529 | 0.00541  | -0.08811 | 0.05709 | -0.00272 |
| -0.07302 | 0.11508  | -0.03684 | 0.42704 | -0.0354  | 0.44535  | 0.004904 | 0.91583 | -0.0592  |
| -0.0543  | 0.24153  | 0.020549 | 0.65782 | -0.12237 | 0.00811  | -0.05773 | 0.21306 | -0.18904 |
| -0.03496 | 0.45101  | -0.04193 | 0.36596 | 0.004044 | 0.93054  | -0.03389 | 0.46507 | -0.03011 |
| 0.05018  | 0.27918  | -0.05798 | 0.21103 | -0.03047 | 0.5113   | -0.04367 | 0.34638 | 0.016436 |
| -0.01798 | 0.69828  | 0.056218 | 0.22529 | 0.01723  | 0.71036  | 0.127907 | 0.00564 | -0.06392 |
| -0.00115 | 0.98031  | 0.030185 | 0.51524 | -0.00217 | 0.9627   | 0.031742 | 0.49379 | -0.13916 |
| -0.18323 | 6.81E-05 | -0.01567 | 0.73563 | -0.1838  | 6.46E-05 | -0.04631 | 0.318   | -0.20282 |
| -0.03072 | 0.5078   | -0.11382 | 0.01386 | 0.059221 | 0.20143  | -0.13128 | 0.00449 | -0.0963  |
| 0.041074 | 0.37583  | 0.03355  | 0.4695  | 0.097181 | 0.03578  | 0.041292 | 0.37329 | 0.07831  |
| -0.03205 | 0.48956  | 0.011794 | 0.79934 | -0.01101 | 0.81246  | 0.025746 | 0.57891 | -0.1285  |
| -0.0828  | 0.07384  | -0.05796 | 0.2112  | 0.001159 | 0.98008  | -0.03301 | 0.47676 | -0.03939 |
| -0.0473  | 0.30776  | 0.016883 | 0.71594 | -0.04835 | 0.29707  | 0.065217 | 0.15941 | -0.05634 |
| -0.05996 | 0.19584  | 0.002915 | 0.9499  | 0.004422 | 0.92407  | -0.04934 | 0.28729 | -0.07196 |
| -0.0072  | 0.87663  | 0.010944 | 0.81354 | 0.014854 | 0.74884  | 0.041449 | 0.37148 | -0.08222 |
| -0.0664  | 0.15198  | -0.13948 | 0.00252 | 0.013369 | 0.77324  | -0.16996 | 0.00022 | 0.069947 |
| -0.09181 | 0.04737  | -0.04713 | 0.30951 | -0.0027  | 0.9536   | -0.074   | 0.11026 | -0.10997 |
| 0.003943 | 0.93227  | -0.03919 | 0.39813 | 0.153081 | 0.0009   | -0.05981 | 0.19699 | -0.00164 |
| -0.02102 | 0.65055  | -0.02839 | 0.54051 | -0.1037  | 0.02503  | 0.040008 | 0.38835 | -0.04337 |
| -0.05166 | 0.26521  | 0.016687 | 0.71909 | -0.04763 | 0.3044   | 0.108131 | 0.01942 | 0.051912 |
| -0.08959 | 0.05303  | -0.05751 | 0.2148  | -0.16025 | 0.00051  | 0.013926 | 0.76406 | -0.08437 |
| -0.07923 | 0.08722  | -0.01858 | 0.68886 | -0.01543 | 0.73945  | -0.04733 | 0.30742 | -0.0485  |
| -0.02387 | 0.60687  | 0.041001 | 0.37668 | 0.006552 | 0.8877   | 0.041804 | 0.36739 | -0.10883 |

|          |          |          |          |          |          |          |          |          |
|----------|----------|----------|----------|----------|----------|----------|----------|----------|
| -0.05271 | 0.25561  | 0.018385 | 0.69191  | 0.048275 | 0.29786  | 0.013853 | 0.76527  | -0.13461 |
| -0.04341 | 0.34928  | -0.02397 | 0.60544  | 0.036528 | 0.43098  | -0.00817 | 0.86027  | -0.01706 |
| -0.0584  | 0.20778  | -0.03893 | 0.40128  | 0.039054 | 0.39978  | -0.0955  | 0.03911  | -0.07604 |
| 0.036564 | 0.43053  | 0.022847 | 0.62239  | 0.077163 | 0.09581  | -0.03317 | 0.47454  | -0.04148 |
| -0.07331 | 0.11363  | 0.015859 | 0.73249  | -0.18264 | 7.19E-05 | 0.079311 | 0.08689  | 0.015505 |
| 0.04903  | 0.29036  | 0.108007 | 0.01956  | 0.173117 | 0.00017  | 0.139037 | 0.0026   | 0.040342 |
| 0.013556 | 0.77015  | -0.07626 | 0.09978  | 0.058674 | 0.20564  | -0.09404 | 0.04222  | 0.032807 |
| -0.04279 | 0.35623  | -0.00341 | 0.94138  | -0.0079  | 0.86474  | 0.053928 | 0.24478  | -0.01628 |
| -0.02744 | 0.5542   | 0.000118 | 0.99797  | -0.01615 | 0.72779  | 0.044044 | 0.34226  | -0.03966 |
| 0.03768  | 0.41657  | -0.0211  | 0.64928  | 0.121152 | 0.00877  | -0.0574  | 0.21569  | 0.021216 |
| -0.05907 | 0.20261  | -0.02227 | 0.63127  | -0.073   | 0.11514  | -0.01204 | 0.79524  | -0.08    |
| -0.0499  | 0.28186  | 0.041511 | 0.37076  | -0.02563 | 0.58066  | 0.092842 | 0.04493  | -0.09338 |
| 0.027394 | 0.55485  | 0.140233 | 0.00239  | -0.06197 | 0.18126  | 0.054793 | 0.23729  | -0.1019  |
| -0.00779 | 0.8667   | 0.073055 | 0.11489  | 0.078683 | 0.08942  | 0.091458 | 0.04824  | -0.07941 |
| -0.00156 | 0.97316  | -0.03572 | 0.44128  | 0.023122 | 0.6182   | -0.02435 | 0.59963  | -0.02792 |
| 0.030794 | 0.5068   | -0.0392  | 0.39798  | 0.043058 | 0.35319  | -0.03851 | 0.40641  | 0.097313 |
| -0.08638 | 0.06216  | -0.06118 | 0.18689  | -0.13265 | 0.00408  | -0.05522 | 0.23363  | -0.09016 |
| -0.08708 | 0.06006  | -0.08726 | 0.05954  | -0.12359 | 0.0075   | -0.10381 | 0.02488  | -0.10656 |
| -0.02436 | 0.59952  | 0.058942 | 0.20358  | -0.02549 | 0.58273  | 0.088864 | 0.05498  | -0.09523 |
| 0.003072 | 0.94721  | 0.023851 | 0.60717  | 0.07386  | 0.11093  | -0.03575 | 0.44084  | -0.0357  |
| -0.01999 | 0.66662  | -0.07594 | 0.10122  | -0.01234 | 0.79024  | -0.00368 | 0.93686  | 0.114761 |
| -0.07253 | 0.11753  | 0.017902 | 0.69959  | -0.00503 | 0.91368  | -0.04756 | 0.30511  | 0.015625 |
| -0.03693 | 0.42587  | -0.07198 | 0.12034  | 0.039767 | 0.39122  | -0.02553 | 0.5821   | 0.068602 |
| -0.0603  | 0.19334  | 0.056443 | 0.22344  | -0.01086 | 0.81498  | 0.085075 | 0.06623  | -0.07797 |
| 0.190338 | 3.47E-05 | 0.124101 | 0.00725  | 0.139611 | 0.0025   | 0.127473 | 0.0058   | 0.017769 |
| 0.024599 | 0.59594  | 0.069107 | 0.13591  | 0.038537 | 0.40604  | 0.039503 | 0.39438  | -0.0302  |
| 0.082766 | 0.07396  | 0.171643 | 0.00019  | 0.24139  | 1.29E-07 | 0.246298 | 6.98E-08 | 0.100123 |
| -0.10722 | 0.02048  | -0.07204 | 0.12002  | -0.0501  | 0.27992  | -0.02872 | 0.53589  | -0.03795 |
| -0.13229 | 0.00419  | -0.02063 | 0.65653  | -0.15733 | 0.00064  | 0.034427 | 0.45797  | -0.11183 |
| -0.05371 | 0.24671  | -0.15744 | 0.00064  | -0.12084 | 0.00895  | -0.1511  | 0.00105  | 0.005527 |
| -0.06455 | 0.1637   | -0.01698 | 0.71444  | -0.08334 | 0.07197  | 0.036864 | 0.42675  | -0.11531 |
| -0.05819 | 0.20938  | -0.00509 | 0.91256  | 0.003235 | 0.94442  | 0.03524  | 0.44741  | -0.08862 |
| 0.035694 | 0.44157  | 0.09028  | 0.05121  | 0.049476 | 0.28599  | 0.1315   | 0.00442  | 0.25442  |
| 0.076837 | 0.09722  | 0.07215  | 0.11946  | 0.061169 | 0.18698  | 0.135165 | 0.00343  | -0.00589 |
| -0.02159 | 0.64168  | 0.011668 | 0.80145  | 0.023378 | 0.61431  | 0.027859 | 0.54814  | -0.13342 |
| -0.04436 | 0.33881  | 0.026992 | 0.56066  | -0.00255 | 0.95621  | 0.058612 | 0.20612  | -0.14058 |
| -0.1146  | 0.01321  | -0.10976 | 0.01766  | -0.12215 | 0.00823  | -0.0927  | 0.04527  | -0.13197 |
| 0.085588 | 0.0646   | 0.065253 | 0.15918  | 0.176635 | 0.00012  | -0.03211 | 0.48887  | -0.00787 |
| -0.04973 | 0.28353  | 0.073118 | 0.11457  | 0.021655 | 0.64066  | 0.019967 | 0.66693  | -0.26301 |
| -0.00118 | 0.97971  | -0.01748 | 0.70629  | 0.02566  | 0.58018  | -0.10879 | 0.01869  | -0.01145 |
| 0.070287 | 0.12934  | 0.137313 | 0.00294  | 0.085151 | 0.06598  | 0.063062 | 0.17367  | -0.01397 |
| -0.11913 | 0.00997  | -0.09027 | 0.05122  | -0.0157  | 0.73511  | -0.11062 | 0.01678  | -0.02253 |
| 0.034786 | 0.45329  | 0.213942 | 3.09E-06 | 0.181854 | 7.74E-05 | 0.233318 | 3.41E-07 | 0.012323 |
| -0.04273 | 0.35685  | -0.05683 | 0.22024  | -0.12919 | 0.00517  | -0.06489 | 0.16148  | -0.15272 |
| 0.046414 | 0.31689  | 0.006298 | 0.89203  | -0.03716 | 0.42302  | 0.005571 | 0.90444  | -0.07421 |

|          |          |          |          |          |          |          |          |          |
|----------|----------|----------|----------|----------|----------|----------|----------|----------|
| -0.03826 | 0.40942  | -0.13516 | 0.00343  | -0.06821 | 0.14107  | -0.11894 | 0.01009  | 0.124651 |
| 0.002708 | 0.95346  | -0.06849 | 0.13943  | 0.063304 | 0.17203  | -0.07363 | 0.11205  | 0.179794 |
| -0.09476 | 0.04067  | -0.11176 | 0.01568  | -0.00349 | 0.93997  | -0.10583 | 0.02218  | -0.01188 |
| -0.02621 | 0.57213  | -0.09441 | 0.04141  | 0.009763 | 0.83334  | -0.2105  | 4.47E-06 | -0.06049 |
| -0.11814 | 0.01061  | -0.17165 | 0.00019  | -0.20326 | 9.56E-06 | -0.06356 | 0.17029  | 0.026315 |
| 0.080178 | 0.08349  | 0.250653 | 4.02E-08 | 0.345981 | 1.41E-14 | 0.198023 | 1.63E-05 | 0.018315 |
| 0.024786 | 0.59315  | -0.00135 | 0.97677  | -0.01699 | 0.71417  | -0.05874 | 0.20514  | -0.01589 |
| -0.12967 | 0.00501  | -0.06901 | 0.13649  | -0.07375 | 0.11147  | -0.05851 | 0.20695  | 0.03559  |
| -0.00182 | 0.96864  | -0.01732 | 0.70892  | 0.04581  | 0.32324  | 0.015516 | 0.73805  | -0.03045 |
| -0.15095 | 0.00107  | -0.13093 | 0.0046   | -0.07942 | 0.08646  | -0.14863 | 0.00128  | -0.01838 |
| -0.02698 | 0.56081  | -0.02923 | 0.52858  | 0.031098 | 0.50261  | -0.00939 | 0.83962  | -0.08163 |
| -0.08158 | 0.07822  | -0.02707 | 0.55954  | -0.05966 | 0.1981   | 0.035105 | 0.44916  | -0.04484 |
| -0.02632 | 0.57052  | 0.022161 | 0.63288  | 0.016976 | 0.71444  | 0.049816 | 0.28268  | -0.07305 |
| -0.02853 | 0.53853  | 4.77E-05 | 0.99918  | -0.01154 | 0.8035   | 0.003136 | 0.94612  | -0.07545 |
| -0.04633 | 0.31781  | -0.02351 | 0.61236  | -0.02215 | 0.63303  | 0.006937 | 0.88116  | -0.04978 |
| 0.034421 | 0.45804  | -0.0132  | 0.77607  | 0.154522 | 0.00081  | -0.01191 | 0.79741  | 0.076468 |
| -0.04881 | 0.2925   | 0.007881 | 0.86512  | 0.009382 | 0.83975  | 0.047301 | 0.30772  | -0.04594 |
| -0.03235 | 0.48552  | -0.02628 | 0.57109  | 0.043887 | 0.34398  | -0.03053 | 0.51039  | -0.09048 |
| -0.01588 | 0.73218  | -0.00117 | 0.9799   | 0.049097 | 0.28969  | 0.027887 | 0.54774  | -0.07195 |
| -0.01735 | 0.70849  | 0.004677 | 0.91971  | 0.100781 | 0.02944  | -0.04784 | 0.30224  | -0.03235 |
| 0.004772 | 0.91808  | -0.03822 | 0.40991  | 0.015383 | 0.74023  | -0.07106 | 0.12518  | -0.0291  |
| -0.01425 | 0.75879  | 0.071056 | 0.12519  | 0.041824 | 0.36716  | 0.102494 | 0.02677  | -0.10086 |
| -0.0288  | 0.53468  | 0.046076 | 0.32043  | 0.001561 | 0.97317  | 0.086776 | 0.06096  | -0.08344 |
| -0.07253 | 0.11754  | -0.02931 | 0.52752  | 0.106735 | 0.02106  | 0.079134 | 0.0876   | 0.287526 |
| 0.268825 | 3.57E-09 | 0.395793 | 5.78E-19 | 0.358572 | 1.29E-15 | 0.451033 | 8.80E-25 | 0.020892 |
| -0.0227  | 0.62469  | 0.097464 | 0.03524  | 0.096668 | 0.03677  | 0.127686 | 0.00572  | -0.04964 |
| -0.04372 | 0.34578  | 0.062006 | 0.18101  | 0.03047  | 0.51128  | 0.150292 | 0.00112  | -0.0256  |
| -0.03444 | 0.45782  | -0.02208 | 0.63416  | -0.03599 | 0.43785  | 0.013727 | 0.76734  | -0.03712 |
| 0.078565 | 0.08991  | -0.03423 | 0.4606   | 0.060799 | 0.18967  | -0.08253 | 0.07478  | -0.10341 |
| -0.03606 | 0.43689  | -0.00373 | 0.93586  | -0.00265 | 0.9545   | 0.051463 | 0.26705  | -0.05929 |
| -0.04127 | 0.3735   | 0.110145 | 0.01726  | 0.187371 | 4.61E-05 | 0.174449 | 0.00015  | 0.115117 |
| 0.038639 | 0.40481  | 0.047877 | 0.30186  | -0.00019 | 0.99678  | 0.007299 | 0.875    | -0.04671 |
| -0.1187  | 0.01025  | 0.011808 | 0.7991   | -0.01208 | 0.79467  | 0.078022 | 0.09216  | -0.09815 |
| 0.003745 | 0.93568  | -0.04926 | 0.28806  | -0.00184 | 0.96845  | -0.06035 | 0.19295  | 0.014932 |
| 0.115169 | 0.01276  | 0.111133 | 0.01628  | 0.210289 | 4.57E-06 | 0.056038 | 0.22678  | 0.080327 |
| -0.0307  | 0.50805  | -0.15761 | 0.00063  | -0.07052 | 0.12806  | -0.09116 | 0.04899  | -0.01317 |
| -0.01166 | 0.80159  | -0.13554 | 0.00334  | -0.00418 | 0.92818  | -0.21365 | 3.18E-06 | -0.06202 |
| -0.04441 | 0.33825  | 0.022536 | 0.62713  | -0.00021 | 0.99632  | 0.031046 | 0.50332  | 0.018797 |
| 0.011127 | 0.81047  | -0.13742 | 0.00292  | 0.079652 | 0.08554  | -0.07634 | 0.09942  | 0.093125 |
| -0.13344 | 0.00387  | -0.01996 | 0.66708  | 0.039561 | 0.39368  | -0.06916 | 0.1356   | -0.00464 |
| -0.03166 | 0.49488  | 0.018107 | 0.69634  | 0.011485 | 0.8045   | 0.034219 | 0.46069  | -0.13816 |
| -0.05647 | 0.22323  | -0.04744 | 0.30626  | -0.13032 | 0.00479  | -0.07314 | 0.11448  | -0.00583 |
| 0.047132 | 0.30946  | 0.118336 | 0.01049  | 0.102625 | 0.02658  | 0.065878 | 0.15521  | -0.0642  |
| 0.059402 | 0.20006  | -0.04718 | 0.30901  | 0.133843 | 0.00376  | -0.09371 | 0.04296  | 0.008361 |
| -0.02802 | 0.54591  | -0.15726 | 0.00065  | -0.03299 | 0.4769   | -0.14993 | 0.00115  | 0.004453 |

|          |          |          |          |          |          |          |          |          |
|----------|----------|----------|----------|----------|----------|----------|----------|----------|
| 0.003181 | 0.94533  | -0.11333 | 0.01427  | 0.017245 | 0.71012  | -0.08388 | 0.07014  | 0.071218 |
| 0.029352 | 0.52691  | -0.00021 | 0.99632  | 0.116448 | 0.01179  | 0.00672  | 0.88484  | 0.012532 |
| -0.01468 | 0.75162  | 0.030966 | 0.50442  | 0.037118 | 0.42357  | 0.0222   | 0.63228  | -0.03913 |
| -0.05471 | 0.23802  | -0.01074 | 0.81692  | 0.00888  | 0.84822  | -0.03753 | 0.41839  | -0.08593 |
| -0.08914 | 0.05422  | 0.019726 | 0.6707   | -0.06503 | 0.16064  | -0.00778 | 0.86687  | -0.14602 |
| -0.00583 | 0.89998  | -0.03952 | 0.39413  | 0.051521 | 0.26651  | -0.1305  | 0.00473  | -0.10615 |
| -0.00489 | 0.9161   | -0.09426 | 0.04175  | -0.08262 | 0.07446  | -0.17973 | 9.40E-05 | -0.20575 |
| -0.0339  | 0.46485  | -0.00716 | 0.87731  | -0.04487 | 0.33331  | -0.03402 | 0.4633   | -0.09293 |
| 0.057158 | 0.21761  | -0.01293 | 0.78049  | -0.03712 | 0.42353  | -0.04737 | 0.30699  | -0.06467 |
| 0.030243 | 0.51444  | 0.031487 | 0.49728  | -0.06198 | 0.1812   | -0.04051 | 0.3824   | -0.0051  |
| -0.07281 | 0.11611  | 0.109911 | 0.0175   | -0.17815 | 0.00011  | 0.112672 | 0.01485  | -0.2358  |
| -0.04096 | 0.37719  | -0.02655 | 0.56713  | -0.12069 | 0.00904  | -0.02064 | 0.65643  | -0.02698 |
| 0.068916 | 0.137    | 0.13401  | 0.00372  | 0.135933 | 0.00325  | 0.098755 | 0.03287  | -0.12455 |
| -0.09333 | 0.04381  | -0.0178  | 0.70123  | -0.07645 | 0.09892  | -0.00874 | 0.85061  | -0.10999 |
| 0.00387  | 0.93353  | -0.02038 | 0.66042  | 0.052222 | 0.26006  | 0.012988 | 0.77953  | -0.04544 |
| 0.083066 | 0.07291  | 0.232415 | 3.80E-07 | 0.274636 | 1.58E-09 | 0.285986 | 3.06E-10 | 0.303746 |
| 0.006246 | 0.89292  | -0.0063  | 0.89201  | 0.033253 | 0.47345  | -0.02478 | 0.59319  | 0.014826 |
| -0.00434 | 0.92553  | 0.011801 | 0.79922  | 0.10941  | 0.01802  | 0.029451 | 0.52552  | 0.042487 |
| -0.04281 | 0.35601  | -0.04554 | 0.32613  | -0.04228 | 0.36191  | 0.028949 | 0.5326   | -0.03715 |
| -0.11129 | 0.01613  | -0.04514 | 0.33038  | -0.16635 | 0.00031  | -0.06511 | 0.16007  | -0.11521 |
| 0.01377  | 0.76663  | -0.08646 | 0.06192  | 0.128855 | 0.00529  | -0.11978 | 0.00958  | 0.081961 |
| 0.017037 | 0.71345  | -0.01713 | 0.71198  | -0.01348 | 0.77138  | -0.04638 | 0.31722  | 0.01959  |
| 0.056737 | 0.22103  | 0.036811 | 0.42741  | 0.043825 | 0.34467  | 0.008413 | 0.85611  | -0.05131 |
| -0.08301 | 0.07312  | -0.12465 | 0.00699  | -0.12525 | 0.00672  | -0.09008 | 0.05172  | -0.16838 |
| -0.28278 | 4.91E-10 | -0.12666 | 0.00613  | -0.30207 | 2.62E-11 | -0.06387 | 0.16821  | -0.10648 |
| 0.037275 | 0.4216   | 0.004481 | 0.92307  | 0.035953 | 0.43827  | -0.06949 | 0.13378  | -0.1545  |
| -0.16817 | 0.00026  | -0.0901  | 0.05169  | -0.15927 | 0.00055  | -0.06985 | 0.13173  | -0.05547 |
| -0.05507 | 0.23489  | 0.016617 | 0.72023  | 0.028843 | 0.5341   | -0.02694 | 0.56137  | -0.16725 |
| -0.05414 | 0.24295  | 0.09807  | 0.03411  | 0.189268 | 3.85E-05 | 0.239314 | 1.66E-07 | 0.221469 |
| -0.03169 | 0.49452  | 0.055969 | 0.22735  | 0.033864 | 0.46536  | 0.129826 | 0.00496  | 0.05853  |
| 0.001057 | 0.98182  | 0.114689 | 0.01314  | 0.198063 | 1.62E-05 | 0.163498 | 0.00039  | 0.033756 |
| -0.03366 | 0.46804  | 0.150186 | 0.00113  | 0.185823 | 5.34E-05 | 0.193062 | 2.66E-05 | 0.051311 |
| -0.01718 | 0.71118  | 0.098029 | 0.03419  | 0.227364 | 6.86E-07 | 0.189143 | 3.89E-05 | 0.110691 |
| 0.024892 | 0.59157  | 0.085796 | 0.06395  | 0.248893 | 5.03E-08 | 0.233929 | 3.17E-07 | 0.064237 |
| 0.029588 | 0.52358  | 0.033725 | 0.46719  | 0.184938 | 5.81E-05 | 0.028956 | 0.5325   | 0.048333 |
| 0.104894 | 0.02339  | 0.038135 | 0.41097  | 0.190568 | 3.39E-05 | 0.017603 | 0.70437  | 0.056593 |
| 0.001995 | 0.96571  | -0.12916 | 0.00518  | -0.02877 | 0.53516  | -0.18261 | 7.22E-05 | -0.17742 |
| 0.071315 | 0.12381  | -0.0178  | 0.70128  | -0.05115 | 0.26996  | -0.08352 | 0.07136  | -0.01786 |
| -0.03626 | 0.43437  | -0.07174 | 0.12157  | -0.0585  | 0.20701  | -0.04972 | 0.28358  | 0.023864 |
| 0.007424 | 0.87288  | 0.145075 | 0.00167  | 0.024042 | 0.6043   | 0.173582 | 0.00016  | -0.03284 |
| 0.101323 | 0.02857  | 0.290621 | 1.53E-10 | 0.331458 | 1.94E-13 | 0.214237 | 2.99E-06 | 0.190206 |
| 0.021836 | 0.63788  | 0.019187 | 0.6792   | 0.040707 | 0.38011  | 0.005191 | 0.91092  | -0.00548 |
| -0.14024 | 0.00239  | -0.0646  | 0.16342  | -0.19571 | 2.05E-05 | -0.17151 | 0.0002   | -0.27168 |
| 0.011688 | 0.80111  | -0.03922 | 0.39774  | 0.130388 | 0.00477  | -0.0342  | 0.46093  | -0.02019 |
| -0.02875 | 0.53543  | 0.071772 | 0.12142  | 0.161374 | 0.00046  | 0.125345 | 0.00668  | 0.189993 |

|          |          |          |          |          |          |          |          |          |
|----------|----------|----------|----------|----------|----------|----------|----------|----------|
| 0.016791 | 0.71742  | 0.002856 | 0.95092  | 0.10009  | 0.03057  | -0.01317 | 0.77657  | -0.08103 |
| 0.077082 | 0.09616  | 0.139253 | 0.00256  | 0.243639 | 9.74E-08 | 0.21373  | 3.16E-06 | 0.338324 |
| -0.00597 | 0.89754  | 0.143042 | 0.00194  | -0.07076 | 0.12675  | 0.144131 | 0.00179  | -0.18916 |
| -0.04074 | 0.37968  | 0.046817 | 0.3127   | -0.0392  | 0.39806  | -0.05589 | 0.22801  | -0.17737 |
| -0.04627 | 0.31839  | 0.099129 | 0.03221  | -0.01422 | 0.75925  | 0.147106 | 0.00143  | -0.00943 |
| -0.12546 | 0.00663  | 0.105691 | 0.02236  | -0.09953 | 0.03152  | 0.078011 | 0.09221  | -0.19408 |
| 0.161354 | 0.00046  | 0.071362 | 0.12357  | 0.135166 | 0.00343  | 0.038849 | 0.40226  | 0.044875 |
| -0.06063 | 0.19088  | 0.016424 | 0.72335  | -0.12955 | 0.00505  | -0.01977 | 0.67     | -0.16224 |
| -0.02435 | 0.59966  | 0.019854 | 0.66869  | -0.01745 | 0.70681  | 0.017777 | 0.70159  | -0.10218 |
| -0.04458 | 0.33641  | -0.03749 | 0.41899  | -0.03191 | 0.49152  | 0.003166 | 0.94559  | -0.09211 |
| -0.02648 | 0.56807  | 0.029108 | 0.53034  | -0.01437 | 0.75673  | 0.027394 | 0.55484  | -0.14343 |
| -0.09484 | 0.04051  | 0.045782 | 0.32353  | -0.05426 | 0.24185  | 0.066624 | 0.15058  | -0.02078 |
| -0.00378 | 0.93508  | 0.008266 | 0.8586   | 0.057809 | 0.21242  | 0.003214 | 0.94478  | -0.08014 |
| 0.000136 | 0.99766  | -0.09342 | 0.04362  | 0.045997 | 0.32127  | -0.09692 | 0.03629  | -0.04012 |
| -0.00461 | 0.92089  | 0.014981 | 0.74678  | 0.055419 | 0.23196  | 0.017181 | 0.71114  | -0.08072 |
| -0.01409 | 0.76136  | -0.09311 | 0.04432  | -0.06484 | 0.16184  | -0.04035 | 0.38431  | -0.00375 |
| -0.01018 | 0.82629  | -0.01327 | 0.7748   | 0.041677 | 0.36885  | 0.021913 | 0.63669  | -0.1053  |
| -0.003   | 0.9485   | -0.01441 | 0.75608  | 0.114787 | 0.01306  | 0.010392 | 0.82278  | -0.01388 |
| -0.00485 | 0.91667  | -0.03198 | 0.49054  | 0.0711   | 0.12496  | -0.01184 | 0.79857  | -0.0382  |
| 0.02038  | 0.66046  | -0.02513 | 0.588    | 0.157735 | 0.00062  | -0.02796 | 0.54674  | 0.010479 |
| -0.03605 | 0.43702  | -0.01829 | 0.69347  | 0.026158 | 0.57285  | 0.010565 | 0.81987  | -0.10949 |
| -0.04013 | 0.38686  | 0.020462 | 0.65918  | 0.008257 | 0.85875  | 0.062416 | 0.17813  | -0.07721 |
| -0.02362 | 0.6106   | 0.038233 | 0.40977  | 0.032771 | 0.47989  | 0.073697 | 0.11172  | -0.07418 |
| 0.005791 | 0.90067  | -0.00657 | 0.88746  | 0.027577 | 0.55221  | -0.04461 | 0.33608  | -0.03947 |
| -0.03204 | 0.4898   | 0.0667   | 0.15011  | 0.046021 | 0.32101  | 0.090631 | 0.05031  | -0.00649 |
| -0.03822 | 0.40993  | -0.05529 | 0.23309  | 0.063281 | 0.17219  | -0.0984  | 0.03351  | -0.05859 |
| -0.03443 | 0.45793  | -0.12252 | 0.00803  | 0.047284 | 0.3079   | -0.17889 | 0.0001   | -0.051   |
| -0.18777 | 4.44E-05 | -0.08407 | 0.0695   | -0.19329 | 2.61E-05 | -0.05225 | 0.25984  | -0.12382 |
| -0.10489 | 0.02339  | -0.03669 | 0.42892  | -0.06428 | 0.16547  | 0.070306 | 0.12924  | 0.043268 |
| 0.040013 | 0.38829  | 0.001002 | 0.98277  | -0.02342 | 0.6137   | 0.056856 | 0.22006  | -0.03656 |
| -0.20725 | 6.31E-06 | -0.09906 | 0.03234  | -0.2722  | 2.24E-09 | -0.04767 | 0.30399  | -0.21885 |
| -0.03005 | 0.51714  | -0.12463 | 0.00701  | -0.03489 | 0.45188  | -0.05216 | 0.26064  | 0.038638 |
| -0.05236 | 0.25882  | 0.007427 | 0.87283  | -0.00155 | 0.97342  | 0.05105  | 0.27091  | -0.02205 |
| -0.04587 | 0.32259  | 0.006913 | 0.88155  | -0.01562 | 0.73638  | 0.070946 | 0.12578  | -0.06441 |
| 0.017544 | 0.70532  | 0.106942 | 0.02081  | -0.00742 | 0.87295  | 0.067149 | 0.14738  | -0.13172 |
| 0.036054 | 0.43699  | 0.089391 | 0.05355  | 0.15777  | 0.00062  | 0.076111 | 0.10044  | -0.04763 |
| -0.03497 | 0.45087  | -0.01641 | 0.72359  | -0.04268 | 0.35741  | -0.02947 | 0.52522  | 0.004009 |
| 0.003908 | 0.93288  | -0.05471 | 0.23801  | -0.0649  | 0.16145  | -0.06607 | 0.154    | 0.008656 |
| -0.02509 | 0.58865  | -0.01772 | 0.70251  | -0.04386 | 0.34427  | -0.06987 | 0.13166  | 0.025486 |
| 0.018159 | 0.6955   | 0.003471 | 0.94037  | -0.0077  | 0.86813  | 0.013839 | 0.7655   | 0.045838 |
| -0.12942 | 0.00509  | -0.04772 | 0.3035   | -0.09019 | 0.05146  | -0.08765 | 0.05839  | -0.07174 |
| 0.006557 | 0.88762  | 0.015188 | 0.74339  | 0.051463 | 0.26705  | 0.045316 | 0.32849  | -0.02763 |
| -0.00755 | 0.87075  | -0.08521 | 0.06578  | 0.079173 | 0.08744  | -0.13881 | 0.00265  | -0.03661 |
| 0.080521 | 0.08217  | 0.237079 | 2.18E-07 | 0.276315 | 1.25E-09 | 0.163202 | 0.0004   | 0.120217 |
| -0.00981 | 0.83253  | -0.02887 | 0.53367  | -0.00559 | 0.90409  | 0.012735 | 0.78371  | -0.05731 |



|          |          |          |         |          |         |          |          |          |
|----------|----------|----------|---------|----------|---------|----------|----------|----------|
| -0.02499 | 0.59015  | -0.07725 | 0.09544 | -0.05381 | 0.2458  | -0.00475 | 0.91841  | 0.010241 |
| 0.011852 | 0.79838  | -0.10233 | 0.02702 | 0.140595 | 0.00232 | -0.1342  | 0.00367  | -0.0025  |
| -0.0804  | 0.08264  | -0.13527 | 0.0034  | 0.040908 | 0.37776 | -0.19336 | 2.59E-05 | 0.042457 |
| -0.12332 | 0.00763  | 0.007019 | 0.87976 | -0.04538 | 0.32779 | 0.094688 | 0.04082  | 0.00474  |
| -0.03378 | 0.46648  | -0.00246 | 0.95774 | -0.01115 | 0.81014 | 0.014074 | 0.76162  | -0.11227 |
| -0.13387 | 0.00375  | 0.079413 | 0.08648 | -0.04955 | 0.28524 | 0.105829 | 0.02218  | -0.05902 |
| -0.03727 | 0.42161  | -0.12517 | 0.00676 | 0.047468 | 0.30602 | -0.1348  | 0.00352  | 0.118184 |
| -0.0573  | 0.21647  | -0.01126 | 0.80828 | -0.00825 | 0.85879 | -0.01022 | 0.82565  | -0.03924 |
| -0.00697 | 0.88057  | -0.15507 | 0.00077 | -0.05269 | 0.2558  | -0.18488 | 5.84E-05 | 0.051803 |
| 0.043555 | 0.34765  | 0.033447 | 0.47087 | 0.103075 | 0.02592 | 0.027442 | 0.55416  | -0.06081 |
| 0.00522  | 0.91043  | -0.0378  | 0.41514 | 0.100659 | 0.02963 | -0.09078 | 0.04993  | 0.00446  |
| -0.11304 | 0.01452  | -0.09424 | 0.04179 | -0.10922 | 0.01822 | 0.010286 | 0.82455  | -0.089   |
| 0.014541 | 0.75397  | -0.02916 | 0.5296  | -0.06636 | 0.15218 | -0.03706 | 0.42428  | -0.01792 |
| -0.01851 | 0.68994  | 0.036844 | 0.42699 | 0.027406 | 0.55468 | 0.054862 | 0.2367   | -0.06866 |
| 0.035833 | 0.4398   | -0.01792 | 0.69939 | 0.080702 | 0.08148 | -0.054   | 0.24412  | -0.06795 |
| -0.07893 | 0.08841  | -0.07265 | 0.11694 | -0.07062 | 0.12751 | -0.00072 | 0.98758  | -0.049   |
| -0.03575 | 0.44081  | -0.0482  | 0.29858 | -0.01493 | 0.74766 | -0.02663 | 0.56598  | -0.07487 |
| -0.01521 | 0.74302  | 0.020012 | 0.66621 | 0.072111 | 0.11967 | 0.011881 | 0.7979   | -0.04438 |
| -0.03769 | 0.4164   | -0.02177 | 0.63884 | -0.01162 | 0.8023  | -0.07283 | 0.11601  | -0.05928 |
| -0.03529 | 0.44677  | -0.01989 | 0.66807 | -0.04432 | 0.33922 | 0.013435 | 0.77215  | -0.07833 |
| 0.019687 | 0.67132  | -0.03073 | 0.50771 | 0.040749 | 0.37962 | -0.01576 | 0.73408  | 0.0192   |
| -0.00571 | 0.90199  | -0.02373 | 0.60901 | 0.066301 | 0.15257 | -0.03645 | 0.43198  | -0.05654 |
| -0.00132 | 0.97734  | -0.02946 | 0.5254  | 0.024326 | 0.60004 | -0.02345 | 0.61325  | -0.04344 |
| -0.02288 | 0.62193  | -0.04584 | 0.32296 | 0.000816 | 0.98596 | -0.05886 | 0.2042   | -0.06663 |
| -0.04059 | 0.38145  | -0.11912 | 0.00998 | 0.021447 | 0.64388 | -0.11511 | 0.0128   | 0.102948 |
| -0.14137 | 0.0022   | -0.13057 | 0.00471 | -0.09288 | 0.04484 | -0.05153 | 0.26647  | -0.02137 |
| -0.00191 | 0.96709  | -0.00739 | 0.87342 | -0.05125 | 0.26903 | 0.111754 | 0.01569  | 0.087409 |
| -0.00055 | 0.99061  | 0.018189 | 0.69502 | -0.01027 | 0.82475 | -0.02302 | 0.61981  | -0.00888 |
| 0.034685 | 0.4546   | 0.005353 | 0.90815 | 0.066415 | 0.15186 | -0.04904 | 0.29026  | -0.01808 |
| -0.09123 | 0.04879  | -0.07105 | 0.12519 | -0.07343 | 0.11303 | -0.06272 | 0.17605  | -0.08149 |
| -0.09217 | 0.04652  | 0.084187 | 0.06912 | -0.16105 | 0.00048 | 0.056923 | 0.21952  | -0.23374 |
| -0.0526  | 0.25665  | -0.01265 | 0.78508 | 0.016118 | 0.72829 | 0.024089 | 0.60359  | -0.06783 |
| -0.02854 | 0.53836  | -0.06073 | 0.19015 | 0.013361 | 0.77337 | -0.01391 | 0.76437  | -0.08509 |
| -0.1072  | 0.0205   | -0.16711 | 0.00029 | -0.00721 | 0.87645 | -0.09783 | 0.03455  | 0.12921  |
| 0.047846 | 0.30217  | 0.022485 | 0.62792 | 0.054796 | 0.23726 | -0.04774 | 0.30328  | -0.13357 |
| 0.040714 | 0.38003  | -0.10456 | 0.02384 | -0.04943 | 0.28639 | -0.15075 | 0.00108  | -0.06592 |
| -0.06724 | 0.14681  | -0.09518 | 0.03978 | -0.09384 | 0.04267 | -0.04028 | 0.38515  | -0.06947 |
| -0.05064 | 0.2748   | -0.00914 | 0.84383 | 0.035668 | 0.44191 | -0.00516 | 0.91145  | -0.1545  |
| -0.00544 | 0.9066   | 0.056717 | 0.22119 | 0.056096 | 0.2263  | 0.125887 | 0.00645  | 0.212258 |
| 0.023384 | 0.61422  | 0.081196 | 0.07963 | -0.08699 | 0.06033 | -0.02981 | 0.52053  | -0.10939 |
| -0.03137 | 0.49881  | -0.02092 | 0.65211 | 0.068656 | 0.13849 | 0.084896 | 0.0668   | 0.295095 |
| -0.03011 | 0.51621  | -0.04197 | 0.36553 | -0.1034  | 0.02544 | -0.04019 | 0.38621  | -0.02374 |
| 0.028086 | 0.54489  | -0.05591 | 0.22786 | 0.011368 | 0.80644 | -0.06201 | 0.18098  | 0.005774 |
| -0.17078 | 0.00021  | -0.12773 | 0.00571 | -0.16605 | 0.00031 | -0.07797 | 0.09237  | -0.02706 |
| 0.212411 | 3.64E-06 | 0.015784 | 0.73371 | -0.01795 | 0.69884 | 0.032609 | 0.48207  | -0.11117 |

|          |         |          |          |          |          |          |          |          |
|----------|---------|----------|----------|----------|----------|----------|----------|----------|
| -0.02793 | 0.54708 | -0.05016 | 0.27939  | -0.09339 | 0.04368  | 0.02172  | 0.63966  | 0.08839  |
| -0.03904 | 0.3999  | -0.01818 | 0.6951   | 0.128294 | 0.00549  | 3.04E-05 | 0.99948  | 0.256414 |
| 0.00752  | 0.87125 | -0.02794 | 0.54695  | 0.018048 | 0.69726  | 0.0661   | 0.15382  | -0.13109 |
| -0.05865 | 0.20584 | 0.177249 | 0.00012  | 0.141558 | 0.00217  | 0.095627 | 0.03885  | 0.027145 |
| -0.02865 | 0.53683 | -0.01673 | 0.71837  | -0.0339  | 0.4649   | -0.07864 | 0.08961  | -0.04185 |
| -0.06592 | 0.15494 | -0.04018 | 0.38626  | 0.012164 | 0.79319  | -0.02971 | 0.52193  | 0.089927 |
| -0.00654 | 0.88787 | 0.06305  | 0.17376  | -0.01894 | 0.68316  | -0.02638 | 0.56961  | -0.19692 |
| -0.05545 | 0.23168 | -0.06017 | 0.1943   | -0.01193 | 0.79706  | -0.09624 | 0.03761  | -0.05833 |
| 0.073289 | 0.11372 | 0.051116 | 0.27029  | 0.138828 | 0.00264  | -0.01857 | 0.68889  | -0.0931  |
| 0.121777 | 0.00843 | 0.022103 | 0.63377  | 0.074021 | 0.11015  | 0.000619 | 0.98936  | 0.025376 |
| 0.000115 | 0.99802 | -0.00784 | 0.86575  | 0.044642 | 0.33575  | -0.01338 | 0.77307  | -0.11673 |
| -0.10325 | 0.02567 | -0.05459 | 0.23901  | -0.11787 | 0.0108   | -0.16234 | 0.00043  | -0.10848 |
| -0.04062 | 0.38108 | -0.11462 | 0.0132   | -0.01126 | 0.80832  | -0.20152 | 1.14E-05 | 0.021041 |
| 0.025983 | 0.57542 | -0.07916 | 0.08749  | -0.04605 | 0.32075  | -0.04794 | 0.30127  | -0.02724 |
| -0.06761 | 0.1446  | 0.047736 | 0.30329  | 0.003364 | 0.94221  | 0.073626 | 0.11207  | -0.09878 |
| 0.067248 | 0.14678 | 0.082526 | 0.07481  | 0.014118 | 0.76091  | 0.116162 | 0.012    | -0.09886 |
| -0.07546 | 0.1034  | 0.016398 | 0.72376  | 0.017632 | 0.70391  | -0.04191 | 0.36615  | -0.10433 |
| 0.000531 | 0.99088 | 0.125072 | 0.00681  | 0.087091 | 0.06003  | 0.106689 | 0.02111  | -0.04196 |
| 0.058662 | 0.20574 | -0.09895 | 0.03252  | 0.173948 | 0.00016  | -0.1382  | 0.00276  | 0.138419 |
| -0.11231 | 0.01517 | -0.11656 | 0.01171  | -0.14604 | 0.00155  | 0.00708  | 0.87871  | 0.073117 |
| -0.03717 | 0.42294 | -0.08482 | 0.06706  | -0.12408 | 0.00726  | -0.08867 | 0.05551  | -0.16697 |
| 0.000594 | 0.98979 | -0.02687 | 0.56241  | 0.055774 | 0.22898  | -0.04435 | 0.33894  | 0.043281 |
| -0.0605  | 0.19184 | -0.00414 | 0.92886  | -0.04833 | 0.29726  | 0.04692  | 0.31163  | -0.11702 |
| -0.00963 | 0.83563 | -0.04355 | 0.34765  | -0.01812 | 0.6961   | 0.069235 | 0.13518  | -0.01164 |
| -0.01589 | 0.73199 | -0.02268 | 0.62494  | 0.083285 | 0.07216  | -0.11508 | 0.01283  | 0.017218 |
| -0.04464 | 0.33576 | 0.013798 | 0.76617  | 0.049856 | 0.2823   | 0.037851 | 0.41447  | -0.12123 |
| 0.015291 | 0.74173 | -0.03747 | 0.41916  | 0.0807   | 0.08149  | -0.08066 | 0.08165  | 0.10078  |
| 0.003052 | 0.94756 | -0.0683  | 0.14052  | -0.09969 | 0.03125  | -0.07871 | 0.08931  | 0.041571 |
| -0.00797 | 0.86359 | -0.05323 | 0.25099  | 0.03327  | 0.47323  | -0.07056 | 0.12783  | 0.038811 |
| -0.07461 | 0.10733 | -0.10342 | 0.02542  | -0.11304 | 0.01452  | -0.09088 | 0.04968  | -0.09629 |
| -0.01896 | 0.68275 | 0.095782 | 0.03854  | 0.069003 | 0.1365   | 0.160243 | 0.00051  | 0.134733 |
| -0.00724 | 0.87608 | -0.00609 | 0.89563  | 0.063823 | 0.16853  | -0.00035 | 0.99398  | -0.06224 |
| -0.02466 | 0.59507 | 0.028479 | 0.53927  | 0.025313 | 0.58531  | 0.002518 | 0.95672  | -0.13188 |
| -0.04682 | 0.31269 | -0.01203 | 0.79545  | 0.012001 | 0.7959   | 0.026063 | 0.57425  | -0.0232  |
| -0.0058  | 0.90058 | -0.07598 | 0.10101  | -0.12288 | 0.00785  | -0.08453 | 0.06799  | -0.00629 |
| -0.0967  | 0.03671 | -0.16021 | 0.00051  | -0.19985 | 1.35E-05 | -0.17181 | 0.00019  | -0.1153  |
| -0.07718 | 0.09573 | -0.18072 | 8.59E-05 | -0.13136 | 0.00446  | -0.16573 | 0.00032  | -0.04394 |
| -0.02226 | 0.63129 | 0.080398 | 0.08264  | 0.055189 | 0.23391  | 0.113059 | 0.0145   | -0.10392 |
| -0.08642 | 0.06205 | -0.14031 | 0.00237  | -0.06962 | 0.133    | -0.17737 | 0.00012  | 0.012403 |
| -0.074   | 0.11026 | -0.0278  | 0.54894  | -0.03119 | 0.50135  | -0.00753 | 0.87106  | -0.12015 |
| 0.056008 | 0.22703 | -0.06534 | 0.15863  | 0.178238 | 0.00011  | -0.08853 | 0.05591  | 0.049283 |
| -0.02195 | 0.63606 | -0.15818 | 0.0006   | -0.00069 | 0.98807  | -0.16844 | 0.00026  | 0.027163 |
| -0.02499 | 0.59015 | -0.02629 | 0.57085  | -0.00882 | 0.84919  | -0.02438 | 0.5992   | -0.05096 |
| -0.10009 | 0.03057 | -0.08872 | 0.05538  | -0.13762 | 0.00288  | -0.0958  | 0.0385   | -0.04024 |
| -0.09025 | 0.05129 | -0.10011 | 0.03055  | -0.03009 | 0.51662  | -0.14894 | 0.00125  | -0.11408 |

|          |          |          |          |          |          |          |          |          |
|----------|----------|----------|----------|----------|----------|----------|----------|----------|
| 0.029285 | 0.52784  | 0.035608 | 0.44268  | 0.00129  | 0.97782  | 0.017558 | 0.7051   | -0.03158 |
| -0.16593 | 0.00032  | -0.12341 | 0.00759  | -0.21912 | 1.75E-06 | 0.002921 | 0.9498   | -0.06209 |
| -0.06271 | 0.1761   | 0.031698 | 0.4944   | 0.064692 | 0.1628   | 0.201752 | 1.12E-05 | -0.03599 |
| 0.037282 | 0.42152  | -0.04462 | 0.33597  | 0.047456 | 0.30614  | -0.04067 | 0.3806   | -0.07491 |
| 0.019062 | 0.68118  | 0.159155 | 0.00056  | 0.180527 | 8.74E-05 | 0.236545 | 2.32E-07 | 0.040737 |
| 0.016731 | 0.71838  | 0.056408 | 0.22372  | 0.046022 | 0.321    | -0.02994 | 0.51862  | -0.10188 |
| 0.012975 | 0.77974  | -0.01051 | 0.82083  | 0.083887 | 0.07012  | -0.08135 | 0.07906  | 0.09949  |
| 0.002154 | 0.96298  | -0.04166 | 0.36903  | 0.043582 | 0.34735  | -0.03718 | 0.42274  | -0.04946 |
| -0.00286 | 0.95083  | 0.030059 | 0.51699  | 0.099499 | 0.03157  | 0.074736 | 0.10675  | 0.014607 |
| -0.00657 | 0.88737  | -0.08007 | 0.08391  | -0.09762 | 0.03494  | -0.09024 | 0.05132  | -0.16147 |
| -0.02155 | 0.64223  | -0.02431 | 0.60033  | 0.094717 | 0.04076  | -0.04691 | 0.3117   | -0.02668 |
| 0.068194 | 0.14117  | 0.030331 | 0.5132   | 0.021727 | 0.63955  | 0.024778 | 0.59327  | -0.00638 |
| 0.141433 | 0.00219  | -0.04404 | 0.34228  | 0.172581 | 0.00018  | -0.05534 | 0.23262  | -0.00517 |
| 0.028342 | 0.54123  | -0.02032 | 0.66144  | 0.157154 | 0.00065  | 0.011843 | 0.79853  | 0.007413 |
| 0.040031 | 0.38808  | -0.05932 | 0.20066  | 0.07191  | 0.1207   | -0.08627 | 0.0625   | 0.016903 |
| -0.00065 | 0.98886  | 0.003593 | 0.93827  | 0.034227 | 0.46058  | 0.017155 | 0.71156  | -0.08197 |
| -0.09219 | 0.04647  | 0.062699 | 0.17617  | 0.009188 | 0.84302  | 0.051875 | 0.26323  | 0.031911 |
| -0.02714 | 0.55852  | 0.009363 | 0.84007  | -0.02187 | 0.63743  | -0.02669 | 0.56513  | -0.02509 |
| -0.02774 | 0.54983  | 0.048495 | 0.29566  | 0.015428 | 0.73949  | 0.107928 | 0.01965  | 0.031347 |
| 0.022172 | 0.63271  | -0.00446 | 0.92345  | -0.041   | 0.37673  | 0.020357 | 0.66081  | -0.04988 |
| 0.032828 | 0.47913  | 0.046359 | 0.31746  | 0.070495 | 0.1282   | 0.003794 | 0.93484  | 0.01219  |
| -0.08442 | 0.06835  | 0.026583 | 0.56663  | -0.06624 | 0.15294  | 0.081272 | 0.07935  | 0.017737 |
| -0.04209 | 0.36414  | -0.01545 | 0.73914  | -0.06184 | 0.18215  | 0.03704  | 0.42454  | -0.04612 |
| -0.00414 | 0.92884  | -0.05674 | 0.221    | -0.0852  | 0.06582  | 0.012442 | 0.78858  | -0.07213 |
| -0.02776 | 0.5496   | -0.00858 | 0.85321  | 0.062141 | 0.18006  | -0.00345 | 0.94067  | -0.10669 |
| 0.041694 | 0.36866  | -0.04905 | 0.2902   | 0.111184 | 0.01623  | -0.12357 | 0.00751  | -0.06845 |
| 0.017835 | 0.70066  | -0.07251 | 0.11762  | 0.101706 | 0.02797  | -0.0654  | 0.15825  | 0.090557 |
| 0.177866 | 0.00011  | 0.027844 | 0.54836  | 0.107465 | 0.02019  | 0.094568 | 0.04108  | 0.037931 |
| 0.116693 | 0.01162  | 0.184521 | 6.04E-05 | 0.235269 | 2.70E-07 | 0.232778 | 3.64E-07 | 0.063008 |
| -0.06898 | 0.13662  | -0.10276 | 0.02637  | -0.13954 | 0.00251  | 0.02818  | 0.54354  | 0.101644 |
| -0.07131 | 0.12382  | 0.13286  | 0.00402  | 0.10141  | 0.02843  | 0.076903 | 0.09693  | 0.077202 |
| 0.111327 | 0.01609  | -0.04385 | 0.34441  | 0.171283 | 0.0002   | -0.043   | 0.35381  | 0.131866 |
| -0.00478 | 0.91794  | 0.023116 | 0.6183   | 0.015553 | 0.73745  | 0.068967 | 0.13671  | -0.02374 |
| 0.009923 | 0.83064  | 0.007999 | 0.86312  | -0.07719 | 0.0957   | 0.080557 | 0.08203  | 0.010134 |
| -0.04773 | 0.30333  | 0.038576 | 0.40558  | 0.010475 | 0.82139  | 0.075244 | 0.10438  | -0.11487 |
| -0.10289 | 0.02618  | 0.011285 | 0.80783  | -0.11238 | 0.01511  | -0.03671 | 0.42874  | -0.13    |
| 0.085082 | 0.0662   | 0.027796 | 0.54905  | 0.060843 | 0.18934  | 0.016929 | 0.71519  | 0.036628 |
| -0.07732 | 0.09513  | -0.00629 | 0.89213  | -0.12007 | 0.0094   | -0.12485 | 0.00691  | -0.26518 |
| -0.15078 | 0.00108  | -0.0754  | 0.10367  | -0.11858 | 0.01033  | -0.12348 | 0.00755  | -0.23599 |
| 0.076179 | 0.10013  | 0.192645 | 2.77E-05 | 0.137964 | 0.00281  | 0.194533 | 2.30E-05 | -0.017   |
| 0.02827  | 0.54226  | 0.004619 | 0.9207   | 0.068706 | 0.1382   | 0.027619 | 0.55159  | 0.040832 |
| 0.288413 | 2.13E-10 | 0.301283 | 2.96E-11 | 0.535519 | 5.14E-36 | 0.299228 | 4.09E-11 | 0.159355 |
| -0.0114  | 0.80585  | -0.07579 | 0.1019   | -0.08393 | 0.06998  | -0.03542 | 0.4451   | -0.08927 |
| -0.12942 | 0.00509  | -0.18635 | 5.08E-05 | -0.26455 | 6.42E-09 | -0.18854 | 4.13E-05 | -0.17783 |
| 0.06096  | 0.1885   | 0.035705 | 0.44143  | 0.099791 | 0.03108  | -0.01379 | 0.76622  | 0.025094 |

|          |          |          |          |          |          |          |          |          |
|----------|----------|----------|----------|----------|----------|----------|----------|----------|
| -0.09831 | 0.03367  | -0.07353 | 0.11252  | 0.02882  | 0.53443  | -0.09325 | 0.04399  | 0.015289 |
| -0.04179 | 0.36754  | -0.09065 | 0.05025  | -0.05795 | 0.21128  | -0.14438 | 0.00176  | -0.07972 |
| -0.0181  | 0.69646  | -0.03891 | 0.40146  | -0.04685 | 0.31237  | -0.09037 | 0.05096  | -0.15825 |
| 0.068229 | 0.14096  | 0.108037 | 0.01953  | -0.01093 | 0.8137   | 0.122675 | 0.00796  | -0.04744 |
| -0.02087 | 0.65282  | 0.01658  | 0.72082  | 0.081812 | 0.07736  | 0.011717 | 0.80062  | 0.071236 |
| -0.08767 | 0.05833  | -0.10703 | 0.0207   | -0.20094 | 1.21E-05 | -0.07904 | 0.08799  | 0.043322 |
| -0.06329 | 0.17212  | -0.09097 | 0.04946  | -0.12503 | 0.00682  | 0.012086 | 0.79449  | 0.133912 |
| 0.03588  | 0.4392   | 0.110696 | 0.01671  | -0.02318 | 0.61734  | 0.080561 | 0.08202  | -0.0712  |
| 0.027567 | 0.55236  | -0.0516  | 0.26581  | 0.053813 | 0.24579  | -0.06722 | 0.14696  | -0.02635 |
| 0.055278 | 0.23316  | -0.01266 | 0.78501  | 0.078581 | 0.08984  | -0.02097 | 0.65129  | 0.062871 |
| 0.040467 | 0.38293  | -0.04945 | 0.2862   | 0.068961 | 0.13674  | -0.05128 | 0.26876  | 0.033843 |
| 0.032077 | 0.48925  | 0.015098 | 0.74486  | 0.085532 | 0.06478  | -0.01202 | 0.7956   | -0.0097  |
| 0.016644 | 0.71978  | -0.08519 | 0.06585  | 0.025974 | 0.57556  | -0.05222 | 0.26009  | 0.068836 |
| -0.14747 | 0.00139  | -0.05568 | 0.2298   | -0.07844 | 0.09041  | -0.07711 | 0.09603  | -0.17104 |
| -0.08976 | 0.05257  | -0.03686 | 0.42676  | -0.03993 | 0.38922  | -0.06346 | 0.171    | -0.10738 |
| 0.056544 | 0.22261  | 0.131852 | 0.00431  | 0.097728 | 0.03474  | 0.076108 | 0.10045  | -0.05161 |
| 0.095219 | 0.0397   | 0.069577 | 0.13326  | 0.068926 | 0.13694  | 0.047442 | 0.30628  | 0.04227  |
| -0.20013 | 1.32E-05 | -0.1591  | 0.00056  | -0.27417 | 1.69E-09 | -0.15294 | 0.00091  | -0.11162 |
| 0.067245 | 0.1468   | 0.04842  | 0.2964   | 0.036052 | 0.43701  | 0.024969 | 0.59043  | 0.045829 |
| 0.031205 | 0.50114  | -0.02453 | 0.59699  | 0.075375 | 0.10378  | -0.07858 | 0.08985  | -0.02632 |
| -0.00218 | 0.9626   | 0.013706 | 0.76768  | 0.003595 | 0.93823  | 0.043077 | 0.35297  | -0.04949 |
| -0.03713 | 0.42338  | -0.06395 | 0.16771  | -0.11815 | 0.01061  | -0.10725 | 0.02044  | -0.03325 |
| -0.01238 | 0.78955  | 0.150622 | 0.0011   | 0.161766 | 0.00045  | 0.21898  | 1.77E-06 | -0.01516 |
| 0.006109 | 0.89525  | -0.00457 | 0.92146  | 0.097039 | 0.03605  | -0.03658 | 0.43038  | 0.088528 |
| -0.02006 | 0.66544  | 0.036433 | 0.43218  | 0.031479 | 0.49738  | 0.079162 | 0.08749  | 0.190337 |
| -0.02325 | 0.61632  | -0.04008 | 0.38753  | 0.023507 | 0.61237  | -0.03607 | 0.43684  | -0.02215 |
| 0.011727 | 0.80047  | -0.05541 | 0.23207  | -0.03745 | 0.41942  | 0.021182 | 0.64797  | 0.089193 |
| -0.01125 | 0.80845  | 0.022055 | 0.6345   | 0.010495 | 0.82105  | 0.063845 | 0.16838  | -0.11012 |
| 0.052885 | 0.25404  | 0.118268 | 0.01053  | 0.157759 | 0.00062  | 0.070979 | 0.1256   | 0.173615 |
| 0.155736 | 0.00073  | 0.204698 | 8.23E-06 | 0.268885 | 3.54E-09 | 0.103966 | 0.02465  | -0.01279 |
| 0.010012 | 0.82915  | -0.06527 | 0.15906  | 0.006658 | 0.88589  | -0.01707 | 0.71292  | 0.027204 |
| -0.02939 | 0.52636  | -0.00406 | 0.93033  | 0.01916  | 0.67961  | 0.025805 | 0.57804  | -0.08481 |
| -0.01676 | 0.71788  | -0.08144 | 0.07874  | -0.07544 | 0.10346  | -0.12339 | 0.0076   | -0.08152 |
| 0.058093 | 0.21017  | -0.016   | 0.73017  | 0.139564 | 0.00251  | -0.02778 | 0.54929  | -0.0125  |
| 0.063916 | 0.16791  | -0.02287 | 0.6221   | -0.0472  | 0.30875  | 0.009694 | 0.83449  | -0.02981 |
| 0.08641  | 0.06207  | 0.031092 | 0.50268  | 0.072979 | 0.11526  | 0.102847 | 0.02625  | 0.071328 |
| 0.030887 | 0.50551  | -0.06237 | 0.17845  | 0.012658 | 0.785    | 0.026703 | 0.56487  | 0.082021 |
| 0.124262 | 0.00718  | 0.280057 | 7.30E-10 | 0.264938 | 6.09E-09 | 0.168528 | 0.00025  | 0.098922 |
| -0.05325 | 0.25073  | 0.083553 | 0.07124  | -0.02376 | 0.60861  | 0.001617 | 0.97219  | -0.23456 |
| -0.05541 | 0.23205  | -0.06498 | 0.16093  | -0.0654  | 0.15827  | -0.06865 | 0.13854  | -0.11719 |
| -0.00155 | 0.97331  | -0.19249 | 2.82E-05 | -0.02005 | 0.66569  | -0.20399 | 8.86E-06 | -0.05844 |
| 0.038135 | 0.41096  | 0.008872 | 0.84836  | -0.0222  | 0.63222  | -0.02121 | 0.64752  | -0.05906 |
| 0.070887 | 0.12609  | 0.045325 | 0.32839  | 0.091221 | 0.04882  | 0.081856 | 0.0772   | 0.045245 |
| 0.109078 | 0.01838  | 0.211974 | 3.82E-06 | 0.252552 | 3.15E-08 | 0.123414 | 0.00758  | 0.091836 |
| -0.03388 | 0.46512  | -0.01133 | 0.80707  | -0.10793 | 0.01965  | -0.09042 | 0.05084  | -0.15984 |

|          |         |          |          |          |          |          |          |          |
|----------|---------|----------|----------|----------|----------|----------|----------|----------|
| 0.067209 | 0.14702 | 0.138135 | 0.00278  | 0.052606 | 0.25655  | 0.102577 | 0.02665  | -0.09218 |
| -0.12298 | 0.0078  | -0.11207 | 0.01539  | -0.09313 | 0.04426  | -0.08433 | 0.06865  | -0.06176 |
| 0.044878 | 0.33319 | 0.096247 | 0.0376   | 0.056634 | 0.22187  | 0.101023 | 0.02905  | 0.003281 |
| -0.08306 | 0.07293 | -0.0291  | 0.53049  | 0.015432 | 0.73943  | 0.052034 | 0.26177  | 0.157362 |
| -0.05766 | 0.21356 | -0.08612 | 0.06296  | -0.07761 | 0.09391  | -0.10133 | 0.02856  | 0.022324 |
| -0.06788 | 0.14299 | -0.0175  | 0.70597  | 0.007361 | 0.87395  | 0.031749 | 0.49369  | 0.077383 |
| -0.1084  | 0.01912 | -0.05214 | 0.26076  | -0.11239 | 0.0151   | -0.01346 | 0.7718   | -0.01036 |
| -0.11253 | 0.01497 | -0.02382 | 0.60762  | -0.07201 | 0.1202   | 0.016514 | 0.72188  | 0.042718 |
| -0.04252 | 0.35927 | 0.167117 | 0.00029  | 0.154348 | 0.00082  | 0.256309 | 1.93E-08 | 0.346918 |
| -0.02029 | 0.66193 | 0.133516 | 0.00385  | 0.042912 | 0.35483  | 0.124438 | 0.00709  | 0.027577 |
| -0.10248 | 0.0268  | 0.070773 | 0.1267   | -0.0102  | 0.82599  | 0.029965 | 0.51831  | -0.16586 |
| 0.066279 | 0.1527  | 0.172119 | 0.00019  | 0.031705 | 0.4943   | 0.093465 | 0.04351  | -0.01635 |
| 0.040608 | 0.38128 | 0.010882 | 0.81456  | 0.053928 | 0.24479  | -0.02725 | 0.55698  | -0.03905 |
| -0.02452 | 0.59717 | -0.04479 | 0.33413  | 0.044035 | 0.34236  | -0.00399 | 0.93144  | -0.03123 |
| 0.030697 | 0.50813 | -0.01564 | 0.73608  | 0.100573 | 0.02977  | -0.06276 | 0.17577  | -0.03049 |
| 0.031902 | 0.49162 | 0.139102 | 0.00259  | 0.063516 | 0.17059  | 0.065841 | 0.15545  | -0.13945 |
| -0.07952 | 0.08608 | -0.17691 | 0.00012  | -0.20466 | 8.27E-06 | -0.08975 | 0.05261  | -0.07969 |
| -0.13785 | 0.00283 | -0.08466 | 0.06756  | -0.14557 | 0.00161  | -0.0989  | 0.03262  | -0.12893 |
| -0.0838  | 0.07041 | -0.13612 | 0.0032   | -0.14748 | 0.00139  | -0.10209 | 0.02738  | 0.016112 |
| -0.17227 | 0.00018 | -0.13424 | 0.00366  | -0.16372 | 0.00038  | -0.04252 | 0.3592   | -0.05251 |
| -0.00552 | 0.90522 | 0.050381 | 0.27725  | -0.04086 | 0.37828  | 0.051904 | 0.26297  | -0.14594 |
| -0.1625  | 0.00042 | 0.064959 | 0.16107  | -0.16701 | 0.00029  | 0.071228 | 0.12427  | -0.13857 |
| -0.10671 | 0.02109 | -0.17401 | 0.00016  | -0.15358 | 0.00087  | -0.13943 | 0.00253  | -0.1416  |
| -0.12584 | 0.00647 | -0.17456 | 0.00015  | -0.00861 | 0.85286  | -0.09716 | 0.03581  | 0.246647 |
| -0.06539 | 0.15828 | -0.12475 | 0.00695  | -0.00516 | 0.91152  | -0.18084 | 8.50E-05 | 0.102821 |
| -0.0454  | 0.32757 | -0.06964 | 0.13293  | 0.054    | 0.24415  | -0.16758 | 0.00028  | -0.1185  |
| 0.003256 | 0.94405 | -0.00454 | 0.92201  | 0.021411 | 0.64443  | -0.03691 | 0.4262   | -0.08259 |
| -0.06567 | 0.15652 | -0.01941 | 0.67571  | -0.02536 | 0.58461  | 0.014285 | 0.75817  | 0.106826 |
| -0.00916 | 0.84353 | -0.02279 | 0.62331  | 0.080451 | 0.08244  | 0.078988 | 0.08819  | 0.228038 |
| 0.049517 | 0.28558 | 0.167195 | 0.00028  | 0.258266 | 1.49E-08 | 0.144075 | 0.0018   | 0.194505 |
| 0.067492 | 0.14532 | 0.15567  | 0.00074  | 0.151204 | 0.00105  | 0.257884 | 1.57E-08 | 0.103404 |
| 0.009942 | 0.83033 | 0.118102 | 0.01064  | 0.083353 | 0.07193  | 0.06288  | 0.17492  | -0.09518 |
| 0.041938 | 0.36586 | 0.084168 | 0.06918  | 0.082296 | 0.07562  | 0.062303 | 0.17892  | -0.04709 |
| -0.01433 | 0.75736 | 0.019992 | 0.66653  | 0.056542 | 0.22262  | 0.037581 | 0.4178   | -0.08328 |
| 0.115762 | 0.0123  | 0.220046 | 1.58E-06 | 0.38389  | 7.59E-18 | 0.174211 | 0.00015  | 0.185159 |
| -0.05465 | 0.23853 | 0.057416 | 0.21554  | -0.0821  | 0.07633  | -0.05489 | 0.23649  | -0.10858 |
| -0.00469 | 0.9195  | 0.03934  | 0.39632  | -0.02622 | 0.57196  | 0.029086 | 0.53065  | -0.00559 |
| -0.02202 | 0.63501 | -0.17009 | 0.00022  | 0.044098 | 0.34166  | -0.24651 | 6.80E-08 | -0.02086 |
| 0.088976 | 0.05468 | 0.272957 | 2.01E-09 | 0.35716  | 1.70E-15 | 0.218849 | 1.80E-06 | 0.117044 |
| -0.07734 | 0.09503 | -0.16733 | 0.00028  | -0.15284 | 0.00092  | -0.09643 | 0.03725  | 0.05792  |
| -0.07466 | 0.10709 | 0.032975 | 0.47716  | 0.008388 | 0.85653  | 0.122549 | 0.00802  | 0.019079 |
| -0.09943 | 0.0317  | -0.05013 | 0.27969  | -0.07134 | 0.12369  | -0.04004 | 0.38793  | -0.11411 |
| 0.027484 | 0.55354 | -0.01131 | 0.80738  | 0.080187 | 0.08345  | 0.040778 | 0.37928  | 0.049282 |
| 0.004401 | 0.92444 | -0.02936 | 0.52676  | 0.071226 | 0.12428  | -0.08658 | 0.06155  | -0.04454 |
| -0.08116 | 0.07975 | -0.1039  | 0.02474  | -0.0096  | 0.83604  | -0.12676 | 0.00609  | 0.071099 |

|          |          |          |          |          |          |          |          |          |
|----------|----------|----------|----------|----------|----------|----------|----------|----------|
| 0.050061 | 0.28032  | -0.01148 | 0.80456  | 0.148776 | 0.00126  | 0.000457 | 0.99215  | 0.035543 |
| -0.02092 | 0.65205  | 0.01042  | 0.8223   | 0.098545 | 0.03325  | 0.011147 | 0.81013  | -0.06672 |
| -0.06716 | 0.14729  | -0.02042 | 0.65987  | -0.06714 | 0.14742  | -0.00618 | 0.89398  | -0.0032  |
| 0.29304  | 1.06E-10 | 0.138777 | 0.00265  | 0.179508 | 9.60E-05 | 0.138281 | 0.00275  | -0.04101 |
| 0.334377 | 1.16E-13 | 0.140076 | 0.00241  | 0.108265 | 0.01927  | 0.088507 | 0.05597  | 0.004101 |
| -0.03073 | 0.50774  | -0.17814 | 0.00011  | -0.07265 | 0.11693  | -0.09    | 0.05193  | 0.109423 |
| -0.08211 | 0.0763   | 0.058133 | 0.20986  | -0.08194 | 0.0769   | 0.038511 | 0.40637  | -0.13016 |
| 0.001113 | 0.98086  | 0.101032 | 0.02903  | 0.085393 | 0.06522  | 0.144012 | 0.00181  | 0.05299  |
| 0.081182 | 0.07968  | 0.045857 | 0.32274  | 0.135976 | 0.00324  | 0.106014 | 0.02195  | -0.02906 |
| -0.0923  | 0.04619  | -0.15807 | 0.00061  | -0.24128 | 1.30E-07 | -0.12937 | 0.00511  | -0.06036 |
| 0.096158 | 0.03778  | -0.00559 | 0.90408  | -0.03258 | 0.48239  | -0.01048 | 0.82138  | -0.04559 |
| 0.059161 | 0.2019   | -0.05147 | 0.26698  | 0.085999 | 0.06332  | -0.09955 | 0.03149  | -0.01182 |
| 0.065455 | 0.15789  | 0.086225 | 0.06263  | 0.174514 | 0.00015  | 0.00816  | 0.86039  | -0.02929 |
| -0.01235 | 0.79017  | 0.034672 | 0.45477  | 0.036094 | 0.43648  | 0.009188 | 0.84302  | -0.15661 |
| 0.064944 | 0.16116  | -0.01782 | 0.70098  | 0.002895 | 0.95024  | 0.050314 | 0.27789  | 0.123854 |
| -0.00578 | 0.90089  | 0.111811 | 0.01563  | 0.168286 | 0.00026  | 0.062822 | 0.17532  | -0.13479 |
| 0.033948 | 0.46425  | 8.58E-05 | 0.99853  | 0.040153 | 0.38663  | 0.000472 | 0.99187  | 0.086227 |
| -0.05786 | 0.21201  | -0.05478 | 0.23736  | 0.009612 | 0.83587  | -0.06017 | 0.1943   | -0.05798 |
| 0.069781 | 0.13213  | -0.06597 | 0.15463  | 0.197033 | 1.80E-05 | -0.13425 | 0.00366  | -0.0119  |
| -0.11986 | 0.00952  | 0.010727 | 0.81716  | 0.05264  | 0.25625  | 0.101996 | 0.02753  | 0.262511 |
| 0.055828 | 0.22853  | 0.04145  | 0.37147  | 0.019341 | 0.67676  | 0.059426 | 0.19988  | -0.01301 |
| 0.014814 | 0.7495   | -0.03146 | 0.49761  | 0.091989 | 0.04695  | -0.07853 | 0.09007  | -0.06352 |
| -0.03065 | 0.50875  | -0.052   | 0.2621   | 0.010455 | 0.82171  | -0.11127 | 0.01614  | -0.02438 |
| 0.006553 | 0.88768  | -0.0646  | 0.1634   | 0.006449 | 0.88946  | -0.15042 | 0.00111  | -0.13216 |
| 0.000289 | 0.99503  | -0.05757 | 0.2143   | 0.059383 | 0.2002   | -0.09824 | 0.03379  | -0.0436  |
| -0.00696 | 0.88068  | 0.00556  | 0.90461  | -0.11963 | 0.00967  | 0.00072  | 0.98761  | -0.02052 |
| 0.019562 | 0.67328  | 0.02019  | 0.66344  | 0.069134 | 0.13576  | 0.016506 | 0.72201  | -0.03939 |
| 0.117925 | 0.01076  | 0.060344 | 0.193    | 0.086837 | 0.06078  | 0.08479  | 0.06714  | 0.036119 |
| -0.02795 | 0.54687  | 0.057961 | 0.21121  | 0.030019 | 0.51755  | 0.089317 | 0.05375  | -0.0589  |
| -0.08818 | 0.05687  | -0.0987  | 0.03298  | -0.05268 | 0.25592  | -0.1065  | 0.02135  | 0.134032 |
| -0.05884 | 0.20435  | -0.12204 | 0.00829  | 0.0868   | 0.06089  | -0.17382 | 0.00016  | 0.035313 |
| 0.001307 | 0.97753  | -0.05959 | 0.19864  | 0.011421 | 0.80556  | -0.04246 | 0.35994  | 0.063863 |
| -0.07015 | 0.13009  | -0.02946 | 0.52535  | -0.05292 | 0.2537   | 0.020157 | 0.66394  | -0.10836 |
| 0.375351 | 4.51E-17 | 0.097378 | 0.0354   | 0.200899 | 1.22E-05 | 0.051787 | 0.26404  | 0.084836 |
| -0.13962 | 0.0025   | -0.07463 | 0.10727  | -0.26296 | 7.97E-09 | -0.10546 | 0.02265  | -0.13312 |
| 0.046446 | 0.31656  | -0.06329 | 0.17212  | -0.00069 | 0.98815  | -0.11853 | 0.01036  | -0.01767 |
| -0.00118 | 0.97971  | -0.07526 | 0.10429  | 0.00929  | 0.84131  | -0.07546 | 0.1034   | 0.050832 |
| 0.030703 | 0.50805  | 0.003632 | 0.9376   | 0.074291 | 0.10886  | -0.04977 | 0.28312  | -0.01109 |
| 0.23254  | 3.74E-07 | 0.474534 | 1.34E-27 | 0.533725 | 9.64E-36 | 0.416024 | 5.69E-21 | 0.096517 |
| -0.0381  | 0.4114   | 0.051287 | 0.2687   | -0.03669 | 0.42899  | 0.026399 | 0.56931  | -0.02245 |
| -0.04388 | 0.34405  | -0.11095 | 0.01645  | 0.003151 | 0.94586  | -0.12758 | 0.00576  | -0.0832  |
| -0.0087  | 0.85125  | 0.04996  | 0.28129  | 0.018173 | 0.69527  | 0.041794 | 0.36751  | -0.07088 |
| 0.058354 | 0.20813  | 0.006752 | 0.88429  | 0.02777  | 0.54942  | -0.00995 | 0.83019  | -0.07451 |
| 0.148009 | 0.00134  | 0.094861 | 0.04045  | 0.128633 | 0.00537  | 0.128575 | 0.00539  | -0.01933 |
| 0.045879 | 0.32251  | 0.02298  | 0.62036  | 0.079952 | 0.08437  | 0.016147 | 0.72783  | -0.04844 |

|          |          |          |          |          |          |          |          |          |
|----------|----------|----------|----------|----------|----------|----------|----------|----------|
| 0.064499 | 0.16406  | 0.082918 | 0.07343  | 0.051975 | 0.26231  | 0.055976 | 0.22729  | 0.106336 |
| -0.00611 | 0.89527  | -0.09697 | 0.03618  | 0.132465 | 0.00414  | -0.14117 | 0.00223  | 0.00104  |
| -0.0005  | 0.99148  | -0.04216 | 0.36328  | 0.064568 | 0.16361  | -0.07518 | 0.10467  | 0.049467 |
| -0.02588 | 0.57692  | 0.068277 | 0.14069  | 0.054793 | 0.23728  | 0.104272 | 0.02423  | -0.06414 |
| 0.040117 | 0.38706  | -0.08794 | 0.05758  | 0.05926  | 0.20114  | -0.11408 | 0.01363  | 0.096615 |
| -0.06153 | 0.18435  | -0.12337 | 0.00761  | -0.14123 | 0.00222  | -0.05741 | 0.21556  | 0.088963 |
| -0.01294 | 0.78027  | 0.011367 | 0.80646  | -0.07306 | 0.11487  | 0.058984 | 0.20325  | 0.024594 |
| -0.03599 | 0.43774  | -0.07832 | 0.09093  | -0.01623 | 0.72646  | -0.16235 | 0.00043  | 0.026814 |
| 0.001489 | 0.9744   | -0.01379 | 0.76635  | 0.075954 | 0.10114  | -0.01106 | 0.81155  | -0.08344 |
| 0.043423 | 0.34912  | -0.01588 | 0.73215  | -0.01427 | 0.75837  | 0.000512 | 0.9912   | -0.0113  |
| 0.267194 | 4.47E-09 | 0.075514 | 0.10314  | 0.106857 | 0.02091  | 0.072711 | 0.11661  | -0.05741 |
| -0.06635 | 0.15225  | -0.14795 | 0.00134  | -0.05791 | 0.21161  | -0.03844 | 0.4072   | 0.166209 |
| -0.05394 | 0.24471  | 0.006951 | 0.88092  | -0.02624 | 0.57168  | 0.073767 | 0.11138  | -0.17572 |
| -0.03825 | 0.40957  | 0.022674 | 0.62502  | 0.039974 | 0.38876  | -0.01685 | 0.71652  | -0.05414 |
| -0.11345 | 0.01417  | -0.2078  | 5.95E-06 | -0.1568  | 0.00067  | -0.18546 | 5.53E-05 | -0.00351 |
| -0.0725  | 0.11766  | -0.00403 | 0.93077  | 0.052913 | 0.25379  | -0.07095 | 0.12575  | -0.00195 |
| 0.013132 | 0.77714  | 0.009062 | 0.84516  | 0.071358 | 0.12359  | -0.04813 | 0.29927  | -0.15485 |
| -0.05145 | 0.26713  | 0.000719 | 0.98763  | -0.03894 | 0.40118  | 0.036306 | 0.43378  | -0.08289 |
| -0.11722 | 0.01124  | -0.15609 | 0.00071  | -0.09458 | 0.04105  | -0.16809 | 0.00026  | -0.10699 |
| -0.02172 | 0.6397   | 0.034846 | 0.4525   | 0.043324 | 0.35022  | 0.052451 | 0.25797  | -0.11171 |
| -0.06432 | 0.16522  | -0.00553 | 0.90514  | -0.07287 | 0.11581  | 0.057679 | 0.21344  | -0.16412 |
| -0.0577  | 0.21326  | -0.03713 | 0.42345  | -0.08579 | 0.06396  | -0.01014 | 0.82702  | -0.10777 |
| 0.011129 | 0.81043  | -0.06537 | 0.15843  | 0.084367 | 0.06852  | -0.06932 | 0.13471  | 0.15638  |
| -0.0031  | 0.94681  | 0.013185 | 0.77628  | -0.03305 | 0.47621  | -0.05076 | 0.27369  | -0.22376 |
| -0.06067 | 0.19059  | -0.06305 | 0.17376  | -0.0556  | 0.23042  | -0.06308 | 0.17357  | 0.085763 |
| -0.04026 | 0.38537  | -0.0182  | 0.69492  | -0.02451 | 0.5972   | 0.047447 | 0.30623  | -0.0214  |
| -0.05416 | 0.24276  | 0.037164 | 0.423    | -0.03513 | 0.44877  | 0.059084 | 0.20248  | -0.14605 |
| -0.03384 | 0.46569  | 0.024023 | 0.60458  | -0.01643 | 0.72324  | 0.008135 | 0.86083  | -0.17678 |
| -0.05716 | 0.21759  | -0.13613 | 0.0032   | 0.019908 | 0.66785  | -0.17993 | 9.23E-05 | -0.04463 |
| -0.10294 | 0.02611  | -0.02897 | 0.53229  | -0.144   | 0.00181  | -0.01629 | 0.7255   | -0.04584 |
| -0.03274 | 0.4803   | -0.03121 | 0.50109  | 0.022951 | 0.62081  | -0.03009 | 0.51661  | -0.00451 |
| 0.05375  | 0.24634  | 0.043716 | 0.34587  | 0.130101 | 0.00486  | 0.016001 | 0.73019  | -0.02284 |
| -0.03395 | 0.46427  | 0.011072 | 0.81139  | -0.02969 | 0.52214  | 0.052203 | 0.26023  | -0.12618 |
| -0.06342 | 0.17122  | -0.02404 | 0.60434  | -0.09793 | 0.03436  | 0.077298 | 0.09523  | -0.04238 |
| 0.017385 | 0.70787  | 0.035972 | 0.43802  | 0.007126 | 0.87793  | 0.050232 | 0.27867  | -0.10344 |
| -0.0117  | 0.8009   | -0.0734  | 0.11316  | 0.079978 | 0.08426  | -0.06276 | 0.17573  | 0.045739 |
| 0.013351 | 0.77353  | -0.04853 | 0.29529  | 0.056624 | 0.22195  | -0.0941  | 0.0421   | 0.011218 |
| -0.06373 | 0.16914  | -0.05003 | 0.2806   | -0.07429 | 0.10884  | -0.06383 | 0.16849  | -0.13343 |
| -0.12676 | 0.00609  | 0.012702 | 0.78426  | -0.12844 | 0.00544  | 0.065632 | 0.15676  | -0.09483 |
| -0.05829 | 0.20861  | 6.40E-05 | 0.9989   | 0.056747 | 0.22095  | 0.134473 | 0.0036   | 0.074897 |
| 0.010079 | 0.82802  | 0.200646 | 1.25E-05 | -0.01885 | 0.6845   | 0.09892  | 0.03258  | -0.16737 |
| 0.064796 | 0.16212  | 0.274438 | 1.63E-09 | 0.320169 | 1.36E-12 | 0.250412 | 4.14E-08 | 0.265763 |
| -0.04763 | 0.30438  | -0.1767  | 0.00012  | 0.03138  | 0.49874  | -0.23443 | 2.99E-07 | 0.036048 |
| -0.0208  | 0.65398  | -0.08882 | 0.05509  | 0.003432 | 0.94104  | -0.07771 | 0.09349  | 0.112448 |
| -0.07393 | 0.11059  | -0.13517 | 0.00343  | -0.05914 | 0.20206  | -0.21931 | 1.71E-06 | -0.26228 |

|          |          |          |          |          |          |          |          |           |
|----------|----------|----------|----------|----------|----------|----------|----------|-----------|
| 0.008594 | 0.85306  | -0.04358 | 0.34737  | 0.127229 | 0.0059   | -0.01406 | 0.76179  | 0.075826  |
| -0.03072 | 0.50778  | 0.01778  | 0.70155  | 0.09849  | 0.03335  | 0.021036 | 0.65025  | -0.05919  |
| -0.03211 | 0.4888   | 0.0119   | 0.79757  | 0.066273 | 0.15275  | 0.043244 | 0.35111  | -0.06466  |
| -0.01658 | 0.72078  | -0.00326 | 0.94391  | 0.015484 | 0.73858  | -0.03981 | 0.39074  | -0.07143  |
| 0.063298 | 0.17207  | 0.091884 | 0.0472   | 0.003699 | 0.93646  | 0.036691 | 0.42892  | -0.09052  |
| -0.10213 | 0.02732  | -0.07723 | 0.09554  | -0.15277 | 0.00093  | 0.02186  | 0.6375   | -0.00104  |
| -0.19895 | 1.48E-05 | -0.19542 | 2.11E-05 | -0.22003 | 1.58E-06 | -0.08612 | 0.06295  | 0.040334  |
| -0.04973 | 0.28348  | -0.06869 | 0.13828  | -0.0673  | 0.14647  | -0.04782 | 0.30245  | -0.11436  |
| -0.00285 | 0.95108  | -0.00565 | 0.90311  | -0.02341 | 0.61377  | 0.039699 | 0.39203  | -0.04563  |
| -0.00262 | 0.95497  | 0.044935 | 0.33257  | 0.025694 | 0.57968  | 0.03559  | 0.44291  | -0.04272  |
| -0.08806 | 0.05723  | -0.08043 | 0.08252  | -0.18327 | 6.78E-05 | -0.12531 | 0.0067   | 0.036156  |
| -0.04556 | 0.32585  | -0.0184  | 0.69168  | -0.15493 | 0.00078  | -0.15849 | 0.00059  | -0.06691  |
| -0.04506 | 0.33124  | 0.043738 | 0.34563  | 0.010374 | 0.82307  | 0.089661 | 0.05283  | -0.02278  |
| 0.028027 | 0.54574  | 0.064214 | 0.16593  | 0.037668 | 0.41672  | 0.087994 | 0.05741  | 0.006572  |
| 0.202359 | 1.05E-05 | 0.039416 | 0.39542  | 0.149788 | 0.00117  | 0.014292 | 0.75805  | 0.012508  |
| -0.06226 | 0.17919  | -0.02374 | 0.60877  | -0.04557 | 0.3258   | 0.008433 | 0.85577  | -0.05093  |
| -0.05619 | 0.2255   | -0.12785 | 0.00566  | -0.05581 | 0.22871  | -0.08654 | 0.06168  | 0.020889  |
| -0.00049 | 0.99162  | -0.04274 | 0.3568   | 0.107271 | 0.02042  | -0.15549 | 0.00075  | 0.063798  |
| 0.029763 | 0.52114  | 0.051223 | 0.26929  | 0.149158 | 0.00123  | -0.04248 | 0.35972  | -0.10809  |
| -0.12662 | 0.00614  | -0.01017 | 0.82656  | -0.19727 | 1.76E-05 | 0.015029 | 0.74599  | 0.040081  |
| -0.04581 | 0.32326  | -0.09499 | 0.04018  | -0.07246 | 0.11788  | -0.03991 | 0.3895   | 0.019306  |
| -0.09263 | 0.04543  | -0.07001 | 0.13086  | -0.01921 | 0.67875  | -0.07224 | 0.11899  | 0.102327  |
| 0.060402 | 0.19258  | -0.02166 | 0.64052  | 0.073929 | 0.11059  | -0.11717 | 0.01128  | -0.03013  |
| -0.02852 | 0.53869  | 0.070547 | 0.12792  | 0.106172 | 0.02175  | 0.007998 | 0.86315  | -0.08282  |
| -0.02372 | 0.60921  | 0.006288 | 0.89219  | 0.016602 | 0.72046  | 0.063459 | 0.17098  | -0.06355  |
| -0.05148 | 0.26693  | 0.047947 | 0.30115  | -0.01352 | 0.77076  | 0.050922 | 0.27212  | -0.04852  |
| -0.01453 | 0.75416  | -0.05681 | 0.22042  | -0.07565 | 0.1025   | -0.01573 | 0.73456  | 0.036686  |
| -0.07793 | 0.09253  | -0.1125  | 0.015    | -0.05373 | 0.24648  | -0.07101 | 0.12544  | -0.02741  |
| -0.08137 | 0.07898  | -0.09698 | 0.03617  | -0.18662 | 4.95E-05 | -0.09576 | 0.03859  | -0.03612  |
| -0.05641 | 0.22374  | -0.11049 | 0.01691  | -0.02271 | 0.62452  | -0.12428 | 0.00717  | 0.046869  |
| 0.004886 | 0.91613  | -0.05337 | 0.24974  | 0.005635 | 0.90334  | -0.02203 | 0.63489  | 0.102833  |
| -0.04879 | 0.29273  | -0.12168 | 0.00848  | -0.00837 | 0.85693  | -0.10402 | 0.02458  | 0.096551  |
| 0.122444 | 0.00808  | 0.050514 | 0.27598  | 0.060225 | 0.19389  | -0.01669 | 0.719    | -7.60E-05 |
| -0.00857 | 0.85352  | 0.030744 | 0.50748  | 0.009746 | 0.83363  | 0.043874 | 0.34412  | -0.01042  |
| -0.02574 | 0.57906  | -0.02218 | 0.63264  | -0.09296 | 0.04467  | -0.00707 | 0.87891  | -0.01897  |
| -0.11728 | 0.0112   | -0.06224 | 0.17939  | -0.07827 | 0.09114  | -0.03303 | 0.47642  | -0.01171  |
| -0.03337 | 0.47183  | -0.00394 | 0.93224  | -0.07378 | 0.11133  | 0.054726 | 0.23786  | -0.05708  |
| -0.14246 | 0.00203  | -0.1842  | 6.22E-05 | -0.20202 | 1.09E-05 | -0.2177  | 2.04E-06 | -0.18757  |
| -0.05038 | 0.27729  | -0.01055 | 0.82016  | -0.0413  | 0.37325  | 0.020991 | 0.65094  | -0.12543  |
| -0.11473 | 0.0131   | -0.10671 | 0.02109  | -0.06347 | 0.17088  | -0.13    | 0.0049   | -0.05378  |
| -0.08913 | 0.05424  | 0.025077 | 0.58881  | -0.03519 | 0.44806  | -0.0341  | 0.46226  | -0.1927   |
| 0.013046 | 0.77857  | -0.00261 | 0.95511  | 0.078004 | 0.09224  | -0.02406 | 0.60398  | -0.09979  |
| -0.05181 | 0.26387  | 0.01318  | 0.77636  | 0.037483 | 0.41902  | 0.043079 | 0.35295  | -0.03953  |
| 0.016124 | 0.72819  | 0.067254 | 0.14675  | 0.016918 | 0.71538  | 0.053968 | 0.24443  | 0.054292  |
| -0.02255 | 0.62699  | -0.00439 | 0.92466  | -0.02889 | 0.53349  | 0.033422 | 0.47121  | -0.13602  |



|          |         |          |          |          |          |          |         |          |
|----------|---------|----------|----------|----------|----------|----------|---------|----------|
| -0.09783 | 0.03455 | -0.01173 | 0.80037  | -0.14895 | 0.00125  | -0.12195 | 0.00834 | -0.21389 |
| -0.05002 | 0.28069 | 0.061352 | 0.18566  | -0.05764 | 0.21379  | -0.05855 | 0.20661 | -0.10099 |
| 0.024328 | 0.6     | 0.016954 | 0.7148   | 0.176387 | 0.00013  | 0.047973 | 0.30089 | 0.022037 |
| 0.025969 | 0.57563 | 0.180213 | 9.00E-05 | 0.158383 | 0.00059  | 0.17045  | 0.00022 | -0.01193 |
| -0.04594 | 0.32182 | 0.093599 | 0.04321  | 0.099502 | 0.03157  | 0.17507  | 0.00014 | 0.233815 |
| -0.07406 | 0.10998 | -0.01295 | 0.78013  | 0.004946 | 0.9151   | -0.01045 | 0.82178 | -0.00792 |
| -0.06378 | 0.16879 | -0.00659 | 0.88701  | 0.08344  | 0.07163  | 0.011681 | 0.80122 | 0.104028 |
| -0.01533 | 0.7411  | -0.04899 | 0.29073  | -0.0523  | 0.25936  | -0.04997 | 0.28117 | -0.14886 |
| 0.000909 | 0.98437 | -0.05281 | 0.25472  | 0.01457  | 0.7535   | -0.05023 | 0.2787  | -0.07567 |
| -0.04207 | 0.36435 | -0.1127  | 0.01482  | -0.15697 | 0.00066  | -0.0342  | 0.46097 | 0.168942 |
| -0.10438 | 0.02408 | -0.00303 | 0.948    | -0.09583 | 0.03844  | -0.0517  | 0.26481 | -0.19339 |
| 0.020862 | 0.65295 | 0.021082 | 0.64953  | 0.034183 | 0.46115  | -0.01338 | 0.77314 | -0.07127 |
| -0.06179 | 0.18253 | -0.06099 | 0.18828  | -0.11356 | 0.01407  | -0.03124 | 0.50062 | 0.090373 |
| 0.034724 | 0.45409 | -0.09826 | 0.03377  | 0.012071 | 0.79473  | -0.04166 | 0.36905 | 0.127582 |
| -0.0374  | 0.42008 | 0.033746 | 0.46691  | -0.10742 | 0.02024  | -0.05184 | 0.26359 | -0.20964 |
| 0.027243 | 0.55703 | 0.007304 | 0.87491  | 0.115223 | 0.01272  | 0.002712 | 0.95339 | -0.06523 |
| -0.04629 | 0.31818 | -0.1009  | 0.02925  | 0.012629 | 0.78548  | -0.06817 | 0.14133 | 0.060566 |
| 0.018107 | 0.69634 | 0.012166 | 0.79316  | 0.055376 | 0.23232  | 0.000794 | 0.98635 | -0.06929 |
| -0.00459 | 0.92117 | -0.00911 | 0.84434  | -0.03046 | 0.51141  | -0.02392 | 0.60614 | 0.064431 |
| -0.08076 | 0.08128 | -0.02236 | 0.6299   | -0.04803 | 0.30036  | 0.021328 | 0.64572 | -0.14299 |
| 0.016901 | 0.71564 | -0.00226 | 0.9611   | -0.06792 | 0.14276  | 0.010321 | 0.82397 | -0.09236 |
| 0.051433 | 0.26733 | -0.05113 | 0.27016  | 0.095343 | 0.03944  | -0.07831 | 0.09097 | 0.015422 |
| -0.06774 | 0.14386 | -0.02905 | 0.5312   | -0.02326 | 0.61613  | -0.06755 | 0.145   | -0.10265 |
| -0.08239 | 0.07527 | -0.20062 | 1.25E-05 | 0.023025 | 0.61967  | -0.15425 | 0.00082 | 0.107999 |
| -0.01334 | 0.77369 | -0.02034 | 0.66109  | 0.021294 | 0.64625  | 0.02421  | 0.60177 | -0.02099 |
| 0.028318 | 0.54157 | -0.01444 | 0.75554  | -0.04903 | 0.29036  | -0.05747 | 0.21507 | -0.09241 |
| 0.032479 | 0.48382 | -0.07979 | 0.08501  | 0.053803 | 0.24588  | -0.11368 | 0.01397 | 0.044602 |
| -0.08689 | 0.06062 | -0.04769 | 0.30376  | -0.08721 | 0.05968  | -0.0882  | 0.05683 | -0.12696 |
| -0.04025 | 0.38547 | -0.08987 | 0.05228  | 0.006272 | 0.89247  | -0.07146 | 0.12307 | 0.004713 |
| -0.0689  | 0.1371  | -0.10011 | 0.03054  | -0.03303 | 0.47642  | -0.10646 | 0.02139 | -0.0056  |
| 0.070525 | 0.12804 | 0.065829 | 0.15552  | 0.071448 | 0.12312  | 0.110297 | 0.01711 | -0.07202 |
| 0.019447 | 0.67509 | 0.035063 | 0.44969  | 0.077048 | 0.09631  | 0.103731 | 0.02498 | 0.162088 |
| -0.11309 | 0.01447 | -0.02231 | 0.63057  | -0.0761  | 0.10047  | -0.07186 | 0.12096 | -0.0651  |
| 0.043302 | 0.35047 | -0.03261 | 0.48205  | 0.099404 | 0.03174  | 0.017748 | 0.70206 | 0.237742 |
| -0.11325 | 0.01434 | 0.012665 | 0.78488  | -0.19479 | 2.25E-05 | -0.02356 | 0.61154 | -0.03286 |
| -0.06506 | 0.16044 | 0.005028 | 0.91371  | -0.11979 | 0.00957  | 0.049998 | 0.28092 | -0.08742 |
| -0.06229 | 0.17903 | -0.19163 | 3.06E-05 | -0.09978 | 0.03109  | -0.17437 | 0.00015 | 0.120917 |
| -0.16103 | 0.00048 | -0.06898 | 0.13663  | -0.00344 | 0.94097  | -0.00592 | 0.89839 | -0.00681 |
| -0.00416 | 0.92848 | 0.056549 | 0.22257  | 0.045034 | 0.33151  | -0.01127 | 0.808   | -0.05198 |
| -0.01467 | 0.7519  | 0.002609 | 0.95516  | 0.068376 | 0.14011  | -0.04882 | 0.29246 | -0.00826 |
| -0.03541 | 0.44516 | 0.0107   | 0.81762  | 0.020259 | 0.66234  | 0.002151 | 0.96302 | -0.08164 |
| -0.01034 | 0.82364 | 0.070583 | 0.12773  | 0.048025 | 0.30037  | 0.079197 | 0.08735 | -0.07751 |
| -0.07233 | 0.11856 | 0.074546 | 0.10764  | 0.066567 | 0.15093  | 0.106277 | 0.02162 | 0.006036 |
| -0.13541 | 0.00337 | -0.10549 | 0.02262  | -0.13192 | 0.00429  | -0.14739 | 0.0014  | -0.11367 |
| -0.04376 | 0.34534 | -0.05601 | 0.22704  | 0.09291  | 0.04478  | -0.11202 | 0.01544 | 0.054522 |

|          |         |          |          |          |          |          |          |          |
|----------|---------|----------|----------|----------|----------|----------|----------|----------|
| -0.01124 | 0.80864 | 0.313535 | 4.12E-12 | 0.178845 | 0.0001   | 0.399835 | 2.36E-19 | 0.194787 |
| 0.0112   | 0.80926 | 0.033639 | 0.46833  | 0.018774 | 0.68573  | 0.062678 | 0.17632  | 0.013559 |
| -0.03072 | 0.50782 | -0.03333 | 0.47241  | -0.01279 | 0.7828   | 0.067166 | 0.14728  | -0.08383 |
| -0.00031 | 0.99463 | 0.023024 | 0.61969  | 0.092337 | 0.04612  | 0.04822  | 0.2984   | -0.10421 |
| 0.062167 | 0.17988 | -0.01134 | 0.80695  | 0.022703 | 0.62458  | -0.0236  | 0.61093  | -0.08473 |
| 0.026817 | 0.56322 | 0.010183 | 0.82629  | 0.038124 | 0.4111   | -0.0031  | 0.94678  | -0.01878 |
| -0.12053 | 0.00913 | -0.04803 | 0.30029  | -0.06935 | 0.13454  | -0.02273 | 0.62418  | -0.08997 |
| -0.09    | 0.05194 | -0.11544 | 0.01255  | -0.06218 | 0.1798   | -0.08736 | 0.05924  | -0.04157 |
| -0.03351 | 0.47008 | 0.087432 | 0.05903  | 0.041453 | 0.37143  | 0.070403 | 0.1287   | -0.11308 |
| -0.01435 | 0.75711 | 0.009475 | 0.83818  | 0.099391 | 0.03176  | 0.017205 | 0.71077  | 0.043831 |
| 0.003308 | 0.94316 | -0.04558 | 0.32573  | -0.07319 | 0.11421  | -0.03582 | 0.44003  | 0.043531 |
| -0.11175 | 0.01569 | 0.017029 | 0.71359  | -0.16054 | 0.0005   | 0.019996 | 0.66646  | -0.16871 |
| -0.04474 | 0.33473 | -0.06157 | 0.18407  | -0.01724 | 0.71018  | -0.01886 | 0.68432  | -0.09149 |
| -0.04521 | 0.32963 | -0.0894  | 0.05352  | -0.04972 | 0.28365  | -0.09036 | 0.05099  | 0.014011 |
| -0.05247 | 0.25778 | 0.045821 | 0.32312  | 0.107224 | 0.02047  | -0.04638 | 0.31721  | -0.11392 |
| -0.11226 | 0.01522 | -0.08214 | 0.07618  | 0.011147 | 0.81013  | -0.13797 | 0.00281  | -0.0425  |
| -0.06517 | 0.15971 | -0.04478 | 0.33426  | -0.00323 | 0.94447  | -0.12322 | 0.00768  | -0.10113 |
| 0.037382 | 0.42027 | 0.029641 | 0.52284  | 0.117562 | 0.011    | -0.06016 | 0.1944   | -0.05372 |
| 0.119065 | 0.01002 | -0.07335 | 0.11341  | 0.019762 | 0.67014  | -0.03998 | 0.38869  | 0.186876 |
| -0.02397 | 0.60537 | 0.051864 | 0.26333  | -0.16403 | 0.00037  | 0.062202 | 0.17963  | -0.23453 |
| -0.03398 | 0.46384 | -0.18878 | 4.03E-05 | -0.20628 | 6.98E-06 | -0.19505 | 2.19E-05 | -0.06468 |
| -0.05903 | 0.20287 | -0.08046 | 0.08239  | -0.02111 | 0.64908  | -0.09276 | 0.04513  | -0.07254 |
| -0.15982 | 0.00053 | -0.00363 | 0.9376   | -0.10041 | 0.03004  | -0.01104 | 0.81197  | -0.10367 |
| -0.07138 | 0.12347 | -0.15096 | 0.00107  | -0.09648 | 0.03713  | -0.18161 | 7.91E-05 | -0.04158 |
| -0.00437 | 0.92504 | -0.07839 | 0.09063  | -0.1355  | 0.00335  | 0.040296 | 0.38494  | -0.06117 |
| -0.0063  | 0.89203 | -0.00813 | 0.86087  | 0.061818 | 0.18234  | 0.114991 | 0.0129   | 0.084392 |
| 0.031436 | 0.49797 | -0.03405 | 0.46295  | -0.03611 | 0.43633  | -0.03779 | 0.41525  | 0.079161 |
| 0.040073 | 0.38758 | 0.117478 | 0.01106  | 0.04279  | 0.35619  | 0.04731  | 0.30763  | 0.075634 |
| 0.089917 | 0.05216 | 0.068657 | 0.13848  | 0.021497 | 0.6431   | 0.010937 | 0.81365  | -0.16856 |
| -0.00031 | 0.9946  | -0.04894 | 0.29128  | 0.148245 | 0.00131  | -0.0006  | 0.9897   | 0.223176 |
| -0.01915 | 0.67981 | 0.023069 | 0.61901  | 0.024333 | 0.59993  | -0.00225 | 0.96125  | -0.01956 |
| -0.07722 | 0.09555 | -0.04922 | 0.28846  | -0.03257 | 0.48264  | -0.00582 | 0.90016  | -0.04387 |
| -0.03999 | 0.38859 | -0.03296 | 0.47731  | 0.017961 | 0.69865  | -0.01918 | 0.67928  | -0.01061 |
| -0.0279  | 0.54756 | 0.024419 | 0.59864  | 0.050916 | 0.27217  | 0.052695 | 0.25575  | -0.07837 |
| -0.01894 | 0.68316 | -0.0602  | 0.19405  | 0.050457 | 0.27652  | -0.10028 | 0.03025  | -0.0685  |
| -0.00638 | 0.89067 | 0.094818 | 0.04054  | 0.197046 | 1.80E-05 | 0.021955 | 0.63604  | 0.017292 |
| -0.07702 | 0.09644 | 0.072148 | 0.11948  | 0.047314 | 0.30758  | 0.169096 | 0.00024  | 0.081306 |
| -0.03619 | 0.43529 | -0.02285 | 0.62227  | 0.056123 | 0.22608  | 0.027919 | 0.54729  | 0.018206 |
| -0.10874 | 0.01875 | -0.06963 | 0.13299  | 0.049211 | 0.28858  | -0.05994 | 0.19603  | 0.021701 |
| 0.007355 | 0.87405 | 0.10554  | 0.02255  | -0.05772 | 0.2131   | 0.052946 | 0.25349  | -0.19918 |
| 0.054074 | 0.2435  | 0.404616 | 8.01E-20 | 0.400994 | 1.82E-19 | 0.420463 | 1.98E-21 | 0.167563 |
| -0.14939 | 0.0012  | -0.07065 | 0.12737  | -0.20835 | 5.62E-06 | -0.06263 | 0.17662  | -0.05564 |
| -0.1113  | 0.01612 | -0.04204 | 0.36466  | -0.00541 | 0.90717  | -0.11109 | 0.01632  | 0.117188 |
| -0.08128 | 0.0793  | -0.14582 | 0.00158  | -0.17137 | 0.0002   | -0.08061 | 0.08184  | 0.047295 |
| 0.002218 | 0.96187 | 0.093562 | 0.04329  | 0.112907 | 0.01464  | 0.064054 | 0.16699  | -0.02181 |

|          |          |          |         |          |          |          |          |          |
|----------|----------|----------|---------|----------|----------|----------|----------|----------|
| -0.08611 | 0.06298  | -0.14761 | 0.00138 | -0.15585 | 0.00073  | -0.24844 | 5.33E-08 | -0.0957  |
| -0.07387 | 0.11087  | 0.028133 | 0.54422 | 0.031913 | 0.49147  | 0.092678 | 0.04531  | 0.001043 |
| 0.464432 | 2.32E-26 | 0.170156 | 0.00022 | 0.23029  | 4.88E-07 | 0.184424 | 6.09E-05 | -0.02994 |
| 0.092998 | 0.04457  | 0.005758 | 0.90123 | 0.161241 | 0.00047  | 0.082294 | 0.07563  | 0.222862 |
| -0.08465 | 0.0676   | -0.07786 | 0.09283 | -0.20253 | 1.03E-05 | -0.03785 | 0.41447  | -0.03877 |
| 0.052077 | 0.26138  | 0.059835 | 0.19679 | 0.093479 | 0.04347  | 0.056718 | 0.22118  | 0.053964 |
| -0.13767 | 0.00287  | -0.05311 | 0.25204 | 0.068956 | 0.13677  | 0.005683 | 0.90251  | 0.054324 |
| 0.005639 | 0.90327  | -0.04491 | 0.33288 | -0.07086 | 0.12623  | -0.08416 | 0.06922  | 0.004654 |
| -0.01783 | 0.70076  | 0.101596 | 0.02814 | 0.055547 | 0.23089  | -0.00316 | 0.94565  | -0.11543 |
| -0.04795 | 0.30111  | -0.06334 | 0.17179 | 0.009559 | 0.83677  | -0.02389 | 0.6066   | -0.01581 |
| 0.029572 | 0.52381  | -0.04998 | 0.28107 | 0.05591  | 0.22785  | -0.04811 | 0.29953  | 0.00861  |
| -0.04439 | 0.33851  | -0.01993 | 0.66747 | -0.17547 | 0.00014  | 0.00244  | 0.95806  | -0.1032  |
| -0.11591 | 0.01219  | -0.09971 | 0.03121 | -0.1338  | 0.00377  | -0.11474 | 0.0131   | 0.017254 |
| -0.09002 | 0.05189  | -0.1064  | 0.02146 | -0.0447  | 0.33509  | -0.0167  | 0.71881  | 0.060774 |
| -0.04241 | 0.36043  | 0.060152 | 0.19443 | -0.0178  | 0.70128  | 0.072657 | 0.11688  | -0.15145 |
| -0.00879 | 0.84966  | 0.030864 | 0.50583 | 0.02083  | 0.65344  | -0.00901 | 0.84598  | -0.05901 |
| -0.01725 | 0.70996  | -0.0427  | 0.35719 | 0.006091 | 0.89555  | -0.03259 | 0.48234  | -0.06316 |
| 0.041794 | 0.3675   | 0.033646 | 0.46824 | 0.047484 | 0.30585  | 0.036395 | 0.43266  | -0.06448 |
| 0.007    | 0.88008  | -0.03779 | 0.41523 | -0.03766 | 0.41686  | -0.03066 | 0.50864  | -0.08732 |
| 0.23571  | 2.57E-07 | 0.123053 | 0.00776 | 0.075313 | 0.10406  | 0.199529 | 1.40E-05 | 0.012946 |
| -0.01411 | 0.76101  | -0.02198 | 0.63569 | -0.00931 | 0.84103  | 0.009746 | 0.83362  | -0.01444 |
| -0.04539 | 0.32771  | 0.017905 | 0.69955 | 0.011473 | 0.80469  | 0.085063 | 0.06627  | -0.02409 |
| -0.03677 | 0.42797  | -0.10745 | 0.0202  | -0.08337 | 0.07188  | -0.07888 | 0.08862  | -0.06861 |
| 0.008986 | 0.84644  | 0.130735 | 0.00466 | 0.028529 | 0.53857  | 0.170926 | 0.00021  | 0.120396 |
| -0.06866 | 0.13847  | -0.06825 | 0.14085 | -0.0061  | 0.8954   | -0.04459 | 0.33629  | 0.076925 |
| 0.030332 | 0.5132   | 0.088935 | 0.05479 | -0.0356  | 0.44277  | 0.137417 | 0.00292  | 0.059765 |
| 0.008215 | 0.85947  | -0.10762 | 0.02    | -0.11508 | 0.01283  | -0.17083 | 0.00021  | -0.04344 |
| 0.058375 | 0.20796  | 0.125758 | 0.0065  | 0.32467  | 6.33E-13 | 0.097411 | 0.03534  | 0.227489 |
| 0.073675 | 0.11183  | -0.05683 | 0.22031 | 0.071861 | 0.12096  | -0.07178 | 0.12137  | -0.00505 |
| 0.024856 | 0.59211  | -0.10886 | 0.01862 | -0.04675 | 0.31339  | -0.10533 | 0.02282  | 0.01504  |
| -0.03282 | 0.47917  | 0.010519 | 0.82065 | -0.12209 | 0.00826  | -0.01997 | 0.66682  | -0.10315 |
| -0.00151 | 0.97401  | 0.009509 | 0.83762 | 0.021144 | 0.64856  | -0.05142 | 0.26747  | -0.14849 |
| 0.018677 | 0.68727  | 0.038695 | 0.40412 | -0.10494 | 0.02333  | -0.03089 | 0.50554  | -0.13572 |
| -0.13503 | 0.00346  | -0.0454  | 0.3276  | -0.06547 | 0.15777  | -0.0071  | 0.87845  | 0.012636 |
| 0.059366 | 0.20033  | 0.066223 | 0.15306 | 0.084354 | 0.06857  | 0.009401 | 0.83943  | -0.0829  |
| 0.031552 | 0.49639  | -0.12812 | 0.00556 | -0.06903 | 0.13637  | -0.14954 | 0.00119  | 0.025232 |
| -0.05895 | 0.2035   | -0.03023 | 0.51461 | -0.03904 | 0.39991  | -0.06003 | 0.19537  | -0.06581 |
| 0.017831 | 0.70074  | 0.103319 | 0.02557 | 0.131552 | 0.0044   | 0.062534 | 0.17732  | 0.013187 |
| -0.04215 | 0.36338  | -0.09155 | 0.04801 | -0.01296 | 0.78002  | -0.16277 | 0.00041  | 0.027374 |
| 0.043263 | 0.35089  | 0.056933 | 0.21944 | 0.081036 | 0.08023  | 0.11769  | 0.01092  | 0.262756 |
| -0.02879 | 0.53492  | 0.028799 | 0.53472 | 0.02414  | 0.60282  | 0.038041 | 0.41212  | 0.039875 |
| -0.03704 | 0.42456  | -0.04713 | 0.30947 | 0.037384 | 0.42024  | -0.1121  | 0.01536  | 0.04078  |
| 0.002009 | 0.96547  | -0.02536 | 0.58466 | -0.0685  | 0.13939  | -0.01884 | 0.68461  | 0.051448 |
| -0.08943 | 0.05346  | -0.10427 | 0.02423 | -0.19288 | 2.71E-05 | -0.08221 | 0.07593  | -0.05298 |
| -0.02653 | 0.56747  | 0.053822 | 0.24571 | 0.048999 | 0.29066  | 0.028886 | 0.53349  | -0.15849 |

|          |          |          |          |          |          |          |          |          |
|----------|----------|----------|----------|----------|----------|----------|----------|----------|
| -0.0755  | 0.10321  | -0.13492 | 0.00349  | 0.06484  | 0.16184  | -0.16742 | 0.00028  | 0.006521 |
| -0.06152 | 0.18447  | -0.13583 | 0.00327  | -0.15081 | 0.00108  | -0.09781 | 0.03458  | -0.15354 |
| 0.01858  | 0.68881  | -0.06376 | 0.16893  | 0.042725 | 0.35693  | -0.09344 | 0.04357  | -0.06769 |
| -0.01998 | 0.66672  | -0.10898 | 0.01848  | -0.03682 | 0.42734  | -0.08632 | 0.06235  | -0.082   |
| -0.02911 | 0.53037  | -0.04806 | 0.30001  | 0.110348 | 0.01705  | -0.05099 | 0.27149  | 0.023567 |
| 0.085748 | 0.0641   | 0.192581 | 2.79E-05 | 0.12499  | 0.00684  | 0.197451 | 1.72E-05 | 0.196484 |
| -0.06669 | 0.1502   | 0.008963 | 0.84683  | -0.06007 | 0.19503  | 0.028535 | 0.53847  | -0.07755 |
| -0.08035 | 0.08281  | 0.009415 | 0.8392   | -0.04725 | 0.30819  | 0.061348 | 0.18569  | 0.01739  |
| -0.01446 | 0.75528  | 0.043559 | 0.3476   | 0.010453 | 0.82176  | 0.059352 | 0.20044  | -0.08866 |
| 0.019846 | 0.66882  | 0.184461 | 6.07E-05 | 0.165299 | 0.00033  | 0.218028 | 1.97E-06 | -0.04588 |
| -0.20469 | 8.24E-06 | -0.08598 | 0.06339  | -0.15682 | 0.00067  | -0.08527 | 0.06559  | -0.06044 |
| 0.013003 | 0.77928  | 0.099061 | 0.03233  | 0.047197 | 0.30879  | 0.130369 | 0.00478  | 0.070324 |
| 0.067598 | 0.14469  | -0.05106 | 0.27082  | 0.072891 | 0.11571  | -0.0979  | 0.03442  | 0.098229 |
| -0.05447 | 0.24006  | -0.05893 | 0.20367  | -0.00437 | 0.92499  | -0.0961  | 0.0379   | -0.05274 |
| -0.01223 | 0.79213  | -0.03072 | 0.50779  | -0.00533 | 0.90853  | -0.04341 | 0.34931  | -0.01906 |
| -0.06159 | 0.18394  | 0.003624 | 0.93775  | -0.01571 | 0.73485  | 0.04867  | 0.29392  | -0.10174 |
| 0.039264 | 0.39724  | 0.000612 | 0.98948  | 0.138527 | 0.0027   | -0.01419 | 0.75969  | 0.008642 |
| -0.02401 | 0.60483  | -0.03815 | 0.41074  | -0.05694 | 0.21937  | -0.05433 | 0.24129  | 0.016155 |
| 0.012053 | 0.79503  | -0.03994 | 0.3892   | 0.076728 | 0.0977   | -0.0092  | 0.84281  | 0.016847 |
| 0.079786 | 0.08501  | -0.02331 | 0.61542  | 0.060554 | 0.19146  | -0.0774  | 0.09479  | 0.014803 |
| 0.0145   | 0.75465  | 0.097374 | 0.03541  | 0.097738 | 0.03473  | 0.067909 | 0.14284  | 0.03865  |
| 0.038229 | 0.40981  | -0.00972 | 0.83401  | 0.029221 | 0.52875  | -0.08856 | 0.05583  | -0.08586 |
| 0.027257 | 0.55683  | 0.033443 | 0.47092  | 0.07099  | 0.12554  | -0.00032 | 0.99441  | 0.031106 |
| 0.061235 | 0.1865   | 0.043324 | 0.35021  | 0.061205 | 0.18672  | 0.030977 | 0.50427  | -0.06283 |
| -0.01856 | 0.68908  | -0.03642 | 0.43231  | 0.018823 | 0.68496  | -0.0196  | 0.67261  | -0.03878 |
| 0.017936 | 0.69905  | -0.00188 | 0.96776  | 0.094545 | 0.04113  | 0.016622 | 0.72015  | 0.040386 |
| 0.024359 | 0.59953  | -0.05494 | 0.23606  | 0.055679 | 0.22977  | -0.04622 | 0.31896  | 0.054724 |
| 0.159871 | 0.00052  | 0.182354 | 7.39E-05 | 0.092563 | 0.04558  | 0.083346 | 0.07195  | -0.008   |
| -0.01224 | 0.79197  | -0.07159 | 0.12239  | 0.088733 | 0.05534  | -0.1068  | 0.02098  | 0.072762 |
| -0.04151 | 0.37077  | -0.12458 | 0.00703  | 0.05387  | 0.24529  | -0.19906 | 1.47E-05 | -0.09869 |
| -0.02135 | 0.64544  | 0.164052 | 0.00037  | 0.133653 | 0.00381  | 0.227233 | 6.96E-07 | -0.01599 |
| -0.08173 | 0.07767  | 0.004045 | 0.93053  | -0.03776 | 0.41563  | 0.039273 | 0.39714  | -0.08013 |
| -0.00687 | 0.88229  | 0.036462 | 0.4318   | 0.05008  | 0.28013  | 0.038659 | 0.40456  | -0.05094 |
| 0.000436 | 0.99249  | 0.037984 | 0.41282  | 0.067603 | 0.14465  | 0.01179  | 0.7994   | -0.05859 |
| -0.03356 | 0.46932  | 0.010624 | 0.81888  | -0.05282 | 0.25463  | 0.054493 | 0.23987  | -0.11865 |
| -0.00094 | 0.98383  | -0.06455 | 0.16372  | 0.116768 | 0.01156  | -0.07395 | 0.11049  | 0.039694 |
| -0.04454 | 0.33687  | -0.01277 | 0.78318  | 0.041327 | 0.37289  | 0.012563 | 0.78656  | -0.05783 |
| -0.01589 | 0.73194  | 0.016662 | 0.7195   | 0.016746 | 0.71815  | 0.024808 | 0.59282  | -0.01402 |
| 0.083724 | 0.07067  | 0.08072  | 0.08141  | 0.201069 | 1.20E-05 | 0.147465 | 0.00139  | 0.03626  |
| -0.0708  | 0.12657  | -0.09779 | 0.03463  | -0.12053 | 0.00913  | -0.04466 | 0.3355   | -0.04375 |
| -0.08942 | 0.05347  | 0.014936 | 0.74751  | 0.021832 | 0.63793  | -0.04327 | 0.35084  | -0.0419  |
| -0.06969 | 0.13265  | -0.09168 | 0.0477   | 0.024614 | 0.59572  | -0.05972 | 0.19765  | 0.057111 |
| -0.06391 | 0.16792  | 0.157505 | 0.00064  | 0.077124 | 0.09598  | 0.123605 | 0.00749  | -0.14518 |
| -0.13318 | 0.00394  | -0.00274 | 0.9529   | -0.17285 | 0.00017  | -0.02555 | 0.58184  | -0.2335  |
| -0.03887 | 0.40202  | 0.035658 | 0.44204  | -0.04038 | 0.38399  | 0.052717 | 0.25556  | -0.07666 |

|          |         |          |          |           |          |          |          |          |
|----------|---------|----------|----------|-----------|----------|----------|----------|----------|
| -0.10222 | 0.02719 | 0.073106 | 0.11463  | -0.03464  | 0.45523  | 0.049404 | 0.28668  | -0.10847 |
| -0.05092 | 0.27209 | 0.060925 | 0.18875  | -0.01651  | 0.72191  | -0.01212 | 0.79385  | -0.14039 |
| -0.14642 | 0.00151 | 0.038247 | 0.40959  | -0.09699  | 0.03614  | -0.02705 | 0.55987  | -0.16836 |
| -0.00761 | 0.86975 | 0.036308 | 0.43375  | -0.0927   | 0.04526  | -0.02427 | 0.60083  | -0.25318 |
| 0.016726 | 0.71847 | -0.01305 | 0.77852  | 0.074022  | 0.11015  | -0.02062 | 0.65664  | -0.03409 |
| -0.07385 | 0.11096 | -0.09656 | 0.03698  | -0.10302  | 0.026    | -0.01243 | 0.78873  | -0.11629 |
| -0.08776 | 0.05809 | -0.12094 | 0.00889  | -0.09211  | 0.04666  | -0.0259  | 0.57663  | -0.04498 |
| 0.097382 | 0.0354  | 0.122559 | 0.00802  | 0.157801  | 0.00062  | 0.171493 | 0.0002   | 0.149623 |
| 0.011692 | 0.80104 | -0.0036  | 0.93822  | -0.0719   | 0.12074  | -0.00073 | 0.98749  | -0.19362 |
| 0.046198 | 0.31915 | -0.00292 | 0.94976  | 0.042546  | 0.35895  | 0.027984 | 0.54634  | -0.03224 |
| 0.016724 | 0.71849 | 0.126223 | 0.00631  | 0.052636  | 0.25628  | 0.072664 | 0.11685  | -0.08365 |
| -0.04505 | 0.3313  | -0.0301  | 0.51642  | 0.074057  | 0.10998  | -0.06506 | 0.16044  | -0.07377 |
| -0.05877 | 0.20489 | -0.0436  | 0.34716  | 0.019262  | 0.67802  | 0.005997 | 0.89717  | 0.006129 |
| 0.118805 | 0.01018 | 0.0261   | 0.5737   | 0.027192  | 0.55777  | -0.00543 | 0.90691  | -0.10965 |
| 0.079245 | 0.08716 | 0.130042 | 0.00488  | 0.046688  | 0.31404  | 0.146753 | 0.00147  | -0.13261 |
| 0.097775 | 0.03466 | 0.107426 | 0.02023  | 0.089729  | 0.05265  | 0.133549 | 0.00384  | -0.1292  |
| -0.04239 | 0.36076 | -0.00407 | 0.93013  | 0.005951  | 0.89794  | -0.01591 | 0.73167  | -0.05324 |
| -0.15132 | 0.00104 | -0.06669 | 0.15019  | -0.1305   | 0.00473  | -0.00547 | 0.90612  | 0.073279 |
| 0.012036 | 0.79532 | 0.044629 | 0.33588  | 0.090755  | 0.04999  | 0.051248 | 0.26906  | 0.101176 |
| 0.024768 | 0.59342 | 0.161084 | 0.00047  | 0.002673  | 0.95406  | 0.110291 | 0.01711  | -0.00664 |
| 0.090388 | 0.05093 | 0.065417 | 0.15812  | 0.180144  | 9.06E-05 | -0.01569 | 0.73515  | 0.041397 |
| -0.00141 | 0.97577 | 0.026017 | 0.57492  | 0.018249  | 0.69407  | 0.00583  | 0.90001  | 0.079819 |
| -0.05814 | 0.20981 | -0.10827 | 0.01926  | -0.12724  | 0.0059   | -0.17123 | 0.0002   | -0.04631 |
| 0.041063 | 0.37595 | 0.320612 | 1.26E-12 | 0.181952  | 7.67E-05 | 0.326478 | 4.64E-13 | 0.267913 |
| -0.00232 | 0.96019 | 0.06852  | 0.13928  | 0.043286  | 0.35064  | 0.007354 | 0.87406  | -0.03084 |
| -0.0605  | 0.19188 | -0.01646 | 0.72272  | -0.07411  | 0.10972  | -0.06451 | 0.164    | -0.10482 |
| -0.03051 | 0.51071 | 0.052471 | 0.25778  | 0.036429  | 0.43223  | -0.01151 | 0.80412  | -0.17242 |
| -0.13548 | 0.00335 | -0.16316 | 0.0004   | -0.07936  | 0.08669  | -0.22961 | 5.28E-07 | -0.01674 |
| -0.037   | 0.42503 | -0.09112 | 0.04907  | -0.01315  | 0.77689  | -0.1269  | 0.00603  | -0.07142 |
| -0.05488 | 0.23656 | 0.079703 | 0.08534  | -0.05904  | 0.20279  | 0.079868 | 0.08469  | -0.18329 |
| -0.05005 | 0.2804  | -0.05158 | 0.26593  | 0.028622  | 0.53723  | -0.02439 | 0.59903  | 0.051097 |
| -0.0179  | 0.69966 | 0.145027 | 0.00168  | 0.130431  | 0.00476  | 0.127431 | 0.00582  | 0.041088 |
| -0.08113 | 0.07987 | -0.0558  | 0.22878  | -7.82E-06 | 0.99987  | -0.07155 | 0.1226   | 0.047127 |
| -0.04404 | 0.34236 | -0.00673 | 0.88474  | 0.070019  | 0.13081  | -0.04551 | 0.32644  | 0.019269 |
| -0.06365 | 0.16971 | -0.04061 | 0.38121  | 0.02874   | 0.53556  | -0.02621 | 0.57213  | -0.00093 |
| 0.053908 | 0.24496 | -0.05025 | 0.27855  | -0.03308  | 0.47578  | -0.08036 | 0.08277  | -0.07016 |
| 0.032815 | 0.4793  | -0.19441 | 2.33E-05 | -0.17074  | 0.00021  | -0.2242  | 9.86E-07 | -0.21482 |
| 0.023031 | 0.61959 | 0.133206 | 0.00393  | 0.21956   | 1.66E-06 | 0.140802 | 0.00229  | 0.059636 |
| -0.06797 | 0.14249 | -0.01576 | 0.73416  | -0.04136  | 0.3725   | -0.10554 | 0.02255  | -0.14223 |
| 0.039619 | 0.39299 | 0.053803 | 0.24588  | 0.04767   | 0.30396  | 0.0465   | 0.316    | -0.06565 |
| -0.09736 | 0.03543 | -0.0811  | 0.08     | -0.04099  | 0.37684  | -0.08274 | 0.07405  | 0.053609 |
| -0.01444 | 0.75568 | 0.032796 | 0.47956  | 0.004142  | 0.92886  | -0.01329 | 0.77458  | -0.08772 |
| -0.07488 | 0.10608 | -0.13611 | 0.00321  | 0.002979  | 0.9488   | -0.09779 | 0.03462  | 0.024674 |
| 0.047107 | 0.30971 | 0.114996 | 0.01289  | 0.219724  | 1.63E-06 | 0.15689  | 0.00067  | 0.160073 |
| 0.01239  | 0.78943 | 0.002303 | 0.96041  | 0.007816  | 0.86623  | 0.018211 | 0.69467  | -0.0482  |

|           |          |          |          |          |          |          |          |          |
|-----------|----------|----------|----------|----------|----------|----------|----------|----------|
| -0.01626  | 0.72605  | -0.04561 | 0.32537  | 0.012571 | 0.78643  | 0.046978 | 0.31104  | 0.046097 |
| 0.205838  | 7.31E-06 | -0.15898 | 0.00056  | -0.11469 | 0.01314  | -0.0923  | 0.04621  | 0.071026 |
| -0.04884  | 0.2922   | -0.0181  | 0.69641  | -0.06885 | 0.1374   | 0.050122 | 0.27973  | 0.083403 |
| 0.03438   | 0.45859  | -0.01567 | 0.73551  | 0.086447 | 0.06195  | -0.04001 | 0.38833  | -0.07261 |
| -0.04926  | 0.28807  | 0.069918 | 0.13137  | 0.033798 | 0.46623  | 0.125417 | 0.00665  | 0.083596 |
| 0.097313  | 0.03553  | -0.03576 | 0.44079  | 0.051613 | 0.26565  | 0.020251 | 0.66247  | 0.10477  |
| -0.02293  | 0.62118  | 0.040795 | 0.37908  | 0.040387 | 0.38387  | -0.00721 | 0.87646  | -0.14723 |
| 0.038291  | 0.40906  | -0.00782 | 0.8661   | 0.022866 | 0.62209  | 0.0337   | 0.46753  | -0.04363 |
| 0.054851  | 0.23678  | -0.03686 | 0.42679  | -0.05584 | 0.22846  | -0.01361 | 0.7693   | 0.129115 |
| 0.045061  | 0.33122  | -0.00184 | 0.96831  | 0.151144 | 0.00105  | 0.079221 | 0.08725  | 0.098113 |
| 0.063171  | 0.17293  | -0.03136 | 0.49904  | 0.03435  | 0.45898  | -0.078   | 0.09225  | -0.04241 |
| -0.04057  | 0.3817   | -0.06211 | 0.18028  | -0.06101 | 0.1881   | -0.02141 | 0.64442  | 0.101226 |
| 0.016024  | 0.72982  | 0.114823 | 0.01303  | 0.019862 | 0.66857  | 0.162429 | 0.00042  | -0.01327 |
| 0.101317  | 0.02858  | 0.010797 | 0.81599  | -0.00964 | 0.83538  | -0.0737  | 0.11173  | -0.13835 |
| -0.00012  | 0.99791  | 0.070611 | 0.12758  | -0.02191 | 0.6368   | 0.114253 | 0.01349  | 0.032577 |
| 0.080982  | 0.08042  | -0.03372 | 0.46727  | 0.096006 | 0.03809  | -0.05786 | 0.21203  | 0.044285 |
| -0.00909  | 0.8447   | 0.205107 | 7.89E-06 | 0.137557 | 0.00289  | 0.149743 | 0.00117  | 0.041046 |
| 0.061417  | 0.18519  | -0.09508 | 0.03999  | -0.00252 | 0.9567   | -0.11799 | 0.01072  | -0.1375  |
| -0.01062  | 0.81893  | -0.00206 | 0.96459  | -0.04333 | 0.35014  | 0.018454 | 0.69081  | 0.031975 |
| -0.02905  | 0.5312   | 0.092073 | 0.04674  | 0.010626 | 0.81885  | 0.095074 | 0.04     | -0.11561 |
| -0.09293  | 0.04472  | -0.08342 | 0.07169  | -0.11564 | 0.0124   | -0.00901 | 0.84603  | 0.136538 |
| 0.043028  | 0.35352  | -0.03651 | 0.43124  | -0.00087 | 0.98497  | -0.00449 | 0.92299  | -0.06368 |
| -0.05637  | 0.22405  | -0.00593 | 0.89838  | -0.10139 | 0.02847  | 0.004576 | 0.92143  | -0.12745 |
| -0.06115  | 0.18715  | 0.116987 | 0.01141  | -0.07269 | 0.11673  | 0.195392 | 2.12E-05 | -0.02203 |
| -0.03038  | 0.51259  | 0.108685 | 0.01881  | 0.041026 | 0.37639  | 0.067889 | 0.14296  | -0.17137 |
| -0.09991  | 0.03088  | -0.05346 | 0.24894  | -0.19854 | 1.55E-05 | 0.023973 | 0.60533  | -0.03186 |
| -0.02702  | 0.56027  | 0.001979 | 0.96597  | 0.031689 | 0.49452  | 0.009723 | 0.83401  | -0.11012 |
| 0.013352  | 0.77351  | -0.09301 | 0.04455  | 1.46E-05 | 0.99975  | -0.10718 | 0.02052  | 0.029594 |
| -0.04767  | 0.30392  | -0.10191 | 0.02766  | -0.02246 | 0.62824  | -0.19952 | 1.40E-05 | -0.25544 |
| 0.069152  | 0.13565  | -0.03309 | 0.4756   | 0.017439 | 0.70701  | 0.048782 | 0.29281  | 0.136066 |
| -0.19294  | 2.70E-05 | -0.16538 | 0.00033  | -0.21549 | 2.61E-06 | -0.12253 | 0.00803  | -0.0816  |
| -4.80E-05 | 0.99917  | -0.03688 | 0.42659  | -0.0203  | 0.66167  | -0.05685 | 0.22011  | -0.0301  |
| 0.157714  | 0.00063  | 0.062345 | 0.17863  | 0.143668 | 0.00185  | 0.076623 | 0.09816  | 0.166056 |
| -0.09584  | 0.03842  | -0.01554 | 0.73765  | -0.02858 | 0.53779  | -0.01877 | 0.6858   | -0.06138 |
| -0.02931  | 0.52755  | 0.021649 | 0.64076  | 0.193322 | 2.60E-05 | 0.020743 | 0.65479  | 0.185287 |
| -0.01808  | 0.69674  | -0.14636 | 0.00152  | 0.014741 | 0.75071  | -0.15135 | 0.00104  | 0.069189 |
| -0.00421  | 0.92768  | -0.10976 | 0.01766  | 0.013971 | 0.76331  | -0.09489 | 0.04039  | 0.018421 |
| 0.017304  | 0.70917  | -0.03027 | 0.51411  | 0.003631 | 0.93762  | -0.04998 | 0.28109  | 0.002796 |
| -0.04054  | 0.38202  | 0.014488 | 0.75484  | -0.00742 | 0.87301  | 0.036887 | 0.42645  | -0.06372 |
| -0.04525  | 0.32923  | -0.06235 | 0.17863  | -0.00234 | 0.95981  | -0.03232 | 0.48601  | -0.00109 |
| -0.06572  | 0.15622  | -0.01646 | 0.72282  | 0.005418 | 0.90705  | -0.04045 | 0.38319  | -0.17614 |
| -0.01218  | 0.79291  | -0.01949 | 0.67447  | -0.05617 | 0.22567  | 0.010618 | 0.81899  | 0.085066 |
| -0.10782  | 0.01977  | 0.025768 | 0.57859  | -0.13574 | 0.00329  | 0.013499 | 0.77109  | -0.14235 |
| 0.033579  | 0.46912  | 0.007917 | 0.86451  | 0.052024 | 0.26186  | -0.01417 | 0.75998  | -0.03809 |
| -0.01401  | 0.76261  | -0.16413 | 0.00037  | 0.010986 | 0.81283  | -0.20634 | 6.94E-06 | -0.06924 |

|          |          |          |          |          |          |          |          |          |
|----------|----------|----------|----------|----------|----------|----------|----------|----------|
| 0.024279 | 0.60073  | 0.052453 | 0.25795  | 0.175298 | 0.00014  | 0.068257 | 0.1408   | 0.122546 |
| 0.001775 | 0.96948  | -0.09858 | 0.03318  | 0.044084 | 0.34182  | -0.15227 | 0.00096  | -0.01228 |
| -0.02508 | 0.58883  | -0.00697 | 0.88056  | -0.00788 | 0.86512  | 0.009406 | 0.83935  | -0.12157 |
| -0.0691  | 0.13594  | 0.116601 | 0.01168  | 0.169122 | 0.00024  | 0.157731 | 0.00062  | 0.022774 |
| -0.0761  | 0.1005   | -0.00442 | 0.92415  | -0.0699  | 0.13148  | 0.068736 | 0.13803  | -0.0492  |
| -0.00678 | 0.88385  | -0.09158 | 0.04793  | -0.01715 | 0.71168  | -0.14078 | 0.00229  | -0.06152 |
| -0.0251  | 0.58841  | 0.038157 | 0.41069  | -0.09335 | 0.04377  | 0.067863 | 0.14312  | 0.008608 |
| 0.107908 | 0.01968  | 0.312992 | 4.51E-12 | 0.172069 | 0.00019  | 0.324971 | 6.01E-13 | 0.046319 |
| -0.14702 | 0.00144  | 0.048129 | 0.29932  | -0.26157 | 9.60E-09 | -0.00588 | 0.89923  | -0.26716 |
| -0.05187 | 0.26331  | -0.14422 | 0.00178  | 0.013883 | 0.76477  | -0.15256 | 0.00094  | -0.00666 |
| -0.00091 | 0.98434  | -0.17454 | 0.00015  | -0.20016 | 1.31E-05 | -0.14086 | 0.00228  | 0.03263  |
| -0.02757 | 0.55224  | -0.00078 | 0.98667  | 0.048294 | 0.29767  | 0.024679 | 0.59475  | -0.07801 |
| -0.09729 | 0.03557  | -0.16537 | 0.00033  | -0.08397 | 0.06984  | -0.11764 | 0.01095  | 0.080846 |
| 0.107741 | 0.01987  | 0.056752 | 0.22091  | 0.096707 | 0.03669  | 0.020486 | 0.6588   | 0.012632 |
| 0.08793  | 0.0576   | 0.139098 | 0.00259  | 0.245193 | 8.02E-08 | 0.165955 | 0.00032  | 0.119234 |
| -0.10956 | 0.01787  | -0.11251 | 0.015    | -0.13146 | 0.00443  | -0.06459 | 0.16346  | 0.00571  |
| 0.228689 | 5.88E-07 | 0.060585 | 0.19123  | 0.180446 | 8.81E-05 | 0.019855 | 0.66868  | 0.107585 |
| -0.02394 | 0.60583  | -0.09349 | 0.04345  | 0.042726 | 0.35692  | -0.0958  | 0.03851  | 0.009885 |
| -0.08537 | 0.06528  | -0.15621 | 0.00071  | -0.16472 | 0.00035  | -0.19847 | 1.56E-05 | 0.002656 |
| -0.03977 | 0.39123  | 0.000756 | 0.987    | 0.017037 | 0.71346  | 0.018838 | 0.68471  | -0.10382 |
| -0.03968 | 0.39224  | 0.025693 | 0.5797   | 0.031543 | 0.49652  | 0.070866 | 0.1262   | -0.09944 |
| -0.05812 | 0.20997  | -0.13743 | 0.00292  | -0.03266 | 0.48133  | -0.10242 | 0.02689  | 0.065111 |
| -0.09683 | 0.03646  | -0.04912 | 0.28949  | -0.06073 | 0.19015  | -0.07526 | 0.10431  | -0.10698 |
| -0.09354 | 0.04333  | 0.008718 | 0.85096  | -0.08924 | 0.05396  | -0.06861 | 0.13873  | -0.15163 |
| -0.01466 | 0.75207  | -0.09514 | 0.03987  | -0.00438 | 0.92472  | -0.03221 | 0.48738  | 0.200613 |
| 0.001384 | 0.9762   | 0.055295 | 0.23301  | -0.02751 | 0.55318  | 0.105828 | 0.02218  | 0.077352 |
| -0.12977 | 0.00497  | -0.06295 | 0.17443  | -0.20954 | 4.95E-06 | -0.0957  | 0.0387   | -0.00804 |
| 0.015682 | 0.73535  | 0.024303 | 0.60037  | 0.134447 | 0.0036   | 0.1133   | 0.0143   | 0.250232 |
| -0.04683 | 0.31256  | -0.01043 | 0.82218  | 0.077061 | 0.09625  | 0.027831 | 0.54854  | 0.164859 |
| 0.059322 | 0.20067  | -0.03192 | 0.49141  | 0.089413 | 0.05349  | 0.081639 | 0.07799  | 0.197992 |
| 0.011189 | 0.80943  | 0.014122 | 0.76085  | -0.0348  | 0.45311  | 0.104769 | 0.02356  | 0.030673 |
| -0.01216 | 0.79321  | 0.076746 | 0.09762  | 0.007069 | 0.8789   | 0.118212 | 0.01057  | -0.00567 |
| 0.026073 | 0.5741   | 0.060077 | 0.19499  | 0.087794 | 0.05798  | 0.080551 | 0.08205  | 0.042794 |
| 0.022285 | 0.63098  | -0.00997 | 0.82993  | 0.071375 | 0.1235   | -0.01339 | 0.77283  | -0.00031 |
| 0.046859 | 0.31227  | -0.04311 | 0.35259  | 0.092801 | 0.04503  | -0.03396 | 0.46411  | -0.02384 |
| 0.035254 | 0.44723  | 0.044794 | 0.3341   | 0.071934 | 0.12058  | -0.01956 | 0.67329  | -0.05165 |
| -0.01527 | 0.74205  | 0.088791 | 0.05518  | 0.146217 | 0.00153  | 0.021308 | 0.64603  | -0.02597 |
| -0.00538 | 0.90773  | 0.08376  | 0.07054  | 0.027104 | 0.55904  | -0.00338 | 0.9419   | -0.08194 |
| 0.006594 | 0.88698  | -0.06592 | 0.15493  | -0.08072 | 0.0814   | -0.02814 | 0.54413  | 0.07241  |
| -0.02941 | 0.52606  | 0.010378 | 0.82301  | -0.00381 | 0.93461  | 0.033312 | 0.47267  | -0.13861 |
| 0.03216  | 0.48813  | 0.08691  | 0.06057  | 0.171823 | 0.00019  | 0.045401 | 0.32758  | 0.042682 |
| -0.11974 | 0.0096   | -0.03712 | 0.42352  | -0.0902  | 0.05142  | -0.02926 | 0.52817  | -0.02767 |
| -0.02456 | 0.59656  | 0.091073 | 0.04919  | 0.024649 | 0.59519  | 0.103421 | 0.02542  | -0.1198  |
| -0.06574 | 0.1561   | -0.12512 | 0.00679  | -0.09433 | 0.04159  | -0.14462 | 0.00173  | -0.07853 |
| -0.13747 | 0.00291  | -0.2118  | 3.89E-06 | -0.16598 | 0.00032  | -0.17953 | 9.58E-05 | -0.05108 |

|          |         |          |          |          |          |          |          |          |
|----------|---------|----------|----------|----------|----------|----------|----------|----------|
| 0.012272 | 0.79139 | -0.19984 | 1.36E-05 | -0.0592  | 0.20156  | -0.16613 | 0.00031  | 0.024225 |
| -0.05675 | 0.22095 | 0.008289 | 0.85821  | 0.012287 | 0.79115  | 0.060199 | 0.19408  | -0.06087 |
| -0.107   | 0.02074 | -0.03283 | 0.47909  | -0.11819 | 0.01058  | 0.043013 | 0.35369  | -0.04037 |
| -0.01554 | 0.73759 | 0.032087 | 0.48912  | -0.00752 | 0.87128  | 0.036638 | 0.42959  | -0.14342 |
| -0.05061 | 0.27512 | 0.058138 | 0.20982  | -0.01212 | 0.7939   | 0.094083 | 0.04213  | -0.15236 |
| -0.00214 | 0.96316 | 0.046168 | 0.31947  | 0.045216 | 0.32956  | 0.025537 | 0.58199  | 0.010623 |
| -0.02229 | 0.63084 | -0.08092 | 0.08066  | 0.111862 | 0.01559  | -0.10562 | 0.02245  | 0.026185 |
| -0.02073 | 0.65497 | 0.090222 | 0.05136  | -0.04606 | 0.32055  | 0.033443 | 0.47092  | -0.21034 |
| 0.06963  | 0.13297 | 0.072266 | 0.11887  | 0.018658 | 0.68757  | 0.075653 | 0.1025   | -0.1193  |
| -0.06504 | 0.16054 | -0.08232 | 0.07553  | 0.048059 | 0.30002  | 0.035616 | 0.44258  | 0.16743  |
| -0.04241 | 0.36051 | -0.08868 | 0.05548  | 0.028899 | 0.53331  | -0.14955 | 0.00119  | 0.037954 |
| -0.01213 | 0.79372 | 0.007802 | 0.86647  | 0.042502 | 0.35945  | -0.03863 | 0.40493  | 0.000871 |
| 0.084118 | 0.06935 | 0.025073 | 0.58888  | 0.081711 | 0.07773  | -0.00621 | 0.89353  | -0.0096  |
| 0.07148  | 0.12295 | 0.064528 | 0.16387  | 0.121231 | 0.00873  | 0.06802  | 0.14219  | 0.022004 |
| 0.010492 | 0.82111 | 0.110119 | 0.01729  | 0.093342 | 0.04379  | 0.052251 | 0.25978  | -0.14521 |
| -0.02255 | 0.62699 | 0.072789 | 0.11622  | -0.01191 | 0.79748  | 0.05082  | 0.27308  | -0.14607 |
| -0.04416 | 0.341   | 0.011686 | 0.80113  | 0.00353  | 0.93936  | -0.02812 | 0.54435  | -0.15173 |
| 0.010842 | 0.81523 | 0.132265 | 0.00419  | 0.089108 | 0.05432  | 0.213577 | 3.21E-06 | 0.038168 |
| 0.034349 | 0.45898 | 0.10097  | 0.02913  | 0.075475 | 0.10332  | 0.004124 | 0.92918  | -0.06075 |
| -0.03343 | 0.4711  | 0.068111 | 0.14165  | -0.07328 | 0.11378  | 0.026738 | 0.56436  | -0.27042 |
| 0.120112 | 0.00937 | 0.242381 | 1.14E-07 | 0.19056  | 3.40E-05 | 0.269663 | 3.18E-09 | 0.167727 |
| 0.071207 | 0.12438 | 0.133487 | 0.00385  | 0.238948 | 1.73E-07 | 0.040058 | 0.38776  | 0.060076 |
| -0.02916 | 0.52956 | -0.1422  | 0.00207  | 0.023571 | 0.6114   | -0.12087 | 0.00894  | 0.093127 |
| 0.118484 | 0.01039 | 0.175793 | 0.00013  | 0.153115 | 0.0009   | 0.207453 | 6.17E-06 | 0.219864 |
| -0.02131 | 0.64597 | -0.121   | 0.00886  | -0.14548 | 0.00162  | -0.12085 | 0.00895  | -0.11797 |
| -0.01412 | 0.76088 | -0.01937 | 0.6763   | -0.05256 | 0.25697  | 0.024965 | 0.59049  | -0.06649 |
| -0.03949 | 0.39458 | -0.06206 | 0.18063  | -0.0272  | 0.55766  | -0.06195 | 0.18138  | 0.012387 |
| -0.01447 | 0.75513 | 0.011736 | 0.80031  | 0.050494 | 0.27617  | 0.009775 | 0.83314  | -0.0319  |
| -0.09587 | 0.03835 | -0.06127 | 0.18622  | -0.03279 | 0.47963  | -0.03536 | 0.44589  | -0.12503 |
| 0.003052 | 0.94755 | -0.00597 | 0.89754  | 0.077653 | 0.09371  | -0.01039 | 0.82273  | -0.03425 |
| -0.09512 | 0.0399  | 2.14E-05 | 0.99963  | -0.12204 | 0.00829  | 0.060847 | 0.18931  | -0.0007  |
| -0.0748  | 0.10646 | -0.19172 | 3.03E-05 | -0.16109 | 0.00047  | -0.24076 | 1.39E-07 | -0.14672 |
| -0.03536 | 0.44584 | -0.04139 | 0.37216  | -0.04504 | 0.33142  | -0.07989 | 0.0846   | 0.097868 |
| -0.01093 | 0.8138  | -0.04746 | 0.30606  | -0.09855 | 0.03323  | -0.05306 | 0.25251  | -0.02832 |
| -0.02959 | 0.52361 | 0.060874 | 0.18912  | 0.053456 | 0.24894  | 0.092104 | 0.04667  | 0.052486 |
| -0.04118 | 0.37459 | -0.01346 | 0.77168  | -0.01043 | 0.82211  | 0.006558 | 0.8876   | -0.0107  |
| -0.04639 | 0.3171  | -0.19442 | 2.33E-05 | 0.028941 | 0.5327   | -0.21748 | 2.09E-06 | 0.040411 |
| -0.09138 | 0.04843 | -0.10877 | 0.01871  | -0.1408  | 0.00229  | -0.11211 | 0.01536  | -0.12571 |
| -0.06294 | 0.17449 | 0.062936 | 0.17454  | 0.060843 | 0.18935  | 0.171474 | 0.0002   | 0.310521 |
| 0.061412 | 0.18523 | -0.00892 | 0.84747  | 0.040293 | 0.38498  | -0.04366 | 0.34648  | 0.013874 |
| -0.05556 | 0.23075 | 0.083999 | 0.06974  | 0.057441 | 0.21535  | 0.152848 | 0.00092  | -0.00168 |
| -0.01532 | 0.74131 | -0.03698 | 0.42528  | -0.13606 | 0.00322  | -0.00188 | 0.96775  | -0.04101 |
| 0.139824 | 0.00246 | 0.285732 | 3.18E-10 | 0.15964  | 0.00053  | 0.359236 | 1.13E-15 | 0.062102 |
| -0.03812 | 0.41116 | 0.012998 | 0.77936  | 0.010143 | 0.82695  | 0.044526 | 0.337    | -0.03136 |
| -0.05728 | 0.21667 | 0.037704 | 0.41628  | -0.03141 | 0.49831  | 0.031526 | 0.49674  | -0.12823 |



|          |          |          |          |          |          |          |          |          |
|----------|----------|----------|----------|----------|----------|----------|----------|----------|
| 0.153584 | 0.00087  | 0.122755 | 0.00791  | 0.097266 | 0.03562  | 0.089369 | 0.05361  | 0.086741 |
| 0.010348 | 0.82351  | -0.03423 | 0.46053  | 0.041578 | 0.36999  | -0.01679 | 0.71736  | -0.04714 |
| -0.0739  | 0.11072  | 0.028815 | 0.5345   | -0.02959 | 0.52353  | 0.05266  | 0.25607  | -0.18251 |
| -0.02285 | 0.62227  | -0.06337 | 0.17161  | -0.01672 | 0.71852  | -0.01098 | 0.81291  | 0.099426 |
| -0.08861 | 0.05568  | -0.07818 | 0.09149  | 0.079693 | 0.08538  | -0.13213 | 0.00423  | 0.112563 |
| 0.003894 | 0.93311  | 0.128373 | 0.00547  | 0.083702 | 0.07074  | 0.130172 | 0.00484  | -0.05218 |
| 0.077499 | 0.09437  | 0.037844 | 0.41454  | 0.004708 | 0.91918  | 0.10072  | 0.02953  | 0.183714 |
| 0.064311 | 0.16529  | 0.179412 | 9.68E-05 | 0.202925 | 9.89E-06 | 0.224346 | 9.69E-07 | 0.202923 |
| 0.028412 | 0.54023  | 0.199912 | 1.35E-05 | 0.167859 | 0.00027  | 0.264347 | 6.60E-09 | 0.169219 |
| -0.00012 | 0.99797  | 0.272985 | 2.00E-09 | 0.218787 | 1.81E-06 | 0.292297 | 1.19E-10 | 0.131167 |
| 0.021172 | 0.64814  | -0.01243 | 0.78874  | -0.13901 | 0.00261  | -0.055   | 0.23548  | 0.001916 |
| -0.01323 | 0.7755   | 0.043746 | 0.34554  | 0.111227 | 0.01619  | 0.105805 | 0.02221  | -0.03246 |
| 0.047744 | 0.30321  | 0.004541 | 0.92204  | -0.08891 | 0.05486  | -0.05082 | 0.27308  | -0.13086 |
| 0.044033 | 0.34239  | 0.07884  | 0.08879  | 0.010063 | 0.8283   | 0.06007  | 0.19504  | -0.04044 |
| -0.04815 | 0.29916  | -0.11497 | 0.01292  | 0.032194 | 0.48766  | -0.09806 | 0.03413  | 0.049194 |
| -0.06689 | 0.14894  | 0.003795 | 0.93482  | -0.08066 | 0.08165  | 0.026707 | 0.56482  | -0.14349 |
| -0.12744 | 0.00582  | 0.046527 | 0.31572  | -0.04041 | 0.38357  | 0.116181 | 0.01199  | -0.00886 |
| 0.018128 | 0.69599  | 0.01586  | 0.73247  | 0.101209 | 0.02875  | 0.001681 | 0.9711   | 0.033969 |
| -0.0538  | 0.24591  | -0.08511 | 0.06612  | -0.0101  | 0.82762  | -0.07515 | 0.10481  | 0.058624 |
| -0.12547 | 0.00663  | -0.04951 | 0.28565  | -0.02414 | 0.60276  | -0.03886 | 0.40207  | -0.01217 |
| 0.041969 | 0.36551  | 0.085744 | 0.06411  | 0.042358 | 0.36107  | 0.069553 | 0.13339  | -0.06981 |
| -0.0173  | 0.70931  | 0.01887  | 0.68421  | -0.03162 | 0.49551  | 0.033436 | 0.47101  | -0.11767 |
| -0.00301 | 0.94822  | -0.10126 | 0.02867  | -0.01104 | 0.81196  | -0.09223 | 0.04637  | -0.04127 |
| -0.03783 | 0.4147   | 0.008419 | 0.85601  | -0.0155  | 0.73838  | 0.022253 | 0.63147  | -0.07917 |
| -0.06003 | 0.19535  | -0.09544 | 0.03923  | 0.070893 | 0.12606  | -0.11269 | 0.01483  | 0.028725 |
| -0.03633 | 0.43345  | 0.007021 | 0.87972  | 0.043415 | 0.34921  | 0.02978  | 0.52089  | -0.07373 |
| -0.03182 | 0.49269  | -0.16914 | 0.00024  | 0.042626 | 0.35804  | -0.12129 | 0.0087   | 0.206465 |
| -0.07018 | 0.12995  | -0.15421 | 0.00083  | 0.00337  | 0.9421   | -0.10291 | 0.02616  | 0.147137 |
| 0.02818  | 0.54355  | -0.06476 | 0.16234  | -0.01787 | 0.70011  | -0.05775 | 0.21291  | 0.011633 |
| 0.02851  | 0.53883  | -0.11325 | 0.01434  | 0.038935 | 0.40121  | -0.06167 | 0.18337  | 0.153197 |
| 0.014427 | 0.75584  | -0.01244 | 0.78861  | -0.00985 | 0.83192  | -0.06684 | 0.14928  | -0.04572 |
| -0.07611 | 0.10043  | -0.11094 | 0.01646  | -0.06757 | 0.14485  | -0.24398 | 9.33E-08 | -0.13575 |
| -0.12391 | 0.00735  | -0.12593 | 0.00643  | -0.2101  | 4.66E-06 | -0.07647 | 0.09883  | -0.24543 |
| -0.04026 | 0.38537  | 0.011229 | 0.80876  | -0.01379 | 0.76623  | 0.044903 | 0.33292  | -0.1157  |
| -0.10639 | 0.02147  | -0.19071 | 3.35E-05 | -0.07155 | 0.12259  | -0.24898 | 4.97E-08 | 0.038078 |
| 0.102585 | 0.02664  | 0.036279 | 0.43413  | 0.055276 | 0.23317  | 0.052551 | 0.25705  | -0.02786 |
| 0.019559 | 0.67332  | -0.11185 | 0.01559  | 0.047853 | 0.3021   | -0.19386 | 2.46E-05 | -0.05244 |
| -0.0143  | 0.75799  | -0.02711 | 0.55893  | 0.021071 | 0.6497   | 0.019295 | 0.67749  | 0.011468 |
| -0.00718 | 0.87701  | 0.117105 | 0.01132  | -0.00345 | 0.94079  | 0.118071 | 0.01066  | 0.028725 |
| 0.045493 | 0.32661  | -0.08092 | 0.08064  | 0.056845 | 0.22015  | -0.16582 | 0.00032  | 0.001575 |
| -0.1302  | 0.00483  | -0.08063 | 0.08177  | -0.05793 | 0.21143  | -0.0846  | 0.06777  | -0.08011 |
| -0.04671 | 0.31384  | 0.078039 | 0.09209  | -0.12165 | 0.0085   | 0.114239 | 0.0135   | -0.07222 |
| 0.179691 | 9.44E-05 | 0.098345 | 0.03361  | 0.104321 | 0.02416  | 0.086615 | 0.06145  | -0.03077 |
| -0.07035 | 0.12897  | -0.07597 | 0.10106  | -0.14209 | 0.00208  | -0.05143 | 0.26735  | -0.11343 |
| -0.023   | 0.62005  | 0.169256 | 0.00024  | 0.190144 | 3.54E-05 | 0.214524 | 2.90E-06 | 0.179118 |

|          |         |          |         |          |          |          |          |          |
|----------|---------|----------|---------|----------|----------|----------|----------|----------|
| -0.00964 | 0.83545 | -0.03314 | 0.47494 | -0.03692 | 0.42604  | -0.02132 | 0.64584  | 0.039281 |
| 0.038572 | 0.40562 | 0.007166 | 0.87725 | 0.159628 | 0.00054  | -0.02178 | 0.63867  | -0.01445 |
| -0.0375  | 0.41887 | -0.06957 | 0.13329 | -0.05338 | 0.24963  | -0.01569 | 0.7353   | 0.034107 |
| 0.019576 | 0.67306 | -0.09417 | 0.04193 | 0.017181 | 0.71115  | -0.10339 | 0.02546  | 0.091474 |
| -0.08515 | 0.06599 | 0.023613 | 0.61077 | 0.015153 | 0.74397  | 0.055725 | 0.22939  | -0.07563 |
| 0.02581  | 0.57797 | -0.06975 | 0.13231 | -0.0703  | 0.12929  | -0.04214 | 0.36355  | 0.064244 |
| 0.059853 | 0.19666 | 0.067586 | 0.14476 | 0.027994 | 0.54621  | 0.067649 | 0.14439  | 0.034517 |
| -0.02393 | 0.60594 | -0.1742  | 0.00015 | -0.18574 | 5.38E-05 | -0.17356 | 0.00016  | -0.069   |
| 0.007391 | 0.87343 | -0.08524 | 0.06569 | -0.01239 | 0.78946  | -0.02761 | 0.55179  | 0.015895 |
| -0.07442 | 0.10824 | -0.15986 | 0.00053 | -0.17677 | 0.00012  | -0.16675 | 0.0003   | -0.0354  |
| 0.045428 | 0.3273  | -0.03287 | 0.47851 | 0.060346 | 0.19299  | -0.02181 | 0.63835  | 0.192576 |
| 0.031139 | 0.50205 | 0.030347 | 0.51299 | -0.014   | 0.7629   | -0.01597 | 0.73069  | 0.001486 |
| 0.027356 | 0.55539 | 0.100617 | 0.0297  | 0.18005  | 9.13E-05 | 0.19504  | 2.19E-05 | 0.153419 |
| -0.03655 | 0.43071 | 0.0506   | 0.27516 | 0.069301 | 0.13481  | 0.147712 | 0.00137  | 0.102983 |
| 0.075512 | 0.10315 | -0.04951 | 0.28566 | -0.0251  | 0.58846  | -0.04802 | 0.30039  | 0.100466 |
| -0.03973 | 0.39164 | 0.000703 | 0.98792 | -0.04524 | 0.32932  | 0.009175 | 0.84324  | -0.14399 |
| -0.02503 | 0.58947 | 0.030895 | 0.5054  | 0.03672  | 0.42855  | 0.042937 | 0.35454  | -0.07387 |
| 0.028518 | 0.53872 | -0.08711 | 0.05997 | 0.000939 | 0.98385  | -0.04215 | 0.36343  | 0.0997   |
| -0.03275 | 0.48015 | -0.01481 | 0.74956 | -0.09137 | 0.04846  | -0.00407 | 0.93003  | -0.11982 |
| 0.032564 | 0.48268 | 0.032913 | 0.47799 | 0.107073 | 0.02065  | 0.050642 | 0.27476  | 0.11329  |
| -0.03407 | 0.46261 | 0.016043 | 0.72951 | -0.09188 | 0.04722  | 0.062729 | 0.17596  | -0.11334 |
| 0.00036  | 0.99381 | -0.01761 | 0.7043  | -0.08027 | 0.08312  | 0.112304 | 0.01518  | 0.090723 |
| -0.02786 | 0.54816 | -0.12666 | 0.00613 | 0.02553  | 0.5821   | -0.20678 | 6.63E-06 | 0.037787 |
| -0.08913 | 0.05426 | -0.12308 | 0.00775 | -0.08341 | 0.07172  | -0.1888  | 4.02E-05 | -0.17746 |
| -0.05153 | 0.26647 | 0.026824 | 0.56311 | -0.01347 | 0.77157  | 0.07359  | 0.11224  | -0.09919 |
| -0.02792 | 0.54721 | 0.026643 | 0.56575 | 0.114725 | 0.01311  | 0.057476 | 0.21507  | 0.036623 |
| -0.1177  | 0.01091 | -0.06966 | 0.13283 | -0.19739 | 1.73E-05 | 0.038372 | 0.40806  | -0.09808 |
| -0.02483 | 0.59249 | -0.08894 | 0.05478 | 0.032832 | 0.47907  | -0.13308 | 0.00396  | 0.131403 |
| -0.07903 | 0.08802 | -0.07588 | 0.10146 | 0.048823 | 0.2924   | -0.15083 | 0.00108  | -0.0352  |
| -0.0391  | 0.39916 | -0.03696 | 0.42557 | 0.024362 | 0.59949  | -0.0117  | 0.80092  | -0.04542 |
| -0.04958 | 0.28501 | -0.03671 | 0.42868 | -0.0145  | 0.75462  | -0.00973 | 0.83383  | -0.09854 |
| -0.08318 | 0.07252 | -0.01951 | 0.67418 | -0.07268 | 0.11675  | 0.029064 | 0.53098  | -0.04543 |
| -0.04826 | 0.29802 | -0.03871 | 0.40389 | 0.058214 | 0.20922  | -0.0302  | 0.51507  | -0.0444  |
| -0.11235 | 0.01514 | -0.02781 | 0.54879 | -0.21251 | 3.60E-06 | -0.07371 | 0.11165  | -0.13225 |
| 0.021911 | 0.63671 | -0.0215  | 0.64302 | 0.064496 | 0.16408  | -0.02692 | 0.56178  | 0.078917 |
| -0.00831 | 0.85783 | -0.01077 | 0.81643 | -0.01088 | 0.81461  | 0.007525 | 0.87116  | -0.05845 |
| 0.003325 | 0.94286 | -0.06821 | 0.14105 | -0.11752 | 0.01103  | -0.00563 | 0.90341  | -0.00143 |
| -0.00268 | 0.954   | 0.008736 | 0.85066 | -0.0073  | 0.875    | -0.02693 | 0.56159  | -0.16839 |
| -0.05531 | 0.23285 | -0.01523 | 0.74264 | 0.017291 | 0.70939  | -0.00085 | 0.98541  | 0.004775 |
| -0.023   | 0.62006 | -0.09908 | 0.03231 | -0.01186 | 0.79833  | -0.14698 | 0.00145  | -0.07793 |
| -0.04393 | 0.34352 | 0.020215 | 0.66304 | 0.014923 | 0.74772  | 0.060928 | 0.18872  | -0.08527 |
| 0.074679 | 0.10701 | -0.03254 | 0.48296 | 0.059114 | 0.20226  | -0.1178  | 0.01084  | -0.12763 |
| -0.02039 | 0.66025 | -0.02808 | 0.54493 | 0.027842 | 0.54839  | -0.00862 | 0.85261  | -0.0235  |
| 0.011963 | 0.79653 | 0.038264 | 0.40939 | 0.052408 | 0.25835  | -0.08482 | 0.06703  | -0.12669 |
| -0.0349  | 0.45178 | -0.0058  | 0.90058 | -0.01355 | 0.77028  | 0.03054  | 0.51031  | 0.061683 |

|          |         |          |          |          |          |          |          |          |
|----------|---------|----------|----------|----------|----------|----------|----------|----------|
| 0.099873 | 0.03094 | -0.02777 | 0.54938  | 0.04074  | 0.37973  | 0.01025  | 0.82516  | 0.106601 |
| -0.10969 | 0.01773 | 0.000464 | 0.99202  | -0.12906 | 0.00522  | -0.05866 | 0.20573  | -0.28526 |
| 0.046612 | 0.31483 | -0.05272 | 0.2555   | -0.06583 | 0.15552  | -0.06239 | 0.17829  | 0.088376 |
| 0.040702 | 0.38016 | -0.07618 | 0.10012  | -0.0451  | 0.33085  | -0.08213 | 0.07622  | 0.039549 |
| 0.084401 | 0.06841 | 0.197651 | 1.69E-05 | 0.088703 | 0.05543  | 0.139003 | 0.00261  | 0.029371 |
| -0.03704 | 0.42455 | -0.06913 | 0.13579  | -0.09832 | 0.03365  | -0.04616 | 0.31956  | -0.00207 |
| -0.02753 | 0.55282 | -0.07509 | 0.10508  | -0.06698 | 0.14841  | -0.04106 | 0.376    | -0.04487 |
| 0.035549 | 0.44344 | 0.206674 | 6.70E-06 | 0.137621 | 0.00288  | 0.157317 | 0.00065  | 0.02588  |
| -0.08    | 0.08416 | 0.01262  | 0.78562  | -0.05844 | 0.20747  | 0.074558 | 0.10759  | -0.10486 |
| -0.01784 | 0.70058 | -0.08474 | 0.06731  | -0.0642  | 0.166    | -0.06802 | 0.1422   | -0.08729 |
| 0.005033 | 0.91362 | -0.05531 | 0.23288  | 0.105917 | 0.02207  | -0.10909 | 0.01836  | 0.053944 |
| -0.04799 | 0.30073 | -0.07086 | 0.12622  | -0.01678 | 0.7176   | -0.14957 | 0.00119  | -0.1006  |
| 0.02232  | 0.63044 | -0.04335 | 0.34998  | 0.010557 | 0.82002  | -0.07291 | 0.11563  | -0.02876 |
| -0.04185 | 0.3669  | -0.10983 | 0.01758  | -0.03791 | 0.41372  | -0.08058 | 0.08195  | -0.02551 |
| -0.03673 | 0.4284  | -0.15415 | 0.00083  | 0.004371 | 0.92495  | -0.20215 | 1.07E-05 | 0.101672 |
| -0.05101 | 0.27133 | -0.11735 | 0.01115  | -0.01591 | 0.73166  | -0.13427 | 0.00365  | 0.054812 |
| -0.04344 | 0.34889 | -0.08623 | 0.0626   | 0.03967  | 0.39237  | -0.12655 | 0.00617  | 0.040476 |
| -0.13954 | 0.00251 | -0.05221 | 0.26019  | -0.27219 | 2.24E-09 | -0.05478 | 0.23742  | -0.20656 |
| -0.01576 | 0.73408 | -0.06553 | 0.1574   | -0.00645 | 0.88939  | -0.05203 | 0.26185  | 0.060275 |
| -0.04107 | 0.37588 | 0.00196  | 0.96631  | 0.048596 | 0.29465  | 0.036808 | 0.42745  | -0.07162 |
| -0.0262  | 0.57228 | -0.02751 | 0.55322  | -0.00187 | 0.96794  | -0.06969 | 0.13265  | -0.11395 |
| -0.11954 | 0.00972 | -0.06685 | 0.14921  | -0.18847 | 4.15E-05 | -0.03598 | 0.43796  | -0.13844 |
| -0.10366 | 0.02508 | -0.13172 | 0.00435  | -0.14566 | 0.0016   | -0.12927 | 0.00514  | -0.11976 |
| 0.051127 | 0.27019 | -0.16397 | 0.00037  | -0.0697  | 0.13257  | -0.19204 | 2.94E-05 | 0.04135  |
| 0.042115 | 0.36383 | 0.218221 | 1.93E-06 | 0.225468 | 8.53E-07 | 0.20209  | 1.08E-05 | 0.008977 |
| -0.03981 | 0.39075 | 0.011345 | 0.80683  | -0.01383 | 0.7657   | -0.08467 | 0.06754  | -0.04254 |
| 0.002833 | 0.95131 | 0.000575 | 0.99012  | 0.078675 | 0.08946  | 0.002433 | 0.95818  | -0.02626 |
| 0.036862 | 0.42677 | -0.03091 | 0.50522  | -0.02605 | 0.57449  | -0.0675  | 0.14526  | -0.03529 |
| 0.046926 | 0.31157 | 0.030746 | 0.50745  | 0.069757 | 0.13226  | 0.055482 | 0.23143  | 0.171038 |
| -0.04976 | 0.28323 | -0.1692  | 0.00024  | 0.041413 | 0.37189  | -0.23038 | 4.83E-07 | 0.065013 |
| 0.078626 | 0.08966 | -0.0765  | 0.09869  | 0.145369 | 0.00163  | -0.0443  | 0.33942  | 0.07008  |
| -0.05996 | 0.19583 | -0.1669  | 0.00029  | 0.001416 | 0.97566  | -0.16235 | 0.00043  | 0.039611 |
| 0.120103 | 0.00938 | 0.154948 | 0.00078  | 0.277664 | 1.03E-09 | 0.152589 | 0.00094  | 0.035443 |
| 0.049462 | 0.28612 | -0.09488 | 0.04041  | 0.160053 | 0.00052  | -0.16922 | 0.00024  | 0.128829 |
| -0.11638 | 0.01184 | -0.0144  | 0.75634  | 0.007876 | 0.8652   | -0.04347 | 0.34856  | 0.018776 |
| -0.03289 | 0.47836 | -0.11654 | 0.01173  | 0.036266 | 0.43429  | -0.23057 | 4.72E-07 | -0.11083 |
| -0.14728 | 0.00141 | -0.0935  | 0.04342  | -0.15273 | 0.00093  | -0.08609 | 0.06304  | -0.1078  |
| -0.05877 | 0.2049  | -0.09311 | 0.04431  | 0.024913 | 0.59125  | -0.12412 | 0.00724  | 0.025486 |
| -0.0643  | 0.16535 | 0.023034 | 0.61954  | 0.014889 | 0.74828  | 0.000843 | 0.9855   | -0.05762 |
| 0.095543 | 0.03903 | -0.02377 | 0.6084   | 0.084794 | 0.06713  | -0.08304 | 0.073    | -0.2702  |
| -0.03428 | 0.45993 | -0.17654 | 0.00013  | 0.064206 | 0.16599  | -0.23359 | 3.30E-07 | 0.076118 |
| -0.06575 | 0.15602 | -0.08848 | 0.05606  | 0.026049 | 0.57445  | -0.17737 | 0.00012  | -0.02364 |
| -0.01626 | 0.72601 | -0.1838  | 6.46E-05 | 0.04772  | 0.30345  | -0.28633 | 2.91E-10 | -0.03817 |
| -0.02559 | 0.58118 | -0.05244 | 0.25808  | 0.095224 | 0.03969  | -0.15839 | 0.00059  | -0.01974 |
| 0.052043 | 0.26169 | 0.050373 | 0.27732  | 0.175903 | 0.00013  | -0.02943 | 0.5258   | 0.026731 |

|          |          |          |          |          |          |          |          |          |
|----------|----------|----------|----------|----------|----------|----------|----------|----------|
| -0.02208 | 0.63408  | -0.18266 | 7.18E-05 | -0.02432 | 0.60018  | -0.2427  | 1.09E-07 | -0.06549 |
| 0.006826 | 0.88304  | -0.08103 | 0.08025  | 0.032187 | 0.48775  | -0.0966  | 0.03691  | -0.10899 |
| -0.15031 | 0.00112  | -0.10464 | 0.02373  | -0.12228 | 0.00816  | -0.12326 | 0.00766  | -0.09751 |
| 0.000989 | 0.983    | -0.10834 | 0.01919  | 0.062196 | 0.17967  | -0.18135 | 8.10E-05 | -0.0903  |
| -0.09939 | 0.03176  | 0.002558 | 0.95603  | -0.02443 | 0.59851  | -0.03512 | 0.44893  | -0.01861 |
| 0.014269 | 0.75843  | -0.13893 | 0.00262  | 0.014744 | 0.75065  | -0.24142 | 1.28E-07 | -0.1178  |
| -0.08278 | 0.07391  | 0.018083 | 0.69672  | 0.016685 | 0.71912  | -0.03439 | 0.45846  | -0.11823 |
| -0.12418 | 0.00721  | -0.1065  | 0.02135  | -0.1494  | 0.0012   | -0.1297  | 0.005    | -0.14537 |
| 0.054048 | 0.24373  | 0.007939 | 0.86414  | 0.22036  | 1.52E-06 | -0.15287 | 0.00092  | 0.063276 |
| 0.036876 | 0.4266   | 0.152825 | 0.00092  | 0.210801 | 4.33E-06 | 0.027367 | 0.55524  | 0.012609 |
| -0.00782 | 0.8662   | -0.15304 | 0.00091  | 0.042744 | 0.35671  | -0.29929 | 4.05E-11 | 0.015852 |
| -0.07337 | 0.11332  | -0.0386  | 0.40534  | 0.069235 | 0.13518  | -0.02405 | 0.60421  | 0.141409 |
| 0.014593 | 0.75312  | -0.05246 | 0.25784  | 0.117993 | 0.01071  | -0.14576 | 0.00159  | 0.133759 |
| -0.01492 | 0.74777  | -0.10614 | 0.02179  | 0.04219  | 0.36299  | -0.19966 | 1.38E-05 | -0.08322 |
| 0.054954 | 0.23591  | -0.0443  | 0.33944  | 0.189548 | 3.75E-05 | -0.192   | 2.95E-05 | 0.031708 |
| -0.15611 | 0.00071  | -0.16473 | 0.00035  | -0.17141 | 0.0002   | -0.09879 | 0.03281  | -0.15524 |
| -0.06373 | 0.16913  | -0.15508 | 0.00077  | 0.063121 | 0.17328  | -0.22675 | 7.36E-07 | -0.00723 |
| 0.055062 | 0.23499  | 0.003079 | 0.9471   | 0.220734 | 1.46E-06 | -0.02565 | 0.58034  | 0.111465 |
| -0.06817 | 0.1413   | -0.10733 | 0.02034  | -0.03959 | 0.39336  | -0.08421 | 0.06906  | 0.000528 |
| -0.05273 | 0.25541  | -0.12418 | 0.00721  | 0.06801  | 0.14225  | -0.20721 | 6.33E-06 | -0.03391 |
| -0.02659 | 0.56655  | -0.1697  | 0.00023  | 0.058595 | 0.20625  | -0.22276 | 1.16E-06 | 0.037313 |
| 0.089453 | 0.05338  | 0.231334 | 4.32E-07 | 0.265242 | 5.84E-09 | 0.059036 | 0.20285  | -0.03364 |
| 0.042615 | 0.35816  | 0.001282 | 0.97796  | 0.142921 | 0.00196  | -0.07029 | 0.12933  | 0.06315  |
| 0.00479  | 0.91777  | 0.021691 | 0.64011  | 0.162685 | 0.00042  | -0.0411  | 0.37556  | -0.08338 |
| -0.06542 | 0.15814  | -0.09948 | 0.03161  | 0.045065 | 0.33118  | -0.04102 | 0.37647  | 0.059185 |
| -0.06075 | 0.19002  | 0.002396 | 0.95882  | 0.009722 | 0.83404  | -0.05423 | 0.24218  | -0.13346 |
| -0.06723 | 0.14688  | -0.21757 | 2.07E-06 | -0.01568 | 0.73544  | -0.32912 | 2.93E-13 | -0.04945 |
| -0.09637 | 0.03736  | -0.07835 | 0.09078  | -0.00646 | 0.88928  | -0.10165 | 0.02806  | 0.010627 |
| 0.033069 | 0.4759   | -0.14486 | 0.0017   | -0.00937 | 0.83998  | -0.16091 | 0.00048  | -0.0121  |
| 0.032314 | 0.48604  | -0.04764 | 0.30425  | 0.159479 | 0.00054  | -0.20871 | 5.40E-06 | -0.00315 |
| 0.001047 | 0.982    | -0.13648 | 0.00312  | 0.116647 | 0.01165  | -0.22153 | 1.33E-06 | 0.076708 |
| -0.03261 | 0.48199  | -0.11762 | 0.01097  | -0.00242 | 0.95841  | -0.21398 | 3.07E-06 | -0.02239 |
| -0.10663 | 0.02119  | -0.26899 | 3.49E-09 | -0.19628 | 1.94E-05 | -0.25109 | 3.80E-08 | -0.10971 |
| 0.171815 | 0.00019  | 0.004962 | 0.91484  | 0.208685 | 5.42E-06 | -0.00705 | 0.87931  | 0.043348 |
| 0.121272 | 0.00871  | -0.02807 | 0.54514  | 0.09796  | 0.03431  | -0.0341  | 0.46221  | 0.041109 |
| 0.066262 | 0.15281  | -0.01161 | 0.80245  | 0.134114 | 0.00369  | -0.02339 | 0.61409  | 0.034255 |
| 0.077724 | 0.09341  | 0.024417 | 0.59866  | 0.123629 | 0.00748  | 0.040635 | 0.38095  | 0.115513 |
| 0.109632 | 0.01779  | -0.01905 | 0.68141  | 0.106837 | 0.02093  | 0.00637  | 0.8908   | 0.117069 |
| 0.074502 | 0.10785  | -0.0433  | 0.35043  | 0.065785 | 0.1558   | -0.05049 | 0.27622  | 0.036633 |
| 0.202253 | 1.06E-05 | 0.059705 | 0.19777  | 0.224586 | 9.43E-07 | 0.003626 | 0.93771  | 0.046702 |
| 0.118544 | 0.01035  | -0.06885 | 0.13736  | 0.096169 | 0.03776  | -0.05571 | 0.22949  | 0.087366 |
| 0.148772 | 0.00126  | 0.011252 | 0.80838  | 0.172606 | 0.00018  | 0.001399 | 0.97594  | 0.060459 |
| 0.216574 | 2.31E-06 | 0.006489 | 0.88878  | 0.172313 | 0.00018  | -0.00119 | 0.97946  | 0.076404 |
| 0.230322 | 4.86E-07 | 0.025089 | 0.58863  | 0.094164 | 0.04195  | 0.05479  | 0.23731  | -0.00047 |
| 0.098373 | 0.03356  | -0.02592 | 0.57639  | 0.128806 | 0.00531  | -0.01743 | 0.70716  | 0.040969 |

|          |          |          |          |          |          |          |          |          |
|----------|----------|----------|----------|----------|----------|----------|----------|----------|
| 0.241813 | 1.22E-07 | 0.061686 | 0.18327  | 0.208944 | 5.27E-06 | 0.037727 | 0.41599  | 0.036818 |
| 0.150986 | 0.00106  | 0.034851 | 0.45245  | 0.128707 | 0.00534  | 0.012471 | 0.7881   | 0.057374 |
| 0.200409 | 1.28E-05 | 0.028998 | 0.53191  | 0.21173  | 3.92E-06 | 0.028721 | 0.53583  | 0.109844 |
| 0.112689 | 0.01483  | -0.01521 | 0.74299  | 0.167339 | 0.00028  | 0.030724 | 0.50776  | 0.120895 |
| 0.09138  | 0.04843  | -0.09085 | 0.04975  | 0.070168 | 0.12999  | -0.15733 | 0.00064  | 0.036433 |
| 0.174306 | 0.00015  | 0.03099  | 0.50409  | 0.216968 | 2.22E-06 | 0.022936 | 0.62104  | 0.081994 |
| 0.164823 | 0.00035  | -0.00731 | 0.87476  | 0.081935 | 0.07692  | -0.02922 | 0.5288   | 0.004089 |
| 0.1236   | 0.00749  | 0.04862  | 0.29441  | 0.115271 | 0.01268  | 0.021621 | 0.64118  | 0.032348 |
| 0.236129 | 2.44E-07 | 0.085733 | 0.06415  | 0.184708 | 5.93E-05 | 0.107291 | 0.02039  | 0.074594 |
| 0.170407 | 0.00022  | 0.007319 | 0.87466  | 0.138953 | 0.00262  | 0.012015 | 0.79567  | 0.040673 |
| 0.199355 | 1.42E-05 | 0.074691 | 0.10696  | 0.146104 | 0.00155  | 0.051015 | 0.27124  | 0.132131 |
| 0.162515 | 0.00042  | 0.012793 | 0.78276  | 0.151152 | 0.00105  | 0.009219 | 0.8425   | 0.045962 |
| 0.1761   | 0.00013  | 0.004529 | 0.92224  | 0.145557 | 0.00161  | 0.05171  | 0.26476  | 0.055739 |
| 0.144414 | 0.00175  | -0.04826 | 0.29796  | 0.134552 | 0.00358  | -0.07447 | 0.10801  | 0.052317 |
| 0.184773 | 5.90E-05 | 0.041506 | 0.37082  | 0.197635 | 1.69E-05 | 0.019277 | 0.67778  | 0.062199 |
| 0.300884 | 3.15E-11 | 0.15492  | 0.00078  | 0.367053 | 2.43E-16 | 0.075168 | 0.10473  | 0.098976 |
| 0.19162  | 3.07E-05 | 0.004712 | 0.91911  | 0.154085 | 0.00084  | -0.03438 | 0.45857  | 0.033504 |
| 0.137614 | 0.00288  | 0.056912 | 0.21961  | 0.122989 | 0.0078   | 0.076742 | 0.09764  | 0.040266 |
| 0.058248 | 0.20896  | 0.148771 | 0.00126  | 0.14451  | 0.00174  | 0.056063 | 0.22657  | 0.040141 |
| 0.226102 | 7.93E-07 | 0.245406 | 7.81E-08 | 0.37252  | 8.06E-17 | 0.205907 | 7.26E-06 | 0.161984 |
| 0.256078 | 1.99E-08 | 0.32603  | 5.01E-13 | 0.371255 | 1.04E-16 | 0.297351 | 5.47E-11 | 0.185321 |
| 0.180482 | 8.78E-05 | 0.059887 | 0.1964   | 0.230174 | 4.94E-07 | 0.031001 | 0.50394  | 0.050015 |
| 0.103967 | 0.02465  | 0.028119 | 0.54442  | 0.228509 | 6.00E-07 | 0.020845 | 0.65321  | 0.106985 |
| 0.061797 | 0.18248  | 0.047579 | 0.30489  | 0.12794  | 0.00563  | 0.019869 | 0.66845  | 0.0177   |
| 0.117123 | 0.01131  | 0.015437 | 0.73934  | 0.16685  | 0.00029  | -0.02093 | 0.65191  | 0.027953 |
| 0.099981 | 0.03075  | 0.064719 | 0.16262  | 0.192192 | 2.90E-05 | 0.023984 | 0.60517  | 0.068561 |
| 0.100003 | 0.03072  | 0.007028 | 0.8796   | 0.157632 | 0.00063  | -0.03065 | 0.50873  | 0.024085 |
| 0.107482 | 0.02017  | -0.10185 | 0.02775  | 0.069522 | 0.13357  | -0.04235 | 0.36118  | 0.208415 |
| 0.178656 | 0.0001   | -0.00064 | 0.989    | 0.201862 | 1.10E-05 | -0.00527 | 0.90959  | 0.080865 |
| 0.185856 | 5.33E-05 | 0.005209 | 0.91062  | 0.182198 | 7.50E-05 | -0.00604 | 0.8965   | 0.083198 |
| 0.144315 | 0.00177  | 0.03602  | 0.43742  | 0.115546 | 0.01247  | 0.003718 | 0.93613  | 0.004241 |
| 0.178332 | 0.00011  | 0.015215 | 0.74296  | 0.192009 | 2.95E-05 | 0.016189 | 0.72714  | 0.086267 |
| 0.186835 | 4.85E-05 | 0.012919 | 0.78067  | 0.138783 | 0.00265  | -0.02103 | 0.65037  | 0.002835 |
| 0.14942  | 0.0012   | 0.0096   | 0.83608  | 0.092001 | 0.04692  | -0.0039  | 0.93304  | 0.041102 |
| 0.176531 | 0.00013  | -0.00707 | 0.87892  | 0.134454 | 0.0036   | 0.017894 | 0.69973  | 0.035568 |
| 0.212045 | 3.79E-06 | 0.008764 | 0.85018  | 0.160519 | 0.0005   | 0.032892 | 0.47828  | 0.085509 |
| 0.097451 | 0.03527  | -0.02669 | 0.56507  | 0.042125 | 0.36372  | -0.05589 | 0.22799  | 0.07275  |
| 0.135045 | 0.00346  | -0.04506 | 0.33123  | -0.00067 | 0.98841  | -0.05017 | 0.27931  | -0.02693 |
| 0.16252  | 0.00042  | -0.00571 | 0.90204  | 0.114924 | 0.01295  | -0.00298 | 0.94884  | 0.033349 |
| 0.34258  | 2.64E-14 | 0.044217 | 0.34036  | 0.186392 | 5.06E-05 | 0.057102 | 0.21806  | 0.117962 |
| 0.33344  | 1.37E-13 | 0.006269 | 0.89253  | 0.128791 | 0.00531  | 0.019401 | 0.67582  | 0.05094  |
| 0.153207 | 0.0009   | -0.0786  | 0.08977  | 0.13475  | 0.00353  | -0.11923 | 0.00991  | 0.075063 |
| 0.066053 | 0.15411  | 0.011666 | 0.80148  | 0.0476   | 0.30467  | 0.009046 | 0.84542  | 0.003488 |
| 0.125375 | 0.00667  | 0.056495 | 0.22301  | 0.154112 | 0.00083  | 0.042132 | 0.36365  | 0.063526 |
| 0.220842 | 1.44E-06 | 0.051231 | 0.26921  | 0.118652 | 0.01028  | 0.036032 | 0.43727  | 0.019549 |

|          |          |          |         |          |          |          |         |          |
|----------|----------|----------|---------|----------|----------|----------|---------|----------|
| 0.209536 | 4.95E-06 | 0.015068 | 0.74535 | 0.222796 | 1.16E-06 | -0.02096 | 0.65146 | 0.070585 |
| 0.239187 | 1.68E-07 | 0.027209 | 0.55752 | 0.182804 | 7.09E-05 | 0.008676 | 0.85167 | 0.036368 |
| 0.065914 | 0.15499  | -0.07876 | 0.08911 | 0.036063 | 0.43687  | -0.078   | 0.09225 | 0.007195 |
| 0.402999 | 1.16E-19 | 0.012421 | 0.78892 | 0.076155 | 0.10024  | 0.041145 | 0.375   | 0.064746 |
| -0.01537 | 0.74052  | -0.01782 | 0.70084 | -0.03099 | 0.50408  | -0.017   | 0.714   | -0.00867 |
| 0.168722 | 0.00025  | 0.024288 | 0.6006  | 0.165048 | 0.00034  | 0.014221 | 0.75922 | 0.041261 |
| 0.217084 | 2.19E-06 | 0.039825 | 0.39053 | 0.231856 | 4.06E-07 | 0.016609 | 0.72035 | 0.057716 |
| 0.156638 | 0.00068  | 0.046481 | 0.3162  | 0.185902 | 5.30E-05 | 0.037016 | 0.42484 | 0.095233 |
| 0.083486 | 0.07147  | 0.013596 | 0.7695  | 0.067124 | 0.14753  | 0.047538 | 0.3053  | 0.09023  |
| 0.194521 | 2.31E-05 | -0.04438 | 0.33855 | 0.021683 | 0.64023  | -0.0369  | 0.4263  | 0.116131 |
| 0.206    | 7.19E-06 | 0.066699 | 0.15012 | 0.21948  | 1.68E-06 | 0.033962 | 0.46406 | 0.095983 |
| 0.148279 | 0.00131  | -0.00617 | 0.89425 | 0.027733 | 0.54995  | -0.02906 | 0.53097 | 0.010346 |
| 0.123163 | 0.00771  | -0.04956 | 0.28512 | 0.050405 | 0.27702  | -0.08239 | 0.07527 | -0.00836 |
| 0.054063 | 0.2436   | 0.000736 | 0.98734 | 0.106071 | 0.02188  | 0.041436 | 0.37163 | 0.139658 |
| 0.195446 | 2.11E-05 | 0.028793 | 0.5348  | 0.2123   | 3.68E-06 | 0.012851 | 0.7818  | 0.086213 |
| 0.164948 | 0.00034  | 0.115839 | 0.01224 | 0.161125 | 0.00047  | 0.107784 | 0.01982 | 0.068465 |
| 0.131562 | 0.0044   | 0.113888 | 0.01379 | 0.177052 | 0.00012  | 0.06173  | 0.18296 | 0.087774 |
| 0.151463 | 0.00103  | 0.005286 | 0.90929 | 0.160352 | 0.0005   | -0.01697 | 0.7145  | 0.045188 |
| 0.155047 | 0.00077  | 0.019938 | 0.66738 | 0.227546 | 6.71E-07 | 0.002823 | 0.95149 | 0.041147 |
| 0.170617 | 0.00021  | 0.012953 | 0.78011 | 0.202275 | 1.06E-05 | -0.01209 | 0.79448 | 0.061322 |
| 0.167897 | 0.00027  | -0.04021 | 0.38591 | 0.059391 | 0.20014  | -0.00671 | 0.88496 | 0.033022 |
| 0.219327 | 1.71E-06 | -0.01319 | 0.7762  | 0.128523 | 0.00541  | -0.00468 | 0.91964 | 0.081363 |
| 0.107531 | 0.02011  | -0.07228 | 0.11879 | 0.062916 | 0.17468  | -0.08618 | 0.06276 | 0.043298 |
| 0.12971  | 0.00499  | -0.05178 | 0.26411 | 0.065742 | 0.15607  | -0.06513 | 0.15995 | 0.001942 |
| 0.113786 | 0.01388  | -0.04481 | 0.33395 | 0.047348 | 0.30724  | -0.08441 | 0.06838 | -0.04002 |
| 0.143755 | 0.00184  | 0.04224  | 0.36242 | 0.147051 | 0.00144  | 0.026588 | 0.56656 | 0.023469 |
| 0.149114 | 0.00123  | 0.066414 | 0.15187 | 0.181578 | 7.94E-05 | 0.043617 | 0.34697 | 0.056835 |
| 0.216382 | 2.36E-06 | 0.06608  | 0.15394 | 0.256023 | 2.00E-08 | 0.096737 | 0.03663 | 0.100578 |
| 0.105126 | 0.02309  | 0.010858 | 0.81497 | 0.128839 | 0.0053   | -0.04008 | 0.38749 | 0.104242 |
| 0.087421 | 0.05906  | -0.03187 | 0.4921  | 0.114694 | 0.01313  | -0.01875 | 0.68615 | 0.071843 |
| 0.145244 | 0.00165  | -0.00143 | 0.97533 | 0.105605 | 0.02247  | -0.00202 | 0.96535 | 0.050333 |
| 0.165777 | 0.00032  | -0.02845 | 0.53975 | 0.019821 | 0.66922  | -0.01523 | 0.74267 | 0.076114 |
| 0.089505 | 0.05325  | 0.022878 | 0.62191 | 0.068404 | 0.13995  | 0.006985 | 0.88033 | -0.05849 |
| 0.156596 | 0.00068  | -0.04545 | 0.32706 | 0.07512  | 0.10495  | -0.06561 | 0.15688 | 0.066026 |
| 0.14463  | 0.00173  | 0.029408 | 0.52612 | 0.200574 | 1.26E-05 | 0.002112 | 0.96369 | 0.041499 |
| 0.158794 | 0.00057  | 0.034899 | 0.45182 | 0.165438 | 0.00033  | 0.006831 | 0.88296 | 0.006653 |
| 0.107055 | 0.02067  | -0.04367 | 0.34636 | 0.024139 | 0.60283  | -0.03163 | 0.49531 | 0.035221 |
| 0.032811 | 0.47935  | -0.04165 | 0.36914 | -0.01558 | 0.73703  | -0.01636 | 0.7244  | -0.0273  |
| 0.166216 | 0.00031  | 0.014478 | 0.755   | 0.164233 | 0.00037  | 0.014631 | 0.7525  | 0.065762 |
| 0.139706 | 0.00248  | -0.04815 | 0.29916 | 0.037649 | 0.41696  | -0.05761 | 0.21399 | -0.04227 |
| 0.142358 | 0.00204  | -0.02723 | 0.55719 | 0.100841 | 0.02934  | -0.01417 | 0.75999 | 0.031117 |
| 0.151981 | 0.00099  | -0.02177 | 0.63887 | 0.06448  | 0.16418  | -0.01421 | 0.75935 | 0.076273 |
| 0.140597 | 0.00232  | -0.06218 | 0.17979 | 0.039703 | 0.39198  | -0.06662 | 0.15062 | -0.02466 |
| 0.091757 | 0.04751  | 0.063981 | 0.16748 | 0.102972 | 0.02607  | 0.042134 | 0.36363 | 0.009545 |
| 0.121882 | 0.00837  | 0.057057 | 0.21843 | 0.174048 | 0.00016  | 0.038599 | 0.40529 | 0.093096 |

|          |          |          |         |          |          |          |         |           |
|----------|----------|----------|---------|----------|----------|----------|---------|-----------|
| 0.191822 | 3.01E-05 | 0.018177 | 0.69521 | 0.15272  | 0.00093  | 0.019143 | 0.67989 | 0.041482  |
| 0.138236 | 0.00276  | 0.055718 | 0.22945 | 0.161569 | 0.00046  | 0.052109 | 0.26108 | 0.000206  |
| 0.246659 | 6.68E-08 | 0.015231 | 0.7427  | 0.18241  | 7.35E-05 | -0.00713 | 0.8778  | 0.053212  |
| 0.114809 | 0.01304  | 0.007187 | 0.8769  | 0.14159  | 0.00216  | -0.01135 | 0.80668 | 0.139892  |
| 0.203634 | 9.19E-06 | 0.01476  | 0.75039 | 0.101554 | 0.02821  | -0.01141 | 0.80568 | -0.00888  |
| 0.064849 | 0.16178  | -0.01326 | 0.77508 | 0.081289 | 0.07928  | -0.0302  | 0.51504 | -0.02901  |
| 0.181937 | 7.68E-05 | 0.005774 | 0.90097 | 0.1724   | 0.00018  | 0.023136 | 0.61799 | 0.077519  |
| 0.115074 | 0.01283  | -0.00905 | 0.8453  | 0.098833 | 0.03274  | -0.05    | 0.28091 | 0.000398  |
| 0.063191 | 0.1728   | 0.079092 | 0.08777 | 0.042755 | 0.35659  | 0.036121 | 0.43613 | -0.07386  |
| 0.196821 | 1.84E-05 | 0.00307  | 0.94724 | 0.180744 | 8.57E-05 | -0.01747 | 0.70651 | 0.035679  |
| 0.160284 | 0.00051  | -0.016   | 0.73026 | 0.135835 | 0.00327  | -0.01803 | 0.69757 | 0.057947  |
| 0.054966 | 0.23581  | -0.10993 | 0.01748 | 0.009137 | 0.84389  | -0.09244 | 0.04587 | 0.009732  |
| 0.154514 | 0.00081  | 0.047432 | 0.30638 | 0.161956 | 0.00044  | 0.035299 | 0.44665 | 0.063034  |
| 0.168009 | 0.00027  | 0.007718 | 0.86788 | 0.122324 | 0.00814  | -0.02946 | 0.52539 | 0.002007  |
| 0.198139 | 1.61E-05 | 0.029849 | 0.51993 | 0.215496 | 2.60E-06 | 0.016587 | 0.7207  | 0.066443  |
| 0.074821 | 0.10635  | -0.06205 | 0.18068 | -0.07092 | 0.12591  | -0.05359 | 0.24775 | -0.00743  |
| 0.200186 | 1.31E-05 | -0.00019 | 0.99682 | 0.166935 | 0.00029  | -0.00964 | 0.83535 | 0.074976  |
| 0.173592 | 0.00016  | 0.032438 | 0.48437 | 0.130349 | 0.00478  | 0.028336 | 0.54131 | 0.002856  |
| 0.179527 | 9.58E-05 | 0.056687 | 0.22144 | 0.173562 | 0.00016  | 0.031148 | 0.50192 | 0.048681  |
| 0.121516 | 0.00857  | -0.0023  | 0.96045 | 0.093765 | 0.04283  | -0.00738 | 0.87361 | 0.045968  |
| 0.202808 | 1.00E-05 | 0.018476 | 0.69046 | 0.09378  | 0.0428   | -0.00105 | 0.98186 | -0.00223  |
| 0.148211 | 0.00132  | 0.009603 | 0.83603 | 0.161144 | 0.00047  | 0.012991 | 0.77949 | 0.064363  |
| 0.2042   | 8.67E-06 | 0.041139 | 0.37507 | 0.271083 | 2.61E-09 | 0.035524 | 0.44376 | 0.077838  |
| 0.064057 | 0.16697  | -0.10824 | 0.0193  | 0.033596 | 0.46889  | -0.08026 | 0.08318 | 0.069926  |
| 0.154359 | 0.00082  | 0.037264 | 0.42174 | 0.223681 | 1.05E-06 | 0.012969 | 0.77984 | 0.036205  |
| 0.218635 | 1.84E-06 | 0.012742 | 0.78359 | 0.160739 | 0.00049  | -0.00299 | 0.94854 | 0.071456  |
| 0.075402 | 0.10365  | -0.06469 | 0.1628  | 0.00027  | 0.99536  | -0.02713 | 0.55861 | 0.000968  |
| 0.176136 | 0.00013  | 0.009463 | 0.83838 | 0.171303 | 0.0002   | -0.00754 | 0.87097 | 0.087808  |
| 0.156042 | 0.00071  | 0.046613 | 0.31482 | 0.176956 | 0.00012  | 0.038348 | 0.40836 | 0.020642  |
| 0.085656 | 0.06439  | -0.01404 | 0.76218 | 0.086909 | 0.06057  | -0.01133 | 0.80708 | 0.048579  |
| 0.091867 | 0.04724  | 0.038914 | 0.40146 | 0.05302  | 0.25283  | -0.00939 | 0.83962 | 0.017197  |
| 0.196999 | 1.80E-05 | 0.045931 | 0.32196 | 0.147218 | 0.00142  | 0.025189 | 0.58715 | 0.07111   |
| 0.252132 | 3.32E-08 | -0.00785 | 0.8657  | 0.093205 | 0.0441   | 0.004088 | 0.92979 | 0.052599  |
| 0.150774 | 0.00108  | 0.025366 | 0.58453 | 0.205072 | 7.92E-06 | -0.00735 | 0.87416 | 0.040351  |
| 0.259858 | 1.21E-08 | 0.05278  | 0.25498 | 0.160351 | 0.0005   | 0.009552 | 0.83688 | 0.029339  |
| 0.055284 | 0.2331   | 0.065673 | 0.1565  | 0.107897 | 0.01969  | -0.0031  | 0.94668 | -0.01995  |
| 0.173548 | 0.00016  | 0.001383 | 0.97622 | 0.193818 | 2.47E-05 | -0.00641 | 0.89014 | 0.060158  |
| 0.110278 | 0.01712  | 0.032709 | 0.48073 | 0.154615 | 0.0008   | 0.024704 | 0.59437 | -0.02975  |
| 0.179834 | 9.32E-05 | 0.046925 | 0.31159 | 0.099835 | 0.031    | 0.019637 | 0.67211 | 0.006605  |
| 0.115461 | 0.01253  | 0.038607 | 0.40519 | 0.139145 | 0.00258  | 0.084285 | 0.06879 | 0.132643  |
| 0.150257 | 0.00113  | -0.02373 | 0.60902 | 0.075758 | 0.10203  | -0.05754 | 0.21453 | 0.020291  |
| 0.15589  | 0.00072  | -0.01621 | 0.72682 | 0.076959 | 0.09669  | -0.02547 | 0.58293 | -0.00911  |
| 0.174373 | 0.00015  | 0.07108  | 0.12506 | 0.134578 | 0.00357  | 0.047487 | 0.30582 | -3.45E-05 |
| 0.158853 | 0.00057  | 0.013231 | 0.77551 | 0.219952 | 1.59E-06 | 0.003761 | 0.93539 | 0.064258  |
| 0.176644 | 0.00012  | 0.026797 | 0.56351 | 0.128402 | 0.00546  | 0.006665 | 0.88578 | 0.023202  |

|          |          |          |         |          |          |          |         |          |
|----------|----------|----------|---------|----------|----------|----------|---------|----------|
| 0.12773  | 0.00571  | 0.038809 | 0.40274 | 0.130101 | 0.00486  | 0.028264 | 0.54234 | 0.130739 |
| 0.137749 | 0.00285  | -0.08736 | 0.05924 | -0.05702 | 0.21869  | -0.07574 | 0.10212 | -0.05429 |
| 0.200793 | 1.23E-05 | -0.00584 | 0.89978 | 0.111988 | 0.01547  | -0.00766 | 0.8688  | 0.096424 |
| 0.197163 | 1.77E-05 | 0.024162 | 0.60249 | 0.156031 | 0.00072  | -0.00706 | 0.87908 | 0.042055 |
| 0.193437 | 2.57E-05 | -0.02322 | 0.61665 | 0.128145 | 0.00555  | -0.0088  | 0.84958 | 0.048716 |
| 0.18692  | 4.81E-05 | 0.08372  | 0.07068 | 0.219719 | 1.63E-06 | 0.056774 | 0.22073 | 0.11474  |
| 0.164177 | 0.00037  | 0.06064  | 0.19083 | 0.226979 | 7.17E-07 | 0.001768 | 0.96961 | 0.038983 |
| 0.17177  | 0.00019  | -0.02344 | 0.61334 | 0.043213 | 0.35145  | -0.0271  | 0.55905 | -0.01583 |
| 0.189132 | 3.90E-05 | 0.012447 | 0.78848 | 0.163437 | 0.00039  | -0.01518 | 0.74356 | 0.022599 |
| 0.200648 | 1.25E-05 | 0.01148  | 0.80458 | 0.127713 | 0.00571  | -0.00069 | 0.98807 | 0.021105 |
| 0.104011 | 0.02459  | -0.00779 | 0.86664 | 0.064264 | 0.1656   | -0.05048 | 0.27632 | 0.008118 |
| 0.20122  | 1.18E-05 | -0.00116 | 0.9801  | 0.174949 | 0.00014  | -0.01325 | 0.77521 | 0.066463 |
| 0.110716 | 0.01669  | 0.012536 | 0.78702 | 0.123398 | 0.00759  | -0.00055 | 0.99059 | 0.016009 |
| 0.14521  | 0.00165  | 0.058267 | 0.2088  | 0.203316 | 9.50E-06 | 0.034475 | 0.45734 | 0.106226 |
| 0.155021 | 0.00078  | -0.02046 | 0.65926 | 0.005181 | 0.91109  | -0.00196 | 0.96627 | 0.051585 |
| 0.204312 | 8.57E-06 | -0.01002 | 0.82894 | 0.193555 | 2.54E-05 | -0.03058 | 0.50976 | 0.059224 |
| 0.152171 | 0.00097  | -0.00051 | 0.99122 | 0.080314 | 0.08296  | 0.003184 | 0.94528 | -0.00926 |
| 0.168902 | 0.00025  | 0.002916 | 0.94988 | 0.179308 | 9.77E-05 | 0.005054 | 0.91326 | 0.042091 |
| 0.144684 | 0.00172  | 0.021123 | 0.64889 | 0.185057 | 5.74E-05 | 0.011008 | 0.81245 | 0.027243 |
| 0.180807 | 8.52E-05 | 0.008009 | 0.86296 | 0.187777 | 4.44E-05 | 0.00133  | 0.97713 | 0.058403 |
| 0.148886 | 0.00125  | 0.026015 | 0.57494 | 0.145007 | 0.00168  | 0.019835 | 0.66899 | 0.067958 |
| 0.339212 | 4.87E-14 | 0.060902 | 0.18892 | 0.27827  | 9.44E-10 | 0.027013 | 0.56037 | 0.10537  |
| 0.16828  | 0.00026  | -0.02919 | 0.52917 | 0.061191 | 0.18682  | -0.02804 | 0.54558 | -0.01672 |
| 0.19855  | 1.54E-05 | -0.01357 | 0.76986 | 0.157506 | 0.00064  | -0.04103 | 0.37633 | 0.00639  |
| 0.138854 | 0.00264  | 0.013248 | 0.77523 | 0.157092 | 0.00066  | 0.03383  | 0.4658  | 0.126825 |
| 0.172466 | 0.00018  | -0.03366 | 0.46806 | 0.049512 | 0.28563  | -0.04362 | 0.34693 | -0.03102 |
| 0.216764 | 2.27E-06 | 0.043858 | 0.34431 | 0.197602 | 1.70E-05 | 0.010756 | 0.81668 | 0.038653 |
| 0.198513 | 1.55E-05 | -0.01963 | 0.67216 | 0.106949 | 0.0208   | -0.01599 | 0.73034 | 0.016108 |
| 0.166866 | 0.00029  | 0.161967 | 0.00044 | 0.290777 | 1.50E-10 | 0.103259 | 0.02565 | 0.207136 |
| 0.1448   | 0.00171  | -0.01586 | 0.7324  | 0.155276 | 0.00076  | -0.01389 | 0.76462 | 0.081495 |
| 0.189565 | 3.74E-05 | -0.01417 | 0.76    | 0.141899 | 0.00211  | -0.02112 | 0.64892 | 0.083368 |
| 0.147888 | 0.00135  | 0.001674 | 0.97121 | 0.078452 | 0.09037  | 0.016478 | 0.72247 | -0.01236 |
| 0.181706 | 7.84E-05 | 0.036921 | 0.42603 | 0.103835 | 0.02484  | 0.009379 | 0.8398  | 0.025458 |
| 0.179914 | 9.25E-05 | 0.01716  | 0.71148 | 0.185283 | 5.62E-05 | -0.00817 | 0.86024 | 0.073117 |
| 0.18121  | 8.21E-05 | 0.043219 | 0.35138 | 0.154965 | 0.00078  | 0.004109 | 0.92942 | 0.023293 |
| 0.199895 | 1.35E-05 | 0.016453 | 0.72287 | 0.205489 | 7.58E-06 | 0.005452 | 0.90647 | 0.075928 |
| 0.185183 | 5.67E-05 | 0.036069 | 0.4368  | 0.159838 | 0.00053  | 0.00542  | 0.907   | 0.06051  |
| 0.156005 | 0.00072  | -0.01294 | 0.78038 | 0.171187 | 0.0002   | -0.0217  | 0.63992 | 0.025481 |
| 0.153479 | 0.00088  | 0.070696 | 0.12712 | 0.180968 | 8.40E-05 | 0.034254 | 0.46023 | 0.067151 |
| 0.16448  | 0.00036  | 0.0302   | 0.51503 | 0.241978 | 1.20E-07 | 0.001603 | 0.97244 | 0.067671 |
| 0.11558  | 0.01244  | -0.00645 | 0.88936 | 0.084762 | 0.06724  | -0.02962 | 0.52309 | 0.027532 |
| 0.168586 | 0.00025  | -0.01246 | 0.78819 | 0.140632 | 0.00232  | -0.00328 | 0.94368 | 0.077408 |
| 0.147427 | 0.0014   | -0.04603 | 0.32092 | 0.059389 | 0.20016  | -0.03687 | 0.42669 | -0.00277 |
| 0.085439 | 0.06507  | 0.035684 | 0.44171 | 0.107013 | 0.02072  | 0.087887 | 0.05772 | 0.045209 |
| 0.170383 | 0.00022  | -0.00643 | 0.88977 | 0.113811 | 0.01386  | 0.002573 | 0.95578 | 0.081909 |



|          |          |          |         |          |          |          |         |          |
|----------|----------|----------|---------|----------|----------|----------|---------|----------|
| 0.160524 | 0.0005   | 0.037726 | 0.416   | 0.185932 | 5.29E-05 | 0.009568 | 0.83662 | 0.058911 |
| 0.252736 | 3.07E-08 | 0.003446 | 0.94079 | 0.198789 | 1.51E-05 | -0.00561 | 0.90369 | 0.073124 |
| 0.105876 | 0.02212  | -0.00185 | 0.96823 | 0.088433 | 0.05618  | -0.0112  | 0.80917 | 0.001484 |
| 0.087722 | 0.05819  | -0.02306 | 0.6191  | 0.095315 | 0.0395   | -0.02121 | 0.64761 | 0.027741 |
| 0.161085 | 0.00047  | -0.01362 | 0.76902 | 0.125102 | 0.00679  | -0.01487 | 0.74861 | 0.040122 |
| 0.135329 | 0.00339  | 0.028774 | 0.53508 | 0.078997 | 0.08815  | -0.00482 | 0.91728 | -0.01741 |
| 0.14001  | 0.00243  | -0.04271 | 0.35706 | 0.065443 | 0.15796  | -0.06    | 0.19557 | -0.00853 |
| 0.176555 | 0.00013  | 0.001171 | 0.97986 | 0.161776 | 0.00045  | -0.00418 | 0.9282  | 0.059623 |
| 0.131338 | 0.00447  | -0.04015 | 0.38672 | 0.136918 | 0.00303  | -0.05001 | 0.28082 | 0.042501 |
| 0.175355 | 0.00014  | 0.049554 | 0.28522 | 0.14273  | 0.00199  | -0.00229 | 0.96061 | 0.004775 |
| 0.159874 | 0.00052  | 0.02231  | 0.63059 | 0.187644 | 4.49E-05 | -0.00173 | 0.97027 | 0.053096 |
| 0.134364 | 0.00363  | -0.05999 | 0.19563 | 0.054428 | 0.24043  | -0.01966 | 0.67178 | 0.008297 |
| 0.19637  | 1.92E-05 | 0.038236 | 0.40972 | 0.212455 | 3.62E-06 | 0.034312 | 0.45948 | 0.052939 |
| 0.196209 | 1.95E-05 | 0.036301 | 0.43385 | 0.227665 | 6.62E-07 | 0.030571 | 0.50988 | 0.081724 |
| 0.166721 | 0.0003   | 0.0102   | 0.82599 | 0.190436 | 3.44E-05 | -0.00198 | 0.96602 | 0.068237 |
| 0.110123 | 0.01728  | 0.018391 | 0.69181 | 0.185701 | 5.40E-05 | 0.093835 | 0.04268 | 0.124281 |
| 0.187725 | 4.46E-05 | 0.028691 | 0.53625 | 0.175339 | 0.00014  | 7.79E-05 | 0.99866 | 0.053921 |
| 0.093402 | 0.04365  | -0.01449 | 0.75476 | 0.052372 | 0.25868  | 0.000265 | 0.99543 | 0.041682 |
| 0.168194 | 0.00026  | 0.059173 | 0.20181 | 0.221801 | 1.29E-06 | 0.010988 | 0.8128  | 0.051722 |
| 0.165287 | 0.00033  | 0.028159 | 0.54385 | 0.183241 | 6.80E-05 | -0.0032  | 0.94504 | 0.056802 |
| 0.20595  | 7.23E-06 | -0.00502 | 0.91378 | 0.1323   | 0.00418  | -0.0069  | 0.88186 | 0.062368 |
| 0.202501 | 1.03E-05 | -0.00297 | 0.94902 | 0.090709 | 0.05011  | 0.004287 | 0.92638 | 0.001982 |
| 0.145642 | 0.0016   | 0.078175 | 0.09152 | 0.142544 | 0.00202  | 0.06448  | 0.16419 | 0.077082 |
| 0.195775 | 2.04E-05 | 0.000239 | 0.9959  | 0.107259 | 0.02043  | 0.001936 | 0.96671 | 0.002734 |
| 0.157401 | 0.00064  | -0.0139  | 0.76448 | 0.122437 | 0.00808  | -0.01831 | 0.69307 | 0.106621 |
| 0.152106 | 0.00098  | 0.002343 | 0.95973 | 0.126554 | 0.00617  | 0.015138 | 0.74422 | 0.005903 |
| 0.172148 | 0.00019  | 0.014278 | 0.75828 | 0.177638 | 0.00011  | -0.0156  | 0.73672 | 0.032443 |
| 0.127257 | 0.00589  | 0.025087 | 0.58867 | 0.102555 | 0.02668  | 0.015645 | 0.73596 | 0.00338  |
| 0.18309  | 6.90E-05 | 0.041025 | 0.37639 | 0.185878 | 5.31E-05 | 0.027704 | 0.55038 | 0.058703 |
| 0.099789 | 0.03108  | -0.00667 | 0.88567 | 0.089117 | 0.05429  | -0.02324 | 0.61637 | -0.0364  |
| 0.099617 | 0.03137  | 0.017278 | 0.70958 | 0.12829  | 0.0055   | 0.036749 | 0.42819 | 0.074082 |
| 0.21002  | 4.70E-06 | -0.00265 | 0.95439 | 0.137528 | 0.0029   | -0.032   | 0.49029 | 0.013909 |
| 0.130613 | 0.0047   | 0.050185 | 0.27913 | 0.129797 | 0.00496  | -0.00693 | 0.88135 | 0.050307 |
| 0.148858 | 0.00125  | -0.01594 | 0.7311  | 0.189769 | 3.67E-05 | -0.02304 | 0.61944 | 0.062108 |
| 0.17203  | 0.00019  | 0.009383 | 0.83974 | 0.137686 | 0.00287  | -0.00587 | 0.89935 | 0.062818 |
| 0.159131 | 0.00056  | 0.00364  | 0.93747 | 0.154843 | 0.00079  | -0.01419 | 0.75969 | 0.074273 |
| 0.141612 | 0.00216  | 0.013278 | 0.77473 | 0.078051 | 0.09204  | 0.001151 | 0.9802  | -0.02052 |
| 0.209629 | 4.90E-06 | 0.076845 | 0.09719 | 0.221286 | 1.37E-06 | 0.064348 | 0.16505 | 0.085263 |
| 0.118535 | 0.01036  | -0.00498 | 0.9145  | 0.068577 | 0.13894  | -0.01287 | 0.78156 | 0.088115 |
| 0.133249 | 0.00392  | 0.027216 | 0.55743 | 0.166405 | 0.0003   | -0.00162 | 0.97217 | 0.030287 |
| 0.150496 | 0.00111  | -0.04568 | 0.32458 | 0.009036 | 0.84558  | -0.0243  | 0.60048 | 0.01578  |
| 0.068211 | 0.14107  | -0.0026  | 0.95536 | 0.106348 | 0.02153  | -0.04411 | 0.3415  | 0.032239 |
| 0.202755 | 1.01E-05 | 0.001594 | 0.97259 | 0.193555 | 2.54E-05 | -0.00412 | 0.92924 | 0.077667 |
| 0.062882 | 0.17491  | -0.01201 | 0.79583 | 0.018668 | 0.6874   | 0.009    | 0.84619 | 0.004867 |
| 0.074402 | 0.10833  | -0.04615 | 0.31965 | 0.02744  | 0.55417  | -0.04199 | 0.36527 | 0.053522 |

|          |          |          |          |          |          |          |          |          |
|----------|----------|----------|----------|----------|----------|----------|----------|----------|
| 0.200019 | 1.33E-05 | -0.01922 | 0.67869  | 0.078016 | 0.09219  | -0.01834 | 0.69259  | -0.01641 |
| 0.160742 | 0.00049  | 0.039315 | 0.39663  | 0.140943 | 0.00227  | -0.03909 | 0.3994   | 0.023415 |
| 0.153865 | 0.00085  | -0.03166 | 0.49494  | 0.082561 | 0.07468  | -0.02226 | 0.63131  | -0.00054 |
| 0.129412 | 0.0051   | -0.01064 | 0.81856  | 0.091346 | 0.04851  | -0.04967 | 0.28408  | 0.064306 |
| 0.123619 | 0.00748  | 0.045454 | 0.32702  | 0.122322 | 0.00814  | 0.035168 | 0.44834  | 0.043244 |
| 0.131485 | 0.00442  | -0.03749 | 0.41894  | 0.112677 | 0.01484  | -0.02727 | 0.55667  | 0.014112 |
| 0.082173 | 0.07606  | -0.0184  | 0.69172  | 0.137214 | 0.00297  | -0.04394 | 0.34337  | 0.025732 |
| 0.189052 | 3.93E-05 | 0.022601 | 0.62614  | 0.149327 | 0.00121  | -0.02519 | 0.58712  | 0.039415 |
| 0.163342 | 0.00039  | 0.026439 | 0.56873  | 0.152357 | 0.00096  | 0.029574 | 0.52378  | 0.052754 |
| 0.126233 | 0.0063   | 0.016669 | 0.71938  | 0.153538 | 0.00087  | 0.03297  | 0.47723  | 0.031945 |
| 0.188268 | 4.24E-05 | 0.050941 | 0.27194  | 0.173613 | 0.00016  | 0.028031 | 0.54568  | 0.067329 |
| 0.218576 | 1.86E-06 | -0.03319 | 0.47425  | 0.02143  | 0.64414  | 0.012163 | 0.79321  | 0.034159 |
| 0.181218 | 8.21E-05 | -0.00534 | 0.90844  | 0.086416 | 0.06205  | -0.01567 | 0.7356   | -0.00549 |
| 0.097693 | 0.03481  | -0.04948 | 0.28595  | 0.066089 | 0.15389  | -0.02962 | 0.5232   | 0.021798 |
| 0.12803  | 0.00559  | 0.027016 | 0.56033  | 0.029342 | 0.52704  | 0.045522 | 0.32629  | 0.045485 |
| 0.155021 | 0.00078  | -0.02046 | 0.65926  | 0.005181 | 0.91109  | -0.00196 | 0.96627  | 0.051585 |
| 0.162592 | 0.00042  | 0.004838 | 0.91695  | 0.153191 | 0.0009   | -0.01088 | 0.81454  | 0.048638 |
| 0.13584  | 0.00327  | -0.02623 | 0.57183  | 0.090137 | 0.05158  | -0.03105 | 0.50331  | 0.114617 |
| 0.157381 | 0.00064  | 0.051074 | 0.27069  | 0.208081 | 5.78E-06 | 0.013691 | 0.76792  | 0.031987 |
| 0.162158 | 0.00043  | 0.014122 | 0.76084  | 0.218899 | 1.79E-06 | -0.02702 | 0.56029  | 0.016245 |
| 0.162379 | 0.00043  | -0.04571 | 0.32428  | 0.058424 | 0.20758  | -0.03657 | 0.4305   | -0.01293 |
| 0.148095 | 0.00133  | 0.022826 | 0.62271  | 0.151982 | 0.00099  | 0.004004 | 0.93123  | 0.065825 |
| 0.107624 | 0.02     | 0.005487 | 0.90586  | 0.144284 | 0.00177  | -0.01348 | 0.77133  | 0.137397 |
| 0.057726 | 0.21307  | -0.02325 | 0.6162   | 0.05457  | 0.2392   | -0.01284 | 0.78196  | -0.01262 |
| 0.157143 | 0.00065  | 0.008834 | 0.849    | 0.129622 | 0.00502  | -0.00482 | 0.91725  | -0.00052 |
| 0.100632 | 0.02968  | 0.025164 | 0.58752  | 0.182352 | 7.39E-05 | 0.02579  | 0.57826  | 0.081307 |
| 0.17911  | 9.95E-05 | 0.002759 | 0.95259  | 0.174031 | 0.00016  | 0.002661 | 0.95426  | 0.083801 |
| 0.071345 | 0.12365  | 0.282033 | 5.47E-10 | 0.386004 | 4.84E-18 | 0.267422 | 4.34E-09 | 0.063831 |
| 0.053215 | 0.25109  | 0.196234 | 1.95E-05 | 0.287296 | 2.52E-10 | 0.096628 | 0.03685  | 0.024389 |
| 0.030981 | 0.50422  | 0.056473 | 0.22319  | 0.149416 | 0.0012   | -0.05912 | 0.2022   | -0.03097 |
| 0.005672 | 0.9027   | -0.02536 | 0.58456  | 0.046821 | 0.31266  | -0.10591 | 0.02208  | 0.0009   |
| 0.031163 | 0.50171  | 0.328478 | 3.28E-13 | 0.273086 | 1.97E-09 | 0.267757 | 4.14E-09 | -0.03107 |
| 0.137848 | 0.00283  | 0.35761  | 1.56E-15 | 0.339725 | 4.44E-14 | 0.331878 | 1.81E-13 | -0.03484 |
| 0.032411 | 0.48473  | 0.181062 | 8.32E-05 | 0.224872 | 9.13E-07 | 0.084531 | 0.06798  | -0.03647 |
| 0.037095 | 0.42385  | 0.187485 | 4.56E-05 | 0.165601 | 0.00033  | 0.132928 | 0.00401  | 0.002965 |
| 0.189404 | 3.80E-05 | 0.243162 | 1.03E-07 | 0.3939   | 8.77E-19 | 0.254154 | 2.56E-08 | 0.314432 |
| 0.077934 | 0.09253  | 0.153111 | 0.0009   | 0.242226 | 1.16E-07 | 0.166289 | 0.00031  | 0.053811 |
| -0.03882 | 0.40264  | 0.082523 | 0.07481  | 0.084405 | 0.0684   | 0.016992 | 0.71418  | -0.14996 |
| 0.014719 | 0.75106  | 0.145435 | 0.00163  | 0.160398 | 0.0005   | 0.06221  | 0.17957  | -0.09757 |
| 0.212023 | 3.80E-06 | 0.237372 | 2.10E-07 | 0.442337 | 8.57E-24 | 0.141475 | 0.00218  | 0.049555 |
| 0.015398 | 0.73998  | 0.159137 | 0.00056  | 0.173007 | 0.00017  | 0.069665 | 0.13277  | -0.08841 |
| 0.213326 | 3.30E-06 | 0.446897 | 2.62E-24 | 0.613319 | 1.36E-49 | 0.32247  | 9.22E-13 | 0.199818 |
| 0.019477 | 0.67463  | 0.288598 | 2.08E-10 | 0.17265  | 0.00018  | 0.230754 | 4.62E-07 | 0.123734 |
| 0.039721 | 0.39176  | 0.079399 | 0.08654  | 0.200517 | 1.27E-05 | -0.11338 | 0.01423  | -0.12307 |
| 0.018679 | 0.68723  | 0.171621 | 0.00019  | 0.258108 | 1.52E-08 | 0.087187 | 0.05975  | -0.01156 |

|          |          |          |          |          |          |          |          |          |
|----------|----------|----------|----------|----------|----------|----------|----------|----------|
| -0.02979 | 0.52076  | 0.07652  | 0.09862  | 0.148315 | 0.00131  | 0.052273 | 0.25959  | 0.076468 |
| -0.01692 | 0.71536  | 0.073319 | 0.11358  | 0.070331 | 0.1291   | 0.013371 | 0.77321  | -0.07583 |
| 0.047902 | 0.30161  | 0.224544 | 9.48E-07 | 0.285052 | 3.52E-10 | 0.250631 | 4.03E-08 | 0.144808 |
| 0.179615 | 9.51E-05 | 0.327699 | 3.75E-13 | 0.371162 | 1.06E-16 | 0.273032 | 1.99E-09 | 0.057744 |
| 0.139238 | 0.00256  | 0.545644 | 1.39E-37 | 0.56089  | 4.72E-40 | 0.601401 | 2.87E-47 | 0.223591 |
| 0.019513 | 0.67405  | 0.114518 | 0.01328  | 0.277741 | 1.02E-09 | -0.0183  | 0.69319  | 0.036292 |
| 0.198334 | 1.58E-05 | 0.171003 | 0.0002   | 0.198336 | 1.58E-05 | 0.126339 | 0.00626  | -0.04707 |
| 0.126033 | 0.00639  | 0.290024 | 1.68E-10 | 0.243896 | 9.43E-08 | 0.203456 | 9.36E-06 | 0.036532 |
| 0.137418 | 0.00292  | 0.43582  | 4.52E-23 | 0.431743 | 1.26E-22 | 0.358252 | 1.37E-15 | 0.085593 |
| 0.021135 | 0.6487   | 0.088183 | 0.05688  | 0.07215  | 0.11947  | 0.049168 | 0.289    | -0.00379 |
| 0.050646 | 0.27473  | 0.149388 | 0.0012   | 0.217717 | 2.04E-06 | 0.075089 | 0.1051   | 0.029371 |
| 0.055172 | 0.23406  | 0.191432 | 3.12E-05 | 0.389691 | 2.19E-18 | 0.117143 | 0.0113   | 0.045471 |
| 0.058896 | 0.20393  | 0.345668 | 1.49E-14 | 0.368156 | 1.95E-16 | 0.405019 | 7.31E-20 | 0.215126 |
| 0.028882 | 0.53354  | 0.138714 | 0.00266  | 0.196903 | 1.82E-05 | 0.018398 | 0.6917   | -0.02056 |
| 0.125975 | 0.00641  | 0.251055 | 3.82E-08 | 0.174371 | 0.00015  | 0.16158  | 0.00046  | 0.020898 |
| 0.036938 | 0.42582  | 0.229227 | 5.52E-07 | 0.124196 | 0.00721  | 0.201435 | 1.15E-05 | -0.07221 |
| 0.006612 | 0.88668  | 0.198138 | 1.61E-05 | 0.237475 | 2.07E-07 | 0.133688 | 0.0038   | 0.028349 |
| 0.119506 | 0.00974  | 0.225688 | 8.32E-07 | 0.316286 | 2.61E-12 | 0.101998 | 0.02752  | 0.043871 |
| 0.137229 | 0.00296  | 0.568799 | 2.21E-41 | 0.595993 | 3.03E-46 | 0.480946 | 2.09E-28 | 0.159309 |
| 0.024985 | 0.59018  | 0.119476 | 0.00976  | 0.087032 | 0.0602   | -0.00014 | 0.9976   | -0.12741 |
| 0.338419 | 5.62E-14 | 0.438168 | 2.49E-23 | 0.505495 | 1.17E-31 | 0.341323 | 3.32E-14 | 0.140377 |
| 0.186618 | 4.95E-05 | 0.382312 | 1.06E-17 | 0.495236 | 2.87E-30 | 0.233384 | 3.39E-07 | 0.118915 |
| 0.065972 | 0.15462  | 0.11426  | 0.01349  | 0.166421 | 0.0003   | 0.015967 | 0.73073  | -0.01296 |
| -0.02403 | 0.60442  | -0.00248 | 0.9573   | -0.02349 | 0.61267  | -0.11642 | 0.01181  | -0.1485  |
| 0.061455 | 0.18492  | 0.16391  | 0.00038  | 0.22193  | 1.27E-06 | 0.06324  | 0.17247  | -0.04869 |
| 0.00203  | 0.9651   | 0.216876 | 2.24E-06 | 0.08712  | 0.05994  | 0.106897 | 0.02086  | -0.25505 |
| 0.047596 | 0.30471  | 0.091584 | 0.04793  | 0.19206  | 2.94E-05 | -0.0222  | 0.63232  | 0.042346 |
| 0.023492 | 0.61259  | 0.242807 | 1.08E-07 | 0.197666 | 1.69E-05 | 0.156612 | 0.00068  | -0.07646 |
| 0.037404 | 0.42     | 0.1003   | 0.03022  | 0.104788 | 0.02353  | 0.017029 | 0.71359  | -0.07003 |
| 0.153237 | 0.00089  | 0.263457 | 7.45E-09 | 0.357844 | 1.49E-15 | 0.258093 | 1.53E-08 | 0.119443 |
| 0.003685 | 0.93669  | 0.208224 | 5.69E-06 | 0.173658 | 0.00016  | 0.156649 | 0.00068  | -0.07229 |
| -0.0043  | 0.92617  | 0.049009 | 0.29056  | 0.178718 | 0.0001   | 0.009386 | 0.83968  | 0.195423 |
| 0.011671 | 0.8014   | 0.05054  | 0.27574  | -0.05466 | 0.2384   | 0.035271 | 0.44701  | -0.11505 |
| 0.018248 | 0.69409  | 0.12497  | 0.00685  | 0.055138 | 0.23434  | 0.054904 | 0.23633  | -0.12484 |
| 0.159838 | 0.00053  | 0.333242 | 1.42E-13 | 0.425666 | 5.62E-22 | 0.272978 | 2.00E-09 | 0.122609 |
| 0.082866 | 0.07361  | 0.204267 | 8.61E-06 | 0.361547 | 7.23E-16 | 0.082181 | 0.07603  | 0.02069  |
| 0.029745 | 0.52138  | 0.129818 | 0.00496  | 0.221393 | 1.35E-06 | 0.011312 | 0.80737  | -0.04376 |
| 0.010091 | 0.82783  | 0.305174 | 1.60E-11 | 0.237386 | 2.10E-07 | 0.28207  | 5.45E-10 | 0.028178 |
| 0.125662 | 0.00655  | 0.131872 | 0.00431  | 0.270253 | 2.93E-09 | 0.069268 | 0.135    | 0.065863 |
| 0.121502 | 0.00858  | 0.190992 | 3.26E-05 | 0.343775 | 2.12E-14 | 0.052446 | 0.25801  | -0.01461 |
| 0.046504 | 0.31595  | 0.034625 | 0.45538  | 0.179947 | 9.22E-05 | -0.05036 | 0.27744  | -0.02027 |
| 0.016754 | 0.71802  | 0.06906  | 0.13618  | 0.132812 | 0.00404  | -0.08579 | 0.06396  | -0.11928 |
| 0.013216 | 0.77575  | 0.135459 | 0.00336  | 0.149028 | 0.00124  | 0.050949 | 0.27187  | -0.06459 |
| 0.098412 | 0.03349  | 0.342629 | 2.61E-14 | 0.511614 | 1.64E-32 | 0.171827 | 0.00019  | 0.108078 |
| -0.10583 | 0.02218  | 0.201582 | 1.14E-05 | 0.038035 | 0.4122   | 0.133493 | 0.00385  | 0.069373 |

|          |          |          |          |          |          |          |          |          |
|----------|----------|----------|----------|----------|----------|----------|----------|----------|
| -0.02424 | 0.60129  | 0.116803 | 0.01154  | 0.034755 | 0.45369  | -0.0035  | 0.93985  | -0.113   |
| -0.00346 | 0.94053  | 0.176047 | 0.00013  | 0.160122 | 0.00051  | 0.104167 | 0.02438  | -0.05892 |
| 0.040893 | 0.37794  | 0.003101 | 0.94671  | 0.110299 | 0.0171   | -0.05781 | 0.21239  | -0.02562 |
| 0.005337 | 0.90843  | 0.26448  | 6.48E-09 | 0.084442 | 0.06828  | 0.241959 | 1.20E-07 | -0.09536 |
| -0.01238 | 0.78962  | 0.130168 | 0.00484  | -0.02098 | 0.65107  | 0.079095 | 0.08776  | -0.12403 |
| 0.019303 | 0.67736  | 0.106554 | 0.02128  | 0.231511 | 4.23E-07 | 0.125017 | 0.00683  | 0.081008 |
| 0.195896 | 2.01E-05 | 0.481865 | 1.60E-28 | 0.579682 | 2.83E-43 | 0.363213 | 5.21E-16 | 0.11727  |
| 0.070504 | 0.12816  | -0.00707 | 0.87895  | 0.232986 | 3.55E-07 | -0.11014 | 0.01727  | 0.055706 |
| 0.011669 | 0.80142  | 0.13469  | 0.00354  | 0.11052  | 0.01688  | 0.008677 | 0.85166  | -0.11586 |
| 0.049203 | 0.28866  | 0.182464 | 7.31E-05 | 0.14788  | 0.00135  | 0.018039 | 0.69741  | -0.11791 |
| 0.006457 | 0.88932  | 0.213089 | 3.38E-06 | 0.008172 | 0.8602   | 0.126715 | 0.00611  | -0.24901 |
| 0.145045 | 0.00167  | 0.559494 | 8.05E-40 | 0.546853 | 8.92E-38 | 0.479779 | 2.94E-28 | 0.105648 |
| 0.162013 | 0.00044  | 0.519101 | 1.40E-33 | 0.589771 | 4.31E-45 | 0.438346 | 2.38E-23 | 0.285172 |
| 0.177888 | 0.00011  | 0.683111 | 1.84E-65 | 0.72555  | 1.72E-77 | 0.588561 | 7.18E-45 | 0.25522  |
| 0.306722 | 1.25E-11 | 0.415485 | 6.46E-21 | 0.591082 | 2.47E-45 | 0.292597 | 1.14E-10 | 0.159921 |
| 0.171587 | 0.00019  | 0.528119 | 6.69E-35 | 0.614384 | 8.33E-50 | 0.395643 | 5.98E-19 | 0.134648 |
| 0.143238 | 0.00191  | 0.628754 | 9.35E-53 | 0.61063  | 4.64E-49 | 0.459296 | 9.53E-26 | 0.187484 |
| 0.192672 | 2.77E-05 | 0.486672 | 3.84E-29 | 0.57836  | 4.85E-43 | 0.394164 | 8.28E-19 | 0.11631  |
| 0.027596 | 0.55193  | 0.162747 | 0.00041  | 0.125195 | 0.00675  | 0.05164  | 0.2654   | -0.08786 |
| -0.04439 | 0.33852  | 0.040613 | 0.38121  | -0.00444 | 0.92377  | 0.024995 | 0.59003  | -0.14571 |
| -0.02893 | 0.53286  | 0.140843 | 0.00228  | 0.155076 | 0.00077  | 0.05446  | 0.24015  | 0.014754 |
| 0.02497  | 0.5904   | 0.277595 | 1.04E-09 | 0.161826 | 0.00045  | 0.290368 | 1.59E-10 | -0.05288 |
| 0.105381 | 0.02275  | 0.121542 | 0.00856  | 0.355719 | 2.24E-15 | 0.020027 | 0.66599  | 0.080477 |
| -0.03483 | 0.45272  | 0.193973 | 2.44E-05 | 0.15104  | 0.00106  | 0.111309 | 0.01611  | -0.03499 |
| 0.262762 | 8.18E-09 | 0.236293 | 2.39E-07 | 0.351285 | 5.21E-15 | 0.20608  | 7.13E-06 | 0.027782 |
| -0.03754 | 0.41833  | 0.088823 | 0.05509  | 0.174684 | 0.00015  | 0.07952  | 0.08606  | 0.06016  |
| 0.044637 | 0.33579  | 0.034333 | 0.4592   | 0.192055 | 2.94E-05 | -0.0892  | 0.05408  | -0.10064 |
| 0.085739 | 0.06413  | 0.489043 | 1.89E-29 | 0.4019   | 1.48E-19 | 0.395751 | 5.84E-19 | -0.03093 |
| 0.092843 | 0.04493  | 0.107697 | 0.01992  | 0.332848 | 1.52E-13 | 0.043776 | 0.3452   | 0.066615 |
| -0.05473 | 0.23783  | 0.041937 | 0.36587  | 0.05064  | 0.27479  | -0.07459 | 0.10743  | -0.17434 |
| 0.186912 | 4.82E-05 | 0.251535 | 3.59E-08 | 0.363785 | 4.65E-16 | 0.23639  | 2.36E-07 | 0.247707 |
| 0.033763 | 0.46669  | 0.099067 | 0.03232  | 0.062531 | 0.17733  | 0.007519 | 0.87126  | -0.14976 |
| -0.00221 | 0.96209  | -0.05851 | 0.20694  | -0.01317 | 0.77645  | -0.04364 | 0.34668  | 0.115247 |
| 0.029724 | 0.52168  | 0.10278  | 0.02635  | 0.135321 | 0.00339  | -0.05063 | 0.27487  | -0.00862 |
| 0.021416 | 0.64436  | 0.054461 | 0.24014  | 0.042956 | 0.35433  | -0.08574 | 0.06414  | -0.08209 |
| 0.05158  | 0.26597  | 0.000299 | 0.99485  | 0.08954  | 0.05315  | -0.08934 | 0.05369  | -0.03038 |
| 0.018382 | 0.69195  | -0.00997 | 0.82982  | 0.018249 | 0.69407  | -0.08472 | 0.06739  | -0.01014 |
| 0.054023 | 0.24395  | 0.034245 | 0.46035  | 0.086086 | 0.06306  | -0.06582 | 0.15559  | -0.06272 |
| 0.027022 | 0.56023  | 0.135367 | 0.00338  | 0.062584 | 0.17697  | 0.026691 | 0.56506  | -0.07876 |
| -0.01671 | 0.71868  | 0.162536 | 0.00042  | 0.044377 | 0.33862  | 0.095997 | 0.0381   | 0.015349 |
| 0.305354 | 1.55E-11 | 0.477315 | 6.02E-28 | 0.487415 | 3.08E-29 | 0.392277 | 1.25E-18 | 0.106857 |
| 0.230353 | 4.84E-07 | 0.174708 | 0.00015  | 0.163479 | 0.00039  | 0.153246 | 0.00089  | -0.03219 |
| 0.106882 | 0.02088  | 0.343963 | 2.04E-14 | 0.386956 | 3.95E-18 | 0.349771 | 6.94E-15 | 0.32172  |
| 0.160554 | 0.0005   | 0.55363  | 7.33E-39 | 0.51069  | 2.21E-32 | 0.473706 | 1.70E-27 | 0.04883  |
| 0.032484 | 0.48375  | 0.251268 | 3.71E-08 | 0.273498 | 1.86E-09 | 0.167793 | 0.00027  | -0.03296 |

|          |          |          |          |          |          |          |          |          |
|----------|----------|----------|----------|----------|----------|----------|----------|----------|
| 0.044173 | 0.34084  | 0.10756  | 0.02008  | 0.245052 | 8.17E-08 | 0.011331 | 0.80706  | -0.01058 |
| 0.069456 | 0.13394  | 0.347853 | 9.94E-15 | 0.283104 | 4.68E-10 | 0.354546 | 2.80E-15 | 0.11212  |
| 0.171185 | 0.0002   | 0.388015 | 3.15E-18 | 0.27262  | 2.11E-09 | 0.322894 | 8.58E-13 | -0.07554 |
| 0.084805 | 0.06709  | 0.08367  | 0.07085  | 0.17372  | 0.00016  | -0.00534 | 0.90845  | -0.06464 |
| 0.308507 | 9.36E-12 | 0.203826 | 9.01E-06 | 0.48797  | 2.61E-29 | 0.272379 | 2.18E-09 | 0.155764 |
| 0.058283 | 0.20868  | 0.152935 | 0.00091  | 0.294374 | 8.65E-11 | -0.00517 | 0.91135  | -0.00824 |
| 0.117648 | 0.01095  | 0.190474 | 3.43E-05 | 0.318275 | 1.87E-12 | 0.174031 | 0.00016  | 0.068987 |
| -0.00326 | 0.94397  | 0.222028 | 1.26E-06 | 0.162203 | 0.00043  | 0.13653  | 0.00311  | -0.11779 |
| 0.035963 | 0.43814  | 0.067539 | 0.14504  | 0.237275 | 2.12E-07 | -0.05945 | 0.19971  | 0.030534 |
| 0.117745 | 0.01088  | 0.038219 | 0.40994  | 0.193927 | 2.45E-05 | -0.05512 | 0.23445  | 0.004044 |
| 0.00484  | 0.91693  | -0.01039 | 0.82288  | 0.066151 | 0.1535   | -0.05753 | 0.21466  | 0.044323 |
| 0.127151 | 0.00593  | 0.556963 | 2.10E-39 | 0.432299 | 1.09E-22 | 0.553996 | 6.39E-39 | 0.062461 |
| 0.002045 | 0.96485  | 0.239512 | 1.62E-07 | 0.087006 | 0.06028  | 0.163551 | 0.00039  | -0.13489 |
| -0.00634 | 0.89132  | -0.02066 | 0.65611  | 0.110519 | 0.01688  | -0.07363 | 0.11204  | 0.121275 |
| 0.13068  | 0.00468  | 0.55997  | 6.71E-40 | 0.478862 | 3.84E-28 | 0.501122 | 4.63E-31 | 0.012224 |
| 0.0682   | 0.14114  | 0.17736  | 0.00012  | 0.323847 | 7.29E-13 | 0.091432 | 0.0483   | 0.05323  |
| 0.068292 | 0.1406   | 0.184575 | 6.01E-05 | 0.251432 | 3.64E-08 | 0.101671 | 0.02803  | 0.02987  |
| 0.041566 | 0.37013  | 0.10809  | 0.01947  | 0.233252 | 3.44E-07 | -0.02689 | 0.56216  | -0.01317 |
| -0.00338 | 0.94191  | 0.15917  | 0.00056  | 0.172674 | 0.00018  | 0.125378 | 0.00667  | 0.006086 |
| 0.045877 | 0.32253  | 0.140296 | 0.00238  | 0.175466 | 0.00014  | 0.044125 | 0.34137  | -0.06332 |
| 0.045446 | 0.3271   | 0.077992 | 0.09229  | 0.106761 | 0.02102  | 0.034876 | 0.45212  | -0.03375 |
| 0.050071 | 0.28022  | 0.202397 | 1.04E-05 | 0.374621 | 5.24E-17 | 0.172387 | 0.00018  | 0.147203 |
| 0.10498  | 0.02328  | 0.146168 | 0.00154  | 0.106074 | 0.02187  | 0.018844 | 0.68463  | -0.17609 |
| 0.145681 | 0.0016   | 0.050441 | 0.27668  | 0.093878 | 0.04258  | -0.05203 | 0.26177  | -0.15005 |
| 0.42376  | 8.93E-22 | 0.538979 | 1.52E-36 | 0.679375 | 1.68E-64 | 0.501379 | 4.27E-31 | 0.17447  |
| -0.01535 | 0.74079  | 0.084352 | 0.06857  | 0.181925 | 7.69E-05 | 0.056813 | 0.22041  | -0.04677 |
| -0.01366 | 0.76841  | 0.09981  | 0.03104  | 0.284368 | 3.89E-10 | 0.018426 | 0.69125  | 0.051974 |
| 0.120091 | 0.00939  | 0.375058 | 4.79E-17 | 0.473939 | 1.59E-27 | 0.320982 | 1.19E-12 | 0.098174 |
| 0.271988 | 2.30E-09 | 0.358093 | 1.42E-15 | 0.468397 | 7.66E-27 | 0.378999 | 2.12E-17 | 0.11642  |
| -0.01111 | 0.81069  | 0.183004 | 6.96E-05 | 0.032629 | 0.4818   | 0.09527  | 0.03959  | -0.1574  |
| 0.127397 | 0.00583  | 0.199458 | 1.41E-05 | 0.252637 | 3.11E-08 | 0.205578 | 7.51E-06 | 0.035529 |
| 0.00375  | 0.93559  | 0.178852 | 0.0001   | 0.230718 | 4.64E-07 | 0.034384 | 0.45853  | -0.06792 |
| 0.12081  | 0.00897  | 0.298854 | 4.33E-11 | 0.180332 | 8.90E-05 | 0.219427 | 1.69E-06 | -0.03805 |
| 0.200739 | 1.24E-05 | 0.526339 | 1.23E-34 | 0.550426 | 2.41E-38 | 0.389669 | 2.20E-18 | 0.093786 |
| 0.120882 | 0.00893  | 0.30135  | 2.93E-11 | 0.38084  | 1.44E-17 | 0.112065 | 0.0154   | 0.033095 |
| 0.138467 | 0.00271  | 0.361318 | 7.56E-16 | 0.357989 | 1.45E-15 | 0.396086 | 5.42E-19 | 0.076731 |
| 0.034984 | 0.45072  | 0.111755 | 0.01569  | 0.262211 | 8.81E-09 | -0.02918 | 0.52933  | -0.04855 |
| 0.000255 | 0.99561  | 0.160655 | 0.00049  | 0.037325 | 0.42098  | 0.078942 | 0.08837  | -0.10425 |
| 0.017094 | 0.71254  | 0.303159 | 2.20E-11 | 0.185709 | 5.40E-05 | 0.2498   | 4.48E-08 | -0.08901 |
| 0.138046 | 0.00279  | 0.481752 | 1.65E-28 | 0.391384 | 1.52E-18 | 0.356113 | 2.08E-15 | 0.01567  |
| -0.02289 | 0.62178  | 0.044721 | 0.33489  | -0.01542 | 0.73965  | 0.058667 | 0.20569  | 0.021436 |
| 0.137178 | 0.00297  | 0.241472 | 1.27E-07 | 0.215888 | 2.50E-06 | 0.192348 | 2.86E-05 | 0.014841 |
| 0.178883 | 0.0001   | 0.44924  | 1.42E-24 | 0.497156 | 1.59E-30 | 0.333448 | 1.37E-13 | 0.083709 |
| 0.071459 | 0.12305  | 0.180108 | 9.09E-05 | 0.271277 | 2.54E-09 | 0.125534 | 0.0066   | 0.079398 |
| 0.060029 | 0.19534  | 0.136571 | 0.0031   | 0.251049 | 3.82E-08 | -0.06508 | 0.16029  | -0.02466 |

|           |          |          |          |          |          |          |          |           |
|-----------|----------|----------|----------|----------|----------|----------|----------|-----------|
| 0.049686  | 0.28394  | 0.138719 | 0.00266  | 0.216783 | 2.26E-06 | 0.020787 | 0.65411  | -0.0288   |
| 0.012117  | 0.79396  | 0.131959 | 0.00428  | 0.151873 | 0.00099  | 0.022779 | 0.62342  | -0.11163  |
| 0.086772  | 0.06098  | 0.205619 | 7.48E-06 | 0.347672 | 1.03E-14 | 0.081113 | 0.07993  | -9.89E-06 |
| 0.138765  | 0.00265  | 0.284455 | 3.84E-10 | 0.390278 | 1.93E-18 | 0.274939 | 1.52E-09 | 0.073613  |
| 0.015532  | 0.7378   | 0.247137 | 6.28E-08 | 0.315895 | 2.79E-12 | 0.148599 | 0.00128  | -0.00234  |
| -0.02777  | 0.54949  | 0.031887 | 0.49182  | 0.020971 | 0.65125  | -0.05289 | 0.25395  | -0.07594  |
| 0.021834  | 0.63791  | 0.21971  | 1.64E-06 | 0.214934 | 2.77E-06 | 0.267595 | 4.23E-09 | 0.019689  |
| 0.087598  | 0.05855  | 0.050249 | 0.27851  | 0.160991 | 0.00048  | -0.00022 | 0.99627  | -0.04652  |
| 0.24045   | 1.44E-07 | 0.46271  | 3.73E-26 | 0.589745 | 4.36E-45 | 0.321244 | 1.14E-12 | 0.085962  |
| 0.163124  | 0.0004   | 0.379415 | 1.94E-17 | 0.631166 | 2.89E-53 | 0.368277 | 1.90E-16 | 0.260119  |
| 0.075356  | 0.10387  | 0.427336 | 3.73E-22 | 0.315478 | 2.99E-12 | 0.298013 | 4.94E-11 | -0.01059  |
| 0.159589  | 0.00054  | 0.108515 | 0.01899  | 0.255323 | 2.20E-08 | 0.009506 | 0.83767  | -0.0051   |
| -0.01413  | 0.76073  | -0.00811 | 0.86123  | 0.091323 | 0.04857  | -0.10728 | 0.0204   | 0.149141  |
| -0.13755  | 0.0029   | -0.18952 | 3.76E-05 | -0.13732 | 0.00294  | -0.10866 | 0.01883  | 0.12086   |
| 0.263556  | 7.35E-09 | 0.435414 | 5.01E-23 | 0.597036 | 1.93E-46 | 0.383578 | 8.11E-18 | 0.155901  |
| 0.015859  | 0.73249  | 0.22303  | 1.13E-06 | 0.122552 | 0.00802  | 0.191392 | 3.13E-05 | 0.032214  |
| 0.18359   | 6.59E-05 | 0.157001 | 0.00066  | 0.296176 | 6.56E-11 | 0.093673 | 0.04304  | 0.052794  |
| 0.151893  | 0.00099  | 0.277412 | 1.07E-09 | 0.433057 | 9.05E-23 | 0.226946 | 7.20E-07 | 0.1718    |
| 0.072856  | 0.11588  | 0.149917 | 0.00116  | 0.310732 | 6.52E-12 | 0.05907  | 0.20259  | 0.007012  |
| 0.210637  | 4.40E-06 | 0.61704  | 2.44E-50 | 0.707518 | 4.08E-72 | 0.493291 | 5.21E-30 | 0.262569  |
| 0.017993  | 0.69815  | 0.155935 | 0.00072  | 0.111354 | 0.01607  | 0.100319 | 0.03019  | -0.11333  |
| 0.032567  | 0.48263  | 0.103584 | 0.02519  | 0.239742 | 1.57E-07 | -0.0175  | 0.70603  | -0.06501  |
| 0.098006  | 0.03423  | 0.373453 | 6.66E-17 | 0.341791 | 3.05E-14 | 0.361932 | 6.70E-16 | 0.112096  |
| 0.096371  | 0.03735  | 0.126225 | 0.00631  | 0.39309  | 1.05E-18 | 0.074792 | 0.10648  | 0.19248   |
| 0.020097  | 0.66488  | 0.099643 | 0.03133  | 0.244058 | 9.24E-08 | 0.05294  | 0.25355  | -0.02977  |
| 0.026057  | 0.57433  | 0.134231 | 0.00366  | 0.151649 | 0.00101  | 0.000802 | 0.98621  | -0.08479  |
| 0.026308  | 0.57064  | 0.18929  | 3.84E-05 | 0.199953 | 1.34E-05 | 0.104129 | 0.02443  | -0.0079   |
| 0.138744  | 0.00266  | 0.208933 | 5.28E-06 | 0.39514  | 6.68E-19 | 0.120592 | 0.00909  | -0.05228  |
| 0.05367   | 0.24705  | 0.078602 | 0.08976  | 0.201417 | 1.15E-05 | -0.07427 | 0.10895  | -0.04204  |
| -0.01336  | 0.77331  | 0.179014 | 0.0001   | 0.122228 | 0.00819  | 0.052124 | 0.26095  | -0.17524  |
| 0.028519  | 0.5387   | 0.258843 | 1.38E-08 | 0.194069 | 2.41E-05 | 0.189275 | 3.85E-05 | -0.07796  |
| 0.001805  | 0.96897  | -0.03892 | 0.40136  | 0.055023 | 0.23532  | -0.10976 | 0.01766  | -0.00663  |
| 0.03163   | 0.49532  | 0.088659 | 0.05555  | 0.06004  | 0.19526  | 0.124196 | 0.00721  | -0.04223  |
| -0.04564  | 0.32509  | 0.052695 | 0.25575  | 0.094925 | 0.04032  | -0.05203 | 0.26177  | -0.06602  |
| 0.064728  | 0.16257  | 0.128066 | 0.00558  | 0.213282 | 3.31E-06 | 0.134922 | 0.00349  | -0.06775  |
| -7.76E-05 | 0.99867  | 0.085554 | 0.06471  | -0.02275 | 0.6239   | -0.03004 | 0.51722  | -0.25071  |
| 0.182333  | 7.40E-05 | 0.162057 | 0.00044  | 0.327702 | 3.75E-13 | 0.091885 | 0.0472   | 0.023893  |
| -0.01402  | 0.76246  | -0.13992 | 0.00244  | 0.105278 | 0.02289  | -0.11643 | 0.01181  | 0.153117  |
| -0.00136  | 0.97664  | -0.0769  | 0.09697  | 0.135052 | 0.00345  | -0.17364 | 0.00016  | 0.025237  |
| -0.00717  | 0.87715  | -0.15127 | 0.00104  | 0.070399 | 0.12873  | -0.21047 | 4.48E-06 | 0.048895  |
| 0.038085  | 0.41158  | -0.17978 | 9.36E-05 | 0.15545  | 0.00075  | -0.16558 | 0.00033  | 0.236333  |
| -0.04864  | 0.29421  | -0.12329 | 0.00764  | 0.075847 | 0.10162  | -0.20697 | 6.49E-06 | 0.198499  |
| -0.14188  | 0.00212  | -0.17204 | 0.00019  | -0.18685 | 4.85E-05 | -0.20631 | 6.96E-06 | -0.04861  |
| -0.02313  | 0.61814  | -0.18266 | 7.18E-05 | 0.009504 | 0.8377   | -0.28671 | 2.75E-10 | 0.061716  |
| -0.08357  | 0.07119  | -0.27304 | 1.98E-09 | -0.18706 | 4.75E-05 | -0.2551  | 2.26E-08 | 0.018051  |

|          |         |          |          |          |          |          |          |          |
|----------|---------|----------|----------|----------|----------|----------|----------|----------|
| -0.02589 | 0.57679 | -0.19417 | 2.39E-05 | -0.11337 | 0.01424  | -0.19644 | 1.91E-05 | 0.136864 |
| -0.0493  | 0.28772 | -0.20017 | 1.31E-05 | -0.01305 | 0.77857  | -0.25468 | 2.39E-08 | 0.173167 |
| -0.06047 | 0.19205 | -0.13053 | 0.00472  | 0.055621 | 0.23026  | -0.17484 | 0.00015  | 0.020481 |
| -0.00619 | 0.89394 | -0.2001  | 1.32E-05 | 0.129189 | 0.00517  | -0.21935 | 1.70E-06 | 0.227405 |
| -0.05368 | 0.24695 | -0.18142 | 8.05E-05 | 0.119151 | 0.00996  | -0.18995 | 3.60E-05 | 0.174178 |
| -0.09415 | 0.04199 | 0.000282 | 0.99515  | -0.04971 | 0.28369  | 0.018455 | 0.69079  | 0.162885 |
| 0.03412  | 0.46199 | -0.13832 | 0.00274  | 0.050704 | 0.27418  | -0.21467 | 2.85E-06 | 0.256594 |
| 0.048535 | 0.29525 | -0.15828 | 0.0006   | 0.16779  | 0.00027  | -0.19818 | 1.60E-05 | 0.252173 |
| -0.05782 | 0.2123  | -0.23591 | 2.51E-07 | -0.10726 | 0.02043  | -0.22038 | 1.52E-06 | -0.02181 |
| 9.94E-05 | 0.99829 | -0.09663 | 0.03685  | 0.097695 | 0.03481  | -0.19645 | 1.91E-05 | 0.144784 |
| -0.06891 | 0.13703 | -0.19362 | 2.52E-05 | -0.06758 | 0.14479  | -0.11103 | 0.01638  | 0.241572 |
| -0.09612 | 0.03786 | -0.15423 | 0.00083  | -0.10734 | 0.02033  | -0.13179 | 0.00433  | 0.227958 |
| 0.023285 | 0.61573 | -0.11285 | 0.01469  | 0.163522 | 0.00039  | -0.12581 | 0.00648  | 0.123755 |
| -0.04728 | 0.3079  | -0.18878 | 4.03E-05 | 0.102206 | 0.02721  | -0.21976 | 1.63E-06 | 0.232118 |
| -0.02691 | 0.56191 | -0.14135 | 0.0022   | -0.04094 | 0.37742  | -0.15805 | 0.00061  | 0.109404 |
| -0.02609 | 0.5739  | -0.06582 | 0.15558  | 0.080689 | 0.08153  | -0.20443 | 8.46E-06 | 0.009158 |
| -0.0504  | 0.27704 | -0.1742  | 0.00015  | 0.127965 | 0.00562  | -0.21541 | 2.63E-06 | 0.179279 |
| -0.00239 | 0.959   | -0.10312 | 0.02586  | 0.064509 | 0.164    | -0.15926 | 0.00055  | 0.261883 |
| 0.025877 | 0.57699 | -0.08802 | 0.05734  | 0.049544 | 0.28532  | -0.1651  | 0.00034  | 0.14247  |
| -0.04024 | 0.38565 | -0.08454 | 0.06797  | -0.01034 | 0.82371  | -0.07705 | 0.09629  | 0.086354 |
| -0.04961 | 0.28464 | -0.17052 | 0.00021  | 0.085935 | 0.06352  | -0.21665 | 2.29E-06 | 0.154988 |
| -0.02909 | 0.53061 | -0.16479 | 0.00035  | -0.07464 | 0.10718  | -0.22103 | 1.41E-06 | 0.072706 |
| -0.06909 | 0.13602 | -0.21788 | 2.00E-06 | 0.042105 | 0.36395  | -0.20813 | 5.75E-06 | 0.210318 |
| -0.00956 | 0.83682 | -0.0958  | 0.03849  | 0.12653  | 0.00618  | -0.09965 | 0.03132  | 0.252543 |
| -0.06041 | 0.19252 | -0.14478 | 0.00171  | 0.053682 | 0.24694  | -0.12959 | 0.00503  | 0.246166 |
| -0.02491 | 0.59138 | -0.16845 | 0.00026  | 0.044877 | 0.3332   | -0.19079 | 3.32E-05 | 0.212221 |
| 0.127341 | 0.00586 | 0.026655 | 0.56558  | 0.265663 | 5.52E-09 | -0.00962 | 0.83573  | 0.234088 |
| -0.03617 | 0.43549 | -0.17558 | 0.00014  | 0.090221 | 0.05136  | -0.23274 | 3.66E-07 | 0.045235 |
| 0.070789 | 0.12662 | -0.02036 | 0.66074  | 0.235936 | 2.50E-07 | -0.03499 | 0.45066  | 0.294664 |
| -0.05995 | 0.19596 | -0.12265 | 0.00797  | -0.06867 | 0.13841  | -0.15455 | 0.00081  | 0.06019  |
| 0.031215 | 0.501   | -0.00022 | 0.99628  | 0.143718 | 0.00185  | -0.10436 | 0.02411  | 0.12058  |
| -0.08141 | 0.07883 | -0.29328 | 1.02E-10 | -0.1161  | 0.01205  | -0.31662 | 2.47E-12 | 0.149834 |
| 0.048586 | 0.29475 | -0.02782 | 0.54872  | 0.21694  | 2.22E-06 | -0.13045 | 0.00475  | 0.043862 |
| -0.01987 | 0.66851 | -0.12787 | 0.00565  | 0.105233 | 0.02295  | -0.11719 | 0.01126  | 0.235369 |
| -0.06047 | 0.19204 | -0.15191 | 0.00099  | 0.072491 | 0.11772  | -0.19092 | 3.28E-05 | 0.227904 |
| -0.03726 | 0.42185 | -0.16128 | 0.00047  | 0.117122 | 0.01131  | -0.18135 | 8.11E-05 | 0.299682 |
| 0.015366 | 0.7405  | -0.08503 | 0.06635  | 0.13736  | 0.00293  | -0.21888 | 1.79E-06 | 0.115005 |
| -0.10163 | 0.02808 | -0.06762 | 0.14458  | -0.04958 | 0.28497  | -0.02541 | 0.58385  | 0.067844 |
| -0.00316 | 0.94567 | -0.16047 | 0.0005   | 0.033717 | 0.4673   | -0.21583 | 2.51E-06 | 0.201217 |
| 0.012162 | 0.79322 | 0.052948 | 0.25347  | 0.042771 | 0.35641  | -0.02227 | 0.63117  | -0.01637 |
| -0.067   | 0.1483  | -0.00515 | 0.91168  | 0.029209 | 0.52891  | -0.05795 | 0.21126  | 0.023507 |
| -0.00363 | 0.93765 | -0.15559 | 0.00074  | 0.147924 | 0.00135  | -0.14098 | 0.00226  | 0.245332 |
| 0.02449  | 0.59757 | -0.05198 | 0.26226  | 0.168035 | 0.00026  | -0.03899 | 0.40056  | 0.04932  |
| 0.131369 | 0.00446 | 0.231495 | 4.23E-07 | 0.333752 | 1.30E-13 | 0.24543  | 7.79E-08 | 0.31263  |
| -0.02482 | 0.59267 | -0.12117 | 0.00876  | 0.111292 | 0.01612  | -0.21012 | 4.65E-06 | 0.162665 |

|          |         |          |          |          |          |          |          |          |
|----------|---------|----------|----------|----------|----------|----------|----------|----------|
| 0.009227 | 0.84236 | -0.05713 | 0.21785  | 0.158649 | 0.00058  | -0.06412 | 0.16652  | 0.154761 |
| -0.06512 | 0.16001 | -0.22911 | 5.60E-07 | 0.024028 | 0.6045   | -0.24125 | 1.31E-07 | 0.120217 |
| 0.023428 | 0.61357 | -0.04974 | 0.28342  | 0.217837 | 2.01E-06 | -0.07616 | 0.1002   | 0.307575 |
| -0.02316 | 0.61766 | -0.12434 | 0.00714  | 0.114685 | 0.01314  | -0.2413  | 1.30E-07 | 0.137048 |
| -0.16131 | 0.00047 | -0.27544 | 1.41E-09 | -0.21476 | 2.82E-06 | -0.26478 | 6.22E-09 | 0.058101 |
| -0.11087 | 0.01654 | -0.06023 | 0.19387  | -0.00139 | 0.97613  | -0.10482 | 0.02349  | 0.029092 |
| -0.09714 | 0.03586 | -0.14473 | 0.00171  | 0.030988 | 0.50412  | -0.22466 | 9.36E-07 | 0.122075 |
| -0.09261 | 0.04547 | -0.10606 | 0.02189  | -0.10488 | 0.02341  | -0.16244 | 0.00042  | 0.114342 |
| 0.002448 | 0.95792 | -0.11916 | 0.00996  | 0.113429 | 0.01418  | -0.15579 | 0.00073  | 0.067095 |
| 0.029747 | 0.52135 | -0.05685 | 0.22011  | 0.177907 | 0.00011  | -0.10849 | 0.01902  | 0.134257 |
| 0.017138 | 0.71184 | -0.09824 | 0.0338   | 0.105521 | 0.02257  | -0.15406 | 0.00084  | -0.00466 |
| 0.002176 | 0.96259 | -0.04702 | 0.31064  | 0.150639 | 0.00109  | -0.13476 | 0.00353  | 0.069969 |
| 0.051343 | 0.26817 | -0.11561 | 0.01241  | 0.129776 | 0.00497  | -0.21428 | 2.97E-06 | 0.120366 |
| 0.038073 | 0.41173 | -0.07997 | 0.08428  | 0.198418 | 1.56E-05 | -0.06718 | 0.14722  | 0.250924 |
| -0.01827 | 0.69378 | -0.18446 | 6.07E-05 | 0.04641  | 0.31693  | -0.26053 | 1.10E-08 | 0.115757 |
| -0.07986 | 0.08471 | -0.16199 | 0.00044  | -0.06846 | 0.1396   | -0.11926 | 0.00989  | 0.274377 |
| -0.10975 | 0.01767 | -0.08302 | 0.07307  | -0.10765 | 0.01997  | -0.19658 | 1.88E-05 | -0.01758 |
| 0.035795 | 0.44029 | -0.14436 | 0.00176  | 0.165767 | 0.00032  | -0.14684 | 0.00146  | 0.227855 |
| 0.038894 | 0.40171 | -0.00915 | 0.84363  | 0.183457 | 6.67E-05 | -0.06671 | 0.15003  | 0.006708 |
| -0.01315 | 0.77678 | -0.07688 | 0.09703  | 0.211319 | 4.09E-06 | -0.0717  | 0.12178  | 0.158136 |
| -0.01619 | 0.72705 | -0.12428 | 0.00717  | 0.1535   | 0.00087  | -0.13758 | 0.00289  | 0.17918  |
| -0.03602 | 0.43736 | -0.10545 | 0.02266  | 0.020745 | 0.65476  | -0.13255 | 0.00411  | 0.189622 |
| -0.12417 | 0.00722 | -0.2246  | 9.42E-07 | -0.16859 | 0.00025  | -0.25988 | 1.20E-08 | 0.136003 |
| -0.07986 | 0.08473 | -0.18    | 9.17E-05 | -0.01889 | 0.68394  | -0.27611 | 1.29E-09 | 0.148235 |
| -0.02885 | 0.53394 | -0.04069 | 0.38031  | 0.05053  | 0.27583  | -0.01911 | 0.68034  | 0.087284 |
| 0.063034 | 0.17387 | -0.08448 | 0.06814  | 0.095745 | 0.03861  | -0.13399 | 0.00372  | 0.204868 |
| -0.00287 | 0.9506  | -0.12901 | 0.00524  | 0.105083 | 0.02314  | -0.15209 | 0.00098  | 0.239912 |
| 0.003164 | 0.94563 | -0.12874 | 0.00533  | 0.067506 | 0.14523  | -0.22066 | 1.47E-06 | 0.080425 |
| 0.071994 | 0.12027 | -0.04759 | 0.30481  | 0.092146 | 0.04657  | -0.06433 | 0.16519  | 0.172569 |
| 0.009519 | 0.83744 | -0.12788 | 0.00565  | -0.0242  | 0.60197  | -0.19513 | 2.17E-05 | 0.16039  |
| -0.01412 | 0.76094 | -0.12135 | 0.00866  | 0.105211 | 0.02297  | -0.16231 | 0.00043  | 0.076105 |
| -0.00515 | 0.91155 | -0.05809 | 0.21017  | 0.154487 | 0.00081  | -0.11722 | 0.01124  | 0.086546 |
| -0.06099 | 0.18831 | -0.03347 | 0.4706   | 0.052956 | 0.2534   | -0.09319 | 0.04414  | 0.048588 |
| 0.067674 | 0.14423 | -0.10131 | 0.02859  | 0.142517 | 0.00202  | -0.158   | 0.00061  | 0.06438  |
| 0.010685 | 0.81787 | -0.12407 | 0.00727  | 0.12914  | 0.00519  | -0.21683 | 2.25E-06 | 0.114061 |
| -0.03725 | 0.42187 | -0.17775 | 0.00011  | 0.030795 | 0.50678  | -0.20832 | 5.63E-06 | 0.229406 |
| -0.01528 | 0.74191 | -0.10385 | 0.02482  | 0.161413 | 0.00046  | -0.11409 | 0.01362  | 0.170933 |
| 0.029805 | 0.52054 | -0.03533 | 0.44624  | 0.138941 | 0.00262  | -0.1039  | 0.02474  | 0.046874 |
| -0.13892 | 0.00263 | -0.27144 | 2.48E-09 | -0.17013 | 0.00022  | -0.24325 | 1.02E-07 | 0.134604 |
| -0.0287  | 0.53609 | -0.12808 | 0.00557  | 0.115785 | 0.01228  | -0.16623 | 0.00031  | 0.194052 |
| 0.025343 | 0.58488 | -0.1128  | 0.01473  | 0.093279 | 0.04393  | -0.16904 | 0.00024  | 0.275466 |
| -0.02624 | 0.57169 | -0.1835  | 6.64E-05 | 0.081873 | 0.07714  | -0.18862 | 4.10E-05 | 0.140411 |
| -0.0348  | 0.45317 | -0.10652 | 0.02132  | 0.054677 | 0.23828  | -0.17156 | 0.0002   | 0.046187 |
| -0.04678 | 0.31308 | -0.09218 | 0.04649  | 0.077388 | 0.09484  | -0.18879 | 4.03E-05 | 0.040244 |
| -0.00609 | 0.89558 | -0.19135 | 3.15E-05 | 0.048313 | 0.29747  | -0.21177 | 3.90E-06 | 0.187434 |



|           |         |          |          |          |          |          |          |          |
|-----------|---------|----------|----------|----------|----------|----------|----------|----------|
| 0.018128  | 0.696   | -0.14357 | 0.00187  | 0.082349 | 0.07543  | -0.15601 | 0.00072  | 0.283287 |
| -0.0335   | 0.47017 | -0.1279  | 0.00564  | 0.15566  | 0.00074  | -0.15135 | 0.00104  | 0.183671 |
| -0.01789  | 0.69976 | -0.15877 | 0.00057  | 0.009092 | 0.84464  | -0.15685 | 0.00067  | 0.139578 |
| -0.09162  | 0.04784 | -0.16045 | 0.0005   | -0.03534 | 0.44612  | -0.26579 | 5.43E-09 | 0.076508 |
| 0.025003  | 0.58991 | 0.016441 | 0.72307  | 0.161091 | 0.00047  | -0.12058 | 0.0091   | -0.00582 |
| 0.006026  | 0.89667 | -0.2316  | 4.18E-07 | 0.067527 | 0.14511  | -0.20401 | 8.84E-06 | 0.186639 |
| -0.0572   | 0.21731 | -0.12333 | 0.00762  | 0.10006  | 0.03062  | -0.11306 | 0.01451  | 0.280976 |
| 7.03E-05  | 0.99879 | -0.04035 | 0.38435  | 0.138027 | 0.0028   | -0.12562 | 0.00656  | 0.05188  |
| 0.023659  | 0.61007 | -0.0379  | 0.41391  | 0.209109 | 5.18E-06 | -0.10951 | 0.01791  | 0.008087 |
| -0.01851  | 0.68987 | -0.10407 | 0.02451  | 0.104839 | 0.02347  | -0.17178 | 0.00019  | 0.069854 |
| -0.06325  | 0.17243 | -0.14575 | 0.00159  | 0.071406 | 0.12334  | -0.11026 | 0.01714  | 0.221804 |
| -0.06128  | 0.18615 | -0.20841 | 5.58E-06 | -0.01392 | 0.76411  | -0.30618 | 1.36E-11 | 0.137607 |
| -0.00845  | 0.85543 | -0.18141 | 8.06E-05 | 0.152196 | 0.00097  | -0.20956 | 4.94E-06 | 0.204039 |
| 0.002981  | 0.94877 | -0.05976 | 0.19738  | 0.140282 | 0.00238  | -0.18341 | 6.70E-05 | -0.01827 |
| 0.026854  | 0.56268 | -0.1303  | 0.0048   | 0.137749 | 0.00285  | -0.18669 | 4.92E-05 | 0.170305 |
| -0.03928  | 0.39705 | -0.14216 | 0.00207  | 0.060733 | 0.19014  | -0.17014 | 0.00022  | 0.048092 |
| -0.01357  | 0.76993 | -0.09978 | 0.0311   | 0.058726 | 0.20524  | -0.13079 | 0.00464  | 0.120169 |
| -0.06261  | 0.1768  | -0.2438  | 9.55E-08 | -0.09098 | 0.04942  | -0.2658  | 5.41E-09 | 0.117519 |
| -0.06963  | 0.13295 | -0.15404 | 0.00084  | -0.03386 | 0.46541  | -0.16141 | 0.00046  | 0.017408 |
| -0.06217  | 0.17987 | -0.12527 | 0.00672  | 0.044414 | 0.33822  | -0.15646 | 0.00069  | 0.182031 |
| 0.005632  | 0.90338 | -0.12462 | 0.00701  | 0.181219 | 8.20E-05 | -0.17341 | 0.00017  | 0.239303 |
| -0.08564  | 0.06443 | -0.15107 | 0.00106  | -0.12594 | 0.00643  | -0.17405 | 0.00016  | 0.113873 |
| 0.052647  | 0.25618 | 0.021738 | 0.63939  | 0.195142 | 2.17E-05 | 0.063077 | 0.17357  | 0.072445 |
| 0.038639  | 0.4048  | -0.04254 | 0.35898  | 0.133446 | 0.00386  | -0.1293  | 0.00513  | 0.201437 |
| -0.00955  | 0.83685 | -0.15241 | 0.00095  | 0.08852  | 0.05593  | -0.26079 | 1.07E-08 | 0.141229 |
| -3.55E-05 | 0.99939 | -0.13604 | 0.00322  | 0.113344 | 0.01426  | -0.14992 | 0.00116  | 0.223994 |
| -0.00825  | 0.85888 | -0.12063 | 0.00907  | 0.144782 | 0.00171  | -0.19984 | 1.36E-05 | 0.116313 |
| -0.00213  | 0.96345 | -0.15145 | 0.00103  | 0.053001 | 0.253    | -0.18674 | 4.90E-05 | 0.189819 |
| -0.01244  | 0.78865 | -0.07004 | 0.13071  | 0.183204 | 6.83E-05 | -0.09854 | 0.03326  | 0.247443 |
| -0.08832  | 0.05648 | -0.09337 | 0.04372  | 0.008815 | 0.84931  | -0.15445 | 0.00081  | 0.141965 |
| -0.03096  | 0.50444 | -0.18926 | 3.85E-05 | 0.056289 | 0.2247   | -0.22186 | 1.29E-06 | 0.231403 |
| -0.0941   | 0.04209 | -0.15841 | 0.00059  | 0.063902 | 0.168    | -0.18361 | 6.57E-05 | 0.180398 |
| 0.003578  | 0.93854 | -0.15393 | 0.00085  | -0.05567 | 0.22982  | -0.11658 | 0.0117   | 0.180262 |
| -0.02951  | 0.52461 | -0.1423  | 0.00205  | 0.041748 | 0.36804  | -0.24507 | 8.15E-08 | 0.119289 |
| -0.03586  | 0.43942 | -0.11526 | 0.01268  | 0.062485 | 0.17766  | -0.13787 | 0.00283  | 0.093758 |
| -0.03832  | 0.40869 | 0.056167 | 0.22571  | 0.095196 | 0.03975  | 0.057668 | 0.21353  | 0.089016 |
| 0.058035  | 0.21063 | 0.097888 | 0.03445  | 0.175687 | 0.00014  | 0.062899 | 0.1748   | 0.166002 |
| -0.04512  | 0.33058 | -0.12798 | 0.00561  | 0.048183 | 0.29878  | -0.18389 | 6.41E-05 | 0.002517 |
| -0.03339  | 0.47158 | -0.17876 | 0.0001   | 0.066081 | 0.15394  | -0.18877 | 4.04E-05 | 0.150318 |
| -0.04098  | 0.37694 | -0.21189 | 3.85E-06 | 0.067797 | 0.14351  | -0.20188 | 1.10E-05 | 0.21384  |
| -0.03537  | 0.44571 | -0.12718 | 0.00592  | 0.025756 | 0.57877  | -0.15861 | 0.00058  | 0.101263 |
| -0.00561  | 0.90382 | -0.0974  | 0.03537  | 0.163648 | 0.00038  | -0.15371 | 0.00086  | 0.093377 |
| -0.06523  | 0.15931 | -0.17915 | 9.92E-05 | 0.021862 | 0.63747  | -0.17421 | 0.00015  | 0.188035 |
| 0.024419  | 0.59863 | -0.06623 | 0.15301  | 0.187011 | 4.77E-05 | -0.16475 | 0.00035  | 0.062431 |
| -0.00846  | 0.85538 | -0.20356 | 9.26E-06 | 0.105083 | 0.02314  | -0.21674 | 2.27E-06 | 0.22984  |

|          |          |          |          |          |          |          |          |          |
|----------|----------|----------|----------|----------|----------|----------|----------|----------|
| 0.076269 | 0.09973  | -0.08138 | 0.07896  | 0.202885 | 9.93E-06 | -0.05871 | 0.20537  | 0.325959 |
| -0.01291 | 0.7809   | -0.10411 | 0.02446  | 0.126865 | 0.00604  | -0.16197 | 0.00044  | 0.248106 |
| -0.03149 | 0.49729  | -0.10094 | 0.02918  | 0.081247 | 0.07944  | -0.11117 | 0.01624  | 0.290549 |
| -0.14457 | 0.00174  | -0.17336 | 0.00017  | -0.18201 | 7.63E-05 | -0.20814 | 5.74E-06 | 0.134688 |
| -0.00219 | 0.96241  | -0.14761 | 0.00138  | 0.181908 | 7.70E-05 | -0.13562 | 0.00332  | 0.277072 |
| -0.00429 | 0.92631  | -0.09372 | 0.04294  | 0.112673 | 0.01485  | -0.16137 | 0.00046  | 0.135945 |
| -0.11206 | 0.0154   | -0.24511 | 8.11E-08 | 0.022259 | 0.63137  | -0.23434 | 3.02E-07 | 0.198618 |
| -0.09712 | 0.03589  | -0.1912  | 3.19E-05 | -0.00172 | 0.97043  | -0.20477 | 8.17E-06 | 0.189861 |
| 0.028552 | 0.53823  | -0.08753 | 0.05875  | 0.177322 | 0.00012  | -0.19845 | 1.56E-05 | 0.060622 |
| -0.06542 | 0.15808  | 0.051538 | 0.26635  | 0.022903 | 0.62153  | -0.04135 | 0.37265  | 0.039385 |
| 0.014312 | 0.75773  | -0.06217 | 0.17988  | 0.115823 | 0.01226  | -0.14359 | 0.00187  | 0.149603 |
| -0.04429 | 0.33957  | -0.04382 | 0.34468  | -0.03829 | 0.40909  | -0.07876 | 0.08911  | -0.02909 |
| -0.07583 | 0.1017   | -0.01354 | 0.77036  | -0.05857 | 0.20646  | -0.05129 | 0.26865  | 0.033476 |
| 0.019297 | 0.67747  | -0.06443 | 0.1645   | -0.04372 | 0.34585  | -0.13073 | 0.00466  | 0.062125 |
| 0.022464 | 0.62823  | 0.0219   | 0.63689  | -0.00345 | 0.94071  | -0.00743 | 0.87281  | 0.007755 |
| -0.04396 | 0.34315  | -0.07141 | 0.12332  | -0.08088 | 0.08081  | -0.0748  | 0.10645  | -0.08973 |
| -0.04639 | 0.31715  | -0.07749 | 0.09441  | -0.14218 | 0.00207  | -0.10246 | 0.02682  | -0.06324 |
| 0.225882 | 8.13E-07 | 0.131075 | 0.00455  | 0.139141 | 0.00258  | 0.121275 | 0.0087   | -0.07897 |
| 0.031733 | 0.49392  | -0.01325 | 0.77522  | 0.068079 | 0.14185  | 0.006399 | 0.8903   | 0.075644 |
| -0.03041 | 0.51206  | -0.08537 | 0.0653   | -0.07127 | 0.12405  | -0.12221 | 0.0082   | -0.03325 |
| 0.008203 | 0.85966  | -0.05528 | 0.23313  | -0.07512 | 0.10496  | -0.0619  | 0.18176  | -0.07078 |
| 0.185682 | 5.41E-05 | 0.164773 | 0.00035  | 0.115724 | 0.01233  | 0.116253 | 0.01194  | -0.03741 |
| -0.01052 | 0.82066  | -0.01541 | 0.73974  | 0.005473 | 0.9061   | -0.02391 | 0.60622  | -0.05941 |
| -0.03717 | 0.42291  | -0.01681 | 0.71705  | 0.004572 | 0.9215   | -0.01751 | 0.70583  | -0.07204 |
| -0.01954 | 0.67358  | -0.05803 | 0.21067  | -0.04794 | 0.30126  | -0.12296 | 0.00781  | -0.06149 |
| 0.004843 | 0.91686  | -0.04545 | 0.32702  | -0.04654 | 0.31562  | -0.1042  | 0.02433  | -0.04333 |
| -0.05076 | 0.27367  | -0.07473 | 0.10678  | -0.04127 | 0.3735   | -0.10856 | 0.01895  | -0.13565 |
| 0.026348 | 0.57007  | -0.05748 | 0.21507  | 0.01554  | 0.73768  | -0.13163 | 0.00438  | 0.0232   |
| -0.04803 | 0.30029  | 0.04469  | 0.33522  | -0.02487 | 0.59188  | -0.00353 | 0.9394   | -0.08839 |
| -0.12728 | 0.00588  | -0.05387 | 0.24527  | -0.05153 | 0.26641  | -0.01708 | 0.7128   | 0.048679 |
| -0.04789 | 0.30175  | -0.02912 | 0.5302   | 0.054759 | 0.23757  | 0.007371 | 0.87377  | -0.00869 |
| -0.09084 | 0.04977  | -0.21288 | 3.46E-06 | -0.15113 | 0.00105  | -0.20218 | 1.07E-05 | -0.06038 |
| -0.04414 | 0.34123  | -0.0714  | 0.12338  | -0.00131 | 0.97756  | -0.0346  | 0.45576  | 0.010286 |
| -0.06942 | 0.13415  | -0.04991 | 0.28181  | -0.04886 | 0.29199  | -0.08208 | 0.0764   | 0.102271 |
| 0.08127  | 0.07935  | 0.200779 | 1.23E-05 | 0.301053 | 3.07E-11 | 0.368067 | 1.98E-16 | 0.334321 |
| -0.00121 | 0.9792   | -0.05536 | 0.23243  | -0.0181  | 0.69648  | -0.04916 | 0.28905  | 0.006985 |
| -0.04906 | 0.29004  | -0.10673 | 0.02106  | -0.12682 | 0.00606  | -0.14481 | 0.0017   | -0.13257 |
| 0.031151 | 0.50188  | -0.00706 | 0.87904  | 0.015926 | 0.7314   | -0.03694 | 0.42584  | 0.053526 |
| 0.022386 | 0.62943  | -0.02175 | 0.63926  | -0.06249 | 0.17762  | -0.09055 | 0.05052  | -0.05682 |
| -0.06288 | 0.17492  | 0.056072 | 0.2265   | -0.00436 | 0.92522  | 0.030083 | 0.51666  | -0.02901 |
| -0.058   | 0.21092  | -0.06104 | 0.18794  | -0.1099  | 0.01751  | -0.03441 | 0.45823  | -0.00022 |
| -0.0907  | 0.05013  | -0.06777 | 0.14369  | -0.13382 | 0.00377  | -0.07053 | 0.12802  | -0.06905 |
| -0.10635 | 0.02153  | -0.07348 | 0.11281  | -0.15637 | 0.0007   | -0.01474 | 0.75079  | 0.069531 |
| -0.00711 | 0.8782   | 0.007421 | 0.87293  | -0.01186 | 0.79821  | -0.03949 | 0.39453  | -0.01657 |
| -0.03527 | 0.44708  | 0.010468 | 0.82149  | -0.02138 | 0.64497  | -0.0701  | 0.13034  | -0.02713 |

|          |         |          |         |          |          |          |          |          |
|----------|---------|----------|---------|----------|----------|----------|----------|----------|
| -0.03198 | 0.49061 | -0.04171 | 0.36844 | -0.04462 | 0.33594  | -0.11149 | 0.01593  | -0.05922 |
| -0.10043 | 0.03001 | -0.14725 | 0.00142 | -0.14953 | 0.00119  | -0.09023 | 0.05134  | 0.035541 |
| -0.0864  | 0.0621  | -0.10928 | 0.01817 | -0.1419  | 0.00211  | -0.11218 | 0.0153   | -0.05922 |
| -0.05433 | 0.24125 | -0.09803 | 0.03419 | -0.14779 | 0.00136  | -0.11687 | 0.01149  | -0.09859 |
| -0.04695 | 0.31129 | -0.09001 | 0.05191 | -0.13341 | 0.00387  | -0.11335 | 0.01425  | -0.09059 |
| -0.01143 | 0.80542 | -0.01763 | 0.70395 | -0.03026 | 0.51425  | -0.05259 | 0.25671  | 0.008895 |
| 0.029208 | 0.52893 | -0.07187 | 0.12089 | -0.0463  | 0.31811  | -0.08255 | 0.07472  | -0.07602 |
| -0.02073 | 0.65492 | -0.03588 | 0.43923 | -0.09316 | 0.0442   | -0.04477 | 0.33437  | -0.04134 |
| -0.00503 | 0.91359 | -0.12769 | 0.00572 | -0.15216 | 0.00097  | -0.16339 | 0.00039  | -0.06246 |
| -0.0149  | 0.74817 | -0.02057 | 0.65756 | -0.06147 | 0.1848   | -0.05561 | 0.23033  | -0.04496 |
| -0.01849 | 0.69022 | -0.02662 | 0.56608 | -0.02959 | 0.52356  | -0.03664 | 0.42951  | -0.00845 |
| 0.053673 | 0.24702 | -0.00885 | 0.84868 | 0.048351 | 0.2971   | -0.00581 | 0.90041  | 0.003    |
| -0.02523 | 0.58649 | -0.03391 | 0.46469 | -0.04525 | 0.32924  | -0.0467  | 0.31396  | -0.01668 |
| -0.02468 | 0.5947  | -0.04483 | 0.33368 | -0.04905 | 0.2902   | -0.06006 | 0.19513  | -0.00959 |
| -0.01898 | 0.68254 | -0.03172 | 0.49405 | 0.014994 | 0.74657  | -0.02785 | 0.5482   | -0.0007  |
| -0.06735 | 0.14618 | 0.061031 | 0.18798 | -0.00848 | 0.85493  | 0.077549 | 0.09416  | 0.045725 |
| -0.07914 | 0.08756 | -0.04894 | 0.29124 | -0.08659 | 0.06151  | -0.06103 | 0.188    | 0.043035 |
| 0.036113 | 0.43623 | -0.03714 | 0.42331 | -0.01627 | 0.72587  | -0.10387 | 0.02479  | -0.01404 |
| -0.01761 | 0.70424 | -0.03368 | 0.46779 | -0.04938 | 0.28691  | -0.07135 | 0.12364  | -0.09792 |
| 0.01114  | 0.81025 | -0.00775 | 0.86736 | -0.00409 | 0.92978  | 0.043889 | 0.34397  | 0.180422 |
| -0.01815 | 0.69559 | -0.09414 | 0.042   | -0.08012 | 0.08372  | -0.11033 | 0.01707  | -0.0578  |
| 0.011594 | 0.80267 | -0.06926 | 0.13507 | -0.05043 | 0.27675  | -0.04027 | 0.38524  | 0.065724 |
| -0.05941 | 0.19999 | 0.075875 | 0.1015  | 0.030994 | 0.50403  | 0.196793 | 1.84E-05 | 0.156182 |
| -0.06084 | 0.18936 | -0.07386 | 0.11095 | -0.08724 | 0.05959  | -0.11987 | 0.00952  | -0.01356 |
| 0.016177 | 0.72734 | 0.001919 | 0.96701 | -0.02487 | 0.59195  | -0.02832 | 0.54154  | -0.01842 |
| -0.04601 | 0.32118 | -0.03546 | 0.44464 | -0.13097 | 0.00458  | -0.03818 | 0.41042  | -0.08347 |
| -0.02283 | 0.62266 | -0.00134 | 0.97688 | -0.03144 | 0.49792  | -0.0646  | 0.16341  | -0.0109  |
| -0.06911 | 0.13591 | -0.04497 | 0.33223 | -0.02757 | 0.5523   | -0.07723 | 0.09553  | -0.0035  |
| -0.02968 | 0.52235 | -0.08989 | 0.05222 | -0.10813 | 0.01942  | -0.0678  | 0.14349  | 0.000605 |
| -0.0175  | 0.70609 | -0.06706 | 0.14791 | -0.04413 | 0.34128  | -0.03486 | 0.45239  | -0.08325 |
| -0.03911 | 0.39913 | -0.09799 | 0.03426 | -0.09304 | 0.04448  | -0.13383 | 0.00376  | -0.12391 |
| -0.00326 | 0.9439  | 0.090365 | 0.05099 | 0.145795 | 0.00158  | 0.157546 | 0.00063  | 0.034683 |
| -0.13409 | 0.0037  | -0.07603 | 0.1008  | -0.13907 | 0.0026   | 0.069798 | 0.13203  | 0.102085 |
| -0.03393 | 0.46455 | 0.061735 | 0.18292 | -0.03982 | 0.39053  | 0.009347 | 0.84034  | -0.06006 |
| -0.03556 | 0.44333 | 0.025032 | 0.58948 | -0.01207 | 0.79468  | 0.042161 | 0.36331  | 0.045238 |
| -0.00189 | 0.96745 | -0.03599 | 0.43779 | -0.00892 | 0.84753  | -0.01944 | 0.67513  | 0.025676 |
| -0.00391 | 0.93279 | 0.154171 | 0.00083 | 0.184461 | 6.07E-05 | 0.29008  | 1.66E-10 | 0.166748 |
| 0.01714  | 0.7118  | 0.114978 | 0.01291 | 0.162462 | 0.00042  | 0.290607 | 1.53E-10 | 0.18872  |
| 0.047751 | 0.30314 | 0.079548 | 0.08595 | -0.0128  | 0.78272  | 0.074882 | 0.10606  | -0.05842 |
| -0.04249 | 0.35963 | -0.11075 | 0.01665 | -0.15461 | 0.0008   | -0.11992 | 0.00949  | -0.0922  |
| -0.00831 | 0.8579  | -0.10859 | 0.01891 | -0.0863  | 0.06241  | -0.15307 | 0.0009   | -0.06049 |
| 0.001968 | 0.96617 | -0.07597 | 0.10105 | -0.03898 | 0.40072  | -0.11787 | 0.0108   | -0.02968 |
| 0.016599 | 0.72052 | -0.02319 | 0.61713 | -0.01187 | 0.79804  | -0.06786 | 0.14312  | -0.03489 |
| -0.0044  | 0.92446 | -0.02867 | 0.5366  | 0.015952 | 0.73098  | -0.05509 | 0.23478  | -0.00532 |
| -0.04891 | 0.29156 | -0.03783 | 0.41473 | -0.00533 | 0.90849  | -0.07663 | 0.09814  | 0.023281 |

|          |         |          |          |          |          |          |          |          |
|----------|---------|----------|----------|----------|----------|----------|----------|----------|
| -0.05558 | 0.23057 | 0.046566 | 0.31531  | 0.063716 | 0.16925  | -0.00677 | 0.88391  | 0.005197 |
| -0.06249 | 0.17762 | -0.06519 | 0.15955  | -0.11326 | 0.01433  | -0.033   | 0.4768   | 0.006659 |
| 0.035203 | 0.44789 | 0.048459 | 0.29602  | 0.030447 | 0.5116   | -0.03193 | 0.49118  | -0.09135 |
| -0.03337 | 0.47191 | -0.008   | 0.86315  | -0.0012  | 0.97932  | -0.03552 | 0.44379  | -0.09705 |
| -0.01435 | 0.75713 | -0.09431 | 0.04163  | -0.06573 | 0.15612  | -0.12576 | 0.0065   | -0.11132 |
| -0.03321 | 0.47396 | -0.0611  | 0.1875   | -0.06307 | 0.17364  | -0.12326 | 0.00766  | -0.12541 |
| 0.000212 | 0.99635 | -0.0478  | 0.30262  | -0.01773 | 0.70242  | -0.09917 | 0.03215  | -0.03053 |
| -0.0688  | 0.13766 | -0.14043 | 0.00235  | -0.18387 | 6.42E-05 | -0.15807 | 0.00061  | -0.16417 |
| -0.07821 | 0.09139 | -0.14526 | 0.00165  | -0.19309 | 2.66E-05 | -0.17381 | 0.00016  | -0.16408 |
| -0.05918 | 0.20174 | -0.13525 | 0.00341  | -0.14817 | 0.00132  | -0.14518 | 0.00166  | -0.13574 |
| -0.02045 | 0.65934 | -0.07191 | 0.12071  | -0.07308 | 0.11475  | -0.10769 | 0.01993  | -0.04046 |
| -0.06831 | 0.14051 | -0.12386 | 0.00737  | -0.14131 | 0.00221  | -0.14809 | 0.00133  | -0.15922 |
| -0.04334 | 0.35007 | -0.09751 | 0.03514  | -0.11879 | 0.01019  | -0.12522 | 0.00674  | -0.11934 |
| -0.02897 | 0.5323  | -0.1292  | 0.00517  | -0.12334 | 0.00762  | -0.15323 | 0.00089  | -0.12621 |
| -0.01985 | 0.66881 | -0.07757 | 0.09407  | -0.10234 | 0.027    | -0.11599 | 0.01213  | -0.08625 |
| -0.07064 | 0.12741 | -0.08991 | 0.05216  | -0.11005 | 0.01736  | -0.12155 | 0.00855  | -0.1388  |
| -0.03958 | 0.39341 | -0.0336  | 0.46885  | -0.037   | 0.42508  | -0.06494 | 0.16116  | -0.08786 |
| -0.00418 | 0.92818 | -0.08216 | 0.07611  | -0.08556 | 0.0647   | -0.11288 | 0.01466  | -0.04155 |
| 0.001509 | 0.97405 | -0.06273 | 0.17596  | -0.04847 | 0.29592  | -0.10867 | 0.01882  | -0.02272 |
| 0.020225 | 0.66288 | -0.02681 | 0.56327  | -0.05952 | 0.19917  | -0.06572 | 0.15621  | -0.07301 |
| -0.02044 | 0.65948 | -0.08099 | 0.08038  | -0.03872 | 0.40386  | -0.11656 | 0.01171  | -0.10258 |
| -0.06873 | 0.13807 | -0.01261 | 0.78587  | -0.08394 | 0.06995  | -0.03973 | 0.39167  | -0.09105 |
| -0.09114 | 0.04903 | -0.07927 | 0.08704  | -0.09579 | 0.03853  | -0.02911 | 0.53036  | 0.094628 |
| -0.02583 | 0.57761 | -0.01677 | 0.7177   | -0.04921 | 0.28859  | -0.06772 | 0.14394  | -0.02546 |
| -0.00803 | 0.86265 | -0.11422 | 0.01352  | -0.11533 | 0.01264  | -0.15729 | 0.00065  | -0.14519 |
| -0.08386 | 0.07022 | -0.10193 | 0.02763  | -0.04226 | 0.36219  | -0.10631 | 0.02157  | -0.04032 |
| 0.070267 | 0.12945 | -0.01295 | 0.78016  | 0.222926 | 1.14E-06 | -0.09469 | 0.04081  | 0.132953 |
| 0.095459 | 0.0392  | -0.03834 | 0.40848  | 0.191931 | 2.97E-05 | -0.12997 | 0.00491  | 0.082745 |
| 0.062247 | 0.17931 | -0.06968 | 0.13269  | 0.243753 | 9.60E-08 | -0.10129 | 0.02862  | 0.218259 |
| 0.036397 | 0.43263 | -0.05139 | 0.26775  | 0.031275 | 0.50018  | -0.09953 | 0.03151  | 0.018392 |
| 0.020096 | 0.6649  | -0.13302 | 0.00398  | -0.01032 | 0.82397  | -0.21822 | 1.93E-06 | -0.04775 |
| 0.033974 | 0.4639  | -0.11312 | 0.01445  | 0.100124 | 0.03051  | -0.22902 | 5.66E-07 | 0.122777 |
| 0.03725  | 0.42191 | -0.11721 | 0.01125  | 0.001693 | 0.9709   | -0.18585 | 5.33E-05 | 0.067294 |
| 0.04603  | 0.32092 | -0.17536 | 0.00014  | -0.05792 | 0.21152  | -0.12548 | 0.00662  | 0.104542 |
| 0.051633 | 0.26547 | -0.04722 | 0.30859  | 0.187988 | 4.35E-05 | -0.16856 | 0.00025  | 0.13085  |
| 0.028096 | 0.54475 | -0.2173  | 2.14E-06 | 0.109286 | 0.01816  | -0.16885 | 0.00025  | 0.200196 |
| 0.011737 | 0.80029 | -0.07605 | 0.1007   | 0.019107 | 0.68045  | -0.14725 | 0.00142  | 0.112521 |
| 0.05355  | 0.24811 | -0.0762  | 0.10005  | 0.181094 | 8.30E-05 | -0.17481 | 0.00015  | 0.272367 |
| 0.042119 | 0.3638  | -0.08678 | 0.06096  | 0.148703 | 0.00127  | -0.16857 | 0.00025  | 0.140091 |
| -0.10025 | 0.03031 | -0.20037 | 1.28E-05 | -0.14013 | 0.0024   | -0.30465 | 1.74E-11 | -0.08182 |
| 0.033553 | 0.46947 | -0.13779 | 0.00285  | 0.047669 | 0.30397  | -0.24035 | 1.46E-07 | 0.106184 |
| 0.014782 | 0.75003 | -0.18664 | 4.94E-05 | 0.087091 | 0.06003  | -0.30586 | 1.43E-11 | 0.111758 |
| 0.048696 | 0.29365 | -0.04845 | 0.29609  | 0.191572 | 3.08E-05 | -0.13823 | 0.00276  | 0.135882 |
| 0.030742 | 0.50751 | -0.13399 | 0.00372  | 0.080966 | 0.08049  | -0.2194  | 1.69E-06 | 0.018956 |
| 0.028647 | 0.53688 | -0.12907 | 0.00521  | 0.105018 | 0.02323  | -0.12636 | 0.00625  | 0.23844  |

|          |         |          |          |          |          |          |          |          |
|----------|---------|----------|----------|----------|----------|----------|----------|----------|
| 0.005135 | 0.91187 | -0.20026 | 1.30E-05 | 0.096139 | 0.03782  | -0.26966 | 3.18E-09 | 0.121319 |
| 0.021717 | 0.63972 | -0.15339 | 0.00088  | 0.148411 | 0.0013   | -0.23531 | 2.69E-07 | 0.068886 |
| 0.089892 | 0.05222 | -0.10912 | 0.01833  | 0.216677 | 2.29E-06 | -0.20025 | 1.30E-05 | 0.116769 |
| 0.07284  | 0.11596 | -0.1106  | 0.0168   | 0.15052  | 0.0011   | -0.20014 | 1.31E-05 | 0.088864 |
| 0.019357 | 0.67651 | -0.11946 | 0.00977  | 0.036233 | 0.4347   | -0.17116 | 0.0002   | 0.128708 |
| -0.02459 | 0.59601 | -0.13215 | 0.00423  | 0.119876 | 0.00952  | -0.14499 | 0.00168  | 0.151378 |
| 0.060782 | 0.18979 | -0.10899 | 0.01847  | -0.0391  | 0.39917  | -0.14956 | 0.00119  | 0.087913 |
| 0.030091 | 0.51654 | -0.06989 | 0.13154  | 0.141336 | 0.0022   | -0.17566 | 0.00014  | 0.089668 |
| 0.095866 | 0.03837 | 0.010521 | 0.82061  | 0.212065 | 3.78E-06 | -0.07726 | 0.09538  | 0.083633 |
| -0.04573 | 0.32406 | -0.17355 | 0.00016  | 0.067823 | 0.14335  | -0.26058 | 1.10E-08 | 0.122956 |
| -0.00358 | 0.93842 | -0.22209 | 1.25E-06 | 0.081646 | 0.07797  | -0.18227 | 7.45E-05 | 0.219049 |
| 0.03408  | 0.46252 | -0.08861 | 0.05567  | 0.059143 | 0.20204  | -0.13719 | 0.00297  | 0.018284 |
| -0.01648 | 0.72246 | -0.1562  | 0.00071  | -0.07516 | 0.10477  | -0.22182 | 1.29E-06 | -0.07826 |
| 0.064429 | 0.16452 | -0.0937  | 0.04297  | 0.200902 | 1.22E-05 | -0.18135 | 8.10E-05 | 0.153409 |
| 0.017233 | 0.71032 | -0.15159 | 0.00102  | 0.09289  | 0.04482  | -0.22229 | 1.22E-06 | 0.146641 |
| -0.05778 | 0.21263 | -0.31076 | 6.50E-12 | -0.03742 | 0.4198   | -0.34786 | 9.92E-15 | 0.009912 |
| 0.016721 | 0.71854 | -0.0921  | 0.04669  | 0.10378  | 0.02491  | -0.09851 | 0.03332  | 0.05636  |
| -0.01183 | 0.79881 | 0.042844 | 0.35559  | 0.171746 | 0.00019  | 0.08603  | 0.06323  | 0.23038  |
| 0.110816 | 0.01659 | -0.03575 | 0.44086  | 0.295017 | 7.84E-11 | -0.1192  | 0.00993  | 0.236306 |
| -0.03959 | 0.39338 | -0.23621 | 2.42E-07 | -0.0024  | 0.95879  | -0.29766 | 5.22E-11 | 0.0627   |
| 0.035652 | 0.44212 | -0.16032 | 0.00051  | 0.101007 | 0.02907  | -0.25887 | 1.38E-08 | 0.126994 |
| 0.15203  | 0.00098 | -0.02433 | 0.59993  | 0.044868 | 0.3333   | -0.12972 | 0.00499  | -0.13166 |
| 0.107033 | 0.0207  | -0.01095 | 0.81336  | 0.185404 | 5.56E-05 | 0.016907 | 0.71555  | 0.075056 |
| -0.0575  | 0.21486 | -0.13959 | 0.0025   | 0.054057 | 0.24365  | -0.1254  | 0.00666  | 0.189696 |
| 0.003468 | 0.94042 | -0.19764 | 1.69E-05 | 0.065536 | 0.15737  | -0.20324 | 9.58E-06 | 0.220155 |
| 0.001165 | 0.97997 | -0.14398 | 0.00181  | 0.046179 | 0.31935  | -0.22956 | 5.31E-07 | 0.101065 |
| 0.01583  | 0.73295 | -0.17027 | 0.00022  | 0.084415 | 0.06837  | -0.24074 | 1.39E-07 | 0.096333 |
| -0.0171  | 0.71248 | -0.20071 | 1.24E-05 | -0.04917 | 0.28895  | -0.20624 | 7.01E-06 | 0.106879 |
| 0.01505  | 0.74565 | -0.17197 | 0.00019  | 0.02785  | 0.54827  | -0.21445 | 2.92E-06 | 0.047273 |
| -0.00531 | 0.90881 | -0.08194 | 0.0769   | 0.052354 | 0.25885  | -0.12038 | 0.00921  | 0.050881 |
| 0.027421 | 0.55446 | -0.1783  | 0.00011  | 0.020618 | 0.65674  | -0.30521 | 1.59E-11 | 0.016835 |
| -0.12068 | 0.00904 | -0.34413 | 1.98E-14 | -0.09763 | 0.03493  | -0.32494 | 6.05E-13 | 0.074402 |
| -0.03476 | 0.45364 | -0.16789 | 0.00027  | 0.005505 | 0.90555  | -0.20799 | 5.83E-06 | -0.02902 |
| -0.02421 | 0.60182 | -0.22153 | 1.33E-06 | -0.06385 | 0.16834  | -0.22039 | 1.52E-06 | 0.008024 |
| 0.131957 | 0.00428 | 0.091696 | 0.04766  | 0.213795 | 3.14E-06 | -0.01528 | 0.74183  | 0.094137 |
| 0.062587 | 0.17695 | -0.08938 | 0.05357  | 0.162867 | 0.00041  | -0.1126  | 0.01492  | 0.099845 |
| -0.00984 | 0.83204 | -0.1296  | 0.00503  | -0.03392 | 0.46466  | -0.23065 | 4.68E-07 | -0.02514 |
| 0.09346  | 0.04352 | -0.09843 | 0.03345  | 0.053288 | 0.25044  | -0.21259 | 3.57E-06 | 0.028353 |
| -0.00771 | 0.86795 | -0.13064 | 0.00469  | 0.078117 | 0.09176  | -0.24497 | 8.25E-08 | 0.091424 |
| -0.07649 | 0.09873 | -0.20177 | 1.11E-05 | -0.04371 | 0.34591  | -0.21395 | 3.08E-06 | -0.04687 |
| 0.104249 | 0.02426 | 0.12814  | 0.00555  | 0.331187 | 2.04E-13 | 0.136596 | 0.0031   | 0.302835 |
| -0.00791 | 0.86461 | -0.23759 | 2.04E-07 | -0.05373 | 0.2465   | -0.21299 | 3.42E-06 | 0.086469 |
| 0.055831 | 0.2285  | -0.08319 | 0.07249  | 0.088209 | 0.0568   | -0.14302 | 0.00195  | 0.046387 |
| -0.01646 | 0.72282 | -0.16169 | 0.00045  | -0.11377 | 0.0139   | -0.19302 | 2.67E-05 | 0.068299 |
| -0.0699  | 0.13147 | -0.23737 | 2.10E-07 | -0.02886 | 0.53392  | -0.27115 | 2.59E-09 | 0.165703 |

|          |         |          |          |          |          |          |          |          |
|----------|---------|----------|----------|----------|----------|----------|----------|----------|
| -0.07272 | 0.11655 | -0.20466 | 8.26E-06 | -0.04473 | 0.33477  | -0.24759 | 5.93E-08 | -0.00804 |
| 0.003797 | 0.93478 | -0.12496 | 0.00686  | -0.04122 | 0.37409  | -0.16462 | 0.00035  | 0.069767 |
| 0.103217 | 0.02571 | 0.058902 | 0.20388  | 0.18272  | 7.14E-05 | 0.091705 | 0.04763  | 0.16205  |
| 0.056069 | 0.22653 | -0.04529 | 0.32873  | 0.062854 | 0.1751   | -0.10401 | 0.0246   | -0.06033 |
| -0.028   | 0.54615 | -0.08843 | 0.05618  | -0.03713 | 0.42343  | -0.15981 | 0.00053  | 0.015503 |
| 0.008405 | 0.85625 | -0.16216 | 0.00043  | 0.045216 | 0.32956  | -0.22888 | 5.75E-07 | 0.207633 |
| -0.02671 | 0.56473 | -0.20715 | 6.37E-06 | -0.01438 | 0.75666  | -0.28369 | 4.29E-10 | 0.17668  |
| -0.00903 | 0.84568 | -0.25046 | 4.12E-08 | -0.11193 | 0.01553  | -0.31008 | 7.25E-12 | 0.066721 |
| 0.033776 | 0.46652 | -0.13267 | 0.00408  | 0.192909 | 2.70E-05 | -0.19583 | 2.03E-05 | 0.232649 |
| 0.06793  | 0.14272 | -0.06706 | 0.14795  | 0.112047 | 0.01541  | -0.11264 | 0.01487  | 0.132643 |
| 0.099958 | 0.03079 | -0.08669 | 0.06122  | 0.169635 | 0.00023  | 0.010569 | 0.81981  | 0.305381 |
| 0.04116  | 0.37483 | -0.14962 | 0.00118  | 0.149629 | 0.00118  | -0.23437 | 3.01E-07 | 0.093994 |
| 0.040676 | 0.38047 | 0.07017  | 0.12998  | 0.216723 | 2.28E-06 | -0.06959 | 0.13322  | 0.064892 |
| 0.041359 | 0.37252 | -0.1546  | 0.0008   | 0.12067  | 0.00905  | -0.27046 | 2.85E-09 | 0.042144 |
| 0.034729 | 0.45403 | -0.18867 | 4.07E-05 | 0.028165 | 0.54376  | -0.22548 | 8.51E-07 | 0.163044 |
| 0.051964 | 0.26242 | -0.104   | 0.0246   | 0.211802 | 3.89E-06 | -0.2214  | 1.35E-06 | 0.126885 |
| 0.017118 | 0.71215 | -0.19857 | 1.54E-05 | -0.00755 | 0.87082  | -0.32084 | 1.22E-12 | 0.024922 |
| 0.047389 | 0.30682 | -0.12414 | 0.00723  | 0.082112 | 0.07628  | -0.13771 | 0.00286  | 0.156685 |
| 0.022986 | 0.62028 | -0.10431 | 0.02418  | 0.08557  | 0.06466  | -0.14284 | 0.00197  | 0.165011 |
| 0.026072 | 0.57411 | -0.17129 | 0.0002   | 0.102317 | 0.02704  | -0.23107 | 4.45E-07 | 0.179875 |
| 0.040383 | 0.38392 | -0.15073 | 0.00109  | 0.167738 | 0.00027  | -0.17332 | 0.00017  | 0.209169 |
| 0.007575 | 0.87032 | -0.15845 | 0.00059  | 0.0117   | 0.80091  | -0.24598 | 7.27E-08 | 0.001253 |
| -0.00729 | 0.87513 | -0.09102 | 0.04933  | 0.117894 | 0.01078  | -0.09085 | 0.04974  | 0.110983 |
| 0.056981 | 0.21905 | -0.11047 | 0.01693  | 0.163628 | 0.00038  | -0.24329 | 1.02E-07 | 0.143741 |
| 0.007019 | 0.87976 | -0.03007 | 0.51691  | 0.092054 | 0.04679  | -0.06197 | 0.18127  | 0.107908 |
| -0.05953 | 0.19911 | -0.17395 | 0.00016  | -0.05679 | 0.22059  | -0.21308 | 3.39E-06 | -0.12644 |
| 0.029266 | 0.52812 | -0.0703  | 0.12928  | 0.173601 | 0.00016  | -0.12352 | 0.00753  | 0.086557 |
| -0.05198 | 0.26228 | -0.21593 | 2.48E-06 | -0.06243 | 0.17802  | -0.22765 | 6.63E-07 | 0.211135 |
| 0.011534 | 0.80367 | -0.10849 | 0.01902  | 0.123941 | 0.00733  | -0.18832 | 4.22E-05 | 0.17356  |
| 0.061633 | 0.18365 | -0.09495 | 0.04027  | -0.00314 | 0.94606  | -0.17425 | 0.00015  | 0.078108 |
| -0.0098  | 0.83265 | -0.22585 | 8.16E-07 | -0.01672 | 0.71852  | -0.31205 | 5.26E-12 | 0.070134 |
| 0.069766 | 0.13221 | -0.20247 | 1.04E-05 | 0.061103 | 0.18746  | -0.28618 | 2.98E-10 | 0.017182 |
| -0.01264 | 0.78529 | -0.20391 | 8.93E-06 | 0.008181 | 0.86004  | -0.31756 | 2.11E-12 | 0.069934 |
| -0.02848 | 0.53923 | -0.08393 | 0.06997  | 0.112653 | 0.01486  | -0.08468 | 0.0675   | 0.208768 |
| 0.058996 | 0.20316 | -0.08757 | 0.05863  | 0.164344 | 0.00036  | -0.22254 | 1.19E-06 | 0.069256 |
| 0.097507 | 0.03516 | -0.13004 | 0.00488  | 0.049322 | 0.28749  | -0.12705 | 0.00597  | 0.141674 |
| -0.01006 | 0.82843 | -0.17597 | 0.00013  | 0.090825 | 0.04982  | -0.20067 | 1.25E-05 | 0.225098 |
| 0.026994 | 0.56065 | 0.071482 | 0.12293  | 0.074038 | 0.11007  | -0.09106 | 0.04923  | -0.06583 |
| 0.064651 | 0.16307 | -0.17844 | 0.00011  | 0.141985 | 0.0021   | -0.29968 | 3.81E-11 | 0.048595 |
| -0.07376 | 0.11141 | -0.19013 | 3.54E-05 | -0.08551 | 0.06485  | -0.19028 | 3.49E-05 | 0.170836 |
| -0.00596 | 0.89776 | -0.09136 | 0.04849  | 0.028962 | 0.53241  | -0.14183 | 0.00212  | -0.00843 |
| -0.06578 | 0.15583 | -0.15542 | 0.00075  | -0.11923 | 0.00991  | -0.18797 | 4.36E-05 | 0.114182 |
| 0.082213 | 0.07592 | -0.01948 | 0.67465  | 0.191182 | 3.20E-05 | -0.12217 | 0.00822  | 0.180003 |
| 0.066925 | 0.14874 | -0.05953 | 0.19907  | 0.155759 | 0.00073  | -0.20099 | 1.21E-05 | 0.066833 |
| 0.091737 | 0.04756 | -0.07662 | 0.09815  | 0.227468 | 6.77E-07 | -0.15548 | 0.00075  | 0.188012 |

|          |          |          |          |          |          |          |          |          |
|----------|----------|----------|----------|----------|----------|----------|----------|----------|
| -0.09203 | 0.04686  | -0.20549 | 7.58E-06 | -0.02201 | 0.63522  | -0.20076 | 1.23E-05 | 0.110411 |
| 0.075607 | 0.10271  | -0.09915 | 0.03217  | 0.12534  | 0.00669  | -0.23165 | 4.16E-07 | 0.066329 |
| -0.02343 | 0.61354  | -0.11949 | 0.00975  | 0.023192 | 0.61714  | -0.10033 | 0.03017  | 0.140489 |
| 0.106008 | 0.02195  | -0.11854 | 0.01035  | 0.142965 | 0.00195  | -0.23962 | 1.60E-07 | 0.048804 |
| 0.011898 | 0.79761  | -0.15512 | 0.00077  | 0.15045  | 0.00111  | -0.25238 | 3.22E-08 | 0.108759 |
| 0.003336 | 0.94269  | -0.19795 | 1.64E-05 | 0.090438 | 0.0508   | -0.28542 | 3.33E-10 | 0.076354 |
| 0.059409 | 0.20001  | -0.13575 | 0.00329  | 0.120637 | 0.00907  | -0.20508 | 7.91E-06 | 0.074577 |
| 0.056627 | 0.22193  | -0.09299 | 0.04459  | 0.211982 | 3.81E-06 | -0.16792 | 0.00027  | 0.211867 |
| -0.04284 | 0.35563  | -0.17704 | 0.00012  | 0.013485 | 0.77132  | -0.19664 | 1.87E-05 | 0.101123 |
| 0.045419 | 0.32739  | -0.15839 | 0.00059  | 0.10559  | 0.02248  | -0.24423 | 9.05E-08 | 0.11958  |
| -0.1445  | 0.00174  | -0.15086 | 0.00108  | -0.20225 | 1.06E-05 | -0.10503 | 0.02322  | -0.01804 |
| -0.21394 | 3.09E-06 | -0.0505  | 0.2761   | -0.21806 | 1.96E-06 | -0.02031 | 0.66158  | 0.000897 |
| 0.035517 | 0.44385  | 0.216178 | 2.42E-06 | 0.074152 | 0.10952  | 0.132161 | 0.00422  | 0.036308 |
| -0.15089 | 0.00107  | 0.004943 | 0.91516  | -0.17968 | 9.45E-05 | 0.002192 | 0.96232  | -0.02139 |
| -0.11196 | 0.01549  | -0.06116 | 0.18703  | -0.10192 | 0.02764  | 0.068822 | 0.13753  | 0.034018 |
| -0.16261 | 0.00042  | 0.003573 | 0.93861  | -0.11883 | 0.01016  | 0.006373 | 0.89076  | -0.05576 |
| -0.03054 | 0.51031  | 0.070257 | 0.1295   | 0.109999 | 0.01741  | 0.147524 | 0.00139  | 0.289278 |
| -0.17454 | 0.00015  | -0.08309 | 0.07283  | -0.13253 | 0.00412  | 0.000472 | 0.99188  | 0.172259 |
| -0.16955 | 0.00023  | -0.08736 | 0.05925  | -0.08103 | 0.08025  | 0.024334 | 0.59991  | 0.28642  |
| -0.14337 | 0.0019   | -0.01954 | 0.67358  | -0.22481 | 9.20E-07 | 0.012591 | 0.7861   | -0.06628 |
| -0.1276  | 0.00576  | -0.02022 | 0.66301  | -0.07215 | 0.11948  | 0.082212 | 0.07592  | 0.160849 |
| -0.15115 | 0.00105  | -0.04974 | 0.28344  | -0.19777 | 1.67E-05 | 0.052492 | 0.25759  | 0.061783 |
| -0.16891 | 0.00025  | -0.04578 | 0.32353  | -0.2095  | 4.97E-06 | -0.04623 | 0.31881  | -0.0252  |
| -0.06475 | 0.1624   | -0.04286 | 0.35535  | 0.007818 | 0.86619  | -0.02785 | 0.54822  | 0.116202 |
| -0.01439 | 0.75645  | 0.144368 | 0.00176  | 0.160996 | 0.00048  | 0.299399 | 3.98E-11 | 0.214356 |
| -0.14894 | 0.00125  | -0.16496 | 0.00034  | -0.06994 | 0.13124  | -0.0739  | 0.11075  | 0.203769 |
| -0.18847 | 4.15E-05 | -0.0879  | 0.05769  | -0.14515 | 0.00166  | -0.02277 | 0.62349  | 0.065522 |
| -0.11393 | 0.01376  | 0.019971 | 0.66686  | 0.06721  | 0.14701  | 0.085999 | 0.06332  | 0.200125 |
| -0.19144 | 3.12E-05 | -0.03978 | 0.39105  | -0.04143 | 0.37168  | -0.02214 | 0.63323  | 0.076829 |
| -0.15903 | 0.00056  | -0.06159 | 0.18396  | -0.05322 | 0.25106  | -0.02443 | 0.59846  | 0.132825 |
| -0.15113 | 0.00105  | -0.1608  | 0.00049  | -0.12182 | 0.00841  | -0.08435 | 0.06859  | 0.155112 |
| -0.04943 | 0.28645  | -0.05668 | 0.22152  | 0.005754 | 0.90131  | 0.020199 | 0.66329  | 0.25743  |
| -0.15836 | 0.00059  | -0.15837 | 0.00059  | -0.10627 | 0.02163  | -0.13369 | 0.0038   | 0.13958  |
| -0.2336  | 3.30E-07 | -0.02224 | 0.63161  | -0.18979 | 3.66E-05 | 0.097173 | 0.03579  | 0.070018 |
| -0.22203 | 1.26E-06 | -0.08935 | 0.05366  | -0.12755 | 0.00578  | 0.032723 | 0.48053  | 0.145371 |
| -0.19483 | 2.24E-05 | -0.05508 | 0.23485  | -0.13334 | 0.00389  | 0.041843 | 0.36695  | 0.147462 |
| -0.05162 | 0.26557  | 0.124189 | 0.00721  | 0.093037 | 0.04448  | 0.183982 | 6.35E-05 | 0.123269 |
| -0.12724 | 0.00589  | -0.00618 | 0.89399  | -0.21589 | 2.50E-06 | 0.003566 | 0.93874  | 0.048081 |
| -0.05934 | 0.20052  | 0.01761  | 0.70426  | 0.076613 | 0.0982   | 0.083068 | 0.07291  | 0.144248 |
| -0.21328 | 3.31E-06 | 0.011374 | 0.80635  | -0.18764 | 4.50E-05 | 0.036632 | 0.42966  | -0.02027 |
| -0.24638 | 6.91E-08 | -0.16994 | 0.00022  | -0.12775 | 0.0057   | -0.05613 | 0.22601  | 0.175724 |
| 0.000282 | 0.99515  | -0.10477 | 0.02356  | -0.11084 | 0.01656  | 0.010427 | 0.8222   | 0.047758 |
| -0.15764 | 0.00063  | -0.00177 | 0.96962  | -0.0448  | 0.33407  | 0.099865 | 0.03095  | 0.181971 |
| -0.06294 | 0.17451  | 0.173438 | 0.00017  | -0.00223 | 0.96173  | 0.209464 | 4.99E-06 | 0.088256 |
| -0.20141 | 1.16E-05 | -0.02396 | 0.60558  | -0.07268 | 0.11679  | 0.010112 | 0.82748  | 0.153494 |

|          |          |          |          |          |          |          |          |          |
|----------|----------|----------|----------|----------|----------|----------|----------|----------|
| -0.18614 | 5.19E-05 | -0.04494 | 0.33256  | -0.16378 | 0.00038  | -0.02229 | 0.63088  | 0.023377 |
| -0.15416 | 0.00083  | -0.13156 | 0.0044   | -0.25151 | 3.60E-08 | -0.12174 | 0.00845  | -0.07918 |
| -0.13341 | 0.00387  | 0.07538  | 0.10375  | -0.08077 | 0.08123  | 0.164732 | 0.00035  | 0.148994 |
| -0.10397 | 0.02465  | 0.076904 | 0.09693  | -0.07851 | 0.09012  | 0.152607 | 0.00094  | 0.168691 |
| -0.04145 | 0.37151  | -0.03526 | 0.44721  | -0.09217 | 0.0465   | -0.00791 | 0.86456  | 0.113828 |
| -0.21639 | 2.36E-06 | -0.13376 | 0.00378  | -0.10391 | 0.02474  | -0.10514 | 0.02307  | 0.166961 |
| -0.10171 | 0.02797  | 0.026545 | 0.56719  | -0.07184 | 0.12109  | 0.021362 | 0.6452   | 0.085022 |
| -0.14947 | 0.0012   | -0.06252 | 0.17741  | -0.23008 | 5.00E-07 | -0.05274 | 0.25536  | 0.047285 |
| -0.14246 | 0.00203  | -0.14775 | 0.00136  | -0.13971 | 0.00248  | -0.07391 | 0.11068  | 0.064453 |
| -0.12653 | 0.00618  | -0.00667 | 0.88562  | 0.039924 | 0.38935  | -0.00057 | 0.99026  | 0.157122 |
| -0.15196 | 0.00099  | 0.007008 | 0.87994  | -0.05661 | 0.2221   | 0.022311 | 0.63057  | -0.01937 |
| -0.11018 | 0.01723  | 0.072141 | 0.11951  | -0.02348 | 0.61274  | 0.093843 | 0.04266  | 0.031829 |
| -0.10486 | 0.02343  | -0.01459 | 0.75322  | -0.16487 | 0.00035  | 0.04931  | 0.28761  | 0.106675 |
| -0.12527 | 0.00672  | 0.027979 | 0.54642  | -0.01669 | 0.71902  | 0.062759 | 0.17576  | 0.031297 |
| -0.09604 | 0.03802  | 0.047708 | 0.30357  | -0.07631 | 0.09956  | 0.070932 | 0.12585  | 0.020609 |
| -0.09483 | 0.04053  | -0.10931 | 0.01813  | -0.18479 | 5.89E-05 | -0.01543 | 0.73945  | 0.11     |
| -0.10903 | 0.01843  | 0.097504 | 0.03516  | 0.027262 | 0.55675  | 0.170189 | 0.00022  | 0.138497 |
| -0.1049  | 0.02338  | -0.03317 | 0.47452  | -0.02211 | 0.63365  | 0.062419 | 0.17811  | 0.081964 |
| -0.19693 | 1.82E-05 | -0.1886  | 4.10E-05 | -0.17633 | 0.00013  | -0.19932 | 1.43E-05 | 0.00152  |
| -0.17449 | 0.00015  | -0.13185 | 0.00431  | -0.25475 | 2.37E-08 | -0.11176 | 0.01568  | -0.08288 |
| -0.08351 | 0.07138  | -0.09509 | 0.03997  | -0.12023 | 0.0093   | -0.12663 | 0.00614  | -0.06974 |
| -0.13808 | 0.00279  | 0.02342  | 0.61369  | -0.00453 | 0.92221  | 0.037957 | 0.41315  | 0.140144 |
| -0.21671 | 2.28E-06 | -0.18581 | 5.35E-05 | -0.1303  | 0.0048   | -0.15504 | 0.00077  | 0.006829 |
| -0.08058 | 0.08194  | 0.109322 | 0.01812  | 0.074426 | 0.10821  | 0.153379 | 0.00088  | 0.202314 |
| -0.20384 | 9.00E-06 | -0.05169 | 0.26494  | -0.15605 | 0.00071  | 0.04033  | 0.38454  | 0.149656 |
| -0.22152 | 1.34E-06 | -0.08076 | 0.08127  | -0.21247 | 3.62E-06 | -0.02919 | 0.52925  | 0.077111 |
| -0.16097 | 0.00048  | -0.11553 | 0.01248  | -0.14584 | 0.00158  | -0.01988 | 0.66824  | 0.155134 |
| -0.13952 | 0.00251  | -0.0116  | 0.80263  | 0.005712 | 0.90202  | -0.07682 | 0.09731  | 0.116708 |
| -0.08232 | 0.07555  | 0.133019 | 0.00398  | -0.1338  | 0.00377  | 0.137343 | 0.00294  | -0.02167 |
| -0.22233 | 1.22E-06 | 0.042358 | 0.36108  | -0.11908 | 0.01001  | 0.078006 | 0.09223  | 0.146386 |
| -0.10986 | 0.01755  | 0.088337 | 0.05644  | -0.12749 | 0.0058   | 0.125976 | 0.00641  | 0.075208 |
| -0.09511 | 0.03994  | -0.10183 | 0.02777  | -0.08142 | 0.0788   | -0.06299 | 0.17417  | 0.113328 |
| -0.16926 | 0.00024  | 0.003551 | 0.93899  | -0.17577 | 0.00013  | 0.08164  | 0.07799  | 0.032679 |
| -0.13502 | 0.00346  | 0.062735 | 0.17592  | -0.09151 | 0.0481   | 0.070418 | 0.12862  | -0.01122 |
| -0.07845 | 0.0904   | 0.044425 | 0.33809  | 0.049032 | 0.29033  | 0.162394 | 0.00043  | 0.193215 |
| -0.21065 | 4.40E-06 | -0.03026 | 0.51422  | 0.000755 | 0.98702  | 0.01545  | 0.73914  | 0.057418 |
| -0.11155 | 0.01588  | 0.134038 | 0.00371  | 0.077305 | 0.0952   | 0.247562 | 5.96E-08 | 0.203184 |
| -0.1066  | 0.02122  | 0.050987 | 0.27151  | -0.16005 | 0.00052  | 0.048398 | 0.29663  | 0.007426 |
| 0.001308 | 0.9775   | 0.11741  | 0.01111  | 0.125657 | 0.00655  | 0.279326 | 8.11E-10 | 0.156085 |
| -0.07171 | 0.12174  | 0.018989 | 0.68233  | -0.10885 | 0.01863  | 0.140544 | 0.00233  | 0.162477 |
| -0.10403 | 0.02457  | -0.10458 | 0.02382  | -0.11385 | 0.01382  | -0.04084 | 0.37853  | 0.169878 |
| -0.06945 | 0.13396  | -0.03714 | 0.42334  | 0.038776 | 0.40314  | 0.010402 | 0.82261  | 0.286302 |
| -0.14907 | 0.00123  | -0.11032 | 0.01708  | -0.00532 | 0.90875  | -0.12302 | 0.00778  | 0.218341 |
| -0.05157 | 0.26603  | 0.061517 | 0.18448  | 0.02198  | 0.63565  | 0.05987  | 0.19653  | 0.111612 |
| -0.11089 | 0.01651  | -0.10627 | 0.02163  | -0.07408 | 0.10985  | -0.12262 | 0.00798  | 0.018262 |



|          |          |          |          |          |          |          |          |          |
|----------|----------|----------|----------|----------|----------|----------|----------|----------|
| -0.18982 | 3.65E-05 | -0.03701 | 0.42487  | -0.07932 | 0.08687  | -0.04883 | 0.29235  | 0.077693 |
| -0.11101 | 0.01639  | 0.090878 | 0.04968  | -0.03854 | 0.40604  | 0.154425 | 0.00081  | 0.179763 |
| -0.0484  | 0.29657  | -0.07589 | 0.10142  | 0.019663 | 0.6717   | -0.13041 | 0.00476  | 0.067034 |
| -0.16929 | 0.00024  | -0.01184 | 0.79858  | -0.0753  | 0.10414  | 0.126067 | 0.00637  | 0.211104 |
| -0.08356 | 0.07123  | -0.00159 | 0.9727   | 0.010798 | 0.81597  | 0.140176 | 0.0024   | 0.336282 |
| -0.12238 | 0.00811  | -0.0211  | 0.64921  | -0.06246 | 0.17785  | 0.08511  | 0.06612  | 0.193374 |
| -0.14234 | 0.00205  | -0.11244 | 0.01506  | -0.00054 | 0.99077  | -0.08965 | 0.05285  | 0.133731 |
| -0.18708 | 4.74E-05 | -0.09766 | 0.03487  | -0.22923 | 5.52E-07 | -0.08175 | 0.07758  | -0.07488 |
| -0.07351 | 0.11261  | 0.215893 | 2.49E-06 | 0.151354 | 0.00103  | 0.329548 | 2.72E-13 | 0.23179  |
| -0.10024 | 0.03032  | -0.08951 | 0.05322  | -0.07682 | 0.09729  | -0.16334 | 0.00039  | -0.03991 |
| -0.26585 | 5.38E-09 | 0.016214 | 0.72674  | -0.13891 | 0.00263  | 0.088226 | 0.05676  | 0.126184 |
| -0.13042 | 0.00476  | -0.09368 | 0.04302  | -0.03425 | 0.46033  | -0.03321 | 0.47397  | 0.162249 |
| -0.15249 | 0.00095  | -0.05177 | 0.26422  | -0.21371 | 3.16E-06 | -0.06413 | 0.16652  | -0.08481 |
| -0.13749 | 0.00291  | -0.10951 | 0.01792  | -0.12844 | 0.00544  | -0.05535 | 0.23251  | 0.090977 |
| -0.19727 | 1.76E-05 | -0.16985 | 0.00023  | -0.218   | 1.98E-06 | -0.18287 | 7.05E-05 | -0.04739 |
| -0.10562 | 0.02245  | -0.0484  | 0.29656  | -0.13766 | 0.00287  | -0.04051 | 0.38237  | -0.00237 |
| -0.20154 | 1.14E-05 | -0.02268 | 0.62486  | -0.17449 | 0.00015  | 0.078181 | 0.09149  | -0.03374 |
| -0.14582 | 0.00158  | -0.05202 | 0.26194  | -0.05341 | 0.24934  | 0.06088  | 0.18907  | 0.143758 |
| -0.22742 | 6.82E-07 | -0.14016 | 0.0024   | -0.25273 | 3.08E-08 | -0.04562 | 0.3252   | 0.023774 |
| -0.01532 | 0.74124  | 0.04204  | 0.36469  | -0.04419 | 0.34065  | 0.072487 | 0.11774  | 0.131657 |
| -0.06872 | 0.13814  | -0.04014 | 0.38684  | -0.03547 | 0.44439  | -0.08951 | 0.05322  | -0.14717 |
| -0.13321 | 0.00393  | -0.26351 | 7.40E-09 | -0.17506 | 0.00014  | -0.14956 | 0.00119  | 0.083113 |
| -0.13866 | 0.00267  | -0.16416 | 0.00037  | -0.18509 | 5.72E-05 | -0.11028 | 0.01713  | 0.076111 |
| -0.23182 | 4.08E-07 | -0.14153 | 0.00217  | -0.24732 | 6.14E-08 | -0.07548 | 0.1033   | 0.002173 |
| -0.08704 | 0.06018  | -0.17596 | 0.00013  | -0.13126 | 0.00449  | -0.14553 | 0.00161  | 0.013012 |
| 0.017107 | 0.71234  | -0.09725 | 0.03565  | -0.18793 | 4.37E-05 | -0.08688 | 0.06065  | -0.12203 |
| -0.15562 | 0.00074  | -0.10358 | 0.0252   | -0.32135 | 1.12E-12 | -0.09543 | 0.03925  | -0.05492 |
| -0.15158 | 0.00102  | -0.1302  | 0.00483  | -0.13916 | 0.00258  | -0.05891 | 0.20382  | 0.129012 |
| -0.17982 | 9.33E-05 | -0.00564 | 0.90329  | -0.08669 | 0.06122  | 0.020962 | 0.6514   | 0.105768 |
| -0.00467 | 0.91989  | 0.035499 | 0.44408  | 0.099901 | 0.03089  | 0.048971 | 0.29094  | 0.076837 |
| -0.14669 | 0.00148  | -0.0899  | 0.05221  | -0.13798 | 0.00281  | -0.03803 | 0.41223  | -0.03337 |
| -0.06157 | 0.1841   | -0.02917 | 0.52952  | 0.090353 | 0.05102  | 0.046746 | 0.31344  | 0.23898  |
| -0.12509 | 0.0068   | 0.072824 | 0.11604  | -0.08001 | 0.08413  | 0.090687 | 0.05016  | 0.078145 |
| -0.14778 | 0.00136  | -0.05408 | 0.24343  | 0.002941 | 0.94946  | 0.083959 | 0.06988  | 0.248982 |
| -0.06105 | 0.18786  | 0.077953 | 0.09245  | 0.021128 | 0.64882  | 0.042614 | 0.35818  | 0.056957 |
| -0.11161 | 0.01582  | -0.04714 | 0.30933  | -0.05843 | 0.20751  | 0.002577 | 0.95571  | 0.130037 |
| -0.15865 | 0.00058  | 0.042131 | 0.36365  | -0.03264 | 0.48163  | 0.162113 | 0.00044  | 0.174642 |
| -0.18722 | 4.68E-05 | -0.08258 | 0.07461  | -0.17531 | 0.00014  | 0.027249 | 0.55694  | 0.092828 |
| -0.01503 | 0.74598  | 0.111574 | 0.01586  | -0.01019 | 0.82615  | 0.079906 | 0.08454  | -0.07007 |
| -0.19995 | 1.34E-05 | -0.06465 | 0.16308  | -0.14651 | 0.0015   | 0.046462 | 0.31639  | 0.052201 |
| -0.20454 | 8.37E-06 | -0.08505 | 0.0663   | -0.16527 | 0.00034  | 0.0342   | 0.46093  | 0.143587 |
| -0.18751 | 4.55E-05 | -0.01757 | 0.70494  | -0.11214 | 0.01533  | 0.103779 | 0.02491  | 0.13986  |
| -0.06457 | 0.1636   | 0.187237 | 4.67E-05 | -0.08512 | 0.06609  | 0.252185 | 3.30E-08 | -0.07189 |
| -0.13462 | 0.00356  | -0.02554 | 0.58188  | -0.23207 | 3.96E-07 | 0.003809 | 0.93457  | 0.003842 |
| -0.05625 | 0.22503  | 0.224257 | 9.79E-07 | 0.043009 | 0.35374  | 0.311704 | 5.57E-12 | 0.075463 |

|          |          |          |          |          |          |          |          |          |
|----------|----------|----------|----------|----------|----------|----------|----------|----------|
| -0.08364 | 0.07095  | 0.178825 | 0.0001   | -0.09244 | 0.04587  | 0.135907 | 0.00325  | -0.14052 |
| -0.20626 | 7.00E-06 | -0.03267 | 0.48127  | -0.03712 | 0.42358  | 0.032636 | 0.48171  | 0.147325 |
| -0.10473 | 0.02361  | 0.020432 | 0.65964  | -0.06265 | 0.17653  | 0.105632 | 0.02243  | 0.151508 |
| -0.15984 | 0.00053  | 0.082071 | 0.07643  | -0.08701 | 0.06026  | 0.120341 | 0.00924  | -0.05588 |
| -0.17962 | 9.50E-05 | -0.01846 | 0.69079  | -0.14409 | 0.0018   | 0.042954 | 0.35435  | 0.015406 |
| -0.12639 | 0.00624  | -0.00619 | 0.89395  | -0.06955 | 0.13344  | 0.104075 | 0.0245   | 0.081457 |
| -0.17091 | 0.00021  | -0.04801 | 0.30054  | -0.16524 | 0.00034  | 0.055991 | 0.22717  | 0.12889  |
| -0.15749 | 0.00064  | 0.005336 | 0.90844  | -0.06822 | 0.14103  | 0.081788 | 0.07745  | 0.137506 |
| -0.05667 | 0.22161  | 0.03587  | 0.43932  | -0.09471 | 0.04077  | -0.00238 | 0.95905  | -0.05643 |
| -0.13897 | 0.00261  | -0.14191 | 0.00211  | -0.1125  | 0.01501  | -0.1499  | 0.00116  | 0.095947 |
| -0.18779 | 4.43E-05 | -0.1042  | 0.02432  | -0.20149 | 1.15E-05 | -0.10131 | 0.02859  | -0.02728 |
| -0.1502  | 0.00113  | -0.03881 | 0.4027   | -0.06549 | 0.15767  | 0.060127 | 0.19461  | 0.070528 |
| -0.07379 | 0.11129  | -0.01726 | 0.70983  | -0.19931 | 1.43E-05 | -0.00025 | 0.99573  | -0.00038 |
| -0.12367 | 0.00746  | -0.07162 | 0.1222   | -0.11034 | 0.01706  | -0.1002  | 0.03039  | -0.07172 |
| -0.02449 | 0.59763  | 0.205321 | 7.72E-06 | 0.057188 | 0.21737  | 0.338522 | 5.52E-14 | 0.128382 |
| -0.13819 | 0.00277  | -0.13093 | 0.0046   | -0.00596 | 0.89781  | 0.044187 | 0.34069  | 0.256798 |
| -0.18422 | 6.21E-05 | -0.12003 | 0.00942  | -0.18756 | 4.53E-05 | 0.009338 | 0.84049  | 0.104842 |
| -0.12417 | 0.00722  | -0.04331 | 0.35041  | -0.07393 | 0.1106   | 0.026576 | 0.56674  | 0.149847 |
| -0.11426 | 0.01349  | -0.06195 | 0.18141  | -0.20778 | 5.96E-06 | -0.00117 | 0.97991  | 0.039736 |
| -0.06321 | 0.17267  | -0.1131  | 0.01447  | -0.15661 | 0.00068  | 0.00504  | 0.91351  | 0.115034 |
| -0.08537 | 0.0653   | -0.10146 | 0.02836  | -0.1426  | 0.00201  | -0.08288 | 0.07357  | 0.021536 |
| 0.052091 | 0.26125  | -0.13532 | 0.00339  | 0.029602 | 0.52338  | -0.26116 | 1.02E-08 | -0.0009  |
| -0.06225 | 0.17932  | -0.18022 | 9.00E-05 | 0.013691 | 0.76793  | -0.25579 | 2.07E-08 | 0.068226 |
| -0.00183 | 0.96848  | -0.14499 | 0.00168  | 0.031949 | 0.49099  | -0.20861 | 5.46E-06 | 0.122286 |
| -0.00357 | 0.93862  | -0.1107  | 0.01671  | 0.083973 | 0.06983  | -0.22585 | 8.16E-07 | 0.108944 |
| 0.02699  | 0.5607   | -0.09051 | 0.05062  | 0.144053 | 0.0018   | -0.18608 | 5.21E-05 | 0.212743 |
| -0.02661 | 0.56623  | -0.10186 | 0.02773  | 0.067194 | 0.14711  | -0.20809 | 5.77E-06 | 0.178295 |
| 0.017761 | 0.70185  | 0.019573 | 0.67312  | 0.032416 | 0.48467  | -0.1073  | 0.02038  | 0.013345 |
| -0.03403 | 0.46312  | -0.03648 | 0.43162  | 0.097426 | 0.03531  | -0.1085  | 0.01901  | 0.183592 |
| 0.000222 | 0.99619  | -0.07646 | 0.09889  | 0.036276 | 0.43417  | -0.15042 | 0.00111  | 0.109336 |
| -0.00823 | 0.85917  | -0.08483 | 0.06701  | 0.069352 | 0.13453  | -0.21227 | 3.70E-06 | 0.027958 |
| -0.00956 | 0.83672  | 0.032774 | 0.47985  | 0.089912 | 0.05217  | -0.09873 | 0.03293  | 0.023734 |
| 0.005508 | 0.9055   | -0.10098 | 0.02912  | 0.083806 | 0.07039  | -0.19981 | 1.36E-05 | 0.133134 |
| 0.000867 | 0.98509  | -0.0512  | 0.26952  | 0.077384 | 0.09486  | -0.14825 | 0.00131  | 0.077196 |
| 0.038256 | 0.40948  | -0.0599  | 0.19629  | 0.162897 | 0.00041  | -0.14723 | 0.00142  | 0.135996 |
| 0.065126 | 0.15999  | -0.01772 | 0.70257  | 0.200769 | 1.23E-05 | -0.14756 | 0.00138  | 0.116499 |
| 0.047867 | 0.30196  | 7.44E-05 | 0.99872  | 0.076266 | 0.09974  | -0.07951 | 0.08612  | 0.168343 |
| 0.052152 | 0.26069  | -0.06518 | 0.15962  | 0.162596 | 0.00042  | -0.14492 | 0.00169  | 0.109881 |
| -0.01195 | 0.79673  | -0.06854 | 0.13914  | -0.05424 | 0.24205  | -0.11909 | 0.01     | 0.008489 |
| -0.0077  | 0.86817  | -0.17313 | 0.00017  | 0.017518 | 0.70574  | -0.23365 | 3.28E-07 | 0.127434 |
| 0.012636 | 0.78535  | -0.06395 | 0.1677   | 0.06388  | 0.16815  | -0.08425 | 0.06892  | 0.04036  |
| 0.013612 | 0.76923  | -0.14722 | 0.00142  | 0.092558 | 0.04559  | -0.27012 | 2.99E-09 | 0.050675 |
| 0.061607 | 0.18384  | -0.01136 | 0.8066   | 0.111652 | 0.01578  | -0.10468 | 0.02368  | 0.114279 |
| -0.05918 | 0.20171  | -0.14112 | 0.00224  | -0.07399 | 0.11032  | -0.25375 | 2.70E-08 | -0.10797 |
| -0.05631 | 0.22456  | -0.13607 | 0.00322  | -0.03444 | 0.45773  | -0.17015 | 0.00022  | 0.140352 |

|          |         |          |          |          |          |          |          |          |
|----------|---------|----------|----------|----------|----------|----------|----------|----------|
| 0.012527 | 0.78717 | -0.06678 | 0.14964  | -0.03436 | 0.45883  | -0.13687 | 0.00304  | 0.042452 |
| -0.01883 | 0.68488 | -0.10543 | 0.02269  | 0.103105 | 0.02587  | -0.17993 | 9.24E-05 | 0.151202 |
| 0.03671  | 0.42868 | -0.11034 | 0.01706  | 0.040607 | 0.38128  | -0.21656 | 2.32E-06 | -0.06201 |
| 0.032675 | 0.48117 | -0.15106 | 0.00106  | -0.03106 | 0.50313  | -0.25352 | 2.78E-08 | -0.03374 |
| 0.040488 | 0.38268 | -0.10433 | 0.02416  | -0.03215 | 0.48822  | -0.1683  | 0.00026  | -0.04521 |
| 0.012312 | 0.79074 | 0.002375 | 0.95918  | -0.06813 | 0.14152  | -0.09718 | 0.03579  | -0.11799 |
| 0.032822 | 0.4792  | -0.09026 | 0.05127  | 0.088427 | 0.05619  | -0.23    | 5.04E-07 | 0.123941 |
| 0.007305 | 0.8749  | -0.11761 | 0.01097  | -0.01911 | 0.68048  | -0.18395 | 6.37E-05 | 0.030654 |
| 0.058818 | 0.20453 | -0.12445 | 0.00709  | 0.09253  | 0.04566  | -0.21602 | 2.46E-06 | 0.160706 |
| 0.055006 | 0.23546 | -0.07697 | 0.09664  | 0.061801 | 0.18246  | -0.21257 | 3.58E-06 | -0.00374 |
| -0.01953 | 0.67372 | -0.11262 | 0.01489  | -0.02926 | 0.52824  | -0.1745  | 0.00015  | 0.103609 |
| -0.011   | 0.81252 | -0.20264 | 1.02E-05 | -0.0906  | 0.05039  | -0.25169 | 3.52E-08 | 0.094624 |
| 0.001878 | 0.96772 | -0.03941 | 0.39549  | 0.071776 | 0.1214   | -0.12575 | 0.00651  | 0.056559 |
| -0.00629 | 0.89218 | -0.20408 | 8.77E-06 | 0.026106 | 0.57362  | -0.32082 | 1.22E-12 | 0.076209 |
| 0.02588  | 0.57693 | -0.10059 | 0.02975  | 0.054107 | 0.24322  | -0.27216 | 2.25E-09 | -0.0498  |
| 0.01123  | 0.80875 | -0.12491 | 0.00688  | 0.023752 | 0.60867  | -0.24169 | 1.24E-07 | 0.005048 |
| -0.04652 | 0.31582 | -0.17345 | 0.00017  | 0.017162 | 0.71146  | -0.21547 | 2.61E-06 | 0.084349 |
| 0.036482 | 0.43156 | -0.13804 | 0.0028   | 0.000455 | 0.99218  | -0.20001 | 1.33E-05 | -0.02044 |
| -0.08457 | 0.06786 | -0.1352  | 0.00342  | -0.02181 | 0.63832  | -0.1871  | 4.73E-05 | 0.083789 |
| 0.030714 | 0.5079  | -0.08787 | 0.05778  | 0.011272 | 0.80804  | -0.11069 | 0.01671  | 0.147064 |
| -0.01785 | 0.70049 | -0.137   | 0.00301  | 0.073817 | 0.11114  | -0.23732 | 2.11E-07 | 0.150525 |
| 0.016279 | 0.72568 | 0.051642 | 0.26539  | -0.02406 | 0.60396  | -0.03462 | 0.45546  | -0.06258 |
| -0.05711 | 0.21802 | -0.19444 | 2.33E-05 | -0.06591 | 0.15504  | -0.19889 | 1.49E-05 | -0.03542 |
| 0.055674 | 0.22982 | -0.01063 | 0.81885  | 0.082898 | 0.0735   | -0.09009 | 0.05171  | -0.03772 |
| -0.05685 | 0.22013 | -0.13772 | 0.00286  | -0.09931 | 0.03189  | -0.12039 | 0.00921  | -0.03619 |
| 0.053282 | 0.25049 | 0.010752 | 0.81675  | 0.099471 | 0.03162  | -0.04486 | 0.33339  | 0.024612 |
| -0.03148 | 0.49735 | -0.16539 | 0.00033  | -0.08513 | 0.06606  | -0.16697 | 0.00029  | -0.08258 |
| 0.005915 | 0.89856 | -0.09555 | 0.03902  | -0.02343 | 0.61347  | -0.22512 | 8.88E-07 | -0.1148  |
| 0.021377 | 0.64496 | 0.110161 | 0.01724  | 0.173048 | 0.00017  | 0.021577 | 0.64188  | -0.0361  |
| -0.0072  | 0.8766  | 0.009487 | 0.83798  | 0.130635 | 0.00469  | -0.13968 | 0.00248  | 0.037018 |
| 0.057599 | 0.21408 | 0.129943 | 0.00492  | 0.225078 | 8.92E-07 | 0.018535 | 0.68952  | -0.07663 |
| 0.010896 | 0.81434 | 0.031535 | 0.49661  | 0.240866 | 1.37E-07 | -0.07765 | 0.09372  | 0.046034 |
| 0.003418 | 0.94127 | 0.060202 | 0.19406  | 0.117349 | 0.01115  | -0.03203 | 0.48982  | -0.14438 |
| -0.04428 | 0.33966 | -0.0663  | 0.1526   | 0.130403 | 0.00476  | -0.18623 | 5.14E-05 | 0.046254 |
| -0.0181  | 0.69647 | -0.00522 | 0.91048  | 0.0609   | 0.18893  | -0.10462 | 0.02376  | -0.19015 |
| -0.01688 | 0.71595 | 0.021184 | 0.64796  | 0.14359  | 0.00187  | -0.13455 | 0.00358  | -0.04189 |
| 0.022293 | 0.63085 | 0.081523 | 0.07842  | 0.194852 | 2.23E-05 | 0.016562 | 0.72111  | -0.07643 |
| 0.06702  | 0.14816 | 0.058539 | 0.20668  | 0.141403 | 0.00219  | -0.05064 | 0.27482  | -0.06971 |
| 0.023273 | 0.61591 | 0.120668 | 0.00905  | 0.228989 | 5.68E-07 | 0.097999 | 0.03424  | 0.119183 |
| -0.07285 | 0.11593 | -0.02858 | 0.5378   | 0.109207 | 0.01824  | -0.07867 | 0.08949  | -0.02402 |
| 0.053529 | 0.24829 | 0.170887 | 0.00021  | 0.306437 | 1.31E-11 | 0.118699 | 0.01025  | 0.264115 |
| -0.06175 | 0.18279 | -0.03154 | 0.4966   | 0.06246  | 0.17783  | -0.09231 | 0.04617  | 0.020499 |
| -0.0131  | 0.77765 | -0.07709 | 0.09615  | 0.035278 | 0.44692  | -0.16203 | 0.00044  | -0.20461 |
| 0.026276 | 0.57112 | 0.024272 | 0.60083  | 0.210459 | 4.49E-06 | -0.03866 | 0.40456  | 0.02937  |
| -0.02287 | 0.62206 | -0.01218 | 0.79288  | -0.1558  | 0.00073  | 0.037341 | 0.42078  | 0.004818 |

|          |          |          |          |          |          |          |          |          |
|----------|----------|----------|----------|----------|----------|----------|----------|----------|
| 0.031358 | 0.49905  | 0.118901 | 0.01012  | 0.146869 | 0.00146  | 0.094026 | 0.04226  | -0.01667 |
| 0.025354 | 0.58471  | 0.094969 | 0.04022  | 0.203586 | 9.24E-06 | -0.01181 | 0.79902  | 0.023601 |
| 0.012406 | 0.78917  | -0.02743 | 0.55439  | 0.227    | 7.15E-07 | -0.1583  | 0.0006   | 0.052509 |
| -0.05007 | 0.28024  | 0.071672 | 0.12194  | 0.1844   | 6.11E-05 | 0.019147 | 0.67983  | 0.25898  |
| -0.01336 | 0.77343  | -0.10325 | 0.02567  | 0.079519 | 0.08606  | -0.11307 | 0.01449  | -0.01174 |
| 0.073785 | 0.1113   | 0.142695 | 0.00199  | 0.301269 | 2.97E-11 | 0.139074 | 0.0026   | 0.089659 |
| 0.12901  | 0.00524  | 0.11829  | 0.01052  | 0.309339 | 8.18E-12 | 0.034122 | 0.46196  | 0.037208 |
| 0.094167 | 0.04195  | 0.197773 | 1.67E-05 | 0.337548 | 6.58E-14 | 0.06378  | 0.16882  | 0.11829  |
| -0.09281 | 0.045    | -0.03588 | 0.43922  | -0.00602 | 0.89673  | -0.09793 | 0.03437  | 0.020727 |
| 0.076259 | 0.09978  | 0.011768 | 0.79977  | 0.142109 | 0.00208  | -0.03053 | 0.51046  | -0.03177 |
| -0.01562 | 0.73639  | 0.002291 | 0.96061  | 0.027406 | 0.55468  | -0.07882 | 0.08887  | -0.16234 |
| -0.02475 | 0.59364  | -0.14882 | 0.00126  | 0.067236 | 0.14686  | -0.25556 | 2.13E-08 | -0.07912 |
| 0.059651 | 0.19818  | 0.073416 | 0.1131   | 0.271245 | 2.55E-09 | -0.02393 | 0.60599  | 0.142391 |
| 0.009395 | 0.83953  | 0.047817 | 0.30247  | 0.243047 | 1.05E-07 | 0.044086 | 0.3418   | 0.158192 |
| 0.049456 | 0.28618  | 0.005208 | 0.91063  | 0.161385 | 0.00046  | -0.15723 | 0.00065  | -0.08538 |
| 0.023653 | 0.61015  | -0.04019 | 0.38617  | 0.204543 | 8.37E-06 | -0.19497 | 2.21E-05 | 0.019803 |
| 0.021584 | 0.64177  | 0.019588 | 0.67287  | 0.04356  | 0.3476   | -0.1179  | 0.01078  | -0.10582 |
| 0.03608  | 0.43665  | -0.04536 | 0.32803  | 0.175377 | 0.00014  | -0.06423 | 0.16582  | 0.06945  |
| -0.04711 | 0.30964  | -0.01973 | 0.67057  | -0.15526 | 0.00076  | 0.054361 | 0.24101  | 0.145141 |
| 0.037175 | 0.42285  | 0.089956 | 0.05205  | 0.206975 | 6.49E-06 | -0.00337 | 0.94206  | 0.002611 |
| -0.00019 | 0.99669  | 0.000522 | 0.99102  | 0.08203  | 0.07657  | -0.0385  | 0.40649  | -0.07618 |
| 0.156849 | 0.00067  | 0.172917 | 0.00017  | 0.23167  | 4.15E-07 | 0.052278 | 0.25954  | 0.007808 |
| -0.11433 | 0.01343  | -0.01393 | 0.76408  | -0.01247 | 0.78815  | -0.16904 | 0.00024  | -0.08668 |
| -0.04043 | 0.38333  | -0.02297 | 0.6205   | 0.114227 | 0.01351  | -0.14446 | 0.00175  | -0.02482 |
| 0.027372 | 0.55516  | 0.065964 | 0.15467  | 0.280822 | 6.53E-10 | -0.04088 | 0.3781   | 0.005865 |
| 0.057231 | 0.21702  | 0.065887 | 0.15516  | 0.298925 | 4.29E-11 | 0.007512 | 0.87138  | 0.014532 |
| 0.102753 | 0.02639  | 0.103637 | 0.02511  | 0.246365 | 6.93E-08 | 0.106808 | 0.02097  | 0.10726  |
| 0.028773 | 0.53509  | -0.06309 | 0.1735   | 0.141255 | 0.00222  | -0.19594 | 2.00E-05 | 0.000704 |
| -0.14433 | 0.00177  | -0.14624 | 0.00153  | -0.27739 | 1.07E-09 | -0.02114 | 0.64864  | 0.089659 |
| 0.208022 | 5.81E-06 | 0.318292 | 1.87E-12 | 0.448943 | 1.53E-24 | 0.192879 | 2.71E-05 | 0.011821 |
| -0.01212 | 0.79394  | -0.02389 | 0.60656  | 0.141209 | 0.00222  | -0.10124 | 0.0287   | -0.01172 |
| -0.02186 | 0.63745  | -0.09262 | 0.04545  | 0.085919 | 0.06357  | -0.14592 | 0.00157  | 0.047264 |
| 0.045637 | 0.32507  | -0.05847 | 0.20721  | 0.189542 | 3.75E-05 | -0.20282 | 1.00E-05 | 0.075003 |
| 0.081111 | 0.07994  | 0.031531 | 0.49668  | 0.252897 | 3.01E-08 | -0.03978 | 0.39103  | 0.088551 |
| -0.00632 | 0.8917   | 0.084614 | 0.06771  | 0.141189 | 0.00223  | 0.024072 | 0.60384  | 0.10273  |
| 0.021819 | 0.63814  | 0.056677 | 0.22152  | 0.152042 | 0.00098  | -0.02962 | 0.52317  | -0.01676 |
| 0.042115 | 0.36384  | 0.128826 | 0.0053   | 0.252339 | 3.24E-08 | -0.01379 | 0.76635  | 0.020917 |
| 0.098994 | 0.03245  | 0.051155 | 0.26993  | 0.24302  | 1.05E-07 | -0.09224 | 0.04635  | 0.045813 |
| -0.00621 | 0.89355  | 0.037138 | 0.42331  | 0.11449  | 0.0133   | -0.07051 | 0.12814  | -0.11804 |
| -0.01539 | 0.74009  | -0.0393  | 0.39681  | 0.038409 | 0.40761  | -0.1285  | 0.00542  | 0.042681 |
| 0.030983 | 0.50419  | -0.07692 | 0.09687  | 0.149507 | 0.00119  | -0.1599  | 0.00052  | 0.108669 |
| 0.017339 | 0.70861  | 0.070161 | 0.13003  | 0.147549 | 0.00139  | -0.02244 | 0.6286   | -0.09188 |
| -0.09578 | 0.03855  | -0.06841 | 0.13992  | 0.093964 | 0.04239  | -0.05983 | 0.1968   | 0.203056 |
| -0.02701 | 0.56043  | -0.05465 | 0.23853  | 0.090565 | 0.05048  | -0.13628 | 0.00317  | -0.01679 |
| 0.045317 | 0.32848  | 0.003582 | 0.93846  | 0.187151 | 4.71E-05 | -0.08692 | 0.06053  | 0.093405 |

|          |          |          |          |           |          |          |          |          |
|----------|----------|----------|----------|-----------|----------|----------|----------|----------|
| -0.12823 | 0.00552  | -0.00951 | 0.83751  | 0.082896  | 0.07351  | -0.11406 | 0.01365  | -0.00743 |
| 0.050081 | 0.28013  | 0.233645 | 3.28E-07 | 0.258635  | 1.42E-08 | 0.135226 | 0.00341  | -0.07377 |
| 0.099457 | 0.03165  | 0.098834 | 0.03273  | 0.183115  | 6.88E-05 | 0.037173 | 0.42288  | 0.075456 |
| -0.00742 | 0.87302  | 0.030457 | 0.51146  | 0.155504  | 0.00075  | -0.08602 | 0.06326  | 0.058364 |
| -0.00443 | 0.92385  | -0.03627 | 0.4343   | 0.203892  | 8.95E-06 | -0.09219 | 0.04646  | 0.14342  |
| 0.07651  | 0.09866  | 0.141102 | 0.00224  | 0.227678  | 6.61E-07 | 0.079812 | 0.08491  | 0.039107 |
| 0.023408 | 0.61386  | -0.07374 | 0.11151  | 0.109829  | 0.01758  | -0.13074 | 0.00466  | 0.059576 |
| -0.00332 | 0.94287  | -0.00598 | 0.89749  | 0.022452  | 0.62842  | -0.13844 | 0.00272  | -0.21579 |
| 0.032814 | 0.47931  | -0.04671 | 0.31382  | 0.013351  | 0.77353  | -0.115   | 0.01289  | 0.025923 |
| -0.04927 | 0.28801  | -0.04019 | 0.38625  | -0.12798  | 0.00561  | 0.085384 | 0.06524  | 0.145358 |
| -0.0568  | 0.22055  | -0.04989 | 0.28193  | 0.067497  | 0.14529  | -0.13833 | 0.00274  | -0.06505 |
| -0.041   | 0.37672  | 0.067056 | 0.14794  | 0.136902  | 0.00303  | -0.02098 | 0.65105  | -0.03373 |
| -0.13229 | 0.00419  | -0.09283 | 0.04495  | -0.25038  | 4.16E-08 | -0.01093 | 0.8138   | 0.083916 |
| 0.050536 | 0.27577  | 0.115113 | 0.0128   | 0.249018  | 4.95E-08 | 0.052993 | 0.25307  | 0.185113 |
| -0.01446 | 0.75524  | 0.003142 | 0.94602  | 0.137914  | 0.00282  | 0.030432 | 0.5118   | 0.067613 |
| 0.014179 | 0.75991  | -0.04179 | 0.3676   | -5.06E-05 | 0.99913  | -0.10701 | 0.02072  | -0.14334 |
| -0.01968 | 0.67143  | -0.05993 | 0.19605  | 0.045969  | 0.32156  | -0.0923  | 0.0462   | -0.13953 |
| 0.042193 | 0.36295  | 0.036715 | 0.42862  | 0.214615  | 2.87E-06 | -0.06361 | 0.16999  | 0.015786 |
| 0.092524 | 0.04567  | 0.170018 | 0.00022  | 0.401672  | 1.56E-19 | 0.088474 | 0.05606  | 0.149676 |
| -0.00642 | 0.89     | -0.04822 | 0.29843  | 0.131711  | 0.00436  | -0.15816 | 0.0006   | 0.034205 |
| 0.022502 | 0.62765  | -0.04615 | 0.31969  | 0.178604  | 0.0001   | -0.16549 | 0.00033  | 0.051066 |
| 0.258484 | 1.45E-08 | 0.26765  | 4.20E-09 | 0.509166  | 3.61E-32 | 0.240065 | 1.51E-07 | 0.138118 |
| -0.00047 | 0.99197  | -0.09403 | 0.04225  | 0.169561  | 0.00023  | -0.14185 | 0.00212  | 0.137217 |
| 0.01408  | 0.76152  | -0.05061 | 0.27507  | 0.186966  | 4.79E-05 | -0.14703 | 0.00144  | 0.166868 |
| -0.10906 | 0.01839  | -0.15216 | 0.00097  | -0.07239  | 0.11826  | -0.1991  | 1.46E-05 | -0.11662 |
| 0.062698 | 0.17618  | 0.011511 | 0.80405  | 0.145151  | 0.00166  | -0.11472 | 0.01312  | -0.19968 |
| 0.054357 | 0.24105  | 0.147216 | 0.00142  | 0.241783  | 1.23E-07 | -0.00081 | 0.986    | -0.10384 |
| 0.025609 | 0.58093  | -0.06551 | 0.15753  | 0.122268  | 0.00817  | -0.23198 | 4.00E-07 | -0.0664  |
| -0.0376  | 0.4176   | 0.005124 | 0.91206  | 0.046796  | 0.31293  | -0.02047 | 0.65912  | 0.072142 |
| 0.095663 | 0.03878  | 0.091509 | 0.04811  | 0.125227  | 0.00674  | -0.07964 | 0.08561  | -0.00152 |
| 0.040159 | 0.38657  | -0.06424 | 0.16578  | 0.103415  | 0.02543  | -0.1614  | 0.00046  | -0.13196 |
| -0.10231 | 0.02706  | -0.12732 | 0.00587  | -0.03513  | 0.44886  | -0.24968 | 4.55E-08 | -0.07553 |
| -0.03092 | 0.50503  | -0.08081 | 0.08108  | 0.058778  | 0.20484  | -0.09958 | 0.03144  | -0.05233 |
| -0.08728 | 0.05947  | -0.00451 | 0.92253  | 0.0559    | 0.22793  | -0.03124 | 0.50066  | 0.022729 |
| 0.017249 | 0.71005  | 0.125065 | 0.00681  | 0.243147  | 1.04E-07 | 0.056142 | 0.22592  | 0.196226 |
| -0.01991 | 0.66783  | 0.051511 | 0.2666   | 0.040933  | 0.37747  | -0.12735 | 0.00585  | -0.08032 |
| -0.11373 | 0.01393  | -0.05605 | 0.22665  | 0.024793  | 0.59305  | -0.12529 | 0.00671  | 0.071568 |
| 0.037059 | 0.42431  | 0.048192 | 0.29869  | 0.010624  | 0.81888  | -0.09223 | 0.04637  | -0.13137 |
| 0.020001 | 0.66639  | -0.03602 | 0.43745  | -0.14903  | 0.00124  | 0.026317 | 0.57052  | 0.083361 |
| -0.1165  | 0.01175  | -0.06078 | 0.1898   | 0.015353  | 0.74071  | -0.14753 | 0.00139  | -0.08289 |
| 0.014034 | 0.76229  | -0.07526 | 0.1043   | -0.09973  | 0.03118  | 0.056052 | 0.22666  | 0.05402  |
| -0.071   | 0.12551  | -0.02895 | 0.53254  | 0.046834  | 0.31253  | -0.14665 | 0.00148  | -0.02246 |
| 0.041802 | 0.36742  | -0.02728 | 0.55647  | 0.088008  | 0.05737  | -0.08906 | 0.05444  | 0.031198 |
| -0.0577  | 0.21326  | -0.00519 | 0.91085  | 0.040716  | 0.38     | -0.06408 | 0.16683  | -0.03818 |
| 0.038248 | 0.40958  | 0.023993 | 0.60502  | 0.191541  | 3.09E-05 | -0.04449 | 0.33737  | 0.137476 |

|          |         |          |          |          |          |          |          |          |
|----------|---------|----------|----------|----------|----------|----------|----------|----------|
| -0.14868 | 0.00127 | -0.10472 | 0.02363  | -0.27336 | 1.90E-09 | -0.07464 | 0.10718  | -0.08215 |
| 0.021885 | 0.63713 | 0.061333 | 0.1858   | 0.138168 | 0.00277  | -0.00797 | 0.86357  | -0.04961 |
| 0.021496 | 0.64312 | 0.013482 | 0.77137  | -0.15429 | 0.00082  | 0.036658 | 0.42934  | 0.036013 |
| -0.06702 | 0.14816 | -0.08605 | 0.06316  | 0.008736 | 0.85066  | -0.11256 | 0.01494  | 0.00425  |
| 0.088267 | 0.05664 | -0.01065 | 0.81849  | 0.235758 | 2.55E-07 | -0.1272  | 0.00591  | 0.062691 |
| -0.00815 | 0.86056 | -0.06409 | 0.16675  | 0.156992 | 0.00066  | -0.18099 | 8.38E-05 | 0.079873 |
| 0.025444 | 0.58337 | -0.01425 | 0.75867  | 0.173643 | 0.00016  | -0.11783 | 0.01082  | 0.056123 |
| -0.05425 | 0.24201 | -0.08993 | 0.05212  | -0.04918 | 0.28884  | -0.16655 | 0.0003   | -0.10114 |
| -0.04183 | 0.36712 | 0.002486 | 0.95728  | -0.11046 | 0.01694  | 0.132883 | 0.00402  | 0.14187  |
| 0.016021 | 0.72986 | -0.02217 | 0.63274  | 0.242588 | 1.11E-07 | -0.16693 | 0.00029  | 0.088924 |
| -0.03718 | 0.4228  | -0.06193 | 0.18158  | 0.062175 | 0.17982  | -0.1771  | 0.00012  | -0.09596 |
| -0.05165 | 0.26533 | -0.08584 | 0.06381  | -0.06531 | 0.1588   | -0.12115 | 0.00877  | -0.05821 |
| -0.06857 | 0.13897 | -0.19889 | 1.49E-05 | -0.13676 | 0.00306  | -0.28675 | 2.74E-10 | -0.1894  |
| 0.005383 | 0.90765 | -0.0985  | 0.03333  | 0.055557 | 0.2308   | -0.14604 | 0.00155  | -0.06507 |
| 0.017312 | 0.70904 | -0.08028 | 0.0831   | 0.153738 | 0.00086  | -0.23087 | 4.56E-07 | 0.039055 |
| -0.00497 | 0.91462 | 0.098134 | 0.034    | 0.183219 | 6.82E-05 | 0.063599 | 0.17003  | 0.194527 |
| 0.025841 | 0.57751 | 0.015383 | 0.74022  | 0.156751 | 0.00068  | -0.082   | 0.07669  | 0.061566 |
| -0.06729 | 0.14652 | 0.017004 | 0.71399  | 0.130934 | 0.0046   | -0.07927 | 0.08705  | 0.005409 |
| -0.08908 | 0.0544  | -0.19719 | 1.77E-05 | -0.04875 | 0.29316  | -0.26121 | 1.01E-08 | 0.02973  |
| -0.0219  | 0.63685 | 0.058799 | 0.20467  | 0.06406  | 0.16695  | -0.0469  | 0.31189  | -0.12875 |
| 0.016836 | 0.71669 | 0.025553 | 0.58175  | 0.265982 | 5.28E-09 | -0.0805  | 0.08225  | 0.083342 |
| 0.048868 | 0.29195 | 0.177372 | 0.00012  | 0.145485 | 0.00162  | 0.081105 | 0.07997  | -0.04506 |
| -0.06759 | 0.14474 | -0.21593 | 2.48E-06 | -0.08185 | 0.07723  | -0.26995 | 3.06E-09 | -0.10643 |
| -0.05296 | 0.25341 | 0.111331 | 0.01609  | 0.110198 | 0.01721  | 0.049122 | 0.28945  | 0.045063 |
| 0.050373 | 0.27733 | 0.064356 | 0.165    | 0.255872 | 2.04E-08 | -0.07159 | 0.12239  | 0.079408 |
| 0.104641 | 0.02373 | 0.159014 | 0.00056  | 0.2347   | 2.90E-07 | -0.00366 | 0.9371   | -0.00101 |
| 0.00587  | 0.89933 | -0.03466 | 0.45489  | 0.150704 | 0.00109  | -0.1379  | 0.00282  | 0.06333  |
| -0.05199 | 0.26217 | -0.11652 | 0.01174  | -0.00975 | 0.83348  | -0.19418 | 2.39E-05 | -0.14145 |
| -0.11735 | 0.01115 | -0.18633 | 5.09E-05 | -0.04224 | 0.36245  | -0.28549 | 3.29E-10 | -0.16241 |
| 0.033133 | 0.47506 | 0.001327 | 0.97719  | 0.256917 | 1.78E-08 | -0.13895 | 0.00262  | 0.10786  |
| -0.05452 | 0.23961 | -0.05646 | 0.22326  | 0.037262 | 0.42176  | -0.03811 | 0.41123  | -0.00592 |
| -0.0554  | 0.23215 | -0.16263 | 0.00042  | -0.02116 | 0.64835  | -0.15135 | 0.00104  | -0.04997 |
| -0.02532 | 0.58527 | -0.06626 | 0.15284  | 0.094988 | 0.04019  | -0.031   | 0.5039   | 0.257421 |
| -0.07332 | 0.11358 | -0.13654 | 0.00311  | -0.05241 | 0.25835  | -0.17633 | 0.00013  | -0.08966 |
| -0.00765 | 0.86905 | -0.04976 | 0.2832   | 0.170364 | 0.00022  | -0.13722 | 0.00296  | 0.048625 |
| 0.0003   | 0.99484 | -0.04573 | 0.32411  | 0.190354 | 3.47E-05 | -0.14014 | 0.0024   | 0.120439 |
| 0.087459 | 0.05895 | 0.062985 | 0.1742   | 0.268303 | 3.84E-09 | 0.088987 | 0.05464  | 0.223741 |
| -0.01102 | 0.81233 | -0.06329 | 0.1721   | 0.105705 | 0.02234  | -0.13694 | 0.00302  | -0.06213 |
| -0.04359 | 0.34731 | 0.039533 | 0.39402  | 0.246575 | 6.75E-08 | 0.016351 | 0.72453  | 0.280437 |
| 0.016615 | 0.72025 | 0.025724 | 0.57924  | 0.125746 | 0.00651  | -0.09753 | 0.03512  | -0.07609 |
| -0.03422 | 0.46063 | -0.01268 | 0.7847   | 0.113385 | 0.01422  | -0.13207 | 0.00425  | 0.135455 |
| 0.139514 | 0.00251 | 0.100999 | 0.02908  | 0.315646 | 2.91E-12 | -0.0349  | 0.45175  | 0.056449 |
| 0.139299 | 0.00255 | 0.166077 | 0.00031  | 0.314416 | 3.56E-12 | 0.096977 | 0.03617  | 0.086602 |
| 0.058122 | 0.20995 | 0.110063 | 0.01734  | 0.30228  | 2.53E-11 | -0.03024 | 0.51449  | 0.0415   |
| 0.10343  | 0.02541 | 0.131603 | 0.00439  | 0.380869 | 1.43E-17 | 0.063898 | 0.16803  | 0.105123 |

|          |         |          |          |          |          |          |          |          |
|----------|---------|----------|----------|----------|----------|----------|----------|----------|
| 0.023229 | 0.61658 | 0.040288 | 0.38504  | 0.064597 | 0.16342  | -0.10734 | 0.02034  | -0.16117 |
| 0.056788 | 0.22062 | -0.0259  | 0.57665  | 0.250064 | 4.33E-08 | -0.14562 | 0.0016   | 0.050066 |
| -0.01079 | 0.81605 | 0.02934  | 0.52708  | 0.167934 | 0.00027  | -0.03205 | 0.4896   | -0.01073 |
| 0.034105 | 0.46218 | 0.061066 | 0.18772  | 0.204016 | 8.84E-06 | 0.065432 | 0.15803  | 0.182193 |
| 0.092195 | 0.04645 | 0.074417 | 0.10826  | 0.303205 | 2.19E-11 | -0.06823 | 0.14096  | -0.01134 |
| -0.0006  | 0.98971 | -0.05742 | 0.21553  | 0.087311 | 0.05938  | -0.12165 | 0.0085   | -0.02159 |
| -0.06244 | 0.17797 | -0.04566 | 0.3248   | 0.008418 | 0.85602  | -0.20454 | 8.37E-06 | -0.05864 |
| -0.05718 | 0.21746 | 0.014402 | 0.75624  | 0.041021 | 0.37645  | -0.07103 | 0.12533  | -0.01746 |
| -0.04108 | 0.37572 | 0.022948 | 0.62085  | 0.01269  | 0.78446  | -0.08192 | 0.07698  | -0.01686 |
| 0.077892 | 0.0927  | 0.078758 | 0.08912  | 0.306442 | 1.31E-11 | -0.0477  | 0.30361  | 0.092898 |
| -0.03191 | 0.49145 | -0.03262 | 0.4819   | 0.166765 | 0.0003   | -0.07449 | 0.10789  | 0.175209 |
| -0.09532 | 0.03949 | -0.09497 | 0.04023  | -0.25564 | 2.11E-08 | -0.01452 | 0.75436  | 0.048099 |
| -0.02615 | 0.57298 | 0.084483 | 0.06814  | 0.100106 | 0.03054  | -0.0737  | 0.11171  | -0.09518 |
| -0.01104 | 0.81192 | 0.161115 | 0.00047  | 0.268929 | 3.52E-09 | 0.118541 | 0.01035  | 0.291011 |
| 0.008755 | 0.85033 | -0.05272 | 0.25551  | 0.052074 | 0.2614   | -0.0308  | 0.50666  | 0.045775 |
| -0.08511 | 0.06613 | -0.18368 | 6.53E-05 | -0.0316  | 0.49569  | -0.23451 | 2.96E-07 | -0.01119 |
| 0.053103 | 0.25209 | -0.04249 | 0.35959  | 0.214826 | 2.80E-06 | -0.14821 | 0.00132  | 0.145375 |
| -0.03666 | 0.42925 | -0.11887 | 0.01014  | 0.034854 | 0.45241  | -0.16398 | 0.00037  | -0.08907 |
| 0.0535   | 0.24855 | 0.003914 | 0.93277  | 0.142315 | 0.00205  | -0.08042 | 0.08254  | -0.0673  |
| -0.03158 | 0.496   | -0.02476 | 0.5936   | 0.134896 | 0.00349  | -0.0215  | 0.6431   | 0.087353 |
| 0.019027 | 0.68173 | -0.05209 | 0.26122  | 0.160703 | 0.00049  | -0.14469 | 0.00172  | 0.052136 |
| 0.011537 | 0.80362 | -0.01844 | 0.69104  | 0.155523 | 0.00075  | -0.14392 | 0.00182  | -0.0043  |
| 0.037775 | 0.4154  | 0.099546 | 0.03149  | 0.188033 | 4.33E-05 | 0.003296 | 0.94337  | -0.06551 |
| -0.12461 | 0.00701 | -0.05267 | 0.25602  | -0.21023 | 4.60E-06 | 0.000538 | 0.99074  | 0.004933 |
| 0.011996 | 0.79599 | 0.066284 | 0.15268  | 0.119629 | 0.00967  | -0.0566  | 0.22213  | 0.03945  |
| 0.002076 | 0.96432 | 0.163451 | 0.00039  | 0.206489 | 6.83E-06 | 0.092826 | 0.04497  | 0.164962 |
| -0.0158  | 0.73347 | -0.02995 | 0.51854  | 0.14751  | 0.00139  | 0.010815 | 0.81568  | 0.173961 |
| -0.07336 | 0.11337 | -0.11248 | 0.01502  | 0.064365 | 0.16494  | -0.202   | 1.09E-05 | -0.06885 |
| 0.026245 | 0.57158 | 0.043607 | 0.34707  | 0.268713 | 3.63E-09 | -0.06814 | 0.14149  | 0.136346 |
| -0.02188 | 0.63726 | 0.084437 | 0.06829  | 0.14992  | 0.00116  | 0.02254  | 0.62707  | 0.057207 |
| 0.001943 | 0.96661 | -0.02616 | 0.57275  | 0.18261  | 7.22E-05 | -0.18415 | 6.25E-05 | -0.00222 |
| 0.017055 | 0.71317 | -0.07344 | 0.11297  | 0.081961 | 0.07682  | -0.12352 | 0.00753  | -0.08263 |
| 0.010527 | 0.82051 | 0.038936 | 0.40121  | 0.11748  | 0.01106  | -0.05871 | 0.20534  | 0.104901 |
| -0.07456 | 0.10759 | -0.17335 | 0.00017  | -0.01187 | 0.79805  | -0.26538 | 5.74E-09 | -0.0686  |
| -0.07704 | 0.09635 | -0.00521 | 0.91058  | 0.029208 | 0.52893  | -0.07228 | 0.11877  | -0.00224 |
| -0.00246 | 0.95767 | -0.06371 | 0.16932  | 0.123362 | 0.00761  | -0.17437 | 0.00015  | -0.01978 |
| -0.02231 | 0.63062 | -0.07198 | 0.12033  | 0.157995 | 0.00061  | -0.14585 | 0.00158  | 0.11774  |
| 0.123891 | 0.00735 | 0.202649 | 1.02E-05 | 0.398312 | 3.31E-19 | 0.055501 | 0.23127  | 0.112292 |
| 0.019015 | 0.68192 | -0.08362 | 0.071    | 0.180283 | 8.94E-05 | -0.20175 | 1.12E-05 | 0.16945  |
| -0.05534 | 0.23261 | -0.0252  | 0.58694  | -0.18709 | 4.74E-05 | 0.067025 | 0.14813  | 0.006223 |
| 0.051289 | 0.26867 | -0.04858 | 0.29483  | 0.202296 | 1.06E-05 | -0.2056  | 7.50E-06 | 0.112064 |
| 0.06687  | 0.14907 | 0.168065 | 0.00026  | 0.296351 | 6.39E-11 | 0.077611 | 0.09389  | 0.006039 |
| 0.035008 | 0.45042 | -0.07869 | 0.0894   | 0.034376 | 0.45863  | -0.13712 | 0.00298  | -0.08764 |
| 0.052195 | 0.2603  | -0.07261 | 0.11712  | 0.214522 | 2.90E-06 | -0.18267 | 7.18E-05 | 0.097768 |
| -0.06655 | 0.15103 | -0.08055 | 0.08206  | -0.24571 | 7.52E-08 | -0.02686 | 0.56265  | 0.038942 |

|          |         |          |          |          |          |          |          |          |
|----------|---------|----------|----------|----------|----------|----------|----------|----------|
| 0.089467 | 0.05335 | -0.13377 | 0.00378  | 0.075712 | 0.10224  | -0.22243 | 1.21E-06 | 0.031493 |
| 0.060735 | 0.19013 | -0.02315 | 0.61784  | -0.03807 | 0.41172  | -0.08967 | 0.05281  | 0.006877 |
| 0.038796 | 0.40289 | -0.12158 | 0.00854  | -0.0835  | 0.07142  | -0.18099 | 8.38E-05 | -0.05504 |
| 0.048436 | 0.29624 | -0.13204 | 0.00426  | 0.073694 | 0.11174  | -0.25791 | 1.56E-08 | 0.008298 |
| 0.038046 | 0.41207 | -0.16404 | 0.00037  | 0.063585 | 0.17013  | -0.2679  | 4.06E-09 | 0.068045 |
| 0.093403 | 0.04365 | -0.0076  | 0.86994  | 0.109127 | 0.01833  | -0.02725 | 0.55692  | 0.152975 |
| 0.095463 | 0.03919 | -0.10911 | 0.01834  | 0.150232 | 0.00113  | -0.1626  | 0.00042  | 0.172982 |
| 0.014653 | 0.75214 | -0.1665  | 0.0003   | 0.064111 | 0.16662  | -0.22395 | 1.01E-06 | 0.158508 |
| 0.072784 | 0.11624 | -0.08596 | 0.06343  | -0.03093 | 0.50495  | -0.14857 | 0.00128  | 0.022871 |
| 0.091481 | 0.04818 | -0.04516 | 0.3302   | 0.13025  | 0.00481  | -0.07341 | 0.11314  | 0.243608 |
| 0.077619 | 0.09386 | -0.10171 | 0.02797  | 0.025195 | 0.58706  | -0.0692  | 0.13536  | 0.231112 |
| 0.067126 | 0.14752 | -0.06132 | 0.18587  | 0.090362 | 0.051    | -0.04999 | 0.28101  | 0.226232 |
| 0.103779 | 0.02491 | -0.12868 | 0.00536  | -0.01268 | 0.78463  | -0.27355 | 1.85E-09 | 0.014103 |
| 0.123484 | 0.00755 | -0.09293 | 0.04474  | 0.072441 | 0.11798  | -0.13492 | 0.00349  | 0.149622 |
| 0.126317 | 0.00627 | -0.07798 | 0.09233  | 0.072863 | 0.11585  | -0.20887 | 5.32E-06 | 0.022894 |
| 0.100944 | 0.02917 | -0.00938 | 0.83978  | 0.042268 | 0.3621   | -0.07379 | 0.11129  | 0.106024 |
| 0.05699  | 0.21897 | -0.17934 | 9.74E-05 | 0.039306 | 0.39674  | -0.23249 | 3.77E-07 | 0.058994 |
| 0.064675 | 0.16291 | -0.09937 | 0.0318   | 0.090732 | 0.05005  | -0.20347 | 9.35E-06 | 0.185522 |
| 0.122325 | 0.00814 | -0.14007 | 0.00241  | 0.13311  | 0.00396  | -0.18676 | 4.89E-05 | 0.194006 |
| 0.11903  | 0.01004 | -0.12279 | 0.00789  | 0.057184 | 0.21741  | -0.20457 | 8.34E-06 | 0.048263 |
| 0.14345  | 0.00189 | -0.05475 | 0.23764  | 0.073574 | 0.11232  | -0.1917  | 3.04E-05 | 0.064569 |
| 0.139195 | 0.00257 | -0.03727 | 0.42161  | 0.097361 | 0.03544  | -0.11838 | 0.01045  | 0.066272 |
| 0.050649 | 0.2747  | -0.12925 | 0.00515  | -0.02782 | 0.54867  | -0.1741  | 0.00016  | 0.00834  |
| 0.071999 | 0.12024 | -0.13992 | 0.00244  | 0.070625 | 0.1275   | -0.26132 | 9.93E-09 | 0.088557 |
| 0.05763  | 0.21383 | -0.13513 | 0.00344  | 0.091781 | 0.04745  | -0.26042 | 1.12E-08 | 0.168415 |
| 0.158967 | 0.00056 | -0.06639 | 0.15204  | 0.092498 | 0.04573  | -0.12466 | 0.00699  | 0.123429 |
| 0.121288 | 0.0087  | -0.10207 | 0.0274   | 0.075823 | 0.10173  | -0.18706 | 4.75E-05 | 0.084489 |
| 0.078407 | 0.09056 | -0.11795 | 0.01074  | 0.081718 | 0.0777   | -0.21064 | 4.40E-06 | 0.004709 |
| 0.115437 | 0.01255 | -0.10454 | 0.02387  | 0.088515 | 0.05595  | -0.24182 | 1.22E-07 | 0.044778 |
| 0.108885 | 0.01859 | -0.17615 | 0.00013  | 0.103665 | 0.02507  | -0.21824 | 1.93E-06 | 0.13847  |
| 0.09248  | 0.04578 | -0.09025 | 0.05128  | 0.060229 | 0.19386  | -0.16994 | 0.00022  | 0.07552  |
| 0.007516 | 0.87131 | -0.17811 | 0.00011  | -0.09724 | 0.03566  | -0.17004 | 0.00022  | 0.04328  |
| 0.006297 | 0.89204 | -0.17754 | 0.00011  | -0.11532 | 0.01264  | -0.17348 | 0.00016  | 0.141401 |
| 0.095489 | 0.03914 | -0.02339 | 0.61408  | 0.159771 | 0.00053  | -0.11227 | 0.01521  | 0.098379 |
| 0.123742 | 0.00742 | -0.03162 | 0.49545  | 0.173462 | 0.00017  | -0.13109 | 0.00455  | 0.090009 |
| 0.087697 | 0.05826 | -0.11357 | 0.01407  | 0.1093   | 0.01814  | -0.18225 | 7.46E-05 | 0.073051 |
| 0.044867 | 0.33331 | -0.14625 | 0.00153  | 0.025789 | 0.57827  | -0.22628 | 7.77E-07 | 0.081239 |
| 0.112606 | 0.01491 | -0.08301 | 0.07312  | 0.095026 | 0.0401   | -0.10359 | 0.02518  | 0.229949 |
| 0.09324  | 0.04402 | -0.1064  | 0.02147  | 0.017894 | 0.69973  | -0.15702 | 0.00066  | 0.099492 |
| 0.034899 | 0.45182 | -0.11867 | 0.01027  | -0.00578 | 0.90094  | -0.15692 | 0.00067  | 0.19794  |
| 0.154028 | 0.00084 | 0.080649 | 0.08168  | 0.188702 | 4.06E-05 | 0.056275 | 0.22482  | -0.04689 |
| -0.01343 | 0.77229 | -0.00875 | 0.85033  | -0.03671 | 0.42871  | -0.08008 | 0.08385  | -0.20039 |
| 0.022134 | 0.63329 | -0.11081 | 0.01659  | -0.06963 | 0.13294  | -0.16533 | 0.00033  | -0.12895 |
| -0.03084 | 0.50609 | -0.14126 | 0.00222  | -0.1149  | 0.01297  | -0.22219 | 1.24E-06 | -0.08076 |
| -0.07615 | 0.10027 | -0.14508 | 0.00167  | -0.12865 | 0.00537  | -0.2469  | 6.47E-08 | -0.29973 |



|          |          |          |          |          |         |          |          |          |
|----------|----------|----------|----------|----------|---------|----------|----------|----------|
| -0.05999 | 0.1956   | -0.03513 | 0.44879  | -0.08996 | 0.05205 | -0.05261 | 0.25649  | -0.1588  |
| -0.01409 | 0.76143  | 0.000562 | 0.99033  | -0.02117 | 0.64823 | -0.05142 | 0.2675   | -0.0717  |
| -0.09954 | 0.03151  | -0.21886 | 1.80E-06 | -0.0911  | 0.04913 | -0.21604 | 2.45E-06 | -0.04403 |
| 0.062491 | 0.17762  | 0.044835 | 0.33365  | 0.039125 | 0.39891 | 0.022209 | 0.63215  | -0.03152 |
| -0.10022 | 0.03035  | -0.0133  | 0.77433  | -0.03672 | 0.42855 | -0.05873 | 0.2052   | -0.08419 |
| -0.01341 | 0.77258  | -0.02651 | 0.56765  | -0.08506 | 0.06627 | -0.05869 | 0.20549  | -0.113   |
| -0.10266 | 0.02653  | -0.11785 | 0.01081  | -0.07973 | 0.08523 | -0.19309 | 2.66E-05 | -0.13526 |
| -0.03835 | 0.40834  | -0.15018 | 0.00113  | -0.1702  | 0.00022 | -0.22349 | 1.07E-06 | -0.20069 |
| 0.014578 | 0.75337  | 0.021641 | 0.64088  | -0.0002  | 0.99659 | -0.03604 | 0.43713  | -0.05115 |
| -0.00799 | 0.86322  | -0.00623 | 0.89314  | -0.03692 | 0.42609 | -0.08957 | 0.05307  | -0.1981  |
| 0.000838 | 0.98559  | -0.00121 | 0.97925  | -0.01571 | 0.73492 | -0.03898 | 0.4007   | -0.09168 |
| 0.034896 | 0.45187  | 0.011696 | 0.80098  | 0.057429 | 0.21544 | -0.01693 | 0.71516  | 0.025538 |
| -0.03031 | 0.51344  | 0.009867 | 0.83159  | -0.0176  | 0.70449 | -0.0658  | 0.15568  | -0.17084 |
| -0.00383 | 0.93421  | -0.03613 | 0.43601  | -0.04764 | 0.30431 | -0.06358 | 0.17013  | -0.1524  |
| 0.021094 | 0.64935  | -0.08602 | 0.06327  | -0.08905 | 0.05447 | -0.11535 | 0.01262  | -0.12482 |
| 0.011742 | 0.80021  | 0.031719 | 0.4941   | -0.0267  | 0.56499 | 0.01411  | 0.76104  | -0.11521 |
| -0.02958 | 0.52366  | 0.000304 | 0.99477  | -0.06763 | 0.14448 | -0.02705 | 0.55986  | -0.16244 |
| 0.13507  | 0.00345  | 0.063831 | 0.16848  | 0.175796 | 0.00013 | 0.007824 | 0.8661   | -0.07666 |
| 0.01027  | 0.82483  | -0.01697 | 0.71449  | -0.06256 | 0.17716 | -0.03766 | 0.41679  | -0.16114 |
| -0.0923  | 0.0462   | -0.09682 | 0.03648  | -0.05005 | 0.28043 | -0.16781 | 0.00027  | -0.14135 |
| -0.00883 | 0.84904  | 0.006735 | 0.8846   | -0.01199 | 0.79615 | -0.0168  | 0.71734  | -0.13521 |
| 0.03049  | 0.511    | -0.01282 | 0.78236  | 0.056482 | 0.22312 | -0.04629 | 0.31822  | -0.11158 |
| 0.23456  | 2.94E-07 | 0.145054 | 0.00167  | 0.101886 | 0.02769 | 0.16893  | 0.00025  | 0.003704 |
| -0.00278 | 0.95216  | -0.0207  | 0.65544  | -0.0847  | 0.06744 | -0.02394 | 0.60587  | -0.16726 |
| -0.026   | 0.57514  | 0.024926 | 0.59107  | -0.00812 | 0.86109 | 0.041275 | 0.37349  | -0.06779 |
| 0.000385 | 0.99338  | 0.032871 | 0.47855  | -0.04709 | 0.30984 | -0.01508 | 0.74515  | -0.17512 |
| 0.013453 | 0.77185  | 0.065836 | 0.15548  | -0.01294 | 0.78029 | 0.016912 | 0.71547  | -0.15683 |
| 0.014466 | 0.7552   | -0.0051  | 0.91241  | -0.05419 | 0.2425  | -0.0215  | 0.6431   | -0.13043 |
| 0.014663 | 0.75198  | 0.019342 | 0.67675  | -0.02298 | 0.62033 | 0.05336  | 0.2498   | -0.01439 |
| 0.023953 | 0.60563  | 0.028585 | 0.53777  | -0.0675  | 0.14527 | 0.005731 | 0.9017   | -0.15363 |
| -0.04418 | 0.34073  | 0.032221 | 0.4873   | -0.0593  | 0.20081 | -0.03412 | 0.46196  | -0.22186 |
| 0.016231 | 0.72646  | 0.045615 | 0.3253   | -0.01587 | 0.73234 | 0.010464 | 0.82157  | -0.14455 |
| -0.00432 | 0.92588  | -0.10937 | 0.01807  | -0.03009 | 0.5166  | -0.1434  | 0.00189  | -0.12462 |
| 0.001589 | 0.97269  | 0.012074 | 0.79469  | -0.04511 | 0.33068 | -0.01579 | 0.73361  | -0.13714 |
| 0.00231  | 0.96029  | 0.020698 | 0.6555   | -0.01404 | 0.76226 | -0.01619 | 0.72719  | -0.0981  |
| 0.009011 | 0.84601  | 0.005234 | 0.91019  | 0.057206 | 0.21723 | -0.02244 | 0.62861  | 0.025441 |
| 0.008567 | 0.8535   | -0.06327 | 0.17229  | -0.02121 | 0.64748 | -0.11615 | 0.01201  | -0.01819 |
| 0.005521 | 0.90529  | 0.019747 | 0.67038  | -0.00847 | 0.85523 | -0.08754 | 0.05871  | -0.14688 |
| -0.02657 | 0.56682  | -0.06651 | 0.1513   | -0.10082 | 0.02938 | -0.07296 | 0.11534  | -0.17171 |
| -0.06422 | 0.1659   | -0.1524  | 0.00095  | -0.15396 | 0.00084 | -0.09595 | 0.03819  | 0.099714 |
| 0.059011 | 0.20304  | 0.105602 | 0.02247  | 0.015603 | 0.73665 | 0.086231 | 0.06261  | -0.14178 |
| -0.06614 | 0.15358  | -0.13056 | 0.00471  | -0.1149  | 0.01297 | -0.13845 | 0.00272  | -0.06253 |
| -0.05285 | 0.25437  | -0.15943 | 0.00054  | -0.12144 | 0.00861 | -0.23857 | 1.82E-07 | -0.20155 |
| -0.05142 | 0.26742  | -0.01165 | 0.80175  | -0.00915 | 0.84362 | -0.09172 | 0.0476   | -0.08208 |
| -0.06245 | 0.17788  | -0.12319 | 0.0077   | -0.13838 | 0.00273 | -0.12168 | 0.00848  | -0.21754 |

|          |          |          |          |          |          |          |          |          |
|----------|----------|----------|----------|----------|----------|----------|----------|----------|
| -0.03918 | 0.39823  | -0.13306 | 0.00397  | -0.09143 | 0.04832  | -0.21893 | 1.78E-06 | -0.13487 |
| -0.03597 | 0.43807  | -0.1106  | 0.0168   | -0.07605 | 0.10072  | -0.11709 | 0.01133  | -0.02398 |
| 0.008057 | 0.86214  | 0.075902 | 0.10138  | 0.053663 | 0.24711  | 0.022824 | 0.62274  | -0.00311 |
| -0.03993 | 0.38925  | -0.00735 | 0.87416  | -0.06756 | 0.14494  | -0.02128 | 0.64649  | -0.09068 |
| 0.046205 | 0.31908  | 0.083866 | 0.07019  | 0.04064  | 0.3809   | 0.046331 | 0.31776  | -0.05386 |
| 0.009764 | 0.83332  | -0.02406 | 0.60399  | -0.08352 | 0.07137  | -0.04986 | 0.28226  | -0.05619 |
| -0.10109 | 0.02894  | -0.20788 | 5.90E-06 | -0.21725 | 2.15E-06 | -0.30354 | 2.07E-11 | -0.18317 |
| 0.022833 | 0.62261  | -0.01733 | 0.70876  | -0.06281 | 0.17542  | -0.0694  | 0.13428  | -0.14267 |
| -0.02571 | 0.57946  | -0.03211 | 0.48875  | -0.0644  | 0.16469  | -0.05062 | 0.27494  | -0.18006 |
| -0.02239 | 0.62931  | -0.01329 | 0.77446  | -0.07028 | 0.1294   | -0.02781 | 0.54884  | -0.145   |
| -0.02137 | 0.64508  | -0.01524 | 0.74254  | -0.06559 | 0.157    | -0.05816 | 0.20966  | -0.12006 |
| -0.02789 | 0.54771  | -0.02896 | 0.53239  | -0.09867 | 0.03302  | -0.04675 | 0.31337  | -0.13997 |
| -0.0205  | 0.65856  | 0.119406 | 0.0098   | 0.02635  | 0.57003  | 0.013085 | 0.77793  | -0.1927  |
| -0.00429 | 0.92626  | -0.0125  | 0.7876   | -0.03248 | 0.48376  | -0.04736 | 0.30714  | 0.037205 |
| -0.04187 | 0.36663  | -0.13381 | 0.00377  | -0.15462 | 0.0008   | -0.09471 | 0.04078  | -0.07013 |
| -0.14782 | 0.00136  | -0.09064 | 0.05027  | -0.14582 | 0.00158  | -0.15541 | 0.00075  | -0.19362 |
| -0.0457  | 0.32441  | -0.09326 | 0.04396  | -0.13599 | 0.00323  | -0.14181 | 0.00213  | -0.21735 |
| 0.005546 | 0.90485  | -0.07218 | 0.11933  | -0.09389 | 0.04255  | -0.11397 | 0.01372  | -0.15948 |
| 0.008754 | 0.85034  | -0.05327 | 0.25061  | -0.01691 | 0.71552  | -0.09538 | 0.03936  | -0.1344  |
| 0.019567 | 0.67321  | 0.085662 | 0.06437  | 0.067622 | 0.14454  | 0.03903  | 0.40006  | 0.023852 |
| -0.00565 | 0.90313  | -0.04091 | 0.37779  | -0.04412 | 0.3414   | -0.06487 | 0.16163  | -0.10822 |
| -0.03476 | 0.45362  | -0.06886 | 0.13734  | -0.02184 | 0.63776  | -0.12862 | 0.00537  | -0.11033 |
| 0.188975 | 3.96E-05 | 0.196539 | 1.89E-05 | 0.299417 | 3.97E-11 | 0.133044 | 0.00397  | 0.053116 |
| -0.00028 | 0.99513  | -0.00241 | 0.95859  | -0.01795 | 0.69886  | -0.02883 | 0.53434  | -0.05958 |
| 0.158841 | 0.00057  | 0.132458 | 0.00414  | 0.081715 | 0.07772  | 0.105594 | 0.02248  | -0.10565 |
| -0.05538 | 0.23227  | -0.07709 | 0.09614  | -0.04467 | 0.33546  | -0.13571 | 0.0033   | -0.2175  |
| 0.026602 | 0.56635  | -0.01568 | 0.73536  | 0.013394 | 0.77283  | -0.04397 | 0.34312  | -0.06456 |
| 0.016619 | 0.7202   | 0.09073  | 0.05006  | 0.090882 | 0.04967  | 0.045454 | 0.32702  | -0.00892 |
| 0.016229 | 0.7265   | 0.096417 | 0.03726  | 0.100613 | 0.02971  | 0.083257 | 0.07226  | -0.04091 |
| 0.065593 | 0.15701  | -0.07504 | 0.10532  | -0.02454 | 0.59684  | -0.1112  | 0.01622  | -0.11423 |
| 0.021854 | 0.6376   | -0.09605 | 0.038    | -0.04617 | 0.31949  | -0.17171 | 0.00019  | -0.21009 |
| -0.00282 | 0.95153  | -0.09371 | 0.04297  | -0.04981 | 0.28278  | -0.14857 | 0.00128  | -0.14792 |
| -0.06126 | 0.18634  | -0.21202 | 3.80E-06 | -0.10616 | 0.02176  | -0.20447 | 8.43E-06 | 0.04926  |
| -0.00871 | 0.85104  | -0.10542 | 0.02271  | -0.067   | 0.14827  | -0.09531 | 0.0395   | 0.041241 |
| 0.012749 | 0.78348  | 0.011456 | 0.80497  | 0.00269  | 0.95377  | -0.0328  | 0.47946  | -0.02279 |
| 0.088591 | 0.05574  | 0.132031 | 0.00426  | 0.252822 | 3.04E-08 | 0.179974 | 9.20E-05 | 0.121507 |
| -0.14134 | 0.0022   | -0.27333 | 1.91E-09 | -0.18356 | 6.61E-05 | -0.34104 | 3.50E-14 | -0.17124 |
| -0.03397 | 0.46397  | 0.070626 | 0.12749  | 0.097257 | 0.03563  | 0.126142 | 0.00634  | 0.155397 |
| 0.230364 | 4.84E-07 | 0.130408 | 0.00476  | 0.203303 | 9.51E-06 | 0.116936 | 0.01144  | -0.03474 |
| 0.108686 | 0.0188   | 0.153601 | 0.00087  | 0.174006 | 0.00016  | 0.14655  | 0.0015   | 0.046269 |
| 0.033815 | 0.466    | 0.064869 | 0.16165  | 0.075826 | 0.10172  | 0.034168 | 0.46135  | 0.053973 |
| -0.08418 | 0.06913  | -0.1163  | 0.0119   | -0.03817 | 0.4106   | -0.1374  | 0.00293  | -0.09106 |
| -0.04774 | 0.30327  | -0.02782 | 0.54865  | -0.05865 | 0.2058   | -0.07948 | 0.08623  | -0.18801 |
| -0.00867 | 0.85175  | -0.0219  | 0.63692  | -0.07123 | 0.12427  | -0.06695 | 0.14857  | -0.23346 |
| -0.02419 | 0.60205  | -0.03044 | 0.51175  | -0.05443 | 0.24042  | -0.07558 | 0.10284  | -0.09386 |

|          |          |          |          |          |          |          |          |           |
|----------|----------|----------|----------|----------|----------|----------|----------|-----------|
| 0.010737 | 0.817    | -0.04059 | 0.38154  | -0.06354 | 0.1704   | -0.07408 | 0.10985  | -0.05507  |
| 0.015619 | 0.73638  | -0.01706 | 0.71307  | -0.06092 | 0.18882  | -0.053   | 0.25297  | -0.24121  |
| -0.07815 | 0.09161  | -0.04006 | 0.38774  | -0.04431 | 0.33936  | -0.10098 | 0.02912  | -0.1499   |
| -0.03891 | 0.40157  | -0.19076 | 3.33E-05 | -0.17817 | 0.00011  | -0.23622 | 2.41E-07 | -0.17752  |
| 0.036111 | 0.43626  | 0.025417 | 0.58377  | 0.069481 | 0.1338   | -0.02046 | 0.65926  | -0.04646  |
| -0.01424 | 0.75898  | -0.04796 | 0.30099  | -0.09501 | 0.04014  | -0.08007 | 0.08391  | -0.09716  |
| 0.032498 | 0.48356  | -0.00548 | 0.90599  | -0.03147 | 0.49747  | -0.05635 | 0.22423  | -0.01979  |
| -0.09731 | 0.03553  | -0.10127 | 0.02866  | -0.15515 | 0.00077  | -0.18026 | 8.96E-05 | -0.20203  |
| -0.01807 | 0.6969   | 0.009903 | 0.83099  | -0.04297 | 0.35419  | 0.000155 | 0.99733  | -0.15991  |
| 0.013173 | 0.77647  | -0.00276 | 0.95264  | -0.07789 | 0.09273  | -0.04545 | 0.32704  | -0.17975  |
| 0.046916 | 0.31168  | -0.06585 | 0.15536  | -0.07454 | 0.10769  | -0.1051  | 0.02312  | -0.11332  |
| -0.04349 | 0.34832  | -0.07944 | 0.08639  | -0.06991 | 0.13141  | -0.12335 | 0.00762  | -0.17867  |
| -0.04596 | 0.32168  | -0.04312 | 0.3525   | -0.11911 | 0.00999  | 0.003559 | 0.93885  | -0.06856  |
| 0.031762 | 0.49352  | 0.038838 | 0.40239  | 0.053921 | 0.24485  | -0.00221 | 0.96193  | 0.005402  |
| -0.05434 | 0.24121  | -0.08243 | 0.07513  | -0.12762 | 0.00575  | -0.07269 | 0.11673  | -0.14102  |
| 0.030987 | 0.50414  | 0.050189 | 0.27909  | 0.060323 | 0.19316  | 0.018264 | 0.69383  | 0.004197  |
| 0.023629 | 0.61052  | -0.01783 | 0.70075  | 0.022086 | 0.63404  | -0.08509 | 0.06619  | -0.0499   |
| 0.020395 | 0.66022  | 0.112254 | 0.01522  | 0.045678 | 0.32463  | 0.077642 | 0.09376  | -0.01047  |
| 0.02903  | 0.53144  | -0.05302 | 0.25287  | -0.01484 | 0.74901  | -0.06657 | 0.15092  | -0.08899  |
| -0.08586 | 0.06376  | 0.025048 | 0.58925  | 0.044791 | 0.33413  | -0.03902 | 0.40021  | -0.17075  |
| -0.01742 | 0.70726  | -0.04654 | 0.3156   | -0.05782 | 0.2123   | -0.09974 | 0.03116  | -0.06175  |
| -0.0271  | 0.55912  | -0.0216  | 0.64152  | -0.01296 | 0.77995  | -0.00824 | 0.859    | -0.10051  |
| 0.09684  | 0.03644  | 0.007801 | 0.86647  | 0.076766 | 0.09753  | -0.08707 | 0.06009  | -0.09279  |
| -0.02195 | 0.63611  | 0.000321 | 0.99447  | -0.02139 | 0.64478  | -0.04347 | 0.34858  | -0.08855  |
| 0.155884 | 0.00072  | 0.242812 | 1.08E-07 | 0.370921 | 1.12E-16 | 0.19402  | 2.42E-05 | -9.30E-05 |
| 0.01888  | 0.68404  | -0.01268 | 0.78458  | -0.04279 | 0.35618  | -0.03748 | 0.41902  | -0.2095   |
| -0.07773 | 0.09338  | -0.19174 | 3.03E-05 | -0.14902 | 0.00124  | -0.20768 | 6.03E-06 | -0.11938  |
| -0.07918 | 0.08743  | -0.14098 | 0.00226  | -0.13464 | 0.00356  | -0.17309 | 0.00017  | -0.01863  |
| 0.017307 | 0.70913  | 0.093301 | 0.04388  | 0.032601 | 0.48217  | 0.092463 | 0.04582  | 0.018236  |
| 0.029658 | 0.52261  | 0.070722 | 0.12698  | 0.137223 | 0.00296  | -0.00052 | 0.99106  | -0.04537  |
| 0.03215  | 0.48825  | -0.06478 | 0.16224  | -0.01487 | 0.74852  | -0.18687 | 4.84E-05 | -0.05451  |
| -0.00535 | 0.90813  | 0.0115   | 0.80424  | -0.01457 | 0.7535   | -0.00498 | 0.91461  | -0.03471  |
| -0.01592 | 0.73143  | -0.04269 | 0.35727  | -0.04286 | 0.35541  | -0.12908 | 0.00521  | -0.24527  |
| 0.190703 | 3.35E-05 | -0.02412 | 0.60311  | -0.01    | 0.82928  | -0.06256 | 0.17715  | -0.18277  |
| -0.01082 | 0.81564  | 0.001359 | 0.97664  | -0.01029 | 0.82448  | -0.0394  | 0.39563  | -0.06902  |
| -0.02207 | 0.6342   | -0.10759 | 0.02004  | -0.09694 | 0.03624  | -0.16079 | 0.00049  | -0.23249  |
| 0.030943 | 0.50474  | 0.016822 | 0.71692  | 0.022082 | 0.63409  | -0.02972 | 0.52176  | -0.03513  |
| -0.02987 | 0.51966  | 0.039812 | 0.39069  | 0.047323 | 0.3075   | -0.07351 | 0.11265  | -0.14974  |
| -0.03802 | 0.41237  | -0.08676 | 0.061    | -0.03508 | 0.44954  | -0.10566 | 0.0224   | -0.01231  |
| 0.021943 | 0.63623  | -0.05821 | 0.20922  | 0.006509 | 0.88844  | -0.09357 | 0.04328  | -0.04053  |
| -0.02865 | 0.53681  | -0.02841 | 0.5402   | -0.06575 | 0.15603  | -0.08381 | 0.07037  | -0.11654  |
| -0.00875 | 0.85043  | -0.06817 | 0.14132  | -0.12965 | 0.00501  | -0.13034 | 0.00478  | -0.24727  |
| -0.04336 | 0.34978  | -0.06547 | 0.15782  | -0.10695 | 0.0208   | -0.11456 | 0.01324  | 0.023165  |
| -0.02499 | 0.59016  | -0.08186 | 0.07719  | -0.07058 | 0.12774  | -0.11207 | 0.01539  | -0.13174  |
| 0.005171 | 0.91126  | -0.00317 | 0.94551  | 0.028111 | 0.54452  | 0.001361 | 0.9766   | 0.086411  |

|          |         |          |          |          |          |          |          |          |
|----------|---------|----------|----------|----------|----------|----------|----------|----------|
| 0.032581 | 0.48244 | 0.040158 | 0.38657  | 0.01718  | 0.71116  | -0.05767 | 0.21355  | -0.03025 |
| 0.016773 | 0.7177  | 0.153958 | 0.00084  | 0.137366 | 0.00293  | 0.133354 | 0.00389  | 0.056434 |
| -0.04406 | 0.34203 | -0.05357 | 0.2479   | -0.076   | 0.10093  | -0.12107 | 0.00882  | -0.15343 |
| 0.052794 | 0.25486 | 0.089822 | 0.0524   | 0.084478 | 0.06816  | 0.07726  | 0.09539  | -0.04432 |
| 0.038043 | 0.41209 | 0.044409 | 0.33827  | -0.08219 | 0.076    | 0.029488 | 0.52499  | -0.17523 |
| -0.11983 | 0.00954 | -0.23077 | 4.61E-07 | -0.13739 | 0.00293  | -0.24287 | 1.07E-07 | -0.04632 |
| 0.001169 | 0.97991 | -0.07773 | 0.09337  | -0.07681 | 0.09736  | -0.10818 | 0.01937  | -0.16561 |
| 0.028989 | 0.53203 | 0.072135 | 0.11954  | 0.056495 | 0.22301  | 0.020446 | 0.65943  | -0.22205 |
| -0.16323 | 0.0004  | -0.18746 | 4.58E-05 | -0.17057 | 0.00021  | -0.25733 | 1.69E-08 | -0.21971 |
| -0.06136 | 0.18564 | -0.01955 | 0.67354  | -0.03701 | 0.42493  | -0.07488 | 0.10606  | -0.25723 |
| -0.13994 | 0.00244 | -0.05248 | 0.25773  | -0.08574 | 0.06412  | -0.09894 | 0.03254  | -0.15414 |
| -0.01516 | 0.7439  | 0.074129 | 0.10963  | 0.043153 | 0.35212  | -0.00014 | 0.99754  | -0.14437 |
| -0.10574 | 0.02229 | -0.22449 | 9.54E-07 | -0.14743 | 0.0014   | -0.19407 | 2.41E-05 | -0.13582 |
| -0.03966 | 0.39244 | -0.09529 | 0.03956  | -0.10158 | 0.02817  | -0.14806 | 0.00133  | -0.22176 |
| 0.058544 | 0.20664 | 0.04594  | 0.32186  | 0.048478 | 0.29582  | -0.00452 | 0.9224   | 0.004409 |
| -0.02998 | 0.51811 | -0.03869 | 0.40414  | -0.07777 | 0.09323  | 0.005296 | 0.90913  | 0.013171 |
| -0.0056  | 0.90392 | -0.02677 | 0.56391  | -0.07408 | 0.10986  | -0.06174 | 0.18292  | -0.06762 |
| 0.11038  | 0.01702 | 0.076073 | 0.10061  | 0.223446 | 1.07E-06 | 0.079655 | 0.08553  | 0.020464 |
| 0.035747 | 0.4409  | 0.099565 | 0.03146  | 0.083496 | 0.07144  | 0.182863 | 7.05E-05 | 0.145918 |
| 0.146431 | 0.00151 | 0.062628 | 0.17666  | 0.26908  | 3.45E-09 | 0.055897 | 0.22795  | 0.090705 |
| 0.105215 | 0.02297 | 0.024421 | 0.59861  | 0.149044 | 0.00124  | 0.007428 | 0.87281  | -0.02251 |
| 0.057476 | 0.21506 | -0.05634 | 0.22424  | 0.091395 | 0.04839  | -0.02197 | 0.63581  | 0.1523   |
| 0.064714 | 0.16266 | 0.015544 | 0.7376   | 0.15787  | 0.00062  | 0.013484 | 0.77135  | 0.019123 |
| 0.034724 | 0.4541  | -0.01073 | 0.81718  | 0.111933 | 0.01552  | 0.08371  | 0.07071  | 0.166987 |
| 0.021092 | 0.64938 | 0.043736 | 0.34565  | 0.190162 | 3.53E-05 | 0.10136  | 0.02851  | 0.112436 |
| -0.01287 | 0.78155 | 0.070632 | 0.12746  | 0.041822 | 0.36718  | 0.134077 | 0.0037   | -0.05423 |
| 0.102464 | 0.02682 | 0.097257 | 0.03563  | 0.244705 | 8.53E-08 | 0.113044 | 0.01452  | 0.098629 |
| 0.102745 | 0.0264  | 0.030954 | 0.50459  | 0.151815 | 0.001    | 0.026316 | 0.57054  | -0.02603 |
| 0.048838 | 0.29225 | 0.001606 | 0.97239  | 0.195136 | 2.17E-05 | 0.042756 | 0.35657  | 0.11858  |
| 0.042101 | 0.364   | 0.068477 | 0.13953  | 0.150525 | 0.0011   | 0.051131 | 0.27015  | -0.01167 |
| 0.026486 | 0.56804 | 0.041995 | 0.36521  | 0.123526 | 0.00753  | 0.066764 | 0.14972  | -0.00693 |
| 0.010165 | 0.82659 | 0.039089 | 0.39935  | 0.127894 | 0.00564  | 0.079988 | 0.08422  | 0.039285 |
| 0.055211 | 0.23372 | 0.1014   | 0.02845  | 0.204312 | 8.57E-06 | 0.175758 | 0.00013  | 0.159769 |
| -0.00414 | 0.92889 | 0.078525 | 0.09007  | 0.074602 | 0.10738  | 0.151241 | 0.00104  | 0.128481 |
| 0.034886 | 0.45199 | 0.127374 | 0.00584  | 0.134062 | 0.0037   | 0.080724 | 0.0814   | -0.02992 |
| 0.050354 | 0.27751 | 0.010862 | 0.81489  | 0.169688 | 0.00023  | 0.028897 | 0.53333  | 0.065215 |
| 0.020454 | 0.65931 | 0.016553 | 0.72126  | 0.131422 | 0.00444  | 0.083541 | 0.07129  | 0.008889 |
| -0.04725 | 0.30826 | 0.029466 | 0.5253   | 0.025941 | 0.57604  | 0.071808 | 0.12123  | 0.064293 |
| 0.105495 | 0.02261 | 0.079572 | 0.08585  | 0.25245  | 3.19E-08 | 0.060381 | 0.19273  | 0.073107 |
| 0.056435 | 0.2235  | 0.083494 | 0.07145  | 0.193035 | 2.67E-05 | 0.206543 | 6.79E-06 | 0.212811 |
| 0.023224 | 0.61665 | 0.018519 | 0.68977  | 0.119165 | 0.00995  | 0.122967 | 0.00781  | 0.195436 |
| 0.062436 | 0.178   | -0.0096  | 0.83615  | 0.112621 | 0.01489  | -0.00181 | 0.96888  | 0.031437 |
| 0.079549 | 0.08595 | 0.092646 | 0.04539  | 0.186636 | 4.95E-05 | 0.040005 | 0.38839  | -0.02471 |
| 0.092979 | 0.04462 | -0.042   | 0.36515  | 0.136905 | 0.00303  | -0.01531 | 0.74137  | 0.102765 |
| 0.039192 | 0.39811 | 0.006898 | 0.88181  | 0.13004  | 0.00488  | 0.025474 | 0.58294  | 0.179683 |

|          |         |          |          |          |          |          |          |          |
|----------|---------|----------|----------|----------|----------|----------|----------|----------|
| 0.042021 | 0.36491 | 0.0511   | 0.27044  | 0.161759 | 0.00045  | 0.031206 | 0.50112  | -0.02131 |
| 0.072334 | 0.11852 | 0.026961 | 0.56113  | 0.17383  | 0.00016  | 0.046019 | 0.32103  | 0.078952 |
| 0.062585 | 0.17696 | 0.088128 | 0.05703  | 0.156209 | 0.00071  | 0.082254 | 0.07577  | 0.069902 |
| 0.001436 | 0.97532 | 0.123231 | 0.00767  | 0.117833 | 0.01082  | 0.187855 | 4.41E-05 | 0.041246 |
| 0.075889 | 0.10143 | 0.033738 | 0.46702  | 0.118176 | 0.01059  | 0.054651 | 0.2385   | 0.075001 |
| 0.063    | 0.1741  | 0.054064 | 0.24359  | 0.171607 | 0.00019  | 0.121102 | 0.0088   | 0.185664 |
| -0.0101  | 0.82775 | 0.053855 | 0.24542  | 0.088001 | 0.05739  | 0.120384 | 0.00921  | 0.100284 |
| 0.078901 | 0.08854 | 0.066523 | 0.1512   | 0.177576 | 0.00011  | 0.078337 | 0.09085  | 0.02579  |
| 0.050725 | 0.27398 | 0.038008 | 0.41253  | 0.15812  | 0.0006   | 0.034641 | 0.45518  | 0.059423 |
| 0.05648  | 0.22313 | 0.050766 | 0.27359  | 0.132912 | 0.00401  | -0.00202 | 0.96527  | -0.05233 |
| 0.067319 | 0.14636 | 0.025919 | 0.57636  | 0.156845 | 0.00067  | 0.025707 | 0.57949  | -0.04443 |
| 0.102106 | 0.02736 | -0.00559 | 0.90417  | 0.189741 | 3.68E-05 | -0.00167 | 0.97134  | 0.019068 |
| 0.059381 | 0.20022 | 0.096427 | 0.03724  | 0.221475 | 1.34E-06 | 0.080408 | 0.0826   | 0.059032 |
| 0.039316 | 0.39662 | 0.017824 | 0.70084  | 0.120576 | 0.0091   | 0.016459 | 0.72278  | 0.016601 |
| 0.144127 | 0.00179 | 0.093535 | 0.04335  | 0.256124 | 1.98E-08 | 0.06741  | 0.14581  | 0.039954 |
| 0.036442 | 0.43207 | -0.00419 | 0.92801  | 0.142406 | 0.00204  | 0.098125 | 0.03401  | 0.225152 |
| 0.041098 | 0.37555 | 0.056441 | 0.22345  | 0.119524 | 0.00973  | 0.126774 | 0.00608  | 0.181456 |
| 0.047143 | 0.30934 | 0.050223 | 0.27876  | 0.171918 | 0.00019  | 0.101246 | 0.02869  | 0.104691 |
| 0.137345 | 0.00294 | 0.026792 | 0.56359  | 0.213856 | 3.11E-06 | 0.043206 | 0.35153  | 0.026431 |
| 0.10752  | 0.02012 | 0.009607 | 0.83596  | 0.186992 | 4.78E-05 | 0.003259 | 0.944    | 0.037966 |
| -0.00191 | 0.96714 | 0.029866 | 0.51969  | -0.03367 | 0.46788  | 0.036263 | 0.43432  | -0.02676 |
| -0.00666 | 0.8858  | -0.05392 | 0.24485  | 0.005424 | 0.90693  | -0.04492 | 0.33269  | -0.00148 |
| 0.048203 | 0.29858 | -0.02167 | 0.64038  | 0.159164 | 0.00056  | -0.00999 | 0.82945  | 0.03485  |
| 0.078107 | 0.0918  | -0.02986 | 0.51974  | 0.144499 | 0.00174  | 0.010891 | 0.81441  | 0.042771 |
| 0.006855 | 0.88255 | -0.08007 | 0.08392  | 0.01768  | 0.70316  | -0.01714 | 0.71182  | 0.178978 |
| 0.026614 | 0.56617 | 0.017502 | 0.706    | 0.025323 | 0.58517  | 0.064626 | 0.16323  | 0.210127 |
| -0.06279 | 0.17557 | -0.03085 | 0.506    | 0.061635 | 0.18363  | -0.01614 | 0.72789  | 0.078828 |
| -0.04449 | 0.33742 | -0.13497 | 0.00347  | -0.12983 | 0.00495  | -0.10068 | 0.02961  | 0.193848 |
| 0.082015 | 0.07663 | 0.159052 | 0.00056  | 0.233478 | 3.35E-07 | 0.096531 | 0.03704  | 0.191791 |
| 0.033618 | 0.4686  | 0.132845 | 0.00403  | 0.033949 | 0.46424  | 0.159366 | 0.00055  | 0.002861 |
| 0.012476 | 0.788   | 0.031479 | 0.49738  | -0.01577 | 0.73392  | -0.00202 | 0.96527  | 0.064423 |
| -0.0656  | 0.15699 | -0.01236 | 0.78995  | -0.06524 | 0.15927  | 0.100984 | 0.02911  | 0.131595 |
| -0.02741 | 0.55458 | -0.03038 | 0.51252  | -0.00916 | 0.84342  | -0.02752 | 0.55301  | 0.159637 |
| 0.108652 | 0.01884 | 0.027335 | 0.55571  | 0.076347 | 0.09938  | 0.026217 | 0.57199  | 0.311951 |
| -0.09069 | 0.05015 | -0.15633 | 0.0007   | -0.03238 | 0.48519  | -0.11373 | 0.01393  | 0.166475 |
| -0.07613 | 0.10034 | -0.13696 | 0.00302  | -0.0016  | 0.97257  | -0.16552 | 0.00033  | 0.291219 |
| 0.051661 | 0.26522 | 0.234939 | 2.81E-07 | 0.197157 | 1.78E-05 | 0.297493 | 5.35E-11 | 0.396758 |
| 0.014028 | 0.76238 | -0.14696 | 0.00145  | -0.05023 | 0.27866  | -0.05095 | 0.27185  | 0.194164 |
| 0.132629 | 0.00409 | 0.225205 | 8.79E-07 | 0.214966 | 2.76E-06 | 0.214958 | 2.76E-06 | 0.074666 |
| 0.006568 | 0.88743 | 0.010282 | 0.82463  | 0.053512 | 0.24844  | 0.111035 | 0.01637  | 0.32103  |
| -0.00413 | 0.92905 | -0.07449 | 0.10789  | -0.04424 | 0.34017  | -0.12414 | 0.00724  | 0.187701 |
| -0.10134 | 0.02854 | -0.03926 | 0.39724  | -0.09656 | 0.03698  | 0.074008 | 0.11021  | 0.157819 |
| -0.00738 | 0.87361 | 0.036885 | 0.42648  | -0.01714 | 0.7118   | -0.0413  | 0.3732   | -0.04668 |
| 0.015356 | 0.74066 | -0.11834 | 0.01048  | -0.07726 | 0.09538  | -0.05425 | 0.24196  | 0.274507 |
| 0.174677 | 0.00015 | 0.195771 | 2.04E-05 | 0.034338 | 0.45913  | 0.101361 | 0.02851  | -0.21041 |

|          |         |          |          |          |          |          |          |          |
|----------|---------|----------|----------|----------|----------|----------|----------|----------|
| -0.06532 | 0.15874 | -0.06897 | 0.1367   | -0.23082 | 4.58E-07 | -0.12175 | 0.00845  | -0.08808 |
| -0.03203 | 0.48989 | -0.07451 | 0.10781  | 0.059289 | 0.20092  | -0.08761 | 0.0585   | 0.285194 |
| 0.057442 | 0.21533 | 0.098798 | 0.0328   | 0.156046 | 0.00071  | 0.218929 | 1.78E-06 | 0.227797 |
| -0.07613 | 0.10034 | -0.22523 | 8.76E-07 | -0.12057 | 0.0091   | -0.08376 | 0.07054  | 0.241328 |
| -0.01044 | 0.82194 | -0.08624 | 0.06258  | -0.0967  | 0.03671  | -0.02555 | 0.58175  | 0.18593  |
| -0.02907 | 0.53084 | -0.02502 | 0.58961  | -0.02719 | 0.55778  | 0.091226 | 0.04881  | 0.286951 |
| -0.03217 | 0.48795 | -0.05011 | 0.27981  | 0.04636  | 0.31745  | -0.08541 | 0.06515  | 0.226241 |
| 0.008522 | 0.85426 | -0.02648 | 0.56816  | 0.040751 | 0.37959  | -0.08179 | 0.07743  | 0.256395 |
| 0.00603  | 0.8966  | -0.08174 | 0.07762  | -0.21638 | 2.36E-06 | -0.16032 | 0.00051  | -0.04633 |
| -0.07713 | 0.09597 | -0.10076 | 0.02947  | -0.01715 | 0.71163  | -0.09869 | 0.03299  | 0.023769 |
| -0.06021 | 0.19399 | 0.020228 | 0.66283  | -0.1237  | 0.00744  | -0.00711 | 0.87814  | 0.188028 |
| 0.048953 | 0.29112 | 0.056948 | 0.21932  | 0.026595 | 0.56645  | -0.03378 | 0.46646  | -0.0251  |
| -0.03272 | 0.48061 | 0.037351 | 0.42066  | 0.138995 | 0.00261  | 0.132518 | 0.00412  | 0.277582 |
| -0.00168 | 0.97105 | -0.05258 | 0.25675  | 0.058674 | 0.20564  | -0.11429 | 0.01346  | 0.215299 |
| 0.058018 | 0.21076 | 0.209653 | 4.89E-06 | 0.356577 | 1.90E-15 | 0.264582 | 6.39E-09 | 0.330565 |
| -0.07556 | 0.10292 | -0.00979 | 0.83292  | -0.12731 | 0.00587  | 0.017191 | 0.71098  | 0.176713 |
| -0.13682 | 0.00305 | 0.015551 | 0.73749  | -0.17131 | 0.0002   | 0.079641 | 0.08558  | 0.036699 |
| 0.016442 | 0.72306 | -0.02456 | 0.5965   | -0.02895 | 0.53263  | 0.007781 | 0.86682  | 0.147059 |
| -0.00885 | 0.84876 | -0.12701 | 0.00599  | 0.051517 | 0.26655  | -0.14468 | 0.00172  | 0.289453 |
| 0.016125 | 0.72817 | -0.09857 | 0.0332   | 0.047936 | 0.30127  | -0.13071 | 0.00467  | 0.272564 |
| 0.052577 | 0.25683 | -0.08179 | 0.07745  | 0.127728 | 0.00571  | -0.14236 | 0.00204  | 0.260895 |
| -0.12074 | 0.00901 | -0.16951 | 0.00023  | -0.23067 | 4.67E-07 | -0.18114 | 8.27E-05 | -0.02228 |
| -0.00932 | 0.84075 | 0.144743 | 0.00171  | 0.074114 | 0.1097   | 0.29224  | 1.20E-10 | 0.315036 |
| -0.07952 | 0.08608 | 0.00425  | 0.92701  | -0.17348 | 0.00016  | 0.010011 | 0.82918  | 0.065206 |
| -0.04286 | 0.35536 | -0.0315  | 0.49715  | 0.029645 | 0.52278  | -0.03583 | 0.43986  | 0.016765 |
| -0.07647 | 0.09885 | 0.006091 | 0.89555  | -0.05934 | 0.20051  | 0.038376 | 0.40801  | 0.111227 |
| -0.03453 | 0.4566  | -0.07074 | 0.1269   | -0.06711 | 0.14764  | -0.0936  | 0.04321  | 0.172252 |
| -0.06366 | 0.16962 | -0.03144 | 0.49798  | -0.0287  | 0.53606  | -0.00675 | 0.88425  | 0.271016 |
| -0.00173 | 0.97024 | -0.00333 | 0.94276  | 0.014579 | 0.75334  | 0.038457 | 0.40703  | 0.325203 |
| -0.08199 | 0.07672 | 0.031678 | 0.49467  | -0.13882 | 0.00264  | 0.079083 | 0.0878   | 0.112914 |
| 0.008889 | 0.84807 | 0.166426 | 0.0003   | 0.153973 | 0.00084  | 0.277364 | 1.07E-09 | 0.448182 |
| 0.004201 | 0.92786 | -0.1567  | 0.00068  | 0.041335 | 0.3728   | -0.27384 | 1.77E-09 | 0.158087 |
| -0.11273 | 0.01479 | 0.038519 | 0.40626  | -0.17648 | 0.00013  | 0.106152 | 0.02177  | 0.106857 |
| 0.041722 | 0.36834 | -0.05978 | 0.19718  | 0.083217 | 0.07239  | -0.03316 | 0.47473  | 0.116492 |
| -0.0151  | 0.74489 | -0.13648 | 0.00312  | -0.07393 | 0.11058  | -0.14207 | 0.00209  | 0.155893 |
| -0.05595 | 0.22754 | -0.03977 | 0.39118  | -0.10469 | 0.02366  | 0.035803 | 0.44019  | 0.173855 |
| -0.00996 | 0.8301  | -0.02225 | 0.63155  | 0.021468 | 0.64355  | -0.05479 | 0.23735  | 0.210243 |
| -0.04296 | 0.35423 | -0.16804 | 0.00026  | -0.11316 | 0.01441  | -0.1743  | 0.00015  | -0.03801 |
| 0.041684 | 0.36878 | 0.044777 | 0.33427  | -0.05362 | 0.24746  | 0.041147 | 0.37498  | 0.143808 |
| -0.02294 | 0.62093 | -0.02757 | 0.5523   | 0.113365 | 0.01424  | -0.06302 | 0.17395  | 0.263466 |
| 0.00819  | 0.8599  | -0.03751 | 0.41871  | 0.075624 | 0.10263  | -0.08045 | 0.08245  | 0.160914 |
| 0.072746 | 0.11643 | -0.00694 | 0.88111  | 0.211205 | 4.14E-06 | -0.03406 | 0.46279  | 0.265234 |
| -0.03456 | 0.45621 | -0.01857 | 0.68893  | 0.018503 | 0.69002  | -0.03934 | 0.39629  | 0.040904 |
| -0.02394 | 0.60577 | -0.10354 | 0.02525  | 0.001717 | 0.97048  | -0.17858 | 0.0001   | 0.219875 |
| -0.02512 | 0.58814 | -0.08406 | 0.06954  | 0.036601 | 0.43006  | -0.04106 | 0.37599  | 0.310833 |

|          |          |          |          |          |          |          |          |          |
|----------|----------|----------|----------|----------|----------|----------|----------|----------|
| -0.06312 | 0.17331  | -0.10694 | 0.02081  | -0.01583 | 0.73295  | -0.10672 | 0.02108  | 0.226841 |
| -0.02101 | 0.65057  | -0.00737 | 0.87372  | 0.03401  | 0.46344  | -0.10641 | 0.02145  | 0.037588 |
| -0.11738 | 0.01113  | -0.12349 | 0.00754  | -0.18456 | 6.01E-05 | 0.013419 | 0.77242  | 0.154859 |
| -0.0919  | 0.04716  | -0.18481 | 5.88E-05 | -0.03442 | 0.458    | -0.12287 | 0.00786  | 0.21556  |
| -0.13483 | 0.00351  | -0.13519 | 0.00342  | -0.23105 | 4.46E-07 | -0.03492 | 0.45152  | 0.035441 |
| -0.14194 | 0.00211  | -0.10628 | 0.02161  | -0.21993 | 1.59E-06 | -0.07086 | 0.12626  | 0.112825 |
| -0.01848 | 0.69047  | -0.08347 | 0.07154  | -0.16631 | 0.00031  | -0.11067 | 0.01673  | -0.03581 |
| -0.10764 | 0.01998  | -0.03349 | 0.47034  | -0.2213  | 1.37E-06 | 0.034611 | 0.45557  | 0.082517 |
| -0.02173 | 0.63958  | 0.006654 | 0.88597  | -0.04381 | 0.34481  | -0.01374 | 0.76719  | -0.07637 |
| -0.05587 | 0.22814  | -0.03849 | 0.40663  | -0.1165  | 0.01175  | 0.016619 | 0.72019  | 0.2021   |
| -0.01296 | 0.78001  | 0.000999 | 0.98282  | -0.07208 | 0.11985  | 0.063605 | 0.17     | 0.164016 |
| 0.03546  | 0.44458  | -0.05934 | 0.20052  | 0.123159 | 0.00771  | -0.11537 | 0.0126   | 0.168121 |
| 0.039033 | 0.40003  | -0.04762 | 0.30451  | -0.05132 | 0.26842  | 0.010602 | 0.81926  | 0.174558 |
| -0.07102 | 0.12538  | -0.01175 | 0.80004  | -0.15746 | 0.00064  | 0.018049 | 0.69726  | 0.071393 |
| -0.01679 | 0.71744  | -0.14164 | 0.00215  | -0.15913 | 0.00056  | -0.09271 | 0.04523  | 0.157641 |
| -0.00984 | 0.83202  | -0.1829  | 7.03E-05 | 0.039865 | 0.39006  | -0.16533 | 0.00033  | 0.28927  |
| 0.006726 | 0.88473  | -0.07792 | 0.09257  | -0.10204 | 0.02746  | -0.2059  | 7.27E-06 | -0.17572 |
| 0.023101 | 0.61852  | -0.01886 | 0.68442  | 0.089892 | 0.05222  | 0.155615 | 0.00074  | 0.346549 |
| -0.02093 | 0.65192  | -0.11456 | 0.01324  | -0.14034 | 0.00237  | -0.07756 | 0.0941   | 0.251649 |
| -0.06651 | 0.15129  | -0.08054 | 0.08212  | 0.070351 | 0.12899  | -0.15548 | 0.00075  | 0.143012 |
| 0.0339   | 0.46488  | -0.09252 | 0.04569  | 0.063403 | 0.17136  | -0.09075 | 0.05     | 0.32345  |
| -0.02719 | 0.55773  | -0.02749 | 0.55339  | -0.00072 | 0.98755  | -0.09871 | 0.03296  | 0.058825 |
| -0.0631  | 0.17339  | -0.12668 | 0.00612  | -0.11948 | 0.00976  | -0.10676 | 0.02103  | 0.284014 |
| -0.25266 | 3.11E-08 | -0.24795 | 5.67E-08 | -0.31101 | 6.24E-12 | -0.20242 | 1.04E-05 | -0.04105 |
| 0.036008 | 0.43757  | -0.0293  | 0.52764  | -0.00629 | 0.8922   | -0.11965 | 0.00965  | -0.15079 |
| -0.08587 | 0.06371  | 0.063277 | 0.17221  | 0.101785 | 0.02785  | 0.124238 | 0.00719  | 0.254065 |
| -0.00679 | 0.88361  | -0.0672  | 0.14707  | 0.068327 | 0.14039  | -0.12212 | 0.00825  | 0.151367 |
| 0.002021 | 0.96525  | -0.04766 | 0.30401  | 0.026204 | 0.57217  | 0.050202 | 0.27896  | 0.296617 |
| -0.09886 | 0.03269  | -0.21865 | 1.84E-06 | -0.20537 | 7.68E-06 | -0.11184 | 0.01561  | 0.10908  |
| -0.01625 | 0.72621  | -0.16646 | 0.0003   | 0.033724 | 0.46721  | -0.2069  | 6.54E-06 | 0.176918 |
| -0.09204 | 0.04681  | -0.11607 | 0.01207  | -0.12025 | 0.00929  | -0.14985 | 0.00116  | 0.21376  |
| 0.00591  | 0.89864  | -0.13393 | 0.00374  | -0.04508 | 0.33098  | -0.12798 | 0.00561  | 0.191817 |
| 0.016298 | 0.72538  | -0.09987 | 0.03095  | -0.01461 | 0.75288  | -0.10818 | 0.01937  | 0.186644 |
| 0.026505 | 0.56777  | -0.02661 | 0.56617  | 0.135196 | 0.00342  | -0.0895  | 0.05326  | 0.258148 |
| -0.11712 | 0.01131  | -0.04394 | 0.34336  | -0.06446 | 0.16434  | -0.01854 | 0.68938  | 0.001855 |
| -0.0401  | 0.3873   | -0.12429 | 0.00717  | -0.05383 | 0.24566  | -0.06251 | 0.17746  | 0.243911 |
| -0.04208 | 0.36425  | -0.02418 | 0.60229  | 0.016071 | 0.72905  | -0.03184 | 0.49241  | 0.208712 |
| -0.11631 | 0.01189  | -0.05719 | 0.21737  | -0.09511 | 0.03993  | -0.00277 | 0.95247  | 0.205218 |
| -0.09145 | 0.04826  | -0.04245 | 0.36005  | -0.07413 | 0.10964  | 0.016825 | 0.71687  | 0.191591 |
| -0.04595 | 0.32175  | -0.0014  | 0.97592  | -0.00611 | 0.89517  | 0.122795 | 0.00789  | 0.307644 |
| -0.00161 | 0.97235  | -0.13162 | 0.00438  | -0.03063 | 0.50913  | -0.22109 | 1.40E-06 | 0.121207 |
| -0.06664 | 0.15049  | -0.05954 | 0.19903  | -0.12684 | 0.00605  | -0.02508 | 0.5888   | 0.132874 |
| -0.09491 | 0.04035  | -0.19177 | 3.02E-05 | -0.19494 | 2.21E-05 | -0.07861 | 0.08971  | 0.110774 |
| -0.05274 | 0.25539  | -0.13827 | 0.00275  | 0.021653 | 0.64069  | -0.11348 | 0.01414  | 0.100955 |
| -0.0857  | 0.06425  | -0.03943 | 0.3953   | -0.15871 | 0.00058  | -0.075   | 0.1055   | 0.069668 |

|          |         |          |         |          |          |          |          |          |
|----------|---------|----------|---------|----------|----------|----------|----------|----------|
| -0.02791 | 0.54743 | 0.028797 | 0.53475 | 0.207538 | 6.12E-06 | 0.158003 | 0.00061  | 0.114588 |
| -0.0615  | 0.18457 | -0.02079 | 0.654   | -0.10508 | 0.02315  | 0.065753 | 0.156    | -0.03636 |
| -0.10606 | 0.02188 | -0.07853 | 0.09004 | -0.02931 | 0.5275   | -0.01725 | 0.71007  | 0.174705 |
| -0.08261 | 0.07451 | -0.0023  | 0.9605  | -0.12554 | 0.0066   | 0.09815  | 0.03397  | 0.189198 |
| 0.002631 | 0.95478 | -0.10641 | 0.02146 | -0.10228 | 0.02709  | -0.09142 | 0.04833  | 0.144387 |
| -0.04856 | 0.29497 | -0.07166 | 0.12198 | -0.1265  | 0.00619  | -0.03166 | 0.49486  | 0.204009 |
| -0.05174 | 0.26449 | 0.019649 | 0.67192 | -0.06475 | 0.16241  | 0.06052  | 0.19171  | 0.120703 |
| -0.03608 | 0.43671 | 0.005654 | 0.90302 | -0.04374 | 0.3456   | -0.00649 | 0.88878  | 0.138197 |
| -0.031   | 0.50397 | -0.06202 | 0.18088 | 0.025623 | 0.58072  | -0.06994 | 0.13122  | 0.325884 |
| -0.06056 | 0.19144 | -0.04207 | 0.3643  | -0.00044 | 0.99246  | -0.04615 | 0.31967  | 0.203796 |
| -0.09315 | 0.04423 | -0.0143  | 0.75795 | -0.15748 | 0.00064  | 0.000574 | 0.99012  | 0.109792 |
| -0.11898 | 0.01007 | -0.10719 | 0.02051 | -0.2055  | 7.57E-06 | -0.10522 | 0.02296  | 0.103377 |
| -0.06685 | 0.14918 | -0.06649 | 0.15143 | -0.09124 | 0.04877  | 0.046989 | 0.31092  | 0.233912 |
| -0.03961 | 0.39306 | -0.06554 | 0.15734 | -0.06873 | 0.13807  | -0.16063 | 0.00049  | -0.05778 |
| -0.06218 | 0.17978 | -0.04641 | 0.31692 | -0.0714  | 0.12335  | 0.004692 | 0.91946  | 0.246528 |
| -0.11402 | 0.01368 | -0.13377 | 0.00378 | -0.24118 | 1.32E-07 | -0.18508 | 5.73E-05 | -0.08838 |
| -0.08139 | 0.07892 | -0.08324 | 0.0723  | -0.05325 | 0.25077  | -0.10697 | 0.02078  | 0.167825 |
| -0.09795 | 0.03433 | -0.05278 | 0.25499 | -0.14581 | 0.00158  | 0.011404 | 0.80585  | 0.117287 |
| -0.05406 | 0.24361 | -0.14875 | 0.00126 | -0.03691 | 0.4262   | -0.20856 | 5.49E-06 | 0.223566 |
| -0.01158 | 0.80283 | -0.01317 | 0.77652 | -0.08683 | 0.0608   | 0.059728 | 0.1976   | 0.184152 |
| -0.02224 | 0.63174 | -0.0608  | 0.18963 | -0.02401 | 0.60471  | 0.134373 | 0.00362  | 0.438901 |
| -0.05341 | 0.24935 | 0.00361  | 0.93799 | -0.03651 | 0.43124  | 0.000785 | 0.98651  | 0.154891 |
| -0.13753 | 0.0029  | 0.039941 | 0.38915 | 0.009442 | 0.83875  | 0.100813 | 0.02938  | 0.259906 |
| -0.07183 | 0.12114 | 0.069486 | 0.13377 | -0.14806 | 0.00133  | 0.086807 | 0.06087  | 0.010794 |
| 0.050186 | 0.27911 | -0.00922 | 0.84247 | -0.02427 | 0.60086  | 0.00643  | 0.88978  | 0.060145 |
| -0.05773 | 0.21307 | -0.04625 | 0.31865 | -0.04577 | 0.32364  | 0.001682 | 0.97108  | 0.273612 |
| -0.02145 | 0.64384 | -0.06293 | 0.17461 | 0.072189 | 0.11926  | -0.12223 | 0.00819  | 0.23802  |
| -0.06989 | 0.13151 | -0.13071 | 0.00467 | -0.01866 | 0.68754  | -0.13618 | 0.00319  | 0.249023 |
| -0.06131 | 0.186   | -0.04147 | 0.37121 | -0.10764 | 0.01999  | -0.06068 | 0.19052  | 0.083822 |
| -0.00378 | 0.93512 | -0.10845 | 0.01907 | 0.051036 | 0.27104  | -0.11911 | 0.00999  | 0.283357 |
| -0.01953 | 0.67383 | -0.03665 | 0.42946 | 0.068022 | 0.14218  | -0.08326 | 0.07223  | 0.151543 |
| 0.012448 | 0.78847 | -0.12963 | 0.00502 | -0.00477 | 0.91809  | -0.15461 | 0.0008   | 0.267202 |
| -0.00175 | 0.97    | 0.032475 | 0.48387 | 0.074887 | 0.10604  | 0.037475 | 0.41912  | 0.17175  |
| -0.04368 | 0.34622 | -0.05457 | 0.23924 | -0.0318  | 0.49297  | 0.008169 | 0.86025  | 0.198292 |
| 0.054445 | 0.24028 | -0.02246 | 0.62837 | 0.114749 | 0.01309  | -0.08114 | 0.07983  | 0.075441 |
| -0.04458 | 0.33638 | -0.00475 | 0.91852 | -0.01557 | 0.73712  | -0.05558 | 0.2306   | 0.111377 |
| -0.10374 | 0.02497 | -0.02345 | 0.61319 | -0.07433 | 0.10869  | 0.054798 | 0.23724  | 0.178497 |
| -0.07053 | 0.12803 | -0.00538 | 0.90763 | 0.017173 | 0.71127  | -0.01058 | 0.81961  | 0.203855 |
| -0.02293 | 0.6211  | -0.10078 | 0.02943 | -0.01273 | 0.7838   | -0.07021 | 0.12977  | 0.185204 |
| 0.014145 | 0.76046 | -0.13251 | 0.00412 | 0.004113 | 0.92936  | -0.15097 | 0.00107  | 0.18588  |
| -0.09338 | 0.0437  | -0.13216 | 0.00422 | -0.12422 | 0.0072   | -0.07636 | 0.09932  | 0.060151 |
| -0.01899 | 0.68233 | -0.05252 | 0.25735 | -0.11447 | 0.01332  | 0.012763 | 0.78325  | -0.06644 |
| -0.03877 | 0.40319 | 0.13168  | 0.00437 | 0.134042 | 0.00371  | 0.092533 | 0.04565  | -0.01349 |
| -0.03379 | 0.46632 | -0.02492 | 0.59109 | 0.096123 | 0.03785  | -0.0751  | 0.10506  | 0.246333 |
| -0.06869 | 0.13829 | 0.032957 | 0.4774  | -0.07381 | 0.11119  | 0.040801 | 0.37901  | 0.042267 |



|          |         |          |          |          |          |          |          |          |
|----------|---------|----------|----------|----------|----------|----------|----------|----------|
| -0.08084 | 0.08095 | -0.01975 | 0.67031  | -0.10222 | 0.02719  | -0.00852 | 0.85427  | 0.175268 |
| -0.06958 | 0.13323 | -0.12448 | 0.00707  | -0.04909 | 0.28972  | -0.12286 | 0.00786  | 0.191293 |
| -0.03649 | 0.43151 | -0.08538 | 0.06526  | -0.05065 | 0.27466  | -0.03719 | 0.42272  | 0.174146 |
| -0.01039 | 0.82289 | -0.05664 | 0.22185  | -0.07008 | 0.13045  | -0.10018 | 0.03043  | 0.211245 |
| -0.00668 | 0.88555 | -0.10428 | 0.02422  | -0.0825  | 0.0749   | -0.13033 | 0.00479  | 0.037951 |
| 0.044533 | 0.33692 | 0.009204 | 0.84275  | 0.126513 | 0.00619  | 0.011843 | 0.79852  | 0.331037 |
| -0.04792 | 0.30138 | -0.15337 | 0.00088  | -0.10212 | 0.02734  | -0.00685 | 0.88261  | 0.214279 |
| -0.09256 | 0.04559 | -0.03125 | 0.5005   | -0.17889 | 0.0001   | -0.13687 | 0.00304  | -0.32923 |
| -0.03742 | 0.41981 | -0.07312 | 0.11455  | -0.05804 | 0.21056  | -0.06278 | 0.17559  | 0.169242 |
| -0.03218 | 0.48783 | -0.10787 | 0.01972  | 0.040003 | 0.38842  | -0.13303 | 0.00398  | 0.210778 |
| -0.01371 | 0.76757 | -0.06289 | 0.17488  | 0.039602 | 0.39319  | -0.08908 | 0.05439  | 0.256378 |
| -0.04464 | 0.33573 | -0.17614 | 0.00013  | -0.00898 | 0.84654  | -0.20736 | 6.23E-06 | 0.164961 |
| -0.07248 | 0.11775 | -0.11475 | 0.01309  | -0.06065 | 0.19078  | 0.025311 | 0.58535  | 0.246782 |
| -0.08249 | 0.07493 | 0.026967 | 0.56104  | -0.06164 | 0.18361  | 0.060667 | 0.19063  | 0.092277 |
| -0.06525 | 0.15922 | -0.11478 | 0.01307  | -0.20238 | 1.05E-05 | -0.10505 | 0.02319  | 0.129673 |
| -0.00538 | 0.90773 | 0.177532 | 0.00011  | 0.111933 | 0.01552  | 0.270334 | 2.90E-09 | 0.217703 |
| 0.008206 | 0.85963 | 0.087344 | 0.05929  | 0.052906 | 0.25385  | 0.13963  | 0.00249  | 0.067181 |
| 0.032856 | 0.47875 | -0.00534 | 0.90839  | -0.01908 | 0.68084  | 0.114967 | 0.01292  | 0.156711 |
| 0.00113  | 0.98057 | -0.0453  | 0.32862  | 0.073427 | 0.11304  | -0.06868 | 0.13838  | 0.196018 |
| 0.072709 | 0.11662 | -0.00457 | 0.92156  | 0.068706 | 0.1382   | 0.123369 | 0.00761  | 0.156272 |
| 0.03888  | 0.40188 | 0.135822 | 0.00327  | 0.139241 | 0.00256  | 0.086997 | 0.06031  | 0.025518 |
| 0.070934 | 0.12584 | -0.04562 | 0.3253   | 0.049835 | 0.2825   | -0.03491 | 0.45172  | 0.119268 |
| -0.02049 | 0.6587  | 0.033628 | 0.46847  | 0.018983 | 0.68242  | 0.148407 | 0.0013   | 0.175691 |
| -0.09537 | 0.03939 | -0.00262 | 0.95495  | 0.040158 | 0.38658  | -0.01613 | 0.72817  | 0.002751 |
| -0.11966 | 0.00965 | -0.10141 | 0.02843  | -0.20284 | 9.98E-06 | -0.06693 | 0.1487   | 0.046579 |
| -0.00745 | 0.87238 | 0.107604 | 0.02003  | 0.184658 | 5.96E-05 | 0.100875 | 0.02928  | 0.094415 |
| -0.019   | 0.68214 | 0.00856  | 0.85364  | -0.04569 | 0.3245   | -0.01284 | 0.78193  | 0.135244 |
| -0.09405 | 0.0422  | -0.09166 | 0.04775  | -0.08359 | 0.07113  | -0.03405 | 0.46295  | 0.205177 |
| 0.003532 | 0.93932 | -0.04642 | 0.31683  | -0.11737 | 0.01114  | 0.047137 | 0.30941  | 0.045689 |
| -0.01551 | 0.73818 | -0.03815 | 0.41081  | 0.036287 | 0.43403  | -0.08899 | 0.05463  | -0.14772 |
| -0.0433  | 0.35052 | -0.16618 | 0.00031  | -0.01049 | 0.82109  | -0.1208  | 0.00897  | 0.267057 |
| 0.100877 | 0.02928 | -0.04523 | 0.32935  | 0.001084 | 0.98136  | -0.03083 | 0.50627  | 0.132327 |
| -0.05862 | 0.20605 | -0.16622 | 0.00031  | -0.16623 | 0.00031  | -0.11592 | 0.01218  | 0.095433 |
| -0.07782 | 0.09299 | -0.01734 | 0.70855  | 0.044219 | 0.34034  | 0.006764 | 0.8841   | 0.238351 |
| -0.01817 | 0.69541 | -0.08393 | 0.06998  | 0.083288 | 0.07215  | -0.05217 | 0.26056  | 0.249838 |
| -0.0251  | 0.58849 | -0.00834 | 0.8574   | 0.158226 | 0.0006   | -0.03728 | 0.42153  | 0.149134 |
| 0.018498 | 0.69011 | -0.08605 | 0.06316  | -0.04246 | 0.35993  | -0.06843 | 0.13978  | 0.091699 |
| 0.037246 | 0.42196 | 0.138884 | 0.00263  | 0.329073 | 2.95E-13 | 0.236167 | 2.43E-07 | 0.114379 |
| -0.09509 | 0.03996 | -0.07794 | 0.0925   | -0.1664  | 0.0003   | -0.11454 | 0.01326  | -0.21577 |
| 0.168893 | 0.00025 | 0.233025 | 3.53E-07 | 0.234919 | 2.82E-07 | 0.285872 | 3.11E-10 | 0.00321  |
| 0.030216 | 0.51481 | -0.14146 | 0.00218  | 0.018172 | 0.69529  | -0.1278  | 0.00568  | 0.195066 |
| -0.14293 | 0.00196 | 0.011161 | 0.8099   | -0.13904 | 0.0026   | 0.040172 | 0.3864   | 0.158785 |
| -0.07083 | 0.12642 | 0.063425 | 0.17121  | -0.11936 | 0.00983  | 0.050936 | 0.27199  | 0.00725  |
| -0.01446 | 0.75526 | -0.04739 | 0.30677  | 0.070849 | 0.1263   | -0.08743 | 0.05905  | 0.201179 |
| -0.00016 | 0.99726 | -0.03223 | 0.48718  | -0.09093 | 0.04955  | -0.06902 | 0.1364   | 0.154719 |

|          |          |          |          |          |          |          |          |          |
|----------|----------|----------|----------|----------|----------|----------|----------|----------|
| -0.22333 | 1.09E-06 | -0.20967 | 4.88E-06 | -0.30443 | 1.80E-11 | -0.14366 | 0.00186  | 0.021518 |
| -0.08388 | 0.07015  | -0.00523 | 0.91023  | -0.19947 | 1.41E-05 | 0.011534 | 0.80367  | 0.115077 |
| 0.010033 | 0.82879  | -0.07601 | 0.10088  | 0.08392  | 0.07001  | -0.07673 | 0.0977   | 0.278014 |
| -0.06895 | 0.13681  | -0.07477 | 0.10658  | 0.033756 | 0.46678  | -0.0099  | 0.83098  | 0.269349 |
| 0.014669 | 0.75187  | -0.07971 | 0.08531  | 0.088872 | 0.05496  | -0.06656 | 0.151    | 0.289555 |
| -0.10698 | 0.02076  | -0.07239 | 0.11825  | -0.19969 | 1.38E-05 | -0.08775 | 0.05812  | 0.062156 |
| -0.01845 | 0.6908   | -0.05472 | 0.23795  | 0.010215 | 0.82574  | 0.056856 | 0.22006  | 0.356587 |
| -0.01908 | 0.68096  | -0.11392 | 0.01377  | 0.047975 | 0.30088  | -0.09851 | 0.03332  | 0.2689   |
| -0.01747 | 0.70644  | -0.06345 | 0.17102  | 0.020888 | 0.65254  | -0.06849 | 0.13943  | 0.220373 |
| -0.07097 | 0.12564  | -0.123   | 0.00779  | -0.05169 | 0.26492  | -0.10698 | 0.02076  | 0.036372 |
| 0.037066 | 0.42421  | -0.09461 | 0.04099  | -0.03512 | 0.449    | 0.047153 | 0.30924  | 0.236325 |
| 0.036771 | 0.42791  | -0.05896 | 0.20346  | 0.014634 | 0.75245  | 0.079811 | 0.08492  | 0.32639  |
| -0.09176 | 0.0475   | -0.1451  | 0.00167  | -0.25262 | 3.12E-08 | -0.11505 | 0.01285  | -0.01334 |
| -0.05799 | 0.21099  | -0.12597 | 0.00641  | -0.01852 | 0.6897   | -0.1496  | 0.00118  | 0.110382 |
| 0.010854 | 0.81504  | 0.029273 | 0.52802  | -0.09288 | 0.04483  | -0.03992 | 0.38942  | -0.19301 |
| -0.06156 | 0.18414  | -0.01661 | 0.72038  | -0.09576 | 0.03857  | 0.074342 | 0.10861  | 0.093375 |
| -0.03274 | 0.48026  | -0.06632 | 0.15246  | 0.085368 | 0.06529  | -0.07328 | 0.11377  | 0.20327  |
| -0.08116 | 0.07978  | -0.08674 | 0.06107  | -0.01426 | 0.75856  | -0.05583 | 0.22852  | 0.273104 |
| -0.01806 | 0.69715  | -0.1397  | 0.00248  | 0.011901 | 0.79756  | -0.19593 | 2.01E-05 | 0.174064 |
| -0.00211 | 0.96369  | -0.0268  | 0.56345  | 0.009815 | 0.83247  | 0.057038 | 0.21859  | 0.274396 |
| -0.0117  | 0.80089  | -0.05791 | 0.21159  | -0.00739 | 0.87352  | -0.04759 | 0.3048   | 0.223369 |
| -0.08171 | 0.07775  | -0.1581  | 0.00061  | -0.05842 | 0.20759  | -0.18019 | 9.02E-05 | 0.144408 |
| -0.03843 | 0.40732  | 0.035929 | 0.43857  | -0.0347  | 0.45439  | 0.172396 | 0.00018  | 0.140749 |
| -0.03505 | 0.44981  | -0.03159 | 0.49582  | 0.001018 | 0.98249  | -0.0349  | 0.45186  | 0.189559 |
| -0.06882 | 0.13752  | -0.21007 | 4.68E-06 | -0.10576 | 0.02227  | -0.14572 | 0.00159  | 0.157461 |
| -0.07165 | 0.12204  | -0.05868 | 0.20563  | -0.02954 | 0.52429  | -0.08862 | 0.05566  | 0.181217 |
| 0.013976 | 0.76324  | 0.008811 | 0.84938  | -0.01168 | 0.80128  | -0.10052 | 0.02986  | 0.203323 |
| 0.004426 | 0.92401  | -0.0229  | 0.62163  | -0.05279 | 0.25487  | 0.012357 | 0.78998  | 0.078573 |
| 0.002559 | 0.95601  | -0.07569 | 0.10234  | -0.04208 | 0.36422  | 0.011401 | 0.8059   | 0.239452 |
| -0.0535  | 0.24855  | -0.00488 | 0.91626  | -0.11242 | 0.01507  | 0.029744 | 0.52139  | 0.070684 |
| -0.02255 | 0.62698  | -0.25258 | 3.13E-08 | -0.06954 | 0.13347  | -0.24292 | 1.06E-07 | 0.218889 |
| -0.0459  | 0.3223   | -0.1295  | 0.00506  | -0.05351 | 0.2485   | -0.13734 | 0.00294  | 0.124665 |
| 0.005693 | 0.90235  | -0.07062 | 0.12751  | -0.04832 | 0.29736  | -0.04126 | 0.37362  | 0.268357 |
| -0.0707  | 0.12708  | -0.08236 | 0.07538  | -0.10473 | 0.02361  | -0.03898 | 0.40071  | 0.139039 |
| -0.02841 | 0.54024  | -0.0869  | 0.06059  | -0.02929 | 0.52773  | -0.12507 | 0.00681  | 0.175288 |
| -0.10543 | 0.02269  | -0.02254 | 0.62705  | -0.1643  | 0.00036  | 0.048196 | 0.29865  | 0.018514 |
| 0.244891 | 8.33E-08 | -0.08038 | 0.08272  | -0.0088  | 0.84957  | 0.032844 | 0.47891  | 0.238437 |
| -0.05478 | 0.23736  | -0.04982 | 0.28268  | -0.14048 | 0.00234  | 0.04104  | 0.37622  | 0.181597 |
| 0.004158 | 0.92859  | -0.02015 | 0.66403  | -0.06689 | 0.14893  | -0.01075 | 0.8168   | 0.12133  |
| -0.00996 | 0.82996  | -0.10397 | 0.02464  | 0.04168  | 0.36882  | -0.11733 | 0.01116  | 0.317317 |
| -0.07573 | 0.10214  | -0.08972 | 0.05267  | -0.01362 | 0.76911  | -0.11514 | 0.01278  | 0.046764 |
| -0.07491 | 0.10594  | -0.08022 | 0.08332  | 0.022927 | 0.62117  | -0.07033 | 0.12911  | 0.272155 |
| -0.0554  | 0.23208  | 0.023401 | 0.61397  | -0.15317 | 0.0009   | 0.060961 | 0.18849  | 0.033678 |
| -0.0333  | 0.47287  | -0.08916 | 0.05418  | 0.089103 | 0.05433  | -0.07008 | 0.13048  | 0.321455 |
| -0.01449 | 0.75476  | 0.055046 | 0.23513  | -0.02538 | 0.58436  | 0.029364 | 0.52673  | 0.158686 |

|          |         |          |          |          |          |          |          |          |
|----------|---------|----------|----------|----------|----------|----------|----------|----------|
| -0.08777 | 0.05806 | -0.09877 | 0.03285  | -0.14391 | 0.00182  | -0.10803 | 0.01954  | 0.114632 |
| -0.02094 | 0.65174 | -0.00533 | 0.90848  | 0.103379 | 0.02548  | 0.123601 | 0.00749  | 0.270789 |
| -0.15431 | 0.00082 | -0.1182  | 0.01057  | -0.08904 | 0.05451  | -0.17768 | 0.00011  | 0.014992 |
| 0.009979 | 0.82971 | -0.10026 | 0.0303   | -0.02241 | 0.62914  | -0.1336  | 0.00382  | 0.12063  |
| -0.06286 | 0.17503 | -0.24663 | 6.70E-08 | -0.07858 | 0.08984  | -0.17122 | 0.0002   | 0.131174 |
| -0.02563 | 0.58063 | -0.02097 | 0.6513   | -0.07394 | 0.11052  | -0.03106 | 0.50308  | 0.20131  |
| -0.11087 | 0.01653 | -0.08083 | 0.08101  | -0.24918 | 4.85E-08 | -0.10953 | 0.0179   | -0.17366 |
| -0.01485 | 0.74896 | -0.08758 | 0.05861  | -0.04604 | 0.32081  | -0.09929 | 0.03194  | 0.028445 |
| 0.029913 | 0.51903 | -0.05692 | 0.21956  | 0.148383 | 0.0013   | -0.07231 | 0.11865  | 0.290118 |
| -0.14297 | 0.00195 | -0.09134 | 0.04853  | -0.25089 | 3.90E-08 | -0.01497 | 0.7469   | 0.112582 |
| -0.04585 | 0.32277 | -0.08432 | 0.06869  | 0.035663 | 0.44197  | -0.0695  | 0.13372  | 0.284569 |
| -0.14455 | 0.00174 | -0.06344 | 0.17112  | -0.17648 | 0.00013  | -0.15153 | 0.00102  | 0.039436 |
| -0.03231 | 0.4861  | -0.11529 | 0.01266  | 0.03317  | 0.47456  | -0.13752 | 0.0029   | 0.164977 |
| -0.03063 | 0.50908 | -0.26753 | 4.27E-09 | -0.18011 | 9.09E-05 | -0.2653  | 5.80E-09 | 0.053156 |
| -0.03311 | 0.47538 | -0.12171 | 0.00846  | -0.11354 | 0.01409  | -0.06804 | 0.14209  | 0.29167  |
| -0.00958 | 0.83637 | 0.139414 | 0.00253  | 0.177113 | 0.00012  | 0.162086 | 0.00044  | 0.136906 |
| -0.0529  | 0.25386 | -0.0103  | 0.82431  | 0.022277 | 0.6311   | 0.014703 | 0.75131  | 0.111817 |
| -0.0268  | 0.56344 | -0.09832 | 0.03365  | -0.02993 | 0.51878  | -0.08887 | 0.05497  | 0.199483 |
| -0.07929 | 0.08699 | -0.05583 | 0.22852  | 0.03338  | 0.47177  | -0.04328 | 0.35068  | 0.278008 |
| -0.03348 | 0.47044 | -0.04871 | 0.29353  | -0.09102 | 0.04933  | -0.07691 | 0.0969   | 0.031764 |
| -0.08141 | 0.07884 | -0.0641  | 0.16668  | 0.046939 | 0.31144  | -0.03475 | 0.45372  | 0.330075 |
| -0.04748 | 0.30587 | -0.0389  | 0.40168  | -0.03041 | 0.51211  | -0.00286 | 0.95088  | 0.174669 |
| -0.00473 | 0.91881 | -0.05513 | 0.23444  | -0.06727 | 0.14665  | -0.08471 | 0.06739  | 0.057234 |
| 0.038277 | 0.40923 | -0.08393 | 0.06996  | -0.02069 | 0.65559  | -0.15045 | 0.00111  | 0.024338 |
| -0.12682 | 0.00606 | -0.14717 | 0.00143  | -0.19586 | 2.02E-05 | -0.18004 | 9.14E-05 | -0.11197 |
| -0.01592 | 0.73152 | -0.05596 | 0.22743  | 0.002682 | 0.95391  | -0.05104 | 0.27103  | 0.131461 |
| -0.05294 | 0.25351 | -0.05556 | 0.23074  | -0.00891 | 0.84766  | -0.0872  | 0.05971  | 0.221847 |
| -0.07884 | 0.08879 | 0.058853 | 0.20425  | 0.060199 | 0.19408  | 0.128793 | 0.00531  | 0.212319 |
| -0.06314 | 0.17316 | -0.09585 | 0.0384   | -0.14146 | 0.00218  | -0.04732 | 0.30749  | 0.107206 |
| -0.1042  | 0.02433 | -0.01624 | 0.72636  | -0.06549 | 0.15765  | 0.053903 | 0.245    | 0.222003 |
| -0.01086 | 0.81488 | -0.17103 | 0.0002   | -0.07365 | 0.11193  | -0.14044 | 0.00235  | -0.11933 |
| -0.10635 | 0.02153 | -0.09733 | 0.03549  | -0.13886 | 0.00264  | -0.07172 | 0.12169  | 0.145414 |
| 0.022682 | 0.6249  | -0.04798 | 0.30077  | 0.069406 | 0.13422  | -0.08548 | 0.06493  | 0.269097 |
| 6.22E-05 | 0.99893 | -0.06982 | 0.13189  | 0.061225 | 0.18658  | -0.07534 | 0.10393  | 0.278523 |
| 0.063063 | 0.17367 | 0.034445 | 0.45774  | 0.020233 | 0.66276  | -0.00438 | 0.92487  | 0.128447 |
| 0.047954 | 0.30109 | 0.052581 | 0.25679  | 0.068697 | 0.13825  | 0.034176 | 0.46125  | 0.173655 |
| -0.05325 | 0.25077 | -0.09321 | 0.04409  | -0.02907 | 0.53094  | -0.05052 | 0.27589  | 0.288816 |
| -0.0034  | 0.94162 | 0.054685 | 0.23821  | 0.00847  | 0.85515  | 0.011427 | 0.80547  | 0.113598 |
| 0.016388 | 0.72392 | -0.1401  | 0.00241  | 0.07702  | 0.09643  | -0.1433  | 0.00191  | 0.233869 |
| -0.07813 | 0.09171 | -0.10997 | 0.01744  | -0.06231 | 0.17885  | -0.15119 | 0.00105  | -0.04495 |
| 0.002551 | 0.95615 | -0.10411 | 0.02446  | -0.01655 | 0.72138  | -0.09848 | 0.03337  | 0.187565 |
| -0.00864 | 0.85223 | -0.12688 | 0.00604  | -0.10062 | 0.02969  | -0.1085  | 0.01901  | 0.183015 |
| -0.10706 | 0.02067 | -0.04953 | 0.28547  | -0.16476 | 0.00035  | -0.06933 | 0.13463  | 0.130023 |
| -0.04549 | 0.32667 | -0.05235 | 0.25888  | -0.01256 | 0.78667  | -0.08511 | 0.0661   | 0.133228 |
| -0.1014  | 0.02845 | -0.01253 | 0.78719  | -0.17565 | 0.00014  | 0.081053 | 0.08016  | 0.10022  |

|          |         |          |          |          |          |          |          |          |
|----------|---------|----------|----------|----------|----------|----------|----------|----------|
| -0.05893 | 0.20366 | -0.13004 | 0.00488  | -0.18489 | 5.83E-05 | -0.168   | 0.00027  | 0.024281 |
| -0.01838 | 0.69197 | -0.10272 | 0.02643  | -0.13398 | 0.00372  | -0.08891 | 0.05485  | 0.024611 |
| 0.044298 | 0.33948 | -0.06361 | 0.16997  | 0.05945  | 0.1997   | -0.06191 | 0.18169  | 0.222488 |
| -0.0914  | 0.04837 | -0.22654 | 7.54E-07 | -0.15353 | 0.00087  | -0.21468 | 2.85E-06 | 0.013104 |
| -0.12722 | 0.0059  | -0.12637 | 0.00625  | -0.17204 | 0.00019  | -0.03542 | 0.44504  | 0.140563 |
| -0.01591 | 0.73166 | 0.109783 | 0.01763  | 0.05638  | 0.22395  | 0.021988 | 0.63554  | -0.18741 |
| 0.05386  | 0.24538 | -0.02572 | 0.57925  | -0.01597 | 0.73066  | -0.03207 | 0.48931  | 0.204484 |
| 0.03827  | 0.40931 | -0.08287 | 0.07361  | -0.05854 | 0.20666  | -0.10508 | 0.02315  | 0.030694 |
| 0.021235 | 0.64716 | -0.14905 | 0.00124  | 0.02224  | 0.63166  | -0.16163 | 0.00045  | 0.21687  |
| -0.05501 | 0.23547 | -0.09805 | 0.03416  | 0.092101 | 0.04668  | -0.12403 | 0.00729  | 0.296147 |
| -0.09218 | 0.04648 | -0.03554 | 0.4436   | -0.11659 | 0.01169  | 0.04791  | 0.30153  | 0.156023 |
| -0.00093 | 0.98395 | -0.20274 | 1.01E-05 | 0.02403  | 0.60448  | -0.27292 | 2.02E-09 | 0.238812 |
| -0.094   | 0.04232 | -0.15832 | 0.0006   | -0.19046 | 3.43E-05 | -0.03972 | 0.39179  | 0.09005  |
| -0.06909 | 0.13603 | -0.05609 | 0.22633  | -0.11799 | 0.01072  | -0.0669  | 0.14889  | 0.172461 |
| -0.07162 | 0.12223 | -0.05948 | 0.1995   | -0.04654 | 0.31557  | -0.02704 | 0.55991  | 0.220765 |
| 0.000611 | 0.9895  | -0.0902  | 0.05141  | -0.13423 | 0.00366  | -0.13475 | 0.00353  | 0.009716 |
| -0.041   | 0.37665 | 0.01048  | 0.82129  | 0.02486  | 0.59205  | 0.043632 | 0.3468   | 0.142176 |
| -0.09035 | 0.05104 | -0.14773 | 0.00137  | -0.14942 | 0.0012   | -0.13511 | 0.00344  | 0.089956 |
| -0.02853 | 0.53857 | 0.112404 | 0.01509  | 0.051308 | 0.2685   | 0.136537 | 0.00311  | -0.12503 |
| 0.03569  | 0.44163 | 0.172657 | 0.00018  | -0.02082 | 0.65352  | 0.092586 | 0.04553  | -0.28633 |
| -0.00526 | 0.90966 | -0.0059  | 0.89882  | 0.042396 | 0.36064  | 0.054315 | 0.2414   | 0.192906 |
| 0.043347 | 0.34996 | -0.01612 | 0.72818  | 0.115992 | 0.01213  | -0.05457 | 0.23919  | 0.218318 |
| -0.08709 | 0.06003 | -0.06746 | 0.14552  | -0.05931 | 0.20077  | -0.07723 | 0.0955   | 0.106248 |
| -0.01004 | 0.82868 | -0.01017 | 0.82647  | -0.05133 | 0.26826  | 0.005542 | 0.90493  | 0.053081 |
| -0.00725 | 0.8759  | -0.08181 | 0.07737  | -0.03065 | 0.50879  | -0.07684 | 0.0972   | 0.184373 |
| -0.07742 | 0.09471 | -0.04188 | 0.36657  | -0.15525 | 0.00076  | 0.04294  | 0.35451  | 0.109651 |
| -0.0715  | 0.12283 | -0.12714 | 0.00594  | -0.01988 | 0.66836  | -0.0864  | 0.06208  | 0.195795 |
| 0.001363 | 0.97657 | -0.07306 | 0.11486  | 0.057426 | 0.21546  | -0.10981 | 0.0176   | 0.257182 |
| -0.05614 | 0.22592 | -0.16923 | 0.00024  | -0.1166  | 0.01169  | -0.15811 | 0.00061  | 0.105348 |
| -0.08849 | 0.05602 | -0.17191 | 0.00019  | -0.08564 | 0.06442  | -0.09713 | 0.03588  | 0.226893 |
| -0.01243 | 0.7887  | -0.06212 | 0.18021  | -0.01834 | 0.69264  | -0.05355 | 0.24814  | 0.272262 |
| -0.07791 | 0.09261 | 0.049814 | 0.2827   | -0.08748 | 0.05889  | 0.02474  | 0.59384  | 0.028744 |
| -0.066   | 0.15445 | 0.006079 | 0.89577  | 0.022682 | 0.6249   | -0.05614 | 0.22597  | 0.025748 |
| -0.03474 | 0.45394 | -0.16088 | 0.00048  | -0.04486 | 0.33342  | -0.13462 | 0.00356  | 0.195928 |
| 0.073917 | 0.11066 | 0.098545 | 0.03325  | 0.068441 | 0.13973  | 0.133386 | 0.00388  | 0.09622  |
| 0.010042 | 0.82865 | -0.08654 | 0.06168  | -0.01147 | 0.80468  | 0.012075 | 0.79467  | 0.328885 |
| -0.11728 | 0.0112  | -0.07197 | 0.12037  | -0.15537 | 0.00075  | -0.00112 | 0.98075  | 0.183573 |
| -0.03411 | 0.46214 | -0.03391 | 0.46474  | 0.014988 | 0.74666  | 0.010049 | 0.82853  | 0.229744 |
| 0.033228 | 0.47378 | -0.14433 | 0.00177  | 0.101134 | 0.02887  | -0.16727 | 0.00028  | 0.279898 |
| 0.021681 | 0.64027 | -0.0242  | 0.60191  | -0.03803 | 0.41221  | -0.04549 | 0.32658  | 0.047106 |
| -0.04712 | 0.30961 | -0.2227  | 1.17E-06 | -0.20305 | 9.76E-06 | -0.22567 | 8.34E-07 | 0.033076 |
| 0.069333 | 0.13463 | 0.043977 | 0.343    | -0.02835 | 0.54105  | -0.03454 | 0.45654  | -0.19395 |
| 0.119866 | 0.00952 | 0.090922 | 0.04957  | 0.109058 | 0.0184   | 0.114467 | 0.01332  | 0.333745 |
| -0.05265 | 0.25615 | -0.00354 | 0.93912  | -0.0229  | 0.62158  | -0.02007 | 0.66535  | 0.126881 |
| -0.04776 | 0.30303 | -0.16607 | 0.00031  | 0.003863 | 0.93365  | -0.24241 | 1.13E-07 | 0.187843 |

|          |         |          |          |          |          |          |          |          |
|----------|---------|----------|----------|----------|----------|----------|----------|----------|
| -0.02428 | 0.60066 | 0.105725 | 0.02231  | -0.10409 | 0.02448  | 0.126991 | 0.00599  | 0.027242 |
| -0.05042 | 0.27686 | 0.007806 | 0.8664   | 0.055205 | 0.23377  | -0.00635 | 0.89114  | 0.189958 |
| -0.14871 | 0.00127 | -0.19498 | 2.20E-05 | -0.23883 | 1.76E-07 | -0.19139 | 3.13E-05 | 0.100433 |
| -0.09092 | 0.04958 | -0.16132 | 0.00047  | -0.09052 | 0.05058  | -0.13668 | 0.00308  | 0.239406 |
| -0.05188 | 0.26319 | -0.02023 | 0.66282  | -0.01536 | 0.74057  | 0.029488 | 0.52499  | 0.308111 |
| -0.04594 | 0.32181 | -0.03757 | 0.41788  | -0.14545 | 0.00162  | -0.01227 | 0.79144  | 0.141156 |
| -0.04977 | 0.28313 | -0.12364 | 0.00747  | 0.042904 | 0.35491  | -0.06077 | 0.18987  | 0.27192  |
| -0.06129 | 0.18611 | -0.02169 | 0.64006  | -0.08476 | 0.06725  | -0.03022 | 0.51469  | 0.165118 |
| -0.0685  | 0.13939 | -0.16061 | 0.00049  | -0.08205 | 0.07649  | -0.18959 | 3.73E-05 | 0.001952 |
| -0.1489  | 0.00125 | -0.00408 | 0.92986  | -0.23238 | 3.82E-07 | 0.01659  | 0.72066  | 0.011016 |
| -0.04632 | 0.3179  | -0.09302 | 0.04452  | -0.05259 | 0.2567   | -0.07329 | 0.11374  | 0.164013 |
| -0.10788 | 0.01971 | -0.07503 | 0.10537  | -0.08999 | 0.05197  | -0.03821 | 0.4101   | 0.066261 |
| -0.07355 | 0.11243 | -0.11882 | 0.01017  | -0.07101 | 0.12544  | -0.15913 | 0.00056  | 0.091456 |
| 0.039577 | 0.39349 | -0.05233 | 0.25905  | -0.13848 | 0.00271  | -0.07987 | 0.0847   | 0.137955 |
| -0.0929  | 0.0448  | 0.035211 | 0.44779  | -0.07432 | 0.10872  | 0.088867 | 0.05497  | 0.222457 |
| -0.08501 | 0.06644 | -0.05947 | 0.19951  | -0.12586 | 0.00646  | -0.07824 | 0.09126  | 0.075917 |
| -0.06168 | 0.1833  | -0.0645  | 0.16404  | -0.04482 | 0.3338   | -0.06982 | 0.13188  | 0.079106 |
| -0.09166 | 0.04774 | -0.12469 | 0.00698  | -0.03607 | 0.43673  | 0.051349 | 0.26812  | 0.322975 |
| -0.00817 | 0.86029 | -0.06647 | 0.15155  | 0.024796 | 0.59299  | -0.18047 | 8.79E-05 | 0.077279 |
| 0.055838 | 0.22844 | 0.019365 | 0.67638  | 0.067559 | 0.14492  | 0.087364 | 0.05923  | 0.334809 |
| -0.09205 | 0.0468  | -0.14258 | 0.00201  | -0.14907 | 0.00123  | -0.14203 | 0.00209  | 0.073777 |
| -0.05214 | 0.26082 | -0.03297 | 0.47729  | -0.08705 | 0.06015  | -0.03247 | 0.48394  | 0.237833 |
| -0.0859  | 0.06364 | -0.01082 | 0.81562  | -0.12642 | 0.00623  | -0.00366 | 0.93719  | 0.196352 |
| -0.03715 | 0.42317 | 0.017682 | 0.70311  | -0.00863 | 0.85237  | 0.150398 | 0.00111  | 0.268503 |
| -0.06946 | 0.13389 | -0.01265 | 0.78518  | -0.04522 | 0.32951  | -0.06829 | 0.14058  | 0.19829  |
| -0.16528 | 0.00033 | -0.14788 | 0.00135  | -0.21181 | 3.88E-06 | -0.10635 | 0.02153  | 0.102085 |
| -0.01299 | 0.77949 | -0.04208 | 0.36419  | 0.044884 | 0.33313  | -0.07149 | 0.1229   | 0.263139 |
| -0.08987 | 0.05227 | 0.065153 | 0.15982  | -0.09723 | 0.03568  | 0.122835 | 0.00787  | 0.099359 |
| -0.11677 | 0.01156 | -0.02249 | 0.62791  | -0.1051  | 0.02312  | -0.0055  | 0.90566  | 0.103349 |
| -0.01822 | 0.69451 | -0.09384 | 0.04266  | -0.10613 | 0.02181  | -0.01584 | 0.73272  | 0.263144 |
| 0.014205 | 0.75948 | 0.029837 | 0.52009  | 0.094356 | 0.04154  | -0.01563 | 0.73615  | 0.157169 |
| 0.004887 | 0.91611 | -0.23795 | 1.96E-07 | -0.10691 | 0.02084  | -0.16602 | 0.00031  | 0.213167 |
| -0.03819 | 0.41035 | -0.08562 | 0.06449  | 0.102689 | 0.02648  | -0.13933 | 0.00255  | 0.230115 |
| 0.032961 | 0.47734 | -0.08773 | 0.05817  | 0.017873 | 0.70007  | -0.10693 | 0.02083  | 0.132392 |
| -0.0174  | 0.70758 | -0.13496 | 0.00348  | -0.00347 | 0.94041  | -0.10032 | 0.03019  | 0.177289 |
| 0.040624 | 0.38108 | -0.01991 | 0.66786  | 0.061709 | 0.18311  | 0.000507 | 0.99129  | 0.010004 |
| -0.05498 | 0.23571 | 0.004844 | 0.91685  | -0.06568 | 0.15643  | 0.073067 | 0.11483  | 0.052687 |
| -0.05216 | 0.26062 | 0.109505 | 0.01792  | 0.040794 | 0.3791   | 0.055165 | 0.23411  | -0.22687 |
| -0.12197 | 0.00833 | -0.19661 | 1.88E-05 | -0.1078  | 0.0198   | -0.09988 | 0.03092  | 0.186383 |
| -0.11413 | 0.01359 | -0.19475 | 2.26E-05 | -0.2216  | 1.32E-06 | -0.22465 | 9.36E-07 | 0.070818 |
| -0.04928 | 0.28792 | 0.031138 | 0.50206  | -0.081   | 0.08038  | 0.077967 | 0.09239  | 0.042487 |
| -0.06901 | 0.13647 | -0.03444 | 0.45785  | -0.02638 | 0.56953  | 0.000327 | 0.99438  | 0.133847 |
| -0.04572 | 0.32415 | -0.13091 | 0.0046   | -0.12671 | 0.00611  | -0.14534 | 0.00164  | 0.186245 |
| -0.07103 | 0.12532 | -0.11296 | 0.0146   | -0.04108 | 0.37578  | -0.09543 | 0.03927  | 0.206172 |
| 0.006032 | 0.89656 | -0.0692  | 0.13536  | 0.068771 | 0.13783  | -0.14717 | 0.00143  | 0.105266 |

|          |          |          |          |          |          |          |          |          |
|----------|----------|----------|----------|----------|----------|----------|----------|----------|
| -0.04027 | 0.3853   | -0.05449 | 0.23988  | -0.10053 | 0.02985  | -0.09055 | 0.05051  | 0.174591 |
| -0.03122 | 0.50097  | 0.002582 | 0.95562  | 0.053903 | 0.245    | 0.134264 | 0.00365  | 0.304781 |
| 0.026354 | 0.56998  | 0.021638 | 0.64093  | 0.052463 | 0.25786  | 0.004159 | 0.92858  | 0.042373 |
| 0.042249 | 0.36231  | 0.223437 | 1.08E-06 | 0.12474  | 0.00696  | 0.17011  | 0.00022  | -0.23876 |
| -0.14467 | 0.00172  | -0.21575 | 2.53E-06 | -0.15999 | 0.00052  | -0.16482 | 0.00035  | 0.235472 |
| -0.20224 | 1.06E-05 | -0.27984 | 7.53E-10 | -0.21902 | 1.77E-06 | -0.24489 | 8.33E-08 | 0.018716 |
| -0.07925 | 0.08714  | 0.018655 | 0.68762  | -0.07521 | 0.10453  | -0.01153 | 0.80378  | 0.064284 |
| 0.010228 | 0.82553  | -0.07528 | 0.10421  | 0.112685 | 0.01484  | -0.08286 | 0.07365  | 0.353306 |
| -0.04156 | 0.37019  | -0.06663 | 0.15052  | -0.12386 | 0.00737  | -0.0895  | 0.05325  | 0.010429 |
| -0.06747 | 0.14547  | -0.10194 | 0.02761  | -0.04606 | 0.32056  | -0.11627 | 0.01192  | 0.177325 |
| -0.02665 | 0.5656   | -0.11823 | 0.01056  | 0.042333 | 0.36136  | -0.16202 | 0.00044  | 0.257993 |
| -0.06484 | 0.16183  | -0.13397 | 0.00373  | -0.031   | 0.50399  | -0.13835 | 0.00273  | 0.210547 |
| -0.06154 | 0.18432  | -0.0568  | 0.22051  | 0.077754 | 0.09329  | -0.0534  | 0.24945  | 0.321354 |
| -0.05088 | 0.27253  | -0.01527 | 0.74213  | -0.0932  | 0.04411  | -0.00644 | 0.88968  | 0.185488 |
| -0.07973 | 0.08522  | -0.19399 | 2.43E-05 | -0.12037 | 0.00922  | -0.06724 | 0.14684  | 0.286383 |
| -0.05986 | 0.19658  | -0.06112 | 0.18734  | -0.09533 | 0.03946  | -0.06776 | 0.14373  | 0.219287 |
| -0.02409 | 0.60361  | -0.1159  | 0.0122   | 0.061634 | 0.18364  | -0.20138 | 1.16E-05 | 0.208716 |
| -0.09604 | 0.03801  | -0.01767 | 0.70336  | -0.16285 | 0.00041  | 0.041597 | 0.36977  | 0.130413 |
| -0.05644 | 0.22349  | -0.07454 | 0.10765  | 9.60E-05 | 0.99835  | -0.07984 | 0.08482  | 0.240688 |
| -0.05165 | 0.26533  | -0.04922 | 0.28845  | -0.0784  | 0.09059  | 0.033213 | 0.47398  | 0.260233 |
| -0.07409 | 0.10983  | -0.09031 | 0.05113  | -0.06205 | 0.18068  | -0.04642 | 0.31681  | 0.237907 |
| -0.00476 | 0.91825  | -0.06829 | 0.1406   | -0.0244  | 0.59893  | -0.09089 | 0.04965  | 0.031764 |
| -0.08964 | 0.05289  | -0.04738 | 0.30696  | -0.13923 | 0.00257  | 0.01629  | 0.72551  | 0.211146 |
| -0.01216 | 0.79322  | -0.04783 | 0.30229  | -0.08905 | 0.05447  | 0.00305  | 0.94758  | 0.257585 |
| -0.09091 | 0.04961  | -0.15091 | 0.00107  | -0.03757 | 0.41796  | -0.07833 | 0.09087  | 0.187695 |
| -0.00124 | 0.97864  | -0.13526 | 0.0034   | -0.06574 | 0.15606  | -0.04377 | 0.34532  | 0.22723  |
| -0.05789 | 0.2118   | -0.15897 | 0.00056  | -0.1167  | 0.01161  | -0.1029  | 0.02618  | 0.162247 |
| -0.07099 | 0.12552  | -0.06971 | 0.13255  | -0.06059 | 0.1912   | -0.08433 | 0.06864  | 0.177643 |
| 0.044212 | 0.34042  | -0.01084 | 0.81532  | 0.060427 | 0.19239  | -0.10918 | 0.01827  | 0.214827 |
| -0.07265 | 0.11689  | -0.03244 | 0.48432  | 0.036259 | 0.43438  | 0.052907 | 0.25384  | 0.285136 |
| -0.06285 | 0.1751   | -0.0522  | 0.26025  | -0.21251 | 3.60E-06 | -0.04741 | 0.30662  | 0.140898 |
| -0.10776 | 0.01984  | 0.048767 | 0.29295  | -0.11155 | 0.01588  | 0.079107 | 0.08771  | -0.02042 |
| -0.02966 | 0.52259  | -0.16648 | 0.0003   | -0.00357 | 0.93866  | -0.22408 | 9.99E-07 | 0.145294 |
| -0.1198  | 0.00956  | -0.22173 | 1.30E-06 | -0.0719  | 0.12073  | -0.05487 | 0.2366   | 0.18338  |
| -0.08726 | 0.05953  | 0.02682  | 0.56317  | 0.040023 | 0.38817  | 0.033384 | 0.47171  | 0.131107 |
| -0.08701 | 0.06028  | -0.03121 | 0.50107  | -0.09098 | 0.04942  | 0.04043  | 0.38336  | 0.258407 |
| -0.04165 | 0.36915  | -0.00404 | 0.93056  | -0.12269 | 0.00795  | -0.02424 | 0.60135  | -0.01613 |
| -0.10582 | 0.02219  | 0.016429 | 0.72326  | -0.1249  | 0.00688  | 0.001495 | 0.97429  | 0.077591 |
| 0.033151 | 0.47481  | 0.121383 | 0.00864  | 0.058922 | 0.20373  | 0.116896 | 0.01147  | 0.198421 |
| 0.000699 | 0.98798  | -0.08185 | 0.07724  | 0.024352 | 0.59963  | -0.11083 | 0.01658  | 0.069768 |
| -0.08139 | 0.0789   | -0.07627 | 0.09973  | -0.06215 | 0.18002  | -0.08304 | 0.073    | 0.202976 |
| -0.16435 | 0.00036  | -0.07197 | 0.12039  | -0.15798 | 0.00061  | -0.04421 | 0.34042  | 0.001436 |
| 0.01322  | 0.7757   | -0.04525 | 0.32918  | 0.008592 | 0.85309  | 0.065497 | 0.15762  | 0.222885 |
| -0.0187  | 0.68685  | -0.09789 | 0.03444  | 0.053416 | 0.2493   | -0.01587 | 0.73225  | 0.383724 |
| -0.01029 | 0.82456  | 0.035183 | 0.44814  | 0.089049 | 0.05448  | 0.025074 | 0.58887  | 0.240573 |

|          |          |          |          |          |          |          |          |          |
|----------|----------|----------|----------|----------|----------|----------|----------|----------|
| -0.09715 | 0.03584  | -0.1113  | 0.01612  | 0.010742 | 0.81691  | -0.08512 | 0.06607  | 0.185963 |
| -0.01185 | 0.79846  | -0.15629 | 0.0007   | -0.10596 | 0.02201  | -0.10839 | 0.01913  | 0.187879 |
| -0.09053 | 0.05056  | -0.11451 | 0.01329  | -0.18969 | 3.69E-05 | -0.12268 | 0.00795  | -0.14508 |
| 0.101221 | 0.02873  | 0.225654 | 8.35E-07 | 0.022768 | 0.62359  | 0.189103 | 3.91E-05 | -0.15499 |
| -0.00569 | 0.90236  | -0.05531 | 0.23289  | 0.101951 | 0.02759  | 0.018383 | 0.69193  | 0.376088 |
| -0.00873 | 0.85081  | -0.12128 | 0.0087   | -0.01011 | 0.82747  | -0.09535 | 0.03942  | 0.286822 |
| -0.1145  | 0.01329  | -0.05873 | 0.20522  | -0.20657 | 6.77E-06 | 0.055338 | 0.23265  | 0.060331 |
| -0.12118 | 0.00876  | -0.0541  | 0.24325  | -0.22206 | 1.26E-06 | 0.03392  | 0.46461  | 0.060139 |
| -0.03233 | 0.48584  | 0.039344 | 0.39628  | 0.067212 | 0.147    | 0.066553 | 0.15101  | 0.201999 |
| 0.027171 | 0.55807  | -0.02075 | 0.65473  | -0.07159 | 0.12238  | -0.03251 | 0.48336  | -0.02299 |
| -0.04453 | 0.337    | -0.03428 | 0.45983  | -0.03485 | 0.45241  | 0.049366 | 0.28706  | 0.053831 |
| -0.04293 | 0.35459  | 0.014983 | 0.74675  | -0.087   | 0.06028  | -0.04186 | 0.36678  | -0.11153 |
| -0.04961 | 0.2847   | -0.07435 | 0.10856  | 0.037031 | 0.42465  | -0.05068 | 0.27443  | 0.221415 |
| -0.10974 | 0.01768  | -0.06943 | 0.13411  | -0.22253 | 1.19E-06 | -0.00069 | 0.98808  | 0.002454 |
| -0.12427 | 0.00717  | -0.16629 | 0.00031  | -0.17201 | 0.00019  | -0.12369 | 0.00745  | 0.170081 |
| -0.13182 | 0.00432  | -0.02079 | 0.65412  | -0.09922 | 0.03206  | 0.008206 | 0.85961  | 0.227353 |
| 0.001279 | 0.97801  | 0.000419 | 0.99279  | -0.09036 | 0.05101  | -0.02266 | 0.62517  | 0.049679 |
| -0.0004  | 0.99317  | 0.053014 | 0.25288  | -0.04481 | 0.33396  | 0.072919 | 0.11556  | 0.093282 |
| 0.030377 | 0.51257  | -0.10366 | 0.02509  | -0.04072 | 0.37992  | -0.09932 | 0.03189  | 0.164229 |
| -0.0057  | 0.90217  | 0.037861 | 0.41434  | 0.057144 | 0.21773  | 0.125971 | 0.00641  | 0.247147 |
| -0.03569 | 0.44157  | -0.17452 | 0.00015  | -0.18177 | 7.80E-05 | -0.0764  | 0.09913  | 0.14304  |
| -0.03286 | 0.47871  | -0.07091 | 0.12598  | 0.091423 | 0.04832  | -0.10625 | 0.02166  | 0.324527 |
| -0.04285 | 0.35551  | -0.08391 | 0.07005  | -0.00503 | 0.91368  | -0.08281 | 0.07381  | 0.237324 |
| -0.07614 | 0.1003   | -0.09235 | 0.04608  | -0.09277 | 0.04509  | -0.01306 | 0.77833  | 0.235917 |
| -0.05488 | 0.23656  | -0.09774 | 0.03472  | -0.09407 | 0.04215  | -0.06216 | 0.17992  | 0.246237 |
| -0.04413 | 0.34128  | -0.10651 | 0.02133  | -0.05397 | 0.24444  | -0.08434 | 0.0686   | 0.198715 |
| -0.01671 | 0.71867  | 0.118343 | 0.01048  | -0.04361 | 0.34703  | 0.136517 | 0.00312  | 0.080171 |
| -0.0368  | 0.4275   | -0.07099 | 0.12553  | -0.01265 | 0.78508  | -0.08157 | 0.07824  | 0.240719 |
| -0.06005 | 0.19518  | -0.07598 | 0.101    | -0.15325 | 0.00089  | 0.031611 | 0.49558  | 0.06097  |
| 0.046799 | 0.31289  | -0.11944 | 0.00978  | 0.078484 | 0.09024  | -0.11681 | 0.01153  | 0.315367 |
| 0.058453 | 0.20736  | -0.0594  | 0.2001   | 0.102724 | 0.02643  | -0.06081 | 0.18955  | 0.313975 |
| -0.02167 | 0.64039  | -0.09151 | 0.0481   | 0.001657 | 0.97152  | -0.12945 | 0.00508  | 0.198775 |
| -0.05946 | 0.19966  | -0.0709  | 0.12604  | -0.05687 | 0.21992  | -0.0566  | 0.22218  | 0.239766 |
| 0.015868 | 0.73235  | 0.091258 | 0.04873  | 0.053525 | 0.24833  | 0.194929 | 2.22E-05 | 0.328661 |
| -0.07073 | 0.12692  | -0.01362 | 0.76902  | 0.015918 | 0.73153  | -0.00662 | 0.88659  | 0.286854 |
| -0.09612 | 0.03786  | -0.1658  | 0.00032  | -0.13815 | 0.00277  | -0.1365  | 0.00312  | 0.154724 |
| -0.05297 | 0.25332  | -0.00375 | 0.93556  | -0.08656 | 0.06161  | 0.015909 | 0.73168  | 0.103893 |
| -0.02912 | 0.53024  | -0.0526  | 0.25664  | -0.09049 | 0.05068  | -0.08904 | 0.05449  | -0.10282 |
| -0.16357 | 0.00039  | -0.33988 | 4.32E-14 | -0.29766 | 5.22E-11 | -0.28346 | 4.44E-10 | 0.046247 |
| -0.17929 | 9.79E-05 | -0.12995 | 0.00491  | -0.16374 | 0.00038  | -0.21025 | 4.59E-06 | -0.10813 |
| 0.089722 | 0.05267  | 0.099921 | 0.03086  | 0.146545 | 0.0015   | 0.067575 | 0.14482  | -0.05723 |
| 0.046988 | 0.31094  | -0.04554 | 0.32615  | 0.010652 | 0.81841  | -0.06284 | 0.1752   | 0.254435 |
| 0.079528 | 0.08603  | 0.231732 | 4.12E-07 | 0.270989 | 2.65E-09 | 0.214962 | 2.76E-06 | 0.344987 |
| -0.11002 | 0.01739  | -0.16153 | 0.00046  | -0.12649 | 0.0062   | -0.13377 | 0.00378  | 0.228057 |
| -0.03689 | 0.42647  | -0.05295 | 0.25342  | -0.03923 | 0.39766  | -0.044   | 0.34276  | 0.147812 |

|          |         |          |          |          |          |          |          |          |
|----------|---------|----------|----------|----------|----------|----------|----------|----------|
| -0.08093 | 0.0806  | -0.15935 | 0.00055  | -0.16813 | 0.00026  | -0.16672 | 0.0003   | 0.117339 |
| 0.076145 | 0.10028 | -0.08763 | 0.05845  | 0.128752 | 0.00533  | -0.17425 | 0.00015  | 0.190644 |
| -0.07677 | 0.0975  | -0.00803 | 0.86254  | -0.04009 | 0.38732  | -0.01882 | 0.68505  | 0.103943 |
| -0.0652  | 0.15952 | -0.09932 | 0.03189  | -0.03118 | 0.50151  | -0.10068 | 0.02959  | 0.161607 |
| -0.05629 | 0.22469 | -0.01624 | 0.7263   | -0.08506 | 0.06627  | 0.056451 | 0.22337  | 0.242572 |
| -0.08082 | 0.08102 | -0.05919 | 0.20168  | -0.1304  | 0.00477  | 0.095635 | 0.03884  | 0.142676 |
| -0.05252 | 0.25731 | -0.10536 | 0.02278  | -0.07381 | 0.11118  | -0.03159 | 0.49593  | 0.235148 |
| -0.05085 | 0.27279 | -0.15021 | 0.00113  | 0.023168 | 0.6175   | -0.14923 | 0.00122  | 0.303957 |
| -0.09859 | 0.03316 | -0.08167 | 0.07786  | -0.12659 | 0.00615  | 0.052154 | 0.26067  | 0.121472 |
| -0.01603 | 0.72972 | -0.01711 | 0.71228  | -0.03325 | 0.47347  | 0.052137 | 0.26083  | 0.252025 |
| -0.10412 | 0.02444 | -0.04309 | 0.35285  | -0.12696 | 0.00601  | -0.01046 | 0.82156  | 0.054831 |
| -0.05714 | 0.21777 | -0.15081 | 0.00108  | -0.14349 | 0.00188  | -0.0905  | 0.05065  | 0.068722 |
| -0.03715 | 0.42322 | 0.018215 | 0.6946   | -0.083   | 0.07314  | 0.117445 | 0.01108  | 0.12633  |
| -0.10211 | 0.02735 | -0.01492 | 0.74769  | -0.18215 | 7.53E-05 | 0.03     | 0.51782  | 0.011377 |
| -0.06916 | 0.13561 | -0.22314 | 1.11E-06 | -0.01287 | 0.78151  | -0.21474 | 2.83E-06 | 0.261626 |
| -0.1445  | 0.00174 | -0.23147 | 4.25E-07 | -0.26295 | 7.97E-09 | -0.16804 | 0.00026  | -0.00379 |
| -0.14531 | 0.00164 | -0.01246 | 0.78825  | -0.10399 | 0.02462  | 0.036687 | 0.42897  | 0.071023 |
| 0.006577 | 0.88727 | -0.1869  | 4.82E-05 | 0.024126 | 0.60303  | -0.22083 | 1.44E-06 | 0.28409  |
| -0.06539 | 0.15829 | -0.04515 | 0.33025  | 0.008266 | 0.8586   | 0.012459 | 0.78829  | 0.089655 |
| -0.00275 | 0.95279 | 0.018727 | 0.68648  | 0.04357  | 0.34749  | 0.049514 | 0.28562  | 0.318866 |
| -0.03602 | 0.43747 | -0.01128 | 0.80798  | -0.00434 | 0.92548  | -0.07196 | 0.12046  | 0.158976 |
| -0.05893 | 0.20365 | -0.0326  | 0.48217  | 0.048795 | 0.29267  | 0.071083 | 0.12505  | 0.26632  |
| 0.021197 | 0.64774 | -0.02564 | 0.58052  | 0.106943 | 0.02081  | 0.009422 | 0.83908  | 0.266243 |
| 0.024465 | 0.59795 | -0.04535 | 0.3281   | 0.0602   | 0.19407  | -0.00185 | 0.96814  | 0.262485 |
| 0.065308 | 0.15882 | 0.002046 | 0.96483  | 0.125474 | 0.00663  | -0.06663 | 0.15053  | 0.171565 |
| -0.05792 | 0.21156 | 0.00555  | 0.90479  | -0.10902 | 0.01845  | 0.07827  | 0.09113  | 0.192931 |
| -0.02948 | 0.52505 | -0.08511 | 0.0661   | -0.03207 | 0.48932  | 0.014947 | 0.74732  | 0.261702 |
| 0.003429 | 0.94108 | 0.047506 | 0.30563  | -0.00181 | 0.96895  | -0.02251 | 0.62746  | 0.051586 |
| 0.045469 | 0.32686 | 0.151701 | 0.00101  | 0.121805 | 0.00841  | 0.183105 | 6.89E-05 | 0.140754 |
| -0.08266 | 0.07434 | -0.08021 | 0.08335  | -0.07704 | 0.09634  | -0.06915 | 0.13566  | 0.172054 |
| 0.074914 | 0.10591 | -0.09873 | 0.03292  | 0.110802 | 0.0166   | -0.13626 | 0.00317  | 0.164745 |
| -0.14084 | 0.00228 | 0.014621 | 0.75266  | -0.08731 | 0.05937  | -0.03186 | 0.49218  | 0.037862 |
| -0.10468 | 0.02368 | -0.05478 | 0.2374   | -0.10255 | 0.02669  | -0.05566 | 0.22993  | 0.194794 |
| -0.08437 | 0.06851 | -0.12742 | 0.00582  | -0.11493 | 0.01295  | -0.07464 | 0.10721  | 0.150238 |
| -0.07827 | 0.09113 | -0.15133 | 0.00104  | -0.07079 | 0.12661  | -0.10452 | 0.02389  | 0.246962 |
| -0.05723 | 0.21703 | -0.11676 | 0.01156  | -0.00451 | 0.92254  | -0.1521  | 0.00098  | 0.098924 |
| -0.02357 | 0.61135 | -0.03961 | 0.39304  | -0.01235 | 0.79009  | -0.04697 | 0.3111   | 0.212599 |
| -0.03243 | 0.48446 | -0.0804  | 0.08263  | 0.074213 | 0.10923  | -0.11168 | 0.01576  | 0.212574 |
| -0.05009 | 0.28008 | -0.02613 | 0.57329  | -0.00086 | 0.98518  | -0.00197 | 0.96617  | 0.275223 |
| -0.02589 | 0.57686 | -0.11562 | 0.01241  | 0.005726 | 0.90178  | -0.09673 | 0.03664  | 0.31304  |
| -0.03336 | 0.47206 | -0.18538 | 5.57E-05 | 0.023926 | 0.60605  | -0.15146 | 0.00103  | 0.254881 |
| -0.04354 | 0.34777 | -0.05527 | 0.23318  | -0.01193 | 0.79716  | -0.04082 | 0.37875  | 0.344692 |
| -0.02976 | 0.52116 | 0.139809 | 0.00246  | -0.01135 | 0.80675  | 0.117895 | 0.01078  | 0.082013 |
| -0.04731 | 0.30766 | -0.13469 | 0.00354  | -0.10182 | 0.0278   | -0.14664 | 0.00148  | -0.11788 |
| 0.051682 | 0.26502 | 0.022876 | 0.62194  | 0.049597 | 0.2848   | -0.02334 | 0.61486  | 0.078708 |



|          |          |          |          |          |          |          |          |          |
|----------|----------|----------|----------|----------|----------|----------|----------|----------|
| 0.045724 | 0.32415  | -0.05632 | 0.22442  | 0.092131 | 0.04661  | 0.005042 | 0.91346  | 0.275403 |
| -0.01364 | 0.76869  | -0.06695 | 0.14862  | 0.023724 | 0.60908  | -0.08379 | 0.07043  | 0.222913 |
| -0.08381 | 0.07037  | -0.09064 | 0.05028  | -0.03058 | 0.50975  | -0.06074 | 0.19012  | 0.203098 |
| -0.07182 | 0.12115  | -0.15067 | 0.00109  | -0.18718 | 4.70E-05 | -0.10065 | 0.02964  | 0.171652 |
| 0.030227 | 0.51465  | -0.00991 | 0.83084  | 0.024458 | 0.59806  | -0.05709 | 0.21814  | 0.071747 |
| -0.05471 | 0.23798  | 0.005659 | 0.90292  | -0.06595 | 0.15477  | -0.05776 | 0.21281  | -0.25031 |
| 0.028613 | 0.53736  | -0.04614 | 0.31971  | -0.01724 | 0.71015  | -0.0948  | 0.04059  | 0.060674 |
| -0.05903 | 0.20293  | -0.12112 | 0.00879  | 0.032218 | 0.48734  | -0.07326 | 0.11384  | 0.34399  |
| 0.026292 | 0.57089  | -0.16788 | 0.00027  | -0.09534 | 0.03945  | -0.05092 | 0.27209  | 0.108103 |
| -0.05797 | 0.21115  | 0.021125 | 0.64886  | -0.15252 | 0.00094  | -0.0464  | 0.31708  | -0.05678 |
| -0.07097 | 0.12567  | -0.23373 | 3.25E-07 | -0.22207 | 1.26E-06 | -0.11798 | 0.01072  | 0.138576 |
| -0.02414 | 0.60286  | -0.07294 | 0.11548  | -0.02294 | 0.62091  | 0.067223 | 0.14693  | 0.169366 |
| -0.07278 | 0.11628  | 0.042826 | 0.35579  | -0.12639 | 0.00624  | 0.061464 | 0.18486  | 0.146707 |
| -0.02826 | 0.54246  | -0.07962 | 0.08568  | -0.07258 | 0.11725  | 0.01968  | 0.67143  | 0.214807 |
| -0.08396 | 0.06988  | 0.022267 | 0.63125  | -0.17656 | 0.00013  | -0.03726 | 0.42184  | -0.36118 |
| 0.069398 | 0.13426  | 0.065438 | 0.15799  | 0.07506  | 0.10523  | 0.113642 | 0.014    | 0.22789  |
| -0.0551  | 0.2347   | 0.061052 | 0.18783  | -0.03284 | 0.479    | -0.03935 | 0.39625  | -0.15815 |
| -0.07407 | 0.1099   | 0.037307 | 0.4212   | -0.17619 | 0.00013  | -0.00192 | 0.96702  | -0.00054 |
| 0.194467 | 2.32E-05 | 0.011214 | 0.80902  | 0.118494 | 0.01038  | 0.047233 | 0.30842  | 0.164563 |
| 0.038428 | 0.40738  | -0.03908 | 0.39951  | 0.115237 | 0.0127   | -0.03734 | 0.42076  | 0.306795 |
| -0.0022  | 0.96218  | -0.13486 | 0.0035   | 0.058689 | 0.20553  | -0.13816 | 0.00277  | 0.217207 |
| -0.01056 | 0.81992  | -0.12348 | 0.00755  | 0.042102 | 0.36399  | 0.001328 | 0.97716  | 0.24923  |
| -0.09128 | 0.04868  | -0.15703 | 0.00066  | -0.30573 | 1.46E-11 | -0.1215  | 0.00858  | -0.14881 |
| -0.08613 | 0.06293  | -0.02538 | 0.58432  | 0.01798  | 0.69835  | -0.07553 | 0.10307  | 0.159346 |
| 0.072459 | 0.11789  | 0.031606 | 0.49565  | 0.068964 | 0.13673  | -0.01383 | 0.76565  | 0.186567 |
| -0.01209 | 0.79435  | -0.0195  | 0.67418  | 0.065596 | 0.15699  | 0.028439 | 0.53985  | 0.178462 |
| -0.04475 | 0.3346   | 0.060091 | 0.19489  | 0.027576 | 0.55221  | 0.104758 | 0.02357  | 0.154114 |
| -0.04421 | 0.34039  | -0.07921 | 0.08729  | -0.04701 | 0.31076  | -0.09401 | 0.04229  | 0.243877 |
| -0.01486 | 0.74874  | -0.12801 | 0.0056   | 0.042627 | 0.35802  | -0.15243 | 0.00095  | 0.310423 |
| 0.040552 | 0.38193  | -0.16396 | 0.00037  | 0.072331 | 0.11854  | -0.17998 | 9.19E-05 | 0.222639 |
| -0.01342 | 0.77242  | -0.03233 | 0.48587  | -0.07651 | 0.09868  | 0.000375 | 0.99355  | 0.112079 |
| 0.040435 | 0.38331  | -0.07896 | 0.08829  | -0.00287 | 0.95075  | -0.14516 | 0.00166  | 0.061345 |
| -0.09463 | 0.04094  | -0.00446 | 0.92342  | -0.04961 | 0.28465  | 0.045579 | 0.32568  | 0.166122 |
| -0.02095 | 0.65155  | -0.01537 | 0.74038  | -0.04884 | 0.29224  | 0.025457 | 0.58318  | 0.200485 |
| -0.08594 | 0.06351  | -0.05179 | 0.26404  | -0.02849 | 0.53918  | -0.05527 | 0.23323  | 0.057626 |
| -0.07252 | 0.11757  | -0.01522 | 0.74291  | -0.02774 | 0.54989  | -0.01319 | 0.77621  | 0.077778 |
| -0.04775 | 0.30317  | -0.06598 | 0.1546   | -0.05733 | 0.21626  | -0.09057 | 0.05047  | 0.157995 |
| -0.03769 | 0.4164   | -0.15406 | 0.00084  | -0.17    | 0.00022  | -0.07517 | 0.1047   | 0.134641 |
| -0.10379 | 0.0249   | -0.00184 | 0.96843  | -0.12933 | 0.00512  | 0.099922 | 0.03085  | 0.100895 |
| -0.08185 | 0.07721  | -0.19563 | 2.07E-05 | -0.07894 | 0.08837  | -0.15135 | 0.00103  | 0.160794 |
| -0.05777 | 0.2127   | -0.06865 | 0.13852  | -0.05202 | 0.26194  | -0.04683 | 0.31254  | 0.16642  |
| -0.01528 | 0.74188  | -0.03204 | 0.48973  | -0.02433 | 0.59992  | 0.013301 | 0.77436  | 0.198775 |
| -0.04204 | 0.36474  | -0.0361  | 0.43643  | -0.06401 | 0.16731  | -0.0816  | 0.07814  | 0.128546 |
| -0.07473 | 0.10676  | -0.05536 | 0.23249  | -0.13802 | 0.0028   | -0.05272 | 0.25552  | 0.062228 |
| 0.188548 | 4.12E-05 | 0.153774 | 0.00086  | 0.290746 | 1.50E-10 | 0.144087 | 0.0018   | 0.251662 |

|          |         |          |          |          |          |          |          |          |
|----------|---------|----------|----------|----------|----------|----------|----------|----------|
| -0.03653 | 0.43091 | 0.001328 | 0.97717  | -0.19799 | 1.63E-05 | -0.01448 | 0.75498  | 0.088756 |
| -0.10891 | 0.01856 | -0.16267 | 0.00042  | -0.13445 | 0.0036   | -0.24052 | 1.43E-07 | -0.00179 |
| -0.01788 | 0.69999 | -0.01649 | 0.72221  | -0.05243 | 0.25816  | 0.079414 | 0.08648  | 0.231718 |
| -0.10358 | 0.0252  | -0.06749 | 0.14532  | -0.07249 | 0.11773  | -0.12606 | 0.00638  | 0.155544 |
| -0.05041 | 0.27693 | -0.10442 | 0.02403  | 0.045055 | 0.33129  | -0.12077 | 0.00899  | 0.245194 |
| 0.011706 | 0.80081 | -0.00295 | 0.94931  | -0.0537  | 0.24679  | -0.07755 | 0.09416  | 0.057696 |
| -0.07056 | 0.12786 | -0.08407 | 0.0695   | -0.07907 | 0.08786  | -0.09067 | 0.0502   | 0.129726 |
| -0.07118 | 0.12453 | -0.11702 | 0.01138  | -0.1136  | 0.01404  | -0.0968  | 0.03652  | -0.04345 |
| -0.08615 | 0.06285 | -0.00826 | 0.85874  | -0.0508  | 0.27326  | 0.073675 | 0.11183  | 0.166553 |
| 0.013008 | 0.7792  | 0.094553 | 0.04111  | -0.02322 | 0.61673  | 0.131414 | 0.00445  | 0.112208 |
| -0.0847  | 0.06745 | -0.0004  | 0.99316  | -0.02799 | 0.54631  | 0.00191  | 0.96717  | 0.170822 |
| 0.002177 | 0.96257 | -0.09213 | 0.04661  | 0.002522 | 0.95666  | -0.08773 | 0.05816  | 0.229415 |
| -0.06292 | 0.17467 | -0.05963 | 0.19832  | -0.09239 | 0.046    | 0.087551 | 0.05868  | 0.128943 |
| 0.017209 | 0.71069 | 0.030941 | 0.50477  | -0.07966 | 0.08552  | 0.06534  | 0.15862  | 0.131223 |
| 0.056825 | 0.22031 | 0.035696 | 0.44156  | -0.01876 | 0.68594  | 0.066094 | 0.15386  | 0.202922 |
| 0.00925  | 0.84197 | -0.12872 | 0.00534  | 0.005584 | 0.90421  | -0.14019 | 0.00239  | 0.121177 |
| -0.03632 | 0.43358 | 0.014079 | 0.76155  | -0.0689  | 0.13711  | 0.029565 | 0.52391  | 0.210909 |
| 0.005721 | 0.90187 | -0.03902 | 0.40019  | -0.00533 | 0.90862  | -0.05478 | 0.23736  | -0.02082 |
| -0.07073 | 0.12694 | 0.093004 | 0.04456  | -0.01158 | 0.80297  | 0.075211 | 0.10453  | -0.01265 |
| -0.0915  | 0.04815 | -0.08039 | 0.08266  | -0.16255 | 0.00042  | 0.062051 | 0.18069  | 0.155076 |
| 0.043427 | 0.34907 | -0.07468 | 0.10702  | -0.00832 | 0.85772  | -0.08528 | 0.06559  | 0.170824 |
| -0.06462 | 0.16328 | -0.02593 | 0.57621  | -0.09513 | 0.03988  | -0.00357 | 0.93867  | 0.063377 |
| -0.03446 | 0.45752 | 0.022442 | 0.62857  | 0.005478 | 0.90602  | -0.01511 | 0.74464  | 0.049818 |
| -0.07366 | 0.11191 | -0.2697  | 3.17E-09 | -0.2618  | 9.32E-09 | -0.12309 | 0.00774  | 0.101876 |
| -0.02509 | 0.5886  | 0.018208 | 0.69473  | -0.09034 | 0.05106  | 0.046735 | 0.31355  | 0.168257 |
| -0.00556 | 0.90461 | -0.10452 | 0.0239   | -0.02571 | 0.57937  | -0.15116 | 0.00105  | 0.171595 |
| -0.09615 | 0.03779 | -0.00561 | 0.90384  | -0.15729 | 0.00065  | 0.038863 | 0.40208  | 0.092642 |
| -0.08691 | 0.06058 | 0.090161 | 0.05152  | -0.09213 | 0.04661  | 0.075282 | 0.10421  | -0.12186 |
| -0.11013 | 0.01728 | -0.07821 | 0.09136  | -0.13387 | 0.00375  | -0.07484 | 0.10628  | 0.004756 |
| -0.00718 | 0.87707 | -0.07186 | 0.12096  | -0.16261 | 0.00042  | -0.12271 | 0.00794  | -0.12312 |
| 0.042156 | 0.36337 | -0.00667 | 0.88566  | -0.07651 | 0.09864  | 0.018649 | 0.68771  | 0.105294 |
| -0.07015 | 0.13006 | -0.00304 | 0.94769  | -0.08154 | 0.07836  | 0.063447 | 0.17106  | 0.198594 |
| -0.06369 | 0.16942 | -0.06568 | 0.15644  | 0.030568 | 0.50992  | -0.08045 | 0.08243  | 0.175751 |
| -0.11379 | 0.01388 | -0.07368 | 0.11181  | -0.04901 | 0.29059  | -0.00693 | 0.88128  | 0.08406  |
| 0.068809 | 0.13761 | 0.119537 | 0.00972  | -0.02046 | 0.65917  | 0.025627 | 0.58067  | -0.2195  |
| -0.08156 | 0.07827 | -0.01585 | 0.73269  | -0.09717 | 0.0358   | 0.109318 | 0.01812  | 0.129045 |
| -0.00282 | 0.95156 | -0.15522 | 0.00076  | 0.065909 | 0.15502  | -0.22351 | 1.07E-06 | 0.170438 |
| -0.06242 | 0.17811 | 0.014133 | 0.76066  | -0.08873 | 0.05536  | 0.073249 | 0.11392  | 0.173689 |
| -0.07153 | 0.12271 | -0.02163 | 0.64106  | -0.16475 | 0.00035  | 0.076585 | 0.09833  | 0.090155 |
| -0.07622 | 0.09997 | -0.10981 | 0.0176   | 0.090514 | 0.05061  | -0.14487 | 0.0017   | 0.212374 |
| -0.07209 | 0.11975 | -0.05026 | 0.27841  | -0.168   | 0.00027  | -0.09775 | 0.03471  | 0.030475 |
| 0.004317 | 0.92587 | -0.00412 | 0.92918  | 0.018497 | 0.69012  | -0.08204 | 0.07652  | 0.13049  |
| 0.035086 | 0.4494  | -0.03669 | 0.42899  | 0.108364 | 0.01916  | -0.04872 | 0.29347  | 0.306409 |
| -0.04562 | 0.32529 | -0.16224 | 0.00043  | -0.05127 | 0.26884  | -0.1322  | 0.00421  | 0.132632 |
| -0.11377 | 0.01389 | -0.17623 | 0.00013  | -0.21775 | 2.03E-06 | -0.15315 | 0.0009   | -0.03046 |

|          |          |          |          |          |          |          |          |          |
|----------|----------|----------|----------|----------|----------|----------|----------|----------|
| 0.01166  | 0.80157  | -0.07357 | 0.11232  | 0.013751 | 0.76694  | -0.06995 | 0.13117  | 0.182605 |
| 0.033705 | 0.46745  | 0.055339 | 0.23264  | 0.063819 | 0.16856  | 0.167156 | 0.00029  | 0.260183 |
| -0.1007  | 0.02957  | -0.03179 | 0.49315  | -0.13302 | 0.00398  | 0.035241 | 0.44739  | 0.022701 |
| -0.03633 | 0.43347  | -0.00916 | 0.84355  | -0.04718 | 0.30893  | 0.136384 | 0.00314  | 0.176675 |
| -0.11513 | 0.01279  | 0.014803 | 0.74968  | -0.12593 | 0.00643  | 0.067137 | 0.14745  | 0.132279 |
| -0.14395 | 0.00182  | 0.012611 | 0.78577  | -0.17629 | 0.00013  | 0.091872 | 0.04723  | 0.091505 |
| -0.06655 | 0.151    | -0.09755 | 0.03508  | -0.0769  | 0.09693  | -0.12578 | 0.00649  | 0.153976 |
| -0.22574 | 8.27E-07 | -0.124   | 0.0073   | -0.26029 | 1.14E-08 | -0.07202 | 0.12011  | -0.05641 |
| -0.00597 | 0.89762  | 0.081646 | 0.07797  | -0.05747 | 0.21511  | 0.197055 | 1.79E-05 | 0.144967 |
| -0.03824 | 0.40972  | 0.012133 | 0.79371  | -0.00244 | 0.95806  | 0.063245 | 0.17243  | 0.205475 |
| 0.012399 | 0.78929  | -0.07472 | 0.10683  | 0.031788 | 0.49316  | -0.08801 | 0.05737  | 0.227447 |
| -0.02413 | 0.60301  | -0.13548 | 0.00335  | 0.038406 | 0.40764  | -0.13351 | 0.00385  | 0.366475 |
| -0.06143 | 0.1851   | -0.05369 | 0.24685  | -0.01092 | 0.814    | -0.06295 | 0.17442  | 0.062151 |
| -0.00498 | 0.91444  | -0.06105 | 0.18785  | 0.039382 | 0.39582  | -0.04547 | 0.32684  | 0.157626 |
| -0.0116  | 0.80258  | -0.06281 | 0.17543  | -0.02006 | 0.66541  | -0.02754 | 0.55277  | 0.195829 |
| -0.07546 | 0.1034   | -0.04222 | 0.36266  | -0.12884 | 0.00529  | 0.064848 | 0.16179  | 0.148022 |
| -0.02633 | 0.57027  | -0.05275 | 0.25527  | -0.05564 | 0.23014  | -0.04735 | 0.30723  | 0.15952  |
| -0.05149 | 0.26681  | 0.124688 | 0.00698  | 0.136945 | 0.00302  | 0.246679 | 6.66E-08 | 0.353938 |
| -0.06766 | 0.14431  | -0.00407 | 0.93007  | -0.03152 | 0.49679  | 0.154698 | 0.0008   | 0.182053 |
| -0.01594 | 0.73125  | 0.121916 | 0.00835  | 0.077534 | 0.09422  | 0.232399 | 3.81E-07 | 0.297191 |
| -0.01993 | 0.66748  | 0.065521 | 0.15747  | 0.146752 | 0.00147  | 0.082805 | 0.07382  | 0.300164 |
| -0.06929 | 0.13486  | -0.07948 | 0.08622  | -0.07838 | 0.09069  | -0.13616 | 0.0032   | 0.062391 |
| -0.02963 | 0.52303  | -0.01621 | 0.72688  | 0.062736 | 0.17592  | -0.0193  | 0.67736  | 0.308872 |
| -0.04229 | 0.36184  | -0.06178 | 0.18262  | 0.056423 | 0.2236   | -0.03761 | 0.41745  | 0.245859 |
| -0.07364 | 0.11198  | -0.09552 | 0.03907  | -0.04939 | 0.28684  | 0.047763 | 0.30302  | 0.226114 |
| -0.09442 | 0.04141  | -0.1453  | 0.00164  | -0.18969 | 3.69E-05 | -0.08152 | 0.07844  | 0.166631 |
| -0.14062 | 0.00232  | -0.0368  | 0.4275   | -0.1875  | 4.56E-05 | -0.09595 | 0.03821  | -0.02151 |
| -0.0175  | 0.70604  | -0.12852 | 0.00541  | -0.04318 | 0.35177  | -0.10157 | 0.02819  | 0.025298 |
| -0.23227 | 3.87E-07 | -0.03924 | 0.39758  | -0.15271 | 0.00093  | -0.05981 | 0.19701  | 0.040187 |
| -0.05407 | 0.24351  | 0.029535 | 0.52433  | -0.10475 | 0.02359  | 0.074114 | 0.1097   | 0.152855 |
| -0.06124 | 0.18647  | -0.15598 | 0.00072  | 0.020707 | 0.65535  | -0.19782 | 1.66E-05 | 0.119386 |
| -0.04713 | 0.3095   | 0.034271 | 0.46001  | 0.027912 | 0.54738  | 0.044315 | 0.33929  | -0.01698 |
| -0.16091 | 0.00048  | -0.19887 | 1.50E-05 | -0.26535 | 5.76E-09 | -0.18577 | 5.37E-05 | -0.06343 |
| -0.06813 | 0.14152  | -0.17171 | 0.00019  | -0.15039 | 0.00112  | -0.07749 | 0.09442  | 0.012114 |
| -0.05314 | 0.2518   | -0.13765 | 0.00288  | 0.020044 | 0.66571  | -0.15825 | 0.0006   | 0.14465  |
| -0.01572 | 0.73482  | -0.08508 | 0.0662   | -0.08107 | 0.08008  | -0.10011 | 0.03055  | 0.08387  |
| -0.0167  | 0.71893  | 0.122112 | 0.00825  | 0.13796  | 0.00281  | 0.137607 | 0.00288  | 0.350903 |
| -0.12177 | 0.00843  | -0.16161 | 0.00045  | -0.31023 | 7.08E-12 | -0.09454 | 0.04114  | 0.053729 |
| -0.04674 | 0.3135   | -0.1306  | 0.0047   | -0.04176 | 0.3679   | -0.09542 | 0.03927  | 0.236552 |
| 0.023999 | 0.60494  | -0.11626 | 0.01193  | 0.077773 | 0.0932   | -0.14838 | 0.0013   | 0.215979 |
| -0.08534 | 0.06537  | -0.00361 | 0.9379   | -0.03936 | 0.39608  | -0.00338 | 0.94197  | 0.182503 |
| -0.05729 | 0.21658  | 0.003817 | 0.93444  | -0.04278 | 0.35635  | 0.044956 | 0.33235  | 0.128491 |
| -0.0222  | 0.63221  | -0.09511 | 0.03993  | 0.046405 | 0.31698  | -0.09075 | 0.05001  | 0.325976 |
| 0.007099 | 0.8784   | -0.02617 | 0.57269  | 0.092639 | 0.0454   | -0.03837 | 0.40803  | 0.224441 |
| -0.04785 | 0.30217  | -0.07758 | 0.09402  | -0.03432 | 0.45935  | -0.01495 | 0.74724  | 0.262172 |

|          |         |          |          |          |          |          |          |          |
|----------|---------|----------|----------|----------|----------|----------|----------|----------|
| -0.03761 | 0.41745 | -0.14293 | 0.00196  | -0.04088 | 0.37813  | -0.02889 | 0.53343  | 0.291224 |
| -0.07266 | 0.11688 | -0.02422 | 0.60162  | -0.05106 | 0.27079  | 0.068887 | 0.13716  | 0.108225 |
| -0.11436 | 0.01341 | -0.07866 | 0.08954  | -0.17822 | 0.00011  | -0.07939 | 0.08656  | -0.12014 |
| -0.10968 | 0.01774 | -0.0546  | 0.23894  | -0.10021 | 0.03037  | -0.07476 | 0.10666  | -0.13975 |
| 0.083215 | 0.0724  | 0.023544 | 0.61181  | 0.159938 | 0.00052  | -0.0619  | 0.18179  | 0.204699 |
| 0.05867  | 0.20567 | 0.001894 | 0.96743  | 0.20957  | 4.93E-06 | -0.02845 | 0.53972  | 0.239163 |
| -0.00836 | 0.857   | -0.09138 | 0.04842  | 0.064212 | 0.16595  | -0.10109 | 0.02895  | 0.197102 |
| 0.011312 | 0.80739 | 0.159996 | 0.00052  | 0.150491 | 0.00111  | 0.079836 | 0.08482  | -0.07049 |
| -0.11376 | 0.0139  | -0.02143 | 0.64413  | -0.07411 | 0.10972  | 0.021558 | 0.64216  | 0.147156 |
| -0.16466 | 0.00035 | -0.11948 | 0.00975  | -0.12486 | 0.0069   | -0.06807 | 0.14192  | 0.214795 |
| -0.06582 | 0.1556  | -0.01083 | 0.81549  | -0.16244 | 0.00042  | -0.07524 | 0.1044   | -0.07431 |
| -0.12097 | 0.00888 | -0.04495 | 0.33245  | -0.10244 | 0.02685  | 0.08847  | 0.05607  | 0.17659  |
| -0.11399 | 0.01371 | -0.22532 | 8.67E-07 | -0.24036 | 1.46E-07 | -0.15471 | 0.00079  | 0.040083 |
| -0.03074 | 0.50761 | -0.01734 | 0.70857  | -0.0974  | 0.03536  | 0.026477 | 0.56817  | 0.180079 |
| -0.06712 | 0.14754 | -0.03504 | 0.45003  | -0.23655 | 2.32E-07 | 0.015626 | 0.73627  | 0.016879 |
| -0.10713 | 0.02059 | 0.065234 | 0.1593   | -0.1463  | 0.00152  | 0.107916 | 0.01967  | 0.057015 |
| 0.075208 | 0.10454 | 0.149421 | 0.0012   | 0.161208 | 0.00047  | 0.225305 | 8.69E-07 | 0.231581 |
| -0.1047  | 0.02366 | -0.05087 | 0.27261  | -0.19059 | 3.39E-05 | -0.01647 | 0.72265  | 0.064201 |
| -0.04161 | 0.36958 | -0.11046 | 0.01694  | 0.046074 | 0.32045  | -0.16747 | 0.00028  | 0.189828 |
| -0.0272  | 0.55772 | -0.08728 | 0.05948  | -0.06549 | 0.15764  | -0.03743 | 0.41962  | 0.287315 |
| -0.04045 | 0.38318 | -0.09834 | 0.03363  | -0.03828 | 0.40923  | -0.14801 | 0.00134  | 0.177751 |
| 0.003246 | 0.94423 | -0.0527  | 0.25574  | -0.03204 | 0.48969  | 0.037911 | 0.41373  | 0.132806 |
| -0.00922 | 0.84253 | -0.05234 | 0.25902  | 0.048328 | 0.29733  | -0.12178 | 0.00843  | 0.128794 |
| -0.07831 | 0.09095 | -0.04118 | 0.37454  | -0.06365 | 0.16971  | -0.08486 | 0.06692  | 0.181026 |
| -0.03077 | 0.50714 | -0.00955 | 0.83695  | -0.06252 | 0.17742  | 0.022897 | 0.62163  | 0.289189 |
| 0.002675 | 0.95403 | -0.04776 | 0.30309  | 0.10058  | 0.02976  | 0.0315   | 0.4971   | 0.324508 |
| -0.12446 | 0.00708 | -0.03623 | 0.43469  | -0.22676 | 7.35E-07 | 0.025348 | 0.5848   | 0.074232 |
| -0.04092 | 0.37757 | 0.033674 | 0.46787  | 0.031111 | 0.50243  | -0.03479 | 0.45318  | 0.087111 |
| -0.17609 | 0.00013 | -0.15468 | 0.0008   | -0.07794 | 0.09249  | -0.08957 | 0.05308  | 0.166647 |
| 0.031131 | 0.50215 | -0.06407 | 0.16692  | -0.15037 | 0.00112  | -0.01898 | 0.68252  | 0.012311 |
| -0.13337 | 0.00389 | -0.09041 | 0.05088  | -0.21016 | 4.64E-06 | -0.08169 | 0.07781  | 0.026342 |
| -0.04618 | 0.31939 | -0.02823 | 0.5428   | -0.01624 | 0.72627  | 0.032555 | 0.4828   | 0.154107 |
| 0.015324 | 0.74118 | 0.045639 | 0.32505  | 0.055008 | 0.23545  | 0.091321 | 0.04857  | 0.138453 |
| -0.10646 | 0.0214  | -0.1121  | 0.01537  | -0.11557 | 0.01245  | -0.14804 | 0.00134  | -0.0792  |
| -0.15977 | 0.00053 | -0.15446 | 0.00081  | -0.19126 | 3.18E-05 | -0.16615 | 0.00031  | 0.054874 |
| -0.02935 | 0.52692 | -0.10388 | 0.02478  | -0.07967 | 0.08549  | 0.021988 | 0.63553  | 0.175907 |
| -0.13952 | 0.00251 | -0.04182 | 0.36726  | -0.09359 | 0.04322  | 0.029715 | 0.52181  | 0.153133 |
| -0.05265 | 0.25618 | -0.11509 | 0.01282  | -0.10303 | 0.02599  | -0.07424 | 0.10908  | 0.210781 |
| -0.04041 | 0.38355 | -0.07803 | 0.09211  | -0.01995 | 0.66726  | -0.15186 | 0.00099  | 0.100317 |
| -0.09326 | 0.04397 | -0.14245 | 0.00203  | -0.01636 | 0.72436  | -0.14603 | 0.00155  | 0.11853  |
| -0.02715 | 0.55843 | 0.029056 | 0.53109  | 0.01204  | 0.79526  | 0.022497 | 0.62774  | 0.152128 |
| -0.05988 | 0.19645 | 0.020739 | 0.65485  | 0.019448 | 0.67508  | 0.121626 | 0.00851  | 0.265966 |
| -0.09997 | 0.03078 | -0.07829 | 0.09106  | -0.10618 | 0.02174  | -0.05666 | 0.22165  | 0.133631 |
| -0.05504 | 0.23516 | -0.15975 | 0.00053  | -0.04859 | 0.2947   | -0.21007 | 4.68E-06 | 0.166641 |
| -0.09869 | 0.03299 | -0.13218 | 0.00422  | -0.13587 | 0.00326  | 0.002841 | 0.95117  | 0.181652 |

|          |         |          |          |          |          |          |          |          |
|----------|---------|----------|----------|----------|----------|----------|----------|----------|
| -0.13913 | 0.00258 | -0.07808 | 0.09192  | -0.24927 | 4.80E-08 | -0.09047 | 0.05071  | -0.05722 |
| -0.00849 | 0.85481 | -0.12513 | 0.00678  | 0.082197 | 0.07597  | -0.16006 | 0.00052  | 0.312719 |
| 0.020039 | 0.66579 | -0.01197 | 0.79639  | -0.02076 | 0.6545   | -0.04946 | 0.28613  | -0.0299  |
| -0.01039 | 0.82286 | 0.065495 | 0.15763  | -0.07993 | 0.08446  | 0.054894 | 0.23642  | -0.05354 |
| -0.03844 | 0.40718 | -0.06242 | 0.17811  | 0.01615  | 0.72777  | -0.14092 | 0.00227  | 0.159935 |
| 0.070728 | 0.12694 | 0.248078 | 5.58E-08 | 0.238897 | 1.75E-07 | 0.221218 | 1.38E-06 | 0.186066 |
| 0.013727 | 0.76733 | -0.11961 | 0.00968  | 0.132463 | 0.00414  | -0.19305 | 2.67E-05 | 0.287298 |
| -0.13339 | 0.00388 | -0.18878 | 4.03E-05 | -0.18723 | 4.67E-05 | -0.18408 | 6.29E-05 | 0.039414 |
| -0.00235 | 0.95958 | -0.15428 | 0.00082  | -0.08526 | 0.06563  | -0.09167 | 0.04773  | 0.132547 |
| -0.00511 | 0.91224 | 0.096155 | 0.03779  | 0.069207 | 0.13534  | 0.163857 | 0.00038  | 0.059483 |
| -0.09848 | 0.03336 | -0.04764 | 0.30427  | -0.04139 | 0.37222  | -0.09489 | 0.0404   | 0.050708 |
| 0.080205 | 0.08338 | 0.020198 | 0.66331  | 0.150353 | 0.00112  | 0.046825 | 0.31262  | 0.317246 |
| 0.05982  | 0.19691 | 0.014755 | 0.75046  | 0.071165 | 0.12461  | -0.02947 | 0.52523  | 0.09197  |
| 0.066635 | 0.15051 | 0.187224 | 4.68E-05 | 0.191744 | 3.03E-05 | 0.122564 | 0.00801  | -0.0605  |
| 0.015778 | 0.7338  | -0.02854 | 0.53847  | -0.00874 | 0.85063  | 0.11583  | 0.01225  | 0.252224 |
| -0.01104 | 0.81196 | -0.06219 | 0.17971  | 0.036142 | 0.43586  | -0.04831 | 0.29752  | 0.256518 |
| -0.022   | 0.6354  | -0.1413  | 0.00221  | 0.054011 | 0.24405  | -0.13666 | 0.00308  | 0.251504 |
| 0.025064 | 0.58901 | 0.053854 | 0.24543  | 0.069154 | 0.13564  | 0.021465 | 0.64359  | 0.167861 |
| -0.05788 | 0.21188 | -0.09713 | 0.03587  | -0.17111 | 0.0002   | -0.0063  | 0.89205  | 0.080328 |
| -0.07667 | 0.09795 | -0.04455 | 0.3367   | -0.23225 | 3.87E-07 | -0.11677 | 0.01156  | -0.00677 |
| -0.03054 | 0.51028 | -0.01844 | 0.69107  | -0.0629  | 0.1748   | -0.01903 | 0.68169  | 0.146999 |
| -0.05858 | 0.20634 | -0.00741 | 0.87305  | -0.04892 | 0.29141  | -0.01633 | 0.72493  | 0.145033 |
| -0.05669 | 0.22141 | -0.23177 | 4.10E-07 | -0.10172 | 0.02795  | -0.27981 | 7.56E-10 | 0.139743 |
| -0.04107 | 0.37586 | -0.07663 | 0.09814  | -0.03702 | 0.42482  | -0.14668 | 0.00148  | 0.09851  |
| 0.044727 | 0.33481 | -0.12737 | 0.00584  | 0.056279 | 0.22478  | -0.04814 | 0.29918  | 0.233754 |
| 0.0142   | 0.75955 | -0.00657 | 0.88732  | -0.04901 | 0.29052  | -0.02608 | 0.57397  | 0.005903 |
| 0.084947 | 0.06664 | 0.046328 | 0.31779  | 0.114185 | 0.01355  | -0.04549 | 0.32667  | -0.04721 |
| 0.055102 | 0.23464 | 0.148834 | 0.00126  | 0.166575 | 0.0003   | 0.175192 | 0.00014  | 0.336853 |
| -0.04549 | 0.32659 | -0.0791  | 0.08772  | -0.03521 | 0.44776  | -0.06023 | 0.19387  | 0.039272 |
| -0.03538 | 0.44567 | -0.00553 | 0.9052   | -0.09803 | 0.03418  | 0.041036 | 0.37626  | -0.16709 |
| -0.11219 | 0.01528 | -0.14306 | 0.00194  | -0.23851 | 1.83E-07 | -0.0711  | 0.12494  | 0.117325 |
| -0.04944 | 0.28634 | -0.0235  | 0.61244  | 0.072784 | 0.11624  | 0.077207 | 0.09562  | 0.252464 |
| -0.06701 | 0.14821 | -0.06902 | 0.1364   | -0.1108  | 0.01661  | -0.02752 | 0.55302  | 0.19293  |
| -0.03853 | 0.40608 | -0.10915 | 0.0183   | -0.15595 | 0.00072  | -0.06806 | 0.14198  | 0.051605 |
| 0.004743 | 0.91858 | -0.10986 | 0.01755  | -0.09452 | 0.04117  | -0.10013 | 0.0305   | 0.135071 |
| -0.04646 | 0.3164  | 0.048371 | 0.29689  | -0.03458 | 0.45596  | -0.04633 | 0.31782  | -0.0262  |
| -0.06694 | 0.14862 | -0.15359 | 0.00087  | -0.14267 | 0.002    | -0.18147 | 8.02E-05 | 0.177448 |
| 0.058697 | 0.20546 | -0.0443  | 0.3395   | 0.001381 | 0.97625  | -0.00331 | 0.94321  | 0.187492 |
| -0.04291 | 0.35483 | -0.12707 | 0.00596  | 0.037229 | 0.42218  | -0.18919 | 3.88E-05 | 0.076085 |
| -0.00435 | 0.92529 | -0.12248 | 0.00806  | 0.101438 | 0.02839  | -0.16162 | 0.00045  | 0.30555  |
| -0.01009 | 0.8279  | -0.08309 | 0.07283  | -0.03983 | 0.39045  | 0.059919 | 0.19617  | 0.265799 |
| -0.10598 | 0.02199 | -0.17236 | 0.00018  | -0.12552 | 0.00661  | -0.14377 | 0.00184  | 0.185748 |
| -0.05976 | 0.19739 | 0.001004 | 0.98274  | -0.0283  | 0.54183  | 0.035056 | 0.44979  | 0.146266 |
| -0.07445 | 0.10808 | 0.042218 | 0.36266  | -0.18356 | 6.60E-05 | 0.093195 | 0.04412  | 0.092155 |
| -0.09392 | 0.04249 | -0.02109 | 0.64942  | -0.15449 | 0.00081  | 0.11422  | 0.01352  | 0.175771 |

|          |          |          |          |          |          |          |          |          |
|----------|----------|----------|----------|----------|----------|----------|----------|----------|
| -0.11245 | 0.01505  | -0.05659 | 0.2222   | -0.10933 | 0.01811  | 0.013278 | 0.77473  | 0.124685 |
| -0.10364 | 0.02511  | 0.020871 | 0.65281  | -0.10839 | 0.01914  | 0.086828 | 0.06081  | 0.042811 |
| -0.04575 | 0.32389  | 0.086957 | 0.06042  | -0.00689 | 0.88192  | 0.030759 | 0.50728  | -0.0997  |
| -0.10146 | 0.02836  | -0.20634 | 6.94E-06 | -0.27242 | 2.16E-09 | -0.08437 | 0.06852  | 0.113849 |
| -0.05852 | 0.20687  | -0.0438  | 0.34492  | -0.06516 | 0.15979  | -0.01155 | 0.80338  | 0.250912 |
| -0.0711  | 0.12496  | -0.01213 | 0.79379  | -0.17324 | 0.00017  | 0.017755 | 0.70194  | 0.073023 |
| -0.05913 | 0.20216  | -0.06844 | 0.13971  | -0.04769 | 0.30375  | -0.03438 | 0.45852  | 0.226522 |
| -0.02431 | 0.6003   | -0.10607 | 0.02187  | 0.005599 | 0.90395  | -0.12367 | 0.00746  | 0.261777 |
| -0.01514 | 0.74423  | 0.05417  | 0.24267  | 0.000419 | 0.9928   | 0.034159 | 0.46147  | -0.11641 |
| 0.01911  | 0.68041  | -0.1244  | 0.00711  | 0.037562 | 0.41803  | -0.0886  | 0.0557   | 0.215561 |
| -0.13031 | 0.00479  | -0.0752  | 0.10461  | -0.27098 | 2.65E-09 | -0.00027 | 0.99528  | 0.054493 |
| -0.0051  | 0.91252  | -0.03781 | 0.41494  | 0.09001  | 0.05191  | -0.04194 | 0.3658   | 0.321432 |
| -0.10278 | 0.02635  | -0.03468 | 0.45464  | -0.04859 | 0.29471  | 0.056731 | 0.22108  | 0.159027 |
| -0.12389 | 0.00735  | -0.16412 | 0.00037  | -0.15184 | 0.001    | -0.18384 | 6.43E-05 | 0.129351 |
| -0.03784 | 0.41459  | -0.11368 | 0.01397  | -0.03025 | 0.51436  | 0.025025 | 0.58959  | 0.332128 |
| -0.028   | 0.54617  | 0.048273 | 0.29788  | -0.05287 | 0.25418  | 0.105689 | 0.02236  | 0.210937 |
| -0.0408  | 0.37905  | -0.1474  | 0.0014   | 0.043932 | 0.34349  | -0.14729 | 0.00141  | 0.245868 |
| -0.00881 | 0.84939  | -0.06597 | 0.15463  | -0.16277 | 0.00041  | -0.06533 | 0.15871  | 0.045644 |
| 0.093805 | 0.04275  | 0.163496 | 0.00039  | 0.077207 | 0.09562  | 0.226131 | 7.90E-07 | 0.229453 |
| 0.006921 | 0.88143  | -0.06377 | 0.16888  | 0.01639  | 0.72389  | 0.011215 | 0.809    | 0.291709 |
| -0.07561 | 0.10269  | 0.009865 | 0.83163  | -0.12176 | 0.00844  | 0.071466 | 0.12302  | 0.178636 |
| -0.08576 | 0.06406  | -0.15857 | 0.00058  | -0.11169 | 0.01574  | -0.14562 | 0.0016   | 0.177897 |
| -0.0058  | 0.90047  | -0.07404 | 0.11006  | 0.039561 | 0.39368  | -0.14581 | 0.00158  | 0.122022 |
| -0.0424  | 0.36058  | -0.13266 | 0.00408  | 0.061019 | 0.18806  | -0.08754 | 0.05871  | 0.280771 |
| -0.02071 | 0.65534  | 0.046091 | 0.32027  | -0.08166 | 0.07792  | 0.038766 | 0.40326  | 0.015855 |
| 0.055797 | 0.22879  | -0.05073 | 0.27392  | 0.106254 | 0.02165  | -0.06058 | 0.19127  | 0.230849 |
| -0.01172 | 0.80057  | 0.064137 | 0.16644  | 0.041424 | 0.37177  | 0.036124 | 0.43609  | 0.231496 |
| -0.15626 | 0.0007   | -0.09967 | 0.03128  | -0.23602 | 2.47E-07 | -0.14432 | 0.00177  | -0.117   |
| -0.04514 | 0.33042  | -0.0205  | 0.65866  | -0.14178 | 0.00213  | 0.018889 | 0.68391  | 0.127671 |
| -0.07563 | 0.1026   | -0.1433  | 0.00191  | -0.06748 | 0.14542  | -0.1769  | 0.00012  | 0.12793  |
| 0.025138 | 0.58791  | -0.13067 | 0.00468  | -0.0242  | 0.60185  | -0.08272 | 0.07413  | 0.266234 |
| -0.22042 | 1.51E-06 | -0.27171 | 2.39E-09 | -0.19797 | 1.64E-05 | -0.15912 | 0.00056  | 0.156304 |
| -0.07196 | 0.12045  | 0.082652 | 0.07436  | 0.015003 | 0.74642  | 0.230966 | 4.51E-07 | 0.216469 |
| -0.03158 | 0.496    | -0.04763 | 0.30439  | -0.15959 | 0.00054  | -0.04619 | 0.31923  | -0.10207 |
| -0.11142 | 0.016    | -0.13747 | 0.00291  | -0.20767 | 6.04E-06 | -0.1467  | 0.00148  | 0.124993 |
| 0.010552 | 0.82009  | -0.04284 | 0.35563  | 0.059111 | 0.20227  | -0.02715 | 0.55841  | 0.306491 |
| 0.074322 | 0.10871  | -0.09439 | 0.04147  | 0.128825 | 0.0053   | -0.01754 | 0.70541  | 0.166757 |
| -0.08218 | 0.07604  | -0.08623 | 0.06262  | -0.10139 | 0.02846  | -0.00144 | 0.97519  | 0.181202 |
| 0.040103 | 0.38722  | -0.05138 | 0.26778  | 0.008908 | 0.84775  | 0.022909 | 0.62145  | 0.015004 |
| -0.03626 | 0.43436  | -0.06858 | 0.13892  | -0.05722 | 0.21713  | -0.07768 | 0.0936   | 0.165967 |
| -0.02949 | 0.52492  | 0.016624 | 0.72011  | -0.12551 | 0.00661  | 0.024888 | 0.59164  | 0.062738 |
| -0.05407 | 0.24352  | -0.10959 | 0.01784  | -0.06094 | 0.18864  | -0.07778 | 0.09316  | 0.233771 |
| -0.07379 | 0.11126  | 0.043043 | 0.35335  | -0.05567 | 0.22986  | 0.059583 | 0.19869  | 0.063634 |
| -0.05093 | 0.27204  | -0.13027 | 0.00481  | -0.03168 | 0.49461  | -0.03633 | 0.43344  | 0.239526 |
| -0.0381  | 0.41135  | -0.01535 | 0.74072  | -0.06625 | 0.15287  | -0.07138 | 0.12346  | 0.029727 |

|          |         |          |          |          |          |          |          |          |
|----------|---------|----------|----------|----------|----------|----------|----------|----------|
| -0.07656 | 0.09845 | 0.076912 | 0.0969   | -0.11742 | 0.0111   | 0.137525 | 0.0029   | 0.163064 |
| 0.056423 | 0.2236  | 0.048918 | 0.29146  | -0.00482 | 0.9172   | 0.122018 | 0.0083   | 0.116605 |
| -0.13897 | 0.00262 | -0.12895 | 0.00526  | -0.12973 | 0.00499  | -0.05341 | 0.24939  | 0.069303 |
| -0.0215  | 0.64305 | 0.117634 | 0.01096  | 0.12614  | 0.00634  | 0.184132 | 6.26E-05 | 0.225614 |
| 0.036325 | 0.43354 | 0.159069 | 0.00056  | 0.021425 | 0.64422  | 0.160051 | 0.00052  | -0.02197 |
| -0.0555  | 0.23125 | 0.000442 | 0.9924   | -0.10531 | 0.02285  | 0.04668  | 0.31412  | 0.046529 |
| 0.031945 | 0.49103 | -0.12673 | 0.0061   | 0.07919  | 0.08737  | -0.21096 | 4.26E-06 | 0.221331 |
| -0.13512 | 0.00344 | -0.1021  | 0.02737  | -0.24283 | 1.08E-07 | -0.11626 | 0.01193  | 0.024367 |
| -0.03252 | 0.48321 | -0.12736 | 0.00585  | -0.02911 | 0.53027  | -0.09827 | 0.03375  | 0.110078 |
| -0.03203 | 0.48985 | -0.22341 | 1.08E-06 | -0.18908 | 3.92E-05 | -0.06798 | 0.14242  | 0.192621 |
| 0.008249 | 0.85888 | -0.07361 | 0.11214  | 0.01376  | 0.76679  | 0.025065 | 0.589    | 0.312483 |
| -0.07879 | 0.089   | -0.19635 | 1.92E-05 | -0.16899 | 0.00024  | -0.17269 | 0.00018  | 0.043302 |
| -0.00759 | 0.86999 | -0.10422 | 0.0243   | 0.061939 | 0.18148  | -0.17522 | 0.00014  | 0.202011 |
| -0.04912 | 0.28943 | -0.23445 | 2.98E-07 | -0.20801 | 5.82E-06 | -0.26459 | 6.39E-09 | 0.041491 |
| 0.067235 | 0.14686 | 0.305878 | 1.43E-11 | 0.168482 | 0.00025  | 0.245278 | 7.94E-08 | -0.14679 |
| -0.12372 | 0.00744 | -0.19285 | 2.72E-05 | -0.19859 | 1.54E-05 | -0.22504 | 8.96E-07 | -0.06422 |
| 0.009952 | 0.83016 | 0.059257 | 0.20116  | 0.022731 | 0.62416  | -0.0569  | 0.21968  | -0.20594 |
| -0.15851 | 0.00059 | -0.16165 | 0.00045  | -0.14355 | 0.00187  | -0.03648 | 0.43164  | 0.176164 |
| -0.0616  | 0.18391 | 0.037961 | 0.41311  | -0.19169 | 3.04E-05 | 0.086019 | 0.06326  | 0.013763 |
| -0.065   | 0.16079 | -0.0096  | 0.83605  | -0.00497 | 0.91461  | 0.025165 | 0.58751  | 0.23303  |
| -0.0808  | 0.08111 | -0.09747 | 0.03523  | -0.20226 | 1.06E-05 | -0.04579 | 0.32345  | 0.092453 |
| -0.04974 | 0.28342 | -0.09454 | 0.04114  | -0.03481 | 0.45293  | -0.10363 | 0.02513  | 0.213209 |
| 0.0039   | 0.93301 | 0.016599 | 0.72052  | -0.00492 | 0.91557  | -0.04587 | 0.32265  | -0.04958 |
| 0.043524 | 0.34799 | -0.11598 | 0.01214  | 0.120916 | 0.00891  | -0.13556 | 0.00333  | 0.361227 |
| 0.119885 | 0.00951 | 0.130956 | 0.00459  | 0.153313 | 0.00089  | 0.152835 | 0.00092  | -0.02426 |
| -0.17095 | 0.00021 | -0.19165 | 3.06E-05 | -0.10718 | 0.02052  | -0.14905 | 0.00124  | 0.090784 |
| 0.013274 | 0.77481 | 0.018138 | 0.69584  | 0.093739 | 0.04289  | -0.01716 | 0.71145  | 0.225373 |
| -0.02393 | 0.60598 | -0.04182 | 0.36726  | -0.00409 | 0.92982  | -0.04769 | 0.30379  | -0.12093 |
| -0.04815 | 0.29908 | -0.06127 | 0.18625  | -0.05732 | 0.21628  | 0.006179 | 0.89405  | 0.277441 |
| -0.02671 | 0.56481 | -0.17276 | 0.00018  | 0.079027 | 0.08803  | -0.18916 | 3.89E-05 | 0.248507 |
| -0.05934 | 0.20051 | -0.08648 | 0.06186  | -0.18883 | 4.01E-05 | -0.00082 | 0.98587  | 0.150769 |
| 0.025347 | 0.58481 | 0.047127 | 0.3095   | 0.128558 | 0.0054   | -0.03485 | 0.45245  | 0.158324 |
| -0.03663 | 0.42969 | -0.07656 | 0.09844  | -0.03091 | 0.50519  | -0.04074 | 0.37967  | 0.24616  |
| -0.07538 | 0.10374 | -0.05261 | 0.2565   | -0.18967 | 3.70E-05 | -0.03225 | 0.48693  | 0.174686 |
| -0.03775 | 0.41574 | -0.03017 | 0.51538  | -0.03459 | 0.45586  | 0.073681 | 0.1118   | 0.150317 |
| 0.005164 | 0.91137 | -0.0562  | 0.22544  | -0.10444 | 0.02401  | -0.15314 | 0.0009   | 0.126386 |
| -0.0248  | 0.593   | -0.11128 | 0.01614  | 0.044244 | 0.34007  | -0.16976 | 0.00023  | 0.222205 |
| 0.024037 | 0.60437 | -0.14164 | 0.00215  | -0.03306 | 0.47605  | -0.13037 | 0.00477  | 0.274876 |
| -0.03104 | 0.50341 | -0.11881 | 0.01018  | 0.000307 | 0.99472  | -0.09255 | 0.04562  | 0.340573 |
| 0.074899 | 0.10598 | -0.03366 | 0.46801  | 0.081601 | 0.07813  | -0.08318 | 0.07251  | 0.056972 |
| 0.050557 | 0.27558 | -0.06066 | 0.19066  | 0.030848 | 0.50604  | -0.03146 | 0.4977   | 0.22723  |
| -0.02886 | 0.53389 | -0.01449 | 0.75479  | -0.02859 | 0.53771  | 0.013002 | 0.7793   | 0.091192 |
| -0.11373 | 0.01393 | -0.10118 | 0.02879  | -0.04978 | 0.28302  | 0.024639 | 0.59535  | 0.236267 |
| -0.13811 | 0.00278 | -0.12772 | 0.00571  | -0.20344 | 9.38E-06 | -0.03997 | 0.38885  | 0.15888  |
| -0.09089 | 0.04964 | -0.09737 | 0.03541  | -0.05741 | 0.21557  | -0.08101 | 0.08033  | 0.12123  |

|          |          |          |          |          |          |          |          |          |
|----------|----------|----------|----------|----------|----------|----------|----------|----------|
| -0.07187 | 0.12089  | -0.03423 | 0.4605   | -0.03371 | 0.46741  | 0.009085 | 0.84476  | 0.198177 |
| -0.1815  | 8.00E-05 | -0.08542 | 0.06513  | -0.20032 | 1.29E-05 | -0.09189 | 0.04718  | 0.08996  |
| -0.08385 | 0.07026  | -0.01255 | 0.78678  | -0.06974 | 0.13234  | 0.050302 | 0.27801  | 0.106018 |
| -0.05378 | 0.24612  | -0.00038 | 0.9934   | -0.10021 | 0.03037  | 0.045435 | 0.32722  | 0.22097  |
| -0.11329 | 0.01431  | -0.13341 | 0.00387  | -0.20738 | 6.22E-06 | -0.13351 | 0.00385  | 0.063963 |
| -0.08554 | 0.06474  | -0.00666 | 0.88593  | -0.14726 | 0.00142  | 0.071524 | 0.12271  | 0.094483 |
| -0.09236 | 0.04605  | -0.07687 | 0.09709  | -0.12195 | 0.00834  | -0.06301 | 0.17402  | 0.114455 |
| -0.06659 | 0.15079  | -0.04165 | 0.36916  | -0.12396 | 0.00732  | 0.069114 | 0.13587  | 0.088382 |
| 0.053987 | 0.24427  | -0.13552 | 0.00334  | -0.00104 | 0.98211  | -0.00324 | 0.94439  | 0.353885 |
| -0.01692 | 0.71538  | -0.1317  | 0.00436  | -0.11671 | 0.0116   | -0.08933 | 0.05372  | -0.01196 |
| -0.03478 | 0.45337  | 0.140296 | 0.00238  | 0.025411 | 0.58386  | 0.139346 | 0.00254  | -0.01033 |
| -0.08948 | 0.05332  | -0.01772 | 0.70246  | -0.06959 | 0.13318  | -0.03157 | 0.49611  | 0.032523 |
| -0.0185  | 0.69005  | -0.13424 | 0.00366  | -0.06837 | 0.14014  | -0.13144 | 0.00444  | 0.108793 |
| -0.05179 | 0.264    | -0.17481 | 0.00015  | -0.02285 | 0.62237  | -0.07316 | 0.11435  | 0.320323 |
| -0.03133 | 0.49946  | -0.04861 | 0.29448  | -0.09817 | 0.03394  | 0.012576 | 0.78635  | 0.157882 |
| -0.11551 | 0.0125   | -0.1504  | 0.00111  | -0.11878 | 0.0102   | -0.14097 | 0.00226  | 0.195565 |
| -0.0568  | 0.22055  | -0.17622 | 0.00013  | -0.1226  | 0.00799  | -0.1861  | 5.21E-05 | 0.17422  |
| 0.001761 | 0.96972  | -0.02026 | 0.66236  | 0.01793  | 0.69916  | -0.01533 | 0.74111  | 0.07949  |
| -0.0741  | 0.10979  | -0.08614 | 0.06289  | -0.10467 | 0.02369  | -0.07332 | 0.11355  | -0.01022 |
| -0.06177 | 0.18265  | -0.10841 | 0.01911  | 0.029867 | 0.51968  | -0.09423 | 0.0418   | 0.263811 |
| -0.02569 | 0.57969  | 0.032221 | 0.48729  | 0.001839 | 0.96839  | -0.01955 | 0.67341  | 0.015336 |
| -0.02094 | 0.65181  | -0.06999 | 0.13096  | 0.007137 | 0.87774  | -0.06044 | 0.1923   | -0.16079 |
| -0.04785 | 0.30213  | -0.13257 | 0.00411  | -0.00518 | 0.91116  | -0.18058 | 8.70E-05 | 0.210433 |
| -0.02697 | 0.56104  | -0.07059 | 0.1277   | -0.03408 | 0.46247  | -0.02679 | 0.56362  | 0.340843 |
| -0.00683 | 0.88296  | 0.029357 | 0.52684  | -0.0907  | 0.05014  | 0.041336 | 0.37279  | 0.054602 |
| -0.03121 | 0.5011   | -0.2006  | 1.26E-05 | -0.043   | 0.35386  | -0.11493 | 0.01295  | 0.172018 |
| 0.015088 | 0.74503  | -0.02467 | 0.5949   | 0.023372 | 0.61441  | -0.07774 | 0.09334  | 0.11617  |
| -0.11873 | 0.01023  | -0.13556 | 0.00333  | -0.20181 | 1.11E-05 | -0.165   | 0.00034  | -0.25396 |
| -0.06521 | 0.15948  | -0.12957 | 0.00504  | -0.08379 | 0.07046  | -0.18201 | 7.62E-05 | 0.091828 |
| -0.12165 | 0.0085   | 0.025976 | 0.57553  | -0.13091 | 0.0046   | 0.036521 | 0.43106  | 0.01026  |
| -0.09601 | 0.03808  | -0.10411 | 0.02445  | -0.07688 | 0.09704  | -0.07022 | 0.12972  | 0.185908 |
| 0.019271 | 0.67787  | -0.15447 | 0.00081  | 0.00309  | 0.94689  | -0.05617 | 0.2257   | 0.292379 |
| -0.00824 | 0.85908  | -0.08442 | 0.06834  | 0.0491   | 0.28967  | -0.11003 | 0.01738  | 0.221119 |
| -0.07594 | 0.10121  | 0.026598 | 0.56641  | -0.15585 | 0.00073  | -0.01311 | 0.77756  | 0.040977 |
| -0.13606 | 0.00322  | -0.18077 | 8.55E-05 | -0.17644 | 0.00013  | -0.16503 | 0.00034  | 0.214666 |
| 0.127411 | 0.00583  | -0.0179  | 0.6996   | 0.05261  | 0.25652  | -0.0593  | 0.20084  | -0.00953 |
| -0.03675 | 0.42815  | 0.029051 | 0.53115  | 0.029165 | 0.52954  | 0.090926 | 0.04956  | 0.18312  |
| -0.12451 | 0.00706  | -0.11309 | 0.01448  | -0.05585 | 0.2283   | -0.0937  | 0.04299  | 0.125324 |
| -0.04377 | 0.34528  | -0.07364 | 0.11199  | -0.00852 | 0.85437  | 0.01012  | 0.82733  | 0.21897  |
| 0.036576 | 0.43037  | -0.10095 | 0.02916  | -0.11246 | 0.01504  | -0.0587  | 0.20545  | 0.181939 |
| -0.0537  | 0.24675  | -0.03992 | 0.38938  | -0.04977 | 0.28317  | 0.058247 | 0.20896  | 0.173232 |
| -0.01034 | 0.82361  | -0.08448 | 0.06814  | 0.010339 | 0.82366  | -0.09477 | 0.04065  | 0.151575 |
| 0.011154 | 0.81003  | 0.022025 | 0.63497  | 0.035754 | 0.44081  | 0.050891 | 0.27241  | 0.252576 |
| 0.104756 | 0.02358  | -0.05128 | 0.26875  | 0.163475 | 0.00039  | -0.05709 | 0.21816  | 0.301179 |
| 0.016752 | 0.71804  | 0.233037 | 3.53E-07 | 0.093179 | 0.04416  | 0.126072 | 0.00637  | -0.17575 |



|          |         |          |          |          |          |          |          |          |
|----------|---------|----------|----------|----------|----------|----------|----------|----------|
| -0.04993 | 0.28158 | 0.012055 | 0.79499  | -0.0498  | 0.2828   | 0.066914 | 0.1488   | 0.110158 |
| -0.14601 | 0.00156 | -0.06015 | 0.19447  | -0.1148  | 0.01305  | -0.01511 | 0.74468  | 0.089563 |
| -0.08828 | 0.05659 | 0.045535 | 0.32616  | -0.11695 | 0.01143  | 0.011702 | 0.80088  | -0.10589 |
| 0.020576 | 0.6574  | -0.11046 | 0.01694  | 0.065539 | 0.15735  | -0.15431 | 0.00082  | 0.085464 |
| 0.036418 | 0.43237 | -0.04048 | 0.3828   | 0.124627 | 0.00701  | -0.12126 | 0.00871  | 0.16058  |
| -0.00067 | 0.98848 | -0.06389 | 0.16806  | 0.033355 | 0.4721   | -0.15166 | 0.00101  | 0.111982 |
| -0.15737 | 0.00064 | -0.17788 | 0.00011  | -0.25365 | 2.73E-08 | -0.09816 | 0.03394  | 0.021928 |
| 0.07329  | 0.11372 | -0.09972 | 0.0312   | 0.012969 | 0.77984  | -0.0831  | 0.07279  | 0.162995 |
| 0.048227 | 0.29834 | -0.06054 | 0.19157  | -0.0176  | 0.70446  | -0.06071 | 0.19033  | 0.173461 |
| -0.02956 | 0.52399 | -0.13971 | 0.00248  | -0.01481 | 0.74954  | -0.11984 | 0.00954  | 0.201886 |
| -0.15525 | 0.00076 | -0.25291 | 3.00E-08 | -0.23287 | 3.60E-07 | -0.1666  | 0.0003   | 0.119043 |
| 0.007152 | 0.8775  | -0.14768 | 0.00137  | 0.020716 | 0.65522  | -0.12974 | 0.00498  | 0.239825 |
| 0.014534 | 0.75408 | -0.06635 | 0.15226  | -0.03601 | 0.4375   | -0.08228 | 0.07567  | 0.071324 |
| -0.00979 | 0.83293 | -0.05786 | 0.21201  | -0.10658 | 0.02125  | -0.16248 | 0.00042  | -0.17181 |
| -0.02594 | 0.57609 | -0.05827 | 0.20875  | 0.040904 | 0.37781  | 0.026616 | 0.56615  | 0.250968 |
| -0.12168 | 0.00848 | -0.05843 | 0.20756  | -0.09252 | 0.04568  | -0.07323 | 0.11403  | 0.164714 |
| -0.00257 | 0.95579 | -0.07973 | 0.08523  | 0.026516 | 0.5676   | -0.15122 | 0.00105  | 0.119348 |
| -0.10069 | 0.02958 | -0.05196 | 0.26249  | -0.12295 | 0.00781  | -0.0579  | 0.2117   | 0.132039 |
| 0.074155 | 0.10951 | -0.12618 | 0.00633  | -0.03526 | 0.44719  | -0.09041 | 0.05088  | 0.146023 |
| 0.072242 | 0.11899 | -0.06039 | 0.19264  | 0.030701 | 0.50808  | -0.05525 | 0.23338  | 0.110562 |
| -0.14249 | 0.00202 | -0.08677 | 0.06097  | -0.14233 | 0.00205  | -0.14458 | 0.00173  | 0.047764 |
| -0.06206 | 0.18064 | 0.204016 | 8.84E-06 | 0.041762 | 0.36788  | 0.182476 | 7.31E-05 | -0.17241 |
| 0.066629 | 0.15054 | -0.05046 | 0.27652  | 0.011155 | 0.81     | -0.13183 | 0.00432  | 0.024039 |
| 6.23E-05 | 0.99893 | -0.01242 | 0.78889  | -0.11172 | 0.01572  | -0.09232 | 0.04616  | -0.08689 |
| -0.00026 | 0.99556 | -0.14619 | 0.00154  | -0.08641 | 0.06206  | -0.18654 | 4.99E-05 | 0.01113  |
| 0.004757 | 0.91834 | 0.042778 | 0.35632  | -0.06583 | 0.15552  | -0.06502 | 0.16065  | -0.04869 |
| 0.013219 | 0.77572 | -0.10663 | 0.02118  | 0.087965 | 0.0575   | -0.22378 | 1.03E-06 | -0.00606 |
| 0.073893 | 0.11077 | 0.02324  | 0.61641  | 0.009263 | 0.84176  | -0.10417 | 0.02438  | 0.023238 |
| 0.055703 | 0.22958 | 0.07712  | 0.096    | 0.1406   | 0.00232  | -0.13789 | 0.00283  | -0.04963 |
| 0.036752 | 0.42815 | 0.033995 | 0.46363  | 0.047064 | 0.31016  | -0.0854  | 0.06519  | -0.01971 |
| 0.021155 | 0.64839 | -0.10104 | 0.02902  | 0.142224 | 0.00206  | -0.21447 | 2.91E-06 | 0.075569 |
| 0.03247  | 0.48394 | 0.068682 | 0.13834  | 0.106586 | 0.02124  | -0.12406 | 0.00727  | 0.088983 |
| 0.003022 | 0.94808 | -0.01967 | 0.67159  | 0.071236 | 0.12423  | -0.10637 | 0.0215   | 0.068255 |
| -0.11295 | 0.0146  | -0.02204 | 0.63468  | -0.08651 | 0.06175  | 0.165935 | 0.00032  | 0.125477 |
| 0.00224  | 0.96149 | -0.12231 | 0.00814  | 0.034282 | 0.45986  | -0.25545 | 2.16E-08 | 0.110438 |
| 0.114883 | 0.01298 | 0.242344 | 1.14E-07 | 0.103324 | 0.02556  | 0.171195 | 0.0002   | -0.06273 |
| -0.09061 | 0.05036 | -0.09927 | 0.03196  | -0.20877 | 5.37E-06 | -0.00362 | 0.93773  | 0.016673 |
| -0.03777 | 0.41541 | 0.144012 | 0.00181  | 0.074981 | 0.1056   | 0.217683 | 2.05E-06 | -0.13459 |
| 0.066009 | 0.15439 | -0.04685 | 0.31235  | 0.141574 | 0.00216  | -0.15748 | 0.00064  | 0.057624 |
| 0.036467 | 0.43174 | -0.1596  | 0.00054  | 0.106861 | 0.0209   | -0.28667 | 2.77E-10 | 0.170222 |
| 0.031388 | 0.49863 | -0.12215 | 0.00823  | 0.081044 | 0.08019  | -0.2607  | 1.08E-08 | 0.10119  |
| 0.062401 | 0.17824 | -0.05198 | 0.26223  | 0.194508 | 2.31E-05 | -0.20798 | 5.84E-06 | 0.106107 |
| 0.033783 | 0.46642 | 0.000583 | 0.98997  | 0.09311  | 0.04431  | -0.11604 | 0.01209  | 0.168965 |
| 0.054584 | 0.23908 | -0.05428 | 0.2417   | 0.151188 | 0.00105  | -0.16063 | 0.00049  | 0.164374 |
| 0.029649 | 0.52274 | -0.04632 | 0.31791  | 0.144453 | 0.00175  | -0.12554 | 0.0066   | 0.176968 |

|          |          |          |          |           |          |          |          |          |
|----------|----------|----------|----------|-----------|----------|----------|----------|----------|
| 0.054214 | 0.24228  | -0.05198 | 0.26226  | -0.0375   | 0.41882  | -0.15789 | 0.00062  | 0.04989  |
| 0.042604 | 0.35828  | -0.11491 | 0.01296  | -0.0973   | 0.03556  | -0.16942 | 0.00024  | -0.13277 |
| 0.010613 | 0.81907  | -0.07947 | 0.08626  | 0.081772  | 0.07751  | -0.18588 | 5.31E-05 | 0.02397  |
| 0.068429 | 0.1398   | -0.06193 | 0.18151  | -6.02E-05 | 0.99896  | -0.1094  | 0.01803  | 0.121831 |
| 0.118539 | 0.01035  | 0.107905 | 0.01968  | 0.156717  | 0.00068  | -0.02188 | 0.63714  | 0.099674 |
| 0.034408 | 0.45821  | -0.07451 | 0.10784  | 0.017911  | 0.69945  | -0.1884  | 4.18E-05 | 0.051392 |
| 0.192397 | 2.84E-05 | 0.233161 | 3.48E-07 | 0.372742  | 7.70E-17 | 0.065529 | 0.15741  | 0.126815 |
| 0.041108 | 0.37543  | -0.00597 | 0.8977   | -0.00245  | 0.9578   | -0.05592 | 0.2278   | 0.009011 |
| 0.058437 | 0.20748  | -0.00557 | 0.90438  | 0.04452   | 0.33706  | -0.06298 | 0.17422  | 0.120409 |
| -0.03956 | 0.39374  | -0.0668  | 0.14949  | 0.068453  | 0.13966  | -0.17525 | 0.00014  | 0.149105 |
| -0.00292 | 0.94986  | -0.06473 | 0.16258  | 0.017927  | 0.69921  | -0.20262 | 1.02E-05 | 0.123956 |
| 0.060683 | 0.19051  | -0.04892 | 0.29143  | 0.107578  | 0.02006  | -0.21563 | 2.57E-06 | 0.044647 |
| 0.030467 | 0.51132  | 0.070962 | 0.12569  | 0.009864  | 0.83164  | -0.04508 | 0.33098  | 0.046845 |
| 0.077482 | 0.09444  | 0.010986 | 0.81282  | 0.205847  | 7.31E-06 | -0.05214 | 0.2608   | 0.243    |
| 0.001069 | 0.98163  | 0.018204 | 0.69478  | -0.06665  | 0.15041  | -0.07508 | 0.10514  | -0.01035 |
| 0.034307 | 0.45954  | -0.08723 | 0.05961  | 0.109519  | 0.01791  | -0.23818 | 1.90E-07 | 0.10235  |
| -0.00976 | 0.83345  | 0.033744 | 0.46693  | -0.00275  | 0.95274  | -0.04246 | 0.35993  | -0.05738 |
| 0.00734  | 0.87431  | -0.06671 | 0.15003  | -0.04177  | 0.36779  | -0.14262 | 0.002    | -0.07606 |
| -0.03029 | 0.51379  | -0.11129 | 0.01613  | -0.01779  | 0.70137  | -0.13814 | 0.00278  | 0.041349 |
| -0.02673 | 0.5645   | -0.10341 | 0.02543  | 0.04675   | 0.3134   | -0.22919 | 5.55E-07 | 0.088028 |
| 0.021398 | 0.64463  | -0.10992 | 0.01749  | 0.099129  | 0.03221  | -0.24837 | 5.38E-08 | 0.068748 |
| 0.052538 | 0.25718  | -0.04526 | 0.3291   | 0.163542  | 0.00039  | -0.12627 | 0.00629  | 0.20973  |
| 0.012936 | 0.78038  | -0.07457 | 0.10751  | 0.028135  | 0.54419  | -0.1768  | 0.00012  | 0.117093 |
| -0.00659 | 0.88705  | -0.07013 | 0.13021  | -0.0076   | 0.86984  | -0.17802 | 0.00011  | -0.01194 |
| 0.060864 | 0.18919  | 0.0752   | 0.10458  | 0.148643  | 0.00128  | -0.09927 | 0.03196  | -0.00581 |
| 0.078106 | 0.09181  | 0.000404 | 0.99306  | 0.133691  | 0.0038   | -0.108   | 0.01957  | 0.038922 |
| 0.023897 | 0.60647  | -0.03107 | 0.503    | -0.09852  | 0.03329  | -0.09269 | 0.04528  | 0.078517 |
| 0.028283 | 0.54208  | -0.12078 | 0.00898  | 0.072391  | 0.11823  | -0.26325 | 7.66E-09 | -0.0181  |
| 0.021787 | 0.63863  | 0.168567 | 0.00025  | 0.114039  | 0.01367  | 0.30021  | 3.51E-11 | 0.037074 |
| 0.032676 | 0.48117  | -0.06329 | 0.17212  | 0.129953  | 0.00491  | -0.19924 | 1.44E-05 | 0.016309 |
| -0.04103 | 0.37631  | -0.16165 | 0.00045  | 0.050227  | 0.27872  | -0.23317 | 3.47E-07 | 0.249035 |
| 0.060374 | 0.19279  | -0.01558 | 0.73699  | 0.146564  | 0.00149  | -0.10396 | 0.02466  | 0.167527 |
| 0.003343 | 0.94257  | -0.11642 | 0.01181  | -0.03238  | 0.48518  | -0.20303 | 9.78E-06 | 0.140953 |
| 0.066623 | 0.15058  | -0.06614 | 0.1536   | 0.131289  | 0.00448  | -0.17105 | 0.0002   | 0.087003 |
| 0.045648 | 0.32495  | -0.0309  | 0.50534  | -0.07077  | 0.12672  | -0.08885 | 0.05503  | -0.11011 |
| 0.046482 | 0.31619  | -0.05027 | 0.27829  | 0.110526  | 0.01688  | -0.2231  | 1.12E-06 | 0.071372 |
| 0.229647 | 5.26E-07 | 0.073557 | 0.1124   | 0.366341  | 2.80E-16 | 0.017745 | 0.7021   | 0.093922 |
| 0.025774 | 0.57849  | -0.08728 | 0.05948  | 0.018276  | 0.69364  | -0.1291  | 0.00521  | 0.044577 |
| -0.02996 | 0.5184   | -0.07457 | 0.10751  | -0.08832  | 0.05648  | -0.14921 | 0.00122  | -0.0045  |
| 0.019595 | 0.67277  | 0.298353 | 4.68E-11 | 0.166756  | 0.0003   | 0.340578 | 3.80E-14 | 0.137004 |
| -0.01531 | 0.74134  | 0.018163 | 0.69543  | -0.00367  | 0.93702  | -0.0806  | 0.08187  | -0.0342  |
| 0.026885 | 0.56223  | 0.046678 | 0.31414  | -0.01895  | 0.68302  | -0.07394 | 0.11054  | -0.03537 |
| 0.035677 | 0.44179  | -0.07265 | 0.11693  | 0.178867  | 0.0001   | -0.15549 | 0.00075  | 0.240308 |
| -0.06336 | 0.17163  | 0.125379 | 0.00667  | -0.0311   | 0.50264  | 0.162579 | 0.00042  | -0.12021 |
| 0.084285 | 0.06879  | -0.02785 | 0.54829  | 0.216136  | 2.43E-06 | -0.15675 | 0.00068  | 0.120689 |

|          |         |          |          |          |          |          |          |          |
|----------|---------|----------|----------|----------|----------|----------|----------|----------|
| 0.050342 | 0.27763 | 0.042418 | 0.36039  | 0.144913 | 0.00169  | -0.06035 | 0.19296  | 0.079057 |
| 0.055768 | 0.22903 | 0.112174 | 0.0153   | 0.143983 | 0.00181  | 0.019473 | 0.67469  | 0.222133 |
| 0.137113 | 0.00299 | 0.044299 | 0.33947  | 0.331195 | 2.04E-13 | -0.08505 | 0.06632  | 0.16575  |
| 0.002283 | 0.96076 | -0.1452  | 0.00166  | 0.082847 | 0.07368  | -0.2684  | 3.79E-09 | 0.086127 |
| 0.004174 | 0.92833 | -0.06581 | 0.15566  | 0.134207 | 0.00367  | -0.24585 | 7.39E-08 | 0.166932 |
| -0.0299  | 0.51918 | -0.13747 | 0.00291  | 0.005667 | 0.90279  | -0.20567 | 7.44E-06 | 0.030264 |
| -0.00205 | 0.96472 | -0.05094 | 0.27199  | 0.094905 | 0.04036  | -0.16553 | 0.00033  | 0.165261 |
| 0.06517  | 0.15971 | -0.0855  | 0.06487  | 0.125046 | 0.00682  | -0.13253 | 0.00412  | 0.291854 |
| 0.100875 | 0.02928 | 0.111782 | 0.01566  | 0.267082 | 4.54E-09 | -0.06901 | 0.13649  | 0.047193 |
| 0.031547 | 0.49646 | -0.03522 | 0.44771  | 0.087398 | 0.05913  | -0.18902 | 3.94E-05 | 0.089176 |
| 0.04243  | 0.36026 | -0.12505 | 0.00682  | 0.081094 | 0.08001  | -0.22029 | 1.53E-06 | 0.146323 |
| 0.02045  | 0.65937 | -0.06329 | 0.17213  | 0.146205 | 0.00153  | -0.15322 | 0.00089  | 0.076933 |
| -0.02324 | 0.61645 | -0.09103 | 0.04931  | 0.022781 | 0.6234   | -0.18208 | 7.58E-05 | 0.156041 |
| 0.032648 | 0.48154 | 0.091526 | 0.04807  | 0.083154 | 0.07261  | -0.06851 | 0.13934  | -0.05285 |
| 0.001708 | 0.97063 | -0.09947 | 0.03162  | -0.03733 | 0.42094  | -0.19357 | 2.53E-05 | -0.04313 |
| 0.047507 | 0.30562 | -0.05905 | 0.20271  | -0.08141 | 0.07882  | -0.1892  | 3.87E-05 | -0.01017 |
| 0.056612 | 0.22205 | 0.088658 | 0.05555  | -0.00991 | 0.83086  | -0.05715 | 0.21765  | -0.01898 |
| 0.024037 | 0.60437 | -0.10743 | 0.02023  | 0.139491 | 0.00252  | -0.27511 | 1.48E-09 | 0.099529 |
| 0.072827 | 0.11602 | 0.019719 | 0.67081  | 0.145811 | 0.00158  | -0.05814 | 0.2098   | 0.094311 |
| 0.088664 | 0.05553 | -0.00384 | 0.93399  | 0.189233 | 3.86E-05 | -0.10428 | 0.02422  | 0.081556 |
| 0.061487 | 0.18469 | -0.08252 | 0.07484  | 0.143939 | 0.00182  | -0.17551 | 0.00014  | 0.173606 |
| -0.0155  | 0.73836 | -0.02403 | 0.60441  | -0.00089 | 0.98472  | -0.08926 | 0.05391  | 0.021253 |
| -0.00737 | 0.87381 | -0.13969 | 0.00248  | 0.062467 | 0.17778  | -0.19801 | 1.63E-05 | 0.107888 |
| 0.098734 | 0.03291 | 0.03331  | 0.47269  | 0.146673 | 0.00148  | 0.033424 | 0.47118  | 0.252786 |
| 0.012501 | 0.7876  | -0.10666 | 0.02115  | 0.041681 | 0.3688   | -0.21008 | 4.67E-06 | 0.092672 |
| 0.022925 | 0.6212  | -0.05096 | 0.27178  | 0.149862 | 0.00116  | -0.11511 | 0.0128   | 0.209938 |
| -0.02295 | 0.62089 | -0.03167 | 0.4948   | 0.112183 | 0.01529  | -0.17344 | 0.00017  | 0.030495 |
| 0.039964 | 0.38887 | -0.13631 | 0.00316  | -0.02268 | 0.625    | -0.2039  | 8.94E-06 | 0.176641 |
| 0.04347  | 0.3486  | -0.10987 | 0.01755  | 0.08683  | 0.0608   | -0.20038 | 1.28E-05 | 0.138629 |
| -0.02234 | 0.63008 | -0.05301 | 0.25288  | 0.111743 | 0.0157   | -0.1231  | 0.00774  | 0.15834  |
| 0.011071 | 0.81141 | -0.13106 | 0.00456  | -0.07767 | 0.09364  | -0.20567 | 7.44E-06 | -0.03734 |
| 0.045174 | 0.33    | 0.085494 | 0.0649   | 0.133903 | 0.00374  | -0.04245 | 0.36002  | 4.84E-05 |
| 0.08663  | 0.0614  | -0.0616  | 0.18388  | 0.009747 | 0.83361  | -0.09526 | 0.03962  | 0.162826 |
| 0.084879 | 0.06686 | -0.06822 | 0.14101  | 0.172305 | 0.00018  | -0.22213 | 1.25E-06 | 0.023342 |
| 0.07343  | 0.11303 | 0.034406 | 0.45824  | 0.164114 | 0.00037  | -0.03467 | 0.4548   | 0.244666 |
| 0.054464 | 0.24012 | 0.024726 | 0.59405  | 0.052144 | 0.26076  | -0.07372 | 0.11162  | 0.128876 |
| -0.00037 | 0.99363 | -0.05542 | 0.23197  | 0.0005   | 0.9914   | -0.18088 | 8.46E-05 | 0.083579 |
| 0.030912 | 0.50516 | -0.24783 | 5.76E-08 | -0.01316 | 0.77662  | -0.32028 | 1.34E-12 | 0.062705 |
| -0.02179 | 0.63853 | -0.03884 | 0.40239  | 2.17E-05 | 0.99963  | -0.116   | 0.01213  | 0.080033 |
| -0.00179 | 0.96928 | -0.1124  | 0.01509  | -0.10776 | 0.01984  | -0.15829 | 0.0006   | -0.11274 |
| 0.062077 | 0.18051 | -0.16537 | 0.00033  | 0.064395 | 0.16474  | -0.28046 | 6.88E-10 | 0.006626 |
| 0.041901 | 0.36628 | 0.108309 | 0.01922  | 0.199389 | 1.42E-05 | 0.040725 | 0.3799   | 0.237457 |
| 0.014161 | 0.7602  | -0.07878 | 0.08903  | 0.005905 | 0.89874  | -0.2308  | 4.60E-07 | 0.045548 |
| 0.076843 | 0.0972  | -0.07337 | 0.11332  | -0.03743 | 0.41972  | -0.1734  | 0.00017  | 0.132721 |
| 0.00407  | 0.93009 | -0.01877 | 0.68578  | -0.01553 | 0.73782  | -0.11099 | 0.01641  | -0.03775 |

|          |         |          |          |          |          |          |          |          |
|----------|---------|----------|----------|----------|----------|----------|----------|----------|
| 0.098436 | 0.03345 | -0.0284  | 0.54043  | 0.157585 | 0.00063  | -0.1061  | 0.02184  | 0.190659 |
| -0.03936 | 0.39605 | -0.08322 | 0.07239  | -0.09592 | 0.03826  | -0.23731 | 2.12E-07 | -0.09577 |
| 0.00604  | 0.89642 | -0.10222 | 0.02718  | 0.120791 | 0.00898  | -0.18147 | 8.02E-05 | 0.266736 |
| 0.076356 | 0.09934 | 0.046328 | 0.31779  | 0.085402 | 0.06519  | -0.06235 | 0.17859  | -0.02255 |
| 0.075064 | 0.10521 | -0.0887  | 0.05543  | 0.188033 | 4.33E-05 | -0.24807 | 5.59E-08 | 0.136092 |
| 0.101189 | 0.02878 | 0.024313 | 0.60023  | 0.228357 | 6.11E-07 | -0.12383 | 0.00738  | -0.01865 |
| 0.066319 | 0.15246 | -0.03019 | 0.51513  | 0.132953 | 0.004    | -0.22431 | 9.73E-07 | -0.00746 |
| 0.113419 | 0.01419 | -0.02746 | 0.5539   | 0.178117 | 0.00011  | -0.12041 | 0.0092   | 0.112138 |
| 0.074541 | 0.10767 | 0.005435 | 0.90676  | 0.067264 | 0.14669  | -0.06892 | 0.13698  | 0.030147 |
| 0.04085  | 0.37844 | 0.042578 | 0.35859  | 0.087784 | 0.05801  | -0.04894 | 0.29121  | 0.183962 |
| -0.03036 | 0.51283 | -0.14688 | 0.00146  | -0.08528 | 0.06558  | -0.28079 | 6.56E-10 | -0.08379 |
| 0.063488 | 0.17078 | -0.0584  | 0.20775  | 0.104028 | 0.02457  | -0.23416 | 3.09E-07 | 0.015953 |
| 0.070715 | 0.12702 | -0.0177  | 0.70279  | 0.05825  | 0.20894  | -0.18796 | 4.36E-05 | -0.00798 |
| 0.006607 | 0.88677 | 0.007677 | 0.86858  | 0.068535 | 0.13919  | -0.15108 | 0.00106  | 0.018689 |
| -0.00602 | 0.89675 | -0.09208 | 0.04674  | -0.00026 | 0.99556  | -0.18228 | 7.44E-05 | 0.109715 |
| 0.008835 | 0.84899 | -0.05167 | 0.26511  | 0.090859 | 0.04973  | -0.10224 | 0.02716  | 0.152135 |
| -0.04653 | 0.31564 | -0.09279 | 0.04505  | -0.07469 | 0.10697  | -0.18781 | 4.43E-05 | 0.08682  |
| 0.109835 | 0.01758 | 0.021704 | 0.63991  | 0.17276  | 0.00018  | -0.09964 | 0.03134  | 0.204807 |
| -0.05691 | 0.21961 | 0.136385 | 0.00314  | -0.00747 | 0.87205  | 0.281853 | 5.62E-10 | 0.000625 |
| 0.034985 | 0.45071 | -0.12486 | 0.0069   | 0.063392 | 0.17143  | -0.20228 | 1.06E-05 | 0.315167 |
| 0.082851 | 0.07366 | 0.047376 | 0.30696  | 0.145287 | 0.00164  | -0.07079 | 0.12661  | 0.146571 |
| 0.009465 | 0.83835 | -0.13094 | 0.00459  | 0.015423 | 0.73957  | -0.18366 | 6.55E-05 | 0.168994 |
| 0.028531 | 0.53854 | -0.08052 | 0.08219  | 0.115155 | 0.01277  | -0.21588 | 2.50E-06 | 0.010304 |
| 0.044249 | 0.34002 | -0.0799  | 0.08458  | 0.077114 | 0.09602  | -0.22379 | 1.03E-06 | 0.113258 |
| 0.035601 | 0.44277 | -0.03985 | 0.39018  | 0.17642  | 0.00013  | -0.20662 | 6.74E-06 | 0.130205 |
| 0.084942 | 0.06665 | -0.06406 | 0.16697  | 0.159705 | 0.00053  | -0.21284 | 3.48E-06 | 0.037695 |
| 0.055864 | 0.22822 | -0.15805 | 0.00061  | 0.077258 | 0.0954   | -0.26112 | 1.02E-08 | 0.138849 |
| 0.16563  | 0.00032 | 0.209473 | 4.99E-06 | 0.191297 | 3.16E-05 | 0.130856 | 0.00462  | 0.111414 |
| 0.015454 | 0.73906 | -0.21157 | 3.98E-06 | 0.020824 | 0.65353  | -0.23402 | 3.14E-07 | 0.080074 |
| 0.051924 | 0.26278 | 0.116079 | 0.01206  | 0.098031 | 0.03418  | -0.0609  | 0.18892  | -0.09047 |
| 0.005124 | 0.91206 | -0.1376  | 0.00289  | 0.093954 | 0.04242  | -0.20998 | 4.72E-06 | 0.139264 |
| 0.051556 | 0.26619 | -0.06354 | 0.17044  | 0.089619 | 0.05294  | -0.21578 | 2.52E-06 | 0.125893 |
| -0.00827 | 0.85856 | 0.005745 | 0.90145  | 0.104579 | 0.02381  | -0.079   | 0.08814  | 0.169048 |
| 0.0389   | 0.40163 | -0.00428 | 0.92647  | 0.099551 | 0.03148  | -0.02187 | 0.6374   | 0.217439 |
| -0.01578 | 0.73382 | -0.09287 | 0.04487  | 0.000339 | 0.99416  | -0.26539 | 5.73E-09 | -0.12291 |
| 0.035572 | 0.44314 | -0.01634 | 0.72468  | 0.167866 | 0.00027  | -0.10806 | 0.0195   | 0.107726 |
| 0.006683 | 0.88546 | -0.02218 | 0.63257  | 0.13975  | 0.00247  | -0.17226 | 0.00018  | 0.182149 |
| -0.00544 | 0.90675 | -0.04205 | 0.36458  | 0.036658 | 0.42933  | -0.21976 | 1.63E-06 | 0.061179 |
| 0.005246 | 0.90997 | -0.12115 | 0.00877  | 0.061727 | 0.18298  | -0.18786 | 4.40E-05 | 0.201639 |
| 0.163092 | 0.0004  | -0.02651 | 0.56767  | 0.277672 | 1.03E-09 | -0.10182 | 0.02779  | 0.172967 |
| 0.016082 | 0.72888 | -0.0468  | 0.31288  | -0.02295 | 0.6208   | -0.1226  | 0.00799  | 0.036865 |
| 0.047747 | 0.30317 | 0.087457 | 0.05896  | 0.078877 | 0.08864  | -0.0377  | 0.41637  | -0.07558 |
| 0.083122 | 0.07272 | 0.019995 | 0.66648  | 0.257552 | 1.64E-08 | -0.14844 | 0.00129  | 0.218401 |
| -0.02441 | 0.5987  | -0.14382 | 0.00183  | 0.075205 | 0.10456  | -0.26876 | 3.61E-09 | 0.187715 |
| -0.00711 | 0.8783  | -0.05831 | 0.20846  | 0.070524 | 0.12805  | -0.20957 | 4.93E-06 | 0.108228 |

|          |         |          |          |          |          |          |          |          |
|----------|---------|----------|----------|----------|----------|----------|----------|----------|
| 0.036237 | 0.43466 | -0.13115 | 0.00453  | 0.060411 | 0.19251  | -0.20672 | 6.67E-06 | 0.190373 |
| -0.00973 | 0.83385 | -0.04993 | 0.28156  | -0.02375 | 0.60863  | -0.14731 | 0.00141  | -0.14139 |
| -0.00959 | 0.83621 | 0.016493 | 0.72222  | 0.013304 | 0.7743   | -0.0205  | 0.65856  | 0.011609 |
| 0.007231 | 0.87615 | 0.068661 | 0.13846  | 0.118132 | 0.01062  | -0.02088 | 0.65263  | 0.103287 |
| 0.068209 | 0.14108 | -0.06227 | 0.17917  | 0.194204 | 2.38E-05 | -0.11913 | 0.00997  | 0.275196 |
| 0.043206 | 0.35153 | -0.10331 | 0.02558  | -0.07901 | 0.0881   | -0.1363  | 0.00316  | 0.087884 |
| -0.02615 | 0.57295 | -0.12541 | 0.00666  | 0.081462 | 0.07864  | -0.24737 | 6.10E-08 | 0.161289 |
| 0.045713 | 0.32426 | 0.053547 | 0.24814  | 0.069001 | 0.13651  | -0.05697 | 0.21912  | 0.061072 |
| 0.05503  | 0.23526 | -0.00351 | 0.93963  | 0.230867 | 4.56E-07 | -0.08454 | 0.06797  | 0.259509 |
| 0.02506  | 0.58907 | -0.15083 | 0.00108  | 0.146097 | 0.00155  | -0.27254 | 2.13E-09 | 0.161531 |
| 0.036726 | 0.42848 | -0.06218 | 0.17979  | 0.153656 | 0.00086  | -0.22531 | 8.69E-07 | 0.066889 |
| 0.061093 | 0.18753 | 0.004017 | 0.93101  | 0.140891 | 0.00228  | -0.11969 | 0.00963  | 0.039568 |
| 0.000216 | 0.99629 | -0.06477 | 0.16231  | -0.0453  | 0.32863  | -0.10482 | 0.0235   | 0.142819 |
| 0.025586 | 0.58127 | -0.12154 | 0.00856  | -0.08239 | 0.07527  | -0.19893 | 1.49E-05 | 0.007543 |
| 0.001011 | 0.98261 | -0.1787  | 0.0001   | 0.016975 | 0.71446  | -0.29355 | 9.81E-11 | 0.053975 |
| 0.031982 | 0.49053 | 0.061012 | 0.18811  | 0.131503 | 0.00442  | -0.06997 | 0.13107  | 0.04805  |
| 0.047396 | 0.30675 | -0.10077 | 0.02946  | 0.051631 | 0.26549  | -0.18667 | 4.93E-05 | 0.113008 |
| 0.015686 | 0.73529 | -0.08245 | 0.07506  | 0.049333 | 0.28738  | -0.18965 | 3.71E-05 | 0.007988 |
| 0.087158 | 0.05983 | -0.02447 | 0.59784  | 0.086812 | 0.06086  | -0.07375 | 0.11144  | 0.21155  |
| 0.020403 | 0.66009 | -0.057   | 0.21889  | 0.123873 | 0.00736  | -0.21568 | 2.55E-06 | 0.046928 |
| 0.014105 | 0.76111 | -0.05713 | 0.21784  | -0.07484 | 0.10626  | -0.16128 | 0.00047  | 0.048503 |
| -0.00492 | 0.91551 | -0.12255 | 0.00802  | 0.139054 | 0.0026   | -0.22997 | 5.06E-07 | 0.158599 |
| 0.004166 | 0.92845 | -0.12703 | 0.00598  | 0.054353 | 0.24108  | -0.25004 | 4.35E-08 | 0.142963 |
| -0.02071 | 0.65535 | -0.03237 | 0.48526  | 0.023308 | 0.61537  | -0.12448 | 0.00707  | 0.084791 |
| -0.05631 | 0.22456 | -0.17927 | 9.81E-05 | -0.08174 | 0.07762  | -0.18901 | 3.94E-05 | 0.163798 |
| 0.097028 | 0.03607 | 0.063021 | 0.17396  | 0.112015 | 0.01544  | -0.02248 | 0.62798  | 0.15748  |
| 0.004759 | 0.9183  | -0.0308  | 0.50671  | 0.089406 | 0.05351  | -0.17231 | 0.00018  | 0.064733 |
| 0.000837 | 0.9856  | -0.05154 | 0.26632  | 0.037512 | 0.41866  | -0.05271 | 0.25565  | 0.266789 |
| 0.039317 | 0.39661 | -0.0565  | 0.22294  | 0.009865 | 0.83162  | -0.11089 | 0.01652  | 0.119234 |
| 0.061044 | 0.18789 | -0.13795 | 0.00281  | 0.131323 | 0.00447  | -0.1813  | 8.15E-05 | 0.128817 |
| 0.082119 | 0.07625 | 0.173491 | 0.00016  | 0.217743 | 2.03E-06 | 0.030606 | 0.50939  | 0.115986 |
| 0.000592 | 0.98982 | -0.09321 | 0.04409  | 0.040243 | 0.38557  | -0.21816 | 1.94E-06 | 0.131555 |
| 0.143257 | 0.00191 | -0.0337  | 0.46747  | 0.078965 | 0.08828  | -0.12642 | 0.00623  | 0.1027   |
| 0.00066  | 0.98865 | -0.12706 | 0.00597  | 0.041171 | 0.3747   | -0.28238 | 5.21E-10 | 0.091759 |
| -0.01029 | 0.82442 | -0.07513 | 0.1049   | -0.01457 | 0.75349  | -0.16197 | 0.00044  | 0.126728 |
| 0.006476 | 0.88899 | -0.09855 | 0.03325  | 0.159523 | 0.00054  | -0.2192  | 1.73E-06 | 0.142804 |
| -0.00752 | 0.87132 | -0.1136  | 0.01403  | -0.00833 | 0.85752  | -0.17682 | 0.00012  | 0.110293 |
| -0.01796 | 0.69868 | -0.14413 | 0.00179  | 0.000358 | 0.99385  | -0.24938 | 4.73E-08 | 0.072246 |
| 0.056441 | 0.22345 | -0.11024 | 0.01716  | 0.112606 | 0.01491  | -0.17923 | 9.84E-05 | 0.134522 |
| -0.05367 | 0.24705 | -0.1072  | 0.0205   | -0.16031 | 0.00051  | -0.17368 | 0.00016  | 0.052479 |
| -0.05357 | 0.2479  | -0.13688 | 0.00304  | -0.01751 | 0.70589  | -0.21844 | 1.88E-06 | 0.038652 |
| -0.07496 | 0.10571 | -0.00821 | 0.85961  | 0.012141 | 0.79357  | -0.13814 | 0.00277  | -0.03439 |
| -0.10251 | 0.02675 | -0.27052 | 2.83E-09 | -0.28634 | 2.91E-10 | -0.34019 | 4.08E-14 | -0.0692  |
| 0.107123 | 0.02059 | 0.005019 | 0.91385  | 0.069766 | 0.13221  | -0.14794 | 0.00135  | -0.00845 |
| -0.04421 | 0.34039 | -0.07194 | 0.12054  | -0.04047 | 0.38289  | -0.22076 | 1.45E-06 | -0.00816 |

|          |         |          |          |          |          |          |          |          |
|----------|---------|----------|----------|----------|----------|----------|----------|----------|
| 0.073267 | 0.11383 | -0.08032 | 0.08293  | 0.100421 | 0.03002  | -0.21203 | 3.79E-06 | 0.131258 |
| 0.02255  | 0.62692 | -0.18414 | 6.26E-05 | -0.09669 | 0.03672  | -0.27912 | 8.35E-10 | 0.033528 |
| 0.098361 | 0.03358 | 0.007705 | 0.86811  | 0.191393 | 3.13E-05 | -0.09079 | 0.0499   | 0.237618 |
| 0.072618 | 0.11708 | 0.048084 | 0.29978  | -0.0022  | 0.96222  | -0.05636 | 0.22414  | -0.06071 |
| 0.044677 | 0.33536 | -0.09306 | 0.04444  | 0.104263 | 0.02424  | -0.27327 | 1.92E-09 | 0.058679 |
| 0.051499 | 0.26672 | 0.070597 | 0.12765  | 0.119332 | 0.00985  | -0.01624 | 0.72626  | -0.01563 |
| 0.092711 | 0.04524 | -0.06185 | 0.18214  | 0.249518 | 4.65E-08 | -0.11417 | 0.01356  | 0.204342 |
| 0.023333 | 0.61499 | -0.1202  | 0.00932  | 0.104538 | 0.02387  | -0.21709 | 2.19E-06 | 0.263846 |
| 0.029886 | 0.51941 | -0.06479 | 0.16216  | 0.157469 | 0.00064  | -0.20309 | 9.73E-06 | 0.019878 |
| -0.05411 | 0.24317 | -0.08206 | 0.07646  | -0.05116 | 0.26987  | -0.1415  | 0.00218  | -0.03286 |
| 0.126875 | 0.00604 | -0.01426 | 0.75863  | 0.25341  | 2.82E-08 | -0.13691 | 0.00303  | 0.154505 |
| 0.058763 | 0.20495 | -0.00937 | 0.83991  | 0.13338  | 0.00388  | -0.17676 | 0.00012  | -0.04539 |
| -0.02627 | 0.57124 | -0.05955 | 0.19893  | 0.021821 | 0.63811  | -0.17202 | 0.00019  | 0.045172 |
| -0.04715 | 0.3093  | 0.096605 | 0.03689  | 0.017643 | 0.70374  | 0.197958 | 1.64E-05 | -0.09772 |
| 0.065816 | 0.1556  | -0.0387  | 0.40411  | -0.01529 | 0.74174  | -0.1227  | 0.00794  | -0.00591 |
| -0.02929 | 0.5278  | -0.08875 | 0.0553   | 0.014544 | 0.75392  | -0.16167 | 0.00045  | 0.115166 |
| 0.0425   | 0.35946 | -0.01512 | 0.74448  | 0.141295 | 0.00221  | -0.1101  | 0.01731  | 0.127013 |
| 0.080544 | 0.08208 | 0.013726 | 0.76736  | 0.282488 | 5.12E-10 | -0.12266 | 0.00796  | 0.089922 |
| -0.04125 | 0.37375 | -0.09794 | 0.03436  | 0.064872 | 0.16163  | -0.17966 | 9.46E-05 | 0.16892  |
| -0.0155  | 0.73828 | -0.16002 | 0.00052  | -0.04045 | 0.38311  | -0.24481 | 8.41E-08 | 0.068828 |
| 0.115498 | 0.0125  | 0.033058 | 0.47605  | 0.155655 | 0.00074  | -0.14479 | 0.00171  | -0.0119  |
| 0.022385 | 0.62944 | 0.030853 | 0.50599  | 0.120008 | 0.00944  | -0.13596 | 0.00324  | 0.17408  |
| 0.065437 | 0.158   | -0.06085 | 0.18929  | 0.181634 | 7.90E-05 | -0.22853 | 5.99E-07 | 0.097027 |
| 0.096363 | 0.03737 | -0.05678 | 0.2207   | 0.222997 | 1.13E-06 | -0.17819 | 0.00011  | 0.226806 |
| -0.07349 | 0.11273 | -0.24407 | 9.23E-08 | -0.06077 | 0.18989  | -0.30479 | 1.70E-11 | 0.116055 |
| 0.056692 | 0.2214  | -0.08366 | 0.0709   | 0.028568 | 0.53801  | -0.17589 | 0.00013  | 0.026362 |
| 0.051618 | 0.26561 | -0.03785 | 0.41453  | 0.144748 | 0.00171  | -0.21998 | 1.59E-06 | 0.052015 |
| 0.112206 | 0.01527 | 0.00721  | 0.8765   | 0.172065 | 0.00019  | -0.13636 | 0.00315  | 0.08577  |
| 0.026631 | 0.56593 | -0.09547 | 0.03917  | -0.0432  | 0.35158  | -0.25986 | 1.21E-08 | -0.09267 |
| 0.040547 | 0.38199 | -0.09786 | 0.0345   | 0.119724 | 0.00961  | -0.17094 | 0.00021  | 0.163268 |
| 0.014055 | 0.76194 | -0.14606 | 0.00155  | 0.0308   | 0.50671  | -0.20254 | 1.03E-05 | 0.134876 |
| -0.0151  | 0.74481 | -0.1332  | 0.00393  | 0.073287 | 0.11373  | -0.24945 | 4.69E-08 | 0.065805 |
| 0.105551 | 0.02253 | -0.08299 | 0.07317  | 0.041576 | 0.37002  | -0.22116 | 1.39E-06 | 0.042431 |
| 0.018307 | 0.69315 | 0.104822 | 0.02349  | 0.063292 | 0.17211  | -0.0071  | 0.87832  | -0.05844 |
| -0.05157 | 0.26606 | -0.10642 | 0.02143  | 0.027611 | 0.55171  | -0.17077 | 0.00021  | 0.143347 |
| -0.05903 | 0.20293 | -0.11123 | 0.01619  | -0.03858 | 0.40557  | -0.19024 | 3.51E-05 | 0.073944 |
| 0.024211 | 0.60175 | 0.065448 | 0.15793  | 0.055378 | 0.2323   | -0.08991 | 0.05218  | 0.003993 |
| -0.04071 | 0.38009 | -0.19814 | 1.61E-05 | -0.13905 | 0.0026   | -0.26401 | 6.91E-09 | 0.111662 |
| 0.020485 | 0.65882 | -0.12261 | 0.00799  | 0.115462 | 0.01253  | -0.26775 | 4.15E-09 | 0.084901 |
| 0.12208  | 0.00827 | -0.01149 | 0.80433  | 0.10598  | 0.02199  | -0.14818 | 0.00132  | 0.07565  |
| 0.030621 | 0.50918 | 0.060994 | 0.18824  | 0.026912 | 0.56183  | -0.06383 | 0.16848  | 0.002247 |
| -0.00031 | 0.99467 | -0.08781 | 0.05795  | 0.075312 | 0.10406  | -0.15539 | 0.00075  | 0.059852 |
| 0.0175   | 0.70603 | -0.14205 | 0.00209  | 0.034891 | 0.45192  | -0.21996 | 1.59E-06 | 0.159499 |
| -0.02584 | 0.57752 | -0.11017 | 0.01723  | 0.16758  | 0.00028  | -0.19844 | 1.56E-05 | 0.232742 |
| 0.108589 | 0.01891 | 0.024023 | 0.60459  | 0.099922 | 0.03085  | -0.08522 | 0.06576  | 0.083911 |

|          |         |          |          |          |          |          |          |          |
|----------|---------|----------|----------|----------|----------|----------|----------|----------|
| 0.052708 | 0.25564 | -0.11915 | 0.00996  | -0.01657 | 0.721    | -0.19163 | 3.06E-05 | 0.149269 |
| 0.091681 | 0.04769 | -0.0858  | 0.06393  | 0.075929 | 0.10125  | -0.2106  | 4.42E-06 | 0.085665 |
| -0.0081  | 0.86137 | -0.08701 | 0.06026  | 0.041642 | 0.36926  | -0.16842 | 0.00026  | -0.01291 |
| 0.001282 | 0.97795 | -0.0989  | 0.03262  | 0.031501 | 0.49708  | -0.17377 | 0.00016  | 0.125384 |
| 0.047423 | 0.30647 | -0.03241 | 0.48473  | 0.228348 | 6.12E-07 | -0.15071 | 0.00109  | 0.189006 |
| 0.044075 | 0.34192 | -0.11984 | 0.00954  | 0.082023 | 0.0766   | -0.22828 | 6.16E-07 | 0.082721 |
| 0.025923 | 0.57631 | -0.05736 | 0.21598  | -0.06752 | 0.14513  | -0.22705 | 7.11E-07 | -0.13026 |
| -0.04774 | 0.30322 | -0.09751 | 0.03516  | -0.03723 | 0.42211  | -0.20528 | 7.75E-06 | 0.032367 |
| 0.002403 | 0.95869 | -0.18075 | 8.57E-05 | -0.03528 | 0.4469   | -0.21249 | 3.61E-06 | 0.165457 |
| 0.072706 | 0.11663 | -0.01509 | 0.74496  | 0.096458 | 0.03718  | -0.11235 | 0.01513  | 0.065523 |
| -0.03359 | 0.46893 | -0.10183 | 0.02778  | -0.02305 | 0.61932  | -0.26133 | 9.92E-09 | -0.03938 |
| 0.064305 | 0.16533 | -0.03502 | 0.45029  | 0.183635 | 6.56E-05 | -0.18782 | 4.42E-05 | 0.039977 |
| 0.072674 | 0.1168  | -0.08995 | 0.05206  | 0.112956 | 0.01459  | -0.19564 | 2.07E-05 | 0.026034 |
| 0.051235 | 0.26918 | -0.15604 | 0.00072  | -0.01553 | 0.73777  | -0.21474 | 2.83E-06 | 0.00196  |
| 0.030534 | 0.51039 | -0.1037  | 0.02502  | -0.09542 | 0.03929  | -0.25157 | 3.57E-08 | -0.12177 |
| -0.03418 | 0.46117 | -0.14927 | 0.00122  | -0.09864 | 0.03307  | -0.26899 | 3.49E-09 | -0.00247 |
| 0.036146 | 0.43581 | 0.056798 | 0.22053  | 0.059512 | 0.19923  | -0.03439 | 0.45849  | 0.07339  |
| 0.001452 | 0.97503 | -0.15392 | 0.00085  | -0.01929 | 0.67759  | -0.23354 | 3.33E-07 | 0.045909 |
| 0.014491 | 0.75479 | -0.14318 | 0.00192  | 0.123409 | 0.00759  | -0.22824 | 6.20E-07 | 0.215324 |
| 0.083467 | 0.07154 | -0.06536 | 0.15847  | 0.148555 | 0.00128  | -0.11755 | 0.01101  | 0.094806 |
| 0.030718 | 0.50784 | -0.13741 | 0.00292  | 0.100411 | 0.03004  | -0.20582 | 7.33E-06 | 0.21671  |
| 0.018482 | 0.69036 | -0.15011 | 0.00114  | 0.136849 | 0.00304  | -0.21042 | 4.51E-06 | 0.183907 |
| 0.029627 | 0.52303 | -0.08815 | 0.05698  | 0.07944  | 0.08638  | -0.18955 | 3.74E-05 | 0.08771  |
| 0.004727 | 0.91885 | -0.08896 | 0.05473  | -0.03886 | 0.40211  | -0.15853 | 0.00059  | 0.073914 |
| 0.094734 | 0.04072 | -0.07599 | 0.10097  | 0.069442 | 0.13402  | -0.11747 | 0.01106  | 0.23727  |
| 0.06445  | 0.16438 | 0.001115 | 0.98083  | 0.109835 | 0.01758  | -0.14686 | 0.00146  | 0.107078 |
| 0.029477 | 0.52514 | -0.07026 | 0.12949  | 0.137021 | 0.00301  | -0.20374 | 9.09E-06 | 0.056925 |
| 0.021585 | 0.64175 | -0.11494 | 0.01294  | -0.10239 | 0.02693  | -0.18147 | 8.02E-05 | -0.03442 |
| 0.009856 | 0.83177 | -0.1141  | 0.01362  | 0.042971 | 0.35416  | -0.26554 | 5.61E-09 | 0.080221 |
| 0.057061 | 0.2184  | -0.13544 | 0.00336  | 0.129352 | 0.00512  | -0.16634 | 0.00031  | 0.191552 |
| -0.03021 | 0.51494 | -0.0857  | 0.06426  | 0.00666  | 0.88586  | -0.15135 | 0.00103  | 0.153058 |
| 0.07429  | 0.10886 | 0.004293 | 0.92629  | 0.073176 | 0.11428  | -0.08527 | 0.06561  | 0.134246 |
| 0.01301  | 0.77917 | -0.09459 | 0.04104  | -0.13044 | 0.00475  | -0.16768 | 0.00027  | 0.036132 |
| 0.069677 | 0.1327  | -0.00028 | 0.99511  | 0.212778 | 3.50E-06 | -0.15931 | 0.00055  | 0.027929 |
| 0.129142 | 0.00519 | -0.01107 | 0.81137  | 0.044891 | 0.33305  | -0.12268 | 0.00795  | 0.04006  |
| 0.030038 | 0.51729 | -0.00909 | 0.84476  | 0.071763 | 0.12146  | -0.16913 | 0.00024  | -0.0518  |
| 0.007513 | 0.87136 | -0.04812 | 0.2994   | 0.056765 | 0.2208   | -0.17897 | 0.0001   | 0.106828 |
| 0.051128 | 0.27018 | -0.03226 | 0.48677  | -0.03585 | 0.43957  | -0.18086 | 8.48E-05 | -0.10118 |
| -0.03144 | 0.49795 | -0.17656 | 0.00013  | -0.06247 | 0.17779  | -0.31663 | 2.47E-12 | -0.04548 |
| -0.00326 | 0.94396 | -0.01399 | 0.76309  | 0.095799 | 0.0385   | -0.07885 | 0.08873  | 0.15185  |
| 0.02352  | 0.61217 | -0.12199 | 0.00831  | 0.099044 | 0.03236  | -0.21454 | 2.89E-06 | 0.195248 |
| -0.05379 | 0.24603 | -0.11458 | 0.01323  | -0.07385 | 0.11096  | -0.1815  | 8.00E-05 | 0.092388 |
| 0.060068 | 0.19506 | -0.08031 | 0.08299  | 0.159249 | 0.00055  | -0.18067 | 8.63E-05 | 0.197227 |
| -0.00863 | 0.8525  | -0.22165 | 1.32E-06 | -0.00973 | 0.83389  | -0.29644 | 6.30E-11 | 0.06173  |
| -0.05445 | 0.24025 | -0.12442 | 0.0071   | -0.09657 | 0.03695  | -0.20684 | 6.58E-06 | 0.059755 |

|          |          |          |          |          |          |          |          |          |
|----------|----------|----------|----------|----------|----------|----------|----------|----------|
| 0.157854 | 0.00062  | 0.176442 | 0.00013  | 0.123392 | 0.00759  | 0.12485  | 0.00691  | 0.095558 |
| -0.13089 | 0.00461  | 0.075279 | 0.10422  | 0.020414 | 0.65992  | 0.169135 | 0.00024  | -0.01757 |
| 0.049832 | 0.28253  | -0.03655 | 0.43073  | -0.00289 | 0.95038  | -0.05562 | 0.23024  | 0.026511 |
| 0.091553 | 0.048    | -0.05134 | 0.26817  | -0.05696 | 0.21925  | -0.06438 | 0.16484  | -0.02779 |
| -0.07821 | 0.09136  | -0.14046 | 0.00235  | -0.13007 | 0.00487  | -0.27514 | 1.47E-09 | -0.21515 |
| 0.127478 | 0.0058   | 0.218774 | 1.81E-06 | 0.120165 | 0.00934  | 0.217425 | 2.11E-06 | 0.186163 |
| -0.00831 | 0.85794  | -0.14187 | 0.00212  | -0.01387 | 0.765    | -0.05528 | 0.23317  | 0.282808 |
| -0.01464 | 0.75238  | 0.088804 | 0.05515  | 0.01185  | 0.7984   | 0.115287 | 0.01267  | 0.084165 |
| -0.00253 | 0.95657  | -0.04611 | 0.32004  | -0.03454 | 0.45646  | -0.00509 | 0.9127   | 0.170239 |
| -0.00649 | 0.88883  | 0.001789 | 0.96925  | -0.11039 | 0.01702  | -0.02367 | 0.60993  | -0.10756 |
| 0.073402 | 0.11317  | 0.056739 | 0.22101  | 0.016279 | 0.72569  | 0.06252  | 0.17741  | 0.105469 |
| -0.01266 | 0.78491  | -0.05729 | 0.21654  | -0.01349 | 0.77127  | -0.01978 | 0.66987  | 0.059265 |
| 0.103595 | 0.02517  | 0.000625 | 0.98926  | 0.146047 | 0.00155  | 0.066872 | 0.14906  | 0.115672 |
| 0.013319 | 0.77406  | -0.07674 | 0.09766  | -0.12754 | 0.00578  | 0.004965 | 0.91479  | 0.093044 |
| -0.07304 | 0.11497  | -0.0602  | 0.19408  | -0.12985 | 0.00495  | 0.038719 | 0.40383  | 0.027764 |
| 0.098678 | 0.03301  | 0.026768 | 0.56394  | 0.041305 | 0.37315  | 0.039248 | 0.39743  | 0.001359 |
| 0.373176 | 7.05E-17 | 0.184521 | 6.04E-05 | 0.247427 | 6.06E-08 | 0.149872 | 0.00116  | 0.02144  |
| 0.029773 | 0.52099  | 0.153766 | 0.00086  | 0.07949  | 0.08618  | 0.164925 | 0.00034  | -0.02899 |
| 0.055358 | 0.23247  | 0.024369 | 0.59939  | 0.001158 | 0.98008  | -0.05109 | 0.27052  | -0.05213 |
| -0.06633 | 0.15242  | -0.0275  | 0.55334  | -0.06755 | 0.14497  | 0.026475 | 0.5682   | 0.048214 |
| 0.027671 | 0.55085  | 0.064819 | 0.16197  | 0.033106 | 0.47541  | 0.111528 | 0.0159   | -0.00376 |
| 0.029359 | 0.5268   | -0.11065 | 0.01676  | -0.04177 | 0.36782  | -0.04421 | 0.34044  | 0.140466 |
| 0.066402 | 0.15194  | -0.14773 | 0.00137  | -0.12855 | 0.0054   | -0.14888 | 0.00125  | 0.053719 |
| 0.046366 | 0.31739  | 0.03825  | 0.40955  | -0.01731 | 0.70908  | -0.06882 | 0.13756  | -0.06981 |
| 0.059646 | 0.19821  | -0.10077 | 0.02946  | -0.0641  | 0.16668  | -0.06754 | 0.14501  | 0.029642 |
| 0.06557  | 0.15716  | 0.206845 | 6.58E-06 | 0.174335 | 0.00015  | 0.171697 | 0.00019  | 0.11119  |
| -0.03048 | 0.51116  | -0.05588 | 0.22809  | -0.04223 | 0.36257  | -0.08298 | 0.0732   | 0.063762 |
| -0.06751 | 0.14522  | 0.005197 | 0.91082  | -0.13699 | 0.00301  | 0.108545 | 0.01896  | 0.052326 |
| -0.0244  | 0.59885  | -0.12379 | 0.0074   | 0.025327 | 0.58511  | -0.14103 | 0.00225  | -0.06131 |
| 0.02576  | 0.57871  | -0.04731 | 0.30767  | -0.06123 | 0.18653  | -0.10773 | 0.01988  | 0.025435 |
| 0.02905  | 0.53117  | 0.122405 | 0.0081   | 0.127564 | 0.00577  | 0.071962 | 0.12043  | -0.18447 |
| 0.001953 | 0.96642  | -0.02296 | 0.62063  | 0.024998 | 0.58999  | 0.003    | 0.94844  | 0.013062 |
| -0.00637 | 0.89073  | -0.01188 | 0.79788  | -0.03764 | 0.41703  | 0.058578 | 0.20638  | -0.00421 |
| -0.05754 | 0.21457  | -0.02845 | 0.53966  | -0.00656 | 0.88749  | -0.07082 | 0.12646  | -0.02298 |
| -0.02756 | 0.55248  | -0.18367 | 6.53E-05 | -0.08706 | 0.06011  | -0.21313 | 3.37E-06 | 0.025327 |
| 0.049949 | 0.28139  | -0.11535 | 0.01262  | 0.013005 | 0.77925  | -0.13728 | 0.00295  | -0.04838 |
| 0.040832 | 0.37865  | -0.0895  | 0.05325  | 0.035912 | 0.4388   | -0.06982 | 0.13194  | 0.080637 |
| 0.050258 | 0.27843  | -0.07727 | 0.09533  | -0.00373 | 0.93592  | -0.0715  | 0.12286  | -0.01295 |
| -0.01963 | 0.67215  | -0.08794 | 0.05758  | -0.20126 | 1.17E-05 | -0.04487 | 0.33324  | -0.08938 |
| 0.014337 | 0.75731  | -0.03036 | 0.51286  | 0.03012  | 0.51614  | 0.062744 | 0.17586  | 0.045483 |
| 0.110241 | 0.01716  | -0.06381 | 0.16865  | 0.007906 | 0.86471  | -0.04884 | 0.29226  | 0.060182 |
| -0.02257 | 0.62661  | -0.00313 | 0.94616  | 0.008721 | 0.8509   | 0.072783 | 0.11625  | 0.081146 |
| -0.02566 | 0.58021  | -0.02781 | 0.5488   | -0.0272  | 0.5577   | -0.04221 | 0.36276  | 0.056556 |
| -0.00895 | 0.84697  | -0.03647 | 0.43165  | -0.01329 | 0.77461  | -0.04286 | 0.35542  | -0.00757 |
| -0.01758 | 0.70477  | -0.00334 | 0.94254  | 0.009295 | 0.84122  | 0.022888 | 0.62177  | 0.095572 |



|          |         |          |         |          |         |          |         |          |
|----------|---------|----------|---------|----------|---------|----------|---------|----------|
| 0.120023 | 0.00943 | 0.029685 | 0.52223 | 0.034475 | 0.45734 | -0.01072 | 0.81724 | -0.03021 |
| 0.015803 | 0.7334  | -0.07852 | 0.09009 | -0.08187 | 0.07714 | -0.0766  | 0.09825 | -0.00342 |
| -0.02021 | 0.66312 | -0.04114 | 0.37507 | -0.02567 | 0.58002 | -0.12591 | 0.00644 | 0.002288 |
| 0.078591 | 0.0898  | -0.02124 | 0.64715 | -0.03425 | 0.46024 | 0.011946 | 0.79681 | -0.01562 |
| 0.062342 | 0.17865 | 0.013499 | 0.77109 | 0.0128   | 0.78265 | 0.007386 | 0.87352 | 0.00078  |
| 0.028857 | 0.53389 | -0.02575 | 0.57888 | -0.0026  | 0.95533 | -0.00261 | 0.95522 | 0.118733 |
| -0.02124 | 0.64712 | -0.0386  | 0.40527 | -0.02021 | 0.66308 | 0.004021 | 0.93094 | 0.010309 |
| -0.01044 | 0.82203 | -0.03202 | 0.49003 | -0.01817 | 0.69526 | -0.02387 | 0.60693 | -0.00258 |
| -0.00107 | 0.98162 | 0.137313 | 0.00294 | 0.076665 | 0.09798 | 0.046872 | 0.31213 | -0.02458 |
| 0.079399 | 0.08654 | 0.049619 | 0.28459 | 0.004906 | 0.91579 | 0.007548 | 0.87077 | 0.063705 |
| 0.021642 | 0.64087 | 0.021738 | 0.63938 | -0.03547 | 0.44447 | -0.01488 | 0.74847 | 0.009817 |
| -0.01872 | 0.68657 | -0.01193 | 0.79709 | 0.038508 | 0.40641 | 0.036939 | 0.42581 | 0.066569 |
| 0.018152 | 0.69561 | 0.106789 | 0.02099 | 0.088914 | 0.05485 | 0.127386 | 0.00584 | 0.052473 |
| 0.06299  | 0.17417 | 0.015987 | 0.73041 | 0.017372 | 0.70808 | -0.02964 | 0.52285 | -0.03186 |
| -0.01732 | 0.70892 | -0.05844 | 0.20747 | -0.08378 | 0.07048 | -0.05336 | 0.24981 | 0.019405 |
| -0.01583 | 0.733   | -0.04284 | 0.35561 | -0.07425 | 0.10906 | -0.03442 | 0.4581  | -0.01915 |
| -0.02211 | 0.63374 | -0.0283  | 0.54187 | 0.001586 | 0.97273 | 0.04344  | 0.34892 | 0.007635 |
| 0.054268 | 0.24181 | 0.080305 | 0.083   | 0.003299 | 0.94333 | 0.029442 | 0.52564 | -0.04086 |
| 0.078324 | 0.0909  | -0.05335 | 0.24984 | -0.00912 | 0.8441  | -0.08233 | 0.07549 | -0.03983 |
| 0.020278 | 0.66205 | -0.03042 | 0.51194 | -0.03142 | 0.49815 | -0.01778 | 0.7016  | 0.086766 |
| 0.022986 | 0.62027 | 0.047787 | 0.30277 | 0.041583 | 0.36993 | -0.0261  | 0.57363 | 0.088075 |
| 0.012438 | 0.78865 | -0.06363 | 0.16985 | -0.04426 | 0.33988 | -0.02717 | 0.5581  | 0.022146 |
| -0.02003 | 0.66586 | -0.00643 | 0.88979 | 0.00312  | 0.94638 | -0.02587 | 0.57707 | 0.061818 |
| -0.04411 | 0.34155 | -0.10539 | 0.02274 | -0.06196 | 0.18131 | -0.17797 | 0.00011 | -0.11419 |
| 0.01427  | 0.75841 | 0.039327 | 0.39648 | 0.062447 | 0.17792 | 0.060488 | 0.19194 | 0.036943 |
| -0.01088 | 0.81462 | 0.043452 | 0.34879 | 0.057659 | 0.2136  | -0.03317 | 0.47458 | 0.016917 |
| 0.071601 | 0.12231 | 0.035762 | 0.44071 | 0.006203 | 0.89365 | -0.01618 | 0.72727 | 4.33E-06 |
| 0.040201 | 0.38607 | -0.12277 | 0.00791 | 0.067484 | 0.14537 | -0.08342 | 0.07168 | 0.051318 |
| 0.063497 | 0.17072 | 0.073105 | 0.11464 | -0.0178  | 0.70116 | -0.00781 | 0.86625 | 0.010799 |
| -0.02595 | 0.57586 | -0.04155 | 0.37035 | -0.03461 | 0.45555 | -0.04894 | 0.29126 | 0.012989 |
| -0.0299  | 0.51928 | 0.069718 | 0.13248 | 0.10551  | 0.02259 | 0.087394 | 0.05914 | 0.085296 |
| -0.02293 | 0.62108 | -0.03251 | 0.48342 | -0.10288 | 0.0262  | -0.07027 | 0.12945 | -0.09588 |
| -0.01072 | 0.81732 | -0.0562  | 0.22544 | -0.11109 | 0.01632 | -0.02959 | 0.52352 | -0.08387 |
| 0.005277 | 0.90945 | 0.039603 | 0.39318 | 0.037141 | 0.42328 | -0.01611 | 0.72839 | 0.016753 |
| -0.02984 | 0.52011 | -0.04537 | 0.32791 | -0.04726 | 0.30818 | -0.07004 | 0.13067 | -0.0207  |
| 0.002608 | 0.95517 | -0.00769 | 0.86832 | -0.0371  | 0.42373 | -0.02239 | 0.6294  | -0.00878 |
| 0.040073 | 0.38759 | -0.02122 | 0.64737 | 0.004106 | 0.92948 | -0.0125  | 0.7876  | 0.00565  |
| 0.007614 | 0.86966 | 0.052145 | 0.26076 | 0.060346 | 0.19299 | 0.068275 | 0.1407  | 0.016191 |
| -0.00851 | 0.8544  | -0.0749  | 0.10597 | -0.08511 | 0.0661  | -0.09067 | 0.0502  | 0.034557 |
| -0.01806 | 0.69713 | 0.011629 | 0.80209 | 0.025777 | 0.57845 | 0.046716 | 0.31375 | 0.007412 |
| -0.0048  | 0.91755 | 0.000182 | 0.99688 | 0.034781 | 0.45335 | 0.048566 | 0.29495 | 0.110091 |
| -0.04755 | 0.30519 | -0.00779 | 0.86669 | 0.001503 | 0.97415 | 0.038676 | 0.40435 | -0.01693 |
| 0.030907 | 0.50524 | 0.012235 | 0.79201 | 0.060982 | 0.18833 | -0.04168 | 0.36883 | -0.0154  |
| -0.00802 | 0.86282 | -0.02085 | 0.65313 | 0.005267 | 0.90962 | 0.01008  | 0.828   | 0.14913  |
| 0.054426 | 0.24045 | 0.072716 | 0.11659 | 0.038343 | 0.40841 | 0.049515 | 0.2856  | 0.021942 |

|          |          |          |          |          |          |          |          |          |
|----------|----------|----------|----------|----------|----------|----------|----------|----------|
| 0.036475 | 0.43165  | -0.1328  | 0.00404  | -0.11019 | 0.01721  | -0.09116 | 0.04896  | 0.082823 |
| -0.03549 | 0.44418  | -0.04763 | 0.30433  | 0.054197 | 0.24243  | -0.1088  | 0.01868  | 0.044236 |
| -0.00956 | 0.83677  | -0.0496  | 0.2848   | -0.10815 | 0.0194   | -0.12189 | 0.00837  | -0.07829 |
| -0.08148 | 0.07859  | -0.04994 | 0.28152  | -0.02588 | 0.57695  | 0.042883 | 0.35515  | 0.160636 |
| -0.02185 | 0.63773  | -0.05207 | 0.26141  | -0.03284 | 0.47891  | -0.00805 | 0.86222  | 0.07898  |
| -0.02218 | 0.63251  | 0.032238 | 0.48706  | 0.013725 | 0.76737  | 0.11094  | 0.01647  | 0.156292 |
| -0.03186 | 0.49216  | 0.0348   | 0.45311  | -0.02407 | 0.60393  | 0.180943 | 8.42E-05 | 0.15582  |
| 0.019589 | 0.67285  | -0.03266 | 0.48136  | 0.015436 | 0.73936  | -0.01704 | 0.71342  | 0.034746 |
| -0.03987 | 0.38999  | 0.013994 | 0.76294  | -0.06957 | 0.13331  | -0.06391 | 0.16797  | -0.03705 |
| -0.02996 | 0.51843  | -0.01559 | 0.73686  | -0.0048  | 0.91756  | 0.003128 | 0.94624  | 0.083226 |
| -0.00938 | 0.83982  | 0.12276  | 0.00791  | -0.00678 | 0.88379  | 0.150531 | 0.0011   | -0.03077 |
| 0.046609 | 0.31486  | 0.011169 | 0.80976  | 0.007988 | 0.86331  | -0.05404 | 0.24384  | -0.07652 |
| 0.010811 | 0.81575  | 0.094877 | 0.04042  | -0.07454 | 0.10766  | 0.018121 | 0.6961   | -0.13679 |
| -0.00798 | 0.86347  | 0.084573 | 0.06785  | -0.11122 | 0.0162   | 0.06495  | 0.16112  | -0.08781 |
| 0.164445 | 0.00036  | 0.087442 | 0.059    | 0.039362 | 0.39607  | 0.076085 | 0.10055  | -0.02458 |
| -0.0004  | 0.99314  | 0.248081 | 5.58E-08 | 0.258557 | 1.43E-08 | 0.188381 | 4.19E-05 | 0.317752 |
| 0.26268  | 8.27E-09 | 0.20149  | 1.15E-05 | 0.173396 | 0.00017  | 0.168099 | 0.00026  | 0.080461 |
| -0.02921 | 0.52887  | -0.10162 | 0.02811  | -0.00482 | 0.91722  | -0.02838 | 0.54069  | 0.173954 |
| 0.029238 | 0.52851  | -0.02673 | 0.56447  | -0.03223 | 0.48721  | -0.02276 | 0.62373  | 0.019674 |
| 0.012711 | 0.78412  | -0.11393 | 0.01376  | -0.04941 | 0.28667  | -0.07075 | 0.12681  | 0.129393 |
| 0.03253  | 0.48313  | 0.006554 | 0.88768  | -0.02925 | 0.52833  | -0.01486 | 0.74869  | 0.050309 |
| 0.081503 | 0.07849  | 0.046974 | 0.31109  | 0.007968 | 0.86364  | 0.102722 | 0.02643  | 0.176728 |
| 0.070878 | 0.12614  | 0.159995 | 0.00052  | 0.200624 | 1.25E-05 | 0.102361 | 0.02697  | 0.088667 |
| -0.01919 | 0.67918  | -0.05817 | 0.20954  | -0.09191 | 0.04714  | -0.06444 | 0.16442  | -0.23137 |
| -0.04316 | 0.35207  | -0.05513 | 0.23444  | -0.09257 | 0.04557  | -0.10729 | 0.02039  | -0.03381 |
| -0.03394 | 0.4644   | -0.10267 | 0.0265   | 0.020732 | 0.65497  | -0.05597 | 0.22736  | 0.152115 |
| -0.00136 | 0.97666  | -0.00855 | 0.85387  | 0.010895 | 0.81435  | -0.00647 | 0.88911  | 0.170412 |
| 0.075178 | 0.10469  | -0.00669 | 0.88539  | -0.0463  | 0.31809  | 0.065532 | 0.15739  | 0.057143 |
| 0.085189 | 0.06586  | 0.028514 | 0.53878  | 0.080648 | 0.08169  | 0.006903 | 0.88173  | 0.078405 |
| 0.002041 | 0.96491  | 0.047369 | 0.30703  | 0.022141 | 0.63318  | 0.205935 | 7.24E-06 | 0.28222  |
| 0.055428 | 0.23188  | 0.016689 | 0.71906  | 0.097086 | 0.03596  | -0.01726 | 0.70983  | 0.074456 |
| 0.073004 | 0.11514  | -0.0294  | 0.52624  | 0.036534 | 0.4309   | -0.03401 | 0.46345  | 0.033989 |
| 0.014032 | 0.76232  | -0.00669 | 0.88538  | -0.06137 | 0.18555  | 0.003169 | 0.94555  | 0.054438 |
| -0.0149  | 0.74818  | -0.07566 | 0.10248  | -0.1735  | 0.00016  | -0.08005 | 0.084    | -0.14413 |
| -0.03151 | 0.49693  | 0.100414 | 0.03003  | 0.137995 | 0.0028   | 0.127585 | 0.00576  | 0.125385 |
| -0.11755 | 0.01101  | -0.08238 | 0.07533  | -0.19242 | 2.84E-05 | -0.10697 | 0.02078  | -0.13028 |
| 0.013763 | 0.76674  | -0.13221 | 0.00421  | -0.11569 | 0.01236  | -0.06122 | 0.18661  | 0.23125  |
| 0.10893  | 0.01854  | -0.01417 | 0.75998  | -0.01353 | 0.77055  | -0.02702 | 0.56019  | -0.00188 |
| -0.07776 | 0.09324  | -0.01865 | 0.68768  | -0.03423 | 0.4606   | -0.04281 | 0.35596  | 0.056897 |
| -0.10744 | 0.02022  | 0.034772 | 0.45347  | -0.11827 | 0.01053  | 0.027333 | 0.55573  | -0.24658 |
| -0.01581 | 0.73321  | 0.06056  | 0.19141  | -0.09376 | 0.04284  | 0.028817 | 0.53447  | 0.085064 |
| 0.084797 | 0.06712  | -0.07592 | 0.10127  | -0.06394 | 0.16773  | -0.05479 | 0.23729  | 0.021898 |
| -0.01004 | 0.82876  | -0.13314 | 0.00395  | 0.022727 | 0.62422  | 0.004609 | 0.92088  | 0.242293 |
| -0.03261 | 0.48211  | 0.029155 | 0.52968  | -0.05191 | 0.2629   | -0.08724 | 0.05958  | -0.01651 |
| 0.007351 | 0.87411  | 0.110992 | 0.01641  | 0.112745 | 0.01478  | 0.120613 | 0.00908  | 0.063645 |

|          |          |          |          |          |          |          |          |          |
|----------|----------|----------|----------|----------|----------|----------|----------|----------|
| 0.011297 | 0.80763  | 0.03934  | 0.39633  | 0.006815 | 0.88322  | 0.035145 | 0.44864  | 0.056803 |
| 0.055426 | 0.2319   | -0.10867 | 0.01883  | -0.01304 | 0.77874  | -0.12327 | 0.00766  | 0.096952 |
| -0.11101 | 0.0164   | 0.005053 | 0.91327  | -0.12195 | 0.00833  | 0.008202 | 0.85968  | -0.05642 |
| 0.015761 | 0.73407  | -0.17905 | 0.0001   | -0.05569 | 0.22965  | -0.13724 | 0.00296  | 0.202419 |
| 0.032857 | 0.47873  | -0.06378 | 0.16882  | -0.18205 | 7.60E-05 | -0.06064 | 0.19084  | -0.06684 |
| 0.039551 | 0.3938   | 0.047152 | 0.30925  | 0.031772 | 0.49339  | 0.091797 | 0.04741  | 0.029147 |
| -0.06136 | 0.18563  | -0.15765 | 0.00063  | -0.11221 | 0.01527  | -0.06721 | 0.14702  | 0.214594 |
| 0.05069  | 0.27432  | -0.1556  | 0.00074  | -0.06955 | 0.13341  | -0.1488  | 0.00126  | 0.052254 |
| -0.05606 | 0.22658  | -0.17313 | 0.00017  | -0.17045 | 0.00022  | -0.20743 | 6.19E-06 | -0.03796 |
| 0.116712 | 0.0116   | -0.04235 | 0.3612   | 0.041732 | 0.36822  | -0.05331 | 0.25027  | 0.001484 |
| -0.10057 | 0.02978  | -0.15594 | 0.00072  | -0.16605 | 0.00031  | -0.15577 | 0.00073  | -0.04471 |
| 0.017658 | 0.7035   | 0.048042 | 0.3002   | 0.137921 | 0.00282  | -0.02199 | 0.63554  | -0.02825 |
| 0.063898 | 0.16803  | 0.040403 | 0.38369  | 0.042871 | 0.35529  | 0.018815 | 0.68508  | 0.038983 |
| -0.02914 | 0.52983  | -0.01625 | 0.7262   | -0.0536  | 0.24771  | 0.076299 | 0.09959  | -0.01454 |
| 0.032574 | 0.48254  | -0.05546 | 0.23162  | -0.05177 | 0.26422  | -0.0136  | 0.76948  | 0.028877 |
| -0.10226 | 0.02712  | -0.0414  | 0.37202  | -0.17491 | 0.00015  | 0.039545 | 0.39388  | 0.035513 |
| -0.03307 | 0.47583  | -0.02453 | 0.59701  | -0.02494 | 0.59091  | -0.04354 | 0.34784  | -0.1578  |
| 0.018634 | 0.68795  | -0.02478 | 0.59324  | 0.01826  | 0.69389  | -0.0088  | 0.84963  | -0.00836 |
| 0.005275 | 0.90949  | 0.000153 | 0.99738  | 0.025327 | 0.58511  | 0.037934 | 0.41344  | 0.136573 |
| 0.065742 | 0.15607  | 0.022872 | 0.622    | 0.060812 | 0.18957  | -0.00452 | 0.92246  | 0.094364 |
| 0.024486 | 0.59763  | 0.040975 | 0.37698  | 0.062233 | 0.17941  | 0.070109 | 0.13031  | -0.00829 |
| 0.003593 | 0.93827  | 0.162661 | 0.00042  | 0.137771 | 0.00285  | 0.13187  | 0.00431  | 0.081448 |
| -0.04094 | 0.37741  | -0.03785 | 0.41451  | -0.06919 | 0.13545  | -0.06621 | 0.15312  | -0.13986 |
| 0.016968 | 0.71457  | 0.066723 | 0.14997  | -0.07282 | 0.11608  | 0.060011 | 0.19548  | -0.04593 |
| 0.008824 | 0.84918  | -0.01181 | 0.79912  | 0.00034  | 0.99415  | 0.089657 | 0.05284  | 0.148759 |
| 0.00708  | 0.87871  | -0.03461 | 0.45556  | 0.015632 | 0.73618  | -0.04526 | 0.3291   | -0.10903 |
| 0.003806 | 0.93462  | -0.13027 | 0.00481  | -0.05728 | 0.21664  | -0.08564 | 0.06445  | 0.169617 |
| 0.054986 | 0.23563  | -0.08486 | 0.06691  | -0.03464 | 0.4552   | 0.015299 | 0.74159  | 0.112633 |
| -0.04171 | 0.36848  | -0.00165 | 0.97163  | -0.01894 | 0.6831   | -0.0496  | 0.28474  | 0.02161  |
| -0.0561  | 0.2263   | -0.15508 | 0.00077  | -0.19339 | 2.58E-05 | -0.12022 | 0.00931  | 0.019591 |
| -0.05056 | 0.27556  | 0.080873 | 0.08083  | -0.01344 | 0.77204  | -0.00181 | 0.96881  | -0.24933 |
| 0.014301 | 0.75791  | -0.05416 | 0.24278  | -0.0964  | 0.03731  | -0.08816 | 0.05694  | 0.023753 |
| 0.033752 | 0.46684  | -0.02551 | 0.58247  | 0.018679 | 0.68723  | 0.038538 | 0.40603  | -0.00899 |
| -0.03688 | 0.42659  | -0.16841 | 0.00026  | -0.04613 | 0.31991  | -0.14754 | 0.00139  | 0.037754 |
| 0.25091  | 3.89E-08 | -0.00135 | 0.97686  | 0.050001 | 0.28089  | -0.03643 | 0.43221  | -0.01708 |
| -0.00862 | 0.85255  | -0.07028 | 0.12937  | -0.12971 | 0.00499  | -0.08077 | 0.08124  | -0.04655 |
| -0.01217 | 0.7931   | -0.02313 | 0.61809  | 0.049168 | 0.28899  | -0.04829 | 0.29768  | -0.01718 |
| 0.066243 | 0.15293  | -0.09756 | 0.03505  | -0.04025 | 0.38552  | -0.06553 | 0.15744  | 0.138036 |
| 0.027461 | 0.55388  | 0.011196 | 0.80932  | -0.00385 | 0.93392  | 0.014279 | 0.75827  | 0.169969 |
| 0.146007 | 0.00156  | 0.091749 | 0.04753  | 0.221579 | 1.33E-06 | 0.079894 | 0.08459  | -0.00843 |
| 0.371292 | 1.03E-16 | 0.071149 | 0.12469  | 0.144296 | 0.00177  | 0.085778 | 0.06401  | -0.03616 |
| -0.01304 | 0.7786   | -0.07433 | 0.10867  | 0.010559 | 0.81997  | -0.03836 | 0.40818  | 0.055101 |
| -0.11036 | 0.01705  | -0.18381 | 6.45E-05 | -0.184   | 6.34E-05 | -0.20617 | 7.06E-06 | 0.106231 |
| -0.04911 | 0.28953  | -0.01541 | 0.73974  | 0.094482 | 0.04126  | -0.03809 | 0.41146  | 0.09399  |
| 0.043383 | 0.34956  | -0.01748 | 0.7063   | -0.00535 | 0.90829  | -0.05989 | 0.1964   | -0.02104 |

|          |         |          |          |          |          |          |         |          |
|----------|---------|----------|----------|----------|----------|----------|---------|----------|
| -0.07411 | 0.10974 | -0.13089 | 0.00461  | -0.1196  | 0.00968  | -0.05802 | 0.21072 | 0.129414 |
| -0.00111 | 0.98089 | 0.068858 | 0.13733  | -0.04212 | 0.36382  | 0.124035 | 0.00728 | 0.067436 |
| -0.06278 | 0.17565 | -0.11273 | 0.01479  | -0.02637 | 0.56967  | -0.03972 | 0.39174 | 0.205108 |
| 0.120687 | 0.00904 | 0.188616 | 4.10E-05 | 0.273667 | 1.82E-09 | 0.111938 | 0.01552 | 0.179343 |
| -0.00872 | 0.85096 | 0.03675  | 0.42818  | -0.01773 | 0.70234  | 0.044331 | 0.33912 | 0.181447 |
| 0.059226 | 0.2014  | 0.09563  | 0.03885  | 0.037627 | 0.41723  | 0.03182  | 0.49274 | 0.012573 |
| 0.106036 | 0.02192 | -0.0483  | 0.29763  | 0.017627 | 0.704    | -0.01866 | 0.68757 | 0.009368 |
| 0.05968  | 0.19796 | -0.02266 | 0.62519  | 0.013978 | 0.7632   | -0.02286 | 0.62217 | 0.002278 |
| -0.00195 | 0.96648 | -0.09591 | 0.03827  | -0.06232 | 0.17882  | -0.12195 | 0.00833 | -0.08663 |
| -0.06436 | 0.165   | 0.074202 | 0.10928  | -0.06342 | 0.17122  | -0.02427 | 0.60091 | -0.02502 |
| 0.003886 | 0.93326 | -0.11674 | 0.01158  | -0.05001 | 0.28083  | -0.05884 | 0.20435 | 0.090123 |
| -0.02411 | 0.6032  | -0.06967 | 0.13276  | 0.069588 | 0.1332   | -0.13687 | 0.00304 | 0.008072 |
| -0.04306 | 0.35311 | -0.07583 | 0.1017   | -0.03234 | 0.4857   | -0.07911 | 0.08768 | 0.191398 |
| -0.0847  | 0.06745 | -0.06518 | 0.15966  | -0.15996 | 0.00052  | 0.005129 | 0.91198 | 0.155895 |
| -0.01165 | 0.80175 | 0.168996 | 0.00024  | 0.130711 | 0.00467  | 0.102659 | 0.02653 | 0.005091 |
| 0.047475 | 0.30594 | 0.045774 | 0.32362  | 0.079443 | 0.08637  | 0.129574 | 0.00504 | 0.22661  |
| 0.066425 | 0.1518  | 0.001549 | 0.97337  | 0.061542 | 0.1843   | 0.094251 | 0.04176 | 0.080519 |
| 0.00449  | 0.9229  | -0.07167 | 0.12197  | 0.010198 | 0.82604  | 0.005102 | 0.91244 | 0.062721 |
| 0.020659 | 0.6561  | -0.04876 | 0.293    | 0.030368 | 0.51269  | 0.021512 | 0.64287 | -0.02341 |
| 0.032513 | 0.48336 | -0.02024 | 0.66258  | 0.031065 | 0.50307  | 0.026747 | 0.56423 | -0.01653 |
| 0.03743  | 0.41968 | -0.01782 | 0.70097  | 0.097283 | 0.03558  | 0.009524 | 0.83737 | 0.13691  |
| -0.11487 | 0.01299 | -0.07995 | 0.08435  | -0.16324 | 0.0004   | -0.01666 | 0.71956 | -0.14507 |
| 0.044936 | 0.33256 | 0.018167 | 0.69537  | -0.15133 | 0.00104  | -0.0357  | 0.44153 | -0.0711  |
| 0.004994 | 0.91428 | -0.05211 | 0.26111  | -0.06398 | 0.16748  | -0.01221 | 0.79239 | 0.154108 |
| 0.065775 | 0.15586 | 0.036438 | 0.43211  | 0.02317  | 0.61747  | 0.044316 | 0.33929 | 0.201417 |
| 0.018986 | 0.68238 | -0.02111 | 0.64911  | -0.00102 | 0.98239  | 0.043167 | 0.35196 | -0.02807 |
| 0.080369 | 0.08275 | -0.128   | 0.0056   | -0.08705 | 0.06014  | -0.10413 | 0.02442 | 0.007144 |
| 0.047746 | 0.30319 | -0.02026 | 0.66238  | 0.058937 | 0.20361  | -0.05935 | 0.20046 | 0.061082 |
| -0.00178 | 0.96944 | 0.037181 | 0.42278  | 0.031677 | 0.49468  | 0.025859 | 0.57725 | -0.03117 |
| -0.05218 | 0.26043 | -0.05803 | 0.21066  | -0.15374 | 0.00086  | -0.14744 | 0.0014  | -0.23275 |
| -0.02937 | 0.5266  | -0.02121 | 0.64758  | -0.02391 | 0.60621  | 0.018526 | 0.68966 | 0.177353 |
| 0.109319 | 0.01812 | 0.122683 | 0.00795  | 0.089423 | 0.05346  | 0.119425 | 0.00979 | 0.028022 |
| 0.029753 | 0.52126 | 0.007738 | 0.86754  | -0.03978 | 0.39112  | -0.03567 | 0.44195 | -0.0041  |
| -0.00115 | 0.98022 | -0.01858 | 0.68875  | -0.01547 | 0.73873  | -0.02844 | 0.53985 | 0.014677 |
| -0.01564 | 0.73607 | 0.035709 | 0.44138  | -0.0004  | 0.99304  | -0.05377 | 0.2462  | -0.11475 |
| 0.010129 | 0.82719 | -0.0298  | 0.52068  | 0.037788 | 0.41523  | -0.03189 | 0.49176 | -0.00177 |
| -0.00254 | 0.95638 | -0.05082 | 0.27304  | 0.050761 | 0.27364  | -0.10297 | 0.02607 | -0.09309 |
| 0.094197 | 0.04188 | -0.07127 | 0.12408  | -0.04704 | 0.31038  | -0.05997 | 0.19581 | -0.03265 |
| 0.14978  | 0.00117 | 0.115498 | 0.0125   | 0.256861 | 1.80E-08 | 0.075804 | 0.10182 | 0.25082  |
| 0.017127 | 0.71202 | 0.155898 | 0.00072  | 0.078943 | 0.08837  | 0.16401  | 0.00037 | -0.09242 |
| 0.055117 | 0.23452 | -0.08965 | 0.05285  | -0.1804  | 8.84E-05 | -0.01553 | 0.73789 | -0.06231 |
| -0.14235 | 0.00204 | -0.17523 | 0.00014  | -0.20199 | 1.09E-05 | -0.1633  | 0.0004  | -0.00302 |
| 0.075157 | 0.10478 | 0.060117 | 0.19469  | -0.05223 | 0.25998  | -0.03002 | 0.51753 | -0.00271 |
| 0.027117 | 0.55886 | -0.0132  | 0.77603  | 0.019533 | 0.67374  | 0.034417 | 0.4581  | 0.230456 |
| 0.027107 | 0.559   | -0.10901 | 0.01845  | -0.00816 | 0.86041  | -0.02568 | 0.57982 | 0.227228 |

|          |          |          |          |          |          |          |          |          |
|----------|----------|----------|----------|----------|----------|----------|----------|----------|
| 0.017576 | 0.70481  | 0.032895 | 0.47823  | 0.091036 | 0.04929  | 0.105286 | 0.02288  | 0.098955 |
| 0.061045 | 0.18788  | 0.048779 | 0.29284  | -0.02238 | 0.62958  | 0.026077 | 0.57404  | 0.064909 |
| 0.08649  | 0.06182  | 0.106669 | 0.02114  | 0.097171 | 0.0358   | 0.057769 | 0.21273  | 0.026595 |
| 0.047882 | 0.30181  | 0.100376 | 0.0301   | 0.146622 | 0.00149  | 0.028449 | 0.5397   | 0.086802 |
| 0.020094 | 0.66493  | 0.001924 | 0.96692  | -0.02376 | 0.60859  | 0.011494 | 0.80434  | 0.097197 |
| 0.101634 | 0.02808  | -0.00998 | 0.82976  | -0.03848 | 0.40669  | 0.025696 | 0.57965  | -0.00372 |
| 0.058137 | 0.20982  | 0.12265  | 0.00797  | 0.196725 | 1.85E-05 | 0.122765 | 0.00791  | 0.111954 |
| 0.010046 | 0.82857  | 0.008847 | 0.84878  | 0.049832 | 0.28253  | 0.05881  | 0.20459  | 0.084617 |
| -0.14763 | 0.00138  | -0.15876 | 0.00057  | -0.1805  | 8.77E-05 | -0.07223 | 0.11903  | 0.046828 |
| -0.07881 | 0.08891  | 0.056238 | 0.22513  | 0.009982 | 0.82966  | 0.106149 | 0.02178  | 0.072051 |
| -0.02175 | 0.63914  | 0.099022 | 0.0324   | 0.032383 | 0.4851   | 0.114798 | 0.01305  | 0.120023 |
| 0.051865 | 0.26333  | -0.12677 | 0.00608  | -0.01876 | 0.68603  | -0.12747 | 0.00581  | 0.237311 |
| 0.122984 | 0.0078   | -0.02608 | 0.57399  | 0.090292 | 0.05118  | 0.009071 | 0.84499  | 0.12504  |
| -0.01316 | 0.77661  | -0.08238 | 0.07531  | -0.04912 | 0.28947  | -0.03595 | 0.4383   | 0.132636 |
| -0.00491 | 0.91581  | -0.09798 | 0.03428  | -0.08626 | 0.06251  | -0.06211 | 0.1803   | 0.003849 |
| 0.005864 | 0.89943  | -0.07438 | 0.10842  | 0.039643 | 0.3927   | -0.08205 | 0.07649  | -0.03721 |
| 0.333872 | 1.27E-13 | 0.155422 | 0.00075  | 0.118047 | 0.01068  | 0.184932 | 5.81E-05 | -0.0653  |
| 0.373906 | 6.07E-17 | 0.098807 | 0.03278  | 0.177759 | 0.00011  | 0.133556 | 0.00384  | 0.172455 |
| 0.020338 | 0.66111  | -0.06292 | 0.17468  | 0.000942 | 0.98381  | -0.08095 | 0.08055  | -0.03405 |
| -0.01242 | 0.7889   | 0.017028 | 0.71361  | -0.00528 | 0.9094   | -0.0344  | 0.45835  | -0.04834 |
| 0.048083 | 0.29979  | -0.01371 | 0.76768  | 0.041506 | 0.37083  | 0.008851 | 0.84872  | 0.098677 |
| 0.080423 | 0.08254  | 0.027941 | 0.54697  | 0.003848 | 0.93391  | 0.040716 | 0.38001  | 0.036813 |
| -0.06564 | 0.1567   | -0.02262 | 0.62591  | -0.16452 | 0.00036  | -0.08069 | 0.08152  | -0.19709 |
| 0.012075 | 0.79467  | 0.002296 | 0.96053  | -0.05344 | 0.24911  | 0.016271 | 0.72581  | -0.09649 |
| 0.055337 | 0.23265  | 0.170172 | 0.00022  | 0.050037 | 0.28055  | 0.184387 | 6.11E-05 | 0.199651 |
| 0.002131 | 0.96337  | -0.02422 | 0.60164  | -0.00964 | 0.83536  | 0.086613 | 0.06145  | 0.187347 |
| -0.02501 | 0.58978  | -0.08991 | 0.05218  | -0.04575 | 0.32385  | -0.05911 | 0.20226  | 0.034479 |
| 0.016232 | 0.72645  | -0.03105 | 0.5032   | 0.065732 | 0.15613  | -0.0027  | 0.95358  | 0.13662  |
| 0.004429 | 0.92396  | 0.008798 | 0.84961  | 0.132104 | 0.00424  | 0.045966 | 0.3216   | 0.15694  |
| 0.020418 | 0.65986  | -0.00762 | 0.86955  | 0.038338 | 0.40848  | -0.01105 | 0.8117   | 0.039595 |
| 0.051797 | 0.26395  | 0.043912 | 0.34371  | 0.016278 | 0.7257   | 0.000508 | 0.99126  | 0.065457 |
| -0.04478 | 0.3343   | 0.002442 | 0.95802  | -0.12817 | 0.00554  | -0.00545 | 0.90647  | 0.043281 |
| 0.081864 | 0.07718  | -0.01962 | 0.6724   | 0.143203 | 0.00192  | -0.06185 | 0.18214  | 0.116988 |
| 0.033037 | 0.47632  | -0.06757 | 0.14483  | 0.006422 | 0.88992  | -0.02567 | 0.58005  | 0.040283 |
| -0.09005 | 0.0518   | -0.07481 | 0.10639  | -0.08497 | 0.06655  | -0.01    | 0.82933  | -0.08141 |
| 0.045351 | 0.32811  | 0.018808 | 0.68519  | -0.00124 | 0.97875  | 0.030979 | 0.50425  | 0.089525 |
| 0.038252 | 0.40953  | 0.097462 | 0.03524  | 0.022578 | 0.6265   | 0.044434 | 0.338    | -0.04118 |
| -0.00174 | 0.97008  | -0.10085 | 0.02932  | 0.041145 | 0.375    | -0.11162 | 0.01581  | -0.03444 |
| 0.043551 | 0.3477   | -0.06507 | 0.16035  | 0.015479 | 0.73866  | -0.04323 | 0.35128  | -0.03433 |
| -0.08947 | 0.05334  | -0.03641 | 0.43241  | -0.14469 | 0.00172  | -0.1299  | 0.00493  | -0.11376 |
| -0.18867 | 4.08E-05 | -0.18059 | 8.69E-05 | -0.33289 | 1.51E-13 | -0.1759  | 0.00013  | -0.13277 |
| 0.057387 | 0.21577  | 0.006425 | 0.88986  | 0.055785 | 0.22888  | -0.04103 | 0.37634  | 0.110569 |
| 0.043432 | 0.34902  | 0.154637 | 0.00008  | 0.164513 | 0.00036  | 0.221498 | 1.34E-06 | 0.233906 |
| 0.010123 | 0.8273   | 0.012861 | 0.78164  | 0.038386 | 0.40789  | 0.007473 | 0.87204  | 0.002056 |
| 0.025127 | 0.58807  | -0.01872 | 0.68651  | 0.061242 | 0.18646  | 0.004782 | 0.91792  | 0.023866 |

|          |          |          |          |          |          |          |          |          |
|----------|----------|----------|----------|----------|----------|----------|----------|----------|
| 0.00942  | 0.83912  | -0.00951 | 0.83767  | 0.059955 | 0.1959   | -0.06113 | 0.18726  | 0.114852 |
| 0.151489 | 0.00102  | -0.08145 | 0.07869  | -0.05088 | 0.27256  | -0.04119 | 0.37442  | 0.127271 |
| 0.013784 | 0.76639  | -0.00725 | 0.87584  | 0.085813 | 0.0639   | 0.016618 | 0.72021  | 0.16078  |
| 0.048195 | 0.29866  | -0.00643 | 0.8897   | 0.034136 | 0.46178  | -0.00674 | 0.88456  | 0.038509 |
| 0.059128 | 0.20215  | -0.08296 | 0.07328  | 0.022893 | 0.62169  | -0.04867 | 0.2939   | 0.190277 |
| -0.07104 | 0.12528  | -0.14219 | 0.00207  | -0.16461 | 0.00035  | -0.07379 | 0.11129  | 0.017251 |
| -0.05205 | 0.26164  | -0.03527 | 0.44696  | -0.07752 | 0.09427  | -0.134   | 0.00372  | -0.30481 |
| 0.069187 | 0.13546  | -0.09878 | 0.03283  | 0.011696 | 0.80098  | -0.09947 | 0.03163  | 0.059404 |
| 0.064114 | 0.1666   | -0.01357 | 0.7699   | 0.140456 | 0.00235  | -0.05203 | 0.26182  | 0.05456  |
| 0.002788 | 0.95209  | -0.02227 | 0.63125  | -0.07797 | 0.0924   | -0.03124 | 0.50066  | 0.060078 |
| -0.08568 | 0.06431  | -0.06279 | 0.17552  | -0.14145 | 0.00218  | -0.11733 | 0.01117  | -0.03185 |
| 0.00108  | 0.98144  | 0.000599 | 0.98969  | 0.009848 | 0.83191  | -0.01772 | 0.70245  | -0.00167 |
| 0.059637 | 0.19828  | 0.124538 | 0.00705  | 0.105982 | 0.02199  | 0.21643  | 2.35E-06 | 0.10149  |
| 0.032367 | 0.48533  | -0.02424 | 0.60132  | -0.01918 | 0.67937  | 0.027076 | 0.55945  | 0.163163 |
| -0.0524  | 0.25842  | 0.110579 | 0.01682  | 0.130653 | 0.00468  | 0.047304 | 0.30769  | -0.0705  |
| 0.005588 | 0.90414  | 0.138023 | 0.0028   | 0.083676 | 0.07083  | 0.232358 | 3.82E-07 | 0.139385 |
| -0.03196 | 0.4908   | 0.157336 | 0.00064  | 0.089801 | 0.05246  | 0.188898 | 3.99E-05 | -0.07396 |
| 0.070936 | 0.12583  | 0.201168 | 1.18E-05 | 0.081332 | 0.07912  | 0.094621 | 0.04097  | -0.01032 |
| -0.16278 | 0.00041  | -0.06798 | 0.14244  | -0.00186 | 0.96796  | -0.08917 | 0.05415  | 0.09473  |
| 0.074291 | 0.10886  | 0.119926 | 0.00949  | 0.1462   | 0.00154  | 0.101352 | 0.02852  | 0.103893 |
| 0.037966 | 0.41304  | -0.06196 | 0.18132  | 0.010273 | 0.82477  | -0.0225  | 0.62761  | 0.107242 |
| 0.004118 | 0.92928  | 0.015485 | 0.73856  | -0.00846 | 0.85538  | 0.085671 | 0.06434  | 0.251976 |
| 0.090952 | 0.0495   | 0.03796  | 0.41311  | 0.016816 | 0.71702  | -0.04703 | 0.31048  | -0.14487 |
| -0.02967 | 0.52244  | -0.08805 | 0.05725  | -0.04542 | 0.32736  | -0.02238 | 0.6295   | 0.183003 |
| 0.056296 | 0.22465  | 0.006211 | 0.89352  | 0.092839 | 0.04494  | -0.02028 | 0.66195  | 0.154682 |
| -0.01493 | 0.74756  | -0.00094 | 0.98385  | -0.02669 | 0.56501  | -0.02276 | 0.62372  | 0.018926 |
| -0.02634 | 0.57024  | -0.03394 | 0.4643   | -0.01358 | 0.7698   | -0.00962 | 0.83566  | 0.024785 |
| -0.01808 | 0.69669  | -0.05111 | 0.27034  | -0.11395 | 0.01374  | -0.04066 | 0.38061  | -0.03072 |
| -0.01321 | 0.77584  | -0.02386 | 0.60699  | -0.11343 | 0.01418  | -0.02657 | 0.56677  | -0.12157 |
| -0.03715 | 0.42319  | 0.085821 | 0.06387  | 0.113469 | 0.01415  | 0.139831 | 0.00246  | 0.117248 |
| -0.03571 | 0.44135  | -0.01374 | 0.76717  | -0.10946 | 0.01797  | -0.05855 | 0.20659  | -0.13162 |
| 0.024903 | 0.5914   | 0.161593 | 0.00046  | 0.075092 | 0.10509  | 0.219806 | 1.62E-06 | -0.03333 |
| -0.02733 | 0.55584  | 0.060551 | 0.19148  | -0.05429 | 0.24163  | 0.055163 | 0.23413  | 0.078756 |
| 0.043712 | 0.34591  | 0.137903 | 0.00282  | -0.0182  | 0.69479  | 0.155989 | 0.00072  | 0.03326  |
| -0.0442  | 0.34056  | 0.114786 | 0.01306  | -0.02412 | 0.60309  | 0.108164 | 0.01939  | -0.12793 |
| 0.060744 | 0.19007  | -0.06796 | 0.14252  | -0.04147 | 0.37123  | -0.01922 | 0.67864  | 0.221037 |
| 0.082697 | 0.0742   | -0.00158 | 0.97291  | -0.00133 | 0.97711  | -0.08575 | 0.06409  | -0.15929 |
| -0.03251 | 0.48341  | 0.140871 | 0.00228  | 0.026284 | 0.571    | 0.122241 | 0.00818  | 0.017231 |
| 0.070046 | 0.13066  | 0.018139 | 0.69582  | 0.009148 | 0.8437   | 0.115995 | 0.01213  | 0.171227 |
| -0.10689 | 0.02087  | -0.05198 | 0.26228  | -0.12332 | 0.00763  | 0.021711 | 0.6398   | -0.04188 |
| 0.011408 | 0.80578  | -0.02804 | 0.54561  | -0.19458 | 2.29E-05 | -0.09721 | 0.03572  | -0.12147 |
| 0.035596 | 0.44283  | -0.01861 | 0.68837  | 0.023649 | 0.61021  | -0.02719 | 0.55776  | -0.0357  |
| 0.007212 | 0.87647  | -0.12811 | 0.00556  | -0.00176 | 0.96977  | -0.05791 | 0.21164  | 0.144882 |
| 0.360989 | 8.06E-16 | 0.058116 | 0.20999  | 0.062018 | 0.18092  | 0.071911 | 0.1207   | 0.064615 |
| 0.008518 | 0.85434  | 0.009065 | 0.8451   | 0.043124 | 0.35244  | 0.017092 | 0.71257  | 0.038351 |

|          |          |          |          |          |          |          |          |          |
|----------|----------|----------|----------|----------|----------|----------|----------|----------|
| 0.253953 | 2.63E-08 | 0.012857 | 0.78169  | 0.009677 | 0.83479  | 0.106355 | 0.02152  | 0.149229 |
| 0.261967 | 9.10E-09 | 0.097463 | 0.03524  | 0.08054  | 0.0821   | 0.071354 | 0.12361  | -0.00397 |
| 0.009588 | 0.83628  | 0.19273  | 2.75E-05 | 0.112328 | 0.01516  | 0.230061 | 5.01E-07 | 0.325354 |
| -0.05097 | 0.27165  | 0.037539 | 0.41833  | 0.091358 | 0.04848  | 0.084732 | 0.06733  | 0.205996 |
| 0.401076 | 1.78E-19 | 0.112405 | 0.01509  | 0.05805  | 0.21051  | 0.129094 | 0.00521  | 0.034805 |
| -0.09366 | 0.04306  | -0.02586 | 0.57725  | -0.13027 | 0.00481  | -0.06777 | 0.14368  | -0.00836 |
| 0.039651 | 0.3926   | -0.04643 | 0.3167   | 0.068861 | 0.13731  | -0.05911 | 0.20228  | 0.180414 |
| 0.006514 | 0.88835  | -0.00759 | 0.87006  | -0.04967 | 0.2841   | -0.04251 | 0.35934  | -0.00673 |
| -0.00147 | 0.97466  | -0.01336 | 0.77338  | -0.06729 | 0.14655  | -0.04665 | 0.3144   | -0.03012 |
| 0.028151 | 0.54396  | -0.04348 | 0.34852  | -0.09042 | 0.05086  | -0.0604  | 0.1926   | -0.10192 |
| 0.046099 | 0.32019  | -0.06424 | 0.16575  | -0.01663 | 0.71998  | -0.04492 | 0.33272  | -0.00119 |
| 0.019638 | 0.67208  | -0.00448 | 0.92312  | -0.0631  | 0.17344  | -0.01026 | 0.82497  | -0.05838 |
| -0.00789 | 0.86492  | 0.031341 | 0.49927  | 0.06478  | 0.16223  | 0.166083 | 0.00031  | 0.154615 |
| 0.079863 | 0.08471  | 0.156002 | 0.00072  | 0.194554 | 2.30E-05 | 0.254742 | 2.37E-08 | 0.128421 |
| -0.06378 | 0.16883  | -0.16915 | 0.00024  | -0.16646 | 0.0003   | -0.2174  | 2.11E-06 | -0.01401 |
| -0.04378 | 0.34518  | -0.11207 | 0.01539  | -0.09014 | 0.05158  | -0.14424 | 0.00178  | 0.0231   |
| -0.05315 | 0.25166  | 0.002636 | 0.9547   | 0.049111 | 0.28956  | -0.04967 | 0.28407  | -0.0097  |
| -0.03181 | 0.49293  | -0.0366  | 0.43005  | 0.015371 | 0.74042  | -0.03458 | 0.45599  | 0.253488 |
| -0.09121 | 0.04886  | -0.01027 | 0.82482  | -0.12516 | 0.00676  | 0.117082 | 0.01134  | 0.058947 |
| -0.07227 | 0.11887  | -0.09124 | 0.04877  | -0.045   | 0.33183  | -0.12058 | 0.0091   | 0.007983 |
| -0.03845 | 0.40705  | 0.107817 | 0.01978  | 0.082313 | 0.07556  | 0.042452 | 0.36001  | -0.05669 |
| 0.075389 | 0.10371  | 0.088324 | 0.05648  | 0.098347 | 0.03361  | 0.18105  | 8.33E-05 | 0.145669 |
| 0.038882 | 0.40185  | -0.10204 | 0.02746  | -0.07768 | 0.0936   | -0.07536 | 0.10382  | 0.098399 |
| 0.006799 | 0.8835   | 0.032155 | 0.48818  | -0.0119  | 0.7976   | 0.04042  | 0.38348  | 0.200076 |
| -0.01431 | 0.75771  | -0.00173 | 0.9703   | -0.08691 | 0.06058  | 0.016381 | 0.72404  | -0.05458 |
| 0.082582 | 0.07461  | 0.144796 | 0.00171  | 0.112511 | 0.01499  | 0.187144 | 4.71E-05 | 0.105124 |
| 0.027604 | 0.55182  | -0.01213 | 0.79374  | 0.132846 | 0.00403  | -0.02484 | 0.5924   | 0.069786 |
| -0.08587 | 0.06373  | -0.04486 | 0.33337  | 0.044318 | 0.33927  | -0.00984 | 0.83208  | 0.229959 |
| -0.07064 | 0.12739  | -0.17193 | 0.00019  | -0.17253 | 0.00018  | -0.17818 | 0.00011  | -0.02957 |
| 0.146264 | 0.00153  | 0.067212 | 0.147    | 0.057166 | 0.21755  | 0.022614 | 0.62595  | 0.001289 |
| 0.018459 | 0.69072  | -0.09938 | 0.03178  | -0.0889  | 0.05489  | -0.07138 | 0.12348  | 0.173089 |
| 0.027828 | 0.54859  | 0.009074 | 0.84495  | -0.18033 | 8.90E-05 | -0.0788  | 0.08895  | -0.19531 |
| 0.032674 | 0.48119  | 0.161219 | 0.00047  | 0.176662 | 0.00012  | 0.131122 | 0.00454  | 0.095321 |
| -0.02363 | 0.61044  | -0.02002 | 0.66606  | 0.089786 | 0.0525   | 0.045401 | 0.32758  | 0.324904 |
| 0.113876 | 0.01381  | 0.041505 | 0.37083  | 0.070905 | 0.12599  | -0.00178 | 0.96944  | -0.02081 |
| -0.017   | 0.71405  | -0.01069 | 0.81779  | 0.068621 | 0.13869  | -0.07661 | 0.09821  | -0.10593 |
| -0.09433 | 0.04159  | -0.03848 | 0.40673  | -0.1454  | 0.00163  | -0.0576  | 0.21411  | -0.2408  |
| -0.05743 | 0.21541  | -0.07149 | 0.12291  | -0.1064  | 0.02146  | -0.04187 | 0.36663  | 0.081668 |
| -0.05021 | 0.27893  | -0.06761 | 0.14464  | -0.07123 | 0.12427  | -0.04293 | 0.35458  | 0.082205 |
| 0.139547 | 0.00251  | 0.026708 | 0.5648   | -0.04284 | 0.35567  | -0.01884 | 0.68474  | 0.051345 |
| -0.02691 | 0.56187  | 0.164505 | 0.00036  | 0.016715 | 0.71865  | 0.241318 | 1.30E-07 | 0.121497 |
| -0.07162 | 0.12221  | -0.2136  | 3.20E-06 | -0.02371 | 0.60924  | -0.14176 | 0.00214  | 0.20185  |
| 0.053757 | 0.24628  | 0.018227 | 0.69442  | -0.06932 | 0.13468  | -0.07433 | 0.10868  | -0.16553 |
| -0.01466 | 0.752    | -0.03978 | 0.39111  | -0.06021 | 0.19402  | 0.058089 | 0.2102   | 0.044512 |
| 0.089502 | 0.05326  | 0.169251 | 0.00024  | 0.084891 | 0.06682  | 0.129752 | 0.00498  | -0.10869 |

|          |          |          |          |          |          |          |          |          |
|----------|----------|----------|----------|----------|----------|----------|----------|----------|
| -0.025   | 0.58998  | -0.01496 | 0.74704  | -0.03046 | 0.51141  | -0.06895 | 0.13678  | -0.09968 |
| 0.03555  | 0.44342  | -0.00944 | 0.83881  | 0.103417 | 0.02543  | -0.03223 | 0.48716  | 0.10646  |
| -0.07081 | 0.12653  | -0.14765 | 0.00138  | -0.09886 | 0.03269  | -0.11945 | 0.00978  | 0.019731 |
| -0.06782 | 0.14339  | -0.08309 | 0.07283  | 0.025576 | 0.58142  | -0.12808 | 0.00558  | -0.02671 |
| 0.005546 | 0.90486  | -0.14686 | 0.00146  | -0.12113 | 0.00878  | -0.12575 | 0.00651  | 0.11288  |
| -0.03494 | 0.45132  | -0.08887 | 0.05497  | -0.0603  | 0.19334  | -0.10605 | 0.0219   | 0.107163 |
| -0.08127 | 0.07935  | -0.14203 | 0.00209  | -0.13667 | 0.00308  | -0.13526 | 0.00341  | -0.12046 |
| -0.00773 | 0.86766  | -0.17501 | 0.00014  | -0.06149 | 0.18467  | -0.15549 | 0.00075  | 0.196636 |
| 0.050987 | 0.27151  | -0.05429 | 0.24163  | -0.00561 | 0.90368  | 0.010335 | 0.82373  | 0.173867 |
| -0.06045 | 0.19222  | -0.0672  | 0.14709  | -0.09663 | 0.03685  | -0.02189 | 0.63711  | -0.07593 |
| 0.034252 | 0.46025  | -0.00386 | 0.93377  | -0.03452 | 0.45679  | -0.1298  | 0.00496  | -0.01464 |
| 0.033956 | 0.46415  | 0.0979   | 0.03443  | 0.1189   | 0.01012  | 0.055252 | 0.23337  | 0.017731 |
| -0.00939 | 0.83962  | 0.084784 | 0.06716  | -0.06696 | 0.14855  | 0.160758 | 0.00049  | 0.069778 |
| 0.016653 | 0.71964  | -0.02974 | 0.52147  | 0.06785  | 0.14319  | -0.01782 | 0.70086  | 0.201016 |
| 0.020927 | 0.65193  | -0.01034 | 0.82367  | -0.06332 | 0.17195  | -0.06673 | 0.14992  | -0.08604 |
| 0.015567 | 0.73723  | 0.092541 | 0.04564  | -0.09265 | 0.04539  | 0.038693 | 0.40415  | -0.06403 |
| 0.083973 | 0.06983  | 0.003752 | 0.93554  | 0.055698 | 0.22961  | 0.023306 | 0.61541  | 0.031662 |
| 0.045925 | 0.32203  | 0.149348 | 0.00121  | 0.136647 | 0.00309  | 0.158819 | 0.00057  | 0.015024 |
| 0.373673 | 6.37E-17 | 0.269145 | 3.42E-09 | 0.203613 | 9.21E-06 | 0.329311 | 2.83E-13 | 0.086175 |
| -0.04323 | 0.35127  | -0.20825 | 5.68E-06 | -0.26878 | 3.60E-09 | -0.25557 | 2.13E-08 | -0.23648 |
| -0.09218 | 0.04648  | -0.17712 | 0.00012  | -0.14704 | 0.00144  | -0.17873 | 0.0001   | -0.06638 |
| 0.043785 | 0.34511  | 0.05168  | 0.26503  | -0.13864 | 0.00268  | -0.04757 | 0.30498  | -0.13439 |
| 0.015106 | 0.74473  | 0.039075 | 0.39952  | -0.02073 | 0.65495  | 0.160413 | 0.0005   | 0.016724 |
| -0.06738 | 0.14598  | 0.065574 | 0.15713  | -0.09368 | 0.04303  | 0.024224 | 0.60156  | -0.16535 |
| 0.054059 | 0.24364  | -0.02746 | 0.55392  | -0.05495 | 0.23596  | -0.01743 | 0.70717  | 0.013422 |
| 0.030112 | 0.51625  | 0.069405 | 0.13423  | 0.03658  | 0.43032  | 0.158369 | 0.00059  | 0.134657 |
| 0.043137 | 0.3523   | 0.296782 | 5.98E-11 | 0.260871 | 1.05E-08 | 0.289426 | 1.83E-10 | 0.294364 |
| -0.01816 | 0.6955   | -0.07419 | 0.10936  | -0.09191 | 0.04713  | -0.1216  | 0.00853  | -0.01056 |
| -0.01505 | 0.74566  | 0.074218 | 0.1092   | 0.104608 | 0.02377  | 0.22219  | 1.24E-06 | 0.42174  |
| -0.05398 | 0.24436  | -0.13072 | 0.00466  | -0.09332 | 0.04385  | -0.09974 | 0.03117  | 0.170471 |
| -0.02495 | 0.59074  | -0.11676 | 0.01157  | -0.0419  | 0.36634  | -0.09929 | 0.03193  | -0.02737 |
| 0.037466 | 0.41923  | -0.14843 | 0.0013   | -0.03896 | 0.40094  | -0.18108 | 8.31E-05 | -0.0026  |
| 0.031266 | 0.50031  | -0.05413 | 0.24301  | -0.08621 | 0.06269  | 0.015413 | 0.73974  | 0.056018 |
| 0.023321 | 0.61518  | 0.045289 | 0.32878  | 0.056308 | 0.22454  | 0.094672 | 0.04086  | -0.02979 |
| -0.00611 | 0.8952   | -0.05749 | 0.21495  | 0.089007 | 0.05459  | -0.07214 | 0.11951  | 0.098247 |
| -0.08019 | 0.08344  | 0.095416 | 0.03929  | -0.03818 | 0.41037  | 0.079708 | 0.08532  | -0.01845 |
| -0.00629 | 0.89218  | -0.00135 | 0.97685  | 0.011349 | 0.80676  | -0.05187 | 0.26331  | 0.003724 |
| -0.00039 | 0.99335  | 0.071754 | 0.12151  | 0.097468 | 0.03523  | 0.194328 | 2.35E-05 | 0.15296  |
| 0.129268 | 0.00515  | 0.179498 | 9.61E-05 | 0.31452  | 3.50E-12 | 0.288778 | 2.02E-10 | 0.07664  |
| -0.01139 | 0.80605  | 0.127259 | 0.00589  | 0.022816 | 0.62286  | 0.16948  | 0.00023  | 0.147269 |
| 0.053706 | 0.24673  | -0.0634  | 0.17138  | -0.06684 | 0.14926  | -0.10153 | 0.02825  | -0.00723 |
| 0.003997 | 0.93135  | -0.18723 | 4.68E-05 | -0.20808 | 5.78E-06 | -0.17677 | 0.00012  | -0.00982 |
| 0.010126 | 0.82724  | 0.278317 | 9.38E-10 | 0.26148  | 9.72E-09 | 0.307316 | 1.13E-11 | 0.29049  |
| 0.045001 | 0.33186  | 0.042894 | 0.35502  | 0.149751 | 0.00117  | 0.055203 | 0.23378  | 0.133663 |
| -0.01598 | 0.73047  | -0.06466 | 0.16303  | -0.07232 | 0.11861  | -0.06325 | 0.17238  | -0.02853 |



|          |          |          |          |          |          |          |          |          |
|----------|----------|----------|----------|----------|----------|----------|----------|----------|
| 0.068007 | 0.14227  | -0.01165 | 0.80178  | 0.067646 | 0.1444   | -0.02244 | 0.62865  | 0.05795  |
| 0.007898 | 0.86483  | -0.11875 | 0.01021  | -0.05007 | 0.28023  | -0.08872 | 0.05537  | 0.048523 |
| 0.008095 | 0.86149  | -0.1266  | 0.00615  | -0.06585 | 0.1554   | -0.09581 | 0.03848  | 0.072244 |
| -0.01796 | 0.69866  | -0.09156 | 0.04799  | -0.04259 | 0.35842  | -0.10618 | 0.02174  | -0.10817 |
| 0.203936 | 8.91E-06 | 0.266564 | 4.88E-09 | 0.167364 | 0.00028  | 0.263952 | 6.96E-09 | 0.187986 |
| 0.043292 | 0.35057  | -0.08754 | 0.0587   | -0.07999 | 0.08421  | -0.08049 | 0.08228  | -0.04576 |
| 0.024151 | 0.60266  | -0.09282 | 0.04498  | 0.033236 | 0.47368  | 0.001687 | 0.971    | 0.197143 |
| 0.050349 | 0.27755  | -0.08855 | 0.05586  | -0.1197  | 0.00962  | -0.07929 | 0.08699  | -0.06033 |
| 0.025046 | 0.58928  | 0.069559 | 0.13336  | -0.08956 | 0.05311  | 0.080579 | 0.08195  | -0.09587 |
| 0.087341 | 0.0593   | 0.020728 | 0.65502  | -0.08122 | 0.07955  | 0.013199 | 0.77604  | -0.09365 |
| -0.05591 | 0.22783  | 0.043755 | 0.34544  | -0.12475 | 0.00695  | 0.069359 | 0.13448  | -0.07407 |
| 0.120593 | 0.00909  | 0.044671 | 0.33542  | 0.000115 | 0.99803  | 0.004235 | 0.92727  | -0.29942 |
| -0.01387 | 0.7649   | 0.019025 | 0.68175  | 0.004475 | 0.92317  | -0.00073 | 0.98751  | -0.09023 |
| 0.021191 | 0.64784  | 0.238955 | 1.73E-07 | 0.191476 | 3.11E-05 | 0.338675 | 5.37E-14 | 0.069007 |
| -0.09813 | 0.03401  | -0.09287 | 0.04487  | -0.21534 | 2.65E-06 | -0.07545 | 0.10342  | -0.11687 |
| -0.05294 | 0.25351  | -0.09391 | 0.04251  | -0.16122 | 0.00047  | -0.00726 | 0.87569  | 0.17048  |
| -0.10117 | 0.02882  | 0.025045 | 0.58929  | -0.08469 | 0.06748  | -0.09737 | 0.03541  | -0.08225 |
| 0.034841 | 0.45258  | 0.145152 | 0.00166  | 0.179518 | 9.59E-05 | 0.177664 | 0.00011  | 0.008603 |
| 0.003305 | 0.94322  | -0.17885 | 0.0001   | -0.06589 | 0.15513  | -0.14299 | 0.00195  | 0.201221 |
| -0.00574 | 0.90153  | -0.04019 | 0.38615  | 0.011478 | 0.80461  | -0.08255 | 0.07473  | -0.03955 |
| 0.033483 | 0.47039  | 0.012989 | 0.77952  | 0.067946 | 0.14263  | -0.00821 | 0.85953  | -0.01919 |
| -0.01614 | 0.72798  | -0.08359 | 0.07111  | -0.03824 | 0.40973  | -0.0793  | 0.08693  | 0.028954 |
| 0.012213 | 0.79238  | 0.115497 | 0.0125   | 0.014229 | 0.75908  | 0.059418 | 0.19994  | -0.14384 |
| -0.06174 | 0.1829   | -0.0831  | 0.07281  | -0.18343 | 6.68E-05 | -0.08336 | 0.07191  | 0.174983 |
| -0.12962 | 0.00502  | -0.2164  | 2.36E-06 | -0.13157 | 0.0044   | -0.19857 | 1.54E-05 | 0.011316 |
| -0.04938 | 0.28692  | 0.045308 | 0.32857  | 0.049382 | 0.28691  | 0.01795  | 0.69884  | -0.08801 |
| 0.034454 | 0.45762  | -0.03313 | 0.47512  | -0.03948 | 0.39462  | -0.01309 | 0.77791  | 0.022664 |
| 0.052279 | 0.25953  | 0.028839 | 0.53415  | 0.061221 | 0.1866   | 0.02772  | 0.55014  | 0.064059 |
| 0.060397 | 0.19261  | -0.0245  | 0.59744  | 0.035794 | 0.4403   | 0.02714  | 0.55852  | 0.087796 |
| 0.075969 | 0.10107  | -0.01868 | 0.68725  | -0.03667 | 0.42921  | -0.03102 | 0.50373  | -0.00732 |
| -0.00234 | 0.95983  | 0.025062 | 0.58904  | 0.024862 | 0.59201  | 0.008514 | 0.85441  | 0.098659 |
| -0.01388 | 0.7648   | -0.12898 | 0.00525  | -0.09835 | 0.0336   | -0.18546 | 5.53E-05 | -0.02232 |
| 0.023325 | 0.61513  | 0.202192 | 1.07E-05 | 0.143169 | 0.00192  | 0.254692 | 2.38E-08 | 0.196435 |
| 0.06115  | 0.18712  | -0.05053 | 0.27585  | -0.04509 | 0.33091  | -0.04465 | 0.33564  | -0.02813 |
| -0.02199 | 0.63556  | 0.09371  | 0.04296  | 0.061856 | 0.18207  | 0.148684 | 0.00127  | 0.256551 |
| 0.03941  | 0.39548  | 0.010005 | 0.82927  | -0.00587 | 0.89933  | 0.003616 | 0.93788  | 0.077309 |
| -0.0591  | 0.20236  | 0.023359 | 0.6146   | 0.09973  | 0.03118  | 0.163929 | 0.00037  | 0.326964 |
| 0.03361  | 0.46871  | -0.02104 | 0.65021  | 0.005693 | 0.90234  | 0.092025 | 0.04686  | 0.181008 |
| -0.01757 | 0.7049   | -0.07776 | 0.09326  | -0.01831 | 0.69312  | -0.03186 | 0.49217  | 0.008531 |
| -0.18626 | 5.12E-05 | -0.25094 | 3.87E-08 | -0.25589 | 2.04E-08 | -0.15016 | 0.00113  | 0.025146 |
| -0.03565 | 0.44216  | 0.001527 | 0.97375  | 0.055151 | 0.23423  | -0.04768 | 0.30387  | -0.02696 |
| 0.02926  | 0.52821  | -0.12419 | 0.00721  | 0.005596 | 0.90401  | -0.08811 | 0.05708  | 0.063184 |
| 0.233293 | 3.42E-07 | 0.042143 | 0.36352  | 0.061675 | 0.18336  | 0.018022 | 0.69769  | 0.002057 |
| -0.08652 | 0.06174  | 0.014026 | 0.76241  | -0.07323 | 0.114    | 0.059575 | 0.19875  | -0.05342 |
| -0.06863 | 0.13867  | -0.04965 | 0.28427  | -0.02102 | 0.65042  | -0.13479 | 0.00352  | -0.10907 |

|          |          |          |          |          |          |          |          |          |
|----------|----------|----------|----------|----------|----------|----------|----------|----------|
| 0.015742 | 0.73439  | 0.012067 | 0.7948   | -0.01466 | 0.75196  | -0.10799 | 0.01958  | -0.11067 |
| 0.006753 | 0.88429  | 0.041384 | 0.37223  | 0.006406 | 0.89019  | 0.019546 | 0.67353  | -0.08148 |
| -0.00645 | 0.8895   | -0.07322 | 0.11408  | -0.0854  | 0.06519  | 0.01597  | 0.73069  | 0.035688 |
| -0.03638 | 0.43285  | 0.06303  | 0.1739   | -0.00579 | 0.90062  | 0.091607 | 0.04787  | 0.107165 |
| 0.071289 | 0.12395  | 0.245289 | 7.93E-08 | 0.068017 | 0.14221  | 0.133822 | 0.00377  | -0.04397 |
| 0.026558 | 0.56699  | 0.104167 | 0.02438  | 0.08562  | 0.0645   | 0.056565 | 0.22243  | 0.045483 |
| 0.053381 | 0.24961  | -0.01467 | 0.75192  | 0.008768 | 0.85011  | 0.026773 | 0.56386  | 0.039971 |
| 0.043204 | 0.35155  | -0.05478 | 0.23737  | -0.00601 | 0.89695  | -0.01104 | 0.81186  | 0.245918 |
| -0.03088 | 0.50565  | -0.10705 | 0.02068  | -0.0457  | 0.32442  | -0.1573  | 0.00065  | -0.04918 |
| 0.099489 | 0.03159  | 0.282521 | 5.10E-10 | 0.216873 | 2.24E-06 | 0.225032 | 8.96E-07 | 0.019931 |
| -0.07903 | 0.088    | 0.187069 | 4.75E-05 | 0.059051 | 0.20273  | 0.193886 | 2.46E-05 | -0.12613 |
| -0.0326  | 0.48212  | -0.07277 | 0.11631  | -0.09493 | 0.0403   | 0.052284 | 0.25948  | 0.26768  |
| -0.10023 | 0.03034  | -0.12814 | 0.00555  | -0.01965 | 0.67193  | -0.07356 | 0.1124   | 0.129002 |
| -0.00301 | 0.94832  | -0.14923 | 0.00122  | -0.04568 | 0.32463  | -0.1258  | 0.00649  | 0.02517  |
| -0.04548 | 0.32669  | -0.10037 | 0.03011  | -0.04541 | 0.32743  | -0.06236 | 0.17849  | 0.136945 |
| 0.007897 | 0.86485  | 0.174652 | 0.00015  | 0.037424 | 0.41975  | 0.215522 | 2.60E-06 | 0.173101 |
| 0.188777 | 4.03E-05 | 0.070258 | 0.1295   | 0.005024 | 0.91377  | 0.013659 | 0.76846  | -0.05535 |
| -0.02842 | 0.54009  | 0.157021 | 0.00066  | 0.129332 | 0.00512  | 0.121965 | 0.00833  | 0.036704 |
| 0.035062 | 0.44971  | 0.258045 | 1.54E-08 | 0.206402 | 6.89E-06 | 0.220444 | 1.51E-06 | 0.238111 |
| 0.024828 | 0.59252  | 0.127261 | 0.00589  | 0.143792 | 0.00184  | 0.103913 | 0.02473  | 0.092672 |
| -0.03521 | 0.44777  | -0.05442 | 0.24051  | -0.01231 | 0.7908   | -0.06453 | 0.16386  | -0.06144 |
| 0.102583 | 0.02664  | 0.086453 | 0.06194  | 0.118451 | 0.01041  | 0.051633 | 0.26547  | -0.03284 |
| 0.105031 | 0.02321  | -0.00264 | 0.95458  | 0.031099 | 0.50259  | -0.05184 | 0.26352  | 0.039027 |
| -0.09836 | 0.03359  | -0.29878 | 4.38E-11 | -0.2773  | 1.09E-09 | -0.25536 | 2.19E-08 | 0.018884 |
| -0.02694 | 0.56142  | 0.131881 | 0.00431  | -0.0055  | 0.90557  | 0.056219 | 0.22528  | -0.07223 |
| -0.01315 | 0.7768   | -0.18803 | 4.33E-05 | -0.14754 | 0.00139  | -0.151   | 0.00106  | -0.02496 |
| 0.006077 | 0.8958   | -0.18981 | 3.65E-05 | -0.08571 | 0.06422  | -0.08842 | 0.05621  | 0.177912 |
| 0.025724 | 0.57924  | -0.13049 | 0.00474  | -0.01551 | 0.73822  | -0.07388 | 0.11082  | 0.164163 |
| -0.07786 | 0.09285  | -0.15641 | 0.00069  | -0.19793 | 1.64E-05 | -0.21582 | 2.51E-06 | -0.22115 |
| -0.07869 | 0.0894   | -0.05855 | 0.20657  | -0.09318 | 0.04415  | -0.1276  | 0.00576  | -0.05588 |
| 0.069315 | 0.13473  | 0.164583 | 0.00035  | 0.15925  | 0.00055  | 0.127089 | 0.00596  | 0.023264 |
| 0.021516 | 0.64281  | 0.016355 | 0.72445  | -0.01227 | 0.79141  | 0.032715 | 0.48065  | -0.04053 |
| 0.035128 | 0.44886  | 0.328486 | 3.27E-13 | 0.318779 | 1.72E-12 | 0.260388 | 1.12E-08 | 0.076558 |
| -0.00699 | 0.88019  | -0.03617 | 0.43551  | -0.04897 | 0.2909   | -0.07356 | 0.11237  | -0.03637 |
| 0.166883 | 0.00029  | 0.069104 | 0.13592  | 0.127678 | 0.00573  | 0.040836 | 0.37861  | 0.129038 |
| 0.108184 | 0.01936  | 0.090364 | 0.05099  | 0.241766 | 1.23E-07 | 0.066012 | 0.15437  | 0.071391 |
| 0.047228 | 0.30847  | 0.102889 | 0.02619  | 0.108726 | 0.01876  | 0.21941  | 1.69E-06 | 0.147989 |
| 0.015261 | 0.7422   | 0.18019  | 9.02E-05 | 0.105236 | 0.02294  | 0.252658 | 3.10E-08 | 0.170339 |
| 0.246564 | 6.75E-08 | 0.210583 | 4.43E-06 | 0.155942 | 0.00072  | 0.274679 | 1.58E-09 | 0.087491 |
| -0.00275 | 0.95281  | -0.007   | 0.88006  | 0.064851 | 0.16177  | -0.04605 | 0.32065  | -0.01959 |
| 0.046105 | 0.32012  | 0.012767 | 0.78319  | -0.03658 | 0.43033  | -0.04087 | 0.37821  | -0.08517 |
| -0.01518 | 0.74359  | -0.07649 | 0.09877  | -0.02612 | 0.57338  | -0.06979 | 0.13206  | 0.04316  |
| 0.015773 | 0.73389  | 0.143156 | 0.00193  | 0.163401 | 0.00039  | 0.171393 | 0.0002   | 0.079484 |
| -0.02468 | 0.59475  | 0.123554 | 0.00751  | -0.04603 | 0.32087  | 0.1004   | 0.03006  | 0.072647 |
| -0.15623 | 0.0007   | -0.118   | 0.01071  | -0.22996 | 5.07E-07 | -0.01921 | 0.67882  | -0.00566 |

|          |          |          |          |          |          |          |          |          |
|----------|----------|----------|----------|----------|----------|----------|----------|----------|
| 0.014378 | 0.75663  | 0.020822 | 0.65357  | 0.004778 | 0.91798  | -0.03577 | 0.44062  | -0.05614 |
| 0.0388   | 0.40284  | 0.065206 | 0.15947  | 0.061443 | 0.18501  | 0.157771 | 0.00062  | 0.177052 |
| 0.002131 | 0.96336  | -0.15542 | 0.00075  | -0.06142 | 0.18519  | -0.06954 | 0.13348  | 0.072218 |
| -0.12905 | 0.00522  | -0.0711  | 0.12497  | -0.14056 | 0.00233  | -0.07161 | 0.12228  | -0.06275 |
| -0.01104 | 0.81189  | -0.12982 | 0.00496  | -0.06512 | 0.16001  | -0.12301 | 0.00778  | 0.123628 |
| -0.00955 | 0.83693  | -0.05408 | 0.24341  | -0.03661 | 0.42992  | -0.07069 | 0.12714  | -0.02068 |
| -0.04189 | 0.3664   | -0.13132 | 0.00447  | -0.14264 | 0.002    | -0.05805 | 0.21051  | 0.130448 |
| -0.04334 | 0.35009  | -0.08657 | 0.06158  | -0.08031 | 0.08299  | -0.12669 | 0.00611  | 0.16138  |
| 0.006816 | 0.88321  | 0.010911 | 0.81409  | 0.040506 | 0.38247  | -0.11029 | 0.01711  | -0.18561 |
| 0.060809 | 0.18959  | -0.0235  | 0.6124   | 0.062248 | 0.17931  | 0.003443 | 0.94085  | 0.073682 |
| -0.02926 | 0.52818  | -0.18632 | 5.09E-05 | -0.16588 | 0.00032  | -0.1703  | 0.00022  | 0.084428 |
| -0.08049 | 0.08227  | -0.0302  | 0.515    | -0.18735 | 4.62E-05 | -0.02668 | 0.56525  | 0.00152  |
| -0.01127 | 0.80808  | -0.0309  | 0.50528  | -0.02722 | 0.55738  | 0.016286 | 0.72557  | -0.01009 |
| 0.027594 | 0.55196  | -0.07878 | 0.08902  | -0.07846 | 0.09036  | -0.02334 | 0.61492  | 0.01715  |
| -0.0245  | 0.59747  | -0.0547  | 0.23807  | -0.03663 | 0.42975  | 0.065206 | 0.15948  | -0.00375 |
| 0.010353 | 0.82343  | 0.009203 | 0.84276  | -0.03502 | 0.45029  | -0.05178 | 0.26408  | -0.1879  |
| -0.01795 | 0.69886  | -0.04909 | 0.28979  | -0.01728 | 0.70951  | -0.00362 | 0.93779  | 0.043172 |
| 0.085506 | 0.06486  | -0.09712 | 0.0359   | -0.05135 | 0.26809  | -0.02926 | 0.52822  | 0.003559 |
| 0.083525 | 0.07134  | -0.03222 | 0.48728  | -0.04933 | 0.28737  | -0.06596 | 0.15467  | -0.10468 |
| -0.04212 | 0.36383  | -0.13266 | 0.00408  | -0.13512 | 0.00344  | -0.07332 | 0.11357  | 0.048936 |
| 0.247465 | 6.03E-08 | 0.154013 | 0.00084  | 0.197625 | 1.69E-05 | 0.126859 | 0.00605  | 0.09789  |
| 0.044156 | 0.34103  | -0.03673 | 0.4284   | 0.019998 | 0.66643  | -0.00606 | 0.89604  | 0.089158 |
| -0.05539 | 0.23222  | -0.09711 | 0.03592  | -0.06897 | 0.1367   | -0.07488 | 0.10605  | -0.03224 |
| 0.004252 | 0.92698  | -0.00228 | 0.96085  | 0.08166  | 0.07792  | -0.00904 | 0.84544  | -0.058   |
| -0.02926 | 0.52815  | -0.09721 | 0.03573  | -0.12297 | 0.00781  | -0.07706 | 0.09625  | 0.072042 |
| 0.001153 | 0.98017  | -0.0117  | 0.80092  | -0.01473 | 0.75092  | 0.0264   | 0.5693   | 0.107358 |
| -0.10641 | 0.02146  | -0.10997 | 0.01744  | -0.10373 | 0.02499  | -0.0461  | 0.32014  | 0.106201 |
| 0.030426 | 0.51189  | -0.1376  | 0.00288  | -0.08935 | 0.05365  | -0.14624 | 0.00153  | 0.023055 |
| 0.112115 | 0.01535  | -0.02962 | 0.5232   | 0.017514 | 0.70581  | -0.03825 | 0.40952  | 0.001776 |
| -0.01579 | 0.73359  | -0.09107 | 0.0492   | -0.05683 | 0.22027  | -0.03331 | 0.47268  | -0.00312 |
| 0.152738 | 0.00093  | 0.172447 | 0.00018  | 0.11318  | 0.0144   | 0.123856 | 0.00737  | -0.04919 |
| 0.010963 | 0.81321  | -0.14331 | 0.00191  | -0.14237 | 0.00204  | -0.113   | 0.01455  | 0.067292 |
| 0.251637 | 3.54E-08 | 0.115108 | 0.01281  | 0.185875 | 5.32E-05 | 0.201822 | 1.11E-05 | 0.095641 |
| 0.021896 | 0.63696  | -0.16291 | 0.00041  | -0.10834 | 0.01919  | -0.11077 | 0.01664  | 0.132339 |
| -0.04266 | 0.35762  | -0.1417  | 0.00214  | -0.1662  | 0.00031  | -0.1941  | 2.40E-05 | 0.011932 |
| 0.078954 | 0.08832  | -0.03276 | 0.48002  | -0.04007 | 0.38765  | 0.006061 | 0.89607  | -0.10003 |
| -0.00379 | 0.93483  | -0.03584 | 0.43971  | -0.04663 | 0.31462  | -0.05825 | 0.20893  | -0.07377 |
| -0.0034  | 0.94165  | 0.086496 | 0.0618   | 0.219311 | 1.71E-06 | 0.155129 | 0.00077  | 0.106936 |
| -0.04456 | 0.33666  | -0.15608 | 0.00071  | -0.14128 | 0.00221  | -0.16168 | 0.00045  | -0.00594 |
| -0.04374 | 0.3456   | -0.13567 | 0.00331  | -0.11782 | 0.01083  | -0.06897 | 0.13668  | 0.065827 |
| 0.055743 | 0.22924  | -0.01011 | 0.82757  | -0.00132 | 0.97727  | -0.03351 | 0.46999  | -0.06792 |
| -0.00437 | 0.92493  | 0.093567 | 0.04328  | 0.019598 | 0.67272  | 0.079247 | 0.08715  | 0.03058  |
| 0.169792 | 0.00023  | -0.0425  | 0.35947  | 0.085961 | 0.06344  | 0.086514 | 0.06175  | 0.256599 |
| -0.03857 | 0.40561  | -0.07461 | 0.10736  | -0.0933  | 0.04389  | -0.1806  | 8.68E-05 | -0.122   |
| -0.03814 | 0.41089  | 0.046668 | 0.31425  | 0.032692 | 0.48094  | 0.029322 | 0.52732  | 0.126075 |

|          |         |          |          |          |          |          |          |          |
|----------|---------|----------|----------|----------|----------|----------|----------|----------|
| 0.026542 | 0.56722 | -0.02641 | 0.56921  | 0.002397 | 0.95879  | 0.039192 | 0.39812  | 0.212246 |
| 0.031885 | 0.49185 | 0.019767 | 0.67006  | -0.01139 | 0.80615  | 0.079597 | 0.08576  | 0.015069 |
| -0.01535 | 0.74076 | -0.02508 | 0.58874  | -0.05968 | 0.19799  | 0.006072 | 0.89588  | -0.10733 |
| -0.07904 | 0.08797 | 0.037991 | 0.41274  | -0.10333 | 0.02556  | 0.056402 | 0.22377  | 0.002182 |
| 0.038398 | 0.40774 | 0.033366 | 0.47195  | 0.021683 | 0.64023  | 0.00045  | 0.99226  | -0.09537 |
| 0.021833 | 0.63792 | -0.07715 | 0.09587  | -0.04382 | 0.34474  | -0.06686 | 0.14913  | 0.067682 |
| -0.09434 | 0.04157 | 0.031554 | 0.49636  | -0.11771 | 0.0109   | -0.0622  | 0.17964  | -0.04305 |
| -0.01808 | 0.69675 | 0.123563 | 0.00751  | 0.151062 | 0.00106  | 0.11675  | 0.01157  | 0.160231 |
| -0.1239  | 0.00735 | 0.020377 | 0.6605   | -0.01296 | 0.77999  | 0.099253 | 0.032    | 0.127381 |
| -0.0228  | 0.62306 | -0.04223 | 0.36254  | -0.06044 | 0.19228  | 0.000759 | 0.98695  | 0.155392 |
| -0.00459 | 0.92118 | 0.059121 | 0.2022   | -0.02784 | 0.54848  | -0.02525 | 0.58629  | -0.05982 |
| 0.042833 | 0.35571 | -0.05117 | 0.26976  | 0.029386 | 0.52643  | -0.03015 | 0.51575  | 0.00443  |
| 0.111774 | 0.01567 | -0.04639 | 0.31714  | 0.010697 | 0.81766  | 0.020935 | 0.65181  | 0.177821 |
| 0.012618 | 0.78565 | -0.09549 | 0.03913  | 0.022339 | 0.63015  | -0.10923 | 0.01821  | 0.073114 |
| 0.077399 | 0.09479 | 0.006676 | 0.88559  | 0.00918  | 0.84316  | -0.09877 | 0.03284  | -0.04804 |
| -0.00213 | 0.96335 | -0.0859  | 0.06363  | -0.06112 | 0.18732  | -0.08765 | 0.05839  | -0.07768 |
| -0.02508 | 0.58875 | -0.00759 | 0.86997  | -0.15759 | 0.00063  | -0.03414 | 0.46177  | -0.15507 |
| -0.00805 | 0.86219 | -0.06841 | 0.1399   | 0.003045 | 0.94767  | -0.12    | 0.00944  | 0.02785  |
| -0.03817 | 0.41054 | 0.035866 | 0.43938  | -0.04969 | 0.28393  | 0.077582 | 0.09401  | 0.15781  |
| 0.030994 | 0.50404 | 0.02544  | 0.58344  | -0.01318 | 0.7763   | 0.01247  | 0.7881   | -0.03361 |
| 0.011936 | 0.79698 | 0.02782  | 0.5487   | 0.024514 | 0.59722  | 0.012856 | 0.78171  | -0.00447 |
| -0.05814 | 0.20977 | 0.07281  | 0.11611  | -0.01328 | 0.77463  | 0.055633 | 0.23016  | -0.11152 |
| 0.036627 | 0.42973 | 0.038064 | 0.41184  | 0.060818 | 0.18952  | 0.004315 | 0.9259   | 0.059763 |
| 0.075184 | 0.10466 | -0.06139 | 0.18538  | -0.08201 | 0.07665  | -0.03274 | 0.48025  | 0.097696 |
| 0.046848 | 0.31238 | 0.007321 | 0.87463  | -0.00713 | 0.87789  | 0.006078 | 0.89577  | 0.028526 |
| 0.092605 | 0.04548 | 0.088681 | 0.05549  | 0.159342 | 0.00055  | 0.153386 | 0.00088  | 0.228603 |
| -0.0633  | 0.17208 | 0.066892 | 0.14894  | -0.02263 | 0.62562  | 0.153218 | 0.00089  | 0.204564 |
| -0.08391 | 0.07005 | -0.09414 | 0.04201  | -0.24381 | 9.53E-08 | -0.13172 | 0.00435  | -0.20269 |
| 0.006722 | 0.88482 | 0.061226 | 0.18657  | -0.1312  | 0.00451  | 0.068107 | 0.14168  | 0.044568 |
| -0.10957 | 0.01785 | -0.02306 | 0.61907  | -0.08475 | 0.06727  | 0.007518 | 0.87128  | 0.069849 |
| 0.01859  | 0.68865 | 0.029083 | 0.5307   | -0.08006 | 0.08393  | 0.086466 | 0.0619   | -0.03197 |
| -0.02697 | 0.56103 | 0.042135 | 0.36361  | -0.05904 | 0.20284  | 0.023966 | 0.60544  | -0.05598 |
| 0.154404 | 0.00081 | 0.016839 | 0.71664  | 0.009795 | 0.83281  | 0.10783  | 0.01977  | 0.199381 |
| -0.05684 | 0.22022 | 0.072547 | 0.11744  | 0.061803 | 0.18244  | 0.055605 | 0.2304   | 0.085773 |
| 0.110777 | 0.01663 | 0.202924 | 9.89E-06 | 0.135518 | 0.00334  | 0.183819 | 6.45E-05 | 0.050201 |
| 0.035482 | 0.4443  | -0.13811 | 0.00278  | -0.11189 | 0.01556  | -0.10762 | 0.02001  | 0.187248 |
| 0.003525 | 0.93944 | -0.03406 | 0.46275  | 0.021516 | 0.64281  | -0.00472 | 0.91898  | 0.069978 |
| -0.02131 | 0.64602 | -0.07523 | 0.10445  | -0.06067 | 0.19059  | -0.05761 | 0.21402  | 0.122374 |
| 0.020329 | 0.66125 | -0.03642 | 0.43236  | -0.06977 | 0.13217  | -0.10681 | 0.02097  | -0.06545 |
| -0.06036 | 0.19292 | -0.11852 | 0.01036  | -0.15549 | 0.00075  | -0.1015  | 0.02829  | -0.04685 |
| 0.176379 | 0.00013 | 0.105847 | 0.02216  | 0.095671 | 0.03877  | 0.091036 | 0.04929  | 0.025739 |
| 0.038031 | 0.41225 | -0.02333 | 0.61498  | -0.0143  | 0.75786  | -0.01664 | 0.71981  | 0.006309 |
| 0.061333 | 0.1858  | -0.06388 | 0.16815  | 0.030675 | 0.50844  | -0.02518 | 0.58725  | 0.109503 |
| 0.035851 | 0.43957 | -0.02676 | 0.56403  | -0.0046  | 0.92108  | 0.042883 | 0.35514  | 0.092327 |
| -0.04504 | 0.33149 | -0.20778 | 5.97E-06 | -0.2399  | 1.54E-07 | -0.13351 | 0.00385  | 0.01676  |

|          |          |          |          |          |          |          |          |          |
|----------|----------|----------|----------|----------|----------|----------|----------|----------|
| 0.04239  | 0.36071  | -0.08502 | 0.0664   | 0.039558 | 0.39371  | -0.11921 | 0.00993  | 0.022831 |
| -0.07407 | 0.10993  | 0.102062 | 0.02742  | -0.00429 | 0.92634  | 0.118524 | 0.01036  | -0.05524 |
| 0.063719 | 0.16923  | -0.03307 | 0.47591  | 0.021636 | 0.64095  | -0.00577 | 0.90111  | 0.042324 |
| 0.047862 | 0.30201  | 0.039968 | 0.38882  | 0.012709 | 0.78416  | 0.025654 | 0.58027  | 0.063225 |
| -0.00074 | 0.98729  | -0.02572 | 0.57923  | 0.057703 | 0.21326  | 0.072615 | 0.1171   | 0.2005   |
| 0.035525 | 0.44374  | 0.115288 | 0.01267  | 0.060867 | 0.18917  | 0.083505 | 0.07141  | 0.017339 |
| -0.08079 | 0.08114  | -0.05797 | 0.21115  | -0.114   | 0.0137   | -0.05596 | 0.22743  | -0.01817 |
| 0.096996 | 0.03613  | 0.073892 | 0.11077  | 0.11721  | 0.01125  | 0.023649 | 0.61022  | 0.078099 |
| -0.01965 | 0.67197  | -0.04783 | 0.30233  | -0.03632 | 0.43358  | -0.0408  | 0.37897  | -0.0985  |
| -0.04316 | 0.3521   | 0.030275 | 0.51398  | -0.03078 | 0.50704  | 0.08424  | 0.06894  | 0.02727  |
| -0.02993 | 0.51881  | -0.16325 | 0.0004   | -0.11844 | 0.01042  | -0.11208 | 0.01538  | -0.07766 |
| -0.01909 | 0.68065  | 0.056357 | 0.22414  | -0.05017 | 0.27923  | -0.05004 | 0.28049  | -0.32227 |
| 0.030584 | 0.5097   | 0.126311 | 0.00627  | 0.023697 | 0.60949  | -0.00632 | 0.89164  | -0.01519 |
| 0.010961 | 0.81325  | -0.07857 | 0.08989  | 0.03813  | 0.41102  | -0.05064 | 0.27476  | 0.121758 |
| -0.02104 | 0.65022  | 0.063283 | 0.17217  | 0.050897 | 0.27235  | 0.067143 | 0.14742  | 0.096354 |
| -0.02275 | 0.62382  | 0.070571 | 0.12779  | 0.009626 | 0.83564  | 0.101593 | 0.02815  | 0.048911 |
| -0.02602 | 0.57488  | -0.11373 | 0.01393  | -0.20706 | 6.44E-06 | -0.0957  | 0.03871  | 0.024896 |
| 0.046294 | 0.31815  | 0.038257 | 0.40947  | 0.138035 | 0.0028   | 0.032848 | 0.47886  | 0.218075 |
| -0.09488 | 0.0404   | -0.08856 | 0.05582  | -0.11483 | 0.01302  | 0.01989  | 0.66813  | 0.182388 |
| 0.006624 | 0.88648  | -0.03015 | 0.51577  | 0.022721 | 0.6243   | -0.04206 | 0.36447  | 0.090872 |
| 0.253099 | 2.93E-08 | 0.061369 | 0.18554  | 0.042372 | 0.36092  | 0.087434 | 0.05902  | 0.034857 |
| 0.046766 | 0.31323  | -0.00407 | 0.93003  | 0.003414 | 0.94135  | -0.009   | 0.84624  | 0.073472 |
| 0.029332 | 0.52719  | 0.009667 | 0.83495  | -0.14767 | 0.00137  | 0.027068 | 0.55957  | -0.01399 |
| 0.075766 | 0.10199  | 0.056749 | 0.22093  | 0.106315 | 0.02157  | 0.043481 | 0.34847  | 0.037805 |
| 0.05362  | 0.24749  | -0.00543 | 0.90686  | 0.065327 | 0.1587   | -0.06426 | 0.16565  | 0.149186 |
| 0.010427 | 0.82219  | -0.01008 | 0.828    | 0.116431 | 0.0118   | -0.03372 | 0.46725  | 0.090548 |
| 0.056114 | 0.22615  | -0.05235 | 0.25888  | 0.007455 | 0.87236  | -0.01365 | 0.76868  | 0.032942 |
| 0.031441 | 0.4979   | -0.08269 | 0.07421  | 0.04001  | 0.38833  | -0.07276 | 0.11635  | 0.281969 |
| 0.110559 | 0.01684  | 0.208404 | 5.58E-06 | 0.278044 | 9.75E-10 | 0.255515 | 2.14E-08 | 0.241219 |
| 0.127197 | 0.00591  | 0.25919  | 1.32E-08 | 0.295152 | 7.68E-11 | 0.285124 | 3.48E-10 | 0.217721 |
| 0.158724 | 0.00058  | 0.10868  | 0.01881  | 0.088259 | 0.05666  | 0.110513 | 0.01689  | -0.04465 |
| -0.03599 | 0.43779  | 0.001602 | 0.97246  | 0.102682 | 0.02649  | -0.00081 | 0.98615  | 0.093032 |
| 0.0744   | 0.10834  | -0.09033 | 0.05109  | 0.014975 | 0.74687  | -0.14423 | 0.00178  | -0.02126 |
| 0.406298 | 5.46E-20 | 0.068033 | 0.14211  | 0.171072 | 0.0002   | -0.01595 | 0.73107  | -0.01549 |
| 0.004083 | 0.92988  | 0.005011 | 0.914    | -0.03687 | 0.42662  | 0.022398 | 0.62925  | 0.031179 |
| -0.02515 | 0.58775  | 0.034285 | 0.45983  | 0.054831 | 0.23696  | 0.097908 | 0.03441  | -0.05719 |
| -0.0431  | 0.35275  | -0.00693 | 0.88131  | -0.08806 | 0.05721  | -0.11369 | 0.01397  | -0.17824 |
| 0.054581 | 0.23911  | -0.123   | 0.00779  | -0.03198 | 0.49056  | -0.0968  | 0.03652  | 0.137185 |
| 0.166729 | 0.0003   | -0.01139 | 0.806    | 0.021565 | 0.64205  | 0.038596 | 0.40533  | 0.062583 |
| 0.041842 | 0.36695  | -0.05481 | 0.23713  | 0.010099 | 0.82769  | -0.12981 | 0.00496  | 0.032516 |
| -0.01711 | 0.71223  | -0.0401  | 0.38726  | 0.038675 | 0.40436  | -0.05914 | 0.20208  | 0.029411 |
| 0.01707  | 0.71292  | 0.114494 | 0.0133   | -0.0518  | 0.26388  | 0.107107 | 0.02061  | 0.017393 |
| 0.024348 | 0.5997   | -0.06178 | 0.18258  | -0.02754 | 0.5528   | -0.05604 | 0.22679  | -0.00939 |
| -0.10685 | 0.02092  | -0.03795 | 0.41323  | 0.052333 | 0.25903  | -0.07143 | 0.12322  | 0.039694 |
| -0.0877  | 0.05825  | -0.00543 | 0.90687  | -0.09682 | 0.03647  | -0.04608 | 0.32044  | -0.16004 |

|          |          |          |          |          |          |          |          |          |
|----------|----------|----------|----------|----------|----------|----------|----------|----------|
| 0.049638 | 0.28441  | 0.046878 | 0.31207  | 0.064297 | 0.16539  | 0.037208 | 0.42244  | 0.016406 |
| -0.00926 | 0.84185  | -0.09287 | 0.04487  | -0.09889 | 0.03264  | -0.15575 | 0.00073  | -0.077   |
| 0.223278 | 1.09E-06 | -0.03667 | 0.42919  | 0.023154 | 0.61772  | 0.007664 | 0.8688   | 0.047782 |
| 0.018801 | 0.68531  | -0.04348 | 0.34853  | -0.07459 | 0.10743  | -0.13944 | 0.00253  | -0.09962 |
| 0.02616  | 0.57281  | 0.132436 | 0.00414  | -0.01481 | 0.74949  | 0.095919 | 0.03826  | -0.09943 |
| 0.055652 | 0.23     | -0.0203  | 0.66172  | -0.08003 | 0.08406  | 0.003457 | 0.9406   | 0.027996 |
| 0.047102 | 0.30977  | -0.06712 | 0.14754  | -0.01496 | 0.74715  | -0.03845 | 0.40713  | 0.240044 |
| -0.00051 | 0.99116  | 0.097167 | 0.0358   | 0.01178  | 0.79958  | 0.02986  | 0.51977  | -0.0239  |
| 0.078391 | 0.09063  | 0.112148 | 0.01532  | 0.136581 | 0.0031   | 0.016316 | 0.72508  | -0.04749 |
| 0.060397 | 0.19261  | 0.001705 | 0.97068  | 0.092663 | 0.04535  | 0.021606 | 0.64142  | 0.126731 |
| -0.041   | 0.37667  | -0.0498  | 0.28279  | -0.0624  | 0.17828  | -0.03476 | 0.45366  | -0.11854 |
| -0.04475 | 0.33459  | -0.01177 | 0.79968  | 0.003316 | 0.94302  | -0.05653 | 0.22269  | -0.15642 |
| 0.000318 | 0.99453  | -0.1391  | 0.00259  | -0.07709 | 0.09612  | -0.11576 | 0.0123   | 0.014564 |
| 0.088629 | 0.05563  | -0.03107 | 0.50297  | 0.032117 | 0.4887   | -0.0175  | 0.70608  | 0.002867 |
| 0.130206 | 0.00483  | -0.0022  | 0.96221  | 0.013729 | 0.76731  | -0.02755 | 0.55254  | -0.03066 |
| -0.10867 | 0.01883  | -0.08545 | 0.06503  | -0.13638 | 0.00315  | 0.006568 | 0.88743  | 0.151777 |
| -0.06822 | 0.14102  | 0.007096 | 0.87845  | -0.03309 | 0.47568  | 0.005416 | 0.90708  | -0.07007 |
| -0.12991 | 0.00493  | -0.1441  | 0.0018   | -0.10627 | 0.02162  | -0.08133 | 0.07913  | -0.07407 |
| 0.087567 | 0.05864  | 0.009525 | 0.83735  | -0.00817 | 0.86022  | 0.02683  | 0.56302  | 0.089313 |
| -0.00193 | 0.96682  | -0.02378 | 0.60821  | -0.04414 | 0.34122  | 0.052783 | 0.25496  | 0.117605 |
| 0.006653 | 0.88598  | -0.00195 | 0.96649  | -0.02568 | 0.57981  | 0.049778 | 0.28305  | 0.178852 |
| 0.058506 | 0.20694  | -0.07936 | 0.08671  | -0.0585  | 0.20699  | -0.03683 | 0.42722  | 0.144882 |
| 0.044616 | 0.33602  | -0.01976 | 0.67016  | 0.021916 | 0.63665  | -0.15961 | 0.00054  | -0.1196  |
| 0.090581 | 0.05044  | 0.101863 | 0.02773  | 0.050576 | 0.27539  | 0.143848 | 0.00183  | 0.220486 |
| 0.041617 | 0.36954  | -0.00823 | 0.85925  | -0.0542  | 0.24238  | 0.013756 | 0.76686  | -0.02731 |
| 0.03973  | 0.39166  | -0.12406 | 0.00727  | -0.0662  | 0.15318  | -0.08843 | 0.05619  | 0.074394 |
| -0.03706 | 0.42427  | -0.02755 | 0.55258  | -0.09745 | 0.03527  | 0.017499 | 0.70604  | 0.075236 |
| -0.16706 | 0.00029  | -0.18508 | 5.73E-05 | -0.26437 | 6.58E-09 | -0.273   | 2.00E-09 | -0.17719 |
| 0.051426 | 0.2674   | -0.05451 | 0.23971  | -0.04339 | 0.34944  | -0.01357 | 0.76987  | -0.00362 |
| 0.033759 | 0.46674  | 0.033151 | 0.47482  | 0.00773  | 0.86768  | 0.034465 | 0.45747  | 0.05238  |
| -0.02199 | 0.63556  | -0.14181 | 0.00213  | -0.13568 | 0.0033   | -0.07458 | 0.10746  | 0.092584 |
| -0.02692 | 0.56179  | -0.13404 | 0.00371  | -0.1341  | 0.00369  | -0.11756 | 0.01101  | -0.06555 |
| 0.066109 | 0.15376  | -0.03264 | 0.48163  | -0.06078 | 0.18982  | -0.01603 | 0.72969  | -0.01894 |
| 0.029791 | 0.52074  | -0.14194 | 0.00211  | -0.09742 | 0.03532  | -0.09061 | 0.05035  | 0.051436 |
| -0.09876 | 0.03287  | -0.1603  | 0.00051  | -0.1012  | 0.02876  | -0.18111 | 8.29E-05 | -0.14632 |
| 0.029739 | 0.52146  | -0.02645 | 0.56862  | 0.02586  | 0.57723  | 0.015496 | 0.73839  | -0.06622 |
| 0.043257 | 0.35097  | 0.046153 | 0.31963  | 0.089993 | 0.05196  | -0.01621 | 0.7268   | -0.06124 |
| 0.083401 | 0.07176  | 0.004812 | 0.9174   | 0.119009 | 0.01005  | 0.038308 | 0.40884  | 0.170587 |
| 0.008818 | 0.84927  | 0.003791 | 0.93489  | 0.035979 | 0.43793  | -0.0361  | 0.43645  | -0.00155 |
| -0.0468  | 0.31289  | -0.05149 | 0.26682  | 0.006136 | 0.89479  | 0.055223 | 0.23362  | 0.086278 |
| -0.02053 | 0.65804  | -0.1081  | 0.01946  | -0.078   | 0.09223  | -0.07382 | 0.11112  | 0.191319 |
| -0.01887 | 0.68426  | -0.10698 | 0.02076  | -0.04521 | 0.32965  | -0.07129 | 0.12396  | 0.179293 |
| 0.010623 | 0.8189   | 0.053873 | 0.24526  | 0.039463 | 0.39485  | 0.08668  | 0.06125  | 0.11574  |
| 0.063735 | 0.16912  | 0.074347 | 0.10859  | -0.11533 | 0.01264  | -0.02066 | 0.65606  | -0.16117 |
| 0.016312 | 0.72515  | 0.000924 | 0.98412  | -0.05299 | 0.25308  | 0.042441 | 0.36014  | 0.031372 |

|          |         |          |          |          |          |           |          |          |
|----------|---------|----------|----------|----------|----------|-----------|----------|----------|
| 0.018741 | 0.68625 | -0.04134 | 0.37274  | 0.08474  | 0.06731  | 0.015475  | 0.73873  | 0.226401 |
| 0.03934  | 0.39632 | -0.09901 | 0.03242  | -0.06394 | 0.16777  | -0.10842  | 0.0191   | -0.05572 |
| -0.03441 | 0.45824 | -0.20398 | 8.87E-06 | -0.26316 | 7.75E-09 | -0.15953  | 0.00054  | 0.029865 |
| 0.004184 | 0.92815 | -0.03607 | 0.43677  | -0.12449 | 0.00707  | -0.03387  | 0.46526  | 0.024973 |
| 0.138287 | 0.00275 | 0.262678 | 8.27E-09 | 0.336443 | 8.02E-14 | 0.125014  | 0.00683  | 0.077372 |
| 0.014548 | 0.75386 | -0.05508 | 0.23486  | -0.05375 | 0.24635  | -0.07406  | 0.10995  | 0.000987 |
| 0.010364 | 0.82325 | -0.12889 | 0.00528  | -0.13813 | 0.00278  | -0.12513  | 0.00678  | 0.046809 |
| 0.087437 | 0.05901 | 0.071273 | 0.12404  | 0.026943 | 0.56138  | 0.096476  | 0.03715  | 0.065308 |
| -0.07257 | 0.11731 | -0.11318 | 0.0144   | -0.07794 | 0.09251  | -0.08368  | 0.07082  | -0.03517 |
| -0.03748 | 0.41901 | 0.067938 | 0.14267  | -0.12648 | 0.0062   | 0.06024   | 0.19378  | -0.07697 |
| 0.044799 | 0.33404 | 0.077707 | 0.09349  | -0.00709 | 0.87863  | 0.053113  | 0.252    | 0.009934 |
| -0.0523  | 0.25931 | -0.11322 | 0.01437  | -0.07304 | 0.11498  | 0.013063  | 0.77829  | 0.092259 |
| 0.014899 | 0.74811 | 0.03648  | 0.43158  | 0.048476 | 0.29584  | 0.022913  | 0.62139  | 0.048137 |
| -0.01565 | 0.7358  | -0.02668 | 0.56523  | -0.03763 | 0.41723  | -0.01074  | 0.81702  | 0.134309 |
| 0.00061  | 0.98952 | 0.065796 | 0.15572  | -0.0311  | 0.50258  | 0.010873  | 0.81472  | -0.10386 |
| -0.01058 | 0.81967 | 0.030585 | 0.50969  | 0.031195 | 0.50128  | -0.0059   | 0.89889  | -0.11912 |
| 0.000138 | 0.99763 | -0.00824 | 0.85903  | -0.05652 | 0.22276  | -0.01204  | 0.79531  | -0.03508 |
| -0.0271  | 0.55915 | 0.076934 | 0.0968   | -0.00031 | 0.9946   | 0.071378  | 0.12348  | -0.11796 |
| 0.043891 | 0.34394 | -0.09203 | 0.04685  | -0.11652 | 0.01174  | -0.08935  | 0.05367  | 0.086379 |
| 0.086549 | 0.06164 | 0.204426 | 8.47E-06 | 0.367654 | 2.15E-16 | 0.216605  | 2.31E-06 | 0.252738 |
| 0.098641 | 0.03308 | 0.025814 | 0.57791  | 0.014681 | 0.75168  | 0.081646  | 0.07797  | 0.111826 |
| 0.017195 | 0.71091 | -0.07867 | 0.08947  | -0.06113 | 0.18725  | -0.00952  | 0.83745  | 0.054834 |
| 0.102696 | 0.02647 | 0.002939 | 0.94949  | 0.083081 | 0.07286  | 0.056494  | 0.22302  | 0.044314 |
| -0.05028 | 0.27825 | -0.17839 | 0.00011  | -0.21975 | 1.63E-06 | -0.20638  | 6.91E-06 | -0.0302  |
| 0.00198  | 0.96596 | -0.12865 | 0.00536  | -0.05886 | 0.20423  | -0.04616  | 0.31954  | 0.033444 |
| -0.06729 | 0.14655 | -0.05237 | 0.2587   | -0.07065 | 0.12738  | -0.08065  | 0.08168  | 0.00299  |
| -0.00747 | 0.87211 | -0.12253 | 0.00803  | -0.08423 | 0.06898  | -0.12871  | 0.00534  | -0.01715 |
| 0.104945 | 0.02333 | -0.07017 | 0.12998  | -0.02578 | 0.57844  | -0.05303  | 0.2527   | 0.121049 |
| -0.08564 | 0.06444 | -0.1225  | 0.00804  | -0.0794  | 0.08654  | -0.16509  | 0.00034  | -0.06162 |
| 0.060954 | 0.18854 | 0.123019 | 0.00778  | -0.01125 | 0.80843  | 0.113903  | 0.01378  | 0.011473 |
| 0.045586 | 0.32561 | 0.105076 | 0.02315  | 0.108819 | 0.01866  | 0.075741  | 0.1021   | 0.065582 |
| 0.116999 | 0.0114  | 0.026908 | 0.56189  | 0.063433 | 0.17116  | 0.044563  | 0.33659  | 0.066879 |
| -0.00022 | 0.99624 | -0.08878 | 0.05521  | -0.06177 | 0.18265  | -0.06951  | 0.13364  | 0.086306 |
| 0.046628 | 0.31466 | 0.112706 | 0.01482  | 0.096255 | 0.03759  | 0.122121  | 0.00824  | 0.217806 |
| 0.068811 | 0.1376  | 0.154131 | 0.00083  | 0.196906 | 1.82E-05 | 0.262622  | 8.34E-09 | 0.312216 |
| 0.034772 | 0.45347 | 0.197136 | 1.78E-05 | 0.132879 | 0.00402  | 0.169266  | 0.00024  | 0.107782 |
| 0.006607 | 0.88676 | 0.099288 | 0.03194  | 0.01743  | 0.70716  | 0.076511  | 0.09866  | 0.052632 |
| 0.016482 | 0.72241 | -0.08562 | 0.06451  | -0.09526 | 0.03962  | -0.05526  | 0.23328  | 0.085505 |
| 0.011087 | 0.81114 | 0.179386 | 9.71E-05 | 0.053469 | 0.24882  | 0.199011  | 1.47E-05 | 0.172694 |
| 0.029912 | 0.51905 | 0.005742 | 0.90151  | -0.13064 | 0.00469  | -0.09889  | 0.03264  | -0.28953 |
| -0.11678 | 0.01155 | -0.03963 | 0.39283  | -0.09639 | 0.03732  | -1.29E-05 | 0.99978  | 0.020348 |
| 0.036397 | 0.43263 | 0.31026  | 7.04E-12 | 0.362401 | 6.11E-16 | 0.267215  | 4.46E-09 | 0.367518 |
| 0.035022 | 0.45022 | -0.07788 | 0.09274  | 0.094795 | 0.04059  | -0.1065   | 0.02134  | 0.093412 |
| 0.056183 | 0.22558 | 0.132548 | 0.00411  | -0.01726 | 0.70985  | 0.072778  | 0.11627  | -0.1559  |
| -0.02647 | 0.56827 | -0.15674 | 0.00068  | -0.06051 | 0.1918   | -0.12822  | 0.00552  | 0.032617 |

|          |          |          |          |          |          |          |          |          |
|----------|----------|----------|----------|----------|----------|----------|----------|----------|
| 0.05422  | 0.24223  | -0.03435 | 0.45897  | -0.01333 | 0.77381  | -0.04445 | 0.33784  | -0.0102  |
| -0.00666 | 0.8859   | 0.048804 | 0.29258  | -0.07142 | 0.12324  | 0.085289 | 0.06555  | -0.08293 |
| 0.052795 | 0.25485  | -0.00465 | 0.92017  | -0.03963 | 0.39281  | 0.065931 | 0.15488  | -0.00868 |
| 0.045205 | 0.32968  | 0.047759 | 0.30306  | -0.00775 | 0.86732  | 0.018296 | 0.69333  | 0.016507 |
| 0.07931  | 0.08689  | 0.015784 | 0.73371  | -0.01685 | 0.71644  | -0.0059  | 0.89886  | -0.02877 |
| -0.03205 | 0.48968  | -0.12541 | 0.00666  | 0.035114 | 0.44904  | -0.14025 | 0.00238  | 0.086375 |
| -0.02243 | 0.62879  | -0.03069 | 0.50822  | -0.07507 | 0.10517  | -0.16418 | 0.00037  | -0.11654 |
| 0.013475 | 0.77149  | -0.0726  | 0.11716  | -0.00777 | 0.86693  | -0.09769 | 0.03481  | -0.09274 |
| 0.093238 | 0.04402  | -0.03144 | 0.49792  | -0.17591 | 0.00013  | -0.07748 | 0.09445  | -0.15976 |
| 0.049568 | 0.28508  | -0.05054 | 0.27576  | 0.022334 | 0.63023  | 0.023092 | 0.61866  | 0.231864 |
| 0.091313 | 0.0486   | 0.090156 | 0.05153  | 0.02957  | 0.52384  | 0.127984 | 0.00561  | 0.155254 |
| 0.047672 | 0.30394  | 0.181733 | 7.83E-05 | 0.163806 | 0.00038  | 0.090828 | 0.04981  | 0.029821 |
| -0.05809 | 0.21019  | -0.15549 | 0.00075  | -0.08388 | 0.07015  | -0.01836 | 0.69237  | 0.176371 |
| -0.11655 | 0.01172  | 0.044668 | 0.33545  | -0.09827 | 0.03374  | -0.03172 | 0.49412  | -0.093   |
| 0.06425  | 0.1657   | -0.06763 | 0.14451  | -0.03545 | 0.44468  | 0.004613 | 0.92081  | 0.079933 |
| -0.02186 | 0.63748  | -0.18248 | 7.30E-05 | -0.19328 | 2.61E-05 | -0.18269 | 7.16E-05 | -0.01769 |
| -0.0265  | 0.56777  | 0.1981   | 1.62E-05 | 0.232739 | 3.66E-07 | 0.178319 | 0.00011  | 0.003166 |
| 0.098852 | 0.0327   | 0.343146 | 2.38E-14 | 0.241918 | 1.21E-07 | 0.263298 | 7.61E-09 | -0.00691 |
| 0.0322   | 0.48758  | -0.00358 | 0.93855  | -0.00948 | 0.83814  | -0.06141 | 0.18525  | -0.13558 |
| 0.002946 | 0.94937  | -0.02286 | 0.62221  | -0.01568 | 0.73538  | -0.00695 | 0.88097  | -0.04151 |
| 0.005358 | 0.90806  | -0.07208 | 0.1198   | 0.053804 | 0.24587  | -0.02949 | 0.52498  | 0.208178 |
| 0.079357 | 0.08671  | -0.08538 | 0.06524  | 0.015676 | 0.73546  | -0.11139 | 0.01603  | 0.09106  |
| -0.08889 | 0.05492  | 0.011065 | 0.8115   | -0.04866 | 0.29399  | -0.10242 | 0.02689  | -0.20866 |
| 0.088356 | 0.05639  | 0.228141 | 6.27E-07 | 0.170719 | 0.00021  | 0.279513 | 7.89E-10 | 0.296839 |
| 0.072918 | 0.11557  | 0.108364 | 0.01916  | 0.117709 | 0.0109   | 0.127765 | 0.00569  | 0.239415 |
| -0.05598 | 0.22724  | -0.22874 | 5.84E-07 | -0.1506  | 0.0011   | -0.102   | 0.02752  | 0.149901 |
| 0.128627 | 0.00537  | 0.196555 | 1.89E-05 | 0.081576 | 0.07822  | 0.146156 | 0.00154  | -0.10577 |
| 0.022035 | 0.63482  | 0.141713 | 0.00214  | 0.185982 | 5.26E-05 | 0.113945 | 0.01375  | 0.096194 |
| -0.02353 | 0.61206  | 0.014383 | 0.75655  | 0.008834 | 0.849    | 0.053567 | 0.24796  | 0.00442  |
| 0.020224 | 0.66289  | 0.129403 | 0.0051   | 0.213784 | 3.14E-06 | 0.338424 | 5.62E-14 | 0.110944 |
| -0.04715 | 0.30923  | -0.03718 | 0.42277  | 0.041452 | 0.37145  | 0.126818 | 0.00606  | 0.007637 |
| 0.110084 | 0.01732  | 0.170175 | 0.00022  | 0.169319 | 0.00024  | 0.167301 | 0.00028  | 0.135595 |
| -0.1199  | 0.0095   | -0.11932 | 0.00986  | -0.12554 | 0.0066   | 0.008698 | 0.85129  | -0.08949 |
| -0.09436 | 0.04152  | 0.028142 | 0.54408  | -0.06819 | 0.1412   | 0.117302 | 0.01118  | 0.030421 |
| 0.050676 | 0.27444  | 0.240549 | 1.43E-07 | 0.306099 | 1.38E-11 | 0.154656 | 0.0008   | -0.00157 |
| -0.08243 | 0.07515  | -0.06862 | 0.13872  | 0.082331 | 0.0755   | -0.05687 | 0.21996  | 0.143341 |
| 0.077018 | 0.09644  | 0.078333 | 0.09086  | 0.198345 | 1.58E-05 | 0.04647  | 0.31631  | 0.06485  |
| 0.418411 | 3.23E-21 | 0.227706 | 6.59E-07 | 0.294231 | 8.85E-11 | 0.28079  | 6.56E-10 | 0.036056 |
| 0.168334 | 0.00026  | 0.195625 | 2.07E-05 | 0.329443 | 2.77E-13 | 0.26761  | 4.23E-09 | 0.300124 |
| -0.00286 | 0.95092  | 0.08927  | 0.05388  | 0.03734  | 0.4208   | 0.071151 | 0.12468  | -0.13377 |
| 0.070196 | 0.12984  | 0.20325  | 9.56E-06 | 0.074181 | 0.10938  | 0.151877 | 0.00099  | 0.007334 |
| -0.09176 | 0.04751  | -0.10554 | 0.02255  | -0.2073  | 6.27E-06 | -0.18206 | 7.60E-05 | -0.11094 |
| 0.020697 | 0.65552  | 0.062275 | 0.17912  | -0.00185 | 0.96822  | 0.059442 | 0.19975  | -0.01918 |
| -0.08123 | 0.07951  | -0.12733 | 0.00586  | 0.00124  | 0.97867  | 0.007625 | 0.86946  | 0.248514 |
| 0.017276 | 0.70961  | -0.01764 | 0.70372  | 0.052899 | 0.25391  | -0.03153 | 0.49673  | -0.05702 |



|          |          |           |          |          |          |          |          |          |
|----------|----------|-----------|----------|----------|----------|----------|----------|----------|
| 0.005547 | 0.90484  | -0.05396  | 0.24447  | 0.041739 | 0.36814  | -0.00851 | 0.85453  | 0.100292 |
| 0.01371  | 0.76762  | 0.012717  | 0.78401  | -0.05672 | 0.22113  | 0.025951 | 0.57589  | -0.00287 |
| 0.04138  | 0.37228  | 0.111903  | 0.01555  | 0.045176 | 0.32998  | 0.099338 | 0.03185  | 0.125184 |
| 0.120903 | 0.00891  | 0.085758  | 0.06407  | 0.106116 | 0.02182  | 0.047621 | 0.30446  | 0.015103 |
| -0.01996 | 0.66703  | -0.07929  | 0.08697  | -0.00048 | 0.99169  | -0.04774 | 0.3033   | 0.132022 |
| 0.061289 | 0.18612  | -0.02084  | 0.65336  | 0.114854 | 0.01301  | -0.00181 | 0.96894  | 0.085091 |
| 0.012371 | 0.78976  | -0.14417  | 0.00179  | -0.06876 | 0.13786  | -0.19625 | 1.94E-05 | -0.10765 |
| 0.031846 | 0.49239  | -0.09015  | 0.05155  | -0.05842 | 0.20763  | -0.04696 | 0.31127  | 0.012433 |
| -0.00432 | 0.92583  | -0.05478  | 0.2374   | -0.08482 | 0.06704  | -0.0273  | 0.55615  | -0.01743 |
| 0.053912 | 0.24492  | 0.054712  | 0.23798  | 0.146008 | 0.00156  | 0.05867  | 0.20567  | 0.057438 |
| -0.18598 | 5.26E-05 | -0.18334  | 6.74E-05 | -0.1336  | 0.00382  | -0.07653 | 0.09856  | 0.151212 |
| 0.01205  | 0.79509  | -0.0179   | 0.69965  | -0.02211 | 0.63365  | -0.05383 | 0.2456   | -0.0607  |
| -0.01691 | 0.71551  | -0.08717  | 0.0598   | 0.025758 | 0.57874  | 0.004608 | 0.92089  | 0.300199 |
| -0.01108 | 0.81131  | 0.043344  | 0.35     | -0.05437 | 0.24097  | -0.02603 | 0.57467  | -0.12098 |
| 0.183901 | 6.40E-05 | 0.070644  | 0.1274   | 0.067405 | 0.14584  | 0.040394 | 0.38379  | 0.034114 |
| -0.0191  | 0.68063  | -0.03165  | 0.49502  | -0.12924 | 0.00515  | -0.00354 | 0.93922  | -0.01107 |
| -0.01411 | 0.76099  | 0.079914  | 0.08451  | -0.02487 | 0.59189  | 0.023854 | 0.60712  | 0.021692 |
| -0.10835 | 0.01918  | 0.053724  | 0.24657  | -0.04416 | 0.34101  | 0.000475 | 0.99182  | 0.08601  |
| -0.03495 | 0.45116  | -0.09734  | 0.03547  | -0.14091 | 0.00227  | -0.00283 | 0.95143  | 0.210041 |
| -0.025   | 0.59     | -0.08359  | 0.07111  | -0.07406 | 0.10997  | -0.10409 | 0.02448  | 0.106152 |
| 0.040974 | 0.37699  | 0.044993  | 0.33195  | 0.028655 | 0.53676  | 0.065064 | 0.16039  | 0.11263  |
| -0.10231 | 0.02705  | -0.18296  | 6.99E-05 | -0.18834 | 4.21E-05 | -0.13139 | 0.00445  | 0.026134 |
| -0.02205 | 0.63463  | -0.04662  | 0.31473  | 0.146387 | 0.00151  | 0.04666  | 0.31433  | 0.334698 |
| 0.048029 | 0.30033  | 0.113863  | 0.01382  | 0.067231 | 0.14688  | 0.099374 | 0.03179  | 0.191566 |
| 0.035867 | 0.43936  | 0.050722  | 0.27401  | 0.014004 | 0.76277  | 0.019837 | 0.66895  | 0.010579 |
| 0.014446 | 0.75553  | 0.175808  | 0.00013  | 0.119057 | 0.01002  | 0.126415 | 0.00623  | 0.045006 |
| 0.012299 | 0.79094  | -0.01861  | 0.68826  | 0.002565 | 0.95591  | -0.01334 | 0.77366  | -0.03001 |
| -0.02858 | 0.5379   | -7.02E-05 | 0.99879  | -0.01518 | 0.74356  | -0.04498 | 0.33206  | 0.02899  |
| 0.024509 | 0.59729  | -0.07348  | 0.11277  | -0.15738 | 0.00064  | -0.0591  | 0.20235  | 0.010702 |
| 0.028421 | 0.54009  | 0.05071   | 0.27412  | 0.009044 | 0.84545  | 0.049125 | 0.28942  | 0.080766 |
| -0.02866 | 0.5367   | 0.091662  | 0.04774  | 0.061643 | 0.18358  | 0.070718 | 0.127    | -0.01149 |
| -0.0289  | 0.53334  | 0.11143   | 0.01599  | 0.128876 | 0.00528  | 0.127865 | 0.00565  | 0.095235 |
| 0.001968 | 0.96616  | 0.159117  | 0.00056  | 0.159427 | 0.00054  | 0.186475 | 5.02E-05 | 0.071486 |
| 0.214997 | 2.75E-06 | 0.246962  | 6.42E-08 | 0.297474 | 5.37E-11 | 0.336302 | 8.23E-14 | 0.201597 |
| 0.051839 | 0.26357  | 0.064622  | 0.16326  | 0.106038 | 0.02192  | 0.229186 | 5.55E-07 | 0.31465  |
| 0.020271 | 0.66216  | 0.107262  | 0.02043  | 0.117221 | 0.01124  | 0.132491 | 0.00413  | 0.074756 |
| 0.082759 | 0.07399  | 0.056706  | 0.22128  | 0.082916 | 0.07344  | 0.130133 | 0.00485  | -0.06361 |
| 0.088897 | 0.05489  | 0.03735   | 0.42067  | -0.05849 | 0.20708  | -0.01447 | 0.75512  | -0.21256 |
| 0.084873 | 0.06688  | 0.029076  | 0.53079  | -0.07236 | 0.11838  | -0.00839 | 0.85649  | -0.20631 |
| 0.020183 | 0.66353  | -0.05858  | 0.20639  | -0.02357 | 0.61139  | -0.00656 | 0.8875   | 0.23481  |
| 0.030783 | 0.50695  | -0.13417  | 0.00367  | -0.1659  | 0.00032  | -0.12943 | 0.00509  | -0.0402  |
| 0.05464  | 0.2386   | 0.1373    | 0.00295  | 0.083484 | 0.07148  | 0.134086 | 0.0037   | 0.138674 |
| 0.041072 | 0.37585  | 0.013549  | 0.77027  | 0.002868 | 0.95072  | 0.031524 | 0.49676  | 0.07144  |
| -0.07696 | 0.0967   | -0.06077  | 0.18985  | -0.17119 | 0.0002   | -0.12911 | 0.0052   | -0.0848  |
| 0.034911 | 0.45167  | -0.05679  | 0.22062  | -0.00039 | 0.99326  | -0.10152 | 0.02825  | 0.065131 |

|          |          |          |          |          |          |          |          |          |
|----------|----------|----------|----------|----------|----------|----------|----------|----------|
| -0.05784 | 0.21218  | -0.19523 | 2.15E-05 | -0.25236 | 3.23E-08 | -0.15236 | 0.00096  | -0.06579 |
| 0.032603 | 0.48215  | -0.04058 | 0.38161  | -0.06556 | 0.15722  | -0.05264 | 0.25624  | 0.037575 |
| 0.176772 | 0.00012  | 0.297988 | 4.96E-11 | 0.234181 | 3.08E-07 | 0.327978 | 3.58E-13 | 0.078567 |
| 0.021421 | 0.64428  | 0.09005  | 0.05181  | 0.061353 | 0.18565  | 0.049696 | 0.28384  | 0.002298 |
| 0.020672 | 0.65591  | 0.089283 | 0.05384  | 0.088459 | 0.0561   | 0.027835 | 0.54849  | 0.024356 |
| 0.002964 | 0.94907  | 0.129559 | 0.00505  | 0.262749 | 8.19E-09 | 0.186998 | 4.78E-05 | 0.104405 |
| 0.214349 | 2.95E-06 | -0.00012 | 0.99797  | 0.05893  | 0.20366  | 0.008019 | 0.86279  | -0.03376 |
| 0.056326 | 0.2244   | -0.03092 | 0.50508  | -0.00632 | 0.89172  | -0.05833 | 0.2083   | -0.06344 |
| 0.074527 | 0.10773  | -0.05864 | 0.20586  | 0.098276 | 0.03374  | -0.04398 | 0.34301  | 0.119743 |
| 0.098864 | 0.03268  | -0.00674 | 0.88449  | 0.070991 | 0.12553  | -0.03314 | 0.47499  | -0.01765 |
| 0.004168 | 0.92842  | -0.00299 | 0.94862  | 0.047874 | 0.3019   | 0.041378 | 0.3723   | 0.085153 |
| -0.00385 | 0.93387  | -0.13645 | 0.00313  | -0.10182 | 0.0278   | -0.09772 | 0.03475  | -0.06125 |
| 0.008691 | 0.85142  | 0.019177 | 0.67935  | -0.03284 | 0.47902  | 0.033916 | 0.46467  | 0.058893 |
| 0.027528 | 0.55291  | 0.026859 | 0.56261  | -0.0346  | 0.45567  | 0.021113 | 0.64905  | 0.08343  |
| 0.057424 | 0.21548  | 0.045321 | 0.32844  | 0.000154 | 0.99736  | 0.117689 | 0.01092  | 0.1454   |
| -0.00588 | 0.89921  | -0.0017  | 0.97085  | -0.0096  | 0.83616  | 0.031709 | 0.49425  | -0.04064 |
| -0.00136 | 0.97669  | 0.005738 | 0.90157  | -0.00709 | 0.8786   | 0.023781 | 0.60822  | -0.02021 |
| -0.0212  | 0.64776  | -0.11261 | 0.01491  | -0.08738 | 0.05917  | -0.08352 | 0.07135  | 0.040036 |
| -0.02067 | 0.65593  | 0.03686  | 0.42679  | 0.112854 | 0.01468  | 0.016685 | 0.71913  | 0.012447 |
| -0.01535 | 0.74082  | -0.07466 | 0.10712  | -0.04929 | 0.2878   | -0.09211 | 0.04667  | 0.010162 |
| 0.022154 | 0.63298  | 0.004829 | 0.9171   | 0.000135 | 0.99768  | 0.049784 | 0.28299  | 0.067469 |
| 0.05941  | 0.2      | -0.00291 | 0.94991  | 0.105555 | 0.02253  | -0.03319 | 0.47429  | 0.006001 |
| -0.02692 | 0.56178  | 0.004213 | 0.92765  | -0.00272 | 0.95317  | 0.004616 | 0.92076  | 0.011137 |
| -0.03487 | 0.45223  | 0.027342 | 0.5556   | -0.05702 | 0.21877  | 0.057771 | 0.21271  | -0.03643 |
| -0.00741 | 0.87308  | -0.02841 | 0.54027  | 0.010622 | 0.81891  | -0.00324 | 0.94425  | 0.087512 |
| -0.00883 | 0.84912  | -0.04193 | 0.36598  | 0.012673 | 0.78474  | -0.01525 | 0.74246  | 0.144592 |
| 0.032437 | 0.48438  | 0.12855  | 0.0054   | 0.102627 | 0.02657  | 0.061071 | 0.18769  | 0.083342 |
| -0.06992 | 0.13135  | 0.118474 | 0.01039  | 0.007724 | 0.86779  | 0.168365 | 0.00026  | 0.200293 |
| 0.071133 | 0.12478  | -0.01986 | 0.66857  | 0.031577 | 0.49604  | -0.05949 | 0.19941  | 0.113462 |
| 0.01007  | 0.82818  | -0.06372 | 0.16922  | -0.03061 | 0.50932  | -0.05361 | 0.24755  | 0.040048 |
| 0.013075 | 0.77809  | 0.059854 | 0.19665  | -0.0376  | 0.41757  | 0.144072 | 0.0018   | 0.048043 |
| -0.1737  | 0.00016  | -0.11543 | 0.01255  | -0.12462 | 0.00701  | -0.13356 | 0.00384  | -0.13532 |
| 0.096816 | 0.03648  | 0.035645 | 0.4422   | 0.023936 | 0.60589  | 0.033215 | 0.47396  | 0.036665 |
| 0.058413 | 0.20767  | 0.134849 | 0.0035   | 0.064236 | 0.16579  | 0.085323 | 0.06544  | 0.022956 |
| 0.047017 | 0.31063  | -0.00828 | 0.85829  | 0.018413 | 0.69146  | -0.0229  | 0.62156  | 0.022072 |
| 0.133521 | 0.00384  | 0.216513 | 2.33E-06 | 0.254253 | 2.52E-08 | 0.327293 | 4.03E-13 | 0.216779 |
| 0.129951 | 0.00491  | 0.278896 | 8.63E-10 | 0.295128 | 7.71E-11 | 0.333194 | 1.43E-13 | 0.144221 |
| -0.01266 | 0.78492  | 0.047088 | 0.30991  | -0.00703 | 0.87959  | -0.04279 | 0.3562   | 0.074757 |
| -0.00606 | 0.89602  | -0.10672 | 0.02108  | 0.042645 | 0.35783  | -0.01986 | 0.66865  | 0.221838 |
| -0.08466 | 0.06755  | 0.100117 | 0.03053  | -0.03629 | 0.43401  | 0.162921 | 0.00041  | 0.038139 |
| -0.0102  | 0.82597  | -0.05406 | 0.24367  | 0.049779 | 0.28304  | 0.050906 | 0.27227  | 0.29342  |
| 0.030599 | 0.50949  | -0.03788 | 0.41406  | -0.04326 | 0.35088  | 0.029772 | 0.521    | 0.08607  |
| -0.00154 | 0.97358  | -0.1328  | 0.00404  | -0.04334 | 0.35003  | -0.1199  | 0.0095   | 0.091734 |
| 0.031588 | 0.4959   | 0.023787 | 0.60814  | -0.03279 | 0.47968  | -0.03651 | 0.43118  | 0.052834 |
| 0.007706 | 0.86808  | -0.01773 | 0.70238  | 0.024554 | 0.59661  | -0.06923 | 0.1352   | -0.06677 |

|          |          |          |          |           |          |          |          |          |
|----------|----------|----------|----------|-----------|----------|----------|----------|----------|
| 0.029825 | 0.52027  | -0.15412 | 0.00083  | -0.03609  | 0.4365   | -0.177   | 0.00012  | -0.04071 |
| -0.01156 | 0.8032   | -0.07582 | 0.10172  | -0.06664  | 0.15048  | -0.062   | 0.18104  | 0.002577 |
| -0.02029 | 0.66185  | 0.09167  | 0.04772  | -0.10732  | 0.02035  | -0.00592 | 0.89851  | -0.15597 |
| 0.031644 | 0.49513  | 0.125904 | 0.00644  | 0.106097  | 0.02184  | 0.113709 | 0.01395  | 0.074709 |
| 0.024604 | 0.59587  | -0.05058 | 0.27537  | -0.04436  | 0.33877  | -0.03811 | 0.41129  | 0.001013 |
| 0.076065 | 0.10064  | 0.128739 | 0.00533  | 0.176179  | 0.00013  | 0.103988 | 0.02462  | 0.058565 |
| 0.036634 | 0.42964  | -0.04851 | 0.29548  | 0.024415  | 0.59869  | -0.04574 | 0.32399  | 0.145196 |
| -0.0214  | 0.64465  | -0.12145 | 0.00861  | -0.08304  | 0.07299  | -0.12729 | 0.00588  | -0.01528 |
| 0.024254 | 0.60111  | 0.085939 | 0.06351  | 0.066908  | 0.14884  | 0.098908 | 0.0326   | 0.253855 |
| 0.042504 | 0.35942  | -0.01496 | 0.74719  | 0.051595  | 0.26582  | -0.02927 | 0.52808  | 0.054812 |
| 0.027353 | 0.55544  | 0.011912 | 0.79739  | 0.033906  | 0.46481  | 0.037379 | 0.42031  | 0.090281 |
| 0.041692 | 0.36868  | -0.04171 | 0.36851  | -0.05192  | 0.26282  | -0.02645 | 0.56858  | -0.06831 |
| 0.107453 | 0.0202   | 0.10902  | 0.01844  | 0.05341   | 0.24935  | 0.081728 | 0.07767  | 0.009391 |
| -0.1024  | 0.02691  | 0.010955 | 0.81335  | 0.000816  | 0.98596  | 0.054381 | 0.24084  | -0.02115 |
| -0.10718 | 0.02052  | -0.23237 | 3.82E-07 | -0.24687  | 6.50E-08 | -0.18251 | 7.28E-05 | -0.04789 |
| 0.322054 | 9.90E-13 | 0.06396  | 0.16762  | 0.087788  | 0.058    | 0.205867 | 7.29E-06 | 0.203816 |
| -0.14501 | 0.00168  | -0.13985 | 0.00245  | -0.19911  | 1.46E-05 | -0.1678  | 0.00027  | -0.07127 |
| 0.050138 | 0.27958  | -0.0023  | 0.96039  | 0.204355  | 8.53E-06 | 0.085714 | 0.06421  | 0.182508 |
| 0.047487 | 0.30582  | 0.020966 | 0.65133  | 0.024232  | 0.60144  | -0.02805 | 0.54542  | -0.05715 |
| -0.06998 | 0.13103  | -0.14191 | 0.00211  | -0.14117  | 0.00223  | -0.23972 | 1.58E-07 | -0.28111 |
| 0.013463 | 0.77168  | 0.059286 | 0.20094  | 0.073806  | 0.11119  | 0.020559 | 0.65766  | -0.0162  |
| 0.053517 | 0.2484   | -0.0672  | 0.14707  | -0.06353  | 0.17047  | -0.02995 | 0.51855  | -0.00493 |
| -0.0064  | 0.89024  | -0.11923 | 0.00991  | 0.044015  | 0.34258  | -0.1092  | 0.01825  | 0.075886 |
| -0.10328 | 0.02563  | -0.25092 | 3.89E-08 | -0.26492  | 6.11E-09 | -0.24786 | 5.73E-08 | 0.01466  |
| -0.04307 | 0.35307  | -0.19504 | 2.19E-05 | -0.17101  | 0.0002   | -0.0734  | 0.11315  | 0.007936 |
| 0.030433 | 0.51179  | 0.014136 | 0.76061  | 0.010368  | 0.82318  | 0.039923 | 0.38936  | -0.02496 |
| -0.03756 | 0.41811  | -0.05502 | 0.23538  | -0.08183  | 0.07729  | -0.04025 | 0.38554  | -0.07    |
| -0.12394 | 0.00733  | -0.11329 | 0.0143   | -0.09867  | 0.03303  | -0.0501  | 0.27994  | -0.04741 |
| -0.06665 | 0.15044  | -0.09689 | 0.03634  | -0.18378  | 6.47E-05 | -0.04207 | 0.3644   | -0.04988 |
| 0.070847 | 0.12631  | 0.105973 | 0.022    | -8.49E-06 | 0.99985  | 0.136229 | 0.00318  | 0.000308 |
| -0.03139 | 0.49857  | 0.023798 | 0.60797  | -0.10479  | 0.02353  | 0.049885 | 0.28202  | 0.07536  |
| -0.0348  | 0.45305  | -0.04752 | 0.30553  | -0.1233   | 0.00764  | 0.019372 | 0.67628  | 0.116357 |
| -0.00174 | 0.97004  | -0.10923 | 0.01822  | -0.01179  | 0.79941  | -0.08486 | 0.06693  | 0.026778 |
| 0.149922 | 0.00116  | 0.142522 | 0.00202  | 0.161286  | 0.00047  | 0.120932 | 0.0089   | 0.051741 |
| -0.06065 | 0.19076  | -0.05888 | 0.20402  | 0.025212  | 0.58681  | -0.0252  | 0.58694  | -0.03167 |
| -0.09349 | 0.04346  | 0.049572 | 0.28505  | 0.048482  | 0.29578  | 0.037014 | 0.42487  | 0.132974 |
| 0.0913   | 0.04863  | -0.1417  | 0.00215  | 0.035891  | 0.43907  | -0.06956 | 0.13337  | 0.326585 |
| 0.055273 | 0.2332   | -0.10406 | 0.02453  | -0.09125  | 0.04876  | -0.04574 | 0.32398  | 0.078101 |
| -0.00684 | 0.88283  | -0.10956 | 0.01786  | -0.07758  | 0.09404  | -0.00039 | 0.99326  | 0.259684 |
| 0.0461   | 0.32018  | 0.020672 | 0.6559   | 0.196921  | 1.82E-05 | 0.07023  | 0.12965  | 0.213412 |
| -0.06755 | 0.145    | 0.038313 | 0.40878  | 0.045816  | 0.32317  | 0.08984  | 0.05236  | 0.014187 |
| 0.042949 | 0.35441  | 0.172728 | 0.00018  | 0.055105  | 0.23462  | 0.080802 | 0.0811   | 0.021404 |
| -0.02022 | 0.66299  | 0.025086 | 0.58869  | 0.158293  | 0.0006   | 0.144278 | 0.00177  | 0.319148 |
| -0.03077 | 0.50716  | -0.08294 | 0.07335  | -0.05577  | 0.22898  | -0.08057 | 0.08198  | -0.03082 |
| 0.058667 | 0.20569  | -0.08443 | 0.0683   | -0.05736  | 0.21598  | -0.03845 | 0.40717  | 0.109906 |

|          |         |          |          |          |          |          |          |          |
|----------|---------|----------|----------|----------|----------|----------|----------|----------|
| 0.056826 | 0.2203  | 0.056706 | 0.22128  | 0.023887 | 0.60663  | 0.054417 | 0.24052  | 0.027574 |
| 0.013646 | 0.76866 | -0.04204 | 0.36473  | -0.01933 | 0.67692  | -0.04694 | 0.31141  | 0.024576 |
| 0.026095 | 0.57377 | -0.06573 | 0.15614  | -0.00067 | 0.98852  | -0.06661 | 0.15067  | 0.121317 |
| 0.087101 | 0.06    | -0.04766 | 0.30402  | 0.018872 | 0.68418  | -0.08698 | 0.06035  | -0.07391 |
| -0.04809 | 0.29969 | -0.11429 | 0.01346  | -0.11834 | 0.01048  | 0.014749 | 0.75057  | 0.231844 |
| 0.05154  | 0.26634 | 0.02933  | 0.52721  | -0.05269 | 0.25584  | 0.007791 | 0.86666  | -0.03373 |
| 0.02636  | 0.56988 | -0.08514 | 0.06603  | -0.09008 | 0.05174  | -0.03949 | 0.39455  | 0.048873 |
| 0.044014 | 0.34259 | -0.01754 | 0.70545  | -0.06442 | 0.1646   | 0.019362 | 0.67643  | -0.04134 |
| 0.014448 | 0.75549 | -0.06497 | 0.16098  | -0.04591 | 0.32221  | -0.09069 | 0.05017  | -0.04492 |
| 0.122889 | 0.00785 | -0.00493 | 0.91536  | 0.074267 | 0.10897  | 0.022128 | 0.63339  | 0.06352  |
| -0.00032 | 0.99452 | -0.04993 | 0.28153  | -0.03561 | 0.44262  | -0.07726 | 0.0954   | -0.02279 |
| -0.02345 | 0.61319 | -0.05083 | 0.27301  | -0.10577 | 0.02226  | -0.05286 | 0.25428  | -0.02143 |
| -0.07764 | 0.09375 | 0.149062 | 0.00123  | -0.04671 | 0.31382  | 0.130608 | 0.0047   | -0.01034 |
| -0.02997 | 0.51823 | 0.052837 | 0.25447  | 0.074119 | 0.10968  | 0.006659 | 0.88588  | 0.087206 |
| -0.04332 | 0.35022 | -0.11029 | 0.01711  | -0.19516 | 2.17E-05 | -0.16521 | 0.00034  | 0.052077 |
| -0.03173 | 0.49398 | 0.024252 | 0.60114  | -0.1064  | 0.02147  | -0.07044 | 0.12851  | -0.21516 |
| 0.101928 | 0.02763 | 0.252417 | 3.20E-08 | 0.245844 | 7.39E-08 | 0.169873 | 0.00023  | 0.083047 |
| 0.067326 | 0.14631 | -0.05752 | 0.21471  | -0.0945  | 0.04123  | -0.06857 | 0.13899  | 0.043902 |
| 0.003099 | 0.94676 | -0.07346 | 0.11289  | -0.12763 | 0.00574  | -0.05826 | 0.20887  | 0.062804 |
| 0.032151 | 0.48825 | -0.11189 | 0.01556  | -0.1753  | 0.00014  | -0.11073 | 0.01667  | 0.032163 |
| -0.05661 | 0.22209 | 0.023698 | 0.60947  | -0.15054 | 0.0011   | 0.015907 | 0.73171  | -0.01412 |
| 0.06932  | 0.13471 | 0.095044 | 0.04007  | 0.055449 | 0.2317   | 0.111558 | 0.01587  | -0.00659 |
| -0.10882 | 0.01866 | -0.05638 | 0.22397  | -0.05066 | 0.27458  | -0.08103 | 0.08024  | -0.00907 |
| -0.05331 | 0.25024 | -0.10023 | 0.03034  | -0.06813 | 0.14157  | -0.03978 | 0.39107  | 0.208788 |
| 0.021615 | 0.64128 | -0.00924 | 0.84215  | -0.01277 | 0.78306  | -0.03366 | 0.46804  | 0.141803 |
| -0.10829 | 0.01924 | -0.26644 | 4.96E-09 | -0.23139 | 4.29E-07 | -0.21524 | 2.68E-06 | 0.002564 |
| 0.086638 | 0.06138 | 0.097696 | 0.03481  | 0.04176  | 0.3679   | 0.057182 | 0.21742  | 0.002193 |
| 0.002672 | 0.95407 | -0.14339 | 0.00189  | -0.11842 | 0.01043  | -0.14917 | 0.00123  | -0.12246 |
| -0.02787 | 0.548   | 0.001412 | 0.97573  | -0.04046 | 0.38307  | 0.00166  | 0.97147  | -0.03176 |
| 0.01833  | 0.69278 | 0.169489 | 0.00023  | 0.136754 | 0.00306  | 0.215627 | 2.57E-06 | 0.002693 |
| -0.09161 | 0.04787 | 0.04593  | 0.32197  | -0.03754 | 0.41834  | 0.121264 | 0.00871  | 0.065996 |
| -0.02234 | 0.63011 | -0.05911 | 0.2023   | -0.02155 | 0.64235  | -0.04578 | 0.32351  | 0.067702 |
| 0.039523 | 0.39413 | -0.12667 | 0.00612  | -0.04683 | 0.31257  | -0.14736 | 0.00141  | -0.07143 |
| -0.01285 | 0.78185 | -0.0633  | 0.17207  | -0.06346 | 0.17096  | -0.06171 | 0.18313  | 0.118806 |
| 0.108151 | 0.0194  | 0.053389 | 0.24954  | 0.147606 | 0.00138  | 0.17203  | 0.00019  | 0.186811 |
| 0.036311 | 0.43372 | -0.08793 | 0.05761  | 0.026696 | 0.56498  | -0.12166 | 0.00849  | 0.110353 |
| -0.02031 | 0.66153 | 0.13088  | 0.00461  | 0.093909 | 0.04252  | 0.050508 | 0.27604  | -0.05365 |
| -0.01738 | 0.70798 | -0.10136 | 0.02851  | -0.04484 | 0.33356  | -0.16742 | 0.00028  | -0.26901 |
| 0.033079 | 0.47577 | -0.02549 | 0.58264  | -0.0278  | 0.54897  | -0.06164 | 0.18362  | -0.04124 |
| 0.063644 | 0.16973 | -0.01208 | 0.79464  | 0.108886 | 0.01859  | -0.01216 | 0.79319  | 0.183275 |
| 0.019723 | 0.67076 | 0.011481 | 0.80456  | -0.02249 | 0.6278   | 0.087128 | 0.05992  | 0.133234 |
| -0.01966 | 0.6718  | -0.21014 | 4.64E-06 | -0.1577  | 0.00063  | -0.16782 | 0.00027  | 0.083483 |
| 0.05981  | 0.19698 | -0.00798 | 0.86345  | 0.084546 | 0.06794  | -0.02002 | 0.66603  | 0.009905 |
| -0.02723 | 0.55726 | -0.14178 | 0.00213  | -0.08579 | 0.06398  | -0.12638 | 0.00624  | -0.10516 |
| 0.097657 | 0.03488 | -0.03194 | 0.49109  | 0.050996 | 0.27142  | -0.05007 | 0.28023  | -0.02318 |

|          |          |          |          |          |          |          |          |          |
|----------|----------|----------|----------|----------|----------|----------|----------|----------|
| -0.12734 | 0.00586  | -0.04613 | 0.3199   | -0.18438 | 6.12E-05 | -0.07829 | 0.09105  | -0.0964  |
| -0.04109 | 0.37559  | -0.00402 | 0.93092  | -0.02362 | 0.61073  | -0.01669 | 0.71907  | 0.038293 |
| -0.02441 | 0.59873  | 0.051231 | 0.26921  | 0.021951 | 0.6361   | -0.0481  | 0.29964  | 0.092561 |
| 0.001116 | 0.98082  | -0.06969 | 0.13264  | 0.041225 | 0.37407  | -0.03908 | 0.39942  | -0.02942 |
| 0.02901  | 0.53173  | -0.09027 | 0.05123  | -0.08702 | 0.06024  | -0.07921 | 0.08729  | 0.217982 |
| -0.05001 | 0.28077  | -0.08757 | 0.05863  | -0.03854 | 0.40605  | -0.02694 | 0.56143  | 0.107307 |
| -0.07466 | 0.10712  | -0.06274 | 0.17588  | -0.09638 | 0.03733  | -0.12036 | 0.00923  | -0.14536 |
| -0.10617 | 0.02175  | -0.17378 | 0.00016  | -0.20051 | 1.27E-05 | -0.08584 | 0.06382  | 0.09208  |
| 0.12216  | 0.00822  | -0.00291 | 0.95007  | 0.099461 | 0.03164  | -0.01397 | 0.76326  | -0.01003 |
| 0.047863 | 0.30201  | 0.045359 | 0.32803  | 0.1238   | 0.0074   | 0.096012 | 0.03807  | 0.220818 |
| -0.04601 | 0.3211   | -0.20124 | 1.18E-05 | -0.14093 | 0.00227  | -0.0779  | 0.09268  | 0.197668 |
| -0.03783 | 0.41476  | -0.18397 | 6.36E-05 | -0.09289 | 0.04483  | -0.14852 | 0.00129  | 0.186199 |
| -0.04704 | 0.31038  | -0.11835 | 0.01047  | -0.13063 | 0.00469  | -0.00603 | 0.89665  | 0.046424 |
| 0.027105 | 0.55904  | -0.02676 | 0.56405  | -0.04942 | 0.28652  | -0.06952 | 0.13356  | -0.0959  |
| -0.00437 | 0.92489  | -0.02315 | 0.61772  | -0.09227 | 0.04628  | -0.07457 | 0.10753  | -0.12956 |
| 0.115262 | 0.01269  | 0.001044 | 0.98204  | 0.133897 | 0.00375  | -0.00013 | 0.99785  | 0.120487 |
| 0.105418 | 0.02271  | -0.01426 | 0.75856  | 0.118812 | 0.01018  | -0.02164 | 0.6409   | 0.151092 |
| -0.02661 | 0.56623  | -0.0078  | 0.86651  | -0.03839 | 0.40787  | -0.0377  | 0.41632  | -0.05556 |
| 0.114624 | 0.01319  | -0.03087 | 0.50578  | 0.1052   | 0.02299  | 0.076112 | 0.10043  | 0.172238 |
| -0.00839 | 0.85642  | -0.09576 | 0.03858  | 0.008124 | 0.86101  | 0.022764 | 0.62365  | 0.339779 |
| -0.08905 | 0.05448  | -0.13267 | 0.00408  | -0.15437 | 0.00082  | -0.00346 | 0.94062  | 0.242736 |
| 0.007227 | 0.87622  | -0.18548 | 5.52E-05 | -0.1807  | 8.60E-05 | -0.18943 | 3.79E-05 | 0.094071 |
| 0.10948  | 0.01795  | -0.02089 | 0.65244  | 0.062964 | 0.17435  | 0.030866 | 0.50581  | 0.065896 |
| 0.144023 | 0.00181  | 0.024156 | 0.60258  | -0.03555 | 0.44338  | -0.02241 | 0.62907  | -0.08721 |
| -0.03751 | 0.41874  | -0.14113 | 0.00224  | -0.15537 | 0.00075  | -0.19505 | 2.19E-05 | -0.21585 |
| -0.03814 | 0.41091  | -0.08874 | 0.05531  | -0.04197 | 0.36553  | -0.09572 | 0.03867  | -0.01151 |
| -0.00055 | 0.99061  | -0.02626 | 0.57129  | -0.04814 | 0.29918  | 0.006416 | 0.89002  | 0.026054 |
| -0.02359 | 0.61109  | -0.00998 | 0.82976  | -0.10657 | 0.02126  | -0.06697 | 0.14843  | -0.03956 |
| -0.08408 | 0.06946  | -0.02463 | 0.59545  | -0.17036 | 0.00022  | -0.08476 | 0.06723  | -0.08131 |
| 0.07911  | 0.0877   | 0.15821  | 0.0006   | 0.085671 | 0.06434  | 0.121679 | 0.00848  | 0.085024 |
| 0.016572 | 0.72095  | 0.128327 | 0.00548  | 0.045513 | 0.32639  | 0.157301 | 0.00065  | -0.04608 |
| 0.020172 | 0.66371  | 0.00966  | 0.83508  | -0.1411  | 0.00224  | -0.04542 | 0.3274   | -0.11269 |
| -0.00038 | 0.99347  | -0.03936 | 0.3961   | -0.08755 | 0.05869  | -0.02629 | 0.57093  | 0.097796 |
| 0.029079 | 0.53075  | 0.02381  | 0.60779  | 0.020088 | 0.66502  | 0.077088 | 0.09613  | 0.084225 |
| 0.014026 | 0.76241  | 0.019808 | 0.66942  | 0.067076 | 0.14782  | 0.053885 | 0.24516  | 0.228849 |
| 0.116268 | 0.01192  | 0.011223 | 0.80886  | 0.066599 | 0.15073  | 0.052081 | 0.26134  | 0.117735 |
| -0.03192 | 0.49134  | -0.04617 | 0.31947  | 0.127536 | 0.00578  | 0.12511  | 0.00679  | 0.408552 |
| 0.088578 | 0.05577  | -0.04051 | 0.38246  | -0.07109 | 0.12502  | -0.05559 | 0.23054  | -0.07865 |
| 0.043069 | 0.35306  | -0.05974 | 0.19754  | -0.09326 | 0.04398  | -0.10602 | 0.02193  | -0.02084 |
| -0.03357 | 0.46924  | -0.01587 | 0.73224  | 0.00581  | 0.90036  | 0.00423  | 0.92736  | 0.09221  |
| 0.029383 | 0.52647  | 0.286688 | 2.76E-10 | 0.15842  | 0.00059  | 0.216125 | 2.43E-06 | 0.018994 |
| 0.014768 | 0.75025  | -0.10505 | 0.02319  | -0.05133 | 0.26824  | -0.09419 | 0.04189  | 0.074611 |
| -0.03202 | 0.48996  | -0.13805 | 0.00279  | -0.08861 | 0.05569  | -0.00298 | 0.94884  | 0.159735 |
| 0.371465 | 9.99E-17 | 0.011132 | 0.81038  | 0.09291  | 0.04477  | 0.000817 | 0.98594  | 0.026201 |
| 0.007479 | 0.87194  | 0.038995 | 0.40049  | -0.11572 | 0.01233  | -0.00193 | 0.96683  | -0.09252 |

|           |          |          |          |          |          |          |          |          |
|-----------|----------|----------|----------|----------|----------|----------|----------|----------|
| 0.05678   | 0.22068  | -0.00501 | 0.914    | 0.007037 | 0.87945  | 0.03289  | 0.47829  | -0.04437 |
| -0.00925  | 0.84191  | -0.03902 | 0.40016  | -0.07416 | 0.1095   | -0.03758 | 0.41778  | -0.0685  |
| 0.187235  | 4.67E-05 | 0.02507  | 0.58893  | 0.043024 | 0.35356  | 0.012332 | 0.7904   | -0.03818 |
| 0.081504  | 0.07849  | -0.0365  | 0.43137  | 0.036547 | 0.43073  | -0.04945 | 0.28619  | 0.083243 |
| 0.025893  | 0.57674  | 0.223424 | 1.08E-06 | 0.025778 | 0.57844  | 0.151741 | 0.001    | -0.0712  |
| 0.06505   | 0.16048  | 0.018984 | 0.68241  | 0.038382 | 0.40794  | -0.01635 | 0.72447  | 0.018825 |
| 0.118833  | 0.01016  | 0.089075 | 0.05441  | 0.200573 | 1.26E-05 | 0.109461 | 0.01797  | 0.097983 |
| 0.087618  | 0.05849  | -0.03172 | 0.49414  | 0.046966 | 0.31116  | -0.0341  | 0.46224  | 0.065735 |
| 0.059972  | 0.19577  | 0.003417 | 0.94129  | 0.054867 | 0.23665  | -0.00195 | 0.96655  | 0.062078 |
| 0.008679  | 0.85162  | 0.023908 | 0.60631  | 0.091143 | 0.04902  | -0.02058 | 0.65728  | 0.095628 |
| 0.007777  | 0.86689  | 0.121827 | 0.0084   | -0.04583 | 0.32304  | 0.104108 | 0.02446  | 0.026053 |
| -0.00962  | 0.83583  | -0.04887 | 0.29196  | -0.03382 | 0.46595  | 0.013265 | 0.77496  | 0.163088 |
| -6.21E-05 | 0.99893  | -0.01068 | 0.81803  | 0.084313 | 0.0687   | 0.027619 | 0.5516   | 0.139623 |
| 0.024916  | 0.59121  | -0.01457 | 0.7535   | 0.047273 | 0.30801  | -0.01954 | 0.67356  | 0.262002 |
| -0.0272   | 0.55764  | -0.22278 | 1.16E-06 | -0.20633 | 6.95E-06 | -0.15148 | 0.00102  | 0.096818 |
| -0.13438  | 0.00362  | -0.12682 | 0.00606  | -0.16068 | 0.00049  | -0.04684 | 0.31246  | 0.181086 |
| 0.192931  | 2.70E-05 | 0.195315 | 2.13E-05 | 0.195486 | 2.10E-05 | 0.103691 | 0.02504  | 0.020144 |
| -0.03241  | 0.4848   | 0.077068 | 0.09622  | -0.02304 | 0.61938  | 0.034486 | 0.4572   | -0.20753 |
| 0.04724   | 0.30835  | -0.01517 | 0.74365  | 0.040123 | 0.38699  | 0.044062 | 0.34206  | 0.149267 |
| 0.048388  | 0.29672  | -0.04654 | 0.31558  | 0.04247  | 0.3598   | -0.046   | 0.32119  | -0.02176 |
| -0.05618  | 0.22558  | -0.12616 | 0.00634  | -0.21151 | 4.01E-06 | -0.05172 | 0.26462  | -0.073   |
| -0.01438  | 0.75665  | -0.00376 | 0.93544  | 0.003241 | 0.94431  | -0.0051  | 0.9125   | 0.007642 |
| 0.004326  | 0.92571  | -0.08308 | 0.07286  | -0.04024 | 0.38555  | -0.0689  | 0.13709  | 0.014378 |
| -0.00255  | 0.95611  | -0.1486  | 0.00128  | -0.16218 | 0.00043  | -0.08306 | 0.07293  | 0.084793 |
| 0.046008  | 0.32115  | -0.00715 | 0.8776   | -0.01231 | 0.79083  | -0.03743 | 0.41971  | -0.02263 |
| -0.00054  | 0.99065  | -0.04258 | 0.35859  | -0.05584 | 0.22841  | -0.04297 | 0.35419  | -0.02385 |
| 0.354425  | 2.87E-15 | 0.070344 | 0.12902  | 0.099675 | 0.03127  | 0.115617 | 0.01241  | 0.052277 |
| 0.00633   | 0.89148  | -0.14721 | 0.00142  | -0.0747  | 0.1069   | -0.06078 | 0.18979  | 0.10424  |
| -0.08998  | 0.05199  | -0.07852 | 0.09009  | -0.22426 | 9.79E-07 | -0.07608 | 0.10056  | -0.00015 |
| -0.03946  | 0.39486  | -0.0246  | 0.59599  | -0.15876 | 0.00057  | 0.015671 | 0.73555  | 0.062282 |
| -0.01071  | 0.81751  | -0.00069 | 0.98813  | 0.047928 | 0.30135  | 0.017779 | 0.70157  | 0.066905 |
| 0.057101  | 0.21807  | 0.07769  | 0.09356  | 0.024868 | 0.59193  | 0.045363 | 0.32799  | 0.028212 |
| 0.010483  | 0.82125  | 0.06636  | 0.15221  | -0.08161 | 0.07808  | 0.015226 | 0.74278  | -0.10263 |
| -0.0041   | 0.92966  | -0.0147  | 0.75139  | -0.05063 | 0.27485  | -0.04279 | 0.35623  | 0.00769  |
| -0.00765  | 0.86903  | -0.04288 | 0.35515  | -0.05759 | 0.21415  | -0.03159 | 0.49592  | 0.06409  |
| -0.00512  | 0.91208  | 0.0366   | 0.43007  | 0.05026  | 0.27841  | 0.045151 | 0.33025  | 0.086903 |
| 0.025237  | 0.58644  | 0.056831 | 0.22026  | -0.09494 | 0.04029  | -0.05073 | 0.2739   | -0.16333 |
| 0.029694  | 0.52211  | -0.01412 | 0.76092  | -0.0567  | 0.22134  | -0.02456 | 0.59648  | 0.004702 |
| 0.124802  | 0.00693  | 0.070177 | 0.12994  | 0.090712 | 0.0501   | 0.084313 | 0.0687   | 0.111405 |
| 0.125313  | 0.0067   | 0.298943 | 4.27E-11 | 0.296668 | 6.08E-11 | 0.277897 | 9.96E-10 | 0.072615 |
| -0.07215  | 0.11945  | 0.045374 | 0.32787  | 0.02626  | 0.57136  | 0.051895 | 0.26305  | -0.13039 |
| 0.01636   | 0.72437  | 0.115922 | 0.01218  | 0.106597 | 0.02122  | 0.115356 | 0.01261  | 0.058663 |
| 0.014159  | 0.76024  | 0.155071 | 0.00077  | 0.094012 | 0.04229  | 0.125586 | 0.00658  | 0.047471 |
| 0.036293  | 0.43394  | -0.04016 | 0.38652  | -0.06486 | 0.16168  | -0.03785 | 0.41445  | -0.00387 |
| 0.049288  | 0.28782  | -0.00462 | 0.92065  | 0.005638 | 0.90329  | -0.04077 | 0.37942  | -0.02113 |

|          |          |          |          |          |         |          |         |          |
|----------|----------|----------|----------|----------|---------|----------|---------|----------|
| 0.03573  | 0.44112  | 0.007824 | 0.8661   | 0.069821 | 0.1319  | 0.05015  | 0.27946 | 0.074636 |
| -0.08015 | 0.0836   | -0.16825 | 0.00026  | -0.09116 | 0.04897 | -0.16921 | 0.00024 | 0.002079 |
| -0.11682 | 0.01153  | -0.19385 | 2.47E-05 | -0.13301 | 0.00398 | -0.17283 | 0.00017 | 0.126221 |
| 0.031378 | 0.49877  | -0.04269 | 0.35727  | 0.073799 | 0.11123 | -0.02377 | 0.6084  | 0.072689 |
| -0.09277 | 0.04509  | 0.037108 | 0.42369  | -0.00467 | 0.91981 | 0.161353 | 0.00046 | 0.100538 |
| 0.047722 | 0.30343  | -0.11441 | 0.01336  | -0.05275 | 0.25528 | -0.04481 | 0.33393 | 0.113246 |
| 0.018894 | 0.68383  | -0.06935 | 0.13453  | -0.02375 | 0.60869 | -0.03894 | 0.40121 | 0.020076 |
| 0.196915 | 1.82E-05 | 0.01935  | 0.67663  | 0.046788 | 0.313   | 0.069897 | 0.13148 | 0.148777 |
| 0.106858 | 0.02091  | 0.001115 | 0.98083  | 0.057527 | 0.21465 | 0.069685 | 0.13266 | 0.148846 |
| 0.032491 | 0.48365  | -0.01159 | 0.80277  | 0.018911 | 0.68356 | 0.01111  | 0.81075 | 0.115053 |
| 0.158626 | 0.00058  | 0.040023 | 0.38817  | 0.072903 | 0.11565 | 0.059698 | 0.19783 | 0.131051 |
| 0.00407  | 0.9301   | 0.095745 | 0.03861  | 0.059819 | 0.19691 | 0.126832 | 0.00606 | -0.03575 |
| -0.00834 | 0.85728  | -0.0441  | 0.34162  | -0.05787 | 0.21193 | -0.06835 | 0.14027 | 0.042641 |
| 0.302864 | 2.31E-11 | 0.025075 | 0.58884  | 0.077159 | 0.09583 | 0.045665 | 0.32477 | 0.061853 |
| -0.02393 | 0.606    | 0.02058  | 0.65733  | 0.014873 | 0.74855 | -0.0034  | 0.94157 | 0.007106 |
| 0.0963   | 0.0375   | -0.03091 | 0.50513  | -0.00282 | 0.95147 | -0.01852 | 0.68983 | 0.052744 |
| -0.01048 | 0.82133  | 0.001334 | 0.97706  | 0.018127 | 0.696   | 0.046334 | 0.31773 | 0.106353 |
| 0.001269 | 0.97818  | 0.058041 | 0.21058  | 0.035863 | 0.43942 | 0.031265 | 0.50031 | 0.075499 |
| -0.06063 | 0.1909   | 0.044311 | 0.33934  | 0.026071 | 0.57412 | -0.00226 | 0.96107 | 0.092617 |
| 3.88E-05 | 0.99933  | 0.126837 | 0.00606  | 0.007035 | 0.87949 | 0.057403 | 0.21564 | -0.0012  |
| -0.03037 | 0.51262  | 0.033125 | 0.47516  | 0.067391 | 0.14593 | 0.059485 | 0.19943 | 0.189543 |
| 0.074631 | 0.10724  | -0.02754 | 0.55273  | 0.091148 | 0.04901 | -0.01133 | 0.80712 | 0.091371 |
| 0.009926 | 0.83061  | -0.0352  | 0.44793  | -0.03133 | 0.49948 | -0.03483 | 0.45273 | -0.05455 |
| 0.001553 | 0.97329  | 0.066344 | 0.1523   | 0.072864 | 0.11584 | 0.083403 | 0.07176 | 0.14464  |
| 0.007889 | 0.86498  | 0.094911 | 0.04035  | 0.062785 | 0.17558 | 0.107247 | 0.02044 | -0.00209 |
| -0.02442 | 0.59863  | -0.04971 | 0.2837   | -0.10619 | 0.02172 | 0.034162 | 0.46143 | 0.076672 |
| -0.02673 | 0.56442  | 0.006283 | 0.89229  | 0.008307 | 0.85791 | 0.009422 | 0.83909 | 0.030117 |
| -0.00515 | 0.91164  | 0.026726 | 0.56454  | 0.009912 | 0.83084 | 0.006084 | 0.89568 | -0.05823 |
| 0.054959 | 0.23587  | -0.03408 | 0.46252  | -0.03073 | 0.50768 | -0.00793 | 0.86423 | 0.063464 |
| -0.04506 | 0.33123  | -0.06705 | 0.14796  | -0.01948 | 0.6746  | -0.02387 | 0.60689 | 0.032372 |
| 0.08192  | 0.07697  | 0.036009 | 0.43756  | 0.045757 | 0.3238  | 0.013415 | 0.77248 | 0.061741 |
| 0.030758 | 0.50729  | 0.021185 | 0.64793  | 0.092826 | 0.04497 | -0.01259 | 0.78613 | 0.003927 |
| -0.02218 | 0.63255  | -0.06775 | 0.14379  | -0.06428 | 0.16552 | -0.04751 | 0.30559 | -0.06911 |
| -0.01996 | 0.667    | -0.01686 | 0.71626  | -0.0102  | 0.82593 | -0.01481 | 0.74958 | -0.01032 |
| 0.007307 | 0.87487  | 0.069782 | 0.13212  | 0.015257 | 0.74227 | -0.01477 | 0.75016 | -0.24232 |
| 0.090464 | 0.05074  | -0.02521 | 0.58679  | 0.04789  | 0.30173 | 0.061451 | 0.18495 | 0.271678 |
| 0.055981 | 0.22726  | 0.045692 | 0.32449  | -0.01092 | 0.81395 | 0.046226 | 0.31886 | 0.011696 |
| 0.148393 | 0.0013   | -0.00466 | 0.91999  | 0.073601 | 0.11219 | -0.10372 | 0.025   | -0.00697 |
| 0.023816 | 0.6077   | 0.054897 | 0.23639  | 0.033056 | 0.47607 | 0.088609 | 0.05569 | 0.090447 |
| -0.03749 | 0.41894  | 0.08693  | 0.0605   | 0.064972 | 0.16099 | 0.073656 | 0.11192 | 0.027356 |
| 0.005074 | 0.91292  | -0.0901  | 0.05168  | -0.00422 | 0.92759 | -0.13359 | 0.00383 | 0.029846 |
| -0.01185 | 0.79846  | 0.003895 | 0.93311  | -0.01829 | 0.69348 | 0.002779 | 0.95224 | -0.06319 |
| -0.00212 | 0.96349  | 0.040055 | 0.3878   | -0.04188 | 0.36651 | 0.033246 | 0.47354 | -0.13041 |
| -0.03851 | 0.40637  | -0.0701  | 0.13037  | -0.10163 | 0.02809 | -0.06848 | 0.13952 | -0.11887 |
| 0.210658 | 4.39E-06 | 0.054099 | 0.24329  | 0.083017 | 0.07309 | 0.086406 | 0.06208 | 0.012664 |

|          |         |          |          |          |          |          |          |          |
|----------|---------|----------|----------|----------|----------|----------|----------|----------|
| -0.04391 | 0.3437  | -0.10281 | 0.0263   | -0.07072 | 0.12701  | -0.09939 | 0.03176  | -0.01635 |
| -0.02746 | 0.55388 | -0.06216 | 0.17989  | -0.03841 | 0.4076   | -0.05624 | 0.22512  | 0.071405 |
| 0.039595 | 0.39327 | 0.126532 | 0.00618  | 0.10861  | 0.01889  | 0.092579 | 0.04555  | 0.04921  |
| -0.02344 | 0.61333 | -0.03492 | 0.45157  | -0.11676 | 0.01156  | -0.08831 | 0.05653  | 0.054006 |
| 0.034766 | 0.45355 | -0.0169  | 0.71571  | -0.12149 | 0.00859  | -0.00079 | 0.98637  | -0.03821 |
| 0.024184 | 0.60216 | -0.15931 | 0.00055  | -0.10099 | 0.0291   | -0.15431 | 0.00082  | 0.002089 |
| -0.02157 | 0.64191 | -0.06659 | 0.15078  | -0.08891 | 0.05487  | -0.09796 | 0.03432  | -0.08282 |
| -0.02768 | 0.55068 | -0.05325 | 0.25077  | -0.07476 | 0.10663  | -0.03074 | 0.50751  | 0.034221 |
| 0.000232 | 0.99601 | 0.076521 | 0.09861  | 0.074993 | 0.10554  | 0.065613 | 0.15688  | 0.06215  |
| -0.02104 | 0.65018 | 0.008859 | 0.84858  | 0.070826 | 0.12642  | -0.0126  | 0.78596  | 0.166036 |
| -0.02463 | 0.59544 | -0.09195 | 0.04705  | -0.10439 | 0.02407  | -0.05673 | 0.22109  | -0.08179 |
| -0.01488 | 0.74838 | 0.00516  | 0.91145  | -0.02108 | 0.64959  | 0.064947 | 0.16115  | -0.00601 |
| 0.02167  | 0.64044 | 0.13853  | 0.0027   | 0.085931 | 0.06353  | 0.185315 | 5.60E-05 | -0.02127 |
| 0.028119 | 0.54442 | -0.03811 | 0.41126  | 0.022269 | 0.63123  | -0.04456 | 0.3366   | 0.01124  |
| -0.01471 | 0.75128 | -0.01019 | 0.82615  | -0.03194 | 0.49116  | -0.01709 | 0.71268  | 0.028699 |
| -0.02311 | 0.6184  | -0.0236  | 0.611    | -0.03624 | 0.43465  | 0.002825 | 0.95145  | -0.06951 |
| 0.018827 | 0.68489 | -0.06032 | 0.19318  | -0.04509 | 0.33091  | -0.10945 | 0.01799  | -0.10591 |
| -0.07142 | 0.12327 | 0.06377  | 0.16889  | -0.05287 | 0.2542   | 0.098715 | 0.03295  | 0.013692 |
| 0.107894 | 0.01969 | -0.03996 | 0.3889   | 0.004889 | 0.91609  | -0.0946  | 0.04101  | -0.25462 |
| 0.01034  | 0.82364 | -0.05614 | 0.22592  | -0.03435 | 0.45892  | -0.16238 | 0.00043  | -0.04042 |
| -0.01471 | 0.75119 | -0.0397  | 0.39205  | 0.118123 | 0.01063  | 0.033887 | 0.46506  | 0.247134 |
| 0.133556 | 0.00384 | -0.05877 | 0.20488  | -0.03077 | 0.50713  | -0.08838 | 0.05633  | -0.10744 |
| 0.060908 | 0.18887 | 0.139262 | 0.00256  | 0.145751 | 0.00159  | 0.176765 | 0.00012  | 0.034954 |
| 0.013907 | 0.76437 | -0.02016 | 0.66397  | -0.03197 | 0.49063  | -0.02082 | 0.65365  | -0.01203 |
| 0.072451 | 0.11792 | 0.007449 | 0.87245  | -0.0295  | 0.52479  | 0.005194 | 0.91087  | -0.01756 |
| 0.060628 | 0.19091 | 0.187772 | 4.44E-05 | 0.147247 | 0.00142  | 0.336426 | 8.05E-14 | 0.286465 |
| 0.001324 | 0.97723 | 0.265306 | 5.79E-09 | 0.246791 | 6.56E-08 | 0.295388 | 7.41E-11 | 0.173795 |
| 0.093997 | 0.04232 | 0.189283 | 3.84E-05 | 0.150415 | 0.00111  | 0.225948 | 8.07E-07 | -0.05297 |
| -0.11671 | 0.0116  | -0.04738 | 0.30689  | -0.08627 | 0.06248  | -0.00243 | 0.95831  | -0.0712  |
| -0.1614  | 0.00046 | 0.04173  | 0.36824  | 0.003371 | 0.94209  | 0.094489 | 0.04125  | -0.03336 |
| -0.00767 | 0.86874 | -0.01402 | 0.76259  | 0.081855 | 0.07721  | -0.05179 | 0.26398  | 0.149891 |
| 4.13E-05 | 0.99929 | 0.009189 | 0.843    | 0.047457 | 0.30613  | -0.00682 | 0.88311  | 0.023182 |
| 0.022246 | 0.63158 | 0.029372 | 0.52662  | -0.02526 | 0.5861   | 0.107025 | 0.02071  | 0.087918 |
| 0.022673 | 0.62504 | -0.11457 | 0.01323  | -0.15986 | 0.00053  | -0.17325 | 0.00017  | -0.12197 |
| 0.082572 | 0.07464 | -0.01996 | 0.66697  | 0.035366 | 0.44579  | -0.01296 | 0.78006  | 0.153095 |
| 0.021615 | 0.64128 | 0.0844   | 0.06841  | 0.101309 | 0.02859  | 0.007854 | 0.86557  | 0.103284 |
| -0.09541 | 0.0393  | 0.114942 | 0.01294  | 0.128995 | 0.00524  | 0.154907 | 0.00078  | 0.193376 |
| -0.02132 | 0.64592 | 0.002293 | 0.96058  | 0.186556 | 4.98E-05 | 0.123727 | 0.00743  | 0.187525 |
| -0.01711 | 0.71226 | 0.031075 | 0.50292  | 0.230603 | 4.70E-07 | 0.136622 | 0.00309  | 0.129401 |
| -0.00995 | 0.83017 | 0.096905 | 0.03631  | 0.202771 | 1.00E-05 | 0.236888 | 2.23E-07 | 0.038832 |
| -0.02468 | 0.5947  | 0.113921 | 0.01377  | 0.123    | 0.00779  | 0.126637 | 0.00614  | 0.098408 |
| 0.061741 | 0.18288 | 0.091667 | 0.04773  | 0.157957 | 0.00061  | 0.116196 | 0.01198  | 0.410504 |
| -0.03632 | 0.43357 | -0.0753  | 0.1041   | -0.05233 | 0.25907  | -0.02171 | 0.63976  | 0.010225 |
| -0.04797 | 0.30097 | -0.02409 | 0.60363  | -0.02897 | 0.53228  | 0.018234 | 0.69431  | -0.00495 |
| 0.034656 | 0.45498 | -0.00147 | 0.97471  | -0.00598 | 0.89737  | 0.032171 | 0.48798  | 0.132292 |



|          |          |          |          |          |          |          |          |          |
|----------|----------|----------|----------|----------|----------|----------|----------|----------|
| 0.029667 | 0.52247  | -0.04476 | 0.33442  | -0.06355 | 0.17034  | 0.03435  | 0.45898  | 0.186362 |
| 0.024493 | 0.59752  | -0.01646 | 0.72274  | 0.024984 | 0.5902   | -0.01947 | 0.67471  | -0.04639 |
| -0.03016 | 0.51558  | -0.09317 | 0.04417  | -0.04078 | 0.37926  | -0.11678 | 0.01155  | -0.00238 |
| -0.06849 | 0.13947  | 0.146075 | 0.00155  | 0.137941 | 0.00282  | 0.049436 | 0.28637  | 0.011399 |
| -0.08418 | 0.06915  | -0.03718 | 0.42283  | -0.11829 | 0.01052  | -0.09198 | 0.04697  | -0.02497 |
| -0.01081 | 0.81575  | 0.072514 | 0.11761  | 0.006282 | 0.89229  | 0.033457 | 0.47074  | -0.08777 |
| 0.040877 | 0.37812  | 0.046531 | 0.31567  | 0.113759 | 0.0139   | 0.069995 | 0.13094  | 0.242929 |
| 0.033091 | 0.47562  | -0.02609 | 0.57382  | -0.03711 | 0.42369  | -0.00441 | 0.9243   | -0.01542 |
| 0.072293 | 0.11873  | -0.01966 | 0.67173  | 0.006278 | 0.89236  | -0.00653 | 0.88816  | 0.033311 |
| 0.031639 | 0.4952   | -0.0595  | 0.19929  | -0.03825 | 0.40954  | 0.005004 | 0.91412  | 0.159871 |
| 0.149893 | 0.00116  | 0.090296 | 0.05117  | 0.064666 | 0.16297  | 0.119706 | 0.00962  | 0.117638 |
| -0.03915 | 0.39866  | -0.01382 | 0.76573  | 0.056412 | 0.22369  | -0.04303 | 0.35348  | 0.011116 |
| -0.05575 | 0.22915  | -0.1047  | 0.02365  | -0.12209 | 0.00826  | -0.10785 | 0.01974  | 0.021621 |
| 0.125805 | 0.00648  | -0.01364 | 0.76872  | 0.046542 | 0.31556  | -0.05339 | 0.24954  | 0.032601 |
| -0.00055 | 0.99057  | -0.06633 | 0.15238  | -0.06007 | 0.19507  | -0.04213 | 0.36371  | 0.110879 |
| 0.374213 | 5.70E-17 | 0.290866 | 1.48E-10 | 0.252897 | 3.01E-08 | 0.222683 | 1.17E-06 | 0.013282 |
| -0.01771 | 0.7026   | 0.102315 | 0.02704  | 0.128079 | 0.00557  | 0.041936 | 0.36588  | 0.082816 |
| 0.078061 | 0.092    | -0.03175 | 0.49365  | 0.014421 | 0.75593  | -0.05361 | 0.24761  | -0.01309 |
| 0.228181 | 6.24E-07 | 0.109874 | 0.01754  | 0.065454 | 0.15789  | 0.064141 | 0.16642  | 0.023897 |
| 0.072357 | 0.11841  | 0.160718 | 0.00049  | 0.124698 | 0.00697  | 0.127206 | 0.00591  | 0.099337 |
| 0.094231 | 0.04181  | 0.133815 | 0.00377  | 0.053167 | 0.25151  | 0.064065 | 0.16692  | -0.00129 |
| -0.05945 | 0.19967  | 0.011979 | 0.79626  | -0.12577 | 0.0065   | 0.051559 | 0.26616  | 0.001257 |
| 0.11748  | 0.01106  | 0.033275 | 0.47316  | -0.02518 | 0.5873   | -0.0133  | 0.77431  | -0.07636 |
| 0.064205 | 0.16599  | -0.0862  | 0.0627   | -0.03595 | 0.43837  | -0.12064 | 0.00906  | 0.112214 |
| 0.067584 | 0.14477  | 0.22033  | 1.53E-06 | 0.206941 | 6.52E-06 | 0.333944 | 1.25E-13 | 0.307156 |
| 0.057354 | 0.21604  | -0.03975 | 0.3914   | -0.10398 | 0.02463  | -0.05354 | 0.2482   | 0.119021 |
| 0.209033 | 5.22E-06 | 0.137429 | 0.00292  | 0.14869  | 0.00127  | 0.048152 | 0.29909  | -0.05648 |
| 0.293721 | 9.56E-11 | 0.114811 | 0.01304  | 0.226179 | 7.86E-07 | 0.049372 | 0.287    | 0.046173 |
| 0.142643 | 0.002    | 0.050556 | 0.27558  | 0.031699 | 0.49438  | 0.009221 | 0.84246  | 0.006588 |
| 0.023053 | 0.61926  | 0.017136 | 0.71187  | 0.005369 | 0.90787  | 0.089404 | 0.05352  | 0.176    |
| 0.019451 | 0.67504  | 0.10675  | 0.02104  | 0.072977 | 0.11528  | 0.034577 | 0.45601  | 0.067702 |
| 0.086052 | 0.06316  | 0.08675  | 0.06104  | 0.072041 | 0.12002  | 0.089503 | 0.05325  | 0.096262 |
| 0.022152 | 0.63302  | -0.10208 | 0.02739  | -0.09529 | 0.03955  | -0.08901 | 0.05458  | 0.021899 |
| -0.01331 | 0.77418  | -0.11279 | 0.01474  | -0.05761 | 0.214    | -0.11743 | 0.01109  | 0.12961  |
| 0.150866 | 0.00107  | 0.205379 | 7.67E-06 | 0.300299 | 3.46E-11 | 0.210924 | 4.27E-06 | 0.109782 |
| -0.01327 | 0.77491  | 0.010694 | 0.81772  | -0.21686 | 2.24E-06 | -0.01737 | 0.70812  | -0.17033 |
| -0.12557 | 0.00659  | -0.084   | 0.06975  | -0.2465  | 6.81E-08 | -0.10223 | 0.02717  | -0.12985 |
| -0.11137 | 0.01605  | -0.24145 | 1.28E-07 | -0.20813 | 5.75E-06 | -0.25349 | 2.79E-08 | 0.020201 |
| 0.061998 | 0.18107  | -0.15603 | 0.00072  | -0.05717 | 0.2175   | -0.16286 | 0.00041  | 0.104764 |
| -0.12361 | 0.00749  | -0.04186 | 0.36675  | -0.09096 | 0.04948  | -0.11831 | 0.0105   | -0.0769  |
| 0.023054 | 0.61924  | -0.04619 | 0.31926  | 0.009432 | 0.83892  | -0.06718 | 0.14721  | 0.03766  |
| -0.00343 | 0.94101  | -0.04569 | 0.32449  | -0.00287 | 0.95072  | -0.06723 | 0.14687  | -0.03886 |
| 0.144329 | 0.00177  | 0.10279  | 0.02633  | 0.131391 | 0.00445  | -0.00298 | 0.94871  | -0.07068 |
| -0.02999 | 0.51793  | 0.04696  | 0.31123  | -0.00896 | 0.84681  | -0.0209  | 0.65238  | -0.05425 |
| -0.04587 | 0.32263  | -0.09601 | 0.03808  | -0.11249 | 0.01501  | -0.06613 | 0.1536   | 0.036183 |

|          |          |          |          |          |          |          |          |          |
|----------|----------|----------|----------|----------|----------|----------|----------|----------|
| 0.00133  | 0.97714  | -0.02994 | 0.51868  | -0.01019 | 0.82616  | 0.001707 | 0.97066  | 0.080259 |
| 0.006532 | 0.88804  | -0.00975 | 0.83362  | 0.010151 | 0.82682  | 0.028646 | 0.5369   | 0.073917 |
| -0.01153 | 0.8037   | 0.023809 | 0.6078   | -0.09272 | 0.04522  | 0.086314 | 0.06236  | 0.012097 |
| 0.014035 | 0.76227  | -0.02112 | 0.64888  | -0.0274  | 0.55478  | -0.03999 | 0.38863  | 0.054224 |
| 0.039195 | 0.39808  | -0.07318 | 0.11425  | 0.02342  | 0.61368  | -0.04521 | 0.32959  | -0.02175 |
| 0.017623 | 0.70406  | -0.00632 | 0.89159  | 0.052751 | 0.25525  | -0.00119 | 0.9796   | 0.277414 |
| -0.10243 | 0.02687  | -0.19854 | 1.55E-05 | -0.11756 | 0.01101  | -0.16403 | 0.00037  | 0.124831 |
| 0.037827 | 0.41476  | -0.04051 | 0.38242  | -0.01216 | 0.79326  | -0.00544 | 0.90674  | 0.058459 |
| 0.033619 | 0.46859  | -0.05351 | 0.24843  | -0.00186 | 0.96799  | -0.04197 | 0.36549  | -0.00841 |
| 0.392374 | 1.22E-18 | 0.221239 | 1.38E-06 | 0.268895 | 3.54E-09 | 0.225841 | 8.17E-07 | 0.075504 |
| -0.10747 | 0.02018  | -0.04335 | 0.34992  | 0.012509 | 0.78746  | -0.12396 | 0.00732  | -0.03197 |
| 0.090632 | 0.05031  | 0.013379 | 0.77306  | 0.074915 | 0.10591  | 0.004832 | 0.91705  | 0.082249 |
| 0.037651 | 0.41694  | -0.04139 | 0.37215  | -0.082   | 0.0767   | -0.07667 | 0.09794  | -0.09199 |
| 0.009144 | 0.84376  | -0.09623 | 0.03764  | -0.04444 | 0.33795  | -0.13014 | 0.00485  | -0.03757 |
| -0.03202 | 0.48998  | 0.157136 | 0.00065  | -0.06734 | 0.14625  | 0.123805 | 0.00739  | -0.04572 |
| 0.052959 | 0.25338  | -0.00301 | 0.94824  | 0.051285 | 0.26871  | -0.03215 | 0.48821  | -0.0614  |
| -0.06034 | 0.193    | -0.06447 | 0.16422  | -0.05733 | 0.21624  | -0.13655 | 0.00311  | -0.16854 |
| 0.017941 | 0.69898  | -0.05274 | 0.25531  | -0.09194 | 0.04706  | -0.10033 | 0.03017  | 0.012673 |
| -0.00966 | 0.83503  | -0.09699 | 0.03615  | -0.06077 | 0.18988  | -0.16831 | 0.00026  | -0.10552 |
| -0.08906 | 0.05445  | 0.062348 | 0.17861  | -0.08088 | 0.08082  | 0.130066 | 0.00487  | 0.170479 |
| 0.013527 | 0.77063  | 0.192875 | 2.71E-05 | 0.060755 | 0.18998  | 0.168454 | 0.00026  | -0.15601 |
| 0.25216  | 3.31E-08 | -0.00552 | 0.9053   | 0.041139 | 0.37508  | 0.017556 | 0.70513  | 0.091548 |
| -0.02177 | 0.63893  | -0.01104 | 0.81195  | -0.08726 | 0.05952  | 0.011261 | 0.80824  | 0.112696 |
| -0.10218 | 0.02724  | 0.005522 | 0.90527  | 0.007946 | 0.86401  | 0.057762 | 0.21279  | -0.06346 |
| -0.06536 | 0.15849  | -0.13778 | 0.00285  | -0.03776 | 0.41553  | -0.15789 | 0.00062  | -0.10891 |
| -0.00439 | 0.92466  | -0.10149 | 0.0283   | -0.14193 | 0.00211  | -0.12863 | 0.00537  | -0.01333 |
| 0.106045 | 0.02191  | 0.036923 | 0.42601  | -0.05127 | 0.26884  | 0.023501 | 0.61246  | 0.021371 |
| -0.05701 | 0.21883  | 0.14141  | 0.00219  | -0.00362 | 0.93779  | 0.081837 | 0.07727  | -0.15588 |
| 0.05745  | 0.21527  | -0.10232 | 0.02703  | -0.0299  | 0.51923  | -0.10238 | 0.02695  | 0.080357 |
| 0.08594  | 0.06351  | 0.016263 | 0.72594  | 0.110872 | 0.01653  | 0.040378 | 0.38397  | 0.006036 |
| 0.081007 | 0.08033  | 0.017313 | 0.70902  | 0.048137 | 0.29924  | -0.0375  | 0.41883  | -0.13184 |
| -0.00123 | 0.9788   | 0.185637 | 5.44E-05 | -0.01599 | 0.73036  | 0.192056 | 2.94E-05 | -0.03108 |
| 0.042764 | 0.35648  | 0.119135 | 0.00997  | -0.0067  | 0.88512  | 0.024315 | 0.60019  | -0.14867 |
| -0.01218 | 0.79285  | 0.085375 | 0.06527  | 0.070879 | 0.12614  | 0.142006 | 0.0021   | 0.037322 |
| -0.00875 | 0.85042  | 0.097946 | 0.03434  | 0.051235 | 0.26917  | 0.078281 | 0.09108  | 0.018081 |
| -0.0634  | 0.17136  | 0.047316 | 0.30756  | -0.03835 | 0.40834  | 0.067482 | 0.14538  | -0.0181  |
| -0.00688 | 0.8822   | -0.02493 | 0.59102  | 0.013106 | 0.77758  | -0.01136 | 0.80656  | -0.02163 |
| -0.00802 | 0.86282  | -0.04886 | 0.29205  | -0.04484 | 0.33356  | -0.07375 | 0.11145  | -0.04543 |
| -0.02081 | 0.65379  | -0.04133 | 0.37283  | -0.05117 | 0.26975  | -0.08135 | 0.07907  | -0.04525 |
| 0.004756 | 0.91837  | 0.002231 | 0.96164  | 0.046376 | 0.31729  | 0.019396 | 0.6759   | -0.00764 |
| -0.01053 | 0.82049  | -0.0278  | 0.54896  | 0.010138 | 0.82703  | -0.00091 | 0.98443  | -0.00926 |
| 0.000622 | 0.9893   | -0.02842 | 0.54011  | 0.013831 | 0.76563  | 0.019848 | 0.66879  | 0.09437  |
| -0.01269 | 0.7844   | -0.01626 | 0.72596  | -0.00089 | 0.98463  | -0.0439  | 0.34385  | -0.02873 |
| 0.046045 | 0.32075  | -0.05952 | 0.19919  | -0.05824 | 0.209    | -0.01912 | 0.68021  | 0.024728 |
| 0.001533 | 0.97365  | -0.05276 | 0.25513  | -0.09321 | 0.04408  | 0.008814 | 0.84934  | -0.00307 |

|          |          |          |          |          |          |          |          |          |
|----------|----------|----------|----------|----------|----------|----------|----------|----------|
| 0.047214 | 0.30861  | -0.04691 | 0.31173  | 0.014507 | 0.75453  | -0.03464 | 0.45524  | -0.02083 |
| 0.022233 | 0.63177  | 0.033845 | 0.4656   | 0.093534 | 0.04335  | 0.082559 | 0.07469  | 0.032969 |
| -0.07681 | 0.09736  | -0.00689 | 0.8819   | -0.0324  | 0.4849   | 0.016006 | 0.7301   | -0.05956 |
| -0.01031 | 0.82413  | -0.04403 | 0.34247  | -0.02909 | 0.53065  | -0.02352 | 0.61216  | -0.02726 |
| -0.08788 | 0.05773  | -0.03122 | 0.50091  | -0.20526 | 7.77E-06 | -0.02069 | 0.65564  | -0.15251 |
| 0.057812 | 0.21239  | 0.024172 | 0.60234  | 0.055606 | 0.23039  | 0.052332 | 0.25905  | 0.018397 |
| 0.052859 | 0.25427  | -0.01737 | 0.70816  | -0.02512 | 0.58811  | -0.01949 | 0.67445  | 0.045029 |
| 0.126437 | 0.00622  | 0.186431 | 5.04E-05 | 0.12335  | 0.00762  | 0.082323 | 0.07552  | 0.017543 |
| 0.013904 | 0.76442  | -0.04799 | 0.30068  | -0.10083 | 0.02935  | -0.01952 | 0.67391  | 0.091211 |
| -0.06367 | 0.16958  | -0.0273  | 0.55628  | -0.08524 | 0.0657   | -0.04644 | 0.31658  | -0.04267 |
| 0.040293 | 0.38498  | 0.326294 | 4.79E-13 | 0.186264 | 5.12E-05 | 0.167454 | 0.00028  | 0.002503 |
| 0.198463 | 1.56E-05 | 0.005807 | 0.90039  | 0.105628 | 0.02244  | 0.035716 | 0.4413   | 0.124431 |
| 0.046389 | 0.31715  | -0.08408 | 0.06948  | -0.02594 | 0.57603  | -0.08115 | 0.07981  | 0.021808 |
| 0.010872 | 0.81474  | 0.139256 | 0.00256  | -0.0041  | 0.9296   | 0.113878 | 0.0138   | -0.04092 |
| 0.013968 | 0.76338  | 0.016403 | 0.72367  | 0.063377 | 0.17153  | 0.030603 | 0.50943  | 0.052031 |
| 0.014203 | 0.75952  | -0.10325 | 0.02567  | -0.17417 | 0.00016  | -0.03287 | 0.47856  | 0.060717 |
| -0.02657 | 0.56677  | 0.054316 | 0.2414   | -0.08621 | 0.06267  | -0.03402 | 0.46335  | -0.23771 |
| -0.02058 | 0.65739  | 0.019656 | 0.6718   | -0.15837 | 0.00059  | -0.03293 | 0.47775  | -0.03093 |
| 0.032364 | 0.48537  | 0.096602 | 0.0369   | 0.004155 | 0.92865  | 0.048921 | 0.29143  | 0.010461 |
| -0.06176 | 0.18277  | -0.02975 | 0.52136  | -0.03921 | 0.39788  | -0.08673 | 0.06111  | -0.19432 |
| 0.16018  | 0.00051  | 0.25092  | 3.88E-08 | 0.323325 | 7.97E-13 | 0.309665 | 7.76E-12 | 0.146559 |
| -0.05111 | 0.27036  | 0.055756 | 0.22913  | -0.02582 | 0.57776  | 0.036481 | 0.43157  | -0.19063 |
| -0.01524 | 0.74263  | -0.08833 | 0.05647  | 0.065171 | 0.1597   | -0.05324 | 0.25084  | 0.024553 |
| -0.03203 | 0.48992  | -0.1928  | 2.73E-05 | -0.15635 | 0.0007   | -0.24946 | 4.68E-08 | -0.05672 |
| 0.055589 | 0.23053  | -0.14589 | 0.00157  | 0.041492 | 0.37099  | -0.12445 | 0.00709  | 0.100228 |
| 0.053537 | 0.24822  | 0.002733 | 0.95302  | -0.0219  | 0.63692  | 0.001506 | 0.97411  | 0.012878 |
| 0.029159 | 0.52962  | -0.10359 | 0.02519  | -0.03194 | 0.49104  | -0.17765 | 0.00011  | 0.033    |
| 0.050327 | 0.27776  | 0.04794  | 0.30123  | 0.120476 | 0.00916  | 0.002722 | 0.95321  | -0.01185 |
| -0.01619 | 0.72709  | -0.08049 | 0.08229  | -0.18109 | 8.30E-05 | -0.05927 | 0.20105  | -0.09758 |
| -0.22393 | 1.02E-06 | -0.09364 | 0.04311  | -0.17409 | 0.00016  | -0.07342 | 0.11306  | 0.030926 |
| -0.00737 | 0.87383  | -0.08791 | 0.05765  | -0.01273 | 0.78381  | -0.13908 | 0.00259  | -0.09612 |
| 0.049095 | 0.28972  | 0.019977 | 0.66676  | 0.026678 | 0.56524  | -0.02635 | 0.57008  | 0.007257 |
| 0.024678 | 0.59476  | -0.15776 | 0.00062  | -0.12299 | 0.0078   | -0.06103 | 0.18798  | 0.160341 |
| -0.12504 | 0.00682  | -0.15819 | 0.0006   | -0.18829 | 4.22E-05 | -0.15375 | 0.00086  | 0.105719 |
| 0.248829 | 5.07E-08 | -0.09778 | 0.03464  | -0.05267 | 0.25596  | -0.07374 | 0.11151  | 0.019775 |
| 0.101197 | 0.02877  | 0.024168 | 0.60239  | 0.011103 | 0.81087  | 0.095486 | 0.03915  | 0.21171  |
| 0.058247 | 0.20896  | 0.027177 | 0.55798  | -0.0215  | 0.64298  | 0.079189 | 0.08738  | 0.159329 |
| -0.02575 | 0.57888  | -0.07128 | 0.12401  | -0.0597  | 0.19784  | -0.08008 | 0.08387  | -0.0532  |
| -0.02464 | 0.59537  | -0.04664 | 0.31454  | -0.03026 | 0.51424  | -0.04763 | 0.30432  | -0.02515 |
| 0.008212 | 0.85952  | -0.10839 | 0.01913  | -0.10282 | 0.0263   | -0.0225  | 0.62762  | 0.155495 |
| -0.17285 | 0.00017  | -0.12878 | 0.00532  | -0.24182 | 1.22E-07 | -0.24474 | 8.49E-08 | -0.19641 |
| -0.14686 | 0.00146  | -0.1806  | 8.69E-05 | -0.23536 | 2.67E-07 | -0.25306 | 2.95E-08 | -0.10745 |
| -0.0524  | 0.25841  | -0.11066 | 0.01675  | -0.09777 | 0.03467  | -0.04617 | 0.31944  | 0.135437 |
| 0.050589 | 0.27527  | 0.082811 | 0.0738   | 0.057738 | 0.21298  | -0.00461 | 0.9208   | 0.035903 |
| 0.129988 | 0.0049   | 0.034018 | 0.46333  | 0.194905 | 2.22E-05 | 0.00593  | 0.8983   | 0.223131 |

|          |          |          |          |          |          |          |          |          |
|----------|----------|----------|----------|----------|----------|----------|----------|----------|
| -0.10263 | 0.02657  | -0.13123 | 0.0045   | -0.18829 | 4.23E-05 | 0.015894 | 0.73193  | 0.065626 |
| -0.02621 | 0.57206  | -0.13276 | 0.00405  | -0.04543 | 0.32732  | -0.06769 | 0.14415  | 0.187127 |
| 0.02174  | 0.63935  | -0.01656 | 0.72119  | -0.0452  | 0.32971  | -0.03716 | 0.42306  | 0.175448 |
| -0.03381 | 0.46607  | -0.09921 | 0.03207  | -0.08436 | 0.06855  | -0.05883 | 0.20446  | 0.141136 |
| 0.030369 | 0.51268  | -0.11976 | 0.00958  | -0.05466 | 0.23839  | -0.12396 | 0.00732  | 0.115143 |
| -0.03826 | 0.40945  | 0.040874 | 0.37815  | -0.04821 | 0.29846  | 0.073227 | 0.11403  | 0.035931 |
| 0.014169 | 0.76007  | -0.04168 | 0.36883  | -0.02732 | 0.55595  | -0.01743 | 0.7071   | 0.061765 |
| 0.03184  | 0.49247  | -0.05899 | 0.2032   | -0.06152 | 0.18447  | -0.04336 | 0.34979  | -0.04475 |
| 0.033964 | 0.46404  | -0.05952 | 0.19915  | -0.04078 | 0.37925  | -0.1006  | 0.02973  | 0.019228 |
| -0.14334 | 0.0019   | -0.03741 | 0.41995  | -0.182   | 7.63E-05 | -0.12041 | 0.0092   | -0.07804 |
| -0.03174 | 0.4938   | -0.07178 | 0.12137  | -0.11919 | 0.00993  | -0.07592 | 0.10128  | 0.020314 |
| 0.081985 | 0.07674  | 0.109516 | 0.01791  | 0.040295 | 0.38495  | -0.01846 | 0.69065  | -0.12972 |
| -0.02225 | 0.63144  | -0.13399 | 0.00372  | -0.02944 | 0.52561  | -0.12574 | 0.00651  | 0.171552 |
| -0.09907 | 0.03232  | -0.04191 | 0.36621  | -0.06369 | 0.16945  | -0.03983 | 0.39046  | 0.031123 |
| -0.04771 | 0.3035   | 0.00181  | 0.96887  | -0.11192 | 0.01553  | -0.01099 | 0.81274  | -0.08646 |
| -0.05045 | 0.27656  | 0.092476 | 0.04579  | 0.106801 | 0.02098  | 0.064254 | 0.16567  | 0.017677 |
| -0.02365 | 0.61023  | -0.04828 | 0.29782  | 0.035873 | 0.4393   | -0.06568 | 0.15646  | -0.01296 |
| -0.04052 | 0.38227  | 0.109323 | 0.01812  | 0.031674 | 0.49472  | 0.00814  | 0.86074  | -0.05122 |
| 0.147735 | 0.00137  | -0.05325 | 0.25081  | -0.00227 | 0.96092  | -0.01857 | 0.68892  | 0.062737 |
| -0.09732 | 0.03551  | 0.023602 | 0.61093  | -0.11791 | 0.01077  | 0.023179 | 0.61734  | -0.01752 |
| 0.000443 | 0.99239  | 0.033942 | 0.46433  | -0.09891 | 0.0326   | -0.03872 | 0.40379  | -0.08976 |
| 0.020374 | 0.66055  | -0.09394 | 0.04246  | -0.00958 | 0.83642  | -0.06043 | 0.19236  | 0.054422 |
| 0.008982 | 0.8465   | 0.016808 | 0.71714  | -0.0843  | 0.06875  | -0.02123 | 0.64718  | -0.07976 |
| 0.016705 | 0.7188   | 0.056572 | 0.22238  | 0.013327 | 0.77394  | 0.008339 | 0.85736  | 0.061074 |
| -0.06896 | 0.13677  | -0.05492 | 0.23621  | -0.04169 | 0.36868  | -0.16784 | 0.00027  | -0.1922  |
| 0.020708 | 0.65535  | 0.018778 | 0.68567  | 0.126256 | 0.00629  | 0.128702 | 0.00535  | 0.211752 |
| 0.074479 | 0.10796  | -0.10006 | 0.03063  | -0.01753 | 0.70553  | -0.06538 | 0.15835  | 0.191035 |
| -0.0527  | 0.25573  | 0.015685 | 0.73531  | -0.04428 | 0.3397   | -0.06786 | 0.14311  | -0.17597 |
| -0.09783 | 0.03456  | -0.02546 | 0.58312  | -0.07626 | 0.09977  | -0.03184 | 0.49242  | 0.054901 |
| 0.044166 | 0.34092  | -0.03403 | 0.46313  | 0.059608 | 0.1985   | 0.025846 | 0.57744  | 0.182773 |
| -0.05209 | 0.26128  | 0.037907 | 0.41377  | -0.03831 | 0.40881  | 0.101706 | 0.02797  | 0.094578 |
| 0.137513 | 0.0029   | 0.118112 | 0.01063  | 0.178352 | 0.00011  | 0.096212 | 0.03767  | 0.104085 |
| 0.265526 | 5.62E-09 | 0.151696 | 0.00101  | 0.20131  | 1.17E-05 | 0.18487  | 5.84E-05 | 0.116124 |
| 0.029383 | 0.52646  | 0.169712 | 0.00023  | 0.239303 | 1.66E-07 | 0.143243 | 0.00191  | 0.130448 |
| 0.051699 | 0.26486  | 0.189068 | 3.92E-05 | 0.151084 | 0.00106  | 0.176902 | 0.00012  | 0.125633 |
| 0.079359 | 0.0867   | 0.119662 | 0.00964  | 0.061887 | 0.18185  | 0.105898 | 0.02209  | -0.01533 |
| 0.056512 | 0.22287  | 0.006972 | 0.88056  | 0.040048 | 0.38787  | 0.044249 | 0.34001  | 0.000636 |
| 0.052544 | 0.25712  | 0.024922 | 0.59112  | 0.026885 | 0.56222  | 0.072586 | 0.11724  | 0.026243 |
| 0.049725 | 0.28356  | -0.02818 | 0.54353  | -0.04281 | 0.35594  | -0.02822 | 0.54293  | 0.006715 |
| 0.24286  | 1.07E-07 | 0.046313 | 0.31795  | 0.120028 | 0.00942  | 0.04802  | 0.30042  | 0.036981 |
| 0.059646 | 0.19821  | -0.06914 | 0.13574  | -0.05605 | 0.22667  | -0.05668 | 0.22153  | 0.083849 |
| 0.025678 | 0.57991  | 0.04971  | 0.28371  | 0.029921 | 0.51892  | 0.096888 | 0.03634  | 0.078011 |
| 0.071033 | 0.12531  | -0.01881 | 0.68519  | 0.056442 | 0.22345  | -0.02755 | 0.55263  | 0.065338 |
| -0.00718 | 0.87699  | -0.02136 | 0.64528  | -0.07709 | 0.09614  | -0.06801 | 0.14227  | -0.04651 |
| 0.024797 | 0.59298  | -0.09802 | 0.0342   | -0.09518 | 0.03977  | -0.05991 | 0.19626  | -0.01784 |

|          |         |          |          |          |          |          |          |          |
|----------|---------|----------|----------|----------|----------|----------|----------|----------|
| 0.028538 | 0.53843 | -0.02414 | 0.60284  | -0.03414 | 0.46171  | -0.05886 | 0.20421  | -0.03996 |
| 0.037532 | 0.4184  | -0.02046 | 0.65919  | 0.027073 | 0.55949  | -0.01967 | 0.67152  | 0.009711 |
| -0.01747 | 0.70658 | -0.06191 | 0.18166  | -0.01816 | 0.69553  | -0.06369 | 0.16945  | 0.022258 |
| 0.140895 | 0.00227 | -0.03646 | 0.43187  | 0.074936 | 0.10581  | -0.0277  | 0.55037  | 0.129451 |
| 0.072773 | 0.1163  | -0.04548 | 0.32672  | 0.008105 | 0.86133  | -0.00194 | 0.96658  | 0.161062 |
| 0.044561 | 0.33662 | 0.105896 | 0.02209  | 0.105957 | 0.02202  | 0.212098 | 3.77E-06 | 0.230921 |
| -0.03327 | 0.47318 | 0.182019 | 7.62E-05 | 0.08811  | 0.05708  | 0.182613 | 7.21E-05 | 0.039731 |
| -0.08984 | 0.05236 | -0.10974 | 0.01768  | -0.18951 | 3.76E-05 | -0.13366 | 0.00381  | -0.03383 |
| -0.04305 | 0.35333 | -0.01936 | 0.67643  | 0.036318 | 0.43363  | 0.00895  | 0.84704  | 0.156396 |
| 0.080078 | 0.08387 | 0.11944  | 0.00978  | 0.067081 | 0.14779  | 0.146351 | 0.00152  | -0.05625 |
| 0.009435 | 0.83885 | 0.067129 | 0.1475   | 0.186241 | 5.14E-05 | 0.093696 | 0.04299  | 0.148953 |
| 0.173365 | 0.00017 | 0.093045 | 0.04446  | 0.105289 | 0.02287  | 0.151295 | 0.00104  | 0.015824 |
| 0.032787 | 0.47968 | -0.11352 | 0.0141   | -0.14943 | 0.0012   | -0.03506 | 0.44974  | 0.168838 |
| -0.00844 | 0.85567 | 0.132337 | 0.00417  | 0.087697 | 0.05826  | 0.090242 | 0.05131  | 0.152011 |
| 0.139385 | 0.00254 | 0.086247 | 0.06256  | 0.151518 | 0.00102  | 0.056653 | 0.22172  | 0.02423  |
| 0.056895 | 0.21974 | 0.036419 | 0.43235  | 0.024998 | 0.58999  | 0.032943 | 0.47759  | 0.011323 |
| 0.028957 | 0.53249 | -0.01908 | 0.68083  | -0.11617 | 0.01199  | -0.11448 | 0.0133   | 0.015686 |
| -0.04171 | 0.36851 | 0.0305   | 0.51086  | -0.01003 | 0.82889  | -0.0658  | 0.15573  | -0.15515 |
| -0.0712  | 0.12445 | -0.00047 | 0.99194  | 0.007465 | 0.87218  | -0.11325 | 0.01434  | -0.11818 |
| -0.13692 | 0.00303 | -0.08261 | 0.07449  | -0.14697 | 0.00145  | -0.16482 | 0.00035  | -0.16678 |
| -0.00651 | 0.88841 | -0.07781 | 0.09306  | 0.021791 | 0.63856  | -0.09111 | 0.0491   | 0.09183  |
| -0.08961 | 0.05297 | -0.08006 | 0.08396  | -0.08489 | 0.06682  | -0.08824 | 0.05671  | 0.103457 |
| -0.10804 | 0.01953 | -0.04368 | 0.34631  | -0.21304 | 3.40E-06 | 0.020846 | 0.65319  | 0.051786 |
| -0.00566 | 0.90295 | 0.201463 | 1.15E-05 | 0.085451 | 0.06503  | 0.138482 | 0.00271  | 0.066842 |
| -0.1253  | 0.00671 | 0.004355 | 0.92522  | -0.00909 | 0.84461  | 0.02355  | 0.61172  | 0.060679 |
| 0.007476 | 0.87199 | -0.03637 | 0.43302  | -0.03031 | 0.51347  | 0.0029   | 0.95017  | 0.111564 |
| -0.0871  | 0.05999 | -0.30108 | 3.06E-11 | -0.17741 | 0.00012  | -0.22568 | 8.32E-07 | 0.02504  |
| 0.047394 | 0.30677 | 0.056324 | 0.22442  | 0.028719 | 0.53586  | 0.056232 | 0.22517  | 0.040203 |
| -0.08009 | 0.08381 | -0.13187 | 0.00431  | -0.17325 | 0.00017  | -0.1029  | 0.02617  | 0.011771 |
| 0.067284 | 0.14657 | -0.04294 | 0.35453  | 0.020854 | 0.65307  | -0.04171 | 0.36842  | 0.079691 |
| -0.11903 | 0.01003 | -0.15903 | 0.00056  | -0.17388 | 0.00016  | -0.08379 | 0.07046  | 0.015892 |
| 0.060065 | 0.19508 | 0.079254 | 0.08712  | 0.032705 | 0.48078  | 0.101582 | 0.02816  | 0.048406 |
| 0.04692  | 0.31163 | -0.03515 | 0.44863  | 0.019664 | 0.67168  | -0.03404 | 0.463    | -0.02617 |
| 0.060299 | 0.19334 | -0.0466  | 0.31498  | -0.06769 | 0.14415  | -0.03837 | 0.40807  | 0.005459 |
| 0.010938 | 0.81363 | -0.08813 | 0.05702  | -0.03502 | 0.45024  | -0.04811 | 0.29952  | 0.016676 |
| -0.08941 | 0.0535  | -0.13349 | 0.00385  | -0.14981 | 0.00117  | -0.09906 | 0.03233  | 0.192883 |
| -0.04672 | 0.31368 | -0.02598 | 0.57546  | 0.106272 | 0.02162  | -0.05182 | 0.26371  | 0.130579 |
| -0.10862 | 0.01888 | -0.24361 | 9.77E-08 | -0.18172 | 7.84E-05 | -0.20278 | 1.00E-05 | 0.07119  |
| -0.04097 | 0.37706 | -0.14574 | 0.00159  | -0.12852 | 0.00541  | -0.2018  | 1.11E-05 | -0.07944 |
| 0.029393 | 0.52632 | -0.05355 | 0.2481   | 0.09167  | 0.04772  | -0.00691 | 0.88165  | 0.156205 |
| -0.04248 | 0.35975 | -0.20001 | 1.33E-05 | -0.09791 | 0.03441  | -0.1465  | 0.0015   | 0.230283 |
| 0.097063 | 0.036   | -0.0345  | 0.45702  | 0.117354 | 0.01115  | -0.03766 | 0.41687  | 0.16771  |
| -0.03428 | 0.4599  | -0.02196 | 0.63592  | 0.064294 | 0.16541  | -0.09253 | 0.04566  | -0.03173 |
| -0.00985 | 0.83183 | -0.0322  | 0.48753  | -0.01939 | 0.67599  | -0.02739 | 0.55486  | 0.072797 |
| 0.021119 | 0.64896 | 0.018153 | 0.6956   | 0.107804 | 0.01979  | 0.012755 | 0.78338  | 0.128763 |

|           |          |          |          |           |          |          |          |          |
|-----------|----------|----------|----------|-----------|----------|----------|----------|----------|
| -0.01715  | 0.71171  | 0.106255 | 0.02165  | 0.18487   | 5.84E-05 | 0.095272 | 0.03959  | 0.127464 |
| 0.107428  | 0.02023  | 0.036091 | 0.43651  | 0.039211  | 0.39789  | 0.011313 | 0.80737  | -0.08119 |
| -0.00814  | 0.86075  | -0.06221 | 0.17954  | -0.0537   | 0.2468   | -0.13764 | 0.00288  | -0.18139 |
| -0.02633  | 0.57039  | -0.07563 | 0.10262  | -0.05608  | 0.22639  | -0.04443 | 0.3381   | -0.01818 |
| 0.199471  | 1.41E-05 | -0.04107 | 0.37586  | 0.128235  | 0.00552  | -0.0689  | 0.13712  | -0.01286 |
| 0.054691  | 0.23816  | 0.089613 | 0.05296  | -0.05995  | 0.19596  | 0.024192 | 0.60204  | -0.09005 |
| -0.05072  | 0.27405  | 0.073551 | 0.11243  | -0.06335  | 0.17172  | 0.059121 | 0.2022   | -0.10892 |
| 0.022638  | 0.62558  | 0.085077 | 0.06622  | -0.01302  | 0.77895  | 0.052123 | 0.26095  | -0.07665 |
| 0.032525  | 0.48319  | -0.05836 | 0.20806  | -0.02365  | 0.6102   | -0.12765 | 0.00574  | -0.04835 |
| 0.085935  | 0.06352  | -0.02668 | 0.56528  | -0.05218  | 0.2604   | -0.02428 | 0.60066  | 0.03507  |
| 0.08728   | 0.05947  | 0.02002  | 0.66609  | 0.057651  | 0.21366  | 0.020151 | 0.66404  | 0.040434 |
| 0.059016  | 0.203    | 0.078214 | 0.09136  | 0.145463  | 0.00162  | 0.078183 | 0.09149  | 0.343988 |
| -0.04594  | 0.32189  | -0.06162 | 0.18371  | -0.07894  | 0.08837  | -0.12752 | 0.00579  | -0.10181 |
| 0.023142  | 0.6179   | 0.076429 | 0.09902  | 0.072792  | 0.1162   | 0.096916 | 0.03629  | 0.096758 |
| 0.01199   | 0.79608  | 0.028878 | 0.5336   | -0.00283  | 0.95134  | -0.02224 | 0.63165  | 0.034452 |
| 0.263483  | 7.42E-09 | -0.03866 | 0.40456  | 0.082886  | 0.07354  | -0.03688 | 0.4265   | 0.141836 |
| 0.034004  | 0.46351  | -0.00963 | 0.83556  | 0.017513  | 0.70583  | 0.086948 | 0.06045  | 0.338176 |
| 0.089024  | 0.05454  | -0.04747 | 0.30603  | 0.065506  | 0.15756  | -0.05738 | 0.21581  | 0.140511 |
| 0.102183  | 0.02724  | -0.01611 | 0.72841  | 0.020495  | 0.65866  | 0.015584 | 0.73695  | 0.02642  |
| -0.08787  | 0.05775  | -0.02983 | 0.52025  | -0.08357  | 0.07117  | -0.08191 | 0.07702  | -0.05422 |
| 0.010108  | 0.82755  | 0.230245 | 4.90E-07 | 0.134599  | 0.00357  | 0.142021 | 0.00209  | -0.01835 |
| 0.031239  | 0.50068  | 0.132487 | 0.00413  | -0.0592   | 0.20159  | 0.042592 | 0.35843  | -0.10159 |
| -0.09239  | 0.04599  | -0.25507 | 2.27E-08 | -0.24027  | 1.48E-07 | -0.10808 | 0.01948  | 0.011941 |
| 0.094625  | 0.04096  | 0.188286 | 4.23E-05 | 0.245277  | 7.94E-08 | 0.244004 | 9.31E-08 | 0.061427 |
| -1.87E-05 | 0.99968  | 0.21214  | 3.75E-06 | 0.060937  | 0.18866  | 0.19259  | 2.79E-05 | 0.024614 |
| 0.007543  | 0.87085  | 0.218379 | 1.90E-06 | 0.052095  | 0.26122  | 0.229893 | 5.11E-07 | 0.037225 |
| -0.11276  | 0.01477  | -0.11637 | 0.01185  | -0.12303  | 0.00777  | -0.13151 | 0.00442  | -0.03022 |
| 0.079298  | 0.08694  | 0.04974  | 0.28342  | 0.023744  | 0.60878  | 0.07709  | 0.09612  | 0.013771 |
| -0.13264  | 0.00409  | -0.25479 | 2.35E-08 | -0.24999  | 4.38E-08 | -0.27436 | 1.65E-09 | -0.10028 |
| 0.010841  | 0.81525  | 0.028267 | 0.5423   | 0.016845  | 0.71656  | 0.027628 | 0.55147  | -0.05651 |
| -0.0415   | 0.37095  | 0.066268 | 0.15278  | -0.00861  | 0.85273  | -0.05205 | 0.26165  | -0.2433  |
| -0.13547  | 0.00336  | -0.16802 | 0.00027  | -0.09902  | 0.0324   | -0.17654 | 0.00013  | 0.033414 |
| 0.030448  | 0.51158  | 0.061648 | 0.18355  | -0.09048  | 0.05068  | 0.006176 | 0.8941   | -0.09082 |
| 0.01348   | 0.77141  | 0.039732 | 0.39164  | -0.04902  | 0.29046  | -0.01252 | 0.78734  | -0.06835 |
| -0.03918  | 0.39824  | -0.12403 | 0.00729  | -0.13247  | 0.00414  | -0.0371  | 0.42375  | 0.203844 |
| -0.0834   | 0.07176  | -0.11645 | 0.01179  | -0.16769  | 0.00027  | -0.07363 | 0.11204  | -0.07337 |
| -0.0141   | 0.76124  | 0.019961 | 0.66701  | 0.016062  | 0.7292   | -0.07094 | 0.12579  | -0.12031 |
| 0.341702  | 3.10E-14 | 0.200944 | 1.21E-05 | 0.217864  | 2.01E-06 | 0.197618 | 1.70E-05 | 0.137822 |
| 0.21422   | 2.99E-06 | 0.210879 | 4.29E-06 | 0.201785  | 1.11E-05 | 0.151643 | 0.00101  | 0.050713 |
| -0.04076  | 0.37952  | 0.049426 | 0.28647  | -0.0636   | 0.17006  | 0.086971 | 0.06038  | -0.08352 |
| -0.00748  | 0.87189  | -0.03481 | 0.45294  | 0.038587  | 0.40544  | -0.03183 | 0.49264  | 0.258193 |
| 0.060872  | 0.18913  | 0.08827  | 0.05663  | 0.065963  | 0.15468  | 0.122084 | 0.00826  | 0.127473 |
| -0.10973  | 0.01769  | -0.01042 | 0.82226  | 0.026027  | 0.57478  | -0.00066 | 0.98861  | 0.109632 |
| 0.023854  | 0.60713  | -0.09934 | 0.03185  | -0.13354  | 0.00384  | -0.12313 | 0.00772  | -0.05825 |
| 0.008596  | 0.85302  | -0.14648 | 0.0015   | -3.49E-05 | 0.9994   | -0.09603 | 0.03803  | 0.15755  |

|          |          |          |          |          |          |          |          |          |
|----------|----------|----------|----------|----------|----------|----------|----------|----------|
| -0.10517 | 0.02302  | -0.22606 | 7.97E-07 | -0.31583 | 2.82E-12 | -0.28082 | 6.53E-10 | -0.19484 |
| -0.09387 | 0.04261  | -0.20326 | 9.55E-06 | -0.13561 | 0.00332  | -0.16369 | 0.00038  | -0.09476 |
| -0.00684 | 0.88282  | 0.049314 | 0.28757  | 0.032664 | 0.48133  | 0.072598 | 0.11718  | 0.192498 |
| -0.01226 | 0.79153  | -0.15064 | 0.00109  | -0.00882 | 0.84931  | -0.07815 | 0.09164  | 0.271919 |
| -0.00141 | 0.97581  | -0.04659 | 0.3151   | -0.18611 | 5.20E-05 | -0.10015 | 0.03046  | -0.02151 |
| -0.01444 | 0.75564  | -0.10476 | 0.02357  | -0.04436 | 0.33884  | -0.02967 | 0.52245  | 0.167699 |
| 0.039235 | 0.3976   | 0.187024 | 4.77E-05 | 0.101089 | 0.02894  | 0.149523 | 0.00119  | -0.01844 |
| 0.005273 | 0.90952  | 0.023117 | 0.61828  | 0.083991 | 0.06977  | -0.01245 | 0.78846  | 0.102113 |
| 0.087537 | 0.05872  | 0.300273 | 3.47E-11 | 0.281627 | 5.81E-10 | 0.248317 | 5.41E-08 | 0.240832 |
| 0.008794 | 0.84968  | -0.0238  | 0.60788  | -0.06152 | 0.18446  | -0.01189 | 0.7977   | 0.049841 |
| -0.13373 | 0.00379  | -0.14587 | 0.00157  | -0.1373  | 0.00295  | -0.04434 | 0.33901  | 0.215958 |
| 0.004214 | 0.92763  | 0.063614 | 0.16993  | 0.088505 | 0.05597  | -0.02744 | 0.55413  | 0.065312 |
| 0.088783 | 0.0552   | -0.02203 | 0.63485  | -0.00699 | 0.88019  | -0.0338  | 0.46625  | 0.029652 |
| 0.012154 | 0.79336  | 0.045628 | 0.32516  | -0.05421 | 0.24234  | 0.015448 | 0.73917  | -0.12863 |
| 0.128245 | 0.00551  | 0.117964 | 0.01073  | 0.25272  | 3.08E-08 | 0.032677 | 0.48115  | 0.067775 |
| 0.093128 | 0.04427  | -0.01369 | 0.76793  | 0.090697 | 0.05014  | 0.063445 | 0.17107  | 0.07065  |
| 0.027344 | 0.55556  | -0.02442 | 0.59863  | -0.00865 | 0.85205  | 0.013822 | 0.76578  | 0.149301 |
| 0.029756 | 0.52123  | -0.03161 | 0.49564  | -0.03772 | 0.41604  | -0.04082 | 0.37877  | 0.081616 |
| 0.059695 | 0.19785  | -0.05692 | 0.21956  | -0.05618 | 0.22559  | -0.08286 | 0.07365  | -0.00973 |
| -0.03709 | 0.42386  | -0.23064 | 4.68E-07 | -0.14953 | 0.00119  | -0.11642 | 0.01181  | 0.21031  |
| 0.088401 | 0.05626  | -0.06179 | 0.18256  | -0.0468  | 0.31287  | -0.08325 | 0.07229  | -0.04743 |
| -0.04849 | 0.29573  | -0.06878 | 0.1378   | -0.02485 | 0.59217  | -0.1611  | 0.00047  | -0.07074 |
| -0.00125 | 0.97843  | -0.03098 | 0.50422  | 0.073232 | 0.11401  | 0.033575 | 0.46917  | 0.092977 |
| -0.12203 | 0.0083   | 0.064228 | 0.16584  | -0.0983  | 0.03369  | 0.000822 | 0.98587  | -0.0719  |
| 0.031209 | 0.50108  | 0.156225 | 0.0007   | 0.078584 | 0.08983  | 0.063581 | 0.17015  | -0.02674 |
| 0.015579 | 0.73704  | -0.09244 | 0.04588  | -0.10009 | 0.03057  | -0.06244 | 0.17798  | 0.170584 |
| -0.01266 | 0.78498  | -0.00939 | 0.83959  | -0.05665 | 0.22178  | 0.104936 | 0.02334  | 0.022777 |
| 0.106577 | 0.02125  | 0.294519 | 8.47E-11 | 0.220108 | 1.56E-06 | 0.343895 | 2.07E-14 | 0.341148 |
| 0.011941 | 0.79689  | 0.037413 | 0.41988  | 0.042044 | 0.36465  | -0.07133 | 0.12372  | -0.01358 |
| -0.13991 | 0.00244  | -0.14354 | 0.00187  | -0.16088 | 0.00048  | -0.17214 | 0.00019  | -0.26581 |
| -0.06093 | 0.18871  | -0.15743 | 0.00064  | -0.12994 | 0.00492  | -0.18305 | 6.92E-05 | -0.11793 |
| 0.085602 | 0.06456  | -0.07    | 0.13091  | 0.010919 | 0.81394  | -0.00246 | 0.95767  | 0.147714 |
| 0.077363 | 0.09495  | 0.152361 | 0.00096  | 0.165976 | 0.00032  | -0.0013  | 0.97771  | -0.02395 |
| -0.02323 | 0.61653  | 0.082846 | 0.07368  | 0.01155  | 0.80341  | 0.124576 | 0.00703  | 0.023617 |
| -0.05851 | 0.20693  | 0.022624 | 0.6258   | 0.051386 | 0.26777  | -0.10488 | 0.02341  | -0.03524 |
| 0.182522 | 7.27E-05 | 0.073519 | 0.11259  | 0.135548 | 0.00334  | 0.039405 | 0.39555  | -0.03431 |
| -0.04411 | 0.3415   | 0.08341  | 0.07173  | -0.02908 | 0.5307   | 0.07087  | 0.12618  | 0.062716 |
| -0.03407 | 0.46268  | 0.008807 | 0.84945  | -0.02652 | 0.56759  | -0.00134 | 0.97697  | 0.020851 |
| -0.03846 | 0.407    | 0.009838 | 0.83209  | 0.01652  | 0.72179  | 0.012965 | 0.77992  | 0.033953 |
| -0.03453 | 0.45659  | 0.094583 | 0.04105  | -0.09596 | 0.03818  | -0.03298 | 0.47703  | -0.11642 |
| 0.389882 | 2.10E-18 | 0.084301 | 0.06874  | 0.116809 | 0.01153  | 0.077185 | 0.09571  | -0.00795 |
| 0.002458 | 0.95775  | -0.04368 | 0.34624  | 0.060029 | 0.19535  | -0.00938 | 0.83986  | 0.049693 |
| 0.145094 | 0.00167  | 0.079536 | 0.086    | 0.129506 | 0.00506  | 0.142057 | 0.00209  | 0.171841 |
| 0.002987 | 0.94867  | -0.0139  | 0.76442  | -0.02663 | 0.56596  | -0.03867 | 0.40442  | 0.005587 |
| 0.00069  | 0.98813  | 0.103401 | 0.02545  | -0.00205 | 0.9648   | 0.186676 | 4.93E-05 | 0.203087 |

|          |         |          |          |          |          |          |          |          |
|----------|---------|----------|----------|----------|----------|----------|----------|----------|
| 0.016348 | 0.72457 | -0.1901  | 3.55E-05 | -0.17154 | 0.0002   | -0.13389 | 0.00375  | -0.00999 |
| -0.0208  | 0.65399 | -0.10614 | 0.02178  | -0.16964 | 0.00023  | 0.000554 | 0.99047  | -0.08558 |
| -0.00887 | 0.8484  | -0.06225 | 0.17929  | -0.09992 | 0.03086  | -0.02929 | 0.5278   | -0.04818 |
| -0.05856 | 0.20654 | -0.05666 | 0.22167  | -0.12359 | 0.0075   | -0.03172 | 0.49405  | -0.02666 |
| -0.02835 | 0.54114 | -0.0875  | 0.05885  | -0.10092 | 0.02922  | -0.06162 | 0.18373  | -0.00636 |
| 0.096711 | 0.03669 | 0.03591  | 0.43882  | -0.03639 | 0.43267  | -0.05309 | 0.25217  | -0.19335 |
| -0.02243 | 0.62878 | -0.10911 | 0.01834  | 0.006435 | 0.8897   | -0.03264 | 0.4817   | 0.257233 |
| -0.08487 | 0.06688 | -0.0123  | 0.79087  | -0.19599 | 2.00E-05 | -0.01082 | 0.81555  | -0.13152 |
| 0.033698 | 0.46755 | 0.078735 | 0.08922  | 0.004877 | 0.91628  | 0.013893 | 0.7646   | -0.04626 |
| 0.090675 | 0.0502  | 0.123673 | 0.00746  | 0.116283 | 0.01191  | 0.05528  | 0.23314  | -0.02045 |
| 0.005149 | 0.91164 | -0.06982 | 0.13191  | -0.04678 | 0.3131   | -0.05666 | 0.22162  | 0.102933 |
| -0.10082 | 0.02937 | -0.22182 | 1.29E-06 | -0.20374 | 9.10E-06 | -0.18381 | 6.45E-05 | 0.046722 |
| 0.011461 | 0.80489 | -0.12729 | 0.00588  | -0.13632 | 0.00316  | -0.0211  | 0.64924  | 0.196079 |
| -0.00373 | 0.93589 | 0.039724 | 0.39173  | -0.06585 | 0.15537  | 0.093325 | 0.04382  | 0.137884 |
| 0.069668 | 0.13275 | -0.05954 | 0.19904  | 0.056359 | 0.22413  | -0.0068  | 0.88343  | 0.187708 |
| -0.08847 | 0.05608 | -0.1721  | 0.00019  | -0.17613 | 0.00013  | -0.07493 | 0.10582  | 0.058842 |
| -0.04339 | 0.34948 | -0.19629 | 1.94E-05 | -0.04891 | 0.29149  | -0.20856 | 5.49E-06 | 0.068769 |
| -0.01772 | 0.70252 | 0.086349 | 0.06225  | -0.04262 | 0.35806  | 0.047779 | 0.30285  | -0.16597 |
| 0.109862 | 0.01755 | 0.007737 | 0.86757  | 0.067387 | 0.14595  | 0.027381 | 0.55504  | 0.009441 |
| 0.054429 | 0.24042 | 0.062943 | 0.17449  | 0.060519 | 0.19171  | 0.0507   | 0.27421  | 0.106396 |
| 0.165097 | 0.00034 | 0.085833 | 0.06384  | 0.124979 | 0.00685  | 0.067646 | 0.1444   | 0.115587 |
| -0.03193 | 0.49121 | -0.00026 | 0.99551  | 0.005128 | 0.91199  | -0.06153 | 0.18442  | -0.15155 |
| -0.05168 | 0.26503 | -0.16853 | 0.00025  | -0.16613 | 0.00031  | -0.11069 | 0.01671  | -0.02142 |
| 0.002692 | 0.95374 | -0.05359 | 0.24776  | -0.05951 | 0.19928  | -0.06531 | 0.15884  | 0.006391 |
| -0.08038 | 0.08272 | 0.042638 | 0.3579   | -0.14062 | 0.00232  | -0.00865 | 0.85219  | -0.19014 |
| 0.119244 | 0.0099  | 0.076894 | 0.09698  | -0.0824  | 0.07526  | -0.0015  | 0.97428  | -0.15474 |
| -0.03812 | 0.41112 | -0.05057 | 0.27545  | 0.001326 | 0.9772   | 0.011673 | 0.80136  | 0.18835  |
| 0.136467 | 0.00313 | 0.020162 | 0.66387  | 0.062182 | 0.17977  | 0.012684 | 0.78457  | -0.05455 |
| -0.11992 | 0.00949 | -0.28051 | 6.83E-10 | -0.18413 | 6.27E-05 | -0.24051 | 1.43E-07 | -0.052   |
| -0.14919 | 0.00122 | -0.21589 | 2.50E-06 | -0.32455 | 6.47E-13 | -0.20696 | 6.50E-06 | -0.06438 |
| 0.100333 | 0.03017 | 0.178406 | 0.00011  | 0.169049 | 0.00024  | 0.224396 | 9.64E-07 | 0.020664 |
| 0.092362 | 0.04606 | 0.012927 | 0.78054  | -0.03315 | 0.4748   | -0.03628 | 0.43416  | 0.049612 |
| -0.02051 | 0.65848 | -0.01906 | 0.68128  | -0.0848  | 0.06711  | -0.03518 | 0.44818  | -0.15609 |
| -0.04752 | 0.30549 | 0.082397 | 0.07526  | -0.00662 | 0.88649  | -0.03758 | 0.41781  | -0.07199 |
| 0.080732 | 0.08137 | 0.015323 | 0.7412   | 0.065661 | 0.15658  | -0.03094 | 0.50478  | 0.016399 |
| 0.07845  | 0.09038 | -0.07213 | 0.11958  | -0.11261 | 0.0149   | -0.0523  | 0.25936  | 0.057136 |
| 0.075949 | 0.10116 | -0.04287 | 0.35531  | -0.0275  | 0.55339  | -0.04641 | 0.31697  | 0.113671 |
| 0.095966 | 0.03817 | 0.201932 | 1.10E-05 | 0.098258 | 0.03377  | 0.146459 | 0.00151  | 0.065041 |
| 0.120358 | 0.00923 | 0.202853 | 9.96E-06 | 0.082754 | 0.074    | 0.189078 | 3.92E-05 | 0.081019 |
| 0.038588 | 0.40543 | 0.087376 | 0.05919  | 0.18739  | 4.60E-05 | 0.235026 | 2.78E-07 | 0.310994 |
| 0.000797 | 0.9863  | 0.007191 | 0.87684  | 0.025621 | 0.58075  | 0.18403  | 6.32E-05 | 0.204194 |
| -0.08967 | 0.05281 | -0.15062 | 0.0011   | -0.14257 | 0.00201  | -0.23467 | 2.90E-07 | -0.19061 |
| -0.01031 | 0.82419 | -0.17588 | 0.00013  | -0.09668 | 0.03675  | -0.14452 | 0.00174  | 0.081145 |
| -0.05807 | 0.21038 | 0.082518 | 0.07483  | -0.03313 | 0.47507  | 0.144657 | 0.00172  | 0.226292 |
| 0.024688 | 0.59462 | 0.194587 | 2.29E-05 | 0.088843 | 0.05504  | 0.165276 | 0.00033  | 0.030811 |



|          |          |          |          |          |          |          |          |          |
|----------|----------|----------|----------|----------|----------|----------|----------|----------|
| 0.04661  | 0.31485  | 0.070565 | 0.12783  | 0.021029 | 0.65035  | 0.04112  | 0.37529  | 0.077072 |
| 0.105756 | 0.02227  | -0.08929 | 0.05384  | 0.027236 | 0.55714  | -0.08756 | 0.05867  | 0.206034 |
| 0.054864 | 0.23668  | -0.03277 | 0.47984  | 0.051421 | 0.26744  | -0.10027 | 0.03028  | -0.05751 |
| -0.01695 | 0.71478  | -0.01942 | 0.67549  | -0.04998 | 0.28114  | -0.04741 | 0.30656  | -0.05371 |
| 0.005612 | 0.90373  | -0.01293 | 0.78056  | 0.028322 | 0.54151  | -0.00125 | 0.97853  | 0.007766 |
| 0.004974 | 0.91463  | -0.03201 | 0.49019  | -0.0482  | 0.29859  | -0.07206 | 0.11992  | -0.04309 |
| 0.042666 | 0.35759  | -0.01446 | 0.75532  | 0.022714 | 0.62442  | 0.030657 | 0.50869  | 0.225047 |
| -0.00847 | 0.85521  | 0.189745 | 3.68E-05 | 0.140308 | 0.00237  | 0.12199  | 0.00831  | 0.050869 |
| 0.003449 | 0.94075  | -0.02417 | 0.60242  | -0.02784 | 0.54838  | 0.039342 | 0.39631  | 0.176429 |
| -0.04069 | 0.38032  | -0.03793 | 0.41352  | -0.08233 | 0.07549  | -0.04953 | 0.2855   | -0.10836 |
| -0.04366 | 0.34645  | -0.0135  | 0.77115  | -0.04793 | 0.30134  | 0.010859 | 0.81496  | -0.13139 |
| 0.074844 | 0.10624  | 0.051639 | 0.26541  | 0.246719 | 6.62E-08 | 0.039967 | 0.38884  | 0.17382  |
| -0.0934  | 0.04366  | -0.02613 | 0.57327  | 0.003296 | 0.94337  | 0.049884 | 0.28203  | 0.143324 |
| 0.032573 | 0.48255  | -0.07889 | 0.08857  | -0.04845 | 0.29609  | -0.11618 | 0.01199  | -0.07713 |
| -0.00166 | 0.97153  | -0.04516 | 0.33018  | 0.021935 | 0.63635  | 0.040047 | 0.38789  | 0.106959 |
| 0.010497 | 0.82101  | -0.10252 | 0.02674  | -0.1549  | 0.00078  | -0.07044 | 0.1285   | 0.035833 |
| 0.024205 | 0.60184  | 0.061249 | 0.1864   | 0.003196 | 0.94508  | -0.00267 | 0.95414  | -0.15307 |
| -0.17584 | 0.00013  | -0.05381 | 0.24582  | -0.15383 | 0.00085  | -0.05364 | 0.24736  | -0.17368 |
| 0.077704 | 0.0935   | -0.04809 | 0.29968  | -0.09231 | 0.04618  | -0.02896 | 0.53249  | -0.03903 |
| -0.13156 | 0.0044   | -0.26339 | 7.52E-09 | -0.37753 | 2.88E-17 | -0.22397 | 1.01E-06 | -0.11413 |
| 0.000114 | 0.99804  | -0.06922 | 0.13528  | -0.11874 | 0.01022  | -0.08681 | 0.06085  | -0.14413 |
| 0.075693 | 0.10232  | -0.01297 | 0.77986  | 0.02046  | 0.65921  | 0.01434  | 0.75727  | 0.059951 |
| 0.091285 | 0.04867  | 0.027011 | 0.5604   | -0.02605 | 0.57439  | -0.01044 | 0.822    | 0.01803  |
| 0.040993 | 0.37677  | -0.04701 | 0.31066  | -0.06293 | 0.17458  | -0.10586 | 0.02214  | -0.03835 |
| -0.04759 | 0.30478  | 0.000717 | 0.98768  | -0.00445 | 0.92351  | 0.074815 | 0.10638  | 0.147425 |
| -0.08462 | 0.06769  | -0.03744 | 0.4195   | -0.0519  | 0.26298  | 0.004226 | 0.92743  | 0.045704 |
| -0.11744 | 0.01109  | -0.02145 | 0.64383  | -0.1479  | 0.00135  | 0.002655 | 0.95437  | 0.012985 |
| 0.036626 | 0.42973  | -0.02728 | 0.55646  | -0.00926 | 0.84179  | 0.085854 | 0.06377  | 0.336276 |
| 0.067294 | 0.1465   | -0.07286 | 0.11586  | 0.001714 | 0.97054  | -0.07026 | 0.12948  | 0.110409 |
| -0.0097  | 0.83441  | 0.100533 | 0.02984  | -0.12981 | 0.00496  | 0.01674  | 0.71824  | -0.13103 |
| -0.00044 | 0.99247  | 0.036183 | 0.43534  | 0.052122 | 0.26096  | 0.08924  | 0.05396  | 0.056896 |
| -0.06556 | 0.15723  | -0.14729 | 0.00141  | -0.00309 | 0.94686  | -0.04082 | 0.37881  | 0.077443 |
| 0.130353 | 0.00478  | 0.076469 | 0.09884  | 0.021533 | 0.64255  | 0.08979  | 0.05249  | 0.043724 |
| 0.008823 | 0.84918  | -0.10807 | 0.01949  | -0.00416 | 0.92852  | -0.11895 | 0.01009  | -0.00622 |
| -0.19337 | 2.58E-05 | -0.08243 | 0.07516  | -0.1066  | 0.02123  | -0.13559 | 0.00333  | -0.11602 |
| -0.00236 | 0.95943  | -0.04018 | 0.38637  | -0.14175 | 0.00214  | -0.04741 | 0.30664  | -0.08591 |
| -0.07331 | 0.1136   | -0.0084  | 0.85635  | -0.00761 | 0.86964  | -0.03796 | 0.41318  | 0.08143  |
| 0.005267 | 0.90962  | 0.051415 | 0.2675   | 0.012599 | 0.78596  | -0.04084 | 0.37861  | -0.10463 |
| -0.02295 | 0.62078  | -0.22798 | 6.38E-07 | -0.21042 | 4.51E-06 | -0.17327 | 0.00017  | 0.102238 |
| 0.03889  | 0.40176  | -0.05549 | 0.23139  | -0.04123 | 0.37401  | -0.08261 | 0.07452  | -0.06287 |
| -0.03816 | 0.41069  | -0.01381 | 0.76602  | -0.07226 | 0.11891  | -0.03311 | 0.47535  | 0.064914 |
| 0.016533 | 0.72158  | 0.009179 | 0.84317  | -0.03452 | 0.4568   | 0.035299 | 0.44665  | 0.158968 |
| -0.02064 | 0.65633  | 0.013976 | 0.76324  | -0.10116 | 0.02882  | -0.02777 | 0.5494   | 0.046827 |
| -0.00776 | 0.86723  | 0.017108 | 0.71232  | -0.02958 | 0.52374  | 0.159298 | 0.00055  | 0.276496 |
| 0.0823   | 0.07561  | -0.0289  | 0.53326  | -0.09746 | 0.03525  | -0.04205 | 0.36459  | -0.17684 |

|          |          |          |          |          |          |          |          |          |
|----------|----------|----------|----------|----------|----------|----------|----------|----------|
| 0.06506  | 0.16041  | -0.0761  | 0.10049  | -0.03913 | 0.39885  | -0.00234 | 0.95977  | 0.248664 |
| -0.15168 | 0.00101  | -0.12681 | 0.00607  | -0.28823 | 2.19E-10 | -0.16918 | 0.00024  | -0.03786 |
| 0.043992 | 0.34283  | 0.166363 | 0.00031  | 0.358522 | 1.30E-15 | 0.296123 | 6.62E-11 | 0.152944 |
| -0.01726 | 0.7098   | 0.105815 | 0.0222   | 0.001593 | 0.97261  | 0.178265 | 0.00011  | -0.00291 |
| 0.091463 | 0.04822  | 0.153504 | 0.00087  | 0.09535  | 0.03943  | 0.15254  | 0.00094  | 0.155307 |
| 0.034893 | 0.4519   | -0.00397 | 0.93187  | 0.02449  | 0.59758  | 0.049952 | 0.28136  | 0.069904 |
| 0.03797  | 0.41299  | 0.233476 | 3.35E-07 | 0.071516 | 0.12275  | 0.169141 | 0.00024  | -0.03936 |
| 0.072549 | 0.11743  | 0.35309  | 3.70E-15 | 0.310511 | 6.76E-12 | 0.292333 | 1.18E-10 | 0.049827 |
| 0.12583  | 0.00647  | 0.169228 | 0.00024  | 0.198066 | 1.62E-05 | 0.17988  | 9.28E-05 | 0.180085 |
| -0.00916 | 0.84355  | 0.178323 | 0.00011  | 0.196268 | 1.94E-05 | 0.141827 | 0.00212  | 0.06341  |
| -0.02991 | 0.5191   | 0.030504 | 0.51081  | -0.05122 | 0.26936  | -0.04936 | 0.28707  | -0.01909 |
| 0.005179 | 0.91112  | -0.00668 | 0.88552  | -0.09916 | 0.03216  | -0.06076 | 0.18998  | -0.20764 |
| 0.108096 | 0.01946  | -0.07065 | 0.12735  | 0.023964 | 0.60547  | 0.009958 | 0.83006  | 0.157256 |
| -0.0066  | 0.88696  | -0.04012 | 0.38701  | -0.06487 | 0.16165  | -0.0183  | 0.69321  | -0.06791 |
| -0.06521 | 0.15947  | -0.03079 | 0.5068   | 0.039826 | 0.39051  | -0.08774 | 0.05815  | 0.011506 |
| 0.133958 | 0.00373  | 0.031763 | 0.49351  | 0.062888 | 0.17487  | -0.03547 | 0.4444   | -0.04563 |
| 0.040559 | 0.38185  | -0.01332 | 0.77408  | -0.01865 | 0.68767  | -0.02599 | 0.57539  | -0.02364 |
| 0.012931 | 0.78047  | 0.070457 | 0.12841  | 0.015929 | 0.73136  | 0.029924 | 0.51888  | -0.03192 |
| 0.060284 | 0.19345  | -0.00445 | 0.92356  | 0.036253 | 0.43445  | -0.02286 | 0.62226  | -0.03835 |
| 0.074245 | 0.10908  | -0.06281 | 0.17541  | -0.01858 | 0.68886  | -0.01963 | 0.67224  | 0.051113 |
| -0.14854 | 0.00128  | -0.16914 | 0.00024  | -0.15623 | 0.0007   | -0.17529 | 0.00014  | 0.022975 |
| 0.005789 | 0.90071  | -0.14154 | 0.00217  | -0.02269 | 0.62485  | -0.07373 | 0.11156  | 0.084351 |
| 0.029926 | 0.51885  | -0.14655 | 0.0015   | -0.01825 | 0.69407  | -0.10221 | 0.02719  | 0.248085 |
| 0.032393 | 0.48497  | -0.05417 | 0.24267  | 0.013211 | 0.77584  | -0.02652 | 0.56758  | 0.003455 |
| 0.004178 | 0.92825  | -0.05213 | 0.26092  | -0.11728 | 0.0112   | -0.06302 | 0.17396  | -0.03389 |
| -0.09407 | 0.04217  | -0.10417 | 0.02436  | -0.17587 | 0.00013  | -0.11887 | 0.01014  | 0.024021 |
| 0.052212 | 0.26014  | 0.030394 | 0.51233  | 0.019891 | 0.66812  | 0.072626 | 0.11704  | 0.091413 |
| -0.00298 | 0.94877  | -0.07626 | 0.09978  | -0.10774 | 0.01987  | -0.14567 | 0.0016   | -0.09305 |
| 0.038212 | 0.41002  | 0.027184 | 0.55788  | 0.024857 | 0.59209  | 0.03148  | 0.49737  | -0.01965 |
| 0.045873 | 0.32257  | 0.05212  | 0.26098  | 0.123531 | 0.00753  | 0.018523 | 0.6897   | 0.023021 |
| -0.08384 | 0.07028  | -0.2148  | 2.81E-06 | -0.15144 | 0.00103  | -0.24211 | 1.18E-07 | 0.064583 |
| 0.163153 | 0.0004   | 0.095734 | 0.03864  | 0.097621 | 0.03494  | 0.088866 | 0.05498  | 0.103819 |
| -0.02694 | 0.5614   | -0.06622 | 0.15306  | -0.12824 | 0.00551  | -0.13468 | 0.00355  | -0.14226 |
| -0.1546  | 0.0008   | -0.30927 | 8.28E-12 | -0.22287 | 1.15E-06 | -0.30553 | 1.51E-11 | -0.14214 |
| -0.0725  | 0.1177   | -0.14193 | 0.00211  | -0.06441 | 0.16462  | -0.13364 | 0.00381  | 0.086834 |
| 0.077446 | 0.09459  | -0.0469  | 0.31181  | -0.10075 | 0.02948  | -0.04063 | 0.38099  | 0.035693 |
| 0.149478 | 0.0012   | 0.063469 | 0.17091  | -0.0235  | 0.61254  | 0.087881 | 0.05773  | 0.061571 |
| -0.09445 | 0.04133  | -0.16677 | 0.0003   | -0.19977 | 1.37E-05 | -0.10721 | 0.02048  | -0.05938 |
| 0.233559 | 3.32E-07 | 0.059587 | 0.19866  | 0.102324 | 0.02703  | 0.037481 | 0.41904  | -0.0412  |
| -0.09881 | 0.03277  | -0.14864 | 0.00128  | -0.08604 | 0.06321  | -0.15763 | 0.00063  | 0.12857  |
| -0.1414  | 0.00219  | 0.018052 | 0.69721  | 0.087782 | 0.05802  | 0.055587 | 0.23055  | 0.036978 |
| 0.020773 | 0.65433  | 0.202555 | 1.03E-05 | -0.02285 | 0.62242  | 0.073724 | 0.11159  | -0.20969 |
| -0.03295 | 0.47752  | -0.04558 | 0.32568  | -0.04266 | 0.35771  | 0.00961  | 0.83592  | -0.06435 |
| 0.056802 | 0.2205   | 0.171719 | 0.00019  | 0.166501 | 0.0003   | 0.072385 | 0.11826  | -0.08927 |
| -0.01593 | 0.73136  | 0.006791 | 0.88364  | -0.03644 | 0.43203  | 0.014227 | 0.75911  | 0.020878 |

|          |          |          |          |          |          |          |          |          |
|----------|----------|----------|----------|----------|----------|----------|----------|----------|
| -0.12675 | 0.00609  | -0.10753 | 0.02011  | -0.0614  | 0.18532  | -0.03774 | 0.41579  | 0.175298 |
| -0.10085 | 0.02933  | -0.14032 | 0.00237  | -0.16168 | 0.00045  | -0.09968 | 0.03127  | -0.02004 |
| 0.093981 | 0.04236  | 0.353658 | 3.32E-15 | 0.193829 | 2.47E-05 | 0.253911 | 2.64E-08 | 0.015127 |
| 0.033869 | 0.46529  | 0.056564 | 0.22245  | 0.017779 | 0.70157  | 0.140801 | 0.00229  | 0.179586 |
| 0.080433 | 0.0825   | -0.04766 | 0.30409  | 0.060333 | 0.19309  | 0.026072 | 0.57411  | 0.156265 |
| 0.231011 | 4.48E-07 | 0.245295 | 7.92E-08 | 0.357776 | 1.51E-15 | 0.156563 | 0.00069  | 0.218454 |
| -0.08059 | 0.0819   | -0.05293 | 0.25361  | -0.05386 | 0.2454   | -0.1073  | 0.02038  | 0.116315 |
| 0.034607 | 0.45562  | -0.00153 | 0.97364  | -0.00484 | 0.91689  | 0.027645 | 0.55123  | 0.140607 |
| 0.027692 | 0.55055  | -0.06379 | 0.16875  | 0.032285 | 0.48644  | -0.02901 | 0.53168  | 0.081965 |
| 0.025167 | 0.58748  | -0.03163 | 0.49539  | -0.01646 | 0.72271  | 0.013166 | 0.7766   | 0.023734 |
| 0.089352 | 0.05366  | 0.042613 | 0.35819  | 0.063861 | 0.16828  | 0.017154 | 0.71159  | -0.0192  |
| 0.07141  | 0.12332  | -0.05902 | 0.20301  | 0.013475 | 0.77149  | -0.03498 | 0.45077  | 0.045079 |
| 0.024744 | 0.59377  | -0.00941 | 0.8393   | 0.022239 | 0.63168  | -0.00091 | 0.98433  | 0.05154  |
| -0.00905 | 0.84536  | -0.04913 | 0.28935  | 0.00431  | 0.92598  | -0.0009  | 0.98459  | 0.093545 |
| 0.026034 | 0.57467  | -0.08345 | 0.0716   | 0.047522 | 0.30547  | -0.05184 | 0.26359  | 0.046699 |
| -0.00096 | 0.98343  | -0.10301 | 0.02601  | -0.05078 | 0.27345  | -0.10362 | 0.02514  | -0.00856 |
| -0.0328  | 0.47948  | -0.16914 | 0.00024  | -0.11505 | 0.01285  | -0.16789 | 0.00027  | -0.04362 |
| 0.010279 | 0.82467  | -0.03811 | 0.41131  | 0.113815 | 0.01386  | -0.02596 | 0.57583  | 0.075773 |
| 0.004315 | 0.92591  | 0.086164 | 0.06282  | -0.06767 | 0.14425  | 0.00106  | 0.98178  | -0.22181 |
| -0.00441 | 0.92429  | -0.01674 | 0.71817  | 0.014865 | 0.74867  | -0.0779  | 0.09266  | -0.11857 |
| 0.044433 | 0.33801  | 0.095998 | 0.0381   | 0.105911 | 0.02208  | 0.050338 | 0.27766  | 0.000303 |
| 0.078546 | 0.08999  | -0.04827 | 0.29787  | -0.01909 | 0.68069  | -0.02154 | 0.64237  | 0.114182 |
| -0.04783 | 0.30237  | 0.007763 | 0.86713  | -0.18044 | 8.81E-05 | -0.00373 | 0.93598  | -0.05868 |
| 0.083633 | 0.07097  | -0.0201  | 0.66482  | 0.039718 | 0.3918   | 0.018152 | 0.69561  | 0.056465 |
| 0.046537 | 0.31561  | -0.11359 | 0.01405  | -0.03139 | 0.4986   | -0.12858 | 0.00539  | 0.075368 |
| -0.12449 | 0.00707  | -0.02664 | 0.56574  | -0.22637 | 7.69E-07 | -0.09878 | 0.03283  | -0.06542 |
| -0.00082 | 0.98591  | -0.02516 | 0.58758  | -0.02197 | 0.63579  | -0.03072 | 0.50775  | 0.049773 |
| -0.01538 | 0.74021  | -0.09951 | 0.03156  | -0.07562 | 0.10265  | -0.04764 | 0.30424  | 0.053977 |
| -0.07029 | 0.12931  | 0.017995 | 0.69811  | -0.02815 | 0.54403  | 0.145878 | 0.00157  | 0.185418 |
| 0.058608 | 0.20615  | 0.061938 | 0.18149  | 0.038453 | 0.40707  | 0.140768 | 0.0023   | 0.210095 |
| 0.111448 | 0.01598  | 0.051143 | 0.27004  | 0.004353 | 0.92525  | 0.099884 | 0.03092  | 0.062849 |
| -0.0852  | 0.06582  | -0.01984 | 0.6689   | 0.079749 | 0.08516  | 0.061115 | 0.18737  | 0.136015 |
| -0.04287 | 0.35525  | 0.042391 | 0.3607   | 0.017931 | 0.69913  | -0.05163 | 0.26549  | -0.12942 |
| 0.026505 | 0.56777  | 0.057234 | 0.217    | 0.046329 | 0.31778  | 0.062622 | 0.1767   | 0.083276 |
| 0.059511 | 0.19923  | 0.171838 | 0.00019  | 0.108795 | 0.01868  | 0.118446 | 0.01041  | 0.026196 |
| 0.007955 | 0.86386  | -0.02497 | 0.59044  | -0.025   | 0.58997  | 0.04725  | 0.30824  | 0.122969 |
| -0.04268 | 0.35746  | -0.01703 | 0.71358  | -0.12406 | 0.00727  | -0.06659 | 0.15076  | -0.01854 |
| 0.006884 | 0.88205  | 0.013355 | 0.77347  | -0.07498 | 0.10559  | -0.01582 | 0.73306  | -0.04954 |
| -0.02111 | 0.64903  | 0.026876 | 0.56236  | -0.01287 | 0.78148  | -0.03695 | 0.42566  | 0.00324  |
| -0.03088 | 0.50567  | 0.004066 | 0.93018  | -0.03883 | 0.40254  | -0.00909 | 0.84473  | -0.02856 |
| 0.159337 | 0.00055  | 0.10177  | 0.02787  | 0.135807 | 0.00328  | 0.112667 | 0.01485  | 0.125107 |
| -0.02647 | 0.56826  | 0.118091 | 0.01065  | 0.033218 | 0.47392  | 0.03747  | 0.41918  | -0.00914 |
| 0.003129 | 0.94624  | -0.01538 | 0.7403   | -0.00987 | 0.83156  | 0.027565 | 0.55238  | 0.007319 |
| 0.016338 | 0.72473  | -0.05552 | 0.23114  | -0.10695 | 0.0208   | -0.04308 | 0.35299  | 0.050735 |
| -0.03337 | 0.47187  | -0.02098 | 0.65111  | -0.02773 | 0.54998  | 0.008623 | 0.85256  | 0.030881 |

|          |          |          |          |          |          |          |          |          |
|----------|----------|----------|----------|----------|----------|----------|----------|----------|
| 0.006324 | 0.89159  | -0.08162 | 0.07805  | -0.08383 | 0.07031  | -0.03646 | 0.43188  | 0.149602 |
| 0.008973 | 0.84665  | -0.09489 | 0.04039  | -0.11612 | 0.01203  | -0.06961 | 0.13309  | 0.080948 |
| -0.05501 | 0.23545  | -0.21709 | 2.19E-06 | -0.19956 | 1.39E-05 | -0.14298 | 0.00195  | 0.207464 |
| -0.10849 | 0.01902  | -0.00508 | 0.91286  | -0.02181 | 0.6383   | -0.03285 | 0.47877  | 0.068092 |
| 0.112998 | 0.01456  | -0.00233 | 0.95999  | 0.037463 | 0.41927  | 0.049727 | 0.28354  | 0.133837 |
| 0.017678 | 0.70319  | -0.11371 | 0.01395  | -0.02183 | 0.63798  | -0.07111 | 0.1249   | 0.195306 |
| -0.00106 | 0.98178  | 0.002764 | 0.9525   | 0.00495  | 0.91503  | -0.03644 | 0.43209  | -0.00217 |
| 0.00213  | 0.96338  | -0.04454 | 0.3368   | -0.00087 | 0.9851   | -0.02697 | 0.56094  | -0.03469 |
| 0.111324 | 0.01609  | 0.080035 | 0.08404  | 0.057594 | 0.21412  | 0.046753 | 0.31337  | 0.048676 |
| 0.128014 | 0.0056   | 0.01802  | 0.69772  | 0.125249 | 0.00673  | 0.009944 | 0.8303   | 0.074392 |
| 0.016786 | 0.7175   | -0.03444 | 0.45777  | 0.047242 | 0.30833  | -0.03587 | 0.43938  | 0.045518 |
| 0.046538 | 0.3156   | 0.006477 | 0.88899  | 0.050952 | 0.27184  | -0.03183 | 0.49264  | 0.036467 |
| -0.01815 | 0.69557  | -0.06884 | 0.13741  | 0.051056 | 0.27086  | -0.09267 | 0.04532  | -0.02223 |
| -0.06439 | 0.1648   | -0.08752 | 0.05878  | -0.23284 | 3.61E-07 | -0.08658 | 0.06154  | 0.018093 |
| -0.0005  | 0.9914   | -0.03562 | 0.44256  | 0.007062 | 0.87902  | -0.05976 | 0.19738  | 0.102437 |
| -0.09547 | 0.03918  | -0.01731 | 0.70908  | -0.07289 | 0.11571  | 0.001331 | 0.97711  | -0.05595 |
| -0.01469 | 0.75147  | -0.02362 | 0.61072  | -0.12523 | 0.00674  | -0.03979 | 0.39094  | -0.03139 |
| 0.084212 | 0.06904  | 0.017729 | 0.70236  | 0.022393 | 0.62932  | -0.0712  | 0.12443  | 0.002451 |
| 0.022661 | 0.62522  | 0.06239  | 0.17832  | 0.004791 | 0.91775  | 0.119348 | 0.00984  | 0.218782 |
| 0.051177 | 0.26972  | 0.016593 | 0.72062  | 0.12876  | 0.00532  | 0.004792 | 0.91773  | -0.01663 |
| 0.227899 | 6.44E-07 | -0.01521 | 0.74305  | -0.08745 | 0.05897  | 0.000814 | 0.98601  | 0.040468 |
| 0.085912 | 0.06359  | -0.13273 | 0.00406  | 0.008595 | 0.85304  | -0.05067 | 0.27449  | 0.20433  |
| 0.00068  | 0.98831  | 0.025242 | 0.58636  | 0.060496 | 0.19188  | 0.108105 | 0.01945  | 0.069993 |
| 0.021703 | 0.63992  | 0.055277 | 0.23316  | 0.033744 | 0.46694  | 0.002747 | 0.95278  | -0.01834 |
| -0.01897 | 0.68255  | 0.004465 | 0.92334  | -0.0528  | 0.25485  | 0.023472 | 0.61289  | -0.00415 |
| -0.07654 | 0.09851  | -0.14369 | 0.00185  | -0.1238  | 0.00739  | -0.07317 | 0.11432  | 0.168709 |
| -0.0593  | 0.20081  | 0.025147 | 0.58777  | -0.02533 | 0.58511  | 0.056056 | 0.22663  | -0.00986 |
| 0.162456 | 0.00042  | 0.183948 | 6.37E-05 | 0.296317 | 6.42E-11 | 0.113838 | 0.01384  | 0.170196 |
| 0.01369  | 0.76795  | -0.03965 | 0.39261  | -0.07284 | 0.11595  | 0.06027  | 0.19356  | -0.03452 |
| 0.014344 | 0.75719  | 0.088777 | 0.05522  | 0.027302 | 0.55618  | 0.072622 | 0.11706  | -0.09927 |
| 0.135966 | 0.00324  | 0.139689 | 0.00248  | 0.125361 | 0.00668  | 0.152481 | 0.00095  | 0.029844 |
| -0.01402 | 0.76254  | 0.026143 | 0.57307  | -0.09924 | 0.03203  | -0.02905 | 0.53115  | -0.04712 |
| 0.116505 | 0.01175  | 0.053894 | 0.24508  | 0.017211 | 0.71066  | 0.078777 | 0.08904  | 0.129151 |
| -0.09488 | 0.04042  | -0.11378 | 0.01389  | -0.24856 | 5.25E-08 | -0.03742 | 0.41981  | -0.0238  |
| -0.10777 | 0.01983  | -0.14895 | 0.00125  | -0.14768 | 0.00137  | -0.14976 | 0.00117  | -0.14844 |
| 0.012231 | 0.79208  | -0.056   | 0.22705  | -0.11785 | 0.01081  | -0.03867 | 0.40446  | 0.01826  |
| 0.007798 | 0.86654  | 0.141449 | 0.00218  | 0.160082 | 0.00052  | 0.244124 | 9.17E-08 | -0.0523  |
| 0.076475 | 0.09882  | 0.071116 | 0.12487  | -0.04714 | 0.30941  | 0.141331 | 0.0022   | 0.051563 |
| 0.06754  | 0.14503  | -0.01806 | 0.69712  | -0.0639  | 0.16803  | 0.078924 | 0.08845  | 0.063307 |
| 0.013828 | 0.76568  | -0.08349 | 0.07148  | -0.07039 | 0.12877  | -0.04994 | 0.28153  | -0.01388 |
| 0.00425  | 0.92702  | -0.04961 | 0.28468  | -0.00809 | 0.86155  | -0.06326 | 0.17232  | 0.029067 |
| 0.037643 | 0.41703  | -0.03288 | 0.47836  | 0.024944 | 0.59079  | -0.0352  | 0.44788  | 0.116967 |
| 0.079796 | 0.08497  | -0.08984 | 0.05235  | -0.04953 | 0.28548  | -0.0523  | 0.25935  | 0.01257  |
| -0.06092 | 0.18882  | -0.00083 | 0.98572  | -0.13926 | 0.00256  | -0.00428 | 0.92643  | -0.18257 |
| 0.041952 | 0.3657   | -0.06639 | 0.15204  | 0.030951 | 0.50463  | -0.01933 | 0.67695  | 0.257559 |

|          |         |          |          |          |          |          |          |          |
|----------|---------|----------|----------|----------|----------|----------|----------|----------|
| 0.024264 | 0.60096 | -0.04925 | 0.28818  | -0.00043 | 0.99261  | -0.09222 | 0.0464   | 0.04758  |
| 0.097954 | 0.03433 | -0.09129 | 0.04865  | -0.04077 | 0.37941  | -0.07387 | 0.1109   | 0.00408  |
| -0.03412 | 0.46204 | -0.17384 | 0.00016  | -0.12178 | 0.00843  | -0.13068 | 0.00468  | 0.049039 |
| 0.048064 | 0.29997 | -0.1634  | 0.00039  | -0.07353 | 0.11252  | -0.19953 | 1.40E-05 | 0.120692 |
| 0.105686 | 0.02236 | -0.04439 | 0.33847  | 0.033847 | 0.46559  | -0.00542 | 0.90706  | 0.072947 |
| 0.016119 | 0.72827 | -0.04954 | 0.28533  | -0.03191 | 0.49153  | -0.05919 | 0.20171  | -0.06276 |
| -0.08109 | 0.08003 | -0.03619 | 0.43521  | -0.00406 | 0.9303   | -0.10701 | 0.02073  | -0.09153 |
| 0.11835  | 0.01048 | -0.0145  | 0.75468  | 0.016374 | 0.72416  | -0.01141 | 0.80579  | -0.01998 |
| 0.042151 | 0.36343 | -0.06559 | 0.15702  | 0.004284 | 0.92643  | -0.07675 | 0.09759  | 0.04625  |
| -0.02332 | 0.61523 | -0.06726 | 0.14674  | -0.06693 | 0.14869  | -0.06029 | 0.19343  | 0.135047 |
| -0.02362 | 0.61059 | -0.0349  | 0.45187  | -0.01753 | 0.70555  | 0.003249 | 0.94417  | 0.065608 |
| -0.00607 | 0.89591 | -0.08706 | 0.06011  | -0.04718 | 0.30894  | -0.06515 | 0.15982  | 0.161032 |
| -0.01404 | 0.76227 | 0.13313  | 0.00395  | -0.01564 | 0.73602  | 0.117858 | 0.0108   | -0.07106 |
| -0.0193  | 0.67738 | -0.03209 | 0.48901  | -0.06728 | 0.1466   | 0.007629 | 0.8694   | 0.075474 |
| 0.05279  | 0.25489 | 0.116014 | 0.01211  | -0.00536 | 0.90809  | 0.120642 | 0.00906  | 0.107322 |
| -0.02536 | 0.58468 | -0.00467 | 0.91985  | -0.04653 | 0.31573  | -0.0283  | 0.5419   | 0.116756 |
| -0.02381 | 0.60774 | -0.14896 | 0.00124  | -0.06496 | 0.16104  | -0.06675 | 0.1498   | 0.221669 |
| 0.029224 | 0.52871 | -0.11615 | 0.01201  | -0.02863 | 0.53706  | -0.17805 | 0.00011  | -0.01762 |
| 0.001261 | 0.97833 | -0.00741 | 0.87313  | 0.015572 | 0.73715  | 0.101793 | 0.02784  | 0.169092 |
| -0.05851 | 0.20688 | -0.18137 | 8.09E-05 | -0.16829 | 0.00026  | -0.14625 | 0.00153  | -0.11624 |
| -0.01615 | 0.7277  | 0.056885 | 0.21982  | 0.157944 | 0.00061  | 0.088281 | 0.0566   | 0.058672 |
| 0.081611 | 0.0781  | -0.00309 | 0.9469   | 0.023305 | 0.61542  | -0.01127 | 0.80815  | 0.071083 |
| 0.00503  | 0.91367 | -0.05703 | 0.21864  | -0.07459 | 0.10745  | -0.01707 | 0.71292  | 0.002062 |
| -0.03041 | 0.51205 | -0.05808 | 0.21026  | -0.06976 | 0.13222  | -0.05496 | 0.23582  | 0.001342 |
| 0.057675 | 0.21347 | -0.09904 | 0.03237  | -0.03801 | 0.41253  | -0.07654 | 0.09853  | 0.062872 |
| 0.027459 | 0.55391 | 0.023288 | 0.61568  | -0.12371 | 0.00744  | -0.00269 | 0.95381  | -0.13055 |
| 0.03473  | 0.45402 | 0.1043   | 0.02419  | -0.03815 | 0.41075  | 0.14425  | 0.00178  | 0.239903 |
| 0.090629 | 0.05031 | 0.064121 | 0.16655  | -0.10033 | 0.03018  | 0.011288 | 0.80778  | -0.26115 |
| 0.074538 | 0.10768 | -0.06316 | 0.17299  | -0.03616 | 0.43563  | -0.07838 | 0.09067  | -0.00764 |
| -0.05069 | 0.27433 | -0.10165 | 0.02806  | -0.0878  | 0.05798  | -0.0502  | 0.27899  | 0.201784 |
| 0.02035  | 0.66093 | -0.12517 | 0.00676  | -0.02458 | 0.59629  | -0.19251 | 2.81E-05 | -0.07933 |
| -0.03732 | 0.42104 | 0.117808 | 0.01084  | -0.01857 | 0.68895  | 0.152306 | 0.00096  | -0.07663 |
| 0.020229 | 0.66282 | 0.050629 | 0.27489  | -0.05176 | 0.26432  | 0.004781 | 0.91793  | -0.03953 |
| -0.12373 | 0.00743 | -0.17282 | 0.00017  | -0.16418 | 0.00037  | -0.19198 | 2.96E-05 | -0.0096  |
| 0.07134  | 0.12368 | 0.255402 | 2.17E-08 | 0.20821  | 5.70E-06 | 0.194105 | 2.40E-05 | 0.018513 |
| 0.009834 | 0.83215 | -0.015   | 0.74644  | 0.004148 | 0.92876  | 0.071592 | 0.12236  | 0.022797 |
| 0.116683 | 0.01162 | -0.05352 | 0.24837  | 0.054046 | 0.24375  | -0.09041 | 0.05089  | -0.08721 |
| -0.07063 | 0.12747 | -0.12477 | 0.00694  | -0.23655 | 2.32E-07 | -0.11567 | 0.01237  | -0.03635 |
| 0.149948 | 0.00115 | 0.17823  | 0.00011  | 0.218103 | 1.96E-06 | 0.225239 | 8.75E-07 | 0.061628 |
| 0.038949 | 0.40104 | 0.167765 | 0.00027  | 0.218886 | 1.79E-06 | 0.088692 | 0.05545  | 0.174441 |
| 0.024909 | 0.59131 | -0.06942 | 0.13412  | -0.06501 | 0.16077  | -0.04927 | 0.288    | 0.126592 |
| 0.059    | 0.20313 | 0.105266 | 0.0229   | 0.122838 | 0.00787  | 0.096395 | 0.03731  | 0.042518 |
| 0.047302 | 0.30771 | -0.13513 | 0.00344  | -0.10874 | 0.01875  | -0.05287 | 0.25418  | 0.143201 |
| 0.037415 | 0.41986 | -0.16332 | 0.00039  | -0.13035 | 0.00478  | -0.14513 | 0.00166  | 0.119481 |
| 0.09485  | 0.04048 | 0.095589 | 0.03893  | 0.034998 | 0.45054  | 0.04963  | 0.28448  | 0.045645 |

|          |         |          |          |          |          |          |          |          |
|----------|---------|----------|----------|----------|----------|----------|----------|----------|
| 0.05749  | 0.21495 | 0.016835 | 0.7167   | 0.15341  | 0.00088  | -0.02576 | 0.57863  | 0.233212 |
| -0.0041  | 0.92953 | 0.046522 | 0.31577  | 0.088131 | 0.05702  | 0.048201 | 0.2986   | 0.070536 |
| -0.1051  | 0.02312 | -0.18581 | 5.35E-05 | -0.13159 | 0.00439  | -0.14677 | 0.00147  | 0.072106 |
| 0.00235  | 0.9596  | 0.078923 | 0.08845  | 0.01624  | 0.72631  | 0.039778 | 0.39109  | -0.11229 |
| 0.023106 | 0.61844 | 0.015804 | 0.73338  | -0.05984 | 0.19672  | -0.01511 | 0.74472  | -0.0669  |
| 0.037951 | 0.41323 | -0.15884 | 0.00057  | -0.05189 | 0.26305  | -0.15711 | 0.00066  | 0.027141 |
| 0.050044 | 0.28048 | -0.10927 | 0.01817  | -0.14749 | 0.00139  | -0.20777 | 5.97E-06 | -0.035   |
| 0.027055 | 0.55976 | -0.13633 | 0.00316  | -0.1263  | 0.00628  | -0.0812  | 0.0796   | 0.127314 |
| 0.007141 | 0.87768 | 0.125966 | 0.00642  | 6.71E-05 | 0.99885  | 0.070889 | 0.12608  | 0.021213 |
| 0.046895 | 0.31189 | 0.05429  | 0.24163  | -0.00417 | 0.92844  | 0.066716 | 0.15002  | 0.152708 |
| -0.01707 | 0.71287 | 0.085839 | 0.06382  | -0.08582 | 0.06387  | 0.037468 | 0.4192   | -0.08826 |
| 0.09289  | 0.04482 | -0.08086 | 0.08088  | -0.05866 | 0.20573  | -0.006   | 0.89708  | -0.00408 |
| 0.058958 | 0.20345 | -0.0152  | 0.74322  | 0.145137 | 0.00166  | 0.141691 | 0.00215  | 0.282374 |
| 0.012354 | 0.79004 | -0.04286 | 0.35537  | -0.01716 | 0.71154  | -0.03181 | 0.49292  | 0.037156 |
| 0.005982 | 0.89741 | -0.06823 | 0.14095  | -0.12224 | 0.00818  | -0.05172 | 0.26465  | -0.066   |
| 0.004486 | 0.92297 | -0.1142  | 0.01354  | -0.10727 | 0.02041  | -0.06231 | 0.17891  | -0.0164  |
| 0.004413 | 0.92423 | 0.029141 | 0.52988  | -0.0105  | 0.82095  | 0.070831 | 0.12639  | 0.032576 |
| 0.062706 | 0.17612 | 0.063746 | 0.16905  | 0.072554 | 0.1174   | 0.024114 | 0.6032   | 0.032575 |
| 0.044388 | 0.3385  | 0.043861 | 0.34427  | 0.04551  | 0.32642  | 0.030196 | 0.51508  | 0.21262  |
| -0.05427 | 0.2418  | -0.01897 | 0.68265  | -0.02382 | 0.60771  | -0.03799 | 0.41278  | -0.05436 |
| -0.02105 | 0.65008 | -0.14067 | 0.00231  | -0.17359 | 0.00016  | -0.10308 | 0.02591  | 0.015829 |
| 0.078233 | 0.09128 | 0.064195 | 0.16606  | -0.01832 | 0.69297  | 0.099826 | 0.03102  | -0.08091 |
| 0.03673  | 0.42842 | -0.05115 | 0.26999  | -0.06301 | 0.17404  | -0.00618 | 0.89397  | 0.045123 |
| -0.05222 | 0.26007 | -0.25313 | 2.92E-08 | -0.16092 | 0.00048  | -0.12019 | 0.00933  | 0.146086 |
| -0.00883 | 0.84908 | -0.02739 | 0.55487  | -0.05945 | 0.19966  | 0.007545 | 0.87082  | -0.00279 |
| 0.085811 | 0.06391 | 0.049308 | 0.28763  | 0.040546 | 0.382    | 0.032292 | 0.48634  | 0.017334 |
| 0.06283  | 0.17527 | 0.113298 | 0.0143   | 0.126008 | 0.0064   | 0.117937 | 0.01075  | 0.066327 |
| 0.059192 | 0.20166 | -0.03796 | 0.41317  | -0.0529  | 0.25393  | -0.04443 | 0.33808  | -0.02655 |
| 0.092676 | 0.04532 | -0.02237 | 0.6297   | 0.047472 | 0.30597  | 0.03487  | 0.4522   | 0.025164 |
| 0.004004 | 0.93123 | -0.05644 | 0.22347  | -0.13312 | 0.00395  | -0.09383 | 0.04268  | -0.05359 |
| -0.01426 | 0.75859 | 0.032664 | 0.48133  | 0.09845  | 0.03342  | 0.117237 | 0.01123  | 0.080833 |
| 0.08384  | 0.07027 | -0.02642 | 0.56907  | 0.094699 | 0.0408   | -0.07434 | 0.10863  | 0.025057 |
| -0.09269 | 0.04529 | 0.078064 | 0.09198  | -0.12312 | 0.00773  | 0.056373 | 0.22401  | 0.059493 |
| 0.029876 | 0.51955 | 0.124543 | 0.00705  | 0.117395 | 0.01112  | 0.089604 | 0.05298  | 0.066338 |
| 0.029486 | 0.52502 | 0.108818 | 0.01866  | 0.009399 | 0.83947  | 0.094822 | 0.04054  | -0.06357 |
| -0.09931 | 0.0319  | 0.05009  | 0.28004  | -0.01916 | 0.67966  | 0.103832 | 0.02484  | 0.20485  |
| -0.02703 | 0.56015 | 0.131362 | 0.00446  | 0.056321 | 0.22443  | 0.124962 | 0.00685  | 0.042022 |
| -0.05466 | 0.23845 | 0.091412 | 0.04835  | 0.029006 | 0.53178  | 0.078489 | 0.09022  | 0.106557 |
| 0.055794 | 0.22881 | -0.01212 | 0.79395  | -0.01599 | 0.7303   | -0.07617 | 0.10016  | -0.02802 |
| -0.0622  | 0.17962 | -0.15861 | 0.00058  | -0.06889 | 0.13713  | -0.07746 | 0.09452  | 0.033338 |
| 0.067862 | 0.14312 | -0.057   | 0.21892  | 0.045427 | 0.3273   | 0.001832 | 0.9685   | 0.271056 |
| 0.009017 | 0.84591 | -0.02236 | 0.62979  | -0.04384 | 0.34445  | 0.038671 | 0.40442  | 0.110527 |
| -0.00305 | 0.9476  | -0.08628 | 0.06245  | -0.04494 | 0.33254  | -0.06813 | 0.14152  | 0.101347 |
| 0.148479 | 0.00129 | 0.307278 | 1.14E-11 | 0.329352 | 2.81E-13 | 0.310553 | 6.72E-12 | 0.26601  |
| 0.024645 | 0.59526 | -0.07026 | 0.12949  | -0.01825 | 0.69409  | -0.13321 | 0.00393  | 0.054479 |

|          |          |          |          |          |          |          |          |          |
|----------|----------|----------|----------|----------|----------|----------|----------|----------|
| -0.12395 | 0.00732  | -0.10707 | 0.02065  | -0.15826 | 0.0006   | -0.11014 | 0.01727  | -0.12844 |
| 0.152964 | 0.00091  | 0.065712 | 0.15625  | 0.025676 | 0.57994  | 0.038382 | 0.40793  | -0.09015 |
| -0.01664 | 0.71982  | -0.02    | 0.66639  | -0.08869 | 0.05545  | -0.11877 | 0.0102   | -0.19338 |
| 0.042079 | 0.36425  | 0.15035  | 0.00112  | 0.164482 | 0.00036  | 0.086971 | 0.06038  | 0.03531  |
| -0.08003 | 0.08408  | -0.10493 | 0.02335  | -0.25212 | 3.33E-08 | -0.15047 | 0.00111  | -0.103   |
| -0.01934 | 0.67675  | 0.090027 | 0.05187  | 0.077811 | 0.09305  | 0.090013 | 0.0519   | 0.012141 |
| 0.101771 | 0.02787  | 0.110297 | 0.01711  | 0.050648 | 0.27471  | -0.00517 | 0.91132  | -0.00859 |
| 0.083025 | 0.07306  | -0.08123 | 0.07951  | -0.05174 | 0.26452  | -0.08161 | 0.07811  | 0.04269  |
| 0.037404 | 0.42     | -0.07793 | 0.09256  | -0.04801 | 0.30056  | -0.16634 | 0.00031  | -0.00193 |
| 0.00898  | 0.84654  | 0.245194 | 8.02E-08 | 0.084774 | 0.06719  | 0.196667 | 1.86E-05 | 0.026102 |
| -0.00988 | 0.83142  | -0.14433 | 0.00177  | -0.05609 | 0.22631  | -0.0905  | 0.05065  | 0.07538  |
| 0.045883 | 0.32246  | -0.02092 | 0.6521   | -0.11198 | 0.01548  | -0.08142 | 0.0788   | -0.05667 |
| 0.027881 | 0.54783  | -0.02856 | 0.53818  | -0.06624 | 0.15296  | -0.04618 | 0.31933  | -0.09022 |
| 0.001087 | 0.98131  | -0.00129 | 0.97777  | -0.01091 | 0.81416  | 0.017962 | 0.69864  | 0.077837 |
| -0.01513 | 0.74438  | -0.08536 | 0.06532  | -0.06707 | 0.14788  | -0.1598  | 0.00053  | -0.09766 |
| 0.014021 | 0.76251  | -0.07274 | 0.11648  | -0.04882 | 0.2924   | -0.02866 | 0.53672  | 0.076034 |
| 0.009383 | 0.83974  | 0.020998 | 0.65084  | -0.00634 | 0.89127  | -0.02532 | 0.58525  | -0.08828 |
| 0.013369 | 0.77323  | -0.04448 | 0.33755  | -0.01082 | 0.8156   | -0.1069  | 0.02086  | -0.05922 |
| 0.007058 | 0.8791   | -0.02527 | 0.58599  | 0.02955  | 0.52412  | -0.07454 | 0.10769  | -0.01557 |
| -0.03377 | 0.46655  | 0.089863 | 0.0523   | -0.01427 | 0.7584   | 0.024652 | 0.59516  | -0.18815 |
| 0.078004 | 0.09223  | 0.071591 | 0.12236  | 0.141192 | 0.00223  | 0.02535  | 0.58477  | 0.041417 |
| 0.021169 | 0.64819  | 0.054324 | 0.24133  | -0.00452 | 0.92245  | 0.081933 | 0.07693  | -0.10964 |
| 0.062499 | 0.17755  | 0.254913 | 2.32E-08 | 0.17399  | 0.00016  | 0.185137 | 5.70E-05 | 0.090161 |
| 0.090566 | 0.05047  | 0.051212 | 0.26939  | 0.045038 | 0.33146  | 0.050377 | 0.27729  | 0.009377 |
| 0.110367 | 0.01704  | 0.285049 | 3.52E-10 | 0.193091 | 2.66E-05 | 0.302144 | 2.59E-11 | 0.177457 |
| 0.214247 | 2.98E-06 | -0.14607 | 0.00155  | -0.02608 | 0.57405  | -0.10582 | 0.02219  | 0.039117 |
| -0.0725  | 0.11769  | -0.18128 | 8.16E-05 | -0.14334 | 0.0019   | -0.20191 | 1.10E-05 | -0.07099 |
| 0.106017 | 0.02194  | -0.02209 | 0.63393  | -0.04584 | 0.32291  | 0.01004  | 0.82869  | 0.096743 |
| -0.00332 | 0.943    | -0.02604 | 0.57463  | -0.04759 | 0.30482  | 0.055045 | 0.23513  | 0.122243 |
| 0.022278 | 0.63109  | -0.00128 | 0.97797  | -0.0187  | 0.6869   | 0.012368 | 0.7898   | 0.023735 |
| -0.05574 | 0.22923  | -0.01728 | 0.7095   | -0.12048 | 0.00916  | -0.00167 | 0.97134  | -0.10374 |
| 0.002883 | 0.95045  | 0.071472 | 0.12299  | 0.167719 | 0.00027  | 0.129432 | 0.00509  | 0.194691 |
| 0.030909 | 0.50521  | 0.088816 | 0.05511  | 0.121028 | 0.00884  | 0.070047 | 0.13065  | 0.099488 |
| 0.038299 | 0.40896  | 0.132263 | 0.00419  | 0.168008 | 0.00027  | 0.132247 | 0.0042   | 0.151941 |
| 0.109784 | 0.01763  | 0.295363 | 7.44E-11 | 0.255718 | 2.09E-08 | 0.324832 | 6.16E-13 | 0.038159 |
| 0.055713 | 0.22949  | -0.02752 | 0.55297  | 0.032927 | 0.4778   | -0.07248 | 0.11778  | -0.03983 |
| 0.104689 | 0.02367  | -0.05229 | 0.25943  | 9.39E-05 | 0.99839  | -0.00582 | 0.90025  | 0.114991 |
| -0.07367 | 0.11186  | -0.06908 | 0.13606  | -0.08123 | 0.0795   | -0.0212  | 0.64768  | 0.196999 |
| 0.134808 | 0.00351  | 0.247096 | 6.32E-08 | 0.286906 | 2.67E-10 | 0.146829 | 0.00146  | 0.078434 |
| 0.078505 | 0.09015  | -0.04886 | 0.29202  | -0.0011  | 0.98111  | -0.05375 | 0.24634  | -0.0379  |
| 0.008581 | 0.85327  | -0.14933 | 0.00121  | -0.03495 | 0.45116  | -0.11482 | 0.01304  | 0.25179  |
| -0.09653 | 0.03704  | -0.16619 | 0.00031  | -0.14262 | 0.002    | -0.19637 | 1.92E-05 | -0.11678 |
| 0.065554 | 0.15726  | -0.04238 | 0.36081  | 0.111601 | 0.01583  | 0.05526  | 0.2333   | 0.402758 |
| 0.021713 | 0.63977  | -0.03936 | 0.39612  | 0.067144 | 0.14741  | -0.04291 | 0.35481  | 0.228599 |
| -0.05682 | 0.22039  | -0.17704 | 0.00012  | -0.05729 | 0.21655  | -0.15452 | 0.00081  | 0.158975 |

|          |          |          |          |          |          |          |          |          |
|----------|----------|----------|----------|----------|----------|----------|----------|----------|
| 0.05099  | 0.27148  | 0.209832 | 4.80E-06 | 0.294789 | 8.12E-11 | 0.264293 | 6.65E-09 | 0.273413 |
| 0.003209 | 0.94486  | 0.198241 | 1.59E-05 | 0.020412 | 0.65996  | 0.14718  | 0.00143  | -0.07991 |
| 0.038953 | 0.401    | 0.028472 | 0.53937  | 0.053567 | 0.24796  | -0.06702 | 0.14818  | 0.054375 |
| 0.063211 | 0.17266  | -0.03154 | 0.49652  | -0.02722 | 0.55742  | 0.045301 | 0.32864  | 0.081729 |
| 0.058822 | 0.2045   | -0.02621 | 0.57209  | 0.024004 | 0.60487  | -0.00886 | 0.84856  | 0.087125 |
| -0.016   | 0.73014  | -0.00335 | 0.94237  | -0.01388 | 0.76489  | -0.02934 | 0.5271   | 0.002326 |
| 0.043749 | 0.34551  | 0.189472 | 3.77E-05 | 0.173316 | 0.00017  | 0.203872 | 8.97E-06 | 0.048431 |
| 0.009497 | 0.83782  | -0.04102 | 0.37642  | -0.04118 | 0.37462  | -0.02352 | 0.61213  | -0.00764 |
| 0.038444 | 0.40719  | -0.0646  | 0.16342  | -0.0722  | 0.11918  | -0.04871 | 0.29352  | 0.072809 |
| -0.01483 | 0.74927  | -0.10444 | 0.024    | -0.0105  | 0.82093  | -0.10887 | 0.0186   | -0.00081 |
| 0.00808  | 0.86175  | -0.09112 | 0.04908  | 0.012019 | 0.79561  | -0.09574 | 0.03862  | 0.106267 |
| 0.040412 | 0.38357  | -0.04501 | 0.33182  | -0.05514 | 0.23429  | -0.04504 | 0.33148  | 0.000479 |
| 0.066199 | 0.1532   | -0.06782 | 0.14339  | -0.05807 | 0.21037  | -0.116   | 0.01212  | 0.025261 |
| 0.036495 | 0.43139  | -0.08233 | 0.07549  | -0.01011 | 0.82747  | -0.13385 | 0.00376  | -0.10768 |
| -0.13028 | 0.0048   | -0.05127 | 0.26885  | -0.05076 | 0.27361  | -0.06698 | 0.14841  | -0.00425 |
| -0.00753 | 0.87111  | -0.13889 | 0.00263  | -0.01223 | 0.79207  | -0.0371  | 0.42377  | 0.222714 |
| 0.003093 | 0.94685  | 0.05508  | 0.23483  | 0.008736 | 0.85065  | 0.15929  | 0.00055  | 0.16707  |
| 0.00559  | 0.9041   | -0.0836  | 0.0711   | -0.05161 | 0.26568  | 0.032988 | 0.47698  | 0.333062 |
| 0.039029 | 0.40008  | 0.166381 | 0.0003   | -0.02519 | 0.58717  | 0.02419  | 0.60208  | -0.07937 |
| -0.08375 | 0.07059  | -0.15956 | 0.00054  | -0.21881 | 1.81E-06 | -0.17501 | 0.00014  | -0.09959 |
| 0.111559 | 0.01587  | 0.064273 | 0.16555  | 0.054965 | 0.23581  | 0.137588 | 0.00289  | 0.091326 |
| -0.05471 | 0.23796  | -0.10197 | 0.02756  | -0.12778 | 0.00569  | -0.10392 | 0.02472  | 0.089284 |
| 0.056721 | 0.22116  | 0.043909 | 0.34374  | -0.03181 | 0.4929   | 0.091869 | 0.04724  | 0.058592 |
| 0.185888 | 5.31E-05 | 0.159659 | 0.00053  | 0.203474 | 9.35E-06 | 0.135748 | 0.00329  | 0.21322  |
| -0.06981 | 0.13194  | -0.03595 | 0.43835  | -0.04653 | 0.31568  | -0.04946 | 0.28618  | 0.032635 |
| -0.00441 | 0.92431  | 0.026333 | 0.57029  | 0.096166 | 0.03776  | 0.015115 | 0.74459  | 0.012913 |
| 0.023222 | 0.61669  | 0.022274 | 0.63115  | -0.02314 | 0.61791  | -0.0499  | 0.28191  | -0.13797 |
| -0.08802 | 0.05735  | -0.08721 | 0.05969  | -0.08948 | 0.05332  | 0.014705 | 0.75129  | 0.27712  |
| -0.06576 | 0.15597  | -0.09944 | 0.03168  | 0.013231 | 0.77552  | -0.10618 | 0.02173  | 0.118756 |
| 0.080214 | 0.08335  | 0.018464 | 0.69065  | 0.034192 | 0.46105  | -0.03789 | 0.41401  | -0.02946 |
| 0.065491 | 0.15766  | -0.12666 | 0.00613  | 0.016761 | 0.71791  | -0.0973  | 0.03555  | 0.184823 |
| 0.024285 | 0.60065  | -0.13327 | 0.00391  | -0.09113 | 0.04904  | -0.06076 | 0.18991  | 0.176611 |
| -0.03908 | 0.39943  | -0.05965 | 0.19821  | -0.03843 | 0.40734  | -0.06203 | 0.18082  | 0.020679 |
| 0.015852 | 0.73261  | -0.0157  | 0.73514  | -0.04126 | 0.37366  | -0.02875 | 0.53535  | -0.01416 |
| -0.02364 | 0.61036  | -0.15533 | 0.00076  | -0.07472 | 0.1068   | -0.10281 | 0.0263   | 0.182101 |
| 0.06317  | 0.17294  | -0.02813 | 0.54422  | 0.071845 | 0.12104  | -0.01545 | 0.73919  | -0.00196 |
| 0.030162 | 0.51555  | -0.00658 | 0.88726  | -0.03741 | 0.41996  | -0.01302 | 0.77907  | 0.085664 |
| 0.01181  | 0.79908  | 0.152195 | 0.00097  | 0.018075 | 0.69685  | 0.152893 | 0.00092  | 0.054987 |
| 0.251021 | 3.83E-08 | 0.221631 | 1.32E-06 | 0.293815 | 9.43E-11 | 0.143858 | 0.00183  | 0.129103 |
| -0.00458 | 0.92142  | 0.034357 | 0.45888  | 0.121442 | 0.00861  | 0.073019 | 0.11506  | 0.275488 |
| 0.028306 | 0.54174  | -0.16526 | 0.00034  | -0.13704 | 0.003    | -0.12913 | 0.00519  | 0.041286 |
| 0.003385 | 0.94184  | -0.10009 | 0.03058  | -0.07137 | 0.12352  | -0.16398 | 0.00037  | -0.07722 |
| 0.073361 | 0.11337  | -0.04809 | 0.29967  | 0.051578 | 0.26598  | -0.01108 | 0.81131  | 0.08154  |
| -0.00074 | 0.98721  | -0.01839 | 0.69187  | -0.11269 | 0.01483  | -0.09196 | 0.04703  | -0.2017  |
| 0.013894 | 0.76459  | -0.06533 | 0.1587   | -0.0539  | 0.245    | -0.04407 | 0.342    | 0.10372  |



|          |          |          |          |          |          |          |          |          |
|----------|----------|----------|----------|----------|----------|----------|----------|----------|
| 0.102734 | 0.02642  | 0.005415 | 0.90709  | -0.02267 | 0.62508  | -0.0597  | 0.19784  | 0.061021 |
| -0.05038 | 0.27728  | 0.060862 | 0.1892   | 0.004715 | 0.91906  | 0.010253 | 0.82511  | -0.00123 |
| 0.003988 | 0.9315   | -0.07648 | 0.09881  | 0.038957 | 0.40095  | -0.09846 | 0.0334   | 0.055499 |
| -0.09324 | 0.04402  | -0.10815 | 0.0194   | -0.14067 | 0.00231  | -0.13776 | 0.00285  | 0.017197 |
| -0.03869 | 0.40417  | -0.03331 | 0.47266  | -0.09518 | 0.03978  | 0.065506 | 0.15756  | 0.090926 |
| 0.070404 | 0.1287   | 0.22131  | 1.37E-06 | 0.152259 | 0.00096  | 0.174754 | 0.00015  | 0.298552 |
| -0.00676 | 0.88414  | 0.069047 | 0.13625  | 0.151725 | 0.00101  | 0.12129  | 0.0087   | 0.260622 |
| 0.02819  | 0.5434   | 0.001728 | 0.97029  | 0.022179 | 0.6326   | 0.058071 | 0.21034  | 0.01541  |
| -0.0424  | 0.36061  | -0.06081 | 0.18957  | -0.04586 | 0.32267  | -0.05981 | 0.19697  | -0.08879 |
| 0.195501 | 2.09E-05 | -0.00681 | 0.8834   | 0.069621 | 0.13302  | 0.026567 | 0.56687  | 0.04521  |
| 0.049332 | 0.28739  | 0.020633 | 0.65651  | 0.04216  | 0.36332  | 0.019509 | 0.67412  | -0.04595 |
| -0.02699 | 0.56065  | -0.05173 | 0.26457  | -0.04944 | 0.2863   | -0.00194 | 0.96669  | 0.034471 |
| 0.074452 | 0.10809  | 0.026926 | 0.56163  | -0.01845 | 0.69084  | 0.087888 | 0.05771  | 0.107456 |
| -0.04718 | 0.30892  | -0.13606 | 0.00322  | -0.16687 | 0.00029  | -0.12565 | 0.00655  | -0.08508 |
| -0.01253 | 0.78715  | -0.0755  | 0.1032   | -0.13808 | 0.00279  | -0.07839 | 0.09061  | 0.120528 |
| -0.00917 | 0.8434   | -0.00599 | 0.89733  | -0.0144  | 0.75625  | -0.04768 | 0.30389  | -0.02841 |
| 0.046181 | 0.31933  | -0.01026 | 0.82493  | -0.05101 | 0.27129  | -0.02628 | 0.57099  | -0.09874 |
| 0.088655 | 0.05556  | -0.02045 | 0.65937  | 0.079767 | 0.08509  | -0.01215 | 0.79336  | 0.028322 |
| -0.00733 | 0.87444  | -0.0448  | 0.33406  | -0.02232 | 0.63049  | -0.09454 | 0.04113  | -0.01474 |
| 0.196313 | 1.93E-05 | 0.156083 | 0.00071  | 0.206094 | 7.12E-06 | 0.200095 | 1.32E-05 | 0.185145 |
| 0.122427 | 0.00808  | 0.20396  | 8.89E-06 | 0.17833  | 0.00011  | 0.251528 | 3.59E-08 | 0.163666 |
| 0.017116 | 0.71219  | 0.047375 | 0.30697  | -0.02103 | 0.65038  | -0.04743 | 0.3064   | -0.0696  |
| 0.121409 | 0.00863  | 0.02435  | 0.59966  | 0.020886 | 0.65257  | 0.038505 | 0.40644  | 0.068808 |
| 0.220965 | 1.42E-06 | 0.013295 | 0.77446  | 0.022777 | 0.62346  | 0.02227  | 0.6312   | 0.030941 |
| 0.044732 | 0.33477  | 0.105561 | 0.02252  | 0.020563 | 0.65761  | 0.091947 | 0.04705  | 0.025497 |
| 0.070204 | 0.12979  | 0.171502 | 0.0002   | 0.103015 | 0.02601  | 0.170906 | 0.00021  | 0.123986 |
| 0.092993 | 0.04458  | -0.01171 | 0.80081  | -0.05413 | 0.24299  | 0.067335 | 0.14626  | 0.062363 |
| -0.0023  | 0.96045  | -0.01581 | 0.73326  | -0.14032 | 0.00237  | 0.035966 | 0.4381   | 0.022743 |
| 0.013077 | 0.77805  | -0.09371 | 0.04295  | -0.06316 | 0.17301  | -0.03844 | 0.40723  | 0.036829 |
| 0.0719   | 0.12075  | 0.006074 | 0.89584  | 0.076361 | 0.09932  | -0.03921 | 0.39791  | -0.08204 |
| -0.11703 | 0.01138  | -0.14703 | 0.00144  | -0.1258  | 0.00649  | -0.13651 | 0.00312  | 0.014518 |
| 0.019142 | 0.6799   | -0.00199 | 0.96578  | -0.03701 | 0.42491  | -0.00287 | 0.95061  | 0.005813 |
| -0.00994 | 0.83043  | 0.011425 | 0.80549  | -0.03702 | 0.42483  | 0.012108 | 0.79412  | 0.020977 |
| -0.01811 | 0.69632  | 0.078759 | 0.08912  | 0.050198 | 0.279    | 0.088344 | 0.05642  | 0.047666 |
| -0.00647 | 0.8891   | 0.11271  | 0.01481  | 0.001817 | 0.96876  | 0.128535 | 0.00541  | -0.05685 |
| -0.11998 | 0.00945  | -0.26438 | 6.57E-09 | -0.29966 | 3.82E-11 | -0.22086 | 1.44E-06 | -0.08761 |
| 0.056405 | 0.22374  | -0.08697 | 0.0604   | -0.05095 | 0.27183  | -0.07104 | 0.12527  | 0.048132 |
| 0.062781 | 0.1756   | -0.03947 | 0.39482  | -0.00196 | 0.96637  | 0.022442 | 0.62858  | 0.078379 |
| 0.033036 | 0.47634  | -0.04239 | 0.36072  | -0.06616 | 0.15346  | -0.02002 | 0.66605  | 0.059488 |
| 0.013668 | 0.7683   | -0.05076 | 0.27363  | -0.08212 | 0.07624  | -0.08291 | 0.07345  | -0.03501 |
| -0.04732 | 0.3075   | -0.03941 | 0.39551  | -0.0141  | 0.76119  | 0.000477 | 0.9918   | -0.0724  |
| 0.184349 | 6.14E-05 | 0.030609 | 0.50935  | 0.093774 | 0.04281  | 0.02943  | 0.5258   | 0.151652 |
| -0.03063 | 0.50911  | -0.00602 | 0.89683  | -0.02573 | 0.57911  | -0.03137 | 0.49892  | -0.04265 |
| 0.203456 | 9.36E-06 | 0.051122 | 0.27023  | 0.062813 | 0.17539  | 0.006976 | 0.88048  | -0.08003 |
| 0.025905 | 0.57656  | 0.041424 | 0.37177  | -0.01381 | 0.76591  | -0.02447 | 0.5979   | 0.004073 |

|          |          |          |          |          |          |          |          |          |
|----------|----------|----------|----------|----------|----------|----------|----------|----------|
| -0.08058 | 0.08195  | 0.11332  | 0.01428  | 0.058669 | 0.20568  | 0.208259 | 5.67E-06 | 0.237275 |
| -0.03437 | 0.45874  | -0.03912 | 0.39899  | -0.00961 | 0.83595  | -0.05869 | 0.20548  | 0.029134 |
| -0.05248 | 0.25771  | 0.028696 | 0.53618  | -0.10031 | 0.03021  | -0.01096 | 0.81327  | -0.0072  |
| 5.25E-05 | 0.9991   | -0.06842 | 0.13983  | 0.053039 | 0.25266  | -0.09418 | 0.04191  | -0.06495 |
| -0.06711 | 0.14764  | 0.043481 | 0.34847  | 0.041764 | 0.36785  | -0.02214 | 0.63313  | -0.09527 |
| 0.266077 | 5.21E-09 | 0.187886 | 4.39E-05 | 0.209543 | 4.95E-06 | 0.177    | 0.00012  | 0.0864   |
| -0.01717 | 0.71139  | 0.019657 | 0.67179  | -0.07033 | 0.12912  | -0.01708 | 0.71283  | -0.15288 |
| -0.01732 | 0.70896  | 0.01508  | 0.74516  | -0.07339 | 0.1132   | 0.028024 | 0.54577  | -0.11497 |
| -0.02655 | 0.56717  | -0.04139 | 0.37211  | 0.005345 | 0.90829  | -0.03234 | 0.48575  | -0.05535 |
| 0.027765 | 0.5495   | 0.149499 | 0.00119  | 0.139814 | 0.00246  | 0.107262 | 0.02043  | 0.012685 |
| 0.128788 | 0.00531  | 0.074059 | 0.10997  | 0.057438 | 0.21537  | 0.065803 | 0.15568  | 0.120732 |
| -0.00373 | 0.93599  | -0.01522 | 0.74285  | -0.00745 | 0.87238  | 0.004255 | 0.92694  | -0.01067 |
| 0.005272 | 0.90953  | 0.098689 | 0.03299  | -0.0159  | 0.73179  | 0.104526 | 0.02389  | -0.07073 |
| 0.016771 | 0.71774  | -0.02148 | 0.64331  | -0.03813 | 0.41108  | -0.01844 | 0.69105  | -0.02558 |
| -0.00487 | 0.91649  | -0.13869 | 0.00267  | -0.04222 | 0.3626   | -0.07193 | 0.12062  | 0.120532 |
| 0.096559 | 0.03698  | 0.098492 | 0.03334  | 0.198587 | 1.54E-05 | 0.224748 | 9.26E-07 | 0.157024 |
| 0.227594 | 6.68E-07 | 0.147248 | 0.00142  | 0.287545 | 2.43E-10 | 0.255762 | 2.07E-08 | 0.06417  |
| 0.130818 | 0.00463  | 0.28038  | 6.96E-10 | 0.229455 | 5.38E-07 | 0.144717 | 0.00172  | 0.097487 |
| -0.00539 | 0.90753  | -0.00924 | 0.84209  | 0.022448 | 0.62849  | -0.07314 | 0.11446  | -0.12762 |
| 0.034378 | 0.45861  | 0.092327 | 0.04614  | 0.009003 | 0.84614  | 0.072102 | 0.11971  | -0.04467 |
| 0.007489 | 0.87176  | -0.04143 | 0.37166  | -0.21456 | 2.89E-06 | -0.14682 | 0.00147  | -0.11441 |
| 0.028231 | 0.54282  | -0.06841 | 0.13993  | -0.01148 | 0.80458  | -0.06422 | 0.1659   | 0.02022  |
| -0.09985 | 0.03097  | -0.18592 | 5.29E-05 | -0.24964 | 4.57E-08 | -0.09346 | 0.04352  | 0.094843 |
| -0.01277 | 0.78321  | -0.09739 | 0.03539  | -0.08036 | 0.08277  | -0.08666 | 0.06131  | 0.093474 |
| -0.08124 | 0.07946  | -0.01981 | 0.66946  | -0.04239 | 0.36071  | 0.018359 | 0.69232  | 0.25581  |
| 0.004824 | 0.9172   | -0.06257 | 0.17706  | 0.00044  | 0.99244  | -0.12731 | 0.00587  | -0.02414 |
| -0.00835 | 0.8571   | 0.032423 | 0.48456  | -0.09874 | 0.03291  | 0.040203 | 0.38604  | -0.06534 |
| -0.0155  | 0.73829  | 0.026924 | 0.56165  | 0.029031 | 0.53143  | 0.03776  | 0.41559  | -0.05539 |
| 0.015521 | 0.73797  | 0.116328 | 0.01188  | 0.122454 | 0.00807  | 0.146997 | 0.00145  | 0.216734 |
| -0.07569 | 0.10233  | -0.13346 | 0.00386  | -0.10303 | 0.02599  | -0.0877  | 0.05826  | -0.12012 |
| -0.00457 | 0.92154  | -0.00421 | 0.92767  | 0.032987 | 0.477    | -0.01576 | 0.73409  | 0.113872 |
| -0.03686 | 0.42676  | 0.125024 | 0.00683  | -0.04584 | 0.32289  | 0.088383 | 0.05632  | -0.00295 |
| 0.047702 | 0.30364  | -0.05972 | 0.19768  | 0.036209 | 0.43501  | -0.05861 | 0.20615  | 0.022787 |
| 0.071836 | 0.12109  | -0.03754 | 0.41827  | -0.04806 | 0.30003  | -0.04022 | 0.38589  | 0.083697 |
| 0.068603 | 0.13879  | 0.024992 | 0.59008  | -0.089   | 0.05461  | -0.04628 | 0.31824  | -0.13714 |
| -0.11817 | 0.0106   | -0.06141 | 0.18525  | -0.13608 | 0.00321  | -0.12081 | 0.00897  | -0.09803 |
| -0.11416 | 0.01357  | -0.03645 | 0.43195  | -0.09301 | 0.04455  | -0.02197 | 0.63579  | -0.04928 |
| 0.03336  | 0.47203  | 0.092517 | 0.04569  | 0.059953 | 0.19591  | 0.08356  | 0.07122  | 0.016962 |
| 0.023745 | 0.60877  | 0.081534 | 0.07838  | -0.00189 | 0.96744  | 0.130048 | 0.00488  | -0.0754  |
| -0.09964 | 0.03134  | 0.077255 | 0.09541  | 0.012008 | 0.79578  | 0.016836 | 0.71669  | 0.096934 |
| 0.013533 | 0.77054  | 0.062809 | 0.17541  | -0.05187 | 0.26325  | 0.008922 | 0.84752  | -0.07395 |
| -0.06933 | 0.13466  | -0.12313 | 0.00773  | -0.152   | 0.00098  | -0.16754 | 0.00028  | -0.21384 |
| -0.00466 | 0.92     | 0.003332 | 0.94275  | -0.14152 | 0.00217  | 0.005725 | 0.9018   | -0.0205  |
| -0.00079 | 0.98648  | 0.078851 | 0.08874  | 0.072452 | 0.11792  | -0.05461 | 0.23883  | -0.21514 |
| -0.05181 | 0.26385  | 0.014701 | 0.75135  | -0.13583 | 0.00327  | -0.0233  | 0.61548  | 0.020372 |

|          |          |          |          |          |          |          |          |          |
|----------|----------|----------|----------|----------|----------|----------|----------|----------|
| -0.00714 | 0.87766  | -0.00215 | 0.96311  | 0.097961 | 0.03431  | 0.026388 | 0.56949  | 0.055842 |
| -0.01942 | 0.67551  | 0.004827 | 0.91714  | -0.05175 | 0.26441  | 0.065509 | 0.15754  | -0.0266  |
| -0.0052  | 0.91077  | -0.01337 | 0.77317  | 0.063601 | 0.17002  | 0.039281 | 0.39704  | 0.03916  |
| -0.01224 | 0.79193  | 0.043232 | 0.35124  | 0.021818 | 0.63815  | 0.063721 | 0.16922  | -0.02752 |
| 0.001801 | 0.96904  | 0.053743 | 0.24641  | 0.026652 | 0.56563  | 0.01069  | 0.81779  | -0.01777 |
| 0.010343 | 0.82359  | 0.095424 | 0.03927  | 0.153715 | 0.00086  | 0.176146 | 0.00013  | 0.224078 |
| -0.02145 | 0.6438   | -0.03384 | 0.46567  | 0.035337 | 0.44616  | 0.015588 | 0.73689  | 0.052546 |
| -0.05946 | 0.19962  | -0.08046 | 0.08242  | -0.17514 | 0.00014  | -0.06168 | 0.18332  | -0.04743 |
| -0.07076 | 0.12678  | -0.06662 | 0.15062  | -0.06685 | 0.14919  | -0.01015 | 0.82682  | -0.06007 |
| -0.02922 | 0.52878  | 0.034817 | 0.45288  | 0.027586 | 0.55208  | 0.055689 | 0.22969  | 0.102915 |
| -0.0458  | 0.32335  | -0.11838 | 0.01046  | -0.06096 | 0.18847  | -0.17245 | 0.00018  | 0.03204  |
| 0.080593 | 0.0819   | -0.0975  | 0.03517  | 0.065172 | 0.15969  | -0.08493 | 0.06669  | 0.037145 |
| 0.361796 | 6.88E-16 | 0.093235 | 0.04403  | 0.08276  | 0.07398  | 0.077028 | 0.09639  | -0.05447 |
| -0.07605 | 0.1007   | -0.12774 | 0.0057   | -0.09984 | 0.031    | -0.22428 | 9.77E-07 | -0.09589 |
| 0.122557 | 0.00802  | 0.287952 | 2.29E-10 | 0.21758  | 2.07E-06 | 0.217993 | 1.98E-06 | 0.018038 |
| 0.042618 | 0.35813  | 0.059767 | 0.1973   | 0.052075 | 0.26139  | 0.052061 | 0.26152  | 0.055372 |
| 0.115804 | 0.01227  | 0.174531 | 0.00015  | 0.119645 | 0.00966  | 0.17707  | 0.00012  | 0.092336 |
| 0.013674 | 0.76821  | -0.03103 | 0.50348  | -0.04245 | 0.35999  | -0.02524 | 0.58642  | -0.01467 |
| 0.00772  | 0.86785  | 0.158462 | 0.00059  | 0.067047 | 0.148    | 0.13064  | 0.00469  | -0.00782 |
| 0.009977 | 0.82974  | 0.096211 | 0.03767  | 0.080851 | 0.08092  | 0.088373 | 0.05634  | 0.048729 |
| 0.048935 | 0.29129  | 0.149227 | 0.00122  | 0.073917 | 0.11065  | 0.085442 | 0.06506  | 0.014012 |
| 0.235178 | 2.73E-07 | 0.161904 | 0.00044  | 0.130665 | 0.00468  | 0.139464 | 0.00252  | 0.018395 |
| 0.021518 | 0.64277  | -0.06588 | 0.15521  | -0.03897 | 0.40085  | -0.07093 | 0.12587  | 0.027444 |
| 0.015873 | 0.73226  | -0.07865 | 0.08956  | -0.05972 | 0.19767  | -0.06098 | 0.18835  | 0.043385 |
| 0.136666 | 0.00308  | 0.045035 | 0.33149  | 0.063758 | 0.16897  | 0.066207 | 0.15316  | 0.116866 |
| -0.12292 | 0.00783  | -0.08328 | 0.07216  | -0.17505 | 0.00014  | 0.020286 | 0.66193  | -0.04032 |
| -0.07043 | 0.12855  | -0.0308  | 0.50674  | -0.02497 | 0.59048  | 0.01741  | 0.70747  | 0.118099 |
| 0.081786 | 0.07746  | 0.010989 | 0.81277  | 0.150886 | 0.00107  | 0.029633 | 0.52295  | 0.167464 |
| 0.090644 | 0.05027  | 0.071718 | 0.1217   | 0.116297 | 0.0119   | 0.065394 | 0.15827  | 0.163534 |
| -0.04158 | 0.36995  | -0.04985 | 0.28236  | 0.01193  | 0.79708  | -0.08278 | 0.07393  | -0.00359 |
| 0.036478 | 0.4316   | 0.03053  | 0.51045  | 0.057472 | 0.2151   | 0.029078 | 0.53076  | 0.170449 |
| 0.011001 | 0.81258  | 0.067786 | 0.14357  | 0.08496  | 0.0666   | 0.068026 | 0.14216  | 0.12362  |
| -0.00493 | 0.91533  | 0.02831  | 0.54169  | 0.039233 | 0.39761  | -0.00095 | 0.98363  | 0.098185 |
| -0.00508 | 0.9129   | -0.04545 | 0.32703  | 0.014961 | 0.7471   | -0.11459 | 0.01322  | 0.026933 |
| -0.0082  | 0.85964  | -0.05895 | 0.20353  | -0.04051 | 0.38243  | -0.08838 | 0.05633  | 0.029316 |
| -0.04074 | 0.37976  | -0.06019 | 0.19413  | -0.07176 | 0.12149  | -0.11553 | 0.01248  | -0.08887 |
| -0.00193 | 0.96679  | -0.05731 | 0.21643  | -0.10035 | 0.03015  | -0.06268 | 0.17631  | -0.02872 |
| -0.10167 | 0.02802  | -0.05732 | 0.21631  | -0.13629 | 0.00317  | -0.02589 | 0.57686  | 0.064253 |
| -0.12591 | 0.00644  | -0.09776 | 0.03469  | -0.12815 | 0.00555  | -0.05926 | 0.20117  | 0.084287 |
| -0.09691 | 0.0363   | -0.1028  | 0.02631  | -0.09907 | 0.03232  | -0.05537 | 0.23237  | 0.194951 |
| 0.082253 | 0.07577  | 0.05227  | 0.25962  | -0.01211 | 0.79405  | 0.018887 | 0.68394  | -0.10549 |
| 0.073958 | 0.11045  | 0.064181 | 0.16615  | -0.02549 | 0.58264  | 0.010758 | 0.81664  | -0.13035 |
| 0.053068 | 0.2524   | 0.008934 | 0.84731  | 0.01864  | 0.68786  | 0.030306 | 0.51356  | -0.05533 |
| 0.068455 | 0.13965  | 0.009381 | 0.83977  | -0.00995 | 0.83018  | 0.017902 | 0.69961  | -0.08956 |
| 0.050865 | 0.27266  | 0.054272 | 0.24178  | 0.027177 | 0.55799  | 0.05817  | 0.20957  | 0.084303 |

|          |          |          |          |          |          |           |          |          |
|----------|----------|----------|----------|----------|----------|-----------|----------|----------|
| 0.090928 | 0.04956  | 0.009827 | 0.83226  | -0.04051 | 0.38245  | -0.05787  | 0.21193  | -0.14323 |
| 0.10008  | 0.03059  | 0.031447 | 0.49782  | -0.00068 | 0.98834  | -0.01536  | 0.74064  | -0.11907 |
| 0.074055 | 0.10999  | 0.038733 | 0.40366  | -0.04185 | 0.36684  | -0.01095  | 0.81339  | -0.1423  |
| 0.033484 | 0.47038  | -0.06175 | 0.18284  | -0.06051 | 0.19181  | -0.09954  | 0.0315   | -0.00106 |
| 0.067587 | 0.14475  | -0.04055 | 0.382    | -0.0216  | 0.64158  | -0.05277  | 0.25505  | -0.0576  |
| 0.117861 | 0.0108   | 0.012948 | 0.78019  | 0.035233 | 0.44751  | 0.118446  | 0.01041  | 0.036206 |
| 0.170275 | 0.00022  | -0.01288 | 0.78139  | 0.043082 | 0.35291  | 0.090283  | 0.0512   | 0.187947 |
| -0.01974 | 0.67056  | -0.01788 | 0.69998  | 0.033926 | 0.46454  | 0.010488  | 0.82117  | -0.10896 |
| 0.084663 | 0.06755  | -0.02197 | 0.63578  | -0.0489  | 0.29167  | 0.017766  | 0.70177  | 0.149356 |
| 0.315988 | 2.75E-12 | 0.117552 | 0.01101  | 0.182369 | 7.38E-05 | 0.124801  | 0.00693  | 0.058247 |
| 0.035945 | 0.43836  | 0.160578 | 0.00049  | 0.01614  | 0.72793  | 0.172075  | 0.00019  | -0.17723 |
| -0.09112 | 0.04908  | 0.006894 | 0.88188  | -0.11746 | 0.01108  | 0.070442  | 0.12849  | -0.08421 |
| 0.101295 | 0.02861  | 0.265843 | 5.38E-09 | 0.386915 | 3.98E-18 | 0.283963  | 4.13E-10 | 0.390942 |
| -0.06821 | 0.1411   | -0.10666 | 0.02115  | -0.16484 | 0.00035  | -0.15892  | 0.00057  | 0.001064 |
| -0.04488 | 0.33314  | -0.22278 | 1.16E-06 | -0.13188 | 0.00431  | -0.09659  | 0.03692  | 0.274909 |
| 0.074728 | 0.10678  | -0.02109 | 0.64938  | 0.051026 | 0.27114  | -0.01699  | 0.71417  | 0.032748 |
| -0.03874 | 0.40361  | 0.080768 | 0.08123  | 0.219509 | 1.67E-06 | 0.149255  | 0.00122  | 0.232232 |
| 0.0057   | 0.90222  | -0.10225 | 0.02714  | -0.09076 | 0.04998  | -0.08455  | 0.06791  | -0.03366 |
| 0.056805 | 0.22047  | -0.05801 | 0.21083  | 0.020178 | 0.66361  | 0.040406  | 0.38365  | 0.07784  |
| -0.01851 | 0.68993  | 0.033622 | 0.46855  | -0.04074 | 0.37972  | 0.010992  | 0.81273  | -0.07427 |
| -0.0999  | 0.03088  | -0.04527 | 0.32898  | -0.00912 | 0.84413  | -0.02834  | 0.54132  | -0.10903 |
| -0.07106 | 0.12516  | -0.00097 | 0.98333  | 0.0375   | 0.4188   | 0.044847  | 0.33352  | 0.012671 |
| 0.0252   | 0.58698  | 0.050388 | 0.27718  | 0.111689 | 0.01575  | -1.64E-05 | 0.99972  | -0.06747 |
| 0.053458 | 0.24892  | 0.010648 | 0.81848  | 0.017577 | 0.70479  | -0.02126  | 0.64683  | -0.05553 |
| 0.002085 | 0.96416  | -0.09643 | 0.03725  | -0.01768 | 0.70322  | -0.06375  | 0.16903  | -0.02394 |
| 0.005436 | 0.90674  | 0.094223 | 0.04183  | 0.003572 | 0.93863  | 0.098294  | 0.0337   | 0.026935 |
| -0.141   | 0.00226  | -0.22139 | 1.36E-06 | -0.36202 | 6.58E-16 | -0.26257  | 8.39E-09 | -0.24854 |
| -0.02755 | 0.55263  | 0.046726 | 0.31365  | -0.07382 | 0.11114  | 0.074402  | 0.10833  | -0.10574 |
| 0.065323 | 0.15873  | 0.109636 | 0.01779  | 0.072905 | 0.11563  | 0.127191  | 0.00592  | -0.03318 |
| 0.294347 | 8.69E-11 | 0.058413 | 0.20766  | 0.006876 | 0.88219  | 0.022179  | 0.6326   | -0.16111 |
| 0.07664  | 0.09809  | -0.06006 | 0.19509  | -0.03487 | 0.45219  | -0.08871  | 0.05541  | -0.07218 |
| -0.09161 | 0.04786  | -0.09477 | 0.04065  | -0.06822 | 0.14101  | -0.18     | 9.18E-05 | -0.22244 |
| -0.01702 | 0.71369  | 0.060441 | 0.19229  | -0.14042 | 0.00235  | -0.03439  | 0.4585   | -0.20728 |
| 0.011033 | 0.81204  | -0.0518  | 0.26397  | 0.022207 | 0.63218  | -0.04553  | 0.32625  | 0.034149 |
| -0.02185 | 0.63769  | -0.03396 | 0.46403  | -0.06023 | 0.19387  | -0.09625  | 0.03761  | -0.04911 |
| -0.01988 | 0.66822  | -0.08177 | 0.0775   | -0.05558 | 0.23064  | -0.0747   | 0.10691  | 0.011318 |
| -0.02036 | 0.66081  | -0.04434 | 0.33903  | -0.03686 | 0.42681  | -0.04475  | 0.33456  | 0.019721 |
| 0.012628 | 0.78548  | 0.078539 | 0.09002  | 0.087115 | 0.05996  | 0.096199  | 0.0377   | 0.070834 |
| -0.05556 | 0.23081  | -0.01245 | 0.78836  | -0.02086 | 0.65294  | 0.012403  | 0.78921  | 0.035381 |
| -0.069   | 0.13649  | 0.014946 | 0.74734  | 0.026774 | 0.56384  | -0.06878  | 0.13775  | -0.06137 |
| 0.004062 | 0.93024  | 0.056228 | 0.2252   | 0.046378 | 0.31727  | 0.07839   | 0.09063  | 0.0264   |
| 0.115167 | 0.01276  | 0.069383 | 0.13435  | -0.06516 | 0.15979  | 0.081206  | 0.07959  | 0.176962 |
| 0.090915 | 0.04959  | 0.191434 | 3.12E-05 | 0.291107 | 1.42E-10 | 0.310869  | 6.38E-12 | 0.368216 |
| 0.007228 | 0.87621  | 0.067391 | 0.14592  | 0.096907 | 0.0363   | 0.067067  | 0.14787  | 0.021843 |
| 0.060073 | 0.19502  | 0.147226 | 0.00142  | 0.169851 | 0.00023  | 0.095264  | 0.03961  | 0.09068  |

|          |          |          |          |          |          |          |          |          |
|----------|----------|----------|----------|----------|----------|----------|----------|----------|
| 0.028325 | 0.54148  | 0.008944 | 0.84714  | -0.01303 | 0.77887  | -0.0222  | 0.63233  | -0.1986  |
| 0.020978 | 0.65115  | -0.05697 | 0.21911  | 0.053089 | 0.25221  | -0.01311 | 0.77747  | 0.13134  |
| 0.012066 | 0.79481  | -0.04585 | 0.32286  | 0.025112 | 0.5883   | 0.08913  | 0.05426  | 0.246475 |
| 0.074474 | 0.10798  | -0.02645 | 0.5685   | 0.002966 | 0.94903  | 0.017732 | 0.70232  | 0.065025 |
| 0.038526 | 0.40619  | 0.118148 | 0.01061  | 0.112136 | 0.01533  | 0.126557 | 0.00617  | 0.07288  |
| 0.048359 | 0.29702  | -0.10822 | 0.01933  | -0.06508 | 0.16026  | -0.02875 | 0.53535  | 0.105571 |
| 0.101153 | 0.02884  | 0.049158 | 0.2891   | 0.177164 | 0.00012  | 0.048224 | 0.29837  | 0.01352  |
| 0.03754  | 0.41831  | 0.114373 | 0.01339  | 0.003985 | 0.93156  | 0.033062 | 0.47599  | -0.01564 |
| -0.08539 | 0.06521  | -0.18461 | 5.99E-05 | -0.25558 | 2.12E-08 | -0.10954 | 0.01789  | -0.03344 |
| 0.061615 | 0.18378  | 0.009085 | 0.84477  | 0.027228 | 0.55724  | -0.0247  | 0.59442  | 0.048709 |
| -0.08398 | 0.0698   | -0.00277 | 0.95232  | -0.08893 | 0.0548   | -0.03946 | 0.39492  | 0.032994 |
| 0.006454 | 0.88937  | -0.00704 | 0.87932  | -0.0313  | 0.49989  | -0.13592 | 0.00325  | -0.12361 |
| 0.064615 | 0.1633   | 0.105734 | 0.0223   | 0.074502 | 0.10785  | -0.0031  | 0.94675  | -0.05999 |
| 0.028049 | 0.54542  | 0.040699 | 0.3802   | -0.02486 | 0.59199  | -0.00094 | 0.98386  | -0.04614 |
| -0.0452  | 0.32977  | 0.055901 | 0.22792  | 0.041038 | 0.37625  | 0.046654 | 0.31439  | -0.0019  |
| 0.050947 | 0.27188  | -0.07838 | 0.09066  | 0.062352 | 0.17858  | -0.03059 | 0.50957  | 0.023163 |
| 0.01923  | 0.67852  | 0.019629 | 0.67222  | 0.082785 | 0.07389  | 0.024241 | 0.60131  | 0.056407 |
| 0.027012 | 0.56037  | 0.034778 | 0.45339  | 0.044303 | 0.33943  | 0.090333 | 0.05107  | 0.205554 |
| 0.007039 | 0.87941  | -0.0198  | 0.66953  | 0.060354 | 0.19293  | 0.111275 | 0.01614  | 0.191112 |
| -0.13964 | 0.00249  | 0.012132 | 0.79373  | -0.10343 | 0.0254   | 0.01871  | 0.68675  | -0.17734 |
| -0.01911 | 0.68047  | 0.042277 | 0.362    | 0.059802 | 0.19704  | -0.09844 | 0.03344  | -0.08733 |
| -0.07807 | 0.09194  | 0.004242 | 0.92715  | -0.04207 | 0.36438  | -0.03918 | 0.39826  | -0.23011 |
| -0.09051 | 0.05063  | -0.05759 | 0.21416  | -0.0113  | 0.80763  | -0.10748 | 0.02017  | 0.026003 |
| 0.096285 | 0.03753  | 0.083569 | 0.07119  | 0.083904 | 0.07006  | 0.072313 | 0.11863  | 0.076322 |
| -0.14265 | 0.002    | -0.03818 | 0.41045  | -0.11382 | 0.01386  | 0.002919 | 0.94983  | 0.039873 |
| -0.12053 | 0.00913  | 0.007344 | 0.87423  | -0.02594 | 0.57599  | 0.004741 | 0.91861  | -0.01371 |
| -0.03996 | 0.38894  | 0.121589 | 0.00853  | 0.10296  | 0.02609  | 0.04601  | 0.32112  | -0.06703 |
| -0.13259 | 0.0041   | 0.054677 | 0.23828  | -0.09496 | 0.04025  | 0.138576 | 0.00269  | -0.02396 |
| -0.03469 | 0.45456  | -0.01681 | 0.71704  | 0.053207 | 0.25116  | -0.01258 | 0.78633  | -0.01013 |
| 0.062667 | 0.17639  | 0.214571 | 2.88E-06 | 0.132815 | 0.00404  | 0.288569 | 2.08E-10 | 0.124861 |
| 0.023606 | 0.61087  | 0.005157 | 0.9115   | -0.0022  | 0.96224  | -0.0498  | 0.28283  | 0.035077 |
| 0.047752 | 0.30313  | 0.034506 | 0.45694  | 0.058894 | 0.20394  | -0.00461 | 0.92088  | 0.142973 |
| -0.00867 | 0.8518   | 0.129103 | 0.0052   | 0.117135 | 0.0113   | 0.058293 | 0.20861  | 0.19165  |
| 0.072923 | 0.11554  | 0.154184 | 0.00083  | 0.240493 | 1.44E-07 | 0.260284 | 1.14E-08 | 0.218008 |
| -0.05315 | 0.25166  | -0.13137 | 0.00446  | -0.09947 | 0.03162  | -0.18943 | 3.79E-05 | 0.09941  |
| 0.038128 | 0.41105  | -0.22131 | 1.37E-06 | -0.18983 | 3.64E-05 | -0.2253  | 8.70E-07 | 0.002381 |
| -0.03973 | 0.39171  | 0.00464  | 0.92034  | -0.03062 | 0.50922  | -0.03542 | 0.44504  | -0.13649 |
| 0.236215 | 2.41E-07 | 0.052292 | 0.25941  | 0.101912 | 0.02765  | 0.069139 | 0.13573  | 0.082891 |
| 0.023505 | 0.61239  | 0.041505 | 0.37084  | -0.0332  | 0.4741   | 0.119692 | 0.00963  | 0.154242 |
| 0.287285 | 2.52E-10 | 0.182625 | 7.20E-05 | 0.181929 | 7.68E-05 | 0.153772 | 0.00086  | 0.065599 |
| -0.16956 | 0.00023  | -0.25246 | 3.18E-08 | -0.20632 | 6.95E-06 | -0.08915 | 0.05419  | 0.166047 |
| -0.01192 | 0.7973   | 0.074263 | 0.10899  | 0.090418 | 0.05085  | 0.053268 | 0.25062  | 0.087489 |
| -0.04057 | 0.38171  | -0.0756  | 0.10276  | -0.10022 | 0.03036  | -0.05724 | 0.21692  | -0.02993 |
| -0.00941 | 0.83931  | 0.204236 | 8.64E-06 | 0.172394 | 0.00018  | 0.186662 | 4.93E-05 | 0.069811 |
| -0.01691 | 0.71553  | -0.02228 | 0.63113  | -0.02953 | 0.52445  | -0.02115 | 0.64847  | -0.1002  |

|          |          |          |          |          |          |          |          |          |
|----------|----------|----------|----------|----------|----------|----------|----------|----------|
| -0.04555 | 0.32599  | 0.034781 | 0.45335  | -0.04601 | 0.32115  | -0.01019 | 0.82622  | 0.021477 |
| 0.025377 | 0.58437  | -0.0896  | 0.05299  | -0.06003 | 0.19537  | -0.02222 | 0.6319   | 0.106049 |
| 0.018105 | 0.69636  | -0.12506 | 0.00681  | -0.00104 | 0.9822   | -0.09053 | 0.05057  | 0.136773 |
| 0.044977 | 0.33213  | -0.12102 | 0.00885  | 0.037271 | 0.42166  | -0.13582 | 0.00327  | 0.04197  |
| 0.080888 | 0.08078  | -0.07507 | 0.1052   | -0.0004  | 0.99307  | -0.09047 | 0.05073  | 0.036355 |
| 0.106511 | 0.02133  | 0.04692  | 0.31164  | 0.062828 | 0.17528  | 0.166131 | 0.00031  | 0.028855 |
| 0.034595 | 0.45578  | -0.00624 | 0.89296  | -0.03147 | 0.49751  | 0.071564 | 0.12251  | 0.105305 |
| 0.059446 | 0.19973  | 0.048761 | 0.29302  | 0.147344 | 0.00141  | 0.036866 | 0.42672  | 0.145551 |
| 0.063095 | 0.17345  | 0.250693 | 4.00E-08 | 0.221041 | 1.41E-06 | 0.308404 | 9.52E-12 | 0.324237 |
| -0.01086 | 0.81496  | -0.07688 | 0.09706  | -0.03013 | 0.51606  | -0.08308 | 0.07287  | 0.050842 |
| 0.188867 | 4.00E-05 | 0.276907 | 1.15E-09 | 0.331549 | 1.91E-13 | 0.272259 | 2.22E-09 | 0.29832  |
| 0.010563 | 0.8199   | -0.06937 | 0.13444  | -0.02366 | 0.61011  | -0.041   | 0.37667  | 0.097704 |
| 0.043635 | 0.34677  | 0.14878  | 0.00126  | 0.136903 | 0.00303  | 0.112111 | 0.01535  | 0.013651 |
| 0.043544 | 0.34778  | 0.03092  | 0.50505  | -0.02757 | 0.55231  | -0.01055 | 0.82019  | -0.08471 |
| -0.04575 | 0.32389  | 0.010562 | 0.81992  | -0.01079 | 0.81602  | 0.019759 | 0.67019  | -0.06588 |
| 0.184652 | 5.96E-05 | 0.269583 | 3.22E-09 | 0.309915 | 7.45E-12 | 0.304117 | 1.89E-11 | 0.080188 |
| 0.090567 | 0.05047  | -0.03723 | 0.42212  | -0.06271 | 0.17608  | -0.16049 | 0.0005   | -0.10615 |
| -0.0648  | 0.16207  | 0.070928 | 0.12587  | -0.10433 | 0.02415  | 0.071894 | 0.12079  | 0.001568 |
| -0.065   | 0.16077  | -0.01966 | 0.67173  | -0.13033 | 0.00479  | 0.04076  | 0.37949  | 0.066732 |
| 0.128125 | 0.00556  | 0.046312 | 0.31795  | 0.113263 | 0.01433  | 0.045954 | 0.32172  | 0.009395 |
| -0.04095 | 0.37724  | 0.039664 | 0.39245  | 0.00274  | 0.95291  | 0.012664 | 0.78489  | -0.03845 |
| -0.01095 | 0.81343  | 0.020239 | 0.66266  | 0.122251 | 0.00818  | 0.011835 | 0.79866  | -0.02875 |
| 0.023189 | 0.61718  | 0.008376 | 0.85675  | 0.032799 | 0.47951  | 0.05326  | 0.25068  | 0.221174 |
| 0.035313 | 0.44647  | -0.02569 | 0.57976  | 0.032826 | 0.47915  | -0.03829 | 0.40912  | -0.04804 |
| 0.081855 | 0.07721  | 0.131674 | 0.00437  | 0.106262 | 0.02164  | 0.187059 | 4.75E-05 | 0.128092 |
| 0.025871 | 0.57707  | 0.021981 | 0.63564  | 0.037855 | 0.41441  | 0.06872  | 0.13812  | 0.393884 |
| 0.068932 | 0.13691  | 0.226932 | 7.21E-07 | 0.31368  | 4.02E-12 | 0.266338 | 5.03E-09 | 0.205148 |
| 0.032935 | 0.47769  | 0.211829 | 3.88E-06 | 0.181011 | 8.36E-05 | 0.3017   | 2.77E-11 | 0.187102 |
| 0.011209 | 0.80909  | -0.0403  | 0.38484  | -0.00101 | 0.98256  | -0.01587 | 0.73236  | 0.025334 |
| 0.005306 | 0.90896  | -0.05109 | 0.27053  | -0.02676 | 0.56401  | -0.05387 | 0.2453   | 0.020487 |
| 0.013791 | 0.76627  | 0.104089 | 0.02448  | 0.222207 | 1.24E-06 | 0.152058 | 0.00098  | 0.107896 |
| 0.154022 | 0.00084  | 0.194494 | 2.31E-05 | 0.352851 | 3.87E-15 | 0.172002 | 0.00019  | 0.141162 |
| 0.073462 | 0.11287  | -0.10536 | 0.02279  | -0.00445 | 0.92359  | -0.11306 | 0.0145   | -0.07569 |
| 0.034162 | 0.46144  | -0.00645 | 0.88943  | 0.078838 | 0.0888   | -0.00784 | 0.86585  | 0.10609  |
| 0.036743 | 0.42826  | -0.1188  | 0.01018  | -0.04721 | 0.30863  | -0.15074 | 0.00109  | 0.093947 |
| -0.00737 | 0.87378  | 0.154971 | 0.00078  | 0.022951 | 0.62081  | 0.198737 | 1.52E-05 | 0.158509 |
| -0.11912 | 0.00998  | -0.04715 | 0.30927  | -0.08901 | 0.05458  | -0.13548 | 0.00335  | -0.06567 |
| -0.12379 | 0.0074   | -0.20057 | 1.26E-05 | -0.16573 | 0.00032  | -0.07394 | 0.11055  | 0.054248 |
| -0.0435  | 0.34831  | -0.09794 | 0.03436  | -0.17465 | 0.00015  | -0.14954 | 0.00119  | -0.02395 |
| -0.05967 | 0.19806  | -0.05609 | 0.22634  | -0.02948 | 0.52512  | 0.00376  | 0.93541  | 0.008047 |
| 0.211896 | 3.85E-06 | 0.08496  | 0.0666   | 0.127693 | 0.00572  | 0.116481 | 0.01177  | 0.151281 |
| -0.07573 | 0.10217  | -0.11607 | 0.01207  | -0.12366 | 0.00746  | -0.09208 | 0.04672  | -0.03525 |
| -0.04115 | 0.37496  | 0.106518 | 0.02132  | -0.13736 | 0.00293  | 0.019041 | 0.6815   | -0.14774 |
| 0.05482  | 0.23706  | 0.206447 | 6.86E-06 | 0.262889 | 8.04E-09 | 0.143433 | 0.00189  | 0.232586 |
| -0.07432 | 0.10874  | -0.13464 | 0.00356  | -0.20242 | 1.04E-05 | -0.05151 | 0.26663  | 0.044444 |

|          |          |          |          |          |          |          |          |          |
|----------|----------|----------|----------|----------|----------|----------|----------|----------|
| 0.017028 | 0.7136   | 0.249413 | 4.71E-08 | 0.03704  | 0.42455  | 0.203755 | 9.08E-06 | -0.12071 |
| -0.06721 | 0.14701  | -0.0306  | 0.50941  | -0.10861 | 0.01889  | -0.02746 | 0.55383  | 0.108038 |
| 0.052437 | 0.25809  | -0.00729 | 0.87518  | -0.02509 | 0.58856  | -0.02135 | 0.64533  | 0.040923 |
| 0.076061 | 0.10066  | -0.06734 | 0.14621  | -0.06949 | 0.13373  | -0.06961 | 0.13309  | 0.096428 |
| -0.03378 | 0.46646  | -0.08721 | 0.05968  | -0.06281 | 0.17539  | -0.05147 | 0.26697  | 0.085061 |
| 0.01766  | 0.70346  | 0.032735 | 0.48038  | 0.040918 | 0.37765  | 0.015653 | 0.73582  | -0.00024 |
| 0.03204  | 0.48975  | 0.054403 | 0.24065  | 0.016103 | 0.72853  | -0.00245 | 0.95789  | 0.035822 |
| 0.050095 | 0.27999  | 0.010153 | 0.82679  | 0.062849 | 0.17514  | 0.041675 | 0.36887  | 0.024697 |
| 0.052031 | 0.2618   | -0.0185  | 0.69009  | -0.01338 | 0.77306  | -0.01978 | 0.66987  | -0.00288 |
| -0.13237 | 0.00416  | -0.11348 | 0.01414  | -0.21292 | 3.45E-06 | -0.00525 | 0.90989  | -0.01818 |
| -0.12712 | 0.00594  | -0.14674 | 0.00147  | -0.28925 | 1.88E-10 | -0.16125 | 0.00047  | -0.19556 |
| 0.14346  | 0.00188  | -0.04608 | 0.32038  | 0.037811 | 0.41495  | 0.024056 | 0.60409  | 0.080928 |
| -0.0031  | 0.94667  | -0.12174 | 0.00845  | -0.03194 | 0.4911   | -0.06477 | 0.16232  | 0.147609 |
| 0.043571 | 0.34748  | -0.04633 | 0.31777  | -0.06935 | 0.13452  | -0.07604 | 0.10074  | -0.01754 |
| -0.01408 | 0.76157  | -0.0367  | 0.42883  | -0.07392 | 0.11065  | -0.02141 | 0.64439  | 0.107519 |
| 0.179122 | 9.94E-05 | 0.191998 | 2.95E-05 | 0.361565 | 7.20E-16 | 0.284191 | 3.99E-10 | 0.272307 |
| -0.01317 | 0.77656  | -0.06593 | 0.15489  | -0.02828 | 0.54211  | -0.11515 | 0.01277  | -0.18735 |
| -0.01467 | 0.75192  | 0.058779 | 0.20483  | 0.040475 | 0.38284  | 0.044211 | 0.34043  | 0.060916 |
| 0.019871 | 0.66843  | -0.01389 | 0.76458  | -0.04141 | 0.37196  | 0.003214 | 0.94477  | -0.04619 |
| -0.02492 | 0.59122  | -0.04514 | 0.33035  | -0.12076 | 0.00899  | -0.13419 | 0.00367  | -0.0787  |
| 0.029598 | 0.52345  | -0.00239 | 0.95885  | -0.04632 | 0.31786  | 0.070405 | 0.12869  | 0.003133 |
| 0.016951 | 0.71485  | 0.047961 | 0.30102  | 0.03751  | 0.41868  | -0.00011 | 0.99817  | -0.01912 |
| 0.054679 | 0.23826  | 0.070912 | 0.12596  | 0.023053 | 0.61926  | 0.052681 | 0.25588  | 0.011053 |
| -0.10358 | 0.0252   | -0.1578  | 0.00062  | -0.10099 | 0.02909  | -0.11053 | 0.01687  | -0.05703 |
| -0.03151 | 0.49694  | 0.032019 | 0.49003  | 0.087206 | 0.05969  | 0.014001 | 0.76283  | 0.051115 |
| 0.009839 | 0.83206  | -0.11716 | 0.01128  | -0.05422 | 0.24225  | -0.08062 | 0.08178  | 0.08365  |
| -0.03548 | 0.44433  | -0.05028 | 0.27822  | 0.032628 | 0.48181  | -0.00972 | 0.83409  | 0.028087 |
| -0.04252 | 0.3592   | -0.1117  | 0.01574  | -0.11683 | 0.01152  | -0.12064 | 0.00906  | 0.009465 |
| 0.043263 | 0.35089  | 6.41E-05 | 0.9989   | -0.02691 | 0.56185  | -0.12973 | 0.00499  | -0.18876 |
| 0.008289 | 0.85821  | -0.09135 | 0.0485   | -0.23627 | 2.40E-07 | -0.08367 | 0.07083  | -0.05007 |
| 0.184958 | 5.79E-05 | 0.341224 | 3.38E-14 | 0.325207 | 5.77E-13 | 0.282932 | 4.80E-10 | 0.109868 |
| 0.018862 | 0.68434  | 0.064172 | 0.16621  | 0.23968  | 1.59E-07 | 0.099898 | 0.03089  | 0.120892 |
| -0.14281 | 0.00198  | 0.024023 | 0.60458  | -0.06942 | 0.13413  | 0.012171 | 0.79307  | 0.014825 |
| -0.08145 | 0.07867  | -0.19884 | 1.50E-05 | -0.11773 | 0.01089  | -0.11001 | 0.0174   | -0.00506 |
| -0.09586 | 0.03839  | -0.04192 | 0.36601  | 0.093727 | 0.04292  | 0.006927 | 0.88132  | 0.136633 |
| 0.047469 | 0.30601  | 0.057313 | 0.21637  | 0.158494 | 0.00059  | 0.054459 | 0.24016  | 0.059621 |
| 0.142039 | 0.00209  | 0.082415 | 0.0752   | 0.07756  | 0.09411  | 0.081552 | 0.07831  | 0.001861 |
| 0.014816 | 0.74948  | -0.03423 | 0.46057  | -0.06935 | 0.13455  | -0.01893 | 0.68321  | -0.05379 |
| 0.010366 | 0.82322  | 0.019707 | 0.67101  | -0.10724 | 0.02045  | 0.034496 | 0.45706  | -0.01373 |
| -0.06891 | 0.13705  | 0.095097 | 0.03995  | 0.031389 | 0.49861  | 0.136068 | 0.00322  | 0.121755 |
| 0.145892 | 0.00157  | 0.271739 | 2.38E-09 | 0.268536 | 3.72E-09 | 0.265195 | 5.88E-09 | 0.224212 |
| -0.05868 | 0.2056   | -0.01614 | 0.72791  | -0.13643 | 0.00313  | -0.01865 | 0.68776  | -0.04887 |
| 0.062175 | 0.17982  | 0.072395 | 0.11821  | 0.086649 | 0.06135  | 0.036146 | 0.43581  | -0.04994 |
| 0.105824 | 0.02219  | -0.01907 | 0.68107  | -0.05336 | 0.24977  | -0.01823 | 0.69444  | 0.032244 |
| 0.045112 | 0.33067  | -0.00281 | 0.95176  | 0.041085 | 0.3757   | -0.07986 | 0.08474  | 0.065923 |

|          |         |          |          |          |          |          |          |          |
|----------|---------|----------|----------|----------|----------|----------|----------|----------|
| -0.13285 | 0.00403 | 0.003241 | 0.94431  | -0.12009 | 0.00939  | 0.035857 | 0.43949  | 0.063252 |
| 0.11254  | 0.01496 | 0.099504 | 0.03157  | 0.166818 | 0.00029  | 0.066923 | 0.14875  | 0.143875 |
| 0.067266 | 0.14667 | 0.012519 | 0.78729  | 0.110191 | 0.01721  | 0.011021 | 0.81224  | 0.062144 |
| -0.08569 | 0.06429 | -0.02175 | 0.63923  | 0.075021 | 0.10542  | 0.048995 | 0.2907   | 0.281039 |
| 0.026785 | 0.56368 | 0.125091 | 0.0068   | 0.04372  | 0.34582  | 0.126085 | 0.00637  | -0.03646 |
| 0.017663 | 0.70342 | -0.23    | 5.05E-07 | -0.08288 | 0.07355  | -0.26342 | 7.48E-09 | 0.060898 |
| 0.107225 | 0.02047 | -0.05301 | 0.25295  | -0.00305 | 0.94754  | 0.005014 | 0.91395  | 0.051749 |
| -0.09184 | 0.0473  | -0.15233 | 0.00096  | -0.08977 | 0.05253  | -0.18417 | 6.24E-05 | 0.027125 |
| -0.04332 | 0.35024 | 0.077366 | 0.09493  | 0.08574  | 0.06413  | 0.133104 | 0.00396  | 0.106744 |
| 0.005593 | 0.90406 | 0.069931 | 0.13129  | 0.036266 | 0.43429  | 0.105491 | 0.02261  | 0.047937 |
| 0.019109 | 0.68043 | -0.10324 | 0.02569  | 0.049388 | 0.28684  | -0.03688 | 0.42656  | 0.082568 |
| -0.07485 | 0.10621 | -0.23058 | 4.71E-07 | -0.13798 | 0.00281  | -0.16654 | 0.0003   | 0.052742 |
| -0.07314 | 0.11446 | 0.145454 | 0.00162  | 0.039355 | 0.39615  | 0.116289 | 0.01191  | 0.040473 |
| 0.004241 | 0.92717 | 0.008861 | 0.84855  | -0.10099 | 0.02909  | -0.01693 | 0.71525  | -0.01676 |
| -0.1113  | 0.01611 | -0.06546 | 0.15782  | -0.21452 | 2.90E-06 | -0.05543 | 0.2319   | -0.18984 |
| -0.07676 | 0.09758 | -0.08546 | 0.06499  | 0.0598   | 0.19706  | 0.072033 | 0.12007  | 0.322575 |
| 0.036453 | 0.43193 | -0.03507 | 0.44961  | 0.040532 | 0.38217  | -0.07872 | 0.08928  | -0.04992 |
| -0.00074 | 0.98729 | -0.0039  | 0.9331   | -0.03745 | 0.41942  | -0.01644 | 0.72312  | 0.055287 |
| 0.058282 | 0.20869 | -0.03871 | 0.4039   | -0.00673 | 0.88465  | -0.03997 | 0.38878  | 0.015639 |
| 0.019264 | 0.67798 | 0.007219 | 0.87636  | 0.017636 | 0.70385  | -0.01832 | 0.69294  | 0.033609 |
| 0.05567  | 0.22985 | 0.030272 | 0.51403  | 0.098173 | 0.03392  | 0.054038 | 0.24382  | 0.265781 |
| 0.016561 | 0.72113 | -0.08291 | 0.07346  | -0.1187  | 0.01025  | -0.03939 | 0.39572  | 0.154048 |
| 0.064094 | 0.16673 | 0.03536  | 0.44587  | 0.091474 | 0.0482   | 0.046453 | 0.31648  | 0.045381 |
| -0.01387 | 0.76501 | -0.06487 | 0.16165  | -0.09787 | 0.03447  | -0.09191 | 0.04715  | -0.00318 |
| -0.01199 | 0.79607 | -0.15018 | 0.00113  | -0.16162 | 0.00045  | -0.11794 | 0.01075  | -0.06178 |
| -0.0741  | 0.10975 | -0.14959 | 0.00119  | -0.1437  | 0.00185  | -0.11814 | 0.01061  | 0.12664  |
| 0.068061 | 0.14195 | 0.05959  | 0.19864  | 0.089246 | 0.05394  | 0.06943  | 0.13409  | 0.018486 |
| 0.015858 | 0.7325  | -0.05312 | 0.25192  | -0.05299 | 0.25313  | -0.10011 | 0.03053  | 0.006286 |
| 0.076916 | 0.09688 | -0.01415 | 0.76032  | 0.017241 | 0.71018  | -0.06527 | 0.15909  | -0.0074  |
| 0.023189 | 0.61718 | -0.15099 | 0.00106  | -0.13585 | 0.00327  | -0.09238 | 0.046    | 0.167078 |
| 0.025106 | 0.58838 | -0.04863 | 0.29427  | 0.026112 | 0.57353  | 0.01277  | 0.78314  | 0.154588 |
| -0.08539 | 0.06522 | -0.10033 | 0.03017  | -0.22666 | 7.44E-07 | -0.08241 | 0.0752   | -0.06736 |
| -0.05067 | 0.27454 | -0.17436 | 0.00015  | -0.12325 | 0.00766  | -0.06334 | 0.17175  | 0.159781 |
| 0.031905 | 0.49158 | 0.031124 | 0.50225  | -0.09098 | 0.04943  | 0.035598 | 0.44281  | -0.07501 |
| 0.014877 | 0.74847 | -0.03067 | 0.50848  | 0.001882 | 0.96764  | -0.01894 | 0.68312  | -0.07382 |
| 0.083533 | 0.07131 | 0.037893 | 0.41394  | 0.119601 | 0.00968  | 0.039147 | 0.39866  | 0.162367 |
| 0.021655 | 0.64066 | 0.052307 | 0.25927  | 0.020438 | 0.65955  | 0.090517 | 0.0506   | -0.01999 |
| 0.084562 | 0.06788 | 0.109391 | 0.01804  | 0.263439 | 7.46E-09 | 0.076934 | 0.0968   | 0.049986 |
| 0.088655 | 0.05556 | -0.05577 | 0.22903  | 0.009822 | 0.83234  | 0.003128 | 0.94626  | -0.04909 |
| 0.039933 | 0.38924 | -0.09574 | 0.03862  | -0.05777 | 0.21269  | -0.02006 | 0.66547  | 0.065629 |
| 0.147432 | 0.0014  | -0.01487 | 0.74863  | 0.052261 | 0.2597   | 0.064858 | 0.16172  | 0.079233 |
| -0.13709 | 0.00299 | 0.003022 | 0.94807  | 0.036928 | 0.42595  | -0.02652 | 0.56759  | 0.013939 |
| 0.031834 | 0.49255 | -0.01766 | 0.70351  | 0.025261 | 0.58608  | -0.02972 | 0.52179  | -0.00122 |
| -0.08602 | 0.06327 | -0.17471 | 0.00015  | -0.13447 | 0.0036   | -0.03172 | 0.49409  | 0.154949 |
| 0.014832 | 0.74921 | 0.014609 | 0.75285  | 0.033602 | 0.46882  | -0.01137 | 0.80642  | 0.137978 |



|          |          |          |          |          |          |          |          |          |
|----------|----------|----------|----------|----------|----------|----------|----------|----------|
| 0.023762 | 0.60852  | -0.06297 | 0.17434  | -0.08066 | 0.08165  | -0.06945 | 0.13397  | 0.033284 |
| 0.055682 | 0.22975  | -0.04314 | 0.35221  | 0.048462 | 0.29598  | -0.06866 | 0.13845  | -0.00558 |
| -0.00676 | 0.8842   | -0.15912 | 0.00056  | -0.08495 | 0.06662  | -0.12577 | 0.0065   | 0.111164 |
| -0.0638  | 0.16871  | -0.06629 | 0.15262  | -0.07325 | 0.11393  | 0.005476 | 0.90605  | 0.220693 |
| -0.04978 | 0.28305  | 0.015911 | 0.73165  | -0.10773 | 0.01988  | 0.059074 | 0.20256  | 0.062008 |
| 0.036964 | 0.4255   | -0.04382 | 0.34477  | -0.02837 | 0.54089  | 0.026798 | 0.56349  | 0.222848 |
| -0.01502 | 0.74609  | -0.08883 | 0.05506  | -0.08069 | 0.08152  | -0.15472 | 0.00079  | 0.014079 |
| -0.03285 | 0.47883  | -0.11393 | 0.01376  | -0.13682 | 0.00305  | -0.07099 | 0.12554  | -0.0568  |
| -0.03733 | 0.42095  | 0.104157 | 0.02439  | -0.00796 | 0.86373  | 0.096356 | 0.03739  | -0.15152 |
| -0.04866 | 0.29402  | 0.001829 | 0.96856  | -0.00035 | 0.99402  | 0.098093 | 0.03407  | 0.112085 |
| 0.018326 | 0.69285  | 0.021201 | 0.64769  | -0.00315 | 0.94586  | 0.056587 | 0.22225  | -0.00196 |
| 0.027927 | 0.54717  | -0.02134 | 0.64551  | 0.139111 | 0.00259  | 0.009913 | 0.83082  | 0.230327 |
| -0.03501 | 0.45037  | -0.01496 | 0.74715  | -0.03384 | 0.4657   | -0.0472  | 0.30871  | 0.062331 |
| -0.01746 | 0.70669  | 0.002216 | 0.96192  | 0.042885 | 0.35513  | 0.077451 | 0.09457  | 0.29773  |
| -0.00896 | 0.84692  | -0.12968 | 0.00501  | -0.08183 | 0.07731  | -0.12225 | 0.00818  | 0.100205 |
| 0.067878 | 0.14302  | -0.07644 | 0.09897  | -0.05327 | 0.25064  | 0.021338 | 0.64557  | 0.201736 |
| 0.056054 | 0.22665  | -0.02732 | 0.55596  | -0.00441 | 0.92423  | -0.0219  | 0.63683  | 0.119879 |
| 0.117532 | 0.01103  | 0.054221 | 0.24223  | 0.115157 | 0.01277  | 0.03383  | 0.46581  | 0.103571 |
| 0.02471  | 0.59429  | 0.082771 | 0.07394  | 0.063574 | 0.1702   | 0.180023 | 9.16E-05 | 0.180447 |
| -0.16755 | 0.00028  | -0.10191 | 0.02766  | -0.09512 | 0.0399   | -0.06809 | 0.14179  | -0.08015 |
| -0.08815 | 0.05697  | 0.016482 | 0.7224   | -0.11681 | 0.01153  | -0.04716 | 0.30914  | -0.15633 |
| -0.13129 | 0.00448  | -0.03465 | 0.45499  | -0.05006 | 0.28037  | -0.01283 | 0.78209  | 0.080955 |
| 0.15271  | 0.00093  | -0.01508 | 0.74514  | 0.104718 | 0.02363  | -0.02667 | 0.56532  | 0.005376 |
| 0.011071 | 0.81141  | 0.021319 | 0.64586  | 0.033414 | 0.47131  | 0.053865 | 0.24534  | 0.147985 |
| -0.06244 | 0.178    | -0.01613 | 0.72814  | 0.034505 | 0.45694  | -0.06085 | 0.18928  | 0.162178 |
| 0.066005 | 0.15441  | 0.100704 | 0.02956  | 0.08984  | 0.05236  | 0.028997 | 0.53191  | 0.006819 |
| 0.073738 | 0.11152  | 0.014001 | 0.76282  | 0.009862 | 0.83167  | 0.018086 | 0.69666  | -0.02243 |
| 0.040152 | 0.38665  | 0.124656 | 0.00699  | 0.029122 | 0.53014  | 0.129282 | 0.00514  | 0.082075 |
| -0.05459 | 0.239    | -0.04466 | 0.33558  | -0.16841 | 0.00026  | 0.044683 | 0.33529  | 0.088806 |
| 0.30711  | 1.17E-11 | 0.324044 | 7.05E-13 | 0.305345 | 1.56E-11 | 0.337376 | 6.78E-14 | 0.120043 |
| 0.004829 | 0.9171   | -0.07051 | 0.1281   | -0.01999 | 0.6666   | -0.09309 | 0.04437  | -0.0363  |
| 0.071205 | 0.12439  | -0.03821 | 0.41004  | -0.03506 | 0.44969  | -0.00513 | 0.91188  | 0.245931 |
| -0.03298 | 0.47714  | -0.054   | 0.24412  | 0.051701 | 0.26484  | -0.0806  | 0.08187  | -0.02442 |
| -0.04668 | 0.31408  | -0.21129 | 4.11E-06 | -0.14075 | 0.0023   | -0.24084 | 1.38E-07 | -0.11376 |
| 0.001191 | 0.97951  | 0.005485 | 0.90589  | 0.035396 | 0.4454   | -0.07804 | 0.09209  | 0.007482 |
| -0.02892 | 0.53306  | -0.09495 | 0.04026  | -0.02673 | 0.56447  | -0.02251 | 0.62752  | 0.092516 |
| -0.11803 | 0.01068  | -0.05037 | 0.27731  | -0.23925 | 1.67E-07 | -0.16292 | 0.00041  | -0.21339 |
| 0.095062 | 0.04003  | 0.34538  | 1.57E-14 | 0.191781 | 3.02E-05 | 0.320374 | 1.32E-12 | -0.11802 |
| -0.00399 | 0.9314   | -0.0914  | 0.04839  | -0.0686  | 0.13879  | -0.12503 | 0.00682  | -0.01959 |
| -0.04533 | 0.32832  | -0.03416 | 0.46144  | 0.029885 | 0.51942  | -0.00805 | 0.8622   | 0.237676 |
| -0.03218 | 0.48791  | -0.183   | 6.96E-05 | -0.07327 | 0.11383  | -0.09309 | 0.04435  | 0.127404 |
| -0.01541 | 0.73972  | -0.15072 | 0.00109  | 0.005162 | 0.91142  | -0.16542 | 0.00033  | 0.026555 |
| 0.028599 | 0.53757  | 0.149687 | 0.00118  | 0.002762 | 0.95254  | 0.111039 | 0.01637  | -0.01366 |
| -0.07925 | 0.08714  | 0.050433 | 0.27675  | 0.059679 | 0.19796  | 0.027574 | 0.55225  | -0.03723 |
| 0.066735 | 0.1499   | -0.0582  | 0.20934  | -0.09163 | 0.04781  | -0.05202 | 0.26186  | 0.04272  |

|          |          |          |          |          |          |          |          |          |
|----------|----------|----------|----------|----------|----------|----------|----------|----------|
| 0.071026 | 0.12535  | -0.05297 | 0.25331  | 0.022366 | 0.62974  | -0.0716  | 0.12233  | 0.158737 |
| -0.03287 | 0.47862  | -0.17032 | 0.00022  | -0.05836 | 0.20805  | -0.1571  | 0.00066  | 0.09774  |
| -0.04601 | 0.32113  | -0.16091 | 0.00048  | -0.11928 | 0.00988  | -0.13353 | 0.00384  | 0.108768 |
| 0.033593 | 0.46894  | 0.158951 | 0.00057  | 0.220975 | 1.42E-06 | 0.273613 | 1.83E-09 | 0.137466 |
| 0.005415 | 0.90709  | 0.224456 | 9.57E-07 | 0.169467 | 0.00023  | 0.143183 | 0.00192  | 0.05167  |
| 0.017414 | 0.70741  | 0.24479  | 8.44E-08 | 0.179902 | 9.26E-05 | 0.159886 | 0.00052  | 0.043671 |
| 0.019384 | 0.67609  | 0.21104  | 4.22E-06 | 0.170684 | 0.00021  | 0.157866 | 0.00062  | 0.053938 |
| 0.241312 | 1.30E-07 | 0.423996 | 8.44E-22 | 0.341268 | 3.35E-14 | 0.306226 | 1.35E-11 | 0.099509 |
| 0.098656 | 0.03305  | -0.04743 | 0.30637  | -0.03247 | 0.48398  | 0.031172 | 0.50159  | 0.101599 |
| -0.00014 | 0.99758  | -0.1002  | 0.03039  | -0.10112 | 0.02889  | -0.141   | 0.00226  | -0.08883 |
| -0.04264 | 0.35793  | -0.08643 | 0.062    | -0.1684  | 0.00026  | -0.04866 | 0.29406  | -0.02059 |
| -0.02852 | 0.53873  | 0.041888 | 0.36644  | -0.0529  | 0.25394  | 0.047865 | 0.30198  | -0.02689 |
| -0.15487 | 0.00079  | 0.012423 | 0.78889  | -0.14744 | 0.0014   | -0.07954 | 0.086    | -0.04556 |
| -0.07374 | 0.11152  | -0.10253 | 0.02672  | -0.15208 | 0.00098  | -0.00439 | 0.92461  | 0.142245 |
| 0.080674 | 0.08159  | 0.039925 | 0.38934  | -0.03874 | 0.40354  | 0.098081 | 0.03409  | 0.102554 |
| 0.02151  | 0.6429   | -0.02138 | 0.64488  | -0.01154 | 0.8036   | -0.02363 | 0.61052  | -0.01756 |
| 0.1458   | 0.00158  | -0.11733 | 0.01116  | -0.06321 | 0.17267  | -0.13946 | 0.00252  | -0.00386 |
| -0.06261 | 0.17678  | 0.065383 | 0.15835  | 0.014243 | 0.75886  | 0.09572  | 0.03867  | 0.098052 |
| -0.01838 | 0.692    | -0.13805 | 0.00279  | -0.15042 | 0.00111  | -0.18408 | 6.29E-05 | -0.00617 |
| 0.108093 | 0.01947  | 0.00764  | 0.86921  | 0.084844 | 0.06697  | 0.158342 | 0.00059  | 0.117017 |
| 0.001118 | 0.98078  | -0.05105 | 0.27092  | -0.02668 | 0.56525  | -0.05599 | 0.22715  | 0.10355  |
| -0.03648 | 0.43154  | 0.127326 | 0.00586  | -0.10181 | 0.02781  | 0.077326 | 0.09511  | -0.11121 |
| -0.10665 | 0.02116  | -0.0108  | 0.81586  | -0.14799 | 0.00134  | -0.00566 | 0.90287  | -0.22045 |
| -0.16791 | 0.00027  | -0.12137 | 0.00865  | -0.1946  | 2.29E-05 | -0.09122 | 0.04882  | -0.23559 |
| 0.033774 | 0.46655  | -0.0595  | 0.19933  | 0.074587 | 0.10745  | -0.06779 | 0.14357  | 0.145722 |
| 0.030014 | 0.51763  | 0.019124 | 0.68019  | 0.095849 | 0.0384   | 0.113247 | 0.01434  | 0.196974 |
| 0.090883 | 0.04967  | 0.064343 | 0.16509  | 0.018274 | 0.69368  | 0.051699 | 0.26486  | 0.072526 |
| 0.041067 | 0.37591  | 0.015463 | 0.73892  | -0.07013 | 0.13021  | 0.048522 | 0.29538  | 0.151159 |
| 0.029338 | 0.52711  | -0.09119 | 0.04889  | -0.07131 | 0.12387  | -0.09789 | 0.03445  | -0.01512 |
| 0.034625 | 0.45538  | 0.049194 | 0.28874  | 0.015435 | 0.73937  | 0.050583 | 0.27533  | -0.05682 |
| -0.06317 | 0.17293  | 0.117133 | 0.0113   | 0.06363  | 0.16982  | 0.172773 | 0.00018  | 0.20781  |
| -0.0163  | 0.72527  | -0.03689 | 0.42637  | -0.12509 | 0.0068   | -0.12052 | 0.00914  | -0.21164 |
| -0.00955 | 0.83692  | 0.054863 | 0.23668  | 0.024879 | 0.59176  | 0.09566  | 0.03879  | 0.17905  |
| -0.02227 | 0.63114  | 0.04171  | 0.36847  | -0.09745 | 0.03526  | -0.05513 | 0.23445  | -0.12906 |
| 0.058593 | 0.20626  | 0.016302 | 0.72532  | -0.01909 | 0.68072  | 0.006485 | 0.88884  | -0.14045 |
| 0.016002 | 0.73017  | 0.014282 | 0.75821  | -0.01827 | 0.69374  | -0.03416 | 0.4615   | -0.12721 |
| 0.032154 | 0.4882   | -0.03949 | 0.39455  | -0.07016 | 0.13004  | -0.04973 | 0.28355  | -0.06634 |
| -0.03033 | 0.51315  | -0.0552  | 0.23377  | -0.00941 | 0.8392   | 0.03709  | 0.42392  | 0.264679 |
| -0.00625 | 0.89286  | 0.015069 | 0.74534  | 0.039156 | 0.39854  | 0.103328 | 0.02555  | 0.223157 |
| -0.03784 | 0.41457  | -0.03257 | 0.48261  | 0.01821  | 0.69469  | 0.072768 | 0.11632  | 0.304732 |
| -0.01193 | 0.79711  | 0.00266  | 0.95428  | 0.016679 | 0.71923  | 0.120951 | 0.00889  | 0.296327 |
| 0.021516 | 0.64282  | 0.030945 | 0.50471  | 0.013216 | 0.77576  | 0.075411 | 0.10361  | 0.045446 |
| 0.18233  | 7.40E-05 | 0.114368 | 0.0134   | 0.012897 | 0.78104  | 0.034889 | 0.45194  | -0.08691 |
| 0.059113 | 0.20226  | 0.087064 | 0.06011  | 0.182076 | 7.58E-05 | 0.078958 | 0.08831  | 0.121776 |
| 0.185996 | 5.26E-05 | 0.130609 | 0.0047   | 0.208495 | 5.53E-06 | 0.097266 | 0.03562  | -0.09805 |

|          |          |          |         |          |         |          |          |          |
|----------|----------|----------|---------|----------|---------|----------|----------|----------|
| -0.08192 | 0.07697  | -0.13403 | 0.00371 | -0.15818 | 0.0006  | -0.0948  | 0.04058  | 0.061439 |
| -0.02413 | 0.60292  | 0.04191  | 0.36617 | -0.02103 | 0.65034 | 0.142215 | 0.00207  | 0.110492 |
| -0.01972 | 0.67075  | 0.013126 | 0.77725 | -0.1071  | 0.02061 | -0.07755 | 0.09414  | -0.08395 |
| -0.05696 | 0.21926  | -0.00631 | 0.89187 | -0.02524 | 0.58641 | 0.027141 | 0.55851  | 0.115995 |
| 0.104061 | 0.02452  | 0.045246 | 0.32924 | 0.05084  | 0.27289 | 0.025364 | 0.58455  | 0.024232 |
| -0.09138 | 0.04844  | 0.00803  | 0.8626  | -0.01574 | 0.73441 | -0.00138 | 0.97626  | -0.02685 |
| 0.002684 | 0.95387  | 0.082943 | 0.07334 | 0.066734 | 0.14991 | 0.054036 | 0.24384  | -0.02378 |
| 0.011249 | 0.80843  | 0.038828 | 0.40251 | 0.04163  | 0.36939 | 0.004707 | 0.91919  | 0.072203 |
| 0.050947 | 0.27188  | 0.062413 | 0.17816 | 0.038486 | 0.40667 | 0.093077 | 0.04439  | 0.003769 |
| -0.0195  | 0.67424  | 0.021948 | 0.63616 | 0.006003 | 0.89706 | 0.070389 | 0.12878  | 0.100044 |
| 0.014515 | 0.75439  | 0.119653 | 0.00965 | 0.085867 | 0.06373 | 0.071456 | 0.12307  | -0.02497 |
| 0.008656 | 0.852    | 0.054375 | 0.24089 | 0.022082 | 0.63409 | 0.014594 | 0.7531   | 0.026272 |
| 0.013025 | 0.77891  | 0.043403 | 0.34934 | 0.037193 | 0.42262 | 0.000304 | 0.99477  | 0.038729 |
| -0.05935 | 0.20042  | -0.14878 | 0.00126 | -0.14503 | 0.00168 | -0.13481 | 0.00351  | -0.03101 |
| 0.043775 | 0.34522  | -0.01316 | 0.77661 | 0.005039 | 0.91351 | 0.006544 | 0.88784  | 0.027783 |
| 0.006824 | 0.88307  | 0.031128 | 0.50219 | -0.01829 | 0.69347 | 0.070627 | 0.12749  | -0.09227 |
| -0.01356 | 0.77008  | 0.082385 | 0.0753  | 0.017964 | 0.69862 | 0.105    | 0.02325  | 0.076791 |
| -0.07478 | 0.10652  | 0.112675 | 0.01484 | 0.017986 | 0.69826 | 0.144047 | 0.0018   | 0.142976 |
| 0.052014 | 0.26196  | 0.063165 | 0.17297 | 0.042094 | 0.36408 | 0.062415 | 0.17814  | 0.019316 |
| -0.03104 | 0.50341  | -0.02506 | 0.58909 | 0.010679 | 0.81797 | 0.044938 | 0.33255  | 0.128427 |
| -0.01627 | 0.7259   | 0.076016 | 0.10086 | 0.036415 | 0.43241 | 0.020031 | 0.66591  | 0.028917 |
| 0.088937 | 0.05478  | 0.042291 | 0.36184 | 0.002606 | 0.95521 | 0.011547 | 0.80347  | 0.017159 |
| 0.051847 | 0.26349  | -0.03186 | 0.49215 | 0.011637 | 0.80196 | -0.05944 | 0.1998   | -0.04667 |
| 0.033894 | 0.46495  | 0.01091  | 0.8141  | 0.092564 | 0.04558 | 0.110129 | 0.01728  | 0.016905 |
| -0.00721 | 0.87659  | -0.00991 | 0.8308  | -0.11131 | 0.01611 | -0.08059 | 0.0819   | -0.12121 |
| 0.012883 | 0.78127  | -0.05035 | 0.27757 | -0.15202 | 0.00098 | 0.000389 | 0.99331  | -0.00452 |
| 0.060251 | 0.19369  | 0.018963 | 0.68273 | -0.03272 | 0.4806  | 0.049069 | 0.28997  | 0.098692 |
| -0.00536 | 0.90795  | -0.03082 | 0.50638 | -0.13837 | 0.00273 | -0.02944 | 0.52569  | -0.01195 |
| -0.00408 | 0.92993  | -0.04452 | 0.33712 | -0.13898 | 0.00261 | 0.003291 | 0.94346  | -0.04853 |
| 0.068788 | 0.13773  | -0.06344 | 0.17113 | 0.032334 | 0.48577 | -0.04897 | 0.29091  | 0.107721 |
| 0.034639 | 0.4552   | 0.007473 | 0.87204 | 0.009793 | 0.83283 | -0.02932 | 0.52735  | -0.04813 |
| -0.01923 | 0.67852  | 0.006827 | 0.88302 | 0.047319 | 0.30754 | 0.014713 | 0.75115  | 0.04119  |
| -0.05975 | 0.19741  | 0.072258 | 0.11891 | -0.04397 | 0.34309 | 0.083692 | 0.07077  | -0.14262 |
| 0.008383 | 0.85663  | -0.06287 | 0.17498 | 0.000446 | 0.99232 | -0.06423 | 0.16582  | -0.04144 |
| 0.010489 | 0.82116  | -0.1646  | 0.00035 | -0.06086 | 0.1892  | -0.09028 | 0.05122  | 0.068395 |
| -0.08597 | 0.06341  | 0.076612 | 0.09821 | 0.163032 | 0.0004  | 0.073304 | 0.11365  | 0.164717 |
| -0.1298  | 0.00496  | -0.13128 | 0.00449 | -0.11924 | 0.00991 | -0.04461 | 0.33608  | 0.203626 |
| -0.09554 | 0.03903  | -0.12784 | 0.00566 | -0.08792 | 0.05763 | -0.007   | 0.88002  | 0.055719 |
| -0.04573 | 0.32405  | 0.042599 | 0.35835 | -0.02062 | 0.65667 | 0.048569 | 0.29492  | 0.027478 |
| -0.08191 | 0.077    | -0.09755 | 0.03507 | -0.05385 | 0.24548 | 0.016601 | 0.72049  | 0.017054 |
| -0.04985 | 0.28234  | -0.17444 | 0.00015 | -0.06891 | 0.13702 | -0.18234 | 7.40E-05 | 0.073676 |
| -0.1139  | 0.01378  | -0.11234 | 0.01515 | -0.1121  | 0.01537 | -0.11806 | 0.01067  | -0.04252 |
| 0.245053 | 8.17E-08 | 0.040688 | 0.38033 | 0.076102 | 0.10048 | 0.143184 | 0.00192  | 0.106192 |
| -0.031   | 0.50397  | -0.05512 | 0.2345  | -0.07812 | 0.09174 | -0.05307 | 0.25238  | -0.04227 |
| 0.022009 | 0.63522  | 0.069363 | 0.13446 | -0.04992 | 0.28163 | 0.076352 | 0.09936  | -0.06181 |

|          |         |          |          |          |          |          |          |          |
|----------|---------|----------|----------|----------|----------|----------|----------|----------|
| 0.03691  | 0.42616 | -0.01801 | 0.69793  | 0.042654 | 0.35773  | -0.01676 | 0.71798  | 0.038865 |
| -0.01302 | 0.77903 | 0.090203 | 0.05141  | 0.043741 | 0.34559  | 0.022778 | 0.62344  | -0.02387 |
| 0.013186 | 0.77626 | -0.04409 | 0.34174  | -0.00653 | 0.88812  | -0.02133 | 0.64562  | -0.00942 |
| 0.003966 | 0.93188 | -0.01351 | 0.77088  | 0.007006 | 0.87997  | -0.02531 | 0.58538  | 0.046704 |
| 0.057918 | 0.21155 | -0.00588 | 0.89915  | 0.055703 | 0.22957  | 0.012213 | 0.79237  | 0.016476 |
| 0.037793 | 0.41517 | -0.055   | 0.23552  | -0.0025  | 0.95704  | -0.01481 | 0.74952  | 0.004218 |
| 0.058562 | 0.20651 | -0.0365  | 0.43131  | -0.03903 | 0.40004  | -0.03036 | 0.51274  | 0.020262 |
| 0.071483 | 0.12293 | -0.11362 | 0.01402  | -0.04926 | 0.2881   | -0.05004 | 0.28048  | 0.124407 |
| -0.07528 | 0.1042  | -0.15369 | 0.00086  | -0.0812  | 0.07963  | -0.16231 | 0.00043  | 0.051292 |
| 0.006997 | 0.88014 | -0.00052 | 0.99114  | 0.016408 | 0.72359  | 0.064662 | 0.16299  | 0.063002 |
| -0.0189  | 0.68379 | 0.041952 | 0.3657   | -0.07732 | 0.09515  | 0.096552 | 0.037    | 0.015494 |
| 1.16E-05 | 0.9998  | -0.06993 | 0.13132  | -0.11178 | 0.01566  | -0.06864 | 0.13859  | -0.1479  |
| -0.00877 | 0.85008 | 0.009424 | 0.83905  | -0.04232 | 0.36152  | 0.001901 | 0.96731  | -0.04565 |
| 0.054848 | 0.23682 | -0.02182 | 0.63819  | -0.02995 | 0.51857  | -0.01219 | 0.79284  | -0.02537 |
| 0.057602 | 0.21406 | 0.017116 | 0.7122   | 0.015325 | 0.74117  | 0.02685  | 0.56274  | -0.00897 |
| 0.043097 | 0.35275 | -0.02596 | 0.57571  | 0.006764 | 0.88409  | 0.04648  | 0.31621  | 0.154886 |
| 0.017583 | 0.7047  | 0.113452 | 0.01416  | -0.00732 | 0.8747   | 0.109852 | 0.01756  | -0.13284 |
| -0.00802 | 0.86275 | 0.063658 | 0.16964  | -0.05589 | 0.22803  | 0.05359  | 0.24776  | 0.101507 |
| -0.03561 | 0.44261 | -0.1411  | 0.00224  | -0.10395 | 0.02468  | -0.10277 | 0.02636  | 0.055264 |
| 0.151115 | 0.00105 | 0.04412  | 0.34143  | -0.02961 | 0.52331  | -0.0758  | 0.10184  | -0.12395 |
| 0.072775 | 0.11629 | -0.08166 | 0.07793  | -0.05163 | 0.26549  | -0.07861 | 0.08974  | 0.033984 |
| 0.001148 | 0.98025 | 0.086094 | 0.06303  | -0.00118 | 0.97971  | 0.060885 | 0.18904  | -0.09447 |
| -0.04219 | 0.36304 | -0.14383 | 0.00183  | -0.08183 | 0.07731  | -0.06522 | 0.15942  | 0.104172 |
| 0.007104 | 0.87831 | -0.05704 | 0.21853  | 0.021821 | 0.63811  | -0.07763 | 0.09382  | -0.02916 |
| 0.068747 | 0.13797 | -0.04776 | 0.30305  | -0.04477 | 0.33431  | -0.1506  | 0.0011   | -0.1243  |
| -0.02455 | 0.59664 | 0.023971 | 0.60536  | -0.14551 | 0.00162  | -0.08246 | 0.07505  | -0.25607 |
| 0.037669 | 0.41671 | 0.036442 | 0.43206  | 0.078696 | 0.08937  | 0.153279 | 0.00089  | 0.118263 |
| 0.108425 | 0.01909 | 0.04232  | 0.36151  | 0.050533 | 0.2758   | 0.068817 | 0.13757  | 0.100213 |
| -0.00064 | 0.98901 | 0.194048 | 2.42E-05 | 0.182431 | 7.34E-05 | 0.179501 | 9.60E-05 | 0.055389 |
| 0.144113 | 0.00179 | 0.091743 | 0.04754  | 0.02631  | 0.57061  | 0.036857 | 0.42683  | -0.02592 |
| 0.017501 | 0.70602 | -0.0793  | 0.08695  | -0.10858 | 0.01892  | -0.05414 | 0.24295  | 0.075633 |
| -0.035   | 0.45054 | -0.10817 | 0.01938  | -0.17392 | 0.00016  | -0.03257 | 0.48259  | 0.055063 |
| 0.056242 | 0.22509 | 0.137022 | 0.00301  | 0.071642 | 0.12209  | 0.142034 | 0.00209  | 0.159328 |
| 0.100695 | 0.02958 | 0.140229 | 0.00239  | 0.097903 | 0.03442  | 0.166968 | 0.00029  | 0.150148 |
| 0.063953 | 0.16767 | -0.00414 | 0.92894  | 0.011357 | 0.80662  | -0.02837 | 0.54084  | -0.02075 |
| -0.10057 | 0.02978 | -0.16403 | 0.00037  | -0.09137 | 0.04845  | -0.12444 | 0.00709  | 0.145553 |
| -0.05707 | 0.21831 | -0.06796 | 0.14256  | -0.06479 | 0.16218  | -0.03571 | 0.44139  | 0.185724 |
| -0.02812 | 0.54447 | -0.05905 | 0.20271  | -0.086   | 0.06331  | -0.04512 | 0.3306   | 0.126443 |
| 0.042647 | 0.35781 | 0.070476 | 0.12831  | 0.112619 | 0.01489  | 0.008133 | 0.86086  | 0.061626 |
| 0.038936 | 0.4012  | -0.04559 | 0.32558  | -0.04477 | 0.33435  | -0.05872 | 0.20525  | -0.00119 |
| 0.024589 | 0.5961  | -0.01639 | 0.72384  | -0.0058  | 0.9006   | -0.00346 | 0.94059  | 0.073545 |
| 0.028561 | 0.5381  | 0.048788 | 0.29274  | -0.009   | 0.84627  | 0.05146  | 0.26708  | -0.0137  |
| -0.01628 | 0.72559 | -0.07524 | 0.10442  | -0.08317 | 0.07255  | -0.08313 | 0.0727   | 0.006546 |
| 0.057893 | 0.21175 | 0.006634 | 0.8863   | -0.03086 | 0.50591  | 0.045332 | 0.32832  | -0.01663 |
| 0.040174 | 0.38638 | -0.0707  | 0.12709  | -0.0352  | 0.44788  | -0.07344 | 0.11297  | -0.02758 |

|           |          |          |          |          |          |          |          |          |
|-----------|----------|----------|----------|----------|----------|----------|----------|----------|
| -3.40E-05 | 0.99942  | -0.08975 | 0.05261  | -0.04783 | 0.30237  | -0.06691 | 0.14882  | 0.030924 |
| -0.08141  | 0.07884  | 0.036647 | 0.42948  | 0.093963 | 0.0424   | 0.05611  | 0.22619  | 0.045267 |
| 0.155062  | 0.00077  | -0.02915 | 0.52972  | -0.02216 | 0.63292  | -0.0106  | 0.81936  | 0.10421  |
| 0.000212  | 0.99636  | 0.108535 | 0.01897  | -0.09015 | 0.05155  | 0.048807 | 0.29256  | 0.01792  |
| -0.06322  | 0.17261  | -0.04054 | 0.38205  | 0.0281   | 0.54469  | 0.052169 | 0.26054  | 0.183577 |
| -0.0243   | 0.60042  | 0.053879 | 0.24521  | -0.00188 | 0.96776  | 0.032209 | 0.48746  | -0.02382 |
| -0.02695  | 0.56135  | 0.02443  | 0.59848  | -0.02763 | 0.55149  | 0.036931 | 0.42591  | -0.08691 |
| 0.392083  | 1.30E-18 | 0.037842 | 0.41457  | 0.092672 | 0.04533  | 0.061678 | 0.18333  | -0.01497 |
| 0.081385  | 0.07893  | 0.068326 | 0.1404   | 0.016474 | 0.72253  | 0.0972   | 0.03574  | 0.146564 |
| 0.013955  | 0.76358  | 0.10168  | 0.02801  | -0.01528 | 0.74186  | 0.092451 | 0.04585  | -0.03342 |
| -0.04573  | 0.32413  | -0.15295 | 0.00091  | -0.20173 | 1.12E-05 | -0.13066 | 0.00468  | 0.003047 |
| -0.02432  | 0.60015  | 0.103839 | 0.02483  | 0.012529 | 0.78713  | 0.114854 | 0.01301  | 0.00291  |
| 0.035524  | 0.44375  | 0.023168 | 0.6175   | -0.06221 | 0.1796   | -0.0492  | 0.28866  | -0.05583 |
| 0.369072  | 1.62E-16 | 0.253858 | 2.66E-08 | 0.25947  | 1.27E-08 | 0.231997 | 3.99E-07 | 0.180532 |
| -0.00051  | 0.99119  | -0.03378 | 0.46648  | -0.10157 | 0.02818  | -0.0768  | 0.0974   | -0.01857 |
| 0.017836  | 0.70066  | -0.08951 | 0.05323  | -0.03304 | 0.47627  | -0.06572 | 0.15623  | -0.03423 |
| -0.02441  | 0.59877  | 0.071347 | 0.12365  | 0.105654 | 0.0224   | 0.115815 | 0.01226  | 0.182221 |
| 0.050709  | 0.27413  | 0.266843 | 4.70E-09 | 0.196232 | 1.95E-05 | 0.193426 | 2.57E-05 | -0.01029 |
| -0.00801  | 0.86288  | -0.05024 | 0.27856  | 0.006957 | 0.88082  | -0.00611 | 0.89518  | 0.188387 |
| -0.01458  | 0.75339  | 0.010416 | 0.82237  | -0.01914 | 0.67997  | 0.001608 | 0.97235  | 0.024234 |
| 0.033046  | 0.47621  | -0.01438 | 0.75664  | -0.04359 | 0.34724  | -0.06132 | 0.18589  | -0.08002 |
| -0.05309  | 0.25224  | -0.17602 | 0.00013  | -0.07154 | 0.12262  | -0.08757 | 0.05862  | 0.160758 |
| -0.01657  | 0.72102  | -0.00971 | 0.83415  | -0.12734 | 0.00586  | -0.07094 | 0.12582  | -0.1651  |
| -0.06916  | 0.13564  | 0.091066 | 0.04921  | -0.02438 | 0.59923  | 0.110433 | 0.01697  | -0.00666 |
| -0.01471  | 0.75113  | 0.028955 | 0.53251  | -0.18493 | 5.81E-05 | -0.03412 | 0.46195  | -0.14713 |
| -0.0103   | 0.82426  | -0.11668 | 0.01163  | -0.10833 | 0.0192   | -0.03988 | 0.38982  | 0.14226  |
| -0.00894  | 0.84713  | 0.023454 | 0.61317  | 0.030507 | 0.51077  | -0.01331 | 0.77416  | 0.009803 |
| 0.049339  | 0.28733  | -0.08822 | 0.05679  | 0.004332 | 0.92561  | -0.08703 | 0.06022  | 0.130105 |
| -0.11838  | 0.01045  | 0.029081 | 0.53073  | 0.005774 | 0.90097  | 0.004929 | 0.9154   | 0.146345 |
| 0.104199  | 0.02433  | 0.006797 | 0.88353  | -0.0147  | 0.75137  | -0.0449  | 0.33297  | 0.017693 |
| -0.06691  | 0.14883  | 0.015515 | 0.73807  | -0.13669 | 0.00308  | 0.053763 | 0.24623  | -0.03522 |
| 0.012083  | 0.79454  | -0.05776 | 0.21277  | -0.09416 | 0.04196  | -0.04613 | 0.31987  | -0.05379 |
| 0.006723  | 0.88479  | -0.03742 | 0.41982  | 0.056564 | 0.22244  | -0.00076 | 0.98692  | 0.100364 |
| -0.01981  | 0.66932  | -0.07561 | 0.10269  | 0.080181 | 0.08348  | -0.10168 | 0.02801  | 0.056737 |
| -0.07719  | 0.09569  | -0.09679 | 0.03653  | -0.14629 | 0.00153  | -0.00507 | 0.91295  | 0.007833 |
| 0.072898  | 0.11567  | -0.0399  | 0.38965  | 0.045263 | 0.32905  | -0.0272  | 0.55762  | 0.119617 |
| -0.04459  | 0.33633  | 0.161103 | 0.00047  | 0.081014 | 0.08031  | 0.185122 | 5.71E-05 | 0.165292 |
| -0.06942  | 0.13415  | -0.10025 | 0.03031  | -0.13672 | 0.00307  | -0.01182 | 0.79883  | 0.0581   |
| -0.02248  | 0.62797  | -0.12862 | 0.00537  | 0.020039 | 0.66579  | -0.15025 | 0.00113  | -0.04597 |
| -0.01905  | 0.6814   | -0.11793 | 0.01076  | -0.10739 | 0.02028  | -0.11579 | 0.01228  | 0.166655 |
| 0.24732   | 6.14E-08 | 0.127999 | 0.0056   | 0.238381 | 1.86E-07 | 0.131656 | 0.00437  | 0.082186 |
| 0.013793  | 0.76625  | -0.07046 | 0.12838  | -0.04066 | 0.38066  | -0.0318  | 0.49307  | 0.091181 |
| -0.06492  | 0.16131  | -0.05038 | 0.2773   | -0.1955  | 2.09E-05 | -0.09474 | 0.0407   | -0.2469  |
| 0.030492  | 0.51097  | 0.098805 | 0.03279  | 0.219875 | 1.61E-06 | 0.049438 | 0.28636  | 0.076816 |
| 0.047296  | 0.30777  | -0.03808 | 0.41165  | -0.02439 | 0.59904  | -0.07767 | 0.09363  | -0.05633 |

|          |         |          |          |          |          |          |          |           |
|----------|---------|----------|----------|----------|----------|----------|----------|-----------|
| 0.037853 | 0.41444 | -0.15619 | 0.00071  | -0.0923  | 0.04621  | -0.18513 | 5.70E-05 | -0.05087  |
| -0.00245 | 0.95784 | 0.046739 | 0.31351  | -0.02284 | 0.62244  | 0.08577  | 0.06403  | -0.0473   |
| 0.045644 | 0.325   | -0.05962 | 0.19843  | -0.091   | 0.04938  | -0.00129 | 0.9778   | 0.185134  |
| 0.070121 | 0.13025 | -0.07728 | 0.09529  | -0.10311 | 0.02586  | -0.08838 | 0.05632  | -0.09803  |
| 0.013205 | 0.77594 | 0.020768 | 0.65441  | -0.0266  | 0.56635  | -0.04338 | 0.34961  | -0.12885  |
| 0.012105 | 0.79417 | -0.05149 | 0.26678  | 0.048248 | 0.29813  | 0.03308  | 0.47576  | 0.203153  |
| -0.10291 | 0.02616 | -0.15464 | 0.0008   | -0.16906 | 0.00024  | -0.04548 | 0.32673  | 0.000808  |
| 0.060914 | 0.18883 | 0.019404 | 0.67577  | -0.01295 | 0.7801   | -0.03129 | 0.49993  | 0.071523  |
| 0.002339 | 0.9598  | -0.10049 | 0.02991  | -0.09265 | 0.04539  | -0.08775 | 0.0581   | -0.02745  |
| 0.080537 | 0.08211 | 0.064825 | 0.16193  | 0.126653 | 0.00613  | 0.02237  | 0.62968  | -0.08346  |
| 0.018579 | 0.68883 | 0.015027 | 0.74602  | 0.039513 | 0.39426  | -0.03707 | 0.42412  | 0.091091  |
| -0.00349 | 0.94004 | -0.0266  | 0.56633  | -0.01758 | 0.7048   | -0.05949 | 0.19943  | 0.150221  |
| 0.042457 | 0.35995 | -0.03801 | 0.41251  | -0.04676 | 0.31332  | -0.03853 | 0.4061   | -0.00341  |
| -0.09137 | 0.04847 | 0.000108 | 0.99814  | 0.016438 | 0.72311  | -0.06456 | 0.16369  | -0.13263  |
| -0.01179 | 0.79947 | -0.03391 | 0.46471  | 0.050318 | 0.27785  | -0.02976 | 0.52112  | 0.148578  |
| -0.04437 | 0.33869 | -0.09805 | 0.03415  | -0.0452  | 0.32969  | -0.04714 | 0.30941  | -0.04153  |
| -0.02389 | 0.60663 | -0.12488 | 0.00689  | -0.12247 | 0.00806  | -0.11732 | 0.01117  | 0.108674  |
| 0.043882 | 0.34404 | -0.04504 | 0.33147  | 0.000194 | 0.99666  | -0.0373  | 0.42126  | 0.017431  |
| 0.008828 | 0.8491  | 0.000934 | 0.98393  | 0.074225 | 0.10917  | 0.063888 | 0.1681   | 0.016118  |
| -0.08097 | 0.08048 | 0.024797 | 0.59299  | -0.08028 | 0.08308  | 0.088839 | 0.05505  | -0.00811  |
| 0.021945 | 0.63619 | -0.01568 | 0.73541  | -0.10228 | 0.0271   | -0.12326 | 0.00766  | -0.13738  |
| 0.077619 | 0.09386 | 0.029199 | 0.52906  | 0.090987 | 0.04941  | 0.023267 | 0.61601  | 0.261126  |
| 0.116962 | 0.01142 | 0.140374 | 0.00236  | 0.201079 | 1.19E-05 | 0.107301 | 0.02038  | 0.121502  |
| -0.01082 | 0.81566 | -0.12779 | 0.00568  | 0.027099 | 0.55912  | -0.07132 | 0.1238   | 0.179257  |
| -0.0669  | 0.14887 | -0.28563 | 3.23E-10 | -0.15476 | 0.00079  | -0.04651 | 0.31591  | 0.248607  |
| -0.00964 | 0.83549 | 0.063891 | 0.16808  | 0.0865   | 0.06179  | 0.134309 | 0.00364  | 0.200417  |
| -0.10449 | 0.02394 | -0.22373 | 1.04E-06 | -0.20389 | 8.96E-06 | -0.16529 | 0.00033  | 0.064756  |
| 0.069317 | 0.13472 | 0.034064 | 0.46273  | 0.060937 | 0.18866  | -0.03016 | 0.51557  | -0.05963  |
| -0.03028 | 0.5139  | -0.1643  | 0.00036  | -0.16169 | 0.00045  | -0.15141 | 0.00103  | -0.06351  |
| 0.109122 | 0.01833 | 0.164253 | 0.00036  | -0.00395 | 0.93209  | 0.084345 | 0.06859  | 0.004287  |
| -0.04466 | 0.33557 | -0.21013 | 4.65E-06 | -0.15063 | 0.00109  | -0.11325 | 0.01434  | 0.034675  |
| -0.1181  | 0.01064 | -0.06369 | 0.16943  | -0.17567 | 0.00014  | -0.04368 | 0.34631  | -0.02265  |
| -0.00624 | 0.89298 | 0.116807 | 0.01153  | -0.00223 | 0.96162  | 0.066015 | 0.15435  | 0.000897  |
| 0.035353 | 0.44595 | -0.09687 | 0.03638  | -0.04866 | 0.294    | -0.06994 | 0.13127  | -0.0114   |
| 0.040486 | 0.3827  | 0.005093 | 0.91259  | 0.016483 | 0.72239  | -0.0709  | 0.12604  | -0.06329  |
| 0.016714 | 0.71866 | -0.05151 | 0.26662  | -0.04191 | 0.3662   | -0.11844 | 0.01042  | -0.0059   |
| 0.013612 | 0.76923 | 0.142484 | 0.00202  | 0.273327 | 1.91E-09 | 0.12353  | 0.00753  | 0.146516  |
| 0.057953 | 0.21127 | 0.026543 | 0.56721  | -0.00138 | 0.97634  | 0.048252 | 0.29809  | -6.75E-05 |
| -0.02925 | 0.52828 | -0.05711 | 0.21804  | -0.08688 | 0.06066  | 0.024349 | 0.59969  | 0.178239  |
| 0.043446 | 0.34886 | 0.145674 | 0.0016   | 0.214577 | 2.88E-06 | 0.196199 | 1.95E-05 | 0.121506  |
| 0.022917 | 0.62133 | 0.175818 | 0.00013  | 0.012727 | 0.78385  | 0.076444 | 0.09895  | 0.055434  |
| -0.08883 | 0.05509 | -0.06927 | 0.13501  | -0.0355  | 0.4441   | 0.047471 | 0.30598  | 0.177974  |
| 0.003547 | 0.93906 | 0.002785 | 0.95214  | -0.05278 | 0.25499  | 0.043633 | 0.34679  | 0.161427  |
| 0.058561 | 0.20652 | 0.245219 | 8.00E-08 | 0.158501 | 0.00059  | 0.211183 | 4.15E-06 | 0.219401  |
| -0.05784 | 0.21218 | -0.11811 | 0.01063  | -0.08166 | 0.07793  | 0.007725 | 0.86777  | 0.26408   |

|          |          |          |          |          |          |          |          |          |
|----------|----------|----------|----------|----------|----------|----------|----------|----------|
| 0.070992 | 0.12553  | -0.0077  | 0.86824  | 0.068922 | 0.13696  | 0.065008 | 0.16075  | 0.248854 |
| 0.057835 | 0.21221  | -0.00792 | 0.86449  | 0.044185 | 0.34072  | -0.10963 | 0.0178   | -0.11684 |
| -0.00272 | 0.95328  | 0.013197 | 0.77607  | -0.0228  | 0.62313  | -0.00347 | 0.94047  | 0.005729 |
| 0.115317 | 0.01264  | 0.087218 | 0.05966  | -0.06509 | 0.16021  | 0.025927 | 0.57625  | -0.20142 |
| -0.02107 | 0.64972  | -0.00616 | 0.89435  | 0.008122 | 0.86104  | -0.02216 | 0.63285  | 0.131962 |
| 0.000804 | 0.98617  | -0.00737 | 0.87376  | -0.05944 | 0.19977  | -0.00725 | 0.87588  | 0.057783 |
| 0.022044 | 0.63467  | 0.074542 | 0.10766  | 0.233285 | 3.43E-07 | 0.102292 | 0.02708  | 0.28103  |
| 0.105302 | 0.02286  | 0.29469  | 8.25E-11 | 0.139599 | 0.0025   | 0.232157 | 3.92E-07 | -0.04522 |
| 0.05805  | 0.21051  | 0.170976 | 0.00021  | 0.172403 | 0.00018  | 0.141299 | 0.00221  | -0.02461 |
| 0.020826 | 0.65351  | 0.010911 | 0.81409  | -0.03094 | 0.50485  | -0.0328  | 0.47951  | -0.08009 |
| 0.003672 | 0.93692  | -0.08847 | 0.05607  | -0.10312 | 0.02586  | 0.000492 | 0.99154  | 0.051712 |
| -0.02352 | 0.61224  | 0.042611 | 0.35821  | 0.094732 | 0.04073  | -0.00635 | 0.8912   | 0.01043  |
| 0.027089 | 0.55927  | -0.10313 | 0.02584  | -0.06923 | 0.13519  | -0.03465 | 0.45507  | 0.071463 |
| 0.143343 | 0.0019   | 0.00928  | 0.84148  | 0.070161 | 0.13003  | 0.015707 | 0.73496  | 0.087779 |
| 0.144961 | 0.00168  | 0.002344 | 0.9597   | 0.076715 | 0.09776  | 0.033632 | 0.46842  | 0.210895 |
| 0.010586 | 0.81953  | -0.08689 | 0.06062  | -0.00946 | 0.83845  | -0.04167 | 0.3689   | 0.172267 |
| 0.187444 | 4.58E-05 | 0.044592 | 0.33628  | 0.077539 | 0.0942   | 0.052719 | 0.25553  | 0.019654 |
| 0.144384 | 0.00176  | 0.030849 | 0.50603  | 0.112988 | 0.01457  | 0.057601 | 0.21406  | 0.033523 |
| 0.11458  | 0.01323  | -0.03661 | 0.4299   | 0.032677 | 0.48115  | 0.031898 | 0.49167  | 0.237155 |
| 0.11082  | 0.01658  | -0.00296 | 0.94911  | 0.079719 | 0.08527  | 0.023622 | 0.61062  | 0.041788 |
| 0.122003 | 0.00831  | 0.007143 | 0.87765  | 0.040273 | 0.38521  | 0.024721 | 0.59413  | 0.046087 |
| 0.044827 | 0.33374  | -0.10022 | 0.03035  | 0.015801 | 0.73343  | -0.03394 | 0.46435  | 0.136668 |
| -0.01578 | 0.73375  | -0.0346  | 0.45572  | 0.043337 | 0.35007  | 0.065933 | 0.15486  | 0.075284 |
| 0.047947 | 0.30116  | -0.08045 | 0.08244  | -0.01428 | 0.75827  | -0.08145 | 0.07868  | 0.035316 |
| 0.004951 | 0.91503  | -0.03545 | 0.44465  | 0.020674 | 0.65587  | -0.01924 | 0.67828  | 0.014771 |
| 0.086562 | 0.06161  | -0.06699 | 0.14834  | 0.00496  | 0.91487  | -0.08189 | 0.07707  | 0.144667 |
| 0.126464 | 0.00621  | -0.00971 | 0.83415  | 0.036824 | 0.42725  | 0.025971 | 0.57559  | 0.095535 |
| 0.262729 | 8.22E-09 | 0.069621 | 0.13301  | 0.116411 | 0.01182  | 0.098149 | 0.03397  | 0.01982  |
| 0.015225 | 0.7428   | -0.05821 | 0.20928  | -0.04929 | 0.28784  | -0.05411 | 0.24316  | 0.088964 |
| 0.053989 | 0.24425  | 0.005389 | 0.90753  | 0.085125 | 0.06607  | 0.05083  | 0.27298  | 0.115771 |
| 0.213087 | 3.38E-06 | -0.02389 | 0.60654  | 0.026906 | 0.56192  | 0.0006   | 0.98968  | 0.112379 |
| 0.2165   | 2.33E-06 | -0.01798 | 0.69842  | 0.050381 | 0.27725  | 0.032491 | 0.48366  | 0.190187 |
| 0.047553 | 0.30514  | 0.015446 | 0.7392   | 0.049487 | 0.28588  | -0.00924 | 0.84219  | 0.079182 |
| -0.05375 | 0.24633  | -0.08818 | 0.05689  | -0.01583 | 0.73291  | -0.01367 | 0.76829  | 0.19602  |
| -0.05465 | 0.23853  | -0.16769 | 0.00027  | -0.10286 | 0.02623  | -0.10556 | 0.02253  | 0.180227 |
| -0.00369 | 0.93657  | -0.08831 | 0.05652  | -0.06561 | 0.15689  | -0.05688 | 0.21989  | 0.023532 |
| -0.05007 | 0.28027  | -0.10665 | 0.02115  | -0.11432 | 0.01344  | -0.10123 | 0.02871  | 0.134147 |
| -0.10855 | 0.01895  | -0.04547 | 0.32686  | -0.09106 | 0.04923  | 0.042489 | 0.35959  | -0.11052 |
| 0.048368 | 0.29692  | 0.104579 | 0.02381  | -0.0606  | 0.19111  | 0.063103 | 0.17339  | -0.15782 |
| 0.001952 | 0.96645  | -0.08138 | 0.07895  | -0.09891 | 0.0326   | -0.03134 | 0.49923  | 0.079618 |
| 0.062773 | 0.17566  | 0.183287 | 6.77E-05 | 0.208713 | 5.40E-06 | 0.279465 | 7.95E-10 | 0.251372 |
| 0.004705 | 0.91923  | -0.02844 | 0.53978  | -0.0083  | 0.85797  | -0.03724 | 0.42202  | -0.04779 |
| 0.024397 | 0.59896  | 0.084172 | 0.06917  | 0.061768 | 0.18269  | -0.00745 | 0.87243  | -0.05315 |
| -0.08663 | 0.06141  | -0.1123  | 0.01519  | -0.21714 | 2.17E-06 | -0.05311 | 0.25201  | -0.09515 |
| -0.01655 | 0.72132  | 0.060003 | 0.19554  | 0.010925 | 0.81384  | 0.03522  | 0.44767  | 0.001904 |

|          |          |          |          |          |          |          |          |          |
|----------|----------|----------|----------|----------|----------|----------|----------|----------|
| 0.082296 | 0.07562  | -0.13479 | 0.00352  | -0.00153 | 0.97369  | -0.12542 | 0.00665  | -0.05734 |
| 0.07878  | 0.08903  | 0.064681 | 0.16287  | 0.162764 | 0.00041  | 0.087692 | 0.05828  | 0.077114 |
| 0.089554 | 0.05312  | -0.13264 | 0.00409  | -0.01818 | 0.69523  | -0.05829 | 0.2086   | 0.165351 |
| -0.0769  | 0.09696  | 0.031998 | 0.49032  | -0.13854 | 0.0027   | -0.05197 | 0.2624   | -0.07455 |
| -0.00032 | 0.9945   | 0.028214 | 0.54305  | -0.0879  | 0.05768  | -0.01301 | 0.7791   | 0.060614 |
| 0.120722 | 0.00902  | 0.325145 | 5.83E-13 | 0.291484 | 1.34E-10 | 0.263411 | 7.49E-09 | 0.067372 |
| 0.129023 | 0.00523  | -0.06158 | 0.184    | 0.018064 | 0.69702  | -0.02224 | 0.63162  | 0.121686 |
| -0.10045 | 0.02998  | 0.084788 | 0.06715  | -0.04778 | 0.30281  | 0.066686 | 0.15019  | 0.010978 |
| -0.00315 | 0.94587  | 0.113244 | 0.01434  | 0.282574 | 5.06E-10 | 0.121114 | 0.00879  | 0.264299 |
| 0.014567 | 0.75354  | -0.19581 | 2.03E-05 | -0.13204 | 0.00426  | -0.22785 | 6.48E-07 | 0.017534 |
| -0.0005  | 0.99148  | 0.133841 | 0.00376  | 0.057431 | 0.21542  | 0.107236 | 0.02046  | 0.109055 |
| -0.00603 | 0.89654  | 0.056443 | 0.22344  | -0.14307 | 0.00194  | -0.05443 | 0.24041  | -0.15842 |
| 0.01571  | 0.73491  | 0.113573 | 0.01406  | 0.062825 | 0.1753   | 0.119784 | 0.00957  | 0.14458  |
| 0.063111 | 0.17334  | 0.00027  | 0.99535  | 0.034109 | 0.46213  | -0.01971 | 0.67098  | -0.01852 |
| -0.03173 | 0.49397  | -0.10356 | 0.02522  | -0.10603 | 0.02192  | -0.20373 | 9.10E-06 | -0.09452 |
| 0.047787 | 0.30277  | -0.13141 | 0.00445  | -0.10725 | 0.02045  | -0.0748  | 0.10645  | 0.054062 |
| 0.046894 | 0.31191  | -0.02582 | 0.57786  | 0.016611 | 0.72033  | -0.0959  | 0.03831  | -0.19346 |
| 0.072689 | 0.11672  | 0.142231 | 0.00206  | 0.120259 | 0.00929  | 0.086604 | 0.06148  | 0.126802 |
| 0.243619 | 9.76E-08 | -0.04868 | 0.29379  | 0.000827 | 0.98578  | 0.046048 | 0.32072  | 0.148532 |
| 0.003653 | 0.93725  | 0.019887 | 0.66818  | -0.08882 | 0.05511  | -0.02918 | 0.52928  | -0.19311 |
| 0.006289 | 0.89218  | 0.014821 | 0.74939  | 0.061351 | 0.18567  | 0.001363 | 0.97656  | 0.0845   |
| 0.039801 | 0.39082  | -0.09036 | 0.051    | -0.14106 | 0.00225  | -0.03157 | 0.49615  | 0.101368 |
| 0.079555 | 0.08592  | -0.0305  | 0.51086  | 0.026511 | 0.56768  | -0.04659 | 0.31506  | -0.02105 |
| -0.04957 | 0.28509  | -0.05473 | 0.2378   | -0.1741  | 0.00016  | -0.12008 | 0.00939  | -0.04642 |
| -0.00453 | 0.92225  | -0.05407 | 0.24351  | -0.01047 | 0.82148  | 0.011179 | 0.8096   | 0.035724 |
| 0.086967 | 0.0604   | -0.12539 | 0.00667  | -0.07248 | 0.11777  | -0.1161  | 0.01205  | -0.03426 |
| 0.070868 | 0.12619  | -0.06154 | 0.18434  | -0.03608 | 0.43668  | -0.01177 | 0.79978  | 0.034839 |
| 0.054956 | 0.23589  | -0.11577 | 0.01229  | -0.00695 | 0.88089  | -0.1517  | 0.00101  | 0.062432 |
| 0.075171 | 0.10472  | 0.099195 | 0.0321   | 0.174309 | 0.00015  | -0.00484 | 0.91691  | 0.057325 |
| -0.06987 | 0.13164  | -0.05728 | 0.21665  | -0.11209 | 0.01537  | -0.03032 | 0.51338  | 0.041391 |
| -0.06005 | 0.19521  | -0.06716 | 0.14733  | -0.1016  | 0.02813  | -0.05255 | 0.25706  | -0.02571 |
| 0.195247 | 2.15E-05 | 0.025764 | 0.57864  | 0.211294 | 4.11E-06 | 0.051843 | 0.26353  | 0.199312 |
| -0.06005 | 0.19515  | 0.033477 | 0.47047  | -0.00292 | 0.9499   | 0.008387 | 0.85655  | 0.112052 |
| -0.14441 | 0.00176  | -0.14091 | 0.00227  | -0.27063 | 2.78E-09 | -0.10813 | 0.01942  | -0.09619 |
| -0.00617 | 0.89422  | 0.049787 | 0.28296  | 0.044893 | 0.33303  | 0.072781 | 0.11626  | 0.140356 |
| 0.038042 | 0.41211  | -0.1106  | 0.01681  | -0.01879 | 0.68545  | -0.10214 | 0.0273   | 0.122683 |
| -0.03915 | 0.39857  | 0.068138 | 0.14149  | -0.09467 | 0.04085  | 0.095435 | 0.03925  | -0.17158 |
| -0.0206  | 0.65707  | -0.02226 | 0.63131  | -0.1733  | 0.00017  | -0.05559 | 0.23052  | 0.103785 |
| -0.13717 | 0.00297  | -0.05054 | 0.27576  | -0.11091 | 0.0165   | -0.09501 | 0.04014  | -0.08884 |
| 0.069152 | 0.13565  | 0.330665 | 2.24E-13 | 0.118927 | 0.0101   | 0.229416 | 5.40E-07 | 0.041962 |
| -0.02368 | 0.60981  | 0.02935  | 0.52694  | 0.079849 | 0.08476  | 0.003947 | 0.9322   | 0.119131 |
| 0.003565 | 0.93875  | -0.11082 | 0.01659  | 0.003298 | 0.94333  | -0.1411  | 0.00224  | -0.0296  |
| -0.02117 | 0.64819  | -0.0522  | 0.26021  | 0.043626 | 0.34686  | 0.022686 | 0.62485  | 0.061373 |
| -0.05323 | 0.25092  | -0.08233 | 0.07551  | -0.07266 | 0.11687  | -0.03213 | 0.48859  | 0.177173 |
| -0.06084 | 0.18936  | -0.20446 | 8.44E-06 | -0.12776 | 0.00569  | -0.09022 | 0.05136  | -0.09284 |



|          |          |          |          |          |          |          |          |          |
|----------|----------|----------|----------|----------|----------|----------|----------|----------|
| 0.048838 | 0.29226  | -0.06419 | 0.1661   | 0.044959 | 0.33232  | -0.06699 | 0.14833  | 0.174282 |
| -0.02283 | 0.62259  | -0.13487 | 0.0035   | -0.19305 | 2.67E-05 | -0.02373 | 0.60897  | 0.104957 |
| -0.05498 | 0.23565  | 0.168364 | 0.00026  | 0.092853 | 0.04491  | 0.072657 | 0.11688  | 0.004576 |
| -0.00596 | 0.89773  | -0.02453 | 0.59702  | -0.11145 | 0.01598  | -0.02248 | 0.62801  | 0.025738 |
| -0.02795 | 0.54686  | 0.052843 | 0.25442  | 0.147203 | 0.00142  | 0.047301 | 0.30772  | 0.132613 |
| -0.02557 | 0.58148  | 0.055776 | 0.22896  | -0.10458 | 0.02381  | 0.08291  | 0.07346  | -0.09986 |
| -0.00131 | 0.97741  | 0.081719 | 0.0777   | 0.076853 | 0.09715  | 0.214349 | 2.95E-06 | 0.258107 |
| 0.029181 | 0.52932  | -0.02344 | 0.61331  | -0.02573 | 0.57917  | -0.08734 | 0.05931  | -0.19566 |
| -0.01691 | 0.71546  | 0.024375 | 0.5993   | -0.1008  | 0.0294   | -0.02393 | 0.60594  | -0.06747 |
| 0.072466 | 0.11785  | 0.164598 | 0.00035  | 0.092257 | 0.0463   | 0.232612 | 3.71E-07 | 0.284222 |
| -0.19952 | 1.40E-05 | -0.28756 | 2.42E-10 | -0.27927 | 8.17E-10 | -0.2097  | 4.87E-06 | 0.132859 |
| -0.10705 | 0.02068  | -0.14988 | 0.00116  | -0.10628 | 0.02161  | -0.10804 | 0.01953  | -0.03376 |
| 0.031601 | 0.49571  | 0.012755 | 0.78339  | -0.01897 | 0.6827   | 0.134115 | 0.00369  | 0.200667 |
| -0.03613 | 0.43605  | 0.024229 | 0.60149  | 0.006524 | 0.88818  | 0.038221 | 0.40991  | 0.009876 |
| -0.02441 | 0.59877  | -0.08292 | 0.07341  | -0.1191  | 0.01     | -0.07196 | 0.12042  | -0.0228  |
| -0.01069 | 0.81782  | -0.00715 | 0.87754  | 0.051718 | 0.26468  | 0.000709 | 0.98782  | 0.018186 |
| -0.07094 | 0.1258   | -0.13406 | 0.0037   | -0.12532 | 0.00669  | -0.00563 | 0.90336  | 0.279221 |
| 0.103561 | 0.02522  | 0.251791 | 3.47E-08 | 0.162074 | 0.00044  | 0.326041 | 5.00E-13 | 0.06853  |
| 0.067346 | 0.1462   | 0.144541 | 0.00174  | 0.107033 | 0.0207   | 0.296975 | 5.80E-11 | 0.164562 |
| -0.00534 | 0.90841  | 0.026316 | 0.57053  | 0.107979 | 0.0196   | 0.143109 | 0.00193  | 0.225163 |
| -0.01421 | 0.75932  | -0.08322 | 0.07237  | -0.07076 | 0.12679  | -0.11429 | 0.01347  | -0.0087  |
| 0.019734 | 0.67058  | -0.0087  | 0.85122  | 0.07685  | 0.09717  | 0.044056 | 0.34213  | 0.122484 |
| -0.02576 | 0.57874  | -0.15141 | 0.00103  | -0.15793 | 0.00061  | -0.12626 | 0.00629  | -0.06418 |
| -0.02601 | 0.57498  | 0.067315 | 0.14638  | -0.00197 | 0.96614  | 0.124495 | 0.00707  | -0.00846 |
| -0.02002 | 0.66603  | 0.136437 | 0.00313  | 0.071988 | 0.1203   | 0.109225 | 0.01822  | -0.00943 |
| 0.009047 | 0.8454   | 0.100417 | 0.03003  | 0.033937 | 0.4644   | 0.076537 | 0.09854  | -0.02399 |
| -0.06852 | 0.13929  | 0.078405 | 0.09057  | 0.060356 | 0.19292  | 0.092551 | 0.04561  | 0.006714 |
| -0.14012 | 0.00241  | 0.043594 | 0.34721  | -0.02813 | 0.54421  | 0.033122 | 0.4752   | -0.0102  |
| -0.11266 | 0.01486  | -0.05448 | 0.23998  | -0.13288 | 0.00402  | -0.03652 | 0.43112  | -0.02937 |
| 0.027945 | 0.54691  | 0.109947 | 0.01746  | 0.038883 | 0.40185  | 0.117571 | 0.011    | 0.006792 |
| 0.040795 | 0.37908  | 0.012359 | 0.78994  | 0.051595 | 0.26583  | 0.027213 | 0.55747  | 0.011063 |
| 0.165935 | 0.00032  | 0.200734 | 1.24E-05 | 0.079551 | 0.08594  | 0.180515 | 8.75E-05 | 0.056997 |
| 0.159109 | 0.00056  | 0.227838 | 6.49E-07 | 0.171692 | 0.00019  | 0.20419  | 8.68E-06 | 0.208093 |
| 0.130282 | 0.0048   | 0.196995 | 1.80E-05 | 0.204169 | 8.70E-06 | 0.202385 | 1.05E-05 | 0.256518 |
| -0.10146 | 0.02836  | 0.020888 | 0.65254  | -0.08261 | 0.07452  | -0.02741 | 0.55464  | -0.21712 |
| -0.02601 | 0.57501  | 0.130396 | 0.00477  | 0.035402 | 0.44532  | 0.066756 | 0.14977  | -0.04219 |
| 0.019154 | 0.67971  | -0.05303 | 0.25274  | 0.05887  | 0.20413  | -0.02732 | 0.55585  | 0.178903 |
| 0.080967 | 0.08048  | 0.093528 | 0.04337  | 0.06365  | 0.16969  | 0.07905  | 0.08794  | 0.054273 |
| -0.04592 | 0.32211  | -0.15825 | 0.0006   | -0.14784 | 0.00136  | -0.14516 | 0.00166  | -0.20367 |
| -0.00288 | 0.95046  | -0.13014 | 0.00485  | -0.01348 | 0.77143  | -0.03402 | 0.46331  | 0.268952 |
| 0.059971 | 0.19578  | 0.035456 | 0.44464  | 0.160727 | 0.00049  | 0.066938 | 0.14866  | 0.168805 |
| -0.14277 | 0.00198  | -0.09975 | 0.03114  | -0.16767 | 0.00027  | -0.14545 | 0.00162  | -0.06808 |
| -0.06526 | 0.1591   | 0.003762 | 0.93538  | 0.079771 | 0.08507  | -0.11026 | 0.01714  | 0.00853  |
| -0.0035  | 0.93981  | -0.03924 | 0.39756  | -0.06904 | 0.13631  | -0.10851 | 0.01899  | -0.02655 |
| 0.038875 | 0.40194  | 0.005708 | 0.90208  | -0.00749 | 0.87177  | 0.001238 | 0.97871  | -0.05014 |

|          |          |          |          |          |          |          |          |          |
|----------|----------|----------|----------|----------|----------|----------|----------|----------|
| -0.03281 | 0.47943  | -0.03782 | 0.41484  | -0.01319 | 0.77618  | -0.07786 | 0.09283  | -0.09538 |
| 0.08102  | 0.08028  | 0.014558 | 0.7537   | -0.08746 | 0.05894  | 0.064786 | 0.16219  | 0.091159 |
| -0.08271 | 0.07417  | -0.02122 | 0.64738  | -0.11261 | 0.0149   | 0.058113 | 0.21001  | 0.147932 |
| -0.03519 | 0.44802  | -0.02885 | 0.53399  | -0.01153 | 0.80377  | -0.0484  | 0.29659  | 0.133844 |
| 0.011652 | 0.8017   | -0.05104 | 0.27104  | 0.108898 | 0.01857  | -0.00424 | 0.92725  | -0.00899 |
| -0.03904 | 0.39991  | 0.032816 | 0.47928  | -0.06814 | 0.1415   | 0.015046 | 0.74571  | -0.1668  |
| 0.034452 | 0.45764  | 0.009085 | 0.84476  | 0.10951  | 0.01792  | 0.050991 | 0.27147  | 0.13494  |
| -0.01745 | 0.70682  | 0.009175 | 0.84324  | -0.01934 | 0.67674  | 0.028704 | 0.53607  | -0.05081 |
| 0.023916 | 0.60618  | 0.018232 | 0.69433  | 0.046713 | 0.31378  | 0.009798 | 0.83275  | 0.123387 |
| -0.0407  | 0.38022  | 0.013049 | 0.77852  | 0.058243 | 0.20899  | 2.54E-05 | 0.99956  | 0.035645 |
| -0.11631 | 0.01189  | 0.076    | 0.10093  | 0.142171 | 0.00207  | 0.151505 | 0.00102  | 0.217519 |
| 0.044192 | 0.34064  | 0.047524 | 0.30545  | 0.128941 | 0.00526  | 0.049022 | 0.29044  | 0.121417 |
| 0.008683 | 0.85156  | 0.172657 | 0.00018  | 0.013197 | 0.77607  | 0.098181 | 0.03391  | -0.11705 |
| -0.10281 | 0.02631  | 0.077992 | 0.09229  | 0.072835 | 0.11599  | 0.085189 | 0.06586  | 0.115147 |
| -0.07912 | 0.08766  | -0.21347 | 3.25E-06 | -0.14526 | 0.00165  | -0.12792 | 0.00564  | 0.092548 |
| 0.054193 | 0.24247  | -0.023   | 0.62011  | 0.053666 | 0.24708  | -0.04953 | 0.28545  | 0.022591 |
| -0.00022 | 0.9962   | 0.110647 | 0.01675  | 0.097052 | 0.03602  | 0.158022 | 0.00061  | 0.174153 |
| -0.02922 | 0.52881  | 0.079382 | 0.08661  | 0.064798 | 0.16211  | 0.029476 | 0.52515  | -0.19254 |
| -0.08897 | 0.05469  | -0.14221 | 0.00207  | -0.04792 | 0.30144  | -0.22533 | 8.66E-07 | 0.022498 |
| 0.034536 | 0.45654  | -0.03224 | 0.48698  | -0.03285 | 0.47889  | -0.00925 | 0.84194  | 0.041395 |
| 0.053076 | 0.25233  | 0.07686  | 0.09712  | 0.005563 | 0.90456  | -0.03222 | 0.4873   | -0.04429 |
| 0.18056  | 8.72E-05 | 0.210485 | 4.48E-06 | 0.22311  | 1.12E-06 | 0.108158 | 0.01939  | 0.11934  |
| -0.06528 | 0.15898  | -0.06615 | 0.1535   | -0.17467 | 0.00015  | -0.06867 | 0.13841  | -0.13878 |
| 0.143233 | 0.00192  | -0.01223 | 0.79217  | -0.00268 | 0.95388  | 0.023709 | 0.60931  | 0.090897 |
| -0.00895 | 0.84704  | -0.19856 | 1.54E-05 | -0.14511 | 0.00167  | -0.19977 | 1.36E-05 | 0.015648 |
| 0.035274 | 0.44697  | -0.05562 | 0.23026  | -0.00373 | 0.93589  | -0.09583 | 0.03845  | 0.125727 |
| 0.047525 | 0.30543  | -0.08211 | 0.0763   | -0.06476 | 0.16237  | -0.12439 | 0.00711  | -0.05522 |
| -0.0048  | 0.91757  | 0.075676 | 0.1024   | -0.04617 | 0.3194   | 0.018845 | 0.6846   | -0.0291  |
| 0.098652 | 0.03306  | -0.04786 | 0.30202  | 0.008057 | 0.86213  | -0.02149 | 0.64326  | 0.13853  |
| 0.191986 | 2.96E-05 | 0.109126 | 0.01833  | 0.141101 | 0.00224  | 0.10578  | 0.02224  | 0.098572 |
| -0.07846 | 0.09036  | -0.07116 | 0.12463  | -0.06634 | 0.15236  | -0.14762 | 0.00138  | 0.044711 |
| -0.01495 | 0.74736  | -0.0849  | 0.06678  | -0.08734 | 0.05931  | -0.07365 | 0.11195  | -0.09104 |
| -0.04005 | 0.38781  | -0.08507 | 0.06625  | -0.05932 | 0.20069  | -0.09324 | 0.04402  | 0.11513  |
| -0.03005 | 0.51717  | 0.079616 | 0.08568  | -0.05971 | 0.19776  | 0.110172 | 0.01723  | 0.028198 |
| 0.09071  | 0.05011  | -0.04823 | 0.29828  | 0.119268 | 0.00989  | 0.008801 | 0.84956  | 0.021027 |
| 0.060359 | 0.1929   | -0.05532 | 0.23277  | -0.02471 | 0.59422  | -0.0026  | 0.95531  | 0.118477 |
| -0.02933 | 0.52716  | 0.058685 | 0.20556  | -0.0779  | 0.09268  | 0.111445 | 0.01598  | 0.23659  |
| 0.028746 | 0.53547  | -0.06327 | 0.17228  | -0.00655 | 0.88774  | -0.10049 | 0.02991  | 0.092733 |
| 0.017714 | 0.70261  | -0.01516 | 0.74379  | -0.0035  | 0.93979  | -0.0564  | 0.22379  | 0.005419 |
| -0.02522 | 0.58673  | -0.00478 | 0.91795  | -0.11895 | 0.01009  | 0.030564 | 0.50998  | 0.107055 |
| 0.017063 | 0.71305  | -0.0752  | 0.10457  | -0.03636 | 0.43306  | 0.025219 | 0.5867   | 0.277904 |
| 0.131396 | 0.00445  | 0.042611 | 0.35821  | 0.186614 | 4.96E-05 | 0.08919  | 0.05409  | 0.105823 |
| 0.039126 | 0.39891  | -0.0345  | 0.45695  | -0.04896 | 0.29104  | -0.07206 | 0.11991  | -0.06608 |
| 0.078114 | 0.09177  | 0.060626 | 0.19093  | 0.078738 | 0.0892   | 0.003996 | 0.93137  | -0.01866 |
| -0.06098 | 0.18836  | 0.040635 | 0.38096  | 0.023045 | 0.61937  | 0.165429 | 0.00033  | 0.238801 |

|          |          |          |          |          |          |          |          |          |
|----------|----------|----------|----------|----------|----------|----------|----------|----------|
| -0.00185 | 0.96819  | -0.02359 | 0.6111   | -0.04342 | 0.34917  | 0.057902 | 0.21168  | 0.189215 |
| 0.001163 | 0.98     | 0.105659 | 0.0224   | 0.079248 | 0.08714  | 0.102312 | 0.02705  | -0.06997 |
| 0.135349 | 0.00338  | 0.023359 | 0.61461  | -0.12947 | 0.00508  | 0.050551 | 0.27563  | -0.07201 |
| -0.07829 | 0.09105  | 0.193729 | 2.49E-05 | 0.028297 | 0.54186  | 0.144621 | 0.00173  | 0.015419 |
| 0.038264 | 0.40938  | 0.005045 | 0.91341  | -0.00095 | 0.98374  | -0.12806 | 0.00558  | -0.08492 |
| -0.02417 | 0.60236  | -0.04881 | 0.29254  | -0.07707 | 0.09621  | -0.02347 | 0.61294  | 0.073971 |
| 0.003792 | 0.93486  | -0.02364 | 0.61028  | -0.06697 | 0.14848  | -0.02362 | 0.61065  | -0.08174 |
| 0.002488 | 0.95724  | 0.108919 | 0.01855  | 0.062137 | 0.18009  | 0.169475 | 0.00023  | 0.134159 |
| 0.016068 | 0.72909  | 0.008761 | 0.85023  | -0.04922 | 0.2885   | 0.089445 | 0.05341  | 0.101225 |
| 0.069794 | 0.13205  | 0.100545 | 0.02982  | 0.10575  | 0.02228  | 0.226375 | 7.69E-07 | 0.22515  |
| 0.075735 | 0.10213  | -0.01032 | 0.82395  | -0.02433 | 0.59996  | -0.01645 | 0.72285  | -0.0322  |
| 0.00048  | 0.99174  | 0.033572 | 0.46921  | 0.031354 | 0.49909  | 0.115701 | 0.01235  | 0.193339 |
| -0.06192 | 0.1816   | -0.121   | 0.00886  | -0.2063  | 6.97E-06 | -0.07212 | 0.1196   | -0.09734 |
| -0.16799 | 0.00027  | -0.1783  | 0.00011  | -0.34926 | 7.63E-15 | -0.2507  | 4.00E-08 | -0.10268 |
| -0.03011 | 0.51628  | -0.04526 | 0.32907  | -0.04989 | 0.28193  | -0.10956 | 0.01786  | -0.10611 |
| -0.04691 | 0.31175  | -0.05043 | 0.27678  | -0.17086 | 0.00021  | -0.17136 | 0.0002   | -0.18327 |
| 0.056142 | 0.22592  | 0.03644  | 0.43209  | 0.051447 | 0.2672   | 0.031614 | 0.49553  | 0.011339 |
| 0.035121 | 0.44894  | 0.042801 | 0.35607  | 0.066416 | 0.15186  | 0.066238 | 0.15296  | 0.109902 |
| 0.008806 | 0.84947  | 0.00191  | 0.96716  | -0.03669 | 0.42898  | -0.01416 | 0.76021  | -0.06276 |
| 0.084833 | 0.067    | 0.054053 | 0.24369  | -0.00353 | 0.93928  | -0.0007  | 0.9879   | -0.04634 |
| -0.00455 | 0.92192  | 0.073958 | 0.11045  | 0.016888 | 0.71587  | 0.003304 | 0.94323  | -0.06038 |
| 0.034736 | 0.45393  | 0.081237 | 0.07948  | 0.01655  | 0.72131  | 0.021985 | 0.63558  | -0.08214 |
| 0.069011 | 0.13646  | 0.017276 | 0.70962  | -0.01079 | 0.81615  | -0.01975 | 0.67035  | -0.09244 |
| 0.001089 | 0.98128  | 0.002609 | 0.95516  | -0.0112  | 0.80918  | -0.01743 | 0.7072   | -0.03904 |
| -0.01322 | 0.77577  | 0.011802 | 0.79921  | 0.016625 | 0.7201   | -0.00207 | 0.96446  | -0.02972 |
| 0.036572 | 0.43042  | -0.19974 | 1.37E-05 | -0.08152 | 0.07843  | -0.27486 | 1.54E-09 | -0.09566 |
| -0.08384 | 0.07028  | -0.10917 | 0.01828  | -0.1447  | 0.00172  | -0.20468 | 8.25E-06 | -0.24823 |
| 0.126077 | 0.00637  | 0.087557 | 0.05867  | 0.035515 | 0.44388  | 0.101358 | 0.02851  | -0.03834 |
| -0.00081 | 0.98603  | -0.08746 | 0.05896  | 0.049379 | 0.28693  | -0.09072 | 0.05008  | 0.146873 |
| -0.03681 | 0.42744  | 0.059228 | 0.20138  | 0.130754 | 0.00465  | 0.13935  | 0.00254  | 0.240799 |
| -0.01721 | 0.71062  | 0.005924 | 0.89841  | 0.020717 | 0.6552   | 0.047846 | 0.30217  | 0.131292 |
| 0.24519  | 8.03E-08 | 0.116135 | 0.01202  | 0.111632 | 0.0158   | 0.152056 | 0.00098  | 0.103692 |
| -0.01054 | 0.82025  | -0.0151  | 0.74491  | -0.10303 | 0.02599  | -0.08938 | 0.05358  | -0.17603 |
| -0.02564 | 0.58055  | -0.0444  | 0.33838  | -0.04311 | 0.35255  | -0.08123 | 0.07951  | -0.16968 |
| -0.08533 | 0.06542  | 0.013014 | 0.77911  | -0.08901 | 0.05457  | -0.02872 | 0.53584  | 0.017495 |
| -0.06243 | 0.17804  | 0.08663  | 0.0614   | -0.07936 | 0.08668  | 0.080551 | 0.08205  | -0.2267  |
| -0.06308 | 0.17358  | -0.03962 | 0.39292  | 0.119305 | 0.00987  | 0.006213 | 0.89347  | 0.122969 |
| 0.029431 | 0.5258   | -0.11152 | 0.01591  | -0.16923 | 0.00024  | -0.13233 | 0.00418  | -0.1009  |
| 0.114518 | 0.01328  | 0.105143 | 0.02306  | 0.125942 | 0.00643  | 0.110708 | 0.01669  | 0.001363 |
| -0.02288 | 0.62186  | 0.005796 | 0.90059  | -0.0086  | 0.85294  | 0.056178 | 0.22562  | 0.079458 |
| 0.086265 | 0.06251  | 0.159213 | 0.00055  | 0.136811 | 0.00305  | 0.220831 | 1.44E-06 | 0.016542 |
| 0.078851 | 0.08874  | 0.047938 | 0.30125  | 0.062956 | 0.1744   | 0.103686 | 0.02505  | 0.131427 |
| 0.132571 | 0.00411  | -0.02142 | 0.6443   | 0.019762 | 0.67014  | 0.001727 | 0.9703   | 0.14338  |
| -0.05462 | 0.23876  | -0.10932 | 0.01811  | -0.11751 | 0.01104  | -0.10587 | 0.02213  | -0.12617 |
| -0.04482 | 0.33382  | 0.187901 | 4.39E-05 | 0.104743 | 0.02359  | 0.159671 | 0.00053  | 0.013247 |

|          |         |          |          |          |          |          |          |          |
|----------|---------|----------|----------|----------|----------|----------|----------|----------|
| 0.035207 | 0.44783 | 0.100122 | 0.03052  | 0.070134 | 0.13018  | 0.045306 | 0.32859  | 0.00642  |
| 0.072142 | 0.11951 | -0.10285 | 0.02624  | -0.06839 | 0.14     | -0.10596 | 0.02201  | 0.061512 |
| 0.063784 | 0.16879 | 0.070148 | 0.1301   | 0.009933 | 0.83049  | 0.023546 | 0.61178  | -0.03788 |
| 0.025529 | 0.58211 | -0.04086 | 0.37836  | -0.07236 | 0.11837  | -0.05074 | 0.27383  | 0.022326 |
| 0.067676 | 0.14422 | 0.040327 | 0.38457  | 0.02134  | 0.64554  | 0.029345 | 0.52701  | 0.093538 |
| 0.105828 | 0.02218 | -0.03623 | 0.43469  | 0.056386 | 0.2239   | -0.05527 | 0.23323  | -0.01694 |
| 0.065783 | 0.15581 | -0.02687 | 0.56249  | -0.00649 | 0.8887   | -0.02755 | 0.55259  | -0.0306  |
| 0.037065 | 0.42423 | 0.004379 | 0.92481  | -0.01796 | 0.69862  | 0.012719 | 0.78398  | -0.11088 |
| -0.0573  | 0.21647 | 0.112751 | 0.01478  | 0.15848  | 0.00059  | 0.104362 | 0.02411  | 0.203686 |
| -0.09622 | 0.03766 | 0.092177 | 0.0465   | 0.01829  | 0.69341  | 0.114456 | 0.01333  | 0.152965 |
| 0.058388 | 0.20786 | 0.02965  | 0.52272  | -0.02153 | 0.64261  | 0.024503 | 0.59738  | -0.11086 |
| 0.032122 | 0.48864 | 0.118407 | 0.01044  | 0.043085 | 0.35289  | 0.129013 | 0.00523  | -0.03515 |
| -0.00557 | 0.9044  | -0.01484 | 0.74905  | -0.10944 | 0.01799  | -0.00526 | 0.90966  | 0.048072 |
| 0.061768 | 0.18269 | 0.013185 | 0.77627  | 0.094724 | 0.04074  | -0.01499 | 0.74661  | 0.197784 |
| 0.068373 | 0.14012 | -0.03283 | 0.47912  | -0.06473 | 0.16258  | -0.05382 | 0.24574  | 0.054227 |
| 0.160494 | 0.0005  | 0.154451 | 0.00081  | 0.119359 | 0.00983  | 0.135037 | 0.00346  | 0.085195 |
| 0.150425 | 0.00111 | 0.177063 | 0.00012  | 0.136311 | 0.00316  | 0.137974 | 0.00281  | 0.014486 |
| 0.003766 | 0.9353  | 0.145385 | 0.00163  | 0.07629  | 0.09964  | 0.094627 | 0.04095  | -0.10561 |
| 0.061562 | 0.18416 | -0.06353 | 0.17049  | -0.05163 | 0.26549  | -0.07428 | 0.10892  | -0.00305 |
| -0.04092 | 0.37763 | -0.20391 | 8.94E-06 | -0.05707 | 0.21834  | -0.1817  | 7.85E-05 | 0.037981 |
| 0.118675 | 0.01026 | 0.029735 | 0.52153  | 0.013548 | 0.77028  | 0.027429 | 0.55434  | 0.082508 |
| 0.026242 | 0.57162 | 0.01528  | 0.7419   | 0.100554 | 0.0298   | 0.070584 | 0.12772  | 0.097435 |
| -0.00879 | 0.84972 | -0.15312 | 0.0009   | -0.13189 | 0.0043   | -0.10366 | 0.02508  | 0.153311 |
| 0.074094 | 0.1098  | -0.05056 | 0.27551  | -0.03898 | 0.4007   | -0.06274 | 0.17589  | -0.00764 |
| 0.086176 | 0.06278 | 0.066815 | 0.14941  | 0.093823 | 0.04271  | 0.071009 | 0.12544  | 0.108168 |
| 0.116367 | 0.01185 | 0.038785 | 0.40303  | 0.135952 | 0.00324  | -0.02533 | 0.58503  | 0.030031 |
| 0.021281 | 0.64645 | -0.14494 | 0.00169  | -0.10276 | 0.02638  | -0.06153 | 0.18439  | 0.178857 |
| -0.03377 | 0.46659 | 0.07583  | 0.1017   | -0.121   | 0.00886  | 0.065116 | 0.16005  | -0.02659 |
| 0.061557 | 0.18419 | 0.129082 | 0.00521  | 0.096347 | 0.0374   | 0.136241 | 0.00318  | 0.186348 |
| 0.099867 | 0.03095 | 0.070995 | 0.12551  | 0.016633 | 0.71996  | -0.01666 | 0.7195   | -0.02012 |
| 0.028793 | 0.5348  | -0.09787 | 0.03447  | -0.06027 | 0.19356  | -0.03873 | 0.4037   | 0.173322 |
| 0.074021 | 0.11015 | 0.10242  | 0.02688  | 0.119223 | 0.00992  | 0.059625 | 0.19838  | 0.020395 |
| -0.07902 | 0.08807 | -0.09396 | 0.04239  | -0.09903 | 0.03239  | -0.09324 | 0.04403  | 0.112951 |
| 0.008298 | 0.85806 | 0.011141 | 0.81024  | -0.09466 | 0.04088  | -0.04556 | 0.3259   | -0.1601  |
| 0.054062 | 0.24361 | 0.169137 | 0.00024  | 0.130495 | 0.00473  | 0.160525 | 0.0005   | -0.04202 |
| -0.01353 | 0.77056 | -0.02545 | 0.58324  | -0.08362 | 0.07101  | -0.06663 | 0.15055  | -0.05975 |
| -0.07029 | 0.12932 | 0.067632 | 0.14448  | -0.04571 | 0.32425  | 0.096223 | 0.03765  | -0.03907 |
| 0.049314 | 0.28757 | -0.03049 | 0.51094  | 0.011777 | 0.79962  | -0.06972 | 0.13244  | -0.13949 |
| -0.01757 | 0.70496 | -0.20599 | 7.20E-06 | -0.07696 | 0.0967   | -0.16619 | 0.00031  | 0.007467 |
| -0.08297 | 0.07324 | -0.13682 | 0.00305  | -0.27814 | 9.62E-10 | -0.06473 | 0.16254  | -0.1405  |
| 0.08297  | 0.07325 | -0.01118 | 0.80961  | 0.032929 | 0.47777  | -0.03309 | 0.47565  | 0.123169 |
| 0.057953 | 0.21127 | 0.046944 | 0.31139  | 0.055346 | 0.23258  | 0.080385 | 0.08269  | 0.121371 |
| -0.03953 | 0.39402 | 0.032399 | 0.48489  | 0.083755 | 0.07056  | -0.00763 | 0.86941  | 0.084607 |
| -0.06652 | 0.15124 | -0.03999 | 0.38856  | -0.22082 | 1.44E-06 | -0.1188  | 0.01019  | -0.16155 |
| -0.01296 | 0.78001 | -0.10409 | 0.02448  | -0.08652 | 0.06173  | -0.07774 | 0.09332  | 0.125431 |

|          |         |          |          |          |          |          |          |          |
|----------|---------|----------|----------|----------|----------|----------|----------|----------|
| -0.03134 | 0.49933 | -0.12227 | 0.00816  | -0.07817 | 0.09153  | -0.0854  | 0.06521  | 0.150762 |
| -0.12264 | 0.00797 | -0.1723  | 0.00018  | -0.08748 | 0.0589   | -0.17037 | 0.00022  | -0.02397 |
| -0.00015 | 0.99738 | -0.02915 | 0.52971  | 0.06712  | 0.14756  | -0.0869  | 0.06059  | -0.05515 |
| 0.093568 | 0.04328 | -0.02002 | 0.6661   | -0.03823 | 0.40976  | -0.02822 | 0.54299  | 0.016714 |
| -0.08152 | 0.07842 | -0.12791 | 0.00564  | -0.14814 | 0.00132  | -0.09269 | 0.04528  | 0.061086 |
| 0.086637 | 0.06138 | 0.138976 | 0.00261  | 0.263503 | 7.40E-09 | 0.148599 | 0.00128  | 0.318527 |
| -0.08192 | 0.07698 | -0.08129 | 0.07928  | -0.26295 | 7.98E-09 | -0.0521  | 0.2612   | -0.13242 |
| 0.037832 | 0.4147  | 0.089482 | 0.05331  | 0.117989 | 0.01072  | 0.129003 | 0.00524  | 0.059073 |
| 0.013528 | 0.77061 | -0.07724 | 0.09548  | 0.020363 | 0.66072  | -0.06235 | 0.17858  | 0.12545  |
| 0.085375 | 0.06527 | -0.01981 | 0.66943  | 0.070254 | 0.12952  | -0.04417 | 0.34092  | -0.04746 |
| -0.08223 | 0.07586 | -0.17463 | 0.00015  | -0.17814 | 0.00011  | -0.07013 | 0.1302   | -0.03612 |
| -0.00544 | 0.90673 | -0.06673 | 0.14993  | -0.17517 | 0.00014  | -0.07566 | 0.10245  | -0.05309 |
| 0.016373 | 0.72416 | -0.04608 | 0.32038  | 0.071567 | 0.12249  | -0.06487 | 0.16162  | 0.139391 |
| 0.054757 | 0.23759 | -0.04145 | 0.37149  | -0.04365 | 0.34664  | -0.01039 | 0.82282  | -0.03385 |
| 0.006579 | 0.88725 | -0.15245 | 0.00095  | -0.04595 | 0.32172  | -0.1706  | 0.00021  | 0.011739 |
| -0.01542 | 0.73961 | 0.036333 | 0.43344  | -0.01025 | 0.82519  | 0.044588 | 0.33633  | -0.01601 |
| 0.091876 | 0.04722 | -0.0927  | 0.04526  | -0.00534 | 0.90838  | 0.005072 | 0.91295  | 0.139168 |
| 0.064109 | 0.16663 | 0.027103 | 0.55906  | 0.011185 | 0.8095   | 0.005569 | 0.90446  | -0.00824 |
| -0.03989 | 0.3898  | 0.026331 | 0.57031  | -0.17526 | 0.00014  | 0.047561 | 0.30507  | 0.010886 |
| -0.01544 | 0.73932 | -0.13702 | 0.00301  | -0.12013 | 0.00936  | -0.10828 | 0.01925  | -0.00708 |
| 0.038921 | 0.40138 | 0.09458  | 0.04105  | 0.160744 | 0.00049  | 0.02631  | 0.57062  | 0.02549  |
| 0.019497 | 0.67431 | 0.105159 | 0.02304  | 0.192909 | 2.70E-05 | 0.143314 | 0.0019   | 0.085863 |
| 0.031562 | 0.49625 | 0.007044 | 0.87932  | -0.06485 | 0.16175  | 0.00975  | 0.83357  | 0.047393 |
| 0.024557 | 0.59658 | -0.08313 | 0.0727   | -0.08975 | 0.05259  | -0.1061  | 0.02184  | 0.048895 |
| 0.090946 | 0.04951 | -0.06981 | 0.13197  | -0.02581 | 0.57791  | -0.04062 | 0.38108  | 0.034013 |
| -0.02038 | 0.66046 | -0.01463 | 0.75247  | -0.0466  | 0.31494  | -0.02506 | 0.58911  | 0.063992 |
| -0.01536 | 0.74052 | 0.024714 | 0.59423  | -0.02947 | 0.52524  | -0.06783 | 0.14328  | -0.05887 |
| 0.004177 | 0.92826 | 0.05844  | 0.20746  | 0.010201 | 0.82599  | -0.01622 | 0.72669  | 0.004416 |
| -0.00996 | 0.83011 | 0.00982  | 0.83238  | -0.0403  | 0.38491  | -0.02919 | 0.52917  | -0.09898 |
| 0.072392 | 0.11822 | 0.226676 | 7.42E-07 | 0.220006 | 1.58E-06 | 0.216003 | 2.46E-06 | 0.076989 |
| -0.05569 | 0.2297  | -0.07503 | 0.10537  | -0.07999 | 0.08421  | 0.089642 | 0.05288  | 0.148424 |
| 0.051713 | 0.26473 | -0.03462 | 0.45548  | 0.098468 | 0.03339  | -0.01164 | 0.80193  | 0.209787 |
| -0.05577 | 0.22898 | -0.11845 | 0.01041  | -0.00506 | 0.91311  | -0.13855 | 0.00269  | 0.028118 |
| -0.09598 | 0.03813 | -0.17024 | 0.00022  | -0.10071 | 0.02955  | -0.18207 | 7.59E-05 | -0.02518 |
| 0.003708 | 0.93631 | 0.156074 | 0.00071  | 0.278493 | 9.14E-10 | 0.273854 | 1.77E-09 | 0.285343 |
| 0.072508 | 0.11764 | 0.196851 | 1.83E-05 | 0.156922 | 0.00067  | 0.221256 | 1.38E-06 | 0.17887  |
| 0.049998 | 0.28092 | 0.088352 | 0.0564   | 0.184855 | 5.85E-05 | -0.00296 | 0.94917  | 0.018674 |
| 0.040826 | 0.37871 | -0.01811 | 0.69623  | -0.05098 | 0.27156  | -0.00742 | 0.87287  | 0.154526 |
| -0.05297 | 0.25325 | -0.08124 | 0.07947  | -0.13521 | 0.00342  | -0.09475 | 0.04068  | 0.011678 |
| -0.13299 | 0.00399 | -0.25604 | 2.00E-08 | -0.15784 | 0.00062  | -0.10043 | 0.03001  | 0.156805 |
| 0.038755 | 0.40339 | -0.0252  | 0.58693  | -0.09244 | 0.04587  | -0.06331 | 0.17197  | 0.036817 |
| 0.077407 | 0.09476 | 0.057379 | 0.21584  | 0.064316 | 0.16526  | 0.046735 | 0.31355  | 0.010498 |
| -0.01695 | 0.71481 | -0.07414 | 0.10956  | 0.004958 | 0.91491  | 0.042409 | 0.3605   | 0.367216 |
| 0.049627 | 0.28451 | -0.00973 | 0.83393  | -0.04277 | 0.35643  | -0.06695 | 0.1486   | -0.08667 |
| 0.048693 | 0.29369 | 0.296455 | 6.29E-11 | 0.247227 | 6.21E-08 | 0.327179 | 4.11E-13 | 0.124148 |

|           |         |          |          |          |          |          |          |          |
|-----------|---------|----------|----------|----------|----------|----------|----------|----------|
| 0.045644  | 0.32499 | 0.125663 | 0.00655  | 0.133373 | 0.00388  | 0.011123 | 0.81053  | -0.17355 |
| 0.121745  | 0.00845 | 0.122426 | 0.00808  | 0.225697 | 8.31E-07 | 0.113565 | 0.01407  | 0.055057 |
| -0.00701  | 0.87989 | -0.01499 | 0.74665  | -0.16726 | 0.00028  | -0.00491 | 0.9157   | 0.007319 |
| -0.04469  | 0.33524 | -0.11676 | 0.01157  | -0.10308 | 0.0259   | -0.08019 | 0.08345  | 0.107169 |
| 0.006701  | 0.88516 | -0.08485 | 0.06696  | -0.06289 | 0.17484  | -0.10523 | 0.02295  | 0.006496 |
| -0.0153   | 0.74152 | -0.12522 | 0.00674  | -0.09682 | 0.03648  | -0.11246 | 0.01504  | -0.03761 |
| 0.041842  | 0.36695 | -0.00506 | 0.91315  | -0.00554 | 0.90501  | 0.07519  | 0.10463  | 0.191001 |
| -0.02839  | 0.54056 | -0.07537 | 0.10378  | -0.14793 | 0.00135  | -0.10114 | 0.02886  | 0.015379 |
| 0.059792  | 0.19712 | 0.010943 | 0.81354  | -0.01512 | 0.74449  | 0.021931 | 0.63642  | -0.02437 |
| -0.02431  | 0.60021 | -0.11931 | 0.00986  | -0.08858 | 0.05577  | -0.15337 | 0.00088  | -0.07402 |
| -0.04512  | 0.33056 | -0.08806 | 0.05722  | -0.06334 | 0.17179  | -0.08415 | 0.06925  | 0.069391 |
| -0.00454  | 0.92197 | 0.017879 | 0.69997  | -0.02106 | 0.64982  | -0.00887 | 0.84841  | -0.05438 |
| 0.021355  | 0.64531 | 0.037192 | 0.42264  | -0.00861 | 0.85274  | 5.32E-05 | 0.99908  | -0.09048 |
| 0.032539  | 0.483   | -0.00612 | 0.89514  | -0.02903 | 0.53147  | -0.0164  | 0.72372  | -0.01988 |
| 0.003399  | 0.94161 | 0.061828 | 0.18226  | 0.017941 | 0.69899  | 0.10085  | 0.02932  | 0.104404 |
| -0.00428  | 0.92657 | 0.00776  | 0.86717  | -0.0236  | 0.61103  | 0.039165 | 0.39843  | 0.095063 |
| -4.87E-05 | 0.99916 | 0.016414 | 0.7235   | 0.042103 | 0.36397  | -0.07031 | 0.12923  | 0.09843  |
| 0.019767  | 0.67006 | -0.1171  | 0.01133  | -0.08408 | 0.06948  | -0.11387 | 0.01381  | -0.00486 |
| -0.01417  | 0.75997 | -0.05768 | 0.2134   | -0.07952 | 0.08607  | -0.06988 | 0.13155  | -0.02213 |
| 0.019193  | 0.6791  | -0.05973 | 0.19758  | -0.00587 | 0.89939  | -0.02388 | 0.60672  | 0.032634 |
| 0.017336  | 0.70865 | -0.03549 | 0.4442   | -0.03227 | 0.48668  | 0.021898 | 0.63692  | -0.08491 |
| -0.10165  | 0.02806 | -0.06178 | 0.18264  | -0.17622 | 0.00013  | -0.04834 | 0.29722  | -0.16899 |
| -0.0639   | 0.16803 | -0.07805 | 0.09204  | 0.029259 | 0.52822  | -0.05996 | 0.19586  | 0.181082 |
| 0.034238  | 0.46044 | 0.026883 | 0.56226  | 0.062686 | 0.17626  | 0.049461 | 0.28613  | 0.10141  |
| 0.126242  | 0.0063  | 0.030312 | 0.51347  | 0.024202 | 0.60189  | 0.045694 | 0.32446  | 0.038291 |
| -0.00075  | 0.98705 | -0.03294 | 0.4776   | -0.05151 | 0.26659  | -0.01797 | 0.69859  | 0.04046  |
| 0.170541  | 0.00021 | -0.01122 | 0.80898  | 0.013824 | 0.76574  | 0.040421 | 0.38347  | 0.082706 |
| 0.086291  | 0.06243 | 0.052333 | 0.25904  | 0.094354 | 0.04154  | 0.123345 | 0.00762  | 0.248843 |
| -0.10458  | 0.02381 | -0.00247 | 0.9575   | -0.07246 | 0.1179   | 0.041249 | 0.37379  | -0.12258 |
| -0.13507  | 0.00345 | -0.08425 | 0.06889  | -0.1638  | 0.00038  | 0.025974 | 0.57555  | 0.102936 |
| -0.07631  | 0.09954 | -0.04565 | 0.32488  | -0.10864 | 0.01885  | 0.013211 | 0.77585  | -0.12898 |
| 0.122615  | 0.00799 | 0.011241 | 0.80856  | 0.099921 | 0.03086  | 0.020191 | 0.66341  | 0.08293  |
| -0.00967  | 0.83491 | -0.08077 | 0.08122  | -0.02804 | 0.54549  | -0.09466 | 0.04088  | 0.003327 |
| -0.02812  | 0.54446 | -0.17245 | 0.00018  | -0.12364 | 0.00747  | -0.19005 | 3.57E-05 | -0.00791 |
| -0.0004   | 0.99308 | 0.11843  | 0.01042  | 0.06185  | 0.18211  | 0.034342 | 0.45908  | -0.14448 |
| -0.00606  | 0.8961  | 0.087855 | 0.05781  | 0.074213 | 0.10923  | 0.046484 | 0.31616  | -0.0695  |
| 0.057116  | 0.21796 | 0.271994 | 2.30E-09 | 0.26153  | 9.65E-09 | 0.320807 | 1.22E-12 | 0.037853 |
| -0.04787  | 0.30194 | -0.12296 | 0.00781  | -0.19723 | 1.76E-05 | -0.21066 | 4.39E-06 | -0.17675 |
| -0.05923  | 0.20136 | -0.01526 | 0.74226  | -0.17213 | 0.00019  | -0.08139 | 0.07891  | -0.17191 |
| 0.015147  | 0.74407 | -0.14672 | 0.00148  | -0.09483 | 0.04052  | -0.15155 | 0.00102  | 0.034023 |
| -0.02746  | 0.55386 | -0.1223  | 0.00815  | -0.01129 | 0.80775  | -0.0469  | 0.31185  | 0.274435 |
| 0.037929  | 0.4135  | 0.090622 | 0.05033  | 0.060692 | 0.19045  | 0.059196 | 0.20163  | 0.065493 |
| -4.53E-05 | 0.99922 | 0.244851 | 8.37E-08 | 0.189816 | 3.65E-05 | 0.182976 | 6.97E-05 | 0.150484 |
| -0.07839  | 0.09061 | -0.04044 | 0.38326  | 0.017709 | 0.70268  | -0.05098 | 0.27158  | 0.044712 |
| 0.019246  | 0.67826 | -0.01234 | 0.79026  | 0.154932 | 0.00078  | 0.038335 | 0.40852  | 0.172673 |

|          |          |          |          |          |          |          |          |          |
|----------|----------|----------|----------|----------|----------|----------|----------|----------|
| -0.04596 | 0.32168  | 0.002208 | 0.96205  | -0.01907 | 0.68098  | -0.00335 | 0.94241  | 0.04596  |
| 0.054377 | 0.24087  | 0.070978 | 0.12561  | -0.04494 | 0.33256  | 0.090094 | 0.05169  | -0.01741 |
| 0.055973 | 0.22732  | -0.01915 | 0.67979  | -0.03339 | 0.47159  | -0.02454 | 0.59678  | -0.00689 |
| 0.000943 | 0.98379  | -0.07994 | 0.0844   | -0.08396 | 0.06986  | -0.08623 | 0.06261  | -0.004   |
| 0.211902 | 3.85E-06 | 0.064581 | 0.16353  | 0.062612 | 0.17677  | 0.094534 | 0.04115  | -0.01247 |
| -0.01097 | 0.81309  | -0.06623 | 0.15299  | -0.04793 | 0.30135  | -0.03331 | 0.47275  | 0.122777 |
| -0.00223 | 0.96158  | 0.004647 | 0.92022  | -0.10756 | 0.02008  | -0.0775  | 0.09438  | -0.04965 |
| 0.013347 | 0.7736   | 0.106007 | 0.02195  | 0.040299 | 0.38491  | 0.027937 | 0.54703  | -0.03429 |
| 0.00895  | 0.84704  | -0.00083 | 0.98577  | -0.14198 | 0.0021   | -0.05836 | 0.2081   | -0.10192 |
| -0.00261 | 0.95522  | 0.05378  | 0.24608  | -0.05468 | 0.23823  | -0.0205  | 0.65865  | -0.10604 |
| -0.01059 | 0.81939  | 0.063495 | 0.17074  | 0.025364 | 0.58455  | 0.013673 | 0.76822  | 0.009116 |
| 0.001677 | 0.97116  | -0.04325 | 0.35109  | -0.08843 | 0.05618  | -0.05885 | 0.20427  | 0.007019 |
| 0.01611  | 0.72841  | 0.043243 | 0.35112  | -0.09125 | 0.04875  | -0.01069 | 0.8177   | -0.08556 |
| -0.00366 | 0.93713  | 0.159107 | 0.00056  | 0.030534 | 0.51039  | 0.072479 | 0.11778  | 0.019917 |
| 0.064719 | 0.16262  | -0.01105 | 0.81173  | -0.14344 | 0.00189  | -0.09861 | 0.03312  | -0.11314 |
| 0.002414 | 0.95851  | 0.022938 | 0.621    | -0.05497 | 0.23573  | -0.06518 | 0.15963  | -0.08135 |
| 0.026629 | 0.56595  | -0.04104 | 0.37618  | -0.0115  | 0.80425  | -0.04306 | 0.35319  | 0.088461 |
| -0.03239 | 0.48501  | 0.011678 | 0.80127  | -0.11871 | 0.01024  | -0.0516  | 0.26577  | -0.18615 |
| -0.04    | 0.3884   | -0.05444 | 0.24032  | 0.017882 | 0.69992  | -0.1487  | 0.00127  | -0.02926 |
| 0.088391 | 0.05629  | 0.049622 | 0.28457  | 0.021488 | 0.64324  | -0.00639 | 0.89052  | 0.044567 |
| 0.050662 | 0.27458  | -0.07499 | 0.10556  | -0.05137 | 0.26796  | -0.01212 | 0.79392  | 0.107989 |
| -0.05787 | 0.21196  | -0.07598 | 0.10102  | -0.07311 | 0.11463  | -0.04663 | 0.31467  | 0.016601 |
| 0.029012 | 0.5317   | 0.049303 | 0.28767  | 0.073664 | 0.11188  | -0.00948 | 0.83818  | -0.03194 |
| 0.037616 | 0.41736  | 0.054708 | 0.23801  | 0.020523 | 0.65822  | 0.030008 | 0.5177   | -0.00211 |
| -0.00568 | 0.90251  | 0.061115 | 0.18737  | 0.075674 | 0.10241  | 0.022342 | 0.63011  | -0.10723 |
| 0.03465  | 0.45506  | -0.1449  | 0.00169  | -0.10769 | 0.01993  | -0.09701 | 0.03611  | 0.03989  |
| -0.01481 | 0.74953  | -0.12504 | 0.00682  | -0.05572 | 0.22945  | -0.04156 | 0.37019  | 0.15987  |
| 0.019883 | 0.66824  | -0.04525 | 0.32924  | -0.01181 | 0.79913  | -0.01216 | 0.79325  | 0.074386 |
| 0.041414 | 0.37188  | -0.06543 | 0.15808  | -0.16498 | 0.00034  | -0.01632 | 0.72506  | 0.053666 |
| 0.033871 | 0.46527  | -0.10877 | 0.01872  | -0.06792 | 0.14276  | -0.07632 | 0.09948  | 0.112086 |
| 0.094169 | 0.04194  | 0.222906 | 1.14E-06 | 0.087693 | 0.05827  | 0.190061 | 3.57E-05 | -0.01269 |
| 0.174496 | 0.00015  | -0.00275 | 0.95266  | 0.033722 | 0.46723  | 0.045762 | 0.32374  | 0.090102 |
| 0.32408  | 7.01E-13 | 0.072173 | 0.11935  | 0.081332 | 0.07912  | 0.140753 | 0.0023   | 0.017788 |
| 0.349324 | 7.55E-15 | 0.039508 | 0.39432  | 0.08626  | 0.06252  | 0.070607 | 0.1276   | 0.085756 |
| 0.095657 | 0.03879  | -0.01183 | 0.79874  | -0.00307 | 0.94721  | 0.013122 | 0.77731  | 0.053691 |
| 0.043809 | 0.34485  | 0.047189 | 0.30887  | 0.139541 | 0.00251  | 0.028736 | 0.53562  | -0.02524 |
| 0.011395 | 0.80599  | -0.09612 | 0.03785  | -0.04942 | 0.28656  | -0.02849 | 0.53909  | 0.116287 |
| -0.09422 | 0.04182  | -0.0416  | 0.36969  | -0.02238 | 0.62954  | -0.02636 | 0.56987  | 0.02751  |
| -0.11193 | 0.01552  | -0.01692 | 0.71536  | -0.0301  | 0.51644  | 0.022152 | 0.63301  | 0.167627 |
| 0.020892 | 0.65249  | -0.18348 | 6.66E-05 | -0.14937 | 0.00121  | -0.21565 | 2.56E-06 | 0.061974 |
| -0.09758 | 0.03502  | -0.1903  | 3.48E-05 | -0.04367 | 0.34639  | -0.13183 | 0.00432  | 0.154847 |
| 0.050801 | 0.27326  | 0.14481  | 0.0017   | 0.233233 | 3.45E-07 | 0.072699 | 0.11667  | 0.041941 |
| 0.008626 | 0.85251  | -0.07534 | 0.10393  | -0.05342 | 0.24926  | -0.07571 | 0.10225  | -0.04861 |
| 0.059838 | 0.19677  | -0.0094  | 0.83938  | 0.030755 | 0.50733  | 0.003089 | 0.94691  | 0.118769 |
| -0.03293 | 0.47778  | 0.099305 | 0.03191  | -0.05505 | 0.23506  | 0.059264 | 0.20111  | -0.0967  |

|          |          |          |         |          |          |          |         |          |
|----------|----------|----------|---------|----------|----------|----------|---------|----------|
| 0.160352 | 0.0005   | 0.006244 | 0.89294 | 0.195781 | 2.04E-05 | 0.031148 | 0.50192 | 0.313886 |
| 0.020447 | 0.65941  | 0.056307 | 0.22456 | -0.01402 | 0.7625   | 0.083814 | 0.07036 | 0.094226 |
| 0.006494 | 0.88868  | -0.01687 | 0.71617 | -0.01906 | 0.68117  | -0.08267 | 0.07429 | -0.01504 |
| -0.04609 | 0.32032  | -0.10615 | 0.02178 | -0.22778 | 6.53E-07 | -0.05377 | 0.24614 | 0.118094 |
| 0.032614 | 0.482    | -0.05829 | 0.20859 | -0.0159  | 0.73181  | -0.07549 | 0.10324 | -0.09237 |
| -0.00082 | 0.98589  | -0.04401 | 0.34262 | 0.046319 | 0.31788  | -0.02567 | 0.57996 | 0.065904 |
| -0.06822 | 0.14102  | 0.045004 | 0.33183 | 0.008601 | 0.85294  | 0.149354 | 0.00121 | 0.210035 |
| -0.11168 | 0.01576  | -0.10817 | 0.01938 | -0.21186 | 3.86E-06 | -0.09694 | 0.03624 | -0.05582 |
| -0.02765 | 0.55121  | 0.03788  | 0.4141  | 0.014064 | 0.76179  | 0.022696 | 0.62469 | 0.030619 |
| -0.09815 | 0.03397  | -0.02833 | 0.5414  | -0.20139 | 1.16E-05 | -0.03257 | 0.48264 | -0.13325 |
| 0.001442 | 0.97521  | -0.11026 | 0.01714 | -0.2131  | 3.38E-06 | -0.1254  | 0.00666 | -0.06725 |
| 0.023625 | 0.61058  | -0.14224 | 0.00206 | -0.10754 | 0.0201   | -0.12565 | 0.00655 | 0.060843 |
| -0.0013  | 0.97768  | -0.06688 | 0.149   | -0.0317  | 0.49431  | 0.008354 | 0.85712 | 0.200532 |
| -0.01215 | 0.79349  | -0.15938 | 0.00055 | -0.09832 | 0.03365  | -0.15075 | 0.00108 | 0.08204  |
| 0.006341 | 0.89129  | 0.032465 | 0.484   | -0.11074 | 0.01666  | -0.045   | 0.33183 | -0.08189 |
| 0.03174  | 0.49383  | -0.13726 | 0.00296 | -0.02888 | 0.53356  | -0.11407 | 0.01364 | 0.005886 |
| 0.05918  | 0.20175  | 0.139315 | 0.00255 | 0.09599  | 0.03812  | 0.083876 | 0.07015 | 0.027425 |
| 0.006323 | 0.8916   | -0.12636 | 0.00625 | -0.01621 | 0.72679  | -0.1166  | 0.01168 | -0.00605 |
| 0.003614 | 0.93791  | 0.031434 | 0.498   | 0.049082 | 0.28985  | 0.061567 | 0.18412 | 0.069265 |
| 0.033531 | 0.46976  | -0.06267 | 0.1764  | -0.04574 | 0.32393  | -0.02158 | 0.64179 | 0.009823 |
| -0.06895 | 0.13679  | 0.139726 | 0.00248 | 0.109846 | 0.01757  | 0.146829 | 0.00146 | 0.142226 |
| -0.07253 | 0.11754  | -0.14055 | 0.00233 | -0.11097 | 0.01644  | -0.09524 | 0.03965 | -0.03705 |
| 0.057909 | 0.21162  | 0.057635 | 0.2138  | 0.118665 | 0.01027  | 0.102597 | 0.02662 | 0.195213 |
| 0.025065 | 0.58899  | -0.08278 | 0.07391 | -0.04685 | 0.31236  | -0.10887 | 0.0186  | 0.184334 |
| 0.065823 | 0.15556  | -0.03876 | 0.4034  | 0.0492   | 0.28868  | -0.07418 | 0.1094  | 0.097279 |
| -0.01646 | 0.72281  | -0.164   | 0.00037 | -0.1337  | 0.0038   | -0.08011 | 0.08374 | 0.170623 |
| 0.004221 | 0.92752  | -0.1303  | 0.0048  | -0.09458 | 0.04105  | -0.13712 | 0.00298 | 0.094298 |
| 0.016705 | 0.71881  | -0.11982 | 0.00955 | 0.009118 | 0.8442   | -0.13118 | 0.00452 | 0.089289 |
| -0.03012 | 0.5162   | -0.02123 | 0.6472  | -0.03683 | 0.42721  | -0.02858 | 0.53784 | 0.039979 |
| 0.055577 | 0.23063  | -0.03191 | 0.49153 | -0.05122 | 0.26931  | -0.074   | 0.11024 | -0.02039 |
| 0.034331 | 0.45923  | 0.006805 | 0.8834  | 0.078036 | 0.0921   | 0.0057   | 0.90222 | 0.001738 |
| -0.10377 | 0.02492  | 0.02032  | 0.66139 | -0.06087 | 0.18913  | -0.05513 | 0.2344  | -0.10195 |
| -0.01774 | 0.70218  | -0.10858 | 0.01892 | -0.04571 | 0.32427  | -0.10876 | 0.01873 | 0.062421 |
| -0.18854 | 4.13E-05 | -0.11316 | 0.01442 | -0.09076 | 0.04998  | -0.07707 | 0.0962  | -0.03923 |
| 0.00143  | 0.97542  | -0.03296 | 0.47737 | 0.003445 | 0.94081  | -0.10561 | 0.02246 | -0.1429  |
| 0.049712 | 0.28369  | -0.07475 | 0.10669 | -0.05887 | 0.20415  | -0.09458 | 0.04105 | -0.088   |
| 0.012562 | 0.78659  | -0.0063  | 0.89202 | 0.101774 | 0.02787  | 0.013697 | 0.76783 | 0.1262   |
| -0.08955 | 0.05311  | -0.15942 | 0.00054 | -0.05187 | 0.26325  | -0.09003 | 0.05187 | 0.200502 |
| 0.105911 | 0.02208  | 0.066005 | 0.15441 | 0.008536 | 0.85403  | 0.054204 | 0.24237 | 0.0389   |
| -0.01174 | 0.80023  | -0.06099 | 0.18826 | 0.01286  | 0.78165  | -0.05993 | 0.19609 | -0.04876 |
| 0.047584 | 0.30484  | 0.022986 | 0.62027 | -0.11508 | 0.01283  | -0.01661 | 0.72029 | -0.18456 |
| -0.05819 | 0.20944  | 0.067651 | 0.14437 | -0.00401 | 0.9312   | 0.01246  | 0.78827 | -0.13315 |
| 0.01026  | 0.82499  | -0.03786 | 0.41432 | -0.0725  | 0.11767  | -0.04559 | 0.3256  | -0.09937 |
| -0.00402 | 0.93094  | -0.0467  | 0.31389 | -0.09546 | 0.03919  | -0.09943 | 0.0317  | -0.16392 |
| 0.012384 | 0.78953  | -0.12836 | 0.00547 | -0.09881 | 0.03277  | -0.05905 | 0.20278 | 0.162675 |



|          |          |          |          |          |          |          |          |          |
|----------|----------|----------|----------|----------|----------|----------|----------|----------|
| -0.06846 | 0.13962  | -0.19506 | 2.19E-05 | -0.23419 | 3.08E-07 | -0.08712 | 0.05995  | 0.028697 |
| 0.037776 | 0.41538  | 0.029348 | 0.52696  | 0.073035 | 0.11499  | 0.026011 | 0.575    | 0.093439 |
| -0.0229  | 0.62163  | -0.13175 | 0.00435  | -0.06799 | 0.14238  | -0.04295 | 0.35441  | 0.192745 |
| -0.03691 | 0.4262   | 0.025111 | 0.58831  | 0.025065 | 0.58899  | 0.047078 | 0.31001  | 0.003879 |
| 0.063575 | 0.1702   | 0.03238  | 0.48514  | -0.09105 | 0.04925  | -0.01188 | 0.79798  | -0.13352 |
| -0.0286  | 0.53748  | -0.07133 | 0.12375  | -0.11286 | 0.01468  | 0.028223 | 0.54293  | 0.052626 |
| 0.001983 | 0.96592  | -0.01881 | 0.68508  | 0.019135 | 0.68002  | -0.02908 | 0.53076  | 0.134933 |
| 0.001648 | 0.97167  | -0.03331 | 0.47266  | 0.019445 | 0.67513  | -0.05385 | 0.24543  | -0.02968 |
| 0.0434   | 0.34937  | 0.00684  | 0.8828   | -0.03428 | 0.45986  | 0.004287 | 0.92639  | -0.02726 |
| 0.011378 | 0.80627  | 0.009894 | 0.83114  | 0.002783 | 0.95217  | 0.044811 | 0.33391  | 0.060966 |
| 0.027097 | 0.55915  | -0.01026 | 0.82493  | 0.003918 | 0.93271  | 0.007153 | 0.87747  | 0.07758  |
| 0.329963 | 2.53E-13 | 0.199009 | 1.47E-05 | 0.208372 | 5.60E-06 | 0.161281 | 0.00047  | 0.014491 |
| 0.167189 | 0.00028  | 0.044846 | 0.33354  | 0.117399 | 0.01112  | 0.050076 | 0.28017  | 0.100174 |
| -0.03082 | 0.50638  | 0.095807 | 0.03849  | -0.03264 | 0.48162  | -0.00254 | 0.9563   | -0.22401 |
| 0.043942 | 0.34338  | 0.013545 | 0.77033  | 0.036514 | 0.43115  | 0.069263 | 0.13502  | 0.02755  |
| 0.018319 | 0.69296  | 0.120473 | 0.00916  | 0.034364 | 0.45878  | 0.14251  | 0.00202  | 0.064214 |
| 0.04364  | 0.34671  | 0.017463 | 0.70662  | -0.03018 | 0.51526  | -0.03986 | 0.39006  | -0.02418 |
| 0.017714 | 0.70261  | 0.009267 | 0.8417   | 0.034699 | 0.45442  | -0.01279 | 0.78277  | 0.129311 |
| -0.06226 | 0.17919  | -0.15959 | 0.00054  | -0.13039 | 0.00477  | -0.21162 | 3.97E-06 | 0.029459 |
| 0.058984 | 0.20325  | 0.056083 | 0.2264   | 0.094685 | 0.04083  | 0.162363 | 0.00043  | 0.163334 |
| 0.075064 | 0.10521  | 0.035843 | 0.43967  | 0.066778 | 0.14964  | 0.019796 | 0.6696   | 0.028605 |
| 0.02136  | 0.64523  | -0.04557 | 0.32583  | 0.018343 | 0.69257  | -0.04607 | 0.32047  | 0.078758 |
| 0.000294 | 0.99495  | -0.00948 | 0.83808  | -0.03751 | 0.41865  | -0.05963 | 0.19831  | -0.06089 |
| 0.022519 | 0.6274   | -0.062   | 0.18105  | -0.0374  | 0.42003  | -0.0522  | 0.26023  | -0.072   |
| 0.063257 | 0.17235  | -0.04305 | 0.35326  | -0.03367 | 0.46798  | -0.02453 | 0.59692  | -0.03954 |
| 0.098953 | 0.03252  | 0.089039 | 0.0545   | 0.073861 | 0.11092  | 0.111376 | 0.01604  | 0.011629 |
| 0.007746 | 0.86741  | -0.02259 | 0.62638  | 0.055659 | 0.22994  | -0.00259 | 0.9555   | 0.005284 |
| 0.069704 | 0.13255  | -0.05746 | 0.21519  | -0.00405 | 0.93044  | -0.00825 | 0.85886  | 0.174899 |
| 0.057965 | 0.21118  | -0.07059 | 0.12769  | 0.032165 | 0.48805  | -0.07879 | 0.08899  | 0.021175 |
| 0.036434 | 0.43217  | -0.0634  | 0.17138  | -0.01436 | 0.75693  | -0.10362 | 0.02514  | -0.07469 |
| -0.00129 | 0.97774  | -0.08108 | 0.08007  | -0.03708 | 0.42405  | -0.06157 | 0.18411  | 0.048261 |
| 0.048834 | 0.29229  | -0.0478  | 0.30265  | 0.013674 | 0.76821  | -0.0627  | 0.17619  | 0.033388 |
| -0.0208  | 0.65396  | -0.01277 | 0.78318  | -0.02741 | 0.55459  | 0.004468 | 0.92328  | -0.00309 |
| 0.040077 | 0.38754  | 0.102163 | 0.02727  | 0.043683 | 0.34623  | 0.026981 | 0.56084  | 0.048943 |
| 0.06117  | 0.18697  | 0.106606 | 0.02121  | 0.066945 | 0.14861  | 0.00908  | 0.84484  | -0.01404 |
| 0.039572 | 0.39355  | 0.004156 | 0.92862  | 0.090312 | 0.05113  | -0.00403 | 0.93072  | 0.032101 |
| 0.067948 | 0.14261  | -0.02244 | 0.6286   | 0.031435 | 0.49798  | -0.0316  | 0.49573  | 0.00532  |
| 0.052387 | 0.25855  | 0.040799 | 0.37904  | 0.032659 | 0.4814   | 0.007002 | 0.88004  | 0.12203  |
| 0.0647   | 0.16275  | 0.01068  | 0.81795  | -0.00068 | 0.98837  | 0.044655 | 0.3356   | 0.018116 |
| 0.038212 | 0.41002  | -0.08372 | 0.07068  | -0.03344 | 0.47098  | -0.07686 | 0.09714  | -0.02885 |
| -0.00949 | 0.83791  | -0.07265 | 0.11692  | -0.08239 | 0.07528  | -0.0758  | 0.10183  | -0.01275 |
| 0.021413 | 0.64441  | -0.06443 | 0.16452  | -0.00578 | 0.90087  | -0.00037 | 0.99357  | 0.046551 |
| 0.020385 | 0.66038  | -0.07941 | 0.08649  | -0.06297 | 0.17428  | -0.04283 | 0.35579  | 0.078587 |
| 0.092874 | 0.04486  | -0.00873 | 0.85068  | 0.043284 | 0.35067  | 0.003222 | 0.94463  | 0.067203 |
| 0.060053 | 0.19516  | -0.03392 | 0.4646   | -0.02978 | 0.52092  | -0.03793 | 0.41344  | 0.051154 |

|          |          |          |          |          |          |          |         |          |
|----------|----------|----------|----------|----------|----------|----------|---------|----------|
| 0.04404  | 0.3423   | 0.047616 | 0.30451  | -0.0046  | 0.92097  | -0.00028 | 0.9952  | -0.05204 |
| 0.121146 | 0.00878  | 0.245184 | 8.03E-08 | 0.230104 | 4.99E-07 | 0.161116 | 0.00047 | 0.118577 |
| -0.00257 | 0.95575  | -0.03347 | 0.4706   | -0.041   | 0.37674  | -0.0053  | 0.9091  | -0.05893 |
| -0.01207 | 0.79471  | -0.05521 | 0.23371  | -0.0471  | 0.30978  | -0.05195 | 0.26251 | 0.077503 |
| 0.071518 | 0.12274  | -0.02527 | 0.58591  | 0.072745 | 0.11644  | 0.004781 | 0.91792 | 0.030586 |
| 0.023225 | 0.61664  | -0.04016 | 0.38655  | -0.01416 | 0.76015  | -0.04548 | 0.32672 | 0.038326 |
| 0.110391 | 0.01701  | -0.04152 | 0.3706   | -0.01243 | 0.78873  | -0.02678 | 0.56382 | 0.04108  |
| 0.01405  | 0.76202  | 0.004924 | 0.91548  | 0.016559 | 0.72116  | 0.005167 | 0.91133 | 0.009127 |
| 0.070788 | 0.12662  | -0.06458 | 0.16355  | 0.031769 | 0.49343  | -0.01499 | 0.74665 | 0.180985 |
| 0.037032 | 0.42464  | -0.04471 | 0.33502  | 0.048591 | 0.2947   | -0.0391  | 0.39928 | 6.57E-05 |
| -0.00363 | 0.93773  | -0.07916 | 0.08751  | -0.11449 | 0.0133   | -0.08602 | 0.06325 | -0.11544 |
| 0.101296 | 0.02861  | -0.03104 | 0.50342  | 0.016092 | 0.7287   | -0.0085  | 0.85466 | 0.021411 |
| 0.013392 | 0.77286  | -0.02404 | 0.60439  | -0.03979 | 0.39091  | -0.00614 | 0.8947  | 0.03036  |
| 0.043636 | 0.34676  | -0.06808 | 0.14186  | 0.0062   | 0.8937   | -0.02121 | 0.6476  | 0.051146 |
| 0.05335  | 0.24989  | -0.00665 | 0.88607  | -0.01454 | 0.75393  | -0.06972 | 0.13246 | -0.08082 |
| 0.073173 | 0.1143   | -0.04615 | 0.31964  | -0.06091 | 0.18884  | -0.08488 | 0.06686 | -0.0858  |
| 0.04486  | 0.33339  | 0.018243 | 0.69416  | 0.001493 | 0.97433  | 0.007384 | 0.87356 | 5.01E-05 |
| -0.0182  | 0.6949   | -0.08425 | 0.06889  | -0.07418 | 0.10939  | -0.07941 | 0.08651 | 0.010379 |
| 0.089802 | 0.05246  | -0.07107 | 0.12513  | -0.04987 | 0.28217  | -0.08143 | 0.07877 | -0.06239 |
| -0.04544 | 0.3272   | -0.02679 | 0.56361  | -0.04256 | 0.35883  | 0.04438  | 0.33859 | 0.057285 |
| -0.00858 | 0.85322  | -0.05419 | 0.2425   | -0.11449 | 0.0133   | -0.11338 | 0.01423 | -0.00756 |
| 0.195227 | 2.15E-05 | 0.047906 | 0.30156  | 0.0553   | 0.23296  | 0.098188 | 0.0339  | -0.08017 |
| 0.15577  | 0.00073  | 0.038217 | 0.40996  | 0.021582 | 0.6418   | 0.046456 | 0.31645 | -0.13785 |
| -0.00887 | 0.84836  | -0.02716 | 0.55822  | -0.05574 | 0.22923  | -0.02876 | 0.53521 | 0.110099 |
| -0.07076 | 0.12676  | -0.2015  | 1.15E-05 | -0.1622  | 0.00043  | -0.16951 | 0.00023 | 0.090782 |
| -0.00926 | 0.84178  | -0.03632 | 0.43361  | 0.061391 | 0.18538  | 0.031339 | 0.4993  | 0.267929 |
| 0.041554 | 0.37027  | 0.110994 | 0.01641  | -0.03176 | 0.49359  | 0.068368 | 0.14016 | -0.07081 |
| -0.0661  | 0.15379  | 0.09533  | 0.03947  | -0.10948 | 0.01795  | 0.028299 | 0.54185 | -0.12206 |
| 0.040108 | 0.38717  | 0.125918 | 0.00644  | 0.037549 | 0.4182   | 0.166789 | 0.00029 | -0.11468 |
| 0.011436 | 0.8053   | 0.226352 | 7.71E-07 | 0.196896 | 1.82E-05 | 0.150791 | 0.00108 | -0.0536  |
| 0.048666 | 0.29396  | -0.06706 | 0.14793  | 0.000884 | 0.9848   | -0.06488 | 0.16156 | 0.080224 |
| 0.045483 | 0.32671  | -0.06433 | 0.16516  | -0.07554 | 0.10301  | -0.03783 | 0.41471 | -0.07569 |
| 0.024575 | 0.59631  | 0.097431 | 0.0353   | 0.095833 | 0.03843  | 0.139317 | 0.00255 | 0.219327 |
| 0.008109 | 0.86125  | -0.10283 | 0.02628  | -0.08735 | 0.05926  | -0.09011 | 0.05164 | 0.034906 |
| -0.03215 | 0.48828  | -0.0377  | 0.41635  | -0.03047 | 0.51128  | -0.07199 | 0.12031 | -0.024   |
| -0.00212 | 0.96361  | -0.09655 | 0.03699  | -0.07589 | 0.10142  | -0.12018 | 0.00933 | -0.10054 |
| -0.05679 | 0.22063  | -0.11259 | 0.01492  | -0.14254 | 0.00202  | -0.13157 | 0.0044  | 0.022657 |
| 0.062669 | 0.17638  | -0.0222  | 0.63223  | -0.03961 | 0.39305  | -0.03981 | 0.39065 | 0.032683 |
| -0.04243 | 0.36025  | 0.028943 | 0.53268  | 0.00166  | 0.97147  | 0.142122 | 0.00208 | 0.13555  |
| 0.035342 | 0.44609  | -0.04873 | 0.29335  | -0.07359 | 0.11222  | -0.05252 | 0.25733 | 0.013733 |
| 0.089477 | 0.05332  | -0.06244 | 0.178    | -0.00321 | 0.94493  | -0.07172 | 0.12168 | 0.093011 |
| 0.068296 | 0.14058  | 0.169429 | 0.00023  | 0.044113 | 0.3415   | 0.110887 | 0.01652 | 0.018343 |
| -0.01391 | 0.76438  | 0.12843  | 0.00544  | -0.01768 | 0.70313  | 0.111232 | 0.01618 | -0.05354 |
| 0.053301 | 0.25032  | 0.03291  | 0.47802  | -0.01547 | 0.73876  | 0.043627 | 0.34686 | 0.097347 |
| -0.04039 | 0.38387  | -0.15181 | 0.001    | -0.02873 | 0.53575  | -0.10479 | 0.02353 | 0.200331 |

|          |          |          |          |          |          |          |          |          |
|----------|----------|----------|----------|----------|----------|----------|----------|----------|
| 0.410899 | 1.89E-20 | 0.123301 | 0.00764  | 0.093796 | 0.04277  | 0.118063 | 0.01067  | 0.006202 |
| 0.007701 | 0.86818  | -0.01381 | 0.76601  | 0.011381 | 0.80622  | -0.04989 | 0.28197  | -0.04462 |
| -0.08251 | 0.07486  | -0.10137 | 0.02849  | -0.05566 | 0.22991  | 0.056832 | 0.22025  | 0.129899 |
| -0.05385 | 0.24547  | 0.030068 | 0.51687  | -0.0985  | 0.03334  | 0.054227 | 0.24217  | -0.05959 |
| -0.13648 | 0.00312  | -0.12753 | 0.00578  | -0.29801 | 4.94E-11 | -0.08065 | 0.08167  | -0.13962 |
| -0.10607 | 0.02188  | -0.04884 | 0.29219  | -0.01592 | 0.7315   | -0.02039 | 0.66025  | -0.0518  |
| -0.11068 | 0.01672  | -0.14629 | 0.00152  | -0.19839 | 1.57E-05 | -0.16496 | 0.00034  | -0.07071 |
| 0.037373 | 0.42038  | -0.00576 | 0.90113  | -0.08066 | 0.08164  | 0.004478 | 0.92311  | 0.195215 |
| 0.070221 | 0.1297   | -0.02247 | 0.62812  | 0.031872 | 0.49203  | -0.04725 | 0.30819  | 0.124991 |
| 0.088038 | 0.05729  | -0.03258 | 0.48243  | 0.033038 | 0.47631  | 0.005076 | 0.91288  | 0.091072 |
| -0.03901 | 0.40028  | -0.08244 | 0.07511  | -0.05043 | 0.27674  | -0.12529 | 0.00671  | -0.07738 |
| -0.00373 | 0.93597  | -0.09589 | 0.03831  | -0.02172 | 0.63961  | -0.10706 | 0.02067  | 0.129586 |
| 0.057927 | 0.21148  | 0.076107 | 0.10045  | 0.074757 | 0.10665  | 0.056568 | 0.22241  | 0.071405 |
| 0.003505 | 0.93978  | 0.056172 | 0.22567  | -0.00421 | 0.92766  | 0.096306 | 0.03748  | 0.058036 |
| 0.06897  | 0.13669  | 0.082398 | 0.07526  | 0.137304 | 0.00295  | 0.084323 | 0.06867  | -0.05002 |
| -0.16835 | 0.00026  | -0.15709 | 0.00066  | -0.29491 | 7.97E-11 | -0.09236 | 0.04606  | -0.08119 |
| -0.04558 | 0.32569  | 0.026803 | 0.56342  | -0.00035 | 0.99397  | 0.02375  | 0.60869  | 0.013726 |
| 0.049542 | 0.28534  | 0.033474 | 0.47052  | 0.069104 | 0.13593  | 0.107301 | 0.02038  | 0.209209 |
| 0.013114 | 0.77744  | -0.04091 | 0.37768  | -0.00826 | 0.85865  | 0.012976 | 0.77973  | 0.185426 |
| -0.01764 | 0.70374  | 0.031637 | 0.49522  | 0.004338 | 0.92551  | 0.008823 | 0.84919  | 0.016815 |
| -0.09773 | 0.03474  | 0.001552 | 0.97332  | -0.18541 | 5.55E-05 | 0.093356 | 0.04375  | 0.058028 |
| 0.069189 | 0.13545  | -0.01569 | 0.73527  | 0.00443  | 0.92393  | -0.00073 | 0.98745  | 0.068664 |
| 0.031653 | 0.49501  | -0.03001 | 0.51766  | 0.050784 | 0.27342  | 0.074314 | 0.10874  | 0.179324 |
| 0.26696  | 4.62E-09 | 0.04308  | 0.35294  | 0.143622 | 0.00186  | 0.121778 | 0.00843  | 0.14312  |
| 0.062052 | 0.18068  | -0.02324 | 0.61643  | 0.036662 | 0.42928  | -0.04545 | 0.32704  | 0.025288 |
| 0.034925 | 0.45149  | -0.01416 | 0.76026  | -0.02707 | 0.5596   | 0.022378 | 0.62954  | 0.072991 |
| -0.10652 | 0.02132  | -0.09128 | 0.04868  | -0.14507 | 0.00167  | -0.10897 | 0.01849  | 0.072511 |
| -0.05749 | 0.21494  | -0.06229 | 0.17903  | 0.00117  | 0.97989  | -0.06062 | 0.19097  | 0.06967  |
| -0.12156 | 0.00855  | -0.10807 | 0.0195   | -0.26647 | 4.94E-09 | -0.09177 | 0.04748  | 0.055096 |
| -0.08845 | 0.05612  | -0.06589 | 0.15517  | -0.03064 | 0.50896  | -0.0249  | 0.59149  | 0.000315 |
| -0.04045 | 0.38316  | -0.05632 | 0.22444  | -0.132   | 0.00427  | -0.00503 | 0.91374  | 0.114712 |
| 0.051289 | 0.26867  | -0.06988 | 0.13158  | -0.08082 | 0.08105  | -0.18761 | 4.51E-05 | 0.049616 |
| -0.07295 | 0.11541  | 0.062139 | 0.18007  | 0.000623 | 0.98929  | 0.022763 | 0.62367  | 0.098695 |
| -0.01468 | 0.75176  | -0.0104  | 0.82267  | -0.05234 | 0.25896  | 0.04631  | 0.31797  | 0.105589 |
| 0.008042 | 0.8624   | 0.181488 | 8.00E-05 | 0.050097 | 0.27997  | 0.2333   | 3.42E-07 | 0.066911 |
| 0.011596 | 0.80265  | -0.16382 | 0.00038  | -0.13531 | 0.00339  | -0.10296 | 0.02608  | 0.064381 |
| 0.002789 | 0.95206  | -0.09325 | 0.044    | -0.07987 | 0.08467  | -0.11661 | 0.01167  | -0.03588 |
| 0.130259 | 0.00481  | 0.13762  | 0.00288  | 0.325126 | 5.85E-13 | 0.140228 | 0.00239  | 0.058791 |
| 0.017542 | 0.70535  | -0.02829 | 0.54194  | 0.083731 | 0.07064  | -0.0564  | 0.22381  | 0.056124 |
| -0.01469 | 0.75152  | -0.0307  | 0.50807  | -0.2072  | 6.34E-06 | -0.04841 | 0.29648  | -0.10256 |
| -0.08712 | 0.05994  | 0.098458 | 0.03341  | 0.002845 | 0.9511   | 0.093036 | 0.04448  | 0.009634 |
| 0.134925 | 0.00349  | 0.06541  | 0.15817  | 0.195523 | 2.09E-05 | 0.069765 | 0.13221  | 0.087359 |
| -0.00966 | 0.83515  | -0.06604 | 0.15417  | -0.06739 | 0.14595  | -0.06543 | 0.15804  | 0.060489 |
| 0.054553 | 0.23935  | 0.265504 | 5.64E-09 | 0.210874 | 4.29E-06 | 0.292927 | 1.08E-10 | 0.284084 |
| 0.047171 | 0.30906  | 0.031473 | 0.49747  | -0.05932 | 0.20066  | -0.02676 | 0.564    | 0.093903 |

|          |          |          |          |          |          |          |          |          |
|----------|----------|----------|----------|----------|----------|----------|----------|----------|
| 0.11137  | 0.01605  | 0.190353 | 3.47E-05 | 0.109892 | 0.01752  | 0.165579 | 0.00033  | -0.07056 |
| 0.222382 | 1.21E-06 | -0.00404 | 0.93059  | 0.06053  | 0.19164  | 0.039438 | 0.39515  | 0.084757 |
| -0.19048 | 3.42E-05 | -0.24874 | 5.13E-08 | -0.32125 | 1.13E-12 | -0.22798 | 6.38E-07 | -0.00507 |
| 0.031532 | 0.49666  | -0.09763 | 0.03494  | -0.10355 | 0.02524  | -0.1239  | 0.00735  | -0.00145 |
| 0.042945 | 0.35445  | -0.07399 | 0.11029  | -0.04829 | 0.2977   | -0.08104 | 0.08022  | -0.0376  |
| 0.023677 | 0.6098   | -0.05661 | 0.22203  | -0.0606  | 0.19115  | -0.09786 | 0.03449  | 0.002546 |
| 0.106314 | 0.02157  | 0.237563 | 2.05E-07 | 0.149898 | 0.00116  | 0.128365 | 0.00547  | 0.010035 |
| -0.03166 | 0.49489  | 0.048309 | 0.29752  | 0.07466  | 0.1071   | 0.047412 | 0.30658  | 0.051169 |
| 0.024854 | 0.59214  | -0.03791 | 0.41377  | -0.05451 | 0.23974  | -0.07278 | 0.11624  | -0.03002 |
| -0.05601 | 0.22701  | 0.005867 | 0.89938  | -0.06894 | 0.13689  | -0.03738 | 0.42026  | -0.21143 |
| 0.023651 | 0.61019  | 0.140121 | 0.00241  | -0.04647 | 0.31634  | 0.134078 | 0.0037   | 0.110592 |
| -0.01058 | 0.81968  | -0.07105 | 0.1252   | -0.11454 | 0.01326  | 0.009137 | 0.84389  | -0.00759 |
| -0.07019 | 0.12988  | -0.10368 | 0.02506  | -0.01567 | 0.73555  | -0.15418 | 0.00083  | -0.13878 |
| -0.0651  | 0.16019  | -0.0792  | 0.08732  | -0.0296  | 0.52341  | -0.00714 | 0.87773  | 0.054754 |
| -0.02978 | 0.52091  | -0.07389 | 0.11081  | 0.008764 | 0.85018  | -0.05206 | 0.26153  | 0.18009  |
| 0.077372 | 0.09491  | -0.11885 | 0.01015  | 0.025511 | 0.58239  | -0.12891 | 0.00527  | 0.046522 |
| 0.102892 | 0.02618  | -0.06929 | 0.13488  | 0.04589  | 0.32239  | -0.0534  | 0.2494   | 0.12222  |
| 0.024985 | 0.59018  | -0.0369  | 0.42634  | 0.015841 | 0.73277  | -0.01252 | 0.78729  | 0.07678  |
| -0.09379 | 0.04279  | -0.16575 | 0.00032  | -0.09658 | 0.03695  | -0.18523 | 5.65E-05 | -0.06785 |
| -0.01048 | 0.82122  | -0.09525 | 0.03962  | -0.05018 | 0.2792   | -0.06164 | 0.18357  | -0.04007 |
| 0.019779 | 0.66988  | -0.10914 | 0.01831  | -0.13917 | 0.00258  | -0.13192 | 0.00429  | -0.02587 |
| 0.068869 | 0.13727  | -0.03467 | 0.45486  | 0.063188 | 0.17282  | -0.05712 | 0.2179   | 0.020783 |
| 0.06415  | 0.16635  | 0.014077 | 0.76158  | 0.073666 | 0.11187  | 0.024703 | 0.59439  | 0.088801 |
| 0.030866 | 0.5058   | 0.047297 | 0.30776  | 0.105093 | 0.02313  | 0.006538 | 0.88795  | 0.005129 |
| 0.018549 | 0.68929  | -0.08727 | 0.0595   | -0.08423 | 0.06897  | -0.1376  | 0.00289  | -0.03115 |
| 0.092496 | 0.04574  | -0.03673 | 0.42846  | 0.018896 | 0.6838   | -0.09859 | 0.03316  | 0.021492 |
| -0.00364 | 0.93754  | -0.10186 | 0.02773  | -0.02427 | 0.60082  | -0.10766 | 0.01996  | -0.00571 |
| -0.00066 | 0.98859  | -0.04885 | 0.29216  | 0.00184  | 0.96836  | -0.08727 | 0.05949  | 0.009269 |
| 0.037721 | 0.41606  | 0.019531 | 0.67377  | -0.00492 | 0.91553  | -0.06249 | 0.17759  | -0.08262 |
| 0.00477  | 0.91811  | -0.01933 | 0.67688  | 0.045315 | 0.3285   | -0.15505 | 0.00077  | -0.0339  |
| 0.015906 | 0.73173  | -0.01692 | 0.7154   | 0.058071 | 0.21034  | -0.06068 | 0.19055  | -0.04085 |
| -0.03795 | 0.41327  | -0.10543 | 0.02269  | -0.01856 | 0.68911  | -0.08711 | 0.05997  | 0.017724 |
| 0.051353 | 0.26807  | -0.18163 | 7.90E-05 | -0.04087 | 0.37817  | -0.16915 | 0.00024  | 0.031374 |
| 0.034971 | 0.45089  | -0.16613 | 0.00031  | -0.08222 | 0.07589  | -0.18343 | 6.69E-05 | 0.056583 |
| -0.01395 | 0.76363  | -0.0345  | 0.45696  | -0.0085  | 0.85458  | -0.07048 | 0.12828  | -0.00793 |
| 0.024707 | 0.59432  | -0.10957 | 0.01785  | 0.003092 | 0.94688  | -0.1075  | 0.02015  | 0.116244 |
| -0.02432 | 0.60016  | -0.0758  | 0.10182  | 0.022153 | 0.633    | -0.13497 | 0.00347  | -0.03669 |
| 0.01237  | 0.78977  | -0.15714 | 0.00065  | -0.05187 | 0.26324  | -0.16848 | 0.00025  | 0.013972 |
| -0.01215 | 0.79334  | -0.10014 | 0.03049  | 0.020468 | 0.65908  | -0.10871 | 0.01878  | 0.005934 |
| -0.00691 | 0.88159  | -0.03947 | 0.39482  | 0.040385 | 0.38389  | -0.07844 | 0.09041  | 0.036377 |
| -0.14742 | 0.0014   | -0.067   | 0.1483   | -0.31189 | 5.40E-12 | -0.13064 | 0.00469  | -0.0941  |
| 0.02369  | 0.6096   | -0.10031 | 0.03021  | -0.03728 | 0.42154  | 0.001538 | 0.97356  | 0.170252 |
| 0.304002 | 1.93E-11 | -0.04479 | 0.33417  | 0.068395 | 0.14     | -0.06307 | 0.17359  | 0.045798 |
| -0.04501 | 0.33171  | -0.11606 | 0.01208  | -0.07423 | 0.10913  | -0.11579 | 0.01228  | 0.050967 |
| -0.04802 | 0.30043  | -0.16013 | 0.00051  | -0.08698 | 0.06036  | -0.15371 | 0.00086  | 0.009146 |

|          |          |          |          |          |          |          |          |          |
|----------|----------|----------|----------|----------|----------|----------|----------|----------|
| 0.076108 | 0.10045  | 0.006324 | 0.89158  | 0.052229 | 0.25999  | -0.01238 | 0.78958  | 0.11501  |
| -0.03909 | 0.39939  | -0.07153 | 0.12269  | -0.12084 | 0.00895  | 0.044057 | 0.34211  | 0.16151  |
| 0.092837 | 0.04494  | -0.05044 | 0.27665  | 0.046269 | 0.31841  | -0.11482 | 0.01304  | -0.0277  |
| 0.112313 | 0.01517  | -0.08781 | 0.05795  | 0.009895 | 0.83111  | -0.04802 | 0.30039  | -0.04869 |
| -0.01772 | 0.70251  | 0.093353 | 0.04376  | -0.00532 | 0.90872  | 0.060101 | 0.19481  | -0.07389 |
| 0.062851 | 0.17512  | 0.033579 | 0.46913  | 0.093276 | 0.04394  | 0.015629 | 0.73623  | 0.113581 |
| -0.00561 | 0.9038   | -0.11158 | 0.01585  | -0.04922 | 0.28852  | -0.0162  | 0.72698  | 0.209567 |
| 0.048766 | 0.29297  | -0.08452 | 0.06801  | -0.05307 | 0.25237  | -0.09257 | 0.04556  | -0.04248 |
| 0.194098 | 2.41E-05 | 0.0741   | 0.10977  | 0.201701 | 1.12E-05 | 0.006584 | 0.88716  | 0.118352 |
| 0.121024 | 0.00885  | 0.183213 | 6.82E-05 | 0.150525 | 0.0011   | 0.164502 | 0.00036  | 0.113185 |
| -0.02555 | 0.58187  | 0.126637 | 0.00614  | 0.115032 | 0.01287  | 0.156891 | 0.00067  | 0.210196 |
| 0.058328 | 0.20833  | -0.02695 | 0.56132  | -0.04183 | 0.36707  | -0.01779 | 0.70133  | -0.02129 |
| 0.050103 | 0.27991  | -0.02313 | 0.61803  | 0.005538 | 0.90499  | 0.089149 | 0.0542   | 0.273297 |
| -0.02607 | 0.57413  | 0.123919 | 0.00734  | 0.104469 | 0.02396  | 0.030734 | 0.50762  | 0.197292 |
| 0.182346 | 7.39E-05 | 0.173216 | 0.00017  | 0.142797 | 0.00198  | 0.213102 | 3.38E-06 | 0.209708 |
| -0.06583 | 0.15554  | -0.15154 | 0.00102  | -0.1651  | 0.00034  | -0.04625 | 0.31859  | 0.045069 |
| 0.021838 | 0.63784  | -0.05105 | 0.27087  | -0.04377 | 0.34527  | -0.06673 | 0.14995  | -0.09934 |
| -0.01621 | 0.72678  | 0.055875 | 0.22814  | 0.00411  | 0.92941  | 0.115266 | 0.01268  | 0.023771 |
| -0.09807 | 0.0341   | -0.15806 | 0.00061  | -0.15353 | 0.00087  | -0.1359  | 0.00325  | -0.00561 |
| 0.046201 | 0.31912  | -0.04145 | 0.37152  | -0.0386  | 0.40523  | -0.07046 | 0.12837  | 0.041292 |
| 0.113162 | 0.01441  | 0.124564 | 0.00704  | 0.028172 | 0.54365  | 0.085411 | 0.06516  | -0.06088 |
| 0.038608 | 0.40519  | -0.02338 | 0.61424  | -0.02109 | 0.64937  | -0.00151 | 0.97406  | 0.052396 |
| 0.095118 | 0.03991  | -0.01754 | 0.7054   | -0.05646 | 0.2233   | -0.00782 | 0.86611  | -0.04783 |
| 0.128063 | 0.00558  | 0.013792 | 0.76626  | 0.038557 | 0.40581  | -0.03506 | 0.44973  | -0.03103 |
| -0.01598 | 0.73052  | -0.06688 | 0.14903  | 0.002112 | 0.96369  | -0.03764 | 0.41711  | 0.065537 |
| -0.00481 | 0.91747  | -0.06913 | 0.13579  | -0.0718  | 0.1213   | -0.09904 | 0.03237  | -0.09241 |
| 0.060466 | 0.19211  | 0.08529  | 0.06554  | 0.144768 | 0.00171  | 0.077082 | 0.09616  | 0.220116 |
| 0.0818   | 0.07741  | 0.014383 | 0.75656  | 0.049599 | 0.28478  | 0.115551 | 0.01246  | 0.161624 |
| 0.051607 | 0.26572  | 0.122539 | 0.00803  | 0.103704 | 0.02502  | 0.179554 | 9.56E-05 | 0.122446 |
| 0.011144 | 0.81019  | -0.00935 | 0.84029  | 0.142398 | 0.00204  | 0.037888 | 0.414    | -0.00937 |
| -0.06738 | 0.14596  | 0.016813 | 0.71706  | 0.014762 | 0.75036  | 0.065384 | 0.15834  | 0.054337 |
| -0.01372 | 0.76751  | -0.06865 | 0.13851  | -0.07165 | 0.12207  | -0.05469 | 0.2382   | 0.061605 |
| -0.01445 | 0.75546  | -0.03109 | 0.50274  | 0.012401 | 0.78925  | 0.017908 | 0.6995   | 0.073181 |
| 0.00878  | 0.8499   | -0.05322 | 0.25105  | 0.008956 | 0.84693  | 0.059532 | 0.19907  | 0.153128 |
| -0.02936 | 0.52682  | -0.06407 | 0.16686  | -0.14664 | 0.00148  | -0.01154 | 0.80352  | 0.009167 |
| 0.078941 | 0.08838  | 0.175962 | 0.00013  | 0.189413 | 3.79E-05 | 0.136734 | 0.00307  | 0.035727 |
| 0.065005 | 0.16077  | 0.044736 | 0.33472  | -0.01649 | 0.72223  | 0.030645 | 0.50885  | -0.09192 |
| 0.026807 | 0.56336  | 0.001082 | 0.9814   | -0.03176 | 0.49355  | -0.03864 | 0.40477  | -0.08535 |
| 0.028702 | 0.53611  | 0.063344 | 0.17176  | 0.075689 | 0.10234  | 0.127089 | 0.00596  | -0.01807 |
| 0.191179 | 3.20E-05 | -0.01997 | 0.66691  | -0.00491 | 0.91576  | -0.03115 | 0.50193  | 0.106289 |
| -0.00112 | 0.9808   | -0.17248 | 0.00018  | -0.04275 | 0.3566   | -0.12166 | 0.00849  | 0.104462 |
| 0.127498 | 0.0058   | -0.0256  | 0.58108  | 0.048422 | 0.29638  | -0.05069 | 0.27432  | 0.029659 |
| -0.05833 | 0.20828  | 0.031195 | 0.50127  | -0.02035 | 0.66088  | 0.081425 | 0.07878  | 0.086505 |
| 0.035645 | 0.4422   | -0.04253 | 0.35909  | 0.08048  | 0.08233  | -0.04959 | 0.28492  | 0.099315 |
| 0.01614  | 0.72794  | 0.324507 | 6.51E-13 | 0.309926 | 7.44E-12 | 0.243222 | 1.03E-07 | 0.301456 |

|          |          |          |          |          |          |          |          |          |
|----------|----------|----------|----------|----------|----------|----------|----------|----------|
| 0.117512 | 0.01104  | -0.00052 | 0.99097  | -0.00031 | 0.99472  | -0.0469  | 0.31188  | -0.04034 |
| 0.038946 | 0.40108  | -0.12269 | 0.00795  | -0.12667 | 0.00612  | -0.15016 | 0.00114  | -0.01618 |
| -0.13927 | 0.00256  | 0.082414 | 0.0752   | -0.07361 | 0.11213  | 0.094318 | 0.04162  | -0.14271 |
| -0.03635 | 0.4332   | -0.02128 | 0.64642  | -0.23072 | 4.64E-07 | -0.11886 | 0.01015  | -0.25917 |
| -0.10128 | 0.02863  | -0.18437 | 6.12E-05 | -0.16866 | 0.00025  | -0.26973 | 3.15E-09 | -0.23022 |
| 0.026317 | 0.57052  | -0.01659 | 0.72063  | 0.032499 | 0.48355  | 0.084163 | 0.0692   | 0.12983  |
| 0.010941 | 0.81358  | -0.0657  | 0.15634  | -0.07828 | 0.0911   | -0.04562 | 0.3253   | 0.104361 |
| 0.011952 | 0.79672  | -0.0458  | 0.32334  | -0.02898 | 0.53223  | -0.03021 | 0.51486  | 0.121243 |
| 0.028273 | 0.54221  | -0.14544 | 0.00163  | -0.04312 | 0.35248  | -0.12524 | 0.00673  | 0.046615 |
| -0.05214 | 0.26076  | 0.108249 | 0.01929  | -0.05349 | 0.24865  | 0.044873 | 0.33324  | -0.14144 |
| 0.120444 | 0.00918  | 0.239409 | 1.64E-07 | 0.200668 | 1.25E-05 | 0.251587 | 3.56E-08 | 0.023147 |
| 0.069217 | 0.13529  | 0.199027 | 1.47E-05 | 0.195871 | 2.02E-05 | 0.227895 | 6.45E-07 | 0.096066 |
| 0.042652 | 0.35775  | 0.076161 | 0.10021  | -0.03805 | 0.41197  | 0.045801 | 0.32334  | -0.05277 |
| -0.02904 | 0.53124  | -0.0231  | 0.61847  | -0.0008  | 0.98633  | -0.08963 | 0.05291  | -0.11442 |
| 0.07735  | 0.095    | 0.046879 | 0.31206  | -0.04395 | 0.34331  | 0.028855 | 0.53393  | -0.04757 |
| 0.016002 | 0.73017  | -0.05138 | 0.26787  | -0.00375 | 0.93558  | -0.09108 | 0.04919  | -0.06924 |
| 0.064095 | 0.16672  | -0.03216 | 0.48811  | -0.01283 | 0.78212  | -0.0707  | 0.12711  | 0.126772 |
| 0.057837 | 0.21219  | 0.168678 | 0.00025  | 0.185826 | 5.34E-05 | 0.092678 | 0.04531  | 0.078671 |
| -0.05345 | 0.24903  | 0.074719 | 0.10683  | -0.06572 | 0.1562   | 0.070123 | 0.13023  | -0.0723  |
| -0.00607 | 0.896    | 0.07301  | 0.11511  | 0.068556 | 0.13907  | 0.046852 | 0.31234  | -0.07078 |
| -0.06166 | 0.18346  | -0.15591 | 0.00072  | -0.15204 | 0.00098  | -0.2449  | 8.32E-08 | -0.06173 |
| -0.02323 | 0.61661  | -0.06528 | 0.159    | -0.08464 | 0.06764  | 0.004959 | 0.91488  | 0.239738 |
| 0.202869 | 9.95E-06 | 0.10556  | 0.02252  | 0.163832 | 0.00038  | 0.133293 | 0.00391  | 0.196182 |
| -0.0537  | 0.24676  | -0.07783 | 0.09297  | -0.0711  | 0.12495  | -0.08811 | 0.0571   | -0.08418 |
| 0.009652 | 0.8352   | 0.05526  | 0.23331  | 0.066967 | 0.14848  | 0.119028 | 0.01004  | 0.248499 |
| -0.0792  | 0.08733  | -0.03875 | 0.40349  | -0.05462 | 0.23874  | -0.10514 | 0.02306  | -0.17198 |
| 0.011299 | 0.80759  | 0.1019   | 0.02767  | 0.069151 | 0.13566  | 0.020675 | 0.65586  | -0.04668 |
| -0.08253 | 0.0748   | -0.05643 | 0.22357  | -0.06694 | 0.14865  | -0.05835 | 0.20816  | 0.010498 |
| 0.073886 | 0.1108   | 0.05734  | 0.21616  | 0.035281 | 0.44688  | 0.050443 | 0.27666  | 0.028022 |
| 0.022237 | 0.63171  | 0.04862  | 0.29441  | -0.01126 | 0.8082   | 0.042635 | 0.35794  | 0.048266 |
| 0.044158 | 0.34101  | -0.08517 | 0.06592  | -0.10342 | 0.02542  | -0.13062 | 0.00469  | -0.07985 |
| 0.19257  | 2.79E-05 | 0.179676 | 9.45E-05 | 0.261765 | 9.35E-09 | 0.118949 | 0.01009  | 0.176277 |
| 0.027025 | 0.5602   | -0.00743 | 0.87276  | -0.01623 | 0.7264   | -0.06014 | 0.19451  | -0.03184 |
| -0.00969 | 0.8346   | -0.05786 | 0.212    | -0.10106 | 0.02899  | -0.10252 | 0.02674  | -0.23246 |
| 0.121702 | 0.00847  | -0.1315  | 0.00442  | -0.04019 | 0.38616  | -0.17628 | 0.00013  | -0.01444 |
| 0.037748 | 0.41573  | -0.14635 | 0.00152  | -0.0159  | 0.73179  | -0.1512  | 0.00105  | 0.152175 |
| 0.01196  | 0.79659  | 0.148903 | 0.00125  | 0.280272 | 7.07E-10 | 0.253073 | 2.94E-08 | 0.226872 |
| -0.02516 | 0.58763  | -0.12305 | 0.00776  | -0.04342 | 0.3492   | -0.10965 | 0.01777  | 0.098194 |
| 0.121608 | 0.00852  | 0.31377  | 3.96E-12 | 0.295379 | 7.42E-11 | 0.278538 | 9.08E-10 | 0.099494 |
| 0.075398 | 0.10367  | 0.141207 | 0.00222  | 0.140244 | 0.00238  | 0.322762 | 8.78E-13 | 0.148087 |
| 0.073165 | 0.11434  | 0.183457 | 6.67E-05 | 0.156659 | 0.00068  | 0.302101 | 2.60E-11 | 0.226414 |
| 0.071067 | 0.12513  | 0.07834  | 0.09083  | 0.115068 | 0.01284  | 0.092841 | 0.04493  | 0.039859 |
| 0.038097 | 0.41144  | 0.012914 | 0.78076  | -0.02917 | 0.5295   | -0.03309 | 0.47567  | -0.20864 |
| -0.05949 | 0.19936  | -0.09407 | 0.04215  | -0.01192 | 0.7973   | -0.16335 | 0.00039  | -0.1463  |
| -0.01036 | 0.8233   | -0.16717 | 0.00029  | -0.20323 | 9.58E-06 | -0.18496 | 5.79E-05 | -0.06788 |

|          |          |          |          |          |          |          |          |          |
|----------|----------|----------|----------|----------|----------|----------|----------|----------|
| -0.02865 | 0.53683  | 0.016011 | 0.73003  | -0.18691 | 4.82E-05 | -0.08765 | 0.05841  | -0.19373 |
| 0.064551 | 0.16372  | -0.05442 | 0.24052  | -0.00721 | 0.87651  | 0.017565 | 0.70499  | 0.18271  |
| 0.026576 | 0.56673  | 0.041295 | 0.37326  | -0.11267 | 0.01484  | 0.000534 | 0.99081  | -0.01472 |
| -0.03077 | 0.50708  | 0.185837 | 5.33E-05 | 0.259041 | 1.35E-08 | 0.275527 | 1.40E-09 | 0.041506 |
| -0.01865 | 0.68773  | 0.242555 | 1.11E-07 | 0.254808 | 2.35E-08 | 0.330607 | 2.26E-13 | 0.074042 |
| 0.09486  | 0.04046  | 0.074893 | 0.10601  | 0.168076 | 0.00026  | 0.173866 | 0.00016  | 0.11059  |
| 0.124137 | 0.00723  | 0.212643 | 3.55E-06 | 0.304288 | 1.84E-11 | 0.284599 | 3.76E-10 | 0.274425 |
| -0.03915 | 0.39856  | 0.038892 | 0.40173  | -0.05962 | 0.19843  | 0.028963 | 0.5324   | 0.001179 |
| 0.08745  | 0.05898  | -0.07681 | 0.09732  | 0.024463 | 0.59797  | -0.12807 | 0.00558  | 0.076718 |
| 0.119804 | 0.00956  | 0.241511 | 1.27E-07 | 0.320797 | 1.23E-12 | 0.173552 | 0.00016  | 0.204419 |
| 0.043534 | 0.34788  | 0.042883 | 0.35515  | -0.03959 | 0.39339  | 0.007683 | 0.86847  | 0.079042 |
| 0.165375 | 0.00033  | 0.143455 | 0.00188  | 0.183259 | 6.79E-05 | 0.104346 | 0.02413  | -0.01039 |
| 0.072185 | 0.11928  | -0.03473 | 0.45405  | -0.0705  | 0.12817  | 0.098547 | 0.03325  | 0.149249 |
| 0.03312  | 0.47522  | -0.12321 | 0.00769  | -0.06931 | 0.13477  | -0.18116 | 8.25E-05 | -0.11169 |
| -0.04853 | 0.2953   | -0.02119 | 0.64793  | -0.06182 | 0.18233  | -0.09752 | 0.03514  | -0.02588 |
| -0.09522 | 0.0397   | 0.022485 | 0.62791  | -0.02758 | 0.55221  | 0.100372 | 0.0301   | 0.224852 |
| -0.04768 | 0.30382  | 0.025778 | 0.57843  | 0.035621 | 0.44251  | 0.154434 | 0.00081  | 0.39181  |
| 0.006095 | 0.89548  | 0.116253 | 0.01194  | 0.114323 | 0.01343  | 0.098159 | 0.03395  | 0.131902 |
| -0.04641 | 0.3169   | -0.13972 | 0.00248  | -0.13122 | 0.00451  | -0.08989 | 0.05223  | 0.098959 |
| -0.04187 | 0.36667  | -0.06349 | 0.17078  | -0.05274 | 0.25537  | -0.01827 | 0.69376  | 0.119327 |
| -0.06079 | 0.18973  | -0.24726 | 6.18E-08 | -0.16807 | 0.00026  | -0.22037 | 1.52E-06 | -0.01092 |
| 0.005297 | 0.90912  | -0.16417 | 0.00037  | -0.20008 | 1.32E-05 | -0.20279 | 1.00E-05 | 0.09808  |
| -0.11121 | 0.0162   | -0.22642 | 7.64E-07 | -0.26099 | 1.04E-08 | -0.18609 | 5.21E-05 | 0.032348 |
| -0.2276  | 6.67E-07 | -0.06994 | 0.13124  | -0.13674 | 0.00307  | -0.05334 | 0.24998  | 0.107844 |
| -0.20289 | 9.93E-06 | -0.09421 | 0.04185  | -0.22891 | 5.73E-07 | -0.14106 | 0.00225  | -0.14562 |
| 0.034046 | 0.46296  | 0.209264 | 5.10E-06 | 0.119827 | 0.00955  | 0.146992 | 0.00145  | -0.08718 |
| -0.07884 | 0.08879  | 0.087348 | 0.05927  | 0.001318 | 0.97734  | 0.087184 | 0.05975  | 0.205027 |
| 0.055103 | 0.23464  | -0.07321 | 0.11409  | -0.02344 | 0.61337  | -0.12843 | 0.00544  | -0.02465 |
| -0.00151 | 0.97411  | -0.05086 | 0.27272  | 0.063871 | 0.16821  | -0.06405 | 0.16703  | 0.113498 |
| 0.027423 | 0.55442  | 0.026756 | 0.56411  | -0.00251 | 0.95678  | -0.01284 | 0.7819   | -0.06292 |
| -0.07463 | 0.10723  | 0.036616 | 0.42986  | 0.029691 | 0.52214  | 0.101004 | 0.02908  | -0.13072 |
| 0.027755 | 0.54964  | 0.010141 | 0.82699  | -0.02859 | 0.53763  | 0.064309 | 0.16531  | 0.042629 |
| 0.075708 | 0.10225  | 0.336662 | 7.71E-14 | 0.327054 | 4.20E-13 | 0.300329 | 3.44E-11 | 0.082741 |
| -0.04282 | 0.35584  | 0.021658 | 0.64061  | -0.05621 | 0.22536  | 0.063538 | 0.17044  | 0.131391 |
| 0.003119 | 0.94641  | -0.03282 | 0.47921  | -0.00534 | 0.90836  | 0.130059 | 0.00488  | 0.176287 |
| -0.03042 | 0.51201  | -0.05242 | 0.25825  | -0.02485 | 0.59219  | -0.07999 | 0.08422  | -0.01728 |
| -0.02862 | 0.53732  | -0.13622 | 0.00318  | -0.06821 | 0.14109  | -0.09039 | 0.05094  | 0.15726  |
| -0.0331  | 0.47551  | -0.06586 | 0.1553   | -0.03199 | 0.49046  | -0.07532 | 0.10401  | -0.00798 |
| -0.05119 | 0.26959  | 0.014605 | 0.75293  | 0.130578 | 0.00471  | 0.032972 | 0.47719  | 0.140687 |
| 0.221058 | 1.41E-06 | 0.074635 | 0.10722  | 0.067527 | 0.14511  | 0.058572 | 0.20643  | 0.001252 |
| 0.162724 | 0.00041  | 0.079025 | 0.08804  | 0.06118  | 0.1869   | 0.009236 | 0.84221  | -0.04291 |
| -0.0146  | 0.75304  | -0.13734 | 0.00294  | -0.14938 | 0.00121  | -0.0642  | 0.16601  | 0.020388 |
| 0.046376 | 0.31729  | -0.00216 | 0.96293  | 0.06609  | 0.15389  | -0.00914 | 0.84378  | 0.118666 |
| 0.036768 | 0.42796  | -0.17348 | 0.00016  | -0.11772 | 0.0109   | -0.06281 | 0.17543  | 0.254333 |
| -0.02    | 0.66646  | -0.10954 | 0.01788  | -0.12345 | 0.00757  | 0.018595 | 0.68856  | 0.166674 |

|          |          |          |          |           |          |          |         |          |
|----------|----------|----------|----------|-----------|----------|----------|---------|----------|
| -0.04135 | 0.37265  | -0.15311 | 0.0009   | -0.00213  | 0.9633   | -0.04534 | 0.32824 | 0.219067 |
| 0.015849 | 0.73265  | -0.1255  | 0.00662  | -0.17029  | 0.00022  | -0.09714 | 0.03586 | -0.00206 |
| 0.029703 | 0.52197  | 0.009981 | 0.82968  | 0.044605  | 0.33615  | 0.056362 | 0.2241  | 0.275467 |
| -0.03505 | 0.44981  | -0.16286 | 0.00041  | -0.1069   | 0.02086  | -0.14787 | 0.00135 | 0.03462  |
| -0.0193  | 0.67735  | -0.00438 | 0.92472  | -0.02032  | 0.66138  | -0.01962 | 0.67229 | -0.08025 |
| -0.03587 | 0.43938  | -0.18836 | 4.20E-05 | -0.14324  | 0.00192  | -0.11056 | 0.01684 | 0.132375 |
| -0.03138 | 0.49874  | 0.020464 | 0.65914  | -0.05763  | 0.21381  | 0.060161 | 0.19436 | -0.10444 |
| 0.01092  | 0.81393  | 0.035469 | 0.44446  | 0.113831  | 0.01384  | -0.01364 | 0.76877 | 0.119631 |
| 0.027705 | 0.55036  | 0.025962 | 0.57573  | -0.12023  | 0.0093   | -0.01035 | 0.82345 | 0.041125 |
| 0.091524 | 0.04808  | 0.08543  | 0.0651   | 0.024312  | 0.60024  | 0.023423 | 0.61364 | -0.08621 |
| 0.037005 | 0.42498  | 0.026933 | 0.56153  | 0.025128  | 0.58806  | 0.001262 | 0.9783  | -0.02254 |
| -0.03072 | 0.50781  | 0.020825 | 0.65352  | 0.061767  | 0.1827   | 0.029298 | 0.52767 | 0.080401 |
| 0.015502 | 0.73828  | 0.017624 | 0.70404  | -0.02357  | 0.61145  | -0.01677 | 0.71779 | 0.015085 |
| 0.043681 | 0.34626  | 0.028435 | 0.5399   | 0.020731  | 0.65499  | 0.035657 | 0.44205 | 0.015035 |
| 0.156964 | 0.00066  | 0.088491 | 0.05601  | 0.133395  | 0.00388  | 0.150919 | 0.00107 | 0.189572 |
| 0.048501 | 0.2956   | -0.03544 | 0.44479  | 0.019104  | 0.68051  | -0.03198 | 0.49054 | -0.02318 |
| 0.005767 | 0.90108  | 0.005717 | 0.90193  | -0.08041  | 0.08261  | -0.03531 | 0.44656 | -0.0752  |
| -0.0863  | 0.06241  | -0.14934 | 0.00121  | -0.24186  | 1.21E-07 | -0.08418 | 0.06915 | -0.06388 |
| -0.08953 | 0.05318  | 0.010672 | 0.81807  | -0.15451  | 0.00081  | 0.084789 | 0.06715 | -0.1283  |
| -0.10902 | 0.01844  | -0.04719 | 0.30883  | -0.08581  | 0.06392  | -0.03495 | 0.45117 | -0.07275 |
| 0.052889 | 0.25401  | -0.00182 | 0.96863  | 0.033557  | 0.46942  | -0.04418 | 0.34082 | -0.03989 |
| 0.180088 | 9.10E-05 | -0.05249 | 0.25763  | 0.027554  | 0.55254  | -0.05475 | 0.23764 | 0.0504   |
| -0.01469 | 0.75161  | -0.0324  | 0.48482  | -0.02362  | 0.61065  | -0.03416 | 0.46153 | 0.128682 |
| 0.0003   | 0.99484  | -0.0387  | 0.4041   | -0.04164  | 0.36929  | -0.07548 | 0.10331 | -0.01697 |
| -0.02398 | 0.60517  | -0.03486 | 0.45237  | -0.03956  | 0.39364  | -0.04448 | 0.33754 | 0.036449 |
| 0.062518 | 0.17742  | -0.04731 | 0.30761  | 0.014742  | 0.75068  | -0.0432  | 0.35159 | -0.00649 |
| 0.04285  | 0.35552  | 0.015443 | 0.73924  | 0.055841  | 0.22842  | 0.060391 | 0.19266 | -0.01199 |
| 0.050978 | 0.27159  | -0.03766 | 0.41682  | -0.00883  | 0.84911  | -0.00928 | 0.84151 | 0.051494 |
| -0.01021 | 0.82575  | 0.094574 | 0.04107  | 0.045789  | 0.32346  | 0.052108 | 0.2611  | 0.111393 |
| -0.0193  | 0.67749  | -0.06399 | 0.16744  | -0.08338  | 0.07183  | -0.11983 | 0.00954 | -0.14682 |
| 0.003886 | 0.93325  | -0.09121 | 0.04884  | -0.07339  | 0.11325  | -0.07098 | 0.12559 | -0.02675 |
| -0.05354 | 0.24819  | -0.03834 | 0.40841  | -0.02139  | 0.64483  | 0.022193 | 0.63239 | 0.114201 |
| 0.06885  | 0.13737  | -0.0927  | 0.04525  | -0.06483  | 0.16189  | -0.1423  | 0.00205 | -0.07088 |
| 0.161424 | 0.00046  | -0.11545 | 0.01254  | 0.016229  | 0.72649  | -0.09617 | 0.03775 | 0.190549 |
| 0.169037 | 0.00024  | 0.093612 | 0.04318  | 0.231136  | 4.42E-07 | 0.086988 | 0.06033 | 0.159431 |
| -0.03376 | 0.46671  | 0.086874 | 0.06067  | 0.090689  | 0.05016  | 0.094459 | 0.04131 | 0.067629 |
| 0.0049   | 0.9159   | -0.05555 | 0.23086  | -0.00016  | 0.99732  | -0.11241 | 0.01508 | -0.04533 |
| 0.021433 | 0.6441   | -0.02566 | 0.58011  | -0.01762  | 0.70408  | 0.009484 | 0.83803 | 0.031868 |
| -0.02278 | 0.62348  | -0.03032 | 0.51335  | -0.01385  | 0.76538  | -0.00257 | 0.95589 | 0.069629 |
| 0.03318  | 0.47443  | 0.03682  | 0.4273   | -0.04516  | 0.33011  | -0.02594 | 0.57603 | -0.12397 |
| 0.03746  | 0.41931  | -0.02218 | 0.63252  | 0.046084  | 0.32035  | 0.01393  | 0.764   | 0.088084 |
| -0.03906 | 0.3997   | -0.0772  | 0.09565  | -0.07758  | 0.09403  | -0.01535 | 0.74081 | 0.047277 |
| -0.07801 | 0.09221  | 0.008506 | 0.85454  | -5.12E-05 | 0.99912  | 0.073101 | 0.11466 | 0.085683 |
| -0.00561 | 0.90377  | -0.0352  | 0.44789  | -0.03106  | 0.50316  | -0.172   | 0.00019 | -0.06422 |
| -0.03977 | 0.39114  | -0.07416 | 0.10947  | -0.11937  | 0.00983  | -0.03604 | 0.4371  | -0.00185 |



|          |         |          |          |          |          |          |          |          |
|----------|---------|----------|----------|----------|----------|----------|----------|----------|
| 0.077336 | 0.09507 | 0.176081 | 0.00013  | 0.129658 | 0.00501  | 0.262735 | 8.21E-09 | 0.182474 |
| -0.13933 | 0.00255 | -0.1199  | 0.0095   | -0.21187 | 3.86E-06 | -0.19125 | 3.18E-05 | -0.12924 |
| -0.11457 | 0.01323 | -0.02177 | 0.63885  | -0.15577 | 0.00073  | -0.12312 | 0.00773  | -0.09696 |
| 0.005553 | 0.90473 | 0.00984  | 0.83204  | 0.02531  | 0.58536  | -0.04561 | 0.32534  | 0.223311 |
| 0.062    | 0.18105 | 0.068912 | 0.13702  | -0.00052 | 0.99097  | 0.116183 | 0.01199  | 0.08217  |
| -0.07247 | 0.11783 | 0.004931 | 0.91536  | -0.00893 | 0.84746  | -0.0493  | 0.28771  | -0.06771 |
| 0.066325 | 0.15242 | -0.04672 | 0.31374  | -0.01082 | 0.81565  | -0.09671 | 0.0367   | -0.02497 |
| 0.099055 | 0.03235 | -0.06267 | 0.17637  | -0.05879 | 0.20475  | -0.00141 | 0.97571  | 0.068047 |
| -0.08057 | 0.08197 | -0.09416 | 0.04196  | -0.15555 | 0.00074  | -0.06001 | 0.19545  | -0.1157  |
| 0.012277 | 0.79131 | -0.01243 | 0.7888   | 0.059566 | 0.19882  | -0.0082  | 0.85976  | 0.063937 |
| -0.17762 | 0.00011 | -0.16171 | 0.00045  | -0.22623 | 7.81E-07 | -0.159   | 0.00056  | -0.03131 |
| -0.11325 | 0.01434 | -0.02222 | 0.63201  | -0.25212 | 3.33E-08 | -0.04483 | 0.33369  | -0.08349 |
| 0.057875 | 0.21189 | -0.00193 | 0.96674  | -0.02722 | 0.55731  | -0.10988 | 0.01753  | -0.07803 |
| 0.023156 | 0.61769 | -0.04425 | 0.34004  | -0.00305 | 0.94757  | -0.02714 | 0.55846  | 0.035509 |
| 0.014582 | 0.7533  | -0.07849 | 0.0902   | -0.0721  | 0.11972  | -0.1053  | 0.02285  | -0.00118 |
| 0.038148 | 0.41081 | 0.233474 | 3.35E-07 | 0.103812 | 0.02487  | 0.164804 | 0.00035  | -0.01997 |
| 0.010156 | 0.82674 | -0.01791 | 0.6995   | 0.019065 | 0.68112  | -0.0244  | 0.59896  | 0.167455 |
| -0.04812 | 0.29945 | -0.01889 | 0.68391  | 0.027209 | 0.55753  | -0.02111 | 0.64909  | -0.11904 |
| -0.02424 | 0.60133 | -0.09392 | 0.04248  | -0.17875 | 0.0001   | -0.14123 | 0.00222  | -0.18625 |
| -0.0393  | 0.3968  | 0.099572 | 0.03145  | 0.040675 | 0.38049  | 0.018428 | 0.69123  | 0.007021 |
| 0.118145 | 0.01061 | -0.05691 | 0.2196   | 0.089254 | 0.05392  | -0.04002 | 0.38818  | 0.02316  |
| 0.00646  | 0.88927 | 0.093292 | 0.0439   | -0.09278 | 0.04507  | 0.073703 | 0.11169  | -0.20734 |
| 0.030652 | 0.50876 | -0.10201 | 0.02751  | 0.017074 | 0.71286  | -0.10324 | 0.02568  | 0.102483 |
| 0.060758 | 0.18996 | 0.02501  | 0.58982  | -0.02185 | 0.63773  | 0.061959 | 0.18134  | 0.025135 |
| 0.003009 | 0.9483  | -0.01236 | 0.78986  | 0.068662 | 0.13846  | 0.012387 | 0.78948  | 0.245161 |
| 0.010244 | 0.82526 | -0.07623 | 0.09991  | -0.07963 | 0.08563  | -0.07072 | 0.12701  | -0.02895 |
| -0.00466 | 0.91995 | -0.07016 | 0.13003  | -0.12827 | 0.0055   | -0.07804 | 0.09207  | 0.026071 |
| 0.01265  | 0.78512 | -0.08024 | 0.08325  | -0.08843 | 0.05619  | -0.07054 | 0.12798  | -0.00526 |
| 0.139276 | 0.00256 | -0.06752 | 0.14516  | -0.0621  | 0.18037  | 0.028284 | 0.54205  | 0.187138 |
| 0.055079 | 0.23484 | 0.033149 | 0.47484  | 0.014501 | 0.75463  | -0.01802 | 0.69764  | -0.04811 |
| 0.121602 | 0.00852 | 0.015667 | 0.73561  | -0.05146 | 0.2671   | -0.0106  | 0.81936  | -0.01478 |
| 0.067493 | 0.14531 | 0.057678 | 0.21345  | 0.043413 | 0.34923  | 0.074258 | 0.10901  | -0.03147 |
| -0.01428 | 0.75822 | -0.05257 | 0.25685  | -0.05994 | 0.19601  | -0.0194  | 0.67591  | 0.155782 |
| 0.005416 | 0.90708 | -0.0721  | 0.11973  | -0.04989 | 0.28197  | -0.08314 | 0.07266  | -0.06926 |
| 0.037259 | 0.42181 | -0.01016 | 0.82667  | 0.039496 | 0.39446  | -0.0538  | 0.24588  | -0.01686 |
| 0.044778 | 0.33427 | -0.02693 | 0.56162  | 0.017879 | 0.69997  | 0.002847 | 0.95108  | 0.089807 |
| 0.093649 | 0.04309 | 0.051184 | 0.26965  | 0.116181 | 0.01199  | 0.03666  | 0.42931  | -0.00352 |
| -0.05899 | 0.20322 | -0.07929 | 0.08699  | -0.05129 | 0.26868  | -0.14059 | 0.00233  | 0.037336 |
| -0.00186 | 0.96808 | -0.04501 | 0.33174  | -0.03756 | 0.41804  | -0.07365 | 0.11197  | 0.135674 |
| -0.04241 | 0.36054 | -0.02335 | 0.61471  | -0.05974 | 0.1975   | -0.01785 | 0.70041  | -0.10697 |
| 0.031054 | 0.50322 | 0.003405 | 0.9415   | -0.07052 | 0.1281   | -0.06878 | 0.1378   | 0.094965 |
| -0.05891 | 0.20379 | -0.05866 | 0.20572  | -0.15279 | 0.00093  | 0.0102   | 0.82599  | 0.053037 |
| 0.022128 | 0.63338 | 0.039831 | 0.39045  | 0.041224 | 0.37408  | 0.125309 | 0.0067   | 0.215169 |
| 0.03407  | 0.46264 | 0.161703 | 0.00045  | 0.157812 | 0.00062  | 0.111768 | 0.01567  | 0.131473 |
| -0.01558 | 0.73701 | -0.13704 | 0.003    | -0.01031 | 0.82412  | -0.15042 | 0.00111  | 0.06272  |

|          |         |          |          |          |          |          |          |          |
|----------|---------|----------|----------|----------|----------|----------|----------|----------|
| -0.07858 | 0.08983 | -0.02561 | 0.5809   | 0.030838 | 0.50619  | -0.01665 | 0.7197   | 0.166273 |
| 0.004102 | 0.92955 | 0.048202 | 0.29859  | 0.047924 | 0.30139  | 0.001674 | 0.97121  | 0.093278 |
| -0.01395 | 0.76367 | 0.072336 | 0.11851  | -0.08226 | 0.07576  | 0.060826 | 0.18947  | -0.14036 |
| 0.062734 | 0.17593 | 0.023589 | 0.61112  | 0.021594 | 0.6416   | -0.02472 | 0.59407  | -0.07206 |
| -0.10201 | 0.02751 | -0.02774 | 0.54992  | -0.02779 | 0.54907  | 0.064874 | 0.16162  | 0.038829 |
| 0.041731 | 0.36823 | -0.00222 | 0.96182  | -0.05202 | 0.26189  | 0.030721 | 0.50781  | 0.129895 |
| 0.035006 | 0.45044 | 0.054301 | 0.24153  | -0.03721 | 0.42239  | 0.000416 | 0.99285  | -0.02505 |
| 0.001481 | 0.97454 | -0.14185 | 0.00212  | -0.07915 | 0.08755  | -0.11034 | 0.01707  | 0.116787 |
| 0.031258 | 0.50041 | -0.09283 | 0.04496  | -0.0458  | 0.32338  | -0.08679 | 0.06092  | 0.083319 |
| -0.00486 | 0.91656 | -0.10051 | 0.02988  | -0.05123 | 0.26921  | -0.01448 | 0.75494  | 0.115242 |
| 0.022655 | 0.62531 | -0.04865 | 0.29414  | -0.05708 | 0.21826  | -0.07169 | 0.12185  | -0.04954 |
| -0.03633 | 0.43351 | -0.07954 | 0.08596  | -0.01177 | 0.79969  | -0.05939 | 0.20016  | 0.044736 |
| -0.01078 | 0.81634 | 0.030048 | 0.51715  | 0.010961 | 0.81325  | 0.039392 | 0.3957   | 0.015835 |
| 0.109197 | 0.01825 | 0.189088 | 3.92E-05 | 0.066722 | 0.14998  | 0.049755 | 0.28327  | -0.11537 |
| -0.04252 | 0.35928 | -0.12077 | 0.00899  | -0.10134 | 0.02854  | -0.07695 | 0.09674  | -0.0142  |
| 0.045393 | 0.32767 | -0.01796 | 0.69867  | -0.04895 | 0.2911   | -0.03909 | 0.39936  | -0.07383 |
| -0.06567 | 0.15653 | 0.026518 | 0.56758  | -0.1732  | 0.00017  | -0.0358  | 0.44028  | -0.0749  |
| 0.002442 | 0.95803 | -0.03939 | 0.39573  | -0.04588 | 0.32247  | -0.04103 | 0.37635  | 0.015526 |
| 0.002416 | 0.95848 | -0.03939 | 0.39577  | -0.05914 | 0.20209  | -0.07211 | 0.11968  | -0.06779 |
| 0.010394 | 0.82274 | -0.05679 | 0.22059  | -0.05449 | 0.2399   | -0.07892 | 0.08846  | -0.11354 |
| -0.00149 | 0.97435 | -0.10831 | 0.01922  | -0.11679 | 0.01155  | -0.05085 | 0.2728   | -0.03296 |
| -0.01141 | 0.80571 | 0.11955  | 0.00971  | 0.129895 | 0.00493  | 0.105739 | 0.02229  | -0.03213 |
| -0.0999  | 0.03088 | -0.1277  | 0.00572  | -0.17529 | 0.00014  | -0.05435 | 0.24109  | 0.098465 |
| -0.00765 | 0.86913 | -0.16053 | 0.0005   | -0.15868 | 0.00058  | -0.18425 | 6.19E-05 | -0.02702 |
| -0.01179 | 0.79939 | -0.06651 | 0.15128  | -0.0139  | 0.76442  | 0.077324 | 0.09512  | 0.290641 |
| -0.05048 | 0.2763  | 0.051443 | 0.26724  | 0.050058 | 0.28035  | 0.047138 | 0.30939  | 0.23406  |
| 0.032306 | 0.48614 | -0.06515 | 0.15981  | -0.01341 | 0.77261  | 0.069989 | 0.13097  | 0.17209  |
| 0.126154 | 0.00634 | 0.035595 | 0.44285  | 0.004383 | 0.92473  | 0.069776 | 0.13216  | 0.079544 |
| -0.02337 | 0.6145  | -0.06417 | 0.16626  | -0.09782 | 0.03457  | -0.05509 | 0.23471  | -0.11232 |
| 0.03568  | 0.44175 | 0.146473 | 0.0015   | 0.014275 | 0.75833  | 0.24576  | 7.47E-08 | 0.076213 |
| 0.026272 | 0.57118 | -0.11422 | 0.01352  | -0.11541 | 0.01257  | -0.09268 | 0.04531  | 0.034633 |
| 0.055706 | 0.22955 | -0.08547 | 0.06496  | -0.10001 | 0.03071  | -0.00029 | 0.995    | 0.186454 |
| 0.059007 | 0.20307 | 0.034116 | 0.46204  | 0.036776 | 0.42785  | -0.09531 | 0.03951  | -0.06389 |
| -0.06659 | 0.15081 | -0.01212 | 0.79397  | -0.03847 | 0.40688  | -0.00302 | 0.94804  | -0.09268 |
| 0.143568 | 0.00187 | 0.092868 | 0.04487  | 0.051581 | 0.26596  | 0.084963 | 0.06659  | 0.05157  |
| 0.02249  | 0.62784 | 0.051389 | 0.26774  | -0.00877 | 0.85005  | 0.070639 | 0.12743  | -0.05292 |
| 0.007411 | 0.87309 | -0.00361 | 0.9379   | -0.01874 | 0.6862   | -0.02564 | 0.58051  | -0.00095 |
| 0.110541 | 0.01686 | 0.088757 | 0.05528  | 0.218475 | 1.88E-06 | 0.285699 | 3.19E-10 | 0.039303 |
| 0.051635 | 0.26545 | 0.02192  | 0.63658  | 0.054252 | 0.24195  | 0.056991 | 0.21896  | 0.054277 |
| -0.05432 | 0.24136 | 0.010227 | 0.82554  | -0.06512 | 0.16     | 0.00978  | 0.83305  | 0.030197 |
| 0.06358  | 0.17016 | -0.07924 | 0.08717  | -0.08656 | 0.06161  | -0.10368 | 0.02506  | -0.01747 |
| 0.042916 | 0.35478 | 0.054744 | 0.23771  | 0.009259 | 0.84183  | 0.080996 | 0.08037  | 0.016075 |
| 0.048263 | 0.29797 | 0.061773 | 0.18266  | 0.055949 | 0.22752  | 0.043393 | 0.34944  | 0.026017 |
| 0.040338 | 0.38445 | 0.092981 | 0.04461  | -0.00052 | 0.99109  | 0.09437  | 0.04151  | 0.156599 |
| -0.01173 | 0.80046 | 0.051373 | 0.26789  | 0.026325 | 0.5704   | 0.061888 | 0.18184  | 0.09676  |

|          |          |          |          |          |          |          |          |          |
|----------|----------|----------|----------|----------|----------|----------|----------|----------|
| -0.04735 | 0.30719  | 0.017208 | 0.71072  | -0.11176 | 0.01568  | -0.02008 | 0.66513  | -0.25488 |
| 0.036607 | 0.42998  | -0.16802 | 0.00027  | -0.05407 | 0.24358  | -0.13675 | 0.00306  | 0.16403  |
| 0.122203 | 0.0082   | 0.111237 | 0.01618  | 0.21598  | 2.47E-06 | 0.094123 | 0.04204  | 0.100004 |
| -0.05183 | 0.26363  | -0.05526 | 0.23334  | -0.09428 | 0.04169  | 0.028141 | 0.5441   | -0.1288  |
| -0.02    | 0.66635  | -0.0624  | 0.17822  | -0.01702 | 0.71377  | -0.10791 | 0.01968  | -0.18741 |
| 0.019279 | 0.67774  | -0.07876 | 0.08912  | -0.08277 | 0.07395  | -0.11334 | 0.01426  | -0.08163 |
| -0.01238 | 0.78959  | -0.0524  | 0.25842  | -0.118   | 0.01071  | 0.030991 | 0.50407  | 0.109122 |
| 0.038534 | 0.40609  | 0.227235 | 6.96E-07 | 0.203745 | 9.09E-06 | 0.253634 | 2.74E-08 | 0.203633 |
| -0.00096 | 0.98348  | -0.02498 | 0.59022  | 0.027572 | 0.55227  | -0.03612 | 0.43611  | 0.039509 |
| -0.05096 | 0.2718   | -0.13813 | 0.00278  | -0.05932 | 0.20067  | -0.06755 | 0.14496  | -0.02142 |
| -0.00374 | 0.93571  | -0.03003 | 0.51741  | 0.072406 | 0.11816  | 0.156005 | 0.00072  | 0.299579 |
| -0.0605  | 0.19184  | -0.16506 | 0.00034  | -0.05205 | 0.26167  | -0.17889 | 0.0001   | -0.11999 |
| 0.086775 | 0.06097  | 0.176765 | 0.00012  | 0.289878 | 1.71E-10 | 0.204615 | 8.31E-06 | 0.206685 |
| -0.00082 | 0.98584  | 0.031155 | 0.50182  | -0.01868 | 0.68723  | 0.084632 | 0.06766  | -0.02464 |
| 0.039794 | 0.3909   | -0.00687 | 0.88223  | 0.067849 | 0.1432   | 0.000145 | 0.9975   | 0.066686 |
| -0.02527 | 0.58601  | 0.058446 | 0.20741  | 0.102253 | 0.02713  | -0.02134 | 0.64546  | -0.03884 |
| 0.03471  | 0.45428  | 0.131004 | 0.00457  | 0.030351 | 0.51292  | 0.091796 | 0.04741  | 0.012138 |
| -0.29874 | 4.41E-11 | -0.29518 | 7.64E-11 | -0.27253 | 2.13E-09 | -0.27644 | 1.23E-09 | -0.05448 |
| -0.03903 | 0.40004  | -0.06533 | 0.1587   | -0.08633 | 0.06232  | 0.051934 | 0.26269  | 0.166985 |
| 0.000442 | 0.9924   | 0.04538  | 0.32781  | 0.096408 | 0.03728  | 0.060896 | 0.18896  | 0.058686 |
| 0.055343 | 0.2326   | 0.288122 | 2.23E-10 | 0.090463 | 0.05074  | 0.247575 | 5.95E-08 | -0.03997 |
| 0.087153 | 0.05985  | -0.06322 | 0.17261  | 0.071053 | 0.12521  | -0.03609 | 0.43649  | 0.170953 |
| 0.067021 | 0.14815  | -0.07767 | 0.09363  | -0.03257 | 0.4826   | -0.03167 | 0.49477  | 0.023341 |
| 0.059979 | 0.19572  | 0.277685 | 1.03E-09 | 0.218623 | 1.85E-06 | 0.271049 | 2.62E-09 | 0.076512 |
| 0.002803 | 0.95182  | 0.092568 | 0.04557  | 0.209486 | 4.98E-06 | 0.10227  | 0.02711  | 0.167207 |
| -0.00123 | 0.97881  | -0.15783 | 0.00062  | -0.09217 | 0.04652  | -0.11395 | 0.01374  | -0.0392  |
| -0.1608  | 0.00049  | -0.20314 | 9.67E-06 | -0.20895 | 5.27E-06 | -0.0947  | 0.04081  | -0.02831 |
| -0.09605 | 0.038    | -0.13929 | 0.00256  | -0.12385 | 0.00737  | -0.06879 | 0.13773  | 0.072755 |
| 0.002719 | 0.95326  | 0.037543 | 0.41827  | 0.035587 | 0.44294  | -0.0055  | 0.90567  | 0.031181 |
| 0.027095 | 0.55917  | -0.03028 | 0.51396  | -0.02172 | 0.63964  | -0.02132 | 0.64577  | 0.069533 |
| -0.05464 | 0.23863  | 0.012829 | 0.78216  | 0.085998 | 0.06333  | 0.034671 | 0.45478  | 0.154635 |
| 0.009224 | 0.84242  | -0.12136 | 0.00866  | 0.049922 | 0.28166  | -0.0087  | 0.85125  | 0.276759 |
| 0.090172 | 0.05149  | -0.0067  | 0.88527  | 0.003072 | 0.94722  | 0.072114 | 0.11965  | 0.121503 |
| -0.03489 | 0.45198  | -0.00863 | 0.85238  | 0.042435 | 0.3602   | 0.048415 | 0.29645  | 0.150096 |
| 0.124451 | 0.00709  | 0.040501 | 0.38253  | 0.129635 | 0.00502  | 0.081814 | 0.07735  | 0.202086 |
| 0.071723 | 0.12167  | -0.09248 | 0.04577  | 0.050146 | 0.2795   | -0.04978 | 0.28298  | 0.094821 |
| 0.014149 | 0.7604   | 0.003276 | 0.94372  | 0.030694 | 0.50818  | 0.047595 | 0.30473  | 0.002683 |
| -0.00124 | 0.97861  | 0.046342 | 0.31764  | 0.079939 | 0.08441  | 0.064368 | 0.16492  | 0.176688 |
| -0.08653 | 0.06171  | -0.0412  | 0.37432  | -0.1851  | 5.72E-05 | -0.03513 | 0.44879  | -0.02074 |
| 0.046112 | 0.32005  | 0.038478 | 0.40676  | 0.005819 | 0.9002   | 0.08899  | 0.05464  | 0.080775 |
| -0.02616 | 0.57284  | 0.021487 | 0.64326  | -0.04864 | 0.29424  | 0.07646  | 0.09888  | -0.05088 |
| -0.02795 | 0.54678  | -0.00537 | 0.90794  | 0.035773 | 0.44056  | -0.01644 | 0.72316  | 0.038935 |
| -0.06973 | 0.1324   | -0.08009 | 0.08382  | -0.15002 | 0.00115  | -0.08133 | 0.07912  | -0.1442  |
| -0.02206 | 0.63449  | -0.14    | 0.00243  | -0.1668  | 0.00029  | -0.11485 | 0.01301  | -0.07354 |
| 0.098314 | 0.03367  | 0.035868 | 0.43935  | 0.120827 | 0.00896  | 0.009422 | 0.83908  | 0.016883 |

|          |         |          |          |          |          |          |          |          |
|----------|---------|----------|----------|----------|----------|----------|----------|----------|
| 0.065113 | 0.16007 | 0.086161 | 0.06283  | 0.072559 | 0.11738  | 0.159137 | 0.00056  | 0.197395 |
| 0.017165 | 0.7114  | -0.09327 | 0.04396  | -0.0994  | 0.03174  | -0.10569 | 0.02236  | 0.066329 |
| -0.13423 | 0.00366 | -0.16427 | 0.00036  | -0.11623 | 0.01195  | -0.0286  | 0.53758  | 0.091176 |
| -0.06894 | 0.13687 | -0.1814  | 8.07E-05 | -0.15777 | 0.00062  | -0.19735 | 1.74E-05 | -0.02897 |
| -0.16434 | 0.00036 | -0.12633 | 0.00626  | -0.25474 | 2.37E-08 | -0.20854 | 5.51E-06 | -0.31264 |
| -0.15308 | 0.0009  | -0.04818 | 0.29882  | -0.14688 | 0.00146  | 0.097262 | 0.03562  | 0.072588 |
| -0.05431 | 0.24146 | -0.15813 | 0.0006   | -0.0426  | 0.35838  | -0.13126 | 0.00449  | 0.171477 |
| -0.08814 | 0.05699 | -0.14306 | 0.00194  | -0.23941 | 1.64E-07 | -0.17499 | 0.00014  | -0.06735 |
| 0.050481 | 0.2763  | -0.14022 | 0.00239  | -0.0861  | 0.06301  | -0.17162 | 0.00019  | -0.15033 |
| -0.12119 | 0.00875 | -0.0815  | 0.07851  | -0.10266 | 0.02653  | -0.09436 | 0.04154  | 0.018931 |
| -0.00643 | 0.88983 | 0.082813 | 0.07379  | 0.006825 | 0.88305  | 0.040179 | 0.38633  | -0.03187 |
| 0.049892 | 0.28195 | -0.10858 | 0.01892  | -0.04733 | 0.30737  | -0.0431  | 0.35273  | 0.094694 |
| 0.062853 | 0.17511 | 0.224672 | 9.34E-07 | 0.275932 | 1.32E-09 | 0.233271 | 3.43E-07 | 0.17772  |
| -0.00253 | 0.95644 | -0.16332 | 0.00039  | -0.11194 | 0.01551  | -0.13823 | 0.00276  | -0.09096 |
| -0.0524  | 0.25843 | 0.02575  | 0.57885  | 0.048193 | 0.29868  | 0.100931 | 0.02919  | 0.004608 |
| 0.029627 | 0.52304 | 0.025024 | 0.58961  | 0.010998 | 0.81263  | -0.04535 | 0.32814  | -0.11299 |
| 0.040097 | 0.3873  | 0.091171 | 0.04895  | 0.018822 | 0.68497  | -0.00526 | 0.9097   | -0.15183 |
| 0.019674 | 0.67152 | -0.06058 | 0.19127  | -0.04403 | 0.34242  | -0.03221 | 0.48749  | 0.039249 |
| -0.04785 | 0.30214 | 0.012102 | 0.79422  | -0.05944 | 0.19978  | 0.030063 | 0.51694  | 0.006375 |
| 0.057582 | 0.21422 | -0.02953 | 0.52443  | 0.049419 | 0.28654  | 0.016881 | 0.71597  | -0.01865 |
| -0.11473 | 0.01311 | -0.10641 | 0.02146  | 0.003292 | 0.94344  | -0.06638 | 0.15207  | 0.126311 |
| -0.03915 | 0.39859 | 0.037098 | 0.42382  | -0.03945 | 0.39507  | -0.03694 | 0.42578  | -0.09647 |
| -0.00068 | 0.98837 | -0.10248 | 0.02679  | -0.04643 | 0.31669  | -0.08737 | 0.0592   | 0.056227 |
| 0.005753 | 0.90132 | 0.043075 | 0.35299  | 0.025128 | 0.58807  | -0.00307 | 0.94721  | -0.05627 |
| -0.00333 | 0.94279 | 0.030968 | 0.50439  | 0.021768 | 0.63892  | 0.078371 | 0.09071  | 0.113546 |
| -0.04084 | 0.37853 | 0.085148 | 0.06599  | -0.11389 | 0.01379  | -0.02629 | 0.57087  | -0.07908 |
| 0.05076  | 0.27365 | 0.008872 | 0.84836  | -0.07652 | 0.0986   | 0.031752 | 0.49366  | 0.035234 |
| -0.0995  | 0.03157 | -0.12    | 0.00944  | -0.06881 | 0.13758  | -0.02598 | 0.57552  | 0.29837  |
| 0.075316 | 0.10405 | 0.158877 | 0.00057  | 0.286782 | 2.72E-10 | 0.260816 | 1.06E-08 | 0.348954 |
| -0.07248 | 0.11778 | -0.00404 | 0.93062  | -0.04082 | 0.37875  | 0.105046 | 0.02319  | 0.25125  |
| 0.144336 | 0.00177 | 0.078977 | 0.08823  | 0.237167 | 2.15E-07 | 0.066066 | 0.15403  | 0.111391 |
| 0.009166 | 0.84339 | -0.10464 | 0.02373  | -0.11039 | 0.01701  | -0.00817 | 0.86024  | 0.047503 |
| 0.051964 | 0.26241 | 0.057477 | 0.21506  | -0.04164 | 0.36932  | 0.078431 | 0.09046  | -0.06002 |
| -0.01671 | 0.71878 | -0.15078 | 0.00108  | -0.08944 | 0.05341  | -0.09168 | 0.04769  | 0.137691 |
| 0.016298 | 0.72537 | 0.222796 | 1.16E-06 | 0.080629 | 0.08176  | 0.18225  | 7.46E-05 | -0.06951 |
| -0.04328 | 0.35069 | -0.06271 | 0.1761   | -0.07064 | 0.12743  | -0.04598 | 0.32141  | 0.142819 |
| 0.037723 | 0.41604 | -0.10752 | 0.02013  | -0.10268 | 0.02649  | -0.08618 | 0.06276  | 0.016139 |
| 0.01351  | 0.77092 | 0.007385 | 0.87354  | 0.010676 | 0.81802  | 0.047135 | 0.30943  | -0.04996 |
| 0.095734 | 0.03864 | -0.03307 | 0.47584  | 0.028104 | 0.54463  | -0.07958 | 0.08584  | -0.0607  |
| -0.08113 | 0.07987 | 0.014264 | 0.75851  | -0.06409 | 0.16672  | 0.065703 | 0.15631  | -0.13532 |
| 0.078066 | 0.09197 | -0.07382 | 0.11112  | 0.092903 | 0.04479  | -0.05973 | 0.19761  | 0.328541 |
| 0.01335  | 0.77355 | 0.095005 | 0.04015  | 0.053199 | 0.25123  | 0.086856 | 0.06072  | 0.034199 |
| 0.004465 | 0.92333 | -0.00059 | 0.9899   | 0.040667 | 0.38058  | -0.05631 | 0.22457  | -0.12306 |
| -0.13264 | 0.00409 | -0.10941 | 0.01802  | -0.15171 | 0.00101  | -0.25254 | 3.15E-08 | -0.04357 |
| -0.16645 | 0.0003  | -0.15491 | 0.00078  | -0.22517 | 8.82E-07 | -0.06162 | 0.18375  | -0.07871 |

|          |          |          |          |          |          |          |          |          |
|----------|----------|----------|----------|----------|----------|----------|----------|----------|
| 0.071044 | 0.12525  | -0.07645 | 0.09894  | 0.015894 | 0.73192  | -0.03806 | 0.41193  | 0.017954 |
| 0.274328 | 1.66E-09 | 0.002345 | 0.95969  | 0.027655 | 0.55108  | 0.050337 | 0.27767  | 0.084306 |
| -0.00268 | 0.95399  | 0.021031 | 0.65032  | 0.137585 | 0.00289  | 0.015226 | 0.74279  | 0.035293 |
| -0.02505 | 0.58928  | 0.015651 | 0.73586  | -0.00612 | 0.89503  | -0.00808 | 0.8617   | -0.09167 |
| 0.037573 | 0.4179   | -0.03315 | 0.47479  | 0.018606 | 0.68839  | 0.010554 | 0.82006  | 0.1553   |
| -0.04599 | 0.32133  | -0.08825 | 0.05669  | 0.021374 | 0.64501  | -0.04472 | 0.33491  | 0.114055 |
| -0.03495 | 0.4512   | -0.01264 | 0.78532  | 0.025919 | 0.57636  | -0.08359 | 0.07113  | -0.01615 |
| -0.00831 | 0.85778  | 0.016638 | 0.71988  | -0.09007 | 0.05175  | 0.016776 | 0.71767  | 0.047124 |
| 0.112286 | 0.0152   | -0.0043  | 0.92618  | -0.05437 | 0.24092  | -0.05316 | 0.25156  | 0.050005 |
| 0.040518 | 0.38233  | 0.160379 | 0.0005   | 0.131434 | 0.00444  | 0.10604  | 0.02191  | 0.111846 |
| -0.09159 | 0.04791  | 0.040104 | 0.38721  | -0.04636 | 0.31746  | 0.072464 | 0.11786  | 0.175169 |
| 0.012685 | 0.78455  | -0.01613 | 0.72802  | -0.15642 | 0.00069  | 0.031967 | 0.49074  | 0.116155 |
| -0.04157 | 0.37011  | -0.10037 | 0.0301   | -0.14993 | 0.00116  | -0.05458 | 0.23915  | 0.146123 |
| 0.071585 | 0.1224   | 0.017382 | 0.70792  | 0.038243 | 0.40964  | 0.100456 | 0.02996  | 0.124873 |
| 0.050542 | 0.27571  | -0.01247 | 0.78803  | 0.009847 | 0.83193  | -0.00386 | 0.93368  | 0.060874 |
| 0.42857  | 2.76E-22 | 0.082395 | 0.07527  | 0.095301 | 0.03953  | 0.083118 | 0.07273  | -0.04264 |
| 0.015855 | 0.73254  | -0.03304 | 0.47625  | -0.03235 | 0.48556  | -0.00615 | 0.89453  | 0.015406 |
| 0.129397 | 0.0051   | 0.146578 | 0.00149  | 0.156095 | 0.00071  | 0.136294 | 0.00317  | 0.071162 |
| -0.10103 | 0.02903  | -0.06369 | 0.16945  | -0.08125 | 0.07943  | -0.04006 | 0.38776  | 0.097828 |
| 0.122283 | 0.00816  | 0.158137 | 0.0006   | 0.137034 | 0.003    | 0.124115 | 0.00725  | 0.145092 |
| 0.028884 | 0.53352  | -0.08334 | 0.07198  | 0.016761 | 0.71791  | -0.04608 | 0.3204   | 0.0358   |
| -0.03048 | 0.51116  | 0.081909 | 0.07701  | 0.026827 | 0.56307  | 0.106916 | 0.02084  | -0.02599 |
| 0.022825 | 0.62272  | 0.031901 | 0.49163  | 0.090485 | 0.05068  | 0.066221 | 0.15307  | 0.177842 |
| -0.12037 | 0.00922  | -0.05633 | 0.22438  | -0.12996 | 0.00491  | 0.004416 | 0.92417  | -0.06074 |
| 0.001459 | 0.97491  | -0.1411  | 0.00224  | -0.14817 | 0.00132  | -0.14228 | 0.00206  | -0.0257  |
| -0.04563 | 0.32512  | 0.092574 | 0.04556  | -0.10384 | 0.02482  | -0.03482 | 0.45285  | -0.13055 |
| 0.081636 | 0.07801  | -0.0029  | 0.95015  | 0.024292 | 0.60054  | 0.025928 | 0.57622  | 0.167958 |
| 0.0556   | 0.23044  | 0.017596 | 0.70449  | -0.0021  | 0.96398  | -0.01946 | 0.67484  | 0.037331 |
| 0.076921 | 0.09686  | 0.04341  | 0.34926  | -0.02963 | 0.52299  | 0.018878 | 0.68407  | 0.038755 |
| 0.071937 | 0.12056  | -0.01455 | 0.75387  | 0.007571 | 0.87037  | -0.02403 | 0.60447  | 0.013049 |
| 0.096353 | 0.03739  | -0.01514 | 0.74416  | 0.128578 | 0.00539  | 0.004287 | 0.92639  | -0.00437 |
| -0.11889 | 0.01013  | -0.15349 | 0.00088  | -0.20967 | 4.88E-06 | -0.11389 | 0.01379  | -0.03518 |
| -0.11206 | 0.0154   | -0.11572 | 0.01234  | -0.24452 | 8.73E-08 | -0.15166 | 0.00101  | 0.013653 |
| 0.030206 | 0.51494  | -0.03392 | 0.46458  | 0.02176  | 0.63904  | -0.04117 | 0.37466  | 0.001243 |
| 0.025762 | 0.57868  | -0.04548 | 0.32675  | 0.006543 | 0.88786  | -0.0365  | 0.4313   | -0.01508 |
| 0.024567 | 0.59642  | 0.001369 | 0.97646  | 0.027267 | 0.55668  | -0.00955 | 0.83687  | -0.0204  |
| 0.034586 | 0.45589  | -0.07235 | 0.11843  | -0.09585 | 0.0384   | -0.09671 | 0.03668  | -0.13117 |
| -0.0496  | 0.28476  | 0.015591 | 0.73684  | -0.03004 | 0.51733  | 0.088725 | 0.05537  | -0.00982 |
| 0.009546 | 0.83699  | 0.030196 | 0.51508  | -0.0631  | 0.17342  | -0.01869 | 0.68713  | -0.03452 |
| -0.00163 | 0.97193  | 0.218878 | 1.79E-06 | 0.049329 | 0.28742  | 0.254005 | 2.61E-08 | 0.200974 |
| -0.01627 | 0.72586  | 0.030428 | 0.51185  | 0.169091 | 0.00024  | 0.102224 | 0.02718  | 0.221536 |
| -0.0073  | 0.87493  | 0.034515 | 0.45682  | 0.06619  | 0.15326  | 0.001472 | 0.9747   | -0.00618 |
| -0.04361 | 0.34704  | 0.17882  | 0.0001   | 0.093593 | 0.04322  | 0.149636 | 0.00118  | -0.05153 |
| 0.00391  | 0.93285  | -0.12286 | 0.00786  | -0.11753 | 0.01103  | -0.16984 | 0.00023  | -0.02942 |
| 0.063521 | 0.17056  | 0.014851 | 0.74889  | 0.016288 | 0.72555  | 0.061351 | 0.18567  | 0.024654 |

|          |          |          |          |          |          |          |          |          |
|----------|----------|----------|----------|----------|----------|----------|----------|----------|
| 0.088651 | 0.05557  | -0.01121 | 0.80909  | -0.01319 | 0.77617  | -0.00254 | 0.9564   | 0.085948 |
| -0.08874 | 0.05532  | 0.025793 | 0.57821  | -0.12539 | 0.00667  | -0.06939 | 0.13433  | -0.18546 |
| 0.0567   | 0.22133  | 0.27846  | 9.18E-10 | 0.237968 | 1.95E-07 | 0.364357 | 4.15E-16 | 0.396067 |
| -0.00577 | 0.901    | 0.030286 | 0.51384  | 0.16446  | 0.00036  | 0.141428 | 0.00219  | 0.290309 |
| -0.02098 | 0.65106  | -0.12443 | 0.0071   | -0.10346 | 0.02537  | -0.12492 | 0.00687  | -0.06415 |
| 0.148609 | 0.00128  | -0.08413 | 0.06931  | -0.04711 | 0.30966  | -0.03977 | 0.39118  | 0.059096 |
| 0.061615 | 0.18378  | -0.14443 | 0.00175  | -0.0996  | 0.0314   | -0.0886  | 0.0557   | 0.137153 |
| 0.083647 | 0.07093  | -0.05013 | 0.27968  | -0.04345 | 0.34887  | -0.01992 | 0.66773  | 0.068182 |
| -0.10436 | 0.02411  | 0.008068 | 0.86195  | -0.15701 | 0.00066  | 0.060593 | 0.19117  | -0.00811 |
| 0.029697 | 0.52206  | 0.27814  | 9.62E-10 | 0.20312  | 9.69E-06 | 0.280237 | 7.11E-10 | 0.257458 |
| 0.030126 | 0.51606  | 0.022741 | 0.624    | 0.027108 | 0.55899  | 0.031453 | 0.49774  | 0.181133 |
| 0.019407 | 0.67572  | -0.04628 | 0.3183   | -0.03796 | 0.41311  | -0.02439 | 0.59909  | -0.00799 |
| 0.012967 | 0.77988  | -0.02113 | 0.64871  | -0.00876 | 0.85032  | -0.02643 | 0.56882  | 0.053794 |
| -0.11398 | 0.01372  | 0.022799 | 0.62312  | -0.04355 | 0.3477   | 0.009549 | 0.83694  | 0.076593 |
| -0.00321 | 0.94489  | 0.01186  | 0.79825  | 0.007756 | 0.86725  | -0.02217 | 0.63274  | -0.09813 |
| 0.110868 | 0.01654  | 0.03034  | 0.51308  | 0.069249 | 0.13511  | 0.035695 | 0.44157  | 0.026962 |
| 0.08682  | 0.06083  | 0.046382 | 0.31722  | 0.119179 | 0.00994  | 0.052701 | 0.2557   | 0.001211 |
| 0.088921 | 0.05482  | 0.119993 | 0.00944  | 0.079462 | 0.08629  | 0.134599 | 0.00357  | 0.004641 |
| -0.02078 | 0.65422  | -0.10942 | 0.01801  | -0.12817 | 0.00554  | -0.12375 | 0.00742  | -0.10488 |
| 0.049995 | 0.28095  | 0.081449 | 0.07869  | 0.114264 | 0.01348  | -0.00252 | 0.95675  | 0.038394 |
| -0.00656 | 0.88751  | -0.05744 | 0.21537  | -0.01675 | 0.71802  | -0.11569 | 0.01236  | -0.10083 |
| -0.05451 | 0.23973  | -0.24293 | 1.06E-07 | -0.15563 | 0.00074  | -0.18759 | 4.52E-05 | 0.057753 |
| 0.100061 | 0.03062  | 0.151433 | 0.00103  | 0.057458 | 0.21521  | 0.108049 | 0.01951  | 0.166526 |
| 0.00825  | 0.85887  | 0.193029 | 2.67E-05 | 0.220641 | 1.47E-06 | 0.133839 | 0.00376  | 0.066031 |
| 0.065514 | 0.15751  | 0.289332 | 1.86E-10 | 0.230232 | 4.91E-07 | 0.334493 | 1.14E-13 | 0.24264  |
| 0.108628 | 0.01887  | 0.075272 | 0.10425  | 0.029611 | 0.52326  | 0.050835 | 0.27294  | 0.110082 |
| 0.046449 | 0.31652  | -0.01719 | 0.71107  | -0.01542 | 0.73963  | -0.03155 | 0.49643  | 0.010504 |
| -0.0497  | 0.28383  | 0.011214 | 0.80902  | -0.09859 | 0.03316  | -0.04635 | 0.31755  | -0.06333 |
| 0.056258 | 0.22496  | -0.00232 | 0.96018  | -0.00957 | 0.83655  | -0.02636 | 0.56987  | -0.00127 |
| 0.052089 | 0.26127  | 0.009592 | 0.83623  | 0.041885 | 0.36646  | 0.010331 | 0.8238   | 0.206652 |
| 0.00011  | 0.99811  | -0.0579  | 0.21167  | -0.00799 | 0.8632   | -0.0558  | 0.2288   | 0.175205 |
| -0.04114 | 0.37511  | -0.10071 | 0.02956  | -0.23947 | 1.63E-07 | -0.0698  | 0.13203  | 0.011727 |
| -0.05168 | 0.26502  | 0.130267 | 0.00481  | 0.134726 | 0.00353  | 0.230249 | 4.90E-07 | 0.15277  |
| -0.03382 | 0.46594  | -0.13273 | 0.00406  | -0.13287 | 0.00402  | -0.10468 | 0.02368  | -0.01391 |
| 0.016362 | 0.72434  | -0.02119 | 0.6478   | 0.007226 | 0.87624  | -0.0255  | 0.58262  | 0.077702 |
| 0.064674 | 0.16292  | 0.276257 | 1.26E-09 | 0.163767 | 0.00038  | 0.282298 | 5.27E-10 | -0.02315 |
| -0.01574 | 0.73436  | 0.198919 | 1.49E-05 | 0.013428 | 0.77227  | 0.168891 | 0.00025  | -0.21062 |
| 0.008019 | 0.86279  | 0.101532 | 0.02824  | 0.113861 | 0.01382  | 0.142156 | 0.00207  | 0.063271 |
| 0.032681 | 0.4811   | -0.124   | 0.0073   | -0.06785 | 0.14316  | -0.01297 | 0.77978  | 0.161375 |
| -0.12352 | 0.00753  | -0.02455 | 0.59664  | -0.08033 | 0.08292  | -0.04007 | 0.38765  | 0.0548   |
| 0.022484 | 0.62794  | 0.000146 | 0.99749  | 0.041932 | 0.36593  | -0.00058 | 0.99002  | -0.00515 |
| 0.214598 | 2.87E-06 | -0.00599 | 0.8973   | 0.073568 | 0.11235  | 0.002555 | 0.95608  | -0.01554 |
| 0.114487 | 0.0133   | 0.076035 | 0.10078  | 0.188526 | 4.13E-05 | 0.168147 | 0.00026  | 0.029441 |
| 0.025494 | 0.58264  | -0.05832 | 0.2084   | 0.111862 | 0.01559  | -0.02631 | 0.57056  | 0.176237 |
| 0.096199 | 0.0377   | 0.068702 | 0.13823  | -0.00079 | 0.98645  | 0.037949 | 0.41325  | -0.02496 |

|          |         |          |          |          |         |          |          |          |
|----------|---------|----------|----------|----------|---------|----------|----------|----------|
| 0.135425 | 0.00337 | -0.0529  | 0.25388  | -0.01042 | 0.8223  | -0.03884 | 0.40233  | 0.098102 |
| 0.055642 | 0.23009 | -0.09636 | 0.03738  | 0.038341 | 0.40844 | 0.017362 | 0.70823  | 0.244115 |
| 0.085015 | 0.06642 | -0.00338 | 0.94186  | 0.059948 | 0.19595 | -0.01627 | 0.72591  | -0.00027 |
| 0.075948 | 0.10117 | -0.00171 | 0.97058  | 0.012495 | 0.78769 | -0.00557 | 0.90448  | 0.013119 |
| -0.00831 | 0.85794 | -0.05245 | 0.25799  | -0.00733 | 0.87449 | -0.06608 | 0.15394  | 0.252389 |
| 0.059544 | 0.19899 | -0.00086 | 0.98524  | -0.00797 | 0.86359 | 0.094998 | 0.04016  | 0.060115 |
| 0.064555 | 0.16369 | 0.149674 | 0.00118  | 0.131156 | 0.00453 | 0.167015 | 0.00029  | 0.186199 |
| 0.06082  | 0.18951 | -0.0693  | 0.1348   | -0.03982 | 0.39059 | 0.002517 | 0.95674  | 0.223825 |
| -0.05369 | 0.24685 | -0.05763 | 0.21383  | -0.1596  | 0.00054 | -0.04272 | 0.35693  | -0.05251 |
| -0.11594 | 0.01217 | 0.030346 | 0.513    | -0.14413 | 0.00179 | -0.04543 | 0.32723  | -0.12376 |
| 0.008011 | 0.86292 | -0.05295 | 0.25343  | -0.15609 | 0.00071 | -0.03029 | 0.51372  | 0.008012 |
| -0.04846 | 0.29604 | -0.11948 | 0.00976  | -0.09405 | 0.0422  | -0.09371 | 0.04297  | -0.01998 |
| -0.02923 | 0.52857 | -0.1984  | 1.57E-05 | -0.09449 | 0.04124 | -0.23318 | 3.47E-07 | -0.0602  |
| -0.08732 | 0.05936 | -0.01503 | 0.74602  | -0.0244  | 0.59895 | -0.08412 | 0.06932  | -0.0389  |
| 0.080975 | 0.08045 | -0.03354 | 0.4697   | 0.12669  | 0.00612 | -0.00127 | 0.97825  | 0.223935 |
| 0.057074 | 0.21829 | -0.01244 | 0.78856  | -0.00661 | 0.88672 | 0.049557 | 0.28519  | 0.102132 |
| -0.01151 | 0.8041  | -0.00962 | 0.83577  | -0.06646 | 0.15162 | 0.059968 | 0.1958   | 0.029869 |
| -0.00385 | 0.93383 | 0.042952 | 0.35437  | 0.044479 | 0.33751 | 0.021647 | 0.64078  | 0.017708 |
| -0.08603 | 0.06322 | -0.17095 | 0.00021  | -0.12222 | 0.00819 | -0.1902  | 3.52E-05 | -0.14131 |
| -0.0286  | 0.53756 | -0.03859 | 0.40545  | -0.06638 | 0.15209 | -0.03273 | 0.48039  | 0.032707 |
| -0.00164 | 0.97185 | -0.07616 | 0.10023  | 0.015839 | 0.73281 | -0.05172 | 0.2647   | 0.055705 |
| -0.00198 | 0.96596 | -0.05253 | 0.25725  | -0.05776 | 0.21281 | -0.05718 | 0.21744  | 0.059014 |
| -0.02276 | 0.62369 | -0.11852 | 0.01037  | -0.03198 | 0.49051 | -0.08661 | 0.06146  | 0.02861  |
| -0.02496 | 0.5906  | 0.018519 | 0.68977  | 0.007007 | 0.87996 | 0.016336 | 0.72477  | 0.029812 |
| -0.00313 | 0.94625 | -0.04439 | 0.33845  | -0.04698 | 0.31101 | -0.02906 | 0.53109  | -0.00769 |
| -0.04675 | 0.31335 | -0.05805 | 0.21051  | -0.02824 | 0.54266 | -0.0156  | 0.73676  | 0.050897 |
| -0.02334 | 0.61483 | -0.01097 | 0.81314  | -0.00332 | 0.94298 | -0.02699 | 0.56065  | -0.05058 |
| 0.007045 | 0.87932 | -0.02191 | 0.63676  | 0.003358 | 0.9423  | -0.02107 | 0.6497   | -0.02777 |
| 0.047278 | 0.30796 | 0.053534 | 0.24825  | -0.02938 | 0.52647 | -0.03764 | 0.41704  | -0.10113 |
| 0.047072 | 0.31008 | 0.141195 | 0.00223  | 0.047211 | 0.30864 | 0.094554 | 0.04111  | 0.07731  |
| 0.001486 | 0.97445 | -0.03363 | 0.46845  | -0.0108  | 0.81592 | -0.04759 | 0.30482  | 0.009253 |
| -0.02219 | 0.6325  | -0.1014  | 0.02845  | -0.10416 | 0.02439 | -0.11833 | 0.01049  | -0.0067  |
| -0.01961 | 0.67247 | -0.03323 | 0.47374  | -0.09139 | 0.04841 | -0.09284 | 0.04494  | -0.02941 |
| 0.119496 | 0.00975 | 0.07733  | 0.09509  | 0.154336 | 0.00082 | 0.083933 | 0.06996  | 0.034339 |
| -0.00023 | 0.99605 | 0.003455 | 0.94064  | 0.001645 | 0.97173 | 0.029274 | 0.528    | 0.055653 |
| -0.00715 | 0.87758 | -0.02499 | 0.59005  | 0.011985 | 0.79617 | -0.0232  | 0.61709  | -0.0916  |
| -0.00667 | 0.88562 | -0.05597 | 0.22734  | -0.03252 | 0.48327 | -0.04277 | 0.35637  | 0.040529 |
| -0.03615 | 0.4358  | -0.04021 | 0.38595  | -0.02767 | 0.55085 | -0.01357 | 0.76989  | 0.019897 |
| -0.02356 | 0.61153 | -0.05088 | 0.27253  | -0.03962 | 0.39293 | -0.05254 | 0.25716  | -0.04575 |
| -0.0081  | 0.86139 | -0.02492 | 0.59121  | 0.00669  | 0.88535 | 0.017425 | 0.70723  | -0.00247 |
| 0.001436 | 0.97532 | 0.049615 | 0.28463  | -0.03902 | 0.40024 | 0.044567 | 0.33655  | -0.1294  |
| -0.01824 | 0.69428 | -0.06414 | 0.16643  | -0.00408 | 0.9299  | -0.02727 | 0.55667  | 0.023675 |
| -0.02644 | 0.56872 | -0.00385 | 0.93393  | -0.08466 | 0.06756 | -0.03728 | 0.42158  | 0.048997 |
| 0.007195 | 0.87677 | -0.08017 | 0.08351  | -0.01615 | 0.72774 | -0.04269 | 0.35732  | -0.03198 |
| 0.047038 | 0.31042 | -0.02987 | 0.51968  | -0.03954 | 0.39396 | -0.02591 | 0.57655  | -0.07149 |

|          |         |          |          |          |          |          |          |          |
|----------|---------|----------|----------|----------|----------|----------|----------|----------|
| -0.01694 | 0.71495 | -0.069   | 0.13654  | -0.06096 | 0.18852  | -0.02789 | 0.54765  | -0.00158 |
| -0.01926 | 0.67812 | 0.019744 | 0.67042  | -0.0942  | 0.04188  | -0.00708 | 0.87864  | 0.091808 |
| 0.01336  | 0.77338 | 0.002339 | 0.95979  | 0.079014 | 0.08808  | 0.010928 | 0.8138   | 0.030039 |
| -0.04119 | 0.37447 | -0.06956 | 0.13338  | -0.15739 | 0.00064  | -0.00935 | 0.84036  | -0.08097 |
| -0.04901 | 0.29055 | -0.09238 | 0.04602  | -0.01152 | 0.80392  | -0.05673 | 0.22105  | -0.02146 |
| 0.000482 | 0.99171 | 0.019223 | 0.67862  | -0.02186 | 0.63754  | 0.039897 | 0.38967  | 0.135931 |
| -0.02624 | 0.57159 | -0.09054 | 0.05055  | -0.09487 | 0.04043  | -0.03712 | 0.42358  | -0.04987 |
| 0.137036 | 0.003   | 0.090859 | 0.04973  | 0.126741 | 0.00609  | 0.144447 | 0.00175  | 0.103783 |
| 0.053859 | 0.24539 | 0.041454 | 0.37142  | 0.136872 | 0.00304  | 0.030202 | 0.515    | 0.168947 |
| -0.03622 | 0.4349  | -0.07984 | 0.08482  | -0.10587 | 0.02212  | -0.03064 | 0.50899  | 0.026429 |
| 0.156031 | 0.00072 | 0.021189 | 0.64788  | 0.018452 | 0.69084  | 0.005398 | 0.90738  | -0.00662 |
| 0.052766 | 0.25511 | -0.12842 | 0.00545  | -0.14161 | 0.00216  | -0.13345 | 0.00386  | -0.20513 |
| -0.00297 | 0.94898 | 0.038244 | 0.40963  | 0.001232 | 0.97881  | 0.056463 | 0.22327  | -0.07705 |
| -0.05681 | 0.22044 | 0.021836 | 0.63787  | 0.033665 | 0.46798  | 0.079444 | 0.08636  | 0.118387 |
| 0.04398  | 0.34297 | -0.0537  | 0.2468   | -0.02036 | 0.66083  | -0.05197 | 0.26239  | 0.053075 |
| -0.012   | 0.79589 | 0.003899 | 0.93303  | -0.03152 | 0.49681  | -0.00379 | 0.93494  | 0.111197 |
| 0.05224  | 0.25989 | -0.07479 | 0.10649  | -0.11329 | 0.0143   | -0.04132 | 0.37293  | -0.0395  |
| 0.032476 | 0.48385 | -0.1023  | 0.02706  | 0.017426 | 0.70722  | -0.09366 | 0.04306  | 0.095227 |
| -0.02055 | 0.65774 | 0.217201 | 2.16E-06 | 0.179733 | 9.40E-05 | 0.15012  | 0.00114  | 0.168952 |
| -0.00981 | 0.83257 | 0.036673 | 0.42915  | 0.105261 | 0.02291  | 0.129612 | 0.00503  | 0.194039 |
| 0.098826 | 0.03275 | 0.103807 | 0.02487  | 0.124622 | 0.00701  | 0.066978 | 0.14842  | 0.087842 |
| -0.00992 | 0.83063 | -0.01717 | 0.71131  | -0.04362 | 0.34689  | -0.04505 | 0.3313   | 0.095541 |
| -0.02596 | 0.57578 | -0.06355 | 0.17034  | -0.04578 | 0.32359  | -0.06837 | 0.14014  | -0.01634 |
| 0.038862 | 0.4021  | 0.143459 | 0.00188  | 0.120906 | 0.00891  | 0.125691 | 0.00653  | 0.043302 |
| -0.01819 | 0.69498 | -0.03385 | 0.4655   | -0.03397 | 0.46392  | -0.02369 | 0.60953  | -0.01263 |
| 0.006149 | 0.89457 | 0.040992 | 0.37678  | 0.004101 | 0.92957  | 0.112381 | 0.01511  | 0.038838 |
| -0.03199 | 0.49041 | -0.12327 | 0.00766  | -0.04319 | 0.35175  | -0.08764 | 0.05844  | 0.051248 |
| -0.04101 | 0.37661 | 0.055671 | 0.22984  | 0.112385 | 0.01511  | 0.04839  | 0.2967   | 0.079366 |
| -0.02339 | 0.6141  | 0.024959 | 0.59057  | 0.037033 | 0.42463  | 0.016264 | 0.72592  | 0.01307  |
| -0.00054 | 0.99073 | -0.00043 | 0.99254  | 0.033243 | 0.47359  | 0.044386 | 0.33852  | 0.040845 |
| -0.02183 | 0.63793 | 0.150769 | 0.00108  | 0.109932 | 0.01748  | 0.206019 | 7.18E-06 | 0.143493 |
| -0.01788 | 0.69999 | -0.02335 | 0.61473  | -0.02511 | 0.58839  | -0.01173 | 0.80047  | -0.03448 |
| 0.082467 | 0.07501 | -0.04842 | 0.29645  | -0.0154  | 0.73987  | -0.09711 | 0.03591  | -0.16134 |
| 0.056687 | 0.22144 | 0.036449 | 0.43197  | 0.102784 | 0.02634  | 0.003644 | 0.9374   | 0.030133 |
| 0.045574 | 0.32574 | 0.082712 | 0.07415  | -0.06769 | 0.14414  | 0.010374 | 0.82308  | -0.12696 |
| 0.01312  | 0.77735 | 0.02364  | 0.61036  | 0.161253 | 0.00047  | 0.031411 | 0.49832  | 0.015684 |
| -0.03378 | 0.46647 | 0.066147 | 0.15352  | 0.098694 | 0.03298  | 0.089996 | 0.05195  | 0.123243 |
| 0.054223 | 0.24221 | 0.039767 | 0.39121  | 0.165943 | 0.00032  | 0.023916 | 0.60619  | -0.00124 |
| 0.001853 | 0.96815 | -0.02559 | 0.58117  | 0.03935  | 0.39621  | -0.04663 | 0.31466  | -0.01872 |
| -0.03542 | 0.44503 | -0.07225 | 0.11898  | -0.06    | 0.19559  | -0.07287 | 0.11579  | 0.051054 |
| -0.00962 | 0.8358  | -0.00932 | 0.84076  | 0.002643 | 0.95457  | 0.021249 | 0.64695  | 0.007755 |
| -0.03243 | 0.48442 | -0.02484 | 0.5923   | -0.02428 | 0.60065  | -0.0436  | 0.34714  | 0.038058 |
| -0.01824 | 0.69426 | -0.02291 | 0.62144  | -0.00597 | 0.89767  | -0.05389 | 0.24508  | -0.00467 |
| 0.061217 | 0.18663 | 0.067856 | 0.14315  | 0.074125 | 0.10965  | -0.06974 | 0.13233  | -0.04953 |
| 0.007006 | 0.87999 | 0.047234 | 0.30841  | 0.011749 | 0.80009  | -0.01182 | 0.79891  | 0.024512 |



|          |         |          |          |          |         |          |         |          |
|----------|---------|----------|----------|----------|---------|----------|---------|----------|
| -0.01896 | 0.68283 | 0.017705 | 0.70275  | 0.036278 | 0.43414 | 0.05482  | 0.23706 | -0.03694 |
| 0.048486 | 0.29574 | -0.07719 | 0.09569  | 0.008106 | 0.86131 | -0.11771 | 0.01091 | 0.025121 |
| 0.018402 | 0.69163 | 0.122371 | 0.00811  | 0.088903 | 0.05488 | 0.084801 | 0.06711 | 0.077619 |
| 0.028662 | 0.53667 | 0.030667 | 0.50855  | 0.075406 | 0.10364 | 0.024012 | 0.60475 | -0.08734 |
| 0.029553 | 0.52408 | -0.03843 | 0.40732  | -0.0213  | 0.64619 | -0.04325 | 0.35101 | -0.00688 |
| -0.03625 | 0.43446 | 0.019661 | 0.67173  | 0.065443 | 0.15796 | 0.069626 | 0.13299 | 0.129966 |
| -0.00116 | 0.98013 | -0.04496 | 0.33227  | 0.045539 | 0.32611 | -0.02239 | 0.62935 | 0.026664 |
| -0.02961 | 0.52328 | 0.044364 | 0.33876  | -0.01534 | 0.74085 | 0.032088 | 0.48909 | -0.03974 |
| 0.00231  | 0.96029 | 0.073375 | 0.1133   | 0.041722 | 0.36834 | 0.035421 | 0.44509 | 0.038967 |
| -0.02053 | 0.65808 | -0.08293 | 0.0734   | -0.06156 | 0.18417 | -0.07584 | 0.10167 | -0.03462 |
| -0.04973 | 0.28354 | -0.1219  | 0.00836  | -0.09766 | 0.03487 | -0.14019 | 0.00239 | -0.02882 |
| -0.03401 | 0.4634  | -0.04651 | 0.31585  | -0.09763 | 0.03493 | -0.06274 | 0.17588 | -0.08073 |
| -0.01462 | 0.75271 | -0.00509 | 0.91259  | 0.020048 | 0.66565 | 0.009247 | 0.84204 | 0.01689  |
| 0.056853 | 0.22008 | -0.02847 | 0.53937  | -0.05035 | 0.27757 | -0.01589 | 0.73197 | 0.075709 |
| 0.045318 | 0.32847 | 0.052896 | 0.25394  | -0.00647 | 0.88917 | 0.007586 | 0.87012 | -0.0509  |
| -0.02628 | 0.57102 | -0.08789 | 0.05772  | -0.01268 | 0.78467 | -0.06496 | 0.16105 | 0.12363  |
| 0.046254 | 0.31856 | -0.08445 | 0.06826  | -0.01189 | 0.79775 | -0.13439 | 0.00362 | 0.023366 |
| -0.00113 | 0.9805  | -0.03838 | 0.40791  | -0.01596 | 0.73091 | -0.06629 | 0.15262 | 0.0197   |
| 0.007811 | 0.8663  | 0.050286 | 0.27816  | 0.02855  | 0.53826 | 0.013507 | 0.77096 | -0.04398 |
| -0.01862 | 0.68821 | -0.06409 | 0.16677  | -0.0464  | 0.31707 | -0.05869 | 0.20555 | 0.003873 |
| -0.048   | 0.3006  | -0.10645 | 0.0214   | 0.008633 | 0.85239 | -0.1338  | 0.00377 | 0.089835 |
| -0.04929 | 0.28778 | -0.0604  | 0.19262  | -0.05977 | 0.19726 | -0.07951 | 0.08611 | 0.001063 |
| -0.04039 | 0.38379 | -0.07958 | 0.08582  | -0.03497 | 0.45089 | -0.02986 | 0.5198  | 0.046575 |
| 0.083226 | 0.07236 | 0.181957 | 7.66E-05 | 0.080615 | 0.08181 | 0.08989  | 0.05223 | 0.112441 |
| 0.00406  | 0.93027 | -0.13595 | 0.00324  | -0.17686 | 0.00012 | -0.11493 | 0.01294 | 0.078143 |
| -0.00456 | 0.92169 | 0.046696 | 0.31395  | 0.049487 | 0.28588 | 0.066143 | 0.15355 | 0.016871 |
| -0.06314 | 0.17315 | -0.03137 | 0.49882  | 0.02123  | 0.64723 | -0.04131 | 0.37304 | 0.009489 |
| 0.016994 | 0.71416 | -0.01869 | 0.68703  | -0.01986 | 0.66862 | -0.04102 | 0.37647 | 0.016136 |
| 0.047732 | 0.30333 | -0.06263 | 0.17664  | -0.03745 | 0.41948 | -0.05878 | 0.20482 | 0.016335 |
| -0.04338 | 0.34959 | 0.041721 | 0.36834  | 0.040446 | 0.38318 | 0.058976 | 0.20331 | 0.028559 |
| 0.008384 | 0.8566  | 0.162118 | 0.00044  | -0.01691 | 0.71556 | 0.055541 | 0.23093 | -0.23646 |
| -0.01938 | 0.67621 | -0.10063 | 0.02969  | -0.15441 | 0.00081 | -0.15447 | 0.00081 | -0.09516 |
| 0.014524 | 0.75424 | -0.03041 | 0.51208  | -0.02088 | 0.65269 | -0.0217  | 0.64003 | 0.033323 |
| 0.012878 | 0.78134 | -0.03333 | 0.47248  | -0.04706 | 0.31024 | -0.0375  | 0.41876 | -0.11712 |
| 0.01286  | 0.78164 | 0.085513 | 0.06484  | -0.05317 | 0.25151 | 0.044438 | 0.33796 | -0.10901 |
| 0.098672 | 0.03302 | -0.04571 | 0.32432  | 0.096166 | 0.03776 | 0.05241  | 0.25833 | 0.180341 |
| 0.040287 | 0.38505 | 0.074179 | 0.10939  | -0.01208 | 0.79453 | 0.012158 | 0.79328 | -0.06972 |
| -0.00349 | 0.94002 | -0.12953 | 0.00506  | -0.06527 | 0.15908 | -0.06634 | 0.15231 | 0.086246 |
| 0.055607 | 0.23038 | 0.04541  | 0.32748  | 0.030236 | 0.51452 | 0.052854 | 0.25432 | 0.053682 |
| -0.01183 | 0.79881 | -0.01376 | 0.76677  | -0.00988 | 0.83131 | -0.03642 | 0.4324  | -0.01743 |
| 0.141608 | 0.00216 | 0.055561 | 0.23076  | 0.093268 | 0.04395 | 0.07807  | 0.09196 | 0.014245 |
| -0.02813 | 0.5442  | -0.09371 | 0.04296  | -0.05281 | 0.25471 | -0.10879 | 0.01869 | 0.014361 |
| -0.00662 | 0.88656 | 0.058752 | 0.20503  | 0.014968 | 0.74699 | 0.002136 | 0.96328 | -0.01453 |
| -0.04863 | 0.29429 | -0.10606 | 0.02189  | -0.14775 | 0.00137 | -0.02561 | 0.58089 | -0.06263 |
| 0.105781 | 0.02224 | 0.043289 | 0.3506   | 0.063367 | 0.1716  | 0.004663 | 0.91994 | 0.008359 |

|          |          |          |          |          |          |          |          |          |
|----------|----------|----------|----------|----------|----------|----------|----------|----------|
| -0.02809 | 0.54483  | -0.0321  | 0.48893  | -0.04444 | 0.33796  | -0.04624 | 0.31875  | -0.03973 |
| 0.015405 | 0.73986  | -0.08768 | 0.0583   | -0.01271 | 0.78413  | -0.02093 | 0.65192  | 0.000779 |
| 0.255631 | 2.11E-08 | 0.102771 | 0.02636  | 0.19751  | 1.71E-05 | 0.14902  | 0.00124  | 0.076847 |
| 0.120288 | 0.00927  | 0.176864 | 0.00012  | 0.088683 | 0.05548  | 0.103979 | 0.02464  | 0.038997 |
| -0.03221 | 0.48746  | -0.0827  | 0.0742   | -0.09782 | 0.03457  | -0.06899 | 0.13656  | 0.093211 |
| 0.004813 | 0.91739  | -0.02227 | 0.63117  | 0.074149 | 0.10954  | -0.02132 | 0.64585  | -0.0583  |
| -0.02921 | 0.52892  | -0.03955 | 0.39386  | 0.029369 | 0.52666  | -0.03087 | 0.50575  | 0.095962 |
| -0.01087 | 0.81477  | 0.011219 | 0.80894  | -0.03767 | 0.41664  | -0.03559 | 0.44287  | -0.05595 |
| 0.042776 | 0.35635  | -0.08916 | 0.05419  | -0.01718 | 0.71111  | -0.02198 | 0.63569  | 0.091211 |
| 0.039348 | 0.39623  | -0.14904 | 0.00124  | -0.0544  | 0.24067  | -0.19062 | 3.38E-05 | 0.01018  |
| 0.009087 | 0.84472  | 0.142569 | 0.00201  | 0.072851 | 0.11591  | 0.082511 | 0.07486  | 0.020614 |
| 0.16583  | 0.00032  | 0.090931 | 0.04955  | 0.169633 | 0.00023  | 0.084312 | 0.0687   | 0.18009  |
| 0.020124 | 0.66446  | -0.0243  | 0.60039  | -0.07895 | 0.08833  | -0.01305 | 0.77847  | -0.11383 |
| 0.075821 | 0.10174  | 0.00054  | 0.99071  | -0.05615 | 0.22585  | -0.04655 | 0.31551  | -0.1483  |
| -0.04089 | 0.37803  | -0.08757 | 0.05863  | -0.0531  | 0.25212  | -0.08767 | 0.05833  | -0.05862 |
| 0.029266 | 0.52812  | -0.0059  | 0.89873  | -0.07862 | 0.0897   | -0.02999 | 0.51793  | -0.02726 |
| -0.04198 | 0.36542  | -0.07011 | 0.13033  | -0.09799 | 0.03426  | -0.01943 | 0.67531  | -0.02949 |
| -0.0133  | 0.77433  | -0.01231 | 0.7908   | -0.07257 | 0.11732  | -0.02294 | 0.62091  | -0.07643 |
| 0.068354 | 0.14024  | 0.014408 | 0.75615  | 0.000934 | 0.98395  | 0.011728 | 0.80044  | 0.02706  |
| 0.033628 | 0.46847  | 0.005259 | 0.90976  | -0.09557 | 0.03897  | -0.04117 | 0.37473  | -0.02316 |
| -0.05599 | 0.22722  | -0.04638 | 0.31729  | 0.037713 | 0.41617  | -0.02089 | 0.65254  | 0.126105 |
| 0.153488 | 0.00088  | -0.03344 | 0.47099  | 0.140861 | 0.00228  | 0.057331 | 0.21622  | 0.129242 |
| -0.0409  | 0.37785  | 0.015019 | 0.74616  | -0.08116 | 0.07977  | 0.012588 | 0.78616  | 0.059216 |
| -0.05302 | 0.25281  | -0.07697 | 0.09664  | -0.23859 | 1.81E-07 | -0.07689 | 0.09701  | -0.06417 |
| -0.00487 | 0.91645  | 0.048958 | 0.29107  | 0.046147 | 0.31968  | 0.024332 | 0.59993  | 0.004291 |
| 0.209923 | 4.75E-06 | 0.010622 | 0.81892  | 0.000491 | 0.99155  | -0.0132  | 0.77597  | -0.03026 |
| -0.07951 | 0.08611  | -0.04078 | 0.3793   | -0.05    | 0.28086  | -0.00357 | 0.93859  | -0.0609  |
| 0.005282 | 0.90937  | -0.03757 | 0.41789  | -0.02489 | 0.59163  | -0.06562 | 0.15684  | 0.006501 |
| 0.031299 | 0.49985  | -0.02055 | 0.65786  | -0.02831 | 0.54167  | 0.053003 | 0.25298  | 0.149279 |
| 0.062238 | 0.17938  | 0.044189 | 0.34068  | 0.047439 | 0.30631  | -0.01112 | 0.81061  | 0.127893 |
| -0.0033  | 0.94327  | -0.1138  | 0.01387  | -0.08304 | 0.07301  | -0.11804 | 0.01068  | -0.01766 |
| 0.079808 | 0.08493  | 0.091518 | 0.04809  | 0.040668 | 0.38057  | 0.131407 | 0.00445  | 0.087425 |
| -0.05246 | 0.25787  | -0.08233 | 0.07549  | -0.16814 | 0.00026  | -0.04319 | 0.35175  | 0.051577 |
| -0.02556 | 0.5817   | -0.09436 | 0.04153  | -0.12387 | 0.00736  | -0.09963 | 0.03135  | -0.0977  |
| 0.045822 | 0.32311  | -0.06867 | 0.13843  | -0.10816 | 0.01939  | -0.08188 | 0.0771   | -0.05963 |
| 0.003394 | 0.94169  | -0.03887 | 0.40204  | -0.02912 | 0.53022  | -0.03299 | 0.47695  | -0.0274  |
| 0.017758 | 0.7019   | -0.01581 | 0.73325  | 0.029401 | 0.52621  | 0.042168 | 0.36324  | 0.118711 |
| 0.065311 | 0.1588   | 0.005939 | 0.89815  | -0.00886 | 0.84862  | 0.042849 | 0.35553  | 0.141647 |
| 0.050562 | 0.27553  | 0.076919 | 0.09687  | 0.15135  | 0.00103  | 0.043042 | 0.35336  | -0.0115  |
| 0.055946 | 0.22754  | 0.307304 | 1.14E-11 | 0.274666 | 1.58E-09 | 0.366458 | 2.74E-16 | 0.321066 |
| -0.09477 | 0.04066  | -0.07914 | 0.08759  | -0.19861 | 1.53E-05 | -0.11726 | 0.01121  | 0.037805 |
| -0.0701  | 0.13037  | -0.05404 | 0.24377  | -0.041   | 0.3767   | -0.01977 | 0.66994  | 0.128296 |
| 0.020701 | 0.65546  | 0.097822 | 0.03457  | 0.134879 | 0.0035   | 0.021291 | 0.64629  | 0.017058 |
| 0.026867 | 0.56248  | -0.0501  | 0.27997  | -0.01908 | 0.68082  | -0.06676 | 0.14974  | -0.0152  |
| 0.058474 | 0.20719  | -0.02189 | 0.63707  | -0.10945 | 0.01798  | -0.03594 | 0.43847  | -0.09543 |

|          |         |          |          |          |          |          |          |          |
|----------|---------|----------|----------|----------|----------|----------|----------|----------|
| 0.021745 | 0.63927 | -0.01265 | 0.78509  | -0.02518 | 0.58735  | 0.031755 | 0.49362  | -0.06566 |
| -0.09741 | 0.03535 | -0.09854 | 0.03326  | -0.12242 | 0.00809  | -0.04659 | 0.31504  | 0.074315 |
| -0.0676  | 0.14469 | -0.20617 | 7.07E-06 | -0.19577 | 2.04E-05 | -0.24078 | 1.39E-07 | -0.08126 |
| 0.10267  | 0.02651 | -0.05414 | 0.24292  | -0.02292 | 0.6212   | 0.049727 | 0.28354  | 0.28279  |
| -0.00928 | 0.84149 | 0.111263 | 0.01615  | 0.077074 | 0.09619  | 0.117343 | 0.01116  | 0.070663 |
| -0.1105  | 0.01691 | 0.031065 | 0.50306  | -0.05559 | 0.23052  | 0.045199 | 0.32973  | 0.251306 |
| -0.0735  | 0.1127  | 0.113605 | 0.01403  | -0.00716 | 0.87742  | 0.091867 | 0.04724  | 0.153277 |
| -0.02068 | 0.65579 | 0.190895 | 3.29E-05 | 0.106624 | 0.02119  | 0.269312 | 3.34E-09 | 0.132873 |
| 0.029986 | 0.51801 | 0.063967 | 0.16757  | 0.006855 | 0.88254  | 0.119039 | 0.01003  | 0.146485 |
| -0.0742  | 0.1093  | 0.180836 | 8.50E-05 | 0.047938 | 0.30125  | 0.240589 | 1.42E-07 | 0.120367 |
| -0.05424 | 0.24206 | -0.05502 | 0.23532  | -0.09173 | 0.04757  | 0.022531 | 0.62721  | 0.080867 |
| 0.074429 | 0.1082  | 0.030181 | 0.51529  | 0.00993  | 0.83054  | 0.091644 | 0.04778  | 6.30E-06 |
| -0.0245  | 0.5974  | 0.202532 | 1.03E-05 | 0.167796 | 0.00027  | 0.337367 | 6.80E-14 | 0.238554 |
| -0.02442 | 0.59865 | 0.192012 | 2.95E-05 | 0.178148 | 0.00011  | 0.282733 | 4.94E-10 | 0.18749  |
| -0.01697 | 0.71452 | 0.219947 | 1.59E-06 | 0.181117 | 8.28E-05 | 0.290714 | 1.51E-10 | 0.194925 |
| 0.010006 | 0.82926 | 0.19917  | 1.45E-05 | 0.172648 | 0.00018  | 0.265541 | 5.61E-09 | 0.146797 |
| -0.15029 | 0.00112 | -0.04461 | 0.33613  | -0.15979 | 0.00053  | -0.02343 | 0.61358  | -0.0275  |
| -0.09377 | 0.04282 | 0.072132 | 0.11956  | -0.11497 | 0.01291  | -0.00745 | 0.87236  | -0.08065 |
| -0.00011 | 0.99803 | -0.03822 | 0.40988  | 0.022674 | 0.62502  | 0.001983 | 0.96591  | 0.078031 |
| -0.01086 | 0.81491 | -0.00675 | 0.88431  | -0.01997 | 0.66681  | -0.01625 | 0.72615  | 0.014955 |
| 0.099501 | 0.03157 | -0.04298 | 0.35404  | -0.03206 | 0.48949  | -0.04498 | 0.33208  | 0.1681   |
| -0.08516 | 0.06596 | -0.16378 | 0.00038  | -0.14235 | 0.00204  | -0.08064 | 0.0817   | 0.105971 |
| -0.01361 | 0.76922 | -0.10935 | 0.01809  | -0.00174 | 0.97017  | -0.12172 | 0.00846  | -0.01672 |
| 0.007905 | 0.86472 | -0.00696 | 0.88075  | 0.005339 | 0.9084   | -0.02939 | 0.52642  | -0.08353 |
| -0.02349 | 0.61263 | -0.13509 | 0.00345  | -0.13071 | 0.00467  | -0.17842 | 0.00011  | 0.110204 |
| -0.12771 | 0.00572 | -0.14627 | 0.00153  | -0.21377 | 3.14E-06 | -0.10357 | 0.02521  | -0.17625 |
| -0.03153 | 0.49672 | 0.040562 | 0.38181  | -0.11054 | 0.01686  | 0.072682 | 0.11676  | 0.11239  |
| 0.036599 | 0.43008 | 0.056324 | 0.22441  | -0.1313  | 0.00448  | -0.00931 | 0.84101  | 0.017284 |
| 0.141384 | 0.00219 | 0.194399 | 2.34E-05 | 0.08192  | 0.07697  | 0.122796 | 0.00789  | 0.020458 |
| 0.064387 | 0.16479 | -0.03742 | 0.41981  | -0.0207  | 0.6555   | -0.15292 | 0.00092  | -0.14293 |
| -0.11094 | 0.01647 | -0.04608 | 0.32037  | -0.07693 | 0.09683  | 0.00025  | 0.9957   | 0.227278 |
| 0.091704 | 0.04764 | 0.014039 | 0.76221  | 0.019706 | 0.67101  | 0.04503  | 0.33155  | 0.053883 |
| -0.04088 | 0.37804 | 0.165672 | 0.00032  | 0.113892 | 0.01379  | 0.230029 | 5.03E-07 | 0.114146 |
| -0.092   | 0.04692 | -0.21354 | 3.22E-06 | -0.13647 | 0.00313  | -0.1882  | 4.26E-05 | 0.069745 |
| -0.01101 | 0.81241 | 0.212109 | 3.76E-06 | 0.077603 | 0.09393  | 0.212772 | 3.50E-06 | 0.035719 |
| 0.046566 | 0.3153  | -0.05046 | 0.2765   | -0.01743 | 0.70707  | 0.079875 | 0.08466  | 0.183175 |
| 0.145356 | 0.00164 | 0.017715 | 0.70259  | -0.0319  | 0.4916   | 0.061004 | 0.18817  | -0.09508 |
| -0.14584 | 0.00158 | -0.16021 | 0.00051  | -0.10026 | 0.03029  | -0.19288 | 2.71E-05 | -0.11997 |
| 0.000853 | 0.98533 | 0.018878 | 0.68408  | 0.146134 | 0.00154  | 0.063334 | 0.17183  | 0.20613  |
| 0.019067 | 0.68109 | 0.078311 | 0.09095  | 0.084074 | 0.06949  | -0.00854 | 0.85394  | -0.06113 |
| 0.065752 | 0.156   | 0.047652 | 0.30414  | 0.065354 | 0.15853  | 0.011469 | 0.80476  | 0.069055 |
| -0.04153 | 0.37057 | -0.04475 | 0.33459  | -0.01283 | 0.78211  | -0.06388 | 0.16817  | 0.108939 |
| 0.025299 | 0.58552 | -0.06133 | 0.18582  | -0.0797  | 0.08535  | -0.01144 | 0.80518  | -0.01905 |
| 0.019719 | 0.67081 | -0.05528 | 0.23317  | -0.08193 | 0.07694  | -0.00988 | 0.83138  | -0.03494 |
| -0.04573 | 0.32411 | 0.00624  | 0.89302  | -0.04657 | 0.31529  | -0.04961 | 0.28465  | -0.08505 |

|          |         |          |          |          |          |          |          |          |
|----------|---------|----------|----------|----------|----------|----------|----------|----------|
| -0.01413 | 0.76076 | -0.00918 | 0.84316  | 0.042831 | 0.35573  | -0.00441 | 0.92429  | 0.088151 |
| 0.144258 | 0.00178 | 0.096009 | 0.03808  | 0.081052 | 0.08016  | 0.03261  | 0.48205  | 0.043952 |
| 0.050179 | 0.27918 | 0.16259  | 0.00042  | 0.24794  | 5.68E-08 | 0.146405 | 0.00151  | 0.165519 |
| -0.10322 | 0.02571 | -0.14477 | 0.00171  | -0.13837 | 0.00273  | -0.21437 | 2.95E-06 | -0.13086 |
| 0.044584 | 0.33637 | -0.09721 | 0.03573  | -0.06461 | 0.1633   | -0.05237 | 0.25867  | 0.143208 |
| 0.011478 | 0.80461 | -0.05202 | 0.26188  | -0.01924 | 0.67831  | -0.00051 | 0.99128  | 0.09327  |
| 0.136267 | 0.00317 | -0.02046 | 0.6592   | 0.057402 | 0.21565  | -0.00683 | 0.88305  | 0.22164  |
| 0.06838  | 0.14009 | -0.0574  | 0.2157   | 0.064259 | 0.16563  | -0.06983 | 0.13185  | 0.121862 |
| 0.007115 | 0.87813 | -0.03198 | 0.4906   | -0.16365 | 0.00038  | 0.003438 | 0.94092  | 0.04194  |
| 0.141048 | 0.00225 | 0.038155 | 0.41072  | 0.244126 | 9.17E-08 | 0.15812  | 0.0006   | 0.280775 |
| 0.049608 | 0.2847  | -0.01347 | 0.7715   | -0.00433 | 0.92565  | 0.012161 | 0.79324  | 0.086994 |
| 0.0682   | 0.14113 | -0.03683 | 0.42719  | 0.002138 | 0.96324  | -0.06089 | 0.18897  | -0.02795 |
| 0.087372 | 0.0592  | -0.04926 | 0.28812  | 0.004491 | 0.9229   | 0.004502 | 0.9227   | 0.098984 |
| -0.07955 | 0.08595 | -0.0772  | 0.09563  | -0.0589  | 0.20389  | -0.10984 | 0.01757  | -0.00804 |
| -0.01333 | 0.77386 | -0.25391 | 2.64E-08 | -0.15282 | 0.00092  | -0.24358 | 9.81E-08 | -0.0083  |
| -0.0824  | 0.07525 | -0.17073 | 0.00021  | -0.26449 | 6.47E-09 | -0.09239 | 0.046    | 0.078624 |
| 0.019645 | 0.67197 | 0.035207 | 0.44783  | 0.034475 | 0.45734  | 0.117301 | 0.01119  | 0.161885 |
| -0.0635  | 0.1707  | 0.102408 | 0.0269   | 0.015223 | 0.74283  | 0.07151  | 0.12279  | -0.05068 |
| -0.12105 | 0.00883 | -0.14059 | 0.00233  | -0.14783 | 0.00136  | 0.02639  | 0.56945  | 0.12731  |
| -0.09555 | 0.03902 | -0.21887 | 1.79E-06 | -0.15251 | 0.00095  | -0.18894 | 3.97E-05 | -0.01312 |
| 0.012071 | 0.79474 | -0.0671  | 0.14765  | -0.06141 | 0.18522  | -0.07249 | 0.11772  | 0.063178 |
| -0.00402 | 0.93093 | -0.00919 | 0.84298  | 0.033454 | 0.47077  | 0.041271 | 0.37354  | 0.162096 |
| 0.016642 | 0.71983 | -0.05844 | 0.20746  | 0.063423 | 0.17123  | -0.06466 | 0.16302  | 0.153326 |
| 0.01656  | 0.72114 | 0.166817 | 0.00029  | 0.146107 | 0.00155  | 0.118692 | 0.01025  | -0.02072 |
| -0.13321 | 0.00393 | -0.02948 | 0.52515  | -0.07676 | 0.09757  | -0.00512 | 0.91217  | 0.051935 |
| 0.072807 | 0.11613 | -0.06176 | 0.18273  | 0.007098 | 0.87841  | 0.015118 | 0.74455  | 0.231342 |
| 0.046215 | 0.31898 | -0.02874 | 0.53551  | 0.0439   | 0.34384  | 0.007184 | 0.87695  | 0.138855 |
| 0.098156 | 0.03396 | 0.160226 | 0.00051  | 0.062807 | 0.17543  | 0.049081 | 0.28985  | -0.17502 |
| 0.099322 | 0.03188 | -0.12521 | 0.00674  | -0.11391 | 0.01378  | -0.10217 | 0.02726  | 0.115504 |
| -0.07408 | 0.10989 | -0.02673 | 0.56446  | 0.059371 | 0.2003   | -0.00781 | 0.86639  | 0.065926 |
| -0.09428 | 0.0417  | 0.002583 | 0.9556   | -0.10084 | 0.02935  | 0.037869 | 0.41424  | -0.0454  |
| -0.11427 | 0.01348 | -0.10236 | 0.02697  | -0.16203 | 0.00044  | -0.01875 | 0.68616  | -0.00324 |
| -0.12496 | 0.00686 | -0.24394 | 9.38E-08 | -0.18397 | 6.36E-05 | -0.17489 | 0.00015  | 0.080324 |
| 0.107414 | 0.02025 | 0.01745  | 0.70683  | -0.00768 | 0.86851  | -0.025   | 0.59003  | 0.024156 |
| 0.00878  | 0.84991 | -0.17925 | 9.83E-05 | -0.17678 | 0.00012  | -0.18839 | 4.19E-05 | -0.03076 |
| 0.025092 | 0.58859 | -0.16414 | 0.00037  | -0.08776 | 0.05808  | -0.23602 | 2.47E-07 | -0.00386 |
| -0.02913 | 0.53004 | -0.19896 | 1.48E-05 | -0.19149 | 3.10E-05 | -0.18726 | 4.66E-05 | 0.023027 |
| 0.037703 | 0.4163  | -0.19186 | 2.99E-05 | -0.03945 | 0.395    | -0.1261  | 0.00636  | 0.111994 |
| -0.00726 | 0.87561 | 0.136629 | 0.00309  | 0.146965 | 0.00145  | 0.124958 | 0.00686  | 0.01972  |
| 0.048386 | 0.29674 | 0.017595 | 0.70451  | 0.064324 | 0.16521  | 0.048185 | 0.29876  | 0.070317 |
| -0.01472 | 0.75107 | -0.03092 | 0.50507  | -0.00059 | 0.98988  | 0.009836 | 0.83211  | 0.094414 |
| 0.078335 | 0.09086 | -0.01343 | 0.77225  | 0.071282 | 0.12399  | -0.03328 | 0.47305  | -0.03976 |
| -0.07014 | 0.13014 | -0.10022 | 0.03035  | -0.18645 | 5.04E-05 | -0.18962 | 3.72E-05 | -0.24439 |
| 0.088497 | 0.056   | 0.003566 | 0.93873  | 0.079746 | 0.08517  | 0.038619 | 0.40505  | 0.035536 |
| -0.06783 | 0.14333 | -0.16436 | 0.00036  | -0.16036 | 0.0005   | -0.16708 | 0.00029  | -0.10586 |

|           |          |          |          |          |          |          |          |          |
|-----------|----------|----------|----------|----------|----------|----------|----------|----------|
| 0.090694  | 0.05015  | 0.306339 | 1.33E-11 | 0.272075 | 2.27E-09 | 0.210457 | 4.49E-06 | 0.273284 |
| 0.00601   | 0.89694  | -0.07502 | 0.10541  | -0.05178 | 0.26414  | -0.0681  | 0.14171  | -0.00893 |
| 0.024695  | 0.59451  | -0.04211 | 0.36385  | -0.04339 | 0.34945  | -0.06666 | 0.15036  | 0.005985 |
| -0.01932  | 0.67716  | 0.007463 | 0.87221  | 0.014102 | 0.76118  | -0.00666 | 0.8858   | 0.067602 |
| 0.111026  | 0.01638  | 0.256864 | 1.79E-08 | 0.262604 | 8.35E-09 | 0.362923 | 5.51E-16 | 0.065156 |
| 0.072921  | 0.11555  | 0.015558 | 0.73738  | 0.042242 | 0.36239  | 0.009332 | 0.84059  | -0.07149 |
| 0.001443  | 0.97519  | -0.01156 | 0.80325  | -0.00119 | 0.97958  | 0.014082 | 0.76149  | -0.09908 |
| -8.71E-05 | 0.9985   | -0.03631 | 0.43372  | 0.003524 | 0.93946  | -0.00877 | 0.85008  | -0.04413 |
| 0.043276  | 0.35075  | 0.217006 | 2.21E-06 | 0.169986 | 0.00022  | 0.136275 | 0.00317  | -0.01249 |
| 0.013337  | 0.77376  | 0.262492 | 8.48E-09 | 0.276243 | 1.26E-09 | 0.300273 | 3.47E-11 | 0.187761 |
| 0.0254    | 0.58402  | -0.01093 | 0.81375  | 0.066371 | 0.15214  | -0.01839 | 0.69186  | 0.024776 |
| -0.02654  | 0.5673   | -0.0122  | 0.79259  | 0.002042 | 0.9649   | -0.00017 | 0.99707  | 0.01353  |
| -0.00832  | 0.8577   | 0.023971 | 0.60537  | 0.024997 | 0.59001  | 0.034392 | 0.45842  | 0.078638 |
| 0.005024  | 0.91377  | -0.04205 | 0.36461  | -0.01613 | 0.72806  | -0.04192 | 0.36608  | 0.019003 |
| 0.083702  | 0.07074  | 0.198054 | 1.62E-05 | 0.353621 | 3.35E-15 | 0.226475 | 7.60E-07 | 0.20871  |
| 0.212841  | 3.48E-06 | 0.219186 | 1.73E-06 | 0.149055 | 0.00124  | 0.265091 | 5.97E-09 | 0.020511 |
| 0.093056  | 0.04444  | 0.025496 | 0.5826   | 0.114733 | 0.0131   | -0.05107 | 0.27077  | 0.168999 |
| -0.0339   | 0.46494  | 0.111842 | 0.0156   | -0.00365 | 0.93731  | 0.110824 | 0.01658  | 0.089731 |
| -0.00855  | 0.85379  | 0.034696 | 0.45446  | 0.034914 | 0.45162  | 0.082867 | 0.07361  | 0.006321 |
| -0.06951  | 0.13362  | -0.04105 | 0.37615  | -0.04915 | 0.28917  | -0.11941 | 0.0098   | 0.027407 |
| 0.078096  | 0.09185  | 0.101889 | 0.02769  | 0.12339  | 0.0076   | 0.085238 | 0.0657   | 0.056122 |
| -0.06026  | 0.19363  | -0.04629 | 0.31823  | -0.09412 | 0.04204  | 0.017748 | 0.70205  | 0.096261 |
| -0.05859  | 0.20629  | -0.0293  | 0.52759  | -0.17646 | 0.00013  | -0.05271 | 0.25562  | 0.112181 |
| 0.004645  | 0.92026  | -0.00816 | 0.86042  | 0.032976 | 0.47714  | -0.00806 | 0.86203  | -0.07263 |
| 0.022909  | 0.62144  | -0.07169 | 0.12184  | -0.05592 | 0.22776  | -0.08555 | 0.06473  | -0.04628 |
| -0.01734  | 0.70866  | 0.043812 | 0.34481  | -0.08938 | 0.05359  | -0.06075 | 0.19003  | -0.01297 |
| -0.02274  | 0.62402  | 0.223222 | 1.10E-06 | 0.069195 | 0.13541  | 0.183482 | 6.65E-05 | 0.045904 |
| -0.02236  | 0.62983  | -0.07009 | 0.13043  | -0.05193 | 0.2627   | -0.06658 | 0.15085  | 0.050717 |
| 0.02284   | 0.62249  | -0.01413 | 0.76068  | 0.04321  | 0.35149  | -0.0274  | 0.55475  | 0.090075 |
| 0.060708  | 0.19033  | 0.051752 | 0.26437  | 0.075149 | 0.10482  | 0.054246 | 0.24201  | 0.030077 |
| -0.00304  | 0.94779  | -0.04652 | 0.31581  | -0.00842 | 0.856    | -0.00884 | 0.84885  | 0.132137 |
| 0.088202  | 0.05682  | -0.0354  | 0.44535  | -0.01075 | 0.81678  | -0.04911 | 0.28957  | -0.0368  |
| -0.03104  | 0.5034   | -0.15085 | 0.00108  | -0.11758 | 0.011    | -0.04183 | 0.36704  | 0.153537 |
| -0.03046  | 0.51135  | -0.15494 | 0.00078  | -0.12125 | 0.00872  | -0.17281 | 0.00017  | -0.04956 |
| -0.08621  | 0.06268  | -0.18359 | 6.59E-05 | -0.06046 | 0.19216  | -0.19654 | 1.89E-05 | -0.05248 |
| 0.030024  | 0.51749  | -0.12211 | 0.00825  | -0.05151 | 0.26663  | -0.06143 | 0.18509  | 0.077529 |
| 0.151185  | 0.00105  | 0.155994 | 0.00072  | 0.309427 | 8.07E-12 | 0.097637 | 0.03492  | 0.066772 |
| 0.11181   | 0.01563  | 0.15005  | 0.00114  | 0.094095 | 0.04211  | 0.135949 | 0.00324  | 0.05588  |
| -0.06469  | 0.16282  | 0.012354 | 0.79003  | -0.04438 | 0.33855  | -0.0622  | 0.17964  | -0.06923 |
| -0.02873  | 0.53565  | 0.080078 | 0.08387  | -0.08973 | 0.05265  | 0.078954 | 0.08832  | -0.09872 |
| 0.042505  | 0.35941  | -0.11894 | 0.01009  | -0.03133 | 0.49946  | -0.11695 | 0.01143  | 0.120573 |
| -0.06002  | 0.19539  | 0.046859 | 0.31227  | -0.14788 | 0.00135  | -0.03586 | 0.43943  | -0.29384 |
| -0.06184  | 0.18221  | -0.07233 | 0.11856  | -0.24304 | 1.05E-07 | -0.13808 | 0.00279  | -0.11554 |
| 0.048352  | 0.29709  | 0.107687 | 0.01993  | 0.065871 | 0.15525  | 0.155592 | 0.00074  | 0.162573 |
| 0.01003   | 0.82885  | 0.010757 | 0.81666  | -0.0148  | 0.74979  | 0.026826 | 0.56308  | 0.137666 |

|          |          |          |          |          |          |          |          |          |
|----------|----------|----------|----------|----------|----------|----------|----------|----------|
| 0.00905  | 0.84535  | -0.07542 | 0.10355  | -0.03425 | 0.46025  | -0.09372 | 0.04295  | -0.00347 |
| 0.055463 | 0.23159  | 0.110835 | 0.01657  | 0.210868 | 4.30E-06 | 0.121753 | 0.00844  | 0.266309 |
| 0.131361 | 0.00446  | 0.225616 | 8.39E-07 | 0.153699 | 0.00086  | 0.311099 | 6.14E-12 | 0.116697 |
| 0.043169 | 0.35194  | 0.078377 | 0.09068  | 0.158347 | 0.00059  | 0.070082 | 0.13046  | 0.104969 |
| -0.03058 | 0.5098   | -0.02789 | 0.54775  | 0.030325 | 0.51329  | 0.033773 | 0.46655  | -0.00863 |
| 0.203032 | 9.78E-06 | 0.043311 | 0.35036  | -0.01752 | 0.70573  | 0.065489 | 0.15767  | -0.03354 |
| -0.02504 | 0.58931  | 0.058504 | 0.20696  | 0.093343 | 0.04378  | 0.000567 | 0.99025  | -0.06821 |
| -0.00734 | 0.87425  | -0.11934 | 0.00984  | -0.05454 | 0.23944  | -0.1642  | 0.00037  | -0.04084 |
| 0.033112 | 0.47533  | 0.006828 | 0.883    | -0.03937 | 0.39593  | -0.00025 | 0.99576  | -0.07061 |
| -0.01333 | 0.77382  | 0.185522 | 5.50E-05 | 0.109249 | 0.01819  | 0.139366 | 0.00254  | -0.08424 |
| -0.00443 | 0.92397  | -0.02081 | 0.65378  | -0.0283  | 0.54178  | -0.1222  | 0.0082   | -0.11561 |
| 0.014721 | 0.75103  | -0.09789 | 0.03445  | -0.06852 | 0.13926  | -0.12366 | 0.00746  | -0.1259  |
| -0.07153 | 0.12268  | -0.20612 | 7.10E-06 | -0.16241 | 0.00043  | -0.07815 | 0.09161  | 0.092073 |
| 0.012458 | 0.7883   | -0.09595 | 0.03819  | -0.00874 | 0.85065  | -0.09266 | 0.04535  | 0.020888 |
| 0.08531  | 0.06548  | -0.01389 | 0.76468  | 0.077766 | 0.09324  | -0.02143 | 0.64409  | 0.11422  |
| -0.03404 | 0.46301  | 0.15971  | 0.00053  | -0.00652 | 0.88823  | 0.106995 | 0.02074  | -0.17045 |
| 0.043837 | 0.34454  | 0.049847 | 0.28239  | -0.04817 | 0.29894  | 0.040462 | 0.38299  | 0.004533 |
| -0.05992 | 0.19615  | -0.1686  | 0.00025  | -0.09534 | 0.03945  | -0.18977 | 3.67E-05 | 0.005197 |
| -0.04374 | 0.34563  | -0.03535 | 0.44604  | 0.013593 | 0.76954  | -0.02603 | 0.57474  | 0.009194 |
| 0.044704 | 0.33507  | -0.03921 | 0.39795  | -0.03242 | 0.48458  | -0.04698 | 0.31103  | -0.013   |
| -0.03384 | 0.46567  | -0.0185  | 0.69003  | 0.055816 | 0.22863  | -0.04238 | 0.36079  | 0.013094 |
| 0.005855 | 0.89958  | -0.01752 | 0.70579  | -0.02423 | 0.60146  | -0.04722 | 0.3085   | 0.007105 |
| -0.01357 | 0.76996  | -0.05355 | 0.2481   | -0.07084 | 0.12635  | -0.08257 | 0.07463  | -0.01231 |
| 0.055852 | 0.22833  | 0.038226 | 0.40985  | -0.03545 | 0.4447   | 0.017661 | 0.70345  | -0.05068 |
| -0.09529 | 0.03954  | -0.00478 | 0.91802  | -0.16585 | 0.00032  | -0.05074 | 0.27388  | -0.10054 |
| 0.001522 | 0.97383  | -0.0667  | 0.15012  | -0.08536 | 0.06532  | -0.02693 | 0.56152  | 0.052296 |
| -0.06255 | 0.17721  | -0.14433 | 0.00177  | -0.11345 | 0.01417  | -0.1234  | 0.00759  | 0.191455 |
| -0.0334  | 0.47151  | -0.02889 | 0.53342  | -0.0911  | 0.04913  | -0.06889 | 0.13712  | 0.045953 |
| -0.01882 | 0.68505  | -0.03835 | 0.40829  | -0.02255 | 0.62686  | 0.02787  | 0.54798  | 0.169377 |
| 0.042439 | 0.36016  | 0.332527 | 1.61E-13 | 0.249028 | 4.95E-08 | 0.315556 | 2.95E-12 | 0.114204 |
| 0.062052 | 0.18069  | -0.05345 | 0.24904  | 0.014297 | 0.75797  | -0.02971 | 0.52183  | -0.01552 |
| 0.025939 | 0.57607  | -0.03068 | 0.50832  | -0.09492 | 0.04033  | -0.09528 | 0.03957  | -0.13252 |
| 0.007669 | 0.86872  | 0.059358 | 0.20039  | 0.100866 | 0.0293   | 0.182085 | 7.57E-05 | 0.046376 |
| 0.09119  | 0.0489   | 0.037194 | 0.42261  | 0.056483 | 0.22311  | 0.045999 | 0.32124  | 0.026258 |
| -0.03157 | 0.49614  | -0.10672 | 0.02108  | -0.09234 | 0.0461   | -0.03527 | 0.44702  | 0.087355 |
| 0.020349 | 0.66095  | -0.10889 | 0.01859  | -0.04601 | 0.32115  | -0.1195  | 0.00974  | -0.03098 |
| 0.110243 | 0.01716  | -0.06293 | 0.17458  | -0.06062 | 0.19095  | -0.0565  | 0.22295  | 0.058414 |
| 0.092337 | 0.04612  | 0.018905 | 0.68365  | -0.06772 | 0.14399  | 0.083647 | 0.07093  | 0.1917   |
| 0.004821 | 0.91725  | 0.098818 | 0.03276  | -0.07929 | 0.08698  | 0.167532 | 0.00028  | -0.00471 |
| 0.042577 | 0.35859  | 0.026178 | 0.57256  | -0.0129  | 0.781    | 0.037123 | 0.4235   | 0.03206  |
| 0.102221 | 0.02718  | -0.0955  | 0.03911  | -0.02721 | 0.55755  | -0.0817  | 0.07776  | 0.019016 |
| 0.100347 | 0.03015  | -0.01398 | 0.76319  | 0.023345 | 0.61481  | 0.046692 | 0.31399  | 0.131034 |
| -0.00455 | 0.92191  | -0.11617 | 0.012    | -0.06315 | 0.17305  | -0.09168 | 0.04768  | 0.008631 |
| 0.043483 | 0.34845  | -0.07326 | 0.11387  | -0.0237  | 0.60949  | -0.06954 | 0.13345  | 0.068469 |
| 0.002682 | 0.9539   | 0.024637 | 0.59538  | 0.008539 | 0.85398  | 0.034973 | 0.45087  | 0.11564  |

|          |          |          |          |          |          |          |          |          |
|----------|----------|----------|----------|----------|----------|----------|----------|----------|
| -0.0353  | 0.44666  | -0.14327 | 0.00191  | -0.09516 | 0.03983  | -0.21534 | 2.65E-06 | -0.16107 |
| -0.00033 | 0.99441  | 0.03872  | 0.40382  | 0.042002 | 0.36512  | 0.035244 | 0.44736  | 0.165229 |
| 0.051828 | 0.26367  | 0.150004 | 0.00115  | 0.108573 | 0.01893  | 0.188991 | 3.95E-05 | 0.16729  |
| 0.135889 | 0.00326  | 0.138466 | 0.00271  | 0.262298 | 8.71E-09 | 0.150792 | 0.00108  | 0.221995 |
| -0.00428 | 0.92647  | -0.05013 | 0.27961  | -0.09183 | 0.04734  | -0.11206 | 0.0154   | 0.029907 |
| -0.05823 | 0.2091   | -0.09798 | 0.03427  | -0.00235 | 0.95956  | -0.10992 | 0.01749  | 0.198628 |
| 0.120295 | 0.00927  | 0.094185 | 0.04191  | 0.110336 | 0.01707  | 0.063556 | 0.17032  | 0.097452 |
| 0.160576 | 0.0005   | 0.029222 | 0.52873  | 0.099869 | 0.03094  | 0.048507 | 0.29553  | 0.049219 |
| 0.002614 | 0.95507  | -0.0586  | 0.20623  | -0.03195 | 0.49103  | 0.026253 | 0.57145  | 0.00835  |
| 0.203668 | 9.16E-06 | 0.338537 | 5.50E-14 | 0.254016 | 2.60E-08 | 0.32957  | 2.71E-13 | 0.258629 |
| 0.059863 | 0.19658  | 0.041397 | 0.37208  | 0.034015 | 0.46337  | 0.054695 | 0.23813  | 0.016842 |
| -0.01094 | 0.81355  | -0.06424 | 0.16576  | -0.04695 | 0.31134  | -0.14534 | 0.00164  | -0.0545  |
| 0.000102 | 0.99825  | -0.13468 | 0.00355  | -0.10966 | 0.01776  | -0.09689 | 0.03634  | 0.079142 |
| 0.25958  | 1.25E-08 | -0.00484 | 0.917    | 0.090165 | 0.05151  | 0.068965 | 0.13672  | 0.082459 |
| -0.01891 | 0.68356  | -0.02428 | 0.60068  | 0.039395 | 0.39567  | -0.12213 | 0.00824  | -0.17106 |
| 0.126255 | 0.00629  | 0.010547 | 0.82017  | 0.174687 | 0.00015  | 0.101103 | 0.02892  | 0.235385 |
| 0.100734 | 0.02951  | 0.090102 | 0.05167  | 0.102734 | 0.02642  | 0.016182 | 0.72725  | -0.08406 |
| 0.009278 | 0.8415   | 0.171792 | 0.00019  | 0.070539 | 0.12797  | 0.208701 | 5.41E-06 | 0.088018 |
| 0.034424 | 0.458    | -0.06277 | 0.17569  | -0.04497 | 0.33221  | 0.000185 | 0.99681  | 0.032511 |
| -0.06385 | 0.16838  | -0.15041 | 0.00111  | -0.06818 | 0.14123  | -0.14104 | 0.00225  | 0.000553 |
| 0.131503 | 0.00442  | 0.144544 | 0.00174  | 0.122782 | 0.0079   | 0.129941 | 0.00492  | -0.00475 |
| 0.077347 | 0.09502  | -0.00305 | 0.94762  | -0.066   | 0.15444  | -0.01336 | 0.77342  | -0.01746 |
| -0.01773 | 0.70228  | -0.10359 | 0.02518  | -0.02939 | 0.52638  | -0.05822 | 0.20915  | 0.187951 |
| 0.024496 | 0.59749  | 0.136276 | 0.00317  | -0.03208 | 0.48924  | 0.144622 | 0.00173  | -0.02142 |
| 0.107295 | 0.02039  | 0.057076 | 0.21828  | 0.011419 | 0.8056   | 0.09795  | 0.03433  | 0.120709 |
| 0.16097  | 0.00048  | 0.025791 | 0.57824  | 0.086896 | 0.06061  | 0.056028 | 0.22687  | 0.037314 |
| 0.089816 | 0.05242  | 0.06856  | 0.13905  | -0.01713 | 0.712    | -0.02532 | 0.58528  | -0.08259 |
| 0.02359  | 0.61111  | 0.008084 | 0.86168  | 0.015147 | 0.74407  | -0.06725 | 0.14674  | 0.05671  |
| 0.403857 | 9.52E-20 | 0.134637 | 0.00356  | 0.136846 | 0.00304  | 0.144181 | 0.00179  | -0.00616 |
| 0.160551 | 0.0005   | 0.211221 | 4.14E-06 | 0.234091 | 3.11E-07 | 0.227333 | 6.88E-07 | 0.013175 |
| 0.000483 | 0.9917   | -0.10936 | 0.01808  | -0.05284 | 0.25446  | -0.20107 | 1.20E-05 | -0.07756 |
| -0.11474 | 0.0131   | -0.12058 | 0.0091   | -0.13633 | 0.00316  | -0.14725 | 0.00142  | 0.066835 |
| 0.018107 | 0.69633  | -0.11544 | 0.01255  | -0.04759 | 0.30479  | -0.0812  | 0.07963  | -0.13814 |
| -0.12757 | 0.00577  | 0.001669 | 0.97131  | -0.13383 | 0.00376  | 0.002634 | 0.95473  | 0.08349  |
| 0.048215 | 0.29846  | 0.074842 | 0.10625  | -0.04571 | 0.32432  | -0.0093  | 0.84121  | -0.04031 |
| -0.06822 | 0.14104  | -0.06264 | 0.17658  | -0.09094 | 0.04952  | -0.13877 | 0.00265  | -0.11734 |
| -0.10723 | 0.02046  | -0.02223 | 0.63189  | -0.03189 | 0.49172  | 0.080396 | 0.08265  | 0.080929 |
| 0.038341 | 0.40844  | 0.121652 | 0.0085   | 0.023803 | 0.60789  | 0.162614 | 0.00042  | 0.092945 |
| 0.162879 | 0.00041  | 0.282609 | 5.03E-10 | 0.06091  | 0.18885  | 0.141569 | 0.00217  | -0.03663 |
| 0.05177  | 0.2642   | 0.094265 | 0.04173  | -0.00045 | 0.99227  | 0.101779 | 0.02786  | -0.04792 |
| -0.01956 | 0.67335  | 0.000609 | 0.98953  | -0.08335 | 0.07194  | -0.06782 | 0.14336  | -0.14858 |
| 0.069401 | 0.13425  | 0.046252 | 0.31858  | 0.005715 | 0.90197  | 0.024852 | 0.59217  | 0.01954  |
| 0.088208 | 0.05681  | -0.09772 | 0.03475  | -0.07447 | 0.10802  | -0.07093 | 0.12586  | 0.153211 |
| 0.065051 | 0.16047  | -0.01211 | 0.79414  | 0.024796 | 0.593    | -0.02179 | 0.63866  | -0.01356 |
| 0.013766 | 0.76669  | 0.018058 | 0.6971   | 0.114673 | 0.01315  | 0.041738 | 0.36815  | -0.02714 |

|          |          |          |          |          |          |          |          |          |
|----------|----------|----------|----------|----------|----------|----------|----------|----------|
| -0.03609 | 0.43646  | -0.18165 | 7.89E-05 | -0.06139 | 0.18541  | -0.15852 | 0.00059  | 0.083107 |
| -0.01448 | 0.75505  | 0.134983 | 0.00347  | 0.151255 | 0.00104  | 0.143224 | 0.00192  | 0.132414 |
| 0.067419 | 0.14575  | 0.032043 | 0.48971  | -0.0881  | 0.0571   | 0.089009 | 0.05458  | 0.161447 |
| 0.067617 | 0.14457  | -0.01035 | 0.82347  | 0.022628 | 0.62572  | -0.02658 | 0.5666   | -0.05492 |
| 0.193732 | 2.49E-05 | 0.167225 | 0.00028  | 0.232951 | 3.57E-07 | 0.310907 | 6.34E-12 | 0.185691 |
| -0.04211 | 0.36394  | -0.10586 | 0.02213  | -0.21086 | 4.30E-06 | -0.06026 | 0.19363  | -0.07684 |
| 0.029379 | 0.52653  | -0.12879 | 0.00531  | 0.007575 | 0.87031  | -0.15249 | 0.00095  | 0.131211 |
| 0.051787 | 0.26405  | -0.04942 | 0.28657  | -0.09111 | 0.0491   | -0.04838 | 0.29682  | -0.09141 |
| 0.11168  | 0.01576  | -0.03591 | 0.4388   | 0.01573  | 0.73458  | -0.03738 | 0.42034  | 0.086492 |
| 0.10825  | 0.01929  | -0.03291 | 0.47803  | 0.06571  | 0.15627  | 0.005589 | 0.90412  | 0.092296 |
| -0.01214 | 0.79362  | -0.04371 | 0.34597  | -0.05836 | 0.20806  | 0.021723 | 0.63961  | 0.136582 |
| 0.04245  | 0.36003  | -0.0504  | 0.27707  | -0.05186 | 0.2634   | -0.05349 | 0.24867  | -0.02877 |
| 0.064482 | 0.16417  | -0.01508 | 0.74519  | 0.087999 | 0.0574   | -0.01895 | 0.6829   | -0.00728 |
| 0.062688 | 0.17625  | -0.05297 | 0.2533   | -0.12221 | 0.0082   | -0.04074 | 0.37977  | 0.002971 |
| -0.08044 | 0.08247  | 0.046156 | 0.31959  | 0.004165 | 0.92847  | 0.122439 | 0.00808  | 0.034886 |
| 0.048986 | 0.29079  | 0.086503 | 0.06179  | 0.130937 | 0.00459  | 0.055609 | 0.23037  | -0.05159 |
| 0.029979 | 0.51811  | -0.0379  | 0.41384  | -0.04372 | 0.34581  | -0.08517 | 0.06591  | -0.12578 |
| -0.10454 | 0.02387  | -0.05938 | 0.20024  | -0.07991 | 0.08452  | 0.03285  | 0.47883  | 0.193001 |
| -0.06573 | 0.15612  | 0.007599 | 0.86991  | 0.091139 | 0.04903  | 0.019407 | 0.67572  | 0.180286 |
| 0.036502 | 0.43131  | 0.208311 | 5.64E-06 | 0.148498 | 0.00129  | 0.263378 | 7.53E-09 | 0.123552 |
| 0.004634 | 0.92045  | 0.003329 | 0.94281  | -0.07635 | 0.09936  | -0.01946 | 0.67488  | -0.15305 |
| 0.049637 | 0.28441  | -0.04388 | 0.34407  | 0.045354 | 0.32808  | 0.015402 | 0.73992  | 0.09436  |
| -0.02312 | 0.61827  | 0.051423 | 0.26742  | -0.15017 | 0.00113  | 0.028827 | 0.53432  | -0.0969  |
| 0.054631 | 0.23868  | 0.009654 | 0.83517  | 0.0655   | 0.1576   | -0.06129 | 0.18611  | -0.04308 |
| 0.046176 | 0.31938  | 0.291612 | 1.32E-10 | 0.21629  | 2.39E-06 | 0.25708  | 1.74E-08 | 0.116902 |
| -0.01741 | 0.70744  | -0.03935 | 0.39622  | -0.0477  | 0.3037   | 0.02212  | 0.63351  | 0.0322   |
| -0.01579 | 0.73367  | 0.080753 | 0.08129  | -0.07084 | 0.12635  | 0.110974 | 0.01643  | -0.00657 |
| -0.03888 | 0.40192  | -0.02578 | 0.57843  | -0.02504 | 0.58933  | -0.00488 | 0.91627  | 0.122217 |
| 0.2327   | 3.67E-07 | 0.032318 | 0.48598  | -0.00585 | 0.89958  | 0.036527 | 0.43099  | 0.096101 |
| 0.048444 | 0.29616  | -0.01968 | 0.67136  | 0.127028 | 0.00598  | -0.00663 | 0.8864   | 0.05525  |
| 0.066814 | 0.14941  | 0.051163 | 0.26985  | 0.055839 | 0.22844  | 0.040195 | 0.38613  | 0.085999 |
| -0.12146 | 0.0086   | -0.20644 | 6.86E-06 | -0.20259 | 1.02E-05 | -0.18108 | 8.31E-05 | -0.11833 |
| 0.028753 | 0.53538  | 0.158615 | 0.00058  | 0.059022 | 0.20295  | 0.241322 | 1.30E-07 | -0.02655 |
| 0.118517 | 0.01037  | 0.111306 | 0.01611  | 0.203673 | 9.16E-06 | 0.251029 | 3.83E-08 | 0.30666  |
| 0.085768 | 0.06404  | -0.07007 | 0.13054  | 0.034006 | 0.46349  | -0.04395 | 0.34327  | 0.101323 |
| 0.11811  | 0.01063  | 0.033948 | 0.46424  | 0.026957 | 0.56118  | -0.03712 | 0.42358  | -0.09742 |
| -0.01577 | 0.73396  | -0.03045 | 0.51153  | -0.02833 | 0.54136  | -0.05658 | 0.22228  | 0.086545 |
| -0.00098 | 0.98307  | 0.108375 | 0.01915  | 0.012315 | 0.79068  | 0.169809 | 0.00023  | 0.132909 |
| -0.03881 | 0.40271  | -0.20529 | 7.74E-06 | -0.19841 | 1.57E-05 | -0.15247 | 0.00095  | 0.035151 |
| 0.047373 | 0.30699  | 0.010654 | 0.81839  | -0.07992 | 0.08448  | 0.024366 | 0.59942  | 0.04609  |
| 0.031616 | 0.49551  | 0.148302 | 0.00131  | 0.14077  | 0.0023   | 0.228098 | 6.30E-07 | 0.087638 |
| 0.056512 | 0.22286  | -0.01571 | 0.73497  | 0.034838 | 0.45261  | -0.0435  | 0.34827  | 0.01364  |
| -0.00185 | 0.96816  | 0.011338 | 0.80695  | -0.01304 | 0.77859  | -0.0082  | 0.85974  | -0.02609 |
| 0.039688 | 0.39217  | -0.14512 | 0.00166  | -0.10451 | 0.02391  | -0.10519 | 0.023    | 0.189    |
| 0.070732 | 0.12693  | -0.04046 | 0.38296  | -0.05139 | 0.26774  | -0.0131  | 0.77775  | 0.066636 |



|          |          |          |          |           |          |          |          |          |
|----------|----------|----------|----------|-----------|----------|----------|----------|----------|
| 0.031213 | 0.50102  | -0.11926 | 0.00989  | -0.00186  | 0.96798  | -0.07128 | 0.12402  | 0.17867  |
| 0.054663 | 0.2384   | -0.0527  | 0.25571  | -0.01718  | 0.7111   | -0.07507 | 0.10518  | -0.04301 |
| -0.05995 | 0.19594  | -0.05367 | 0.24702  | -0.03474  | 0.45388  | -0.0216  | 0.64159  | 0.044678 |
| 0.072482 | 0.11777  | 0.010523 | 0.82058  | -0.01552  | 0.73797  | -0.01613 | 0.72813  | 0.042432 |
| 0.036849 | 0.42694  | -0.04432 | 0.33923  | 0.018329  | 0.6928   | -0.0456  | 0.32543  | -0.01877 |
| -0.1609  | 0.00048  | -0.17021 | 0.00022  | -0.25149  | 3.61E-08 | -0.1294  | 0.0051   | -0.03452 |
| -0.06898 | 0.13661  | -0.00544 | 0.9067   | 0.015446  | 0.73919  | 0.068252 | 0.14083  | 0.313642 |
| 0.240034 | 1.52E-07 | -0.09813 | 0.034    | -0.03264  | 0.4816   | -0.02582 | 0.57778  | 0.159581 |
| -0.01885 | 0.68456  | -0.0068  | 0.88346  | 0.094873  | 0.04043  | -0.03872 | 0.40381  | -0.03203 |
| 0.051988 | 0.26219  | -0.04153 | 0.3706   | -0.0123   | 0.79092  | -0.02771 | 0.55032  | 0.033187 |
| 0.125171 | 0.00676  | -0.00496 | 0.91478  | 0.124925  | 0.00687  | -0.01845 | 0.69085  | 0.088786 |
| -0.01898 | 0.68242  | -0.20798 | 5.84E-06 | -0.20279  | 1.00E-05 | -0.18381 | 6.45E-05 | 0.0212   |
| 0.091897 | 0.04717  | 0.078372 | 0.0907   | 0.232139  | 3.92E-07 | 0.042904 | 0.35491  | 0.062966 |
| 0.066801 | 0.14949  | -0.082   | 0.07667  | 0.007943  | 0.86407  | -0.05051 | 0.27603  | 0.030807 |
| 0.286586 | 2.80E-10 | 0.139695 | 0.00248  | 0.157206  | 0.00065  | 0.135152 | 0.00343  | 0.201905 |
| 0.084465 | 0.0682   | 0.215161 | 2.70E-06 | 0.139601  | 0.0025   | 0.298636 | 4.48E-11 | 0.166141 |
| 0.016846 | 0.71653  | -0.07229 | 0.11875  | -0.01777  | 0.70168  | -0.13387 | 0.00375  | -0.04721 |
| 0.078834 | 0.08881  | -0.12868 | 0.00535  | -0.04074  | 0.3797   | -0.08805 | 0.05725  | -0.01444 |
| 0.002071 | 0.96439  | -0.07345 | 0.11293  | 0.000317  | 0.99455  | -0.07626 | 0.09976  | 0.050777 |
| 0.060676 | 0.19057  | -0.00809 | 0.86151  | -0.1386   | 0.00269  | -0.10772 | 0.01989  | -0.11622 |
| 0.069972 | 0.13107  | 0.019581 | 0.67298  | 0.084974  | 0.06655  | 0.029901 | 0.51919  | 0.119915 |
| -0.0241  | 0.60339  | 0.033714 | 0.46733  | 0.031388  | 0.49863  | 0.039778 | 0.39109  | -0.09074 |
| 0.03149  | 0.49723  | -0.00688 | 0.88211  | 0.04755   | 0.30518  | -0.02048 | 0.65886  | -0.00267 |
| 0.096809 | 0.0365   | -0.07357 | 0.11236  | 0.02277   | 0.62356  | -0.07572 | 0.1022   | 0.192635 |
| 0.064347 | 0.16506  | 0.094814 | 0.04055  | 0.251387  | 3.66E-08 | 0.081557 | 0.07829  | 0.36118  |
| 0.053703 | 0.24676  | 0.095619 | 0.03887  | 0.104264  | 0.02424  | 0.067597 | 0.14469  | 0.281607 |
| -0.00156 | 0.97324  | -0.05587 | 0.22821  | -0.1051   | 0.02312  | -0.06308 | 0.17355  | 0.021875 |
| 0.036476 | 0.43163  | -0.10056 | 0.0298   | 0.02089   | 0.65251  | -0.04182 | 0.36724  | 0.168614 |
| 0.021712 | 0.63979  | -0.09933 | 0.03186  | -7.96E-05 | 0.99863  | -0.04834 | 0.29717  | 0.040069 |
| -0.0785  | 0.09019  | -0.12062 | 0.00908  | -0.12982  | 0.00496  | -0.19294 | 2.70E-05 | -0.20202 |
| 0.013632 | 0.76891  | 0.021504 | 0.643    | 0.033029  | 0.47644  | 0.06706  | 0.14792  | 0.102234 |
| 0.00056  | 0.99038  | 0.087501 | 0.05883  | -0.03551  | 0.44395  | 0.056108 | 0.2262   | 0.022885 |
| 0.012329 | 0.79044  | -0.06432 | 0.16522  | 0.080504  | 0.08223  | -0.03412 | 0.46201  | 0.151524 |
| -0.09343 | 0.04359  | -0.04957 | 0.28503  | -0.0305   | 0.51087  | -0.07163 | 0.12216  | 0.085002 |
| -0.06611 | 0.15373  | -0.06482 | 0.16194  | -0.04733  | 0.30745  | -0.01296 | 0.78002  | 0.07849  |
| -0.01994 | 0.66735  | -0.07692 | 0.09685  | -0.04134  | 0.37278  | 0.031202 | 0.50118  | 0.159634 |
| 0.022565 | 0.62668  | 0.268201 | 3.90E-09 | 0.227307  | 6.90E-07 | 0.271139 | 2.59E-09 | 0.186986 |
| 0.0389   | 0.40163  | 0.019762 | 0.67014  | -0.02337  | 0.61444  | 0.026807 | 0.56336  | 0.060268 |
| -0.08278 | 0.0739   | -0.12364 | 0.00747  | -0.13306  | 0.00397  | -0.1381  | 0.00278  | -0.06108 |
| 0.037675 | 0.41664  | -0.07195 | 0.12047  | 0.002601  | 0.95529  | -0.06172 | 0.183    | 0.002228 |
| 0.069687 | 0.13265  | 0.086247 | 0.06256  | -0.03193  | 0.49126  | 0.029999 | 0.51784  | -0.04556 |
| -0.00792 | 0.86445  | -0.07488 | 0.10607  | -0.15994  | 0.00052  | -0.01756 | 0.70515  | 0.136219 |
| 0.074224 | 0.10918  | -0.04505 | 0.33133  | 0.056824  | 0.22032  | -0.04839 | 0.29671  | -0.01237 |
| 0.013187 | 0.77624  | -0.02051 | 0.65842  | -0.00755  | 0.87073  | -0.08786 | 0.0578   | -0.01079 |
| -0.18743 | 4.59E-05 | -0.21373 | 3.16E-06 | -0.21454  | 2.89E-06 | -0.18295 | 6.99E-05 | 0.003999 |

|          |          |          |          |          |          |          |          |          |
|----------|----------|----------|----------|----------|----------|----------|----------|----------|
| -0.02367 | 0.60997  | 0.064091 | 0.16675  | -0.00521 | 0.91058  | 0.08901  | 0.05458  | -0.02051 |
| 0.003925 | 0.93259  | 0.061737 | 0.18291  | 0.030818 | 0.50646  | -0.00672 | 0.88484  | -0.04685 |
| 0.008947 | 0.84708  | -0.04457 | 0.33647  | -0.03763 | 0.41725  | -0.05072 | 0.27406  | -0.01791 |
| 0.012325 | 0.79052  | -0.07024 | 0.12958  | -0.1307  | 0.00467  | -0.08322 | 0.07239  | -0.03147 |
| 0.103965 | 0.02465  | -0.02127 | 0.6466   | 0.01478  | 0.75006  | -0.02864 | 0.53703  | -0.09175 |
| -0.01323 | 0.77551  | -0.12073 | 0.00901  | -0.09073 | 0.05005  | -0.10073 | 0.02951  | -0.07404 |
| -0.02187 | 0.63738  | 0.079083 | 0.08781  | 0.121229 | 0.00873  | 0.074096 | 0.10979  | 0.11502  |
| 0.185321 | 5.60E-05 | 0.125182 | 0.00676  | 0.176954 | 0.00012  | 0.073523 | 0.11257  | 0.002295 |
| 0.052369 | 0.25871  | -0.04925 | 0.28819  | -0.02984 | 0.52011  | -0.09905 | 0.03236  | -0.05064 |
| 0.043048 | 0.3533   | 0.135236 | 0.00341  | 0.109456 | 0.01797  | 0.130154 | 0.00485  | 0.123217 |
| 0.030291 | 0.51377  | -0.05709 | 0.21813  | -0.08616 | 0.06284  | -0.00385 | 0.93384  | 0.071949 |
| 0.015574 | 0.73711  | 0.124138 | 0.00723  | 0.093143 | 0.04424  | 0.210009 | 4.71E-06 | 0.178863 |
| -0.0794  | 0.08656  | -0.08245 | 0.07507  | -0.09614 | 0.03782  | -0.02716 | 0.55822  | -0.12055 |
| -0.0262  | 0.57218  | 0.028902 | 0.53326  | 0.009242 | 0.84211  | 0.065046 | 0.16051  | -0.14688 |
| -0.07579 | 0.10189  | -0.04984 | 0.28243  | -0.15358 | 0.00087  | -0.0022  | 0.96226  | 0.095727 |
| 0.116994 | 0.0114   | -0.11875 | 0.01021  | 0.023206 | 0.61692  | -0.12915 | 0.00519  | -0.03535 |
| 0.077914 | 0.09261  | -0.03135 | 0.49917  | -0.01361 | 0.7693   | -0.02515 | 0.58772  | 0.012388 |
| 0.050274 | 0.27828  | 0.206998 | 6.48E-06 | 0.109542 | 0.01788  | 0.254066 | 2.59E-08 | 0.096288 |
| 0.058626 | 0.20601  | -0.07066 | 0.12729  | -0.02381 | 0.60779  | -0.08111 | 0.07996  | 0.080264 |
| 0.011222 | 0.80889  | 0.112252 | 0.01523  | 0.239873 | 1.55E-07 | 0.223912 | 1.02E-06 | 0.378598 |
| 0.041859 | 0.36676  | -0.04912 | 0.28947  | -0.04443 | 0.33805  | -0.02146 | 0.64361  | 0.049923 |
| 0.132214 | 0.00421  | -0.0416  | 0.36979  | 0.029611 | 0.52327  | -0.06185 | 0.18214  | 0.035015 |
| -0.02918 | 0.52934  | -0.0579  | 0.21173  | 0.043135 | 0.35232  | 0.027084 | 0.55934  | 0.103683 |
| 0.136027 | 0.00323  | -0.08807 | 0.0572   | 0.026203 | 0.57219  | -0.11826 | 0.01054  | -0.04657 |
| -0.10508 | 0.02315  | -0.11588 | 0.01221  | -0.07427 | 0.10894  | -0.05608 | 0.22645  | 0.020775 |
| 0.03372  | 0.46726  | -0.05022 | 0.27884  | 0.00829  | 0.8582   | -0.00953 | 0.83734  | -0.00365 |
| -0.05613 | 0.22599  | -0.05831 | 0.20843  | 0.0509   | 0.27232  | -0.00605 | 0.89631  | 0.246447 |
| 0.066456 | 0.15161  | -0.04248 | 0.35974  | -0.04882 | 0.29241  | -0.04057 | 0.38174  | -0.06398 |
| 0.001065 | 0.98169  | -0.16144 | 0.00046  | -0.13381 | 0.00377  | -0.12076 | 0.00899  | 0.106767 |
| -0.13216 | 0.00422  | -0.21123 | 4.13E-06 | -0.21687 | 2.24E-06 | -0.27143 | 2.49E-09 | -0.05843 |
| -0.00974 | 0.8338   | 0.000355 | 0.9939   | 0.000937 | 0.98389  | -0.01915 | 0.67983  | 0.0742   |
| 0.001151 | 0.9802   | -0.00096 | 0.98354  | 0.003625 | 0.93773  | -0.00753 | 0.87101  | -0.0039  |
| 0.016932 | 0.71515  | 0.013945 | 0.76374  | -0.03406 | 0.46272  | -0.04841 | 0.29648  | -0.19783 |
| -0.0448  | 0.33399  | -0.08268 | 0.07426  | -0.07742 | 0.09472  | -0.09767 | 0.03485  | -0.00315 |
| -0.01042 | 0.82237  | -0.11741 | 0.01111  | -0.06246 | 0.17786  | -0.09058 | 0.05045  | 0.020614 |
| -0.04998 | 0.28108  | -0.18366 | 6.54E-05 | -0.17999 | 9.18E-05 | -0.20866 | 5.44E-06 | -0.0383  |
| 0.062336 | 0.1787   | -0.01379 | 0.76632  | -0.02469 | 0.59452  | -0.04795 | 0.30117  | -0.03953 |
| -0.01291 | 0.78079  | -0.04526 | 0.32912  | -0.06816 | 0.14137  | -0.07425 | 0.10907  | -0.10017 |
| -0.02307 | 0.61896  | -0.07557 | 0.10286  | -0.07506 | 0.10523  | -0.08421 | 0.06905  | -0.11275 |
| -0.01659 | 0.72072  | -0.04204 | 0.36469  | -0.04752 | 0.30546  | -0.04484 | 0.33358  | 0.060604 |
| -0.00205 | 0.96471  | -0.01548 | 0.73862  | 0.015437 | 0.73935  | 0.009562 | 0.83673  | 0.02699  |
| 0.072571 | 0.11732  | 0.056406 | 0.22374  | 0.070156 | 0.13005  | 0.026085 | 0.57392  | 0.009272 |
| 0.058672 | 0.20565  | -0.04305 | 0.35322  | 0.000812 | 0.98604  | -0.04737 | 0.30697  | -0.05421 |
| 0.007285 | 0.87524  | -0.06655 | 0.15104  | -0.02839 | 0.5406   | -0.06363 | 0.16984  | -0.04984 |
| 0.05238  | 0.25861  | 0.029047 | 0.53121  | 0.09471  | 0.04077  | 0.037878 | 0.41413  | 0.017646 |

|          |         |          |          |          |          |          |          |          |
|----------|---------|----------|----------|----------|----------|----------|----------|----------|
| 0.052436 | 0.2581  | -0.03724 | 0.42205  | 0.032808 | 0.4794   | -0.01189 | 0.79767  | -0.04518 |
| -0.024   | 0.605   | 0.073675 | 0.11183  | -0.15389 | 0.00085  | 0.018082 | 0.69672  | -0.16024 |
| 0.024876 | 0.5918  | -0.02124 | 0.64707  | -0.00694 | 0.88109  | -0.05473 | 0.2378   | 0.015573 |
| 0.063078 | 0.17357 | -0.13649 | 0.00312  | -0.00392 | 0.93266  | -0.10274 | 0.0264   | 0.202459 |
| 0.100425 | 0.03002 | -0.00908 | 0.84477  | 0.050759 | 0.27366  | -0.01797 | 0.69857  | 0.107159 |
| -0.00938 | 0.83978 | 0.037468 | 0.4192   | 0.063423 | 0.17122  | 0.030655 | 0.50871  | 0.046003 |
| 0.053717 | 0.24663 | -0.02932 | 0.52742  | -0.00127 | 0.97814  | 5.79E-05 | 0.999    | 0.109438 |
| 0.026786 | 0.56367 | -0.03236 | 0.48538  | -0.0293  | 0.52766  | -0.04234 | 0.36128  | 0.047685 |
| 0.075618 | 0.10266 | -0.00219 | 0.96236  | -0.03533 | 0.44625  | -0.0454  | 0.32757  | -0.0538  |
| 0.075485 | 0.10327 | 0.063772 | 0.16887  | 0.063306 | 0.17201  | 0.085126 | 0.06606  | -0.04411 |
| -0.08715 | 0.05985 | -0.06892 | 0.13696  | -0.22139 | 1.35E-06 | -0.01925 | 0.67817  | -0.06682 |
| 0.075069 | 0.10519 | 0.143725 | 0.00185  | 0.291111 | 1.42E-10 | 0.148309 | 0.00131  | 0.389691 |
| -0.00569 | 0.90243 | 0.078206 | 0.09139  | -0.01304 | 0.77865  | 0.100806 | 0.02939  | -0.03165 |
| 0.074027 | 0.11012 | -0.1081  | 0.01946  | 0.007554 | 0.87067  | -0.06971 | 0.1325   | 0.16482  |
| 0.013484 | 0.77133 | -0.03469 | 0.45455  | 0.02884  | 0.53413  | -0.01114 | 0.81021  | 0.019026 |
| -0.07943 | 0.08643 | -0.07451 | 0.10783  | -0.06272 | 0.17604  | -0.10545 | 0.02266  | -0.10468 |
| 0.044803 | 0.334   | -0.06144 | 0.18503  | -0.04905 | 0.29014  | -0.01573 | 0.73454  | 0.124442 |
| 0.001736 | 0.97016 | -0.02869 | 0.53632  | -0.0491  | 0.28962  | 0.005853 | 0.89962  | 0.109065 |
| 0.107427 | 0.02023 | -0.01342 | 0.77239  | 0.057136 | 0.2178   | -0.00194 | 0.96669  | 0.01189  |
| -0.10252 | 0.02674 | -0.09547 | 0.03918  | -0.14495 | 0.00169  | -0.042   | 0.36521  | 0.072601 |
| -0.07911 | 0.08768 | -0.05578 | 0.22894  | -0.1204  | 0.00921  | -0.10396 | 0.02466  | -0.05367 |
| 0.149827 | 0.00116 | 0.12021  | 0.00932  | 0.102181 | 0.02724  | 0.155783 | 0.00073  | 0.129926 |
| 0.02297  | 0.62051 | 0.010489 | 0.82115  | -0.01713 | 0.71193  | 0.003558 | 0.93888  | 0.083954 |
| 0.02221  | 0.63213 | -0.01175 | 0.80002  | 0.029956 | 0.51843  | -0.0443  | 0.33946  | -0.01412 |
| -0.00957 | 0.83654 | 0.10006  | 0.03062  | 0.06922  | 0.13527  | 0.055274 | 0.23318  | -0.00521 |
| 0.020133 | 0.66433 | 0.085315 | 0.06546  | 0.099781 | 0.03109  | 0.093967 | 0.04239  | 0.061522 |
| 0.018754 | 0.68604 | -0.13874 | 0.00266  | -0.04768 | 0.30383  | -0.17691 | 0.00012  | 0.092006 |
| -0.09769 | 0.03481 | -0.0674  | 0.14586  | 0.047895 | 0.30168  | -0.01937 | 0.67633  | 0.216421 |
| 0.082627 | 0.07445 | 0.016256 | 0.72606  | 0.046725 | 0.31366  | 0.000587 | 0.98991  | 0.096171 |
| 0.018078 | 0.69679 | 0.135573 | 0.00333  | 0.036319 | 0.43361  | 0.209825 | 4.80E-06 | 0.047113 |
| -0.02105 | 0.65    | -0.12839 | 0.00546  | 0.012004 | 0.79585  | -0.0964  | 0.0373   | 0.030335 |
| -0.06571 | 0.15629 | -0.10603 | 0.02193  | -0.05988 | 0.19648  | -0.18147 | 8.01E-05 | -0.06913 |
| 0.088412 | 0.05623 | -0.08387 | 0.07018  | -0.02616 | 0.57289  | -0.06559 | 0.15703  | 0.216253 |
| 0.02942  | 0.52594 | -0.18408 | 6.29E-05 | -0.15725 | 0.00065  | -0.17634 | 0.00013  | 0.061745 |
| -0.00744 | 0.87263 | 0.033664 | 0.468    | -0.09314 | 0.04425  | -0.03665 | 0.42944  | 0.066489 |
| -0.01449 | 0.75476 | -0.08561 | 0.06453  | -0.0064  | 0.89023  | -0.07432 | 0.10871  | 0.012826 |
| 0.101954 | 0.02759 | 0.053952 | 0.24457  | 0.175514 | 0.00014  | 0.157694 | 0.00063  | 0.210869 |
| 0.053067 | 0.2524  | 0.040972 | 0.37701  | -0.00906 | 0.84519  | -0.00375 | 0.93564  | 0.0638   |
| -0.01305 | 0.77847 | 0.063928 | 0.16783  | -0.04232 | 0.36151  | -0.00837 | 0.85684  | -0.00825 |
| -0.01623 | 0.72655 | -0.01424 | 0.75895  | -0.10911 | 0.01835  | -0.06847 | 0.13959  | -0.06344 |
| -0.06215 | 0.18003 | 0.03406  | 0.46278  | 0.021218 | 0.64742  | -0.08406 | 0.06955  | -0.13137 |
| -0.00384 | 0.93403 | 0.007446 | 0.87251  | -0.03511 | 0.44908  | -0.01124 | 0.80854  | -0.09991 |
| 0.040605 | 0.3813  | -0.03359 | 0.46898  | -0.00528 | 0.90945  | -0.05264 | 0.25627  | 0.030898 |
| 0.037817 | 0.41488 | -0.10862 | 0.01887  | -0.00797 | 0.86361  | -0.04805 | 0.30011  | 0.044934 |
| 0.131871 | 0.00431 | -0.02508 | 0.5888   | -0.00109 | 0.98127  | 0.011757 | 0.79997  | 0.039387 |

|          |         |          |          |          |          |          |          |          |
|----------|---------|----------|----------|----------|----------|----------|----------|----------|
| -0.16084 | 0.00048 | -0.25392 | 2.64E-08 | -0.25008 | 4.33E-08 | -0.19143 | 3.12E-05 | 0.173126 |
| 0.011901 | 0.79756 | -0.10195 | 0.02759  | -0.06342 | 0.17128  | 0.032338 | 0.48571  | 0.283764 |
| -0.12016 | 0.00935 | 0.051131 | 0.27015  | -0.11429 | 0.01346  | 0.022573 | 0.62657  | 0.020234 |
| 0.045296 | 0.3287  | -0.08736 | 0.05923  | -0.13343 | 0.00387  | -0.12031 | 0.00926  | -0.01579 |
| 0.033311 | 0.47268 | -0.07553 | 0.10307  | -0.05336 | 0.24979  | 0.039104 | 0.39917  | 0.268403 |
| -0.01261 | 0.78582 | -0.05035 | 0.27756  | -0.03911 | 0.39907  | -0.0803  | 0.08303  | -0.05964 |
| 0.161294 | 0.00047 | 0.076069 | 0.10062  | 0.026948 | 0.56132  | 0.067056 | 0.14794  | -0.04017 |
| 0.004706 | 0.91921 | -0.04786 | 0.30201  | -0.05062 | 0.275    | -0.05231 | 0.25924  | 0.0572   |
| 0.069065 | 0.13615 | -0.05289 | 0.25399  | 0.026244 | 0.57159  | -0.02489 | 0.59161  | 0.0509   |
| 0.051755 | 0.26434 | 0.004849 | 0.91676  | 0.056325 | 0.22441  | 0.034622 | 0.45543  | 0.138434 |
| 0.040993 | 0.37677 | -0.02489 | 0.59166  | -0.00533 | 0.90859  | 0.002779 | 0.95225  | 0.08962  |
| -0.01556 | 0.7373  | -0.02998 | 0.51806  | 0.008358 | 0.85704  | 0.022037 | 0.63478  | 0.091707 |
| 0.086212 | 0.06267 | 0.035918 | 0.43872  | 0.193712 | 2.50E-05 | 0.122349 | 0.00812  | 0.203532 |
| 0.015162 | 0.74382 | 0.023953 | 0.60564  | 0.022778 | 0.62344  | 0.036354 | 0.43317  | 0.066045 |
| 0.047905 | 0.30157 | 0.055383 | 0.23227  | 0.214194 | 3.00E-06 | 0.134068 | 0.0037   | 0.322055 |
| 0.022677 | 0.62499 | 0.163227 | 0.0004   | 0.069023 | 0.13639  | 0.253234 | 2.88E-08 | 0.082059 |
| -0.01358 | 0.76977 | 0.006222 | 0.89332  | 0.080367 | 0.08276  | 0.020919 | 0.65207  | 0.09284  |
| -0.06832 | 0.14043 | 0.03203  | 0.48989  | 0.029944 | 0.5186   | -0.04491 | 0.33281  | 0.095541 |
| -0.03998 | 0.38867 | -0.11353 | 0.01409  | -0.10858 | 0.01892  | -0.09033 | 0.05108  | 0.075985 |
| 0.02665  | 0.56565 | -0.12917 | 0.00518  | -0.10921 | 0.01823  | -0.07328 | 0.11377  | 0.081468 |
| -0.02311 | 0.61836 | -0.05065 | 0.27467  | 0.035277 | 0.44693  | -0.05773 | 0.21304  | 0.084688 |
| 0.101784 | 0.02785 | 0.004849 | 0.91676  | 0.1101   | 0.01731  | 0.022066 | 0.63434  | 0.163493 |
| 0.000247 | 0.99576 | -0.18169 | 7.86E-05 | -0.1037  | 0.02502  | -0.06689 | 0.14896  | 0.10244  |
| 0.047227 | 0.30848 | 0.016797 | 0.71732  | -0.05164 | 0.26539  | -0.01123 | 0.80868  | -0.00316 |
| -0.0047  | 0.91939 | 0.045006 | 0.33181  | -0.04691 | 0.31175  | 0.106155 | 0.02177  | 0.019124 |
| 0.107768 | 0.01984 | -0.01482 | 0.74942  | 0.008696 | 0.85133  | -0.04637 | 0.31731  | 0.104135 |
| 0.02211  | 0.63365 | 0.023037 | 0.61949  | 0.046066 | 0.32053  | 0.036944 | 0.42574  | 0.070331 |
| 0.05025  | 0.27851 | -0.00645 | 0.88945  | 0.053819 | 0.24574  | 0.02573  | 0.57914  | 0.026628 |
| -0.1124  | 0.01509 | -0.09492 | 0.04032  | -0.01439 | 0.75639  | -0.10686 | 0.02091  | 0.021202 |
| 0.121879 | 0.00837 | 0.01907  | 0.68104  | 0.126325 | 0.00627  | 0.065786 | 0.15579  | 0.261865 |
| -0.02636 | 0.56984 | -0.07665 | 0.09804  | -0.06738 | 0.14598  | 0.011719 | 0.8006   | 0.004391 |
| -0.05473 | 0.2378  | -0.04972 | 0.28361  | -0.10572 | 0.02232  | 0.039328 | 0.39648  | 0.000536 |
| -0.10714 | 0.02057 | -0.03847 | 0.40683  | -0.15406 | 0.00084  | 0.028891 | 0.53342  | -0.08909 |
| -0.15764 | 0.00063 | -0.10813 | 0.01942  | -0.2819  | 5.58E-10 | -0.05063 | 0.2749   | -0.1108  |
| -0.0388  | 0.40281 | -0.06397 | 0.16752  | -0.02232 | 0.63041  | -0.12635 | 0.00626  | -0.02019 |
| -0.02413 | 0.60295 | -0.13051 | 0.00473  | -0.08276 | 0.07396  | -0.15126 | 0.00104  | -0.09883 |
| 0.015445 | 0.73922 | 0.005418 | 0.90704  | -0.08725 | 0.05957  | 0.102168 | 0.02726  | 0.084179 |
| -0.00633 | 0.89142 | -0.02679 | 0.56364  | 0.050478 | 0.27633  | -0.10397 | 0.02465  | -0.0627  |
| 0.112626 | 0.01489 | -0.07194 | 0.12056  | -0.10191 | 0.02766  | -0.12735 | 0.00585  | -0.10189 |
| -0.03001 | 0.51767 | 0.022761 | 0.6237   | -0.00206 | 0.96464  | -0.05161 | 0.26566  | -0.07099 |
| 0.026465 | 0.56836 | -0.02874 | 0.53556  | -0.03175 | 0.49367  | -0.04442 | 0.33812  | 0.048444 |
| 0.015387 | 0.74015 | 0.171053 | 0.0002   | 0.010828 | 0.81548  | 0.163778 | 0.00038  | -0.07648 |
| -0.05307 | 0.25237 | -0.16868 | 0.00025  | -0.08287 | 0.0736   | -0.12569 | 0.00654  | 0.237678 |
| -0.12902 | 0.00523 | -0.05241 | 0.25831  | -0.09619 | 0.03771  | -0.01571 | 0.7349   | -0.00484 |
| 0.083582 | 0.07115 | 0.07318  | 0.11427  | 0.053947 | 0.24462  | 0.076091 | 0.10053  | 0.01215  |

|          |         |          |          |          |          |          |          |          |
|----------|---------|----------|----------|----------|----------|----------|----------|----------|
| 0.069696 | 0.1326  | -0.0435  | 0.34829  | -0.1233  | 0.00764  | -0.08473 | 0.06734  | -0.05158 |
| 0.094193 | 0.04189 | 0.021519 | 0.64276  | 0.071572 | 0.12246  | -0.02232 | 0.63048  | 0.06411  |
| -0.04992 | 0.28168 | -0.00985 | 0.83194  | -0.13033 | 0.00479  | 0.01119  | 0.80942  | 0.077943 |
| 0.010444 | 0.8219  | 0.108815 | 0.01866  | 0.170229 | 0.00022  | 0.067456 | 0.14553  | 0.188756 |
| 0.020469 | 0.65906 | 0.075935 | 0.10122  | -0.00277 | 0.95233  | 0.120588 | 0.00909  | 0.198961 |
| 0.019144 | 0.67988 | 0.034629 | 0.45533  | -0.01097 | 0.8131   | -0.03118 | 0.50145  | 0.041692 |
| 0.069331 | 0.13464 | 0.049251 | 0.28818  | 0.054247 | 0.242    | 0.096596 | 0.03691  | 0.037266 |
| 0.159779 | 0.00053 | 0.032251 | 0.48689  | 0.134272 | 0.00365  | 0.057431 | 0.21542  | 0.232612 |
| 0.031995 | 0.49036 | -0.09385 | 0.04264  | -0.07092 | 0.12589  | -0.08544 | 0.06506  | 0.054779 |
| -0.05934 | 0.20056 | 0.0934   | 0.04365  | -0.10207 | 0.02742  | 0.026169 | 0.57269  | -0.16422 |
| -0.0062  | 0.89376 | -0.13689 | 0.00303  | -0.14907 | 0.00123  | -0.0961  | 0.03789  | 0.034441 |
| -0.05643 | 0.22352 | -0.21103 | 4.22E-06 | -0.13261 | 0.0041   | -0.17651 | 0.00013  | -0.04118 |
| -0.0203  | 0.66166 | -0.10836 | 0.01917  | -0.06077 | 0.18991  | -0.10517 | 0.02302  | 0.030839 |
| -0.04438 | 0.33854 | 0.006947 | 0.88098  | -0.15981 | 0.00053  | 0.062293 | 0.17899  | 0.069575 |
| -0.09495 | 0.04025 | -0.08378 | 0.07048  | -0.13103 | 0.00456  | -0.01421 | 0.7594   | 0.059309 |
| 0.06762  | 0.14456 | 0.219118 | 1.75E-06 | 0.231529 | 4.22E-07 | 0.287972 | 2.28E-10 | 0.31089  |
| -0.00986 | 0.83165 | -0.16716 | 0.00029  | -0.11511 | 0.01281  | -0.05058 | 0.27537  | 0.197847 |
| -0.04642 | 0.3168  | -0.106   | 0.02197  | -0.04235 | 0.3612   | -0.09556 | 0.03899  | 0.132927 |
| 0.053122 | 0.25191 | 0.012029 | 0.79544  | 0.112833 | 0.0147   | 0.03484  | 0.45259  | 0.099345 |
| 0.023641 | 0.61035 | -0.12784 | 0.00567  | -0.05292 | 0.25377  | -0.12207 | 0.00827  | 0.036227 |
| 0.178341 | 0.00011 | -0.05519 | 0.23391  | -0.02828 | 0.54213  | -0.00885 | 0.84869  | -0.01277 |
| 0.007869 | 0.86533 | -0.01943 | 0.67537  | -0.02124 | 0.64715  | -0.0431  | 0.35267  | 0.000318 |
| -0.01346 | 0.7717  | 0.034449 | 0.45768  | -0.0542  | 0.2424   | 0.115966 | 0.01215  | 0.118147 |
| 0.066207 | 0.15315 | 0.021879 | 0.63722  | 0.021817 | 0.63817  | 0.016126 | 0.72816  | 0.137736 |
| -0.02857 | 0.53804 | -0.15781 | 0.00062  | -0.14764 | 0.00138  | -0.2166  | 2.31E-06 | -0.05777 |
| -0.03868 | 0.40432 | -0.13846 | 0.00271  | -0.08078 | 0.08117  | -0.08304 | 0.073    | 0.03925  |
| 0.015798 | 0.73347 | 0.010483 | 0.82125  | -0.00524 | 0.91     | 0.032583 | 0.48241  | 0.07022  |
| -0.00935 | 0.84037 | -0.11762 | 0.01096  | -0.08779 | 0.058    | -0.04167 | 0.36888  | -0.00268 |
| 0.089201 | 0.05406 | 0.02842  | 0.54012  | -0.04767 | 0.304    | 0.038064 | 0.41184  | -0.02287 |
| -0.01022 | 0.82571 | -0.05973 | 0.19758  | -0.06542 | 0.15811  | -0.10235 | 0.02698  | -0.03495 |
| 0.074981 | 0.1056  | 0.045043 | 0.33141  | 0.010001 | 0.82935  | 0.03115  | 0.50189  | 0.043276 |
| -0.03797 | 0.41301 | -0.09118 | 0.04891  | 0.048435 | 0.29626  | -0.06541 | 0.15815  | 0.098248 |
| 0.007388 | 0.87349 | 0.009055 | 0.84527  | 0.045877 | 0.32253  | 0.1476   | 0.00138  | 0.204337 |
| 0.022412 | 0.62904 | -0.0116  | 0.80255  | 0.096411 | 0.03728  | -0.01165 | 0.80179  | 0.103995 |
| -0.0629  | 0.1748  | -0.06105 | 0.18781  | -0.04894 | 0.29124  | 0.044946 | 0.33246  | 0.204143 |
| -0.01821 | 0.69474 | -0.06504 | 0.16055  | 0.009479 | 0.83813  | -0.06296 | 0.17436  | 0.045249 |
| 0.054369 | 0.24094 | -0.04846 | 0.296    | -0.06131 | 0.18595  | 0.028561 | 0.53811  | 0.020826 |
| 0.061355 | 0.18564 | -0.00686 | 0.88245  | 0.036625 | 0.42975  | 0.017907 | 0.69952  | 0.038549 |
| -0.0382  | 0.41022 | -0.13528 | 0.0034   | -0.0687  | 0.13822  | -0.09255 | 0.04562  | 0.051848 |
| 0.05292  | 0.25372 | 0.274171 | 1.69E-09 | 0.104925 | 0.02335  | 0.187555 | 4.53E-05 | 0.049721 |
| 0.022082 | 0.63409 | -0.03907 | 0.39955  | -0.04781 | 0.30249  | -0.05267 | 0.25599  | -0.03779 |
| 0.10193  | 0.02763 | -0.03931 | 0.39673  | 0.010583 | 0.81958  | -0.00289 | 0.95042  | 0.029223 |
| -0.03107 | 0.50295 | -0.04515 | 0.33029  | 0.028642 | 0.53695  | -0.05884 | 0.20434  | -0.03227 |
| 0.015277 | 0.74195 | 0.050585 | 0.27531  | -0.03844 | 0.40719  | -0.00616 | 0.8943   | -0.15538 |
| -0.0571  | 0.21806 | -0.03635 | 0.43326  | -0.09155 | 0.04801  | -0.12816 | 0.00554  | -0.01297 |

|          |         |          |          |          |          |          |          |          |
|----------|---------|----------|----------|----------|----------|----------|----------|----------|
| -0.10825 | 0.01929 | 0.010224 | 0.82559  | -0.0531  | 0.25209  | -0.04936 | 0.28714  | -0.06701 |
| -0.05116 | 0.26985 | 0.10416  | 0.02439  | -0.0883  | 0.05656  | -0.01019 | 0.82619  | -0.11367 |
| -0.11364 | 0.014   | -0.00726 | 0.87562  | -0.15272 | 0.00093  | 0.047074 | 0.31005  | 0.060168 |
| 0.090668 | 0.05021 | -0.07658 | 0.09836  | -0.06847 | 0.13955  | -0.13256 | 0.00411  | 0.08053  |
| 0.012861 | 0.78163 | 0.018741 | 0.68625  | -0.00018 | 0.99686  | -0.00961 | 0.83598  | 0.097042 |
| 0.125316 | 0.0067  | 0.102335 | 0.02701  | 0.086609 | 0.06146  | 0.034276 | 0.45994  | 0.0347   |
| 0.042063 | 0.36443 | -0.02852 | 0.53872  | 0.015984 | 0.73045  | -0.0831  | 0.07279  | 0.005581 |
| 0.00777  | 0.867   | 0.022437 | 0.62864  | -0.05039 | 0.27712  | 0.043853 | 0.34436  | 0.025734 |
| 0.14116  | 0.00223 | 0.311068 | 6.18E-12 | 0.200215 | 1.30E-05 | 0.209939 | 4.74E-06 | 0.110372 |
| -0.00123 | 0.9788  | 0.079732 | 0.08522  | 0.056607 | 0.22209  | 0.052559 | 0.25698  | -0.00093 |
| -0.00592 | 0.89844 | -0.01929 | 0.67753  | 0.07674  | 0.09765  | 0.085409 | 0.06517  | 0.144215 |
| -0.08913 | 0.05426 | 0.052499 | 0.25753  | -0.15811 | 0.00061  | 0.06601  | 0.15438  | 0.020745 |
| 0.001277 | 0.97805 | 0.022874 | 0.62197  | -0.06581 | 0.15566  | 0.013437 | 0.77211  | -0.0789  |
| -0.10229 | 0.02708 | -0.20044 | 1.28E-05 | -0.17155 | 0.0002   | -0.16989 | 0.00023  | -0.14435 |
| 0.047499 | 0.3057  | 0.198734 | 1.52E-05 | 0.163425 | 0.00039  | 0.268421 | 3.78E-09 | 0.007644 |
| -0.00236 | 0.95939 | -0.01721 | 0.71064  | 0.01761  | 0.70427  | -0.12939 | 0.0051   | -0.02534 |
| 0.038196 | 0.41022 | 0.205966 | 7.22E-06 | 0.102622 | 0.02658  | 0.274937 | 1.52E-09 | -0.07582 |
| -0.02648 | 0.56814 | -0.07053 | 0.12802  | -0.10432 | 0.02416  | -0.07445 | 0.10809  | 0.087933 |
| -0.00294 | 0.94946 | 0.026325 | 0.57041  | 0.06381  | 0.16862  | 0.090264 | 0.05125  | 0.119719 |
| 0.048341 | 0.2972  | -0.08336 | 0.07189  | -0.04375 | 0.3455   | -0.0835  | 0.07144  | 0.043265 |
| 0.072715 | 0.11659 | -0.00439 | 0.92454  | 0.023868 | 0.60692  | -0.01495 | 0.74736  | 0.014809 |
| -0.02654 | 0.56721 | -0.02018 | 0.66363  | -0.02299 | 0.62028  | -0.00248 | 0.95739  | 0.06491  |
| 0.029849 | 0.51993 | -0.01697 | 0.71454  | -0.02493 | 0.59101  | -0.01447 | 0.75508  | 0.012531 |
| -0.02559 | 0.58122 | 0.017709 | 0.70269  | -0.03912 | 0.39894  | 0.022532 | 0.6272   | -0.02654 |
| -0.01328 | 0.77477 | -0.01751 | 0.7059   | -0.00355 | 0.93904  | 0.059777 | 0.19723  | -0.00176 |
| -0.02233 | 0.63033 | -0.01759 | 0.70464  | -0.0179  | 0.69962  | -0.00937 | 0.83995  | 0.064041 |
| 0.005475 | 0.90607 | -0.0544  | 0.24067  | -0.00892 | 0.84751  | -0.0455  | 0.32651  | -0.0051  |
| 0.045158 | 0.33017 | -0.00697 | 0.88051  | 0.001893 | 0.96745  | 0.007081 | 0.8787   | 0.056953 |
| 0.016208 | 0.72683 | -0.0144  | 0.75624  | -0.00306 | 0.94737  | -0.00188 | 0.96766  | -0.01819 |
| 0.010954 | 0.81336 | 0.033229 | 0.47377  | -0.00385 | 0.93384  | 0.043192 | 0.35169  | -0.02739 |
| -0.02274 | 0.62399 | 0.035691 | 0.44161  | 0.055172 | 0.23405  | 0.014635 | 0.75244  | 0.070273 |
| -0.01567 | 0.73549 | -0.03828 | 0.40914  | -0.04404 | 0.34235  | -0.00564 | 0.90331  | 0.019285 |
| -0.12969 | 0.005   | 0.03763  | 0.41719  | -0.06854 | 0.13917  | 0.017619 | 0.70412  | 0.192406 |
| 0.014809 | 0.74959 | 0.01815  | 0.69564  | -0.07023 | 0.12965  | 0.000591 | 0.98984  | 0.061268 |
| 0.015634 | 0.73614 | 0.034741 | 0.45388  | 0.031571 | 0.49613  | 0.00799  | 0.86328  | 0.026566 |
| -0.0011  | 0.98103 | -0.0645  | 0.16408  | -0.08558 | 0.06463  | -0.07999 | 0.08421  | -0.09994 |
| 0.013088 | 0.77787 | 0.052993 | 0.25307  | 0.001349 | 0.9768   | 0.040443 | 0.38321  | -0.06482 |
| -0.02672 | 0.5646  | -0.10146 | 0.02835  | -0.06736 | 0.14613  | -0.08081 | 0.08108  | 0.064333 |
| -0.01758 | 0.7047  | -0.16193 | 0.00044  | -0.12602 | 0.00639  | -0.20985 | 4.79E-06 | -0.12001 |
| -0.00021 | 0.99638 | -0.00963 | 0.8356   | 0.021144 | 0.64857  | -0.00735 | 0.87407  | 0.12657  |
| 0.001836 | 0.96844 | -0.15757 | 0.00063  | -0.04776 | 0.30305  | -0.15793 | 0.00061  | 0.076675 |
| -0.00918 | 0.84322 | -0.12247 | 0.00806  | -0.08864 | 0.0556   | -0.12915 | 0.00519  | 0.09486  |
| 0.057223 | 0.2171  | -0.07904 | 0.08799  | -0.05476 | 0.23758  | -0.08718 | 0.05976  | 0.071789 |
| 0.02321  | 0.61687 | -0.04821 | 0.29852  | -0.09341 | 0.04364  | -0.06301 | 0.17403  | -0.12797 |
| 0.019883 | 0.66824 | 0.048659 | 0.29403  | -0.10685 | 0.02092  | 0.00514  | 0.91179  | -0.0404  |

|          |          |          |          |          |          |          |          |          |
|----------|----------|----------|----------|----------|----------|----------|----------|----------|
| 0.023569 | 0.61142  | -0.04902 | 0.29049  | -0.08512 | 0.06607  | -0.02356 | 0.61157  | 0.00382  |
| 0.06519  | 0.15958  | -0.01494 | 0.74747  | -0.05011 | 0.27987  | -0.03496 | 0.45106  | 0.045981 |
| -0.00148 | 0.97451  | -0.01287 | 0.78146  | -0.00852 | 0.85433  | -0.0392  | 0.39798  | -0.00245 |
| 0.037636 | 0.41711  | -0.06341 | 0.1713   | -0.03384 | 0.46574  | -0.06888 | 0.13723  | -0.00889 |
| 0.057556 | 0.21442  | -0.09908 | 0.0323   | -0.02404 | 0.60437  | -0.10572 | 0.02232  | 0.089456 |
| -0.10509 | 0.02314  | -0.32253 | 9.13E-13 | -0.27269 | 2.09E-09 | -0.2662  | 5.13E-09 | -0.00256 |
| 0.049454 | 0.28619  | 0.022172 | 0.63271  | 0.003279 | 0.94366  | -0.00601 | 0.89686  | 0.068064 |
| 0.00405  | 0.93045  | 0.121235 | 0.00873  | 0.105473 | 0.02263  | 0.066467 | 0.15154  | -0.05421 |
| 0.055628 | 0.2302   | 0.062583 | 0.17697  | 0.102934 | 0.02612  | 0.126575 | 0.00616  | 0.119223 |
| 0.036378 | 0.43287  | -0.10322 | 0.02572  | 0.003553 | 0.93897  | -0.06735 | 0.14615  | 0.131696 |
| 0.055268 | 0.23324  | 0.046699 | 0.31392  | 0.019161 | 0.6796   | 0.026122 | 0.57338  | 0.08337  |
| -0.00429 | 0.92633  | -0.09079 | 0.04991  | -0.00708 | 0.87865  | -0.10145 | 0.02837  | 0.061114 |
| 0.04751  | 0.30559  | 0.057703 | 0.21326  | -0.00941 | 0.83928  | 0.03592  | 0.43869  | -0.03497 |
| 0.038758 | 0.40336  | 0.208234 | 5.69E-06 | 0.267088 | 4.54E-09 | 0.206599 | 6.75E-06 | 0.180719 |
| 0.255397 | 2.17E-08 | 0.006779 | 0.88384  | 0.100638 | 0.02967  | 0.004393 | 0.92458  | 0.174169 |
| 0.006459 | 0.88928  | -0.10383 | 0.02485  | -0.01483 | 0.74922  | -0.08279 | 0.07387  | 0.314794 |
| 0.222801 | 1.16E-06 | 0.075123 | 0.10494  | 0.07502  | 0.10542  | 0.048623 | 0.29438  | 0.01979  |
| -0.02227 | 0.63113  | -0.01362 | 0.76916  | 0.029277 | 0.52796  | -0.05968 | 0.19797  | -0.02215 |
| 0.080152 | 0.08359  | 0.274468 | 1.62E-09 | 0.095441 | 0.03924  | 0.240852 | 1.37E-07 | -0.11799 |
| 0.043406 | 0.34931  | -0.09861 | 0.03314  | 0.007037 | 0.87944  | -0.10195 | 0.02759  | 0.172642 |
| 0.037559 | 0.41808  | 0.023512 | 0.61229  | 0.03025  | 0.51434  | 0.008158 | 0.86043  | -0.02835 |
| -0.02653 | 0.56738  | -0.05314 | 0.25173  | -0.16381 | 0.00038  | -0.01706 | 0.71309  | -0.0441  |
| 0.090128 | 0.0516   | -0.01946 | 0.67493  | 0.120254 | 0.00929  | 0.02556  | 0.58165  | 0.117418 |
| -0.01518 | 0.74359  | -0.06375 | 0.16905  | -0.07687 | 0.09708  | -0.09839 | 0.03352  | 0.150243 |
| 0.013535 | 0.77049  | -0.09167 | 0.04771  | 0.026167 | 0.57272  | -0.09024 | 0.0513   | 0.195044 |
| 0.01772  | 0.70251  | -0.08121 | 0.07958  | -0.06683 | 0.14934  | -0.10628 | 0.02161  | -0.08659 |
| 0.012666 | 0.78487  | -0.09771 | 0.03477  | -0.01356 | 0.77009  | -0.11708 | 0.01134  | -0.05154 |
| -0.04395 | 0.34329  | -0.10979 | 0.01762  | -0.01854 | 0.68945  | -0.09301 | 0.04456  | 0.143904 |
| 0.031828 | 0.49263  | 0.020367 | 0.66067  | 0.045737 | 0.32401  | 0.067449 | 0.14558  | 0.113956 |
| 0.021042 | 0.65015  | 0.075768 | 0.10198  | -0.03625 | 0.43454  | 0.04081  | 0.37891  | -0.24648 |
| -0.08841 | 0.05625  | 0.044808 | 0.33395  | -0.10789 | 0.01969  | -0.05102 | 0.27118  | 0.038837 |
| 0.030257 | 0.51424  | -0.03663 | 0.42974  | 0.073245 | 0.11394  | -0.04664 | 0.3145   | 0.238912 |
| 0.038623 | 0.405    | -0.0533  | 0.25032  | 0.01432  | 0.75758  | -0.04814 | 0.29918  | -0.012   |
| 0.173395 | 0.00017  | 0.077439 | 0.09463  | 0.066377 | 0.1521   | 0.140589 | 0.00233  | 0.112088 |
| 0.026502 | 0.56782  | -0.06792 | 0.14278  | -0.138   | 0.0028   | -0.0369  | 0.42625  | -0.02255 |
| 0.028064 | 0.54521  | 0.165104 | 0.00034  | 0.016217 | 0.72669  | 0.12805  | 0.00559  | -0.0779  |
| 0.053304 | 0.25029  | -0.00127 | 0.97819  | 0.049554 | 0.28523  | -0.00623 | 0.89313  | 0.064033 |
| -0.01495 | 0.7473   | -0.10581 | 0.02221  | -0.03096 | 0.50446  | -0.10547 | 0.02264  | -0.02712 |
| 0.142261 | 0.00206  | 0.027985 | 0.54634  | 0.051637 | 0.26543  | -0.02681 | 0.56333  | -0.04321 |
| -0.10964 | 0.01778  | -0.04109 | 0.37559  | -0.0056  | 0.90398  | -0.05718 | 0.21743  | 0.178415 |
| -0.0183  | 0.69333  | 0.012485 | 0.78786  | -0.04686 | 0.31226  | 0.019218 | 0.67871  | 0.087849 |
| 0.002801 | 0.95186  | 0.134617 | 0.00356  | 0.09148  | 0.04818  | 0.040326 | 0.38459  | 0.006562 |
| -0.02571 | 0.57949  | -0.09888 | 0.03266  | -0.04132 | 0.37296  | -0.1058  | 0.02221  | -0.0108  |
| -0.00519 | 0.91097  | -0.04666 | 0.31436  | -0.07043 | 0.12857  | -0.0325  | 0.48355  | -0.03247 |
| -0.07242 | 0.1181   | 0.090494 | 0.05066  | 0.104564 | 0.02383  | 0.043214 | 0.35144  | -0.05195 |

|          |          |          |          |          |          |          |          |          |
|----------|----------|----------|----------|----------|----------|----------|----------|----------|
| 0.024311 | 0.60026  | -0.06925 | 0.13511  | -0.002   | 0.96563  | -0.05115 | 0.26997  | 0.045092 |
| -0.08688 | 0.06066  | -0.10196 | 0.02759  | -0.00876 | 0.85019  | -0.09694 | 0.03623  | 0.067787 |
| -0.00781 | 0.86634  | 0.083254 | 0.07227  | -0.04609 | 0.32024  | 0.058327 | 0.20833  | -0.10599 |
| -0.12099 | 0.00886  | -0.05937 | 0.20034  | -0.06607 | 0.15403  | -0.18604 | 5.24E-05 | -0.02842 |
| -0.07281 | 0.1161   | -0.11935 | 0.00984  | 0.002471 | 0.95753  | 0.032754 | 0.48012  | 0.315233 |
| -0.05707 | 0.21833  | -0.11911 | 0.00999  | 0.007882 | 0.86511  | -0.0002  | 0.99648  | 0.164017 |
| -0.00414 | 0.92891  | -0.02814 | 0.54418  | -0.04016 | 0.38655  | -0.04902 | 0.29045  | 0.011093 |
| -0.01814 | 0.69588  | -0.01186 | 0.7982   | -0.02462 | 0.59569  | 0.067916 | 0.1428   | 0.151751 |
| -0.01954 | 0.67356  | -0.1118  | 0.01564  | -0.03612 | 0.43615  | -0.0246  | 0.59594  | 0.090973 |
| -0.00656 | 0.88751  | -0.05916 | 0.20189  | -0.09056 | 0.05049  | -0.01207 | 0.79469  | -0.02611 |
| 0.044739 | 0.3347   | -0.06107 | 0.18772  | -0.11982 | 0.00955  | -0.05778 | 0.21265  | 0.010716 |
| 0.055885 | 0.22805  | -0.07389 | 0.1108   | 0.086659 | 0.06131  | 0.009606 | 0.83599  | 0.15187  |
| -0.03912 | 0.399    | -0.14421 | 0.00178  | -0.1163  | 0.0119   | -0.04166 | 0.3691   | 0.126925 |
| 0.017734 | 0.70229  | -0.06601 | 0.15441  | -0.02171 | 0.6398   | -0.09362 | 0.04316  | -0.06575 |
| 0.060119 | 0.19468  | -0.08827 | 0.05663  | -0.08269 | 0.07422  | -0.1478  | 0.00136  | 0.068096 |
| 0.033515 | 0.46997  | 0.074435 | 0.10817  | 0.050319 | 0.27785  | 0.04092  | 0.37762  | 0.18616  |
| 0.0164   | 0.72373  | -0.09693 | 0.03627  | -0.10448 | 0.02395  | -0.0609  | 0.18896  | -0.01503 |
| -0.01218 | 0.79299  | 0.026316 | 0.57053  | -0.00208 | 0.96425  | 0.038024 | 0.41233  | 0.063893 |
| -0.01026 | 0.82507  | -0.12517 | 0.00676  | 0.00545  | 0.90649  | -0.08613 | 0.06293  | 0.08204  |
| -0.06721 | 0.14703  | 0.10029  | 0.03024  | 0.017709 | 0.70268  | 0.123141 | 0.00772  | -0.00558 |
| -0.04908 | 0.2899   | -0.08122 | 0.07955  | -0.12894 | 0.00526  | -0.15511 | 0.00077  | -0.03862 |
| 0.045922 | 0.32206  | 0.059639 | 0.19827  | 0.107249 | 0.02044  | 0.070124 | 0.13023  | 0.026391 |
| 0.158325 | 0.00059  | 0.097815 | 0.03458  | 0.110437 | 0.01696  | 0.098037 | 0.03417  | 0.014436 |
| -0.05938 | 0.20022  | 0.02802  | 0.54584  | -0.02895 | 0.53258  | -0.01627 | 0.72588  | -0.08488 |
| -0.01582 | 0.73307  | -0.07095 | 0.12573  | -0.10833 | 0.0192   | -0.07056 | 0.12788  | 0.159273 |
| 0.136    | 0.00323  | 0.023439 | 0.6134   | 0.027551 | 0.55257  | 0.082031 | 0.07657  | 0.134403 |
| 0.017176 | 0.71123  | 0.012954 | 0.7801   | 0.065796 | 0.15573  | 0.075602 | 0.10273  | 0.164834 |
| -0.06473 | 0.16258  | 0.018012 | 0.69785  | 0.114478 | 0.01331  | -0.01864 | 0.6878   | 0.103346 |
| 0.127726 | 0.00571  | 0.114906 | 0.01297  | 0.216159 | 2.42E-06 | 0.142462 | 0.00203  | 0.349895 |
| -0.11413 | 0.0136   | -0.14813 | 0.00133  | -0.12477 | 0.00694  | -0.13071 | 0.00467  | -0.0881  |
| -0.03925 | 0.39739  | -0.00151 | 0.97397  | -0.10195 | 0.0276   | -0.04814 | 0.29917  | -0.12156 |
| -0.03387 | 0.46524  | -0.01036 | 0.82331  | -0.17222 | 0.00018  | -0.04121 | 0.37426  | -0.20134 |
| -0.05622 | 0.2253   | -0.04687 | 0.31214  | -0.06648 | 0.15147  | -0.0608  | 0.18965  | 0.056419 |
| -0.05478 | 0.23744  | -0.08503 | 0.06637  | 0.026493 | 0.56795  | -0.02973 | 0.52156  | 0.073838 |
| 0.046573 | 0.31523  | -0.04025 | 0.3855   | 0.085486 | 0.06492  | 0.01315  | 0.77685  | 0.061692 |
| -0.02928 | 0.52786  | -0.0278  | 0.54894  | -0.08582 | 0.06386  | -0.06464 | 0.16312  | -0.08684 |
| 0.002669 | 0.95414  | -0.04684 | 0.31243  | -0.06991 | 0.13141  | -0.07011 | 0.13033  | -0.03152 |
| 0.073552 | 0.11243  | -0.0524  | 0.25841  | -0.07389 | 0.11078  | -0.00432 | 0.92589  | 0.075817 |
| -0.02498 | 0.59022  | -0.05857 | 0.20645  | -0.12153 | 0.00857  | -0.07822 | 0.09135  | 0.050279 |
| 0.06179  | 0.18254  | 0.211822 | 3.88E-06 | 0.234028 | 3.14E-07 | 0.172306 | 0.00018  | 0.022788 |
| 0.351871 | 4.67E-15 | 0.245571 | 7.65E-08 | 0.255568 | 2.13E-08 | 0.264707 | 6.29E-09 | 0.03807  |
| 0.148128 | 0.00133  | -0.00572 | 0.90181  | 0.042946 | 0.35444  | 0.044992 | 0.33196  | 0.04267  |
| 0.324803 | 6.19E-13 | 0.237546 | 2.06E-07 | 0.265979 | 5.29E-09 | 0.240639 | 1.41E-07 | 0.106339 |
| 0.079579 | 0.08583  | 0.027023 | 0.56022  | -0.02493 | 0.59098  | 0.072179 | 0.11932  | 0.078563 |
| 0.043155 | 0.3521   | 0.038464 | 0.40693  | 0.150588 | 0.0011   | 0.13946  | 0.00252  | 0.198404 |



|          |          |          |          |          |          |          |          |          |
|----------|----------|----------|----------|----------|----------|----------|----------|----------|
| 0.12129  | 0.0087   | 0.021211 | 0.64752  | 0.10949  | 0.01794  | -0.01714 | 0.71183  | 0.116445 |
| 0.014414 | 0.75605  | -0.04937 | 0.28703  | -0.02036 | 0.66074  | -0.024   | 0.60491  | 0.096872 |
| 0.00813  | 0.86091  | -0.01077 | 0.81652  | 0.095701 | 0.0387   | -0.00576 | 0.90119  | 0.147923 |
| -0.03251 | 0.48342  | -0.03013 | 0.51599  | -0.10265 | 0.02654  | -0.02601 | 0.57504  | 0.025533 |
| 0.04127  | 0.37355  | -0.05334 | 0.24995  | -0.15973 | 0.00053  | -0.04255 | 0.35891  | 0.097278 |
| 0.00152  | 0.97387  | -0.12655 | 0.00617  | -0.06722 | 0.14696  | -0.20258 | 1.02E-05 | 0.007864 |
| 0.07142  | 0.12326  | -0.02302 | 0.61979  | -0.0925  | 0.04574  | -0.06477 | 0.16228  | -0.10444 |
| 0.00726  | 0.87567  | -0.19454 | 2.30E-05 | -0.13159 | 0.00439  | -0.18803 | 4.33E-05 | 0.156679 |
| -0.028   | 0.54616  | 0.121973 | 0.00832  | -0.00772 | 0.86793  | 0.128191 | 0.00553  | -0.15928 |
| 0.050824 | 0.27304  | -0.03005 | 0.51717  | 0.003548 | 0.93905  | -0.06444 | 0.16444  | -0.02562 |
| -0.01777 | 0.70174  | -0.10877 | 0.01872  | -0.18194 | 7.68E-05 | -0.06036 | 0.19287  | -0.06572 |
| -0.10517 | 0.02303  | -0.07081 | 0.12652  | -0.23882 | 1.76E-07 | -0.04462 | 0.33599  | -0.09522 |
| 0.038749 | 0.40347  | 0.092268 | 0.04628  | 0.102894 | 0.02618  | 0.108227 | 0.01931  | 0.101814 |
| 0.056086 | 0.22638  | -0.03082 | 0.50648  | 0.038985 | 0.40061  | -0.0508  | 0.27328  | 0.04688  |
| 0.035114 | 0.44904  | -0.00865 | 0.85205  | -0.02647 | 0.56823  | -0.06499 | 0.16084  | -0.0901  |
| 0.020059 | 0.66549  | -0.00892 | 0.84752  | -0.04816 | 0.29903  | -0.01685 | 0.7165   | -0.07365 |
| 0.09037  | 0.05098  | 0.118815 | 0.01017  | -0.07701 | 0.09649  | -0.00545 | 0.90651  | -0.06774 |
| 0.135055 | 0.00345  | 0.02072  | 0.65516  | -0.03541 | 0.44521  | 0.041662 | 0.36902  | -0.04486 |
| -0.01298 | 0.77968  | -0.02624 | 0.57159  | -0.11276 | 0.01477  | 0.054878 | 0.23656  | 0.035932 |
| -0.02994 | 0.51864  | -0.10666 | 0.02115  | -0.10025 | 0.0303   | -0.24522 | 7.99E-08 | -0.21571 |
| 0.132154 | 0.00423  | -0.0037  | 0.93642  | -0.02269 | 0.62478  | 0.053113 | 0.25199  | 0.00066  |
| 0.037559 | 0.41807  | -0.05854 | 0.20668  | -0.05505 | 0.23511  | -0.07486 | 0.10617  | 0.036491 |
| 0.08408  | 0.06947  | 0.178723 | 0.0001   | 0.178206 | 0.00011  | 0.163468 | 0.00039  | 0.12918  |
| -0.02034 | 0.66105  | -0.06881 | 0.13758  | -0.0134  | 0.77266  | -0.11273 | 0.01479  | -0.08685 |
| 0.064142 | 0.16641  | 0.015763 | 0.73405  | 0.115673 | 0.01237  | 0.034277 | 0.45993  | 0.193036 |
| 0.185394 | 5.56E-05 | 0.261097 | 1.02E-08 | 0.25462  | 2.41E-08 | 0.332879 | 1.51E-13 | 0.24536  |
| 0.081908 | 0.07701  | 0.145768 | 0.00159  | 0.213272 | 3.32E-06 | 0.075076 | 0.10516  | 0.050868 |
| 0.010984 | 0.81286  | -0.06057 | 0.19135  | 0.02352  | 0.61216  | 0.003432 | 0.94103  | 0.093003 |
| -0.01666 | 0.71961  | 0.011552 | 0.80337  | -0.08663 | 0.0614   | 0.061882 | 0.18189  | 0.037124 |
| 0.037383 | 0.42026  | -0.10045 | 0.02997  | -0.14385 | 0.00183  | -0.10953 | 0.0179   | 0.004458 |
| -0.06917 | 0.13558  | -0.02478 | 0.5932   | -0.09979 | 0.03108  | 0.039845 | 0.39029  | 0.021825 |
| 0.144703 | 0.00172  | -0.01926 | 0.67802  | 0.047761 | 0.30304  | 0.056421 | 0.22361  | 0.050761 |
| -0.01059 | 0.81953  | 0.018791 | 0.68547  | -0.00729 | 0.87509  | 0.001085 | 0.98135  | -0.11487 |
| -0.09012 | 0.05163  | -0.0099  | 0.83097  | -0.09513 | 0.03989  | 0.02572  | 0.57929  | 0.094044 |
| 0.028048 | 0.54543  | -0.05055 | 0.27562  | 0.045911 | 0.32217  | 0.027241 | 0.55706  | 0.123835 |
| 0.012868 | 0.78152  | -0.12311 | 0.00774  | -0.10381 | 0.02487  | -0.10427 | 0.02424  | 0.022445 |
| 0.015281 | 0.74188  | -0.00723 | 0.87611  | 0.041345 | 0.37268  | -0.05684 | 0.22022  | 0.068266 |
| 0.026807 | 0.56336  | 0.283735 | 4.27E-10 | 0.209199 | 5.13E-06 | 0.272613 | 2.11E-09 | 0.127257 |
| 0.006458 | 0.8893   | -0.10022 | 0.03035  | -0.04875 | 0.29312  | -0.10076 | 0.02946  | -0.10596 |
| 0.38833  | 2.94E-18 | 0.179069 | 9.99E-05 | 0.300274 | 3.47E-11 | 0.12322  | 0.00768  | -0.00184 |
| -0.20103 | 1.20E-05 | -0.21237 | 3.66E-06 | -0.19236 | 2.85E-05 | -0.17248 | 0.00018  | 0.066283 |
| 0.008107 | 0.86129  | 0.046942 | 0.31142  | 0.123412 | 0.00758  | 0.010567 | 0.81985  | 0.1534   |
| 0.072804 | 0.11614  | -0.11941 | 0.0098   | -0.07921 | 0.08731  | -0.15343 | 0.00088  | -0.093   |
| -0.02263 | 0.62568  | -0.065   | 0.1608   | 0.006605 | 0.88679  | -0.09624 | 0.03761  | -0.11347 |
| -0.10237 | 0.02696  | -0.05301 | 0.25291  | -0.11297 | 0.01458  | 0.003723 | 0.93604  | 0.001884 |

|          |         |          |          |          |          |          |          |          |
|----------|---------|----------|----------|----------|----------|----------|----------|----------|
| 0.045874 | 0.32256 | 0.031036 | 0.50346  | -0.02157 | 0.64193  | -0.03244 | 0.4843   | 0.048695 |
| -0.00911 | 0.84434 | -0.00329 | 0.94356  | -0.02387 | 0.6069   | -0.11028 | 0.01712  | -0.02187 |
| 0.073214 | 0.1141  | 0.090972 | 0.04945  | 0.06505  | 0.16048  | 0.134482 | 0.0036   | 0.100303 |
| -0.00575 | 0.90139 | -0.0172  | 0.71088  | -0.1398  | 0.00246  | -0.02194 | 0.63631  | -0.04039 |
| -0.028   | 0.54609 | 0.015279 | 0.74191  | -0.07535 | 0.10391  | 0.021978 | 0.63569  | 0.123462 |
| 0.027898 | 0.54758 | 0.218892 | 1.79E-06 | 0.218334 | 1.91E-06 | 0.325924 | 5.10E-13 | 0.234056 |
| -0.02421 | 0.60174 | -0.08159 | 0.07817  | -0.08951 | 0.05323  | -0.06319 | 0.17284  | 0.021786 |
| -0.05161 | 0.26565 | -0.1125  | 0.015    | -0.14142 | 0.00219  | -0.05233 | 0.25909  | 0.170339 |
| 0.062095 | 0.18038 | -0.01639 | 0.72395  | -0.00272 | 0.95331  | 0.01783  | 0.70076  | 0.302132 |
| -0.0385  | 0.40645 | -0.15453 | 0.00081  | -0.14506 | 0.00167  | -0.09349 | 0.04346  | 0.0264   |
| 0.030133 | 0.51596 | -0.0009  | 0.98454  | 0.001178 | 0.97974  | -0.05953 | 0.19908  | 0.04089  |
| 0.043266 | 0.35086 | 0.040551 | 0.38194  | -0.01477 | 0.75021  | 0.062362 | 0.17851  | 0.092241 |
| -0.08131 | 0.0792  | -0.15139 | 0.00103  | -0.21401 | 3.06E-06 | -0.13614 | 0.0032   | 0.01642  |
| -0.06225 | 0.1793  | -0.0412  | 0.37438  | -0.09414 | 0.042    | -0.11669 | 0.01162  | -0.03488 |
| -0.02885 | 0.53407 | -0.12936 | 0.00511  | -0.15064 | 0.00109  | -0.08316 | 0.07261  | -0.05787 |
| 0.097958 | 0.03432 | 0.095016 | 0.04013  | 0.041147 | 0.37498  | 0.104    | 0.02461  | 0.10782  |
| 0.020537 | 0.65801 | -0.05428 | 0.24169  | -0.04125 | 0.37382  | -0.02926 | 0.5282   | 0.184318 |
| 0.040971 | 0.37703 | -0.07478 | 0.10652  | -0.0889  | 0.05489  | -0.03422 | 0.46062  | -0.05318 |
| -0.04913 | 0.28939 | 0.040405 | 0.38365  | 0.025111 | 0.58832  | 0.134232 | 0.00366  | 0.206665 |
| -0.12672 | 0.0061  | -0.25192 | 3.42E-08 | -0.20345 | 9.37E-06 | -0.25585 | 2.05E-08 | -0.10554 |
| -0.00116 | 0.98013 | -0.08795 | 0.05754  | -0.07947 | 0.08625  | -0.10569 | 0.02235  | -0.01645 |
| 0.019929 | 0.66752 | 0.018882 | 0.68401  | 0.017146 | 0.71171  | 0.127535 | 0.00578  | 0.187973 |
| 0.091429 | 0.04831 | -0.00772 | 0.86785  | 0.015156 | 0.74392  | -0.01423 | 0.75902  | -0.0392  |
| -0.0003  | 0.99492 | 0.023491 | 0.6126   | 0.01889  | 0.68389  | 0.030316 | 0.51342  | 0.041939 |
| 0.001443 | 0.97518 | 0.02349  | 0.61262  | 0.048689 | 0.29373  | -0.00356 | 0.9389   | -0.03142 |
| 0.000845 | 0.98547 | 0.02874  | 0.53556  | -0.03538 | 0.44555  | 0.00733  | 0.87448  | -0.04288 |
| 0.065339 | 0.15862 | -0.02555 | 0.58183  | -0.02452 | 0.59714  | -0.00082 | 0.98584  | 0.11941  |
| -0.06318 | 0.17289 | 0.158486 | 0.00059  | 0.031343 | 0.49924  | 0.094529 | 0.04116  | -0.0829  |
| 0.024231 | 0.60146 | 0.009301 | 0.84113  | -0.02994 | 0.51867  | -0.02308 | 0.61883  | -0.03904 |
| -0.00405 | 0.93045 | 0.080897 | 0.08074  | -0.07677 | 0.0975   | 0.010948 | 0.81346  | -0.1203  |
| 0.037278 | 0.42157 | -0.00231 | 0.96027  | 0.108496 | 0.01901  | -0.00613 | 0.89494  | 0.035577 |
| -0.04327 | 0.35082 | 0.116416 | 0.01182  | 0.202442 | 1.04E-05 | 0.277265 | 1.09E-09 | 0.258246 |
| 0.01164  | 0.80191 | 0.163908 | 0.00038  | 0.168633 | 0.00025  | 0.262458 | 8.52E-09 | 0.364767 |
| 0.065922 | 0.15494 | 0.225155 | 8.84E-07 | 0.427383 | 3.69E-22 | 0.244833 | 8.39E-08 | 0.302037 |
| 0.163682 | 0.00038 | 0.130459 | 0.00475  | 0.377437 | 2.93E-17 | 0.21527  | 2.67E-06 | 0.239932 |
| 0.012727 | 0.78384 | 0.105123 | 0.02309  | 0.093222 | 0.04406  | 0.163774 | 0.00038  | -0.06441 |
| 0.026003 | 0.57513 | -0.14201 | 0.0021   | -0.0108  | 0.81587  | -0.16163 | 0.00045  | -0.23197 |
| 0.018142 | 0.69578 | 0.068718 | 0.13813  | 0.17767  | 0.00011  | 0.122267 | 0.00817  | 0.178652 |
| 0.038385 | 0.4079  | 0.050638 | 0.2748   | 0.153815 | 0.00085  | 0.013733 | 0.76723  | 0.042648 |
| -0.10763 | 0.01999 | -0.0018  | 0.96913  | -0.00306 | 0.94744  | 0.09005  | 0.05181  | 0.179958 |
| 0.085945 | 0.06349 | 0.262707 | 8.24E-09 | 0.17806  | 0.00011  | 0.220679 | 1.47E-06 | 0.227104 |
| -0.03313 | 0.4751  | 0.235851 | 2.52E-07 | 0.070677 | 0.12722  | 0.274228 | 1.68E-09 | 0.102553 |
| -0.04958 | 0.28502 | 0.138845 | 0.00264  | 0.119524 | 0.00973  | 0.258001 | 1.54E-08 | 0.104905 |
| -0.14075 | 0.0023  | 0.030702 | 0.50807  | 0.078679 | 0.08944  | 0.035108 | 0.44912  | 0.147111 |
| -0.03779 | 0.41521 | 0.148921 | 0.00125  | -0.02724 | 0.55704  | 0.141778 | 0.00213  | 0.119945 |

|          |          |          |          |          |          |          |          |          |
|----------|----------|----------|----------|----------|----------|----------|----------|----------|
| -0.03124 | 0.50065  | 0.145752 | 0.00159  | 0.095908 | 0.03828  | 0.068983 | 0.13661  | -0.00206 |
| 0.069307 | 0.13478  | 0.067989 | 0.14237  | 0.106531 | 0.0213   | 0.110743 | 0.01666  | 0.090533 |
| 0.155602 | 0.00074  | 0.186409 | 5.05E-05 | 0.293622 | 9.71E-11 | 0.180106 | 9.09E-05 | 0.120478 |
| 0.042198 | 0.3629   | 0.05821  | 0.20925  | 0.134928 | 0.00348  | -0.00506 | 0.91309  | 0.117071 |
| 0.053514 | 0.24843  | 0.183763 | 6.48E-05 | 0.2533   | 2.86E-08 | 0.120435 | 0.00918  | 0.110655 |
| 0.016975 | 0.71445  | 0.241555 | 1.26E-07 | 0.131126 | 0.00454  | 0.2064   | 6.90E-06 | 0.02899  |
| 0.168838 | 0.00025  | 0.046724 | 0.31367  | 0.167848 | 0.00027  | -0.02758 | 0.55222  | 0.090513 |
| 0.013217 | 0.77574  | 0.242983 | 1.06E-07 | 0.130659 | 0.00468  | 0.357061 | 1.73E-15 | 0.066902 |
| 0.025181 | 0.58727  | 0.107445 | 0.02021  | -0.02428 | 0.60065  | 0.12343  | 0.00758  | 0.181033 |
| -0.21477 | 2.82E-06 | -0.13434 | 0.00363  | -0.11398 | 0.01372  | -0.09701 | 0.03611  | 0.088904 |
| 0.037342 | 0.42077  | -0.07754 | 0.09418  | 0.004895 | 0.91597  | -0.06033 | 0.19314  | 0.16698  |
| 0.065291 | 0.15893  | 0.126344 | 0.00626  | 0.173653 | 0.00016  | 0.131409 | 0.00445  | 0.074607 |
| -0.07474 | 0.10675  | 0.035139 | 0.44871  | -0.0568  | 0.22054  | 0.131414 | 0.00445  | 0.086056 |
| 0.001077 | 0.98149  | -0.13823 | 0.00276  | -0.14796 | 0.00134  | -0.133   | 0.00399  | -0.00606 |
| 0.070383 | 0.12881  | -0.01871 | 0.68672  | 0.039751 | 0.39141  | -0.08538 | 0.06524  | -0.10972 |
| 0.049955 | 0.28133  | -0.00151 | 0.97411  | -0.10789 | 0.01969  | -0.04732 | 0.30753  | -0.08428 |
| 0.052787 | 0.25493  | -0.04679 | 0.31299  | -0.0027  | 0.95364  | -0.02165 | 0.6408   | 0.025816 |
| 0.062268 | 0.17917  | 0.019449 | 0.67507  | 0.120111 | 0.00937  | 0.103831 | 0.02484  | 0.242994 |
| 0.06006  | 0.19511  | 0.153657 | 0.00086  | 0.138001 | 0.0028   | 0.190863 | 3.30E-05 | 0.116973 |
| 0.070862 | 0.12622  | 0.136035 | 0.00322  | 0.167356 | 0.00028  | 0.079447 | 0.08635  | 0.107941 |
| 0.083824 | 0.07033  | 0.237123 | 2.16E-07 | 0.181011 | 8.36E-05 | 0.203159 | 9.65E-06 | 0.200748 |
| 0.089683 | 0.05277  | 0.03726  | 0.42179  | 0.040186 | 0.38624  | -0.05408 | 0.24346  | -0.16525 |
| -0.11432 | 0.01344  | -0.02662 | 0.56603  | -0.10459 | 0.0238   | -0.04634 | 0.31764  | -0.06992 |
| -0.13923 | 0.00257  | -0.05097 | 0.27171  | -0.18726 | 4.66E-05 | 0.001277 | 0.97804  | -0.07069 |
| 0.007376 | 0.87369  | -0.0443  | 0.33944  | 0.047501 | 0.30568  | -0.04974 | 0.28345  | 0.080473 |
| 0.001735 | 0.97017  | -0.03895 | 0.401    | -0.0215  | 0.64312  | -0.01368 | 0.76803  | 0.077263 |
| 0.014387 | 0.75649  | -0.14254 | 0.00202  | -0.08279 | 0.07386  | -0.1429  | 0.00196  | 0.1291   |
| -0.00939 | 0.83954  | -0.02378 | 0.60824  | 0.018619 | 0.68819  | -0.03978 | 0.39103  | 0.024536 |
| -0.12208 | 0.00827  | -0.05916 | 0.20187  | 0.07076  | 0.12677  | -0.0581  | 0.21015  | 0.043918 |
| -0.0195  | 0.67428  | 0.124726 | 0.00696  | 0.110612 | 0.01679  | 0.209629 | 4.90E-06 | 0.32056  |
| -0.12087 | 0.00893  | -0.08326 | 0.07223  | -0.0365  | 0.43139  | -0.10383 | 0.02485  | 0.080848 |
| 0.027122 | 0.55878  | 0.043866 | 0.34422  | 0.013483 | 0.77135  | 0.142756 | 0.00198  | 0.188496 |
| 0.097952 | 0.03433  | 0.086826 | 0.06081  | 0.141571 | 0.00216  | 0.070733 | 0.12692  | 0.150531 |
| 0.091199 | 0.04888  | -0.06247 | 0.17779  | -0.00578 | 0.90086  | -0.06518 | 0.15965  | 0.011926 |
| 0.004983 | 0.91447  | -0.07376 | 0.11143  | 0.015883 | 0.7321   | -0.07906 | 0.0879   | 0.05567  |
| 0.09991  | 0.03087  | 0.016435 | 0.72316  | 0.101628 | 0.02809  | 0.037937 | 0.4134   | 0.082592 |
| 0.028418 | 0.54015  | 0.063593 | 0.17007  | 0.0383   | 0.40894  | -0.00804 | 0.86241  | -0.02694 |
| 0.132347 | 0.00417  | 0.079685 | 0.08541  | 0.099457 | 0.03165  | 0.102828 | 0.02628  | 0.050494 |
| 0.058515 | 0.20687  | 0.047477 | 0.30592  | 0.04251  | 0.35935  | 0.004748 | 0.91849  | 0.026938 |
| 0.044946 | 0.33246  | -0.00673 | 0.88461  | 0.01914  | 0.67994  | -0.04621 | 0.319    | -0.03564 |
| -0.03554 | 0.44352  | 0.005072 | 0.91296  | -0.15982 | 0.00053  | -0.04559 | 0.32553  | -0.2882  |
| 0.016789 | 0.71745  | 0.074649 | 0.10716  | 0.258026 | 1.54E-08 | 0.306237 | 1.35E-11 | 0.149147 |
| 0.022988 | 0.62024  | -0.05293 | 0.25362  | 0.009766 | 0.83329  | -0.02749 | 0.55342  | 0.162955 |
| 0.041882 | 0.3665   | -0.0637  | 0.16938  | -0.01913 | 0.68007  | -0.12335 | 0.00761  | -0.03485 |
| -0.02509 | 0.58867  | -0.03764 | 0.41705  | -0.15065 | 0.00109  | -0.00528 | 0.90945  | 0.034959 |

|          |          |          |          |          |          |          |          |          |
|----------|----------|----------|----------|----------|----------|----------|----------|----------|
| 0.029554 | 0.52406  | -0.06818 | 0.14127  | 0.060791 | 0.18972  | -0.05118 | 0.2697   | 0.192499 |
| 0.008384 | 0.85661  | 0.023565 | 0.61149  | 0.151232 | 0.00104  | 0.048098 | 0.29963  | 0.203025 |
| -0.06977 | 0.13218  | -0.02351 | 0.61226  | 0.027594 | 0.55195  | -0.09633 | 0.03743  | 0.137827 |
| -0.07128 | 0.12398  | -0.19821 | 1.60E-05 | -0.09896 | 0.03252  | -0.15054 | 0.0011   | 0.04765  |
| -0.06198 | 0.18119  | 0.011645 | 0.80182  | -0.06593 | 0.15491  | 0.087154 | 0.05984  | 0.143735 |
| -0.05146 | 0.2671   | -0.02701 | 0.56035  | 0.012927 | 0.78055  | 0.013886 | 0.76472  | -0.04157 |
| -0.00132 | 0.97723  | -0.09618 | 0.03775  | -0.05313 | 0.25181  | -0.03954 | 0.39391  | -0.11287 |
| -0.02946 | 0.52533  | 0.001506 | 0.97411  | 0.060879 | 0.18908  | 0.160601 | 0.00049  | 0.337697 |
| 0.011717 | 0.80063  | 0.018343 | 0.69258  | 0.115992 | 0.01213  | 0.040782 | 0.37923  | 0.149717 |
| -0.08066 | 0.08165  | 0.135271 | 0.0034   | 0.050558 | 0.27556  | 0.09473  | 0.04073  | 0.286508 |
| -0.02728 | 0.55645  | -0.00985 | 0.83186  | 0.038814 | 0.40268  | 0.073455 | 0.11291  | 0.153928 |
| -0.03055 | 0.51013  | -0.01188 | 0.7979   | 0.005903 | 0.89876  | -0.09409 | 0.04211  | -0.02284 |
| 0.004291 | 0.92632  | 0.001451 | 0.97505  | 0.042458 | 0.35994  | -0.0416  | 0.36971  | 0.230638 |
| -0.04689 | 0.31198  | 0.051027 | 0.27113  | -0.00541 | 0.90712  | 0.04294  | 0.35451  | 0.064857 |
| 0.039077 | 0.3995   | -0.18656 | 4.98E-05 | -0.14445 | 0.00175  | -0.12129 | 0.0087   | 0.127591 |
| -0.0062  | 0.89363  | 0.188195 | 4.26E-05 | 0.187628 | 4.50E-05 | 0.340841 | 3.62E-14 | 0.31549  |
| 0.099505 | 0.03156  | -0.02146 | 0.64375  | 0.012177 | 0.79297  | -0.00749 | 0.87177  | 0.08315  |
| 0.361007 | 8.03E-16 | 0.061485 | 0.18471  | 0.097617 | 0.03495  | 0.120631 | 0.00907  | 0.144244 |
| 0.058144 | 0.20977  | 0.092361 | 0.04606  | 0.000863 | 0.98516  | 0.120884 | 0.00893  | 0.01635  |
| -0.007   | 0.88007  | -0.13838 | 0.00273  | -0.05928 | 0.20102  | -0.11421 | 0.01352  | 0.133968 |
| -0.00493 | 0.91537  | -0.04023 | 0.38576  | 0.026078 | 0.57402  | -0.0661  | 0.15382  | 0.045695 |
| -0.02558 | 0.58142  | -0.07849 | 0.0902   | -0.06253 | 0.17733  | -0.12738 | 0.00584  | 0.167981 |
| 0.007528 | 0.8711   | -0.01475 | 0.75049  | -0.01536 | 0.74066  | -0.00836 | 0.85705  | -0.01136 |
| -0.00563 | 0.90346  | 0.002472 | 0.95751  | -0.07328 | 0.11378  | 0.008678 | 0.85164  | 0.003609 |
| 0.019357 | 0.67651  | 0.064238 | 0.16578  | 0.013674 | 0.76821  | 0.032555 | 0.4828   | 0.048034 |
| -0.05072 | 0.27406  | -0.00857 | 0.85339  | -0.01561 | 0.73652  | 0.035062 | 0.44971  | -0.01572 |
| -0.10827 | 0.01926  | 0.107863 | 0.01973  | -0.07335 | 0.11341  | 0.076939 | 0.09678  | -0.0672  |
| -0.0614  | 0.18532  | -0.02611 | 0.57351  | -0.06133 | 0.1858   | 0.100493 | 0.02991  | 0.123888 |
| -0.05439 | 0.24079  | -0.07662 | 0.09818  | -0.07373 | 0.11157  | -0.10513 | 0.02309  | -0.02198 |
| 0.081712 | 0.07773  | 0.112907 | 0.01464  | 0.107629 | 0.02     | 0.191599 | 3.07E-05 | 0.207786 |
| 0.044876 | 0.33321  | -0.01085 | 0.81519  | 0.046505 | 0.31594  | -0.04185 | 0.36687  | -0.08671 |
| 0.080569 | 0.08199  | -0.01696 | 0.71464  | 0.058347 | 0.20818  | -0.17338 | 0.00017  | -0.11926 |
| 0.071687 | 0.12186  | -0.10084 | 0.02933  | -0.08404 | 0.06961  | -0.07416 | 0.10947  | 0.067142 |
| 0.042956 | 0.35433  | -0.05676 | 0.22084  | -0.04351 | 0.34813  | -0.06325 | 0.1724   | -0.05784 |
| 0.069539 | 0.13347  | -0.04322 | 0.35133  | 0.016334 | 0.72479  | -0.10893 | 0.01854  | -0.06704 |
| 0.02843  | 0.53997  | 0.03955  | 0.39381  | 0.103356 | 0.02551  | 0.093576 | 0.04326  | 0.085006 |
| 0.083853 | 0.07023  | 0.064805 | 0.16207  | 0.084979 | 0.06653  | 0.008081 | 0.86174  | 0.197606 |
| 0.017977 | 0.6984   | 0.096467 | 0.03717  | 0.031948 | 0.491    | 0.180176 | 9.03E-05 | -0.01072 |
| -0.0513  | 0.26859  | -0.21659 | 2.31E-06 | -0.22319 | 1.11E-06 | -0.1891  | 3.91E-05 | 0.037877 |
| 0.002189 | 0.96237  | 0.112066 | 0.0154   | -0.0097  | 0.83437  | 0.179471 | 9.63E-05 | 0.107303 |
| 0.140979 | 0.00226  | 0.052654 | 0.25613  | 0.148877 | 0.00125  | 0.045363 | 0.32799  | 0.206416 |
| 0.108643 | 0.01885  | 0.042298 | 0.36176  | -0.02121 | 0.64762  | 0.048269 | 0.29792  | -0.01761 |
| 0.065239 | 0.15927  | -0.03547 | 0.44443  | -0.09103 | 0.0493   | 0.002555 | 0.95608  | 0.111265 |
| 0.021038 | 0.65022  | -0.07307 | 0.11482  | 0.059883 | 0.19644  | -0.08516 | 0.06595  | 0.113237 |
| -0.04961 | 0.28472  | -0.06902 | 0.13639  | -0.08154 | 0.07834  | -0.07707 | 0.0962   | 0.002524 |

|          |         |          |          |          |          |          |          |          |
|----------|---------|----------|----------|----------|----------|----------|----------|----------|
| 0.060403 | 0.19257 | -0.06174 | 0.18289  | -0.01968 | 0.67137  | -0.03797 | 0.41303  | 0.143537 |
| -0.01309 | 0.77792 | -0.0298  | 0.5206   | -0.02544 | 0.58344  | 0.021204 | 0.64764  | 0.062283 |
| -0.01056 | 0.81997 | -0.03734 | 0.4208   | -0.05858 | 0.2064   | -0.0553  | 0.23296  | -0.07139 |
| -0.07025 | 0.12953 | -0.05239 | 0.25848  | -0.09867 | 0.03302  | 0.022973 | 0.62047  | 0.136457 |
| 0.088577 | 0.05577 | 0.120339 | 0.00924  | 0.043935 | 0.34345  | 0.09377  | 0.04282  | 0.163919 |
| 0.007994 | 0.8632  | 0.02307  | 0.619    | 0.009543 | 0.83703  | 0.09753  | 0.03512  | 0.338918 |
| -0.02959 | 0.52349 | -0.056   | 0.22707  | -0.04942 | 0.28653  | -0.10267 | 0.02651  | -0.13068 |
| -0.02606 | 0.57425 | -0.12352 | 0.00753  | -0.11063 | 0.01678  | -0.17961 | 9.51E-05 | 0.076424 |
| 0.032628 | 0.48181 | 0.114491 | 0.0133   | -0.04113 | 0.37516  | 0.083176 | 0.07254  | -0.23627 |
| 0.004747 | 0.91852 | 0.07458  | 0.10748  | 0.084533 | 0.06798  | 0.128054 | 0.00558  | 0.160798 |
| 0.028531 | 0.53854 | 0.237435 | 2.08E-07 | 0.165524 | 0.00033  | 0.282997 | 4.76E-10 | 0.128138 |
| 0.08745  | 0.05898 | 0.111136 | 0.01628  | -0.0738  | 0.1112   | 0.072102 | 0.11971  | -0.10873 |
| -0.01025 | 0.82514 | -0.02679 | 0.5636   | 0.065808 | 0.15565  | -0.05112 | 0.27027  | -0.05534 |
| 0.05078  | 0.27346 | -0.07008 | 0.13048  | -0.02482 | 0.59262  | -0.04269 | 0.35736  | 0.008703 |
| 0.073183 | 0.11425 | -0.08413 | 0.0693   | -0.00696 | 0.88068  | -0.12765 | 0.00574  | 0.050262 |
| 0.05037  | 0.27736 | -0.04313 | 0.35234  | -0.05689 | 0.21979  | -0.05366 | 0.24716  | -0.04956 |
| -0.13548 | 0.00335 | -0.1761  | 0.00013  | -0.15994 | 0.00052  | -0.14168 | 0.00215  | -0.17343 |
| 0.024466 | 0.59793 | 0.037537 | 0.41835  | 0.029631 | 0.52298  | 0.068586 | 0.13889  | 0.018384 |
| -0.02802 | 0.54591 | 0.01574  | 0.73443  | -0.02976 | 0.52113  | 0.032003 | 0.49025  | -0.1402  |
| 0.085169 | 0.06593 | 0.009134 | 0.84394  | 0.022815 | 0.62288  | -0.03005 | 0.51709  | -0.03392 |
| 0.014941 | 0.74743 | -0.1289  | 0.00527  | -0.10512 | 0.0231   | -0.14786 | 0.00135  | 0.005852 |
| -0.01284 | 0.78197 | -0.06071 | 0.19032  | -0.14003 | 0.00242  | -0.08477 | 0.06721  | 0.01257  |
| 0.024309 | 0.60028 | 0.148291 | 0.00131  | -0.04617 | 0.3194   | 0.015239 | 0.74257  | -0.23541 |
| 0.026563 | 0.56692 | -0.16956 | 0.00023  | -0.11421 | 0.01353  | -0.1622  | 0.00043  | 0.127867 |
| -0.06748 | 0.14537 | -0.2117  | 3.93E-06 | -0.08771 | 0.05821  | -0.19592 | 2.01E-05 | -0.01465 |
| 0.125727 | 0.00652 | 0.343965 | 2.04E-14 | 0.236359 | 2.37E-07 | 0.302257 | 2.54E-11 | 0.074135 |
| -0.03194 | 0.49104 | 0.012098 | 0.79428  | -0.00592 | 0.8985   | 0.005919 | 0.89849  | -0.00217 |
| -0.05749 | 0.21491 | -0.21341 | 3.27E-06 | -0.07831 | 0.09098  | -0.12866 | 0.00536  | 0.201187 |
| -0.01697 | 0.71454 | -0.19167 | 3.05E-05 | -0.16322 | 0.0004   | -0.23641 | 2.36E-07 | -0.11456 |
| 0.013705 | 0.7677  | -0.04999 | 0.28103  | 0.016126 | 0.72816  | -0.01577 | 0.73387  | 0.103166 |
| 0.012344 | 0.79021 | 0.024336 | 0.59988  | 0.064096 | 0.16671  | -0.05717 | 0.21751  | 0.02853  |
| 0.025932 | 0.57617 | 0.090342 | 0.05105  | -0.02072 | 0.65518  | 0.062311 | 0.17887  | -0.12596 |
| -0.04451 | 0.33721 | 0.106376 | 0.0215   | 0.017776 | 0.70161  | 0.192892 | 2.71E-05 | 0.024006 |
| -0.07635 | 0.09937 | 0.077281 | 0.0953   | -0.02288 | 0.62191  | 0.177572 | 0.00011  | -0.03914 |
| 0.091317 | 0.04859 | 0.201955 | 1.09E-05 | 0.270991 | 2.65E-09 | 0.16214  | 0.00044  | 0.152865 |
| -0.03593 | 0.43851 | 0.093757 | 0.04285  | 0.081127 | 0.07989  | 0.12952  | 0.00506  | -0.08616 |
| -0.04067 | 0.38058 | 0.086508 | 0.06177  | -0.02686 | 0.56255  | 0.071817 | 0.12118  | -0.12036 |
| -0.03299 | 0.47701 | 0.119508 | 0.00974  | 0.002031 | 0.96509  | 0.128612 | 0.00538  | 0.003959 |
| -0.02378 | 0.60819 | -0.02508 | 0.58873  | -0.01295 | 0.7802   | -0.05271 | 0.25562  | -0.00208 |
| 0.004218 | 0.92756 | -0.05639 | 0.22384  | -0.10592 | 0.02207  | -0.06256 | 0.17716  | -0.02726 |
| 0.108415 | 0.0191  | 0.038029 | 0.41227  | 0.198554 | 1.54E-05 | 0.108691 | 0.0188   | 0.216998 |
| -0.11943 | 0.00979 | -0.0195  | 0.67426  | -0.13845 | 0.00272  | -0.08814 | 0.05699  | -0.06737 |
| -0.07971 | 0.0853  | 0.128826 | 0.0053   | -0.00905 | 0.84537  | 0.144541 | 0.00174  | -0.0612  |
| 0.025953 | 0.57586 | -0.02724 | 0.55704  | 0.019783 | 0.6698   | -0.04039 | 0.38386  | -0.03301 |
| -0.01434 | 0.75734 | -0.14847 | 0.00129  | -0.07575 | 0.10205  | -0.11108 | 0.01633  | 0.136046 |

|          |          |          |          |          |          |          |          |          |
|----------|----------|----------|----------|----------|----------|----------|----------|----------|
| -0.07372 | 0.11162  | -0.11541 | 0.01257  | -0.10946 | 0.01797  | -0.11619 | 0.01198  | -0.04762 |
| 0.000267 | 0.99541  | -0.08149 | 0.07855  | -0.16368 | 0.00038  | -0.05487 | 0.23664  | -0.0139  |
| 0.017204 | 0.71078  | 0.034545 | 0.45643  | 0.007694 | 0.86829  | 0.017011 | 0.71387  | 0.126838 |
| 0.035318 | 0.44641  | -0.05281 | 0.25467  | -0.01473 | 0.75086  | 0.014549 | 0.75384  | 0.034798 |
| 0.017293 | 0.70935  | 0.028951 | 0.53257  | 0.002146 | 0.96311  | 0.030344 | 0.51303  | -0.08023 |
| 0.007277 | 0.87537  | -0.15654 | 0.00069  | -0.09926 | 0.03199  | -0.15434 | 0.00082  | 0.046308 |
| 0.034121 | 0.46198  | 0.103388 | 0.02547  | -0.00681 | 0.88325  | 0.005813 | 0.90031  | 0.046388 |
| 0.099496 | 0.03158  | 0.044171 | 0.34087  | 0.079281 | 0.08701  | 0.057093 | 0.21814  | 0.035518 |
| 0.08019  | 0.08344  | 0.033836 | 0.46573  | 0.078011 | 0.0922   | 0.077967 | 0.09239  | 0.010267 |
| 0.094694 | 0.04081  | 0.045837 | 0.32296  | 0.083811 | 0.07037  | 0.055666 | 0.22988  | 0.03373  |
| 0.243661 | 9.71E-08 | 0.012171 | 0.79308  | 0.043587 | 0.34729  | 0.020002 | 0.66637  | 0.033429 |
| 0.014706 | 0.75128  | 0.041912 | 0.36616  | -0.01215 | 0.79337  | 0.029373 | 0.52661  | 0.086416 |
| 0.126443 | 0.00622  | -0.01558 | 0.73695  | 0.014164 | 0.76014  | 0.015871 | 0.73229  | 0.079545 |
| 0.028158 | 0.54385  | -0.074   | 0.11027  | 0.012218 | 0.79229  | -0.04979 | 0.28291  | 0.008407 |
| 0.123375 | 0.0076   | 0.058827 | 0.20446  | 0.114929 | 0.01295  | 0.077461 | 0.09453  | 0.075029 |
| 0.004532 | 0.92218  | -0.00531 | 0.9089   | 0.090036 | 0.05184  | 0.095444 | 0.03923  | 0.153821 |
| 0.190251 | 3.50E-05 | -0.0081  | 0.86143  | 0.036217 | 0.43491  | -0.01514 | 0.74421  | -0.02763 |
| 0.063167 | 0.17296  | -0.0651  | 0.16015  | -0.00508 | 0.91285  | -0.05833 | 0.20828  | 0.072489 |
| 0.046607 | 0.31488  | -0.10731 | 0.02037  | -0.11341 | 0.0142   | -0.13257 | 0.00411  | 0.093421 |
| -0.02382 | 0.60769  | -0.16959 | 0.00023  | -0.06602 | 0.15434  | -0.18124 | 8.19E-05 | 0.001937 |
| -0.07169 | 0.12183  | 0.016172 | 0.72741  | -0.20221 | 1.06E-05 | -0.07324 | 0.11398  | -0.1336  |
| 0.051402 | 0.26762  | 0.089429 | 0.05345  | 0.110221 | 0.01718  | 0.149673 | 0.00118  | 0.040221 |
| 0.092048 | 0.04681  | 0.116737 | 0.01158  | 0.081006 | 0.08034  | 0.127065 | 0.00597  | -0.05259 |
| 0.007549 | 0.87076  | 0.210316 | 4.56E-06 | 0.139503 | 0.00252  | 0.207851 | 5.92E-06 | 0.133441 |
| 0.038664 | 0.4045   | -0.12345 | 0.00757  | -0.01047 | 0.82139  | -0.15549 | 0.00075  | -0.05122 |
| 0.122848 | 0.00787  | 0.058101 | 0.21011  | 0.031961 | 0.49082  | 0.036723 | 0.42851  | 0.104863 |
| 0.092147 | 0.04657  | -0.06208 | 0.18046  | 0.059859 | 0.19662  | -0.0779  | 0.09267  | 0.011318 |
| -0.01779 | 0.7014   | -0.13788 | 0.00283  | -0.08167 | 0.0779   | -0.08614 | 0.0629   | -0.05436 |
| 0.01551  | 0.73815  | -0.04132 | 0.37298  | -0.06319 | 0.17279  | -0.05128 | 0.2688   | 0.030875 |
| -0.01874 | 0.6863   | -0.0911  | 0.04914  | -0.11639 | 0.01184  | -0.15172 | 0.00101  | 0.078543 |
| 0.022623 | 0.6258   | -0.13769 | 0.00287  | -0.16776 | 0.00027  | -0.13107 | 0.00455  | 0.042519 |
| -0.01936 | 0.67639  | -0.14047 | 0.00235  | -0.1719  | 0.00019  | -0.12784 | 0.00567  | 0.15505  |
| 0.043648 | 0.34662  | 0.004734 | 0.91874  | -0.0623  | 0.17897  | 0.032634 | 0.48173  | -0.00702 |
| -0.00074 | 0.98731  | -0.02323 | 0.61652  | -0.02926 | 0.52821  | 0.078243 | 0.09124  | 0.278802 |
| 0.003811 | 0.93454  | 0.054173 | 0.24264  | -0.02007 | 0.66523  | 0.068146 | 0.14145  | -0.00839 |
| 0.047591 | 0.30476  | 0.256288 | 1.94E-08 | 0.203237 | 9.58E-06 | 0.320454 | 1.30E-12 | 0.188228 |
| 0.029522 | 0.52451  | -0.03882 | 0.4026   | 0.040952 | 0.37725  | 0.003552 | 0.93897  | 0.251418 |
| -0.00594 | 0.89817  | 0.050673 | 0.27448  | 0.021384 | 0.64485  | 0.039876 | 0.38992  | -0.09794 |
| -0.01681 | 0.7171   | 0.011966 | 0.79648  | -0.06408 | 0.16684  | -0.00609 | 0.8955   | -0.0953  |
| 0.087078 | 0.06007  | 0.008377 | 0.85672  | -0.00896 | 0.84683  | -0.05542 | 0.23195  | -0.01588 |
| -0.08264 | 0.07441  | -0.09132 | 0.04858  | -0.11434 | 0.01342  | -0.12464 | 0.007    | -0.04249 |
| -0.05655 | 0.22257  | -0.02649 | 0.56804  | -0.03102 | 0.50374  | 0.05844  | 0.20746  | -0.01404 |
| 0.005147 | 0.91166  | 0.173315 | 0.00017  | 0.13478  | 0.00352  | 0.164771 | 0.00035  | 0.001654 |
| 0.05486  | 0.23671  | 0.028978 | 0.53218  | 0.078432 | 0.09046  | 0.020086 | 0.66506  | 0.034417 |
| -0.0231  | 0.61856  | -0.04976 | 0.28321  | -0.00768 | 0.86856  | -0.01803 | 0.69751  | 0.238987 |

|          |          |          |          |          |          |          |          |          |
|----------|----------|----------|----------|----------|----------|----------|----------|----------|
| 1.85E-05 | 0.99968  | 0.010456 | 0.82171  | 0.006756 | 0.88423  | 0.005662 | 0.90288  | -0.02241 |
| -0.02134 | 0.6456   | -0.05915 | 0.20194  | -0.07052 | 0.12808  | -0.06453 | 0.16383  | 0.030187 |
| 0.0013   | 0.97765  | -0.0383  | 0.40897  | 0.030168 | 0.51547  | -0.01159 | 0.80272  | -0.00663 |
| 0.015486 | 0.73855  | 0.001287 | 0.97788  | 0.079321 | 0.08685  | -0.01861 | 0.6883   | 0.000312 |
| -0.04802 | 0.30038  | 0.129    | 0.00524  | -0.06179 | 0.1825   | 0.069988 | 0.13098  | -0.14007 |
| -0.03157 | 0.49618  | -0.00132 | 0.97736  | -0.01693 | 0.71521  | -0.06903 | 0.13632  | 0.102028 |
| 0.007855 | 0.86557  | -0.14777 | 0.00136  | 0.006858 | 0.88249  | -0.11589 | 0.0122   | 0.153557 |
| 0.042525 | 0.35918  | -0.12202 | 0.0083   | -0.02646 | 0.56849  | -0.13847 | 0.00271  | 0.113312 |
| 0.006562 | 0.88753  | 0.004859 | 0.9166   | -0.0115  | 0.80431  | 0.041754 | 0.36797  | 0.019706 |
| 0.046523 | 0.31576  | 0.260017 | 1.18E-08 | 0.188812 | 4.02E-05 | 0.23589  | 2.51E-07 | 0.08129  |
| 0.195516 | 2.09E-05 | 0.128409 | 0.00545  | 0.10251  | 0.02675  | 0.118059 | 0.01067  | 0.091931 |
| 0.110373 | 0.01703  | 0.224515 | 9.51E-07 | 0.21578  | 2.53E-06 | 0.124976 | 0.00685  | 0.169363 |
| -0.15999 | 0.00052  | -0.29611 | 6.63E-11 | -0.21689 | 2.24E-06 | -0.23016 | 4.95E-07 | 0.105321 |
| -0.03345 | 0.47086  | -0.04639 | 0.31718  | -0.05265 | 0.2562   | 0.071294 | 0.12393  | 0.193072 |
| -0.02216 | 0.63286  | 0.266576 | 4.87E-09 | 0.150305 | 0.00112  | 0.254276 | 2.52E-08 | 0.133629 |
| 0.071855 | 0.12099  | 0.007763 | 0.86712  | -0.00372 | 0.93606  | 0.001512 | 0.97401  | -0.07556 |
| -0.0734  | 0.11316  | -0.04266 | 0.35762  | -0.05556 | 0.23076  | -0.0239  | 0.60646  | 0.002694 |
| 0.011304 | 0.80752  | -0.04088 | 0.37805  | -0.05811 | 0.21006  | -0.04968 | 0.28398  | -0.09052 |
| -0.00611 | 0.89523  | -0.00036 | 0.99377  | -0.01306 | 0.77833  | -0.01048 | 0.82126  | 0.100289 |
| 0.015897 | 0.73187  | -0.02168 | 0.64021  | -0.04978 | 0.28298  | -0.03496 | 0.45103  | -0.08163 |
| -0.03759 | 0.41766  | 0.198345 | 1.58E-05 | 0.204154 | 8.71E-06 | 0.216166 | 2.42E-06 | 0.153838 |
| -0.03981 | 0.39071  | -0.19901 | 1.47E-05 | -0.13007 | 0.00487  | -0.25041 | 4.15E-08 | 0.096061 |
| -0.04156 | 0.37021  | -0.00767 | 0.86868  | 0.033371 | 0.47188  | 0.100467 | 0.02995  | 0.350744 |
| 0.027718 | 0.55017  | 0.002139 | 0.96323  | -0.00147 | 0.97481  | -0.02626 | 0.57141  | 0.007957 |
| 0.061355 | 0.18564  | 0.069169 | 0.13556  | 0.031434 | 0.498    | 0.012983 | 0.77961  | 0.045171 |
| 0.079699 | 0.08535  | 0.179821 | 9.33E-05 | 0.070851 | 0.12628  | 0.148134 | 0.00133  | 0.041342 |
| 0.037418 | 0.41982  | 0.182046 | 7.60E-05 | 0.132032 | 0.00426  | 0.134832 | 0.00351  | -0.08314 |
| -0.02873 | 0.53574  | -0.06829 | 0.14064  | -0.16769 | 0.00027  | -0.14644 | 0.00151  | -0.20762 |
| -0.17259 | 0.00018  | -0.1776  | 0.00011  | -0.07866 | 0.08952  | -0.2249  | 9.10E-07 | -0.1206  |
| 0.084236 | 0.06896  | 0.174153 | 0.00016  | 0.198789 | 1.51E-05 | 0.177623 | 0.00011  | 0.073312 |
| 0.024272 | 0.60084  | 0.065025 | 0.16064  | 0.156241 | 0.0007   | 0.19094  | 3.27E-05 | 0.101818 |
| 0.046353 | 0.31753  | 0.216592 | 2.31E-06 | 0.109647 | 0.01777  | 0.140307 | 0.00237  | -0.0403  |
| -0.09059 | 0.05042  | -0.01307 | 0.77823  | -0.07501 | 0.10547  | -0.07436 | 0.10855  | -0.20663 |
| -0.01917 | 0.67945  | 0.01197  | 0.79641  | -0.04574 | 0.32394  | -0.00747 | 0.87209  | 0.03805  |
| -0.15667 | 0.00068  | -0.12592 | 0.00643  | -0.25747 | 1.66E-08 | -0.06608 | 0.15392  | -0.03678 |
| -0.03012 | 0.51619  | -0.01946 | 0.67486  | -0.05357 | 0.24797  | -0.11162 | 0.01581  | -0.17422 |
| 0.054354 | 0.24107  | 0.095711 | 0.03868  | 0.060709 | 0.19032  | 0.020947 | 0.65163  | -0.14142 |
| 0.025628 | 0.58065  | -0.0267  | 0.56497  | 0.017198 | 0.71087  | -0.03103 | 0.50356  | 0.02602  |
| -0.07327 | 0.1138   | -0.09916 | 0.03216  | -0.07138 | 0.12346  | -0.17384 | 0.00016  | -0.03516 |
| 0.063251 | 0.17239  | 0.146363 | 0.00152  | 0.175913 | 0.00013  | 0.220781 | 1.45E-06 | 0.089293 |
| 0.020005 | 0.66633  | -0.06506 | 0.16044  | -0.07245 | 0.11792  | -0.10755 | 0.02008  | -0.05904 |
| 0.030583 | 0.50972  | -0.06667 | 0.15028  | -0.016   | 0.73015  | 0.001905 | 0.96724  | 0.146582 |
| 0.018042 | 0.69737  | -0.0033  | 0.94333  | -0.02183 | 0.63797  | 0.006016 | 0.89684  | -0.01409 |
| 0.013596 | 0.76949  | -0.14216 | 0.00207  | -0.07223 | 0.11907  | -0.14365 | 0.00186  | 0.21507  |
| 0.086581 | 0.06155  | -0.0444  | 0.33832  | 0.02783  | 0.54856  | -0.05097 | 0.27166  | 0.068326 |

|          |         |          |          |          |          |          |          |          |
|----------|---------|----------|----------|----------|----------|----------|----------|----------|
| 0.046236 | 0.31876 | 0.013809 | 0.76599  | -0.00385 | 0.93394  | -0.00402 | 0.93101  | -0.01842 |
| 0.031063 | 0.50309 | 0.098047 | 0.03415  | 0.263485 | 7.42E-09 | 0.180444 | 8.81E-05 | 0.217538 |
| 0.029899 | 0.51923 | -0.13406 | 0.0037   | -0.10983 | 0.01758  | -0.02376 | 0.6085   | 0.061458 |
| -0.10591 | 0.02207 | -0.19333 | 2.59E-05 | -0.22732 | 6.89E-07 | -0.21765 | 2.06E-06 | -0.05992 |
| -0.06943 | 0.13406 | 0.021499 | 0.64307  | -0.09903 | 0.03238  | 0.115261 | 0.01269  | 0.025657 |
| -0.05174 | 0.26446 | -0.00487 | 0.91634  | -0.06014 | 0.19453  | -0.13589 | 0.00326  | -0.15787 |
| -0.02044 | 0.65956 | 0.053851 | 0.24546  | 0.120166 | 0.00934  | 0.051854 | 0.26342  | 0.044721 |
| -0.09014 | 0.05158 | -0.18303 | 6.94E-05 | -0.20738 | 6.22E-06 | -0.1531  | 0.0009   | -0.12681 |
| -0.01368 | 0.76809 | 0.054979 | 0.2357   | 0.032062 | 0.48945  | 0.034644 | 0.45514  | 0.086618 |
| -0.01698 | 0.71432 | 0.008953 | 0.84699  | -0.06796 | 0.14254  | 0.021171 | 0.64815  | -0.06606 |
| 0.018244 | 0.69415 | -0.01446 | 0.75526  | -0.19026 | 3.50E-05 | -0.09913 | 0.03222  | -0.17038 |
| -0.00391 | 0.93283 | -0.00017 | 0.99699  | 0.087513 | 0.05879  | -0.03702 | 0.42477  | 0.072005 |
| -0.04405 | 0.34215 | -0.12002 | 0.00943  | -0.06871 | 0.13817  | 0.011447 | 0.80512  | 0.144381 |
| 0.015425 | 0.73953 | 0.089068 | 0.05442  | 0.112779 | 0.01475  | 0.115393 | 0.01258  | 0.271611 |
| -0.08362 | 0.07102 | -0.10441 | 0.02404  | -0.17175 | 0.00019  | -0.15928 | 0.00055  | -0.17803 |
| 0.132816 | 0.00404 | 0.031245 | 0.50058  | -0.01157 | 0.80311  | 0.011287 | 0.80779  | -0.10938 |
| 0.074408 | 0.1083  | 0.071535 | 0.12265  | 0.064887 | 0.16153  | 0.068996 | 0.13654  | 0.081243 |
| 0.015487 | 0.73852 | 0.100167 | 0.03044  | 0.100472 | 0.02994  | 0.180441 | 8.81E-05 | 0.258385 |
| 0.052542 | 0.25714 | 0.163615 | 0.00038  | 0.088715 | 0.05539  | 0.139754 | 0.00247  | 0.089642 |
| -0.06917 | 0.13554 | -0.18304 | 6.94E-05 | -0.18446 | 6.07E-05 | -0.12155 | 0.00855  | 0.012045 |
| 0.074178 | 0.1094  | -0.01456 | 0.75364  | 0.007019 | 0.87976  | -0.01215 | 0.79346  | 0.067255 |
| -0.01555 | 0.73756 | 0.096606 | 0.03689  | 0.001849 | 0.96821  | 0.091937 | 0.04707  | 0.071652 |
| 0.004717 | 0.91903 | -0.06319 | 0.17277  | -0.08193 | 0.07693  | -0.04743 | 0.30642  | -0.00598 |
| -0.06184 | 0.18215 | -0.05143 | 0.26735  | -0.02751 | 0.55312  | 0.037438 | 0.41957  | 0.285161 |
| -0.04488 | 0.33317 | 0.144195 | 0.00178  | 0.071127 | 0.12481  | 0.208237 | 5.68E-06 | 0.08303  |
| -0.02592 | 0.57639 | -0.12569 | 0.00653  | -0.03748 | 0.41911  | -0.10531 | 0.02284  | 0.164054 |
| 0.05938  | 0.20022 | 0.066274 | 0.15274  | 0.062512 | 0.17747  | 0.050832 | 0.27297  | 0.021892 |
| -0.01748 | 0.7063  | -0.00742 | 0.87292  | -0.00144 | 0.97525  | 0.033819 | 0.46594  | 0.137292 |
| -0.01143 | 0.80537 | 0.017496 | 0.7061   | 0.055907 | 0.22787  | -0.06212 | 0.1802   | -0.03588 |
| -0.00504 | 0.91349 | -0.05788 | 0.21185  | -0.02534 | 0.58491  | -0.04991 | 0.28179  | 0.079602 |
| -0.01275 | 0.78345 | -0.02741 | 0.55468  | -0.00039 | 0.99331  | -0.00595 | 0.89795  | 0.122956 |
| 0.00792  | 0.86446 | -0.08127 | 0.07936  | 0.005406 | 0.90725  | 0.004822 | 0.91722  | 0.196694 |
| 0.03235  | 0.48555 | 0.039571 | 0.39356  | 0.045023 | 0.33163  | 0.063193 | 0.17278  | 0.108643 |
| 0.038073 | 0.41173 | -0.05033 | 0.27777  | -0.02709 | 0.55932  | -0.02873 | 0.53577  | 0.112114 |
| 0.031715 | 0.49416 | 0.204635 | 8.29E-06 | 0.14644  | 0.00151  | 0.176792 | 0.00012  | 0.097129 |
| -0.01673 | 0.71843 | 0.037409 | 0.41994  | 0.107189 | 0.02051  | 0.088253 | 0.05668  | 0.13703  |
| 0.028934 | 0.53281 | 0.291519 | 1.34E-10 | 0.283899 | 4.17E-10 | 0.220613 | 1.48E-06 | -0.02254 |
| 0.020402 | 0.66012 | -0.0444  | 0.33838  | 0.069423 | 0.13413  | -0.08047 | 0.08235  | 0.2235   |
| -0.01255 | 0.78671 | -0.13295 | 0.004    | -0.04407 | 0.34201  | -0.12272 | 0.00793  | 0.070307 |
| 0.010341 | 0.82364 | -0.01388 | 0.76482  | 0.036589 | 0.4302   | 0.000679 | 0.98832  | 0.074455 |
| -0.02045 | 0.65932 | 0.148793 | 0.00126  | -0.0864  | 0.06209  | 0.055209 | 0.23374  | -0.02403 |
| 0.093958 | 0.04241 | -0.13296 | 0.004    | -0.00323 | 0.94458  | -0.09334 | 0.04379  | 0.210994 |
| -0.11922 | 0.00992 | -0.0605  | 0.19184  | -0.14558 | 0.00161  | -0.18276 | 7.11E-05 | -0.02038 |
| 0.055952 | 0.22749 | 0.053816 | 0.24577  | 0.127669 | 0.00573  | 0.106186 | 0.02173  | 0.149183 |
| 0.095149 | 0.03985 | 0.203204 | 9.61E-06 | 0.224716 | 9.29E-07 | 0.203399 | 9.42E-06 | 0.057401 |



|          |         |          |          |          |          |          |          |          |
|----------|---------|----------|----------|----------|----------|----------|----------|----------|
| -0.04536 | 0.32807 | 0.033379 | 0.47178  | 0.086028 | 0.06323  | 0.107092 | 0.02063  | 0.303594 |
| -0.02276 | 0.62377 | -0.02204 | 0.63474  | -0.02667 | 0.56533  | -0.02619 | 0.57236  | -0.06347 |
| -0.14897 | 0.00124 | -0.1262  | 0.00632  | -0.25191 | 3.42E-08 | -0.05403 | 0.24385  | -0.02309 |
| -0.00856 | 0.85357 | 0.033527 | 0.46981  | 0.107101 | 0.02062  | 0.046162 | 0.31953  | 0.124571 |
| 0.124586 | 0.00703 | 0.02351  | 0.61233  | 0.059106 | 0.20232  | 0.000291 | 0.99499  | -0.09576 |
| -0.0175  | 0.70606 | 0.070458 | 0.12841  | -0.07281 | 0.11613  | 0.008824 | 0.84916  | 0.032328 |
| -0.09103 | 0.04931 | -0.26952 | 3.25E-09 | -0.17848 | 0.00011  | -0.19977 | 1.36E-05 | -0.01441 |
| -0.04636 | 0.31743 | 0.221847 | 1.29E-06 | 0.291642 | 1.31E-10 | 0.267233 | 4.45E-09 | 0.198382 |
| 0.038878 | 0.40191 | 0.011861 | 0.79823  | -0.01061 | 0.81914  | 0.017537 | 0.70544  | 0.041238 |
| -0.03321 | 0.47396 | -0.01062 | 0.81892  | -0.03005 | 0.51717  | -0.05188 | 0.26316  | -0.09769 |
| 0.039551 | 0.3938  | 0.041943 | 0.36581  | 0.111689 | 0.01575  | 0.061497 | 0.18462  | 0.177247 |
| -0.15567 | 0.00074 | -0.21764 | 2.06E-06 | -0.19854 | 1.54E-05 | -0.15477 | 0.00079  | 0.150401 |
| -0.16315 | 0.0004  | -0.18941 | 3.79E-05 | -0.18482 | 5.87E-05 | -0.14557 | 0.00161  | 0.115926 |
| -0.04745 | 0.30624 | 0.002963 | 0.94908  | -0.11397 | 0.01373  | -0.00443 | 0.924    | -0.06112 |
| -0.07474 | 0.10671 | -0.14103 | 0.00225  | -0.0742  | 0.10929  | -0.04978 | 0.28304  | 0.104642 |
| -0.01477 | 0.75024 | -0.18658 | 4.97E-05 | -0.13773 | 0.00286  | -0.20674 | 6.65E-06 | 0.067168 |
| -0.02345 | 0.61327 | -0.13808 | 0.00279  | -0.09851 | 0.03332  | -0.13239 | 0.00416  | 0.075106 |
| -0.05443 | 0.24045 | 0.149596 | 0.00119  | 0.099841 | 0.03099  | 0.130261 | 0.00481  | 0.023394 |
| -0.025   | 0.59002 | -0.12325 | 0.00766  | -0.03235 | 0.48561  | -0.13438 | 0.00362  | 0.03987  |
| 0.021813 | 0.63822 | -0.07681 | 0.09733  | -0.12375 | 0.00742  | -0.02374 | 0.60879  | 0.142434 |
| -0.11928 | 0.00988 | -0.22582 | 8.19E-07 | -0.10704 | 0.02069  | -0.19162 | 3.06E-05 | 0.035586 |
| -0.01581 | 0.73328 | 0.155657 | 0.00074  | 0.038576 | 0.40557  | 0.141921 | 0.00211  | -0.07557 |
| 0.045653 | 0.32489 | -0.10558 | 0.0225   | 0.045973 | 0.32151  | -0.08439 | 0.06844  | 0.089673 |
| 0.010354 | 0.82341 | 0.073119 | 0.11457  | 0.142459 | 0.00203  | 0.014345 | 0.75717  | 0.068648 |
| 0.005063 | 0.9131  | -0.04512 | 0.33059  | -0.01247 | 0.78811  | -0.07281 | 0.1161   | 0.069561 |
| -0.00065 | 0.98877 | -0.1336  | 0.00382  | -0.02487 | 0.59189  | -0.0523  | 0.25937  | 0.217201 |
| 0.023192 | 0.61714 | -0.04711 | 0.30963  | -0.09025 | 0.05128  | -0.01021 | 0.82577  | 0.026156 |
| 0.091688 | 0.04767 | -0.05309 | 0.25217  | 0.022128 | 0.63338  | -0.05153 | 0.26644  | 0.005666 |
| 0.014202 | 0.75953 | 0.066203 | 0.15318  | 0.034013 | 0.4634   | 0.129398 | 0.0051   | 0.283218 |
| -0.01481 | 0.74962 | -0.07696 | 0.0967   | -0.06029 | 0.19339  | -0.04081 | 0.37895  | -0.02142 |
| -0.04895 | 0.2911  | 0.008675 | 0.85169  | -0.02303 | 0.6196   | -0.00881 | 0.84933  | 0.023665 |
| 0.027479 | 0.55362 | -0.07118 | 0.12455  | -0.01856 | 0.68908  | -0.06908 | 0.13606  | 0.004065 |
| 0.020121 | 0.66451 | -0.01879 | 0.68552  | 0.035195 | 0.44799  | 0.002003 | 0.96556  | -0.00738 |
| -0.03581 | 0.44004 | -0.02475 | 0.59366  | -0.02656 | 0.56692  | -0.04788 | 0.30187  | 0.058555 |
| 0.032473 | 0.4839  | 0.013134 | 0.77711  | 0.135127 | 0.00344  | 0.006392 | 0.89042  | 0.163537 |
| -0.0406  | 0.38137 | -0.1901  | 3.55E-05 | -0.12203 | 0.00829  | -0.20544 | 7.63E-06 | -0.0585  |
| -0.09834 | 0.03362 | -0.02974 | 0.52145  | -0.15133 | 0.00104  | 0.000414 | 0.99287  | -0.02341 |
| -0.07696 | 0.09669 | -0.0707  | 0.12707  | -0.06677 | 0.14967  | -0.05195 | 0.26259  | -0.02561 |
| 0.030724 | 0.50775 | -0.04197 | 0.36547  | -0.06346 | 0.17097  | -0.04501 | 0.33181  | -0.01707 |
| -0.03016 | 0.51558 | -0.09254 | 0.04564  | -0.13781 | 0.00284  | -0.09951 | 0.03156  | 0.097297 |
| 0.005336 | 0.90844 | -0.07976 | 0.08512  | -0.01237 | 0.78973  | -0.05493 | 0.23612  | 0.158333 |
| -0.01769 | 0.70297 | -0.05476 | 0.23755  | 0.050689 | 0.27432  | -0.03735 | 0.42062  | 0.219436 |
| -0.13817 | 0.00277 | -0.13942 | 0.00253  | -0.16991 | 0.00023  | -0.10301 | 0.02602  | 0.001573 |
| 0.112766 | 0.01476 | 0.116959 | 0.01142  | 0.172055 | 0.00019  | -0.02419 | 0.60208  | 0.10386  |
| -0.13714 | 0.00298 | -0.23656 | 2.32E-07 | -0.26837 | 3.80E-09 | -0.18623 | 5.14E-05 | -0.08914 |

|          |          |          |          |          |          |           |          |          |
|----------|----------|----------|----------|----------|----------|-----------|----------|----------|
| -0.09324 | 0.04401  | -0.10953 | 0.01789  | -0.13073 | 0.00466  | -0.12759  | 0.00576  | -0.01678 |
| 0.002989 | 0.94864  | -0.04079 | 0.37916  | 0.007885 | 0.86506  | -0.1369   | 0.00303  | 0.035967 |
| -0.07264 | 0.11696  | -0.05411 | 0.24318  | -0.0076  | 0.86995  | -0.07007  | 0.13054  | -0.07036 |
| 0.024773 | 0.59334  | 0.181351 | 8.11E-05 | 0.011478 | 0.8046   | 0.040576  | 0.38165  | -0.06498 |
| -0.01345 | 0.77186  | -0.05608 | 0.22647  | -0.02401 | 0.6048   | -0.06987  | 0.13166  | 0.013572 |
| -0.18076 | 8.56E-05 | -0.04301 | 0.35376  | -0.2065  | 6.83E-06 | -0.06344  | 0.1711   | -0.18878 |
| -0.01608 | 0.72889  | -0.0792  | 0.08733  | -0.01816 | 0.69546  | -0.07837  | 0.09072  | 0.147265 |
| 0.06793  | 0.14272  | -0.07883 | 0.08882  | 0.043732 | 0.3457   | -0.05685  | 0.22014  | 0.157274 |
| -0.02109 | 0.64937  | -0.05189 | 0.26312  | -0.01025 | 0.82518  | -0.09416  | 0.04197  | -0.00075 |
| -0.10483 | 0.02347  | -0.04504 | 0.33141  | -0.13652 | 0.00312  | -0.07954  | 0.08597  | -0.00409 |
| -0.0794  | 0.08654  | -0.09978 | 0.03109  | -0.13207 | 0.00425  | -0.10771  | 0.0199   | -0.03564 |
| -0.02558 | 0.58133  | 0.103871 | 0.02479  | -0.07245 | 0.11792  | 0.037627  | 0.41724  | 0.015366 |
| -0.05205 | 0.26161  | -0.13643 | 0.00314  | -0.17455 | 0.00015  | -0.10192  | 0.02765  | 0.067088 |
| -0.11588 | 0.01222  | -0.19956 | 1.39E-05 | -0.23664 | 2.29E-07 | -0.24679  | 6.57E-08 | 0.024402 |
| 0.033041 | 0.47627  | -0.03033 | 0.51324  | 0.106574 | 0.02125  | -0.06231  | 0.1789   | 0.024355 |
| 0.095536 | 0.03904  | 0.218731 | 1.82E-06 | 0.131291 | 0.00448  | 0.293807  | 9.44E-11 | 0.121628 |
| -0.03833 | 0.40857  | -0.10635 | 0.02152  | -0.0877  | 0.05824  | -0.19471  | 2.27E-05 | -0.14003 |
| -0.0105  | 0.82093  | -0.09311 | 0.04432  | -0.13899 | 0.00261  | -0.14155  | 0.00217  | 0.068166 |
| 0.114165 | 0.01356  | 0.115783 | 0.01229  | 0.102415 | 0.02689  | 0.124816  | 0.00692  | 0.126472 |
| 0.057835 | 0.21221  | 0.009545 | 0.83702  | 0.096569 | 0.03696  | -0.0358   | 0.44018  | 0.189559 |
| -0.05908 | 0.2025   | -0.17032 | 0.00022  | -0.11172 | 0.01572  | -0.16659  | 0.0003   | -0.06841 |
| -0.07743 | 0.09467  | -0.03172 | 0.49406  | -0.13443 | 0.00361  | 0.049888  | 0.28199  | 0.126574 |
| 0.03646  | 0.43183  | 0.052922 | 0.25371  | 0.070717 | 0.12701  | -0.04062  | 0.38113  | 0.053409 |
| 0.002682 | 0.9539   | -0.01117 | 0.80978  | 0.009816 | 0.83244  | -0.0078   | 0.86651  | 0.050889 |
| -0.14698 | 0.00145  | -0.20752 | 6.13E-06 | -0.19297 | 2.69E-05 | -0.18081  | 8.52E-05 | 0.056934 |
| -0.10361 | 0.02516  | -0.04342 | 0.34911  | -0.19923 | 1.44E-05 | -0.03893  | 0.40132  | 0.059983 |
| -0.07243 | 0.11803  | -0.00645 | 0.88946  | -0.12486 | 0.0069   | 0.018801  | 0.6853   | -0.00052 |
| 0.088252 | 0.05668  | -0.09287 | 0.04486  | -0.06758 | 0.14479  | -0.10779  | 0.01981  | -0.05302 |
| 0.037934 | 0.41344  | -0.07497 | 0.10565  | -0.14011 | 0.00241  | -0.11346  | 0.01416  | 0.047388 |
| 0.02143  | 0.64414  | 0.013633 | 0.76889  | 0.05081  | 0.27317  | 0.034812  | 0.45295  | 0.143512 |
| -0.02373 | 0.60901  | -0.0021  | 0.96398  | 0.097673 | 0.03485  | -0.00729  | 0.87509  | 0.085263 |
| -0.04239 | 0.36072  | -0.17113 | 0.0002   | -0.19104 | 3.24E-05 | -0.2458   | 7.44E-08 | -0.08153 |
| -0.02592 | 0.5763   | -0.06786 | 0.14316  | -0.07119 | 0.12448  | -0.087    | 0.06029  | -0.02712 |
| 0.080825 | 0.08102  | -0.02774 | 0.5498   | 0.058744 | 0.2051   | -0.06244  | 0.17796  | 0.059412 |
| -0.13461 | 0.00356  | -0.02327 | 0.61588  | -0.24257 | 1.11E-07 | -0.03001  | 0.51773  | -0.05495 |
| -0.11654 | 0.01172  | -0.05417 | 0.24268  | -0.12637 | 0.00625  | 0.018605  | 0.68841  | 0.029098 |
| 0.010104 | 0.8276   | 0.088831 | 0.05507  | 0.15772  | 0.00062  | -0.00608  | 0.89567  | -0.03514 |
| -0.00518 | 0.91108  | -0.11394 | 0.01375  | -0.07721 | 0.0956   | -0.10753  | 0.02011  | -0.05466 |
| -0.06096 | 0.18849  | -0.08585 | 0.06378  | 0.004602 | 0.92099  | -0.06238  | 0.1784   | 0.126897 |
| 0.028559 | 0.53814  | 0.0229   | 0.62158  | 0.110975 | 0.01643  | -6.19E-05 | 0.99894  | 0.108143 |
| 0.085112 | 0.06611  | -0.092   | 0.04693  | -0.01694 | 0.71495  | -0.08672  | 0.06112  | 0.179591 |
| 0.03419  | 0.46106  | -0.11948 | 0.00976  | 0.029288 | 0.52781  | -0.07376  | 0.1114   | 0.179658 |
| -0.10395 | 0.02468  | -0.00472 | 0.91897  | -0.09375 | 0.04287  | -0.00975  | 0.83363  | -0.07591 |
| -0.082   | 0.07668  | -0.09394 | 0.04245  | -0.12331 | 0.00764  | -0.07434  | 0.10863  | -0.03577 |
| -0.06049 | 0.19196  | -0.08386 | 0.07022  | -0.16164 | 0.00045  | -0.13105  | 0.00456  | -0.04878 |

|          |          |          |          |          |          |          |          |          |
|----------|----------|----------|----------|----------|----------|----------|----------|----------|
| -0.0805  | 0.08223  | -0.03184 | 0.49242  | -0.19577 | 2.04E-05 | -0.03207 | 0.48929  | 0.042352 |
| -0.00193 | 0.96683  | -0.07583 | 0.1017   | -0.12271 | 0.00794  | -0.15621 | 0.00071  | -0.07212 |
| -0.07866 | 0.08953  | -0.14618 | 0.00154  | -0.33544 | 9.60E-14 | -0.13203 | 0.00426  | -0.05303 |
| -0.0758  | 0.10182  | -0.14241 | 0.00204  | -0.12565 | 0.00655  | -0.21539 | 2.63E-06 | -0.1188  |
| -0.05843 | 0.20752  | -0.02487 | 0.59192  | -0.14259 | 0.00201  | -0.01077 | 0.81636  | -0.07953 |
| -0.01595 | 0.73101  | -0.07085 | 0.1263   | -0.10307 | 0.02592  | -0.06307 | 0.17359  | 0.048043 |
| -0.01908 | 0.68091  | -0.1984  | 1.57E-05 | -0.12866 | 0.00536  | -0.25016 | 4.28E-08 | -0.05977 |
| 0.08166  | 0.07792  | -0.03012 | 0.51614  | 0.065347 | 0.15858  | -0.0802  | 0.0834   | -0.01253 |
| 0.117646 | 0.01095  | 0.003852 | 0.93384  | 0.089296 | 0.05381  | 0.003402 | 0.94154  | 0.01066  |
| -0.09573 | 0.03865  | -0.17423 | 0.00015  | -0.12054 | 0.00912  | -0.10981 | 0.01761  | 0.017014 |
| 0.031741 | 0.4938   | 0.016733 | 0.71836  | 0.041052 | 0.37608  | 0.00388  | 0.93335  | 0.071124 |
| -0.14197 | 0.0021   | 0.012775 | 0.78305  | -0.14292 | 0.00196  | 0.021074 | 0.64966  | -0.14864 |
| 0.143041 | 0.00194  | 0.028311 | 0.54167  | 0.048764 | 0.29298  | -0.01818 | 0.69523  | -0.07433 |
| 0.095218 | 0.0397   | 0.007405 | 0.8732   | 0.016881 | 0.71597  | -0.00059 | 0.98989  | 0.06947  |
| 0.023161 | 0.61762  | -0.00187 | 0.96777  | -0.10644 | 0.02141  | 0.040292 | 0.38499  | 0.038354 |
| 0.03655  | 0.4307   | -0.01257 | 0.7865   | -0.06354 | 0.17046  | 0.01709  | 0.71262  | 0.060278 |
| -0.09868 | 0.03301  | -0.15114 | 0.00105  | -0.12348 | 0.00755  | -0.14229 | 0.00205  | -0.09706 |
| -0.05523 | 0.23353  | -0.14285 | 0.00197  | 0.02523  | 0.58655  | -0.09142 | 0.04834  | 0.131868 |
| 0.036892 | 0.42639  | -0.0029  | 0.95017  | -0.03319 | 0.47425  | -0.00264 | 0.95471  | -0.02367 |
| 0.00722  | 0.87634  | -0.02099 | 0.65098  | 0.010318 | 0.82402  | 0.070496 | 0.1282   | 0.230395 |
| -0.0971  | 0.03594  | -0.10053 | 0.02985  | -0.05402 | 0.24396  | -0.0147  | 0.75143  | 0.276732 |
| 0.025993 | 0.57527  | -0.07536 | 0.10384  | -0.05402 | 0.24395  | -0.1673  | 0.00028  | -0.19646 |
| 0.166389 | 0.0003   | 0.883814 | #####    | 0.612741 | 1.77E-49 | 0.716781 | 7.97E-75 | 0.13662  |
| 0.169776 | 0.00023  | 0.744941 | 8.98E-84 | 0.55582  | 3.23E-39 | 0.60746  | 1.94E-48 | 0.130222 |
| 0.025873 | 0.57703  | 0.061556 | 0.1842   | 0.110271 | 0.01713  | -0.04912 | 0.28949  | -0.112   |
| 0.204043 | 8.81E-06 | 0.551774 | 1.46E-38 | 0.46577  | 1.60E-26 | 0.391612 | 1.45E-18 | 0.1492   |
| 0.077877 | 0.09277  | 0.382516 | 1.01E-17 | 0.291517 | 1.34E-10 | 0.346208 | 1.35E-14 | -0.01056 |
| 0.095521 | 0.03907  | 0.420348 | 2.03E-21 | 0.379104 | 2.08E-17 | 0.383132 | 8.91E-18 | 0.205541 |
| 0.163114 | 0.0004   | 0.633    | 1.17E-53 | 0.514878 | 5.65E-33 | 0.58217  | 1.02E-43 | 0.422593 |
| 0.110558 | 0.01684  | 0.657613 | 3.58E-59 | 0.559512 | 7.99E-40 | 0.581232 | 1.50E-43 | 0.510597 |
| 0.129262 | 0.00515  | 0.721428 | 3.17E-76 | 0.519018 | 1.44E-33 | 0.565424 | 8.24E-41 | 0.255322 |
| 0.286086 | 3.02E-10 | 0.754142 | 5.88E-87 | 0.770434 | 5.89E-93 | 0.64468  | 3.28E-56 | 0.217618 |
| 0.156081 | 0.00071  | 0.925591 | #####    | 0.781956 | 1.66E-97 | 0.863446 | #####    | 0.308736 |
| 0.151745 | 0.001    | 0.769022 | 2.04E-92 | 0.69938  | 8.02E-70 | 0.755389 | 2.12E-87 | 0.251989 |
| 0.052441 | 0.25805  | 0.424275 | 7.88E-22 | 0.146697 | 0.00148  | 0.305016 | 1.64E-11 | -0.0159  |
| 0.174612 | 0.00015  | 0.582041 | 1.08E-43 | 0.403758 | 9.74E-20 | 0.471148 | 3.52E-27 | 0.062358 |
| 0.069991 | 0.13096  | 0.388993 | 2.55E-18 | 0.225147 | 8.85E-07 | 0.283566 | 4.37E-10 | -0.02333 |
| 0.113051 | 0.01451  | 0.750556 | 1.06E-85 | 0.540014 | 1.05E-36 | 0.715725 | 1.64E-74 | 0.209307 |
| 0.201589 | 1.13E-05 | 0.575475 | 1.56E-42 | 0.530753 | 2.70E-35 | 0.378297 | 2.45E-17 | 0.199168 |
| 0.132968 | 0.00399  | 0.403314 | 1.08E-19 | 0.296768 | 5.99E-11 | 0.35616  | 2.06E-15 | 0.15814  |
| 0.253335 | 2.84E-08 | 0.859378 | #####    | 0.824335 | #####    | 0.79951  | #####    | 0.372384 |
| 0.117425 | 0.0111   | 0.684451 | 8.25E-66 | 0.526282 | 1.25E-34 | 0.540279 | 9.55E-37 | 0.249422 |
| 0.202177 | 1.07E-05 | 0.632111 | 1.82E-53 | 0.503997 | 1.87E-31 | 0.487903 | 2.66E-29 | 0.240799 |
| 0.243058 | 1.05E-07 | 0.898495 | #####    | 0.761493 | 1.32E-89 | 0.71418  | 4.71E-74 | 0.245386 |
| 0.144635 | 0.00173  | 0.425278 | 6.18E-22 | 0.297363 | 5.46E-11 | 0.362374 | 6.14E-16 | 0.011909 |

|          |          |          |          |          |          |          |          |          |
|----------|----------|----------|----------|----------|----------|----------|----------|----------|
| 0.172268 | 0.00018  | 0.693619 | 3.03E-68 | 0.529298 | 4.46E-35 | 0.542157 | 4.88E-37 | 0.121518 |
| 0.101801 | 0.02782  | 0.869882 | #####    | 0.656638 | 6.06E-59 | 0.767771 | 6.08E-92 | 0.308684 |
| 0.327465 | 3.91E-13 | 0.831025 | #####    | 0.802703 | #####    | 0.703482 | 5.72E-71 | 0.264293 |
| 0.208816 | 5.35E-06 | 0.910443 | #####    | 0.856943 | #####    | 0.839288 | #####    | 0.35823  |
| 0.135881 | 0.00326  | 0.721298 | 3.47E-76 | 0.550826 | 2.08E-38 | 0.58005  | 2.44E-43 | 0.184957 |
| 0.039721 | 0.39177  | 0.386967 | 3.94E-18 | 0.270357 | 2.89E-09 | 0.269935 | 3.06E-09 | 0.106445 |
| 0.172873 | 0.00017  | 0.621237 | 3.41E-51 | 0.40623  | 5.55E-20 | 0.502507 | 3.00E-31 | 0.213662 |
| 0.130566 | 0.00471  | 0.917437 | #####    | 0.732032 | 1.57E-79 | 0.765003 | 6.67E-91 | 0.267076 |
| 0.291398 | 1.36E-10 | 0.807897 | #####    | 0.696684 | 4.44E-69 | 0.68082  | 7.18E-65 | 0.211677 |
| 0.169441 | 0.00023  | 0.939235 | #####    | 0.744396 | 1.37E-83 | 0.771555 | 2.18E-93 | 0.268082 |
| 0.122963 | 0.00781  | 0.895804 | #####    | 0.651277 | 1.05E-57 | 0.736792 | 4.58E-81 | 0.218503 |
| 0.389171 | 2.45E-18 | 0.75894  | 1.13E-88 | 0.78487  | 1.06E-98 | 0.620462 | 4.92E-51 | 0.22014  |
| 0.195836 | 2.03E-05 | 0.865905 | #####    | 0.768622 | 2.89E-92 | 0.824233 | #####    | 0.243548 |
| 0.215386 | 2.64E-06 | 0.76268  | 4.85E-90 | 0.726969 | 6.21E-78 | 0.685879 | 3.49E-66 | 0.477661 |
| 0.108573 | 0.01893  | 0.901499 | #####    | 0.653508 | 3.23E-58 | 0.772352 | 1.07E-93 | 0.204256 |
| 0.1355   | 0.00335  | 0.931449 | #####    | 0.706563 | 7.65E-72 | 0.752469 | 2.28E-86 | 0.221579 |
| 0.227967 | 6.39E-07 | 0.902111 | #####    | 0.776167 | 3.47E-95 | 0.698222 | 1.68E-69 | 0.317976 |
| 0.244159 | 9.13E-08 | 0.742115 | 8.01E-83 | 0.648889 | 3.69E-57 | 0.555519 | 3.61E-39 | 0.176714 |
| 0.204664 | 8.26E-06 | 0.909569 | #####    | 0.858051 | #####    | 0.875421 | #####    | 0.352464 |
| 0.185731 | 5.39E-05 | 0.812042 | #####    | 0.676875 | 7.27E-64 | 0.634275 | 6.25E-54 | 0.198839 |
| 0.105695 | 0.02235  | 0.793623 | #####    | 0.604934 | 6.01E-48 | 0.71404  | 5.18E-74 | 0.196727 |
| 0.198097 | 1.62E-05 | 0.900949 | #####    | 0.685063 | 5.71E-66 | 0.751283 | 5.93E-86 | 0.252945 |
| 0.116672 | 0.01163  | 0.831622 | #####    | 0.558237 | 1.30E-39 | 0.719728 | 1.04E-75 | 0.254908 |
| 0.11289  | 0.01465  | 0.49343  | 4.99E-30 | 0.322742 | 8.81E-13 | 0.4389   | 2.07E-23 | 0.1256   |
| 0.124746 | 0.00695  | 0.822927 | #####    | 0.602031 | 2.18E-47 | 0.632202 | 1.74E-53 | 0.242311 |
| 0.151181 | 0.00105  | 0.655006 | 1.45E-58 | 0.494931 | 3.16E-30 | 0.547299 | 7.58E-38 | 0.1427   |
| 0.145875 | 0.00157  | 0.893982 | #####    | 0.700924 | 2.98E-70 | 0.674783 | 2.44E-63 | 0.280825 |
| 0.083622 | 0.07101  | 0.55184  | 1.43E-38 | 0.392267 | 1.25E-18 | 0.462271 | 4.21E-26 | 0.16544  |
| 0.193643 | 2.52E-05 | 0.831    | #####    | 0.708913 | 1.62E-72 | 0.613991 | 9.98E-50 | 0.209424 |
| 0.226876 | 7.25E-07 | 0.605609 | 4.45E-48 | 0.564808 | 1.05E-40 | 0.384239 | 7.05E-18 | 0.233005 |
| 0.232572 | 3.73E-07 | 0.547976 | 5.92E-38 | 0.403847 | 9.54E-20 | 0.377101 | 3.15E-17 | 0.074956 |
| 0.090282 | 0.0512   | 0.8595   | #####    | 0.657495 | 3.82E-59 | 0.830264 | #####    | 0.2621   |
| 0.122542 | 0.00802  | 0.478473 | 4.30E-28 | 0.397111 | 4.32E-19 | 0.352295 | 4.31E-15 | 0.105377 |
| 0.29047  | 1.57E-10 | 0.843652 | #####    | 0.744816 | 9.89E-84 | 0.657104 | 4.71E-59 | 0.259637 |
| 0.131932 | 0.00429  | 0.831786 | #####    | 0.637555 | 1.22E-54 | 0.718331 | 2.74E-75 | 0.186917 |
| 0.169499 | 0.00023  | 0.782443 | 1.05E-97 | 0.625678 | 4.12E-52 | 0.626169 | 3.26E-52 | 0.189955 |
| 0.100567 | 0.02978  | 0.756279 | 1.02E-87 | 0.548085 | 5.69E-38 | 0.649855 | 2.23E-57 | 0.213948 |
| 0.034176 | 0.46125  | 0.755063 | 2.77E-87 | 0.565917 | 6.80E-41 | 0.523506 | 3.21E-34 | 0.259056 |
| 0.166361 | 0.00031  | 0.782771 | 7.71E-98 | 0.683946 | 1.12E-65 | 0.628176 | 1.24E-52 | 0.243736 |
| 0.136731 | 0.00307  | 0.922723 | #####    | 0.65242  | 5.76E-58 | 0.739185 | 7.52E-82 | 0.218263 |
| 0.171187 | 0.0002   | 0.446577 | 2.85E-24 | 0.348037 | 9.60E-15 | 0.34097  | 3.54E-14 | 0.084289 |
| 0.213627 | 3.19E-06 | 0.898607 | #####    | 0.79208  | #####    | 0.71356  | 7.17E-74 | 0.264668 |
| 0.189074 | 3.92E-05 | 0.695034 | 1.25E-68 | 0.497153 | 1.59E-30 | 0.569011 | 2.03E-41 | 0.185108 |
| 0.206617 | 6.74E-06 | 0.795919 | #####    | 0.800037 | #####    | 0.668248 | 1.02E-61 | 0.357842 |
| 0.024879 | 0.59177  | 0.473927 | 1.60E-27 | 0.199748 | 1.37E-05 | 0.435116 | 5.40E-23 | 0.104961 |

|          |          |          |          |          |          |          |          |          |
|----------|----------|----------|----------|----------|----------|----------|----------|----------|
| 0.069039 | 0.1363   | 0.434813 | 5.83E-23 | 0.343892 | 2.07E-14 | 0.356009 | 2.12E-15 | 0.251896 |
| 0.083948 | 0.06991  | 0.535535 | 5.11E-36 | 0.322093 | 9.84E-13 | 0.417428 | 4.08E-21 | 0.071511 |
| 0.124688 | 0.00698  | 0.375004 | 4.85E-17 | 0.181277 | 8.16E-05 | 0.276381 | 1.24E-09 | -0.11447 |
| 0.126663 | 0.00613  | 0.423156 | 1.03E-21 | 0.329974 | 2.52E-13 | 0.312167 | 5.16E-12 | 0.114599 |
| 0.285146 | 3.47E-10 | 0.797514 | #####    | 0.650864 | 1.31E-57 | 0.555018 | 4.36E-39 | 0.214684 |
| 0.208717 | 5.40E-06 | 0.741951 | 9.09E-83 | 0.637143 | 1.50E-54 | 0.598759 | 9.13E-47 | 0.237053 |
| 0.191215 | 3.19E-05 | 0.441088 | 1.18E-23 | 0.272021 | 2.29E-09 | 0.403602 | 1.01E-19 | 0.024047 |
| 0.259005 | 1.35E-08 | 0.880721 | #####    | 0.757292 | 4.43E-88 | 0.794972 | #####    | 0.280093 |
| 0.120397 | 0.00921  | 0.799603 | #####    | 0.627951 | 1.38E-52 | 0.588976 | 6.03E-45 | 0.229117 |
| 0.016401 | 0.72371  | 0.403235 | 1.10E-19 | 0.223713 | 1.04E-06 | 0.404372 | 8.47E-20 | 0.324451 |
| 0.314648 | 3.43E-12 | 0.570291 | 1.23E-41 | 0.412235 | 1.39E-20 | 0.412295 | 1.37E-20 | 0.047367 |
| 0.307377 | 1.12E-11 | 0.671385 | 1.72E-62 | 0.561014 | 4.51E-40 | 0.472991 | 2.09E-27 | 0.149004 |
| 0.35742  | 1.61E-15 | 0.848901 | #####    | 0.727826 | 3.36E-78 | 0.641217 | 1.92E-55 | 0.226419 |
| 0.111816 | 0.01563  | 0.558901 | 1.01E-39 | 0.436178 | 4.13E-23 | 0.363361 | 5.06E-16 | 0.119261 |
| 0.267232 | 4.45E-09 | 0.757308 | 4.37E-88 | 0.63221  | 1.73E-53 | 0.564366 | 1.24E-40 | 0.216025 |
| 0.234345 | 3.02E-07 | 0.520919 | 7.65E-34 | 0.475359 | 1.06E-27 | 0.386861 | 4.03E-18 | 0.149418 |
| 0.211391 | 4.06E-06 | 0.758831 | 1.23E-88 | 0.585477 | 2.61E-44 | 0.553569 | 7.50E-39 | 0.164332 |
| 0.174747 | 0.00015  | 0.752151 | 2.95E-86 | 0.618107 | 1.48E-50 | 0.759268 | 8.57E-89 | 0.360276 |
| 0.162214 | 0.00043  | 0.723709 | 6.36E-77 | 0.547226 | 7.79E-38 | 0.622668 | 1.73E-51 | 0.257899 |
| 0.180938 | 8.42E-05 | 0.694419 | 1.84E-68 | 0.679729 | 1.37E-64 | 0.58578  | 2.30E-44 | 0.423129 |
| 0.207415 | 6.20E-06 | 0.855351 | #####    | 0.687686 | 1.17E-66 | 0.627398 | 1.80E-52 | 0.234583 |
| 0.163009 | 0.0004   | 0.775797 | 4.85E-95 | 0.65378  | 2.80E-58 | 0.782898 | 6.84E-98 | 0.196383 |
| 0.201275 | 1.17E-05 | 0.749823 | 1.91E-85 | 0.651649 | 8.66E-58 | 0.793131 | #####    | 0.284192 |
| 0.04967  | 0.2841   | 0.571763 | 6.85E-42 | 0.407459 | 4.18E-20 | 0.513178 | 9.84E-33 | 0.165334 |
| 0.133992 | 0.00372  | 0.5853   | 2.81E-44 | 0.435765 | 4.58E-23 | 0.504354 | 1.67E-31 | 0.174273 |
| 0.247011 | 6.38E-08 | 0.779263 | 2.03E-96 | 0.710372 | 6.13E-73 | 0.525194 | 1.81E-34 | 0.303644 |
| 0.35826  | 1.37E-15 | 0.7242   | 4.49E-77 | 0.785152 | 8.08E-99 | 0.535281 | 5.59E-36 | 0.309023 |
| 0.006794 | 0.88359  | 0.590791 | 2.80E-45 | 0.376253 | 3.75E-17 | 0.470482 | 4.25E-27 | 0.220823 |
| 0.104959 | 0.02331  | 0.490412 | 1.25E-29 | 0.371998 | 8.96E-17 | 0.401381 | 1.67E-19 | -0.07912 |
| 0.171806 | 0.00019  | 0.762547 | 5.43E-90 | 0.651302 | 1.04E-57 | 0.801195 | #####    | 0.290221 |
| 0.242529 | 1.12E-07 | 0.868518 | #####    | 0.754477 | 4.47E-87 | 0.679724 | 1.37E-64 | 0.22223  |
| 0.112706 | 0.01482  | 0.807757 | #####    | 0.627565 | 1.66E-52 | 0.646813 | 1.09E-56 | 0.195928 |
| 0.072546 | 0.11744  | 0.735823 | 9.46E-81 | 0.502844 | 2.70E-31 | 0.570148 | 1.30E-41 | 0.191547 |
| 0.132292 | 0.00419  | 0.821738 | #####    | 0.611679 | 2.88E-49 | 0.679356 | 1.70E-64 | 0.172344 |
| 0.18388  | 6.41E-05 | 0.839976 | #####    | 0.710376 | 6.11E-73 | 0.624024 | 9.09E-52 | 0.200475 |
| 0.114025 | 0.01368  | 0.821223 | #####    | 0.581453 | 1.37E-43 | 0.705699 | 1.35E-71 | 0.206073 |
| 0.15988  | 0.00052  | 0.809308 | #####    | 0.568276 | 2.71E-41 | 0.816086 | #####    | 0.25184  |
| 0.109435 | 0.018    | 0.49773  | 1.33E-30 | 0.426321 | 4.79E-22 | 0.44779  | 2.07E-24 | 0.395012 |
| 0.23108  | 4.45E-07 | 0.810281 | #####    | 0.696886 | 3.90E-69 | 0.666334 | 2.97E-61 | 0.251459 |
| 0.283942 | 4.14E-10 | 0.859891 | #####    | 0.794609 | #####    | 0.673192 | 6.11E-63 | 0.347162 |
| 0.174524 | 0.00015  | 0.793446 | #####    | 0.616799 | 2.73E-50 | 0.614647 | 7.38E-50 | 0.242937 |
| 0.118681 | 0.01026  | 0.735422 | 1.28E-80 | 0.665114 | 5.87E-61 | 0.592975 | 1.11E-45 | 0.264749 |
| 0.043212 | 0.35146  | 0.457109 | 1.73E-25 | 0.277127 | 1.11E-09 | 0.292928 | 1.08E-10 | 0.080341 |
| 0.071095 | 0.12498  | 0.7528   | 1.75E-86 | 0.566676 | 5.06E-41 | 0.61558  | 4.80E-50 | 0.235141 |
| 0.131741 | 0.00435  | 0.581139 | 1.56E-43 | 0.504498 | 1.60E-31 | 0.395997 | 5.53E-19 | 0.274281 |

|          |          |          |          |          |          |          |          |          |
|----------|----------|----------|----------|----------|----------|----------|----------|----------|
| 0.260462 | 1.11E-08 | 0.919859 | #####    | 0.776753 | 2.03E-95 | 0.836087 | #####    | 0.326659 |
| 0.235965 | 2.49E-07 | 0.85869  | #####    | 0.763075 | 3.47E-90 | 0.693368 | 3.54E-68 | 0.200321 |
| 0.235928 | 2.50E-07 | 0.769895 | 9.47E-93 | 0.676428 | 9.43E-64 | 0.690571 | 2.00E-67 | 0.324253 |
| 0.289683 | 1.76E-10 | 0.798355 | #####    | 0.707266 | 4.81E-72 | 0.654622 | 1.79E-58 | 0.284072 |
| 0.247496 | 6.01E-08 | 0.904561 | #####    | 0.810425 | #####    | 0.838176 | #####    | 0.315294 |
| 0.099868 | 0.03095  | 0.796216 | #####    | 0.66138  | 4.61E-60 | 0.611137 | 3.68E-49 | 0.257758 |
| 0.160756 | 0.00049  | 0.902928 | #####    | 0.744132 | 1.68E-83 | 0.840629 | #####    | 0.307351 |
| 0.048462 | 0.29598  | 0.634914 | 4.55E-54 | 0.504248 | 1.73E-31 | 0.476833 | 6.92E-28 | 0.187782 |
| 0.238929 | 1.74E-07 | 0.826332 | #####    | 0.717415 | 5.15E-75 | 0.619191 | 8.93E-51 | 0.239372 |
| 0.034039 | 0.46306  | 0.464194 | 2.48E-26 | 0.283869 | 4.18E-10 | 0.469405 | 5.77E-27 | 0.326588 |
| -0.02187 | 0.6374   | 0.484657 | 7.00E-29 | 0.275894 | 1.33E-09 | 0.367031 | 2.44E-16 | 0.006988 |
| 0.239892 | 1.55E-07 | 0.916479 | #####    | 0.777963 | 6.72E-96 | 0.802393 | #####    | 0.249256 |
| 0.289817 | 1.73E-10 | 0.845417 | #####    | 0.806328 | #####    | 0.580552 | 1.99E-43 | 0.257456 |
| 0.103639 | 0.02511  | 0.455399 | 2.74E-25 | 0.323383 | 7.89E-13 | 0.321121 | 1.16E-12 | 0.033168 |
| 0.196549 | 1.89E-05 | 0.369384 | 1.52E-16 | 0.325511 | 5.48E-13 | 0.232575 | 3.73E-07 | 0.084138 |
| 0.069768 | 0.1322   | 0.597189 | 1.81E-46 | 0.467732 | 9.23E-27 | 0.462071 | 4.45E-26 | 0.313936 |
| 0.148176 | 0.00132  | 0.765042 | 6.45E-91 | 0.650351 | 1.72E-57 | 0.608509 | 1.21E-48 | 0.128509 |
| 0.107808 | 0.01979  | 0.531772 | 1.90E-35 | 0.49651  | 1.94E-30 | 0.411117 | 1.80E-20 | 0.22762  |
| 0.043749 | 0.3455   | 0.59527  | 4.13E-46 | 0.507705 | 5.76E-32 | 0.413953 | 9.27E-21 | 0.182889 |
| 0.231089 | 4.44E-07 | 0.704562 | 2.83E-71 | 0.64475  | 3.16E-56 | 0.492572 | 6.49E-30 | 0.239117 |
| 0.034149 | 0.4616   | 0.084505 | 0.06807  | 0.16762  | 0.00027  | 0.073393 | 0.11321  | 0.072389 |
| 0.136316 | 0.00316  | 0.772047 | 1.41E-93 | 0.56135  | 3.96E-40 | 0.639312 | 5.04E-55 | 0.325208 |
| 0.041339 | 0.37275  | 0.453055 | 5.14E-25 | 0.340266 | 4.02E-14 | 0.371096 | 1.08E-16 | 0.121602 |
| 0.194552 | 2.30E-05 | 0.413569 | 1.01E-20 | 0.274192 | 1.69E-09 | 0.281419 | 5.99E-10 | 0.10708  |
| 0.319162 | 1.61E-12 | 0.800206 | #####    | 0.727207 | 5.24E-78 | 0.607238 | 2.15E-48 | 0.266403 |
| 0.140132 | 0.0024   | 0.836084 | #####    | 0.649728 | 2.38E-57 | 0.702348 | 1.19E-70 | 0.245439 |
| 0.251538 | 3.59E-08 | 0.801205 | #####    | 0.782269 | 1.24E-97 | 0.711317 | 3.25E-73 | 0.252938 |
| 0.184403 | 6.10E-05 | 0.804014 | #####    | 0.619706 | 7.02E-51 | 0.733189 | 6.70E-80 | 0.222652 |
| 0.349198 | 7.73E-15 | 0.863147 | #####    | 0.688859 | 5.71E-67 | 0.674949 | 2.22E-63 | 0.196298 |
| 0.177267 | 0.00012  | 0.613068 | 1.53E-49 | 0.418566 | 3.11E-21 | 0.545214 | 1.62E-37 | 0.372027 |
| 0.145104 | 0.00167  | 0.505282 | 1.25E-31 | 0.353513 | 3.42E-15 | 0.487257 | 3.23E-29 | 0.054842 |
| 0.205403 | 7.65E-06 | 0.751999 | 3.33E-86 | 0.561274 | 4.08E-40 | 0.624743 | 6.45E-52 | 0.175018 |
| 0.156859 | 0.00067  | 0.432459 | 1.05E-22 | 0.346997 | 1.17E-14 | 0.373504 | 6.59E-17 | 0.085033 |
| 0.13405  | 0.00371  | 0.544409 | 2.17E-37 | 0.502221 | 3.28E-31 | 0.459646 | 8.66E-26 | 0.294513 |
| 0.213522 | 3.23E-06 | 0.773521 | 3.78E-94 | 0.634224 | 6.41E-54 | 0.540961 | 7.48E-37 | 0.208833 |
| 0.162107 | 0.00044  | 0.784768 | 1.16E-98 | 0.684644 | 7.34E-66 | 0.765612 | 3.95E-91 | 0.298877 |
| 0.208584 | 5.48E-06 | 0.588637 | 6.95E-45 | 0.471295 | 3.38E-27 | 0.481198 | 1.94E-28 | 0.327166 |
| 0.118023 | 0.01069  | 0.76622  | 2.34E-91 | 0.555692 | 3.39E-39 | 0.637383 | 1.33E-54 | 0.197998 |
| 0.191346 | 3.15E-05 | 0.655267 | 1.26E-58 | 0.495006 | 3.08E-30 | 0.472262 | 2.57E-27 | 0.200497 |
| 0.144552 | 0.00174  | 0.772653 | 8.22E-94 | 0.572312 | 5.51E-42 | 0.715856 | 1.50E-74 | 0.206876 |
| 0.107031 | 0.0207   | 0.849113 | #####    | 0.631507 | 2.44E-53 | 0.74968  | 2.14E-85 | 0.248826 |
| 0.2364   | 2.36E-07 | 0.767016 | 1.17E-91 | 0.692452 | 6.26E-68 | 0.520325 | 9.33E-34 | 0.160347 |
| 0.165151 | 0.00034  | 0.43216  | 1.13E-22 | 0.318982 | 1.66E-12 | 0.333338 | 1.40E-13 | 0.13937  |
| 0.316203 | 2.65E-12 | 0.708773 | 1.78E-72 | 0.604389 | 7.67E-48 | 0.551737 | 1.48E-38 | 0.292357 |
| 0.219913 | 1.60E-06 | 0.615631 | 4.68E-50 | 0.487044 | 3.44E-29 | 0.425511 | 5.84E-22 | 0.07894  |

|          |          |          |          |          |          |          |          |          |
|----------|----------|----------|----------|----------|----------|----------|----------|----------|
| 0.163667 | 0.00038  | 0.464301 | 2.40E-26 | 0.326859 | 4.34E-13 | 0.401349 | 1.68E-19 | 0.157967 |
| 0.298869 | 4.32E-11 | 0.853131 | #####    | 0.821529 | #####    | 0.649568 | 2.59E-57 | 0.29686  |
| 0.261004 | 1.04E-08 | 0.838059 | #####    | 0.704023 | 4.03E-71 | 0.670366 | 3.07E-62 | 0.172728 |
| 0.350341 | 6.23E-15 | 0.797337 | #####    | 0.780526 | 6.30E-97 | 0.603179 | 1.31E-47 | 0.29605  |
| 0.082678 | 0.07427  | 0.487612 | 2.90E-29 | 0.327355 | 3.98E-13 | 0.339392 | 4.71E-14 | -0.0253  |
| 0.129584 | 0.00504  | 0.842194 | #####    | 0.568722 | 2.27E-41 | 0.641079 | 2.06E-55 | 0.207378 |
| 0.17729  | 0.00012  | 0.680855 | 7.03E-65 | 0.571471 | 7.69E-42 | 0.579777 | 2.73E-43 | 0.29862  |
| 0.263461 | 7.44E-09 | 0.800137 | #####    | 0.666028 | 3.52E-61 | 0.741976 | 8.91E-83 | 0.225357 |
| 0.200652 | 1.25E-05 | 0.790347 | #####    | 0.611241 | 3.51E-49 | 0.601629 | 2.60E-47 | 0.20621  |
| 0.138484 | 0.00271  | 0.829946 | #####    | 0.679231 | 1.83E-64 | 0.679595 | 1.48E-64 | 0.276288 |
| 0.166404 | 0.0003   | 0.877512 | #####    | 0.659422 | 1.34E-59 | 0.808227 | #####    | 0.226314 |
| 0.178029 | 0.00011  | 0.898164 | #####    | 0.712803 | 1.20E-73 | 0.791255 | #####    | 0.258435 |
| 0.318694 | 1.75E-12 | 0.907915 | #####    | 0.777119 | 1.46E-95 | 0.658008 | 2.89E-59 | 0.275041 |
| 0.072464 | 0.11786  | 0.404564 | 8.11E-20 | 0.291904 | 1.26E-10 | 0.354328 | 2.92E-15 | 0.155846 |
| 0.352513 | 4.13E-15 | 0.655296 | 1.24E-58 | 0.540494 | 8.84E-37 | 0.526582 | 1.13E-34 | 0.116221 |
| 0.167868 | 0.00027  | 0.831162 | #####    | 0.667245 | 1.78E-61 | 0.764773 | 8.13E-91 | 0.332955 |
| 0.146029 | 0.00155  | 0.928997 | #####    | 0.703856 | 4.49E-71 | 0.813227 | #####    | 0.21075  |
| 0.255969 | 2.02E-08 | 0.892686 | #####    | 0.812223 | #####    | 0.736449 | 5.92E-81 | 0.259791 |
| 0.191681 | 3.05E-05 | 0.552053 | 1.32E-38 | 0.365091 | 3.59E-16 | 0.447508 | 2.23E-24 | 0.264219 |
| 0.051993 | 0.26215  | 0.530565 | 2.89E-35 | 0.419211 | 2.67E-21 | 0.391532 | 1.47E-18 | 0.164922 |
| 0.317042 | 2.30E-12 | 0.708982 | 1.55E-72 | 0.505768 | 1.07E-31 | 0.49513  | 2.97E-30 | 0.113567 |
| 0.151183 | 0.00105  | 0.870827 | #####    | 0.597301 | 1.72E-46 | 0.742792 | 4.75E-83 | 0.134168 |
| 0.151137 | 0.00105  | 0.899025 | #####    | 0.811456 | #####    | 0.887275 | #####    | 0.318734 |
| 0.237829 | 1.99E-07 | 0.704245 | 3.48E-71 | 0.595271 | 4.13E-46 | 0.531555 | 2.05E-35 | 0.188399 |
| 0.228845 | 5.77E-07 | 0.745018 | 8.45E-84 | 0.73053  | 4.72E-79 | 0.634855 | 4.69E-54 | 0.392013 |
| 0.162035 | 0.00044  | 0.844984 | #####    | 0.72469  | 3.17E-77 | 0.855552 | #####    | 0.246115 |
| 0.155628 | 0.00074  | 0.806536 | #####    | 0.519893 | 1.08E-33 | 0.595028 | 4.59E-46 | 0.059027 |
| 0.216047 | 2.45E-06 | 0.918564 | #####    | 0.767297 | 9.19E-92 | 0.667634 | 1.43E-61 | 0.271981 |
| 0.127444 | 0.00582  | 0.369331 | 1.54E-16 | 0.403269 | 1.09E-19 | 0.252001 | 3.38E-08 | 0.171792 |
| 0.106276 | 0.02162  | 0.441925 | 9.53E-24 | 0.28504  | 3.52E-10 | 0.411586 | 1.61E-20 | 0.319549 |
| 0.181145 | 8.26E-05 | 0.936582 | #####    | 0.694351 | 1.92E-68 | 0.739664 | 5.23E-82 | 0.277477 |
| 0.151322 | 0.00104  | 0.890859 | #####    | 0.651956 | 7.36E-58 | 0.718306 | 2.78E-75 | 0.223461 |
| 0.179722 | 9.41E-05 | 0.914591 | #####    | 0.717664 | 4.34E-75 | 0.700087 | 5.10E-70 | 0.298636 |
| 0.28815  | 2.22E-10 | 0.939922 | #####    | 0.811113 | #####    | 0.751859 | 3.73E-86 | 0.253766 |
| 0.23223  | 3.88E-07 | 0.92738  | #####    | 0.78186  | 1.81E-97 | 0.716168 | 1.21E-74 | 0.300709 |
| 0.26608  | 5.21E-09 | 0.905994 | #####    | 0.808079 | #####    | 0.809024 | #####    | 0.31374  |
| 0.108313 | 0.01922  | 0.615053 | 6.12E-50 | 0.445833 | 3.46E-24 | 0.571058 | 9.05E-42 | 0.134051 |
| 0.197291 | 1.75E-05 | 0.888729 | #####    | 0.826863 | #####    | 0.905343 | #####    | 0.343495 |
| 0.034696 | 0.45446  | 0.499985 | 6.61E-31 | 0.277164 | 1.11E-09 | 0.434089 | 6.99E-23 | 0.209194 |
| 0.228323 | 6.14E-07 | 0.879525 | #####    | 0.776896 | 1.78E-95 | 0.75244  | 2.34E-86 | 0.415738 |
| 0.298493 | 4.58E-11 | 0.853846 | #####    | 0.749412 | 2.65E-85 | 0.723593 | 6.90E-77 | 0.229411 |
| 0.110744 | 0.01666  | 0.369956 | 1.36E-16 | 0.246669 | 6.67E-08 | 0.349452 | 7.37E-15 | 0.249331 |
| 0.268178 | 3.91E-09 | 0.740425 | 2.93E-82 | 0.707304 | 4.70E-72 | 0.557396 | 1.78E-39 | 0.241151 |
| 0.126735 | 0.0061   | 0.728947 | 1.49E-78 | 0.50692  | 7.41E-32 | 0.649466 | 2.73E-57 | 0.244614 |
| 0.270338 | 2.90E-09 | 0.888774 | #####    | 0.697824 | 2.16E-69 | 0.71817  | 3.06E-75 | 0.221804 |

|          |          |          |          |          |          |          |          |          |
|----------|----------|----------|----------|----------|----------|----------|----------|----------|
| 0.160238 | 0.00051  | 0.567392 | 3.83E-41 | 0.395755 | 5.83E-19 | 0.418877 | 2.89E-21 | 0.150913 |
| 0.248435 | 5.33E-08 | 0.792211 | #####    | 0.71487  | 2.94E-74 | 0.603558 | 1.11E-47 | 0.212304 |
| 0.3005   | 3.35E-11 | 0.71205  | 1.99E-73 | 0.725847 | 1.39E-77 | 0.492593 | 6.45E-30 | 0.228437 |
| 0.190644 | 3.37E-05 | 0.912293 | #####    | 0.753472 | 1.01E-86 | 0.706525 | 7.84E-72 | 0.33377  |
| 0.155304 | 0.00076  | 0.846226 | #####    | 0.632752 | 1.33E-53 | 0.741626 | 1.17E-82 | 0.260664 |
| 0.219921 | 1.60E-06 | 0.831741 | #####    | 0.750148 | 1.47E-85 | 0.709337 | 1.22E-72 | 0.2599   |
| 0.038216 | 0.40998  | 0.578585 | 4.43E-43 | 0.426615 | 4.46E-22 | 0.497768 | 1.32E-30 | 0.214576 |
| 0.194616 | 2.29E-05 | 0.759914 | 4.99E-89 | 0.539404 | 1.30E-36 | 0.570537 | 1.11E-41 | 0.153404 |
| 0.175267 | 0.00014  | 0.789388 | #####    | 0.626065 | 3.42E-52 | 0.614681 | 7.27E-50 | 0.262982 |
| 0.080382 | 0.0827   | 0.410026 | 2.32E-20 | 0.350663 | 5.86E-15 | 0.352715 | 3.98E-15 | 0.094195 |
| 0.274742 | 1.56E-09 | 0.740144 | 3.63E-82 | 0.762841 | 4.23E-90 | 0.700132 | 4.96E-70 | 0.312017 |
| 0.230305 | 4.87E-07 | 0.713242 | 8.89E-74 | 0.56802  | 2.99E-41 | 0.552486 | 1.12E-38 | 0.126609 |
| 0.253059 | 2.95E-08 | 0.911612 | #####    | 0.878819 | #####    | 0.752564 | 2.11E-86 | 0.341336 |
| 0.30211  | 2.60E-11 | 0.836658 | #####    | 0.772451 | 9.83E-94 | 0.584471 | 3.96E-44 | 0.279386 |
| 0.188102 | 4.30E-05 | 0.480727 | 2.23E-28 | 0.371835 | 9.27E-17 | 0.369231 | 1.57E-16 | 0.187613 |
| 0.222145 | 1.24E-06 | 0.658615 | 2.08E-59 | 0.525315 | 1.74E-34 | 0.451346 | 8.10E-25 | 0.224441 |
| 0.202473 | 1.04E-05 | 0.935481 | #####    | 0.741454 | 1.33E-82 | 0.762512 | 5.59E-90 | 0.269405 |
| 0.06962  | 0.13302  | 0.536923 | 3.14E-36 | 0.260452 | 1.12E-08 | 0.376419 | 3.62E-17 | 0.093412 |
| 0.168424 | 0.00026  | 0.879865 | #####    | 0.73097  | 3.42E-79 | 0.900595 | #####    | 0.310909 |
| 0.112048 | 0.01541  | 0.687467 | 1.33E-66 | 0.588386 | 7.72E-45 | 0.535427 | 5.31E-36 | 0.239744 |
| 0.124839 | 0.00691  | 0.75125  | 6.09E-86 | 0.507831 | 5.54E-32 | 0.599129 | 7.77E-47 | 0.097704 |
| 0.02911  | 0.53032  | 0.375783 | 4.13E-17 | 0.303144 | 2.21E-11 | 0.357247 | 1.67E-15 | 0.226569 |
| 0.159574 | 0.00054  | 0.688539 | 6.94E-67 | 0.582271 | 9.81E-44 | 0.636    | 2.65E-54 | 0.619293 |
| 0.189425 | 3.79E-05 | 0.531516 | 2.08E-35 | 0.461781 | 4.82E-26 | 0.415795 | 6.01E-21 | 0.171239 |
| 0.32748  | 3.90E-13 | 0.811376 | #####    | 0.736395 | 6.17E-81 | 0.650027 | 2.03E-57 | 0.247043 |
| -0.02275 | 0.62391  | 0.747314 | 1.40E-84 | 0.515767 | 4.22E-33 | 0.613208 | 1.43E-49 | 0.208556 |
| 0.377716 | 2.77E-17 | 0.820453 | #####    | 0.737911 | 1.97E-81 | 0.581702 | 1.24E-43 | 0.190529 |
| 0.196518 | 1.89E-05 | -0.03245 | 0.48422  | -0.00859 | 0.85307  | -0.0143  | 0.75793  | 0.160374 |
| 0.045886 | 0.32243  | -0.04649 | 0.31612  | 0.005113 | 0.91225  | -0.06269 | 0.17626  | 0.006157 |
| 0.041439 | 0.3716   | -0.08048 | 0.08231  | 0.037408 | 0.41995  | -0.12059 | 0.00909  | 0.016068 |
| 0.035322 | 0.44636  | 0.009543 | 0.83703  | 0.012308 | 0.79079  | -0.01735 | 0.70848  | 0.087877 |
| -0.01425 | 0.75871  | -0.05872 | 0.20527  | 0.00501  | 0.91401  | -0.08385 | 0.07024  | -0.00334 |
| 0.093699 | 0.04298  | -0.03784 | 0.41456  | -0.00623 | 0.89313  | -0.0548  | 0.23722  | 0.128397 |
| 0.191513 | 3.10E-05 | 0.004393 | 0.92457  | 0.069897 | 0.13148  | -0.00553 | 0.90512  | 0.004822 |
| 0.151773 | 0.001    | -0.05852 | 0.20685  | 0.064459 | 0.16432  | -0.10146 | 0.02835  | -0.07026 |
| 0.089284 | 0.05384  | -0.06839 | 0.14     | -0.04561 | 0.32539  | -0.05755 | 0.21443  | 0.060611 |
| 0.117701 | 0.01091  | -0.03354 | 0.46964  | 0.152366 | 0.00096  | -0.06955 | 0.13341  | 0.035871 |
| 0.150903 | 0.00107  | -0.026   | 0.57522  | 0.056057 | 0.22662  | -0.06273 | 0.17594  | 0.013122 |
| -0.00295 | 0.94931  | -0.00434 | 0.92549  | 0.029426 | 0.52587  | 0.048066 | 0.29995  | 0.171998 |
| 0.001456 | 0.97496  | 0.086526 | 0.06171  | 0.062539 | 0.17728  | 0.087283 | 0.05946  | 0.021564 |
| 0.094396 | 0.04145  | 0.064341 | 0.16509  | 0.154617 | 0.0008   | 0.012264 | 0.79152  | 0.079098 |
| 0.039409 | 0.39551  | -0.0496  | 0.28482  | 0.017228 | 0.71039  | -0.0636  | 0.17001  | 0.024836 |
| 0.026935 | 0.56149  | 0.003437 | 0.94095  | -0.04332 | 0.35029  | -0.03741 | 0.41989  | 0.02686  |
| 0.040091 | 0.38737  | -0.02449 | 0.59764  | -0.00537 | 0.90782  | -0.02348 | 0.61271  | 0.078561 |
| 0.074484 | 0.10794  | 0.006013 | 0.89688  | 0.008729 | 0.85077  | 0.013386 | 0.77295  | -0.09167 |



|          |          |          |          |          |          |          |          |          |
|----------|----------|----------|----------|----------|----------|----------|----------|----------|
| 0.105261 | 0.02291  | -0.00835 | 0.85711  | -0.03886 | 0.40218  | -0.0427  | 0.35721  | 0.053865 |
| 0.013686 | 0.76801  | -0.04773 | 0.30333  | -0.05632 | 0.22442  | -0.0634  | 0.1714   | 0.090129 |
| 0.009287 | 0.84135  | -0.05922 | 0.20141  | -0.04742 | 0.30646  | -0.06432 | 0.16522  | 0.114511 |
| 0.005016 | 0.91392  | 0.013108 | 0.77754  | 0.030561 | 0.51001  | -0.03988 | 0.38982  | 0.086874 |
| 0.003215 | 0.94476  | 0.003068 | 0.94728  | -0.00964 | 0.83547  | 0.038308 | 0.40884  | -0.02911 |
| 0.0027   | 0.95359  | -0.01071 | 0.8174   | 0.000282 | 0.99515  | -0.02244 | 0.62866  | 0.050085 |
| 0.039695 | 0.39208  | -0.04935 | 0.28718  | 0.097811 | 0.03459  | -0.01057 | 0.81983  | 0.198836 |
| 0.013198 | 0.77606  | -0.04569 | 0.32449  | -0.04055 | 0.38194  | -0.05558 | 0.23063  | -0.00096 |
| 0.041225 | 0.37407  | -0.03689 | 0.42639  | 0.053633 | 0.24738  | -0.05401 | 0.24409  | 0.030657 |
| 0.016416 | 0.72347  | -0.0385  | 0.4065   | -0.04113 | 0.37517  | -0.06749 | 0.1453   | -0.00743 |
| 0.039375 | 0.39591  | -0.07184 | 0.12106  | -0.0792  | 0.08735  | -0.05417 | 0.2427   | 0.051456 |
| 0.058899 | 0.2039   | -0.01844 | 0.69103  | 0.04214  | 0.36355  | -0.04406 | 0.34213  | 0.116684 |
| 0.020594 | 0.65711  | -0.02491 | 0.59136  | -0.0586  | 0.2062   | -0.07086 | 0.12623  | -0.00123 |
| 0.052369 | 0.25871  | -0.02915 | 0.52977  | -0.01247 | 0.78812  | -0.03527 | 0.44701  | 0.090154 |
| 0.003444 | 0.94083  | -0.07493 | 0.10585  | -0.06511 | 0.1601   | -0.08543 | 0.06511  | 0.033227 |
| 0.056076 | 0.22647  | 0.060129 | 0.1946   | 0.054376 | 0.24088  | 0.093307 | 0.04386  | 0.16995  |
| -0.0082  | 0.85978  | -0.064   | 0.16735  | -0.06794 | 0.14263  | -0.07853 | 0.09005  | 0.109642 |
| 0.034291 | 0.45975  | -0.02032 | 0.66143  | -0.03837 | 0.40808  | -0.00113 | 0.98064  | 0.074293 |
| -0.01346 | 0.77171  | -0.04895 | 0.29113  | -0.06112 | 0.18733  | -0.07542 | 0.10356  | 0.087824 |
| 0.013711 | 0.7676   | -0.02645 | 0.56858  | -0.03646 | 0.43178  | -0.07602 | 0.10083  | 0.005545 |
| 0.017615 | 0.70419  | -0.03453 | 0.4566   | -0.03959 | 0.39338  | -0.04927 | 0.28798  | 0.073492 |
| 0.030457 | 0.51146  | -0.03819 | 0.41031  | 0.016161 | 0.7276   | -0.05681 | 0.22046  | 0.151317 |
| 0.224387 | 9.65E-07 | 0.010781 | 0.81625  | 0.081092 | 0.08001  | 0.021647 | 0.64079  | 0.049295 |
| 0.028849 | 0.53401  | -0.03541 | 0.44516  | -0.01424 | 0.75892  | -0.02963 | 0.523    | -0.0688  |
| 0.151134 | 0.00105  | -0.03181 | 0.49293  | 0.003589 | 0.93834  | -0.03528 | 0.44689  | -0.03014 |
| 0.138905 | 0.00263  | 0.011781 | 0.79956  | 0.058742 | 0.20512  | -0.03369 | 0.46765  | -0.03804 |
| -0.02402 | 0.60462  | -0.06253 | 0.17736  | 0.000176 | 0.99696  | -0.0377  | 0.41628  | 0.129992 |
| 0.001201 | 0.97934  | 0.052892 | 0.25398  | 0.023792 | 0.60807  | -0.00522 | 0.91038  | -0.0099  |
| -0.01178 | 0.79952  | -0.02627 | 0.57114  | -0.03351 | 0.47001  | -0.03331 | 0.47276  | 0.068026 |
| 0.038437 | 0.40727  | -0.00387 | 0.9335   | -0.02555 | 0.58185  | -0.04361 | 0.34709  | -0.01504 |
| 0.017307 | 0.70913  | -0.05434 | 0.2412   | -0.04494 | 0.33253  | -0.06174 | 0.18288  | 0.068638 |
| 0.037949 | 0.41325  | 0.007048 | 0.87927  | 0.052702 | 0.25569  | -0.04521 | 0.32957  | -0.01553 |
| 0.019954 | 0.66712  | -0.02343 | 0.61354  | -0.00081 | 0.98616  | -0.06407 | 0.16692  | 0.043852 |
| 0.057192 | 0.21734  | -0.06773 | 0.14389  | -0.05456 | 0.23929  | -0.02983 | 0.52014  | 0.024189 |
| 0.019212 | 0.6788   | -0.05947 | 0.19954  | -0.01146 | 0.80499  | -0.0366  | 0.43     | 0.191434 |
| 0.037082 | 0.42401  | -0.05073 | 0.27395  | -0.04111 | 0.37542  | -0.03262 | 0.48197  | -0.03613 |
| 0.216417 | 2.35E-06 | 0.114436 | 0.01334  | 0.202367 | 1.05E-05 | 0.101672 | 0.02802  | 0.062982 |
| 0.086609 | 0.06146  | -0.01698 | 0.71433  | 0.045513 | 0.32638  | -0.03639 | 0.43274  | 0.081171 |
| 0.501286 | 4.40E-31 | 0.256716 | 1.83E-08 | 0.428303 | 2.94E-22 | 0.359686 | 1.04E-15 | 0.124878 |
| 0.077867 | 0.09281  | 0.34076  | 3.68E-14 | 0.435514 | 4.88E-23 | 0.285673 | 3.21E-10 | 0.061285 |
| 0.239946 | 1.54E-07 | 0.61628  | 3.47E-50 | 0.776596 | 2.34E-95 | 0.714131 | 4.87E-74 | 0.450458 |
| 0.597065 | 1.91E-46 | 0.332209 | 1.70E-13 | 0.501377 | 4.28E-31 | 0.287815 | 2.33E-10 | 0.107401 |
| 0.182978 | 6.97E-05 | 0.699875 | 5.84E-70 | 0.67288  | 7.31E-63 | 0.636078 | 2.55E-54 | 0.425564 |
| 0.343882 | 2.08E-14 | 0.563232 | 1.92E-40 | 0.731112 | 3.09E-79 | 0.396504 | 4.94E-19 | 0.181621 |
| 0.297608 | 5.26E-11 | 0.741366 | 1.42E-82 | 0.844755 | #####    | 0.816227 | #####    | 0.35741  |

|          |          |          |          |          |          |          |          |          |
|----------|----------|----------|----------|----------|----------|----------|----------|----------|
| 0.215353 | 2.65E-06 | 0.849819 | #####    | 0.878566 | #####    | 0.869021 | #####    | 0.347569 |
| 0.202383 | 1.05E-05 | 0.704805 | 2.42E-71 | 0.703398 | 6.05E-71 | 0.659862 | 1.06E-59 | 0.399764 |
| 0.226803 | 7.32E-07 | 0.242212 | 1.16E-07 | 0.477695 | 5.39E-28 | 0.408217 | 3.52E-20 | 0.193793 |
| 0.272864 | 2.04E-09 | 0.766632 | 1.64E-91 | 0.794631 | #####    | 0.682213 | 3.14E-65 | 0.304824 |
| 0.2313   | 4.33E-07 | 0.855637 | #####    | 0.853093 | #####    | 0.848999 | #####    | 0.370284 |
| 0.319049 | 1.65E-12 | 0.518158 | 1.92E-33 | 0.63171  | 2.21E-53 | 0.644794 | 3.09E-56 | 0.372934 |
| 0.06478  | 0.16222  | 0.391014 | 1.65E-18 | 0.406257 | 5.51E-20 | 0.393339 | 9.92E-19 | 0.404481 |
| 0.13976  | 0.00247  | 0.417179 | 4.33E-21 | 0.561405 | 3.88E-40 | 0.436358 | 3.95E-23 | 0.354401 |
| 0.302204 | 2.56E-11 | 0.814721 | #####    | 0.908077 | #####    | 0.864812 | #####    | 0.38658  |
| 0.152376 | 0.00096  | 0.396069 | 5.44E-19 | 0.435416 | 5.00E-23 | 0.266281 | 5.07E-09 | 0.148663 |
| 0.216798 | 2.26E-06 | 0.669203 | 5.92E-62 | 0.86182  | #####    | 0.852559 | #####    | 0.356248 |
| 0.180252 | 8.97E-05 | 0.465811 | 1.58E-26 | 0.52612  | 1.32E-34 | 0.403382 | 1.06E-19 | 0.476551 |
| 0.13459  | 0.00357  | 0.416374 | 5.24E-21 | 0.469722 | 5.27E-27 | 0.332558 | 1.60E-13 | 0.377522 |
| 0.173747 | 0.00016  | 0.334629 | 1.11E-13 | 0.450779 | 9.42E-25 | 0.325301 | 5.68E-13 | 0.390592 |
| 0.057893 | 0.21175  | 0.343155 | 2.37E-14 | 0.404616 | 8.01E-20 | 0.372534 | 8.04E-17 | 0.344512 |
| 0.281537 | 5.88E-10 | 0.571677 | 7.08E-42 | 0.651745 | 8.23E-58 | 0.613145 | 1.47E-49 | 0.365164 |
| 0.426627 | 4.44E-22 | 0.484491 | 7.35E-29 | 0.660651 | 6.87E-60 | 0.486904 | 3.59E-29 | 0.240405 |
| 0.202136 | 1.07E-05 | 0.426764 | 4.30E-22 | 0.404111 | 8.99E-20 | 0.384191 | 7.12E-18 | 0.07569  |
| 0.238407 | 1.85E-07 | 0.595314 | 4.06E-46 | 0.811364 | #####    | 0.727294 | 4.92E-78 | 0.562373 |
| 0.246483 | 6.82E-08 | 0.616577 | 3.02E-50 | 0.631952 | 1.96E-53 | 0.445872 | 3.42E-24 | 0.208412 |
| 0.175302 | 0.00014  | 0.315797 | 2.83E-12 | 0.439637 | 1.71E-23 | 0.304157 | 1.88E-11 | 0.208415 |
| 0.384605 | 6.52E-18 | 0.712492 | 1.48E-73 | 0.795916 | #####    | 0.745888 | 4.28E-84 | 0.277165 |
| 0.217256 | 2.15E-06 | 0.525407 | 1.69E-34 | 0.780395 | 7.11E-97 | 0.733874 | 4.04E-80 | 0.433125 |
| 0.178617 | 0.0001   | 0.27812  | 9.64E-10 | 0.366502 | 2.71E-16 | 0.303803 | 1.99E-11 | 0.09621  |
| 0.171326 | 0.0002   | 0.637631 | 1.17E-54 | 0.69422  | 2.08E-68 | 0.66706  | 1.98E-61 | 0.284577 |
| 0.135142 | 0.00343  | 0.493284 | 5.22E-30 | 0.489221 | 1.79E-29 | 0.504527 | 1.58E-31 | 0.144271 |
| 0.361622 | 7.12E-16 | 0.591658 | 1.94E-45 | 0.765219 | 5.54E-91 | 0.485386 | 5.64E-29 | 0.29802  |
| 0.443889 | 5.74E-24 | 0.560571 | 5.34E-40 | 0.642348 | 1.08E-55 | 0.567196 | 4.13E-41 | 0.167978 |
| 0.347114 | 1.14E-14 | 0.573043 | 4.12E-42 | 0.718506 | 2.43E-75 | 0.442524 | 8.17E-24 | 0.186502 |
| 0.320375 | 1.32E-12 | 0.630246 | 4.53E-53 | 0.7319   | 1.73E-79 | 0.562947 | 2.15E-40 | 0.514607 |
| 0.205749 | 7.38E-06 | 0.749014 | 3.64E-85 | 0.788951 | #####    | 0.837557 | #####    | 0.283367 |
| 0.200475 | 1.27E-05 | 0.834818 | #####    | 0.895085 | #####    | 0.842858 | #####    | 0.35665  |
| 0.047038 | 0.31042  | 0.402657 | 1.25E-19 | 0.470903 | 3.78E-27 | 0.299786 | 3.75E-11 | 0.22046  |
| 0.542403 | 4.46E-37 | 0.566189 | 6.12E-41 | 0.788319 | #####    | 0.608273 | 1.35E-48 | 0.390484 |
| 0.403257 | 1.09E-19 | 0.733589 | 4.98E-80 | 0.919302 | #####    | 0.757556 | 3.56E-88 | 0.338075 |
| 0.241248 | 1.31E-07 | 0.741759 | 1.05E-82 | 0.87278  | #####    | 0.862967 | #####    | 0.421169 |
| 0.110933 | 0.01647  | 0.300923 | 3.13E-11 | 0.319308 | 1.58E-12 | 0.29573  | 7.03E-11 | 0.098156 |
| 0.521795 | 5.70E-34 | 0.683819 | 1.20E-65 | 0.744165 | 1.64E-83 | 0.664927 | 6.51E-61 | 0.234077 |
| 0.528651 | 5.57E-35 | 0.418304 | 3.31E-21 | 0.567738 | 3.34E-41 | 0.36203  | 6.57E-16 | 0.168207 |
| 0.267862 | 4.08E-09 | 0.589418 | 5.00E-45 | 0.7674   | 8.40E-92 | 0.694035 | 2.34E-68 | 0.252957 |
| 0.264804 | 6.20E-09 | 0.317784 | 2.03E-12 | 0.422106 | 1.33E-21 | 0.364914 | 3.72E-16 | 0.176953 |
| 0.126891 | 0.00603  | 0.295182 | 7.65E-11 | 0.563975 | 1.44E-40 | 0.536631 | 3.48E-36 | 0.304429 |
| 0.634438 | 5.77E-54 | 0.453537 | 4.52E-25 | 0.647759 | 6.66E-57 | 0.437747 | 2.77E-23 | 0.187432 |
| 0.274222 | 1.68E-09 | 0.504247 | 1.73E-31 | 0.757622 | 3.37E-88 | 0.587414 | 1.16E-44 | 0.398962 |
| 0.312039 | 5.27E-12 | 0.749832 | 1.90E-85 | 0.744959 | 8.85E-84 | 0.721287 | 3.50E-76 | 0.301283 |

|          |          |          |          |          |          |          |          |          |
|----------|----------|----------|----------|----------|----------|----------|----------|----------|
| 0.279247 | 8.20E-10 | 0.623947 | 9.43E-52 | 0.727912 | 3.15E-78 | 0.686888 | 1.90E-66 | 0.228171 |
| 0.511197 | 1.87E-32 | 0.312092 | 5.22E-12 | 0.560506 | 5.47E-40 | 0.371789 | 9.35E-17 | 0.112916 |
| 0.299209 | 4.10E-11 | 0.619863 | 6.52E-51 | 0.703665 | 5.08E-71 | 0.713127 | 9.61E-74 | 0.25736  |
| 0.309691 | 7.73E-12 | 0.73663  | 5.17E-81 | 0.876163 | #####    | 0.720962 | 4.39E-76 | 0.264811 |
| 0.083854 | 0.07023  | 0.309756 | 7.65E-12 | 0.365947 | 3.03E-16 | 0.33117  | 2.05E-13 | 0.24732  |
| 0.13669  | 0.00308  | 0.339422 | 4.69E-14 | 0.472405 | 2.46E-27 | 0.475545 | 1.00E-27 | 0.333442 |
| 0.199322 | 1.43E-05 | 0.601739 | 2.48E-47 | 0.724398 | 3.90E-77 | 0.68611  | 3.04E-66 | 0.373023 |
| 0.066641 | 0.15047  | 0.582821 | 7.83E-44 | 0.604743 | 6.55E-48 | 0.593182 | 1.01E-45 | 0.637147 |
| 0.062372 | 0.17844  | 0.599435 | 6.80E-47 | 0.6028   | 1.55E-47 | 0.563134 | 2.00E-40 | 0.639122 |
| 0.285402 | 3.34E-10 | 0.671824 | 1.34E-62 | 0.87147  | #####    | 0.765767 | 3.45E-91 | 0.468996 |
| 0.241883 | 1.21E-07 | 0.637828 | 1.06E-54 | 0.89144  | #####    | 0.794752 | #####    | 0.369205 |
| 0.152689 | 0.00093  | 0.414849 | 7.51E-21 | 0.611221 | 3.55E-49 | 0.280401 | 6.94E-10 | 0.219014 |
| 0.229548 | 5.32E-07 | 0.324686 | 6.31E-13 | 0.492858 | 5.95E-30 | 0.272905 | 2.02E-09 | 0.209159 |
| 0.102955 | 0.02609  | 0.295195 | 7.63E-11 | 0.488478 | 2.24E-29 | 0.327599 | 3.82E-13 | 0.294342 |
| 0.175488 | 0.00014  | 0.417933 | 3.62E-21 | 0.517363 | 2.49E-33 | 0.477294 | 6.05E-28 | 0.278432 |
| 0.280937 | 6.42E-10 | 0.373608 | 6.45E-17 | 0.402267 | 1.36E-19 | 0.388838 | 2.64E-18 | 0.050777 |
| 0.247232 | 6.21E-08 | 0.497802 | 1.30E-30 | 0.713556 | 7.19E-74 | 0.42621  | 4.92E-22 | 0.293762 |
| 0.336849 | 7.46E-14 | 0.792048 | #####    | 0.92251  | #####    | 0.774467 | 1.61E-94 | 0.342962 |
| 0.24957  | 4.62E-08 | 0.535932 | 4.45E-36 | 0.664096 | 1.03E-60 | 0.479784 | 2.94E-28 | 0.428096 |
| 0.204624 | 8.30E-06 | 0.476576 | 7.45E-28 | 0.50834  | 4.70E-32 | 0.495754 | 2.45E-30 | 0.134093 |
| 0.111063 | 0.01635  | 0.45327  | 4.85E-25 | 0.539951 | 1.07E-36 | 0.360645 | 8.62E-16 | 0.214976 |
| 0.385392 | 5.52E-18 | 0.461207 | 5.65E-26 | 0.67358  | 4.89E-63 | 0.532365 | 1.55E-35 | 0.235805 |
| 0.158149 | 0.0006   | 0.12247  | 0.00806  | 0.318806 | 1.71E-12 | 0.258721 | 1.40E-08 | 0.052814 |
| 0.249934 | 4.41E-08 | 0.747416 | 1.29E-84 | 0.894378 | #####    | 0.69165  | 1.03E-67 | 0.317409 |
| 0.241099 | 1.33E-07 | 0.855592 | #####    | 0.9224   | #####    | 0.786321 | 2.64E-99 | 0.361273 |
| 0.201243 | 1.18E-05 | 0.303143 | 2.21E-11 | 0.475091 | 1.14E-27 | 0.274676 | 1.58E-09 | 0.228701 |
| 0.320782 | 1.23E-12 | 0.194464 | 2.32E-05 | 0.443427 | 6.47E-24 | 0.330819 | 2.18E-13 | 0.158635 |
| 0.225066 | 8.93E-07 | 0.597068 | 1.90E-46 | 0.829417 | #####    | 0.764548 | 9.85E-91 | 0.332729 |
| 0.149337 | 0.00121  | 0.607317 | 2.07E-48 | 0.727868 | 3.26E-78 | 0.725175 | 2.24E-77 | 0.395913 |
| 0.406246 | 5.53E-20 | 0.728099 | 2.76E-78 | 0.792507 | #####    | 0.782036 | 1.54E-97 | 0.439074 |
| 0.219125 | 1.75E-06 | 0.518439 | 1.75E-33 | 0.727943 | 3.08E-78 | 0.513004 | 1.04E-32 | 0.196744 |
| 0.245616 | 7.61E-08 | 0.648986 | 3.51E-57 | 0.71679  | 7.92E-75 | 0.704547 | 2.86E-71 | 0.156984 |
| 0.341258 | 3.36E-14 | 0.381768 | 1.19E-17 | 0.409917 | 2.37E-20 | 0.32762  | 3.80E-13 | 0.194125 |
| 0.305934 | 1.42E-11 | 0.418983 | 2.82E-21 | 0.54091  | 7.62E-37 | 0.477638 | 5.48E-28 | 0.272082 |
| 0.346728 | 1.23E-14 | 0.295087 | 7.76E-11 | 0.565238 | 8.86E-41 | 0.435093 | 5.43E-23 | 0.206866 |
| 0.201054 | 1.20E-05 | 0.574664 | 2.15E-42 | 0.830434 | #####    | 0.732092 | 1.50E-79 | 0.496026 |
| 0.282187 | 5.35E-10 | 0.778561 | 3.88E-96 | 0.917803 | #####    | 0.72353  | 7.21E-77 | 0.373271 |
| 0.333699 | 1.31E-13 | 0.716986 | 6.92E-75 | 0.827349 | #####    | 0.691243 | 1.32E-67 | 0.282062 |
| 0.070954 | 0.12573  | 0.459324 | 9.45E-26 | 0.595998 | 3.02E-46 | 0.517832 | 2.13E-33 | 0.259365 |
| 0.083344 | 0.07196  | 0.514508 | 6.38E-33 | 0.596662 | 2.27E-46 | 0.469864 | 5.07E-27 | 0.714187 |
| 0.102939 | 0.02612  | 0.58611  | 2.00E-44 | 0.577851 | 5.96E-43 | 0.519877 | 1.08E-33 | 0.31206  |
| 0.123322 | 0.00763  | 0.695353 | 1.02E-68 | 0.713894 | 5.72E-74 | 0.598216 | 1.16E-46 | 0.531352 |
| 0.204448 | 8.45E-06 | 0.310692 | 6.57E-12 | 0.534603 | 7.09E-36 | 0.282799 | 4.90E-10 | 0.327395 |
| 0.191973 | 2.96E-05 | 0.232224 | 3.89E-07 | 0.439781 | 1.65E-23 | 0.284455 | 3.84E-10 | 0.242298 |
| 0.149572 | 0.00119  | 0.523324 | 3.41E-34 | 0.729609 | 9.23E-79 | 0.517249 | 2.59E-33 | 0.294681 |

|          |          |          |          |          |          |          |          |          |
|----------|----------|----------|----------|----------|----------|----------|----------|----------|
| 0.147085 | 0.00144  | 0.353657 | 3.32E-15 | 0.686461 | 2.46E-66 | 0.431522 | 1.33E-22 | 0.226091 |
| 0.256667 | 1.84E-08 | 0.793824 | #####    | 0.924603 | #####    | 0.816752 | #####    | 0.402251 |
| 0.165013 | 0.00034  | 0.266483 | 4.93E-09 | 0.444886 | 4.43E-24 | 0.204721 | 8.21E-06 | 0.073322 |
| 0.110519 | 0.01688  | 0.512936 | 1.07E-32 | 0.539546 | 1.24E-36 | 0.56397  | 1.45E-40 | 0.372583 |
| 0.364339 | 4.17E-16 | 0.189996 | 3.59E-05 | 0.40911  | 2.86E-20 | 0.274826 | 1.54E-09 | 0.139125 |
| 0.450343 | 1.06E-24 | 0.499159 | 8.55E-31 | 0.54848  | 4.92E-38 | 0.414038 | 9.09E-21 | 0.024022 |
| 0.449352 | 1.37E-24 | 0.671947 | 1.25E-62 | 0.682632 | 2.45E-65 | 0.66105  | 5.52E-60 | 0.153173 |
| 0.118321 | 0.0105   | 0.382901 | 9.36E-18 | 0.546591 | 9.82E-38 | 0.510246 | 2.55E-32 | 0.441424 |
| 0.280015 | 7.34E-10 | 0.854729 | #####    | 0.865289 | #####    | 0.730533 | 4.71E-79 | 0.294912 |
| 0.261112 | 1.02E-08 | 0.870644 | #####    | 0.89895  | #####    | 0.855531 | #####    | 0.346416 |
| 0.214645 | 2.86E-06 | 0.505693 | 1.10E-31 | 0.536819 | 3.26E-36 | 0.399903 | 2.32E-19 | 0.257749 |
| 0.119155 | 0.00996  | 0.375777 | 4.14E-17 | 0.507034 | 7.14E-32 | 0.359871 | 1.00E-15 | 0.406546 |
| 0.10699  | 0.02075  | 0.558563 | 1.15E-39 | 0.538074 | 2.09E-36 | 0.562842 | 2.24E-40 | 0.39797  |
| 0.045539 | 0.32611  | 0.238271 | 1.88E-07 | 0.473097 | 2.02E-27 | 0.447158 | 2.45E-24 | 0.198028 |
| 0.302869 | 2.31E-11 | 0.37243  | 8.21E-17 | 0.452445 | 6.05E-25 | 0.253363 | 2.83E-08 | 0.133581 |
| 0.150736 | 0.00109  | 0.395272 | 6.49E-19 | 0.399105 | 2.77E-19 | 0.303002 | 2.26E-11 | 0.209212 |
| 0.298014 | 4.94E-11 | 0.720556 | 5.83E-76 | 0.784439 | 1.59E-98 | 0.722706 | 1.29E-76 | 0.273987 |
| 0.091054 | 0.04924  | 0.371137 | 1.07E-16 | 0.407797 | 3.87E-20 | 0.399846 | 2.35E-19 | 0.162206 |
| 0.219202 | 1.73E-06 | 0.579583 | 2.95E-43 | 0.720054 | 8.28E-76 | 0.504336 | 1.68E-31 | 0.216317 |
| 0.201588 | 1.13E-05 | 0.729401 | 1.07E-78 | 0.73107  | 3.18E-79 | 0.718704 | 2.11E-75 | 0.245357 |
| 0.188674 | 4.07E-05 | 0.605607 | 4.46E-48 | 0.665098 | 5.92E-61 | 0.611299 | 3.42E-49 | 0.248289 |
| 0.26052  | 1.11E-08 | 0.529258 | 4.53E-35 | 0.605747 | 4.19E-48 | 0.512592 | 1.19E-32 | 0.251588 |
| 0.157467 | 0.00064  | 0.535968 | 4.39E-36 | 0.51814  | 1.93E-33 | 0.49778  | 1.31E-30 | 0.280398 |
| 0.287744 | 2.36E-10 | 0.313461 | 4.17E-12 | 0.478964 | 3.73E-28 | 0.212133 | 3.75E-06 | 0.266034 |
| 0.376215 | 3.78E-17 | 0.66608  | 3.42E-61 | 0.691614 | 1.05E-67 | 0.520738 | 8.12E-34 | 0.201952 |
| 0.459076 | 1.01E-25 | 0.506764 | 7.79E-32 | 0.525911 | 1.42E-34 | 0.501201 | 4.52E-31 | 0.197456 |
| 0.180759 | 8.56E-05 | 0.392388 | 1.22E-18 | 0.407863 | 3.81E-20 | 0.357583 | 1.56E-15 | 0.030737 |
| 0.170019 | 0.00022  | 0.471857 | 2.88E-27 | 0.4596   | 8.77E-26 | 0.319368 | 1.56E-12 | 0.223822 |
| 0.252685 | 3.09E-08 | 0.492179 | 7.31E-30 | 0.591705 | 1.90E-45 | 0.309197 | 8.37E-12 | 0.23303  |
| 0.173255 | 0.00017  | 0.431799 | 1.24E-22 | 0.506978 | 7.27E-32 | 0.249605 | 4.60E-08 | 0.205759 |
| 0.266569 | 4.88E-09 | 0.331337 | 1.99E-13 | 0.431012 | 1.51E-22 | 0.233873 | 3.20E-07 | 0.223685 |
| 0.227353 | 6.86E-07 | 0.621398 | 3.16E-51 | 0.582801 | 7.89E-44 | 0.398284 | 3.33E-19 | 0.196253 |
| 0.263533 | 7.37E-09 | 0.346602 | 1.25E-14 | 0.492208 | 7.25E-30 | 0.396719 | 4.71E-19 | 0.113276 |
| 0.227703 | 6.59E-07 | 0.370883 | 1.12E-16 | 0.498356 | 1.10E-30 | 0.322418 | 9.31E-13 | 0.163372 |
| 0.146343 | 0.00152  | 0.587018 | 1.37E-44 | 0.654598 | 1.81E-58 | 0.573132 | 3.97E-42 | 0.250843 |
| 0.245374 | 7.84E-08 | 0.871414 | #####    | 0.922278 | #####    | 0.80402  | #####    | 0.358795 |
| 0.387806 | 3.29E-18 | 0.477372 | 5.92E-28 | 0.525616 | 1.57E-34 | 0.521842 | 5.61E-34 | 0.086402 |
| 0.171773 | 0.00019  | 0.271506 | 2.46E-09 | 0.456025 | 2.31E-25 | 0.333464 | 1.36E-13 | 0.239331 |
| 0.216116 | 2.43E-06 | 0.608415 | 1.26E-48 | 0.713773 | 6.21E-74 | 0.645131 | 2.60E-56 | 0.288026 |
| 0.10629  | 0.0216   | 0.310811 | 6.44E-12 | 0.486188 | 4.44E-29 | 0.357789 | 1.50E-15 | 0.292334 |
| 0.139147 | 0.00258  | 0.391879 | 1.36E-18 | 0.486944 | 3.54E-29 | 0.359399 | 1.10E-15 | 0.386518 |
| 0.18612  | 5.19E-05 | 0.662783 | 2.13E-60 | 0.782367 | 1.13E-97 | 0.675513 | 1.60E-63 | 0.245468 |
| 0.120412 | 0.0092   | 0.261155 | 1.02E-08 | 0.421233 | 1.64E-21 | 0.317499 | 2.13E-12 | 0.324309 |
| 0.371483 | 9.95E-17 | 0.429123 | 2.41E-22 | 0.764466 | 1.06E-90 | 0.46399  | 2.62E-26 | 0.364423 |
| 0.211824 | 3.88E-06 | 0.357842 | 1.49E-15 | 0.42425  | 7.93E-22 | 0.363203 | 5.22E-16 | 0.321461 |

|          |          |          |          |          |          |          |          |          |
|----------|----------|----------|----------|----------|----------|----------|----------|----------|
| 0.325843 | 5.17E-13 | 0.406885 | 4.77E-20 | 0.521806 | 5.68E-34 | 0.500733 | 5.23E-31 | 0.248312 |
| 0.120406 | 0.0092   | 0.316395 | 2.57E-12 | 0.447565 | 2.20E-24 | 0.396137 | 5.36E-19 | 0.166217 |
| 0.232502 | 3.76E-07 | 0.659536 | 1.26E-59 | 0.878793 | #####    | 0.806758 | #####    | 0.467438 |
| 0.268801 | 3.59E-09 | 0.737858 | 2.05E-81 | 0.893167 | #####    | 0.831161 | #####    | 0.338718 |
| 0.217994 | 1.98E-06 | 0.327973 | 3.58E-13 | 0.468149 | 8.21E-27 | 0.388754 | 2.68E-18 | 0.190869 |
| 0.437142 | 3.24E-23 | 0.452108 | 6.62E-25 | 0.673559 | 4.95E-63 | 0.425491 | 5.86E-22 | 0.070642 |
| 0.223423 | 1.08E-06 | 0.473236 | 1.94E-27 | 0.602351 | 1.89E-47 | 0.508983 | 3.83E-32 | 0.23135  |
| 0.223936 | 1.02E-06 | 0.629664 | 6.01E-53 | 0.824823 | #####    | 0.77674  | 2.06E-95 | 0.338029 |
| 0.17597  | 0.00013  | 0.71962  | 1.12E-75 | 0.868155 | #####    | 0.848866 | #####    | 0.357662 |
| 0.249688 | 4.55E-08 | 0.602648 | 1.66E-47 | 0.833844 | #####    | 0.679563 | 1.51E-64 | 0.327051 |
| 0.254324 | 2.50E-08 | 0.499265 | 8.27E-31 | 0.779585 | 1.51E-96 | 0.655709 | 9.98E-59 | 0.396269 |
| 0.257523 | 1.65E-08 | 0.586271 | 1.87E-44 | 0.739025 | 8.49E-82 | 0.70096  | 2.92E-70 | 0.276816 |
| 0.27911  | 8.36E-10 | 0.835957 | #####    | 0.910858 | #####    | 0.869612 | #####    | 0.348168 |
| 0.096755 | 0.0366   | 0.292672 | 1.12E-10 | 0.361601 | 7.15E-16 | 0.370197 | 1.29E-16 | 0.17195  |
| 0.372399 | 8.26E-17 | 0.4557   | 2.53E-25 | 0.697342 | 2.93E-69 | 0.580819 | 1.78E-43 | 0.344535 |
| 0.241081 | 1.34E-07 | 0.494945 | 3.14E-30 | 0.745387 | 6.34E-84 | 0.620652 | 4.50E-51 | 0.267211 |
| 0.117989 | 0.01072  | 0.369636 | 1.45E-16 | 0.418698 | 3.02E-21 | 0.39511  | 6.72E-19 | 0.219399 |
| 0.333711 | 1.31E-13 | 0.579314 | 3.29E-43 | 0.742269 | 7.11E-83 | 0.652785 | 4.75E-58 | 0.378371 |
| 0.232207 | 3.89E-07 | 0.380453 | 1.57E-17 | 0.424816 | 6.91E-22 | 0.409746 | 2.47E-20 | 0.274577 |
| 0.069679 | 0.13269  | 0.318225 | 1.89E-12 | 0.389237 | 2.42E-18 | 0.38702  | 3.90E-18 | 0.400166 |
| 0.039397 | 0.39564  | 0.390501 | 1.84E-18 | 0.619019 | 9.68E-51 | 0.515144 | 5.18E-33 | 0.322349 |
| 0.411463 | 1.66E-20 | 0.324901 | 6.08E-13 | 0.521879 | 5.55E-34 | 0.298325 | 4.70E-11 | 0.109321 |
| 0.380594 | 1.52E-17 | 0.702029 | 1.47E-70 | 0.84098  | #####    | 0.722208 | 1.83E-76 | 0.237175 |
| 0.255366 | 2.18E-08 | 0.426942 | 4.11E-22 | 0.57301  | 4.17E-42 | 0.279302 | 8.14E-10 | 0.182545 |
| 0.208767 | 5.37E-06 | 0.497319 | 1.51E-30 | 0.470026 | 4.84E-27 | 0.438994 | 2.02E-23 | 0.455777 |
| 0.340737 | 3.69E-14 | 0.624912 | 5.95E-52 | 0.78974  | #####    | 0.584907 | 3.30E-44 | 0.35197  |
| 0.17656  | 0.00013  | 0.34243  | 2.71E-14 | 0.505169 | 1.29E-31 | 0.279101 | 8.38E-10 | 0.107711 |
| 0.248843 | 5.06E-08 | 0.416319 | 5.31E-21 | 0.58093  | 1.70E-43 | 0.465266 | 1.84E-26 | 0.343697 |
| 0.206548 | 6.79E-06 | 0.685917 | 3.41E-66 | 0.661053 | 5.51E-60 | 0.655854 | 9.23E-59 | 0.333057 |
| 0.292525 | 1.15E-10 | 0.728397 | 2.22E-78 | 0.763963 | 1.63E-90 | 0.729627 | 9.11E-79 | 0.283526 |
| 0.207101 | 6.41E-06 | 0.395439 | 6.25E-19 | 0.473795 | 1.66E-27 | 0.399611 | 2.48E-19 | 0.13216  |
| 0.256353 | 1.92E-08 | 0.766387 | 2.02E-91 | 0.911707 | #####    | 0.833316 | #####    | 0.392307 |
| 0.20533  | 7.71E-06 | 0.372369 | 8.31E-17 | 0.617605 | 1.87E-50 | 0.330704 | 2.22E-13 | 0.177317 |
| 0.12423  | 0.00719  | 0.287837 | 2.33E-10 | 0.347489 | 1.06E-14 | 0.311966 | 5.33E-12 | 0.273299 |
| 0.312866 | 4.60E-12 | 0.640892 | 2.27E-55 | 0.699517 | 7.35E-70 | 0.556624 | 2.39E-39 | 0.178587 |
| 0.106893 | 0.02087  | 0.470632 | 4.08E-27 | 0.471956 | 2.80E-27 | 0.369369 | 1.53E-16 | 0.181053 |
| 0.203484 | 9.34E-06 | 0.364685 | 3.89E-16 | 0.503455 | 2.22E-31 | 0.338324 | 5.72E-14 | 0.23508  |
| 0.202924 | 9.89E-06 | 0.649414 | 2.81E-57 | 0.683583 | 1.39E-65 | 0.486705 | 3.81E-29 | 0.255945 |
| 0.240601 | 1.42E-07 | 0.789569 | #####    | 0.92118  | #####    | 0.680556 | 8.39E-65 | 0.342457 |
| 0.137627 | 0.00288  | 0.378956 | 2.14E-17 | 0.55131  | 1.74E-38 | 0.299962 | 3.64E-11 | 0.273401 |
| 0.210868 | 4.30E-06 | 0.397567 | 3.91E-19 | 0.527735 | 7.63E-35 | 0.298759 | 4.40E-11 | 0.255185 |
| 0.209965 | 4.73E-06 | 0.352628 | 4.04E-15 | 0.558916 | 1.00E-39 | 0.31586  | 2.80E-12 | 0.3028   |
| 0.222124 | 1.25E-06 | 0.654427 | 1.98E-58 | 0.648938 | 3.60E-57 | 0.507592 | 5.98E-32 | 0.204754 |
| 0.244381 | 8.88E-08 | 0.744662 | 1.12E-83 | 0.79853  | #####    | 0.617802 | 1.71E-50 | 0.22614  |
| 0.13058  | 0.00471  | 0.526479 | 1.17E-34 | 0.673116 | 6.39E-63 | 0.514258 | 6.92E-33 | 0.332962 |

|          |          |          |          |          |          |          |          |          |
|----------|----------|----------|----------|----------|----------|----------|----------|----------|
| 0.282403 | 5.19E-10 | 0.569927 | 1.41E-41 | 0.832063 | #####    | 0.58044  | 2.08E-43 | 0.325498 |
| 0.222692 | 1.17E-06 | 0.54025  | 9.65E-37 | 0.602326 | 1.91E-47 | 0.344924 | 1.71E-14 | 0.17616  |
| 0.268097 | 3.95E-09 | 0.749332 | 2.82E-85 | 0.909823 | #####    | 0.707455 | 4.25E-72 | 0.385332 |
| 0.464242 | 2.44E-26 | 0.785837 | 4.20E-99 | 0.876541 | #####    | 0.825172 | #####    | 0.278885 |
| 0.118953 | 0.01009  | 0.413792 | 9.63E-21 | 0.557386 | 1.79E-39 | 0.369874 | 1.38E-16 | 0.414635 |
| 0.464036 | 2.59E-26 | 0.526274 | 1.26E-34 | 0.626994 | 2.19E-52 | 0.625419 | 4.67E-52 | 0.282367 |
| 0.435185 | 5.31E-23 | 0.575831 | 1.35E-42 | 0.800714 | #####    | 0.724507 | 3.61E-77 | 0.32176  |
| 0.55335  | 8.14E-39 | 0.485336 | 5.72E-29 | 0.59061  | 3.02E-45 | 0.436902 | 3.44E-23 | 0.185499 |
| 0.25503  | 2.28E-08 | 0.84964  | #####    | 0.911432 | #####    | 0.796286 | #####    | 0.332143 |
| 0.109053 | 0.01841  | 0.324167 | 6.90E-13 | 0.49046  | 1.23E-29 | 0.32494  | 6.04E-13 | 0.077654 |
| 0.320668 | 1.25E-12 | 0.353499 | 3.42E-15 | 0.532605 | 1.42E-35 | 0.421904 | 1.40E-21 | 0.164601 |
| 0.188489 | 4.15E-05 | 0.252228 | 3.28E-08 | 0.421581 | 1.51E-21 | 0.272053 | 2.28E-09 | 0.169977 |
| 0.290072 | 1.66E-10 | 0.603806 | 9.93E-48 | 0.824528 | #####    | 0.69958  | 7.06E-70 | 0.247939 |
| 0.343825 | 2.10E-14 | 0.737643 | 2.41E-81 | 0.788089 | #####    | 0.555115 | 4.21E-39 | 0.391554 |
| 0.14363  | 0.00186  | 0.370608 | 1.19E-16 | 0.344669 | 1.80E-14 | 0.341048 | 3.49E-14 | 0.099415 |
| 0.320624 | 1.26E-12 | 0.395404 | 6.30E-19 | 0.530443 | 3.01E-35 | 0.369188 | 1.58E-16 | 0.300662 |
| 0.146988 | 0.00145  | 0.287205 | 2.55E-10 | 0.465136 | 1.91E-26 | 0.384073 | 7.30E-18 | 0.295339 |
| 0.185312 | 5.60E-05 | 0.647331 | 8.32E-57 | 0.839061 | #####    | 0.688094 | 9.11E-67 | 0.377909 |
| 0.16249  | 0.00042  | 0.335893 | 8.85E-14 | 0.500768 | 5.17E-31 | 0.288721 | 2.04E-10 | 0.319622 |
| 0.184841 | 5.86E-05 | 0.36285  | 5.59E-16 | 0.442143 | 9.01E-24 | 0.205206 | 7.81E-06 | 0.099177 |
| 0.269688 | 3.17E-09 | 0.700255 | 4.58E-70 | 0.648079 | 5.64E-57 | 0.557523 | 1.70E-39 | 0.312599 |
| 0.232026 | 3.98E-07 | 0.61886  | 1.04E-50 | 0.624418 | 7.54E-52 | 0.614544 | 7.74E-50 | 0.287535 |
| 0.179993 | 9.18E-05 | 0.454777 | 3.24E-25 | 0.625582 | 4.32E-52 | 0.313898 | 3.88E-12 | 0.332049 |
| 0.313255 | 4.32E-12 | 0.658741 | 1.94E-59 | 0.758141 | 2.19E-88 | 0.661255 | 4.93E-60 | 0.334748 |
| 0.454657 | 3.34E-25 | 0.398763 | 2.99E-19 | 0.5614   | 3.89E-40 | 0.393414 | 9.76E-19 | 0.185836 |
| 0.39988  | 2.33E-19 | 0.605267 | 5.19E-48 | 0.871788 | #####    | 0.655628 | 1.04E-58 | 0.418608 |
| 0.240849 | 1.37E-07 | 0.324477 | 6.54E-13 | 0.628203 | 1.22E-52 | 0.344957 | 1.70E-14 | 0.266344 |
| 0.219037 | 1.76E-06 | 0.680613 | 8.11E-65 | 0.701138 | 2.60E-70 | 0.608554 | 1.19E-48 | 0.205028 |
| 0.181672 | 7.87E-05 | 0.36542  | 3.36E-16 | 0.611375 | 3.31E-49 | 0.516743 | 3.06E-33 | 0.358153 |
| 0.267699 | 4.17E-09 | 0.385143 | 5.82E-18 | 0.585474 | 2.61E-44 | 0.348948 | 8.10E-15 | 0.215905 |
| 0.182936 | 7.00E-05 | 0.502255 | 3.25E-31 | 0.772962 | 6.23E-94 | 0.608062 | 1.48E-48 | 0.382403 |
| 0.515754 | 4.24E-33 | 0.608519 | 1.21E-48 | 0.839191 | #####    | 0.666848 | 2.23E-61 | 0.265778 |
| 0.303849 | 1.97E-11 | 0.34559  | 1.51E-14 | 0.68136  | 5.21E-65 | 0.369208 | 1.58E-16 | 0.219806 |
| 0.263265 | 7.64E-09 | 0.521273 | 6.79E-34 | 0.583814 | 5.19E-44 | 0.471948 | 2.81E-27 | 0.259124 |
| 0.187966 | 4.36E-05 | 0.481188 | 1.95E-28 | 0.629131 | 7.79E-53 | 0.472975 | 2.09E-27 | 0.504421 |
| 0.172351 | 0.00018  | 0.393921 | 8.73E-19 | 0.563333 | 1.85E-40 | 0.395883 | 5.67E-19 | 0.19966  |
| 0.178959 | 0.0001   | 0.457722 | 1.46E-25 | 0.589375 | 5.09E-45 | 0.406953 | 4.70E-20 | 0.353677 |
| 0.276698 | 1.18E-09 | 0.731978 | 1.63E-79 | 0.839826 | #####    | 0.765747 | 3.52E-91 | 0.43477  |
| 0.190033 | 3.57E-05 | 0.360823 | 8.33E-16 | 0.420178 | 2.12E-21 | 0.313807 | 3.94E-12 | 0.06107  |
| 0.072638 | 0.11698  | 0.322733 | 8.82E-13 | 0.371937 | 9.08E-17 | 0.348922 | 8.14E-15 | 0.194066 |
| 0.161377 | 0.00046  | 0.477762 | 5.29E-28 | 0.581817 | 1.18E-43 | 0.389919 | 2.09E-18 | 0.172121 |
| 0.135237 | 0.00341  | 0.384872 | 6.16E-18 | 0.510209 | 2.58E-32 | 0.455848 | 2.43E-25 | 0.311398 |
| 0.213207 | 3.34E-06 | 0.552613 | 1.07E-38 | 0.754119 | 5.99E-87 | 0.775507 | 6.31E-95 | 0.321152 |
| 0.346941 | 1.18E-14 | 0.533306 | 1.12E-35 | 0.588387 | 7.72E-45 | 0.494911 | 3.17E-30 | 0.186935 |
| 0.247639 | 5.90E-08 | 0.681548 | 4.66E-65 | 0.76502  | 6.57E-91 | 0.532645 | 1.40E-35 | 0.219216 |

|          |          |          |          |          |          |          |          |          |
|----------|----------|----------|----------|----------|----------|----------|----------|----------|
| 0.407081 | 4.56E-20 | 0.533161 | 1.17E-35 | 0.585161 | 2.97E-44 | 0.45922  | 9.73E-26 | 0.235536 |
| 0.249653 | 4.57E-08 | 0.550461 | 2.37E-38 | 0.542443 | 4.40E-37 | 0.389832 | 2.13E-18 | 0.153513 |
| 0.844656 | #####    | 0.193037 | 2.67E-05 | 0.347965 | 9.73E-15 | 0.214639 | 2.86E-06 | 0.068516 |
| 0.726996 | 6.10E-78 | 0.144299 | 0.00177  | 0.314155 | 3.72E-12 | 0.173774 | 0.00016  | 0.047364 |
| 0.665517 | 4.69E-61 | 0.131697 | 0.00436  | 0.169744 | 0.00023  | 0.163698 | 0.00038  | 0.068886 |
| 0.893413 | #####    | 0.211899 | 3.85E-06 | 0.301218 | 2.99E-11 | 0.240245 | 1.48E-07 | 0.07767  |
| 0.472155 | 2.65E-27 | 0.089811 | 0.05243  | 0.125376 | 0.00667  | 0.065559 | 0.15722  | 0.067132 |
| 0.828796 | #####    | 0.2021   | 1.08E-05 | 0.259029 | 1.35E-08 | 0.219783 | 1.62E-06 | 0.055448 |
| 0.767324 | 8.98E-92 | 0.185565 | 5.47E-05 | 0.207394 | 6.21E-06 | 0.17424  | 0.00015  | -0.01886 |
| 0.920389 | #####    | 0.217593 | 2.07E-06 | 0.34693  | 1.18E-14 | 0.23938  | 1.65E-07 | 0.053133 |
| 0.813493 | #####    | 0.164829 | 0.00035  | 0.21034  | 4.55E-06 | 0.170729 | 0.00021  | 0.010362 |
| 0.614249 | 8.87E-50 | 0.088943 | 0.05476  | 0.141969 | 0.0021   | 0.085054 | 0.06629  | -0.05681 |
| 0.55295  | 9.44E-39 | 0.247744 | 5.82E-08 | 0.410941 | 1.87E-20 | 0.343828 | 2.10E-14 | 0.109415 |
| 0.681472 | 4.88E-65 | 0.141577 | 0.00216  | 0.227029 | 7.13E-07 | 0.190314 | 3.48E-05 | 0.007098 |
| 0.913615 | #####    | 0.225223 | 8.77E-07 | 0.327    | 4.24E-13 | 0.246374 | 6.92E-08 | 0.023019 |
| 0.712681 | 1.30E-73 | 0.238076 | 1.93E-07 | 0.264212 | 6.72E-09 | 0.252953 | 2.99E-08 | 0.021275 |
| 0.30937  | 8.14E-12 | 0.033565 | 0.4693   | 0.073667 | 0.11187  | -0.01731 | 0.70905  | 0.004206 |
| 0.510124 | 2.65E-32 | 0.311994 | 5.31E-12 | 0.44108  | 1.18E-23 | 0.310805 | 6.45E-12 | 0.011089 |
| 0.689513 | 3.83E-67 | 0.334302 | 1.18E-13 | 0.460935 | 6.08E-26 | 0.362354 | 6.17E-16 | 0.065868 |
| 0.67443  | 3.00E-63 | 0.127016 | 0.00598  | 0.245857 | 7.38E-08 | 0.116536 | 0.01173  | 0.016379 |
| 0.615369 | 5.29E-50 | 0.177437 | 0.00012  | 0.176347 | 0.00013  | 0.166255 | 0.00031  | -0.05554 |
| 0.734358 | 2.82E-80 | 0.182258 | 7.45E-05 | 0.27374  | 1.80E-09 | 0.268152 | 3.92E-09 | 0.031342 |
| 0.490893 | 1.08E-29 | 0.117941 | 0.01075  | 0.244567 | 8.68E-08 | 0.10802  | 0.01955  | 0.10316  |
| 0.58508  | 3.07E-44 | 0.129024 | 0.00523  | 0.199925 | 1.34E-05 | 0.157937 | 0.00061  | 0.106046 |
| 0.345044 | 1.68E-14 | 0.059855 | 0.19665  | 0.105351 | 0.02279  | 0.088937 | 0.05478  | 0.094131 |
| 0.775042 | 9.61E-95 | 0.155853 | 0.00073  | 0.24817  | 5.51E-08 | 0.183396 | 6.71E-05 | 0.099648 |
| 0.545249 | 1.60E-37 | 0.105242 | 0.02293  | 0.169568 | 0.00023  | 0.139231 | 0.00257  | 0.023721 |
| 0.530702 | 2.75E-35 | 0.346403 | 1.30E-14 | 0.378317 | 2.44E-17 | 0.247859 | 5.74E-08 | 0.035983 |
| 0.544449 | 2.14E-37 | 0.101153 | 0.02884  | 0.193592 | 2.53E-05 | 0.166416 | 0.0003   | 0.018957 |
| 0.559181 | 9.06E-40 | 0.252035 | 3.37E-08 | 0.32378  | 7.38E-13 | 0.263615 | 7.29E-09 | 0.090543 |
| 0.676128 | 1.12E-63 | 0.132578 | 0.0041   | 0.206662 | 6.71E-06 | 0.123161 | 0.00771  | 0.015829 |
| 0.729258 | 1.19E-78 | 0.194926 | 2.22E-05 | 0.281281 | 6.11E-10 | 0.228262 | 6.18E-07 | 0.105024 |
| 0.901463 | #####    | 0.213956 | 3.08E-06 | 0.349891 | 6.78E-15 | 0.236028 | 2.47E-07 | 0.046901 |
| 0.895193 | #####    | 0.240744 | 1.39E-07 | 0.32229  | 9.51E-13 | 0.274828 | 1.54E-09 | 0.036926 |
| 0.592145 | 1.58E-45 | 0.20266  | 1.02E-05 | 0.246375 | 6.92E-08 | 0.175314 | 0.00014  | -0.07003 |
| 0.519691 | 1.15E-33 | 0.166332 | 0.00031  | 0.202516 | 1.03E-05 | 0.180109 | 9.09E-05 | 0.079643 |
| 0.299036 | 4.21E-11 | -0.01154 | 0.80353  | 0.038939 | 0.40117  | -0.04182 | 0.36716  | -0.01078 |
| 0.684113 | 1.01E-65 | 0.144724 | 0.00171  | 0.287889 | 2.31E-10 | 0.154149 | 0.00083  | 0.056245 |
| 0.464971 | 2.00E-26 | 0.113482 | 0.01414  | 0.184815 | 5.87E-05 | 0.123312 | 0.00763  | 0.076682 |
| 0.442133 | 9.03E-24 | 0.179713 | 9.42E-05 | 0.234933 | 2.82E-07 | 0.219889 | 1.60E-06 | 0.047735 |
| 0.825646 | #####    | 0.194321 | 2.35E-05 | 0.316856 | 2.38E-12 | 0.198746 | 1.51E-05 | 0.04152  |
| 0.706343 | 8.84E-72 | 0.163016 | 0.0004   | 0.246273 | 7.01E-08 | 0.15964  | 0.00053  | -0.05288 |
| 0.577998 | 5.62E-43 | 0.14378  | 0.00184  | 0.196299 | 1.93E-05 | 0.170918 | 0.00021  | 0.099732 |
| 0.761259 | 1.61E-89 | 0.161197 | 0.00047  | 0.265725 | 5.47E-09 | 0.170342 | 0.00022  | 0.042095 |
| 0.71018  | 6.96E-73 | 0.325725 | 5.28E-13 | 0.428688 | 2.68E-22 | 0.316034 | 2.73E-12 | 0.118601 |

|          |          |          |          |          |          |          |          |          |
|----------|----------|----------|----------|----------|----------|----------|----------|----------|
| 0.685841 | 3.57E-66 | 0.140577 | 0.00233  | 0.302575 | 2.42E-11 | 0.145414 | 0.00163  | 0.028922 |
| 0.797919 | #####    | 0.163559 | 0.00039  | 0.378278 | 2.46E-17 | 0.167755 | 0.00027  | 0.053264 |
| 0.467272 | 1.05E-26 | 0.001589 | 0.97268  | 0.092913 | 0.04477  | 0.015927 | 0.73139  | 0.028143 |
| 0.578536 | 4.52E-43 | 0.097405 | 0.03535  | 0.151184 | 0.00105  | 0.100148 | 0.03048  | 0.022398 |
| 0.630658 | 3.70E-53 | 0.150743 | 0.00108  | 0.285475 | 3.30E-10 | 0.117318 | 0.01117  | -0.05749 |
| 0.199967 | 1.34E-05 | -0.00419 | 0.92797  | 0.051895 | 0.26305  | 0.048446 | 0.29614  | 0.032096 |
| 0.896072 | #####    | 0.186664 | 4.93E-05 | 0.380933 | 1.42E-17 | 0.207522 | 6.13E-06 | 0.077677 |
| 0.565202 | 8.98E-41 | 0.069625 | 0.133    | 0.136503 | 0.00312  | 0.088599 | 0.05571  | 0.023469 |
| 0.74082  | 2.16E-82 | 0.183246 | 6.80E-05 | 0.395685 | 5.92E-19 | 0.196247 | 1.94E-05 | 0.057367 |
| 0.622751 | 1.67E-51 | 0.117023 | 0.01138  | 0.132259 | 0.0042   | 0.105509 | 0.02259  | -0.00653 |
| 0.635493 | 3.42E-54 | 0.112826 | 0.01471  | 0.171192 | 0.0002   | 0.141013 | 0.00225  | 0.028173 |
| 0.471487 | 3.20E-27 | 0.078331 | 0.09087  | 0.071911 | 0.1207   | 0.101556 | 0.0282   | 0.064191 |
| 0.650627 | 1.48E-57 | 0.193757 | 2.49E-05 | 0.198226 | 1.60E-05 | 0.19994  | 1.34E-05 | 0.058377 |
| 0.704354 | 3.25E-71 | 0.133652 | 0.00381  | 0.197552 | 1.71E-05 | 0.129011 | 0.00524  | 0.016032 |
| 0.355364 | 2.40E-15 | 0.032639 | 0.48167  | 0.091093 | 0.04914  | 0.093134 | 0.04426  | 0.02164  |
| 0.325728 | 5.28E-13 | 0.045427 | 0.32731  | 0.065146 | 0.15986  | 0.015662 | 0.73568  | -0.00193 |
| 0.260046 | 1.18E-08 | -0.00187 | 0.96781  | 0.014179 | 0.7599   | 0.028387 | 0.54058  | 0.078451 |
| 0.361974 | 6.65E-16 | 0.039251 | 0.3974   | 0.053061 | 0.25246  | 0.064324 | 0.16521  | 0.003385 |
| 0.623028 | 1.46E-51 | 0.147107 | 0.00143  | 0.174302 | 0.00015  | 0.174662 | 0.00015  | 0.008748 |
| 0.773399 | 4.21E-94 | 0.162826 | 0.00041  | 0.296227 | 6.51E-11 | 0.205656 | 7.45E-06 | 0.043229 |
| -0.09979 | 0.03108  | -0.0967  | 0.0367   | -0.15606 | 0.00071  | -0.01689 | 0.71583  | 0.158472 |
| -0.04719 | 0.30891  | -0.14956 | 0.00119  | -0.0745  | 0.10785  | -0.07315 | 0.11441  | 0.251468 |
| -0.06404 | 0.16711  | 0.018977 | 0.68251  | 0.039951 | 0.38903  | 0.051966 | 0.2624   | 0.149677 |
| -0.051   | 0.27142  | -0.0782  | 0.09142  | -0.01554 | 0.73767  | 0.096009 | 0.03808  | 0.2728   |
| -0.06771 | 0.14403  | -0.04787 | 0.30198  | -0.00635 | 0.89121  | 0.039384 | 0.3958   | 0.120886 |
| -0.08539 | 0.06522  | -0.00292 | 0.9498   | -0.06204 | 0.1808   | 0.033747 | 0.4669   | 0.230893 |
| -0.02925 | 0.52841  | -0.01025 | 0.82522  | -0.00115 | 0.98029  | 0.061195 | 0.18679  | -0.01092 |
| -0.15126 | 0.00104  | -0.29667 | 6.08E-11 | -0.26289 | 8.04E-09 | -0.22097 | 1.42E-06 | 0.055399 |
| -0.05202 | 0.26192  | -0.1318  | 0.00433  | -0.08185 | 0.07724  | -0.0314  | 0.49841  | 0.121432 |
| -0.1348  | 0.00352  | 0.007158 | 0.87739  | -0.12942 | 0.00509  | 0.021825 | 0.63805  | -0.0149  |
| -0.10271 | 0.02645  | -0.08885 | 0.05503  | -0.03304 | 0.47632  | 0.004828 | 0.91713  | 0.243954 |
| 0.06319  | 0.17281  | 0.031235 | 0.50073  | 0.113284 | 0.01431  | 0.123055 | 0.00776  | 0.152881 |
| -0.05519 | 0.2339   | 0.029014 | 0.53168  | 0.00377  | 0.93524  | 0.08468  | 0.0675   | 0.059159 |
| 0.044405 | 0.33831  | 0.087203 | 0.0597   | -0.08902 | 0.05456  | -0.01789 | 0.69984  | -0.12863 |
| -0.10849 | 0.01902  | -0.00183 | 0.96859  | -0.06114 | 0.1872   | 0.024762 | 0.59351  | 0.0181   |
| -0.19484 | 2.24E-05 | -0.22402 | 1.01E-06 | -0.25082 | 3.93E-08 | -0.16835 | 0.00026  | -0.04059 |
| -0.05573 | 0.22938  | -0.21751 | 2.09E-06 | -0.11204 | 0.01542  | -0.09579 | 0.03852  | 0.139332 |
| 0.043617 | 0.34697  | 0.172818 | 0.00017  | 0.366575 | 2.67E-16 | 0.273295 | 1.92E-09 | 0.331205 |
| -0.08232 | 0.07554  | -0.08507 | 0.06626  | -0.06647 | 0.15155  | -0.00499 | 0.91442  | 0.001694 |
| -0.01647 | 0.72268  | -0.0753  | 0.10413  | -0.03873 | 0.4037   | 0.032022 | 0.48999  | 0.161133 |
| -0.05264 | 0.25624  | -0.13405 | 0.00371  | 0.001536 | 0.9736   | -0.04071 | 0.38012  | 0.132354 |
| -0.03581 | 0.44015  | -0.04834 | 0.29723  | -0.04735 | 0.30717  | 0.025613 | 0.58088  | 0.124671 |
| -0.07399 | 0.11032  | -0.0258  | 0.57819  | -0.0371  | 0.42375  | 0.031983 | 0.49052  | 0.104789 |
| -0.08443 | 0.0683   | -0.19355 | 2.54E-05 | -0.15463 | 0.0008   | -0.11718 | 0.01127  | 0.090736 |
| -0.08756 | 0.05867  | 0.006616 | 0.88662  | -0.09842 | 0.03347  | 0.095709 | 0.03869  | 0.065004 |



|          |         |          |          |          |          |          |          |          |
|----------|---------|----------|----------|----------|----------|----------|----------|----------|
| -0.06904 | 0.1363  | -0.01143 | 0.80536  | -0.0471  | 0.30977  | 0.006078 | 0.89577  | 0.050979 |
| -0.01109 | 0.81117 | -0.092   | 0.04693  | 0.092817 | 0.04499  | 0.005761 | 0.90118  | 0.371988 |
| 0.048062 | 0.29999 | -0.01274 | 0.78361  | 0.112611 | 0.0149   | 0.081254 | 0.07941  | 0.327315 |
| -0.08994 | 0.0521  | 0.007364 | 0.87389  | 0.030329 | 0.51323  | 0.056731 | 0.22108  | 0.288271 |
| -0.06531 | 0.15883 | -0.23941 | 1.64E-07 | -0.16602 | 0.00031  | -0.20688 | 6.56E-06 | 0.00505  |
| -0.05996 | 0.19589 | 0.079425 | 0.08644  | -0.00922 | 0.84251  | 0.127084 | 0.00596  | 0.016447 |
| -0.07061 | 0.12758 | 0.019349 | 0.67664  | -0.07277 | 0.11631  | 0.118484 | 0.01039  | 0.08451  |
| -0.07851 | 0.09013 | -0.05441 | 0.24057  | -0.08705 | 0.06016  | 0.045188 | 0.32986  | 0.152837 |
| -0.11069 | 0.01671 | -0.05846 | 0.20732  | -0.06368 | 0.1695   | -0.02468 | 0.5947   | 0.218    |
| -0.0907  | 0.05013 | -0.14491 | 0.00169  | -0.02971 | 0.52184  | -0.08781 | 0.05793  | 0.172808 |
| -0.09356 | 0.04329 | -0.16799 | 0.00027  | -0.05455 | 0.23939  | -0.06718 | 0.14722  | 0.168439 |
| -0.10081 | 0.02939 | -0.08112 | 0.07992  | -0.20324 | 9.57E-06 | 0.008175 | 0.86014  | -0.01195 |
| -0.09116 | 0.04898 | -0.18391 | 6.39E-05 | -0.04872 | 0.29345  | -0.09658 | 0.03694  | 0.153964 |
| -0.08039 | 0.08267 | -0.13414 | 0.00368  | -0.19695 | 1.81E-05 | -0.06176 | 0.18274  | -0.12623 |
| -0.08811 | 0.05709 | -0.09082 | 0.04983  | -0.12682 | 0.00606  | 0.051946 | 0.26258  | -0.02487 |
| -0.05943 | 0.19984 | -0.10109 | 0.02895  | 0.068373 | 0.14013  | -0.05173 | 0.26453  | 0.237635 |
| -0.10056 | 0.0298  | -0.03551 | 0.44394  | -0.05839 | 0.20788  | 0.009557 | 0.8368   | -0.00104 |
| -0.05773 | 0.21308 | -0.03823 | 0.40976  | 0.090823 | 0.04982  | 0.060402 | 0.19258  | 0.344282 |
| -0.14884 | 0.00126 | 0.03493  | 0.45141  | -0.05273 | 0.25544  | 0.087548 | 0.05869  | 0.285382 |
| -0.00853 | 0.85417 | -0.07967 | 0.08546  | 0.010404 | 0.82257  | 0.018397 | 0.69172  | 0.158942 |
| -0.03795 | 0.41318 | -0.13954 | 0.00251  | -0.03166 | 0.49493  | -0.05284 | 0.25442  | 0.3211   |
| 0.035483 | 0.44428 | 0.016463 | 0.72272  | -0.10257 | 0.02665  | -0.06721 | 0.14699  | -0.1637  |
| -0.0946  | 0.04102 | -0.0897  | 0.05273  | -0.06179 | 0.18252  | -0.02355 | 0.61173  | 0.05235  |
| -0.11343 | 0.01418 | -0.10889 | 0.01858  | -0.01466 | 0.75196  | -0.00429 | 0.92629  | 0.169549 |
| -0.10794 | 0.01963 | -0.10785 | 0.01974  | -0.1365  | 0.00312  | -0.04554 | 0.32613  | 0.101935 |
| -0.12276 | 0.00791 | -0.16246 | 0.00042  | -0.21464 | 2.86E-06 | -0.14542 | 0.00163  | -0.10076 |
| -0.11659 | 0.01169 | -0.04167 | 0.36898  | -0.13198 | 0.00428  | 0.023039 | 0.61947  | 0.000469 |
| -0.09659 | 0.03693 | -0.09854 | 0.03326  | -0.07693 | 0.0968   | 0.032744 | 0.48025  | 0.104397 |
| -0.13786 | 0.00283 | -0.17767 | 0.00011  | -0.18885 | 4.01E-05 | -0.08353 | 0.07133  | 0.061307 |
| -0.12273 | 0.00793 | -0.04865 | 0.29415  | 0.005392 | 0.90749  | 0.037764 | 0.41554  | 0.188955 |
| -0.10099 | 0.0291  | -0.15083 | 0.00108  | -0.14634 | 0.00152  | -0.07322 | 0.11407  | 0.068284 |
| -0.04759 | 0.30476 | -0.00235 | 0.95954  | -0.01931 | 0.6772   | 0.041871 | 0.36663  | 0.178904 |
| -0.0798  | 0.08496 | -0.16686 | 0.00029  | -0.05397 | 0.24441  | -0.12721 | 0.00591  | 0.261246 |
| -0.12487 | 0.0069  | 0.011702 | 0.80087  | -0.14288 | 0.00197  | 0.029733 | 0.52156  | -0.0696  |
| -0.12487 | 0.0069  | 0.011948 | 0.79679  | -0.09217 | 0.0465   | 3.65E-06 | 0.99994  | -0.05513 |
| -0.09243 | 0.04589 | 0.039311 | 0.39668  | -0.09089 | 0.04965  | 0.024037 | 0.60437  | -0.15339 |
| -0.03234 | 0.48575 | 0.000247 | 0.99575  | -0.04842 | 0.29645  | -0.01529 | 0.74175  | 0.09218  |
| -0.0646  | 0.16342 | 0.024279 | 0.60074  | -0.04755 | 0.30516  | 0.042444 | 0.36009  | 0.105515 |
| -0.02503 | 0.58958 | -0.02401 | 0.60483  | -0.00863 | 0.85249  | 0.078499 | 0.09018  | 0.144693 |
| -0.06682 | 0.14938 | -0.10278 | 0.02635  | -0.03966 | 0.3925   | -0.02151 | 0.64293  | 0.220778 |
| -0.06958 | 0.13323 | -0.13738 | 0.00293  | -0.01184 | 0.79856  | -0.01454 | 0.75402  | 0.290962 |
| -0.10775 | 0.01985 | -0.00505 | 0.91339  | -0.04211 | 0.36391  | 0.0676   | 0.14467  | 0.094266 |
| -0.06852 | 0.13926 | 0.082189 | 0.076    | -0.0195  | 0.67421  | 0.096913 | 0.03629  | -0.04733 |
| -0.03622 | 0.43488 | -0.09332 | 0.04384  | 0.022927 | 0.62117  | -0.05037 | 0.27738  | 0.11395  |
| 0.026129 | 0.57328 | 0.029392 | 0.52634  | 0.120121 | 0.00937  | 0.02502  | 0.58967  | -0.002   |

|          |         |          |          |          |          |          |          |          |
|----------|---------|----------|----------|----------|----------|----------|----------|----------|
| -0.11206 | 0.01541 | -0.03248 | 0.48386  | 0.020466 | 0.65911  | 0.091788 | 0.04743  | 0.222907 |
| -0.06892 | 0.13697 | -0.05898 | 0.20329  | -0.02429 | 0.60054  | 0.058172 | 0.20955  | 0.053819 |
| -0.0977  | 0.03479 | -0.13546 | 0.00336  | -0.08734 | 0.05929  | -0.04258 | 0.35858  | 0.184354 |
| -0.05968 | 0.19797 | -0.02951 | 0.52469  | -0.04991 | 0.28179  | -0.07561 | 0.10268  | 0.145099 |
| 0.028139 | 0.54413 | 0.008591 | 0.85311  | 0.100224 | 0.03035  | 0.153452 | 0.00088  | 0.161998 |
| -0.05053 | 0.27582 | -0.00598 | 0.89744  | 0.006225 | 0.89327  | 0.080381 | 0.0827   | 0.237906 |
| -0.10977 | 0.01764 | -0.08631 | 0.06236  | -0.06388 | 0.16813  | -0.0926  | 0.0455   | -0.0518  |
| -0.09551 | 0.03909 | -0.21927 | 1.72E-06 | -0.0868  | 0.06089  | -0.14501 | 0.00168  | 0.156596 |
| -0.04717 | 0.30911 | -0.07329 | 0.1137   | 0.002584 | 0.95558  | 0.0453   | 0.32866  | 0.237864 |
| 0.063521 | 0.17056 | 0.056644 | 0.22179  | 0.18984  | 3.64E-05 | 0.087366 | 0.05922  | 0.154219 |
| -0.08684 | 0.06077 | -0.12177 | 0.00843  | -0.06384 | 0.16842  | -0.02825 | 0.5426   | 0.096273 |
| -0.06295 | 0.17448 | 0.036419 | 0.43236  | 0.032781 | 0.47975  | 0.152911 | 0.00092  | 0.215528 |
| -0.04952 | 0.2856  | -0.14284 | 0.00197  | 0.034817 | 0.45288  | -0.0252  | 0.58703  | 0.317288 |
| -0.15915 | 0.00056 | -0.01417 | 0.76013  | -0.14994 | 0.00115  | 0.020476 | 0.65896  | -0.08906 |
| 0.013241 | 0.77534 | 0.035577 | 0.44308  | 0.111671 | 0.01576  | 0.057653 | 0.21365  | 0.256268 |
| -0.06309 | 0.17347 | -0.12685 | 0.00605  | -0.05064 | 0.27482  | -0.02354 | 0.61182  | 0.067132 |
| -0.06378 | 0.16883 | -0.03656 | 0.43056  | -0.05996 | 0.19587  | 0.018552 | 0.68925  | -0.10124 |
| -0.04296 | 0.35428 | 0.010709 | 0.81746  | -0.03497 | 0.45095  | 0.047428 | 0.30642  | 0.01086  |
| -0.12158 | 0.00854 | -0.12741 | 0.00583  | -0.04204 | 0.36466  | -0.0802  | 0.08339  | 0.226453 |
| -0.14804 | 0.00134 | -0.12062 | 0.00908  | -0.06402 | 0.16719  | -0.03579 | 0.44035  | 0.076745 |
| -0.0868  | 0.06089 | -0.21004 | 4.70E-06 | -0.0742  | 0.10929  | -0.11276 | 0.01477  | 0.17507  |
| -0.10546 | 0.02266 | -0.09354 | 0.04333  | -0.0062  | 0.89367  | 0.04877  | 0.29292  | 0.20877  |
| -0.02554 | 0.58191 | -0.05111 | 0.27032  | 0.170505 | 0.00021  | 0.055541 | 0.23093  | 0.17311  |
| -0.06886 | 0.1373  | -0.11329 | 0.0143   | -0.13719 | 0.00297  | -0.07489 | 0.10604  | 0.072044 |
| -0.01552 | 0.73796 | -0.11881 | 0.01018  | 0.067533 | 0.14507  | -0.0236  | 0.61097  | 0.24971  |
| -0.00294 | 0.94942 | 0.065291 | 0.15893  | 0.094428 | 0.04138  | 0.106127 | 0.0218   | 0.255977 |
| -0.089   | 0.05462 | -0.14489 | 0.00169  | -0.05582 | 0.2286   | -0.0457  | 0.32436  | 0.121916 |
| 0.055169 | 0.23408 | 0.085823 | 0.06387  | 0.205546 | 7.54E-06 | 0.25254  | 3.15E-08 | 0.325961 |
| -0.11756 | 0.01101 | -0.17627 | 0.00013  | -0.00424 | 0.92718  | -0.03452 | 0.45673  | 0.283964 |
| -0.10827 | 0.01927 | -0.16884 | 0.00025  | -0.19403 | 2.42E-05 | -0.13031 | 0.00479  | 0.070107 |
| -0.08636 | 0.06221 | -0.00525 | 0.90996  | -0.00789 | 0.86492  | 0.120887 | 0.00892  | 0.288878 |
| -0.05372 | 0.24665 | 0.077095 | 0.0961   | 0.100373 | 0.0301   | 0.193139 | 2.64E-05 | 0.200629 |
| -0.01017 | 0.82654 | -0.07466 | 0.10712  | 0.025307 | 0.5854   | -0.05991 | 0.19622  | 0.200109 |
| -0.08424 | 0.06895 | -0.07477 | 0.1066   | -0.10105 | 0.029    | 0.081701 | 0.07777  | 0.042782 |
| -0.04235 | 0.36118 | -0.03506 | 0.44972  | -0.01435 | 0.75712  | 0.015508 | 0.73818  | -0.01834 |
| -0.07726 | 0.09539 | -0.02318 | 0.61729  | -0.10662 | 0.0212   | -0.02575 | 0.57888  | -0.0048  |
| -0.0241  | 0.60344 | -0.15395 | 0.00084  | -0.03426 | 0.46011  | -0.04635 | 0.31752  | 0.281842 |
| -0.08945 | 0.05339 | -0.03143 | 0.49811  | -0.14952 | 0.00119  | 0.112206 | 0.01527  | 0.128083 |
| -0.05121 | 0.26942 | 0.008669 | 0.85178  | 0.107488 | 0.02016  | 0.050752 | 0.27372  | 0.252234 |
| -0.05338 | 0.24961 | -0.12831 | 0.00549  | -0.06777 | 0.14365  | -0.09237 | 0.04605  | -0.01239 |
| -0.0916  | 0.0479  | -0.11195 | 0.01551  | 0.015945 | 0.73109  | -0.05813 | 0.20988  | 0.203284 |
| -0.0765  | 0.09872 | -0.0307  | 0.50805  | -0.00536 | 0.90803  | 0.092493 | 0.04575  | 0.282459 |
| -0.00272 | 0.95329 | -0.00757 | 0.87032  | -0.05962 | 0.19838  | 0.072442 | 0.11797  | 0.180967 |
| -0.09377 | 0.04283 | -0.03888 | 0.40189  | -0.10289 | 0.02618  | 0.073788 | 0.11128  | -0.0274  |
| 0.051348 | 0.26813 | 0.121719 | 0.00846  | -0.04892 | 0.29147  | -0.0161  | 0.72865  | -0.17369 |

|          |         |          |          |          |          |          |          |          |
|----------|---------|----------|----------|----------|----------|----------|----------|----------|
| 0.058323 | 0.20837 | 0.065882 | 0.15518  | 0.01988  | 0.66829  | -0.12824 | 0.00552  | -0.06061 |
| 0.06452  | 0.16392 | 0.09787  | 0.03448  | 0.007668 | 0.86874  | -0.03398 | 0.46384  | -0.12647 |
| 0.062145 | 0.18003 | 0.142799 | 0.00198  | -0.05747 | 0.21511  | 0.06058  | 0.19127  | -0.14225 |
| 0.038735 | 0.40363 | 0.101919 | 0.02764  | -0.03683 | 0.42722  | -0.02576 | 0.57874  | -0.15617 |
| 0.065474 | 0.15777 | 0.088678 | 0.0555   | -0.04167 | 0.36894  | -0.07524 | 0.10439  | -0.18735 |
| 0.031363 | 0.49898 | 0.07431  | 0.10876  | -0.05229 | 0.25946  | -0.04967 | 0.28411  | -0.14122 |
| 0.040404 | 0.38368 | 0.08933  | 0.05372  | -0.04854 | 0.29518  | -0.04279 | 0.35618  | -0.08997 |
| 0.049729 | 0.28352 | 0.09518  | 0.03978  | -0.06234 | 0.17865  | -0.02647 | 0.56825  | -0.14916 |
| 0.059155 | 0.20194 | 0.111355 | 0.01606  | -0.03213 | 0.48853  | -0.0511  | 0.27048  | -0.14421 |
| 0.061534 | 0.18436 | 0.082704 | 0.07418  | -0.02064 | 0.65635  | -0.10234 | 0.027    | -0.13276 |
| 0.063073 | 0.1736  | 0.109166 | 0.01828  | 0.0312   | 0.50121  | -0.05527 | 0.23325  | -0.10907 |
| 0.028877 | 0.53361 | 0.09054  | 0.05054  | -0.00552 | 0.9053   | -0.02674 | 0.56432  | -0.10689 |
| -0.05885 | 0.20431 | -0.15545 | 0.00075  | -0.09712 | 0.03589  | -0.02386 | 0.60704  | 0.151887 |
| -0.04572 | 0.32416 | -0.01736 | 0.70829  | 0.013525 | 0.77067  | 0.032814 | 0.47931  | 0.173991 |
| 0.043536 | 0.34786 | 0.125623 | 0.00656  | 0.176894 | 0.00012  | 0.188865 | 4.00E-05 | 0.232826 |
| -0.14372 | 0.00185 | -0.1972  | 1.77E-05 | -0.12075 | 0.009    | -0.16364 | 0.00038  | 0.185823 |
| -0.13055 | 0.00472 | -0.17387 | 0.00016  | -0.20879 | 5.36E-06 | -0.04394 | 0.34344  | 0.147009 |
| -0.12309 | 0.00775 | -0.0256  | 0.58101  | -0.08623 | 0.06262  | -0.02332 | 0.61517  | -0.11272 |
| -0.09679 | 0.03652 | -0.05746 | 0.21518  | -0.14286 | 0.00197  | 0.014629 | 0.75254  | 0.133964 |
| -0.06151 | 0.18452 | -0.16921 | 0.00024  | -0.02156 | 0.64216  | -0.16784 | 0.00027  | 0.102651 |
| -0.07674 | 0.09765 | -0.1159  | 0.0122   | -0.02964 | 0.52288  | -0.07792 | 0.09258  | 0.064763 |
| -0.074   | 0.11024 | 0.07786  | 0.09284  | 0.003962 | 0.93195  | 0.174631 | 0.00015  | 0.013233 |
| -0.07322 | 0.11409 | -0.02894 | 0.53272  | 0.03841  | 0.4076   | -0.0084  | 0.8564   | 0.217729 |
| -0.02074 | 0.6548  | -0.03295 | 0.47746  | -0.03999 | 0.38855  | -0.01537 | 0.74037  | 0.026401 |
| -0.06526 | 0.15914 | -0.10641 | 0.02145  | -0.00026 | 0.9955   | 0.009809 | 0.83257  | 0.132315 |
| -0.07201 | 0.12021 | -0.17984 | 9.31E-05 | -0.07985 | 0.08477  | -0.02992 | 0.51892  | 0.281506 |
| -0.02524 | 0.58633 | -0.20101 | 1.20E-05 | -0.08891 | 0.05486  | -0.09736 | 0.03544  | 0.046922 |
| -0.09225 | 0.04632 | -0.01572 | 0.73478  | -0.0139  | 0.76455  | 0.086913 | 0.06056  | 0.154241 |
| -0.10186 | 0.02773 | -0.18079 | 8.53E-05 | 0.042421 | 0.36036  | -0.06027 | 0.19356  | 0.299185 |
| -0.03505 | 0.4498  | -0.09599 | 0.03812  | -0.07696 | 0.09668  | -0.06503 | 0.16064  | 0.007518 |
| -0.05586 | 0.22823 | -0.01763 | 0.70401  | -0.1062  | 0.02171  | 0.116451 | 0.01179  | 0.029291 |
| -0.10135 | 0.02853 | -0.11264 | 0.01488  | -0.10519 | 0.023    | -0.11094 | 0.01647  | 0.090169 |
| -0.03665 | 0.42942 | -0.0886  | 0.0557   | 0.066635 | 0.15051  | -0.06154 | 0.18435  | 0.054429 |
| -0.04453 | 0.337   | -0.11433 | 0.01343  | 0.078174 | 0.09152  | -0.01073 | 0.81705  | 0.194524 |
| -0.05222 | 0.26011 | -0.08753 | 0.05873  | 0.012207 | 0.79248  | 0.000655 | 0.98874  | 0.150056 |
| -0.08382 | 0.07034 | -0.01047 | 0.8215   | -0.12368 | 0.00745  | 0.108364 | 0.01916  | 0.053547 |
| -0.1541  | 0.00083 | -0.04342 | 0.34912  | -0.10593 | 0.02206  | 0.021514 | 0.64285  | -0.00234 |
| -0.07304 | 0.11494 | -0.09492 | 0.04032  | 0.012803 | 0.78259  | 0.014038 | 0.76222  | 0.140754 |
| -0.0865  | 0.0618  | -0.18743 | 4.59E-05 | -0.19457 | 2.30E-05 | -0.03654 | 0.43087  | 0.10256  |
| -0.00451 | 0.92258 | -0.14699 | 0.00145  | 0.035233 | 0.4475   | -0.11812 | 0.01063  | 0.267669 |
| -0.01608 | 0.7289  | -0.19691 | 1.82E-05 | -0.10175 | 0.0279   | -0.1796  | 9.52E-05 | 0.041357 |
| -0.05004 | 0.28055 | -0.13415 | 0.00368  | 0.034348 | 0.459    | -0.03474 | 0.45382  | 0.279239 |
| -0.11766 | 0.01094 | -0.10601 | 0.02195  | -0.08538 | 0.06525  | -0.0967  | 0.0367   | 0.075144 |
| -0.0578  | 0.21247 | -0.05718 | 0.21747  | -0.10102 | 0.02905  | -0.06194 | 0.18148  | 0.098664 |
| -0.07974 | 0.08519 | -0.09491 | 0.04036  | -0.11331 | 0.01429  | -0.01475 | 0.75055  | -0.002   |

|          |          |          |          |          |          |          |          |          |
|----------|----------|----------|----------|----------|----------|----------|----------|----------|
| -0.0832  | 0.07246  | -0.11607 | 0.01207  | -0.03923 | 0.39768  | -0.10906 | 0.01839  | 0.114091 |
| -0.16698 | 0.00029  | -0.07919 | 0.08739  | -0.18227 | 7.44E-05 | 0.02967  | 0.52243  | 0.014464 |
| -0.02796 | 0.54676  | -0.11006 | 0.01735  | 0.073254 | 0.1139   | -0.01014 | 0.82701  | 0.269112 |
| -0.07614 | 0.10031  | -0.07054 | 0.12794  | -0.09308 | 0.04439  | -0.02059 | 0.65724  | 0.139211 |
| -0.0489  | 0.29166  | 0.043735 | 0.34566  | 0.111238 | 0.01618  | 0.058555 | 0.20656  | 0.086819 |
| -0.09472 | 0.04076  | 0.02174  | 0.63935  | -0.01921 | 0.67878  | 0.108427 | 0.01909  | 0.027623 |
| -0.06354 | 0.17046  | 0.016639 | 0.71987  | -0.10025 | 0.03031  | 0.067559 | 0.14492  | -0.08432 |
| -0.09179 | 0.04742  | -0.10023 | 0.03034  | -0.0381  | 0.41137  | -0.02956 | 0.52404  | 0.126602 |
| -0.16558 | 0.00033  | -0.22727 | 6.93E-07 | -0.17431 | 0.00015  | -0.21806 | 1.96E-06 | 0.00438  |
| -0.06542 | 0.15811  | -0.08059 | 0.08191  | -0.01406 | 0.76178  | 0.044776 | 0.33429  | 0.161428 |
| -0.13063 | 0.00469  | -0.16749 | 0.00028  | -0.10452 | 0.02389  | -0.06451 | 0.16397  | 0.194957 |
| -0.04257 | 0.35865  | -0.08874 | 0.05533  | 0.056761 | 0.22083  | -0.02653 | 0.56743  | 0.219708 |
| -0.05919 | 0.20168  | -0.14485 | 0.0017   | -0.04874 | 0.2932   | 0.01336  | 0.77339  | 0.165981 |
| -0.10971 | 0.01771  | -0.09984 | 0.031    | -0.05289 | 0.25397  | -0.11525 | 0.0127   | -0.05683 |
| -0.05725 | 0.21687  | -0.073   | 0.11515  | -0.16204 | 0.00044  | 0.020365 | 0.66069  | -0.04369 |
| -0.05174 | 0.26444  | 0.003139 | 0.94607  | 0.048582 | 0.29479  | 0.098392 | 0.03352  | 0.059723 |
| -0.07179 | 0.12135  | -0.08031 | 0.08297  | -0.04327 | 0.35078  | -0.0587  | 0.20546  | 0.065034 |
| -0.01972 | 0.67083  | 0.002373 | 0.9592   | 0.066645 | 0.15045  | 0.012797 | 0.78269  | 0.052554 |
| -0.07843 | 0.09047  | -0.04031 | 0.38475  | -0.04998 | 0.28113  | 0.056779 | 0.22069  | 0.038515 |
| -0.04729 | 0.30778  | -0.00479 | 0.91775  | -0.03403 | 0.46316  | 0.060736 | 0.19013  | 0.021056 |
| 0.004043 | 0.93057  | 0.055272 | 0.2332   | 0.081532 | 0.07839  | 0.114626 | 0.01319  | 0.23418  |
| -0.09602 | 0.03805  | -0.13866 | 0.00267  | -0.10397 | 0.02464  | -0.04823 | 0.29832  | 0.099481 |
| -0.05919 | 0.2017   | -0.15688 | 0.00067  | -0.06783 | 0.14332  | -0.06081 | 0.18957  | 0.210734 |
| -0.11075 | 0.01666  | -0.05973 | 0.19755  | -0.01843 | 0.69122  | 0.010135 | 0.82708  | 0.174829 |
| -0.04593 | 0.32202  | -0.12938 | 0.00511  | -0.08566 | 0.06438  | -0.10232 | 0.02703  | 0.000981 |
| -0.07788 | 0.09276  | -0.10191 | 0.02765  | -0.09368 | 0.04303  | -0.08735 | 0.05928  | -0.07899 |
| -0.05027 | 0.27829  | -0.06279 | 0.17555  | 0.012073 | 0.7947   | 0.066849 | 0.1492   | 0.171162 |
| 0.015134 | 0.74428  | -0.14292 | 0.00196  | -0.01166 | 0.80158  | -0.0479  | 0.30163  | 0.106786 |
| -0.15485 | 0.00079  | -0.16644 | 0.0003   | -0.14064 | 0.00232  | -0.05052 | 0.27589  | 0.109613 |
| -0.10205 | 0.02744  | -0.08405 | 0.06958  | -0.07523 | 0.10445  | 0.058446 | 0.20741  | 0.070731 |
| -0.06003 | 0.19532  | -0.06045 | 0.19221  | 0.017493 | 0.70615  | 0.029628 | 0.52302  | 0.166629 |
| -0.07405 | 0.11003  | -0.12706 | 0.00597  | -0.00859 | 0.85315  | -0.03443 | 0.45796  | 0.174924 |
| -0.18173 | 7.83E-05 | -0.06419 | 0.16612  | -0.19684 | 1.83E-05 | -0.03835 | 0.40829  | -0.01675 |
| -0.1378  | 0.00284  | -0.08919 | 0.05408  | -0.10335 | 0.02552  | 0.016743 | 0.71819  | 0.190116 |
| -0.00454 | 0.92209  | 0.013039 | 0.77869  | 0.014532 | 0.75412  | 0.182726 | 7.14E-05 | 0.133937 |
| -0.07576 | 0.10202  | -0.10018 | 0.03042  | 0.046168 | 0.31946  | -0.02989 | 0.51935  | 0.183253 |
| -0.00793 | 0.86429  | -0.07917 | 0.08746  | -0.02743 | 0.5543   | -0.0231  | 0.61855  | 0.287048 |
| -0.06631 | 0.15254  | -0.04966 | 0.28422  | -0.079   | 0.08814  | -0.04191 | 0.36622  | 0.088203 |
| -0.0202  | 0.66325  | -0.00414 | 0.92895  | 0.037477 | 0.41909  | -0.0025  | 0.95699  | 0.109271 |
| -0.12117 | 0.00877  | -0.12784 | 0.00567  | -0.0614  | 0.18529  | -0.03745 | 0.41948  | 0.105089 |
| -0.12716 | 0.00593  | -0.18114 | 8.26E-05 | -0.12409 | 0.00726  | -0.12606 | 0.00638  | 0.097669 |
| 0.049268 | 0.28801  | -0.01622 | 0.7266   | 0.170689 | 0.00021  | 0.0672   | 0.14707  | 0.313016 |
| -0.10684 | 0.02093  | -0.09765 | 0.03489  | -0.05364 | 0.24727  | 0.004056 | 0.93033  | 0.1807   |
| -0.15255 | 0.00094  | -0.08741 | 0.05911  | -0.19988 | 1.35E-05 | 0.026037 | 0.57462  | 0.11841  |
| -0.03089 | 0.50547  | 0.067306 | 0.14644  | 0.085882 | 0.06369  | 0.064338 | 0.16512  | -0.01853 |

|          |          |          |          |          |          |          |          |          |
|----------|----------|----------|----------|----------|----------|----------|----------|----------|
| -0.11653 | 0.01173  | -0.06948 | 0.13381  | -0.03615 | 0.43578  | -0.02286 | 0.62212  | 0.062066 |
| -0.07577 | 0.10196  | 0.072099 | 0.11973  | -0.01601 | 0.73006  | 0.075717 | 0.10221  | -0.07609 |
| -0.11971 | 0.00962  | -0.13602 | 0.00323  | -0.1353  | 0.0034   | -0.01218 | 0.79287  | 0.128803 |
| -0.07407 | 0.1099   | -0.12895 | 0.00526  | -0.1321  | 0.00424  | -0.01122 | 0.80887  | 0.083056 |
| 0.008013 | 0.86289  | -0.06247 | 0.17779  | 0.071753 | 0.12152  | 0.026468 | 0.5683   | 0.203695 |
| -0.04773 | 0.30331  | 0.003284 | 0.94358  | -0.08017 | 0.08352  | 0.06237  | 0.17846  | 0.11974  |
| 0.038042 | 0.4121   | 0.228693 | 5.88E-07 | 0.298781 | 4.38E-11 | 0.250919 | 3.88E-08 | 0.375692 |
| -0.07484 | 0.10625  | -0.126   | 0.0064   | 0.001195 | 0.97946  | -0.06846 | 0.13962  | 0.171208 |
| 0.005761 | 0.90119  | 0.082804 | 0.07383  | 0.207054 | 6.44E-06 | 0.211271 | 4.12E-06 | 0.27763  |
| -0.19769 | 1.68E-05 | -0.13113 | 0.00453  | -0.26946 | 3.27E-09 | -0.12817 | 0.00554  | -0.07272 |
| -0.01122 | 0.80896  | -0.04571 | 0.32426  | 0.060254 | 0.19367  | 0.121752 | 0.00844  | 0.24786  |
| -0.13245 | 0.00414  | -0.07784 | 0.09294  | -0.14432 | 0.00177  | 0.056744 | 0.22097  | 0.057163 |
| -0.14379 | 0.00184  | -0.00358 | 0.93846  | -0.01177 | 0.79983  | 0.055697 | 0.22963  | 0.118323 |
| -0.11211 | 0.01536  | -0.07654 | 0.09853  | -0.11187 | 0.01558  | -0.02611 | 0.57359  | 0.059184 |
| -0.06064 | 0.19085  | -0.07618 | 0.10011  | -0.00055 | 0.99048  | -0.04563 | 0.32519  | -0.05713 |
| -0.079   | 0.08812  | -0.03572 | 0.44128  | -0.01749 | 0.70614  | 0.019437 | 0.67526  | 0.038249 |
| -0.03451 | 0.45694  | -0.14709 | 0.00144  | -0.0441  | 0.34169  | -0.03169 | 0.4945   | 0.068653 |
| -0.1083  | 0.01923  | -0.10363 | 0.02513  | -0.10528 | 0.02289  | -0.0251  | 0.58844  | 0.123868 |
| -0.03796 | 0.41313  | -0.07215 | 0.11946  | 0.033244 | 0.47357  | 0.02574  | 0.57899  | 0.201495 |
| -0.04267 | 0.35752  | -0.0526  | 0.25662  | -0.05751 | 0.21482  | 0.084837 | 0.06699  | 0.115852 |
| 0.130682 | 0.00467  | 0.19535  | 2.13E-05 | 0.297215 | 5.59E-11 | 0.336703 | 7.66E-14 | 0.483477 |
| -0.05258 | 0.25678  | 0.076667 | 0.09797  | 0.089172 | 0.05414  | 0.277461 | 1.06E-09 | 0.619967 |
| 0.11133  | 0.01609  | 0.308944 | 8.72E-12 | 0.236246 | 2.41E-07 | 0.338468 | 5.57E-14 | 0.609063 |
| 0.054227 | 0.24217  | 0.229363 | 5.44E-07 | 0.370135 | 1.31E-16 | 0.288231 | 2.19E-10 | 0.903523 |
| -0.00331 | 0.94321  | 0.090128 | 0.0516   | 0.271903 | 2.33E-09 | 0.172096 | 0.00019  | 0.860735 |
| 0.035243 | 0.44738  | 0.146875 | 0.00146  | 0.383865 | 7.63E-18 | 0.151783 | 0.001    | 0.82337  |
| 0.099716 | 0.0312   | 0.198483 | 1.55E-05 | 0.377691 | 2.78E-17 | 0.160778 | 0.00049  | 0.637948 |
| 0.049072 | 0.28994  | 0.161304 | 0.00047  | 0.35463  | 2.76E-15 | 0.255661 | 2.10E-08 | 0.828417 |
| 0.014009 | 0.7627   | -0.03942 | 0.39538  | 0.238918 | 1.74E-07 | -0.03851 | 0.40638  | 0.727448 |
| 0.095013 | 0.04013  | 0.502919 | 2.63E-31 | 0.567426 | 3.78E-41 | 0.520961 | 7.54E-34 | 0.749834 |
| 0.05058  | 0.27536  | 0.104451 | 0.02399  | 0.127142 | 0.00593  | 0.094832 | 0.04052  | 0.499995 |
| 0.030869 | 0.50576  | 0.133931 | 0.00374  | 0.173104 | 0.00017  | 0.224207 | 9.85E-07 | 0.697094 |
| 0.059236 | 0.20132  | 0.132412 | 0.00415  | 0.299847 | 3.71E-11 | 0.19717  | 1.77E-05 | 0.768182 |
| -0.01838 | 0.69199  | 0.089014 | 0.05457  | 0.221478 | 1.34E-06 | 0.176246 | 0.00013  | 0.855939 |
| 0.057012 | 0.2188   | 0.387802 | 3.29E-18 | 0.262829 | 8.11E-09 | 0.41308  | 1.14E-20 | 0.600735 |
| 0.06104  | 0.18791  | 0.30038  | 3.41E-11 | 0.450641 | 9.77E-25 | 0.300953 | 3.12E-11 | 0.652608 |
| -0.05334 | 0.25001  | 0.188873 | 4.00E-05 | 0.13734  | 0.00294  | 0.321336 | 1.12E-12 | 0.700886 |
| -0.01417 | 0.75999  | 0.140853 | 0.00228  | 0.261478 | 9.72E-09 | 0.245052 | 8.17E-08 | 0.901886 |
| 0.001675 | 0.97121  | 0.16933  | 0.00024  | 0.311105 | 6.14E-12 | 0.259907 | 1.20E-08 | 0.914961 |
| -0.0238  | 0.60788  | 0.10758  | 0.02005  | 0.085497 | 0.06489  | 0.251846 | 3.45E-08 | 0.760721 |
| 0.034154 | 0.46155  | 0.194455 | 2.32E-05 | 0.395051 | 6.81E-19 | 0.279295 | 8.14E-10 | 0.873151 |
| -0.02584 | 0.57756  | 0.079476 | 0.08623  | 0.197808 | 1.66E-05 | 0.174158 | 0.00016  | 0.891009 |
| 0.027848 | 0.5483   | 0.227838 | 6.49E-07 | 0.408383 | 3.38E-20 | 0.299361 | 4.00E-11 | 0.874979 |
| 0.013581 | 0.76973  | 0.293713 | 9.58E-11 | 0.41652  | 5.06E-21 | 0.376424 | 3.62E-17 | 0.936013 |
| 0.024257 | 0.60107  | 0.151169 | 0.00105  | 0.321715 | 1.05E-12 | 0.123034 | 0.00777  | 0.741621 |

|          |         |          |          |          |          |          |          |          |
|----------|---------|----------|----------|----------|----------|----------|----------|----------|
| 0.000911 | 0.98433 | 0.023767 | 0.60843  | 0.118798 | 0.01019  | 0.103317 | 0.02557  | 0.467955 |
| -0.00772 | 0.86792 | 0.291536 | 1.33E-10 | 0.12694  | 0.00601  | 0.370701 | 1.17E-16 | 0.617489 |
| 0.035917 | 0.43873 | 0.187261 | 4.66E-05 | 0.217858 | 2.01E-06 | 0.214349 | 2.95E-06 | 0.682345 |
| -0.06726 | 0.14672 | 0.239815 | 1.56E-07 | 0.076919 | 0.09686  | 0.355164 | 2.49E-15 | 0.666039 |
| 0.087608 | 0.05852 | 0.296322 | 6.42E-11 | 0.356143 | 2.06E-15 | 0.352634 | 4.04E-15 | 0.825879 |
| 0.075893 | 0.10141 | 0.326621 | 4.52E-13 | 0.471199 | 3.47E-27 | 0.402902 | 1.18E-19 | 0.640368 |
| -0.0464  | 0.31701 | 0.030042 | 0.51723  | 0.004582 | 0.92133  | 0.222385 | 1.21E-06 | 0.523231 |
| 0.003966 | 0.93188 | 0.169504 | 0.00023  | 0.21925  | 1.72E-06 | 0.30085  | 3.17E-11 | 0.906447 |
| 0.094666 | 0.04087 | 0.161407 | 0.00046  | 0.261474 | 9.73E-09 | 0.252308 | 3.25E-08 | 0.663497 |
| -0.01645 | 0.72291 | 0.194272 | 2.36E-05 | 0.335218 | 9.99E-14 | 0.30841  | 9.51E-12 | 0.729705 |
| 0.044115 | 0.34148 | 0.2723   | 2.20E-09 | 0.312321 | 5.03E-12 | 0.370828 | 1.14E-16 | 0.880056 |
| 0.061445 | 0.18499 | 0.352195 | 4.39E-15 | 0.409795 | 2.44E-20 | 0.423007 | 1.07E-21 | 0.914191 |
| 0.029506 | 0.52474 | 0.211751 | 3.91E-06 | 0.302508 | 2.44E-11 | 0.273513 | 1.86E-09 | 0.86597  |
| 0.032826 | 0.47915 | 0.361652 | 7.08E-16 | 0.314648 | 3.43E-12 | 0.422434 | 1.23E-21 | 0.826457 |
| 0.064638 | 0.16315 | 0.278459 | 9.19E-10 | 0.392913 | 1.09E-18 | 0.398036 | 3.52E-19 | 0.614816 |
| 0.070937 | 0.12582 | 0.353716 | 3.29E-15 | 0.335839 | 8.94E-14 | 0.484382 | 7.59E-29 | 0.759181 |
| 0.063194 | 0.17277 | 0.257717 | 1.60E-08 | 0.439791 | 1.65E-23 | 0.331764 | 1.84E-13 | 0.855987 |
| 0.030885 | 0.50553 | 0.233393 | 3.38E-07 | 0.396348 | 5.12E-19 | 0.289509 | 1.81E-10 | 0.877979 |
| 0.038806 | 0.40278 | 0.143918 | 0.00182  | 0.360951 | 8.12E-16 | 0.211422 | 4.05E-06 | 0.797221 |
| 0.146112 | 0.00155 | 0.32984  | 2.58E-13 | 0.458963 | 1.04E-25 | 0.385481 | 5.41E-18 | 0.710615 |
| 0.011283 | 0.80787 | 0.176834 | 0.00012  | 0.314971 | 3.25E-12 | 0.265534 | 5.62E-09 | 0.908694 |
| 0.001092 | 0.98122 | 0.320677 | 1.25E-12 | 0.3457   | 1.48E-14 | 0.439911 | 1.60E-23 | 0.737685 |
| 0.038857 | 0.40216 | 0.322845 | 8.65E-13 | 0.26595  | 5.31E-09 | 0.350804 | 5.71E-15 | 0.553224 |
| 0.069664 | 0.13278 | 0.17885  | 0.0001   | 0.412591 | 1.28E-20 | 0.221572 | 1.33E-06 | 0.836579 |
| 0.171061 | 0.0002  | 0.482701 | 1.25E-28 | 0.646042 | 1.62E-56 | 0.462285 | 4.20E-26 | 0.811428 |
| 0.079936 | 0.08443 | 0.198428 | 1.56E-05 | 0.245876 | 7.36E-08 | 0.229067 | 5.63E-07 | 0.640285 |
| 0.057035 | 0.21861 | 0.298044 | 4.91E-11 | 0.462071 | 4.45E-26 | 0.288742 | 2.03E-10 | 0.756427 |
| 0.116383 | 0.01184 | 0.328141 | 3.47E-13 | 0.397948 | 3.59E-19 | 0.400571 | 2.00E-19 | 0.775881 |
| 0.124051 | 0.00728 | 0.371465 | 9.99E-17 | 0.431623 | 1.29E-22 | 0.40733  | 4.31E-20 | 0.626289 |
| 0.130129 | 0.00485 | 0.340408 | 3.92E-14 | 0.499327 | 8.11E-31 | 0.373758 | 6.26E-17 | 0.811481 |
| 0.119786 | 0.00957 | 0.315854 | 2.81E-12 | 0.364061 | 4.40E-16 | 0.291529 | 1.33E-10 | 0.660169 |
| 0.125476 | 0.00663 | 0.2193   | 1.71E-06 | 0.323104 | 8.28E-13 | 0.396188 | 5.30E-19 | 0.503171 |
| -0.0102  | 0.82598 | 0.092941 | 0.0447   | 0.213156 | 3.36E-06 | 0.252386 | 3.22E-08 | 0.505983 |
| 0.110743 | 0.01666 | 0.371245 | 1.04E-16 | 0.452788 | 5.52E-25 | 0.433646 | 7.81E-23 | 0.685898 |
| -0.01022 | 0.82564 | 0.389692 | 2.19E-18 | 0.379469 | 1.92E-17 | 0.411287 | 1.73E-20 | 0.668973 |
| 0.037433 | 0.41963 | 0.071278 | 0.12401  | 0.268824 | 3.57E-09 | 0.104744 | 0.02359  | 0.508006 |
| 0.090218 | 0.05137 | 0.446984 | 2.56E-24 | 0.466376 | 1.35E-26 | 0.377177 | 3.10E-17 | 0.628023 |
| 0.046029 | 0.32093 | 0.399418 | 2.59E-19 | 0.42323  | 1.02E-21 | 0.527088 | 9.52E-35 | 0.796119 |
| -0.06716 | 0.14733 | 0.019308 | 0.67729  | 0.102889 | 0.02619  | 0.117634 | 0.01096  | 0.652501 |
| 0.063039 | 0.17383 | 0.234195 | 3.07E-07 | 0.368136 | 1.96E-16 | 0.226995 | 7.15E-07 | 0.812248 |
| 0.127383 | 0.00584 | 0.28545  | 3.31E-10 | 0.448665 | 1.65E-24 | 0.322402 | 9.33E-13 | 0.671449 |
| 0.001754 | 0.96985 | -0.08921 | 0.05405  | 0.138778 | 0.00265  | -0.23377 | 3.24E-07 | 0.140148 |
| 0.029918 | 0.51897 | 0.293913 | 9.29E-11 | 0.090646 | 0.05027  | 0.287834 | 2.33E-10 | -0.03812 |
| 0.004112 | 0.92937 | -0.10155 | 0.02822  | 0.128256 | 0.00551  | -0.17014 | 0.00022  | 0.077127 |
| 0.020815 | 0.65368 | -0.04451 | 0.33716  | 0.222466 | 1.20E-06 | -0.12755 | 0.00577  | 0.207465 |

|           |         |          |          |          |          |          |          |          |
|-----------|---------|----------|----------|----------|----------|----------|----------|----------|
| 0.072816  | 0.11608 | -0.02917 | 0.52944  | 0.264768 | 6.23E-09 | -0.13128 | 0.00449  | 0.142232 |
| -0.05291  | 0.2538  | 0.069398 | 0.13427  | -0.2604  | 1.12E-08 | 0.065633 | 0.15676  | -0.22629 |
| -0.01427  | 0.75846 | -0.01745 | 0.70688  | 0.095374 | 0.03938  | -0.12544 | 0.00664  | -0.036   |
| 0.01881   | 0.68515 | -0.01218 | 0.79295  | 0.249523 | 4.64E-08 | -0.1043  | 0.02419  | 0.149798 |
| 0.070393  | 0.12876 | -0.10078 | 0.02943  | 0.170242 | 0.00022  | -0.12918 | 0.00518  | 0.239217 |
| 0.030303  | 0.5136  | 0.00203  | 0.9651   | 0.14021  | 0.00239  | -0.00895 | 0.84697  | -0.03872 |
| 0.05485   | 0.2368  | 0.016067 | 0.72912  | 0.19255  | 2.80E-05 | -0.11605 | 0.01208  | 0.040504 |
| -0.0383   | 0.40895 | -0.13281 | 0.00404  | -0.06525 | 0.15918  | -0.18136 | 8.10E-05 | 0.013621 |
| -0.00951  | 0.83755 | -0.10039 | 0.03008  | 0.137923 | 0.00282  | -0.14803 | 0.00134  | 0.117151 |
| 0.049874  | 0.28212 | -0.05035 | 0.27752  | 0.243603 | 9.78E-08 | -0.10697 | 0.02078  | 0.290078 |
| 0.037268  | 0.42169 | 0.015666 | 0.73562  | 0.261597 | 9.57E-09 | -0.00056 | 0.99033  | 0.318149 |
| -0.03872  | 0.40377 | -0.11068 | 0.01672  | 0.087022 | 0.06023  | -0.14277 | 0.00198  | 0.115063 |
| 0.072582  | 0.11726 | 0.041422 | 0.37179  | 0.298541 | 4.55E-11 | -0.03732 | 0.42103  | 0.162798 |
| -0.11301  | 0.01455 | -0.08892 | 0.05482  | 0.021995 | 0.63542  | -0.17477 | 0.00015  | -0.10069 |
| 0.013575  | 0.76984 | -0.07837 | 0.0907   | 0.070405 | 0.1287   | -0.1331  | 0.00396  | 0.165613 |
| -0.12937  | 0.00511 | -0.10685 | 0.02092  | -0.02624 | 0.57159  | -0.12126 | 0.00871  | 0.048821 |
| 0.037123  | 0.4235  | -0.0526  | 0.25662  | 0.105817 | 0.0222   | -0.12759 | 0.00576  | 0.079974 |
| 0.09753   | 0.03512 | 0.125446 | 0.00664  | 0.205044 | 7.94E-06 | 0.082071 | 0.07643  | 0.1217   |
| 0.021296  | 0.64622 | -0.08836 | 0.05637  | 0.20696  | 6.50E-06 | -0.20298 | 9.83E-06 | 0.158502 |
| -0.02919  | 0.52926 | -0.15114 | 0.00105  | 0.055238 | 0.23349  | -0.10098 | 0.02911  | 0.270612 |
| 0.060171  | 0.19429 | -0.01287 | 0.78156  | 0.208766 | 5.37E-06 | -0.09055 | 0.05051  | 0.145058 |
| 0.003838  | 0.93408 | -0.12134 | 0.00867  | 0.108041 | 0.01952  | -0.1907  | 3.35E-05 | 0.13039  |
| -0.00572  | 0.90195 | -0.18384 | 6.44E-05 | 0.077687 | 0.09357  | -0.25907 | 1.34E-08 | 0.147145 |
| 0.046596  | 0.31499 | -0.05477 | 0.23744  | 0.195892 | 2.01E-05 | -0.10016 | 0.03045  | 0.103742 |
| 0.05558   | 0.2306  | -0.11541 | 0.01257  | 0.188654 | 4.08E-05 | -0.17625 | 0.00013  | 0.253571 |
| 0.006891  | 0.88194 | -0.20925 | 5.10E-06 | -0.03646 | 0.43179  | -0.16592 | 0.00032  | 0.17283  |
| 0.006291  | 0.89214 | -0.17145 | 0.0002   | 0.121541 | 0.00856  | -0.15614 | 0.00071  | 0.305248 |
| -0.00439  | 0.92466 | -0.10005 | 0.03063  | 0.090557 | 0.0505   | -0.06322 | 0.1726   | 0.308513 |
| 0.007659  | 0.86889 | -0.00668 | 0.88561  | 0.172546 | 0.00018  | -0.11377 | 0.0139   | 0.039163 |
| 0.011581  | 0.8029  | -0.06327 | 0.17223  | 0.032568 | 0.48262  | -0.05352 | 0.24833  | 0.172822 |
| -0.05401  | 0.24402 | -0.07188 | 0.12084  | 0.059894 | 0.19635  | -0.08037 | 0.08276  | 0.253143 |
| -0.01791  | 0.69941 | -0.06771 | 0.14399  | 0.063596 | 0.17006  | -0.11394 | 0.01375  | 0.237252 |
| 0.002616  | 0.95503 | -0.15453 | 0.00081  | 0.065929 | 0.15489  | -0.22271 | 1.17E-06 | 0.058462 |
| -0.03845  | 0.40706 | -0.06163 | 0.18366  | 0.110443 | 0.01696  | -0.13526 | 0.0034   | 0.193175 |
| -0.00085  | 0.98531 | -0.00507 | 0.913    | 0.033583 | 0.46907  | -0.06041 | 0.19255  | 0.152769 |
| 0.009559  | 0.83677 | -0.13367 | 0.0038   | 0.059566 | 0.19882  | -0.12301 | 0.00779  | 0.251128 |
| -0.02089  | 0.65246 | 0.18744  | 4.58E-05 | -0.08623 | 0.0626   | 0.201992 | 1.09E-05 | -0.04276 |
| 0.035419  | 0.44511 | 0.004504 | 0.92266  | 0.149786 | 0.00117  | -0.11041 | 0.01699  | 0.083807 |
| -9.69E-05 | 0.99833 | 0.014343 | 0.75722  | 0.177345 | 0.00012  | -0.06358 | 0.17017  | 0.148746 |
| 0.036536  | 0.43088 | -0.03559 | 0.44297  | 0.210477 | 4.48E-06 | -0.1838  | 6.46E-05 | 0.111807 |
| -0.00121  | 0.97924 | -0.11241 | 0.01508  | 0.010657 | 0.81833  | -0.20505 | 7.94E-06 | 0.043123 |
| -0.04261  | 0.35821 | 0.028857 | 0.5339   | 0.084399 | 0.06842  | -0.04864 | 0.29423  | 0.051859 |
| 0.016015  | 0.72996 | -0.10169 | 0.028    | 0.138014 | 0.0028   | -0.17469 | 0.00015  | 0.117286 |
| 1.39E-05  | 0.99976 | -0.15158 | 0.00102  | 0.098151 | 0.03396  | -0.2423  | 1.15E-07 | 0.086436 |
| 0.042836  | 0.35567 | -0.09893 | 0.03257  | 0.135152 | 0.00343  | -0.24135 | 1.29E-07 | 0.16282  |

|          |         |          |          |          |          |          |          |          |
|----------|---------|----------|----------|----------|----------|----------|----------|----------|
| -0.03221 | 0.48747 | -0.08983 | 0.05239  | 0.168627 | 0.00025  | -0.12117 | 0.00876  | 0.156354 |
| -0.0449  | 0.33293 | -0.10414 | 0.02441  | 0.08011  | 0.08375  | -0.10597 | 0.022    | 0.193556 |
| 0.002355 | 0.95953 | -0.05624 | 0.22509  | 0.187104 | 4.73E-05 | -0.13295 | 0.004    | 0.127665 |
| -0.01661 | 0.72039 | -0.03202 | 0.48998  | 0.153735 | 0.00086  | -0.10177 | 0.02787  | 0.119266 |
| -0.05227 | 0.25957 | 0.054637 | 0.23862  | 0.217836 | 2.01E-06 | 0.015668 | 0.73558  | 0.247019 |
| 0.020819 | 0.65362 | -0.06035 | 0.19295  | 0.060484 | 0.19197  | -0.1755  | 0.00014  | -0.06352 |
| 0.0743   | 0.10881 | -0.07266 | 0.11688  | 0.29733  | 5.49E-11 | -0.12623 | 0.00631  | 0.207316 |
| 0.011828 | 0.79878 | -0.14874 | 0.00127  | 0.132926 | 0.00401  | -0.25467 | 2.39E-08 | 0.184516 |
| -0.13075 | 0.00465 | -0.10259 | 0.02662  | 0.047714 | 0.30352  | -0.12169 | 0.00848  | 0.098944 |
| -0.05748 | 0.21503 | -0.18368 | 6.53E-05 | 0.022296 | 0.6308   | -0.25185 | 3.44E-08 | 0.111051 |
| -0.10078 | 0.02944 | -0.18989 | 3.63E-05 | -0.00333 | 0.94277  | -0.16462 | 0.00035  | 0.160798 |
| 0.011394 | 0.80602 | -0.15387 | 0.00085  | 0.023123 | 0.61818  | -0.24086 | 1.37E-07 | 0.107754 |
| 0.003392 | 0.94171 | -0.05369 | 0.24688  | 0.04085  | 0.37844  | -0.121   | 0.00886  | 0.025143 |
| -0.02955 | 0.52416 | -0.16787 | 0.00027  | 0.013579 | 0.76977  | -0.15432 | 0.00082  | 0.13059  |
| -0.04159 | 0.36982 | -0.13684 | 0.00305  | 0.113016 | 0.01454  | -0.1631  | 0.0004   | 0.184795 |
| 0.007548 | 0.87078 | -0.16446 | 0.00036  | 0.089295 | 0.05381  | -0.20144 | 1.15E-05 | 0.047474 |
| -0.02878 | 0.53503 | -0.07419 | 0.10936  | 0.07815  | 0.09162  | -0.10899 | 0.01847  | 0.261568 |
| -0.01748 | 0.70639 | -0.12979 | 0.00497  | 0.069553 | 0.1334   | -0.236   | 2.48E-07 | 0.013659 |
| 0.036523 | 0.43104 | -0.05859 | 0.2063   | 0.230579 | 4.72E-07 | -0.11958 | 0.00969  | 0.287634 |
| 0.053845 | 0.24551 | 0.135546 | 0.00334  | 0.278993 | 8.51E-10 | 0.1639   | 0.00038  | 0.220137 |
| -0.00017 | 0.99711 | -0.06339 | 0.17142  | 0.193792 | 2.48E-05 | -0.0825  | 0.07491  | 0.270978 |
| -0.0616  | 0.18391 | -0.00479 | 0.91774  | 0.159833 | 0.00053  | -0.1405  | 0.00234  | 0.063874 |
| -0.04451 | 0.33721 | -0.1754  | 0.00014  | 0.04175  | 0.36802  | -0.21352 | 3.23E-06 | 0.086169 |
| 0.082968 | 0.07326 | -0.09751 | 0.03515  | 0.138726 | 0.00266  | -0.06773 | 0.14393  | 0.236348 |
| 0.118562 | 0.01034 | 0.009075 | 0.84493  | 0.261069 | 1.03E-08 | -0.0357  | 0.44149  | 0.190174 |
| -0.06298 | 0.17423 | -0.00802 | 0.86272  | 0.092721 | 0.04521  | -0.02752 | 0.55307  | 0.023712 |
| 0.009773 | 0.83317 | -0.0413  | 0.37315  | 0.118377 | 0.01046  | -0.10132 | 0.02857  | 0.054458 |
| -0.01768 | 0.70311 | -0.21592 | 2.49E-06 | 0.057011 | 0.2188   | -0.25813 | 1.52E-08 | 0.10152  |
| 0.027536 | 0.5528  | -0.10777 | 0.01984  | 0.167541 | 0.00028  | -0.1877  | 4.47E-05 | 0.168418 |
| -0.01278 | 0.78298 | -0.14439 | 0.00176  | 0.057734 | 0.21301  | -0.12847 | 0.00543  | 0.238223 |
| 0.009805 | 0.83264 | -0.00735 | 0.87417  | 0.258907 | 1.37E-08 | -0.06786 | 0.14313  | 0.309307 |
| -0.00768 | 0.86856 | 0.089675 | 0.05279  | 0.208951 | 5.27E-06 | -0.00087 | 0.98504  | 0.074997 |
| -0.02314 | 0.618   | -0.11262 | 0.01489  | 0.0909   | 0.04963  | -0.22993 | 5.09E-07 | 0.016491 |
| -0.07147 | 0.12297 | -0.13662 | 0.00309  | 0.056132 | 0.226    | -0.14297 | 0.00195  | 0.278005 |
| 0.022108 | 0.63369 | -0.19444 | 2.33E-05 | 0.070996 | 0.12551  | -0.25054 | 4.08E-08 | 0.092002 |
| -0.03194 | 0.49109 | -0.02464 | 0.59536  | 0.217098 | 2.18E-06 | -0.07478 | 0.10654  | 0.220851 |
| 0.037689 | 0.41646 | -0.01162 | 0.80219  | 0.130756 | 0.00465  | -0.08717 | 0.0598   | 0.069069 |
| 0.06307  | 0.17362 | -0.04543 | 0.32725  | 0.100379 | 0.03009  | -0.04956 | 0.28521  | 0.026158 |
| -0.06474 | 0.1625  | 0.162719 | 0.00041  | 0.062892 | 0.17484  | 0.275889 | 1.33E-09 | 0.109804 |
| -0.01171 | 0.80082 | -0.15304 | 0.00091  | 0.134536 | 0.00358  | -0.27213 | 2.26E-09 | 0.128901 |
| 0.012305 | 0.79085 | -0.07179 | 0.1213   | -0.02198 | 0.63567  | -0.13201 | 0.00427  | 0.038187 |
| 0.023106 | 0.61845 | -0.02706 | 0.55976  | 0.27225  | 2.22E-09 | -0.09968 | 0.03126  | 0.226115 |
| 0.078328 | 0.09089 | -0.07023 | 0.12964  | 0.165116 | 0.00034  | -0.07006 | 0.13059  | 0.230867 |
| -0.01472 | 0.75102 | -0.15801 | 0.00061  | 0.0482   | 0.29861  | -0.22291 | 1.14E-06 | 0.11585  |
| -0.09282 | 0.04498 | -0.13499 | 0.00347  | 0.00275  | 0.95274  | -0.0838  | 0.07041  | 0.159534 |



|          |         |          |          |          |          |          |          |          |
|----------|---------|----------|----------|----------|----------|----------|----------|----------|
| -0.09501 | 0.04013 | -0.25834 | 1.48E-08 | -0.13206 | 0.00425  | -0.17246 | 0.00018  | 0.052234 |
| -0.04545 | 0.32703 | 0.055201 | 0.23381  | 0.117159 | 0.01128  | 0.035032 | 0.4501   | 0.227782 |
| -0.04572 | 0.32416 | -0.06023 | 0.19387  | 0.126789 | 0.00608  | -0.10068 | 0.0296   | 0.250699 |
| -0.07314 | 0.11448 | -0.00083 | 0.9858   | 0.090597 | 0.05039  | -0.07467 | 0.10708  | 0.054307 |
| -0.00847 | 0.85508 | -0.18375 | 6.49E-05 | 0.07621  | 0.09999  | -0.23665 | 2.29E-07 | 0.218828 |
| -0.06693 | 0.14871 | -0.18707 | 4.75E-05 | -0.02021 | 0.66309  | -0.21071 | 4.37E-06 | 0.106054 |
| 0.065647 | 0.15667 | -0.04415 | 0.34108  | 0.230392 | 4.82E-07 | -0.08092 | 0.08065  | 0.092575 |
| -0.08163 | 0.07801 | -0.05262 | 0.2564   | 0.17336  | 0.00017  | -0.10486 | 0.02344  | 0.102068 |
| -0.0576  | 0.21404 | -0.05779 | 0.21256  | 0.042009 | 0.36504  | -0.12092 | 0.0089   | 0.119336 |
| -0.15506 | 0.00077 | -0.13063 | 0.00469  | -0.05758 | 0.21426  | -0.10667 | 0.02113  | 0.089013 |
| -0.01704 | 0.71342 | -0.15355 | 0.00087  | 0.143198 | 0.00192  | -0.17333 | 0.00017  | 0.212814 |
| 0.042969 | 0.35419 | -0.05441 | 0.24058  | 0.086628 | 0.06141  | -0.08554 | 0.06476  | -0.119   |
| 0.027492 | 0.55343 | -0.12576 | 0.0065   | 0.032895 | 0.47823  | -0.19751 | 1.71E-05 | 0.097887 |
| -0.02353 | 0.61204 | -0.15376 | 0.00086  | 0.060779 | 0.18981  | -0.23698 | 2.20E-07 | 0.112187 |
| -0.02169 | 0.64019 | -0.09561 | 0.03888  | 0.192735 | 2.75E-05 | -0.13778 | 0.00285  | 0.199485 |
| 0.095551 | 0.03901 | 0.066354 | 0.15224  | 0.29499  | 7.87E-11 | 0.049699 | 0.28382  | 0.17806  |
| 0.056778 | 0.22069 | 0.112578 | 0.01493  | 0.282083 | 5.44E-10 | 0.115496 | 0.01251  | 0.196439 |
| 0.062711 | 0.17609 | -0.12944 | 0.00509  | 0.056299 | 0.22462  | -0.19125 | 3.18E-05 | 0.177277 |
| 0.029804 | 0.52056 | -0.11564 | 0.01239  | 0.185046 | 5.75E-05 | -0.16664 | 0.0003   | 0.081082 |
| -0.00436 | 0.92509 | -0.05805 | 0.21051  | 0.099722 | 0.03119  | -0.20306 | 9.76E-06 | 0.02957  |
| -0.04817 | 0.2989  | -0.10406 | 0.02452  | -0.04331 | 0.35035  | -0.1644  | 0.00036  | 0.097218 |
| -0.03279 | 0.47961 | -0.0743  | 0.10879  | 0.012347 | 0.79014  | -0.18583 | 5.34E-05 | -0.09976 |
| 0.002911 | 0.94997 | -0.0755  | 0.10319  | 0.168731 | 0.00025  | -0.0796  | 0.08576  | 0.235461 |
| 0.025715 | 0.57937 | -0.02795 | 0.5468   | 0.19788  | 1.65E-05 | -0.05217 | 0.26054  | 0.288033 |
| -0.0596  | 0.19855 | 0.045088 | 0.33092  | 0.190642 | 3.37E-05 | 0.055045 | 0.23513  | 0.243504 |
| -0.08954 | 0.05316 | -0.06329 | 0.1721   | -0.00574 | 0.9015   | -0.09541 | 0.0393   | 0.132501 |
| -0.04508 | 0.331   | 0.015143 | 0.74413  | -0.18205 | 7.60E-05 | 0.03307  | 0.47589  | -0.13729 |
| 0.016994 | 0.71416 | -0.19853 | 1.55E-05 | 0.135923 | 0.00325  | -0.26466 | 6.32E-09 | 0.224275 |
| 0.033953 | 0.46418 | -0.10206 | 0.02743  | 0.189969 | 3.60E-05 | -0.20356 | 9.26E-06 | 0.229118 |
| 0.026589 | 0.56654 | -0.0377  | 0.41637  | 0.048416 | 0.29645  | -0.05184 | 0.26358  | 0.144223 |
| 0.053375 | 0.24966 | 0.009463 | 0.83839  | 0.266173 | 5.15E-09 | -0.056   | 0.22707  | 0.265953 |
| -0.02625 | 0.57143 | -0.02532 | 0.58524  | 0.127377 | 0.00584  | -0.04717 | 0.30906  | 0.046214 |
| 0.018015 | 0.69779 | -0.02098 | 0.65115  | 0.191548 | 3.09E-05 | -0.0411  | 0.37554  | 0.186733 |
| 0.041339 | 0.37275 | -0.12998 | 0.0049   | 0.118731 | 0.01023  | -0.17654 | 0.00013  | 0.262148 |
| 0.047049 | 0.31031 | -0.13079 | 0.00464  | 0.156626 | 0.00068  | -0.24242 | 1.13E-07 | 0.243091 |
| -0.02543 | 0.58365 | -0.0871  | 0.05999  | 0.126763 | 0.00609  | -0.13584 | 0.00327  | 0.094913 |
| 0.003035 | 0.94785 | 0.061909 | 0.18169  | 0.215854 | 2.50E-06 | 0.137371 | 0.00293  | 0.34551  |
| 0.091118 | 0.04908 | 0.03089  | 0.50547  | 0.219377 | 1.70E-06 | -0.11655 | 0.01172  | 0.079895 |
| -0.00064 | 0.98898 | -0.04317 | 0.35198  | 0.082328 | 0.07551  | -0.14018 | 0.0024   | -0.01829 |
| 0.097973 | 0.03429 | 0.065521 | 0.15746  | 0.364674 | 3.90E-16 | 0.032248 | 0.48693  | 0.254119 |
| 0.005382 | 0.90765 | -0.18547 | 5.52E-05 | 0.138874 | 0.00263  | -0.14523 | 0.00165  | 0.19294  |
| 0.022679 | 0.62495 | -0.11533 | 0.01263  | 0.191787 | 3.02E-05 | -0.13693 | 0.00303  | 0.143316 |
| 0.030757 | 0.50731 | -0.1447  | 0.00172  | 0.103595 | 0.02517  | -0.18034 | 8.89E-05 | 0.125932 |
| 0.046667 | 0.31426 | 0.096771 | 0.03657  | 0.307616 | 1.08E-11 | 0.107677 | 0.01994  | 0.273092 |
| 0.060758 | 0.18996 | 0.080798 | 0.08112  | 0.267819 | 4.11E-09 | -0.01547 | 0.73888  | 0.277278 |

|          |         |          |          |          |          |          |          |          |
|----------|---------|----------|----------|----------|----------|----------|----------|----------|
| 0.039784 | 0.39101 | 0.039789 | 0.39096  | 0.300686 | 3.25E-11 | -0.01151 | 0.804    | 0.159565 |
| -0.05344 | 0.24913 | -0.19066 | 3.36E-05 | -0.13214 | 0.00423  | -0.26045 | 1.12E-08 | -0.1025  |
| 0.020088 | 0.66502 | 0.074156 | 0.1095   | 0.207663 | 6.04E-06 | -0.00219 | 0.96239  | 0.181604 |
| 0.02136  | 0.64522 | 0.08606  | 0.06314  | 0.28102  | 6.34E-10 | 0.054002 | 0.24414  | 0.476631 |
| 0.071796 | 0.12129 | 0.077875 | 0.09278  | 0.289512 | 1.81E-10 | 0.000805 | 0.98617  | 0.224667 |
| 0.012872 | 0.78145 | 0.028722 | 0.53582  | 0.151069 | 0.00106  | -0.16216 | 0.00043  | -0.01785 |
| -0.03625 | 0.4345  | -0.20932 | 5.07E-06 | 0.065164 | 0.15975  | -0.17502 | 0.00014  | 0.260372 |
| 0.084788 | 0.06715 | -0.03024 | 0.51441  | 0.139603 | 0.0025   | -0.0687  | 0.13826  | 0.187302 |
| -0.13031 | 0.00479 | -0.25138 | 3.66E-08 | -0.11865 | 0.01028  | -0.29235 | 1.18E-10 | 0.136948 |
| -0.07555 | 0.10299 | -0.04303 | 0.35349  | 0.060027 | 0.19536  | -0.13036 | 0.00478  | 0.047009 |
| 0.030436 | 0.51175 | -0.07072 | 0.12701  | 0.019504 | 0.67419  | -0.11751 | 0.01104  | 0.064031 |
| -0.01737 | 0.70805 | -0.12793 | 0.00563  | 0.152775 | 0.00093  | -0.20201 | 1.09E-05 | 0.067975 |
| -0.00394 | 0.93229 | -0.1138  | 0.01387  | 0.040194 | 0.38615  | -0.156   | 0.00072  | 0.138772 |
| 0.006379 | 0.89065 | -0.08884 | 0.05505  | 0.145563 | 0.00161  | -0.11373 | 0.01393  | 0.221955 |
| 0.048548 | 0.29513 | -0.06049 | 0.1919   | 0.202339 | 1.05E-05 | -0.08046 | 0.08241  | 0.220958 |
| -0.01777 | 0.70176 | -0.16826 | 0.00026  | 0.020942 | 0.65171  | -0.23861 | 1.81E-07 | -0.03996 |
| -0.06724 | 0.14684 | -0.16019 | 0.00051  | -0.00469 | 0.9195   | -0.23934 | 1.65E-07 | -0.00336 |
| -0.01084 | 0.81534 | -0.25986 | 1.21E-08 | 0.00265  | 0.95446  | -0.24213 | 1.17E-07 | 0.194858 |
| 0.116818 | 0.01153 | -0.01864 | 0.68785  | 0.284625 | 3.74E-10 | -0.02928 | 0.52796  | 0.3412   |
| -0.06374 | 0.16907 | -0.16334 | 0.00039  | 0.02238  | 0.62953  | -0.06229 | 0.17904  | 0.179771 |
| 0.010281 | 0.82464 | -0.08179 | 0.07745  | 0.14955  | 0.00119  | -0.01072 | 0.81733  | 0.270498 |
| -0.01878 | 0.68561 | -0.08553 | 0.06479  | 0.125135 | 0.00678  | -0.11125 | 0.01616  | 0.230758 |
| 0.051013 | 0.27126 | -0.04977 | 0.28308  | 0.172862 | 0.00017  | -0.14918 | 0.00122  | 0.240809 |
| -0.01379 | 0.7663  | 0.045359 | 0.32803  | 0.234729 | 2.89E-07 | -0.00657 | 0.88735  | 0.322053 |
| -0.02098 | 0.65116 | -0.05066 | 0.27456  | 0.015704 | 0.735    | -0.15639 | 0.00069  | -0.14157 |
| 0.035203 | 0.44789 | -0.00664 | 0.88624  | 0.239391 | 1.64E-07 | -0.10924 | 0.0182   | 0.208034 |
| -0.06522 | 0.1594  | 0.078762 | 0.08911  | -0.05024 | 0.27864  | 0.084286 | 0.06879  | -0.04017 |
| -0.02787 | 0.54795 | -0.18024 | 8.97E-05 | 0.10975  | 0.01767  | -0.20346 | 9.36E-06 | 0.273943 |
| 0.004408 | 0.9243  | -0.25564 | 2.11E-08 | -0.03986 | 0.39008  | -0.2058  | 7.34E-06 | 0.202759 |
| -0.14668 | 0.00148 | -0.08031 | 0.08296  | -0.02074 | 0.65479  | -0.15077 | 0.00108  | 0.036366 |
| 0.00763  | 0.86938 | -0.11098 | 0.01642  | 0.089189 | 0.0541   | -0.12669 | 0.00612  | 0.086271 |
| -0.06888 | 0.13722 | 0.159083 | 0.00056  | -0.11325 | 0.01434  | 0.165649 | 0.00032  | -0.0757  |
| 0.029696 | 0.52207 | -0.01748 | 0.70629  | 0.12009  | 0.00939  | -0.09106 | 0.04923  | 0.209826 |
| -0.01708 | 0.7128  | -0.13566 | 0.00331  | 0.079851 | 0.08476  | -0.23607 | 2.46E-07 | 0.135006 |
| 0.115363 | 0.01261 | 0.098096 | 0.03406  | 0.182542 | 7.26E-05 | -0.04794 | 0.30127  | 0.055164 |
| 0.073291 | 0.11372 | -0.02298 | 0.62041  | 0.280629 | 6.71E-10 | -0.00515 | 0.91159  | 0.338848 |
| -0.00105 | 0.98202 | -0.18875 | 4.04E-05 | 0.098506 | 0.03332  | -0.16983 | 0.00023  | 0.213256 |
| 0.013346 | 0.77362 | -0.15739 | 0.00064  | 0.13892  | 0.00262  | -0.13706 | 0.003    | 0.304381 |
| -0.01671 | 0.71877 | -0.18901 | 3.94E-05 | 0.095913 | 0.03827  | -0.18258 | 7.24E-05 | 0.190671 |
| -0.06719 | 0.14714 | -0.0263  | 0.57082  | 0.057666 | 0.21355  | -0.10581 | 0.0222   | 0.070306 |
| -0.0299  | 0.51921 | -0.13696 | 0.00302  | 0.099104 | 0.03226  | -0.2811  | 6.27E-10 | 0.158802 |
| 0.057663 | 0.21357 | -0.13157 | 0.0044   | 0.085443 | 0.06506  | -0.20086 | 1.22E-05 | 0.11833  |
| -0.15734 | 0.00064 | -0.19709 | 1.79E-05 | -0.00913 | 0.84394  | -0.18701 | 4.77E-05 | 0.201064 |
| -0.00681 | 0.88328 | -0.08029 | 0.08305  | 0.10682  | 0.02095  | -0.12194 | 0.00834  | 0.248263 |
| -0.02123 | 0.6473  | -0.107   | 0.02073  | 0.039589 | 0.39334  | -0.20598 | 7.21E-06 | -0.02911 |

|          |         |          |          |          |          |          |          |          |
|----------|---------|----------|----------|----------|----------|----------|----------|----------|
| 0.03302  | 0.47656 | -0.22085 | 1.44E-06 | 0.063234 | 0.1725   | -0.25602 | 2.00E-08 | 0.139082 |
| -0.11879 | 0.01019 | 0.002696 | 0.95366  | 0.032582 | 0.48243  | -0.06524 | 0.15925  | -0.02452 |
| -0.03896 | 0.40094 | -0.00425 | 0.92698  | 0.130709 | 0.00467  | -0.07715 | 0.09585  | 0.100632 |
| 0.0143   | 0.75792 | -0.19819 | 1.60E-05 | 0.066357 | 0.15223  | -0.25912 | 1.33E-08 | 0.138613 |
| 0.010217 | 0.82571 | -0.09559 | 0.03894  | 0.227125 | 7.05E-07 | -0.12958 | 0.00504  | 0.189743 |
| -0.08064 | 0.08171 | -0.19027 | 3.50E-05 | 0.074074 | 0.10989  | -0.24214 | 1.17E-07 | 0.033573 |
| -0.00053 | 0.99094 | 0.028753 | 0.53537  | 0.226463 | 7.61E-07 | 0.033118 | 0.47525  | 0.380674 |
| 0.031924 | 0.49132 | 0.222929 | 1.14E-06 | 0.06938  | 0.13437  | 0.210195 | 4.62E-06 | 0.019036 |
| 0.08709  | 0.06003 | -0.02748 | 0.55356  | 0.263909 | 7.00E-09 | -0.0841  | 0.06939  | 0.113768 |
| -0.01149 | 0.80446 | -0.12241 | 0.00809  | 0.101846 | 0.02776  | -0.13495 | 0.00348  | 0.121327 |
| -0.0328  | 0.47949 | 0.157735 | 0.00062  | -0.01728 | 0.70956  | 0.159349 | 0.00055  | -0.25057 |
| 0.041723 | 0.36833 | -0.01117 | 0.80973  | 0.225718 | 8.29E-07 | -0.03215 | 0.48824  | 0.279287 |
| 0.003397 | 0.94163 | -0.11989 | 0.0095   | 0.02354  | 0.61186  | -0.09469 | 0.04082  | -0.01817 |
| -0.06439 | 0.1648  | -0.17967 | 9.46E-05 | -0.04522 | 0.32949  | -0.12644 | 0.00622  | 0.1484   |
| 0.022187 | 0.63249 | -0.07686 | 0.09711  | 0.130073 | 0.00487  | -0.16668 | 0.0003   | 0.086728 |
| -0.03269 | 0.48103 | -0.03598 | 0.4379   | 0.090674 | 0.0502   | -0.11295 | 0.0146   | 0.212741 |
| -0.00025 | 0.99577 | -0.14247 | 0.00203  | -0.00707 | 0.8789   | -0.17322 | 0.00017  | 0.142266 |
| 0.084344 | 0.0686  | 0.116776 | 0.01156  | 0.232419 | 3.80E-07 | -0.07182 | 0.12118  | -0.02767 |
| 0.001208 | 0.97923 | -0.04894 | 0.29122  | 0.159791 | 0.00053  | -0.14227 | 0.00206  | 0.035089 |
| 0.0097   | 0.83441 | -0.02042 | 0.65983  | 0.054858 | 0.23673  | -0.08206 | 0.07647  | 0.051727 |
| -0.02043 | 0.65967 | -0.09797 | 0.0343   | 0.094766 | 0.04065  | -0.21102 | 4.23E-06 | 0.130838 |
| -0.07352 | 0.11259 | -0.156   | 0.00072  | 0.068824 | 0.13752  | -0.16227 | 0.00043  | 0.167776 |
| 0.017433 | 0.7071  | -0.16722 | 0.00028  | 0.033734 | 0.46707  | -0.1471  | 0.00143  | 0.137985 |
| -0.01791 | 0.69946 | -0.15542 | 0.00075  | 0.004942 | 0.91517  | -0.10361 | 0.02515  | 0.351468 |
| 0.011001 | 0.81257 | -0.05156 | 0.26612  | -0.00858 | 0.85333  | -0.09389 | 0.04255  | -0.12157 |
| -0.02441 | 0.5987  | -0.16092 | 0.00048  | -0.02777 | 0.54949  | -0.21199 | 3.81E-06 | 0.181587 |
| 0.013824 | 0.76575 | 0.033454 | 0.47077  | 0.216336 | 2.38E-06 | 0.02422  | 0.60162  | 0.185244 |
| -0.00386 | 0.93369 | -0.05932 | 0.20071  | 0.184978 | 5.78E-05 | -0.12017 | 0.00934  | 0.186861 |
| -0.04067 | 0.38055 | -0.07803 | 0.09213  | 0.131963 | 0.00428  | -0.06293 | 0.17458  | 0.239158 |
| -0.11078 | 0.01662 | -0.18674 | 4.90E-05 | -0.07124 | 0.12423  | -0.22034 | 1.52E-06 | 0.011042 |
| -0.06737 | 0.14602 | -0.10398 | 0.02464  | 0.104306 | 0.02418  | -0.11046 | 0.01694  | 0.012356 |
| -0.0617  | 0.18318 | -0.1638  | 0.00038  | 0.03942  | 0.39537  | -0.22833 | 6.13E-07 | 0.104785 |
| 0.069148 | 0.13568 | 0.138777 | 0.00265  | 0.304454 | 1.79E-11 | 0.004665 | 0.91991  | 0.210219 |
| 0.010119 | 0.82735 | -0.03046 | 0.51136  | 0.033207 | 0.47406  | -0.06865 | 0.13855  | -0.01387 |
| 0.040596 | 0.38142 | -0.08874 | 0.05534  | 0.050714 | 0.27408  | -0.21885 | 1.80E-06 | 0.072056 |
| 0.030607 | 0.50937 | -0.06652 | 0.15123  | 0.035699 | 0.44152  | -0.10367 | 0.02507  | -0.08472 |
| 0.099214 | 0.03207 | 0.076866 | 0.0971   | 0.219772 | 1.62E-06 | -0.02395 | 0.60563  | 0.160581 |
| 0.017859 | 0.70029 | -0.06958 | 0.13322  | 0.134794 | 0.00352  | -0.16153 | 0.00046  | 0.117327 |
| 0.020717 | 0.65521 | -0.16947 | 0.00023  | -0.00977 | 0.83316  | -0.15745 | 0.00064  | 0.089123 |
| 0.038955 | 0.40097 | 0.064881 | 0.16157  | 0.286345 | 2.90E-10 | 0.030658 | 0.50867  | 0.212487 |
| 0.036469 | 0.43172 | -0.09665 | 0.0368   | 0.1095   | 0.01793  | -0.08319 | 0.07248  | 0.217422 |
| -0.01873 | 0.68644 | -0.13098 | 0.00458  | 0.111046 | 0.01636  | -0.23663 | 2.30E-07 | 0.114715 |
| -0.0097  | 0.83433 | -0.22315 | 1.11E-06 | 0.016931 | 0.71516  | -0.20678 | 6.63E-06 | 0.219773 |
| 0.054123 | 0.24308 | 0.041095 | 0.37558  | 0.157276 | 0.00065  | -0.0741  | 0.10979  | -0.0732  |
| -0.02339 | 0.61418 | 0.1286   | 0.00538  | -0.09234 | 0.0461   | 0.219181 | 1.73E-06 | -0.13925 |

|          |         |          |          |          |          |          |          |          |
|----------|---------|----------|----------|----------|----------|----------|----------|----------|
| -0.03339 | 0.47158 | -0.13162 | 0.00438  | 0.034279 | 0.4599   | -0.20534 | 7.70E-06 | 0.057983 |
| 0.046574 | 0.31523 | -0.03244 | 0.48436  | 0.058462 | 0.20728  | -0.13824 | 0.00276  | 0.055747 |
| -0.06025 | 0.19371 | -0.14128 | 0.00221  | 0.043081 | 0.35292  | -0.1982  | 1.60E-05 | -0.01573 |
| -0.11202 | 0.01544 | -0.26018 | 1.16E-08 | -0.13601 | 0.00323  | -0.27226 | 2.21E-09 | 0.142953 |
| -0.02307 | 0.61897 | -0.10582 | 0.02219  | 0.127994 | 0.00561  | -0.19612 | 1.97E-05 | 0.109542 |
| 0.02682  | 0.56317 | -0.06393 | 0.16779  | 0.195338 | 2.13E-05 | -0.08153 | 0.0784   | 0.264921 |
| -0.03073 | 0.50764 | -0.10301 | 0.02601  | 0.070514 | 0.1281   | -0.15102 | 0.00106  | 0.102968 |
| -0.02903 | 0.53148 | -0.17191 | 0.00019  | 0.154192 | 0.00083  | -0.24404 | 9.26E-08 | 0.118581 |
| -0.03119 | 0.50129 | -0.13777 | 0.00285  | 0.110451 | 0.01695  | -0.21807 | 1.96E-06 | 0.251563 |
| -0.07993 | 0.08445 | -0.09939 | 0.03176  | 0.055091 | 0.23474  | -0.09397 | 0.04239  | 0.158795 |
| -0.09281 | 0.04501 | -0.18768 | 4.48E-05 | -0.0754  | 0.10365  | -0.18215 | 7.53E-05 | 0.034726 |
| -0.02736 | 0.55532 | -0.11642 | 0.01181  | 0.101321 | 0.02857  | -0.07462 | 0.1073   | 0.281194 |
| 0.114967 | 0.01292 | 0.141168 | 0.00223  | 0.35381  | 3.23E-15 | 0.043434 | 0.34899  | 0.107278 |
| -0.10345 | 0.02537 | -0.05662 | 0.22199  | -0.30069 | 3.25E-11 | -0.04186 | 0.36671  | -0.2234  |
| -0.01495 | 0.74725 | -0.21486 | 2.79E-06 | 0.032148 | 0.48828  | -0.29437 | 8.66E-11 | 0.110847 |
| -0.07524 | 0.10441 | -0.18103 | 8.35E-05 | 0.010396 | 0.8227   | -0.19318 | 2.63E-05 | 0.223742 |
| 0.044931 | 0.33262 | -0.00779 | 0.86659  | 0.232586 | 3.72E-07 | -0.1246  | 0.00702  | 0.195663 |
| 0.009265 | 0.84173 | -0.17693 | 0.00012  | -0.02432 | 0.60017  | -0.29536 | 7.44E-11 | 0.072903 |
| -0.08439 | 0.06846 | -0.17228 | 0.00018  | -0.02115 | 0.64844  | -0.19636 | 1.92E-05 | 0.170648 |
| -0.07721 | 0.09561 | -0.18538 | 5.57E-05 | 0.01673  | 0.7184   | -0.23151 | 4.23E-07 | 0.105778 |
| 0.058252 | 0.20893 | -0.09713 | 0.03587  | 0.205858 | 7.30E-06 | -0.13542 | 0.00337  | 0.287895 |
| 0.030725 | 0.50775 | 0.008594 | 0.85305  | 0.123753 | 0.00742  | -0.01478 | 0.7501   | 0.110772 |
| 0.013171 | 0.7765  | -0.13442 | 0.00361  | 0.14829  | 0.00131  | -0.19103 | 3.25E-05 | 0.14936  |
| 0.021192 | 0.64783 | -0.08403 | 0.06964  | 0.231816 | 4.08E-07 | -0.18424 | 6.20E-05 | 0.148643 |
| 0.008936 | 0.84727 | -0.158   | 0.00061  | 0.097618 | 0.03495  | -0.21037 | 4.53E-06 | 0.196964 |
| -0.06726 | 0.14673 | -0.17702 | 0.00012  | 0.007033 | 0.87952  | -0.1991  | 1.46E-05 | 0.046297 |
| -0.01842 | 0.69141 | -0.02075 | 0.65466  | 0.095736 | 0.03863  | -0.02439 | 0.59913  | 0.1865   |
| -0.00649 | 0.88873 | -0.13192 | 0.00429  | 0.135289 | 0.0034   | -0.13529 | 0.0034   | 0.332775 |
| 0.001698 | 0.97081 | 0.023966 | 0.60544  | 0.149932 | 0.00116  | -0.02079 | 0.65409  | 0.191766 |
| -0.05519 | 0.2339  | -0.05502 | 0.2353   | -0.1075  | 0.02015  | -0.15659 | 0.00068  | -0.10372 |
| -0.02631 | 0.5706  | -0.07476 | 0.10662  | -0.0021  | 0.96385  | -0.16739 | 0.00028  | 0.111276 |
| -0.03701 | 0.42493 | -0.10146 | 0.02836  | 0.138495 | 0.00271  | -0.19085 | 3.30E-05 | 0.101393 |
| -0.11929 | 0.00987 | -0.17356 | 0.00016  | -0.02628 | 0.57102  | -0.16354 | 0.00039  | -0.03902 |
| 0.062277 | 0.17911 | -0.02982 | 0.52029  | 0.209095 | 5.19E-06 | -0.14541 | 0.00163  | 0.10506  |
| 0.011132 | 0.81038 | -0.08835 | 0.05641  | 0.132417 | 0.00415  | -0.1475  | 0.00139  | 0.141433 |
| -0.01136 | 0.80652 | -0.08476 | 0.06724  | 0.162527 | 0.00042  | -0.08735 | 0.05927  | 0.162632 |
| -0.10861 | 0.01888 | -0.12014 | 0.00936  | 0.013505 | 0.77099  | -0.13168 | 0.00437  | 0.123629 |
| -0.07472 | 0.10681 | 0.017062 | 0.71305  | 0.17812  | 0.00011  | 0.111402 | 0.01602  | 0.44437  |
| -0.03965 | 0.39264 | 0.015098 | 0.74486  | 0.116946 | 0.01143  | -0.11042 | 0.01699  | -0.0055  |
| 0.01706  | 0.7131  | -0.10689 | 0.02086  | 0.135974 | 0.00324  | -0.19022 | 3.51E-05 | 0.219701 |
| -0.02895 | 0.53263 | -0.07154 | 0.12265  | -0.01127 | 0.80812  | -0.10095 | 0.02916  | 0.207124 |
| -0.0016  | 0.97247 | -0.10866 | 0.01883  | 0.088296 | 0.05656  | -0.20661 | 6.75E-06 | 0.193108 |
| 0.153461 | 0.00088 | 0.049521 | 0.28555  | 0.294528 | 8.45E-11 | 0.022995 | 0.62014  | 0.236057 |
| 0.009432 | 0.83892 | -0.07553 | 0.10308  | 0.155541 | 0.00074  | -0.05998 | 0.19572  | 0.346749 |
| 0.003775 | 0.93515 | -0.01342 | 0.77233  | 0.132057 | 0.00425  | -0.15062 | 0.0011   | -0.07148 |

|          |         |          |          |          |          |          |          |          |
|----------|---------|----------|----------|----------|----------|----------|----------|----------|
| 0.071025 | 0.12535 | -0.03992 | 0.38936  | 0.263245 | 7.66E-09 | -0.16149 | 0.00046  | 0.248534 |
| 0.068637 | 0.1386  | 0.063922 | 0.16787  | -0.07432 | 0.10873  | 0.065762 | 0.15594  | -0.09937 |
| -0.04432 | 0.33925 | -0.13367 | 0.00381  | -0.0536  | 0.24764  | -0.1818  | 7.77E-05 | -0.02783 |
| -0.11622 | 0.01196 | -0.17077 | 0.00021  | -0.03732 | 0.42104  | -0.21021 | 4.61E-06 | 0.088938 |
| -0.04163 | 0.36945 | -0.11508 | 0.01283  | 0.038434 | 0.4073   | -0.22072 | 1.46E-06 | -0.04867 |
| 0.023594 | 0.61106 | -0.06326 | 0.17234  | 0.09739  | 0.03538  | -0.16674 | 0.0003   | 0.109253 |
| -0.06603 | 0.15425 | 0.009117 | 0.84423  | -0.15835 | 0.00059  | 0.085748 | 0.0641   | -0.01619 |
| 0.00891  | 0.84772 | -0.00326 | 0.94399  | 0.111514 | 0.01591  | -0.06924 | 0.13514  | 0.002662 |
| -0.08909 | 0.05436 | 0.092452 | 0.04584  | -0.26837 | 3.81E-09 | 0.043629 | 0.34683  | -0.21484 |
| 0.073805 | 0.1112  | -0.02693 | 0.56156  | 0.187325 | 4.63E-05 | -0.12058 | 0.0091   | 0.157469 |
| -0.00758 | 0.8702  | -0.13757 | 0.00289  | 0.052498 | 0.25753  | -0.21441 | 2.93E-06 | 0.12051  |
| 0.055548 | 0.23088 | 0.016883 | 0.71593  | 0.19898  | 1.48E-05 | 0.019642 | 0.67203  | 0.212324 |
| -0.04748 | 0.30587 | -0.11596 | 0.01215  | 0.052491 | 0.2576   | -0.13037 | 0.00478  | 0.021973 |
| -0.15362 | 0.00087 | -0.12335 | 0.00762  | -0.06554 | 0.15731  | -0.11618 | 0.01199  | 0.00791  |
| 0.081895 | 0.07706 | -0.10024 | 0.03033  | 0.196158 | 1.96E-05 | -0.14929 | 0.00121  | 0.124372 |
| -0.00571 | 0.90201 | -0.09026 | 0.05125  | 0.09694  | 0.03624  | -0.14674 | 0.00147  | 0.139427 |
| -0.03195 | 0.49097 | -0.20451 | 8.39E-06 | 0.002147 | 0.96309  | -0.21175 | 3.91E-06 | 0.076319 |
| -0.01974 | 0.67053 | -0.07875 | 0.08915  | 0.132345 | 0.00417  | -0.12181 | 0.00841  | 0.107346 |
| -0.02384 | 0.60738 | -0.07514 | 0.10484  | 0.14499  | 0.00168  | -0.16935 | 0.00024  | 0.004458 |
| -0.00459 | 0.92117 | -0.23205 | 3.96E-07 | -0.00294 | 0.9495   | -0.27945 | 7.96E-10 | 0.027689 |
| -0.05656 | 0.22249 | -0.12683 | 0.00606  | 0.155164 | 0.00077  | -0.19337 | 2.58E-05 | 0.151807 |
| 0.039884 | 0.38982 | -0.11889 | 0.01013  | 0.152441 | 0.00095  | -0.12856 | 0.0054   | 0.213267 |
| -0.05355 | 0.24812 | -0.10053 | 0.02984  | -0.05978 | 0.1972   | -0.1232  | 0.00769  | 0.011507 |
| -0.03434 | 0.45906 | -0.00855 | 0.85386  | 0.027523 | 0.55298  | -0.15233 | 0.00096  | -0.10726 |
| -0.04871 | 0.29351 | -0.14728 | 0.00141  | -0.06091 | 0.18884  | -0.15754 | 0.00063  | -0.01989 |
| 0.021838 | 0.63784 | -0.09995 | 0.03081  | 0.111388 | 0.01603  | -0.18267 | 7.18E-05 | 0.065406 |
| 0.006389 | 0.89048 | -0.06671 | 0.15006  | 0.167721 | 0.00027  | -0.11756 | 0.01101  | 0.196423 |
| -0.04445 | 0.33778 | -0.00823 | 0.85925  | 0.082321 | 0.07553  | -0.10303 | 0.02599  | 0.068037 |
| 0.022508 | 0.62756 | -0.12895 | 0.00526  | 0.046037 | 0.32084  | -0.20803 | 5.81E-06 | 0.062395 |
| -0.00906 | 0.84517 | -0.094   | 0.04232  | 0.063078 | 0.17357  | -0.11286 | 0.01468  | -0.01017 |
| 0.009875 | 0.83146 | -0.11577 | 0.01229  | 0.156092 | 0.00071  | -0.09403 | 0.04224  | 0.222715 |
| 0.004429 | 0.92395 | 0.203916 | 8.93E-06 | 0.002959 | 0.94914  | 0.237691 | 2.02E-07 | -0.06018 |
| -0.09941 | 0.03172 | -0.23119 | 4.39E-07 | -0.08931 | 0.05376  | -0.34596 | 1.41E-14 | 0.041019 |
| -0.10564 | 0.02242 | 0.018084 | 0.6967   | -0.21347 | 3.25E-06 | 0.02579  | 0.57826  | -0.25439 |
| 0.036684 | 0.429   | -0.09699 | 0.03614  | 0.188817 | 4.02E-05 | -0.21757 | 2.07E-06 | 0.112155 |
| 0.057613 | 0.21397 | 0.011653 | 0.80169  | 0.218995 | 1.77E-06 | -0.07757 | 0.09405  | 0.050431 |
| -0.06995 | 0.1312  | -0.1746  | 0.00015  | 0.02494  | 0.59086  | -0.09674 | 0.03662  | 0.132646 |
| 0.007884 | 0.86507 | -0.13292 | 0.00401  | 0.057819 | 0.21233  | -0.18611 | 5.20E-05 | 0.181532 |
| -0.08041 | 0.0826  | -0.25136 | 3.67E-08 | -0.06028 | 0.19347  | -0.29805 | 4.91E-11 | 0.119135 |
| -0.06256 | 0.17717 | -0.06295 | 0.17445  | 0.136491 | 0.00312  | -0.041   | 0.37669  | 0.12942  |
| -0.05325 | 0.25077 | -0.05131 | 0.26847  | -0.00233 | 0.95992  | -0.20354 | 9.28E-06 | -0.07347 |
| -0.07714 | 0.09589 | -0.08707 | 0.06008  | -0.26782 | 4.11E-09 | -0.07363 | 0.11207  | -0.08912 |
| -0.0314  | 0.49847 | -0.19391 | 2.45E-05 | -0.0406  | 0.38137  | -0.28866 | 2.06E-10 | 0.002808 |
| -0.01214 | 0.79354 | -0.14329 | 0.00191  | 0.034521 | 0.45674  | -0.20012 | 1.32E-05 | -0.01246 |
| 0.022388 | 0.6294  | -0.11688 | 0.01148  | 0.14316  | 0.00193  | -0.18108 | 8.31E-05 | 0.136412 |

|          |         |          |          |          |          |          |          |          |
|----------|---------|----------|----------|----------|----------|----------|----------|----------|
| 0.011287 | 0.8078  | 0.049658 | 0.28421  | 0.093227 | 0.04405  | -0.09812 | 0.03403  | -0.03476 |
| -0.04167 | 0.3689  | -0.15412 | 0.00083  | 0.011642 | 0.80188  | -0.24335 | 1.01E-07 | 0.02545  |
| 0.030614 | 0.50928 | -0.1226  | 0.00799  | 0.127115 | 0.00595  | -0.23864 | 1.80E-07 | 0.167757 |
| 0.006483 | 0.88887 | -0.12867 | 0.00536  | -0.06851 | 0.13935  | -0.19589 | 2.02E-05 | 0.046352 |
| -0.04458 | 0.33644 | -0.1309  | 0.00461  | -0.06271 | 0.17609  | -0.25214 | 3.32E-08 | -0.06334 |
| -0.03325 | 0.47348 | -0.14934 | 0.00121  | -0.02459 | 0.59605  | -0.24024 | 1.48E-07 | -0.08334 |
| 0.047754 | 0.30311 | -0.11013 | 0.01728  | 0.110609 | 0.01679  | -0.11856 | 0.01034  | 0.245766 |
| 0.091535 | 0.04805 | -0.0183  | 0.69333  | 0.129014 | 0.00523  | -0.00776 | 0.8671   | 0.107826 |
| 0.04194  | 0.36584 | -0.02067 | 0.6559   | 0.138611 | 0.00268  | -0.03413 | 0.46187  | 0.179858 |
| -0.04107 | 0.37582 | -0.1637  | 0.00038  | 0.052789 | 0.25491  | -0.19676 | 1.85E-05 | 0.177324 |
| 0.012123 | 0.79387 | -0.08825 | 0.05668  | 0.078715 | 0.0893   | -0.13629 | 0.00317  | -0.02058 |
| -0.0701  | 0.13036 | -0.01398 | 0.76312  | 0.201977 | 1.09E-05 | -0.08485 | 0.06696  | 0.126518 |
| -0.00666 | 0.88584 | -0.1155  | 0.01251  | 0.036587 | 0.43023  | -0.11333 | 0.01427  | 0.05507  |
| 0.065676 | 0.15648 | 0.034761 | 0.45361  | 0.275371 | 1.43E-09 | 0.098292 | 0.03371  | 0.383837 |
| 0.086247 | 0.06256 | 0.074757 | 0.10665  | 0.208926 | 5.28E-06 | 0.060659 | 0.19069  | 0.242064 |
| -0.02538 | 0.58436 | -0.01135 | 0.80676  | 0.102421 | 0.02688  | -0.04145 | 0.37142  | 0.052869 |
| -0.05032 | 0.27781 | -0.17322 | 0.00017  | 0.044677 | 0.33537  | -0.26172 | 9.41E-09 | 0.005613 |
| 0.03771  | 0.41621 | 0.020868 | 0.65285  | 0.256538 | 1.87E-08 | -0.06633 | 0.15242  | 0.207795 |
| 0.042437 | 0.36018 | -0.04058 | 0.38165  | 0.126276 | 0.00629  | -0.04514 | 0.33035  | 0.249985 |
| 0.008617 | 0.85267 | -0.00277 | 0.95232  | 0.120267 | 0.00928  | -0.06604 | 0.15422  | 0.032339 |
| -0.01388 | 0.76489 | -0.07879 | 0.08898  | 0.128929 | 0.00526  | -0.08393 | 0.06998  | 0.113756 |
| -0.0689  | 0.13707 | -0.08203 | 0.07656  | 0.096715 | 0.03668  | -0.15332 | 0.00089  | 0.199796 |
| 0.124688 | 0.00698 | 0.050632 | 0.27486  | 0.201392 | 1.16E-05 | 0.093952 | 0.04242  | 0.164637 |
| 0.004802 | 0.91757 | -0.13919 | 0.00257  | 0.023665 | 0.60997  | -0.13287 | 0.00402  | 0.008852 |
| 0.100565 | 0.02979 | 0.06636  | 0.1522   | 0.283002 | 4.75E-10 | -0.11071 | 0.01669  | 0.129188 |
| 0.039969 | 0.38881 | -0.08981 | 0.05244  | 0.0398   | 0.39082  | -0.11471 | 0.01312  | 0.052523 |
| 0.005637 | 0.9033  | 0.149789 | 0.00117  | -0.12325 | 0.00766  | 0.082708 | 0.07416  | -0.14392 |
| -0.13761 | 0.00288 | -0.25737 | 1.68E-08 | -0.04071 | 0.38008  | -0.34093 | 3.56E-14 | 0.068662 |
| -0.07642 | 0.09907 | -0.25297 | 2.98E-08 | -0.13185 | 0.00431  | -0.30732 | 1.13E-11 | -0.13109 |
| -0.11033 | 0.01707 | -0.25356 | 2.76E-08 | -0.09986 | 0.03097  | -0.28873 | 2.03E-10 | 0.010772 |
| 0.031752 | 0.49367 | -0.14087 | 0.00228  | 0.133968 | 0.00373  | -0.20788 | 5.90E-06 | 0.219461 |
| 0.000746 | 0.98716 | -0.13088 | 0.00461  | 0.176091 | 0.00013  | -0.19712 | 1.78E-05 | 0.133434 |
| 0.044037 | 0.34234 | -0.09722 | 0.03569  | 0.190827 | 3.31E-05 | -0.22097 | 1.42E-06 | 0.158321 |
| 0.026355 | 0.56996 | -0.07234 | 0.11851  | 0.11701  | 0.01139  | -0.20092 | 1.21E-05 | 0.055075 |
| -0.02568 | 0.57988 | -0.11938 | 0.00982  | 0.111249 | 0.01617  | -0.13326 | 0.00391  | 0.061221 |
| -0.023   | 0.6201  | -0.11388 | 0.0138   | 0.091376 | 0.04844  | -0.06003 | 0.19531  | 0.35788  |
| -0.01685 | 0.7165  | -0.17005 | 0.00022  | 0.020503 | 0.65853  | -0.21756 | 2.08E-06 | -0.01332 |
| -0.0311  | 0.50263 | -0.1229  | 0.00784  | 0.05572  | 0.22943  | -0.21672 | 2.28E-06 | -0.08206 |
| 0.065509 | 0.15754 | 0.049658 | 0.28421  | 0.212086 | 3.77E-06 | 0.041576 | 0.37001  | 0.264557 |
| 0.140907 | 0.00227 | 0.287311 | 2.51E-10 | 0.380397 | 1.58E-17 | 0.185331 | 5.60E-05 | 0.266061 |
| 0.093401 | 0.04365 | -0.01321 | 0.77589  | 0.24686  | 6.51E-08 | 0.038496 | 0.40654  | 0.217357 |
| -0.06792 | 0.14277 | -0.15393 | 0.00085  | -0.03607 | 0.43683  | -0.1141  | 0.01362  | 0.104    |
| -0.06909 | 0.13603 | -0.12942 | 0.00509  | 0.036757 | 0.42808  | -0.12165 | 0.0085   | 0.106325 |
| 0.026726 | 0.56453 | -0.10157 | 0.02818  | 0.027365 | 0.55526  | -0.11618 | 0.01199  | 0.081788 |
| -0.01124 | 0.80858 | -0.08747 | 0.05893  | 0.099438 | 0.03168  | -0.11395 | 0.01374  | 0.059814 |

|          |         |          |          |          |          |          |          |          |
|----------|---------|----------|----------|----------|----------|----------|----------|----------|
| 0.015102 | 0.74481 | -0.03828 | 0.40914  | 0.180786 | 8.54E-05 | -0.12582 | 0.00648  | 0.142555 |
| 0.051719 | 0.26468 | 0.012655 | 0.78503  | 0.136524 | 0.00311  | -0.02884 | 0.53418  | 0.050966 |
| -0.05398 | 0.24429 | -0.11795 | 0.01074  | 0.117271 | 0.01121  | -0.16421 | 0.00037  | 0.169984 |
| 0.101657 | 0.02805 | 0.076937 | 0.09679  | 0.140524 | 0.00234  | -0.05178 | 0.26414  | -0.08373 |
| 0.027415 | 0.55455 | -0.18783 | 4.42E-05 | 0.055499 | 0.23129  | -0.27759 | 1.04E-09 | 0.114534 |
| 0.03213  | 0.48853 | -0.1354  | 0.00337  | 0.159037 | 0.00056  | -0.19997 | 1.34E-05 | 0.180685 |
| 0.057287 | 0.21658 | -0.03229 | 0.4863   | 0.195505 | 2.09E-05 | -0.01952 | 0.67387  | 0.13867  |
| -0.04906 | 0.29007 | -0.0357  | 0.44154  | 0.1001   | 0.03055  | -0.10508 | 0.02314  | 0.054249 |
| 0.033487 | 0.47035 | -0.10632 | 0.02157  | 0.211784 | 3.90E-06 | -0.20951 | 4.97E-06 | 0.152033 |
| -0.00547 | 0.90623 | -0.07629 | 0.09962  | 0.126548 | 0.00617  | -0.17034 | 0.00022  | 0.191271 |
| 0.025201 | 0.58697 | -0.11196 | 0.01549  | 0.071905 | 0.12073  | -0.1601  | 0.00051  | 0.168854 |
| 0.060502 | 0.19184 | -0.06603 | 0.15424  | 0.157876 | 0.00062  | -0.1717  | 0.00019  | 0.192065 |
| 0.054308 | 0.24146 | -0.01649 | 0.72231  | 0.219224 | 1.73E-06 | -0.0908  | 0.04988  | 0.231784 |
| 0.014541 | 0.75398 | -0.11535 | 0.01262  | 0.139861 | 0.00245  | -0.2163  | 2.39E-06 | 0.086893 |
| 0.010458 | 0.82166 | -0.29072 | 1.51E-10 | -0.09861 | 0.03314  | -0.3514  | 5.11E-15 | -0.0842  |
| 0.04686  | 0.31226 | -0.07472 | 0.10683  | 0.178756 | 0.0001   | -0.11357 | 0.01407  | 0.206598 |
| 0.014315 | 0.75767 | -0.07344 | 0.11299  | 0.117054 | 0.01136  | -0.05399 | 0.24423  | 0.184391 |
| 0.054759 | 0.23757 | 0.010609 | 0.81915  | 0.249712 | 4.53E-08 | -0.07516 | 0.10478  | 0.181125 |
| 0.009867 | 0.83159 | -0.15698 | 0.00066  | 0.036354 | 0.43317  | -0.21308 | 3.39E-06 | 0.19605  |
| -0.07321 | 0.11411 | -0.12211 | 0.00825  | 0.071475 | 0.12297  | -0.10514 | 0.02307  | 0.137495 |
| 0.043171 | 0.35192 | 0.02115  | 0.64848  | 0.180617 | 8.67E-05 | -0.02512 | 0.5881   | 0.094265 |
| 0.007787 | 0.86672 | -0.12229 | 0.00816  | 0.117872 | 0.01079  | -0.14406 | 0.0018   | 0.086098 |
| -0.06667 | 0.15029 | -0.20872 | 5.40E-06 | -0.13136 | 0.00446  | -0.28082 | 6.53E-10 | -0.11456 |
| 0.039614 | 0.39304 | -0.10333 | 0.02555  | 0.168921 | 0.00025  | -0.25449 | 2.45E-08 | 0.130799 |
| 0.029746 | 0.52137 | -0.04017 | 0.38646  | 0.172629 | 0.00018  | -0.07635 | 0.09938  | 0.272893 |
| 0.041961 | 0.36559 | 0.049247 | 0.28822  | 0.314135 | 3.73E-12 | -0.00651 | 0.88838  | 0.187298 |
| 0.017672 | 0.70328 | -0.14416 | 0.00179  | 0.07251  | 0.11763  | -0.20448 | 8.42E-06 | 0.189083 |
| 0.061592 | 0.18395 | -0.12329 | 0.00764  | 0.13595  | 0.00324  | -0.2178  | 2.02E-06 | 0.147374 |
| 0.002143 | 0.96316 | -0.11528 | 0.01267  | 0.127094 | 0.00595  | -0.07409 | 0.10981  | 0.312161 |
| -0.00408 | 0.92999 | -0.10973 | 0.01769  | -0.02795 | 0.54679  | -0.18744 | 4.58E-05 | -0.06607 |
| 0.039423 | 0.39533 | 0.091476 | 0.04819  | 0.244108 | 9.19E-08 | 0.090556 | 0.0505   | 0.191694 |
| 0.084694 | 0.06745 | 0.090764 | 0.04997  | 0.199807 | 1.36E-05 | 0.089999 | 0.05194  | 0.046957 |
| -0.00125 | 0.97859 | -0.03584 | 0.43977  | 0.112962 | 0.01459  | -0.04553 | 0.32615  | 0.065242 |
| -0.03819 | 0.41035 | -0.12649 | 0.0062   | 0.130426 | 0.00476  | -0.09996 | 0.0308   | 0.282682 |
| 0.026123 | 0.57336 | -0.05769 | 0.21338  | 0.157174 | 0.00065  | -0.15705 | 0.00066  | 0.042681 |
| -0.03335 | 0.47215 | -0.05768 | 0.21347  | 0.040275 | 0.3852   | -0.0936  | 0.04319  | 0.009493 |
| -0.01866 | 0.68757 | -0.17222 | 0.00018  | 0.085477 | 0.06495  | -0.20334 | 9.48E-06 | 0.294055 |
| 0.033878 | 0.46517 | -0.14454 | 0.00174  | 0.135674 | 0.00331  | -0.2071  | 6.40E-06 | 0.14646  |
| -0.11911 | 0.00998 | -0.24756 | 5.96E-08 | -0.03407 | 0.4626   | -0.21467 | 2.85E-06 | 0.196037 |
| -0.01374 | 0.76711 | -0.12609 | 0.00636  | 0.042888 | 0.35509  | -0.15078 | 0.00108  | 0.033394 |
| 0.026223 | 0.57189 | 0.049955 | 0.28134  | 0.096127 | 0.03784  | 0.011186 | 0.80949  | 0.04548  |
| 0.041723 | 0.36832 | 0.007841 | 0.86581  | 0.217437 | 2.10E-06 | -0.08219 | 0.07602  | 0.112771 |
| 0.043128 | 0.35241 | 0.024443 | 0.59827  | 0.146233 | 0.00153  | 0.070871 | 0.12617  | 0.053097 |
| -0.03103 | 0.50348 | 0.172428 | 0.00018  | -0.10596 | 0.02202  | 0.196367 | 1.92E-05 | 0.007942 |
| 0.0007   | 0.98797 | -0.1191  | 0.00999  | 0.205487 | 7.58E-06 | -0.19331 | 2.60E-05 | 0.203512 |

|          |         |          |          |          |          |          |          |          |
|----------|---------|----------|----------|----------|----------|----------|----------|----------|
| 0.026661 | 0.56548 | -0.01317 | 0.7765   | 0.193986 | 2.43E-05 | -0.00274 | 0.95284  | 0.138787 |
| 0.003275 | 0.94373 | -0.11949 | 0.00975  | 0.049568 | 0.28509  | -0.15918 | 0.00055  | 0.082522 |
| 0.035631 | 0.44238 | -0.01601 | 0.72998  | 0.154857 | 0.00079  | -0.04032 | 0.38467  | 0.17414  |
| -0.03995 | 0.38898 | -0.15813 | 0.0006   | 0.050132 | 0.27964  | -0.2415  | 1.27E-07 | 0.045881 |
| 0.067068 | 0.14787 | 0.245995 | 7.26E-08 | 0.099511 | 0.03155  | 0.239998 | 1.53E-07 | -0.04636 |
| -0.0698  | 0.13202 | -0.06329 | 0.17211  | 0.038956 | 0.40096  | -0.04985 | 0.28233  | 0.093646 |
| 0.003204 | 0.94495 | -0.16596 | 0.00032  | 0.075824 | 0.10173  | -0.21745 | 2.10E-06 | 0.131356 |
| -0.09599 | 0.03813 | -0.12664 | 0.00614  | 0.060358 | 0.19291  | -0.17577 | 0.00013  | 0.136133 |
| -0.05788 | 0.21189 | -0.11273 | 0.01479  | -0.00366 | 0.93709  | -0.23628 | 2.40E-07 | 0.010835 |
| -0.07756 | 0.09411 | -0.10593 | 0.02206  | 0.123698 | 0.00744  | -0.13416 | 0.00368  | 0.213506 |
| -0.08678 | 0.06094 | -0.11062 | 0.01678  | 0.010331 | 0.82379  | -0.19201 | 2.95E-05 | 0.119547 |
| 0.002702 | 0.95356 | -0.14061 | 0.00232  | 0.160266 | 0.00051  | -0.20048 | 1.27E-05 | 0.140445 |
| -0.02895 | 0.53257 | -0.13407 | 0.0037   | 0.140448 | 0.00235  | -0.19461 | 2.29E-05 | 0.167662 |
| -0.06423 | 0.16581 | -0.18197 | 7.65E-05 | 0.063293 | 0.1721   | -0.19887 | 1.49E-05 | 0.240161 |
| 0.01891  | 0.68358 | -0.16319 | 0.0004   | 0.10938  | 0.01806  | -0.22039 | 1.52E-06 | 0.114224 |
| -0.0101  | 0.8277  | -0.07196 | 0.12042  | 0.038492 | 0.4066   | -0.15257 | 0.00094  | 0.171195 |
| 0.006681 | 0.8855  | -0.19153 | 3.09E-05 | 0.092167 | 0.04652  | -0.23615 | 2.43E-07 | 0.106171 |
| -0.01699 | 0.71422 | -0.06691 | 0.14882  | 0.145671 | 0.0016   | -0.17251 | 0.00018  | 0.080756 |
| -0.04724 | 0.30833 | -0.14264 | 0.002    | 0.008562 | 0.85359  | -0.26175 | 9.37E-09 | 0.066889 |
| -0.08804 | 0.05727 | -0.07395 | 0.11049  | 0.0305   | 0.51087  | -0.05702 | 0.21871  | 0.106116 |
| 0.06125  | 0.1864  | -0.04107 | 0.37582  | 0.213529 | 3.23E-06 | -0.16456 | 0.00036  | 0.135787 |
| 0.049846 | 0.28239 | -0.06518 | 0.15964  | 0.070658 | 0.12732  | -0.12254 | 0.00802  | -0.03482 |
| -0.03226 | 0.48681 | -0.05479 | 0.23735  | 0.150997 | 0.00106  | -0.05849 | 0.20707  | 0.159037 |
| -0.07685 | 0.09718 | -0.11544 | 0.01255  | 0.048506 | 0.29555  | -0.13526 | 0.0034   | 0.211518 |
| 0.031382 | 0.49871 | -0.12045 | 0.00918  | 0.075855 | 0.10159  | -0.13566 | 0.00331  | 0.176255 |
| -0.00885 | 0.84878 | -0.04781 | 0.30251  | 0.126727 | 0.0061   | -0.09801 | 0.03422  | -0.00739 |
| -0.06519 | 0.15958 | 0.158101 | 0.00061  | -0.14903 | 0.00124  | 0.206673 | 6.70E-06 | -0.14488 |
| 0.025669 | 0.58005 | -0.02653 | 0.5674   | 0.113478 | 0.01414  | -0.09813 | 0.03401  | 0.06237  |
| -0.02706 | 0.55974 | 0.09158  | 0.04794  | -0.12159 | 0.00853  | 0.108307 | 0.01922  | -0.10147 |
| -0.0095  | 0.8378  | -0.05555 | 0.23082  | 0.118761 | 0.01021  | -0.0949  | 0.04036  | 0.084496 |
| -0.03615 | 0.43572 | 0.012255 | 0.79168  | 0.06887  | 0.13726  | 0.01786  | 0.70028  | 0.135303 |
| -0.11095 | 0.01646 | -0.21382 | 3.13E-06 | -0.03115 | 0.5019   | -0.17948 | 9.63E-05 | 0.198164 |
| -0.0876  | 0.05854 | -0.21754 | 2.08E-06 | -0.00096 | 0.98356  | -0.2729  | 2.02E-09 | 0.109049 |
| 0.085813 | 0.0639  | 0.130488 | 0.00474  | 0.257657 | 1.62E-08 | 0.082271 | 0.07571  | 0.16257  |
| 0.041689 | 0.36872 | -0.12019 | 0.00933  | 0.167077 | 0.00029  | -0.07545 | 0.10343  | 0.220048 |
| -0.0315  | 0.49712 | -0.20033 | 1.29E-05 | -0.00143 | 0.97534  | -0.21581 | 2.52E-06 | -0.02391 |
| 0.014935 | 0.74753 | -0.14631 | 0.00152  | 0.096887 | 0.03634  | -0.22401 | 1.01E-06 | 0.14286  |
| -0.0502  | 0.27901 | -0.0437  | 0.34602  | 0.04255  | 0.3589   | -0.01767 | 0.70327  | 0.106246 |
| -0.00648 | 0.88893 | -0.02973 | 0.52162  | 0.043928 | 0.34353  | -0.13396 | 0.00373  | -0.12968 |
| 0.049316 | 0.28754 | -0.0899  | 0.0522   | 0.116915 | 0.01146  | -0.17508 | 0.00014  | 0.073786 |
| -0.08284 | 0.0737  | -0.0366  | 0.43003  | 0.109827 | 0.01759  | -0.12455 | 0.00704  | 0.184371 |
| -0.00528 | 0.90936 | -0.05617 | 0.22568  | 0.041307 | 0.37312  | -0.0861  | 0.06301  | 0.122494 |
| 0.055025 | 0.2353  | -0.0597  | 0.19782  | 0.185387 | 5.57E-05 | -0.16565 | 0.00032  | 0.137092 |
| 0.001292 | 0.97779 | -0.08254 | 0.07474  | 0.209007 | 5.24E-06 | -0.09874 | 0.0329   | 0.056804 |
| -0.03713 | 0.42343 | -0.18671 | 4.91E-05 | 0.003408 | 0.94145  | -0.23761 | 2.04E-07 | -0.10352 |



|          |         |          |          |          |          |          |          |          |
|----------|---------|----------|----------|----------|----------|----------|----------|----------|
| -0.02053 | 0.65805 | -0.1521  | 0.00098  | 0.129141 | 0.00519  | -0.24247 | 1.13E-07 | 0.056485 |
| 0.027932 | 0.5471  | -0.15125 | 0.00104  | 0.145192 | 0.00166  | -0.19682 | 1.84E-05 | 0.152636 |
| 0.054427 | 0.24044 | -0.10386 | 0.0248   | 0.198771 | 1.51E-05 | -0.20235 | 1.05E-05 | 0.119926 |
| 0.028341 | 0.54124 | -0.05534 | 0.23266  | 0.264521 | 6.45E-09 | -0.07671 | 0.09776  | 0.144415 |
| -0.07502 | 0.1054  | -0.0448  | 0.33401  | 0.132822 | 0.00404  | -0.06338 | 0.17153  | 0.277528 |
| -0.00806 | 0.86202 | -0.02781 | 0.54879  | 0.156733 | 0.00068  | -0.13117 | 0.00452  | 0.037952 |
| -0.03696 | 0.42553 | -0.08801 | 0.05737  | 0.047962 | 0.301    | -0.15864 | 0.00058  | 0.217648 |
| -0.0639  | 0.16804 | -0.12878 | 0.00532  | 0.062654 | 0.17648  | -0.10728 | 0.0204   | 0.192433 |
| -0.01711 | 0.71234 | -0.11518 | 0.01275  | 0.067359 | 0.14612  | -0.11518 | 0.01275  | 0.153815 |
| 0.011306 | 0.80747 | -0.08377 | 0.07051  | 0.032539 | 0.48301  | -0.13768 | 0.00287  | 0.001723 |
| 0.028212 | 0.54308 | -0.06846 | 0.1396   | 0.156881 | 0.00067  | -0.13201 | 0.00427  | 0.13695  |
| -0.11855 | 0.01034 | -0.18819 | 4.26E-05 | -0.00716 | 0.87738  | -0.20798 | 5.84E-06 | 0.141888 |
| -0.08819 | 0.05685 | -0.07712 | 0.09598  | 0.080764 | 0.08125  | -0.06298 | 0.17427  | 0.20729  |
| -0.00575 | 0.90142 | -0.15976 | 0.00053  | 0.074114 | 0.1097   | -0.29072 | 1.51E-10 | -0.00848 |
| -0.04703 | 0.31054 | -0.17268 | 0.00018  | -0.02031 | 0.66155  | -0.25519 | 2.23E-08 | -0.03926 |
| -0.06571 | 0.15626 | -0.09963 | 0.03134  | 0.070253 | 0.12952  | -0.204   | 8.85E-06 | 0.072077 |
| 0.026834 | 0.56297 | -0.0951  | 0.03994  | 0.133075 | 0.00397  | -0.20272 | 1.01E-05 | 0.161972 |
| 0.098787 | 0.03282 | -0.01275 | 0.78348  | 0.111033 | 0.01638  | -0.07309 | 0.11473  | 0.099904 |
| 0.064875 | 0.16161 | -0.07617 | 0.10019  | 0.175923 | 0.00013  | -0.19101 | 3.25E-05 | 0.004735 |
| -0.0399  | 0.38961 | -0.10703 | 0.0207   | 0.150927 | 0.00107  | -0.22984 | 5.14E-07 | 0.003838 |
| -0.00626 | 0.89261 | -0.17091 | 0.00021  | 0.038868 | 0.40203  | -0.2549  | 2.32E-08 | 0.126117 |
| -0.05509 | 0.23472 | -0.20201 | 1.09E-05 | 0.013107 | 0.77756  | -0.3042  | 1.87E-11 | 0.010058 |
| 0.046311 | 0.31797 | -0.10028 | 0.03025  | 0.1258   | 0.00649  | -0.18312 | 6.88E-05 | 0.077314 |
| 0.037626 | 0.41724 | -0.0761  | 0.10048  | 0.215507 | 2.60E-06 | -0.15984 | 0.00053  | 0.10356  |
| 0.015854 | 0.73257 | -0.05037 | 0.27737  | 0.112347 | 0.01514  | -0.09483 | 0.04052  | 0.203768 |
| 0.005985 | 0.89736 | -0.13803 | 0.0028   | 0.130668 | 0.00468  | -0.2085  | 5.53E-06 | 0.206629 |
| -0.02033 | 0.66128 | -0.05831 | 0.20847  | 0.117153 | 0.01129  | -0.12787 | 0.00565  | 0.209048 |
| -0.00266 | 0.95433 | -0.11905 | 0.01003  | 0.141312 | 0.00221  | -0.22295 | 1.14E-06 | 0.197074 |
| -0.04372 | 0.34579 | -0.15355 | 0.00087  | 0.141167 | 0.00223  | -0.20851 | 5.52E-06 | 0.201848 |
| 0.039853 | 0.3902  | -0.1285  | 0.00542  | 0.117385 | 0.01113  | -0.16765 | 0.00027  | 0.092333 |
| 0.04751  | 0.30559 | 0.003876 | 0.93343  | 0.20101  | 1.20E-05 | -0.12102 | 0.00885  | 0.055497 |
| -0.02248 | 0.62806 | -0.22165 | 1.32E-06 | -0.06905 | 0.13624  | -0.26334 | 7.57E-09 | -0.0135  |
| 0.04925  | 0.28819 | -0.09786 | 0.0345   | 0.152613 | 0.00094  | -0.18308 | 6.90E-05 | 0.189713 |
| 0.042491 | 0.35957 | 0.185168 | 5.68E-05 | 0.021651 | 0.64073  | 0.100049 | 0.03064  | -0.16245 |
| -0.01858 | 0.6888  | -0.00181 | 0.96883  | 0.07842  | 0.09051  | -0.08012 | 0.08371  | 0.009022 |
| 0.022881 | 0.62187 | -0.15601 | 0.00072  | -0.03198 | 0.4905   | -0.26204 | 9.01E-09 | -0.06938 |
| -0.01261 | 0.78585 | -0.11998 | 0.00945  | 0.109517 | 0.01791  | -0.14157 | 0.00217  | 0.177291 |
| 0.009439 | 0.8388  | 0.139966 | 0.00243  | -0.07189 | 0.12081  | 0.141401 | 0.00219  | -0.02367 |
| -0.09283 | 0.04496 | -0.00534 | 0.90836  | -0.15091 | 0.00107  | 0.045331 | 0.32833  | -0.1435  |
| 0.003301 | 0.94328 | -0.036   | 0.43769  | 0.052593 | 0.25667  | -0.18954 | 3.75E-05 | 0.120968 |
| 0.049322 | 0.28749 | -0.02008 | 0.66507  | 0.192987 | 2.68E-05 | -0.12028 | 0.00927  | 0.186979 |
| -0.03351 | 0.47009 | -0.17837 | 0.00011  | 0.118434 | 0.01042  | -0.2432  | 1.03E-07 | 0.076476 |
| -0.00741 | 0.8732  | 0.151561 | 0.00102  | -0.08055 | 0.08207  | 0.078582 | 0.08984  | -0.34347 |
| 0.051011 | 0.27128 | -0.01132 | 0.80717  | 0.148794 | 0.00126  | -0.07957 | 0.08586  | 0.28494  |
| -0.01854 | 0.68942 | -0.20426 | 8.61E-06 | 0.065535 | 0.15738  | -0.20086 | 1.22E-05 | 0.189809 |

|          |          |          |          |          |          |          |          |          |
|----------|----------|----------|----------|----------|----------|----------|----------|----------|
| -0.00143 | 0.97534  | -0.12691 | 0.00603  | 0.131811 | 0.00433  | -0.25514 | 2.25E-08 | 0.162871 |
| -0.00317 | 0.94561  | -0.07989 | 0.08461  | 0.06636  | 0.1522   | -0.24646 | 6.84E-08 | -0.04514 |
| -0.02603 | 0.57473  | -0.0962  | 0.03769  | -0.28805 | 2.25E-10 | -0.11478 | 0.01306  | -0.23963 |
| -0.01605 | 0.72935  | -0.10538 | 0.02276  | 0.145324 | 0.00164  | -0.12148 | 0.00859  | 0.259333 |
| 0.001453 | 0.97502  | -0.17052 | 0.00021  | 0.051513 | 0.26658  | -0.25678 | 1.82E-08 | 0.131335 |
| -0.02069 | 0.65561  | 0.068643 | 0.13856  | -0.1516  | 0.00101  | 0.069166 | 0.13557  | -0.11304 |
| 0.006792 | 0.88362  | -0.16441 | 0.00036  | 0.011396 | 0.80598  | -0.06854 | 0.13913  | 0.064385 |
| -0.01221 | 0.79241  | -0.14721 | 0.00142  | 0.071534 | 0.12266  | -0.18162 | 7.91E-05 | 0.198072 |
| -0.00348 | 0.94023  | -0.13182 | 0.00432  | 0.083882 | 0.07014  | -0.20829 | 5.65E-06 | 0.125707 |
| 0.007043 | 0.87935  | -0.12445 | 0.00709  | 0.170797 | 0.00021  | -0.13611 | 0.00321  | 0.260897 |
| 0.060459 | 0.19216  | -0.02955 | 0.52416  | 0.19868  | 1.52E-05 | 0.04777  | 0.30294  | 0.124047 |
| 0.026179 | 0.57254  | -0.00372 | 0.93608  | 0.176122 | 0.00013  | -0.09444 | 0.04135  | 0.105989 |
| -0.03209 | 0.48912  | -0.08838 | 0.05632  | 0.091184 | 0.04892  | -0.20109 | 1.19E-05 | 0.152741 |
| 0.034151 | 0.46158  | -0.06784 | 0.14324  | 0.087837 | 0.05786  | -0.18675 | 4.89E-05 | 0.038359 |
| 0.009863 | 0.83167  | -0.10196 | 0.02758  | 0.135147 | 0.00343  | -0.09054 | 0.05053  | 0.301732 |
| -0.11612 | 0.01203  | -0.1653  | 0.00033  | 0.009031 | 0.84567  | -0.23518 | 2.73E-07 | 0.027953 |
| 0.026609 | 0.56625  | -0.15807 | 0.00061  | 0.156285 | 0.0007   | -0.24657 | 6.75E-08 | 0.158217 |
| 0.030968 | 0.5044   | -0.03735 | 0.42066  | 0.182561 | 7.25E-05 | -0.02963 | 0.52299  | 0.104405 |
| 0.055337 | 0.23266  | 0.084812 | 0.06707  | 0.291519 | 1.34E-10 | -0.00575 | 0.90133  | 0.235087 |
| 0.032355 | 0.48549  | 0.279495 | 7.91E-10 | 0.303906 | 1.96E-11 | 0.17303  | 0.00017  | 0.260328 |
| 0.011779 | 0.79959  | -0.05687 | 0.21992  | 0.127481 | 0.0058   | -0.04278 | 0.35627  | 0.281425 |
| -0.06261 | 0.17682  | -0.12932 | 0.00513  | 0.059847 | 0.19671  | -0.19486 | 2.23E-05 | 0.173825 |
| 0.015619 | 0.73638  | 0.10805  | 0.01951  | -0.07667 | 0.09794  | 0.075613 | 0.10269  | -0.03716 |
| 0.047402 | 0.30669  | -0.10952 | 0.0179   | 0.205601 | 7.50E-06 | -0.13447 | 0.0036   | 0.264306 |
| 0.067573 | 0.14484  | 0.085032 | 0.06636  | 0.347514 | 1.06E-14 | 0.052959 | 0.25337  | 0.333598 |
| 0.060083 | 0.19494  | 0.229426 | 5.40E-07 | 0.05802  | 0.21075  | 0.278801 | 8.75E-10 | -0.04632 |
| 0.000815 | 0.98599  | 0.057311 | 0.21639  | 0.119421 | 0.00979  | -0.03365 | 0.46824  | 0.087406 |
| 0.056268 | 0.22488  | 0.048235 | 0.29826  | 0.252105 | 3.33E-08 | -0.03137 | 0.49888  | 0.138991 |
| -0.0432  | 0.3516   | -0.18729 | 4.65E-05 | 0.075238 | 0.10441  | -0.28095 | 6.41E-10 | 0.146156 |
| -0.07744 | 0.09464  | -0.13268 | 0.00408  | 0.084616 | 0.06771  | -0.23002 | 5.03E-07 | 0.118802 |
| -0.03298 | 0.47709  | -0.0215  | 0.64301  | 0.01975  | 0.67033  | -0.05984 | 0.19679  | 0.000557 |
| -0.0887  | 0.05542  | -0.18741 | 4.60E-05 | 0.014653 | 0.75214  | -0.2067  | 6.68E-06 | 0.081669 |
| -0.00262 | 0.95501  | -0.09871 | 0.03295  | 0.045226 | 0.32945  | -0.17081 | 0.00021  | -0.01918 |
| 0.018948 | 0.68297  | -0.07106 | 0.12519  | 0.206879 | 6.56E-06 | -0.15612 | 0.00071  | 0.183372 |
| 0.016458 | 0.72279  | -0.10572 | 0.02231  | 0.051755 | 0.26435  | -0.12495 | 0.00686  | 0.157279 |
| -0.0225  | 0.62775  | -0.06925 | 0.13513  | -0.00454 | 0.92198  | -0.05064 | 0.27476  | 0.131218 |
| 0.017675 | 0.70323  | -0.12373 | 0.00743  | 0.05353  | 0.24829  | -0.11927 | 0.00989  | 0.210616 |
| 0.071388 | 0.12343  | -0.06154 | 0.18432  | 0.138473 | 0.00271  | -0.13087 | 0.00462  | 0.157008 |
| -0.05191 | 0.26289  | -0.15547 | 0.00075  | 0.069017 | 0.13642  | -0.17144 | 0.0002   | 0.024534 |
| -0.06731 | 0.1464   | -0.0941  | 0.0421   | 0.054068 | 0.24356  | -0.05259 | 0.25667  | 0.114699 |
| -0.02067 | 0.65601  | -0.05488 | 0.23653  | 0.083096 | 0.07281  | -0.04159 | 0.36983  | 0.096686 |
| 0.217306 | 2.14E-06 | 0.232279 | 3.86E-07 | 0.542021 | 5.12E-37 | 0.279038 | 8.45E-10 | 0.306665 |
| 0.064286 | 0.16546  | -0.00925 | 0.84193  | 0.124055 | 0.00727  | -0.05661 | 0.22203  | 0.08746  |
| -0.07686 | 0.0971   | 0.039756 | 0.39135  | -0.14106 | 0.00225  | 0.048791 | 0.29272  | -0.10417 |
| -0.04509 | 0.3309   | 0.212895 | 3.46E-06 | 0.027044 | 0.55991  | 0.223189 | 1.11E-06 | -0.00734 |

|          |         |          |          |          |          |          |          |          |
|----------|---------|----------|----------|----------|----------|----------|----------|----------|
| -0.00486 | 0.91661 | -0.02745 | 0.55406  | 0.025973 | 0.57557  | -0.11826 | 0.01053  | -0.06903 |
| 0.085912 | 0.06359 | -0.02711 | 0.559    | 0.217061 | 2.19E-06 | -0.01895 | 0.68301  | 0.223631 |
| 0.041625 | 0.36945 | -0.05808 | 0.21026  | 0.091051 | 0.04925  | -0.09195 | 0.04704  | 0.104851 |
| 0.001333 | 0.97708 | -0.21106 | 4.21E-06 | 0.006279 | 0.89235  | -0.24488 | 8.34E-08 | 0.02161  |
| 0.018995 | 0.68223 | -0.02579 | 0.57825  | 0.105489 | 0.02261  | -0.11403 | 0.01367  | 0.189659 |
| 0.009629 | 0.83559 | -0.14558 | 0.00161  | 0.008686 | 0.8515   | -0.30044 | 3.38E-11 | 0.03035  |
| 0.013774 | 0.76657 | -0.15278 | 0.00093  | -0.01958 | 0.67306  | -0.20902 | 5.23E-06 | 0.014641 |
| -0.03998 | 0.38871 | -0.14062 | 0.00232  | 0.147462 | 0.0014   | -0.1139  | 0.01378  | 0.249024 |
| 0.111437 | 0.01599 | -0.01504 | 0.74585  | 0.177862 | 0.00011  | -0.04985 | 0.28233  | 0.24212  |
| 0.10278  | 0.02635 | 0.029755 | 0.52124  | 0.318361 | 1.85E-12 | -0.03929 | 0.39687  | 0.306571 |
| -0.01715 | 0.71168 | 0.022396 | 0.62927  | 0.089227 | 0.05399  | -0.12896 | 0.00525  | 0.007508 |
| 0.069164 | 0.13559 | -0.00572 | 0.90195  | 0.23822  | 1.89E-07 | -0.07745 | 0.09459  | 0.219346 |
| -0.01397 | 0.76341 | -0.15887 | 0.00057  | 0.133811 | 0.00377  | -0.21079 | 4.33E-06 | 0.138072 |
| -0.14886 | 0.00125 | -0.20867 | 5.43E-06 | -0.13901 | 0.00261  | -0.21272 | 3.52E-06 | -0.02849 |
| -0.0308  | 0.50666 | -0.10474 | 0.0236   | 0.073715 | 0.11164  | -0.15733 | 0.00064  | 0.20992  |
| -0.05426 | 0.24192 | -0.18657 | 4.98E-05 | -0.03788 | 0.41414  | -0.18961 | 3.72E-05 | -0.00167 |
| -0.02372 | 0.60913 | -0.1312  | 0.00451  | 0.068048 | 0.14203  | -0.24212 | 1.18E-07 | 0.103304 |
| -0.0093  | 0.84112 | -0.03816 | 0.4106   | -0.0007  | 0.98801  | 0.005266 | 0.90964  | 0.220528 |
| -0.04252 | 0.35928 | -0.11332 | 0.01428  | -0.0581  | 0.21013  | -0.17008 | 0.00022  | -0.13493 |
| 0.035602 | 0.44275 | -0.10437 | 0.0241   | 0.115462 | 0.01253  | -0.1362  | 0.00319  | 0.112903 |
| 0.004762 | 0.91826 | -0.05838 | 0.2079   | 0.071385 | 0.12344  | -0.04416 | 0.34093  | 0.151331 |
| 0.020844 | 0.65323 | -0.1206  | 0.00909  | 0.04817  | 0.29891  | -0.14529 | 0.00164  | 0.25886  |
| -0.01433 | 0.75747 | -0.1543  | 0.00082  | 0.100116 | 0.03053  | -0.21204 | 3.79E-06 | 0.0838   |
| -0.02228 | 0.63107 | -0.27313 | 1.96E-09 | -0.02742 | 0.55451  | -0.21839 | 1.89E-06 | 0.23512  |
| -0.03455 | 0.45642 | -0.11844 | 0.01042  | 0.005352 | 0.90817  | -0.21253 | 3.59E-06 | 0.06253  |
| -0.01887 | 0.68417 | 0.010723 | 0.81722  | 0.134518 | 0.00359  | -0.0151  | 0.74481  | 0.341474 |
| -0.02962 | 0.52321 | -0.06647 | 0.1515   | 0.043307 | 0.35041  | -0.1617  | 0.00045  | 0.000122 |
| -0.0136  | 0.76945 | -0.11312 | 0.01445  | 0.122572 | 0.00801  | -0.16887 | 0.00025  | 0.288344 |
| -0.03498 | 0.45081 | -0.01656 | 0.72119  | 0.045206 | 0.32967  | -0.08065 | 0.08169  | -0.00466 |
| -0.02027 | 0.66211 | -0.10707 | 0.02065  | 0.019111 | 0.6804   | -0.19566 | 2.06E-05 | 0.022251 |
| -0.03786 | 0.41429 | -0.10449 | 0.02393  | 0.118721 | 0.01023  | -0.21477 | 2.82E-06 | 0.067491 |
| 0.121542 | 0.00856 | 0.012032 | 0.79539  | 0.195732 | 2.05E-05 | -0.08206 | 0.07648  | 0.19562  |
| 0.040057 | 0.38777 | -0.07739 | 0.09483  | 0.20965  | 4.89E-06 | -0.17532 | 0.00014  | 0.070725 |
| 0.063791 | 0.16874 | -0.02317 | 0.61753  | 0.174975 | 0.00014  | -0.04432 | 0.33925  | 0.186213 |
| -0.05425 | 0.24196 | -0.06874 | 0.13801  | 0.072861 | 0.11586  | -0.08653 | 0.0617   | 0.18841  |
| -0.01287 | 0.78146 | -0.12126 | 0.00872  | 0.072041 | 0.12002  | -0.21246 | 3.62E-06 | 0.052215 |
| -0.00206 | 0.96455 | -0.18769 | 4.48E-05 | 0.079277 | 0.08703  | -0.21011 | 4.66E-06 | 0.115306 |
| -0.05362 | 0.24753 | -0.01831 | 0.69304  | -0.20439 | 8.51E-06 | -0.0829  | 0.07349  | -0.19347 |
| 0.011801 | 0.79922 | -0.07915 | 0.08752  | 0.216162 | 2.42E-06 | -0.12116 | 0.00877  | 0.209415 |
| 0.028391 | 0.54053 | -0.11929 | 0.00987  | 0.161894 | 0.00044  | -0.21469 | 2.85E-06 | 0.159415 |
| 0.007972 | 0.86358 | -0.12911 | 0.0052   | 0.146998 | 0.00145  | -0.11596 | 0.01215  | 0.29664  |
| 0.040982 | 0.3769  | -0.17296 | 0.00017  | 0.051252 | 0.26902  | -0.2303  | 4.87E-07 | 0.155961 |
| -0.0364  | 0.43253 | 0.133549 | 0.00384  | -0.08544 | 0.06508  | 0.095636 | 0.03884  | -0.14507 |
| -0.04431 | 0.33933 | -0.06646 | 0.15156  | 0.061325 | 0.18586  | -0.17082 | 0.00021  | 0.051475 |
| -0.00886 | 0.84862 | -0.12047 | 0.00916  | 0.170983 | 0.00021  | -0.20375 | 9.09E-06 | 0.15456  |

|          |         |          |          |          |          |          |          |          |
|----------|---------|----------|----------|----------|----------|----------|----------|----------|
| 0.053382 | 0.2496  | 0.049604 | 0.28474  | 0.356015 | 2.12E-15 | 0.034479 | 0.45729  | 0.288448 |
| 0.009461 | 0.83842 | -0.07423 | 0.10913  | 0.092081 | 0.04673  | -0.1087  | 0.01879  | 0.119874 |
| -0.07057 | 0.1278  | -0.21203 | 3.80E-06 | -0.03019 | 0.51512  | -0.26041 | 1.12E-08 | 0.13771  |
| 0.064952 | 0.16111 | 0.012341 | 0.79026  | 0.329313 | 2.83E-13 | 0.012532 | 0.78708  | 0.347112 |
| -0.13107 | 0.00455 | -0.17735 | 0.00012  | -0.09632 | 0.03745  | -0.14275 | 0.00198  | 0.244939 |
| -0.03573 | 0.44113 | -0.04926 | 0.28806  | 0.164788 | 0.00035  | -0.11904 | 0.01003  | 0.116668 |
| -0.00643 | 0.88971 | -0.05199 | 0.2622   | 0.078843 | 0.08878  | -0.05685 | 0.22008  | 0.075601 |
| 0.035287 | 0.44681 | 0.049878 | 0.28208  | 0.225077 | 8.92E-07 | -0.1088  | 0.01868  | 0.088572 |
| 0.007812 | 0.86629 | -0.07989 | 0.08459  | 0.184558 | 6.02E-05 | -0.22164 | 1.32E-06 | 0.193039 |
| -0.15666 | 0.00068 | -0.13197 | 0.00428  | -0.01515 | 0.74401  | -0.2439  | 9.43E-08 | -0.11172 |
| 0.070623 | 0.12751 | -0.05438 | 0.24085  | 0.188344 | 4.20E-05 | -0.04688 | 0.312    | 0.24577  |
| 0.008807 | 0.84945 | -0.0109  | 0.81432  | 0.163299 | 0.0004   | -0.03216 | 0.48818  | 0.164708 |
| -0.06034 | 0.19307 | -0.17057 | 0.00021  | 0.041082 | 0.37573  | -0.22312 | 1.11E-06 | 0.019829 |
| 0.112329 | 0.01516 | 0.327936 | 3.60E-13 | 0.185083 | 5.73E-05 | 0.436615 | 3.70E-23 | -0.02587 |
| 0.003706 | 0.93634 | 0.06547  | 0.15779  | 0.153021 | 0.00091  | 0.016781 | 0.71758  | 0.161951 |
| 0.032611 | 0.48204 | -0.15908 | 0.00056  | 0.053353 | 0.24985  | -0.22706 | 7.10E-07 | 0.034306 |
| -0.01349 | 0.77117 | -0.08644 | 0.06197  | 0.046021 | 0.32101  | -0.15378 | 0.00086  | 0.186871 |
| 0.005002 | 0.91415 | -0.11573 | 0.01232  | 0.035619 | 0.44254  | -0.19065 | 3.37E-05 | 0.077492 |
| 0.007885 | 0.86506 | -0.10983 | 0.01759  | 0.035024 | 0.45021  | -0.13245 | 0.00414  | 0.077991 |
| 0.069243 | 0.13514 | -0.10357 | 0.0252   | 0.167264 | 0.00028  | -0.1566  | 0.00068  | 0.160501 |
| -0.04924 | 0.28831 | -0.05097 | 0.27169  | 0.047783 | 0.30282  | -0.06858 | 0.1389   | -0.06521 |
| 0.063018 | 0.17398 | -0.13166 | 0.00437  | 0.088226 | 0.05676  | -0.17945 | 9.65E-05 | 0.109367 |
| 0.036034 | 0.43724 | -0.0852  | 0.06582  | 0.165578 | 0.00033  | -0.12889 | 0.00528  | 0.170869 |
| -0.02051 | 0.65836 | -0.11    | 0.01741  | 0.091518 | 0.04809  | -0.09469 | 0.04083  | 0.295198 |
| -0.01015 | 0.82676 | -0.09118 | 0.04892  | 0.180596 | 8.69E-05 | -0.12628 | 0.00628  | 0.185078 |
| 0.008312 | 0.85782 | 0.076163 | 0.1002   | -0.07451 | 0.10782  | -0.05396 | 0.24449  | -0.0793  |
| 0.0104   | 0.82264 | 0.141218 | 0.00222  | -0.078   | 0.09226  | 0.03798  | 0.41287  | -0.10613 |
| -0.04257 | 0.35862 | 0.17063  | 0.00021  | -0.10808 | 0.01948  | 0.151411 | 0.00103  | -0.1525  |
| 0.052431 | 0.25814 | -0.06739 | 0.14595  | 0.206675 | 6.70E-06 | -0.04969 | 0.28392  | 0.355985 |
| 0.037988 | 0.41277 | -0.00763 | 0.86933  | 0.199271 | 1.44E-05 | -0.05901 | 0.20302  | 0.214014 |
| 0.005565 | 0.90453 | -0.05532 | 0.2328   | 0.138352 | 0.00273  | -0.17963 | 9.49E-05 | 0.135243 |
| 0.00326  | 0.94398 | -0.09339 | 0.04367  | 0.070055 | 0.13061  | -0.20162 | 1.13E-05 | 0.090605 |
| -0.03392 | 0.46456 | -0.13285 | 0.00403  | 0.12536  | 0.00668  | -0.23339 | 3.39E-07 | 0.069467 |
| 0.020514 | 0.65837 | -0.16805 | 0.00026  | 0.031583 | 0.49596  | -0.23524 | 2.71E-07 | -0.04207 |
| -0.03924 | 0.39748 | -0.09571 | 0.03868  | 0.049856 | 0.28229  | -0.16583 | 0.00032  | 0.089999 |
| 0.043352 | 0.34991 | 0.092048 | 0.04681  | 0.209983 | 4.72E-06 | -0.01355 | 0.77029  | 0.124887 |
| -0.04619 | 0.31929 | -0.13634 | 0.00316  | 0.14209  | 0.00208  | -0.19105 | 3.24E-05 | 0.209986 |
| 0.086238 | 0.06259 | -0.06501 | 0.16074  | 0.207574 | 6.10E-06 | -0.19164 | 3.06E-05 | 0.083964 |
| 0.076161 | 0.10021 | -0.01972 | 0.67085  | 0.256639 | 1.85E-08 | -0.12069 | 0.00904  | 0.176669 |
| 0.032897 | 0.4782  | -0.10298 | 0.02606  | 0.118453 | 0.01041  | -0.1178  | 0.01084  | 0.231181 |
| -0.03227 | 0.48663 | 0.028212 | 0.54309  | 0.049289 | 0.28781  | -0.13069 | 0.00467  | -0.09038 |
| -0.10236 | 0.02698 | -0.22482 | 9.18E-07 | -0.0943  | 0.04166  | -0.22568 | 8.32E-07 | 0.156163 |
| -0.03713 | 0.42336 | -0.05619 | 0.22554  | 0.095707 | 0.03869  | -0.0956  | 0.03892  | 0.068974 |
| 0.001188 | 0.97957 | -0.02822 | 0.54299  | 0.191232 | 3.18E-05 | -0.10409 | 0.02448  | 0.137948 |
| -0.02425 | 0.60112 | 0.081673 | 0.07787  | 0.194905 | 2.22E-05 | 0.097472 | 0.03522  | 0.346458 |

|          |         |          |          |          |          |          |          |          |
|----------|---------|----------|----------|----------|----------|----------|----------|----------|
| -0.01126 | 0.80829 | -0.14545 | 0.00162  | 0.005421 | 0.90699  | -0.22931 | 5.47E-07 | 0.028352 |
| 0.003065 | 0.94734 | -0.173   | 0.00017  | 0.059904 | 0.19628  | -0.26619 | 5.14E-09 | 0.129408 |
| 0.018236 | 0.69428 | 0.13954  | 0.00251  | -0.0196  | 0.67266  | 0.199719 | 1.37E-05 | -0.13717 |
| -0.06831 | 0.14047 | -0.22786 | 6.48E-07 | -0.04702 | 0.31059  | -0.22513 | 8.87E-07 | 0.019271 |
| -0.0483  | 0.29757 | -0.2025  | 1.03E-05 | 0.037981 | 0.41286  | -0.23404 | 3.13E-07 | 0.067    |
| -0.03039 | 0.51243 | -0.11923 | 0.00991  | 0.090779 | 0.04993  | -0.15027 | 0.00113  | 0.103306 |
| -0.048   | 0.30066 | -0.19072 | 3.35E-05 | 0.088682 | 0.05548  | -0.21491 | 2.78E-06 | 0.214822 |
| -0.00273 | 0.95306 | -0.12493 | 0.00687  | 0.104476 | 0.02395  | -0.14927 | 0.00121  | 0.138723 |
| -0.08585 | 0.06377 | -0.23696 | 2.21E-07 | -0.07091 | 0.12595  | -0.22756 | 6.70E-07 | 0.002828 |
| 0.064193 | 0.16607 | -0.16054 | 0.0005   | 0.166729 | 0.0003   | -0.25382 | 2.67E-08 | 0.154033 |
| -0.00259 | 0.95543 | -0.03706 | 0.42425  | 0.231694 | 4.14E-07 | 0.004841 | 0.91691  | 0.430481 |
| 0.042971 | 0.35416 | -0.0137  | 0.76783  | 0.175519 | 0.00014  | -0.15724 | 0.00065  | 0.013518 |
| 0.013482 | 0.77137 | -0.12612 | 0.00635  | 0.121236 | 0.00873  | -0.18744 | 4.58E-05 | 0.182461 |
| -0.00235 | 0.95957 | -0.00282 | 0.95156  | 0.001093 | 0.9812   | -0.11404 | 0.01367  | -0.09895 |
| 0.045341 | 0.32822 | -0.1719  | 0.00019  | 0.143851 | 0.00183  | -0.26544 | 5.69E-09 | 0.042939 |
| -0.01471 | 0.75121 | -0.0953  | 0.03953  | 0.039753 | 0.39139  | -0.22645 | 7.62E-07 | 0.013681 |
| -0.03663 | 0.42969 | -0.07678 | 0.09749  | 0.046464 | 0.31637  | -0.126   | 0.0064   | 0.105065 |
| -0.02291 | 0.62139 | -0.06571 | 0.15625  | 0.125291 | 0.00671  | -0.02511 | 0.58833  | 0.255361 |
| 0.019546 | 0.67354 | -0.04731 | 0.30761  | 0.240625 | 1.41E-07 | -0.02841 | 0.5402   | 0.392541 |
| -0.04188 | 0.36648 | -0.09257 | 0.04557  | 0.025745 | 0.57892  | -0.20459 | 8.32E-06 | 0.081636 |
| 0.083514 | 0.07138 | -0.03239 | 0.48504  | 0.178512 | 0.00011  | -0.13938 | 0.00254  | 0.074073 |
| -0.04379 | 0.34504 | -0.06616 | 0.15345  | 0.06226  | 0.17922  | -0.12047 | 0.00916  | 0.107511 |
| 0.002145 | 0.96312 | -0.08815 | 0.05697  | 0.121655 | 0.0085   | -0.21029 | 4.57E-06 | 0.118327 |
| 0.058645 | 0.20587 | -0.10013 | 0.03051  | 0.091806 | 0.04739  | -0.13813 | 0.00278  | 0.10203  |
| 0.016938 | 0.71506 | -0.09516 | 0.03982  | 0.138604 | 0.00268  | -0.23022 | 4.92E-07 | 0.063963 |
| 0.054189 | 0.2425  | -0.07448 | 0.10796  | 0.033074 | 0.47583  | -0.10612 | 0.02182  | 0.022636 |
| -0.01773 | 0.70238 | -0.07446 | 0.10807  | 0.05121  | 0.26941  | -0.09883 | 0.03274  | 0.10863  |
| -0.04995 | 0.28136 | -0.16666 | 0.0003   | 0.02523  | 0.58655  | -0.27154 | 2.45E-09 | -0.08358 |
| -0.02649 | 0.56805 | -0.10513 | 0.02308  | 0.136362 | 0.00315  | -0.16404 | 0.00037  | 0.11155  |
| 0.043753 | 0.34546 | -0.07192 | 0.12068  | 0.207887 | 5.90E-06 | -0.11792 | 0.01076  | 0.305061 |
| -0.05953 | 0.19907 | -0.2638  | 7.11E-09 | -0.07112 | 0.12482  | -0.20606 | 7.14E-06 | 0.058127 |
| 0.028619 | 0.53728 | -0.06493 | 0.16127  | 0.229573 | 5.30E-07 | -0.11185 | 0.0156   | 0.088966 |
| 0.067807 | 0.14345 | -0.00296 | 0.94907  | 0.181292 | 8.15E-05 | -0.07512 | 0.10493  | 0.085489 |
| -0.15817 | 0.0006  | -0.19263 | 2.78E-05 | -0.02915 | 0.52974  | -0.26397 | 6.95E-09 | 0.141172 |
| -0.05123 | 0.26921 | -0.08625 | 0.06257  | 0.014317 | 0.75764  | -0.19545 | 2.10E-05 | -0.0558  |
| -0.03646 | 0.43182 | -0.12082 | 0.00896  | 0.058861 | 0.2042   | -0.17502 | 0.00014  | 0.080369 |
| 0.023029 | 0.61962 | -0.17813 | 0.00011  | 0.05865  | 0.20582  | -0.27518 | 1.47E-09 | 0.070898 |
| -0.11674 | 0.01158 | -0.18449 | 6.06E-05 | -0.05562 | 0.23023  | -0.23595 | 2.49E-07 | 0.092886 |
| -0.0324  | 0.48493 | -0.12061 | 0.00908  | 0.02635  | 0.57003  | -0.14568 | 0.0016   | 0.074447 |
| 0.008158 | 0.86044 | -0.23157 | 4.19E-07 | 0.082725 | 0.0741   | -0.22308 | 1.12E-06 | 0.188123 |
| -0.00344 | 0.94085 | -0.18079 | 8.54E-05 | 0.097767 | 0.03467  | -0.10863 | 0.01886  | 0.152523 |
| 0.063271 | 0.17225 | -0.04294 | 0.35447  | 0.171159 | 0.0002   | -0.141   | 0.00226  | 0.113772 |
| 0.015286 | 0.7418  | -0.00824 | 0.85911  | 0.157933 | 0.00061  | -0.1113  | 0.01612  | 0.13009  |
| 0.017068 | 0.71296 | -0.04609 | 0.32026  | 0.15398  | 0.00084  | -0.13106 | 0.00456  | 0.103785 |
| -0.04789 | 0.30174 | -0.15493 | 0.00078  | 0.086972 | 0.06038  | -0.08706 | 0.06011  | 0.185933 |

|          |         |          |          |          |          |          |          |          |
|----------|---------|----------|----------|----------|----------|----------|----------|----------|
| 0.019728 | 0.67068 | -0.10963 | 0.01779  | 0.189062 | 3.92E-05 | -0.16989 | 0.00023  | 0.19795  |
| -0.03207 | 0.48929 | -0.17624 | 0.00013  | 0.038275 | 0.40925  | -0.26659 | 4.86E-09 | -0.04841 |
| 0.045797 | 0.32337 | -0.02455 | 0.59667  | 0.105817 | 0.02219  | -0.08963 | 0.05292  | 0.153223 |
| 0.105177 | 0.02302 | 0.031143 | 0.50199  | 0.314391 | 3.58E-12 | 0.036313 | 0.4337   | 0.247414 |
| 0.088217 | 0.05678 | 0.085002 | 0.06646  | 0.302628 | 2.40E-11 | 0.070073 | 0.13051  | 0.282997 |
| -0.10294 | 0.02612 | -0.20275 | 1.01E-05 | -0.05302 | 0.25285  | -0.20851 | 5.52E-06 | 0.015009 |
| -0.0659  | 0.15507 | -0.09598 | 0.03814  | 0.11701  | 0.01139  | -0.12831 | 0.00549  | 0.279212 |
| -0.00938 | 0.83971 | -0.17307 | 0.00017  | 0.071393 | 0.1234   | -0.2479  | 5.71E-08 | 0.066218 |
| -0.03723 | 0.42212 | -0.20544 | 7.62E-06 | -0.02635 | 0.56999  | -0.2324  | 3.80E-07 | 0.075976 |
| -0.04097 | 0.37706 | -0.09779 | 0.03464  | 0.100546 | 0.02982  | -0.14566 | 0.0016   | 0.103384 |
| -0.07383 | 0.1111  | -0.05159 | 0.26589  | 0.084663 | 0.06755  | -0.08033 | 0.08289  | 0.120225 |
| -0.06697 | 0.14844 | -0.02764 | 0.55127  | 0.115286 | 0.01267  | -0.10835 | 0.01918  | 0.038408 |
| 0.052836 | 0.25448 | -0.01038 | 0.82294  | 0.22883  | 5.78E-07 | -0.04786 | 0.30208  | 0.183633 |
| -0.05444 | 0.24032 | -0.10108 | 0.02896  | -0.02162 | 0.64124  | -0.18569 | 5.41E-05 | -0.00401 |
| -0.09249 | 0.04575 | -0.16372 | 0.00038  | -0.06137 | 0.18554  | -0.25781 | 1.58E-08 | 0.066884 |
| -0.08306 | 0.07294 | 0.016281 | 0.72565  | -0.14008 | 0.00241  | 0.101722 | 0.02795  | 0.06967  |
| 0.013528 | 0.77061 | 0.231623 | 4.17E-07 | 0.026267 | 0.57125  | 0.280886 | 6.47E-10 | -0.12691 |
| 0.018155 | 0.69557 | -0.06823 | 0.14097  | 0.1378   | 0.00284  | -0.0668  | 0.14952  | 0.46423  |
| 0.01203  | 0.79542 | -0.05564 | 0.23009  | 0.09639  | 0.03732  | -0.21635 | 2.37E-06 | 0.084283 |
| -0.05571 | 0.22952 | -0.05436 | 0.24099  | 0.023967 | 0.60543  | -0.07322 | 0.11406  | 0.096669 |
| -0.03839 | 0.40783 | -0.09856 | 0.03322  | -0.0232  | 0.61709  | -0.15344 | 0.00088  | -0.00621 |
| 0.025999 | 0.57519 | -0.11044 | 0.01696  | 0.069902 | 0.13146  | -0.13399 | 0.00372  | 0.188208 |
| 0.054015 | 0.24402 | 0.010221 | 0.82564  | 0.082367 | 0.07537  | -0.06857 | 0.13897  | 0.076174 |
| 0.001223 | 0.97897 | -0.09137 | 0.04846  | 0.06782  | 0.14337  | -0.10166 | 0.02804  | 0.057965 |
| 0.005959 | 0.89781 | -0.10428 | 0.02422  | 0.172858 | 0.00017  | -0.14971 | 0.00118  | 0.209871 |
| -0.08634 | 0.06227 | -0.0234  | 0.61405  | 0.026136 | 0.57317  | -0.01301 | 0.77921  | 0.133807 |
| -0.0275  | 0.55335 | -0.09599 | 0.03812  | 0.053604 | 0.24763  | -0.14128 | 0.00221  | 0.067428 |
| 0.004417 | 0.92416 | -0.13501 | 0.00346  | 0.093501 | 0.04343  | -0.18329 | 6.77E-05 | 0.188771 |
| -0.02952 | 0.52459 | -0.0639  | 0.16799  | 0.14087  | 0.00228  | -0.10044 | 0.02999  | 0.121011 |
| -0.02715 | 0.55841 | -0.15207 | 0.00098  | 0.094085 | 0.04213  | -0.23361 | 3.29E-07 | 0.216585 |
| -0.02108 | 0.64962 | -0.10301 | 0.02602  | 0.144965 | 0.00168  | -0.228   | 6.37E-07 | 0.19418  |
| 0.050619 | 0.27499 | 0.013292 | 0.7745   | 0.206674 | 6.70E-06 | -0.10004 | 0.03066  | 0.203326 |
| -0.04752 | 0.30551 | -0.18255 | 7.26E-05 | 0.146394 | 0.00151  | -0.14533 | 0.00164  | 0.23788  |
| -0.02014 | 0.66422 | -0.10201 | 0.0275   | 0.123727 | 0.00743  | -0.17067 | 0.00021  | 0.136053 |
| 0.039639 | 0.39275 | 0.030277 | 0.51396  | 0.13625  | 0.00318  | -0.08594 | 0.06352  | 0.009223 |
| 0.003351 | 0.94243 | -0.01715 | 0.71169  | 0.190868 | 3.30E-05 | -0.14099 | 0.00226  | 0.052143 |
| -0.02918 | 0.52928 | -0.12458 | 0.00703  | 0.144464 | 0.00175  | -0.2142  | 3.00E-06 | 0.177568 |
| 0.017253 | 0.71    | -0.13966 | 0.00249  | 0.104151 | 0.0244   | -0.21732 | 2.13E-06 | 0.192803 |
| 0.091991 | 0.04694 | -0.00887 | 0.84832  | 0.27549  | 1.40E-09 | -0.10659 | 0.02123  | 0.178796 |
| 0.034909 | 0.45169 | -0.08872 | 0.05537  | 0.111181 | 0.01623  | -0.063   | 0.17413  | 0.121967 |
| -0.00123 | 0.97893 | -0.0674  | 0.14587  | 0.101476 | 0.02833  | -0.12675 | 0.00609  | 0.052309 |
| 0.042944 | 0.35446 | -0.10548 | 0.02263  | 0.126761 | 0.00609  | -0.13588 | 0.00326  | 0.066544 |
| -0.00018 | 0.99697 | -0.13376 | 0.00378  | 0.103242 | 0.02568  | -0.20534 | 7.71E-06 | 0.126658 |
| -0.03703 | 0.42461 | -0.1753  | 0.00014  | -0.0345  | 0.45708  | -0.17747 | 0.00012  | 0.227265 |
| -0.02212 | 0.6335  | -0.1     | 0.03072  | 0.144228 | 0.00178  | -0.06354 | 0.17043  | 0.205091 |

|           |         |          |          |          |          |          |          |          |
|-----------|---------|----------|----------|----------|----------|----------|----------|----------|
| -0.09118  | 0.04893 | -0.19162 | 3.06E-05 | 0.007555 | 0.87066  | -0.19618 | 1.96E-05 | 0.237015 |
| -0.00192  | 0.96698 | -0.15854 | 0.00058  | 0.150773 | 0.00108  | -0.19072 | 3.34E-05 | 0.254053 |
| -0.04215  | 0.36348 | -0.06383 | 0.16848  | -0.00385 | 0.93385  | -0.21389 | 3.10E-06 | 0.050745 |
| -0.06596  | 0.15472 | -0.13362 | 0.00382  | -0.03442 | 0.45805  | -0.18844 | 4.17E-05 | -0.00122 |
| 0.008659  | 0.85195 | -0.03953 | 0.39403  | 0.144373 | 0.00176  | -0.07052 | 0.12808  | 0.158849 |
| -0.04091  | 0.37778 | -0.01218 | 0.793    | 0.200067 | 1.32E-05 | 0.027696 | 0.55049  | 0.361411 |
| -0.09326  | 0.04396 | -0.10553 | 0.02256  | 0.073688 | 0.11177  | -0.13729 | 0.00295  | 0.183553 |
| -0.00463  | 0.92046 | -0.03065 | 0.50881  | 0.150145 | 0.00114  | -0.10877 | 0.01872  | 0.30154  |
| 0.004938  | 0.91524 | -0.15878 | 0.00057  | 0.117868 | 0.0108   | -0.1354  | 0.00337  | 0.228321 |
| 0.057539  | 0.21456 | 0.219689 | 1.64E-06 | -0.00884 | 0.84887  | 0.158708 | 0.00058  | -0.07636 |
| -0.09412  | 0.04204 | -0.04172 | 0.36841  | 0.03756  | 0.41806  | -0.10102 | 0.02904  | 0.034016 |
| -0.01525  | 0.74241 | -0.15713 | 0.00065  | -0.05135 | 0.26813  | -0.11187 | 0.01558  | 0.021208 |
| 0.047656  | 0.3041  | 0.027147 | 0.55842  | 0.260108 | 1.17E-08 | -0.07553 | 0.10307  | 0.112002 |
| 0.020495  | 0.65866 | -0.2006  | 1.25E-05 | 0.009854 | 0.83182  | -0.24575 | 7.49E-08 | 0.07063  |
| 0.029049  | 0.53119 | 0.036255 | 0.43443  | 0.231001 | 4.49E-07 | -0.04247 | 0.35983  | 0.22043  |
| -0.03024  | 0.51449 | -0.12091 | 0.00891  | 0.078871 | 0.08866  | -0.13091 | 0.0046   | 0.192677 |
| 0.083586  | 0.07113 | 0.003521 | 0.93951  | 0.256367 | 1.92E-08 | -0.06829 | 0.14063  | 0.11408  |
| 0.067423  | 0.14573 | 0.116962 | 0.01142  | 0.30847  | 9.42E-12 | 0.167294 | 0.00028  | 0.321064 |
| -0.00542  | 0.90698 | -0.11669 | 0.01162  | 0.130974 | 0.00458  | -0.18619 | 5.16E-05 | 0.202    |
| 0.022587  | 0.62635 | -0.08746 | 0.05893  | 0.208544 | 5.50E-06 | -0.21131 | 4.10E-06 | 0.166229 |
| -0.06081  | 0.18958 | -0.13724 | 0.00296  | -0.01667 | 0.7194   | -0.10282 | 0.02629  | 0.07456  |
| -0.08788  | 0.05775 | -0.16386 | 0.00038  | -0.08722 | 0.05965  | -0.27392 | 1.75E-09 | 0.004606 |
| 0.048395  | 0.29666 | 0.411402 | 1.68E-20 | 0.201574 | 1.14E-05 | 0.507255 | 6.66E-32 | 0.136109 |
| 0.047657  | 0.30409 | 0.010571 | 0.81978  | 0.115139 | 0.01278  | -0.05817 | 0.20954  | 0.134226 |
| 0.057576  | 0.21426 | -0.07644 | 0.09897  | 0.186307 | 5.10E-05 | -0.04698 | 0.31105  | 0.171335 |
| 0.011496  | 0.80432 | -0.10788 | 0.01971  | 0.152197 | 0.00097  | -0.14687 | 0.00146  | 0.253831 |
| 0.061713  | 0.18308 | 0.027801 | 0.54899  | 0.270251 | 2.93E-09 | -0.04218 | 0.36308  | 0.281076 |
| 0.029146  | 0.52982 | -0.03896 | 0.40086  | 0.237777 | 2.00E-07 | -0.16978 | 0.00023  | 0.11782  |
| -0.02319  | 0.61723 | -0.05162 | 0.26558  | 0.190108 | 3.55E-05 | -0.09358 | 0.04326  | 0.214766 |
| 0.091202  | 0.04887 | -0.01079 | 0.81619  | 0.230324 | 4.86E-07 | -0.17229 | 0.00018  | 0.174703 |
| -0.00725  | 0.87575 | -0.03567 | 0.44186  | 0.081834 | 0.07728  | -0.07861 | 0.08973  | 0.062218 |
| -0.01946  | 0.67491 | -0.13625 | 0.00318  | 0.087583 | 0.05859  | -0.22876 | 5.83E-07 | 0.075214 |
| 0.068276  | 0.14069 | 0.085913 | 0.06359  | 0.23934  | 1.65E-07 | 0.214011 | 3.06E-06 | 0.247559 |
| -0.01656  | 0.7212  | -0.09159 | 0.04793  | 0.094759 | 0.04067  | -0.08508 | 0.0662   | 0.23511  |
| -0.0448   | 0.334   | -0.18135 | 8.10E-05 | -0.05652 | 0.22282  | -0.25994 | 1.19E-08 | 0.158334 |
| -0.03922  | 0.39778 | -0.1153  | 0.01266  | 0.147622 | 0.00138  | -0.18877 | 4.04E-05 | 0.193209 |
| 0.081688  | 0.07781 | 0.043833 | 0.34458  | 0.182271 | 7.44E-05 | 0.031103 | 0.50254  | 0.226751 |
| -0.0403   | 0.38488 | 0.028827 | 0.53433  | 0.141684 | 0.00215  | -0.02886 | 0.53381  | 0.171817 |
| 0.079074  | 0.08784 | -0.06804 | 0.14208  | 0.139736 | 0.00247  | -0.0902  | 0.05142  | 0.160353 |
| -8.75E-05 | 0.9985  | -0.12809 | 0.00557  | 0.149176 | 0.00122  | -0.16102 | 0.00048  | 0.163048 |
| -0.01822  | 0.69449 | -0.17641 | 0.00013  | 0.018619 | 0.68818  | -0.24553 | 7.70E-08 | 0.140892 |
| 0.030098  | 0.51645 | -0.05817 | 0.2096   | 0.000455 | 0.99217  | -0.07701 | 0.09648  | 0.140066 |
| -0.04512  | 0.33057 | -0.15005 | 0.00114  | 0.045955 | 0.32171  | -0.08886 | 0.05499  | 0.231737 |
| 0.048884  | 0.29179 | 0.046052 | 0.32068  | 0.271833 | 2.35E-09 | 0.02109  | 0.64941  | 0.203908 |
| 0.02082   | 0.6536  | -0.05135 | 0.26814  | 0.200263 | 1.30E-05 | -0.14796 | 0.00134  | 0.195264 |

|          |         |          |          |          |          |          |          |          |
|----------|---------|----------|----------|----------|----------|----------|----------|----------|
| 0.099436 | 0.03168 | 0.123841 | 0.00738  | 0.402214 | 1.38E-19 | 0.044707 | 0.33504  | 0.209455 |
| -0.02307 | 0.61906 | -0.06572 | 0.15619  | 0.091648 | 0.04777  | -0.11422 | 0.01352  | -0.03186 |
| 0.100649 | 0.02965 | -0.02524 | 0.58633  | 0.276046 | 1.30E-09 | -0.11682 | 0.01153  | 0.134428 |
| 0.014673 | 0.75182 | -0.15933 | 0.00055  | 0.055918 | 0.22778  | -0.18679 | 4.87E-05 | 0.087649 |
| -0.10952 | 0.0179  | -0.08885 | 0.05502  | 0.115397 | 0.01258  | -0.11217 | 0.0153   | 0.236792 |
| -0.03941 | 0.39544 | -0.18977 | 3.67E-05 | 0.018275 | 0.69365  | -0.25776 | 1.59E-08 | 0.078651 |
| 0.023578 | 0.6113  | -0.0393  | 0.39686  | 0.059129 | 0.20214  | -0.0313  | 0.49978  | 0.172955 |
| 0.038503 | 0.40647 | -0.11644 | 0.0118   | 0.150475 | 0.00111  | -0.20223 | 1.06E-05 | 0.194762 |
| -0.09941 | 0.03172 | -0.21219 | 3.73E-06 | -0.00311 | 0.94656  | -0.18412 | 6.27E-05 | 0.182616 |
| 0.018037 | 0.69745 | -0.06728 | 0.14659  | 0.118599 | 0.01031  | -0.11286 | 0.01468  | 0.141033 |
| -0.0447  | 0.33509 | -0.1277  | 0.00572  | 0.15455  | 0.00081  | -0.13635 | 0.00315  | 0.081061 |
| -0.08184 | 0.07726 | -0.25806 | 1.53E-08 | -0.06552 | 0.15744  | -0.31749 | 2.14E-12 | 0.082601 |
| -0.0861  | 0.06301 | -0.10576 | 0.02226  | 0.043717 | 0.34586  | -0.11922 | 0.00992  | 0.242476 |
| -0.10401 | 0.0246  | -0.25633 | 1.92E-08 | -0.03039 | 0.51242  | -0.25004 | 4.35E-08 | 0.104444 |
| 0.049635 | 0.28443 | -0.08667 | 0.06128  | 0.198415 | 1.57E-05 | -0.19405 | 2.42E-05 | 0.107143 |
| 0.018551 | 0.68926 | -0.05472 | 0.23795  | 0.180879 | 8.47E-05 | -0.17937 | 9.72E-05 | 0.056139 |
| -0.09301 | 0.04455 | -0.07325 | 0.11391  | 0.091472 | 0.0482   | -0.12415 | 0.00723  | -0.03967 |
| 0.008753 | 0.85036 | -0.00385 | 0.93384  | 0.150492 | 0.00111  | -0.09018 | 0.05148  | 0.002125 |
| 0.048128 | 0.29933 | 0.024654 | 0.59512  | 0.224664 | 9.35E-07 | 0.077897 | 0.09268  | 0.379277 |
| -0.00101 | 0.98256 | -0.09266 | 0.04535  | 0.100745 | 0.02949  | -0.19925 | 1.44E-05 | 0.061196 |
| -0.09285 | 0.04492 | -0.24052 | 1.43E-07 | -0.1703  | 0.00022  | -0.31015 | 7.17E-12 | -0.08258 |
| -0.03264 | 0.48169 | -0.10511 | 0.02311  | 0.100024 | 0.03068  | -0.09282 | 0.04497  | 0.143625 |
| 0.046204 | 0.31909 | 0.047216 | 0.30859  | 0.198419 | 1.56E-05 | 0.057714 | 0.21317  | -0.01289 |
| 0.034244 | 0.46036 | -0.07547 | 0.10336  | 0.139624 | 0.00249  | -0.2183  | 1.91E-06 | 0.080361 |
| -0.01205 | 0.79508 | -0.10351 | 0.02529  | 0.106409 | 0.02145  | -0.07877 | 0.08909  | 0.28311  |
| 0.08376  | 0.07054 | -0.0397  | 0.39196  | 0.220567 | 1.49E-06 | -0.05481 | 0.23712  | 0.247278 |
| -0.08008 | 0.08388 | -0.12681 | 0.00607  | 0.013535 | 0.77049  | -0.20104 | 1.20E-05 | 0.118328 |
| 0.009063 | 0.84513 | -0.09501 | 0.04014  | 0.15888  | 0.00057  | -0.18411 | 6.27E-05 | 0.19134  |
| -0.05838 | 0.20788 | -0.13384 | 0.00376  | 0.058249 | 0.20894  | -0.11931 | 0.00986  | 0.123457 |
| 0.096104 | 0.03789 | 0.099732 | 0.03118  | 0.261528 | 9.66E-09 | 0.077939 | 0.09251  | 0.161702 |
| 0.021078 | 0.64959 | -0.02344 | 0.61332  | 0.105098 | 0.02312  | -0.04571 | 0.32432  | 0.070149 |
| 0.000686 | 0.98821 | -0.08665 | 0.06133  | 0.117445 | 0.01109  | -0.17392 | 0.00016  | 0.16535  |
| 0.06518  | 0.15965 | 0.0121   | 0.79425  | 0.164455 | 0.00036  | -0.07398 | 0.11035  | 0.115079 |
| 0.092282 | 0.04625 | -0.0702  | 0.12979  | 0.210301 | 4.57E-06 | -0.14065 | 0.00232  | 0.170628 |
| -0.06919 | 0.13544 | 0.019783 | 0.66981  | -0.21411 | 3.03E-06 | 0.06514  | 0.1599   | -0.13547 |
| 0.065835 | 0.15548 | 0.121903 | 0.00836  | -0.04512 | 0.3306   | 0.061215 | 0.18665  | -0.06997 |
| 0.021569 | 0.642   | -0.02321 | 0.61689  | 0.044518 | 0.33709  | -0.02668 | 0.56522  | 0.083267 |
| -0.00679 | 0.88358 | -0.09092 | 0.04958  | 0.15131  | 0.00104  | -0.11777 | 0.01086  | 0.308802 |
| 0.035086 | 0.4494  | -0.07022 | 0.1297   | 0.232984 | 3.55E-07 | -0.08861 | 0.05567  | 0.287475 |
| -0.05725 | 0.21688 | -0.20645 | 6.86E-06 | -0.04013 | 0.38695  | -0.20131 | 1.17E-05 | 0.151242 |
| -0.05621 | 0.22532 | -0.27238 | 2.18E-09 | -0.02488 | 0.59177  | -0.33716 | 7.05E-14 | 0.078695 |
| 0.048845 | 0.29218 | -0.03788 | 0.41406  | 0.171213 | 0.0002   | -0.14721 | 0.00142  | 0.166671 |
| 0.08987  | 0.05228 | 0.020088 | 0.66502  | 0.241516 | 1.27E-07 | 0.043178 | 0.35184  | 0.28528  |
| 0.032501 | 0.48351 | 0.244895 | 8.33E-08 | 0.099204 | 0.03208  | 0.284185 | 3.99E-10 | 0.052532 |
| -0.04992 | 0.28167 | -0.1063  | 0.02159  | 0.096808 | 0.0365   | -0.13478 | 0.00352  | 0.137867 |



|          |         |          |          |          |          |          |          |          |
|----------|---------|----------|----------|----------|----------|----------|----------|----------|
| 0.037983 | 0.41283 | -0.08667 | 0.06129  | 0.160975 | 0.00048  | -0.17464 | 0.00015  | 0.113042 |
| -0.02191 | 0.6368  | -0.14954 | 0.00119  | 0.009116 | 0.84423  | -0.28231 | 5.25E-10 | 0.095608 |
| 0.019784 | 0.66979 | -0.13392 | 0.00374  | -0.00086 | 0.98529  | -0.17545 | 0.00014  | 0.202214 |
| -0.01025 | 0.82512 | 0.052853 | 0.25433  | 0.180495 | 8.77E-05 | -0.06937 | 0.13441  | 0.064691 |
| -0.00618 | 0.89408 | 0.003406 | 0.94149  | 0.140971 | 0.00226  | -0.01581 | 0.7333   | 0.214783 |
| -0.06878 | 0.1378  | -0.06278 | 0.17564  | -0.00323 | 0.94451  | -0.18274 | 7.13E-05 | -0.0928  |
| -0.05332 | 0.25014 | -0.16034 | 0.0005   | 0.012963 | 0.77994  | -0.0744  | 0.10834  | 0.236291 |
| 0.002069 | 0.96443 | -0.05949 | 0.19937  | 0.05183  | 0.26365  | -0.08745 | 0.05897  | 0.073148 |
| -0.00429 | 0.92627 | -0.06263 | 0.17664  | 0.131927 | 0.00429  | -0.09281 | 0.045    | 0.20275  |
| 0.023299 | 0.61552 | -0.08208 | 0.07641  | 0.083453 | 0.07158  | -0.16393 | 0.00037  | 0.054246 |
| -0.0712  | 0.12444 | -0.16734 | 0.00028  | 0.02529  | 0.58565  | -0.29554 | 7.23E-11 | 0.045612 |
| 0.079937 | 0.08442 | 0.031961 | 0.49081  | 0.21753  | 2.08E-06 | -0.07406 | 0.10995  | 0.132053 |
| 0.02233  | 0.63029 | -0.19048 | 3.43E-05 | 0.061377 | 0.18548  | -0.197   | 1.80E-05 | 0.228903 |
| 0.060633 | 0.19088 | -0.06296 | 0.17436  | 0.203816 | 9.02E-06 | -0.12008 | 0.0094   | 0.090657 |
| -0.00395 | 0.93215 | -0.0046  | 0.92097  | 0.16991  | 0.00023  | -0.12151 | 0.00858  | 0.1168   |
| 0.028055 | 0.54533 | 0.03358  | 0.46911  | 0.182031 | 7.61E-05 | 0.00472  | 0.91897  | 0.047473 |
| 0.019223 | 0.67863 | -0.09292 | 0.04476  | 0.203464 | 9.36E-06 | -0.19921 | 1.44E-05 | 0.168618 |
| 0.082717 | 0.07413 | 0.001128 | 0.98061  | 0.296223 | 6.51E-11 | -0.01631 | 0.72526  | 0.182881 |
| 0.070761 | 0.12677 | -0.05449 | 0.23988  | 0.239799 | 1.56E-07 | -0.10124 | 0.02871  | 0.260136 |
| -0.00271 | 0.95341 | -0.16588 | 0.00032  | 0.053094 | 0.25217  | -0.26575 | 5.45E-09 | -0.02505 |
| 0.041878 | 0.36655 | -0.14229 | 0.00205  | 0.146128 | 0.00154  | -0.19756 | 1.71E-05 | 0.121901 |
| 0.047756 | 0.30308 | -0.0347  | 0.45439  | 0.17905  | 0.0001   | -0.05014 | 0.27952  | 0.185866 |
| 0.007133 | 0.87783 | -0.13499 | 0.00347  | 0.132265 | 0.00419  | -0.22119 | 1.39E-06 | 0.147123 |
| -0.0288  | 0.53473 | -0.11523 | 0.01271  | 0.06037  | 0.19281  | -0.17664 | 0.00012  | 0.214439 |
| -0.0391  | 0.39921 | 0.146361 | 0.00152  | -0.19878 | 1.51E-05 | 0.135109 | 0.00344  | -0.24104 |
| 0.075963 | 0.1011  | 0.079175 | 0.08744  | 0.287561 | 2.42E-10 | 0.017323 | 0.70887  | 0.201974 |
| 0.026674 | 0.5653  | -0.10635 | 0.02153  | 0.190971 | 3.27E-05 | -0.21505 | 2.74E-06 | 0.137391 |
| -0.08783 | 0.05789 | -0.23295 | 3.57E-07 | 0.003592 | 0.93829  | -0.20744 | 6.18E-06 | 0.19782  |
| -0.05613 | 0.22601 | -0.16013 | 0.00051  | 0.049418 | 0.28655  | -0.09895 | 0.03253  | 0.181393 |
| 0.020241 | 0.66264 | 0.007425 | 0.87286  | 0.110649 | 0.01675  | -0.01537 | 0.74046  | 0.108597 |
| -0.07935 | 0.08675 | -0.12771 | 0.00572  | 0.029403 | 0.52619  | -0.14992 | 0.00116  | 0.12938  |
| 0.030797 | 0.50675 | 0.023969 | 0.60539  | 0.161308 | 0.00047  | -0.09918 | 0.03213  | 0.065535 |
| -0.04553 | 0.32617 | -0.02695 | 0.56133  | 0.039125 | 0.39891  | -0.11069 | 0.01671  | -0.00198 |
| -0.11541 | 0.01257 | 0.075486 | 0.10327  | -0.20226 | 1.06E-05 | 0.023687 | 0.60964  | -0.16002 |
| -0.01243 | 0.78874 | -0.12868 | 0.00535  | 0.034959 | 0.45104  | -0.21175 | 3.91E-06 | 0.069854 |
| -0.15831 | 0.0006  | -0.18854 | 4.13E-05 | -0.06691 | 0.14885  | -0.16609 | 0.00031  | 0.135834 |
| 0.135389 | 0.00337 | 0.159485 | 0.00054  | 0.325893 | 5.13E-13 | 0.146542 | 0.0015   | 0.230208 |
| -0.0113  | 0.80756 | -0.10851 | 0.019    | 0.146994 | 0.00145  | -0.20645 | 6.86E-06 | 0.084963 |
| 0.047775 | 0.3029  | -0.02795 | 0.54689  | 0.187822 | 4.42E-05 | -0.06238 | 0.17836  | 0.094183 |
| 0.028145 | 0.54404 | -0.17479 | 0.00015  | 0.037556 | 0.41812  | -0.1459  | 0.00157  | 0.158058 |
| -0.03581 | 0.44005 | -0.08568 | 0.0643   | -0.00627 | 0.89253  | -0.20518 | 7.83E-06 | -0.04223 |
| 0.010446 | 0.82187 | -0.15241 | 0.00095  | 0.1946   | 2.29E-05 | -0.14161 | 0.00216  | 0.245603 |
| 0.08678  | 0.06095 | -0.06348 | 0.17084  | 0.166585 | 0.0003   | -0.1887  | 4.06E-05 | 0.058592 |
| -0.0498  | 0.28288 | -0.20311 | 9.70E-06 | 0.068361 | 0.14019  | -0.251   | 3.84E-08 | 0.074716 |
| 0.108647 | 0.01885 | -0.00514 | 0.91171  | 0.227548 | 6.71E-07 | -0.05193 | 0.2627   | 0.166036 |

|          |          |          |          |          |          |          |          |          |
|----------|----------|----------|----------|----------|----------|----------|----------|----------|
| 0.071804 | 0.12125  | -0.05807 | 0.21037  | 0.203327 | 9.49E-06 | -0.17235 | 0.00018  | 0.108267 |
| 0.022328 | 0.63031  | -0.03607 | 0.43677  | 0.215443 | 2.62E-06 | -0.01928 | 0.67772  | 0.26192  |
| 0.004972 | 0.91466  | -0.20778 | 5.96E-06 | -0.05452 | 0.23968  | -0.26372 | 7.19E-09 | -0.07446 |
| 0.015396 | 0.74002  | -0.1224  | 0.0081   | 0.042804 | 0.35604  | -0.2317  | 4.14E-07 | -0.03196 |
| -0.01219 | 0.79271  | -0.05548 | 0.23143  | 0.143691 | 0.00185  | -0.05839 | 0.20787  | 0.340798 |
| -0.10097 | 0.02912  | 0.03268  | 0.48112  | -0.23727 | 2.13E-07 | 0.013116 | 0.77741  | -0.21635 |
| 0.023421 | 0.61367  | -0.09374 | 0.04289  | 0.131742 | 0.00435  | -0.10418 | 0.02436  | 0.269064 |
| -0.00254 | 0.9564   | -0.10809 | 0.01947  | 0.091283 | 0.04867  | -0.03645 | 0.432    | 0.16543  |
| -0.03037 | 0.51268  | -0.2169  | 2.23E-06 | 0.041317 | 0.373    | -0.20041 | 1.28E-05 | 0.133462 |
| -0.0042  | 0.92795  | -0.11585 | 0.01223  | 0.195143 | 2.17E-05 | -0.16224 | 0.00043  | 0.205951 |
| -0.05957 | 0.19882  | -0.0991  | 0.03226  | -0.03748 | 0.41904  | -0.24874 | 5.13E-08 | -0.12022 |
| 0.009305 | 0.84106  | -0.0445  | 0.33725  | 0.176455 | 0.00013  | -0.17122 | 0.0002   | 0.200026 |
| 0.010464 | 0.82157  | -0.13314 | 0.00395  | 0.181277 | 8.16E-05 | -0.19341 | 2.57E-05 | 0.248223 |
| -0.01776 | 0.70182  | -0.05769 | 0.21333  | -0.2407  | 1.40E-07 | -0.01131 | 0.80742  | -0.02237 |
| -0.00167 | 0.97125  | -0.14216 | 0.00207  | 0.094901 | 0.04037  | -0.23393 | 3.18E-07 | 0.136163 |
| -0.058   | 0.2109   | -0.14484 | 0.0017   | -0.00482 | 0.91724  | -0.16794 | 0.00027  | 0.184635 |
| -0.04008 | 0.38753  | -0.12881 | 0.00531  | 0.078023 | 0.09216  | -0.23973 | 1.58E-07 | 0.036058 |
| 0.032108 | 0.48882  | -0.11833 | 0.01049  | 0.116231 | 0.01195  | -0.21449 | 2.91E-06 | 0.089917 |
| 0.051908 | 0.26294  | -0.06411 | 0.16659  | 0.153928 | 0.00085  | -0.08835 | 0.05642  | 0.108851 |
| 0.067149 | 0.14738  | -0.01671 | 0.71865  | 0.231997 | 3.99E-07 | 0.017461 | 0.70666  | 0.335056 |
| 0.066156 | 0.15347  | 0.053356 | 0.24983  | 0.179896 | 9.26E-05 | 0.044441 | 0.33792  | 0.272008 |
| -0.01029 | 0.82445  | -0.03302 | 0.47662  | 0.148791 | 0.00126  | -0.14423 | 0.00178  | -0.03411 |
| 0.052825 | 0.25458  | 0.061907 | 0.18171  | 0.250425 | 4.14E-08 | -0.01058 | 0.81957  | 0.164142 |
| 0.033105 | 0.47543  | -0.04837 | 0.29693  | 0.199812 | 1.36E-05 | -0.09612 | 0.03786  | 0.278394 |
| 0.059918 | 0.19617  | 0.004924 | 0.91548  | 0.173931 | 0.00016  | -0.0564  | 0.22378  | 0.198026 |
| 0.010232 | 0.82546  | -0.03455 | 0.45642  | 0.24815  | 5.53E-08 | -0.08274 | 0.07407  | 0.304814 |
| -0.05279 | 0.25489  | -0.02831 | 0.54173  | 0.178708 | 0.0001   | -0.01446 | 0.75526  | 0.18412  |
| 0.019563 | 0.67327  | -0.12359 | 0.0075   | 0.147745 | 0.00137  | -0.24546 | 7.76E-08 | 0.123686 |
| -0.0065  | 0.88855  | -0.14107 | 0.00225  | 0.017725 | 0.70242  | -0.08259 | 0.07459  | 0.13432  |
| -0.22495 | 9.05E-07 | -0.23206 | 3.96E-07 | -0.17767 | 0.00011  | -0.28364 | 4.33E-10 | -0.07121 |
| -0.09141 | 0.04835  | -0.06016 | 0.19434  | 0.00584  | 0.89984  | -0.1175  | 0.01104  | -0.00786 |
| -0.06319 | 0.1728   | -0.1712  | 0.0002   | -0.15261 | 0.00094  | -0.25042 | 4.14E-08 | -0.12786 |
| -0.03447 | 0.45743  | -0.12366 | 0.00746  | 0.036971 | 0.42541  | -0.11909 | 0.01     | 0.10696  |
| -0.04493 | 0.33268  | -0.05084 | 0.27293  | 0.109579 | 0.01784  | -0.17325 | 0.00017  | 0.146135 |
| 0.008984 | 0.84646  | 0.005698 | 0.90227  | 0.160701 | 0.00049  | -0.06461 | 0.16334  | 0.068483 |
| -0.07103 | 0.12533  | -0.11118 | 0.01623  | -0.05444 | 0.24033  | -0.12639 | 0.00624  | 0.102104 |
| -0.05578 | 0.2289   | -0.05683 | 0.22025  | 0.096343 | 0.03741  | -0.06046 | 0.19214  | 0.228316 |
| -0.05272 | 0.25551  | -0.05903 | 0.20289  | 0.07217  | 0.11936  | -0.1454  | 0.00163  | 0.138012 |
| 0.032283 | 0.48646  | -0.04487 | 0.33329  | 0.269474 | 3.27E-09 | -0.08185 | 0.07723  | 0.208633 |
| 0.030984 | 0.50418  | -0.03781 | 0.41496  | 0.221154 | 1.39E-06 | -0.14091 | 0.00227  | 0.164114 |
| 0.03749  | 0.41893  | -0.12024 | 0.0093   | 0.184729 | 5.92E-05 | -0.19512 | 2.17E-05 | 0.193811 |
| -0.02882 | 0.53437  | -0.07587 | 0.10153  | 0.032203 | 0.48754  | -0.01108 | 0.81118  | 0.071217 |
| -0.02432 | 0.60017  | -0.03303 | 0.4764   | 0.164805 | 0.00035  | -0.08518 | 0.06588  | 0.205669 |
| 0.015351 | 0.74074  | -0.0937  | 0.04299  | 0.162068 | 0.00044  | -0.16986 | 0.00023  | 0.114464 |
| -0.00967 | 0.83489  | -0.14825 | 0.00131  | 0.10728  | 0.0204   | -0.13771 | 0.00286  | 0.298544 |

|          |         |          |          |          |          |          |          |          |
|----------|---------|----------|----------|----------|----------|----------|----------|----------|
| -0.05679 | 0.22061 | -0.17248 | 0.00018  | 0.074173 | 0.10942  | -0.23897 | 1.73E-07 | 0.017857 |
| -0.04828 | 0.29778 | -0.14239 | 0.00204  | 0.059016 | 0.20301  | -0.27855 | 9.06E-10 | 0.125835 |
| -0.05202 | 0.26186 | 0.009998 | 0.82939  | 0.02526  | 0.5861   | -0.15686 | 0.00067  | 0.020468 |
| 0.061205 | 0.18672 | -0.03993 | 0.38929  | 0.194989 | 2.20E-05 | -0.07672 | 0.09775  | 0.155056 |
| 0.101802 | 0.02782 | 0.039196 | 0.39806  | 0.226186 | 7.85E-07 | 0.0198   | 0.66955  | 0.020265 |
| 0.029165 | 0.52954 | -0.1194  | 0.0098   | 0.09223  | 0.04637  | -0.17171 | 0.00019  | 0.095747 |
| 0.008876 | 0.84829 | -0.08759 | 0.05857  | 0.177834 | 0.00011  | -0.19237 | 2.85E-05 | 0.11167  |
| 0.012133 | 0.79371 | -0.12875 | 0.00533  | 0.155069 | 0.00077  | -0.1117  | 0.01574  | 0.241265 |
| 0.065356 | 0.15852 | 0.033339 | 0.47231  | 0.217737 | 2.04E-06 | -0.09814 | 0.03398  | 0.131531 |
| -0.00372 | 0.93613 | -0.11633 | 0.01188  | 0.14731  | 0.00141  | -0.07201 | 0.1202   | 0.319867 |
| 0.045002 | 0.33185 | 0.067095 | 0.14771  | 0.257837 | 1.58E-08 | 0.00813  | 0.86091  | 0.219146 |
| -0.02793 | 0.5471  | -0.12175 | 0.00844  | 0.14749  | 0.00139  | -0.21098 | 4.25E-06 | 0.132834 |
| 0.104645 | 0.02373 | 0.027627 | 0.55148  | 0.122369 | 0.00811  | -0.10043 | 0.03     | 0.140502 |
| -0.06404 | 0.16711 | -0.13028 | 0.0048   | 0.080942 | 0.08058  | -0.11093 | 0.01648  | 0.166499 |
| -0.11477 | 0.01308 | -0.12034 | 0.00924  | 0.000607 | 0.98957  | -0.13278 | 0.00405  | 0.069035 |
| -0.00441 | 0.92433 | -0.14525 | 0.00165  | 0.119112 | 0.00999  | -0.20719 | 6.35E-06 | 0.051731 |
| 0.037983 | 0.41283 | -0.04738 | 0.30694  | 0.111882 | 0.01557  | -0.0428  | 0.35606  | 0.16552  |
| 0.055978 | 0.22728 | -0.04566 | 0.32481  | 0.225777 | 8.23E-07 | -0.15716 | 0.00065  | 0.260669 |
| 0.047934 | 0.30129 | -0.0017  | 0.97075  | 0.190585 | 3.39E-05 | -0.14174 | 0.00214  | 0.144497 |
| -0.04313 | 0.35243 | -0.07544 | 0.10346  | 0.126513 | 0.00619  | -0.17082 | 0.00021  | 0.043672 |
| -0.09107 | 0.04919 | -0.15493 | 0.00078  | 0.018562 | 0.68909  | -0.26176 | 9.35E-09 | 0.013725 |
| -0.04823 | 0.29826 | -0.13496 | 0.00348  | 0.007578 | 0.87026  | -0.17298 | 0.00017  | 0.138537 |
| 0.010808 | 0.81581 | -0.00744 | 0.87263  | 0.162383 | 0.00043  | -0.07994 | 0.0844   | -0.03295 |
| 0.038712 | 0.40392 | 0.051662 | 0.26521  | -0.00684 | 0.88283  | 0.033069 | 0.4759   | 0.181763 |
| 0.017923 | 0.69927 | -0.09293 | 0.04474  | 0.157613 | 0.00063  | -0.18191 | 7.70E-05 | 0.22206  |
| -0.03697 | 0.42542 | -0.17017 | 0.00022  | 0.096913 | 0.03629  | -0.22118 | 1.39E-06 | 0.212794 |
| -0.05836 | 0.20807 | -0.09654 | 0.03703  | 0.133033 | 0.00398  | -0.1984  | 1.57E-05 | 0.06864  |
| -0.00089 | 0.98477 | 0.013317 | 0.77409  | 0.194646 | 2.28E-05 | 0.029691 | 0.52214  | 0.185094 |
| 0.026618 | 0.56611 | -0.18257 | 7.24E-05 | 0.120329 | 0.00925  | -0.19431 | 2.36E-05 | 0.244704 |
| 0.032587 | 0.48237 | -0.06103 | 0.18798  | 0.098627 | 0.0331   | -0.12974 | 0.00498  | 0.116501 |
| 0.009103 | 0.84446 | 0.074787 | 0.10651  | 0.153143 | 0.0009   | -0.06414 | 0.16644  | 0.062877 |
| -0.04153 | 0.37051 | -0.09692 | 0.03628  | 0.035688 | 0.44165  | -0.16778 | 0.00027  | 0.046527 |
| 0.1424   | 0.00204 | 0.298047 | 4.91E-11 | 0.201272 | 1.17E-05 | 0.366527 | 2.70E-16 | 0.009952 |
| 0.012737 | 0.78368 | -0.05595 | 0.22753  | 0.194559 | 2.30E-05 | -0.08581 | 0.06392  | 0.139964 |
| -0.08008 | 0.08388 | 0.055395 | 0.23216  | -0.15097 | 0.00107  | 0.019996 | 0.66647  | -0.10967 |
| 0.099343 | 0.03184 | 0.072349 | 0.11845  | 0.324565 | 6.45E-13 | -0.0478  | 0.30261  | 0.327824 |
| 0.015344 | 0.74086 | -0.08642 | 0.06205  | 0.08196  | 0.07683  | -0.11818 | 0.01059  | 0.240715 |
| -0.0253  | 0.58557 | -0.12092 | 0.0089   | 0.097275 | 0.0356   | -0.15586 | 0.00073  | 0.19348  |
| -0.03763 | 0.41716 | -0.13569 | 0.0033   | 0.056428 | 0.22356  | -0.14325 | 0.00191  | 0.10694  |
| 0.042229 | 0.36254 | -0.04351 | 0.34811  | 0.116702 | 0.01161  | -0.10986 | 0.01755  | 0.224892 |
| 0.063552 | 0.17035 | 0.445299 | 3.98E-24 | 0.209634 | 4.90E-06 | 0.509415 | 3.33E-32 | 0.109315 |
| -0.01662 | 0.72014 | -0.07847 | 0.0903   | 0.094109 | 0.04207  | -0.08681 | 0.06086  | 0.163681 |
| -0.10179 | 0.02784 | -0.19224 | 2.89E-05 | -0.09423 | 0.04182  | -0.21636 | 2.37E-06 | -0.18662 |
| -0.06775 | 0.1438  | -0.11017 | 0.01724  | 0.027403 | 0.55471  | -0.21738 | 2.12E-06 | 0.071062 |
| 0.033409 | 0.47138 | -0.0451  | 0.33082  | 0.132602 | 0.0041   | -0.08797 | 0.05748  | 0.23895  |

|          |         |          |          |          |          |          |          |          |
|----------|---------|----------|----------|----------|----------|----------|----------|----------|
| -0.04821 | 0.29847 | -0.23011 | 4.98E-07 | -0.01746 | 0.70662  | -0.29365 | 9.66E-11 | 0.201221 |
| -0.06139 | 0.18538 | -0.02005 | 0.66563  | 0.057453 | 0.21525  | -0.10767 | 0.01995  | 0.028757 |
| -0.08063 | 0.08174 | 0.020117 | 0.66457  | 0.140787 | 0.00229  | -0.05292 | 0.25376  | 0.111943 |
| -0.06204 | 0.18076 | -0.18768 | 4.48E-05 | -0.0061  | 0.89545  | -0.19932 | 1.43E-05 | 0.079115 |
| -0.00577 | 0.90107 | -0.18305 | 6.92E-05 | 0.070353 | 0.12898  | -0.22184 | 1.29E-06 | 0.229847 |
| -0.01983 | 0.6691  | -0.11408 | 0.01363  | 0.021475 | 0.64344  | -0.15292 | 0.00092  | 0.119649 |
| 0.041472 | 0.37121 | -0.06243 | 0.17807  | 0.166473 | 0.0003   | -0.126   | 0.0064   | 0.145334 |
| -0.01811 | 0.69622 | -0.11145 | 0.01598  | 0.144174 | 0.00179  | -0.15519 | 0.00077  | 0.207637 |
| -0.05612 | 0.22608 | -0.13685 | 0.00304  | 0.038332 | 0.40856  | -0.2224  | 1.21E-06 | 0.166969 |
| 0.029451 | 0.52551 | -0.03853 | 0.40609  | 0.211435 | 4.04E-06 | -0.17618 | 0.00013  | 0.037195 |
| -0.06209 | 0.1804  | -0.24266 | 1.10E-07 | -0.06405 | 0.167    | -0.23031 | 4.87E-07 | 0.186824 |
| -0.01058 | 0.81967 | -0.12696 | 0.00601  | 0.013802 | 0.7661   | -0.18273 | 7.13E-05 | 0.103267 |
| -0.02424 | 0.60125 | -0.17961 | 9.51E-05 | -0.01915 | 0.67984  | -0.26014 | 1.16E-08 | -0.00499 |
| -0.00795 | 0.86402 | 0.034497 | 0.45705  | 0.173499 | 0.00016  | -0.02198 | 0.63573  | 0.138355 |
| -0.03715 | 0.42315 | -0.04934 | 0.28729  | 0.099806 | 0.03105  | -0.08181 | 0.07737  | 0.105399 |
| 0.038591 | 0.40539 | -0.04665 | 0.3144   | 0.111252 | 0.01616  | -0.12228 | 0.00816  | -0.01076 |
| -0.03109 | 0.50271 | -0.12639 | 0.00624  | 0.004733 | 0.91875  | -0.16579 | 0.00032  | 0.080388 |
| 0.064108 | 0.16663 | -0.11152 | 0.01591  | 0.181362 | 8.10E-05 | -0.23476 | 2.87E-07 | 0.133222 |
| 0.007717 | 0.8679  | -0.11936 | 0.00983  | 0.101282 | 0.02863  | -0.11989 | 0.00951  | 0.244795 |
| 0.028711 | 0.53597 | -0.1407  | 0.00231  | 0.170378 | 0.00022  | -0.17965 | 9.47E-05 | 0.180056 |
| -0.01231 | 0.79068 | -0.05099 | 0.2715   | 0.014614 | 0.75277  | -0.13916 | 0.00258  | -0.09208 |
| -0.02623 | 0.5718  | -0.09084 | 0.04977  | 0.093114 | 0.04431  | -0.05671 | 0.22129  | 0.110875 |
| 0.00796  | 0.86378 | -0.09409 | 0.04213  | 0.197092 | 1.79E-05 | -0.05081 | 0.2732   | 0.164568 |
| -0.01925 | 0.67819 | -0.16469 | 0.00035  | 0.080813 | 0.08106  | -0.25324 | 2.88E-08 | -0.03999 |
| -0.0344  | 0.45834 | -0.12407 | 0.00727  | 0.076511 | 0.09866  | -0.16235 | 0.00043  | 0.110289 |
| 0.142681 | 0.002   | 0.052521 | 0.25733  | 0.344941 | 1.71E-14 | 0.002334 | 0.95989  | 0.219249 |
| 0.041521 | 0.37065 | 0.001624 | 0.97208  | 0.174614 | 0.00015  | -0.01697 | 0.7145   | 0.126892 |
| -0.0207  | 0.65546 | -0.14942 | 0.0012   | 0.124357 | 0.00713  | -0.24429 | 8.98E-08 | 0.125322 |
| -0.0012  | 0.97936 | 0.056552 | 0.22254  | 0.146809 | 0.00147  | -0.07421 | 0.10925  | 0.199919 |
| -0.0649  | 0.16143 | -0.13719 | 0.00297  | -0.01206 | 0.79495  | -0.21413 | 3.02E-06 | 0.091619 |
| 0.111791 | 0.01565 | -0.01182 | 0.79892  | 0.240346 | 1.46E-07 | -0.11543 | 0.01256  | 0.133163 |
| -0.0447  | 0.33513 | -0.14414 | 0.00179  | 0.045564 | 0.32585  | -0.10965 | 0.01777  | 0.247642 |
| 0.050544 | 0.2757  | -0.08566 | 0.06436  | 0.150952 | 0.00107  | -0.1659  | 0.00032  | 0.126687 |
| -0.02116 | 0.6483  | 0.148173 | 0.00132  | -0.12321 | 0.00769  | 0.090643 | 0.05028  | -0.17749 |
| 0.038802 | 0.40282 | -0.13497 | 0.00347  | 0.138012 | 0.0028   | -0.12728 | 0.00588  | 0.179001 |
| 0.006489 | 0.88878 | -0.14131 | 0.00221  | 0.174826 | 0.00015  | -0.19272 | 2.75E-05 | 0.138283 |
| 0.088087 | 0.05715 | 0.05133  | 0.26829  | 0.211364 | 4.07E-06 | 0.042714 | 0.35704  | 0.211034 |
| -0.07437 | 0.1085  | -0.04449 | 0.33744  | 0.061777 | 0.18263  | -0.08952 | 0.0532   | -0.03391 |
| 0.055066 | 0.23495 | 0.052941 | 0.25354  | 0.159234 | 0.00055  | -0.01771 | 0.70269  | 0.187979 |
| 0.022451 | 0.62844 | 0.000803 | 0.9862   | 0.113986 | 0.01371  | 0.033757 | 0.46676  | 0.131779 |
| 0.035598 | 0.4428  | -0.01483 | 0.74921  | 0.186747 | 4.89E-05 | -0.11964 | 0.00966  | 0.1291   |
| 0.05498  | 0.23569 | -0.04313 | 0.35233  | 0.197989 | 1.63E-05 | -0.11366 | 0.01399  | 0.171114 |
| 0.167502 | 0.00028 | 0.099678 | 0.03127  | 0.220625 | 1.48E-06 | -0.02112 | 0.64894  | 0.071183 |
| 0.034126 | 0.46191 | -0.13426 | 0.00365  | 0.03889  | 0.40176  | -0.12916 | 0.00518  | 0.136896 |
| -0.03008 | 0.51666 | -0.09813 | 0.034    | 0.071722 | 0.12168  | -0.13719 | 0.00297  | 0.183102 |

|           |         |          |          |          |          |          |          |          |
|-----------|---------|----------|----------|----------|----------|----------|----------|----------|
| -0.03435  | 0.45894 | -0.13018 | 0.00484  | -0.00967 | 0.83491  | -0.22635 | 7.70E-07 | 0.047645 |
| -4.39E-05 | 0.99924 | -0.09161 | 0.04787  | 0.00676  | 0.88416  | -0.13317 | 0.00394  | 0.207722 |
| -0.06067  | 0.1906  | -0.11687 | 0.01149  | 0.091462 | 0.04823  | -0.08411 | 0.06938  | 0.080984 |
| -0.02799  | 0.54632 | -0.1675  | 0.00028  | 0.11889  | 0.01013  | -0.2887  | 2.04E-10 | 0.09469  |
| -0.12781  | 0.00568 | -0.23492 | 2.82E-07 | -0.11572 | 0.01233  | -0.25114 | 3.77E-08 | 0.001328 |
| 0.011939  | 0.79693 | -0.02048 | 0.65887  | 0.215508 | 2.60E-06 | -0.07428 | 0.10891  | 0.203018 |
| 0.040277  | 0.38517 | -0.14482 | 0.0017   | 0.178617 | 0.0001   | -0.22597 | 8.05E-07 | 0.129682 |
| 0.106067  | 0.02188 | -0.09449 | 0.04125  | 0.12134  | 0.00867  | -0.14107 | 0.00224  | 0.172995 |
| -0.04843  | 0.29632 | -0.12271 | 0.00794  | 0.095688 | 0.03873  | -0.19315 | 2.64E-05 | 0.252105 |
| -0.0525   | 0.25754 | -0.20145 | 1.15E-05 | 0.076484 | 0.09878  | -0.25172 | 3.51E-08 | 0.13908  |
| -0.07728  | 0.09529 | -0.04306 | 0.35314  | 0.136556 | 0.00311  | -0.06256 | 0.17716  | 0.23361  |
| 0.098219  | 0.03384 | 0.05448  | 0.23998  | 0.288064 | 2.25E-10 | -0.00785 | 0.8657   | 0.231357 |
| -0.03408  | 0.46253 | 0.072863 | 0.11584  | -0.12424 | 0.00719  | 0.035745 | 0.44093  | -0.18283 |
| -0.00789  | 0.86501 | -0.08513 | 0.06606  | 0.131073 | 0.00455  | -0.17284 | 0.00017  | 0.11692  |
| -0.00613  | 0.89482 | -0.0663  | 0.15258  | 0.00199  | 0.96579  | -0.22535 | 8.65E-07 | -0.06255 |
| 0.003466  | 0.94045 | -0.0698  | 0.13203  | 0.070511 | 0.12812  | -0.17077 | 0.00021  | 0.03781  |
| 0.045936  | 0.3219  | -0.09512 | 0.0399   | 0.058303 | 0.20852  | -0.18792 | 4.38E-05 | 0.005113 |
| -0.0037   | 0.93638 | 0.044489 | 0.3374   | 0.175329 | 0.00014  | 0.044297 | 0.33949  | 0.088846 |
| -0.03081  | 0.50651 | -0.11109 | 0.01632  | 0.024918 | 0.59119  | -0.19159 | 3.08E-05 | 0.014406 |
| 0.041886  | 0.36645 | -0.08063 | 0.08174  | 0.153204 | 0.0009   | -0.12999 | 0.0049   | 0.206506 |
| 0.003658  | 0.93716 | -0.07079 | 0.1266   | 0.070146 | 0.13011  | -0.08592 | 0.06357  | 0.135674 |
| -0.0098   | 0.83264 | -0.09918 | 0.03213  | 0.058337 | 0.20826  | -0.09112 | 0.04908  | 0.298958 |
| -0.01083  | 0.81542 | -0.22878 | 5.82E-07 | 0.058123 | 0.20993  | -0.3076  | 1.08E-11 | 0.139188 |
| -0.05276  | 0.25518 | -0.02084 | 0.65323  | 0.12026  | 0.00929  | 0.015061 | 0.74547  | 0.145983 |
| -0.02506  | 0.58906 | -0.20497 | 8.01E-06 | 0.015195 | 0.74329  | -0.20902 | 5.23E-06 | 0.180101 |
| 0.033891  | 0.465   | -0.0321  | 0.48898  | 0.137829 | 0.00284  | -0.05389 | 0.24515  | 0.136223 |
| -0.15949  | 0.00054 | -0.23522 | 2.72E-07 | -0.12261 | 0.00799  | -0.20123 | 1.18E-05 | 0.118366 |
| -0.11046  | 0.01694 | -0.17005 | 0.00022  | -0.07919 | 0.08738  | -0.23293 | 3.57E-07 | -0.18837 |
| -0.02988  | 0.51954 | -0.07209 | 0.11979  | 0.098524 | 0.03329  | -0.01724 | 0.71014  | 0.249457 |
| 0.03802   | 0.41238 | -0.03768 | 0.4166   | 0.061077 | 0.18765  | -0.13444 | 0.00361  | 0.143824 |
| -0.06045  | 0.19224 | -0.09979 | 0.03107  | 0.077116 | 0.09601  | -0.10378 | 0.02491  | 0.17833  |
| -0.0363   | 0.43387 | -0.10857 | 0.01893  | 0.031466 | 0.49756  | -0.1554  | 0.00075  | 0.215462 |
| -0.043    | 0.3538  | -0.10804 | 0.01952  | 0.008305 | 0.85793  | -0.21625 | 2.40E-06 | -0.01135 |
| -0.02572  | 0.5793  | -0.06919 | 0.13544  | 0.136144 | 0.0032   | -0.03901 | 0.40033  | 0.116138 |
| -0.00982  | 0.83231 | -0.04667 | 0.3142   | 0.184024 | 6.33E-05 | -0.15309 | 0.0009   | 0.098489 |
| -0.00988  | 0.83136 | -0.11234 | 0.01514  | 0.076221 | 0.09994  | -0.22371 | 1.04E-06 | 0.175365 |
| -0.04646  | 0.31643 | -0.21429 | 2.97E-06 | 0.01014  | 0.82701  | -0.30783 | 1.04E-11 | 0.127423 |
| 0.088699  | 0.05544 | 0.013454 | 0.77184  | 0.208563 | 5.49E-06 | 0.016259 | 0.72601  | 0.153442 |
| 0.010311  | 0.82413 | -0.15509 | 0.00077  | 0.07259  | 0.11722  | -0.18663 | 4.95E-05 | 0.07114  |
| 0.02151   | 0.64291 | -0.05658 | 0.22234  | 0.145769 | 0.00159  | -0.11889 | 0.01013  | 0.042335 |
| 0.096312  | 0.03747 | 0.00647  | 0.88909  | 0.182703 | 7.15E-05 | -0.09498 | 0.0402   | 0.082904 |
| -0.1164   | 0.01183 | -0.11625 | 0.01194  | 0.030089 | 0.51658  | -0.11506 | 0.01285  | 0.237705 |
| -0.00605  | 0.89623 | 0.036995 | 0.4251   | 0.198139 | 1.61E-05 | -0.02994 | 0.51861  | 0.199161 |
| 0.13645   | 0.00313 | 0.038423 | 0.40744  | 0.261597 | 9.57E-09 | -0.05583 | 0.2285   | 0.19678  |
| 0.00495   | 0.91503 | -0.0208  | 0.65387  | 0.26368  | 7.22E-09 | -0.06056 | 0.19139  | 0.164645 |

|          |         |          |          |          |          |          |          |          |
|----------|---------|----------|----------|----------|----------|----------|----------|----------|
| -0.0248  | 0.59298 | -0.12917 | 0.00518  | 0.082783 | 0.0739   | -0.14274 | 0.00199  | 0.22301  |
| -0.1561  | 0.00071 | -0.19422 | 2.38E-05 | -0.06648 | 0.15149  | -0.19187 | 2.99E-05 | 0.091782 |
| 0.021208 | 0.64758 | -0.024   | 0.60494  | 0.223965 | 1.01E-06 | -0.10064 | 0.02966  | 0.102217 |
| -0.15186 | 0.00099 | -0.14799 | 0.00134  | 0.012626 | 0.78552  | -0.12236 | 0.00812  | 0.177696 |
| -0.00348 | 0.94026 | -0.08202 | 0.07661  | 0.109239 | 0.01821  | -0.17547 | 0.00014  | 0.079495 |
| -0.08454 | 0.06797 | -0.07885 | 0.08873  | 0.006227 | 0.89323  | -0.20228 | 1.06E-05 | 0.109843 |
| 0.022072 | 0.63424 | -0.07602 | 0.10083  | 0.187433 | 4.59E-05 | -0.16706 | 0.00029  | 0.094689 |
| -0.11043 | 0.01697 | -0.12711 | 0.00595  | -0.06304 | 0.17382  | -0.12619 | 0.00632  | 0.152042 |
| -0.02102 | 0.65054 | -0.15226 | 0.00096  | 0.127759 | 0.0057   | -0.21748 | 2.09E-06 | 0.190171 |
| -0.02429 | 0.60058 | 0.021656 | 0.64065  | 0.094777 | 0.04063  | -0.12841 | 0.00545  | 0.107325 |
| -0.04679 | 0.313   | -0.20615 | 7.08E-06 | 0.053357 | 0.24982  | -0.24095 | 1.36E-07 | 0.161817 |
| -0.01322 | 0.77572 | -0.1323  | 0.00418  | 0.097997 | 0.03425  | -0.17491 | 0.00015  | 0.200983 |
| -0.04428 | 0.33972 | -0.05734 | 0.21612  | 0.12497  | 0.00685  | -0.07388 | 0.11083  | -0.01264 |
| -0.00647 | 0.88903 | -0.0665  | 0.15132  | 0.148697 | 0.00127  | -0.07625 | 0.09981  | 0.256412 |
| -0.02373 | 0.60906 | -0.10795 | 0.01962  | 0.171028 | 0.0002   | -0.13987 | 0.00245  | 0.230435 |
| 0.039581 | 0.39344 | -0.02729 | 0.55637  | 0.145524 | 0.00162  | -0.14017 | 0.0024   | 0.104135 |
| -0.02934 | 0.5271  | -0.17832 | 0.00011  | 0.09004  | 0.05183  | -0.20423 | 8.65E-06 | 0.284886 |
| 0.010607 | 0.81916 | -0.09361 | 0.04318  | 0.12544  | 0.00664  | -0.16437 | 0.00036  | 0.264908 |
| 0.0229   | 0.62158 | -0.0417  | 0.36856  | 0.217716 | 2.04E-06 | -0.15569 | 0.00074  | 0.226321 |
| -0.03898 | 0.40067 | -0.13735 | 0.00294  | 0.105359 | 0.02278  | -0.14914 | 0.00123  | 0.272607 |
| 0.04899  | 0.29075 | -0.04102 | 0.37641  | 0.282355 | 5.22E-10 | -0.10892 | 0.01855  | 0.232402 |
| -0.05428 | 0.24171 | -0.10962 | 0.0178   | 0.07667  | 0.09796  | -0.19917 | 1.45E-05 | 0.114205 |
| -0.06857 | 0.13897 | -0.09575 | 0.0386   | -0.00888 | 0.84829  | -0.23071 | 4.64E-07 | -0.09045 |
| 0.033028 | 0.47645 | -0.05501 | 0.23547  | 0.133741 | 0.00379  | -0.12779 | 0.00568  | 0.121791 |
| 0.015595 | 0.73678 | -0.04647 | 0.31629  | 0.116533 | 0.01173  | -0.04205 | 0.36461  | 0.182434 |
| -0.0621  | 0.18034 | 0.00266  | 0.95428  | 0.100125 | 0.03051  | 0.02606  | 0.57428  | 0.158733 |
| 0.010646 | 0.81852 | 0.001886 | 0.96758  | 0.101691 | 0.02799  | 0.010329 | 0.82384  | 0.212973 |
| -0.06194 | 0.18149 | -0.14822 | 0.00132  | 0.074916 | 0.1059   | -0.06765 | 0.14435  | 0.247964 |
| 0.046659 | 0.31434 | -0.03191 | 0.49154  | 0.256888 | 1.79E-08 | -0.13835 | 0.00273  | 0.160932 |
| 0.046008 | 0.32115 | -0.08917 | 0.05414  | 0.12775  | 0.0057   | -0.12017 | 0.00934  | 0.138129 |
| -0.04404 | 0.3423  | -0.17262 | 0.00018  | -0.02369 | 0.60962  | -0.24201 | 1.19E-07 | 0.080087 |
| -0.06707 | 0.14786 | -0.21316 | 3.36E-06 | -0.13103 | 0.00456  | -0.21277 | 3.50E-06 | 0.037249 |
| -0.04214 | 0.36355 | -0.109   | 0.01846  | 0.123632 | 0.00748  | -0.25376 | 2.69E-08 | 0.062355 |
| -0.04122 | 0.37418 | -0.13724 | 0.00296  | -0.02583 | 0.5777   | -0.1746  | 0.00015  | 0.055337 |
| 0.013762 | 0.76676 | -0.18978 | 3.66E-05 | 0.046039 | 0.32082  | -0.2205  | 1.50E-06 | 0.094956 |
| 0.046151 | 0.31965 | -0.05383 | 0.24568  | 0.161337 | 0.00047  | -0.13938 | 0.00254  | 0.188793 |
| -0.02749 | 0.55347 | -0.13908 | 0.00259  | 0.097027 | 0.03607  | -0.19955 | 1.40E-05 | 0.112541 |
| -0.01762 | 0.70405 | -0.07605 | 0.10071  | 0.159377 | 0.00055  | -0.1396  | 0.0025   | 0.072942 |
| 0.000466 | 0.99199 | -0.09521 | 0.03972  | 0.184649 | 5.97E-05 | -0.15895 | 0.00057  | 0.139145 |
| 0.001086 | 0.98133 | 0.312594 | 4.81E-12 | 0.069601 | 0.13313  | 0.321336 | 1.12E-12 | 0.011154 |
| 0.026167 | 0.57272 | -0.01916 | 0.67956  | 0.271987 | 2.30E-09 | -0.08861 | 0.05568  | 0.306969 |
| -0.01471 | 0.75122 | -0.12086 | 0.00894  | 0.146457 | 0.00151  | -0.14592 | 0.00157  | 0.29866  |
| 0.041696 | 0.36863 | -0.10181 | 0.0278   | 0.104171 | 0.02437  | -0.14776 | 0.00136  | 0.114474 |
| -0.02626 | 0.57141 | -0.02201 | 0.63518  | 0.10969  | 0.01773  | -0.03809 | 0.41151  | 0.137563 |
| -0.11197 | 0.01549 | -0.05776 | 0.21284  | -0.12755 | 0.00578  | 0.094405 | 0.04143  | 0.073481 |

|          |         |          |          |          |          |          |          |          |
|----------|---------|----------|----------|----------|----------|----------|----------|----------|
| -0.09884 | 0.03273 | -0.11196 | 0.01549  | 0.007128 | 0.8779   | -0.09768 | 0.03483  | 0.082412 |
| -0.01307 | 0.7782  | -0.16622 | 0.00031  | 0.141699 | 0.00214  | -0.23963 | 1.60E-07 | 0.156159 |
| 0.023464 | 0.61301 | -0.11232 | 0.01516  | 0.13424  | 0.00366  | -0.18945 | 3.78E-05 | 0.054397 |
| -0.14318 | 0.00192 | -0.22293 | 1.14E-06 | -0.08375 | 0.07059  | -0.21264 | 3.55E-06 | 0.021652 |
| -0.02336 | 0.61457 | 0.000335 | 0.99423  | 0.136949 | 0.00302  | -0.12778 | 0.00569  | -0.00548 |
| -0.07426 | 0.10903 | -0.17048 | 0.00021  | 0.015967 | 0.73073  | -0.13351 | 0.00385  | 0.206303 |
| -0.0566  | 0.22213 | -0.19037 | 3.46E-05 | -0.00599 | 0.89734  | -0.16879 | 0.00025  | 0.135238 |
| -0.06548 | 0.15776 | 0.038835 | 0.40242  | -0.18374 | 6.50E-05 | 0.117952 | 0.01074  | -0.13919 |
| -0.07074 | 0.1269  | 0.084859 | 0.06692  | -0.1963  | 1.93E-05 | 0.104339 | 0.02414  | -0.16762 |
| -0.01299 | 0.77955 | -0.2251  | 8.89E-07 | 0.061454 | 0.18493  | -0.20217 | 1.07E-05 | 0.256945 |
| 0.053816 | 0.24576 | 0.002383 | 0.95903  | 0.135558 | 0.00333  | -0.09775 | 0.03471  | -0.0186  |
| -0.00595 | 0.89794 | -0.16893 | 0.00025  | 0.111997 | 0.01546  | -0.17022 | 0.00022  | 0.268274 |
| 0.008402 | 0.8563  | -0.08851 | 0.05595  | 0.146449 | 0.00151  | -0.13244 | 0.00414  | 0.097201 |
| -0.05593 | 0.22771 | -0.25649 | 1.89E-08 | -0.13002 | 0.00489  | -0.20212 | 1.07E-05 | 0.024222 |
| -0.06908 | 0.13606 | -0.19238 | 2.85E-05 | 0.013806 | 0.76604  | -0.30329 | 2.16E-11 | -0.05444 |
| -0.0117  | 0.80099 | -0.03351 | 0.46997  | 0.036085 | 0.43658  | -0.08466 | 0.06756  | -0.04991 |
| 0.038838 | 0.40239 | -0.00443 | 0.92392  | 0.236155 | 2.43E-07 | -0.02924 | 0.52848  | 0.260846 |
| -0.10599 | 0.02197 | 0.059167 | 0.20185  | -0.25569 | 2.09E-08 | 0.072365 | 0.11836  | -0.2313  |
| -0.04723 | 0.30846 | -0.05572 | 0.22941  | 0.01872  | 0.68658  | -0.06516 | 0.1598   | -0.13432 |
| 0.035978 | 0.43795 | -0.16847 | 0.00026  | 0.076768 | 0.09753  | -0.20248 | 1.04E-05 | 0.250367 |
| 0.020448 | 0.65939 | -0.0268  | 0.56342  | 0.177725 | 0.00011  | 0.013599 | 0.76944  | 0.310114 |
| -0.07569 | 0.10234 | -0.23169 | 4.14E-07 | -0.00977 | 0.83319  | -0.21166 | 3.95E-06 | 0.195787 |
| -0.0515  | 0.26673 | -0.12467 | 0.00699  | 0.02929  | 0.52778  | -0.17487 | 0.00015  | 0.170777 |
| -0.05353 | 0.24826 | -0.17091 | 0.00021  | 0.129999 | 0.0049   | -0.21961 | 1.65E-06 | 0.258732 |
| 0.062432 | 0.17802 | -0.14401 | 0.00181  | 0.11222  | 0.01525  | -0.15916 | 0.00056  | 0.186005 |
| 0.04516  | 0.33016 | -0.05201 | 0.26196  | 0.241326 | 1.30E-07 | -0.08871 | 0.0554   | 0.237712 |
| -0.00693 | 0.88126 | -0.13272 | 0.00407  | 0.125565 | 0.00659  | -0.2415  | 1.27E-07 | 0.115928 |
| -0.02082 | 0.65358 | -0.15751 | 0.00064  | 0.143892 | 0.00182  | -0.18901 | 3.95E-05 | 0.207419 |
| 0.006133 | 0.89485 | 0.200848 | 1.22E-05 | 0.004067 | 0.93016  | 0.197776 | 1.67E-05 | -0.00039 |
| -0.11688 | 0.01148 | -0.1999  | 1.35E-05 | -0.04711 | 0.3097   | -0.20601 | 7.18E-06 | 0.073829 |
| 0.003055 | 0.9475  | -0.0931  | 0.04434  | 0.168276 | 0.00026  | -0.03809 | 0.41155  | 0.34866  |
| -0.02079 | 0.65401 | -0.16422 | 0.00037  | -0.11313 | 0.01444  | -0.27577 | 1.35E-09 | -0.10089 |
| -0.02038 | 0.66042 | -0.05405 | 0.24369  | 0.160947 | 0.00048  | -0.09258 | 0.04553  | 0.294902 |
| -0.02545 | 0.58324 | -0.12722 | 0.0059   | 0.137136 | 0.00298  | -0.13023 | 0.00482  | 0.282422 |
| 0.025056 | 0.58913 | -0.09488 | 0.04041  | 0.167124 | 0.00029  | -0.20695 | 6.51E-06 | 0.100406 |
| -0.02148 | 0.64337 | -0.12044 | 0.00918  | -0.04177 | 0.3678   | -0.22106 | 1.41E-06 | -0.06792 |
| 0.028515 | 0.53876 | -0.10815 | 0.0194   | 0.193427 | 2.57E-05 | -0.19644 | 1.91E-05 | 0.169704 |
| 0.032303 | 0.48619 | 0.150018 | 0.00115  | -0.11976 | 0.00959  | 0.050233 | 0.27866  | -0.24266 |
| 0.024997 | 0.59001 | -0.11687 | 0.01149  | 0.162593 | 0.00042  | -0.1246  | 0.00702  | 0.284744 |
| 0.000244 | 0.9958  | 0.048148 | 0.29913  | 0.173304 | 0.00017  | 0.089637 | 0.0529   | 0.235409 |
| -0.05447 | 0.24007 | -0.1861  | 5.20E-05 | 0.092293 | 0.04622  | -0.29973 | 3.78E-11 | 0.034496 |
| 0.109848 | 0.01756 | 0.210022 | 4.70E-06 | 0.237917 | 1.97E-07 | 0.103657 | 0.02509  | 0.125402 |
| -0.04636 | 0.3175  | -0.16112 | 0.00047  | -0.02277 | 0.62361  | -0.25779 | 1.59E-08 | 0.044452 |
| -0.09924 | 0.03201 | -0.08153 | 0.07839  | -0.00807 | 0.86193  | -0.09821 | 0.03386  | -0.03498 |
| -0.04994 | 0.28151 | -0.13166 | 0.00437  | 0.082758 | 0.07399  | -0.21745 | 2.10E-06 | 0.208445 |

|          |         |          |          |          |          |          |          |          |
|----------|---------|----------|----------|----------|----------|----------|----------|----------|
| -0.01158 | 0.80284 | -0.00354 | 0.93913  | 0.217828 | 2.02E-06 | -0.0733  | 0.11365  | -0.02574 |
| 0.049302 | 0.28768 | -0.15332 | 0.00089  | 0.040947 | 0.37731  | -0.22525 | 8.74E-07 | 0.109099 |
| 0.020833 | 0.65339 | -0.18543 | 5.54E-05 | 0.146871 | 0.00146  | -0.21287 | 3.47E-06 | 0.218653 |
| -0.00828 | 0.85833 | 0.002716 | 0.95333  | 0.178332 | 0.00011  | -0.04605 | 0.32071  | 0.063333 |
| -0.0365  | 0.43132 | 0.065749 | 0.15603  | -0.11969 | 0.00963  | 0.11847  | 0.0104   | 0.031073 |
| -0.02933 | 0.52718 | -0.16443 | 0.00036  | -0.02138 | 0.64493  | -0.18254 | 7.26E-05 | 0.106806 |
| -0.02305 | 0.61933 | -0.05995 | 0.19593  | 0.011385 | 0.80616  | -0.17851 | 0.00011  | 0.026971 |
| -0.05223 | 0.25996 | -0.0311  | 0.5026   | -0.01871 | 0.68667  | -0.16709 | 0.00029  | -0.1355  |
| -0.0958  | 0.0385  | -0.24028 | 1.47E-07 | -0.04022 | 0.38579  | -0.29965 | 3.83E-11 | 0.147602 |
| 0.010313 | 0.8241  | -0.1529  | 0.00092  | 0.111584 | 0.01585  | -0.17503 | 0.00014  | 0.21126  |
| -0.07253 | 0.11753 | -0.04472 | 0.33485  | 0.028699 | 0.53615  | -0.10579 | 0.02223  | 0.093478 |
| -0.13122 | 0.00451 | 0.001963 | 0.96625  | -0.22712 | 7.05E-07 | 0.017272 | 0.70969  | -0.09801 |
| -0.04981 | 0.28278 | -0.01666 | 0.71954  | 0.044502 | 0.33726  | -0.00855 | 0.85387  | 0.057919 |
| 0.027751 | 0.5497  | -0.15067 | 0.00109  | 0.141644 | 0.00215  | -0.24985 | 4.46E-08 | 0.180497 |
| 0.056408 | 0.22372 | -0.07455 | 0.10763  | 0.134005 | 0.00372  | -0.11521 | 0.01273  | 0.200153 |
| -0.01488 | 0.74849 | -0.21834 | 1.90E-06 | 0.038252 | 0.40953  | -0.23185 | 4.06E-07 | 0.148169 |
| 0.041398 | 0.37207 | 0.00258  | 0.95566  | 0.180049 | 9.14E-05 | -0.10895 | 0.01851  | 0.196325 |
| -0.03001 | 0.51768 | -0.16821 | 0.00026  | 0.083055 | 0.07295  | -0.171   | 0.0002   | 0.196262 |
| -0.06062 | 0.19098 | -0.0235  | 0.61251  | -0.07959 | 0.08577  | 0.014549 | 0.75384  | 0.045616 |
| -0.04144 | 0.37153 | -0.14967 | 0.00118  | -0.02369 | 0.60962  | -0.15462 | 0.0008   | 0.019638 |
| -0.04455 | 0.33676 | -0.04869 | 0.29373  | 0.016691 | 0.71902  | -0.13651 | 0.00312  | -0.10135 |
| 0.007784 | 0.86677 | -0.03808 | 0.41165  | 0.041719 | 0.36837  | -0.0241  | 0.60343  | 0.002859 |
| -0.09714 | 0.03586 | -0.02481 | 0.59278  | -0.11035 | 0.01705  | 0.01231  | 0.79077  | -0.00157 |
| 0.079866 | 0.0847  | -0.10786 | 0.01973  | -0.07071 | 0.12703  | -0.09894 | 0.03255  | 0.172189 |
| 0.096315 | 0.03747 | 0.130465 | 0.00474  | 0.214047 | 3.05E-06 | 0.12846  | 0.00543  | 0.071537 |
| -0.02279 | 0.62327 | -0.03949 | 0.39459  | 0.083098 | 0.07281  | -0.1038  | 0.02488  | -0.01814 |
| -0.10334 | 0.02553 | -0.19525 | 2.15E-05 | 0.024152 | 0.60265  | -0.14599 | 0.00156  | 0.066844 |
| -0.08315 | 0.07264 | -0.17106 | 0.0002   | -0.13596 | 0.00324  | -0.19105 | 3.24E-05 | -0.06819 |
| -0.11142 | 0.016   | -0.0784  | 0.09057  | -0.17919 | 9.88E-05 | -0.09658 | 0.03694  | -0.04854 |
| -0.04471 | 0.33496 | -0.06345 | 0.17103  | 0.105131 | 0.02308  | -0.01451 | 0.75445  | 0.175768 |
| -0.00827 | 0.85859 | 0.024533 | 0.59693  | 0.082562 | 0.07468  | -0.04196 | 0.36559  | -0.13901 |
| 0.004986 | 0.91443 | -0.03262 | 0.48198  | 0.168444 | 0.00026  | -0.08802 | 0.05733  | 0.156473 |
| -0.04281 | 0.35591 | 0.010217 | 0.82571  | 0.0403   | 0.38489  | -0.10107 | 0.02897  | -0.0401  |
| 0.004424 | 0.92405 | -0.11079 | 0.01661  | -0.02554 | 0.58197  | -0.13682 | 0.00305  | 0.047384 |
| -0.05938 | 0.20021 | -0.00561 | 0.90369  | -0.04264 | 0.35792  | 0.008156 | 0.86046  | -0.02172 |
| -0.04165 | 0.36918 | -0.04852 | 0.29539  | 0.05552  | 0.23111  | -0.06049 | 0.19195  | -0.00015 |
| -0.13894 | 0.00262 | -0.24928 | 4.79E-08 | -0.10584 | 0.02217  | -0.26485 | 6.16E-09 | -0.02008 |
| -0.02374 | 0.6088  | -0.21174 | 3.91E-06 | -0.01969 | 0.67134  | -0.19522 | 2.15E-05 | 0.108292 |
| 0.001876 | 0.96774 | -0.02846 | 0.53958  | 0.080222 | 0.08332  | -0.05628 | 0.22481  | 0.033209 |
| -0.05281 | 0.25473 | -0.15152 | 0.00102  | 0.004263 | 0.9268   | -0.17437 | 0.00015  | 0.126677 |
| -0.00858 | 0.85321 | 0.110346 | 0.01706  | -0.15046 | 0.00111  | 0.132652 | 0.00408  | -0.13647 |
| -0.12795 | 0.00562 | -0.19193 | 2.98E-05 | -0.12006 | 0.00941  | -0.12799 | 0.00561  | 0.22043  |
| -0.04681 | 0.31277 | 0.019289 | 0.67759  | -0.00542 | 0.90698  | 0.101847 | 0.02775  | 0.169317 |
| -0.1706  | 0.00021 | -0.13505 | 0.00345  | -0.25821 | 1.50E-08 | -0.18127 | 8.17E-05 | -0.06429 |
| 0.028352 | 0.54108 | 0.021938 | 0.6363   | 0.111907 | 0.01554  | -0.02972 | 0.52173  | 0.044813 |



|          |          |          |          |          |          |          |          |          |
|----------|----------|----------|----------|----------|----------|----------|----------|----------|
| -0.00242 | 0.95834  | -0.01926 | 0.67799  | 0.160098 | 0.00051  | -0.07304 | 0.11498  | 0.143284 |
| -0.07428 | 0.10891  | -0.15192 | 0.00099  | 0.023336 | 0.61496  | -0.13841 | 0.00272  | 0.06283  |
| -0.06488 | 0.16161  | -0.15746 | 0.00064  | -0.00348 | 0.94022  | -0.16766 | 0.00027  | -0.05847 |
| 0.014374 | 0.75671  | -0.06002 | 0.19542  | 0.170586 | 0.00021  | -0.17436 | 0.00015  | 0.076182 |
| 0.016333 | 0.72481  | -0.03219 | 0.48767  | 0.053302 | 0.25031  | -0.12048 | 0.00916  | -0.04053 |
| -0.03584 | 0.43975  | -0.05522 | 0.23362  | -0.0657  | 0.15632  | -0.09631 | 0.03748  | 0.106457 |
| -0.07084 | 0.12634  | -0.11553 | 0.01248  | -0.17544 | 0.00014  | -0.16126 | 0.00047  | 0.030636 |
| -0.03717 | 0.42292  | -0.03335 | 0.47215  | -0.0394  | 0.39561  | 0.00279  | 0.95205  | -0.01059 |
| -0.02338 | 0.61429  | -0.06112 | 0.18736  | -0.18011 | 9.09E-05 | -0.00202 | 0.96531  | -0.06188 |
| 0.058234 | 0.20907  | -0.03776 | 0.41561  | 0.131889 | 0.0043   | -0.1063  | 0.02159  | 0.249843 |
| -0.02117 | 0.64821  | -0.16612 | 0.00031  | -0.02457 | 0.59634  | -0.25062 | 4.04E-08 | -0.0968  |
| -0.03504 | 0.44997  | -0.13593 | 0.00325  | -0.00128 | 0.97798  | -0.08696 | 0.06041  | 0.161022 |
| -0.09054 | 0.05055  | 0.012092 | 0.79439  | -0.24427 | 9.00E-08 | 0.028153 | 0.54393  | -0.11061 |
| -0.01672 | 0.71859  | -0.07931 | 0.08691  | 0.093345 | 0.04378  | -0.08243 | 0.07516  | 0.147285 |
| -0.02416 | 0.60256  | -0.00826 | 0.85871  | 0.189418 | 3.79E-05 | 0.006962 | 0.88073  | 0.11202  |
| -0.06858 | 0.13894  | -0.0889  | 0.05488  | 0.007935 | 0.86421  | -0.15941 | 0.00054  | 0.137038 |
| -0.08569 | 0.06427  | -0.18126 | 8.17E-05 | -0.04491 | 0.3328   | -0.22786 | 6.47E-07 | -0.0031  |
| -0.04231 | 0.36166  | -0.13306 | 0.00397  | 0.000315 | 0.99458  | -0.10808 | 0.01948  | 0.087507 |
| -0.02078 | 0.65419  | -0.04723 | 0.30845  | -0.02621 | 0.57205  | -0.12064 | 0.00906  | 0.042518 |
| 0.036042 | 0.43714  | -0.14856 | 0.00128  | 0.096929 | 0.03626  | -0.16248 | 0.00042  | 0.296096 |
| -0.04539 | 0.32767  | 0.066667 | 0.15031  | 0.226126 | 7.91E-07 | 0.06303  | 0.17389  | 0.348391 |
| 0.004289 | 0.92635  | 0.033778 | 0.46648  | 0.018518 | 0.6898   | 0.156053 | 0.00071  | 0.220041 |
| -0.03707 | 0.42414  | -0.12207 | 0.00827  | -0.00161 | 0.97232  | -0.16121 | 0.00047  | 0.088194 |
| 0.045875 | 0.32255  | 0.028265 | 0.54232  | 0.141235 | 0.00222  | -0.02673 | 0.56456  | 0.0934   |
| 0.028654 | 0.53678  | 0.030636 | 0.50898  | 0.117803 | 0.01084  | -0.05704 | 0.2186   | 0.020801 |
| -0.036   | 0.4377   | -0.14007 | 0.00242  | -0.10373 | 0.02499  | -0.07803 | 0.09214  | 0.129202 |
| 0.011323 | 0.8072   | 0.028093 | 0.54479  | 0.150464 | 0.00111  | 0.072715 | 0.11659  | 0.098283 |
| 0.020612 | 0.65684  | 0.136394 | 0.00314  | 0.031388 | 0.49863  | -0.00669 | 0.88544  | -0.13937 |
| -0.08949 | 0.05329  | -0.11333 | 0.01427  | -0.11736 | 0.01114  | -0.13392 | 0.00374  | 0.061054 |
| -0.10068 | 0.0296   | -0.05595 | 0.22755  | -0.14927 | 0.00122  | 0.053794 | 0.24595  | 0.051007 |
| -0.05821 | 0.20928  | -0.15816 | 0.0006   | -0.01688 | 0.71598  | -0.13897 | 0.00261  | 0.14213  |
| -0.06697 | 0.14845  | -0.06654 | 0.15108  | 0.03014  | 0.51587  | -0.10597 | 0.022    | 0.092207 |
| 0.049854 | 0.28231  | -0.06828 | 0.14066  | 0.128256 | 0.00551  | -0.04542 | 0.32735  | 0.184561 |
| -0.19901 | 1.47E-05 | -0.09369 | 0.043    | -0.16532 | 0.00033  | -0.10527 | 0.0229   | 0.065609 |
| -0.04747 | 0.30604  | 0.068807 | 0.13762  | 0.083817 | 0.07035  | 0.012683 | 0.78458  | -0.09017 |
| -0.06808 | 0.14186  | -0.16064 | 0.00049  | 0.029472 | 0.52521  | -0.15718 | 0.00065  | 0.159719 |
| 0.04084  | 0.37856  | 0.277531 | 1.05E-09 | 0.059163 | 0.20188  | 0.232345 | 3.83E-07 | -0.0841  |
| -0.05366 | 0.24711  | -0.06642 | 0.15182  | 0.101315 | 0.02858  | -0.0346  | 0.45565  | 0.110807 |
| -0.09362 | 0.04315  | -0.18843 | 4.17E-05 | -0.16627 | 0.00031  | -0.1731  | 0.00017  | 0.11907  |
| -0.07275 | 0.1164   | -0.04148 | 0.37115  | -0.13159 | 0.00439  | -0.07435 | 0.10857  | -0.10749 |
| 0.001882 | 0.96765  | 0.014225 | 0.75916  | 0.092627 | 0.04543  | -0.04259 | 0.35843  | 0.066889 |
| -0.00282 | 0.95159  | 0.093853 | 0.04264  | 0.048119 | 0.29943  | 0.156003 | 0.00072  | 0.057548 |
| 0.11866  | 0.01027  | 0.208381 | 5.60E-06 | -0.00665 | 0.88598  | 0.102462 | 0.02682  | -0.17955 |
| 0.024786 | 0.59315  | 0.095983 | 0.03813  | 0.245127 | 8.09E-08 | 0.032014 | 0.49009  | 0.045667 |
| 0.063771 | 0.16888  | 0.036212 | 0.43497  | 0.165733 | 0.00032  | -0.01981 | 0.66938  | 0.064893 |

|          |          |          |          |          |          |          |          |          |
|----------|----------|----------|----------|----------|----------|----------|----------|----------|
| -0.04253 | 0.35914  | -0.0722  | 0.11921  | -0.06847 | 0.13954  | -0.05308 | 0.25231  | -0.00982 |
| -0.13943 | 0.00253  | -0.05399 | 0.24423  | -0.17568 | 0.00014  | -0.06282 | 0.17531  | 0.00189  |
| -0.02713 | 0.55868  | -0.09493 | 0.04031  | 0.051226 | 0.26926  | -0.16002 | 0.00052  | 0.017694 |
| 0.119554 | 0.00971  | -0.0652  | 0.15952  | 0.143328 | 0.0019   | -0.14265 | 0.002    | 0.100081 |
| -0.08943 | 0.05345  | -0.03658 | 0.43037  | -0.10721 | 0.02049  | -0.00686 | 0.88243  | 0.10826  |
| -0.1572  | 0.00065  | -0.11099 | 0.01642  | -0.23255 | 3.74E-07 | -0.22048 | 1.50E-06 | -0.21023 |
| -0.11602 | 0.01211  | 0.015553 | 0.73746  | -0.21975 | 1.63E-06 | -0.01769 | 0.70301  | -0.10653 |
| -0.05941 | 0.20001  | -0.13152 | 0.00442  | -0.01822 | 0.69457  | -0.12181 | 0.00841  | 0.102587 |
| 0.013613 | 0.7692   | -0.13996 | 0.00243  | 0.088412 | 0.05623  | -0.11542 | 0.01256  | 0.240448 |
| -0.10958 | 0.01784  | -0.15224 | 0.00097  | -0.03491 | 0.45162  | -0.14932 | 0.00121  | 0.051914 |
| -0.04974 | 0.28338  | -0.11517 | 0.01276  | -0.12046 | 0.00917  | -0.02621 | 0.57204  | 0.108208 |
| 0.200173 | 1.31E-05 | 0.155469 | 0.00075  | 0.243729 | 9.63E-08 | 0.220537 | 1.49E-06 | 0.072461 |
| -0.09152 | 0.04808  | -0.12624 | 0.0063   | -0.02001 | 0.66619  | -0.18075 | 8.56E-05 | 0.009055 |
| -0.04753 | 0.30536  | 0.009852 | 0.83184  | 0.118881 | 0.01013  | -0.01016 | 0.82665  | -0.08207 |
| -0.01662 | 0.72014  | -0.17674 | 0.00012  | -0.07286 | 0.11586  | -0.18722 | 4.68E-05 | -0.02681 |
| -0.08187 | 0.07714  | -0.212   | 3.80E-06 | -0.08528 | 0.06557  | -0.16435 | 0.00036  | 0.103547 |
| -0.06676 | 0.14977  | -0.0669  | 0.14892  | -0.11157 | 0.01586  | 0.007795 | 0.86659  | -0.01484 |
| -0.00945 | 0.83861  | -0.07143 | 0.12321  | 0.042189 | 0.36299  | -0.06661 | 0.15068  | 0.057093 |
| -0.02969 | 0.52215  | -0.18645 | 5.03E-05 | -0.05538 | 0.23227  | -0.11475 | 0.01309  | 0.098894 |
| -0.06002 | 0.19538  | -0.04509 | 0.33096  | 0.089347 | 0.05367  | -0.04633 | 0.31772  | 0.157215 |
| -0.17937 | 9.72E-05 | -0.07306 | 0.11487  | -0.17054 | 0.00021  | -0.05299 | 0.25308  | -0.12876 |
| -0.08418 | 0.06914  | -0.10661 | 0.02121  | -0.21712 | 2.18E-06 | -0.04864 | 0.29419  | -0.11558 |
| -0.04934 | 0.28731  | 0.050652 | 0.27467  | 0.054121 | 0.2431   | 0.001694 | 0.97088  | -0.06488 |
| -0.03083 | 0.50634  | -0.04445 | 0.33785  | 0.062714 | 0.17607  | -0.03539 | 0.44542  | 0.03791  |
| 0.003703 | 0.93639  | -0.00691 | 0.88158  | 0.007593 | 0.87002  | -0.18069 | 8.61E-05 | -0.07109 |
| -0.12404 | 0.00728  | -0.21917 | 1.74E-06 | -0.10556 | 0.02252  | -0.30236 | 2.50E-11 | -0.0347  |
| -0.02313 | 0.61807  | -0.102   | 0.02752  | -0.00442 | 0.92411  | -0.14781 | 0.00136  | 0.070531 |
| -0.11013 | 0.01727  | -0.14056 | 0.00233  | -0.10558 | 0.02249  | -0.10919 | 0.01826  | 0.025682 |
| -0.01013 | 0.82724  | -0.05224 | 0.25986  | -0.01395 | 0.76364  | -0.06494 | 0.16119  | 0.079739 |
| 0.075666 | 0.10244  | 0.055099 | 0.23467  | 0.115014 | 0.01288  | 0.035371 | 0.44572  | 0.145741 |
| 0.016124 | 0.72819  | 0.110195 | 0.01721  | 0.041655 | 0.36911  | 0.093618 | 0.04316  | 0.145776 |
| -0.09711 | 0.03591  | -0.18253 | 7.27E-05 | -0.17697 | 0.00012  | -0.17552 | 0.00014  | 0.106017 |
| -0.07371 | 0.11165  | -0.0511  | 0.27042  | -0.08901 | 0.05457  | -0.12019 | 0.00933  | -0.09977 |
| -0.06956 | 0.13336  | 0.058503 | 0.20697  | -0.01389 | 0.76458  | 0.012443 | 0.78855  | -0.137   |
| -0.06841 | 0.13991  | -0.05402 | 0.24401  | 0.026834 | 0.56296  | -0.07931 | 0.08691  | -0.05608 |
| -0.00145 | 0.97514  | -0.08897 | 0.05468  | -0.04462 | 0.33597  | -0.08038 | 0.08273  | 0.009255 |
| -0.03694 | 0.42575  | -0.029   | 0.53187  | 0.047064 | 0.31016  | -0.08158 | 0.0782   | 0.008075 |
| -0.10319 | 0.02576  | -0.18696 | 4.80E-05 | -0.02837 | 0.54081  | -0.14046 | 0.00235  | -0.16159 |
| -0.03576 | 0.44076  | -0.02727 | 0.55668  | -0.11394 | 0.01375  | 0.064405 | 0.16468  | -0.11863 |
| -0.01799 | 0.69817  | -0.02305 | 0.61928  | -0.01041 | 0.82249  | 0.078731 | 0.08923  | 0.088865 |
| -0.00679 | 0.88373  | 0.099967 | 0.03078  | -0.03331 | 0.47273  | 0.19676  | 1.85E-05 | -0.00228 |
| -0.05492 | 0.23618  | -0.17071 | 0.00021  | -0.04151 | 0.37075  | -0.20387 | 8.97E-06 | 0.059742 |
| -0.04474 | 0.33472  | -0.16101 | 0.00048  | 0.030327 | 0.51326  | -0.19851 | 1.55E-05 | -0.10055 |
| -0.00251 | 0.95679  | -0.17882 | 0.0001   | 0.054202 | 0.24239  | -0.21822 | 1.93E-06 | -0.08754 |
| 0.000626 | 0.98923  | -0.05909 | 0.20242  | 0.040364 | 0.38414  | -0.12793 | 0.00563  | 0.050612 |

|          |         |          |          |          |          |          |          |          |
|----------|---------|----------|----------|----------|----------|----------|----------|----------|
| -0.0892  | 0.05406 | -0.13955 | 0.00251  | 0.052941 | 0.25354  | -0.13934 | 0.00255  | 0.14556  |
| -0.03238 | 0.48516 | 0.152992 | 0.00091  | 0.13147  | 0.00443  | 0.121559 | 0.00855  | 0.174566 |
| -0.00578 | 0.90081 | -0.08217 | 0.07607  | 0.116104 | 0.01205  | -0.18986 | 3.64E-05 | 0.163536 |
| 0.035854 | 0.43954 | -0.09575 | 0.03861  | 0.090907 | 0.04961  | -0.20908 | 5.20E-06 | 0.029639 |
| 0.005069 | 0.91301 | -0.07229 | 0.11875  | 0.039593 | 0.39329  | -0.16239 | 0.00043  | -0.02684 |
| -0.10863 | 0.01887 | -0.135   | 0.00347  | -0.15445 | 0.00081  | -0.14467 | 0.00172  | 0.093443 |
| -0.02204 | 0.63472 | -0.09164 | 0.04779  | 0.009655 | 0.83516  | -0.12944 | 0.00508  | 0.105576 |
| -0.01294 | 0.78035 | -0.22991 | 5.10E-07 | -0.00223 | 0.9617   | -0.26194 | 9.14E-09 | 0.001996 |
| -0.02716 | 0.5582  | -0.15389 | 0.00085  | -0.01024 | 0.8254   | -0.27986 | 7.51E-10 | -0.10176 |
| -0.01787 | 0.70018 | -0.0108  | 0.81601  | -0.05303 | 0.25274  | -0.09442 | 0.0414   | 0.078723 |
| -0.06376 | 0.16894 | -0.09317 | 0.04418  | 0.014851 | 0.7489   | -0.06014 | 0.1945   | 0.132384 |
| 0.043885 | 0.34401 | -0.10618 | 0.02174  | 0.016648 | 0.71972  | -0.0835  | 0.07141  | 0.015483 |
| -0.03173 | 0.49394 | -0.09429 | 0.04168  | 0.112542 | 0.01496  | -0.13481 | 0.00351  | 0.143192 |
| 0.004879 | 0.91626 | -0.13561 | 0.00332  | 0.03031  | 0.51349  | -0.14353 | 0.00187  | 0.132991 |
| 0.05358  | 0.24784 | -0.14124 | 0.00222  | 0.024654 | 0.59513  | -0.113   | 0.01455  | 0.025708 |
| -0.0517  | 0.26487 | 0.106944 | 0.0208   | 0.077212 | 0.0956   | 0.139303 | 0.00255  | 0.029829 |
| -0.01043 | 0.82212 | 0.041818 | 0.36724  | -0.12416 | 0.00722  | 0.078461 | 0.09034  | 0.010445 |
| 0.041112 | 0.37538 | -0.0792  | 0.08733  | 0.068104 | 0.14169  | -0.13625 | 0.00317  | -0.02237 |
| -0.06372 | 0.16925 | -0.19079 | 3.32E-05 | -0.22391 | 1.02E-06 | -0.13558 | 0.00333  | 0.107937 |
| -0.06226 | 0.1792  | 0.013089 | 0.77785  | -0.0173  | 0.70931  | 0.022847 | 0.62239  | 0.174175 |
| 0.014839 | 0.7491  | -0.05087 | 0.27257  | 0.094797 | 0.04059  | -0.19701 | 1.80E-05 | -0.15144 |
| 0.038791 | 0.40296 | -0.0814  | 0.07887  | 0.043779 | 0.34518  | -0.09271 | 0.04524  | -0.06554 |
| -0.06505 | 0.16046 | -0.04267 | 0.35751  | -0.12506 | 0.00681  | -0.09823 | 0.03382  | 0.031236 |
| 0.005632 | 0.90338 | 0.004125 | 0.92916  | 0.060961 | 0.18848  | -0.05975 | 0.19745  | -0.09111 |
| -0.06063 | 0.19088 | -0.06422 | 0.16593  | 0.095061 | 0.04003  | -0.06585 | 0.15538  | 0.159489 |
| -0.00862 | 0.85268 | -0.08944 | 0.05342  | 0.013032 | 0.7788   | 0.007742 | 0.86748  | 0.099418 |
| -0.03736 | 0.42056 | -0.04388 | 0.34404  | 0.040148 | 0.3867   | -0.08867 | 0.05552  | -0.03931 |
| -0.09235 | 0.04609 | -0.00638 | 0.89068  | -0.19907 | 1.46E-05 | -0.08713 | 0.05991  | -0.07352 |
| -0.05953 | 0.19908 | -0.10989 | 0.01752  | 0.036069 | 0.43679  | -0.15277 | 0.00093  | 0.041653 |
| -0.08616 | 0.06283 | -0.06465 | 0.16308  | 0.038845 | 0.4023   | -0.01396 | 0.76354  | 0.158448 |
| -0.14113 | 0.00224 | -0.03706 | 0.42429  | -0.03738 | 0.42025  | -0.056   | 0.22706  | -0.15176 |
| -0.00338 | 0.94188 | -0.08251 | 0.07487  | 0.090492 | 0.05066  | -0.11071 | 0.0167   | 0.052598 |
| 0.052399 | 0.25844 | -0.07984 | 0.08482  | 0.125415 | 0.00665  | -0.06561 | 0.1569   | 0.076496 |
| -0.09849 | 0.03336 | -0.09391 | 0.04251  | -0.00362 | 0.93775  | -0.08405 | 0.06957  | 0.098634 |
| -0.01073 | 0.81707 | -0.09866 | 0.03304  | -0.02029 | 0.66185  | -0.1969  | 1.82E-05 | -0.02615 |
| -0.06949 | 0.13373 | -0.07913 | 0.08762  | -0.08771 | 0.05822  | -0.07426 | 0.109    | -0.03364 |
| 0.017259 | 0.70989 | 0.046935 | 0.31148  | 0.13445  | 0.0036   | 0.107619 | 0.02001  | 0.166277 |
| -0.01646 | 0.72277 | 0.098679 | 0.03301  | -0.10642 | 0.02144  | 0.154534 | 0.00081  | -0.07259 |
| -0.0308  | 0.50666 | -0.08419 | 0.0691   | -0.01225 | 0.79184  | -0.03925 | 0.39745  | 0.123978 |
| 0.018067 | 0.69697 | -0.11572 | 0.01234  | 0.061381 | 0.18545  | -0.22123 | 1.38E-06 | -0.00808 |
| -0.02769 | 0.55059 | -0.07698 | 0.0966   | 0.038313 | 0.40878  | -0.13605 | 0.00322  | -0.02696 |
| -0.06439 | 0.16476 | -0.06868 | 0.13838  | -0.10323 | 0.02569  | -0.11723 | 0.01123  | 0.146903 |
| 0.101958 | 0.02758 | -0.11903 | 0.01004  | -0.04645 | 0.31654  | -0.16088 | 0.00048  | 0.044232 |
| -0.04369 | 0.34614 | -0.14059 | 0.00233  | -0.03497 | 0.45094  | -0.12509 | 0.0068   | 0.128111 |
| 0.02255  | 0.62691 | -0.13827 | 0.00275  | 0.14676  | 0.00147  | -0.10156 | 0.02819  | 0.201595 |

|          |         |          |          |          |          |          |          |           |
|----------|---------|----------|----------|----------|----------|----------|----------|-----------|
| 0.091436 | 0.04829 | -0.0505  | 0.27611  | 0.211622 | 3.96E-06 | -0.03767 | 0.41664  | 0.138829  |
| 0.019948 | 0.66723 | 0.012566 | 0.78651  | 0.186189 | 5.16E-05 | 0.04459  | 0.3363   | 0.301541  |
| -0.04492 | 0.33271 | -0.05897 | 0.20333  | 0.121445 | 0.00861  | -0.06886 | 0.13734  | 0.049832  |
| 0.016659 | 0.71955 | 0.006826 | 0.88303  | 0.192838 | 2.72E-05 | -0.06363 | 0.16982  | 0.106803  |
| 0.018096 | 0.6965  | -0.08605 | 0.06316  | -0.07719 | 0.0957   | -0.12263 | 0.00798  | -0.06783  |
| 0.006791 | 0.88364 | -0.07799 | 0.0923   | 0.130258 | 0.00481  | -0.10838 | 0.01915  | 0.139805  |
| 0.071123 | 0.12483 | 0.268789 | 3.59E-09 | 0.375846 | 4.08E-17 | 0.173959 | 0.00016  | 0.25774   |
| -0.08035 | 0.08281 | -0.13932 | 0.00255  | -0.02156 | 0.6422   | -0.08592 | 0.06356  | 0.244632  |
| -0.06136 | 0.18561 | -0.08409 | 0.06944  | 0.009512 | 0.83757  | -0.07146 | 0.12305  | 0.118378  |
| -0.06599 | 0.15449 | -0.1292  | 0.00517  | 0.030772 | 0.50709  | -0.14611 | 0.00155  | 0.06128   |
| -0.05282 | 0.25466 | 0.044183 | 0.34074  | 0.052846 | 0.25439  | 0.009954 | 0.83013  | 0.131217  |
| -0.0739  | 0.11072 | -0.09176 | 0.04751  | -0.05514 | 0.23435  | -0.13488 | 0.0035   | 0.016559  |
| -0.0045  | 0.92278 | -0.10876 | 0.01872  | 0.091032 | 0.0493   | -0.11689 | 0.01148  | 0.188314  |
| -0.06008 | 0.19494 | -0.1385  | 0.0027   | -0.21511 | 2.72E-06 | -0.13141 | 0.00445  | -0.10641  |
| 0.027676 | 0.55077 | -0.08219 | 0.07599  | 0.0819   | 0.07704  | -0.13389 | 0.00375  | 0.060796  |
| 0.005174 | 0.91122 | -0.10117 | 0.02882  | 0.070754 | 0.12681  | -0.19388 | 2.46E-05 | 0.075076  |
| -0.10685 | 0.02092 | -0.09753 | 0.03511  | -0.16469 | 0.00035  | -0.1091  | 0.01836  | 0.069357  |
| -0.01012 | 0.82728 | -0.00826 | 0.85871  | 0.057634 | 0.2138   | -0.0777  | 0.09353  | -0.15521  |
| 0.081166 | 0.07974 | -0.01048 | 0.82138  | -0.04348 | 0.34845  | -0.0823  | 0.0756   | 0.082057  |
| 0.019849 | 0.66877 | -0.07489 | 0.10602  | 0.059415 | 0.19996  | -0.18733 | 4.63E-05 | 0.072915  |
| -0.02304 | 0.61948 | -0.07214 | 0.1195   | 0.055557 | 0.2308   | -0.08604 | 0.0632   | 0.079196  |
| -0.11233 | 0.01516 | -0.26247 | 8.50E-09 | -0.14251 | 0.00202  | -0.25794 | 1.56E-08 | 0.009545  |
| -0.09427 | 0.04173 | -0.22645 | 7.62E-07 | -0.05769 | 0.21334  | -0.24967 | 4.56E-08 | -0.01525  |
| -0.10806 | 0.0195  | -0.12833 | 0.00548  | -0.03875 | 0.40341  | -0.16715 | 0.00029  | 0.057139  |
| -0.0933  | 0.04387 | -0.12875 | 0.00533  | -0.06482 | 0.16194  | -0.1273  | 0.00587  | 0.075559  |
| 0.020466 | 0.65911 | -0.12631 | 0.00627  | 0.069622 | 0.13301  | -0.09959 | 0.03143  | 0.169757  |
| 0.083425 | 0.07168 | 0.047423 | 0.30647  | 0.119409 | 0.0098   | 0.030126 | 0.51606  | 0.148178  |
| -0.1325  | 0.00413 | -0.10783 | 0.01977  | -0.17808 | 0.00011  | -0.07802 | 0.09216  | -0.05553  |
| -0.05172 | 0.2647  | -0.11277 | 0.01476  | -0.18555 | 5.48E-05 | -0.12607 | 0.00637  | -0.12112  |
| -0.1207  | 0.00903 | -0.13787 | 0.00283  | -0.17611 | 0.00013  | -0.11113 | 0.01628  | -0.10957  |
| -0.04321 | 0.35147 | 0.046816 | 0.31271  | 0.042288 | 0.36186  | 0.04076  | 0.37949  | 0.059553  |
| 0.040938 | 0.37741 | -0.04241 | 0.36046  | 0.219117 | 1.75E-06 | -0.01661 | 0.72029  | 0.2198    |
| -0.10763 | 0.01999 | -0.07526 | 0.10431  | -0.15496 | 0.00078  | -0.06337 | 0.17156  | -0.03048  |
| 0.063341 | 0.17178 | -0.0378  | 0.41514  | 0.120638 | 0.00907  | -0.04862 | 0.29444  | -4.03E-05 |
| 0.03808  | 0.41164 | -0.067   | 0.14828  | 0.02173  | 0.63951  | -0.13649 | 0.00312  | 0.072296  |
| -0.07014 | 0.13017 | -0.05022 | 0.27881  | -0.12816 | 0.00554  | -0.13512 | 0.00344  | -0.1032   |
| -0.08922 | 0.05402 | -0.09848 | 0.03337  | -0.05885 | 0.20427  | -0.07383 | 0.11106  | 0.068246  |
| -0.01019 | 0.82608 | -0.04557 | 0.32577  | 0.042305 | 0.36167  | -0.08824 | 0.05672  | 0.064393  |
| -0.08858 | 0.05577 | -0.0843  | 0.06876  | 0.026733 | 0.56443  | -0.16565 | 0.00032  | -0.11509  |
| 0.063908 | 0.16796 | -0.06943 | 0.13408  | 0.129555 | 0.00505  | -0.03842 | 0.40753  | 0.132259  |
| -0.01823 | 0.69444 | -0.11177 | 0.01567  | -0.06525 | 0.15922  | -0.17703 | 0.00012  | 0.069581  |
| -0.05776 | 0.21277 | -0.07904 | 0.08798  | 0.061306 | 0.18599  | -0.07253 | 0.11751  | 0.132231  |
| -0.04677 | 0.31314 | -0.23032 | 4.86E-07 | -0.02209 | 0.634    | -0.15645 | 0.00069  | -0.02409  |
| 0.004578 | 0.92141 | 0.065262 | 0.15912  | 0.117356 | 0.01115  | 0.04779  | 0.30275  | 0.041803  |
| 0.004681 | 0.91964 | 0.083681 | 0.07081  | 0.085791 | 0.06397  | 0.0313   | 0.49984  | -0.0169   |

|          |          |          |          |          |          |          |          |          |
|----------|----------|----------|----------|----------|----------|----------|----------|----------|
| 0.030039 | 0.51727  | 0.056025 | 0.22689  | 0.162997 | 0.00041  | 0.078702 | 0.08935  | -0.03661 |
| 0.016302 | 0.72532  | -0.13185 | 0.00431  | 0.190362 | 3.46E-05 | -0.12368 | 0.00745  | 0.155974 |
| -0.01676 | 0.71793  | -0.02824 | 0.54267  | -0.03082 | 0.50643  | -0.10029 | 0.03024  | -0.0848  |
| 0.011238 | 0.80861  | 0.057508 | 0.21481  | 0.194135 | 2.40E-05 | 0.035056 | 0.44979  | 0.166705 |
| -0.04821 | 0.29854  | -0.07207 | 0.1199   | 0.022663 | 0.6252   | -0.00622 | 0.89343  | 0.135507 |
| 0.044432 | 0.33802  | 0.190384 | 3.46E-05 | 0.25304  | 2.96E-08 | 0.163352 | 0.00039  | 0.335927 |
| 0.054915 | 0.23624  | 0.108247 | 0.01929  | 0.23682  | 2.24E-07 | 0.072007 | 0.1202   | 0.268002 |
| -0.09169 | 0.04766  | -0.12819 | 0.00553  | -0.00354 | 0.93924  | -0.16137 | 0.00046  | 0.022102 |
| 0.070942 | 0.12579  | 0.194578 | 2.29E-05 | 0.277652 | 1.03E-09 | 0.076876 | 0.09705  | 0.077456 |
| -0.01958 | 0.67304  | 0.101279 | 0.02864  | 0.051657 | 0.26525  | 0.040476 | 0.38283  | 0.029232 |
| -0.14115 | 0.00223  | -0.14881 | 0.00126  | -0.07481 | 0.10642  | -0.16515 | 0.00034  | -0.00876 |
| 0.012311 | 0.79074  | -0.19528 | 2.14E-05 | -0.00132 | 0.97738  | -0.16533 | 0.00033  | 0.109042 |
| -0.18463 | 5.97E-05 | -0.17222 | 0.00018  | -0.31917 | 1.61E-12 | -0.18918 | 3.88E-05 | -0.07784 |
| -0.06167 | 0.18336  | -0.02143 | 0.64412  | -0.14322 | 0.00192  | -0.05426 | 0.24192  | -0.15068 |
| -0.05357 | 0.24795  | -0.0587  | 0.20543  | 0.02261  | 0.626    | -0.08239 | 0.0753   | 0.02192  |
| -0.06331 | 0.172    | -0.05187 | 0.26331  | -0.12266 | 0.00796  | -0.06092 | 0.18878  | 0.09739  |
| -0.10063 | 0.02969  | -0.1288  | 0.00531  | -0.21639 | 2.36E-06 | -0.16531 | 0.00033  | -0.25419 |
| -0.0081  | 0.86144  | 0.124778 | 0.00694  | 0.121435 | 0.00862  | 0.127453 | 0.00581  | 0.172567 |
| -0.12282 | 0.00788  | -0.15594 | 0.00072  | -0.05813 | 0.20992  | -0.16392 | 0.00038  | -0.074   |
| 0.021859 | 0.63752  | -0.11851 | 0.01037  | 0.135224 | 0.00341  | -0.07105 | 0.12521  | 0.222436 |
| 0.058653 | 0.2058   | -0.11599 | 0.01213  | 0.125179 | 0.00676  | -0.05836 | 0.20809  | 0.172856 |
| -0.04683 | 0.31259  | -0.08603 | 0.06324  | 0.060496 | 0.19189  | -0.0257  | 0.57966  | 0.146371 |
| -0.0273  | 0.55615  | -0.02239 | 0.62941  | -0.0237  | 0.6095   | -0.04767 | 0.30396  | -0.00422 |
| 0.012854 | 0.78175  | 0.073764 | 0.1114   | 0.163165 | 0.0004   | 0.007194 | 0.87678  | 0.043326 |
| -0.11478 | 0.01306  | -0.1792  | 9.87E-05 | -0.13576 | 0.00329  | -0.28189 | 5.59E-10 | -0.0123  |
| 0.013848 | 0.76534  | -0.03951 | 0.39432  | -0.02344 | 0.61338  | -0.0518  | 0.26395  | 0.008386 |
| 0.008832 | 0.84903  | -0.05327 | 0.25058  | -0.04578 | 0.32352  | -0.08905 | 0.05447  | -0.01896 |
| 0.047327 | 0.30745  | -0.19516 | 2.17E-05 | 0.017034 | 0.71351  | -0.1531  | 0.0009   | 0.087231 |
| 0.007614 | 0.86965  | -0.02399 | 0.60506  | 0.198006 | 1.63E-05 | -0.09655 | 0.03701  | 0.030085 |
| -0.07967 | 0.08548  | -0.07579 | 0.10188  | -0.01458 | 0.75326  | -0.07977 | 0.08506  | 0.096136 |
| -0.11638 | 0.01184  | -0.12141 | 0.00863  | -0.19202 | 2.95E-05 | -0.10747 | 0.02018  | 0.045923 |
| -0.0092  | 0.84285  | 0.023574 | 0.61135  | 0.197569 | 1.70E-05 | 0.032803 | 0.47946  | 0.118452 |
| 0.083214 | 0.0724   | -0.02607 | 0.57409  | 0.135662 | 0.00331  | -0.05428 | 0.2417   | -0.00396 |
| -0.03527 | 0.44708  | -0.04092 | 0.37765  | 0.091474 | 0.0482   | -0.04021 | 0.38595  | 0.040331 |
| -0.08076 | 0.08126  | -0.21239 | 3.65E-06 | -0.02645 | 0.56852  | -0.11566 | 0.01238  | 0.219673 |
| -0.02164 | 0.64083  | 0.008383 | 0.85662  | -0.01679 | 0.71736  | -0.00311 | 0.94663  | -0.11113 |
| -0.01986 | 0.66865  | 0.083846 | 0.07025  | 0.020034 | 0.66586  | 0.14227  | 0.00206  | 0.046565 |
| -0.05853 | 0.20675  | -0.07979 | 0.085    | -0.14543 | 0.00163  | -0.08287 | 0.0736   | 0.139199 |
| 0.015227 | 0.74277  | -0.0698  | 0.13203  | 0.032611 | 0.48204  | -0.08393 | 0.06998  | 0.119235 |
| -0.09811 | 0.03403  | -0.08436 | 0.06855  | -0.01996 | 0.667    | -0.10362 | 0.02513  | -0.05441 |
| -0.00433 | 0.92561  | 0.034639 | 0.4552   | 0.124331 | 0.00714  | 0.00027  | 0.99535  | 0.017803 |
| -0.03293 | 0.47775  | -0.13957 | 0.0025   | -0.03212 | 0.48871  | -0.13238 | 0.00416  | 0.083348 |
| -0.02872 | 0.53579  | -0.07717 | 0.09577  | -0.01915 | 0.67984  | -0.12826 | 0.00551  | 0.022094 |
| -0.01111 | 0.81073  | -0.09087 | 0.0497   | -0.04283 | 0.35579  | -0.1051  | 0.02312  | 0.020431 |
| -0.01076 | 0.81668  | -0.18921 | 3.87E-05 | 0.000194 | 0.99667  | -0.21773 | 2.04E-06 | 0.106567 |

|          |          |          |          |          |          |          |          |          |
|----------|----------|----------|----------|----------|----------|----------|----------|----------|
| -0.06562 | 0.15687  | -0.15338 | 0.00088  | -0.11225 | 0.01523  | -0.18457 | 6.01E-05 | 0.027884 |
| -0.03766 | 0.4168   | 0.051811 | 0.26382  | -0.03262 | 0.48187  | 0.009586 | 0.83632  | -0.02167 |
| -0.01616 | 0.72765  | 0.157643 | 0.00063  | 0.123713 | 0.00744  | 0.140212 | 0.00239  | 0.178846 |
| -0.0771  | 0.09608  | -0.1533  | 0.00089  | 0.037445 | 0.41948  | -0.19514 | 2.17E-05 | 0.064314 |
| -0.10199 | 0.02754  | -0.16584 | 0.00032  | 0.006075 | 0.89583  | -0.09901 | 0.03242  | 0.187553 |
| -0.02087 | 0.65275  | -0.07298 | 0.11528  | -0.01495 | 0.74729  | -0.10235 | 0.02698  | -0.08568 |
| -0.01316 | 0.77669  | -0.07253 | 0.11753  | 0.079861 | 0.08472  | -0.05602 | 0.22689  | 0.186889 |
| -0.09653 | 0.03703  | -0.08822 | 0.05676  | -0.12686 | 0.00605  | -0.16046 | 0.0005   | 0.043509 |
| -0.04559 | 0.32552  | -0.16567 | 0.00032  | 0.034037 | 0.46308  | -0.19012 | 3.54E-05 | 0.08328  |
| -0.08434 | 0.06863  | -0.09317 | 0.04418  | -0.07011 | 0.13032  | -0.11667 | 0.01163  | -0.16091 |
| -0.01823 | 0.69437  | 0.016525 | 0.72172  | 0.091258 | 0.04873  | -0.0011  | 0.98117  | 0.125826 |
| -0.22325 | 1.10E-06 | -0.29459 | 8.38E-11 | -0.13377 | 0.00378  | -0.32042 | 1.31E-12 | -0.0258  |
| -0.0375  | 0.41883  | -0.04187 | 0.36661  | -0.14669 | 0.00148  | -0.07881 | 0.0889   | -0.08068 |
| 0.018755 | 0.68603  | -0.04078 | 0.37924  | 0.126389 | 0.00624  | -0.09795 | 0.03433  | 0.015888 |
| -0.00309 | 0.94694  | -0.0911  | 0.04913  | 0.109928 | 0.01748  | -0.0924  | 0.04597  | 0.15704  |
| -0.06621 | 0.15316  | 0.10902  | 0.01844  | 0.109716 | 0.0177   | 0.101633 | 0.02808  | 0.120196 |
| 0.006116 | 0.89513  | 0.126296 | 0.00628  | 0.170689 | 0.00021  | 0.171807 | 0.00019  | 0.161288 |
| -0.0248  | 0.59299  | -0.03469 | 0.45455  | 0.109223 | 0.01822  | 0.039899 | 0.38965  | 0.280892 |
| 0.006983 | 0.88036  | 0.086933 | 0.0605   | 0.167844 | 0.00027  | 0.141445 | 0.00218  | 0.1191   |
| -0.12553 | 0.0066   | -0.12405 | 0.00728  | -0.04849 | 0.2957   | -0.16564 | 0.00032  | 0.02593  |
| -0.01208 | 0.79453  | 0.055055 | 0.23504  | 0.037538 | 0.41833  | -0.05028 | 0.27819  | -0.12652 |
| 0.137554 | 0.00289  | 0.218909 | 1.79E-06 | 0.318016 | 1.96E-12 | 0.153374 | 0.00088  | 0.116172 |
| -0.06535 | 0.15857  | -0.12181 | 0.00841  | -0.07001 | 0.13088  | -0.15381 | 0.00085  | 0.134935 |
| -0.09285 | 0.04491  | -0.09152 | 0.04808  | -0.08237 | 0.07537  | -0.07079 | 0.12659  | 0.073987 |
| -0.09133 | 0.04856  | -0.0991  | 0.03226  | 0.011789 | 0.79942  | -0.06172 | 0.183    | 0.095452 |
| 0.060121 | 0.19466  | -0.04926 | 0.2881   | 0.270336 | 2.90E-09 | -0.08528 | 0.06558  | 0.25471  |
| -0.03439 | 0.45847  | -0.00354 | 0.93915  | 0.036409 | 0.43248  | -0.07235 | 0.11842  | -0.03296 |
| 0.078474 | 0.09028  | -0.01435 | 0.75718  | 0.187522 | 4.55E-05 | -0.06418 | 0.16618  | 0.09978  |
| -0.10884 | 0.01864  | -0.09195 | 0.04703  | -0.21079 | 4.33E-06 | -0.10312 | 0.02586  | -0.00017 |
| -0.05044 | 0.27664  | -0.14169 | 0.00215  | 0.040374 | 0.38402  | -0.15906 | 0.00056  | 0.133002 |
| 0.000424 | 0.99272  | -0.13563 | 0.00332  | -0.03599 | 0.43784  | -0.13206 | 0.00425  | 0.001647 |
| 0.024751 | 0.59367  | 0.171428 | 0.0002   | 0.32541  | 5.57E-13 | 0.240629 | 1.41E-07 | 0.273623 |
| 0.02482  | 0.59264  | -0.01748 | 0.7063   | 0.114111 | 0.01361  | -0.03663 | 0.42975  | 0.088812 |
| -0.04216 | 0.36328  | -0.05454 | 0.23949  | 0.089561 | 0.0531   | -0.0349  | 0.45177  | 0.345074 |
| -0.07142 | 0.12325  | -0.14627 | 0.00153  | -0.01699 | 0.71416  | -0.16899 | 0.00024  | 0.130367 |
| 0.00068  | 0.98831  | -0.09596 | 0.03818  | -0.02785 | 0.54826  | -0.09646 | 0.03719  | 0.201419 |
| -0.05534 | 0.2326   | -0.11937 | 0.00982  | -0.1486  | 0.00128  | -0.13309 | 0.00396  | -0.11409 |
| 0.042227 | 0.36256  | -0.01663 | 0.72007  | 0.003655 | 0.9372   | -0.04532 | 0.32849  | 0.058337 |
| -0.06573 | 0.15617  | -0.149   | 0.00124  | -0.05131 | 0.26847  | -0.16972 | 0.00023  | 0.096422 |
| 0.016562 | 0.72111  | 0.091156 | 0.04898  | 0.010966 | 0.81316  | -0.006   | 0.89713  | -0.13058 |
| -0.09782 | 0.03458  | -0.10683 | 0.02094  | -0.23078 | 4.61E-07 | -0.01213 | 0.79382  | -0.16095 |
| -0.00652 | 0.88827  | -0.13987 | 0.00245  | 0.083904 | 0.07006  | -0.05985 | 0.19671  | 0.284283 |
| 0.006336 | 0.89138  | 0.041049 | 0.37612  | 0.110168 | 0.01724  | -0.053   | 0.25304  | -0.06159 |
| 0.014695 | 0.75145  | -0.13294 | 0.004    | 0.088953 | 0.05474  | -0.17381 | 0.00016  | 0.083339 |
| -0.15916 | 0.00056  | -0.23447 | 2.98E-07 | -0.11322 | 0.01436  | -0.17846 | 0.00011  | 0.077924 |

|          |         |          |          |          |          |          |          |          |
|----------|---------|----------|----------|----------|----------|----------|----------|----------|
| -0.03978 | 0.39102 | -0.08244 | 0.07511  | 0.008559 | 0.85364  | -0.1435  | 0.00188  | 0.02855  |
| -0.08687 | 0.06067 | -0.08272 | 0.07414  | -0.12449 | 0.00707  | -0.03493 | 0.45141  | -0.00066 |
| -0.06609 | 0.15387 | -0.04301 | 0.35372  | -0.21347 | 3.25E-06 | -0.0546  | 0.23894  | 0.019053 |
| -0.0492  | 0.28864 | -0.0353  | 0.44669  | -0.03021 | 0.51484  | -0.14835 | 0.0013   | 0.042581 |
| -0.08988 | 0.05224 | -0.11853 | 0.01036  | -0.06215 | 0.18     | -0.12202 | 0.0083   | 0.044544 |
| -0.01566 | 0.73573 | -0.13988 | 0.00245  | 0.013341 | 0.7737   | -0.14008 | 0.00241  | 0.092087 |
| -0.13541 | 0.00337 | -0.15765 | 0.00063  | -0.17427 | 0.00015  | -0.1545  | 0.00081  | -0.02913 |
| -0.02096 | 0.65143 | -0.02601 | 0.57497  | 0.13984  | 0.00246  | -0.07566 | 0.10246  | -0.00903 |
| -0.03015 | 0.51577 | 0.108016 | 0.01955  | 0.008161 | 0.86039  | 0.128697 | 0.00535  | 0.017692 |
| -0.01631 | 0.72515 | -0.01181 | 0.79902  | 0.060922 | 0.18877  | -0.08705 | 0.06014  | 0.021235 |
| -0.02186 | 0.63746 | -0.14949 | 0.0012   | -0.02633 | 0.57034  | -0.24537 | 7.85E-08 | 0.078488 |
| -0.01063 | 0.81883 | -0.08925 | 0.05392  | 0.108021 | 0.01955  | -0.1803  | 8.92E-05 | -0.02415 |
| 0.054173 | 0.24264 | 0.013035 | 0.77876  | 0.104921 | 0.02336  | -0.08825 | 0.05668  | -0.06613 |
| -0.00921 | 0.84266 | -0.13425 | 0.00366  | 0.005469 | 0.90617  | -0.10268 | 0.0265   | 0.173501 |
| -0.06032 | 0.19322 | -0.17672 | 0.00012  | 0.020633 | 0.65651  | -0.163   | 0.00041  | 0.18484  |
| -0.03258 | 0.48239 | -0.24334 | 1.01E-07 | -0.08935 | 0.05365  | -0.28872 | 2.04E-10 | -0.06314 |
| -0.01686 | 0.71623 | -0.17376 | 0.00016  | -0.04609 | 0.32024  | -0.17523 | 0.00014  | 0.140644 |
| -0.05797 | 0.21114 | -0.07246 | 0.11788  | 0.012005 | 0.79583  | -0.11509 | 0.01282  | 0.071708 |
| -0.00359 | 0.93841 | -0.11363 | 0.01401  | 0.087406 | 0.05911  | -0.19911 | 1.46E-05 | 0.085955 |
| 0.046077 | 0.32042 | -0.12126 | 0.00871  | -0.02749 | 0.55347  | -0.07311 | 0.11462  | 0.121881 |
| -0.00466 | 0.92005 | -0.02547 | 0.58302  | 0.068573 | 0.13897  | -0.06169 | 0.18327  | 0.018454 |
| 0.065799 | 0.15571 | -0.06063 | 0.19093  | 0.129718 | 0.00499  | -0.08746 | 0.05896  | 0.083277 |
| -0.03225 | 0.48685 | -0.11392 | 0.01377  | -0.03032 | 0.51335  | -0.20016 | 1.31E-05 | -0.05352 |
| -0.03549 | 0.44414 | -0.10763 | 0.01999  | 0.044076 | 0.34191  | -0.10689 | 0.02087  | 0.141686 |
| -0.12964 | 0.00502 | 0.01961  | 0.67253  | -0.22442 | 9.61E-07 | -0.07869 | 0.08941  | -0.08991 |
| -0.02982 | 0.52039 | -0.00197 | 0.96609  | 0.089557 | 0.05311  | -0.03514 | 0.44865  | 0.003194 |
| -0.07473 | 0.10679 | -0.20349 | 9.33E-06 | -0.07731 | 0.09519  | -0.23218 | 3.90E-07 | 0.163754 |
| 0.020096 | 0.6649  | 0.06002  | 0.19541  | 0.239536 | 1.61E-07 | 0.055698 | 0.22961  | 0.094633 |
| -0.11242 | 0.01507 | 0.022707 | 0.62452  | -0.11198 | 0.01548  | -0.04631 | 0.31799  | 0.012587 |
| -0.06239 | 0.1783  | -0.10739 | 0.02028  | -0.01541 | 0.73971  | -0.13377 | 0.00378  | 0.090221 |
| -0.06809 | 0.1418  | 0.04767  | 0.30396  | -0.05505 | 0.2351   | -0.05171 | 0.26472  | -0.12316 |
| -0.04291 | 0.35481 | -0.07104 | 0.12529  | -0.07073 | 0.12691  | -0.09231 | 0.04617  | -0.01731 |
| 0.086839 | 0.06077 | -0.00635 | 0.89123  | 0.194661 | 2.28E-05 | 0.018841 | 0.68466  | 0.200334 |
| -0.07988 | 0.08463 | -0.09112 | 0.04907  | 0.050748 | 0.27376  | -0.03469 | 0.45457  | 0.162743 |
| 0.137004 | 0.00301 | 0.101282 | 0.02863  | 0.191643 | 3.06E-05 | 0.020992 | 0.65092  | 0.237694 |
| -0.0606  | 0.19109 | 0.013153 | 0.7768   | 0.11861  | 0.01031  | 0.006961 | 0.88074  | 0.164192 |
| -0.12958 | 0.00504 | -0.11711 | 0.01132  | -0.00575 | 0.90136  | -0.00822 | 0.85932  | 0.128889 |
| -0.04355 | 0.34773 | 0.015382 | 0.74023  | 0.068332 | 0.14037  | 0.031943 | 0.49106  | 0.00847  |
| 0.022378 | 0.62955 | 0.066107 | 0.15378  | 0.165462 | 0.00033  | 0.107694 | 0.01992  | 0.194898 |
| -0.05862 | 0.20605 | -0.01591 | 0.73167  | -0.01708 | 0.71275  | -0.0302  | 0.51506  | 0.070467 |
| -0.01772 | 0.70253 | 0.044572 | 0.3365   | 0.097118 | 0.0359   | 0.08122  | 0.07954  | 0.130262 |
| -0.09314 | 0.04424 | -0.19213 | 2.92E-05 | -0.189   | 3.95E-05 | -0.2329  | 3.59E-07 | -0.02994 |
| 0.120997 | 0.00886 | 0.097038 | 0.03605  | 0.292483 | 1.15E-10 | 0.114052 | 0.01366  | 0.087011 |
| -0.07948 | 0.08621 | -0.13593 | 0.00325  | -0.01306 | 0.77833  | -0.18832 | 4.22E-05 | 0.02469  |
| -0.05563 | 0.2302  | -0.11481 | 0.01304  | 0.055043 | 0.23515  | -0.0788  | 0.08893  | 0.125725 |

|          |         |          |          |          |          |          |          |          |
|----------|---------|----------|----------|----------|----------|----------|----------|----------|
| -0.09899 | 0.03247 | -0.08127 | 0.07937  | -0.12335 | 0.00761  | -0.04496 | 0.33227  | -0.01398 |
| 0.066937 | 0.14866 | 0.073378 | 0.11329  | 0.207724 | 6.00E-06 | 0.114365 | 0.0134   | 0.139656 |
| -0.08361 | 0.07104 | -0.04684 | 0.31245  | -0.09604 | 0.03801  | -0.00577 | 0.9011   | -0.01506 |
| 0.061413 | 0.18523 | -0.03338 | 0.47181  | 0.199998 | 1.33E-05 | -0.06961 | 0.13307  | 0.234468 |
| -0.06722 | 0.14693 | -0.04378 | 0.34516  | -0.03742 | 0.41983  | -0.01965 | 0.67182  | -0.02522 |
| -0.03249 | 0.4837  | -0.0564  | 0.22379  | -0.14792 | 0.00135  | -0.02629 | 0.57097  | -0.05655 |
| 0.085769 | 0.06404 | 0.019459 | 0.6749   | 0.193266 | 2.61E-05 | 0.009793 | 0.83283  | 0.104349 |
| 0.008656 | 0.85201 | 0.159346 | 0.00055  | 0.001675 | 0.97121  | 0.152077 | 0.00098  | 0.09125  |
| 0.002279 | 0.96083 | -0.10142 | 0.02842  | 0.01002  | 0.82902  | -0.19751 | 1.71E-05 | 0.029297 |
| -0.02302 | 0.61979 | -0.07846 | 0.09032  | 0.076912 | 0.0969   | -0.08823 | 0.05675  | 0.151468 |
| -0.11152 | 0.01591 | -0.17005 | 0.00022  | -0.24387 | 9.47E-08 | -0.18283 | 7.07E-05 | -0.06215 |
| -0.01798 | 0.69835 | -0.18092 | 8.43E-05 | -0.03099 | 0.50412  | -0.18379 | 6.46E-05 | -0.16098 |
| -0.00911 | 0.8443  | -0.10134 | 0.02855  | 0.014217 | 0.75928  | -0.11515 | 0.01277  | -0.00289 |
| -0.0188  | 0.68529 | -0.10563 | 0.02243  | 0.063088 | 0.1735   | -0.15038 | 0.00112  | 0.010848 |
| -0.007   | 0.88008 | -0.0986  | 0.03315  | -0.05669 | 0.22139  | -0.04159 | 0.36984  | 0.057376 |
| -0.05225 | 0.25982 | -0.16973 | 0.00023  | -0.02303 | 0.61962  | -0.18143 | 8.05E-05 | -0.0869  |
| -0.05759 | 0.21419 | -0.04426 | 0.33993  | -0.24154 | 1.26E-07 | -0.02373 | 0.60907  | -0.27771 |
| -0.02162 | 0.64127 | -0.12175 | 0.00845  | 0.093952 | 0.04242  | -0.14289 | 0.00197  | 0.100015 |
| -0.03365 | 0.46821 | -0.05689 | 0.21979  | -0.0658  | 0.15571  | -0.00824 | 0.85902  | 0.063217 |
| -0.09257 | 0.04557 | -0.05448 | 0.24     | -0.09634 | 0.03742  | 0.010481 | 0.82127  | -0.07407 |
| -0.05144 | 0.26731 | -0.13866 | 0.00267  | -0.05684 | 0.22022  | -0.1518  | 0.001    | 0.182245 |
| 0.048209 | 0.29852 | -0.04892 | 0.29143  | 0.090456 | 0.05076  | -0.14252 | 0.00202  | -0.07042 |
| -0.03267 | 0.48125 | 0.028325 | 0.54148  | -0.15061 | 0.0011   | 0.077996 | 0.09227  | -0.04763 |
| -0.06531 | 0.15883 | 0.041285 | 0.37338  | 0.05431  | 0.24145  | 0.045181 | 0.32993  | -0.025   |
| -0.12781 | 0.00567 | -0.16062 | 0.00049  | -0.16442 | 0.00036  | -0.16152 | 0.00046  | -0.08962 |
| 0.10826  | 0.01928 | 0.193732 | 2.49E-05 | 0.204805 | 8.14E-06 | 0.23354  | 3.32E-07 | -0.0055  |
| -0.07021 | 0.12978 | -0.07191 | 0.12071  | -0.04319 | 0.3517   | -0.09241 | 0.04593  | 0.003931 |
| -0.0308  | 0.50676 | 0.083344 | 0.07196  | 0.101766 | 0.02788  | 0.050708 | 0.27414  | -0.08736 |
| -0.01653 | 0.72156 | -0.08502 | 0.06639  | 0.085457 | 0.06501  | -0.12729 | 0.00588  | 0.023472 |
| 0.038545 | 0.40595 | 0.129135 | 0.00519  | 0.071871 | 0.1209   | 0.177421 | 0.00012  | 0.065332 |
| -0.00648 | 0.88898 | -0.22601 | 8.02E-07 | 0.001452 | 0.97504  | -0.28183 | 5.64E-10 | 0.156366 |
| -0.08448 | 0.06814 | -0.03352 | 0.46989  | -0.07308 | 0.11476  | -0.14651 | 0.0015   | 0.072899 |
| -0.03281 | 0.47941 | -0.01918 | 0.67936  | 0.053158 | 0.25159  | -0.08094 | 0.08059  | 0.004466 |
| -0.04511 | 0.33068 | -0.05443 | 0.24042  | 0.071762 | 0.12147  | -0.2208  | 1.45E-06 | -0.07708 |
| -0.07902 | 0.08807 | 0.00433  | 0.92565  | -0.13816 | 0.00277  | -0.05932 | 0.20071  | -0.10387 |
| 0.00027  | 0.99535 | -0.08325 | 0.0723   | 0.067721 | 0.14395  | -0.07939 | 0.08657  | 0.203786 |
| -0.03072 | 0.50784 | -0.18704 | 4.76E-05 | -0.05878 | 0.20479  | -0.11776 | 0.01087  | 0.200985 |
| -0.02719 | 0.55784 | 0.026355 | 0.56996  | 0.056602 | 0.22213  | -0.03282 | 0.47921  | -0.0255  |
| -0.06036 | 0.1929  | -0.14227 | 0.00206  | -0.00416 | 0.92864  | -0.18041 | 8.83E-05 | 0.139814 |
| -0.09495 | 0.04027 | -0.24077 | 1.39E-07 | -0.16753 | 0.00028  | -0.24658 | 6.74E-08 | -0.02421 |
| -0.08302 | 0.07306 | -0.1385  | 0.0027   | -0.20532 | 7.72E-06 | -0.13737 | 0.00293  | -0.12821 |
| -0.01709 | 0.71265 | -0.00374 | 0.93576  | 0.063293 | 0.1721   | -0.04346 | 0.34868  | 0.055233 |
| -0.02989 | 0.5193  | -0.12386 | 0.00736  | -0.06458 | 0.16352  | -0.13633 | 0.00316  | 0.103081 |
| -0.0955  | 0.03911 | -0.09947 | 0.03162  | -0.13602 | 0.00323  | -0.11989 | 0.00951  | -0.01266 |
| -0.02363 | 0.61058 | -0.0078  | 0.86653  | 0.067019 | 0.14817  | -0.00676 | 0.8842   | 0.076824 |



|          |         |          |          |          |          |          |          |          |
|----------|---------|----------|----------|----------|----------|----------|----------|----------|
| -0.15983 | 0.00053 | -0.19385 | 2.47E-05 | -0.25499 | 2.29E-08 | -0.2143  | 2.97E-06 | -0.14975 |
| -0.02657 | 0.56683 | -0.2044  | 8.50E-06 | -0.01864 | 0.68786  | -0.17419 | 0.00015  | 0.225256 |
| -0.13427 | 0.00365 | -0.07892 | 0.08848  | -0.2077  | 6.02E-06 | -0.07444 | 0.10814  | -0.03488 |
| -0.01955 | 0.6735  | -0.04317 | 0.35195  | -0.06162 | 0.18375  | -0.1341  | 0.00369  | -0.09604 |
| 0.114667 | 0.01316 | 0.158188 | 0.0006   | 0.24079  | 1.38E-07 | 0.023913 | 0.60623  | -0.0182  |
| 0.025851 | 0.57736 | 0.089088 | 0.05437  | 0.171198 | 0.0002   | -0.00209 | 0.96413  | -0.11289 |
| 0.013087 | 0.77789 | -0.04327 | 0.35084  | 0.166049 | 0.00031  | -0.07276 | 0.11638  | -0.00805 |
| 0.042425 | 0.36032 | 0.228501 | 6.01E-07 | 0.247197 | 6.24E-08 | 0.090517 | 0.0506   | -0.09767 |
| -0.0621  | 0.18033 | 0.095241 | 0.03965  | 0.08555  | 0.06472  | 0.056559 | 0.22249  | -0.09715 |
| -0.0289  | 0.53332 | 0.022124 | 0.63345  | 0.125257 | 0.00672  | -0.03782 | 0.41481  | 0.04152  |
| -0.09198 | 0.04697 | -0.0661  | 0.15379  | 0.1184   | 0.01044  | -0.15976 | 0.00053  | -0.02123 |
| -0.06137 | 0.18554 | 0.152179 | 0.00097  | 0.060041 | 0.19525  | 0.106904 | 0.02085  | -0.14694 |
| 0.070766 | 0.12674 | 0.146421 | 0.00151  | 0.261044 | 1.03E-08 | 0.123557 | 0.00751  | 0.06759  |
| -0.04755 | 0.30521 | 0.05843  | 0.20753  | -0.0292  | 0.52901  | -0.03571 | 0.44142  | -0.13257 |
| -0.01965 | 0.67187 | 0.047743 | 0.30322  | 0.15514  | 0.00077  | -0.09417 | 0.04194  | -0.17658 |
| 0.097337 | 0.03548 | 0.253626 | 2.74E-08 | 0.348631 | 8.59E-15 | 0.227676 | 6.61E-07 | 0.15179  |
| 0.020984 | 0.65105 | 0.050627 | 0.27491  | 0.227416 | 6.81E-07 | 0.041442 | 0.37156  | -0.01144 |
| 0.011967 | 0.79647 | 0.224013 | 1.01E-06 | 0.315116 | 3.17E-12 | 0.068893 | 0.13713  | -0.10596 |
| -0.06957 | 0.13332 | 0.075441 | 0.10347  | 0.049627 | 0.28451  | -0.00758 | 0.87023  | -0.18096 |
| -0.06146 | 0.18492 | 0.036231 | 0.43474  | 0.100456 | 0.02997  | -0.05936 | 0.2004   | -0.16463 |
| -0.03994 | 0.38918 | 0.111168 | 0.01624  | 0.217806 | 2.02E-06 | 0.006983 | 0.88036  | -0.11283 |
| -0.01051 | 0.82082 | 0.043534 | 0.34788  | 0.17264  | 0.00018  | -0.06136 | 0.1856   | 0.080502 |
| -0.07372 | 0.11159 | 0.026637 | 0.56585  | 0.070544 | 0.12794  | -0.02871 | 0.53596  | 0.042974 |
| -0.04145 | 0.37145 | 0.035023 | 0.45022  | 0.09489  | 0.04039  | -0.05829 | 0.2086   | -0.14884 |
| -0.02785 | 0.54831 | 0.035898 | 0.43897  | 0.168263 | 0.00026  | -0.0649  | 0.16146  | -0.07466 |
| -0.04321 | 0.3515  | 0.120939 | 0.00889  | 0.074864 | 0.10615  | 0.059062 | 0.20265  | -0.0727  |
| -0.04433 | 0.33918 | 0.123187 | 0.0077   | 0.061786 | 0.18257  | 0.080635 | 0.08173  | -0.12531 |
| 0.00109  | 0.98126 | 0.109311 | 0.01813  | 0.233283 | 3.43E-07 | -0.0041  | 0.92953  | -0.0877  |
| -0.02485 | 0.59215 | 0.042327 | 0.36143  | 0.17061  | 0.00021  | -0.0275  | 0.55334  | -0.046   |
| -0.06287 | 0.17498 | 0.16012  | 0.00051  | 0.17578  | 0.00013  | 0.042827 | 0.35577  | -0.10302 |
| -0.07567 | 0.10242 | -0.01416 | 0.76028  | 0.066942 | 0.14863  | -0.073   | 0.11514  | -0.0246  |
| -0.05288 | 0.25408 | 0.114662 | 0.01316  | 0.067824 | 0.14334  | 0.03786  | 0.41435  | -0.18306 |
| 0.008858 | 0.84859 | 0.034587 | 0.45588  | 0.143475 | 0.00188  | -0.06335 | 0.17171  | -0.05088 |
| 0.087975 | 0.05747 | 0.186426 | 5.05E-05 | 0.303882 | 1.96E-11 | 0.015634 | 0.73613  | 0.003925 |
| -0.00986 | 0.83173 | 0.135756 | 0.00329  | 0.313394 | 4.22E-12 | 0.02469  | 0.59458  | -0.00696 |
| 0.008196 | 0.85979 | 0.011303 | 0.80754  | 0.17929  | 9.79E-05 | -0.09503 | 0.0401   | -0.13823 |
| 0.119611 | 0.00968 | 0.045896 | 0.32233  | 0.277778 | 1.01E-09 | 0.08821  | 0.0568   | 0.027848 |
| -0.06014 | 0.19455 | 0.084819 | 0.06705  | 0.159842 | 0.00053  | 0.025805 | 0.57804  | -0.03321 |
| -0.11787 | 0.01079 | -0.09778 | 0.03465  | 0.039963 | 0.38888  | -0.1168  | 0.01154  | -0.05697 |
| 0.024656 | 0.59509 | 0.117248 | 0.01122  | 0.25332  | 2.85E-08 | 0.008988 | 0.8464   | -0.03014 |
| -0.12756 | 0.00577 | 0.131797 | 0.00433  | 0.042552 | 0.35888  | 0.064891 | 0.1615   | -0.15917 |
| -0.02998 | 0.51812 | -0.04987 | 0.28219  | 0.027003 | 0.56051  | -0.12759 | 0.00576  | -0.17066 |
| -0.07164 | 0.12211 | 0.008186 | 0.85995  | 0.030357 | 0.51284  | -0.00529 | 0.90923  | -0.07422 |
| -0.08177 | 0.0775  | 0.163526 | 0.00039  | 0.251474 | 3.62E-08 | 0.023629 | 0.61052  | -0.04515 |
| -0.14535 | 0.00164 | 0.139173 | 0.00258  | 0.024467 | 0.59792  | 0.122251 | 0.00818  | -0.04686 |

|          |          |          |          |          |          |          |          |          |
|----------|----------|----------|----------|----------|----------|----------|----------|----------|
| -0.0659  | 0.15506  | -0.02809 | 0.54489  | 0.087348 | 0.05927  | 0.033333 | 0.47239  | -0.01645 |
| -0.12158 | 0.00854  | -0.01387 | 0.76503  | 0.014828 | 0.74927  | -0.07306 | 0.11487  | -0.16341 |
| -0.05705 | 0.21845  | -0.01844 | 0.69097  | 0.020874 | 0.65276  | -0.13047 | 0.00474  | -0.18342 |
| 0.014845 | 0.74899  | 0.035543 | 0.44351  | 0.002494 | 0.95714  | -0.03741 | 0.41988  | -0.07728 |
| 0.047575 | 0.30493  | 0.014222 | 0.7592   | 0.139672 | 0.00249  | -0.1372  | 0.00297  | -0.10961 |
| 0.039258 | 0.39732  | 0.053357 | 0.24982  | 0.186735 | 4.90E-05 | -0.01022 | 0.82571  | -0.02753 |
| -0.02723 | 0.55726  | 0.045528 | 0.32623  | 0.10452  | 0.02389  | 0.029576 | 0.52375  | -0.04172 |
| 0.068818 | 0.13756  | 0.284063 | 4.07E-10 | 0.319616 | 1.50E-12 | 0.21732  | 2.13E-06 | -0.08836 |
| -0.01677 | 0.71771  | -0.03029 | 0.51381  | 0.035052 | 0.44985  | -0.1002  | 0.03039  | -0.11653 |
| -0.0462  | 0.31915  | 0.128357 | 0.00547  | 0.122579 | 0.008    | 0.027091 | 0.55923  | -0.10403 |
| -0.02777 | 0.54948  | 0.064716 | 0.16264  | -0.01326 | 0.77509  | 0.064827 | 0.16192  | -0.057   |
| -0.0096  | 0.83607  | 0.070183 | 0.1299   | 0.121206 | 0.00874  | 0.063528 | 0.17051  | 0.031731 |
| 0.037732 | 0.41594  | 0.163958 | 0.00037  | 0.209093 | 5.19E-06 | 0.007795 | 0.86658  | -0.12408 |
| -0.11687 | 0.01149  | -0.01562 | 0.73634  | -0.01455 | 0.75385  | -0.09094 | 0.04952  | -0.19155 |
| 0.107608 | 0.02002  | 0.354172 | 3.01E-15 | 0.424917 | 6.74E-22 | 0.147384 | 0.0014   | 0.0457   |
| -0.00759 | 0.87     | -0.13778 | 0.00285  | 0.014966 | 0.74703  | -0.10121 | 0.02875  | 0.081181 |
| 0.018437 | 0.69108  | 0.082635 | 0.07442  | 0.196537 | 1.89E-05 | 0.010577 | 0.81967  | -0.05131 |
| -0.04154 | 0.37038  | -0.05414 | 0.24293  | -0.03476 | 0.45366  | -0.15373 | 0.00086  | -0.14864 |
| -0.02456 | 0.59649  | 0.195854 | 2.02E-05 | 0.127069 | 0.00596  | 0.090073 | 0.05175  | -0.17134 |
| -0.06025 | 0.19367  | 0.131679 | 0.00437  | 0.175963 | 0.00013  | 0.090141 | 0.05157  | -0.03332 |
| -0.05067 | 0.27451  | 0.153565 | 0.00087  | 0.304927 | 1.66E-11 | 0.108126 | 0.01943  | 0.003345 |
| 0.007689 | 0.86839  | 0.091817 | 0.04736  | 0.104067 | 0.02451  | 0.02534  | 0.58491  | -0.05524 |
| -0.03183 | 0.49262  | -0.01287 | 0.7814   | 0.060037 | 0.19528  | -0.00484 | 0.91685  | -0.12    |
| 0.01329  | 0.77454  | 0.115934 | 0.01217  | 0.279547 | 7.85E-10 | 0.015635 | 0.73612  | -0.05851 |
| -0.03989 | 0.3898   | 0.128185 | 0.00554  | 0.214581 | 2.88E-06 | 0.026805 | 0.56339  | -0.11945 |
| 0.017277 | 0.70961  | 0.130491 | 0.00474  | 0.097704 | 0.03479  | 0.125414 | 0.00665  | 0.070063 |
| -0.08276 | 0.07398  | -0.03421 | 0.46075  | 0.050661 | 0.27458  | -0.07008 | 0.13048  | -0.0084  |
| -0.01136 | 0.80654  | 0.00054  | 0.99071  | 0.145175 | 0.00166  | -0.0525  | 0.25756  | -0.0753  |
| -0.00226 | 0.96123  | 0.08212  | 0.07625  | 0.266916 | 4.65E-09 | -0.00454 | 0.92201  | -0.01474 |
| -0.05141 | 0.26755  | 0.227722 | 6.58E-07 | 0.213895 | 3.10E-06 | 0.108032 | 0.01953  | -0.07981 |
| -0.07501 | 0.10546  | -0.07961 | 0.0857   | 0.052635 | 0.25629  | -0.18816 | 4.28E-05 | -0.07681 |
| 0.00634  | 0.89131  | 0.137346 | 0.00294  | 0.185499 | 5.51E-05 | 0.050533 | 0.2758   | -0.13541 |
| 0.107489 | 0.02016  | 0.731267 | 2.75E-79 | 0.662262 | 2.84E-60 | 0.801739 | #####    | 0.198261 |
| 0.168076 | 0.00026  | 0.580517 | 2.01E-43 | 0.494713 | 3.37E-30 | 0.664268 | 9.38E-61 | 0.216241 |
| 0.040796 | 0.37907  | 0.42088  | 1.79E-21 | 0.422046 | 1.35E-21 | 0.616714 | 2.84E-50 | 0.286085 |
| 0.207073 | 6.43E-06 | 0.608735 | 1.09E-48 | 0.756506 | 8.47E-88 | 0.795275 | #####    | 0.365866 |
| 0.093845 | 0.04266  | 0.447466 | 2.26E-24 | 0.560651 | 5.18E-40 | 0.66162  | 4.04E-60 | 0.325685 |
| 0.156005 | 0.00072  | 0.685355 | 4.79E-66 | 0.744725 | 1.06E-83 | 0.847823 | #####    | 0.293537 |
| 0.392734 | 1.13E-18 | 0.288821 | 2.01E-10 | 0.352593 | 4.07E-15 | 0.409597 | 2.56E-20 | 0.229358 |
| 0.063358 | 0.17166  | 0.394714 | 7.33E-19 | 0.507572 | 6.01E-32 | 0.548449 | 4.98E-38 | 0.402898 |
| 0.073309 | 0.11363  | 0.53379  | 9.42E-36 | 0.680308 | 9.71E-65 | 0.72153  | 2.95E-76 | 0.266046 |
| 0.271277 | 2.54E-09 | 0.816079 | #####    | 0.77744  | 1.09E-95 | 0.816166 | #####    | 0.172086 |
| 0.115998 | 0.01212  | 0.66445  | 8.48E-61 | 0.588472 | 7.45E-45 | 0.815574 | #####    | 0.246579 |
| 0.15881  | 0.00057  | 0.558631 | 1.12E-39 | 0.501501 | 4.11E-31 | 0.707892 | 3.18E-72 | 0.277405 |
| 0.520058 | 1.02E-33 | 0.470877 | 3.80E-27 | 0.503506 | 2.19E-31 | 0.602519 | 1.75E-47 | 0.144849 |

|          |          |          |          |          |          |          |          |          |
|----------|----------|----------|----------|----------|----------|----------|----------|----------|
| 0.581555 | 1.32E-43 | 0.400142 | 2.20E-19 | 0.508276 | 4.80E-32 | 0.523371 | 3.36E-34 | 0.176376 |
| 0.122383 | 0.00811  | 0.498371 | 1.09E-30 | 0.420596 | 1.92E-21 | 0.668309 | 9.81E-62 | 0.319437 |
| 0.124081 | 0.00726  | 0.379975 | 1.73E-17 | 0.239787 | 1.57E-07 | 0.44346  | 6.41E-24 | 0.247736 |
| 0.156276 | 0.0007   | 0.456448 | 2.06E-25 | 0.364871 | 3.75E-16 | 0.554371 | 5.56E-39 | 0.214638 |
| 0.106567 | 0.02126  | 0.385413 | 5.49E-18 | 0.322952 | 8.50E-13 | 0.401193 | 1.74E-19 | 0.207504 |
| 0.341386 | 3.28E-14 | 0.351746 | 4.78E-15 | 0.263916 | 7.00E-09 | 0.383828 | 7.69E-18 | 0.06981  |
| 0.195415 | 2.11E-05 | 0.622806 | 1.62E-51 | 0.713273 | 8.71E-74 | 0.746811 | 2.08E-84 | 0.283817 |
| 0.100214 | 0.03037  | 0.360332 | 9.16E-16 | 0.442387 | 8.46E-24 | 0.506572 | 8.28E-32 | 0.324239 |
| 0.114868 | 0.013    | 0.580748 | 1.83E-43 | 0.542844 | 3.81E-37 | 0.604045 | 8.93E-48 | 0.171039 |
| 0.159574 | 0.00054  | 0.541649 | 5.85E-37 | 0.428395 | 2.88E-22 | 0.559122 | 9.27E-40 | 0.329809 |
| 0.195444 | 2.11E-05 | 0.674923 | 2.26E-63 | 0.711851 | 2.27E-73 | 0.794564 | #####    | 0.284418 |
| 0.124358 | 0.00713  | 0.325132 | 5.85E-13 | 0.310083 | 7.25E-12 | 0.365078 | 3.60E-16 | 0.017326 |
| 0.171411 | 0.0002   | 0.711677 | 2.55E-73 | 0.70004  | 5.26E-70 | 0.880284 | #####    | 0.339155 |
| 0.167652 | 0.00027  | 0.714192 | 4.67E-74 | 0.717358 | 5.36E-75 | 0.880016 | #####    | 0.319574 |
| 0.148806 | 0.00126  | 0.676412 | 9.51E-64 | 0.699779 | 6.22E-70 | 0.860412 | #####    | 0.362543 |
| 0.194323 | 2.35E-05 | 0.516504 | 3.31E-33 | 0.450703 | 9.61E-25 | 0.612467 | 2.01E-49 | 0.389999 |
| 0.05143  | 0.26736  | 0.19456  | 2.30E-05 | 0.26625  | 5.09E-09 | 0.390705 | 1.76E-18 | 0.286381 |
| 0.217986 | 1.98E-06 | 0.364551 | 4.00E-16 | 0.488274 | 2.38E-29 | 0.522642 | 4.29E-34 | 0.167336 |
| 0.15148  | 0.00102  | 0.366631 | 2.64E-16 | 0.451042 | 8.78E-25 | 0.527561 | 8.10E-35 | 0.208471 |
| 0.099756 | 0.03114  | 0.300561 | 3.32E-11 | 0.224044 | 1.00E-06 | 0.480935 | 2.10E-28 | 0.307158 |
| 0.136999 | 0.00301  | 0.500302 | 5.98E-31 | 0.424798 | 6.94E-22 | 0.505679 | 1.10E-31 | 0.347475 |
| 0.092174 | 0.0465   | 0.643983 | 4.69E-56 | 0.554536 | 5.23E-39 | 0.689363 | 4.20E-67 | 0.40121  |
| 0.101088 | 0.02894  | 0.332076 | 1.74E-13 | 0.274555 | 1.60E-09 | 0.498384 | 1.09E-30 | 0.270884 |
| 0.101471 | 0.02834  | 0.579184 | 3.47E-43 | 0.658037 | 2.85E-59 | 0.666817 | 2.27E-61 | 0.582395 |
| 0.084016 | 0.06969  | 0.529013 | 4.92E-35 | 0.319252 | 1.59E-12 | 0.562211 | 2.85E-40 | 0.109283 |
| 0.273226 | 1.93E-09 | 0.394865 | 7.10E-19 | 0.363397 | 5.02E-16 | 0.372409 | 8.24E-17 | 0.026016 |
| 0.192924 | 2.70E-05 | 0.526312 | 1.24E-34 | 0.522705 | 4.20E-34 | 0.535029 | 6.11E-36 | 0.184434 |
| 0.016974 | 0.71448  | 0.413945 | 9.29E-21 | 0.471563 | 3.13E-27 | 0.488299 | 2.36E-29 | 0.266792 |
| 0.055442 | 0.23176  | 0.395367 | 6.35E-19 | 0.263033 | 7.89E-09 | 0.413073 | 1.14E-20 | 0.31659  |
| 0.166502 | 0.0003   | 0.648593 | 4.31E-57 | 0.594097 | 6.84E-46 | 0.750161 | 1.46E-85 | 0.283231 |
| 0.107738 | 0.01987  | 0.53725  | 2.80E-36 | 0.49813  | 1.18E-30 | 0.636172 | 2.44E-54 | 0.204764 |
| 0.183152 | 6.86E-05 | 0.824179 | #####    | 0.76913  | 1.85E-92 | 0.784488 | 1.52E-98 | 0.318138 |
| 0.117144 | 0.01129  | 0.671786 | 1.37E-62 | 0.652128 | 6.72E-58 | 0.718086 | 3.24E-75 | 0.297818 |
| 0.031077 | 0.5029   | 0.27906  | 8.43E-10 | 0.34838  | 9.00E-15 | 0.356415 | 1.96E-15 | 0.313639 |
| 0.087638 | 0.05843  | 0.392529 | 1.18E-18 | 0.448004 | 1.96E-24 | 0.475864 | 9.15E-28 | 0.48492  |
| 0.12155  | 0.00855  | 0.585808 | 2.27E-44 | 0.62825  | 1.19E-52 | 0.87101  | #####    | 0.255711 |
| 0.409701 | 2.50E-20 | 0.402742 | 1.23E-19 | 0.521164 | 7.05E-34 | 0.514823 | 5.75E-33 | 0.114748 |
| 0.113824 | 0.01385  | 0.367349 | 2.29E-16 | 0.423806 | 8.83E-22 | 0.46992  | 4.99E-27 | 0.023276 |
| 0.09513  | 0.03989  | 0.291773 | 1.29E-10 | 0.433018 | 9.14E-23 | 0.430924 | 1.54E-22 | 0.120427 |
| 0.128787 | 0.00532  | 0.598065 | 1.23E-46 | 0.688895 | 5.59E-67 | 0.844047 | #####    | 0.290086 |
| 0.320635 | 1.26E-12 | 0.557348 | 1.82E-39 | 0.67884  | 2.30E-64 | 0.790849 | #####    | 0.293768 |
| 0.105539 | 0.02255  | 0.302489 | 2.45E-11 | 0.450799 | 9.37E-25 | 0.46679  | 1.20E-26 | 0.338577 |
| 0.248399 | 5.36E-08 | 0.433627 | 7.85E-23 | 0.518919 | 1.49E-33 | 0.579836 | 2.66E-43 | 0.130212 |
| 0.321979 | 1.00E-12 | 0.766142 | 2.50E-91 | 0.784699 | 1.24E-98 | 0.902399 | #####    | 0.260801 |
| 0.434431 | 6.41E-23 | 0.653779 | 2.80E-58 | 0.802726 | #####    | 0.828256 | #####    | 0.301054 |

|          |          |          |          |          |          |          |          |          |
|----------|----------|----------|----------|----------|----------|----------|----------|----------|
| 0.171988 | 0.00019  | 0.419699 | 2.38E-21 | 0.447812 | 2.06E-24 | 0.4718   | 2.93E-27 | 0.400548 |
| 0.136955 | 0.00302  | 0.406016 | 5.82E-20 | 0.422291 | 1.27E-21 | 0.522062 | 5.21E-34 | 0.207246 |
| 0.218067 | 1.96E-06 | 0.695828 | 7.60E-69 | 0.572991 | 4.20E-42 | 0.753702 | 8.41E-87 | 0.284949 |
| 0.067286 | 0.14655  | 0.532849 | 1.31E-35 | 0.461295 | 5.51E-26 | 0.659394 | 1.36E-59 | 0.328354 |
| 0.056286 | 0.22473  | 0.212965 | 3.43E-06 | 0.270461 | 2.85E-09 | 0.367171 | 2.37E-16 | 0.081507 |
| 0.128364 | 0.00547  | 0.598148 | 1.19E-46 | 0.518514 | 1.70E-33 | 0.638599 | 7.23E-55 | 0.134836 |
| 0.090258 | 0.05127  | 0.380668 | 1.50E-17 | 0.231702 | 4.13E-07 | 0.392935 | 1.08E-18 | -0.03757 |
| 0.398091 | 3.48E-19 | 0.433109 | 8.93E-23 | 0.454198 | 3.78E-25 | 0.468618 | 7.20E-27 | 0.07474  |
| 0.134159 | 0.00368  | 0.514156 | 7.15E-33 | 0.587831 | 9.75E-45 | 0.616598 | 2.99E-50 | 0.479029 |
| 0.255151 | 2.25E-08 | 0.62447  | 7.35E-52 | 0.651997 | 7.20E-58 | 0.684051 | 1.05E-65 | 0.077036 |
| 0.323134 | 8.24E-13 | 0.53785  | 2.26E-36 | 0.653638 | 3.02E-58 | 0.669112 | 6.24E-62 | 0.292937 |
| 0.371013 | 1.09E-16 | 0.204376 | 8.51E-06 | 0.275801 | 1.34E-09 | 0.333715 | 1.30E-13 | -0.01575 |
| 0.010893 | 0.81439  | 0.337714 | 6.38E-14 | 0.273334 | 1.90E-09 | 0.380958 | 1.41E-17 | 0.156844 |
| 0.033345 | 0.47223  | 0.306988 | 1.20E-11 | 0.438549 | 2.26E-23 | 0.511205 | 1.87E-32 | 0.399844 |
| 0.174979 | 0.00014  | 0.6037   | 1.04E-47 | 0.755411 | 2.08E-87 | 0.828939 | #####    | 0.282787 |
| 0.195291 | 2.14E-05 | 0.38529  | 5.64E-18 | 0.511789 | 1.55E-32 | 0.569034 | 2.01E-41 | 0.250375 |
| 0.127317 | 0.00587  | 0.380863 | 1.44E-17 | 0.399196 | 2.72E-19 | 0.435228 | 5.25E-23 | 0.264345 |
| 0.113414 | 0.0142   | 0.48786  | 2.69E-29 | 0.304094 | 1.90E-11 | 0.450391 | 1.04E-24 | 0.179089 |
| 0.048179 | 0.29882  | 0.167322 | 0.00028  | 0.231741 | 4.11E-07 | 0.379601 | 1.87E-17 | 0.126844 |
| 0.069319 | 0.13471  | 0.292288 | 1.19E-10 | 0.247429 | 6.06E-08 | 0.548214 | 5.43E-38 | 0.274052 |
| 0.118921 | 0.01011  | 0.284077 | 4.06E-10 | 0.233592 | 3.30E-07 | 0.464716 | 2.14E-26 | 0.129325 |
| 0.078425 | 0.09049  | 0.290004 | 1.68E-10 | 0.338477 | 5.56E-14 | 0.483355 | 1.03E-28 | 0.438343 |
| 0.220135 | 1.56E-06 | 0.840433 | #####    | 0.810769 | #####    | 0.923584 | #####    | 0.306214 |
| 0.197353 | 1.74E-05 | 0.828153 | #####    | 0.73492  | 1.86E-80 | 0.868972 | #####    | 0.251075 |
| 0.212544 | 3.59E-06 | 0.696177 | 6.10E-69 | 0.563694 | 1.61E-40 | 0.707487 | 4.16E-72 | 0.226643 |
| 0.311904 | 5.39E-12 | 0.658488 | 2.23E-59 | 0.648692 | 4.09E-57 | 0.70522  | 1.85E-71 | 0.129855 |
| 0.158925 | 0.00057  | 0.612256 | 2.21E-49 | 0.545081 | 1.70E-37 | 0.708853 | 1.68E-72 | 0.285688 |
| 0.005609 | 0.90378  | 0.41705  | 4.47E-21 | 0.230155 | 4.96E-07 | 0.49188  | 8.01E-30 | 0.14772  |
| 0.364619 | 3.94E-16 | 0.438375 | 2.37E-23 | 0.500579 | 5.49E-31 | 0.564497 | 1.18E-40 | 0.23883  |
| 0.185766 | 5.37E-05 | 0.725116 | 2.34E-77 | 0.677263 | 5.80E-64 | 0.766881 | 1.32E-91 | 0.399738 |
| 0.112207 | 0.01527  | 0.344624 | 1.81E-14 | 0.269851 | 3.10E-09 | 0.396877 | 4.55E-19 | -0.01186 |
| 0.001944 | 0.96659  | 0.056114 | 0.22615  | 0.198746 | 1.51E-05 | 0.165479 | 0.00033  | 0.008323 |
| 0.166068 | 0.00031  | 0.741558 | 1.23E-82 | 0.761788 | 1.03E-89 | 0.890916 | #####    | 0.340577 |
| 0.198178 | 1.60E-05 | 0.699461 | 7.61E-70 | 0.698125 | 1.78E-69 | 0.846708 | #####    | 0.297609 |
| 0.269139 | 3.42E-09 | 0.675195 | 1.93E-63 | 0.679662 | 1.42E-64 | 0.784134 | 2.13E-98 | 0.320523 |
| 0.219425 | 1.69E-06 | 0.578201 | 5.17E-43 | 0.742201 | 7.50E-83 | 0.801555 | #####    | 0.297032 |
| 0.236085 | 2.45E-07 | 0.510307 | 2.50E-32 | 0.602521 | 1.75E-47 | 0.66032  | 8.23E-60 | 0.228735 |
| 0.201236 | 1.18E-05 | 0.845722 | #####    | 0.758789 | 1.28E-88 | 0.932489 | #####    | 0.280659 |
| 0.051613 | 0.26566  | 0.192553 | 2.80E-05 | 0.252477 | 3.18E-08 | 0.341676 | 3.11E-14 | 0.091555 |
| 0.140856 | 0.00228  | 0.533033 | 1.23E-35 | 0.372786 | 7.63E-17 | 0.557611 | 1.64E-39 | 0.123936 |
| 0.099159 | 0.03216  | 0.371732 | 9.46E-17 | 0.271601 | 2.43E-09 | 0.384986 | 6.01E-18 | 0.18831  |
| 0.240195 | 1.49E-07 | 0.43713  | 3.25E-23 | 0.463019 | 3.43E-26 | 0.508463 | 4.52E-32 | 0.074076 |
| 0.140322 | 0.00237  | 0.402443 | 1.31E-19 | 0.627205 | 1.98E-52 | 0.658557 | 2.15E-59 | 0.236782 |
| 0.199859 | 1.35E-05 | 0.314652 | 3.43E-12 | 0.310069 | 7.27E-12 | 0.459492 | 9.03E-26 | 0.16098  |
| 0.078068 | 0.09197  | 0.673877 | 4.12E-63 | 0.51996  | 1.05E-33 | 0.741675 | 1.12E-82 | 0.208797 |

|          |          |          |          |          |          |          |          |          |
|----------|----------|----------|----------|----------|----------|----------|----------|----------|
| 0.100979 | 0.02912  | 0.480257 | 2.56E-28 | 0.374657 | 5.21E-17 | 0.534737 | 6.77E-36 | 0.149715 |
| -0.06841 | 0.13989  | 0.301152 | 3.02E-11 | 0.39425  | 8.12E-19 | 0.413624 | 1.00E-20 | 0.182043 |
| 0.104722 | 0.02362  | 0.296011 | 6.73E-11 | 0.278126 | 9.64E-10 | 0.379443 | 1.93E-17 | 0.178614 |
| 0.266099 | 5.20E-09 | 0.37952  | 1.90E-17 | 0.415895 | 5.87E-21 | 0.445714 | 3.57E-24 | 0.144403 |
| 0.08052  | 0.08217  | 0.37956  | 1.89E-17 | 0.336033 | 8.63E-14 | 0.534622 | 7.04E-36 | 0.162417 |
| 0.110853 | 0.01655  | 0.491595 | 8.73E-30 | 0.60036  | 4.53E-47 | 0.767599 | 7.07E-92 | 0.298747 |
| 0.069968 | 0.13109  | 0.385132 | 5.83E-18 | 0.344521 | 1.84E-14 | 0.577597 | 6.61E-43 | 0.070744 |
| 0.220024 | 1.58E-06 | 0.810119 | #####    | 0.869844 | #####    | 0.90493  | #####    | 0.401315 |
| 0.20605  | 7.15E-06 | 0.571741 | 6.91E-42 | 0.669283 | 5.66E-62 | 0.775377 | 7.09E-95 | 0.329784 |
| 0.2632   | 7.71E-09 | 0.64642  | 1.33E-56 | 0.6633   | 1.60E-60 | 0.833991 | #####    | 0.289505 |
| 0.053105 | 0.25207  | 0.497381 | 1.48E-30 | 0.447774 | 2.08E-24 | 0.61293  | 1.62E-49 | 0.349865 |
| 0.06473  | 0.16255  | 0.297155 | 5.64E-11 | 0.319686 | 1.48E-12 | 0.362346 | 6.18E-16 | 0.167367 |
| 0.139331 | 0.00255  | 0.482976 | 1.15E-28 | 0.589768 | 4.32E-45 | 0.596274 | 2.68E-46 | 0.450289 |
| 0.131119 | 0.00454  | 0.63254  | 1.47E-53 | 0.677067 | 6.50E-64 | 0.70845  | 2.20E-72 | 0.351694 |
| 0.110192 | 0.01721  | 0.636841 | 1.74E-54 | 0.637626 | 1.18E-54 | 0.765675 | 3.74E-91 | 0.33037  |
| 0.178562 | 0.0001   | 0.720432 | 6.36E-76 | 0.740609 | 2.54E-82 | 0.809152 | #####    | 0.333505 |
| 0.128874 | 0.00528  | 0.39267  | 1.15E-18 | 0.440687 | 1.31E-23 | 0.484329 | 7.71E-29 | 0.189817 |
| 0.071115 | 0.12487  | 0.535448 | 5.27E-36 | 0.478924 | 3.77E-28 | 0.650448 | 1.63E-57 | 0.320707 |
| 0.109925 | 0.01749  | 0.397406 | 4.05E-19 | 0.419162 | 2.70E-21 | 0.511718 | 1.58E-32 | 0.18137  |
| 0.103811 | 0.02487  | 0.556542 | 2.46E-39 | 0.625953 | 3.61E-52 | 0.684868 | 6.42E-66 | 0.421063 |
| 0.084765 | 0.06722  | 0.541988 | 5.18E-37 | 0.538689 | 1.68E-36 | 0.706941 | 5.96E-72 | 0.387748 |
| 0.079423 | 0.08645  | 0.476709 | 7.17E-28 | 0.507772 | 5.64E-32 | 0.612786 | 1.74E-49 | 0.379438 |
| 0.12891  | 0.00527  | 0.686779 | 2.02E-66 | 0.449866 | 1.20E-24 | 0.663539 | 1.40E-60 | 0.132689 |
| 0.150115 | 0.00114  | 0.439951 | 1.58E-23 | 0.499152 | 8.57E-31 | 0.569041 | 2.01E-41 | 0.235053 |
| 0.297176 | 5.62E-11 | 0.352709 | 3.98E-15 | 0.391774 | 1.40E-18 | 0.401095 | 1.78E-19 | 0.074297 |
| 0.169211 | 0.00024  | 0.472978 | 2.09E-27 | 0.426236 | 4.89E-22 | 0.571314 | 8.18E-42 | 0.40198  |
| 0.160621 | 0.00049  | 0.567576 | 3.56E-41 | 0.394837 | 7.14E-19 | 0.608369 | 1.29E-48 | 0.267926 |
| 0.323438 | 7.82E-13 | 0.733649 | 4.77E-80 | 0.792428 | #####    | 0.807984 | #####    | 0.172341 |
| 0.160596 | 0.00049  | 0.495667 | 2.52E-30 | 0.491906 | 7.95E-30 | 0.545317 | 1.56E-37 | 0.200206 |
| 0.327262 | 4.05E-13 | 0.483703 | 9.29E-29 | 0.388527 | 2.82E-18 | 0.489318 | 1.74E-29 | 0.167543 |
| 0.055182 | 0.23396  | 0.557859 | 1.50E-39 | 0.405811 | 6.10E-20 | 0.636016 | 2.63E-54 | 0.236543 |
| 0.029516 | 0.52459  | 0.316876 | 2.37E-12 | 0.295896 | 6.85E-11 | 0.544232 | 2.31E-37 | 0.35841  |
| 0.162716 | 0.00041  | 0.264449 | 6.51E-09 | 0.170081 | 0.00022  | 0.25791  | 1.56E-08 | 0.165418 |
| 0.069818 | 0.13192  | 0.634521 | 5.53E-54 | 0.580694 | 1.87E-43 | 0.66411  | 1.02E-60 | 0.510635 |
| 0.128496 | 0.00542  | 0.38326  | 8.67E-18 | 0.370943 | 1.11E-16 | 0.506409 | 8.72E-32 | 0.337771 |
| 0.272701 | 2.08E-09 | 0.527048 | 9.65E-35 | 0.66539  | 5.03E-61 | 0.748058 | 7.76E-85 | 0.190906 |
| 0.27999  | 7.37E-10 | 0.68417  | 9.76E-66 | 0.735291 | 1.41E-80 | 0.810062 | #####    | 0.256413 |
| 0.195962 | 2.00E-05 | 0.767291 | 9.24E-92 | 0.787559 | #####    | 0.912299 | #####    | 0.296708 |
| 0.218254 | 1.92E-06 | 0.619927 | 6.32E-51 | 0.538963 | 1.53E-36 | 0.59573  | 3.39E-46 | 0.279105 |
| 0.242682 | 1.10E-07 | 0.673849 | 4.19E-63 | 0.608819 | 1.05E-48 | 0.659925 | 1.02E-59 | 0.239818 |
| 0.07828  | 0.09108  | 0.225945 | 8.07E-07 | 0.310058 | 7.28E-12 | 0.353693 | 3.30E-15 | 0.185873 |
| 0.041128 | 0.3752   | 0.402837 | 1.20E-19 | 0.29911  | 4.16E-11 | 0.450333 | 1.06E-24 | 0.449445 |
| 0.23376  | 3.24E-07 | 0.782119 | 1.42E-97 | 0.850227 | #####    | 0.930361 | #####    | 0.328102 |
| 0.163948 | 0.00037  | 0.766839 | 1.37E-91 | 0.784357 | 1.72E-98 | 0.918404 | #####    | 0.290795 |
| 0.158267 | 0.0006   | 0.782405 | 1.09E-97 | 0.780812 | 4.83E-97 | 0.896164 | #####    | 0.308624 |

|          |          |          |          |          |          |          |          |          |
|----------|----------|----------|----------|----------|----------|----------|----------|----------|
| 0.278211 | 9.52E-10 | 0.626573 | 2.68E-52 | 0.529639 | 3.97E-35 | 0.642171 | 1.18E-55 | 0.137906 |
| 0.429998 | 1.94E-22 | 0.562324 | 2.73E-40 | 0.70768  | 3.66E-72 | 0.711621 | 2.65E-73 | 0.211107 |
| 0.340352 | 3.96E-14 | 0.467123 | 1.10E-26 | 0.606192 | 3.43E-48 | 0.696079 | 6.49E-69 | 0.233789 |
| 0.209688 | 4.87E-06 | 0.581273 | 1.48E-43 | 0.530562 | 2.89E-35 | 0.586578 | 1.65E-44 | 0.224372 |
| 0.156728 | 0.00068  | 0.504261 | 1.72E-31 | 0.58066  | 1.90E-43 | 0.693718 | 2.85E-68 | 0.283145 |
| 0.422724 | 1.15E-21 | 0.5534   | 7.99E-39 | 0.677006 | 6.73E-64 | 0.68172  | 4.21E-65 | 0.273105 |
| 0.303237 | 2.18E-11 | 0.789024 | #####    | 0.820392 | #####    | 0.88951  | #####    | 0.319353 |
| 0.228323 | 6.14E-07 | 0.723446 | 7.66E-77 | 0.76042  | 3.27E-89 | 0.840197 | #####    | 0.312188 |
| 0.366408 | 2.76E-16 | 0.628619 | 9.99E-53 | 0.689982 | 2.87E-67 | 0.757643 | 3.31E-88 | 0.216538 |
| 0.252401 | 3.21E-08 | 0.726443 | 9.07E-78 | 0.7853   | 7.01E-99 | 0.881891 | #####    | 0.354406 |
| 0.052653 | 0.25613  | 0.395401 | 6.31E-19 | 0.185423 | 5.55E-05 | 0.380475 | 1.56E-17 | 0.148193 |
| 0.050484 | 0.27627  | 0.445835 | 3.46E-24 | 0.403063 | 1.14E-19 | 0.471439 | 3.24E-27 | 0.226286 |
| 0.257846 | 1.58E-08 | 0.652946 | 4.36E-58 | 0.730607 | 4.46E-79 | 0.897328 | #####    | 0.309106 |
| 0.112817 | 0.01472  | 0.775096 | 9.15E-95 | 0.670845 | 2.34E-62 | 0.793936 | #####    | 0.235008 |
| 0.181307 | 8.14E-05 | 0.740409 | 2.96E-82 | 0.676198 | 1.08E-63 | 0.897953 | #####    | 0.224901 |
| 0.048407 | 0.29654  | 0.528455 | 5.96E-35 | 0.389948 | 2.07E-18 | 0.656492 | 6.55E-59 | 0.243813 |
| 0.173308 | 0.00017  | 0.646447 | 1.32E-56 | 0.728067 | 2.82E-78 | 0.82507  | #####    | 0.33708  |
| 0.172916 | 0.00017  | 0.350437 | 6.12E-15 | 0.428372 | 2.89E-22 | 0.551463 | 1.64E-38 | 0.152428 |
| 0.004533 | 0.92218  | 0.182838 | 7.06E-05 | 0.23981  | 1.56E-07 | 0.39131  | 1.54E-18 | 0.067224 |
| 0.134458 | 0.0036   | 0.489959 | 1.43E-29 | 0.590559 | 3.09E-45 | 0.65088  | 1.30E-57 | 0.298654 |
| 0.263322 | 7.58E-09 | 0.46935  | 5.86E-27 | 0.465604 | 1.67E-26 | 0.542852 | 3.80E-37 | 0.213075 |
| 0.130225 | 0.00482  | 0.447203 | 2.42E-24 | 0.428702 | 2.67E-22 | 0.608678 | 1.12E-48 | 0.184425 |
| 0.213914 | 3.09E-06 | 0.838118 | #####    | 0.783773 | 2.99E-98 | 0.917074 | #####    | 0.243243 |
| 0.197944 | 1.64E-05 | 0.254799 | 2.35E-08 | 0.297278 | 5.53E-11 | 0.388126 | 3.07E-18 | 0.236468 |
| 0.280371 | 6.97E-10 | 0.780398 | 7.09E-97 | 0.745364 | 6.45E-84 | 0.895949 | #####    | 0.330217 |
| 0.141146 | 0.00223  | 0.766648 | 1.61E-91 | 0.67631  | 1.01E-63 | 0.871379 | #####    | 0.272591 |
| 0.023206 | 0.61692  | 0.317835 | 2.02E-12 | 0.288899 | 1.98E-10 | 0.428635 | 2.71E-22 | 0.353657 |
| 0.223161 | 1.11E-06 | 0.538574 | 1.75E-36 | 0.56238  | 2.67E-40 | 0.7004   | 4.18E-70 | 0.159162 |
| 0.070157 | 0.13005  | 0.383066 | 9.03E-18 | 0.29792  | 5.01E-11 | 0.606022 | 3.70E-48 | 0.280812 |
| 0.260675 | 1.08E-08 | 0.611896 | 2.61E-49 | 0.514118 | 7.24E-33 | 0.69988  | 5.82E-70 | 0.155702 |
| 0.308001 | 1.02E-11 | 0.61581  | 4.31E-50 | 0.668176 | 1.06E-61 | 0.853361 | #####    | 0.29631  |
| 0.021829 | 0.63798  | 0.309563 | 7.89E-12 | 0.458717 | 1.12E-25 | 0.518354 | 1.80E-33 | 0.242997 |
| 0.102271 | 0.02711  | 0.430701 | 1.63E-22 | 0.413211 | 1.10E-20 | 0.566041 | 6.48E-41 | 0.34163  |
| 0.043965 | 0.34313  | 0.374384 | 5.51E-17 | 0.231279 | 4.34E-07 | 0.369944 | 1.36E-16 | 0.0687   |
| 0.332365 | 1.66E-13 | 0.723213 | 9.03E-77 | 0.696225 | 5.92E-69 | 0.76563  | 3.89E-91 | 0.176673 |
| 0.275647 | 1.37E-09 | 0.429816 | 2.03E-22 | 0.455797 | 2.46E-25 | 0.644971 | 2.82E-56 | 0.34291  |
| 0.371587 | 9.74E-17 | 0.383376 | 8.46E-18 | 0.404825 | 7.64E-20 | 0.544909 | 1.81E-37 | 0.223867 |
| 0.198566 | 1.54E-05 | 0.696858 | 3.97E-69 | 0.655281 | 1.26E-58 | 0.724756 | 3.02E-77 | 0.245482 |
| 0.050845 | 0.27285  | 0.396481 | 4.97E-19 | 0.385531 | 5.36E-18 | 0.467927 | 8.74E-27 | 0.154311 |
| 0.044519 | 0.33707  | 0.346061 | 1.39E-14 | 0.210102 | 4.66E-06 | 0.343037 | 2.42E-14 | 0.060463 |
| 0.184095 | 6.28E-05 | 0.563973 | 1.45E-40 | 0.568047 | 2.96E-41 | 0.666462 | 2.77E-61 | 0.235821 |
| 0.22392  | 1.02E-06 | 0.699642 | 6.78E-70 | 0.589809 | 4.24E-45 | 0.644485 | 3.62E-56 | 0.190079 |
| 0.166952 | 0.00029  | 0.562233 | 2.82E-40 | 0.467631 | 9.50E-27 | 0.669401 | 5.30E-62 | 0.112569 |
| 0.018924 | 0.68335  | 0.569035 | 2.01E-41 | 0.374577 | 5.29E-17 | 0.618323 | 1.34E-50 | 0.299319 |
| -0.0535  | 0.24854  | 0.329853 | 2.58E-13 | 0.176944 | 0.00012  | 0.419114 | 2.73E-21 | 0.460663 |

|          |          |          |          |          |          |          |          |          |
|----------|----------|----------|----------|----------|----------|----------|----------|----------|
| -0.00424 | 0.9272   | 0.420833 | 1.81E-21 | 0.197166 | 1.77E-05 | 0.47909  | 3.59E-28 | 0.370444 |
| 0.195171 | 2.16E-05 | 0.469739 | 5.25E-27 | 0.559983 | 6.68E-40 | 0.659966 | 9.98E-60 | 0.311009 |
| 0.44008  | 1.53E-23 | 0.571553 | 7.44E-42 | 0.500502 | 5.62E-31 | 0.627519 | 1.70E-52 | 0.167994 |
| 0.105963 | 0.02201  | 0.476529 | 7.55E-28 | 0.442482 | 8.26E-24 | 0.458688 | 1.12E-25 | 0.237543 |
| 0.147892 | 0.00135  | 0.254156 | 2.56E-08 | 0.339997 | 4.22E-14 | 0.386354 | 4.49E-18 | 0.343818 |
| 0.025101 | 0.58846  | 0.521687 | 5.91E-34 | 0.424365 | 7.71E-22 | 0.608009 | 1.52E-48 | 0.520627 |
| 0.294479 | 8.52E-11 | 0.395171 | 6.63E-19 | 0.597939 | 1.30E-46 | 0.558616 | 1.12E-39 | 0.217627 |
| 0.254383 | 2.48E-08 | 0.55358  | 7.47E-39 | 0.57018  | 1.28E-41 | 0.670154 | 3.46E-62 | 0.283381 |
| 0.018476 | 0.69046  | 0.265446 | 5.68E-09 | 0.267933 | 4.04E-09 | 0.461676 | 4.96E-26 | 0.345319 |
| 0.155416 | 0.00075  | 0.358773 | 1.24E-15 | 0.30238  | 2.49E-11 | 0.512201 | 1.35E-32 | 0.266679 |
| 0.046136 | 0.3198   | 0.235079 | 2.77E-07 | 0.230544 | 4.73E-07 | 0.406231 | 5.54E-20 | 0.105527 |
| 0.073841 | 0.11102  | 0.385885 | 4.97E-18 | 0.319034 | 1.65E-12 | 0.490295 | 1.29E-29 | 0.383089 |
| 0.097086 | 0.03596  | 0.424374 | 7.70E-22 | 0.37741  | 2.95E-17 | 0.479011 | 3.68E-28 | 0.161973 |
| 0.015697 | 0.73512  | 0.463261 | 3.21E-26 | 0.562451 | 2.60E-40 | 0.612565 | 1.92E-49 | 0.323499 |
| 0.122466 | 0.00806  | 0.597126 | 1.86E-46 | 0.675847 | 1.32E-63 | 0.71564  | 1.74E-74 | 0.228885 |
| 0.059998 | 0.19558  | 0.489089 | 1.86E-29 | 0.293416 | 1.00E-10 | 0.467888 | 8.84E-27 | 0.037325 |
| 0.019022 | 0.6818   | 0.33258  | 1.60E-13 | 0.345241 | 1.62E-14 | 0.460677 | 6.53E-26 | 0.131248 |
| 0.066145 | 0.15354  | 0.295178 | 7.65E-11 | 0.318794 | 1.72E-12 | 0.369707 | 1.43E-16 | 0.374357 |
| 0.053277 | 0.25053  | 0.377368 | 2.98E-17 | 0.461727 | 4.90E-26 | 0.599499 | 6.61E-47 | 0.355287 |
| 0.280633 | 6.71E-10 | 0.560087 | 6.42E-40 | 0.639268 | 5.16E-55 | 0.757955 | 2.56E-88 | 0.552086 |
| 0.205028 | 7.96E-06 | 0.733353 | 5.93E-80 | 0.784636 | 1.32E-98 | 0.842083 | #####    | 0.328678 |
| 0.18518  | 5.68E-05 | 0.388572 | 2.79E-18 | 0.377724 | 2.76E-17 | 0.478672 | 4.06E-28 | 0.137045 |
| 0.180373 | 8.87E-05 | 0.565351 | 8.47E-41 | 0.66142  | 4.51E-60 | 0.723229 | 8.93E-77 | 0.388126 |
| 0.178131 | 0.00011  | 0.38319  | 8.80E-18 | 0.542172 | 4.85E-37 | 0.579326 | 3.28E-43 | 0.250471 |
| 0.326767 | 4.41E-13 | 0.607199 | 2.18E-48 | 0.758767 | 1.30E-88 | 0.833195 | #####    | 0.369295 |
| 0.11654  | 0.01173  | 0.652527 | 5.44E-58 | 0.620973 | 3.87E-51 | 0.660393 | 7.91E-60 | 0.297399 |
| 0.28127  | 6.12E-10 | 0.608308 | 1.33E-48 | 0.756063 | 1.22E-87 | 0.861183 | #####    | 0.322172 |
| 0.216953 | 2.22E-06 | 0.284889 | 3.60E-10 | 0.419521 | 2.48E-21 | 0.433833 | 7.45E-23 | 0.189333 |
| 0.240384 | 1.46E-07 | 0.819276 | #####    | 0.79959  | #####    | 0.911662 | #####    | 0.306813 |
| 0.042901 | 0.35494  | 0.252491 | 3.17E-08 | 0.347882 | 9.88E-15 | 0.552266 | 1.22E-38 | 0.262497 |
| 0.159463 | 0.00054  | 0.577295 | 7.47E-43 | 0.57236  | 5.40E-42 | 0.717747 | 4.10E-75 | 0.634916 |
| 0.138965 | 0.00262  | 0.48329  | 1.05E-28 | 0.533533 | 1.03E-35 | 0.620543 | 4.73E-51 | 0.337265 |
| 0.261072 | 1.03E-08 | 0.531444 | 2.13E-35 | 0.666293 | 3.04E-61 | 0.751216 | 6.26E-86 | 0.239591 |
| 0.276187 | 1.27E-09 | 0.627971 | 1.37E-52 | 0.714548 | 3.67E-74 | 0.774782 | 1.22E-94 | 0.301719 |
| 0.149659 | 0.00118  | 0.336205 | 8.37E-14 | 0.303552 | 2.07E-11 | 0.366232 | 2.86E-16 | 0.121222 |
| 0.189627 | 3.72E-05 | 0.541078 | 7.18E-37 | 0.417933 | 3.62E-21 | 0.611013 | 3.90E-49 | 0.157847 |
| 0.172386 | 0.00018  | 0.321923 | 1.01E-12 | 0.315527 | 2.96E-12 | 0.450215 | 1.09E-24 | 0.134065 |
| 0.090029 | 0.05186  | 0.290666 | 1.52E-10 | 0.298914 | 4.29E-11 | 0.371772 | 9.38E-17 | 0.195314 |
| 0.148477 | 0.00129  | 0.746624 | 2.40E-84 | 0.706979 | 5.81E-72 | 0.92243  | #####    | 0.303182 |
| 0.082842 | 0.0737   | 0.405309 | 6.84E-20 | 0.33428  | 1.18E-13 | 0.402269 | 1.36E-19 | 0.11973  |
| 0.074422 | 0.10823  | 0.407124 | 4.52E-20 | 0.328327 | 3.36E-13 | 0.45294  | 5.30E-25 | 0.105697 |
| 0.040512 | 0.3824   | 0.498331 | 1.11E-30 | 0.544948 | 1.78E-37 | 0.684584 | 7.61E-66 | 0.165426 |
| 0.102089 | 0.02738  | 0.466558 | 1.28E-26 | 0.303845 | 1.98E-11 | 0.524719 | 2.13E-34 | 0.168771 |
| 0.144725 | 0.00171  | 0.422814 | 1.12E-21 | 0.448793 | 1.59E-24 | 0.530216 | 3.25E-35 | 0.280287 |
| 0.184324 | 6.15E-05 | 0.45536  | 2.77E-25 | 0.547319 | 7.53E-38 | 0.620976 | 3.86E-51 | 0.189828 |

|          |          |          |          |          |          |          |          |          |
|----------|----------|----------|----------|----------|----------|----------|----------|----------|
| 0.112671 | 0.01485  | 0.345781 | 1.46E-14 | 0.252813 | 3.04E-08 | 0.423803 | 8.84E-22 | 0.187093 |
| 0.505958 | 1.01E-31 | 0.724813 | 2.90E-77 | 0.713772 | 6.21E-74 | 0.755523 | 1.90E-87 | 0.237154 |
| 0.354935 | 2.60E-15 | 0.543538 | 2.97E-37 | 0.536315 | 3.89E-36 | 0.603863 | 9.68E-48 | 0.294239 |
| 0.33973  | 4.43E-14 | 0.694346 | 1.92E-68 | 0.664373 | 8.85E-61 | 0.757215 | 4.72E-88 | 0.315031 |
| 0.176298 | 0.00013  | 0.36736  | 2.28E-16 | 0.37327  | 6.92E-17 | 0.462002 | 4.54E-26 | 0.272969 |
| 0.159463 | 0.00054  | 0.271942 | 2.32E-09 | 0.330929 | 2.13E-13 | 0.388384 | 2.91E-18 | 0.287969 |
| 0.193514 | 2.55E-05 | 0.771242 | 2.88E-93 | 0.716796 | 7.89E-75 | 0.912427 | #####    | 0.254978 |
| 0.076451 | 0.09892  | 0.533704 | 9.71E-36 | 0.374815 | 5.04E-17 | 0.547606 | 6.78E-38 | 0.186835 |
| 0.133724 | 0.00379  | 0.713995 | 5.34E-74 | 0.706915 | 6.07E-72 | 0.759868 | 5.19E-89 | 0.312972 |
| 0.138341 | 0.00274  | 0.614487 | 7.94E-50 | 0.39334  | 9.92E-19 | 0.620548 | 4.72E-51 | 0.09521  |
| 0.167676 | 0.00027  | 0.375996 | 3.95E-17 | 0.299934 | 3.66E-11 | 0.37238  | 8.29E-17 | 0.076808 |
| 0.110449 | 0.01695  | 0.438858 | 2.09E-23 | 0.46565  | 1.65E-26 | 0.684908 | 6.26E-66 | 0.205615 |
| 0.272347 | 2.19E-09 | 0.424039 | 8.35E-22 | 0.479581 | 3.12E-28 | 0.514976 | 5.47E-33 | 0.178711 |
| 0.232812 | 3.62E-07 | 0.684625 | 7.43E-66 | 0.636746 | 1.83E-54 | 0.735801 | 9.62E-81 | 0.154452 |
| 0.078653 | 0.08955  | 0.589533 | 4.77E-45 | 0.491264 | 9.65E-30 | 0.732961 | 7.93E-80 | 0.436396 |
| 0.130281 | 0.0048   | 0.714174 | 4.73E-74 | 0.638893 | 6.23E-55 | 0.902458 | #####    | 0.295963 |
| 0.146508 | 0.0015   | 0.581017 | 1.64E-43 | 0.599021 | 8.14E-47 | 0.665077 | 5.99E-61 | 0.432521 |
| 0.154112 | 0.00083  | 0.382662 | 9.84E-18 | 0.299949 | 3.65E-11 | 0.42977  | 2.05E-22 | 0.294289 |
| 0.134985 | 0.00347  | 0.607967 | 1.55E-48 | 0.425503 | 5.85E-22 | 0.587601 | 1.07E-44 | 0.018167 |
| 0.179368 | 9.72E-05 | 0.60061  | 4.06E-47 | 0.578548 | 4.49E-43 | 0.697155 | 3.29E-69 | 0.341304 |
| 0.056149 | 0.22586  | 0.276268 | 1.26E-09 | 0.345681 | 1.49E-14 | 0.463352 | 3.13E-26 | 0.072705 |
| 0.088043 | 0.05727  | 0.313543 | 4.12E-12 | 0.229535 | 5.33E-07 | 0.477928 | 5.04E-28 | 0.114129 |
| 0.353296 | 3.56E-15 | 0.375229 | 4.63E-17 | 0.364116 | 4.36E-16 | 0.398884 | 2.91E-19 | 0.07348  |
| 0.197527 | 1.71E-05 | 0.397062 | 4.37E-19 | 0.390795 | 1.73E-18 | 0.554901 | 4.56E-39 | 0.420462 |
| -0.03833 | 0.40859  | -0.08869 | 0.05545  | 0.133047 | 0.00397  | -0.11855 | 0.01035  | 0.178307 |
| -0.02951 | 0.52463  | -0.02299 | 0.62017  | 0.068954 | 0.13678  | -0.07479 | 0.10652  | 0.091775 |
| -0.0002  | 0.99659  | -0.10853 | 0.01897  | 0.12045  | 0.00918  | -0.17438 | 0.00015  | 0.113096 |
| 0.009662 | 0.83503  | 0.110816 | 0.01659  | 0.104627 | 0.02375  | 0.055078 | 0.23485  | -0.04381 |
| 0.018618 | 0.68821  | 0.013161 | 0.77666  | 0.258872 | 1.38E-08 | -0.08043 | 0.08251  | 0.157734 |
| -0.01321 | 0.77592  | -0.08501 | 0.06643  | 0.008425 | 0.85592  | -0.15175 | 0.001    | 0.059294 |
| -0.03221 | 0.48743  | -0.06661 | 0.15069  | -0.03441 | 0.45819  | -0.16802 | 0.00027  | -0.15569 |
| 0.02562  | 0.58077  | -0.02027 | 0.66224  | 0.157806 | 0.00062  | -0.11127 | 0.01614  | 0.145022 |
| 0.016077 | 0.72895  | -0.06165 | 0.18352  | 0.141408 | 0.00219  | -0.12743 | 0.00582  | 0.116274 |
| -0.01549 | 0.73855  | -0.06472 | 0.16262  | 0.067073 | 0.14784  | -0.21055 | 4.44E-06 | 0.134935 |
| 0.043734 | 0.34568  | -0.00703 | 0.87956  | 0.145673 | 0.0016   | -0.16749 | 0.00028  | 0.023068 |
| 0.068316 | 0.14046  | -0.02186 | 0.63744  | 0.242215 | 1.16E-07 | -0.06863 | 0.13861  | 0.19183  |
| -0.02497 | 0.59047  | 0.002921 | 0.94981  | 0.051004 | 0.27135  | -0.10225 | 0.02713  | -0.03536 |
| -0.06665 | 0.1504   | -0.13624 | 0.00318  | -0.12808 | 0.00557  | -0.18551 | 5.50E-05 | 0.009603 |
| -0.13914 | 0.00258  | -0.12329 | 0.00764  | -0.06195 | 0.18139  | -0.12987 | 0.00494  | -0.00828 |
| 0.052464 | 0.25785  | 0.038217 | 0.40995  | 0.15226  | 0.00096  | -0.06885 | 0.13735  | 0.050346 |
| -0.1061  | 0.02184  | -0.11717 | 0.01127  | -0.08109 | 0.08002  | -0.09526 | 0.03962  | -0.0426  |
| -0.06639 | 0.15199  | -0.15118 | 0.00105  | -0.05431 | 0.24145  | -0.22513 | 8.87E-07 | -0.01382 |
| -0.0468  | 0.31288  | -0.07125 | 0.12413  | 0.123494 | 0.00754  | -0.14235 | 0.00204  | 0.207287 |
| -0.00837 | 0.85687  | -0.03836 | 0.40816  | 0.160196 | 0.00051  | -0.04389 | 0.34392  | 0.224785 |
| -0.07036 | 0.12893  | -0.1611  | 0.00047  | -0.07972 | 0.08526  | -0.20325 | 9.56E-06 | -0.01448 |



|          |         |          |          |          |          |          |          |          |
|----------|---------|----------|----------|----------|----------|----------|----------|----------|
| -0.02765 | 0.55114 | -0.0196  | 0.67267  | 0.112475 | 0.01502  | -0.13843 | 0.00272  | 0.007988 |
| -0.0257  | 0.57961 | -0.11719 | 0.01126  | 0.031963 | 0.49079  | -0.21681 | 2.26E-06 | 0.162501 |
| -0.00358 | 0.93843 | -0.01483 | 0.74917  | 0.144169 | 0.00179  | -0.11679 | 0.01154  | 0.124266 |
| 0.040202 | 0.38606 | 0.014001 | 0.76284  | 0.165649 | 0.00032  | -0.08914 | 0.05423  | -0.0245  |
| -0.05661 | 0.2221  | -0.05883 | 0.20442  | 0.148482 | 0.00129  | -0.12304 | 0.00777  | 0.182848 |
| 0.002618 | 0.95501 | -0.03565 | 0.44208  | 0.161118 | 0.00047  | -0.08275 | 0.074    | 0.158088 |
| -0.08578 | 0.064   | -0.09479 | 0.0406   | -0.02837 | 0.54079  | -0.19059 | 3.39E-05 | 0.021741 |
| -0.00522 | 0.91034 | -0.08979 | 0.05249  | 0.092152 | 0.04655  | -0.1369  | 0.00303  | 0.0524   |
| 0.077912 | 0.09262 | 0.053371 | 0.2497   | 0.159355 | 0.00055  | 0.034366 | 0.45877  | 0.226045 |
| 0.011002 | 0.81257 | -0.12767 | 0.00573  | 0.05124  | 0.26913  | -0.23585 | 2.52E-07 | 0.036035 |
| -0.00974 | 0.83369 | -0.09554 | 0.03904  | 0.101007 | 0.02907  | -0.24781 | 5.77E-08 | -0.00415 |
| -0.01793 | 0.6992  | -0.07603 | 0.10081  | -0.0107  | 0.81757  | -0.12719 | 0.00592  | 0.08933  |
| -0.04423 | 0.34024 | -0.07726 | 0.09541  | 0.013596 | 0.76949  | -0.20001 | 1.33E-05 | 0.026295 |
| -0.01643 | 0.72329 | -0.13212 | 0.00424  | 0.039217 | 0.39781  | -0.18927 | 3.85E-05 | 0.112189 |
| -0.02265 | 0.6254  | 0.056664 | 0.22163  | 0.048768 | 0.29294  | -0.00683 | 0.88295  | 0.045001 |
| 0.018998 | 0.68219 | -0.01026 | 0.82506  | 0.066875 | 0.14904  | -0.10195 | 0.0276   | -0.06803 |
| -0.06617 | 0.15338 | -0.14674 | 0.00147  | -0.07556 | 0.10294  | -0.15227 | 0.00096  | -0.05293 |
| -0.00106 | 0.98176 | -0.0711  | 0.12494  | 0.143606 | 0.00186  | -0.11807 | 0.01066  | 0.262512 |
| -0.05881 | 0.2046  | -0.04888 | 0.29182  | -0.03689 | 0.42636  | -0.0845  | 0.0681   | 0.004362 |
| -0.10948 | 0.01795 | -0.06796 | 0.14252  | -0.00724 | 0.87594  | -0.08982 | 0.05241  | 0.141036 |
| -0.04879 | 0.29271 | -0.12366 | 0.00747  | 0.029688 | 0.52219  | -0.26801 | 4.00E-09 | -0.00572 |
| 0.037041 | 0.42452 | -0.11181 | 0.01563  | 0.087471 | 0.05892  | -0.11284 | 0.0147   | 0.185284 |
| 0.04305  | 0.35327 | -0.10228 | 0.0271   | 0.10665  | 0.02116  | -0.20877 | 5.37E-06 | 0.079088 |
| -0.03811 | 0.41127 | -0.18484 | 5.86E-05 | -0.01504 | 0.74583  | -0.23163 | 4.17E-07 | -0.04494 |
| -0.00848 | 0.85505 | -0.09052 | 0.05059  | 0.100219 | 0.03036  | -0.15341 | 0.00088  | 0.011902 |
| -0.04591 | 0.32218 | 0.015279 | 0.74191  | 0.128128 | 0.00556  | -0.06027 | 0.19357  | 0.09766  |
| -0.01492 | 0.74781 | 0.114557 | 0.01324  | 0.190986 | 3.26E-05 | 0.103361 | 0.02551  | 0.168498 |
| 0.004766 | 0.91819 | -0.02185 | 0.63767  | 0.070006 | 0.13088  | -0.11915 | 0.00996  | 0.022474 |
| 0.010593 | 0.8194  | -0.08907 | 0.05443  | 0.098032 | 0.03418  | -0.14503 | 0.00168  | 0.160641 |
| -0.02962 | 0.52318 | -0.11959 | 0.00969  | -0.04082 | 0.37877  | -0.20717 | 6.36E-06 | -0.13207 |
| -0.06095 | 0.18856 | 0.002585 | 0.95557  | -0.02333 | 0.61501  | -0.03909 | 0.39929  | -0.10259 |
| -0.01383 | 0.76565 | -0.13933 | 0.00255  | -0.08161 | 0.0781   | -0.2093  | 5.08E-06 | -0.03451 |
| -0.02253 | 0.6273  | -0.09158 | 0.04795  | 0.121925 | 0.00835  | -0.14271 | 0.00199  | 0.191654 |
| -0.03654 | 0.43079 | 0.046842 | 0.31244  | 0.183466 | 6.66E-05 | -0.00392 | 0.93259  | 0.266959 |
| 0.019415 | 0.6756  | -0.00013 | 0.99784  | 0.068871 | 0.13726  | -0.08888 | 0.05494  | 0.03009  |
| 0.026344 | 0.57013 | -0.08572 | 0.06418  | 0.158809 | 0.00057  | -0.11757 | 0.011    | 0.078243 |
| -0.03338 | 0.47176 | -0.02845 | 0.53969  | 0.130061 | 0.00488  | -0.10158 | 0.02817  | 0.189263 |
| 0.071061 | 0.12516 | -0.05155 | 0.26626  | -0.02593 | 0.57613  | -0.10765 | 0.01997  | -0.07543 |
| -0.03818 | 0.41046 | -0.14402 | 0.00181  | 0.016984 | 0.71432  | -0.22877 | 5.82E-07 | 0.098717 |
| 0.044163 | 0.34095 | 0.10094  | 0.02918  | 0.214531 | 2.89E-06 | 0.015875 | 0.73223  | 0.175896 |
| -0.05072 | 0.27402 | -0.07633 | 0.09946  | 0.05097  | 0.27166  | -0.16636 | 0.00031  | 0.186138 |
| -0.05365 | 0.24727 | 0.027765 | 0.5495   | 0.05225  | 0.2598   | -0.03352 | 0.46987  | 0.053872 |
| 0.038345 | 0.40839 | 0.029971 | 0.51823  | 0.094895 | 0.04038  | -0.02712 | 0.55879  | 0.102412 |
| -0.00426 | 0.92679 | -0.08533 | 0.06541  | 0.050956 | 0.2718   | -0.13873 | 0.00266  | 0.148867 |
| -0.04764 | 0.30426 | -0.06474 | 0.16251  | 0.125116 | 0.00679  | -0.14856 | 0.00128  | 0.097201 |

|          |         |          |          |          |          |          |          |          |
|----------|---------|----------|----------|----------|----------|----------|----------|----------|
| -0.00439 | 0.92462 | -0.08792 | 0.05762  | 0.18408  | 6.29E-05 | -0.17213 | 0.00019  | 0.116939 |
| -0.006   | 0.89718 | -0.08967 | 0.05282  | 0.170935 | 0.00021  | -0.13507 | 0.00345  | 0.098336 |
| -0.07959 | 0.08577 | -0.16013 | 0.00051  | 0.03819  | 0.41029  | -0.25755 | 1.64E-08 | 0.155876 |
| -0.03103 | 0.50348 | 0.00508  | 0.91281  | 0.089578 | 0.05305  | -0.12973 | 0.00499  | 0.001574 |
| -0.01301 | 0.77911 | 0.077667 | 0.09365  | 0.013602 | 0.7694   | -0.01544 | 0.73936  | -0.05946 |
| -0.03841 | 0.40761 | -0.02723 | 0.55729  | 0.069223 | 0.13525  | -0.07987 | 0.08469  | -0.03181 |
| -0.00265 | 0.95443 | -0.10672 | 0.02108  | 0.048936 | 0.29128  | -0.15328 | 0.00089  | 0.007232 |
| 0.016627 | 0.72006 | -0.11705 | 0.01136  | 0.018136 | 0.69586  | -0.23978 | 1.57E-07 | -0.02172 |
| -0.04006 | 0.38778 | 0.055861 | 0.22825  | 0.079135 | 0.0876   | -0.00887 | 0.84836  | 0.058745 |
| -0.01935 | 0.67663 | -0.02593 | 0.57624  | 0.06758  | 0.14479  | -0.14231 | 0.00205  | 0.05028  |
| -0.03703 | 0.4247  | 0.095952 | 0.03819  | 0.043629 | 0.34683  | 0.047639 | 0.30427  | -0.07278 |
| -0.04927 | 0.28805 | -0.08786 | 0.05781  | -0.01789 | 0.69972  | -0.05127 | 0.26881  | -0.0123  |
| -0.10024 | 0.03033 | -0.08789 | 0.0577   | 0.05812  | 0.20996  | -0.19536 | 2.12E-05 | 0.162184 |
| -0.02664 | 0.56581 | -0.03086 | 0.50586  | 0.059395 | 0.20012  | -0.07647 | 0.09885  | 0.141695 |
| 0.029595 | 0.52348 | -0.05573 | 0.22931  | 0.137499 | 0.00291  | -0.1666  | 0.0003   | 0.100808 |
| -0.06761 | 0.14462 | -0.1448  | 0.0017   | -0.02752 | 0.55303  | -0.16094 | 0.00048  | 0.037998 |
| -0.055   | 0.23551 | -0.01802 | 0.69776  | 0.028905 | 0.53322  | -0.08249 | 0.07495  | -0.07442 |
| 0.001541 | 0.97351 | 0.085367 | 0.0653   | 0.218783 | 1.81E-06 | 0.01587  | 0.73231  | 0.412863 |
| -0.02888 | 0.53356 | -0.09778 | 0.03465  | 0.014694 | 0.75147  | -0.14832 | 0.00131  | 0.12779  |
| -0.0286  | 0.53755 | -0.04323 | 0.35129  | 0.095011 | 0.04014  | -0.11077 | 0.01663  | 0.139394 |
| -0.05146 | 0.2671  | -0.02566 | 0.58023  | 0.059801 | 0.19705  | -0.06574 | 0.15605  | -0.00776 |
| 0.021318 | 0.64587 | -0.11163 | 0.0158   | 0.167559 | 0.00028  | -0.17977 | 9.37E-05 | 0.224715 |
| -0.08934 | 0.05369 | -0.03763 | 0.41718  | -0.14242 | 0.00203  | -0.10454 | 0.02387  | 0.013245 |
| -0.03217 | 0.48799 | -0.10016 | 0.03045  | -0.03882 | 0.40261  | -0.15928 | 0.00055  | 0.089378 |
| 0.006267 | 0.89256 | 0.135205 | 0.00342  | 0.091283 | 0.04867  | 0.057977 | 0.21109  | -0.08099 |
| 0.035674 | 0.44184 | -0.01588 | 0.73207  | 0.174061 | 0.00016  | -0.11764 | 0.01095  | 0.222443 |
| 0.015449 | 0.73914 | -0.09752 | 0.03513  | 0.078664 | 0.0895   | -0.20398 | 8.87E-06 | 0.122786 |
| 0.004608 | 0.9209  | 0.01326  | 0.77504  | 0.116684 | 0.01162  | -0.09936 | 0.03182  | 0.148321 |
| 0.045475 | 0.32679 | 0.031521 | 0.4968   | 0.222206 | 1.24E-06 | -0.0153  | 0.74165  | 0.06242  |
| -0.00411 | 0.92943 | -0.10075 | 0.02949  | 0.137162 | 0.00298  | -0.20462 | 8.31E-06 | 0.12498  |
| -0.03731 | 0.42112 | -0.07618 | 0.10012  | 0.059335 | 0.20057  | -0.16505 | 0.00034  | 0.073656 |
| -0.03353 | 0.46977 | -0.13219 | 0.00421  | 0.056429 | 0.22355  | -0.18865 | 4.08E-05 | 0.220358 |
| -0.05338 | 0.24966 | 0.024001 | 0.60492  | 0.066534 | 0.15113  | -0.04004 | 0.38799  | 0.025218 |
| 0.040123 | 0.38699 | -0.00225 | 0.96128  | 0.18281  | 7.08E-05 | -0.15117 | 0.00105  | 0.10626  |
| 0.002171 | 0.96269 | -0.07034 | 0.12904  | 0.107212 | 0.02048  | -0.18046 | 8.79E-05 | 0.087018 |
| 0.094345 | 0.04156 | -0.07577 | 0.10198  | 0.029787 | 0.5208   | -0.11031 | 0.01709  | 0.024303 |
| 0.02611  | 0.57355 | -0.0772  | 0.09564  | 0.055154 | 0.2342   | -0.18532 | 5.60E-05 | 0.077335 |
| 0.042337 | 0.36132 | -0.05683 | 0.22026  | 0.119008 | 0.01005  | -0.15934 | 0.00055  | -0.01925 |
| 0.010391 | 0.82279 | 0.190483 | 3.42E-05 | 0.126231 | 0.0063   | 0.069524 | 0.13356  | -0.24311 |
| -0.0424  | 0.36056 | -0.14056 | 0.00233  | -0.08072 | 0.0814   | -0.15902 | 0.00056  | 0.004742 |
| -0.0436  | 0.34714 | -0.09068 | 0.0502   | 0.011773 | 0.7997   | -0.17841 | 0.00011  | -0.0592  |
| -0.0014  | 0.97594 | -0.06582 | 0.1556   | 0.126194 | 0.00632  | -0.15511 | 0.00077  | 0.080025 |
| -0.03615 | 0.4358  | -0.07928 | 0.08702  | 0.131319 | 0.00448  | -0.17543 | 0.00014  | 0.082108 |
| 0.082325 | 0.07552 | -0.01845 | 0.69091  | 0.205373 | 7.68E-06 | -0.07328 | 0.11377  | 0.232396 |
| -0.10374 | 0.02497 | -0.07939 | 0.08657  | -0.08805 | 0.05725  | -0.13209 | 0.00425  | -0.16055 |

|          |         |          |          |          |          |          |          |          |
|----------|---------|----------|----------|----------|----------|----------|----------|----------|
| -0.01651 | 0.72199 | -0.0576  | 0.21406  | 0.181711 | 7.84E-05 | -0.06139 | 0.18539  | 0.205218 |
| 0.00737  | 0.87379 | -0.03298 | 0.47714  | 0.043985 | 0.3429   | -0.13781 | 0.00284  | 0.022576 |
| -0.00234 | 0.95984 | -0.05605 | 0.2267   | 0.107868 | 0.01972  | -0.17071 | 0.00021  | 0.073011 |
| -0.02166 | 0.64055 | -0.1397  | 0.00248  | 0.073071 | 0.11481  | -0.10573 | 0.0223   | 0.089945 |
| 0.032941 | 0.47761 | -0.08109 | 0.08004  | 0.123403 | 0.00759  | -0.12249 | 0.00805  | 0.186481 |
| 0.016931 | 0.71516 | -0.05295 | 0.25342  | 0.017776 | 0.70162  | -0.02954 | 0.52425  | 0.011093 |
| -0.06529 | 0.15893 | -0.10766 | 0.01996  | -0.00797 | 0.86354  | -0.13914 | 0.00258  | 0.086755 |
| -0.08546 | 0.065   | -0.10485 | 0.02345  | 0.032078 | 0.48923  | -0.1657  | 0.00032  | 0.177571 |
| -0.05214 | 0.26081 | 0.042655 | 0.35772  | 0.102484 | 0.02679  | -0.00753 | 0.87099  | 0.11264  |
| 0.026089 | 0.57386 | 0.089696 | 0.05274  | 0.079637 | 0.0856   | -0.01505 | 0.74566  | -0.09026 |
| -0.11666 | 0.01164 | -0.03154 | 0.49658  | -0.10038 | 0.0301   | -0.07851 | 0.09014  | -0.11404 |
| -0.00645 | 0.88945 | -0.11986 | 0.00953  | 0.095567 | 0.03898  | -0.17419 | 0.00015  | -0.04016 |
| -0.0593  | 0.20084 | -0.03956 | 0.39364  | 0.014752 | 0.75052  | -0.07998 | 0.08424  | 0.074046 |
| 0.010612 | 0.81909 | 0.121833 | 0.0084   | 0.093897 | 0.04254  | -0.01454 | 0.75398  | 0.071484 |
| -0.05969 | 0.19787 | 0.023644 | 0.61029  | 0.028295 | 0.54189  | -0.06047 | 0.19211  | -0.02159 |
| 0.032583 | 0.48241 | -0.07057 | 0.12777  | 0.060266 | 0.19358  | -0.21367 | 3.18E-06 | -0.02521 |
| -0.01753 | 0.70549 | -0.0217  | 0.63993  | 0.164619 | 0.00035  | -0.06967 | 0.13274  | 0.138115 |
| 0.02218  | 0.63259 | 0.035822 | 0.43994  | 0.113129 | 0.01444  | -0.05069 | 0.27429  | 0.053048 |
| 0.088692 | 0.05546 | -0.04946 | 0.28617  | 0.088117 | 0.05706  | -0.12558 | 0.00658  | 0.102548 |
| -0.0601  | 0.19484 | -0.20801 | 5.82E-06 | -0.06495 | 0.1611   | -0.27067 | 2.77E-09 | 0.113863 |
| 0.035024 | 0.4502  | -0.054   | 0.24419  | 0.186468 | 5.03E-05 | -0.10877 | 0.01871  | 0.218516 |
| -0.05841 | 0.20768 | -0.03558 | 0.44302  | -0.00424 | 0.92716  | -0.12243 | 0.00808  | -0.07305 |
| -0.04062 | 0.38112 | -0.12029 | 0.00927  | 0.100152 | 0.03047  | -0.19722 | 1.77E-05 | 0.081578 |
| 0.056444 | 0.22343 | 0.020215 | 0.66304  | 0.216562 | 2.32E-06 | -0.06283 | 0.17525  | 0.183852 |
| -0.00898 | 0.84648 | -0.06226 | 0.17923  | 0.186384 | 5.07E-05 | -0.14999 | 0.00115  | 0.135397 |
| 0.05038  | 0.27726 | 0.022971 | 0.62049  | 0.210033 | 4.70E-06 | -0.10902 | 0.01844  | 0.04874  |
| 0.069585 | 0.13322 | -0.04874 | 0.29321  | 0.208349 | 5.62E-06 | -0.08746 | 0.05893  | 0.169736 |
| -0.02423 | 0.60141 | -0.05403 | 0.24387  | 0.106362 | 0.02151  | -0.13565 | 0.00331  | 0.036228 |
| -0.00594 | 0.8982  | -0.07315 | 0.11442  | 0.177475 | 0.00012  | -0.12375 | 0.00742  | 0.174627 |
| -0.03394 | 0.46433 | -0.1038  | 0.02488  | -0.00404 | 0.93067  | -0.20214 | 1.07E-05 | 0.080077 |
| 0.003295 | 0.94339 | 0.034527 | 0.45666  | 0.118377 | 0.01046  | -0.00682 | 0.88316  | -0.04784 |
| 0.005422 | 0.90697 | 0.000849 | 0.98541  | 0.093387 | 0.04368  | -0.12292 | 0.00783  | 0.044033 |
| -0.01557 | 0.7371  | -0.08561 | 0.06452  | 0.084383 | 0.06847  | -0.19904 | 1.47E-05 | 0.160596 |
| 0.053066 | 0.25241 | 0.005356 | 0.9081   | 0.17083  | 0.00021  | -0.05139 | 0.26775  | 0.199277 |
| -0.06424 | 0.16574 | -0.05513 | 0.2344   | 0.040545 | 0.38201  | -0.06552 | 0.15749  | 0.131793 |
| 0.012798 | 0.78267 | -0.02375 | 0.60875  | 0.2291   | 5.61E-07 | -0.07907 | 0.08787  | 0.156906 |
| -0.06361 | 0.16998 | -0.13968 | 0.00248  | -0.04878 | 0.29282  | -0.21171 | 3.93E-06 | 0.072283 |
| 0.073264 | 0.11385 | 0.016034 | 0.72965  | 0.045807 | 0.32327  | 0.004401 | 0.92444  | 0.041615 |
| -0.04172 | 0.36835 | -0.06535 | 0.15855  | -0.04303 | 0.35347  | -0.05806 | 0.21041  | -0.07269 |
| 0.053022 | 0.25281 | -0.0085  | 0.85471  | 0.022393 | 0.62932  | -0.02197 | 0.63584  | -0.04946 |
| 0.026494 | 0.56793 | 0.022242 | 0.63163  | 0.020211 | 0.66309  | -0.03357 | 0.4693   | -0.05462 |
| 0.067951 | 0.14259 | 0.001754 | 0.96984  | 0.020921 | 0.65202  | 0.019788 | 0.66973  | -0.00117 |
| -0.02622 | 0.57195 | -0.024   | 0.60492  | 0.032098 | 0.48896  | -0.00445 | 0.92354  | 0.01446  |
| -0.00439 | 0.92458 | -0.07574 | 0.10212  | -0.06921 | 0.13533  | -0.08822 | 0.05677  | -0.00663 |
| 0.027732 | 0.54998 | 0.044194 | 0.34062  | 0.040712 | 0.38006  | 0.00645  | 0.88944  | -0.00419 |

|          |         |          |         |          |         |          |         |          |
|----------|---------|----------|---------|----------|---------|----------|---------|----------|
| 0.045861 | 0.3227  | 0.036672 | 0.42916 | 0.049917 | 0.28171 | -0.00786 | 0.86549 | -0.03652 |
| 0.089186 | 0.05411 | 0.114912 | 0.01296 | 0.106998 | 0.02074 | 0.081236 | 0.07948 | 0.013731 |
| -0.01953 | 0.67386 | 0.017654 | 0.70357 | 0.004822 | 0.91723 | -0.05912 | 0.20217 | 0.006223 |
| 0.019949 | 0.6672  | 0.008809 | 0.84941 | 0.017493 | 0.70615 | -0.00637 | 0.8908  | 0.065956 |
| 0.022332 | 0.63026 | 0.05743  | 0.21543 | 0.056724 | 0.22113 | -0.00047 | 0.99191 | 0.053468 |
| 0.029249 | 0.52835 | 0.026587 | 0.56657 | 0.029869 | 0.51965 | -0.01365 | 0.76857 | 0.035069 |
| 0.003268 | 0.94386 | -0.05493 | 0.23608 | -0.06767 | 0.14429 | -0.07556 | 0.10295 | -0.06668 |
| 0.061652 | 0.18352 | 0.010058 | 0.82837 | 0.025419 | 0.58375 | -0.01569 | 0.73529 | 0.06542  |
| -0.00144 | 0.97519 | 0.021885 | 0.63712 | 0.016092 | 0.7287  | -0.00711 | 0.87815 | -0.00083 |
| 0.080754 | 0.08128 | 0.043645 | 0.34666 | 0.014645 | 0.75227 | 0.037746 | 0.41576 | -0.0274  |
| 0.003228 | 0.94453 | 0.002636 | 0.95469 | -0.03814 | 0.41087 | -0.01809 | 0.69658 | -0.11268 |
| 0.016136 | 0.728   | 0.025243 | 0.58635 | 0.017861 | 0.70025 | -0.00689 | 0.88194 | -0.0572  |
| 0.115775 | 0.01229 | 0.076782 | 0.09746 | 0.049685 | 0.28395 | 0.066078 | 0.15396 | 0.003689 |
| 0.020072 | 0.66528 | -0.00158 | 0.97292 | -0.00343 | 0.94104 | -0.02435 | 0.59962 | 0.084696 |
| 0.041784 | 0.36762 | 0.035785 | 0.44041 | 0.021502 | 0.64303 | -0.0101  | 0.82769 | -0.0517  |
| 0.121498 | 0.00858 | 0.068827 | 0.13751 | 0.089368 | 0.05361 | 0.0646   | 0.1634  | -0.00495 |
| 0.100756 | 0.02948 | 0.016239 | 0.72633 | 0.052802 | 0.25479 | 0.006096 | 0.89547 | -0.03351 |
| 0.007315 | 0.87472 | 0.032373 | 0.48525 | 0.012951 | 0.78014 | 0.00287  | 0.95068 | -0.03626 |
| 0.079374 | 0.08664 | 0.049713 | 0.28368 | 0.031662 | 0.49488 | 0.032256 | 0.48682 | -0.03259 |
| 0.05059  | 0.27526 | 0.050553 | 0.27561 | 0.061909 | 0.18169 | 0.019988 | 0.6666  | 0.015244 |
| 0.074069 | 0.10992 | 0.040756 | 0.37954 | 0.02151  | 0.6429  | 0.031794 | 0.49308 | -0.04417 |
| 0.017066 | 0.71299 | 0.001847 | 0.96825 | 0.010271 | 0.8248  | -0.07283 | 0.116   | -0.02325 |
| 0.013246 | 0.77526 | -0.00176 | 0.9697  | 0.014394 | 0.75637 | -0.03391 | 0.4647  | -0.01277 |
| 0.069501 | 0.13369 | 0.040738 | 0.37975 | 0.058685 | 0.20556 | 0.017807 | 0.70112 | -0.00125 |
| -0.00026 | 0.99551 | 0.081823 | 0.07732 | 0.060984 | 0.18832 | 0.030659 | 0.50866 | 0.003545 |
| 0.04456  | 0.33662 | 0.027154 | 0.55832 | 0.047627 | 0.30439 | 0.008865 | 0.84847 | -0.00879 |
| -0.00217 | 0.96261 | 0.036158 | 0.43566 | 0.02416  | 0.60252 | 0.026201 | 0.57222 | -0.01538 |
| 0.013373 | 0.77317 | 0.014364 | 0.75687 | 0.038075 | 0.4117  | 0.00992  | 0.8307  | -0.00089 |
| 0.01219  | 0.79276 | 0.02249  | 0.62784 | 0.041117 | 0.37533 | 0.010394 | 0.82274 | 0.002915 |
| 0.052631 | 0.25633 | 0.027033 | 0.56007 | 0.047563 | 0.30505 | -0.00214 | 0.9632  | 0.020498 |
| 0.040208 | 0.38599 | 0.045781 | 0.32354 | 0.030224 | 0.5147  | 0.007516 | 0.87131 | -0.04907 |
| 0.128308 | 0.00549 | 0.128829 | 0.0053  | 0.077459 | 0.09454 | 0.134024 | 0.00371 | -0.07553 |
| -0.00454 | 0.922   | 0.006166 | 0.89428 | -0.00208 | 0.9642  | -0.02612 | 0.57345 | -0.04413 |
| 0.009229 | 0.84233 | 0.012771 | 0.78312 | 0.001374 | 0.97637 | -0.03274 | 0.48032 | -0.06417 |
| 0.043865 | 0.34423 | -0.01286 | 0.78167 | -0.0358  | 0.44025 | -0.00341 | 0.94134 | 0.052366 |
| 0.021437 | 0.64403 | -0.01741 | 0.70747 | 0.025473 | 0.58295 | 0.047002 | 0.31079 | -0.02193 |
| 0.017031 | 0.71356 | 0.011042 | 0.8119  | 0.006894 | 0.88189 | 0.005842 | 0.8998  | -0.03273 |
| -0.00333 | 0.9428  | 0.00405  | 0.93044 | 0.000697 | 0.98801 | -0.00532 | 0.90879 | -0.02889 |
| 0.008463 | 0.85528 | 0.010046 | 0.82859 | 0.01417  | 0.76005 | -0.00091 | 0.98439 | -0.03433 |
| 0.001022 | 0.98243 | 0.004834 | 0.91702 | 0.007263 | 0.87561 | -0.00556 | 0.90462 | -0.03498 |
| -0.0002  | 0.99655 | 0.021584 | 0.64176 | 0.023562 | 0.61154 | 0.010795 | 0.81602 | -0.02157 |
| 0.002562 | 0.95596 | 0.014697 | 0.75141 | -0.00201 | 0.96538 | 0.006885 | 0.88204 | -0.05735 |
| -0.0121  | 0.79422 | -0.01225 | 0.79183 | -0.02139 | 0.64483 | -0.03372 | 0.46723 | -0.09124 |
| -0.01466 | 0.75196 | -0.00882 | 0.84918 | -0.01271 | 0.78413 | -0.00989 | 0.83123 | -0.06968 |
| -0.02287 | 0.62206 | -0.02804 | 0.54553 | -0.02599 | 0.57535 | -0.04885 | 0.29218 | -0.10922 |

|          |          |          |          |          |          |          |          |          |
|----------|----------|----------|----------|----------|----------|----------|----------|----------|
| 0.036945 | 0.42573  | 0.07144  | 0.12316  | 0.093392 | 0.04367  | 0.007719 | 0.86787  | 0.011744 |
| 0.065667 | 0.15654  | 0.02273  | 0.62417  | -0.00598 | 0.8974   | 0.013389 | 0.77291  | -0.054   |
| 0.083383 | 0.07182  | -0.01669 | 0.71911  | 0.085636 | 0.06445  | -0.02747 | 0.55381  | 0.01369  |
| 0.028412 | 0.54023  | 0.030765 | 0.50719  | 0.036748 | 0.4282   | 0.006913 | 0.88156  | -0.00058 |
| 0.026972 | 0.56096  | 0.014019 | 0.76253  | 0.025488 | 0.58272  | -0.0035  | 0.93988  | -0.0308  |
| 0.016075 | 0.72898  | 0.035568 | 0.44319  | 0.032871 | 0.47855  | 0.01352  | 0.77074  | -0.0109  |
| 0.070805 | 0.12653  | 0.027676 | 0.55077  | 0.007062 | 0.87903  | 0.028927 | 0.53292  | -0.05142 |
| 0.01074  | 0.81694  | 0.011    | 0.8126   | 0.003981 | 0.93162  | 0.004316 | 0.92588  | -0.03657 |
| 0.05839  | 0.20784  | 0.029893 | 0.51931  | 0.010594 | 0.81939  | 0.011057 | 0.81164  | -0.03516 |
| 0.021256 | 0.64683  | -0.05383 | 0.24564  | -0.03226 | 0.48677  | -0.04022 | 0.38584  | -0.08543 |
| -0.00383 | 0.93425  | 0.034942 | 0.45126  | 0.037996 | 0.41267  | 0.017914 | 0.6994   | 0.001257 |
| 0.054206 | 0.24235  | 0.022889 | 0.62175  | -0.0172  | 0.71088  | 0.011131 | 0.81041  | -0.08602 |
| 0.032457 | 0.48411  | 0.018427 | 0.69123  | 0.001504 | 0.97414  | 0.007127 | 0.87791  | -0.05059 |
| 0.038115 | 0.41121  | -0.01226 | 0.79157  | -0.06461 | 0.16335  | -0.05921 | 0.20154  | -0.0561  |
| 0.026524 | 0.56749  | 0.02644  | 0.56872  | 0.034457 | 0.45757  | 0.011204 | 0.80918  | -0.02405 |
| 0.066221 | 0.15307  | 0.018613 | 0.68828  | 0.011088 | 0.81112  | 0.035569 | 0.44318  | -0.01822 |
| 0.07414  | 0.10958  | 0.014769 | 0.75024  | 0.057599 | 0.21408  | 0.031968 | 0.49073  | 0.038397 |
| -0.00704 | 0.87943  | -0.05011 | 0.27982  | -0.05773 | 0.21308  | -0.04159 | 0.36984  | -0.07911 |
| 0.05006  | 0.28033  | -0.00019 | 0.99669  | 0.039403 | 0.39557  | -0.01038 | 0.82293  | -0.03297 |
| -0.07711 | 0.09603  | 0.158112 | 0.00061  | -0.07413 | 0.10962  | 0.173934 | 0.00016  | -0.12293 |
| -0.05936 | 0.2004   | 0.170549 | 0.00021  | -0.11681 | 0.01153  | 0.105297 | 0.02286  | -0.30063 |
| -0.01351 | 0.77092  | 0.150802 | 0.00108  | -0.08901 | 0.05459  | 0.170225 | 0.00022  | -0.1564  |
| -0.07705 | 0.0963   | 0.127212 | 0.00591  | -0.12054 | 0.00912  | 0.039296 | 0.39686  | -0.20492 |
| 0.016511 | 0.72193  | 0.146438 | 0.00151  | -0.06019 | 0.19417  | 0.115558 | 0.01246  | -0.14197 |
| -0.10251 | 0.02675  | 0.017743 | 0.70214  | -0.15049 | 0.00111  | 0.069183 | 0.13548  | -0.13706 |
| -0.0366  | 0.43004  | 0.251333 | 3.68E-08 | 0.017033 | 0.71352  | 0.232351 | 3.83E-07 | -0.0104  |
| -0.04477 | 0.33435  | 0.180488 | 8.78E-05 | -0.09305 | 0.04446  | 0.212313 | 3.68E-06 | -0.09648 |
| -0.08958 | 0.05304  | 0.070118 | 0.13026  | -0.22673 | 7.38E-07 | 0.081931 | 0.07693  | -0.24942 |
| -0.06728 | 0.1466   | 0.09644  | 0.03722  | -0.15521 | 0.00076  | 0.067536 | 0.14506  | -0.18662 |
| -0.05195 | 0.26256  | 0.057841 | 0.21216  | -0.00149 | 0.97432  | 0.033118 | 0.47525  | -0.16833 |
| -0.02249 | 0.62781  | 0.263832 | 7.08E-09 | 0.030697 | 0.50814  | 0.230475 | 4.77E-07 | -0.14881 |
| -0.06546 | 0.15787  | 0.129585 | 0.00504  | -0.18514 | 5.70E-05 | 0.1573   | 0.00065  | -0.17849 |
| -0.06394 | 0.16773  | 0.167549 | 0.00028  | -0.24892 | 5.01E-08 | 0.151478 | 0.00102  | -0.32044 |
| -0.05126 | 0.2689   | 0.137442 | 0.00292  | -0.06061 | 0.19102  | 0.124329 | 0.00714  | -0.21868 |
| -0.13759 | 0.00289  | -0.02942 | 0.52589  | -0.34643 | 1.30E-14 | -0.0558  | 0.22874  | -0.27173 |
| -0.18964 | 3.71E-05 | -0.04909 | 0.28974  | -0.31413 | 3.74E-12 | -0.06594 | 0.15479  | -0.22325 |
| -0.00452 | 0.92242  | 0.266591 | 4.86E-09 | 0.023349 | 0.61476  | 0.272995 | 2.00E-09 | -0.19261 |
| -0.04713 | 0.30943  | 0.20591  | 7.26E-06 | -0.15352 | 0.00087  | 0.237872 | 1.98E-07 | -0.22235 |
| -0.02645 | 0.56854  | 0.182897 | 7.03E-05 | -0.09174 | 0.04756  | 0.159686 | 0.00053  | -0.23053 |
| -0.05818 | 0.20948  | 0.163506 | 0.00039  | -0.18775 | 4.45E-05 | 0.158034 | 0.00061  | -0.24734 |
| -0.11377 | 0.01389  | 0.069494 | 0.13373  | -0.19902 | 1.47E-05 | 0.050574 | 0.27541  | -0.17572 |
| -0.12301 | 0.00778  | 0.074507 | 0.10783  | -0.10011 | 0.03054  | 0.15075  | 0.00108  | -0.03628 |
| -0.13383 | 0.00376  | 0.116781 | 0.01155  | -0.16538 | 0.00033  | 0.031593 | 0.49583  | -0.23152 |
| -0.10188 | 0.02771  | 0.204893 | 8.07E-06 | -0.17449 | 0.00015  | 0.158298 | 0.0006   | -0.18055 |
| -0.15982 | 0.00053  | -0.06722 | 0.14694  | -0.3041  | 1.90E-11 | -0.01873 | 0.68645  | -0.16207 |

|          |          |          |          |          |          |          |          |          |
|----------|----------|----------|----------|----------|----------|----------|----------|----------|
| -0.09463 | 0.04094  | 0.028075 | 0.54504  | -0.22945 | 5.38E-07 | 0.072137 | 0.11953  | -0.1918  |
| -0.13936 | 0.00254  | 0.142285 | 0.00205  | -0.14182 | 0.00213  | 0.155125 | 0.00077  | -0.17222 |
| -0.09042 | 0.05086  | 0.1083   | 0.01923  | -0.18375 | 6.49E-05 | 0.125189 | 0.00675  | -0.22417 |
| -0.05857 | 0.20642  | 0.056914 | 0.21959  | -0.15423 | 0.00083  | 0.02572  | 0.57929  | -0.19116 |
| -0.06207 | 0.18055  | 0.186283 | 5.11E-05 | -0.16047 | 0.0005   | 0.207031 | 6.45E-06 | -0.27037 |
| -0.08437 | 0.06852  | 0.138585 | 0.00269  | -0.09962 | 0.03137  | 0.123441 | 0.00757  | -0.14144 |
| -0.027   | 0.56061  | 0.250329 | 4.19E-08 | 0.001052 | 0.98192  | 0.253282 | 2.86E-08 | -0.00267 |
| -0.15072 | 0.00109  | 0.025802 | 0.57808  | -0.12784 | 0.00566  | 0.035386 | 0.44553  | -0.11897 |
| -0.0735  | 0.1127   | 0.142007 | 0.0021   | -0.11243 | 0.01506  | 0.131637 | 0.00438  | -0.19546 |
| -0.10096 | 0.02914  | 0.173185 | 0.00017  | -0.117   | 0.01139  | 0.146176 | 0.00154  | -0.17817 |
| -0.10517 | 0.02303  | -0.0486  | 0.29465  | -0.26166 | 9.48E-09 | -0.0021  | 0.96392  | -0.19428 |
| -0.15545 | 0.00075  | 0.11014  | 0.01726  | -0.1239  | 0.00735  | 0.07445  | 0.1081   | -0.24994 |
| -0.07806 | 0.09199  | 0.032343 | 0.48565  | -0.04911 | 0.28959  | 0.095614 | 0.03888  | 0.086944 |
| -0.15665 | 0.00068  | 0.092549 | 0.04562  | -0.2163  | 2.39E-06 | 0.101656 | 0.02805  | -0.21835 |
| -0.0148  | 0.74971  | 0.077339 | 0.09505  | -0.07596 | 0.1011   | 0.115141 | 0.01278  | -0.18217 |
| -0.05418 | 0.24262  | 0.017653 | 0.70359  | -0.10685 | 0.02092  | -0.04843 | 0.29629  | -0.2052  |
| -0.04063 | 0.38103  | 0.12463  | 0.00701  | -0.03313 | 0.47511  | 0.131071 | 0.00455  | -0.14328 |
| -0.11188 | 0.01557  | 0.058994 | 0.20317  | -0.17495 | 0.00014  | 0.057574 | 0.21428  | -0.24305 |
| -0.02189 | 0.63704  | 0.083232 | 0.07234  | -0.09965 | 0.03131  | 0.069896 | 0.13149  | -0.07883 |
| -0.05726 | 0.21682  | 0.201277 | 1.17E-05 | -0.12554 | 0.0066   | 0.209527 | 4.96E-06 | -0.24132 |
| -0.06584 | 0.15546  | 0.133064 | 0.00397  | -0.20561 | 7.49E-06 | 0.178531 | 0.0001   | -0.11436 |
| -0.0904  | 0.05089  | 0.055347 | 0.23257  | -0.17308 | 0.00017  | 0.068775 | 0.13781  | -0.20793 |
| -0.08507 | 0.06625  | 0.036131 | 0.43601  | -0.15249 | 0.00095  | 0.008569 | 0.85347  | -0.21725 |
| -0.15702 | 0.00066  | 0.080333 | 0.08289  | -0.21455 | 2.89E-06 | 0.039274 | 0.39712  | -0.27615 |
| -0.07209 | 0.11978  | 0.058268 | 0.2088   | -0.03557 | 0.44316  | 0.123808 | 0.00739  | -0.01758 |
| -0.03594 | 0.43842  | 0.178251 | 0.00011  | -0.12347 | 0.00756  | 0.230832 | 4.58E-07 | -0.14704 |
| -0.03286 | 0.47868  | 0.109543 | 0.01788  | -0.04142 | 0.37177  | 0.137135 | 0.00298  | -0.12024 |
| -0.02187 | 0.63738  | 0.207563 | 6.10E-06 | -0.11247 | 0.01503  | 0.241575 | 1.26E-07 | -0.25039 |
| -0.15208 | 0.00098  | 0.035604 | 0.44273  | -0.20386 | 8.98E-06 | 0.014672 | 0.75182  | -0.22751 |
| -0.15642 | 0.00069  | 0.084234 | 0.06896  | -0.22192 | 1.28E-06 | 0.026329 | 0.57034  | -0.33058 |
| -0.02952 | 0.52448  | 0.06035  | 0.19297  | -0.06487 | 0.16166  | 0.129562 | 0.00504  | -0.1667  |
| -0.07958 | 0.08582  | 0.137303 | 0.00295  | -0.07998 | 0.08426  | 0.154384 | 0.00082  | -0.07783 |
| -0.02231 | 0.63058  | 0.166329 | 0.00031  | -0.07639 | 0.09919  | 0.148379 | 0.0013   | -0.17475 |
| -0.09669 | 0.03673  | 0.039512 | 0.39427  | -0.17775 | 0.00011  | 0.088202 | 0.05682  | -0.17054 |
| -0.18125 | 8.18E-05 | 0.098764 | 0.03286  | -0.27322 | 1.94E-09 | 0.10324  | 0.02568  | -0.30991 |
| -0.0893  | 0.0538   | 0.148758 | 0.00126  | -0.20126 | 1.17E-05 | 0.190011 | 3.58E-05 | -0.27096 |
| -0.10856 | 0.01895  | 0.069482 | 0.13379  | -0.24007 | 1.51E-07 | 0.083455 | 0.07158  | -0.2456  |
| -0.10733 | 0.02034  | 0.069465 | 0.13389  | -0.14852 | 0.00129  | 0.136299 | 0.00316  | -0.1552  |
| -0.11158 | 0.01585  | 0.072421 | 0.11808  | -0.18898 | 3.96E-05 | 0.092419 | 0.04592  | -0.20669 |
| -0.02257 | 0.62664  | 0.297127 | 5.67E-11 | 0.077276 | 0.09532  | 0.341715 | 3.09E-14 | -0.08466 |
| -0.05477 | 0.23749  | 0.132395 | 0.00416  | -0.11413 | 0.01359  | 0.037055 | 0.42436  | -0.25179 |
| 0.014734 | 0.75081  | 0.317253 | 2.22E-12 | 0.115787 | 0.01228  | 0.229245 | 5.51E-07 | -0.17594 |
| -0.04528 | 0.32883  | 0.153927 | 0.00085  | -0.13999 | 0.00243  | 0.153077 | 0.0009   | -0.33363 |
| -0.07209 | 0.11979  | 0.186457 | 5.03E-05 | -0.07481 | 0.10638  | 0.191674 | 3.05E-05 | -0.19353 |
| -0.07887 | 0.08867  | 0.134312 | 0.00364  | -0.1328  | 0.00404  | 0.157358 | 0.00064  | -0.26485 |

|          |          |          |          |          |          |          |          |          |
|----------|----------|----------|----------|----------|----------|----------|----------|----------|
| -0.07744 | 0.09461  | 0.112275 | 0.01521  | -0.07649 | 0.09874  | 0.156892 | 0.00067  | -0.22751 |
| -0.10403 | 0.02457  | 0.086456 | 0.06193  | -0.20143 | 1.15E-05 | 0.121511 | 0.00857  | -0.21035 |
| -0.09894 | 0.03254  | 0.116805 | 0.01154  | -0.22355 | 1.06E-06 | 0.134331 | 0.00363  | -0.29941 |
| -0.03211 | 0.48881  | 0.192298 | 2.87E-05 | -0.12675 | 0.00609  | 0.214136 | 3.02E-06 | -0.23193 |
| -0.1134  | 0.0142   | 0.014238 | 0.75893  | -0.18712 | 4.73E-05 | 0.082861 | 0.07363  | -0.08793 |
| -0.08983 | 0.05238  | 0.129223 | 0.00516  | -0.14727 | 0.00142  | 0.099959 | 0.03079  | -0.18882 |
| -0.03856 | 0.40577  | 0.202395 | 1.04E-05 | -0.01596 | 0.73092  | 0.228558 | 5.97E-07 | -0.12341 |
| -0.13336 | 0.00389  | 0.133271 | 0.00391  | -0.17219 | 0.00018  | 0.118594 | 0.01032  | -0.22699 |
| -0.01031 | 0.82413  | 0.256807 | 1.81E-08 | 0.045022 | 0.33164  | 0.288616 | 2.07E-10 | -0.11437 |
| -0.08075 | 0.08129  | 0.095111 | 0.03993  | -0.10342 | 0.02543  | 0.057185 | 0.2174   | -0.13983 |
| -0.11517 | 0.01276  | -0.02911 | 0.53036  | -0.21282 | 3.48E-06 | -0.01635 | 0.72456  | -0.24632 |
| -0.13823 | 0.00276  | 0.034732 | 0.45399  | -0.2232  | 1.10E-06 | 0.009351 | 0.84027  | -0.32546 |
| -0.13045 | 0.00475  | 0.074095 | 0.1098   | -0.16271 | 0.00041  | -0.01664 | 0.71989  | -0.16898 |
| -0.10157 | 0.02818  | 0.00992  | 0.8307   | -0.22409 | 9.98E-07 | 0.059844 | 0.19673  | -0.17068 |
| -0.10186 | 0.02773  | 0.073905 | 0.11071  | -0.19483 | 2.24E-05 | 0.095773 | 0.03856  | -0.22387 |
| -0.14325 | 0.00191  | 0.032177 | 0.4879   | -0.13774 | 0.00286  | 0.009424 | 0.83905  | -0.17973 |
| -0.05814 | 0.20978  | 0.108592 | 0.01891  | -0.20822 | 5.69E-06 | 0.118051 | 0.01067  | -0.23478 |
| -0.08431 | 0.06873  | 0.114483 | 0.0133   | -0.10325 | 0.02566  | 0.135434 | 0.00336  | -0.17498 |
| -0.0905  | 0.05064  | 0.024566 | 0.59644  | -0.14048 | 0.00234  | 0.109575 | 0.01785  | -0.13025 |
| -0.077   | 0.0965   | 0.088769 | 0.05524  | -0.1681  | 0.00026  | 0.049053 | 0.29013  | -0.25401 |
| -0.10498 | 0.02328  | 0.010325 | 0.82391  | -0.14466 | 0.00172  | 0.005963 | 0.89774  | -0.21014 |
| -0.09344 | 0.04356  | 0.239449 | 1.63E-07 | -0.04721 | 0.30861  | 0.199774 | 1.36E-05 | -0.15393 |
| -0.15962 | 0.00054  | 0.02263  | 0.6257   | -0.21507 | 2.73E-06 | 0.020942 | 0.6517   | -0.19499 |
| -0.08343 | 0.07168  | 0.136608 | 0.0031   | -0.1007  | 0.02957  | 0.024499 | 0.59743  | -0.25396 |
| -0.06496 | 0.16104  | 0.134537 | 0.00358  | -0.17308 | 0.00017  | 0.081461 | 0.07865  | -0.21535 |
| -0.09314 | 0.04424  | 0.104287 | 0.02421  | -0.27061 | 2.79E-09 | 0.069499 | 0.1337   | -0.38134 |
| -0.07015 | 0.13011  | 0.178708 | 0.0001   | -0.05914 | 0.20202  | 0.205522 | 7.56E-06 | -0.06053 |
| -0.05974 | 0.1975   | 0.197084 | 1.79E-05 | -0.12631 | 0.00627  | 0.229703 | 5.22E-07 | -0.19481 |
| -0.1133  | 0.01429  | 0.088357 | 0.05639  | -0.27764 | 1.03E-09 | -0.03866 | 0.40451  | -0.21926 |
| -0.12365 | 0.00747  | 0.091165 | 0.04896  | -0.1383  | 0.00274  | 0.09125  | 0.04875  | -0.23785 |
| -0.16659 | 0.0003   | 0.088213 | 0.05679  | -0.23379 | 3.23E-07 | 0.044731 | 0.33478  | -0.27976 |
| -0.18515 | 5.69E-05 | 0.080938 | 0.08059  | -0.23281 | 3.62E-07 | 0.042685 | 0.35738  | -0.26075 |
| -0.02634 | 0.57022  | 0.121139 | 0.00878  | -0.14116 | 0.00223  | 0.199799 | 1.36E-05 | -0.12782 |
| -0.0877  | 0.05827  | 0.228293 | 6.16E-07 | -0.15942 | 0.00054  | 0.205622 | 7.48E-06 | -0.26637 |
| -0.0328  | 0.47944  | 0.082396 | 0.07527  | -0.14554 | 0.00161  | 0.06339  | 0.17145  | -0.16655 |
| -0.10635 | 0.02152  | 0.108698 | 0.01879  | -0.19004 | 3.57E-05 | 0.11312  | 0.01445  | -0.25257 |
| -0.14599 | 0.00156  | 0.098697 | 0.03298  | -0.22606 | 7.97E-07 | 0.071777 | 0.12139  | -0.22    |
| -0.05034 | 0.27764  | 0.205088 | 7.91E-06 | -0.10837 | 0.01915  | 0.203507 | 9.31E-06 | -0.18144 |
| -0.12103 | 0.00884  | 0.067065 | 0.14789  | -0.16541 | 0.00033  | 0.042826 | 0.35579  | -0.18829 |
| -0.10317 | 0.02578  | -0.02226 | 0.63138  | -0.18353 | 6.62E-05 | 0.007439 | 0.87262  | -0.09507 |
| -0.09254 | 0.04564  | 0.119303 | 0.00987  | 0.001624 | 0.97207  | 0.168281 | 0.00026  | -0.14756 |
| -0.06656 | 0.15096  | 0.128152 | 0.00555  | -0.1916  | 3.07E-05 | 0.142951 | 0.00196  | -0.23797 |
| -0.12701 | 0.00599  | 0.06333  | 0.17185  | -0.22564 | 8.36E-07 | 0.054968 | 0.23579  | -0.25171 |
| -0.15005 | 0.00114  | 0.039897 | 0.38968  | -0.25873 | 1.40E-08 | 0.099876 | 0.03093  | -0.26512 |
| -0.08865 | 0.05557  | -0.08261 | 0.0745   | -0.20652 | 6.81E-06 | -0.02705 | 0.55989  | -0.19982 |

|          |          |          |          |          |          |          |          |          |
|----------|----------|----------|----------|----------|----------|----------|----------|----------|
| -0.02317 | 0.61746  | 0.276929 | 1.14E-09 | -0.03545 | 0.44476  | 0.291006 | 1.44E-10 | -0.12285 |
| -0.08692 | 0.06052  | 0.11985  | 0.00953  | -0.1378  | 0.00284  | 0.111673 | 0.01576  | -0.19214 |
| -0.10866 | 0.01883  | 0.119668 | 0.00964  | -0.21096 | 4.25E-06 | 0.138206 | 0.00276  | -0.1281  |
| -0.06915 | 0.13568  | 0.128732 | 0.00534  | -0.18897 | 3.96E-05 | 0.088208 | 0.05681  | -0.13635 |
| -0.0277  | 0.55045  | 0.075122 | 0.10494  | -0.08781 | 0.05793  | 0.077492 | 0.0944   | -0.15427 |
| -0.04495 | 0.33241  | 0.211518 | 4.01E-06 | -0.11423 | 0.01351  | 0.198612 | 1.53E-05 | -0.25884 |
| -0.0764  | 0.09915  | 0.038744 | 0.40353  | -0.06017 | 0.19429  | 0.08209  | 0.07636  | -0.0395  |
| -0.10855 | 0.01896  | 0.077667 | 0.09365  | -0.16659 | 0.0003   | 0.02275  | 0.62387  | -0.12408 |
| -0.0791  | 0.08773  | 0.0045   | 0.92275  | -0.15717 | 0.00065  | 0.075311 | 0.10407  | -0.22993 |
| -0.04355 | 0.34765  | 0.083858 | 0.07022  | -0.17429 | 0.00015  | 0.143474 | 0.00188  | -0.22967 |
| -0.10401 | 0.02459  | 0.099203 | 0.03209  | -0.15064 | 0.00109  | 0.113348 | 0.01425  | -0.28521 |
| -0.05044 | 0.27665  | 0.121685 | 0.00848  | -0.13659 | 0.0031   | 0.158937 | 0.00057  | -0.24927 |
| 0.056578 | 0.22233  | 0.20374  | 9.09E-06 | 0.03062  | 0.50919  | 0.216259 | 2.40E-06 | -0.06915 |
| -0.04186 | 0.36675  | 0.167722 | 0.00027  | -0.04543 | 0.32727  | 0.098211 | 0.03385  | -0.1987  |
| -0.07247 | 0.11785  | 0.086069 | 0.06311  | -0.21576 | 2.53E-06 | 0.123795 | 0.0074   | -0.19072 |
| -0.16646 | 0.0003   | 0.002582 | 0.95562  | -0.33698 | 7.29E-14 | 0.002271 | 0.96096  | -0.27332 |
| -0.14592 | 0.00157  | 0.038729 | 0.40372  | -0.27975 | 7.63E-10 | -0.00671 | 0.88504  | -0.2035  |
| -0.06332 | 0.17192  | 0.169792 | 0.00023  | -0.15661 | 0.00068  | 0.15899  | 0.00056  | -0.28511 |
| -0.06683 | 0.14929  | 0.051698 | 0.26487  | -0.12705 | 0.00597  | -0.00299 | 0.94866  | -0.3173  |
| 0.163456 | 0.00039  | 0.085147 | 0.066    | 0.07748  | 0.09445  | 0.057579 | 0.21424  | 0.014871 |
| 0.29705  | 5.73E-11 | 0.017206 | 0.71075  | 0.030386 | 0.51244  | 0.008641 | 0.85227  | 0.107368 |
| 0.133948 | 0.00373  | -0.00159 | 0.97269  | 0.057504 | 0.21484  | -0.04081 | 0.37891  | -0.11983 |
| 0.120972 | 0.00887  | -0.01799 | 0.69819  | -0.0072  | 0.87664  | 0.028751 | 0.53541  | 0.04112  |
| 0.074289 | 0.10886  | 0.032301 | 0.48621  | -0.00325 | 0.94414  | -0.01536 | 0.74053  | -0.01941 |
| 0.091027 | 0.04931  | 0.02964  | 0.52285  | -0.04398 | 0.34293  | -0.00912 | 0.84424  | -0.05858 |
| 0.099503 | 0.03157  | 0.166873 | 0.00029  | 0.062166 | 0.17988  | 0.094544 | 0.04113  | 0.060969 |
| 0.142478 | 0.00203  | 0.043949 | 0.3433   | 0.039669 | 0.39239  | 0.007948 | 0.86399  | -0.0416  |
| 0.145382 | 0.00163  | -0.01413 | 0.7607   | 0.004289 | 0.92635  | -0.02086 | 0.65299  | -0.03295 |
| 0.168307 | 0.00026  | 0.009087 | 0.84473  | 0.044145 | 0.34116  | -0.00188 | 0.96764  | -0.04735 |
| 0.132815 | 0.00404  | 0.062172 | 0.17984  | -0.00221 | 0.96209  | 0.030308 | 0.51353  | -0.11064 |
| 0.172636 | 0.00018  | 0.023969 | 0.60539  | 0.12081  | 0.00897  | -0.03683 | 0.42721  | 0.03939  |
| 0.118297 | 0.01051  | 0.014804 | 0.74967  | -0.00267 | 0.95414  | 0.03331  | 0.4727   | -0.01128 |
| 0.160759 | 0.00049  | -0.01684 | 0.71664  | 0.059338 | 0.20055  | -0.00619 | 0.89381  | -0.05911 |
| 0.184851 | 5.85E-05 | 0.08416  | 0.06921  | 0.063805 | 0.16865  | 0.061842 | 0.18217  | -0.03151 |
| 0.17068  | 0.00021  | 0.084031 | 0.06964  | 0.079874 | 0.08467  | 0.063305 | 0.17202  | -0.0381  |
| 0.135646 | 0.00331  | 0.019781 | 0.66984  | -0.03215 | 0.48826  | -0.00273 | 0.95308  | 0.014365 |
| 0.178978 | 0.0001   | 0.042804 | 0.35604  | 0.032376 | 0.4852   | 0.038383 | 0.40793  | -0.02333 |
| 0.144817 | 0.0017   | 0.182426 | 7.34E-05 | 0.156549 | 0.00069  | 0.169258 | 0.00024  | -0.05287 |
| 0.103211 | 0.02572  | 0.15883  | 0.00057  | 0.07233  | 0.11854  | 0.145512 | 0.00162  | 0.098218 |
| 0.420134 | 2.14E-21 | 0.151381 | 0.00103  | 0.203126 | 9.69E-06 | 0.140489 | 0.00234  | 0.000315 |
| 0.15557  | 0.00074  | 0.034395 | 0.45838  | 0.060172 | 0.19428  | 0.017461 | 0.70666  | -0.02182 |
| 0.082258 | 0.07576  | 0.042149 | 0.36345  | -0.00377 | 0.9353   | 0.024083 | 0.60368  | -0.00297 |
| 0.172008 | 0.00019  | 0.03666  | 0.42931  | 5.62E-05 | 0.99903  | 0.040984 | 0.37687  | -0.07333 |
| 0.076532 | 0.09856  | 0.065424 | 0.15809  | -0.0087  | 0.85129  | -0.02721 | 0.55756  | -0.07848 |
| 0.240782 | 1.39E-07 | 0.324944 | 6.04E-13 | 0.259652 | 1.24E-08 | 0.329172 | 2.90E-13 | 0.214795 |



|          |          |          |          |          |          |          |          |          |
|----------|----------|----------|----------|----------|----------|----------|----------|----------|
| 0.063769 | 0.16889  | -0.02798 | 0.54638  | 0.032581 | 0.48244  | -0.05785 | 0.21205  | 0.038004 |
| 0.076723 | 0.09772  | 0.024052 | 0.60414  | -0.00614 | 0.8948   | 0.003347 | 0.9425   | -0.0056  |
| 0.229746 | 5.20E-07 | 0.024746 | 0.59375  | -0.02167 | 0.64043  | -0.00397 | 0.93184  | -0.16735 |
| 0.137959 | 0.00281  | 0.017416 | 0.70737  | 0.00896  | 0.84687  | 0.029517 | 0.52458  | 0.05387  |
| 0.168824 | 0.00025  | 0.04928  | 0.2879   | 0.056257 | 0.22496  | 0.01303  | 0.77883  | -0.03109 |
| 0.153144 | 0.0009   | 0.045723 | 0.32416  | 0.002533 | 0.95646  | 0.044232 | 0.3402   | -0.04332 |
| 0.186695 | 4.92E-05 | 0.023944 | 0.60577  | 0.151685 | 0.00101  | -0.01161 | 0.80249  | 0.003988 |
| 0.13916  | 0.00258  | 0.015394 | 0.74004  | 0.039631 | 0.39284  | 0.004494 | 0.92285  | 0.05842  |
| 0.647589 | 7.28E-57 | 0.405011 | 7.32E-20 | 0.413726 | 9.78E-21 | 0.519517 | 1.22E-33 | 0.036629 |
| 0.129539 | 0.00505  | -0.03083 | 0.50635  | -0.05375 | 0.24638  | -0.0651  | 0.16018  | -0.01326 |
| 0.084864 | 0.0669   | 0.012402 | 0.78924  | -0.00295 | 0.94925  | 0.015279 | 0.74191  | -0.11494 |
| 0.118095 | 0.01064  | 0.022968 | 0.62055  | 0.001893 | 0.96745  | 0.05608  | 0.22643  | -0.00215 |
| 0.082025 | 0.07659  | -0.00485 | 0.91677  | 0.025973 | 0.57556  | 0.039809 | 0.39072  | 0.068062 |
| 0.102235 | 0.02716  | 0.022034 | 0.63483  | -0.00811 | 0.86132  | 0.050196 | 0.27902  | 0.045001 |
| 0.156305 | 0.0007   | 0.043649 | 0.34661  | 0.004848 | 0.91679  | 0.049788 | 0.28295  | -0.03982 |
| 0.183006 | 6.95E-05 | 0.043474 | 0.34855  | 0.024076 | 0.60378  | 0.0413   | 0.3732   | -0.04295 |
| 0.414013 | 9.14E-21 | 0.238019 | 1.94E-07 | 0.259629 | 1.24E-08 | 0.162942 | 0.00041  | 0.028402 |
| 0.083606 | 0.07106  | -0.06992 | 0.13136  | 0.005447 | 0.90655  | -0.11768 | 0.01093  | 0.04427  |
| 0.128451 | 0.00544  | 0.029971 | 0.51822  | 0.012091 | 0.7944   | 0.002812 | 0.95167  | -0.02153 |
| 0.178934 | 0.0001   | 0.041196 | 0.37441  | 0.054798 | 0.23724  | 0.063835 | 0.16845  | 0.054453 |
| 0.167189 | 0.00028  | 0.093227 | 0.04405  | 0.094903 | 0.04036  | 0.076227 | 0.09992  | 0.003516 |
| 0.136586 | 0.0031   | -0.00268 | 0.95387  | 0.010087 | 0.8279   | -0.00672 | 0.88481  | -0.05091 |
| 0.106277 | 0.02162  | 0.056946 | 0.21933  | 0.076677 | 0.09792  | 0.050028 | 0.28064  | -0.05805 |
| 0.258083 | 1.53E-08 | 0.319809 | 1.45E-12 | 0.320883 | 1.21E-12 | 0.270865 | 2.69E-09 | 0.056508 |
| 0.168157 | 0.00026  | 0.050898 | 0.27234  | 0.076012 | 0.10088  | 0.058137 | 0.20982  | -0.02247 |
| 0.122518 | 0.00804  | 0.001208 | 0.97922  | 0.016609 | 0.72035  | -0.01536 | 0.74053  | 0.063085 |
| 0.229457 | 5.38E-07 | 0.068213 | 0.14106  | 0.078997 | 0.08815  | 0.031922 | 0.49135  | -0.02666 |
| 0.114295 | 0.01346  | 0.008445 | 0.85557  | -0.01157 | 0.803    | 0.055136 | 0.23436  | 0.104215 |
| 0.090746 | 0.05002  | 0.1029   | 0.02617  | -0.0303  | 0.51358  | 0.060423 | 0.19242  | -0.04308 |
| 0.085622 | 0.06449  | 0.060317 | 0.19321  | 0.03528  | 0.44689  | 0.065193 | 0.15956  | 0.073561 |
| 0.258556 | 1.44E-08 | 0.094788 | 0.04061  | 0.07029  | 0.12932  | 0.03278  | 0.47977  | -0.0829  |
| 0.125771 | 0.0065   | 0.06541  | 0.15817  | 0.1042   | 0.02433  | 0.093655 | 0.04308  | 0.133242 |
| 0.1808   | 8.53E-05 | 0.032065 | 0.48941  | 0.023026 | 0.61966  | 0.03626  | 0.43437  | -0.01432 |
| 0.175441 | 0.00014  | 0.057869 | 0.21194  | 0.109279 | 0.01816  | 0.024866 | 0.59196  | -0.00015 |
| 0.131272 | 0.00449  | 0.018185 | 0.69509  | -0.00803 | 0.86254  | 0.017464 | 0.70661  | -0.05884 |
| 0.152108 | 0.00098  | 0.099666 | 0.03129  | 0.14997  | 0.00115  | 0.085791 | 0.06397  | 0.053459 |
| 0.104707 | 0.02364  | 0.106032 | 0.02192  | 0.138897 | 0.00263  | 0.118869 | 0.01014  | 0.037894 |
| 0.190342 | 3.47E-05 | 0.093084 | 0.04437  | 0.114716 | 0.01312  | 0.051713 | 0.26473  | 0.04868  |
| 0.173684 | 0.00016  | -0.01813 | 0.69604  | 0.05375  | 0.24634  | -0.06431 | 0.16531  | -0.00819 |
| 0.121587 | 0.00853  | -0.0933  | 0.04389  | -0.07104 | 0.12527  | -0.06995 | 0.13116  | 0.055386 |
| 0.213133 | 3.37E-06 | 0.038777 | 0.40313  | 0.117072 | 0.01135  | 0.064231 | 0.16582  | 0.005088 |
| 0.200306 | 1.29E-05 | 0.22079  | 1.45E-06 | 0.169496 | 0.00023  | 0.164042 | 0.00037  | -0.01999 |
| 0.145224 | 0.00165  | 0.030613 | 0.5093   | -0.03908 | 0.39943  | 0.029142 | 0.52987  | 0.057036 |
| 0.145016 | 0.00168  | 0.064611 | 0.16333  | 0.073716 | 0.11163  | 0.041794 | 0.36751  | 0.011993 |
| 0.198262 | 1.59E-05 | 0.054611 | 0.23885  | 0.047824 | 0.3024   | 0.069232 | 0.1352   | 0.000331 |

|          |          |          |          |          |          |          |          |          |
|----------|----------|----------|----------|----------|----------|----------|----------|----------|
| 0.14065  | 0.00232  | 0.013415 | 0.77248  | 0.012079 | 0.7946   | 0.001593 | 0.97262  | -0.0203  |
| 0.158247 | 0.0006   | 0.031109 | 0.50245  | -0.02106 | 0.64994  | 0.022545 | 0.627    | -0.06309 |
| 0.123749 | 0.00742  | 0.01713  | 0.71196  | 0.010357 | 0.82337  | 0.014512 | 0.75444  | -0.06302 |
| 0.08324  | 0.07231  | -0.00258 | 0.95572  | -0.01446 | 0.75522  | -0.0192  | 0.67897  | -0.06681 |
| 0.11211  | 0.01536  | 0.019672 | 0.67155  | 0.011683 | 0.8012   | 0.043365 | 0.34976  | 0.024589 |
| 0.118657 | 0.01028  | 0.276305 | 1.25E-09 | 0.207032 | 6.45E-06 | 0.397099 | 4.33E-19 | 0.057441 |
| 0.150318 | 0.00112  | 0.059857 | 0.19663  | -0.02596 | 0.57579  | 0.034213 | 0.46077  | -0.05184 |
| 0.076231 | 0.0999   | -0.01117 | 0.80972  | -0.02413 | 0.60303  | 0.018442 | 0.691    | -0.00501 |
| 0.1377   | 0.00286  | 0.028535 | 0.53847  | 0.008844 | 0.84883  | 0.047198 | 0.30878  | -0.03181 |
| 0.157042 | 0.00066  | -0.07297 | 0.1153   | -0.02057 | 0.65751  | -0.07785 | 0.09289  | 0.078563 |
| 0.139056 | 0.0026   | 0.017416 | 0.70737  | -0.02624 | 0.57168  | 0.039491 | 0.39452  | -0.00414 |
| 0.214911 | 2.78E-06 | 0.049667 | 0.28413  | 0.13618  | 0.00319  | 0.001134 | 0.98051  | 0.008169 |
| 0.168315 | 0.00026  | -0.00167 | 0.97131  | -0.00806 | 0.86213  | 0.00097  | 0.98332  | -0.02841 |
| 0.171912 | 0.00019  | 0.000768 | 0.9868   | -0.00021 | 0.9963   | 0.013359 | 0.7734   | -0.04436 |
| 0.106689 | 0.02111  | 0.041807 | 0.36736  | 0.016429 | 0.72326  | 0.054782 | 0.23738  | -0.12508 |
| 0.136293 | 0.00317  | 0.043443 | 0.3489   | 0.064879 | 0.16159  | 0.036192 | 0.43523  | 0.012392 |
| 0.09425  | 0.04177  | 0.036841 | 0.42703  | -0.03214 | 0.48839  | 0.017269 | 0.70973  | -0.06586 |
| 0.199731 | 1.37E-05 | 0.009218 | 0.84252  | 0.020558 | 0.65769  | 0.023759 | 0.60856  | -0.04921 |
| 0.068572 | 0.13897  | 0.284343 | 3.90E-10 | 0.237268 | 2.13E-07 | 0.375524 | 4.36E-17 | 0.139144 |
| 0.245243 | 7.97E-08 | 0.063062 | 0.17368  | 0.076236 | 0.09988  | 0.120465 | 0.00917  | 0.026593 |
| 0.099653 | 0.03131  | 0.023664 | 0.60999  | 0.073116 | 0.11458  | 0.077203 | 0.09564  | 0.056143 |
| 0.148079 | 0.00133  | 0.025981 | 0.57545  | -0.00247 | 0.95756  | 0.021441 | 0.64398  | -0.09456 |
| 0.093116 | 0.0443   | 0.099666 | 0.03129  | -0.00129 | 0.97786  | 0.093844 | 0.04266  | 0.049946 |
| 0.148883 | 0.00125  | 0.044943 | 0.33249  | 0.088392 | 0.05629  | 0.083974 | 0.06983  | 0.078341 |
| 0.094966 | 0.04023  | 0.051794 | 0.26398  | 0.039397 | 0.39564  | 0.057067 | 0.21835  | -0.0084  |
| 0.157866 | 0.00062  | -0.01032 | 0.82396  | -0.02086 | 0.65297  | -0.02395 | 0.60573  | -0.00866 |
| 0.265317 | 5.78E-09 | 0.373837 | 6.16E-17 | 0.306164 | 1.36E-11 | 0.287085 | 2.60E-10 | 0.044574 |
| 0.189371 | 3.81E-05 | -0.006   | 0.89709  | 0.051257 | 0.26897  | 0.037382 | 0.42028  | 0.013073 |
| 0.094169 | 0.04194  | -0.06902 | 0.13639  | 0.00451  | 0.92257  | -0.05174 | 0.26452  | 0.021369 |
| 0.170364 | 0.00022  | 0.030607 | 0.50938  | -0.00389 | 0.93323  | 0.051443 | 0.26724  | 0.089704 |
| 0.151893 | 0.00099  | -0.04717 | 0.30907  | -0.0106  | 0.81921  | -0.04435 | 0.33891  | 0.044865 |
| 0.160948 | 0.00048  | -0.07025 | 0.12956  | 0.017587 | 0.70464  | -0.05816 | 0.20967  | 0.080615 |
| 0.140772 | 0.00229  | -0.00447 | 0.92329  | 0.021093 | 0.64937  | 0.002823 | 0.95148  | -0.02462 |
| 0.207305 | 6.27E-06 | 0.199492 | 1.40E-05 | 0.234874 | 2.84E-07 | 0.161454 | 0.00046  | 0.027596 |
| 0.15833  | 0.00059  | 0.05356  | 0.24802  | 0.001287 | 0.97787  | 0.042174 | 0.36316  | -0.03702 |
| 0.116709 | 0.0116   | 0.00365  | 0.93729  | -0.03983 | 0.39046  | -0.01455 | 0.75376  | -0.05622 |
| 0.092835 | 0.04495  | 0.008684 | 0.85152  | -0.02394 | 0.60579  | 0.003605 | 0.93806  | -0.04192 |
| 0.131152 | 0.00453  | 0.014089 | 0.76138  | -0.04266 | 0.35765  | 0.035051 | 0.44986  | -0.06634 |
| 0.089732 | 0.05264  | 0.083275 | 0.07219  | 0.005619 | 0.9036   | 0.069672 | 0.13273  | -0.0428  |
| 0.062932 | 0.17457  | -0.00149 | 0.97437  | -0.02084 | 0.6533   | 0.003542 | 0.93914  | 0.033755 |
| 0.11304  | 0.01452  | 0.123743 | 0.00742  | 0.095494 | 0.03913  | 0.165589 | 0.00033  | 0.036518 |
| 0.145634 | 0.0016   | 0.024013 | 0.60473  | 0.096049 | 0.038    | 0.005465 | 0.90624  | -0.02478 |
| 0.108457 | 0.01906  | 0.14147  | 0.00218  | 0.034952 | 0.45113  | 0.130793 | 0.00464  | -0.01681 |
| 0.177555 | 0.00011  | 0.057685 | 0.2134   | 0.044242 | 0.34009  | 0.027193 | 0.55776  | 0.010253 |
| 0.155789 | 0.00073  | -0.00327 | 0.94389  | 0.02471  | 0.59428  | -0.01334 | 0.77365  | -0.05051 |

|          |          |          |          |          |          |          |          |          |
|----------|----------|----------|----------|----------|----------|----------|----------|----------|
| 0.163898 | 0.00038  | 0.019395 | 0.67592  | 0.095222 | 0.03969  | 0.048018 | 0.30044  | -0.01364 |
| 0.063618 | 0.16991  | -0.04672 | 0.31369  | -0.07089 | 0.12609  | -0.00451 | 0.92254  | 0.106641 |
| 0.031017 | 0.50371  | -0.04728 | 0.30791  | -0.04121 | 0.3743   | 0.000476 | 0.99181  | 0.144232 |
| 0.105407 | 0.02272  | -0.0336  | 0.46884  | -0.00574 | 0.90161  | -0.0803  | 0.08303  | -0.04987 |
| 0.217778 | 2.03E-06 | -0.02475 | 0.59366  | -0.0421  | 0.36399  | -0.04084 | 0.37857  | -0.00195 |
| 0.052521 | 0.25733  | -0.05656 | 0.22244  | -0.12947 | 0.00507  | -0.04755 | 0.30517  | -0.03008 |
| 0.154902 | 0.00078  | 0.023057 | 0.61919  | 0.012904 | 0.78092  | 0.02408  | 0.60372  | -0.05037 |
| 0.057551 | 0.21447  | -0.03956 | 0.39373  | -0.10438 | 0.02408  | -0.11674 | 0.01158  | -0.05018 |
| 0.009448 | 0.83865  | -0.0133  | 0.77442  | -0.19283 | 2.72E-05 | -0.08335 | 0.07193  | -0.19015 |
| 0.420909 | 1.78E-21 | 0.109406 | 0.01803  | 0.160902 | 0.00048  | 0.106253 | 0.02165  | -0.00262 |
| 0.187909 | 4.38E-05 | 0.014448 | 0.7555   | 0.019839 | 0.66892  | 0.00428  | 0.92651  | -0.0596  |
| 0.16091  | 0.00048  | 0.045024 | 0.33161  | 0.039035 | 0.4      | 0.0198   | 0.66954  | 0.001046 |
| 0.210893 | 4.29E-06 | 0.0282   | 0.54326  | 0.048814 | 0.29249  | 0.032806 | 0.47942  | -0.02029 |
| 0.224998 | 9.00E-07 | 0.052757 | 0.25519  | 0.125781 | 0.00649  | 0.067262 | 0.1467   | 0.004542 |
| 0.113497 | 0.01413  | 0.013933 | 0.76395  | -0.03803 | 0.41224  | 0.014667 | 0.75191  | -0.03659 |
| 0.19236  | 2.85E-05 | 0.054839 | 0.23689  | 0.087607 | 0.05852  | 0.043606 | 0.34709  | -0.03287 |
| 0.12492  | 0.00687  | 0.025936 | 0.57611  | -0.04869 | 0.29369  | -0.01766 | 0.70354  | -0.0298  |
| 0.104679 | 0.02368  | -0.05685 | 0.22014  | 0.006626 | 0.88645  | -0.02032 | 0.66139  | 0.184313 |
| 0.174159 | 0.00016  | 0.002374 | 0.9592   | 0.026784 | 0.5637   | -0.01443 | 0.7558   | -0.035   |
| 0.102661 | 0.02653  | -0.00692 | 0.88138  | -0.02764 | 0.5513   | 0.00113  | 0.98058  | 0.028132 |
| 0.03395  | 0.46423  | -0.07149 | 0.12287  | -0.04265 | 0.35781  | -0.07717 | 0.09576  | 0.02808  |
| 0.112047 | 0.01541  | 0.00545  | 0.90649  | -0.02748 | 0.55354  | 0.030741 | 0.50753  | -0.03652 |
| 0.056458 | 0.22331  | 0.007389 | 0.87347  | -0.01392 | 0.76419  | 0.066605 | 0.1507   | -0.08531 |
| 0.126142 | 0.00634  | 0.025872 | 0.57705  | 0.065211 | 0.15945  | 0.034693 | 0.45449  | 0.047637 |
| 0.142238 | 0.00206  | 0.002994 | 0.94854  | 0.123944 | 0.00733  | -0.00207 | 0.96437  | -0.00454 |
| 0.095871 | 0.03836  | -0.04393 | 0.34351  | -0.06601 | 0.15439  | -0.02172 | 0.6397   | 0.031245 |
| 0.115334 | 0.01263  | 0.018388 | 0.69186  | -0.01954 | 0.67356  | 0.028306 | 0.54174  | -0.01937 |
| 0.199111 | 1.46E-05 | 0.340352 | 3.96E-14 | 0.281653 | 5.79E-10 | 0.316491 | 2.53E-12 | 0.102032 |
| 0.179885 | 9.27E-05 | -0.08677 | 0.06098  | -0.02225 | 0.63154  | -0.05172 | 0.26471  | 0.040697 |
| 0.084752 | 0.06727  | 0.057463 | 0.21516  | -0.00906 | 0.84523  | 0.039932 | 0.38926  | -0.05635 |
| 0.18005  | 9.13E-05 | -0.00134 | 0.97704  | 0.121933 | 0.00835  | -0.01936 | 0.67643  | -0.01178 |
| 0.074367 | 0.10849  | -0.0231  | 0.61849  | -0.08825 | 0.05669  | -0.03967 | 0.39241  | -0.10466 |
| 0.18704  | 4.76E-05 | 0.054    | 0.24415  | 0.097915 | 0.0344   | 0.06092  | 0.18878  | -0.00146 |
| 0.146769 | 0.00147  | -0.01541 | 0.73984  | -0.00824 | 0.85908  | -0.02592 | 0.57635  | -0.06923 |
| 0.155307 | 0.00076  | 0.020886 | 0.65257  | 0.054717 | 0.23793  | 0.000482 | 0.99171  | -0.03933 |
| 0.130888 | 0.00461  | -0.04402 | 0.34256  | -0.0059  | 0.8989   | -0.07559 | 0.1028   | 0.028404 |
| 0.141268 | 0.00221  | 0.091228 | 0.04881  | 0.088896 | 0.05489  | 0.159134 | 0.00056  | 0.061243 |
| 0.052117 | 0.26101  | 0.101372 | 0.02849  | 0.130758 | 0.00465  | 0.197391 | 1.73E-05 | -0.05575 |
| 0.197133 | 1.78E-05 | 0.017787 | 0.70144  | 0.058219 | 0.20918  | 0.019864 | 0.66854  | -0.04907 |
| 0.186912 | 4.82E-05 | 0.014169 | 0.76007  | 0.019246 | 0.67827  | -0.00383 | 0.93421  | 0.039068 |
| 0.154342 | 0.00082  | 0.042271 | 0.36207  | 0.019061 | 0.68118  | 0.06311  | 0.17335  | -0.06428 |
| 0.116891 | 0.01147  | -0.01801 | 0.69788  | 0.028816 | 0.53448  | -0.03129 | 0.49991  | 0.01849  |
| 0.18055  | 8.73E-05 | 0.036445 | 0.43203  | 0.139928 | 0.00244  | 0.012925 | 0.78057  | -0.04362 |
| 0.75924  | 8.78E-89 | 0.173766 | 0.00016  | 0.24793  | 5.68E-08 | 0.19866  | 1.53E-05 | 0.005527 |
| 0.103875 | 0.02478  | 0.020219 | 0.66298  | 0.050557 | 0.27557  | -0.01369 | 0.76793  | 0.055864 |

|          |          |          |         |          |         |          |         |           |
|----------|----------|----------|---------|----------|---------|----------|---------|-----------|
| 0.08586  | 0.06375  | -0.00706 | 0.87901 | 0.030614 | 0.50928 | 0.007755 | 0.86727 | 0.018558  |
| 0.157542 | 0.00063  | 0.034401 | 0.45831 | 0.060457 | 0.19218 | -0.01059 | 0.81941 | -0.00713  |
| 0.146113 | 0.00155  | 0.049065 | 0.29001 | 0.014465 | 0.75521 | 0.048523 | 0.29538 | -0.03295  |
| 0.089769 | 0.05254  | 0.015415 | 0.7397  | -0.03877 | 0.4032  | 0.025069 | 0.58894 | -0.03695  |
| 0.044688 | 0.33524  | 0.006793 | 0.8836  | -0.07189 | 0.1208  | -0.00045 | 0.99228 | -0.11392  |
| 0.121762 | 0.00844  | 0.084725 | 0.06735 | 0.040262 | 0.38534 | 0.084596 | 0.06777 | 0.001845  |
| 0.216678 | 2.29E-06 | 0.080965 | 0.08049 | 0.024395 | 0.59899 | 0.074891 | 0.10602 | -0.04095  |
| 0.067103 | 0.14766  | -0.00105 | 0.98189 | 0.048196 | 0.29865 | 0.049252 | 0.28817 | 0.079534  |
| 0.100083 | 0.03058  | -0.02411 | 0.6032  | -0.02598 | 0.57546 | -0.01572 | 0.73474 | -0.02613  |
| 0.129661 | 0.00501  | 0.0126   | 0.78596 | -0.0158  | 0.73337 | 0.037619 | 0.41733 | -0.03018  |
| 0.109628 | 0.01779  | -0.03713 | 0.42345 | -0.06519 | 0.1596  | -0.03303 | 0.47647 | 0.06422   |
| 0.129189 | 0.00517  | 0.094675 | 0.04085 | 0.063778 | 0.16883 | 0.043436 | 0.34897 | 0.029994  |
| 0.122344 | 0.00813  | 0.081144 | 0.07982 | 0.070582 | 0.12773 | 0.058059 | 0.21044 | 0.038848  |
| 0.150968 | 0.00107  | 0.065735 | 0.15611 | -0.00375 | 0.93553 | 0.060088 | 0.1949  | -0.03128  |
| 0.066843 | 0.14923  | 0.038662 | 0.40452 | 0.022553 | 0.62687 | 0.023851 | 0.60716 | 0.006601  |
| 0.156449 | 0.00069  | -0.01518 | 0.74358 | -0.01398 | 0.76314 | -0.02506 | 0.58913 | -0.085    |
| 0.14008  | 0.00241  | -0.02052 | 0.65823 | 0.063013 | 0.17401 | -0.01948 | 0.67458 | -0.03336  |
| 0.164776 | 0.00035  | 0.057545 | 0.21451 | 0.027135 | 0.5586  | 0.076334 | 0.09944 | -0.03876  |
| 0.142067 | 0.00209  | 0.005769 | 0.90105 | 0.037888 | 0.41401 | 0.069155 | 0.13564 | 0.06782   |
| 0.099731 | 0.03118  | 0.002903 | 0.95011 | -0.06104 | 0.18791 | -0.00784 | 0.86582 | -0.0717   |
| 0.164414 | 0.00036  | 0.064631 | 0.1632  | 0.032921 | 0.47788 | 0.073485 | 0.11276 | -0.0026   |
| 0.1298   | 0.00496  | 0.020574 | 0.65742 | -0.05281 | 0.2547  | 0.020133 | 0.66431 | -0.0792   |
| 0.075905 | 0.10136  | 0.006836 | 0.88287 | 0.053681 | 0.24695 | 0.016584 | 0.72076 | 0.101729  |
| 0.127111 | 0.00595  | 0.107355 | 0.02032 | 0.138854 | 0.00264 | 0.14434  | 0.00176 | 0.011055  |
| 0.118426 | 0.01043  | 0.040121 | 0.38701 | 0.002561 | 0.95598 | 0.023538 | 0.6119  | -0.08341  |
| 0.199289 | 1.43E-05 | 0.015049 | 0.74566 | 0.050096 | 0.27998 | 0.018643 | 0.68781 | 0.01074   |
| 0.175021 | 0.00014  | 0.01148  | 0.80458 | 0.038022 | 0.41235 | 0.012544 | 0.78688 | -0.03771  |
| 0.213529 | 3.23E-06 | 0.052282 | 0.2595  | 0.120619 | 0.00908 | -0.00396 | 0.93195 | -0.04873  |
| 0.162322 | 0.00043  | 0.021916 | 0.63665 | 0.09164  | 0.04779 | -0.0315  | 0.49709 | 0.064672  |
| 0.113279 | 0.01431  | -0.09421 | 0.04185 | -0.00507 | 0.91298 | -0.09055 | 0.05052 | 0.131516  |
| 0.115833 | 0.01225  | 0.120046 | 0.00941 | 0.02566  | 0.58017 | 0.068511 | 0.13933 | -0.10789  |
| 0.125135 | 0.00678  | -0.02744 | 0.55413 | -0.05681 | 0.22042 | -0.05594 | 0.22761 | -0.10663  |
| 0.176102 | 0.00013  | -0.00396 | 0.93198 | 0.037048 | 0.42443 | 0.004233 | 0.9273  | -0.02113  |
| 0.1481   | 0.00133  | -0.02591 | 0.57644 | -0.03392 | 0.46463 | -0.01615 | 0.72781 | -0.04117  |
| 0.129317 | 0.00513  | -0.00654 | 0.88784 | -0.00303 | 0.94796 | -0.0078  | 0.86651 | -0.08367  |
| 0.119287 | 0.00988  | -0.00155 | 0.97329 | 0.060897 | 0.18895 | -0.01703 | 0.71354 | -0.01798  |
| 0.076436 | 0.09899  | 0.010364 | 0.82325 | 0.050269 | 0.27833 | -0.02886 | 0.53384 | -2.17E-07 |
| 0.112936 | 0.01461  | 0.132034 | 0.00426 | 0.085461 | 0.065   | 0.172613 | 0.00018 | 0.42918   |
| 0.094708 | 0.04078  | 0.037937 | 0.4134  | 0.003734 | 0.93586 | 0.090377 | 0.05096 | 0.262665  |
| 0.04118  | 0.37459  | 0.034054 | 0.46285 | 0.054641 | 0.23859 | 0.106435 | 0.02142 | 0.318104  |
| 0.132056 | 0.00425  | 0.05277  | 0.25507 | 0.144139 | 0.00179 | 0.019869 | 0.66846 | -0.00131  |
| 0.235995 | 2.48E-07 | 0.134855 | 0.0035  | 0.160763 | 0.00049 | 0.154623 | 0.0008  | -0.03491  |
| 0.156481 | 0.00069  | 0.022169 | 0.63276 | 0.004277 | 0.92655 | 0.002351 | 0.95959 | -0.0601   |
| 0.205182 | 7.83E-06 | -0.06037 | 0.19278 | 0.001725 | 0.97034 | -0.0337  | 0.46749 | 0.116925  |
| 0.057235 | 0.217    | 0.008864 | 0.84848 | -0.06325 | 0.17236 | -0.03528 | 0.44687 | -0.07274  |

|          |          |          |          |          |          |          |          |          |
|----------|----------|----------|----------|----------|----------|----------|----------|----------|
| 0.126992 | 0.00599  | 0.03114  | 0.50203  | 0.010962 | 0.81323  | 0.035594 | 0.44286  | -0.08584 |
| 0.082376 | 0.07534  | -0.03711 | 0.42363  | -0.05065 | 0.27467  | -0.02311 | 0.61843  | -0.10442 |
| 0.094601 | 0.04101  | 0.012144 | 0.79352  | -0.08598 | 0.06337  | -0.02179 | 0.63853  | -0.09158 |
| 0.151529 | 0.00102  | 0.040822 | 0.37876  | 0.077138 | 0.09592  | 0.05877  | 0.2049   | 0.106406 |
| 0.201708 | 1.12E-05 | 0.090061 | 0.05178  | 0.104799 | 0.02352  | 0.09007  | 0.05175  | -0.0147  |
| 0.184957 | 5.80E-05 | 0.052436 | 0.2581   | 0.040838 | 0.37858  | 0.048703 | 0.29359  | -0.04539 |
| 0.16927  | 0.00024  | 0.147541 | 0.00139  | 0.113132 | 0.01444  | 0.177743 | 0.00011  | 0.013881 |
| 0.021667 | 0.64048  | -0.07022 | 0.12968  | -0.00134 | 0.97693  | -0.04727 | 0.30808  | 0.121402 |
| 0.079831 | 0.08484  | -0.05632 | 0.22447  | 0.013395 | 0.7728   | -0.04495 | 0.33244  | -0.02533 |
| 0.125497 | 0.00662  | 0.009762 | 0.83336  | 0.012431 | 0.78875  | 0.022913 | 0.62139  | -0.07277 |
| 0.160528 | 0.0005   | 0.012594 | 0.78605  | 0.049285 | 0.28785  | -0.01916 | 0.67967  | -0.03751 |
| 0.100414 | 0.03003  | -0.00724 | 0.87607  | -0.0103  | 0.82439  | 0.024541 | 0.5968   | 0.035636 |
| 0.138547 | 0.0027   | 0.02112  | 0.64894  | -0.04455 | 0.33678  | 0.022918 | 0.62131  | -0.07374 |
| 0.171582 | 0.00019  | 0.137161 | 0.00298  | 0.115713 | 0.01234  | 0.09514  | 0.03987  | 0.016908 |
| 0.296708 | 6.04E-11 | 0.364006 | 4.45E-16 | 0.289638 | 1.78E-10 | 0.261669 | 9.48E-09 | 0.045857 |
| 0.150342 | 0.00112  | -0.00411 | 0.92948  | 0.072195 | 0.11923  | -0.02389 | 0.60652  | -0.02969 |
| 0.039343 | 0.39629  | 0.054998 | 0.23553  | 0.01434  | 0.75727  | 0.010886 | 0.8145   | -0.00129 |
| 0.049201 | 0.28867  | 0.05569  | 0.22968  | 0.016444 | 0.72301  | 0.039775 | 0.39113  | 0.014662 |
| 0.15164  | 0.00101  | 0.041242 | 0.37387  | -0.00218 | 0.9625   | 0.072275 | 0.11882  | -0.07132 |
| 0.141797 | 0.00213  | 0.014029 | 0.76238  | -0.03655 | 0.43069  | 0.038577 | 0.40556  | -0.05478 |
| 0.127583 | 0.00576  | 0.041384 | 0.37223  | 0.003072 | 0.94721  | 0.050982 | 0.27155  | -0.04819 |
| 0.116947 | 0.01143  | -0.00607 | 0.89587  | -0.04508 | 0.33104  | 0.00037  | 0.99363  | -0.0503  |
| 0.130139 | 0.00485  | 0.042411 | 0.36047  | -0.0116  | 0.80258  | 0.040246 | 0.38554  | -0.0364  |
| 0.145311 | 0.00164  | 0.046217 | 0.31895  | 0.027334 | 0.55572  | 0.049558 | 0.28519  | -0.06252 |
| 0.123663 | 0.00746  | 0.01996  | 0.66703  | -0.00132 | 0.97731  | 0.034352 | 0.45894  | -0.0554  |
| 0.101388 | 0.02847  | -0.00965 | 0.83525  | -0.05568 | 0.22973  | -0.00083 | 0.98578  | -0.09669 |
| 0.152127 | 0.00097  | 0.051998 | 0.26211  | 0.061841 | 0.18217  | 0.050659 | 0.27461  | -0.01648 |
| 0.111363 | 0.01606  | -0.01354 | 0.77037  | 0.007846 | 0.86572  | 0.003134 | 0.94614  | -0.03468 |
| 0.059947 | 0.19596  | 0.032197 | 0.48762  | -0.01614 | 0.72796  | 0.013948 | 0.7637   | -0.08561 |
| 0.183838 | 6.44E-05 | 0.053618 | 0.24751  | 0.048904 | 0.2916   | 0.049313 | 0.28757  | -0.03102 |
| 0.182716 | 7.14E-05 | 0.039691 | 0.39213  | 0.06869  | 0.13829  | 0.045114 | 0.33065  | 0.014279 |
| 0.142739 | 0.00199  | 0.019108 | 0.68044  | 0.060396 | 0.19262  | 0.044278 | 0.3397   | 0.033206 |
| 0.103804 | 0.02488  | 0.018143 | 0.69576  | -0.01612 | 0.72833  | 0.03554  | 0.44355  | 0.053586 |
| 0.108014 | 0.01955  | 0.026772 | 0.56386  | -0.02709 | 0.55926  | 0.010664 | 0.81821  | -0.03824 |
| 0.145833 | 0.00158  | 0.054747 | 0.23768  | 0.005058 | 0.91319  | 0.029622 | 0.52311  | -0.01859 |
| 0.16864  | 0.00025  | 0.045352 | 0.3281   | 0.01626  | 0.726    | 0.064112 | 0.16661  | -0.01276 |
| 0.115068 | 0.01284  | 0.063209 | 0.17267  | -0.01666 | 0.71948  | 0.056685 | 0.22145  | -0.03717 |
| 0.172068 | 0.00019  | 0.015546 | 0.73757  | 0.030833 | 0.50625  | 0.016927 | 0.71522  | -0.04197 |
| 0.06786  | 0.14313  | -0.02286 | 0.62221  | -0.01207 | 0.79483  | -0.02736 | 0.5553   | -0.04664 |
| 0.064997 | 0.16082  | 0.035749 | 0.44087  | -0.00684 | 0.88281  | 0.050534 | 0.27579  | -0.03751 |
| 0.075431 | 0.10352  | -0.03006 | 0.51701  | -0.01966 | 0.67178  | -0.02221 | 0.63214  | -0.05481 |
| 0.20429  | 8.59E-06 | 0.027025 | 0.5602   | 0.017839 | 0.7006   | 0.006611 | 0.8867   | -0.05452 |
| 0.142894 | 0.00196  | 0.036393 | 0.43268  | -0.01042 | 0.82225  | 0.028888 | 0.53346  | -0.01029 |
| 0.12584  | 0.00647  | 0.105758 | 0.02227  | 0.16126  | 0.00047  | 0.171016 | 0.0002   | 0.067605 |
| 0.071888 | 0.12081  | -0.01348 | 0.77138  | -0.02602 | 0.5748   | 0.026018 | 0.5749   | -0.04817 |

|          |          |          |          |          |          |          |          |          |
|----------|----------|----------|----------|----------|----------|----------|----------|----------|
| 0.077198 | 0.09566  | -0.051   | 0.27139  | -0.07071 | 0.12703  | -0.06447 | 0.16422  | 0.014954 |
| 0.18302  | 6.95E-05 | 0.037274 | 0.42161  | 0.062284 | 0.17906  | 0.022931 | 0.62111  | -0.06373 |
| 0.232631 | 3.70E-07 | 0.102469 | 0.02681  | 0.114355 | 0.01341  | 0.001496 | 0.97427  | -0.08987 |
| 0.104549 | 0.02385  | -0.00874 | 0.85059  | 0.056621 | 0.22197  | -0.0272  | 0.55767  | -0.00844 |
| 0.146213 | 0.00153  | 0.04438  | 0.33859  | 0.037496 | 0.41886  | 0.0257   | 0.57959  | -0.0878  |
| 0.160716 | 0.00049  | 0.070569 | 0.1278   | 0.029473 | 0.5252   | 0.061337 | 0.18577  | -0.02447 |
| 0.157061 | 0.00066  | 0.021307 | 0.64604  | 0.029432 | 0.52577  | 0.038146 | 0.41083  | 0.006652 |
| 0.090204 | 0.05141  | -0.00641 | 0.89006  | -0.01517 | 0.74372  | -0.02221 | 0.63213  | -0.05794 |
| 0.066169 | 0.15339  | 0.034937 | 0.45133  | -0.01058 | 0.81957  | -0.00695 | 0.88088  | -0.05871 |
| 0.128762 | 0.00532  | 0.049048 | 0.29018  | -0.03698 | 0.42523  | 0.020382 | 0.66043  | -0.04587 |
| 0.13948  | 0.00252  | 0.022682 | 0.6249   | 0.02653  | 0.56741  | 0.002562 | 0.95596  | -0.03231 |
| 0.176087 | 0.00013  | 0.049153 | 0.28915  | 0.114347 | 0.01342  | 0.035675 | 0.44183  | -0.0068  |
| 0.128138 | 0.00555  | 0.104511 | 0.02391  | 0.124467 | 0.00708  | 0.047894 | 0.30169  | 0.039075 |
| 0.199997 | 1.33E-05 | 0.049778 | 0.28305  | 0.065262 | 0.15912  | 0.066195 | 0.15323  | -0.00232 |
| 0.204068 | 8.79E-06 | 0.050787 | 0.2734   | 0.070443 | 0.12849  | 0.03017  | 0.51544  | 0.054938 |
| 0.173321 | 0.00017  | 0.2346   | 2.93E-07 | 0.133691 | 0.0038   | 0.180617 | 8.67E-05 | 0.02308  |
| 0.24991  | 4.42E-08 | 0.194396 | 2.34E-05 | 0.199858 | 1.35E-05 | 0.204593 | 8.32E-06 | 0.021744 |
| 0.094077 | 0.04214  | -0.00906 | 0.84516  | -0.00546 | 0.90634  | -0.02484 | 0.59239  | -0.06756 |
| 0.135283 | 0.0034   | -0.01583 | 0.73295  | -0.00892 | 0.8475   | 0.003608 | 0.93802  | 0.053334 |
| 0.188093 | 4.31E-05 | 0.005744 | 0.90148  | -0.00826 | 0.85876  | 0.003537 | 0.93923  | -0.0841  |
| 0.408881 | 3.02E-20 | 0.087172 | 0.05979  | 0.085882 | 0.06368  | 0.109839 | 0.01757  | 0.00255  |
| 0.080284 | 0.08308  | -0.11271 | 0.01481  | -0.05356 | 0.24801  | -0.1474  | 0.0014   | 0.015458 |
| 0.127711 | 0.00571  | 0.0171   | 0.71245  | 0.062307 | 0.1789   | -0.04369 | 0.34618  | -0.00772 |
| 0.115854 | 0.01223  | -0.00219 | 0.96238  | -0.03941 | 0.39554  | -0.03037 | 0.51272  | -0.06844 |
| 0.180711 | 8.60E-05 | 0.045915 | 0.32213  | 0.094092 | 0.04211  | 0.033546 | 0.46955  | -0.02959 |
| 0.217219 | 2.16E-06 | 0.131968 | 0.00428  | 0.139235 | 0.00257  | 0.10494  | 0.02333  | 0.058554 |
| 0.169477 | 0.00023  | 0.066125 | 0.15367  | 0.045976 | 0.32148  | 0.072248 | 0.11896  | -0.03999 |
| 0.105506 | 0.02259  | -0.03907 | 0.39963  | -0.0162  | 0.72703  | -0.05155 | 0.26625  | 0.003659 |
| 0.142728 | 0.00199  | 0.039187 | 0.39817  | 0.032289 | 0.48638  | 0.024766 | 0.59345  | -0.01782 |
| 0.161434 | 0.00046  | 0.042161 | 0.36331  | 0.0865   | 0.0618   | 0.044574 | 0.33648  | 0.016634 |
| 0.231577 | 4.19E-07 | 0.009717 | 0.83411  | 0.016101 | 0.72856  | 0.029048 | 0.53119  | -0.01885 |
| 0.072626 | 0.11704  | -0.07437 | 0.10848  | -0.11539 | 0.01258  | -0.05464 | 0.23862  | -0.06162 |
| 0.077592 | 0.09397  | -0.05954 | 0.19898  | 0.052193 | 0.26031  | -0.06344 | 0.17114  | 0.114091 |
| 0.111518 | 0.01591  | -0.00232 | 0.96014  | 0.040874 | 0.37816  | 0.007888 | 0.865    | -0.09029 |
| 0.172665 | 0.00018  | 0.088068 | 0.0572   | 0.039664 | 0.39245  | 0.085811 | 0.0639   | -0.03036 |
| 0.175082 | 0.00014  | 0.096575 | 0.03695  | 0.076266 | 0.09974  | 0.03386  | 0.46541  | 0.006155 |
| 0.088184 | 0.05687  | -0.00835 | 0.85726  | -0.06273 | 0.17599  | 0.008387 | 0.85655  | -0.02673 |
| 0.072641 | 0.11696  | 0.001127 | 0.98062  | -0.04014 | 0.38673  | -0.01768 | 0.70311  | -0.09203 |
| 0.158904 | 0.00057  | 0.022299 | 0.63077  | 0.042169 | 0.36323  | 0.021491 | 0.64319  | 0.03623  |
| 0.155829 | 0.00073  | 0.133126 | 0.00395  | 0.141593 | 0.00216  | 0.200041 | 1.33E-05 | -0.00334 |
| 0.164588 | 0.00035  | 0.060457 | 0.19218  | 0.000983 | 0.83221  | 0.047864 | 0.30199  | -0.04378 |
| 0.086592 | 0.06152  | 0.008991 | 0.84635  | 0.009661 | 0.83506  | 0.053134 | 0.25181  | 0.123108 |
| 0.178335 | 0.00011  | 0.04636  | 0.31745  | 0.024569 | 0.5964   | 0.047074 | 0.31005  | -0.04164 |
| 0.179394 | 9.70E-05 | 0.043182 | 0.3518   | 0.021338 | 0.64556  | -0.01665 | 0.71971  | -0.05587 |
| 0.142103 | 0.00208  | 0.072775 | 0.11629  | 0.053714 | 0.24666  | 0.086178 | 0.06277  | -0.03179 |

|          |          |          |          |          |          |          |          |          |
|----------|----------|----------|----------|----------|----------|----------|----------|----------|
| 0.136626 | 0.00309  | 0.050612 | 0.27505  | 0.041168 | 0.37473  | 0.04943  | 0.28644  | 0.044039 |
| 0.164808 | 0.00035  | 0.015469 | 0.73882  | -0.03483 | 0.45267  | 0.045918 | 0.32209  | -0.0038  |
| 0.101091 | 0.02894  | 0.072351 | 0.11844  | 0.038328 | 0.40861  | 0.118915 | 0.01011  | -0.01925 |
| 0.134977 | 0.00347  | -0.03275 | 0.48023  | 0.022436 | 0.62867  | 0.030629 | 0.50907  | 0.243144 |
| 0.143233 | 0.00192  | -0.05265 | 0.25614  | 0.028586 | 0.53775  | -0.04331 | 0.35035  | 0.046189 |
| 0.306879 | 1.22E-11 | 0.208987 | 5.25E-06 | 0.199568 | 1.39E-05 | 0.192289 | 2.87E-05 | 0.016575 |
| 0.152688 | 0.00093  | 0.017431 | 0.70714  | 0.011449 | 0.80509  | 0.026102 | 0.57368  | 0.025067 |
| 0.08703  | 0.06021  | 0.058387 | 0.20787  | -0.04196 | 0.36562  | 0.012098 | 0.79428  | -0.07817 |
| 0.121804 | 0.00841  | 0.010659 | 0.8183   | -0.00613 | 0.89487  | 0.018994 | 0.68225  | -0.02389 |
| 0.13568  | 0.00331  | 0.04319  | 0.35171  | 0.036792 | 0.42765  | 0.061102 | 0.18747  | -0.02845 |
| 0.107937 | 0.01964  | -0.01234 | 0.79024  | -0.07523 | 0.10447  | -0.04793 | 0.30136  | -0.0936  |
| 0.236023 | 2.47E-07 | 0.055466 | 0.23157  | 0.126381 | 0.00624  | 0.0984   | 0.03351  | 0.12641  |
| 0.093426 | 0.0436   | 0.004539 | 0.92207  | 0.031785 | 0.49322  | 0.042944 | 0.35446  | 0.082097 |
| 0.088734 | 0.05534  | -0.04474 | 0.33465  | -0.02821 | 0.54315  | -0.02073 | 0.65501  | -0.05352 |
| 0.094423 | 0.04139  | 0.037128 | 0.42344  | -0.00267 | 0.9541   | 0.024728 | 0.59402  | -0.00453 |
| 0.154782 | 0.00079  | 0.009538 | 0.83712  | 0.104566 | 0.02383  | -0.00458 | 0.92136  | -0.01918 |
| 0.20339  | 9.43E-06 | 0.042288 | 0.36186  | 0.163629 | 0.00038  | 0.012694 | 0.7844   | -0.0092  |
| 0.164845 | 0.00035  | 0.106503 | 0.02134  | 0.062276 | 0.17911  | 0.10061  | 0.02971  | -0.05066 |
| 0.148273 | 0.00131  | 0.031657 | 0.49496  | 0.003776 | 0.93514  | 0.038242 | 0.40966  | -0.06837 |
| 0.091    | 0.04937  | -0.00809 | 0.8616   | -0.02204 | 0.63467  | 0.002338 | 0.95981  | -0.03506 |
| 0.128694 | 0.00535  | 0.007493 | 0.8717   | 0.010966 | 0.81316  | 0.027796 | 0.54905  | -0.04521 |
| 0.108327 | 0.0192   | -0.01176 | 0.79983  | 0.082781 | 0.07391  | 0.037148 | 0.4232   | 0.030661 |
| 0.160074 | 0.00052  | 0.00196  | 0.9663   | -0.02295 | 0.62078  | 0.008557 | 0.85368  | -0.08489 |
| 0.154472 | 0.00081  | 0.029006 | 0.53179  | -0.00218 | 0.96256  | 0.036137 | 0.43593  | -0.05233 |
| 0.18781  | 4.42E-05 | 0.025757 | 0.57874  | 0.069361 | 0.13448  | 0.038011 | 0.41249  | -0.01774 |
| 0.162372 | 0.00043  | 0.021842 | 0.63778  | 0.018544 | 0.68938  | 0.018783 | 0.68559  | -0.05809 |
| 0.144733 | 0.00171  | 0.019941 | 0.66733  | -0.02805 | 0.54537  | 0.031421 | 0.49818  | -0.0485  |
| 0.176178 | 0.00013  | -0.00793 | 0.86437  | 0.062928 | 0.1746   | 0.010162 | 0.82664  | 0.007831 |
| 0.161504 | 0.00046  | 0.061738 | 0.18291  | 0.024422 | 0.59859  | 0.069818 | 0.13192  | -0.04219 |
| 0.175039 | 0.00014  | 0.015425 | 0.73953  | 0.033612 | 0.46869  | 0.023416 | 0.61374  | -0.02599 |
| 0.181443 | 8.04E-05 | 0.070804 | 0.12653  | 0.046147 | 0.31968  | 0.054905 | 0.23633  | -0.0402  |
| 0.169466 | 0.00023  | 0.031462 | 0.49762  | 0.027548 | 0.55262  | 0.056745 | 0.22097  | -0.03009 |
| 0.166073 | 0.00031  | 0.054437 | 0.24035  | 0.042109 | 0.36391  | 0.058866 | 0.20416  | -0.03169 |
| 0.182656 | 7.18E-05 | 0.058318 | 0.20841  | 0.110998 | 0.01641  | 0.042255 | 0.36225  | 0.022292 |
| 0.198219 | 1.60E-05 | 0.040319 | 0.38467  | 0.100492 | 0.02991  | 0.059841 | 0.19675  | -0.01696 |
| 0.212668 | 3.54E-06 | 0.098976 | 0.03248  | 0.120909 | 0.00891  | 0.100936 | 0.02919  | 0.028859 |
| 0.103727 | 0.02499  | -0.04933 | 0.28745  | -0.09944 | 0.03168  | -0.09439 | 0.04147  | -0.05978 |
| 0.165694 | 0.00032  | -0.0118  | 0.79922  | 0.000509 | 0.99125  | -0.01412 | 0.76086  | -0.01006 |
| 0.16289  | 0.00041  | 0.029297 | 0.52768  | 0.039371 | 0.39596  | 0.040177 | 0.38635  | -0.04131 |
| 0.180885 | 8.46E-05 | 0.015097 | 0.74488  | -0.00169 | 0.97088  | 0.018104 | 0.69638  | -0.06235 |
| 0.133968 | 0.00373  | 0.030613 | 0.5093   | -0.00667 | 0.88564  | 0.046964 | 0.31118  | -0.07153 |
| 0.18333  | 6.75E-05 | 0.05076  | 0.27365  | 0.037644 | 0.41703  | 0.031025 | 0.5036   | -0.05041 |
| 0.117295 | 0.01119  | -0.02091 | 0.65216  | -0.03759 | 0.41774  | -0.00895 | 0.84707  | -0.09687 |
| 0.137163 | 0.00298  | -0.02288 | 0.62186  | 0.026827 | 0.56307  | 0.004717 | 0.91903  | -0.02929 |
| 0.138481 | 0.00271  | 0.030122 | 0.51612  | -0.01865 | 0.68764  | 0.033631 | 0.46844  | -0.07491 |

|          |          |          |         |          |         |           |         |          |
|----------|----------|----------|---------|----------|---------|-----------|---------|----------|
| 0.057069 | 0.21833  | 0.005411 | 0.90716 | -0.00655 | 0.88775 | 0.033339  | 0.4723  | -0.0438  |
| 0.17929  | 9.79E-05 | 0.019274 | 0.67782 | 0.066647 | 0.15043 | 0.028815  | 0.53449 | 0.004186 |
| 0.113216 | 0.01437  | 0.005445 | 0.90658 | -0.01022 | 0.82569 | 0.019021  | 0.68182 | -0.05738 |
| 0.110435 | 0.01697  | 0.021003 | 0.65076 | -0.03227 | 0.48664 | 0.032836  | 0.47902 | -0.08458 |
| 0.164145 | 0.00037  | 0.016935 | 0.7151  | 0.010967 | 0.81314 | 0.034369  | 0.45872 | -0.06774 |
| 0.145608 | 0.0016   | 0.033208 | 0.47405 | 0.00449  | 0.9229  | 0.033527  | 0.46981 | -0.03777 |
| 0.145213 | 0.00165  | 0.043717 | 0.34586 | 0.034837 | 0.45262 | 0.043263  | 0.35089 | -0.05032 |
| 0.12601  | 0.0064   | -0.03903 | 0.40012 | -0.00985 | 0.83192 | -0.00932  | 0.84087 | 0.051334 |
| 0.110548 | 0.01685  | 0.025626 | 0.58068 | -0.00649 | 0.88873 | 0.071518  | 0.12275 | 0.034919 |
| 0.120129 | 0.00936  | 0.01692  | 0.71534 | 0.073307 | 0.11364 | 0.016522  | 0.72175 | -0.01444 |
| 0.198275 | 1.59E-05 | 0.025653 | 0.58028 | 0.058461 | 0.2073  | 0.019423  | 0.67547 | -0.04132 |
| 0.114145 | 0.01358  | -0.01418 | 0.75988 | -0.02019 | 0.66343 | 0.014714  | 0.75114 | -0.02598 |
| 0.161635 | 0.00045  | 0.05849  | 0.20707 | 0.048886 | 0.29178 | 0.072685  | 0.11674 | -0.02518 |
| 0.100724 | 0.02953  | 0.0311   | 0.50257 | 0.010779 | 0.81629 | 0.041859  | 0.36676 | -0.03814 |
| 0.074583 | 0.10747  | 0.007736 | 0.86758 | -0.03276 | 0.48004 | 0.01948   | 0.67458 | -0.07787 |
| 0.05449  | 0.23989  | -0.00144 | 0.97526 | -0.02414 | 0.60279 | -0.00318  | 0.94541 | -0.02352 |
| 0.08073  | 0.08138  | 0.036067 | 0.43681 | -0.02025 | 0.6625  | 0.045936  | 0.3219  | -0.05971 |
| 0.119147 | 0.00996  | 0.008063 | 0.86204 | 0.018966 | 0.68269 | 0.026979  | 0.56085 | -0.05453 |
| 0.109023 | 0.01844  | -0.01558 | 0.73703 | -0.06261 | 0.17677 | -0.01908  | 0.6809  | -0.06759 |
| 0.156544 | 0.00069  | 0.032561 | 0.48272 | -0.01146 | 0.80496 | 0.039062  | 0.39968 | -0.06665 |
| 0.113199 | 0.01438  | -0.03686 | 0.42682 | -0.03303 | 0.47648 | -0.03339  | 0.47158 | -0.00777 |
| 0.164842 | 0.00035  | -0.02207 | 0.6342  | -0.0374  | 0.4201  | -0.01535  | 0.74079 | -0.02929 |
| 0.079199 | 0.08734  | 0.127242 | 0.0059  | 0.102566 | 0.02667 | 0.04443   | 0.33805 | 0.007504 |
| 0.197627 | 1.69E-05 | 0.062563 | 0.17712 | 0.074432 | 0.10818 | 0.040075  | 0.38756 | -0.00501 |
| 0.146809 | 0.00147  | 0.052302 | 0.25932 | 0.066247 | 0.15291 | 0.065538  | 0.15736 | -0.02275 |
| 0.182151 | 7.53E-05 | 0.028694 | 0.53622 | 0.033859 | 0.46543 | 0.029103  | 0.53042 | -0.04664 |
| 0.16467  | 0.00035  | 0.00333  | 0.94279 | 0.069941 | 0.13124 | 0.008223  | 0.85932 | 0.054194 |
| 0.132963 | 0.004    | 0.034369 | 0.45872 | -0.02132 | 0.64589 | 0.038885  | 0.40182 | -0.06593 |
| 0.147215 | 0.00142  | 0.046076 | 0.32043 | 0.00319  | 0.94518 | 0.049073  | 0.28993 | -0.05733 |
| 0.172922 | 0.00017  | 0.040836 | 0.3786  | 0.048101 | 0.2996  | 0.030919  | 0.50506 | -0.05097 |
| 0.12222  | 0.00819  | 0.00862  | 0.85262 | -0.03797 | 0.41297 | 0.003874  | 0.93346 | -0.08354 |
| 0.213218 | 3.34E-06 | 0.014086 | 0.76143 | 0.100445 | 0.02998 | 0.032094  | 0.48901 | 0.010511 |
| 0.143157 | 0.00193  | 0.000575 | 0.99011 | -0.01334 | 0.77374 | 0.011551  | 0.8034  | -0.05671 |
| 0.175665 | 0.00014  | 0.018302 | 0.69322 | 0.016299 | 0.72537 | 0.025516  | 0.5823  | -0.04777 |
| 0.13436  | 0.00363  | 0.010673 | 0.81807 | 0.04693  | 0.31154 | 0.030876  | 0.50566 | -0.00535 |
| 0.218242 | 1.93E-06 | 0.052711 | 0.2556  | 0.09888  | 0.03265 | 0.071484  | 0.12292 | -0.02569 |
| 0.183825 | 6.44E-05 | 0.035491 | 0.44418 | 0.037734 | 0.41591 | 0.048699  | 0.29363 | -0.07024 |
| 0.129674 | 0.00501  | 0.044241 | 0.3401  | 0.065328 | 0.1587  | 0.019172  | 0.67943 | -0.04006 |
| 0.142989 | 0.00195  | 0.051795 | 0.26398 | 0.014607 | 0.75289 | 0.064548  | 0.16374 | -0.0564  |
| 0.15374  | 0.00086  | 0.041269 | 0.37356 | 4.13E-05 | 0.99929 | 0.039178  | 0.39828 | -0.05802 |
| 0.13561  | 0.00332  | -0.00319 | 0.94521 | 0.010536 | 0.82037 | -0.00414  | 0.92896 | -0.03169 |
| 0.161122 | 0.00047  | 0.009312 | 0.84093 | 0.007005 | 0.87999 | 0.030098  | 0.51645 | -0.05359 |
| 0.150319 | 0.00112  | 0.058008 | 0.21084 | 0.015966 | 0.73075 | 0.056148  | 0.22587 | -0.07312 |
| 0.19757  | 1.70E-05 | 0.058294 | 0.2086  | 0.038931 | 0.40126 | 0.052874  | 0.25414 | -0.05008 |
| 0.108959 | 0.01851  | 0.009523 | 0.83738 | 0.038943 | 0.40112 | -9.11E-06 | 0.99984 | -0.01718 |



|          |          |          |         |          |         |          |         |          |
|----------|----------|----------|---------|----------|---------|----------|---------|----------|
| 0.178346 | 0.00011  | 0.042616 | 0.35815 | 0.119641 | 0.00966 | 0.041074 | 0.37583 | -0.02328 |
| 0.145363 | 0.00163  | 0.04217  | 0.36321 | 0.004813 | 0.91739 | 0.042823 | 0.35582 | -0.07674 |
| 0.210295 | 4.57E-06 | -0.02141 | 0.64444 | 0.111866 | 0.01558 | -0.00543 | 0.90684 | 0.014441 |
| 0.12763  | 0.00574  | -0.05721 | 0.21719 | 0.029139 | 0.52991 | -0.06316 | 0.17301 | 0.02802  |
| 0.182371 | 7.38E-05 | 0.050681 | 0.27439 | 0.054387 | 0.24078 | 0.055587 | 0.23055 | 0.013036 |
| 0.208376 | 5.60E-06 | 0.102998 | 0.02603 | 0.104209 | 0.02432 | 0.076461 | 0.09888 | 0.008281 |
| 0.170853 | 0.00021  | 0.051493 | 0.26677 | 0.062849 | 0.17514 | 0.051727 | 0.2646  | -0.02538 |
| 0.115141 | 0.01278  | 0.050762 | 0.27363 | -0.02269 | 0.62482 | 0.044457 | 0.33775 | -0.09334 |
| 0.153621 | 0.00087  | 0.006135 | 0.89481 | 0.017119 | 0.71214 | -0.00898 | 0.84652 | -0.04099 |
| 0.14418  | 0.00179  | -0.01042 | 0.82229 | 0.093768 | 0.04283 | 0.00989  | 0.8312  | 0.028576 |
| 0.164931 | 0.00034  | 0.049533 | 0.28543 | 0.055914 | 0.22781 | 0.046934 | 0.31149 | -0.01281 |
| 0.205179 | 7.83E-06 | 0.039647 | 0.39265 | 0.041192 | 0.37445 | 0.049596 | 0.28482 | 0.029921 |
| 0.15379  | 0.00085  | 0.046398 | 0.31706 | 0.054357 | 0.24104 | 0.037907 | 0.41378 | -0.02332 |
| 0.183523 | 6.63E-05 | 0.073182 | 0.11425 | 0.05293  | 0.25364 | 0.052491 | 0.2576  | -0.03894 |
| 0.087832 | 0.05788  | -0.01474 | 0.75067 | -0.02928 | 0.5279  | -0.00894 | 0.84726 | -0.09046 |
| 0.134651 | 0.00355  | 0.020395 | 0.66022 | -0.02245 | 0.62846 | 0.026215 | 0.57202 | -0.06337 |
| 0.142505 | 0.00202  | 0.027856 | 0.54818 | 0.03691  | 0.42617 | 0.031367 | 0.49891 | 0.042779 |
| 0.183638 | 6.56E-05 | 0.049541 | 0.28535 | 0.024922 | 0.59112 | 0.067895 | 0.14292 | -0.02592 |
| 0.13676  | 0.00306  | -0.02634 | 0.57017 | -0.02198 | 0.6356  | -0.00217 | 0.96273 | -0.06795 |
| 0.146023 | 0.00156  | 0.060701 | 0.19038 | 0.065915 | 0.15498 | 0.057298 | 0.21649 | -0.00705 |
| 0.177893 | 0.00011  | 0.030644 | 0.50887 | 0.034584 | 0.45591 | 0.044704 | 0.33507 | -0.05247 |
| 0.112569 | 0.01494  | -0.02515 | 0.58774 | -0.01611 | 0.72839 | -0.00883 | 0.84912 | -0.06383 |
| 0.210757 | 4.35E-06 | 0.061296 | 0.18607 | 0.062276 | 0.17911 | 0.051267 | 0.26888 | -0.00431 |
| 0.075219 | 0.1045   | 0.041992 | 0.36524 | 0.03916  | 0.3985  | 0.026698 | 0.56495 | 0.037674 |
| 0.11613  | 0.01203  | 0.013278 | 0.77474 | 0.020282 | 0.66199 | 0.021287 | 0.64635 | -0.05537 |
| 0.087787 | 0.058    | -0.0356  | 0.44278 | -0.03503 | 0.45019 | -0.00496 | 0.91486 | -0.06652 |
| 0.092308 | 0.04618  | 0.016102 | 0.72856 | 0.037636 | 0.41711 | 0.031753 | 0.49364 | -0.05761 |
| 0.185371 | 5.57E-05 | 0.049139 | 0.28929 | 0.031403 | 0.49842 | 0.050023 | 0.28068 | -0.04579 |
| 0.150763 | 0.00108  | 0.057523 | 0.21468 | 0.035091 | 0.44933 | 0.063576 | 0.17019 | -0.00028 |
| 0.163786 | 0.00038  | -0.01441 | 0.7562  | -0.02236 | 0.62979 | -0.03817 | 0.41058 | -0.08075 |
| 0.174844 | 0.00015  | 0.050181 | 0.27917 | 0.144496 | 0.00174 | 0.05421  | 0.24232 | 0.010015 |
| 0.168071 | 0.00026  | 0.021529 | 0.64261 | 0.001524 | 0.97381 | 0.035527 | 0.44371 | -0.04929 |
| 0.101119 | 0.02889  | 0.002812 | 0.95168 | -0.0712  | 0.12442 | -0.00158 | 0.97283 | -0.06949 |
| 0.087788 | 0.058    | -0.04689 | 0.31197 | 0.006155 | 0.89447 | -0.0591  | 0.20234 | -0.04888 |
| 0.195755 | 2.04E-05 | -0.03545 | 0.44466 | 0.01911  | 0.68042 | -0.03883 | 0.40253 | -0.08835 |
| 0.148224 | 0.00132  | 0.058488 | 0.20708 | 0.049567 | 0.2851  | 0.075548 | 0.10298 | 0.004686 |
| 0.191721 | 3.04E-05 | 0.059073 | 0.20257 | 0.048086 | 0.29976 | 0.059401 | 0.20007 | 0.016152 |
| 0.124697 | 0.00698  | -0.05546 | 0.23161 | -0.00847 | 0.85518 | -0.02392 | 0.60608 | -0.03711 |
| 0.122062 | 0.00828  | 0.057409 | 0.2156  | 0.034563 | 0.45619 | 0.066748 | 0.14982 | 0.073605 |
| 0.096504 | 0.03709  | 0.019958 | 0.66707 | 0.129054 | 0.00522 | 0.010498 | 0.82099 | 0.073804 |
| 0.046231 | 0.31881  | -0.06536 | 0.15849 | -0.018   | 0.69799 | -0.08309 | 0.07283 | -0.01761 |
| 0.093349 | 0.04377  | 0.014626 | 0.75257 | 0.027303 | 0.55617 | 0.023974 | 0.60532 | 0.007918 |
| 0.176052 | 0.00013  | 0.127366 | 0.00585 | 0.04209  | 0.36413 | 0.129023 | 0.00523 | -0.00557 |
| 0.178977 | 0.0001   | 0.045606 | 0.3254  | 0.026931 | 0.56156 | 0.050649 | 0.2747  | -0.00381 |
| 0.465779 | 1.59E-26 | 0.069457 | 0.13393 | 0.049286 | 0.28784 | 0.066412 | 0.15189 | -0.03288 |

|          |          |          |         |          |         |          |         |          |
|----------|----------|----------|---------|----------|---------|----------|---------|----------|
| 0.068852 | 0.13736  | 0.0253   | 0.58551 | -0.03035 | 0.51298 | 0.029614 | 0.52321 | 0.005405 |
| 0.192181 | 2.90E-05 | 0.015693 | 0.73518 | 0.013464 | 0.77166 | 0.024002 | 0.6049  | -0.01502 |
| 0.132154 | 0.00423  | 0.055006 | 0.23546 | 0.113394 | 0.01421 | 0.065396 | 0.15826 | 0.100188 |
| 0.203002 | 9.81E-06 | 0.075442 | 0.10347 | 0.066698 | 0.15012 | 0.03024  | 0.51447 | -0.0336  |
| 0.174101 | 0.00016  | 0.024093 | 0.60353 | 0.039791 | 0.39093 | 0.047745 | 0.3032  | -0.01852 |
| 0.20028  | 1.30E-05 | 0.074108 | 0.10973 | 0.136921 | 0.00303 | 0.039365 | 0.39602 | 0.013423 |
| 0.133067 | 0.00397  | 0.037454 | 0.41938 | 0.020558 | 0.65768 | 0.005731 | 0.9017  | -0.01606 |
| 0.168762 | 0.00025  | 0.049551 | 0.28525 | -0.0077  | 0.86822 | 0.040476 | 0.38282 | -0.05318 |
| 0.083737 | 0.07062  | -0.02969 | 0.52216 | -0.05637 | 0.224   | -0.02886 | 0.53387 | 0.05726  |
| 0.126943 | 0.00601  | 0.012483 | 0.7879  | -0.02604 | 0.5746  | -0.00255 | 0.95616 | 0.011275 |
| 0.161278 | 0.00047  | 0.033111 | 0.47534 | -0.02402 | 0.60467 | 0.011975 | 0.79633 | -0.0683  |
| 0.115848 | 0.01224  | 0.049179 | 0.28889 | 0.013595 | 0.76952 | 0.055008 | 0.23544 | -0.08539 |
| 0.06103  | 0.18799  | -0.0414  | 0.37203 | -0.03407 | 0.46264 | -0.00228 | 0.96079 | -0.02249 |
| 0.148442 | 0.00129  | -0.02862 | 0.53732 | 0.023298 | 0.61553 | -0.02879 | 0.53484 | -0.01633 |
| 0.153166 | 0.0009   | 0.039858 | 0.39014 | 0.022473 | 0.6281  | 0.047124 | 0.30954 | -0.04936 |
| 0.248124 | 5.55E-08 | 0.050843 | 0.27287 | 0.013854 | 0.76525 | 0.052979 | 0.25319 | -0.01479 |
| 0.136822 | 0.00305  | 0.020777 | 0.65427 | -0.03881 | 0.40274 | -0.01549 | 0.73844 | -0.0483  |
| 0.089708 | 0.05271  | -0.02049 | 0.65881 | -0.06838 | 0.1401  | -0.00203 | 0.96512 | -0.05173 |
| 0.120772 | 0.00899  | 0.026108 | 0.57359 | -0.04237 | 0.3609  | -0.02002 | 0.66607 | -0.06561 |
| 0.111444 | 0.01598  | 0.015499 | 0.73833 | -0.05412 | 0.24313 | -0.02499 | 0.59016 | -0.05056 |
| 0.129863 | 0.00494  | 0.01459  | 0.75316 | -0.00652 | 0.88819 | -0.00916 | 0.84347 | -0.00896 |
| 0.118732 | 0.01023  | 0.026391 | 0.56944 | -0.04797 | 0.30095 | -0.00846 | 0.85537 | -0.05005 |
| 0.09043  | 0.05082  | 0.060114 | 0.19471 | 0.100419 | 0.03003 | 0.080575 | 0.08196 | 0.110128 |
| 0.180058 | 9.13E-05 | 0.064725 | 0.16258 | 0.07824  | 0.09125 | 0.072902 | 0.11565 | -0.0415  |
| 0.164746 | 0.00035  | -0.00939 | 0.83964 | 0.03172  | 0.49409 | -0.0422  | 0.36292 | -0.07463 |
| 0.198353 | 1.57E-05 | 0.022681 | 0.62492 | 0.074913 | 0.10592 | 0.016487 | 0.72232 | -0.02574 |
| 0.124913 | 0.00688  | 0.040203 | 0.38604 | -0.01726 | 0.70994 | 0.053693 | 0.24685 | -0.04628 |
| 0.38251  | 1.02E-17 | 0.112912 | 0.01463 | 0.13965  | 0.00249 | 0.088866 | 0.05498 | 0.044788 |
| 0.065226 | 0.15935  | 0.031787 | 0.49318 | -0.02967 | 0.52247 | 0.001845 | 0.96829 | -0.07768 |
| 0.042034 | 0.36477  | -0.03599 | 0.43773 | -0.04042 | 0.3835  | -0.04611 | 0.32002 | 0.061008 |
| 0.130384 | 0.00477  | -0.0337  | 0.46753 | -0.06409 | 0.16676 | -0.02601 | 0.57507 | 0.129044 |
| 0.126562 | 0.00617  | 0.050019 | 0.28072 | 0.08641  | 0.06206 | 0.027801 | 0.54899 | -0.05078 |
| 0.156875 | 0.00067  | 0.064124 | 0.16653 | 0.01385  | 0.76531 | 0.043879 | 0.34407 | -0.05991 |
| 0.127422 | 0.00583  | 0.063413 | 0.17129 | 0.085013 | 0.06642 | 0.099725 | 0.03119 | 0.105685 |
| 0.145859 | 0.00157  | 0.076603 | 0.09825 | 0.049778 | 0.28305 | 0.060796 | 0.18969 | -0.02573 |
| 0.218876 | 1.79E-06 | 0.004518 | 0.92243 | -0.00381 | 0.93458 | -0.01203 | 0.79549 | -0.02982 |
| 0.146152 | 0.00154  | 0.078799 | 0.08895 | 0.095893 | 0.03831 | 0.056592 | 0.22221 | -0.02144 |
| 0.087974 | 0.05747  | 0.000573 | 0.99015 | 0.029788 | 0.52079 | -0.05234 | 0.25894 | -0.02144 |
| 0.106792 | 0.02099  | 0.009831 | 0.8322  | 0.011129 | 0.81043 | 0.025019 | 0.58968 | 0.045776 |
| 0.212024 | 3.80E-06 | 0.075057 | 0.10525 | 0.162242 | 0.00043 | 0.069786 | 0.1321  | 0.059553 |
| 0.151436 | 0.00103  | 0.051702 | 0.26483 | 0.029735 | 0.52153 | 0.012393 | 0.78939 | -0.0574  |
| 0.154487 | 0.00081  | 0.03573  | 0.44111 | 0.008463 | 0.85528 | 0.05196  | 0.26245 | -0.06933 |
| 0.049285 | 0.28785  | 0.001889 | 0.96753 | 0.008662 | 0.85191 | 0.001931 | 0.96681 | -0.03441 |
| 0.079811 | 0.08492  | -0.01152 | 0.80394 | -0.0436  | 0.34716 | 0.018291 | 0.6934  | -0.06126 |
| 0.065843 | 0.15543  | -0.0358  | 0.4402  | -0.0441  | 0.34164 | -0.05875 | 0.20505 | -0.04715 |

|          |          |          |          |          |          |          |          |          |
|----------|----------|----------|----------|----------|----------|----------|----------|----------|
| 0.060658 | 0.1907   | 0.0337   | 0.46752  | -0.01149 | 0.80435  | 0.036893 | 0.42638  | -0.03892 |
| 0.191071 | 3.23E-05 | 0.022887 | 0.62178  | 0.033904 | 0.46483  | 0.036073 | 0.43674  | -0.00394 |
| 0.179483 | 9.62E-05 | -0.02188 | 0.63713  | -0.13782 | 0.00284  | -0.0334  | 0.47147  | -0.05937 |
| 0.078697 | 0.08937  | 0.095178 | 0.03979  | -0.02857 | 0.53803  | 0.080358 | 0.08279  | -0.06974 |
| 0.132847 | 0.00403  | 0.006323 | 0.8916   | 0.012796 | 0.78271  | 0.032859 | 0.47871  | -0.01212 |
| 0.10644  | 0.02142  | -0.01153 | 0.80378  | -0.01653 | 0.72159  | -0.02044 | 0.65952  | -0.04369 |
| 0.117731 | 0.01089  | 0.003924 | 0.9326   | -0.02227 | 0.63121  | -0.02257 | 0.62656  | -0.1081  |
| 0.114272 | 0.01348  | -0.05656 | 0.22245  | -0.06102 | 0.18806  | -0.05198 | 0.26225  | -0.04802 |
| 0.136792 | 0.00306  | 0.01131  | 0.80741  | 0.035256 | 0.4472   | 0.031428 | 0.49809  | 0.05344  |
| 0.190082 | 3.56E-05 | 0.047811 | 0.30253  | 0.048372 | 0.29688  | 0.056829 | 0.22028  | -0.03585 |
| 0.16481  | 0.00035  | 0.056031 | 0.22683  | -0.08065 | 0.0817   | -0.01274 | 0.78368  | -0.01955 |
| 0.196562 | 1.88E-05 | -0.01887 | 0.68413  | 0.09752  | 0.03514  | -0.03    | 0.51778  | 0.016889 |
| 0.15265  | 0.00094  | 0.007466 | 0.87216  | -0.00627 | 0.8925   | -0.00709 | 0.87861  | -0.00745 |
| 0.079719 | 0.08528  | 0.004807 | 0.91749  | 0.071473 | 0.12298  | 0.015905 | 0.73175  | 0.033466 |
| 0.292222 | 1.20E-10 | 0.038685 | 0.40425  | 0.09907  | 0.03232  | 0.028818 | 0.53445  | 0.006264 |
| 0.198789 | 1.51E-05 | 0.083189 | 0.07249  | 0.132571 | 0.00411  | 0.031794 | 0.49309  | 0.021738 |
| 0.124479 | 0.00708  | 0.106059 | 0.02189  | 0.046293 | 0.31815  | 0.06158  | 0.18403  | -0.00845 |
| 0.147304 | 0.00141  | 0.021129 | 0.6488   | -0.00658 | 0.88714  | 0.020103 | 0.66479  | 0.073334 |
| 0.173694 | 0.00016  | 0.003229 | 0.94451  | 0.043977 | 0.343    | -0.00955 | 0.83694  | -0.03202 |
| 0.144536 | 0.00174  | 0.016918 | 0.71537  | -0.03068 | 0.50838  | 0.0139   | 0.76449  | -0.05726 |
| 0.551253 | 1.77E-38 | 0.192129 | 2.92E-05 | 0.203782 | 9.05E-06 | 0.177309 | 0.00012  | 0.036674 |
| 0.210385 | 4.52E-06 | 0.020864 | 0.65291  | 0.05155  | 0.26624  | 0.016111 | 0.7284   | -0.03308 |
| 0.139893 | 0.00245  | 0.016646 | 0.71976  | 0.056165 | 0.22573  | -0.01816 | 0.69549  | 0.009791 |
| 0.085921 | 0.06356  | 0.103444 | 0.02539  | 0.084813 | 0.06707  | 0.100818 | 0.02938  | 0.032274 |
| 0.110275 | 0.01713  | -0.01007 | 0.82813  | -0.01858 | 0.68884  | -0.02038 | 0.66039  | -0.00816 |
| 0.124151 | 0.00723  | 0.047837 | 0.30227  | -0.02621 | 0.57202  | 0.031635 | 0.49525  | -0.04534 |
| 0.115888 | 0.01221  | 0.006299 | 0.892    | -0.0103  | 0.82437  | 0.019352 | 0.67659  | 0.046801 |
| 0.202317 | 1.05E-05 | 0.070203 | 0.1298   | 0.07787  | 0.09279  | 0.075588 | 0.1028   | -0.01435 |
| 0.1442   | 0.00178  | 0.016457 | 0.72281  | -0.03147 | 0.49746  | 0.020248 | 0.66252  | -0.03279 |
| 0.195667 | 2.06E-05 | -0.01983 | 0.669    | -0.01594 | 0.73115  | -0.01244 | 0.78857  | 0.009542 |
| 0.197306 | 1.75E-05 | 0.059054 | 0.20271  | 0.016327 | 0.72491  | 0.04663  | 0.31464  | -0.00569 |
| 0.177694 | 0.00011  | 0.307642 | 1.08E-11 | 0.268774 | 3.60E-09 | 0.155449 | 0.00075  | 0.092888 |
| 0.181105 | 8.29E-05 | 0.025767 | 0.57859  | 0.062984 | 0.17421  | 0.017111 | 0.71226  | 0.059026 |
| 0.068496 | 0.13941  | 0.006339 | 0.89133  | -0.05803 | 0.21064  | -0.04469 | 0.33526  | -0.02785 |
| 0.204618 | 8.30E-06 | 0.045317 | 0.32847  | 0.064482 | 0.16417  | 0.02132  | 0.64584  | -0.04801 |
| 0.40034  | 2.10E-19 | 0.203586 | 9.24E-06 | 0.14534  | 0.00164  | 0.144298 | 0.00177  | -0.02685 |
| 0.092486 | 0.04576  | 0.014016 | 0.76258  | -0.04524 | 0.32932  | 0.030273 | 0.51401  | -0.0927  |
| 0.093885 | 0.04257  | 0.085971 | 0.06341  | 0.044917 | 0.33276  | 0.084937 | 0.06667  | -0.08645 |
| 0.173061 | 0.00017  | 0.045338 | 0.32825  | 0.022374 | 0.62962  | 0.042295 | 0.36179  | -0.03729 |
| 0.638571 | 7.33E-55 | 0.275858 | 1.33E-09 | 0.373971 | 5.99E-17 | 0.3029   | 2.30E-11 | 0.102972 |
| 0.187941 | 4.37E-05 | 0.04012  | 0.38703  | 0.021224 | 0.64733  | 0.068912 | 0.13702  | -0.02637 |
| 0.224158 | 9.90E-07 | 0.084966 | 0.06658  | 0.160589 | 0.00049  | 0.052171 | 0.26051  | -0.00158 |
| 0.094164 | 0.04196  | -0.00414 | 0.92897  | -0.02235 | 0.62994  | -0.02903 | 0.53146  | -0.02298 |
| 0.093145 | 0.04423  | 0.082787 | 0.07389  | 0.055822 | 0.22858  | 0.096593 | 0.03692  | 0.08161  |
| 0.130093 | 0.00487  | 0.025341 | 0.58489  | -0.01626 | 0.72597  | 0.055187 | 0.23392  | -0.05533 |

|          |          |          |         |          |         |          |         |          |
|----------|----------|----------|---------|----------|---------|----------|---------|----------|
| 0.122943 | 0.00782  | 0.024307 | 0.60032 | -0.04999 | 0.28101 | -0.01717 | 0.71135 | -0.01208 |
| 0.084874 | 0.06687  | 0.003256 | 0.94405 | 0.043762 | 0.34536 | -0.01614 | 0.72789 | 0.015777 |
| 0.160391 | 0.0005   | 0.047553 | 0.30515 | 0.021772 | 0.63885 | 0.040374 | 0.38403 | -0.0508  |
| 0.147094 | 0.00143  | 0.028443 | 0.53979 | -0.00017 | 0.99708 | 0.029933 | 0.51875 | -0.02175 |
| 0.280907 | 6.45E-10 | 0.114674 | 0.01315 | 0.082928 | 0.07339 | 0.112681 | 0.01484 | -0.02988 |
| 0.178481 | 0.00011  | 0.051193 | 0.26957 | 0.057711 | 0.21319 | 0.051138 | 0.27008 | 0.024282 |
| 0.123417 | 0.00758  | -0.0893  | 0.0538  | -0.03505 | 0.4498  | -0.07648 | 0.09877 | -0.00722 |
| 0.141258 | 0.00221  | 0.016288 | 0.72553 | 0.020632 | 0.65653 | 0.043788 | 0.34508 | -0.03155 |
| 0.120599 | 0.00909  | 0.011197 | 0.8093  | 0.059561 | 0.19886 | 0.080149 | 0.0836  | 0.027492 |
| 0.141276 | 0.00221  | 0.023206 | 0.61693 | -0.00649 | 0.88881 | 0.032872 | 0.47854 | -0.06871 |
| 0.153459 | 0.00088  | 0.092957 | 0.04467 | 0.042487 | 0.35961 | 0.107233 | 0.02046 | -0.03307 |
| 0.063595 | 0.17006  | -0.02575 | 0.57883 | -0.02073 | 0.65502 | 0.019507 | 0.67415 | 0.053745 |
| 0.110528 | 0.01687  | -0.02884 | 0.53412 | 0.0036   | 0.93815 | -0.0127  | 0.78437 | -0.04339 |
| 0.16158  | 0.00046  | -0.04599 | 0.32132 | 0.005843 | 0.89978 | -0.06649 | 0.15142 | 0.011543 |
| 0.192093 | 2.93E-05 | 0.059658 | 0.19813 | 0.067664 | 0.14429 | 0.042129 | 0.36367 | -0.04498 |
| 0.169802 | 0.00023  | 0.064034 | 0.16713 | 0.172658 | 0.00018 | 0.076801 | 0.09738 | 0.045859 |
| 0.216939 | 2.22E-06 | -0.05993 | 0.19611 | 0.05325  | 0.25078 | -0.07078 | 0.12668 | 0.081118 |
| 0.099591 | 0.03142  | 0.0071   | 0.87837 | -0.03924 | 0.39758 | 0.026483 | 0.56808 | 0.0178   |
| 0.179441 | 9.66E-05 | 0.002426 | 0.95831 | 0.038935 | 0.40121 | -0.01258 | 0.78621 | 0.004338 |
| 0.131156 | 0.00453  | 0.020441 | 0.65951 | 0.028262 | 0.54238 | -0.01376 | 0.76673 | -0.01183 |
| 0.135705 | 0.0033   | -0.01615 | 0.72778 | -0.04867 | 0.29394 | 0.014739 | 0.75074 | -0.0374  |
| 0.159039 | 0.00056  | 0.10865  | 0.01884 | 0.06054  | 0.19156 | 0.045015 | 0.33171 | -0.07601 |
| 0.132985 | 0.00399  | -0.00802 | 0.86272 | 0.026008 | 0.57505 | -0.04913 | 0.28938 | -0.0202  |
| 0.085509 | 0.06485  | -0.02856 | 0.5381  | -0.03753 | 0.41849 | -0.03432 | 0.45936 | 0.04356  |
| 0.142351 | 0.00204  | 0.060774 | 0.18985 | 0.023899 | 0.60644 | 0.071585 | 0.12239 | -0.05091 |
| 0.152462 | 0.00095  | 0.014693 | 0.75148 | 0.04087  | 0.37821 | 0.035469 | 0.44446 | -0.03363 |
| 0.203618 | 9.21E-06 | 0.036977 | 0.42533 | 0.105299 | 0.02286 | 0.034915 | 0.45161 | -0.00515 |
| 0.205049 | 7.94E-06 | 0.001634 | 0.97191 | 0.036104 | 0.43635 | 0.032772 | 0.47988 | -0.00767 |
| 0.155626 | 0.00074  | 0.041101 | 0.37551 | 0.005585 | 0.90419 | 0.027084 | 0.55934 | -0.06655 |
| 0.152777 | 0.00093  | 0.158706 | 0.00058 | 0.113485 | 0.01414 | 0.174755 | 0.00015 | -0.04013 |
| 0.19869  | 1.52E-05 | -0.00587 | 0.89924 | 0.039351 | 0.39619 | 0.018546 | 0.68934 | -0.0345  |
| 0.077041 | 0.09634  | 0.161516 | 0.00046 | 0.026274 | 0.57115 | 0.132215 | 0.00421 | -0.05656 |
| 0.161338 | 0.00047  | 0.054513 | 0.2397  | 0.057614 | 0.21397 | 0.023498 | 0.6125  | -0.0388  |
| 0.201212 | 1.18E-05 | -0.01056 | 0.81989 | 0.06597  | 0.15463 | -0.03388 | 0.46514 | 0.024712 |
| 0.038453 | 0.40708  | -0.06584 | 0.15545 | -0.08481 | 0.06708 | -0.06367 | 0.16957 | -0.0242  |
| 0.174721 | 0.00015  | 0.028451 | 0.53967 | 0.037388 | 0.4202  | 0.01639  | 0.72389 | -0.02427 |
| 0.076022 | 0.10083  | 0.034687 | 0.45458 | 0.017639 | 0.7038  | 0.043247 | 0.35107 | -0.04951 |
| 0.175768 | 0.00013  | 0.104078 | 0.0245  | 0.120003 | 0.00944 | 0.087651 | 0.0584  | 0.043298 |
| 0.152576 | 0.00094  | 0.058962 | 0.20342 | 0.010966 | 0.81316 | 0.049612 | 0.28466 | 0.009811 |
| 0.422037 | 1.36E-21 | 0.091667 | 0.04772 | 0.138547 | 0.0027  | 0.129816 | 0.00496 | -0.01186 |
| 0.396065 | 5.45E-19 | 0.050439 | 0.2767  | 0.05001  | 0.28081 | 0.077375 | 0.0949  | -0.04611 |
| 0.261647 | 9.50E-09 | -0.00106 | 0.98181 | 0.022571 | 0.6266  | 0.047188 | 0.30888 | -0.04298 |
| 0.237426 | 2.09E-07 | 0.103129 | 0.02584 | 0.160144 | 0.00051 | 0.112861 | 0.01468 | 0.013897 |
| 0.081778 | 0.07749  | -0.04289 | 0.35504 | -0.0412  | 0.37437 | -0.0018  | 0.96914 | -0.05274 |
| 0.05706  | 0.2184   | -0.03403 | 0.46314 | -0.07168 | 0.12192 | -0.02909 | 0.53065 | 0.032008 |

|          |          |          |          |          |          |          |          |          |
|----------|----------|----------|----------|----------|----------|----------|----------|----------|
| 0.08655  | 0.06164  | -0.02044 | 0.65952  | -0.05449 | 0.23989  | -0.0183  | 0.69331  | -0.10929 |
| 0.054855 | 0.23675  | 0.025826 | 0.57773  | 0.009851 | 0.83186  | 0.063516 | 0.17059  | 0.071036 |
| 0.044066 | 0.34202  | -0.02826 | 0.54234  | -0.0102  | 0.82599  | 0.038078 | 0.41166  | 0.046437 |
| 0.181506 | 7.99E-05 | 0.043791 | 0.34505  | 0.137722 | 0.00286  | 0.061945 | 0.18144  | 0.088817 |
| 0.114829 | 0.01303  | 0.052428 | 0.25817  | 0.04745  | 0.3062   | 0.065634 | 0.15675  | 0.020205 |
| 0.171094 | 0.0002   | 0.039109 | 0.39912  | 0.074186 | 0.10936  | 0.063238 | 0.17248  | -0.00861 |
| 0.041021 | 0.37645  | 0.001557 | 0.97323  | -0.00679 | 0.88368  | 0.023042 | 0.61943  | -0.06206 |
| 0.035321 | 0.44637  | 0.011842 | 0.79854  | -0.00466 | 0.92007  | -0.00096 | 0.98355  | -0.00452 |
| 0.147579 | 0.00138  | 0.018969 | 0.68263  | -0.01349 | 0.77117  | 0.027723 | 0.5501   | -0.04156 |
| 0.151618 | 0.00101  | 0.023625 | 0.61057  | 0.009005 | 0.84612  | 0.028869 | 0.53372  | -0.0465  |
| 0.120945 | 0.00889  | 0.042615 | 0.35816  | 0.001307 | 0.97752  | 0.033596 | 0.4689   | -0.00167 |
| 0.221725 | 1.30E-06 | -0.0354  | 0.44535  | 0.057512 | 0.21478  | -0.06177 | 0.18267  | -0.01534 |
| 0.171047 | 0.0002   | 0.050644 | 0.27475  | 0.058953 | 0.20349  | 0.049144 | 0.28923  | -0.02159 |
| 0.138941 | 0.00262  | -0.00781 | 0.86628  | 0.112779 | 0.01475  | -0.06932 | 0.13468  | -0.03356 |
| 0.158147 | 0.0006   | -0.02192 | 0.63663  | 0.060168 | 0.19431  | -0.03754 | 0.41837  | 0.020728 |
| 0.138311 | 0.00274  | 0.049224 | 0.28845  | -0.01205 | 0.79512  | 0.03588  | 0.4392   | -0.06154 |
| 0.093197 | 0.04412  | -0.02126 | 0.6467   | -0.03783 | 0.41468  | 0.016881 | 0.71598  | 0.002209 |
| 0.213394 | 3.27E-06 | 0.078437 | 0.09044  | 0.111173 | 0.01624  | 0.074357 | 0.10854  | 0.011207 |
| 0.162703 | 0.00042  | 0.061007 | 0.18815  | 0.016444 | 0.72302  | 0.032561 | 0.48271  | -0.02357 |
| -0.01207 | 0.79479  | -0.22859 | 5.95E-07 | -0.03572 | 0.44125  | -0.37811 | 2.55E-17 | 0.046186 |
| 0.04654  | 0.31558  | -0.08501 | 0.06644  | 0.220217 | 1.55E-06 | -0.12526 | 0.00672  | 0.244326 |
| 0.036899 | 0.42631  | -0.16679 | 0.00029  | 0.101773 | 0.02787  | -0.23509 | 2.76E-07 | 0.196277 |
| 0.103249 | 0.02567  | -0.01747 | 0.70647  | 0.263671 | 7.23E-09 | -0.02726 | 0.55673  | 0.228292 |
| -0.03729 | 0.42137  | -0.1401  | 0.00241  | 0.022875 | 0.62196  | -0.08345 | 0.07159  | 0.12616  |
| -0.02115 | 0.6485   | -0.17087 | 0.00021  | 0.089531 | 0.05318  | -0.24941 | 4.71E-08 | 0.083953 |
| -0.01893 | 0.68324  | -0.04159 | 0.3698   | -0.0081  | 0.86146  | 0.004188 | 0.92808  | 0.149471 |
| 0.010366 | 0.82322  | -0.18952 | 3.75E-05 | -0.01419 | 0.75966  | -0.20041 | 1.28E-05 | 0.140306 |
| -0.03672 | 0.42851  | -0.12857 | 0.00539  | -0.0194  | 0.67588  | -0.15733 | 0.00064  | 0.181792 |
| 0.010462 | 0.8216   | -0.15919 | 0.00055  | 0.133346 | 0.00389  | -0.27796 | 9.86E-10 | 0.100254 |
| 0.005039 | 0.91351  | -0.1241  | 0.00725  | 0.054796 | 0.23726  | -0.09017 | 0.05148  | 0.229855 |
| 0.073589 | 0.11225  | 0.023473 | 0.61288  | 0.199183 | 1.45E-05 | 0.009294 | 0.84124  | 0.267797 |
| -0.00287 | 0.95066  | -0.19091 | 3.28E-05 | 0.092825 | 0.04497  | -0.29788 | 5.04E-11 | 0.134014 |
| -0.04053 | 0.38215  | -0.21701 | 2.21E-06 | 0.010775 | 0.81636  | -0.22375 | 1.04E-06 | 0.209321 |
| -0.00801 | 0.86292  | -0.0458  | 0.32334  | 0.090545 | 0.05053  | -0.09282 | 0.04498  | 0.172207 |
| -0.07103 | 0.12533  | -0.14961 | 0.00118  | -0.05589 | 0.22804  | -0.13914 | 0.00258  | -0.04656 |
| -0.00568 | 0.90255  | -0.05131 | 0.26844  | 0.188275 | 4.23E-05 | -0.12213 | 0.00824  | 0.16904  |
| -0.08229 | 0.07563  | -0.08879 | 0.05519  | -0.01785 | 0.70041  | -0.07367 | 0.11187  | 0.14475  |
| 0.009186 | 0.84306  | -0.06864 | 0.13861  | 0.118644 | 0.01028  | -0.00594 | 0.89806  | 0.288263 |
| -0.09933 | 0.03186  | -0.19928 | 1.43E-05 | -0.03856 | 0.4058   | -0.22584 | 8.17E-07 | 0.159033 |
| 0.068137 | 0.1415   | -0.08065 | 0.08167  | 0.222052 | 1.26E-06 | -0.14079 | 0.00229  | 0.272791 |
| 0.007352 | 0.8741   | -0.07313 | 0.1145   | 0.018482 | 0.69036  | -0.11628 | 0.01191  | 0.128253 |
| 0.114138 | 0.01359  | 0.001969 | 0.96614  | 0.226653 | 7.44E-07 | -0.1486  | 0.00128  | 0.168335 |
| 0.017717 | 0.70255  | -0.20017 | 1.31E-05 | 0.068019 | 0.14219  | -0.25804 | 1.54E-08 | 0.107144 |
| 0.01703  | 0.71358  | -0.17413 | 0.00016  | 0.125495 | 0.00662  | -0.20315 | 9.66E-06 | 0.187972 |
| 0.064444 | 0.16442  | 0.002699 | 0.95361  | 0.126097 | 0.00636  | -0.03674 | 0.42831  | 0.253915 |

|          |         |          |          |          |          |          |          |          |
|----------|---------|----------|----------|----------|----------|----------|----------|----------|
| 0.03419  | 0.46107 | -0.08796 | 0.05751  | 0.147298 | 0.00141  | -0.13441 | 0.00361  | 0.13115  |
| -0.06492 | 0.16131 | -0.15257 | 0.00094  | 0.021094 | 0.64934  | -0.09543 | 0.03927  | 0.219477 |
| -0.04878 | 0.29285 | -0.09555 | 0.03902  | 0.006101 | 0.89538  | -0.01003 | 0.82892  | 0.180904 |
| -0.06063 | 0.19087 | -0.10486 | 0.02344  | -0.02596 | 0.5758   | -0.07341 | 0.11314  | 0.121909 |
| 0.046739 | 0.31351 | -0.04468 | 0.33538  | 0.236028 | 2.47E-07 | -0.10141 | 0.02844  | 0.139687 |
| -0.04085 | 0.37849 | -0.06635 | 0.15226  | 0.012841 | 0.78196  | -0.11752 | 0.01103  | 0.21643  |
| -0.00992 | 0.83069 | -0.11866 | 0.01028  | 0.117133 | 0.0113   | -0.17238 | 0.00018  | 0.096418 |
| 0.078071 | 0.09195 | 0.019742 | 0.67046  | 0.297997 | 4.95E-11 | -0.08441 | 0.06837  | 0.237582 |
| 0.06457  | 0.1636  | -0.15487 | 0.00079  | 0.157037 | 0.00066  | -0.22959 | 5.30E-07 | 0.195405 |
| 0.060726 | 0.1902  | -0.0459  | 0.32231  | 0.06336  | 0.17165  | -0.05748 | 0.21507  | 0.175113 |
| 0.003741 | 0.93574 | -0.1445  | 0.00174  | -0.04195 | 0.36576  | -0.14501 | 0.00168  | 0.128015 |
| 0.007117 | 0.8781  | -0.11116 | 0.01625  | 0.106896 | 0.02086  | -0.08633 | 0.06232  | 0.24887  |
| 0.08675  | 0.06104 | 0.032315 | 0.48603  | 0.256488 | 1.89E-08 | -0.07314 | 0.11446  | 0.141741 |
| 0.044139 | 0.34122 | -0.13685 | 0.00304  | 0.164073 | 0.00037  | -0.20862 | 5.46E-06 | 0.189627 |
| -0.05648 | 0.22309 | -0.21631 | 2.38E-06 | -0.11987 | 0.00952  | -0.22988 | 5.12E-07 | -0.08656 |
| -0.06412 | 0.16658 | -0.19852 | 1.55E-05 | 0.008265 | 0.85862  | -0.25178 | 3.48E-08 | 0.038447 |
| 0.02794  | 0.54698 | -0.0386  | 0.40533  | 0.225191 | 8.80E-07 | -0.08086 | 0.0809   | 0.24722  |
| 0.025399 | 0.58404 | -0.02406 | 0.60398  | 0.118164 | 0.0106   | -0.06457 | 0.16358  | 0.214926 |
| 0.001185 | 0.97962 | -0.25198 | 3.39E-08 | 0.034506 | 0.45694  | -0.29061 | 1.53E-10 | 0.115535 |
| -0.03402 | 0.46326 | -0.10698 | 0.02076  | 0.086381 | 0.06215  | -0.17129 | 0.0002   | 0.148546 |
| -0.02676 | 0.56408 | -0.14836 | 0.0013   | 0.082118 | 0.07626  | -0.20554 | 7.54E-06 | 0.250348 |
| 0.056347 | 0.22422 | -0.1546  | 0.0008   | 0.163447 | 0.00039  | -0.22269 | 1.17E-06 | 0.220559 |
| 0.093317 | 0.04384 | -0.01187 | 0.79804  | 0.101758 | 0.02789  | -0.08691 | 0.06056  | 0.008043 |
| 0.004961 | 0.91486 | -0.1766  | 0.00012  | 0.032341 | 0.48567  | -0.26211 | 8.93E-09 | 0.124051 |
| 0.088938 | 0.05478 | -0.07185 | 0.12104  | 0.208847 | 5.33E-06 | -0.16583 | 0.00032  | 0.184602 |
| -0.03881 | 0.40276 | -0.25585 | 2.05E-08 | -0.11133 | 0.01609  | -0.24886 | 5.05E-08 | 0.040699 |
| -0.01191 | 0.79747 | -0.22863 | 5.92E-07 | 0.048773 | 0.29289  | -0.2582  | 1.50E-08 | 0.193151 |
| 0.006416 | 0.89002 | -0.13709 | 0.00299  | 0.163763 | 0.00038  | -0.20902 | 5.23E-06 | 0.14963  |
| 0.006749 | 0.88435 | -0.17185 | 0.00019  | 0.124303 | 0.00716  | -0.25648 | 1.89E-08 | 0.208868 |
| -0.01678 | 0.71764 | -0.23137 | 4.30E-07 | -0.0065  | 0.88864  | -0.22322 | 1.10E-06 | 0.198859 |
| 0.009198 | 0.84286 | -0.1657  | 0.00032  | 0.09041  | 0.05087  | -0.23504 | 2.78E-07 | 0.144684 |
| -0.01516 | 0.74389 | -0.0356  | 0.44275  | -0.05385 | 0.2455   | 0.004633 | 0.92046  | 0.138639 |
| 0.006687 | 0.8854  | -0.20208 | 1.08E-05 | 0.082291 | 0.07564  | -0.22433 | 9.71E-07 | 0.179668 |
| -0.02112 | 0.64894 | -0.15846 | 0.00059  | 0.029439 | 0.52568  | -0.23087 | 4.56E-07 | -0.01186 |
| 0.008962 | 0.84683 | -0.02641 | 0.56922  | 0.102338 | 0.02701  | -0.0385  | 0.40647  | 0.148177 |
| 0.031261 | 0.50037 | -0.05787 | 0.21194  | 0.084718 | 0.06738  | -0.0672  | 0.1471   | 0.200388 |
| -0.04411 | 0.34154 | -0.19834 | 1.58E-05 | -0.07874 | 0.08919  | -0.13484 | 0.00351  | 0.0673   |
| -0.02981 | 0.52048 | -0.15864 | 0.00058  | 0.056478 | 0.22315  | -0.18416 | 6.25E-05 | 0.104575 |
| 0.068385 | 0.14006 | -0.1453  | 0.00164  | 0.179778 | 9.36E-05 | -0.21602 | 2.46E-06 | 0.19838  |
| 0.017213 | 0.71063 | -0.19564 | 2.07E-05 | 0.12417  | 0.00722  | -0.23104 | 4.47E-07 | 0.192715 |
| 0.021626 | 0.64111 | -0.14527 | 0.00165  | 0.123339 | 0.00762  | -0.21958 | 1.66E-06 | 0.194273 |
| -0.04465 | 0.33565 | -0.13015 | 0.00485  | 0.081729 | 0.07767  | -0.15565 | 0.00074  | 0.227273 |
| 0.020784 | 0.65416 | -0.18451 | 6.04E-05 | 0.081579 | 0.07821  | -0.24083 | 1.38E-07 | 0.108263 |
| 0.022651 | 0.62537 | -0.1798  | 9.34E-05 | 0.093144 | 0.04424  | -0.25687 | 1.79E-08 | 0.066207 |
| -0.09269 | 0.04529 | -0.25155 | 3.58E-08 | -0.23579 | 2.54E-07 | -0.27136 | 2.51E-09 | 0.050399 |

|          |         |          |          |          |          |          |          |          |
|----------|---------|----------|----------|----------|----------|----------|----------|----------|
| -0.09423 | 0.04181 | -0.27111 | 2.60E-09 | -0.09612 | 0.03785  | -0.24135 | 1.29E-07 | 0.101621 |
| -0.02152 | 0.64272 | -0.19941 | 1.42E-05 | -0.02162 | 0.64126  | -0.16158 | 0.00046  | 0.235956 |
| -0.01565 | 0.73596 | -0.24536 | 7.85E-08 | -0.02703 | 0.56012  | -0.29039 | 1.58E-10 | 0.168956 |
| 0.009335 | 0.84055 | -0.16397 | 0.00037  | -0.0681  | 0.14174  | -0.19312 | 2.65E-05 | 0.091737 |
| 0.015442 | 0.73927 | -0.00595 | 0.89796  | 0.09764  | 0.03491  | -0.09411 | 0.04207  | 0.104437 |
| -0.00073 | 0.98753 | 0.41426  | 8.62E-21 | 0.372782 | 7.64E-17 | 0.508226 | 4.88E-32 | 0.508115 |
| 0.04665  | 0.31444 | 0.49629  | 2.08E-30 | 0.397591 | 3.88E-19 | 0.514047 | 7.41E-33 | 0.446128 |
| 0.117666 | 0.01093 | 0.534279 | 7.94E-36 | 0.63413  | 6.72E-54 | 0.516425 | 3.40E-33 | 0.700853 |
| 0.080354 | 0.08281 | 0.475694 | 9.61E-28 | 0.586411 | 1.77E-44 | 0.516925 | 2.88E-33 | 0.575266 |
| 0.045346 | 0.32817 | 0.56805  | 2.96E-41 | 0.457454 | 1.57E-25 | 0.559953 | 6.76E-40 | 0.66593  |
| 0.061317 | 0.18592 | 0.245355 | 7.86E-08 | 0.336835 | 7.48E-14 | 0.258773 | 1.39E-08 | 0.329066 |
| 0.0968   | 0.03651 | 0.423383 | 9.79E-22 | 0.498095 | 1.19E-30 | 0.364962 | 3.68E-16 | 0.535794 |
| 0.068047 | 0.14203 | 0.439113 | 1.96E-23 | 0.436663 | 3.65E-23 | 0.448914 | 1.54E-24 | 0.478557 |
| 0.043739 | 0.34562 | 0.352747 | 3.95E-15 | 0.451222 | 8.37E-25 | 0.357042 | 1.74E-15 | 0.559882 |
| 0.023497 | 0.61251 | 0.147167 | 0.00143  | 0.185297 | 5.61E-05 | 0.39153  | 1.47E-18 | 0.476715 |
| 0.025271 | 0.58593 | 0.29675  | 6.01E-11 | 0.198428 | 1.56E-05 | 0.352829 | 3.89E-15 | 0.554785 |
| 0.054545 | 0.23942 | 0.562825 | 2.25E-40 | 0.459182 | 9.83E-26 | 0.60224  | 1.98E-47 | 0.639006 |
| 0.009663 | 0.83502 | 0.25899  | 1.35E-08 | 0.360861 | 8.26E-16 | 0.25725  | 1.71E-08 | 0.39742  |
| 0.023753 | 0.60866 | 0.392967 | 1.08E-18 | 0.29935  | 4.01E-11 | 0.525894 | 1.43E-34 | 0.498852 |
| 0.047391 | 0.3068  | 0.441725 | 1.00E-23 | 0.405921 | 5.95E-20 | 0.570102 | 1.32E-41 | 0.594399 |
| -0.00924 | 0.84221 | 0.339158 | 4.92E-14 | 0.295184 | 7.64E-11 | 0.463455 | 3.04E-26 | 0.526395 |
| 0.08093  | 0.08062 | 0.563946 | 1.46E-40 | 0.507506 | 6.14E-32 | 0.594843 | 4.97E-46 | 0.490507 |
| 0.102755 | 0.02639 | 0.566823 | 4.78E-41 | 0.464432 | 2.32E-26 | 0.60519  | 5.37E-48 | 0.52053  |
| 0.067168 | 0.14726 | 0.353719 | 3.28E-15 | 0.311782 | 5.50E-12 | 0.432661 | 9.99E-23 | 0.396217 |
| 0.007151 | 0.87752 | 0.376084 | 3.88E-17 | 0.354515 | 2.82E-15 | 0.399841 | 2.35E-19 | 0.457858 |
| 0.056895 | 0.21975 | 0.44888  | 1.56E-24 | 0.317794 | 2.03E-12 | 0.543293 | 3.24E-37 | 0.682423 |
| -0.09368 | 0.04302 | 0.171055 | 0.0002   | 0.125227 | 0.00674  | 0.279909 | 7.45E-10 | 0.566132 |
| -0.02518 | 0.5873  | 0.235425 | 2.65E-07 | 0.105004 | 0.02325  | 0.267303 | 4.41E-09 | 0.055954 |
| -0.0708  | 0.12655 | 0.237666 | 2.03E-07 | 0.147041 | 0.00144  | 0.392752 | 1.13E-18 | 0.52136  |
| -0.06562 | 0.15681 | 0.065197 | 0.15954  | -0.01822 | 0.69455  | 0.20622  | 7.03E-06 | 0.504231 |
| 0.004355 | 0.92522 | 0.380592 | 1.52E-17 | 0.271244 | 2.55E-09 | 0.534541 | 7.25E-36 | 0.513016 |
| 0.008295 | 0.85812 | 0.338143 | 5.91E-14 | 0.270492 | 2.84E-09 | 0.464024 | 2.60E-26 | 0.323112 |
| 0.101342 | 0.02854 | 0.534839 | 6.53E-36 | 0.450398 | 1.04E-24 | 0.45927  | 9.59E-26 | 0.520123 |
| 0.007787 | 0.86671 | 0.279693 | 7.69E-10 | 0.225698 | 8.31E-07 | 0.377695 | 2.78E-17 | 0.511119 |
| 0.011305 | 0.8075  | 0.37756  | 2.86E-17 | 0.26013  | 1.16E-08 | 0.488509 | 2.22E-29 | 0.571516 |
| 0.056772 | 0.22075 | 0.620203 | 5.55E-51 | 0.489637 | 1.58E-29 | 0.671569 | 1.55E-62 | 0.624322 |
| 0.048608 | 0.29453 | 0.456932 | 1.81E-25 | 0.380903 | 1.42E-17 | 0.532378 | 1.54E-35 | 0.445648 |
| 0.024203 | 0.60187 | 0.473877 | 1.62E-27 | 0.456429 | 2.07E-25 | 0.535101 | 5.96E-36 | 0.698093 |
| 0.093345 | 0.04378 | 0.47033  | 4.44E-27 | 0.460585 | 6.70E-26 | 0.515528 | 4.56E-33 | 0.749501 |
| 0.041561 | 0.37019 | 0.39292  | 1.09E-18 | 0.260081 | 1.17E-08 | 0.529965 | 3.55E-35 | 0.430327 |
| 0.032524 | 0.4832  | 0.296902 | 5.87E-11 | 0.295402 | 7.39E-11 | 0.430608 | 1.67E-22 | 0.432585 |
| 0.066654 | 0.15039 | 0.370216 | 1.29E-16 | 0.513395 | 9.17E-33 | 0.364271 | 4.22E-16 | 0.633156 |
| 0.036862 | 0.42677 | 0.35926  | 1.13E-15 | 0.289427 | 1.83E-10 | 0.468485 | 7.47E-27 | 0.560087 |
| 0.093796 | 0.04277 | 0.490543 | 1.20E-29 | 0.458055 | 1.34E-25 | 0.508995 | 3.81E-32 | 0.522314 |
| -0.01562 | 0.73639 | 0.101701 | 0.02798  | -0.10038 | 0.03009  | 0.212739 | 3.51E-06 | 0.049299 |

|          |         |          |          |          |          |          |          |          |
|----------|---------|----------|----------|----------|----------|----------|----------|----------|
| -0.05373 | 0.24654 | 0.117962 | 0.01073  | -0.1102  | 0.01721  | 0.125914 | 0.00644  | -0.10113 |
| -0.01126 | 0.80817 | 0.202494 | 1.03E-05 | -0.01411 | 0.76102  | 0.231592 | 4.19E-07 | 0.018507 |
| -0.08982 | 0.0524  | 0.104354 | 0.02412  | -0.06271 | 0.17607  | 0.229228 | 5.52E-07 | 0.288542 |
| -0.07547 | 0.10335 | -0.08249 | 0.07492  | 0.063367 | 0.1716   | -0.10041 | 0.03005  | 0.218905 |
| -0.04153 | 0.3705  | 0.144618 | 0.00173  | -0.0771  | 0.09607  | 0.109835 | 0.01758  | -0.11714 |
| -0.13682 | 0.00305 | -0.1098  | 0.01762  | -0.2715  | 2.46E-09 | -0.0702  | 0.12983  | -0.14412 |
| -0.13855 | 0.00269 | -0.14476 | 0.00171  | -0.28936 | 1.85E-10 | -0.0111  | 0.81095  | 0.085074 |
| -0.07304 | 0.11497 | -0.06086 | 0.1892   | -0.23259 | 3.72E-07 | -0.03433 | 0.45926  | 0.013432 |
| -0.08307 | 0.07291 | 0.168054 | 0.00026  | -0.00618 | 0.89408  | 0.240704 | 1.40E-07 | 0.082509 |
| 0.001028 | 0.98232 | 0.070464 | 0.12838  | -0.09403 | 0.04226  | 0.104602 | 0.02378  | 0.03667  |
| 0.098052 | 0.03415 | 0.263757 | 7.15E-09 | 0.036645 | 0.4295   | 0.395762 | 5.82E-19 | -0.00525 |
| -0.02274 | 0.62398 | 0.057352 | 0.21606  | -0.08451 | 0.06805  | 0.196009 | 1.99E-05 | 0.027194 |
| -0.01463 | 0.75246 | 0.092772 | 0.0451   | -0.18792 | 4.38E-05 | 0.114228 | 0.01351  | -0.09659 |
| -0.03284 | 0.47902 | 0.111838 | 0.01561  | -0.05983 | 0.19685  | 0.098913 | 0.03259  | 0.068707 |
| -0.06326 | 0.17236 | 0.053935 | 0.24472  | -0.19856 | 1.54E-05 | 0.115303 | 0.01265  | -0.07099 |
| -0.01851 | 0.68998 | 0.11121  | 0.0162   | -0.12726 | 0.00589  | 0.164729 | 0.00035  | -0.02004 |
| -0.05978 | 0.19718 | 0.088808 | 0.05514  | -0.06216 | 0.17993  | 0.164549 | 0.00036  | 0.036589 |
| -0.0499  | 0.28191 | -0.02633 | 0.57038  | -0.17226 | 0.00018  | 0.044886 | 0.3331   | 0.031805 |
| -0.0991  | 0.03226 | 0.109235 | 0.01821  | -0.13094 | 0.00459  | 0.056034 | 0.22681  | -0.16009 |
| -0.08955 | 0.05312 | 0.098812 | 0.03277  | -0.20998 | 4.72E-06 | 0.179578 | 9.54E-05 | -0.01736 |
| -0.08224 | 0.07582 | -0.00405 | 0.93041  | -0.15953 | 0.00054  | 0.132008 | 0.00427  | 0.11809  |
| -0.16116 | 0.00047 | 0.007513 | 0.87137  | -0.21061 | 4.42E-06 | 0.06438  | 0.16484  | -0.11172 |
| -0.09505 | 0.04006 | 0.107411 | 0.02025  | -0.07161 | 0.12227  | 0.18719  | 4.69E-05 | -0.08309 |
| -0.07805 | 0.09205 | 0.059079 | 0.20252  | -0.14869 | 0.00127  | 0.123963 | 0.00732  | -0.00826 |
| -0.07312 | 0.11456 | -0.01179 | 0.79933  | -0.25643 | 1.90E-08 | -0.03579 | 0.44032  | -0.02758 |
| -0.05466 | 0.23845 | 0.097625 | 0.03494  | -0.07579 | 0.1019   | 0.104667 | 0.0237   | -0.10558 |
| -0.13953 | 0.00251 | -0.02952 | 0.52452  | -0.32727 | 4.04E-13 | -0.0292  | 0.52908  | -0.18015 |
| -0.12611 | 0.00635 | -0.00977 | 0.8332   | -0.25482 | 2.35E-08 | -0.07899 | 0.08818  | -0.11642 |
| -0.02713 | 0.55866 | 0.033505 | 0.4701   | -0.18874 | 4.05E-05 | 0.003897 | 0.93307  | -0.14473 |
| -0.10893 | 0.01853 | 0.132301 | 0.00418  | -0.14828 | 0.00131  | 0.265257 | 5.83E-09 | 0.036467 |
| -0.14599 | 0.00156 | 0.066198 | 0.15321  | -0.18276 | 7.12E-05 | 0.012685 | 0.78455  | -0.02855 |
| -0.12475 | 0.00695 | -0.00975 | 0.83349  | -0.16213 | 0.00044  | 0.105306 | 0.02285  | 0.081902 |
| -0.10316 | 0.0258  | 0.036807 | 0.42746  | -0.09708 | 0.03597  | 0.051429 | 0.26737  | -0.0544  |
| -0.02558 | 0.58138 | 0.071826 | 0.12114  | -0.1497  | 0.00118  | 0.108638 | 0.01886  | -0.10229 |
| -0.08745 | 0.05898 | 0.094218 | 0.04184  | -0.29705 | 5.73E-11 | 0.078993 | 0.08817  | -0.20794 |
| 0.15617  | 0.00071 | 0.044801 | 0.33402  | -0.07282 | 0.11606  | 0.09615  | 0.0378   | -0.13068 |
| -0.02649 | 0.568   | 0.063664 | 0.1696   | -0.20672 | 6.67E-06 | 0.083832 | 0.0703   | -0.18263 |
| -0.05032 | 0.27781 | 0.050424 | 0.27684  | -0.24125 | 1.31E-07 | -0.00993 | 0.83047  | -0.21958 |
| -0.03769 | 0.41649 | 0.02691  | 0.56187  | -0.09384 | 0.04267  | 0.188768 | 4.04E-05 | 0.131618 |
| -0.11793 | 0.01075 | -0.04466 | 0.33559  | -0.2699  | 3.08E-09 | -0.02654 | 0.56721  | 0.033915 |
| -0.0746  | 0.10737 | 0.052302 | 0.25932  | -0.1457  | 0.00159  | 0.107852 | 0.01974  | -0.1029  |
| -0.01987 | 0.6684  | 0.081204 | 0.0796   | -0.1835  | 6.64E-05 | 0.102191 | 0.02723  | 0.121287 |
| -0.06056 | 0.1914  | -0.03357 | 0.46926  | -0.15846 | 0.00059  | 0.024571 | 0.59636  | -0.00896 |
| -0.14097 | 0.00226 | -0.00662 | 0.88646  | -0.21442 | 2.93E-06 | 0.08108  | 0.08006  | -0.02461 |
| -0.07854 | 0.09002 | 0.175158 | 0.00014  | -0.18001 | 9.17E-05 | 0.133106 | 0.00396  | -0.19548 |



|          |         |          |          |          |          |           |          |          |
|----------|---------|----------|----------|----------|----------|-----------|----------|----------|
| -0.15097 | 0.00107 | 0.059603 | 0.19854  | -0.13425 | 0.00365  | 0.121192  | 0.00875  | -0.0159  |
| -0.10033 | 0.03017 | 0.061547 | 0.18427  | -0.18191 | 7.70E-05 | 0.049072  | 0.28994  | -0.23983 |
| -0.12903 | 0.00523 | 0.033066 | 0.47594  | -0.20812 | 5.75E-06 | 0.04448   | 0.33749  | 0.038541 |
| -0.0494  | 0.28676 | 0.063253 | 0.17237  | -0.14212 | 0.00208  | 0.13877   | 0.00265  | 0.116674 |
| -0.08559 | 0.06461 | -0.01388 | 0.76475  | -0.20805 | 5.80E-06 | 0.10549   | 0.02261  | 0.000679 |
| -0.09192 | 0.04712 | 0.00425  | 0.92701  | -0.18944 | 3.79E-05 | 0.061919  | 0.18162  | 0.103249 |
| -0.11566 | 0.01238 | 0.034517 | 0.45679  | -0.15824 | 0.0006   | 0.105405  | 0.02272  | -0.04903 |
| -0.01384 | 0.7655  | -0.0796  | 0.08575  | -0.19674 | 1.85E-05 | -0.04911  | 0.28957  | -0.07807 |
| -0.049   | 0.29061 | 0.093074 | 0.0444   | -0.04506 | 0.33127  | 0.139381  | 0.00254  | 0.04203  |
| -0.06687 | 0.1491  | 0.111623 | 0.01581  | -0.15659 | 0.00068  | 0.024276  | 0.60078  | -0.15781 |
| -0.09349 | 0.04344 | -0.00805 | 0.86224  | -0.20277 | 1.01E-05 | -3.67E-05 | 0.99937  | -0.09439 |
| -0.07592 | 0.1013  | -0.08964 | 0.05289  | -0.20543 | 7.63E-06 | 0.040008  | 0.38835  | -0.03032 |
| -0.10872 | 0.01877 | 0.187861 | 4.40E-05 | -0.16708 | 0.00029  | 0.208678  | 5.42E-06 | -0.15303 |
| -0.07799 | 0.09231 | 0.125874 | 0.00646  | -0.1698  | 0.00023  | 0.110935  | 0.01647  | -0.17088 |
| 0.0004   | 0.99312 | 0.140853 | 0.00228  | -0.01483 | 0.74923  | 0.206618  | 6.74E-06 | 0.059604 |
| -0.14498 | 0.00168 | 0.029714 | 0.52181  | -0.21287 | 3.47E-06 | 0.01797   | 0.69851  | -0.20475 |
| -0.05692 | 0.21953 | 0.057842 | 0.21215  | -0.12641 | 0.00623  | 0.153882  | 0.00085  | -0.02215 |
| -0.03043 | 0.5118  | 0.134095 | 0.00369  | -0.16382 | 0.00038  | 0.121998  | 0.00831  | -0.12104 |
| -0.13123 | 0.0045  | 0.067511 | 0.1452   | -0.10818 | 0.01936  | 0.155349  | 0.00076  | 0.063917 |
| -0.06999 | 0.13099 | 0.157585 | 0.00063  | -0.05226 | 0.25966  | 0.182735  | 7.13E-05 | -0.09337 |
| -0.11804 | 0.01068 | 0.016911 | 0.71548  | -0.13938 | 0.00254  | 0.083419  | 0.0717   | 0.053872 |
| -0.07636 | 0.09931 | 0.124674 | 0.00699  | -0.11611 | 0.01204  | 0.15807   | 0.00061  | -0.10996 |
| -0.07029 | 0.1293  | -0.00182 | 0.96874  | -0.1572  | 0.00065  | 0.056949  | 0.21931  | -0.01119 |
| -0.06009 | 0.19488 | 0.136055 | 0.00322  | -0.18281 | 7.08E-05 | 0.18753   | 4.54E-05 | -0.1268  |
| -0.03841 | 0.40763 | 0.033779 | 0.46648  | -0.03983 | 0.39044  | 0.127065  | 0.00597  | 0.087935 |
| -0.02642 | 0.56904 | 0.114948 | 0.01293  | -0.03615 | 0.43577  | 0.151801  | 0.001    | -0.04011 |
| -0.09049 | 0.05066 | -0.01098 | 0.81299  | -0.14625 | 0.00153  | 0.038968  | 0.40082  | -0.0932  |
| -0.03801 | 0.41251 | 0.066777 | 0.14964  | -0.08929 | 0.05382  | 0.206872  | 6.56E-06 | 0.019131 |
| -0.03242 | 0.48454 | 0.115673 | 0.01237  | -0.17915 | 9.92E-05 | 0.158662  | 0.00058  | -0.02411 |
| -0.09305 | 0.04445 | 0.082117 | 0.07626  | -0.19697 | 1.81E-05 | 0.129712  | 0.00499  | -0.07064 |
| 0.060383 | 0.19272 | 0.12286  | 0.00786  | -0.16762 | 0.00027  | 0.203477  | 9.34E-06 | -0.05327 |
| -0.029   | 0.53192 | 0.034808 | 0.453    | -0.09272 | 0.04521  | 0.061991  | 0.18111  | -0.01134 |
| -0.03211 | 0.48884 | 0.12896  | 0.00525  | -0.06315 | 0.17311  | 0.189885  | 3.63E-05 | 0.079096 |
| -0.07241 | 0.11816 | -0.03315 | 0.47488  | -0.17161 | 0.00019  | 0.003217  | 0.94472  | -0.08571 |
| -0.08424 | 0.06896 | 0.06152  | 0.18446  | -0.14719 | 0.00142  | 0.071954  | 0.12047  | -0.11272 |
| -0.06188 | 0.18192 | 0.148942 | 0.00125  | -0.03687 | 0.42672  | 0.181079  | 8.31E-05 | -0.11186 |
| -0.01323 | 0.77556 | 0.085885 | 0.06368  | -0.13831 | 0.00274  | 0.166582  | 0.0003   | 0.069305 |
| -0.0838  | 0.07041 | 0.044342 | 0.339    | -0.15357 | 0.00087  | 0.048767  | 0.29295  | -0.11744 |
| -0.06452 | 0.16389 | -0.03431 | 0.45955  | -0.26535 | 5.76E-09 | -0.05872  | 0.20531  | -0.09558 |
| -0.03155 | 0.49636 | 0.027869 | 0.54801  | -0.16515 | 0.00034  | 0.066763  | 0.14972  | -0.00895 |
| -0.08348 | 0.07149 | 0.019318 | 0.67713  | -0.11572 | 0.01234  | 0.136435  | 0.00313  | 0.207171 |
| -0.05739 | 0.21579 | 0.066357 | 0.15222  | -0.15487 | 0.00078  | 0.075165  | 0.10475  | -0.14526 |
| -0.06664 | 0.15045 | 0.121657 | 0.00849  | -0.19239 | 2.84E-05 | 0.148109  | 0.00133  | -0.19519 |
| -0.06509 | 0.1602  | 0.014155 | 0.76029  | -0.19087 | 3.30E-05 | 0.04534   | 0.32823  | 0.110128 |
| -0.10758 | 0.02005 | 0.006142 | 0.89469  | -0.18884 | 4.01E-05 | 0.0795    | 0.08614  | -0.1053  |

|          |         |          |          |          |          |          |          |          |
|----------|---------|----------|----------|----------|----------|----------|----------|----------|
| -0.08934 | 0.0537  | 0.079529 | 0.08603  | -0.25016 | 4.28E-08 | 0.083144 | 0.07265  | -0.21583 |
| -0.10492 | 0.02336 | 0.157167 | 0.00065  | -0.20176 | 1.11E-05 | 0.208539 | 5.51E-06 | -0.19574 |
| -0.10266 | 0.02652 | 0.007688 | 0.86839  | -0.25966 | 1.24E-08 | 0.038624 | 0.40499  | -0.12467 |
| -0.12147 | 0.0086  | -0.0402  | 0.38612  | -0.19033 | 3.47E-05 | 0.053255 | 0.25072  | -0.03524 |
| -0.09618 | 0.03774 | 0.15333  | 0.00089  | -0.12441 | 0.00711  | 0.160078 | 0.00052  | -0.04725 |
| -0.11904 | 0.01003 | -0.03656 | 0.43061  | -0.24338 | 1.01E-07 | 0.009794 | 0.83282  | -0.15562 |
| -0.1101  | 0.01731 | 0.013446 | 0.77196  | -0.19023 | 3.51E-05 | 0.087645 | 0.05841  | -0.15592 |
| 0.088931 | 0.0548  | 0.05093  | 0.27204  | -0.17168 | 0.00019  | 0.048139 | 0.29922  | -0.1373  |
| 0.01004  | 0.82868 | 0.164554 | 0.00036  | -0.08442 | 0.06834  | 0.090103 | 0.05167  | 0.004733 |
| 0.007853 | 0.8656  | -0.19266 | 2.77E-05 | 0.12662  | 0.00614  | -0.24185 | 1.22E-07 | 0.224231 |
| -0.03814 | 0.4109  | 0.018231 | 0.69436  | -0.21432 | 2.96E-06 | 0.085724 | 0.06418  | 0.023148 |
| -0.09161 | 0.04788 | -0.02136 | 0.64522  | -0.18341 | 6.70E-05 | 0.065476 | 0.15775  | -0.10552 |
| -0.16127 | 0.00047 | -0.007   | 0.88007  | -0.27263 | 2.10E-09 | 0.006576 | 0.88729  | -0.16661 |
| -0.08344 | 0.07164 | -0.09641 | 0.03728  | -0.21318 | 3.35E-06 | -0.08297 | 0.07325  | 0.026117 |
| -0.05682 | 0.22039 | 0.203839 | 9.00E-06 | -0.16608 | 0.00031  | 0.204763 | 8.18E-06 | -0.12758 |
| -0.01254 | 0.78701 | 0.098885 | 0.03264  | -0.19382 | 2.47E-05 | 0.142735 | 0.00199  | -0.12346 |
| -0.06887 | 0.13728 | 0.164066 | 0.00037  | -0.17636 | 0.00013  | 0.203081 | 9.73E-06 | -0.0938  |
| -0.03921 | 0.39789 | 0.110732 | 0.01667  | -0.13011 | 0.00486  | 0.09239  | 0.04599  | -0.01418 |
| -0.04272 | 0.35702 | 0.05115  | 0.26997  | -0.15645 | 0.00069  | 0.122899 | 0.00784  | 0.050833 |
| -0.09605 | 0.03799 | -0.05816 | 0.20965  | -0.1523  | 0.00096  | 0.10347  | 0.02535  | 0.22724  |
| 0.077463 | 0.09452 | 0.130579 | 0.00471  | 0.01393  | 0.76399  | 0.251081 | 3.80E-08 | 0.197245 |
| -0.10918 | 0.01826 | 0.099864 | 0.03095  | -0.242   | 1.19E-07 | 0.130751 | 0.00465  | -0.08842 |
| -0.07554 | 0.10302 | -0.00639 | 0.89054  | -0.2531  | 2.93E-08 | -0.02642 | 0.56898  | -0.14319 |
| -0.02513 | 0.58807 | 0.082539 | 0.07476  | -0.08939 | 0.05356  | 0.134902 | 0.00349  | 0.102703 |
| -0.01358 | 0.7697  | 0.105192 | 0.023    | -0.12399 | 0.0073   | 0.084158 | 0.06921  | -0.15024 |
| -0.04701 | 0.31073 | 0.047123 | 0.30955  | -0.07128 | 0.12398  | 0.137717 | 0.00286  | 0.104298 |
| -0.07626 | 0.09978 | 0.093244 | 0.04401  | -0.13731 | 0.00294  | 0.08656  | 0.06161  | -0.16025 |
| 0.028275 | 0.54219 | 0.227007 | 7.14E-07 | 0.053244 | 0.25082  | 0.224397 | 9.64E-07 | 0.031522 |
| -0.17525 | 0.00014 | 0.020596 | 0.65709  | -0.20923 | 5.12E-06 | 0.077272 | 0.09534  | -0.12154 |
| -0.10222 | 0.02718 | 0.084639 | 0.06763  | -0.14566 | 0.0016   | 0.115403 | 0.01258  | -0.09356 |
| -0.04946 | 0.28613 | 0.011565 | 0.80316  | -0.10206 | 0.02742  | -0.06332 | 0.17191  | -0.05794 |
| -0.09982 | 0.03103 | 0.147055 | 0.00144  | -0.08647 | 0.06188  | 0.100308 | 0.03021  | -0.09934 |
| -0.01312 | 0.77727 | -0.11321 | 0.01438  | -0.02334 | 0.61487  | -0.19763 | 1.69E-05 | 0.006069 |
| -0.01365 | 0.76854 | 0.118264 | 0.01053  | -0.15575 | 0.00073  | 0.148941 | 0.00125  | -0.06696 |
| -0.10232 | 0.02704 | 0.075771 | 0.10197  | -0.19777 | 1.67E-05 | 0.104381 | 0.02408  | 0.043089 |
| -0.0782  | 0.09143 | 0.037216 | 0.42234  | -0.19027 | 3.49E-05 | 0.141991 | 0.0021   | 0.018815 |
| -0.03444 | 0.45784 | 0.119374 | 0.00982  | -0.08429 | 0.06878  | 0.12427  | 0.00717  | 0.04867  |
| 0.092614 | 0.04546 | -0.15114 | 0.00105  | 0.00243  | 0.95823  | -0.14742 | 0.0014   | -0.01349 |
| -0.07143 | 0.12323 | 0.099588 | 0.03142  | -0.09623 | 0.03764  | 0.140407 | 0.00236  | -0.08841 |
| -0.12441 | 0.00711 | -0.04029 | 0.38498  | -0.15485 | 0.00079  | 0.102192 | 0.02723  | 0.111621 |
| -0.05853 | 0.20672 | -0.00155 | 0.9733   | -0.15579 | 0.00073  | 0.059302 | 0.20082  | 0.020101 |
| -0.01322 | 0.77567 | 0.153711 | 0.00086  | -0.01649 | 0.72228  | 0.163576 | 0.00039  | 0.000307 |
| -0.09037 | 0.05098 | -0.01305 | 0.7785   | -0.25106 | 3.82E-08 | -0.04693 | 0.31157  | -0.1049  |
| 0.012869 | 0.78149 | -0.05783 | 0.21223  | 0.114823 | 0.01303  | -0.07665 | 0.09804  | 0.141714 |
| -0.03578 | 0.44049 | -0.01053 | 0.82045  | -0.17154 | 0.0002   | 0.128029 | 0.00559  | 0.100073 |

|          |          |          |          |          |          |          |          |          |
|----------|----------|----------|----------|----------|----------|----------|----------|----------|
| -0.08359 | 0.07111  | 0.029545 | 0.52418  | -0.24445 | 8.81E-08 | 0.115615 | 0.01241  | -0.14777 |
| -0.11061 | 0.01679  | 0.012059 | 0.79493  | -0.17523 | 0.00014  | 0.085219 | 0.06577  | 0.108448 |
| -0.13159 | 0.00439  | -0.00962 | 0.83568  | -0.27061 | 2.79E-09 | -0.02574 | 0.57905  | -0.08076 |
| 0.019441 | 0.67519  | -0.18328 | 6.78E-05 | 0.158753 | 0.00057  | -0.22776 | 6.55E-07 | 0.170662 |
| -0.12075 | 0.009    | -0.01643 | 0.72317  | -0.26339 | 7.52E-09 | 0.074249 | 0.10906  | 0.028277 |
| -0.10663 | 0.02119  | 0.052014 | 0.26195  | -0.17111 | 0.0002   | 0.115865 | 0.01222  | 0.134139 |
| -0.07969 | 0.0854   | 0.178399 | 0.00011  | -0.09595 | 0.03819  | 0.142899 | 0.00196  | -0.14858 |
| -0.20368 | 9.15E-06 | -0.0833  | 0.0721   | -0.14544 | 0.00163  | -0.02496 | 0.59056  | 0.088624 |
| -0.10177 | 0.02788  | 0.046656 | 0.31437  | -0.14221 | 0.00207  | 0.087789 | 0.058    | -0.05772 |
| 0.023458 | 0.61311  | -0.04465 | 0.3356   | 0.230754 | 4.62E-07 | -0.16501 | 0.00034  | 0.122084 |
| -0.02672 | 0.56465  | 0.051182 | 0.26967  | -0.09789 | 0.03445  | 0.159801 | 0.00053  | 0.083238 |
| -0.06732 | 0.14636  | 0.021152 | 0.64844  | -0.11056 | 0.01684  | 0.050378 | 0.27728  | -0.0683  |
| -0.02557 | 0.58157  | 0.048971 | 0.29094  | -0.1623  | 0.00043  | 0.096134 | 0.03783  | 0.078857 |
| -0.07762 | 0.09387  | -0.07341 | 0.11311  | -0.2793  | 8.14E-10 | -0.01924 | 0.67833  | -0.12453 |
| -0.10165 | 0.02806  | 0.127388 | 0.00584  | -0.08029 | 0.08304  | 0.18498  | 5.78E-05 | -0.08908 |
| -0.05956 | 0.19889  | 0.127739 | 0.0057   | -0.13875 | 0.00266  | 0.120319 | 0.00925  | 0.032918 |
| -0.08381 | 0.07038  | 0.024048 | 0.6042   | -0.23841 | 1.85E-07 | 0.131109 | 0.00454  | 0.04176  |
| -0.09788 | 0.03446  | 0.016931 | 0.71516  | -0.17483 | 0.00015  | 0.156248 | 0.0007   | 0.098247 |
| -0.07652 | 0.0986   | 0.085185 | 0.06587  | -0.09333 | 0.04382  | 0.056704 | 0.2213   | 0.001447 |
| -0.10076 | 0.02947  | 0.048115 | 0.29947  | -0.107   | 0.02073  | 0.09635  | 0.0374   | 0.043682 |
| -0.07991 | 0.08451  | 0.03404  | 0.46304  | -0.15839 | 0.00059  | 0.098996 | 0.03245  | 0.012989 |
| -0.05176 | 0.26431  | 0.068792 | 0.13771  | -0.16067 | 0.00049  | 0.040775 | 0.37932  | 0.021347 |
| -0.0965  | 0.03709  | 0.145999 | 0.00156  | -0.21065 | 4.40E-06 | 0.169496 | 0.00023  | -0.16859 |
| -0.07821 | 0.09136  | -0.01999 | 0.66649  | -0.28527 | 3.41E-10 | -0.00785 | 0.86564  | -0.14524 |
| -0.08316 | 0.0726   | 0.118379 | 0.01046  | -0.18723 | 4.68E-05 | 0.182213 | 7.49E-05 | -0.07594 |
| -0.05967 | 0.19805  | 0.072326 | 0.11856  | -0.06746 | 0.14551  | 0.082199 | 0.07597  | 0.070733 |
| -0.04314 | 0.35232  | -0.01366 | 0.76849  | -0.15512 | 0.00077  | 0.046473 | 0.31628  | 0.034557 |
| -0.03478 | 0.45335  | 0.239181 | 1.69E-07 | -0.14517 | 0.00166  | 0.212099 | 3.77E-06 | -0.25851 |
| -0.08155 | 0.07831  | 0.071235 | 0.12424  | -0.1636  | 0.00039  | 0.127952 | 0.00562  | -0.10468 |
| 0.014335 | 0.75734  | -0.01328 | 0.77468  | -0.14473 | 0.00171  | 0.024458 | 0.59806  | 0.031559 |
| -0.07823 | 0.0913   | 0.141547 | 0.00217  | -0.18139 | 8.08E-05 | 0.078716 | 0.08929  | -0.23121 |
| -0.04829 | 0.29774  | 0.119465 | 0.00977  | -0.09274 | 0.04516  | 0.116276 | 0.01192  | 0.01089  |
| 0.003828 | 0.93425  | -0.02297 | 0.62054  | -0.14848 | 0.00129  | 0.002456 | 0.95779  | -0.01976 |
| 0.015829 | 0.73297  | 0.075088 | 0.1051   | 0.017957 | 0.69872  | 0.201154 | 1.19E-05 | 0.182215 |
| 0.048829 | 0.29234  | 0.200945 | 1.21E-05 | 0.354385 | 2.89E-15 | 0.198031 | 1.63E-05 | 0.33209  |
| -0.02834 | 0.54119  | -0.01699 | 0.71428  | -0.17145 | 0.0002   | 0.050265 | 0.27836  | 0.173387 |
| 0.171898 | 0.00019  | 0.212252 | 3.70E-06 | 0.088825 | 0.05509  | 0.29772  | 5.17E-11 | 0.079181 |
| -0.03751 | 0.41874  | 0.035881 | 0.43918  | -0.18629 | 5.11E-05 | 0.023168 | 0.61751  | 0.00805  |
| -0.09478 | 0.04063  | 0.000709 | 0.98782  | -0.23078 | 4.60E-07 | -0.00545 | 0.90641  | -0.03845 |
| -0.10124 | 0.0287   | 0.010396 | 0.82272  | -0.1977  | 1.68E-05 | 0.073623 | 0.11208  | -0.08863 |
| -0.13668 | 0.00308  | -0.12386 | 0.00737  | -0.34253 | 2.66E-14 | -0.03781 | 0.41501  | -0.08534 |
| -0.07479 | 0.10648  | 0.142003 | 0.0021   | -0.1835  | 6.64E-05 | 0.2067   | 6.68E-06 | -0.0437  |
| -0.12194 | 0.00834  | 0.088479 | 0.05605  | -0.24405 | 9.25E-08 | 0.164576 | 0.00036  | -0.1454  |
| -0.06246 | 0.17781  | 0.004573 | 0.92149  | -0.23268 | 3.68E-07 | 0.018836 | 0.68474  | 0.050879 |
| -0.05679 | 0.22056  | 0.221006 | 1.41E-06 | 0.046674 | 0.31419  | 0.255579 | 2.12E-08 | -0.15556 |

|          |         |           |          |          |          |          |          |          |
|----------|---------|-----------|----------|----------|----------|----------|----------|----------|
| -0.03595 | 0.4383  | 0.020246  | 0.66255  | -0.17948 | 9.62E-05 | 0.039551 | 0.3938   | -0.07463 |
| -0.01804 | 0.69736 | 0.153219  | 0.00089  | -0.06105 | 0.18781  | 0.176381 | 0.00013  | 0.047921 |
| -0.06356 | 0.17032 | 0.105164  | 0.02304  | -0.1008  | 0.02941  | 0.06198  | 0.18119  | 0.002582 |
| -0.08637 | 0.0622  | 0.126911  | 0.00603  | -0.19958 | 1.39E-05 | 0.215479 | 2.61E-06 | -0.14209 |
| -0.03224 | 0.48707 | 0.111634  | 0.0158   | -0.24481 | 8.42E-08 | 0.137482 | 0.00291  | -0.13121 |
| -0.05388 | 0.2452  | 0.160417  | 0.0005   | -0.20826 | 5.67E-06 | 0.189069 | 3.92E-05 | -0.18493 |
| -0.03817 | 0.41054 | 0.152408  | 0.00095  | -0.08167 | 0.07789  | 0.097261 | 0.03562  | -0.17063 |
| -0.10722 | 0.02047 | 0.053479  | 0.24874  | -0.23249 | 3.77E-07 | 0.0598   | 0.19705  | -0.116   |
| -0.03917 | 0.39842 | 0.082951  | 0.07331  | -0.08216 | 0.07612  | 0.199832 | 1.36E-05 | 0.08925  |
| -0.10333 | 0.02555 | 0.060083  | 0.19494  | -0.15157 | 0.00102  | 0.176404 | 0.00013  | 0.015718 |
| -0.07856 | 0.08994 | 0.040328  | 0.38457  | -0.08305 | 0.07297  | 0.133543 | 0.00384  | 0.014053 |
| -0.09165 | 0.04777 | 0.025636  | 0.58053  | -0.10551 | 0.02258  | -0.02172 | 0.63962  | 0.049521 |
| -0.07856 | 0.08994 | 0.095628  | 0.03885  | -0.23612 | 2.44E-07 | 0.188408 | 4.18E-05 | -0.04614 |
| -0.03734 | 0.42078 | -0.05364  | 0.24735  | -0.17733 | 0.00012  | 0.054124 | 0.24307  | 0.102952 |
| -0.05398 | 0.24436 | 0.130364  | 0.00478  | -0.0275  | 0.55328  | 0.056796 | 0.22055  | -0.07715 |
| -0.14039 | 0.00236 | 0.022212  | 0.6321   | -0.28694 | 2.66E-10 | 0.055553 | 0.23083  | -0.18684 |
| -0.06606 | 0.15406 | 0.006606  | 0.88679  | -0.22304 | 1.12E-06 | 0.142977 | 0.00195  | -0.00057 |
| -0.0942  | 0.04188 | 0.141542  | 0.00217  | -0.23368 | 3.27E-07 | 0.205534 | 7.55E-06 | -0.09531 |
| -0.0028  | 0.95187 | 0.042432  | 0.36023  | -0.23011 | 4.98E-07 | 0.017282 | 0.70952  | -0.12363 |
| -0.07856 | 0.08994 | -5.57E-05 | 0.99904  | -0.20439 | 8.50E-06 | 0.092783 | 0.04507  | 0.088336 |
| -0.08302 | 0.07306 | 0.078685  | 0.08942  | -0.1605  | 0.0005   | 0.135976 | 0.00324  | -0.00856 |
| 0.001159 | 0.98008 | 0.135557  | 0.00333  | -0.08437 | 0.06852  | 0.081294 | 0.07926  | -0.06557 |
| -0.05579 | 0.22881 | 0.184939  | 5.81E-05 | -0.02314 | 0.618    | 0.197202 | 1.77E-05 | -0.12584 |
| -0.05216 | 0.2606  | 0.029303  | 0.52759  | -0.1465  | 0.0015   | 0.0907   | 0.05013  | 0.012998 |
| -0.04437 | 0.33872 | 0.081046  | 0.08019  | -0.22494 | 9.06E-07 | 0.08093  | 0.08062  | -0.13524 |
| -0.06909 | 0.136   | 0.026545  | 0.56719  | -0.21451 | 2.90E-06 | 0.114457 | 0.01333  | 0.11522  |
| -0.02904 | 0.5313  | 0.039339  | 0.39634  | 0.224771 | 9.24E-07 | 0.074902 | 0.10597  | 0.200165 |
| -0.09866 | 0.03305 | 0.049202  | 0.28866  | -0.15042 | 0.00111  | 0.142199 | 0.00207  | -0.02466 |
| -0.0675  | 0.14525 | 0.070768  | 0.12673  | -0.14307 | 0.00194  | 0.140626 | 0.00232  | 0.009442 |
| 0.026352 | 0.57    | 0.054875  | 0.23658  | 0.314484 | 3.52E-12 | 0.151119 | 0.00105  | 0.327357 |
| -0.05316 | 0.2516  | 0.050573  | 0.27542  | -0.11491 | 0.01296  | 0.046856 | 0.3123   | -0.00575 |
| -0.04004 | 0.38798 | 0.142341  | 0.00205  | -0.07856 | 0.08995  | 0.090563 | 0.05048  | -0.09554 |
| -0.13031 | 0.0048  | 0.051511  | 0.26661  | -0.14742 | 0.0014   | 0.061953 | 0.18138  | -0.09436 |
| -0.11304 | 0.01452 | -0.06178  | 0.18262  | -0.18624 | 5.13E-05 | 0.032625 | 0.48185  | 0.016422 |
| -0.09091 | 0.04959 | 0.036102  | 0.43638  | -0.16445 | 0.00036  | -0.0035  | 0.93994  | 0.043015 |
| -0.13756 | 0.00289 | 0.014868  | 0.74862  | -0.28623 | 2.95E-10 | 0.02539  | 0.58418  | -0.0668  |
| -0.02293 | 0.62114 | 0.099256  | 0.03199  | -0.12852 | 0.00541  | 0.111285 | 0.01613  | 0.104057 |
| -0.09552 | 0.03907 | 0.13356   | 0.00383  | -0.21542 | 2.63E-06 | 0.184629 | 5.98E-05 | -0.25788 |
| -0.15085 | 0.00108 | 0.018372  | 0.69211  | -0.22934 | 5.45E-07 | 0.02513  | 0.58804  | -0.18354 |
| -0.07212 | 0.11964 | 0.074704  | 0.1069   | -0.18943 | 3.79E-05 | 0.070675 | 0.12723  | -0.16866 |
| -0.13035 | 0.00478 | -0.03487  | 0.45222  | -0.21028 | 4.58E-06 | 0.039437 | 0.39517  | 0.010783 |
| -0.07352 | 0.11258 | -0.04288  | 0.35515  | -0.18933 | 3.83E-05 | -0.05134 | 0.26816  | 0.056129 |
| -0.06252 | 0.1774  | -0.05691  | 0.2196   | -0.26985 | 3.10E-09 | -0.01157 | 0.80301  | -0.05187 |
| -0.04726 | 0.30813 | 0.05702   | 0.21873  | -0.17611 | 0.00013  | 0.113431 | 0.01418  | -0.15002 |
| -0.12959 | 0.00504 | -0.0814   | 0.07886  | -0.26366 | 7.24E-09 | 0.001972 | 0.9661   | -0.11615 |

|          |         |          |          |          |          |          |          |          |
|----------|---------|----------|----------|----------|----------|----------|----------|----------|
| -0.02445 | 0.59816 | -0.00513 | 0.91205  | -0.07096 | 0.12568  | 0.076717 | 0.09775  | 0.043895 |
| -0.1206  | 0.00909 | -0.03305 | 0.47615  | -0.16562 | 0.00033  | 0.081437 | 0.07874  | 0.14655  |
| -0.11832 | 0.01049 | 0.078985 | 0.0882   | -0.26694 | 4.63E-09 | 0.108079 | 0.01948  | -0.14914 |
| -0.06518 | 0.15965 | 0.10643  | 0.02143  | -0.18307 | 6.92E-05 | 0.113493 | 0.01413  | -0.06276 |
| -0.05817 | 0.20954 | 0.020819 | 0.65362  | -0.24105 | 1.34E-07 | 0.087967 | 0.05749  | -0.03575 |
| -0.05761 | 0.21398 | 0.013281 | 0.77469  | -0.13277 | 0.00405  | 0.083317 | 0.07205  | 0.079822 |
| 0.010992 | 0.81273 | 0.138689 | 0.00267  | -0.0389  | 0.40168  | 0.170609 | 0.00021  | -0.09911 |
| -0.03341 | 0.4713  | -0.02219 | 0.63248  | -0.1944  | 2.33E-05 | -0.03296 | 0.47731  | -0.15155 |
| -0.0164  | 0.72378 | 0.001354 | 0.97671  | -0.12794 | 0.00563  | 0.108856 | 0.01862  | 0.04724  |
| -0.13539 | 0.00337 | 0.015441 | 0.73928  | -0.15824 | 0.0006   | 0.10153  | 0.02824  | 0.063144 |
| -0.06743 | 0.14569 | 0.132463 | 0.00414  | -0.18315 | 6.86E-05 | 0.156533 | 0.00069  | -0.07275 |
| -0.071   | 0.1255  | 0.122735 | 0.00792  | -0.11851 | 0.01037  | 0.14954  | 0.00119  | -0.07657 |
| 0.006199 | 0.89371 | 0.112814 | 0.01472  | -0.10308 | 0.02591  | 0.137931 | 0.00282  | -0.09508 |
| -0.11115 | 0.01627 | 0.000992 | 0.98294  | -0.17777 | 0.00011  | -0.00474 | 0.9187   | 0.014107 |
| -0.05723 | 0.21706 | 0.098563 | 0.03322  | -0.07915 | 0.08755  | 0.162219 | 0.00043  | 0.07968  |
| -0.06559 | 0.15705 | 0.170217 | 0.00022  | -0.14276 | 0.00198  | 0.243527 | 9.88E-08 | -0.01555 |
| -0.08231 | 0.07558 | 0.156203 | 0.00071  | -0.11734 | 0.01116  | 0.228387 | 6.09E-07 | -0.07773 |
| -0.07398 | 0.11036 | 0.117395 | 0.01112  | -0.15769 | 0.00063  | 0.176893 | 0.00012  | -0.07958 |
| -0.00614 | 0.89476 | 0.116939 | 0.01144  | -0.05478 | 0.23738  | 0.186312 | 5.10E-05 | 0.193626 |
| -0.07657 | 0.09837 | 0.13045  | 0.00475  | -0.1223  | 0.00815  | 0.198552 | 1.54E-05 | 0.028374 |
| -0.11807 | 0.01066 | 0.048754 | 0.29309  | -0.11215 | 0.01532  | 0.125238 | 0.00673  | 0.049003 |
| -0.08312 | 0.07274 | 0.074539 | 0.10768  | -0.23572 | 2.56E-07 | 0.12188  | 0.00837  | -0.17029 |
| -0.10701 | 0.02072 | 0.089372 | 0.0536   | -0.03295 | 0.47744  | 0.137751 | 0.00285  | 0.004842 |
| -0.00879 | 0.84982 | 0.102463 | 0.02682  | -0.02421 | 0.60174  | 0.109749 | 0.01767  | 0.134471 |
| -0.0563  | 0.22459 | 0.011664 | 0.80151  | -0.25498 | 2.30E-08 | 0.032529 | 0.48314  | -0.13709 |
| 0.010253 | 0.82511 | 0.012989 | 0.77951  | -0.13018 | 0.00484  | 0.049111 | 0.28956  | -0.0654  |
| -0.1044  | 0.02406 | 0.044105 | 0.34159  | -0.2276  | 6.67E-07 | 0.055723 | 0.22941  | -0.10905 |
| -0.13416 | 0.00368 | 0.028467 | 0.53945  | -0.22614 | 7.89E-07 | 0.082029 | 0.07658  | -0.17934 |
| -0.02884 | 0.5341  | 0.10836  | 0.01917  | -0.10268 | 0.02649  | 0.115781 | 0.01229  | 0.121332 |
| -0.11428 | 0.01347 | 0.137463 | 0.00291  | -0.14122 | 0.00222  | 0.194976 | 2.21E-05 | -0.00549 |
| -0.03715 | 0.42318 | -0.03168 | 0.49468  | 0.13238  | 0.00416  | -0.10201 | 0.0275   | 0.146029 |
| -0.06686 | 0.14912 | 0.130973 | 0.00458  | -0.06403 | 0.16714  | 0.105227 | 0.02295  | -0.06542 |
| -0.05703 | 0.21867 | 0.052053 | 0.26159  | -0.12083 | 0.00896  | 0.155273 | 0.00076  | -0.04485 |
| -0.0275  | 0.55325 | 0.028608 | 0.53744  | -0.20185 | 1.10E-05 | -0.01919 | 0.67918  | -0.14074 |
| -0.06879 | 0.1377  | 0.085856 | 0.06376  | -0.23897 | 1.73E-07 | 0.090862 | 0.04972  | -0.15452 |
| -0.06726 | 0.1467  | 0.126089 | 0.00636  | -0.14645 | 0.00151  | 0.257544 | 1.64E-08 | 0.009529 |
| -0.08817 | 0.05692 | 0.068826 | 0.13751  | -0.1361  | 0.00321  | 0.104474 | 0.02396  | -0.09756 |
| -0.07945 | 0.08635 | 0.084975 | 0.06655  | -0.26042 | 1.12E-08 | 0.191736 | 3.03E-05 | -0.03649 |
| -0.02732 | 0.55586 | 0.010851 | 0.81509  | -0.04518 | 0.32994  | 0.08821  | 0.0568   | 0.007812 |
| -0.06051 | 0.19179 | -0.11955 | 0.00972  | -0.20291 | 9.91E-06 | -0.08746 | 0.05895  | -0.11314 |
| -0.08668 | 0.06124 | 0.007714 | 0.86795  | -0.16187 | 0.00044  | 0.087253 | 0.05955  | -0.02348 |
| -0.11842 | 0.01043 | 0.021495 | 0.64314  | -0.21742 | 2.11E-06 | 0.04182  | 0.36721  | 0.031123 |
| -0.00986 | 0.83175 | 0.062158 | 0.17994  | -0.04861 | 0.29448  | 0.166406 | 0.0003   | 0.127035 |
| -0.03948 | 0.39465 | 0.180095 | 9.10E-05 | -0.09625 | 0.0376   | 0.218914 | 1.79E-06 | -0.08956 |
| -0.13695 | 0.00302 | 0.000407 | 0.993    | -0.25373 | 2.70E-08 | 0.017585 | 0.70466  | -0.14457 |

|          |         |          |          |          |          |          |          |          |
|----------|---------|----------|----------|----------|----------|----------|----------|----------|
| -0.03876 | 0.40337 | 0.047986 | 0.30076  | -0.17297 | 0.00017  | 0.066717 | 0.15001  | -0.0261  |
| -0.09466 | 0.04087 | -0.02362 | 0.61071  | -0.18621 | 5.15E-05 | 0.118833 | 0.01016  | 0.143898 |
| -0.0889  | 0.05488 | 0.117066 | 0.01135  | -0.01996 | 0.66697  | 0.003418 | 0.94127  | -0.09459 |
| -0.01461 | 0.75281 | 0.061104 | 0.18745  | -0.10471 | 0.02364  | 0.12561  | 0.00657  | -0.03984 |
| -0.04176 | 0.36791 | 0.120686 | 0.00904  | -0.14432 | 0.00177  | 0.223327 | 1.09E-06 | -0.06993 |
| -0.04621 | 0.31904 | 0.151141 | 0.00105  | -0.05304 | 0.25269  | 0.137193 | 0.00297  | -0.19634 |
| -0.04912 | 0.28952 | 0.153893 | 0.00085  | -0.20201 | 1.09E-05 | 0.165072 | 0.00034  | -0.2197  |
| -0.09292 | 0.04474 | 0.015581 | 0.737    | -0.18681 | 4.87E-05 | 0.047785 | 0.30279  | -0.06372 |
| -0.061   | 0.1882  | 0.083671 | 0.07084  | -0.15867 | 0.00058  | 0.066343 | 0.15231  | -0.01407 |
| 0.069842 | 0.13178 | 0.026092 | 0.57381  | 0.175781 | 0.00013  | -0.01455 | 0.75376  | 0.124293 |
| -0.07102 | 0.12538 | 0.139349 | 0.00254  | -0.09866 | 0.03305  | 0.145136 | 0.00166  | -0.18215 |
| 0.01936  | 0.67647 | 0.082484 | 0.07495  | -0.08601 | 0.06329  | 0.08713  | 0.05991  | -0.08662 |
| -0.00023 | 0.99612 | -0.03741 | 0.41995  | -0.17996 | 9.21E-05 | 0.032862 | 0.47867  | 0.141233 |
| -0.01746 | 0.70665 | 0.117547 | 0.01101  | -0.06267 | 0.17637  | 0.203166 | 9.65E-06 | -0.03072 |
| -0.11107 | 0.01634 | -0.0034  | 0.94158  | -0.24809 | 5.57E-08 | 0.080956 | 0.08052  | -0.07088 |
| -0.15584 | 0.00073 | 0.018996 | 0.68221  | -0.25833 | 1.48E-08 | 0.025746 | 0.57891  | -0.00644 |
| -0.08691 | 0.06057 | 0.002813 | 0.95166  | -0.15744 | 0.00064  | 0.061966 | 0.18129  | 0.130375 |
| -0.04634 | 0.31765 | 0.149877 | 0.00116  | -0.1411  | 0.00224  | 0.163299 | 0.0004   | -0.10698 |
| -0.03988 | 0.38986 | 0.020229 | 0.66281  | -0.12547 | 0.00663  | 0.038046 | 0.41205  | 0.012233 |
| -0.10591 | 0.02208 | 0.146298 | 0.00152  | -0.23698 | 2.20E-07 | 0.175206 | 0.00014  | -0.18894 |
| -0.09713 | 0.03587 | -0.15987 | 0.00052  | -0.28776 | 2.35E-10 | -0.085   | 0.06648  | -0.18009 |
| -0.08842 | 0.05621 | 0.115129 | 0.01279  | -0.17381 | 0.00016  | 0.214045 | 3.05E-06 | 0.059116 |
| -0.09319 | 0.04413 | 0.018225 | 0.69445  | -0.11943 | 0.00979  | 0.073499 | 0.11269  | 0.054656 |
| -0.11169 | 0.01574 | 0.061026 | 0.18801  | -0.21792 | 2.00E-06 | 0.105713 | 0.02233  | -0.05169 |
| -0.08716 | 0.05983 | 0.003423 | 0.94118  | -0.14225 | 0.00206  | 0.11938  | 0.00982  | 0.041111 |
| -0.00454 | 0.92202 | 0.178725 | 0.0001   | -0.05999 | 0.19563  | 0.217551 | 2.08E-06 | -0.09221 |
| -0.07961 | 0.0857  | 0.107135 | 0.02058  | -0.23436 | 3.01E-07 | 0.147137 | 0.00143  | -0.09672 |
| -0.12905 | 0.00522 | -0.04499 | 0.33201  | -0.14286 | 0.00197  | -0.02404 | 0.60434  | -0.02398 |
| -0.01916 | 0.67955 | 0.082576 | 0.07463  | -0.0621  | 0.18037  | 0.184743 | 5.91E-05 | 0.146323 |
| -0.04383 | 0.34464 | 0.208356 | 5.61E-06 | -0.10945 | 0.01798  | 0.207158 | 6.37E-06 | -0.05709 |
| -0.09424 | 0.04179 | 0.130736 | 0.00466  | -0.24278 | 1.08E-07 | 0.20462  | 8.30E-06 | -0.20627 |
| -0.07711 | 0.09605 | 0.116415 | 0.01182  | -0.12692 | 0.00602  | 0.261314 | 9.94E-09 | 0.000304 |
| -0.07234 | 0.1185  | 0.075898 | 0.10139  | -0.14284 | 0.00197  | 0.146757 | 0.00147  | 0.030177 |
| -0.11337 | 0.01424 | 0.039475 | 0.39471  | -0.11333 | 0.01427  | 0.053536 | 0.24823  | -0.07363 |
| -0.14073 | 0.0023  | 0.080065 | 0.08393  | -0.22081 | 1.45E-06 | 0.01757  | 0.70491  | -0.139   |
| -0.00721 | 0.87647 | 0.031075 | 0.50293  | -0.17938 | 9.71E-05 | 0.06019  | 0.19415  | 0.061604 |
| -0.08819 | 0.05685 | 0.057552 | 0.21445  | -0.16505 | 0.00034  | 0.110058 | 0.01735  | -0.06115 |
| -0.13217 | 0.00422 | -0.02319 | 0.61719  | -0.29271 | 1.12E-10 | -0.01805 | 0.69717  | -0.12591 |
| -0.0458  | 0.32339 | 0.066969 | 0.14847  | -0.15339 | 0.00088  | 0.089056 | 0.05446  | 0.117328 |
| -0.11563 | 0.0124  | 0.010285 | 0.82457  | -0.2414  | 1.28E-07 | 0.053617 | 0.24751  | -0.17809 |
| -0.04728 | 0.30791 | 0.030352 | 0.51291  | -0.15547 | 0.00075  | 0.005856 | 0.89957  | -0.06662 |
| -0.09159 | 0.04791 | 0.022769 | 0.62358  | -0.09505 | 0.04006  | 0.085566 | 0.06467  | 0.12332  |
| -0.02927 | 0.52812 | 0.162828 | 0.00041  | -0.14347 | 0.00188  | 0.181288 | 8.15E-05 | -0.11185 |
| -0.02494 | 0.59086 | 0.137352 | 0.00294  | 0.008432 | 0.85579  | 0.15807  | 0.00061  | -0.03489 |
| -0.04932 | 0.28754 | 0.060203 | 0.19405  | -0.16087 | 0.00048  | 0.100734 | 0.02951  | 0.143691 |

|          |          |          |          |          |          |          |          |          |
|----------|----------|----------|----------|----------|----------|----------|----------|----------|
| -0.11775 | 0.01088  | 0.077832 | 0.09296  | -0.15019 | 0.00113  | 0.173898 | 0.00016  | 0.036124 |
| -0.17149 | 0.0002   | 0.044138 | 0.34123  | -0.20494 | 8.03E-06 | 0.104478 | 0.02395  | -0.10432 |
| 0.000109 | 0.99813  | 0.066985 | 0.14837  | -0.11929 | 0.00987  | 0.135843 | 0.00327  | -0.04725 |
| -0.03586 | 0.43946  | 0.069583 | 0.13323  | -0.23816 | 1.91E-07 | 0.110604 | 0.0168   | -0.01833 |
| 0.027276 | 0.55655  | 0.144804 | 0.0017   | -0.00777 | 0.86695  | 0.139611 | 0.0025   | -0.13947 |
| -0.09638 | 0.03734  | 0.083979 | 0.06981  | -0.10917 | 0.01828  | 0.119833 | 0.00954  | -0.03428 |
| -0.00423 | 0.92743  | 0.11639  | 0.01183  | 0.079599 | 0.08575  | 0.203448 | 9.37E-06 | 0.116144 |
| -0.08726 | 0.05953  | 0.015721 | 0.73473  | -0.15354 | 0.00087  | 0.070498 | 0.12819  | 0.097766 |
| -0.04839 | 0.2967   | 0.085147 | 0.066    | -0.15425 | 0.00082  | 0.099759 | 0.03113  | -0.01052 |
| -0.08163 | 0.07803  | -0.01003 | 0.8289   | -0.22921 | 5.53E-07 | 0.06678  | 0.14962  | -0.10644 |
| -0.03301 | 0.47663  | 0.061994 | 0.18109  | 0.006636 | 0.88628  | 0.106978 | 0.02076  | 0.019639 |
| -0.05617 | 0.22567  | 0.098144 | 0.03398  | -0.21455 | 2.89E-06 | 0.045151 | 0.33025  | -0.21605 |
| -0.05198 | 0.26231  | 0.049938 | 0.2815   | -0.16921 | 0.00024  | 0.097684 | 0.03483  | 0.045987 |
| -0.11214 | 0.01533  | 0.011222 | 0.80888  | -0.28646 | 2.86E-10 | 0.088827 | 0.05508  | -0.09853 |
| -0.07772 | 0.09344  | 0.071349 | 0.12364  | -0.23057 | 4.72E-07 | 0.110869 | 0.01654  | -0.15896 |
| -0.06758 | 0.14477  | 0.080019 | 0.0841   | -0.14877 | 0.00126  | 0.132333 | 0.00417  | -0.17934 |
| -0.07129 | 0.12395  | -0.02292 | 0.62124  | -0.17574 | 0.00013  | 0.043907 | 0.34377  | 0.029616 |
| -0.04829 | 0.29767  | 0.024339 | 0.59983  | -0.23543 | 2.65E-07 | 0.007411 | 0.8731   | -0.11286 |
| -0.07015 | 0.13007  | 0.106296 | 0.02159  | -0.03861 | 0.4052   | 0.153092 | 0.0009   | -0.02667 |
| -0.10476 | 0.02357  | 0.005126 | 0.91203  | -0.18203 | 7.61E-05 | 0.067701 | 0.14407  | 0.009091 |
| -0.21169 | 3.94E-06 | 0.035132 | 0.44881  | -0.28603 | 3.04E-10 | 0.073182 | 0.11426  | -0.18272 |
| -0.04248 | 0.35974  | 0.004124 | 0.92918  | -0.11198 | 0.01547  | 0.164403 | 0.00036  | 0.152653 |
| -0.08791 | 0.05764  | -0.0088  | 0.8496   | -0.13463 | 0.00356  | 0.1051   | 0.02312  | 0.133713 |
| -0.06405 | 0.167    | 0.044219 | 0.34034  | -0.15931 | 0.00055  | 0.031123 | 0.50226  | 0.047235 |
| -0.11868 | 0.01026  | 0.041441 | 0.37158  | -0.168   | 0.00027  | 0.122703 | 0.00794  | -0.0926  |
| 0.078414 | 0.09053  | 0.046717 | 0.31374  | 0.324838 | 6.15E-13 | -0.09551 | 0.0391   | 0.084871 |
| 0.041241 | 0.37389  | 0.177155 | 0.00012  | 0.057898 | 0.21171  | 0.122649 | 0.00797  | 0.032731 |
| -0.08602 | 0.06326  | 0.096654 | 0.0368   | -0.10556 | 0.02252  | 0.132624 | 0.00409  | -0.14833 |
| -0.10085 | 0.02933  | 0.069168 | 0.13556  | -0.19913 | 1.46E-05 | 0.033508 | 0.47007  | -0.04827 |
| -0.04117 | 0.37471  | 0.198253 | 1.59E-05 | -0.09713 | 0.03587  | 0.178117 | 0.00011  | 0.147207 |
| -0.09541 | 0.0393   | -0.18282 | 7.08E-05 | -0.30897 | 8.68E-12 | -0.14839 | 0.0013   | -0.14125 |
| -0.06848 | 0.1395   | 0.092569 | 0.04557  | -0.16787 | 0.00027  | 0.175011 | 0.00014  | -0.12262 |
| -0.0081  | 0.86134  | 0.120035 | 0.00942  | -0.15811 | 0.00061  | 0.162297 | 0.00043  | -0.16587 |
| 0.436204 | 4.10E-23 | 0.115809 | 0.01227  | 0.296347 | 6.39E-11 | 0.107693 | 0.01992  | 0.091299 |
| 0.140147 | 0.0024   | -0.0217  | 0.63993  | 0.227202 | 6.99E-07 | -0.04833 | 0.29728  | 0.045843 |
| 0.04983  | 0.28255  | -0.02566 | 0.58021  | 0.065647 | 0.15667  | -0.06474 | 0.16246  | -0.04126 |
| 0.063155 | 0.17304  | 0.017282 | 0.70952  | 0.228369 | 6.10E-07 | 0.047077 | 0.31002  | 0.277554 |
| 0.121372 | 0.00865  | -0.02276 | 0.62369  | 0.146072 | 0.00155  | -0.06373 | 0.16912  | -0.05759 |
| 0.167746 | 0.00027  | 0.012022 | 0.79554  | 0.240565 | 1.42E-07 | -0.02569 | 0.5798   | 0.013922 |
| 0.153334 | 0.00089  | -0.00581 | 0.90037  | 0.252643 | 3.11E-08 | -0.0351  | 0.44928  | 0.047891 |
| 0.094774 | 0.04064  | -0.02836 | 0.54098  | 0.050693 | 0.27428  | -0.02112 | 0.64892  | -0.06897 |
| 0.09999  | 0.03074  | 0.010833 | 0.81539  | 0.112811 | 0.01472  | -0.0214  | 0.64467  | -0.01578 |
| 0.170063 | 0.00022  | 0.037418 | 0.41983  | 0.040694 | 0.38026  | -0.00993 | 0.83057  | 0.010663 |
| 0.186331 | 5.09E-05 | 0.007082 | 0.87868  | 0.25688  | 1.79E-08 | -0.02119 | 0.64786  | 0.094939 |
| 0.137792 | 0.00285  | -0.00012 | 0.99787  | 0.259211 | 1.32E-08 | -0.04167 | 0.36896  | 0.047186 |

|          |          |          |         |          |          |          |         |          |
|----------|----------|----------|---------|----------|----------|----------|---------|----------|
| 0.113589 | 0.01405  | 0.005243 | 0.91004 | 0.087787 | 0.058    | -0.10683 | 0.02094 | 0.002289 |
| 0.062636 | 0.1766   | -0.00013 | 0.99768 | 0.191899 | 2.98E-05 | -0.01432 | 0.75757 | -0.02125 |
| 0.024784 | 0.59318  | -0.00813 | 0.86086 | 0.115703 | 0.01235  | -0.01734 | 0.70856 | 0.023223 |
| 0.153309 | 0.00089  | 0.029789 | 0.52077 | 0.256113 | 1.98E-08 | -0.0222  | 0.63221 | 0.051606 |
| 0.109704 | 0.01771  | -0.02362 | 0.61066 | 0.183161 | 6.85E-05 | -0.05692 | 0.21955 | 0.080189 |
| 0.19177  | 3.02E-05 | -0.03814 | 0.4109  | 0.15236  | 0.00096  | -0.05111 | 0.27033 | -0.01336 |
| 0.095549 | 0.03902  | -0.00921 | 0.84271 | 0.20547  | 7.60E-06 | -0.04959 | 0.28484 | 0.075079 |
| 0.167677 | 0.00027  | -0.01603 | 0.72968 | 0.245903 | 7.34E-08 | -0.04236 | 0.36109 | 0.026832 |
| 0.148798 | 0.00126  | -0.00319 | 0.94522 | 0.274857 | 1.54E-09 | -0.04166 | 0.36909 | 0.048071 |
| 0.09717  | 0.0358   | -0.00558 | 0.90426 | 0.173793 | 0.00016  | -0.04478 | 0.3343  | 0.030374 |
| 0.088016 | 0.05735  | 0.07481  | 0.1064  | 0.168163 | 0.00026  | -0.01663 | 0.71999 | 0.031152 |
| 0.089249 | 0.05393  | 0.015858 | 0.7325  | 0.117034 | 0.01137  | -0.03806 | 0.4119  | -0.04915 |
| 0.057828 | 0.21226  | -0.02167 | 0.6404  | 0.171347 | 0.0002   | -0.09658 | 0.03695 | 0.003435 |
| 0.140735 | 0.0023   | -0.00334 | 0.94258 | 0.232827 | 3.62E-07 | -0.04682 | 0.31266 | 0.026322 |
| 0.132814 | 0.00404  | -0.00535 | 0.90816 | 0.247886 | 5.72E-08 | -0.04618 | 0.31936 | 0.082008 |
| 0.135801 | 0.00328  | 0.014479 | 0.75499 | 0.247335 | 6.13E-08 | -0.03605 | 0.43709 | 0.03626  |
| 0.028878 | 0.5336   | -0.03576 | 0.44069 | 0.065371 | 0.15842  | -0.0462  | 0.31913 | -0.00827 |
| 0.123421 | 0.00758  | 0.009291 | 0.84128 | 0.230366 | 4.83E-07 | -0.03895 | 0.40098 | 0.035261 |
| 0.144273 | 0.00177  | 0.002384 | 0.95903 | 0.273297 | 1.91E-09 | -0.04286 | 0.35545 | 0.04831  |
| 0.178928 | 0.0001   | -0.01247 | 0.78813 | 0.193807 | 2.48E-05 | -0.02184 | 0.63786 | 0.075976 |
| 0.099977 | 0.03076  | -0.02969 | 0.52211 | 0.206412 | 6.89E-06 | -0.05838 | 0.20792 | 0.044401 |
| 0.052713 | 0.25559  | -0.03684 | 0.42707 | 0.17071  | 0.00021  | -0.11193 | 0.01552 | 0.029969 |
| 0.125325 | 0.00669  | 0.018221 | 0.69451 | 0.111176 | 0.01568  | -0.03949 | 0.39455 | -0.00298 |
| 0.100798 | 0.02941  | -0.03495 | 0.45114 | 0.167305 | 0.00028  | -0.08395 | 0.06991 | 0.024509 |
| 0.067282 | 0.14658  | -0.10719 | 0.02051 | 0.194664 | 2.27E-05 | -0.11481 | 0.01304 | 0.139566 |
| 0.151848 | 0.001    | -0.00803 | 0.86258 | 0.27966  | 7.73E-10 | -0.04911 | 0.28959 | 0.053439 |
| 0.14926  | 0.00122  | -0.03335 | 0.47218 | 0.193869 | 2.46E-05 | -0.05901 | 0.20303 | 0.043773 |
| 0.19224  | 2.89E-05 | 0.052681 | 0.25588 | 0.225664 | 8.34E-07 | 0.048962 | 0.29103 | 0.136744 |
| 0.070724 | 0.12696  | -0.08012 | 0.0837  | 0.175548 | 0.00014  | -0.12539 | 0.00666 | 0.062126 |
| 0.1749   | 0.00015  | 0.058316 | 0.20842 | 0.217213 | 2.16E-06 | 0.004864 | 0.91651 | 0.007639 |
| 0.110875 | 0.01653  | 0.042024 | 0.36487 | 0.221994 | 1.27E-06 | -0.02515 | 0.5878  | 0.075577 |
| 0.116376 | 0.01185  | -0.01622 | 0.72662 | 0.23475  | 2.88E-07 | -0.05402 | 0.24399 | 0.043461 |
| 0.205312 | 7.72E-06 | 0.052623 | 0.2564  | 0.201014 | 1.20E-05 | -0.00304 | 0.94768 | -0.0034  |
| 0.118934 | 0.0101   | -0.07639 | 0.09918 | 0.150646 | 0.00109  | -0.13065 | 0.00469 | 0.10007  |
| 0.10659  | 0.02123  | -0.04192 | 0.36602 | 0.223793 | 1.03E-06 | -0.12602 | 0.0064  | 0.092024 |
| -0.02954 | 0.52421  | 0.045254 | 0.32915 | 0.114995 | 0.0129   | 0.082661 | 0.07433 | 0.257055 |
| 0.188961 | 3.96E-05 | 0.084641 | 0.06763 | 0.23364  | 3.29E-07 | 0.059025 | 0.20294 | 0.063179 |
| 0.106961 | 0.02078  | 0.002935 | 0.94956 | 0.012372 | 0.78974  | -0.04931 | 0.28758 | -0.08635 |
| 0.070324 | 0.12913  | -0.03173 | 0.49391 | 0.018474 | 0.69049  | -0.01956 | 0.67338 | 0.106164 |
| 0.181096 | 8.30E-05 | -0.00556 | 0.90461 | 0.21077  | 4.34E-06 | -0.03657 | 0.43046 | 0.034939 |
| 0.071617 | 0.12223  | -0.05638 | 0.22398 | 0.155348 | 0.00076  | -0.00167 | 0.97129 | 0.095316 |
| 0.155019 | 0.00078  | 0.012689 | 0.78447 | 0.216107 | 2.44E-06 | -0.03921 | 0.39788 | 0.012197 |
| 0.022913 | 0.62138  | -0.15217 | 0.00097 | 0.025994 | 0.57525  | -0.14293 | 0.00196 | -0.02018 |
| 0.291004 | 1.45E-10 | 0.055271 | 0.23321 | 0.144779 | 0.00171  | -0.01453 | 0.75412 | -0.02615 |
| 0.322567 | 9.07E-13 | 0.023629 | 0.61053 | 0.247273 | 6.18E-08 | -0.0344  | 0.45833 | -0.01164 |



|          |          |          |          |          |          |          |         |          |
|----------|----------|----------|----------|----------|----------|----------|---------|----------|
| 0.183114 | 6.89E-05 | 0.017804 | 0.70116  | 0.156871 | 0.00067  | -0.05154 | 0.26638 | -0.10286 |
| 0.201271 | 1.17E-05 | 0.227815 | 6.51E-07 | 0.305498 | 1.52E-11 | 0.114714 | 0.01312 | 0.091389 |
| 0.049891 | 0.28196  | -0.09334 | 0.04379  | 0.015973 | 0.73065  | -0.16644 | 0.0003  | 0.011115 |
| 0.10935  | 0.01809  | -0.02307 | 0.61902  | 0.180978 | 8.39E-05 | -0.09079 | 0.0499  | 0.110305 |
| 0.066533 | 0.15113  | -0.11165 | 0.01578  | 0.06649  | 0.1514   | -0.11001 | 0.0174  | 0.09115  |
| 0.128671 | 0.00536  | 0.013209 | 0.77588  | 0.222681 | 1.17E-06 | -0.0349  | 0.45175 | 0.119988 |
| 0.1969   | 1.82E-05 | 0.00492  | 0.91555  | 0.211561 | 3.99E-06 | -0.03066 | 0.50869 | 0.019584 |
| 0.075933 | 0.10123  | -0.01822 | 0.69448  | 0.201367 | 1.16E-05 | -0.0722  | 0.11921 | 0.034404 |
| 0.146103 | 0.00155  | -0.06125 | 0.1864   | 0.105177 | 0.02302  | -0.13983 | 0.00246 | -0.00414 |
| 0.154016 | 0.00084  | -0.00355 | 0.93909  | 0.225866 | 8.15E-07 | -0.0346  | 0.45565 | 0.051542 |
| 0.121362 | 0.00866  | -0.02063 | 0.65656  | 0.204878 | 8.08E-06 | -0.10632 | 0.02157 | 0.073778 |
| 0.114717 | 0.01312  | -0.02885 | 0.53398  | 0.184922 | 5.81E-05 | -0.04213 | 0.36362 | -0.01026 |
| 0.191476 | 3.11E-05 | 0.065881 | 0.15519  | 0.285337 | 3.37E-10 | 0.011682 | 0.80121 | 0.043451 |
| 0.034448 | 0.45769  | 0.045249 | 0.3292   | 0.169426 | 0.00023  | 0.008881 | 0.84821 | -0.01075 |
| 0.119874 | 0.00952  | -0.03398 | 0.46383  | 0.117399 | 0.01112  | -0.08763 | 0.05846 | -0.01903 |
| 0.141154 | 0.00223  | 0.009162 | 0.84346  | 0.251271 | 3.71E-08 | -0.0318  | 0.49301 | 0.038529 |
| 0.151091 | 0.00106  | -0.02153 | 0.64267  | 0.177059 | 0.00012  | -0.07664 | 0.0981  | 0.00569  |
| 0.14303  | 0.00194  | -0.03425 | 0.46024  | 0.211613 | 3.97E-06 | -0.07107 | 0.12509 | 0.03251  |
| 0.112658 | 0.01486  | 0.012916 | 0.78072  | 0.158128 | 0.0006   | -0.05    | 0.28088 | -0.02355 |
| 0.208691 | 5.42E-06 | -0.00516 | 0.91139  | 0.27764  | 1.03E-09 | -0.0466  | 0.31496 | 0.078562 |
| 0.179606 | 9.51E-05 | -0.06869 | 0.1383   | 0.102151 | 0.02729  | -0.05625 | 0.22503 | -0.00184 |
| 0.179494 | 9.61E-05 | 0.0057   | 0.90222  | 0.264979 | 6.06E-09 | -0.09347 | 0.0435  | 0.03045  |
| 0.126757 | 0.00609  | 0.143599 | 0.00186  | 0.233614 | 3.30E-07 | 0.022323 | 0.63039 | 0.060139 |
| 0.062944 | 0.17449  | 0.162241 | 0.00043  | 0.160456 | 0.0005   | 0.0728   | 0.11616 | -0.15171 |
| 0.116243 | 0.01194  | 0.04573  | 0.32408  | 0.257099 | 1.74E-08 | -0.00321 | 0.94489 | 0.067115 |
| 0.102302 | 0.02706  | -0.03747 | 0.41916  | 0.060153 | 0.19442  | -0.04503 | 0.33153 | 0.014806 |
| 0.123655 | 0.00747  | -0.01232 | 0.7906   | 0.268163 | 3.92E-09 | -0.10924 | 0.0182  | 0.066065 |
| 0.117107 | 0.01132  | -0.0022  | 0.9621   | 0.294628 | 8.32E-11 | -0.0694  | 0.13426 | 0.094185 |
| 0.120615 | 0.00908  | 0.003792 | 0.93487  | 0.283299 | 4.55E-10 | -0.06756 | 0.14493 | 0.060016 |
| 0.190157 | 3.53E-05 | 0.202029 | 1.08E-05 | 0.280203 | 7.14E-10 | 0.108518 | 0.01899 | 0.008434 |
| 0.144695 | 0.00172  | -0.02489 | 0.59164  | 0.189567 | 3.74E-05 | -0.11213 | 0.01534 | 0.075989 |
| 0.166293 | 0.00031  | 0.030197 | 0.51507  | 0.270167 | 2.97E-09 | 0.029746 | 0.52137 | 0.205735 |
| 0.114346 | 0.01342  | 0.121622 | 0.00851  | 0.236834 | 2.24E-07 | 0.080981 | 0.08043 | 0.153704 |
| 0.096876 | 0.03637  | -0.01744 | 0.70699  | 0.153963 | 0.00084  | -0.10588 | 0.02211 | 0.063716 |
| 0.051328 | 0.26831  | -0.15026 | 0.00113  | 0.164653 | 0.00035  | -0.13601 | 0.00323 | 0.219653 |
| 0.181552 | 7.96E-05 | 0.04671  | 0.31381  | 0.18784  | 4.41E-05 | 0.023244 | 0.61635 | 0.041417 |
| 0.294364 | 8.67E-11 | 0.041816 | 0.36726  | 0.256608 | 1.86E-08 | -0.01289 | 0.78116 | 0.097829 |
| 0.070597 | 0.12765  | -0.02439 | 0.59911  | 0.03635  | 0.43323  | -0.04539 | 0.32775 | 0.045743 |
| -0.00287 | 0.95074  | -0.03183 | 0.49262  | 0.02995  | 0.51852  | -0.03651 | 0.43116 | 0.005356 |
| -0.10007 | 0.03061  | 0.138176 | 0.00277  | -0.10325 | 0.02567  | 0.133193 | 0.00393 | -0.00515 |
| 0.161133 | 0.00047  | -0.05413 | 0.24298  | 0.242236 | 1.16E-07 | -0.11751 | 0.01104 | 0.064857 |
| 0.103573 | 0.02521  | -0.03818 | 0.41045  | 0.160209 | 0.00051  | -0.13466 | 0.00355 | 0.035344 |
| 0.005315 | 0.90881  | 0.021744 | 0.63929  | 0.065407 | 0.15819  | -0.04997 | 0.28123 | -0.02847 |
| 0.157623 | 0.00063  | 0.039355 | 0.39615  | 0.158668 | 0.00058  | -0.06031 | 0.19328 | -0.08271 |
| 0.174959 | 0.00014  | 0.061461 | 0.18488  | 0.179209 | 9.86E-05 | 0.023517 | 0.61221 | 0.045378 |

|          |          |          |          |          |          |          |          |          |
|----------|----------|----------|----------|----------|----------|----------|----------|----------|
| 0.184416 | 6.10E-05 | 0.057337 | 0.21618  | 0.209444 | 5.00E-06 | 0.026111 | 0.57354  | 0.094421 |
| 0.086826 | 0.06081  | -0.0026  | 0.9553   | -0.08195 | 0.07687  | -0.05168 | 0.26501  | -0.05176 |
| 0.136437 | 0.00313  | -0.01628 | 0.72563  | 0.129197 | 0.00517  | -0.04149 | 0.37099  | -0.02803 |
| 0.075882 | 0.10146  | -0.0725  | 0.11767  | 0.153651 | 0.00086  | -0.10576 | 0.02227  | 0.102894 |
| 0.108437 | 0.01908  | -0.03035 | 0.51294  | 0.161808 | 0.00045  | -0.13043 | 0.00476  | -0.06993 |
| 0.12511  | 0.00679  | -0.08599 | 0.06336  | 0.102892 | 0.02618  | -0.15816 | 0.0006   | 0.073398 |
| 0.052661 | 0.25606  | -0.1171  | 0.01133  | 0.026689 | 0.56509  | -0.16775 | 0.00027  | 0.055064 |
| -0.09476 | 0.04067  | 0.166284 | 0.00031  | 0.01377  | 0.76663  | 0.206621 | 6.74E-06 | 0.104508 |
| 0.123565 | 0.00751  | -0.01555 | 0.73755  | 0.209292 | 5.08E-06 | -0.04488 | 0.3332   | 0.055288 |
| 0.123735 | 0.00743  | 0.031101 | 0.50257  | 0.178424 | 0.00011  | 0.002064 | 0.96452  | 0.032273 |
| 0.182538 | 7.26E-05 | 0.01151  | 0.80407  | 0.264172 | 6.76E-09 | -0.02572 | 0.57925  | 0.08837  |
| 0.174519 | 0.00015  | 0.012576 | 0.78635  | 0.271678 | 2.40E-09 | -0.0331  | 0.47551  | 0.039791 |
| 0.128745 | 0.00533  | -0.0386  | 0.4053   | 0.159676 | 0.00053  | -0.10437 | 0.0241   | 0.049768 |
| 0.194816 | 2.24E-05 | 0.01296  | 0.78     | 0.213636 | 3.19E-06 | -0.03602 | 0.43746  | 0.021723 |
| 0.096465 | 0.03717  | -0.04295 | 0.35445  | 0.185833 | 5.34E-05 | -0.08407 | 0.0695   | 0.012429 |
| 0.145763 | 0.00159  | -0.03867 | 0.40447  | 0.103165 | 0.02579  | -0.09625 | 0.0376   | -0.03677 |
| 0.116691 | 0.01162  | -0.00717 | 0.87714  | 0.20678  | 6.63E-06 | -0.04702 | 0.3106   | 0.122274 |
| -0.08902 | 0.05455  | 0.034219 | 0.46069  | -0.1298  | 0.00496  | 0.071388 | 0.12343  | -0.10274 |
| 0.269305 | 3.34E-09 | 0.046512 | 0.31587  | 0.304126 | 1.89E-11 | 0.0127   | 0.78429  | 0.05505  |
| 0.129323 | 0.00513  | -0.00307 | 0.94725  | 0.215139 | 2.71E-06 | -0.05285 | 0.2544   | 0.084167 |
| 0.149471 | 0.0012   | 0.234421 | 2.99E-07 | 0.323545 | 7.68E-13 | 0.133943 | 0.00373  | 0.028649 |
| 0.172217 | 0.00018  | 0.035575 | 0.4431   | 0.220641 | 1.47E-06 | 0.006129 | 0.89491  | 0.087537 |
| 0.099873 | 0.03094  | -0.11611 | 0.01204  | 0.01124  | 0.80858  | -0.12022 | 0.00931  | 0.018975 |
| 0.197356 | 1.74E-05 | 0.005601 | 0.90392  | 0.23011  | 4.98E-07 | -0.03712 | 0.42354  | 0.065892 |
| 0.197922 | 1.64E-05 | -0.02266 | 0.62526  | 0.15977  | 0.00053  | -0.0294  | 0.52619  | 0.075842 |
| 0.045731 | 0.32407  | 0.003834 | 0.93415  | -0.02128 | 0.64645  | -0.02992 | 0.51896  | -0.0067  |
| 0.134759 | 0.00353  | 0.025107 | 0.58838  | 0.128211 | 0.00553  | -0.04184 | 0.36698  | -0.04847 |
| 0.211184 | 4.15E-06 | 0.012587 | 0.78616  | 0.181474 | 8.01E-05 | -0.01954 | 0.67364  | 0.041978 |
| 0.116035 | 0.0121   | -0.02708 | 0.5594   | 0.237717 | 2.01E-07 | -0.07294 | 0.11548  | 0.054004 |
| 0.11092  | 0.01649  | 0.036314 | 0.43368  | 0.135549 | 0.00334  | -0.03158 | 0.49604  | -0.02753 |
| 0.175872 | 0.00013  | 0.044172 | 0.34085  | 0.307129 | 1.17E-11 | 0.010824 | 0.81554  | 0.086037 |
| 0.081382 | 0.07894  | -0.06145 | 0.18494  | 0.155007 | 0.00078  | -0.07928 | 0.08701  | 0.120801 |
| 0.142828 | 0.00197  | -0.05902 | 0.20299  | 0.045018 | 0.33168  | -0.07145 | 0.1231   | 0.087263 |
| 0.06653  | 0.15116  | -0.05746 | 0.21523  | 0.1353   | 0.0034   | 0.010831 | 0.81543  | 0.161414 |
| 0.112113 | 0.01535  | -0.06421 | 0.16595  | 0.217412 | 2.11E-06 | -0.1321  | 0.00424  | 0.018318 |
| 0.182148 | 7.53E-05 | 0.01789  | 0.6998   | 0.271747 | 2.38E-09 | -0.04113 | 0.37515  | 0.04022  |
| 0.092613 | 0.04546  | 0.057921 | 0.21153  | 0.203728 | 9.10E-06 | 0.115936 | 0.01217  | 0.106024 |
| 0.111345 | 0.01607  | -0.01591 | 0.7316   | 0.164756 | 0.00035  | -0.03596 | 0.43819  | 0.037431 |
| 0.07854  | 0.09001  | 0.031055 | 0.50319  | 0.091798 | 0.04741  | -0.05868 | 0.20558  | -0.06672 |
| 0.102492 | 0.02678  | -0.06476 | 0.16234  | 0.168691 | 0.00025  | -0.08946 | 0.05335  | 0.162101 |
| 0.138347 | 0.00273  | 0.010609 | 0.81913  | 0.239544 | 1.61E-07 | -0.04929 | 0.28782  | 0.097507 |
| 0.191558 | 3.08E-05 | 0.010691 | 0.81776  | 0.234541 | 2.95E-07 | -0.03962 | 0.39293  | 0.03773  |
| 0.151239 | 0.00104  | 0.029891 | 0.51934  | 0.204943 | 8.03E-06 | -0.03847 | 0.40686  | 0.056716 |
| 0.114115 | 0.01361  | -0.01283 | 0.78208  | 0.239638 | 1.59E-07 | -0.03706 | 0.42433  | 0.02268  |
| 0.152276 | 0.00096  | 0.012902 | 0.78095  | 0.253057 | 2.95E-08 | -0.02819 | 0.54347  | 0.023333 |

|          |          |          |          |          |          |          |          |          |
|----------|----------|----------|----------|----------|----------|----------|----------|----------|
| 0.123474 | 0.00755  | -0.02349 | 0.61263  | 0.235249 | 2.71E-07 | -0.05995 | 0.19596  | 0.047043 |
| 0.098523 | 0.03329  | -0.03095 | 0.50459  | 0.166599 | 0.0003   | -0.05833 | 0.20828  | 0.009441 |
| 0.14396  | 0.00182  | -0.03029 | 0.51373  | 0.115474 | 0.01252  | -0.01418 | 0.75985  | -0.01651 |
| -0.0787  | 0.08937  | 0.242458 | 1.13E-07 | 0.104887 | 0.0234   | 0.193025 | 2.67E-05 | 0.001395 |
| 0.078631 | 0.08964  | -0.05473 | 0.23779  | 0.053956 | 0.24453  | -0.04979 | 0.28297  | 0.068326 |
| 0.170771 | 0.00021  | -0.03376 | 0.46678  | 0.188224 | 4.25E-05 | -0.07234 | 0.11849  | -0.00765 |
| 0.134563 | 0.00358  | -0.02687 | 0.5624   | 0.156315 | 0.0007   | -0.09457 | 0.04107  | 0.112915 |
| 0.136046 | 0.00322  | 0.001059 | 0.98178  | 0.285066 | 3.51E-10 | -0.07605 | 0.10073  | 0.036902 |
| 0.113523 | 0.0141   | -0.01156 | 0.80321  | 0.192807 | 2.73E-05 | -0.04852 | 0.29544  | 0.046118 |
| 0.095713 | 0.03868  | -0.10735 | 0.02032  | 0.097898 | 0.03443  | -0.09989 | 0.03091  | 0.104073 |
| 0.074332 | 0.10866  | -0.06477 | 0.16228  | 0.133181 | 0.00394  | -0.077   | 0.09652  | 0.094154 |
| 0.152291 | 0.00096  | -0.03264 | 0.48163  | 0.243745 | 9.61E-08 | -0.06589 | 0.15511  | 0.043615 |
| 0.212649 | 3.55E-06 | -0.02558 | 0.58136  | 0.231967 | 4.01E-07 | -0.06904 | 0.1363   | 0.108295 |
| 0.05819  | 0.20941  | -0.11216 | 0.01531  | 0.098824 | 0.03275  | -0.12156 | 0.00855  | 0.08052  |
| 0.169261 | 0.00024  | 0.044791 | 0.33412  | 0.194386 | 2.34E-05 | -0.05073 | 0.27389  | 0.076916 |
| 0.090988 | 0.0494   | -0.00174 | 0.97011  | 0.131838 | 0.00432  | -0.11758 | 0.01099  | -0.05423 |
| 0.121629 | 0.00851  | 0.013279 | 0.77473  | 0.193284 | 2.61E-05 | -0.00797 | 0.8636   | 0.036212 |
| 0.136812 | 0.00305  | 0.029381 | 0.5265   | 0.197652 | 1.69E-05 | 0.021099 | 0.64927  | 0.090742 |
| -0.12621 | 0.00631  | -0.0005  | 0.99136  | -0.12251 | 0.00804  | 0.014608 | 0.75287  | 0.008401 |
| 0.372109 | 8.76E-17 | 0.253383 | 2.83E-08 | 0.468653 | 7.13E-27 | 0.208739 | 5.39E-06 | 0.117906 |
| 0.061928 | 0.18156  | -0.13422 | 0.00366  | 0.166628 | 0.0003   | -0.18201 | 7.63E-05 | 0.066462 |
| 0.209989 | 4.72E-06 | 0.168459 | 0.00026  | 0.40352  | 1.03E-19 | 0.064673 | 0.16292  | 0.163578 |
| 0.159243 | 0.00055  | 0.007982 | 0.86341  | 0.267711 | 4.17E-09 | -0.01374 | 0.76712  | 0.065807 |
| -0.07781 | 0.09303  | 0.105746 | 0.02229  | -0.15883 | 0.00057  | 0.104664 | 0.0237   | -0.00485 |
| 0.149447 | 0.0012   | -0.02114 | 0.64858  | 0.135178 | 0.00342  | -0.02899 | 0.53197  | 0.067166 |
| 0.066318 | 0.15246  | -0.01848 | 0.69041  | 0.066827 | 0.14933  | -0.05823 | 0.20906  | 0.037821 |
| 0.097053 | 0.03602  | 0.002616 | 0.95503  | 0.117361 | 0.01114  | -0.01698 | 0.71438  | 0.114036 |
| 0.116386 | 0.01184  | -0.0342  | 0.46094  | 0.145994 | 0.00156  | -0.06467 | 0.16293  | 0.022452 |
| 0.054372 | 0.24091  | -0.01997 | 0.66694  | 0.100396 | 0.03006  | -0.04734 | 0.30733  | 0.035077 |
| 0.064029 | 0.16716  | 0.011019 | 0.81228  | 0.107326 | 0.02035  | -0.07865 | 0.08956  | -0.03966 |
| 0.179976 | 9.20E-05 | -0.00814 | 0.86068  | 0.096276 | 0.03754  | -0.04388 | 0.34408  | -0.04819 |
| 0.135314 | 0.00339  | -0.10747 | 0.02018  | 0.026337 | 0.57022  | -0.13283 | 0.00403  | -0.05055 |
| 0.117843 | 0.01081  | -0.02363 | 0.61055  | 0.135739 | 0.00329  | -0.03989 | 0.38975  | 0.043586 |
| 0.077378 | 0.09489  | 0.009985 | 0.82961  | 0.056652 | 0.22172  | -0.05048 | 0.27635  | -0.04565 |
| 0.191197 | 3.19E-05 | 0.011842 | 0.79854  | 0.277533 | 1.05E-09 | -0.00342 | 0.94121  | 0.096488 |
| 0.162139 | 0.00044  | 0.031015 | 0.50374  | 0.175568 | 0.00014  | 0.0144   | 0.75627  | 0.047729 |
| 0.061331 | 0.18581  | -0.06226 | 0.17923  | -0.01449 | 0.75483  | -0.04366 | 0.34654  | -0.02322 |
| 0.042956 | 0.35433  | -0.06894 | 0.13687  | 0.024419 | 0.59863  | -0.07644 | 0.09896  | -0.03149 |
| 0.100033 | 0.03067  | 0.08916  | 0.05417  | 0.209448 | 5.00E-06 | 0.080854 | 0.08091  | 0.009535 |
| 0.127212 | 0.00591  | -0.00478 | 0.91803  | 0.248869 | 5.05E-08 | -0.08455 | 0.06794  | 0.033504 |
| -0.09808 | 0.0341   | -0.06433 | 0.16515  | -0.20472 | 8.22E-06 | -0.0078  | 0.8665   | -0.00208 |
| 0.120316 | 0.00925  | -0.07483 | 0.10629  | 0.125389 | 0.00666  | -0.10178 | 0.02786  | 0.117904 |
| 0.109343 | 0.01809  | -0.03361 | 0.46876  | 0.178901 | 0.0001   | -0.08706 | 0.06011  | 0.068464 |
| -0.06318 | 0.1729   | 0.056885 | 0.21983  | -0.04709 | 0.30991  | 0.062792 | 0.17553  | -0.00568 |
| 0.075665 | 0.10245  | -0.02296 | 0.62069  | 0.058869 | 0.20413  | -0.021   | 0.65076  | 0.080495 |

|          |          |          |          |          |          |          |          |          |
|----------|----------|----------|----------|----------|----------|----------|----------|----------|
| -0.13673 | 0.00307  | 0.073612 | 0.11214  | -0.08477 | 0.06721  | 0.110789 | 0.01661  | 0.024061 |
| 0.132164 | 0.00422  | 0.019701 | 0.6711   | 0.207401 | 6.21E-06 | -0.02463 | 0.59554  | 0.079822 |
| 0.075372 | 0.10379  | -0.05651 | 0.22291  | 0.043899 | 0.34386  | -0.06643 | 0.15177  | -0.10003 |
| 0.086724 | 0.06112  | -0.02131 | 0.64595  | 0.126034 | 0.00639  | -0.07297 | 0.11529  | 0.007867 |
| 0.092909 | 0.04478  | -0.0273  | 0.55614  | 0.089741 | 0.05262  | -0.03001 | 0.5177   | -0.03963 |
| 0.107997 | 0.01957  | -0.02281 | 0.62291  | 0.128928 | 0.00527  | -0.05215 | 0.26075  | -0.00273 |
| 0.117202 | 0.01125  | -0.06385 | 0.16832  | 0.173575 | 0.00016  | -0.11744 | 0.01109  | 0.118752 |
| 0.138002 | 0.0028   | 0.01668  | 0.71921  | 0.229321 | 5.46E-07 | -0.03393 | 0.46449  | 0.038387 |
| 0.080614 | 0.08181  | -0.08367 | 0.07084  | 0.18795  | 4.37E-05 | -0.12128 | 0.0087   | 0.157051 |
| 0.180714 | 8.59E-05 | 0.051939 | 0.26265  | 0.327352 | 3.99E-13 | 0.008329 | 0.85754  | 0.074677 |
| 0.074767 | 0.1066   | 0.055593 | 0.23049  | 0.107905 | 0.01968  | 0.029592 | 0.52352  | 0.002269 |
| 0.140859 | 0.00228  | -0.00042 | 0.99277  | 0.249444 | 4.69E-08 | -0.04825 | 0.2981   | 0.047654 |
| -0.07418 | 0.10939  | -0.01427 | 0.75838  | -0.16636 | 0.00031  | -0.0261  | 0.57369  | -0.07896 |
| 0.05215  | 0.26071  | 0.182501 | 7.29E-05 | 0.207527 | 6.13E-06 | 0.167119 | 0.00029  | 0.083477 |
| 0.151615 | 0.00101  | -0.00062 | 0.98926  | 0.220658 | 1.47E-06 | -0.01659 | 0.72068  | 0.067528 |
| 0.18559  | 5.46E-05 | 0.003324 | 0.94288  | 0.113502 | 0.01412  | -0.02862 | 0.5372   | -0.02028 |
| 0.127756 | 0.0057   | 0.091825 | 0.04734  | 0.244182 | 9.10E-08 | 0.039416 | 0.39542  | 0.071825 |
| 0.204283 | 8.60E-06 | 0.016269 | 0.72584  | 0.170741 | 0.00021  | -0.02212 | 0.63353  | 0.12795  |
| 0.106375 | 0.0215   | 0.106649 | 0.02116  | 0.336871 | 7.43E-14 | 0.036274 | 0.43418  | 0.155259 |
| 0.1711   | 0.0002   | 0.028091 | 0.54482  | 0.186726 | 4.90E-05 | 0.047097 | 0.30981  | 0.190291 |
| 0.110332 | 0.01707  | 0.019052 | 0.68133  | 0.120398 | 0.00921  | -0.06631 | 0.15249  | 0.120983 |
| 0.201489 | 1.15E-05 | -0.00457 | 0.92151  | 0.151213 | 0.00105  | -0.03706 | 0.42434  | -0.01638 |
| 0.04746  | 0.30609  | 0.033341 | 0.47228  | 0.139422 | 0.00253  | 0.039911 | 0.3895   | 0.161541 |
| 0.102084 | 0.02739  | -0.0089  | 0.84792  | 0.220704 | 1.46E-06 | -0.03695 | 0.42566  | 0.052944 |
| 0.157323 | 0.00065  | 0.035691 | 0.44162  | 0.209067 | 5.21E-06 | 0.004173 | 0.92834  | 0.032701 |
| 0.02026  | 0.66234  | 0.087076 | 0.06007  | 0.108285 | 0.01925  | 0.001742 | 0.97006  | -0.01414 |
| 0.147436 | 0.0014   | 0.021204 | 0.64764  | 0.171795 | 0.00019  | 0.015775 | 0.73385  | 0.007652 |
| 0.025434 | 0.58353  | -0.05932 | 0.2007   | 0.020213 | 0.66307  | -0.06665 | 0.15043  | -0.00956 |
| 0.099941 | 0.03082  | 0.026053 | 0.5744   | 0.276154 | 1.28E-09 | -0.08724 | 0.05958  | -0.0019  |
| 0.11388  | 0.0138   | 0.092576 | 0.04555  | 0.287052 | 2.61E-10 | 0.072926 | 0.11553  | 0.054583 |
| 0.153491 | 0.00088  | 0.036122 | 0.43612  | 0.157476 | 0.00064  | 0.043068 | 0.35308  | 0.064539 |
| 0.117962 | 0.01073  | -0.03087 | 0.50579  | 0.191838 | 3.00E-05 | -0.10917 | 0.01828  | 0.014844 |
| 0.220758 | 1.45E-06 | 0.20964  | 4.90E-06 | 0.522769 | 4.11E-34 | 0.259151 | 1.33E-08 | 0.215524 |
| 0.206779 | 6.63E-06 | 0.032241 | 0.48702  | 0.248325 | 5.41E-08 | 0.00944  | 0.83877  | 0.063864 |
| 0.102088 | 0.02738  | -0.09291 | 0.04478  | 0.097153 | 0.03583  | -0.13936 | 0.00254  | 0.079177 |
| 0.193871 | 2.46E-05 | -0.02249 | 0.62791  | 0.220381 | 1.52E-06 | -0.09975 | 0.03115  | 0.03947  |
| 0.145853 | 0.00158  | 0.081365 | 0.079    | 0.070046 | 0.13066  | 0.000408 | 0.99298  | 0.116113 |
| 0.079798 | 0.08497  | -0.07795 | 0.09246  | 0.148732 | 0.00127  | -0.13863 | 0.00268  | 0.072653 |
| 0.141797 | 0.00213  | 0.003242 | 0.9443   | 0.134222 | 0.00366  | -0.0055  | 0.90562  | -0.02893 |
| 0.17554  | 0.00014  | -0.00781 | 0.86627  | 0.17843  | 0.00011  | -0.03007 | 0.51687  | 2.31E-05 |
| 0.112306 | 0.01518  | -0.07515 | 0.10481  | 0.212321 | 3.68E-06 | -0.12637 | 0.00625  | 0.071646 |
| 0.09299  | 0.04459  | -0.07708 | 0.09617  | 0.023869 | 0.6069   | -0.0918  | 0.04739  | 0.028226 |
| 0.111709 | 0.01573  | 0.008156 | 0.86046  | 0.218519 | 1.87E-06 | -0.08135 | 0.07906  | 0.089095 |
| 0.09276  | 0.04512  | 0.020439 | 0.65954  | 0.176818 | 0.00012  | 0.042224 | 0.3626   | 0.088457 |
| -0.13822 | 0.00276  | -0.07186 | 0.12098  | -0.25195 | 3.40E-08 | -0.08852 | 0.05593  | -0.0324  |

|          |          |          |          |          |          |          |          |          |
|----------|----------|----------|----------|----------|----------|----------|----------|----------|
| 0.087695 | 0.05827  | -0.10855 | 0.01895  | 0.006473 | 0.88905  | -0.16795 | 0.00027  | -0.07809 |
| 0.179478 | 9.62E-05 | 0.022414 | 0.62901  | 0.173281 | 0.00017  | -0.02798 | 0.54646  | 0.026551 |
| 0.251457 | 3.63E-08 | 0.063561 | 0.17029  | 0.192598 | 2.79E-05 | 0.012464 | 0.78821  | 0.013424 |
| 0.070885 | 0.1261   | -0.05615 | 0.22587  | 0.141367 | 0.0022   | -0.0605  | 0.19184  | -0.004   |
| 0.105154 | 0.02305  | -0.01865 | 0.68775  | 0.126317 | 0.00627  | -0.09111 | 0.0491   | -0.05428 |
| 0.092039 | 0.04683  | 0.035393 | 0.44544  | 0.132513 | 0.00412  | -0.00404 | 0.93064  | 0.182445 |
| 0.063651 | 0.16968  | -0.16284 | 0.00041  | 0.009212 | 0.84261  | -0.2087  | 5.41E-06 | 0.070163 |
| 0.13431  | 0.00364  | 0.003513 | 0.93964  | 0.142554 | 0.00201  | -0.12373 | 0.00743  | 0.027999 |
| 0.294365 | 8.67E-11 | 0.030563 | 0.50999  | 0.248898 | 5.03E-08 | -0.01333 | 0.77386  | -0.00703 |
| 0.075829 | 0.1017   | -0.05593 | 0.22768  | 0.091545 | 0.04802  | -0.06485 | 0.16176  | 0.01096  |
| 0.128887 | 0.00528  | -0.01149 | 0.80436  | 0.111925 | 0.01553  | -0.03083 | 0.50628  | 0.127509 |
| 0.137979 | 0.00281  | 0.196042 | 1.98E-05 | 0.288355 | 2.15E-10 | 0.115727 | 0.01233  | 0.13716  |
| 0.026666 | 0.56541  | -0.09329 | 0.04391  | 0.054001 | 0.24414  | -0.14452 | 0.00174  | 0.264106 |
| 0.203528 | 9.29E-06 | -0.00035 | 0.99393  | 0.288534 | 2.10E-10 | -0.04796 | 0.30105  | 0.092531 |
| 0.051719 | 0.26467  | -0.02726 | 0.55682  | 0.095417 | 0.03929  | -0.09573 | 0.03865  | 0.030224 |
| 0.115545 | 0.01247  | -0.02871 | 0.53595  | 0.22007  | 1.57E-06 | -0.08948 | 0.05332  | 0.034779 |
| -0.14173 | 0.00214  | -0.0591  | 0.20235  | -0.29796 | 4.98E-11 | -0.05049 | 0.27621  | -0.05124 |
| 0.148875 | 0.00125  | -0.07635 | 0.09935  | 0.068003 | 0.14229  | -0.13544 | 0.00336  | 0.013068 |
| 0.143537 | 0.00187  | -0.0632  | 0.17274  | 0.066312 | 0.1525   | -0.11353 | 0.0141   | 0.039222 |
| 0.121499 | 0.00858  | 0.00067  | 0.98847  | 0.219547 | 1.67E-06 | -0.03581 | 0.44008  | -0.01716 |
| 0.103301 | 0.02559  | 0.024123 | 0.60308  | 0.202672 | 1.02E-05 | -0.0484  | 0.29665  | -0.01255 |
| 0.161436 | 0.00046  | 0.027334 | 0.55571  | 0.249462 | 4.68E-08 | -0.00805 | 0.86225  | 0.025928 |
| 0.108563 | 0.01894  | -0.11392 | 0.01377  | 0.071902 | 0.12074  | -0.09998 | 0.03075  | 0.14774  |
| 0.151926 | 0.00099  | 0.005665 | 0.90282  | 0.139825 | 0.00246  | -0.02798 | 0.54641  | 0.00802  |
| 0.074236 | 0.10912  | -0.0547  | 0.23805  | 0.125713 | 0.00652  | -0.07092 | 0.12592  | 0.011321 |
| 0.231339 | 4.31E-07 | -0.0152  | 0.74327  | 0.175583 | 0.00014  | -0.04898 | 0.29082  | -0.0281  |
| 0.057817 | 0.21235  | -0.05864 | 0.20589  | 0.053713 | 0.24667  | -0.0279  | 0.54752  | 0.062497 |
| 0.110692 | 0.01671  | 0.049669 | 0.2841   | 0.248882 | 5.04E-08 | 0.003142 | 0.946    | 0.037089 |
| 0.027103 | 0.55906  | -0.0497  | 0.28377  | 0.03819  | 0.41029  | -0.04912 | 0.28946  | 0.02012  |
| 0.074806 | 0.10642  | -0.01949 | 0.67435  | 0.101703 | 0.02798  | -0.06744 | 0.14562  | 0.050117 |
| 0.212321 | 3.68E-06 | 0.169903 | 0.00023  | 0.375288 | 4.57E-17 | 0.095987 | 0.03812  | 0.105696 |
| 0.071668 | 0.12196  | 0.026291 | 0.57089  | 0.08798  | 0.05745  | -0.03574 | 0.44096  | -0.05086 |
| 0.055957 | 0.22746  | -0.00221 | 0.962    | 0.107961 | 0.01961  | 0.009544 | 0.83703  | 0.028341 |
| 0.116157 | 0.01201  | 0.050333 | 0.27771  | 0.210315 | 4.56E-06 | -0.01361 | 0.76926  | -0.0205  |
| 0.130245 | 0.00482  | -0.05519 | 0.23388  | 0.143194 | 0.00192  | -0.13845 | 0.00271  | -0.03115 |
| 0.113898 | 0.01379  | -0.03865 | 0.40472  | 0.211252 | 4.12E-06 | -0.07082 | 0.12646  | 0.030624 |
| 0.134652 | 0.00355  | -0.02866 | 0.53665  | 0.237555 | 2.05E-07 | -0.09339 | 0.04368  | 0.03992  |
| 0.033773 | 0.46656  | -0.05482 | 0.23709  | 0.085963 | 0.06343  | -0.09356 | 0.0433   | -0.05702 |
| 0.074622 | 0.10729  | -0.07678 | 0.09747  | 0.04947  | 0.28604  | -0.0805  | 0.08223  | -0.02664 |
| 0.194705 | 2.27E-05 | 0.02174  | 0.63936  | 0.189904 | 3.62E-05 | -0.01282 | 0.78236  | 0.15969  |
| 0.119039 | 0.01003  | -0.01678 | 0.71764  | 0.124139 | 0.00723  | -0.03011 | 0.51632  | -0.01807 |
| 0.121887 | 0.00837  | -0.02639 | 0.56939  | 0.155752 | 0.00073  | -0.05372 | 0.2466   | 0.007885 |
| 0.094368 | 0.04151  | 0.071799 | 0.12128  | 0.316528 | 2.51E-12 | 0.032884 | 0.47837  | 0.249824 |
| 0.19563  | 2.07E-05 | 0.001284 | 0.97793  | 0.217907 | 2.00E-06 | -0.03996 | 0.38895  | 0.040757 |
| 0.166215 | 0.00031  | -0.00786 | 0.86546  | 0.273345 | 1.90E-09 | -0.0512  | 0.26946  | 0.083303 |

|          |          |          |          |          |          |          |          |          |
|----------|----------|----------|----------|----------|----------|----------|----------|----------|
| 0.274744 | 1.56E-09 | 0.433196 | 8.74E-23 | 0.583614 | 5.64E-44 | 0.278265 | 9.45E-10 | 0.205962 |
| -0.0593  | 0.20081  | 0.046684 | 0.31408  | -0.19032 | 3.48E-05 | -0.01602 | 0.72994  | -0.15052 |
| 0.105322 | 0.02283  | 0.065962 | 0.15468  | 0.198049 | 1.62E-05 | 0.055493 | 0.23134  | 0.039556 |
| 0.110744 | 0.01666  | 0.157531 | 0.00063  | 0.169764 | 0.00023  | 0.174143 | 0.00016  | 0.019076 |
| 0.127595 | 0.00576  | 0.000529 | 0.9909   | 0.072152 | 0.11945  | 0.000931 | 0.98399  | 0.036132 |
| 0.213927 | 3.09E-06 | 0.023533 | 0.61197  | 0.173727 | 0.00016  | -0.01349 | 0.77117  | -0.0005  |
| 0.114019 | 0.01369  | -0.02335 | 0.61477  | 0.211181 | 4.16E-06 | -0.06786 | 0.14315  | 0.063939 |
| 0.180553 | 8.72E-05 | 0.02539  | 0.58418  | 0.232331 | 3.84E-07 | 0.016844 | 0.71657  | 0.052891 |
| 0.177835 | 0.00011  | -0.00873 | 0.85067  | 0.248548 | 5.26E-08 | -0.07993 | 0.08444  | 0.034311 |
| -0.10745 | 0.0202   | 0.001196 | 0.97943  | -0.18701 | 4.77E-05 | 0.078706 | 0.08933  | -0.12217 |
| 0.133906 | 0.00374  | -0.01777 | 0.70167  | 0.246812 | 6.55E-08 | -0.06559 | 0.15705  | 0.042533 |
| 0.039242 | 0.39751  | -0.06858 | 0.13892  | 0.086957 | 0.06042  | -0.05896 | 0.20343  | 0.035515 |
| 0.11948  | 0.00976  | -0.07023 | 0.12967  | 0.123954 | 0.00732  | -0.05645 | 0.22338  | 0.086173 |
| 0.018571 | 0.68895  | -0.00468 | 0.91957  | 0.10169  | 0.028    | 0.045367 | 0.32794  | 0.324969 |
| 0.221508 | 1.34E-06 | 0.435197 | 5.29E-23 | 0.558465 | 1.19E-39 | 0.3062   | 1.36E-11 | 0.132145 |
| 0.10312  | 0.02585  | 0.00795  | 0.86396  | 0.255392 | 2.18E-08 | -0.0232  | 0.61704  | 0.019071 |
| 0.096202 | 0.03769  | 0.031167 | 0.50165  | 0.229554 | 5.32E-07 | -0.08997 | 0.05201  | -0.00331 |
| 0.163297 | 0.0004   | 0.018071 | 0.6969   | 0.274271 | 1.67E-09 | -0.03177 | 0.49342  | 0.048835 |
| 0.13584  | 0.00327  | -0.03596 | 0.4382   | 0.00662  | 0.88655  | -0.07339 | 0.11324  | 0.085027 |
| 0.18125  | 8.18E-05 | 0.239758 | 1.57E-07 | 0.517545 | 2.35E-33 | 0.280267 | 7.08E-10 | 0.208864 |
| 0.089531 | 0.05318  | -0.08052 | 0.08219  | 0.050358 | 0.27747  | -0.16955 | 0.00023  | -0.08986 |
| 0.096076 | 0.03794  | -0.02017 | 0.66368  | 0.150768 | 0.00108  | -0.0398  | 0.39084  | 0.013203 |
| 0.072423 | 0.11807  | -0.05695 | 0.21927  | 0.041462 | 0.37133  | -0.11488 | 0.01299  | 0.001423 |
| 0.079768 | 0.08508  | -0.16075 | 0.00049  | -0.0301  | 0.51638  | -0.16091 | 0.00048  | 0.060754 |
| 0.040294 | 0.38496  | 0.004418 | 0.92413  | 0.141779 | 0.00213  | 0.016386 | 0.72395  | -0.004   |
| 0.134835 | 0.00351  | -0.03262 | 0.48189  | 0.191424 | 3.12E-05 | -0.06233 | 0.17873  | 0.062282 |
| -0.11226 | 0.01522  | -0.03586 | 0.4394   | -0.23908 | 1.71E-07 | -0.0705  | 0.12817  | -0.01451 |
| 0.210124 | 4.65E-06 | 0.03821  | 0.41005  | 0.260807 | 1.06E-08 | 0.033796 | 0.46625  | 0.157103 |
| 0.098788 | 0.03282  | -0.04215 | 0.36341  | 0.092713 | 0.04523  | -0.06451 | 0.16401  | 0.031409 |
| 0.125115 | 0.00679  | -0.02949 | 0.52501  | 0.153671 | 0.00086  | -0.04847 | 0.29592  | 0.087966 |
| 0.096456 | 0.03719  | 0.029229 | 0.52864  | 0.216011 | 2.46E-06 | 0.034732 | 0.45399  | 0.162011 |
| -0.08338 | 0.07185  | -0.0547  | 0.23806  | -0.30335 | 2.14E-11 | -0.06683 | 0.14933  | -0.06655 |
| 0.151395 | 0.00103  | -0.03888 | 0.40184  | 0.117008 | 0.01139  | -0.06457 | 0.16358  | -0.00902 |
| 0.054274 | 0.24176  | -0.03973 | 0.39167  | 0.132725 | 0.00406  | -0.03819 | 0.4103   | 0.191143 |
| 0.167651 | 0.00027  | 0.028613 | 0.53737  | 0.276935 | 1.14E-09 | -0.01409 | 0.7613   | 0.067312 |
| 0.074094 | 0.1098   | 0.011427 | 0.80545  | 0.152895 | 0.00092  | 0.049489 | 0.28586  | 0.035944 |
| 0.135131 | 0.00344  | 0.045098 | 0.33082  | 0.253458 | 2.80E-08 | 0.04257  | 0.35868  | 0.067869 |
| 0.128945 | 0.00526  | -0.06992 | 0.13138  | 0.052905 | 0.25386  | -0.0826  | 0.07455  | 0.04072  |
| 0.119257 | 0.0099   | 0.003501 | 0.93985  | 0.244015 | 9.29E-08 | -0.02544 | 0.58344  | 0.117934 |
| 0.198665 | 1.53E-05 | 0.0007   | 0.98796  | 0.252855 | 3.03E-08 | -0.03636 | 0.43315  | 0.056584 |
| 0.218607 | 1.85E-06 | -0.00047 | 0.99188  | 0.201705 | 1.12E-05 | -0.02954 | 0.52427  | 0.101094 |
| 0.070066 | 0.13055  | -0.06785 | 0.14319  | 0.052413 | 0.25831  | -0.09657 | 0.03697  | 0.090827 |
| 0.034486 | 0.4572   | -0.12702 | 0.00598  | -0.01915 | 0.67974  | -0.14967 | 0.00118  | -0.00904 |
| 0.092636 | 0.04541  | -0.02805 | 0.54545  | 0.151644 | 0.00101  | -0.02427 | 0.60092  | 0.191013 |
| 0.169506 | 0.00023  | -0.00526 | 0.90982  | 0.201267 | 1.17E-05 | -0.0137  | 0.76774  | 0.069529 |

|          |          |          |         |          |          |          |         |          |
|----------|----------|----------|---------|----------|----------|----------|---------|----------|
| 0.147344 | 0.00141  | 0.055801 | 0.22875 | 0.291289 | 1.38E-10 | 0.027227 | 0.55726 | 0.178406 |
| 0.114545 | 0.01325  | 0.010662 | 0.81825 | 0.149461 | 0.0012   | -0.02984 | 0.52005 | 0.074786 |
| 0.174266 | 0.00015  | 0.016644 | 0.71979 | 0.276822 | 1.16E-09 | -0.02369 | 0.60964 | 0.064476 |
| 0.150558 | 0.0011   | 0.00502  | 0.91385 | 0.163381 | 0.00039  | -0.03136 | 0.49895 | 0.117226 |
| 0.038986 | 0.4006   | -0.10338 | 0.02548 | 0.118558 | 0.01034  | -0.10464 | 0.02373 | 0.085659 |
| 0.103617 | 0.02514  | 0.071535 | 0.12265 | 0.215409 | 2.63E-06 | 0.024458 | 0.59805 | 0.031411 |
| 0.196126 | 1.97E-05 | 0.025549 | 0.58182 | 0.270604 | 2.79E-09 | -0.00979 | 0.83292 | 0.065838 |
| 0.109978 | 0.01743  | -0.04741 | 0.30664 | 0.231421 | 4.27E-07 | -0.1007  | 0.02957 | 0.036827 |
| 0.082276 | 0.07569  | 0.059013 | 0.20303 | 0.21367  | 3.18E-06 | 0.067527 | 0.14511 | 0.173816 |
| -0.14399 | 0.00181  | -0.09806 | 0.03414 | -0.3097  | 7.71E-12 | -0.09634 | 0.03742 | -0.0369  |
| 0.423533 | 9.44E-22 | 0.12997  | 0.00491 | 0.265403 | 5.72E-09 | 0.078485 | 0.09024 | 0.094698 |
| 0.030204 | 0.51498  | -0.05259 | 0.25669 | 0.203317 | 9.50E-06 | -0.0461  | 0.3202  | 0.214079 |
| 0.113967 | 0.01373  | -0.01974 | 0.67043 | 0.13262  | 0.00409  | -0.12469 | 0.00698 | -0.02991 |
| 0.161725 | 0.00045  | -0.02658 | 0.56662 | 0.055382 | 0.23227  | -0.01779 | 0.70145 | 0.060397 |
| 0.097566 | 0.03505  | -0.01296 | 0.78    | 0.08323  | 0.07235  | -0.07109 | 0.12501 | 0.120913 |
| 0.058545 | 0.20664  | 0.000636 | 0.98907 | 0.116156 | 0.01201  | -0.0446  | 0.33617 | 0.062837 |
| 0.093034 | 0.04449  | -0.05075 | 0.27378 | 0.163478 | 0.00039  | -0.03866 | 0.4045  | 0.11066  |
| 0.073042 | 0.11495  | 0.003733 | 0.93588 | 0.150944 | 0.00107  | 0.012028 | 0.79545 | 0.282473 |
| 0.086772 | 0.06098  | -0.01935 | 0.67659 | 0.182467 | 7.31E-05 | -0.10981 | 0.01761 | -0.01857 |
| 0.126139 | 0.00634  | -0.02744 | 0.55419 | 0.155928 | 0.00072  | -0.06306 | 0.17367 | 0.052936 |
| 0.178325 | 0.00011  | 0.012584 | 0.78623 | 0.276889 | 1.15E-09 | -0.03356 | 0.46933 | 0.055511 |
| -0.10022 | 0.03036  | -0.01834 | 0.69266 | -0.18359 | 6.59E-05 | -0.01697 | 0.71452 | -0.11173 |
| 0.196344 | 1.93E-05 | 0.002077 | 0.96429 | 0.267645 | 4.21E-09 | -0.06131 | 0.18598 | 0.058411 |
| 0.167707 | 0.00027  | 0.076661 | 0.09799 | 0.312529 | 4.86E-12 | 0.039901 | 0.38962 | 0.131836 |
| 0.068656 | 0.13849  | 0.046148 | 0.31967 | 0.240012 | 1.52E-07 | -0.00416 | 0.92849 | 0.096474 |
| -0.0097  | 0.83433  | 0.012    | 0.79592 | -0.05536 | 0.23247  | -0.04353 | 0.34791 | -0.12095 |
| 0.088987 | 0.05465  | -0.03996 | 0.38895 | 0.055948 | 0.22753  | -0.05191 | 0.2629  | -0.03603 |
| 0.102096 | 0.02737  | 0.043928 | 0.34353 | 0.126299 | 0.00628  | -0.00834 | 0.85742 | -0.0461  |
| 0.18031  | 8.92E-05 | 0.024762 | 0.59351 | 0.183184 | 6.84E-05 | -0.00111 | 0.98084 | 0.229092 |
| 0.15039  | 0.00111  | 0.009452 | 0.83858 | 0.211892 | 3.85E-06 | -0.03521 | 0.44778 | 0.00086  |
| 0.11024  | 0.01716  | -0.00072 | 0.98767 | 0.228243 | 6.19E-07 | -0.03694 | 0.42576 | 0.010484 |
| 0.125938 | 0.00643  | -0.0669  | 0.14887 | 0.043873 | 0.34414  | -0.10928 | 0.01816 | 0.043708 |
| 0.129316 | 0.00513  | -0.00784 | 0.86578 | 0.137627 | 0.00288  | 0.009925 | 0.83061 | 0.129177 |
| 0.157811 | 0.00062  | -0.04538 | 0.32785 | 0.118289 | 0.01052  | -0.08649 | 0.06182 | 0.035857 |
| 0.101916 | 0.02765  | -0.07612 | 0.1004  | 0.141107 | 0.00224  | -0.12226 | 0.00817 | 0.120494 |
| 0.120376 | 0.00922  | -0.04827 | 0.29793 | 0.245691 | 7.54E-08 | -0.1112  | 0.01622 | 0.091931 |
| 0.100893 | 0.02926  | 0.005482 | 0.90594 | 0.225487 | 8.51E-07 | 0.010373 | 0.8231  | 0.014379 |
| 0.056414 | 0.22367  | -0.02958 | 0.52377 | 0.035564 | 0.44325  | -0.12601 | 0.0064  | 0.008782 |
| 0.114806 | 0.01305  | -0.06229 | 0.17898 | 0.179423 | 9.67E-05 | -0.05022 | 0.27878 | 0.061185 |
| 0.173826 | 0.00016  | 0.119703 | 0.00962 | 0.222536 | 1.19E-06 | 0.064601 | 0.16339 | 0.112646 |
| 0.100888 | 0.02926  | 0.007744 | 0.86744 | 0.160254 | 0.00051  | -0.03577 | 0.44054 | 0.007422 |
| 0.031059 | 0.50314  | -0.08148 | 0.07857 | 0.071586 | 0.12239  | -0.17395 | 0.00016 | 0.088862 |
| 0.149783 | 0.00117  | 0.093793 | 0.04277 | 0.200972 | 1.21E-05 | 0.031036 | 0.50346 | 0.06344  |
| 0.112988 | 0.01457  | -0.04431 | 0.33939 | 0.121124 | 0.00879  | -0.1006  | 0.02974 | 0.012783 |
| 0.059995 | 0.1956   | -0.02945 | 0.52548 | 0.085487 | 0.06492  | -0.054   | 0.24417 | 0.192645 |

|          |          |          |          |          |          |          |          |          |
|----------|----------|----------|----------|----------|----------|----------|----------|----------|
| 0.137399 | 0.00293  | -0.06432 | 0.16527  | 0.108207 | 0.01934  | -0.08117 | 0.07971  | 0.116089 |
| 0.176586 | 0.00013  | 0.078546 | 0.08999  | 0.157309 | 0.00065  | -0.00377 | 0.93516  | 0.085884 |
| 0.048376 | 0.29685  | -0.01656 | 0.72117  | 0.152335 | 0.00096  | -0.03528 | 0.44693  | 0.070443 |
| 0.174029 | 0.00016  | -0.01409 | 0.76142  | 0.263259 | 7.65E-09 | -0.05798 | 0.21104  | 0.076987 |
| 0.119246 | 0.0099   | -0.03532 | 0.44642  | 0.125197 | 0.00675  | -0.04766 | 0.30405  | 0.03173  |
| 0.069518 | 0.13359  | 0.074661 | 0.1071   | 0.12113  | 0.00879  | -0.02336 | 0.61466  | 0.007489 |
| 0.071442 | 0.12314  | 0.056474 | 0.22318  | 0.160172 | 0.00051  | 0.082912 | 0.07345  | 0.138641 |
| -0.21909 | 1.75E-06 | -0.15908 | 0.00056  | -0.32075 | 1.24E-12 | -0.12602 | 0.00639  | -0.08149 |
| 0.082123 | 0.07624  | -0.10974 | 0.01768  | 0.060001 | 0.19555  | -0.15488 | 0.00078  | -0.00481 |
| 0.150704 | 0.00109  | 0.01054  | 0.82029  | 0.27657  | 1.20E-09 | -0.02406 | 0.60405  | 0.050738 |
| 0.062169 | 0.17986  | -0.10641 | 0.02146  | 0.103949 | 0.02468  | -0.08355 | 0.07124  | 0.09856  |
| 0.132796 | 0.00404  | -0.03672 | 0.42858  | 0.074399 | 0.10834  | -0.07398 | 0.11034  | 0.127683 |
| 0.219621 | 1.65E-06 | -0.04769 | 0.30378  | 0.142905 | 0.00196  | -0.12321 | 0.00768  | -0.00353 |
| 0.108542 | 0.01896  | -0.12863 | 0.00537  | 0.16895  | 0.00024  | -0.23325 | 3.44E-07 | 0.083944 |
| 0.19532  | 2.13E-05 | 0.079175 | 0.08744  | 0.195219 | 2.15E-05 | 0.013436 | 0.77213  | 0.096636 |
| 0.101709 | 0.02797  | -0.10291 | 0.02615  | 0.054351 | 0.2411   | -0.17381 | 0.00016  | 0.008935 |
| 0.247035 | 6.37E-08 | 0.119268 | 0.00989  | 0.356782 | 1.83E-15 | 0.117437 | 0.01109  | 0.092627 |
| 0.172631 | 0.00018  | -0.0065  | 0.88862  | 0.16827  | 0.00026  | -0.0182  | 0.6949   | -0.00867 |
| 0.087761 | 0.05808  | -0.09144 | 0.04829  | 0.151306 | 0.00104  | -0.14324 | 0.00191  | 0.063957 |
| 0.104096 | 0.02447  | 0.084059 | 0.06954  | 0.212514 | 3.60E-06 | 0.031006 | 0.50388  | 0.043157 |
| 0.144589 | 0.00173  | -0.00979 | 0.83284  | 0.171722 | 0.00019  | -0.08771 | 0.05823  | -0.00786 |
| 0.089151 | 0.0542   | 0.002667 | 0.95416  | 0.173609 | 0.00016  | 0.016955 | 0.71478  | 0.029845 |
| 0.109159 | 0.01829  | 0.037343 | 0.42076  | 0.215287 | 2.66E-06 | -0.00289 | 0.9503   | -0.00489 |
| 0.118634 | 0.01029  | -0.02792 | 0.54722  | 0.201539 | 1.14E-05 | -0.0738  | 0.11122  | 0.025977 |
| -0.17584 | 0.00013  | -0.0421  | 0.36395  | -0.26414 | 6.79E-09 | 0.011096 | 0.81099  | 0.044198 |
| 0.104312 | 0.02418  | -0.03324 | 0.47366  | 0.08716  | 0.05983  | -0.03328 | 0.47307  | 0.075487 |
| 0.135076 | 0.00345  | 0.002413 | 0.95853  | 0.148337 | 0.00131  | -0.10414 | 0.02441  | -0.01495 |
| -0.09115 | 0.04901  | -0.06427 | 0.16557  | -0.28132 | 6.07E-10 | -0.02852 | 0.53866  | -0.12737 |
| -0.12917 | 0.00518  | 0.107385 | 0.02028  | -0.1198  | 0.00956  | 0.130635 | 0.00469  | -0.18438 |
| 0.134444 | 0.00361  | -0.05093 | 0.27204  | 0.197043 | 1.80E-05 | -0.06839 | 0.14002  | 0.070966 |
| 0.097219 | 0.03571  | 0.052714 | 0.25558  | 0.196138 | 1.97E-05 | 0.065612 | 0.15689  | 0.11996  |
| 0.002894 | 0.95027  | 0.02374  | 0.60884  | -0.08237 | 0.07534  | 0.025256 | 0.58616  | -0.03533 |
| 0.109661 | 0.01776  | -0.00229 | 0.96063  | 0.124049 | 0.00728  | -0.03464 | 0.45525  | 0.019885 |
| 0.135433 | 0.00336  | -0.03022 | 0.51477  | 0.127589 | 0.00576  | -0.06049 | 0.19193  | 0.047537 |
| 0.142531 | 0.00202  | 0.215497 | 2.60E-06 | 0.443944 | 5.65E-24 | 0.256919 | 1.78E-08 | 0.08046  |
| 0.15575  | 0.00073  | 0.055708 | 0.22953  | 0.178755 | 0.0001   | 0.034537 | 0.45653  | 0.007335 |
| 0.089835 | 0.05237  | -0.07758 | 0.09401  | -0.04169 | 0.36874  | -0.07771 | 0.09349  | 0.034547 |
| 0.184981 | 5.78E-05 | -0.08044 | 0.08246  | 0.152718 | 0.00093  | -0.165   | 0.00034  | 0.067925 |
| 0.082368 | 0.07536  | 0.022199 | 0.63229  | 0.097491 | 0.03519  | -0.00059 | 0.98993  | 0.009831 |
| 0.075581 | 0.10283  | 0.040956 | 0.3772   | 0.077271 | 0.09535  | -0.02267 | 0.62508  | -0.06977 |
| 0.155027 | 0.00078  | -0.05027 | 0.27828  | 0.117915 | 0.01077  | -0.08875 | 0.05529  | 0.015609 |
| 0.215947 | 2.48E-06 | 0.028789 | 0.53486  | 0.189218 | 3.87E-05 | -0.00205 | 0.96482  | 0.040995 |
| 0.22131  | 1.37E-06 | 0.028611 | 0.5374   | 0.164985 | 0.00034  | 0.007752 | 0.86731  | 0.026428 |
| 0.281494 | 5.92E-10 | 0.025454 | 0.58322  | 0.176438 | 0.00013  | 0.015509 | 0.73817  | 0.001307 |
| 0.08325  | 0.07228  | -0.04322 | 0.35139  | 0.042162 | 0.3633   | -0.06945 | 0.13398  | 0.006024 |



|          |          |          |          |          |          |          |          |          |
|----------|----------|----------|----------|----------|----------|----------|----------|----------|
| 0.172366 | 0.00018  | -0.00237 | 0.95926  | 0.188212 | 4.26E-05 | -0.0326  | 0.48222  | 0.047359 |
| 0.088996 | 0.05462  | 0.030294 | 0.51372  | 0.075727 | 0.10217  | 0.005026 | 0.91375  | -0.05042 |
| 0.196046 | 1.98E-05 | 0.021779 | 0.63876  | 0.170261 | 0.00022  | 0.040446 | 0.38318  | 0.122417 |
| 0.143586 | 0.00187  | 0.036087 | 0.43657  | 0.225637 | 8.36E-07 | 0.047289 | 0.30785  | 0.176259 |
| 0.377644 | 2.81E-17 | 0.239881 | 1.55E-07 | 0.45056  | 9.98E-25 | 0.201854 | 1.10E-05 | 0.102161 |
| 0.116112 | 0.01204  | -0.03479 | 0.45318  | 0.289034 | 1.94E-10 | -0.0666  | 0.1507   | 0.087903 |
| 0.246865 | 6.50E-08 | 0.023741 | 0.60883  | 0.275306 | 1.44E-09 | -0.02941 | 0.52609  | 0.087477 |
| 0.149836 | 0.00116  | -0.01244 | 0.7886   | 0.188603 | 4.10E-05 | -0.04777 | 0.30296  | 0.074293 |
| -0.1375  | 0.00291  | -0.04632 | 0.3179   | -0.14724 | 0.00142  | 0.029463 | 0.52534  | 0.071923 |
| 0.14803  | 0.00134  | -0.02035 | 0.6609   | 0.279494 | 7.91E-10 | -0.06057 | 0.19137  | 0.091116 |
| 0.12798  | 0.00561  | -0.04123 | 0.37396  | 0.097331 | 0.03549  | -0.06441 | 0.16461  | 0.037568 |
| 0.210238 | 4.60E-06 | -0.00393 | 0.93244  | 0.141614 | 0.00216  | 0.001508 | 0.97407  | 0.081006 |
| 0.076904 | 0.09693  | -0.03233 | 0.48576  | 0.168676 | 0.00025  | 0.000558 | 0.9904   | 0.094577 |
| 0.151311 | 0.00104  | -0.05966 | 0.19812  | 0.192138 | 2.91E-05 | -0.08344 | 0.07164  | 0.073173 |
| 0.130872 | 0.00461  | 0.04395  | 0.3433   | 0.171118 | 0.0002   | -0.07778 | 0.09318  | 0.065672 |
| 0.193233 | 2.62E-05 | 0.01532  | 0.74124  | 0.243083 | 1.04E-07 | -0.03618 | 0.43535  | 0.032069 |
| 0.128851 | 0.00529  | -0.02935 | 0.52687  | 0.210596 | 4.42E-06 | -0.0328  | 0.4795   | 0.164585 |
| -0.04197 | 0.36545  | 0.016873 | 0.7161   | -0.17668 | 0.00012  | 0.11102  | 0.01639  | -0.05042 |
| 0.10265  | 0.02654  | -0.05292 | 0.25373  | 0.092957 | 0.04467  | -0.15924 | 0.00055  | -0.14494 |
| 0.181625 | 7.90E-05 | 0.018823 | 0.68495  | 0.153771 | 0.00086  | 0.001205 | 0.97928  | 0.02118  |
| 0.05458  | 0.23911  | -0.05095 | 0.27186  | 0.083523 | 0.07135  | -0.10472 | 0.02363  | 0.094201 |
| 0.120427 | 0.00919  | 0.058979 | 0.20329  | 0.178151 | 0.00011  | -0.02384 | 0.60727  | -0.03287 |
| 0.041404 | 0.372    | -0.09557 | 0.03897  | 0.02494  | 0.59086  | -0.0817  | 0.07776  | 0.073108 |
| 0.07838  | 0.09067  | -0.08427 | 0.06884  | -0.02798 | 0.5464   | -0.08593 | 0.06355  | 0.013647 |
| 0.19044  | 3.44E-05 | 0.021949 | 0.63614  | 0.246955 | 6.43E-08 | -0.03289 | 0.47836  | 0.034529 |
| 0.069253 | 0.13508  | 0.142719 | 0.00199  | 0.235852 | 2.52E-07 | 0.0247   | 0.59443  | -0.03531 |
| 0.146994 | 0.00145  | -0.07608 | 0.10055  | 0.167537 | 0.00028  | -0.1525  | 0.00095  | 0.066328 |
| 0.129147 | 0.00519  | -0.02445 | 0.59823  | 0.195986 | 2.00E-05 | -0.06054 | 0.19153  | 0.032812 |
| 0.115831 | 0.01225  | -0.03007 | 0.51691  | 0.070018 | 0.13081  | -0.03279 | 0.47958  | 0.154493 |
| 0.357192 | 1.69E-15 | 0.08148  | 0.07858  | 0.17634  | 0.00013  | 0.078602 | 0.08976  | 0.037282 |
| 0.190439 | 3.44E-05 | 0.026073 | 0.57409  | 0.194516 | 2.31E-05 | -0.00916 | 0.84343  | -0.01985 |
| 0.13873  | 0.00266  | 0.002883 | 0.95045  | 0.132861 | 0.00402  | -0.02302 | 0.61979  | 0.100452 |
| 0.177726 | 0.00011  | 0.013464 | 0.77167  | 0.251725 | 3.50E-08 | -0.001   | 0.98281  | 0.096971 |
| 0.146615 | 0.00149  | 0.002535 | 0.95643  | 0.219779 | 1.62E-06 | -0.02981 | 0.52048  | 0.09479  |
| 0.201379 | 1.16E-05 | 0.031348 | 0.49917  | 0.177064 | 0.00012  | -0.00971 | 0.83425  | 0.01959  |
| 0.154257 | 0.00082  | 0.004649 | 0.92019  | 0.258214 | 1.50E-08 | -0.03195 | 0.49103  | 0.042641 |
| 0.117933 | 0.01075  | 0.02102  | 0.65049  | 0.188995 | 3.95E-05 | -0.01999 | 0.66662  | 0.04227  |
| 0.212019 | 3.80E-06 | 0.032874 | 0.4785   | 0.218932 | 1.78E-06 | 0.016597 | 0.72055  | 0.044913 |
| 0.171362 | 0.0002   | 0.033445 | 0.4709   | 0.303113 | 2.22E-11 | 0.009747 | 0.83361  | 0.100666 |
| 0.016042 | 0.72952  | 0.013345 | 0.77362  | 0.058034 | 0.21064  | -0.02102 | 0.65043  | 0.043089 |
| 0.16588  | 0.00032  | 0.016986 | 0.71428  | 0.159032 | 0.00056  | 0.000204 | 0.99648  | 0.031001 |
| 0.179555 | 9.56E-05 | -0.03872 | 0.40384  | 0.122264 | 0.00817  | -0.06143 | 0.18507  | -0.01186 |
| 0.162723 | 0.00041  | 0.019096 | 0.68064  | 0.188584 | 4.11E-05 | -0.02664 | 0.56576  | 0.036667 |
| 0.130754 | 0.00465  | 0.030152 | 0.51569  | 0.136327 | 0.00316  | -0.01332 | 0.774    | 0.033058 |
| 0.105374 | 0.02276  | 0.009018 | 0.84589  | 0.198439 | 1.56E-05 | -0.04798 | 0.30086  | 0.017625 |

|          |          |          |         |          |          |          |         |          |
|----------|----------|----------|---------|----------|----------|----------|---------|----------|
| 0.176316 | 0.00013  | 0.028001 | 0.54611 | 0.219029 | 1.76E-06 | -0.00408 | 0.93001 | 0.040945 |
| 0.081945 | 0.07688  | 0.039261 | 0.39728 | 0.160607 | 0.00049  | 0.032167 | 0.48803 | 0.046844 |
| 0.034164 | 0.4614   | -0.00842 | 0.85602 | 0.112554 | 0.01495  | -0.02185 | 0.63762 | 0.024578 |
| 0.075804 | 0.10182  | -0.00324 | 0.94429 | 0.123032 | 0.00777  | -0.02594 | 0.57609 | 0.005017 |
| 0.143653 | 0.00186  | -0.02697 | 0.56104 | 0.105354 | 0.02279  | -0.03291 | 0.47806 | 0.030132 |
| 0.063875 | 0.16819  | -0.01664 | 0.71981 | 0.085506 | 0.06486  | -0.01897 | 0.68262 | -0.01422 |
| 0.261787 | 9.33E-09 | 0.078401 | 0.09058 | 0.20706  | 6.43E-06 | 0.060241 | 0.19377 | 0.144952 |
| 0.156855 | 0.00067  | 0.002653 | 0.95441 | 0.220229 | 1.54E-06 | -0.03451 | 0.4569  | 0.069251 |
| 0.136345 | 0.00315  | 0.077835 | 0.09294 | 0.183121 | 6.88E-05 | 0.032227 | 0.48721 | 0.051841 |
| 0.15908  | 0.00056  | -0.0042  | 0.92795 | 0.144592 | 0.00173  | -0.03861 | 0.40521 | 0.003922 |
| 0.141403 | 0.00219  | 0.015038 | 0.74585 | 0.176704 | 0.00012  | -0.04337 | 0.34967 | 0.037505 |
| 0.091484 | 0.04817  | -0.00079 | 0.98639 | 0.178308 | 0.00011  | -0.04566 | 0.32483 | 0.052932 |
| 0.213474 | 3.25E-06 | 0.049578 | 0.28499 | 0.160781 | 0.00049  | 0.050305 | 0.27798 | 0.042663 |
| 0.203504 | 9.32E-06 | 0.034017 | 0.46334 | 0.193539 | 2.54E-05 | 0.001771 | 0.96954 | 0.01659  |
| 0.153174 | 0.0009   | 0.014897 | 0.74816 | 0.220461 | 1.50E-06 | -0.0428  | 0.35603 | 0.067818 |
| 0.146653 | 0.00148  | -0.00776 | 0.8671  | 0.158278 | 0.0006   | -0.04424 | 0.34016 | 0.048246 |
| 0.179454 | 9.65E-05 | 0.011952 | 0.79672 | 0.211245 | 4.13E-06 | -0.02369 | 0.60961 | 0.053108 |
| 0.161637 | 0.00045  | -0.00182 | 0.96876 | 0.199598 | 1.39E-05 | -0.04161 | 0.36961 | 0.083354 |
| 0.122498 | 0.00805  | -0.01436 | 0.75686 | 0.127779 | 0.00569  | -0.02478 | 0.59331 | 0.035345 |
| 0.188989 | 3.95E-05 | 0.041061 | 0.37597 | 0.262583 | 8.38E-09 | 0.010088 | 0.82788 | 0.076459 |
| 0.121751 | 0.00844  | -0.01765 | 0.70369 | 0.188642 | 4.09E-05 | -0.05617 | 0.22569 | 0.063956 |
| 0.167376 | 0.00028  | 0.016293 | 0.72546 | 0.237706 | 2.02E-07 | -0.01855 | 0.68927 | 0.069211 |
| 0.111943 | 0.01551  | 0.044799 | 0.33405 | 0.131639 | 0.00438  | 0.021823 | 0.63808 | 0.110528 |
| 0.15533  | 0.00076  | 0.027072 | 0.55952 | 0.237767 | 2.00E-07 | -0.01438 | 0.75661 | 0.074774 |
| 0.100795 | 0.02941  | -0.0377  | 0.41627 | 0.086003 | 0.06331  | -0.03916 | 0.39855 | 0.074889 |
| 0.175473 | 0.00014  | 0.029207 | 0.52895 | 0.225871 | 8.14E-07 | -0.01152 | 0.80396 | 0.077407 |
| 0.142907 | 0.00196  | 0.007472 | 0.87205 | 0.231204 | 4.38E-07 | -0.00163 | 0.97195 | 0.049756 |
| 0.110186 | 0.01722  | -0.0081  | 0.86146 | 0.105471 | 0.02264  | -0.04267 | 0.35752 | 0.022677 |
| 0.153594 | 0.00087  | -0.02491 | 0.59132 | 0.115274 | 0.01268  | -0.01597 | 0.73073 | 0.033217 |
| 0.177254 | 0.00012  | -0.00345 | 0.94065 | 0.218127 | 1.95E-06 | -0.05978 | 0.1972  | 0.043564 |
| 0.159715 | 0.00053  | 0.028365 | 0.5409  | 0.17191  | 0.00019  | -0.04798 | 0.3008  | -0.01723 |
| 0.109194 | 0.01825  | 0.023986 | 0.60514 | 0.128921 | 0.00527  | 0.014433 | 0.75575 | 0.03212  |
| 0.170087 | 0.00022  | 0.015069 | 0.74534 | 0.159162 | 0.00056  | -0.01985 | 0.66883 | 0.107652 |
| 0.184811 | 5.88E-05 | -0.0193  | 0.67744 | 0.105071 | 0.02316  | -0.0491  | 0.28965 | 0.026153 |
| 0.044628 | 0.33589  | -0.14317 | 0.00193 | -0.02694 | 0.5615   | -0.1483  | 0.00131 | 0.113873 |
| 0.142206 | 0.00207  | -0.03384 | 0.46569 | 0.180693 | 8.61E-05 | -0.07434 | 0.10864 | -0.00042 |
| 0.172065 | 0.00019  | -0.01584 | 0.73278 | 0.20643  | 6.87E-06 | -0.05738 | 0.21581 | 0.04434  |
| 0.137923 | 0.00282  | 0.002153 | 0.963   | 0.200573 | 1.26E-05 | -0.03715 | 0.42315 | 0.050936 |
| 0.114268 | 0.01348  | -0.00267 | 0.95406 | 0.172104 | 0.00019  | -0.04949 | 0.2858  | 0.080446 |
| 0.17238  | 0.00018  | 0.024103 | 0.60338 | 0.186796 | 4.87E-05 | -0.01057 | 0.81978 | 0.033327 |
| 0.150026 | 0.00115  | 0.006299 | 0.89202 | 0.200289 | 1.29E-05 | -0.03617 | 0.43547 | 0.041492 |
| 0.164253 | 0.00036  | 0.011013 | 0.81237 | 0.278927 | 8.59E-10 | -0.02567 | 0.58009 | 0.058214 |
| 0.043626 | 0.34687  | -0.08132 | 0.07918 | 0.0805   | 0.08225  | -0.11006 | 0.01735 | -0.04757 |
| 0.088111 | 0.05708  | -0.0052  | 0.91069 | 0.162358 | 0.00043  | -0.05914 | 0.20203 | 0.057703 |
| 0.083746 | 0.07059  | -0.04299 | 0.35396 | 0.02646  | 0.56842  | -0.08985 | 0.05233 | 0.023392 |

|          |          |          |         |          |          |          |         |          |
|----------|----------|----------|---------|----------|----------|----------|---------|----------|
| 0.078637 | 0.08962  | -0.04702 | 0.31058 | 0.049306 | 0.28764  | -0.08154 | 0.07836 | 0.008211 |
| 0.190819 | 3.31E-05 | 0.010642 | 0.81859 | 0.259501 | 1.27E-08 | -0.03251 | 0.48335 | 0.068276 |
| 0.115538 | 0.01247  | 0.057967 | 0.21116 | 0.299364 | 4.00E-11 | -0.04765 | 0.30413 | 0.038778 |
| 0.152964 | 0.00091  | -0.0251  | 0.58844 | 0.209992 | 4.72E-06 | -0.06026 | 0.19363 | 0.048267 |
| 0.05234  | 0.25897  | -0.08141 | 0.07883 | 0.105339 | 0.02281  | -0.16181 | 0.00045 | -0.00213 |
| 0.161129 | 0.00047  | -0.02046 | 0.65918 | 0.21805  | 1.97E-06 | -0.06817 | 0.14131 | 0.048787 |
| 0.10735  | 0.02032  | -0.02281 | 0.62295 | 0.072758 | 0.11637  | -0.11343 | 0.01419 | -0.04519 |
| 0.185621 | 5.44E-05 | 0.034082 | 0.46248 | 0.225547 | 8.45E-07 | -0.04877 | 0.29289 | 0.003236 |
| -0.07536 | 0.10386  | 0.098717 | 0.03294 | -0.05797 | 0.21118  | 0.147618 | 0.00138 | 0.086453 |
| 0.116884 | 0.01148  | 0.024314 | 0.60022 | 0.001017 | 0.98252  | -0.02629 | 0.57098 | -0.07825 |
| 0.093537 | 0.04335  | -0.03299 | 0.477   | 0.192275 | 2.88E-05 | -0.03679 | 0.42764 | 0.053085 |
| 0.095813 | 0.03847  | -0.00194 | 0.96673 | -0.02614 | 0.57314  | -0.06897 | 0.13667 | -0.16527 |
| 0.205663 | 7.45E-06 | 0.018437 | 0.69108 | 0.26649  | 4.93E-09 | -0.03238 | 0.48515 | 0.072322 |
| 0.088995 | 0.05462  | -0.01073 | 0.81714 | 0.140408 | 0.00236  | -0.0112  | 0.8093  | 0.074943 |
| 0.152914 | 0.00092  | 0.002171 | 0.96268 | 0.251782 | 3.48E-08 | -0.03029 | 0.51379 | 0.037711 |
| 0.120681 | 0.00904  | -0.03558 | 0.44305 | 0.119397 | 0.00981  | -0.06029 | 0.19342 | 0.148265 |
| 0.099902 | 0.03089  | -0.03236 | 0.48546 | 0.174079 | 0.00016  | -0.06357 | 0.17021 | 0.023214 |
| 0.155104 | 0.00077  | 0.005466 | 0.90622 | 0.238171 | 1.91E-07 | -0.02695 | 0.56126 | 0.033105 |
| 0.07124  | 0.12421  | 0.002177 | 0.96257 | 0.118046 | 0.01068  | 0.003846 | 0.93393 | 0.012121 |
| 0.115106 | 0.01281  | 0.03049  | 0.511   | 0.205902 | 7.26E-06 | 0.027767 | 0.54946 | 0.04388  |
| 0.187377 | 4.61E-05 | 0.023527 | 0.61206 | 0.259915 | 1.20E-08 | -0.02272 | 0.62436 | 0.049643 |
| 0.127803 | 0.00568  | -0.00221 | 0.96201 | 0.122858 | 0.00786  | -0.00109 | 0.9812  | 0.146922 |
| 0.177859 | 0.00011  | 0.015616 | 0.73644 | 0.293207 | 1.03E-10 | -0.04868 | 0.29381 | 0.070163 |
| 0.126246 | 0.0063   | -0.03579 | 0.44041 | 0.167534 | 0.00028  | -0.06101 | 0.18815 | 0.023504 |
| 0.051648 | 0.26534  | 0.006123 | 0.89501 | 0.086649 | 0.06135  | -0.03736 | 0.42052 | -0.01397 |
| 0.073846 | 0.111    | -0.06104 | 0.18795 | 0.013646 | 0.76867  | -0.08026 | 0.08315 | 0.050107 |
| 0.079656 | 0.08552  | 0.068451 | 0.13968 | 0.171077 | 0.0002   | 0.004457 | 0.92347 | 0.020179 |
| 0.238467 | 1.84E-07 | -0.05355 | 0.24814 | 0.178546 | 0.0001   | -0.06912 | 0.13584 | 0.072224 |
| -0.04719 | 0.30884  | 0.018282 | 0.69354 | -0.11537 | 0.0126   | 0.055062 | 0.23498 | 0.042466 |
| 0.115037 | 0.01286  | 0.020325 | 0.66132 | 0.172442 | 0.00018  | -0.05619 | 0.22553 | 0.035351 |
| 0.120774 | 0.00899  | -0.0116  | 0.80252 | 0.169017 | 0.00024  | -0.07316 | 0.11436 | -0.03572 |
| 0.158503 | 0.00059  | 0.061641 | 0.1836  | 0.268658 | 3.66E-09 | -0.03671 | 0.42865 | 0.089317 |
| 0.118808 | 0.01018  | 0.078435 | 0.09044 | 0.180761 | 8.56E-05 | -0.00659 | 0.88708 | -0.0262  |
| 0.112405 | 0.01509  | 0.058701 | 0.20543 | 0.18445  | 6.08E-05 | 0.004088 | 0.9298  | -0.03364 |
| 0.111618 | 0.01581  | -0.03154 | 0.49657 | 0.202102 | 1.08E-05 | -0.12118 | 0.00876 | 0.065651 |
| 0.009695 | 0.83448  | -0.04106 | 0.37602 | 0.062091 | 0.18041  | -0.05035 | 0.27751 | 0.106528 |
| 0.158275 | 0.0006   | -0.02181 | 0.63824 | 0.219286 | 1.71E-06 | -0.05381 | 0.24579 | -0.00039 |
| 0.139798 | 0.00246  | -0.01258 | 0.78622 | 0.090097 | 0.05168  | -0.0563  | 0.22461 | 0.040763 |
| 0.086052 | 0.06316  | -0.1048  | 0.02352 | 0.008421 | 0.85597  | -0.0817  | 0.07779 | 0.091789 |
| 0.155405 | 0.00075  | 0.003647 | 0.93734 | 0.245273 | 7.94E-08 | -0.03461 | 0.45555 | 0.029508 |
| 0.185973 | 5.27E-05 | 0.015795 | 0.73352 | 0.11334  | 0.01426  | -0.01499 | 0.7466  | -0.00515 |
| 0.188752 | 4.04E-05 | 0.014543 | 0.75394 | 0.132587 | 0.0041   | -0.01024 | 0.82531 | 0.021307 |
| 0.189096 | 3.91E-05 | 0.042289 | 0.36186 | 0.104399 | 0.02406  | -0.00475 | 0.91851 | 0.018748 |
| 0.206694 | 6.69E-06 | -0.0072  | 0.87675 | 0.169586 | 0.00023  | -0.03685 | 0.42695 | 0.00925  |
| 0.204975 | 8.00E-06 | 0.015659 | 0.73574 | 0.133408 | 0.00388  | -0.00085 | 0.98532 | 0.017842 |

|          |          |          |          |          |          |          |          |          |
|----------|----------|----------|----------|----------|----------|----------|----------|----------|
| 0.148148 | 0.00132  | 0.025978 | 0.57549  | 0.159168 | 0.00056  | -0.01828 | 0.6936   | 0.031882 |
| -0.18895 | 3.97E-05 | -0.12033 | 0.00925  | -0.32697 | 4.26E-13 | -0.08858 | 0.05575  | -0.12765 |
| 0.135172 | 0.00343  | 0.146413 | 0.00151  | 0.182761 | 7.11E-05 | 0.026307 | 0.57067  | -0.04022 |
| 0.158826 | 0.00057  | 0.042087 | 0.36416  | 0.291021 | 1.44E-10 | -0.00923 | 0.84227  | 0.096152 |
| 0.067772 | 0.14365  | 0.011879 | 0.79793  | 0.132139 | 0.00423  | -0.00857 | 0.85354  | 0.093479 |
| -0.15181 | 0.001    | 0.000124 | 0.99787  | -0.14914 | 0.00123  | 0.063623 | 0.16987  | -0.04801 |
| 0.414949 | 7.33E-21 | 0.246039 | 7.22E-08 | 0.5336   | 1.01E-35 | 0.277676 | 1.03E-09 | 0.27644  |
| 0.057606 | 0.21403  | -0.09329 | 0.0439   | 0.077678 | 0.09361  | -0.09792 | 0.03438  | 0.115023 |
| 0.123705 | 0.00744  | -0.02015 | 0.66399  | 0.234638 | 2.92E-07 | -0.06186 | 0.18202  | 0.082103 |
| 0.210847 | 4.31E-06 | 0.033125 | 0.47515  | 0.234901 | 2.83E-07 | 0.021977 | 0.6357   | 0.088289 |
| 0.092747 | 0.04515  | -0.1196  | 0.00968  | 0.131639 | 0.00438  | -0.13107 | 0.00455  | 0.076492 |
| 0.077042 | 0.09633  | -0.05636 | 0.22416  | 0.193463 | 2.56E-05 | -0.13436 | 0.00363  | 0.011924 |
| 0.034194 | 0.46101  | -0.15016 | 0.00113  | 0.106621 | 0.02119  | -0.13552 | 0.00334  | 0.161792 |
| 0.092239 | 0.04635  | 0.033166 | 0.47461  | 0.223555 | 1.06E-06 | -0.09181 | 0.04738  | 0.024227 |
| 0.083962 | 0.06987  | -0.00999 | 0.82959  | 0.145906 | 0.00157  | -0.03685 | 0.42693  | 0.000402 |
| 0.168531 | 0.00025  | 0.007376 | 0.8737   | 0.223612 | 1.05E-06 | -0.02938 | 0.5265   | 0.011823 |
| 0.195223 | 2.15E-05 | -0.02394 | 0.60577  | 0.099583 | 0.03143  | -0.03755 | 0.41824  | 0.109187 |
| 0.109772 | 0.01764  | -0.08284 | 0.0737   | -0.01304 | 0.77861  | -0.1333  | 0.0039   | 0.019807 |
| 0.184723 | 5.92E-05 | 0.570114 | 1.31E-41 | 0.581846 | 1.17E-43 | 0.405524 | 6.52E-20 | 0.161996 |
| 0.100361 | 0.03012  | 0.045051 | 0.33133  | 0.1789   | 0.0001   | 0.025719 | 0.57931  | 0.06438  |
| 0.097673 | 0.03485  | 0.03488  | 0.45206  | 0.196137 | 1.97E-05 | 0.016676 | 0.71927  | 0.085272 |
| 0.039184 | 0.3982   | -0.01953 | 0.67386  | 0.090269 | 0.05124  | -0.01839 | 0.69183  | 0.105537 |
| 0.118451 | 0.01041  | -0.0521  | 0.2612   | 0.212232 | 3.71E-06 | -0.13131 | 0.00448  | 0.156095 |
| 0.114267 | 0.01348  | -0.01359 | 0.76954  | 0.170359 | 0.00022  | -0.0768  | 0.09736  | -0.03457 |
| 0.100662 | 0.02963  | 0.044991 | 0.33198  | 0.156069 | 0.00071  | 0.033915 | 0.46469  | 0.09535  |
| 0.031215 | 0.501    | 0.204516 | 8.39E-06 | 0.260445 | 1.12E-08 | 0.224415 | 9.62E-07 | 0.047339 |
| 0.130301 | 0.0048   | -0.01337 | 0.77329  | 0.227786 | 6.53E-07 | -0.05792 | 0.21156  | 0.02666  |
| 0.094135 | 0.04202  | 0.012901 | 0.78097  | 0.227418 | 6.81E-07 | -0.08059 | 0.0819   | 0.057711 |
| 0.130643 | 0.00469  | 0.138022 | 0.0028   | 0.258649 | 1.42E-08 | 0.055791 | 0.22883  | 0.079858 |
| -0.08085 | 0.08092  | -0.0108  | 0.8159   | -0.10041 | 0.03004  | 0.021861 | 0.63749  | 0.063038 |
| 0.159089 | 0.00056  | -0.03216 | 0.48811  | 0.136026 | 0.00323  | -0.06412 | 0.16653  | 0.096611 |
| -0.02997 | 0.51828  | 0.127166 | 0.00593  | 0.019052 | 0.68132  | 0.192848 | 2.72E-05 | -0.01217 |
| 0.080638 | 0.08172  | -0.12165 | 0.0085   | 0.216894 | 2.23E-06 | -0.1683  | 0.00026  | 0.181655 |
| 0.091982 | 0.04696  | -0.05947 | 0.19956  | 0.150682 | 0.00109  | -0.12643 | 0.00622  | 0.053332 |
| 0.086414 | 0.06205  | -0.02728 | 0.55651  | 0.148441 | 0.00129  | -0.06538 | 0.15834  | 0.025546 |
| 0.095352 | 0.03942  | 0.070509 | 0.12813  | 0.110341 | 0.01706  | -0.01876 | 0.6859   | -0.0376  |
| 0.148504 | 0.00129  | 0.027163 | 0.55819  | 0.292564 | 1.14E-10 | -0.03849 | 0.40668  | 0.046521 |
| 0.168121 | 0.00026  | -0.00379 | 0.93485  | 0.219259 | 1.72E-06 | -0.06887 | 0.13726  | 0.01352  |
| 0.194823 | 2.24E-05 | 0.019589 | 0.67286  | 0.24084  | 1.38E-07 | -0.05045 | 0.27663  | 0.074209 |
| 0.150057 | 0.00114  | -0.02916 | 0.52954  | 0.148856 | 0.00125  | -0.04093 | 0.37754  | 0.129794 |
| 0.008426 | 0.8559   | -0.01782 | 0.70095  | 0.13538  | 0.00338  | 0.012674 | 0.78472  | 0.085969 |
| 0.089996 | 0.05195  | -0.04149 | 0.371    | 0.148926 | 0.00125  | -0.15632 | 0.0007   | -0.02092 |
| 0.114163 | 0.01357  | -0.02275 | 0.62391  | 0.212617 | 3.56E-06 | -0.0888  | 0.05515  | 0.002585 |
| 0.087915 | 0.05764  | -0.05044 | 0.27669  | 0.173527 | 0.00016  | -0.10493 | 0.02334  | 0.081051 |
| 0.087445 | 0.05899  | -0.03424 | 0.46047  | 0.145316 | 0.00164  | -0.10984 | 0.01757  | 0.064635 |

|          |          |          |         |          |          |          |          |          |
|----------|----------|----------|---------|----------|----------|----------|----------|----------|
| 0.141185 | 0.00223  | -0.01598 | 0.7306  | 0.247654 | 5.89E-08 | -0.07988 | 0.08466  | 0.070733 |
| 0.028369 | 0.54084  | 0.038415 | 0.40754 | 0.14184  | 0.00212  | -0.00674 | 0.88443  | 0.056019 |
| 0.04881  | 0.29252  | 0.001451 | 0.97505 | 0.138304 | 0.00274  | -0.13347 | 0.00386  | 0.009895 |
| 0.171152 | 0.0002   | 0.00717  | 0.87718 | 0.264036 | 6.88E-09 | -0.05003 | 0.2806   | 0.033805 |
| 0.148169 | 0.00132  | -0.0017  | 0.97078 | 0.21852  | 1.87E-06 | -0.05776 | 0.21282  | 0.051549 |
| 0.113151 | 0.01442  | -0.02331 | 0.61531 | 0.109525 | 0.0179   | -0.1383  | 0.00274  | 0.079345 |
| 0.013664 | 0.76837  | -0.051   | 0.27134 | 0.048018 | 0.30043  | -0.03253 | 0.48316  | -0.01314 |
| 0.137861 | 0.00283  | -0.04853 | 0.29528 | 0.149947 | 0.00115  | -0.11595 | 0.01216  | 0.012103 |
| 0.034098 | 0.46228  | -0.03847 | 0.40684 | 0.117609 | 0.01097  | -0.06603 | 0.15426  | 0.020289 |
| 0.120052 | 0.00941  | -0.06311 | 0.17332 | 0.17071  | 0.00021  | -0.10515 | 0.02305  | 0.149676 |
| 0.04632  | 0.31787  | -0.0063  | 0.89198 | 0.08098  | 0.08043  | -0.04208 | 0.36426  | 0.011559 |
| 0.035147 | 0.44862  | -0.01937 | 0.67638 | 0.096174 | 0.03775  | -0.02381 | 0.60772  | -0.00316 |
| 0.166077 | 0.00031  | 0.047621 | 0.30446 | 0.254978 | 2.30E-08 | -0.00143 | 0.97542  | 0.053399 |
| 0.103091 | 0.0259   | -0.02895 | 0.53257 | 0.249519 | 4.65E-08 | -0.06638 | 0.1521   | 0.073058 |
| 0.114924 | 0.01295  | 0.016047 | 0.72944 | 0.288716 | 2.04E-10 | -0.05753 | 0.21465  | 0.04374  |
| 0.094241 | 0.04179  | -0.05769 | 0.21339 | 0.207764 | 5.97E-06 | -0.11484 | 0.01302  | 0.086685 |
| 0.064222 | 0.16588  | -0.02962 | 0.52316 | 0.132925 | 0.00401  | -0.05331 | 0.25021  | 0.183581 |
| 0.114038 | 0.01367  | -0.04346 | 0.34867 | 0.085581 | 0.06462  | -0.1195  | 0.00974  | 0.203226 |
| 0.114888 | 0.01298  | -0.00405 | 0.93048 | 0.10888  | 0.01859  | -0.0432  | 0.35159  | -0.04221 |
| 0.109322 | 0.01812  | -0.06048 | 0.19199 | 0.119341 | 0.00984  | -0.06607 | 0.15402  | 0.050721 |
| 0.095384 | 0.03936  | -0.07715 | 0.09586 | 0.084508 | 0.06806  | -0.09753 | 0.03512  | 0.059913 |
| 0.093711 | 0.04296  | -0.00769 | 0.86843 | 0.205958 | 7.22E-06 | -0.08064 | 0.08173  | 0.066601 |
| 0.090527 | 0.05057  | 0.053059 | 0.25248 | 0.193989 | 2.43E-05 | -0.04064 | 0.38086  | 0.023337 |
| 0.16781  | 0.00027  | 0.024818 | 0.59267 | 0.278353 | 9.33E-10 | -0.02875 | 0.53548  | 0.056702 |
| 0.137856 | 0.00283  | 0.009716 | 0.83413 | 0.248498 | 5.29E-08 | -0.02913 | 0.53002  | 0.114703 |
| 0.14745  | 0.0014   | 0.044815 | 0.33387 | 0.224168 | 9.89E-07 | -0.00262 | 0.955    | 0.158491 |
| 0.086406 | 0.06208  | -0.03205 | 0.48967 | 0.104525 | 0.02389  | -0.07924 | 0.08716  | 0.003896 |
| 0.19138  | 3.14E-05 | -0.0243  | 0.60035 | 0.164329 | 0.00036  | -0.03915 | 0.39865  | 0.043689 |
| 0.083423 | 0.07169  | -0.06131 | 0.18595 | 0.079035 | 0.088    | -0.14084 | 0.00228  | 0.070131 |
| 0.101791 | 0.02784  | 0.013991 | 0.76299 | 0.061761 | 0.18274  | -0.08561 | 0.06452  | -0.0265  |
| 0.208387 | 5.59E-06 | 0.162786 | 0.00041 | 0.355224 | 2.46E-15 | 0.188186 | 4.27E-05 | 0.226342 |
| 0.08177  | 0.07752  | 0.013646 | 0.76867 | 0.083343 | 0.07196  | -0.00072 | 0.98756  | 0.013167 |
| -0.15728 | 0.00065  | -0.02224 | 0.63164 | -0.29328 | 1.02E-10 | -0.00397 | 0.93176  | -0.01128 |
| 0.160889 | 0.00048  | -0.0315  | 0.49704 | 0.089804 | 0.05245  | -0.01746 | 0.70663  | 0.100188 |
| 0.066679 | 0.15024  | -0.03927 | 0.39714 | 0.165436 | 0.00033  | -0.07349 | 0.11274  | 0.065512 |
| 0.155688 | 0.00074  | 0.056954 | 0.21926 | 0.086098 | 0.06302  | 0.056035 | 0.2268   | 0.016299 |
| 0.107853 | 0.01974  | -0.01796 | 0.69862 | 0.103297 | 0.0256   | 0.025217 | 0.58674  | 0.166282 |
| 0.140605 | 0.00232  | -0.00275 | 0.95275 | 0.186485 | 5.02E-05 | -0.01553 | 0.73787  | 0.028514 |
| 0.101123 | 0.02889  | -0.06342 | 0.17122 | 0.130342 | 0.00478  | -0.08166 | 0.07793  | -0.014   |
| -0.10796 | 0.01962  | -0.02673 | 0.56442 | -0.18235 | 7.39E-05 | 0.028973 | 0.53226  | 1.54E-05 |
| 0.076413 | 0.09909  | 0.017819 | 0.70093 | 0.172652 | 0.00018  | -0.01605 | 0.72937  | 0.029699 |
| 0.120157 | 0.00935  | 0.046587 | 0.31508 | 0.096127 | 0.03784  | -0.03554 | 0.44359  | -0.02291 |
| 0.18683  | 4.86E-05 | 0.023834 | 0.60743 | 0.124842 | 0.00691  | -0.01281 | 0.78253  | 0.050691 |
| 0.129327 | 0.00513  | -0.02232 | 0.63039 | 0.135185 | 0.00342  | -0.04176 | 0.36796  | 0.086684 |
| 0.233903 | 3.18E-07 | 0.028873 | 0.53367 | 0.217992 | 1.98E-06 | 0.002326 | 0.96002  | 0.068393 |

|          |          |          |          |          |          |          |          |          |
|----------|----------|----------|----------|----------|----------|----------|----------|----------|
| -0.10093 | 0.02919  | -0.02443 | 0.59851  | -0.16193 | 0.00044  | 0.008534 | 0.85407  | 0.127827 |
| 0.131224 | 0.0045   | -0.06439 | 0.16475  | 0.094141 | 0.042    | -0.14022 | 0.00239  | 0.036227 |
| 0.207392 | 6.21E-06 | 0.044501 | 0.33727  | 0.214442 | 2.92E-06 | 0.001308 | 0.97752  | 0.056931 |
| 0.140302 | 0.00237  | 0.020863 | 0.65293  | 0.103397 | 0.02545  | 0.015945 | 0.73109  | 0.035656 |
| 0.059584 | 0.19868  | -0.07154 | 0.12261  | 0.04969  | 0.2839   | -0.14148 | 0.00218  | -0.01664 |
| 0.210551 | 4.45E-06 | -0.05825 | 0.20894  | 0.138595 | 0.00269  | -0.0929  | 0.04479  | 0.129999 |
| 0.153522 | 0.00087  | -0.04849 | 0.29573  | 0.175621 | 0.00014  | -0.05425 | 0.24195  | 0.075662 |
| 0.091487 | 0.04817  | 0.032184 | 0.4878   | 0.131146 | 0.00453  | -0.03446 | 0.45753  | -0.02792 |
| 0.086468 | 0.06189  | 0.04562  | 0.32526  | 0.14128  | 0.00221  | 0.012094 | 0.79435  | 0.133094 |
| 0.135057 | 0.00345  | -0.05433 | 0.2413   | 0.066526 | 0.15118  | -0.11554 | 0.01247  | -0.03374 |
| 0.192214 | 2.89E-05 | -0.00151 | 0.97405  | 0.031322 | 0.49953  | 0.001447 | 0.97513  | -0.0458  |
| -0.04099 | 0.37682  | 0.070848 | 0.1263   | -0.17035 | 0.00022  | 0.072656 | 0.11689  | -0.04429 |
| 0.177376 | 0.00012  | -0.0315  | 0.49714  | 0.160506 | 0.0005   | -0.10975 | 0.01766  | -0.01089 |
| 0.119535 | 0.00972  | -0.02483 | 0.59247  | 0.106281 | 0.02161  | -0.06548 | 0.15772  | 0.09278  |
| 0.255047 | 2.28E-08 | 0.16877  | 0.00025  | 0.295605 | 7.17E-11 | 0.153208 | 0.00089  | 0.089048 |
| 0.094553 | 0.04111  | -0.03374 | 0.46704  | 0.066356 | 0.15223  | -0.02029 | 0.66188  | 0.172589 |
| 0.080033 | 0.08405  | -0.04182 | 0.36717  | 0.074585 | 0.10746  | -0.05685 | 0.22014  | -0.00048 |
| 0.101911 | 0.02765  | 0.075799 | 0.10184  | 0.210775 | 4.34E-06 | 0.009866 | 0.83161  | 0.078663 |
| 0.159319 | 0.00055  | 0.037148 | 0.42319  | 0.05528  | 0.23313  | -0.0805  | 0.08224  | -0.0521  |
| 0.309638 | 7.79E-12 | 0.264929 | 6.10E-09 | 0.302096 | 2.61E-11 | 0.226216 | 7.83E-07 | 0.090668 |
| 0.127745 | 0.0057   | 0.013828 | 0.76568  | 0.219374 | 1.70E-06 | -0.05296 | 0.25333  | 0.061984 |
| 0.110541 | 0.01686  | 0.004434 | 0.92387  | 0.14392  | 0.00182  | 0.019818 | 0.66925  | 0.152888 |
| 0.121101 | 0.0088   | 0.002664 | 0.95422  | 0.123153 | 0.00771  | 0.009713 | 0.83418  | -0.05082 |
| 0.132969 | 0.00399  | -0.03087 | 0.50579  | 0.126197 | 0.00632  | 0.007454 | 0.87237  | 0.089176 |
| 0.128764 | 0.00532  | -0.06531 | 0.1588   | 0.183543 | 6.62E-05 | -0.12725 | 0.00589  | 0.117167 |
| 0.061781 | 0.1826   | -0.01236 | 0.78996  | 0.05843  | 0.20753  | -0.02133 | 0.64571  | -0.01172 |
| 0.095803 | 0.0385   | 0.034754 | 0.45371  | 0.140789 | 0.00229  | -0.07719 | 0.09569  | 0.008025 |
| 0.168319 | 0.00026  | 0.001345 | 0.97688  | 0.265185 | 5.89E-09 | -0.04705 | 0.3103   | 0.03282  |
| -0.12365 | 0.00747  | 0.126345 | 0.00626  | -0.07102 | 0.12536  | 0.040773 | 0.37933  | -0.20991 |
| 0.065553 | 0.15726  | -0.08208 | 0.07641  | 0.112383 | 0.01511  | -0.1168  | 0.01154  | 0.095985 |
| -0.05323 | 0.25091  | 0.011774 | 0.79968  | -0.04573 | 0.32412  | 0.112842 | 0.0147   | 0.069979 |
| 0.110048 | 0.01736  | -0.05209 | 0.26125  | 0.194786 | 2.25E-05 | -0.11312 | 0.01445  | 0.08086  |
| 0.190551 | 3.40E-05 | 0.010993 | 0.81272  | 0.177741 | 0.00011  | -0.01519 | 0.74345  | 0.071193 |
| 0.139865 | 0.00245  | 0.011684 | 0.80118  | 0.145554 | 0.00161  | -0.00723 | 0.8762   | 0.005567 |
| 0.057584 | 0.2142   | 0.053964 | 0.24447  | 0.147928 | 0.00135  | 0.038377 | 0.408    | 0.189473 |
| 0.105308 | 0.02285  | 0.0203   | 0.6617   | 0.195437 | 2.11E-05 | -0.04584 | 0.32288  | 0.09596  |
| 0.169376 | 0.00024  | 0.009056 | 0.84525  | 0.266619 | 4.84E-09 | -0.04307 | 0.35307  | 0.093205 |
| 0.099899 | 0.03089  | -0.01455 | 0.75387  | 0.236707 | 2.28E-07 | -0.05782 | 0.21236  | 0.125508 |
| 0.016114 | 0.72835  | -0.0191  | 0.68062  | 0.094472 | 0.04129  | -0.04689 | 0.31197  | 0.031025 |
| 0.139189 | 0.00257  | 0.020925 | 0.65197  | 0.22577  | 8.24E-07 | -0.02993 | 0.51878  | 0.028204 |
| 8.68E-05 | 0.99851  | -0.0097  | 0.83447  | 0.032257 | 0.48681  | -0.02471 | 0.59423  | 0.082505 |
| 0.031185 | 0.50142  | -0.00264 | 0.9547   | 0.129861 | 0.00494  | -0.04372 | 0.34585  | 0.07879  |
| 0.140738 | 0.0023   | -0.00453 | 0.92223  | 0.234301 | 3.04E-07 | -0.05411 | 0.24316  | 0.104868 |
| 0.108655 | 0.01884  | 0.073824 | 0.11111  | 0.176468 | 0.00013  | 0.012468 | 0.78814  | -0.04379 |
| 0.203679 | 9.15E-06 | 0.032695 | 0.48091  | 0.239426 | 1.64E-07 | -0.01437 | 0.75672  | 0.040269 |

|          |          |          |         |          |          |          |         |          |
|----------|----------|----------|---------|----------|----------|----------|---------|----------|
| 0.193378 | 2.58E-05 | 0.014805 | 0.74966 | 0.202004 | 1.09E-05 | -0.02077 | 0.65431 | 0.040079 |
| 0.08873  | 0.05535  | -0.01454 | 0.75405 | 0.15161  | 0.00101  | -0.06467 | 0.16297 | 0.044577 |
| 0.098629 | 0.0331   | 0.009474 | 0.8382  | 0.136844 | 0.00304  | 0.055165 | 0.23411 | 0.142535 |
| 0.144197 | 0.00178  | -0.02693 | 0.56152 | 0.22964  | 5.26E-07 | -0.06255 | 0.17722 | 0.061561 |
| -0.15331 | 0.00089  | 0.026963 | 0.5611  | -0.12283 | 0.00788  | 0.093351 | 0.04376 | -0.02942 |
| 0.176567 | 0.00013  | 0.023186 | 0.61723 | 0.291472 | 1.35E-10 | -0.01557 | 0.73721 | 0.071033 |
| 0.141183 | 0.00223  | 0.029384 | 0.52645 | 0.265847 | 5.38E-09 | -0.04581 | 0.32321 | 0.069411 |
| 0.121647 | 0.0085   | -0.05397 | 0.2444  | 0.062534 | 0.17732  | -0.10591 | 0.02207 | 0.10717  |
| 0.130895 | 0.00461  | -0.03675 | 0.4282  | 0.05728  | 0.21663  | -0.06464 | 0.16314 | 0.04712  |
| 0.182298 | 7.43E-05 | 0.049749 | 0.28333 | 0.261905 | 9.18E-09 | -0.0224  | 0.62926 | 0.03345  |
| 0.211926 | 3.84E-06 | 0.024569 | 0.59639 | 0.134792 | 0.00352  | 0.035388 | 0.44551 | 0.028176 |
| 0.058114 | 0.21001  | -0.05622 | 0.22528 | 0.013613 | 0.76922  | -0.11185 | 0.0156  | 0.044672 |
| 0.058147 | 0.20975  | -0.09948 | 0.03161 | 0.127317 | 0.00587  | -0.13195 | 0.00429 | 0.088783 |
| 0.223804 | 1.03E-06 | 0.018355 | 0.69239 | 0.140154 | 0.0024   | 0.044348 | 0.33894 | 0.0995   |
| 0.194408 | 2.33E-05 | -0.01201 | 0.79582 | 0.140709 | 0.00231  | -0.00293 | 0.94968 | 0.097893 |
| -0.09996 | 0.03079  | 0.012148 | 0.79346 | -0.16508 | 0.00034  | -0.03149 | 0.49726 | -0.12833 |
| 0.120211 | 0.00932  | 0.017811 | 0.70106 | 0.126263 | 0.00629  | -0.02353 | 0.61207 | -0.01218 |
| 0.052087 | 0.26129  | -0.01402 | 0.76251 | 0.09807  | 0.03411  | -0.02484 | 0.59229 | 0.077688 |
| 0.124163 | 0.00722  | -0.00223 | 0.96175 | 0.185918 | 5.29E-05 | -0.07304 | 0.11498 | 0.071979 |
| 0.158356 | 0.00059  | 0.000712 | 0.98776 | 0.276739 | 1.18E-09 | -0.03584 | 0.43971 | 0.054906 |
| 0.101189 | 0.02878  | -0.01195 | 0.79679 | 0.226392 | 7.67E-07 | -0.14021 | 0.00239 | 0.077136 |
| 0.131688 | 0.00436  | -0.05751 | 0.2148  | 0.188621 | 4.09E-05 | -0.14169 | 0.00215 | 0.02091  |
| 0.103283 | 0.02562  | -0.07997 | 0.08429 | 0.222928 | 1.14E-06 | -0.14689 | 0.00146 | 0.116175 |
| 0.149123 | 0.00123  | -0.00244 | 0.95805 | 0.272788 | 2.06E-09 | -0.04666 | 0.31437 | 0.049601 |
| 0.140097 | 0.00241  | -0.00334 | 0.94267 | 0.274994 | 1.51E-09 | -0.04056 | 0.38188 | 0.053111 |
| 0.100998 | 0.02909  | -0.06105 | 0.18787 | 0.219847 | 1.61E-06 | -0.11525 | 0.01269 | 0.070892 |
| 0.116043 | 0.01209  | -0.02837 | 0.54076 | 0.192478 | 2.82E-05 | -0.10172 | 0.02796 | 0.025251 |
| 0.197378 | 1.74E-05 | 0.017075 | 0.71285 | 0.267857 | 4.08E-09 | -0.00644 | 0.88969 | 0.043992 |
| 0.064667 | 0.16296  | -0.03806 | 0.41195 | 0.185742 | 5.38E-05 | -0.05497 | 0.23576 | 0.004733 |
| 0.222527 | 1.19E-06 | 0.001778 | 0.96943 | 0.223076 | 1.12E-06 | -0.0424  | 0.36056 | 0.037858 |
| 0.095178 | 0.03979  | -0.01754 | 0.70545 | 0.20891  | 5.29E-06 | -0.06981 | 0.13196 | 0.047412 |
| 0.141044 | 0.00225  | 0.000936 | 0.9839  | 0.279571 | 7.83E-10 | -0.04298 | 0.35403 | 0.056316 |
| 0.140926 | 0.00227  | -0.0047  | 0.9194  | 0.283293 | 4.55E-10 | -0.04485 | 0.33352 | 0.073071 |
| 0.163009 | 0.0004   | 0.099602 | 0.0314  | 0.260092 | 1.17E-08 | 0.079333 | 0.0868  | 0.108805 |
| 0.123438 | 0.00757  | -0.02085 | 0.6531  | 0.149968 | 0.00115  | -0.07429 | 0.10888 | 0.023304 |
| 0.151099 | 0.00106  | -0.00679 | 0.88365 | 0.201756 | 1.12E-05 | -0.0627  | 0.17615 | 0.025858 |
| 0.13175  | 0.00435  | -0.00525 | 0.90985 | 0.186055 | 5.23E-05 | -0.02417 | 0.60233 | 0.089409 |
| 0.017178 | 0.7112   | -0.00632 | 0.89173 | 0.088935 | 0.05479  | -0.01396 | 0.76358 | 0.010914 |
| 0.11351  | 0.01411  | -0.01732 | 0.70889 | 0.149905 | 0.00116  | -0.04331 | 0.35042 | 0.041676 |
| 0.458029 | 1.34E-25 | 0.088302 | 0.05654 | 0.309625 | 7.81E-12 | 0.041896 | 0.36634 | 0.050571 |
| 0.182263 | 7.45E-05 | -0.04629 | 0.3182  | 0.146463 | 0.0015   | -0.07855 | 0.08996 | 0.040992 |
| 0.176604 | 0.00012  | -0.00263 | 0.95484 | 0.170603 | 0.00021  | -0.05426 | 0.24188 | 0.004988 |
| 0.069444 | 0.13401  | -0.05751 | 0.21477 | -0.06424 | 0.16574  | -0.02993 | 0.51881 | -0.02956 |
| 0.14451  | 0.00174  | 0.00874  | 0.85058 | 0.263002 | 7.92E-09 | -0.02922 | 0.52873 | 0.125603 |
| 0.026636 | 0.56585  | 0.026025 | 0.57481 | 0.025016 | 0.58972  | -0.0185  | 0.69007 | 0.052016 |

|          |          |          |         |          |          |          |          |          |
|----------|----------|----------|---------|----------|----------|----------|----------|----------|
| 0.080185 | 0.08346  | -0.06209 | 0.18042 | 0.065288 | 0.15895  | -0.0606  | 0.19115  | 0.031238 |
| -0.07817 | 0.09153  | -0.06826 | 0.1408  | -0.24808 | 5.58E-08 | 0.046778 | 0.31311  | -0.03997 |
| 0.133782 | 0.00378  | 0.015209 | 0.74305 | 0.291536 | 1.33E-10 | -0.02634 | 0.57018  | 0.049961 |
| -0.11186 | 0.01559  | 0.021471 | 0.6435  | -0.06476 | 0.16237  | 0.105832 | 0.02218  | 0.151375 |
| -0.06692 | 0.14878  | 0.098124 | 0.03401 | -0.08829 | 0.05658  | 0.044819 | 0.33383  | -0.10093 |
| 0.207508 | 6.14E-06 | 0.024896 | 0.5915  | 0.241807 | 1.22E-07 | 0.003497 | 0.93992  | 0.07788  |
| 0.103603 | 0.02516  | -0.0745  | 0.10787 | 0.05588  | 0.2281   | -0.0476  | 0.30466  | 0.100458 |
| 0.087517 | 0.05878  | -0.03409 | 0.46243 | 0.093381 | 0.0437   | -0.04191 | 0.36617  | 0.041721 |
| 0.089818 | 0.05242  | 0.103581 | 0.02519 | 0.257455 | 1.66E-08 | 0.19824  | 1.59E-05 | 0.126978 |
| 0.095049 | 0.04006  | -0.0246  | 0.59595 | 0.194745 | 2.26E-05 | -0.05875 | 0.20509  | 0.014011 |
| 0.059763 | 0.19734  | -0.04346 | 0.34865 | 0.129437 | 0.00509  | -0.07608 | 0.10057  | -0.05956 |
| 0.209709 | 4.86E-06 | 0.00645  | 0.88943 | 0.157137 | 0.00065  | -0.01968 | 0.67139  | -0.00037 |
| 0.176397 | 0.00013  | -0.00048 | 0.99183 | 0.157008 | 0.00066  | -0.0277  | 0.55038  | 0.086211 |
| 0.055836 | 0.22846  | 0.023984 | 0.60517 | 0.154276 | 0.00082  | 0.003656 | 0.93719  | 0.039643 |
| 0.138323 | 0.00274  | 0.013147 | 0.77691 | 0.131    | 0.00457  | 0.004855 | 0.91667  | -0.01085 |
| 0.004067 | 0.93015  | 0.118963 | 0.01008 | -0.02505 | 0.58922  | 0.130613 | 0.0047   | -0.08342 |
| 0.051936 | 0.26268  | 0.014142 | 0.76052 | 0.122713 | 0.00794  | -0.05544 | 0.23181  | -0.01782 |
| 0.082567 | 0.07466  | -0.0983  | 0.0337  | 0.179028 | 0.0001   | -0.13965 | 0.00249  | 0.146912 |
| 0.120961 | 0.00888  | -0.10066 | 0.02963 | 0.152965 | 0.00091  | -0.12245 | 0.00807  | 0.056791 |
| 0.232445 | 3.79E-07 | 0.082194 | 0.07598 | 0.325232 | 5.75E-13 | 0.106901 | 0.02086  | 0.095292 |
| 0.202637 | 1.02E-05 | 0.01892  | 0.68342 | 0.245667 | 7.56E-08 | -0.01091 | 0.81402  | 0.070357 |
| 0.144913 | 0.00169  | 0.09151  | 0.04811 | 0.206603 | 6.75E-06 | 0.049911 | 0.28176  | 0.197361 |
| 0.151971 | 0.00099  | 0.097078 | 0.03597 | 0.201058 | 1.20E-05 | 0.046296 | 0.31812  | 0.047957 |
| 0.297508 | 5.34E-11 | 0.006737 | 0.88456 | 0.124328 | 0.00715  | -0.01239 | 0.7894   | 0.066143 |
| 0.119575 | 0.0097   | 0.004917 | 0.9156  | 0.150503 | 0.00111  | -0.04087 | 0.37821  | 0.034049 |
| 0.093514 | 0.0434   | -0.00691 | 0.88155 | 0.140447 | 0.00235  | -0.05113 | 0.27013  | -0.06769 |
| 0.152889 | 0.00092  | -0.02615 | 0.57304 | 0.181204 | 8.22E-05 | -0.04632 | 0.31788  | 0.011122 |
| 0.151658 | 0.00101  | -0.02631 | 0.57064 | 0.093622 | 0.04315  | -0.09436 | 0.04153  | 0.075174 |
| -0.13301 | 0.00398  | -0.06455 | 0.16371 | -0.20551 | 7.57E-06 | -0.0283  | 0.54186  | 0.023464 |
| 0.044142 | 0.34119  | -0.06174 | 0.18286 | 0.062417 | 0.17813  | -0.09335 | 0.04377  | -0.02026 |
| 0.48788  | 2.68E-29 | 0.168464 | 0.00026 | 0.339103 | 4.97E-14 | 0.157703 | 0.00063  | 0.110119 |
| 0.172086 | 0.00019  | -0.00842 | 0.85604 | 0.223301 | 1.09E-06 | -0.04566 | 0.32478  | 0.027548 |
| 0.086722 | 0.06113  | 0.055051 | 0.23508 | 0.091596 | 0.0479   | -0.02381 | 0.60783  | -0.01689 |
| 0.084993 | 0.06649  | -0.07073 | 0.12695 | 0.106793 | 0.02099  | -0.18427 | 6.18E-05 | 0.021218 |
| 0.113742 | 0.01392  | -0.04253 | 0.35912 | 0.195426 | 2.11E-05 | -0.13699 | 0.00301  | 0.048123 |
| 0.15468  | 0.0008   | -0.00357 | 0.9387  | 0.25689  | 1.79E-08 | -0.06389 | 0.16808  | 0.095881 |
| 0.079283 | 0.087    | -0.01457 | 0.75357 | 0.039396 | 0.39566  | 0.020275 | 0.66209  | 0.198319 |
| 0.068434 | 0.13977  | -0.00965 | 0.83519 | 0.169347 | 0.00024  | -0.06204 | 0.18078  | 0.04284  |
| 0.08985  | 0.05233  | 0.087361 | 0.05924 | 0.186076 | 5.22E-05 | 0.042052 | 0.36455  | -0.04931 |
| 0.211578 | 3.98E-06 | 0.036654 | 0.42939 | 0.251557 | 3.58E-08 | 0.004146 | 0.9288   | 0.05854  |
| 0.063371 | 0.17157  | 0.008373 | 0.85679 | 0.132699 | 0.00407  | -0.02386 | 0.60697  | 0.001618 |
| 0.076589 | 0.09831  | -0.05735 | 0.2161  | 0.179774 | 9.37E-05 | -0.10366 | 0.02508  | 0.176789 |
| 0.145578 | 0.00161  | -0.01348 | 0.7714  | 0.244514 | 8.73E-08 | -0.05368 | 0.24692  | 0.049571 |
| 0.085146 | 0.066    | 0.07482  | 0.10635 | 0.113429 | 0.01418  | -0.04709 | 0.30985  | -0.14373 |
| 0.129386 | 0.0051   | 0.004924 | 0.91548 | 0.205795 | 7.35E-06 | -0.04457 | 0.33654  | 0.054977 |



|          |          |          |         |          |          |          |          |          |
|----------|----------|----------|---------|----------|----------|----------|----------|----------|
| 0.116807 | 0.01153  | 0.016544 | 0.7214  | 0.178308 | 0.00011  | -0.01447 | 0.75505  | 0.048434 |
| -0.12839 | 0.00546  | -0.07729 | 0.09525 | -0.22282 | 1.15E-06 | -0.06104 | 0.18788  | -0.17006 |
| 0.152497 | 0.00095  | 0.061916 | 0.18164 | 0.266144 | 5.17E-09 | 0.020833 | 0.65339  | 0.048031 |
| 0.054864 | 0.23668  | -0.03461 | 0.45558 | 0.058129 | 0.20989  | -0.0486  | 0.29463  | 0.022251 |
| 0.159111 | 0.00056  | -0.03853 | 0.40611 | 0.151911 | 0.00099  | -0.0623  | 0.17893  | 0.017534 |
| 0.043761 | 0.34537  | -0.03133 | 0.49943 | 0.107245 | 0.02045  | -0.05692 | 0.21954  | 0.047265 |
| 0.175773 | 0.00013  | 0.027774 | 0.54936 | 0.157184 | 0.00065  | -0.02309 | 0.61868  | 0.008942 |
| 0.277254 | 1.09E-09 | 0.085125 | 0.06607 | 0.271343 | 2.52E-09 | 0.044426 | 0.33808  | 0.086378 |
| 0.099394 | 0.03175  | -0.02266 | 0.62524 | 0.079119 | 0.08766  | -0.05407 | 0.24355  | -0.01628 |
| 0.07566  | 0.10247  | -0.07565 | 0.1025  | 0.08767  | 0.05834  | -0.0929  | 0.0448   | 0.073845 |
| 0.17895  | 0.0001   | 0.027229 | 0.55723 | 0.217263 | 2.15E-06 | -0.02752 | 0.55297  | 0.05096  |
| 0.055459 | 0.23162  | 0.139701 | 0.00248 | -0.00269 | 0.95378  | 0.159671 | 0.00053  | 0.054002 |
| 0.121706 | 0.00847  | -0.05787 | 0.21191 | 0.005164 | 0.91138  | -0.12131 | 0.00869  | -0.01132 |
| 0.068182 | 0.14124  | -0.14415 | 0.00179 | 0.155066 | 0.00077  | -0.18079 | 8.54E-05 | 0.056343 |
| 0.220236 | 1.54E-06 | 0.048422 | 0.29639 | 0.187078 | 4.74E-05 | -0.00328 | 0.94358  | 0.015828 |
| 0.165313 | 0.00033  | -0.01873 | 0.68645 | 0.055355 | 0.2325   | -0.02786 | 0.54811  | 0.020344 |
| 0.127426 | 0.00582  | -0.00694 | 0.88113 | 0.197768 | 1.67E-05 | -0.0497  | 0.28378  | 0.047725 |
| 0.153751 | 0.00086  | 0.007739 | 0.86753 | 0.184349 | 6.14E-05 | -0.0195  | 0.67426  | 0.02404  |
| 0.097779 | 0.03465  | -0.15496 | 0.00078 | 0.104931 | 0.02334  | -0.11883 | 0.01017  | 0.262798 |
| 0.077086 | 0.09614  | -0.06518 | 0.15965 | 0.083019 | 0.07308  | -0.07567 | 0.10244  | 0.135344 |
| -0.18507 | 5.73E-05 | -0.02053 | 0.65813 | -0.21152 | 4.01E-06 | -0.03467 | 0.45484  | 0.037925 |
| 0.027929 | 0.54714  | 0.055149 | 0.23425 | 0.135686 | 0.0033   | 0.041364 | 0.37246  | 0.08742  |
| -0.1238  | 0.0074   | -0.05295 | 0.25344 | -0.16132 | 0.00047  | 0.059933 | 0.19607  | -0.03045 |
| 0.07542  | 0.10357  | 0.043936 | 0.34345 | 0.017496 | 0.7061   | 0.034783 | 0.45333  | -0.00797 |
| 0.12568  | 0.00654  | 0.023135 | 0.618   | 0.238598 | 1.81E-07 | -0.03746 | 0.41934  | -0.01393 |
| 0.207708 | 6.01E-06 | 0.027823 | 0.54867 | 0.166134 | 0.00031  | -0.03327 | 0.47324  | 0.01     |
| 0.116535 | 0.01173  | -0.04055 | 0.38193 | 0.068162 | 0.14136  | -0.09486 | 0.04046  | -0.01263 |
| 0.207079 | 6.42E-06 | 0.167987 | 0.00027 | 0.387503 | 3.51E-18 | 0.079884 | 0.08463  | 0.078954 |
| 0.021483 | 0.64333  | -0.05405 | 0.24374 | 0.013619 | 0.76912  | -0.11271 | 0.01481  | -0.04574 |
| 0.054219 | 0.24225  | -0.01675 | 0.718   | 0.040305 | 0.38484  | -0.06003 | 0.19534  | 0.010738 |
| 0.090668 | 0.05021  | -0.07507 | 0.1052  | 0.121543 | 0.00856  | -0.0926  | 0.04549  | 0.204187 |
| 0.121294 | 0.00869  | -0.07934 | 0.08677 | 0.207957 | 5.85E-06 | -0.17506 | 0.00014  | 0.146973 |
| 0.129215 | 0.00516  | -0.02995 | 0.51856 | 0.211201 | 4.15E-06 | -0.10009 | 0.03056  | 0.01351  |
| 0.099016 | 0.03241  | -0.00084 | 0.9856  | 0.116032 | 0.0121   | -0.05973 | 0.19757  | 0.035035 |
| 0.117738 | 0.01088  | -0.06275 | 0.17585 | 0.173157 | 0.00017  | -0.13874 | 0.00266  | 0.068611 |
| 0.105474 | 0.02263  | -0.05224 | 0.25993 | 0.15637  | 0.0007   | -0.10788 | 0.01971  | 0.079861 |
| 0.168609 | 0.00025  | -0.03595 | 0.43832 | 0.21761  | 2.06E-06 | -0.08809 | 0.05715  | 0.0409   |
| 0.122206 | 0.0082   | -0.06098 | 0.18836 | 0.051298 | 0.26859  | -0.09448 | 0.04128  | 0.119892 |
| 0.075962 | 0.1011   | 0.060758 | 0.18996 | 0.181017 | 8.36E-05 | 0.02101  | 0.65065  | 0.09211  |
| 0.091913 | 0.04713  | -0.10052 | 0.02986 | 0.057514 | 0.21476  | -0.06686 | 0.14912  | 0.062222 |
| 0.13753  | 0.0029   | -0.02311 | 0.61846 | 0.08866  | 0.05554  | -0.07999 | 0.0842   | 0.052572 |
| 0.098593 | 0.03316  | -0.03669 | 0.42898 | 0.268844 | 3.56E-09 | -0.11298 | 0.01457  | 0.167183 |
| 0.149367 | 0.00121  | -0.09285 | 0.04492 | 0.182302 | 7.42E-05 | -0.16144 | 0.00046  | 0.047626 |
| 0.063531 | 0.17049  | -0.09283 | 0.04496 | 0.097557 | 0.03507  | -0.1348  | 0.00352  | 0.171053 |
| 0.103304 | 0.02559  | -0.11562 | 0.01241 | 0.134289 | 0.00364  | -0.22694 | 7.20E-07 | 0.029103 |

|          |         |          |          |          |          |          |          |          |
|----------|---------|----------|----------|----------|----------|----------|----------|----------|
| 0.117047 | 0.01136 | -0.07842 | 0.09052  | 0.104222 | 0.0243   | -0.06986 | 0.13169  | 0.098707 |
| 0.13532  | 0.00339 | -0.03071 | 0.50799  | 0.101675 | 0.02802  | -0.06762 | 0.14459  | 0.040561 |
| 0.154059 | 0.00084 | -0.03433 | 0.45923  | 0.137639 | 0.00288  | -0.03078 | 0.50699  | 0.092432 |
| 0.14882  | 0.00126 | 0.023359 | 0.6146   | 0.160242 | 0.00051  | -0.05372 | 0.24659  | 0.009113 |
| 0.075609 | 0.1027  | -0.0829  | 0.07351  | 0.186083 | 5.21E-05 | -0.14435 | 0.00176  | 0.109812 |
| 0.102374 | 0.02695 | 0.080809 | 0.08108  | 0.149085 | 0.00123  | 0.062439 | 0.17797  | 0.076352 |
| 0.030359 | 0.51282 | 0.123852 | 0.00737  | -0.1098  | 0.01761  | 0.07357  | 0.11234  | -0.23061 |
| -0.01394 | 0.76384 | 0.246122 | 7.14E-08 | 0.063159 | 0.17302  | 0.248685 | 5.17E-08 | 0.070664 |
| -0.10442 | 0.02403 | 0.084026 | 0.06965  | -0.20987 | 4.78E-06 | 0.061709 | 0.18311  | -0.26394 |
| 0.054352 | 0.24109 | -0.10712 | 0.0206   | 0.194411 | 2.33E-05 | -0.11302 | 0.01454  | 0.263318 |
| -0.01656 | 0.72116 | -0.0323  | 0.48616  | 0.087987 | 0.05743  | -0.02436 | 0.59959  | 0.17694  |
| 0.046654 | 0.3144  | -0.07296 | 0.11534  | 0.093088 | 0.04436  | -0.07207 | 0.11987  | 0.267189 |
| -0.01444 | 0.75571 | -0.18257 | 7.24E-05 | -0.06435 | 0.16505  | -0.2338  | 3.22E-07 | 0.048845 |
| 0.033769 | 0.46661 | -0.07129 | 0.12394  | 0.168979 | 0.00024  | -0.06574 | 0.15611  | 0.259049 |
| -0.01011 | 0.82748 | -0.16691 | 0.00029  | 0.053916 | 0.24489  | -0.21995 | 1.59E-06 | 0.225013 |
| 0.077969 | 0.09238 | -0.09708 | 0.03597  | 0.204478 | 8.42E-06 | -0.12519 | 0.00675  | 0.329519 |
| -0.01778 | 0.70152 | 0.220521 | 1.49E-06 | 0.024671 | 0.59487  | 0.242376 | 1.14E-07 | -0.13594 |
| 0.02306  | 0.61914 | -0.05378 | 0.24604  | 0.137627 | 0.00288  | -0.06634 | 0.15232  | 0.315356 |
| 0.013523 | 0.7707  | -0.16534 | 0.00033  | 0.14572  | 0.00159  | -0.18221 | 7.49E-05 | 0.287293 |
| 0.100231 | 0.03034 | -0.0515  | 0.2667   | 0.239467 | 1.63E-07 | -0.13    | 0.0049   | 0.285036 |
| 0.05555  | 0.23085 | -0.04294 | 0.35447  | 0.193191 | 2.63E-05 | -0.05558 | 0.2306   | 0.200118 |
| -0.12818 | 0.00553 | -0.03422 | 0.46064  | -0.17153 | 0.0002   | -0.01865 | 0.68765  | -0.18751 |
| 0.010753 | 0.81673 | -0.04541 | 0.32753  | 0.009296 | 0.84121  | -0.0852  | 0.06583  | 0.137721 |
| 0.110231 | 0.01717 | -0.06511 | 0.16006  | 0.077122 | 0.09599  | -0.08917 | 0.05414  | 0.173416 |
| -0.00345 | 0.94069 | -0.13162 | 0.00438  | 0.00418  | 0.92821  | -0.11485 | 0.01301  | 0.239635 |
| 0.010402 | 0.8226  | -0.14532 | 0.00164  | 0.126221 | 0.00631  | -0.18309 | 6.90E-05 | 0.268933 |
| -0.00474 | 0.91869 | -0.17522 | 0.00014  | -0.03592 | 0.43869  | -0.16519 | 0.00034  | 0.230717 |
| 0.052605 | 0.25657 | 0.004588 | 0.92124  | 0.267572 | 4.25E-09 | 0.037802 | 0.41507  | 0.464526 |
| -0.02703 | 0.56013 | -0.15431 | 0.00082  | -0.10213 | 0.02732  | -0.19155 | 3.09E-05 | 0.072733 |
| -0.08965 | 0.05285 | -0.20112 | 1.19E-05 | -0.04103 | 0.37636  | -0.1513  | 0.00104  | 0.314465 |
| 0.014336 | 0.75732 | -0.01664 | 0.71982  | 0.185239 | 5.64E-05 | 0.09983  | 0.03101  | 0.506565 |
| 0.043083 | 0.35291 | -0.07241 | 0.11815  | 0.127038 | 0.00598  | -0.08097 | 0.08049  | 0.267988 |
| 0.083744 | 0.0706  | -0.06816 | 0.14138  | 0.082234 | 0.07584  | -0.04496 | 0.33227  | 0.290989 |
| -0.02436 | 0.59953 | -0.08655 | 0.06165  | 0.058861 | 0.20419  | -0.10544 | 0.02267  | 0.168625 |
| -0.0022  | 0.96218 | -0.04977 | 0.28317  | 0.086619 | 0.06143  | -0.01358 | 0.76976  | 0.52122  |
| 0.030045 | 0.51719 | -0.13479 | 0.00352  | 0.143297 | 0.00191  | -0.17242 | 0.00018  | 0.275485 |
| 0.05649  | 0.22305 | -0.11591 | 0.01219  | 0.20123  | 1.18E-05 | -0.14767 | 0.00137  | 0.336066 |
| -0.00839 | 0.85645 | -0.09787 | 0.03447  | -0.02516 | 0.58751  | -0.16123 | 0.00047  | 0.133936 |
| 0.091985 | 0.04696 | -0.01615 | 0.72772  | 0.145349 | 0.00164  | 0.007662 | 0.86883  | 0.358122 |
| 0.054712 | 0.23798 | -0.13211 | 0.00424  | -0.00489 | 0.91614  | -0.19133 | 3.15E-05 | 0.105038 |
| 0.04865  | 0.29412 | -0.1027  | 0.02647  | 0.231772 | 4.10E-07 | -0.16863 | 0.00025  | 0.302122 |
| -0.03713 | 0.42336 | -0.22632 | 7.73E-07 | -0.0021  | 0.96384  | -0.19142 | 3.12E-05 | 0.237346 |
| 0.014866 | 0.74866 | -0.07816 | 0.09158  | 0.153874 | 0.00085  | -0.00876 | 0.85017  | 0.291565 |
| -0.00336 | 0.94234 | -0.19356 | 2.54E-05 | 0.100933 | 0.02919  | -0.22574 | 8.27E-07 | 0.213061 |
| 0.10439  | 0.02407 | -0.06676 | 0.14976  | 0.128925 | 0.00527  | -0.06101 | 0.18816  | 0.238119 |

|          |         |          |          |          |          |          |          |          |
|----------|---------|----------|----------|----------|----------|----------|----------|----------|
| -0.08796 | 0.0575  | -0.12764 | 0.00574  | -0.16421 | 0.00037  | -0.17028 | 0.00022  | 0.125461 |
| 0.027049 | 0.55984 | -0.09866 | 0.03304  | 0.192584 | 2.79E-05 | -0.07433 | 0.10868  | 0.37072  |
| -0.02015 | 0.66413 | -0.19766 | 1.69E-05 | 0.03143  | 0.49806  | -0.195   | 2.20E-05 | 0.244165 |
| 0.009379 | 0.83981 | 0.026115 | 0.57348  | 0.154975 | 0.00078  | -0.02174 | 0.6394   | 0.278438 |
| 0.05687  | 0.21994 | -0.05722 | 0.21708  | 0.122136 | 0.00824  | -0.02009 | 0.66497  | 0.340416 |
| 0.072037 | 0.12004 | 0.0138   | 0.76614  | 0.168254 | 0.00026  | -0.02777 | 0.54942  | 0.256164 |
| -0.02896 | 0.5324  | -0.13206 | 0.00425  | 0.033616 | 0.46863  | -0.07372 | 0.11159  | 0.178306 |
| 0.021317 | 0.64589 | -0.12272 | 0.00793  | 0.146061 | 0.00155  | -0.2053  | 7.73E-06 | 0.226969 |
| -0.03757 | 0.41788 | -0.09023 | 0.05133  | 0.012137 | 0.79365  | -0.06444 | 0.16445  | 0.25692  |
| -0.04774 | 0.30323 | -0.07214 | 0.11949  | -0.01811 | 0.69629  | -0.08413 | 0.06931  | 0.250913 |
| 0.048037 | 0.30025 | -0.054   | 0.24414  | 0.073937 | 0.11055  | -0.0471  | 0.30977  | 0.152369 |
| -0.05247 | 0.25778 | -0.24797 | 5.65E-08 | 0.036028 | 0.43731  | -0.2865  | 2.84E-10 | 0.222078 |
| 0.041011 | 0.37656 | -0.088   | 0.05739  | 0.168635 | 0.00025  | -0.1932  | 2.63E-05 | 0.203592 |
| 0.080969 | 0.08047 | 0.018701 | 0.68689  | 0.185507 | 5.50E-05 | -0.01075 | 0.81683  | 0.233034 |
| -0.00184 | 0.96831 | -0.19747 | 1.72E-05 | 0.104861 | 0.02344  | -0.17556 | 0.00014  | 0.29148  |
| -0.02838 | 0.54075 | 0.146996 | 0.00145  | -0.08646 | 0.06193  | 0.070183 | 0.12991  | -0.28866 |
| -0.13124 | 0.0045  | -0.03644 | 0.43207  | -0.28023 | 7.11E-10 | -0.03473 | 0.45406  | -0.28382 |
| 0.065704 | 0.1563  | -0.1131  | 0.01447  | 0.1101   | 0.01731  | -0.09302 | 0.04452  | 0.17179  |
| -0.04515 | 0.33022 | -0.09313 | 0.04427  | 0.179604 | 9.51E-05 | -0.1401  | 0.00241  | 0.392855 |
| 0.020121 | 0.6645  | 0.060582 | 0.19126  | 0.217896 | 2.00E-06 | 0.053382 | 0.2496   | 0.270236 |
| -0.02229 | 0.63092 | -0.17857 | 0.0001   | 0.018126 | 0.69603  | -0.19405 | 2.42E-05 | 0.185567 |
| 0.017349 | 0.70846 | -0.12869 | 0.00535  | 0.138675 | 0.00267  | -0.17986 | 9.30E-05 | 0.271406 |
| -0.00218 | 0.96256 | -0.1706  | 0.00021  | 0.124599 | 0.00702  | -0.23969 | 1.58E-07 | 0.196102 |
| 0.104201 | 0.02433 | -0.06684 | 0.14927  | 0.235876 | 2.51E-07 | -0.07489 | 0.10605  | 0.33653  |
| -0.00899 | 0.84637 | 0.11956  | 0.00971  | -0.05733 | 0.2162   | 0.118468 | 0.0104   | -0.13928 |
| 0.043806 | 0.34488 | -0.05481 | 0.23712  | -0.00151 | 0.97409  | -0.0995  | 0.03158  | 0.201749 |
| -0.0064  | 0.89036 | -0.14079 | 0.00229  | 0.150913 | 0.00107  | -0.154   | 0.00084  | 0.334483 |
| -0.02399 | 0.60504 | 0.185608 | 5.45E-05 | -0.02187 | 0.63735  | 0.154064 | 0.00084  | -0.15733 |
| -0.01524 | 0.74248 | -0.19307 | 2.66E-05 | -0.05335 | 0.24987  | -0.23019 | 4.94E-07 | 0.198916 |
| 0.014558 | 0.75369 | -0.17256 | 0.00018  | 0.108351 | 0.01918  | -0.25123 | 3.73E-08 | 0.165579 |
| 0.051656 | 0.26525 | -0.11637 | 0.01185  | 0.133595 | 0.00382  | -0.19368 | 2.51E-05 | 0.207676 |
| 0.06481  | 0.16203 | -0.16812 | 0.00026  | 0.08947  | 0.05334  | -0.19888 | 1.49E-05 | 0.240376 |
| 0.074116 | 0.1097  | -0.06964 | 0.13291  | 0.245964 | 7.28E-08 | -0.04622 | 0.3189   | 0.430103 |
| -0.04058 | 0.38161 | -0.03299 | 0.47702  | -0.0024  | 0.95869  | -0.05495 | 0.23592  | 0.22448  |
| 0.034383 | 0.45854 | -0.1878  | 4.43E-05 | 0.160519 | 0.0005   | -0.21325 | 3.32E-06 | 0.243891 |
| -0.02424 | 0.60125 | 0.209695 | 4.87E-06 | -0.00025 | 0.99572  | 0.204969 | 8.01E-06 | -0.05905 |
| -0.01943 | 0.67535 | 0.1205   | 0.00915  | -0.09435 | 0.04155  | 0.123222 | 0.00768  | -0.19412 |
| -0.00441 | 0.92434 | -0.20072 | 1.24E-05 | 0.088463 | 0.05609  | -0.24722 | 6.22E-08 | 0.203401 |
| 0.044222 | 0.34031 | 0.078758 | 0.08912  | 0.124386 | 0.00712  | 0.049311 | 0.2876   | 0.274943 |
| 0.035264 | 0.4471  | -0.17078 | 0.00021  | 0.125476 | 0.00663  | -0.18464 | 5.97E-05 | 0.276549 |
| 0.070538 | 0.12797 | -0.05792 | 0.21157  | 0.271899 | 2.33E-09 | -0.10348 | 0.02534  | 0.294704 |
| 0.058837 | 0.20438 | -0.13188 | 0.00431  | 0.196673 | 1.86E-05 | -0.16891 | 0.00025  | 0.27933  |
| -0.04149 | 0.37102 | -0.21927 | 1.72E-06 | 0.047875 | 0.30188  | -0.23362 | 3.29E-07 | 0.27293  |
| -0.08246 | 0.07504 | 0.128098 | 0.00557  | -0.03095 | 0.50471  | 0.157072 | 0.00066  | -0.13217 |
| -0.08005 | 0.08398 | 0.13585  | 0.00327  | -0.02201 | 0.6352   | 0.167567 | 0.00028  | -0.22403 |

|          |          |          |          |          |          |          |          |          |
|----------|----------|----------|----------|----------|----------|----------|----------|----------|
| 0.217386 | 2.12E-06 | -0.07694 | 0.09676  | 0.132564 | 0.00411  | -0.0422  | 0.36282  | 0.155344 |
| -0.02014 | 0.66426  | 0.2317   | 4.13E-07 | -0.07013 | 0.13017  | 0.171152 | 0.0002   | -0.14947 |
| -0.02925 | 0.52829  | -0.1613  | 0.00047  | 0.033537 | 0.46968  | -0.09762 | 0.03494  | 0.233423 |
| 0.075194 | 0.10461  | -0.13489 | 0.00349  | 0.142513 | 0.00202  | -0.26992 | 3.07E-09 | 0.147136 |
| 0.086177 | 0.06278  | -0.10132 | 0.02857  | 0.090511 | 0.05062  | -0.193   | 2.68E-05 | 0.144628 |
| -0.09262 | 0.04544  | -0.23924 | 1.67E-07 | -0.15102 | 0.00106  | -0.21634 | 2.38E-06 | 0.119865 |
| 0.020646 | 0.65631  | -0.06623 | 0.15303  | 0.082205 | 0.07595  | -0.04294 | 0.35453  | 0.271482 |
| 0.051322 | 0.26837  | -0.08683 | 0.06082  | 0.130509 | 0.00473  | -0.07509 | 0.10507  | 0.199386 |
| -0.01352 | 0.77069  | 0.272446 | 2.16E-09 | 0.053111 | 0.25201  | 0.237603 | 2.04E-07 | -0.15988 |
| 0.090988 | 0.04941  | 0.170768 | 0.00021  | 0.31796  | 1.98E-12 | 0.198178 | 1.60E-05 | 0.42921  |
| 0.072034 | 0.12006  | -0.10529 | 0.02287  | 0.064902 | 0.16144  | -0.07978 | 0.08505  | 0.218699 |
| -0.00739 | 0.87339  | -0.21896 | 1.78E-06 | -0.06962 | 0.13301  | -0.2403  | 1.47E-07 | 0.192109 |
| -0.00244 | 0.95809  | -0.18557 | 5.47E-05 | 0.070366 | 0.12891  | -0.28048 | 6.86E-10 | 0.179097 |
| 0.017492 | 0.70616  | -0.18565 | 5.43E-05 | -0.0034  | 0.94155  | -0.08498 | 0.06654  | 0.284272 |
| -0.03267 | 0.48125  | -0.19104 | 3.24E-05 | -0.0375  | 0.41886  | -0.20524 | 7.78E-06 | 0.211794 |
| 0.039338 | 0.39635  | -0.04307 | 0.35306  | 0.217867 | 2.01E-06 | -0.10217 | 0.02727  | 0.322953 |
| 0.021602 | 0.64148  | -0.14497 | 0.00168  | 0.151361 | 0.00103  | -0.11785 | 0.01081  | 0.336851 |
| 0.108529 | 0.01898  | 0.051868 | 0.2633   | 0.298394 | 4.65E-11 | 0.117552 | 0.01101  | 0.409004 |
| 0.030898 | 0.50536  | -0.11318 | 0.0144   | 0.186753 | 4.89E-05 | -0.17709 | 0.00012  | 0.292182 |
| -0.07215 | 0.11945  | -0.16628 | 0.00031  | -0.00453 | 0.92228  | -0.17576 | 0.00013  | 0.227253 |
| 0.131074 | 0.00455  | -0.14736 | 0.00141  | 0.125408 | 0.00666  | -0.09205 | 0.0468   | 0.176918 |
| -0.00073 | 0.98742  | -0.14623 | 0.00153  | 0.103488 | 0.02532  | -0.21565 | 2.56E-06 | 0.190708 |
| -0.10395 | 0.02468  | -0.23272 | 3.66E-07 | -0.13815 | 0.00277  | -0.24851 | 5.28E-08 | 0.067285 |
| -0.03311 | 0.47533  | -0.18452 | 6.04E-05 | 0.0166   | 0.72049  | -0.2585  | 1.45E-08 | 0.175301 |
| -0.03131 | 0.49972  | -0.23614 | 2.44E-07 | -0.10179 | 0.02784  | -0.23337 | 3.39E-07 | 0.070702 |
| 0.028284 | 0.54206  | -0.13173 | 0.00435  | 0.111548 | 0.01588  | -0.14516 | 0.00166  | 0.271056 |
| 0.05388  | 0.2452   | -0.11333 | 0.01427  | 0.189139 | 3.90E-05 | -0.17341 | 0.00017  | 0.253808 |
| 0.08402  | 0.06967  | 0.015722 | 0.7347   | 0.119449 | 0.00978  | -0.0125  | 0.78754  | 0.243065 |
| -0.04673 | 0.31364  | -0.20098 | 1.21E-05 | -0.13113 | 0.00453  | -0.19377 | 2.48E-05 | 0.176085 |
| -0.11524 | 0.0127   | -0.25319 | 2.90E-08 | -0.124   | 0.0073   | -0.27703 | 1.13E-09 | 0.126167 |
| -0.03216 | 0.48819  | -0.08647 | 0.06189  | 0.117696 | 0.01091  | -0.12384 | 0.00737  | 0.226079 |
| 0.043732 | 0.34569  | -0.16286 | 0.00041  | 0.118573 | 0.01033  | -0.23481 | 2.86E-07 | 0.243459 |
| -0.05244 | 0.25807  | -0.13502 | 0.00346  | 0.100158 | 0.03046  | -0.20391 | 8.93E-06 | 0.203156 |
| -0.03016 | 0.51556  | -0.21554 | 2.59E-06 | 0.081195 | 0.07963  | -0.20811 | 5.76E-06 | 0.264829 |
| 0.109957 | 0.01745  | 0.014818 | 0.74944  | 0.311228 | 6.02E-12 | 0.054874 | 0.23659  | 0.419945 |
| -0.00707 | 0.87885  | -0.13993 | 0.00244  | 0.005601 | 0.90391  | -0.09926 | 0.03198  | 0.256524 |
| 0.082577 | 0.07462  | -0.06096 | 0.18851  | 0.196247 | 1.94E-05 | -0.1153  | 0.01266  | 0.255619 |
| 0.067149 | 0.14738  | -0.03262 | 0.48189  | 0.2263   | 7.75E-07 | 0.063433 | 0.17115  | 0.324828 |
| 0.011444 | 0.80518  | -0.11959 | 0.00969  | 0.007795 | 0.86658  | -0.18188 | 7.72E-05 | 0.113875 |
| 0.064026 | 0.16718  | -0.02184 | 0.63788  | 0.15431  | 0.00082  | -0.00355 | 0.9391   | 0.291238 |
| -0.03217 | 0.48805  | -0.16253 | 0.00042  | -0.00145 | 0.97508  | -0.09975 | 0.03114  | 0.367833 |
| 0.100719 | 0.02954  | 0.042997 | 0.35387  | 0.261431 | 9.78E-09 | 0.049409 | 0.28664  | 0.284415 |
| -0.15661 | 0.00068  | 0.030115 | 0.51622  | -0.23217 | 3.91E-07 | 0.000883 | 0.98482  | -0.27243 |
| 0.011892 | 0.79771  | -0.22137 | 1.36E-06 | -0.10417 | 0.02438  | -0.20259 | 1.02E-05 | 0.134395 |
| -0.02227 | 0.63126  | -0.2167  | 2.28E-06 | 0.02947  | 0.52525  | -0.33032 | 2.38E-13 | 0.159177 |

|          |         |          |          |          |          |          |          |          |
|----------|---------|----------|----------|----------|----------|----------|----------|----------|
| 0.075282 | 0.1042  | -0.09652 | 0.03706  | 0.248079 | 5.58E-08 | -0.10646 | 0.02139  | 0.3495   |
| 0.064539 | 0.1638  | -0.06458 | 0.16354  | 0.10398  | 0.02463  | -0.07712 | 0.09599  | 0.219638 |
| -0.00696 | 0.88083 | 0.15692  | 0.00067  | -0.03536 | 0.44593  | 0.088919 | 0.05483  | -0.28264 |
| 0.115725 | 0.01233 | -0.03475 | 0.4537   | 0.205902 | 7.26E-06 | 0.089312 | 0.05376  | 0.33887  |
| 0.038931 | 0.40126 | -0.14915 | 0.00123  | 0.0056   | 0.90394  | -0.16517 | 0.00034  | 0.113825 |
| -0.01061 | 0.81916 | -0.17702 | 0.00012  | 0.086378 | 0.06216  | -0.10204 | 0.02745  | 0.367353 |
| -0.08429 | 0.06878 | -0.24153 | 1.26E-07 | -0.03077 | 0.50711  | -0.2766  | 1.20E-09 | 0.080545 |
| -0.08938 | 0.05359 | -0.23663 | 2.30E-07 | -0.07986 | 0.08472  | -0.2057  | 7.42E-06 | 0.151669 |
| -0.02504 | 0.58943 | -0.13493 | 0.00348  | -0.03175 | 0.49374  | -0.21295 | 3.44E-06 | 0.069595 |
| 0.047741 | 0.30324 | 0.068192 | 0.14118  | 0.257075 | 1.75E-08 | 0.076375 | 0.09926  | 0.422467 |
| 0.008123 | 0.86102 | -0.23466 | 2.91E-07 | 0.079465 | 0.08628  | -0.26131 | 9.95E-09 | 0.18952  |
| -0.01554 | 0.73774 | -0.20787 | 5.91E-06 | -0.00093 | 0.98399  | -0.17006 | 0.00022  | 0.196307 |
| 0.012613 | 0.78574 | -0.16661 | 0.0003   | 0.107721 | 0.01989  | -0.21417 | 3.01E-06 | 0.295007 |
| 0.040812 | 0.37888 | -0.10073 | 0.02951  | 0.194225 | 2.38E-05 | -0.16941 | 0.00024  | 0.24588  |
| 0.103873 | 0.02478 | -0.03622 | 0.43486  | 0.071987 | 0.1203   | -0.02811 | 0.54454  | 0.320852 |
| 0.039132 | 0.39883 | -0.1464  | 0.00151  | 0.177042 | 0.00012  | -0.18688 | 4.83E-05 | 0.297602 |
| 0.090287 | 0.05119 | 0.112288 | 0.01519  | -0.10109 | 0.02894  | 0.032956 | 0.47741  | -0.26329 |
| 0.019201 | 0.67898 | -0.16869 | 0.00025  | 0.155577 | 0.00074  | -0.21989 | 1.60E-06 | 0.214242 |
| -0.0257  | 0.57961 | 0.287538 | 2.43E-10 | 0.092348 | 0.04609  | 0.258553 | 1.44E-08 | -0.02346 |
| 0.012259 | 0.79161 | -0.02039 | 0.66037  | 0.109985 | 0.01742  | 0.057216 | 0.21715  | 0.440614 |
| 0.026163 | 0.57277 | -0.0958  | 0.03849  | 0.063549 | 0.17037  | -0.1545  | 0.00081  | 0.181053 |
| 0.04268  | 0.35743 | -0.0223  | 0.63073  | 0.124375 | 0.00712  | -0.05987 | 0.19657  | 0.240361 |
| 0.063197 | 0.17276 | -0.13527 | 0.0034   | -0.01974 | 0.67056  | -0.17277 | 0.00018  | 0.120569 |
| 0.025885 | 0.57686 | -0.06154 | 0.18429  | 0.106587 | 0.02124  | -0.08361 | 0.07105  | 0.186663 |
| 0.027243 | 0.55704 | -0.11797 | 0.01073  | 0.123912 | 0.00734  | -0.12544 | 0.00664  | 0.357846 |
| 0.095371 | 0.03938 | -0.03511 | 0.44915  | 0.161627 | 0.00045  | -0.06304 | 0.17381  | 0.277561 |
| 0.00136  | 0.97662 | -0.21046 | 4.49E-06 | 0.073698 | 0.11172  | -0.28355 | 4.38E-10 | 0.280978 |
| -0.02856 | 0.53816 | -0.15814 | 0.0006   | -0.00636 | 0.89106  | -0.04978 | 0.28301  | 0.364349 |
| 0.016198 | 0.727   | -0.15303 | 0.00091  | 0.025109 | 0.58834  | -0.11864 | 0.01029  | 0.180576 |
| 0.102313 | 0.02704 | 0.03293  | 0.47776  | 0.195926 | 2.01E-05 | 0.011036 | 0.81198  | 0.353169 |
| 0.024457 | 0.59806 | 0.038971 | 0.40078  | 0.129666 | 0.00501  | -0.02687 | 0.56246  | 0.198992 |
| 0.059282 | 0.20097 | -0.16173 | 0.00045  | 0.168146 | 0.00026  | -0.12197 | 0.00832  | 0.337816 |
| 0.019718 | 0.67084 | -0.13864 | 0.00268  | 0.077278 | 0.09531  | -0.0964  | 0.03729  | 0.372207 |
| 0.056514 | 0.22285 | -0.04747 | 0.30603  | 0.213348 | 3.29E-06 | 0.055848 | 0.22836  | 0.325151 |
| -0.0047  | 0.91932 | -0.17167 | 0.00019  | 0.060433 | 0.19235  | -0.24596 | 7.29E-08 | 0.207695 |
| 0.04368  | 0.34627 | -0.16979 | 0.00023  | 0.053032 | 0.25272  | -0.23472 | 2.89E-07 | 0.213731 |
| -0.00557 | 0.90449 | -0.12891 | 0.00527  | 0.069493 | 0.13373  | -0.17953 | 9.58E-05 | 0.205717 |
| 0.005201 | 0.91075 | -0.1957  | 2.05E-05 | 0.068687 | 0.13831  | -0.25784 | 1.58E-08 | 0.169507 |
| 0.050072 | 0.28021 | -0.16158 | 0.00046  | 0.013562 | 0.77005  | -0.10004 | 0.03065  | 0.171238 |
| -0.0566  | 0.22218 | -0.181   | 8.38E-05 | 0.051568 | 0.26608  | -0.24215 | 1.17E-07 | 0.247932 |
| -0.02666 | 0.56548 | 0.024791 | 0.59307  | 0.124118 | 0.00724  | 0.055703 | 0.22957  | 0.311838 |
| -0.06714 | 0.14742 | -0.04347 | 0.34864  | -0.24189 | 1.21E-07 | -0.1134  | 0.01421  | -0.26706 |
| 0.017247 | 0.71008 | -0.15233 | 0.00096  | 0.152861 | 0.00092  | -0.16347 | 0.00039  | 0.288221 |
| 0.04466  | 0.33554 | -0.09808 | 0.03409  | 0.106047 | 0.0219   | -0.11259 | 0.01492  | 0.322891 |
| -0.04726 | 0.3081  | -0.06594 | 0.15484  | 0.020308 | 0.66159  | -0.06553 | 0.15742  | 0.210639 |

|          |         |          |          |          |          |          |          |          |
|----------|---------|----------|----------|----------|----------|----------|----------|----------|
| 0.004792 | 0.91774 | -0.1458  | 0.00158  | 0.082741 | 0.07405  | -0.16103 | 0.00048  | 0.234157 |
| 0.037808 | 0.41499 | -0.15477 | 0.00079  | 0.145297 | 0.00164  | -0.13438 | 0.00362  | 0.349367 |
| 0.004064 | 0.9302  | -0.14553 | 0.00161  | -0.03913 | 0.39885  | -0.19425 | 2.37E-05 | 0.174309 |
| -0.03626 | 0.43437 | -0.2055  | 7.58E-06 | -0.02283 | 0.62264  | -0.21008 | 4.67E-06 | 0.104965 |
| -0.11478 | 0.01307 | -0.1356  | 0.00332  | -0.25754 | 1.64E-08 | -0.13761 | 0.00288  | -0.25757 |
| -0.01662 | 0.72023 | -0.22828 | 6.17E-07 | -0.01468 | 0.75174  | -0.15424 | 0.00083  | 0.181576 |
| 0.079813 | 0.08491 | -0.04762 | 0.30448  | 0.180199 | 9.01E-05 | -0.06377 | 0.16889  | 0.233256 |
| -0.02436 | 0.59954 | -0.22023 | 1.54E-06 | 0.008391 | 0.85648  | -0.2249  | 9.10E-07 | 0.228835 |
| 0.003871 | 0.93352 | -0.19148 | 3.11E-05 | -0.03343 | 0.47105  | -0.23061 | 4.70E-07 | 0.073338 |
| -0.00831 | 0.85794 | 0.187739 | 4.45E-05 | 0.004828 | 0.91712  | 0.23321  | 3.46E-07 | -0.21501 |
| -0.01374 | 0.76718 | 0.316153 | 2.67E-12 | 0.139534 | 0.00251  | 0.32568  | 5.32E-13 | -0.08635 |
| -0.01214 | 0.79367 | -0.25166 | 3.53E-08 | -0.08129 | 0.07928  | -0.21566 | 2.56E-06 | 0.141144 |
| -0.00331 | 0.9432  | 0.069066 | 0.13614  | 0.159306 | 0.00055  | 0.072247 | 0.11897  | 0.3708   |
| -0.0002  | 0.99662 | -0.18905 | 3.93E-05 | -0.00121 | 0.97915  | -0.15851 | 0.00059  | 0.303862 |
| 0.085159 | 0.06596 | -0.12522 | 0.00674  | 0.093269 | 0.04395  | -0.1804  | 8.85E-05 | 0.192858 |
| 0.098421 | 0.03347 | 0.004006 | 0.9312   | 0.101723 | 0.02794  | -0.02801 | 0.54592  | 0.210623 |
| 0.063178 | 0.17288 | -0.07527 | 0.10426  | 0.232432 | 3.79E-07 | -0.09654 | 0.03701  | 0.315158 |
| 0.018559 | 0.68914 | -0.21301 | 3.41E-06 | 0.108305 | 0.01923  | -0.27976 | 7.61E-10 | 0.225354 |
| 0.050885 | 0.27247 | -0.13655 | 0.00311  | 0.078041 | 0.09208  | -0.03885 | 0.4022   | 0.248439 |
| -0.02332 | 0.61527 | -0.19746 | 1.72E-05 | -0.0748  | 0.10646  | -0.17    | 0.00022  | 0.279006 |
| -0.00903 | 0.84571 | -0.12044 | 0.00918  | 0.102653 | 0.02654  | -0.14267 | 0.002    | 0.221126 |
| 0.065114 | 0.16007 | -0.11649 | 0.01176  | -0.00417 | 0.92841  | -0.13175 | 0.00434  | 0.196699 |
| 0.008775 | 0.84999 | -0.18106 | 8.33E-05 | 0.07116  | 0.12464  | -0.21003 | 4.70E-06 | 0.290895 |
| -0.02905 | 0.53112 | -0.21584 | 2.51E-06 | 0.01827  | 0.69373  | -0.15848 | 0.00059  | 0.310402 |
| 0.028764 | 0.53521 | -0.12462 | 0.00701  | 0.030863 | 0.50584  | -0.22214 | 1.25E-06 | 0.189116 |
| 0.045449 | 0.32706 | -0.18255 | 7.26E-05 | 0.027677 | 0.55076  | -0.14574 | 0.00159  | 0.254729 |
| 0.018611 | 0.68831 | -0.16853 | 0.00025  | 0.162505 | 0.00042  | -0.15129 | 0.00104  | 0.346107 |
| -0.00845 | 0.85554 | -0.17026 | 0.00022  | 0.007386 | 0.87352  | -0.22651 | 7.57E-07 | 0.159583 |
| -0.05318 | 0.25139 | -0.14455 | 0.00174  | -0.13574 | 0.00329  | -0.18238 | 7.37E-05 | 0.090905 |
| -0.10393 | 0.02471 | -0.16342 | 0.00039  | 0.038517 | 0.40629  | -0.13918 | 0.00258  | 0.341089 |
| 0.094177 | 0.04193 | -0.10052 | 0.02986  | 0.087571 | 0.05863  | -0.09879 | 0.03281  | 0.252722 |
| 0.072144 | 0.11949 | -0.03136 | 0.499    | 0.09953  | 0.03152  | -0.08913 | 0.05426  | 0.225584 |
| -0.01973 | 0.67066 | -0.13467 | 0.00355  | 0.063667 | 0.16958  | -0.12683 | 0.00606  | 0.289529 |
| 0.100836 | 0.02935 | -0.09517 | 0.03979  | 0.022423 | 0.62886  | -0.09129 | 0.04866  | 0.089246 |
| -0.01079 | 0.81614 | -0.22173 | 1.30E-06 | 0.050706 | 0.27416  | -0.26882 | 3.58E-09 | 0.216363 |
| -0.04449 | 0.33743 | -0.20737 | 6.23E-06 | -0.08158 | 0.07822  | -0.1544  | 0.00081  | 0.215939 |
| 0.014106 | 0.7611  | -0.15655 | 0.00069  | -0.04849 | 0.29575  | -0.16362 | 0.00038  | 0.203011 |
| -0.02405 | 0.60421 | -0.16405 | 0.00037  | -0.06184 | 0.18221  | -0.1766  | 0.00012  | 0.134902 |
| -0.00764 | 0.86922 | -0.08877 | 0.05524  | 0.052062 | 0.26152  | -0.06078 | 0.18978  | 0.184134 |
| 0.035499 | 0.44408 | -0.14445 | 0.00175  | 0.048634 | 0.29428  | -0.19568 | 2.06E-05 | 0.233669 |
| 0.021306 | 0.64605 | -0.09536 | 0.03941  | 0.077343 | 0.09503  | -0.12611 | 0.00636  | 0.143915 |
| -0.09426 | 0.04173 | -0.03133 | 0.49946  | -0.04788 | 0.30187  | 0.009472 | 0.83824  | -0.08085 |
| 0.019225 | 0.67859 | 0.005683 | 0.90252  | -0.01486 | 0.7487   | -0.0625  | 0.17754  | -0.1939  |
| 0.068191 | 0.14119 | -0.07269 | 0.11669  | 0.040703 | 0.38016  | 0.002335 | 0.95986  | 0.12478  |
| -0.02273 | 0.62418 | 0.181353 | 8.10E-05 | 0.149963 | 0.00115  | 0.106119 | 0.02181  | 0.00684  |

|          |          |          |          |          |          |          |          |          |
|----------|----------|----------|----------|----------|----------|----------|----------|----------|
| -0.07474 | 0.10671  | 0.027668 | 0.55089  | 0.02904  | 0.53131  | -0.04625 | 0.31859  | -0.13474 |
| -0.09554 | 0.03904  | -0.02649 | 0.56792  | -0.00912 | 0.84422  | -0.05453 | 0.23954  | -0.18789 |
| -0.11531 | 0.01265  | -0.02805 | 0.54537  | -0.14847 | 0.00129  | -0.00449 | 0.92296  | -0.07408 |
| -0.06591 | 0.15503  | 0.039056 | 0.39975  | -0.11804 | 0.01068  | 0.00508  | 0.91282  | -0.12233 |
| -0.15199 | 0.00098  | -0.03874 | 0.40352  | -0.19526 | 2.15E-05 | -0.0558  | 0.22878  | -0.1846  |
| -0.0786  | 0.08978  | -0.06917 | 0.13555  | -0.13622 | 0.00318  | -0.12057 | 0.00911  | -0.16048 |
| -0.06356 | 0.17031  | -0.03284 | 0.47902  | -0.14361 | 0.00186  | -0.08429 | 0.06876  | -0.26543 |
| -0.1582  | 0.0006   | 0.011454 | 0.80502  | -0.15528 | 0.00076  | -0.04159 | 0.36987  | -0.21001 |
| -0.04365 | 0.34664  | 0.002727 | 0.95312  | -0.00566 | 0.90285  | 0.030599 | 0.5095   | -0.07401 |
| -0.15214 | 0.00097  | -0.0944  | 0.04144  | -0.04971 | 0.28373  | -0.06406 | 0.16697  | 0.022644 |
| 0.042177 | 0.36313  | 0.089679 | 0.05278  | 0.089933 | 0.05211  | 0.184789 | 5.89E-05 | 0.224105 |
| -0.04146 | 0.37137  | 0.080558 | 0.08203  | -0.02777 | 0.54939  | -0.01211 | 0.7941   | -0.23816 |
| 0.029212 | 0.52888  | 0.042675 | 0.35749  | 0.081122 | 0.0799   | 0.063842 | 0.16841  | -0.04313 |
| 0.026467 | 0.56832  | 0.107717 | 0.0199   | 0.083039 | 0.07301  | 0.111818 | 0.01563  | -0.16472 |
| -0.08511 | 0.06612  | -0.01021 | 0.82586  | -0.06382 | 0.16857  | -0.08647 | 0.06188  | -0.2216  |
| -0.08142 | 0.0788   | -0.21324 | 3.33E-06 | -0.1561  | 0.00071  | -0.21086 | 4.30E-06 | -0.19677 |
| -0.07005 | 0.13066  | -0.00124 | 0.97873  | -0.03133 | 0.49937  | -0.06766 | 0.14433  | -0.16246 |
| -0.02167 | 0.64047  | -0.06038 | 0.19273  | -0.02562 | 0.58084  | -0.06156 | 0.18418  | -0.14131 |
| 0.017636 | 0.70385  | 0.106481 | 0.02137  | 0.09623  | 0.03764  | 0.047008 | 0.31074  | -0.04541 |
| -0.04227 | 0.36209  | -0.00712 | 0.87804  | -0.12328 | 0.00765  | -0.06517 | 0.1597   | -0.16284 |
| 0.015412 | 0.73975  | 0.014931 | 0.7476   | -0.05985 | 0.19669  | -0.07685 | 0.09718  | -0.20026 |
| -0.00972 | 0.834    | 0.082375 | 0.07534  | 0.040907 | 0.37777  | 0.119398 | 0.00981  | -0.04744 |
| 0.026343 | 0.57014  | -0.1317  | 0.00436  | -0.03644 | 0.43211  | -0.00038 | 0.99355  | 0.252488 |
| 0.187655 | 4.49E-05 | 0.194367 | 2.34E-05 | 0.345914 | 1.43E-14 | 0.303965 | 1.94E-11 | 0.41565  |
| -0.03978 | 0.39102  | 0.039669 | 0.39239  | -0.07506 | 0.10523  | -0.09104 | 0.04927  | -0.3046  |
| -0.10979 | 0.01763  | -0.12607 | 0.00637  | -0.24114 | 1.33E-07 | -0.15738 | 0.00064  | -0.19222 |
| -0.03596 | 0.43818  | 0.077919 | 0.09259  | 0.033423 | 0.4712   | 0.018634 | 0.68795  | -0.2664  |
| -0.22123 | 1.38E-06 | -0.11067 | 0.01673  | -0.23364 | 3.28E-07 | -0.11903 | 0.01004  | -0.1783  |
| -0.15959 | 0.00054  | -0.04104 | 0.37624  | -0.15095 | 0.00107  | -0.02015 | 0.66399  | -0.05192 |
| -0.03643 | 0.43216  | -0.09324 | 0.04402  | -0.05408 | 0.24347  | -0.02808 | 0.54498  | -0.13511 |
| -0.01595 | 0.73096  | -0.00229 | 0.96068  | -0.02723 | 0.55729  | -0.032   | 0.49032  | 0.072163 |
| -0.11887 | 0.01014  | -0.15626 | 0.0007   | -0.09306 | 0.04443  | -0.13637 | 0.00315  | 0.052947 |
| -0.08972 | 0.05268  | -0.09345 | 0.04353  | -0.19106 | 3.24E-05 | -0.10874 | 0.01874  | -0.16337 |
| -0.10921 | 0.01823  | -0.03213 | 0.48847  | -0.05678 | 0.22072  | -0.07963 | 0.08564  | -0.05074 |
| -0.0253  | 0.58553  | -0.05765 | 0.21369  | -0.0946  | 0.04101  | -0.09121 | 0.04885  | -0.10674 |
| 0.026575 | 0.56674  | 0.128131 | 0.00555  | 0.116124 | 0.01203  | 0.014512 | 0.75444  | -0.17902 |
| -0.10853 | 0.01898  | -0.15996 | 0.00052  | -0.15274 | 0.00093  | -0.18705 | 4.76E-05 | -0.19413 |
| -0.02808 | 0.54493  | -0.05488 | 0.23655  | 0.033015 | 0.47662  | 0.112236 | 0.01524  | 0.391875 |
| -0.06233 | 0.17874  | -0.15862 | 0.00058  | -0.22667 | 7.43E-07 | -0.12734 | 0.00586  | -0.14437 |
| -0.06956 | 0.13336  | -0.09643 | 0.03724  | -0.11998 | 0.00945  | -0.12439 | 0.00712  | -0.11274 |
| -0.05973 | 0.19755  | -0.03599 | 0.43777  | -0.05605 | 0.2267   | -0.08219 | 0.07601  | -0.12387 |
| -0.11012 | 0.01729  | -0.09052 | 0.0506   | -0.04557 | 0.32575  | -0.16116 | 0.00047  | -0.15024 |
| -0.14365 | 0.00186  | -0.04656 | 0.31541  | -0.16556 | 0.00033  | -0.03775 | 0.41571  | -0.15849 |
| -0.09812 | 0.03401  | -0.06768 | 0.14421  | -0.0684  | 0.13995  | -0.08621 | 0.06269  | -0.20184 |
| 0.088765 | 0.05525  | 0.253048 | 2.95E-08 | 0.206485 | 6.83E-06 | 0.078115 | 0.09177  | -0.1161  |

|          |          |          |         |          |          |          |          |          |
|----------|----------|----------|---------|----------|----------|----------|----------|----------|
| -0.11928 | 0.00988  | -0.05494 | 0.236   | -0.12756 | 0.00577  | -0.04378 | 0.34512  | -0.21719 |
| 0.059192 | 0.20166  | 0.173279 | 0.00017 | 0.130126 | 0.00486  | 0.269474 | 3.27E-09 | 0.344313 |
| -0.08539 | 0.06521  | -0.01394 | 0.76381 | -0.00762 | 0.86948  | -0.0247  | 0.59445  | -0.08777 |
| -0.01675 | 0.71805  | -0.02172 | 0.63965 | -0.14345 | 0.00188  | -0.10779 | 0.01981  | -0.33537 |
| -0.07743 | 0.09467  | -0.06628 | 0.15272 | -0.09142 | 0.04833  | -0.11715 | 0.01129  | -0.23435 |
| -0.03179 | 0.49321  | -0.01032 | 0.82403 | -0.05577 | 0.229    | -0.03526 | 0.4471   | -0.00545 |
| -0.07035 | 0.12897  | -0.08098 | 0.08045 | -0.02603 | 0.57469  | -0.10585 | 0.02215  | -0.12729 |
| -0.04356 | 0.34764  | -0.0516  | 0.2658  | -0.01352 | 0.77078  | -0.05427 | 0.2418   | -0.0363  |
| 0.014726 | 0.75095  | 0.095517 | 0.03908 | 0.096161 | 0.03777  | 0.088638 | 0.05561  | -0.10545 |
| -0.08569 | 0.0643   | -0.03286 | 0.47874 | -0.05911 | 0.20227  | 0.05411  | 0.24319  | -0.0237  |
| -0.04871 | 0.29348  | -0.07682 | 0.09729 | -0.01953 | 0.67384  | -0.03628 | 0.43415  | 0.212983 |
| -0.08935 | 0.05365  | -0.0476  | 0.30469 | -0.09883 | 0.03274  | -0.10473 | 0.02361  | -0.1628  |
| -0.03515 | 0.44856  | 0.014797 | 0.74979 | 0.005682 | 0.90254  | -0.04258 | 0.35854  | -0.22196 |
| -0.07081 | 0.12649  | -0.12984 | 0.00495 | -0.06201 | 0.181    | -0.20482 | 8.13E-06 | -0.17364 |
| -0.00989 | 0.83116  | -0.00467 | 0.9199  | -0.16223 | 0.00043  | -0.10115 | 0.02884  | -0.26303 |
| -0.15193 | 0.00099  | -0.10298 | 0.02605 | -0.10867 | 0.01882  | -0.15303 | 0.00091  | -0.19266 |
| -0.00854 | 0.85402  | 0.104267 | 0.02424 | 0.039316 | 0.39662  | 0.083888 | 0.07011  | -0.11755 |
| -0.13804 | 0.0028   | -0.02226 | 0.63138 | -0.17661 | 0.00012  | -0.01422 | 0.75929  | -0.087   |
| 0.147017 | 0.00144  | -0.17312 | 0.00017 | -0.06465 | 0.1631   | -0.0894  | 0.05353  | 0.251028 |
| 0.047135 | 0.30942  | -0.16313 | 0.0004  | -0.07644 | 0.09896  | -0.1748  | 0.00015  | 0.136591 |
| 0.036437 | 0.43212  | 0.005898 | 0.89885 | 0.056839 | 0.2202   | 0.069245 | 0.13513  | 0.189437 |
| 0.421036 | 1.72E-21 | 0.100194 | 0.0304  | 0.001031 | 0.98226  | 0.008523 | 0.85426  | -0.18435 |
| 0.040787 | 0.37918  | -0.01755 | 0.7053  | 0.041777 | 0.36771  | 0.001277 | 0.97805  | 0.296457 |
| -0.00964 | 0.83536  | 0.041299 | 0.37322 | -0.0617  | 0.18319  | -0.05025 | 0.27849  | -0.3064  |
| -0.08419 | 0.06911  | -0.05661 | 0.22205 | -0.11031 | 0.01709  | -0.16548 | 0.00033  | -0.30487 |
| 0.025291 | 0.58564  | -0.02627 | 0.57126 | 0.092637 | 0.04541  | -0.03082 | 0.50642  | 0.19184  |
| 0.004039 | 0.93064  | -0.11213 | 0.01534 | -0.07799 | 0.09231  | -0.02601 | 0.57503  | 0.229977 |
| -0.11862 | 0.0103   | -0.05781 | 0.21244 | -0.19915 | 1.45E-05 | -0.17    | 0.00022  | -0.39623 |
| -0.06972 | 0.13244  | -0.0024  | 0.95873 | -0.09499 | 0.04019  | -0.07626 | 0.09976  | -0.28265 |
| 0.042971 | 0.35416  | -0.04728 | 0.30792 | 0.014582 | 0.7533   | 0.035069 | 0.44962  | 0.291838 |
| -0.02466 | 0.59496  | 0.032568 | 0.48261 | -0.11415 | 0.01358  | -0.06143 | 0.18512  | -0.22542 |
| -0.04445 | 0.33785  | 0.013486 | 0.77131 | -0.17435 | 0.00015  | -0.10713 | 0.02058  | -0.31056 |
| 0.072866 | 0.11583  | -0.06138 | 0.18547 | -0.00451 | 0.92258  | 0.002276 | 0.96088  | 0.145851 |
| 0.016143 | 0.72788  | -0.01122 | 0.80898 | 0.003402 | 0.94155  | 0.113656 | 0.01399  | 0.234023 |
| -0.14984 | 0.00116  | -0.1201  | 0.00938 | -0.08586 | 0.06376  | -0.15943 | 0.00054  | -0.06772 |
| -0.12754 | 0.00578  | -0.12741 | 0.00583 | -0.08505 | 0.06631  | -0.13173 | 0.00435  | -0.01485 |
| -0.10181 | 0.02781  | -0.11488 | 0.01298 | -0.17778 | 0.00011  | -0.22367 | 1.05E-06 | -0.24995 |
| -0.08283 | 0.07373  | 0.043656 | 0.34653 | -0.05851 | 0.2069   | 0.027284 | 0.55644  | -0.21681 |
| -0.03074 | 0.50751  | -0.06417 | 0.16624 | -0.07752 | 0.09427  | -0.14429 | 0.00177  | -0.18895 |
| -0.05013 | 0.27964  | 0.061075 | 0.18766 | 0.025455 | 0.58322  | 0.125553 | 0.00659  | -0.01329 |
| -0.04206 | 0.36448  | 0.098966 | 0.0325  | 0.029508 | 0.52471  | 0.116637 | 0.01166  | -0.09722 |
| 0.101035 | 0.02903  | 0.130239 | 0.00482 | 0.145002 | 0.00168  | 0.045935 | 0.32191  | -0.0696  |
| -0.06714 | 0.14745  | 0.10113  | 0.02887 | 0.045518 | 0.32634  | 0.064872 | 0.16163  | -0.04192 |
| -0.07736 | 0.09496  | -0.04041 | 0.38354 | 0.016599 | 0.72052  | -0.14526 | 0.00165  | -0.22371 |
| -0.0355  | 0.44402  | 0.130774 | 0.00465 | 0.078648 | 0.08957  | 0.120457 | 0.00917  | 0.003387 |



|          |         |          |          |          |          |          |          |          |
|----------|---------|----------|----------|----------|----------|----------|----------|----------|
| -0.10319 | 0.02575 | -0.0494  | 0.28669  | -0.04963 | 0.28444  | -0.08923 | 0.05399  | -0.07905 |
| -0.11084 | 0.01656 | 0.004148 | 0.92877  | -0.14033 | 0.00237  | 0.008727 | 0.85081  | -0.13599 |
| -0.02687 | 0.56239 | -0.01529 | 0.74175  | 0.012327 | 0.79049  | -0.09156 | 0.04798  | -0.15505 |
| -0.07027 | 0.12941 | -0.04617 | 0.31945  | -0.0772  | 0.09566  | 0.012526 | 0.78719  | -0.06773 |
| -0.17014 | 0.00022 | -0.0319  | 0.49161  | -0.1861  | 5.20E-05 | -0.05804 | 0.21059  | -0.26149 |
| -0.12085 | 0.00895 | -0.10795 | 0.01962  | -0.13596 | 0.00324  | -0.17612 | 0.00013  | -0.13423 |
| -0.10927 | 0.01817 | -0.04872 | 0.29341  | -0.1239  | 0.00735  | -0.03359 | 0.46895  | -0.07299 |
| 0.046678 | 0.31414 | -0.08971 | 0.05271  | -0.06264 | 0.17658  | -0.00438 | 0.92481  | 0.300631 |
| -0.02553 | 0.58207 | 0.07279  | 0.11621  | -0.00753 | 0.87107  | 0.01601  | 0.73004  | -0.15209 |
| -0.10845 | 0.01906 | -0.15983 | 0.00053  | -0.22809 | 6.30E-07 | -0.11898 | 0.01007  | -0.05429 |
| -0.11678 | 0.01155 | 0.007032 | 0.87954  | -0.18146 | 8.02E-05 | 0.011961 | 0.79656  | -0.18348 |
| -0.12011 | 0.00937 | -0.08105 | 0.08019  | -0.0763  | 0.09961  | -0.05199 | 0.26221  | -0.04533 |
| -0.01322 | 0.77563 | 0.103466 | 0.02536  | -0.03464 | 0.45518  | 0.080992 | 0.08039  | -0.23401 |
| 0.038812 | 0.4027  | 0.072793 | 0.1162   | -0.03584 | 0.43969  | 0.016021 | 0.72985  | -0.27697 |
| -0.08738 | 0.05919 | -0.01663 | 0.72007  | -0.03941 | 0.39545  | -0.10844 | 0.01908  | -0.03001 |
| -0.02383 | 0.60756 | -0.05158 | 0.26601  | -0.09148 | 0.04818  | -0.09263 | 0.04542  | -0.28524 |
| -0.06924 | 0.13515 | -0.02214 | 0.63328  | -0.05241 | 0.25837  | -0.05981 | 0.19696  | -0.20044 |
| 0.094723 | 0.04075 | 0.113002 | 0.01455  | 0.166561 | 0.0003   | 0.236089 | 2.45E-07 | 0.305891 |
| 0.057279 | 0.21664 | 0.058852 | 0.20426  | 0.152886 | 0.00092  | 0.145883 | 0.00157  | 0.288218 |
| -0.11185 | 0.0156  | -0.02414 | 0.60287  | -0.15563 | 0.00074  | -0.07108 | 0.12508  | -0.25806 |
| 0.023068 | 0.61902 | 0.017589 | 0.70461  | -0.07307 | 0.1148   | 0.006962 | 0.88072  | -0.19655 |
| -0.06079 | 0.1897  | 0.060136 | 0.19455  | 0.036109 | 0.43629  | 0.103436 | 0.0254   | -0.08318 |
| -0.08757 | 0.05863 | 0.001747 | 0.96997  | -0.00706 | 0.87904  | 0.034319 | 0.45938  | 0.042808 |
| -0.07146 | 0.12303 | 0.032865 | 0.47863  | 0.103604 | 0.02516  | 0.04815  | 0.29911  | -0.0242  |
| -0.0986  | 0.03316 | -0.02058 | 0.6574   | 0.006206 | 0.8936   | -0.04487 | 0.33327  | -0.01385 |
| -0.15542 | 0.00075 | -0.20202 | 1.08E-05 | -0.18656 | 4.98E-05 | -0.20086 | 1.22E-05 | -0.00699 |
| 0.029234 | 0.52856 | -0.03716 | 0.42301  | -0.00597 | 0.89755  | -0.10594 | 0.02204  | -0.10716 |
| -0.06607 | 0.15402 | 0.026791 | 0.56359  | -0.11428 | 0.01347  | -0.02695 | 0.56127  | -0.31538 |
| -0.04677 | 0.31314 | 0.043849 | 0.34441  | 0.095647 | 0.03882  | 0.106971 | 0.02077  | 0.043087 |
| -0.00302 | 0.94804 | 0.01493  | 0.74761  | -0.13482 | 0.00351  | -0.0981  | 0.03406  | -0.27689 |
| -0.08381 | 0.07038 | -0.08204 | 0.07653  | -0.17676 | 0.00012  | -0.11489 | 0.01298  | -0.19644 |
| -0.02469 | 0.59453 | 0.135982 | 0.00324  | 0.07773  | 0.09339  | 0.056566 | 0.22243  | -0.0407  |
| -0.03701 | 0.42488 | 0.054428 | 0.24043  | -0.01455 | 0.75384  | 0.029287 | 0.52783  | -0.08263 |
| -0.08354 | 0.07129 | -0.0975  | 0.03517  | -0.17302 | 0.00017  | -0.08933 | 0.05372  | -0.12141 |
| 0.004135 | 0.92899 | -0.02328 | 0.61584  | -0.04318 | 0.35185  | 0.091058 | 0.04923  | 0.282619 |
| -0.02174 | 0.63932 | 0.049673 | 0.28407  | -0.06797 | 0.1425   | -0.06789 | 0.14293  | -0.26436 |
| -0.0813  | 0.07923 | 0.07216  | 0.11941  | -0.10926 | 0.01819  | 0.023474 | 0.61286  | -0.21212 |
| -0.08684 | 0.06078 | 0.015422 | 0.73959  | -0.03713 | 0.42346  | -0.00404 | 0.9307   | -0.14994 |
| -0.02373 | 0.60893 | -0.00153 | 0.97368  | -0.01915 | 0.67979  | -0.06098 | 0.18834  | -0.17754 |
| -0.0282  | 0.54331 | -0.00772 | 0.86784  | -0.04027 | 0.38522  | 0.003636 | 0.93754  | -0.14658 |
| 0.030517 | 0.51063 | -0.12962 | 0.00503  | -0.06745 | 0.14554  | -0.04119 | 0.37445  | 0.22832  |
| -0.05585 | 0.22831 | 0.018948 | 0.68297  | 0.005693 | 0.90234  | 0.00602  | 0.89677  | -0.27064 |
| -0.02907 | 0.53094 | 0.055192 | 0.23388  | -0.06611 | 0.15375  | -0.02908 | 0.53073  | -0.29444 |
| 0.013523 | 0.7707  | 0.076727 | 0.09771  | 0.009467 | 0.83833  | 0.044111 | 0.34153  | -0.17843 |
| -0.07861 | 0.08973 | -0.12779 | 0.00568  | -0.05771 | 0.21319  | -0.16748 | 0.00028  | -0.22785 |

|          |          |          |          |          |          |          |          |          |
|----------|----------|----------|----------|----------|----------|----------|----------|----------|
| -0.05166 | 0.26524  | -0.02559 | 0.58114  | -0.2852  | 3.44E-10 | -0.03885 | 0.40225  | -0.05578 |
| 0.162563 | 0.00042  | 0.020564 | 0.65758  | 0.312803 | 4.65E-12 | 0.010878 | 0.81463  | 0.219906 |
| 0.180669 | 8.63E-05 | 0.070349 | 0.129    | 0.361617 | 7.13E-16 | 0.130737 | 0.00466  | 0.192825 |
| 0.016951 | 0.71485  | -0.09333 | 0.04382  | 0.088706 | 0.05542  | -0.13765 | 0.00287  | 0.024481 |
| 0.060896 | 0.18896  | -0.03339 | 0.47163  | 0.074994 | 0.10554  | -0.08154 | 0.07835  | -0.03024 |
| 0.113278 | 0.01431  | -0.07575 | 0.10205  | 0.190485 | 3.42E-05 | -0.13295 | 0.004    | 0.196595 |
| 0.10025  | 0.03031  | -0.04442 | 0.33817  | 0.077081 | 0.09616  | -0.09066 | 0.05025  | 0.057972 |
| 0.0783   | 0.091    | -0.07854 | 0.09     | 0.152888 | 0.00092  | -0.06834 | 0.1403   | 0.167657 |
| 0.016521 | 0.72178  | -0.17559 | 0.00014  | 0.072302 | 0.11869  | -0.21283 | 3.48E-06 | 0.114327 |
| 0.084974 | 0.06655  | -0.12354 | 0.00752  | 0.196305 | 1.93E-05 | -0.20564 | 7.46E-06 | 0.141565 |
| -0.08004 | 0.08403  | 0.078984 | 0.0882   | -0.08874 | 0.05532  | 0.136459 | 0.00313  | -0.05993 |
| 0.102513 | 0.02674  | 0.098034 | 0.03418  | 0.297543 | 5.31E-11 | -0.06875 | 0.13795  | -0.05856 |
| -0.17057 | 0.00021  | -0.08119 | 0.07966  | -0.33263 | 1.58E-13 | -0.01811 | 0.6963   | -0.08984 |
| -0.00319 | 0.94522  | -0.14777 | 0.00136  | 0.069989 | 0.13097  | -0.09459 | 0.04102  | 0.152371 |
| -0.2229  | 1.14E-06 | -0.01578 | 0.73371  | -0.3199  | 1.43E-12 | 0.026449 | 0.56859  | -0.15538 |
| 0.112904 | 0.01464  | -0.06646 | 0.15159  | 0.268047 | 3.98E-09 | -0.10513 | 0.02308  | 0.267112 |
| -0.09829 | 0.03372  | -0.14627 | 0.00153  | -0.00675 | 0.8844   | -0.27282 | 2.05E-09 | -0.09895 |
| -0.02699 | 0.56069  | 0.182156 | 7.53E-05 | -0.01936 | 0.67645  | 0.273953 | 1.75E-09 | -0.03492 |
| 0.025287 | 0.58571  | -0.11518 | 0.01275  | 0.042847 | 0.35555  | -0.05311 | 0.25199  | 0.217553 |
| 0.088306 | 0.05653  | -0.05464 | 0.23862  | 0.306292 | 1.34E-11 | -0.11238 | 0.01511  | 0.24573  |
| -0.07044 | 0.12851  | 0.019401 | 0.67582  | -0.29743 | 5.40E-11 | 0.018801 | 0.68531  | -0.22329 |
| -0.05182 | 0.26375  | 0.197277 | 1.75E-05 | -0.09287 | 0.04488  | 0.224586 | 9.43E-07 | -0.00349 |
| 0.065958 | 0.15471  | -0.03301 | 0.47666  | 0.075911 | 0.10133  | -0.10017 | 0.03044  | -0.17003 |
| -0.10121 | 0.02875  | -0.13752 | 0.0029   | -0.27914 | 8.33E-10 | -0.09535 | 0.03943  | -0.02232 |
| 0.015445 | 0.73921  | -0.20765 | 6.05E-06 | 0.093927 | 0.04247  | -0.24462 | 8.62E-08 | 0.066785 |
| -0.14927 | 0.00122  | -0.10229 | 0.02708  | -0.27271 | 2.08E-09 | -0.00162 | 0.9721   | -0.00354 |
| -0.13665 | 0.00309  | 0.030624 | 0.50914  | -0.19937 | 1.42E-05 | 0.089974 | 0.05201  | 0.06556  |
| 0.084129 | 0.06931  | -0.08019 | 0.08343  | 0.271302 | 2.53E-09 | -0.13884 | 0.00264  | 0.203712 |
| 0.138825 | 0.00264  | 0.06942  | 0.13414  | 0.398152 | 3.43E-19 | 0.049248 | 0.28822  | 0.131621 |
| 0.05043  | 0.27679  | -0.11962 | 0.00967  | 0.182865 | 7.05E-05 | -0.23844 | 1.85E-07 | 0.1115   |
| 0.075296 | 0.10414  | -0.05791 | 0.21165  | 0.23375  | 3.24E-07 | -0.09412 | 0.04206  | 0.11609  |
| -0.04477 | 0.33433  | 0.066539 | 0.1511   | -0.25295 | 2.99E-08 | 0.0926   | 0.0455   | -0.07253 |
| -0.19344 | 2.57E-05 | -0.11222 | 0.01526  | -0.3271  | 4.17E-13 | -0.19292 | 2.70E-05 | -0.06608 |
| -0.08465 | 0.06759  | 0.074762 | 0.10663  | -0.25145 | 3.63E-08 | 0.093253 | 0.04399  | -0.01623 |
| 0.083276 | 0.07219  | -0.02091 | 0.65213  | 0.208648 | 5.44E-06 | -0.06165 | 0.18354  | 0.079416 |
| 0.066205 | 0.15317  | -0.09962 | 0.03137  | 0.148108 | 0.00133  | -0.04154 | 0.37048  | 0.17111  |
| 0.064941 | 0.16118  | -0.12081 | 0.00897  | 0.200001 | 1.33E-05 | -0.17296 | 0.00017  | 0.188642 |
| -0.07939 | 0.08658  | 0.056489 | 0.22306  | -0.1881  | 4.30E-05 | 0.046223 | 0.31889  | -0.15075 |
| 0.096649 | 0.03681  | -0.037   | 0.42504  | 0.252781 | 3.06E-08 | -0.12025 | 0.00929  | 0.175158 |
| -0.10711 | 0.0206   | 0.086698 | 0.0612   | -0.08174 | 0.07762  | 0.092916 | 0.04476  | -0.00221 |
| -0.01295 | 0.78008  | -0.01099 | 0.81283  | 0.121226 | 0.00873  | -0.00502 | 0.91383  | 0.014993 |
| -0.02595 | 0.57594  | 0.157202 | 0.00065  | -0.04816 | 0.29899  | 0.238275 | 1.88E-07 | -0.07036 |
| 0.010536 | 0.82036  | 0.089406 | 0.05351  | -0.14837 | 0.0013   | 0.072784 | 0.11624  | -0.1032  |
| 0.151918 | 0.00099  | 0.069284 | 0.13491  | 0.270559 | 2.81E-09 | 0.043262 | 0.3509   | 0.137124 |
| 0.058034 | 0.21063  | -0.09541 | 0.03929  | 0.075888 | 0.10144  | -0.087   | 0.06031  | 0.166896 |

|          |          |          |          |          |          |          |          |          |
|----------|----------|----------|----------|----------|----------|----------|----------|----------|
| 0.072922 | 0.11555  | -0.09987 | 0.03095  | 0.175084 | 0.00014  | -0.16013 | 0.00051  | 0.133996 |
| -0.03838 | 0.40793  | 0.123841 | 0.00738  | -0.16355 | 0.00039  | 0.064724 | 0.16259  | -0.30232 |
| 0.028329 | 0.54141  | -0.04438 | 0.33862  | 0.161384 | 0.00046  | -0.07987 | 0.08467  | 0.014753 |
| -0.00109 | 0.98131  | -0.15281 | 0.00092  | 0.077149 | 0.09587  | -0.22693 | 7.21E-07 | 0.093375 |
| -0.10394 | 0.02468  | 0.021992 | 0.63547  | -0.19417 | 2.39E-05 | 0.185485 | 5.51E-05 | 0.096311 |
| 0.12163  | 0.00851  | 0.026839 | 0.5629   | 0.182321 | 7.41E-05 | -0.0844  | 0.06841  | -0.05972 |
| -0.05249 | 0.25763  | 0.06719  | 0.14713  | -0.18611 | 5.20E-05 | 0.121028 | 0.00884  | -0.05164 |
| 0.130435 | 0.00475  | 0.014959 | 0.74714  | 0.357229 | 1.67E-15 | -0.05429 | 0.24163  | 0.12085  |
| -0.01002 | 0.8291   | -0.11434 | 0.01342  | 0.068893 | 0.13713  | -0.09676 | 0.03658  | 0.100076 |
| 0.021927 | 0.63647  | -0.17105 | 0.0002   | 0.041736 | 0.36817  | -0.18048 | 8.78E-05 | 0.064757 |
| -0.09264 | 0.0454   | 0.142659 | 0.002    | -0.14207 | 0.00209  | 0.089533 | 0.05317  | -0.09461 |
| -0.12811 | 0.00556  | 0.074762 | 0.10663  | -0.23312 | 3.49E-07 | 0.100805 | 0.0294   | -0.13427 |
| 0.00572  | 0.90189  | 0.107243 | 0.02045  | -0.11862 | 0.0103   | 0.156477 | 0.00069  | -0.15132 |
| -0.1021  | 0.02736  | 0.069872 | 0.13162  | -0.17874 | 0.0001   | 0.081649 | 0.07796  | -0.19322 |
| 0.243089 | 1.04E-07 | 0.1534   | 0.00088  | 0.507398 | 6.36E-32 | 0.135903 | 0.00325  | 0.128583 |
| -0.08187 | 0.07715  | 0.198621 | 1.53E-05 | -0.09153 | 0.04806  | 0.234058 | 3.13E-07 | 0.073212 |
| 0.162443 | 0.00042  | 0.107619 | 0.02001  | 0.421369 | 1.59E-21 | 0.089215 | 0.05403  | 0.141708 |
| -0.10063 | 0.02969  | 0.146953 | 0.00145  | -0.19371 | 2.50E-05 | 0.183254 | 6.80E-05 | -0.07305 |
| -0.01865 | 0.68777  | 0.109208 | 0.01824  | -0.16813 | 0.00026  | 0.133722 | 0.00379  | -0.06025 |
| -0.00354 | 0.93915  | -0.13122 | 0.00451  | 0.133221 | 0.00393  | -0.13814 | 0.00278  | 0.19717  |
| 0.10457  | 0.02383  | -0.07294 | 0.11547  | 0.21795  | 1.99E-06 | -0.1473  | 0.00141  | 0.126224 |
| 0.078768 | 0.08908  | -0.06874 | 0.13798  | 0.148809 | 0.00126  | -0.05845 | 0.20735  | 0.074702 |
| -0.0988  | 0.03279  | -0.01782 | 0.70098  | -0.17455 | 0.00015  | 0.054856 | 0.23675  | -0.10639 |
| -0.13432 | 0.00364  | -0.03245 | 0.48422  | -0.13755 | 0.0029   | 0.098559 | 0.03322  | 0.005683 |
| -0.04576 | 0.32376  | -0.11527 | 0.01268  | 0.137319 | 0.00294  | -0.10446 | 0.02398  | 0.132355 |
| 0.023454 | 0.61317  | -0.13923 | 0.00257  | 0.073994 | 0.11028  | -0.23213 | 3.93E-07 | 0.010309 |
| 0.002268 | 0.96101  | -0.01452 | 0.75435  | 0.115887 | 0.01221  | -0.06578 | 0.15585  | 0.070037 |
| -0.08311 | 0.07275  | 0.064647 | 0.16309  | -0.16093 | 0.00048  | 0.090333 | 0.05107  | -0.05044 |
| -0.10079 | 0.02942  | 0.091669 | 0.04772  | -0.26086 | 1.06E-08 | 0.136688 | 0.00308  | -0.15647 |
| 0.013177 | 0.7764   | -0.06248 | 0.17766  | 0.17505  | 0.00014  | -0.03012 | 0.5162   | 0.299205 |
| 0.130149 | 0.00485  | 0.00355  | 0.93901  | 0.222901 | 1.14E-06 | -0.07386 | 0.11093  | 0.037327 |
| 0.06208  | 0.18048  | -0.0708  | 0.12657  | 0.126123 | 0.00635  | -0.21874 | 1.82E-06 | -0.08742 |
| 0.211933 | 3.83E-06 | 0.199359 | 1.42E-05 | 0.485115 | 6.11E-29 | 0.076527 | 0.09859  | 0.217765 |
| -0.04218 | 0.36306  | -0.08426 | 0.06887  | 0.047783 | 0.30281  | -0.13629 | 0.00317  | 0.031555 |
| -0.04078 | 0.37929  | 0.134459 | 0.0036   | -0.11897 | 0.01007  | 0.130482 | 0.00474  | -0.11585 |
| 0.043029 | 0.35351  | 0.072858 | 0.11587  | 0.105297 | 0.02286  | 0.005551 | 0.90477  | -0.06083 |
| 0.089808 | 0.05244  | -0.1058  | 0.02221  | 0.223005 | 1.13E-06 | -0.21682 | 2.25E-06 | 0.103412 |
| 0.084688 | 0.06747  | -0.12295 | 0.00782  | 0.054396 | 0.2407   | -0.09274 | 0.04517  | 0.081157 |
| 0.100648 | 0.02965  | -0.05449 | 0.23993  | 0.196185 | 1.96E-05 | -0.08119 | 0.07964  | 0.193372 |
| 0.006504 | 0.88852  | 0.281289 | 6.10E-10 | 0.075366 | 0.10382  | 0.233235 | 3.45E-07 | -0.04062 |
| 0.086407 | 0.06208  | -0.00858 | 0.85336  | 0.195517 | 2.09E-05 | -0.08973 | 0.05264  | 0.036179 |
| 0.167251 | 0.00028  | 0.085682 | 0.06431  | 0.358326 | 1.35E-15 | 0.072125 | 0.11959  | 0.363278 |
| 0.143878 | 0.00183  | 0.08058  | 0.08195  | 0.333461 | 1.37E-13 | -0.04343 | 0.34899  | -0.00204 |
| -0.03966 | 0.39255  | 0.100621 | 0.0297   | -0.10179 | 0.02783  | 0.073632 | 0.11204  | -0.04462 |
| 0.033865 | 0.46534  | -0.09392 | 0.04249  | 0.107994 | 0.01958  | -0.09879 | 0.03281  | 0.132687 |

|          |          |          |          |          |          |          |          |          |
|----------|----------|----------|----------|----------|----------|----------|----------|----------|
| 0.02342  | 0.61368  | -0.05711 | 0.21798  | 0.246067 | 7.19E-08 | -0.08444 | 0.0683   | 0.209409 |
| 0.050992 | 0.27146  | 0.00961  | 0.83591  | 0.21132  | 4.09E-06 | -0.05461 | 0.23886  | 0.246502 |
| -0.0247  | 0.59448  | -0.1219  | 0.00836  | 0.030146 | 0.51578  | -0.16491 | 0.00035  | 0.031755 |
| -0.08467 | 0.06755  | 0.025751 | 0.57883  | -0.17083 | 0.00021  | 0.024034 | 0.60441  | -0.0833  |
| 0.027486 | 0.55351  | 0.164383 | 0.00036  | 0.089589 | 0.05302  | 0.259454 | 1.27E-08 | 0.104916 |
| 0.155072 | 0.00077  | 0.274879 | 1.53E-09 | 0.497827 | 1.29E-30 | 0.308274 | 9.72E-12 | 0.44111  |
| 0.090541 | 0.05054  | -0.05935 | 0.20043  | 0.081256 | 0.07941  | -0.06216 | 0.17991  | 0.204214 |
| 0.133901 | 0.00374  | 0.041772 | 0.36776  | 0.250264 | 4.22E-08 | -0.03627 | 0.43418  | 0.284216 |
| 0.187806 | 4.43E-05 | 0.266664 | 4.81E-09 | 0.480261 | 2.55E-28 | 0.155803 | 0.00073  | 0.098629 |
| -0.08752 | 0.05876  | -0.06137 | 0.1855   | -0.18733 | 4.63E-05 | 0.070766 | 0.12674  | 0.043465 |
| 0.051477 | 0.26692  | -0.18322 | 6.82E-05 | -0.06125 | 0.18638  | -0.18608 | 5.22E-05 | -0.10338 |
| 0.00791  | 0.86463  | -0.1805  | 8.77E-05 | 0.084999 | 0.06647  | -0.19669 | 1.86E-05 | 0.081084 |
| 0.017513 | 0.70581  | -0.13976 | 0.00247  | 0.075673 | 0.10241  | -0.19847 | 1.56E-05 | 0.079519 |
| 0.047383 | 0.30689  | -0.09187 | 0.04722  | 0.209078 | 5.20E-06 | -0.10531 | 0.02285  | 0.194645 |
| 0.080754 | 0.08129  | -0.07229 | 0.11874  | 0.114727 | 0.01311  | -0.17748 | 0.00012  | 0.007415 |
| 0.078034 | 0.09211  | -0.10627 | 0.02162  | 0.203614 | 9.21E-06 | -0.19325 | 2.61E-05 | 0.064736 |
| -0.02744 | 0.55419  | -0.1114  | 0.01603  | 0.051937 | 0.26266  | -0.04683 | 0.31262  | 0.049873 |
| 0.036857 | 0.42683  | -0.10195 | 0.0276   | 0.145794 | 0.00158  | -0.16033 | 0.00051  | 0.017168 |
| 0.080274 | 0.08311  | -0.02587 | 0.57703  | 0.240621 | 1.41E-07 | -0.16724 | 0.00028  | 0.066617 |
| 0.040306 | 0.38483  | -0.09667 | 0.03677  | 0.066695 | 0.15014  | -0.16159 | 0.00046  | -0.07001 |
| -0.03146 | 0.49768  | 0.0477   | 0.30366  | -0.23923 | 1.67E-07 | 0.163511 | 0.00039  | -0.17231 |
| -0.00549 | 0.90573  | -0.03105 | 0.50332  | 0.058374 | 0.20797  | -0.06362 | 0.16989  | 0.067352 |
| -0.06491 | 0.1614   | 0.174402 | 0.00015  | -0.06095 | 0.1886   | 0.169257 | 0.00024  | -0.00745 |
| 0.113625 | 0.01402  | -0.05041 | 0.27694  | 0.120749 | 0.009    | -0.10151 | 0.02827  | 0.006571 |
| 0.117087 | 0.01133  | 0.025504 | 0.58248  | 0.129862 | 0.00494  | -0.03586 | 0.43945  | 0.115525 |
| 0.076692 | 0.09786  | -0.05009 | 0.28004  | 0.070338 | 0.12906  | -0.1254  | 0.00666  | 0.114782 |
| -0.00699 | 0.88023  | -0.06786 | 0.14311  | 0.152733 | 0.00093  | 3.25E-05 | 0.99944  | 0.298489 |
| 0.028506 | 0.5389   | -0.02433 | 0.60002  | 0.276441 | 1.23E-09 | -0.114   | 0.0137   | 0.083208 |
| -0.03259 | 0.48226  | -0.10982 | 0.01759  | -0.01008 | 0.82795  | -0.13557 | 0.00333  | -0.03112 |
| 0.0096   | 0.83608  | -0.1518  | 0.001    | 0.111837 | 0.01561  | -0.19971 | 1.37E-05 | 0.041431 |
| -0.02004 | 0.66573  | -0.04542 | 0.32742  | 0.057652 | 0.21366  | -0.08283 | 0.07375  | -0.03617 |
| 0.055879 | 0.22811  | -0.08129 | 0.07928  | 0.116795 | 0.01154  | -0.15905 | 0.00056  | 0.090998 |
| -0.05638 | 0.22396  | 0.023232 | 0.61654  | -0.14233 | 0.00205  | 0.036481 | 0.43157  | 0.054212 |
| 0.002195 | 0.96227  | -0.12001 | 0.00943  | 0.160427 | 0.0005   | -0.20083 | 1.23E-05 | 0.079116 |
| -0.01057 | 0.81977  | 0.205844 | 7.31E-06 | -0.06764 | 0.14444  | 0.149211 | 0.00122  | -0.12802 |
| -0.10303 | 0.02598  | 0.027947 | 0.54688  | -0.22154 | 1.33E-06 | 0.056514 | 0.22286  | 0.068455 |
| 0.100627 | 0.02969  | 0.022574 | 0.62656  | 0.339399 | 4.71E-14 | -0.0546  | 0.23898  | 0.191296 |
| -0.1339  | 0.00374  | 0.007433 | 0.87272  | -0.14916 | 0.00123  | 0.100172 | 0.03043  | -0.00105 |
| 0.216511 | 2.33E-06 | 0.274124 | 1.70E-09 | 0.52583  | 1.46E-34 | 0.224093 | 9.98E-07 | 0.231699 |
| -0.04256 | 0.35883  | 0.026761 | 0.56403  | -0.24364 | 9.74E-08 | 0.051969 | 0.26237  | -0.18319 |
| -0.11716 | 0.01128  | 0.025951 | 0.57588  | -0.29542 | 7.37E-11 | 0.07569  | 0.10233  | -0.19754 |
| 0.043615 | 0.34699  | -0.04782 | 0.30244  | 0.177559 | 0.00011  | -0.12699 | 0.006    | 0.143447 |
| -0.09321 | 0.04409  | 0.029486 | 0.52501  | -0.13641 | 0.00314  | 0.151464 | 0.00103  | 0.024971 |
| 0.055113 | 0.23455  | -0.02668 | 0.56525  | 0.269895 | 3.08E-09 | -0.13971 | 0.00248  | 0.078167 |
| -0.11323 | 0.01436  | -0.10456 | 0.02384  | -0.25946 | 1.27E-08 | 0.020391 | 0.66028  | 0.017527 |

|          |          |          |          |          |          |          |          |          |
|----------|----------|----------|----------|----------|----------|----------|----------|----------|
| 0.042946 | 0.35444  | -0.07348 | 0.11277  | 0.183722 | 6.51E-05 | -0.0654  | 0.15821  | 0.006477 |
| 0.082862 | 0.07362  | 0.042646 | 0.35782  | 0.180647 | 8.65E-05 | -0.04622 | 0.31892  | 0.053839 |
| 0.033029 | 0.47644  | -0.0753  | 0.10414  | 0.05795  | 0.21129  | -0.08513 | 0.06605  | 0.042819 |
| -0.15411 | 0.00083  | -0.02967 | 0.52241  | -0.24681 | 6.55E-08 | 0.028598 | 0.53758  | -0.04464 |
| -0.04136 | 0.3725   | 0.036408 | 0.43249  | -0.04045 | 0.3831   | 0.193199 | 2.63E-05 | 0.092915 |
| -0.06783 | 0.14328  | 0.091059 | 0.04923  | -0.19831 | 1.58E-05 | 0.122166 | 0.00822  | -0.14755 |
| 0.160794 | 0.00049  | 0.099812 | 0.03104  | 0.312588 | 4.82E-12 | 0.076531 | 0.09857  | 0.154187 |
| 0.054723 | 0.23788  | -0.00449 | 0.92291  | 0.129564 | 0.00504  | -0.04378 | 0.34513  | 0.095372 |
| 0.092313 | 0.04617  | -0.0802  | 0.08339  | 0.157058 | 0.00066  | -0.1317  | 0.00436  | 0.037542 |
| 0.049044 | 0.29022  | -0.04325 | 0.35101  | 0.145023 | 0.00168  | -0.11263 | 0.01489  | -0.00947 |
| 0.055505 | 0.23123  | -0.12743 | 0.00582  | 0.010974 | 0.81303  | -0.13207 | 0.00425  | -0.03488 |
| 0.027664 | 0.55096  | -0.03495 | 0.45112  | 0.066486 | 0.15143  | -0.14235 | 0.00204  | 0.154658 |
| 0.105865 | 0.02213  | -0.0369  | 0.42632  | 0.283657 | 4.32E-10 | -0.11665 | 0.01164  | 0.117481 |
| 0.042505 | 0.3594   | 0.07333  | 0.11352  | 0.196023 | 1.99E-05 | -0.00715 | 0.87761  | -0.00215 |
| -0.14323 | 0.00192  | -0.04876 | 0.293    | -0.04078 | 0.37923  | 0.001315 | 0.97738  | 0.145983 |
| 0.048169 | 0.29892  | -0.13707 | 0.003    | 0.035797 | 0.44026  | -0.17483 | 0.00015  | 0.151778 |
| 0.082173 | 0.07606  | -0.07045 | 0.12846  | 0.183061 | 6.92E-05 | -0.17407 | 0.00016  | 0.001812 |
| -0.13684 | 0.00305  | -0.07435 | 0.10858  | -0.28205 | 5.46E-10 | -0.08397 | 0.06984  | -0.20739 |
| 0.009863 | 0.83165  | 0.008078 | 0.86179  | 0.088048 | 0.05726  | -0.1312  | 0.00451  | -0.02701 |
| -0.11779 | 0.01085  | 0.020964 | 0.65137  | -0.26743 | 4.33E-09 | 0.049081 | 0.28985  | -0.0487  |
| -0.09868 | 0.03301  | 0.099284 | 0.03195  | -0.18751 | 4.55E-05 | 0.17459  | 0.00015  | -0.02808 |
| 0.146135 | 0.00154  | -0.06082 | 0.18953  | 0.266229 | 5.11E-09 | -0.12402 | 0.00729  | 0.251471 |
| 0.124604 | 0.00702  | 0.045194 | 0.3298   | 0.281746 | 5.71E-10 | -0.08171 | 0.07774  | 0.179038 |
| 0.185867 | 5.32E-05 | -0.06005 | 0.19521  | 0.283676 | 4.31E-10 | -0.08458 | 0.06784  | 0.15233  |
| -0.06107 | 0.18773  | -0.11411 | 0.01361  | -0.19636 | 1.92E-05 | -0.01535 | 0.74081  | 0.024838 |
| 0.040288 | 0.38504  | -0.10116 | 0.02883  | 0.103307 | 0.02558  | -0.11105 | 0.01635  | 0.012669 |
| 0.117953 | 0.01074  | -0.03096 | 0.50457  | 0.148117 | 0.00133  | -0.09114 | 0.04901  | 0.117604 |
| -0.15298 | 0.00091  | -0.00887 | 0.84832  | -0.15251 | 0.00095  | 0.044984 | 0.33205  | -0.07059 |
| -0.13932 | 0.00255  | 0.042691 | 0.35731  | -0.2136  | 3.20E-06 | 0.194284 | 2.36E-05 | 0.010369 |
| 0.094487 | 0.04125  | -0.13335 | 0.00389  | 0.126758 | 0.00609  | -0.14411 | 0.00179  | 0.259222 |
| 0.050809 | 0.27319  | 0.185727 | 5.39E-05 | 0.064008 | 0.1673   | 0.297085 | 5.70E-11 | 0.203056 |
| 0.048159 | 0.29902  | -0.07495 | 0.10575  | 0.17917  | 9.90E-05 | -0.12606 | 0.00638  | 0.191567 |
| -0.07429 | 0.10886  | 0.003854 | 0.9338   | -0.18949 | 3.77E-05 | 0.07992  | 0.08449  | 0.108381 |
| -0.0911  | 0.04914  | -0.04427 | 0.33981  | -0.22717 | 7.01E-07 | 0.073678 | 0.11181  | 0.051556 |
| 0.00182  | 0.96872  | -0.13537 | 0.00338  | 0.149239 | 0.00122  | -0.16873 | 0.00025  | 0.122467 |
| -0.12402 | 0.00729  | -0.04184 | 0.36701  | -0.21238 | 3.65E-06 | 0.075178 | 0.10469  | 0.031144 |
| -0.11363 | 0.01401  | -0.0158  | 0.73342  | -0.14752 | 0.00139  | 0.000553 | 0.99049  | -0.07256 |
| -0.00691 | 0.88154  | 0.099203 | 0.03209  | -0.09835 | 0.0336   | 0.109773 | 0.01764  | -0.02919 |
| 0.040043 | 0.38794  | -0.09279 | 0.04506  | 0.056776 | 0.22071  | -0.1886  | 4.10E-05 | -0.03247 |
| -0.00199 | 0.96571  | -0.09787 | 0.03449  | 0.118481 | 0.01039  | -0.09915 | 0.03217  | 0.079291 |
| 0.085704 | 0.06424  | -0.029   | 0.53188  | 0.163334 | 0.00039  | -0.14653 | 0.0015   | 0.058944 |
| 0.128597 | 0.00538  | 0.018455 | 0.6908   | 0.349274 | 7.62E-15 | -0.03682 | 0.42729  | 0.111899 |
| 0.064759 | 0.16236  | 0.028782 | 0.53497  | 0.231234 | 4.37E-07 | -0.06527 | 0.15905  | 0.013841 |
| -0.15135 | 0.00103  | -0.00911 | 0.84426  | -0.15168 | 0.00101  | 0.063446 | 0.17107  | -0.12189 |
| -0.08817 | 0.05691  | -0.01144 | 0.80518  | -0.20177 | 1.11E-05 | -0.01735 | 0.70843  | 0.041889 |

|          |         |          |          |          |          |          |          |          |
|----------|---------|----------|----------|----------|----------|----------|----------|----------|
| -0.04773 | 0.30339 | -0.1263  | 0.00628  | 0.046481 | 0.31619  | -0.15708 | 0.00066  | 0.099067 |
| 0.049865 | 0.28221 | -0.13221 | 0.00421  | 0.216131 | 2.43E-06 | -0.21566 | 2.56E-06 | 0.140558 |
| -0.10966 | 0.01776 | 0.040025 | 0.38815  | -0.21574 | 2.54E-06 | 0.113144 | 0.01443  | 0.02996  |
| 0.070301 | 0.12926 | -0.01373 | 0.7673   | 0.121612 | 0.00852  | -0.06896 | 0.13674  | -0.00914 |
| 0.09419  | 0.0419  | -0.05218 | 0.26047  | 0.127267 | 0.00589  | -0.095   | 0.04016  | 0.092919 |
| 0.015941 | 0.73116 | -0.15968 | 0.00053  | 0.0486   | 0.29461  | -0.1598  | 0.00053  | 0.013184 |
| -0.13172 | 0.00435 | -0.01567 | 0.7355   | -0.2688  | 3.59E-09 | 0.050848 | 0.27282  | -0.00453 |
| -0.04796 | 0.30105 | 0.01923  | 0.67852  | -0.22657 | 7.51E-07 | 0.087893 | 0.0577   | -0.13393 |
| 0.083142 | 0.07265 | -0.07594 | 0.1012   | 0.099922 | 0.03085  | -0.14121 | 0.00222  | 0.156076 |
| -0.01053 | 0.82049 | -0.12478 | 0.00694  | 0.17789  | 0.00011  | -0.05541 | 0.23207  | 0.335538 |
| -0.06013 | 0.19461 | 0.018246 | 0.69411  | -0.16467 | 0.00035  | 0.005733 | 0.90166  | -0.33273 |
| -0.00603 | 0.89659 | 0.027843 | 0.54838  | -0.13198 | 0.00428  | 0.093234 | 0.04403  | 0.158467 |
| -0.09489 | 0.04039 | 0.057753 | 0.21286  | -0.24251 | 1.12E-07 | 0.03313  | 0.47509  | -0.19169 |
| -0.07806 | 0.09202 | 0.099711 | 0.03121  | -0.04495 | 0.33236  | 0.088626 | 0.05564  | -0.1255  |
| 0.0319   | 0.49165 | 0.405226 | 6.97E-20 | 0.091958 | 0.04702  | 0.389709 | 2.18E-18 | 0.021768 |
| 0.111703 | 0.01573 | -0.12711 | 0.00595  | 0.242894 | 1.07E-07 | -0.2013  | 1.17E-05 | 0.099321 |
| -0.00049 | 0.99159 | -0.15812 | 0.0006   | 0.070883 | 0.12611  | -0.21846 | 1.88E-06 | 0.065851 |
| -0.00321 | 0.94481 | -0.13662 | 0.00309  | 0.079733 | 0.08522  | -0.23357 | 3.31E-07 | -0.0658  |
| -0.00463 | 0.92048 | -0.03521 | 0.44785  | 0.166225 | 0.00031  | -0.0316  | 0.49575  | 0.130142 |
| -0.00283 | 0.9514  | -0.10521 | 0.02297  | 0.017477 | 0.7064   | -0.14964 | 0.00118  | -0.04813 |
| -0.03574 | 0.44101 | -0.04775 | 0.30312  | 0.081784 | 0.07747  | -0.09307 | 0.0444   | 0.129229 |
| 0.000983 | 0.98311 | -0.11761 | 0.01097  | 0.06488  | 0.16158  | -0.13508 | 0.00345  | 0.080095 |
| -0.09561 | 0.03889 | 0.124796 | 0.00693  | -0.07963 | 0.08563  | 0.139922 | 0.00244  | -0.11237 |
| 0.065518 | 0.15748 | -0.0459  | 0.32233  | 0.159705 | 0.00053  | -0.07939 | 0.08659  | 0.152795 |
| 0.020914 | 0.65214 | -0.01725 | 0.70999  | 0.106551 | 0.02128  | -0.04988 | 0.28207  | 0.157515 |
| 0.137673 | 0.00287 | -0.12692 | 0.00602  | 0.156127 | 0.00071  | -0.17843 | 0.00011  | 0.1035   |
| -0.0821  | 0.07632 | 0.071812 | 0.12121  | -0.15377 | 0.00086  | 0.085904 | 0.06362  | -0.03749 |
| -0.03746 | 0.41935 | 0.120548 | 0.00912  | -0.01513 | 0.7443   | 0.116459 | 0.01178  | -0.23231 |
| -0.05299 | 0.25313 | 0.031634 | 0.49527  | -0.16114 | 0.00047  | 0.077455 | 0.09456  | 0.088229 |
| 0.121496 | 0.00858 | -0.15039 | 0.00111  | 0.145757 | 0.00159  | -0.17478 | 0.00015  | 0.139566 |
| 0.007813 | 0.86628 | -0.01108 | 0.81121  | 0.184523 | 6.04E-05 | -0.0806  | 0.08186  | 0.138583 |
| -0.01685 | 0.71644 | -0.11946 | 0.00977  | -0.02721 | 0.55753  | -0.15687 | 0.00067  | 0.106494 |
| 0.068741 | 0.138   | -0.03169 | 0.49454  | 0.166636 | 0.0003   | -0.13456 | 0.00358  | 0.102425 |
| 0.037808 | 0.415   | 0.024312 | 0.60023  | 0.082635 | 0.07442  | -0.01892 | 0.68346  | 0.163522 |
| -0.14019 | 0.00239 | -0.01101 | 0.81243  | -0.24567 | 7.56E-08 | 0.039278 | 0.39708  | -0.09648 |
| -0.03328 | 0.47311 | -0.15937 | 0.00055  | 0.111374 | 0.01605  | -0.27485 | 1.54E-09 | 0.037638 |
| 0.018361 | 0.69229 | -0.19606 | 1.98E-05 | 0.045255 | 0.32914  | -0.12453 | 0.00705  | 0.186547 |
| 0.108077 | 0.01948 | -0.0411  | 0.37554  | 0.236805 | 2.25E-07 | -0.03173 | 0.49399  | 0.053906 |
| 0.141313 | 0.00221 | 0.084985 | 0.06651  | 0.267098 | 4.53E-09 | -0.00468 | 0.91968  | 0.092148 |
| 0.049022 | 0.29044 | -0.09697 | 0.03618  | 0.165986 | 0.00032  | -0.13832 | 0.00274  | 0.049117 |
| 0.11229  | 0.01519 | 0.25377  | 2.69E-08 | 0.353425 | 3.47E-15 | 0.159104 | 0.00056  | 0.039891 |
| 0.00417  | 0.9284  | -0.22434 | 9.70E-07 | -0.01222 | 0.79222  | -0.28426 | 3.95E-10 | 0.018755 |
| -0.10453 | 0.02388 | 0.078879 | 0.08863  | -0.15889 | 0.00057  | 0.073855 | 0.11095  | -0.10623 |
| -0.02967 | 0.5225  | 0.105292 | 0.02287  | -0.21642 | 2.35E-06 | 0.086827 | 0.06081  | -0.21864 |
| -0.0682  | 0.14112 | 0.059382 | 0.20021  | -0.19904 | 1.47E-05 | 0.063506 | 0.17066  | -0.12957 |

|          |          |          |          |          |          |          |          |          |
|----------|----------|----------|----------|----------|----------|----------|----------|----------|
| -0.09826 | 0.03376  | -0.0145  | 0.75458  | -0.2193  | 1.71E-06 | -0.02323 | 0.61658  | -0.22937 |
| 0.164809 | 0.00035  | -0.02945 | 0.52558  | 0.217267 | 2.14E-06 | -0.0384  | 0.40767  | 0.096864 |
| 0.057168 | 0.21753  | -0.06971 | 0.13254  | 0.239394 | 1.64E-07 | -0.13679 | 0.00306  | 0.105094 |
| -0.09138 | 0.04844  | 0.184732 | 5.92E-05 | -0.17582 | 0.00013  | 0.212724 | 3.52E-06 | -0.14358 |
| -0.12412 | 0.00724  | -0.05421 | 0.24228  | -0.31096 | 6.28E-12 | -0.01167 | 0.80145  | -0.18751 |
| 0.024411 | 0.59876  | -0.1467  | 0.00148  | 0.121304 | 0.00869  | -0.20208 | 1.08E-05 | 0.110521 |
| -0.09125 | 0.04876  | 0.047573 | 0.30494  | -0.17212 | 0.00019  | 0.077145 | 0.09589  | 0.009623 |
| -0.02691 | 0.5618   | -0.09628 | 0.03754  | 0.017197 | 0.71089  | -0.15262 | 0.00094  | -0.11506 |
| 0.002432 | 0.9582   | -0.15419 | 0.00083  | 0.112022 | 0.01544  | -0.21612 | 2.43E-06 | 0.08229  |
| -0.11473 | 0.0131   | 0.108411 | 0.01911  | -0.1622  | 0.00043  | 0.203978 | 8.87E-06 | -0.03629 |
| -0.09036 | 0.051    | 0.027606 | 0.55178  | -0.18012 | 9.08E-05 | 0.104275 | 0.02423  | 0.080015 |
| 0.090726 | 0.05007  | -0.05394 | 0.24469  | 0.189173 | 3.88E-05 | -0.109   | 0.01846  | 0.248856 |
| 0.07899  | 0.08818  | -0.04757 | 0.30498  | 0.245644 | 7.58E-08 | -0.05967 | 0.19803  | 0.189942 |
| 0.050378 | 0.27728  | -0.15724 | 0.00065  | 0.200125 | 1.32E-05 | -0.22936 | 5.44E-07 | 0.158846 |
| 0.078713 | 0.0893   | -0.11897 | 0.01008  | 0.212985 | 3.42E-06 | -0.19683 | 1.83E-05 | 0.144965 |
| 0.09942  | 0.03171  | -0.09284 | 0.04493  | 0.243063 | 1.05E-07 | -0.20296 | 9.86E-06 | 0.064116 |
| 0.179642 | 9.48E-05 | 0.029053 | 0.53112  | 0.320377 | 1.32E-12 | -0.05359 | 0.24776  | 0.021319 |
| 0.068128 | 0.14155  | -0.12329 | 0.00765  | 0.202985 | 9.83E-06 | -0.17823 | 0.00011  | 0.051349 |
| 0.023904 | 0.60637  | -0.07407 | 0.10993  | 0.172333 | 0.00018  | -0.08853 | 0.05591  | 0.136311 |
| 0.035926 | 0.43862  | -0.16081 | 0.00049  | 0.116745 | 0.01158  | -0.23806 | 1.93E-07 | 0.12558  |
| -0.05006 | 0.28032  | -0.1716  | 0.00019  | -0.00484 | 0.91695  | -0.24143 | 1.28E-07 | -0.08822 |
| 0.086623 | 0.06142  | 0.063188 | 0.17282  | 0.219746 | 1.63E-06 | 0.023746 | 0.60875  | 0.292505 |
| 0.026042 | 0.57456  | -0.08862 | 0.05564  | 0.047988 | 0.30074  | -0.11597 | 0.01215  | 0.02727  |
| -0.05904 | 0.20278  | 0.090297 | 0.05116  | -0.10463 | 0.02375  | 0.112199 | 0.01527  | -0.07728 |
| 0.050845 | 0.27284  | -0.03405 | 0.46297  | 0.165031 | 0.00034  | -0.12532 | 0.00669  | -0.01487 |
| -0.01795 | 0.69879  | -0.14458 | 0.00173  | 0.021648 | 0.64078  | -0.27654 | 1.21E-09 | 0.019438 |
| 0.047781 | 0.30284  | -0.01547 | 0.73884  | 0.120254 | 0.00929  | -0.15597 | 0.00072  | -0.01512 |
| 0.011154 | 0.81002  | -0.10687 | 0.0209   | -0.02588 | 0.57701  | -0.26478 | 6.22E-09 | -0.01437 |
| 0.064886 | 0.16154  | -0.1388  | 0.00265  | 0.168792 | 0.00025  | -0.18097 | 8.39E-05 | 0.078823 |
| 0.072206 | 0.11918  | -0.01758 | 0.7048   | 0.116977 | 0.01141  | -0.10579 | 0.02223  | -0.00956 |
| 0.113593 | 0.01404  | -0.04401 | 0.34265  | 0.25254  | 3.15E-08 | -0.0693  | 0.13482  | 0.097261 |
| -0.05821 | 0.20929  | -0.2457  | 7.53E-08 | -0.02646 | 0.56845  | -0.29177 | 1.29E-10 | 0.031999 |
| 0.111371 | 0.01605  | -0.04013 | 0.38691  | 0.224779 | 9.23E-07 | -0.07794 | 0.09249  | 0.097492 |
| 0.035332 | 0.44622  | -0.13599 | 0.00323  | 0.082029 | 0.07658  | -0.2165  | 2.33E-06 | 0.106133 |
| 0.021458 | 0.64371  | -0.13619 | 0.00319  | 0.126621 | 0.00614  | -0.19065 | 3.37E-05 | 0.218514 |
| -0.02514 | 0.58793  | -0.00935 | 0.8403   | 0.07878  | 0.08903  | -0.12641 | 0.00623  | -0.007   |
| 0.005521 | 0.90529  | -0.07134 | 0.12369  | 0.073282 | 0.11376  | -0.14297 | 0.00195  | 0.084873 |
| 0.070538 | 0.12797  | -0.09507 | 0.04001  | 0.115868 | 0.01222  | -0.19619 | 1.96E-05 | 0.073606 |
| 0.01012  | 0.82733  | -0.16674 | 0.0003   | 0.028948 | 0.53261  | -0.19481 | 2.24E-05 | 0.115009 |
| 0.074997 | 0.10552  | -0.08241 | 0.0752   | 0.195159 | 2.17E-05 | -0.20525 | 7.78E-06 | -0.00036 |
| 0.0586   | 0.20621  | -0.04174 | 0.36811  | 0.021242 | 0.64706  | -0.15313 | 0.0009   | -0.04804 |
| 0.048486 | 0.29574  | -0.10226 | 0.02712  | 0.131395 | 0.00445  | -0.14641 | 0.00151  | 0.121917 |
| 0.052831 | 0.25452  | -0.12184 | 0.00839  | 0.079412 | 0.08649  | -0.14745 | 0.0014   | 0.088328 |
| -0.05994 | 0.19598  | -0.15475 | 0.00079  | -0.01589 | 0.73201  | -0.18656 | 4.98E-05 | -0.01997 |
| 0.066899 | 0.14889  | -0.09898 | 0.03248  | 0.100755 | 0.02948  | -0.18342 | 6.69E-05 | 0.148006 |

|          |          |          |          |          |          |          |          |          |
|----------|----------|----------|----------|----------|----------|----------|----------|----------|
| 0.0674   | 0.14587  | -0.04288 | 0.3552   | 0.042373 | 0.3609   | -0.11755 | 0.01101  | -0.10319 |
| -0.03373 | 0.46717  | -0.14752 | 0.00139  | -0.00084 | 0.98563  | -0.19973 | 1.37E-05 | 0.067337 |
| 0.113154 | 0.01442  | -0.07321 | 0.11414  | 0.208908 | 5.29E-06 | -0.13266 | 0.00408  | 0.115344 |
| 0.121293 | 0.00869  | -0.01929 | 0.67754  | 0.185514 | 5.50E-05 | -0.10855 | 0.01896  | 0.05369  |
| 0.028743 | 0.53552  | -0.1262  | 0.00632  | 0.002056 | 0.96466  | -0.13978 | 0.00247  | 0.11796  |
| -0.09049 | 0.05067  | -0.20176 | 1.11E-05 | 0.020055 | 0.66554  | -0.27048 | 2.84E-09 | 0.028694 |
| 0.031187 | 0.50138  | -0.09338 | 0.0437   | 0.160541 | 0.0005   | -0.18116 | 8.25E-05 | 0.157985 |
| -0.09812 | 0.03402  | 0.056957 | 0.21924  | -0.15692 | 0.00067  | 0.139215 | 0.00257  | -0.01347 |
| 0.027589 | 0.55203  | -0.11074 | 0.01666  | 0.057741 | 0.21295  | -0.13301 | 0.00398  | -0.00094 |
| 0.032827 | 0.47914  | -0.15949 | 0.00054  | 0.132949 | 0.004    | -0.179   | 0.0001   | 0.165581 |
| 0.239391 | 1.64E-07 | 0.240833 | 1.38E-07 | 0.269486 | 3.26E-09 | 0.135394 | 0.00337  | 0.043584 |
| 0.119373 | 0.00982  | 0.107835 | 0.01976  | 0.167062 | 0.00029  | 0.164816 | 0.00035  | 0.196441 |
| 0.146786 | 0.00147  | 0.022784 | 0.62334  | 0.138529 | 0.0027   | -0.00402 | 0.93102  | -0.0198  |
| 0.245125 | 8.09E-08 | 0.154052 | 0.00084  | 0.142927 | 0.00196  | 0.087304 | 0.0594   | -0.00936 |
| 0.012561 | 0.78661  | -0.07048 | 0.12831  | -0.12756 | 0.00577  | -0.06779 | 0.14357  | 0.02403  |
| 0.070833 | 0.12638  | 0.136616 | 0.00309  | 0.192419 | 2.84E-05 | 0.13741  | 0.00292  | 0.076366 |
| 0.090832 | 0.0498   | 0.021737 | 0.63941  | 0.02172  | 0.63966  | 0.012362 | 0.7899   | -0.02735 |
| 0.077468 | 0.0945   | -0.02394 | 0.60587  | -0.00316 | 0.94578  | -0.05681 | 0.22041  | -0.05089 |
| 0.176492 | 0.00013  | 0.214463 | 2.92E-06 | 0.143991 | 0.00181  | 0.130819 | 0.00463  | 0.011206 |
| 0.100737 | 0.02951  | -0.01955 | 0.6735   | 0.033556 | 0.46942  | -0.05195 | 0.26257  | 0.041347 |
| 0.050061 | 0.28031  | -0.00721 | 0.87653  | 0.031561 | 0.49627  | -0.06833 | 0.14035  | 0.098916 |
| 0.00238  | 0.95909  | -0.09311 | 0.04432  | -0.09116 | 0.04898  | -0.1238  | 0.00739  | -0.11454 |
| 0.073788 | 0.11128  | -0.00517 | 0.91126  | -0.01108 | 0.81122  | 0.034617 | 0.45549  | 0.108445 |
| -0.00466 | 0.91992  | 0.055298 | 0.23299  | 0.033348 | 0.47218  | 0.006278 | 0.89236  | -0.07101 |
| 0.027984 | 0.54635  | -0.00984 | 0.83199  | 0.004513 | 0.92251  | -0.03142 | 0.49815  | -0.04012 |
| 0.072411 | 0.11813  | 0.010905 | 0.81417  | -0.00846 | 0.85528  | 0.008576 | 0.85336  | -0.01014 |
| 0.279499 | 7.91E-10 | 0.152557 | 0.00094  | 0.30859  | 9.24E-12 | 0.109989 | 0.01742  | 0.13726  |
| 0.060625 | 0.19094  | 0.121996 | 0.00831  | 0.08114  | 0.07984  | 0.073184 | 0.11425  | 0.022161 |
| 0.008859 | 0.84858  | -0.05192 | 0.26286  | -0.07264 | 0.11698  | -0.05377 | 0.24616  | 0.064328 |
| 0.011671 | 0.80139  | -0.06723 | 0.14689  | -0.04674 | 0.31352  | -0.09952 | 0.03154  | -0.02144 |
| 0.045657 | 0.32486  | -0.02311 | 0.61833  | -0.01768 | 0.7031   | -0.05361 | 0.24757  | -0.02018 |
| 0.082016 | 0.07663  | 0.05749  | 0.21495  | 0.098595 | 0.03316  | 0.032363 | 0.48538  | 0.065041 |
| 0.086467 | 0.06189  | 0.098156 | 0.03395  | 0.119096 | 0.01     | 0.030635 | 0.50899  | 0.024195 |
| 0.026925 | 0.56164  | -0.10769 | 0.01992  | -0.06137 | 0.18554  | -0.11638 | 0.01184  | -0.11443 |
| 0.030516 | 0.51064  | 0.051385 | 0.26778  | 0.070298 | 0.12928  | 0.060022 | 0.1954   | -0.01029 |
| 0.077726 | 0.0934   | -0.05272 | 0.25556  | 0.015272 | 0.74203  | -0.09349 | 0.04344  | 0.004199 |
| 0.065977 | 0.15459  | 0.001311 | 0.97745  | 0.064557 | 0.16368  | -0.06408 | 0.16683  | -0.04987 |
| 0.014372 | 0.75673  | 0.053393 | 0.2495   | 0.027087 | 0.5593   | 0.055928 | 0.2277   | -0.03459 |
| 0.087195 | 0.05972  | 0.03389  | 0.46501  | 0.163599 | 0.00039  | -0.07128 | 0.12398  | -0.04685 |
| 0.047429 | 0.30641  | -0.08609 | 0.06304  | -0.00059 | 0.98991  | -0.21078 | 4.34E-06 | -0.15981 |
| 0.084902 | 0.06678  | 0.004881 | 0.91622  | 0.05275  | 0.25525  | -0.01799 | 0.69814  | -0.04679 |
| 0.049526 | 0.2855   | 0.016003 | 0.73015  | 0.043661 | 0.34648  | 0.02137  | 0.64506  | -0.00587 |
| 0.003353 | 0.9424   | -0.03531 | 0.44655  | 0.010869 | 0.81478  | -0.00137 | 0.97642  | 0.044364 |
| 0.035863 | 0.43942  | -0.02758 | 0.55219  | -0.07837 | 0.09072  | -0.03006 | 0.51701  | -0.01865 |
| 0.051671 | 0.26512  | 0.038597 | 0.40532  | 0.006157 | 0.89443  | 0.011815 | 0.799    | -0.031   |



|          |          |          |          |          |          |          |          |          |
|----------|----------|----------|----------|----------|----------|----------|----------|----------|
| 0.223894 | 1.02E-06 | 0.011271 | 0.80806  | 0.068999 | 0.13652  | -0.04954 | 0.28533  | 0.013093 |
| 0.043429 | 0.34905  | 0.022885 | 0.62181  | -0.01461 | 0.75285  | 0.033794 | 0.46628  | 0.035193 |
| 0.035552 | 0.4434   | -0.0202  | 0.66332  | 0.010077 | 0.82806  | -0.0234  | 0.61399  | 0.035835 |
| 0.041432 | 0.37168  | -0.08773 | 0.05818  | -0.00545 | 0.90648  | -0.0756  | 0.10276  | 0.011113 |
| 0.032264 | 0.48671  | 0.026692 | 0.56504  | 0.012318 | 0.79063  | -0.0279  | 0.54753  | -0.00505 |
| 0.085674 | 0.06433  | -0.0316  | 0.49579  | -0.03652 | 0.43102  | -0.05097 | 0.27163  | -0.03514 |
| 0.017755 | 0.70195  | -0.03348 | 0.47039  | -0.03624 | 0.43463  | -0.0374  | 0.42007  | -0.012   |
| 0.032674 | 0.48119  | -0.04397 | 0.34302  | -0.07049 | 0.12821  | -0.07546 | 0.10338  | 0.070463 |
| 0.068394 | 0.14     | 0.052615 | 0.25648  | 0.005295 | 0.90915  | 0.029057 | 0.53107  | -0.02077 |
| 0.089518 | 0.05321  | 0.055707 | 0.22954  | 0.009078 | 0.84487  | 0.027428 | 0.55435  | -0.01966 |
| 0.012188 | 0.7928   | 0.069949 | 0.13119  | 0.146343 | 0.00152  | 0.178092 | 0.00011  | 0.045491 |
| 0.223718 | 1.04E-06 | 0.101555 | 0.02821  | 0.210641 | 4.40E-06 | 0.066645 | 0.15045  | 0.024135 |
| 0.043308 | 0.35039  | 0.011287 | 0.8078   | -0.00195 | 0.96644  | -0.02248 | 0.62802  | -0.03554 |
| 0.031318 | 0.49958  | 0.096825 | 0.03646  | 0.133113 | 0.00396  | 0.072811 | 0.11611  | -0.00709 |
| 0.030802 | 0.50668  | -0.03386 | 0.46541  | -0.02699 | 0.56074  | -0.02052 | 0.6583   | -0.00319 |
| 0.024874 | 0.59183  | 0.038102 | 0.41137  | 0.041099 | 0.37554  | 0.032138 | 0.48842  | 0.057264 |
| 0.045508 | 0.32644  | -0.07796 | 0.09242  | -0.03518 | 0.44813  | -0.12743 | 0.00582  | 0.034161 |
| 0.062774 | 0.17565  | 0.034854 | 0.4524   | 0.054906 | 0.23632  | -0.00424 | 0.92713  | 0.061197 |
| 0.040344 | 0.38438  | 0.100431 | 0.03001  | 0.073113 | 0.1146   | 0.065274 | 0.15904  | 0.011136 |
| 0.067152 | 0.14736  | -0.04853 | 0.29533  | 0.033788 | 0.46635  | -0.11491 | 0.01296  | -0.01015 |
| 0.08579  | 0.06397  | -0.03545 | 0.44469  | 0.084774 | 0.06719  | -0.05418 | 0.24259  | 0.027635 |
| 0.195355 | 2.12E-05 | 0.434369 | 6.51E-23 | 0.482799 | 1.21E-28 | 0.344678 | 1.79E-14 | 0.115895 |
| 0.13672  | 0.00307  | -0.02993 | 0.51878  | 0.005543 | 0.90491  | -0.01808 | 0.69674  | -0.03673 |
| 0.008683 | 0.85155  | -0.07578 | 0.10193  | -0.07806 | 0.09199  | -0.08018 | 0.08349  | -0.0791  |
| 0.234228 | 3.06E-07 | 0.038079 | 0.41166  | 0.038811 | 0.40271  | 0.026021 | 0.57487  | 0.020216 |
| 0.065597 | 0.15698  | 0.025079 | 0.58879  | 0.035361 | 0.44585  | -0.02716 | 0.55825  | -0.02725 |
| 0.025595 | 0.58114  | -0.10626 | 0.02164  | -0.10964 | 0.01778  | -0.10368 | 0.02505  | 0.033728 |
| 0.106303 | 0.02159  | -0.05017 | 0.27927  | 0.074469 | 0.10801  | -0.06516 | 0.15975  | 0.095436 |
| 0.065983 | 0.15456  | -0.03336 | 0.47207  | -0.0536  | 0.2477   | -0.019   | 0.68215  | -0.00687 |
| 0.32411  | 6.97E-13 | 0.477342 | 5.97E-28 | 0.672036 | 1.18E-62 | 0.411986 | 1.47E-20 | 0.212117 |
| 0.07096  | 0.1257   | 0.087969 | 0.05748  | 0.045848 | 0.32283  | 0.027444 | 0.55412  | -0.03638 |
| 0.030175 | 0.51537  | 0.002083 | 0.96419  | -0.00053 | 0.99092  | -0.00422 | 0.92755  | 0.035077 |
| 0.137088 | 0.00299  | 0.037822 | 0.41482  | 0.080488 | 0.08229  | 0.085245 | 0.06568  | 0.027487 |
| -0.01044 | 0.82203  | -0.03721 | 0.42244  | -0.00178 | 0.96947  | 0.02071  | 0.65531  | 0.207136 |
| 0.016139 | 0.72795  | 0.193582 | 2.53E-05 | 0.136766 | 0.00306  | 0.119958 | 0.00947  | 0.003927 |
| 0.047577 | 0.3049   | 0.008927 | 0.84743  | 0.010602 | 0.81925  | 0.000417 | 0.99284  | -0.00731 |
| 0.071444 | 0.12314  | 0.061868 | 0.18198  | 0.068278 | 0.14068  | 0.012777 | 0.78302  | -0.02374 |
| 0.095773 | 0.03856  | 0.026654 | 0.56559  | 0.089346 | 0.05367  | 0.021021 | 0.65048  | 0.011187 |
| 0.021605 | 0.64143  | -0.00015 | 0.99745  | 0.004927 | 0.91543  | -0.03146 | 0.49768  | -0.03474 |
| 0.102793 | 0.02633  | 0.061634 | 0.18364  | 0.06958  | 0.13324  | 0.014772 | 0.75018  | -0.00603 |
| 0.079666 | 0.08548  | 0.068168 | 0.14132  | 0.151618 | 0.00101  | -0.00524 | 0.91016  | -0.00879 |
| 0.060436 | 0.19233  | 0.009395 | 0.83953  | 0.05505  | 0.23509  | -0.02808 | 0.54491  | -0.02546 |
| 0.066043 | 0.15418  | -0.03356 | 0.46942  | -0.02212 | 0.63348  | -0.00955 | 0.83687  | 0.05735  |
| 0.121709 | 0.00847  | 0.009948 | 0.83024  | -0.06225 | 0.17928  | -0.01514 | 0.74416  | -0.05239 |
| 0.055837 | 0.22846  | -0.04523 | 0.32939  | 0.001168 | 0.97992  | -0.06095 | 0.1886   | -0.03988 |

|          |          |          |          |          |          |          |          |          |
|----------|----------|----------|----------|----------|----------|----------|----------|----------|
| 0.078285 | 0.09106  | 0.095212 | 0.03971  | 0.054918 | 0.23622  | 0.069171 | 0.13555  | 0.044758 |
| 0.18178  | 7.79E-05 | 0.002939 | 0.9495   | 0.013125 | 0.77727  | -0.01118 | 0.8095   | -0.01249 |
| 0.076308 | 0.09956  | 0.05901  | 0.20305  | 0.100761 | 0.02947  | 0.002739 | 0.95293  | -0.01362 |
| 0.064554 | 0.1637   | 0.0385   | 0.4065   | 0.079074 | 0.08784  | 0.087148 | 0.05986  | 0.060971 |
| 0.029617 | 0.52318  | 0.073465 | 0.11286  | 0.070958 | 0.12571  | 0.037478 | 0.41908  | -0.00633 |
| 0.025634 | 0.58057  | 0.070062 | 0.13057  | 0.077162 | 0.09581  | 0.023204 | 0.61695  | -0.00582 |
| 0.032964 | 0.4773   | -0.02817 | 0.54366  | 0.016474 | 0.72253  | -0.03457 | 0.45603  | 0.106244 |
| -0.00624 | 0.89295  | 0.033928 | 0.46452  | 0.047638 | 0.30428  | 0.074177 | 0.1094   | 0.085879 |
| 0.084744 | 0.06729  | -0.00155 | 0.97333  | 0.102369 | 0.02696  | -0.02039 | 0.66028  | -0.03002 |
| 0.031276 | 0.50016  | 0.074281 | 0.1089   | 0.078344 | 0.09082  | 0.023159 | 0.61764  | -0.0388  |
| 0.093073 | 0.0444   | 0.095221 | 0.0397   | 0.122999 | 0.00779  | 0.101669 | 0.02803  | 0.084065 |
| -0.00399 | 0.93152  | -0.074   | 0.11026  | -0.1188  | 0.01018  | -0.12418 | 0.00721  | -0.03714 |
| 0.00901  | 0.84602  | -0.03327 | 0.47321  | -0.04743 | 0.30636  | 0.001409 | 0.97577  | -0.05466 |
| 0.183255 | 6.80E-05 | 0.285375 | 3.35E-10 | 0.244232 | 9.05E-08 | 0.185143 | 5.70E-05 | 0.031867 |
| 0.047796 | 0.30268  | -0.05025 | 0.27853  | -0.10762 | 0.02001  | -0.0492  | 0.28866  | 0.037835 |
| 0.005057 | 0.91321  | -0.03157 | 0.49611  | -0.01739 | 0.70773  | -0.01432 | 0.7576   | 0.094826 |
| 0.132655 | 0.00408  | -0.00915 | 0.84372  | -0.01123 | 0.80868  | -0.0336  | 0.46881  | -0.02562 |
| 0.01434  | 0.75726  | -0.05864 | 0.20587  | -0.03014 | 0.51583  | -0.05087 | 0.27263  | 0.120567 |
| 0.035396 | 0.4454   | -0.06286 | 0.17509  | -0.02385 | 0.60721  | -0.07756 | 0.09409  | -0.0108  |
| 0.143121 | 0.00193  | 0.044653 | 0.33562  | 0.101178 | 0.0288   | 0.064387 | 0.16479  | 0.00616  |
| 0.110576 | 0.01683  | 0.030689 | 0.50825  | 0.063802 | 0.16868  | 0.011405 | 0.80583  | -0.02082 |
| -0.09909 | 0.03228  | -0.04173 | 0.3682   | -0.18606 | 5.22E-05 | -0.00684 | 0.88281  | -0.07963 |
| 0.061544 | 0.18429  | 0.156583 | 0.00068  | 0.154855 | 0.00079  | 0.205706 | 7.41E-06 | 0.229622 |
| -0.04347 | 0.34858  | 0.00152  | 0.97386  | 0.015544 | 0.73761  | -0.08896 | 0.05471  | -0.19556 |
| -0.11451 | 0.01328  | -0.0807  | 0.0815   | -0.26134 | 9.91E-09 | -0.04694 | 0.31146  | -0.02383 |
| -0.04859 | 0.2947   | -0.0899  | 0.0522   | -0.18154 | 7.96E-05 | -0.15774 | 0.00062  | -0.22849 |
| 0.082788 | 0.07388  | 0.197208 | 1.77E-05 | 0.265371 | 5.74E-09 | 0.13392  | 0.00374  | 0.242966 |
| -0.0603  | 0.19336  | -0.15876 | 0.00057  | -0.18477 | 5.90E-05 | -0.15387 | 0.00085  | -0.11773 |
| -0.10231 | 0.02704  | -0.25158 | 3.57E-08 | -0.25101 | 3.84E-08 | -0.30319 | 2.19E-11 | -0.17851 |
| 0.005343 | 0.90832  | 0.076768 | 0.09752  | 0.08459  | 0.06779  | 0.093619 | 0.04316  | 0.154614 |
| -0.05064 | 0.27478  | -0.04829 | 0.29769  | -0.07541 | 0.10361  | 0.012871 | 0.78146  | -0.13272 |
| -0.15372 | 0.00086  | -0.1135  | 0.01412  | -0.2567  | 1.83E-08 | -0.06845 | 0.13966  | -0.15057 |
| -0.07939 | 0.08659  | -0.10609 | 0.02186  | -0.05015 | 0.27943  | -0.03995 | 0.38903  | 0.084115 |
| 0.017002 | 0.71402  | -0.01705 | 0.71318  | 0.013917 | 0.76422  | 0.093246 | 0.04401  | 0.049529 |
| -0.02528 | 0.58577  | -0.00045 | 0.99224  | -0.1193  | 0.00987  | -0.01875 | 0.68619  | -0.13999 |
| -0.09777 | 0.03466  | -0.10235 | 0.02699  | -0.12237 | 0.00812  | -0.06879 | 0.1377   | -0.22811 |
| -0.08636 | 0.06223  | -0.11756 | 0.01101  | -0.11091 | 0.01649  | -0.0399  | 0.38963  | 0.080433 |
| -0.00271 | 0.9534   | 0.054442 | 0.24031  | -0.04002 | 0.38822  | 0.029467 | 0.52528  | -0.1883  |
| -0.03183 | 0.49266  | -0.06175 | 0.18283  | -0.1297  | 0.005    | 0.007776 | 0.86691  | -0.17467 |
| -0.11984 | 0.00954  | -0.05804 | 0.2106   | -0.1391  | 0.00259  | -0.02803 | 0.5457   | -0.25958 |
| -0.0866  | 0.06149  | 0.021233 | 0.64719  | -0.19901 | 1.47E-05 | -0.00875 | 0.85037  | -0.31824 |
| -0.08504 | 0.06635  | -0.04939 | 0.28679  | -0.31292 | 4.56E-12 | -0.03209 | 0.48912  | -0.33146 |
| -0.16123 | 0.00047  | -0.1653  | 0.00033  | -0.20362 | 9.21E-06 | -0.234   | 3.15E-07 | -0.13993 |
| 0.019951 | 0.66717  | 0.063279 | 0.1722   | -0.07894 | 0.08839  | 0.059501 | 0.19931  | -0.11693 |
| -0.0826  | 0.07456  | -0.05555 | 0.23088  | -0.07922 | 0.08725  | -0.08032 | 0.08295  | -0.15176 |

|          |         |          |          |          |          |          |          |          |
|----------|---------|----------|----------|----------|----------|----------|----------|----------|
| -0.10073 | 0.02952 | -0.14344 | 0.00189  | -0.23539 | 2.67E-07 | -0.06054 | 0.19156  | -0.16969 |
| -0.04147 | 0.37119 | -0.12169 | 0.00848  | -0.16548 | 0.00033  | -0.03643 | 0.43218  | -0.10154 |
| -0.02272 | 0.62432 | -0.01445 | 0.75538  | 0.009899 | 0.83105  | -0.03186 | 0.49215  | -0.00579 |
| -0.06843 | 0.13978 | -0.0991  | 0.03227  | -0.21419 | 3.00E-06 | -0.04393 | 0.34356  | -0.1122  |
| -0.02858 | 0.5379  | 0.146122 | 0.00154  | 0.04143  | 0.3717   | 0.091137 | 0.04903  | -0.06538 |
| -0.09703 | 0.03606 | -0.11904 | 0.01003  | -0.22974 | 5.20E-07 | -0.1729  | 0.00017  | -0.16632 |
| -0.05746 | 0.2152  | 0.033612 | 0.46869  | -0.02965 | 0.52265  | 0.004161 | 0.92855  | -0.04535 |
| 0.04257  | 0.35868 | -0.0396  | 0.39321  | 0.012439 | 0.78863  | -0.04117 | 0.37476  | 0.059105 |
| 0.131259 | 0.00449 | 0.07416  | 0.10948  | 0.221065 | 1.41E-06 | -0.01238 | 0.78957  | 0.095537 |
| -0.0796  | 0.08573 | 0.032349 | 0.48557  | -0.07868 | 0.08943  | -0.00999 | 0.82944  | -0.17402 |
| -0.02739 | 0.55494 | 0.095737 | 0.03863  | -0.1603  | 0.00051  | 0.121669 | 0.00849  | -0.16559 |
| -0.13761 | 0.00288 | -0.1104  | 0.01701  | -0.25105 | 3.82E-08 | -0.04537 | 0.32788  | -0.043   |
| 0.08622  | 0.06264 | 0.088817 | 0.05511  | 0.075462 | 0.10338  | 0.036839 | 0.42706  | -0.00546 |
| 0.027096 | 0.55916 | -0.02573 | 0.57909  | -0.02475 | 0.59372  | 0.016307 | 0.72523  | 0.086549 |
| -0.09497 | 0.04023 | -0.11135 | 0.01607  | -0.28347 | 4.44E-10 | -0.07672 | 0.09772  | -0.21349 |
| -0.07868 | 0.08946 | -0.01599 | 0.73031  | -0.08094 | 0.08058  | -0.07805 | 0.09205  | -0.14539 |
| -0.10232 | 0.02703 | -0.08169 | 0.07779  | -0.1055  | 0.02261  | -0.13165 | 0.00437  | -0.02971 |
| -0.09181 | 0.04738 | -0.06935 | 0.13454  | -0.16261 | 0.00042  | -0.10404 | 0.02455  | -0.03245 |
| -0.09936 | 0.03181 | 0.067923 | 0.14276  | -0.18626 | 5.13E-05 | 0.136918 | 0.00303  | 0.002599 |
| -0.06778 | 0.14358 | 0.03251  | 0.48339  | -0.1533  | 0.00089  | 0.100844 | 0.02933  | 0.092339 |
| -0.0337  | 0.46755 | -0.10544 | 0.02267  | -0.16286 | 0.00041  | -0.1042  | 0.02433  | 0.124832 |
| -0.08635 | 0.06226 | -0.03017 | 0.51548  | 0.04055  | 0.38196  | 0.053329 | 0.25007  | 0.109625 |
| -0.02044 | 0.65952 | 0.167738 | 0.00027  | -0.03244 | 0.48435  | 0.217894 | 2.00E-06 | 0.045001 |
| -0.113   | 0.01456 | -0.06285 | 0.17511  | -0.18461 | 5.99E-05 | -0.01534 | 0.741    | -0.21225 |
| -0.14093 | 0.00227 | -0.2024  | 1.04E-05 | -0.20902 | 5.23E-06 | -0.11878 | 0.0102   | -0.20287 |
| -0.07339 | 0.11321 | -0.04323 | 0.35128  | -0.17959 | 9.52E-05 | -0.04343 | 0.34899  | -0.22342 |
| -0.0626  | 0.17688 | -0.01282 | 0.78233  | -0.24752 | 5.99E-08 | -0.03065 | 0.5088   | -0.28976 |
| -0.0859  | 0.06362 | 0.082867 | 0.07361  | -0.23281 | 3.62E-07 | 0.064827 | 0.16192  | -0.35819 |
| -0.12547 | 0.00663 | -0.05106 | 0.27085  | -0.21499 | 2.75E-06 | 0.030469 | 0.51129  | -0.24267 |
| -0.07578 | 0.10191 | -0.04977 | 0.28316  | -0.22059 | 1.48E-06 | -0.07085 | 0.12626  | -0.26292 |
| -0.08715 | 0.05985 | -0.12361 | 0.00749  | -0.22161 | 1.32E-06 | -0.19015 | 3.53E-05 | -0.36589 |
| -0.05929 | 0.20088 | -0.15999 | 0.00052  | -0.05651 | 0.22293  | -0.11016 | 0.01724  | -0.08364 |
| -0.10394 | 0.02469 | 0.06163  | 0.18367  | -0.28872 | 2.04E-10 | 0.059213 | 0.20149  | -0.34078 |
| -0.09725 | 0.03565 | -0.00543 | 0.90679  | -0.22459 | 9.42E-07 | 0.078669 | 0.08948  | -0.10611 |
| -0.08256 | 0.07469 | 0.032747 | 0.48021  | -0.21407 | 3.04E-06 | 0.028427 | 0.54002  | -0.19922 |
| 0.009521 | 0.83741 | -0.04062 | 0.38109  | 0.012931 | 0.78047  | -0.00253 | 0.95646  | -0.12247 |
| -0.09277 | 0.04509 | -0.16306 | 0.0004   | -0.07673 | 0.09767  | -0.15427 | 0.00082  | -0.09511 |
| -0.0067  | 0.88521 | 0.045685 | 0.32456  | -0.04952 | 0.28554  | 0.038226 | 0.40985  | -0.03672 |
| -0.07184 | 0.12107 | -0.07205 | 0.11999  | -0.21319 | 3.35E-06 | -0.08267 | 0.07431  | -0.25749 |
| -0.1323  | 0.00418 | -0.084   | 0.06974  | -0.18677 | 4.89E-05 | 0.01783  | 0.70075  | -0.11307 |
| -0.05534 | 0.23261 | -0.04532 | 0.32848  | -0.17164 | 0.00019  | -0.04493 | 0.3326   | -0.10499 |
| -0.08381 | 0.07037 | -0.05684 | 0.2202   | -0.0609  | 0.18896  | -0.01185 | 0.79842  | -0.16025 |
| -0.06498 | 0.16095 | 0.043042 | 0.35336  | -0.13012 | 0.00486  | 0.075117 | 0.10497  | -0.23974 |
| -0.09846 | 0.03341 | 0.027644 | 0.55123  | -0.16501 | 0.00034  | 0.069145 | 0.1357   | -0.16791 |
| -0.08215 | 0.07613 | 0.108211 | 0.01933  | -0.25183 | 3.46E-08 | 0.168044 | 0.00026  | -0.20458 |

|          |         |          |          |          |          |          |          |          |
|----------|---------|----------|----------|----------|----------|----------|----------|----------|
| -0.08634 | 0.06229 | -0.0169  | 0.71568  | -0.3127  | 4.73E-12 | -0.02075 | 0.65474  | -0.34388 |
| -0.14923 | 0.00122 | -0.09483 | 0.04052  | -0.29632 | 6.42E-11 | -0.07898 | 0.08822  | -0.38314 |
| -0.08603 | 0.06322 | -0.1151  | 0.01281  | -0.14026 | 0.00238  | -0.05217 | 0.2605   | -0.04898 |
| -0.08374 | 0.07062 | -0.1173  | 0.01119  | -0.22323 | 1.10E-06 | -0.09559 | 0.03892  | -0.25019 |
| -0.0621  | 0.18034 | -0.02844 | 0.53983  | -0.23465 | 2.91E-07 | -0.01072 | 0.81724  | -0.26982 |
| -0.07587 | 0.10153 | -0.02517 | 0.5874   | -0.19286 | 2.72E-05 | -0.03083 | 0.50633  | -0.30314 |
| -0.06631 | 0.15252 | 0.099065 | 0.03233  | -0.19429 | 2.36E-05 | 0.112423 | 0.01507  | -0.18418 |
| -0.06894 | 0.13683 | -0.13636 | 0.00315  | -0.18019 | 9.02E-05 | -0.05918 | 0.20173  | 0.001236 |
| -0.10806 | 0.0195  | 0.050304 | 0.27799  | -0.25663 | 1.85E-08 | 0.084806 | 0.06709  | -0.30541 |
| -0.06    | 0.19555 | -0.03839 | 0.40782  | -0.15649 | 0.00069  | -0.00211 | 0.96377  | -0.11646 |
| -0.04752 | 0.30544 | -0.04733 | 0.30744  | -0.05288 | 0.25407  | 0.035714 | 0.44132  | 0.020062 |
| -0.08247 | 0.07502 | 0.130078 | 0.00487  | -0.06379 | 0.16878  | 0.133895 | 0.00375  | -0.13382 |
| -0.0936  | 0.04319 | -0.082   | 0.0767   | -0.29203 | 1.24E-10 | -0.02276 | 0.62373  | -0.19752 |
| -0.09892 | 0.03259 | -0.12692 | 0.00602  | -0.25064 | 4.02E-08 | -0.04113 | 0.37513  | -0.20029 |
| -0.02908 | 0.53076 | 0.044585 | 0.33636  | -0.17035 | 0.00022  | 0.084104 | 0.06939  | -0.13071 |
| -0.03912 | 0.39899 | -0.05592 | 0.22773  | -0.03438 | 0.45852  | -0.00384 | 0.93409  | 0.02955  |
| -0.08387 | 0.07017 | -0.07488 | 0.10606  | -0.19278 | 2.74E-05 | -0.1135  | 0.01413  | -0.31875 |
| -0.07744 | 0.09461 | -0.09991 | 0.03087  | -0.0842  | 0.06906  | 0.009649 | 0.83526  | 0.062028 |
| -0.1203  | 0.00926 | -0.19181 | 3.01E-05 | -0.23665 | 2.29E-07 | -0.18525 | 5.64E-05 | -0.27647 |
| -0.10771 | 0.01991 | -0.1265  | 0.00619  | -0.17916 | 9.90E-05 | -0.13387 | 0.00375  | -0.1596  |
| -0.11188 | 0.01557 | -0.31125 | 6.00E-12 | -0.21837 | 1.90E-06 | -0.22408 | 9.99E-07 | -0.10743 |
| -0.12435 | 0.00713 | -0.04004 | 0.38794  | -0.26887 | 3.55E-09 | -0.03993 | 0.38934  | -0.37227 |
| -0.01694 | 0.71494 | -0.05026 | 0.27844  | -0.09829 | 0.03371  | -0.07522 | 0.10447  | -0.19234 |
| -0.15053 | 0.0011  | -0.11155 | 0.01588  | -0.28983 | 1.73E-10 | -0.0285  | 0.53894  | -0.3226  |
| -0.08815 | 0.05697 | 0.057143 | 0.21774  | -0.26602 | 5.26E-09 | 0.083403 | 0.07176  | -0.34436 |
| -0.09277 | 0.0451  | 0.059049 | 0.20275  | -0.25261 | 3.13E-08 | 0.139736 | 0.00247  | -0.21276 |
| -0.07057 | 0.12779 | -0.05379 | 0.24602  | -0.16361 | 0.00039  | 0.063438 | 0.17112  | -0.04798 |
| -0.10351 | 0.02529 | 0.026262 | 0.57133  | -0.24596 | 7.29E-08 | 0.067129 | 0.1475   | -0.29377 |
| -0.0511  | 0.27042 | -0.10735 | 0.02032  | -0.09231 | 0.04618  | 0.019177 | 0.67935  | -0.0719  |
| -0.05853 | 0.20678 | -0.00631 | 0.89183  | -0.09731 | 0.03552  | 0.010246 | 0.82522  | -0.20233 |
| -0.06547 | 0.15782 | -0.02603 | 0.57472  | -0.28383 | 4.21E-10 | 0.019184 | 0.67924  | -0.31604 |
| -0.05178 | 0.26413 | -0.07442 | 0.10823  | -0.08119 | 0.07964  | 0.002174 | 0.96263  | -0.0839  |
| -0.0671  | 0.1477  | -0.04853 | 0.29536  | -0.17377 | 0.00016  | -0.03269 | 0.48101  | -0.22594 |
| -0.08948 | 0.05331 | -0.10213 | 0.02733  | -0.30852 | 9.35E-12 | -0.06313 | 0.17318  | -0.20045 |
| -0.08894 | 0.05479 | 0.036441 | 0.43208  | -0.20804 | 5.80E-06 | 0.112002 | 0.01546  | -0.12506 |
| -0.10305 | 0.02596 | -0.0272  | 0.55763  | -0.347   | 1.17E-14 | -0.00981 | 0.83257  | -0.36498 |
| -0.0485  | 0.29559 | -0.07983 | 0.08485  | -0.1519  | 0.00099  | -0.04483 | 0.33374  | -0.0719  |
| -0.075   | 0.10551 | -0.12871 | 0.00534  | -0.13143 | 0.00444  | -0.09376 | 0.04284  | -0.13004 |
| -0.08395 | 0.0699  | -0.10297 | 0.02607  | -0.18323 | 6.81E-05 | -0.06408 | 0.16683  | -0.16231 |
| -0.06318 | 0.17286 | -0.06524 | 0.15925  | -0.03768 | 0.41657  | -0.0706  | 0.12764  | -0.00064 |
| -0.04343 | 0.34903 | 0.065506 | 0.15756  | -0.14642 | 0.00151  | 0.116595 | 0.01169  | -0.09828 |
| -0.0221  | 0.6338  | -0.09117 | 0.04894  | -0.08189 | 0.07707  | -0.04229 | 0.36185  | -0.07396 |
| -0.06679 | 0.14956 | -0.09636 | 0.03738  | -0.08901 | 0.05458  | 0.030869 | 0.50576  | -0.01787 |
| -0.10115 | 0.02884 | 0.072664 | 0.11685  | -0.24411 | 9.18E-08 | 0.09499  | 0.04018  | -0.35129 |
| -0.05768 | 0.21343 | -0.02986 | 0.51971  | -0.10295 | 0.02611  | 0.063294 | 0.1721   | -0.10825 |

|          |         |          |          |          |          |          |          |          |
|----------|---------|----------|----------|----------|----------|----------|----------|----------|
| -0.10818 | 0.01937 | -0.08267 | 0.07429  | -0.27983 | 7.54E-10 | 0.002774 | 0.95233  | -0.24541 |
| -0.08066 | 0.08166 | -0.13493 | 0.00348  | -0.05213 | 0.26087  | -0.10737 | 0.0203   | -0.15576 |
| -0.1407  | 0.00231 | -0.07395 | 0.11049  | -0.23022 | 4.92E-07 | -0.07712 | 0.09598  | -0.35346 |
| -0.10747 | 0.02018 | -0.07241 | 0.11814  | -0.28071 | 6.64E-10 | 0.000298 | 0.99487  | -0.28361 |
| -0.13847 | 0.00271 | -0.05724 | 0.21696  | -0.19079 | 3.32E-05 | -0.04574 | 0.32395  | -0.2114  |
| -0.07415 | 0.10952 | -0.11998 | 0.00945  | -0.14999 | 0.00115  | -0.10223 | 0.02717  | -0.08532 |
| -0.11493 | 0.01295 | -0.09449 | 0.04125  | -0.2483  | 5.43E-08 | -0.0505  | 0.27612  | -0.23946 |
| -0.11224 | 0.01523 | 0.019502 | 0.67423  | -0.24512 | 8.10E-08 | 0.093211 | 0.04408  | -0.25232 |
| -0.10429 | 0.0242  | -0.03282 | 0.47921  | -0.26288 | 8.05E-09 | 0.033542 | 0.46961  | -0.27051 |
| -0.02341 | 0.61383 | -0.03147 | 0.49748  | -0.22008 | 1.57E-06 | -0.12568 | 0.00654  | -0.20799 |
| 0.034455 | 0.4576  | 0.07582  | 0.10174  | 0.077938 | 0.09251  | 0.14976  | 0.00117  | 0.103709 |
| -0.03899 | 0.40049 | 0.117514 | 0.01104  | -0.01048 | 0.82126  | 0.094463 | 0.0413   | -0.03108 |
| -0.06525 | 0.15917 | -0.02035 | 0.66097  | -0.09152 | 0.04808  | -0.03719 | 0.42265  | -0.09775 |
| -0.12432 | 0.00715 | -0.04432 | 0.33928  | -0.17156 | 0.0002   | -0.06068 | 0.19052  | -0.13823 |
| -0.14837 | 0.0013  | -0.12128 | 0.0087   | -0.13785 | 0.00283  | -0.14477 | 0.00171  | -0.13597 |
| -0.11413 | 0.01359 | -0.05638 | 0.22397  | -0.08977 | 0.05255  | -0.03031 | 0.51356  | 0.045086 |
| -0.02048 | 0.65883 | 0.001089 | 0.98128  | -0.0649  | 0.16145  | 0.040663 | 0.38063  | -0.18388 |
| -0.02564 | 0.58055 | 0.077379 | 0.09488  | 0.012389 | 0.78945  | 0.004153 | 0.92868  | -0.28084 |
| -0.08857 | 0.0558  | 0.029443 | 0.52563  | -0.23681 | 2.25E-07 | 0.144233 | 0.00178  | -0.13385 |
| -0.03758 | 0.4178  | 0.110142 | 0.01726  | -0.05509 | 0.23473  | 0.119268 | 0.00989  | -0.0822  |
| 0.019058 | 0.68123 | 0.149675 | 0.00118  | 0.060071 | 0.19503  | 0.231529 | 4.22E-07 | 0.17063  |
| -0.05006 | 0.28035 | 0.114345 | 0.01342  | -0.09818 | 0.03391  | 0.102187 | 0.02723  | -0.15603 |
| -0.10803 | 0.01954 | -0.08057 | 0.08197  | -0.16145 | 0.00046  | -0.06836 | 0.14019  | -0.08238 |
| -0.15116 | 0.00105 | -0.10668 | 0.02112  | -0.3055  | 1.52E-11 | 0.038006 | 0.41255  | -0.10441 |
| -0.0799  | 0.08457 | -0.0955  | 0.03912  | -0.15546 | 0.00075  | -0.01009 | 0.82784  | 0.125386 |
| -0.07458 | 0.10747 | -0.0606  | 0.19112  | -0.13226 | 0.0042   | 0.056826 | 0.2203   | 0.222826 |
| -0.0771  | 0.09607 | 0.039316 | 0.39662  | -0.2652  | 5.88E-09 | 0.053027 | 0.25276  | -0.13793 |
| 0.006269 | 0.89252 | 0.059151 | 0.20197  | -0.14234 | 0.00205  | 0.161981 | 0.00044  | 0.130704 |
| -0.09695 | 0.03622 | -0.01474 | 0.75079  | -0.15909 | 0.00056  | 0.085792 | 0.06396  | 0.098317 |
| -0.17875 | 0.0001  | -0.19071 | 3.35E-05 | -0.252   | 3.38E-08 | -0.12946 | 0.00508  | -0.00132 |
| -0.09192 | 0.04711 | 0.051468 | 0.26701  | -0.18783 | 4.42E-05 | 0.136771 | 0.00306  | -0.04353 |
| -0.08094 | 0.0806  | -0.04646 | 0.31641  | -0.27535 | 1.43E-09 | 0.04411  | 0.34153  | -0.06833 |
| -0.06464 | 0.16313 | -0.06798 | 0.14242  | -0.28124 | 6.15E-10 | -0.04013 | 0.38695  | -0.06235 |
| -0.00349 | 0.9401  | 0.003664 | 0.93706  | 0.086141 | 0.06289  | -0.21084 | 4.31E-06 | -0.15592 |
| -0.04209 | 0.36416 | 0.028021 | 0.54582  | -0.12709 | 0.00596  | 0.125495 | 0.00662  | 0.036629 |
| -0.07813 | 0.09171 | 0.022026 | 0.63495  | -0.18574 | 5.39E-05 | 0.104345 | 0.02413  | -0.01456 |
| -0.07109 | 0.12502 | -0.0477  | 0.30362  | -0.25696 | 1.77E-08 | -0.01342 | 0.77247  | -0.09094 |
| -0.05966 | 0.19809 | -0.04428 | 0.33969  | -0.21562 | 2.57E-06 | 0.035867 | 0.43937  | -0.00171 |
| -0.09827 | 0.03375 | -0.08938 | 0.05358  | -0.31621 | 2.65E-12 | -0.00311 | 0.9466   | -0.0836  |
| -0.04884 | 0.29228 | 0.057081 | 0.21824  | -0.22675 | 7.36E-07 | 0.074473 | 0.10799  | -0.11031 |
| -0.06346 | 0.17098 | 0.112765 | 0.01476  | -0.04972 | 0.28362  | 0.183576 | 6.60E-05 | 0.273644 |
| -0.02811 | 0.54457 | -0.02351 | 0.61239  | -0.14506 | 0.00167  | 0.10332  | 0.02556  | 0.123771 |
| -0.05357 | 0.24793 | -0.05012 | 0.2798   | -0.13261 | 0.0041   | 0.032153 | 0.48821  | 0.069748 |
| -0.06067 | 0.19057 | -0.05525 | 0.23343  | -0.1447  | 0.00172  | 0.095472 | 0.03917  | 0.008351 |
| -0.09195 | 0.04704 | 0.066654 | 0.15039  | -0.02461 | 0.59582  | 0.134478 | 0.0036   | 0.094308 |

|          |         |          |         |          |          |          |          |          |
|----------|---------|----------|---------|----------|----------|----------|----------|----------|
| -0.08646 | 0.06192 | 0.023283 | 0.61576 | -0.26864 | 3.66E-09 | 0.148631 | 0.00128  | -0.08252 |
| 0.001821 | 0.9687  | 0.018829 | 0.68486 | -0.15678 | 0.00067  | -0.06703 | 0.14811  | -0.16165 |
| -0.08909 | 0.05436 | -0.0815  | 0.07852 | -0.26509 | 5.97E-09 | -0.11632 | 0.01189  | -0.02285 |
| -0.06253 | 0.17733 | 0.070272 | 0.12942 | -0.2319  | 4.04E-07 | 0.104566 | 0.02383  | -0.03474 |
| 0.001025 | 0.98238 | -0.00237 | 0.95933 | -0.24883 | 5.07E-08 | -0.02074 | 0.6549   | -0.12368 |
| -0.09228 | 0.04624 | -0.12959 | 0.00504 | -0.3081  | 9.99E-12 | -0.01429 | 0.75805  | -0.08412 |
| -0.06186 | 0.18201 | 0.071793 | 0.12131 | -0.15286 | 0.00092  | 0.184189 | 6.23E-05 | -0.03623 |
| 0.009359 | 0.84014 | 0.031964 | 0.49078 | -0.0969  | 0.03632  | 0.080455 | 0.08242  | 0.014988 |
| -0.01732 | 0.70888 | -0.04288 | 0.3552  | -0.14074 | 0.0023   | 0.092069 | 0.04675  | 0.026594 |
| -0.09093 | 0.04954 | 0.037635 | 0.41713 | -0.06781 | 0.14345  | 0.156529 | 0.00069  | 0.088857 |
| -0.07669 | 0.09788 | 0.049872 | 0.28214 | -0.22706 | 7.10E-07 | 0.066959 | 0.14853  | -0.03949 |
| -0.08755 | 0.05867 | -0.07412 | 0.10966 | -0.24598 | 7.27E-08 | -0.04369 | 0.34619  | -0.00335 |
| -0.01156 | 0.80318 | -0.04248 | 0.35966 | -0.1259  | 0.00645  | 0.113974 | 0.01372  | 0.150409 |
| -0.07537 | 0.10381 | 0.067894 | 0.14293 | -0.17957 | 9.54E-05 | 0.136738 | 0.00307  | -0.0396  |
| -0.05759 | 0.21416 | 0.003329 | 0.9428  | -0.13387 | 0.00375  | 0.077911 | 0.09262  | -0.06114 |
| -0.07653 | 0.09857 | -0.10147 | 0.02834 | -0.15186 | 0.00099  | 0.019056 | 0.68126  | 0.086104 |
| -0.06025 | 0.19371 | -0.07778 | 0.09319 | -0.22811 | 6.29E-07 | -0.1453  | 0.00164  | -0.01931 |
| -0.15429 | 0.00082 | -0.02606 | 0.57422 | -0.17787 | 0.00011  | 0.104451 | 0.02399  | 0.113688 |
| -0.07901 | 0.08811 | -0.07682 | 0.09729 | -0.21586 | 2.50E-06 | -0.08444 | 0.06829  | -0.02573 |
| -0.09776 | 0.03468 | -0.00437 | 0.92491 | -0.20914 | 5.17E-06 | 0.057512 | 0.21477  | 0.021964 |
| 0.000641 | 0.98898 | 0.169034 | 0.00024 | -0.0387  | 0.40412  | 0.249684 | 4.55E-08 | 0.105195 |
| -0.16326 | 0.0004  | -0.14229 | 0.00205 | -0.2923  | 1.19E-10 | -0.06089 | 0.189    | 0.058043 |
| -0.11686 | 0.0115  | -0.08223 | 0.07584 | -0.29326 | 1.03E-10 | 0.040775 | 0.37932  | -0.09799 |
| -0.0683  | 0.14056 | -0.02157 | 0.64204 | -0.14399 | 0.00181  | 0.00337  | 0.9421   | -0.06322 |
| -0.09357 | 0.04328 | -0.08932 | 0.05375 | -0.18497 | 5.79E-05 | -0.05767 | 0.21351  | 0.049206 |
| -0.03548 | 0.44433 | 0.076666 | 0.09797 | -0.13661 | 0.0031   | 0.12411  | 0.00725  | -0.06852 |
| -0.05828 | 0.20872 | -0.15653 | 0.00069 | -0.1573  | 0.00065  | 0.008667 | 0.85182  | 0.063991 |
| -0.06605 | 0.15416 | 0.042861 | 0.35539 | -0.17298 | 0.00017  | 0.193124 | 2.65E-05 | 0.003704 |
| -0.04532 | 0.32842 | -0.03808 | 0.41164 | -0.12784 | 0.00567  | 0.023882 | 0.6067   | 0.001021 |
| -0.14994 | 0.00115 | -0.01489 | 0.74831 | -0.25372 | 2.71E-08 | 0.097657 | 0.03488  | 0.079182 |
| -0.17296 | 0.00017 | -0.16502 | 0.00034 | -0.32083 | 1.22E-12 | -0.04949 | 0.28583  | -0.0533  |
| -0.12105 | 0.00883 | -0.02897 | 0.53224 | -0.23792 | 1.97E-07 | 0.082157 | 0.07612  | 0.058809 |
| -0.12166 | 0.0085  | -0.01988 | 0.66823 | -0.2682  | 3.89E-09 | 0.085671 | 0.06434  | -0.04564 |
| -0.15862 | 0.00058 | -0.13489 | 0.00349 | -0.30441 | 1.81E-11 | -0.0013  | 0.97765  | 0.032116 |
| -0.12152 | 0.00857 | -0.12649 | 0.0062  | -0.25245 | 3.19E-08 | 0.036953 | 0.42563  | 0.06894  |
| -0.0986  | 0.03316 | -0.01141 | 0.80566 | -0.2775  | 1.05E-09 | 0.039431 | 0.39523  | -0.05611 |
| -0.06544 | 0.15801 | 0.055932 | 0.22766 | -0.1216  | 0.00853  | 0.174942 | 0.00014  | 0.067398 |
| -0.03892 | 0.40143 | -0.00695 | 0.88091 | -0.0484  | 0.29656  | 0.150029 | 0.00115  | 0.279859 |
| -0.14596 | 0.00156 | -0.03035 | 0.51294 | -0.25032 | 4.20E-08 | 0.049492 | 0.28582  | -0.00467 |
| -0.1079  | 0.01968 | -0.04182 | 0.36726 | -0.20743 | 6.19E-06 | 0.005774 | 0.90097  | 0.094332 |
| -0.12992 | 0.00492 | -0.1574  | 0.00064 | -0.2775  | 1.05E-09 | -0.10982 | 0.0176   | 0.0621   |
| -0.07529 | 0.10415 | 0.090686 | 0.05017 | -0.11732 | 0.01117  | 0.16695  | 0.00029  | 0.060227 |
| -0.0777  | 0.0935  | 0.032537 | 0.48304 | -0.30552 | 1.51E-11 | 0.080701 | 0.08149  | -0.12326 |
| 0.004661 | 0.91998 | 0.0194   | 0.67584 | -0.03073 | 0.50764  | 0.172685 | 0.00018  | 0.254015 |
| -0.03107 | 0.50297 | -0.10726 | 0.02043 | -0.25941 | 1.28E-08 | -0.05638 | 0.22393  | -0.07076 |

|          |          |          |          |          |          |          |          |          |
|----------|----------|----------|----------|----------|----------|----------|----------|----------|
| -0.05969 | 0.19788  | -0.01254 | 0.78692  | -0.28656 | 2.81E-10 | 0.015012 | 0.74627  | -0.06701 |
| 0.008181 | 0.86005  | -0.01332 | 0.77411  | 0.020693 | 0.65557  | 0.088005 | 0.05738  | 0.184501 |
| -0.10801 | 0.01956  | 0.017529 | 0.70557  | -0.21094 | 4.26E-06 | 0.108915 | 0.01855  | 0.002441 |
| -0.04295 | 0.3544   | -0.12598 | 0.00641  | -0.25592 | 2.03E-08 | -0.08759 | 0.05856  | 0.044735 |
| -0.02578 | 0.57838  | -0.0258  | 0.57816  | -0.1883  | 4.22E-05 | 0.084063 | 0.06953  | 0.097608 |
| -0.15377 | 0.00086  | -0.13428 | 0.00365  | -0.20371 | 9.12E-06 | -0.00142 | 0.97557  | 0.006519 |
| -0.08544 | 0.06508  | -0.11075 | 0.01665  | -0.2596  | 1.25E-08 | -0.06869 | 0.13827  | -0.04091 |
| 0.015773 | 0.73389  | -0.0557  | 0.22956  | -0.18073 | 8.59E-05 | -0.06816 | 0.14139  | -0.08277 |
| -0.04246 | 0.35988  | -0.1215  | 0.00858  | -0.12138 | 0.00865  | -0.07322 | 0.11405  | -0.03256 |
| -0.08234 | 0.07548  | -0.12119 | 0.00875  | -0.19582 | 2.03E-05 | -0.05916 | 0.20189  | 0.032963 |
| -0.11585 | 0.01223  | 0.018767 | 0.68585  | -0.23545 | 2.65E-07 | 0.103591 | 0.02518  | -0.01923 |
| -0.0965  | 0.0371   | 0.017286 | 0.70947  | -0.08923 | 0.05397  | 0.02721  | 0.55752  | -0.04488 |
| -0.01351 | 0.7709   | 0.064092 | 0.16674  | -0.09944 | 0.03167  | 0.144752 | 0.00171  | 0.037022 |
| -0.10877 | 0.01871  | 0.012328 | 0.79046  | -0.31408 | 3.77E-12 | 0.080512 | 0.08221  | -0.21728 |
| -0.02914 | 0.52996  | 0.0311   | 0.50258  | -0.03198 | 0.49055  | 0.130277 | 0.00481  | 0.057926 |
| -0.03297 | 0.47717  | 0.002554 | 0.9561   | -0.20718 | 6.36E-06 | -0.03174 | 0.49385  | 0.026889 |
| 0.001232 | 0.97882  | -0.10116 | 0.02883  | -0.19694 | 1.82E-05 | -0.02699 | 0.56071  | 0.017215 |
| -0.0857  | 0.06424  | -0.24188 | 1.21E-07 | -0.33602 | 8.66E-14 | -0.22022 | 1.55E-06 | -0.12218 |
| -0.03952 | 0.39422  | -0.21378 | 3.14E-06 | -0.19137 | 3.14E-05 | -0.19884 | 1.50E-05 | 0.10235  |
| -0.04846 | 0.29599  | -0.11634 | 0.01187  | -0.10598 | 0.02199  | -0.03163 | 0.49526  | 0.250046 |
| -0.08098 | 0.08042  | 0.07316  | 0.11436  | -0.16983 | 0.00023  | 0.107779 | 0.01982  | -0.11336 |
| -0.04733 | 0.30746  | 0.07194  | 0.12055  | -0.11342 | 0.01419  | 0.199686 | 1.38E-05 | 0.055627 |
| -0.10112 | 0.0289   | 0.045088 | 0.33093  | -0.28389 | 4.17E-10 | 0.106676 | 0.02113  | -0.15518 |
| -0.14056 | 0.00233  | -0.04348 | 0.34852  | -0.14833 | 0.00131  | 0.03256  | 0.48272  | 0.00879  |
| -0.0494  | 0.2867   | 0.11295  | 0.0146   | -0.17407 | 0.00016  | 0.174198 | 0.00015  | -0.1068  |
| -0.08945 | 0.05338  | -0.02834 | 0.5413   | -0.22404 | 1.00E-06 | 0.047975 | 0.30087  | -0.00463 |
| -0.03651 | 0.43126  | 0.138778 | 0.00265  | -0.10559 | 0.02249  | 0.129852 | 0.00495  | -0.07668 |
| -0.03706 | 0.42429  | 0.063864 | 0.16826  | -0.1804  | 8.84E-05 | 0.058268 | 0.2088   | -0.06792 |
| -0.03488 | 0.45212  | 0.106446 | 0.02141  | -0.20701 | 6.47E-06 | 0.136472 | 0.00313  | -0.07117 |
| -0.09256 | 0.04559  | 0.042397 | 0.36063  | -0.22937 | 5.43E-07 | 0.155739 | 0.00073  | -0.10741 |
| -0.19496 | 2.21E-05 | -0.09201 | 0.04688  | -0.29325 | 1.03E-10 | -0.00963 | 0.83556  | -0.05176 |
| -0.03804 | 0.41218  | 0.017463 | 0.70663  | -0.12907 | 0.00521  | 0.080157 | 0.08357  | -0.04085 |
| -0.10001 | 0.0307   | 0.056447 | 0.2234   | -0.20548 | 7.59E-06 | 0.137865 | 0.00283  | -0.02422 |
| 0.032976 | 0.47715  | 0.285306 | 3.39E-10 | 0.062229 | 0.17944  | 0.36416  | 4.32E-16 | 0.101418 |
| -0.06042 | 0.19247  | 0.027118 | 0.55885  | -0.24779 | 5.78E-08 | 0.014624 | 0.75261  | -0.07648 |
| -0.11511 | 0.01281  | -0.03763 | 0.4172   | -0.27758 | 1.04E-09 | 0.030384 | 0.51247  | -0.12439 |
| -0.04127 | 0.3735   | 0.145701 | 0.00159  | -0.16041 | 0.0005   | 0.178507 | 0.00011  | -0.09029 |
| -0.0701  | 0.13037  | 0.11031  | 0.01709  | -0.17553 | 0.00014  | 0.084973 | 0.06655  | -0.12521 |
| -0.13242 | 0.00415  | 0.027421 | 0.55446  | -0.19999 | 1.33E-05 | 0.113987 | 0.01371  | -0.05368 |
| -0.06897 | 0.1367   | 0.094345 | 0.04156  | -0.15749 | 0.00064  | 0.108682 | 0.01881  | -0.11551 |
| -0.17069 | 0.00021  | -0.0517  | 0.26487  | -0.33429 | 1.18E-13 | -0.02076 | 0.65456  | -0.04264 |
| -0.11752 | 0.01104  | 0.073882 | 0.11082  | -0.10884 | 0.01863  | 0.181179 | 8.24E-05 | 0.070576 |
| 0.034695 | 0.45447  | 0.182927 | 7.01E-05 | -0.07578 | 0.10191  | 0.22524  | 8.75E-07 | -0.0108  |
| -0.08847 | 0.05608  | -0.00216 | 0.96279  | -0.26058 | 1.10E-08 | 0.028423 | 0.54008  | 0.035172 |
| -0.04855 | 0.29508  | 0.136081 | 0.00321  | -0.17443 | 0.00015  | 0.161389 | 0.00046  | -0.03518 |

|          |          |          |          |          |          |          |          |          |
|----------|----------|----------|----------|----------|----------|----------|----------|----------|
| -0.03663 | 0.42965  | 0.058783 | 0.2048   | -0.19524 | 2.15E-05 | 0.152251 | 0.00096  | -0.06295 |
| -0.03851 | 0.4064   | 0.044305 | 0.33941  | -0.19171 | 3.04E-05 | 0.08048  | 0.08233  | -0.03953 |
| -0.04683 | 0.3126   | 0.071434 | 0.12318  | -0.26456 | 6.41E-09 | 0.062009 | 0.18099  | -0.14561 |
| -0.05756 | 0.21439  | 0.106613 | 0.0212   | -0.14461 | 0.00173  | 0.140343 | 0.00237  | 0.077691 |
| -0.06812 | 0.14159  | -0.00442 | 0.92412  | -0.21277 | 3.50E-06 | 0.00102  | 0.98246  | 0.018169 |
| -0.06052 | 0.19172  | 0.071255 | 0.12413  | -0.18227 | 7.44E-05 | 0.170152 | 0.00022  | -0.06989 |
| -0.06521 | 0.15948  | 0.136471 | 0.00313  | -0.17536 | 0.00014  | 0.122348 | 0.00813  | -0.00784 |
| -0.03671 | 0.42862  | 0.056538 | 0.22266  | -0.17352 | 0.00016  | 0.10295  | 0.0261   | -0.05145 |
| -0.12357 | 0.00751  | 0.08991  | 0.05217  | -0.23267 | 3.69E-07 | 0.140913 | 0.00227  | -0.0711  |
| -0.18574 | 5.38E-05 | -0.20209 | 1.08E-05 | -0.31931 | 1.57E-12 | -0.04546 | 0.32699  | 0.086624 |
| -0.06849 | 0.13942  | -0.00677 | 0.88393  | -0.25228 | 3.26E-08 | 0.068048 | 0.14203  | -0.10016 |
| -0.13363 | 0.00381  | -0.00054 | 0.9908   | -0.25037 | 4.17E-08 | 0.101716 | 0.02796  | 0.016601 |
| -0.14726 | 0.00142  | -0.0061  | 0.89535  | -0.27181 | 2.36E-09 | 0.018812 | 0.68512  | -0.14468 |
| -0.0827  | 0.07419  | 0.037887 | 0.41402  | -0.16873 | 0.00025  | 0.037214 | 0.42236  | 0.082036 |
| -0.04191 | 0.36621  | 0.077363 | 0.09495  | -0.16598 | 0.00032  | 0.181601 | 7.92E-05 | 0.026024 |
| -0.11318 | 0.0144   | 0.091881 | 0.04721  | -0.21985 | 1.61E-06 | 0.137773 | 0.00285  | -0.14518 |
| -0.05033 | 0.27778  | 0.060489 | 0.19193  | -0.25117 | 3.76E-08 | 0.090594 | 0.0504   | 0.032485 |
| -0.05136 | 0.26803  | 0.125133 | 0.00678  | -0.15325 | 0.00089  | 0.146409 | 0.00151  | -0.20076 |
| -0.11133 | 0.01609  | 0.043515 | 0.34809  | -0.18206 | 7.59E-05 | 0.10845  | 0.01906  | 0.010497 |
| -0.08841 | 0.05623  | 0.153816 | 0.00085  | -0.11494 | 0.01294  | 0.145803 | 0.00158  | -0.16333 |
| -0.14836 | 0.0013   | 0.102499 | 0.02677  | -0.24886 | 5.05E-08 | 0.12395  | 0.00732  | -0.18366 |
| -0.11387 | 0.01381  | 0.059081 | 0.20251  | -0.25503 | 2.28E-08 | 0.148777 | 0.00126  | -0.10265 |
| -0.05061 | 0.2751   | 0.210726 | 4.36E-06 | -0.04082 | 0.37873  | 0.27739  | 1.07E-09 | 0.168268 |
| -0.07627 | 0.09972  | 0.129957 | 0.00491  | -0.12601 | 0.0064   | 0.245293 | 7.92E-08 | 0.0532   |
| -0.03993 | 0.38932  | 0.012479 | 0.78796  | -0.15869 | 0.00058  | 0.108839 | 0.01864  | 0.05116  |
| -0.0718  | 0.12129  | 0.042703 | 0.35718  | -0.1654  | 0.00033  | 0.11907  | 0.01001  | 0.058914 |
| -0.10637 | 0.02151  | 0.077108 | 0.09605  | -0.10854 | 0.01897  | 0.167727 | 0.00027  | -0.03504 |
| -0.14151 | 0.00217  | 0.047336 | 0.30737  | -0.24205 | 1.19E-07 | 0.063845 | 0.16839  | -0.07635 |
| -0.0643  | 0.16539  | 0.18487  | 5.84E-05 | -0.11843 | 0.01043  | 0.232165 | 3.91E-07 | -0.04728 |
| -0.13339 | 0.00388  | -0.01943 | 0.67539  | -0.29039 | 1.59E-10 | 0.04958  | 0.28497  | -0.12336 |
| -0.14908 | 0.00123  | 0.115233 | 0.01271  | -0.16007 | 0.00052  | 0.147995 | 0.00134  | 0.059455 |
| -0.1063  | 0.02158  | 0.114115 | 0.01361  | -0.21706 | 2.19E-06 | 0.209351 | 5.05E-06 | -0.05695 |
| -0.0976  | 0.03498  | 0.028812 | 0.53454  | -0.09902 | 0.0324   | 0.08479  | 0.06714  | 0.009237 |
| -0.05198 | 0.26227  | 0.023075 | 0.61892  | -0.21155 | 3.99E-06 | 0.13475  | 0.00353  | 0.040983 |
| -0.12849 | 0.00542  | 0.007619 | 0.86957  | -0.32255 | 9.10E-13 | 0.053728 | 0.24654  | -0.08593 |
| -0.10931 | 0.01813  | 0.095736 | 0.03863  | -0.22582 | 8.19E-07 | 0.152766 | 0.00093  | -0.14324 |
| -0.05735 | 0.21609  | 0.043731 | 0.34571  | -0.22877 | 5.83E-07 | 0.040989 | 0.37682  | -0.07642 |
| -0.09343 | 0.04359  | 0.041416 | 0.37186  | -0.18444 | 6.08E-05 | 0.078475 | 0.09028  | -0.05503 |
| -0.08359 | 0.07113  | 0.090352 | 0.05102  | -0.21315 | 3.36E-06 | 0.093745 | 0.04288  | -0.12318 |
| -0.15678 | 0.00067  | -0.05502 | 0.23534  | -0.25639 | 1.91E-08 | 0.044646 | 0.3357   | -0.05972 |
| -0.07758 | 0.09401  | 0.098516 | 0.0333   | -0.20383 | 9.01E-06 | 0.067603 | 0.14465  | -0.11782 |
| -0.09713 | 0.03588  | 0.123953 | 0.00732  | -0.24614 | 7.12E-08 | 0.144198 | 0.00178  | -0.18903 |
| -0.06404 | 0.16711  | 0.085357 | 0.06533  | -0.16137 | 0.00046  | 0.191758 | 3.02E-05 | -0.00427 |
| -0.09512 | 0.03991  | 0.045937 | 0.3219   | -0.29983 | 3.72E-11 | 0.039043 | 0.39991  | -0.24867 |
| -0.0942  | 0.04188  | 0.123462 | 0.00756  | -0.21468 | 2.85E-06 | 0.199965 | 1.34E-05 | -0.03406 |



|          |          |          |          |          |          |          |          |          |
|----------|----------|----------|----------|----------|----------|----------|----------|----------|
| -0.11452 | 0.01328  | 0.123539 | 0.00752  | -0.19187 | 2.99E-05 | 0.220315 | 1.53E-06 | -0.10375 |
| -0.08916 | 0.05418  | -0.00684 | 0.88273  | -0.31025 | 7.06E-12 | 0.061999 | 0.18106  | -0.14692 |
| -0.12979 | 0.00497  | 0.038787 | 0.40301  | -0.31719 | 2.25E-12 | 0.05927  | 0.20106  | -0.22101 |
| -0.13871 | 0.00266  | -0.07972 | 0.08526  | -0.28075 | 6.60E-10 | 0.018969 | 0.68265  | -0.11217 |
| -0.04858 | 0.29482  | 0.093936 | 0.04245  | -0.24503 | 8.19E-08 | 0.126019 | 0.00639  | -0.04598 |
| -0.17356 | 0.00016  | -0.0088  | 0.84949  | -0.31516 | 3.15E-12 | 0.063625 | 0.16986  | -0.07131 |
| -0.01551 | 0.73819  | -0.18134 | 8.11E-05 | 0.104427 | 0.02402  | -0.24294 | 1.06E-07 | 0.073382 |
| -0.09341 | 0.04363  | 0.032604 | 0.48213  | -0.25047 | 4.11E-08 | 0.042677 | 0.35747  | -0.12886 |
| 0.022103 | 0.63376  | 0.097824 | 0.03457  | -0.20125 | 1.17E-05 | 0.099163 | 0.03215  | -0.04059 |
| -0.04909 | 0.2898   | 0.133955 | 0.00373  | -0.14152 | 0.00217  | 0.156465 | 0.00069  | -0.0523  |
| -0.13096 | 0.00459  | -0.05086 | 0.27275  | -0.26126 | 1.00E-08 | 0.064011 | 0.16728  | -0.04803 |
| -0.10129 | 0.02863  | 0.099853 | 0.03097  | -0.19355 | 2.54E-05 | 0.111075 | 0.01633  | -0.13561 |
| -0.12642 | 0.00623  | 0.014382 | 0.75658  | -0.18364 | 6.56E-05 | 0.087637 | 0.05843  | -0.08085 |
| -0.07811 | 0.0918   | 0.061621 | 0.18374  | -0.28241 | 5.18E-10 | 0.130278 | 0.00481  | -0.19096 |
| -0.09686 | 0.03639  | 0.077442 | 0.09461  | -0.20317 | 9.64E-06 | 0.207693 | 6.02E-06 | -0.06145 |
| -0.11847 | 0.0104   | 0.054133 | 0.24299  | -0.09866 | 0.03304  | 0.111997 | 0.01546  | -0.05102 |
| -0.11201 | 0.01545  | 0.101048 | 0.02901  | -0.1347  | 0.00354  | 0.184801 | 5.88E-05 | 0.098368 |
| -0.10521 | 0.02297  | 0.078849 | 0.08875  | -0.18872 | 4.06E-05 | 0.186678 | 4.93E-05 | -0.03266 |
| -0.05167 | 0.2651   | 0.116598 | 0.01168  | -0.16523 | 0.00034  | 0.161295 | 0.00047  | -0.05729 |
| -0.11986 | 0.00953  | 0.062104 | 0.18031  | -0.25056 | 4.07E-08 | 0.144525 | 0.00174  | -0.09901 |
| -0.127   | 0.00599  | 0.094604 | 0.041    | -0.17413 | 0.00016  | 0.194689 | 2.27E-05 | -0.00014 |
| -0.0552  | 0.23381  | -0.01089 | 0.81441  | -0.11255 | 0.01495  | 0.073076 | 0.11478  | 0.053542 |
| -0.11181 | 0.01564  | 0.107231 | 0.02046  | -0.17207 | 0.00019  | 0.199743 | 1.37E-05 | -0.08631 |
| -0.17934 | 9.75E-05 | -0.02362 | 0.61073  | -0.35943 | 1.09E-15 | 0.02899  | 0.53202  | -0.23126 |
| -0.18685 | 4.85E-05 | -0.05181 | 0.26388  | -0.32554 | 5.45E-13 | -0.074   | 0.11027  | -0.18976 |
| -0.05157 | 0.26603  | 0.063568 | 0.17024  | -0.22958 | 5.30E-07 | 0.088196 | 0.05684  | -0.04585 |
| -0.09134 | 0.04853  | 0.029919 | 0.51895  | -0.19996 | 1.34E-05 | 0.122053 | 0.00828  | -0.12907 |
| -0.10614 | 0.02178  | 0.052635 | 0.25629  | -0.13989 | 0.00245  | 0.11381  | 0.01386  | 0.063544 |
| -0.06837 | 0.14012  | 0.081351 | 0.07905  | -0.21731 | 2.14E-06 | 0.140421 | 0.00235  | -0.0119  |
| -0.11986 | 0.00953  | 0.064012 | 0.16728  | -0.23454 | 2.95E-07 | 0.139407 | 0.00253  | -0.12811 |
| -0.13187 | 0.00431  | 0.027226 | 0.55727  | -0.26704 | 4.57E-09 | 0.131151 | 0.00453  | -0.03154 |
| -0.1404  | 0.00236  | -0.08727 | 0.05949  | -0.31372 | 4.00E-12 | -0.05875 | 0.20502  | -0.03589 |
| -0.13265 | 0.00408  | 0.075603 | 0.10273  | -0.28255 | 5.08E-10 | 0.134319 | 0.00364  | -0.11048 |
| -0.05706 | 0.21843  | 0.068001 | 0.1423   | -0.08167 | 0.07788  | 0.115775 | 0.01229  | -0.05038 |
| -0.09592 | 0.03826  | 0.063853 | 0.16833  | -0.2027  | 1.01E-05 | 0.182492 | 7.29E-05 | -0.14108 |
| 0.010213 | 0.82577  | 0.223664 | 1.05E-06 | -0.00357 | 0.9386   | 0.224798 | 9.21E-07 | 0.09827  |
| -0.10263 | 0.02657  | 0.024709 | 0.5943   | -0.28108 | 6.29E-10 | 0.054572 | 0.23918  | -0.12895 |
| -0.13793 | 0.00282  | 0.038652 | 0.40464  | -0.25826 | 1.49E-08 | 0.072707 | 0.11663  | -0.05096 |
| -0.11548 | 0.01252  | 0.062877 | 0.17495  | -0.25206 | 3.35E-08 | 0.119527 | 0.00973  | -0.06035 |
| -0.08246 | 0.07503  | 0.049369 | 0.28703  | -0.16888 | 0.00025  | 0.095889 | 0.03832  | -0.12819 |
| -0.04209 | 0.36411  | -0.12427 | 0.00717  | -0.26367 | 7.24E-09 | -0.07008 | 0.13047  | -0.00704 |
| -0.15031 | 0.00112  | 0.072878 | 0.11577  | -0.23732 | 2.11E-07 | 0.063912 | 0.16794  | -0.16543 |
| -0.13422 | 0.00366  | 0.000817 | 0.98594  | -0.2569  | 1.79E-08 | 0.030979 | 0.50425  | -0.16033 |
| -0.12737 | 0.00584  | 0.019292 | 0.67754  | -0.32287 | 8.62E-13 | 0.032053 | 0.48956  | -0.14405 |
| -0.00117 | 0.97997  | 0.177746 | 0.00011  | -0.144   | 0.00181  | 0.154719 | 0.00079  | -0.08608 |

|          |          |          |         |          |          |          |          |          |
|----------|----------|----------|---------|----------|----------|----------|----------|----------|
| -0.08606 | 0.06312  | 0.083042 | 0.073   | -0.21765 | 2.05E-06 | 0.071573 | 0.12246  | -0.14418 |
| -0.08202 | 0.07661  | -0.07721 | 0.0956  | -0.27359 | 1.84E-09 | -0.05673 | 0.22112  | 0.016631 |
| -0.08632 | 0.06233  | 0.052988 | 0.25312 | -0.25159 | 3.57E-08 | 0.121553 | 0.00855  | -0.10881 |
| -0.12943 | 0.00509  | 0.021315 | 0.64592 | -0.294   | 9.17E-11 | 0.016077 | 0.72895  | -0.17446 |
| -0.1489  | 0.00125  | 0.064195 | 0.16606 | -0.25963 | 1.24E-08 | 0.099149 | 0.03218  | -0.05476 |
| -0.11182 | 0.01563  | 0.065271 | 0.15906 | -0.18304 | 6.93E-05 | 0.125008 | 0.00683  | 0.022942 |
| -0.13104 | 0.00456  | 0.148525 | 0.00129 | -0.13858 | 0.00269  | 0.175547 | 0.00014  | -0.12533 |
| 0.004123 | 0.92919  | -0.00266 | 0.95436 | -0.23878 | 1.77E-07 | 0.109972 | 0.01744  | -0.06594 |
| -0.06767 | 0.14425  | 0.149208 | 0.00122 | -0.1824  | 7.36E-05 | 0.186378 | 5.07E-05 | -0.10665 |
| -0.00579 | 0.90074  | 0.054076 | 0.24349 | -0.17463 | 0.00015  | 0.045212 | 0.3296   | -0.12823 |
| -0.09432 | 0.04162  | 0.016644 | 0.71979 | -0.22192 | 1.28E-06 | 0.104825 | 0.02348  | -0.05405 |
| -0.07845 | 0.09036  | 0.080581 | 0.08194 | -0.21776 | 2.03E-06 | 0.132198 | 0.00421  | -0.06319 |
| -0.0286  | 0.53751  | 0.143445 | 0.00189 | -0.16879 | 0.00025  | 0.169048 | 0.00024  | -0.16503 |
| -0.08989 | 0.05222  | -0.0075  | 0.87157 | -0.19619 | 1.96E-05 | 0.041036 | 0.37627  | -0.08198 |
| -0.08137 | 0.07896  | 0.081517 | 0.07844 | -0.20917 | 5.15E-06 | 0.133502 | 0.00385  | 0.008324 |
| -0.08774 | 0.05813  | 0.116408 | 0.01182 | -0.17258 | 0.00018  | 0.219117 | 1.75E-06 | -0.10943 |
| -0.03334 | 0.47235  | 0.040978 | 0.37694 | -0.2006  | 1.25E-05 | 0.123122 | 0.00773  | -0.09474 |
| -0.20884 | 5.33E-06 | -0.03239 | 0.48503 | -0.32779 | 3.70E-13 | 0.006355 | 0.89106  | -0.16599 |
| -0.10283 | 0.02627  | -0.05204 | 0.26167 | -0.27919 | 8.26E-10 | 0.047317 | 0.30756  | -0.10474 |
| -0.08007 | 0.08392  | -0.01994 | 0.66736 | -0.15882 | 0.00057  | 0.007888 | 0.86501  | 0.010122 |
| -0.14759 | 0.00138  | -0.10158 | 0.02817 | -0.31281 | 4.64E-12 | -0.02151 | 0.64296  | -0.0036  |
| -0.11783 | 0.01082  | 0.017799 | 0.70124 | -0.20443 | 8.47E-06 | 0.12862  | 0.00538  | 0.074782 |
| -0.1441  | 0.0018   | 0.033797 | 0.46623 | -0.26647 | 4.94E-09 | 0.140668 | 0.00231  | -0.04173 |
| 0.004837 | 0.91697  | 0.015605 | 0.73661 | -0.04022 | 0.38584  | -0.02803 | 0.54568  | 0.003951 |
| 0.02292  | 0.62127  | 0.123255 | 0.00766 | 0.111767 | 0.01567  | 0.083379 | 0.07184  | 0.170851 |
| -0.01792 | 0.69934  | -0.02923 | 0.52859 | 0.085548 | 0.06473  | 0.029861 | 0.51976  | 0.137419 |
| -0.02392 | 0.60619  | -0.01116 | 0.80994 | -0.07104 | 0.12526  | -0.05011 | 0.27981  | -0.15389 |
| -0.10287 | 0.02621  | -0.10848 | 0.01903 | -0.07903 | 0.08801  | -0.04576 | 0.32379  | 0.100398 |
| -0.04286 | 0.35544  | 0.015584 | 0.73695 | -0.01789 | 0.69985  | 0.015821 | 0.73311  | 0.086908 |
| -0.04154 | 0.37043  | -0.02635 | 0.57009 | -0.0475  | 0.30571  | 0.040396 | 0.38377  | 0.062895 |
| -0.00597 | 0.89766  | 0.169565 | 0.00023 | 0.089454 | 0.05338  | 0.150848 | 0.00108  | 0.104333 |
| -0.0299  | 0.51917  | -0.04768 | 0.30382 | -0.06834 | 0.14033  | -0.01338 | 0.77299  | 0.112817 |
| -0.1169  | 0.01147  | 0.14349  | 0.00188 | -0.04169 | 0.36868  | 0.097024 | 0.03608  | -0.17047 |
| -0.05653 | 0.22275  | -0.09782 | 0.03458 | -0.04182 | 0.3672   | -0.11023 | 0.01717  | 0.119766 |
| 0.077106 | 0.09606  | 0.042068 | 0.36437 | 0.125617 | 0.00657  | 0.029351 | 0.52692  | 0.111879 |
| 0.006861 | 0.88245  | -0.04776 | 0.30308 | 0.002265 | 0.96107  | -0.01196 | 0.79665  | 0.08865  |
| -0.0294  | 0.52618  | -0.09624 | 0.03761 | 0.025277 | 0.58584  | -0.13392 | 0.00374  | 0.249558 |
| -0.0829  | 0.07348  | -0.09553 | 0.03906 | -0.10006 | 0.03063  | -0.01988 | 0.66824  | -0.02819 |
| -0.05576 | 0.22906  | -0.15255 | 0.00094 | 0.049279 | 0.28791  | -0.18156 | 7.95E-05 | 0.239944 |
| -0.01709 | 0.7126   | -0.0068  | 0.88352 | 0.000809 | 0.98608  | 0.044621 | 0.33597  | 0.166117 |
| -0.07246 | 0.11788  | -0.08258 | 0.07463 | -0.03012 | 0.5161   | -0.05944 | 0.19976  | 0.153838 |
| -0.05823 | 0.20907  | 0.022361 | 0.62981 | -0.04959 | 0.28486  | 0.100902 | 0.02924  | 0.116494 |
| -0.12317 | 0.00771  | -0.00242 | 0.95844 | -0.09035 | 0.05102  | -0.04327 | 0.35083  | -0.0423  |
| -0.04566 | 0.32481  | -0.03245 | 0.48427 | -0.04855 | 0.29516  | -0.06162 | 0.18373  | 0.075712 |
| -0.09412 | 0.04205  | -0.02802 | 0.54577 | 0.011274 | 0.80801  | -0.05134 | 0.26819  | 0.079883 |

|          |         |          |          |          |          |          |          |          |
|----------|---------|----------|----------|----------|----------|----------|----------|----------|
| -0.02384 | 0.60741 | 0.028808 | 0.53459  | -0.03162 | 0.4954   | 8.19E-07 | 0.99999  | 0.148281 |
| -0.06554 | 0.15733 | -0.05971 | 0.19771  | -0.01184 | 0.79852  | -0.05999 | 0.19562  | 0.086475 |
| -0.04107 | 0.37584 | -0.07272 | 0.11659  | -0.03033 | 0.51321  | -0.0811  | 0.07998  | 0.074002 |
| -0.04813 | 0.29936 | -0.02647 | 0.56826  | 0.003959 | 0.93201  | -0.01975 | 0.67035  | 0.168794 |
| -0.00112 | 0.98077 | -0.09914 | 0.0322   | 0.042728 | 0.35689  | -0.08725 | 0.05957  | 0.190123 |
| -0.04513 | 0.33051 | -0.20789 | 5.90E-06 | -0.04461 | 0.33609  | -0.20405 | 8.81E-06 | 0.190183 |
| -0.09445 | 0.04133 | -0.12269 | 0.00795  | -0.08447 | 0.06818  | -0.04811 | 0.29954  | 0.207697 |
| -0.01687 | 0.7161  | -0.02495 | 0.59069  | 0.06422  | 0.16589  | -0.0897  | 0.05272  | 0.051354 |
| -0.0247  | 0.59447 | -0.04448 | 0.33747  | -0.00749 | 0.87182  | 0.000155 | 0.99733  | 0.227408 |
| -0.05662 | 0.22199 | -0.07271 | 0.11663  | 0.01789  | 0.69979  | -0.12883 | 0.0053   | 0.214503 |
| -0.05776 | 0.21279 | -0.10189 | 0.02769  | -0.03605 | 0.43698  | -0.10256 | 0.02667  | 0.171441 |
| -0.06769 | 0.14415 | -0.04321 | 0.35144  | 0.046347 | 0.31759  | 0.043171 | 0.35192  | 0.106633 |
| 0.015406 | 0.73985 | -0.10421 | 0.02432  | 0.072403 | 0.11817  | -0.17829 | 0.00011  | 0.262081 |
| -0.09722 | 0.0357  | -0.06305 | 0.17375  | -0.07238 | 0.11829  | -0.0892  | 0.05407  | -0.10429 |
| 0.007654 | 0.86897 | 0.020655 | 0.65617  | -0.03159 | 0.49586  | -0.00978 | 0.83298  | 0.098894 |
| 0.018769 | 0.68581 | -0.03251 | 0.4834   | 0.039115 | 0.39904  | 0.016863 | 0.71626  | 0.236974 |
| -0.05672 | 0.22116 | -0.05955 | 0.1989   | 0.02976  | 0.52117  | 0.032938 | 0.47765  | 0.189731 |
| -0.00228 | 0.96074 | 0.064084 | 0.16679  | 0.144637 | 0.00173  | 0.11579  | 0.01228  | 0.15275  |
| 0.020248 | 0.66252 | 0.260701 | 1.08E-08 | 0.249246 | 4.81E-08 | 0.331527 | 1.92E-13 | 0.081426 |
| 0.055617 | 0.2303  | 0.069576 | 0.13327  | 0.140064 | 0.00242  | 0.022501 | 0.62767  | 0.143376 |
| -0.03552 | 0.4438  | -0.17057 | 0.00021  | -0.05557 | 0.23072  | -0.11865 | 0.01028  | 0.223278 |
| -0.00856 | 0.85357 | -0.07379 | 0.11128  | 0.001913 | 0.96711  | -0.11654 | 0.01173  | 0.164505 |
| 0.010523 | 0.82058 | 0.04254  | 0.35902  | 0.004702 | 0.91928  | 0.055733 | 0.22932  | 0.166332 |
| -0.03059 | 0.50955 | -0.04327 | 0.35085  | -0.0694  | 0.13427  | -0.05097 | 0.27166  | -0.01157 |
| -0.10788 | 0.0197  | -0.07474 | 0.10673  | -0.10276 | 0.02637  | -0.06947 | 0.13387  | -0.02469 |
| -0.00432 | 0.92584 | 0.125942 | 0.00643  | 0.04815  | 0.29911  | 0.131082 | 0.00455  | 0.111621 |
| -0.03734 | 0.42082 | 0.036338 | 0.43338  | -0.12316 | 0.00771  | 0.029134 | 0.52999  | -0.02776 |
| -0.04029 | 0.38503 | -0.14277 | 0.00198  | 0.00292  | 0.94981  | -0.11184 | 0.0156   | 0.10375  |
| 0.00344  | 0.94091 | 0.030405 | 0.51218  | -0.12183 | 0.0084   | -0.02953 | 0.52435  | -0.28386 |
| 0.019134 | 0.68003 | -0.10095 | 0.02916  | 0.051181 | 0.26968  | -0.10515 | 0.02305  | 0.227067 |
| 0.001961 | 0.96629 | 0.000591 | 0.98984  | 0.026202 | 0.57221  | -0.05123 | 0.2692   | 0.059835 |
| -0.06029 | 0.19342 | -0.06745 | 0.14557  | 0.017005 | 0.71398  | -0.13675 | 0.00306  | 0.155711 |
| -0.02141 | 0.64438 | 0.016032 | 0.72968  | -0.01718 | 0.71113  | 0.101165 | 0.02882  | 0.228738 |
| 0.04503  | 0.33156 | 0.048719 | 0.29343  | 0.025401 | 0.58401  | -0.01778 | 0.70159  | -0.02814 |
| -0.06932 | 0.13469 | 0.04234  | 0.36128  | -0.02862 | 0.53727  | -0.02943 | 0.52583  | 0.129284 |
| 0.051926 | 0.26277 | -0.02807 | 0.54515  | 0.059907 | 0.19626  | -0.03524 | 0.44741  | 0.187421 |
| -0.08332 | 0.07204 | -0.02004 | 0.66583  | -0.05736 | 0.21599  | 0.028769 | 0.53515  | -0.01877 |
| -0.02445 | 0.59822 | -0.02797 | 0.54656  | -0.07646 | 0.09888  | 0.091312 | 0.0486   | 0.080441 |
| -0.03531 | 0.44646 | 0.065275 | 0.15903  | 0.026976 | 0.56091  | -0.00537 | 0.9078   | -0.01169 |
| -0.05082 | 0.27304 | -0.11845 | 0.01041  | 0.056677 | 0.22151  | -0.11591 | 0.01219  | 0.237878 |
| -0.09684 | 0.03644 | 0.015978 | 0.73055  | -0.12933 | 0.00513  | 0.021077 | 0.64961  | 0.043967 |
| -0.01792 | 0.69936 | -0.06292 | 0.17464  | 0.093044 | 0.04447  | -0.11315 | 0.01442  | 0.239331 |
| -0.04111 | 0.37542 | 0.056642 | 0.2218   | 0.088785 | 0.0552   | 0.054913 | 0.23626  | 0.123563 |
| -0.08387 | 0.07019 | 0.055521 | 0.2311   | 0.026195 | 0.5723   | 0.013749 | 0.76697  | 0.02811  |
| -0.04648 | 0.31618 | -0.09259 | 0.04551  | 0.079583 | 0.08581  | -0.07081 | 0.12648  | 0.268147 |

|          |         |          |          |          |         |          |          |          |
|----------|---------|----------|----------|----------|---------|----------|----------|----------|
| -0.08566 | 0.06437 | -0.07264 | 0.11698  | -0.06396 | 0.16765 | -0.01727 | 0.70969  | 0.164932 |
| -0.08953 | 0.05318 | -0.06312 | 0.17328  | -0.04093 | 0.37745 | 0.076089 | 0.10053  | 0.255093 |
| -0.08699 | 0.06034 | -0.03608 | 0.4366   | -0.0686  | 0.13884 | -0.04009 | 0.38744  | -0.02302 |
| -0.01066 | 0.81836 | 0.011328 | 0.80711  | 0.048689 | 0.29373 | 0.020198 | 0.6633   | 0.19381  |
| -0.10894 | 0.01853 | -0.03282 | 0.47924  | -0.1524  | 0.00095 | -0.09569 | 0.03872  | -0.39406 |
| -0.04101 | 0.37657 | -0.0346  | 0.45572  | -0.05756 | 0.21441 | -0.1075  | 0.02015  | 0.104972 |
| -0.05912 | 0.2022  | -0.06281 | 0.17537  | 0.041038 | 0.37624 | -0.01669 | 0.71908  | 0.125676 |
| -0.02812 | 0.54442 | -0.00846 | 0.85531  | 0.004061 | 0.93026 | -0.04826 | 0.29802  | 0.118879 |
| 0.01874  | 0.68627 | 0.07667  | 0.09796  | 0.043038 | 0.35341 | 0.179956 | 9.21E-05 | 0.024834 |
| -0.01035 | 0.82354 | 0.058374 | 0.20797  | -0.00119 | 0.9796  | -0.05678 | 0.22069  | -0.03658 |
| 0.005971 | 0.8976  | 0.017918 | 0.69935  | 0.04537  | 0.32791 | -0.03638 | 0.43291  | 0.167391 |
| -0.06621 | 0.15311 | -0.06681 | 0.14941  | 0.007585 | 0.87015 | -0.09177 | 0.04748  | 0.113024 |
| 0.026259 | 0.57137 | 0.053815 | 0.24578  | 0.102562 | 0.02667 | 0.147179 | 0.00143  | 0.227184 |
| -0.12118 | 0.00876 | -0.06228 | 0.17909  | -0.03854 | 0.40596 | -0.07517 | 0.10472  | 0.155365 |
| -0.03842 | 0.40754 | 0.001892 | 0.96748  | 0.046559 | 0.31538 | 0.018455 | 0.6908   | 0.087432 |
| -0.03806 | 0.41195 | -0.05887 | 0.20412  | -0.01163 | 0.80214 | -0.02575 | 0.5789   | 0.190193 |
| 0.058504 | 0.20696 | 0.058231 | 0.20909  | 0.139534 | 0.00251 | 0.126574 | 0.00616  | 0.247075 |
| -0.08116 | 0.07978 | -0.05167 | 0.26512  | -0.01456 | 0.75373 | -0.04719 | 0.30884  | 0.270347 |
| -0.01631 | 0.72523 | -0.08021 | 0.08336  | 0.025385 | 0.58425 | -0.01073 | 0.81716  | 0.168002 |
| -0.04711 | 0.30969 | -0.03598 | 0.43792  | -0.00969 | 0.83462 | -0.00722 | 0.87642  | 0.029187 |
| -0.14002 | 0.00242 | -0.05588 | 0.22806  | -0.12353 | 0.00752 | -0.02371 | 0.60929  | 0.087298 |
| -0.06975 | 0.13229 | -0.11012 | 0.01729  | -0.05297 | 0.25328 | -0.08033 | 0.0829   | 0.037714 |
| -0.02544 | 0.58339 | 0.033499 | 0.47018  | -0.04459 | 0.33635 | 0.07276  | 0.11636  | 0.165416 |
| -0.09978 | 0.0311  | -0.12166 | 0.00849  | -0.1492  | 0.00122 | -0.11664 | 0.01165  | -0.02408 |
| -0.00517 | 0.9113  | -0.15896 | 0.00056  | -0.02236 | 0.62978 | -0.1973  | 1.75E-05 | 0.199536 |
| -0.04475 | 0.33461 | -0.0994  | 0.03174  | 0.038408 | 0.40762 | -0.06346 | 0.171    | 0.084019 |
| -0.04966 | 0.28418 | -0.05476 | 0.2376   | -0.07286 | 0.11587 | -0.02894 | 0.53277  | 0.127168 |
| -0.04638 | 0.31721 | 0.044118 | 0.34145  | 0.058202 | 0.20932 | 0.08851  | 0.05596  | 0.28149  |
| -0.06798 | 0.14241 | -0.04717 | 0.30905  | -0.08903 | 0.05454 | -0.09289 | 0.04483  | 0.199045 |
| -0.04192 | 0.3661  | -0.09792 | 0.0344   | 0.003427 | 0.94113 | -0.10171 | 0.02797  | 0.151137 |
| -0.01779 | 0.70145 | -0.07455 | 0.10761  | -0.11537 | 0.01261 | 0.013922 | 0.76413  | 0.124299 |
| -0.05391 | 0.24497 | -0.01702 | 0.71368  | -0.05399 | 0.24422 | -0.00616 | 0.89442  | 0.059054 |
| -0.05652 | 0.22283 | 0.021947 | 0.63617  | 0.043663 | 0.34646 | -0.04115 | 0.37495  | -0.01613 |
| -0.02384 | 0.60728 | -0.04145 | 0.37148  | 0.009915 | 0.83079 | -0.1332  | 0.00393  | -0.06082 |
| -0.02729 | 0.55637 | -0.07558 | 0.10285  | -0.03436 | 0.4588  | -0.05695 | 0.21931  | 0.163596 |
| -0.08964 | 0.0529  | -0.01668 | 0.71922  | -0.08338 | 0.07185 | -0.04648 | 0.31615  | -0.0106  |
| -0.05676 | 0.22081 | 0.022929 | 0.62114  | -0.05483 | 0.23696 | 0.022617 | 0.6259   | 0.04548  |
| -0.07013 | 0.13018 | -0.18629 | 5.11E-05 | 0.008845 | 0.84881 | -0.16465 | 0.00035  | 0.13527  |
| -0.08556 | 0.06469 | -0.09064 | 0.05029  | -0.04629 | 0.31819 | -0.12159 | 0.00853  | 0.07369  |
| -0.05001 | 0.28078 | -0.11339 | 0.01422  | -0.08004 | 0.08401 | -0.09174 | 0.04754  | 0.091319 |
| -0.07697 | 0.09664 | -0.05479 | 0.2373   | -0.03585 | 0.43964 | -0.12771 | 0.00571  | 0.056592 |
| -0.08294 | 0.07334 | -0.04895 | 0.2911   | -0.09634 | 0.03742 | -0.07874 | 0.08921  | -0.06508 |
| 0.089368 | 0.05361 | -0.0052  | 0.9107   | 0.087704 | 0.05824 | -0.02659 | 0.56648  | 0.225264 |
| -0.06788 | 0.143   | -0.08198 | 0.07677  | 0.039086 | 0.39939 | -0.14243 | 0.00203  | 0.130923 |
| -0.10905 | 0.0184  | -0.13723 | 0.00296  | -0.06046 | 0.19213 | -0.09846 | 0.0334   | 0.24918  |

|          |         |          |          |          |          |          |          |          |
|----------|---------|----------|----------|----------|----------|----------|----------|----------|
| -0.05946 | 0.19961 | -0.06161 | 0.1838   | -0.01864 | 0.68788  | -0.03341 | 0.47142  | 0.131041 |
| -0.08341 | 0.07172 | -0.06999 | 0.13099  | 0.019111 | 0.6804   | -0.1624  | 0.00043  | 0.161201 |
| -0.09538 | 0.03936 | -0.15114 | 0.00105  | 0.015928 | 0.73137  | -0.13939 | 0.00254  | 0.169611 |
| -0.13015 | 0.00485 | -0.07916 | 0.08749  | -0.04743 | 0.30637  | -0.14123 | 0.00222  | 0.108042 |
| -0.0841  | 0.06941 | -0.13607 | 0.00321  | -0.02027 | 0.66222  | -0.12086 | 0.00894  | 0.222805 |
| -0.09843 | 0.03345 | -0.02091 | 0.65213  | -0.08717 | 0.05979  | -0.07757 | 0.09407  | 0.103003 |
| -0.02088 | 0.65267 | -0.01842 | 0.69142  | 0.000139 | 0.9976   | -0.04397 | 0.34302  | 0.079306 |
| -0.06833 | 0.14036 | -0.10049 | 0.02991  | 0.020492 | 0.65871  | -0.01805 | 0.69728  | 0.260257 |
| -0.02391 | 0.60629 | -0.05167 | 0.26512  | 0.024974 | 0.59034  | -0.02933 | 0.52728  | 0.154904 |
| -0.02186 | 0.63748 | 0.023959 | 0.60555  | 0.071203 | 0.12441  | 0.026277 | 0.5711   | 0.211831 |
| -0.06833 | 0.14037 | -0.00068 | 0.98823  | -0.05616 | 0.22573  | 0.05009  | 0.28004  | 0.120262 |
| -0.07603 | 0.10082 | -0.00777 | 0.86693  | 0.058575 | 0.20641  | 0.023743 | 0.6088   | 0.146139 |
| -0.05804 | 0.21061 | -0.10101 | 0.02907  | -0.06626 | 0.15279  | -0.14663 | 0.00149  | -0.02095 |
| -0.00796 | 0.86377 | -0.02861 | 0.53747  | -0.05445 | 0.24022  | 0.021757 | 0.63909  | 0.130017 |
| -0.06145 | 0.18496 | -0.03845 | 0.40712  | -0.037   | 0.425    | -0.00759 | 0.87005  | 0.166975 |
| 0.013615 | 0.76919 | 0.083346 | 0.07195  | 0.100632 | 0.02968  | 0.051767 | 0.26423  | 0.166194 |
| 0.040348 | 0.38432 | -0.03436 | 0.45886  | 0.02749  | 0.55346  | -0.12194 | 0.00834  | 0.091455 |
| -0.02199 | 0.63546 | 0.046838 | 0.31249  | -0.03334 | 0.47232  | 0.059585 | 0.19867  | 0.067654 |
| 0.003626 | 0.93771 | -0.04841 | 0.29648  | 0.061901 | 0.18175  | 0.000999 | 0.98283  | 0.204089 |
| -0.04934 | 0.28732 | -0.05287 | 0.25418  | 0.077881 | 0.09275  | -0.0954  | 0.03933  | 0.165778 |
| -0.04955 | 0.28524 | -0.04431 | 0.3394   | -0.01352 | 0.77081  | -0.00454 | 0.92213  | 0.126317 |
| -0.03628 | 0.43406 | -0.11729 | 0.01119  | -0.063   | 0.17408  | -0.09225 | 0.04631  | 0.117011 |
| -0.02299 | 0.62023 | 0.025578 | 0.58139  | 0.189093 | 3.91E-05 | 0.063295 | 0.17209  | 0.277512 |
| -0.0279  | 0.54753 | -0.04895 | 0.29112  | 0.079517 | 0.08607  | -0.08672 | 0.06114  | 0.249136 |
| -0.03264 | 0.48171 | -0.02516 | 0.58752  | 0.023024 | 0.61969  | -0.02703 | 0.56017  | 0.233842 |
| -0.01349 | 0.77119 | 0.058958 | 0.20345  | 0.079389 | 0.08658  | -0.00907 | 0.84495  | 0.191227 |
| -0.03496 | 0.45109 | 0.01303  | 0.77884  | 0.048503 | 0.29558  | 0.093962 | 0.0424   | 0.190536 |
| -0.0218  | 0.6384  | 0.215286 | 2.67E-06 | 0.045249 | 0.3292   | 0.184009 | 6.33E-05 | -0.06093 |
| -0.01768 | 0.70309 | -0.03399 | 0.46371  | 0.066191 | 0.15325  | -0.13599 | 0.00323  | 0.056068 |
| -0.01906 | 0.68117 | -0.06534 | 0.1586   | 0.073262 | 0.11386  | -0.08726 | 0.05953  | 0.262571 |
| 0.059747 | 0.19745 | 0.060132 | 0.19458  | -0.01192 | 0.79723  | -0.00681 | 0.88337  | 0.073071 |
| -0.09973 | 0.03117 | -0.08563 | 0.06448  | -0.07332 | 0.11356  | -0.08873 | 0.05535  | 0.113218 |
| -0.0582  | 0.20931 | 0.058025 | 0.2107   | -0.08399 | 0.06977  | 0.011689 | 0.80109  | -0.12129 |
| -0.00227 | 0.96094 | -0.10329 | 0.02561  | -0.01609 | 0.72878  | -0.06596 | 0.15472  | 0.100768 |
| 0.000649 | 0.98884 | 0.204289 | 8.59E-06 | 0.097564 | 0.03505  | 0.171858 | 0.00019  | -0.0628  |
| -0.1053  | 0.02286 | -0.09188 | 0.0472   | 0.011312 | 0.80738  | -0.13384 | 0.00376  | 0.087671 |
| -0.02491 | 0.5913  | -0.07489 | 0.10605  | 0.004813 | 0.91738  | -0.18057 | 8.71E-05 | 0.165153 |
| -0.0227  | 0.62469 | -0.11026 | 0.01715  | -0.017   | 0.71402  | -0.14104 | 0.00225  | 0.155457 |
| -0.08207 | 0.07642 | -0.07519 | 0.10461  | -0.03649 | 0.43149  | -0.07247 | 0.11785  | 0.065013 |
| 0.005719 | 0.9019  | 0.148762 | 0.00126  | 0.013669 | 0.7683   | 0.052446 | 0.25801  | 0.086541 |
| -0.06758 | 0.14481 | -0.02249 | 0.62779  | 0.051298 | 0.26859  | -0.0561  | 0.22629  | 0.202127 |
| -0.03255 | 0.48279 | -0.05544 | 0.23178  | 0.076915 | 0.09689  | 0.014304 | 0.75785  | 0.146654 |
| -0.02626 | 0.57135 | -0.08445 | 0.06824  | 0.044162 | 0.34096  | -0.11448 | 0.01331  | 0.181648 |
| -0.07096 | 0.1257  | -0.0219  | 0.63686  | -0.00276 | 0.95259  | -0.06216 | 0.17993  | 0.125022 |
| 0.032835 | 0.47904 | 0.024315 | 0.6002   | 0.074645 | 0.10718  | 0.102589 | 0.02663  | 0.126798 |

|          |         |          |          |          |          |          |          |          |
|----------|---------|----------|----------|----------|----------|----------|----------|----------|
| -0.10263 | 0.02658 | -0.0277  | 0.55047  | -0.09293 | 0.04472  | 0.075249 | 0.10435  | 0.110898 |
| 0.00196  | 0.9663  | -0.10132 | 0.02857  | 0.070557 | 0.12787  | -0.08833 | 0.05646  | 0.232413 |
| -0.08533 | 0.06543 | -0.1936  | 2.53E-05 | -0.20337 | 9.45E-06 | -0.10701 | 0.02072  | -0.03936 |
| -0.03891 | 0.40147 | 0.054086 | 0.2434   | 0.166495 | 0.0003   | 0.118133 | 0.01062  | 0.280425 |
| -0.00991 | 0.8309  | -0.04548 | 0.32673  | 0.070097 | 0.13038  | -0.05239 | 0.25848  | 0.319083 |
| 0.009933 | 0.83047 | 0.07803  | 0.09213  | 0.077937 | 0.09252  | -0.02855 | 0.5382   | 0.065505 |
| -0.04362 | 0.34688 | -0.03033 | 0.51326  | -0.03894 | 0.4011   | -0.01875 | 0.68608  | 0.019804 |
| -0.00733 | 0.87454 | 0.009064 | 0.84512  | 0.071076 | 0.12508  | 0.009331 | 0.84062  | 0.222729 |
| -0.09512 | 0.0399  | -0.07757 | 0.09408  | -0.07162 | 0.1222   | -0.02058 | 0.65732  | 0.107942 |
| -0.00906 | 0.84522 | -0.06142 | 0.18517  | 0.05657  | 0.22239  | -0.1624  | 0.00043  | 0.063472 |
| 0.068298 | 0.14056 | 0.0803   | 0.08302  | 0.134525 | 0.00358  | 0.008707 | 0.85115  | 0.183512 |
| -0.0527  | 0.25569 | -0.00192 | 0.96698  | -0.05207 | 0.26146  | -0.0144  | 0.75629  | -0.07822 |
| -0.04171 | 0.36852 | -0.07035 | 0.12901  | -0.05051 | 0.27606  | -0.0227  | 0.62463  | 0.000697 |
| -0.04459 | 0.3363  | -0.02513 | 0.58801  | -0.06476 | 0.16237  | 0.077387 | 0.09485  | 0.066695 |
| 0.005575 | 0.90436 | -0.05033 | 0.27777  | 0.025824 | 0.57777  | -0.01189 | 0.7977   | 0.166358 |
| -0.01596 | 0.73091 | 0.014792 | 0.74986  | 0.05298  | 0.25319  | 0.0757   | 0.10229  | 0.205935 |
| -0.08008 | 0.08386 | -0.01576 | 0.73415  | -0.06176 | 0.18277  | -0.01712 | 0.71212  | 0.105285 |
| -0.08033 | 0.08288 | -0.11824 | 0.01055  | -0.1375  | 0.00291  | -0.05076 | 0.27367  | 0.014915 |
| -0.065   | 0.16078 | 0.089534 | 0.05317  | 0.08894  | 0.05477  | 0.071855 | 0.12099  | 0.086048 |
| -0.0655  | 0.15757 | -0.05094 | 0.27191  | -0.00403 | 0.93078  | 0.009945 | 0.83028  | 0.251717 |
| -0.05082 | 0.27308 | -0.12181 | 0.00841  | 0.018603 | 0.68845  | -0.13294 | 0.004    | 0.206108 |
| 0.001489 | 0.97439 | -0.01154 | 0.80353  | 0.006986 | 0.88032  | 0.039119 | 0.39899  | 0.252934 |
| -0.04586 | 0.32269 | -0.13375 | 0.00378  | 0.003158 | 0.94574  | -0.09766 | 0.03486  | 0.288981 |
| -0.03642 | 0.43233 | 0.012527 | 0.78717  | 0.01865  | 0.6877   | 0.016963 | 0.71465  | 0.237115 |
| -0.05461 | 0.23882 | -0.1172  | 0.01126  | -0.01909 | 0.68072  | -0.10702 | 0.02071  | 0.259609 |
| 0.021216 | 0.64745 | 0.048658 | 0.29404  | -0.02732 | 0.5559   | -0.02216 | 0.63296  | -0.02977 |
| -0.03529 | 0.44681 | -0.01841 | 0.6915   | 0.024672 | 0.59486  | -0.0926  | 0.04549  | 0.000337 |
| 0.024076 | 0.60379 | -0.04326 | 0.35091  | 0.061271 | 0.18625  | -0.03342 | 0.47121  | 0.10555  |
| -0.09032 | 0.05111 | 0.054544 | 0.23942  | 0.029192 | 0.52916  | 0.107918 | 0.01966  | 0.157582 |
| 0.014356 | 0.75701 | -0.15041 | 0.00111  | -0.01029 | 0.82449  | -0.11303 | 0.01453  | 0.148219 |
| 0.051325 | 0.26834 | -0.03721 | 0.4224   | 0.059416 | 0.19995  | -0.07482 | 0.10636  | 0.152545 |
| -0.13544 | 0.00336 | -0.08896 | 0.05471  | -0.07575 | 0.10207  | -0.03411 | 0.46209  | 0.116692 |
| -0.03825 | 0.40954 | -0.01892 | 0.68337  | -0.02906 | 0.53099  | -0.04394 | 0.34344  | 0.074895 |
| -0.04841 | 0.29646 | 0.020518 | 0.6583   | 0.012681 | 0.7846   | 0.021449 | 0.64385  | 0.089713 |
| -0.00818 | 0.85998 | -0.00939 | 0.83965  | 0.068319 | 0.14044  | 0.021014 | 0.65059  | 0.233946 |
| -0.07292 | 0.11555 | -0.02424 | 0.60136  | -0.12511 | 0.00679  | -0.03445 | 0.45764  | -0.10202 |
| -0.02421 | 0.60173 | 0.150431 | 0.00111  | -0.02296 | 0.62061  | 0.028971 | 0.53228  | -0.22607 |
| -0.06059 | 0.19117 | -0.12682 | 0.00606  | -0.11712 | 0.01131  | -0.14657 | 0.00149  | -0.01456 |
| -0.01428 | 0.7583  | 0.100825 | 0.02936  | -0.00452 | 0.92239  | 0.049712 | 0.28369  | -0.01903 |
| -0.04082 | 0.37884 | -0.00091 | 0.98436  | 0.099142 | 0.03219  | 0.030049 | 0.51713  | 0.255518 |
| -0.07599 | 0.10099 | 0.042095 | 0.36406  | -0.09355 | 0.04332  | 0.065344 | 0.15859  | -0.0988  |
| -0.04392 | 0.3436  | -0.06322 | 0.17258  | 0.002768 | 0.95243  | -0.07739 | 0.09485  | 0.127693 |
| 0.007123 | 0.87799 | 0.144434 | 0.00175  | 0.111564 | 0.01587  | 0.179922 | 9.24E-05 | 0.144976 |
| -0.10692 | 0.02083 | -0.09386 | 0.04263  | -0.01485 | 0.7489   | -0.08816 | 0.05694  | -0.02681 |
| -0.06139 | 0.1854  | -0.07446 | 0.10805  | -0.0221  | 0.63383  | -0.08395 | 0.06992  | 0.174889 |

|          |         |          |          |          |          |          |          |          |
|----------|---------|----------|----------|----------|----------|----------|----------|----------|
| 0.060249 | 0.19371 | -0.07005 | 0.13065  | 0.004469 | 0.92327  | -0.06361 | 0.16999  | 0.180522 |
| 0.038221 | 0.40991 | 0.073775 | 0.11134  | 0.097405 | 0.03535  | 0.151241 | 0.00104  | 0.157635 |
| -0.04926 | 0.28807 | -0.15476 | 0.00079  | -0.1251  | 0.00679  | -0.09364 | 0.04312  | 0.136606 |
| -0.02515 | 0.58778 | 0.056445 | 0.22342  | 0.128377 | 0.00546  | 0.06442  | 0.16458  | 0.220728 |
| -0.01321 | 0.77593 | -0.01203 | 0.79539  | 0.061979 | 0.1812   | 0.036244 | 0.43457  | 0.153492 |
| -0.05442 | 0.24047 | 0.13859  | 0.00269  | 0.132761 | 0.00405  | 0.131239 | 0.0045   | 0.263639 |
| -0.05901 | 0.20304 | 0.124524 | 0.00705  | 0.087096 | 0.06001  | 0.140849 | 0.00228  | 0.207602 |
| -0.05604 | 0.22673 | -0.02669 | 0.56513  | 0.126881 | 0.00604  | -0.09342 | 0.04361  | 0.229517 |
| -0.02041 | 0.65993 | -0.00711 | 0.87828  | 0.063456 | 0.171    | -0.08812 | 0.05704  | 0.091693 |
| -0.05169 | 0.26499 | -0.04116 | 0.37484  | -0.07789 | 0.09273  | -0.06582 | 0.15557  | 0.175236 |
| -0.03345 | 0.4708  | 0.08037  | 0.08275  | 0.075207 | 0.10455  | -0.00116 | 0.97998  | 0.181298 |
| -0.0976  | 0.03498 | 0.038972 | 0.40076  | 0.039117 | 0.39901  | -0.04294 | 0.35446  | -0.02295 |
| -0.02764 | 0.55131 | 0.013794 | 0.76624  | 0.029158 | 0.52964  | -0.02531 | 0.58534  | 0.007203 |
| 0.010586 | 0.81952 | 0.000303 | 0.9948   | 0.12173  | 0.00845  | 0.053103 | 0.25209  | 0.253834 |
| -0.09598 | 0.03814 | -0.04566 | 0.32478  | -0.00556 | 0.90468  | -0.05086 | 0.27274  | 0.238743 |
| -0.12964 | 0.00502 | -0.15183 | 0.001    | -0.0992  | 0.0321   | -0.04634 | 0.31761  | 0.175579 |
| -0.04791 | 0.30149 | -0.0237  | 0.6094   | -0.03361 | 0.46869  | -0.03775 | 0.41572  | 0.017255 |
| -0.10636 | 0.02152 | -0.1074  | 0.02026  | 0.01903  | 0.68168  | -0.08909 | 0.05437  | 0.266861 |
| -0.03048 | 0.51114 | -0.13008 | 0.00487  | -0.07752 | 0.09428  | -0.14101 | 0.00225  | -0.02876 |
| 0.075099 | 0.10505 | 0.128009 | 0.0056   | 0.20363  | 9.20E-06 | 0.028632 | 0.53709  | 0.075789 |
| -0.05831 | 0.20846 | -0.08416 | 0.06919  | -0.11419 | 0.01354  | -0.00871 | 0.85112  | 0.181002 |
| -0.08358 | 0.07115 | 0.005976 | 0.89752  | -0.10467 | 0.0237   | -0.03544 | 0.44488  | 0.057826 |
| -0.01489 | 0.74822 | -0.07414 | 0.10959  | -0.0332  | 0.47418  | -0.09531 | 0.03952  | 0.108621 |
| -0.046   | 0.32124 | -0.07214 | 0.11949  | 0.061483 | 0.18472  | -0.06091 | 0.18883  | 0.239261 |
| 0.03164  | 0.49518 | -0.06692 | 0.14876  | -0.03595 | 0.43826  | -0.11302 | 0.01454  | 0.099413 |
| -0.06334 | 0.17182 | -0.02862 | 0.53729  | -0.02422 | 0.60164  | -0.05386 | 0.24538  | 0.081273 |
| -0.006   | 0.89715 | -0.11182 | 0.01563  | 0.009348 | 0.84033  | -0.06646 | 0.15161  | 0.033713 |
| -0.01253 | 0.78706 | -0.07321 | 0.1141   | 0.01451  | 0.75448  | 0.010251 | 0.82514  | 0.250343 |
| 0.008135 | 0.86083 | 0.012947 | 0.78021  | 0.04575  | 0.32388  | -0.01454 | 0.75398  | -0.0182  |
| -0.05108 | 0.27063 | -0.03829 | 0.40901  | -0.04014 | 0.38681  | -0.06774 | 0.14383  | -0.03153 |
| -0.05018 | 0.27922 | -0.02581 | 0.57794  | -0.04749 | 0.30581  | 0.06109  | 0.18755  | -0.03478 |
| -0.08983 | 0.05238 | -0.11739 | 0.01112  | -0.06508 | 0.16026  | -0.03026 | 0.51425  | 0.222344 |
| -0.09504 | 0.04007 | -0.13696 | 0.00302  | -0.03861 | 0.40519  | -0.18806 | 4.32E-05 | 0.161207 |
| -0.00927 | 0.84158 | 0.051141 | 0.27006  | 0.142962 | 0.00195  | 0.08704  | 0.06018  | 0.198188 |
| -0.02839 | 0.54061 | -0.02373 | 0.60892  | 0.04187  | 0.36663  | -0.09358 | 0.04324  | 0.232321 |
| -0.05689 | 0.21978 | -0.05435 | 0.24106  | -0.04412 | 0.3414   | -0.00589 | 0.89891  | 0.031563 |
| -0.03236 | 0.48543 | -0.0149  | 0.7481   | 0.004225 | 0.92744  | -0.07481 | 0.10641  | 0.069927 |
| -0.0784  | 0.0906  | -0.09429 | 0.04169  | -0.0809  | 0.08072  | -0.08613 | 0.06291  | 0.021695 |
| 0.001536 | 0.97358 | -0.10899 | 0.01848  | 0.097794 | 0.03462  | -0.17495 | 0.00014  | 0.182976 |
| -0.02261 | 0.62603 | -0.04981 | 0.28274  | 0.010389 | 0.82283  | -0.04641 | 0.31697  | 0.218607 |
| -0.09803 | 0.03418 | -0.18444 | 6.09E-05 | -0.13552 | 0.00334  | -0.09108 | 0.04916  | 0.095747 |
| -0.09442 | 0.0414  | -0.02758 | 0.55217  | -0.04426 | 0.33994  | 0.033411 | 0.47135  | 0.149451 |
| -0.04982 | 0.28264 | -0.00305 | 0.94757  | 0.01648  | 0.72244  | 0.009758 | 0.83342  | 0.05254  |
| -0.02093 | 0.65193 | 0.001856 | 0.96809  | 0.044504 | 0.33723  | 0.016171 | 0.72742  | 0.084888 |
| -0.01074 | 0.81694 | 0.044709 | 0.33501  | 0.055389 | 0.23221  | 0.027079 | 0.55941  | 0.060431 |

|          |         |          |          |          |          |          |          |          |
|----------|---------|----------|----------|----------|----------|----------|----------|----------|
| -0.05854 | 0.20667 | -0.14015 | 0.0024   | 0.00059  | 0.98985  | -0.19383 | 2.47E-05 | 0.192918 |
| -0.04316 | 0.35208 | -0.06764 | 0.14445  | 0.023113 | 0.61834  | -0.09976 | 0.03112  | 0.248183 |
| -0.084   | 0.06975 | -0.14401 | 0.00181  | -0.00278 | 0.95231  | -0.14386 | 0.00183  | 0.192027 |
| -0.09605 | 0.038   | -0.08181 | 0.07738  | -0.0319  | 0.49165  | -0.10109 | 0.02894  | 0.177762 |
| -0.06365 | 0.16968 | -0.11287 | 0.01467  | 0.066331 | 0.15239  | -0.09759 | 0.03499  | 0.273779 |
| -0.10429 | 0.02421 | 0.008695 | 0.85134  | -0.04069 | 0.38027  | 0.03031  | 0.51349  | 0.082942 |
| 0.008704 | 0.8512  | -0.01511 | 0.74468  | 0.132572 | 0.00411  | -0.04677 | 0.31316  | 0.190448 |
| 0.013193 | 0.77614 | -0.05548 | 0.23141  | -0.05499 | 0.23561  | 0.030045 | 0.51719  | 0.098761 |
| -0.06292 | 0.17462 | -0.11089 | 0.01652  | 0.05972  | 0.19766  | -0.05367 | 0.24707  | 0.285865 |
| -0.03625 | 0.43446 | -0.06378 | 0.1688   | 0.02625  | 0.5715   | -0.09233 | 0.04612  | 0.198465 |
| -0.05002 | 0.28076 | -0.12515 | 0.00677  | -0.09374 | 0.04289  | -0.10486 | 0.02344  | 0.024726 |
| -0.09815 | 0.03396 | -0.13903 | 0.0026   | -0.04676 | 0.31334  | -0.1192  | 0.00993  | 0.175882 |
| -0.06371 | 0.16927 | -0.05243 | 0.25814  | -0.01011 | 0.82756  | -0.05893 | 0.20367  | 0.10431  |
| 0.071777 | 0.12139 | 0.013384 | 0.77299  | 0.17868  | 0.0001   | -0.0095  | 0.8378   | 0.200604 |
| -0.06106 | 0.18779 | -0.08078 | 0.0812   | -0.09276 | 0.04511  | -0.11913 | 0.00997  | -0.07198 |
| 0.007211 | 0.8765  | 0.058157 | 0.20967  | 0.081847 | 0.07724  | -0.01248 | 0.78801  | 0.125081 |
| -0.04257 | 0.35872 | 0.003493 | 0.93999  | 0.008565 | 0.85354  | -0.04153 | 0.37055  | 0.047457 |
| -0.03455 | 0.45642 | -0.06541 | 0.15815  | -0.04952 | 0.28551  | -0.09811 | 0.03404  | 0.01352  |
| -0.0167  | 0.71888 | -0.07366 | 0.1119   | 0.036595 | 0.43013  | 0.004641 | 0.92033  | 0.306093 |
| -0.06001 | 0.19552 | -0.03436 | 0.45887  | -0.11414 | 0.01358  | -0.03176 | 0.4935   | -0.03876 |
| -0.02654 | 0.56724 | 0.091562 | 0.04798  | 0.032934 | 0.47771  | 0.04758  | 0.30487  | 0.033192 |
| -0.02048 | 0.65888 | -0.13161 | 0.00439  | -0.00779 | 0.86661  | -0.03337 | 0.47185  | 0.240073 |
| -0.02269 | 0.62477 | -0.0895  | 0.05325  | -0.06391 | 0.16797  | -0.0503  | 0.27806  | 0.069736 |
| -0.01365 | 0.76858 | 0.018623 | 0.68812  | 0.070765 | 0.12675  | 0.073105 | 0.11464  | 0.275846 |
| -0.05111 | 0.27031 | -0.06764 | 0.14441  | 0.021205 | 0.64763  | -0.10705 | 0.02068  | 0.060121 |
| -0.04196 | 0.36558 | 0.026868 | 0.56248  | -0.0346  | 0.45566  | -0.03447 | 0.45736  | 0.048048 |
| -0.01929 | 0.67756 | -0.00496 | 0.91483  | -0.04746 | 0.30608  | 0.059577 | 0.19873  | 0.054646 |
| -0.04065 | 0.38079 | -0.10199 | 0.02754  | -0.02074 | 0.65489  | -0.05661 | 0.22207  | 0.206741 |
| -0.02518 | 0.58734 | -0.06862 | 0.13868  | -0.02587 | 0.57709  | -0.09482 | 0.04053  | 0.154834 |
| -0.0907  | 0.05014 | -0.05212 | 0.26102  | -0.06309 | 0.17351  | -0.02304 | 0.61948  | 0.100014 |
| -0.09083 | 0.04981 | -0.21063 | 4.41E-06 | -0.05061 | 0.27503  | -0.17105 | 0.0002   | 0.270823 |
| -0.01722 | 0.71048 | -0.12657 | 0.00617  | 0.039619 | 0.39299  | -0.08337 | 0.07187  | 0.321743 |
| -0.0623  | 0.17895 | -0.13162 | 0.00438  | -0.27556 | 1.39E-09 | -0.13276 | 0.00405  | -0.1812  |
| -0.00768 | 0.86853 | 0.000149 | 0.99744  | -0.06528 | 0.15901  | 0.087777 | 0.05803  | 0.184028 |
| -0.06034 | 0.19301 | 0.005672 | 0.90271  | -0.04691 | 0.31175  | 0.082702 | 0.07419  | 0.140423 |
| 0.01187  | 0.79808 | -0.09449 | 0.04124  | 0.013396 | 0.77279  | -0.02642 | 0.56899  | 0.201018 |
| -0.02191 | 0.63672 | -0.04801 | 0.30052  | -0.01126 | 0.80827  | -0.01318 | 0.77644  | 0.15483  |
| 0.012127 | 0.79381 | -0.09361 | 0.04318  | 0.178767 | 0.0001   | -0.03146 | 0.49761  | 0.287027 |
| -0.05183 | 0.26362 | -0.13594 | 0.00324  | -0.04169 | 0.36869  | -0.18539 | 5.57E-05 | 0.187197 |
| -0.0405  | 0.38254 | -0.03469 | 0.45458  | -0.06301 | 0.17405  | -0.04208 | 0.36419  | -0.05561 |
| -0.03748 | 0.4191  | -0.0632  | 0.17273  | 0.021261 | 0.64675  | -0.10101 | 0.02906  | 0.158203 |
| -0.07622 | 0.09994 | -0.16013 | 0.00051  | -0.05813 | 0.2099   | -0.14086 | 0.00228  | 0.191208 |
| -0.03897 | 0.40081 | -0.11345 | 0.01417  | 0.084567 | 0.06787  | -0.14095 | 0.00227  | 0.192456 |
| 0.037987 | 0.41279 | 0.085696 | 0.06426  | 0.150162 | 0.00113  | 0.006302 | 0.89196  | 0.173056 |
| 0.071171 | 0.12458 | 0.056113 | 0.22616  | 0.102    | 0.02752  | 0.058893 | 0.20395  | 0.14554  |



|          |          |          |          |          |          |          |          |          |
|----------|----------|----------|----------|----------|----------|----------|----------|----------|
| -0.05857 | 0.20644  | -0.09938 | 0.03177  | -0.08128 | 0.0793   | -0.19334 | 2.59E-05 | 0.092859 |
| -0.1095  | 0.01792  | 0.011902 | 0.79754  | -0.22711 | 7.06E-07 | -0.0332  | 0.47416  | -0.22174 |
| 0.026893 | 0.56211  | -0.01504 | 0.74584  | 0.136622 | 0.00309  | -0.14445 | 0.00175  | -0.04557 |
| 0.063995 | 0.16739  | -0.00043 | 0.99261  | 0.098463 | 0.0334   | -0.09801 | 0.03422  | -0.09235 |
| 0.145263 | 0.00165  | 0.079047 | 0.08795  | 0.228369 | 6.10E-07 | -0.02839 | 0.54061  | -0.04536 |
| 0.022941 | 0.62096  | 0.040652 | 0.38076  | 0.16362  | 0.00038  | -0.05197 | 0.26237  | -0.06781 |
| 0.070629 | 0.12748  | 0.07056  | 0.12785  | 0.186373 | 5.07E-05 | -0.03313 | 0.47508  | -0.06413 |
| -0.02883 | 0.53432  | -0.15013 | 0.00114  | -0.08598 | 0.0634   | -0.08098 | 0.08045  | 0.054539 |
| 0.0808   | 0.08111  | 0.058817 | 0.20454  | 0.231128 | 4.42E-07 | -0.06234 | 0.17866  | -0.06047 |
| 0.191602 | 3.07E-05 | 0.31647  | 2.53E-12 | 0.385146 | 5.81E-18 | 0.148316 | 0.00131  | 0.054928 |
| -0.16184 | 0.00045  | 0.028017 | 0.54588  | -0.18223 | 7.47E-05 | 0.078059 | 0.09201  | 0.072254 |
| -0.17427 | 0.00015  | -0.05793 | 0.21148  | -0.0704  | 0.1287   | -0.1187  | 0.01025  | -0.06607 |
| 0.024529 | 0.59699  | 0.126982 | 0.006    | 0.232899 | 3.59E-07 | 0.003345 | 0.94253  | 0.016526 |
| 0.225221 | 8.77E-07 | 0.146672 | 0.00148  | 0.277073 | 1.12E-09 | 0.113445 | 0.01417  | 0.008328 |
| -0.08672 | 0.06114  | -0.04373 | 0.34566  | -0.00953 | 0.83731  | -0.025   | 0.58999  | 0.109784 |
| 0.067026 | 0.14812  | -0.05969 | 0.1979   | 0.033481 | 0.47042  | -0.06687 | 0.14909  | 0.114315 |
| 0.120357 | 0.00923  | 0.163614 | 0.00038  | 0.333445 | 1.37E-13 | 0.088395 | 0.05628  | 0.168573 |
| 0.0596   | 0.19856  | 0.043387 | 0.34952  | 0.044996 | 0.33192  | -0.00369 | 0.93657  | -0.0375  |
| 0.045378 | 0.32783  | -0.12424 | 0.00719  | 0.015339 | 0.74093  | -0.16844 | 0.00026  | 0.104221 |
| -0.02397 | 0.60537  | 0.122579 | 0.00801  | 0.125543 | 0.0066   | 0.01478  | 0.75007  | -0.18719 |
| 0.007474 | 0.87203  | -0.0777  | 0.0935   | -0.06351 | 0.17064  | -0.1147  | 0.01313  | -0.05188 |
| -0.03435 | 0.45901  | 0.095927 | 0.03824  | 0.094043 | 0.04222  | -0.00528 | 0.90943  | -0.15096 |
| -0.04828 | 0.29782  | -0.01689 | 0.71585  | 0.065255 | 0.15916  | -0.1083  | 0.01924  | 0.008546 |
| -0.08719 | 0.05974  | -0.19841 | 1.57E-05 | -0.17968 | 9.45E-05 | -0.13222 | 0.00421  | -0.04273 |
| 0.026808 | 0.56335  | -0.04957 | 0.2851   | -0.17413 | 0.00016  | -0.01172 | 0.80062  | -0.05251 |
| 0.034906 | 0.45173  | -0.03397 | 0.46392  | -0.07933 | 0.0868   | -0.07875 | 0.08917  | -0.06217 |
| 0.032107 | 0.48884  | -0.06999 | 0.13098  | 0.071614 | 0.12224  | -0.19257 | 2.79E-05 | -0.08893 |
| 0.025217 | 0.58673  | -0.04646 | 0.31646  | -0.05117 | 0.26983  | -0.09655 | 0.03701  | -0.02416 |
| -0.04392 | 0.34361  | -0.02987 | 0.51966  | 0.156438 | 0.00069  | -0.02948 | 0.52507  | 0.218355 |
| 0.014144 | 0.76048  | 0.045442 | 0.32715  | 0.027731 | 0.54998  | -0.03207 | 0.48933  | -0.12308 |
| 0.002812 | 0.95167  | -0.09467 | 0.04086  | 0.0453   | 0.32866  | -0.21262 | 3.56E-06 | 0.00253  |
| -0.01749 | 0.70613  | 0.089252 | 0.05393  | 0.176689 | 0.00012  | 0.058355 | 0.20812  | -0.03362 |
| -0.01483 | 0.74919  | 0.005325 | 0.90862  | 0.124037 | 0.00728  | -0.01048 | 0.82124  | 0.037688 |
| 0.202479 | 1.04E-05 | 0.097372 | 0.03541  | 0.249031 | 4.94E-08 | 0.090637 | 0.05029  | 0.162977 |
| 0.087361 | 0.05924  | 0.143093 | 0.00194  | 0.095793 | 0.03852  | 0.022225 | 0.63189  | -0.10737 |
| 0.058876 | 0.20408  | 0.005497 | 0.9057   | 0.091025 | 0.04931  | -0.08694 | 0.06047  | 0.043472 |
| 0.111558 | 0.01587  | -0.04628 | 0.31832  | 0.007875 | 0.86523  | -0.10966 | 0.01776  | -0.01954 |
| 0.038197 | 0.4102   | 0.034947 | 0.45119  | 0.1674   | 0.00028  | 0.008698 | 0.8513   | 0.151195 |
| 0.010204 | 0.82594  | -0.02308 | 0.61892  | 0.026873 | 0.5624   | -0.00089 | 0.98465  | 0.135649 |
| 0.084071 | 0.0695   | 0.131869 | 0.00431  | 0.196898 | 1.82E-05 | 0.094573 | 0.04107  | 0.19255  |
| 0.042299 | 0.36174  | -0.05176 | 0.26433  | 0.010553 | 0.82007  | -0.09349 | 0.04345  | -0.01036 |
| 0.046423 | 0.3168   | 0.027223 | 0.55733  | 0.116411 | 0.01182  | -0.04623 | 0.31886  | -0.08481 |
| 0.103217 | 0.02571  | 0.066014 | 0.15436  | 0.087772 | 0.05805  | 0.017245 | 0.71012  | 0.068431 |
| 0.039602 | 0.39319  | 0.091516 | 0.0481   | -0.00434 | 0.92553  | 0.102915 | 0.02615  | 0.125481 |
| 0.108908 | 0.01856  | -0.09646 | 0.03718  | -0.00851 | 0.85454  | -0.10708 | 0.02064  | 0.005408 |

|          |         |          |         |          |          |          |          |          |
|----------|---------|----------|---------|----------|----------|----------|----------|----------|
| -0.04711 | 0.30972 | 0.04939  | 0.28682 | -0.00672 | 0.88484  | -0.08656 | 0.06161  | -0.22254 |
| -0.10179 | 0.02784 | 0.022534 | 0.62717 | -0.0744  | 0.10833  | 0.018523 | 0.68971  | 0.001758 |
| 0.146407 | 0.00151 | 0.095529 | 0.03906 | 0.235474 | 2.64E-07 | 0.035611 | 0.44265  | -0.00636 |
| -0.00889 | 0.848   | 0.095457 | 0.0392  | 0.142334 | 0.00205  | -0.00558 | 0.90433  | 0.03161  |
| 0.02018  | 0.66359 | 0.008049 | 0.86228 | 0.097692 | 0.03481  | -0.07069 | 0.12714  | -0.16489 |
| 0.079981 | 0.08425 | 0.034422 | 0.45803 | 0.008422 | 0.85596  | 0.048388 | 0.29673  | 0.075612 |
| -0.1646  | 0.00035 | -0.07374 | 0.11154 | -0.09067 | 0.05021  | 0.072742 | 0.11645  | 0.266574 |
| -0.07564 | 0.10258 | -0.13779 | 0.00285 | -0.24381 | 9.53E-08 | -0.03216 | 0.48817  | -0.00144 |
| 0.084794 | 0.06713 | 0.020015 | 0.66617 | 0.244746 | 8.48E-08 | -0.02675 | 0.56424  | 0.097275 |
| -0.12035 | 0.00923 | -0.038   | 0.4126  | -0.05373 | 0.24648  | 0.064227 | 0.16585  | 0.188519 |
| 0.152192 | 0.00097 | 0.052583 | 0.25677 | 0.309239 | 8.32E-12 | -0.01751 | 0.70591  | 0.061122 |
| 0.105804 | 0.02221 | 0.020743 | 0.65479 | 0.101293 | 0.02862  | -0.07862 | 0.0897   | 0.030811 |
| 0.113305 | 0.01429 | 0.128431 | 0.00544 | 0.300796 | 3.20E-11 | -0.00027 | 0.99535  | -0.03186 |
| -0.12029 | 0.00927 | -0.09123 | 0.04879 | -0.08004 | 0.08401  | -0.12375 | 0.00742  | -0.15962 |
| 0.079215 | 0.08728 | 0.06666  | 0.15036 | 0.148321 | 0.00131  | 0.011425 | 0.8055   | 0.021346 |
| 0.02249  | 0.62785 | 0.036988 | 0.42519 | 0.109646 | 0.01777  | -0.06068 | 0.19051  | -0.01987 |
| -0.04092 | 0.37766 | 0.126626 | 0.00614 | 0.165581 | 0.00033  | 0.002477 | 0.95743  | -0.16346 |
| -0.08019 | 0.08346 | -0.09138 | 0.04843 | -0.01991 | 0.66777  | -0.1243  | 0.00716  | 0.026304 |
| -0.07455 | 0.10764 | -0.00304 | 0.94769 | -0.15312 | 0.0009   | 0.114456 | 0.01333  | 0.021428 |
| 0.000103 | 0.99822 | -0.12044 | 0.00918 | -0.0205  | 0.65857  | -0.11244 | 0.01506  | 0.069786 |
| -0.00412 | 0.92933 | -0.05687 | 0.21996 | 0.010244 | 0.82526  | -0.11964 | 0.00966  | -0.09208 |
| 0.101949 | 0.0276  | 0.059606 | 0.19852 | -0.02314 | 0.61794  | 0.004543 | 0.922    | -0.2779  |
| 0.122103 | 0.00825 | 0.006331 | 0.89147 | 0.207744 | 5.99E-06 | -0.08671 | 0.06115  | 0.086408 |
| 0.027084 | 0.55934 | -0.09479 | 0.04061 | 0.05261  | 0.25652  | -0.19197 | 2.96E-05 | -0.07115 |
| 0.016718 | 0.71859 | -0.08845 | 0.05613 | 0.074242 | 0.10909  | -0.13447 | 0.0036   | -0.05228 |
| 0.087428 | 0.05904 | 0.036622 | 0.42978 | 0.119875 | 0.00952  | -0.01569 | 0.73522  | 0.119508 |
| 0.071938 | 0.12055 | 0.016109 | 0.72844 | 0.098925 | 0.03257  | -0.09142 | 0.04834  | -0.04333 |
| 0.050852 | 0.27278 | 0.033694 | 0.4676  | 0.179148 | 9.92E-05 | 0.078511 | 0.09013  | 0.255629 |
| 0.029529 | 0.52442 | 0.013414 | 0.77249 | 0.009746 | 0.83362  | -0.09787 | 0.03447  | -0.12499 |
| -0.07733 | 0.0951  | -0.0996  | 0.03141 | -0.21206 | 3.78E-06 | -0.06431 | 0.16531  | -0.03801 |
| 0.001985 | 0.96588 | 0.042438 | 0.36016 | 0.081574 | 0.07823  | -0.09768 | 0.03483  | -0.10901 |
| 0.132289 | 0.00419 | -0.08857 | 0.05579 | 0.086192 | 0.06273  | -0.12476 | 0.00694  | 0.102099 |
| -0.04426 | 0.33991 | 0.087348 | 0.05928 | -0.05263 | 0.25638  | 0.168079 | 0.00026  | 0.137046 |
| 0.053844 | 0.24552 | 0.101016 | 0.02906 | 0.241036 | 1.34E-07 | -0.03529 | 0.44676  | -0.13371 |
| 0.073304 | 0.11365 | 0.172953 | 0.00017 | 0.197496 | 1.72E-05 | 0.1642   | 0.00037  | 0.063516 |
| 0.062355 | 0.17856 | 0.113699 | 0.01395 | 0.167713 | 0.00027  | 0.020776 | 0.65429  | -0.11827 |
| 0.095525 | 0.03906 | -0.03614 | 0.43595 | 0.115112 | 0.0128   | -0.05204 | 0.26167  | -0.00853 |
| -0.08866 | 0.05555 | -0.02443 | 0.59848 | -0.14459 | 0.00173  | 0.046745 | 0.31345  | -0.06279 |
| 0.012399 | 0.78929 | 0.012798 | 0.78267 | 0.099659 | 0.0313   | -0.07371 | 0.11167  | 0.034639 |
| 0.035277 | 0.44694 | -0.06612 | 0.15372 | 0.042659 | 0.35766  | -0.16141 | 0.00046  | -0.09272 |
| 0.041104 | 0.37548 | -0.03395 | 0.46422 | 0.016265 | 0.72591  | -0.01948 | 0.6746   | 0.078798 |
| -0.06533 | 0.1587  | -0.0358  | 0.44016 | -0.13729 | 0.00295  | 0.104253 | 0.02426  | -0.02647 |
| -0.06588 | 0.15522 | -0.01601 | 0.73003 | -0.09207 | 0.04675  | 0.051204 | 0.26946  | 0.11909  |
| 0.006736 | 0.88456 | 0.148022 | 0.00134 | 0.105645 | 0.02241  | 0.070759 | 0.12678  | -0.14454 |
| 0.038505 | 0.40643 | -0.02188 | 0.63713 | 0.150037 | 0.00115  | -0.11227 | 0.01521  | 0.037522 |

|          |          |          |          |          |          |          |          |          |
|----------|----------|----------|----------|----------|----------|----------|----------|----------|
| 0.057306 | 0.21642  | 0.008751 | 0.8504   | -0.04042 | 0.38349  | -0.04129 | 0.37337  | -0.09489 |
| -0.08227 | 0.07572  | -0.0963  | 0.03749  | 0.0114   | 0.80591  | -0.12544 | 0.00664  | -0.00577 |
| 0.103719 | 0.025    | 0.111008 | 0.0164   | 0.179952 | 9.22E-05 | 0.029133 | 0.53     | -0.13913 |
| 0.034611 | 0.45556  | 0.038185 | 0.41035  | 0.15976  | 0.00053  | -0.06702 | 0.14819  | -0.08517 |
| -0.01799 | 0.69816  | 0.082077 | 0.0764   | 0.124663 | 0.00699  | 0.04567  | 0.32472  | 0.213601 |
| 0.123892 | 0.00735  | 0.029729 | 0.5216   | 0.205589 | 7.51E-06 | -0.05025 | 0.27847  | 0.026027 |
| 0.056049 | 0.22669  | -0.0446  | 0.33624  | 0.087791 | 0.05799  | -0.12226 | 0.00817  | -0.0535  |
| -0.03255 | 0.48288  | -0.07512 | 0.10494  | 0.00786  | 0.86548  | -0.17853 | 0.0001   | -0.07301 |
| -0.09381 | 0.04273  | -0.11534 | 0.01263  | 0.013838 | 0.76551  | -0.10154 | 0.02823  | 0.108428 |
| -0.2239  | 1.02E-06 | -0.31364 | 4.05E-12 | -0.40715 | 4.49E-20 | -0.24669 | 6.65E-08 | -0.06854 |
| -0.04753 | 0.3054   | -0.07227 | 0.11884  | -0.01988 | 0.66836  | -0.1041  | 0.02447  | -0.02755 |
| 0.050603 | 0.27513  | -0.16009 | 0.00052  | -0.00509 | 0.91262  | -0.22897 | 5.69E-07 | -0.0666  |
| -0.0061  | 0.89536  | -0.11904 | 0.01003  | -0.01847 | 0.6906   | -0.10747 | 0.02018  | -0.00189 |
| -0.1675  | 0.00028  | -0.07027 | 0.12943  | -0.03803 | 0.41226  | 0.041144 | 0.37502  | 0.200036 |
| 0.039792 | 0.39092  | -0.11703 | 0.01138  | 0.041839 | 0.36699  | -0.15389 | 0.00085  | 0.104097 |
| -0.09968 | 0.03126  | -0.12301 | 0.00779  | -0.00398 | 0.93171  | -0.13494 | 0.00348  | -0.03507 |
| 0.034902 | 0.45178  | -0.07461 | 0.10732  | 0.096283 | 0.03753  | -0.11319 | 0.01439  | 0.217587 |
| 0.031678 | 0.49467  | -0.09995 | 0.0308   | 0.046877 | 0.31208  | -0.15775 | 0.00062  | 0.101566 |
| 0.203207 | 9.61E-06 | 0.31401  | 3.81E-12 | 0.423845 | 8.75E-22 | 0.386257 | 4.59E-18 | 0.15819  |
| 0.013917 | 0.76422  | 0.015591 | 0.73684  | 0.060703 | 0.19037  | 0.031524 | 0.49677  | -0.01494 |
| 0.159008 | 0.00056  | 0.017052 | 0.71323  | 0.249093 | 4.90E-08 | -0.03439 | 0.45841  | 0.007358 |
| -0.1229  | 0.00784  | -0.06113 | 0.18724  | -0.2154  | 2.63E-06 | -0.09018 | 0.05148  | 0.007897 |
| -0.19147 | 3.11E-05 | -0.17836 | 0.00011  | -0.32539 | 5.59E-13 | -0.14403 | 0.00181  | -0.12053 |
| 0.008041 | 0.86242  | -0.12861 | 0.00538  | -0.01617 | 0.72741  | -0.11627 | 0.01192  | -0.03225 |
| 0.022206 | 0.63219  | 0.296669 | 6.08E-11 | 0.238075 | 1.93E-07 | 0.201103 | 1.19E-05 | -0.001   |
| 0.116241 | 0.01194  | 0.030814 | 0.50652  | 0.10189  | 0.02769  | -0.04834 | 0.29725  | -0.01612 |
| 0.042355 | 0.36111  | -0.00554 | 0.90499  | 0.092122 | 0.04663  | -0.08759 | 0.05857  | -0.06597 |
| 0.016493 | 0.72223  | 0.162812 | 0.00041  | 0.231432 | 4.27E-07 | -0.00631 | 0.89189  | -0.13996 |
| -0.04133 | 0.37286  | -0.04785 | 0.30213  | -0.10905 | 0.01841  | 0.047459 | 0.30611  | 0.005368 |
| -0.02838 | 0.54075  | -0.06156 | 0.18421  | 0.101382 | 0.02848  | -0.16141 | 0.00046  | 0.068723 |
| 0.009642 | 0.83538  | -0.01962 | 0.67242  | 0.017948 | 0.69886  | -0.067   | 0.14831  | -0.05129 |
| -0.09392 | 0.0425   | 0.065561 | 0.15721  | -0.19785 | 1.66E-05 | 0.084094 | 0.06943  | -0.07357 |
| -0.10283 | 0.02627  | 0.01884  | 0.68468  | -0.1541  | 0.00083  | 0.024293 | 0.60053  | -0.08037 |
| 0.024841 | 0.59234  | -0.03549 | 0.44418  | -0.00212 | 0.96361  | -0.09856 | 0.03322  | -0.02495 |
| -0.01238 | 0.78957  | -0.0139  | 0.76448  | -0.08347 | 0.07151  | 0.101282 | 0.02863  | 0.033848 |
| -0.04065 | 0.38077  | 0.08883  | 0.05508  | -0.10759 | 0.02004  | 0.23024  | 4.91E-07 | -0.02014 |
| 0.036064 | 0.43685  | -0.08504 | 0.06633  | -0.02758 | 0.5522   | -0.16415 | 0.00037  | 0.032388 |
| 0.064439 | 0.16445  | 0.05027  | 0.27831  | 0.185392 | 5.56E-05 | -0.01558 | 0.73707  | 0.145612 |
| 0.174175 | 0.00016  | 0.188414 | 4.18E-05 | 0.443624 | 6.14E-24 | 0.133014 | 0.00398  | 0.058535 |
| 0.059603 | 0.19854  | -0.09526 | 0.03961  | 0.074967 | 0.10566  | -0.11344 | 0.01418  | 0.070285 |
| 0.026005 | 0.5751   | -0.01697 | 0.7146   | 0.134429 | 0.00361  | -0.11928 | 0.00988  | 0.007629 |
| 0.077909 | 0.09263  | 0.026369 | 0.56976  | 0.037204 | 0.42249  | 0.031448 | 0.49781  | 0.072499 |
| -0.16927 | 0.00024  | -0.01371 | 0.76764  | -0.19986 | 1.35E-05 | -0.02266 | 0.62526  | -0.07654 |
| 0.073014 | 0.11509  | 0.297449 | 5.39E-11 | 0.408058 | 3.65E-20 | 0.288513 | 2.10E-10 | 0.117686 |
| 0.023057 | 0.61919  | -0.03467 | 0.45479  | 0.105662 | 0.02239  | -0.146   | 0.00156  | -0.06666 |

|          |          |          |          |          |          |          |          |          |
|----------|----------|----------|----------|----------|----------|----------|----------|----------|
| -0.06376 | 0.16897  | -0.06116 | 0.18701  | -0.14243 | 0.00203  | -0.04625 | 0.31864  | 0.051386 |
| -0.02738 | 0.55509  | -0.18202 | 7.62E-05 | -0.20293 | 9.89E-06 | -0.19368 | 2.51E-05 | -0.13144 |
| 0.088272 | 0.05663  | -0.0612  | 0.18678  | 0.073721 | 0.11161  | -0.14789 | 0.00135  | 0.093924 |
| -0.00701 | 0.87998  | -0.05081 | 0.27318  | 0.094815 | 0.04055  | -0.17783 | 0.00011  | 0.076604 |
| 0.048192 | 0.29869  | -0.11579 | 0.01228  | 0.022565 | 0.6267   | -0.16108 | 0.00048  | -0.04773 |
| -0.01422 | 0.75926  | 0.057195 | 0.21732  | -0.02275 | 0.62394  | 0.128979 | 0.00525  | 0.068042 |
| 0.018137 | 0.69586  | -0.00335 | 0.94236  | 0.006699 | 0.8852   | -0.02069 | 0.65557  | -0.10426 |
| 0.01075  | 0.81678  | -0.04779 | 0.30272  | 0.090243 | 0.0513   | -0.11066 | 0.01674  | -0.0445  |
| -0.00145 | 0.97513  | -0.09125 | 0.04875  | 0.041313 | 0.37305  | -0.17814 | 0.00011  | -0.05271 |
| -0.0254  | 0.58399  | -0.01307 | 0.77825  | -0.10091 | 0.02923  | 0.012224 | 0.7922   | 0.050738 |
| 0.013433 | 0.77218  | 0.000782 | 0.98655  | 0.020545 | 0.65789  | -0.01801 | 0.69785  | -0.01311 |
| 0.059121 | 0.2022   | -0.08023 | 0.08329  | 0.10054  | 0.02983  | -0.11217 | 0.0153   | 0.176107 |
| 0.207139 | 6.38E-06 | 0.139477 | 0.00252  | 0.280086 | 7.26E-10 | 0.188383 | 4.19E-05 | 0.05066  |
| 0.082348 | 0.07543  | 0.080215 | 0.08334  | 0.231127 | 4.42E-07 | 0.205853 | 7.30E-06 | 0.207215 |
| 0.148647 | 0.00127  | 0.059518 | 0.19918  | 0.223139 | 1.11E-06 | 0.053683 | 0.24694  | 0.240502 |
| -0.1157  | 0.01235  | 0.169568 | 0.00023  | 0.013145 | 0.77693  | 0.199849 | 1.35E-05 | 0.082313 |
| 0.057676 | 0.21347  | 0.033122 | 0.47519  | 0.088119 | 0.05706  | -0.04825 | 0.29814  | -0.02984 |
| 0.037607 | 0.41747  | 0.008802 | 0.84953  | 0.157685 | 0.00063  | -0.06773 | 0.14391  | -0.01358 |
| -0.05776 | 0.21283  | -0.20897 | 5.26E-06 | -0.0737  | 0.1117   | -0.21091 | 4.28E-06 | 0.107963 |
| 0.112714 | 0.01481  | 0.074609 | 0.10735  | 0.083517 | 0.07137  | 0.044477 | 0.33753  | -0.017   |
| 0.14824  | 0.00132  | 0.21639  | 2.36E-06 | 0.354244 | 2.97E-15 | 0.231308 | 4.33E-07 | 0.14698  |
| 0.065913 | 0.15499  | 0.131325 | 0.00447  | 0.222839 | 1.15E-06 | 0.058734 | 0.20518  | 0.098366 |
| 0.076453 | 0.09891  | 0.134417 | 0.00361  | 0.255343 | 2.19E-08 | -0.03105 | 0.50332  | 0.001643 |
| 0.05167  | 0.26513  | -0.10294 | 0.02612  | 0.035074 | 0.44955  | -0.16621 | 0.00031  | 0.117521 |
| -0.04776 | 0.30308  | -0.20398 | 8.87E-06 | -0.08338 | 0.07182  | -0.26504 | 6.01E-09 | 0.019599 |
| -0.00756 | 0.87063  | 0.175631 | 0.00014  | 0.123    | 0.00779  | 0.057955 | 0.21126  | -0.19826 |
| 0.045209 | 0.32964  | 0.073069 | 0.11482  | 0.148783 | 0.00126  | -0.08708 | 0.06007  | -0.08412 |
| -0.01852 | 0.68975  | 0.005105 | 0.91239  | 0.104019 | 0.02458  | 0.049199 | 0.2887   | 0.139623 |
| 0.03148  | 0.49737  | 0.070488 | 0.12824  | 0.117916 | 0.01076  | -0.00065 | 0.98887  | -0.04956 |
| 0.089043 | 0.05449  | 0.170355 | 0.00022  | 0.123894 | 0.00735  | 0.20866  | 5.44E-06 | -0.01164 |
| 0.031411 | 0.49831  | -0.03501 | 0.45033  | 0.081175 | 0.0797   | -0.09261 | 0.04547  | 0.083769 |
| 0.008907 | 0.84776  | -0.10913 | 0.01832  | -0.05693 | 0.21942  | -0.17667 | 0.00012  | -0.16039 |
| -0.03702 | 0.42483  | 0.071538 | 0.12264  | -0.19214 | 2.91E-05 | 0.048194 | 0.29866  | -0.10977 |
| -0.1253  | 0.0067   | 0.018756 | 0.68601  | -0.23351 | 3.34E-07 | -0.0053  | 0.90906  | -0.0185  |
| 0.029052 | 0.53114  | -0.02207 | 0.63426  | 0.040006 | 0.38837  | -0.12074 | 0.009    | -0.12513 |
| -0.05613 | 0.22599  | -0.012   | 0.79591  | -0.0963  | 0.0375   | 0.045919 | 0.32209  | 0.138673 |
| 0.028005 | 0.54605  | 0.138277 | 0.00275  | 0.126693 | 0.00611  | 0.077445 | 0.0946   | -0.06771 |
| 0.02951  | 0.52468  | 0.021439 | 0.644    | 0.029893 | 0.51932  | -0.06757 | 0.14487  | -0.09676 |
| 0.010058 | 0.82838  | 0.077044 | 0.09632  | -0.02706 | 0.5597   | -0.00083 | 0.98574  | -0.12195 |
| 0.048049 | 0.30013  | 0.021805 | 0.63835  | 0.154476 | 0.00081  | -0.10994 | 0.01747  | -0.08678 |
| 0.004639 | 0.92036  | 0.31786  | 2.01E-12 | 0.340521 | 3.84E-14 | 0.407666 | 3.99E-20 | 0.286406 |
| 0.100041 | 0.03065  | 0.401457 | 1.64E-19 | 0.505674 | 1.10E-31 | 0.425058 | 6.52E-22 | 0.268064 |
| 0.011777 | 0.79963  | 0.010833 | 0.81539  | -0.01418 | 0.75986  | -0.00432 | 0.92588  | -0.05864 |
| -0.08053 | 0.08214  | -0.17614 | 0.00013  | -0.10125 | 0.02868  | -0.1153  | 0.01265  | 0.193206 |
| -0.03614 | 0.4359   | -0.16746 | 0.00028  | -0.03467 | 0.45482  | -0.09971 | 0.03122  | 0.079611 |

|          |          |          |          |          |          |          |          |          |
|----------|----------|----------|----------|----------|----------|----------|----------|----------|
| 0.065673 | 0.1565   | 0.048137 | 0.29924  | 0.159123 | 0.00056  | 0.048329 | 0.29731  | 0.107031 |
| 0.05579  | 0.22885  | -0.11829 | 0.01052  | -0.07761 | 0.09388  | -0.11602 | 0.01211  | -0.01675 |
| 0.078621 | 0.08968  | 0.022957 | 0.62071  | 0.132875 | 0.00402  | -0.08594 | 0.0635   | -0.07005 |
| 0.131411 | 0.00445  | 0.137712 | 0.00286  | 0.244562 | 8.68E-08 | -0.01117 | 0.80975  | -0.00968 |
| 0.019377 | 0.6762   | 0.035599 | 0.44279  | 0.129859 | 0.00494  | -0.03828 | 0.40917  | -0.05856 |
| 0.134043 | 0.00371  | 0.047046 | 0.31034  | 0.164335 | 0.00036  | 0.061882 | 0.18188  | 0.246694 |
| 0.136708 | 0.00307  | 0.084704 | 0.06742  | 0.140338 | 0.00237  | 0.018696 | 0.68696  | 0.072724 |
| 0.14236  | 0.00204  | -0.0505  | 0.27609  | 0.148271 | 0.00131  | -0.06913 | 0.13578  | 0.058122 |
| 0.034746 | 0.4538   | 0.080616 | 0.08181  | 0.122827 | 0.00788  | -0.05355 | 0.24813  | -0.06012 |
| 0.061886 | 0.18185  | 0.007831 | 0.86598  | -0.01343 | 0.77224  | 0.002125 | 0.96347  | -0.07064 |
| 0.035419 | 0.4451   | -0.15193 | 0.00099  | -0.0227  | 0.62459  | -0.17067 | 0.00021  | 0.034176 |
| 0.023533 | 0.61198  | 0.01068  | 0.81795  | 0.118402 | 0.01044  | -0.07131 | 0.12383  | -0.08003 |
| 0.018941 | 0.68309  | 0.004635 | 0.92043  | -0.01876 | 0.68588  | -0.03034 | 0.51312  | -0.12395 |
| 0.012486 | 0.78785  | 0.001864 | 0.96795  | 0.085576 | 0.06464  | -0.12649 | 0.0062   | -0.13742 |
| -0.01342 | 0.77233  | -0.04763 | 0.30441  | -0.0395  | 0.39444  | -0.13511 | 0.00344  | -0.14859 |
| 0.03809  | 0.41152  | 0.063068 | 0.17363  | 0.091181 | 0.04892  | -0.03223 | 0.48724  | -0.13284 |
| 0.133611 | 0.00382  | 0.025558 | 0.58169  | 0.172147 | 0.00019  | -0.07086 | 0.12625  | -0.0446  |
| 0.07558  | 0.10284  | -0.00314 | 0.94606  | 0.115843 | 0.01224  | -0.13794 | 0.00282  | -0.06901 |
| 0.042969 | 0.35418  | 0.030985 | 0.50416  | 0.096142 | 0.03781  | 0.046985 | 0.31097  | 0.049106 |
| 0.018627 | 0.68806  | -0.04771 | 0.30352  | 0.068654 | 0.1385   | -0.13338 | 0.00388  | 0.040779 |
| 0.021235 | 0.64716  | 0.045215 | 0.32957  | 0.222613 | 1.18E-06 | -0.09425 | 0.04178  | -0.02997 |
| 0.044295 | 0.33952  | 0.199294 | 1.43E-05 | 0.229347 | 5.45E-07 | 0.149723 | 0.00117  | 0.066646 |
| -0.14222 | 0.00206  | -0.05933 | 0.20064  | -0.14775 | 0.00137  | 0.111275 | 0.01614  | 0.224408 |
| 0.051606 | 0.26572  | -0.02343 | 0.6135   | 0.064871 | 0.16164  | -0.10065 | 0.02965  | -0.09219 |
| -0.01929 | 0.67764  | -0.10836 | 0.01917  | 0.029624 | 0.52308  | -0.1829  | 7.03E-05 | 0.082395 |
| -0.06846 | 0.13962  | -0.13093 | 0.0046   | -0.11554 | 0.01247  | -0.16549 | 0.00033  | 0.019893 |
| -0.00729 | 0.87509  | -0.11578 | 0.01229  | -0.00497 | 0.91474  | -0.07813 | 0.0917   | 0.21331  |
| -0.05582 | 0.22861  | 0.057265 | 0.21675  | -0.16924 | 0.00024  | 0.000528 | 0.99093  | -0.055   |
| -0.12179 | 0.00842  | -0.1462  | 0.00153  | -0.18354 | 6.62E-05 | -0.1661  | 0.00031  | 0.089476 |
| -0.16427 | 0.00036  | -0.05724 | 0.21694  | -0.071   | 0.12548  | -0.03174 | 0.49377  | 0.07598  |
| -0.00135 | 0.97674  | -0.02334 | 0.61484  | 0.068837 | 0.13745  | -0.1146  | 0.01321  | -0.05519 |
| 0.045242 | 0.32928  | 0.152399 | 0.00095  | 0.261472 | 9.73E-09 | 0.012406 | 0.78917  | -0.03399 |
| 0.062727 | 0.17598  | 0.174285 | 0.00015  | 0.29137  | 1.37E-10 | 0.067229 | 0.14689  | 0.033861 |
| 0.021519 | 0.64276  | 0.051228 | 0.26925  | 0.037574 | 0.41788  | -0.04786 | 0.30206  | -0.12541 |
| 0.02896  | 0.53245  | 0.00419  | 0.92804  | 0.04964  | 0.28439  | -0.07735 | 0.09502  | -0.09774 |
| 0.061599 | 0.1839   | -0.00485 | 0.91677  | 0.056151 | 0.22584  | -0.01371 | 0.76764  | -0.04335 |
| 0.089089 | 0.05437  | 0.174445 | 0.00015  | 0.217625 | 2.06E-06 | 0.087104 | 0.05999  | -0.00368 |
| -0.0703  | 0.12927  | -0.03386 | 0.46539  | -0.16308 | 0.0004   | 0.009199 | 0.84283  | -0.00472 |
| 0.018341 | 0.6926   | 0.019229 | 0.67853  | 0.052873 | 0.25415  | -0.0744  | 0.10833  | -0.07677 |
| -0.0485  | 0.29561  | 0.043084 | 0.3529   | 0.037592 | 0.41766  | 0.145678 | 0.0016   | 0.026217 |
| 0.074129 | 0.10963  | 0.068077 | 0.14186  | 0.102814 | 0.0263   | -0.02686 | 0.56264  | 0.064281 |
| 0.199507 | 1.40E-05 | 0.143185 | 0.00192  | 0.29719  | 5.61E-11 | 0.077042 | 0.09633  | 0.039519 |
| -0.05381 | 0.24582  | -0.03037 | 0.51261  | 0.052693 | 0.25577  | -0.11176 | 0.01569  | 0.023534 |
| 0.160731 | 0.00049  | 0.017671 | 0.70329  | 0.170882 | 0.00021  | -0.01825 | 0.69413  | 0.079008 |
| 0.064517 | 0.16394  | -0.09448 | 0.04126  | 0.001671 | 0.97128  | -0.14187 | 0.00212  | 0.067244 |

|          |          |          |          |          |          |          |          |          |
|----------|----------|----------|----------|----------|----------|----------|----------|----------|
| -0.01162 | 0.80225  | 0.097168 | 0.0358   | 0.090561 | 0.05049  | 0.02582  | 0.57782  | -0.027   |
| -0.02071 | 0.65529  | 0.047651 | 0.30415  | 0.097277 | 0.0356   | 0.077184 | 0.09572  | 0.182489 |
| 0.222957 | 1.14E-06 | -0.01734 | 0.70865  | 0.163546 | 0.00039  | -0.06107 | 0.18768  | -0.06401 |
| 0.043019 | 0.35362  | 0.219341 | 1.70E-06 | 0.064976 | 0.16096  | 0.192899 | 2.71E-05 | 0.072325 |
| -0.03546 | 0.44461  | 0.100305 | 0.03021  | 0.223486 | 1.07E-06 | 0.049809 | 0.28275  | 0.00454  |
| 0.02301  | 0.61991  | -0.08234 | 0.07547  | 0.02541  | 0.58387  | -0.13964 | 0.00249  | -0.03197 |
| 0.06627  | 0.15276  | -0.00403 | 0.93073  | 0.057742 | 0.21295  | -0.01673 | 0.71841  | 0.053908 |
| 0.040093 | 0.38734  | 0.041995 | 0.36521  | 0.121008 | 0.00885  | -0.03931 | 0.3967   | -0.0604  |
| 0.271627 | 2.42E-09 | 0.119227 | 0.00991  | 0.177123 | 0.00012  | 0.040794 | 0.3791   | -0.05923 |
| -0.01079 | 0.81606  | 0.281849 | 5.62E-10 | 0.203338 | 9.48E-06 | 0.170703 | 0.00021  | -0.11351 |
| 0.205673 | 7.44E-06 | 0.206606 | 6.75E-06 | 0.296967 | 5.81E-11 | 0.189548 | 3.75E-05 | 0.004438 |
| 0.099884 | 0.03092  | 0.323475 | 7.77E-13 | 0.361421 | 7.41E-16 | 0.158412 | 0.00059  | 0.016389 |
| -0.02929 | 0.52779  | 0.141627 | 0.00216  | 0.208939 | 5.28E-06 | 0.073211 | 0.11411  | 0.055104 |
| 0.118795 | 0.01019  | 0.008782 | 0.84988  | 0.108945 | 0.01852  | -0.02687 | 0.56242  | -0.07156 |
| 0.193283 | 2.61E-05 | 0.064906 | 0.16141  | 0.350122 | 6.49E-15 | -0.02277 | 0.62353  | 0.035243 |
| 0.063962 | 0.16761  | -0.02127 | 0.64666  | 0.032231 | 0.48716  | -0.02287 | 0.62202  | 0.014632 |
| -0.02602 | 0.57487  | -0.11098 | 0.01642  | 0.056946 | 0.21933  | -0.23253 | 3.75E-07 | -0.0506  |
| -0.05122 | 0.26931  | 0.186488 | 5.02E-05 | 0.092086 | 0.04671  | 0.163356 | 0.00039  | 0.008661 |
| 0.021212 | 0.64752  | 0.05097  | 0.27166  | 0.132075 | 0.00425  | -0.08581 | 0.06391  | -0.13853 |
| 0.095199 | 0.03974  | -0.08081 | 0.08106  | -0.02431 | 0.60032  | -0.04807 | 0.29996  | -0.02818 |
| 0.073564 | 0.11237  | 0.094397 | 0.04145  | 0.084282 | 0.0688   | 0.064227 | 0.16585  | 0.100358 |
| 0.033741 | 0.46697  | -0.03759 | 0.41775  | 0.025457 | 0.58318  | -0.11415 | 0.01358  | -0.07116 |
| -0.00897 | 0.84678  | -0.24326 | 1.02E-07 | -0.03744 | 0.41949  | -0.26535 | 5.76E-09 | 0.037014 |
| 0.113614 | 0.01403  | 0.265967 | 5.29E-09 | 0.366413 | 2.76E-16 | 0.114315 | 0.01344  | 0.002506 |
| 0.021287 | 0.64636  | -0.05114 | 0.2701   | 0.170713 | 0.00021  | -0.09827 | 0.03374  | 0.108291 |
| 0.180016 | 9.16E-05 | 0.024418 | 0.59865  | 0.110741 | 0.01666  | 0.035946 | 0.43836  | 0.013427 |
| 0.064482 | 0.16417  | -0.01524 | 0.74251  | 0.138947 | 0.00262  | -0.13384 | 0.00376  | -0.00615 |
| 0.020901 | 0.65233  | -0.07678 | 0.09748  | -0.0093  | 0.84113  | -0.18232 | 7.41E-05 | -0.29678 |
| -0.00631 | 0.8919   | -0.00371 | 0.93627  | -0.07135 | 0.12361  | -0.00977 | 0.83319  | -0.01887 |
| -0.05701 | 0.21884  | 0.034867 | 0.45224  | -0.00831 | 0.85782  | 0.144207 | 0.00178  | 0.016569 |
| 0.104756 | 0.02358  | 0.069029 | 0.13636  | 0.205544 | 7.54E-06 | 0.017341 | 0.70858  | 0.034117 |
| 0.14682  | 0.00146  | 0.140769 | 0.0023   | 0.117785 | 0.01085  | 0.062507 | 0.1775   | -0.03948 |
| 0.004276 | 0.92658  | -0.00691 | 0.88169  | 0.096064 | 0.03797  | -0.07789 | 0.0927   | -0.02693 |
| -0.00373 | 0.93597  | 0.050466 | 0.27644  | 0.080239 | 0.08325  | -0.0485  | 0.29558  | -0.10457 |
| 0.107007 | 0.02073  | 0.072558 | 0.11738  | 0.225553 | 8.45E-07 | -0.02768 | 0.55066  | -0.00156 |
| 0.009546 | 0.83698  | 0.066252 | 0.15287  | 0.141179 | 0.00223  | 0.01491  | 0.74793  | 0.113936 |
| 0.004226 | 0.92743  | 0.088521 | 0.05593  | 0.114204 | 0.01353  | 0.085152 | 0.06598  | -0.01201 |
| 0.037738 | 0.41586  | -0.1292  | 0.00517  | -0.02898 | 0.5321   | -0.13256 | 0.00411  | 0.03071  |
| 0.253619 | 2.74E-08 | 0.157063 | 0.00066  | 0.201851 | 1.10E-05 | 0.169421 | 0.00024  | -0.02167 |
| 0.039327 | 0.39649  | -0.0059  | 0.89876  | 0.027004 | 0.5605   | -0.05821 | 0.20922  | -0.08078 |
| 0.028504 | 0.53892  | 0.090123 | 0.05162  | 0.093401 | 0.04365  | 0.086412 | 0.06206  | 0.044095 |
| 0.024727 | 0.59404  | 0.056657 | 0.22168  | 0.070139 | 0.13015  | -0.03077 | 0.50706  | -0.02439 |
| -0.01463 | 0.75253  | 0.076334 | 0.09944  | 0.186062 | 5.22E-05 | -0.05408 | 0.24343  | -0.08616 |
| 0.011365 | 0.80649  | -0.13318 | 0.00394  | 0.044536 | 0.33689  | -0.14316 | 0.00193  | 0.036387 |
| 0.062021 | 0.1809   | -0.01723 | 0.71031  | 0.058735 | 0.20517  | -0.05513 | 0.23441  | -0.01195 |

|          |          |          |          |          |          |          |          |          |
|----------|----------|----------|----------|----------|----------|----------|----------|----------|
| 0.164813 | 0.00035  | 0.041528 | 0.37057  | 0.156843 | 0.00067  | 0.007205 | 0.87659  | 0.013413 |
| 0.033219 | 0.4739   | 0.179033 | 0.0001   | 0.174773 | 0.00015  | 0.167182 | 0.00028  | 0.008943 |
| 0.04822  | 0.29841  | -0.04948 | 0.28591  | -0.01229 | 0.79107  | -0.07823 | 0.09131  | 0.001402 |
| 0.070976 | 0.12562  | -0.05116 | 0.26991  | 0.141248 | 0.00222  | -0.13844 | 0.00272  | 0.08487  |
| -0.0438  | 0.34499  | 0.085597 | 0.06457  | 0.096907 | 0.0363   | -0.00407 | 0.93006  | -0.10874 |
| 0.131773 | 0.00434  | -0.02572 | 0.57933  | 0.028401 | 0.54039  | -0.08389 | 0.07012  | -0.01566 |
| -0.05756 | 0.21438  | -0.10564 | 0.02242  | -0.11597 | 0.01215  | -0.13813 | 0.00278  | -0.13329 |
| 0.072486 | 0.11775  | 0.1781   | 0.00011  | 0.23961  | 1.60E-07 | 0.052231 | 0.25997  | -0.12312 |
| -0.06135 | 0.1857   | -0.07297 | 0.11529  | 0.00455  | 0.92188  | -0.22926 | 5.50E-07 | -0.15093 |
| 0.02454  | 0.59683  | 0.124264 | 0.00718  | 0.176518 | 0.00013  | -0.05757 | 0.21431  | -0.09792 |
| 0.080486 | 0.0823   | 0.068133 | 0.14153  | 0.135253 | 0.00341  | 0.021425 | 0.64422  | 0.013758 |
| -0.10503 | 0.02322  | -0.03587 | 0.43927  | 0.098593 | 0.03316  | -0.09955 | 0.03149  | -0.06133 |
| 0.021595 | 0.64159  | 0.051644 | 0.26537  | 0.096286 | 0.03752  | -0.09173 | 0.04758  | -0.10646 |
| -0.03511 | 0.44915  | 0.002536 | 0.9564   | 0.03672  | 0.42856  | -0.04841 | 0.29647  | -0.05122 |
| 0.015779 | 0.73379  | -0.07145 | 0.12312  | 0.028668 | 0.53659  | -0.15832 | 0.0006   | -0.0744  |
| 0.10056  | 0.0298   | -0.0228  | 0.62307  | 0.152224 | 0.00097  | -0.01741 | 0.7074   | 0.002741 |
| -0.04723 | 0.30844  | 0.017531 | 0.70553  | -0.05524 | 0.23349  | 0.042851 | 0.3555   | 0.066242 |
| -0.02633 | 0.57028  | -0.00752 | 0.87133  | -0.11712 | 0.01131  | -0.00743 | 0.87274  | -0.08451 |
| 0.069812 | 0.13195  | 0.155725 | 0.00073  | 0.149154 | 0.00123  | 0.114415 | 0.01336  | -0.05241 |
| -0.11622 | 0.01196  | 0.027994 | 0.5462   | -0.15212 | 0.00097  | 0.00983  | 0.83222  | -0.10349 |
| 0.009764 | 0.83333  | -0.04202 | 0.36492  | 0.008135 | 0.86082  | -0.08843 | 0.05617  | -0.05394 |
| 0.060083 | 0.19494  | -0.06427 | 0.16558  | -0.11416 | 0.01357  | -0.07783 | 0.09295  | 0.023474 |
| -0.05822 | 0.20917  | 0.068498 | 0.1394   | -0.0907  | 0.05012  | 0.117664 | 0.01093  | 0.007287 |
| 0.00425  | 0.92701  | 0.179004 | 0.0001   | 0.087235 | 0.05961  | 0.098289 | 0.03371  | -0.22775 |
| 0.051703 | 0.26483  | 0.200528 | 1.26E-05 | 0.28505  | 3.52E-10 | 0.045833 | 0.323    | -0.04191 |
| -0.01613 | 0.72811  | -0.13754 | 0.0029   | 0.033984 | 0.46378  | -0.16471 | 0.00035  | 0.111773 |
| 0.1009   | 0.02924  | -0.03572 | 0.44119  | 0.046935 | 0.31149  | -0.07717 | 0.09578  | -0.01797 |
| 0.094755 | 0.04068  | 0.1243   | 0.00716  | 0.286256 | 2.94E-10 | -0.01117 | 0.80981  | -0.0647  |
| 0.096053 | 0.03799  | 0.027128 | 0.5587   | 0.17488  | 0.00015  | -0.02545 | 0.58322  | 0.064159 |
| -0.04286 | 0.3554   | 0.146796 | 0.00147  | 0.068295 | 0.14058  | 0.106481 | 0.02137  | 0.016086 |
| -0.0166  | 0.72045  | 0.061316 | 0.18592  | 0.048863 | 0.292    | -0.00553 | 0.90512  | -0.09982 |
| 0.179595 | 9.52E-05 | 0.088752 | 0.05529  | 0.319476 | 1.53E-12 | -0.03744 | 0.4196   | 0.134093 |
| 0.080885 | 0.08079  | -0.01633 | 0.7249   | 0.124052 | 0.00728  | -0.06149 | 0.1847   | 0.024697 |
| 0.109965 | 0.01744  | 0.026319 | 0.57049  | 0.294069 | 9.07E-11 | 0.000227 | 0.99609  | 0.190588 |
| 0.048594 | 0.29467  | 0.168287 | 0.00026  | 0.234392 | 3.00E-07 | 0.003414 | 0.94135  | -0.06757 |
| -0.02464 | 0.59532  | -0.0624  | 0.17828  | -0.046   | 0.32128  | -0.12265 | 0.00797  | -0.04525 |
| 0.020975 | 0.65119  | -0.03854 | 0.40605  | 0.044632 | 0.33585  | -0.10161 | 0.02811  | -0.14811 |
| -0.0085  | 0.85464  | 0.04444  | 0.33793  | 0.058708 | 0.20538  | -0.048   | 0.30066  | -0.08661 |
| 0.06593  | 0.15488  | 0.086471 | 0.06188  | 0.196    | 1.99E-05 | -0.02674 | 0.56428  | -0.04542 |
| -0.04219 | 0.36298  | -0.00924 | 0.84218  | 0.047677 | 0.30389  | -0.03674 | 0.42827  | 0.041866 |
| -0.06068 | 0.19052  | -0.02283 | 0.62259  | 0.004763 | 0.91824  | -0.12753 | 0.00578  | -0.11061 |
| -0.003   | 0.9484   | 0.137782 | 0.00285  | -0.01348 | 0.77146  | 0.252747 | 3.07E-08 | 0.093947 |
| 0.200024 | 1.33E-05 | 0.148455 | 0.00129  | 0.259495 | 1.27E-08 | 0.022508 | 0.62756  | -0.02109 |
| 0.040298 | 0.38492  | 0.046034 | 0.32087  | 0.093105 | 0.04433  | -0.04018 | 0.38632  | -0.04333 |
| -0.09741 | 0.03534  | -0.02725 | 0.55694  | -0.10968 | 0.01773  | -0.05445 | 0.24023  | -0.07507 |

|          |          |          |          |          |          |          |          |          |
|----------|----------|----------|----------|----------|----------|----------|----------|----------|
| -0.03548 | 0.44437  | 0.038577 | 0.40556  | 0.170712 | 0.00021  | -0.02206 | 0.63439  | -0.02416 |
| -0.03486 | 0.45228  | -0.10022 | 0.03035  | -0.10842 | 0.0191   | -0.15827 | 0.0006   | -0.23724 |
| 0.052528 | 0.25726  | -0.06397 | 0.16757  | 0.082425 | 0.07516  | -0.1255  | 0.00662  | -0.04205 |
| -0.00683 | 0.88297  | -0.18289 | 7.03E-05 | -0.12438 | 0.00712  | -0.10434 | 0.02414  | 0.033747 |
| 0.096299 | 0.0375   | 0.067404 | 0.14584  | 0.108128 | 0.01943  | 0.018155 | 0.69557  | -0.03156 |
| 0.113926 | 0.01376  | 0.299607 | 3.85E-11 | 0.370851 | 1.13E-16 | 0.171175 | 0.0002   | -0.03448 |
| 0.044964 | 0.33226  | 0.119116 | 0.00998  | 0.322271 | 9.54E-13 | 0.065739 | 0.15609  | 0.225654 |
| -0.07629 | 0.09963  | -0.07586 | 0.10155  | 0.038223 | 0.40989  | -0.13375 | 0.00378  | -0.05041 |
| 0.106805 | 0.02097  | 0.211865 | 3.86E-06 | 0.292413 | 1.17E-10 | 0.098919 | 0.03258  | -0.04392 |
| 0.097256 | 0.03563  | 0.039562 | 0.39366  | 0.138528 | 0.0027   | -0.02017 | 0.66373  | -0.03078 |
| 0.067355 | 0.14614  | -0.00931 | 0.84098  | 0.205818 | 7.33E-06 | -0.0586  | 0.20622  | 0.114873 |
| 0.158932 | 0.00057  | 0.140848 | 0.00228  | 0.292196 | 1.21E-10 | 0.068536 | 0.13918  | 0.044902 |
| 0.048339 | 0.29721  | -0.02519 | 0.58713  | 0.146825 | 0.00146  | -0.12007 | 0.0094   | 0.023116 |
| -0.06091 | 0.18887  | -0.03389 | 0.46504  | 0.057442 | 0.21534  | -0.12547 | 0.00663  | -0.04675 |
| 0.090619 | 0.05034  | 0.068167 | 0.14133  | 0.097298 | 0.03556  | 0.010091 | 0.82783  | 0.019478 |
| 0.028375 | 0.54075  | -0.12628 | 0.00628  | -0.02543 | 0.58353  | -0.10306 | 0.02594  | 0.001467 |
| -0.05189 | 0.26313  | -0.26289 | 8.04E-09 | -0.08444 | 0.06828  | -0.28481 | 3.64E-10 | 0.071436 |
| 0.204334 | 8.55E-06 | 0.229341 | 5.45E-07 | 0.457175 | 1.70E-25 | 0.208805 | 5.35E-06 | 0.026194 |
| 0.007468 | 0.87213  | 0.062337 | 0.17869  | 0.130904 | 0.0046   | -0.06406 | 0.16694  | -0.13309 |
| -0.02868 | 0.53635  | 0.024009 | 0.60479  | 0.086704 | 0.06118  | -0.06131 | 0.18594  | -0.08848 |
| -0.04176 | 0.36789  | 0.038754 | 0.40341  | -0.03306 | 0.47607  | 0.164994 | 0.00034  | 0.089554 |
| 0.008599 | 0.85297  | 0.055529 | 0.23104  | 0.025912 | 0.57646  | 0.114724 | 0.01311  | 0.111667 |
| -0.15477 | 0.00079  | -0.05663 | 0.22191  | -0.21595 | 2.48E-06 | -0.05689 | 0.21978  | -0.02206 |
| 0.028879 | 0.53358  | -0.05135 | 0.26813  | 0.100626 | 0.02969  | -0.00578 | 0.9008   | 0.168003 |
| -0.00335 | 0.9425   | -0.08541 | 0.06517  | -0.01816 | 0.69553  | -0.12049 | 0.00915  | 0.0115   |
| -0.003   | 0.94842  | -0.04658 | 0.31518  | 0.059616 | 0.19844  | -0.13371 | 0.0038   | -0.03799 |
| -0.01276 | 0.78324  | -0.19519 | 2.16E-05 | -0.0162  | 0.7269   | -0.18434 | 6.14E-05 | -0.00079 |
| 0.020716 | 0.65522  | -0.06999 | 0.13096  | 0.073797 | 0.11124  | -0.12601 | 0.0064   | 0.021305 |
| -0.0442  | 0.34051  | 0.128148 | 0.00555  | 0.221361 | 1.36E-06 | 0.012519 | 0.7873   | -0.08824 |
| -0.0887  | 0.05544  | -0.10004 | 0.03065  | -0.05178 | 0.26414  | -0.1382  | 0.00276  | 0.044957 |
| 0.053202 | 0.2512   | 0.060107 | 0.19476  | 0.258458 | 1.45E-08 | -0.04171 | 0.36846  | 0.029734 |
| -0.16036 | 0.0005   | 0.020044 | 0.66572  | -0.1597  | 0.00053  | 0.094015 | 0.04228  | -0.01344 |
| 0.010751 | 0.81677  | 0.105064 | 0.02317  | 0.046635 | 0.31459  | 0.041849 | 0.36688  | -0.02041 |
| 0.003453 | 0.94067  | 0.016661 | 0.71952  | 0.056735 | 0.22104  | -0.07115 | 0.12467  | -0.08211 |
| 0.09611  | 0.03788  | 0.317674 | 2.07E-12 | 0.298031 | 4.92E-11 | 0.37876  | 2.23E-17 | 0.378034 |
| -0.02958 | 0.52376  | 0.077686 | 0.09357  | 0.077783 | 0.09316  | 0.003285 | 0.94357  | -0.06847 |
| -0.01992 | 0.66766  | -0.09141 | 0.04837  | 0.023496 | 0.61254  | -0.17185 | 0.00019  | -0.00825 |
| 0.146973 | 0.00145  | 0.021249 | 0.64695  | 0.211629 | 3.96E-06 | 0.030354 | 0.51288  | 0.088689 |
| 0.050164 | 0.27933  | -0.01164 | 0.80193  | 0.129627 | 0.00502  | -0.05728 | 0.21662  | -0.03401 |
| 0.000661 | 0.98863  | 0.053881 | 0.2452   | 0.054575 | 0.23915  | -0.02001 | 0.66619  | -0.14515 |
| -0.04034 | 0.38441  | -0.17707 | 0.00012  | -0.01489 | 0.74832  | -0.2308  | 4.59E-07 | -0.03694 |
| -0.01091 | 0.8141   | -0.00152 | 0.97388  | 0.017246 | 0.71011  | -0.05169 | 0.26495  | -0.16669 |
| 0.006958 | 0.88079  | -0.03559 | 0.4429   | 0.177205 | 0.00012  | -0.15008 | 0.00114  | -0.04897 |
| 0.008697 | 0.85131  | 0.056712 | 0.22123  | 0.21808  | 1.96E-06 | -0.09639 | 0.03732  | -0.12915 |
| -0.03198 | 0.49052  | -0.10235 | 0.02699  | -0.06057 | 0.19134  | -0.12047 | 0.00916  | -0.07246 |



|          |          |          |          |          |          |          |          |          |
|----------|----------|----------|----------|----------|----------|----------|----------|----------|
| 0.003206 | 0.94492  | 0.015106 | 0.74474  | 0.003704 | 0.93637  | -0.12146 | 0.0086   | -0.05793 |
| 0.038937 | 0.40119  | -0.11459 | 0.01322  | 0.138714 | 0.00266  | -0.18305 | 6.93E-05 | -0.03901 |
| -0.05427 | 0.24181  | -0.02335 | 0.61476  | -0.13632 | 0.00316  | -0.10488 | 0.02341  | -0.15383 |
| -0.01308 | 0.77805  | 0.001287 | 0.97787  | 0.079049 | 0.08794  | -0.01923 | 0.67858  | 0.080762 |
| -0.00867 | 0.85181  | -0.19527 | 2.14E-05 | -0.04091 | 0.37779  | -0.22783 | 6.50E-07 | 0.038743 |
| 0.219958 | 1.59E-06 | 0.294522 | 8.46E-11 | 0.313959 | 3.84E-12 | 0.222809 | 1.15E-06 | 0.01314  |
| 0.054038 | 0.24382  | -0.07863 | 0.08963  | 0.079536 | 0.086    | -0.13753 | 0.0029   | -0.10688 |
| -0.10873 | 0.01876  | -0.07905 | 0.08793  | -0.08607 | 0.06311  | 0.088748 | 0.0553   | 0.21125  |
| -0.00822 | 0.85944  | 0.066303 | 0.15256  | 0.074851 | 0.10621  | -0.05234 | 0.25898  | -0.11739 |
| 0.003534 | 0.93929  | 0.115579 | 0.01244  | 0.158377 | 0.00059  | 0.007331 | 0.87445  | -0.11371 |
| 0.224698 | 9.31E-07 | 0.361982 | 6.64E-16 | 0.551511 | 1.61E-38 | 0.275175 | 1.47E-09 | 0.127413 |
| 0.08702  | 0.06024  | 0.050428 | 0.2768   | 0.204898 | 8.07E-06 | 0.007929 | 0.86431  | -0.02002 |
| -0.04456 | 0.33666  | -0.00422 | 0.92761  | 0.053558 | 0.24804  | -0.07954 | 0.08598  | -0.11537 |
| -0.03392 | 0.46468  | 0.015236 | 0.74262  | -0.01248 | 0.78793  | -0.06222 | 0.17951  | -0.02158 |
| 0.075425 | 0.10355  | 0.005036 | 0.91356  | 0.164056 | 0.00037  | -0.06325 | 0.17241  | 0.080639 |
| 0.076514 | 0.09864  | 0.074247 | 0.10907  | 0.097541 | 0.0351   | 0.016541 | 0.72146  | 0.075049 |
| 0.056049 | 0.22669  | -0.08257 | 0.07464  | 0.061938 | 0.18149  | -0.12015 | 0.00935  | -0.0167  |
| -0.0648  | 0.16207  | -0.15369 | 0.00086  | 0.008023 | 0.86272  | -0.10128 | 0.02863  | 0.19716  |
| -0.08882 | 0.05509  | -0.09359 | 0.04322  | 0.053618 | 0.24751  | -0.18224 | 7.47E-05 | -0.11232 |
| 0.101927 | 0.02763  | -0.08948 | 0.0533   | 0.081527 | 0.0784   | -0.06696 | 0.14851  | 0.109929 |
| -0.08505 | 0.06632  | -0.03372 | 0.46728  | -0.19722 | 1.77E-05 | 0.017015 | 0.71381  | -0.12938 |
| 0.037495 | 0.41887  | 0.075478 | 0.1033   | 0.175839 | 0.00013  | 0.022946 | 0.62088  | 0.009948 |
| 0.121374 | 0.00865  | 0.17004  | 0.00022  | 0.331865 | 1.81E-13 | 0.123416 | 0.00758  | 0.088811 |
| 0.019205 | 0.6789   | -0.03273 | 0.48037  | 0.099968 | 0.03078  | -0.07754 | 0.09419  | 0.13362  |
| 0.032271 | 0.48663  | 0.01889  | 0.68389  | 0.118147 | 0.01061  | -0.05298 | 0.25323  | -0.00041 |
| 0.120208 | 0.00932  | -0.01273 | 0.78387  | 0.11262  | 0.01489  | -0.00329 | 0.94344  | -0.07605 |
| 0.098527 | 0.03328  | -0.03455 | 0.45638  | 0.067735 | 0.14387  | -0.07842 | 0.09051  | -0.0622  |
| 0.023537 | 0.61191  | -0.03231 | 0.48607  | -0.05103 | 0.27107  | -0.06519 | 0.15956  | 0.05354  |
| 0.051463 | 0.26705  | 0.112061 | 0.0154   | 0.24191  | 1.21E-07 | -0.0555  | 0.23131  | -0.09669 |
| -0.03114 | 0.50209  | -0.0804  | 0.08264  | 0.056189 | 0.22553  | -0.15476 | 0.00079  | -0.14927 |
| -0.01768 | 0.70308  | 0.056614 | 0.22203  | -0.00623 | 0.89314  | 0.22995  | 5.08E-07 | 0.18642  |
| 0.00247  | 0.95754  | 0.009617 | 0.83579  | 0.124894 | 0.00689  | -0.13877 | 0.00265  | -0.16225 |
| 0.050114 | 0.27981  | 0.076656 | 0.09801  | 0.207641 | 6.05E-06 | -0.07943 | 0.0864   | -0.11494 |
| 0.120034 | 0.00942  | 0.030421 | 0.51196  | 0.147343 | 0.00141  | -0.11002 | 0.01739  | -0.10815 |
| 0.021279 | 0.64648  | 0.094048 | 0.04221  | 0.026622 | 0.56606  | 0.025689 | 0.57975  | -0.06568 |
| 0.036706 | 0.42873  | 0.079276 | 0.08703  | 0.214734 | 2.83E-06 | 0.055069 | 0.23493  | 0.046538 |
| -0.03817 | 0.41057  | -0.06113 | 0.18728  | -0.07891 | 0.08849  | 0.005627 | 0.90347  | -0.01816 |
| -0.04291 | 0.35483  | 0.028815 | 0.5345   | 0.019694 | 0.6712   | -0.06445 | 0.16441  | -0.02388 |
| -0.09701 | 0.0361   | -0.19831 | 1.58E-05 | -0.31753 | 2.12E-12 | -0.20315 | 9.66E-06 | -0.03266 |
| -0.19366 | 2.51E-05 | -0.25356 | 2.76E-08 | -0.33776 | 6.33E-14 | -0.19407 | 2.41E-05 | -0.02374 |
| -0.05674 | 0.22102  | -0.12685 | 0.00605  | -0.12449 | 0.00707  | -0.23158 | 4.19E-07 | 0.004013 |
| -0.07278 | 0.11628  | -0.04995 | 0.28136  | 0.049241 | 0.28829  | -0.09156 | 0.04798  | 0.032661 |
| 0.107572 | 0.02006  | 0.221307 | 1.37E-06 | 0.315925 | 2.77E-12 | 0.126839 | 0.00606  | 0.084172 |
| 0.076705 | 0.0978   | 0.261109 | 1.02E-08 | 0.309937 | 7.43E-12 | 0.298888 | 4.31E-11 | 0.170511 |
| 0.005519 | 0.90532  | 0.166558 | 0.0003   | 0.128143 | 0.00555  | 0.069751 | 0.13229  | -0.12913 |

|          |          |          |          |          |          |          |          |          |
|----------|----------|----------|----------|----------|----------|----------|----------|----------|
| 0.122499 | 0.00805  | 0.087529 | 0.05875  | 0.24029  | 1.47E-07 | 0.026825 | 0.5631   | 0.187324 |
| -0.00414 | 0.9289   | 0.083301 | 0.07211  | 0.29991  | 3.67E-11 | -0.02984 | 0.52004  | 0.097792 |
| -0.05078 | 0.27346  | -0.10069 | 0.02959  | -0.09626 | 0.03758  | -0.12084 | 0.00895  | -0.00551 |
| 0.015753 | 0.73421  | 0.162301 | 0.00043  | 0.167347 | 0.00028  | 0.076201 | 0.10003  | -0.14814 |
| -0.02422 | 0.60162  | -0.1006  | 0.02973  | -0.05908 | 0.2025   | -0.14658 | 0.00149  | -0.07988 |
| -0.02075 | 0.65467  | -0.07221 | 0.11914  | 0.070546 | 0.12793  | -0.08958 | 0.05306  | 0.10153  |
| 0.098715 | 0.03295  | 0.477217 | 6.19E-28 | 0.348999 | 8.02E-15 | 0.486564 | 3.97E-29 | -0.00893 |
| -0.12086 | 0.00894  | -0.06923 | 0.13521  | -0.10539 | 0.02274  | 0.088494 | 0.056    | 0.131673 |
| 0.034234 | 0.46049  | 0.043459 | 0.34871  | 0.125391 | 0.00666  | -0.03648 | 0.43162  | 0.048714 |
| 0.038008 | 0.41252  | 0.02293  | 0.62113  | 0.167081 | 0.00029  | -0.11709 | 0.01133  | -0.00286 |
| 0.077377 | 0.09489  | -0.05169 | 0.26497  | 0.088659 | 0.05555  | -0.16798 | 0.00027  | -0.03565 |
| -0.08583 | 0.06383  | 0.033076 | 0.47581  | -0.14415 | 0.00179  | 0.085401 | 0.06519  | 0.04744  |
| 0.261469 | 9.73E-09 | 0.318833 | 1.71E-12 | 0.510748 | 2.17E-32 | 0.295104 | 7.74E-11 | 0.107655 |
| 0.048351 | 0.2971   | -0.03576 | 0.44075  | 0.074512 | 0.1078   | -0.08093 | 0.08062  | -0.05005 |
| 0.015381 | 0.74025  | 0.046668 | 0.31424  | 0.147946 | 0.00134  | -0.04458 | 0.33637  | -0.07892 |
| 0.051358 | 0.26803  | -0.03684 | 0.42704  | 0.011208 | 0.80912  | -0.10108 | 0.02896  | -0.09724 |
| -0.00197 | 0.9661   | -0.03421 | 0.46082  | -0.02912 | 0.53016  | 0.014548 | 0.75385  | 0.140788 |
| 0.092464 | 0.04582  | -0.09447 | 0.0413   | 0.140172 | 0.0024   | -0.14461 | 0.00173  | 0.103156 |
| 0.109307 | 0.01813  | -0.02763 | 0.55139  | -0.07329 | 0.11371  | -0.1081  | 0.01946  | -0.18378 |
| -0.15641 | 0.00069  | -0.00969 | 0.83453  | -0.15385 | 0.00085  | 0.08587  | 0.06372  | 0.076975 |
| -0.04725 | 0.30824  | 0.073481 | 0.11278  | -0.0226  | 0.62622  | 0.156143 | 0.00071  | 0.125525 |
| -0.01437 | 0.75685  | -0.07408 | 0.10988  | 0.04756  | 0.30507  | -0.08666 | 0.06132  | 0.129994 |
| 0.01122  | 0.80892  | -0.04126 | 0.37366  | 0.011319 | 0.80726  | -0.0755  | 0.1032   | -0.02564 |
| 0.053053 | 0.25253  | 0.054244 | 0.24202  | 0.101623 | 0.0281   | -0.06977 | 0.1322   | -0.07314 |
| -0.04978 | 0.28307  | 0.079038 | 0.08799  | 0.055709 | 0.22953  | 0.133459 | 0.00386  | 0.134617 |
| 0.141236 | 0.00222  | 0.045102 | 0.33078  | 0.00296  | 0.94913  | -0.03073 | 0.50766  | -0.1251  |
| 0.08148  | 0.07858  | 0.012936 | 0.78039  | -0.11114 | 0.01627  | 0.051914 | 0.26288  | -0.00459 |
| -0.0258  | 0.57818  | 0.124359 | 0.00713  | 0.286331 | 2.91E-10 | 0.113942 | 0.01375  | -0.02905 |
| 0.188295 | 4.22E-05 | -0.02297 | 0.62051  | 0.216647 | 2.30E-06 | -0.08198 | 0.07674  | 0.082714 |
| -0.09917 | 0.03214  | -0.01176 | 0.79997  | 0.053411 | 0.24934  | 0.120078 | 0.00939  | 0.249036 |
| 0.016091 | 0.72873  | 0.005072 | 0.91295  | 0.029168 | 0.52949  | -0.081   | 0.08037  | -0.15782 |
| -0.11226 | 0.01522  | -0.00488 | 0.91632  | -0.19106 | 3.24E-05 | 0.057334 | 0.2162   | -0.01563 |
| 0.032743 | 0.48027  | -0.17442 | 0.00015  | -0.02136 | 0.64515  | -0.12749 | 0.0058   | 0.126348 |
| -0.00153 | 0.97362  | 0.053548 | 0.24812  | 0.142092 | 0.00208  | -0.04935 | 0.28722  | -0.07446 |
| 0.03603  | 0.43729  | 0.048903 | 0.29161  | 0.093587 | 0.04323  | -0.04442 | 0.33811  | 0.139505 |
| 0.146474 | 0.0015   | 0.138776 | 0.00265  | 0.271686 | 2.40E-09 | 0.07505  | 0.10528  | -0.0489  |
| 0.006328 | 0.89152  | 0.088897 | 0.05489  | 0.132017 | 0.00427  | -0.03157 | 0.49616  | -0.07771 |
| -0.00389 | 0.93318  | -0.02925 | 0.52841  | 0.077082 | 0.09616  | -0.15201 | 0.00098  | -0.14335 |
| 0.060014 | 0.19546  | 0.069628 | 0.13298  | 0.146548 | 0.0015   | 0.008127 | 0.86095  | 0.09603  |
| 0.029954 | 0.51846  | -0.06207 | 0.18057  | 0.045549 | 0.326    | -0.13473 | 0.00353  | -0.12218 |
| 0.134796 | 0.00352  | 0.033056 | 0.47607  | 0.103556 | 0.02523  | 0.045118 | 0.33061  | -0.00481 |
| -0.02253 | 0.62728  | -0.10875 | 0.01873  | -0.02288 | 0.62182  | -0.13665 | 0.00309  | 0.00862  |
| 0.083289 | 0.07215  | 0.100577 | 0.02977  | 0.234104 | 3.11E-07 | -0.05727 | 0.21675  | -0.18094 |
| -0.0277  | 0.55044  | -0.00149 | 0.9744   | -0.03959 | 0.39336  | -0.05527 | 0.2332   | -0.13998 |
| -0.00354 | 0.93913  | -0.04493 | 0.33262  | -0.0106  | 0.81934  | -0.14243 | 0.00203  | -0.12992 |

|          |          |          |          |          |          |          |          |          |
|----------|----------|----------|----------|----------|----------|----------|----------|----------|
| 0.053665 | 0.2471   | 0.035383 | 0.44557  | 0.119982 | 0.00945  | -0.03379 | 0.46628  | 0.225818 |
| 0.049746 | 0.28336  | -0.0682  | 0.14111  | -0.03343 | 0.47103  | -0.13945 | 0.00253  | -0.05231 |
| 0.067588 | 0.14475  | 0.09502  | 0.04012  | 0.247969 | 5.66E-08 | 0.002183 | 0.96248  | -0.01473 |
| -0.02943 | 0.52587  | 0.004452 | 0.92356  | 0.021306 | 0.64605  | -0.01231 | 0.79071  | 0.047917 |
| 0.200594 | 1.26E-05 | 0.232531 | 3.75E-07 | 0.434641 | 6.08E-23 | 0.183527 | 6.63E-05 | 0.196177 |
| 0.054543 | 0.23944  | 0.174332 | 0.00015  | 0.171935 | 0.00019  | 0.118094 | 0.01065  | -0.07448 |
| 0.120138 | 0.00936  | 0.287037 | 2.62E-10 | 0.384744 | 6.33E-18 | 0.158091 | 0.00061  | 0.084711 |
| 0.033473 | 0.47053  | 0.020607 | 0.65692  | 0.099614 | 0.03138  | -0.05778 | 0.21262  | 0.037831 |
| 0.149089 | 0.00123  | 0.143014 | 0.00195  | 0.293948 | 9.24E-11 | 0.02871  | 0.53598  | 0.092868 |
| -0.05897 | 0.20333  | -0.07104 | 0.12528  | -0.21191 | 3.84E-06 | 0.032524 | 0.4832   | 0.050207 |
| 0.050839 | 0.2729   | 0.101441 | 0.02838  | 0.118504 | 0.01038  | 0.001436 | 0.97531  | -0.15593 |
| -0.04398 | 0.34301  | -0.00502 | 0.91385  | -0.039   | 0.40042  | 0.025364 | 0.58456  | 0.023447 |
| 0.110897 | 0.01651  | 0.153805 | 0.00085  | 0.207069 | 6.43E-06 | 0.091802 | 0.0474   | 0.150825 |
| 0.040072 | 0.38759  | -0.01898 | 0.68252  | 0.164596 | 0.00035  | -0.14985 | 0.00116  | -0.07644 |
| 0.015293 | 0.74168  | -0.04002 | 0.3882   | 0.077098 | 0.09609  | -0.05417 | 0.24268  | 0.067131 |
| -0.03113 | 0.50223  | 0.017348 | 0.70846  | 0.074854 | 0.1062   | -0.00531 | 0.90896  | 0.04286  |
| -0.02249 | 0.62778  | -0.00845 | 0.85553  | 0.026757 | 0.56408  | -0.12304 | 0.00777  | -0.14541 |
| 0.014347 | 0.75715  | -0.00117 | 0.97982  | 0.087287 | 0.05945  | -0.066   | 0.15444  | -0.12979 |
| 0.100663 | 0.02963  | 0.012353 | 0.79005  | 0.056338 | 0.2243   | 0.000473 | 0.99187  | 0.149986 |
| -0.01523 | 0.74273  | 0.015462 | 0.73893  | 0.165922 | 0.00032  | -0.03158 | 0.49602  | 0.008334 |
| -0.00375 | 0.93553  | -0.07328 | 0.11379  | 0.127772 | 0.00569  | -0.20017 | 1.31E-05 | 0.00431  |
| 0.114371 | 0.0134   | 0.229799 | 5.17E-07 | 0.208089 | 5.77E-06 | 0.299788 | 3.74E-11 | 0.174687 |
| 0.012014 | 0.79568  | 0.039124 | 0.39893  | 0.089861 | 0.0523   | 0.001783 | 0.96934  | -0.08059 |
| -0.03623 | 0.43479  | 0.102525 | 0.02673  | 0.205553 | 7.53E-06 | 0.074798 | 0.10646  | 0.05773  |
| 0.019991 | 0.66655  | -0.03938 | 0.39582  | 0.046206 | 0.31906  | -0.13826 | 0.00275  | -0.09744 |
| 0.019188 | 0.67917  | -0.13169 | 0.00436  | 0.006859 | 0.88248  | -0.24192 | 1.20E-07 | -0.15992 |
| 0.054103 | 0.24326  | 0.080111 | 0.08375  | 0.196717 | 1.86E-05 | -0.0821  | 0.07632  | -0.00643 |
| 0.023979 | 0.60524  | 0.04175  | 0.36802  | 0.163833 | 0.00038  | -0.07654 | 0.09851  | -0.10799 |
| 0.058982 | 0.20327  | 0.074734 | 0.10676  | 0.165269 | 0.00033  | -0.0167  | 0.71888  | -0.04043 |
| -0.08161 | 0.0781   | 0.094474 | 0.04128  | 0.014089 | 0.76139  | 0.071482 | 0.12293  | -0.03378 |
| 0.069389 | 0.13431  | 0.025275 | 0.58588  | 0.151823 | 0.001    | -0.07881 | 0.08891  | -0.07627 |
| 0.002347 | 0.95966  | -0.02499 | 0.59008  | 0.084084 | 0.06946  | -0.06666 | 0.15033  | -0.1236  |
| 0.100982 | 0.02911  | -0.00795 | 0.86402  | 0.054915 | 0.23624  | -0.08638 | 0.06216  | -0.11229 |
| 0.076481 | 0.09879  | -0.03326 | 0.47338  | 0.104107 | 0.02446  | -0.08052 | 0.08217  | -0.03862 |
| 0.040441 | 0.38323  | 0.12414  | 0.00723  | 0.254206 | 2.54E-08 | -0.03965 | 0.39259  | -0.0267  |
| -0.04941 | 0.28668  | -0.09625 | 0.0376   | 0.032741 | 0.48029  | -0.22566 | 8.34E-07 | -0.06861 |
| -0.10225 | 0.02713  | -0.07552 | 0.10313  | -0.24825 | 5.46E-08 | 0.004317 | 0.92586  | 0.050107 |
| -0.02868 | 0.53636  | -0.01757 | 0.70487  | 0.08642  | 0.06204  | -0.03748 | 0.41905  | 0.04839  |
| 0.003659 | 0.93715  | -0.00213 | 0.96337  | 0.078974 | 0.08825  | -0.07172 | 0.12172  | -0.07843 |
| 0.008925 | 0.84747  | -0.02105 | 0.65005  | 0.066553 | 0.15102  | -0.14162 | 0.00216  | -0.12434 |
| 0.119389 | 0.00981  | 0.106879 | 0.02088  | 0.253741 | 2.70E-08 | 0.105021 | 0.02322  | 0.14278  |
| 0.063232 | 0.17252  | 0.111278 | 0.01614  | 0.131626 | 0.00438  | -0.00287 | 0.95076  | -0.06526 |
| -0.05779 | 0.21258  | -0.05771 | 0.21322  | 0.005476 | 0.90606  | -0.06422 | 0.16587  | -0.03297 |
| 0.088176 | 0.0569   | 0.18332  | 6.75E-05 | 0.302112 | 2.60E-11 | 0.176215 | 0.00013  | 0.223013 |
| -0.01556 | 0.73734  | -0.13191 | 0.0043   | -0.08887 | 0.05496  | -0.17551 | 0.00014  | -0.0091  |

|          |         |          |          |          |          |          |          |          |
|----------|---------|----------|----------|----------|----------|----------|----------|----------|
| -0.06583 | 0.15551 | -0.02917 | 0.52953  | 0.037538 | 0.41834  | -0.0766  | 0.09824  | 0.012738 |
| -0.03752 | 0.41859 | -0.04903 | 0.29033  | 0.025354 | 0.58471  | -0.10274 | 0.02641  | -0.03563 |
| -0.01701 | 0.7139  | 0.026187 | 0.57242  | 0.165772 | 0.00032  | 0.021646 | 0.6408   | 0.14439  |
| 0.063811 | 0.16861 | 0.017258 | 0.7099   | 0.014246 | 0.75881  | 0.014694 | 0.75147  | -0.03821 |
| 0.019447 | 0.67509 | 0.035618 | 0.44255  | 0.103645 | 0.0251   | -0.09244 | 0.04588  | -0.06591 |
| -0.03275 | 0.48017 | 0.083496 | 0.07144  | 0.047464 | 0.30606  | -0.01803 | 0.69756  | -0.13832 |
| -0.01794 | 0.699   | 0.023741 | 0.60883  | 0.105782 | 0.02224  | -0.10494 | 0.02333  | -0.10529 |
| 0.117988 | 0.01072 | 0.021319 | 0.64585  | 0.244913 | 8.31E-08 | -0.10025 | 0.0303   | -0.01267 |
| 0.050333 | 0.27771 | 0.048165 | 0.29896  | 0.240213 | 1.49E-07 | -0.04123 | 0.37406  | 0.020762 |
| 0.008224 | 0.85932 | -0.11447 | 0.01331  | -0.01976 | 0.67012  | -0.17118 | 0.0002   | 0.072904 |
| 0.085733 | 0.06415 | 0.136731 | 0.00307  | 0.174391 | 0.00015  | -0.01757 | 0.70494  | -0.17768 |
| 0.11699  | 0.0114  | 0.020908 | 0.65223  | 0.138956 | 0.00262  | -0.04687 | 0.31215  | -0.10253 |
| -0.10512 | 0.0231  | -0.14691 | 0.00145  | -0.14317 | 0.00192  | -0.03989 | 0.38981  | 0.083755 |
| 0.000324 | 0.99442 | 0.000813 | 0.98602  | 0.123779 | 0.00741  | -0.10237 | 0.02696  | -0.0204  |
| 0.116485 | 0.01177 | 0.159606 | 0.00054  | 0.333182 | 1.43E-13 | 0.073755 | 0.11144  | 0.175859 |
| -0.00946 | 0.83852 | -0.04353 | 0.34788  | 0.118161 | 0.0106   | -0.19965 | 1.38E-05 | -0.10215 |
| 0.088167 | 0.05692 | -0.03546 | 0.44459  | 0.099387 | 0.03177  | -0.07898 | 0.08824  | -0.02009 |
| 0.069249 | 0.13511 | 0.056128 | 0.22603  | 0.254738 | 2.37E-08 | -0.02696 | 0.56111  | -0.02842 |
| -0.06857 | 0.13897 | -0.08764 | 0.05842  | 0.096588 | 0.03693  | -0.14135 | 0.0022   | 0.021339 |
| 0.022387 | 0.62942 | 0.048762 | 0.293    | -0.02266 | 0.62529  | 0.067404 | 0.14585  | -0.02346 |
| 0.07516  | 0.10477 | -0.02949 | 0.52503  | -0.00145 | 0.97509  | -0.05073 | 0.27396  | -0.03809 |
| 0.027612 | 0.5517  | -0.09323 | 0.04404  | -0.04734 | 0.30733  | -0.10758 | 0.02005  | 0.052828 |
| 0.013441 | 0.77204 | 0.00622  | 0.89336  | 0.170303 | 0.00022  | -0.12297 | 0.0078   | 0.008841 |
| 0.046016 | 0.32106 | 0.081166 | 0.07974  | 0.147689 | 0.00137  | -0.05664 | 0.22186  | 0.052184 |
| 0.041136 | 0.37511 | 0.02403  | 0.60448  | 0.163215 | 0.0004   | -0.07706 | 0.09624  | 0.056563 |
| -0.02742 | 0.55445 | -0.22428 | 9.77E-07 | -0.06733 | 0.1463   | -0.20803 | 5.81E-06 | 0.056029 |
| 0.038035 | 0.41219 | -0.00923 | 0.84228  | 0.117468 | 0.01107  | -0.08886 | 0.05498  | 0.045147 |
| 0.114315 | 0.01344 | 0.113631 | 0.01401  | 0.239701 | 1.58E-07 | 0.052422 | 0.25823  | 0.094698 |
| 0.031363 | 0.49898 | -0.09622 | 0.03765  | -0.04719 | 0.3089   | -0.14806 | 0.00133  | 0.083868 |
| 0.065798 | 0.15571 | -0.08941 | 0.0535   | 0.031136 | 0.50209  | -0.09522 | 0.03971  | 0.022803 |
| -0.09515 | 0.03984 | 0.094155 | 0.04197  | -0.11045 | 0.01695  | 0.098219 | 0.03384  | 0.059857 |
| 0.138049 | 0.00279 | 0.045303 | 0.32863  | 0.141931 | 0.00211  | -0.02898 | 0.53217  | -0.08762 |
| -0.01451 | 0.75441 | -0.0465  | 0.31595  | 0.021984 | 0.6356   | -0.01365 | 0.76855  | 0.070332 |
| -0.01044 | 0.82195 | 0.034157 | 0.4615   | -0.00458 | 0.92137  | 0.114378 | 0.01339  | 0.055983 |
| -0.14246 | 0.00203 | -0.05544 | 0.23181  | -0.23278 | 3.64E-07 | 0.047523 | 0.30545  | -0.06588 |
| 0.020552 | 0.65777 | -0.13741 | 0.00292  | -0.03034 | 0.51301  | -0.25394 | 2.63E-08 | -0.03983 |
| -0.01467 | 0.75192 | -0.01847 | 0.69052  | 0.075005 | 0.10549  | -0.11118 | 0.01623  | -0.00993 |
| -0.00435 | 0.92528 | 0.051002 | 0.27137  | 0.050319 | 0.27784  | 0.057473 | 0.21508  | -0.01432 |
| 0.048697 | 0.29365 | 0.03696  | 0.42555  | 0.176279 | 0.00013  | 0.042647 | 0.3578   | 0.028672 |
| 0.087191 | 0.05973 | 0.063981 | 0.16748  | 0.18163  | 7.90E-05 | 0.028698 | 0.53616  | 0.004207 |
| 0.146875 | 0.00146 | 0.024248 | 0.60119  | 0.185684 | 5.41E-05 | -0.04086 | 0.37838  | 0.033024 |
| 0.154491 | 0.00081 | 0.073322 | 0.11356  | 0.25884  | 1.38E-08 | -0.01832 | 0.693    | 0.01004  |
| 0.131319 | 0.00448 | -0.04963 | 0.28449  | 0.002798 | 0.95192  | -0.0673  | 0.14647  | -0.01656 |
| -0.01627 | 0.7259  | 0.009019 | 0.84587  | 0.054942 | 0.23601  | -0.04588 | 0.32255  | -0.01679 |
| -0.04178 | 0.36766 | 0.059117 | 0.20223  | -0.03842 | 0.40752  | 0.100533 | 0.02984  | -0.09486 |

|          |          |          |          |          |          |          |          |          |
|----------|----------|----------|----------|----------|----------|----------|----------|----------|
| 0.022654 | 0.62534  | 0.031603 | 0.49569  | 0.082309 | 0.07557  | -0.08681 | 0.06085  | -0.12769 |
| 0.033573 | 0.46921  | 0.197919 | 1.65E-05 | 0.302881 | 2.30E-11 | 0.023462 | 0.61305  | -0.05857 |
| 0.024805 | 0.59287  | 0.020244 | 0.66259  | 0.096248 | 0.0376   | 0.004072 | 0.93007  | -0.00205 |
| -0.00407 | 0.93019  | -0.07025 | 0.12952  | 0.030455 | 0.51148  | -0.07433 | 0.10868  | 0.018444 |
| 0.03829  | 0.40906  | 0.382163 | 1.09E-17 | 0.299565 | 3.88E-11 | 0.350391 | 6.17E-15 | -0.06909 |
| 0.051308 | 0.2685   | -0.06426 | 0.16563  | 0.109713 | 0.01771  | -0.13741 | 0.00292  | 0.010509 |
| -0.15107 | 0.00106  | 0.015999 | 0.73022  | -0.19071 | 3.35E-05 | 0.144172 | 0.00179  | 0.106972 |
| 0.020417 | 0.65987  | 0.037946 | 0.41329  | 0.147605 | 0.00138  | -0.07648 | 0.09881  | -0.06388 |
| -0.06828 | 0.14065  | -0.11733 | 0.01116  | -0.15419 | 0.00083  | -0.10271 | 0.02645  | -0.06552 |
| -0.0167  | 0.71884  | 0.130307 | 0.0048   | 0.084153 | 0.06923  | 0.000377 | 0.99352  | -0.20584 |
| 0.012885 | 0.78123  | -0.0466  | 0.31494  | -0.0212  | 0.64778  | -0.14289 | 0.00197  | -0.10256 |
| 0.007675 | 0.86862  | -0.12997 | 0.00491  | 0.009808 | 0.83259  | -0.1611  | 0.00047  | 0.090512 |
| 0.114417 | 0.01336  | 0.323469 | 7.78E-13 | 0.503537 | 2.17E-31 | 0.210847 | 4.31E-06 | 0.200655 |
| 0.018974 | 0.68255  | -0.00967 | 0.83484  | 0.037318 | 0.42106  | -0.078   | 0.09224  | -0.01099 |
| 0.068508 | 0.13935  | 0.260801 | 1.06E-08 | 0.249041 | 4.94E-08 | 0.27894  | 8.57E-10 | 0.174015 |
| 0.014617 | 0.75273  | -0.00954 | 0.83714  | -0.03028 | 0.51387  | -0.07768 | 0.0936   | -0.03274 |
| 0.115507 | 0.0125   | -0.03094 | 0.5048   | 0.044801 | 0.33402  | -0.0717  | 0.12181  | -0.05201 |
| 0.020399 | 0.66016  | -0.05175 | 0.26439  | 0.049198 | 0.2887   | -0.07961 | 0.0857   | -0.04933 |
| 0.108881 | 0.01859  | 0.080356 | 0.0828   | 0.134893 | 0.00349  | 0.041902 | 0.36628  | -0.01761 |
| -0.01959 | 0.67289  | -0.00989 | 0.83124  | 0.127662 | 0.00573  | -0.12114 | 0.00878  | -0.06572 |
| -0.14779 | 0.00136  | 0.062508 | 0.17749  | -0.0113  | 0.80758  | 0.147828 | 0.00136  | -0.02769 |
| 0.036286 | 0.43403  | 0.314252 | 3.66E-12 | 0.185581 | 5.47E-05 | 0.343039 | 2.42E-14 | 0.127814 |
| 0.040536 | 0.38211  | 0.090219 | 0.05137  | 0.154309 | 0.00082  | -0.04575 | 0.32388  | -0.14552 |
| 0.054164 | 0.24272  | 0.046231 | 0.3188   | 0.139974 | 0.00243  | 0.005481 | 0.90596  | 0.048646 |
| 0.074502 | 0.10785  | 0.014579 | 0.75335  | 0.042798 | 0.35611  | -0.08665 | 0.06134  | -0.07839 |
| 0.002875 | 0.9506   | -0.1956  | 2.07E-05 | -0.10087 | 0.02929  | -0.16019 | 0.00051  | 0.036096 |
| 0.006635 | 0.88629  | 0.092513 | 0.0457   | 0.129184 | 0.00517  | -0.02524 | 0.58645  | -0.1354  |
| 0.137427 | 0.00292  | 0.409143 | 2.84E-20 | 0.496991 | 1.67E-30 | 0.256504 | 1.88E-08 | 0.052964 |
| 0.056618 | 0.222    | 0.109962 | 0.01745  | 0.104848 | 0.02345  | 0.036331 | 0.43346  | -0.08975 |
| 0.049525 | 0.28551  | -0.01785 | 0.70039  | -0.08504 | 0.06635  | 0.026756 | 0.56411  | 0.009165 |
| 0.03106  | 0.50313  | -0.03055 | 0.51012  | -0.13617 | 0.00319  | -0.0045  | 0.92268  | -0.00888 |
| -0.00958 | 0.8365   | -0.03842 | 0.40743  | -0.13334 | 0.00389  | 0.052925 | 0.25368  | 0.091566 |
| 0.142051 | 0.00209  | 0.03503  | 0.45013  | 0.109284 | 0.01816  | 0.003584 | 0.93842  | -0.0901  |
| 0.046026 | 0.32095  | -0.0621  | 0.18034  | 0.038367 | 0.40812  | -0.10814 | 0.01941  | -0.10202 |
| 0.138537 | 0.0027   | 0.013455 | 0.77181  | 0.188485 | 4.15E-05 | -0.0625  | 0.17755  | -0.06247 |
| -0.0058  | 0.90044  | 0.053876 | 0.24524  | 0.131137 | 0.00453  | -0.07282 | 0.11606  | -0.11141 |
| 0.03585  | 0.43958  | -0.01199 | 0.79611  | 0.041106 | 0.37545  | -0.10567 | 0.02238  | -0.06273 |
| 0.255598 | 2.12E-08 | 0.287821 | 2.33E-10 | 0.465764 | 1.60E-26 | 0.249457 | 4.68E-08 | 0.136381 |
| 0.026844 | 0.56283  | -0.02647 | 0.56829  | 0.069567 | 0.13332  | -0.04831 | 0.29748  | -0.07942 |
| -0.01399 | 0.76302  | -0.00312 | 0.94633  | 0.022633 | 0.62565  | -0.00821 | 0.85959  | 0.085931 |
| -0.07602 | 0.10086  | -0.2034  | 9.42E-06 | -0.03623 | 0.43475  | -0.22731 | 6.90E-07 | 0.06295  |
| 0.049126 | 0.28941  | -0.02155 | 0.64236  | 0.064092 | 0.16674  | -0.08826 | 0.05665  | 0.027153 |
| -0.01939 | 0.67607  | -0.19826 | 1.59E-05 | -0.09381 | 0.04273  | -0.1144  | 0.01337  | 0.269307 |
| 0.051071 | 0.27071  | 0.145317 | 0.00164  | 0.236492 | 2.34E-07 | 0.094865 | 0.04045  | 0.033337 |
| 0.076345 | 0.09939  | 0.033204 | 0.4741   | 0.170122 | 0.00022  | -0.03659 | 0.4302   | -0.06804 |

|          |          |          |          |          |          |          |          |          |
|----------|----------|----------|----------|----------|----------|----------|----------|----------|
| 0.026398 | 0.56933  | -0.04181 | 0.36731  | 0.023402 | 0.61395  | -0.06843 | 0.1398   | 0.084939 |
| 0.043473 | 0.34856  | 0.057777 | 0.21267  | 0.089006 | 0.05459  | -0.01399 | 0.76293  | -0.03715 |
| 0.060812 | 0.18957  | 0.013233 | 0.77549  | 0.145016 | 0.00168  | -0.12638 | 0.00624  | -0.04072 |
| 0.002722 | 0.95321  | -0.11716 | 0.01129  | 0.081332 | 0.07912  | -0.19652 | 1.89E-05 | 0.007786 |
| -0.14561 | 0.0016   | 0.018541 | 0.68942  | -0.15131 | 0.00104  | -0.02888 | 0.53364  | -0.0903  |
| 0.013501 | 0.77106  | -0.01172 | 0.80061  | 0.015261 | 0.7422   | -0.00651 | 0.88848  | 0.021172 |
| 0.015282 | 0.74187  | 0.077749 | 0.09331  | 0.212842 | 3.48E-06 | -0.02226 | 0.63133  | -0.0453  |
| 0.085269 | 0.06561  | -0.10181 | 0.02781  | 0.086321 | 0.06234  | -0.15798 | 0.00061  | -0.01251 |
| 0.055068 | 0.23493  | 0.062765 | 0.17572  | 0.100054 | 0.03063  | -0.03476 | 0.45361  | -0.1013  |
| 0.125575 | 0.00658  | 0.202471 | 1.04E-05 | 0.277656 | 1.03E-09 | 0.094441 | 0.04135  | -0.01233 |
| 0.070496 | 0.1282   | -0.00522 | 0.91045  | 0.062027 | 0.18086  | -0.09179 | 0.04743  | -0.06932 |
| -0.02458 | 0.59624  | -0.01085 | 0.81514  | 0.063491 | 0.17076  | -0.04313 | 0.3524   | 0.028838 |
| -0.02047 | 0.65905  | 0.085934 | 0.06352  | 0.110169 | 0.01724  | 0.109138 | 0.01831  | -0.11029 |
| 0.079056 | 0.08791  | 0.057517 | 0.21473  | 0.180709 | 8.60E-05 | 0.025298 | 0.58553  | 0.100464 |
| -0.11306 | 0.01451  | 0.05744  | 0.21535  | -0.1598  | 0.00053  | 0.109756 | 0.01766  | -0.02065 |
| 0.023107 | 0.61843  | -0.09802 | 0.0342   | -0.04496 | 0.33232  | -0.09492 | 0.04032  | 0.114579 |
| 0.034198 | 0.46096  | 0.031466 | 0.49756  | 0.069873 | 0.13162  | -0.06898 | 0.13662  | -0.11359 |
| -0.04472 | 0.33487  | -0.10158 | 0.02817  | -0.04139 | 0.37215  | -0.12508 | 0.0068   | -0.02158 |
| 0.059893 | 0.19636  | 0.0808   | 0.08111  | 0.251745 | 3.49E-08 | -0.05637 | 0.22404  | -0.036   |
| 0.081418 | 0.07881  | 0.054868 | 0.23664  | 0.193613 | 2.52E-05 | -0.02451 | 0.59732  | 0.034372 |
| -0.12431 | 0.00715  | -0.04061 | 0.38119  | -0.18598 | 5.27E-05 | -0.04222 | 0.36265  | -0.0488  |
| -0.02091 | 0.65219  | -0.06443 | 0.16451  | 0.067875 | 0.14304  | -0.0532  | 0.25122  | 0.020922 |
| 0.18306  | 6.92E-05 | 0.262552 | 8.41E-09 | 0.240165 | 1.49E-07 | 0.212128 | 3.75E-06 | -0.02431 |
| -0.00073 | 0.98745  | 0.019753 | 0.67028  | 0.077403 | 0.09478  | -0.06849 | 0.13945  | -0.07724 |
| -0.01776 | 0.70186  | 0.0562   | 0.22544  | 0.082228 | 0.07586  | -0.07422 | 0.1092   | -0.11766 |
| 0.042645 | 0.35783  | -0.00918 | 0.84309  | -0.04985 | 0.28231  | -0.0822  | 0.07597  | -0.1242  |
| 0.037873 | 0.4142   | 0.02665  | 0.56565  | 0.099417 | 0.03171  | 0.021022 | 0.65046  | -0.04146 |
| 0.056583 | 0.22229  | 0.127615 | 0.00575  | 0.252587 | 3.13E-08 | 0.10934  | 0.0181   | -0.01228 |
| -0.00989 | 0.83122  | -0.04851 | 0.29554  | -0.09166 | 0.04773  | -0.04735 | 0.30721  | -0.0791  |
| -0.0288  | 0.5347   | 0.023198 | 0.61705  | 0.119379 | 0.00982  | -0.04833 | 0.29732  | -0.02998 |
| -0.15625 | 0.0007   | -0.05376 | 0.24626  | -0.23763 | 2.04E-07 | -0.08281 | 0.0738   | -0.16997 |
| 0.07134  | 0.12368  | 0.062522 | 0.1774   | 0.252418 | 3.20E-08 | -0.034   | 0.46351  | -0.0263  |
| 0.023009 | 0.61992  | -0.02182 | 0.63813  | 0.013756 | 0.76685  | 0.016573 | 0.72093  | 0.060968 |
| 0.015148 | 0.74405  | 0.232909 | 3.58E-07 | 0.156149 | 0.00071  | 0.08553  | 0.06478  | -0.1915  |
| -0.15087 | 0.00107  | -0.24544 | 7.78E-08 | -0.24375 | 9.61E-08 | -0.2349  | 2.83E-07 | -0.11976 |
| -0.12312 | 0.00773  | 0.010415 | 0.82238  | -0.16202 | 0.00044  | -0.03282 | 0.47927  | -0.08624 |
| 0.010186 | 0.82623  | -0.08117 | 0.07972  | -0.01577 | 0.73394  | -0.0731  | 0.11466  | 0.045794 |
| 0.108241 | 0.0193   | -0.06452 | 0.16392  | 0.046968 | 0.31114  | -0.16109 | 0.00047  | -0.05964 |
| 0.047181 | 0.30895  | 0.100702 | 0.02956  | 0.107679 | 0.01994  | 0.020003 | 0.66635  | 0.012504 |
| -0.15967 | 0.00053  | -0.09362 | 0.04316  | -0.0881  | 0.0571   | -0.07381 | 0.11115  | -0.01499 |
| 0.122426 | 0.00808  | 0.21857  | 1.86E-06 | 0.316751 | 2.42E-12 | 0.148267 | 0.00131  | -0.01335 |
| -0.16936 | 0.00024  | -0.13476 | 0.00353  | -0.20274 | 1.01E-05 | -0.03475 | 0.45376  | 0.056683 |
| 0.018307 | 0.69314  | 0.2787   | 8.87E-10 | 0.309306 | 8.23E-12 | 0.191748 | 3.03E-05 | 0.113303 |
| -0.04028 | 0.38513  | 0.033118 | 0.47525  | 0.020166 | 0.66381  | -0.10829 | 0.01924  | -0.12858 |
| -0.0471  | 0.30978  | 0.113717 | 0.01394  | 0.043436 | 0.34897  | -0.03997 | 0.38881  | -0.1603  |

|          |          |          |          |          |          |          |          |          |
|----------|----------|----------|----------|----------|----------|----------|----------|----------|
| 0.063543 | 0.17041  | 0.074072 | 0.10991  | 0.125117 | 0.00679  | 0.022362 | 0.62979  | 0.008483 |
| 0.070117 | 0.13027  | 0.141826 | 0.00212  | 0.328398 | 3.32E-13 | 0.2202   | 1.55E-06 | 0.029668 |
| 0.016818 | 0.71699  | -0.03403 | 0.46318  | 0.036468 | 0.43173  | -0.11562 | 0.01241  | -0.07275 |
| 0.213779 | 3.14E-06 | 0.062364 | 0.1785   | 0.012103 | 0.7942   | 0.003096 | 0.94681  | -0.17094 |
| -0.0004  | 0.99316  | 0.04123  | 0.37401  | -0.01523 | 0.74266  | 0.072126 | 0.11959  | -0.04292 |
| -0.13179 | 0.00433  | -0.18833 | 4.21E-05 | -0.16148 | 0.00046  | -0.02257 | 0.62665  | 0.166011 |
| 0.030608 | 0.50936  | -0.03008 | 0.51671  | 0.060928 | 0.18873  | -0.14668 | 0.00148  | -0.02989 |
| 0.115101 | 0.01281  | 0.066375 | 0.15211  | 0.249118 | 4.89E-08 | 0.049825 | 0.2826   | 0.105421 |
| 0.098348 | 0.03361  | -0.00246 | 0.95767  | 0.107821 | 0.01978  | -0.06369 | 0.16942  | 0.016031 |
| 0.085439 | 0.06507  | 0.013039 | 0.77868  | 0.124833 | 0.00691  | -0.0767  | 0.09781  | 0.011633 |
| 0.02389  | 0.60659  | 0.117632 | 0.01096  | 0.107498 | 0.02015  | 0.043857 | 0.34432  | -0.05763 |
| 0.020547 | 0.65784  | 0.017988 | 0.69823  | 0.042705 | 0.35715  | 0.015942 | 0.73115  | -0.0381  |
| 0.000589 | 0.98986  | 0.046309 | 0.31799  | 0.101281 | 0.02864  | -0.01287 | 0.78142  | -0.00533 |
| -0.01978 | 0.66982  | 0.049809 | 0.28275  | 0.084564 | 0.06788  | -0.03323 | 0.47378  | -0.03171 |
| 0.035348 | 0.44602  | -0.00148 | 0.97447  | -0.01761 | 0.7042   | -0.07086 | 0.12623  | -0.0062  |
| -0.0067  | 0.88515  | 0.015058 | 0.74552  | 0.079303 | 0.08692  | -0.07169 | 0.12184  | -0.09836 |
| 0.018974 | 0.68256  | -0.00954 | 0.83705  | 0.092895 | 0.04481  | -0.04414 | 0.34122  | -0.0336  |
| 0.022926 | 0.62119  | -0.0074  | 0.87325  | 0.073853 | 0.11097  | -0.04057 | 0.3817   | -0.03656 |
| 0.083497 | 0.07144  | 0.032052 | 0.48958  | 0.115233 | 0.01271  | -0.0547  | 0.23808  | -0.013   |
| -0.00266 | 0.95428  | 0.096344 | 0.03741  | 0.216202 | 2.41E-06 | -0.02446 | 0.59795  | -0.03642 |
| -0.12322 | 0.00768  | -0.10761 | 0.02002  | -0.0937  | 0.04298  | -0.17944 | 9.66E-05 | -0.18921 |
| -0.0958  | 0.03851  | 0.186799 | 4.87E-05 | 0.092419 | 0.04592  | 0.13287  | 0.00402  | -0.18967 |
| -0.07555 | 0.10297  | 0.06749  | 0.14533  | -0.04102 | 0.37648  | 0.149172 | 0.00122  | 0.032828 |
| 0.080765 | 0.08124  | -0.03955 | 0.39386  | 0.06959  | 0.13319  | -0.10694 | 0.02081  | -0.0494  |
| 0.092546 | 0.04562  | -0.02427 | 0.60084  | -0.03152 | 0.49686  | -0.05097 | 0.27166  | 0.022887 |
| -0.11989 | 0.00951  | -0.13866 | 0.00267  | -0.03505 | 0.44989  | -0.18027 | 8.95E-05 | -0.06957 |
| 0.004336 | 0.92555  | 0.054065 | 0.24358  | 0.009732 | 0.83387  | 0.069019 | 0.13641  | 0.007684 |
| 0.030809 | 0.50658  | 0.004917 | 0.9156   | 0.01298  | 0.77966  | -0.05586 | 0.22826  | -0.05482 |
| 0.098497 | 0.03334  | 0.066228 | 0.15302  | 0.185405 | 5.56E-05 | -0.11032 | 0.01708  | -0.0759  |
| -0.18271 | 7.15E-05 | -0.21472 | 2.83E-06 | -0.3513  | 5.20E-15 | -0.15347 | 0.00088  | -0.07505 |
| -0.16308 | 0.0004   | -0.32465 | 6.35E-13 | -0.31398 | 3.83E-12 | -0.22236 | 1.21E-06 | 0.12012  |
| 0.052797 | 0.25484  | -0.01859 | 0.6887   | 0.07932  | 0.08685  | -0.04577 | 0.32365  | 0.012428 |
| 0.07308  | 0.11476  | 0.283016 | 4.74E-10 | 0.231076 | 4.45E-07 | 0.444769 | 4.56E-24 | 0.295945 |
| 0.062699 | 0.17617  | -0.06438 | 0.16483  | -0.05458 | 0.23912  | -0.06948 | 0.13378  | 0.105098 |
| -0.03334 | 0.47224  | -0.12565 | 0.00655  | -0.08336 | 0.07191  | -0.17792 | 0.00011  | -0.06159 |
| 0.00724  | 0.87601  | 0.084704 | 0.06742  | 0.106291 | 0.0216   | 0.039496 | 0.39446  | -0.14524 |
| 0.077031 | 0.09638  | -0.03426 | 0.46016  | 0.124165 | 0.00722  | -0.06663 | 0.15055  | -0.03181 |
| -0.0671  | 0.14769  | -0.22317 | 1.11E-06 | -0.05808 | 0.21029  | -0.29451 | 8.47E-11 | -0.04298 |
| 0.166027 | 0.00031  | 0.094057 | 0.04219  | 0.140077 | 0.00241  | 0.044337 | 0.33905  | -0.05247 |
| 0.059268 | 0.20108  | -0.00732 | 0.8747   | 0.052713 | 0.25559  | 0.000986 | 0.98305  | 0.097868 |
| -0.05013 | 0.27966  | -0.1226  | 0.00799  | 0.030488 | 0.51102  | -0.18082 | 8.51E-05 | -0.00474 |
| 0.067598 | 0.14469  | -0.02509 | 0.58868  | 0.05784  | 0.21217  | -0.06524 | 0.15928  | 0.10842  |
| 0.049645 | 0.28434  | -0.05562 | 0.23024  | 0.011748 | 0.80011  | -0.13771 | 0.00286  | -0.07342 |
| 0.077125 | 0.09597  | 0.241186 | 1.32E-07 | 0.29386  | 9.36E-11 | 0.170732 | 0.00021  | 0.124688 |
| -0.0039  | 0.93302  | 0.099324 | 0.03188  | 0.143762 | 0.00184  | -0.00119 | 0.97962  | -0.16724 |

|          |         |          |          |          |          |          |          |          |
|----------|---------|----------|----------|----------|----------|----------|----------|----------|
| 0.025043 | 0.58932 | -0.04128 | 0.37345  | 0.028158 | 0.54386  | -0.0298  | 0.52063  | 0.089081 |
| 0.076789 | 0.09743 | 0.099347 | 0.03184  | 0.212808 | 3.49E-06 | -0.05645 | 0.22334  | -0.10288 |
| -0.02816 | 0.54386 | -0.0181  | 0.69646  | 0.10603  | 0.02193  | -0.04528 | 0.32882  | -0.01971 |
| 0.038662 | 0.40453 | 0.016796 | 0.71734  | 0.06271  | 0.1761   | -0.05438 | 0.24081  | -0.04481 |
| -0.02962 | 0.52312 | 0.015716 | 0.7348   | 0.065531 | 0.1574   | -0.04929 | 0.28781  | -0.14559 |
| 0.133654 | 0.00381 | 0.392867 | 1.10E-18 | 0.430555 | 1.69E-22 | 0.215015 | 2.75E-06 | 0.126746 |
| -0.03248 | 0.4838  | -0.09216 | 0.04654  | -0.04501 | 0.33177  | -0.20368 | 9.15E-06 | -0.16095 |
| 0.169509 | 0.00023 | 0.038143 | 0.41086  | 0.272554 | 2.13E-09 | -0.05128 | 0.26872  | -0.00734 |
| -0.02446 | 0.59805 | 0.07087  | 0.12618  | 0.157035 | 0.00066  | -0.02689 | 0.56219  | -0.05137 |
| 0.141562 | 0.00217 | 0.286109 | 3.01E-10 | 0.322917 | 8.55E-13 | 0.248252 | 5.46E-08 | 0.2256   |
| 0.019046 | 0.68143 | 0.02864  | 0.53698  | 0.12047  | 0.00916  | -0.10241 | 0.0269   | -0.09782 |
| 0.027694 | 0.55052 | 0.035861 | 0.43944  | 0.106692 | 0.02111  | -0.08964 | 0.05289  | -0.09906 |
| 0.084271 | 0.06884 | 0.056993 | 0.21895  | 0.223462 | 1.07E-06 | -0.04096 | 0.37712  | -0.01794 |
| 0.000796 | 0.9863  | 0.016509 | 0.72197  | 0.096787 | 0.03654  | -0.02288 | 0.62193  | -0.02522 |
| 0.03054  | 0.51031 | 0.031392 | 0.49857  | 0.081071 | 0.08009  | -0.08181 | 0.07736  | -0.06987 |
| -0.07589 | 0.10141 | -0.0338  | 0.46618  | 0.005696 | 0.9023   | -0.16607 | 0.00031  | -0.11141 |
| 0.043758 | 0.34541 | -0.07096 | 0.12571  | 0.151291 | 0.00104  | -0.14411 | 0.0018   | -0.00478 |
| 0.024406 | 0.59883 | 0.028489 | 0.53913  | 0.054951 | 0.23593  | 0.012624 | 0.78555  | -0.06684 |
| 0.171125 | 0.0002  | 0.001451 | 0.97506  | 0.148236 | 0.00132  | -0.0493  | 0.28773  | -0.00709 |
| 0.073982 | 0.11034 | 0.020641 | 0.65639  | 0.069583 | 0.13323  | -0.03861 | 0.40518  | -0.02161 |
| 0.102926 | 0.02614 | -0.03742 | 0.41983  | 0.010047 | 0.82856  | -0.07414 | 0.1096   | 0.016835 |
| 0.118838 | 0.01016 | 0.021962 | 0.63593  | 0.24092  | 1.36E-07 | -0.09083 | 0.04981  | -0.05429 |
| -0.00911 | 0.84428 | 0.065331 | 0.15868  | 0.025006 | 0.58987  | -0.08998 | 0.05199  | -0.06279 |
| 0.022956 | 0.62072 | 0.001968 | 0.96617  | 0.092861 | 0.04489  | -0.06641 | 0.15192  | -0.08573 |
| 0.00083  | 0.98573 | 0.03122  | 0.50093  | 0.227464 | 6.78E-07 | 0.013749 | 0.76697  | 0.079635 |
| 0.014465 | 0.75522 | 0.084506 | 0.06807  | 0.140428 | 0.00235  | -0.00363 | 0.93758  | -0.098   |
| 0.032886 | 0.47835 | 0.084771 | 0.0672   | 0.151554 | 0.00102  | -0.04907 | 0.29     | -0.15342 |
| 0.013596 | 0.76949 | -0.08599 | 0.06334  | -0.02254 | 0.62713  | -0.05206 | 0.2615   | 0.191944 |
| 0.109029 | 0.01843 | 0.092157 | 0.04654  | 0.198176 | 1.60E-05 | 0.012639 | 0.7853   | -0.08094 |
| 0.015812 | 0.73325 | 0.064469 | 0.16426  | 0.07622  | 0.09995  | 0.033192 | 0.47426  | 0.082645 |
| 0.076036 | 0.10077 | 0.077646 | 0.09374  | 0.14215  | 0.00207  | -0.01542 | 0.73963  | -0.14382 |
| -0.00049 | 0.99162 | 0.142836 | 0.00197  | 0.17412  | 0.00016  | 0.041292 | 0.3733   | -0.0873  |
| -0.02411 | 0.60322 | -0.07221 | 0.11914  | -0.06207 | 0.18055  | -0.1674  | 0.00028  | -0.22446 |
| -0.02748 | 0.55361 | -0.03878 | 0.40313  | 0.150616 | 0.0011   | -0.11706 | 0.01135  | 0.051404 |
| 0.133878 | 0.00375 | 0.114494 | 0.0133   | 0.325965 | 5.07E-13 | 0.100162 | 0.03045  | 0.118553 |
| 0.037864 | 0.4143  | -0.1041  | 0.02447  | -0.05683 | 0.22024  | -0.14347 | 0.00188  | -0.14956 |
| 0.045621 | 0.32524 | 0.138355 | 0.00273  | 0.104984 | 0.02327  | 0.165455 | 0.00033  | 0.124653 |
| 0.150207 | 0.00113 | -0.03251 | 0.48343  | 0.165638 | 0.00032  | -0.11723 | 0.01123  | -0.05803 |
| 0.030184 | 0.51525 | 0.018147 | 0.69569  | 0.081784 | 0.07747  | -0.0897  | 0.05272  | -0.10559 |
| -0.00936 | 0.84013 | -0.03981 | 0.3907   | -0.00337 | 0.94215  | -0.12754 | 0.00578  | -0.04341 |
| 0.080835 | 0.08098 | 0.057209 | 0.2172   | 0.18821  | 4.26E-05 | -0.05151 | 0.26658  | -0.05998 |
| 0.024323 | 0.60007 | -0.10578 | 0.02224  | -0.04407 | 0.34198  | -0.18264 | 7.19E-05 | -0.105   |
| 0.003095 | 0.94681 | 0.04122  | 0.37413  | 0.096986 | 0.03615  | -0.09205 | 0.04681  | -0.13872 |
| 0.02486  | 0.59205 | 0.231977 | 4.00E-07 | 0.193085 | 2.66E-05 | 0.095508 | 0.0391   | -0.11827 |
| 0.007258 | 0.8757  | -0.05129 | 0.26863  | -0.02649 | 0.56792  | -0.13453 | 0.00358  | -0.11566 |



|          |         |          |          |          |          |          |          |          |
|----------|---------|----------|----------|----------|----------|----------|----------|----------|
| 0.025801 | 0.5781  | -0.08943 | 0.05344  | 0.031474 | 0.49745  | -0.18631 | 5.10E-05 | -0.02881 |
| 0.070163 | 0.13002 | 0.004393 | 0.92457  | 0.076334 | 0.09944  | -0.05745 | 0.21529  | -0.08241 |
| 0.050201 | 0.27897 | 0.28317  | 4.64E-10 | 0.234954 | 2.81E-07 | 0.172988 | 0.00017  | -0.12675 |
| -0.01729 | 0.7094  | -0.01292 | 0.78072  | 0.119085 | 0.01     | -0.11121 | 0.0162   | -0.06462 |
| 0.059002 | 0.20311 | -0.05653 | 0.22275  | 0.194015 | 2.43E-05 | -0.13307 | 0.00397  | 0.029643 |
| 0.09502  | 0.04012 | 0.064929 | 0.16126  | 0.27082  | 2.71E-09 | -0.0417  | 0.36856  | -0.01078 |
| 0.070532 | 0.128   | 0.0005   | 0.9914   | 0.144468 | 0.00175  | -0.16163 | 0.00045  | -0.05695 |
| -0.00182 | 0.96878 | -0.0091  | 0.8445   | 0.119596 | 0.00969  | -0.06834 | 0.14032  | -0.08431 |
| 0.044806 | 0.33396 | 0.03733  | 0.42092  | 0.119221 | 0.00992  | -0.02975 | 0.52133  | -0.01511 |
| 0.08349  | 0.07146 | -0.03069 | 0.50825  | 0.031748 | 0.49372  | -0.07622 | 0.09997  | -0.1027  |
| 0.037836 | 0.41465 | 0.006455 | 0.88935  | 0.088936 | 0.05479  | -0.07789 | 0.09273  | -0.05785 |
| 0.040573 | 0.38168 | -0.04683 | 0.31257  | 0.082249 | 0.07579  | -0.10747 | 0.02018  | -0.06579 |
| 0.095178 | 0.03978 | 0.162007 | 0.00044  | 0.201111 | 1.19E-05 | 0.051559 | 0.26616  | 0.037585 |
| -0.13061 | 0.0047  | -0.02862 | 0.5373   | -0.10526 | 0.02292  | 0.08902  | 0.05455  | 0.191267 |
| 0.078904 | 0.08853 | -0.00065 | 0.98881  | 0.10505  | 0.02319  | -0.04167 | 0.36897  | 0.148916 |
| 0.044033 | 0.34238 | -0.10579 | 0.02223  | 0.015684 | 0.73533  | -0.09554 | 0.03904  | -0.05182 |
| 0.029707 | 0.52191 | 0.005375 | 0.90777  | 0.168015 | 0.00027  | -0.07409 | 0.1098   | -0.03962 |
| 0.028928 | 0.53289 | 0.118887 | 0.01013  | 0.238915 | 1.74E-07 | -0.02344 | 0.61332  | -0.09185 |
| -0.05413 | 0.24298 | 0.036114 | 0.43622  | -0.11719 | 0.01126  | 0.084158 | 0.06921  | -0.0252  |
| 0.084047 | 0.06958 | 0.04258  | 0.35856  | 0.232592 | 3.72E-07 | -0.06976 | 0.13227  | 0.076834 |
| 0.053755 | 0.2463  | 0.149305 | 0.00121  | 0.237602 | 2.04E-07 | 0.108462 | 0.01905  | 0.118359 |
| -0.02118 | 0.64793 | 0.159513 | 0.00054  | 0.17927  | 9.81E-05 | 0.09611  | 0.03788  | 0.158545 |
| 0.003627 | 0.93769 | -0.03998 | 0.38868  | 0.05112  | 0.27026  | -0.07932 | 0.08684  | 0.018246 |
| 0.004988 | 0.91439 | -0.00719 | 0.8769   | 0.076624 | 0.09816  | -0.05134 | 0.26819  | -0.01237 |
| 0.030066 | 0.5169  | 0.093014 | 0.04454  | 0.209078 | 5.20E-06 | -0.06432 | 0.16526  | -0.08147 |
| 0.001827 | 0.9686  | -0.01141 | 0.80575  | -0.00499 | 0.91438  | -0.10292 | 0.02615  | -0.04937 |
| -0.01115 | 0.81017 | -0.02583 | 0.57765  | -0.00793 | 0.86422  | -0.09119 | 0.04891  | -0.12981 |
| 0.010877 | 0.81465 | 0.087692 | 0.05828  | 0.237145 | 2.16E-07 | -0.01619 | 0.72711  | -0.02827 |
| -0.02338 | 0.61423 | 0.003353 | 0.94239  | -0.00589 | 0.89892  | -0.10918 | 0.01827  | -0.09826 |
| 0.105267 | 0.0229  | 0.034573 | 0.45606  | 0.221026 | 1.41E-06 | -0.06471 | 0.16269  | 0.049056 |
| 0.03074  | 0.50754 | -0.00563 | 0.9034   | 0.124947 | 0.00686  | -0.02278 | 0.62334  | 0.062683 |
| 0.046489 | 0.31611 | -0.05509 | 0.23476  | -0.0301  | 0.51643  | -0.06716 | 0.14733  | -0.08983 |
| 0.132596 | 0.0041  | 0.116733 | 0.01159  | 0.129459 | 0.00508  | 0.009197 | 0.84286  | -0.07567 |
| 0.006565 | 0.88749 | 0.103842 | 0.02483  | 0.202059 | 1.08E-05 | -0.03029 | 0.51379  | -0.01962 |
| 0.036175 | 0.43545 | -0.13685 | 0.00304  | 0.115993 | 0.01213  | -0.20671 | 6.68E-06 | 0.034634 |
| -0.02102 | 0.65053 | 0.053456 | 0.24895  | 0.004208 | 0.92773  | 0.028132 | 0.54424  | -0.09191 |
| 0.054201 | 0.2424  | 0.006439 | 0.88962  | 0.133159 | 0.00394  | -0.10496 | 0.0233   | -0.06611 |
| 0.025435 | 0.58351 | -0.06731 | 0.14639  | 0.020959 | 0.65143  | -0.12101 | 0.00885  | 0.023233 |
| 0.065953 | 0.15474 | 0.118061 | 0.01067  | 0.226301 | 7.75E-07 | 0.008291 | 0.85817  | -0.08213 |
| 0.025212 | 0.58681 | 0.083241 | 0.07231  | 0.173692 | 0.00016  | 0.040181 | 0.3863   | -0.00145 |
| -0.00923 | 0.84232 | 0.095492 | 0.03913  | 0.13191  | 0.0043   | -0.01583 | 0.73293  | -0.10102 |
| 0.059864 | 0.19658 | -0.09761 | 0.03497  | 0.011456 | 0.80498  | -0.09667 | 0.03677  | 0.076614 |
| -0.03725 | 0.42194 | -0.10422 | 0.02431  | 0.091708 | 0.04763  | -0.17448 | 0.00015  | -0.03475 |
| 0.068549 | 0.13911 | -0.01551 | 0.73816  | 0.108963 | 0.0185   | 0.059918 | 0.19617  | 0.081462 |
| -0.02704 | 0.55993 | -0.06503 | 0.16063  | 0.039696 | 0.39207  | -0.12869 | 0.00535  | -0.15564 |

|          |          |          |          |          |          |          |          |          |
|----------|----------|----------|----------|----------|----------|----------|----------|----------|
| -0.13768 | 0.00287  | -0.00855 | 0.85385  | -0.23135 | 4.31E-07 | 0.070277 | 0.12939  | -0.02578 |
| 0.11524  | 0.0127   | -0.07515 | 0.10483  | 0.079406 | 0.08651  | -0.12832 | 0.00549  | -0.01631 |
| 0.07135  | 0.12363  | 0.190437 | 3.44E-05 | 0.325701 | 5.30E-13 | 0.078001 | 0.09225  | -0.00718 |
| 0.050562 | 0.27552  | -0.03278 | 0.47982  | 0.222305 | 1.22E-06 | -0.17995 | 9.22E-05 | 0.006773 |
| 0.052652 | 0.25614  | -0.06661 | 0.15067  | 0.123533 | 0.00753  | -0.1222  | 0.0082   | 0.111258 |
| 0.029219 | 0.52878  | -0.06646 | 0.15161  | 0.053743 | 0.2464   | -0.07512 | 0.10497  | 0.080509 |
| 0.084896 | 0.0668   | 0.017476 | 0.70641  | 0.182768 | 7.11E-05 | 0.023777 | 0.60829  | -0.02222 |
| 0.024888 | 0.59163  | -0.04001 | 0.3883   | 0.017474 | 0.70644  | -0.13946 | 0.00252  | -0.15804 |
| 0.041521 | 0.37065  | 0.077134 | 0.09593  | 0.109782 | 0.01763  | -0.00099 | 0.9829   | -0.04486 |
| 0.039844 | 0.39031  | 0.04846  | 0.296    | -0.00321 | 0.94477  | -0.02741 | 0.55468  | -0.13626 |
| 0.094048 | 0.04221  | 0.00562  | 0.9036   | 0.260036 | 1.18E-08 | -0.10471 | 0.02364  | 0.002052 |
| 0.183276 | 6.78E-05 | 0.269093 | 3.44E-09 | 0.477829 | 5.18E-28 | 0.157915 | 0.00061  | 0.159974 |
| 0.273019 | 1.99E-09 | 0.2044   | 8.49E-06 | 0.438357 | 2.38E-23 | 0.116951 | 0.01143  | 0.083442 |
| -0.04303 | 0.35354  | 0.048731 | 0.29331  | 0.063431 | 0.17117  | -0.05612 | 0.22607  | -0.13798 |
| 0.0389   | 0.40164  | -0.03743 | 0.4197   | 0.030897 | 0.50538  | -0.11694 | 0.01144  | -0.09079 |
| 0.067737 | 0.14386  | 0.023933 | 0.60593  | 0.071176 | 0.12455  | -0.0438  | 0.34498  | -0.00545 |
| -0.10659 | 0.02123  | -0.088   | 0.0574   | 0.032658 | 0.48141  | -0.07364 | 0.11201  | 0.004949 |
| -0.00876 | 0.85024  | 0.089173 | 0.05414  | 0.036578 | 0.43034  | 0.000646 | 0.98889  | -0.10338 |
| 0.012625 | 0.78553  | 0.015693 | 0.73519  | 0.023478 | 0.6128   | -0.02041 | 0.66001  | -0.06062 |
| 0.013924 | 0.76409  | -0.01003 | 0.82891  | 0.072836 | 0.11598  | 0.007839 | 0.86584  | 0.085891 |
| -0.09745 | 0.03526  | 0.038545 | 0.40595  | -0.12517 | 0.00676  | 0.183289 | 6.77E-05 | 0.130841 |
| 0.103152 | 0.02581  | 0.149718 | 0.00117  | 0.237672 | 2.02E-07 | 0.085105 | 0.06613  | 0.065144 |
| 0.056981 | 0.21905  | -0.01518 | 0.74348  | -0.00205 | 0.9648   | -0.10083 | 0.02936  | 0.00476  |
| 0.116057 | 0.01208  | 0.077035 | 0.09636  | 0.286063 | 3.03E-10 | 0.051842 | 0.26354  | 0.006026 |
| 0.127494 | 0.0058   | 0.247598 | 5.93E-08 | 0.3753   | 4.56E-17 | 0.139398 | 0.00254  | 0.003807 |
| -0.01893 | 0.68324  | -0.09898 | 0.03248  | 0.020154 | 0.664    | -0.11592 | 0.01218  | 0.095525 |
| 0.07225  | 0.11895  | -0.09419 | 0.04191  | 0.087064 | 0.06011  | -0.09433 | 0.0416   | 0.089959 |
| 0.05937  | 0.2003   | 0.078682 | 0.08943  | 0.198149 | 1.61E-05 | 0.05281  | 0.25472  | 0.220298 |
| 0.038912 | 0.40149  | -0.06251 | 0.17751  | -0.01141 | 0.80578  | -0.10637 | 0.0215   | 0.017236 |
| 0.086455 | 0.06193  | -0.13242 | 0.00415  | 0.039801 | 0.39081  | -0.18369 | 6.53E-05 | 0.035728 |
| 0.016397 | 0.72378  | 0.006702 | 0.88515  | 0.134074 | 0.0037   | -0.10179 | 0.02784  | -0.04985 |
| -0.01154 | 0.80364  | -0.13989 | 0.00245  | -0.02806 | 0.54532  | -0.18734 | 4.63E-05 | 0.06414  |
| 0.135446 | 0.00336  | 0.151375 | 0.00103  | 0.344291 | 1.93E-14 | 0.070855 | 0.12626  | 0.042076 |
| 0.093657 | 0.04308  | 0.10004  | 0.03066  | 0.139267 | 0.00256  | -0.02984 | 0.52002  | -0.15122 |
| -0.08186 | 0.07718  | -0.02045 | 0.65936  | -0.07072 | 0.12701  | 0.089219 | 0.05402  | 0.021059 |
| 0.024805 | 0.59287  | 0.038557 | 0.40581  | 0.10021  | 0.03037  | -0.04727 | 0.30801  | -0.03706 |
| 0.052373 | 0.25867  | 0.039324 | 0.39652  | 0.158453 | 0.00059  | -0.0001  | 0.99826  | 0.154047 |
| -0.02413 | 0.60297  | -0.13613 | 0.0032   | 0.021149 | 0.64849  | -0.20164 | 1.13E-05 | -0.12055 |
| -0.10769 | 0.01993  | 0.115932 | 0.01217  | 0.029716 | 0.52179  | 0.148206 | 0.00132  | 0.00663  |
| 0.084676 | 0.06751  | -0.03321 | 0.47407  | 0.065185 | 0.15961  | -0.05724 | 0.21692  | 0.147804 |
| 0.138064 | 0.00279  | 0.130675 | 0.00468  | 0.262457 | 8.52E-09 | 0.037188 | 0.4227   | 0.123    |
| 0.156919 | 0.00067  | 0.220809 | 1.45E-06 | 0.260121 | 1.17E-08 | 0.078071 | 0.09196  | -0.00628 |
| 0.088416 | 0.05622  | -0.03333 | 0.47245  | 0.152549 | 0.00094  | -0.03933 | 0.3965   | 0.203332 |
| 0.005685 | 0.90248  | -0.10492 | 0.02336  | 0.05387  | 0.24529  | -0.14327 | 0.00191  | 0.014284 |
| -0.02178 | 0.63877  | 0.100546 | 0.02982  | -0.01111 | 0.81069  | 0.09846  | 0.0334   | 0.047976 |

|          |          |          |          |          |          |          |          |          |
|----------|----------|----------|----------|----------|----------|----------|----------|----------|
| 0.05787  | 0.21193  | 0.077868 | 0.0928   | -0.0117  | 0.80094  | 0.162695 | 0.00042  | 0.127511 |
| -0.0413  | 0.3732   | -0.00741 | 0.8732   | 0.055021 | 0.23534  | -0.12361 | 0.00749  | -0.12584 |
| 0.128895 | 0.00528  | 0.13558  | 0.00333  | 0.227193 | 6.99E-07 | -0.00393 | 0.93243  | -0.07483 |
| -0.24013 | 1.50E-07 | -0.22499 | 9.01E-07 | -0.35084 | 5.67E-15 | -0.21093 | 4.27E-06 | -0.10352 |
| -0.0011  | 0.98102  | 0.013979 | 0.76319  | 0.064733 | 0.16253  | 0.001302 | 0.97762  | -0.03355 |
| 0.408528 | 3.27E-20 | 0.082557 | 0.07469  | 0.203637 | 9.19E-06 | 0.034201 | 0.46093  | -0.03978 |
| 0.117583 | 0.01099  | 0.024626 | 0.59554  | 0.166697 | 0.0003   | -0.02931 | 0.52746  | -0.00409 |
| 0.085623 | 0.06449  | 0.06762  | 0.14455  | 0.133186 | 0.00394  | -0.05711 | 0.21803  | -0.07939 |
| -0.02798 | 0.54638  | 0.030509 | 0.51074  | 0.134051 | 0.00371  | -0.06331 | 0.17197  | -0.08023 |
| -0.03196 | 0.4908   | -0.03687 | 0.42663  | 0.049424 | 0.28649  | -0.03215 | 0.48823  | 0.02261  |
| -0.14211 | 0.00208  | -0.10012 | 0.03052  | -0.23895 | 1.73E-07 | -0.01255 | 0.78683  | 0.008137 |
| 0.132872 | 0.00402  | 0.012247 | 0.79181  | 0.081992 | 0.07671  | -0.01523 | 0.74269  | -0.03234 |
| 0.169215 | 0.00024  | 0.344754 | 1.77E-14 | 0.44713  | 2.46E-24 | 0.18388  | 6.41E-05 | -0.03868 |
| 0.082374 | 0.07534  | 0.070461 | 0.12839  | 0.118164 | 0.0106   | 0.036729 | 0.42844  | 0.146223 |
| 0.046472 | 0.31629  | -0.02282 | 0.62281  | 0.158845 | 0.00057  | -0.07779 | 0.09313  | 0.104972 |
| -0.00976 | 0.83332  | 0.06416  | 0.16629  | 0.172469 | 0.00018  | -0.03513 | 0.44883  | -0.07827 |
| 0.128246 | 0.00551  | 0.240763 | 1.39E-07 | 0.39435  | 7.95E-19 | 0.107659 | 0.01996  | 0.027631 |
| 0.057479 | 0.21504  | 0.067132 | 0.14748  | 0.119807 | 0.00956  | -0.04076 | 0.37947  | -0.06744 |
| -0.00186 | 0.96799  | 0.030794 | 0.50679  | 0.114282 | 0.01347  | -0.01549 | 0.7385   | -0.07266 |
| -0.0041  | 0.92966  | 0.127299 | 0.00587  | 0.102412 | 0.02689  | 0.016243 | 0.72626  | -0.16296 |
| -0.02832 | 0.54161  | 0.044286 | 0.33962  | 0.092215 | 0.0464   | 0.04495  | 0.33241  | 0.124327 |
| 0.036795 | 0.42761  | -0.03785 | 0.41447  | 0.045831 | 0.32302  | -0.06296 | 0.17434  | 0.056565 |
| 0.058413 | 0.20766  | -0.00693 | 0.88123  | 0.055757 | 0.22912  | -0.08304 | 0.073    | -0.09102 |
| -0.0545  | 0.23982  | -0.07378 | 0.11131  | -0.04121 | 0.37423  | -0.22877 | 5.82E-07 | -0.14941 |
| -0.04435 | 0.33892  | 0.009486 | 0.838    | 0.036647 | 0.42948  | -0.08212 | 0.07626  | -0.04007 |
| 0.034618 | 0.45547  | 0.103256 | 0.02566  | 0.167762 | 0.00027  | 0.067071 | 0.14785  | 0.092839 |
| 0.017162 | 0.71145  | -0.02574 | 0.579    | 0.035449 | 0.44472  | -0.12192 | 0.00835  | -0.13335 |
| -0.00504 | 0.91354  | -0.00811 | 0.86128  | -0.05736 | 0.21597  | 0.07145  | 0.12311  | 0.125899 |
| -0.0252  | 0.58699  | 0.183749 | 6.49E-05 | 0.204718 | 8.22E-06 | 0.094528 | 0.04116  | -0.06706 |
| -0.03741 | 0.41997  | 0.036984 | 0.42524  | 0.162095 | 0.00044  | -0.02429 | 0.60062  | -0.05876 |
| 0.054846 | 0.23683  | -0.05922 | 0.20141  | 0.104339 | 0.02414  | -0.17803 | 0.00011  | -0.11222 |
| 0.144997 | 0.00168  | 0.085581 | 0.06462  | 0.25684  | 1.80E-08 | -0.05666 | 0.22169  | -0.09173 |
| -0.02124 | 0.64706  | 0.009803 | 0.83267  | 0.082989 | 0.07318  | -0.07519 | 0.10462  | -0.00893 |
| -0.10987 | 0.01755  | 0.077492 | 0.0944   | -0.07397 | 0.1104   | 0.143661 | 0.00186  | 0.004057 |
| 0.03777  | 0.41547  | -0.07137 | 0.12351  | 0.079003 | 0.08813  | -0.19398 | 2.43E-05 | -0.10254 |
| 0.129764 | 0.00498  | 0.312586 | 4.82E-12 | 0.413591 | 1.01E-20 | 0.240173 | 1.49E-07 | 0.059752 |
| 0.022763 | 0.62367  | 0.027606 | 0.55179  | 0.171772 | 0.00019  | 0.043721 | 0.34582  | 0.140875 |
| 0.004309 | 0.926    | 0.112268 | 0.01521  | 0.137423 | 0.00292  | 0.049685 | 0.28395  | -0.10485 |
| -0.01641 | 0.72358  | -0.09092 | 0.04958  | -0.01923 | 0.67858  | -0.14693 | 0.00145  | -0.0431  |
| 0.075601 | 0.10274  | 0.212985 | 3.42E-06 | 0.309969 | 7.39E-12 | 0.293013 | 1.07E-10 | 0.465883 |
| -0.03169 | 0.49449  | -0.0032  | 0.94499  | -0.17878 | 0.0001   | 0.070696 | 0.12712  | 0.048963 |
| -0.03538 | 0.44565  | 0.18143  | 8.05E-05 | 0.047561 | 0.30507  | 0.266706 | 4.78E-09 | 0.461269 |
| -0.05587 | 0.2282   | 0.021517 | 0.6428   | 0.093784 | 0.04279  | -0.15226 | 0.00096  | -0.10988 |
| 0.0962   | 0.0377   | 0.059667 | 0.19805  | 0.193042 | 2.67E-05 | 0.058463 | 0.20728  | 0.244974 |
| -0.05582 | 0.22856  | 0.00191  | 0.96716  | 0.063796 | 0.16872  | 0.034401 | 0.4583   | -0.00143 |

|          |         |          |          |          |          |          |          |          |
|----------|---------|----------|----------|----------|----------|----------|----------|----------|
| 0.038729 | 0.40371 | 0.045565 | 0.32584  | 0.130169 | 0.00484  | 0.065348 | 0.15857  | 0.147108 |
| 0.005955 | 0.89787 | -0.02695 | 0.56128  | 0.01389  | 0.76465  | -0.09123 | 0.04879  | -0.02761 |
| -0.02849 | 0.53907 | 0.09832  | 0.03366  | 0.115961 | 0.01215  | 0.022481 | 0.62798  | -0.08252 |
| 0.005087 | 0.91269 | 0.141772 | 0.00213  | 0.215747 | 2.53E-06 | 0.010539 | 0.82031  | -0.10463 |
| 0.101395 | 0.02846 | 0.101935 | 0.02762  | 0.240894 | 1.37E-07 | -0.02332 | 0.6152   | -0.02605 |
| 0.099128 | 0.03222 | 0.433794 | 7.53E-23 | 0.312553 | 4.84E-12 | 0.289177 | 1.90E-10 | -0.16311 |
| 0.038595 | 0.40535 | 0.029066 | 0.53094  | 0.172185 | 0.00018  | -0.07854 | 0.09002  | -0.09558 |
| -0.0604  | 0.19261 | -0.06735 | 0.14618  | -0.22867 | 5.90E-07 | -0.02575 | 0.57879  | -0.04016 |
| -0.08217 | 0.07609 | -0.02786 | 0.54814  | -0.18185 | 7.74E-05 | 0.03311  | 0.47535  | -0.00761 |
| -0.06084 | 0.18934 | 0.089082 | 0.05439  | -0.08729 | 0.05945  | 0.194119 | 2.40E-05 | -0.01654 |
| -0.09595 | 0.03821 | -0.20823 | 5.69E-06 | -0.18842 | 4.18E-05 | -0.1197  | 0.00962  | 0.183473 |
| 0.008752 | 0.85039 | -0.02173 | 0.63954  | 0.094333 | 0.04159  | -0.09668 | 0.03674  | 0.09723  |
| 0.015022 | 0.74611 | -0.00858 | 0.85327  | 0.033568 | 0.46927  | -0.09957 | 0.03145  | -0.04409 |
| -0.0423  | 0.36174 | -0.06475 | 0.1624   | -0.12895 | 0.00526  | -0.03006 | 0.51703  | 0.120537 |
| -0.0165  | 0.72206 | 0.042528 | 0.35915  | -0.02422 | 0.60168  | -0.04289 | 0.35512  | -0.25658 |
| 0.025993 | 0.57527 | -0.00158 | 0.97278  | 0.13392  | 0.00374  | -0.11011 | 0.0173   | 0.013884 |
| -0.00194 | 0.96666 | 0.037669 | 0.41672  | 0.055106 | 0.23461  | 0.022266 | 0.63126  | -0.03549 |
| 0.083257 | 0.07226 | 0.049038 | 0.29028  | 0.093539 | 0.04334  | 0.004724 | 0.9189   | 0.00649  |
| -0.04875 | 0.29313 | -0.06802 | 0.14218  | 0.026302 | 0.57074  | -0.13885 | 0.00264  | 0.044231 |
| -0.0168  | 0.7172  | 0.028356 | 0.54103  | 0.122472 | 0.00806  | -0.00921 | 0.84265  | -0.03183 |
| -0.01812 | 0.6961  | 0.097761 | 0.03468  | 0.126814 | 0.00607  | -0.01881 | 0.68508  | -0.12259 |
| 0.016758 | 0.71795 | -0.03434 | 0.45906  | -0.07927 | 0.08706  | -0.07737 | 0.09491  | -0.20563 |
| -0.03252 | 0.48326 | 0.088886 | 0.05492  | 0.051327 | 0.26832  | 0.056157 | 0.22579  | -0.074   |
| 0.018972 | 0.68259 | 0.075494 | 0.10323  | 0.183494 | 6.65E-05 | -0.07038 | 0.12884  | -0.05113 |
| -0.1189  | 0.01012 | -0.26599 | 5.28E-09 | -0.14889 | 0.00125  | -0.23933 | 1.66E-07 | 0.0052   |
| 0.005806 | 0.90043 | 0.012969 | 0.77985  | 0.089323 | 0.05373  | -0.09861 | 0.03314  | -0.10191 |
| 0.064496 | 0.16408 | -0.00909 | 0.84476  | 0.077376 | 0.09489  | -0.03712 | 0.42354  | 0.008429 |
| 0.071071 | 0.12511 | 0.119948 | 0.00947  | 0.04452  | 0.33706  | 0.033632 | 0.46843  | -0.17485 |
| 0.065935 | 0.15485 | -0.01608 | 0.72886  | 0.073349 | 0.11343  | -0.08844 | 0.05616  | -0.09586 |
| 0.06548  | 0.15772 | -0.12338 | 0.0076   | -0.03454 | 0.45645  | -0.12271 | 0.00794  | 0.041072 |
| 0.075913 | 0.10133 | 0.06655  | 0.15103  | 0.126909 | 0.00603  | -0.03348 | 0.47045  | -0.06518 |
| 0.154776 | 0.00079 | 0.240194 | 1.49E-07 | 0.337777 | 6.31E-14 | 0.142069 | 0.00209  | 0.123447 |
| 0.118896 | 0.01012 | -0.03062 | 0.50914  | 0.116815 | 0.01153  | -0.14962 | 0.00118  | 0.048918 |
| 0.039995 | 0.38851 | 0.146873 | 0.00146  | 0.105033 | 0.02321  | 0.082959 | 0.07329  | 0.090314 |
| -0.02516 | 0.58753 | -0.16293 | 0.00041  | -0.13749 | 0.00291  | -0.1518  | 0.001    | 0.041795 |
| -0.11745 | 0.01108 | -0.03701 | 0.42494  | -0.19125 | 3.18E-05 | 0.016341 | 0.72468  | 0.168761 |
| 0.02181  | 0.63827 | 0.048063 | 0.29998  | 0.07368  | 0.11181  | 0.013238 | 0.77539  | -0.17997 |
| 0.055073 | 0.23489 | -0.08102 | 0.08027  | 0.042621 | 0.35809  | -0.13976 | 0.00247  | 0.127261 |
| 0.028282 | 0.54208 | -0.10659 | 0.02124  | 0.01352  | 0.77075  | -0.21152 | 4.01E-06 | -0.01757 |
| 0.023094 | 0.61862 | 0.019318 | 0.67713  | 0.141963 | 0.0021   | -0.09936 | 0.03181  | 0.001475 |
| 0.049123 | 0.28944 | -0.1169  | 0.01147  | 0.01246  | 0.78827  | -0.12022 | 0.00931  | 0.002593 |
| 0.043811 | 0.34482 | -0.06482 | 0.162    | 0.106537 | 0.0213   | -0.11777 | 0.01087  | -0.01845 |
| 0.05003  | 0.28061 | -0.08633 | 0.06231  | 0.140892 | 0.00227  | -0.16152 | 0.00046  | 0.001422 |
| -0.00882 | 0.84923 | 0.048677 | 0.29385  | -0.09626 | 0.03757  | -0.00865 | 0.85216  | -0.09701 |
| -0.06081 | 0.18955 | 0.210627 | 4.41E-06 | 0.078178 | 0.09151  | 0.196384 | 1.92E-05 | -0.07958 |

|          |          |          |          |          |          |          |          |          |
|----------|----------|----------|----------|----------|----------|----------|----------|----------|
| 0.012289 | 0.79112  | -0.13543 | 0.00336  | -0.02578 | 0.57841  | -0.16747 | 0.00028  | -0.0536  |
| -0.05558 | 0.23058  | -0.03729 | 0.42142  | 0.018001 | 0.69802  | 0.016265 | 0.72591  | 0.041803 |
| -0.03042 | 0.512    | 0.172345 | 0.00018  | 0.164549 | 0.00036  | 0.052359 | 0.2588   | -0.12437 |
| -0.01757 | 0.70487  | -0.07873 | 0.08925  | 0.028736 | 0.53561  | -0.14615 | 0.00154  | -0.00635 |
| -0.08956 | 0.05311  | -0.1067  | 0.0211   | -0.06377 | 0.16886  | -0.11273 | 0.01479  | -0.09684 |
| -0.00744 | 0.87263  | -0.08774 | 0.05815  | 0.024539 | 0.59684  | -0.10568 | 0.02237  | 0.146409 |
| 0.113369 | 0.01424  | -0.03589 | 0.43901  | 0.097957 | 0.03432  | -0.10333 | 0.02555  | -0.00556 |
| -0.03485 | 0.45241  | -0.10899 | 0.01848  | -0.19896 | 1.48E-05 | -0.01257 | 0.78646  | 0.06088  |
| 0.12609  | 0.00636  | 0.025276 | 0.58587  | 0.281824 | 5.64E-10 | -0.08656 | 0.06162  | -0.02394 |
| -0.00563 | 0.90348  | -0.01596 | 0.7308   | 0.054551 | 0.23937  | -0.11703 | 0.01138  | -0.08807 |
| 0.049569 | 0.28508  | -0.00404 | 0.93063  | 0.094463 | 0.04131  | -0.05559 | 0.23051  | -0.12371 |
| 0.024809 | 0.59281  | 0.032632 | 0.48175  | 0.05487  | 0.23663  | 0.074375 | 0.10845  | -0.05304 |
| -0.02195 | 0.63609  | -0.0186  | 0.68849  | 0.002143 | 0.96317  | -0.07374 | 0.1115   | -0.04785 |
| 0.007845 | 0.86574  | 0.020712 | 0.65529  | -0.03203 | 0.48987  | 0.127402 | 0.00583  | 0.156492 |
| 0.053021 | 0.25282  | 0.051383 | 0.26779  | 0.04502  | 0.33166  | 0.001084 | 0.98136  | 0.033742 |
| -0.02973 | 0.52166  | -0.14187 | 0.00212  | -0.05353 | 0.24832  | -0.19162 | 3.07E-05 | -0.04063 |
| 0.014406 | 0.75619  | 0.100443 | 0.02999  | 0.23654  | 2.32E-07 | -0.0021  | 0.96388  | 0.03215  |
| 0.022734 | 0.62411  | 0.038951 | 0.40101  | 0.108053 | 0.01951  | -0.02166 | 0.64052  | -0.13541 |
| 0.199658 | 1.38E-05 | 0.344944 | 1.71E-14 | 0.464232 | 2.45E-26 | 0.222957 | 1.14E-06 | 0.209979 |
| -0.08482 | 0.06704  | -0.15491 | 0.00078  | -0.17399 | 0.00016  | -0.12392 | 0.00734  | -0.10254 |
| -0.00845 | 0.85555  | -0.06006 | 0.19515  | -0.06098 | 0.18837  | -0.16276 | 0.00041  | -0.13473 |
| -0.01241 | 0.7891   | 0.015431 | 0.73944  | 0.009326 | 0.84071  | -0.03954 | 0.39398  | -0.10154 |
| 0.123156 | 0.00771  | 0.089324 | 0.05373  | 0.250702 | 3.99E-08 | 0.038648 | 0.40469  | 0.138204 |
| 0.070851 | 0.12628  | 0.109229 | 0.01822  | 0.199465 | 1.41E-05 | 0.030275 | 0.51399  | -0.03073 |
| 0.05225  | 0.25979  | -0.12612 | 0.00635  | 0.014887 | 0.74832  | -0.12993 | 0.00492  | 0.014019 |
| -0.06884 | 0.13742  | -0.14269 | 0.00199  | -0.13069 | 0.00467  | -0.16858 | 0.00025  | 0.029658 |
| 0.030682 | 0.50834  | -0.0827  | 0.07418  | -0.06028 | 0.19348  | -0.16868 | 0.00025  | -0.07576 |
| 0.11679  | 0.01155  | 0.17445  | 0.00015  | 0.217722 | 2.04E-06 | 0.104855 | 0.02345  | 0.151604 |
| 0.042819 | 0.35586  | -0.07642 | 0.09907  | 0.096017 | 0.03806  | -0.1434  | 0.00189  | 0.129551 |
| 0.101459 | 0.02836  | 0.236395 | 2.36E-07 | 0.195608 | 2.07E-05 | 0.156183 | 0.00071  | 0.02281  |
| 0.082854 | 0.07365  | 0.040544 | 0.38203  | 0.126858 | 0.00605  | -0.07545 | 0.10344  | -0.02811 |
| 0.088144 | 0.05699  | 0.078894 | 0.08857  | 0.178888 | 0.0001   | -0.07139 | 0.12342  | -0.0667  |
| 0.074493 | 0.10789  | -0.05647 | 0.22325  | 0.031853 | 0.49229  | -0.11336 | 0.01425  | -0.00141 |
| 0.032087 | 0.48911  | 0.002551 | 0.95615  | 0.049338 | 0.28733  | -0.05946 | 0.19961  | -0.09333 |
| 0.023991 | 0.60505  | 0.009634 | 0.8355   | 0.100626 | 0.02969  | 0.116951 | 0.01143  | 0.243468 |
| 0.007034 | 0.8795   | -0.06042 | 0.19243  | 0.017502 | 0.70599  | -0.12545 | 0.00664  | -0.0033  |
| 0.010695 | 0.8177   | -0.06334 | 0.1718   | 0.074526 | 0.10774  | -0.12576 | 0.0065   | 0.001911 |
| 0.031817 | 0.49278  | -0.02968 | 0.52232  | 0.060438 | 0.19232  | -0.08677 | 0.06097  | 0.057782 |
| 0.05315  | 0.25166  | -0.04077 | 0.37936  | 0.060366 | 0.19285  | -0.06005 | 0.19522  | 0.088401 |
| -0.04114 | 0.37502  | 0.005086 | 0.91272  | 0.03335  | 0.47216  | -0.06097 | 0.18842  | -0.11881 |
| -0.00767 | 0.86872  | 0.154724 | 0.00079  | 0.186752 | 4.89E-05 | -0.02012 | 0.66446  | -0.08096 |
| -0.15158 | 0.00102  | -0.11016 | 0.01724  | -0.231   | 4.49E-07 | 0.043733 | 0.34568  | 0.17933  |
| 0.223266 | 1.10E-06 | 0.228557 | 5.97E-07 | 0.423888 | 8.66E-22 | 0.159921 | 0.00052  | 0.282321 |
| 0.073614 | 0.11213  | -0.08118 | 0.07969  | 0.153246 | 0.00089  | -0.11781 | 0.01083  | 0.033704 |
| -0.05454 | 0.23946  | -0.08492 | 0.06673  | -0.02736 | 0.55536  | -0.19792 | 1.65E-05 | -0.09958 |

|          |          |          |          |          |          |          |          |          |
|----------|----------|----------|----------|----------|----------|----------|----------|----------|
| 0.009395 | 0.83954  | 0.016854 | 0.71641  | 0.093967 | 0.04239  | -0.08326 | 0.07225  | -0.12159 |
| 0.050755 | 0.27369  | 0.021146 | 0.64854  | 0.18675  | 4.89E-05 | -0.04274 | 0.35679  | -0.01102 |
| 0.069653 | 0.13284  | 0.11358  | 0.01406  | 0.13472  | 0.00354  | -0.03035 | 0.51301  | -0.14462 |
| 0.008028 | 0.86263  | -0.0254  | 0.58402  | 0.10303  | 0.02598  | -0.08499 | 0.0665   | -0.00092 |
| -0.00874 | 0.85063  | 0.116805 | 0.01154  | 0.091566 | 0.04797  | 0.035454 | 0.44465  | -0.01125 |
| 0.024271 | 0.60085  | -0.04158 | 0.36995  | 0.077386 | 0.09485  | -0.16846 | 0.00026  | -0.01739 |
| 0.001514 | 0.97398  | 0.049292 | 0.28778  | 0.094116 | 0.04206  | -0.07464 | 0.10718  | -0.15337 |
| 0.044387 | 0.33851  | 0.142113 | 0.00208  | 0.232966 | 3.56E-07 | 0.091487 | 0.04817  | 0.062272 |
| 0.061873 | 0.18195  | -0.03803 | 0.41222  | 0.080646 | 0.0817   | -0.10553 | 0.02256  | -0.01811 |
| 0.04422  | 0.34033  | -0.09    | 0.05194  | 0.112348 | 0.01514  | -0.08598 | 0.06338  | 0.072801 |
| -0.01483 | 0.74917  | -0.01666 | 0.71955  | 0.026965 | 0.56107  | 0.100089 | 0.03057  | 0.351183 |
| 0.013536 | 0.77048  | -0.02691 | 0.5619   | 0.016556 | 0.72121  | -0.15004 | 0.00115  | -0.02338 |
| 0.005974 | 0.89755  | -0.12219 | 0.00821  | -0.03234 | 0.48567  | -0.19966 | 1.38E-05 | 0.048527 |
| 0.068858 | 0.13733  | 0.112688 | 0.01483  | 0.165671 | 0.00032  | 0.045123 | 0.33056  | -0.01655 |
| -0.0358  | 0.44025  | -0.02265 | 0.62535  | -0.09607 | 0.03796  | -0.08754 | 0.05871  | -0.02034 |
| 0.21926  | 1.72E-06 | 0.214852 | 2.79E-06 | 0.355999 | 2.12E-15 | 0.121565 | 0.00854  | 0.226774 |
| 0.003341 | 0.94259  | 0.058805 | 0.20463  | 0.121485 | 0.00859  | -0.00819 | 0.85995  | -0.0729  |
| 0.038958 | 0.40093  | -0.13438 | 0.00362  | -0.06972 | 0.13247  | -0.12868 | 0.00536  | 0.152026 |
| -0.00885 | 0.84864  | 0.051402 | 0.26762  | 0.006456 | 0.88934  | 0.035098 | 0.44924  | 0.048299 |
| -0.18557 | 5.47E-05 | 0.027055 | 0.55976  | -0.11732 | 0.01117  | 0.031557 | 0.49632  | -0.04977 |
| 0.043877 | 0.34409  | 0.049538 | 0.28538  | 0.13851  | 0.0027   | -0.09535 | 0.03943  | -0.13645 |
| 0.011086 | 0.81115  | -0.02999 | 0.51792  | 0.01632  | 0.72501  | -0.06118 | 0.18693  | -0.12907 |
| 0.044184 | 0.34072  | 0.107411 | 0.02025  | 0.175472 | 0.00014  | -0.02681 | 0.56335  | -0.04009 |
| -0.01117 | 0.80972  | 0.021191 | 0.64785  | 0.081482 | 0.07857  | -0.10508 | 0.02314  | -0.13054 |
| -0.06782 | 0.14337  | 0.09823  | 0.03382  | 0.120039 | 0.00942  | 0.059441 | 0.19977  | -0.02296 |
| 0.081091 | 0.08002  | 0.035837 | 0.43975  | 0.189243 | 3.86E-05 | -0.10299 | 0.02603  | -0.09572 |
| 0.026185 | 0.57245  | -0.05146 | 0.26703  | 0.025467 | 0.58303  | -0.11045 | 0.01695  | -0.14856 |
| 0.057475 | 0.21507  | -0.06903 | 0.13637  | 0.105139 | 0.02307  | -0.13282 | 0.00403  | -0.05245 |
| 0.053446 | 0.24903  | 0.017223 | 0.71047  | 0.151658 | 0.00101  | -0.05759 | 0.21413  | -0.00895 |
| -0.0642  | 0.16603  | 0.085084 | 0.0662   | -0.09593 | 0.03824  | 0.168845 | 0.00025  | 0.053569 |
| 0.044563 | 0.33659  | -0.19066 | 3.36E-05 | 0.042568 | 0.35869  | -0.26965 | 3.19E-09 | 0.0515   |
| -0.07068 | 0.12722  | 0.015057 | 0.74554  | -0.05818 | 0.20946  | -0.12641 | 0.00623  | -0.10279 |
| -0.01131 | 0.80746  | -0.07293 | 0.1155   | -0.07154 | 0.12263  | -0.15985 | 0.00053  | -0.14396 |
| -0.0512  | 0.26948  | 0.103872 | 0.02478  | 0.105856 | 0.02214  | -0.01123 | 0.80872  | -0.02826 |
| 0.046277 | 0.31832  | -0.02792 | 0.54733  | 0.043935 | 0.34346  | -0.04441 | 0.33829  | -0.01407 |
| 0.063142 | 0.17313  | -0.01244 | 0.7886   | 0.031877 | 0.49196  | -0.05236 | 0.25883  | -0.06471 |
| 0.044176 | 0.34081  | -0.00351 | 0.93962  | 0.05287  | 0.25418  | -0.06377 | 0.1689   | 0.036313 |
| -0.08545 | 0.06502  | -0.19463 | 2.28E-05 | -0.1637  | 0.00038  | -0.13524 | 0.00341  | 0.136952 |
| 0.155932 | 0.00072  | 0.106769 | 0.02101  | 0.066011 | 0.15438  | 0.083246 | 0.07229  | 0.005654 |
| -0.03285 | 0.47881  | 0.035993 | 0.43776  | -0.09092 | 0.04957  | -0.04393 | 0.3435   | -0.03569 |
| 0.059829 | 0.19684  | 0.005198 | 0.9108   | 0.141259 | 0.00221  | -0.12609 | 0.00636  | -0.10041 |
| 0.151732 | 0.001    | 0.230446 | 4.79E-07 | 0.265796 | 5.42E-09 | 0.066013 | 0.15436  | -0.07884 |
| 0.002324 | 0.96005  | 0.007361 | 0.87394  | 0.123123 | 0.00773  | -0.01037 | 0.8231   | 0.159467 |
| -0.04915 | 0.28914  | -0.02377 | 0.60833  | -0.08927 | 0.05388  | -0.05583 | 0.22853  | -0.09112 |
| 0.054278 | 0.24173  | 0.011631 | 0.80206  | 0.12817  | 0.00554  | -0.1199  | 0.0095   | -0.03727 |

|          |         |          |          |          |          |          |          |          |
|----------|---------|----------|----------|----------|----------|----------|----------|----------|
| -0.1063  | 0.02159 | -0.19762 | 1.70E-05 | -0.20216 | 1.07E-05 | -0.14745 | 0.0014   | 0.088724 |
| -0.00061 | 0.98959 | 0.052164 | 0.26058  | 0.050244 | 0.27856  | -0.04253 | 0.35914  | -0.00604 |
| 0.020903 | 0.65231 | -0.09321 | 0.04409  | 0.034463 | 0.4575   | -0.13918 | 0.00257  | 0.041582 |
| -0.07584 | 0.10165 | -0.07663 | 0.09813  | 0.095353 | 0.03942  | -0.1861  | 5.21E-05 | -0.10668 |
| -0.0029  | 0.9501  | -0.07106 | 0.12515  | -0.08734 | 0.05928  | -0.03575 | 0.44084  | 0.063278 |
| 0.007177 | 0.87708 | -0.05319 | 0.25132  | 0.140095 | 0.00241  | -0.13915 | 0.00258  | 0.003219 |
| 0.066636 | 0.1505  | 0.070845 | 0.12632  | 0.146408 | 0.00151  | 0.078229 | 0.0913   | 0.205974 |
| 0.070095 | 0.13039 | 0.041166 | 0.37476  | 0.183483 | 6.65E-05 | -0.09288 | 0.04485  | -0.03063 |
| -0.10989 | 0.01752 | 0.036321 | 0.43359  | -0.08296 | 0.07328  | 0.00352  | 0.93952  | -0.07069 |
| 0.014507 | 0.75453 | -0.09667 | 0.03676  | 0.010143 | 0.82695  | -0.11675 | 0.01157  | -0.08859 |
| 0.025816 | 0.57788 | 0.051503 | 0.26668  | 0.147321 | 0.00141  | -0.02432 | 0.6001   | -0.09275 |
| -0.12892 | 0.00527 | -0.06281 | 0.1754   | 0.062654 | 0.17648  | -0.13489 | 0.00349  | -0.0529  |
| -0.11575 | 0.01231 | -0.0204  | 0.6601   | -0.10417 | 0.02437  | 0.028268 | 0.54229  | 0.116672 |
| 0.146827 | 0.00146 | 0.155668 | 0.00074  | 0.298498 | 4.58E-11 | 0.114416 | 0.01336  | 0.085087 |
| -0.06041 | 0.19249 | 0.003204 | 0.94494  | -0.15025 | 0.00113  | -0.01646 | 0.7227   | -0.14062 |
| 0.055294 | 0.23302 | 0.0378   | 0.41509  | 0.021609 | 0.64137  | -0.01681 | 0.71717  | -0.04475 |
| -0.01739 | 0.70783 | 0.025745 | 0.57892  | 0.136665 | 0.00308  | -0.12992 | 0.00492  | -0.10591 |
| 0.053914 | 0.2449  | -0.09662 | 0.03686  | -0.03817 | 0.41051  | -0.17801 | 0.00011  | -0.03692 |
| -0.02085 | 0.65319 | -0.07581 | 0.10178  | 0.02585  | 0.57738  | -0.1729  | 0.00017  | -0.07013 |
| -0.02479 | 0.59305 | -0.13349 | 0.00385  | -0.02622 | 0.57195  | -0.14203 | 0.00209  | -0.02726 |
| 0.027679 | 0.55073 | -0.09723 | 0.03568  | 0.083145 | 0.07264  | -0.17487 | 0.00015  | -0.00163 |
| -0.02588 | 0.57688 | -0.08961 | 0.05297  | 0.009994 | 0.82945  | -0.19422 | 2.38E-05 | -0.08439 |
| 0.033909 | 0.46477 | -0.01056 | 0.81992  | 0.079779 | 0.08504  | -0.10761 | 0.02002  | -0.02589 |
| 0.031353 | 0.49911 | -0.04576 | 0.32374  | 0.088779 | 0.05522  | -0.13982 | 0.00246  | -0.01724 |
| 0.040082 | 0.38748 | -0.01074 | 0.81689  | 0.0949   | 0.04037  | -0.02357 | 0.61146  | 0.090178 |
| 0.021172 | 0.64813 | -0.06543 | 0.15804  | 0.010343 | 0.82359  | -0.13819 | 0.00277  | -0.06677 |
| 0.028702 | 0.5361  | -0.09121 | 0.04886  | -0.04776 | 0.30309  | -0.10221 | 0.0272   | -0.04943 |
| 0.054564 | 0.23925 | 0.050039 | 0.28053  | 0.207872 | 5.91E-06 | -0.03537 | 0.44576  | -0.01551 |
| 0.05147  | 0.26698 | -0.03142 | 0.49813  | 0.133186 | 0.00394  | -0.11918 | 0.00994  | -0.00977 |
| 0.022961 | 0.62065 | -0.04697 | 0.3111   | 0.110437 | 0.01696  | -0.11973 | 0.00961  | -0.00985 |
| 0.055207 | 0.23376 | 0.017136 | 0.71187  | 0.185874 | 5.32E-05 | -0.09001 | 0.0519   | -0.02022 |
| 0.074698 | 0.10693 | 0.037567 | 0.41797  | 0.180678 | 8.62E-05 | -0.07654 | 0.09855  | 0.004875 |
| 0.051845 | 0.26351 | -0.06363 | 0.16985  | 0.087977 | 0.05746  | -0.09353 | 0.04337  | -0.00068 |
| 0.017035 | 0.7135  | -0.07147 | 0.12301  | 0.095597 | 0.03892  | -0.12153 | 0.00857  | -0.03323 |
| 0.023808 | 0.60782 | -0.00018 | 0.99688  | 0.123534 | 0.00752  | -0.0452  | 0.32975  | 0.012038 |
| -0.00054 | 0.99064 | -0.01556 | 0.73731  | 0.126522 | 0.00618  | -0.05174 | 0.26449  | -0.02158 |
| -0.06151 | 0.18452 | -0.05213 | 0.26092  | -0.08916 | 0.05416  | -0.0015  | 0.97425  | 0.061812 |
| 0.099649 | 0.03132 | 0.039874 | 0.38995  | 0.202915 | 9.90E-06 | -0.07974 | 0.0852   | -0.06468 |
| 0.044474 | 0.33757 | -0.01335 | 0.77359  | 0.127957 | 0.00562  | -0.05746 | 0.2152   | 0.002843 |
| 0.106324 | 0.02156 | 0.17556  | 0.00014  | 0.254035 | 2.60E-08 | 0.173142 | 0.00017  | 0.10419  |
| 0.057293 | 0.21653 | -0.04767 | 0.30392  | 0.061314 | 0.18594  | -0.07798 | 0.09234  | -0.07653 |
| 0.03211  | 0.4888  | 0.04756  | 0.30507  | 0.117125 | 0.01131  | -0.04188 | 0.36655  | -0.08802 |
| 0.038774 | 0.40317 | 0.010825 | 0.81552  | 0.182838 | 7.06E-05 | -0.15059 | 0.0011   | -0.07083 |
| 0.031768 | 0.49344 | 0.00759  | 0.87006  | 0.178618 | 0.0001   | -0.07549 | 0.10325  | 0.072405 |
| 0.017859 | 0.70028 | -0.05626 | 0.22495  | 0.067109 | 0.14762  | -0.17869 | 0.0001   | -0.0861  |

|          |         |           |          |          |          |          |          |          |
|----------|---------|-----------|----------|----------|----------|----------|----------|----------|
| 0.002733 | 0.95303 | -0.1625   | 0.00042  | 0.007551 | 0.87072  | -0.21126 | 4.12E-06 | -0.0611  |
| 0.023177 | 0.61737 | 0.026601  | 0.56637  | 0.139667 | 0.00249  | -0.10323 | 0.0257   | -0.08158 |
| -0.04111 | 0.37546 | -0.09729  | 0.03556  | 0.005276 | 0.90947  | -0.10009 | 0.03056  | 0.077449 |
| -0.13445 | 0.0036  | -0.11015  | 0.01726  | -0.05968 | 0.19793  | 0.017706 | 0.70273  | 0.16969  |
| 0.108864 | 0.01861 | -0.04364  | 0.34672  | 0.17854  | 0.0001   | -0.10565 | 0.02241  | -0.00321 |
| -0.00395 | 0.93211 | 0.135516  | 0.00334  | 0.050049 | 0.28043  | 0.070249 | 0.12954  | -0.15729 |
| 0.02183  | 0.63797 | 0.099128  | 0.03222  | 0.190028 | 3.58E-05 | 0.005721 | 0.90186  | -0.08597 |
| -0.08638 | 0.06216 | 0.019984  | 0.66665  | -0.09918 | 0.03213  | 0.007168 | 0.87723  | -0.04914 |
| -0.05365 | 0.24721 | -0.00995  | 0.83022  | 0.035456 | 0.44463  | -0.06427 | 0.16555  | 0.061331 |
| 0.05484  | 0.23689 | 0.029136  | 0.52995  | 0.051822 | 0.26373  | 0.024227 | 0.60152  | -0.08863 |
| -0.10723 | 0.02046 | -0.17521  | 0.00014  | -0.11162 | 0.01582  | -0.23663 | 2.30E-07 | -0.15685 |
| 0.02373  | 0.60899 | -0.03986  | 0.39012  | 0.058038 | 0.21061  | -0.08541 | 0.06518  | -0.06476 |
| 0.062874 | 0.17497 | 0.093761  | 0.04284  | 0.149974 | 0.00115  | -0.04234 | 0.36123  | -0.09689 |
| -0.02536 | 0.58459 | -0.14611  | 0.00155  | -0.05566 | 0.22991  | -0.12812 | 0.00556  | 0.050918 |
| 0.178401 | 0.00011 | -0.02085  | 0.65313  | 0.097609 | 0.03497  | -0.10873 | 0.01876  | -0.07421 |
| -0.08448 | 0.06816 | -0.11319  | 0.01439  | -0.16887 | 0.00025  | -0.1118  | 0.01565  | -0.03444 |
| -0.00359 | 0.93838 | -0.0713   | 0.12389  | -0.0245  | 0.59749  | -0.09705 | 0.03603  | -0.02941 |
| 0.090231 | 0.05134 | 0.101092  | 0.02894  | 0.140936 | 0.00227  | 0.008201 | 0.85971  | -0.03105 |
| 0.0499   | 0.28187 | -0.0231   | 0.61858  | 0.11454  | 0.01326  | -0.08488 | 0.06686  | 0.105736 |
| -0.04593 | 0.322   | -0.16699  | 0.00029  | -0.17778 | 0.00011  | -0.12626 | 0.00629  | -0.0277  |
| -0.1427  | 0.00199 | -0.08329  | 0.07213  | -0.25317 | 2.91E-08 | -0.11844 | 0.01041  | -0.10851 |
| -0.0329  | 0.47814 | 0.001559  | 0.97319  | -0.03072 | 0.50782  | 0.107171 | 0.02053  | 0.065606 |
| -0.00487 | 0.91637 | -0.01471  | 0.75127  | 0.060866 | 0.18918  | -0.09025 | 0.05128  | -0.10023 |
| 0.035312 | 0.44648 | 0.112734  | 0.01479  | 0.061297 | 0.18606  | 0.056661 | 0.22165  | 0.098611 |
| 0.021464 | 0.64362 | 0.025742  | 0.57897  | 0.007592 | 0.87002  | -0.0251  | 0.58848  | -0.14225 |
| -0.08145 | 0.0787  | 0.089221  | 0.05401  | -0.02361 | 0.61076  | 0.107542 | 0.0201   | 0.030291 |
| 0.068523 | 0.13926 | -0.04248  | 0.35966  | 0.139075 | 0.0026   | -0.15299 | 0.00091  | -0.06403 |
| 0.017362 | 0.70825 | 0.062379  | 0.17839  | 0.068367 | 0.14016  | 0.007654 | 0.86897  | -0.10374 |
| 0.037275 | 0.4216  | -0.01563  | 0.73619  | 0.160198 | 0.00051  | -0.11418 | 0.01355  | 0.011449 |
| 0.041215 | 0.37419 | -0.00343  | 0.94107  | 0.06502  | 0.16067  | -0.06252 | 0.17744  | -0.0601  |
| -0.03292 | 0.47788 | -0.00347  | 0.94037  | -0.01108 | 0.81122  | -0.06551 | 0.15751  | -0.07534 |
| 0.094626 | 0.04096 | 0.001866  | 0.96792  | 0.116815 | 0.01153  | -0.06835 | 0.14024  | -0.0332  |
| 0.072552 | 0.11741 | -2.58E-05 | 0.99956  | 0.178285 | 0.00011  | -0.0717  | 0.1218   | -0.05114 |
| 0.083251 | 0.07228 | 0.162012  | 0.00044  | 0.240769 | 1.39E-07 | 0.140042 | 0.00242  | 0.063066 |
| 0.09103  | 0.0493  | 0.206895  | 6.55E-06 | 0.17554  | 0.00014  | 0.145992 | 0.00156  | 0.04593  |
| -0.04506 | 0.33124 | 0.087764  | 0.05807  | -0.03507 | 0.44959  | 0.080444 | 0.08246  | 0.069211 |
| 0.092654 | 0.04537 | 0.043999  | 0.34276  | 0.074387 | 0.1084   | -0.03939 | 0.39577  | -0.03549 |
| -0.03062 | 0.5092  | -0.15695  | 0.00066  | 0.022886 | 0.6218   | -0.32225 | 9.57E-13 | -0.13769 |
| -0.01781 | 0.70112 | -0.01935  | 0.67667  | -0.11973 | 0.00961  | -0.12095 | 0.00889  | -0.20528 |
| 0.024521 | 0.5971  | -0.07613  | 0.10035  | 0.162382 | 0.00043  | -0.21224 | 3.71E-06 | 0.003104 |
| -0.06224 | 0.17934 | 0.054312  | 0.24143  | -0.00497 | 0.91472  | -0.02883 | 0.53425  | -0.11545 |
| -0.07716 | 0.0958  | -0.00598  | 0.89741  | -0.09093 | 0.04955  | 0.130739 | 0.00466  | 0.117608 |
| 0.001428 | 0.97544 | -0.08127  | 0.07936  | -0.01254 | 0.78694  | -0.09335 | 0.04376  | -0.02645 |
| 0.0415   | 0.37089 | -0.05979  | 0.19716  | 0.105839 | 0.02217  | -0.14624 | 0.00153  | -0.08229 |
| 0.039382 | 0.39583 | 0.094005  | 0.0423   | 0.103993 | 0.02462  | -0.01636 | 0.72433  | -0.14247 |



|          |          |          |          |          |          |          |          |          |
|----------|----------|----------|----------|----------|----------|----------|----------|----------|
| -0.05578 | 0.22893  | 0.0072   | 0.87668  | 0.056096 | 0.2263   | -0.04743 | 0.30637  | -0.08558 |
| 0.180695 | 8.61E-05 | 0.057417 | 0.21553  | 0.171476 | 0.0002   | -0.06659 | 0.15081  | -0.01335 |
| -0.11167 | 0.01576  | -0.16238 | 0.00043  | -0.14183 | 0.00212  | -0.0334  | 0.47145  | 0.222445 |
| 0.035282 | 0.44687  | -0.05475 | 0.23765  | 0.067484 | 0.14537  | -0.16921 | 0.00024  | -0.00933 |
| 0.015287 | 0.74178  | 0.020658 | 0.65613  | 0.040381 | 0.38394  | -0.02851 | 0.53887  | -0.02316 |
| 0.026239 | 0.57166  | 0.025214 | 0.58678  | -0.01114 | 0.81021  | -0.07669 | 0.09785  | -0.16125 |
| 0.008793 | 0.84969  | 0.090579 | 0.05044  | 0.19497  | 2.21E-05 | -0.04501 | 0.33178  | -0.07911 |
| -0.17151 | 0.0002   | -0.16788 | 0.00027  | -0.25967 | 1.24E-08 | -0.083   | 0.07316  | -0.09152 |
| 0.123739 | 0.00743  | -0.03083 | 0.50626  | 0.081191 | 0.07965  | -0.07506 | 0.10521  | -0.0337  |
| 0.08239  | 0.07529  | 0.0183   | 0.69325  | 0.201886 | 1.10E-05 | -0.09069 | 0.05016  | 0.055788 |
| 0.037663 | 0.41679  | 0.09877  | 0.03285  | 0.156359 | 0.0007   | -0.02785 | 0.54822  | -0.13962 |
| 0.093237 | 0.04402  | 0.139801 | 0.00246  | 0.356787 | 1.82E-15 | 0.13174  | 0.00435  | 0.080346 |
| 0.015429 | 0.73947  | 0.106806 | 0.02097  | 0.200688 | 1.24E-05 | 0.03515  | 0.44857  | -0.1121  |
| 0.038222 | 0.4099   | 0.122215 | 0.0082   | 0.0009   | 0.98452  | 0.267488 | 4.30E-09 | 0.235264 |
| 0.028643 | 0.53694  | -0.04097 | 0.37709  | -0.0134  | 0.77274  | 0.024242 | 0.60129  | 0.156947 |
| -0.01492 | 0.74769  | -0.03286 | 0.47873  | 0.014809 | 0.74959  | -0.10608 | 0.02186  | -0.13246 |
| -0.14785 | 0.00135  | -0.16013 | 0.00051  | -0.24024 | 1.48E-07 | -0.09017 | 0.05149  | 0.04409  |
| -0.06546 | 0.15785  | -0.01404 | 0.76215  | -0.14356 | 0.00187  | 0.087987 | 0.05743  | 0.176061 |
| -0.15265 | 0.00094  | -0.12499 | 0.00684  | -0.09685 | 0.03641  | -0.06886 | 0.13735  | 0.047617 |
| 0.057411 | 0.21559  | 0.198646 | 1.53E-05 | 0.20318  | 9.63E-06 | 0.095355 | 0.03942  | -0.04321 |
| -0.11632 | 0.01188  | -0.04922 | 0.28851  | -0.15448 | 0.00081  | 0.093371 | 0.04372  | 0.096241 |
| -0.02554 | 0.58197  | 0.056768 | 0.22078  | 0.240589 | 1.42E-07 | -0.00986 | 0.83167  | -0.00689 |
| 0.013878 | 0.76485  | 0.008118 | 0.86111  | -0.00158 | 0.97276  | -0.09941 | 0.03173  | -0.057   |
| 0.072712 | 0.1166   | 0.113331 | 0.01427  | 0.127389 | 0.00584  | 0.036807 | 0.42746  | -0.07018 |
| -0.02885 | 0.53407  | -0.21343 | 3.26E-06 | -0.18953 | 3.75E-05 | -0.20304 | 9.77E-06 | -0.03185 |
| 0.073792 | 0.11126  | 0.145465 | 0.00162  | 0.175854 | 0.00013  | 0.083449 | 0.0716   | -0.14175 |
| 0.104342 | 0.02414  | 0.122413 | 0.00809  | 0.261991 | 9.07E-09 | 0.025734 | 0.57909  | 0.189119 |
| 0.016135 | 0.72801  | 0.033182 | 0.47439  | 0.172079 | 0.00019  | -0.10678 | 0.021    | -0.06926 |
| -0.00157 | 0.97296  | 0.081557 | 0.07829  | 0.013367 | 0.77326  | 0.031186 | 0.5014   | -0.01613 |
| -0.0094  | 0.83944  | 0.054842 | 0.23687  | -0.03598 | 0.4379   | 0.046558 | 0.31539  | -0.09594 |
| 0.06918  | 0.13549  | 0.439261 | 1.89E-23 | 0.429552 | 2.16E-22 | 0.36087  | 8.25E-16 | 0.205592 |
| 0.075828 | 0.10171  | -0.05886 | 0.20422  | 0.089211 | 0.05404  | -0.12553 | 0.0066   | -0.03282 |
| -0.05504 | 0.23515  | -0.15245 | 0.00095  | -0.16142 | 0.00046  | -0.04143 | 0.37167  | 0.0355   |
| -0.02537 | 0.58447  | -0.16207 | 0.00044  | -0.04804 | 0.30018  | -0.16866 | 0.00025  | 0.061295 |
| 0.029259 | 0.52821  | -0.114   | 0.0137   | 0.061466 | 0.18484  | -0.19731 | 1.75E-05 | 0.027337 |
| 0.084242 | 0.06894  | 0.181052 | 8.33E-05 | 0.227259 | 6.94E-07 | 0.058399 | 0.20777  | -0.05858 |
| -0.0168  | 0.71721  | 0.040742 | 0.37971  | 0.090138 | 0.05158  | -0.0409  | 0.3779   | -0.06607 |
| -0.02336 | 0.61457  | -0.06952 | 0.13361  | 0.040292 | 0.385    | -0.14594 | 0.00157  | -0.07791 |
| -0.03833 | 0.4086   | -0.13797 | 0.00281  | -0.00336 | 0.94226  | -0.20988 | 4.78E-06 | -0.12442 |
| -0.0521  | 0.26115  | -0.2141  | 3.03E-06 | -0.09102 | 0.04933  | -0.12198 | 0.00832  | 0.191969 |
| 0.093741 | 0.04289  | 0.042759 | 0.35654  | 0.229931 | 5.09E-07 | 0.016824 | 0.71689  | 0.173902 |
| 0.112992 | 0.01456  | 0.057626 | 0.21387  | 0.144071 | 0.0018   | -0.06079 | 0.18976  | -0.12481 |
| 0.025156 | 0.58764  | 0.08363  | 0.07098  | 0.019332 | 0.6769   | 0.149105 | 0.00123  | 0.117124 |
| 0.024628 | 0.5955   | 0.182219 | 7.48E-05 | 0.047154 | 0.30923  | 0.097753 | 0.0347   | 0.012595 |
| -0.1936  | 2.53E-05 | -0.05836 | 0.20809  | -0.09467 | 0.04087  | -0.0251  | 0.5884   | 0.03424  |

|          |          |          |          |          |          |          |          |          |
|----------|----------|----------|----------|----------|----------|----------|----------|----------|
| -0.03241 | 0.48468  | -0.18333 | 6.75E-05 | 0.007501 | 0.87157  | -0.21173 | 3.92E-06 | -0.01876 |
| 0.046329 | 0.31778  | -0.00064 | 0.98901  | 0.157691 | 0.00063  | -0.11762 | 0.01096  | -0.09509 |
| -0.01744 | 0.70693  | 0.010472 | 0.82143  | 0.055056 | 0.23503  | -0.06172 | 0.18304  | -0.08178 |
| 0.026819 | 0.56319  | -0.03182 | 0.49278  | 0.111366 | 0.01605  | -0.14062 | 0.00232  | -0.03591 |
| 0.01571  | 0.73491  | -0.03335 | 0.47213  | 0.030565 | 0.50997  | -0.09361 | 0.04318  | -0.08287 |
| 0.094227 | 0.04182  | 0.042735 | 0.35681  | 0.226519 | 7.56E-07 | 0.024702 | 0.5944   | 0.17794  |
| 0.016546 | 0.72137  | 0.037099 | 0.42381  | 0.047289 | 0.30785  | -0.0105  | 0.82095  | 0.044708 |
| 0.028512 | 0.53881  | 0.239583 | 1.61E-07 | 0.265354 | 5.76E-09 | 0.196476 | 1.90E-05 | 0.069648 |
| 0.173156 | 0.00017  | 0.113083 | 0.01448  | 0.333693 | 1.31E-13 | 0.060304 | 0.1933   | 0.106706 |
| -0.0933  | 0.04387  | 0.018929 | 0.68327  | -0.05862 | 0.20607  | 0.031728 | 0.49399  | 0.014716 |
| 0.140325 | 0.00237  | 0.024061 | 0.604    | 0.107746 | 0.01986  | -0.02759 | 0.55208  | 0.009436 |
| 0.001112 | 0.98088  | 0.082709 | 0.07416  | 0.143131 | 0.00193  | -0.02581 | 0.57794  | -0.00512 |
| -0.19085 | 3.30E-05 | -0.16817 | 0.00026  | -0.35341 | 3.48E-15 | -0.15021 | 0.00113  | -0.16615 |
| -0.12187 | 0.00838  | -0.13103 | 0.00456  | -0.32919 | 2.89E-13 | -0.05831 | 0.20847  | -0.10979 |
| 0.077023 | 0.09641  | -0.07403 | 0.11012  | -0.0053  | 0.90901  | -0.13669 | 0.00308  | 0.056147 |
| -0.00349 | 0.94004  | -0.01683 | 0.71672  | -0.11771 | 0.0109   | -0.06953 | 0.13353  | -0.08683 |
| 0.027267 | 0.55669  | 0.010917 | 0.81399  | 0.028918 | 0.53304  | -0.03311 | 0.47529  | -0.0712  |
| -0.03243 | 0.48445  | -0.02342 | 0.61374  | 0.083926 | 0.06999  | -0.14675 | 0.00147  | -0.11521 |
| -0.04992 | 0.28168  | -0.04933 | 0.28744  | 0.075564 | 0.10291  | -0.11707 | 0.01135  | 0.02744  |
| 0.062274 | 0.17912  | -0.0421  | 0.36399  | 0.046738 | 0.31352  | -0.09283 | 0.04497  | -0.01069 |
| 0.07339  | 0.11323  | 0.036435 | 0.43215  | 0.198614 | 1.53E-05 | -0.03152 | 0.4968   | 0.053661 |
| 0.030974 | 0.50431  | -0.03917 | 0.39833  | -0.00379 | 0.93485  | -0.05036 | 0.27744  | -0.07078 |
| -0.03073 | 0.50767  | 0.026586 | 0.56658  | 0.002715 | 0.95334  | -0.03814 | 0.41094  | -0.0838  |
| -0.06247 | 0.17778  | -0.04063 | 0.38102  | -0.00297 | 0.94892  | -0.15964 | 0.00053  | -0.20305 |
| -0.01707 | 0.71297  | 0.023936 | 0.6059   | -0.07116 | 0.12461  | -0.07997 | 0.0843   | -0.18571 |
| -0.0022  | 0.96217  | -0.08784 | 0.05786  | 0.025774 | 0.57849  | -0.14114 | 0.00223  | -0.02039 |
| 0.138755 | 0.00266  | 0.302642 | 2.39E-11 | 0.366234 | 2.86E-16 | 0.138519 | 0.0027   | -0.00756 |
| 0.079017 | 0.08807  | 0.115306 | 0.01265  | 0.101111 | 0.02891  | 0.033349 | 0.47218  | -0.03297 |
| 0.118404 | 0.01044  | 0.319433 | 1.54E-12 | 0.211936 | 3.83E-06 | 0.283248 | 4.58E-10 | -0.03302 |
| 0.126346 | 0.00626  | 0.172746 | 0.00018  | 0.291046 | 1.44E-10 | 0.104999 | 0.02325  | 0.026807 |
| 0.033182 | 0.47439  | -0.0039  | 0.93301  | 0.103437 | 0.0254   | -0.09621 | 0.03768  | -0.07331 |
| 0.064227 | 0.16585  | 0.027578 | 0.55219  | 0.023115 | 0.6183   | -0.0509  | 0.27232  | -0.00624 |
| 0.04068  | 0.38043  | 0.003731 | 0.93591  | 0.104856 | 0.02344  | -0.11393 | 0.01376  | -0.07267 |
| -0.01511 | 0.74463  | 0.018287 | 0.69346  | 0.116837 | 0.01151  | -0.03112 | 0.50234  | -0.07683 |
| 0.035733 | 0.44108  | 0.095746 | 0.03861  | 0.014456 | 0.75535  | 0.006558 | 0.8876   | -0.16319 |
| -0.05704 | 0.21857  | -0.05647 | 0.22322  | 0.015513 | 0.73811  | -0.10114 | 0.02886  | 0.044441 |
| -0.02181 | 0.6383   | -0.14701 | 0.00144  | 0.024571 | 0.59636  | -0.24953 | 4.64E-08 | -0.00204 |
| 0.07212  | 0.11962  | 0.446979 | 2.56E-24 | 0.198521 | 1.55E-05 | 0.492798 | 6.06E-30 | 0.143171 |
| 0.008984 | 0.84647  | -0.13829 | 0.00275  | -0.02936 | 0.52674  | -0.2076  | 6.08E-06 | -0.10534 |
| 0.058857 | 0.20423  | 0.176779 | 0.00012  | 0.202737 | 1.01E-05 | 0.080611 | 0.08183  | -0.01542 |
| 0.198945 | 1.48E-05 | 0.175221 | 0.00014  | 0.362118 | 6.46E-16 | 0.201494 | 1.15E-05 | 0.14475  |
| 0.035792 | 0.44033  | 0.082943 | 0.07334  | 0.151816 | 0.001    | 0.013181 | 0.77634  | 0.010794 |
| -0.03371 | 0.46745  | 0.101284 | 0.02863  | 0.104131 | 0.02442  | 0.031248 | 0.50055  | -0.08105 |
| 0.057542 | 0.21454  | -0.00812 | 0.86111  | 0.098501 | 0.03333  | -0.09324 | 0.04402  | -0.03323 |
| -0.08719 | 0.05975  | -0.07285 | 0.11592  | -0.18307 | 6.91E-05 | -0.06983 | 0.13185  | -0.10048 |

|          |         |          |          |          |          |          |          |          |
|----------|---------|----------|----------|----------|----------|----------|----------|----------|
| 0.029753 | 0.52127 | -0.01366 | 0.7684   | 0.013683 | 0.76806  | -0.0404  | 0.38376  | -0.02968 |
| -0.10623 | 0.02168 | -0.18804 | 4.33E-05 | -0.13558 | 0.00333  | -0.0168  | 0.7173   | 0.226206 |
| 0.011008 | 0.81247 | -0.04009 | 0.38733  | 0.061058 | 0.18778  | -0.1011  | 0.02892  | 0.052991 |
| -0.14892 | 0.00125 | -0.04231 | 0.36165  | -0.14782 | 0.00136  | 0.077871 | 0.09279  | 0.044418 |
| 0.043626 | 0.34687 | 0.246482 | 6.82E-08 | 0.177223 | 0.00012  | 0.369971 | 1.35E-16 | 0.118904 |
| -0.02067 | 0.65599 | -0.0929  | 0.0448   | 0.165998 | 0.00031  | -0.23867 | 1.79E-07 | 0.088997 |
| 0.119994 | 0.00944 | 0.319824 | 1.44E-12 | 0.529308 | 4.45E-35 | 0.285022 | 3.53E-10 | 0.209989 |
| 0.037819 | 0.41486 | 0.005397 | 0.90739  | 0.064812 | 0.16202  | -0.07244 | 0.118    | -0.05266 |
| 0.004572 | 0.92151 | 0.153883 | 0.00085  | 0.083564 | 0.07121  | 0.139756 | 0.00247  | 0.048387 |
| 0.109248 | 0.0182  | -0.05481 | 0.23715  | 0.048302 | 0.29759  | -0.14779 | 0.00136  | 0.007991 |
| 0.045436 | 0.32721 | -0.03272 | 0.48058  | 0.028145 | 0.54404  | -0.12506 | 0.00681  | -0.07412 |
| 0.047487 | 0.30582 | -0.14957 | 0.00119  | 0.07588  | 0.10147  | -0.18467 | 5.95E-05 | 0.070316 |
| -0.01428 | 0.75819 | -0.10082 | 0.02938  | -0.09041 | 0.05087  | -0.1219  | 0.00836  | -0.00197 |
| -0.07365 | 0.11196 | 0.147685 | 0.00137  | 0.058273 | 0.20876  | 0.093436 | 0.04357  | -0.07684 |
| 0.045322 | 0.32842 | -0.07725 | 0.09543  | 0.114421 | 0.01335  | -0.20649 | 6.83E-06 | -0.05465 |
| 0.010505 | 0.82088 | 0.236352 | 2.37E-07 | 0.138415 | 0.00272  | 0.244423 | 8.83E-08 | -0.03108 |
| 0.103802 | 0.02488 | 0.277351 | 1.08E-09 | 0.340344 | 3.97E-14 | 0.188742 | 4.05E-05 | 0.030691 |
| 0.058898 | 0.20391 | 0.069258 | 0.13505  | 0.169112 | 0.00024  | -0.02286 | 0.62215  | -0.02127 |
| 0.05178  | 0.26412 | 0.05333  | 0.25006  | 0.102063 | 0.02742  | -0.02941 | 0.52613  | 0.003886 |
| -0.00074 | 0.98736 | 0.042254 | 0.36226  | 0.021613 | 0.64131  | -0.03847 | 0.40682  | -0.11662 |
| 0.130382 | 0.00477 | 0.050977 | 0.2716   | 0.171161 | 0.0002   | -0.07721 | 0.09563  | -0.09618 |
| 0.07185  | 0.12101 | 0.105252 | 0.02292  | 0.124672 | 0.00699  | 0.116275 | 0.01192  | 0.102031 |
| 0.038379 | 0.40798 | 0.152809 | 0.00092  | 0.155598 | 0.00074  | 0.034869 | 0.45221  | -0.11295 |
| 0.105115 | 0.0231  | 0.219388 | 1.70E-06 | 0.367437 | 2.25E-16 | 0.157324 | 0.00064  | -0.00868 |
| 0.073077 | 0.11478 | -0.0718  | 0.12127  | 0.168276 | 0.00026  | -0.16953 | 0.00023  | 0.0362   |
| -0.06436 | 0.16497 | -0.10001 | 0.03071  | 0.099121 | 0.03223  | -0.22589 | 8.12E-07 | -0.03068 |
| 0.002256 | 0.96123 | -0.02657 | 0.56689  | 0.034847 | 0.4525   | -0.07756 | 0.09412  | -0.0212  |
| 0.071504 | 0.12282 | 0.000625 | 0.98925  | 0.065681 | 0.15645  | -0.06924 | 0.13515  | -0.09123 |
| -0.02819 | 0.54346 | -0.00537 | 0.90781  | 0.076032 | 0.10079  | -0.11408 | 0.01364  | -0.15533 |
| 0.044301 | 0.33945 | 0.106109 | 0.02183  | 0.112321 | 0.01516  | 0.113856 | 0.01382  | 0.085462 |
| 0.039557 | 0.39373 | -0.02428 | 0.60073  | 0.187366 | 4.62E-05 | -0.08634 | 0.06228  | 0.002872 |
| 0.020997 | 0.65085 | -0.02135 | 0.64539  | -0.02674 | 0.56438  | -0.06331 | 0.17198  | -0.05969 |
| 0.013354 | 0.77348 | -0.08927 | 0.05387  | -0.09204 | 0.04682  | -0.15052 | 0.0011   | -0.11946 |
| 0.038681 | 0.4043  | 0.011372 | 0.80637  | 0.142526 | 0.00202  | -0.07253 | 0.1175   | 0.009959 |
| 0.073867 | 0.1109  | -0.03418 | 0.46121  | 0.142582 | 0.00201  | -0.04886 | 0.29207  | 0.089225 |
| 0.057258 | 0.21681 | -0.02589 | 0.57684  | 0.143487 | 0.00188  | -0.11365 | 0.014    | 0.01141  |
| -0.01106 | 0.81163 | -0.12203 | 0.00829  | -0.0242  | 0.60186  | -0.17431 | 0.00015  | -0.11083 |
| 0.030547 | 0.51021 | 0.192419 | 2.84E-05 | 0.155737 | 0.00073  | 0.113227 | 0.01436  | -0.0432  |
| -0.03157 | 0.49614 | 0.147    | 0.00144  | 0.034622 | 0.45542  | 0.172249 | 0.00018  | 0.131629 |
| 0.054455 | 0.24019 | 0.065636 | 0.15673  | 0.192702 | 2.76E-05 | -0.04063 | 0.38105  | 0.001929 |
| 0.022268 | 0.63124 | -0.01084 | 0.81521  | 0.058773 | 0.20488  | -0.09315 | 0.04422  | -0.10625 |
| 0.113827 | 0.01385 | 0.044809 | 0.33394  | 0.218324 | 1.91E-06 | -0.0934  | 0.04365  | -0.04929 |
| 0.008623 | 0.85257 | -0.13173 | 0.00435  | -0.01223 | 0.79203  | -0.16842 | 0.00026  | 0.049052 |
| 0.114788 | 0.01306 | 0.031909 | 0.49153  | 0.210807 | 4.33E-06 | -0.05611 | 0.22622  | -0.05445 |
| -0.07695 | 0.09675 | -0.06885 | 0.13735  | -0.0265  | 0.56788  | -0.06061 | 0.19103  | 0.069689 |

|          |          |          |          |          |          |          |          |          |
|----------|----------|----------|----------|----------|----------|----------|----------|----------|
| 0.130723 | 0.00466  | -0.03853 | 0.40611  | 0.123524 | 0.00753  | -0.05475 | 0.23769  | 0.148131 |
| 0.08327  | 0.07221  | 0.203153 | 9.66E-06 | 0.312006 | 5.30E-12 | 0.145691 | 0.00159  | -0.02929 |
| -0.02967 | 0.52244  | 0.133101 | 0.00396  | 0.246191 | 7.08E-08 | 0.024213 | 0.60173  | 0.096677 |
| 0.059949 | 0.19594  | -0.00396 | 0.93206  | 0.042477 | 0.35972  | 0.046783 | 0.31306  | 0.102117 |
| -0.04033 | 0.38455  | -0.05149 | 0.26678  | 0.01836  | 0.69231  | -0.10935 | 0.01808  | -0.11629 |
| -0.05452 | 0.23963  | -0.07191 | 0.12068  | -0.08068 | 0.08156  | -0.1187  | 0.01025  | -0.02785 |
| -0.16542 | 0.00033  | 0.015858 | 0.7325   | -0.05597 | 0.22735  | 0.129135 | 0.00519  | 0.068159 |
| -0.01174 | 0.80031  | -0.01665 | 0.71962  | 0.085323 | 0.06544  | 0.060617 | 0.191    | 0.219463 |
| 0.076571 | 0.09839  | -0.02314 | 0.61789  | 0.080408 | 0.0826   | -0.08952 | 0.05321  | 0.062428 |
| -0.06716 | 0.14734  | -0.08054 | 0.08211  | -0.10504 | 0.0232   | -0.09556 | 0.03898  | -0.06212 |
| 0.029009 | 0.53174  | -0.13111 | 0.00454  | 0.019434 | 0.6753   | -0.10004 | 0.03066  | 0.049678 |
| -0.11511 | 0.0128   | -0.06419 | 0.16612  | -0.17565 | 0.00014  | 0.028774 | 0.53508  | 0.006047 |
| 0.056413 | 0.22368  | -0.00519 | 0.91094  | 0.001526 | 0.97376  | -0.07686 | 0.09713  | -0.21838 |
| 0.005967 | 0.89767  | -0.04746 | 0.30609  | -0.01008 | 0.82796  | -0.0812  | 0.07962  | 0.032882 |
| -0.07075 | 0.12685  | -0.17721 | 0.00012  | 0.012148 | 0.79346  | -0.24228 | 1.15E-07 | 0.106813 |
| -0.00827 | 0.85859  | 0.083278 | 0.07218  | 0.13024  | 0.00482  | -0.05979 | 0.1971   | 0.00932  |
| 0.014279 | 0.75826  | -0.10779 | 0.01981  | 0.004982 | 0.91449  | -0.17715 | 0.00012  | 0.048124 |
| 0.03301  | 0.47669  | -0.01824 | 0.6942   | 0.087836 | 0.05786  | -0.05865 | 0.20583  | 0.083974 |
| 0.012116 | 0.79398  | 0.018959 | 0.6828   | 0.089953 | 0.05206  | -0.01113 | 0.81046  | -0.00484 |
| 0.023128 | 0.61811  | 0.022434 | 0.6287   | 0.109619 | 0.0178   | -0.03445 | 0.45768  | 0.03086  |
| 0.062285 | 0.17905  | -0.05801 | 0.2108   | 0.043926 | 0.34356  | -0.07025 | 0.12953  | -0.06082 |
| 0.012492 | 0.78774  | -0.06687 | 0.14907  | -0.01392 | 0.76424  | -0.13639 | 0.00314  | -0.06633 |
| -0.06823 | 0.14098  | 0.000634 | 0.98909  | -0.04807 | 0.29993  | 0.157913 | 0.00062  | 0.242366 |
| 0.033661 | 0.46804  | -0.03973 | 0.39164  | -0.00488 | 0.91626  | -0.14271 | 0.00199  | -0.08567 |
| -0.01007 | 0.82814  | 0.180011 | 9.17E-05 | 0.043176 | 0.35186  | 0.199357 | 1.42E-05 | 0.004445 |
| -0.06997 | 0.13108  | -0.11026 | 0.01714  | 0.03803  | 0.41226  | -0.11796 | 0.01073  | 0.033344 |
| 0.062223 | 0.17948  | -0.09319 | 0.04413  | 0.023883 | 0.60668  | -0.10952 | 0.01791  | 0.126639 |
| -0.00393 | 0.93254  | 0.059601 | 0.19855  | 0.087099 | 0.06     | -0.02155 | 0.64225  | -0.09819 |
| -0.03088 | 0.50565  | 0.009908 | 0.8309   | 0.106921 | 0.02083  | -0.03554 | 0.44355  | 0.122146 |
| -0.09186 | 0.04726  | -0.04566 | 0.32478  | -0.2053  | 7.73E-06 | 0.018982 | 0.68244  | 0.05034  |
| 0.000397 | 0.99317  | 0.088216 | 0.05678  | -0.02103 | 0.65039  | 0.071523 | 0.12272  | -0.0045  |
| 0.018404 | 0.69161  | -0.00411 | 0.92938  | 0.123831 | 0.00738  | -0.07266 | 0.11686  | -0.12095 |
| 0.047629 | 0.30437  | 0.079269 | 0.08706  | 0.165919 | 0.00032  | -0.06041 | 0.19253  | -0.11081 |
| 0.019829 | 0.66909  | 0.026981 | 0.56083  | 0.073037 | 0.11497  | -0.0411  | 0.37554  | 0.019232 |
| 0.100487 | 0.02991  | 0.080918 | 0.08067  | 0.215414 | 2.63E-06 | 0.00285  | 0.95102  | 0.049745 |
| 0.046681 | 0.31412  | 0.026205 | 0.57216  | 0.145758 | 0.00159  | -0.09115 | 0.04901  | -0.05081 |
| -0.06728 | 0.14657  | 0.143032 | 0.00194  | -0.04626 | 0.31855  | 0.18004  | 9.14E-05 | 0.031807 |
| 0.022615 | 0.62593  | 0.069248 | 0.13511  | 0.173306 | 0.00017  | -0.0281  | 0.54473  | -0.02793 |
| -0.03487 | 0.45223  | 0.039608 | 0.39312  | -0.19338 | 2.58E-05 | 0.102395 | 0.02692  | 0.023878 |
| 0.108087 | 0.01947  | 0.111567 | 0.01586  | 0.28966  | 1.77E-10 | 0.032903 | 0.47812  | 0.09571  |
| 0.122448 | 0.00807  | -0.05303 | 0.25277  | 0.13108  | 0.00455  | -0.07622 | 0.09996  | 0.029798 |
| 0.021469 | 0.64354  | -0.02385 | 0.60712  | 0.130005 | 0.0049   | -0.12165 | 0.0085   | 0.07135  |
| 0.10935  | 0.01809  | 0.03893  | 0.40128  | 0.145333 | 0.00164  | -0.0599  | 0.19628  | -0.10444 |
| -0.18423 | 6.20E-05 | -0.19957 | 1.39E-05 | -0.28759 | 2.41E-10 | -0.17312 | 0.00017  | 0.003979 |
| -0.03602 | 0.43738  | -0.04562 | 0.32526  | -0.00489 | 0.91602  | -0.00855 | 0.85383  | 0.050918 |

|          |          |          |          |          |          |          |          |          |
|----------|----------|----------|----------|----------|----------|----------|----------|----------|
| 0.057323 | 0.21629  | -0.02557 | 0.58158  | 0.030911 | 0.50518  | -0.06272 | 0.17605  | -0.09294 |
| -0.05722 | 0.2171   | -0.04441 | 0.33829  | -0.10043 | 0.03     | -0.06509 | 0.16024  | -0.09213 |
| 0.223771 | 1.04E-06 | 0.199437 | 1.41E-05 | 0.244959 | 8.26E-08 | 0.267723 | 4.16E-09 | 0.107628 |
| 0.040935 | 0.37744  | -0.0809  | 0.08074  | 0.017524 | 0.70565  | -0.09089 | 0.04965  | -0.00676 |
| 0.054074 | 0.2435   | 0.047095 | 0.30983  | 0.104266 | 0.02424  | -0.02017 | 0.66369  | 0.06406  |
| 0.032104 | 0.48887  | -0.09415 | 0.04199  | 0.023999 | 0.60495  | -0.13446 | 0.0036   | -0.13411 |
| 0.053474 | 0.24878  | -0.02802 | 0.54587  | 0.084948 | 0.06663  | -0.0941  | 0.04209  | -0.04016 |
| 0.121863 | 0.00838  | 0.020418 | 0.65987  | 0.235714 | 2.56E-07 | -0.0252  | 0.58696  | -0.01706 |
| -0.04882 | 0.29242  | 0.040173 | 0.3864   | -0.06018 | 0.1942   | 0.057717 | 0.21314  | -0.01846 |
| 0.043658 | 0.34651  | 0.063625 | 0.16986  | 0.180428 | 8.82E-05 | -0.04398 | 0.34295  | -0.02059 |
| -0.0809  | 0.08074  | -0.00502 | 0.91388  | -0.0751  | 0.10505  | 0.119341 | 0.00984  | 0.010794 |
| 0.030424 | 0.51191  | -0.04649 | 0.31607  | 0.045277 | 0.3289   | -0.11107 | 0.01634  | -0.08025 |
| 0.003246 | 0.94422  | 0.118279 | 0.01052  | 0.253615 | 2.74E-08 | 0.061014 | 0.1881   | -0.02632 |
| 0.037657 | 0.41686  | 0.169625 | 0.00023  | 0.09743  | 0.03531  | 0.196554 | 1.89E-05 | -0.0288  |
| 0.11009  | 0.01732  | 0.167702 | 0.00027  | 0.095156 | 0.03983  | 0.209557 | 4.94E-06 | 0.143797 |
| -0.01151 | 0.80415  | -0.12953 | 0.00506  | -0.00535 | 0.90821  | -0.20511 | 7.89E-06 | -0.10624 |
| 0.046647 | 0.31446  | -0.00773 | 0.86764  | 0.025761 | 0.57869  | 0.069137 | 0.13574  | 0.064807 |
| 0.106601 | 0.02122  | 0.147749 | 0.00137  | 0.095716 | 0.03867  | 0.020471 | 0.65904  | -0.07552 |
| 0.007061 | 0.87904  | -0.05667 | 0.22154  | 0.003969 | 0.93183  | -0.10021 | 0.03038  | -0.0601  |
| 0.048182 | 0.29879  | 0.218349 | 1.90E-06 | 0.234736 | 2.88E-07 | 0.160686 | 0.00049  | -0.07764 |
| 0.069445 | 0.134    | 0.31526  | 3.10E-12 | 0.333484 | 1.36E-13 | 0.367923 | 2.04E-16 | 0.397957 |
| -0.03737 | 0.42047  | -0.15512 | 0.00077  | -0.01925 | 0.67828  | -0.22142 | 1.35E-06 | -0.08211 |
| -0.01709 | 0.71267  | -0.08461 | 0.06774  | 0.027712 | 0.55025  | -0.12096 | 0.00888  | -0.13595 |
| 0.083796 | 0.07042  | -0.03835 | 0.40835  | 0.132326 | 0.00418  | -0.18113 | 8.27E-05 | -0.03374 |
| 0.1024   | 0.02691  | 0.016855 | 0.71638  | 0.232604 | 3.71E-07 | -0.1198  | 0.00956  | -0.07717 |
| -0.11706 | 0.01135  | 0.117254 | 0.01122  | -0.09513 | 0.03988  | 0.109453 | 0.01798  | -0.08328 |
| -0.02857 | 0.53801  | 0.030921 | 0.50505  | 0.103763 | 0.02494  | -0.06503 | 0.16062  | 0.003747 |
| -0.04559 | 0.32553  | 0.14796  | 0.00134  | 0.127726 | 0.00571  | 0.038182 | 0.41039  | -0.17041 |
| 0.004484 | 0.92301  | 0.060018 | 0.19543  | 0.0698   | 0.13202  | -0.03743 | 0.41968  | -0.12174 |
| 0.042077 | 0.36427  | -0.10095 | 0.02917  | 0.096511 | 0.03708  | -0.08556 | 0.06468  | 0.101892 |
| 0.05054  | 0.27573  | 0.145696 | 0.00159  | 0.247378 | 6.10E-08 | 0.010824 | 0.81553  | 0.012455 |
| 0.093948 | 0.04243  | 0.065255 | 0.15916  | 0.252199 | 3.29E-08 | -0.05732 | 0.21634  | 0.040377 |
| 0.031575 | 0.49607  | -0.07377 | 0.11135  | 0.116541 | 0.01172  | -0.09945 | 0.03166  | 0.080397 |
| -0.01285 | 0.78178  | -0.03552 | 0.4438   | 0.097286 | 0.03558  | -0.13877 | 0.00265  | -0.04185 |
| 0.088897 | 0.05489  | 0.093285 | 0.04392  | 0.032471 | 0.48393  | 0.066886 | 0.14897  | -0.15507 |
| -0.06676 | 0.14976  | -0.16603 | 0.00031  | -0.14744 | 0.0014   | -0.16594 | 0.00032  | -0.07697 |
| -0.09607 | 0.03796  | -0.12201 | 0.00831  | -0.15608 | 0.00071  | -0.07535 | 0.10389  | 0.052388 |
| 0.163826 | 0.00038  | 0.053216 | 0.25108  | 0.074296 | 0.10883  | 0.070903 | 0.12601  | -0.08968 |
| 0.251989 | 3.38E-08 | 0.216248 | 2.40E-06 | 0.325467 | 5.52E-13 | 0.144749 | 0.00171  | 0.076796 |
| 0.058427 | 0.20756  | -0.01317 | 0.7766   | 0.14144  | 0.00219  | -0.08225 | 0.07577  | -0.0555  |
| 0.012236 | 0.79199  | 0.09416  | 0.04196  | 0.121282 | 0.0087   | 0.047389 | 0.30683  | -0.08278 |
| -0.00183 | 0.9685   | 0.007595 | 0.86997  | 0.050957 | 0.27179  | 0.052045 | 0.26168  | 0.058749 |
| -0.07173 | 0.12164  | -0.13882 | 0.00264  | -0.01393 | 0.764    | -0.17293 | 0.00017  | -0.02091 |
| 0.011601 | 0.80255  | 0.129378 | 0.00511  | 0.106251 | 0.02165  | 0.299257 | 4.07E-11 | 0.202917 |
| 0.213635 | 3.19E-06 | 0.155102 | 0.00077  | 0.344365 | 1.90E-14 | 0.017372 | 0.70809  | 0.023945 |

|          |          |          |          |          |          |          |          |          |
|----------|----------|----------|----------|----------|----------|----------|----------|----------|
| 0.146886 | 0.00146  | -0.0229  | 0.62152  | 0.064439 | 0.16445  | -0.08594 | 0.06352  | -0.09599 |
| -0.01683 | 0.71685  | -0.09038 | 0.05096  | -0.10852 | 0.01899  | -0.09784 | 0.03453  | 0.064377 |
| 0.163655 | 0.00038  | 0.120671 | 0.00905  | 0.216871 | 2.24E-06 | 0.043198 | 0.35163  | -0.03619 |
| 0.111959 | 0.0155   | 0.031617 | 0.4955   | 0.174768 | 0.00015  | -0.02062 | 0.65669  | 0.006577 |
| -0.03561 | 0.44261  | 0.003367 | 0.94215  | 0.042923 | 0.3547   | -0.10549 | 0.02261  | -0.10775 |
| -0.11289 | 0.01466  | 0.103895 | 0.02475  | -0.10013 | 0.0305   | 0.139214 | 0.00257  | 0.145733 |
| 0.032566 | 0.48265  | 0.004429 | 0.92396  | -0.01879 | 0.68543  | 0.006234 | 0.89311  | 0.054367 |
| -0.03155 | 0.49644  | -0.0952  | 0.03973  | -0.06669 | 0.15015  | -0.15142 | 0.00103  | -0.07147 |
| -0.01239 | 0.78944  | 0.030332 | 0.51319  | -0.15406 | 0.00084  | 0.011476 | 0.80464  | -0.14571 |
| 0.068054 | 0.14199  | -0.06543 | 0.15806  | 0.012426 | 0.78883  | -0.11366 | 0.01399  | -0.00375 |
| 0.12119  | 0.00875  | 0.20873  | 5.39E-06 | 0.151481 | 0.00102  | 0.382582 | 1.00E-17 | 0.183748 |
| 0.04596  | 0.32166  | -0.09227 | 0.04628  | 0.032974 | 0.47717  | -0.15403 | 0.00084  | -0.05089 |
| 0.137098 | 0.00299  | 0.068866 | 0.13729  | 0.242275 | 1.15E-07 | 0.02237  | 0.62968  | 0.14935  |
| -0.01478 | 0.75006  | 0.093145 | 0.04423  | -0.04367 | 0.34642  | 0.080775 | 0.0812   | -0.08625 |
| 0.076954 | 0.09671  | 0.082691 | 0.07422  | 0.098886 | 0.03264  | 0.089467 | 0.05335  | 0.105122 |
| -0.00339 | 0.94173  | -0.01661 | 0.72026  | -0.04383 | 0.34466  | -0.0622  | 0.17967  | -0.11422 |
| -0.01668 | 0.71913  | 0.065075 | 0.16032  | -0.04894 | 0.29123  | 0.127556 | 0.00577  | 0.181058 |
| 0.161296 | 0.00047  | 0.189693 | 3.69E-05 | 0.187758 | 4.45E-05 | 0.118989 | 0.01006  | -0.00755 |
| 0.16825  | 0.00026  | -0.01603 | 0.7297   | 0.123148 | 0.00772  | -0.0633  | 0.17203  | -0.08461 |
| -0.01113 | 0.81047  | -0.03134 | 0.49929  | -0.00843 | 0.85575  | -0.12823 | 0.00552  | -0.0638  |
| -0.04295 | 0.35441  | 0.089488 | 0.05329  | 0.006696 | 0.88525  | 0.094207 | 0.04186  | -0.04935 |
| 0.158242 | 0.0006   | 0.04221  | 0.36276  | 0.221995 | 1.27E-06 | 0.007462 | 0.87223  | 0.189301 |
| 0.020318 | 0.66143  | -0.00804 | 0.8625   | 0.036644 | 0.42951  | -0.06162 | 0.18376  | -0.03143 |
| 0.087575 | 0.05861  | 0.006832 | 0.88293  | 0.152991 | 0.00091  | -0.11418 | 0.01355  | -0.02975 |
| 0.036004 | 0.43762  | -0.08501 | 0.06643  | 0.015292 | 0.74171  | -0.09983 | 0.031    | -0.00915 |
| 0.032639 | 0.48166  | -0.02477 | 0.59345  | 0.081023 | 0.08027  | -0.03912 | 0.39903  | -0.06029 |
| -0.01154 | 0.8036   | -0.06622 | 0.15307  | 0.004383 | 0.92475  | -0.23145 | 4.26E-07 | -0.23771 |
| -0.1664  | 0.0003   | -0.1422  | 0.00207  | -0.23409 | 3.12E-07 | -0.12297 | 0.00781  | -0.01662 |
| 0.073946 | 0.11052  | -0.02531 | 0.58535  | 0.091966 | 0.047    | -0.04336 | 0.34984  | 0.118951 |
| 0.020525 | 0.65819  | 0.015328 | 0.74111  | 0.043081 | 0.35293  | -0.10316 | 0.02579  | -0.12728 |
| 0.292772 | 1.11E-10 | 0.36291  | 5.53E-16 | 0.502199 | 3.30E-31 | 0.256479 | 1.89E-08 | 0.079272 |
| -0.0273  | 0.55625  | 0.00941  | 0.83928  | -0.03548 | 0.4443   | -0.10481 | 0.0235   | -0.19384 |
| -0.02128 | 0.64644  | -0.01262 | 0.7857   | 0.097362 | 0.03543  | -0.14794 | 0.00135  | -0.12325 |
| 0.066025 | 0.15429  | 0.026025 | 0.57481  | 0.177503 | 0.00012  | 0.026169 | 0.57269  | 0.152668 |
| 0.030899 | 0.50535  | -0.05061 | 0.27506  | 0.105587 | 0.02249  | -0.09469 | 0.04082  | 0.052351 |
| 0.035995 | 0.43773  | 0.038106 | 0.41132  | 0.106359 | 0.02152  | -0.11407 | 0.01364  | -0.07106 |
| -0.02114 | 0.64859  | -0.09274 | 0.04516  | -0.02743 | 0.55432  | -0.17269 | 0.00018  | -0.07896 |
| 0.039644 | 0.39269  | 0.035373 | 0.4457   | 0.06199  | 0.18112  | -0.01053 | 0.82044  | 0.04569  |
| 0.08197  | 0.07679  | 0.008057 | 0.86214  | 0.087986 | 0.05744  | -0.0323  | 0.48621  | -0.04444 |
| -0.07575 | 0.10207  | -0.0419  | 0.36626  | -0.08504 | 0.06633  | -0.07119 | 0.12446  | -0.02002 |
| 0.02553  | 0.5821   | 0.029603 | 0.52337  | 0.093345 | 0.04378  | 0.005876 | 0.89922  | -0.12177 |
| 0.077272 | 0.09534  | -0.0675  | 0.14528  | -0.05531 | 0.23291  | -0.14951 | 0.00119  | -0.06291 |
| -0.0029  | 0.95014  | 0.063673 | 0.16954  | 0.152084 | 0.00098  | -0.08264 | 0.0744   | -0.03856 |
| 0.000404 | 0.99305  | 0.029729 | 0.52161  | 0.185022 | 5.76E-05 | -0.0725  | 0.11768  | -0.02644 |
| 0.0071   | 0.87838  | 0.165801 | 0.00032  | -0.01225 | 0.79171  | 0.052082 | 0.26133  | -0.09083 |

|          |         |          |          |          |          |          |          |          |
|----------|---------|----------|----------|----------|----------|----------|----------|----------|
| 0.057831 | 0.21224 | 0.029386 | 0.52643  | 0.076896 | 0.09697  | -0.0349  | 0.45176  | -0.03955 |
| -0.01816 | 0.69548 | 0.031296 | 0.49989  | 0.018121 | 0.6961   | -0.06996 | 0.13111  | 0.009568 |
| -0.02525 | 0.58618 | -0.01456 | 0.75365  | 0.061304 | 0.18601  | -0.13724 | 0.00296  | -0.06339 |
| -0.02699 | 0.56068 | 0.08378  | 0.07048  | -0.06332 | 0.1719   | 0.126355 | 0.00625  | -0.00057 |
| 0.023898 | 0.60646 | 0.139348 | 0.00254  | 0.266257 | 5.09E-09 | 0.018459 | 0.69073  | 0.021251 |
| -0.00815 | 0.86052 | -0.11437 | 0.0134   | -0.04387 | 0.3442   | -0.14125 | 0.00222  | 0.105559 |
| -0.0041  | 0.92965 | 0.109017 | 0.01844  | 0.264134 | 6.79E-09 | 0.293078 | 1.05E-10 | 0.257225 |
| -0.02345 | 0.61328 | 0.091718 | 0.0476   | 0.147388 | 0.0014   | 0.109191 | 0.01826  | 0.114703 |
| -0.15947 | 0.00054 | -0.19097 | 3.27E-05 | -0.20722 | 6.33E-06 | -0.08877 | 0.05525  | 0.067614 |
| 0.134887 | 0.00349 | -0.03685 | 0.42697  | -0.03719 | 0.42266  | -0.0228  | 0.62312  | 0.015634 |
| -0.04409 | 0.34176 | 0.089147 | 0.05421  | -0.07383 | 0.11107  | 0.099681 | 0.03126  | -0.09899 |
| -0.07085 | 0.12629 | -0.00367 | 0.93689  | -0.00633 | 0.89143  | -0.02329 | 0.6157   | -0.03677 |
| 0.041938 | 0.36586 | 0.046334 | 0.31773  | 0.104773 | 0.02355  | -0.00763 | 0.86943  | 0.03001  |
| -0.03274 | 0.48032 | 0.058038 | 0.2106   | 0.002017 | 0.96533  | 0.096251 | 0.03759  | -0.01352 |
| -0.0068  | 0.8834  | -0.09352 | 0.04337  | 0.000195 | 0.99665  | -0.12522 | 0.00674  | -0.01473 |
| -0.01334 | 0.77365 | -0.05752 | 0.2147   | 0.103409 | 0.02544  | -0.08664 | 0.06137  | 0.024156 |
| -0.02779 | 0.54918 | 0.059641 | 0.19825  | 0.068766 | 0.13786  | -0.015   | 0.74649  | -0.10397 |
| 0.041382 | 0.37225 | 0.046781 | 0.31308  | 0.248398 | 5.36E-08 | 0.053307 | 0.25027  | 0.143613 |
| 0.000897 | 0.98458 | -0.07234 | 0.11849  | 0.029825 | 0.52026  | -0.09892 | 0.03258  | 0.131999 |
| 0.094014 | 0.04228 | 0.038776 | 0.40314  | 0.095408 | 0.03931  | 0.021026 | 0.6504   | 0.116744 |
| 0.091304 | 0.04862 | 0.039843 | 0.39032  | 0.096577 | 0.03695  | 0.024881 | 0.59173  | -0.00436 |
| 0.00778  | 0.86684 | -0.04206 | 0.36442  | -0.09558 | 0.03895  | -0.06019 | 0.19413  | -0.08198 |
| 0.140485 | 0.00234 | 0.185069 | 5.73E-05 | 0.231164 | 4.40E-07 | 0.116141 | 0.01202  | 0.017904 |
| -0.07601 | 0.1009  | -0.08376 | 0.07055  | 0.133182 | 0.00394  | -0.0853  | 0.06552  | 0.147105 |
| -0.0239  | 0.6065  | -0.0322  | 0.48752  | 0.049282 | 0.28788  | -0.14417 | 0.00179  | -0.09656 |
| 0.033171 | 0.47454 | -0.05606 | 0.22659  | 0.033526 | 0.46982  | -0.17322 | 0.00017  | -0.07694 |
| 0.012331 | 0.79041 | 0.088248 | 0.05669  | 0.082463 | 0.07503  | 0.1244   | 0.00711  | 0.016715 |
| 0.091212 | 0.04885 | 0.142236 | 0.00206  | 0.199078 | 1.46E-05 | -0.00686 | 0.88241  | 0.043463 |
| 0.101835 | 0.02777 | 0.019184 | 0.67924  | 0.122033 | 0.00829  | -0.01404 | 0.76227  | -0.08309 |
| 0.043401 | 0.34936 | 0.031327 | 0.49947  | 0.21588  | 2.50E-06 | -0.08707 | 0.06008  | -0.0751  |
| 0.079411 | 0.08649 | 0.252346 | 3.23E-08 | 0.282757 | 4.93E-10 | 0.083289 | 0.07215  | -0.04219 |
| 0.079951 | 0.08437 | 0.047227 | 0.30848  | 0.169488 | 0.00023  | -0.0946  | 0.04101  | -0.06806 |
| 0.044991 | 0.33198 | 0.094705 | 0.04079  | 0.182912 | 7.02E-05 | -0.03971 | 0.39193  | -0.02133 |
| -0.09573 | 0.03864 | -0.13884 | 0.00264  | -0.10519 | 0.023    | -0.04304 | 0.35343  | 0.058513 |
| 0.151731 | 0.001   | 0.02902  | 0.53159  | 0.208882 | 5.31E-06 | -0.00167 | 0.9713   | 0.020801 |
| -0.04743 | 0.30641 | 0.148252 | 0.00131  | 0.064999 | 0.16081  | 0.094793 | 0.0406   | 0.018483 |
| 0.021983 | 0.63561 | -0.10721 | 0.02049  | 0.053138 | 0.25177  | -0.15972 | 0.00053  | 0.084123 |
| 0.055813 | 0.22865 | -0.00694 | 0.88104  | 0.066776 | 0.14965  | -0.02646 | 0.56846  | -0.03166 |
| 0.119489 | 0.00975 | 0.111537 | 0.01589  | 0.125691 | 0.00653  | 0.123599 | 0.00749  | 0.085254 |
| 0.065476 | 0.15775 | 0.118482 | 0.01039  | 0.223698 | 1.04E-06 | 0.03651  | 0.4312   | -0.04769 |
| -0.00202 | 0.9653  | -0.13139 | 0.00445  | -0.03488 | 0.45207  | -0.15397 | 0.00084  | 0.049722 |
| -0.00961 | 0.83596 | 0.043945 | 0.34335  | 0.105617 | 0.02245  | 0.039889 | 0.38976  | -0.02442 |
| 0.00147  | 0.97472 | -0.11646 | 0.01179  | 0.029894 | 0.5193   | -0.15987 | 0.00052  | 0.076205 |
| 0.012444 | 0.78855 | 0.121908 | 0.00836  | 0.244145 | 9.15E-08 | 0.024736 | 0.5939   | -0.1245  |
| -0.03938 | 0.3958  | -0.09627 | 0.03755  | 0.121412 | 0.00863  | -0.15482 | 0.00079  | 0.045895 |

|          |          |          |          |          |          |          |          |          |
|----------|----------|----------|----------|----------|----------|----------|----------|----------|
| 0.014443 | 0.75557  | 0.074708 | 0.10688  | 0.061641 | 0.18359  | 0.073835 | 0.11105  | -0.0263  |
| 0.002315 | 0.96022  | -0.0123  | 0.79094  | 0.11358  | 0.01405  | -0.08131 | 0.07921  | 0.000806 |
| 0.122645 | 0.00797  | 0.162962 | 0.00041  | 0.353254 | 3.59E-15 | 0.03014  | 0.51586  | 0.008591 |
| 0.18021  | 9.00E-05 | 0.161506 | 0.00046  | 0.279873 | 7.49E-10 | 0.066718 | 0.15     | -0.03368 |
| 0.144123 | 0.00179  | 0.035568 | 0.44319  | 0.168647 | 0.00025  | -0.03633 | 0.43348  | -0.00128 |
| 0.040742 | 0.37971  | 0.140293 | 0.00238  | 0.21318  | 3.35E-06 | 0.143399 | 0.00189  | 0.101896 |
| 0.035999 | 0.43768  | 0.106931 | 0.02082  | 0.220596 | 1.48E-06 | -0.03387 | 0.46526  | -0.0678  |
| 0.184478 | 6.06E-05 | 0.088745 | 0.05531  | 0.158259 | 0.0006   | 0.010227 | 0.82554  | -0.08681 |
| 0.05417  | 0.24266  | -0.05589 | 0.22799  | 0.048821 | 0.29242  | -0.13577 | 0.00328  | -0.09441 |
| 0.066716 | 0.15001  | 0.047847 | 0.30217  | 0.170841 | 0.00021  | 0.007092 | 0.87852  | 0.004824 |
| 0.049947 | 0.28142  | -0.06564 | 0.15671  | 0.004971 | 0.91468  | -0.14176 | 0.00213  | -0.00619 |
| -0.00724 | 0.87598  | -0.01224 | 0.7919   | 0.095571 | 0.03897  | -0.1523  | 0.00096  | -0.08981 |
| 0.012195 | 0.79268  | -0.01686 | 0.71627  | 0.053862 | 0.24536  | -0.12766 | 0.00573  | -0.04884 |
| 0.137815 | 0.00284  | 0.129328 | 0.00513  | 0.342149 | 2.85E-14 | 0.0081   | 0.86141  | 0.015917 |
| 0.003667 | 0.93701  | -0.04883 | 0.29228  | 0.018175 | 0.69525  | -0.0823  | 0.07559  | -0.06617 |
| -0.05614 | 0.2259   | 0.094605 | 0.041    | 0.105609 | 0.02246  | 0.010109 | 0.82752  | -0.12381 |
| 0.066058 | 0.15408  | 0.087189 | 0.05974  | 0.18289  | 7.03E-05 | -0.01462 | 0.75275  | -0.04762 |
| -0.05039 | 0.2772   | 0.09404  | 0.04223  | -0.03468 | 0.45467  | 0.21415  | 3.02E-06 | 0.02079  |
| -0.00877 | 0.85001  | -0.01489 | 0.74827  | -0.21441 | 2.93E-06 | 0.128813 | 0.00531  | 0.072976 |
| 0.061258 | 0.18634  | 0.154781 | 0.00079  | 0.233407 | 3.38E-07 | 0.077013 | 0.09646  | -0.01406 |
| 0.150378 | 0.00112  | 0.206016 | 7.18E-06 | 0.367159 | 2.38E-16 | 0.079852 | 0.08475  | 0.049507 |
| -0.09517 | 0.03979  | -0.19474 | 2.26E-05 | -0.21202 | 3.80E-06 | -0.06164 | 0.18359  | -0.01612 |
| 0.008881 | 0.8482   | -0.05986 | 0.1966   | 0.039954 | 0.389    | -0.16781 | 0.00027  | -0.02613 |
| 0.002402 | 0.95871  | 0.101373 | 0.02849  | 0.04106  | 0.37598  | 0.003834 | 0.93414  | -0.12268 |
| -0.0115  | 0.80425  | -0.00434 | 0.92545  | 0.056092 | 0.22633  | -0.15912 | 0.00056  | -0.14568 |
| 0.16038  | 0.0005   | 0.294363 | 8.67E-11 | 0.386003 | 4.84E-18 | 0.14358  | 0.00187  | 0.106255 |
| -0.02969 | 0.52222  | -0.08938 | 0.05358  | 0.088761 | 0.05527  | -0.17763 | 0.00011  | 0.00155  |
| -0.01013 | 0.82715  | -0.11795 | 0.01074  | -0.03837 | 0.40805  | -0.12459 | 0.00702  | -0.00597 |
| -0.08469 | 0.06747  | -0.04053 | 0.38221  | -0.00177 | 0.96963  | -0.0602  | 0.1941   | -0.01071 |
| -0.12453 | 0.00705  | -0.109   | 0.01846  | -0.09183 | 0.04733  | -0.18144 | 8.04E-05 | -0.06064 |
| 0.010032 | 0.82882  | -0.11292 | 0.01462  | -0.02921 | 0.52896  | -0.10079 | 0.02942  | 0.158322 |
| 0.047537 | 0.30531  | -0.04881 | 0.29256  | 0.050521 | 0.27591  | -0.0994  | 0.03174  | -0.06353 |
| -0.01128 | 0.80785  | 0.074469 | 0.10801  | 0.148065 | 0.00133  | -0.07266 | 0.11685  | -0.0731  |
| 0.031546 | 0.49647  | -0.00762 | 0.86963  | 0.043142 | 0.35224  | -0.0845  | 0.06808  | -0.12793 |
| 0.00557  | 0.90444  | 0.003821 | 0.93437  | 0.068053 | 0.142    | -0.06807 | 0.14189  | -0.09267 |
| 0.036375 | 0.43291  | 0.084398 | 0.06842  | 0.249417 | 4.71E-08 | -0.04649 | 0.31614  | -0.03561 |
| 0.035406 | 0.44528  | -0.01051 | 0.82085  | 0.124096 | 0.00725  | -0.03545 | 0.44475  | 0.102117 |
| 0.130174 | 0.00484  | -0.00057 | 0.99025  | 0.050866 | 0.27265  | -0.05953 | 0.1991   | -0.00347 |
| -0.14481 | 0.0017   | -0.23751 | 2.06E-07 | -0.20143 | 1.15E-05 | -0.25479 | 2.35E-08 | 0.101669 |
| 0.012229 | 0.79211  | 0.001833 | 0.96849  | 0.036569 | 0.43046  | -0.05184 | 0.26352  | -0.08869 |
| 0.106424 | 0.02144  | -0.07262 | 0.11705  | 0.103339 | 0.02554  | -0.1349  | 0.00349  | 0.046738 |
| -0.1196  | 0.00968  | -0.07174 | 0.12158  | -0.08164 | 0.07798  | -0.04617 | 0.31949  | 0.05617  |
| 0.101456 | 0.02836  | 0.121681 | 0.00848  | 0.232914 | 3.58E-07 | 0.050688 | 0.27433  | -0.06005 |
| -0.03103 | 0.50358  | 0.067035 | 0.14807  | 0.031029 | 0.50355  | -0.0393  | 0.3968   | -0.14956 |
| -0.02897 | 0.53229  | 0.090228 | 0.05134  | 0.178568 | 0.0001   | 0.043354 | 0.34988  | -0.0712  |



|          |          |          |          |          |          |          |          |          |
|----------|----------|----------|----------|----------|----------|----------|----------|----------|
| 0.056804 | 0.22048  | 0.009849 | 0.83189  | 0.183776 | 6.47E-05 | -0.04747 | 0.30597  | 0.08417  |
| 0.063596 | 0.17006  | 0.351108 | 5.39E-15 | 0.366283 | 2.83E-16 | 0.304672 | 1.73E-11 | 0.130709 |
| -0.01099 | 0.81274  | -0.14175 | 0.00214  | -0.07813 | 0.09173  | -0.1492  | 0.00122  | -0.07202 |
| 0.230556 | 4.73E-07 | 0.047261 | 0.30813  | 0.072406 | 0.11815  | 0.064304 | 0.16534  | 0.105529 |
| -0.03012 | 0.51618  | -0.11896 | 0.01008  | -0.09056 | 0.05048  | -0.15748 | 0.00064  | -0.04661 |
| 0.046798 | 0.3129   | -0.08113 | 0.07989  | 0.088572 | 0.05579  | -0.06366 | 0.16964  | 0.183073 |
| 0.036839 | 0.42706  | -0.01488 | 0.74842  | 0.14762  | 0.00138  | -0.03912 | 0.39895  | 0.177409 |
| 0.049015 | 0.29051  | 0.080535 | 0.08212  | 0.2132   | 3.34E-06 | 0.050604 | 0.27513  | 0.093875 |
| 0.009211 | 0.84263  | -0.04049 | 0.38264  | 0.095261 | 0.03961  | -0.07999 | 0.08421  | -0.02377 |
| 0.091024 | 0.04932  | 0.145977 | 0.00156  | 0.197415 | 1.73E-05 | 0.088747 | 0.0553   | -0.09753 |
| -0.05011 | 0.27988  | 0.023136 | 0.61799  | -0.08062 | 0.08179  | 0.108877 | 0.0186   | -0.03315 |
| -0.06518 | 0.15967  | 0.061979 | 0.1812   | -0.13107 | 0.00455  | 0.138432 | 0.00272  | 0.106145 |
| 0.096314 | 0.03747  | 0.107666 | 0.01995  | 0.23122  | 4.37E-07 | 0.025262 | 0.58606  | 0.051626 |
| 0.040504 | 0.3825   | -0.03294 | 0.47765  | 0.122416 | 0.00809  | -0.06391 | 0.16796  | 0.07219  |
| 0.0743   | 0.10882  | 0.11816  | 0.0106   | 0.219256 | 1.72E-06 | 0.044634 | 0.33583  | 0.111902 |
| -0.09292 | 0.04475  | -0.06121 | 0.18666  | -0.28739 | 2.48E-10 | -0.00852 | 0.85437  | 0.003761 |
| 0.023736 | 0.60891  | 0.217111 | 2.18E-06 | 0.08144  | 0.07873  | 0.29957  | 3.87E-11 | 0.252808 |
| 0.011137 | 0.81031  | 0.260128 | 1.16E-08 | 0.243996 | 9.32E-08 | 0.169515 | 0.00023  | -0.06352 |
| -0.20738 | 6.22E-06 | -0.14019 | 0.00239  | -0.26929 | 3.35E-09 | -0.04528 | 0.32892  | -0.15385 |
| -0.01488 | 0.7485   | -0.00541 | 0.90716  | 0.03953  | 0.39405  | -0.07768 | 0.09361  | -0.0244  |
| -0.06975 | 0.13229  | 0.058742 | 0.20511  | 0.011253 | 0.80837  | -0.03992 | 0.3894   | -0.16153 |
| -0.10456 | 0.02384  | -0.10258 | 0.02664  | -0.14792 | 0.00135  | 0.009216 | 0.84255  | 0.13691  |
| 0.028264 | 0.54234  | 0.013596 | 0.76949  | 0.043021 | 0.3536   | -0.06496 | 0.16109  | -0.04113 |
| 0.037589 | 0.4177   | 0.091293 | 0.04865  | 0.228519 | 6.00E-07 | -0.04106 | 0.376    | 0.001907 |
| 0.026416 | 0.56906  | 0.062984 | 0.17421  | 0.128387 | 0.00546  | -0.05539 | 0.23221  | -0.09119 |
| -0.02983 | 0.52021  | 0.062855 | 0.17509  | 0.118679 | 0.01026  | -0.06549 | 0.15766  | -0.05206 |
| 0.023737 | 0.60888  | 0.090209 | 0.05139  | 0.113306 | 0.01429  | 0.033743 | 0.46696  | -0.04072 |
| -0.11914 | 0.00997  | 0.010454 | 0.82173  | -0.19923 | 1.44E-05 | 0.068195 | 0.14116  | -0.06507 |
| -0.04217 | 0.36322  | -0.04603 | 0.32092  | -0.08113 | 0.07987  | -0.11021 | 0.0172   | -0.15551 |
| -0.00148 | 0.97451  | -0.11026 | 0.01714  | -0.03649 | 0.43142  | -0.14578 | 0.00158  | 0.033568 |
| 0.25611  | 1.98E-08 | 0.139469 | 0.00252  | 0.318892 | 1.69E-12 | 0.157696 | 0.00063  | 0.088582 |
| -0.08136 | 0.07902  | -0.22038 | 1.52E-06 | -0.12281 | 0.00789  | -0.28833 | 2.16E-10 | -0.0515  |
| -0.02845 | 0.53972  | -0.05082 | 0.27305  | 0.106809 | 0.02097  | -0.15438 | 0.00082  | 0.041119 |
| -0.04383 | 0.34459  | 0.067057 | 0.14794  | 0.191089 | 3.23E-05 | -0.05245 | 0.25799  | 0.098491 |
| 0.113232 | 0.01435  | 0.060819 | 0.18952  | 0.269783 | 3.13E-09 | 0.002035 | 0.96502  | 0.135428 |
| -0.12771 | 0.00571  | -0.08642 | 0.06203  | -0.17666 | 0.00012  | 0.008486 | 0.85487  | -0.03311 |
| 0.011137 | 0.8103   | 0.053491 | 0.24863  | -0.07352 | 0.1126   | -0.05918 | 0.20174  | -0.17699 |
| -0.10875 | 0.01873  | 0.037398 | 0.42007  | -0.11455 | 0.01325  | 0.115099 | 0.01281  | -0.04588 |
| -0.1392  | 0.00257  | -0.23632 | 2.38E-07 | -0.27405 | 1.72E-09 | -0.23147 | 4.24E-07 | -0.16886 |
| -0.04273 | 0.35685  | -0.02906 | 0.53105  | 0.096483 | 0.03713  | 0.001685 | 0.97103  | 0.181738 |
| 0.13931  | 0.00255  | 0.02291  | 0.62142  | 0.246129 | 7.13E-08 | -0.05766 | 0.21359  | 0.059525 |
| -0.10547 | 0.02264  | -0.00455 | 0.92193  | -0.02961 | 0.52326  | 0.0575   | 0.21487  | 0.188481 |
| 0.01476  | 0.75039  | 0.03198  | 0.49057  | 0.130502 | 0.00473  | -0.05877 | 0.2049   | -0.10853 |
| 0.049252 | 0.28817  | 0.04997  | 0.28119  | 0.065042 | 0.16053  | -0.04378 | 0.34513  | 0.014915 |
| 0.064034 | 0.16713  | 0.027001 | 0.56055  | 0.201816 | 1.11E-05 | -0.02541 | 0.58387  | 0.052998 |

|          |          |          |          |          |          |          |          |          |
|----------|----------|----------|----------|----------|----------|----------|----------|----------|
| 0.070646 | 0.12739  | 0.122655 | 0.00797  | 0.106852 | 0.02092  | 0.017506 | 0.70593  | -0.08763 |
| 0.020815 | 0.65367  | 0.07483  | 0.1063   | 0.142117 | 0.00208  | -0.03812 | 0.41113  | -0.08971 |
| -0.14543 | 0.00163  | -0.02845 | 0.53974  | -0.16696 | 0.00029  | 0.107518 | 0.02013  | -0.03256 |
| -0.0444  | 0.33837  | 0.004232 | 0.92732  | 0.157437 | 0.00064  | -0.06022 | 0.19391  | -0.00132 |
| -0.08701 | 0.06025  | 0.085715 | 0.0642   | 0.008667 | 0.85182  | 0.067597 | 0.14469  | -0.03031 |
| 0.105471 | 0.02264  | -0.01388 | 0.7648   | 0.077521 | 0.09427  | -0.0536  | 0.24768  | -0.01476 |
| -0.04579 | 0.3234   | 0.024165 | 0.60244  | -0.19257 | 2.79E-05 | 0.086994 | 0.06031  | 0.001437 |
| 0.010492 | 0.8211   | 0.284062 | 4.07E-10 | 0.198251 | 1.59E-05 | 0.170834 | 0.00021  | -0.05836 |
| 0.010874 | 0.81469  | 0.242838 | 1.08E-07 | 0.186435 | 5.04E-05 | 0.140091 | 0.00241  | -0.06021 |
| 0.003794 | 0.93484  | 0.148187 | 0.00132  | 0.15314  | 0.0009   | 0.109877 | 0.01753  | -0.01417 |
| 0.050775 | 0.27351  | -0.04574 | 0.32399  | 0.0337   | 0.46752  | -0.10135 | 0.02852  | -0.06679 |
| -0.17099 | 0.00021  | -0.07698 | 0.09661  | -0.19952 | 1.40E-05 | 0.033913 | 0.46471  | 0.069546 |
| 0.12088  | 0.00893  | 0.332569 | 1.60E-13 | 0.460013 | 7.83E-26 | 0.275233 | 1.46E-09 | 0.493958 |
| 0.032873 | 0.47852  | -0.00553 | 0.90515  | 0.108264 | 0.01927  | 0.012556 | 0.78669  | -0.00333 |
| 0.132352 | 0.00417  | 0.082911 | 0.07345  | 0.221767 | 1.30E-06 | 0.017431 | 0.70714  | 0.154656 |
| -0.02308 | 0.61881  | 0.010548 | 0.82016  | -0.03377 | 0.46663  | -0.04643 | 0.31668  | -0.10046 |
| 0.065342 | 0.15861  | 0.084343 | 0.0686   | 0.220984 | 1.42E-06 | 0.00201  | 0.96545  | 0.06062  |
| 0.069503 | 0.13368  | 0.083489 | 0.07146  | 0.250583 | 4.06E-08 | 0.083323 | 0.07203  | 0.32032  |
| 0.103602 | 0.02516  | 0.043783 | 0.34513  | 0.095264 | 0.03961  | -0.02724 | 0.55701  | -0.06    |
| 0.041232 | 0.37399  | -0.05449 | 0.23993  | 0.018185 | 0.69509  | -0.14187 | 0.00212  | -0.01439 |
| 0.0089   | 0.84788  | 0.081519 | 0.07843  | -0.0955  | 0.03912  | -0.02029 | 0.66185  | -0.07579 |
| 0.002741 | 0.95289  | -0.12424 | 0.00719  | -0.03164 | 0.49517  | -0.05922 | 0.20144  | 0.254566 |
| 0.101038 | 0.02902  | -0.07714 | 0.09593  | 0.069201 | 0.13538  | -0.1879  | 4.38E-05 | 0.000849 |
| 0.049712 | 0.28369  | 0.077736 | 0.09336  | 0.162267 | 0.00043  | -0.05246 | 0.25788  | -0.01625 |
| 0.084732 | 0.06733  | 0.341038 | 3.49E-14 | 0.191422 | 3.13E-05 | 0.446586 | 2.84E-24 | 0.104913 |
| 0.09289  | 0.04482  | -0.01927 | 0.67784  | 0.052722 | 0.25551  | -0.11094 | 0.01646  | -0.06787 |
| -0.11152 | 0.0159   | -0.03869 | 0.40414  | -0.18653 | 5.00E-05 | 0.00784  | 0.86582  | -0.11197 |
| 0.073005 | 0.11513  | -0.04361 | 0.34706  | -0.06229 | 0.179    | -0.05199 | 0.26215  | 0.106721 |
| 0.096654 | 0.0368   | 0.151643 | 0.00101  | 0.225573 | 8.43E-07 | 0.143468 | 0.00188  | 0.164036 |
| 0.096381 | 0.03733  | 0.001057 | 0.98182  | 0.162473 | 0.00042  | -0.08507 | 0.06625  | -0.01969 |
| 0.017206 | 0.71075  | -0.036   | 0.43761  | 0.173759 | 0.00016  | -0.06094 | 0.18862  | 0.089213 |
| 0.071842 | 0.12105  | 0.11316  | 0.01442  | 0.200468 | 1.27E-05 | -0.01968 | 0.67142  | -0.10088 |
| 0.010119 | 0.82736  | -0.0663  | 0.15258  | 0.040715 | 0.38002  | -0.13476 | 0.00353  | -0.03973 |
| -0.09064 | 0.05028  | 0.019385 | 0.67607  | -0.05331 | 0.25025  | 0.167924 | 0.00027  | 0.207787 |
| 0.056039 | 0.22677  | 0.0014   | 0.97593  | 0.094162 | 0.04196  | -0.08066 | 0.08166  | -0.00458 |
| 0.015626 | 0.73627  | -0.01105 | 0.81173  | 0.114899 | 0.01297  | -0.10718 | 0.02052  | 0.068342 |
| 0.139235 | 0.00257  | 0.191988 | 2.96E-05 | 0.139866 | 0.00245  | 0.333643 | 1.32E-13 | 0.123573 |
| 0.147619 | 0.00138  | 0.253339 | 2.84E-08 | 0.191714 | 3.04E-05 | 0.322449 | 9.26E-13 | 0.102812 |
| 0.014801 | 0.74972  | -0.04024 | 0.38559  | 0.020325 | 0.66131  | -0.17865 | 0.0001   | -0.32229 |
| -0.00733 | 0.87448  | -0.18451 | 6.04E-05 | -0.11357 | 0.01407  | -0.17529 | 0.00014  | -0.01215 |
| -0.11186 | 0.01559  | -0.11795 | 0.01074  | -0.09011 | 0.05164  | -0.10003 | 0.03067  | -0.16021 |
| 0.018561 | 0.68911  | 0.045078 | 0.33104  | -0.00911 | 0.84441  | -0.03749 | 0.41888  | -0.12282 |
| 0.045909 | 0.32219  | 0.007337 | 0.87435  | 0.139491 | 0.00252  | -0.00266 | 0.95422  | 0.11995  |
| -0.09943 | 0.0317   | -0.00817 | 0.86027  | -0.10236 | 0.02698  | 0.067142 | 0.14742  | 0.080737 |
| 0.24568  | 7.55E-08 | 0.037576 | 0.41786  | 0.187944 | 4.37E-05 | 0.057071 | 0.21832  | 0.173253 |

|          |         |          |          |          |          |          |          |          |
|----------|---------|----------|----------|----------|----------|----------|----------|----------|
| 0.004747 | 0.9185  | -0.09986 | 0.03097  | 0.000649 | 0.98884  | -0.18033 | 8.90E-05 | 0.030076 |
| 0.042063 | 0.36444 | 0.141472 | 0.00218  | 0.170107 | 0.00022  | 0.142985 | 0.00195  | 0.113776 |
| -0.02122 | 0.64733 | 0.044275 | 0.33973  | -0.08938 | 0.05357  | -0.02804 | 0.54552  | -0.08495 |
| -0.00304 | 0.94782 | -0.0786  | 0.08978  | -0.03797 | 0.41297  | -0.09622 | 0.03766  | 0.054296 |
| 0.157545 | 0.00063 | 0.111597 | 0.01583  | 0.16961  | 0.00023  | 0.06179  | 0.18253  | 0.018817 |
| -0.0496  | 0.28482 | -0.0006  | 0.9896   | 0.004272 | 0.92665  | -0.0721  | 0.11972  | -0.07218 |
| -0.03829 | 0.4091  | 0.055592 | 0.2305   | 0.021854 | 0.6376   | -0.03385 | 0.46559  | -0.07237 |
| 0.152703 | 0.00093 | 0.073162 | 0.11436  | 0.236511 | 2.33E-07 | 0.021994 | 0.63544  | 0.058387 |
| 0.081407 | 0.07884 | 0.077377 | 0.09489  | 0.11811  | 0.01063  | -0.06619 | 0.15328  | -0.10528 |
| 0.074552 | 0.10762 | 0.119897 | 0.0095   | 0.197267 | 1.76E-05 | 0.004781 | 0.91792  | 0.075753 |
| -0.08105 | 0.08015 | -0.03682 | 0.42725  | -0.19312 | 2.65E-05 | 0.022679 | 0.62495  | -0.08092 |
| -0.07865 | 0.08955 | -0.05878 | 0.2048   | -0.23365 | 3.28E-07 | -0.02387 | 0.60689  | -0.06179 |
| 0.024382 | 0.59918 | 0.019293 | 0.67753  | 0.036775 | 0.42787  | -0.06836 | 0.14018  | -0.16307 |
| -0.05992 | 0.19614 | 0.144861 | 0.0017   | -0.03111 | 0.50249  | 0.192758 | 2.74E-05 | 0.021179 |
| -0.01555 | 0.73745 | 0.190183 | 3.52E-05 | 0.021095 | 0.64933  | 0.311206 | 6.04E-12 | 0.328224 |
| -0.04115 | 0.375   | 0.133216 | 0.00393  | -0.06022 | 0.19391  | 0.235602 | 2.60E-07 | 0.092967 |
| -0.01711 | 0.71224 | -0.15382 | 0.00085  | 0.000334 | 0.99425  | -0.17564 | 0.00014  | 0.130671 |
| 0.044001 | 0.34273 | -0.179   | 0.0001   | -0.02183 | 0.63804  | -0.1906  | 3.39E-05 | 0.19887  |
| 0.005532 | 0.90509 | -0.12012 | 0.00937  | 0.049146 | 0.28921  | -0.13054 | 0.00472  | 0.094838 |
| 0.031765 | 0.49349 | 0.087309 | 0.05939  | 0.010358 | 0.82334  | -0.02788 | 0.5479   | -0.25626 |
| 0.074725 | 0.1068  | 0.251484 | 3.61E-08 | 0.327928 | 3.61E-13 | 0.261327 | 9.92E-09 | 0.061165 |
| 0.00848  | 0.85499 | 0.040735 | 0.37979  | 0.074157 | 0.1095   | -0.02936 | 0.52684  | -0.036   |
| -0.04931 | 0.2876  | -0.06864 | 0.1386   | -0.00423 | 0.92728  | -0.03921 | 0.39789  | 0.098769 |
| 0.051845 | 0.26351 | 0.0372   | 0.42254  | 0.204942 | 8.03E-06 | -0.09464 | 0.04093  | -0.09185 |
| 0.05644  | 0.22346 | 0.063895 | 0.16806  | 0.123599 | 0.00749  | -0.05264 | 0.25627  | -0.08204 |
| 0.035422 | 0.44507 | 0.151663 | 0.00101  | 0.132464 | 0.00414  | 0.039966 | 0.38885  | -0.08449 |
| -0.17161 | 0.00019 | 0.009558 | 0.83678  | -0.19125 | 3.18E-05 | 0.023155 | 0.61771  | -0.20542 |
| 0.024791 | 0.59308 | 0.055743 | 0.22924  | 0.118737 | 0.01022  | -0.0641  | 0.16669  | -0.10525 |
| 0.017751 | 0.70202 | -0.074   | 0.11025  | -0.02794 | 0.54692  | -0.15366 | 0.00086  | -0.10972 |
| -0.00013 | 0.99784 | -0.14128 | 0.00221  | -0.1012  | 0.02877  | -0.16229 | 0.00043  | -0.04567 |
| 0.094593 | 0.04102 | -0.10354 | 0.02525  | 0.083479 | 0.0715   | -0.16401 | 0.00037  | 0.08408  |
| 0.043919 | 0.34363 | 0.036677 | 0.4291   | 0.050889 | 0.27243  | 0.011989 | 0.79611  | 0.05111  |
| -0.01229 | 0.79114 | -0.05614 | 0.22589  | -0.01468 | 0.75168  | -0.09884 | 0.03273  | 0.104975 |
| 0.041028 | 0.37636 | -0.02301 | 0.61988  | 0.049092 | 0.28975  | -0.05326 | 0.25073  | -0.06099 |
| 0.095368 | 0.03939 | -0.12566 | 0.00655  | 0.022498 | 0.62772  | -0.18443 | 6.09E-05 | -0.01821 |
| -0.0241  | 0.60335 | 0.019214 | 0.67877  | -0.01091 | 0.81405  | -0.02528 | 0.58584  | -0.11077 |
| 0.053382 | 0.2496  | -0.0388  | 0.4028   | 0.094075 | 0.04215  | -0.08604 | 0.06318  | -0.01495 |
| 0.004337 | 0.92553 | -0.02923 | 0.52863  | 0.042571 | 0.35866  | -0.07722 | 0.09555  | -0.03832 |
| -0.01256 | 0.78655 | -0.00068 | 0.98824  | 0.0914   | 0.04838  | 0.005284 | 0.90932  | 0.129279 |
| 0.034205 | 0.46087 | 0.029666 | 0.52249  | 0.145227 | 0.00165  | -0.0392  | 0.39802  | 0.107829 |
| -0.05256 | 0.25694 | -0.00441 | 0.92426  | 0.170101 | 0.00022  | -0.08654 | 0.06167  | 0.153063 |
| -0.04927 | 0.28798 | -0.09182 | 0.04736  | 0.000451 | 0.99225  | -0.14999 | 0.00115  | 0.002545 |
| 0.127284 | 0.00588 | 0.021733 | 0.63946  | 0.062996 | 0.17413  | 0.010107 | 0.82757  | -0.05283 |
| 0.057912 | 0.21159 | 0.047433 | 0.30638  | 0.140569 | 0.00233  | -0.05414 | 0.24295  | -0.06521 |
| -0.0237  | 0.6094  | 0.070266 | 0.12945  | 0.076282 | 0.09967  | 0.173601 | 0.00016  | 0.090984 |

|          |          |          |          |          |          |          |          |          |
|----------|----------|----------|----------|----------|----------|----------|----------|----------|
| 0.182146 | 7.53E-05 | 0.118572 | 0.01033  | 0.219484 | 1.68E-06 | 0.017686 | 0.70305  | 0.098959 |
| -0.18459 | 6.00E-05 | -0.10245 | 0.02684  | -0.25241 | 3.21E-08 | -0.11477 | 0.01308  | -0.14222 |
| 0.149367 | 0.00121  | 0.034228 | 0.46058  | 0.144588 | 0.00173  | -0.03998 | 0.38868  | -0.04534 |
| -0.01182 | 0.79898  | -0.00944 | 0.83876  | 0.074626 | 0.10726  | -0.11759 | 0.01099  | -0.05387 |
| 0.053103 | 0.25209  | 0.035906 | 0.43887  | 0.048862 | 0.29201  | 0.028356 | 0.54102  | 0.080908 |
| -0.04272 | 0.35702  | -0.08311 | 0.07277  | 0.004655 | 0.92009  | -0.10744 | 0.02022  | 0.021313 |
| 0.059632 | 0.19832  | -0.12854 | 0.0054   | 0.060444 | 0.19227  | -0.19988 | 1.35E-05 | 0.016699 |
| -0.04515 | 0.33027  | -0.08407 | 0.0695   | -0.01613 | 0.7281   | -0.1989  | 1.49E-05 | -0.13491 |
| -0.03919 | 0.39816  | -0.12103 | 0.00884  | -0.04647 | 0.31631  | -0.20182 | 1.11E-05 | 0.037778 |
| 0.029038 | 0.53134  | 0.071325 | 0.12376  | 0.165223 | 0.00034  | -0.02723 | 0.55715  | -0.08416 |
| 0.069569 | 0.1333   | 0.018976 | 0.68254  | 0.126311 | 0.00627  | -0.01207 | 0.79469  | -0.03847 |
| 0.159389 | 0.00055  | 0.005046 | 0.91339  | 0.213404 | 3.27E-06 | -0.05419 | 0.24253  | 0.084096 |
| 0.059907 | 0.19625  | 0.036696 | 0.42886  | 0.08317  | 0.07256  | -0.01832 | 0.69302  | 0.076065 |
| 0.014156 | 0.76028  | -0.14142 | 0.00219  | 0.002133 | 0.96333  | -0.1967  | 1.86E-05 | 0.097811 |
| -0.09245 | 0.04584  | -0.04684 | 0.31245  | -0.18164 | 7.89E-05 | -0.0007  | 0.98794  | -0.06249 |
| 0.086155 | 0.06284  | 0.150045 | 0.00115  | 0.295379 | 7.42E-11 | -0.02056 | 0.6576   | -0.07367 |
| 0.246414 | 6.88E-08 | 0.282773 | 4.91E-10 | 0.529134 | 4.72E-35 | 0.185383 | 5.57E-05 | 0.046935 |
| 0.096857 | 0.0364   | -0.04074 | 0.37975  | 0.185965 | 5.27E-05 | -0.09626 | 0.03758  | 0.008796 |
| -0.13261 | 0.0041   | 0.026677 | 0.56525  | -0.08579 | 0.06397  | -0.12393 | 0.00733  | -0.16174 |
| -0.0631  | 0.17343  | -0.04256 | 0.35883  | -0.02    | 0.66636  | -0.00158 | 0.97288  | 0.218133 |
| 0.059858 | 0.19663  | 0.026195 | 0.57231  | 0.098481 | 0.03336  | -0.05497 | 0.23579  | 0.025656 |
| 0.091249 | 0.04875  | -0.07712 | 0.09599  | 0.052236 | 0.25992  | -0.09978 | 0.03109  | 0.185427 |
| 0.048073 | 0.29988  | -0.09229 | 0.04623  | 0.134369 | 0.00362  | -0.22443 | 9.61E-07 | -0.05699 |
| 0.022678 | 0.62496  | -0.1106  | 0.01681  | -0.1141  | 0.01362  | -0.19764 | 1.69E-05 | -0.05821 |
| 0.13864  | 0.00268  | 0.084891 | 0.06682  | 0.24831  | 5.42E-08 | 0.023269 | 0.61597  | 0.027386 |
| 0.059515 | 0.19921  | 0.105774 | 0.02225  | 0.185905 | 5.30E-05 | 0.054122 | 0.24309  | 0.051498 |
| 0.08542  | 0.06513  | -0.06597 | 0.15464  | 0.114602 | 0.01321  | -0.13726 | 0.00296  | 0.043934 |
| 0.050443 | 0.27666  | -0.0653  | 0.15889  | 0.110818 | 0.01659  | -0.12126 | 0.00871  | 0.073054 |
| 0.055021 | 0.23533  | 0.011803 | 0.7992   | 0.135264 | 0.0034   | -0.04296 | 0.35433  | 0.081768 |
| 0.000206 | 0.99645  | -0.03756 | 0.41804  | 0.093264 | 0.04396  | -0.1254  | 0.00666  | -0.126   |
| 0.107235 | 0.02046  | 0.080232 | 0.08328  | 0.142967 | 0.00195  | -0.06886 | 0.1373   | -0.12257 |
| 0.014708 | 0.75123  | 0.001034 | 0.98222  | 0.087666 | 0.05835  | -0.12192 | 0.00835  | 0.058921 |
| 0.039613 | 0.39306  | 0.166188 | 0.00031  | 0.034437 | 0.45784  | 0.025871 | 0.57706  | -0.15043 |
| 0.076106 | 0.10046  | -0.03584 | 0.43965  | 0.021024 | 0.65042  | -0.06923 | 0.1352   | 0.02902  |
| 0.053178 | 0.25141  | -0.02695 | 0.56135  | 0.122246 | 0.00818  | -0.04933 | 0.28741  | 0.140163 |
| -0.08106 | 0.08012  | 0.012014 | 0.79568  | -0.12056 | 0.00911  | 0.108967 | 0.0185   | 0.039993 |
| 0.058787 | 0.20477  | 0.052377 | 0.25864  | 0.147515 | 0.00139  | -0.0076  | 0.86982  | 0.024214 |
| 0.097612 | 0.03496  | -0.08012 | 0.08369  | 0.052357 | 0.25882  | -0.13211 | 0.00424  | 0.078496 |
| 0.151494 | 0.00102  | -0.07427 | 0.10894  | 0.039483 | 0.39461  | -0.18063 | 8.66E-05 | -0.07251 |
| 0.053087 | 0.25223  | -0.0259  | 0.57663  | 0.037777 | 0.41538  | -0.02819 | 0.54335  | 0.049471 |
| 0.043089 | 0.35283  | -0.06501 | 0.16072  | -0.03395 | 0.46427  | -0.07203 | 0.12007  | 0.052494 |
| -0.00688 | 0.88218  | 0.208872 | 5.31E-06 | 0.118745 | 0.01022  | 0.170778 | 0.00021  | -0.09354 |
| 0.184239 | 6.20E-05 | 0.054718 | 0.23793  | 0.097778 | 0.03465  | 0.000443 | 0.99238  | 0.094057 |
| 0.177216 | 0.00012  | 0.059316 | 0.20071  | 0.143545 | 0.00187  | 0.025377 | 0.58437  | 0.02183  |
| 0.233005 | 3.54E-07 | 0.016164 | 0.72755  | 0.185601 | 5.45E-05 | 0.008509 | 0.85448  | 0.037745 |

|          |          |          |          |          |          |          |          |          |
|----------|----------|----------|----------|----------|----------|----------|----------|----------|
| 0.22767  | 6.62E-07 | 0.061226 | 0.18657  | 0.188317 | 4.22E-05 | 0.039541 | 0.39392  | 0.050105 |
| 0.117889 | 0.01078  | -0.01225 | 0.79182  | 0.095627 | 0.03885  | -0.01253 | 0.78715  | 0.131074 |
| 0.195596 | 2.07E-05 | 0.04899  | 0.29075  | 0.120762 | 0.00899  | 0.039433 | 0.39522  | -0.00538 |
| 0.224447 | 9.58E-07 | 0.082734 | 0.07407  | 0.150796 | 0.00108  | 0.079195 | 0.08735  | 0.072958 |
| 0.182049 | 7.60E-05 | 0.070082 | 0.13046  | 0.146323 | 0.00152  | 0.029936 | 0.51871  | 0.053242 |
| 0.202036 | 1.08E-05 | 0.047389 | 0.30682  | 0.200895 | 1.22E-05 | 0.043362 | 0.3498   | 0.064747 |
| 0.10861  | 0.01889  | 0.009679 | 0.83475  | 0.084409 | 0.06839  | 0.023066 | 0.61905  | 0.125679 |
| 0.045079 | 0.33102  | -0.06508 | 0.16027  | -0.01074 | 0.81687  | -0.08773 | 0.05816  | -0.06598 |
| 0.205213 | 7.80E-06 | 0.064572 | 0.16358  | 0.162777 | 0.00041  | 0.049652 | 0.28427  | 0.049084 |
| 0.136337 | 0.00316  | 0.005484 | 0.90592  | 0.057673 | 0.2135   | 0.003464 | 0.94049  | -0.01316 |
| 0.141884 | 0.00212  | -0.02228 | 0.63111  | 0.003111 | 0.94655  | 0.00783  | 0.866    | 0.095633 |
| 0.234197 | 3.07E-07 | 0.084777 | 0.06719  | 0.186743 | 4.90E-05 | 0.032911 | 0.47802  | 0.013268 |
| 0.47228  | 2.55E-27 | 0.156285 | 0.0007   | 0.281861 | 5.61E-10 | 0.159959 | 0.00052  | 0.084899 |
| 0.266471 | 4.94E-09 | 0.060626 | 0.19093  | 0.225997 | 8.03E-07 | 0.036193 | 0.43522  | 0.055458 |
| 0.127849 | 0.00566  | -0.06454 | 0.16377  | 0.046035 | 0.32086  | -0.05412 | 0.24311  | 0.04484  |
| 0.164172 | 0.00037  | 0.050134 | 0.27962  | 0.063049 | 0.17377  | 0.073114 | 0.11459  | 0.063595 |
| 0.289304 | 1.87E-10 | 0.028164 | 0.54378  | 0.152468 | 0.00095  | 0.039807 | 0.39074  | 0.043961 |
| 0.250634 | 4.03E-08 | 0.010931 | 0.81375  | 0.11747  | 0.01107  | -0.01911 | 0.68048  | -0.00563 |
| 0.217195 | 2.16E-06 | 0.079565 | 0.08588  | 0.132246 | 0.0042   | 0.042657 | 0.35769  | 0.005256 |
| 0.163578 | 0.00039  | 0.004257 | 0.9269   | 0.000714 | 0.98772  | -0.01616 | 0.72769  | -0.03988 |
| 0.11205  | 0.01541  | -0.00707 | 0.87883  | 0.119705 | 0.00962  | -0.02045 | 0.65937  | 0.028309 |
| 0.245503 | 7.72E-08 | 0.039041 | 0.39993  | 0.139916 | 0.00244  | 0.046014 | 0.32108  | 0.062773 |
| 0.195065 | 2.19E-05 | 0.094066 | 0.04217  | 0.14855  | 0.00128  | 0.054831 | 0.23696  | 0.047201 |
| 0.218348 | 1.90E-06 | 0.132216 | 0.00421  | 0.202631 | 1.02E-05 | 0.083474 | 0.07151  | 0.074626 |
| 0.225186 | 8.81E-07 | 0.026853 | 0.56269  | 0.162794 | 0.00041  | 0.025547 | 0.58185  | 0.046107 |
| 0.129799 | 0.00496  | -0.04393 | 0.34353  | 0.04454  | 0.33685  | -0.03666 | 0.42936  | -0.01849 |
| 0.204011 | 8.84E-06 | 0.031847 | 0.49237  | 0.17814  | 0.00011  | -0.01134 | 0.80683  | 0.013842 |
| 0.261669 | 9.48E-09 | 0.070084 | 0.13045  | 0.19016  | 3.53E-05 | 0.082416 | 0.07519  | 0.030165 |
| 0.170151 | 0.00022  | 0.017968 | 0.69854  | 0.137407 | 0.00292  | 0.0228   | 0.62311  | 0.0721   |
| 0.155447 | 0.00075  | 0.037138 | 0.42332  | 0.131315 | 0.00448  | 0.038701 | 0.40405  | 0.028972 |
| 0.126406 | 0.00623  | -0.01048 | 0.82122  | 0.10567  | 0.02238  | -0.00041 | 0.99291  | -0.03806 |
| 0.19716  | 1.78E-05 | 0.141742 | 0.00214  | 0.406111 | 5.70E-20 | 0.264055 | 6.87E-09 | 0.153566 |
| 0.200916 | 1.21E-05 | 0.03621  | 0.435    | 0.096101 | 0.03789  | 0.041869 | 0.36665  | 0.010662 |
| 0.136198 | 0.00319  | 0.095427 | 0.03927  | 0.179273 | 9.81E-05 | 0.02501  | 0.58981  | 0.018628 |
| 0.148004 | 0.00134  | 0.006459 | 0.88928  | 0.070092 | 0.13041  | 0.01476  | 0.75039  | 0.035507 |
| 0.09124  | 0.04878  | -0.03183 | 0.49262  | 0.056056 | 0.22663  | -0.03807 | 0.41183  | 0.059497 |
| 0.160423 | 0.0005   | 0.040684 | 0.38038  | 0.161906 | 0.00044  | 0.083667 | 0.07086  | 0.146383 |
| 0.295926 | 6.82E-11 | 0.314907 | 3.29E-12 | 0.396618 | 4.82E-19 | 0.211489 | 4.02E-06 | 0.090423 |
| 0.168237 | 0.00026  | 0.025461 | 0.58312  | 0.096998 | 0.03613  | 0.04052  | 0.3823   | 0.011697 |
| 0.161424 | 0.00046  | -0.00738 | 0.87356  | 0.117126 | 0.01131  | -0.01723 | 0.71033  | 0.084876 |
| 0.258941 | 1.36E-08 | 0.068138 | 0.1415   | 0.200462 | 1.27E-05 | 0.062361 | 0.17852  | 0.074526 |
| 0.14283  | 0.00197  | 0.090297 | 0.05117  | 0.11896  | 0.01008  | 0.133672 | 0.0038   | -0.00144 |
| 0.243638 | 9.74E-08 | 0.367006 | 2.45E-16 | 0.411374 | 1.69E-20 | 0.26205  | 9.00E-09 | 0.096387 |
| 0.17932  | 9.76E-05 | 0.039884 | 0.38982  | 0.193695 | 2.50E-05 | 0.032665 | 0.48132  | 0.032859 |
| 0.189647 | 3.71E-05 | 0.026611 | 0.56622  | 0.110961 | 0.01645  | 0.040063 | 0.3877   | -0.06028 |

|          |          |          |         |          |          |          |          |          |
|----------|----------|----------|---------|----------|----------|----------|----------|----------|
| 0.217342 | 2.13E-06 | 0.031477 | 0.49741 | 0.208331 | 5.63E-06 | 0.016021 | 0.72985  | 0.05895  |
| 0.219866 | 1.61E-06 | 0.088497 | 0.056   | 0.197334 | 1.74E-05 | 0.068437 | 0.13976  | 0.065994 |
| 0.346885 | 1.19E-14 | 0.0722   | 0.11921 | 0.238214 | 1.90E-07 | 0.087689 | 0.05829  | 0.065158 |
| 0.21477  | 2.82E-06 | 0.044095 | 0.3417  | 0.191353 | 3.15E-05 | 0.018585 | 0.68873  | 0.024959 |
| 0.159303 | 0.00055  | 0.023036 | 0.61952 | 0.177904 | 0.00011  | 0.043409 | 0.34927  | 0.117336 |
| 0.228884 | 5.75E-07 | 0.03537  | 0.44574 | 0.193356 | 2.59E-05 | 0.02958  | 0.52369  | 0.03249  |
| 0.19764  | 1.69E-05 | 0.010743 | 0.81689 | 0.144149 | 0.00179  | -0.0534  | 0.2494   | 0.124047 |
| 0.095825 | 0.03845  | 0.150926 | 0.00107 | 0.203828 | 9.01E-06 | 0.197743 | 1.67E-05 | 0.042495 |
| 0.123107 | 0.00774  | 0.065553 | 0.15726 | 0.064103 | 0.16667  | 0.062831 | 0.17526  | -0.01235 |
| 0.178654 | 0.0001   | -0.01947 | 0.67472 | 0.084923 | 0.06671  | 0.00497  | 0.91469  | 0.036521 |
| 0.200197 | 1.31E-05 | 0.013687 | 0.768   | 0.116844 | 0.01151  | 0.021622 | 0.64117  | 0.002957 |
| 0.183045 | 6.93E-05 | 0.063354 | 0.17169 | 0.139545 | 0.00251  | 0.085267 | 0.06561  | 0.076737 |
| 0.173828 | 0.00016  | -0.03118 | 0.50154 | 0.079037 | 0.08799  | -0.01037 | 0.82317  | 0.077318 |
| 0.17524  | 0.00014  | 0.020144 | 0.66415 | 0.168103 | 0.00026  | 0.049898 | 0.28189  | 0.04335  |
| 0.147964 | 0.00134  | -0.03262 | 0.48185 | 0.056913 | 0.2196   | -0.02574 | 0.57895  | 0.033233 |
| 0.177633 | 0.00011  | 0.015943 | 0.73112 | 0.134159 | 0.00368  | -0.03155 | 0.49644  | -0.03921 |
| 0.147063 | 0.00144  | 0.033228 | 0.47379 | 0.101317 | 0.02858  | 0.021422 | 0.64426  | 0.05715  |
| 0.195127 | 2.17E-05 | 0.054576 | 0.23915 | 0.229664 | 5.25E-07 | 0.016707 | 0.71878  | 0.056634 |
| 0.162323 | 0.00043  | -0.0057  | 0.90217 | 0.10175  | 0.0279   | 0.004548 | 0.92192  | 0.049628 |
| 0.189682 | 3.70E-05 | 0.051299 | 0.26858 | 0.161953 | 0.00044  | 0.040255 | 0.38543  | 0.021757 |
| 0.163124 | 0.0004   | 0.028325 | 0.54148 | 0.102571 | 0.02666  | 0.044367 | 0.33873  | 0.045927 |
| 0.190079 | 3.56E-05 | 0.023582 | 0.61123 | 0.164906 | 0.00035  | 0.027343 | 0.55558  | 0.070125 |
| 0.219266 | 1.72E-06 | 0.040885 | 0.37802 | 0.133511 | 0.00385  | 0.050463 | 0.27647  | 0.063126 |
| 0.217409 | 2.11E-06 | 0.054074 | 0.24351 | 0.109811 | 0.0176   | 0.061291 | 0.1861   | 0.031733 |
| 0.206368 | 6.92E-06 | 0.053932 | 0.24475 | 0.15967  | 0.00053  | 0.046765 | 0.31324  | 0.036777 |
| 0.203502 | 9.32E-06 | 0.054496 | 0.23984 | 0.167185 | 0.00028  | 0.057438 | 0.21537  | 0.05451  |
| 0.130261 | 0.00481  | 0.021341 | 0.64551 | 0.118017 | 0.0107   | 0.031925 | 0.49131  | -0.01862 |
| 0.204271 | 8.61E-06 | 0.043024 | 0.35356 | 0.119486 | 0.00975  | 0.06278  | 0.17561  | 0.078745 |
| 0.216748 | 2.27E-06 | 0.038893 | 0.40172 | 0.124711 | 0.00697  | 0.041628 | 0.36942  | 0.022976 |
| 0.213207 | 3.34E-06 | 0.057931 | 0.21144 | 0.187277 | 4.65E-05 | 0.053173 | 0.25146  | 0.039747 |
| 0.197227 | 1.76E-05 | 0.056243 | 0.22508 | 0.209422 | 5.01E-06 | 0.064228 | 0.16584  | 0.049774 |
| 0.183406 | 6.70E-05 | 0.019793 | 0.66965 | 0.145385 | 0.00163  | 0.008972 | 0.84667  | -0.01907 |
| 0.202427 | 1.04E-05 | 0.023454 | 0.61317 | 0.180485 | 8.78E-05 | 0.022528 | 0.62725  | 0.050853 |
| 0.214905 | 2.78E-06 | 0.042725 | 0.35693 | 0.216472 | 2.34E-06 | 0.0437   | 0.34604  | 0.056672 |
| 0.113835 | 0.01384  | 0.010897 | 0.81432 | 0.177661 | 0.00011  | 0.012622 | 0.78558  | 0.189666 |
| 0.104046 | 0.02454  | -0.08453 | 0.068   | -0.05435 | 0.24107  | -0.08555 | 0.06471  | 0.000898 |
| 0.110649 | 0.01675  | -0.04517 | 0.33008 | 0.057792 | 0.21255  | -0.08327 | 0.0722   | 0.012527 |
| 0.114814 | 0.01304  | 0.011717 | 0.80063 | 0.080286 | 0.08307  | 0.032887 | 0.47834  | 0.037058 |
| 0.134435 | 0.00361  | 0.008562 | 0.85359 | 0.062723 | 0.17601  | 0.008602 | 0.85291  | 0.05996  |
| 0.087363 | 0.05923  | -0.02744 | 0.55414 | 0.050824 | 0.27304  | -0.0118  | 0.79921  | 0.038394 |
| 0.092448 | 0.04585  | -0.00153 | 0.97364 | 0.102136 | 0.02731  | -0.01328 | 0.77473  | 0.039043 |
| 0.132515 | 0.00412  | 0.02975  | 0.52131 | 0.155261 | 0.00076  | 0.043515 | 0.34809  | 0.063272 |
| 0.130233 | 0.00482  | 0.048091 | 0.2997  | 0.14365  | 0.00186  | 0.042005 | 0.3651   | 0.027206 |
| 0.18861  | 4.10E-05 | -0.01004 | 0.82861 | 0.097737 | 0.03473  | -0.01737 | 0.70815  | 0.040288 |
| 0.267291 | 4.42E-09 | 0.052597 | 0.25664 | 0.111372 | 0.01605  | -0.00189 | 0.96752  | 0.135586 |

|          |          |          |         |          |          |          |         |          |
|----------|----------|----------|---------|----------|----------|----------|---------|----------|
| 0.238753 | 1.78E-07 | 0.049031 | 0.29035 | 0.113334 | 0.01427  | 0.096311 | 0.03747 | 0.105454 |
| 0.20211  | 1.08E-05 | 0.050611 | 0.27506 | 0.128878 | 0.00528  | 0.037256 | 0.42184 | 0.048905 |
| 0.191894 | 2.98E-05 | 0.028674 | 0.53649 | 0.151095 | 0.00106  | -0.01438 | 0.75664 | 0.023344 |
| 0.204568 | 8.35E-06 | 0.063504 | 0.17068 | 0.140333 | 0.00237  | 0.050372 | 0.27734 | 0.055593 |
| 0.166772 | 0.00029  | 0.049942 | 0.28146 | 0.162776 | 0.00041  | 0.039888 | 0.38978 | 0.001336 |
| 0.143673 | 0.00185  | 0.111622 | 0.01581 | 0.197399 | 1.73E-05 | 0.104096 | 0.02447 | 0.07031  |
| 0.263646 | 7.26E-09 | -0.00939 | 0.83969 | 0.114131 | 0.01359  | -0.01078 | 0.81634 | 0.029425 |
| 0.206029 | 7.17E-06 | 0.053269 | 0.2506  | 0.140444 | 0.00235  | 0.058176 | 0.20952 | 0.105987 |
| 0.136907 | 0.00303  | 0.11654  | 0.01173 | 0.180876 | 8.47E-05 | 0.070074 | 0.1305  | 0.121035 |
| 0.206327 | 6.95E-06 | -0.00426 | 0.92682 | 0.118359 | 0.01047  | -0.01849 | 0.6903  | 0.045638 |
| 0.125754 | 0.00651  | 0.028148 | 0.544   | 0.1363   | 0.00316  | 0.052468 | 0.25781 | 0.144681 |
| 0.233879 | 3.19E-07 | 0.060131 | 0.19458 | 0.203189 | 9.63E-06 | 0.036526 | 0.431   | 0.043098 |
| 0.179605 | 9.51E-05 | 0.025899 | 0.57665 | 0.12147  | 0.0086   | 0.000415 | 0.99286 | 0.05196  |
| 0.227223 | 6.97E-07 | 0.029374 | 0.52659 | 0.149135 | 0.00123  | 0.027326 | 0.55583 | 0.017079 |
| 0.17862  | 0.0001   | 0.060275 | 0.19352 | 0.12458  | 0.00703  | 0.020986 | 0.65103 | 0.016734 |
| 0.2146   | 2.87E-06 | -0.00965 | 0.83529 | 0.115396 | 0.01258  | -0.02019 | 0.66343 | 0.066869 |
| 0.237564 | 2.05E-07 | 0.060874 | 0.18912 | 0.167475 | 0.00028  | 0.065131 | 0.15995 | 0.050892 |
| 0.204659 | 8.27E-06 | 0.110971 | 0.01644 | 0.239822 | 1.56E-07 | 0.028948 | 0.5326  | -0.0002  |
| 0.248777 | 5.11E-08 | 0.050919 | 0.27214 | 0.238088 | 1.93E-07 | 0.04185  | 0.36687 | 0.067004 |
| 0.099498 | 0.03158  | -0.01439 | 0.75641 | 0.036209 | 0.43501  | -0.03727 | 0.42172 | 0.050047 |
| 0.182035 | 7.61E-05 | -0.01178 | 0.79953 | 0.110448 | 0.01695  | -0.0106  | 0.81923 | 0.059251 |
| 0.231585 | 4.19E-07 | 0.042418 | 0.36039 | 0.187378 | 4.61E-05 | 0.029932 | 0.51877 | -0.00599 |
| 0.164487 | 0.00036  | 0.038232 | 0.40978 | 0.178457 | 0.00011  | 0.014673 | 0.75181 | 0.019533 |
| 0.251226 | 3.73E-08 | 0.073502 | 0.11267 | 0.153374 | 0.00088  | 0.02182  | 0.63812 | 0.103052 |
| 0.157454 | 0.00064  | 0.023327 | 0.61509 | 0.092061 | 0.04677  | -0.01711 | 0.71221 | 0.037977 |
| 0.129469 | 0.00508  | 0.004261 | 0.92684 | 0.096807 | 0.0365   | 0.00089  | 0.9847  | 0.109576 |
| 0.359563 | 1.06E-15 | 0.043384 | 0.34955 | 0.121374 | 0.00865  | 0.010941 | 0.81358 | 0.062744 |
| 0.191232 | 3.18E-05 | 0.026567 | 0.56686 | 0.173044 | 0.00017  | 0.024198 | 0.60195 | 0.080551 |
| 0.212175 | 3.73E-06 | 0.033628 | 0.46848 | 0.110789 | 0.01661  | 0.032406 | 0.4848  | 0.022713 |
| 0.221501 | 1.34E-06 | 0.038806 | 0.40278 | 0.142925 | 0.00196  | 0.035515 | 0.44387 | 0.014831 |
| 0.19751  | 1.71E-05 | 0.000553 | 0.9905  | 0.135167 | 0.00343  | 0.013358 | 0.77343 | 0.059928 |
| 0.232015 | 3.98E-07 | 0.050813 | 0.27315 | 0.167542 | 0.00028  | 0.043547 | 0.34774 | 0.040653 |
| 0.199554 | 1.40E-05 | 0.047078 | 0.31002 | 0.135208 | 0.00342  | 0.040176 | 0.38636 | 0.03119  |
| 0.165629 | 0.00032  | 0.024967 | 0.59045 | 0.038272 | 0.40929  | -0.02842 | 0.54013 | 0.035895 |
| 0.109921 | 0.01749  | -0.0232  | 0.61697 | 0.053157 | 0.2516   | -0.03231 | 0.48604 | 0.047514 |
| 0.176779 | 0.00012  | 0.064598 | 0.16341 | 0.094364 | 0.04152  | 0.047618 | 0.30449 | -0.0007  |
| 0.095605 | 0.0389   | -0.04573 | 0.32404 | 0.025065 | 0.58899  | -0.09293 | 0.04474 | -0.05184 |
| 0.110491 | 0.01691  | -0.07768 | 0.09359 | 0.11431  | 0.01345  | -0.05399 | 0.24428 | 0.194256 |
| 0.192617 | 2.78E-05 | -0.00872 | 0.85088 | 0.118326 | 0.01049  | -0.00142 | 0.97562 | 0.112631 |
| 0.101656 | 0.02805  | 0.048285 | 0.29776 | 0.027156 | 0.55829  | 0.044934 | 0.33259 | 0.018993 |
| 0.038326 | 0.40862  | -0.04637 | 0.31732 | -0.05933 | 0.20057  | -0.05752 | 0.21475 | 0.019334 |
| 0.106859 | 0.02091  | 0.067727 | 0.14392 | 0.141349 | 0.0022   | 0.047848 | 0.30215 | 0.063341 |
| 0.069298 | 0.13483  | 0.003825 | 0.9343  | -0.00721 | 0.87645  | 0.004414 | 0.92421 | 0.00191  |
| 0.177575 | 0.00011  | 0.016948 | 0.71489 | 0.057493 | 0.21493  | -0.00027 | 0.99531 | -0.04959 |
| 0.161798 | 0.00045  | 0.042486 | 0.35962 | 0.068982 | 0.13662  | 0.021592 | 0.64164 | 0.053186 |

|          |          |          |          |          |          |          |         |          |
|----------|----------|----------|----------|----------|----------|----------|---------|----------|
| 0.324057 | 7.03E-13 | 0.023864 | 0.60698  | 0.02958  | 0.5237   | 0.010064 | 0.82828 | -0.00226 |
| 0.361711 | 7.00E-16 | 0.004826 | 0.91715  | 0.057099 | 0.21809  | 0.013334 | 0.77381 | -0.01218 |
| 0.159671 | 0.00053  | 0.059195 | 0.20164  | 0.080941 | 0.08058  | 0.064478 | 0.1642  | 0.007922 |
| 0.175824 | 0.00013  | -0.03404 | 0.46301  | -0.00417 | 0.92841  | -0.04878 | 0.29284 | -0.06295 |
| 0.126765 | 0.00609  | 0.110355 | 0.01705  | 0.101517 | 0.02827  | 0.086612 | 0.06146 | -0.10181 |
| 0.065893 | 0.15512  | -0.03126 | 0.50036  | -0.04189 | 0.36646  | 0.033624 | 0.46852 | 0.012686 |
| 0.121387 | 0.00864  | 0.040323 | 0.38462  | 0.011147 | 0.81013  | 0.013878 | 0.76485 | 0.063391 |
| 0.083101 | 0.07279  | 0.039236 | 0.39758  | 0.080149 | 0.0836   | -0.01357 | 0.76993 | -0.03652 |
| 0.226542 | 7.54E-07 | 0.05623  | 0.22519  | 0.116729 | 0.01159  | 0.022131 | 0.63334 | 0.00491  |
| 0.217245 | 2.15E-06 | 0.05972  | 0.19766  | 0.105439 | 0.02268  | 0.047375 | 0.30697 | -0.01744 |
| 0.150448 | 0.00111  | 0.009445 | 0.83869  | 0.013565 | 0.77001  | -0.02328 | 0.61578 | -0.04607 |
| 0.169572 | 0.00023  | 0.053501 | 0.24855  | 0.030305 | 0.51357  | 0.035513 | 0.4439  | 0.000447 |
| 0.170846 | 0.00021  | -0.00525 | 0.90988  | 0.090016 | 0.0519   | -0.06102 | 0.18809 | 0.097147 |
| 0.14258  | 0.00201  | 0.123066 | 0.00776  | 0.165373 | 0.00033  | 0.086115 | 0.06297 | 0.025963 |
| 0.246466 | 6.84E-08 | 0.041728 | 0.36827  | 0.083848 | 0.07025  | 0.011193 | 0.80937 | 0.058438 |
| 0.205689 | 7.43E-06 | 0.061465 | 0.18485  | 0.122112 | 0.00825  | 0.057754 | 0.21285 | -0.00644 |
| 0.186798 | 4.87E-05 | 0.030952 | 0.50462  | 0.075605 | 0.10272  | 0.042717 | 0.35702 | 0.028687 |
| 0.081899 | 0.07705  | -0.00065 | 0.98882  | -0.02189 | 0.637    | 0.03832  | 0.40869 | 0.054817 |
| 0.336169 | 8.43E-14 | 0.093255 | 0.04398  | 0.201647 | 1.13E-05 | 0.105169 | 0.02303 | 0.035241 |
| 0.143345 | 0.0019   | -0.07355 | 0.11244  | -0.04448 | 0.33746  | -0.07691 | 0.09691 | -0.02309 |
| 0.102783 | 0.02634  | -0.01498 | 0.74676  | 0.092422 | 0.04591  | 0.014839 | 0.7491  | 0.112051 |
| 0.143629 | 0.00186  | 0.067519 | 0.14516  | 0.137226 | 0.00296  | 0.054036 | 0.24384 | -0.03736 |
| 0.009537 | 0.83714  | 0.005168 | 0.91131  | 0.033314 | 0.47265  | 0.010186 | 0.82623 | 0.036344 |
| 0.19244  | 2.83E-05 | 0.048893 | 0.29171  | 0.136352 | 0.00315  | 0.06192  | 0.18161 | 0.019837 |
| 0.167212 | 0.00028  | 0.021463 | 0.64363  | 0.072169 | 0.11937  | 0.004507 | 0.92262 | -0.00382 |
| 0.308273 | 9.72E-12 | 0.231438 | 4.26E-07 | 0.291054 | 1.43E-10 | 0.171117 | 0.0002  | 0.013032 |
| 0.177936 | 0.00011  | 0.050101 | 0.27993  | 0.022731 | 0.62415  | 0.035167 | 0.44835 | -0.04734 |
| 0.206255 | 7.00E-06 | 0.05435  | 0.2411   | 0.091977 | 0.04698  | 0.053073 | 0.25235 | 0.00701  |
| 0.108923 | 0.01855  | 0.06331  | 0.17199  | 0.083781 | 0.07047  | 0.131339 | 0.00447 | 0.104308 |
| 0.148262 | 0.00131  | 0.065686 | 0.15642  | 0.030895 | 0.5054   | 0.023427 | 0.61357 | -0.05067 |
| 0.123493 | 0.00754  | 0.030849 | 0.50603  | 0.003097 | 0.94679  | 0.031545 | 0.49648 | 0.007989 |
| 0.10072  | 0.02953  | 0.074359 | 0.10853  | 0.024556 | 0.59659  | 0.034488 | 0.45717 | 0.009007 |
| 0.141991 | 0.0021   | 0.100479 | 0.02993  | 0.073104 | 0.11464  | 0.004958 | 0.9149  | -0.05327 |
| 0.192934 | 2.70E-05 | 0.0571   | 0.21808  | 0.072034 | 0.12006  | 0.027973 | 0.5465  | 0.003724 |
| 0.14773  | 0.00137  | 0.064969 | 0.161    | 0.093096 | 0.04435  | 0.011235 | 0.80866 | 0.080931 |
| 0.157205 | 0.00065  | 0.0462   | 0.31913  | 0.074001 | 0.11025  | 0.050807 | 0.2732  | 0.000335 |
| 0.183831 | 6.44E-05 | 0.007806 | 0.8664   | 0.063598 | 0.17004  | 0.017292 | 0.70936 | 0.004671 |
| 0.208288 | 5.65E-06 | 0.050199 | 0.27899  | 0.084499 | 0.06809  | 0.050898 | 0.27235 | 0.008227 |
| 0.169382 | 0.00024  | 0.07305  | 0.11491  | 0.128751 | 0.00533  | 0.077645 | 0.09375 | 0.023652 |
| 0.140496 | 0.00234  | 0.101738 | 0.02792  | 0.121014 | 0.00885  | 0.075987 | 0.10099 | 0.028443 |
| 0.310215 | 7.10E-12 | 0.006784 | 0.88375  | 0.025907 | 0.57654  | 0.002515 | 0.95678 | 0.019889 |
| 0.170288 | 0.00022  | 0.021667 | 0.64048  | 0.090662 | 0.05023  | 0.033485 | 0.47037 | 0.041551 |
| 0.126032 | 0.00639  | 0.10895  | 0.01852  | 0.112741 | 0.01479  | 0.100374 | 0.0301  | 0.045238 |
| 0.176648 | 0.00012  | 0.0102   | 0.82599  | 0.043835 | 0.34456  | -0.01466 | 0.75196 | 0.002812 |
| 0.160226 | 0.00051  | 0.012742 | 0.78361  | -0.021   | 0.65083  | 0.014601 | 0.75299 | -0.00699 |



|          |          |          |         |          |         |          |          |          |
|----------|----------|----------|---------|----------|---------|----------|----------|----------|
| 0.143204 | 0.00192  | 0.040034 | 0.38805 | 0.054349 | 0.24111 | 0.068275 | 0.1407   | 0.072533 |
| 0.097527 | 0.03512  | 0.065368 | 0.15844 | 0.11959  | 0.00969 | 0.035793 | 0.44031  | 0.078525 |
| 0.150596 | 0.0011   | 0.168319 | 0.00026 | 0.099616 | 0.03137 | 0.195686 | 2.06E-05 | 0.053176 |
| 0.139318 | 0.00255  | 0.099718 | 0.0312  | 0.04322  | 0.35138 | 0.1043   | 0.02419  | 0.006183 |
| 0.077376 | 0.09489  | 0.008893 | 0.84801 | -0.03318 | 0.47443 | -0.03462 | 0.45546  | -0.01411 |
| 0.074832 | 0.1063   | -0.03634 | 0.4334  | -0.02389 | 0.60661 | -0.04499 | 0.332    | 0.049652 |
| 0.07509  | 0.10509  | 0.022373 | 0.62963 | 0.089084 | 0.05438 | 0.00223  | 0.96166  | -0.04122 |
| 0.130847 | 0.00462  | 0.053782 | 0.24607 | 0.059384 | 0.2002  | 0.047779 | 0.30286  | 0.039335 |
| 0.150796 | 0.00108  | 0.039868 | 0.39001 | 0.010523 | 0.82058 | 0.026017 | 0.57493  | 0.043335 |
| 0.147475 | 0.00139  | 0.108766 | 0.01872 | 0.091299 | 0.04863 | 0.027454 | 0.55398  | -0.00657 |
| 0.102404 | 0.02691  | -0.03224 | 0.48709 | -0.00907 | 0.84496 | -0.05687 | 0.21994  | 0.083794 |
| 0.142485 | 0.00202  | 0.059372 | 0.20029 | 0.013469 | 0.77159 | 0.039632 | 0.39283  | -0.01184 |
| 0.10711  | 0.02061  | 0.058957 | 0.20346 | 0.071759 | 0.12148 | -0.00315 | 0.94586  | 0.038839 |
| 0.058647 | 0.20585  | 0.061765 | 0.18271 | -0.00532 | 0.90879 | -0.00393 | 0.93253  | -0.13436 |
| 0.233162 | 3.48E-07 | 0.024777 | 0.59328 | 0.025286 | 0.58571 | 0.021647 | 0.64079  | 0.070969 |
| 0.063035 | 0.17386  | 0.022477 | 0.62804 | 0.030838 | 0.50618 | 0.049372 | 0.287    | 0.036116 |
| 0.189937 | 3.61E-05 | 0.084103 | 0.0694  | 0.1014   | 0.02845 | 0.101843 | 0.02776  | 0.005062 |
| 0.171092 | 0.0002   | 0.075131 | 0.1049  | 0.138914 | 0.00263 | 0.096208 | 0.03768  | 0.024265 |
| 0.192728 | 2.75E-05 | 0.060081 | 0.19496 | 0.131384 | 0.00446 | 0.002138 | 0.96325  | 0.093041 |
| 0.207964 | 5.85E-06 | 0.06716  | 0.14731 | 0.125923 | 0.00643 | 0.049818 | 0.28266  | 0.048894 |
| 0.112074 | 0.01539  | 0.045144 | 0.33033 | 0.056057 | 0.22662 | 0.038359 | 0.40822  | -0.02054 |
| 0.104789 | 0.02353  | -0.01824 | 0.69428 | 0.046414 | 0.3169  | -0.00917 | 0.84334  | 0.096184 |
| 0.109965 | 0.01744  | -0.05967 | 0.19802 | 0.024556 | 0.59659 | -0.07042 | 0.12862  | -0.04855 |
| 0.095589 | 0.03893  | 0.028849 | 0.53402 | 0.022997 | 0.6201  | 0.002952 | 0.94927  | 0.097583 |
| 0.109733 | 0.01768  | 0.086749 | 0.06105 | 0.046611 | 0.31484 | 0.069035 | 0.13632  | -0.04228 |
| 0.201082 | 1.19E-05 | 0.06584  | 0.15545 | 0.056861 | 0.22002 | 0.060392 | 0.19265  | -0.0192  |
| 0.141832 | 0.00212  | 0.056007 | 0.22704 | 0.04806  | 0.30001 | 0.05909  | 0.20244  | -0.0066  |
| 0.142975 | 0.00195  | 0.046663 | 0.3143  | 0.096718 | 0.03667 | 0.061088 | 0.18757  | 0.020287 |
| 0.10506  | 0.02317  | 0.067736 | 0.14387 | 0.04232  | 0.3615  | 0.038587 | 0.40544  | 0.008103 |
| 0.197018 | 1.80E-05 | 0.033543 | 0.46961 | 0.096668 | 0.03677 | 0.02425  | 0.60116  | -0.00192 |
| 0.149928 | 0.00116  | 0.067181 | 0.14719 | 0.104589 | 0.0238  | 0.091882 | 0.0472   | -0.01082 |
| 0.224013 | 1.01E-06 | 0.035042 | 0.44997 | 0.083198 | 0.07246 | 0.018712 | 0.68671  | -0.00116 |
| 0.109359 | 0.01808  | 0.027095 | 0.55917 | 0.000874 | 0.98496 | 0.009647 | 0.83529  | -0.02731 |
| 0.120463 | 0.00917  | 0.05609  | 0.22635 | 0.12678  | 0.00608 | 0.02952  | 0.52454  | 0.045713 |
| 0.188814 | 4.02E-05 | 0.016567 | 0.72104 | 0.096449 | 0.0372  | 0.039278 | 0.39707  | -0.0067  |
| 0.113481 | 0.01414  | 0.030094 | 0.5165  | 0.023501 | 0.61246 | 0.018774 | 0.68573  | -0.01476 |
| 0.189035 | 3.94E-05 | 0.040725 | 0.3799  | 0.125233 | 0.00673 | 0.056929 | 0.21947  | 0.013334 |
| 0.153309 | 0.00089  | 0.076819 | 0.0973  | 0.104404 | 0.02405 | 0.084424 | 0.06834  | 0.029189 |
| 0.167926 | 0.00027  | 0.054497 | 0.23983 | 0.033406 | 0.47142 | 0.057742 | 0.21294  | -0.01568 |
| 0.197463 | 1.72E-05 | 0.044104 | 0.3416  | 0.11669  | 0.01162 | 0.051576 | 0.266    | 0.017339 |
| 0.153338 | 0.00089  | 0.005065 | 0.91307 | 0.012116 | 0.79399 | 0.026827 | 0.56306  | 0.012983 |
| 0.13752  | 0.0029   | 0.04065  | 0.38078 | 0.062055 | 0.18067 | 0.029085 | 0.53068  | -0.02112 |
| 0.178885 | 0.0001   | 0.035165 | 0.44838 | 0.091094 | 0.04914 | 0.022891 | 0.62172  | 0.026016 |
| 0.16597  | 0.00032  | 0.06842  | 0.13986 | 0.113314 | 0.01428 | 0.045163 | 0.33012  | -0.02195 |
| 0.238557 | 1.82E-07 | 0.116643 | 0.01165 | 0.157994 | 0.00061 | 0.087758 | 0.05809  | 0.008411 |

|          |          |          |         |          |         |          |         |          |
|----------|----------|----------|---------|----------|---------|----------|---------|----------|
| 0.117891 | 0.01078  | 0.095074 | 0.04    | 0.052928 | 0.25365 | 0.097403 | 0.03536 | 0.003859 |
| 0.153494 | 0.00088  | 0.043953 | 0.34326 | 0.038747 | 0.40349 | 0.036252 | 0.43447 | 0.005177 |
| 0.18808  | 4.31E-05 | 0.050868 | 0.27263 | 0.128294 | 0.00549 | 0.062039 | 0.18078 | 0.038654 |
| 0.169048 | 0.00024  | 0.034533 | 0.45658 | 0.148602 | 0.00128 | 0.044848 | 0.33351 | 0.002601 |
| 0.193462 | 2.56E-05 | 0.101163 | 0.02882 | 0.148493 | 0.00129 | 0.088159 | 0.05694 | 0.032874 |
| 0.169978 | 0.00022  | 0.063058 | 0.1737  | 0.089769 | 0.05254 | 0.06375  | 0.16902 | 0.012456 |
| 0.085453 | 0.06503  | 0.020707 | 0.65536 | 0.02055  | 0.65781 | 0.019151 | 0.67976 | -0.01235 |
| 0.082512 | 0.07485  | 0.090591 | 0.05041 | 0.115805 | 0.01227 | 0.144378 | 0.00176 | 0.021459 |
| 0.133847 | 0.00376  | 0.029836 | 0.52011 | 0.079944 | 0.08439 | 0.076816 | 0.09732 | 0.073791 |
| 0.11993  | 0.00948  | 0.059276 | 0.20102 | 0.076376 | 0.09925 | 0.002188 | 0.96239 | -0.06188 |
| 0.111306 | 0.01611  | 0.053377 | 0.24964 | 0.085686 | 0.0643  | 0.034926 | 0.45147 | -0.0392  |
| 0.097824 | 0.03457  | 0.036542 | 0.4308  | -0.03355 | 0.46956 | 0.050134 | 0.27962 | -0.00207 |
| 0.066994 | 0.14832  | 0.014495 | 0.75472 | 0.044502 | 0.33726 | -0.05428 | 0.24169 | -0.04177 |
| 0.185648 | 5.43E-05 | 0.054177 | 0.2426  | 0.083099 | 0.0728  | 0.063586 | 0.17012 | 0.013002 |
| 0.134282 | 0.00365  | 0.040322 | 0.38463 | -0.01669 | 0.71904 | -0.00495 | 0.91501 | -0.06943 |
| 0.15873  | 0.00058  | 0.015514 | 0.73808 | 0.061969 | 0.18127 | 0.006737 | 0.88455 | -0.05488 |
| 0.08988  | 0.05225  | 0.058333 | 0.20829 | 0.073076 | 0.11478 | 0.040972 | 0.37701 | 0.080172 |
| 0.163264 | 0.0004   | 0.054423 | 0.24047 | 0.101358 | 0.02851 | 0.065552 | 0.15727 | 0.039531 |
| 0.114191 | 0.01354  | 0.101507 | 0.02828 | 0.135329 | 0.00339 | 0.04556  | 0.32588 | 0.021546 |
| -0.00846 | 0.85529  | 0.018894 | 0.68383 | 0.045815 | 0.32319 | 0.044605 | 0.33614 | -0.04384 |
| 0.091097 | 0.04913  | -0.04262 | 0.35816 | -0.06867 | 0.13842 | -0.05098 | 0.27153 | -0.00845 |
| 0.047647 | 0.30419  | 0.077606 | 0.09391 | 0.117306 | 0.01118 | 0.101955 | 0.02759 | 0.067699 |
| 0.142612 | 0.00201  | 0.076088 | 0.10054 | 0.017948 | 0.69886 | 0.066163 | 0.15343 | -0.02188 |
| 0.109785 | 0.01763  | -0.00224 | 0.96148 | 0.019774 | 0.66995 | 0.006635 | 0.88628 | -0.02509 |
| 0.270345 | 2.89E-09 | 0.055574 | 0.23066 | 0.175876 | 0.00013 | 0.065384 | 0.15834 | 0.033574 |
| 0.157545 | 0.00063  | 0.138677 | 0.00267 | 0.055782 | 0.22891 | 0.072186 | 0.11928 | -0.06108 |
| 0.073718 | 0.11162  | 0.032377 | 0.48519 | 0.075479 | 0.1033  | 0.057648 | 0.21369 | -0.02413 |
| 0.186052 | 5.23E-05 | 0.04635  | 0.31756 | 0.07185  | 0.12101 | 0.00429  | 0.92633 | -0.02992 |
| 0.152108 | 0.00098  | 0.028781 | 0.53497 | 0.09561  | 0.03889 | 0.076515 | 0.09864 | 0.041874 |
| 0.194503 | 2.31E-05 | 0.05915  | 0.20198 | 0.113355 | 0.01425 | 0.044356 | 0.33885 | -0.0397  |
| 0.131917 | 0.0043   | -0.01168 | 0.80129 | 0.027242 | 0.55705 | -0.02918 | 0.52936 | -0.03558 |
| 0.164032 | 0.00037  | 0.026872 | 0.56242 | 0.079179 | 0.08742 | -0.00311 | 0.94655 | 0.021853 |
| 0.181425 | 8.05E-05 | 0.022195 | 0.63236 | 0.06375  | 0.16902 | 0.038083 | 0.4116  | 0.081448 |
| 0.137851 | 0.00283  | -0.02683 | 0.56305 | 0.031699 | 0.49438 | -0.02474 | 0.59381 | 0.054701 |
| 0.386828 | 4.06E-18 | 0.134032 | 0.00371 | 0.171277 | 0.0002  | 0.101817 | 0.0278  | -0.01221 |
| 0.077552 | 0.09414  | -0.00912 | 0.84417 | 0.00146  | 0.97489 | 0.011276 | 0.80798 | -0.03388 |
| 0.059746 | 0.19746  | 0.108115 | 0.01944 | 0.002186 | 0.96242 | 0.05089  | 0.27242 | -0.08044 |
| 0.173309 | 0.00017  | 0.045019 | 0.33167 | 0.067384 | 0.14596 | 0.054836 | 0.23691 | -0.02197 |
| 0.106155 | 0.02177  | 0.057187 | 0.21738 | -0.0046  | 0.92106 | 0.017407 | 0.70752 | -0.03388 |
| 0.195294 | 2.14E-05 | 0.083441 | 0.07163 | 0.107292 | 0.02039 | 0.082984 | 0.0732  | -0.01952 |
| 0.110482 | 0.01692  | -0.04346 | 0.34874 | 0.010965 | 0.81318 | -0.03799 | 0.41272 | 0.037752 |
| 0.173496 | 0.00016  | -0.00375 | 0.93556 | 0.081509 | 0.07847 | 0.002519 | 0.9567  | 0.030579 |
| 0.208219 | 5.70E-06 | 0.063236 | 0.17249 | 0.053517 | 0.2484  | 0.041884 | 0.36647 | 0.044529 |
| 0.182702 | 7.15E-05 | 0.045364 | 0.32797 | 0.051723 | 0.26464 | 0.041578 | 0.37    | -0.011   |
| 0.150388 | 0.00112  | 0.096996 | 0.03613 | 0.044324 | 0.3392  | 0.120436 | 0.00918 | 0.05079  |

|          |          |          |          |          |          |          |          |          |
|----------|----------|----------|----------|----------|----------|----------|----------|----------|
| 0.160917 | 0.00048  | 0.059175 | 0.20179  | 0.064584 | 0.1635   | 0.051387 | 0.26776  | -0.00113 |
| 0.14773  | 0.00137  | 0.013173 | 0.77647  | 0.070879 | 0.12614  | -0.0322  | 0.48754  | -0.00909 |
| 0.188316 | 4.22E-05 | 0.044835 | 0.33366  | 0.06146  | 0.18489  | 0.055241 | 0.23346  | -0.0097  |
| -0.03821 | 0.41003  | -0.10574 | 0.02229  | 0.119374 | 0.00982  | -0.15805 | 0.00061  | 0.222094 |
| 0.042091 | 0.36411  | -0.11213 | 0.01534  | 0.161566 | 0.00046  | -0.22083 | 1.44E-06 | 0.214037 |
| -0.00719 | 0.87687  | -0.12235 | 0.00813  | 0.0048   | 0.91761  | -0.22216 | 1.24E-06 | 0.155308 |
| 0.052308 | 0.25926  | 0.044343 | 0.33899  | 0.200305 | 1.29E-05 | 0.038983 | 0.40063  | 0.238212 |
| 0.000562 | 0.99033  | -0.05328 | 0.25046  | -0.04385 | 0.34437  | -0.12517 | 0.00676  | 0.087957 |
| -0.08754 | 0.05871  | -0.12092 | 0.00891  | -0.13927 | 0.00256  | -0.052   | 0.26208  | 0.064041 |
| -0.058   | 0.21092  | -0.113   | 0.01455  | 0.031356 | 0.49906  | -0.0313  | 0.4998   | 0.144767 |
| -0.02565 | 0.58028  | -0.03894 | 0.40111  | 0.07224  | 0.119    | -0.10078 | 0.02944  | 0.187399 |
| -0.03012 | 0.51617  | -0.17055 | 0.00021  | -0.0734  | 0.11318  | -0.13098 | 0.00458  | 0.004541 |
| -0.08284 | 0.0737   | -0.22425 | 9.80E-07 | -0.0547  | 0.23808  | -0.19975 | 1.37E-05 | 0.18323  |
| -0.07639 | 0.09917  | -0.11254 | 0.01497  | -0.06847 | 0.13955  | -0.15452 | 0.00081  | 0.069158 |
| 0.090433 | 0.05082  | -0.08064 | 0.0817   | 0.137806 | 0.00284  | -0.14296 | 0.00195  | 0.217183 |
| 0.003573 | 0.93862  | -0.12845 | 0.00544  | -0.01074 | 0.81701  | -0.15891 | 0.00057  | 0.042059 |
| -0.11086 | 0.01654  | -0.19504 | 2.19E-05 | -0.16273 | 0.00041  | -0.13676 | 0.00306  | 0.157653 |
| 0.04216  | 0.36332  | 0.013425 | 0.77232  | 0.01623  | 0.72647  | -0.01968 | 0.67144  | 0.063315 |
| 0.008163 | 0.86035  | -0.10437 | 0.0241   | 0.05898  | 0.20328  | -0.10476 | 0.02357  | 0.115483 |
| -0.02112 | 0.6489   | -0.15517 | 0.00077  | -0.05561 | 0.23034  | -0.18841 | 4.18E-05 | 0.049993 |
| 0.13547  | 0.00335  | -0.03091 | 0.50525  | 0.217655 | 2.05E-06 | 0.031361 | 0.499    | 0.236532 |
| -0.02368 | 0.60979  | -0.1187  | 0.01025  | -0.04435 | 0.33893  | -0.04825 | 0.29816  | 0.179614 |
| -0.05426 | 0.24185  | -0.10418 | 0.02436  | -0.13307 | 0.00397  | -0.15118 | 0.00105  | 0.060486 |
| 0.010965 | 0.81318  | -0.08014 | 0.08365  | -0.02714 | 0.55847  | -0.07548 | 0.10329  | 0.097512 |
| -0.02131 | 0.64592  | -0.07968 | 0.08543  | -0.07364 | 0.112    | -0.09989 | 0.0309   | 0.099452 |
| -0.00949 | 0.83787  | -0.16166 | 0.00045  | 0.09181  | 0.04738  | -0.16117 | 0.00047  | 0.173424 |
| -0.06344 | 0.17109  | -0.1722  | 0.00018  | -0.20381 | 9.03E-06 | -0.08017 | 0.08352  | 0.188434 |
| -0.05239 | 0.2585   | -0.03485 | 0.4525   | -0.09817 | 0.03394  | -0.04993 | 0.28162  | 0.001629 |
| 0.013457 | 0.77178  | -0.14522 | 0.00165  | -0.0731  | 0.11466  | -0.19278 | 2.74E-05 | 0.027113 |
| -0.07106 | 0.12518  | -0.12985 | 0.00495  | -0.01336 | 0.77334  | -0.06113 | 0.18723  | 0.236653 |
| -0.00353 | 0.93928  | -0.05397 | 0.24437  | 0.035666 | 0.44194  | 0.045487 | 0.32667  | 0.232153 |
| -0.05284 | 0.25444  | -0.0786  | 0.08976  | 0.024564 | 0.59646  | -0.16681 | 0.00029  | 0.107703 |
| 0.017985 | 0.69827  | -0.11911 | 0.00999  | 0.000493 | 0.99152  | 0.022163 | 0.63285  | 0.284661 |
| 0.021554 | 0.64222  | 0.069039 | 0.13629  | 0.051653 | 0.26529  | 0.01601  | 0.73005  | 0.010522 |
| -0.04292 | 0.35478  | -0.12297 | 0.00781  | -0.03799 | 0.4128   | -0.17924 | 9.84E-05 | -0.02505 |
| 0.003679 | 0.9368   | -0.00012 | 0.99797  | -0.10293 | 0.02613  | -0.0056  | 0.90385  | 0.044244 |
| 0.01805  | 0.69724  | -0.06089 | 0.18901  | -0.04984 | 0.28248  | -0.06061 | 0.19108  | -0.02901 |
| -0.01659 | 0.72074  | -0.09856 | 0.03322  | 0.119871 | 0.00952  | -0.13931 | 0.00255  | 0.13106  |
| -0.01007 | 0.82818  | -0.08825 | 0.0567   | 0.059891 | 0.19637  | -0.10164 | 0.02808  | 0.22553  |
| -0.03324 | 0.47359  | -0.20929 | 5.09E-06 | -0.09929 | 0.03193  | -0.15709 | 0.00066  | 0.179143 |
| -0.05775 | 0.21292  | -0.03648 | 0.43154  | -0.13576 | 0.00329  | 0.029138 | 0.52992  | 0.017001 |
| -0.08112 | 0.07992  | -0.19341 | 2.57E-05 | -0.29719 | 5.61E-11 | -0.19386 | 2.46E-05 | -0.06254 |
| 0.003643 | 0.93742  | -0.15871 | 0.00058  | 0.045115 | 0.33064  | -0.19881 | 1.50E-05 | 0.29957  |
| -0.06546 | 0.15787  | -0.17261 | 0.00018  | -0.14943 | 0.0012   | -0.16523 | 0.00034  | 0.106654 |
| -0.07527 | 0.10428  | -0.14414 | 0.00179  | -0.01699 | 0.7142   | 0.002946 | 0.94938  | 0.16413  |

|           |         |          |          |          |          |          |          |          |
|-----------|---------|----------|----------|----------|----------|----------|----------|----------|
| -0.04004  | 0.38796 | -0.10593 | 0.02205  | 0.003458 | 0.94058  | -0.13175 | 0.00434  | 0.142838 |
| 0.052701  | 0.2557  | 0.019207 | 0.67888  | 0.040811 | 0.37889  | -0.04876 | 0.293    | -0.03663 |
| -0.0667   | 0.15008 | -0.15598 | 0.00072  | -0.09909 | 0.03228  | -0.09601 | 0.03808  | 0.214556 |
| -0.03421  | 0.46078 | -0.13341 | 0.00387  | -0.0282  | 0.54319  | -0.13464 | 0.00356  | 0.015511 |
| -0.06128  | 0.18615 | -0.06771 | 0.14404  | -0.1018  | 0.02782  | 0.038571 | 0.40564  | 0.071244 |
| 0.027654  | 0.55109 | -0.09687 | 0.03638  | 0.092089 | 0.04671  | -0.17248 | 0.00018  | 0.181808 |
| -0.09994  | 0.03082 | -0.16289 | 0.00041  | -0.1065  | 0.02135  | -0.16618 | 0.00031  | -0.15078 |
| -0.0352   | 0.44798 | -0.2156  | 2.58E-06 | 0.071502 | 0.12283  | -0.20218 | 1.07E-05 | 0.162792 |
| 0.003227  | 0.94456 | -0.13815 | 0.00277  | 0.026209 | 0.57211  | -0.12866 | 0.00536  | 0.163891 |
| -0.03974  | 0.39156 | -0.15387 | 0.00085  | -0.02046 | 0.65929  | -0.13539 | 0.00337  | 0.175359 |
| -0.05499  | 0.2356  | -0.16927 | 0.00024  | -0.02217 | 0.63267  | -0.0895  | 0.05326  | 0.225224 |
| -0.05943  | 0.19981 | -0.09747 | 0.03523  | -0.0328  | 0.47949  | -0.10797 | 0.01961  | 0.085951 |
| -0.02535  | 0.58473 | -0.24    | 1.53E-07 | -0.02513 | 0.58807  | -0.22686 | 7.27E-07 | 0.20788  |
| -0.06963  | 0.13296 | -0.20689 | 6.55E-06 | -0.17306 | 0.00017  | -0.21573 | 2.54E-06 | 0.074882 |
| -0.06836  | 0.14021 | -0.26625 | 5.09E-09 | -0.12977 | 0.00497  | -0.25962 | 1.25E-08 | 0.095084 |
| 0.000986  | 0.98305 | -0.17297 | 0.00017  | -0.03806 | 0.41192  | -0.06304 | 0.1738   | 0.261487 |
| -0.11825  | 0.01054 | -0.15598 | 0.00072  | -0.17632 | 0.00013  | -0.06865 | 0.13852  | 0.161025 |
| -2.16E-05 | 0.99963 | -0.06344 | 0.17112  | -0.00055 | 0.99055  | -0.07318 | 0.11427  | 0.212727 |
| -0.13141  | 0.00445 | -0.1798  | 9.34E-05 | -0.25324 | 2.88E-08 | -0.17024 | 0.00022  | 0.119171 |
| -0.05102  | 0.27117 | -0.13854 | 0.0027   | 0.051481 | 0.26689  | -0.12464 | 0.007    | 0.078321 |
| -0.04793  | 0.30134 | -0.00079 | 0.9864   | -0.0243  | 0.60047  | 0.019277 | 0.67778  | 0.101897 |
| 0.048405  | 0.29655 | -0.02855 | 0.53824  | 0.026817 | 0.56322  | -0.05617 | 0.22565  | 0.02391  |
| -0.01073  | 0.81716 | -0.19612 | 1.97E-05 | -0.02051 | 0.65841  | -0.14254 | 0.00202  | 0.155718 |
| -0.07175  | 0.12153 | 0.007189 | 0.87688  | -0.07317 | 0.11432  | 0.014391 | 0.75643  | 0.050423 |
| -5.48E-05 | 0.99906 | -0.19007 | 3.56E-05 | 0.067871 | 0.14306  | -0.2273  | 6.91E-07 | 0.1559   |
| -0.04184  | 0.36698 | -0.05009 | 0.28005  | -0.15874 | 0.00058  | 0.068884 | 0.13718  | 0.058183 |
| -0.07044  | 0.1285  | -0.10918 | 0.01827  | -0.05043 | 0.27682  | -0.08595 | 0.06346  | 0.000939 |
| 0.028259  | 0.54241 | -0.20722 | 6.33E-06 | 0.013305 | 0.7743   | -0.2055  | 7.57E-06 | 0.159546 |
| -0.0925   | 0.04573 | -0.12786 | 0.00566  | -0.11766 | 0.01094  | -0.02646 | 0.56846  | 0.080243 |
| 0.037959  | 0.41313 | -0.06302 | 0.17394  | 0.039702 | 0.392    | -0.01234 | 0.79031  | 0.171727 |
| -0.06489  | 0.16152 | -0.09543 | 0.03925  | -0.03367 | 0.46796  | -0.15234 | 0.00096  | -0.01664 |
| -0.02044  | 0.65954 | -0.0789  | 0.08854  | 0.000164 | 0.99719  | -0.02381 | 0.60785  | 0.118134 |
| -0.05409  | 0.24337 | -0.10969 | 0.01773  | -0.07047 | 0.12836  | -0.11641 | 0.01182  | 0.135071 |
| -0.06755  | 0.14496 | -0.21151 | 4.01E-06 | -0.03228 | 0.48644  | -0.25108 | 3.81E-08 | 0.059669 |
| -0.09653  | 0.03703 | -0.16505 | 0.00034  | -0.0615  | 0.18463  | -0.17984 | 9.31E-05 | -0.04577 |
| -0.01566  | 0.73576 | -0.13002 | 0.00489  | -0.12772 | 0.00571  | -0.04958 | 0.28492  | 0.217053 |
| 0.096116  | 0.03786 | 0.024707 | 0.59433  | 0.101856 | 0.02774  | -0.06156 | 0.1842   | 0.029348 |
| 2.01E-05  | 0.99965 | -0.1407  | 0.00231  | 0.00984  | 0.83205  | -0.19684 | 1.83E-05 | 0.120952 |
| 0.000596  | 0.98976 | -0.16157 | 0.00046  | 0.046238 | 0.31873  | -0.11463 | 0.01319  | 0.236184 |
| -0.04919  | 0.28876 | -0.11344 | 0.01418  | 0.016533 | 0.72158  | -0.05069 | 0.27433  | 0.139193 |
| -0.02041  | 0.65999 | -0.10184 | 0.02776  | 0.087723 | 0.05819  | -0.17975 | 9.39E-05 | 0.156926 |
| -0.08362  | 0.07102 | -0.22521 | 8.78E-07 | -0.04564 | 0.32508  | -0.17392 | 0.00016  | 0.025533 |
| -0.0339   | 0.46495 | -0.24202 | 1.19E-07 | -0.07711 | 0.09605  | -0.2761  | 1.29E-09 | -0.07115 |
| -0.0684   | 0.13999 | 0.015734 | 0.73451  | -0.01877 | 0.68584  | 0.029619 | 0.52315  | 0.019071 |
| -0.00344  | 0.94093 | -0.02148 | 0.64342  | 0.093176 | 0.04416  | 0.007262 | 0.87563  | 0.223497 |

|          |         |          |          |          |          |          |          |          |
|----------|---------|----------|----------|----------|----------|----------|----------|----------|
| -0.03895 | 0.40103 | -0.1714  | 0.0002   | -0.0194  | 0.67587  | -0.20838 | 5.60E-06 | 0.134303 |
| 0.035164 | 0.4484  | -0.13457 | 0.00357  | 0.093774 | 0.04282  | -0.15777 | 0.00062  | 0.155591 |
| 0.005305 | 0.90898 | -0.0575  | 0.21489  | 0.032503 | 0.48349  | -0.12708 | 0.00596  | 0.177981 |
| -0.02399 | 0.60509 | -0.09084 | 0.04979  | -0.02071 | 0.65535  | -0.09976 | 0.03113  | 0.186158 |
| -0.06849 | 0.13945 | -0.26001 | 1.18E-08 | -0.10728 | 0.0204   | -0.16724 | 0.00028  | 0.149224 |
| 0.014444 | 0.75556 | -0.13246 | 0.00414  | 0.079266 | 0.08707  | -0.22156 | 1.33E-06 | 0.14974  |
| -0.10819 | 0.01935 | -0.24588 | 7.36E-08 | -0.27548 | 1.41E-09 | -0.25554 | 2.13E-08 | 0.032384 |
| -0.03448 | 0.45732 | -0.1105  | 0.01691  | 0.002449 | 0.95791  | -0.10772 | 0.01989  | 0.164438 |
| -0.15094 | 0.00107 | -0.19689 | 1.82E-05 | -0.23945 | 1.63E-07 | -0.12924 | 0.00515  | 0.140937 |

| p.MMligh | MMplum2  | p.MMplur | MMgrey   | p.MMgrey |
|----------|----------|----------|----------|----------|
| 0.00301  | -0.07521 | 0.10452  | 0.177253 | 0.00012  |
| 0.12095  | -0.07914 | 0.08757  | 0.12393  | 0.00733  |
| 0.34704  | -0.08192 | 0.07697  | 0.188838 | 4.01E-05 |
| 0.18611  | -0.08949 | 0.05328  | -0.00023 | 0.99607  |
| 0.70893  | -0.08495 | 0.06663  | 0.295729 | 7.03E-11 |
| 0.89621  | -0.10259 | 0.02663  | 0.199843 | 1.35E-05 |
| 0.57991  | -0.13038 | 0.00477  | 0.218959 | 1.78E-06 |
| 0.3154   | -0.13427 | 0.00365  | 0.168868 | 0.00025  |
| 0.51718  | -0.10376 | 0.02494  | 0.13524  | 0.00341  |
| 0.0266   | 0.010418 | 0.82234  | 0.328069 | 3.52E-13 |
| 0.8882   | -0.06058 | 0.1913   | 0.136695 | 0.00308  |
| 0.21457  | -0.0337  | 0.46757  | 0.219802 | 1.62E-06 |
| 0.7032   | -0.03028 | 0.51386  | 0.342085 | 2.89E-14 |
| 0.4604   | -0.09441 | 0.04142  | 0.018112 | 0.69625  |
| 0.34479  | 0.004622 | 0.92065  | 0.098593 | 0.03316  |
| 0.16591  | 0.000684 | 0.98824  | 0.181934 | 7.68E-05 |
| 0.23345  | -0.07144 | 0.12315  | 0.16193  | 0.00044  |
| 0.87574  | -0.10139 | 0.02846  | 0.1281   | 0.00557  |
| 0.84601  | -0.09073 | 0.05006  | 0.213737 | 3.15E-06 |
| 0.93236  | -0.05015 | 0.27947  | 0.101787 | 0.02785  |
| 0.19081  | -0.07292 | 0.11556  | 0.354706 | 2.72E-15 |
| 0.17978  | -0.06988 | 0.13158  | 0.288583 | 2.08E-10 |
| 0.3205   | -0.16402 | 0.00037  | 0.161057 | 0.00048  |
| 0.25142  | -0.16109 | 0.00047  | 0.158832 | 0.00057  |
| 0.31035  | -0.13189 | 0.0043   | 0.117877 | 0.01079  |
| 0.0517   | -0.18785 | 4.41E-05 | 0.1564   | 0.00069  |
| 0.91238  | -0.03904 | 0.39997  | 0.091886 | 0.04719  |
| 0.5691   | -0.1615  | 0.00046  | 0.310201 | 7.11E-12 |
| 0.3901   | -0.09672 | 0.03666  | 0.275314 | 1.44E-09 |
| 0.72567  | 0.031666 | 0.49483  | 0.086751 | 0.06104  |
| 0.04326  | -0.07622 | 0.09994  | 0.062087 | 0.18044  |
| 0.59711  | -0.12612 | 0.00635  | 0.183956 | 6.37E-05 |
| 0.2401   | -0.10676 | 0.02102  | 0.130268 | 0.00481  |
| 0.51182  | 0.026344 | 0.57012  | 0.049476 | 0.28599  |
| 0.43342  | -0.16495 | 0.00034  | 0.122398 | 0.0081   |
| 0.00136  | -0.11508 | 0.01283  | 0.05066  | 0.2746   |
| 0.30259  | -0.13389 | 0.00375  | 0.141932 | 0.00211  |
| 0.33226  | 0.045205 | 0.32967  | 0.038276 | 0.40923  |
| 0.07971  | -0.06755 | 0.145    | -0.03469 | 0.45455  |
| 0.56416  | -0.17632 | 0.00013  | 0.118615 | 0.0103   |
| 0.15956  | -0.0918  | 0.0474   | 0.061035 | 0.18795  |
| 0.6769   | -0.0882  | 0.05684  | 0.233711 | 3.26E-07 |
| 7.53E-08 | 0.002833 | 0.95131  | 0.220428 | 1.51E-06 |
| 2.67E-14 | 0.08097  | 0.08047  | 0.238099 | 1.92E-07 |

|          |          |          |          |          |
|----------|----------|----------|----------|----------|
| 0.05422  | -0.07096 | 0.12571  | -0.31876 | 1.73E-12 |
| 0.00407  | -0.14924 | 0.00122  | -0.071   | 0.12548  |
| 0.34724  | -0.11673 | 0.01159  | 0.11827  | 0.01053  |
| 0.38092  | -0.13593 | 0.00325  | -0.00264 | 0.95461  |
| 0.87813  | -0.15821 | 0.0006   | 3.79E-05 | 0.99935  |
| 0.37344  | -0.04984 | 0.28244  | -0.18089 | 8.45E-05 |
| 2.24E-09 | 0.006126 | 0.89496  | 0.19718  | 1.77E-05 |
| 0.24769  | -0.0552  | 0.23383  | -0.12765 | 0.00574  |
| 0.53593  | -0.14404 | 0.0018   | -0.07634 | 0.09943  |
| 0.74689  | -0.12622 | 0.00631  | -0.22186 | 1.28E-06 |
| 0.07375  | -0.09792 | 0.03438  | 0.01407  | 0.7617   |
| 0.53812  | -0.13064 | 0.00469  | -0.22789 | 6.45E-07 |
| 2.32E-12 | -0.05639 | 0.22389  | 0.223506 | 1.07E-06 |
| 0.09732  | -0.04393 | 0.3435   | -0.36246 | 6.04E-16 |
| 1.47E-43 | 0.256009 | 2.01E-08 | 0.236331 | 2.38E-07 |
| 0.82708  | -0.08665 | 0.06133  | -0.30815 | 9.92E-12 |
| 0.05395  | -0.12148 | 0.00859  | -0.00619 | 0.89384  |
| 3.28E-08 | -0.19152 | 3.10E-05 | 0.359056 | 1.18E-15 |
| 0.59734  | -0.14749 | 0.00139  | 0.031935 | 0.49117  |
| 0.58306  | 0.030324 | 0.5133   | 0.273349 | 1.90E-09 |
| 2.99E-08 | -0.09451 | 0.0412   | 0.169922 | 0.00023  |
| 0.36517  | -0.00582 | 0.90024  | -0.3479  | 9.85E-15 |
| 0.45909  | -0.15847 | 0.00059  | -0.04282 | 0.35585  |
| 0.94655  | 0.081432 | 0.07875  | 0.121922 | 0.00835  |
| 6.38E-06 | -0.12631 | 0.00627  | 0.504614 | 1.54E-31 |
| 0.70743  | -0.23173 | 4.12E-07 | 0.273335 | 1.90E-09 |
| 0.30544  | -0.1056  | 0.02247  | -0.15452 | 0.00081  |
| 0.03407  | -0.0656  | 0.15694  | -0.00702 | 0.87981  |
| 0.18685  | -0.2662  | 5.13E-09 | 0.270947 | 2.66E-09 |
| 0.23049  | -0.19574 | 2.05E-05 | 0.019786 | 0.66977  |
| 0.09364  | -0.10061 | 0.02971  | 0.326118 | 4.93E-13 |
| 0.09665  | -0.17926 | 9.82E-05 | -0.10788 | 0.0197   |
| 0.00041  | -0.14029 | 0.00238  | 0.238836 | 1.76E-07 |
| 4.17E-05 | 0.018326 | 0.69284  | 0.091853 | 0.04727  |
| 0.29632  | -0.16895 | 0.00024  | 0.02288  | 0.62189  |
| 0.00538  | -0.19227 | 2.88E-05 | 0.021063 | 0.64982  |
| 0.07036  | -0.06886 | 0.1373   | -0.06536 | 0.15852  |
| 0.00049  | -0.11554 | 0.01247  | -0.01746 | 0.70669  |
| 4.95E-07 | -0.11429 | 0.01346  | 0.270478 | 2.84E-09 |
| 0.91605  | 0.022235 | 0.63175  | -0.23231 | 3.85E-07 |
| 0.00907  | -0.13025 | 0.00482  | 0.009415 | 0.8392   |
| 0.37605  | -0.14919 | 0.00122  | 0.178309 | 0.00011  |
| 0.13115  | -0.11399 | 0.01371  | -0.07751 | 0.09432  |
| 0.10393  | -0.15412 | 0.00083  | 0.204468 | 8.43E-06 |
| 0.11569  | -0.21556 | 2.59E-06 | 0.173311 | 0.00017  |

|          |          |          |          |          |
|----------|----------|----------|----------|----------|
| 0.08977  | -0.08154 | 0.07834  | 0.095541 | 0.03903  |
| 0.64551  | -0.08869 | 0.05547  | -0.05869 | 0.20549  |
| 1.27E-08 | -0.11278 | 0.01475  | 0.278312 | 9.38E-10 |
| 0.00024  | -0.10948 | 0.01795  | 0.169102 | 0.00024  |
| 5.06E-05 | -0.02642 | 0.56894  | -0.21946 | 1.68E-06 |
| 0.00845  | -0.16591 | 0.00032  | 0.077242 | 0.09547  |
| 0.00274  | -0.09599 | 0.03811  | 0.065842 | 0.15544  |
| 2.62E-09 | 0.147611 | 0.00138  | 0.051839 | 0.26357  |
| 0.00082  | -0.15428 | 0.00082  | 0.2325   | 3.76E-07 |
| 0.02415  | -0.20936 | 5.05E-06 | 0.246313 | 6.97E-08 |
| 0.81835  | 0.063796 | 0.16871  | -0.05327 | 0.25063  |
| 9.00E-11 | -0.01447 | 0.75517  | 0.182648 | 7.19E-05 |
| 0.06062  | -0.11045 | 0.01695  | 0.079338 | 0.08678  |
| 0.14966  | -0.16725 | 0.00028  | 0.004168 | 0.92842  |
| 0.00092  | 0.02375  | 0.60869  | 0.29608  | 6.66E-11 |
| 0.52543  | -0.12002 | 0.00943  | 0.03818  | 0.41041  |
| 4.14E-05 | -0.04934 | 0.28735  | 0.073849 | 0.11098  |
| 0.37361  | -0.13809 | 0.00278  | 0.094998 | 0.04016  |
| 0.03684  | -0.10993 | 0.01748  | 0.068701 | 0.13823  |
| 3.86E-06 | -0.08096 | 0.08049  | 0.514181 | 7.09E-33 |
| 0.01383  | -0.04628 | 0.31825  | 0.219104 | 1.75E-06 |
| 0.00095  | -0.25718 | 1.72E-08 | 0.03055  | 0.51017  |
| 0.01156  | 0.14662  | 0.00149  | -0.02184 | 0.63781  |
| 5.79E-06 | -0.14977 | 0.00117  | 0.159068 | 0.00056  |
| 0.01217  | -0.12989 | 0.00493  | -0.13445 | 0.0036   |
| 0.05245  | -0.08568 | 0.0643   | 0.304213 | 1.86E-11 |
| 0.81561  | 0.035637 | 0.44231  | -0.26345 | 7.46E-09 |
| 0.0804   | -0.21256 | 3.58E-06 | -0.0359  | 0.43895  |
| 0.05533  | -0.15594 | 0.00072  | 0.103396 | 0.02546  |
| 0.00633  | 0.04801  | 0.30051  | 0.066843 | 0.14924  |
| 0.14349  | -0.0365  | 0.43131  | -0.05405 | 0.24368  |
| 0.18266  | -0.03525 | 0.44732  | 0.147957 | 0.00134  |
| 0.41598  | 0.05439  | 0.24076  | 0.113782 | 0.01388  |
| 0.10681  | -0.00521 | 0.91068  | 0.197087 | 1.79E-05 |
| 4.78E-05 | -0.06674 | 0.14987  | 0.051959 | 0.26246  |
| 0.58561  | 0.004875 | 0.91633  | 0.069211 | 0.13532  |
| 0.29605  | -0.05303 | 0.25277  | 0.045232 | 0.32939  |
| 0.09003  | 0.005238 | 0.91011  | 0.427893 | 3.26E-22 |
| 0.23944  | 0.105898 | 0.02209  | 0.183738 | 6.50E-05 |
| 0.01425  | 0.142446 | 0.00203  | -0.10554 | 0.02255  |
| 0.01112  | -0.03833 | 0.40862  | 0.148862 | 0.00125  |
| 0.83126  | -0.0646  | 0.16342  | -0.05798 | 0.21109  |
| 0.01291  | -0.19772 | 1.68E-05 | 0.147571 | 0.00138  |
| 0.42295  | -0.16644 | 0.0003   | -0.07086 | 0.12625  |
| 0.00312  | -0.19431 | 2.36E-05 | 0.055806 | 0.22871  |



|          |          |          |          |          |
|----------|----------|----------|----------|----------|
| 0.04664  | 0.116933 | 0.01144  | 0.124412 | 0.00711  |
| 0.00581  | -0.13437 | 0.00362  | -0.0567  | 0.22135  |
| 0.00259  | 0.102583 | 0.02664  | 0.03503  | 0.45012  |
| 0.02646  | 0.021059 | 0.64988  | 0.077679 | 0.0936   |
| 2.09E-08 | -0.02458 | 0.59617  | -0.31046 | 6.82E-12 |
| 0.02628  | 0.037754 | 0.41566  | 0.347012 | 1.16E-14 |
| 0.00069  | 0.085741 | 0.06412  | -0.07162 | 0.1222   |
| 0.00836  | -0.19027 | 3.49E-05 | 0.264338 | 6.61E-09 |
| 0.02297  | -0.07849 | 0.0902   | 0.369402 | 1.52E-16 |
| 0.23886  | -0.19441 | 2.33E-05 | -0.16892 | 0.00025  |
| 3.34E-07 | -0.13166 | 0.00437  | 0.078141 | 0.09166  |
| 0.04967  | 0.075634 | 0.10259  | 0.172763 | 0.00018  |
| 1.94E-05 | 0.065966 | 0.15466  | -0.16897 | 0.00024  |
| 1.14E-05 | -0.1295  | 0.00506  | 0.032251 | 0.48689  |
| 0.43736  | -0.13316 | 0.00394  | 0.010041 | 0.82866  |
| 0.00018  | -0.2275  | 6.75E-07 | 0.240105 | 1.51E-07 |
| 0.00163  | -0.05625 | 0.22505  | 0.123381 | 0.0076   |
| 1.78E-05 | 0.012951 | 0.78015  | -0.15824 | 0.0006   |
| 4.61E-07 | 0.018393 | 0.69178  | 0.136982 | 0.00301  |
| 0.5576   | 0.016017 | 0.72992  | 0.089016 | 0.05457  |
| 0.03998  | -0.12942 | 0.00509  | -0.0357  | 0.44153  |
| 0.51842  | -0.11041 | 0.01699  | -0.04826 | 0.29804  |
| 0.02651  | -0.04157 | 0.3701   | 0.174409 | 0.00015  |
| 0.13066  | 0.0097   | 0.83439  | 0.277661 | 1.03E-09 |
| 0.0002   | -0.32621 | 4.86E-13 | -0.0287  | 0.53617  |
| 0.0027   | 0.026847 | 0.56278  | -0.04544 | 0.32713  |
| 2.74E-12 | 0.066278 | 0.15271  | 0.281502 | 5.92E-10 |
| 0.02822  | -0.06093 | 0.18868  | -0.14574 | 0.00159  |
| 0.6548   | 0.017722 | 0.70248  | -0.03739 | 0.42013  |
| 0.27874  | -0.04985 | 0.28232  | -0.17192 | 0.00019  |
| 0.05504  | 0.26482  | 6.19E-09 | -0.16048 | 0.0005   |
| 5.54E-05 | -0.12137 | 0.00865  | 0.319752 | 1.46E-12 |
| 0.9794   | -0.01195 | 0.79673  | -0.20109 | 1.19E-05 |
| 0.11424  | -0.07612 | 0.10041  | -0.27594 | 1.32E-09 |
| 0.76318  | -0.10703 | 0.0207   | -0.00768 | 0.8686   |
| 0.29257  | -0.05439 | 0.24072  | -0.07696 | 0.09668  |
| 0.59827  | 0.044945 | 0.33247  | 0.092649 | 0.04538  |
| 0.00059  | -0.17804 | 0.00011  | 0.123804 | 0.00739  |
| 0.01415  | -0.07305 | 0.1149   | -0.18079 | 8.54E-05 |
| 0.00567  | -0.06274 | 0.17588  | -0.21754 | 2.08E-06 |
| 0.00095  | -0.13609 | 0.00321  | 0.198924 | 1.49E-05 |
| 0.1108   | -0.03233 | 0.48582  | 0.032612 | 0.48203  |
| 0.55341  | -0.08889 | 0.05491  | -0.08051 | 0.08223  |
| 0.16139  | -0.09418 | 0.04191  | -0.00324 | 0.94431  |
| 0.00098  | -0.12943 | 0.00509  | -0.01857 | 0.68904  |

|          |          |          |          |          |
|----------|----------|----------|----------|----------|
| 0.18612  | -0.14509 | 0.00167  | 0.247745 | 5.82E-08 |
| 3.96E-06 | 0.017532 | 0.70552  | 0.38395  | 7.49E-18 |
| 0.0005   | 0.10413  | 0.02443  | -0.21068 | 4.38E-06 |
| 0.15494  | -0.18778 | 4.44E-05 | 0.12286  | 0.00786  |
| 0.94101  | -0.0506  | 0.27516  | 0.137336 | 0.00294  |
| 0.01523  | -0.12832 | 0.00549  | 0.112441 | 0.01505  |
| 0.66667  | -0.06877 | 0.13785  | -0.19274 | 2.75E-05 |
| 0.10287  | -0.0195  | 0.67429  | 0.067754 | 0.14376  |
| 0.01239  | -0.26802 | 3.99E-09 | 0.243064 | 1.05E-07 |
| 1.53E-07 | -0.11777 | 0.01086  | 0.479973 | 2.78E-28 |
| 1.51E-10 | 0.155006 | 0.00078  | -0.03205 | 0.48967  |
| 2.49E-05 | -0.10158 | 0.02816  | 0.316026 | 2.73E-12 |
| 0.17215  | -0.25127 | 3.71E-08 | -0.10668 | 0.02112  |
| 0.46981  | 0.046558 | 0.31539  | 0.376744 | 3.39E-17 |
| 0.1156   | -0.16499 | 0.00034  | 0.014925 | 0.74769  |
| 0.0109   | -0.21836 | 1.90E-06 | 0.006835 | 0.88289  |
| 0.09546  | -0.03762 | 0.41734  | -0.06824 | 0.1409   |
| 0.07893  | -0.07517 | 0.1047   | -0.23262 | 3.71E-07 |
| 0.43289  | 0.071139 | 0.12475  | -0.24047 | 1.44E-07 |
| 0.00202  | -0.06109 | 0.18758  | -0.06784 | 0.14324  |
| 0.14502  | -0.00464 | 0.92035  | 0.112353 | 0.01513  |
| 0.44227  | -0.18379 | 6.47E-05 | 0.243139 | 1.04E-07 |
| 0.07034  | -0.23653 | 2.32E-07 | -0.09395 | 0.04242  |
| 0.0473   | -0.1649  | 0.00035  | -0.00615 | 0.89453  |
| 0.4878   | -0.16662 | 0.0003   | -0.15338 | 0.00088  |
| 0.00137  | 0.051263 | 0.26892  | -0.25538 | 2.18E-08 |
| 0.00049  | 0.057541 | 0.21454  | -0.09867 | 0.03303  |
| 0.63151  | -0.04014 | 0.3868   | -0.07671 | 0.09776  |
| 0.01716  | 0.073484 | 0.11277  | -0.24637 | 6.92E-08 |
| 0.03858  | -0.11295 | 0.0146   | -0.10783 | 0.01976  |
| 0.93854  | -0.06438 | 0.16481  | -0.07779 | 0.09312  |
| 0.00066  | 0.01079  | 0.81611  | -0.23329 | 3.42E-07 |
| 2.47E-05 | -0.08993 | 0.05213  | 0.268748 | 3.61E-09 |
| 4.66E-06 | -0.08523 | 0.06572  | 0.367476 | 2.23E-16 |
| 0.75303  | 0.017491 | 0.70617  | 0.202938 | 9.88E-06 |
| 0.00313  | -0.07213 | 0.11955  | 0.176869 | 0.00012  |
| 0.1142   | -0.06989 | 0.13154  | -0.1104  | 0.01701  |
| 4.07E-07 | -0.00367 | 0.937    | 0.08557  | 0.06466  |
| 0.72901  | -0.14599 | 0.00156  | -0.25731 | 1.69E-08 |
| 0.00268  | -0.1009  | 0.02925  | 0.291904 | 1.26E-10 |
| 0.14323  | -0.06282 | 0.17532  | 0.150119 | 0.00114  |
| 1.81E-19 | 0.384761 | 6.31E-18 | -0.10436 | 0.02412  |
| 0.11249  | -0.18144 | 8.04E-05 | 0.14087  | 0.00228  |
| 1.20E-06 | -0.11341 | 0.0142   | 0.351092 | 5.41E-15 |
| 0.81531  | 0.03852  | 0.40626  | -0.03658 | 0.43037  |

|          |          |          |          |          |
|----------|----------|----------|----------|----------|
| 0.00275  | -0.0404  | 0.38367  | 0.064864 | 0.16168  |
| 0.00045  | -0.02629 | 0.57089  | -0.02567 | 0.5801   |
| 8.55E-06 | -0.04579 | 0.32347  | 0.008787 | 0.84979  |
| 3.81E-07 | -0.06577 | 0.15591  | 0.070201 | 0.12981  |
| 0.00032  | -0.10531 | 0.02284  | 0.121925 | 0.00835  |
| 0.00745  | -0.07402 | 0.11016  | 0.275084 | 1.49E-09 |
| 0.00167  | -0.08045 | 0.08243  | -0.09121 | 0.04885  |
| 0.03153  | -0.18642 | 5.05E-05 | -0.01812 | 0.69615  |
| 0.09729  | -0.22679 | 7.33E-07 | 0.21143  | 4.05E-06 |
| 0.0004   | -0.06274 | 0.17588  | -0.09728 | 0.03559  |
| 0.03092  | -0.16427 | 0.00036  | 0.036059 | 0.43692  |
| 0.15509  | -0.17552 | 0.00014  | 0.050264 | 0.27837  |
| 0.35041  | -0.04727 | 0.30805  | -0.06877 | 0.13781  |
| 0.18757  | 0.037882 | 0.41408  | 0.182243 | 7.46E-05 |
| 0.30615  | -0.05379 | 0.24596  | -0.0172  | 0.71086  |
| 0.279    | -0.22291 | 1.14E-06 | 0.051283 | 0.26873  |
| 0.18169  | -0.25037 | 4.17E-08 | 0.029113 | 0.53028  |
| 0.00899  | -0.15048 | 0.00111  | -0.00586 | 0.89957  |
| 0.04263  | -0.11112 | 0.01629  | -0.18886 | 4.00E-05 |
| 0.05874  | 0.020266 | 0.66225  | 0.065215 | 0.15942  |
| 0.40813  | -0.12864 | 0.00537  | 0.031303 | 0.49979  |
| 3.08E-05 | -0.20695 | 6.51E-06 | 0.152579 | 0.00094  |
| 0.17028  | -0.07656 | 0.09846  | 0.202955 | 9.86E-06 |
| 0.00052  | 0.096019 | 0.03806  | 0.007437 | 0.87266  |
| 0.04375  | -0.18053 | 8.74E-05 | 0.095396 | 0.03933  |
| 0.01173  | 0.131751 | 0.00434  | -0.27133 | 2.52E-09 |
| 0.19812  | 0.122479 | 0.00806  | -0.07249 | 0.11775  |
| 0.04248  | -0.18429 | 6.17E-05 | 0.243984 | 9.33E-08 |
| 0.74422  | -0.1151  | 0.01281  | -0.02064 | 0.65647  |
| 0.09122  | -0.08395 | 0.06992  | -0.06889 | 0.13715  |
| 0.3127   | -0.17386 | 0.00016  | -0.18378 | 6.47E-05 |
| 0.01584  | -0.21807 | 1.96E-06 | 0.106443 | 0.02141  |
| 0.2176   | -0.18046 | 8.80E-05 | -0.09824 | 0.03379  |
| 8.16E-05 | -0.06916 | 0.13559  | 0.271263 | 2.55E-09 |
| 0.39395  | -0.13742 | 0.00292  | -0.16749 | 0.00028  |
| 3.91E-09 | -0.22921 | 5.53E-07 | -0.25672 | 1.83E-08 |
| 1.35E-05 | -0.00659 | 0.88712  | 0.053084 | 0.25225  |
| 0.33593  | -0.06249 | 0.17759  | -0.38858 | 2.78E-18 |
| 0.04344  | -0.02522 | 0.58673  | -0.4175  | 4.01E-21 |
| 0.20535  | -0.20116 | 1.18E-05 | 0.190226 | 3.51E-05 |
| 1.67E-07 | -0.02983 | 0.52013  | 0.271692 | 2.40E-09 |
| 0.03626  | -0.20897 | 5.26E-06 | -0.07778 | 0.09318  |
| 6.00E-05 | -0.16235 | 0.00043  | 0.129638 | 0.00502  |
| 0.68299  | -0.19831 | 1.58E-05 | 0.001392 | 0.97607  |
| 0.30814  | -0.13293 | 0.00401  | -0.01895 | 0.68302  |

|          |          |          |          |          |
|----------|----------|----------|----------|----------|
| 0.03267  | -0.12069 | 0.00904  | 0.171181 | 0.0002   |
| 0.9116   | -0.09206 | 0.04679  | -0.08211 | 0.0763   |
| 0.77134  | -0.07979 | 0.08499  | -0.18299 | 6.96E-05 |
| 0.11751  | 0.047913 | 0.3015   | -0.1546  | 0.0008   |
| 0.08787  | -0.03357 | 0.46925  | -0.17428 | 0.00015  |
| 0.01233  | -0.16112 | 0.00047  | -0.16982 | 0.00023  |
| 0.21805  | -0.17977 | 9.37E-05 | 0.144464 | 0.00175  |
| 0.01585  | -0.21701 | 2.20E-06 | -0.20438 | 8.51E-06 |
| 0.03383  | -0.28213 | 5.40E-10 | -0.04578 | 0.32351  |
| 0.51012  | 0.157436 | 0.00064  | -0.18272 | 7.14E-05 |
| 2.41E-05 | -0.1309  | 0.00461  | 0.064811 | 0.16202  |
| 0.00315  | 0.154095 | 0.00083  | 0.045292 | 0.32875  |
| 0.94186  | 0.128536 | 0.00541  | 0.116867 | 0.01149  |
| 0.042    | -0.13039 | 0.00477  | 0.029656 | 0.52264  |
| 0.00076  | 0.065735 | 0.15611  | 0.089227 | 0.05399  |
| 0.00033  | 0.165298 | 0.00033  | -0.18285 | 7.06E-05 |
| 0.27127  | -0.21356 | 3.21E-06 | 0.25069  | 4.00E-08 |
| 0.08133  | -0.15866 | 0.00058  | -0.01951 | 0.67406  |
| 1.09E-09 | -0.11247 | 0.01503  | 0.160807 | 0.00049  |
| 0.15165  | -0.23544 | 2.65E-07 | -0.01771 | 0.70272  |
| 0.31578  | -0.20548 | 7.59E-06 | 0.17185  | 0.00019  |
| 0.00337  | -0.00893 | 0.84736  | -0.01152 | 0.80391  |
| 0.19158  | -0.04589 | 0.3224   | -0.27068 | 2.76E-09 |
| 0.02648  | -0.03667 | 0.42919  | -0.00761 | 0.8698   |
| 0.00648  | -0.15663 | 0.00068  | 0.020195 | 0.66335  |
| 1.57E-09 | -0.12574 | 0.00651  | 0.137628 | 0.00288  |
| 9.09E-07 | 0.351796 | 4.73E-15 | 0.189791 | 3.66E-05 |
| 0.47941  | -0.03546 | 0.44458  | 0.042887 | 0.3551   |
| 3.97E-05 | 0.05903  | 0.2029   | -0.12687 | 0.00604  |
| 0.45739  | -0.06095 | 0.18855  | -0.22324 | 1.10E-06 |
| 0.00401  | -0.11457 | 0.01323  | 0.192444 | 2.83E-05 |
| 0.0002   | 0.090943 | 0.04952  | 0.007676 | 0.8686   |
| 0.10628  | 0.030367 | 0.51271  | 0.156465 | 0.00069  |
| 0.0094   | -0.05493 | 0.23612  | 0.192244 | 2.88E-05 |
| 0.00374  | -0.19699 | 1.81E-05 | 0.180783 | 8.54E-05 |
| 0.83837  | -0.21838 | 1.90E-06 | -0.05981 | 0.19699  |
| 0.04369  | -0.07134 | 0.12367  | -0.20429 | 8.59E-06 |
| 0.00962  | 0.003117 | 0.94644  | 0.376256 | 3.75E-17 |
| 0.95194  | -0.05256 | 0.25694  | -0.22824 | 6.20E-07 |
| 0.03996  | -0.11893 | 0.0101   | -0.3496  | 7.16E-15 |
| 0.20831  | -0.15702 | 0.00066  | -0.13538 | 0.00338  |
| 0.00527  | 0.070142 | 0.13013  | -0.03562 | 0.44253  |
| 2.19E-05 | 0.03189  | 0.49178  | 0.02499  | 0.59011  |
| 0.0968   | -0.02511 | 0.58825  | -0.15097 | 0.00107  |
| 1.23E-15 | 0.23266  | 3.69E-07 | 0.110628 | 0.01677  |

|          |          |          |          |          |
|----------|----------|----------|----------|----------|
| 0.00315  | -0.14045 | 0.00235  | 0.156507 | 0.00069  |
| 0.02576  | -0.06312 | 0.17328  | -0.03057 | 0.50995  |
| 0.09485  | 0.011204 | 0.80919  | 0.206932 | 6.52E-06 |
| 0.61152  | -0.07188 | 0.12086  | 0.021163 | 0.64828  |
| 0.61364  | -0.16684 | 0.00029  | 0.091243 | 0.04877  |
| 0.3472   | -0.23821 | 1.90E-07 | 0.156789 | 0.00067  |
| 0.04882  | -0.173   | 0.00017  | 0.162729 | 0.00041  |
| 0.04072  | -0.14663 | 0.00149  | 0.062204 | 0.17962  |
| 0.01374  | -0.18068 | 8.62E-05 | 0.009386 | 0.83969  |
| 5.13E-13 | -0.00642 | 0.88989  | 0.182419 | 7.34E-05 |
| 0.27528  | -0.0924  | 0.04596  | 0.090307 | 0.05114  |
| 6.45E-05 | -0.11644 | 0.0118   | 0.140969 | 0.00226  |
| 4.18E-06 | -0.07873 | 0.08924  | 0.028445 | 0.53975  |
| 3.12E-05 | -0.1332  | 0.00393  | -0.19732 | 1.75E-05 |
| 0.003    | -0.03063 | 0.50906  | 0.11267  | 0.01485  |
| 0.00252  | -0.02683 | 0.56308  | 0.04477  | 0.33436  |
| 0.90925  | -0.17931 | 9.77E-05 | -0.1067  | 0.0211   |
| 0.489    | -0.2563  | 1.93E-08 | 0.116713 | 0.0116   |
| 0.00147  | -0.06414 | 0.1664   | 0.111387 | 0.01603  |
| 0.63009  | -0.1448  | 0.0017   | -0.0411  | 0.37556  |
| 0.0989   | -0.31658 | 2.49E-12 | 0.069332 | 0.13464  |
| 0.02367  | -0.00042 | 0.99277  | -0.1944  | 2.34E-05 |
| 0.229    | -0.28186 | 5.62E-10 | -0.01692 | 0.71527  |
| 0.00602  | -0.23341 | 3.37E-07 | 0.161284 | 0.00047  |
| 0.01278  | -0.14033 | 0.00237  | 0.137874 | 0.00283  |
| 0.00021  | -0.05242 | 0.25823  | -0.4766  | 7.40E-28 |
| 8.16E-05 | -0.19563 | 2.07E-05 | 0.254429 | 2.47E-08 |
| 4.31E-06 | -0.12909 | 0.00521  | 0.513167 | 9.88E-33 |
| 0.04504  | -0.03864 | 0.40477  | -0.04197 | 0.36547  |
| 3.77E-05 | -0.10535 | 0.02279  | 0.240345 | 1.46E-07 |
| 0.33105  | -0.17122 | 0.0002   | -0.1195  | 0.00974  |
| 0.09463  | -0.16536 | 0.00033  | 0.066875 | 0.14904  |
| 0.33182  | -0.17126 | 0.0002   | 0.026472 | 0.56825  |
| 0.52468  | 0.087582 | 0.05859  | 0.051063 | 0.27079  |
| 9.65E-05 | -0.09321 | 0.04408  | 0.261506 | 9.68E-09 |
| 0.02312  | -0.23299 | 3.55E-07 | 0.115253 | 0.01269  |
| 0.22304  | -0.03822 | 0.40997  | -0.20581 | 7.34E-06 |
| 5.86E-05 | 0.068446 | 0.1397   | 0.197462 | 1.72E-05 |
| 0.53589  | 0.010897 | 0.81431  | -0.27775 | 1.02E-09 |
| 0.94562  | 0.002535 | 0.95643  | 0.16632  | 0.00031  |
| 0.80924  | -0.09454 | 0.04113  | -0.18196 | 7.66E-05 |
| 4.06E-07 | 0.006895 | 0.88186  | -0.15357 | 0.00087  |
| 0.0015   | -0.08131 | 0.0792   | 0.200563 | 1.26E-05 |
| 0.0002   | -0.09467 | 0.04086  | 0.107345 | 0.02033  |
| 0.24598  | -0.16188 | 0.00044  | -0.14396 | 0.00182  |

|          |          |          |          |          |
|----------|----------|----------|----------|----------|
| 8.23E-09 | 0.027287 | 0.55639  | 0.2466   | 6.72E-08 |
| 0.10389  | -0.19501 | 2.20E-05 | -0.3193  | 1.58E-12 |
| 0.18518  | -0.14908 | 0.00123  | 0.076644 | 0.09807  |
| 0.80464  | 0.165578 | 0.00033  | -0.23054 | 4.74E-07 |
| 2.76E-07 | 0.0354   | 0.44535  | -0.0206  | 0.657    |
| 0.0009   | -0.05256 | 0.25701  | -0.18649 | 5.02E-05 |
| 0.57281  | 0.009702 | 0.83436  | -0.21105 | 4.21E-06 |
| 0.66336  | -0.11285 | 0.01469  | -0.00886 | 0.84855  |
| 0.01432  | -0.05254 | 0.25716  | 0.044965 | 0.33225  |
| 0.0268   | -0.14482 | 0.0017   | 0.066839 | 0.14926  |
| 0.03831  | -0.13002 | 0.00489  | 0.263475 | 7.43E-09 |
| 0.84387  | 0.02578  | 0.5784   | -0.03644 | 0.43205  |
| 0.63858  | 0.134952 | 0.00348  | -0.10143 | 0.0284   |
| 4.82E-07 | 0.011662 | 0.80155  | 0.093724 | 0.04293  |
| 2.45E-06 | -0.20892 | 5.29E-06 | -0.17851 | 0.00011  |
| 0.00068  | 0.044471 | 0.3376   | -0.09925 | 0.032    |
| 0.45575  | -0.19626 | 1.94E-05 | 0.116687 | 0.01162  |
| 0.45459  | -0.08327 | 0.07221  | 0.00574  | 0.90154  |
| 0.99361  | -0.0621  | 0.18033  | -0.02407 | 0.60387  |
| 0.86995  | -0.22037 | 1.52E-06 | -0.00035 | 0.99391  |
| 0.54808  | -0.17795 | 0.00011  | -0.11656 | 0.01171  |
| 1.43E-05 | 0.018266 | 0.6938   | 0.259197 | 1.32E-08 |
| 4.60E-05 | 0.00484  | 0.91693  | 0.115356 | 0.01261  |
| 0.22871  | -0.08549 | 0.06492  | 0.223354 | 1.09E-06 |
| 0.0003   | -0.01663 | 0.71997  | 0.134209 | 0.00366  |
| 0.00611  | 0.07585  | 0.10161  | -0.16414 | 0.00037  |
| 0.03496  | 0.100908 | 0.02923  | -0.19047 | 3.43E-05 |
| 0.0081   | -0.17144 | 0.0002   | 0.075597 | 0.10276  |
| 4.37E-05 | -0.11293 | 0.01462  | -0.03513 | 0.44886  |
| 6.79E-06 | 0.032529 | 0.48315  | 0.189997 | 3.59E-05 |
| 0.08267  | -0.12295 | 0.00781  | 0.122187 | 0.00821  |
| 0.00016  | -0.09651 | 0.03709  | -0.03933 | 0.39639  |
| 0.00041  | -0.02511 | 0.58829  | 0.102738 | 0.02641  |
| 0.0033   | 0.048189 | 0.29872  | 0.301682 | 2.78E-11 |
| 0.00141  | -0.06191 | 0.18171  | -0.07564 | 0.10255  |
| 3.87E-05 | 0.037809 | 0.41498  | -0.0854  | 0.0652   |
| 0.78016  | 0.111179 | 0.01623  | 0.156038 | 0.00072  |
| 0.39596  | 0.010205 | 0.82591  | -0.09616 | 0.03778  |
| 0.01184  | -0.16378 | 0.00038  | 0.098576 | 0.03319  |
| 0.21452  | 0.019264 | 0.67798  | -0.00039 | 0.99326  |
| 0.59808  | 0.028612 | 0.53737  | 0.091698 | 0.04765  |
| 0.00011  | 0.092594 | 0.04551  | -0.20897 | 5.26E-06 |
| 0.25293  | -0.16351 | 0.00039  | 0.316615 | 2.47E-12 |
| 1.06E-07 | 0.046196 | 0.31918  | 0.018426 | 0.69125  |
| 0.09642  | 0.029561 | 0.52396  | 0.154522 | 0.00081  |

|          |          |          |          |          |
|----------|----------|----------|----------|----------|
| 4.04E-07 | -0.01918 | 0.67938  | 0.121396 | 0.00864  |
| 0.00073  | -0.17372 | 0.00016  | 0.128294 | 0.00549  |
| 0.49236  | -0.09853 | 0.03329  | -0.13484 | 0.00351  |
| 0.00069  | 0.007858 | 0.86551  | 0.188915 | 3.98E-05 |
| 0.99473  | -0.26105 | 1.03E-08 | 0.272765 | 2.06E-09 |
| 0.71095  | 0.048694 | 0.29368  | -0.13949 | 0.00252  |
| 0.02958  | 0.027121 | 0.55879  | 0.065851 | 0.15538  |
| 0.24215  | -0.01052 | 0.82069  | -0.38839 | 2.91E-18 |
| 0.99799  | -0.00829 | 0.85827  | -0.26925 | 3.37E-09 |
| 0.05043  | 0.003106 | 0.94663  | -0.00185 | 0.96818  |
| 0.20406  | -0.01404 | 0.76225  | -0.15062 | 0.00109  |
| 0.05055  | -0.14504 | 0.00167  | -0.13442 | 0.00361  |
| 0.01407  | -0.04799 | 0.30077  | -0.01742 | 0.70728  |
| 0.00077  | -0.06346 | 0.17097  | 0.119039 | 0.01003  |
| 0.00705  | -0.03096 | 0.5045   | -0.15617 | 0.00071  |
| 3.59E-06 | -0.10975 | 0.01767  | 0.170989 | 0.00021  |
| 0.25287  | -0.1476  | 0.00138  | -0.23627 | 2.40E-07 |
| 0.05046  | -0.09835 | 0.0336   | -0.23224 | 3.88E-07 |
| 0.00075  | -0.0386  | 0.40533  | -0.10246 | 0.02682  |
| 0.00866  | 0.044405 | 0.33831  | -0.1207  | 0.00903  |
| 3.69E-05 | -0.00564 | 0.9033   | -0.09888 | 0.03266  |
| 0.19095  | -0.01067 | 0.81813  | 0.047369 | 0.30703  |
| 0.01959  | -0.04744 | 0.30629  | 0.184793 | 5.89E-05 |
| 0.0019   | 0.048728 | 0.29334  | -0.1519  | 0.00099  |
| 3.19E-06 | 0.082132 | 0.07621  | 0.299768 | 3.76E-11 |
| 0.98796  | -0.07959 | 0.08578  | -0.1684  | 0.00026  |
| 2.48E-05 | 0.180088 | 9.10E-05 | -0.25799 | 1.55E-08 |
| 0.64395  | -0.1302  | 0.00483  | 0.117877 | 0.01079  |
| 0.00043  | -0.06505 | 0.16049  | -0.02285 | 0.6223   |
| 0.18878  | -0.15362 | 0.00087  | 0.046811 | 0.31276  |
| 0.15462  | 0.014912 | 0.74791  | -0.04751 | 0.30556  |
| 0.00013  | 0.199164 | 1.45E-05 | -0.29893 | 4.28E-11 |
| 4.24E-05 | 0.03639  | 0.43272  | 0.124809 | 0.00692  |
| 0.05269  | -0.14704 | 0.00144  | 0.148356 | 0.0013   |
| 6.51E-05 | -0.05479 | 0.23731  | 0.115618 | 0.01241  |
| 0.06109  | -0.06809 | 0.14176  | 0.314047 | 3.79E-12 |
| 0.67686  | 0.129751 | 0.00498  | 0.187678 | 4.48E-05 |
| 0.65639  | -0.06133 | 0.18586  | -0.12643 | 0.00622  |
| 5.70E-05 | -0.12276 | 0.00791  | 0.194451 | 2.32E-05 |
| 0.01692  | -0.12963 | 0.00502  | -0.08281 | 0.07382  |
| 0.39472  | -0.03188 | 0.49197  | -0.29331 | 1.02E-10 |
| 4.55E-13 | -0.10543 | 0.02268  | 0.229834 | 5.15E-07 |
| 8.04E-05 | -0.17985 | 9.30E-05 | 0.098407 | 0.0335   |
| 0.00028  | -0.13869 | 0.00267  | -0.24415 | 9.14E-08 |
| 0.01854  | 0.010995 | 0.81268  | 0.154728 | 0.00079  |

|          |          |          |          |          |
|----------|----------|----------|----------|----------|
| 7.47E-05 | -0.06282 | 0.17533  | -0.08892 | 0.05484  |
| 0.67166  | 0.143983 | 0.00181  | -0.16134 | 0.00046  |
| 0.9815   | 0.084462 | 0.06821  | 0.080539 | 0.0821   |
| 0.00467  | -0.04928 | 0.28789  | -0.12497 | 0.00685  |
| 1.55E-20 | 0.47809  | 4.81E-28 | 0.328971 | 3.01E-13 |
| 0.41208  | 0.11491  | 0.01296  | 0.207822 | 5.94E-06 |
| 0.00038  | -0.07051 | 0.1281   | 0.199495 | 1.40E-05 |
| 0.00041  | 0.060957 | 0.18851  | -0.16101 | 0.00048  |
| 0.31504  | -0.0461  | 0.32019  | 0.236279 | 2.40E-07 |
| 0.00414  | -0.16377 | 0.00038  | 0.208154 | 5.73E-06 |
| 4.25E-08 | 0.096786 | 0.03654  | -0.13541 | 0.00337  |
| 6.02E-09 | 0.023188 | 0.61719  | -0.03266 | 0.48139  |
| 0.28608  | -0.09314 | 0.04424  | -0.21739 | 2.12E-06 |
| 0.03695  | -0.06826 | 0.14078  | 0.133808 | 0.00377  |
| 0.81438  | -0.0794  | 0.08654  | 0.067946 | 0.14262  |
| 0.98944  | -0.04816 | 0.29902  | 0.003454 | 0.94066  |
| 0.00781  | -0.16823 | 0.00026  | -0.01661 | 0.72027  |
| 5.22E-05 | 0.009587 | 0.83631  | -0.09603 | 0.03804  |
| 0.22504  | 0.000908 | 0.98439  | 0.31326  | 4.31E-12 |
| 0.05368  | -0.20039 | 1.28E-05 | -0.17657 | 0.00013  |
| 0.05016  | 0.1853   | 5.61E-05 | 0.131852 | 0.00431  |
| 0.00552  | 0.004784 | 0.91787  | -0.09915 | 0.03218  |
| 0.22554  | -0.03589 | 0.43905  | 0.049379 | 0.28693  |
| 0.7668   | -0.17195 | 0.00019  | 0.228997 | 5.67E-07 |
| 0.23071  | -0.10331 | 0.02558  | -0.04498 | 0.33204  |
| 0.00114  | -0.08391 | 0.07003  | 0.459166 | 9.87E-26 |
| 4.48E-08 | 0.004583 | 0.92131  | 0.485854 | 4.90E-29 |
| 0.0005   | -0.0496  | 0.2848   | 0.021488 | 0.64324  |
| 0.80906  | -0.19545 | 2.11E-05 | 0.208491 | 5.53E-06 |
| 0.00152  | -0.05464 | 0.23862  | 0.152249 | 0.00096  |
| 0.00421  | -0.17095 | 0.00021  | -0.10952 | 0.01791  |
| 0.05566  | -0.11412 | 0.0136   | -0.06969 | 0.13263  |
| 0.1738   | -0.12469 | 0.00698  | -0.07675 | 0.09758  |
| 0.74127  | 0.095799 | 0.0385   | 0.168664 | 0.00025  |
| 0.0041   | -0.07325 | 0.11393  | 0.275125 | 1.48E-09 |
| 0.10008  | -0.01422 | 0.75928  | 0.007641 | 0.86919  |
| 0.00022  | 0.066983 | 0.14839  | 0.227748 | 6.56E-07 |
| 0.62452  | -0.05156 | 0.26611  | -0.2199  | 1.60E-06 |
| 0.82922  | -0.04925 | 0.28819  | -0.07429 | 0.10885  |
| 0.00276  | 0.031258 | 0.5004   | -0.04449 | 0.33737  |
| 0.00037  | 0.083876 | 0.07016  | 0.118409 | 0.01044  |
| 0.03181  | -0.02519 | 0.58717  | 0.092719 | 0.04522  |
| 5.00E-12 | -0.09817 | 0.03393  | 0.282604 | 5.04E-10 |
| 8.20E-08 | -0.01927 | 0.67786  | 0.100763 | 0.02946  |
| 0.0032   | -0.09422 | 0.04183  | -0.22086 | 1.44E-06 |



|          |          |          |          |          |
|----------|----------|----------|----------|----------|
| 0.01178  | -0.06166 | 0.18347  | -0.19126 | 3.17E-05 |
| 0.03022  | -0.16608 | 0.00031  | 0.010137 | 0.82705  |
| 0.01429  | -0.01664 | 0.71981  | -0.06212 | 0.18019  |
| 1.15E-10 | -0.07034 | 0.12905  | 0.448353 | 1.79E-24 |
| 0.00685  | -0.22254 | 1.19E-06 | 0.057048 | 0.2185   |
| 0.00113  | 0.027928 | 0.54715  | -0.02931 | 0.52749  |
| 5.68E-05 | 0.017846 | 0.7005   | -0.06858 | 0.13892  |
| 0.35131  | -0.01811 | 0.69634  | 0.00762  | 0.86955  |
| 0.01405  | -0.06959 | 0.13319  | 0.282555 | 5.07E-10 |
| 1.71E-08 | -0.05718 | 0.21742  | 0.443646 | 6.11E-24 |
| 0.32432  | 0.2328   | 3.63E-07 | -0.02681 | 0.56338  |
| 1.04E-06 | -0.07485 | 0.1062   | 0.096888 | 0.03634  |
| 1.56E-05 | 0.032525 | 0.48319  | 0.148016 | 0.00134  |
| 1.36E-05 | -0.14148 | 0.00218  | 0.113651 | 0.01399  |
| 0.61652  | -0.11868 | 0.01026  | 0.095189 | 0.03976  |
| 0.16328  | -0.20768 | 6.03E-06 | -0.06672 | 0.15002  |
| 0.66167  | -0.15613 | 0.00071  | -0.0935  | 0.04342  |
| 0.01501  | -0.0998  | 0.03106  | -0.02694 | 0.56145  |
| 0.00261  | -0.06051 | 0.19176  | 0.237972 | 1.95E-07 |
| 0.00856  | -0.07583 | 0.1017   | 0.230162 | 4.95E-07 |
| 0.01054  | -0.11808 | 0.01065  | -0.0343  | 0.45957  |
| 7.48E-06 | -0.01874 | 0.68633  | -0.13808 | 0.00279  |
| 0.00135  | 0.059441 | 0.19977  | 0.007129 | 0.87789  |
| 0.00307  | -0.06872 | 0.1381   | 0.33946  | 4.66E-14 |
| 1.92E-05 | -0.11157 | 0.01586  | 0.307634 | 1.08E-11 |
| 0.09873  | -0.12639 | 0.00624  | -0.01152 | 0.80389  |
| 1.89E-09 | 0.07454  | 0.10767  | 0.117697 | 0.01091  |
| 0.01962  | -0.14642 | 0.00151  | 0.299227 | 4.09E-11 |
| 0.02091  | -0.03977 | 0.39123  | 0.034548 | 0.45639  |
| 3.06E-07 | 0.02868  | 0.53642  | -0.01253 | 0.78706  |
| 0.15801  | -0.16158 | 0.00046  | 0.019307 | 0.6773   |
| 0.2786   | -0.05049 | 0.2762   | -0.2539  | 2.64E-08 |
| 0.89814  | 0.279626 | 7.76E-10 | -0.0684  | 0.13995  |
| 0.07503  | -0.14461 | 0.00173  | 0.115385 | 0.01259  |
| 1.90E-09 | 0.04868  | 0.29381  | -0.42095 | 1.76E-21 |
| 2.40E-07 | 0.084268 | 0.06885  | 0.091517 | 0.04809  |
| 0.016    | -0.13057 | 0.00471  | -0.05252 | 0.25735  |
| 0.16236  | -0.0908  | 0.04987  | -0.11178 | 0.01566  |
| 0.24057  | -0.17411 | 0.00016  | 0.189637 | 3.71E-05 |
| 0.01455  | -0.16856 | 0.00025  | 0.008265 | 0.85861  |
| 0.17073  | 0.073061 | 0.11486  | 0.119887 | 0.00951  |
| 0.00075  | -0.19166 | 3.05E-05 | 0.141417 | 0.00219  |
| 0.55133  | -0.28573 | 3.18E-10 | 0.014197 | 0.75961  |
| 0.1735   | -0.10685 | 0.02092  | 0.262227 | 8.79E-09 |
| 6.09E-07 | 0.105756 | 0.02227  | 0.010475 | 0.82138  |

|          |          |          |          |          |
|----------|----------|----------|----------|----------|
| 0.00366  | 0.271607 | 2.43E-09 | 0.071658 | 0.12201  |
| 1.19E-08 | 0.035759 | 0.44074  | 0.286205 | 2.96E-10 |
| 7.40E-14 | 0.172907 | 0.00017  | 0.126602 | 0.00615  |
| 0.71835  | 0.107036 | 0.02069  | 0.265824 | 5.40E-09 |
| 3.68E-05 | 0.323899 | 7.23E-13 | -0.01295 | 0.78013  |
| 0.09823  | -0.07943 | 0.08641  | -0.09415 | 0.04199  |
| 0.00816  | -0.11523 | 0.01271  | 0.044321 | 0.33923  |
| 0.00015  | -0.13124 | 0.0045   | 0.141534 | 0.00217  |
| 1.73E-06 | -0.19308 | 2.66E-05 | 0.303911 | 1.96E-11 |
| 0.36309  | -0.14436 | 0.00176  | -0.00986 | 0.83179  |
| 0.5045   | 0.235074 | 2.77E-07 | -0.26074 | 1.07E-08 |
| 0.01337  | -0.01553 | 0.73787  | 0.010355 | 0.8234   |
| 0.03965  | -0.02302 | 0.61977  | 0.043964 | 0.34314  |
| 0.00016  | -0.08332 | 0.07203  | 0.161122 | 0.00047  |
| 0.11774  | -0.12382 | 0.00739  | -0.34103 | 3.50E-14 |
| 3.26E-05 | 0.06593  | 0.15489  | 0.419305 | 2.61E-21 |
| 0.01009  | 0.124572 | 0.00703  | 0.26697  | 4.61E-09 |
| 0.00021  | -0.1399  | 0.00244  | -0.37377 | 6.25E-17 |
| 0.00308  | -0.12861 | 0.00538  | 0.47887  | 3.83E-28 |
| 0.14695  | 0.119056 | 0.01002  | 0.250141 | 4.29E-08 |
| 0.02777  | 0.026534 | 0.56734  | 0.170593 | 0.00021  |
| 0.54293  | -0.01436 | 0.75687  | 0.36622  | 2.87E-16 |
| 0.15966  | -0.29073 | 1.51E-10 | 0.098434 | 0.03345  |
| 6.22E-08 | -0.02842 | 0.54018  | 0.201068 | 1.20E-05 |
| 0.72652  | -0.03195 | 0.491    | -0.27068 | 2.76E-09 |
| 0.44532  | 0.059583 | 0.19869  | 0.220594 | 1.48E-06 |
| 0.0001   | -0.09244 | 0.04587  | -0.4385  | 2.29E-23 |
| 0.09177  | -0.01622 | 0.72671  | -0.26075 | 1.07E-08 |
| 0.28326  | -0.15782 | 0.00062  | -0.19673 | 1.85E-05 |
| 0.15528  | 0.009624 | 0.83569  | -0.35837 | 1.34E-15 |
| 0.04926  | 0.005364 | 0.90797  | -0.1023  | 0.02707  |
| 1.56E-12 | -0.1206  | 0.00909  | -0.22314 | 1.11E-06 |
| 0.02333  | -0.19459 | 2.29E-05 | 0.01599  | 0.73036  |
| 0.00421  | -0.18752 | 4.55E-05 | 0.068243 | 0.14088  |
| 2.99E-06 | -0.06653 | 0.15117  | 0.314114 | 3.75E-12 |
| 0.40613  | -0.15179 | 0.001    | -0.01902 | 0.68177  |
| 0.03252  | -0.03768 | 0.41663  | -0.03838 | 0.40798  |
| 0.44916  | -0.0381  | 0.41134  | -0.02461 | 0.59578  |
| 0.0979   | -0.04198 | 0.36537  | -0.01835 | 0.69241  |
| 3.78E-05 | -0.18348 | 6.66E-05 | -0.29591 | 6.83E-11 |
| 2.71E-06 | -0.22955 | 5.32E-07 | -0.16316 | 0.0004   |
| 0.51849  | -0.11107 | 0.01634  | -0.16645 | 0.0003   |
| 0.00753  | 0.004885 | 0.91615  | -0.06862 | 0.13867  |
| 0.03542  | -0.09914 | 0.0322   | 0.047799 | 0.30265  |
| 0.50025  | -0.1302  | 0.00483  | 0.399846 | 2.35E-19 |

|          |          |          |          |          |
|----------|----------|----------|----------|----------|
| 0.05881  | -0.03985 | 0.39017  | 0.005282 | 0.90936  |
| 0.41367  | -0.15107 | 0.00106  | 0.247734 | 5.83E-08 |
| 0.0091   | -0.1824  | 7.36E-05 | -0.36926 | 1.56E-16 |
| 0.84554  | -0.09816 | 0.03395  | -0.14899 | 0.00124  |
| 0.43569  | -0.07443 | 0.1082   | -0.11553 | 0.01248  |
| 0.24896  | -0.2017  | 1.12E-05 | -0.13433 | 0.00363  |
| 0.60371  | 0.250508 | 4.09E-08 | -0.12335 | 0.00761  |
| 0.00019  | -0.09726 | 0.03563  | 0.088826 | 0.05509  |
| 0.12736  | -0.13024 | 0.00482  | 0.033349 | 0.47218  |
| 0.00431  | 0.100598 | 0.02973  | 0.334969 | 1.04E-13 |
| 0.00025  | -0.10127 | 0.02865  | 0.181221 | 8.20E-05 |
| 0.54503  | -0.14075 | 0.0023   | -0.01595 | 0.73107  |
| 8.77E-05 | -0.01978 | 0.66993  | 0.140507 | 0.00234  |
| 0.00501  | 0.083939 | 0.06994  | 0.042036 | 0.36474  |
| 6.16E-05 | -0.02385 | 0.60712  | 0.076083 | 0.10056  |
| 0.01128  | -0.18833 | 4.21E-05 | -0.25552 | 2.14E-08 |
| 0.0059   | -0.08651 | 0.06176  | 0.116507 | 0.01175  |
| 0.4542   | -0.03432 | 0.45941  | -0.19977 | 1.37E-05 |
| 0.01235  | -0.08217 | 0.07606  | 0.002853 | 0.95097  |
| 8.22E-05 | 0.002331 | 0.95993  | -0.04801 | 0.30053  |
| 0.52473  | -0.12071 | 0.00902  | 0.256066 | 1.99E-08 |
| 0.34671  | -0.25439 | 2.48E-08 | 0.019292 | 0.67754  |
| 0.01544  | -0.03583 | 0.43982  | -0.06195 | 0.18137  |
| 3.75E-18 | 0.001335 | 0.97704  | -0.4661  | 1.46E-26 |
| 0.25966  | 0.214406 | 2.93E-06 | -0.29429 | 8.77E-11 |
| 1.75E-08 | 0.013028 | 0.77887  | 0.11381  | 0.01386  |
| 0.00099  | -0.04907 | 0.28993  | 0.281473 | 5.94E-10 |
| 0.03468  | 0.05667  | 0.22158  | -0.0985  | 0.03333  |
| 0.27225  | 0.023962 | 0.6055   | -0.16628 | 0.00031  |
| 0.324    | -0.09932 | 0.03189  | -0.10403 | 0.02457  |
| 0.00616  | -0.02228 | 0.63112  | -0.09877 | 0.03284  |
| 0.14106  | 0.068034 | 0.1421   | -0.14613 | 0.00154  |
| 0.00258  | -0.06475 | 0.16245  | 0.041021 | 0.37645  |
| 0.22119  | -0.04473 | 0.33481  | -0.00066 | 0.9887   |
| 0.28785  | -0.14022 | 0.00239  | -0.16167 | 0.00045  |
| 2.81E-05 | -0.12762 | 0.00575  | 0.05746  | 0.21519  |
| 0.00454  | 0.009797 | 0.83278  | -0.04048 | 0.38273  |
| 0.00075  | -0.02055 | 0.6578   | 0.040153 | 0.38664  |
| 0.80287  | -0.03389 | 0.46501  | -0.37238 | 8.30E-17 |
| 2.70E-09 | -0.02975 | 0.52137  | -0.19849 | 1.55E-05 |
| 0.18121  | -0.1268  | 0.00607  | 0.039893 | 0.38972  |
| 0.16677  | -0.23243 | 3.79E-07 | 0.198303 | 1.58E-05 |
| 0.03608  | 0.015636 | 0.73611  | 0.094833 | 0.04051  |
| 0.10955  | -0.14079 | 0.00229  | -0.03336 | 0.47207  |
| 2.55E-07 | -0.25301 | 2.97E-08 | -0.1352  | 0.00342  |

|          |          |          |          |          |
|----------|----------|----------|----------|----------|
| 0.3656   | 0.185808 | 5.35E-05 | 0.066052 | 0.15412  |
| 0.3936   | -0.07801 | 0.09219  | -0.18581 | 5.35E-05 |
| 0.0219   | 0.058807 | 0.20461  | 0.13919  | 0.00257  |
| 0.00049  | -0.0421  | 0.36403  | -0.26976 | 3.14E-09 |
| 0.93859  | 0.080923 | 0.08065  | -0.29627 | 6.47E-11 |
| 0.00414  | -0.03927 | 0.39721  | 0.148563 | 0.00128  |
| 0.55775  | -0.04454 | 0.3369   | 0.153969 | 0.00084  |
| 5.06E-07 | -0.13363 | 0.00381  | 0.116889 | 0.01147  |
| 1.39E-09 | 0.305484 | 1.52E-11 | -0.17647 | 0.00013  |
| 0.01473  | 0.039287 | 0.39697  | -0.45051 | 1.01E-24 |
| 0.00122  | -0.11326 | 0.01433  | 0.300336 | 3.44E-11 |
| 0.20812  | -0.01696 | 0.71467  | 0.083846 | 0.07026  |
| 0.00114  | -0.07822 | 0.09135  | 0.226871 | 7.26E-07 |
| 0.54814  | -0.06619 | 0.15327  | -0.33309 | 1.46E-13 |
| 0.00098  | -0.17094 | 0.00021  | 0.009855 | 0.83179  |
| 0.89465  | -0.01705 | 0.71324  | -0.20217 | 1.07E-05 |
| 0.02674  | 0.062973 | 0.17429  | 0.120113 | 0.00937  |
| 0.00011  | 0.012564 | 0.78655  | 0.013396 | 0.7728   |
| 0.0009   | -0.06137 | 0.18555  | 0.03705  | 0.42442  |
| 1.51E-05 | 0.00115  | 0.98023  | 0.364096 | 4.37E-16 |
| 0.01354  | -0.19221 | 2.89E-05 | -0.11702 | 0.01138  |
| 0.00127  | -0.17721 | 0.00012  | 0.120383 | 0.00921  |
| 1.29E-13 | 0.051991 | 0.26217  | 0.423487 | 9.55E-22 |
| 0.04602  | -0.06056 | 0.1914   | -0.26459 | 6.39E-09 |
| 0.02956  | 0.14029  | 0.00238  | 0.05733  | 0.21623  |
| 0.05064  | 0.084908 | 0.06676  | 0.028334 | 0.54134  |
| 0.03592  | -0.14197 | 0.0021   | 0.092516 | 0.04569  |
| 0.50297  | -0.19063 | 3.37E-05 | 0.047719 | 0.30346  |
| 0.27102  | -0.04068 | 0.38048  | 0.441179 | 1.15E-23 |
| 8.13E-05 | 0.016444 | 0.72302  | -0.01295 | 0.78008  |
| 0.02836  | -0.03965 | 0.39256  | -0.00454 | 0.92206  |
| 0.00322  | -0.22472 | 9.29E-07 | 0.114427 | 0.01335  |
| 1.48E-08 | -0.00496 | 0.91492  | 0.156657 | 0.00068  |
| 0.43419  | -0.11658 | 0.01169  | 0.013897 | 0.76454  |
| 1.53E-05 | 0.1137   | 0.01395  | 0.154936 | 0.00078  |
| 0.6854   | -0.08234 | 0.07545  | -0.01132 | 0.80716  |
| 0.01445  | -0.11913 | 0.00998  | 0.142663 | 0.002    |
| 0.00032  | -0.0147  | 0.75139  | -0.00335 | 0.94248  |
| 0.07153  | -0.20061 | 1.25E-05 | 0.05118  | 0.26969  |
| 0.60881  | 0.246897 | 6.48E-08 | -0.0742  | 0.10931  |
| 0.0109   | -0.07595 | 0.10116  | -0.40622 | 5.56E-20 |
| 0.20763  | -0.08466 | 0.06755  | -0.02211 | 0.63374  |
| 0.02943  | -0.00925 | 0.84205  | -0.27271 | 2.08E-09 |
| 3.55E-08 | -0.0181  | 0.69651  | 0.385544 | 5.34E-18 |
| 0.89618  | -0.05818 | 0.20949  | -0.11516 | 0.01276  |

|          |          |          |          |          |
|----------|----------|----------|----------|----------|
| 0.04507  | -0.14344 | 0.00189  | 0.274148 | 1.70E-09 |
| 0.10389  | -0.23413 | 3.10E-07 | 0.383338 | 8.53E-18 |
| 0.53354  | -0.147   | 0.00144  | -0.19098 | 3.26E-05 |
| 0.03212  | -0.08813 | 0.05703  | 0.180758 | 8.56E-05 |
| 3.91E-15 | 0.030454 | 0.5115   | 0.376729 | 3.40E-17 |
| 0.00134  | 0.189757 | 3.67E-05 | -0.22086 | 1.44E-06 |
| 0.45352  | -0.17248 | 0.00018  | -0.12789 | 0.00565  |
| 0.25135  | -0.08339 | 0.07181  | 0.058306 | 0.2085   |
| 0.13303  | 0.072287 | 0.11876  | 0.172683 | 0.00018  |
| 1.87E-05 | 0.059024 | 0.20294  | 0.021826 | 0.63803  |
| 0.6099   | 0.196933 | 1.82E-05 | -0.19216 | 2.91E-05 |
| 8.22E-07 | 0.12572  | 0.00652  | 0.082674 | 0.07428  |
| 0.00795  | 0.175425 | 0.00014  | -0.39023 | 1.95E-18 |
| 0.00024  | 0.104327 | 0.02416  | 0.421929 | 1.39E-21 |
| 0.02185  | -0.10281 | 0.0263   | -0.20272 | 1.01E-05 |
| 0.17548  | -0.11447 | 0.01331  | -0.09355 | 0.04332  |
| 0.00606  | 0.183336 | 6.74E-05 | -0.1737  | 0.00016  |
| 0.00015  | -0.1202  | 0.00932  | 0.056274 | 0.22482  |
| 0.00882  | -0.06824 | 0.14088  | 0.179816 | 9.33E-05 |
| 2.82E-07 | -0.0194  | 0.67576  | 0.123372 | 0.0076   |
| 0.47796  | -0.02347 | 0.61287  | 0.06705  | 0.14798  |
| 0.96947  | -0.05889 | 0.20396  | -0.1359  | 0.00325  |
| 0.39832  | -0.01975 | 0.67037  | -0.30287 | 2.31E-11 |
| 6.72E-08 | -0.10796 | 0.01961  | 0.043108 | 0.35263  |
| 0.00149  | -0.1226  | 0.00799  | 0.157295 | 0.00065  |
| 0.33415  | -0.08626 | 0.06254  | 0.020851 | 0.65312  |
| 0.14566  | -0.17658 | 0.00013  | -0.04133 | 0.37287  |
| 0.01393  | -0.08557 | 0.06466  | -0.03304 | 0.47628  |
| 0.43752  | -0.12465 | 0.007    | -0.03147 | 0.49753  |
| 0.26099  | -0.16809 | 0.00026  | 0.069086 | 0.13603  |
| 0.34339  | -0.11553 | 0.01248  | 0.310671 | 6.59E-12 |
| 0.61787  | -0.08757 | 0.05864  | -0.25029 | 4.21E-08 |
| 0.05652  | -0.14278 | 0.00198  | -0.07577 | 0.10198  |
| 0.01824  | 0.013616 | 0.76916  | 0.060369 | 0.19282  |
| 0.01243  | 0.134248 | 0.00365  | 0.315903 | 2.78E-12 |
| 0.01462  | -0.07579 | 0.10187  | 0.00735  | 0.87413  |
| 0.11651  | -0.24433 | 8.93E-08 | 0.112495 | 0.01501  |
| 0.00034  | -0.11043 | 0.01697  | 0.122872 | 0.00785  |
| 0.00025  | -0.06566 | 0.1566   | 0.060343 | 0.19301  |
| 2.04E-05 | -0.0011  | 0.981    | -0.08557 | 0.06467  |
| 0.12736  | -0.06424 | 0.16574  | -0.16076 | 0.00049  |
| 2.78E-13 | 0.003715 | 0.93619  | 0.063704 | 0.16933  |
| 0.11884  | -0.02922 | 0.52872  | -0.11364 | 0.014    |
| 0.01438  | -0.16682 | 0.00029  | -0.25868 | 1.41E-08 |
| 0.00528  | -0.13465 | 0.00355  | -0.03172 | 0.49414  |

|          |          |          |           |          |
|----------|----------|----------|-----------|----------|
| 0.13216  | -0.02891 | 0.53321  | 0.23556   | 2.61E-07 |
| 0.68399  | -0.06245 | 0.17787  | -3.70E-05 | 0.99936  |
| 0.00019  | -0.11855 | 0.01035  | 0.06178   | 0.1826   |
| 0.55156  | -0.06229 | 0.17901  | -0.05289  | 0.25401  |
| 0.01398  | -0.04722 | 0.30853  | -0.12786  | 0.00566  |
| 0.18274  | -0.16687 | 0.00029  | 0.224839  | 9.16E-07 |
| 0.06923  | -0.13116 | 0.00452  | 0.284645  | 3.73E-10 |
| 0.00065  | -0.20061 | 1.25E-05 | -0.27658  | 1.20E-09 |
| 0.5232   | -0.15628 | 0.0007   | -0.19826  | 1.59E-05 |
| 2.55E-08 | -0.06528 | 0.15899  | 0.048327  | 0.29733  |
| 0.00393  | -0.15193 | 0.00099  | 0.026176  | 0.57259  |
| 2.90E-06 | -0.00642 | 0.88996  | -0.0478   | 0.30269  |
| 0.05776  | -0.16128 | 0.00047  | 0.119873  | 0.00952  |
| 0.3937   | -0.16457 | 0.00036  | -0.0416   | 0.36978  |
| 0.14568  | -0.11453 | 0.01327  | 0.008399  | 0.85635  |
| 0.15851  | -0.16351 | 0.00039  | -0.03371  | 0.46745  |
| 0.98666  | 0.027494 | 0.5534   | -0.00661  | 0.88678  |
| 0.04191  | -0.06882 | 0.13754  | 0.217814  | 2.02E-06 |
| 0.00358  | 0.04685  | 0.31236  | -0.2011   | 1.19E-05 |
| 0.08218  | -0.17806 | 0.00011  | -0.24631  | 6.98E-08 |
| 0.03036  | 0.023935 | 0.6059   | 0.240455  | 1.44E-07 |
| 0.41332  | -0.05408 | 0.24349  | -0.17014  | 0.00022  |
| 0.68714  | -0.20173 | 1.12E-05 | 0.168717  | 0.00025  |
| 0.00108  | -0.06112 | 0.18735  | 0.037253  | 0.42187  |
| 0.07932  | -0.20652 | 6.81E-06 | 0.099095  | 0.03227  |
| 0.99256  | -0.02544 | 0.58346  | -0.17131  | 0.0002   |
| 0.0259   | -0.14665 | 0.00148  | -0.2062   | 7.04E-06 |
| 0.03386  | -0.17486 | 0.00015  | -0.0355   | 0.44406  |
| 0.01043  | 0.028212 | 0.54309  | 0.158532  | 0.00058  |
| 0.00259  | -0.0898  | 0.05245  | 0.245107  | 8.11E-08 |
| 0.76246  | 0.012439 | 0.78863  | 0.153871  | 0.00085  |
| 0.32315  | -0.18139 | 8.08E-05 | -0.0684   | 0.13998  |
| 1.45E-20 | 0.065425 | 0.15808  | 0.097583  | 0.03502  |
| 0.16609  | -0.09563 | 0.03886  | 0.156044  | 0.00071  |
| 2.51E-06 | 0.051004 | 0.27134  | -0.09622  | 0.03765  |
| 0.1415   | -0.02594 | 0.57604  | -0.2641   | 6.83E-09 |
| 2.59E-11 | 0.052541 | 0.25715  | 0.352507  | 4.14E-15 |
| 0.10455  | 0.001193 | 0.97948  | -0.08051  | 0.08222  |
| 7.56E-05 | -0.20326 | 9.55E-06 | 0.123653  | 0.00747  |
| 0.91828  | -0.01772 | 0.70252  | 0.045926  | 0.32201  |
| 0.00211  | -0.19278 | 2.74E-05 | 0.199615  | 1.39E-05 |
| 0.42443  | 0.045991 | 0.32133  | 0.142725  | 0.00199  |
| 0.05641  | 0.000418 | 0.99281  | 0.370289  | 1.27E-16 |
| 0.01525  | -0.04336 | 0.34987  | 0.305307  | 1.57E-11 |
| 0.64503  | -0.11569 | 0.01236  | 0.187878  | 4.40E-05 |

|          |          |          |          |          |
|----------|----------|----------|----------|----------|
| 2.18E-05 | -0.11633 | 0.01188  | 0.439208 | 1.91E-23 |
| 0.98739  | -0.07142 | 0.12326  | 0.141447 | 0.00218  |
| 0.53605  | -0.14573 | 0.00159  | -0.12787 | 0.00565  |
| 0.00041  | -0.10432 | 0.02416  | -0.07793 | 0.09254  |
| 0.96748  | -0.15698 | 0.00066  | 0.056901 | 0.2197   |
| 1.31E-06 | -0.15296 | 0.00091  | 0.295428 | 7.36E-11 |
| 0.04947  | -0.19684 | 1.83E-05 | -0.24632 | 6.97E-08 |
| 0.2147   | -0.17737 | 0.00012  | 0.198053 | 1.62E-05 |
| 0.01196  | -0.09709 | 0.03596  | -0.15002 | 0.00115  |
| 2.09E-05 | -0.04261 | 0.35827  | -0.08248 | 0.07495  |
| 9.35E-06 | -0.06596 | 0.15467  | 0.411917 | 1.49E-20 |
| 0.02367  | -0.12123 | 0.00873  | 0.20265  | 1.02E-05 |
| 3.06E-07 | -0.04062 | 0.38119  | 0.358524 | 1.30E-15 |
| 0.55022  | -0.11875 | 0.01021  | -0.18517 | 5.68E-05 |
| 0.00048  | 0.004917 | 0.91561  | 0.341655 | 3.12E-14 |
| 2.85E-05 | -0.0589  | 0.2039   | 0.127142 | 0.00593  |
| 2.46E-05 | -0.00388 | 0.93329  | 0.25979  | 1.22E-08 |
| 0.00183  | 0.137074 | 0.00299  | -0.07025 | 0.12955  |
| 0.1064   | -0.07807 | 0.09196  | 0.2624   | 8.59E-09 |
| 0.01941  | -0.02659 | 0.56646  | 0.050965 | 0.27171  |
| 0.48857  | -0.14506 | 0.00167  | -0.07609 | 0.10051  |
| 0.00141  | -0.19999 | 1.34E-05 | 0.060746 | 0.19006  |
| 2.00E-05 | 0.050237 | 0.27863  | -0.06829 | 0.14063  |
| 0.65284  | -0.1325  | 0.00413  | 0.018043 | 0.69735  |
| 0.51965  | -0.06123 | 0.18655  | -0.05697 | 0.21911  |
| 0.00305  | -0.02753 | 0.55284  | 0.157986 | 0.00061  |
| 0.18471  | -0.10264 | 0.02656  | 0.147701 | 0.00137  |
| 0.00591  | -0.09727 | 0.03561  | 0.100977 | 0.02912  |
| 0.03306  | -0.22434 | 9.70E-07 | 0.187616 | 4.51E-05 |
| 0.52522  | 0.086988 | 0.06033  | -0.29733 | 5.49E-11 |
| 0.87736  | -0.09252 | 0.04568  | 0.064718 | 0.16263  |
| 0.00024  | -0.11306 | 0.0145   | 0.318729 | 1.74E-12 |
| 2.44E-10 | -0.01263 | 0.7854   | 0.456585 | 1.99E-25 |
| 0.00087  | 0.093336 | 0.0438   | -0.00989 | 0.83123  |
| 0.04503  | -0.17517 | 0.00014  | 0.049322 | 0.28749  |
| 0.89835  | -0.11539 | 0.01259  | -0.12786 | 0.00566  |
| 0.00139  | -0.23646 | 2.34E-07 | 0.318046 | 1.95E-12 |
| 0.70511  | -0.18777 | 4.44E-05 | 0.094569 | 0.04108  |
| 0.00028  | -0.19468 | 2.27E-05 | 0.285597 | 3.24E-10 |
| 0.4323   | -0.19819 | 1.60E-05 | -0.08867 | 0.05553  |
| 8.14E-08 | -0.16397 | 0.00037  | 0.182649 | 7.19E-05 |
| 0.09423  | -0.01626 | 0.72606  | -0.11211 | 0.01536  |
| 0.1185   | 0.113468 | 0.01415  | 0.264732 | 6.26E-09 |
| 7.33E-06 | 0.355677 | 2.26E-15 | -0.05032 | 0.2778   |
| 0.22642  | -0.03151 | 0.49692  | -0.0467  | 0.3139   |

|          |          |          |          |          |
|----------|----------|----------|----------|----------|
| 0.0008   | 0.15721  | 0.00065  | -0.1595  | 0.00054  |
| 0.02333  | 0.223224 | 1.10E-06 | 0.13164  | 0.00438  |
| 0.0291   | -0.27656 | 1.21E-09 | 0.265593 | 5.57E-09 |
| 0.31861  | -0.28151 | 5.91E-10 | 0.42778  | 3.35E-22 |
| 0.98227  | -0.2099  | 4.77E-06 | 0.252738 | 3.07E-08 |
| 0.06317  | 0.08492  | 0.06672  | -0.0921  | 0.04668  |
| 0.85083  | -0.13124 | 0.0045   | -0.15816 | 0.0006   |
| 4.80E-07 | 0.190003 | 3.59E-05 | 0.043671 | 0.34637  |
| 0.00298  | 0.17784  | 0.00011  | 0.223312 | 1.09E-06 |
| 0.53582  | -0.1601  | 0.00051  | -0.13171 | 0.00436  |
| 0.01943  | -0.18208 | 7.58E-05 | -0.0669  | 0.14892  |
| 0.1594   | 0.10489  | 0.0234   | 0.11237  | 0.01512  |
| 0.08808  | -0.16733 | 0.00028  | -0.03541 | 0.44521  |
| 0.05662  | -0.13263 | 0.00409  | 0.122877 | 0.00785  |
| 0.0072   | 0.076813 | 0.09733  | -0.05989 | 0.19642  |
| 0.78687  | -0.24645 | 6.85E-08 | 0.016602 | 0.72047  |
| 0.00065  | 0.390113 | 2.00E-18 | -0.03245 | 0.48426  |
| 6.71E-10 | 0.199439 | 1.41E-05 | -0.14044 | 0.00235  |
| 0.11325  | 0.147683 | 0.00137  | 0.191953 | 2.97E-05 |
| 0.0105   | -0.08853 | 0.05591  | -0.02274 | 0.62403  |
| 0.03874  | -0.12175 | 0.00844  | -0.03671 | 0.42867  |
| 1.14E-08 | 0.083478 | 0.0715   | 0.070499 | 0.12818  |
| 0.02586  | -0.20211 | 1.08E-05 | 0.019664 | 0.67167  |
| 0.41785  | -0.15433 | 0.00082  | 0.319698 | 1.48E-12 |
| 0.02886  | -0.22152 | 1.34E-06 | 0.130355 | 0.00478  |
| 0.00584  | -0.15805 | 0.00061  | 0.050047 | 0.28045  |
| 0.00259  | -0.37247 | 8.14E-17 | -0.02976 | 0.52121  |
| 0.0141   | -0.12815 | 0.00555  | 0.021654 | 0.64068  |
| 0.00093  | -0.20624 | 7.01E-06 | 0.144671 | 0.00172  |
| 0.00044  | -0.24623 | 7.05E-08 | 0.173166 | 0.00017  |
| 0.80363  | 0.185017 | 5.76E-05 | 0.056447 | 0.2234   |
| 0.00168  | -0.0029  | 0.95012  | 0.109722 | 0.0177   |
| 0.43646  | -0.12033 | 0.00925  | -0.22914 | 5.58E-07 |
| 5.60E-07 | -0.09596 | 0.03819  | 0.003281 | 0.94362  |
| 0.15931  | -0.12105 | 0.00883  | -0.02324 | 0.61642  |
| 0.05787  | -0.159   | 0.00056  | -0.01977 | 0.67002  |
| 3.16E-17 | 0.135182 | 0.00342  | 0.270665 | 2.77E-09 |
| 0.00056  | -0.15322 | 0.00089  | -0.04285 | 0.35555  |
| 5.81E-08 | -0.12295 | 0.00782  | 0.164209 | 0.00037  |
| 0.00324  | -0.12872 | 0.00534  | 0.116118 | 0.01204  |
| 0.28976  | -0.20777 | 5.97E-06 | -0.0797  | 0.08533  |
| 0.37739  | -0.08835 | 0.0564   | 0.171107 | 0.0002   |
| 0.1162   | -0.10317 | 0.02578  | -0.20928 | 5.09E-06 |
| 0.4409   | 0.134755 | 0.00353  | -0.01775 | 0.70207  |
| 0.90992  | -0.26005 | 1.18E-08 | 0.208134 | 5.75E-06 |



|          |          |          |          |          |
|----------|----------|----------|----------|----------|
| 0.0074   | -0.18999 | 3.59E-05 | -0.00816 | 0.86042  |
| 0.17622  | -0.04477 | 0.33438  | 0.135488 | 0.00335  |
| 0.00237  | -0.20465 | 8.28E-06 | 0.066343 | 0.15231  |
| 0.00034  | -0.1538  | 0.00085  | 0.095698 | 0.03871  |
| 0.12844  | -0.24701 | 6.38E-08 | -0.03724 | 0.42209  |
| 0.0045   | -0.06796 | 0.14252  | 0.025886 | 0.57685  |
| 0.74013  | -0.19312 | 2.65E-05 | -0.23197 | 4.00E-07 |
| 4.35E-11 | 0.218654 | 1.84E-06 | -0.11294 | 0.01461  |
| 0.93408  | 0.126986 | 0.006    | 0.276944 | 1.14E-09 |
| 0.16219  | 0.211578 | 3.98E-06 | 0.291715 | 1.30E-10 |
| 0.03214  | -0.11254 | 0.01497  | -0.13388 | 0.00375  |
| 0.03656  | -0.16335 | 0.00039  | -0.04414 | 0.34126  |
| 0.03227  | -0.25929 | 1.30E-08 | 0.408207 | 3.52E-20 |
| 0.23227  | -0.15114 | 0.00105  | -0.01405 | 0.76195  |
| 0.00066  | -0.20549 | 7.58E-06 | 0.098155 | 0.03396  |
| 0.06168  | -0.14708 | 0.00144  | -0.14078 | 0.00229  |
| 0.1714   | -0.22586 | 8.15E-07 | 0.149878 | 0.00116  |
| 0.02085  | -0.1599  | 0.00052  | -0.07128 | 0.124    |
| 0.12723  | -0.27808 | 9.70E-10 | 0.064011 | 0.16728  |
| 0.14697  | -0.18637 | 5.07E-05 | 0.038324 | 0.40865  |
| 0.00014  | -0.04131 | 0.37307  | 0.148771 | 0.00126  |
| 0.47335  | -0.21488 | 2.79E-06 | -0.07368 | 0.11181  |
| 0.0002   | -0.10577 | 0.02225  | 0.135182 | 0.00342  |
| 0.34677  | 0.071831 | 0.12111  | 0.287155 | 2.57E-10 |
| 0.1285   | -0.1377  | 0.00286  | -0.08629 | 0.06243  |
| 0.09711  | 0.067688 | 0.14415  | 0.206097 | 7.12E-06 |
| 0.65308  | -0.06765 | 0.14437  | -0.22373 | 1.04E-06 |
| 0.00053  | 0.073097 | 0.11467  | -0.06745 | 0.14557  |
| 5.66E-09 | 0.400796 | 1.90E-19 | -0.0108  | 0.8159   |
| 0.07609  | -0.10322 | 0.0257   | -0.16955 | 0.00023  |
| 0.44227  | -0.19194 | 2.97E-05 | -0.16963 | 0.00023  |
| 0.06171  | 0.166916 | 0.00029  | -0.18067 | 8.63E-05 |
| 0.00419  | -0.01174 | 0.80028  | -0.14268 | 0.002    |
| 3.67E-06 | -0.08748 | 0.0589   | 0.190998 | 3.26E-05 |
| 6.03E-05 | -0.04112 | 0.37531  | 0.096025 | 0.03805  |
| 0.00088  | -0.2206  | 1.48E-06 | 0.020636 | 0.65646  |
| 0.89362  | -0.22029 | 1.53E-06 | -0.02892 | 0.53298  |
| 0.02041  | -0.19041 | 3.45E-05 | 0.009264 | 0.84175  |
| 0.00086  | -0.23069 | 4.65E-07 | -0.25331 | 2.85E-08 |
| 0.00013  | -0.14862 | 0.00128  | 0.185367 | 5.58E-05 |
| 0.45788  | -0.19175 | 3.03E-05 | 0.082498 | 0.0749   |
| 0.71129  | 0.021278 | 0.64649  | 0.213366 | 3.28E-06 |
| 0.02366  | -0.15326 | 0.00089  | -0.09786 | 0.0345   |
| 0.02157  | -0.13224 | 0.0042   | 0.07439  | 0.10838  |
| 2.00E-06 | -0.1023  | 0.02707  | 0.295885 | 6.86E-11 |

|          |          |          |          |          |
|----------|----------|----------|----------|----------|
| 3.18E-06 | -0.09855 | 0.03324  | 0.097733 | 0.03474  |
| 0.00424  | -0.22311 | 1.12E-06 | 0.152034 | 0.00098  |
| 0.73953  | -0.14188 | 0.00212  | -0.01912 | 0.68028  |
| 0.08136  | -0.20868 | 5.42E-06 | 0.020662 | 0.65606  |
| 0.83218  | -0.03585 | 0.43964  | -0.16896 | 0.00024  |
| 4.32E-08 | -0.03675 | 0.42818  | 0.063515 | 0.1706   |
| 0.08434  | -0.2117  | 3.93E-06 | -0.01956 | 0.67338  |
| 0.54991  | -0.15508 | 0.00077  | -0.11057 | 0.01683  |
| 0.00023  | -0.0354  | 0.4453   | -0.13798 | 0.00281  |
| 0.00091  | -0.11926 | 0.00989  | 0.063056 | 0.17372  |
| 0.42993  | -0.28045 | 6.89E-10 | 0.433515 | 8.07E-23 |
| 0.00588  | 0.174185 | 0.00015  | -0.06676 | 0.14972  |
| 1.35E-07 | -0.06636 | 0.15219  | 0.137229 | 0.00296  |
| 0.41599  | -0.23618 | 2.42E-07 | 0.04751  | 0.30559  |
| 0.0632   | -0.15534 | 0.00076  | -0.11534 | 0.01262  |
| 1.33E-05 | -0.17576 | 0.00013  | 0.331112 | 2.07E-13 |
| 0.52833  | -0.16297 | 0.00041  | 0.054486 | 0.23993  |
| 1.17E-05 | -0.10272 | 0.02644  | -0.04691 | 0.31169  |
| 0.54019  | -0.11635 | 0.01187  | -0.26844 | 3.77E-09 |
| 0.13515  | 0.189247 | 3.86E-05 | 0.06829  | 0.14061  |
| 0.00321  | -0.17014 | 0.00022  | -0.01639 | 0.72387  |
| 2.70E-08 | 0.028705 | 0.53606  | 0.465924 | 1.53E-26 |
| 0.00126  | -0.20751 | 6.13E-06 | 0.361043 | 7.98E-16 |
| 0.00011  | -0.05637 | 0.224    | 0.190912 | 3.28E-05 |
| 0.83514  | -0.14947 | 0.0012   | 0.166421 | 0.0003   |
| 0.30248  | -0.17332 | 0.00017  | -0.12793 | 0.00563  |
| 0.66924  | 0.19622  | 1.95E-05 | -0.01501 | 0.74629  |
| 0.04054  | -0.28596 | 3.07E-10 | -0.03479 | 0.4533   |
| 0.00128  | -0.16004 | 0.00052  | 0.083559 | 0.07123  |
| 0.30557  | -0.12797 | 0.00561  | -0.06992 | 0.13136  |
| 0.19756  | 0.155557 | 0.00074  | -0.04592 | 0.32203  |
| 0.04557  | -0.24109 | 1.34E-07 | 0.060447 | 0.19225  |
| 0.06045  | 0.1836   | 6.58E-05 | 0.034009 | 0.46345  |
| 6.05E-05 | -0.18306 | 6.92E-05 | 0.029758 | 0.5212   |
| 0.27376  | -0.17444 | 0.00015  | -0.00813 | 0.86083  |
| 0.00296  | -0.03336 | 0.47201  | 0.005034 | 0.9136   |
| 0.78539  | -0.23072 | 4.64E-07 | 0.052189 | 0.26035  |
| 1.61E-16 | 0.214219 | 2.99E-06 | 0.063574 | 0.1702   |
| 0.04134  | -0.06309 | 0.17351  | -0.15966 | 0.00053  |
| 0.01229  | 0.036473 | 0.43166  | -0.15065 | 0.00109  |
| 0.09543  | -0.20578 | 7.35E-06 | 0.055944 | 0.22756  |
| 0.13538  | -0.13506 | 0.00345  | -0.02754 | 0.55267  |
| 4.01E-09 | 0.061436 | 0.18506  | -0.14381 | 0.00184  |
| 0.0026   | -0.15183 | 0.001    | 0.313371 | 4.23E-12 |
| 0.33518  | -0.15015 | 0.00114  | 0.027685 | 0.55065  |

|          |          |          |          |          |
|----------|----------|----------|----------|----------|
| 0.53018  | 0.029429 | 0.52581  | -0.03761 | 0.4174   |
| 0.00084  | -0.15112 | 0.00105  | 0.319359 | 1.56E-12 |
| 0.03254  | -0.22532 | 8.67E-07 | -0.05916 | 0.2019   |
| 1.47E-07 | -0.08937 | 0.05361  | 0.141394 | 0.00219  |
| 0.68567  | -0.17696 | 0.00012  | 0.153586 | 0.00087  |
| 2.53E-12 | -0.04149 | 0.37101  | 0.203342 | 9.47E-06 |
| 5.47E-06 | -0.02183 | 0.638    | 0.284739 | 3.68E-10 |
| 0.00032  | -0.06317 | 0.17295  | 0.048363 | 0.29698  |
| 0.41321  | -0.14256 | 0.00201  | -0.20659 | 6.76E-06 |
| 0.03821  | 0.162755 | 0.00041  | 0.010444 | 0.8219   |
| 0.0418   | -0.23042 | 4.80E-07 | 0.014722 | 0.75101  |
| 0.02085  | 0.167503 | 0.00028  | -0.05855 | 0.20662  |
| 7.53E-05 | -0.11356 | 0.01407  | 0.086124 | 0.06294  |
| 0.31831  | -0.23112 | 4.42E-07 | 0.058932 | 0.20365  |
| 0.70388  | -0.17149 | 0.0002   | 0.037277 | 0.42159  |
| 0.4775   | -0.15031 | 0.00112  | -0.10975 | 0.01767  |
| 0.12021  | 0.16036  | 0.0005   | 0.040558 | 0.38186  |
| 0.16239  | -0.10314 | 0.02582  | 0.071492 | 0.12288  |
| 0.22864  | 0.083728 | 0.07065  | 0.048342 | 0.29718  |
| 1.39E-06 | 0.167308 | 0.00028  | -0.01341 | 0.77249  |
| 0.02467  | -0.18762 | 4.51E-05 | -0.27197 | 2.31E-09 |
| 0.03711  | -0.10148 | 0.02833  | 0.101127 | 0.02888  |
| 0.07152  | -0.02926 | 0.52825  | -0.25296 | 2.99E-08 |
| 0.00294  | -0.20682 | 6.60E-06 | 0.048332 | 0.29728  |
| 0.00057  | 0.11227  | 0.01521  | -0.15019 | 0.00113  |
| 0.11179  | -0.15948 | 0.00054  | 0.095411 | 0.0393   |
| 0.53297  | -0.22552 | 8.47E-07 | -0.09468 | 0.04085  |
| 6.22E-07 | -0.19513 | 2.17E-05 | 0.153495 | 0.00088  |
| 0.14827  | -0.08286 | 0.07362  | -0.14566 | 0.0016   |
| 0.44774  | -0.22899 | 5.68E-07 | 0.043782 | 0.34514  |
| 0.14004  | -0.0808  | 0.08112  | -0.06133 | 0.18582  |
| 0.17678  | 0.092261 | 0.0463   | 0.095142 | 0.03986  |
| 0.00016  | -0.1269  | 0.00603  | 0.009597 | 0.83613  |
| 0.2127   | -0.13092 | 0.0046   | 0.072192 | 0.11925  |
| 0.57657  | -0.14732 | 0.00141  | -0.02783 | 0.54855  |
| 0.1511   | -0.16516 | 0.00034  | -0.11924 | 0.0099   |
| 0.00014  | -0.07935 | 0.08672  | 0.260832 | 1.06E-08 |
| 0.00477  | 0.052855 | 0.25431  | 0.046241 | 0.3187   |
| 2.85E-06 | 0.062185 | 0.17975  | 0.071129 | 0.1248   |
| 0.00046  | -0.11496 | 0.01292  | 0.066981 | 0.1484   |
| 0.01936  | 0.047125 | 0.30953  | 0.1671   | 0.00029  |
| 8.58E-05 | -0.0993  | 0.03192  | 0.219556 | 1.66E-06 |
| 0.00419  | -0.15199 | 0.00098  | 0.067215 | 0.14698  |
| 0.07883  | 0.1698   | 0.00023  | 0.145624 | 0.0016   |
| 0.0202   | -0.23216 | 3.91E-07 | 0.091157 | 0.04898  |

|          |          |          |          |          |
|----------|----------|----------|----------|----------|
| 2.70E-06 | -0.20955 | 4.95E-06 | 0.222345 | 1.22E-06 |
| 0.07654  | -0.12519 | 0.00675  | -0.05722 | 0.21713  |
| 0.00014  | -0.28929 | 1.87E-10 | -0.35531 | 2.42E-15 |
| 0.80565  | 0.012342 | 0.79024  | -0.03866 | 0.40458  |
| 0.00112  | 0.146202 | 0.00153  | -0.20842 | 5.57E-06 |
| 0.08833  | -0.2029  | 9.92E-06 | -0.24516 | 8.05E-08 |
| 0.04549  | -0.062   | 0.18104  | 0.115261 | 0.01269  |
| 2.12E-05 | -0.15368 | 0.00086  | 0.182356 | 7.39E-05 |
| 0.68985  | -0.15847 | 0.00059  | 0.056228 | 0.22521  |
| 0.00027  | -0.09229 | 0.04623  | 0.077902 | 0.09266  |
| 0.13533  | -0.2611  | 1.02E-08 | 0.192394 | 2.84E-05 |
| 0.62949  | 0.232626 | 3.70E-07 | -0.19745 | 1.72E-05 |
| 0.13493  | -0.11761 | 0.01097  | 0.245025 | 8.19E-08 |
| 0.00657  | 0.060392 | 0.19265  | 0.141293 | 0.00221  |
| 0.08064  | -0.20193 | 1.10E-05 | 0.071571 | 0.12247  |
| 0.75278  | -0.15325 | 0.00089  | -0.09967 | 0.03129  |
| 7.01E-05 | -0.15875 | 0.00057  | 0.126733 | 0.0061   |
| 0.00063  | -0.12862 | 0.00538  | 0.104268 | 0.02424  |
| 0.97309  | -0.10986 | 0.01755  | -0.07922 | 0.08726  |
| 5.33E-07 | -0.14852 | 0.00129  | 0.202031 | 1.08E-05 |
| 1.41E-07 | -0.18237 | 7.38E-05 | 0.126071 | 0.00637  |
| 0.23229  | -0.06516 | 0.15976  | 0.118535 | 0.01035  |
| 0.88987  | -0.21066 | 4.39E-06 | 0.165761 | 0.00032  |
| 0.40001  | -0.11948 | 0.00976  | 0.037893 | 0.41394  |
| 0.04032  | -0.21259 | 3.57E-06 | 0.084213 | 0.06903  |
| 1.01E-05 | -0.08946 | 0.05337  | -0.01785 | 0.70041  |
| 0.69773  | -0.17398 | 0.00016  | -0.21664 | 2.30E-06 |
| 1.87E-11 | 0.235899 | 2.51E-07 | -0.0566  | 0.22217  |
| 0.00076  | -0.139   | 0.00261  | 0.086375 | 0.06217  |
| 0.01938  | -0.14382 | 0.00183  | -0.02983 | 0.52013  |
| 0.68805  | -0.18662 | 4.95E-05 | -0.01462 | 0.75268  |
| 0.02803  | -0.20614 | 7.09E-06 | 0.119783 | 0.00957  |
| 0.99873  | -0.17131 | 0.0002   | -0.13377 | 0.00378  |
| 0.00019  | -0.04542 | 0.32736  | -0.00254 | 0.95634  |
| 0.02072  | 0.080858 | 0.08089  | -0.11617 | 0.012    |
| 6.38E-08 | -0.08493 | 0.06668  | 0.151417 | 0.00103  |
| 8.38E-07 | 0.22135  | 1.36E-06 | 0.185051 | 5.74E-05 |
| 9.21E-05 | -0.12419 | 0.00721  | 0.008688 | 0.85147  |
| 9.29E-06 | 0.027303 | 0.55616  | -0.15334 | 0.00089  |
| 0.20461  | -0.20977 | 4.83E-06 | 0.136212 | 0.00318  |
| 0.94864  | -0.14135 | 0.0022   | -0.13825 | 0.00275  |
| 4.67E-05 | 0.157635 | 0.00063  | -0.50044 | 5.74E-31 |
| 0.43477  | -0.29771 | 5.17E-11 | -0.03754 | 0.41827  |
| 0.26089  | -0.25088 | 3.91E-08 | 0.187726 | 4.46E-05 |
| 0.01832  | -0.08559 | 0.0646   | 0.355374 | 2.39E-15 |

|          |          |          |          |          |
|----------|----------|----------|----------|----------|
| 0.12306  | -0.11168 | 0.01576  | -0.17632 | 0.00013  |
| 0.0458   | -0.19499 | 2.20E-05 | 0.165898 | 0.00032  |
| 0.00044  | -0.11997 | 0.00946  | 0.047436 | 0.30634  |
| 0.13587  | -0.08627 | 0.0625   | -0.23842 | 1.85E-07 |
| 1.01E-08 | 0.058917 | 0.20376  | 0.291637 | 1.31E-10 |
| 0.01911  | -0.13202 | 0.00427  | -0.11309 | 0.01448  |
| 0.00017  | 0.18498  | 5.78E-05 | -0.19273 | 2.75E-05 |
| 0.00329  | -0.08999 | 0.05198  | -0.05109 | 0.27051  |
| 0.07819  | 0.038148 | 0.41081  | 0.013536 | 0.77048  |
| 0.5803   | -0.10545 | 0.02267  | -0.07738 | 0.09487  |
| 0.00568  | -0.21334 | 3.29E-06 | 0.140103 | 0.00241  |
| 0.00026  | -0.14634 | 0.00152  | 0.062308 | 0.17889  |
| 0.10975  | -0.0682  | 0.14116  | -0.17914 | 9.93E-05 |
| 0.02568  | -0.0863  | 0.06239  | -0.00418 | 0.9283   |
| 0.15353  | -0.09729 | 0.03556  | -0.07592 | 0.10131  |
| 0.08929  | -0.20215 | 1.07E-05 | -0.08152 | 0.07842  |
| 0.00422  | -0.03204 | 0.48978  | -0.19158 | 3.08E-05 |
| 0.02566  | -0.21737 | 2.12E-06 | -0.07643 | 0.09901  |
| 0.00012  | 0.134425 | 0.00361  | -0.32665 | 4.50E-13 |
| 0.00125  | 0.136408 | 0.00314  | -0.1894  | 3.80E-05 |
| 0.15908  | 0.179245 | 9.83E-05 | -0.22321 | 1.10E-06 |
| 0.57525  | -0.11427 | 0.01348  | -0.11911 | 0.00998  |
| 0.92476  | -0.08418 | 0.06915  | -0.2398  | 1.56E-07 |
| 0.60159  | -0.0654  | 0.15825  | -0.25558 | 2.12E-08 |
| 3.03E-05 | -0.01603 | 0.7298   | 0.283454 | 4.45E-10 |
| 3.94E-05 | 0.054008 | 0.24408  | -0.00557 | 0.90441  |
| 0.51899  | 0.127668 | 0.00573  | -0.02052 | 0.65823  |
| 0.70351  | -0.14098 | 0.00226  | 0.178671 | 0.0001   |
| 0.01283  | -0.16002 | 0.00052  | 0.235232 | 2.72E-07 |
| 1.65E-07 | -0.17509 | 0.00014  | 0.174439 | 0.00015  |
| 0.09931  | -0.22941 | 5.41E-07 | -0.12695 | 0.00601  |
| 0.0344   | 0.007839 | 0.86583  | -0.07942 | 0.08645  |
| 3.46E-05 | -0.14621 | 0.00153  | 0.168021 | 0.00027  |
| 0.01513  | 0.042249 | 0.36231  | -0.01659 | 0.72059  |
| 0.17187  | -0.13821 | 0.00276  | -0.06445 | 0.16438  |
| 3.77E-05 | -0.05518 | 0.23397  | 0.019096 | 0.68064  |
| 0.64606  | -0.14578 | 0.00158  | 0.062161 | 0.17992  |
| 0.00229  | -0.08605 | 0.06317  | 0.026031 | 0.57472  |
| 0.13219  | -0.20484 | 8.11E-06 | 0.005397 | 0.9074   |
| 0.00068  | -0.17102 | 0.0002   | 0.176061 | 0.00013  |
| 0.75028  | -0.23732 | 2.11E-07 | 0.166706 | 0.0003   |
| 0.00044  | 0.010632 | 0.81874  | -0.06076 | 0.18991  |
| 0.48133  | -0.24384 | 9.50E-08 | 0.224895 | 9.11E-07 |
| 0.02583  | -0.25662 | 1.85E-08 | 0.020467 | 0.6591   |
| 9.68E-10 | -0.03057 | 0.50994  | 0.155918 | 0.00072  |

|          |          |          |          |          |
|----------|----------|----------|----------|----------|
| 0.00017  | -0.18783 | 4.42E-05 | 0.156982 | 0.00066  |
| 0.16413  | 0.033151 | 0.47481  | 0.139164 | 0.00258  |
| 0.00074  | -0.16416 | 0.00037  | 0.148469 | 0.00129  |
| 9.03E-05 | 0.038456 | 0.40704  | -0.00974 | 0.83378  |
| 0.69644  | 0.244152 | 9.14E-08 | -0.28645 | 2.86E-10 |
| 0.14811  | 0.392178 | 1.28E-18 | -0.26486 | 6.15E-09 |
| 0.001    | -0.25033 | 4.19E-08 | -0.12199 | 0.00832  |
| 0.9249   | -0.02521 | 0.58677  | -0.12211 | 0.00825  |
| 0.34665  | -0.26318 | 7.73E-09 | -0.14271 | 0.00199  |
| 0.68231  | -0.10089 | 0.02926  | 0.034537 | 0.45653  |
| 5.31E-06 | -0.1752  | 0.00014  | 0.074293 | 0.10885  |
| 0.74737  | -0.25936 | 1.29E-08 | 0.126172 | 0.00633  |
| 0.00081  | -0.2456  | 7.62E-08 | 0.160043 | 0.00052  |
| 0.22734  | -0.12402 | 0.00729  | -0.03765 | 0.41694  |
| 0.91801  | -0.13686 | 0.00304  | -0.03213 | 0.48853  |
| 0.01398  | -0.19238 | 2.85E-05 | 0.058699 | 0.20545  |
| 0.7608   | -0.20543 | 7.63E-06 | -0.12527 | 0.00672  |
| 0.47316  | -0.07941 | 0.0865   | -0.00886 | 0.84852  |
| 0.56592  | -0.26747 | 4.31E-09 | -0.05816 | 0.20964  |
| 0.84799  | -0.00425 | 0.92709  | 0.358197 | 1.39E-15 |
| 0.43692  | -0.18609 | 5.21E-05 | -0.06975 | 0.13228  |
| 0.01263  | -0.17286 | 0.00017  | -0.14498 | 0.00168  |
| 0.01993  | 0.211202 | 4.15E-06 | -0.04959 | 0.28485  |
| 0.04392  | 0.047792 | 0.30272  | 0.066912 | 0.14882  |
| 0.36556  | 0.018184 | 0.6951   | 0.070799 | 0.12657  |
| 2.73E-05 | 0.032654 | 0.48146  | -0.06426 | 0.16562  |
| 0.03759  | -0.21514 | 2.71E-06 | -0.03397 | 0.46398  |
| 0.01654  | 0.063299 | 0.17206  | 0.009641 | 0.8354   |
| 3.68E-09 | 0.055421 | 0.23195  | -0.36687 | 2.52E-16 |
| 0.24465  | -0.11829 | 0.01051  | 0.11176  | 0.01568  |
| 0.66205  | -0.07599 | 0.10098  | -0.21354 | 3.22E-06 |
| 0.00029  | -0.09877 | 0.03285  | -0.02716 | 0.55822  |
| 0.00153  | -0.15098 | 0.00107  | 0.370236 | 1.28E-16 |
| 0.51992  | -0.22764 | 6.64E-07 | 0.037678 | 0.4166   |
| 0.06256  | -0.10607 | 0.02187  | -0.23778 | 2.00E-07 |
| 0.22994  | 0.135698 | 0.0033   | 0.143621 | 0.00186  |
| 0.55878  | -0.13098 | 0.00458  | -0.09349 | 0.04345  |
| 0.00161  | -0.01731 | 0.70905  | 0.1085   | 0.01901  |
| 0.01119  | 0.113078 | 0.01449  | -0.01011 | 0.82758  |
| 0.01031  | 0.015137 | 0.74422  | -0.06935 | 0.13451  |
| 0.55953  | -0.11898 | 0.01007  | 0.062334 | 0.17871  |
| 0.04591  | -0.08584 | 0.06381  | 0.008504 | 0.85458  |
| 0.00048  | -0.15865 | 0.00058  | 0.020721 | 0.65514  |
| 0.36521  | -0.11901 | 0.01005  | -0.22632 | 7.74E-07 |
| 0.07308  | -0.15745 | 0.00064  | -0.05942 | 0.19991  |

|          |          |          |          |          |
|----------|----------|----------|----------|----------|
| 0.05376  | -0.1741  | 0.00016  | -0.09443 | 0.04137  |
| 0.01221  | 0.016107 | 0.72846  | -0.00644 | 0.88964  |
| 0.06965  | -0.11568 | 0.01236  | 0.05645  | 0.22338  |
| 0.00018  | -0.04535 | 0.3281   | 0.134708 | 0.00354  |
| 2.62E-11 | -0.07521 | 0.10455  | 0.201402 | 1.16E-05 |
| 0.04349  | -0.12921 | 0.00517  | -0.10525 | 0.02293  |
| 0.00357  | -0.18568 | 5.42E-05 | 0.032593 | 0.48229  |
| 0.12973  | -0.19839 | 1.57E-05 | 0.170826 | 0.00021  |
| 4.23E-09 | 0.008098 | 0.86144  | -0.20541 | 7.65E-06 |
| 0.00013  | -0.06057 | 0.19134  | 0.023628 | 0.61054  |
| 0.0038   | 0.067509 | 0.14522  | 0.026374 | 0.56968  |
| 0.00421  | -0.12043 | 0.00919  | 0.051038 | 0.27103  |
| 0.59042  | -0.12179 | 0.00842  | -0.10947 | 0.01796  |
| 4.64E-12 | 0.06292  | 0.17465  | -0.22855 | 5.98E-07 |
| 1.52E-06 | 0.082025 | 0.07659  | -0.17817 | 0.00011  |
| 0.24135  | -0.13521 | 0.00342  | -0.14011 | 0.00241  |
| 0.66831  | -0.08932 | 0.05374  | -0.09946 | 0.03163  |
| 0.03163  | -0.18475 | 5.91E-05 | 0.305871 | 1.43E-11 |
| 0.0002   | -0.21869 | 1.83E-06 | -0.25239 | 3.21E-08 |
| 0.00283  | -0.07386 | 0.11093  | -0.13699 | 0.00301  |
| 0.73362  | 0.249802 | 4.48E-08 | -0.24381 | 9.54E-08 |
| 0.04255  | 0.012496 | 0.78768  | 0.058414 | 0.20766  |
| 1.24E-06 | -0.06781 | 0.14345  | 0.079627 | 0.08564  |
| 0.04435  | 0.023537 | 0.61191  | 0.168331 | 0.00026  |
| 0.29462  | -0.21877 | 1.82E-06 | -0.077   | 0.09652  |
| 0.00611  | -0.14016 | 0.0024   | -0.09077 | 0.04996  |
| 0.31959  | 0.114008 | 0.01369  | 0.31269  | 4.74E-12 |
| 0.00076  | -0.0589  | 0.20388  | -0.08191 | 0.07702  |
| 0.00659  | -0.14562 | 0.0016   | 0.049112 | 0.28955  |
| 1.78E-09 | 0.023269 | 0.61598  | 0.04665  | 0.31444  |
| 0.0718   | -0.16289 | 0.00041  | 0.090429 | 0.05083  |
| 0.17935  | -0.15696 | 0.00066  | -0.05574 | 0.22929  |
| 0.4289   | -0.20655 | 6.79E-06 | -0.16192 | 0.00044  |
| 0.00521  | -0.0039  | 0.93302  | -0.02627 | 0.57123  |
| 0.67006  | 0.111838 | 0.01561  | 0.109378 | 0.01806  |
| 0.9781   | 0.079595 | 0.08576  | 0.237377 | 2.10E-07 |
| 0.04056  | -0.14046 | 0.00235  | 0.04347  | 0.3486   |
| 0.00433  | -0.12906 | 0.00522  | 0.226909 | 7.23E-07 |
| 6.66E-05 | 0.100914 | 0.02922  | 0.057959 | 0.21123  |
| 0.00343  | -0.14853 | 0.00129  | 0.011975 | 0.79634  |
| 0.00347  | 0.257858 | 1.57E-08 | 0.141445 | 0.00218  |
| 0.19785  | -0.15743 | 0.00064  | -0.01065 | 0.81852  |
| 2.63E-06 | -0.04078 | 0.37931  | 0.01504  | 0.74582  |
| 0.07215  | 0.022451 | 0.62843  | 0.270158 | 2.97E-09 |
| 0.00197  | -0.19567 | 2.06E-05 | -0.08377 | 0.0705   |

|          |          |          |          |          |
|----------|----------|----------|----------|----------|
| 0.00485  | 0.076676 | 0.09793  | -0.05412 | 0.24313  |
| 1.45E-10 | -0.04784 | 0.30226  | 0.169298 | 0.00024  |
| 0.12986  | -0.07701 | 0.09649  | -0.25035 | 4.18E-08 |
| 0.0626   | -0.07783 | 0.09296  | -0.3     | 3.62E-11 |
| 0.12387  | 0.026513 | 0.56766  | -0.21019 | 4.62E-06 |
| 0.00956  | -0.21809 | 1.96E-06 | 0.174112 | 0.00016  |
| 0.11566  | -0.18042 | 8.83E-05 | 0.066558 | 0.15098  |
| 0.00148  | -0.06933 | 0.13464  | 0.407103 | 4.54E-20 |
| 0.79042  | 0.123456 | 0.00756  | 0.187753 | 4.45E-05 |
| 6.20E-09 | -0.05721 | 0.21719  | 0.063753 | 0.169    |
| 0.29085  | -0.03371 | 0.46743  | -0.38411 | 7.25E-18 |
| 0.00141  | -0.0847  | 0.06743  | 0.152795 | 0.00092  |
| 8.43E-06 | -0.07892 | 0.08846  | 0.115408 | 0.01257  |
| 0.02405  | -0.15098 | 0.00107  | 0.023527 | 0.61206  |
| 0.76861  | -0.19881 | 1.50E-05 | -0.0628  | 0.17549  |
| 0.03234  | 0.070018 | 0.13081  | 0.043592 | 0.34724  |
| 0.03243  | -0.04858 | 0.29478  | 0.097756 | 0.03469  |
| 0.01638  | -0.03906 | 0.39968  | -0.34868 | 8.52E-15 |
| 0.01698  | -0.16917 | 0.00024  | -0.21116 | 4.17E-06 |
| 0.58362  | -0.14961 | 0.00118  | -0.00854 | 0.85393  |
| 0.43105  | -0.16329 | 0.0004   | -0.06063 | 0.19091  |
| 0.00108  | 0.118755 | 0.01021  | -0.10584 | 0.02217  |
| 0.1708   | -0.17345 | 0.00017  | -0.03168 | 0.4947   |
| 0.00578  | -0.12178 | 0.00843  | -0.02082 | 0.65356  |
| 0.1361   | -0.13814 | 0.00278  | -0.35142 | 5.08E-15 |
| 0.78609  | -0.29654 | 6.20E-11 | 0.073888 | 0.11079  |
| 0.13002  | -0.16982 | 0.00023  | -0.10608 | 0.02186  |
| 0.21434  | -0.11664 | 0.01165  | -0.06764 | 0.14446  |
| 1.00E-05 | -0.05856 | 0.2065   | 0.214868 | 2.79E-06 |
| 0.19826  | -0.11244 | 0.01506  | -0.16414 | 0.00037  |
| 1.34E-06 | -0.07837 | 0.09072  | 0.255226 | 2.22E-08 |
| 4.75E-05 | 0.046541 | 0.31556  | 0.152606 | 0.00094  |
| 0.62173  | -0.24576 | 7.47E-08 | -0.05076 | 0.27366  |
| 1.42E-07 | 0.002936 | 0.94954  | 0.071973 | 0.12038  |
| 0.17029  | -0.21814 | 1.95E-06 | -0.19667 | 1.86E-05 |
| 0.03277  | -0.11116 | 0.01625  | -0.00532 | 0.90868  |
| 0.47068  | -0.1647  | 0.00035  | -0.12646 | 0.00621  |
| 0.0025   | -0.22317 | 1.11E-06 | 0.289246 | 1.88E-10 |
| 0.89366  | -0.16487 | 0.00035  | -0.01758 | 0.70473  |
| 0.31138  | -0.20813 | 5.75E-06 | 0.012458 | 0.78831  |
| 0.27855  | -0.24907 | 4.92E-08 | 0.042373 | 0.3609   |
| 0.96877  | -0.22524 | 8.75E-07 | 0.050655 | 0.27464  |
| 0.00114  | -0.11101 | 0.0164   | 0.405341 | 6.79E-20 |
| 0.69085  | -0.21358 | 3.21E-06 | -0.02598 | 0.57553  |
| 0.2354   | -0.12871 | 0.00534  | 0.012966 | 0.7799   |



|          |          |          |          |          |
|----------|----------|----------|----------|----------|
| 0.01894  | 0.142813 | 0.00198  | 0.201456 | 1.15E-05 |
| 6.88E-05 | -0.15774 | 0.00062  | 0.114725 | 0.01311  |
| 7.18E-09 | -0.09788 | 0.03447  | 0.077273 | 0.09533  |
| 0.0432   | -0.06221 | 0.17954  | -0.41082 | 1.93E-20 |
| 0.00034  | -0.1963  | 1.94E-05 | 0.29988  | 3.69E-11 |
| 0.05986  | -0.18833 | 4.21E-05 | -0.09814 | 0.03399  |
| 0.38144  | 0.12418  | 0.00721  | 0.092004 | 0.04691  |
| 0.3273   | 0.108077 | 0.01948  | 0.175954 | 0.00013  |
| 0.06103  | -0.16017 | 0.00051  | 0.129877 | 0.00494  |
| 0.00076  | -0.16891 | 0.00025  | 0.134393 | 0.00362  |
| 0.31859  | -0.15432 | 0.00082  | -0.06316 | 0.17304  |
| 0.14829  | -0.15607 | 0.00071  | -0.01044 | 0.82196  |
| 0.00279  | 0.094475 | 0.04128  | -0.17516 | 0.00014  |
| 0.17974  | -0.04816 | 0.299    | 0.286579 | 2.80E-10 |
| 1.04E-06 | 0.123982 | 0.00731  | -0.07438 | 0.10843  |
| 0.38522  | -0.12684 | 0.00606  | -0.02689 | 0.56212  |
| 0.00619  | -0.11881 | 0.01018  | 0.153077 | 0.0009   |
| 0.03673  | -0.1943  | 2.36E-05 | -0.00501 | 0.91396  |
| 0.7764   | -0.051   | 0.27142  | -0.30772 | 1.06E-11 |
| 0.35681  | -0.21115 | 4.17E-06 | -0.05001 | 0.28078  |
| 0.01388  | -0.21118 | 4.15E-06 | 0.049651 | 0.28428  |
| 0.00968  | -0.09667 | 0.03676  | -0.05584 | 0.22839  |
| 0.8016   | -0.09009 | 0.05171  | -0.07263 | 0.11701  |
| 0.12392  | 0.171451 | 0.0002   | 0.312132 | 5.19E-12 |
| 5.49E-06 | -0.02913 | 0.53007  | 0.173714 | 0.00016  |
| 0.09329  | 0.035706 | 0.44142  | -0.08966 | 0.05284  |
| 0.00842  | -0.04644 | 0.31665  | 0.040911 | 0.37773  |
| 0.00479  | 0.191965 | 2.96E-05 | -0.28261 | 5.03E-10 |
| 0.03105  | -0.0103  | 0.82438  | -0.22992 | 5.10E-07 |
| 6.72E-10 | 0.021957 | 0.63602  | 0.069944 | 0.13122  |
| 0.26122  | -0.20621 | 7.04E-06 | 0.064586 | 0.16349  |
| 0.16467  | -0.15791 | 0.00062  | -0.19378 | 2.48E-05 |
| 0.29874  | -0.23081 | 4.59E-07 | 0.121463 | 0.0086   |
| 8.61E-06 | -0.04392 | 0.34367  | 0.100523 | 0.02986  |
| 0.00347  | -0.16625 | 0.00031  | 0.032903 | 0.47813  |
| 0.0318   | -0.05874 | 0.20516  | -0.2073  | 6.28E-06 |
| 0.01263  | 0.105985 | 0.02198  | 0.036913 | 0.42612  |
| 0.05694  | -0.04069 | 0.38032  | 0.285603 | 3.24E-10 |
| 0.02553  | -0.23537 | 2.67E-07 | -0.19129 | 3.17E-05 |
| 0.03288  | 0.102238 | 0.02716  | 0.118844 | 0.01016  |
| 0.13717  | -0.17402 | 0.00016  | -0.09158 | 0.04795  |
| 0.00024  | 0.265238 | 5.85E-09 | 0.282154 | 5.38E-10 |
| 0.02181  | 0.258605 | 1.43E-08 | -0.0185  | 0.69007  |
| 0.00959  | -0.10537 | 0.02277  | 0.060947 | 0.18858  |
| 0.32581  | -0.1298  | 0.00496  | -0.20732 | 6.26E-06 |

|          |          |          |          |          |
|----------|----------|----------|----------|----------|
| 0.00885  | -0.00561 | 0.90371  | -0.18032 | 8.91E-05 |
| 0.05382  | -0.20894 | 5.28E-06 | -0.04013 | 0.38693  |
| 0.23858  | -0.19649 | 1.90E-05 | -0.20891 | 5.29E-06 |
| 1.73E-06 | -0.13901 | 0.00261  | 0.073678 | 0.11182  |
| 0.00144  | -0.13155 | 0.00441  | -0.03556 | 0.44333  |
| 0.04217  | 0.192304 | 2.87E-05 | -0.14306 | 0.00194  |
| 0.02144  | -0.00386 | 0.93376  | -0.10754 | 0.0201   |
| 0.00788  | -0.22792 | 6.43E-07 | 0.042724 | 0.35694  |
| 0.22216  | -0.10878 | 0.0187   | -0.23992 | 1.54E-07 |
| 0.05137  | -0.17858 | 0.0001   | -0.08275 | 0.074    |
| 0.00392  | -0.05133 | 0.26829  | -0.12283 | 0.00788  |
| 5.39E-06 | 0.097385 | 0.03539  | -0.15647 | 0.00069  |
| 0.27702  | -0.23126 | 4.35E-07 | -0.0282  | 0.54331  |
| 0.78639  | -0.07724 | 0.09549  | -0.00929 | 0.84127  |
| 0.09453  | -0.21074 | 4.36E-06 | -0.09279 | 0.04504  |
| 0.97154  | -0.01824 | 0.69417  | -0.29211 | 1.22E-10 |
| 0.23436  | -0.13067 | 0.00468  | -0.13795 | 0.00281  |
| 0.25071  | -0.17015 | 0.00022  | 0.004644 | 0.92028  |
| 0.92338  | -0.14042 | 0.00235  | -0.12094 | 0.00889  |
| 0.00015  | -0.07516 | 0.10475  | -0.0249  | 0.59151  |
| 0.83017  | -0.07516 | 0.10479  | -0.10163 | 0.02808  |
| 0.00544  | -0.18019 | 9.02E-05 | 0.424168 | 8.09E-22 |
| 1.47E-06 | -0.15607 | 0.00071  | 0.076796 | 0.0974   |
| 0.38492  | -0.16193 | 0.00044  | -0.1025  | 0.02677  |
| 0.20014  | -0.1364  | 0.00314  | 0.059571 | 0.19878  |
| 2.89E-06 | -0.07673 | 0.09769  | 0.256142 | 1.97E-08 |
| 7.04E-10 | -0.06224 | 0.17938  | 0.216854 | 2.24E-06 |
| 0.36549  | -0.20782 | 5.94E-06 | 0.091304 | 0.04862  |
| 0.72142  | -0.10884 | 0.01863  | -0.18829 | 4.23E-05 |
| 0.0255   | 0.008335 | 0.85743  | 0.180469 | 8.79E-05 |
| 0.74451  | -0.15164 | 0.00101  | -0.14228 | 0.00206  |
| 0.4034   | -0.17954 | 9.57E-05 | -0.00829 | 0.85825  |
| 0.22153  | -0.03414 | 0.46168  | -0.30872 | 9.04E-12 |
| 0.12972  | -0.09304 | 0.04447  | -0.27922 | 8.23E-10 |
| 0.54755  | -0.07035 | 0.129    | 0.049218 | 0.2885   |
| 0.8984   | -0.07215 | 0.11948  | 0.031982 | 0.49054  |
| 0.00508  | -0.07072 | 0.12696  | -0.06886 | 0.13734  |
| 0.65648  | -0.15149 | 0.00102  | -0.10823 | 0.01931  |
| 1.08E-05 | -0.06692 | 0.14874  | -0.05472 | 0.23791  |
| 0.84709  | -0.21204 | 3.79E-06 | -0.13347 | 0.00386  |
| 0.04197  | -0.22415 | 9.91E-07 | 0.095964 | 0.03817  |
| 0.34537  | -0.12469 | 0.00698  | -0.201   | 1.20E-05 |
| 0.65755  | -0.16316 | 0.0004   | -0.01879 | 0.68548  |
| 0.17779  | -0.21864 | 1.84E-06 | 0.268006 | 4.00E-09 |
| 0.00144  | -0.09193 | 0.04709  | 0.045559 | 0.3259   |

|          |          |          |          |          |
|----------|----------|----------|----------|----------|
| 0.35088  | 0.283835 | 4.21E-10 | -0.07966 | 0.08549  |
| 0.00035  | -0.01141 | 0.80574  | 0.173035 | 0.00017  |
| 0.81619  | -0.19181 | 3.01E-05 | -0.06625 | 0.15286  |
| 0.00703  | 0.252859 | 3.03E-08 | 0.06702  | 0.14816  |
| 5.91E-08 | 0.508041 | 5.18E-32 | 0.000997 | 0.98286  |
| 0.12598  | 0.198784 | 1.51E-05 | 0.08543  | 0.0651   |
| 0.00093  | -0.19815 | 1.61E-05 | 0.102456 | 0.02683  |
| 0.00311  | 0.07756  | 0.09411  | -0.10422 | 0.02431  |
| 1.81E-05 | 0.033311 | 0.47268  | -0.01878 | 0.68559  |
| 0.56797  | 0.279719 | 7.66E-10 | -0.12423 | 0.00719  |
| 0.00607  | -0.16178 | 0.00045  | -0.28619 | 2.97E-10 |
| 1.49E-06 | -0.04739 | 0.30684  | 0.217925 | 1.99E-06 |
| 0.34615  | -0.15776 | 0.00062  | 0.063595 | 0.17006  |
| 0.04282  | -0.1766  | 0.00012  | 0.200573 | 1.26E-05 |
| 0.09777  | -0.2357  | 2.57E-07 | 0.139729 | 0.00248  |
| 0.27998  | -0.1225  | 0.00805  | -0.01606 | 0.72915  |
| 1.45E-05 | 0.040963 | 0.37711  | -0.13878 | 0.00265  |
| 2.83E-09 | -0.04944 | 0.28631  | 0.437418 | 3.02E-23 |
| 0.01155  | -0.06604 | 0.15417  | -0.20294 | 9.87E-06 |
| 0.27755  | -0.16399 | 0.00037  | -0.16964 | 0.00023  |
| 2.21E-05 | -0.11371 | 0.01394  | 0.256038 | 2.00E-08 |
| 0.00049  | -0.03647 | 0.43176  | -0.01701 | 0.71392  |
| 0.72307  | -0.26166 | 9.49E-09 | 0.147691 | 0.00137  |
| 0.00649  | -0.21132 | 4.09E-06 | 0.080312 | 0.08297  |
| 0.68738  | -0.10352 | 0.02528  | -0.22121 | 1.38E-06 |
| 0.04741  | -0.20566 | 7.45E-06 | -0.02528 | 0.58581  |
| 0.00103  | -0.08782 | 0.05792  | 0.100885 | 0.02927  |
| 0.00475  | -0.13539 | 0.00337  | 0.464441 | 2.31E-26 |
| 0.03724  | -0.21292 | 3.44E-06 | -0.15112 | 0.00105  |
| 0.02301  | -0.08221 | 0.07592  | -0.05748 | 0.21503  |
| 0.02312  | 0.201201 | 1.18E-05 | 0.088571 | 0.05579  |
| 0.01656  | -0.277   | 1.13E-09 | -0.03057 | 0.50995  |
| 0.00587  | -0.21747 | 2.10E-06 | 0.117109 | 0.01132  |
| 2.47E-07 | 0.030052 | 0.5171   | -0.08891 | 0.05486  |
| 0.63666  | -0.07711 | 0.09602  | -0.01202 | 0.79561  |
| 0.92258  | 0.080541 | 0.08209  | 0.142161 | 0.00207  |
| 0.00086  | 0.15528  | 0.00076  | -0.24698 | 6.41E-08 |
| 0.0041   | 0.066267 | 0.15278  | 0.025833 | 0.57762  |
| 0.35952  | -0.17497 | 0.00014  | -0.18186 | 7.73E-05 |
| 0.48194  | -0.22012 | 1.56E-06 | -0.17438 | 0.00015  |
| 0.83729  | -0.19244 | 2.83E-05 | -0.2015  | 1.14E-05 |
| 0.00166  | -0.0731  | 0.11467  | 0.181055 | 8.33E-05 |
| 7.43E-11 | 0.117452 | 0.01108  | -0.0428  | 0.35608  |
| 8.73E-08 | 0.142036 | 0.00209  | -0.08213 | 0.07622  |
| 5.38E-05 | -0.04492 | 0.33271  | -0.09833 | 0.03363  |

|          |          |          |          |          |
|----------|----------|----------|----------|----------|
| 0.01819  | -0.1144  | 0.01338  | 0.295964 | 6.78E-11 |
| 0.82295  | -0.2034  | 9.42E-06 | -0.04519 | 0.32987  |
| 0.01459  | 0.132797 | 0.00404  | -0.12104 | 0.00883  |
| 3.27E-11 | -0.01008 | 0.82803  | 0.190311 | 3.48E-05 |
| 0.17188  | 0.025705 | 0.57952  | -0.20135 | 1.16E-05 |
| 0.55114  | 0.033526 | 0.46983  | -0.20125 | 1.17E-05 |
| 0.29873  | -0.12665 | 0.00613  | -0.09336 | 0.04376  |
| 0.00186  | -0.14041 | 0.00236  | 0.066515 | 0.15125  |
| 0.01471  | -0.18512 | 5.71E-05 | 0.005597 | 0.90398  |
| 0.00012  | 0.133295 | 0.00391  | -0.08067 | 0.0816   |
| 0.12934  | -0.23605 | 2.46E-07 | -0.04239 | 0.36075  |
| 0.02738  | -0.21382 | 3.13E-06 | 0.042368 | 0.36096  |
| 0.57273  | -0.13822 | 0.00276  | -0.02163 | 0.64104  |
| 0.84222  | -0.24162 | 1.25E-07 | 0.077822 | 0.093    |
| 0.24081  | 0.09956  | 0.03147  | -0.29976 | 3.76E-11 |
| 7.55E-10 | -0.12372 | 0.00743  | 0.100095 | 0.03056  |
| 0.00061  | 0.12719  | 0.00592  | -0.10956 | 0.01787  |
| 5.50E-05 | -0.09752 | 0.03513  | 0.05371  | 0.24669  |
| 7.72E-09 | -0.01698 | 0.71442  | 0.175157 | 0.00014  |
| 0.12074  | -0.04521 | 0.3296   | -0.05927 | 0.20109  |
| 0.01292  | -0.25443 | 2.47E-08 | 0.244241 | 9.04E-08 |
| 2.36E-08 | 0.05297  | 0.25328  | -0.10425 | 0.02427  |
| 6.39E-08 | 0.149213 | 0.00122  | -0.13627 | 0.00317  |
| 0.12166  | -0.20999 | 4.72E-06 | 0.017438 | 0.70702  |
| 0.00402  | -0.20476 | 8.18E-06 | -0.05335 | 0.24986  |
| 0.00101  | 0.106252 | 0.02165  | -0.15132 | 0.00104  |
| 0.00219  | -0.11361 | 0.01403  | 0.17047  | 0.00021  |
| 0.00388  | 0.160056 | 0.00052  | -0.03585 | 0.43957  |
| 0.0011   | -0.13391 | 0.00374  | -0.02992 | 0.51889  |
| 0.00756  | -0.19598 | 2.00E-05 | 0.150179 | 0.00113  |
| 4.47E-05 | -0.10214 | 0.02731  | 0.515561 | 4.51E-33 |
| 0.02295  | -0.02551 | 0.58239  | -0.13776 | 0.00285  |
| 6.39E-05 | -0.13479 | 0.00352  | 0.226356 | 7.70E-07 |
| 0.20323  | -0.17039 | 0.00022  | -0.10985 | 0.01756  |
| 2.15E-05 | -0.23773 | 2.01E-07 | -0.10248 | 0.02679  |
| 0.01979  | -0.22771 | 6.58E-07 | -0.15515 | 0.00077  |
| 0.68374  | -0.26463 | 6.35E-09 | 0.227248 | 6.95E-07 |
| 0.0027   | -0.10531 | 0.02285  | 0.397936 | 3.60E-19 |
| 0.00061  | -0.08056 | 0.08204  | 0.162837 | 0.00041  |
| 0.74066  | -0.17398 | 0.00016  | -0.22117 | 1.39E-06 |
| 0.05881  | -0.28258 | 5.06E-10 | 0.142484 | 0.00202  |
| 0.03144  | -0.05661 | 0.22209  | -0.15078 | 0.00108  |
| 0.08195  | -0.1483  | 0.00131  | -0.45552 | 2.65E-25 |
| 0.59214  | -0.19241 | 2.84E-05 | -0.08392 | 0.07002  |
| 0.0995   | -0.23041 | 4.81E-07 | -0.17352 | 0.00016  |

|          |          |          |          |          |
|----------|----------|----------|----------|----------|
| 0.14507  | -0.09633 | 0.03743  | 0.05597  | 0.22734  |
| 0.79002  | -0.21591 | 2.49E-06 | -0.17487 | 0.00015  |
| 0.0146   | -0.12503 | 0.00683  | 0.064646 | 0.1631   |
| 0.01222  | -0.14053 | 0.00234  | 0.003158 | 0.94573  |
| 0.40321  | -0.15597 | 0.00072  | 0.068534 | 0.13919  |
| 7.58E-06 | -0.09214 | 0.04657  | -0.04524 | 0.32929  |
| 0.12717  | -0.13436 | 0.00363  | -0.06683 | 0.14935  |
| 0.87516  | -0.21115 | 4.17E-06 | 0.316565 | 2.49E-12 |
| 0.12885  | -0.17266 | 0.00018  | 0.279981 | 7.38E-10 |
| 0.0165   | -0.08061 | 0.08184  | -0.17382 | 0.00016  |
| 2.95E-11 | 0.076321 | 0.0995   | 0.099199 | 0.03209  |
| 0.29003  | 0.097701 | 0.0348   | -0.09994 | 0.03083  |
| 0.02507  | -0.16046 | 0.0005   | 0.015908 | 0.73168  |
| 0.31109  | -0.10967 | 0.01775  | -0.05939 | 0.20012  |
| 0.12771  | -0.1185  | 0.01038  | -0.08735 | 0.05927  |
| 0.42419  | -0.18833 | 4.21E-05 | -0.00557 | 0.90439  |
| 0.30591  | -0.07673 | 0.09768  | -0.05046 | 0.27649  |
| 0.00549  | -0.13205 | 0.00426  | 0.415226 | 6.87E-21 |
| 0.93613  | -0.08118 | 0.07968  | -0.21293 | 3.44E-06 |
| 0.05681  | -0.03534 | 0.44612  | -0.02894 | 0.53277  |
| 4.83E-06 | -0.07706 | 0.09627  | 0.323204 | 8.14E-13 |
| 0.76665  | -0.25745 | 1.66E-08 | 0.107488 | 0.02016  |
| 0.23406  | 0.038354 | 0.40828  | 0.351831 | 4.70E-15 |
| 0.01129  | -0.23918 | 1.69E-07 | 0.143804 | 0.00184  |
| 0.23508  | -0.2227  | 1.17E-06 | -0.08901 | 0.05457  |
| 0.59421  | -0.22254 | 1.19E-06 | 0.113475 | 0.01414  |
| 1.26E-16 | 0.126779 | 0.00608  | 0.255323 | 2.20E-08 |
| 0.00055  | -0.12816 | 0.00554  | 0.015199 | 0.74322  |
| 0.58487  | -0.17983 | 9.32E-05 | -0.21376 | 3.15E-06 |
| 0.46422  | -0.19809 | 1.62E-05 | 0.087635 | 0.05844  |
| 0.00031  | -0.13209 | 0.00425  | 0.3628   | 5.65E-16 |
| 9.04E-05 | -0.197   | 1.80E-05 | 0.154434 | 0.00081  |
| 0.55191  | -0.0315  | 0.49707  | -0.04298 | 0.35406  |
| 0.00024  | 0.050704 | 0.27418  | 0.128206 | 0.00553  |
| 0.00087  | -0.11217 | 0.0153   | 0.092185 | 0.04648  |
| 0.14304  | -0.05457 | 0.23918  | 0.073645 | 0.11197  |
| 1.51E-09 | -0.12072 | 0.00902  | 0.013953 | 0.76363  |
| 0.03907  | -0.21746 | 2.10E-06 | -0.05951 | 0.19922  |
| 0.00998  | -0.01383 | 0.76568  | 0.08699  | 0.06033  |
| 0.00037  | -0.17378 | 0.00016  | 0.108659 | 0.01883  |
| 0.24133  | -0.22833 | 6.13E-07 | 0.230638 | 4.68E-07 |
| 0.09935  | -0.26328 | 7.63E-09 | 0.000158 | 0.99728  |
| 0.00864  | 0.035534 | 0.44363  | -0.08959 | 0.05303  |
| 0.0066   | 0.019579 | 0.67301  | -0.16587 | 0.00032  |
| 0.15376  | -0.08149 | 0.07854  | -0.07559 | 0.10277  |

|          |          |          |          |          |
|----------|----------|----------|----------|----------|
| 0.07128  | -0.03315 | 0.47481  | -0.28113 | 6.24E-10 |
| 0.24068  | -0.23613 | 2.44E-07 | 0.162697 | 0.00042  |
| 0.51082  | -0.05779 | 0.21258  | -0.24522 | 7.99E-08 |
| 0.00254  | 0.021784 | 0.63868  | -0.00583 | 0.90009  |
| 0.79175  | 0.221124 | 1.40E-06 | -0.09535 | 0.03942  |
| 0.00412  | -0.15955 | 0.00054  | -0.05218 | 0.26041  |
| 2.59E-05 | -0.03325 | 0.47354  | 0.091446 | 0.04827  |
| 0.70112  | -0.07271 | 0.11663  | -0.30413 | 1.89E-11 |
| 0.02471  | -0.08374 | 0.0706   | 0.053057 | 0.2525   |
| 0.40085  | -0.16586 | 0.00032  | -0.08773 | 0.05818  |
| 1.26E-05 | -0.0952  | 0.03974  | 0.28494  | 3.57E-10 |
| 0.0203   | -0.22784 | 6.49E-07 | 0.334737 | 1.09E-13 |
| 0.85443  | -0.29758 | 5.28E-11 | 0.213104 | 3.38E-06 |
| 0.00595  | -0.24092 | 1.36E-07 | 0.166995 | 0.00029  |
| 0.00094  | -0.14808 | 0.00133  | 0.239085 | 1.71E-07 |
| 0.18719  | -0.03271 | 0.48074  | -0.31996 | 1.41E-12 |
| 0.37761  | -0.13161 | 0.00439  | -0.16458 | 0.00036  |
| 0.77688  | -0.19086 | 3.30E-05 | 0.058976 | 0.20331  |
| 3.72E-05 | -0.15996 | 0.00052  | 0.093188 | 0.04414  |
| 0.00205  | -0.3092  | 8.36E-12 | -0.14219 | 0.00207  |
| 0.11253  | -0.0948  | 0.04059  | -0.26171 | 9.42E-09 |
| 0.45649  | -0.08828 | 0.0566   | -0.17138 | 0.0002   |
| 5.84E-08 | -0.00236 | 0.95944  | -0.18795 | 4.36E-05 |
| 0.60695  | 0.099691 | 0.03125  | 0.10124  | 0.0287   |
| 0.0325   | -0.22156 | 1.33E-06 | 0.002499 | 0.95705  |
| 0.02367  | -0.06915 | 0.13567  | 0.154945 | 0.00078  |
| 0.10201  | -0.22406 | 1.00E-06 | -0.14963 | 0.00118  |
| 0.00191  | 0.058637 | 0.20592  | -0.16551 | 0.00033  |
| 0.11431  | -0.12658 | 0.00616  | -0.3713  | 1.03E-16 |
| 0.00054  | -0.14363 | 0.00186  | -0.04932 | 0.28749  |
| 0.06006  | 0.118681 | 0.01026  | 0.255089 | 2.26E-08 |
| 0.04268  | -0.24483 | 8.39E-08 | -0.24064 | 1.41E-07 |
| 8.43E-05 | 0.024734 | 0.59393  | 0.02492  | 0.59115  |
| 1.06E-05 | -0.10564 | 0.02241  | -0.00202 | 0.9653   |
| 0.05511  | -0.21704 | 2.20E-06 | -0.08537 | 0.0653   |
| 6.34E-06 | 0.204864 | 8.09E-06 | -0.09312 | 0.04429  |
| 7.47E-07 | -0.1281  | 0.00557  | 0.148391 | 0.0013   |
| 0.00029  | -0.18778 | 4.44E-05 | 0.133089 | 0.00396  |
| 0.21803  | -0.24272 | 1.09E-07 | 0.036272 | 0.43422  |
| 0.21733  | -0.1898  | 3.66E-05 | -0.02018 | 0.66365  |
| 1.21E-08 | -0.08038 | 0.0827   | 0.249686 | 4.55E-08 |
| 0.39903  | -0.28362 | 4.34E-10 | -0.05982 | 0.19693  |
| 0.40793  | -0.18148 | 8.01E-05 | -0.07534 | 0.10394  |
| 2.45E-05 | 0.022278 | 0.63109  | -0.08755 | 0.05869  |
| 0.04166  | -0.08953 | 0.05319  | 0.164803 | 0.00035  |

|          |          |          |          |          |
|----------|----------|----------|----------|----------|
| 8.10E-06 | -0.06775 | 0.14376  | 0.12492  | 0.00687  |
| 1.97E-05 | -0.1387  | 0.00267  | 0.155707 | 0.00073  |
| 0.00424  | -0.14504 | 0.00167  | -0.1643  | 0.00036  |
| 2.40E-05 | -0.10057 | 0.02977  | -0.05122 | 0.26936  |
| 0.00195  | 0.215231 | 2.68E-06 | 0.104805 | 0.02351  |
| 0.02119  | -0.23577 | 2.55E-07 | 0.217672 | 2.05E-06 |
| 0.00065  | 0.009369 | 0.83998  | 0.036813 | 0.42739  |
| 1.18E-05 | -0.14302 | 0.00195  | 0.113175 | 0.0144   |
| 0.03087  | -0.09581 | 0.03849  | 0.031703 | 0.49433  |
| 0.04434  | -0.18825 | 4.24E-05 | -0.06898 | 0.13665  |
| 0.1916   | -0.24093 | 1.36E-07 | 0.26155  | 9.63E-09 |
| 0.14735  | -0.15747 | 0.00064  | -0.05409 | 0.2434   |
| 0.92623  | -0.12626 | 0.00629  | -0.28184 | 5.63E-10 |
| 0.39038  | -0.13035 | 0.00478  | -0.15037 | 0.00112  |
| 0.00021  | -0.02835 | 0.54105  | -0.05361 | 0.24755  |
| 0.00063  | -0.15244 | 0.00095  | 0.112028 | 0.01543  |
| 0.04736  | 0.11766  | 0.01094  | -0.06466 | 0.16301  |
| 0.08165  | 0.162412 | 0.00043  | 0.06129  | 0.18611  |
| 2.06E-05 | -0.06966 | 0.13279  | 0.07978  | 0.08503  |
| 0.00121  | -0.21355 | 3.22E-06 | 0.083554 | 0.07124  |
| 0.63666  | -0.20439 | 8.50E-06 | 0.047882 | 0.30181  |
| 0.00582  | -0.25535 | 2.19E-08 | 0.102522 | 0.02673  |
| 0.89893  | -0.20214 | 1.07E-05 | -0.01071 | 0.81745  |
| 2.71E-06 | -0.07515 | 0.10479  | -0.04167 | 0.36888  |
| 0.02335  | -0.19584 | 2.03E-05 | 0.043195 | 0.35165  |
| 0.14361  | 0.061503 | 0.18458  | -0.08773 | 0.05816  |
| 9.84E-06 | -0.13051 | 0.00473  | 0.053463 | 0.24888  |
| 0.02876  | -0.19464 | 2.28E-05 | 0.185756 | 5.38E-05 |
| 0.03563  | -0.20563 | 7.47E-06 | 0.099356 | 0.03182  |
| 0.84104  | -0.15116 | 0.00105  | -0.13562 | 0.00332  |
| 0.06043  | -0.19044 | 3.44E-05 | 0.026601 | 0.56637  |
| 0.00082  | 0.113042 | 0.01452  | -0.07993 | 0.08446  |
| 0.00167  | -0.06857 | 0.13897  | 0.200957 | 1.21E-05 |
| 0.00085  | 0.037988 | 0.41278  | -0.18153 | 7.97E-05 |
| 0.40207  | -0.2251  | 8.89E-07 | 0.003898 | 0.93305  |
| 5.32E-05 | -0.12788 | 0.00565  | 0.059849 | 0.19669  |
| 0.68744  | -0.14083 | 0.00229  | 0.057609 | 0.214    |
| 0.57001  | -0.20197 | 1.09E-05 | -0.14093 | 0.00227  |
| 0.92418  | -0.19457 | 2.30E-05 | 0.001894 | 0.96743  |
| 0.03182  | -0.12105 | 0.00883  | -0.16088 | 0.00048  |
| 0.00348  | -0.00585 | 0.89966  | 0.002132 | 0.96334  |
| 2.01E-13 | 0.071698 | 0.1218   | -0.34543 | 1.56E-14 |
| 0.00528  | 0.142259 | 0.00206  | 0.347832 | 9.98E-15 |
| 1.34E-09 | -0.02249 | 0.62786  | -0.1888  | 4.02E-05 |
| 0.00028  | 0.108834 | 0.01864  | -0.03982 | 0.39063  |

|          |          |          |          |          |
|----------|----------|----------|----------|----------|
| 0.00015  | 0.051704 | 0.26481  | -0.0295  | 0.52486  |
| 0.24781  | -0.05327 | 0.25057  | -0.00077 | 0.9868   |
| 0.1281   | -0.13883 | 0.00264  | 0.136618 | 0.00309  |
| 0.39866  | -0.18441 | 6.10E-05 | -0.08943 | 0.05344  |
| 4.34E-07 | -0.14515 | 0.00166  | 0.254615 | 2.41E-08 |
| 0.02617  | 0.36977  | 1.41E-16 | -0.06657 | 0.15093  |
| 0.27795  | 0.063021 | 0.17396  | -0.01657 | 0.72099  |
| 0.00094  | 0.30322  | 2.18E-11 | -0.09585 | 0.03841  |
| 5.55E-08 | 0.001952 | 0.96644  | 0.081367 | 0.07899  |
| 1.93E-09 | 0.054427 | 0.24044  | 0.024745 | 0.59376  |
| 0.83136  | -0.13559 | 0.00333  | 0.049859 | 0.28226  |
| 0.08741  | -0.1605  | 0.0005   | 0.108402 | 0.01912  |
| 0.98984  | -0.13939 | 0.00254  | -0.23125 | 4.36E-07 |
| 0.17264  | -0.14518 | 0.00166  | 0.052216 | 0.2601   |
| 1.15E-05 | -0.09353 | 0.04336  | 0.232771 | 3.64E-07 |
| 3.26E-05 | -0.30362 | 2.05E-11 | 0.114517 | 0.01328  |
| 0.09748  | -0.10333 | 0.02555  | -0.45532 | 2.80E-25 |
| 0.00341  | -0.18298 | 6.97E-05 | 0.219621 | 1.65E-06 |
| 0.00982  | -0.02872 | 0.53578  | -0.08068 | 0.08157  |
| 0.03597  | -0.2906  | 1.54E-10 | 0.092826 | 0.04497  |
| 0.31378  | -0.17845 | 0.00011  | 0.058848 | 0.20429  |
| 0.26597  | 0.007717 | 0.86791  | -0.10219 | 0.02723  |
| 0.07963  | -0.10149 | 0.0283   | -0.14872 | 0.00127  |
| 0.04414  | -0.16936 | 0.00024  | 0.085852 | 0.06378  |
| 0.39933  | -0.04855 | 0.29512  | -0.15641 | 0.00069  |
| 0.09163  | -0.23627 | 2.40E-07 | -0.01831 | 0.69314  |
| 0.54339  | -0.12134 | 0.00867  | 0.070005 | 0.13088  |
| 0.00019  | 0.189425 | 3.79E-05 | -0.23567 | 2.58E-07 |
| 0.69858  | -0.16377 | 0.00038  | -0.13506 | 0.00345  |
| 4.99E-06 | -0.12958 | 0.00504  | 0.332778 | 1.54E-13 |
| 0.00934  | 0.17338  | 0.00017  | -0.19088 | 3.29E-05 |
| 0.67315  | 0.211782 | 3.90E-06 | 0.055413 | 0.23201  |
| 0.15147  | -0.1056  | 0.02247  | -0.1688  | 0.00025  |
| 0.00288  | -0.14709 | 0.00144  | 0.034434 | 0.45788  |
| 0.16991  | -0.20154 | 1.14E-05 | 0.085409 | 0.06516  |
| 0.03519  | -0.04897 | 0.29093  | 0.013534 | 0.77052  |
| 0.20894  | -0.10775 | 0.01985  | 0.195489 | 2.10E-05 |
| 0.0041   | -0.15442 | 0.00081  | 0.232353 | 3.83E-07 |
| 9.88E-05 | 0.049681 | 0.28399  | 0.131194 | 0.00451  |
| 0.01136  | -0.09134 | 0.04854  | -0.28723 | 2.54E-10 |
| 0.04575  | -0.08359 | 0.07111  | 0.023628 | 0.61054  |
| 0.00864  | -0.09912 | 0.03224  | 0.251688 | 3.52E-08 |
| 0.83195  | -0.05525 | 0.23343  | -0.1546  | 0.0008   |
| 0.00161  | -0.22592 | 8.10E-07 | -0.00815 | 0.86049  |
| 0.51558  | -0.18016 | 9.05E-05 | 0.02543  | 0.58358  |



|          |          |          |          |          |
|----------|----------|----------|----------|----------|
| 5.04E-09 | -0.08081 | 0.08109  | 0.106456 | 0.0214   |
| 9.79E-14 | 0.223393 | 1.08E-06 | 0.106773 | 0.02101  |
| 3.02E-05 | 0.106733 | 0.02106  | -0.10428 | 0.02423  |
| 0.42721  | -0.17015 | 0.00022  | -0.15539 | 0.00075  |
| 0.00564  | -0.09668 | 0.03675  | -0.03152 | 0.49688  |
| 0.32678  | -0.07115 | 0.1247   | 0.061524 | 0.18443  |
| 0.00013  | -0.16897 | 0.00024  | 0.032055 | 0.48954  |
| 0.00013  | -0.04445 | 0.33783  | 0.207033 | 6.45E-06 |
| 0.00018  | -0.11768 | 0.01093  | 0.031183 | 0.50143  |
| 3.66E-06 | -0.0395  | 0.39446  | -0.05114 | 0.27005  |
| 0.00336  | -0.19994 | 1.34E-05 | -0.23685 | 2.24E-07 |
| 0.00024  | 0.405552 | 6.47E-20 | 0.030129 | 0.51602  |
| 0.92541  | 0.155318 | 0.00076  | -0.00457 | 0.9215   |
| 0.17135  | -0.1126  | 0.01491  | -0.13653 | 0.00311  |
| 0.41796  | -0.28126 | 6.12E-10 | -0.04376 | 0.34536  |
| 0.00084  | -0.04353 | 0.34797  | 0.008041 | 0.86241  |
| 0.33052  | -0.05421 | 0.24234  | -0.21512 | 2.72E-06 |
| 0.5572   | -0.179   | 0.0001   | -0.0963  | 0.03749  |
| 0.09402  | -0.13361 | 0.00382  | -0.08065 | 0.08168  |
| 1.81E-05 | -0.2187  | 1.83E-06 | 0.224771 | 9.24E-07 |
| 6.60E-12 | -0.08452 | 0.06801  | -0.30417 | 1.88E-11 |
| 8.28E-06 | -0.16051 | 0.0005   | 0.061841 | 0.18217  |
| 0.0006   | -0.05508 | 0.23484  | 0.001942 | 0.96661  |
| 0.00126  | 0.055542 | 0.23093  | -0.1307  | 0.00467  |
| 0.04123  | -0.13482 | 0.00351  | 0.111169 | 0.01624  |
| 0.01695  | -0.17622 | 0.00013  | 0.129001 | 0.00524  |
| 0.02797  | -0.10555 | 0.02254  | 0.107931 | 0.01965  |
| 0.46397  | -0.13033 | 0.00479  | -0.19741 | 1.73E-05 |
| 0.28658  | 0.101065 | 0.02898  | 0.017219 | 0.71054  |
| 0.1177   | -0.08676 | 0.06101  | 0.010909 | 0.81412  |
| 3.66E-05 | 0.098028 | 0.03419  | -0.04875 | 0.29313  |
| 1.77E-06 | -0.08026 | 0.08317  | -0.0102  | 0.82595  |
| 0.86285  | -0.20303 | 9.78E-06 | 0.064396 | 0.16474  |
| 0.61034  | 0.104205 | 0.02432  | 0.133629 | 0.00382  |
| 0.90776  | 0.177861 | 0.00011  | -0.16031 | 0.00051  |
| 0.00906  | 0.114185 | 0.01355  | -0.21391 | 3.10E-06 |
| 8.20E-09 | -0.07445 | 0.10811  | 0.049114 | 0.28953  |
| 0.2384   | -0.14229 | 0.00205  | 0.084665 | 0.06755  |
| 0.02803  | -0.17943 | 9.66E-05 | 0.080219 | 0.08333  |
| 0.31734  | 0.146096 | 0.00155  | -0.04054 | 0.38202  |
| 0.05292  | -0.07727 | 0.09536  | -0.07689 | 0.09701  |
| 0.59491  | -0.22303 | 1.13E-06 | 0.007021 | 0.87972  |
| 0.00151  | 0.009728 | 0.83394  | 0.016559 | 0.72116  |
| 0.0187   | -0.2029  | 9.91E-06 | -0.01079 | 0.81616  |
| 1.26E-08 | -0.09908 | 0.03231  | 0.152819 | 0.00092  |

|          |          |          |          |          |
|----------|----------|----------|----------|----------|
| 0.28406  | 0.027697 | 0.55048  | 0.036301 | 0.43385  |
| 0.07634  | -0.02935 | 0.52695  | -0.14091 | 0.00227  |
| 4.84E-05 | -0.03367 | 0.46792  | 0.395554 | 6.10E-19 |
| 0.63517  | -0.36459 | 3.97E-16 | 0.242588 | 1.11E-07 |
| 1.59E-09 | 0.009998 | 0.82939  | 0.033864 | 0.46536  |
| 0.71268  | -0.13542 | 0.00337  | -0.14022 | 0.00239  |
| 0.33478  | 0.18397  | 6.36E-05 | -0.32857 | 3.22E-13 |
| 5.03E-05 | -0.00678 | 0.88378  | 0.21448  | 2.91E-06 |
| 0.00239  | -0.13016 | 0.00484  | 0.300054 | 3.59E-11 |
| 0.04711  | -0.09293 | 0.04472  | -0.11368 | 0.01397  |
| 9.98E-07 | -0.18902 | 3.94E-05 | 0.241801 | 1.22E-07 |
| 0.58514  | -0.25906 | 1.34E-08 | -0.06415 | 0.16639  |
| 0.13625  | -0.24902 | 4.95E-08 | 0.178822 | 0.0001   |
| 4.52E-26 | 0.593394 | 9.25E-46 | 0.081212 | 0.07957  |
| 1.86E-05 | -0.00662 | 0.88658  | 0.252013 | 3.37E-08 |
| 9.31E-12 | 0.255307 | 2.20E-08 | -0.0796  | 0.08574  |
| 0.02367  | -0.1812  | 8.22E-05 | 0.035174 | 0.44827  |
| 0.44804  | -0.21482 | 2.81E-06 | 0.150733 | 0.00109  |
| 0.70541  | -0.17355 | 0.00016  | 0.129019 | 0.00523  |
| 0.03086  | -0.034   | 0.46362  | 0.044767 | 0.33439  |
| 1.77E-07 | 0.094198 | 0.04188  | -0.1219  | 0.00836  |
| 0.98472  | -0.27344 | 1.88E-09 | -0.0029  | 0.9501   |
| 0.0655   | -0.27804 | 9.75E-10 | 0.126975 | 0.006    |
| 0.08783  | -0.11793 | 0.01075  | -0.15486 | 0.00079  |
| 0.13323  | -0.11609 | 0.01206  | -0.17251 | 0.00018  |
| 0.03594  | -0.0624  | 0.17825  | 0.109885 | 0.01753  |
| 0.09272  | -0.12435 | 0.00713  | -0.08827 | 0.05664  |
| 0.50759  | -0.08775 | 0.05812  | -0.1594  | 0.00054  |
| 0.2855   | -0.12688 | 0.00604  | 0.081751 | 0.07758  |
| 0.1034   | -0.01598 | 0.73049  | -0.42541 | 5.98E-22 |
| 0.07005  | -0.02915 | 0.52975  | -0.19966 | 1.38E-05 |
| 0.99225  | -0.18278 | 7.10E-05 | -0.01546 | 0.73889  |
| 0.48859  | -0.1071  | 0.02062  | 0.134311 | 0.00364  |
| 0.04433  | -0.2095  | 4.97E-06 | 0.109213 | 0.01823  |
| 0.00989  | 0.182248 | 7.46E-05 | 0.210258 | 4.59E-06 |
| 0.00719  | -0.13575 | 0.00329  | 0.039485 | 0.39458  |
| 4.54E-07 | -0.09751 | 0.03515  | 0.474522 | 1.35E-27 |
| 0.16586  | -0.18356 | 6.60E-05 | -0.18441 | 6.10E-05 |
| 0.50569  | -0.10209 | 0.02738  | 0.029429 | 0.52582  |
| 0.81277  | 0.145224 | 0.00165  | 0.063479 | 0.17085  |
| 0.04067  | 0.204512 | 8.39E-06 | -0.10776 | 0.01984  |
| 0.0424   | 0.07718  | 0.09574  | -0.12888 | 0.00528  |
| 0.36728  | 0.230268 | 4.89E-07 | -0.22275 | 1.16E-06 |
| 0.77195  | -0.30755 | 1.09E-11 | 0.192907 | 2.70E-05 |
| 0.05264  | -0.114   | 0.0137   | -0.05892 | 0.20374  |

|          |          |          |          |          |
|----------|----------|----------|----------|----------|
| 0.2026   | -0.1241  | 0.00725  | -0.16526 | 0.00034  |
| 0.00034  | -0.11253 | 0.01497  | 0.023816 | 0.6077   |
| 3.04E-05 | -0.18579 | 5.36E-05 | 0.137335 | 0.00294  |
| 0.22869  | -0.09597 | 0.03816  | 0.236219 | 2.41E-07 |
| 1.78E-07 | -0.15998 | 0.00052  | 0.168795 | 0.00025  |
| 0.00333  | -0.2457  | 7.53E-08 | 0.178083 | 0.00011  |
| 0.0001   | -0.13707 | 0.003    | -0.50012 | 6.34E-31 |
| 0.00196  | -0.05806 | 0.21046  | 0.065768 | 0.15591  |
| 0.00032  | -0.10326 | 0.02565  | -0.02276 | 0.6237   |
| 4.91E-05 | 0.095126 | 0.03989  | -0.09754 | 0.0351   |
| 0.02136  | -0.16443 | 0.00036  | -0.10818 | 0.01937  |
| 0.00204  | -0.16964 | 0.00023  | 0.210382 | 4.53E-06 |
| 0.02052  | -0.26539 | 5.73E-09 | 0.037941 | 0.41335  |
| 0.17023  | 0.001074 | 0.98154  | 0.058867 | 0.20415  |
| 0.71731  | -0.15546 | 0.00075  | -0.15776 | 0.00062  |
| 2.25E-07 | -0.14587 | 0.00157  | 0.090764 | 0.04997  |
| 0.05379  | -0.17439 | 0.00015  | 0.000142 | 0.99756  |
| 1.59E-05 | -0.07622 | 0.09997  | 0.350512 | 6.03E-15 |
| 0.41557  | -0.06324 | 0.17246  | -0.23193 | 4.02E-07 |
| 0.00404  | -0.14686 | 0.00146  | -0.36411 | 4.36E-16 |
| 0.00164  | -0.13085 | 0.00462  | -0.3026  | 2.41E-11 |
| 0.71517  | -0.03639 | 0.43268  | -0.00789 | 0.86495  |
| 0.01106  | -0.03083 | 0.50634  | 0.107366 | 0.0203   |
| 0.24491  | -0.21976 | 1.63E-06 | -0.18268 | 7.17E-05 |
| 0.0004   | -0.18776 | 4.44E-05 | 0.122532 | 0.00803  |
| 0.01776  | -0.15769 | 0.00063  | -0.33395 | 1.25E-13 |
| 3.62E-09 | 0.444854 | 4.46E-24 | 0.20666  | 6.71E-06 |
| 0.00023  | -0.0513  | 0.26854  | -0.08794 | 0.05757  |
| 0.37972  | 0.093567 | 0.04328  | 0.026322 | 0.57045  |
| 1.83E-07 | -0.10563 | 0.02244  | 0.269865 | 3.09E-09 |
| 1.33E-06 | 0.029592 | 0.52353  | 0.191221 | 3.19E-05 |
| 0.0002   | -0.09965 | 0.03132  | 0.292786 | 1.10E-10 |
| 0.02288  | -0.08253 | 0.07478  | -0.19154 | 3.09E-05 |
| 0.66282  | -0.14543 | 0.00163  | -0.01905 | 0.68136  |
| 2.08E-05 | -0.17929 | 9.79E-05 | 0.190109 | 3.55E-05 |
| 0.01088  | 0.036241 | 0.4346   | 0.071929 | 0.1206   |
| 2.97E-06 | -0.10751 | 0.02014  | 0.387992 | 3.16E-18 |
| 0.16648  | -0.26397 | 6.95E-09 | -0.01752 | 0.70564  |
| 0.1144   | -0.18971 | 3.69E-05 | -0.02836 | 0.54103  |
| 0.00482  | -0.15511 | 0.00077  | 0.132841 | 0.00403  |
| 0.00544  | -0.27295 | 2.01E-09 | -0.16192 | 0.00044  |
| 0.00719  | -0.17009 | 0.00022  | 0.049957 | 0.28132  |
| 0.0002   | -0.16142 | 0.00046  | 0.272715 | 2.08E-09 |
| 0.00037  | -0.20466 | 8.26E-06 | -0.28774 | 2.36E-10 |
| 0.0311   | -0.0595  | 0.19935  | -0.09442 | 0.04139  |

|          |          |          |          |          |
|----------|----------|----------|----------|----------|
| 0.58077  | -0.1905  | 3.42E-05 | -0.06608 | 0.15395  |
| 2.65E-06 | -0.02103 | 0.65033  | -0.04476 | 0.33446  |
| 1.52E-05 | -0.16886 | 0.00025  | 0.379491 | 1.91E-17 |
| 0.09584  | 0.014105 | 0.76112  | 0.230814 | 4.59E-07 |
| 0.89797  | -0.22028 | 1.53E-06 | -0.09224 | 0.04634  |
| 0.68921  | -0.20199 | 1.09E-05 | 0.032652 | 0.48149  |
| 2.62E-08 | 0.005822 | 0.90014  | 0.153913 | 0.00085  |
| 0.08972  | -0.17284 | 0.00017  | -0.00781 | 0.86635  |
| 9.37E-06 | 0.156675 | 0.00068  | -0.04633 | 0.31776  |
| 0.0013   | -0.16206 | 0.00044  | 0.095289 | 0.03955  |
| 0.00044  | -0.21881 | 1.81E-06 | 0.108955 | 0.01851  |
| 0.00878  | 0.087238 | 0.0596   | -0.11318 | 0.0144   |
| 1.57E-05 | -0.0722  | 0.11923  | -0.01783 | 0.70074  |
| 0.00908  | -0.1608  | 0.00049  | 0.133844 | 0.00376  |
| 0.48137  | -0.24221 | 1.16E-07 | 0.129847 | 0.00495  |
| 0.05681  | -0.06833 | 0.14037  | -0.03413 | 0.46181  |
| 0.00501  | -0.11196 | 0.01549  | 0.037759 | 0.4156   |
| 0.64203  | -0.00976 | 0.83344  | 0.286473 | 2.85E-10 |
| 4.85E-07 | 0.359233 | 1.14E-15 | 0.106765 | 0.02102  |
| 3.65E-06 | -0.12381 | 0.00739  | 0.166798 | 0.00029  |
| 0.00019  | -0.18011 | 9.09E-05 | 0.227766 | 6.54E-07 |
| 0.05527  | 0.044905 | 0.3329   | 0.092672 | 0.04533  |
| 0.11346  | -0.1433  | 0.00191  | -0.03072 | 0.50783  |
| 8.24E-05 | -0.215   | 2.75E-06 | 0.153725 | 0.00086  |
| 0.29927  | 0.070469 | 0.12835  | 0.383704 | 7.89E-18 |
| 2.52E-09 | -0.00078 | 0.98652  | 0.27068  | 2.76E-09 |
| 0.22216  | -0.22568 | 8.32E-07 | 0.13058  | 0.00471  |
| 0.66886  | -0.19454 | 2.30E-05 | 0.059909 | 0.19624  |
| 0.35995  | -0.18133 | 8.12E-05 | -0.04682 | 0.31263  |
| 0.04044  | 0.016775 | 0.71767  | 0.083969 | 0.06984  |
| 2.95E-06 | 0.026598 | 0.56641  | 0.08428  | 0.06881  |
| 0.25859  | -0.15124 | 0.00104  | -0.04807 | 0.29993  |
| 0.64641  | -0.265   | 6.04E-09 | 0.164707 | 0.00035  |
| 0.00146  | -0.11562 | 0.01241  | -0.12066 | 0.00905  |
| 8.41E-05 | -0.09073 | 0.05005  | 0.335494 | 9.51E-14 |
| 0.15528  | -0.22116 | 1.39E-06 | -0.07201 | 0.1202   |
| 0.67575  | -0.25115 | 3.77E-08 | 0.132727 | 0.00406  |
| 0.00457  | -0.21767 | 2.05E-06 | 0.084091 | 0.06944  |
| 0.19904  | -0.1275  | 0.00579  | 0.002989 | 0.94863  |
| 0.36623  | 0.071348 | 0.12364  | 0.080312 | 0.08297  |
| 0.00013  | -0.1398  | 0.00246  | 0.005309 | 0.90891  |
| 0.34178  | 0.114599 | 0.01321  | -0.04715 | 0.30924  |
| 9.82E-05 | 0.239833 | 1.56E-07 | 0.245076 | 8.14E-08 |
| 0.00147  | -0.15845 | 0.00059  | 0.026105 | 0.57362  |
| 0.03753  | 0.020269 | 0.66219  | 0.036341 | 0.43334  |

|          |          |          |          |          |
|----------|----------|----------|----------|----------|
| 0.24592  | -0.13919 | 0.00257  | 0.086762 | 0.06101  |
| 0.63815  | -0.24983 | 4.46E-08 | 0.203469 | 9.35E-06 |
| 3.58E-06 | 0.015291 | 0.74173  | -0.08717 | 0.05979  |
| 0.00019  | -0.09235 | 0.04608  | 0.159207 | 0.00055  |
| 0.00797  | -0.22619 | 7.85E-07 | 0.042978 | 0.35408  |
| 0.00523  | 0.046751 | 0.31339  | 0.260359 | 1.13E-08 |
| 0.02245  | -0.1319  | 0.0043   | 0.198273 | 1.59E-05 |
| 0.73067  | -0.22911 | 5.60E-07 | 0.089624 | 0.05293  |
| 0.074    | -0.15704 | 0.00066  | 0.161869 | 0.00045  |
| 0.44131  | -0.16751 | 0.00028  | -0.09448 | 0.04128  |
| 0.50207  | -0.19886 | 1.50E-05 | -0.13993 | 0.00244  |
| 3.62E-06 | -0.09017 | 0.05149  | 0.10881  | 0.01867  |
| 0.00642  | -0.01901 | 0.68194  | 0.0017   | 0.97077  |
| 0.04787  | 0.184539 | 6.03E-05 | 0.13556  | 0.00333  |
| 0.21452  | -0.19975 | 1.37E-05 | -0.13966 | 0.00249  |
| 0.036    | -0.27129 | 2.54E-09 | 0.041073 | 0.37584  |
| 0.1373   | 0.194412 | 2.33E-05 | -0.06184 | 0.18217  |
| 0.00892  | -0.12025 | 0.00929  | 0.008126 | 0.86097  |
| 0.41516  | -0.20683 | 6.59E-06 | -0.06827 | 0.14075  |
| 3.71E-06 | -0.06337 | 0.17156  | 0.419332 | 2.59E-21 |
| 0.02331  | -0.12451 | 0.00706  | 0.175282 | 0.00014  |
| 0.00545  | -0.09043 | 0.05083  | 0.106471 | 0.02138  |
| 0.97587  | -0.25724 | 1.71E-08 | -0.04144 | 0.37161  |
| 0.00852  | -0.09851 | 0.03331  | 0.187783 | 4.44E-05 |
| 0.71225  | 0.077535 | 0.09422  | 0.173441 | 0.00017  |
| 0.42647  | -0.19888 | 1.49E-05 | -0.12961 | 0.00503  |
| 0.03271  | -0.16587 | 0.00032  | -0.03277 | 0.47984  |
| 0.00012  | -0.0583  | 0.20857  | -0.06997 | 0.13107  |
| 7.60E-08 | -0.05226 | 0.25972  | 0.106773 | 0.02101  |
| 0.89163  | -0.16779 | 0.00027  | -0.16967 | 0.00023  |
| 1.92E-07 | -0.02438 | 0.5992   | 0.176613 | 0.00012  |
| 0.00033  | -0.10219 | 0.02724  | 0.041034 | 0.37629  |
| 0.25559  | -0.09557 | 0.03898  | 0.016217 | 0.72668  |
| 0.06815  | -0.08474 | 0.0673   | -0.08073 | 0.08137  |
| 1.55E-09 | 0.075708 | 0.10225  | 0.186637 | 4.95E-05 |
| 0.04354  | -0.30817 | 9.88E-12 | -0.11655 | 0.01172  |
| 0.00068  | -0.22683 | 7.29E-07 | 0.126541 | 0.00618  |
| 1.10E-08 | 0.417339 | 4.17E-21 | 0.225333 | 8.66E-07 |
| 0.83652  | 0.073696 | 0.11173  | 0.183842 | 6.43E-05 |
| 8.98E-09 | -0.17426 | 0.00015  | 0.237355 | 2.10E-07 |
| 0.74124  | -0.22192 | 1.28E-06 | 0.100154 | 0.03046  |
| 2.07E-06 | -0.105   | 0.02325  | 0.031278 | 0.50014  |
| 0.14854  | 0.136452 | 0.00313  | 0.342869 | 2.50E-14 |
| 1.72E-10 | 0.125265 | 0.00672  | 0.035836 | 0.43976  |
| 0.00063  | -0.13503 | 0.00346  | 0.199683 | 1.38E-05 |

|          |          |          |          |          |
|----------|----------|----------|----------|----------|
| 1.18E-06 | -0.07896 | 0.0883   | 0.379252 | 2.01E-17 |
| 1.05E-11 | -0.01419 | 0.75978  | 0.09691  | 0.0363   |
| 0.00906  | -0.17663 | 0.00012  | -0.19036 | 3.46E-05 |
| 0.59869  | -0.19176 | 3.02E-05 | -0.10698 | 0.02076  |
| 0.27791  | -0.20117 | 1.18E-05 | -0.06219 | 0.17974  |
| 0.04083  | -0.1622  | 0.00043  | -0.0222  | 0.63222  |
| 0.26868  | -0.20811 | 5.76E-06 | -0.04103 | 0.37632  |
| 0.11446  | -0.145   | 0.00168  | -0.08143 | 0.07876  |
| 0.12371  | 0.149216 | 0.00122  | 0.226162 | 7.88E-07 |
| 0.1472   | 0.103015 | 0.02601  | 0.003118 | 0.94643  |
| 0.05997  | -0.18085 | 8.49E-05 | -0.12035 | 0.00923  |
| 0.58081  | -0.18033 | 8.90E-05 | 0.209518 | 4.96E-06 |
| 0.36068  | 0.404751 | 7.77E-20 | -0.15879 | 0.00057  |
| 8.09E-10 | -0.01017 | 0.82651  | 0.274456 | 1.63E-09 |
| 0.01958  | 0.028481 | 0.53924  | -0.03339 | 0.47167  |
| 9.84E-06 | -0.14098 | 0.00226  | 0.116361 | 0.01186  |
| 0.08757  | -0.22951 | 5.34E-07 | 0.233828 | 3.21E-07 |
| 3.88E-06 | -0.11251 | 0.01499  | 0.247447 | 6.04E-08 |
| 5.23E-08 | -0.211   | 4.24E-06 | 0.263601 | 7.30E-09 |
| 0.20756  | -0.18197 | 7.66E-05 | -0.09837 | 0.03356  |
| 1.16E-05 | -0.21933 | 1.71E-06 | 0.184762 | 5.90E-05 |
| 2.50E-07 | -0.13567 | 0.00331  | 0.074527 | 0.10773  |
| 0.00129  | -0.0912  | 0.04888  | 0.262945 | 7.98E-09 |
| 0.07684  | -0.28405 | 4.08E-10 | 0.142265 | 0.00206  |
| 0.0098   | 0.108739 | 0.01875  | -0.12644 | 0.00622  |
| 4.34E-05 | -0.02398 | 0.60526  | 0.183149 | 6.86E-05 |
| 0.81541  | -0.14653 | 0.0015   | -0.11928 | 0.00988  |
| 0.00389  | -0.15839 | 0.00059  | 0.013666 | 0.76833  |
| 0.32037  | -0.02886 | 0.53382  | -0.12443 | 0.0071   |
| 0.00034  | -0.09523 | 0.03968  | 0.00545  | 0.9065   |
| 0.11425  | -0.06655 | 0.15106  | -0.21057 | 4.43E-06 |
| 0.00383  | -0.08995 | 0.05206  | 0.183004 | 6.96E-05 |
| 1.73E-05 | 0.069215 | 0.1353   | 0.261219 | 1.01E-08 |
| 0.17003  | -0.14968 | 0.00118  | 0.110686 | 0.01672  |
| 0.46395  | 0.024018 | 0.60465  | -0.1096  | 0.01782  |
| 0.74218  | 0.063313 | 0.17197  | 0.111392 | 0.01603  |
| 1.36E-08 | 0.047425 | 0.30646  | 0.079421 | 0.08645  |
| 3.07E-06 | 0.001632 | 0.97195  | -0.01032 | 0.824    |
| 1.29E-05 | -0.026   | 0.57523  | 0.218274 | 1.92E-06 |
| 0.0014   | 0.185978 | 5.26E-05 | -0.21824 | 1.92E-06 |
| 8.66E-05 | -0.15382 | 0.00085  | 0.060313 | 0.19323  |
| 0.00358  | -0.18411 | 6.28E-05 | 0.057222 | 0.2171   |
| 0.02532  | -0.14921 | 0.00122  | -0.09735 | 0.03546  |
| 0.07958  | -0.13504 | 0.00346  | -0.11428 | 0.01347  |
| 0.99709  | -0.1711  | 0.0002   | 0.182224 | 7.48E-05 |

|          |          |          |          |          |
|----------|----------|----------|----------|----------|
| 5.82E-05 | -0.08211 | 0.07629  | -0.06947 | 0.13388  |
| 0.00042  | -0.22662 | 7.47E-07 | 0.141459 | 0.00218  |
| 3.41E-07 | -0.01773 | 0.70234  | 0.012403 | 0.78922  |
| 0.49454  | -0.29133 | 1.38E-10 | 0.246478 | 6.83E-08 |
| 4.61E-09 | -0.14687 | 0.00146  | 0.427173 | 3.89E-22 |
| 0.00986  | 0.003822 | 0.93435  | 0.205798 | 7.34E-06 |
| 7.65E-05 | -0.04324 | 0.35119  | 0.050743 | 0.27381  |
| 0.01231  | 0.24776  | 5.81E-08 | -0.01717 | 0.71135  |
| 0.00146  | -0.1485  | 0.00129  | -0.31586 | 2.81E-12 |
| 0.07174  | -0.20147 | 1.15E-05 | 0.40386  | 9.51E-20 |
| 0.08584  | 0.018136 | 0.69587  | 0.075367 | 0.10381  |
| 0.00536  | -0.21932 | 1.71E-06 | 0.057343 | 0.21613  |
| 0.00077  | -0.10038 | 0.03009  | -0.03418 | 0.46114  |
| 3.19E-05 | -0.20537 | 7.68E-06 | 0.182831 | 7.07E-05 |
| 0.16269  | -0.19617 | 1.96E-05 | -0.33096 | 2.12E-13 |
| 0.23886  | -0.12256 | 0.00801  | 0.007347 | 0.87418  |
| 0.68666  | -0.24995 | 4.40E-08 | 0.039194 | 0.39809  |
| 0.48342  | -0.26437 | 6.58E-09 | -0.00527 | 0.90954  |
| 5.31E-05 | -0.08369 | 0.07078  | 0.299747 | 3.77E-11 |
| 0.31977  | -0.26672 | 4.78E-09 | 0.01021  | 0.82584  |
| 0.00304  | -0.24552 | 7.70E-08 | 0.225758 | 8.25E-07 |
| 0.00056  | -0.20407 | 8.79E-06 | 0.309706 | 7.71E-12 |
| 0.09548  | -0.21267 | 3.54E-06 | -0.05249 | 0.25762  |
| 0.07392  | -0.19065 | 3.37E-05 | 0.083071 | 0.0729   |
| 0.07384  | -0.22119 | 1.38E-06 | 0.080058 | 0.08395  |
| 0.43809  | 0.134992 | 0.00347  | 0.235748 | 2.55E-07 |
| 9.25E-07 | -0.03544 | 0.44487  | 0.158731 | 0.00058  |
| 0.287    | -0.13869 | 0.00267  | -0.19182 | 3.01E-05 |
| 3.83E-07 | -0.12683 | 0.00606  | 0.054743 | 0.23772  |
| 2.91E-07 | -0.17831 | 0.00011  | 0.148491 | 0.00129  |
| 0.22174  | -0.28471 | 3.70E-10 | 0.259628 | 1.24E-08 |
| 0.50875  | -0.17906 | 1.00E-04 | -0.16692 | 0.00029  |
| 0.27979  | -0.16745 | 0.00028  | 0.056071 | 0.2265   |
| 0.30324  | 0.386203 | 4.64E-18 | -0.18863 | 4.09E-05 |
| 0.72112  | -0.201   | 1.21E-05 | -0.16679 | 0.00029  |
| 0.53533  | -0.15672 | 0.00068  | 0.077361 | 0.09496  |
| 0.06146  | 0.265468 | 5.67E-09 | -0.05592 | 0.22773  |
| 0.87743  | -0.21383 | 3.12E-06 | -0.028   | 0.54618  |
| 0.00051  | -0.06169 | 0.18324  | -0.21994 | 1.59E-06 |
| 0.51564  | -0.13723 | 0.00296  | -0.17566 | 0.00014  |
| 0.52819  | -0.16309 | 0.0004   | -0.0086  | 0.85303  |
| 0.42187  | -0.17075 | 0.00021  | -0.24754 | 5.98E-08 |
| 1.91E-05 | -0.06513 | 0.15998  | -0.02563 | 0.58062  |
| 0.19895  | -0.11755 | 0.01101  | -0.11046 | 0.01694  |
| 0.00265  | -0.04782 | 0.30245  | 0.021083 | 0.64952  |

|          |          |          |          |          |
|----------|----------|----------|----------|----------|
| 0.00074  | -0.04518 | 0.32995  | 0.161511 | 0.00046  |
| 0.12405  | -0.15776 | 0.00062  | 0.025431 | 0.58357  |
| 0.12385  | -0.22398 | 1.01E-06 | 0.098016 | 0.03421  |
| 0.00934  | -0.14887 | 0.00125  | 0.012181 | 0.7929   |
| 0.42409  | -0.22651 | 7.57E-07 | -0.21936 | 1.70E-06 |
| 0.01228  | -0.09483 | 0.04052  | 0.090307 | 0.05114  |
| 0.07458  | -0.06885 | 0.13739  | -0.00697 | 0.88065  |
| 0.1818   | 0.211545 | 4.00E-06 | 0.064363 | 0.16495  |
| 0.00042  | -0.20736 | 6.24E-06 | 0.199017 | 1.47E-05 |
| 3.84E-05 | -0.21829 | 1.92E-06 | -0.29398 | 9.20E-11 |
| 0.00542  | -0.25652 | 1.88E-08 | -0.17842 | 0.00011  |
| 0.5407   | -0.12675 | 0.00609  | -0.24763 | 5.91E-08 |
| 0.52313  | -0.11613 | 0.01202  | -0.02781 | 0.5489   |
| 0.01144  | -0.21753 | 2.08E-06 | -0.08989 | 0.05222  |
| 0.0065   | -0.08041 | 0.08259  | -0.03492 | 0.4516   |
| 0.0162   | -0.21345 | 3.25E-06 | 0.108203 | 0.01934  |
| 5.35E-07 | -0.02163 | 0.64102  | 0.07412  | 0.10967  |
| 8.48E-05 | -0.08365 | 0.0709   | 0.254062 | 2.59E-08 |
| 8.96E-05 | 0.005825 | 0.9001   | -0.05238 | 0.25862  |
| 0.00103  | 0.071244 | 0.12419  | -0.24059 | 1.42E-07 |
| 0.19374  | -0.03333 | 0.47239  | -0.08558 | 0.06462  |
| 0.02032  | -0.12884 | 0.00529  | 0.08051  | 0.08221  |
| 0.0005   | 0.139365 | 0.00254  | 0.310014 | 7.33E-12 |
| 0.64305  | -0.13751 | 0.0029   | 0.052819 | 0.25463  |
| 0.49065  | -0.10639 | 0.02148  | -0.08829 | 0.05657  |
| 0.07831  | 0.078993 | 0.08817  | -0.13032 | 0.00479  |
| 3.18E-09 | 0.418901 | 2.87E-21 | 0.042661 | 0.35765  |
| 1.48E-05 | 0.21051  | 4.46E-06 | 0.344373 | 1.90E-14 |
| 0.61352  | -0.20376 | 9.07E-06 | -0.19425 | 2.37E-05 |
| 0.81741  | 0.262634 | 8.32E-09 | -0.15501 | 0.00078  |
| 0.00073  | -0.07998 | 0.08427  | 0.437719 | 2.79E-23 |
| 0.67551  | 0.258939 | 1.36E-08 | -0.04659 | 0.31504  |
| 0.25357  | -0.25535 | 2.19E-08 | 0.052759 | 0.25518  |
| 6.05E-08 | -0.12317 | 0.0077   | 0.226572 | 7.51E-07 |
| 0.99979  | -0.1455  | 0.00162  | -0.29683 | 5.93E-11 |
| 0.03743  | -0.05051 | 0.27602  | -0.2642  | 6.74E-09 |
| 0.76657  | -0.12371 | 0.00744  | -0.0478  | 0.3026   |
| 8.46E-05 | 0.027009 | 0.56043  | 0.177137 | 0.00012  |
| 0.20236  | -0.22764 | 6.64E-07 | -0.0085  | 0.85458  |
| 2.15E-05 | 0.02227  | 0.63121  | -0.18152 | 7.98E-05 |
| 0.00337  | 0.047612 | 0.30455  | -0.03217 | 0.48797  |
| 1.60E-07 | -0.03113 | 0.50221  | 0.336285 | 8.25E-14 |
| 0.04034  | -0.20545 | 7.62E-06 | -0.09515 | 0.03984  |
| 0.03627  | -0.12226 | 0.00817  | -0.12482 | 0.00692  |
| 0.00024  | -0.05531 | 0.2329   | 0.031364 | 0.49896  |



|          |          |          |          |          |
|----------|----------|----------|----------|----------|
| 3.19E-07 | 0.046999 | 0.31083  | -0.16849 | 0.00025  |
| 1.06E-06 | 0.012946 | 0.78022  | -0.03236 | 0.48549  |
| 0.18765  | -0.11129 | 0.01612  | 0.061425 | 0.18514  |
| 0.50565  | -0.00934 | 0.84043  | 0.212094 | 3.77E-06 |
| 0.07305  | -0.09962 | 0.03136  | 0.07216  | 0.11942  |
| 1.11E-06 | -0.0318  | 0.493    | -0.16446 | 0.00036  |
| 0.8195   | -0.21709 | 2.19E-06 | 0.229281 | 5.49E-07 |
| 0.00076  | -0.14068 | 0.00231  | 0.036129 | 0.43603  |
| 2.47E-07 | -0.10156 | 0.0282   | 0.243583 | 9.81E-08 |
| 0.00194  | -0.16511 | 0.00034  | 0.226565 | 7.52E-07 |
| 0.42933  | -0.12201 | 0.00831  | -0.30724 | 1.15E-11 |
| 1.35E-09 | -0.08971 | 0.05271  | 0.293344 | 1.01E-10 |
| 1.26E-11 | -0.07593 | 0.10127  | 0.3887   | 2.72E-18 |
| 0.00327  | -0.21612 | 2.43E-06 | 0.294796 | 8.11E-11 |
| 0.10636  | -0.22155 | 1.33E-06 | -0.08677 | 0.06098  |
| 8.76E-08 | -0.13213 | 0.00423  | 0.257438 | 1.66E-08 |
| 6.12E-06 | -0.0833  | 0.07213  | 0.036582 | 0.43029  |
| 0.0004   | -0.27075 | 2.73E-09 | 0.083551 | 0.07125  |
| 1.18E-15 | 0.155609 | 0.00074  | 0.010826 | 0.8155   |
| 0.78766  | -0.19229 | 2.87E-05 | -0.19545 | 2.10E-05 |
| 0.25609  | -0.11013 | 0.01728  | -0.10359 | 0.02519  |
| 0.00178  | -0.09052 | 0.05059  | -0.02536 | 0.58455  |
| 0.07782  | -0.25    | 4.37E-08 | 0.070536 | 0.12798  |
| 0.62726  | -0.2185  | 1.87E-06 | 0.053598 | 0.24768  |
| 0.69781  | -0.26735 | 4.38E-09 | -0.04295 | 0.35441  |
| 0.16213  | -0.02357 | 0.61138  | -0.10475 | 0.02358  |
| 0.05889  | -0.22544 | 8.56E-07 | -0.04906 | 0.29002  |
| 0.01398  | -0.16787 | 0.00027  | -0.02621 | 0.5721   |
| 3.20E-11 | -0.09525 | 0.03963  | 0.185622 | 5.44E-05 |
| 6.58E-11 | -0.06365 | 0.16968  | 0.160971 | 0.00048  |
| 0.07578  | -0.1812  | 8.22E-05 | 0.255913 | 2.03E-08 |
| 0.00467  | -0.14018 | 0.0024   | -0.04146 | 0.37134  |
| 0.49165  | -0.12066 | 0.00905  | -0.09742 | 0.03532  |
| 0.00088  | -0.0743  | 0.10882  | 0.075054 | 0.10526  |
| 0.01951  | -0.18617 | 5.17E-05 | -0.00032 | 0.99444  |
| 0.01155  | -0.17893 | 0.0001   | 0.053266 | 0.25063  |
| 0.74625  | 0.048886 | 0.29177  | 0.12419  | 0.00721  |
| 0.0978   | -0.0769  | 0.09694  | -0.06844 | 0.13976  |
| 0.00045  | -0.20901 | 5.24E-06 | 0.243067 | 1.05E-07 |
| 0.74196  | -0.17202 | 0.00019  | -0.18419 | 6.23E-05 |
| 5.41E-10 | -0.13146 | 0.00443  | 0.292206 | 1.20E-10 |
| 0.0004   | -0.15806 | 0.00061  | 0.115444 | 0.01254  |
| 0.00202  | -0.13157 | 0.0044   | 0.270864 | 2.69E-09 |
| 0.91951  | -0.0586  | 0.2062   | -0.082   | 0.07669  |
| 0.00033  | -0.03004 | 0.51729  | -0.06023 | 0.19386  |

|          |          |          |          |          |
|----------|----------|----------|----------|----------|
| 4.95E-07 | -0.22168 | 1.31E-06 | 0.229815 | 5.16E-07 |
| 0.00464  | -0.23146 | 4.25E-07 | 0.187427 | 4.59E-05 |
| 0.68611  | -0.2209  | 1.43E-06 | -0.13473 | 0.00353  |
| 0.00927  | 0.151007 | 0.00106  | -0.19863 | 1.53E-05 |
| 0.0008   | -0.18331 | 6.76E-05 | 0.048575 | 0.29486  |
| 0.12306  | -0.06758 | 0.14482  | 0.014993 | 0.74658  |
| 0.00068  | -0.20628 | 6.98E-06 | 0.169673 | 0.00023  |
| 0.53978  | -0.1462  | 0.00154  | -0.01613 | 0.7281   |
| 0.04334  | -0.15626 | 0.0007   | 0.224587 | 9.43E-07 |
| 8.09E-09 | -0.14312 | 0.00193  | 0.187665 | 4.49E-05 |
| 0.9844   | -0.15174 | 0.001    | -0.1273  | 0.00587  |
| 4.89E-17 | 0.147899 | 0.00135  | 0.233838 | 3.21E-07 |
| 0.00019  | -0.19082 | 3.31E-05 | 0.24856  | 5.25E-08 |
| 0.01167  | -0.1359  | 0.00325  | -0.15823 | 0.0006   |
| 5.79E-05 | -0.08239 | 0.07529  | 0.160711 | 0.00049  |
| 0.0414   | -0.21708 | 2.19E-06 | 0.280382 | 6.96E-10 |
| 0.54722  | -0.11507 | 0.01284  | -0.34832 | 9.11E-15 |
| 1.46E-06 | -0.01145 | 0.80511  | 0.044032 | 0.34239  |
| 0.00481  | -0.20362 | 9.21E-06 | 0.030554 | 0.51012  |
| 0.00047  | 0.151379 | 0.00103  | -0.44222 | 8.82E-24 |
| 0.00027  | 0.025467 | 0.58303  | -0.24557 | 7.65E-08 |
| 0.55093  | -0.1089  | 0.01857  | -0.13935 | 0.00254  |
| 0.05966  | -0.14246 | 0.00203  | 0.099514 | 0.03155  |
| 3.36E-14 | -0.00372 | 0.93616  | 0.235842 | 2.53E-07 |
| 0.01924  | -0.15816 | 0.0006   | 0.2628   | 8.14E-09 |
| 3.06E-06 | -0.14535 | 0.00164  | -0.02951 | 0.52465  |
| 0.00137  | -0.19461 | 2.29E-05 | 0.027941 | 0.54696  |
| 5.47E-07 | 0.009665 | 0.83499  | -0.11623 | 0.01195  |
| 0.05703  | 0.275405 | 1.42E-09 | 0.156842 | 0.00067  |
| 0.23576  | 0.111903 | 0.01555  | -0.07254 | 0.11745  |
| 0.08039  | -0.18031 | 8.92E-05 | 0.098414 | 0.03349  |
| 0.78758  | -0.23182 | 4.08E-07 | 0.023872 | 0.60686  |
| 0.70982  | -0.16201 | 0.00044  | -0.17349 | 0.00016  |
| 0.70111  | 0.077535 | 0.09422  | 0.279587 | 7.81E-10 |
| 0.51294  | -0.09903 | 0.03239  | 0.138333 | 0.00274  |
| 0.88688  | -0.19504 | 2.19E-05 | -0.02698 | 0.5608   |
| 0.06618  | -0.18949 | 3.77E-05 | 0.044172 | 0.34086  |
| 0.85477  | -0.03575 | 0.44084  | -0.38248 | 1.02E-17 |
| 0.00112  | -0.05688 | 0.21983  | 0.150727 | 0.00109  |
| 0.24363  | 0.066333 | 0.15237  | 0.144523 | 0.00174  |
| 0.00029  | -0.05525 | 0.23336  | -0.02744 | 0.55414  |
| 0.00586  | -0.09452 | 0.04118  | -0.06854 | 0.13915  |
| 0.10511  | -0.07532 | 0.10404  | 0.092045 | 0.04681  |
| 1.32E-11 | -0.09456 | 0.0411   | 0.248085 | 5.57E-08 |
| 0.00912  | -0.14044 | 0.00235  | 0.044513 | 0.33714  |

|          |          |          |          |          |
|----------|----------|----------|----------|----------|
| 2.31E-11 | -0.07023 | 0.12967  | 0.308254 | 9.75E-12 |
| 0.3954   | -0.18535 | 5.59E-05 | 0.096118 | 0.03786  |
| 0.00436  | -0.20712 | 6.40E-06 | 0.020237 | 0.66269  |
| 0.00017  | 0.078441 | 0.09042  | -0.00017 | 0.99713  |
| 0.11285  | -0.10383 | 0.02484  | -0.23993 | 1.54E-07 |
| 0.28799  | -0.21882 | 1.81E-06 | 0.079306 | 0.08691  |
| 0.16272  | -0.1319  | 0.0043   | 0.255004 | 2.29E-08 |
| 0.0021   | -0.12178 | 0.00843  | 0.16102  | 0.00048  |
| 0.04612  | -0.27143 | 2.49E-09 | -0.1536  | 0.00087  |
| 2.25E-05 | -0.12207 | 0.00827  | 0.142689 | 0.00199  |
| 0.05545  | -0.15252 | 0.00094  | 0.012125 | 0.79384  |
| 4.41E-07 | -0.11531 | 0.01265  | 0.114369 | 0.0134   |
| 0.27982  | -0.10816 | 0.01939  | -0.13108 | 0.00455  |
| 0.39552  | -0.11884 | 0.01016  | 0.073997 | 0.11027  |
| 0.24047  | -0.01909 | 0.68076  | 0.35252  | 4.13E-15 |
| 9.93E-07 | -0.13472 | 0.00354  | 0.175476 | 0.00014  |
| 0.38771  | -0.17061 | 0.00021  | -0.01397 | 0.76333  |
| 0.75104  | -0.13187 | 0.00431  | -0.14668 | 0.00148  |
| 0.19643  | -0.16089 | 0.00048  | 0.047906 | 0.30157  |
| 0.54853  | -0.13532 | 0.00339  | 0.002929 | 0.94967  |
| 0.05461  | -0.23082 | 4.58E-07 | -0.17183 | 0.00019  |
| 0.00018  | -0.18845 | 4.16E-05 | -0.18903 | 3.94E-05 |
| 2.15E-32 | 0.350562 | 5.98E-15 | -0.03564 | 0.44225  |
| 5.50E-05 | -0.15099 | 0.00106  | 0.177329 | 0.00012  |
| 0.30323  | 0.086456 | 0.06193  | 0.057725 | 0.21308  |
| 0.80649  | -0.20929 | 5.09E-06 | -0.22952 | 5.34E-07 |
| 0.18022  | -0.19757 | 1.70E-05 | 0.09445  | 0.04133  |
| 0.00453  | -0.18786 | 4.40E-05 | 0.282035 | 5.47E-10 |
| 0.64743  | 0.101616 | 0.02811  | 0.103599 | 0.02517  |
| 0.23228  | -0.14164 | 0.00215  | -0.14325 | 0.00191  |
| 0.14027  | -0.08857 | 0.05579  | 0.489178 | 1.81E-29 |
| 0.03526  | -0.01293 | 0.78047  | 0.014327 | 0.75748  |
| 0.12037  | -0.10713 | 0.02059  | -0.16614 | 0.00031  |
| 3.16E-05 | -0.09926 | 0.03198  | 0.39472  | 7.33E-19 |
| 0.15538  | -0.09684 | 0.03644  | 0.001998 | 0.96565  |
| 5.41E-05 | -0.08648 | 0.06186  | 0.018881 | 0.68404  |
| 7.54E-08 | 1.74E-05 | 0.9997   | 0.321075 | 1.17E-12 |
| 0.12033  | -0.20563 | 7.47E-06 | 0.005324 | 0.90865  |
| 0.44456  | 0.145567 | 0.00161  | -0.06295 | 0.17443  |
| 8.32E-06 | -0.0834  | 0.07176  | 0.052114 | 0.26104  |
| 0.0031   | 0.102156 | 0.02728  | -0.06905 | 0.13626  |
| 0.91908  | -0.10428 | 0.02422  | -0.08423 | 0.06898  |
| 0.00089  | -0.01726 | 0.70993  | 0.036621 | 0.42981  |
| 0.0053   | -0.19274 | 2.75E-05 | 0.030298 | 0.51366  |
| 0.16938  | -0.24144 | 1.28E-07 | -0.12709 | 0.00596  |

|          |          |          |          |          |
|----------|----------|----------|----------|----------|
| 0.00048  | -0.21361 | 3.20E-06 | 0.391974 | 1.34E-18 |
| 0.99948  | -0.12478 | 0.00694  | -0.30737 | 1.12E-11 |
| 0.14005  | 0.097984 | 0.03427  | -0.12724 | 0.0059   |
| 0.93746  | -0.11336 | 0.01424  | -0.15624 | 0.0007   |
| 0.09751  | 0.107258 | 0.02043  | 0.052117 | 0.26101  |
| 1.37E-07 | 0.109714 | 0.0177   | -0.24115 | 1.32E-07 |
| 0.15045  | -0.14944 | 0.0012   | 0.142709 | 0.00199  |
| 0.08771  | -0.11886 | 0.01015  | -0.15323 | 0.00089  |
| 0.00059  | -0.13063 | 0.00469  | 0.177691 | 0.00011  |
| 0.01686  | -0.08357 | 0.07119  | 0.259832 | 1.21E-08 |
| 0.51288  | 0.246027 | 7.23E-08 | -0.14701 | 0.00144  |
| 0.09781  | 0.015119 | 0.74453  | 0.029487 | 0.525    |
| 0.01082  | -0.17252 | 0.00018  | -0.26464 | 6.35E-09 |
| 0.00213  | -0.11349 | 0.01413  | 0.111119 | 0.01629  |
| 0.52816  | -0.17294 | 0.00017  | 0.144581 | 0.00173  |
| 4.50E-06 | -0.02528 | 0.58576  | -0.17257 | 0.00018  |
| 0.01075  | -0.1046  | 0.02378  | -0.18494 | 5.80E-05 |
| 2.13E-10 | 0.01844  | 0.69103  | 0.446194 | 3.15E-24 |
| 0.61765  | -0.10752 | 0.02012  | -0.20583 | 7.32E-06 |
| 0.49582  | -0.143   | 0.00195  | -0.12037 | 0.00922  |
| 0.85844  | 0.220368 | 1.52E-06 | -0.12231 | 0.00815  |
| 0.52665  | -0.19534 | 2.13E-05 | -0.0628  | 0.17547  |
| 0.44426  | -0.16077 | 0.00049  | 0.135036 | 0.00346  |
| 0.26693  | -0.06883 | 0.13751  | 0.261488 | 9.71E-09 |
| 2.78E-08 | -0.11961 | 0.00968  | 0.095475 | 0.03917  |
| 0.12435  | 0.175147 | 0.00014  | -0.21537 | 2.64E-06 |
| 0.14328  | -0.14998 | 0.00115  | 0.039017 | 0.40022  |
| 0.00859  | -0.14587 | 0.00157  | 0.02484  | 0.59235  |
| 0.98684  | 0.124149 | 0.00723  | 0.320311 | 1.33E-12 |
| 8.70E-06 | -0.02554 | 0.58188  | 0.421078 | 1.71E-21 |
| 0.00592  | 0.209336 | 5.06E-06 | -0.2583  | 1.48E-08 |
| 0.15348  | 0.239253 | 1.67E-07 | 0.019708 | 0.67098  |
| 0.07593  | -0.13061 | 0.0047   | -0.05928 | 0.201    |
| 0.03206  | -0.12477 | 0.00694  | 0.089407 | 0.05351  |
| 0.02392  | -0.16898 | 0.00024  | -0.12553 | 0.0066   |
| 0.02095  | -0.17616 | 0.00013  | -0.03576 | 0.44076  |
| 0.35327  | -0.16336 | 0.00039  | -0.1751  | 0.00014  |
| 0.00062  | -0.27489 | 1.53E-09 | -0.14822 | 0.00132  |
| 0.54133  | -0.20102 | 1.20E-05 | 0.047076 | 0.31003  |
| 0.35859  | 0.028959 | 0.53245  | 0.179593 | 9.52E-05 |
| 0.00787  | -0.23025 | 4.90E-07 | 0.026399 | 0.56932  |
| 5.02E-13 | 0.031593 | 0.49582  | 0.195366 | 2.12E-05 |
| 5.36E-21 | 0.309201 | 8.37E-12 | -0.15205 | 0.00098  |
| 2.30E-07 | 0.058171 | 0.20956  | 0.076949 | 0.09673  |
| 0.83114  | -0.05133 | 0.26833  | -0.00632 | 0.89167  |

|          |          |          |          |          |
|----------|----------|----------|----------|----------|
| 0.00164  | -0.12383 | 0.00738  | -0.04736 | 0.30712  |
| 0.19982  | -0.23556 | 2.61E-07 | -0.06963 | 0.13297  |
| 0.4902   | 0.05165  | 0.26532  | 0.370217 | 1.29E-16 |
| 1.77E-05 | -0.12134 | 0.00867  | 0.18834  | 4.21E-05 |
| 0.24488  | 0.062397 | 0.17827  | 0.229096 | 5.61E-07 |
| 0.35354  | -0.20013 | 1.32E-05 | -0.20356 | 9.26E-06 |
| 0.8988   | -0.11354 | 0.01409  | -0.2792  | 8.25E-10 |
| 0.00048  | 0.067157 | 0.14733  | -0.1468  | 0.00147  |
| 0.03221  | -0.21537 | 2.64E-06 | 0.119922 | 0.00949  |
| 8.11E-06 | -0.19609 | 1.98E-05 | 0.382755 | 9.65E-18 |
| 0.036    | 0.27419  | 1.69E-09 | -0.3647  | 3.88E-16 |
| 0.09506  | -0.20158 | 1.14E-05 | 0.29738  | 5.45E-11 |
| 0.11658  | 0.128516 | 0.00541  | 0.139952 | 0.00244  |
| 0.01404  | 0.228414 | 6.07E-07 | -0.21335 | 3.29E-06 |
| 0.49074  | -0.14617 | 0.00154  | -0.04414 | 0.34116  |
| 0.00198  | -0.10327 | 0.02564  | 0.251881 | 3.43E-08 |
| 0.79497  | -0.30432 | 1.83E-11 | 0.099385 | 0.03177  |
| 0.25884  | -0.29203 | 1.24E-10 | -0.00877 | 0.85014  |
| 0.04773  | -0.19748 | 1.72E-05 | 0.050653 | 0.27466  |
| 0.04029  | -0.10721 | 0.02049  | -0.05272 | 0.25554  |
| 1.75E-05 | 0.143817 | 0.00183  | -0.17139 | 0.0002   |
| 0.1204   | -0.20065 | 1.25E-05 | 0.128565 | 0.0054   |
| 0.75732  | 0.233144 | 3.48E-07 | -0.12233 | 0.00813  |
| 0.00068  | -0.10516 | 0.02304  | 0.229534 | 5.33E-07 |
| 4.92E-05 | 0.056529 | 0.22273  | -0.10126 | 0.02867  |
| 0.09269  | -0.0519  | 0.26302  | 0.025619 | 0.58079  |
| 7.42E-06 | -0.08299 | 0.07317  | -0.08705 | 0.06015  |
| 0.00131  | 0.074553 | 0.10761  | 0.11858  | 0.01033  |
| 0.00064  | 0.279349 | 8.08E-10 | 0.181502 | 7.99E-05 |
| 0.10464  | -0.11794 | 0.01075  | 0.132828 | 0.00403  |
| 0.42179  | -0.25021 | 4.25E-08 | -0.08153 | 0.07841  |
| 0.03052  | -0.17509 | 0.00014  | -0.02899 | 0.53203  |
| 0.7552   | -0.10761 | 0.02002  | -0.09597 | 0.03816  |
| 0.70829  | -0.14128 | 0.00221  | -0.28393 | 4.15E-10 |
| 1.40E-15 | -0.00039 | 0.9933   | 0.189579 | 3.73E-05 |
| 0.01903  | -0.21521 | 2.69E-06 | -0.06775 | 0.14376  |
| 0.91115  | 0.141916 | 0.00211  | 0.166154 | 0.00031  |
| 0.01662  | -0.00972 | 0.83399  | -0.3324  | 1.65E-13 |
| 0.82663  | 0.083807 | 0.07039  | 0.188859 | 4.00E-05 |
| 0.05677  | -0.21517 | 2.70E-06 | 0.189684 | 3.70E-05 |
| 0.54981  | -0.22203 | 1.26E-06 | -0.18391 | 6.40E-05 |
| 0.00021  | -0.17168 | 0.00019  | 0.133846 | 0.00376  |
| 0.06407  | -0.16896 | 0.00024  | 0.036587 | 0.43023  |
| 0.00282  | 0.106063 | 0.02188  | -0.08716 | 0.05983  |
| 0.4986   | 0.125031 | 0.00682  | 0.224353 | 9.69E-07 |

|          |          |          |          |          |
|----------|----------|----------|----------|----------|
| 0.41693  | 0.07447  | 0.10801  | 0.377058 | 3.17E-17 |
| 0.00018  | -0.11642 | 0.01181  | 0.100468 | 0.02995  |
| 0.32803  | -0.17747 | 0.00012  | 0.038945 | 0.40109  |
| 2.12E-10 | -0.02454 | 0.59679  | -0.03391 | 0.4647   |
| 3.13E-08 | -0.06488 | 0.16159  | 0.078588 | 0.08981  |
| 0.01541  | -0.11839 | 0.01045  | -0.26142 | 9.80E-09 |
| 1.96E-09 | -0.07621 | 0.09999  | 0.087662 | 0.05836  |
| 0.00146  | 0.011882 | 0.79787  | 0.168684 | 0.00025  |
| 0.00238  | -0.15695 | 0.00066  | 0.021263 | 0.64673  |
| 0.13651  | -0.18116 | 8.25E-05 | -0.08551 | 0.06483  |
| 0.00163  | -0.2242  | 9.86E-07 | 0.372719 | 7.74E-17 |
| 0.11721  | -0.12164 | 0.0085   | -0.30416 | 1.88E-11 |
| 0.34255  | -0.18254 | 7.27E-05 | -0.20596 | 7.22E-06 |
| 0.07588  | -0.11087 | 0.01654  | -0.16027 | 0.00051  |
| 0.76259  | -0.11349 | 0.01413  | -0.13273 | 0.00406  |
| 5.46E-13 | 0.023522 | 0.61213  | 0.442962 | 7.29E-24 |
| 0.43791  | -0.08404 | 0.06961  | -0.04821 | 0.2985   |
| 5.65E-06 | 0.035452 | 0.44468  | 0.050484 | 0.27627  |
| 0.45792  | -0.08494 | 0.06666  | 0.231207 | 4.38E-07 |
| 5.62E-08 | -0.07566 | 0.10248  | 0.05982  | 0.19691  |
| 0.75443  | 0.033157 | 0.47473  | 0.130441 | 0.00475  |
| 1.13E-06 | 0.06419  | 0.16609  | 0.136236 | 0.00318  |
| 0.01386  | -0.13832 | 0.00274  | -0.06851 | 0.13931  |
| 0.09166  | 0.011694 | 0.80102  | -0.28075 | 6.60E-10 |
| 0.0082   | -0.05982 | 0.19687  | -0.09228 | 0.04624  |
| 0.47875  | 0.064605 | 0.16337  | 0.211177 | 4.16E-06 |
| 0.51733  | -0.16937 | 0.00024  | -0.11699 | 0.0114   |
| 0.2072   | -0.21265 | 3.55E-06 | 0.07487  | 0.10612  |
| 0.00532  | -0.17416 | 0.00016  | -0.06019 | 0.19415  |
| 0.00107  | -0.16265 | 0.00042  | 0.29363  | 9.70E-11 |
| 0.01592  | -0.07162 | 0.12223  | -0.38854 | 2.81E-18 |
| 2.32E-05 | -0.03803 | 0.41229  | 0.217557 | 2.08E-06 |
| 0.23156  | -0.20947 | 4.99E-06 | 0.130486 | 0.00474  |
| 0.47723  | -0.17764 | 0.00011  | -0.15982 | 0.00053  |
| 1.75E-10 | 0.058362 | 0.20806  | -0.04386 | 0.34424  |
| 0.00011  | -0.21545 | 2.62E-06 | -0.12227 | 0.00817  |
| 0.45489  | -0.19345 | 2.56E-05 | -0.1125  | 0.015    |
| 0.06557  | -0.15499 | 0.00078  | 0.000538 | 0.99075  |
| 0.00869  | -0.12649 | 0.0062   | 0.051522 | 0.2665   |
| 0.22209  | -0.15564 | 0.00074  | 0.142188 | 0.00207  |
| 0.00062  | -0.16051 | 0.0005   | -0.02134 | 0.64548  |
| 4.94E-05 | -0.05439 | 0.24075  | -0.06996 | 0.13112  |
| 0.15283  | -0.18931 | 3.83E-05 | -0.02417 | 0.60235  |
| 0.01537  | -0.09957 | 0.03146  | 0.116312 | 0.01189  |
| 0.08657  | -0.1488  | 0.00126  | 0.059286 | 0.20094  |

|          |          |          |          |          |
|----------|----------|----------|----------|----------|
| 0.00866  | 0.010455 | 0.82172  | 0.175129 | 0.00014  |
| 0.52463  | 0.010432 | 0.82211  | -0.16523 | 0.00034  |
| 0.28211  | -0.26205 | 9.00E-09 | -0.01518 | 0.74348  |
| 0.00231  | -0.10002 | 0.0307   | 0.187818 | 4.42E-05 |
| 0.0591   | -0.14234 | 0.00205  | -0.08484 | 0.067    |
| 0.01689  | -0.0877  | 0.05825  | -0.11951 | 0.00974  |
| 0.0006   | -0.17171 | 0.00019  | 0.037998 | 0.41266  |
| 5.97E-15 | 0.037357 | 0.42058  | 0.115814 | 0.01226  |
| 0.006    | -0.20313 | 9.68E-06 | 0.089475 | 0.05333  |
| 0.00183  | -0.05775 | 0.21292  | 0.28562  | 3.23E-10 |
| 0.00011  | 0.009888 | 0.83124  | 0.161524 | 0.00046  |
| 0.01029  | -0.19206 | 2.94E-05 | 0.124872 | 0.0069   |
| 0.90545  | -0.14442 | 0.00175  | -0.23992 | 1.54E-07 |
| 9.00E-05 | -0.19712 | 1.78E-05 | 0.13869  | 0.00267  |
| 0.91865  | -0.17343 | 0.00017  | 0.023108 | 0.61842  |
| 0.00115  | -0.13536 | 0.00338  | 0.026319 | 0.57049  |
| 4.43E-05 | -0.17603 | 0.00013  | 0.121874 | 0.00838  |
| 3.69E-05 | -0.0886  | 0.0557   | 0.144055 | 0.0018   |
| 0.00152  | 0.049756 | 0.28326  | -0.07699 | 0.09654  |
| 0.05593  | -0.17724 | 0.00012  | -0.06008 | 0.19496  |
| 0.53888  | -0.23264 | 3.70E-07 | 0.153508 | 0.00087  |
| 0.08071  | -0.24755 | 5.97E-08 | 0.288804 | 2.01E-10 |
| 0.05767  | -0.18228 | 7.44E-05 | 0.067659 | 0.14433  |
| 7.86E-06 | -0.13804 | 0.0028   | 0.182031 | 7.61E-05 |
| 0.00155  | 0.012351 | 0.79009  | -0.04588 | 0.32247  |
| 0.00088  | -0.29156 | 1.33E-10 | -0.05421 | 0.24228  |
| 0.99383  | -0.20037 | 1.28E-05 | 0.081789 | 0.07745  |
| 0.00521  | -0.09874 | 0.03289  | 0.168018 | 0.00027  |
| 0.18914  | -0.16941 | 0.00024  | 0.055316 | 0.23283  |
| 0.58189  | -0.14152 | 0.00217  | 0.059565 | 0.19883  |
| 0.00253  | -0.09054 | 0.05054  | -0.02653 | 0.56745  |
| 2.58E-13 | 0.134487 | 0.00359  | -0.16143 | 0.00046  |
| 0.87825  | -0.14336 | 0.0019   | -0.12523 | 0.00673  |
| 0.19465  | -0.02819 | 0.54346  | -0.28088 | 6.48E-10 |
| 0.07423  | -0.22053 | 1.49E-06 | -0.07646 | 0.09886  |
| 0.05901  | 0.170356 | 0.00022  | -0.2025  | 1.03E-05 |
| 0.19242  | -0.083   | 0.07314  | -0.23278 | 3.64E-07 |
| 1.03E-05 | -0.12265 | 0.00797  | 0.072049 | 0.11998  |
| 0.05937  | 0.187262 | 4.66E-05 | -0.12615 | 0.00634  |
| 0.03362  | 0.09121  | 0.04885  | 0.035657 | 0.44206  |
| 0.00045  | -0.08687 | 0.06069  | 0.069055 | 0.13621  |
| 0.64126  | -0.14058 | 0.00233  | -0.10982 | 0.0176   |
| 0.98294  | -0.25718 | 1.72E-08 | 0.000717 | 0.98768  |
| 0.00038  | -0.20531 | 7.73E-06 | 0.040263 | 0.38533  |
| 2.95E-05 | -0.01289 | 0.78108  | 0.399179 | 2.73E-19 |

|          |          |          |          |          |
|----------|----------|----------|----------|----------|
| 0.03094  | 0.020853 | 0.65309  | 0.043214 | 0.35144  |
| 0.06368  | -0.2242  | 9.86E-07 | 0.009932 | 0.83049  |
| 0.02741  | -0.16972 | 0.00023  | -0.01867 | 0.68736  |
| 3.34E-05 | -0.09685 | 0.03642  | 0.07823  | 0.09129  |
| 0.39554  | -0.18877 | 4.04E-05 | -0.08492 | 0.06673  |
| 0.00015  | -0.13718 | 0.00297  | 0.122888 | 0.00785  |
| 0.70926  | -0.20155 | 1.14E-05 | -0.03546 | 0.44459  |
| 0.01617  | -0.17529 | 0.00014  | 0.234007 | 3.14E-07 |
| 0.00123  | -0.12997 | 0.00491  | 0.457242 | 1.67E-25 |
| 3.68E-05 | -0.17858 | 0.0001   | 0.340903 | 3.58E-14 |
| 0.11686  | -0.15483 | 0.00079  | -0.10748 | 0.02016  |
| 8.53E-07 | -0.1795  | 9.61E-05 | 0.26315  | 7.76E-09 |
| 0.6585   | -0.25561 | 2.11E-08 | -0.00479 | 0.91777  |
| 8.81E-08 | -0.14277 | 0.00198  | 0.201493 | 1.15E-05 |
| 0.98197  | -0.16478 | 0.00035  | -0.15372 | 0.00086  |
| 5.83E-07 | -0.11287 | 0.01467  | 0.089576 | 0.05306  |
| 0.53191  | -0.14931 | 0.00121  | 0.075082 | 0.10513  |
| 0.00043  | -0.21011 | 4.66E-06 | 0.210038 | 4.70E-06 |
| 0.72237  | -0.20027 | 1.30E-05 | 0.008035 | 0.86252  |
| 0.00291  | -0.24467 | 8.56E-08 | 0.172845 | 0.00017  |
| 0.00016  | -0.19503 | 2.19E-05 | 0.270608 | 2.79E-09 |
| 1.52E-07 | -0.15338 | 0.00088  | 0.156    | 0.00072  |
| 0.62177  | -0.17196 | 0.00019  | 0.032344 | 0.48563  |
| 0.63196  | -0.08701 | 0.06026  | 0.172916 | 0.00017  |
| 0.11128  | -0.11407 | 0.01364  | 0.226202 | 7.84E-07 |
| 0.00051  | -0.13158 | 0.00439  | 0.213197 | 3.34E-06 |
| 0.52658  | -0.12901 | 0.00524  | -0.06966 | 0.13281  |
| 0.22494  | -0.25838 | 1.47E-08 | 0.12201  | 0.0083   |
| 0.03994  | -0.19525 | 2.15E-05 | 0.303535 | 2.08E-11 |
| 0.00184  | -0.09399 | 0.04234  | 0.013561 | 0.77008  |
| 9.45E-07 | 0.02617  | 0.57268  | 0.035044 | 0.44994  |
| 0.00134  | -0.02581 | 0.57793  | 0.274058 | 1.72E-09 |
| 6.62E-11 | 0.001919 | 0.967    | 0.135261 | 0.0034   |
| 0.60056  | -0.14887 | 0.00125  | 0.034357 | 0.45888  |
| 0.04829  | -0.19709 | 1.79E-05 | 0.035077 | 0.44951  |
| 0.00188  | -0.12537 | 0.00667  | 0.437107 | 3.26E-23 |
| 2.06E-12 | 0.078648 | 0.08957  | 0.035228 | 0.44757  |
| 0.00018  | -0.08124 | 0.07945  | 0.259414 | 1.28E-08 |
| 4.26E-05 | -0.16339 | 0.00039  | 0.080856 | 0.0809   |
| 0.21293  | -0.1748  | 0.00015  | -0.12948 | 0.00507  |
| 0.33991  | -0.25332 | 2.85E-08 | 0.162732 | 0.00041  |
| 0.73325  | -0.24178 | 1.23E-07 | 0.21604  | 2.45E-06 |
| 0.86709  | -0.18864 | 4.09E-05 | 0.020846 | 0.6532   |
| 0.06487  | -0.24265 | 1.10E-07 | 0.031628 | 0.49535  |
| 0.32873  | -0.10268 | 0.02649  | 0.054609 | 0.23887  |



|          |          |          |          |          |
|----------|----------|----------|----------|----------|
| 0.53897  | -0.18472 | 5.93E-05 | 0.277464 | 1.06E-09 |
| 0.03614  | -0.1146  | 0.01321  | 0.233491 | 3.34E-07 |
| 0.00209  | -0.15038 | 0.00112  | 0.074868 | 0.10613  |
| 0.8308   | -0.10818 | 0.01937  | -0.07838 | 0.09068  |
| 4.17E-06 | -0.14587 | 0.00157  | 0.442704 | 7.80E-24 |
| 0.00077  | -0.17258 | 0.00018  | 0.170125 | 0.00022  |
| 0.20307  | -0.30586 | 1.43E-11 | 0.132051 | 0.00426  |
| 0.21575  | 0.042633 | 0.35796  | 0.198895 | 1.49E-05 |
| 1.91E-06 | -0.10828 | 0.01926  | 0.09938  | 0.03178  |
| 0.55822  | -0.22828 | 6.17E-07 | 0.067424 | 0.14572  |
| 0.75022  | -0.19327 | 2.61E-05 | -0.04585 | 0.32278  |
| 0.04746  | -0.16031 | 0.00051  | 0.254431 | 2.47E-08 |
| 0.40504  | -0.20208 | 1.08E-05 | 0.175073 | 0.00014  |
| 0.66951  | -0.2968  | 5.96E-11 | 0.15013  | 0.00114  |
| 0.00014  | -0.20635 | 6.93E-06 | 0.166666 | 0.0003   |
| 0.07558  | -0.12925 | 0.00515  | 0.005202 | 0.91074  |
| 0.00276  | -0.27091 | 2.67E-09 | -0.03399 | 0.46369  |
| 0.43585  | -0.24215 | 1.17E-07 | -0.07233 | 0.11852  |
| 0.9906   | -0.20257 | 1.03E-05 | -0.05966 | 0.1981   |
| 0.00027  | -0.20006 | 1.33E-05 | 0.195796 | 2.03E-05 |
| 0.00094  | -0.24817 | 5.52E-08 | 0.437476 | 2.97E-23 |
| 0.00067  | -0.15457 | 0.0008   | 0.10751  | 0.02014  |
| 0.00765  | -0.29252 | 1.15E-10 | -0.01599 | 0.73044  |
| 0.08961  | -0.17738 | 0.00012  | 0.16362  | 0.00038  |
| 0.90456  | -0.18491 | 5.82E-05 | -0.08937 | 0.05361  |
| 0.4762   | -0.15175 | 0.001    | -0.137   | 0.00301  |
| 0.4151   | 0.039989 | 0.38858  | 0.408802 | 3.07E-20 |
| 1.15E-08 | 0.022434 | 0.6287   | 0.031606 | 0.49564  |
| 0.00339  | -0.14275 | 0.00199  | 0.241994 | 1.19E-07 |
| 0.01434  | -0.17376 | 0.00016  | 0.250336 | 4.19E-08 |
| 0.0444   | 0.025833 | 0.57763  | -0.15746 | 0.00064  |
| 0.30807  | -0.2338  | 3.22E-07 | -0.0606  | 0.19111  |
| 0.30276  | -0.19813 | 1.61E-05 | -0.03204 | 0.4898   |
| 0.00594  | -0.22575 | 8.26E-07 | 0.299936 | 3.66E-11 |
| 0.8029   | 0.124282 | 0.00717  | 0.269389 | 3.31E-09 |
| 0.8827   | -0.12965 | 0.00502  | 0.011296 | 0.80764  |
| 0.09474  | -0.11546 | 0.01253  | -0.00485 | 0.9167   |
| 4.30E-10 | -0.16455 | 0.00036  | 0.239412 | 1.64E-07 |
| 0.41056  | -0.12004 | 0.00942  | -0.18758 | 4.52E-05 |
| 0.00094  | -0.00961 | 0.83597  | 0.130402 | 0.00476  |
| 0.02788  | -0.1897  | 3.69E-05 | -0.08466 | 0.06758  |
| 0.01744  | -0.09932 | 0.03189  | 0.146974 | 0.00145  |
| 0.97783  | -0.13728 | 0.00295  | 0.099605 | 0.03139  |
| 0.0196   | -0.22057 | 1.49E-06 | 0.524022 | 2.70E-34 |
| 2.35E-05 | -0.17055 | 0.00021  | 0.282671 | 4.99E-10 |

|          |          |          |          |          |
|----------|----------|----------|----------|----------|
| 0.26746  | -0.36651 | 2.71E-16 | 0.157197 | 0.00065  |
| 1.58E-05 | -0.09082 | 0.04983  | 0.115405 | 0.01257  |
| 3.61E-05 | -0.27393 | 1.75E-09 | -0.15897 | 0.00056  |
| 0.11181  | -0.22404 | 1.00E-06 | 0.319557 | 1.51E-12 |
| 0.13978  | -0.27557 | 1.39E-09 | 0.048061 | 0.30001  |
| 2.20E-05 | -0.03539 | 0.44543  | 0.421934 | 1.39E-21 |
| 4.52E-06 | -0.09768 | 0.03483  | 0.261921 | 9.16E-09 |
| 0.00524  | -0.20144 | 1.15E-05 | 0.094306 | 0.04164  |
| 0.07611  | -0.21354 | 3.22E-06 | 0.32111  | 1.16E-12 |
| 0.09     | -0.11609 | 0.01206  | -0.03731 | 0.42112  |
| 0.00341  | -0.04164 | 0.36923  | -0.05181 | 0.26385  |
| 0.06883  | -0.13563 | 0.00332  | -0.02116 | 0.64838  |
| 0.00021  | -0.09762 | 0.03495  | 0.340608 | 3.78E-14 |
| 0.0004   | -0.03627 | 0.43423  | 0.153283 | 0.00089  |
| 0.5816   | -0.25136 | 3.67E-08 | 0.241287 | 1.30E-07 |
| 0.01274  | -0.12349 | 0.00755  | -0.14802 | 0.00134  |
| 0.04139  | -0.1971  | 1.79E-05 | -0.22337 | 1.08E-06 |
| 0.00238  | -0.05777 | 0.21269  | 0.06764  | 0.14444  |
| 0.18538  | -0.13664 | 0.00309  | -0.05114 | 0.27006  |
| 0.44951  | -0.17612 | 0.00013  | 0.189514 | 3.76E-05 |
| 0.7803   | -0.17592 | 0.00013  | 0.214239 | 2.99E-06 |
| 0.03924  | 0.065394 | 0.15828  | 0.245439 | 7.78E-08 |
| 0.36142  | -0.25021 | 4.26E-08 | 0.11465  | 0.01317  |
| 0.56019  | 0.032542 | 0.48297  | 0.186515 | 5.00E-05 |
| 3.45E-06 | -0.12229 | 0.00816  | 0.445082 | 4.21E-24 |
| 0.89568  | -0.22454 | 9.48E-07 | 0.171197 | 0.0002   |
| 0.00393  | -0.15578 | 0.00073  | 0.390976 | 1.66E-18 |
| 0.80601  | -0.18301 | 6.95E-05 | -0.1119  | 0.01555  |
| 0.02948  | -0.13162 | 0.00438  | -0.02236 | 0.62978  |
| 0.54579  | -0.09998 | 0.03076  | -0.14452 | 0.00174  |
| 0.0006   | -0.08734 | 0.05929  | 0.197792 | 1.67E-05 |
| 0.00427  | -0.18596 | 5.28E-05 | 0.144021 | 0.00181  |
| 3.32E-06 | -0.19726 | 1.76E-05 | 0.243052 | 1.05E-07 |
| 1.30E-05 | -0.19796 | 1.64E-05 | 0.188872 | 4.00E-05 |
| 0.69106  | -0.07705 | 0.09631  | 0.070552 | 0.1279   |
| 0.44664  | -0.00519 | 0.91087  | 0.025077 | 0.58882  |
| 0.85539  | 0.005666 | 0.9028   | -0.00422 | 0.92761  |
| 0.01982  | 0.104151 | 0.0244   | 0.212681 | 3.54E-06 |
| 1.17E-10 | 0.28095  | 6.41E-10 | 0.35942  | 1.09E-15 |
| 4.94E-05 | -0.05899 | 0.20318  | -0.26065 | 1.09E-08 |
| 0.0486   | 0.143957 | 0.00182  | 0.177279 | 0.00012  |
| 0.72879  | -0.00775 | 0.86742  | -0.04492 | 0.33274  |
| 0.0336   | 0.103661 | 0.02508  | -0.16441 | 0.00036  |
| 0.03066  | -0.11823 | 0.01055  | -0.04339 | 0.34951  |
| 0.40294  | 0.04277  | 0.35642  | 0.019692 | 0.67124  |

|          |           |          |          |          |
|----------|-----------|----------|----------|----------|
| 0.25509  | -0.07628  | 0.09966  | 0.005677 | 0.90262  |
| 0.03257  | 0.055275  | 0.23318  | -0.28262 | 5.02E-10 |
| 0.02868  | 0.082181  | 0.07603  | -0.23425 | 3.06E-07 |
| 0.9572   | 0.131591  | 0.00439  | -0.13545 | 0.00336  |
| 0.00183  | 0.276888  | 1.15E-09 | 0.162574 | 0.00042  |
| 0.05525  | 0.009941  | 0.83035  | -0.02918 | 0.5293   |
| 0.00317  | -0.15861  | 0.00058  | -0.1021  | 0.02737  |
| 0.03035  | 0.041038  | 0.37624  | 0.098843 | 0.03272  |
| 0.10324  | 0.01839   | 0.69182  | 0.174267 | 0.00015  |
| 0.4264   | -0.03955  | 0.39383  | 0.064479 | 0.16419  |
| 0.00703  | -0.06299  | 0.17419  | -0.19708 | 1.79E-05 |
| 1.08E-06 | 0.231209  | 4.38E-07 | 0.102128 | 0.02732  |
| 0.87569  | 0.017746  | 0.70209  | 0.118434 | 0.01042  |
| 0.17468  | 0.057697  | 0.2133   | -0.16871 | 0.00025  |
| 0.00336  | 0.076512  | 0.09865  | -0.30585 | 1.43E-11 |
| 0.18367  | 0.098507  | 0.03332  | -0.1894  | 3.80E-05 |
| 0.09808  | -6.27E-05 | 0.99892  | -0.1995  | 1.40E-05 |
| 0.89879  | 0.066054  | 0.15411  | -0.14299 | 0.00195  |
| 0.00179  | -0.02393  | 0.606    | -0.28949 | 1.81E-10 |
| 0.25452  | -0.02185  | 0.63767  | -0.13548 | 0.00335  |
| 0.18532  | 0.005693  | 0.90234  | -0.017   | 0.71407  |
| 0.49224  | 0.071364  | 0.12356  | -0.10193 | 0.02762  |
| 0.26365  | -0.06171  | 0.18314  | 0.184434 | 6.09E-05 |
| 0.43263  | -0.06303  | 0.17387  | 0.137992 | 0.0028   |
| 0.26425  | 0.116026  | 0.0121   | -0.43731 | 3.10E-23 |
| 0.37963  | 0.145616  | 0.0016   | -0.21396 | 3.08E-06 |
| 0.12341  | 0.022111  | 0.63365  | -0.24943 | 4.70E-08 |
| 0.0061   | 0.097163  | 0.03581  | -0.21741 | 2.11E-06 |
| 0.20118  | -0.10309  | 0.02589  | -0.21377 | 3.14E-06 |
| 0.15425  | 0.084424  | 0.06834  | -0.22766 | 6.63E-07 |
| 0.35484  | 0.267263  | 4.43E-09 | -0.20603 | 7.17E-06 |
| 0.96007  | 0.080845  | 0.08094  | -0.17022 | 0.00022  |
| 0.54669  | 0.086708  | 0.06117  | -0.06002 | 0.19539  |
| 0.11354  | 0.067043  | 0.14802  | -0.13851 | 0.0027   |
| 1.74E-07 | 0.29943   | 3.96E-11 | 0.191509 | 3.10E-05 |
| 0.64772  | -0.00627  | 0.89253  | 0.134362 | 0.00363  |
| 0.09137  | -0.00131  | 0.97746  | -0.30331 | 2.15E-11 |
| 0.4915   | 0.106535  | 0.0213   | -0.09697 | 0.03618  |
| 0.3157   | -0.00737  | 0.87387  | -0.10483 | 0.02348  |
| 1.44E-05 | 0.244125  | 9.17E-08 | -0.26365 | 7.25E-09 |
| 0.05552  | 0.215882  | 2.50E-06 | -0.2104  | 4.52E-06 |
| 0.32817  | 0.012769  | 0.78316  | 0.006279 | 0.89236  |
| 0.00012  | 0.255059  | 2.27E-08 | -0.19337 | 2.59E-05 |
| 0.02329  | 0.073566  | 0.11236  | -0.03713 | 0.4234   |
| 0.00123  | 0.025113  | 0.58828  | -0.35133 | 5.17E-15 |

|          |          |          |          |          |
|----------|----------|----------|----------|----------|
| 0.39763  | 0.023988 | 0.6051   | -0.16287 | 0.00041  |
| 4.17E-05 | 0.027328 | 0.5558   | -0.37303 | 7.27E-17 |
| 0.00825  | 0.061991 | 0.18112  | -0.12942 | 0.00509  |
| 0.04407  | 0.063734 | 0.16913  | -0.14061 | 0.00232  |
| 0.00038  | -0.07805 | 0.09204  | 0.234286 | 3.04E-07 |
| 0.00017  | 0.003157 | 0.94576  | -0.31126 | 5.98E-12 |
| 4.39E-06 | -0.12429 | 0.00716  | -0.35479 | 2.68E-15 |
| 0.69649  | -0.00149 | 0.9744   | -0.20099 | 1.21E-05 |
| 0.04976  | -0.03466 | 0.45492  | 0.107655 | 0.01997  |
| 0.5778   | 0.019142 | 0.67991  | 0.290996 | 1.45E-10 |
| 2.02E-05 | 0.053529 | 0.24829  | -0.2283  | 6.15E-07 |
| 0.02859  | 0.15385  | 0.00085  | 0.084193 | 0.0691   |
| 0.05387  | 0.058432 | 0.20752  | -0.24547 | 7.75E-08 |
| 0.20997  | 0.12473  | 0.00696  | -0.04404 | 0.34228  |
| 0.12702  | -0.00075 | 0.98718  | -0.18833 | 4.21E-05 |
| 0.56568  | -0.00562 | 0.90363  | 0.094325 | 0.0416   |
| 0.98516  | 0.139878 | 0.00245  | -0.13136 | 0.00446  |
| 0.57666  | 0.107126 | 0.02059  | -0.03329 | 0.47295  |
| 0.31452  | -0.16978 | 0.00023  | -0.03105 | 0.50325  |
| 0.02029  | 0.038567 | 0.40568  | -0.27543 | 1.42E-09 |
| 0.70199  | -0.02337 | 0.61449  | -0.28487 | 3.61E-10 |
| 0.18161  | -0.0481  | 0.29962  | 0.017829 | 0.70077  |
| 0.20183  | 0.061206 | 0.18671  | -0.20992 | 4.76E-06 |
| 0.43179  | 0.065833 | 0.1555   | -0.05106 | 0.27085  |
| 0.62281  | 0.062488 | 0.17764  | -0.34643 | 1.30E-14 |
| 0.40992  | 0.226979 | 7.17E-07 | -0.50187 | 3.66E-31 |
| 0.42944  | -0.05694 | 0.21937  | 0.133476 | 0.00386  |
| 0.1927   | -0.05757 | 0.2143   | 0.281425 | 5.98E-10 |
| 0.10394  | 0.043446 | 0.34886  | -0.4211  | 1.70E-21 |
| 0.00011  | -0.13098 | 0.00458  | -0.12539 | 0.00666  |
| 0.03076  | -0.11326 | 0.01433  | -0.0224  | 0.62921  |
| 0.40232  | -0.00685 | 0.88266  | -0.04471 | 0.33503  |
| 0.52849  | 0.085445 | 0.06505  | -0.25372 | 2.71E-08 |
| 0.04403  | -0.03064 | 0.50888  | -0.16821 | 0.00026  |
| 0.94145  | 0.110346 | 0.01706  | -0.30402 | 1.92E-11 |
| 0.10395  | 0.121077 | 0.00882  | -0.18002 | 9.16E-05 |
| 0.46615  | 0.184033 | 6.32E-05 | -0.44819 | 1.87E-24 |
| 2.81E-06 | -0.18122 | 8.20E-05 | 0.050623 | 0.27495  |
| 0.09863  | 0.041354 | 0.37258  | 0.069273 | 0.13497  |
| 0.65679  | 0.035389 | 0.4455   | 0.060291 | 0.1934   |
| 0.6356   | -0.0261  | 0.57366  | 0.192952 | 2.69E-05 |
| 0.15343  | -0.07428 | 0.1089   | -0.00691 | 0.88165  |
| 0.29363  | -0.12081 | 0.00897  | -0.0526  | 0.25665  |
| 0.0072   | -0.12917 | 0.00518  | 0.012152 | 0.79339  |
| 0.8945   | -0.03733 | 0.42096  | -0.2515  | 3.60E-08 |

|          |          |          |          |          |
|----------|----------|----------|----------|----------|
| 0.66335  | 0.108368 | 0.01916  | 0.072472 | 0.11782  |
| 0.6493   | 0.016624 | 0.72011  | -0.05547 | 0.23152  |
| 0.01621  | 0.118847 | 0.01015  | -0.25978 | 1.22E-08 |
| 0.80086  | 0.142234 | 0.00206  | -0.28285 | 4.86E-10 |
| 0.13937  | 0.00242  | 0.95841  | 0.086854 | 0.06073  |
| 0.01006  | 0.11371  | 0.01394  | -0.10192 | 0.02764  |
| 0.10922  | 0.222131 | 1.25E-06 | -0.19141 | 3.13E-05 |
| 0.00399  | 0.087709 | 0.05823  | -0.17351 | 0.00016  |
| 0.52093  | -0.02232 | 0.63037  | 0.2216   | 1.32E-06 |
| 0.0161   | 0.026223 | 0.57189  | 0.032175 | 0.48792  |
| 0.17531  | 0.023156 | 0.61769  | -0.04787 | 0.30195  |
| 0.00035  | -0.18481 | 5.88E-05 | -0.23245 | 3.78E-07 |
| 0.6287   | -0.03327 | 0.47325  | -0.00757 | 0.87033  |
| 0.53818  | -0.01491 | 0.74792  | -0.10887 | 0.01861  |
| 0.79883  | -0.04189 | 0.36637  | 0.142414 | 0.00204  |
| 0.92496  | -0.02517 | 0.58741  | 0.013683 | 0.76806  |
| 0.04601  | 0.064785 | 0.1622   | -0.02145 | 0.6438   |
| 2.35E-05 | 0.100737 | 0.02951  | 0.486849 | 3.64E-29 |
| 0.05963  | -0.07484 | 0.10628  | -0.14635 | 0.00152  |
| 0.38155  | -0.11431 | 0.01345  | 0.011596 | 0.80264  |
| 0.00302  | -0.0526  | 0.25665  | -0.34551 | 1.54E-14 |
| 0.05828  | -0.04265 | 0.35782  | 0.161829 | 0.00045  |
| 0.02996  | -0.02094 | 0.65172  | -0.154   | 0.00084  |
| 0.08137  | 0.032653 | 0.48148  | -0.19212 | 2.92E-05 |
| 0.79882  | 0.006536 | 0.88798  | 0.188757 | 4.04E-05 |
| 0.88354  | -0.01625 | 0.72623  | 0.107458 | 0.0202   |
| 0.18712  | 0.094682 | 0.04084  | -0.24228 | 1.15E-07 |
| 0.01189  | -0.09248 | 0.04578  | -0.08186 | 0.07718  |
| 0.79982  | 0.027155 | 0.5583   | -0.20193 | 1.10E-05 |
| 0.20853  | -0.00605 | 0.8963   | -0.26112 | 1.02E-08 |
| 0.90228  | 0.057028 | 0.21866  | -0.12259 | 0.008    |
| 0.8264   | -0.0174  | 0.70764  | -0.0497  | 0.28377  |
| 0.09399  | 0.018599 | 0.68851  | -0.12694 | 0.00602  |
| 0.23622  | 0.109377 | 0.01806  | -0.0235  | 0.61245  |
| 0.06221  | -0.08856 | 0.05581  | 0.146615 | 0.00149  |
| 0.29787  | 0.062041 | 0.18076  | -0.29569 | 7.08E-11 |
| 0.16871  | -0.2271  | 7.07E-07 | 0.225364 | 8.63E-07 |
| 0.00178  | 0.103519 | 0.02528  | 0.172617 | 0.00018  |
| 0.21792  | 0.064624 | 0.16324  | -0.22451 | 9.52E-07 |
| 0.56319  | 0.16192  | 0.00044  | -0.16547 | 0.00033  |
| 0.54669  | 0.011654 | 0.80167  | 0.12156  | 0.00855  |
| 0.00356  | -0.06097 | 0.1884   | 0.122697 | 0.00794  |
| 0.02898  | 0.051075 | 0.27068  | -0.27925 | 8.19E-10 |
| 0.00548  | 0.01685  | 0.71647  | -0.43122 | 1.43E-22 |
| 0.46222  | -0.04693 | 0.31155  | -0.20408 | 8.78E-06 |

|          |          |          |          |          |
|----------|----------|----------|----------|----------|
| 0.0434   | 0.086688 | 0.06123  | -0.21582 | 2.51E-06 |
| 0.21349  | 0.10014  | 0.03049  | -0.07844 | 0.09042  |
| 0.19021  | 0.047307 | 0.30766  | -0.02961 | 0.52324  |
| 0.05369  | 0.023315 | 0.61527  | -0.16167 | 0.00045  |
| 7.90E-06 | -0.10584 | 0.02217  | -0.3193  | 1.58E-12 |
| 3.10E-05 | -0.06017 | 0.19427  | -0.15611 | 0.00071  |
| 2.81E-05 | -0.20883 | 5.34E-06 | -0.07808 | 0.0919   |
| 0.95516  | -0.04115 | 0.37499  | 0.310802 | 6.45E-12 |
| 0.36026  | -0.04207 | 0.36432  | 0.052092 | 0.26124  |
| 0.64307  | 0.040847 | 0.37847  | -0.09704 | 0.03605  |
| 0.36321  | 0.025344 | 0.58485  | -0.11858 | 0.01033  |
| 0.06305  | 0.085    | 0.06647  | -0.23046 | 4.78E-07 |
| 0.27259  | 0.056245 | 0.22506  | -0.0896  | 0.053    |
| 0.0048   | 0.279176 | 8.29E-10 | -0.10947 | 0.01796  |
| 0.02018  | 0.064405 | 0.16468  | -0.24868 | 5.17E-08 |
| 0.00376  | 0.05651  | 0.22289  | -0.26795 | 4.03E-09 |
| 0.03943  | 0.144942 | 0.00169  | -0.08776 | 0.05808  |
| 0.19101  | 0.015195 | 0.74329  | -0.13296 | 0.004    |
| 0.53292  | -0.09381 | 0.04274  | 0.427903 | 3.25E-22 |
| 0.00309  | 0.018833 | 0.6848   | -0.16007 | 0.00052  |
| 0.15621  | 0.042061 | 0.36445  | 0.352843 | 3.88E-15 |
| 0.02697  | 0.106832 | 0.02094  | -0.2201  | 1.57E-06 |
| 0.33152  | -0.08284 | 0.0737   | 0.114953 | 0.01293  |
| 0.29574  | 0.030453 | 0.51151  | -0.0581  | 0.21015  |
| 0.61555  | 0.023744 | 0.60879  | -0.10806 | 0.0195   |
| 0.00352  | 0.068261 | 0.14078  | -0.21761 | 2.06E-06 |
| 0.09032  | -0.09368 | 0.04303  | 0.009201 | 0.8428   |
| 0.37978  | 0.034662 | 0.4549   | 0.025991 | 0.5753   |
| 0.89285  | 0.127011 | 0.00599  | -0.2385  | 1.83E-07 |
| 0.44707  | 0.135417 | 0.00337  | -0.11574 | 0.01232  |
| 0.59817  | 0.097994 | 0.03425  | 0.079597 | 0.08576  |
| 0.11562  | 0.011294 | 0.80768  | -0.14377 | 0.00184  |
| 0.00938  | 0.082642 | 0.0744   | -0.03615 | 0.43573  |
| 0.15269  | 0.195976 | 2.00E-05 | -0.34515 | 1.64E-14 |
| 0.28383  | 0.02069  | 0.65562  | -0.15832 | 0.0006   |
| 0.00011  | 0.133248 | 0.00392  | -0.27532 | 1.44E-09 |
| 0.0642   | -0.03251 | 0.48343  | -0.16496 | 0.00034  |
| 0.33322  | 0.100115 | 0.03053  | -0.11809 | 0.01065  |
| 0.69702  | 0.031928 | 0.49126  | -0.0369  | 0.42627  |
| 0.10795  | 0.006444 | 0.88954  | -0.10141 | 0.02843  |
| 0.11576  | 0.044271 | 0.33978  | -0.17783 | 0.00011  |
| 0.66719  | -0.02782 | 0.54873  | -0.06885 | 0.13738  |
| 0.25108  | -0.06201 | 0.18097  | -0.12458 | 0.00703  |
| 0.01753  | 0.083679 | 0.07082  | 0.008793 | 0.8497   |
| 0.54957  | 0.028089 | 0.54485  | -0.03944 | 0.39519  |

|          |          |          |          |          |
|----------|----------|----------|----------|----------|
| 0.03093  | -0.04529 | 0.32877  | -0.20137 | 1.16E-05 |
| 0.36884  | -0.05428 | 0.24168  | 0.049399 | 0.28673  |
| 0.45317  | 0.059503 | 0.19929  | -0.17822 | 0.00011  |
| 0.53392  | 0.127816 | 0.00567  | -0.23001 | 5.04E-07 |
| 0.74132  | -0.07906 | 0.08789  | -0.18784 | 4.41E-05 |
| 0.91085  | -0.05658 | 0.22229  | 0.055473 | 0.23151  |
| 0.00537  | 0.088657 | 0.05555  | -0.30887 | 8.83E-12 |
| 0.05743  | 0.083566 | 0.0712   | -0.17325 | 0.00017  |
| 0.79321  | 0.021047 | 0.65008  | -0.01311 | 0.77753  |
| 0.01811  | 0.062168 | 0.17987  | -0.17494 | 0.00014  |
| 0.05929  | 0.116283 | 0.01191  | -0.2109  | 4.28E-06 |
| 0.2626   | -0.10827 | 0.01926  | 0.030599 | 0.50949  |
| 0.58455  | 0.095645 | 0.03882  | 0.191458 | 3.11E-05 |
| 2.69E-06 | 0.040133 | 0.38687  | -0.25026 | 4.23E-08 |
| 0.01323  | -0.01351 | 0.77083  | 0.008944 | 0.84714  |
| 0.29532  | -0.17828 | 0.00011  | 0.62645  | 2.85E-52 |
| 0.00251  | 0.040262 | 0.38534  | 0.36645  | 2.74E-16 |
| 0.34158  | -0.09575 | 0.0386   | -0.21805 | 1.97E-06 |
| 0.79165  | 0.076504 | 0.09869  | -0.34846 | 8.88E-15 |
| 0.47166  | 0.051685 | 0.26499  | -0.20428 | 8.60E-06 |
| 0.61103  | -0.01815 | 0.69563  | -0.03044 | 0.51164  |
| 8.39E-07 | 0.035104 | 0.44917  | -0.44173 | 1.00E-23 |
| 0.95317  | -0.06655 | 0.15101  | -0.06909 | 0.13598  |
| 0.20161  | 0.076371 | 0.09927  | -0.20905 | 5.21E-06 |
| 3.93E-05 | -0.07273 | 0.11653  | 0.019099 | 0.68059  |
| 0.51631  | 0.014561 | 0.75364  | -0.16454 | 0.00036  |
| 0.72315  | 0.0099   | 0.83103  | 0.083047 | 0.07298  |
| 0.16786  | 0.119965 | 0.00946  | -0.1578  | 0.00062  |
| 0.00258  | 0.032528 | 0.48315  | -0.1795  | 9.60E-05 |
| 9.99E-06 | -0.01406 | 0.76192  | -0.33792 | 6.15E-14 |
| 0.03749  | -0.07317 | 0.11433  | -0.18856 | 4.12E-05 |
| 0.09096  | 0.01628  | 0.72567  | 0.004536 | 0.92211  |
| 0.00542  | 0.044008 | 0.34265  | -0.19266 | 2.77E-05 |
| 0.39575  | 0.05424  | 0.24206  | -0.24421 | 9.07E-08 |
| 0.22426  | 0.096374 | 0.03735  | -0.10149 | 0.02831  |
| 0.12046  | 0.009294 | 0.84123  | -0.46197 | 4.58E-26 |
| 0.07591  | 0.037247 | 0.42195  | -0.13955 | 0.00251  |
| 0.13121  | -0.18833 | 4.21E-05 | -0.0085  | 0.85458  |
| 0.01744  | -0.10595 | 0.02203  | -0.20606 | 7.14E-06 |
| 0.97173  | -0.05099 | 0.27146  | -0.14997 | 0.00115  |
| 0.34973  | 0.046621 | 0.31473  | 0.127802 | 0.00568  |
| 0.26289  | 0.162906 | 0.00041  | 0.010843 | 0.81523  |
| 0.0685   | 0.012902 | 0.78094  | 0.079231 | 0.08721  |
| 0.29563  | 0.050863 | 0.27268  | -0.45928 | 9.57E-26 |
| 0.01865  | 0.057319 | 0.21632  | -0.18312 | 6.88E-05 |

|          |          |          |          |          |
|----------|----------|----------|----------|----------|
| 0.00356  | 0.068453 | 0.13966  | -0.33926 | 4.83E-14 |
| 0.71311  | 0.002773 | 0.95235  | -0.1413  | 0.00221  |
| 0.10074  | -0.02453 | 0.59693  | -0.26973 | 3.15E-09 |
| 0.37118  | -0.04275 | 0.35666  | 0.02106  | 0.64988  |
| 0.73825  | 0.124506 | 0.00706  | 0.110711 | 0.01669  |
| 0.3844   | 0.080793 | 0.08114  | -0.14554 | 0.00161  |
| 0.47941  | -0.07483 | 0.1063   | 0.058213 | 0.20923  |
| 0.7256   | 0.111377 | 0.01604  | -0.10669 | 0.02111  |
| 0.39252  | 0.082956 | 0.0733   | -0.13776 | 0.00285  |
| 0.64746  | -0.04378 | 0.34515  | 0.000956 | 0.98356  |
| 0.08419  | 0.062227 | 0.17945  | -0.14496 | 0.00168  |
| 0.0437   | 0.122286 | 0.00816  | -0.20745 | 6.17E-06 |
| 0.02767  | 0.055821 | 0.22859  | -0.09288 | 0.04483  |
| 0.0865   | 0.078152 | 0.09162  | -0.24555 | 7.68E-08 |
| 0.54722  | 0.024381 | 0.5992   | -0.1267  | 0.00611  |
| 0.03553  | -0.02075 | 0.65469  | 0.200094 | 1.32E-05 |
| 0.05152  | -0.01183 | 0.79882  | 0.029483 | 0.52506  |
| 0.02127  | -0.04669 | 0.31403  | 0.047234 | 0.3084   |
| 0.03968  | 0.102313 | 0.02704  | -0.19579 | 2.04E-05 |
| 0.44151  | -0.04092 | 0.37757  | 0.051963 | 0.26242  |
| 0.01308  | 0.025101 | 0.58846  | 0.099147 | 0.03218  |
| 0.73628  | 0.014276 | 0.75832  | -0.2521  | 3.34E-08 |
| 0.1388   | 0.041451 | 0.37145  | 0.148855 | 0.00125  |
| 0.09239  | 0.127166 | 0.00593  | -0.27678 | 1.17E-09 |
| 0.70173  | 0.109581 | 0.01784  | -0.07327 | 0.11384  |
| 0.51497  | 0.052476 | 0.25774  | -0.01774 | 0.70222  |
| 0.03052  | 0.244811 | 8.42E-08 | -0.32602 | 5.02E-13 |
| 0.41327  | 0.012109 | 0.7941   | -0.30677 | 1.24E-11 |
| 0.01561  | 0.105165 | 0.02304  | -0.30287 | 2.31E-11 |
| 0.90518  | 0.029789 | 0.52077  | -0.10569 | 0.02236  |
| 0.01265  | 0.069484 | 0.13378  | -0.17356 | 0.00016  |
| 0.05564  | 0.071164 | 0.12462  | -0.31674 | 2.42E-12 |
| 2.47E-08 | 0.060038 | 0.19528  | 0.45164  | 7.49E-25 |
| 0.89906  | 0.10193  | 0.02763  | 0.003792 | 0.93486  |
| 0.00387  | 0.016246 | 0.72622  | -0.23103 | 4.47E-07 |
| 0.00233  | 0.087582 | 0.05859  | -0.29253 | 1.15E-10 |
| 0.00428  | 0.034422 | 0.45803  | -0.18988 | 3.63E-05 |
| 0.8653   | -0.01026 | 0.82492  | -0.06558 | 0.15707  |
| 7.91E-09 | -0.00291 | 0.94998  | -0.52902 | 4.90E-35 |
| 0.80504  | -0.05119 | 0.26964  | 0.041294 | 0.37327  |
| 0.76337  | 0.034988 | 0.45067  | -0.09912 | 0.03223  |
| 0.62724  | -0.05458 | 0.23908  | -0.26122 | 1.01E-08 |
| 0.79054  | 0.245994 | 7.26E-08 | -0.16394 | 0.00037  |
| 0.00093  | -0.03758 | 0.41777  | -0.14645 | 0.00151  |
| 0.10925  | 0.003528 | 0.9394   | 0.066902 | 0.14888  |



|          |          |          |          |          |
|----------|----------|----------|----------|----------|
| 0.007    | -0.04765 | 0.30421  | 0.279853 | 7.51E-10 |
| 9.35E-05 | -0.05386 | 0.2454   | 0.269264 | 3.36E-09 |
| 0.79795  | -0.08383 | 0.07031  | -0.06331 | 0.17202  |
| 0.1919   | -0.21205 | 3.78E-06 | -0.12602 | 0.00639  |
| 0.57055  | -0.04334 | 0.35008  | 0.257139 | 1.73E-08 |
| 0.69302  | 0.102394 | 0.02692  | -0.34239 | 2.73E-14 |
| 0.73206  | 0.000229 | 0.99605  | 0.142846 | 0.00197  |
| 0.4429   | 0.014775 | 0.75014  | -0.02314 | 0.618    |
| 0.5115   | 0.050047 | 0.28046  | -0.12756 | 0.00577  |
| 0.69202  | -0.10711 | 0.0206   | -0.1418  | 0.00213  |
| 0.07801  | 0.012916 | 0.78072  | -0.18831 | 4.22E-05 |
| 0.33365  | 0.113415 | 0.0142   | -0.22204 | 1.26E-06 |
| 0.1149   | 0.071467 | 0.12301  | -0.10902 | 0.01844  |
| 0.10344  | 0.031748 | 0.49371  | -0.0892  | 0.05408  |
| 0.28303  | 0.056621 | 0.22197  | -0.15499 | 0.00078  |
| 0.09885  | -0.00043 | 0.9926   | 0.00582  | 0.90019  |
| 0.32185  | 0.1052   | 0.02299  | -0.17305 | 0.00017  |
| 0.0507   | 0.008098 | 0.86145  | -0.14174 | 0.00214  |
| 0.12049  | 0.026688 | 0.56509  | -0.13908 | 0.00259  |
| 0.48556  | -0.0045  | 0.92265  | -0.12157 | 0.00854  |
| 0.53044  | -0.01517 | 0.74373  | -0.03372 | 0.46727  |
| 0.02931  | 0.076689 | 0.09787  | -0.21851 | 1.87E-06 |
| 0.07163  | 0.104266 | 0.02424  | -0.20857 | 5.49E-06 |
| 2.44E-10 | 0.382964 | 9.23E-18 | 0.002786 | 0.95211  |
| 0.65248  | 0.20113  | 1.19E-05 | -0.11932 | 0.00985  |
| 0.28441  | 0.054529 | 0.23955  | -0.19389 | 2.45E-05 |
| 0.5811   | 0.093639 | 0.04312  | -0.20581 | 7.34E-06 |
| 0.42356  | 0.065898 | 0.15509  | -0.13899 | 0.00261  |
| 0.02543  | -0.09237 | 0.04603  | -0.06006 | 0.19512  |
| 0.20092  | 0.024333 | 0.59992  | -0.07581 | 0.10179  |
| 0.0128   | 0.168663 | 0.00025  | -0.18501 | 5.77E-05 |
| 0.31383  | -0.01384 | 0.76545  | 0.017399 | 0.70764  |
| 0.03397  | 0.0717   | 0.12179  | -0.3902  | 1.97E-18 |
| 0.74757  | -0.0741  | 0.10977  | 0.12342  | 0.00758  |
| 0.08291  | 0.035342 | 0.44609  | 0.006703 | 0.88514  |
| 0.77653  | -0.01623 | 0.72648  | -0.11971 | 0.00962  |
| 0.18092  | -0.17295 | 0.00017  | -0.02567 | 0.58008  |
| 0.68537  | 0.124007 | 0.0073   | -0.0781  | 0.09184  |
| 0.04428  | -0.0502  | 0.27894  | -0.04268 | 0.35748  |
| 0.92036  | 0.06285  | 0.17513  | -0.14717 | 0.00143  |
| 0.00277  | 0.046536 | 0.31562  | -0.26351 | 7.40E-09 |
| 0.90006  | -0.06751 | 0.14524  | 0.044334 | 0.33909  |
| 0.16603  | -0.01134 | 0.80693  | -0.12664 | 0.00614  |
| 0.85699  | -0.13477 | 0.00352  | -0.05942 | 0.19994  |
| 0.92355  | -0.02162 | 0.64118  | 0.022771 | 0.62354  |

|          |          |          |          |          |
|----------|----------|----------|----------|----------|
| 0.12432  | -0.02657 | 0.56677  | 0.082598 | 0.07455  |
| 0.78708  | 0.01928  | 0.67773  | -0.03538 | 0.44558  |
| 0.39883  | 0.068997 | 0.13653  | -0.05668 | 0.2215   |
| 0.06355  | 0.008572 | 0.85342  | -0.28798 | 2.27E-10 |
| 0.00156  | 0.039675 | 0.39232  | -0.28561 | 3.24E-10 |
| 0.02178  | -0.11417 | 0.01356  | -0.23888 | 1.75E-07 |
| 7.38E-06 | -0.17041 | 0.00022  | -0.07808 | 0.09192  |
| 0.04472  | 0.037593 | 0.41765  | -0.12945 | 0.00508  |
| 0.16296  | -0.05098 | 0.27155  | 0.268319 | 3.83E-09 |
| 0.91255  | 0.01684  | 0.71664  | 0.13918  | 0.00258  |
| 2.54E-07 | 0.106572 | 0.02125  | -0.21729 | 2.14E-06 |
| 0.56084  | -0.0202  | 0.66333  | 0.04987  | 0.28216  |
| 0.00704  | 0.024479 | 0.59773  | -0.3591  | 1.17E-15 |
| 0.01742  | 0.058398 | 0.20778  | -0.32005 | 1.39E-12 |
| 0.32712  | 0.027997 | 0.54617  | -0.18908 | 3.92E-05 |
| 2.01E-11 | 0.351776 | 4.75E-15 | -0.01618 | 0.72723  |
| 0.74931  | -0.0063  | 0.89203  | 0.150226 | 0.00113  |
| 0.35961  | 0.088785 | 0.0552   | -0.03686 | 0.42675  |
| 0.42322  | -0.06259 | 0.17694  | 0.183984 | 6.35E-05 |
| 0.01273  | -0.01609 | 0.72878  | 0.068608 | 0.13876  |
| 0.07682  | -0.13486 | 0.0035   | -0.01861 | 0.68841  |
| 0.67284  | -0.01697 | 0.71453  | 0.082328 | 0.07551  |
| 0.26844  | -0.01678 | 0.71758  | -0.01671 | 0.71872  |
| 0.00026  | -0.03061 | 0.50933  | -0.18018 | 9.03E-05 |
| 0.02136  | 0.014561 | 0.75365  | 0.057458 | 0.21521  |
| 0.00081  | -0.0615  | 0.18457  | -0.14369 | 0.00185  |
| 0.2315   | 0.016221 | 0.72662  | -0.26861 | 3.68E-09 |
| 0.00028  | -0.1023  | 0.02706  | -0.2917  | 1.30E-10 |
| 1.34E-06 | 0.266506 | 4.92E-09 | -0.05049 | 0.27623  |
| 0.20675  | 0.223606 | 1.05E-06 | -0.33447 | 1.14E-13 |
| 0.46679  | 0.218425 | 1.89E-06 | -0.2662  | 5.13E-09 |
| 0.26847  | 0.234324 | 3.03E-07 | -0.34681 | 1.21E-14 |
| 0.01671  | 0.230407 | 4.81E-07 | -0.23767 | 2.03E-07 |
| 0.16578  | 0.143042 | 0.00194  | -0.21197 | 3.82E-06 |
| 0.29728  | 0.006391 | 0.89044  | -0.11491 | 0.01296  |
| 0.22221  | -0.02202 | 0.63497  | -0.02748 | 0.5536   |
| 0.00012  | -0.1917  | 3.04E-05 | -0.1926  | 2.79E-05 |
| 0.70019  | -0.06876 | 0.13786  | 0.225798 | 8.21E-07 |
| 0.60698  | -0.03095 | 0.50457  | 0.04201  | 0.36504  |
| 0.47903  | 0.205895 | 7.27E-06 | -0.33981 | 4.37E-14 |
| 3.52E-05 | 0.160118 | 0.00051  | -0.17614 | 0.00013  |
| 0.90604  | -0.00621 | 0.89361  | 0.132367 | 0.00416  |
| 2.40E-09 | -0.13484 | 0.00351  | -0.23617 | 2.43E-07 |
| 0.66344  | -0.05322 | 0.25101  | -0.12275 | 0.00792  |
| 3.59E-05 | 0.102477 | 0.0268   | 0.121383 | 0.00864  |

|          |          |          |          |          |
|----------|----------|----------|----------|----------|
| 0.08025  | -0.03449 | 0.45718  | -0.09567 | 0.03876  |
| 5.72E-14 | 0.412733 | 1.23E-20 | -0.09718 | 0.03577  |
| 3.89E-05 | 0.135923 | 0.00325  | -0.20463 | 8.29E-06 |
| 0.00012  | -0.02652 | 0.5675   | -0.14077 | 0.0023   |
| 0.83899  | 0.161905 | 0.00044  | -0.20539 | 7.66E-06 |
| 2.41E-05 | 0.125747 | 0.00651  | -0.4782  | 4.66E-28 |
| 0.33322  | -0.01425 | 0.75868  | 0.078396 | 0.0906   |
| 0.00043  | -0.03696 | 0.42554  | -0.07874 | 0.08921  |
| 0.02724  | 0.058653 | 0.2058   | -0.15186 | 0.00099  |
| 0.04665  | 0.138359 | 0.00273  | -0.27876 | 8.79E-10 |
| 0.00189  | 0.057249 | 0.21689  | -0.26695 | 4.63E-09 |
| 0.65426  | 0.132558 | 0.00411  | -0.10048 | 0.02993  |
| 0.08364  | -0.00217 | 0.96268  | -0.17456 | 0.00015  |
| 0.38699  | -0.07416 | 0.10948  | -0.19069 | 3.36E-05 |
| 0.08141  | 0.015599 | 0.73671  | -0.21756 | 2.08E-06 |
| 0.93562  | 0.011057 | 0.81164  | 0.096879 | 0.03636  |
| 0.02286  | 0.011    | 0.81259  | -0.22489 | 9.11E-07 |
| 0.76474  | 0.006612 | 0.88668  | -0.16662 | 0.0003   |
| 0.41013  | -0.00196 | 0.96625  | -0.1269  | 0.00603  |
| 0.82131  | -0.04958 | 0.28493  | -0.05521 | 0.23373  |
| 0.01793  | 0.044519 | 0.33707  | -0.2386  | 1.81E-07 |
| 0.0956   | 0.081196 | 0.07963  | -0.20111 | 1.19E-05 |
| 0.10939  | 0.077511 | 0.09432  | -0.15746 | 0.00064  |
| 0.39473  | 0.000433 | 0.99255  | -0.19771 | 1.68E-05 |
| 0.88874  | 0.135458 | 0.00336  | -0.21875 | 1.82E-06 |
| 0.20626  | -0.03886 | 0.40216  | -0.38451 | 6.65E-18 |
| 0.27134  | -0.1369  | 0.00303  | -0.14118 | 0.00223  |
| 0.00739  | 0.013848 | 0.76535  | -0.16565 | 0.00032  |
| 0.35084  | 0.147924 | 0.00135  | 0.029376 | 0.52656  |
| 0.43051  | 0.027589 | 0.55203  | 0.084329 | 0.06865  |
| 1.80E-06 | -0.0321  | 0.48898  | -0.26366 | 7.25E-09 |
| 0.40482  | 0.042395 | 0.36066  | -0.01655 | 0.72129  |
| 0.6346   | 0.112378 | 0.01511  | -0.14754 | 0.00139  |
| 0.16466  | 0.116536 | 0.01173  | -0.19421 | 2.38E-05 |
| 0.00435  | 0.00856  | 0.85363  | -0.09874 | 0.03291  |
| 0.3044   | 0.036227 | 0.43478  | -0.21221 | 3.72E-06 |
| 0.93114  | 0.137881 | 0.00283  | -0.13616 | 0.0032   |
| 0.85201  | 0.066955 | 0.14855  | -0.01487 | 0.74858  |
| 0.58275  | 0.088291 | 0.05657  | -0.05595 | 0.22751  |
| 0.32294  | 0.119848 | 0.00953  | -0.01473 | 0.75092  |
| 0.12158  | -0.08774 | 0.05814  | -0.16341 | 0.00039  |
| 0.55142  | 0.043116 | 0.35254  | -0.03015 | 0.51567  |
| 0.42989  | -0.1238  | 0.0074   | -0.05309 | 0.25222  |
| 0.00931  | 0.111264 | 0.01615  | 0.06181  | 0.18239  |
| 0.21637  | 0.043784 | 0.34512  | -0.17544 | 0.00014  |

|          |          |          |          |          |
|----------|----------|----------|----------|----------|
| 0.82531  | 0.07125  | 0.12416  | -0.05971 | 0.19772  |
| 0.95702  | -0.12608 | 0.00637  | 0.071746 | 0.12155  |
| 0.35995  | -0.14782 | 0.00136  | -0.0084  | 0.85626  |
| 0.91863  | 0.015653 | 0.73583  | -0.15185 | 0.001    |
| 0.01521  | 0.076506 | 0.09868  | -0.22736 | 6.86E-07 |
| 0.20301  | 0.124789 | 0.00693  | -0.48856 | 2.19E-29 |
| 0.01059  | 0.030048 | 0.51715  | -0.02379 | 0.60812  |
| 0.39757  | 0.008289 | 0.85822  | -0.22571 | 8.30E-07 |
| 0.2639   | -0.09542 | 0.03929  | 0.157195 | 0.00065  |
| 0.18957  | -0.015   | 0.74646  | -0.02989 | 0.51929  |
| 0.92343  | -0.06943 | 0.13408  | -0.11179 | 0.01565  |
| 0.05462  | 0.06663  | 0.15054  | -0.18806 | 4.32E-05 |
| 0.69924  | 0.024061 | 0.60401  | 0.018351 | 0.69245  |
| 0.13849  | 0.018017 | 0.69777  | -0.19777 | 1.67E-05 |
| 0.1426   | -0.07205 | 0.12     | -0.05771 | 0.21318  |
| 0.29066  | 0.058274 | 0.20875  | -0.27737 | 1.07E-09 |
| 0.1061   | 0.047271 | 0.30803  | -0.14688 | 0.00146  |
| 0.33857  | 0.005197 | 0.91082  | -0.18707 | 4.75E-05 |
| 0.201    | -0.12211 | 0.00825  | -0.12651 | 0.00619  |
| 0.09088  | 0.057836 | 0.2122   | -0.12787 | 0.00565  |
| 0.67899  | 0.014059 | 0.76187  | -0.00772 | 0.86793  |
| 0.22267  | 0.004103 | 0.92954  | -0.11708 | 0.01134  |
| 0.3489   | -0.00077 | 0.98683  | -0.07494 | 0.10579  |
| 0.15056  | -0.0338  | 0.46618  | -0.04062 | 0.38118  |
| 0.0261   | 0.007972 | 0.86359  | 0.014817 | 0.74946  |
| 0.64513  | 0.045502 | 0.32651  | -0.34824 | 9.24E-15 |
| 0.0591   | 0.179191 | 9.88E-05 | 0.161244 | 0.00047  |
| 0.84829  | -0.01467 | 0.7518   | -0.18242 | 7.34E-05 |
| 0.69678  | -0.0605  | 0.19186  | 0.12296  | 0.00781  |
| 0.07854  | 0.078114 | 0.09178  | -0.48967 | 1.56E-29 |
| 3.25E-07 | 0.072011 | 0.12018  | -0.21791 | 2.00E-06 |
| 0.14333  | 0.05591  | 0.22784  | -0.22491 | 9.09E-07 |
| 0.06617  | 0.019684 | 0.67136  | -0.16287 | 0.00041  |
| 0.00517  | 0.015083 | 0.74511  | -0.09879 | 0.0328   |
| 0.00383  | -0.05857 | 0.20643  | -0.16297 | 0.00041  |
| 0.15492  | -0.15217 | 0.00097  | 0.22746  | 6.78E-07 |
| 0.13388  | 0.044401 | 0.33836  | -0.31483 | 3.33E-12 |
| 0.00081  | 0.042515 | 0.35929  | -0.38457 | 6.57E-18 |
| 3.70E-06 | 0.129447 | 0.00508  | 0.173806 | 0.00016  |
| 0.01805  | -0.00601 | 0.89696  | 0.031391 | 0.49859  |
| 7.75E-11 | 0.159797 | 0.00053  | 0.37499  | 4.86E-17 |
| 0.60889  | -0.09298 | 0.04461  | 0.132488 | 0.00413  |
| 0.90097  | -0.08994 | 0.05209  | 0.128648 | 0.00537  |
| 0.55971  | 0.106722 | 0.02107  | -0.36512 | 3.57E-16 |
| 0.01624  | -0.0543  | 0.24154  | 0.173852 | 0.00016  |

|          |          |          |          |          |
|----------|----------|----------|----------|----------|
| 0.0563   | 0.09877  | 0.03285  | 0.194823 | 2.24E-05 |
| 1.90E-08 | 0.08532  | 0.06545  | -0.00085 | 0.9854   |
| 0.00455  | -0.08847 | 0.05608  | 0.115829 | 0.01225  |
| 0.55845  | 0.14068  | 0.00231  | -0.1692  | 0.00024  |
| 0.36692  | -0.13232 | 0.00418  | 0.046916 | 0.31168  |
| 0.05213  | 0.180442 | 8.81E-05 | -0.20792 | 5.88E-06 |
| 1.82E-05 | 0.040386 | 0.38389  | -0.46546 | 1.74E-26 |
| 0.20828  | 0.035184 | 0.44813  | -0.25671 | 1.83E-08 |
| 0.04434  | -0.12479 | 0.00693  | -0.20535 | 7.69E-06 |
| 0.58438  | 0.006005 | 0.89702  | 0.07676  | 0.09756  |
| 0.01159  | -0.01862 | 0.68822  | -0.23673 | 2.27E-07 |
| 0.01903  | -0.06419 | 0.16608  | -0.06679 | 0.14954  |
| 0.65017  | -0.08684 | 0.06077  | 0.033304 | 0.47277  |
| 0.55701  | -0.02492 | 0.59119  | 0.105207 | 0.02298  |
| 0.03283  | 0.111299 | 0.01612  | -0.25349 | 2.79E-08 |
| 0.0327   | 0.110433 | 0.01697  | -0.13913 | 0.00259  |
| 0.02415  | 0.024552 | 0.59664  | -0.36078 | 8.39E-16 |
| 0.36562  | 0.082413 | 0.0752   | -0.11637 | 0.01185  |
| 0.00272  | -0.09687 | 0.03638  | 0.20665  | 6.72E-06 |
| 0.11458  | 0.091229 | 0.0488   | 0.054555 | 0.23933  |
| 0.00029  | -0.02219 | 0.63245  | -0.11374 | 0.01392  |
| 0.35069  | -0.04073 | 0.3798   | 0.204686 | 8.24E-06 |
| 0.01138  | 0.07756  | 0.09411  | -0.20206 | 1.08E-05 |
| 0.80196  | 0.076457 | 0.0989   | -0.00489 | 0.91607  |
| 0.71055  | -0.07795 | 0.09244  | -0.15627 | 0.0007   |
| 0.00873  | 0.047991 | 0.30072  | -0.30995 | 7.41E-12 |
| 0.02944  | -0.01872 | 0.68666  | -0.00873 | 0.85079  |
| 0.37007  | -0.1184  | 0.01044  | 0.254343 | 2.50E-08 |
| 0.40272  | -0.0408  | 0.37903  | 0.072801 | 0.11616  |
| 0.03751  | -0.01742 | 0.70738  | -0.06729 | 0.14653  |
| 0.00353  | 0.163675 | 0.00038  | -0.00953 | 0.83734  |
| 0.17938  | 0.011903 | 0.79753  | -0.21168 | 3.94E-06 |
| 0.00431  | 0.014808 | 0.7496   | -0.35025 | 6.34E-15 |
| 0.61707  | 0.082736 | 0.07406  | -0.16169 | 0.00045  |
| 0.89216  | -0.04565 | 0.32498  | 0.125963 | 0.00642  |
| 0.01265  | -0.06311 | 0.17336  | -0.13333 | 0.00389  |
| 0.34344  | -0.02837 | 0.54089  | -0.02135 | 0.64536  |
| 0.02472  | 0.107406 | 0.02026  | -0.27523 | 1.46E-09 |
| 0.78922  | -0.07956 | 0.08592  | -0.07931 | 0.08689  |
| 0.00935  | 0.027987 | 0.5463   | -0.23238 | 3.82E-07 |
| 0.28787  | -0.10666 | 0.02114  | -0.02214 | 0.63319  |
| 0.55819  | -0.18265 | 7.19E-05 | 0.263932 | 6.98E-09 |
| 0.27175  | -0.00728 | 0.8753   | 0.007723 | 0.8678   |
| 0.38556  | -0.04132 | 0.37297  | -0.3585  | 1.31E-15 |
| 0.01363  | -0.12168 | 0.00848  | -0.21115 | 4.17E-06 |

|          |          |          |          |          |
|----------|----------|----------|----------|----------|
| 0.49595  | -0.0037  | 0.93641  | 0.001817 | 0.96877  |
| 0.18043  | 0.046175 | 0.31939  | -0.01749 | 0.70625  |
| 0.43781  | 0.161585 | 0.00046  | -0.08898 | 0.05466  |
| 0.10595  | -0.09722 | 0.0357   | -0.07096 | 0.1257   |
| 0.37976  | 0.096569 | 0.03696  | 0.068182 | 0.14124  |
| 0.0277   | -0.00891 | 0.84765  | -0.12384 | 0.00737  |
| 0.03159  | -0.06835 | 0.14027  | 0.025915 | 0.57642  |
| 0.28616  | 0.018047 | 0.69729  | -0.23849 | 1.83E-07 |
| 0.75288  | 0.089894 | 0.05221  | -0.14455 | 0.00174  |
| 0.00046  | -0.06678 | 0.1496   | -0.08902 | 0.05455  |
| 0.56514  | -0.04979 | 0.28297  | 0.077676 | 0.09362  |
| 0.89061  | -0.00505 | 0.91329  | 0.054491 | 0.23988  |
| 0.91131  | -0.10921 | 0.01823  | -0.09908 | 0.0323   |
| 0.87306  | 0.023699 | 0.60946  | -0.11578 | 0.01229  |
| 0.71562  | -0.04143 | 0.37165  | -0.0463  | 0.31804  |
| 0.07677  | 0.006239 | 0.89304  | -0.27339 | 1.89E-09 |
| 0.4915   | 0.096354 | 0.03739  | -0.08873 | 0.05535  |
| 0.58856  | -0.02679 | 0.56355  | -0.18744 | 4.58E-05 |
| 0.49919  | 0.147316 | 0.00141  | -0.18979 | 3.66E-05 |
| 0.28207  | 0.014593 | 0.75312  | 0.081208 | 0.07958  |
| 0.79276  | -0.02017 | 0.66382  | 0.029654 | 0.52266  |
| 0.70223  | 0.18478  | 5.89E-05 | -0.16414 | 0.00037  |
| 0.31998  | 0.054963 | 0.23583  | -0.08924 | 0.05395  |
| 0.11957  | 0.032081 | 0.48918  | 0.010951 | 0.81341  |
| 0.02111  | -0.01098 | 0.81298  | -0.29488 | 8.00E-11 |
| 0.13966  | -0.1559  | 0.00072  | -0.18644 | 5.04E-05 |
| 0.0505   | -0.02116 | 0.6483   | 0.083576 | 0.07117  |
| 0.41347  | -0.06399 | 0.16745  | 0.2348   | 2.86E-07 |
| 0.17404  | 0.210048 | 4.69E-06 | -0.403   | 1.16E-19 |
| 0.02807  | 0.112811 | 0.01472  | 0.310291 | 7.01E-12 |
| 0.09564  | 0.274738 | 1.56E-09 | -0.26591 | 5.33E-09 |
| 0.00431  | 0.014155 | 0.76029  | 0.084661 | 0.06756  |
| 0.60883  | 0.036461 | 0.43182  | -0.09168 | 0.0477   |
| 0.8271   | 0.093558 | 0.0433   | 0.068043 | 0.14206  |
| 0.013    | 0.087402 | 0.05912  | -0.27288 | 2.03E-09 |
| 0.0049   | 0.02749  | 0.55346  | -0.3072  | 1.16E-11 |
| 0.42972  | 0.062975 | 0.17427  | 0.241312 | 1.30E-07 |
| 5.89E-09 | -0.08895 | 0.05476  | -0.33795 | 6.12E-14 |
| 2.48E-07 | -0.10025 | 0.0303   | -0.30743 | 1.11E-11 |
| 0.71403  | 0.164087 | 0.00037  | -0.11479 | 0.01306  |
| 0.37864  | 0.009369 | 0.83997  | 0.078277 | 0.09109  |
| 0.00055  | 0.091047 | 0.04926  | -0.14143 | 0.00219  |
| 0.05387  | 0.015885 | 0.73207  | -0.00323 | 0.94449  |
| 0.00011  | -0.08949 | 0.05329  | -0.08607 | 0.0631   |
| 0.58856  | -0.06462 | 0.1633   | 0.1119   | 0.01555  |

|          |          |          |          |          |
|----------|----------|----------|----------|----------|
| 0.74175  | -0.00029 | 0.99501  | -0.24948 | 4.67E-08 |
| 0.08525  | -0.1115  | 0.01592  | -0.04133 | 0.37289  |
| 0.0006   | -0.11302 | 0.01454  | -0.26143 | 9.79E-09 |
| 0.30626  | 0.156971 | 0.00066  | -0.18692 | 4.82E-05 |
| 0.12423  | 0.061398 | 0.18533  | -0.1225  | 0.00805  |
| 0.35024  | 0.106834 | 0.02094  | -0.17221 | 0.00018  |
| 0.00374  | 0.008434 | 0.85575  | 0.430776 | 1.60E-22 |
| 0.12442  | 0.058636 | 0.20593  | -0.0212  | 0.64764  |
| 0.5701   | -0.06962 | 0.133    | -0.02064 | 0.65639  |
| 0.17499  | -0.03478 | 0.45334  | 0.064769 | 0.1623   |
| 0.46564  | -0.03503 | 0.45014  | 0.040552 | 0.38192  |
| 0.83437  | -0.01818 | 0.69524  | -0.01606 | 0.72929  |
| 0.13745  | -0.02102 | 0.65044  | 0.084433 | 0.06831  |
| 0.0002   | -0.05368 | 0.24699  | -0.45125 | 8.31E-25 |
| 0.02029  | 0.001085 | 0.98134  | -0.34996 | 6.69E-15 |
| 0.26565  | 0.080844 | 0.08095  | -0.24476 | 8.47E-08 |
| 0.36207  | 0.021337 | 0.64558  | 0.142339 | 0.00205  |
| 0.01581  | -0.15999 | 0.00052  | 0.304672 | 1.73E-11 |
| 0.32303  | 0.014263 | 0.75854  | 0.190731 | 3.34E-05 |
| 0.5704   | -0.03238 | 0.48521  | 0.081989 | 0.07672  |
| 0.28587  | 0.014936 | 0.74751  | 0.20889  | 5.30E-06 |
| 0.47346  | -0.10265 | 0.02654  | 0.229731 | 5.21E-07 |
| 0.74392  | 0.188559 | 4.12E-05 | -0.1732  | 0.00017  |
| 0.05591  | 0.028792 | 0.53482  | 0.01037  | 0.82315  |
| 3.47E-05 | 0.182568 | 7.24E-05 | 0.186317 | 5.10E-05 |
| 0.63301  | -0.00789 | 0.86496  | -0.06151 | 0.18451  |
| 0.05409  | 0.066882 | 0.149    | 0.092681 | 0.04531  |
| 0.01728  | 0.025372 | 0.58444  | -0.10035 | 0.03014  |
| 0.00016  | 0.03458  | 0.45597  | 0.221194 | 1.38E-06 |
| 0.78287  | 0.113565 | 0.01407  | -0.27418 | 1.69E-09 |
| 0.5576   | -0.07224 | 0.11899  | 0.067691 | 0.14413  |
| 0.06708  | 0.032837 | 0.47901  | -0.17095 | 0.00021  |
| 0.07844  | -0.03887 | 0.40201  | 0.096567 | 0.03697  |
| 0.78754  | -0.06561 | 0.15691  | -0.06218 | 0.17976  |
| 0.52052  | 0.005829 | 0.90002  | 0.039287 | 0.39697  |
| 0.12375  | 0.208145 | 5.74E-06 | -0.11983 | 0.00954  |
| 0.07661  | 0.005421 | 0.90699  | 0.229013 | 5.66E-07 |
| 0.03258  | 0.10125  | 0.02868  | 0.064776 | 0.16225  |
| 2.94E-07 | -0.03699 | 0.42512  | -0.31083 | 6.42E-12 |
| 0.01126  | -0.00482 | 0.91735  | -0.11168 | 0.01575  |
| 0.20745  | -0.08751 | 0.0588   | -0.10065 | 0.02965  |
| 0.20267  | -0.03331 | 0.47269  | 0.09252  | 0.04568  |
| 0.32925  | 0.096813 | 0.03649  | -0.04048 | 0.38274  |
| 0.04731  | 0.061688 | 0.18326  | 0.056609 | 0.22208  |
| 0.00053  | -0.04553 | 0.3262   | -0.21137 | 4.07E-06 |

|          |          |          |          |          |
|----------|----------|----------|----------|----------|
| 0.04648  | 0.09966  | 0.0313   | -0.28589 | 3.10E-10 |
| 0.18272  | 0.027739 | 0.54987  | -0.33691 | 7.38E-14 |
| 0.94363  | 0.075818 | 0.10175  | -0.04796 | 0.301    |
| 0.00064  | 0.183581 | 6.59E-05 | 0.017238 | 0.71023  |
| 0.63038  | 0.042928 | 0.35464  | 0.006855 | 0.88255  |
| 0.09486  | 0.139027 | 0.0026   | -0.00244 | 0.95812  |
| 0.82329  | 0.112064 | 0.0154   | -0.07449 | 0.10793  |
| 0.35701  | 0.174856 | 0.00015  | -0.0979  | 0.03443  |
| 1.18E-14 | 0.349166 | 7.77E-15 | 0.068386 | 0.14005  |
| 0.5522   | 0.043599 | 0.34716  | 0.198759 | 1.51E-05 |
| 0.00032  | 0.001646 | 0.9717   | -0.42256 | 1.19E-21 |
| 0.72461  | 0.138836 | 0.00264  | -0.05437 | 0.2409   |
| 0.39985  | -0.00719 | 0.87682  | 0.063558 | 0.17031  |
| 0.50073  | 0.005418 | 0.90704  | -0.0585  | 0.20699  |
| 0.51098  | -0.0779  | 0.09267  | -0.03772 | 0.41604  |
| 0.00253  | 0.035792 | 0.44033  | -0.3491  | 7.87E-15 |
| 0.08538  | 0.007597 | 0.86994  | 0.057216 | 0.21714  |
| 0.00527  | 0.002599 | 0.95534  | -0.06135 | 0.18568  |
| 0.72838  | 0.031664 | 0.49486  | 0.048194 | 0.29866  |
| 0.2574   | -0.02302 | 0.61976  | -0.02524 | 0.58637  |
| 0.00157  | -0.00927 | 0.84158  | -0.03085 | 0.50599  |
| 0.00269  | 0.092346 | 0.04609  | -0.12922 | 0.00516  |
| 0.00216  | -0.11276 | 0.01477  | -0.05227 | 0.25962  |
| 6.69E-08 | 0.06212  | 0.18021  | 0.223183 | 1.11E-06 |
| 0.02629  | -0.04812 | 0.29945  | -0.05658 | 0.22231  |
| 0.01038  | -0.16776 | 0.00027  | -0.15088 | 0.00107  |
| 0.07459  | -0.01597 | 0.73061  | -0.15393 | 0.00085  |
| 0.02095  | 0.079167 | 0.08747  | -0.0412  | 0.3744   |
| 6.34E-07 | 0.105443 | 0.02267  | 0.245195 | 8.02E-08 |
| 2.31E-05 | 0.213449 | 3.25E-06 | -0.2153  | 2.66E-06 |
| 0.02544  | 0.225382 | 8.61E-07 | -0.15807 | 0.00061  |
| 0.03978  | 0.037271 | 0.42165  | -0.21208 | 3.77E-06 |
| 0.30988  | 0.016693 | 0.719    | -0.05891 | 0.2038   |
| 0.07217  | 0.033933 | 0.46444  | -0.21996 | 1.59E-06 |
| 5.69E-05 | 0.225611 | 8.39E-07 | -0.14462 | 0.00173  |
| 0.01892  | -0.06311 | 0.17337  | 0.07599  | 0.10098  |
| 0.90408  | 0.016633 | 0.71997  | 0.043298 | 0.35051  |
| 0.65292  | -0.18091 | 8.44E-05 | -0.07904 | 0.08798  |
| 0.01137  | 0.237356 | 2.10E-07 | -0.23137 | 4.30E-07 |
| 0.21154  | -0.10557 | 0.02252  | 0.176512 | 0.00013  |
| 0.68091  | 0.0869   | 0.06059  | -0.08544 | 0.06507  |
| 0.01361  | -0.03414 | 0.4617   | -0.09008 | 0.05172  |
| 0.28788  | 0.045439 | 0.32718  | -0.08976 | 0.05256  |
| 0.33685  | -0.04723 | 0.30847  | -0.15844 | 0.00059  |
| 0.12496  | 0.023921 | 0.60611  | -0.06222 | 0.17949  |



|          |          |          |          |          |
|----------|----------|----------|----------|----------|
| 0.44352  | 0.009202 | 0.84279  | -0.18985 | 3.64E-05 |
| 0.14999  | -0.00999 | 0.82944  | -0.26212 | 8.91E-09 |
| 0.94496  | 0.090387 | 0.05093  | -0.11973 | 0.0096   |
| 0.37654  | 0.038757 | 0.40337  | -0.24065 | 1.41E-07 |
| 0.92957  | 0.022701 | 0.62462  | 0.048383 | 0.29677  |
| 0.01801  | -0.01259 | 0.78609  | 0.178914 | 0.0001   |
| 0.00484  | 0.083226 | 0.07236  | -0.21158 | 3.98E-06 |
| 0.2531   | 0.172842 | 0.00017  | 0.049068 | 0.28998  |
| 0.53107  | 0.057179 | 0.21744  | -0.21231 | 3.68E-06 |
| 0.19286  | -0.0774  | 0.09478  | -0.00151 | 0.97406  |
| 0.32552  | -0.02204 | 0.63471  | 0.087308 | 0.05939  |
| 0.79886  | -0.13957 | 0.0025   | 0.200467 | 1.27E-05 |
| 0.52779  | -0.00025 | 0.99563  | 0.048521 | 0.2954   |
| 0.00068  | -0.02319 | 0.61712  | -0.27163 | 2.42E-09 |
| 0.00737  | -0.0099  | 0.83104  | 0.375773 | 4.14E-17 |
| 0.00352  | 0.014942 | 0.74741  | -0.30622 | 1.35E-11 |
| 0.06262  | -0.01688 | 0.71606  | 0.12523  | 0.00674  |
| 0.21107  | -0.01149 | 0.80442  | -0.06495 | 0.16113  |
| 0.79763  | -0.14367 | 0.00185  | -0.1068  | 0.02098  |
| 8.46E-09 | 0.268928 | 3.52E-09 | 0.054422 | 0.24048  |
| 0.77909  | 0.009416 | 0.83918  | 0.006268 | 0.89255  |
| 0.1706   | -0.05277 | 0.25509  | -0.10574 | 0.02229  |
| 0.59928  | -0.01576 | 0.73405  | -0.03862 | 0.405    |
| 0.00422  | -0.06378 | 0.16882  | -0.13055 | 0.00472  |
| 0.3472   | -0.18873 | 4.05E-05 | -0.15049 | 0.00111  |
| 0.65821  | 0.039623 | 0.39294  | 0.131163 | 0.00452  |
| 0.39571  | 0.010481 | 0.82129  | -0.04409 | 0.34176  |
| 0.43615  | 0.041279 | 0.37345  | 0.176612 | 0.00012  |
| 0.20386  | 0.09865  | 0.03306  | -0.16898 | 0.00024  |
| 0.00371  | -0.02631 | 0.57056  | -0.00215 | 0.96308  |
| 0.44647  | -0.11675 | 0.01158  | -0.13484 | 0.00351  |
| 0.16827  | 0.07011  | 0.13031  | -0.02094 | 0.65168  |
| 0.01917  | 0.008107 | 0.8613   | -0.26837 | 3.81E-09 |
| 0.067    | 0.007993 | 0.86323  | -0.04037 | 0.38411  |
| 0.00395  | 0.05014  | 0.27956  | -0.17474 | 0.00015  |
| 0.70327  | 0.035489 | 0.44421  | -0.07286 | 0.11585  |
| 0.27297  | -0.01025 | 0.82517  | 0.120186 | 0.00933  |
| 0.81103  | -0.0842  | 0.06907  | 0.056937 | 0.2194   |
| 0.03707  | 0.218662 | 1.84E-06 | -0.19458 | 2.29E-05 |
| 0.62841  | 0.143231 | 0.00192  | -0.17806 | 0.00011  |
| 0.07247  | -0.10471 | 0.02364  | -0.12683 | 0.00606  |
| 0.12613  | 0.038367 | 0.40812  | -0.16857 | 0.00025  |
| 0.1078   | -0.00321 | 0.94484  | 0.086074 | 0.06309  |
| 0.67689  | 0.043659 | 0.3465   | -0.13484 | 0.00351  |
| 0.29623  | -0.00258 | 0.95567  | -0.18171 | 7.84E-05 |

|          |          |          |          |          |
|----------|----------|----------|----------|----------|
| 0.02154  | 0.063684 | 0.16946  | -0.01748 | 0.70634  |
| 0.98212  | -0.11822 | 0.01056  | 0.063846 | 0.16838  |
| 0.28607  | 0.014845 | 0.749    | -0.1815  | 8.00E-05 |
| 0.16645  | 0.105943 | 0.02204  | -0.23552 | 2.62E-07 |
| 0.03687  | -0.06334 | 0.17179  | 0.178132 | 0.00011  |
| 0.05471  | 0.034433 | 0.45789  | 0.135895 | 0.00326  |
| 0.59602  | 0.07508  | 0.10514  | 0.195995 | 1.99E-05 |
| 0.56327  | -0.07054 | 0.12794  | -0.09507 | 0.04001  |
| 0.07164  | -0.01967 | 0.67153  | -0.17248 | 0.00018  |
| 0.80758  | -0.01643 | 0.72323  | -0.02026 | 0.66227  |
| 0.21558  | -0.01994 | 0.66729  | 0.042919 | 0.35474  |
| 0.00031  | 0.067176 | 0.14722  | 0.138816 | 0.00264  |
| 0.00014  | 0.038223 | 0.40989  | -0.17042 | 0.00022  |
| 0.24293  | 0.013961 | 0.76349  | -0.19287 | 2.71E-05 |
| 0.93965  | -0.01694 | 0.71501  | -0.10986 | 0.01755  |
| 0.96648  | -0.0371  | 0.42373  | -0.27114 | 2.59E-09 |
| 0.00079  | -0.07583 | 0.10172  | -0.21807 | 1.96E-06 |
| 0.07353  | 0.076806 | 0.09736  | -0.13975 | 0.00247  |
| 0.02075  | -0.08382 | 0.07034  | -0.15384 | 0.00085  |
| 0.01573  | 0.031985 | 0.49049  | -0.25652 | 1.88E-08 |
| 0.00037  | 0.04313  | 0.35238  | -0.18347 | 6.66E-05 |
| 0.01983  | -0.00541 | 0.90716  | -0.01175 | 0.8001   |
| 0.0007   | -0.04001 | 0.3883   | 0.203368 | 9.45E-06 |
| 1.04E-06 | -0.06276 | 0.17576  | -0.27981 | 7.56E-10 |
| 0.06405  | 0.087387 | 0.05916  | 0.004455 | 0.92351  |
| 0.64464  | 0.106567 | 0.02126  | -0.13462 | 0.00356  |
| 0.00155  | 0.086027 | 0.06324  | -0.28615 | 2.99E-10 |
| 0.00012  | 0.024289 | 0.60059  | -0.22679 | 7.32E-07 |
| 0.33584  | -0.08552 | 0.06481  | -0.07651 | 0.09868  |
| 0.3229   | 0.053976 | 0.24436  | -0.099   | 0.03244  |
| 0.92262  | 0.02597  | 0.5756   | -0.14298 | 0.00195  |
| 0.62253  | -0.01939 | 0.67605  | -0.11139 | 0.01603  |
| 0.00633  | 0.084021 | 0.06967  | -0.2394  | 1.64E-07 |
| 0.36083  | 0.088909 | 0.05486  | -0.04609 | 0.32025  |
| 0.0254   | 0.04821  | 0.29851  | -0.15609 | 0.00071  |
| 0.32398  | -0.03577 | 0.44056  | 0.001754 | 0.96985  |
| 0.80895  | -0.08806 | 0.05723  | -0.04091 | 0.37774  |
| 0.00387  | -0.03533 | 0.44621  | -0.26419 | 6.74E-09 |
| 0.04051  | 0.012551 | 0.78676  | -0.12174 | 0.00845  |
| 0.10599  | 0.241343 | 1.29E-07 | -0.21663 | 2.30E-06 |
| 0.00028  | 0.076146 | 0.10028  | -0.2545  | 2.44E-08 |
| 5.44E-09 | 0.284949 | 3.57E-10 | -0.1877  | 4.47E-05 |
| 0.43706  | -0.1357  | 0.0033   | -0.03409 | 0.46241  |
| 0.01505  | 0.031931 | 0.49123  | 0.189641 | 3.71E-05 |
| 8.73E-09 | -0.21874 | 1.82E-06 | -0.30619 | 1.36E-11 |

|          |          |          |          |          |
|----------|----------|----------|----------|----------|
| 0.10172  | 0.016057 | 0.72928  | -0.0233  | 0.61553  |
| 0.20165  | -0.01584 | 0.73286  | -0.03326 | 0.47338  |
| 0.16303  | 0.055445 | 0.23174  | -0.23991 | 1.54E-07 |
| 0.12323  | 0.021177 | 0.64806  | 0.022614 | 0.62594  |
| 0.05058  | -0.08394 | 0.06993  | 0.046685 | 0.31407  |
| 0.98214  | 0.100381 | 0.03009  | 0.115248 | 0.0127   |
| 0.3845   | -0.0233  | 0.61552  | 0.165973 | 0.00032  |
| 0.01341  | 0.05314  | 0.25176  | -0.09391 | 0.04252  |
| 0.32515  | 0.040982 | 0.3769   | 0.020065 | 0.66538  |
| 0.35703  | -0.0424  | 0.36064  | 0.120201 | 0.00932  |
| 0.43569  | -0.11917 | 0.00995  | 0.396439 | 5.01E-19 |
| 0.1488   | -0.15687 | 0.00067  | 0.189428 | 3.79E-05 |
| 0.62346  | 0.122385 | 0.00811  | -0.23802 | 1.94E-07 |
| 0.88736  | 0.112988 | 0.01457  | 0.031575 | 0.49607  |
| 0.78748  | -0.06509 | 0.16021  | 0.063975 | 0.16752  |
| 0.27207  | 0.038562 | 0.40574  | -0.233   | 3.54E-07 |
| 0.65253  | 0.007771 | 0.86699  | 0.018097 | 0.69649  |
| 0.1687   | -0.09655 | 0.03701  | -0.08688 | 0.06066  |
| 0.01947  | -0.10143 | 0.0284   | -0.46568 | 1.64E-26 |
| 0.38748  | 0.073905 | 0.11071  | 0.204784 | 8.16E-06 |
| 0.67732  | -0.01537 | 0.74051  | 0.073515 | 0.11261  |
| 0.02702  | 0.062893 | 0.17483  | 0.138755 | 0.00266  |
| 0.51594  | -0.05979 | 0.19714  | -0.08883 | 0.05508  |
| 0.07377  | 0.019054 | 0.6813   | -0.40777 | 3.89E-20 |
| 0.17037  | 0.036228 | 0.43477  | -0.08109 | 0.08003  |
| 0.29537  | 0.110412 | 0.01699  | -0.44207 | 9.18E-24 |
| 0.42898  | 0.118045 | 0.01068  | -0.15005 | 0.00114  |
| 0.55459  | -0.02009 | 0.66494  | -0.18912 | 3.90E-05 |
| 0.4362   | -0.05552 | 0.23114  | 0.126271 | 0.00629  |
| 0.31217  | -0.07368 | 0.11181  | 0.022199 | 0.63229  |
| 0.02627  | -0.0402  | 0.38607  | 0.126381 | 0.00624  |
| 0.037    | -0.02923 | 0.52858  | 0.003494 | 0.93997  |
| 0.99869  | -0.05912 | 0.2022   | 0.161441 | 0.00046  |
| 0.82224  | 0.057853 | 0.21206  | -0.0334  | 0.47151  |
| 0.68264  | 0.074376 | 0.10845  | 0.151091 | 0.00106  |
| 0.80082  | 0.01239  | 0.78943  | -0.17754 | 0.00011  |
| 0.21827  | 0.04915  | 0.28917  | -0.11711 | 0.01132  |
| 4.53E-05 | -0.20868 | 5.43E-06 | 0.074893 | 0.10601  |
| 0.00665  | 0.058458 | 0.20732  | -0.1725  | 0.00018  |
| 0.24608  | -0.039   | 0.40044  | -0.23008 | 5.00E-07 |
| 2.76E-05 | 0.004451 | 0.92357  | -0.42303 | 1.07E-21 |
| 0.03108  | -0.02958 | 0.52372  | -0.20485 | 8.11E-06 |
| 0.39399  | 0.115812 | 0.01226  | -0.18849 | 4.15E-05 |
| 0.2416   | 0.026614 | 0.56617  | 0.163157 | 0.0004   |
| 0.00323  | 0.004171 | 0.92837  | -0.26789 | 4.07E-09 |

|          |          |          |          |          |
|----------|----------|----------|----------|----------|
| 3.10E-06 | 0.001587 | 0.97271  | -0.40652 | 5.19E-20 |
| 0.02909  | -0.01419 | 0.75972  | -0.14147 | 0.00218  |
| 0.63478  | 0.071882 | 0.12085  | -0.22197 | 1.27E-06 |
| 0.79701  | 0.229638 | 5.26E-07 | -0.39511 | 6.73E-19 |
| 3.22E-07 | 0.293306 | 1.02E-10 | 0.169669 | 0.00023  |
| 0.86439  | -0.00262 | 0.95495  | -0.29062 | 1.53E-10 |
| 0.02457  | 0.027632 | 0.55141  | -0.27866 | 8.92E-10 |
| 0.00125  | -0.00273 | 0.95305  | -0.18262 | 7.21E-05 |
| 0.10241  | 0.005923 | 0.89843  | -0.1972  | 1.77E-05 |
| 0.00024  | 0.001387 | 0.97616  | 0.516011 | 3.89E-33 |
| 2.58E-05 | -0.07857 | 0.08989  | -0.17069 | 0.00021  |
| 0.12403  | -0.06131 | 0.18596  | -0.00553 | 0.90515  |
| 0.05097  | 0.029317 | 0.52739  | 0.236773 | 2.26E-07 |
| 0.00576  | -0.01825 | 0.69409  | 0.14995  | 0.00115  |
| 4.90E-06 | 0.045889 | 0.32241  | -0.30753 | 1.10E-11 |
| 0.15931  | -0.04109 | 0.37561  | -0.19853 | 1.55E-05 |
| 0.19137  | 0.003873 | 0.93348  | 0.022147 | 0.63309  |
| 0.1349   | -0.02672 | 0.56456  | -0.1194  | 0.0098   |
| 0.1645   | -0.02551 | 0.58234  | 0.273441 | 1.88E-09 |
| 0.00195  | 0.042419 | 0.36038  | -0.17248 | 0.00018  |
| 0.04606  | 0.052119 | 0.26099  | 0.012991 | 0.77949  |
| 0.73958  | -0.07781 | 0.09304  | 0.09592  | 0.03826  |
| 0.02653  | 0.020799 | 0.65392  | -0.29362 | 9.71E-11 |
| 0.01957  | -0.05778 | 0.21263  | 0.032294 | 0.48631  |
| 0.65099  | 0.066558 | 0.15099  | -0.09101 | 0.04936  |
| 0.04595  | 0.005767 | 0.90108  | -0.07495 | 0.10573  |
| 0.33618  | -0.08269 | 0.07424  | 0.078691 | 0.0894   |
| 0.00601  | -0.01166 | 0.80165  | -0.25058 | 4.06E-08 |
| 0.91909  | 0.001354 | 0.97672  | -0.03442 | 0.45806  |
| 0.90396  | -0.06128 | 0.18615  | 0.02457  | 0.59638  |
| 0.12016  | 0.033436 | 0.47102  | -0.43676 | 3.56E-23 |
| 0.00044  | 0.154174 | 0.00083  | 0.121133 | 0.00878  |
| 0.16014  | -0.1305  | 0.00473  | 0.181226 | 8.20E-05 |
| 2.01E-07 | 0.057111 | 0.21799  | 0.210427 | 4.50E-06 |
| 0.47872  | -0.04839 | 0.29674  | 0.242031 | 1.19E-07 |
| 0.05908  | 0.049512 | 0.28563  | -0.19336 | 2.59E-05 |
| 0.00891  | -0.0222  | 0.63234  | 0.071234 | 0.12424  |
| 0.88325  | 0.131185 | 0.00452  | -0.18413 | 6.27E-05 |
| 0.26227  | 0.063277 | 0.17221  | -0.3992  | 2.72E-19 |
| 0.85868  | 0.00582  | 0.90018  | -0.21298 | 3.43E-06 |
| 0.07801  | -0.00895 | 0.84697  | -0.24962 | 4.59E-08 |
| 0.09433  | 0.063757 | 0.16898  | -0.10743 | 0.02023  |
| 0.89649  | 0.206109 | 7.11E-06 | -0.21661 | 2.31E-06 |
| 0.01398  | -0.13649 | 0.00312  | -0.24417 | 9.12E-08 |
| 0.23961  | -0.03763 | 0.41722  | -0.20656 | 6.78E-06 |

|          |          |          |          |          |
|----------|----------|----------|----------|----------|
| 2.25E-05 | 0.516665 | 3.14E-33 | -0.22884 | 5.77E-07 |
| 0.77011  | 0.097582 | 0.03502  | 0.113452 | 0.01416  |
| 0.07032  | 0.073067 | 0.11482  | -0.20883 | 5.34E-06 |
| 0.02431  | 0.035137 | 0.44875  | -0.33289 | 1.51E-13 |
| 0.06735  | -0.05374 | 0.24646  | 0.014667 | 0.75191  |
| 0.68556  | -0.03846 | 0.40694  | -0.04063 | 0.38101  |
| 0.05202  | 0.043178 | 0.35184  | -0.24461 | 8.63E-08 |
| 0.37003  | 0.005461 | 0.90631  | -0.27297 | 2.01E-09 |
| 0.01449  | 0.084263 | 0.06887  | -0.27409 | 1.71E-09 |
| 0.3446   | -0.02076 | 0.65459  | 0.249614 | 4.59E-08 |
| 0.34792  | -0.0138  | 0.76619  | 0.2593   | 1.30E-08 |
| 0.00025  | 0.123391 | 0.00759  | -0.19628 | 1.94E-05 |
| 0.04816  | 0.00813  | 0.8609   | -0.0322  | 0.48763  |
| 0.76267  | 0.015732 | 0.73454  | -0.0669  | 0.1489   |
| 0.01377  | -0.04321 | 0.35148  | -0.36865 | 1.76E-16 |
| 0.35946  | 0.045079 | 0.33102  | -0.25398 | 2.61E-08 |
| 0.02888  | 0.018183 | 0.69511  | -0.37921 | 2.03E-17 |
| 0.24661  | 0.021345 | 0.64546  | -0.35124 | 5.26E-15 |
| 4.83E-05 | -0.00025 | 0.99562  | 0.43383  | 7.46E-23 |
| 2.95E-07 | -0.01374 | 0.76707  | -0.00906 | 0.84511  |
| 0.16286  | -0.02579 | 0.57828  | -0.00107 | 0.9816   |
| 0.11747  | -0.04942 | 0.28651  | -0.14827 | 0.00131  |
| 0.02507  | 0.110654 | 0.01675  | -0.40851 | 3.29E-20 |
| 0.36993  | -0.09222 | 0.04639  | -0.19219 | 2.90E-05 |
| 0.18697  | 0.056806 | 0.22046  | 0.064932 | 0.16124  |
| 0.06844  | 0.102254 | 0.02713  | -0.06553 | 0.15739  |
| 0.08749  | -0.01229 | 0.79108  | 0.24836  | 5.38E-08 |
| 0.10259  | -0.0091  | 0.8445   | 0.287132 | 2.58E-10 |
| 0.00025  | -0.02414 | 0.60275  | -0.32149 | 1.09E-12 |
| 1.11E-06 | 0.036758 | 0.42808  | -0.03137 | 0.49885  |
| 0.67334  | 0.098527 | 0.03328  | -0.25574 | 2.08E-08 |
| 0.34413  | 0.072572 | 0.11731  | -0.18315 | 6.86E-05 |
| 0.81918  | 0.026705 | 0.56485  | -0.16136 | 0.00046  |
| 0.0907   | 0.046615 | 0.3148   | -0.23269 | 3.68E-07 |
| 0.13937  | 0.010848 | 0.81514  | -0.37101 | 1.09E-16 |
| 0.70936  | 0.055643 | 0.23007  | -0.402   | 1.45E-19 |
| 0.07922  | 0.139872 | 0.00245  | 0.012773 | 0.78309  |
| 0.69476  | 0.123979 | 0.00731  | -0.25574 | 2.08E-08 |
| 0.63996  | 6.47E-05 | 0.99889  | -0.20613 | 7.09E-06 |
| 1.45E-05 | 0.014225 | 0.75915  | -0.33462 | 1.11E-13 |
| 0.00028  | 0.292833 | 1.10E-10 | -0.16465 | 0.00035  |
| 0.23012  | -0.05206 | 0.26157  | 0.039057 | 0.39973  |
| 0.01126  | 0.092277 | 0.04626  | -0.27705 | 1.12E-09 |
| 0.30779  | 0.083153 | 0.07262  | -0.01719 | 0.71094  |
| 0.63825  | 0.118136 | 0.01062  | -0.35407 | 3.07E-15 |

|          |          |          |          |          |
|----------|----------|----------|----------|----------|
| 0.03871  | -0.11766 | 0.01093  | -0.20822 | 5.70E-06 |
| 0.98207  | 0.243012 | 1.05E-07 | -0.47117 | 3.50E-27 |
| 0.51871  | 0.053089 | 0.25221  | -0.14272 | 0.00199  |
| 1.15E-06 | 0.038539 | 0.40603  | 0.235033 | 2.78E-07 |
| 0.40325  | 0.075247 | 0.10437  | 0.180951 | 8.41E-05 |
| 0.24447  | 0.041215 | 0.37419  | 0.075081 | 0.10513  |
| 0.24133  | 0.195652 | 2.06E-05 | -0.25582 | 2.06E-08 |
| 0.92011  | -0.05866 | 0.20576  | 0.18143  | 8.05E-05 |
| 0.01255  | 0.009452 | 0.83857  | -0.45202 | 6.77E-25 |
| 0.73324  | 0.039195 | 0.39808  | -0.13851 | 0.0027   |
| 0.85278  | -0.04979 | 0.28297  | 0.017128 | 0.712    |
| 0.02573  | 0.044998 | 0.3319   | 0.023071 | 0.61898  |
| 0.70997  | -0.03109 | 0.50278  | 0.037544 | 0.41826  |
| 0.18985  | -0.01421 | 0.75943  | 0.104814 | 0.0235   |
| 0.00103  | 0.068956 | 0.13677  | -0.22623 | 7.82E-07 |
| 0.20304  | 0.047928 | 0.30134  | -0.16225 | 0.00043  |
| 0.17299  | -0.00902 | 0.84593  | -0.13261 | 0.0041   |
| 0.16421  | 0.043749 | 0.34551  | -0.12942 | 0.00509  |
| 0.05936  | -0.02476 | 0.59356  | 0.057067 | 0.21835  |
| 0.78022  | 0.080455 | 0.08242  | 0.021944 | 0.63621  |
| 0.75567  | 0.003467 | 0.94044  | 0.058524 | 0.2068   |
| 0.60355  | 0.133223 | 0.00392  | -0.10042 | 0.03002  |
| 0.13874  | -0.05704 | 0.21858  | -0.01394 | 0.7639   |
| 0.00921  | 0.123921 | 0.00734  | 0.357698 | 1.53E-15 |
| 0.09684  | 0.034565 | 0.45617  | 0.074915 | 0.10591  |
| 0.19732  | 0.10347  | 0.02535  | 0.018186 | 0.69506  |
| 0.34892  | -0.1301  | 0.00486  | 0.057161 | 0.21759  |
| 6.76E-07 | 0.140251 | 0.00238  | -0.14224 | 0.00206  |
| 0.91335  | -0.10805 | 0.01951  | 0.170212 | 0.00022  |
| 0.74582  | -0.10948 | 0.01795  | 0.355406 | 2.38E-15 |
| 0.0258   | 0.087596 | 0.05855  | -0.16944 | 0.00023  |
| 0.00129  | -0.01437 | 0.75675  | -0.29    | 1.68E-10 |
| 0.0033   | -0.0969  | 0.03633  | 0.001775 | 0.96948  |
| 0.78536  | 0.143444 | 0.00189  | -0.09461 | 0.04099  |
| 0.07349  | 0.001102 | 0.98105  | 0.009816 | 0.83245  |
| 0.58652  | -0.10199 | 0.02754  | 0.316003 | 2.74E-12 |
| 0.15565  | 0.026448 | 0.5686   | -0.15693 | 0.00067  |
| 0.77624  | 0.09686  | 0.0364   | -0.20249 | 1.03E-05 |
| 0.55514  | -0.07032 | 0.12915  | 0.034678 | 0.45469  |
| 8.19E-09 | 0.128125 | 0.00556  | 0.371451 | 1.00E-16 |
| 0.38993  | 0.139128 | 0.00259  | -0.10594 | 0.02204  |
| 0.37925  | -0.06888 | 0.13721  | -0.23577 | 2.55E-07 |
| 0.26719  | 0.030784 | 0.50693  | 0.003647 | 0.93735  |
| 0.25322  | 0.000784 | 0.98651  | 0.021402 | 0.64458  |
| 0.00059  | -0.0145  | 0.75463  | -0.13923 | 0.00257  |

|          |          |          |          |          |
|----------|----------|----------|----------|----------|
| 0.88822  | -0.1191  | 0.00999  | -0.15508 | 0.00077  |
| 0.00087  | -0.13102 | 0.00457  | 0.05471  | 0.23799  |
| 0.14414  | -0.06212 | 0.18022  | -0.02236 | 0.62989  |
| 0.07667  | -0.01752 | 0.70566  | -0.03861 | 0.40517  |
| 0.61146  | 0.061048 | 0.18786  | -0.16409 | 0.00037  |
| 1.90E-05 | 0.120177 | 0.00934  | 0.26944  | 3.28E-09 |
| 0.09414  | 0.077334 | 0.09507  | -0.22345 | 1.07E-06 |
| 0.70779  | 0.101797 | 0.02783  | -0.14314 | 0.00193  |
| 0.05555  | 0.095318 | 0.03949  | -0.24018 | 1.49E-07 |
| 0.32254  | 0.207294 | 6.28E-06 | -0.38165 | 1.22E-17 |
| 0.19231  | 0.069881 | 0.13157  | -0.09916 | 0.03216  |
| 0.12914  | 0.130004 | 0.0049   | -0.13245 | 0.00414  |
| 0.03382  | -0.08933 | 0.05371  | 0.190048 | 3.57E-05 |
| 0.25534  | -0.01558 | 0.73706  | -0.27322 | 1.94E-09 |
| 0.68127  | -0.02658 | 0.56673  | -0.0658  | 0.15571  |
| 0.02792  | 0.077851 | 0.09288  | -0.26474 | 6.25E-09 |
| 0.85224  | -0.0239  | 0.60645  | -0.07928 | 0.08703  |
| 0.72769  | 0.065581 | 0.15709  | -0.00111 | 0.98089  |
| 0.71652  | -0.04583 | 0.32305  | 0.034475 | 0.45734  |
| 0.74968  | -0.09737 | 0.03543  | 0.186378 | 5.07E-05 |
| 0.40467  | 0.099847 | 0.03098  | -0.0491  | 0.28969  |
| 0.06375  | -0.02929 | 0.52781  | -0.21739 | 2.11E-06 |
| 0.5025   | -0.05401 | 0.24409  | 0.034809 | 0.45299  |
| 0.17526  | -0.00469 | 0.91942  | -0.01979 | 0.66965  |
| 0.40304  | -0.09191 | 0.04713  | -0.14425 | 0.00178  |
| 0.38388  | -0.00396 | 0.93191  | -0.04504 | 0.33142  |
| 0.23787  | -0.00556 | 0.90464  | 0.055518 | 0.23113  |
| 0.86302  | 0.040616 | 0.38117  | 0.000346 | 0.99406  |
| 0.11635  | -0.04715 | 0.30928  | 0.017831 | 0.70074  |
| 0.033    | -0.2078  | 5.95E-06 | -0.14003 | 0.00242  |
| 0.73036  | 0.225105 | 8.89E-07 | -0.09676 | 0.0366   |
| 0.08369  | 0.121353 | 0.00866  | -0.27251 | 2.14E-09 |
| 0.27194  | 0.003004 | 0.94837  | -0.11396 | 0.01373  |
| 0.20626  | -0.03717 | 0.42293  | -0.10319 | 0.02575  |
| 0.01028  | 0.060203 | 0.19405  | -0.07171 | 0.12174  |
| 0.39209  | -0.02252 | 0.62744  | -0.18255 | 7.26E-05 |
| 0.21225  | 0.033266 | 0.47328  | -0.22757 | 6.69E-07 |
| 0.76245  | 0.059499 | 0.19932  | -0.03436 | 0.45885  |
| 0.43436  | 0.06037  | 0.19281  | -0.00207 | 0.96437  |
| 0.34553  | 0.012288 | 0.79113  | -0.07212 | 0.1196   |
| 0.36625  | 0.03103  | 0.50354  | -0.3159  | 2.78E-12 |
| 0.21799  | -0.009   | 0.84623  | -0.04067 | 0.38054  |
| 0.00166  | 0.09974  | 0.03116  | -0.60249 | 1.78E-47 |
| 3.34E-07 | 0.015777 | 0.73381  | -0.39939 | 2.60E-19 |
| 0.098    | 0.062325 | 0.17877  | -0.20891 | 5.29E-06 |

|          |          |          |          |          |
|----------|----------|----------|----------|----------|
| 0.01905  | 0.117836 | 0.01082  | -0.35251 | 4.14E-15 |
| 0.00236  | 0.077241 | 0.09547  | -0.28076 | 6.59E-10 |
| 0.00026  | 0.114386 | 0.01338  | -0.52145 | 6.39E-34 |
| 2.90E-08 | -0.06745 | 0.14556  | -0.22536 | 8.63E-07 |
| 0.46237  | -0.0342  | 0.46093  | -0.07581 | 0.10178  |
| 0.01191  | 0.068682 | 0.13834  | -0.29731 | 5.51E-11 |
| 0.33209  | 0.111356 | 0.01606  | -0.20073 | 1.24E-05 |
| 0.00118  | 0.124287 | 0.00716  | 0.339714 | 4.45E-14 |
| 2.52E-05 | 0.003928 | 0.93254  | -0.11697 | 0.01142  |
| 0.48701  | 0.001099 | 0.98111  | -0.0756  | 0.10273  |
| 0.07091  | -0.06851 | 0.13932  | -0.04256 | 0.35882  |
| 0.11138  | -0.01189 | 0.79777  | -0.21441 | 2.93E-06 |
| 0.8949   | 0.091946 | 0.04705  | -0.16979 | 0.00023  |
| 0.01777  | 0.069241 | 0.13515  | -0.33363 | 1.32E-13 |
| 0.0041   | 0.113943 | 0.01375  | -0.35632 | 2.00E-15 |
| 0.00517  | 0.124556 | 0.00704  | -0.352   | 4.56E-15 |
| 0.25088  | -0.01269 | 0.7844   | -0.13079 | 0.00464  |
| 0.11377  | 0.028029 | 0.54571  | 0.294346 | 8.69E-11 |
| 0.0288   | 0.053554 | 0.24807  | 0.05651  | 0.22288  |
| 0.88626  | 0.078241 | 0.09125  | 0.06598  | 0.15457  |
| 0.37208  | -0.00668 | 0.8855   | -0.22276 | 1.16E-06 |
| 0.08488  | -0.07141 | 0.12332  | 0.267702 | 4.17E-09 |
| 0.31799  | -0.02714 | 0.55859  | -0.24047 | 1.44E-07 |
| 4.05E-09 | 0.213035 | 3.40E-06 | 0.314356 | 3.60E-12 |
| 0.50616  | -0.05854 | 0.20667  | 0.128596 | 0.00538  |
| 0.0235   | -0.01739 | 0.70772  | -0.37194 | 9.07E-17 |
| 0.00018  | -0.07376 | 0.1114   | 0.041957 | 0.36565  |
| 0.71828  | -0.06951 | 0.13365  | -0.30588 | 1.43E-11 |
| 0.12325  | -0.07133 | 0.12374  | -0.17317 | 0.00017  |
| 6.77E-05 | 0.045334 | 0.3283   | -0.25108 | 3.81E-08 |
| 0.27047  | 0.016951 | 0.71484  | 0.129278 | 0.00514  |
| 0.37567  | 0.22187  | 1.28E-06 | -0.39634 | 5.12E-19 |
| 0.30951  | 0.028893 | 0.53339  | -0.23509 | 2.76E-07 |
| 0.67789  | 0.021966 | 0.63587  | -0.11617 | 0.012    |
| 0.98403  | 0.092733 | 0.04519  | -0.34696 | 1.17E-14 |
| 0.13001  | -0.02827 | 0.54223  | -0.03063 | 0.50903  |
| 2.81E-06 | -0.21771 | 2.04E-06 | -0.04637 | 0.31736  |
| 0.19829  | 0.168871 | 0.00025  | -0.20933 | 5.06E-06 |
| 0.00206  | -0.01964 | 0.67207  | -0.34024 | 4.04E-14 |
| 0.15663  | 0.065537 | 0.15737  | -0.17643 | 0.00013  |
| 0.24759  | -0.03879 | 0.40297  | -0.02512 | 0.58817  |
| 0.05819  | -0.01387 | 0.76492  | -0.31678 | 2.41E-12 |
| 0.59483  | -0.01895 | 0.68297  | -0.00375 | 0.93555  |
| 0.00052  | 0.205299 | 7.73E-06 | -0.20935 | 5.05E-06 |
| 0.29863  | -0.05403 | 0.24392  | 0.05371  | 0.2467   |



|          |          |          |          |          |
|----------|----------|----------|----------|----------|
| 0.32021  | 0.022476 | 0.62806  | 0.057219 | 0.21713  |
| 0.12535  | -0.06086 | 0.1892   | 0.417338 | 4.17E-21 |
| 0.07176  | 0.032561 | 0.48271  | 0.080583 | 0.08193  |
| 0.11714  | 0.093086 | 0.04437  | -0.39825 | 3.35E-19 |
| 0.0711   | 0.269176 | 3.40E-09 | -0.1428  | 0.00198  |
| 0.02356  | 0.084349 | 0.06858  | 0.154313 | 0.00082  |
| 0.00142  | 0.043114 | 0.35256  | -0.29507 | 7.78E-11 |
| 0.34679  | 0.043271 | 0.3508   | -0.11952 | 0.00973  |
| 0.0052   | 0.019304 | 0.67734  | 0.416114 | 5.57E-21 |
| 0.03403  | 0.084701 | 0.06743  | -0.05942 | 0.19991  |
| 0.36054  | -0.10517 | 0.02303  | 0.033549 | 0.46952  |
| 0.02872  | 0.087479 | 0.05889  | -0.02412 | 0.60308  |
| 0.77482  | 0.134373 | 0.00362  | -0.03898 | 0.40069  |
| 0.00273  | -0.12602 | 0.00639  | 0.082202 | 0.07596  |
| 0.4825   | 0.131265 | 0.00449  | -0.20756 | 6.10E-06 |
| 0.33962  | -0.08894 | 0.05477  | 0.189975 | 3.60E-05 |
| 0.37615  | 0.088421 | 0.05621  | 0.054715 | 0.23795  |
| 0.0029   | -0.21875 | 1.82E-06 | 0.083662 | 0.07088  |
| 0.49063  | 0.055566 | 0.23072  | 0.07803  | 0.09212  |
| 0.01242  | 0.140833 | 0.00228  | -0.31796 | 1.98E-12 |
| 0.00311  | 0.072164 | 0.11939  | 0.208373 | 5.60E-06 |
| 0.16946  | -0.0338  | 0.46622  | 0.024894 | 0.59154  |
| 0.00581  | -0.04052 | 0.38232  | 0.064984 | 0.1609   |
| 0.63495  | 0.198905 | 1.49E-05 | -0.20664 | 6.72E-06 |
| 0.0002   | 0.020713 | 0.65526  | -0.40607 | 5.75E-20 |
| 0.49218  | 0.0288   | 0.53471  | 0.112546 | 0.01496  |
| 0.01729  | 0.021758 | 0.63907  | -0.23058 | 4.71E-07 |
| 0.5235   | -0.07613 | 0.10033  | -0.06607 | 0.15401  |
| 2.16E-08 | -0.14647 | 0.0015   | -0.50553 | 1.15E-31 |
| 0.00322  | 0.020175 | 0.66366  | 0.324291 | 6.76E-13 |
| 0.07812  | 0.02319  | 0.61717  | -0.29014 | 1.65E-10 |
| 0.51639  | -0.08143 | 0.07877  | 0.139974 | 0.00243  |
| 0.00031  | 0.065564 | 0.15719  | 0.314855 | 3.31E-12 |
| 0.18545  | 0.048249 | 0.29811  | -0.35083 | 5.68E-15 |
| 5.62E-05 | 0.100144 | 0.03048  | -0.15006 | 0.00114  |
| 0.13545  | -0.09415 | 0.04199  | 0.21406  | 3.05E-06 |
| 0.69134  | -0.06389 | 0.1681   | 0.03791  | 0.41374  |
| 0.95194  | -0.04511 | 0.33064  | 0.190725 | 3.34E-05 |
| 0.16919  | 0.094267 | 0.04173  | -0.15246 | 0.00095  |
| 0.98134  | 0.021886 | 0.63711  | -0.14112 | 0.00224  |
| 0.00013  | 0.038707 | 0.40398  | -0.47369 | 1.71E-27 |
| 0.06625  | 0.087201 | 0.0597   | 0.116832 | 0.01152  |
| 0.00204  | 0.012438 | 0.78864  | -0.20878 | 5.36E-06 |
| 0.41151  | -0.00085 | 0.98535  | 0.000282 | 0.99515  |
| 0.13514  | -0.15971 | 0.00053  | -0.18707 | 4.75E-05 |

|          |          |          |          |          |
|----------|----------|----------|----------|----------|
| 0.00802  | 0.109489 | 0.01794  | -0.03624 | 0.43458  |
| 0.79129  | -0.09005 | 0.05181  | 0.066058 | 0.15408  |
| 0.00854  | 0.015653 | 0.73584  | -0.19459 | 2.29E-05 |
| 0.62351  | 0.230188 | 4.94E-07 | -0.40878 | 3.09E-20 |
| 0.28871  | 0.115719 | 0.01233  | -0.09078 | 0.04994  |
| 0.18447  | -0.0687  | 0.13825  | -0.04766 | 0.30407  |
| 0.85282  | 0.029949 | 0.51853  | 0.208255 | 5.67E-06 |
| 0.31789  | 0.216849 | 2.25E-06 | 0.090594 | 0.0504   |
| 4.49E-09 | 0.048196 | 0.29865  | -0.25355 | 2.77E-08 |
| 0.8858   | -0.03662 | 0.42983  | -0.31337 | 4.23E-12 |
| 0.48179  | -0.041   | 0.37671  | 0.317377 | 2.18E-12 |
| 0.09219  | 0.024196 | 0.60198  | -0.20859 | 5.48E-06 |
| 0.08094  | -0.00189 | 0.96749  | 0.111244 | 0.01617  |
| 0.78543  | -0.01174 | 0.80018  | 0.203954 | 8.89E-06 |
| 0.00991  | 0.062538 | 0.17729  | 0.087269 | 0.0595   |
| 0.90205  | 0.080939 | 0.08059  | -0.1342  | 0.00367  |
| 0.02005  | -0.04801 | 0.30054  | 0.243113 | 1.04E-07 |
| 0.83129  | -0.04449 | 0.33743  | -0.01606 | 0.7292   |
| 0.95436  | -0.07963 | 0.08561  | 0.094106 | 0.04208  |
| 0.02485  | 0.003925 | 0.93259  | -0.23766 | 2.03E-07 |
| 0.03167  | 0.074793 | 0.10648  | -0.24052 | 1.43E-07 |
| 0.16008  | -0.04231 | 0.36163  | -0.02062 | 0.65672  |
| 0.02076  | -0.02354 | 0.61188  | -0.30708 | 1.18E-11 |
| 0.00101  | 0.069678 | 0.1327   | -0.40783 | 3.84E-20 |
| 1.25E-05 | -0.00013 | 0.99777  | 0.44019  | 1.49E-23 |
| 0.095    | 0.160812 | 0.00049  | 0.034841 | 0.45257  |
| 0.86249  | 0.043956 | 0.34323  | -0.10157 | 0.02818  |
| 4.24E-08 | 0.118435 | 0.01042  | 0.24465  | 8.59E-08 |
| 0.00035  | 0.097249 | 0.03565  | -0.03389 | 0.46504  |
| 1.63E-05 | 0.049418 | 0.28655  | 0.269239 | 3.37E-09 |
| 0.50846  | 0.104835 | 0.02347  | 0.135995 | 0.00323  |
| 0.90281  | 0.075317 | 0.10404  | -0.07193 | 0.1206   |
| 0.35614  | 0.083497 | 0.07144  | -0.26025 | 1.15E-08 |
| 0.99466  | 0.009833 | 0.83217  | 0.063522 | 0.17055  |
| 0.60731  | -0.03077 | 0.50717  | 0.007987 | 0.86332  |
| 0.26534  | -0.02173 | 0.63956  | -0.05328 | 0.25053  |
| 0.57561  | 0.035993 | 0.43776  | -0.33036 | 2.36E-13 |
| 0.07689  | 0.043941 | 0.34339  | -0.1438  | 0.00184  |
| 0.11813  | 0.017375 | 0.70803  | 0.295071 | 7.78E-11 |
| 0.00268  | 0.043172 | 0.35192  | -0.21054 | 4.45E-06 |
| 0.35741  | -0.00366 | 0.93718  | 0.090763 | 0.04997  |
| 0.55087  | -0.0186  | 0.68855  | -0.05426 | 0.24185  |
| 0.00956  | 0.094439 | 0.04136  | -0.21258 | 3.58E-06 |
| 0.09007  | -0.00931 | 0.84091  | -0.08829 | 0.05657  |
| 0.27061  | -0.06555 | 0.1573   | -0.00635 | 0.89107  |

|          |          |          |          |          |
|----------|----------|----------|----------|----------|
| 0.60155  | -0.09225 | 0.04632  | 0.229199 | 5.54E-07 |
| 0.18913  | 0.115285 | 0.01267  | -0.2101  | 4.66E-06 |
| 0.3841   | 0.11299  | 0.01456  | -0.07559 | 0.10279  |
| 0.00189  | 0.040678 | 0.38045  | -0.17243 | 0.00018  |
| 0.00096  | 0.086345 | 0.06226  | -0.28443 | 3.85E-10 |
| 0.8189   | 0.013491 | 0.77122  | 0.032202 | 0.48756  |
| 0.57245  | -0.06049 | 0.19196  | -0.11515 | 0.01277  |
| 4.55E-06 | -0.04615 | 0.31971  | -0.36723 | 2.35E-16 |
| 0.00987  | 0.067605 | 0.14464  | -0.27739 | 1.07E-09 |
| 0.00028  | 0.150902 | 0.00107  | 0.20605  | 7.15E-06 |
| 0.41319  | -0.04214 | 0.36359  | -0.13704 | 0.003    |
| 0.98503  | 0.020724 | 0.6551   | -0.24038 | 1.46E-07 |
| 0.8361   | -0.07016 | 0.13005  | 0.093834 | 0.04268  |
| 0.6353   | 0.041033 | 0.3763   | -0.10202 | 0.02748  |
| 0.00165  | 0.005685 | 0.90249  | -0.33087 | 2.16E-13 |
| 0.00155  | 0.155196 | 0.00076  | -0.31335 | 4.25E-12 |
| 0.00101  | -0.03917 | 0.39837  | -0.25273 | 3.07E-08 |
| 0.41056  | 0.111278 | 0.01614  | -0.0314  | 0.49846  |
| 0.19006  | -0.02631 | 0.57063  | -0.05334 | 0.24999  |
| 2.86E-09 | -0.0817  | 0.07778  | -0.06972 | 0.13248  |
| 0.00027  | 0.124272 | 0.00717  | -0.00765 | 0.86897  |
| 0.195    | 0.128351 | 0.00547  | -0.36903 | 1.63E-16 |
| 0.04428  | -0.03581 | 0.44012  | 0.058028 | 0.21068  |
| 1.61E-06 | 0.172192 | 0.00018  | 0.216277 | 2.39E-06 |
| 0.01073  | -0.06076 | 0.18993  | -0.05018 | 0.27921  |
| 0.15138  | 0.069115 | 0.13587  | -0.05229 | 0.25943  |
| 0.78948  | -0.06256 | 0.17716  | 0.242655 | 1.10E-07 |
| 0.49165  | 0.017673 | 0.70326  | -0.124   | 0.0073   |
| 0.00682  | 0.004797 | 0.91765  | -0.24189 | 1.21E-07 |
| 0.46032  | 0.001875 | 0.96777  | -0.16123 | 0.00047  |
| 0.98795  | 0.107232 | 0.02046  | 0.093481 | 0.04347  |
| 0.00148  | -0.15573 | 0.00073  | -0.28326 | 4.58E-10 |
| 0.03449  | -0.05509 | 0.23474  | 0.327211 | 4.08E-13 |
| 0.54152  | 0.029896 | 0.51927  | 0.076746 | 0.09762  |
| 0.25765  | 0.123458 | 0.00756  | -0.09629 | 0.03751  |
| 0.8176   | 0.039763 | 0.39127  | -0.12502 | 0.00683  |
| 0.38358  | -0.15773 | 0.00062  | 0.086359 | 0.06222  |
| 0.00652  | -0.06634 | 0.15232  | -0.30495 | 1.66E-11 |
| 6.75E-12 | 0.34782  | 1.00E-14 | 0.076263 | 0.09975  |
| 0.76491  | -0.04993 | 0.28156  | 0.077081 | 0.09616  |
| 0.97113  | 0.117309 | 0.01118  | -0.13519 | 0.00342  |
| 0.37656  | 0.023351 | 0.61473  | 0.138837 | 0.00264  |
| 0.18033  | 0.145074 | 0.00167  | 0.127689 | 0.00572  |
| 0.49907  | 0.046745 | 0.31345  | -0.22531 | 8.69E-07 |
| 0.00552  | 0.052891 | 0.25399  | -0.34074 | 3.69E-14 |

|          |          |          |          |          |
|----------|----------|----------|----------|----------|
| 0.06107  | 0.047575 | 0.30493  | 0.279653 | 7.73E-10 |
| 0.30936  | -0.01851 | 0.68997  | 0.045093 | 0.33087  |
| 7.28E-05 | 0.073209 | 0.11412  | -0.25608 | 1.99E-08 |
| 0.0317   | 0.019033 | 0.68163  | 0.05156  | 0.26615  |
| 0.01494  | -0.04653 | 0.31563  | -0.09017 | 0.0515   |
| 0.26047  | 0.137836 | 0.00284  | -0.28162 | 5.81E-10 |
| 6.51E-05 | 0.06278  | 0.17561  | 0.256331 | 1.92E-08 |
| 9.89E-06 | 0.279289 | 8.15E-10 | 0.040567 | 0.38175  |
| 0.00024  | 0.32962  | 2.69E-13 | -0.02844 | 0.53977  |
| 0.00452  | 0.358744 | 1.25E-15 | -0.24158 | 1.26E-07 |
| 0.96705  | 0.011743 | 0.8002   | 0.176959 | 0.00012  |
| 0.48404  | 0.053429 | 0.24918  | -0.1482  | 0.00132  |
| 0.00462  | -0.05451 | 0.23975  | 0.071797 | 0.12129  |
| 0.38323  | 0.013864 | 0.76509  | 0.118615 | 0.0103   |
| 0.28874  | -0.05233 | 0.25906  | -0.0039  | 0.93309  |
| 0.00188  | 0.062817 | 0.17536  | -0.18788 | 4.39E-05 |
| 0.84864  | 0.179355 | 9.73E-05 | -0.20654 | 6.80E-06 |
| 0.46398  | -0.01828 | 0.69365  | -0.00742 | 0.873    |
| 0.20602  | 0.023498 | 0.61251  | -0.00433 | 0.92557  |
| 0.79314  | 0.077849 | 0.09288  | -0.27843 | 9.23E-10 |
| 0.13196  | 0.049724 | 0.28357  | -0.0707  | 0.12707  |
| 0.01093  | 0.040795 | 0.37908  | -0.1664  | 0.0003   |
| 0.37359  | -0.04143 | 0.37169  | -0.06104 | 0.18794  |
| 0.08744  | 0.070297 | 0.12928  | -0.17895 | 0.0001   |
| 0.53577  | -0.09679 | 0.03653  | -0.15468 | 0.0008   |
| 0.11154  | 0.034733 | 0.45398  | -0.21324 | 3.33E-06 |
| 6.85E-06 | -0.01263 | 0.78549  | 0.255858 | 2.05E-08 |
| 0.00143  | -0.00508 | 0.91289  | 0.103706 | 0.02502  |
| 0.80203  | -0.03014 | 0.51581  | 0.260875 | 1.05E-08 |
| 0.0009   | -0.04792 | 0.3014   | 0.04847  | 0.29591  |
| 0.32416  | -0.05492 | 0.23616  | -0.10733 | 0.02035  |
| 0.00329  | -0.10497 | 0.02329  | -0.19083 | 3.31E-05 |
| 7.79E-08 | -0.02964 | 0.52282  | -0.22407 | 1.00E-06 |
| 0.01235  | 0.05803  | 0.21067  | -0.20131 | 1.17E-05 |
| 0.41167  | -0.13097 | 0.00458  | -0.03054 | 0.51036  |
| 0.54817  | 0.014262 | 0.75855  | 0.068025 | 0.14216  |
| 0.2581   | -0.09896 | 0.03251  | -0.19235 | 2.85E-05 |
| 0.80477  | 0.049254 | 0.28815  | 0.022003 | 0.6353   |
| 0.53578  | 0.098114 | 0.03403  | -0.01049 | 0.82115  |
| 0.97293  | -0.21678 | 2.26E-06 | 0.135645 | 0.00331  |
| 0.08376  | 0.070638 | 0.12743  | -0.37485 | 5.00E-17 |
| 0.11909  | 0.121734 | 0.00845  | -0.04722 | 0.30857  |
| 0.50718  | -0.00994 | 0.83031  | 0.009633 | 0.83552  |
| 0.01418  | 0.014142 | 0.76052  | -0.25209 | 3.34E-08 |
| 9.95E-05 | 0.234661 | 2.91E-07 | 0.017216 | 0.71058  |

|          |          |          |          |          |
|----------|----------|----------|----------|----------|
| 0.39704  | 0.022389 | 0.62938  | -0.03934 | 0.39629  |
| 0.75545  | -0.09498 | 0.0402   | 0.052128 | 0.26091  |
| 0.46216  | 0.021359 | 0.64523  | 0.042105 | 0.36395  |
| 0.0482   | -0.06368 | 0.16951  | 0.225926 | 8.09E-07 |
| 0.10262  | 0.061347 | 0.1857   | -0.33632 | 8.20E-14 |
| 0.16573  | 0.019555 | 0.67339  | 0.125172 | 0.00676  |
| 0.45679  | 0.082746 | 0.07403  | 0.05229  | 0.25943  |
| 0.13652  | -0.17525 | 0.00014  | 0.249621 | 4.59E-08 |
| 0.73191  | -0.018   | 0.69799  | 0.131711 | 0.00436  |
| 0.4454   | -0.06798 | 0.14242  | 0.067816 | 0.14339  |
| 2.79E-05 | 0.018947 | 0.683    | 0.232812 | 3.62E-07 |
| 0.97446  | -0.11008 | 0.01733  | 0.234336 | 3.02E-07 |
| 0.00088  | 0.221259 | 1.37E-06 | -0.17419 | 0.00015  |
| 0.02605  | 0.127364 | 0.00585  | -0.06001 | 0.19547  |
| 0.02995  | -0.06778 | 0.14363  | 0.400117 | 2.21E-19 |
| 0.00181  | 0.055961 | 0.22742  | -0.20333 | 9.49E-06 |
| 0.11088  | 0.073029 | 0.11501  | -0.2181  | 1.95E-06 |
| 0.03123  | -0.01971 | 0.67091  | 0.324477 | 6.54E-13 |
| 0.00955  | 0.064895 | 0.16148  | -0.2131  | 3.38E-06 |
| 0.0143   | 0.126666 | 0.00613  | 0.133824 | 0.00376  |
| 0.01426  | 0.051561 | 0.26614  | -0.07267 | 0.11684  |
| 0.05007  | 0.134131 | 0.00368  | 0.164172 | 0.00037  |
| 0.41525  | -0.09406 | 0.04219  | 0.064823 | 0.16195  |
| 0.00012  | -0.08456 | 0.06789  | -0.38739 | 3.60E-18 |
| 0.03211  | 0.111589 | 0.01584  | -0.22152 | 1.33E-06 |
| 0.42977  | 0.085184 | 0.06588  | -0.1792  | 9.87E-05 |
| 0.03409  | 0.034842 | 0.45256  | 0.051688 | 0.26496  |
| 0.00445  | -0.04873 | 0.29331  | 0.13102  | 0.00457  |
| 0.4479   | -0.09989 | 0.03092  | -0.06609 | 0.15386  |
| 0.32733  | 0.014026 | 0.76242  | -0.16344 | 0.00039  |
| 0.03326  | 0.002434 | 0.95816  | -0.18838 | 4.19E-05 |
| 0.32723  | 0.042298 | 0.36176  | -0.13815 | 0.00277  |
| 0.33833  | 0.012825 | 0.78222  | -0.21451 | 2.90E-06 |
| 0.0042   | 0.024146 | 0.60273  | -0.12175 | 0.00844  |
| 0.08847  | -0.09178 | 0.04746  | 0.151431 | 0.00103  |
| 0.20738  | 0.035578 | 0.44307  | -0.16087 | 0.00048  |
| 0.97546  | 0.042253 | 0.36226  | 0.001797 | 0.9691   |
| 0.00026  | -0.01861 | 0.68837  | -0.23952 | 1.62E-07 |
| 0.91803  | 0.04234  | 0.36128  | 0.120985 | 0.00887  |
| 0.09255  | -0.12244 | 0.00808  | -0.15314 | 0.0009   |
| 0.0656   | 0.140154 | 0.0024   | -0.36157 | 7.19E-16 |
| 0.00574  | -0.17803 | 0.00011  | -0.22852 | 5.99E-07 |
| 0.61244  | 0.022406 | 0.62912  | -0.11433 | 0.01343  |
| 0.00612  | 0.036373 | 0.43294  | -0.40048 | 2.04E-19 |
| 0.1833   | 0.086948 | 0.06045  | -0.04191 | 0.36622  |

|          |          |          |          |          |
|----------|----------|----------|----------|----------|
| 0.02122  | 0.026928 | 0.5616   | 0.316087 | 2.70E-12 |
| 3.41E-10 | 0.017136 | 0.71186  | -0.37967 | 1.84E-17 |
| 0.05634  | -0.01795 | 0.69881  | 0.287028 | 2.62E-10 |
| 0.39382  | -0.06485 | 0.1618   | 0.345478 | 1.55E-14 |
| 0.52664  | 0.022693 | 0.62474  | -0.0308  | 0.50673  |
| 0.9644   | -0.00057 | 0.9902   | 0.090963 | 0.04947  |
| 0.33328  | -0.0156  | 0.73666  | 0.084282 | 0.0688   |
| 0.57694  | 0.231561 | 4.20E-07 | -0.00664 | 0.88613  |
| 0.02344  | 0.111812 | 0.01563  | -0.23505 | 2.77E-07 |
| 0.05943  | -0.00649 | 0.88882  | -0.14489 | 0.00169  |
| 0.24464  | -0.07672 | 0.09773  | 0.272851 | 2.04E-09 |
| 0.02973  | -0.08375 | 0.07059  | -0.11085 | 0.01656  |
| 0.53531  | -0.15288 | 0.00092  | 0.084892 | 0.06682  |
| 0.58244  | -0.12009 | 0.00939  | 0.020287 | 0.66192  |
| 0.02802  | -0.04638 | 0.31723  | -0.05529 | 0.23305  |
| 0.23712  | -0.01457 | 0.75345  | -0.04214 | 0.3636   |
| 0.38282  | -0.09345 | 0.04355  | -0.02417 | 0.60236  |
| 6.78E-06 | 0.01073  | 0.81711  | -0.04846 | 0.29598  |
| 0.19352  | -0.11489 | 0.01298  | 0.169372 | 0.00024  |
| 0.12221  | 0.040617 | 0.38117  | -0.23823 | 1.89E-07 |
| 0.01374  | -0.07814 | 0.09168  | -0.11563 | 0.0124   |
| 0.00272  | 0.031599 | 0.49574  | -0.05854 | 0.20671  |
| 0.00958  | -0.09638 | 0.03733  | 0.102694 | 0.02648  |
| 0.37262  | -0.20452 | 8.38E-06 | 0.381694 | 1.21E-17 |
| 0.84659  | 0.076079 | 0.10058  | -0.07689 | 0.09699  |
| 0.35902  | -0.09792 | 0.0344   | -0.00059 | 0.9898   |
| 0.57129  | 0.04917  | 0.28897  | -0.25844 | 1.46E-08 |
| 0.44683  | -0.086   | 0.06331  | 0.104407 | 0.02405  |
| 0.0002   | 0.050298 | 0.27804  | 0.194067 | 2.41E-05 |
| 0.16072  | -0.18186 | 7.73E-05 | -0.0979  | 0.03443  |
| 0.13047  | -0.04824 | 0.29822  | -0.21437 | 2.95E-06 |
| 0.39308  | -0.13767 | 0.00287  | -0.01688 | 0.71601  |
| 0.4448   | 0.008453 | 0.85544  | -0.31449 | 3.52E-12 |
| 0.0053   | -0.17197 | 0.00019  | 0.018807 | 0.6852   |
| 0.68569  | 0.047436 | 0.30635  | -0.18141 | 8.06E-05 |
| 0.01658  | -0.22047 | 1.50E-06 | -0.2758  | 1.34E-09 |
| 0.0198   | -0.07491 | 0.10594  | -0.20805 | 5.80E-06 |
| 0.58276  | -0.07366 | 0.1119   | -0.24852 | 5.28E-08 |
| 0.21391  | -0.04353 | 0.34788  | -0.30139 | 2.91E-11 |
| 2.95E-09 | -0.29403 | 9.12E-11 | -0.21312 | 3.37E-06 |
| 0.1004   | -0.21373 | 3.16E-06 | -0.09375 | 0.04288  |
| 0.61043  | -0.12317 | 0.00771  | -0.23311 | 3.50E-07 |
| 0.4106   | -0.26916 | 3.41E-09 | -0.10604 | 0.02191  |
| 0.67043  | -0.10512 | 0.0231   | -0.31622 | 2.64E-12 |
| 0.56447  | -0.10387 | 0.02479  | -0.06131 | 0.18595  |

|         |          |          |          |          |
|---------|----------|----------|----------|----------|
| 0.15764 | -0.14947 | 0.0012   | -0.22998 | 5.06E-07 |
| 0.01847 | -0.14645 | 0.00151  | -0.21907 | 1.76E-06 |
| 0.03516 | -0.02624 | 0.57167  | -0.46547 | 1.74E-26 |
| 0.05115 | -0.23492 | 2.82E-07 | -0.20459 | 8.33E-06 |
| 0.68834 | -0.07145 | 0.12312  | -0.29899 | 4.24E-11 |
| 0.01084 | -0.2433  | 1.02E-07 | -0.01755 | 0.70524  |
| 0.01056 | -0.0347  | 0.45446  | -0.41976 | 2.34E-21 |
| 0.00163 | -0.09154 | 0.04805  | -0.34936 | 7.50E-15 |
| 0.17222 | -0.15309 | 0.0009   | -0.22826 | 6.18E-07 |
| 0.78581 | -0.01313 | 0.77712  | -0.33359 | 1.33E-13 |
| 0.73259 | -0.18854 | 4.13E-05 | -0.11202 | 0.01544  |
| 0.00219 | -0.0397  | 0.39207  | -0.11679 | 0.01154  |
| 0.00378 | -0.16023 | 0.00051  | -0.04756 | 0.30506  |
| 0.07238 | -0.17943 | 9.67E-05 | -0.33077 | 2.19E-13 |
| 0.49425 | -0.22779 | 6.53E-07 | 0.047001 | 0.3108   |
| 0.00076 | -0.06355 | 0.17036  | -0.25704 | 1.75E-08 |
| 0.87623 | -0.16197 | 0.00044  | -0.26173 | 9.40E-09 |
| 0.01596 | 0.006041 | 0.89641  | -0.09644 | 0.03723  |
| 0.99093 | -0.10352 | 0.02528  | -0.01772 | 0.70255  |
| 0.46473 | -0.15664 | 0.00068  | -0.16576 | 0.00032  |
| 0.42113 | -0.20795 | 5.86E-06 | -0.16439 | 0.00036  |
| 0.4683  | -0.00809 | 0.86155  | -0.24351 | 9.89E-08 |
| 0.17308 | -0.08524 | 0.06571  | -0.12345 | 0.00757  |
| 0.07184 | -0.03945 | 0.395    | -0.33657 | 7.84E-14 |
| 0.20171 | -0.04866 | 0.29406  | -0.10641 | 0.02146  |
| 0.00386 | -0.03883 | 0.40251  | -0.41332 | 1.08E-20 |
| 0.28619 | -0.24752 | 5.99E-08 | -0.14344 | 0.00189  |
| 0.81884 | -0.08171 | 0.07772  | -0.23941 | 1.64E-07 |
| 0.79427 | -0.17604 | 0.00013  | -0.06913 | 0.13579  |
| 0.94579 | -0.18734 | 4.63E-05 | -0.27687 | 1.15E-09 |
| 0.09779 | -0.1802  | 9.01E-05 | -0.05149 | 0.2668   |
| 0.6293  | -0.17379 | 0.00016  | -0.18337 | 6.72E-05 |
| 0.01771 | -0.22839 | 6.09E-07 | -0.03081 | 0.50657  |
| 0.34994 | -0.09772 | 0.03476  | 0.057698 | 0.21329  |
| 0.37542 | -0.06973 | 0.13241  | 0.090641 | 0.05028  |
| 0.46022 | -0.07694 | 0.09676  | -0.00192 | 0.96707  |
| 0.01249 | -0.00078 | 0.98656  | 0.087275 | 0.05949  |
| 0.01135 | -0.01797 | 0.69858  | 0.134428 | 0.00361  |
| 0.42965 | -0.09667 | 0.03676  | 0.054769 | 0.23749  |
| 0.31389 | -0.03662 | 0.42978  | 0.114262 | 0.01348  |
| 0.05922 | -0.08821 | 0.0568   | 0.200491 | 1.27E-05 |
| 0.19216 | -0.05493 | 0.23611  | 0.035642 | 0.44224  |
| 0.09913 | -0.05689 | 0.21979  | 0.092354 | 0.04608  |
| 0.99193 | 0.037647 | 0.41698  | -0.06154 | 0.18428  |
| 0.37705 | -0.05855 | 0.20657  | 0.034959 | 0.45105  |

|          |          |         |          |          |
|----------|----------|---------|----------|----------|
| 0.42732  | -0.0651  | 0.16018 | 0.086147 | 0.06287  |
| 0.21588  | -0.00134 | 0.97691 | 0.060568 | 0.19136  |
| 0.01757  | -0.04903 | 0.29032 | 0.123    | 0.00779  |
| 0.00892  | -0.03403 | 0.46317 | 0.113567 | 0.01407  |
| 0.43217  | -0.13855 | 0.0027  | -0.04079 | 0.37915  |
| 0.0767   | -0.04675 | 0.31342 | 0.083302 | 0.0721   |
| 0.92977  | -0.10764 | 0.01999 | 0.210772 | 4.34E-06 |
| 0.48558  | -0.02238 | 0.6296  | 0.062774 | 0.17566  |
| 0.10742  | 0.007891 | 0.86495 | 0.171704 | 0.00019  |
| 0.38051  | -0.0745  | 0.10784 | 0.156977 | 0.00066  |
| 0.00423  | -0.00488 | 0.91624 | 0.299875 | 3.69E-11 |
| 0.32163  | -0.05736 | 0.21597 | 0.060328 | 0.19313  |
| 0.22927  | -0.04722 | 0.3085  | 0.259216 | 1.31E-08 |
| 0.25918  | -0.12776 | 0.0057  | 0.123288 | 0.00765  |
| 0.17965  | -0.0713  | 0.12391 | 0.079068 | 0.08786  |
| 0.03248  | -0.11079 | 0.01661 | 0.216604 | 2.31E-06 |
| 0.47012  | -0.12056 | 0.00911 | 0.129473 | 0.00508  |
| 0.3853   | 0.006282 | 0.8923  | 0.092796 | 0.04504  |
| 0.38678  | -0.03642 | 0.43237 | 0.086351 | 0.06224  |
| 0.00044  | 0.100369 | 0.03011 | 0.113779 | 0.01389  |
| 5.60E-05 | 0.103223 | 0.0257  | 0.108783 | 0.0187   |
| 0.28076  | -0.07746 | 0.09455 | 0.056577 | 0.22234  |
| 0.02076  | -0.01868 | 0.68729 | 0.216926 | 2.23E-06 |
| 0.70283  | -0.03558 | 0.44304 | -0.00393 | 0.93244  |
| 0.5468   | -0.06374 | 0.16906 | 0.03311  | 0.47536  |
| 0.13904  | -0.0235  | 0.61254 | -0.07079 | 0.12662  |
| 0.60364  | -0.10284 | 0.02626 | 0.02758  | 0.55216  |
| 5.58E-06 | -0.01309 | 0.77782 | 0.314186 | 3.70E-12 |
| 0.08087  | -0.07744 | 0.09462 | 0.093589 | 0.04323  |
| 0.07246  | -0.05948 | 0.19947 | 0.080338 | 0.08287  |
| 0.92717  | -0.06302 | 0.17394 | 0.067315 | 0.14638  |
| 0.0625   | -0.04555 | 0.326   | 0.067686 | 0.14417  |
| 0.95128  | -0.10278 | 0.02635 | 0.133683 | 0.0038   |
| 0.37551  | -0.09326 | 0.04397 | 0.105466 | 0.02264  |
| 0.44319  | -0.06375 | 0.16904 | 0.094494 | 0.04124  |
| 0.06485  | -0.04805 | 0.3001  | 0.238395 | 1.86E-07 |
| 0.11642  | -0.12085 | 0.00895 | 0.28876  | 2.03E-10 |
| 0.5615   | -0.13587 | 0.00326 | 0.286733 | 2.74E-10 |
| 0.47217  | -0.08279 | 0.07386 | 0.168706 | 0.00025  |
| 0.01073  | -0.03256 | 0.48273 | 0.13399  | 0.00372  |
| 0.27195  | -0.03638 | 0.43283 | 0.075234 | 0.10442  |
| 0.10522  | -0.16551 | 0.00033 | 0.204868 | 8.09E-06 |
| 0.94008  | 0.018673 | 0.68733 | -0.00294 | 0.94953  |
| 0.17052  | -0.01082 | 0.81557 | 0.10465  | 0.02372  |
| 0.67348  | -0.04178 | 0.36769 | 0.147578 | 0.00138  |



|         |          |         |          |          |
|---------|----------|---------|----------|----------|
| 0.12772 | -0.09009 | 0.0517  | 0.088345 | 0.05642  |
| 0.433   | -0.06536 | 0.15847 | 0.154671 | 0.0008   |
| 0.87676 | -0.09938 | 0.03178 | 0.036826 | 0.42722  |
| 0.16245 | 0.043127 | 0.35242 | 0.059649 | 0.19819  |
| 0.85177 | 0.063082 | 0.17354 | -0.0688  | 0.13769  |
| 0.37365 | -0.09236 | 0.04605 | 0.128373 | 0.00547  |
| 0.21315 | -0.08447 | 0.06818 | 0.101476 | 0.02833  |
| 0.03967 | -0.02656 | 0.56697 | 0.168494 | 0.00025  |
| 0.05134 | 0.017895 | 0.69971 | 0.095998 | 0.0381   |
| 0.01203 | -0.04874 | 0.29319 | 0.366691 | 2.61E-16 |
| 0.03813 | -0.07463 | 0.10726 | 0.22011  | 1.56E-06 |
| 0.82355 | -0.06302 | 0.17399 | 0.25531  | 2.20E-08 |
| 0.85702 | -0.0918  | 0.04741 | 0.029816 | 0.52039  |
| 0.00249 | 0.016573 | 0.72094 | 0.119681 | 0.00963  |
| 0.06267 | -0.07176 | 0.12146 | 0.123623 | 0.00748  |
| 0.13959 | 0.006294 | 0.8921  | 0.148466 | 0.00129  |
| 0.05804 | 0.011555 | 0.80333 | 0.016495 | 0.7222   |
| 0.32986 | -0.07667 | 0.09798 | 0.026836 | 0.56294  |
| 0.37498 | -0.11051 | 0.0169  | 0.033289 | 0.47298  |
| 0.18588 | -0.0782  | 0.09142 | 0.053475 | 0.24877  |
| 0.47653 | -0.04951 | 0.28562 | 0.132543 | 0.00411  |
| 0.07901 | -0.03841 | 0.4076  | 0.147355 | 0.00141  |
| 0.35051 | -0.0778  | 0.09307 | 0.146881 | 0.00146  |
| 0.96661 | -0.08997 | 0.05202 | 0.133405 | 0.00388  |
| 0.38816 | -0.10826 | 0.01928 | -0.06027 | 0.19355  |
| 0.61294 | -0.0749  | 0.10599 | 0.097143 | 0.03585  |
| 0.22023 | -0.02828 | 0.54214 | 0.076184 | 0.10011  |
| 0.02977 | -0.03954 | 0.39399 | 0.1763   | 0.00013  |
| 0.02427 | -0.06849 | 0.13942 | 0.19799  | 1.63E-05 |
| 0.12105 | -0.07543 | 0.10352 | 0.147464 | 0.0014   |
| 0.27771 | -0.03989 | 0.3898  | 0.135661 | 0.00331  |
| 0.10042 | -0.00423 | 0.92736 | 0.223135 | 1.11E-06 |
| 0.20708 | -0.07674 | 0.09765 | -0.0599  | 0.19633  |
| 0.15428 | -0.06181 | 0.18237 | 0.16099  | 0.00048  |
| 0.37091 | -0.07453 | 0.1077  | 0.056358 | 0.22414  |
| 0.88599 | -0.06819 | 0.14122 | 0.075161 | 0.10476  |
| 0.44766 | -0.02003 | 0.66587 | 0.061534 | 0.18436  |
| 0.55625 | 0.002866 | 0.95074 | 0.03987  | 0.39     |
| 0.15594 | -0.0393  | 0.39686 | 0.054672 | 0.23832  |
| 0.36204 | -0.11289 | 0.01465 | 0.091656 | 0.04775  |
| 0.50234 | -0.07939 | 0.08656 | 0.09934  | 0.03185  |
| 0.09971 | -0.01726 | 0.70989 | 0.16832  | 0.00026  |
| 0.59506 | -0.11207 | 0.01539 | 0.092418 | 0.04592  |
| 0.83701 | 0.020942 | 0.6517  | 0.030202 | 0.515    |
| 0.04435 | -0.03301 | 0.47671 | 0.110697 | 0.01671  |

|         |          |         |          |          |
|---------|----------|---------|----------|----------|
| 0.3711  | -0.05675 | 0.22095 | 0.123775 | 0.00741  |
| 0.99646 | -0.04479 | 0.33418 | 0.080913 | 0.08069  |
| 0.25111 | -0.09112 | 0.04907 | 0.194392 | 2.34E-05 |
| 0.00245 | -0.00422 | 0.92752 | 0.031161 | 0.50173  |
| 0.84817 | -0.10346 | 0.02537 | 0.142727 | 0.00199  |
| 0.53171 | -0.05942 | 0.19992 | 0.031649 | 0.49506  |
| 0.09428 | -0.0643  | 0.16537 | 0.224654 | 9.36E-07 |
| 0.99316 | -0.08647 | 0.06187 | 0.038694 | 0.40413  |
| 0.11094 | -0.04634 | 0.31765 | 0.008111 | 0.86122  |
| 0.44177 | -0.09867 | 0.03303 | 0.113638 | 0.01401  |
| 0.21133 | -0.06871 | 0.13819 | 0.09787  | 0.03448  |
| 0.83386 | -0.08888 | 0.05494 | 0.120247 | 0.00929  |
| 0.17387 | -0.01575 | 0.73425 | 0.052426 | 0.25819  |
| 0.96549 | -0.10498 | 0.02327 | 0.107829 | 0.01977  |
| 0.15169 | -0.06362 | 0.16991 | 0.036685 | 0.429    |
| 0.87269 | -0.03309 | 0.47569 | 0.156061 | 0.00071  |
| 0.10562 | -0.06148 | 0.18474 | 0.093228 | 0.04404  |
| 0.95091 | -0.07439 | 0.10841 | 0.120483 | 0.00916  |
| 0.2938  | -0.0353  | 0.4467  | 0.066632 | 0.15053  |
| 0.32157 | -0.04092 | 0.37762 | 0.086627 | 0.06141  |
| 0.96162 | -0.0772  | 0.09563 | 0.084151 | 0.06924  |
| 0.16495 | -0.04301 | 0.35372 | 0.066146 | 0.15353  |
| 0.09293 | -0.08537 | 0.0653  | 0.12722  | 0.0059   |
| 0.13132 | -0.08572 | 0.06419 | 0.142249 | 0.00206  |
| 0.43507 | -0.09289 | 0.04481 | 0.065592 | 0.15702  |
| 0.12307 | -0.04975 | 0.28333 | 0.132663 | 0.00408  |
| 0.98335 | -0.04497 | 0.33218 | 0.121145 | 0.00878  |
| 0.05794 | -0.0635  | 0.17071 | 0.197571 | 1.70E-05 |
| 0.65637 | -0.05019 | 0.27912 | 0.070486 | 0.12826  |
| 0.29482 | -0.00336 | 0.94221 | 0.060147 | 0.19447  |
| 0.71089 | -0.0088  | 0.84963 | 0.113597 | 0.01404  |
| 0.1249  | 0.010015 | 0.8291  | 0.149346 | 0.00121  |
| 0.25662 | -0.05068 | 0.27443 | 0.16724  | 0.00028  |
| 0.38429 | -0.08741 | 0.05909 | 0.052076 | 0.26139  |
| 0.52709 | -0.0488  | 0.29264 | 0.148681 | 0.00127  |
| 0.66711 | -0.03013 | 0.51595 | -0.11178 | 0.01566  |
| 0.19439 | -0.07438 | 0.10844 | 0.057602 | 0.21406  |
| 0.52127 | -0.10551 | 0.02259 | 0.112174 | 0.0153   |
| 0.88681 | -0.05725 | 0.2169  | 0.113083 | 0.01448  |
| 0.00409 | 0.055158 | 0.23417 | 0.16262  | 0.00042  |
| 0.66184 | -0.11921 | 0.00992 | 0.234343 | 3.02E-07 |
| 0.84429 | -0.07738 | 0.09486 | 0.180903 | 8.45E-05 |
| 0.99941 | -0.03454 | 0.45643 | 0.145247 | 0.00165  |
| 0.16564 | -0.0836  | 0.0711  | 0.082708 | 0.07416  |
| 0.617   | -0.07872 | 0.08926 | 0.115186 | 0.01274  |

|          |          |         |          |          |
|----------|----------|---------|----------|----------|
| 0.00466  | 0.008827 | 0.84912 | 0.104774 | 0.02355  |
| 0.24165  | -0.11877 | 0.01021 | 0.243935 | 9.39E-08 |
| 0.03725  | -0.03421 | 0.46075 | 0.214701 | 2.84E-06 |
| 0.36452  | -0.07994 | 0.0844  | 0.117708 | 0.0109   |
| 0.29346  | -0.09068 | 0.05018 | 0.184171 | 6.24E-05 |
| 0.0131   | 0.005519 | 0.90531 | 0.059404 | 0.20004  |
| 0.40063  | -0.09191 | 0.04713 | 0.02996  | 0.51837  |
| 0.73302  | -0.08618 | 0.06276 | 0.172101 | 0.00019  |
| 0.62617  | -0.09891 | 0.03259 | 0.079848 | 0.08477  |
| 0.64918  | -0.08972 | 0.05266 | 0.128379 | 0.00546  |
| 0.8611   | -0.08179 | 0.07745 | 0.088382 | 0.05632  |
| 0.15157  | -0.07011 | 0.13031 | 0.07897  | 0.08826  |
| 0.73005  | -0.05196 | 0.26243 | 0.044227 | 0.34025  |
| 0.02168  | -0.01616 | 0.72766 | 0.049788 | 0.28295  |
| 0.26591  | -0.00242 | 0.95846 | 0.161686 | 0.00045  |
| 0.20141  | -0.09316 | 0.0442  | 0.104646 | 0.02372  |
| 0.8418   | -0.05513 | 0.23443 | 0.118334 | 0.01049  |
| 0.36411  | -0.07992 | 0.08449 | 0.093566 | 0.04328  |
| 0.55703  | -0.06109 | 0.18757 | 0.015772 | 0.73391  |
| 0.20775  | -0.06693 | 0.14871 | 0.044215 | 0.34038  |
| 0.14255  | -0.02334 | 0.6149  | 0.072135 | 0.11954  |
| 0.02277  | -0.06098 | 0.18835 | 0.116472 | 0.01178  |
| 0.71855  | -0.09445 | 0.04133 | 0.07963  | 0.08563  |
| 0.89046  | -0.12114 | 0.00878 | 0.090487 | 0.05068  |
| 0.00606  | 0.016655 | 0.71962 | 0.101772 | 0.02787  |
| 0.50374  | -0.10788 | 0.01971 | 0.098994 | 0.03245  |
| 0.40464  | -0.08657 | 0.06157 | 0.097787 | 0.03464  |
| 0.72845  | -0.0899  | 0.05221 | 0.240412 | 1.45E-07 |
| 6.38E-06 | 0.12073  | 0.00901 | 0.168144 | 0.00026  |
| 0.07852  | -0.06145 | 0.18493 | 0.185075 | 5.73E-05 |
| 0.07188  | -0.06245 | 0.17789 | 0.115008 | 0.01288  |
| 0.78986  | -0.04079 | 0.37918 | 0.077224 | 0.09554  |
| 0.58317  | -0.03404 | 0.46306 | 0.147328 | 0.00141  |
| 0.11457  | -0.06596 | 0.15471 | 0.064975 | 0.16096  |
| 0.6156   | -0.08562 | 0.0645  | 0.115653 | 0.01238  |
| 0.10126  | -0.07601 | 0.10089 | 0.124332 | 0.00714  |
| 0.19179  | -0.02775 | 0.54978 | 0.116335 | 0.01188  |
| 0.58282  | -0.10296 | 0.02609 | 0.088649 | 0.05557  |
| 0.14737  | -0.02573 | 0.5791  | 0.06892  | 0.13698  |
| 0.14425  | -0.07265 | 0.11693 | 0.028301 | 0.54181  |
| 0.55286  | -0.07092 | 0.12592 | 0.050714 | 0.27409  |
| 0.09476  | -0.04189 | 0.36645 | 0.082218 | 0.0759   |
| 0.95231  | -0.09491 | 0.04034 | 0.082547 | 0.07473  |
| 0.32964  | 0.043682 | 0.34624 | -0.0153  | 0.74155  |
| 0.07701  | 0.004944 | 0.91515 | 0.104703 | 0.02365  |

|         |          |         |          |          |
|---------|----------|---------|----------|----------|
| 0.20381 | -0.05634 | 0.22426 | 0.068925 | 0.13695  |
| 0.11454 | -0.07051 | 0.12812 | 0.112461 | 0.01504  |
| 0.97448 | -0.0424  | 0.36055 | 0.080933 | 0.08061  |
| 0.54985 | -0.06635 | 0.15228 | 0.113045 | 0.01452  |
| 0.38701 | -0.07434 | 0.1086  | 0.152696 | 0.00093  |
| 0.70751 | -0.05652 | 0.22278 | 0.037951 | 0.41323  |
| 0.85414 | -0.10191 | 0.02766 | 0.11361  | 0.01403  |
| 0.19839 | -0.05648 | 0.22311 | 0.059351 | 0.20045  |
| 0.35945 | -0.06375 | 0.16904 | -0.00756 | 0.8705   |
| 0.91803 | -0.0789  | 0.08854 | -0.00867 | 0.85185  |
| 0.25215 | -0.07259 | 0.11723 | 0.019422 | 0.67548  |
| 0.85809 | -0.08783 | 0.05787 | 0.168756 | 0.00025  |
| 0.25355 | -0.06062 | 0.19097 | 0.060123 | 0.19465  |
| 0.07768 | -0.05407 | 0.24357 | 0.069824 | 0.13188  |
| 0.14092 | -0.06226 | 0.1792  | 0.043255 | 0.35098  |
| 0.00717 | 0.005945 | 0.89805 | 0.091524 | 0.04808  |
| 0.24484 | -0.05884 | 0.20433 | 0.065904 | 0.15505  |
| 0.3688  | -0.02679 | 0.56355 | 0.07584  | 0.10166  |
| 0.26465 | -0.07927 | 0.08707 | 0.085863 | 0.06374  |
| 0.2205  | -0.05908 | 0.20249 | 0.070974 | 0.12563  |
| 0.17847 | -0.05287 | 0.2542  | 0.140402 | 0.00236  |
| 0.96592 | -0.06778 | 0.14362 | 0.180489 | 8.77E-05 |
| 0.09616 | 0.011561 | 0.80323 | 0.118847 | 0.01015  |
| 0.95301 | -0.08692 | 0.06053 | 0.131507 | 0.00442  |
| 0.0212  | -0.06718 | 0.1472  | 0.171125 | 0.0002   |
| 0.89877 | -0.07698 | 0.09661 | 0.042027 | 0.36484  |
| 0.4843  | -0.09399 | 0.04234 | 0.094806 | 0.04057  |
| 0.94193 | -0.05859 | 0.20628 | 0.193622 | 2.52E-05 |
| 0.20542 | -0.0457  | 0.32445 | 0.05745  | 0.21527  |
| 0.43265 | -0.09614 | 0.03782 | 0.006169 | 0.89423  |
| 0.10986 | -0.02345 | 0.6132  | 0.033448 | 0.47086  |
| 0.76434 | -0.10455 | 0.02385 | 0.117497 | 0.01105  |
| 0.27796 | -0.02199 | 0.63549 | 0.055138 | 0.23434  |
| 0.18029 | -0.11151 | 0.01592 | 0.075793 | 0.10187  |
| 0.17535 | -0.07216 | 0.11941 | 0.207114 | 6.40E-06 |
| 0.10894 | -0.04633 | 0.31778 | 0.053482 | 0.24871  |
| 0.65833 | -0.07354 | 0.11251 | 0.160927 | 0.00048  |
| 0.06563 | -0.01271 | 0.78419 | 0.092139 | 0.04659  |
| 0.05707 | -0.03397 | 0.46401 | 0.20855  | 5.50E-06 |
| 0.51381 | -0.08566 | 0.06438 | 0.051792 | 0.264    |
| 0.73377 | -0.05194 | 0.26268 | 0.149201 | 0.00122  |
| 0.48705 | -0.06716 | 0.14732 | 0.01554  | 0.73766  |
| 0.09365 | -0.06562 | 0.15686 | 0.102012 | 0.0275   |
| 0.91646 | 0.028504 | 0.53892 | 0.001248 | 0.97854  |
| 0.24836 | -0.08634 | 0.06228 | 0.170525 | 0.00021  |

|          |          |          |          |          |
|----------|----------|----------|----------|----------|
| 0.72358  | -0.11873 | 0.01023  | 0.193068 | 2.66E-05 |
| 0.61375  | -0.08387 | 0.07018  | 0.061037 | 0.18794  |
| 0.9907   | -0.08421 | 0.06905  | 0.134194 | 0.00367  |
| 0.16533  | -0.04456 | 0.33665  | 0.074389 | 0.10839  |
| 0.35111  | -0.03138 | 0.49874  | 0.117085 | 0.01134  |
| 0.761    | -0.14306 | 0.00194  | 0.110303 | 0.0171   |
| 0.57911  | -0.08881 | 0.05512  | 0.030282 | 0.51389  |
| 0.39543  | -0.05501 | 0.23541  | 0.079178 | 0.08742  |
| 0.25522  | -0.02305 | 0.61936  | 0.041919 | 0.36607  |
| 0.49104  | -0.07824 | 0.09125  | 0.106731 | 0.02106  |
| 0.1463   | -0.01057 | 0.81972  | 0.113275 | 0.01432  |
| 0.46148  | -0.03147 | 0.49748  | 0.240299 | 1.47E-07 |
| 0.90583  | -0.05764 | 0.21372  | 0.067139 | 0.14744  |
| 0.63847  | -0.08094 | 0.08058  | 0.140683 | 0.00231  |
| 0.32668  | 0.014788 | 0.74994  | 0.189741 | 3.68E-05 |
| 0.26591  | -0.00242 | 0.95846  | 0.161686 | 0.00045  |
| 0.29424  | -0.0762  | 0.10005  | 0.116264 | 0.01193  |
| 0.0132   | -0.04013 | 0.38692  | 0.18573  | 5.39E-05 |
| 0.49047  | -0.04505 | 0.33133  | -0.00694 | 0.88116  |
| 0.72623  | -0.08827 | 0.05664  | 0.054019 | 0.24399  |
| 0.78042  | -0.10475 | 0.02358  | 0.133581 | 0.00383  |
| 0.15554  | -0.04199 | 0.36532  | 0.082693 | 0.07422  |
| 0.00293  | -0.01575 | 0.73433  | 0.148053 | 0.00133  |
| 0.7857   | -0.09066 | 0.05023  | 0.132229 | 0.0042   |
| 0.99109  | -0.0674  | 0.1459   | -0.00308 | 0.94711  |
| 0.07921  | -0.02488 | 0.59181  | -0.01944 | 0.67514  |
| 0.07041  | -0.04085 | 0.37849  | 0.077566 | 0.09408  |
| 0.16848  | 0.215639 | 2.56E-06 | -0.11316 | 0.01441  |
| 0.59909  | 0.124784 | 0.00694  | -0.08882 | 0.05511  |
| 0.50439  | -0.00525 | 0.90992  | 0.025797 | 0.57816  |
| 0.98452  | -0.12724 | 0.0059   | 0.205953 | 7.23E-06 |
| 0.50296  | 0.212634 | 3.55E-06 | -0.09675 | 0.03662  |
| 0.45254  | 0.19366  | 2.51E-05 | -0.0762  | 0.10006  |
| 0.43172  | 0.0059   | 0.89882  | -0.07838 | 0.09066  |
| 0.94905  | 0.180915 | 8.44E-05 | -0.03182 | 0.49271  |
| 3.55E-12 | 0.227895 | 6.45E-07 | 0.253327 | 2.85E-08 |
| 0.24581  | 0.168184 | 0.00026  | -0.19143 | 3.12E-05 |
| 0.00115  | -0.00832 | 0.85761  | -0.1736  | 0.00016  |
| 0.03505  | 0.06912  | 0.13584  | -0.04329 | 0.35064  |
| 0.28521  | 0.039022 | 0.40016  | -0.01067 | 0.81816  |
| 0.05624  | 0.063674 | 0.16953  | -0.08079 | 0.08116  |
| 1.36E-05 | 0.23954  | 1.61E-07 | -0.07836 | 0.09074  |
| 0.00743  | 0.222038 | 1.26E-06 | 0.1962   | 1.95E-05 |
| 0.00775  | -0.10589 | 0.0221   | -0.37207 | 8.84E-17 |
| 0.80316  | 0.031555 | 0.49634  | 0.032659 | 0.4814   |

|          |          |          |          |          |
|----------|----------|----------|----------|----------|
| 0.09884  | 0.072442 | 0.11797  | 0.049801 | 0.28282  |
| 0.1017   | 0.03719  | 0.42267  | -0.01164 | 0.80196  |
| 0.0017   | 0.275256 | 1.45E-09 | 0.003701 | 0.93642  |
| 0.21292  | 0.134329 | 0.00363  | -0.09993 | 0.03084  |
| 1.06E-06 | 0.431981 | 1.18E-22 | 0.0872   | 0.05971  |
| 0.43396  | -0.00844 | 0.85568  | -0.09329 | 0.0439   |
| 0.31012  | 0.020252 | 0.66245  | 0.065083 | 0.16026  |
| 0.43092  | 0.117746 | 0.01088  | 0.163374 | 0.00039  |
| 0.06459  | 0.282129 | 5.40E-10 | -0.0646  | 0.16337  |
| 0.93493  | 0.023819 | 0.60765  | 0.289249 | 1.88E-10 |
| 0.52663  | 0.111857 | 0.01559  | -0.04673 | 0.31362  |
| 0.32684  | 0.077055 | 0.09628  | -0.14126 | 0.00221  |
| 2.71E-06 | 0.388102 | 3.09E-18 | 0.026101 | 0.57369  |
| 0.65768  | 0.090257 | 0.05127  | -0.19258 | 2.79E-05 |
| 0.65238  | 0.064581 | 0.16352  | 0.219206 | 1.73E-06 |
| 0.11915  | 0.11612  | 0.01203  | 0.102772 | 0.02636  |
| 0.54113  | 0.136683 | 0.00308  | -0.07836 | 0.09075  |
| 0.34416  | 0.078506 | 0.09015  | -0.00635 | 0.89113  |
| 0.00055  | 0.302592 | 2.41E-11 | -0.05752 | 0.21473  |
| 0.00583  | 0.00561  | 0.90377  | -0.02259 | 0.62635  |
| 0.00236  | 0.21094  | 4.26E-06 | -0.00651 | 0.88842  |
| 0.01011  | 0.145769 | 0.00159  | -0.03451 | 0.45687  |
| 0.77992  | -0.07735 | 0.09499  | 0.109897 | 0.01751  |
| 0.00129  | -0.06754 | 0.14502  | 0.025862 | 0.5772   |
| 0.29368  | 0.053479 | 0.24874  | -0.03552 | 0.44386  |
| 2.28E-08 | -0.01087 | 0.81472  | -0.176   | 0.00013  |
| 0.36121  | -0.00152 | 0.97389  | 0.142504 | 0.00202  |
| 0.09888  | 0.115196 | 0.01274  | -0.09883 | 0.03274  |
| 0.13077  | 0.048381 | 0.29679  | -0.03254 | 0.48294  |
| 0.00978  | 0.133322 | 0.0039   | 0.102821 | 0.02629  |
| 0.11873  | 0.079408 | 0.08651  | -0.05415 | 0.24286  |
| 2.11E-05 | 0.094041 | 0.04222  | 0.097816 | 0.03458  |
| 0.01285  | -0.02339 | 0.61415  | 0.225899 | 8.12E-07 |
| 0.00691  | 0.004236 | 0.92725  | 0.071685 | 0.12187  |
| 0.00799  | 0.141875 | 0.00212  | -0.01698 | 0.71434  |
| 0.65562  | 0.029372 | 0.52662  | -0.1086  | 0.0189   |
| 0.34541  | 0.010386 | 0.82288  | -0.02342 | 0.61374  |
| 0.54357  | 0.27293  | 2.02E-09 | -0.06655 | 0.15103  |
| 0.1553   | 0.065803 | 0.15568  | 0.092892 | 0.04482  |
| 0.75285  | -0.02254 | 0.62702  | -0.11173 | 0.01571  |
| 0.66225  | 0.033321 | 0.47254  | -0.27784 | 1.00E-09 |
| 0.00988  | -0.05111 | 0.27036  | -0.18676 | 4.89E-05 |
| 0.16349  | 0.050213 | 0.27885  | -0.05027 | 0.27835  |
| 0.01948  | 0.064656 | 0.16303  | -0.11875 | 0.01022  |
| 0.1344   | 0.266574 | 4.87E-09 | -0.08144 | 0.07874  |

|          |          |          |          |          |
|----------|----------|----------|----------|----------|
| 0.01456  | 0.022345 | 0.63006  | -0.02396 | 0.60556  |
| 0.20374  | 0.073598 | 0.11221  | 0.016398 | 0.72377  |
| 0.5808   | -0.01632 | 0.72499  | 0.013082 | 0.77798  |
| 0.03942  | 0.151471 | 0.00103  | -0.02153 | 0.64259  |
| 0.00729  | 0.008566 | 0.85352  | 0.174676 | 0.00015  |
| 0.08033  | 0.143459 | 0.00188  | 0.097967 | 0.0343   |
| 0.01121  | 0.21792  | 2.00E-06 | -0.04783 | 0.30235  |
| 0.22955  | -0.08072 | 0.0814   | -0.10032 | 0.03019  |
| 0.01223  | 0.005005 | 0.91409  | 0.071043 | 0.12526  |
| 0.01077  | 0.030185 | 0.51523  | -0.16709 | 0.00029  |
| 4.96E-08 | 0.02625  | 0.57149  | -0.09597 | 0.03816  |
| 0.02241  | 0.306473 | 1.30E-11 | -0.07061 | 0.12758  |
| 3.45E-10 | 0.479922 | 2.82E-28 | -0.26162 | 9.54E-09 |
| 2.23E-08 | 0.394151 | 8.30E-19 | -0.13181 | 0.00433  |
| 0.00052  | 0.151108 | 0.00105  | -0.01672 | 0.71862  |
| 0.00355  | 0.266873 | 4.68E-09 | -0.12781 | 0.00568  |
| 4.56E-05 | 0.335923 | 8.80E-14 | -0.1269  | 0.00603  |
| 0.01189  | 0.237639 | 2.03E-07 | -0.07424 | 0.10908  |
| 0.05778  | 0.016851 | 0.71645  | 0.049808 | 0.28276  |
| 0.00159  | 0.07355  | 0.11244  | -0.03105 | 0.50322  |
| 0.75049  | 0.077148 | 0.09588  | -0.05239 | 0.25856  |
| 0.25405  | 0.188927 | 3.98E-05 | -0.09796 | 0.03432  |
| 0.08234  | 0.018048 | 0.69726  | -0.05991 | 0.19622  |
| 0.45065  | 0.086    | 0.06332  | -0.11301 | 0.01455  |
| 0.54925  | 0.061581 | 0.18402  | 0.101711 | 0.02796  |
| 0.19437  | 0.156779 | 0.00067  | -0.13975 | 0.00247  |
| 0.02966  | -0.07534 | 0.10396  | -0.30949 | 7.99E-12 |
| 0.5049   | 0.234079 | 3.12E-07 | -0.03544 | 0.4448   |
| 0.15063  | 0.017186 | 0.71106  | 0.060414 | 0.19249  |
| 0.00015  | -0.07044 | 0.12853  | -0.06041 | 0.19254  |
| 5.85E-08 | 0.152999 | 0.00091  | 0.276628 | 1.19E-09 |
| 0.00117  | -0.0386  | 0.40525  | -0.00944 | 0.83883  |
| 0.0127   | -0.06301 | 0.17403  | 0.282147 | 5.38E-10 |
| 0.85254  | -0.05976 | 0.19737  | 0.059037 | 0.20285  |
| 0.07636  | -0.12829 | 0.0055   | 0.1024   | 0.02691  |
| 0.51259  | -0.1384  | 0.00272  | 0.192984 | 2.68E-05 |
| 0.82703  | -0.1184  | 0.01044  | 0.250252 | 4.23E-08 |
| 0.176    | -0.15162 | 0.00101  | 0.176992 | 0.00012  |
| 0.08913  | -0.0341  | 0.46221  | 0.116793 | 0.01154  |
| 0.74078  | 0.210045 | 4.69E-06 | 0.019353 | 0.67658  |
| 0.02091  | 0.185526 | 5.49E-05 | 0.166266 | 0.00031  |
| 0.48777  | 0.088704 | 0.05542  | 0.10542  | 0.0227   |
| 1.05E-12 | 0.305024 | 1.64E-11 | 0.209731 | 4.85E-06 |
| 0.29233  | 0.289625 | 1.78E-10 | -0.03501 | 0.45036  |
| 0.47732  | 0.134718 | 0.00354  | -0.13485 | 0.0035   |

|         |          |          |          |          |
|---------|----------|----------|----------|----------|
| 0.81968 | 0.095754 | 0.0386   | -0.25314 | 2.92E-08 |
| 0.01535 | 0.211294 | 4.11E-06 | 0.188681 | 4.07E-05 |
| 0.103   | 0.172396 | 0.00018  | -0.06691 | 0.14884  |
| 0.1631  | -0.01938 | 0.67619  | 0.095302 | 0.03953  |
| 0.00073 | 0.127738 | 0.0057   | 0.034954 | 0.4511   |
| 0.85899 | 0.0122   | 0.79258  | -0.15543 | 0.00075  |
| 0.13659 | 0.067432 | 0.14568  | 0.008699 | 0.85128  |
| 0.01085 | 0.099992 | 0.03074  | -0.0106  | 0.81936  |
| 0.51039 | -0.00028 | 0.99516  | -0.0632  | 0.17271  |
| 0.93054 | -0.0192  | 0.67902  | 0.086754 | 0.06103  |
| 0.33921 | -0.03974 | 0.39149  | 0.283595 | 4.36E-10 |
| 0.17782 | 0.298361 | 4.68E-11 | 0.093869 | 0.0426   |
| 0.00349 | 0.041432 | 0.37168  | -0.09556 | 0.03899  |
| 0.0087  | -0.03207 | 0.48935  | 0.209122 | 5.18E-06 |
| 0.7922  | 0.268984 | 3.50E-09 | -0.21258 | 3.58E-06 |
| 0.25095 | 0.067472 | 0.14544  | -0.0462  | 0.31915  |
| 0.51963 | 0.086693 | 0.06121  | 0.035633 | 0.44237  |
| 0.77648 | -0.00572 | 0.90184  | -0.01808 | 0.69678  |
| 0.89564 | 0.088763 | 0.05526  | -0.07965 | 0.08556  |
| 0.17189 | 0.036241 | 0.4346   | -0.01441 | 0.75614  |
| 0.46691 | 0.005806 | 0.90041  | 0.254473 | 2.45E-08 |
| 0.00142 | 0.206839 | 6.59E-06 | -0.18583 | 5.34E-05 |
| 0.00013 | -0.00836 | 0.857    | -0.3602  | 9.40E-16 |
| 0.00114 | -0.02481 | 0.59276  | -0.25497 | 2.30E-08 |
| 0.00015 | 0.248101 | 5.56E-08 | -0.00655 | 0.88778  |
| 0.31316 | 0.00372  | 0.93609  | -0.0062  | 0.89378  |
| 0.26232 | -0.0093  | 0.84121  | -0.02523 | 0.58661  |
| 0.03392 | 0.195541 | 2.09E-05 | -0.13678 | 0.00306  |
| 0.01181 | 0.211136 | 4.18E-06 | 0.088122 | 0.05705  |
| 0.00064 | 0.072382 | 0.11828  | -0.12979 | 0.00497  |
| 0.44369 | 0.069601 | 0.13313  | 0.204719 | 8.22E-06 |
| 0.14275 | 0.064211 | 0.16595  | -0.24367 | 9.70E-08 |
| 0.41198 | 0.142442 | 0.00203  | -0.11277 | 0.01476  |
| 0.04279 | 0.265894 | 5.35E-09 | -0.01251 | 0.78738  |
| 0.47556 | 0.084205 | 0.06906  | -0.35141 | 5.09E-15 |
| 0.09769 | 0.162674 | 0.00042  | 0.112138 | 0.01533  |
| 0.29509 | -0.0093  | 0.84109  | -0.13096 | 0.00459  |
| 0.02426 | 0.081798 | 0.07741  | 0.070021 | 0.1308   |
| 0.05457 | 0.204399 | 8.49E-06 | -0.29331 | 1.02E-10 |
| 0.73556 | 0.192276 | 2.88E-05 | 0.070026 | 0.13077  |
| 0.64405 | 0.094013 | 0.04229  | 0.179103 | 9.96E-05 |
| 0.74906 | 0.15421  | 0.00083  | 0.166656 | 0.0003   |
| 0.07072 | 0.176837 | 0.00012  | 0.066566 | 0.15093  |
| 0.08654 | 0.060984 | 0.18832  | -0.00188 | 0.96764  |
| 0.59497 | -0.03914 | 0.39878  | -0.1127  | 0.01482  |



|          |          |          |          |          |
|----------|----------|----------|----------|----------|
| 0.53473  | 0.021338 | 0.64556  | 0.052781 | 0.25497  |
| 0.0158   | 0.026869 | 0.56246  | -0.08717 | 0.05979  |
| 0.99983  | 0.064143 | 0.1664   | -0.1559  | 0.00072  |
| 0.11213  | 0.192463 | 2.82E-05 | 0.013909 | 0.76435  |
| 0.95974  | 0.114871 | 0.01299  | -0.12907 | 0.00521  |
| 0.10121  | 0.030707 | 0.50799  | -0.13634 | 0.00316  |
| 0.67128  | 0.152103 | 0.00098  | 0.109214 | 0.01823  |
| 0.31574  | -0.09198 | 0.04696  | -0.02331 | 0.61541  |
| 0.06344  | 0.12743  | 0.00582  | -0.0369  | 0.4263   |
| 1.17E-08 | 0.25368  | 2.72E-08 | 0.019763 | 0.67012  |
| 0.81942  | 0.230521 | 4.75E-07 | -0.05998 | 0.19569  |
| 0.91243  | -0.01162 | 0.80216  | 0.070993 | 0.12552  |
| 0.00123  | -0.03128 | 0.50007  | 0.158704 | 0.00058  |
| 0.00894  | -0.03099 | 0.50415  | 0.112061 | 0.0154   |
| 0.00072  | 0.202665 | 1.02E-05 | 0.036573 | 0.43041  |
| 0.4874   | 0.144913 | 0.00169  | 0.217505 | 2.09E-06 |
| 0.25486  | 0.076461 | 0.09888  | 0.069124 | 0.13581  |
| 0.00019  | 0.209292 | 5.08E-06 | -0.08843 | 0.05618  |
| 0.87987  | -0.01563 | 0.7362   | -0.11072 | 0.01668  |
| 8.39E-09 | 0.36216  | 6.41E-16 | -0.08345 | 0.07158  |
| 0.01427  | 0.048592 | 0.29469  | 0.027004 | 0.56049  |
| 0.16074  | 0.024398 | 0.59895  | -0.18082 | 8.51E-05 |
| 0.01537  | 0.243417 | 1.00E-07 | 0.090548 | 0.05052  |
| 2.82E-05 | 0.104481 | 0.02395  | -0.01418 | 0.75994  |
| 0.52104  | 0.052111 | 0.26107  | -0.08007 | 0.0839   |
| 0.06715  | 0.023028 | 0.61963  | -0.05442 | 0.24053  |
| 0.86481  | 0.091724 | 0.04759  | 0.088942 | 0.05477  |
| 0.25952  | 0.035196 | 0.44798  | -0.35856 | 1.29E-15 |
| 0.36466  | -0.08435 | 0.06858  | -0.04077 | 0.37943  |
| 0.00014  | 0.03773  | 0.41595  | -0.09275 | 0.04514  |
| 0.09243  | 0.105242 | 0.02293  | 0.053085 | 0.25224  |
| 0.88637  | -0.00668 | 0.88546  | -0.12311 | 0.00774  |
| 0.36255  | 0.099544 | 0.0315   | 0.068957 | 0.13676  |
| 0.1543   | -0.01635 | 0.72458  | -0.15623 | 0.0007   |
| 0.14381  | 0.081614 | 0.07809  | -0.1656  | 0.00033  |
| 3.99E-08 | -0.05357 | 0.2479   | -0.17312 | 0.00017  |
| 0.60654  | 0.07526  | 0.10431  | -0.08714 | 0.05987  |
| 0.0009   | -0.09993 | 0.03084  | 0.075692 | 0.10233  |
| 0.58644  | -0.15385 | 0.00085  | -0.16393 | 0.00037  |
| 0.29169  | -0.1811  | 8.30E-05 | -0.06606 | 0.15408  |
| 2.38E-07 | -0.1939  | 2.45E-05 | 0.257074 | 1.75E-08 |
| 1.55E-05 | -0.14479 | 0.00171  | 0.095238 | 0.03966  |
| 0.29451  | -0.22043 | 1.51E-06 | 0.12439  | 0.00712  |
| 0.18306  | -0.16503 | 0.00034  | -0.03403 | 0.46313  |
| 0.69723  | -0.1984  | 1.57E-05 | 0.188243 | 4.25E-05 |

|          |          |          |          |          |
|----------|----------|----------|----------|----------|
| 0.00304  | -0.10621 | 0.0217   | 0.366933 | 2.49E-16 |
| 0.00017  | -0.17264 | 0.00018  | 0.181045 | 8.34E-05 |
| 0.65888  | -0.15811 | 0.00061  | 0.027665 | 0.55093  |
| 6.82E-07 | -0.19851 | 1.55E-05 | 0.099948 | 0.03081  |
| 0.00016  | -0.11931 | 0.00986  | -0.09242 | 0.04593  |
| 0.00041  | 0.095482 | 0.03915  | 0.062075 | 0.18052  |
| 1.86E-08 | -0.12242 | 0.00809  | 0.224455 | 9.57E-07 |
| 3.31E-08 | -0.13304 | 0.00398  | 0.086298 | 0.06241  |
| 0.63823  | -0.22159 | 1.33E-06 | 0.108426 | 0.01909  |
| 0.00171  | -0.15128 | 0.00104  | 0.043942 | 0.34339  |
| 1.26E-07 | -0.06023 | 0.19384  | 0.4554   | 2.74E-25 |
| 6.40E-07 | -0.07396 | 0.11046  | 0.375194 | 4.66E-17 |
| 0.00742  | -0.10305 | 0.02596  | -0.14843 | 0.0013   |
| 3.93E-07 | -0.17395 | 0.00016  | 0.16349  | 0.00039  |
| 0.01803  | -0.08804 | 0.05729  | -0.07608 | 0.10058  |
| 0.84354  | -0.18746 | 4.58E-05 | -0.07213 | 0.11954  |
| 9.80E-05 | -0.18532 | 5.60E-05 | 0.085431 | 0.06509  |
| 9.21E-09 | -0.11211 | 0.01535  | 0.15345  | 0.00088  |
| 0.00203  | -0.11764 | 0.01095  | 0.116149 | 0.01201  |
| 0.06224  | -0.11912 | 0.00998  | 0.136621 | 0.00309  |
| 0.00078  | -0.15431 | 0.00082  | -0.0266  | 0.56638  |
| 0.11664  | -0.16533 | 0.00033  | 0.100332 | 0.03017  |
| 4.56E-06 | -0.11512 | 0.0128   | 0.124157 | 0.00723  |
| 3.15E-08 | -0.10294 | 0.02611  | 0.185756 | 5.38E-05 |
| 7.10E-08 | -0.05453 | 0.23957  | 0.104711 | 0.02364  |
| 3.72E-06 | -0.08974 | 0.05262  | 0.122067 | 0.00827  |
| 3.11E-07 | -0.0708  | 0.12654  | 0.015469 | 0.73883  |
| 0.32936  | -0.17648 | 0.00013  | -0.1121  | 0.01537  |
| 8.28E-11 | 0.04356  | 0.34759  | 0.06715  | 0.14737  |
| 0.19414  | -0.19384 | 2.47E-05 | 0.245554 | 7.67E-08 |
| 0.0091   | -0.09662 | 0.03687  | -0.12065 | 0.00906  |
| 0.00116  | -0.19367 | 2.51E-05 | 0.162537 | 0.00042  |
| 0.34426  | -0.18192 | 7.69E-05 | 0.00156  | 0.97318  |
| 2.67E-07 | -0.08452 | 0.06803  | 0.164105 | 0.00037  |
| 6.44E-07 | -0.12418 | 0.00721  | 0.083534 | 0.07131  |
| 3.81E-11 | -0.08957 | 0.05309  | 0.19182  | 3.01E-05 |
| 0.01289  | -0.15883 | 0.00057  | 0.040682 | 0.38041  |
| 0.14323  | -0.04363 | 0.34679  | 0.128605 | 0.00538  |
| 1.18E-05 | -0.16157 | 0.00046  | 0.204017 | 8.84E-06 |
| 0.7242   | -0.05473 | 0.23779  | -0.25141 | 3.65E-08 |
| 0.61237  | -0.09229 | 0.04624  | -0.04118 | 0.37458  |
| 7.88E-08 | -0.15042 | 0.00111  | 0.11308  | 0.01449  |
| 0.28751  | -0.09236 | 0.04607  | 0.03683  | 0.42717  |
| 4.78E-12 | 0.114168 | 0.01356  | 0.197479 | 1.72E-05 |
| 0.00042  | -0.13633 | 0.00316  | -0.05396 | 0.24454  |

|          |          |          |          |          |
|----------|----------|----------|----------|----------|
| 0.00079  | -0.03488 | 0.45208  | -0.12363 | 0.00748  |
| 0.00931  | -0.20324 | 9.57E-06 | 0.090746 | 0.05002  |
| 1.09E-11 | 0.017475 | 0.70643  | 0.192276 | 2.88E-05 |
| 0.003    | -0.18665 | 4.94E-05 | -0.00923 | 0.84231  |
| 0.21011  | -0.1187  | 0.01025  | 0.208452 | 5.56E-06 |
| 0.53058  | -0.01602 | 0.72992  | -0.29515 | 7.69E-11 |
| 0.00827  | -0.12826 | 0.00551  | -0.10414 | 0.02441  |
| 0.01342  | -0.1125  | 0.015    | 0.242774 | 1.08E-07 |
| 0.14771  | -0.15969 | 0.00053  | -0.10335 | 0.02552  |
| 0.00365  | -0.03564 | 0.44224  | -0.11959 | 0.00969  |
| 0.92004  | -0.1913  | 3.16E-05 | -0.03894 | 0.40112  |
| 0.13108  | -0.12074 | 0.009    | -0.12723 | 0.0059   |
| 0.00922  | -0.19463 | 2.28E-05 | 0.067191 | 0.14712  |
| 3.88E-08 | -0.05719 | 0.21739  | 0.074578 | 0.10749  |
| 0.01231  | -0.13937 | 0.00254  | -0.00281 | 0.9517   |
| 1.64E-09 | -0.02053 | 0.6581   | 0.369852 | 1.38E-16 |
| 0.70469  | -0.15465 | 0.0008   | -0.09614 | 0.03781  |
| 6.48E-07 | -0.13186 | 0.00431  | 0.161218 | 0.00047  |
| 0.88505  | -0.0481  | 0.29956  | -0.30004 | 3.60E-11 |
| 0.0006   | -0.05739 | 0.21572  | -0.17925 | 9.83E-05 |
| 9.89E-05 | -0.13312 | 0.00395  | 0.051312 | 0.26846  |
| 3.72E-05 | -0.01938 | 0.67621  | -0.00514 | 0.91179  |
| 0.00323  | -0.19687 | 1.83E-05 | 0.233329 | 3.41E-07 |
| 0.00132  | -0.13631 | 0.00316  | 0.126259 | 0.00629  |
| 0.05946  | -0.09053 | 0.05056  | 0.205744 | 7.38E-06 |
| 8.09E-06 | -0.09301 | 0.04455  | 0.041809 | 0.36734  |
| 1.54E-07 | -0.05977 | 0.19726  | 0.198836 | 1.50E-05 |
| 0.08254  | -0.20333 | 9.48E-06 | 0.03031  | 0.51349  |
| 0.00018  | -0.04304 | 0.35338  | 0.155268 | 0.00076  |
| 0.0005   | -0.14209 | 0.00208  | 0.201337 | 1.16E-05 |
| 0.10046  | -0.17247 | 0.00018  | -0.10403 | 0.02457  |
| 0.06166  | -0.14865 | 0.00127  | -0.11687 | 0.01149  |
| 0.29473  | -0.11326 | 0.01433  | -0.10303 | 0.02598  |
| 0.16484  | -0.17589 | 0.00013  | -0.11259 | 0.01492  |
| 0.01365  | -0.16389 | 0.00038  | -0.10488 | 0.02341  |
| 5.41E-07 | -0.15762 | 0.00063  | 0.181221 | 8.20E-05 |
| 0.00021  | -0.082   | 0.07667  | -0.12124 | 0.00872  |
| 0.31211  | -0.20316 | 9.66E-06 | -0.00577 | 0.90096  |
| 0.00356  | -0.12532 | 0.00669  | 0.160675 | 0.00049  |
| 2.42E-05 | -0.17073 | 0.00021  | 0.056422 | 0.2236   |
| 1.41E-09 | -0.07886 | 0.08871  | 0.208701 | 5.41E-06 |
| 0.00236  | -0.16715 | 0.00029  | 0.050517 | 0.27596  |
| 0.31926  | -0.19464 | 2.28E-05 | -0.07031 | 0.1292   |
| 0.38556  | -0.1359  | 0.00325  | -0.14905 | 0.00124  |
| 4.59E-05 | -0.19132 | 3.16E-05 | 0.178996 | 0.0001   |

|          |          |          |          |          |
|----------|----------|----------|----------|----------|
| 4.56E-10 | -0.13342 | 0.00387  | 0.301107 | 3.05E-11 |
| 6.54E-05 | -0.12379 | 0.0074   | 0.007091 | 0.87854  |
| 0.0025   | -0.16314 | 0.0004   | 0.168289 | 0.00026  |
| 0.09867  | -0.20307 | 9.75E-06 | 0.022159 | 0.6329   |
| 0.90018  | -0.13732 | 0.00294  | -0.24623 | 7.04E-08 |
| 4.95E-05 | -0.18509 | 5.72E-05 | 0.218724 | 1.83E-06 |
| 6.39E-10 | -0.04933 | 0.28742  | 0.124265 | 0.00717  |
| 0.26319  | -0.0985  | 0.03332  | -0.17094 | 0.00021  |
| 0.86164  | -0.13669 | 0.00308  | -0.20541 | 7.65E-06 |
| 0.13172  | -0.14612 | 0.00154  | -0.20151 | 1.14E-05 |
| 1.29E-06 | -0.06415 | 0.16633  | 0.180587 | 8.70E-05 |
| 0.00288  | -0.21784 | 2.01E-06 | 0.1182   | 0.01057  |
| 8.82E-06 | -0.18897 | 3.96E-05 | 0.103176 | 0.02577  |
| 0.69378  | -0.15691 | 0.00067  | -0.1742  | 0.00015  |
| 0.00022  | -0.17285 | 0.00017  | 0.085972 | 0.06341  |
| 0.29969  | -0.15623 | 0.0007   | -0.011   | 0.81266  |
| 0.00934  | -0.06596 | 0.15471  | -0.07947 | 0.08625  |
| 0.01103  | -0.17453 | 0.00015  | 0.180706 | 8.60E-05 |
| 0.70751  | -0.1721  | 0.00019  | 0.047404 | 0.30667  |
| 7.61E-05 | -0.13203 | 0.00426  | 0.192841 | 2.72E-05 |
| 1.66E-07 | -0.10538 | 0.02276  | 0.028961 | 0.53242  |
| 0.01381  | -0.06546 | 0.15783  | 0.194124 | 2.40E-05 |
| 0.11795  | 0.000854 | 0.98532  | -0.35296 | 3.79E-15 |
| 1.15E-05 | -0.10295 | 0.0261   | 0.0267   | 0.56492  |
| 0.00222  | -0.23268 | 3.68E-07 | 0.107628 | 0.02     |
| 1.01E-06 | -0.0932  | 0.04411  | 0.09132  | 0.04858  |
| 0.01189  | -0.1363  | 0.00316  | 0.003468 | 0.94042  |
| 3.65E-05 | -0.1584  | 0.00059  | 0.128952 | 0.00526  |
| 6.05E-08 | -0.02155 | 0.64229  | 0.040203 | 0.38605  |
| 0.0021   | -0.09219 | 0.04647  | -0.01693 | 0.71523  |
| 4.28E-07 | -0.19706 | 1.79E-05 | 0.287422 | 2.47E-10 |
| 8.85E-05 | -0.13366 | 0.00381  | 0.040083 | 0.38746  |
| 8.96E-05 | -0.05331 | 0.25024  | 0.225671 | 8.33E-07 |
| 0.00988  | -0.19245 | 2.83E-05 | 0.047717 | 0.30348  |
| 0.04285  | -0.17259 | 0.00018  | -0.04015 | 0.38669  |
| 0.05457  | 0.015669 | 0.73556  | -0.04429 | 0.33954  |
| 0.00031  | 0.058902 | 0.20388  | -0.02502 | 0.58965  |
| 0.95673  | -0.07873 | 0.08924  | -0.1115  | 0.01593  |
| 0.00112  | -0.15236 | 0.00096  | 0.003628 | 0.93768  |
| 3.12E-06 | -0.13124 | 0.0045   | 0.19163  | 3.06E-05 |
| 0.02866  | -0.15351 | 0.00087  | -0.04446 | 0.33768  |
| 0.04371  | -0.13327 | 0.00391  | -0.1375  | 0.00291  |
| 4.33E-05 | -0.10203 | 0.02747  | 0.159506 | 0.00054  |
| 0.17803  | -0.18191 | 7.70E-05 | -0.14014 | 0.0024   |
| 5.14E-07 | -0.18563 | 5.44E-05 | 0.230994 | 4.49E-07 |

|          |          |          |          |          |
|----------|----------|----------|----------|----------|
| 5.07E-13 | -0.04181 | 0.36737  | 0.282465 | 5.14E-10 |
| 5.56E-08 | -0.10492 | 0.02335  | 0.168258 | 0.00026  |
| 1.55E-10 | -0.08694 | 0.06048  | 0.291969 | 1.25E-10 |
| 0.00354  | -0.11045 | 0.01695  | 0.376753 | 3.38E-17 |
| 1.12E-09 | -0.08703 | 0.0602   | 0.202153 | 1.07E-05 |
| 0.00324  | -0.14692 | 0.00145  | -0.08369 | 0.07078  |
| 1.53E-05 | -0.15261 | 0.00094  | 0.105008 | 0.02324  |
| 3.63E-05 | -0.15904 | 0.00056  | 0.232987 | 3.55E-07 |
| 0.19096  | -0.21211 | 3.76E-06 | -0.0162  | 0.72693  |
| 0.39578  | -0.03435 | 0.45891  | -0.08574 | 0.06411  |
| 0.00118  | -0.10935 | 0.01809  | 0.045493 | 0.3266   |
| 0.53065  | -0.01654 | 0.72152  | -0.16585 | 0.00032  |
| 0.47049  | 0.088687 | 0.05547  | -0.09371 | 0.04295  |
| 0.18017  | 0.045535 | 0.32616  | 0.122821 | 0.00788  |
| 0.86725  | 0.023755 | 0.60862  | 0.017149 | 0.71166  |
| 0.05264  | -0.03299 | 0.47695  | -0.17454 | 0.00015  |
| 0.17246  | -0.06248 | 0.17768  | 0.002383 | 0.95905  |
| 0.08828  | 0.085382 | 0.06525  | -0.26365 | 7.25E-09 |
| 0.10255  | 0.063795 | 0.16872  | 0.034206 | 0.46086  |
| 0.4735   | -0.08587 | 0.06374  | 0.01082  | 0.8156   |
| 0.12668  | -0.0444  | 0.33836  | -0.03509 | 0.44934  |
| 0.41995  | 0.091711 | 0.04762  | -0.06188 | 0.18187  |
| 0.19999  | -0.08316 | 0.07259  | -0.02778 | 0.54929  |
| 0.12002  | -0.00348 | 0.94014  | -0.15419 | 0.00083  |
| 0.1847   | -0.0664  | 0.15195  | -0.10491 | 0.02337  |
| 0.35015  | 0.003464 | 0.94049  | -0.0119  | 0.79755  |
| 0.00331  | -0.03038 | 0.51247  | -0.20121 | 1.18E-05 |
| 0.61702  | -0.09292 | 0.04476  | -0.00186 | 0.96803  |
| 0.0563   | -0.06277 | 0.17571  | -0.15264 | 0.00094  |
| 0.29383  | 0.110753 | 0.01665  | -0.24176 | 1.23E-07 |
| 0.85139  | 0.054899 | 0.23637  | -0.3309  | 2.15E-13 |
| 0.19278  | -0.09791 | 0.03442  | -0.10711 | 0.02061  |
| 0.82455  | 0.007535 | 0.87099  | -0.06052 | 0.19168  |
| 0.02711  | -0.03586 | 0.43948  | 0.151909 | 0.00099  |
| 1.17E-13 | 0.270292 | 2.92E-09 | 0.00261  | 0.95515  |
| 0.88034  | -0.03953 | 0.39405  | 0.017147 | 0.71169  |
| 0.00411  | -0.06839 | 0.14004  | -0.13715 | 0.00298  |
| 0.24832  | -0.00327 | 0.94385  | 0.003024 | 0.94803  |
| 0.22038  | -0.05668 | 0.22147  | 0.020528 | 0.65814  |
| 0.53166  | 0.051426 | 0.26739  | -0.05212 | 0.26097  |
| 0.99627  | 0.027126 | 0.55873  | 0.030695 | 0.50816  |
| 0.13625  | 0.023376 | 0.61436  | -0.1727  | 0.00018  |
| 0.13352  | 0.056785 | 0.22063  | 0.184319 | 6.15E-05 |
| 0.72096  | -0.02953 | 0.52442  | -0.02195 | 0.63619  |
| 0.55861  | 0.020923 | 0.65201  | -0.12394 | 0.00733  |

|          |          |          |          |          |
|----------|----------|----------|----------|----------|
| 0.20143  | -0.07191 | 0.1207   | -0.06059 | 0.19116  |
| 0.44353  | 0.026233 | 0.57175  | 0.080605 | 0.08185  |
| 0.20144  | 0.014765 | 0.7503   | -0.15284 | 0.00092  |
| 0.03317  | -0.05726 | 0.21679  | -0.10284 | 0.02627  |
| 0.05042  | -0.04369 | 0.34612  | -0.07777 | 0.09324  |
| 0.84797  | -0.01707 | 0.71285  | 0.062421 | 0.1781   |
| 0.10083  | -0.07383 | 0.11106  | 0.018089 | 0.69662  |
| 0.37278  | -0.0392  | 0.39806  | -0.02993 | 0.51876  |
| 0.17783  | -0.11223 | 0.01524  | 0.043525 | 0.34798  |
| 0.33226  | -0.01784 | 0.70062  | -0.04816 | 0.29902  |
| 0.85556  | -0.02743 | 0.55434  | -0.0247  | 0.59448  |
| 0.94844  | -0.06118 | 0.18693  | 0.046256 | 0.31855  |
| 0.71916  | -0.01098 | 0.81289  | -0.042   | 0.36517  |
| 0.8362   | -0.01208 | 0.79453  | -0.04861 | 0.29449  |
| 0.9879   | 0.013269 | 0.77489  | -0.0776  | 0.09392  |
| 0.32414  | 0.129882 | 0.00494  | 0.037717 | 0.41612  |
| 0.35344  | 0.057564 | 0.21436  | -0.00346 | 0.94054  |
| 0.76221  | -0.10266 | 0.02653  | 0.070766 | 0.12674  |
| 0.0344   | 0.010405 | 0.82255  | -0.19753 | 1.71E-05 |
| 8.83E-05 | 0.100218 | 0.03036  | 0.233159 | 3.48E-07 |
| 0.21245  | -0.03167 | 0.49476  | -0.05623 | 0.22518  |
| 0.15618  | 0.01626  | 0.72598  | 0.096333 | 0.03743  |
| 0.00071  | 0.249607 | 4.59E-08 | 0.004192 | 0.92801  |
| 0.77016  | -0.09023 | 0.05135  | 0.042323 | 0.36147  |
| 0.69127  | 0.056954 | 0.21927  | -0.08877 | 0.05523  |
| 0.07154  | -0.02557 | 0.58156  | 0.088069 | 0.0572   |
| 0.81433  | 0.021278 | 0.6465   | -0.07545 | 0.10342  |
| 0.93991  | -0.02249 | 0.62787  | -0.15261 | 0.00094  |
| 0.9896   | -0.0454  | 0.32764  | 0.098608 | 0.03314  |
| 0.07228  | -0.01429 | 0.75813  | -0.16983 | 0.00023  |
| 0.00734  | -0.05653 | 0.22274  | -0.1632  | 0.0004   |
| 0.45463  | 0.090991 | 0.0494   | -0.09328 | 0.04392  |
| 0.02739  | 0.103351 | 0.02552  | 0.07433  | 0.10867  |
| 0.19509  | 0.055198 | 0.23383  | -0.10651 | 0.02133  |
| 0.32932  | 0.109064 | 0.01839  | -0.0805  | 0.08226  |
| 0.57995  | -0.00045 | 0.9923   | -0.009   | 0.84612  |
| 0.0003   | 0.235149 | 2.74E-07 | -0.08602 | 0.06325  |
| 4.06E-05 | 0.233287 | 3.43E-07 | -0.00754 | 0.87083  |
| 0.20758  | 0.064509 | 0.16399  | -0.26171 | 9.42E-09 |
| 0.04643  | -0.06153 | 0.18439  | -0.00566 | 0.90298  |
| 0.19192  | -0.0925  | 0.04572  | 0.03654  | 0.43083  |
| 0.52235  | -0.05432 | 0.24133  | -0.03633 | 0.43346  |
| 0.45195  | -0.01584 | 0.73283  | -0.08849 | 0.05603  |
| 0.90874  | -0.02003 | 0.66587  | -0.00862 | 0.85259  |
| 0.61579  | -0.04983 | 0.28252  | -0.04561 | 0.32532  |

|          |          |          |          |          |
|----------|----------|----------|----------|----------|
| 0.91081  | 0.105819 | 0.02219  | -0.41889 | 2.88E-21 |
| 0.88588  | 0.068684 | 0.13833  | 0.029087 | 0.53065  |
| 0.04851  | -0.0248  | 0.59301  | -0.18138 | 8.08E-05 |
| 0.03604  | -0.02162 | 0.64113  | -0.20834 | 5.62E-06 |
| 0.0161   | -0.05132 | 0.2684   | -0.18116 | 8.25E-05 |
| 0.00666  | -0.04877 | 0.2929   | -0.18455 | 6.02E-05 |
| 0.51049  | 0.003768 | 0.93527  | -0.1287  | 0.00535  |
| 0.00037  | -0.11407 | 0.01364  | -0.11935 | 0.00984  |
| 0.00037  | -0.10813 | 0.01942  | -0.15496 | 0.00078  |
| 0.00329  | -0.09111 | 0.04911  | -0.10627 | 0.02163  |
| 0.38304  | -0.05144 | 0.26726  | -0.02235 | 0.63003  |
| 0.00055  | -0.08754 | 0.05871  | -0.19489 | 2.22E-05 |
| 0.00985  | -0.05576 | 0.22908  | -0.10711 | 0.0206   |
| 0.00631  | -0.0918  | 0.0474   | -0.04505 | 0.33129  |
| 0.06255  | -0.07183 | 0.12112  | -0.00981 | 0.83257  |
| 0.00265  | -0.08617 | 0.06279  | -0.17137 | 0.0002   |
| 0.05779  | 0.042278 | 0.36198  | -0.31903 | 1.65E-12 |
| 0.37033  | -0.07471 | 0.10689  | 0.036009 | 0.43756  |
| 0.62425  | -0.04079 | 0.3791   | -0.06271 | 0.17613  |
| 0.11509  | 0.02353  | 0.61202  | -0.04796 | 0.30101  |
| 0.02664  | -0.09376 | 0.04285  | -0.15502 | 0.00078  |
| 0.04925  | 0.03569  | 0.44163  | -0.18526 | 5.63E-05 |
| 0.04095  | 0.071104 | 0.12493  | 0.203157 | 9.66E-06 |
| 0.58318  | 0.056739 | 0.22101  | -0.11957 | 0.0097   |
| 0.00166  | -0.09165 | 0.04776  | -0.16933 | 0.00024  |
| 0.38464  | -0.07387 | 0.11088  | -0.20754 | 6.12E-06 |
| 0.004    | -0.07643 | 0.09901  | -0.153   | 0.00091  |
| 0.07403  | -0.12818 | 0.00554  | 0.05662  | 0.22199  |
| 1.92E-06 | -0.04361 | 0.34707  | -0.08409 | 0.06945  |
| 0.6918   | -0.04205 | 0.36457  | -0.25994 | 1.19E-08 |
| 0.30313  | -0.11315 | 0.01442  | -0.31174 | 5.54E-12 |
| 0.0079   | -0.1364  | 0.00314  | 0.02711  | 0.55896  |
| 0.14651  | -0.06922 | 0.13528  | -0.00644 | 0.88961  |
| 0.02386  | -0.10178 | 0.02785  | 0.315871 | 2.80E-12 |
| 0.00462  | -0.1061  | 0.02184  | -0.0279  | 0.54752  |
| 1.31E-05 | -0.05216 | 0.26059  | 0.027985 | 0.54634  |
| 0.01498  | -0.00603 | 0.89656  | -0.02022 | 0.663    |
| 2.18E-09 | -0.06511 | 0.16011  | 0.02239  | 0.62937  |
| 0.00241  | -0.0794  | 0.08654  | -0.13552 | 0.00334  |
| 0.07732  | -0.22595 | 8.07E-07 | -0.00694 | 0.88112  |
| 0.02173  | -0.15279 | 0.00093  | -0.06169 | 0.18324  |
| 0.01568  | -0.22074 | 1.46E-06 | 0.129308 | 0.00513  |
| 0.00326  | -0.00261 | 0.95521  | -0.21549 | 2.61E-06 |
| 0.68285  | -0.13714 | 0.00298  | -0.01671 | 0.71872  |
| 1.84E-07 | -0.0587  | 0.20541  | 0.079503 | 0.08613  |

|          |          |          |          |          |
|----------|----------|----------|----------|----------|
| 0.00868  | -0.19511 | 2.18E-05 | -0.08697 | 0.06039  |
| 0.13717  | -0.21398 | 3.07E-06 | 0.004866 | 0.91647  |
| 0.01156  | -0.16722 | 0.00028  | -0.01796 | 0.69863  |
| 0.05498  | -0.15118 | 0.00105  | 0.006179 | 0.89406  |
| 0.00534  | -0.02507 | 0.58886  | -0.10683 | 0.02094  |
| 0.00103  | -0.0784  | 0.09057  | -0.13287 | 0.00402  |
| 0.05764  | -0.08563 | 0.06446  | 0.261191 | 1.01E-08 |
| 0.05281  | -0.10752 | 0.02013  | -0.0829  | 0.07351  |
| 0.07097  | -0.07261 | 0.11711  | -0.1917  | 3.04E-05 |
| 0.00781  | -0.19909 | 1.46E-05 | -0.04529 | 0.32873  |
| 1.76E-06 | -0.08434 | 0.06861  | 0.156458 | 0.00069  |
| 0.69351  | -0.06498 | 0.16096  | -0.07464 | 0.1072   |
| 0.09117  | -0.19868 | 1.52E-05 | 0.090185 | 0.05146  |
| 0.00088  | -0.08693 | 0.06049  | -0.13335 | 0.00389  |
| 0.00148  | -0.11774 | 0.01088  | -0.00142 | 0.97565  |
| 0.83084  | -0.29596 | 6.79E-11 | -0.04749 | 0.30583  |
| 0.22412  | -0.12802 | 0.0056   | -0.00298 | 0.94871  |
| 4.83E-07 | 0.182583 | 7.23E-05 | -0.16318 | 0.0004   |
| 2.39E-07 | -0.06853 | 0.13922  | 0.016296 | 0.72541  |
| 0.17616  | -0.19395 | 2.44E-05 | 0.111171 | 0.01624  |
| 0.00599  | -0.16162 | 0.00045  | -0.07    | 0.13089  |
| 0.00437  | -0.10719 | 0.02051  | -0.25587 | 2.04E-08 |
| 0.10525  | 0.072416 | 0.1181   | -0.18448 | 6.06E-05 |
| 3.69E-05 | 0.010254 | 0.8251   | -0.03381 | 0.46609  |
| 1.56E-06 | -0.11746 | 0.01107  | 0.268372 | 3.80E-09 |
| 0.02898  | -0.08968 | 0.05278  | -0.11061 | 0.01679  |
| 0.03743  | -0.19301 | 2.68E-05 | 0.006055 | 0.89616  |
| 0.02088  | -0.0484  | 0.29661  | 0.189767 | 3.67E-05 |
| 0.308    | -0.07968 | 0.08541  | -0.09    | 0.05193  |
| 0.2725   | -0.02624 | 0.57164  | -0.11969 | 0.00963  |
| 0.71671  | -0.18328 | 6.78E-05 | -0.07624 | 0.09985  |
| 0.10833  | -0.19683 | 1.83E-05 | -0.01019 | 0.82616  |
| 0.53161  | -0.15989 | 0.00052  | -0.07535 | 0.10389  |
| 0.8627   | -0.15282 | 0.00092  | -0.06227 | 0.17912  |
| 0.04201  | 0.025481 | 0.58283  | -0.15235 | 0.00096  |
| 0.03098  | -0.07876 | 0.08913  | -0.15654 | 0.00069  |
| 0.58786  | -0.09966 | 0.03129  | -0.09517 | 0.03981  |
| 0.54108  | -0.16764 | 0.00027  | 0.135389 | 0.00337  |
| 0.04832  | -0.1249  | 0.00688  | -0.16083 | 0.00049  |
| 0.31213  | -0.10301 | 0.02602  | -0.28056 | 6.78E-10 |
| 2.32E-11 | 0.354756 | 2.69E-15 | -0.11806 | 0.01067  |
| 0.06189  | -0.06537 | 0.15842  | 0.064042 | 0.16707  |
| 0.31718  | -0.09431 | 0.04165  | -0.05284 | 0.2544   |
| 0.14056  | -0.01461 | 0.75284  | -0.10881 | 0.01867  |
| 0.00032  | -0.18443 | 6.09E-05 | 0.163031 | 0.0004   |



|          |          |          |          |          |
|----------|----------|----------|----------|----------|
| 0.86235  | -0.08394 | 0.06993  | -0.15672 | 0.00068  |
| 0.1322   | -0.04714 | 0.30938  | 0.163744 | 0.00038  |
| 0.00044  | 0.126858 | 0.00605  | -0.03249 | 0.48373  |
| 0.19308  | -0.07146 | 0.12303  | -0.24698 | 6.41E-08 |
| 0.73827  | -0.03475 | 0.45377  | -0.06376 | 0.16895  |
| 6.06E-06 | -0.14313 | 0.00193  | 0.236624 | 2.30E-07 |
| 0.00012  | -0.16475 | 0.00035  | 0.160345 | 0.0005   |
| 0.14998  | -0.17822 | 0.00011  | 0.313094 | 4.43E-12 |
| 3.69E-07 | -0.1083  | 0.01924  | 0.037196 | 0.42259  |
| 0.00409  | -0.04971 | 0.28372  | -0.12088 | 0.00893  |
| 1.55E-11 | 0.058227 | 0.20912  | 0.27458  | 1.60E-09 |
| 0.04233  | -0.15836 | 0.00059  | -0.07433 | 0.10869  |
| 0.1615   | -0.05272 | 0.25553  | -0.26742 | 4.34E-09 |
| 0.36351  | -0.17289 | 0.00017  | -0.06547 | 0.15781  |
| 0.0004   | -0.15981 | 0.00053  | 0.103178 | 0.02577  |
| 0.00604  | -0.15216 | 0.00097  | -0.00297 | 0.94889  |
| 0.59112  | -0.22482 | 9.18E-07 | 0.098247 | 0.03379  |
| 0.00068  | -0.08935 | 0.05366  | 0.067356 | 0.14613  |
| 0.00034  | -0.01572 | 0.73471  | 0.095145 | 0.03986  |
| 9.28E-05 | -0.19757 | 1.70E-05 | 0.18133  | 8.12E-05 |
| 5.15E-06 | -0.12435 | 0.00713  | 0.043409 | 0.34927  |
| 0.97846  | -0.12831 | 0.00549  | -0.13952 | 0.00251  |
| 0.01642  | -0.0237  | 0.60952  | -0.07545 | 0.10345  |
| 0.00184  | -0.1346  | 0.00357  | -0.04459 | 0.33629  |
| 0.01968  | -0.00464 | 0.92036  | 0.130688 | 0.00467  |
| 0.00622  | -0.14369 | 0.00185  | -0.29583 | 6.92E-11 |
| 0.06162  | -0.01567 | 0.73555  | -0.32809 | 3.51E-13 |
| 4.18E-06 | -0.11299 | 0.01456  | 0.146644 | 0.00148  |
| 0.00016  | -0.11025 | 0.01715  | -0.05239 | 0.25848  |
| 0.0918   | -0.18357 | 6.60E-05 | 0.274811 | 1.55E-09 |
| 0.13018  | -0.22244 | 1.20E-06 | 0.043503 | 0.34823  |
| 0.71113  | -0.26439 | 6.56E-09 | 0.062349 | 0.1786   |
| 0.13128  | -0.23771 | 2.02E-07 | 0.079761 | 0.08511  |
| 5.37E-06 | 0.034314 | 0.45944  | -0.08539 | 0.06522  |
| 0.13507  | -0.12085 | 0.00894  | -0.1066  | 0.02122  |
| 0.00215  | -0.12343 | 0.00757  | 0.176121 | 0.00013  |
| 8.90E-07 | -0.14641 | 0.00151  | 0.255669 | 2.10E-08 |
| 0.15553  | -0.00304 | 0.94779  | -0.25439 | 2.48E-08 |
| 0.29466  | -0.26605 | 5.24E-09 | -0.00219 | 0.96241  |
| 0.00021  | -0.07249 | 0.11771  | 0.075756 | 0.10204  |
| 0.85588  | -0.07369 | 0.11177  | -0.32519 | 5.79E-13 |
| 0.01355  | -0.05398 | 0.24431  | 0.124472 | 0.00708  |
| 9.17E-05 | -0.03317 | 0.47452  | -0.13913 | 0.00258  |
| 0.1493   | -0.13945 | 0.00253  | -0.02661 | 0.56616  |
| 4.34E-05 | -0.11297 | 0.01459  | 0.022471 | 0.62813  |

|          |          |          |          |          |
|----------|----------|----------|----------|----------|
| 0.01699  | -0.09287 | 0.04486  | -0.0707  | 0.1271   |
| 0.1524   | -0.17426 | 0.00015  | -0.07146 | 0.12305  |
| 0.00234  | -0.04869 | 0.29369  | 0.043412 | 0.34924  |
| 0.29259  | -0.20821 | 5.70E-06 | 0.065584 | 0.15707  |
| 0.01872  | -0.19333 | 2.59E-05 | -0.07725 | 0.09543  |
| 0.09935  | -0.18811 | 4.30E-05 | -0.01057 | 0.81975  |
| 0.1075   | -0.19903 | 1.47E-05 | 0.045178 | 0.32997  |
| 3.86E-06 | -0.14989 | 0.00116  | 0.073023 | 0.11504  |
| 0.02889  | -0.15014 | 0.00114  | 0.019502 | 0.67423  |
| 0.0097   | -0.21215 | 3.75E-06 | 0.106238 | 0.02167  |
| 0.69736  | 0.027591 | 0.55201  | -0.24977 | 4.50E-08 |
| 0.98458  | 0.067974 | 0.14246  | -0.0898  | 0.05246  |
| 0.43376  | 0.127924 | 0.00563  | -0.16404 | 0.00037  |
| 0.64482  | 0.106451 | 0.0214   | -0.16761 | 0.00027  |
| 0.46332  | 0.094755 | 0.04068  | -0.02182 | 0.63815  |
| 0.22911  | 0.084452 | 0.06825  | -0.4175  | 4.01E-21 |
| 1.87E-10 | 0.175105 | 0.00014  | 0.280142 | 7.21E-10 |
| 0.00018  | 0.159453 | 0.00054  | -0.0341  | 0.46229  |
| 2.87E-10 | 0.149661 | 0.00118  | 0.248105 | 5.56E-08 |
| 0.15268  | 0.057573 | 0.21429  | -0.14343 | 0.00189  |
| 0.00048  | 0.202096 | 1.08E-05 | -0.07248 | 0.11775  |
| 0.18259  | 0.154844 | 0.00079  | 0.020265 | 0.66225  |
| 0.58697  | 0.137837 | 0.00284  | -0.24496 | 8.26E-08 |
| 0.01197  | 0.0414   | 0.37205  | -0.16563 | 0.00032  |
| 2.95E-06 | 0.320236 | 1.35E-12 | -0.10257 | 0.02666  |
| 9.07E-06 | 0.074892 | 0.10602  | 0.046538 | 0.3156   |
| 0.15746  | 0.090099 | 0.05168  | -0.11293 | 0.01462  |
| 1.32E-05 | 0.253286 | 2.86E-08 | -0.28254 | 5.09E-10 |
| 0.09726  | 0.040245 | 0.38555  | -0.20792 | 5.88E-06 |
| 0.00403  | 0.11292  | 0.01463  | -0.00068 | 0.98831  |
| 0.00077  | 0.050013 | 0.28078  | 0.187409 | 4.60E-05 |
| 1.67E-08 | 0.072145 | 0.11949  | 0.174713 | 0.00015  |
| 0.0025   | -0.02991 | 0.51912  | -0.03512 | 0.44891  |
| 0.13081  | 0.180054 | 9.13E-05 | 0.041376 | 0.37232  |
| 0.00163  | 0.133158 | 0.00394  | 0.048194 | 0.29867  |
| 0.0014   | 0.163962 | 0.00037  | -0.08027 | 0.08312  |
| 0.00766  | 0.320536 | 1.28E-12 | -0.34833 | 9.08E-15 |
| 0.2998   | 0.140294 | 0.00238  | 0.021444 | 0.64392  |
| 0.00178  | 0.175243 | 0.00014  | -0.24267 | 1.10E-07 |
| 0.66216  | 0.128521 | 0.00541  | -0.23297 | 3.56E-07 |
| 0.00014  | 0.119358 | 0.00983  | 0.12929  | 0.00514  |
| 0.30307  | 0.159708 | 0.00053  | 0.003866 | 0.93359  |
| 7.66E-05 | 0.239018 | 1.72E-07 | -0.09362 | 0.04315  |
| 0.05667  | 0.309173 | 8.41E-12 | -0.04968 | 0.28398  |
| 0.00088  | 0.105727 | 0.02231  | -0.06579 | 0.15574  |

|          |          |          |          |          |
|----------|----------|----------|----------|----------|
| 0.61434  | 0.088649 | 0.05558  | -0.05546 | 0.23162  |
| 0.08742  | -0.05653 | 0.22275  | -0.19837 | 1.57E-05 |
| 0.00124  | 0.215158 | 2.70E-06 | 0.183256 | 6.79E-05 |
| 0.00025  | 0.274168 | 1.69E-09 | 0.029565 | 0.5239   |
| 0.01385  | 0.081161 | 0.07976  | -0.00865 | 0.85215  |
| 0.00029  | -0.0092  | 0.84289  | 0.015851 | 0.73262  |
| 0.0664   | 0.06245  | 0.1779   | -0.11758 | 0.01099  |
| 0.30789  | 0.050346 | 0.27758  | 0.056815 | 0.22039  |
| 0.16436  | 0.090358 | 0.05101  | -0.20008 | 1.32E-05 |
| 0.00066  | 0.1443   | 0.00177  | -0.13609 | 0.00321  |
| 0.67629  | 0.042238 | 0.36244  | -0.20836 | 5.61E-06 |
| 0.49261  | 0.221548 | 1.33E-06 | -0.20902 | 5.23E-06 |
| 0.02113  | 0.125429 | 0.00665  | 0.067431 | 0.14569  |
| 0.49988  | 0.203496 | 9.32E-06 | -0.38478 | 6.28E-18 |
| 0.65688  | 0.194458 | 2.32E-05 | -0.2737  | 1.81E-09 |
| 0.01741  | 0.103673 | 0.02506  | 0.065733 | 0.15612  |
| 0.00271  | 0.231181 | 4.39E-07 | -0.05253 | 0.25721  |
| 0.07681  | 0.144465 | 0.00175  | -0.06181 | 0.18238  |
| 0.97387  | -0.06311 | 0.17334  | -0.23081 | 4.59E-07 |
| 0.07358  | -0.00092 | 0.9841   | -0.2078  | 5.95E-06 |
| 0.13236  | 0.000699 | 0.98798  | -0.31422 | 3.68E-12 |
| 0.0024   | 0.230584 | 4.71E-07 | -0.27768 | 1.03E-09 |
| 0.88299  | 0.012147 | 0.79347  | -0.22374 | 1.04E-06 |
| 1.05E-05 | 0.246939 | 6.44E-08 | 0.263506 | 7.40E-09 |
| 0.00118  | 0.15516  | 0.00077  | 0.162488 | 0.00042  |
| 0.09603  | 0.125251 | 0.00673  | -0.1031  | 0.02589  |
| 0.00077  | 0.043061 | 0.35315  | 0.124242 | 0.00719  |
| 0.0116   | 0.047992 | 0.3007   | -0.07826 | 0.09116  |
| 0.64044  | 0.121929 | 0.00835  | -0.13007 | 0.00487  |
| 0.00151  | 0.182386 | 7.37E-05 | 0.066924 | 0.14874  |
| 0.10455  | 0.151555 | 0.00102  | -0.06174 | 0.18286  |
| 0.01427  | 0.032152 | 0.48823  | 0.063439 | 0.17111  |
| 0.48112  | 0.210473 | 4.48E-06 | -0.13435 | 0.00363  |
| 0.80885  | 0.146664 | 0.00148  | -0.27085 | 2.70E-09 |
| 2.62E-05 | 0.251032 | 3.83E-08 | 0.098674 | 0.03302  |
| 0.21553  | 0.157172 | 0.00065  | -0.25645 | 1.90E-08 |
| 9.63E-06 | 0.394208 | 8.20E-19 | -0.18395 | 6.37E-05 |
| 0.87285  | 0.087027 | 0.06022  | -0.0687  | 0.13825  |
| 0.00071  | 0.40156  | 1.60E-19 | -0.24595 | 7.29E-08 |
| 0.00042  | 0.202479 | 1.04E-05 | 0.090459 | 0.05075  |
| 0.00023  | 0.128019 | 0.0056   | 0.134103 | 0.00369  |
| 2.92E-10 | 0.05915  | 0.20198  | 0.190755 | 3.33E-05 |
| 1.90E-06 | -0.00681 | 0.88336  | -0.06552 | 0.15748  |
| 0.01582  | 0.127522 | 0.00579  | -0.23327 | 3.43E-07 |
| 0.69386  | -0.01097 | 0.81315  | -0.2901  | 1.66E-10 |

|          |          |          |          |          |
|----------|----------|----------|----------|----------|
| 0.09355  | 0.050003 | 0.28088  | -0.27992 | 7.44E-10 |
| 9.38E-05 | 0.206567 | 6.78E-06 | 0.07782  | 0.09301  |
| 0.14808  | -0.05274 | 0.25534  | -0.17325 | 0.00017  |
| 4.19E-06 | 0.393355 | 9.88E-19 | -0.05034 | 0.27765  |
| 8.26E-14 | 0.281423 | 5.98E-10 | 0.259014 | 1.35E-08 |
| 2.58E-05 | 0.131272 | 0.00449  | 0.137519 | 0.0029   |
| 0.00379  | 0.040893 | 0.37794  | -0.08061 | 0.08181  |
| 0.10606  | 0.011552 | 0.80338  | -0.25713 | 1.73E-08 |
| 4.09E-07 | 0.444802 | 4.53E-24 | -0.12268 | 0.00795  |
| 0.38953  | -0.07795 | 0.09246  | -0.35083 | 5.69E-15 |
| 0.00632  | 0.220463 | 1.50E-06 | -0.14882 | 0.00126  |
| 0.00043  | 0.04208  | 0.36424  | 0.17493  | 0.00015  |
| 0.06707  | -0.00162 | 0.97207  | -0.05551 | 0.23116  |
| 0.04943  | 0.094016 | 0.04228  | -0.06522 | 0.15938  |
| 0.30677  | 0.021436 | 0.64405  | -0.36621 | 2.87E-16 |
| 0.95919  | 0.059647 | 0.19821  | -0.14057 | 0.00233  |
| 0.46693  | 0.15975  | 0.00053  | -0.20171 | 1.12E-05 |
| 0.00184  | 0.211514 | 4.01E-06 | -0.02621 | 0.5721   |
| 0.60834  | 0.081728 | 0.07767  | -0.12832 | 0.00549  |
| 0.00437  | 0.121551 | 0.00855  | 0.026335 | 0.57026  |
| 0.00143  | -0.01813 | 0.69597  | -0.44466 | 4.69E-24 |
| 0.07275  | -0.05321 | 0.25115  | 0.056928 | 0.21947  |
| 0.10043  | 0.073686 | 0.11177  | -0.1312  | 0.00451  |
| 0.96265  | 0.106314 | 0.02157  | -0.19934 | 1.43E-05 |
| 0.77913  | -0.10415 | 0.02439  | -0.01978 | 0.6698   |
| 0.00829  | -0.09849 | 0.03334  | -0.12961 | 0.00503  |
| 0.23623  | 0.005788 | 0.90072  | -0.05541 | 0.23203  |
| 0.00524  | 0.072647 | 0.11693  | 0.077781 | 0.09317  |
| 0.02226  | 0.10979  | 0.01763  | -0.07609 | 0.10053  |
| 0.09722  | 0.132607 | 0.0041   | -0.37983 | 1.78E-17 |
| 0.47186  | 0.060599 | 0.19113  | -0.14321 | 0.00192  |
| 1.73E-07 | 0.210249 | 4.59E-06 | -0.09192 | 0.04711  |
| 0.09164  | 0.148671 | 0.00127  | -0.0349  | 0.45187  |
| 4.97E-08 | 0.288232 | 2.19E-10 | -0.00682 | 0.8832   |
| 0.21924  | 0.157457 | 0.00064  | -0.38851 | 2.83E-18 |
| 0.00488  | 0.238412 | 1.85E-07 | -0.02604 | 0.57464  |
| 0.00015  | 0.308224 | 9.80E-12 | -0.12283 | 0.00788  |
| 0.04496  | 0.15755  | 0.00063  | -0.06091 | 0.18884  |
| 0.13052  | 0.119338 | 0.00985  | -0.18365 | 6.55E-05 |
| 0.26024  | 0.154891 | 0.00078  | -0.19266 | 2.77E-05 |
| 0.00187  | 0.113722 | 0.01393  | 0.05358  | 0.24785  |
| 0.00245  | 0.211064 | 4.21E-06 | -0.1073  | 0.02038  |
| 0.1208   | 0.208755 | 5.38E-06 | -0.26905 | 3.46E-09 |
| 0.934    | 0.058555 | 0.20657  | -0.00828 | 0.85831  |
| 0.10337  | 0.340351 | 3.96E-14 | -0.19003 | 3.58E-05 |

|          |          |          |          |          |
|----------|----------|----------|----------|----------|
| 0.00234  | 0.153526 | 0.00087  | -0.41996 | 2.23E-21 |
| 0.00141  | 0.205427 | 7.63E-06 | -0.17382 | 0.00016  |
| 0.00102  | 0.26806  | 3.97E-09 | -0.23061 | 4.70E-07 |
| 0.22812  | 0.174589 | 0.00015  | -0.38983 | 2.13E-18 |
| 0.73985  | 0.195792 | 2.03E-05 | -0.14821 | 0.00132  |
| 0.07866  | 0.161923 | 0.00044  | -0.0973  | 0.03555  |
| 0.00528  | 0.214363 | 2.95E-06 | -0.03274 | 0.48024  |
| 0.0029   | 0.147104 | 0.00143  | 0.010435 | 0.82206  |
| 0.22351  | 0.037547 | 0.41823  | -0.20468 | 8.25E-06 |
| 0.0382   | 0.055554 | 0.23082  | -0.04783 | 0.30235  |
| 0.55655  | 0.059691 | 0.19788  | -0.26696 | 4.62E-09 |
| 0.12802  | 0.213596 | 3.20E-06 | -0.16653 | 0.0003   |
| 0.99351  | 0.111745 | 0.0157   | -0.104   | 0.02461  |
| 0.12167  | 0.077733 | 0.09338  | -0.36504 | 3.63E-16 |
| 0.00546  | 0.292451 | 1.16E-10 | -0.12796 | 0.00562  |
| 1.81E-08 | 0.16842  | 0.00026  | 0.036406 | 0.43252  |
| 0.02346  | 0.244057 | 9.25E-08 | -0.08617 | 0.06278  |
| 0.00116  | 0.097837 | 0.03454  | 0.031708 | 0.49426  |
| 0.39159  | 0.114938 | 0.01294  | 0.097042 | 0.03604  |
| 0.01286  | 0.1044   | 0.02406  | 0.124633 | 0.007    |
| 0.64251  | 0.04408  | 0.34186  | -0.16489 | 0.00035  |
| 0.98447  | -0.2667  | 4.79E-09 | 0.232417 | 3.80E-07 |
| 0.14098  | -0.18297 | 6.98E-05 | 0.097426 | 0.03531  |
| 0.00816  | -0.18387 | 6.42E-05 | 0.217518 | 2.09E-06 |
| 0.01852  | -0.11836 | 0.01047  | 0.039665 | 0.39244  |
| 3.51E-06 | -0.14452 | 0.00174  | 0.309707 | 7.71E-12 |
| 0.00011  | -0.18271 | 7.15E-05 | 0.216024 | 2.46E-06 |
| 0.77363  | -0.08688 | 0.06067  | 0.115472 | 0.01252  |
| 6.59E-05 | -0.0831  | 0.07281  | 0.165627 | 0.00033  |
| 0.0181   | -0.09207 | 0.04675  | 0.183787 | 6.47E-05 |
| 0.54673  | -0.20604 | 7.16E-06 | 0.067979 | 0.14243  |
| 0.60893  | -0.12849 | 0.00542  | 0.024281 | 0.6007   |
| 0.00395  | -0.18324 | 6.81E-05 | 0.131479 | 0.00443  |
| 0.09567  | -0.13372 | 0.00379  | 0.062191 | 0.17971  |
| 0.00323  | -0.14089 | 0.00227  | 0.087223 | 0.05964  |
| 0.01176  | -0.21021 | 4.61E-06 | 0.167566 | 0.00028  |
| 0.00026  | -0.12637 | 0.00625  | 0.29154  | 1.33E-10 |
| 0.01753  | -0.18454 | 6.03E-05 | 0.062302 | 0.17893  |
| 0.85483  | -0.13095 | 0.00459  | 0.119764 | 0.00958  |
| 0.00582  | -0.17227 | 0.00018  | 0.229851 | 5.13E-07 |
| 0.38419  | -0.14356 | 0.00187  | 0.101716 | 0.02795  |
| 0.27446  | -0.24157 | 1.26E-07 | 0.04703  | 0.3105   |
| 0.01347  | -0.12562 | 0.00656  | 0.172126 | 0.00019  |
| 0.01961  | -0.19842 | 1.56E-05 | -0.11397 | 0.01372  |
| 0.00237  | -0.13618 | 0.00319  | 0.236867 | 2.23E-07 |

|          |          |          |          |          |
|----------|----------|----------|----------|----------|
| 0.36001  | -0.18328 | 6.78E-05 | 0.202549 | 1.03E-05 |
| 0.00105  | -0.14633 | 0.00152  | 0.125849 | 0.00647  |
| 0.18095  | -0.27773 | 1.02E-09 | 0.025805 | 0.57804  |
| 0.46693  | -0.19815 | 1.61E-05 | 0.156385 | 0.0007   |
| 0.32962  | -0.15801 | 0.00061  | 0.04884  | 0.29223  |
| 0.01071  | -0.12268 | 0.00795  | -0.03366 | 0.46803  |
| 0.00733  | -0.17759 | 0.00011  | 0.22119  | 1.39E-06 |
| 0.50873  | -0.19881 | 1.50E-05 | 0.157264 | 0.00065  |
| 0.00049  | -0.14396 | 0.00181  | 0.181302 | 8.14E-05 |
| 0.93577  | -0.23599 | 2.48E-07 | 0.069701 | 0.13257  |
| 0.02515  | -0.17597 | 0.00013  | 0.283671 | 4.31E-10 |
| 0.04096  | -0.1564  | 0.00069  | 0.127677 | 0.00573  |
| 0.22248  | -0.15429 | 0.00082  | 0.103558 | 0.02523  |
| 0.1      | -0.24051 | 1.43E-07 | 0.137484 | 0.00291  |
| 0.2828   | -0.25432 | 2.50E-08 | 0.047861 | 0.30202  |
| 0.91337  | -0.27165 | 2.41E-09 | 0.064883 | 0.16156  |
| 0.06858  | -0.16792 | 0.00027  | 0.084009 | 0.06971  |
| 0.65955  | -0.21151 | 4.01E-06 | 0.169387 | 0.00024  |
| 0.07045  | -0.18396 | 6.36E-05 | 0.059455 | 0.19966  |
| 0.00144  | -0.111   | 0.01641  | 0.18964  | 3.71E-05 |
| 0.0011   | -0.13713 | 0.00298  | 0.068452 | 0.13967  |
| 0.17696  | -0.10699 | 0.02074  | 0.076777 | 0.09748  |
| 0.44509  | -0.20225 | 1.06E-05 | 0.045158 | 0.33017  |
| 0.41609  | -0.16053 | 0.0005   | -0.08733 | 0.05933  |
| 0.43524  | -0.13129 | 0.00448  | 0.291546 | 1.33E-10 |
| 0.59575  | -0.03168 | 0.49462  | -0.27291 | 2.02E-09 |
| 0.07461  | -0.01268 | 0.78458  | -0.36999 | 1.35E-16 |
| 0.01305  | -0.1173  | 0.01119  | -0.33996 | 4.25E-14 |
| 0.43635  | 0.04015  | 0.38667  | -0.36617 | 2.90E-16 |
| 0.42482  | 0.007667 | 0.86875  | -0.19779 | 1.67E-05 |
| 0.09814  | -0.00839 | 0.85654  | -0.37289 | 7.47E-17 |
| 0.32087  | -0.0588  | 0.2047   | -0.3669  | 2.51E-16 |
| 0.00176  | -0.01611 | 0.72837  | -0.55666 | 2.36E-39 |
| 0.31856  | -0.08097 | 0.08048  | -0.34177 | 3.06E-14 |
| 3.53E-05 | -0.07522 | 0.1045   | -0.36373 | 4.70E-16 |
| 0.36645  | -0.12972 | 0.00499  | -0.34075 | 3.68E-14 |
| 0.09904  | 0.024737 | 0.59388  | -0.52865 | 5.58E-35 |
| 0.13253  | -0.01838 | 0.69202  | -0.26397 | 6.95E-09 |
| 0.00994  | 0.04524  | 0.3293   | -0.28715 | 2.58E-10 |
| 0.60466  | -0.03902 | 0.40022  | -0.39413 | 8.33E-19 |
| 6.81E-09 | 0.172983 | 0.00017  | -0.13113 | 0.00453  |
| 0.6586   | 0.041773 | 0.36775  | -0.23655 | 2.32E-07 |
| 8.31E-06 | -0.14863 | 0.00128  | -0.32367 | 7.52E-13 |
| 0.52666  | -0.02078 | 0.65416  | -0.28415 | 4.02E-10 |
| 0.91729  | -0.02709 | 0.5593   | 0.412469 | 1.31E-20 |

|          |          |          |          |          |
|----------|----------|----------|----------|----------|
| 0.71939  | 0.08362  | 0.07102  | -0.27266 | 2.09E-09 |
| 0.61094  | 0.12522  | 0.00674  | -0.34629 | 1.33E-14 |
| 0.25743  | -0.09417 | 0.04194  | -0.18392 | 6.39E-05 |
| 1.36E-08 | 0.212038 | 3.79E-06 | -0.2374  | 2.09E-07 |
| 0.80021  | -0.07094 | 0.12581  | -0.30213 | 2.59E-11 |
| 0.05284  | 0.098775 | 0.03284  | -0.14511 | 0.00167  |
| 0.42245  | 0.0031   | 0.94673  | -0.2693  | 3.35E-09 |
| 0.01051  | 0.105474 | 0.02263  | -0.34748 | 1.07E-14 |
| 0.65504  | -0.03227 | 0.48662  | -0.27612 | 1.28E-09 |
| 0.49348  | 0.010522 | 0.82059  | -0.35131 | 5.19E-15 |
| 0.00043  | -0.05984 | 0.19674  | -0.51736 | 2.50E-33 |
| 0.08766  | -0.1813  | 8.14E-05 | -0.36455 | 4.00E-16 |
| 0.00204  | -0.01723 | 0.71032  | -0.31553 | 2.96E-12 |
| 0.0006   | 0.078748 | 0.08916  | -0.1333  | 0.0039   |
| 0.06526  | -0.13986 | 0.00245  | -0.25202 | 3.37E-08 |
| 0.66949  | -0.19116 | 3.21E-05 | -0.16519 | 0.00034  |
| 0.02219  | -0.12588 | 0.00645  | -0.39235 | 1.23E-18 |
| 0.13397  | -0.07198 | 0.12034  | -0.27362 | 1.83E-09 |
| 0.00166  | 0.08523  | 0.06573  | 0.457169 | 1.70E-25 |
| 0.95512  | 0.003757 | 0.93547  | -0.27529 | 1.45E-09 |
| 0.10012  | 0.002171 | 0.96268  | -0.33787 | 6.20E-14 |
| 0.86636  | 0.143037 | 0.00194  | -0.33123 | 2.02E-13 |
| 0.06125  | -0.11458 | 0.01322  | -0.40159 | 1.59E-19 |
| 0.59261  | -0.0876  | 0.05855  | -0.38453 | 6.63E-18 |
| 0.89941  | -0.04613 | 0.31985  | -0.29145 | 1.35E-10 |
| 0.75411  | 0.018896 | 0.68379  | -0.42766 | 3.44E-22 |
| 0.02043  | 0.056426 | 0.22358  | -0.26867 | 3.65E-09 |
| 0.9879   | -0.10868 | 0.01881  | -0.25168 | 3.52E-08 |
| 0.05284  | 0.021538 | 0.64248  | 0.406877 | 4.78E-20 |
| 0.79889  | 0.044187 | 0.3407   | -0.28527 | 3.41E-10 |
| 0.8005   | -0.06416 | 0.16632  | -0.44618 | 3.16E-24 |
| 0.3081   | -0.08644 | 0.06199  | -0.2541  | 2.58E-08 |
| 0.1055   | -0.12285 | 0.00786  | -0.23154 | 4.21E-07 |
| 0.05585  | -0.04219 | 0.36301  | -0.26683 | 4.71E-09 |
| 0.02642  | 0.057498 | 0.21489  | -0.34644 | 1.29E-14 |
| 0.71799  | -0.02449 | 0.59756  | -0.45366 | 4.37E-25 |
| 0.6521   | -0.03929 | 0.39696  | -0.30024 | 3.49E-11 |
| 0.3232   | -0.10646 | 0.02139  | -0.17139 | 0.0002   |
| 0.01068  | -0.06986 | 0.13168  | -0.5628  | 2.28E-40 |
| 0.35743  | -0.02663 | 0.5659   | -0.20671 | 6.68E-06 |
| 0.01882  | -0.09514 | 0.03987  | -0.19176 | 3.02E-05 |
| 0.0472   | -0.08624 | 0.06257  | -0.14556 | 0.00161  |
| 9.76E-06 | 0.014875 | 0.74851  | -0.04646 | 0.31646  |
| 0.71741  | -0.09245 | 0.04586  | -0.47258 | 2.34E-27 |
| 0.04364  | -0.0617  | 0.18319  | -0.27994 | 7.42E-10 |

|          |          |          |          |          |
|----------|----------|----------|----------|----------|
| 0.87286  | 0.008764 | 0.85018  | -0.2875  | 2.44E-10 |
| 0.11137  | 0.11203  | 0.01543  | -0.49146 | 9.11E-30 |
| 0.1034   | 0.152632 | 0.00094  | -0.34954 | 7.24E-15 |
| 0.20805  | -0.01071 | 0.81749  | -0.31538 | 3.04E-12 |
| 0.00189  | 0.002439 | 0.95808  | -0.27752 | 1.05E-09 |
| 0.39913  | 0.109648 | 0.01777  | -0.31548 | 2.99E-12 |
| 0.19874  | 0.004282 | 0.92646  | -0.4022  | 1.38E-19 |
| 2.52E-06 | -0.12085 | 0.00895  | -0.54992 | 2.90E-38 |
| 0.5763   | -0.12522 | 0.00674  | -0.39193 | 1.35E-18 |
| 0.00164  | 0.074922 | 0.10588  | 0.502638 | 2.88E-31 |
| 0.16051  | -0.04906 | 0.29002  | -0.36676 | 2.58E-16 |
| 0.46716  | -0.03132 | 0.49957  | -0.19329 | 2.60E-05 |
| 0.07002  | 0.021642 | 0.64086  | 0.447232 | 2.40E-24 |
| 5.71E-05 | 0.173424 | 0.00017  | 0.027163 | 0.55819  |
| 0.1446   | -0.0059  | 0.89881  | -0.20343 | 9.39E-06 |
| 0.0019   | -0.0331  | 0.47548  | -0.23681 | 2.25E-07 |
| 0.00251  | -0.09917 | 0.03215  | -0.46782 | 9.01E-27 |
| 0.73367  | 0.018051 | 0.69723  | -0.37056 | 1.20E-16 |
| 0.00118  | 0.102358 | 0.02698  | -0.31401 | 3.81E-12 |
| 0.46087  | -0.14395 | 0.00182  | -0.20647 | 6.85E-06 |
| 0.27076  | -0.16183 | 0.00045  | -0.2097  | 4.87E-06 |
| 0.00278  | 0.124268 | 0.00717  | -0.27611 | 1.29E-09 |
| 0.00296  | -0.05119 | 0.2696   | -0.15971 | 0.00053  |
| 0.00029  | -0.02362 | 0.61072  | -0.03705 | 0.42447  |
| 0.01167  | -0.0539  | 0.24502  | -0.39769 | 3.80E-19 |
| 1.38E-05 | -0.11086 | 0.01655  | -0.49447 | 3.64E-30 |
| 0.02483  | -0.06164 | 0.18363  | -0.34223 | 2.81E-14 |
| 0.15198  | -0.23198 | 4.00E-07 | -0.39653 | 4.91E-19 |
| 0.1195   | 0.112258 | 0.01522  | -0.40597 | 5.89E-20 |
| 0.97392  | -0.0849  | 0.06679  | -0.20757 | 6.10E-06 |
| 0.00428  | -0.15249 | 0.00095  | -0.3181  | 1.93E-12 |
| 0.10305  | -0.14429 | 0.00177  | -0.40868 | 3.16E-20 |
| 0.25906  | -0.08407 | 0.06951  | -0.3316  | 1.90E-13 |
| 0.62419  | -0.00307 | 0.94726  | -0.31566 | 2.90E-12 |
| 1.95E-05 | 0.144041 | 0.0018   | -0.22189 | 1.28E-06 |
| 0.08296  | -0.08349 | 0.07144  | -0.30386 | 1.97E-11 |
| 0.12248  | 0.092574 | 0.04556  | -0.40051 | 2.02E-19 |
| 0.00446  | -0.10832 | 0.01921  | -0.22324 | 1.10E-06 |
| 0.0719   | 0.050356 | 0.27749  | 0.503302 | 2.33E-31 |
| 0.07353  | -0.03212 | 0.4886   | -0.4823  | 1.40E-28 |
| 0.24398  | 0.025117 | 0.58823  | 0.456066 | 2.29E-25 |
| 0.62837  | -0.04883 | 0.29237  | -0.3938  | 8.97E-19 |
| 0.50123  | -0.03993 | 0.3893   | -0.12008 | 0.00939  |
| 0.41045  | -0.04164 | 0.36925  | -0.29216 | 1.21E-10 |
| 0.00291  | -0.00667 | 0.88573  | -0.26385 | 7.06E-09 |



|          |          |          |          |          |
|----------|----------|----------|----------|----------|
| 0.07613  | -0.06352 | 0.17053  | 0.277929 | 9.91E-10 |
| 0.28472  | -0.03551 | 0.44396  | -0.43317 | 8.79E-23 |
| 0.43751  | 0.0405   | 0.38254  | 0.476416 | 7.80E-28 |
| 0.92703  | -0.06333 | 0.17182  | -0.34884 | 8.26E-15 |
| 0.17622  | -0.12036 | 0.00923  | -0.2318  | 4.08E-07 |
| 0.08467  | -0.1214  | 0.00863  | -0.04686 | 0.31222  |
| 0.22607  | -0.0476  | 0.30464  | -0.30058 | 3.31E-11 |
| 0.02885  | -0.06896 | 0.13674  | -0.22829 | 6.16E-07 |
| 0.00212  | 0.087157 | 0.05983  | 0.498737 | 9.74E-31 |
| 0.05482  | -0.12967 | 0.00501  | -0.15749 | 0.00064  |
| 0.03817  | -0.11829 | 0.01051  | -0.51464 | 6.10E-33 |
| 0.20925  | -0.00579 | 0.90069  | -0.29064 | 1.53E-10 |
| 3.80E-05 | -0.20034 | 1.29E-05 | -0.29264 | 1.13E-10 |
| 0.16035  | -0.12221 | 0.0082   | -0.2452  | 8.02E-08 |
| 0.39976  | -0.16729 | 0.00028  | -0.2827  | 4.97E-10 |
| 2.31E-05 | 0.173383 | 0.00017  | -0.31783 | 2.02E-12 |
| 0.18413  | -0.07277 | 0.11632  | -0.27839 | 9.28E-10 |
| 0.9072   | -0.03301 | 0.47662  | -0.37995 | 1.74E-17 |
| 0.52159  | -0.14279 | 0.00198  | -0.21578 | 2.52E-06 |
| 0.00533  | -0.07922 | 0.08726  | -0.45294 | 5.30E-25 |
| 0.07196  | -0.06154 | 0.18434  | -0.23839 | 1.86E-07 |
| 0.33119  | 0.071271 | 0.12405  | -0.3699  | 1.37E-16 |
| 0.02143  | -0.11091 | 0.01649  | -0.38727 | 3.69E-18 |
| 0.3312   | 0.125493 | 0.00662  | -0.36949 | 1.49E-16 |
| 0.08651  | -0.06792 | 0.14279  | -0.217   | 2.21E-06 |
| 0.98269  | 0.010397 | 0.82269  | -0.3946  | 7.52E-19 |
| 0.17185  | -0.09696 | 0.0362   | -0.30526 | 1.58E-11 |
| 0.00218  | -0.13209 | 0.00424  | -0.44993 | 1.18E-24 |
| 0.00043  | -0.14742 | 0.0014   | -0.38734 | 3.64E-18 |
| 0.01973  | -0.04459 | 0.33634  | -0.2378  | 2.00E-07 |
| 0.89855  | 0.076802 | 0.09738  | -0.27463 | 1.59E-09 |
| 0.28117  | -0.07163 | 0.12215  | -0.37442 | 5.47E-17 |
| 1.67E-08 | 0.158037 | 0.00061  | -0.13213 | 0.00423  |
| 0.05284  | -0.05994 | 0.196    | -0.35759 | 1.56E-15 |
| 0.29436  | -0.08762 | 0.05849  | -0.26888 | 3.55E-09 |
| 0.00918  | -0.08988 | 0.05225  | -0.27666 | 1.19E-09 |
| 1.04E-06 | 0.176541 | 0.00013  | -0.22904 | 5.65E-07 |
| 0.18013  | -0.07089 | 0.12608  | -0.38335 | 8.50E-18 |
| 6.90E-10 | 0.251259 | 3.72E-08 | -0.29357 | 9.79E-11 |
| 0.10054  | -0.02238 | 0.62955  | -0.44879 | 1.59E-24 |
| 0.00336  | -0.06199 | 0.18114  | -0.209   | 5.24E-06 |
| 0.22339  | -0.02313 | 0.6181   | -0.29231 | 1.19E-10 |
| 0.06148  | 0.064594 | 0.16344  | -0.39201 | 1.33E-18 |
| 0.37089  | -0.01315 | 0.77688  | -0.31695 | 2.34E-12 |
| 0.02309  | 0.048217 | 0.29843  | -0.3888  | 2.66E-18 |

|          |          |          |          |          |
|----------|----------|----------|----------|----------|
| 0.00047  | -0.19587 | 2.02E-05 | -0.24478 | 8.45E-08 |
| 0.28027  | -0.13988 | 0.00245  | -0.19435 | 2.35E-05 |
| 0.81708  | 0.057611 | 0.21398  | -0.36567 | 3.20E-16 |
| 7.50E-05 | 0.206816 | 6.60E-06 | -0.27463 | 1.59E-09 |
| 0.80692  | -0.06479 | 0.16219  | -0.33979 | 4.39E-14 |
| 0.64166  | -0.08523 | 0.06573  | -0.34424 | 1.94E-14 |
| 0.20589  | -0.17915 | 9.91E-05 | -0.27798 | 9.84E-10 |
| 0.70673  | -0.0808  | 0.08109  | -0.37572 | 4.18E-17 |
| 0.71636  | 0.031365 | 0.49895  | -0.29522 | 7.60E-11 |
| 0.0448   | -0.09132 | 0.04859  | -0.19708 | 1.79E-05 |
| 0.00014  | 0.087164 | 0.05981  | -0.25283 | 3.03E-08 |
| 0.29963  | 0.05301  | 0.25292  | 0.562553 | 2.50E-40 |
| 0.03978  | -0.09601 | 0.03807  | -0.17469 | 0.00015  |
| 1.44E-10 | 0.382931 | 9.30E-18 | -0.33642 | 8.05E-14 |
| 0.3236   | 0.002281 | 0.96079  | -0.26203 | 9.03E-09 |
| 0.80942  | -0.06203 | 0.18085  | -0.28957 | 1.79E-10 |
| 0.00163  | -0.04312 | 0.35245  | -0.18001 | 9.17E-05 |
| 0.05442  | -0.11166 | 0.01577  | -0.24431 | 8.96E-08 |
| 0.14647  | -0.07459 | 0.10745  | -0.48235 | 1.38E-28 |
| 0.05926  | 0.045529 | 0.32622  | -0.37254 | 8.03E-17 |
| 0.26084  | -0.10256 | 0.02667  | -0.23472 | 2.89E-07 |
| 0.92621  | -0.1273  | 0.00587  | -0.27039 | 2.88E-09 |
| 0.15752  | 0.027951 | 0.54682  | -0.37241 | 8.24E-17 |
| 0.91534  | 0.028886 | 0.53349  | 0.331533 | 1.92E-13 |
| 0.39501  | -0.08757 | 0.05863  | -0.25781 | 1.58E-08 |
| 0.00034  | 0.137947 | 0.00281  | -0.31082 | 6.44E-12 |
| 0.00016  | 0.120495 | 0.00915  | -0.1141  | 0.01361  |
| 0.13739  | -0.13647 | 0.00313  | -0.38055 | 1.54E-17 |
| 0.00315  | -0.04478 | 0.33421  | -0.22444 | 9.59E-07 |
| 0.21722  | 0.059547 | 0.19896  | -0.37249 | 8.10E-17 |
| 0.96182  | -0.13773 | 0.00286  | -0.39809 | 3.47E-19 |
| 0.07445  | -0.04193 | 0.366    | -0.32267 | 8.92E-13 |
| 0.02338  | -0.05666 | 0.22163  | -0.06997 | 0.13107  |
| 0.13884  | -0.1781  | 0.00011  | -0.38115 | 1.35E-17 |
| 0.96148  | -0.01796 | 0.69866  | -0.40801 | 3.69E-20 |
| 0.66979  | -0.11811 | 0.01063  | -0.34366 | 2.16E-14 |
| 0.01088  | -0.06158 | 0.18402  | -0.31564 | 2.91E-12 |
| 0.01519  | 0.02702  | 0.56026  | -0.33495 | 1.05E-13 |
| 0.00023  | -0.11698 | 0.01141  | -0.11331 | 0.01429  |
| 0.89331  | 0.020395 | 0.66023  | 0.399588 | 2.49E-19 |
| 0.0154   | -0.13792 | 0.00282  | -0.1506  | 0.0011   |
| 0.89644  | 0.05901  | 0.20305  | -0.28123 | 6.16E-10 |
| 0.05843  | -0.16461 | 0.00035  | -0.33792 | 6.15E-14 |
| 0.03467  | -0.14391 | 0.00182  | -0.19661 | 1.88E-05 |
| 0.40113  | 0.018695 | 0.68698  | 0.347083 | 1.15E-14 |

|          |          |          |          |          |
|----------|----------|----------|----------|----------|
| 0.49719  | -0.22986 | 5.13E-07 | 0.224001 | 1.01E-06 |
| 0.88218  | -0.1095  | 0.01792  | 0.374695 | 5.17E-17 |
| 0.23521  | -0.21203 | 3.80E-06 | 0.22839  | 6.09E-07 |
| 0.85806  | -0.25943 | 1.28E-08 | 0.194463 | 2.32E-05 |
| 0.14204  | -0.30987 | 7.51E-12 | 0.199712 | 1.37E-05 |
| 0.00091  | -0.16138 | 0.00046  | 0.471695 | 3.02E-27 |
| 0.00017  | -0.18066 | 8.63E-05 | 0.379432 | 1.94E-17 |
| 0.00059  | -0.23608 | 2.45E-07 | 0.249072 | 4.92E-08 |
| 0.62202  | -0.2132  | 3.34E-06 | 0.157459 | 0.00064  |
| 9.78E-08 | -0.0907  | 0.05014  | 0.537404 | 2.65E-36 |
| 4.43E-07 | -0.0413  | 0.37315  | 0.623968 | 9.34E-52 |
| 7.81E-07 | -0.03707 | 0.42421  | 0.603533 | 1.12E-47 |
| 0.76115  | -0.25112 | 3.78E-08 | 0.397108 | 4.32E-19 |
| 0.00118  | -0.15618 | 0.00071  | 0.388663 | 2.74E-18 |
| 0.62168  | -0.23655 | 2.32E-07 | 0.290612 | 1.53E-10 |
| 0.02193  | -0.04854 | 0.29524  | 0.326396 | 4.70E-13 |
| 0.20317  | -0.26954 | 3.24E-09 | 0.284009 | 4.10E-10 |
| 5.50E-05 | -0.16414 | 0.00037  | 0.313605 | 4.07E-12 |
| 2.43E-05 | -0.18716 | 4.71E-05 | 0.451771 | 7.24E-25 |
| 0.29798  | -0.27157 | 2.44E-09 | 0.319918 | 1.42E-12 |
| 0.1636   | -0.21953 | 1.67E-06 | 0.347034 | 1.16E-14 |
| 0.15275  | -0.11982 | 0.00955  | 0.300051 | 3.59E-11 |
| 0.85735  | -0.19178 | 3.02E-05 | 0.242841 | 1.08E-07 |
| 0.05583  | -0.30823 | 9.80E-12 | 0.346598 | 1.26E-14 |
| 0.00026  | -0.24192 | 1.20E-07 | 0.250401 | 4.15E-08 |
| 0.00758  | -0.18986 | 3.64E-05 | 0.459381 | 9.31E-26 |
| 0.06812  | -0.27161 | 2.43E-09 | 0.281166 | 6.21E-10 |
| 0.91916  | -0.28867 | 2.05E-10 | 0.16525  | 0.00034  |
| 0.33426  | -0.24849 | 5.30E-08 | 0.225185 | 8.81E-07 |
| 0.00271  | -0.24429 | 8.98E-08 | 0.384446 | 6.74E-18 |
| 0.10311  | -0.15782 | 0.00062  | 0.28421  | 3.98E-10 |
| 0.35071  | -0.231   | 4.49E-07 | 0.438762 | 2.14E-23 |
| 0.00219  | -0.11715 | 0.01129  | 0.483618 | 9.52E-29 |
| 0.03355  | -0.13564 | 0.00331  | 0.190763 | 3.33E-05 |
| 0.05191  | -0.17212 | 0.00019  | 0.226229 | 7.82E-07 |
| 0.11491  | -0.21448 | 2.91E-06 | 0.166145 | 0.00031  |
| 0.07947  | -0.26703 | 4.58E-09 | 0.3484   | 8.97E-15 |
| 5.08E-07 | -0.146   | 0.00156  | 0.483854 | 8.88E-29 |
| 0.03159  | -0.27688 | 1.15E-09 | 0.480344 | 2.49E-28 |
| 1.64E-05 | -0.1348  | 0.00352  | 0.487818 | 2.73E-29 |
| 0.31198  | -0.03289 | 0.47828  | 0.004164 | 0.92849  |
| 1.28E-05 | -0.0494  | 0.28674  | -0.19774 | 1.68E-05 |
| 0.00526  | -0.13901 | 0.00261  | -0.02458 | 0.59626  |
| 0.08126  | -0.11641 | 0.01182  | -0.10646 | 0.0214   |
| 3.78E-11 | -0.18375 | 6.49E-05 | -0.28961 | 1.78E-10 |

|          |          |         |          |          |
|----------|----------|---------|----------|----------|
| 0.00057  | 0.005692 | 0.90236 | -0.017   | 0.71403  |
| 0.12181  | -0.07079 | 0.1266  | -0.03231 | 0.48606  |
| 0.34237  | -0.02821 | 0.54311 | -0.13155 | 0.00441  |
| 0.49681  | 0.049647 | 0.28432 | -0.00642 | 0.88991  |
| 0.0691   | 0.065796 | 0.15572 | -0.09031 | 0.05113  |
| 0.01456  | -0.00093 | 0.98398 | -0.05484 | 0.23685  |
| 0.0034   | -0.06751 | 0.14522 | -0.13603 | 0.00323  |
| 1.24E-05 | -0.11461 | 0.0132  | -0.15804 | 0.00061  |
| 0.26996  | 0.020723 | 0.65512 | -0.05912 | 0.2022   |
| 1.62E-05 | -0.07066 | 0.12729 | -0.0842  | 0.06907  |
| 0.04769  | -0.05223 | 0.25994 | -0.0266  | 0.56638  |
| 0.58199  | -0.0626  | 0.17684 | 0.019042 | 0.68149  |
| 0.00021  | 0.031782 | 0.49325 | -0.24237 | 1.14E-07 |
| 0.00095  | 0.005556 | 0.90469 | -0.22224 | 1.23E-06 |
| 0.00692  | -0.03139 | 0.49854 | 0.022745 | 0.62395  |
| 0.01272  | 0.040644 | 0.38085 | -0.07055 | 0.12789  |
| 0.00042  | -0.01    | 0.82934 | -0.14889 | 0.00125  |
| 0.09802  | -0.08033 | 0.08289 | -0.03547 | 0.44441  |
| 0.00047  | -0.02095 | 0.65151 | -0.13894 | 0.00262  |
| 0.0022   | -0.13469 | 0.00354 | -0.14124 | 0.00222  |
| 0.00342  | -0.05107 | 0.27075 | -0.00259 | 0.95553  |
| 0.01585  | -0.03614 | 0.43588 | -0.10135 | 0.02852  |
| 0.93638  | 0.055107 | 0.2346  | 0.205114 | 7.89E-06 |
| 0.00028  | 0.003331 | 0.94277 | -0.15274 | 0.00093  |
| 0.14356  | 0.03707  | 0.42417 | -0.07248 | 0.11778  |
| 0.00014  | 0.026205 | 0.57216 | -0.19695 | 1.81E-05 |
| 0.00067  | 0.053124 | 0.2519  | -0.19303 | 2.67E-05 |
| 0.00475  | 0.02742  | 0.55447 | -0.09487 | 0.04043  |
| 0.75651  | 0.035926 | 0.43861 | 0.115838 | 0.01224  |
| 0.00087  | 0.019018 | 0.68187 | 0.005629 | 0.90344  |
| 1.28E-06 | -0.00124 | 0.97873 | -0.37773 | 2.76E-17 |
| 0.00174  | 0.050306 | 0.27797 | -0.10705 | 0.02068  |
| 0.00701  | -0.02899 | 0.53203 | -0.18619 | 5.16E-05 |
| 0.00298  | -0.0004  | 0.99316 | -0.11463 | 0.01319  |
| 0.03405  | 0.006159 | 0.8944  | -0.09216 | 0.04654  |
| 0.58342  | -0.10524 | 0.02293 | 0.084916 | 0.06674  |
| 0.69506  | -0.0853  | 0.06552 | 0.004382 | 0.92475  |
| 0.00146  | -0.10245 | 0.02684 | -0.15002 | 0.00115  |
| 0.00019  | 0.027477 | 0.55365 | -0.21721 | 2.16E-06 |
| 0.03121  | -0.06418 | 0.16618 | 0.423959 | 8.51E-22 |
| 0.00213  | 0.096959 | 0.0362  | -0.12549 | 0.00662  |
| 0.17736  | -0.05052 | 0.27591 | 0.025485 | 0.58276  |
| 1.14E-05 | -0.13583 | 0.00327 | -0.28456 | 3.78E-10 |
| 0.07639  | -0.02883 | 0.53429 | -0.06676 | 0.14977  |
| 2.08E-06 | -0.02777 | 0.54948 | -0.17364 | 0.00016  |

|          |          |          |          |          |
|----------|----------|----------|----------|----------|
| 0.0035   | -0.11855 | 0.01034  | -0.19837 | 1.57E-05 |
| 0.60525  | -0.00573 | 0.90165  | -0.01203 | 0.79543  |
| 0.94652  | 0.014328 | 0.75746  | 0.052546 | 0.2571   |
| 0.05019  | 0.033779 | 0.46648  | -0.10146 | 0.02836  |
| 0.24537  | 0.037988 | 0.41277  | 0.035011 | 0.45037  |
| 0.22555  | -0.04635 | 0.31752  | 0.185498 | 5.51E-05 |
| 6.85E-05 | -0.16251 | 0.00042  | -0.22625 | 7.80E-07 |
| 0.002    | -0.02239 | 0.62935  | -0.12758 | 0.00576  |
| 9.13E-05 | -0.00188 | 0.96763  | -0.24646 | 6.84E-08 |
| 0.00168  | 0.026612 | 0.56621  | -0.08959 | 0.05302  |
| 0.0094   | -0.01819 | 0.69507  | -0.1045  | 0.02393  |
| 0.00243  | -0.04675 | 0.31341  | -0.02202 | 0.63511  |
| 2.76E-05 | -0.02692 | 0.56172  | -0.30028 | 3.47E-11 |
| 0.42247  | 0.007982 | 0.86341  | 0.203027 | 9.79E-06 |
| 0.13018  | -0.04258 | 0.35857  | 0.134318 | 0.00364  |
| 2.52E-05 | -0.04005 | 0.38785  | -0.29482 | 8.09E-11 |
| 2.13E-06 | -0.05238 | 0.25859  | -0.35977 | 1.02E-15 |
| 0.00054  | -0.11203 | 0.01543  | 0.022461 | 0.62828  |
| 0.00362  | -0.10527 | 0.0229   | -0.0019  | 0.96729  |
| 0.60715  | 0.010455 | 0.82172  | 0.021726 | 0.63957  |
| 0.01932  | -0.04378 | 0.3452   | 0.031608 | 0.49562  |
| 0.01707  | -0.02997 | 0.51818  | -0.27001 | 3.03E-09 |
| 0.25197  | 0.008967 | 0.84675  | 0.073511 | 0.11263  |
| 0.19875  | -0.00084 | 0.98559  | -0.04926 | 0.28808  |
| 0.02241  | 0.104061 | 0.02452  | -0.25655 | 1.87E-08 |
| 2.09E-06 | -0.00396 | 0.93191  | -0.28843 | 2.13E-10 |
| 0.16367  | -0.04668 | 0.31417  | 0.070601 | 0.12763  |
| 0.84762  | 0.05947  | 0.19954  | -0.04221 | 0.36277  |
| 0.37768  | 0.049727 | 0.28354  | -0.0094  | 0.83938  |
| 0.01351  | -0.07045 | 0.12847  | -0.05036 | 0.27748  |
| 4.67E-06 | -0.15493 | 0.00078  | -0.16174 | 0.00045  |
| 0.00135  | -0.0785  | 0.09018  | 0.027197 | 0.55769  |
| 0.28809  | -0.08067 | 0.08161  | 0.207291 | 6.28E-06 |
| 0.37389  | 0.034183 | 0.46116  | 0.08032  | 0.08294  |
| 0.62323  | -0.02982 | 0.5204   | 0.04339  | 0.34949  |
| 0.00858  | 0.135877 | 0.00326  | 0.08485  | 0.06695  |
| 0.0002   | -0.26345 | 7.46E-09 | 0.000743 | 0.98722  |
| 0.00075  | 0.155187 | 0.00077  | 0.121158 | 0.00877  |
| 0.45387  | 0.021535 | 0.64252  | 0.010774 | 0.81637  |
| 0.31841  | 0.094926 | 0.04032  | 0.07096  | 0.1257   |
| 0.24439  | 0.04966  | 0.28419  | 0.049904 | 0.28184  |
| 0.04923  | -0.08515 | 0.06598  | -0.13561 | 0.00332  |
| 4.34E-05 | -0.04829 | 0.29775  | -0.2507  | 4.00E-08 |
| 3.36E-07 | -0.01626 | 0.72598  | -0.20979 | 4.82E-06 |
| 0.04263  | -0.01951 | 0.6741   | -0.13139 | 0.00446  |

|          |          |          |          |          |
|----------|----------|----------|----------|----------|
| 0.23488  | -0.01549 | 0.73853  | 0.015817 | 0.73318  |
| 1.32E-07 | -0.01287 | 0.7814   | -0.18835 | 4.20E-05 |
| 0.00116  | -0.03482 | 0.4529   | -0.29995 | 3.65E-11 |
| 0.00011  | -0.23444 | 2.99E-07 | -0.11349 | 0.01413  |
| 0.31637  | -0.02967 | 0.52241  | -0.02708 | 0.55938  |
| 0.03581  | 0.019197 | 0.67903  | -0.00964 | 0.83541  |
| 0.66964  | -0.05873 | 0.20521  | 0.091792 | 0.04742  |
| 1.08E-05 | -0.07818 | 0.09148  | -0.27785 | 1.00E-09 |
| 0.00052  | 0.017355 | 0.70836  | -0.20366 | 9.17E-06 |
| 9.39E-05 | -0.01872 | 0.68661  | -0.06668 | 0.15024  |
| 0.01427  | -0.15713 | 0.00065  | 0.123491 | 0.00755  |
| 0.0001   | -0.04905 | 0.2902   | -0.12244 | 0.00808  |
| 0.13906  | -0.00519 | 0.91094  | 0.253369 | 2.83E-08 |
| 0.90731  | -0.01049 | 0.82108  | 0.048485 | 0.29576  |
| 0.00225  | 0.002193 | 0.96231  | -0.05866 | 0.20576  |
| 0.92792  | -0.051   | 0.27134  | 0.036482 | 0.43156  |
| 0.28189  | -0.07163 | 0.12218  | 0.004739 | 0.91866  |
| 0.82148  | 0.026603 | 0.56633  | 0.139677 | 0.00248  |
| 0.05463  | -0.07224 | 0.11899  | 0.021115 | 0.64902  |
| 0.00021  | -0.02678 | 0.5637   | -0.31608 | 2.71E-12 |
| 0.18281  | -0.02846 | 0.53952  | -0.049   | 0.29066  |
| 0.02988  | 0.049343 | 0.28729  | -0.16767 | 0.00027  |
| 0.04506  | -0.01918 | 0.6793   | -0.13199 | 0.00427  |
| 0.05584  | 0.017259 | 0.70989  | -0.13103 | 0.00457  |
| 0.9984   | 0.051897 | 0.26303  | -0.07574 | 0.1021   |
| 4.97E-06 | 0.071701 | 0.12179  | -0.29517 | 7.66E-11 |
| 0.00982  | -0.09845 | 0.03342  | 0.106518 | 0.02132  |
| 0.68795  | -0.06774 | 0.14383  | -0.01618 | 0.72735  |
| 0.69427  | 0.078115 | 0.09177  | 0.081921 | 0.07697  |
| 0.32793  | -0.0331  | 0.47554  | -0.04271 | 0.35714  |
| 0.23973  | -0.02663 | 0.56591  | -0.04063 | 0.38104  |
| 0.45428  | 0.035478 | 0.44435  | -0.01416 | 0.76015  |
| 7.95E-08 | -0.07289 | 0.11571  | -0.24997 | 4.39E-08 |
| 7.11E-05 | -0.03892 | 0.40139  | -0.14529 | 0.00164  |
| 0.13641  | -0.08591 | 0.0636   | 0.006835 | 0.88289  |
| 3.76E-07 | -0.07231 | 0.11862  | -0.23452 | 2.96E-07 |
| 0.44888  | -0.07253 | 0.11753  | 0.131596 | 0.00439  |
| 0.00117  | 0.042613 | 0.35818  | -0.21562 | 2.57E-06 |
| 0.79077  | -0.01888 | 0.68412  | -0.14737 | 0.0014   |
| 0.38213  | -0.02681 | 0.56336  | -0.02497 | 0.59035  |
| 0.01173  | -0.04207 | 0.36439  | -0.1783  | 0.00011  |
| 6.18E-08 | -0.06808 | 0.14182  | -0.2239  | 1.02E-06 |
| 0.61756  | -0.03977 | 0.39119  | 0.191317 | 3.16E-05 |
| 0.00435  | -0.09947 | 0.03162  | -0.05975 | 0.19747  |
| 0.06206  | 0.119976 | 0.00946  | 0.087549 | 0.05869  |

|          |          |         |          |          |
|----------|----------|---------|----------|----------|
| 0.51435  | -0.02292 | 0.62131 | -0.08374 | 0.07061  |
| 0.22351  | 0.137599 | 0.00288 | 0.009214 | 0.84259  |
| 0.00088  | -0.05364 | 0.2473  | -0.23567 | 2.58E-07 |
| 0.33921  | 0.020977 | 0.65116 | 0.103293 | 0.0256   |
| 0.00014  | 0.051062 | 0.2708  | -0.06898 | 0.13662  |
| 0.31791  | -0.09531 | 0.03951 | -0.00499 | 0.91435  |
| 0.00033  | -0.0797  | 0.08534 | -0.06984 | 0.1318   |
| 1.26E-06 | 0.015705 | 0.73499 | -0.3323  | 1.68E-13 |
| 1.64E-06 | -0.05885 | 0.20425 | -0.45353 | 4.53E-25 |
| 1.71E-08 | -0.09294 | 0.04472 | -0.24605 | 7.21E-08 |
| 0.00083  | -0.01962 | 0.67234 | -0.41227 | 1.37E-20 |
| 0.00176  | -0.08043 | 0.08251 | -0.14873 | 0.00127  |
| 0.00327  | -0.09672 | 0.03667 | -0.11683 | 0.01151  |
| 1.30E-06 | -0.08885 | 0.05501 | -0.22819 | 6.23E-07 |
| 0.9243   | 0.012104 | 0.79419 | 0.117108 | 0.01132  |
| 0.7765   | 0.062861 | 0.17506 | 0.289213 | 1.89E-10 |
| 0.14456  | -0.05704 | 0.21859 | 0.051336 | 0.26824  |
| 0.65914  | -0.07986 | 0.08471 | 0.03005  | 0.51712  |
| 0.00157  | 0.058674 | 0.20564 | 0.09296  | 0.04466  |
| 0.05012  | -0.07399 | 0.11029 | 0.097169 | 0.0358   |
| 0.62755  | -0.14191 | 0.00211 | -0.01074 | 0.81691  |
| 0.00096  | -0.04442 | 0.33813 | 0.213955 | 3.08E-06 |
| 0.68021  | -0.12222 | 0.00819 | 0.111827 | 0.01562  |
| 0.00029  | 0.052707 | 0.25564 | 0.003658 | 0.93716  |
| 0.01506  | -0.02466 | 0.59499 | -0.04746 | 0.30606  |
| 0.24215  | -0.01156 | 0.8033  | -0.10583 | 0.02218  |
| 0.0331   | -0.06541 | 0.15815 | -0.01002 | 0.82907  |
| 0.57469  | -0.15043 | 0.00111 | 0.061339 | 0.18576  |
| 0.01033  | -0.09663 | 0.03684 | 0.115006 | 0.01289  |
| 0.80147  | -0.09533 | 0.03946 | -0.07573 | 0.10218  |
| 0.88126  | -0.0348  | 0.45311 | -0.10353 | 0.02526  |
| 0.39699  | -0.07833 | 0.09087 | -0.0076  | 0.86985  |
| 0.00053  | 0.069099 | 0.13595 | -0.02359 | 0.61117  |
| 0.00543  | 0.081677 | 0.07785 | 0.011294 | 0.80767  |
| 0.51896  | -0.00431 | 0.92605 | -0.10699 | 0.02075  |
| 0.15942  | -0.06841 | 0.1399  | 0.042415 | 0.36043  |
| 0.84807  | -0.0555  | 0.23129 | -0.03702 | 0.42479  |
| 0.16542  | 0.031738 | 0.49385 | -0.00332 | 0.94289  |
| 0.11463  | -0.05915 | 0.20201 | 0.101962 | 0.02758  |
| 3.49E-06 | 0.0803   | 0.08302 | 0.076066 | 0.10064  |
| 2.11E-05 | 0.061299 | 0.18604 | 0.109355 | 0.01808  |
| 0.49795  | -0.13418 | 0.00367 | 0.079136 | 0.08759  |
| 0.59434  | -0.12176 | 0.00844 | 0.01481  | 0.74958  |
| 0.02637  | -0.11277 | 0.01476 | 0.157432 | 0.00064  |
| 9.45E-05 | -0.04815 | 0.29914 | 0.192788 | 2.74E-05 |

|          |          |          |          |          |
|----------|----------|----------|----------|----------|
| 0.64597  | -0.08617 | 0.06279  | -0.07613 | 0.10034  |
| 0.08833  | -0.09184 | 0.0473   | 0.136743 | 0.00307  |
| 0.13145  | 0.002669 | 0.95414  | 0.005617 | 0.90365  |
| 0.37383  | 0.047059 | 0.3102   | -0.07069 | 0.12713  |
| 0.10551  | -0.03862 | 0.40505  | 0.145285 | 0.00164  |
| 5.42E-05 | 0.033831 | 0.4658   | 0.126063 | 0.00638  |
| 0.03025  | -0.00942 | 0.83912  | 0.021983 | 0.63562  |
| 0.57827  | -0.02646 | 0.56848  | 0.037844 | 0.41454  |
| 0.1999   | -0.08654 | 0.06167  | 0.069925 | 0.13133  |
| 0.2591   | -0.12207 | 0.00827  | 0.015154 | 0.74395  |
| 0.33806  | -0.11936 | 0.00983  | 0.060644 | 0.1908   |
| 0.68107  | -0.17322 | 0.00017  | 0.155936 | 0.00072  |
| 0.20288  | -0.06298 | 0.17426  | -0.00636 | 0.89089  |
| 0.72048  | -0.10439 | 0.02407  | 0.067512 | 0.1452   |
| 0.389    | -0.06223 | 0.17941  | 0.118053 | 0.01067  |
| 8.84E-07 | 0.041763 | 0.36787  | 0.178375 | 0.00011  |
| 8.03E-05 | 0.044672 | 0.33541  | 0.102374 | 0.02695  |
| 0.02366  | -0.03678 | 0.42782  | 0.09576  | 0.03858  |
| 0.56885  | -0.088   | 0.05739  | 0.064634 | 0.16317  |
| 0.41305  | -0.11768 | 0.01092  | 0.080184 | 0.08346  |
| 0.56401  | -0.04731 | 0.30761  | 0.010728 | 0.81714  |
| 0.97454  | -0.0532  | 0.2512   | -0.10958 | 0.01784  |
| 0.45246  | -0.0866  | 0.0615   | -0.00869 | 0.85148  |
| 0.3564   | -0.10028 | 0.03026  | 0.084833 | 0.067    |
| 0.0001   | 0.045616 | 0.32529  | 0.175325 | 0.00014  |
| 4.65E-06 | 0.026937 | 0.56147  | 0.299696 | 3.80E-11 |
| 0.08884  | -0.05168 | 0.26503  | -0.15627 | 0.0007   |
| 2.47E-05 | -0.05525 | 0.23343  | 0.382205 | 1.08E-17 |
| 3.01E-05 | -0.00128 | 0.97804  | -0.10952 | 0.01791  |
| 0.95083  | 0.170511 | 0.00021  | 0.263317 | 7.59E-09 |
| 0.16456  | -0.03982 | 0.3906   | -0.07869 | 0.08938  |
| 0.00439  | 0.086621 | 0.06143  | 0.224829 | 9.17E-07 |
| 0.00053  | -0.00194 | 0.96672  | -0.05536 | 0.23247  |
| 5.35E-12 | 0.049437 | 0.28637  | 0.506281 | 9.08E-32 |
| 0.0003   | -0.09674 | 0.03663  | 0.052731 | 0.25542  |
| 1.40E-10 | -0.09309 | 0.04437  | 0.246873 | 6.50E-08 |
| 4.67E-19 | 0.274339 | 1.65E-09 | 0.418393 | 3.25E-21 |
| 2.39E-05 | -0.06498 | 0.16092  | 0.519861 | 1.09E-33 |
| 0.10708  | 0.215496 | 2.60E-06 | 0.023776 | 0.60831  |
| 1.18E-12 | 0.104728 | 0.02361  | 0.277449 | 1.06E-09 |
| 4.47E-05 | -0.06573 | 0.15613  | 0.137671 | 0.00287  |
| 0.00062  | 0.00693  | 0.88127  | 0.1451   | 0.00167  |
| 0.31417  | -0.11343 | 0.01419  | -0.02845 | 0.53967  |
| 1.61E-09 | -0.07249 | 0.11771  | 0.643603 | 5.69E-56 |
| 4.51E-06 | -0.03596 | 0.4382   | 0.040554 | 0.38191  |



|          |          |          |          |          |
|----------|----------|----------|----------|----------|
| 0.05718  | -0.10727 | 0.02041  | 0.138184 | 0.00277  |
| 3.44E-10 | -0.08713 | 0.05992  | 0.109629 | 0.01779  |
| 6.52E-07 | 0.17037  | 0.00022  | 0.095754 | 0.0386   |
| 1.30E-07 | 0.036858 | 0.42682  | 0.237768 | 2.00E-07 |
| 5.29E-05 | -0.01879 | 0.68547  | 0.542353 | 4.55E-37 |
| 2.65E-10 | 0.142592 | 0.00201  | 0.196956 | 1.81E-05 |
| 7.80E-07 | -0.10489 | 0.0234   | 0.076261 | 0.09976  |
| 1.91E-08 | -0.05671 | 0.22124  | 0.206803 | 6.61E-06 |
| 0.31777  | -0.16485 | 0.00035  | 0.354023 | 3.10E-15 |
| 0.60841  | 0.075378 | 0.10376  | -0.07683 | 0.09727  |
| 4.33E-05 | 0.038393 | 0.4078   | 0.141213 | 0.00222  |
| 0.58849  | -0.14086 | 0.00228  | 0.068541 | 0.13915  |
| 1.04E-09 | 0.098584 | 0.03318  | 0.392343 | 1.23E-18 |
| 2.66E-06 | -0.09228 | 0.04626  | 0.091774 | 0.04746  |
| 2.28E-13 | 0.171449 | 0.0002   | 0.156397 | 0.00069  |
| 0.00012  | 0.022651 | 0.62538  | 0.126773 | 0.00608  |
| 0.42882  | 0.080847 | 0.08093  | 0.09148  | 0.04818  |
| 0.00144  | -0.04178 | 0.36771  | 0.165522 | 0.00033  |
| 1.83E-10 | -0.1275  | 0.00579  | 0.21339  | 3.28E-06 |
| 2.12E-09 | -0.13584 | 0.00327  | 0.280243 | 7.10E-10 |
| 1.05E-08 | -0.15192 | 0.00099  | 0.221389 | 1.36E-06 |
| 0.63112  | -0.13125 | 0.0045   | 0.207219 | 6.33E-06 |
| 3.22E-12 | 0.221754 | 1.30E-06 | 0.299991 | 3.63E-11 |
| 0.15948  | 0.026392 | 0.56942  | 0.231594 | 4.19E-07 |
| 0.71783  | -0.06484 | 0.16183  | -0.14283 | 0.00197  |
| 0.01619  | 0.027603 | 0.55183  | -0.07952 | 0.08607  |
| 0.00018  | -0.01262 | 0.78554  | 0.100982 | 0.02911  |
| 2.64E-09 | -0.02827 | 0.54229  | 0.208696 | 5.41E-06 |
| 5.78E-13 | -0.01106 | 0.81151  | 0.297586 | 5.28E-11 |
| 0.01463  | 0.040317 | 0.38469  | 0.099718 | 0.0312   |
| 1.87E-24 | 0.310689 | 6.57E-12 | 0.292202 | 1.21E-10 |
| 0.00061  | -0.22989 | 5.11E-07 | 0.089499 | 0.05326  |
| 0.02091  | 0.042615 | 0.35816  | 0.18125  | 8.18E-05 |
| 0.01176  | 0.089802 | 0.05246  | 0.156911 | 0.00067  |
| 0.00072  | -0.12105 | 0.00883  | 0.270249 | 2.93E-09 |
| 0.00016  | -0.03046 | 0.51148  | 0.184733 | 5.92E-05 |
| 4.59E-06 | -0.09988 | 0.03092  | 0.18379  | 6.46E-05 |
| 0.41249  | -0.21257 | 3.58E-06 | -0.15099 | 0.00106  |
| 0.00184  | 0.000226 | 0.99612  | 0.050498 | 0.27613  |
| 7.44E-09 | -0.08344 | 0.07163  | 0.177107 | 0.00012  |
| 0.00048  | -0.10284 | 0.02627  | -0.01382 | 0.76585  |
| 5.85E-09 | -0.09538 | 0.03936  | 0.179704 | 9.43E-05 |
| 0.37781  | -0.11623 | 0.01196  | -0.18501 | 5.77E-05 |
| 1.61E-06 | -0.16811 | 0.00026  | 0.161161 | 0.00047  |
| 6.42E-12 | -0.06675 | 0.1498   | 0.230204 | 4.93E-07 |

|          |          |          |          |          |
|----------|----------|----------|----------|----------|
| 7.28E-07 | -0.1053  | 0.02286  | 0.117955 | 0.01074  |
| 0.41771  | -0.10109 | 0.02893  | -0.13562 | 0.00332  |
| 0.00079  | -0.00683 | 0.88299  | 0.305213 | 1.59E-11 |
| 2.59E-06 | -0.08189 | 0.07707  | 0.129237 | 0.00516  |
| 0.44483  | -0.00694 | 0.8811   | 0.146688 | 0.00148  |
| 0.01471  | -0.07574 | 0.10212  | 0.301541 | 2.84E-11 |
| 0.4401   | -0.22137 | 1.36E-06 | 0.281306 | 6.09E-10 |
| 0.07484  | -0.01189 | 0.79768  | 0.174364 | 0.00015  |
| 0.09927  | 0.015486 | 0.73855  | -0.0928  | 0.04503  |
| 1.08E-05 | -0.01018 | 0.8263   | 0.331648 | 1.88E-13 |
| 0.00037  | 0.032111 | 0.48878  | 0.397704 | 3.79E-19 |
| 0.00026  | -0.20659 | 6.76E-06 | 0.276818 | 1.16E-09 |
| 0.00015  | -0.10948 | 0.01795  | 0.395641 | 5.98E-19 |
| 0.1234   | -0.01453 | 0.75407  | 0.315525 | 2.97E-12 |
| 0.00063  | -0.09646 | 0.03718  | 0.492928 | 5.82E-30 |
| 1.88E-10 | -0.12582 | 0.00648  | 0.238233 | 1.89E-07 |
| 0.00014  | -0.05255 | 0.25704  | -0.26329 | 7.62E-09 |
| 1.27E-14 | 0.119503 | 0.00974  | 0.258659 | 1.42E-08 |
| 3.54E-08 | -0.05994 | 0.19599  | 0.545776 | 1.32E-37 |
| 0.00195  | -0.1547  | 0.0008   | 0.056257 | 0.22496  |
| 7.80E-13 | -0.10723 | 0.02047  | 0.397046 | 4.38E-19 |
| 0.20447  | -0.14913 | 0.00123  | 0.026833 | 0.56298  |
| 4.10E-10 | -0.04157 | 0.37011  | 0.522266 | 4.87E-34 |
| 0.37611  | -0.10035 | 0.03014  | 0.078701 | 0.08935  |
| 0.00108  | -0.06045 | 0.1922   | -0.26212 | 8.92E-09 |
| 2.59E-08 | 0.118632 | 0.01029  | -0.062   | 0.18106  |
| 0.00103  | -0.15708 | 0.00066  | -0.01633 | 0.72479  |
| 6.13E-11 | 0.066361 | 0.1522   | 0.375593 | 4.30E-17 |
| 0.01838  | -0.05919 | 0.20164  | 0.241203 | 1.32E-07 |
| 0.00012  | -0.17499 | 0.00014  | 0.281632 | 5.80E-10 |
| 3.15E-06 | 0.020438 | 0.65955  | 0.238032 | 1.94E-07 |
| 3.01E-05 | -0.09529 | 0.03956  | 0.383401 | 8.42E-18 |
| 4.94E-05 | -0.17538 | 0.00014  | 0.416169 | 5.50E-21 |
| 1.51E-08 | -0.10567 | 0.02239  | 0.166737 | 0.0003   |
| 0.96811  | -0.10596 | 0.02201  | -0.01293 | 0.78044  |
| 9.42E-08 | -0.10106 | 0.02899  | 0.437371 | 3.05E-23 |
| 5.41E-06 | -0.08922 | 0.054    | 0.064613 | 0.16331  |
| 7.80E-06 | -0.00321 | 0.94483  | 0.078857 | 0.08872  |
| 3.07E-05 | -0.01225 | 0.79175  | 0.099918 | 0.03086  |
| 1.08E-11 | 0.106719 | 0.02108  | 0.371391 | 1.01E-16 |
| 0.00874  | -0.16507 | 0.00034  | 0.007576 | 0.87029  |
| 0.00402  | -0.08014 | 0.08362  | 0.191767 | 3.02E-05 |
| 0.01663  | -0.04202 | 0.36488  | 0.154101 | 0.00083  |
| 0.02916  | -0.17902 | 0.0001   | -0.00677 | 0.88393  |
| 0.13276  | -0.13124 | 0.0045   | 0.261524 | 9.66E-09 |

|          |          |          |          |          |
|----------|----------|----------|----------|----------|
| 0.01322  | 0.209123 | 5.18E-06 | -0.20721 | 6.33E-06 |
| 0.43311  | 0.17444  | 0.00015  | 0.076913 | 0.09689  |
| 0.00015  | -0.04832 | 0.29739  | 0.046929 | 0.31154  |
| 3.87E-05 | 0.056963 | 0.21919  | 0.164876 | 0.00035  |
| 0.00176  | -0.14615 | 0.00154  | 0.213093 | 3.38E-06 |
| 8.84E-06 | -0.04591 | 0.32214  | 0.255168 | 2.24E-08 |
| 0.00903  | -0.027   | 0.56048  | 0.132366 | 0.00416  |
| 0.00276  | -0.06128 | 0.1862   | -0.01518 | 0.74355  |
| 5.14E-13 | -0.08057 | 0.08198  | 0.301496 | 2.86E-11 |
| 9.04E-06 | -0.08059 | 0.0819   | 0.011603 | 0.80252  |
| 0.01762  | -0.05247 | 0.25776  | 0.171025 | 0.0002   |
| 0.02548  | -0.10809 | 0.01946  | 0.249878 | 4.44E-08 |
| 3.18E-07 | -0.01724 | 0.7102   | 0.252921 | 3.00E-08 |
| 0.21265  | -0.16177 | 0.00045  | -0.24266 | 1.10E-07 |
| 6.79E-08 | -0.01011 | 0.82743  | 0.205736 | 7.39E-06 |
| 0.05633  | -0.17706 | 0.00012  | 0.130259 | 0.00481  |
| 0.00027  | -0.11235 | 0.01513  | 0.042224 | 0.3626   |
| 0.01119  | -0.0099  | 0.83108  | 0.233083 | 3.51E-07 |
| 1.06E-06 | -0.16859 | 0.00025  | 0.240827 | 1.38E-07 |
| 6.25E-05 | -0.00559 | 0.90415  | 0.422582 | 1.19E-21 |
| 2.07E-23 | 0.216048 | 2.45E-06 | 0.541246 | 6.76E-37 |
| 0.00078  | -0.07547 | 0.10336  | 0.112082 | 0.01538  |
| 1.20E-08 | 0.126543 | 0.00618  | 0.250757 | 3.97E-08 |
| 0.81603  | 0.036898 | 0.42632  | -0.07043 | 0.12857  |
| 0.19448  | -0.09502 | 0.04011  | 0.391468 | 1.49E-18 |
| 1.83E-09 | -0.03854 | 0.40597  | 0.281866 | 5.61E-10 |
| 1.94E-07 | -0.15337 | 0.00088  | 0.131084 | 0.00455  |
| 4.95E-08 | -0.11401 | 0.01369  | 0.170193 | 0.00022  |
| 0.07034  | -0.09181 | 0.04737  | 0.095877 | 0.03835  |
| 4.51E-10 | -0.12028 | 0.00927  | 0.203579 | 9.25E-06 |
| 0.00102  | -0.10311 | 0.02587  | -0.03902 | 0.40016  |
| 4.47E-09 | -0.11995 | 0.00947  | 0.257364 | 1.68E-08 |
| 0.00019  | -0.0289  | 0.53334  | -0.04195 | 0.36573  |
| 1.58E-05 | -0.0768  | 0.0974   | 0.31097  | 6.28E-12 |
| 0.10347  | -0.19248 | 2.82E-05 | 0.17173  | 0.00019  |
| 0.01604  | -0.10998 | 0.01743  | -0.02335 | 0.61471  |
| 0.00011  | 0.05063  | 0.27488  | 0.097472 | 0.03523  |
| 8.99E-06 | -0.04801 | 0.30054  | 0.036064 | 0.43686  |
| 5.66E-05 | -0.10998 | 0.01743  | 0.329523 | 2.73E-13 |
| 5.31E-05 | -0.13062 | 0.0047   | 0.110046 | 0.01736  |
| 0.19443  | -0.11397 | 0.01372  | 0.357925 | 1.46E-15 |
| 0.1517   | -0.15188 | 0.00099  | 0.259583 | 1.25E-08 |
| 0.77117  | 0.130532 | 0.00472  | -0.11352 | 0.01411  |
| 6.95E-08 | -0.10178 | 0.02786  | 0.044437 | 0.33797  |
| 0.36211  | -0.02539 | 0.58418  | -0.06744 | 0.14565  |

|          |          |          |          |          |
|----------|----------|----------|----------|----------|
| 0.00014  | 0.016919 | 0.71536  | 0.034151 | 0.46158  |
| 3.16E-05 | -0.16446 | 0.00036  | 0.169645 | 0.00023  |
| 0.00016  | -0.10482 | 0.02349  | 0.166397 | 0.0003   |
| 4.13E-06 | -0.06117 | 0.187    | 0.377794 | 2.72E-17 |
| 0.41322  | -0.17201 | 0.00019  | 0.101302 | 0.0286   |
| 2.09E-13 | -0.00358 | 0.93847  | 0.398708 | 3.03E-19 |
| 2.97E-06 | -0.0217  | 0.64003  | 0.488197 | 2.43E-29 |
| 2.88E-13 | -0.10632 | 0.02156  | -0.15566 | 0.00074  |
| 0.00024  | -0.09593 | 0.03823  | 0.246201 | 7.07E-08 |
| 4.34E-06 | -0.15123 | 0.00104  | 0.165609 | 0.00033  |
| 1.91E-08 | -0.14326 | 0.00191  | 0.22227  | 1.23E-06 |
| 0.00034  | -0.21159 | 3.98E-06 | 0.129001 | 0.00524  |
| 6.57E-08 | -0.00649 | 0.88868  | 0.3164   | 2.56E-12 |
| 0.04626  | -0.03762 | 0.41726  | 0.008566 | 0.85353  |
| 0.00501  | -0.07836 | 0.09074  | 0.444516 | 4.88E-24 |
| 2.04E-06 | 0.227755 | 6.55E-07 | 0.031096 | 0.50263  |
| 0.14719  | 0.049755 | 0.28327  | -0.1148  | 0.01305  |
| 0.00068  | 0.066973 | 0.14845  | 0.205367 | 7.68E-06 |
| 1.99E-05 | -0.11831 | 0.0105   | 0.086091 | 0.06304  |
| 0.0007   | 0.226993 | 7.16E-07 | 0.085583 | 0.06462  |
| 0.58228  | -0.06819 | 0.1412   | -0.12704 | 0.00598  |
| 0.00989  | -0.06395 | 0.16768  | -0.00686 | 0.88241  |
| 0.00014  | 0.10324  | 0.02568  | 0.186216 | 5.15E-05 |
| 0.95272  | -0.09651 | 0.03709  | -0.21165 | 3.95E-06 |
| 0.31517  | -0.06957 | 0.13328  | 0.209116 | 5.18E-06 |
| 0.04141  | 0.022478 | 0.62802  | -0.23249 | 3.77E-07 |
| 0.00341  | -0.05693 | 0.21948  | 0.060518 | 0.19172  |
| 7.83E-06 | -0.04091 | 0.37771  | 0.166265 | 0.00031  |
| 0.32451  | -0.03321 | 0.47404  | 0.196409 | 1.91E-05 |
| 0.00137  | -0.06585 | 0.15536  | -0.08966 | 0.05285  |
| 4.56E-09 | -0.13142 | 0.00444  | 0.282882 | 4.84E-10 |
| 0.00418  | -0.09191 | 0.04712  | 0.25506  | 2.27E-08 |
| 0.03926  | -0.17217 | 0.00019  | 0.238104 | 1.92E-07 |
| 1.87E-07 | -0.00934 | 0.84044  | 0.001835 | 0.96845  |
| 4.46E-08 | -0.04934 | 0.28736  | 0.224074 | 1.00E-06 |
| 0.00123  | -0.09361 | 0.04319  | 0.060118 | 0.19469  |
| 0.04765  | -0.11796 | 0.01073  | 0.212412 | 3.64E-06 |
| 0.01339  | 0.204262 | 8.61E-06 | -0.02432 | 0.60018  |
| 2.53E-06 | 0.007509 | 0.87143  | -0.18412 | 6.27E-05 |
| 0.94485  | 0.168651 | 0.00025  | -0.05669 | 0.2214   |
| 2.19E-05 | -0.10871 | 0.01878  | 0.052502 | 0.2575   |
| 0.00057  | 0.036628 | 0.42971  | 0.226876 | 7.25E-07 |
| 0.87583  | -0.0237  | 0.6094   | -0.07527 | 0.10426  |
| 1.18E-05 | -0.15714 | 0.00065  | 0.086484 | 0.06184  |
| 0.00079  | -0.0728  | 0.11615  | 0.372725 | 7.73E-17 |

|          |          |          |          |          |
|----------|----------|----------|----------|----------|
| 0.64278  | -0.07171 | 0.12172  | 0.287534 | 2.43E-10 |
| 0.01283  | 0.044218 | 0.34035  | 0.422575 | 1.19E-21 |
| 9.79E-10 | -0.03721 | 0.42247  | 0.080834 | 0.08098  |
| 3.32E-09 | -0.0391  | 0.39922  | 0.130129 | 0.00485  |
| 1.80E-10 | -0.06395 | 0.1677   | 0.157955 | 0.00061  |
| 0.17995  | -0.10484 | 0.02346  | 0.162714 | 0.00041  |
| 1.90E-15 | 0.04001  | 0.38833  | 0.487141 | 3.34E-29 |
| 3.54E-09 | -0.12879 | 0.00531  | 0.18093  | 8.43E-05 |
| 1.52E-06 | -0.11705 | 0.01136  | 0.206961 | 6.50E-06 |
| 0.43295  | -0.15084 | 0.00108  | 0.094751 | 0.04069  |
| 2.38E-07 | 0.0178   | 0.70123  | 0.461565 | 5.12E-26 |
| 4.71E-13 | 0.15813  | 0.0006   | 0.151256 | 0.00104  |
| 0.77372  | -0.04966 | 0.28421  | -0.02973 | 0.52163  |
| 0.01702  | -0.13146 | 0.00443  | -0.00629 | 0.89222  |
| 2.68E-05 | -0.05272 | 0.25549  | 0.007534 | 0.87101  |
| 0.04371  | 0.031803 | 0.49296  | 0.117998 | 0.01071  |
| 9.54E-06 | -0.10884 | 0.01864  | 0.073682 | 0.1118   |
| 1.97E-09 | -0.07271 | 0.11661  | 0.183429 | 6.69E-05 |
| 0.00016  | -0.21937 | 1.70E-06 | 0.155212 | 0.00076  |
| 1.64E-09 | 0.071787 | 0.12134  | 0.244282 | 8.99E-08 |
| 1.08E-06 | -0.06859 | 0.13884  | 0.392519 | 1.19E-18 |
| 0.00176  | -0.15144 | 0.00103  | 0.131432 | 0.00444  |
| 0.0023   | 0.16631  | 0.00031  | -0.03769 | 0.4165   |
| 3.74E-05 | 0.010186 | 0.82623  | 0.039388 | 0.39575  |
| 0.00064  | -0.17926 | 9.82E-05 | 0.448167 | 1.88E-24 |
| 8.21E-05 | -0.10705 | 0.02067  | 0.162827 | 0.00041  |
| 9.49E-06 | -0.09315 | 0.04423  | 0.106069 | 0.02188  |
| 0.08988  | -0.10715 | 0.02056  | 0.409995 | 2.33E-20 |
| 1.63E-07 | -0.00509 | 0.91262  | 0.274864 | 1.53E-09 |
| 0.12718  | -0.00631 | 0.89187  | 0.098664 | 0.03304  |
| 1.79E-06 | -0.17996 | 9.21E-05 | 0.399605 | 2.48E-19 |
| 0.00699  | -0.20885 | 5.33E-06 | 0.177195 | 0.00012  |
| 3.81E-09 | -0.07884 | 0.08878  | 0.376067 | 3.90E-17 |
| 0.0026   | -0.01458 | 0.75327  | 0.161071 | 0.00048  |
| 0.00014  | -0.12457 | 0.00703  | 0.052343 | 0.25894  |
| 0.68986  | -0.06079 | 0.18974  | 0.018762 | 0.68592  |
| 1.85E-07 | -0.01052 | 0.82055  | 0.570932 | 9.51E-42 |
| 7.92E-05 | -0.02251 | 0.62755  | 0.354937 | 2.60E-15 |
| 0.00867  | -0.07114 | 0.12472  | 0.162076 | 0.00044  |
| 2.20E-12 | -0.08784 | 0.05785  | 0.297195 | 5.61E-11 |
| 0.31325  | -0.10465 | 0.02371  | -0.18989 | 3.62E-05 |
| 2.25E-09 | -0.03818 | 0.41043  | 0.079508 | 0.08611  |
| 0.46781  | 0.018344 | 0.69255  | 0.064286 | 0.16546  |
| 1.10E-12 | -0.06506 | 0.16044  | 0.147211 | 0.00142  |
| 0.00058  | -0.05564 | 0.23007  | 0.224825 | 9.18E-07 |

|          |          |          |          |          |
|----------|----------|----------|----------|----------|
| 0.01318  | -0.05345 | 0.24899  | 0.00613  | 0.89488  |
| 2.72E-09 | 0.013342 | 0.77369  | 0.176621 | 0.00012  |
| 0.74659  | -0.15241 | 0.00095  | -0.10111 | 0.02891  |
| 0.00907  | -0.14882 | 0.00126  | 0.029858 | 0.5198   |
| 0.00452  | -0.13184 | 0.00432  | 0.127139 | 0.00594  |
| 1.17E-05 | -0.07995 | 0.08436  | 0.278537 | 9.08E-10 |
| 0.00016  | 0.034413 | 0.45815  | -0.21264 | 3.55E-06 |
| 0.53976  | 0.026725 | 0.56456  | 0.069628 | 0.13298  |
| 1.65E-10 | -0.04637 | 0.3174   | 0.109713 | 0.01771  |
| 0.01493  | 0.039556 | 0.39374  | 0.165501 | 0.00033  |
| 3.78E-10 | -0.10105 | 0.02901  | 0.19896  | 1.48E-05 |
| 0.39518  | -0.1036  | 0.02517  | -0.04735 | 0.30719  |
| 0.00034  | -0.12974 | 0.00498  | -0.08793 | 0.0576   |
| 0.25161  | -0.1739  | 0.00016  | 0.113288 | 0.01431  |
| 1.31E-10 | -0.03435 | 0.459    | 0.376238 | 3.76E-17 |
| 0.00303  | 0.240444 | 1.44E-07 | 0.105521 | 0.02257  |
| 0.01563  | -0.0028  | 0.95181  | 0.01182  | 0.79892  |
| 1.41E-05 | -0.11309 | 0.01448  | 0.115012 | 0.01288  |
| 9.80E-10 | -0.01809 | 0.69658  | 0.167044 | 0.00029  |
| 0.4935   | -0.09445 | 0.04132  | 0.192738 | 2.75E-05 |
| 2.48E-13 | -0.02941 | 0.52604  | 0.253333 | 2.85E-08 |
| 0.00015  | -0.07585 | 0.10163  | 0.154722 | 0.00079  |
| 0.21701  | -0.04393 | 0.34348  | 0.018053 | 0.69718  |
| 0.59985  | -0.12277 | 0.0079   | 0.001413 | 0.9757   |
| 0.01548  | -0.09308 | 0.04439  | -0.31438 | 3.58E-12 |
| 0.00443  | -0.14567 | 0.0016   | 0.121364 | 0.00866  |
| 1.29E-06 | -0.00556 | 0.90466  | -0.04505 | 0.33137  |
| 3.68E-06 | 0.119887 | 0.00951  | 0.164726 | 0.00035  |
| 0.02049  | -0.09692 | 0.03628  | 0.082564 | 0.07467  |
| 1.26E-06 | 0.009778 | 0.83308  | 0.348329 | 9.09E-15 |
| 0.00985  | -0.05857 | 0.20647  | 0.030402 | 0.51222  |
| 0.00163  | -0.11726 | 0.01121  | 0.225598 | 8.40E-07 |
| 3.44E-09 | -0.10177 | 0.02787  | 0.258665 | 1.41E-08 |
| 9.10E-10 | -0.11124 | 0.01617  | 0.28844  | 2.12E-10 |
| 0.00544  | -0.07783 | 0.09297  | 0.192381 | 2.85E-05 |
| 0.00016  | -0.0628  | 0.17548  | 0.259642 | 1.24E-08 |
| 2.01E-10 | -0.03898 | 0.40061  | 0.233791 | 3.23E-07 |
| 0.01404  | -0.05561 | 0.23034  | 0.023393 | 0.61409  |
| 3.20E-07 | -0.19307 | 2.66E-05 | 0.225987 | 8.04E-07 |
| 0.33237  | -0.22256 | 1.19E-06 | 0.022402 | 0.62918  |
| 4.53E-05 | -0.12842 | 0.00545  | 0.179673 | 9.45E-05 |
| 6.95E-05 | -0.12915 | 0.00519  | 0.440961 | 1.22E-23 |
| 0.00489  | -0.08993 | 0.05211  | 0.212638 | 3.55E-06 |
| 0.00392  | -0.12962 | 0.00502  | 0.021691 | 0.64011  |
| 0.03036  | 0.070891 | 0.12607  | 0.175654 | 0.00014  |

|          |          |          |          |          |
|----------|----------|----------|----------|----------|
| 0.60071  | -0.13466 | 0.00355  | -0.02231 | 0.63054  |
| 0.59577  | -0.07213 | 0.11959  | 0.026987 | 0.56075  |
| 1.20E-06 | -0.08785 | 0.05781  | 0.166844 | 0.00029  |
| 0.77762  | -0.19511 | 2.18E-05 | 0.182844 | 7.06E-05 |
| 0.00233  | 0.012048 | 0.79512  | 0.356465 | 1.94E-15 |
| 4.60E-05 | 0.050574 | 0.27541  | -0.22393 | 1.02E-06 |
| 8.42E-06 | -0.01953 | 0.67383  | 0.461525 | 5.17E-26 |
| 0.50818  | -0.14556 | 0.00161  | 0.183069 | 6.91E-05 |
| 2.24E-06 | -0.21154 | 4.00E-06 | 0.23062  | 4.69E-07 |
| 6.59E-11 | -0.12515 | 0.00677  | 0.189278 | 3.84E-05 |
| 0.00072  | 0.016005 | 0.73012  | 0.047736 | 0.30329  |
| 1.76E-07 | -0.22717 | 7.01E-07 | 0.215963 | 2.47E-06 |
| 0.05181  | -0.02262 | 0.62588  | 0.169292 | 0.00024  |
| 0.00018  | -0.01373 | 0.76733  | 0.25781  | 1.58E-08 |
| 1.45E-06 | -0.04087 | 0.3782   | 0.141009 | 0.00226  |
| 0.83414  | -0.11057 | 0.01683  | 0.086207 | 0.06269  |
| 0.00207  | 0.087308 | 0.05939  | -0.04098 | 0.37695  |
| 0.05205  | -0.09226 | 0.0463   | 0.323156 | 8.21E-13 |
| 0.00682  | 0.167181 | 0.00028  | -0.21024 | 4.59E-06 |
| 2.91E-10 | 0.033157 | 0.47473  | -0.25188 | 3.43E-08 |
| 2.70E-05 | -0.012   | 0.79598  | 0.034043 | 0.46299  |
| 1.91E-06 | -0.13441 | 0.00361  | 0.189584 | 3.73E-05 |
| 0.02165  | -0.091   | 0.04938  | 0.17152  | 0.0002   |
| 0.25228  | 0.006393 | 0.89041  | 0.127086 | 0.00596  |
| 6.12E-05 | -0.10333 | 0.02555  | 0.239179 | 1.69E-07 |
| 0.01777  | 0.01103  | 0.81208  | 0.319221 | 1.60E-12 |
| 2.03E-05 | -0.12011 | 0.00938  | 0.248781 | 5.10E-08 |
| 1.72E-08 | -0.09635 | 0.0374   | 0.230937 | 4.52E-07 |
| 0.0228   | -0.12325 | 0.00766  | 0.117985 | 0.01072  |
| 7.24E-07 | -0.12768 | 0.00573  | 0.475737 | 9.49E-28 |
| 2.21E-09 | -0.06247 | 0.17773  | 0.263584 | 7.32E-09 |
| 0.5355   | -0.06755 | 0.14497  | -0.04737 | 0.307    |
| 0.57888  | -0.08337 | 0.07188  | -0.19545 | 2.10E-05 |
| 2.01E-05 | -0.12837 | 0.00546  | 0.261751 | 9.37E-09 |
| 0.03766  | 0.089493 | 0.05328  | -0.09035 | 0.05102  |
| 3.05E-13 | 0.092272 | 0.04627  | 0.45115  | 8.54E-25 |
| 6.60E-05 | 0.031306 | 0.49975  | 0.401728 | 1.54E-19 |
| 5.20E-07 | -0.06731 | 0.14643  | 0.168856 | 0.00025  |
| 7.47E-10 | -0.15601 | 0.00072  | 0.207878 | 5.90E-06 |
| 0.30972  | -0.09956 | 0.03147  | 0.05049  | 0.27622  |
| 0.47581  | -0.2148  | 2.81E-06 | 0.420769 | 1.84E-21 |
| 2.44E-05 | 0.028784 | 0.53494  | -0.09041 | 0.05088  |
| 1.30E-13 | 0.051856 | 0.26341  | 0.610286 | 5.42E-49 |
| 0.00604  | -0.01175 | 0.80007  | 0.114768 | 0.01308  |
| 4.41E-05 | -0.19406 | 2.42E-05 | 0.118905 | 0.01012  |

|          |          |          |          |          |
|----------|----------|----------|----------|----------|
| 0.55705  | 0.090754 | 0.04999  | 0.165954 | 0.00032  |
| 3.60E-05 | -0.04445 | 0.33786  | 0.042843 | 0.35559  |
| 0.03     | -0.07832 | 0.09091  | 0.351362 | 5.14E-15 |
| 1.64E-07 | -0.04217 | 0.36326  | 0.24724  | 6.20E-08 |
| 9.98E-12 | 0.169528 | 0.00023  | 0.165193 | 0.00034  |
| 0.00223  | -0.04063 | 0.38101  | 0.445676 | 3.60E-24 |
| 2.32E-09 | -0.08112 | 0.07991  | 0.172587 | 0.00018  |
| 0.00034  | -0.03761 | 0.41742  | 0.08603  | 0.06323  |
| 0.96644  | -0.24213 | 1.17E-07 | 0.130972 | 0.00458  |
| 0.81233  | -0.0093  | 0.8412   | 0.014449 | 0.75547  |
| 0.00037  | 0.017345 | 0.70851  | -0.06785 | 0.14318  |
| 0.15282  | -0.07231 | 0.11863  | -0.15908 | 0.00056  |
| 0.04824  | -0.04604 | 0.32081  | 0.023826 | 0.60755  |
| 0.00281  | -0.05353 | 0.24826  | 0.43463  | 6.10E-23 |
| 1.20E-06 | 0.02424  | 0.60132  | 0.291747 | 1.29E-10 |
| 0.10131  | -0.08544 | 0.06505  | 0.05097  | 0.27166  |
| 0.08771  | -0.06073 | 0.19018  | 0.047803 | 0.30261  |
| 8.46E-13 | 0.060813 | 0.18956  | 0.276762 | 1.17E-09 |
| 0.09531  | -0.21127 | 4.11E-06 | 0.082121 | 0.07625  |
| 1.07E-13 | 0.077074 | 0.09619  | 0.519775 | 1.12E-33 |
| 0.11133  | -0.11038 | 0.01702  | 0.254248 | 2.53E-08 |
| 1.99E-07 | -0.05658 | 0.22233  | 0.266238 | 5.10E-09 |
| 1.92E-05 | 0.066549 | 0.15104  | 0.156468 | 0.00069  |
| 3.74E-09 | 0.102544 | 0.0267   | 0.284864 | 3.61E-10 |
| 1.59E-05 | -0.04148 | 0.37114  | 0.178885 | 0.0001   |
| 0.02739  | -0.08708 | 0.06005  | 0.057348 | 0.21609  |
| 7.77E-09 | -0.04648 | 0.31623  | 0.106746 | 0.02104  |
| 0.03182  | 0.058494 | 0.20703  | -0.02124 | 0.64711  |
| 0.02552  | 0.038918 | 0.40142  | -0.05277 | 0.25509  |
| 7.77E-09 | 0.028412 | 0.54023  | 0.554417 | 5.46E-39 |
| 0.00065  | -0.06153 | 0.18441  | -0.0177  | 0.70276  |
| 3.36E-06 | -0.1374  | 0.00293  | 0.53356  | 1.02E-35 |
| 4.98E-07 | -0.12945 | 0.00508  | 0.058932 | 0.20365  |
| 0.00416  | -0.12313 | 0.00772  | 0.015239 | 0.74257  |
| 0.00012  | -0.13371 | 0.00379  | 0.073245 | 0.11394  |
| 0.82928  | -0.0473  | 0.30776  | -0.01368 | 0.7681   |
| 0.25583  | 0.055503 | 0.23125  | 0.031753 | 0.49365  |
| 7.26E-07 | 0.026547 | 0.56715  | -0.15064 | 0.00109  |
| 5.07E-05 | -0.04704 | 0.31037  | 0.14436  | 0.00176  |
| 0.12646  | -0.17965 | 9.47E-05 | 0.324735 | 6.26E-13 |
| 0.35961  | -0.05102 | 0.27118  | 0.285731 | 3.18E-10 |
| 0.00376  | -0.00652 | 0.88816  | 0.011334 | 0.80701  |
| 5.13E-05 | -0.07821 | 0.09139  | 0.352774 | 3.93E-15 |
| 7.06E-06 | -0.05116 | 0.26984  | 0.104418 | 0.02403  |
| 0.0229   | -0.14905 | 0.00124  | 0.001427 | 0.97546  |



|          |          |          |          |          |
|----------|----------|----------|----------|----------|
| 0.00015  | -0.03847 | 0.40689  | 0.208158 | 5.73E-06 |
| 1.70E-11 | 0.15683  | 0.00067  | 0.121018 | 0.00885  |
| 0.36091  | 0.114389 | 0.01338  | 0.089493 | 0.05328  |
| 1.77E-07 | 0.130902 | 0.0046   | -0.43341 | 8.28E-23 |
| 2.64E-07 | -0.02698 | 0.56088  | 0.339121 | 4.95E-14 |
| 0.68666  | -0.19196 | 2.97E-05 | 0.06407  | 0.16689  |
| 0.16547  | -0.03216 | 0.48812  | -0.17514 | 0.00014  |
| 3.55E-15 | -0.09291 | 0.04478  | 0.272149 | 2.25E-09 |
| 0.82215  | 0.01008  | 0.82802  | 0.31284  | 4.62E-12 |
| 0.00012  | -0.13374 | 0.00379  | 0.100913 | 0.02922  |
| 1.55E-08 | -0.1304  | 0.00476  | 0.133215 | 0.00393  |
| 4.45E-06 | -0.16123 | 0.00047  | 0.181931 | 7.68E-05 |
| 1.11E-12 | -0.05612 | 0.22614  | 0.180894 | 8.45E-05 |
| 5.51E-05 | -0.04946 | 0.28615  | 0.253602 | 2.75E-08 |
| 2.89E-10 | 0.039881 | 0.38986  | 0.490378 | 1.26E-29 |
| 1.71E-06 | -0.02606 | 0.57425  | 0.143886 | 0.00183  |
| 5.40E-06 | -0.17489 | 0.00015  | 0.089946 | 0.05208  |
| 0.00476  | -0.01321 | 0.77593  | 0.276466 | 1.22E-09 |
| 1.40E-07 | -0.09215 | 0.04656  | 0.204783 | 8.16E-06 |
| 1.15E-08 | -0.01221 | 0.79243  | 0.274444 | 1.63E-09 |
| 1.97E-07 | -0.07736 | 0.09497  | 0.16801  | 0.00027  |
| 0.4935   | -0.12246 | 0.00807  | 0.042363 | 0.36102  |
| 4.17E-06 | 0.008697 | 0.85132  | 0.250492 | 4.10E-08 |
| 1.63E-08 | 0.053793 | 0.24596  | 0.394805 | 7.19E-19 |
| 4.47E-05 | -0.10623 | 0.02167  | 0.261211 | 1.01E-08 |
| 6.96E-07 | -0.0674  | 0.14589  | 0.452831 | 5.46E-25 |
| 0.00043  | -0.12517 | 0.00676  | 0.195129 | 2.17E-05 |
| 0.00011  | -0.10719 | 0.02051  | 0.133913 | 0.00374  |
| 2.80E-06 | -0.11365 | 0.014    | 0.200495 | 1.27E-05 |
| 3.47E-10 | 0.028517 | 0.53873  | 0.067415 | 0.14578  |
| 0.00227  | -0.03139 | 0.49864  | 0.391004 | 1.65E-18 |
| 0.65977  | -0.03994 | 0.38918  | -0.01947 | 0.67476  |
| 0.00164  | -0.22403 | 1.01E-06 | 0.105347 | 0.0228   |
| 6.72E-05 | 0.101222 | 0.02873  | 0.034329 | 0.45925  |
| 0.00454  | 0.072536 | 0.11749  | -0.29193 | 1.26E-10 |
| 1.46E-08 | 0.05491  | 0.23628  | 0.467081 | 1.11E-26 |
| 0.72808  | -0.05062 | 0.275    | 0.013483 | 0.77136  |
| 0.09398  | -0.03742 | 0.41981  | 0.162581 | 0.00042  |
| 1.56E-05 | 0.115106 | 0.01281  | 0.24594  | 7.31E-08 |
| 0.1322   | -0.10524 | 0.02293  | 0.097326 | 0.0355   |
| 9.84E-06 | -0.04791 | 0.30151  | 0.052387 | 0.25855  |
| 0.97531  | -0.09912 | 0.03224  | 0.048385 | 0.29676  |
| 1.14E-06 | 0.089848 | 0.05234  | 0.170675 | 0.00021  |
| 7.86E-18 | 0.116659 | 0.01164  | 0.297524 | 5.33E-11 |
| 1.42E-07 | -0.03569 | 0.44158  | 0.086967 | 0.06039  |

|          |          |          |          |          |
|----------|----------|----------|----------|----------|
| 5.27E-05 | -0.01229 | 0.79107  | 0.044686 | 0.33527  |
| 4.40E-05 | -0.04257 | 0.35867  | 0.420591 | 1.92E-21 |
| 0.00167  | -0.17659 | 0.00013  | -0.06482 | 0.16196  |
| 0.00078  | 0.150995 | 0.00106  | -0.06459 | 0.16343  |
| 3.88E-17 | 0.062286 | 0.17905  | 0.223503 | 1.07E-06 |
| 2.70E-10 | -0.08895 | 0.05475  | 0.423472 | 9.58E-22 |
| 0.19311  | 0.025616 | 0.58084  | 0.101786 | 0.02785  |
| 0.19452  | -0.01922 | 0.67875  | 0.112947 | 0.0146   |
| 1.09E-05 | 0.033294 | 0.4729   | 0.141027 | 0.00225  |
| 0.62024  | -0.08989 | 0.05223  | 0.079194 | 0.08736  |
| 0.24563  | 0.181502 | 7.99E-05 | 0.169207 | 0.00024  |
| 0.0159   | 0.021381 | 0.64489  | -0.00323 | 0.94453  |
| 1.35E-06 | -0.10031 | 0.0302   | 0.092079 | 0.04673  |
| 0.95783  | 0.035129 | 0.44884  | 0.171142 | 0.0002   |
| 0.00022  | -0.08243 | 0.07514  | 0.460715 | 6.46E-26 |
| 6.87E-07 | 0.033658 | 0.46807  | 0.247464 | 6.03E-08 |
| 0.28401  | -0.09179 | 0.04742  | 0.211986 | 3.81E-06 |
| 0.04392  | -0.07785 | 0.0929   | 0.373403 | 6.73E-17 |
| 0.00037  | -0.11445 | 0.01333  | 0.378162 | 2.52E-17 |
| 6.28E-08 | 0.057657 | 0.21362  | 0.098354 | 0.0336   |
| 0.00194  | -0.0902  | 0.05142  | 0.574899 | 1.96E-42 |
| 6.49E-13 | -0.09516 | 0.03983  | 0.169621 | 0.00023  |
| 2.11E-07 | -0.13052 | 0.00473  | 0.220424 | 1.51E-06 |
| 2.50E-07 | -0.0023  | 0.96048  | 0.300479 | 3.36E-11 |
| 7.04E-08 | -0.00864 | 0.8523   | 0.321636 | 1.06E-12 |
| 1.52E-05 | -0.08621 | 0.06268  | 0.157453 | 0.00064  |
| 0.08351  | 0.081777 | 0.07749  | 0.114447 | 0.01333  |
| 1.40E-07 | -0.07679 | 0.09743  | 0.187378 | 4.61E-05 |
| 0.18842  | -0.04134 | 0.37272  | 0.225497 | 8.50E-07 |
| 3.04E-12 | -0.15625 | 0.0007   | 0.381998 | 1.13E-17 |
| 3.83E-12 | -0.10896 | 0.0185   | 0.359654 | 1.05E-15 |
| 1.51E-05 | -0.10243 | 0.02687  | 0.252591 | 3.13E-08 |
| 1.57E-07 | -0.00718 | 0.87706  | 0.342474 | 2.69E-14 |
| 3.17E-13 | 0.193348 | 2.59E-05 | 0.170641 | 0.00021  |
| 2.69E-10 | -0.018   | 0.69805  | 0.084791 | 0.06714  |
| 0.00079  | -0.06573 | 0.15614  | 0.24882  | 5.08E-08 |
| 0.02476  | -0.01892 | 0.68349  | 0.289854 | 1.72E-10 |
| 0.0263   | -0.20123 | 1.18E-05 | -0.08146 | 0.07864  |
| 0.31864  | -0.1912  | 3.19E-05 | 0.211573 | 3.98E-06 |
| 0.01943  | -0.16478 | 0.00035  | -0.21819 | 1.94E-06 |
| 0.217    | 0.113046 | 0.01452  | -0.20039 | 1.28E-05 |
| 2.47E-08 | -0.10331 | 0.02558  | 0.396932 | 4.50E-19 |
| 1.69E-14 | 0.309185 | 8.39E-12 | -0.03873 | 0.40368  |
| 6.33E-07 | -0.12677 | 0.00608  | 0.259673 | 1.24E-08 |
| 0.00136  | -0.07987 | 0.08469  | 0.070981 | 0.12559  |

|          |          |          |           |          |
|----------|----------|----------|-----------|----------|
| 0.01116  | -0.08173 | 0.07767  | 0.133921  | 0.00374  |
| 3.37E-05 | -0.20658 | 6.76E-06 | 0.18457   | 6.01E-05 |
| 0.02468  | -0.09644 | 0.03722  | -6.99E-05 | 0.9988   |
| 0.00045  | -0.10546 | 0.02265  | 0.292305  | 1.19E-10 |
| 1.11E-07 | -0.00304 | 0.94784  | 0.529187  | 4.64E-35 |
| 0.002    | 0.026519 | 0.56756  | 0.309516  | 7.95E-12 |
| 2.74E-07 | -0.01512 | 0.74444  | 0.205817  | 7.33E-06 |
| 1.94E-11 | -0.09981 | 0.03104  | 0.219848  | 1.61E-06 |
| 0.0086   | 0.011924 | 0.79717  | 0.037583  | 0.41777  |
| 3.37E-08 | 0.016467 | 0.72265  | 0.259331  | 1.29E-08 |
| 0.23696  | -0.0195  | 0.67419  | 0.003781  | 0.93506  |
| 0.13811  | -0.10383 | 0.02485  | 0.109408  | 0.01803  |
| 0.00626  | 0.044588 | 0.33632  | 0.111416  | 0.01601  |
| 0.80629  | -0.03787 | 0.4142   | 0.064366  | 0.16494  |
| 9.53E-09 | -0.18311 | 6.89E-05 | 0.250586  | 4.05E-08 |
| 0.93489  | -0.14741 | 0.0014   | 0.230482  | 4.77E-07 |
| 0.12537  | 0.007857 | 0.86554  | -0.12589  | 0.00645  |
| 4.05E-10 | -0.20129 | 1.17E-05 | 0.418997  | 2.81E-21 |
| 0.05285  | -0.04931 | 0.28765  | -0.18331  | 6.76E-05 |
| 1.70E-12 | 0.018571 | 0.68895  | 0.216223  | 2.41E-06 |
| 0.00056  | -0.02448 | 0.5977   | -0.01671  | 0.71865  |
| 5.04E-09 | 0.035794 | 0.4403   | 0.235351  | 2.68E-07 |
| 5.10E-09 | -0.01314 | 0.77708  | 0.110516  | 0.01688  |
| 8.49E-09 | -0.05666 | 0.22166  | 0.161131  | 0.00047  |
| 0.0002   | -0.16141 | 0.00046  | 0.220598  | 1.48E-06 |
| 2.70E-05 | 0.033952 | 0.46419  | 0.155029  | 0.00078  |
| 9.43E-09 | 0.024417 | 0.59867  | 0.453593  | 4.45E-25 |
| 0.26591  | -0.06939 | 0.13433  | 0.017665  | 0.70338  |
| 0.0023   | 0.02414  | 0.60282  | 0.295811  | 6.94E-11 |
| 0.00019  | -0.03117 | 0.50165  | 0.137449  | 0.00292  |
| 0.00035  | -0.16164 | 0.00045  | 0.033465  | 0.47064  |
| 0.41433  | -0.03771 | 0.41614  | -0.03036  | 0.51287  |
| 2.25E-05 | -0.05081 | 0.27313  | 0.261684  | 9.46E-09 |
| 0.00113  | -0.05159 | 0.26589  | 0.153597  | 0.00087  |
| 6.42E-08 | -0.08491 | 0.06676  | 0.275422  | 1.42E-09 |
| 0.03258  | -0.16229 | 0.00043  | 0.01776   | 0.70187  |
| 3.57E-06 | -0.09344 | 0.04357  | 0.103233  | 0.02569  |
| 3.58E-06 | -0.15725 | 0.00065  | 0.128185  | 0.00553  |
| 1.46E-09 | -0.02883 | 0.53425  | 0.185629  | 5.44E-05 |
| 4.47E-12 | -0.05475 | 0.23769  | 0.371357  | 1.02E-16 |
| 2.33E-08 | -0.1545  | 0.00081  | 0.183305  | 6.76E-05 |
| 1.79E-14 | -0.01337 | 0.77325  | 0.323542  | 7.68E-13 |
| 0.07664  | 0.081467 | 0.07863  | 0.131101  | 0.00454  |
| 0.01079  | 0.010066 | 0.82824  | -0.116    | 0.01212  |
| 0.08932  | -0.14778 | 0.00136  | 0.23164   | 4.16E-07 |

|          |          |          |          |          |
|----------|----------|----------|----------|----------|
| 1.42E-09 | -0.00727 | 0.87549  | 0.196692 | 1.86E-05 |
| 1.14E-06 | -0.14026 | 0.00238  | 0.201706 | 1.12E-05 |
| 9.72E-06 | -0.05653 | 0.22272  | 0.020599 | 0.65705  |
| 0.00019  | -0.03941 | 0.39553  | 0.316932 | 2.35E-12 |
| 0.12155  | -0.13238 | 0.00416  | 0.114575 | 0.01323  |
| 4.20E-08 | 0.007528 | 0.87112  | -0.43734 | 3.07E-23 |
| 0.19058  | -0.07123 | 0.12429  | -0.12178 | 0.00843  |
| 2.03E-14 | -0.05032 | 0.27788  | 0.342254 | 2.80E-14 |
| 0.01945  | -0.05915 | 0.20195  | 0.178505 | 0.00011  |
| 0.2207   | -0.0374  | 0.42001  | -0.02483 | 0.59253  |
| 0.00269  | -0.08991 | 0.05216  | 0.365309 | 3.44E-16 |
| 0.00024  | 0.046526 | 0.31572  | 0.190216 | 3.51E-05 |
| 0.00148  | 0.013052 | 0.77846  | 0.160978 | 0.00048  |
| 2.81E-06 | -0.03983 | 0.39046  | 0.354987 | 2.58E-15 |
| 7.77E-16 | 0.018255 | 0.69398  | -0.39238 | 1.22E-18 |
| 6.45E-07 | 0.077721 | 0.09343  | 0.311232 | 6.01E-12 |
| 0.0006   | 0.07252  | 0.11758  | -0.10415 | 0.0244   |
| 0.99066  | -0.0427  | 0.3572   | 0.103799 | 0.02489  |
| 0.00036  | -0.08155 | 0.07833  | 0.448409 | 1.76E-24 |
| 1.23E-11 | -0.03041 | 0.51209  | 0.123915 | 0.00734  |
| 2.16E-06 | -0.16302 | 0.0004   | 0.254966 | 2.30E-08 |
| 4.82E-08 | 0.043917 | 0.34365  | 0.088767 | 0.05525  |
| 0.00126  | -0.23556 | 2.61E-07 | 0.348092 | 9.50E-15 |
| 0.00055  | -0.07371 | 0.11165  | 0.047515 | 0.30554  |
| 4.98E-05 | -0.03607 | 0.43681  | 0.113152 | 0.01442  |
| 0.00011  | -0.07313 | 0.1145   | 0.247724 | 5.84E-08 |
| 0.00083  | 0.017545 | 0.70531  | -0.03079 | 0.50691  |
| 9.46E-08 | -0.10005 | 0.03064  | 0.237857 | 1.98E-07 |
| 6.86E-12 | -0.08895 | 0.05474  | 0.279335 | 8.10E-10 |
| 1.18E-06 | -0.20109 | 1.19E-05 | 0.29627  | 6.47E-11 |
| 0.01538  | 0.040088 | 0.38741  | 0.061907 | 0.18171  |
| 0.18571  | -0.23717 | 2.15E-07 | 0.07819  | 0.09146  |
| 0.00031  | 0.059296 | 0.20086  | 0.12613  | 0.00635  |
| 1.27E-05 | -0.02223 | 0.63184  | 0.294356 | 8.68E-11 |
| 0.21386  | -0.06664 | 0.15049  | -0.0382  | 0.41015  |
| 0.09319  | -0.02948 | 0.52515  | -0.02505 | 0.5892   |
| 0.00061  | -0.1065  | 0.02134  | 0.053584 | 0.24781  |
| 0.00356  | -0.07097 | 0.12565  | 0.432324 | 1.09E-22 |
| 0.02925  | 0.041796 | 0.36749  | 0.309699 | 7.72E-12 |
| 0.00049  | -0.14886 | 0.00125  | 0.318617 | 1.77E-12 |
| 0.0003   | -0.08683 | 0.06079  | 0.062773 | 0.17566  |
| 1.51E-05 | -0.0418  | 0.36749  | 0.126306 | 0.00627  |
| 0.0054   | -0.11277 | 0.01476  | 0.084912 | 0.06675  |
| 0.17945  | -0.09447 | 0.04128  | 0.095291 | 0.03955  |
| 3.53E-08 | 0.027406 | 0.55468  | 0.258815 | 1.39E-08 |

|          |          |          |          |          |
|----------|----------|----------|----------|----------|
| 0.05528  | -0.02563 | 0.58059  | 0.176157 | 0.00013  |
| 0.96915  | -0.23409 | 3.11E-07 | -0.09673 | 0.03665  |
| 4.12E-07 | 0.019574 | 0.67309  | 0.450513 | 1.01E-24 |
| 0.00074  | -0.12612 | 0.00635  | 0.233663 | 3.28E-07 |
| 8.02E-08 | -0.13688 | 0.00304  | 0.134855 | 0.0035   |
| 0.21331  | -0.08971 | 0.0527   | 0.10114  | 0.02886  |
| 0.00499  | -0.10722 | 0.02047  | -0.05862 | 0.20602  |
| 0.34887  | 0.027473 | 0.55371  | 0.118724 | 0.01023  |
| 0.0003   | 0.090311 | 0.05113  | -0.03284 | 0.47899  |
| 0.01527  | 0.10177  | 0.02787  | -0.02542 | 0.58369  |
| 0.00021  | -0.02882 | 0.5344   | 0.048315 | 0.29745  |
| 5.40E-07 | -0.06889 | 0.13712  | 0.305528 | 1.51E-11 |
| 0.00526  | 0.035655 | 0.44208  | 0.258805 | 1.39E-08 |
| 0.00451  | -0.03601 | 0.4375   | 0.217509 | 2.09E-06 |
| 9.89E-06 | -0.02344 | 0.61336  | 0.362424 | 6.08E-16 |
| 0.00876  | -0.14765 | 0.00138  | 0.047436 | 0.30634  |
| 4.28E-06 | 0.086289 | 0.06243  | 0.219045 | 1.76E-06 |
| 0.65355  | -0.13333 | 0.0039   | -0.15921 | 0.00055  |
| 0.78514  | 0.195511 | 2.09E-05 | 0.068463 | 0.1396   |
| 0.00077  | -0.00668 | 0.88555  | 0.391072 | 1.63E-18 |
| 0.00021  | -0.13483 | 0.00351  | 0.095067 | 0.04002  |
| 0.17153  | -0.04327 | 0.35086  | -0.046   | 0.32124  |
| 0.28266  | -0.0294  | 0.5263   | -0.06626 | 0.1528   |
| 0.02771  | -0.09062 | 0.05032  | 0.243102 | 1.04E-07 |
| 0.00026  | 0.016331 | 0.72484  | 0.248788 | 5.10E-08 |
| 0.00019  | -0.17212 | 0.00019  | 0.315881 | 2.80E-12 |
| 0.0454   | 0.027987 | 0.54631  | 0.085713 | 0.06421  |
| 0.00839  | 0.002772 | 0.95237  | -0.05132 | 0.26836  |
| 0.91836  | 0.04197  | 0.3655   | -0.19736 | 1.74E-05 |
| 0.00773  | -0.03812 | 0.41119  | 0.083445 | 0.07161  |
| 0.02287  | -0.08722 | 0.05966  | 0.329427 | 2.78E-13 |
| 1.54E-05 | 0.042464 | 0.35987  | 0.138514 | 0.0027   |
| 0.00013  | -0.07922 | 0.08724  | -0.02899 | 0.53196  |
| 0.06954  | 0.021019 | 0.6505   | -0.18014 | 9.06E-05 |
| 1.67E-06 | -0.02632 | 0.57042  | -0.02291 | 0.62143  |
| 0.00522  | 0.027933 | 0.54708  | 0.094123 | 0.04204  |
| 0.00022  | -0.18631 | 5.10E-05 | 0.114458 | 0.01332  |
| 0.00016  | 0.070161 | 0.13003  | 0.061741 | 0.18288  |
| 0.05153  | 0.058072 | 0.21034  | 0.251479 | 3.61E-08 |
| 3.66E-06 | -0.09704 | 0.03605  | -0.00942 | 0.83911  |
| 0.51121  | -0.14434 | 0.00176  | 0.151168 | 0.00105  |
| 0.00474  | -0.16603 | 0.00031  | 0.129952 | 0.00491  |
| 1.31E-11 | -0.08858 | 0.05576  | 0.279391 | 8.03E-10 |
| 0.00409  | -0.22036 | 1.52E-06 | 0.233546 | 3.32E-07 |
| 0.51142  | -0.16895 | 0.00024  | 0.244304 | 8.97E-08 |

|          |          |          |          |          |
|----------|----------|----------|----------|----------|
| 7.22E-05 | -0.12155 | 0.00856  | 0.135039 | 0.00346  |
| 1.16E-08 | 0.118326 | 0.01049  | 0.35754  | 1.58E-15 |
| 0.62462  | 0.014051 | 0.76201  | -0.08285 | 0.07367  |
| 0.00012  | 0.14434  | 0.00176  | 0.068991 | 0.13657  |
| 0.00419  | 0.026145 | 0.57304  | 0.084793 | 0.06713  |
| 0.04812  | 0.077215 | 0.09558  | 0.046944 | 0.31139  |
| 0.00084  | -0.1187  | 0.01025  | 0.11137  | 0.01605  |
| 0.22367  | -0.026   | 0.57521  | -0.07736 | 0.09498  |
| 0.00168  | 0.122017 | 0.0083   | 0.072128 | 0.11958  |
| 7.59E-06 | 0.119301 | 0.00987  | 0.147219 | 0.00142  |
| 6.79E-07 | -0.08886 | 0.05499  | 0.138415 | 0.00272  |
| 2.73E-16 | -0.0554  | 0.23215  | 0.355316 | 2.42E-15 |
| 0.17999  | -0.07107 | 0.12512  | -0.07573 | 0.10213  |
| 0.00063  | -0.10167 | 0.02802  | 0.136585 | 0.0031   |
| 2.03E-05 | -0.1012  | 0.02876  | 0.198633 | 1.53E-05 |
| 0.00134  | 0.020179 | 0.66359  | 0.289046 | 1.94E-10 |
| 0.00054  | -0.08042 | 0.08256  | 0.284193 | 3.99E-10 |
| 3.15E-15 | 0.293825 | 9.41E-11 | -0.1044  | 0.02406  |
| 7.60E-05 | 0.090371 | 0.05097  | 0.146409 | 0.00151  |
| 5.61E-11 | 0.226927 | 7.21E-07 | 0.077845 | 0.0929   |
| 3.53E-11 | 0.067615 | 0.14458  | -0.00742 | 0.87297  |
| 0.17831  | -0.15639 | 0.0007   | 0.09301  | 0.04455  |
| 8.83E-12 | 0.010995 | 0.81267  | 0.071371 | 0.12352  |
| 7.38E-08 | -0.04499 | 0.33197  | 0.030801 | 0.50669  |
| 7.92E-07 | 0.037793 | 0.41518  | 0.268357 | 3.81E-09 |
| 0.0003   | -0.08095 | 0.08055  | 0.272833 | 2.04E-09 |
| 0.6429   | -0.05576 | 0.22907  | -0.09874 | 0.03289  |
| 0.58554  | -0.15581 | 0.00073  | 0.071186 | 0.1245   |
| 0.38623  | -0.04663 | 0.3146   | -0.01571 | 0.73494  |
| 0.00092  | 0.012284 | 0.7912   | 0.145094 | 0.00167  |
| 0.00982  | -0.20964 | 4.90E-06 | 0.031961 | 0.49082  |
| 0.71435  | -0.06106 | 0.18776  | -0.14568 | 0.0016   |
| 0.17115  | -0.10553 | 0.02256  | -0.02587 | 0.57714  |
| 0.79402  | -0.12652 | 0.00619  | 0.0498   | 0.28283  |
| 0.00172  | -0.13745 | 0.00292  | 0.043088 | 0.35285  |
| 0.07017  | -0.04654 | 0.31559  | 0.079652 | 0.08554  |
| 5.60E-15 | 0.134029 | 0.00371  | 0.134762 | 0.00353  |
| 0.24653  | -0.10046 | 0.02996  | 0.268694 | 3.64E-09 |
| 2.32E-07 | -0.09782 | 0.03457  | 0.175016 | 0.00014  |
| 2.47E-06 | -0.20001 | 1.33E-05 | 0.242848 | 1.07E-07 |
| 7.29E-05 | 0.032248 | 0.48693  | 0.205621 | 7.48E-06 |
| 0.00542  | -0.04238 | 0.36078  | 0.052762 | 0.25515  |
| 5.06E-13 | -0.0994  | 0.03175  | 0.279389 | 8.04E-10 |
| 9.59E-07 | -0.04754 | 0.30533  | 0.215004 | 2.75E-06 |
| 8.86E-09 | -0.05133 | 0.26825  | 0.275708 | 1.36E-09 |

|          |          |          |          |          |
|----------|----------|----------|----------|----------|
| 1.40E-10 | -0.07241 | 0.11815  | 0.531684 | 1.96E-35 |
| 0.01932  | -0.06846 | 0.1396   | 0.206233 | 7.02E-06 |
| 0.00936  | 0.120473 | 0.00916  | -0.20491 | 8.06E-06 |
| 0.00247  | 0.03133  | 0.49942  | -0.27178 | 2.37E-09 |
| 8.23E-06 | -0.13619 | 0.00319  | 0.150666 | 0.00109  |
| 1.69E-07 | -0.073   | 0.11516  | 0.107175 | 0.02053  |
| 1.79E-05 | -0.18351 | 6.63E-05 | 0.294005 | 9.16E-11 |
| 0.12821  | 0.135658 | 0.00331  | -0.19321 | 2.63E-05 |
| 0.00143  | 0.029323 | 0.52731  | -0.01237 | 0.78985  |
| 2.81E-06 | 0.036217 | 0.43491  | -0.00364 | 0.93755  |
| 0.10877  | -0.07043 | 0.12857  | 0.020346 | 0.66099  |
| 0.00012  | 0.066227 | 0.15303  | 0.248943 | 5.00E-08 |
| 0.38747  | -0.20482 | 8.13E-06 | 0.310351 | 6.94E-12 |
| 9.11E-05 | -0.00379 | 0.93482  | 0.325798 | 5.21E-13 |
| 0.716    | -0.05364 | 0.24735  | 0.207735 | 5.99E-06 |
| 0.21877  | 0.058745 | 0.20509  | 0.025551 | 0.58178  |
| 4.19E-07 | 0.116225 | 0.01196  | 0.155661 | 0.00074  |
| 0.16602  | -0.06484 | 0.16185  | 0.090775 | 0.04994  |
| 3.65E-05 | -0.17027 | 0.00022  | 0.061504 | 0.18457  |
| 2.51E-10 | -0.06146 | 0.18492  | 0.433958 | 7.22E-23 |
| 0.00011  | -0.16279 | 0.00041  | 0.220513 | 1.49E-06 |
| 0.00404  | -0.02397 | 0.60535  | 0.267663 | 4.20E-09 |
| 0.00531  | -0.099   | 0.03243  | -0.09841 | 0.03349  |
| 8.35E-05 | -0.06155 | 0.18426  | 0.127409 | 0.00583  |
| 1.90E-10 | 0.053769 | 0.24618  | 0.345248 | 1.61E-14 |
| 6.51E-13 | 0.011723 | 0.80052  | 0.244199 | 9.08E-08 |
| 0.10914  | -0.01652 | 0.72184  | 0.246244 | 7.03E-08 |
| 0.05997  | -0.03332 | 0.47255  | -0.03899 | 0.4006   |
| 0.0003   | -0.04954 | 0.2854   | 0.032658 | 0.4814   |
| 0.79074  | -0.07606 | 0.10068  | 0.190056 | 3.57E-05 |
| 0.57016  | -0.0896  | 0.05298  | 0.238692 | 1.79E-07 |
| 0.00083  | 0.021899 | 0.6369   | 0.109957 | 0.01745  |
| 0.00271  | -0.00333 | 0.94274  | 0.074414 | 0.10827  |
| 0.08734  | -0.17368 | 0.00016  | 0.027015 | 0.56034  |
| 0.23659  | -0.089   | 0.0546   | 0.007463 | 0.87222  |
| 0.00013  | 0.005232 | 0.91022  | 0.327511 | 3.88E-13 |
| 0.0009   | 0.06026  | 0.19363  | 0.020009 | 0.66626  |
| 4.34E-06 | -0.06819 | 0.14118  | 0.273503 | 1.86E-09 |
| 0.0302   | -0.16098 | 0.00048  | -0.04048 | 0.38279  |
| 0.01036  | -0.12506 | 0.00681  | -0.10624 | 0.02166  |
| 0.00097  | -0.04529 | 0.32878  | -0.04747 | 0.30604  |
| 5.29E-09 | 0.057016 | 0.21876  | 0.134481 | 0.0036   |
| 0.00382  | -0.04852 | 0.29536  | 0.211927 | 3.84E-06 |
| 0.0003   | -0.19926 | 1.44E-05 | 0.147741 | 0.00137  |
| 7.88E-05 | 0.039694 | 0.39209  | 0.238693 | 1.79E-07 |

|          |          |          |          |          |
|----------|----------|----------|----------|----------|
| 0.21711  | -0.10896 | 0.01851  | -0.14512 | 0.00166  |
| 4.71E-12 | -0.13497 | 0.00347  | 0.177382 | 0.00012  |
| 0.51918  | -0.06197 | 0.18126  | -0.32677 | 4.41E-13 |
| 0.24816  | -0.04155 | 0.37035  | -0.03508 | 0.44949  |
| 0.00052  | -0.20818 | 5.72E-06 | 0.37073  | 1.16E-16 |
| 5.22E-05 | 0.143907 | 0.00182  | 0.141595 | 0.00216  |
| 2.52E-10 | -0.14244 | 0.00203  | 0.240066 | 1.51E-07 |
| 0.39545  | -0.1777  | 0.00011  | 0.121067 | 0.00882  |
| 0.00411  | -0.0793  | 0.08694  | 0.331496 | 1.93E-13 |
| 0.19945  | 0.232737 | 3.66E-07 | -0.01662 | 0.72018  |
| 0.27414  | -0.16289 | 0.00041  | 0.018674 | 0.68732  |
| 2.23E-12 | -0.00094 | 0.9838   | 0.372307 | 8.42E-17 |
| 0.04699  | -0.11722 | 0.01124  | -0.0005  | 0.99148  |
| 0.19188  | 0.13361  | 0.00382  | -0.10091 | 0.02922  |
| 3.28E-08 | 0.145411 | 0.00163  | 0.35795  | 1.46E-15 |
| 1.88E-08 | -0.09697 | 0.03618  | 0.204038 | 8.82E-06 |
| 3.60E-08 | -0.18599 | 5.26E-05 | 0.160649 | 0.00049  |
| 0.00027  | -0.02111 | 0.64913  | -0.05323 | 0.25094  |
| 0.08291  | -0.02738 | 0.55502  | 0.102753 | 0.02639  |
| 0.88406  | -0.01074 | 0.81689  | -0.01587 | 0.73226  |
| 0.00145  | -0.09182 | 0.04736  | 0.116317 | 0.01189  |
| 0.00168  | -0.09392 | 0.04249  | 0.070442 | 0.12849  |
| 0.00247  | -0.25424 | 2.53E-08 | 0.136937 | 0.00302  |
| 0.03331  | -0.16828 | 0.00026  | 0.057795 | 0.21252  |
| 3.24E-07 | -0.07716 | 0.09581  | 0.344033 | 2.02E-14 |
| 0.89875  | 0.021423 | 0.64424  | 0.295282 | 7.53E-11 |
| 0.30867  | -0.19203 | 2.95E-05 | -0.11424 | 0.0135   |
| 7.45E-14 | 0.117271 | 0.01121  | 0.271345 | 2.52E-09 |
| 0.39715  | -0.13959 | 0.0025   | -0.1274  | 0.00583  |
| 0.00029  | -0.00691 | 0.88155  | 0.063382 | 0.1715   |
| 0.01117  | -0.01796 | 0.69869  | 0.243403 | 1.00E-07 |
| 3.18E-08 | 0.100301 | 0.03022  | 0.118453 | 0.01041  |
| 2.70E-05 | -0.02197 | 0.63589  | 0.441333 | 1.11E-23 |
| 0.26573  | -0.0689  | 0.13711  | 0.173999 | 0.00016  |
| 0.00345  | -0.1718  | 0.00019  | 0.576331 | 1.10E-42 |
| 0.57217  | -0.03396 | 0.46408  | -0.10094 | 0.02917  |
| 0.00012  | -0.09927 | 0.03196  | 0.252565 | 3.14E-08 |
| 4.56E-05 | -0.01485 | 0.749    | 0.355574 | 2.30E-15 |
| 0.10055  | -0.21399 | 3.07E-06 | -0.05587 | 0.22818  |
| 1.51E-11 | -0.12942 | 0.00509  | 0.184726 | 5.92E-05 |
| 5.42E-09 | 0.078099 | 0.09184  | 0.361467 | 7.34E-16 |
| 5.38E-05 | -0.1134  | 0.01421  | 0.34517  | 1.64E-14 |
| 0.00153  | 0.006126 | 0.89496  | -0.0512  | 0.26949  |
| 0.04655  | 0.05238  | 0.25861  | 0.167615 | 0.00027  |
| 0.00013  | 0.064939 | 0.1612   | 0.267978 | 4.02E-09 |



|          |          |          |          |          |
|----------|----------|----------|----------|----------|
| 0.00698  | -0.06106 | 0.18779  | 0.113721 | 0.01394  |
| 0.35596  | -0.00136 | 0.97658  | 0.040154 | 0.38663  |
| 0.03124  | 0.013823 | 0.76576  | -0.0398  | 0.39082  |
| 0.01383  | -0.06019 | 0.19413  | 0.482164 | 1.46E-28 |
| 3.89E-08 | -0.02913 | 0.52997  | 0.185216 | 5.66E-05 |
| 0.11505  | -0.06471 | 0.16268  | 0.249587 | 4.61E-08 |
| 7.56E-07 | -0.08259 | 0.07459  | 0.242691 | 1.10E-07 |
| 9.34E-09 | -0.13541 | 0.00337  | 0.289707 | 1.76E-10 |
| 0.01182  | 0.102853 | 0.02624  | -0.25262 | 3.12E-08 |
| 2.59E-06 | -0.0959  | 0.0383   | 0.30898  | 8.67E-12 |
| 0.23987  | -0.01423 | 0.75907  | 0.215908 | 2.49E-06 |
| 1.10E-12 | -0.01752 | 0.7057   | 0.080567 | 0.082    |
| 0.00056  | -0.02078 | 0.65429  | 0.060639 | 0.19084  |
| 0.00512  | -0.17912 | 9.94E-05 | 0.187564 | 4.53E-05 |
| 1.73E-13 | 0.080554 | 0.08204  | 0.375938 | 4.00E-17 |
| 4.27E-06 | 0.086647 | 0.06135  | 0.277775 | 1.01E-09 |
| 7.37E-08 | -0.16591 | 0.00032  | 0.170039 | 0.00022  |
| 0.325    | -0.117   | 0.0114   | 0.353916 | 3.16E-15 |
| 5.38E-07 | 0.181833 | 7.75E-05 | 0.339505 | 4.62E-14 |
| 1.30E-10 | -0.00326 | 0.94392  | 0.573495 | 3.44E-42 |
| 0.0001   | 0.030725 | 0.50775  | 0.195715 | 2.05E-05 |
| 0.00011  | -0.18011 | 9.08E-05 | 0.314582 | 3.47E-12 |
| 0.0083   | -0.23361 | 3.30E-07 | 0.207038 | 6.45E-06 |
| 6.58E-10 | -0.05646 | 0.22329  | 0.091411 | 0.04835  |
| 0.73256  | -0.04363 | 0.34678  | 0.131047 | 0.00456  |
| 4.57E-07 | -0.15629 | 0.0007   | 0.298556 | 4.54E-11 |
| 4.23E-07 | 0.037024 | 0.42474  | 0.13273  | 0.00406  |
| 0.01139  | -0.14305 | 0.00194  | -0.08824 | 0.05671  |
| 0.00573  | -0.02142 | 0.64422  | 0.227086 | 7.08E-07 |
| 0.00563  | -0.13948 | 0.00252  | -0.01834 | 0.69262  |
| 5.10E-09 | -0.01724 | 0.71021  | 0.330086 | 2.47E-13 |
| 0.0007   | -0.03723 | 0.42211  | 0.227452 | 6.79E-07 |
| 2.34E-06 | 0.216164 | 2.42E-06 | 0.260957 | 1.04E-08 |
| 0.02741  | -0.15629 | 0.0007   | 0.101466 | 0.02835  |
| 0.00684  | -0.04634 | 0.31768  | 0.38588  | 4.97E-18 |
| 1.30E-11 | 0.020988 | 0.65099  | 0.221527 | 1.33E-06 |
| 0.0003   | -0.06893 | 0.13694  | -0.08813 | 0.05702  |
| 8.22E-05 | -0.02346 | 0.61312  | 0.206884 | 6.55E-06 |
| 0.7464   | -0.11392 | 0.01377  | 0.238775 | 1.77E-07 |
| 0.00032  | -0.12847 | 0.00543  | 0.225309 | 8.68E-07 |
| 0.1759   | 0.018802 | 0.68528  | 0.098411 | 0.03349  |
| 3.23E-07 | -0.09289 | 0.04482  | 0.207286 | 6.28E-06 |
| 0.1698   | 0.023558 | 0.6116   | -0.13902 | 0.0026   |
| 1.62E-07 | -0.08969 | 0.05275  | 0.281979 | 5.52E-10 |
| 0.52163  | -0.094   | 0.04231  | -0.10314 | 0.02583  |

|          |          |          |          |          |
|----------|----------|----------|----------|----------|
| 0.0004   | 0.122424 | 0.00809  | 0.109632 | 0.01779  |
| 0.01168  | 0.040532 | 0.38216  | 0.13564  | 0.00331  |
| 0.1348   | -0.02809 | 0.54486  | -0.01682 | 0.71701  |
| 8.39E-07 | 0.37675  | 3.38E-17 | 0.056873 | 0.21992  |
| 0.63589  | 0.047065 | 0.31015  | -0.01185 | 0.79849  |
| 0.31569  | -0.05575 | 0.22914  | 0.162133 | 0.00044  |
| 1.36E-06 | -0.22839 | 6.09E-07 | 0.313558 | 4.11E-12 |
| 0.59942  | -0.05514 | 0.23435  | 0.194202 | 2.38E-05 |
| 0.01733  | -0.10148 | 0.02833  | 0.076814 | 0.09732  |
| 2.78E-05 | -0.0583  | 0.20855  | 0.46806  | 8.42E-27 |
| 4.90E-12 | 0.028819 | 0.53444  | 0.49918  | 8.49E-31 |
| 0.35046  | -0.16315 | 0.0004   | 0.049802 | 0.28282  |
| 1.09E-05 | -0.16017 | 0.00051  | 0.123064 | 0.00776  |
| 0.37099  | -0.25554 | 2.14E-08 | 0.413287 | 1.08E-20 |
| 0.00147  | 0.185328 | 5.60E-05 | -0.23738 | 2.10E-07 |
| 0.16588  | -0.21527 | 2.67E-06 | 0.230399 | 4.82E-07 |
| 7.23E-06 | -0.07109 | 0.12502  | -0.02074 | 0.65479  |
| 0.00013  | 0.025634 | 0.58056  | 0.200448 | 1.27E-05 |
| 0.76674  | 0.000205 | 0.99648  | 0.18307  | 6.91E-05 |
| 3.53E-07 | -0.01737 | 0.70805  | 0.160035 | 0.00052  |
| 0.04584  | -0.07527 | 0.10425  | 0.273166 | 1.95E-09 |
| 3.34E-06 | -0.09852 | 0.03329  | 0.122155 | 0.00823  |
| 0.28495  | -0.15391 | 0.00085  | -0.1155  | 0.0125   |
| 7.69E-16 | -0.12532 | 0.0067   | 0.376706 | 3.41E-17 |
| 0.60103  | 0.031447 | 0.49782  | 0.184317 | 6.15E-05 |
| 0.04992  | -0.05667 | 0.22157  | -0.0325  | 0.48359  |
| 8.62E-07 | -0.00926 | 0.84184  | -0.02342 | 0.6137   |
| 0.0089   | -0.02468 | 0.59472  | -0.17109 | 0.0002   |
| 1.06E-09 | -0.03183 | 0.49265  | 0.2838   | 4.23E-10 |
| 5.28E-08 | -0.18228 | 7.44E-05 | 0.257621 | 1.62E-08 |
| 0.00108  | -0.0359  | 0.43894  | 0.385122 | 5.84E-18 |
| 0.00059  | -0.05845 | 0.20734  | 0.083379 | 0.07184  |
| 7.11E-08 | -0.07259 | 0.11723  | 0.276376 | 1.24E-09 |
| 0.00015  | -0.03455 | 0.45631  | 0.258499 | 1.45E-08 |
| 0.00112  | 0.06045  | 0.19222  | 0.161621 | 0.00045  |
| 0.00624  | -0.05864 | 0.2059   | 0.226974 | 7.17E-07 |
| 1.24E-06 | -0.11742 | 0.0111   | 0.075964 | 0.1011   |
| 1.53E-09 | -0.10227 | 0.02711  | 0.467381 | 1.02E-26 |
| 3.80E-14 | -0.08834 | 0.05644  | 0.339142 | 4.93E-14 |
| 0.21912  | -0.22344 | 1.07E-06 | 0.225262 | 8.73E-07 |
| 6.96E-07 | -0.03678 | 0.42777  | 0.163378 | 0.00039  |
| 0.0489   | -0.00078 | 0.9865   | 0.061008 | 0.18814  |
| 2.40E-07 | 0.040192 | 0.38617  | 0.036127 | 0.43605  |
| 0.00057  | -0.02251 | 0.6275   | 0.287373 | 2.49E-10 |
| 0.00873  | -0.00916 | 0.84343  | 0.144931 | 0.00169  |

|          |          |          |          |          |
|----------|----------|----------|----------|----------|
| 1.60E-05 | -0.04825 | 0.29813  | 0.138048 | 0.00279  |
| 0.05204  | -0.00911 | 0.84431  | 0.129674 | 0.00501  |
| 0.02194  | 0.048206 | 0.29855  | 0.087758 | 0.05809  |
| 1.42E-06 | 0.015538 | 0.73769  | 0.240493 | 1.44E-07 |
| 0.1676   | -0.0663  | 0.1526   | 0.158245 | 0.0006   |
| 0.04126  | -0.02934 | 0.52701  | 0.247569 | 5.95E-08 |
| 0.01333  | -0.08153 | 0.07839  | -0.00316 | 0.94565  |
| 0.05632  | 0.027975 | 0.54648  | 0.11505  | 0.01285  |
| 3.18E-15 | 0.022574 | 0.62655  | 0.622533 | 1.85E-51 |
| 0.79653  | -0.08494 | 0.06664  | 0.039351 | 0.3962   |
| 0.82379  | -0.0151  | 0.74481  | -0.03803 | 0.41221  |
| 0.48322  | -0.03258 | 0.4825   | -0.14787 | 0.00135  |
| 0.01869  | -0.08905 | 0.05447  | 0.093406 | 0.04364  |
| 1.33E-12 | -0.05381 | 0.24578  | 0.34364  | 2.17E-14 |
| 0.00062  | -0.03386 | 0.4654   | 0.300317 | 3.45E-11 |
| 2.08E-05 | -0.13344 | 0.00387  | 0.292855 | 1.09E-10 |
| 0.00015  | -0.1813  | 8.14E-05 | 0.27375  | 1.80E-09 |
| 0.08618  | -0.0103  | 0.82431  | -0.23508 | 2.77E-07 |
| 0.82559  | -0.08408 | 0.06947  | -0.03549 | 0.4442   |
| 7.10E-09 | -0.07748 | 0.09443  | 0.215749 | 2.53E-06 |
| 0.74099  | 0.014033 | 0.76231  | 0.168122 | 0.00026  |
| 0.00049  | -0.02566 | 0.58021  | -0.16795 | 0.00027  |
| 4.50E-06 | -0.20979 | 4.82E-06 | 0.187593 | 4.52E-05 |
| 3.62E-14 | -0.01305 | 0.77842  | 0.512832 | 1.10E-32 |
| 0.23893  | -0.08906 | 0.05446  | 0.233449 | 3.36E-07 |
| 0.00019  | -0.13603 | 0.00322  | 0.42252  | 1.21E-21 |
| 0.012    | -0.09677 | 0.03657  | -0.06653 | 0.15114  |
| 2.62E-08 | -0.00829 | 0.85823  | -0.23819 | 1.90E-07 |
| 0.04734  | -0.15894 | 0.00057  | 0.071719 | 0.12169  |
| 0.82498  | 0.047431 | 0.30639  | -0.08158 | 0.0782   |
| 5.30E-05 | -0.02809 | 0.54486  | 0.238807 | 1.76E-07 |
| 1.17E-10 | -0.08815 | 0.05696  | 0.387825 | 3.28E-18 |
| 1.40E-06 | -0.14341 | 0.00189  | 0.140986 | 0.00226  |
| 0.37696  | -0.08907 | 0.05442  | 0.261459 | 9.75E-09 |
| 2.85E-06 | -0.09186 | 0.04725  | 0.403789 | 9.67E-20 |
| 0.83725  | -0.17845 | 0.00011  | -0.06747 | 0.14547  |
| 6.88E-05 | 0.019946 | 0.66724  | -0.01321 | 0.77594  |
| 0.00669  | -0.05626 | 0.22493  | -0.09371 | 0.04297  |
| 1.78E-06 | -0.00641 | 0.89011  | 0.177865 | 0.00011  |
| 7.68E-05 | -0.06394 | 0.16774  | 0.556187 | 2.81E-39 |
| 0.00017  | -0.02958 | 0.52376  | 0.204724 | 8.21E-06 |
| 0.00102  | -0.11864 | 0.01028  | 0.124558 | 0.00704  |
| 3.14E-08 | 0.006069 | 0.89592  | 0.365084 | 3.60E-16 |
| 3.01E-11 | -0.08709 | 0.06003  | 0.321955 | 1.01E-12 |
| 0.00013  | 0.142761 | 0.00198  | -0.43375 | 7.60E-23 |

|          |          |          |          |          |
|----------|----------|----------|----------|----------|
| 0.01725  | -0.05483 | 0.23701  | 0.259586 | 1.25E-08 |
| 0.05309  | -0.0043  | 0.92619  | 0.033587 | 0.46901  |
| 0.0221   | 0.089203 | 0.05406  | -0.01492 | 0.74779  |
| 0.06499  | -0.26062 | 1.09E-08 | 0.140138 | 0.0024   |
| 0.00049  | -0.18419 | 6.23E-05 | 0.205446 | 7.62E-06 |
| 0.01547  | -0.17704 | 0.00012  | 4.06E-05 | 0.9993   |
| 0.63646  | -0.0651  | 0.16014  | 0.309409 | 8.09E-12 |
| 0.00041  | -0.17614 | 0.00013  | 0.484585 | 7.15E-29 |
| 0.00017  | -0.11114 | 0.01627  | 0.296942 | 5.83E-11 |
| 1.10E-05 | -0.08474 | 0.06731  | 0.300275 | 3.47E-11 |
| 0.01003  | -0.0238  | 0.60788  | 0.411892 | 1.50E-20 |
| 1.56E-07 | -0.16673 | 0.0003   | 0.260529 | 1.10E-08 |
| 0.12377  | -0.17376 | 0.00016  | 0.311919 | 5.37E-12 |
| 0.00019  | -0.11037 | 0.01704  | -0.00082 | 0.98596  |
| 3.86E-08 | -0.03418 | 0.46122  | 0.226398 | 7.66E-07 |
| 0.00035  | 0.004794 | 0.91772  | 0.089659 | 0.05284  |
| 0.00984  | -0.16132 | 0.00047  | -0.01992 | 0.66772  |
| 0.00426  | -0.06865 | 0.1385   | 0.015689 | 0.73525  |
| 0.00156  | -0.12722 | 0.0059   | 0.307094 | 1.18E-11 |
| 0.01684  | -0.0955  | 0.03912  | 0.466305 | 1.38E-26 |
| 0.30301  | -0.10074 | 0.02951  | 0.118208 | 0.01057  |
| 0.00018  | 0.067712 | 0.14401  | -0.26864 | 3.67E-09 |
| 0.60434  | -0.1347  | 0.00354  | 0.071737 | 0.1216   |
| 0.06061  | -0.03606 | 0.43686  | 0.039239 | 0.39755  |
| 0.81042  | -0.12874 | 0.00533  | 0.203259 | 9.56E-06 |
| 0.29376  | -0.05308 | 0.25225  | 0.029685 | 0.52223  |
| 0.89616  | -0.18425 | 6.19E-05 | -0.08813 | 0.05703  |
| 0.61644  | -0.08047 | 0.08236  | 0.237461 | 2.08E-07 |
| 0.28444  | -0.11627 | 0.01192  | -0.15753 | 0.00063  |
| 0.67098  | -0.03411 | 0.4621   | 0.138269 | 0.00275  |
| 0.10289  | -0.21305 | 3.40E-06 | -0.00019 | 0.99667  |
| 0.05466  | -0.11883 | 0.01016  | 0.090805 | 0.04987  |
| 0.14082  | -0.08351 | 0.07139  | 0.210862 | 4.30E-06 |
| 0.00663  | 0.165772 | 0.00032  | 0.088934 | 0.05479  |
| 0.01696  | -0.172   | 0.00019  | 0.292572 | 1.14E-10 |
| 0.17594  | 0.100495 | 0.0299   | 0.010984 | 0.81287  |
| 0.71933  | 0.053608 | 0.2476   | 0.118037 | 0.01068  |
| 0.00357  | 0.122028 | 0.00829  | -0.36123 | 7.69E-16 |
| 0.21388  | -0.1888  | 4.02E-05 | 0.26187  | 9.22E-09 |
| 0.00022  | -0.21234 | 3.67E-06 | 0.154024 | 0.00084  |
| 0.02878  | -0.24828 | 5.44E-08 | 0.008817 | 0.84928  |
| 0.02183  | -0.14184 | 0.00212  | 0.173785 | 0.00016  |
| 0.00024  | -0.1632  | 0.0004   | 0.309957 | 7.40E-12 |
| 0.00036  | -0.11842 | 0.01043  | 0.132859 | 0.00403  |
| 0.00012  | -0.14362 | 0.00186  | 0.108709 | 0.01878  |

|          |          |          |          |          |
|----------|----------|----------|----------|----------|
| 0.28196  | -0.05025 | 0.27847  | 0.180372 | 8.87E-05 |
| 0.00405  | -0.18336 | 6.73E-05 | -0.07776 | 0.09325  |
| 0.60537  | -0.24494 | 8.28E-08 | 0.054735 | 0.23778  |
| 0.0084   | -0.1301  | 0.00486  | 0.449317 | 1.39E-24 |
| 0.03127  | 0.072612 | 0.11711  | 0.028276 | 0.54218  |
| 0.26772  | -0.21161 | 3.97E-06 | 0.308234 | 9.78E-12 |
| 0.00606  | -0.02518 | 0.58735  | 0.075381 | 0.10375  |
| 0.846    | -0.01673 | 0.71838  | 0.146169 | 0.00154  |
| 0.0092   | -0.06645 | 0.15163  | 0.224064 | 1.00E-06 |
| 0.00123  | -0.15221 | 0.00097  | -0.03385 | 0.46548  |
| 0.00732  | -0.12992 | 0.00492  | 0.131988 | 0.00427  |
| 0.33568  | -0.19767 | 1.69E-05 | 0.085198 | 0.06583  |
| 0.31241  | -0.06342 | 0.17126  | 0.199979 | 1.34E-05 |
| 1.05E-07 | -0.01619 | 0.72705  | 0.277343 | 1.08E-09 |
| 0.82342  | -0.0388  | 0.40286  | 0.107274 | 0.02041  |
| 0.02699  | -0.19107 | 3.23E-05 | 0.1384   | 0.00272  |
| 0.21582  | -0.08207 | 0.07644  | 0.080182 | 0.08347  |
| 0.10066  | -0.20925 | 5.11E-06 | -0.03837 | 0.40812  |
| 0.37264  | -0.07782 | 0.093    | 0.011631 | 0.80205  |
| 0.05732  | -0.13579 | 0.00328  | -0.04393 | 0.34347  |
| 0.13796  | -0.17911 | 9.95E-05 | 0.041581 | 0.36996  |
| 4.85E-06 | -0.16183 | 0.00045  | 0.120431 | 0.00919  |
| 0.01133  | -0.15632 | 0.0007   | 0.270631 | 2.78E-09 |
| 0.79694  | -0.11329 | 0.0143   | -0.01122 | 0.80899  |
| 0.90034  | -0.09664 | 0.03682  | 0.080746 | 0.08131  |
| 0.40136  | -0.0755  | 0.10318  | 0.177501 | 0.00012  |
| 0.09011  | 0.019386 | 0.67606  | 0.183328 | 6.75E-05 |
| 0.69648  | -0.17938 | 9.71E-05 | -0.06724 | 0.14681  |
| 0.42411  | 0.191296 | 3.16E-05 | -0.05919 | 0.20164  |
| 0.72521  | -0.14542 | 0.00163  | 0.039999 | 0.38846  |
| 4.94E-08 | -0.1572  | 0.00065  | 0.187817 | 4.42E-05 |
| 0.00028  | -0.08847 | 0.05607  | 0.248665 | 5.18E-08 |
| 0.00226  | -0.11242 | 0.01508  | 0.259149 | 1.33E-08 |
| 0.06029  | -0.19299 | 2.68E-05 | 0.202985 | 9.83E-06 |
| 0.0173   | -0.10434 | 0.02413  | 0.177465 | 0.00012  |
| 0.12351  | -0.16268 | 0.00042  | 0.132386 | 0.00416  |
| 0.04249  | -0.11652 | 0.01174  | 0.002255 | 0.96123  |
| 0.33645  | -0.05639 | 0.22384  | 0.182149 | 7.53E-05 |
| 0.92267  | -0.10912 | 0.01834  | 0.288984 | 1.96E-10 |
| 0.00301  | 0.264409 | 6.55E-09 | 0.054161 | 0.24274  |
| 0.46089  | -0.04437 | 0.33866  | -0.13191 | 0.0043   |
| 0.44572  | -0.08816 | 0.05695  | 0.017544 | 0.70533  |
| 1.47E-07 | -0.17424 | 0.00015  | 0.201962 | 1.09E-05 |
| 0.00932  | 0.12866  | 0.00536  | -0.28075 | 6.59E-10 |
| 0.00904  | -0.14924 | 0.00122  | 0.009547 | 0.83698  |

|          |          |          |          |          |
|----------|----------|----------|----------|----------|
| 0.08791  | -0.07898 | 0.08823  | 0.072782 | 0.11625  |
| 1.25E-06 | 0.120497 | 0.00915  | -0.07972 | 0.08525  |
| 0.00032  | -0.15732 | 0.00065  | 0.038761 | 0.40332  |
| 0.06293  | -0.258   | 1.54E-08 | 0.027875 | 0.54792  |
| 0.00029  | -0.16597 | 0.00032  | 0.097011 | 0.0361   |
| 0.51414  | -0.20635 | 6.93E-06 | 0.044626 | 0.33591  |
| 0.00034  | -0.14978 | 0.00117  | 0.172641 | 0.00018  |
| 1.27E-10 | -0.06617 | 0.1534   | 0.27318  | 1.95E-09 |
| 0.30883  | -0.11914 | 0.00997  | -0.03962 | 0.39296  |
| 0.05413  | -0.13561 | 0.00332  | 0.108432 | 0.01908  |
| 0.00152  | -0.23315 | 3.48E-07 | 0.222244 | 1.23E-06 |
| 0.0968   | -0.11004 | 0.01736  | -0.02685 | 0.5627   |
| 0.00071  | -0.20658 | 6.77E-06 | 0.167104 | 0.00029  |
| 0.25433  | -0.12583 | 0.00647  | 0.01591  | 0.73167  |
| 0.35242  | -0.1604  | 0.0005   | 0.027734 | 0.54994  |
| 0.82642  | -0.10517 | 0.02303  | 0.159216 | 0.00055  |
| 0.6825   | -0.02128 | 0.64652  | 0.143967 | 0.00181  |
| 0.03152  | -0.22931 | 5.47E-07 | 0.159653 | 0.00053  |
| 0.04163  | -0.12666 | 0.00613  | 0.23955  | 1.61E-07 |
| 0.0783   | -0.17732 | 0.00012  | 0.091928 | 0.04709  |
| 0.00016  | -0.22028 | 1.54E-06 | 0.188456 | 4.16E-05 |
| 0.64688  | -0.12448 | 0.00707  | 0.308014 | 1.01E-11 |
| 0.0197   | -0.15721 | 0.00065  | 0.146473 | 0.0015   |
| 3.05E-08 | -0.0316  | 0.49573  | 0.446397 | 2.99E-24 |
| 0.04533  | -0.13681 | 0.00305  | 0.181471 | 8.02E-05 |
| 4.75E-06 | -0.09903 | 0.03239  | 0.107405 | 0.02026  |
| 0.51094  | -0.1669  | 0.00029  | -0.09622 | 0.03765  |
| 0.00012  | -0.13597 | 0.00324  | 0.349947 | 6.71E-15 |
| 0.00268  | -0.07886 | 0.08872  | 0.186085 | 5.21E-05 |
| 0.00059  | -0.17063 | 0.00021  | 0.113041 | 0.01452  |
| 0.42077  | -0.13841 | 0.00272  | 0.120802 | 0.00897  |
| 0.99917  | -0.03226 | 0.48683  | 0.033583 | 0.46907  |
| 0.00041  | -0.05045 | 0.27659  | 0.529717 | 3.87E-35 |
| 0.61486  | -0.26783 | 4.10E-09 | -0.07793 | 0.09253  |
| 8.57E-08 | -0.01642 | 0.7234   | 0.240874 | 1.37E-07 |
| 0.00528  | -0.08766 | 0.05836  | 0.300742 | 3.23E-11 |
| 0.07116  | -0.15971 | 0.00053  | 0.213549 | 3.22E-06 |
| 0.17613  | -0.25855 | 1.44E-08 | 0.212165 | 3.74E-06 |
| 0.08405  | -0.1226  | 0.00799  | 0.20144  | 1.15E-05 |
| 0.01479  | -0.17231 | 0.00018  | 0.150383 | 0.00112  |
| 0.88645  | -0.28693 | 2.66E-10 | 0.08487  | 0.06689  |
| 2.08E-07 | 0.02239  | 0.62937  | 0.154179 | 0.00083  |
| 0.32602  | -0.20418 | 8.69E-06 | 0.283751 | 4.26E-10 |
| 0.00406  | -0.09157 | 0.04796  | 0.287673 | 2.38E-10 |
| 0.41567  | -0.12493 | 0.00687  | 0.11659  | 0.01169  |

|          |          |          |          |          |
|----------|----------|----------|----------|----------|
| 3.37E-05 | -0.13337 | 0.00389  | 0.197163 | 1.77E-05 |
| 0.03856  | -0.23174 | 4.11E-07 | -0.04353 | 0.3479   |
| 4.77E-09 | -0.16348 | 0.00039  | 0.299098 | 4.17E-11 |
| 0.6269   | -0.06487 | 0.16161  | -0.07168 | 0.12191  |
| 0.00321  | -0.1599  | 0.00052  | 0.00165  | 0.97164  |
| 0.68775  | -0.14836 | 0.0013   | -0.00994 | 0.83037  |
| 0.87234  | -0.24233 | 1.14E-07 | 0.036747 | 0.42821  |
| 0.01533  | -0.13379 | 0.00377  | 0.319844 | 1.44E-12 |
| 0.51576  | -0.15171 | 0.00101  | 0.255711 | 2.09E-08 |
| 6.36E-05 | 0.00205  | 0.96476  | 0.113415 | 0.0142   |
| 0.07045  | -0.17954 | 9.57E-05 | 0.052035 | 0.26176  |
| 0.73096  | -0.19592 | 2.01E-05 | 0.065636 | 0.15673  |
| 0.86341  | -0.17854 | 0.0001   | 0.171518 | 0.0002   |
| 0.68708  | -0.17891 | 0.0001   | 0.082152 | 0.07614  |
| 0.0177   | -0.14209 | 0.00208  | 0.152619 | 0.00094  |
| 0.00097  | -0.08248 | 0.07497  | 0.035841 | 0.4397   |
| 0.06083  | -0.08778 | 0.05804  | 0.104807 | 0.02351  |
| 8.14E-06 | -0.02865 | 0.53686  | 0.294792 | 8.12E-11 |
| 0.98926  | 0.231154 | 4.41E-07 | -0.17179 | 0.00019  |
| 3.15E-12 | -0.12443 | 0.0071   | 0.327644 | 3.79E-13 |
| 0.00149  | -0.1168  | 0.01154  | 0.112094 | 0.01537  |
| 0.00024  | -0.19286 | 2.72E-05 | 0.287744 | 2.36E-10 |
| 0.82425  | -0.1792  | 9.87E-05 | 0.05312  | 0.25193  |
| 0.01433  | -0.17273 | 0.00018  | 0.116312 | 0.01189  |
| 0.00483  | -0.15862 | 0.00058  | 0.113345 | 0.01426  |
| 0.41639  | -0.14771 | 0.00137  | -0.01552 | 0.73806  |
| 0.00264  | -0.17098 | 0.00021  | 0.352849 | 3.88E-15 |
| 0.01601  | 0.160129 | 0.00051  | 0.199211 | 1.44E-05 |
| 0.08389  | -0.22968 | 5.24E-07 | 0.171417 | 0.0002   |
| 0.05071  | -0.13228 | 0.00419  | 0.0125   | 0.78761  |
| 0.00256  | -0.21725 | 2.15E-06 | 0.100404 | 0.03005  |
| 0.00645  | -0.14431 | 0.00177  | 0.201396 | 1.16E-05 |
| 0.00024  | 0.01597  | 0.73069  | 0.063351 | 0.17171  |
| 2.10E-06 | -0.04463 | 0.33592  | 0.288946 | 1.97E-10 |
| 0.00783  | -0.22793 | 6.42E-07 | -0.11119 | 0.01622  |
| 0.01989  | -0.06824 | 0.14092  | 0.027728 | 0.55003  |
| 7.53E-05 | -0.11931 | 0.00986  | 0.060483 | 0.19198  |
| 0.18691  | -0.18584 | 5.33E-05 | 0.120497 | 0.00915  |
| 1.13E-05 | -0.11878 | 0.0102   | 0.412112 | 1.43E-20 |
| 0.00017  | -0.15466 | 0.0008   | 0.063921 | 0.16788  |
| 0.42673  | -0.14095 | 0.00227  | 0.365057 | 3.62E-16 |
| 0.10284  | -0.00754 | 0.87088  | -0.20142 | 1.15E-05 |
| 1.89E-06 | -0.10187 | 0.02772  | 0.194427 | 2.33E-05 |
| 4.46E-05 | -0.19964 | 1.38E-05 | 0.165007 | 0.00034  |
| 0.01931  | -0.16631 | 0.00031  | 0.018725 | 0.6865   |

|          |          |          |          |          |
|----------|----------|----------|----------|----------|
| 3.46E-05 | -0.15747 | 0.00064  | 0.314789 | 3.35E-12 |
| 0.00219  | -0.13712 | 0.00298  | -0.04648 | 0.31616  |
| 0.80243  | -0.08115 | 0.07981  | 0.111097 | 0.01631  |
| 0.02561  | 0.040848 | 0.37846  | 0.113616 | 0.01402  |
| 1.46E-09 | -0.06251 | 0.17746  | 0.343331 | 2.30E-14 |
| 0.05772  | -0.11377 | 0.01389  | 0.282685 | 4.98E-10 |
| 0.00047  | -0.19722 | 1.77E-05 | 0.093755 | 0.04286  |
| 0.18768  | 0.013581 | 0.76974  | -0.0084  | 0.85635  |
| 1.26E-08 | -0.07721 | 0.09559  | 0.055196 | 0.23385  |
| 0.00046  | -0.21569 | 2.55E-06 | 0.155283 | 0.00076  |
| 0.14896  | -0.17831 | 0.00011  | 0.095595 | 0.03892  |
| 0.3936   | -0.05753 | 0.21463  | -0.13751 | 0.0029   |
| 0.00198  | -0.0612  | 0.18678  | 0.254625 | 2.41E-08 |
| 0.87086  | -0.06562 | 0.15687  | 0.284726 | 3.69E-10 |
| 0.24437  | -0.19495 | 2.21E-05 | 0.030797 | 0.50675  |
| 0.30011  | -0.12373 | 0.00743  | 0.004637 | 0.92039  |
| 0.01455  | -0.17258 | 0.00018  | 0.125471 | 0.00663  |
| 0.86331  | -0.22862 | 5.93E-07 | 0.078303 | 0.09099  |
| 3.99E-06 | -0.02236 | 0.62984  | 0.363452 | 4.97E-16 |
| 0.31156  | -0.14836 | 0.0013   | -0.06703 | 0.14811  |
| 0.29558  | -0.11416 | 0.01357  | 0.139232 | 0.00257  |
| 0.00058  | -0.18793 | 4.37E-05 | 0.010007 | 0.82923  |
| 0.00195  | -0.17221 | 0.00018  | 0.157568 | 0.00063  |
| 0.06714  | -0.02325 | 0.6162   | 0.166639 | 0.0003   |
| 0.00038  | -0.09508 | 0.03998  | 0.298762 | 4.40E-11 |
| 0.00064  | -0.01038 | 0.82305  | 0.355431 | 2.37E-15 |
| 0.16253  | -0.10767 | 0.01995  | -0.04739 | 0.30679  |
| 4.73E-09 | 0.007212 | 0.87647  | 0.384651 | 6.46E-18 |
| 0.00991  | -0.01295 | 0.78018  | 0.04697  | 0.31112  |
| 0.0053   | -0.16742 | 0.00028  | 0.218316 | 1.91E-06 |
| 0.01213  | -0.03357 | 0.46929  | 0.059797 | 0.19708  |
| 0.0044   | -0.1591  | 0.00056  | 0.116891 | 0.01147  |
| 0.02647  | -0.18247 | 7.31E-05 | 0.33789  | 6.18E-14 |
| 0.0475   | -0.22997 | 5.07E-07 | 0.067474 | 0.14542  |
| 0.0061   | -0.1569  | 0.00067  | 0.235953 | 2.49E-07 |
| 0.00198  | -0.21506 | 2.73E-06 | -0.01518 | 0.74361  |
| 0.01711  | -0.16939 | 0.00024  | 0.207675 | 6.03E-06 |
| 0.11897  | -0.18942 | 3.79E-05 | 0.189825 | 3.65E-05 |
| 0.00359  | -0.16951 | 0.00023  | 0.224317 | 9.73E-07 |
| 0.25771  | -0.16608 | 0.00031  | 0.326668 | 4.49E-13 |
| 0.40465  | -0.10602 | 0.02194  | -0.11331 | 0.01429  |
| 0.45849  | -0.11513 | 0.01279  | -0.11799 | 0.01071  |
| 0.13541  | -0.26047 | 1.11E-08 | 0.280584 | 6.76E-10 |
| 0.85541  | -0.12183 | 0.0084   | 0.150532 | 0.0011   |
| 0.86044  | -0.1208  | 0.00898  | -0.00789 | 0.86502  |



|          |          |          |          |          |
|----------|----------|----------|----------|----------|
| 0.00449  | -0.16704 | 0.00029  | 0.110381 | 0.01702  |
| 0.4698   | -0.17869 | 0.0001   | 0.235506 | 2.63E-07 |
| 2.04E-07 | -0.04197 | 0.36551  | 0.355477 | 2.35E-15 |
| 0.19033  | -0.00842 | 0.85596  | 0.142155 | 0.00207  |
| 0.2056   | -0.19983 | 1.36E-05 | 0.04629  | 0.31818  |
| 0.73619  | -0.00798 | 0.86351  | -0.21803 | 1.97E-06 |
| 8.54E-06 | -0.17807 | 0.00011  | 0.163868 | 0.00038  |
| 7.07E-09 | -0.17549 | 0.00014  | 0.243052 | 1.05E-07 |
| 0.66832  | -0.22411 | 9.96E-07 | -0.05242 | 0.25828  |
| 0.47864  | -0.19062 | 3.38E-05 | 0.16403  | 0.00037  |
| 0.00081  | -0.17103 | 0.0002   | 0.098861 | 0.03269  |
| 0.32769  | -0.20395 | 8.90E-06 | -0.0139  | 0.76455  |
| 0.33003  | -0.2134  | 3.27E-06 | 0.176772 | 0.00012  |
| 0.03476  | 0.136715 | 0.00307  | -0.28348 | 4.43E-10 |
| 0.8987   | -0.11066 | 0.01674  | 0.262009 | 9.05E-09 |
| 0.01276  | -0.15245 | 0.00095  | 0.040979 | 0.37694  |
| 0.00599  | -0.11659 | 0.01169  | 0.169703 | 0.00023  |
| 0.05214  | -0.18933 | 3.83E-05 | 0.012221 | 0.79224  |
| 0.00025  | -0.0789  | 0.08853  | 0.208993 | 5.25E-06 |
| 0.1375   | -0.1376  | 0.00288  | 0.18713  | 4.72E-05 |
| 0.7976   | -0.17686 | 0.00012  | 0.072215 | 0.11913  |
| 0.00016  | -0.10159 | 0.02815  | 0.124566 | 0.00703  |
| 0.03607  | -0.18522 | 5.66E-05 | 0.15934  | 0.00055  |
| 7.31E-07 | -0.12933 | 0.00512  | 0.221414 | 1.35E-06 |
| 0.01208  | -0.19326 | 2.61E-05 | 0.122314 | 0.00814  |
| 0.56985  | -0.05805 | 0.2105   | 0.114523 | 0.01327  |
| 0.26195  | -0.17399 | 0.00016  | -0.03115 | 0.50183  |
| 0.06403  | -0.19463 | 2.28E-05 | 0.151549 | 0.00102  |
| 0.04533  | -0.24108 | 1.34E-07 | 0.066397 | 0.15198  |
| 0.0004   | -0.18546 | 5.53E-05 | 0.173109 | 0.00017  |
| 0.0035   | -0.17081 | 0.00021  | 0.037536 | 0.41836  |
| 0.15567  | -0.18521 | 5.66E-05 | -0.01831 | 0.69316  |
| 0.36025  | -0.1931  | 2.65E-05 | 0.187263 | 4.66E-05 |
| 0.20746  | -0.09573 | 0.03865  | -0.11801 | 0.0107   |
| 0.0019   | -0.12794 | 0.00563  | 0.094531 | 0.04116  |
| 0.11052  | -0.16585 | 0.00032  | 0.217733 | 2.04E-06 |
| 0.93142  | -0.06704 | 0.14805  | -0.00557 | 0.90451  |
| 0.01577  | -0.14519 | 0.00166  | 0.393015 | 1.06E-18 |
| 0.06678  | -0.22963 | 5.27E-07 | 0.015131 | 0.74434  |
| 0.10252  | -0.20249 | 1.03E-05 | 0.239801 | 1.56E-07 |
| 0.96137  | -0.07696 | 0.09671  | 0.029862 | 0.51974  |
| 0.19667  | -0.13864 | 0.00268  | 0.001581 | 0.97281  |
| 0.00054  | -0.20132 | 1.17E-05 | 0.280145 | 7.20E-10 |
| 3.65E-07 | -0.14026 | 0.00238  | 0.13224  | 0.0042   |
| 0.07004  | -0.08768 | 0.05831  | 0.309408 | 8.09E-12 |

|          |          |          |          |          |
|----------|----------|----------|----------|----------|
| 0.00122  | -0.18837 | 4.19E-05 | 0.291628 | 1.31E-10 |
| 0.06436  | -0.16565 | 0.00032  | 0.240519 | 1.43E-07 |
| 0.78089  | -0.13198 | 0.00428  | -0.05183 | 0.26362  |
| 0.00667  | -0.13414 | 0.00368  | 0.216928 | 2.23E-06 |
| 3.95E-05 | -0.16544 | 0.00033  | 0.15509  | 0.00077  |
| 0.07412  | -0.2256  | 8.40E-07 | 0.185517 | 5.50E-05 |
| 0.00481  | -0.20493 | 8.04E-06 | -0.04195 | 0.36567  |
| 0.48532  | -0.22107 | 1.40E-06 | 0.118667 | 0.01027  |
| 0.00033  | -0.17213 | 0.00019  | 0.444098 | 5.43E-24 |
| 0.15746  | -0.12362 | 0.00748  | 0.17584  | 0.00013  |
| 0.39585  | -0.23997 | 1.53E-07 | -0.02161 | 0.64142  |
| 0.38872  | -0.21312 | 3.37E-06 | 0.065982 | 0.15456  |
| 0.57468  | -0.21493 | 2.77E-06 | 0.1243   | 0.00716  |
| 0.9663   | -0.21097 | 4.25E-06 | 0.319466 | 1.53E-12 |
| 0.00843  | -0.25078 | 3.95E-08 | 0.172696 | 0.00018  |
| 0.95758  | -0.1401  | 0.00241  | 0.028671 | 0.53654  |
| 0.11322  | -0.06234 | 0.17867  | 0.059552 | 0.19892  |
| 0.3222   | -0.21316 | 3.36E-06 | 0.18472  | 5.93E-05 |
| 2.65E-06 | -0.19328 | 2.61E-05 | 0.222338 | 1.22E-06 |
| 0.04057  | -0.16554 | 0.00033  | 0.160546 | 0.0005   |
| 2.28E-06 | -0.19685 | 1.83E-05 | 0.167403 | 0.00028  |
| 6.39E-05 | -0.17749 | 0.00012  | 0.047675 | 0.30391  |
| 0.05823  | -0.22141 | 1.35E-06 | 0.096083 | 0.03793  |
| 0.11067  | -0.14825 | 0.00131  | 0.166655 | 0.0003   |
| 2.13E-07 | -0.09416 | 0.04197  | 0.395486 | 6.19E-19 |
| 0.02064  | -0.16569 | 0.00032  | 0.138374 | 0.00273  |
| 0.2195   | -0.23197 | 4.00E-07 | 0.089017 | 0.05456  |
| 0.45807  | -0.20746 | 6.17E-06 | 0.289814 | 1.73E-10 |
| 0.08332  | -0.20672 | 6.67E-06 | 0.023813 | 0.60774  |
| 3.09E-05 | -0.18304 | 6.93E-05 | 0.369714 | 1.42E-16 |
| 0.00091  | -0.14161 | 0.00216  | 0.29406  | 9.08E-11 |
| 0.00366  | -0.09716 | 0.03582  | 0.259516 | 1.26E-08 |
| 0.436    | -0.1178  | 0.01085  | 0.326819 | 4.37E-13 |
| 0.54714  | -0.18246 | 7.31E-05 | 0.00576  | 0.90121  |
| 0.38773  | -0.15244 | 0.00095  | 0.196283 | 1.94E-05 |
| 0.26389  | -0.14245 | 0.00203  | -0.10566 | 0.02239  |
| 0.02094  | -0.16652 | 0.0003   | 0.170653 | 0.00021  |
| 0.02879  | -0.15916 | 0.00056  | 0.073896 | 0.11075  |
| 0.32671  | -0.30145 | 2.89E-11 | 0.089503 | 0.05325  |
| 0.001    | -0.11118 | 0.01623  | 0.169539 | 0.00023  |
| 2.15E-05 | -0.1924  | 2.84E-05 | 0.11725  | 0.01122  |
| 0.04599  | -0.15235 | 0.00096  | 0.110618 | 0.01678  |
| 1.76E-05 | -0.14051 | 0.00234  | 0.212989 | 3.42E-06 |
| 0.18296  | -0.20416 | 8.71E-06 | 0.203964 | 8.88E-06 |
| 0.1974   | -0.14099 | 0.00226  | 0.186358 | 5.08E-05 |

|          |          |          |          |          |
|----------|----------|----------|----------|----------|
| 0.039    | 0.037896 | 0.41391  | 0.336658 | 7.72E-14 |
| 0.70488  | 0.274386 | 1.64E-09 | -0.33665 | 7.72E-14 |
| 0.56768  | -0.05918 | 0.20177  | 0.088037 | 0.05729  |
| 0.54912  | -0.0638  | 0.16869  | 0.134263 | 0.00365  |
| 2.70E-06 | -0.22294 | 1.14E-06 | -0.31179 | 5.49E-12 |
| 5.17E-05 | 0.142064 | 0.00209  | 0.373372 | 6.77E-17 |
| 4.89E-10 | -0.00528 | 0.90945  | 0.414553 | 8.05E-21 |
| 0.06919  | 0.007141 | 0.87769  | 0.217754 | 2.03E-06 |
| 0.00022  | 0.019795 | 0.66963  | 0.50896  | 3.85E-32 |
| 0.02008  | -0.01339 | 0.7729   | 0.135222 | 0.00341  |
| 0.02264  | -0.0082  | 0.85974  | 0.475792 | 9.34E-28 |
| 0.20111  | -0.07387 | 0.11089  | 0.265568 | 5.59E-09 |
| 0.01237  | -0.00621 | 0.89349  | 0.155583 | 0.00074  |
| 0.04447  | 0.007699 | 0.86821  | 0.216365 | 2.37E-06 |
| 0.54952  | 0.107042 | 0.02069  | -0.04948 | 0.2859   |
| 0.97663  | -0.00079 | 0.98646  | 0.050468 | 0.27642  |
| 0.64399  | 0.021975 | 0.63574  | -0.01422 | 0.75929  |
| 0.53203  | 0.148016 | 0.00134  | -0.23899 | 1.73E-07 |
| 0.26091  | -0.04172 | 0.36838  | 0.137344 | 0.00294  |
| 0.29847  | 0.053791 | 0.24598  | 0.289815 | 1.73E-10 |
| 0.93546  | 0.139915 | 0.00244  | -0.25162 | 3.55E-08 |
| 0.00235  | -0.04792 | 0.30147  | 0.549283 | 3.66E-38 |
| 0.24662  | -0.08939 | 0.05356  | 0.464893 | 2.04E-26 |
| 0.13197  | -0.12436 | 0.00713  | -0.12098 | 0.00887  |
| 0.52282  | -0.07485 | 0.10623  | 0.193871 | 2.46E-05 |
| 0.01622  | 0.109905 | 0.01751  | -0.10621 | 0.0217   |
| 0.16894  | 0.052318 | 0.25917  | 0.050245 | 0.27855  |
| 0.2591   | 0.031865 | 0.49213  | 0.369052 | 1.63E-16 |
| 0.18593  | -0.1809  | 8.45E-05 | 0.056199 | 0.22544  |
| 0.58351  | -0.00497 | 0.91467  | 0.298889 | 4.31E-11 |
| 6.07E-05 | -0.00655 | 0.88781  | -0.29427 | 8.80E-11 |
| 0.77831  | -0.00864 | 0.85226  | 0.00347  | 0.94038  |
| 0.92776  | -0.01981 | 0.66939  | 0.113384 | 0.01422  |
| 0.62039  | -0.08508 | 0.06619  | -0.00213 | 0.9634   |
| 0.58511  | -0.17756 | 0.00011  | 0.220161 | 1.55E-06 |
| 0.29679  | -0.18862 | 4.10E-05 | 0.128563 | 0.0054   |
| 0.08173  | -0.03764 | 0.41708  | 0.227576 | 6.69E-07 |
| 0.78016  | -0.12585 | 0.00646  | 0.126057 | 0.00638  |
| 0.05358  | -0.04911 | 0.28961  | 0.29936  | 4.00E-11 |
| 0.32671  | -0.03186 | 0.49216  | 0.086792 | 0.06092  |
| 0.1942   | -0.01265 | 0.78517  | 0.13446  | 0.0036   |
| 0.07981  | 0.064783 | 0.16221  | 0.072671 | 0.11681  |
| 0.22251  | -0.00976 | 0.83343  | 0.033631 | 0.46844  |
| 0.87039  | -0.03366 | 0.46803  | 0.067632 | 0.14448  |
| 0.03897  | 0.061635 | 0.18364  | 0.160967 | 0.00048  |

|         |          |         |          |          |
|---------|----------|---------|----------|----------|
| 0.51491 | -0.08828 | 0.05659 | -0.05598 | 0.22722  |
| 0.94116 | -0.11285 | 0.01469 | 0.298585 | 4.52E-11 |
| 0.96066 | -0.0692  | 0.1354  | 0.008673 | 0.85172  |
| 0.7364  | -0.05616 | 0.22577 | 0.166151 | 0.00031  |
| 0.98659 | -0.05304 | 0.25263 | 0.112318 | 0.01517  |
| 0.01023 | 0.038531 | 0.40612 | 0.143562 | 0.00187  |
| 0.82417 | -0.00869 | 0.85135 | 0.055296 | 0.233    |
| 0.95558 | -0.00387 | 0.93361 | -0.03986 | 0.39006  |
| 0.59619 | 0.008592 | 0.85309 | -0.05716 | 0.21756  |
| 0.16932 | 0.04443  | 0.33804 | 0.074054 | 0.10999  |
| 0.83244 | 0.032073 | 0.4893  | 0.084076 | 0.06949  |
| 0.15092 | -0.01557 | 0.73723 | 0.116831 | 0.01152  |
| 0.25776 | 0.121405 | 0.00863 | -0.04312 | 0.35246  |
| 0.49219 | -0.05342 | 0.24928 | 0.121369 | 0.00865  |
| 0.67575 | -0.02073 | 0.65501 | 0.067215 | 0.14698  |
| 0.67984 | -0.0408  | 0.37903 | 0.071801 | 0.12127  |
| 0.86929 | 0.002537 | 0.9564  | 0.10456  | 0.02384  |
| 0.37828 | -0.00739 | 0.8734  | -0.00392 | 0.93275  |
| 0.39048 | -0.09329 | 0.0439  | 0.1272   | 0.00591  |
| 0.06099 | 0.000333 | 0.99428 | 0.275177 | 1.47E-09 |
| 0.05718 | 0.041036 | 0.37627 | -0.00508 | 0.91274  |
| 0.63312 | -0.02843 | 0.53997 | 0.075043 | 0.10531  |
| 0.18234 | -0.00032 | 0.99449 | 0.023433 | 0.61349  |
| 0.01355 | -0.12998 | 0.0049  | -0.01976 | 0.67015  |
| 0.42575 | -0.02909 | 0.53054 | 0.076629 | 0.09814  |
| 0.71539 | -0.02835 | 0.54118 | -0.14437 | 0.00176  |
| 0.99993 | -0.00703 | 0.87952 | 0.078101 | 0.09183  |
| 0.2684  | -0.0577  | 0.2133  | 0.044653 | 0.33562  |
| 0.81596 | -0.00707 | 0.87881 | 0.184588 | 6.00E-05 |
| 0.77951 | -0.02869 | 0.53627 | 0.031842 | 0.49243  |
| 0.06552 | 0.097558 | 0.03506 | 0.018091 | 0.69659  |
| 0.03833 | -0.06626 | 0.15282 | -0.09034 | 0.05104  |
| 0.07019 | 0.000785 | 0.9865  | -0.04194 | 0.36584  |
| 0.71802 | -0.02473 | 0.59393 | 0.042029 | 0.36482  |
| 0.65545 | -0.05142 | 0.26748 | 0.078856 | 0.08872  |
| 0.84998 | -0.01245 | 0.7885  | 0.135788 | 0.00328  |
| 0.90309 | -0.03182 | 0.49276 | 0.057297 | 0.2165   |
| 0.7271  | 0.032875 | 0.47849 | -0.02564 | 0.58054  |
| 0.45627 | -0.01905 | 0.68142 | 0.01981  | 0.66938  |
| 0.87309 | 0.026843 | 0.56284 | -0.01654 | 0.72144  |
| 0.01732 | 0.056259 | 0.22495 | 0.054048 | 0.24373  |
| 0.71523 | -0.06158 | 0.18402 | 0.023397 | 0.61403  |
| 0.73995 | -0.09245 | 0.04584 | 0.165547 | 0.00033  |
| 0.00123 | 0.016438 | 0.72311 | 0.257979 | 1.55E-08 |
| 0.63625 | -0.04504 | 0.33149 | 0.140565 | 0.00233  |

|          |          |          |          |          |
|----------|----------|----------|----------|----------|
| 0.07376  | -0.1475  | 0.00139  | 0.536842 | 3.23E-36 |
| 0.34015  | -0.12693 | 0.00602  | 0.062874 | 0.17497  |
| 0.09103  | -0.08589 | 0.06367  | 0.10818  | 0.01937  |
| 0.00049  | 0.231259 | 4.35E-07 | -0.00538 | 0.90774  |
| 0.08822  | 0.054927 | 0.23613  | 0.011981 | 0.79623  |
| 0.0007   | 0.152996 | 0.00091  | 0.12896  | 0.00525  |
| 0.00073  | 0.205356 | 7.69E-06 | 0.226192 | 7.85E-07 |
| 0.45381  | -0.04467 | 0.3354   | 0.116867 | 0.01149  |
| 0.42437  | -0.04492 | 0.33278  | 0.019716 | 0.67086  |
| 0.07236  | 0.035257 | 0.44719  | 0.13073  | 0.00466  |
| 0.50708  | 0.131978 | 0.00428  | -0.18293 | 7.00E-05 |
| 0.09862  | -0.07375 | 0.11145  | -0.02349 | 0.61257  |
| 0.00306  | 0.024482 | 0.5977   | -0.03567 | 0.4419   |
| 0.05794  | 0.088345 | 0.05642  | 0.138934 | 0.00262  |
| 0.59627  | 0.135616 | 0.00332  | -0.05237 | 0.25869  |
| 2.05E-12 | 0.352757 | 3.94E-15 | -0.19966 | 1.38E-05 |
| 0.0824   | 0.092534 | 0.04565  | 0.328913 | 3.04E-13 |
| 0.00016  | 0.039043 | 0.39991  | 0.356752 | 1.84E-15 |
| 0.67152  | -0.00938 | 0.83982  | -0.05279 | 0.25486  |
| 0.0051   | 0.003692 | 0.93658  | 0.190121 | 3.54E-05 |
| 0.27794  | 0.011137 | 0.81031  | -0.09605 | 0.038    |
| 0.00012  | 0.166202 | 0.00031  | -0.1015  | 0.02829  |
| 0.05553  | -0.00444 | 0.92369  | -0.05616 | 0.22573  |
| 4.30E-07 | -0.08726 | 0.05953  | -0.39878 | 2.98E-19 |
| 0.46613  | -0.02396 | 0.60556  | -0.15615 | 0.00071  |
| 0.00098  | 0.009124 | 0.84411  | 0.05983  | 0.19684  |
| 0.00022  | 0.093668 | 0.04305  | 0.434308 | 6.61E-23 |
| 0.21773  | 0.037201 | 0.42253  | 0.209458 | 4.99E-06 |
| 0.09057  | -0.04401 | 0.34265  | 0.320153 | 1.37E-12 |
| 5.33E-10 | 0.181779 | 7.79E-05 | 0.376659 | 3.45E-17 |
| 0.10807  | 0.044104 | 0.34161  | -0.12167 | 0.00848  |
| 0.46371  | -0.08512 | 0.06609  | 0.142481 | 0.00202  |
| 0.24034  | 0.057159 | 0.21761  | 0.123289 | 0.00765  |
| 0.00179  | -0.10095 | 0.02917  | 0.153361 | 0.00088  |
| 0.00667  | 0.20456  | 8.35E-06 | -0.05372 | 0.24659  |
| 0.0048   | -0.08767 | 0.05833  | -0.08912 | 0.0543   |
| 4.36E-07 | 0.019917 | 0.6677   | 0.400446 | 2.05E-19 |
| 0.96771  | -0.07327 | 0.1138   | 0.2806   | 6.74E-10 |
| 0.21973  | 0.049461 | 0.28613  | 0.094931 | 0.0403   |
| 6.74E-08 | -0.06206 | 0.18061  | -0.26322 | 7.69E-09 |
| 0.06626  | 0.006498 | 0.88862  | 0.247941 | 5.68E-08 |
| 0.63692  | -0.07045 | 0.12845  | 0.3112   | 6.04E-12 |
| 1.15E-07 | 0.046232 | 0.3188   | 0.376338 | 3.68E-17 |
| 0.7219   | -0.11272 | 0.0148   | 0.082913 | 0.07345  |
| 0.16973  | 0.083732 | 0.07064  | 0.068904 | 0.13706  |

|          |          |         |          |          |
|----------|----------|---------|----------|----------|
| 0.22049  | 0.002194 | 0.96228 | 0.103045 | 0.02596  |
| 0.03622  | -0.0952  | 0.03973 | 0.130351 | 0.00478  |
| 0.22359  | 0.123934 | 0.00733 | -0.28293 | 4.80E-10 |
| 1.04E-05 | -0.1082  | 0.01934 | 0.414577 | 8.01E-21 |
| 0.14926  | 0.042848 | 0.35554 | 0.266624 | 4.84E-09 |
| 0.52979  | 0.080045 | 0.084   | 0.188805 | 4.02E-05 |
| 2.87E-06 | 0.030256 | 0.51425 | 0.43387  | 7.38E-23 |
| 0.25976  | -0.14881 | 0.00126 | 0.453942 | 4.05E-25 |
| 0.4131   | -0.14529 | 0.00164 | 0.211561 | 3.99E-06 |
| 0.97449  | -0.14322 | 0.00192 | 0.193692 | 2.50E-05 |
| 0.335    | -0.07956 | 0.0859  | 0.177498 | 0.00012  |
| 0.54252  | -0.12591 | 0.00644 | 0.135482 | 0.00335  |
| 0.40063  | 0.023984 | 0.60516 | 0.327867 | 3.64E-13 |
| 0.75395  | 0.020831 | 0.65343 | 0.027053 | 0.55979  |
| 0.53362  | 0.014605 | 0.75292 | 0.215255 | 2.67E-06 |
| 0.44389  | 0.038789 | 0.40299 | 0.303135 | 2.21E-11 |
| 0.00062  | -0.10208 | 0.0274  | -0.14665 | 0.00148  |
| 0.85703  | -0.02947 | 0.52524 | 0.2368   | 2.25E-07 |
| 0.0031   | -0.00155 | 0.97331 | -0.07    | 0.13092  |
| 0.04152  | -0.05088 | 0.27251 | 0.20375  | 9.08E-06 |
| 0.85825  | 0.006493 | 0.8887  | 0.058423 | 0.20759  |
| 0.0787   | 0.099875 | 0.03093 | -0.00791 | 0.8647   |
| 0.00245  | -0.09826 | 0.03377 | -0.36607 | 2.96E-16 |
| 0.32201  | 0.008795 | 0.84966 | 0.2844   | 3.87E-10 |
| 0.00126  | 0.011722 | 0.80054 | 0.378559 | 2.32E-17 |
| 0.01843  | -0.04965 | 0.28425 | -0.16263 | 0.00042  |
| 0.00023  | -0.02786 | 0.54813 | 0.524429 | 2.35E-34 |
| 0.01488  | -0.04558 | 0.32567 | 0.532808 | 1.33E-35 |
| 0.64136  | -0.03492 | 0.45158 | 0.0508   | 0.27327  |
| 0.67283  | 0.002554 | 0.95611 | 0.240358 | 1.46E-07 |
| 4.76E-08 | -0.06754 | 0.14502 | -0.39521 | 6.58E-19 |
| 0.60865  | -0.11161 | 0.01582 | 0.31614  | 2.68E-12 |
| 0.84639  | -0.03091 | 0.50522 | 0.023628 | 0.61054  |
| 0.41566  | -0.07782 | 0.09302 | -0.1467  | 0.00148  |
| 0.71279  | -0.093   | 0.04457 | 0.088562 | 0.05581  |
| 0.31545  | -0.06044 | 0.1923  | -0.01095 | 0.81347  |
| 0.71115  | 0.03955  | 0.39381 | -0.33076 | 2.20E-13 |
| 0.0028   | -0.03154 | 0.49648 | 0.263835 | 7.08E-09 |
| 0.00022  | 0.168752 | 0.00025 | -0.1006  | 0.02973  |
| 0.85587  | -0.07101 | 0.12541 | 0.003552 | 0.93898  |
| 0.43562  | -0.00445 | 0.92368 | 0.10966  | 0.01776  |
| 0.23465  | 0.007452 | 0.87241 | 0.004999 | 0.9142   |
| 0.02168  | -0.01473 | 0.75089 | 0.362317 | 6.21E-16 |
| 0.04234  | -0.02117 | 0.64811 | 0.216937 | 2.22E-06 |
| 0.65021  | -0.1313  | 0.00448 | 0.245389 | 7.83E-08 |

|          |          |          |          |          |
|----------|----------|----------|----------|----------|
| 0.0051   | -0.01036 | 0.82328  | 0.416911 | 4.61E-21 |
| 0.14566  | 0.199847 | 1.35E-05 | -0.17327 | 0.00017  |
| 7.89E-06 | 0.085411 | 0.06516  | 0.189535 | 3.75E-05 |
| 9.74E-05 | 0.212309 | 3.68E-06 | -0.20101 | 1.20E-05 |
| 8.03E-05 | 0.131118 | 0.00454  | 0.143686 | 0.00185  |
| 0.78639  | 0.002334 | 0.95988  | 0.31851  | 1.80E-12 |
| 0.83999  | -0.05918 | 0.20173  | 0.144433 | 0.00175  |
| 0.96085  | -0.11457 | 0.01324  | 0.330836 | 2.17E-13 |
| 0.0614   | -0.17726 | 0.00012  | 0.112111 | 0.01536  |
| 0.58959  | 0.047498 | 0.30571  | -0.04271 | 0.35713  |
| 0.05162  | -0.03165 | 0.4951   | 0.243116 | 1.04E-07 |
| 0.86189  | -0.05994 | 0.19604  | -0.01411 | 0.761    |
| 3.13E-05 | -0.05098 | 0.27155  | 0.387522 | 3.50E-18 |
| 0.00072  | -0.01327 | 0.77484  | 0.493433 | 4.99E-30 |
| 0.91262  | 0.05568  | 0.22977  | -0.25096 | 3.86E-08 |
| 7.48E-07 | 0.043787 | 0.34509  | 0.443603 | 6.18E-24 |
| 0.08218  | 0.074866 | 0.10614  | -0.08896 | 0.05473  |
| 0.17602  | -0.01188 | 0.79794  | -0.03973 | 0.39164  |
| 0.6138   | -0.03409 | 0.4624   | -0.08043 | 0.0825   |
| 0.72165  | -0.00986 | 0.83165  | -0.11072 | 0.01669  |
| 0.00303  | 0.029768 | 0.52106  | 0.071961 | 0.12044  |
| 0.00167  | -0.04804 | 0.30019  | -0.12813 | 0.00556  |
| 0.12495  | -0.01186 | 0.79825  | 0.102749 | 0.02639  |
| 0.00083  | 0.018328 | 0.69281  | 0.432362 | 1.08E-22 |
| 1.15E-05 | 0.122088 | 0.00826  | 0.153536 | 0.00087  |
| 0.5451   | -0.03748 | 0.41899  | 0.030292 | 0.51374  |
| 0.87763  | -0.09905 | 0.03236  | 0.157365 | 0.00064  |
| 0.18761  | -0.04589 | 0.32243  | 0.100503 | 0.02989  |
| 0.50167  | -0.02662 | 0.56606  | -0.04241 | 0.36046  |
| 3.65E-07 | -0.15777 | 0.00062  | -0.10487 | 0.02342  |
| 0.00012  | 0.042079 | 0.36425  | 0.292928 | 1.08E-10 |
| 0.54581  | 0.054636 | 0.23863  | 0.013082 | 0.77798  |
| 0.92955  | 0.025696 | 0.57965  | 0.050992 | 0.27146  |
| 0.75175  | -0.01683 | 0.71672  | 0.091821 | 0.04735  |
| 0.01309  | 0.043299 | 0.3505   | -0.35386 | 3.20E-15 |
| 0.96963  | -0.10491 | 0.02337  | 0.086815 | 0.06085  |
| 0.04436  | -0.06233 | 0.17871  | -0.22257 | 1.19E-06 |
| 0.48151  | 0.027299 | 0.55622  | -0.06948 | 0.13381  |
| 3.93E-08 | 0.032795 | 0.47956  | 0.114964 | 0.01292  |
| 0.04591  | 0.15021  | 0.00113  | -0.31316 | 4.38E-12 |
| 0.17887  | 0.007536 | 0.87097  | 0.022157 | 0.63294  |
| 0.94806  | -0.09762 | 0.03494  | -0.03446 | 0.4575   |
| 0.95349  | -0.01348 | 0.77143  | 0.149014 | 0.00124  |
| 4.78E-07 | 0.109097 | 0.01836  | 0.375516 | 4.36E-17 |
| 6.96E-07 | -0.00809 | 0.86161  | 0.458692 | 1.12E-25 |

|          |          |          |          |          |
|----------|----------|----------|----------|----------|
| 0.03252  | 0.018065 | 0.69699  | 0.367097 | 2.41E-16 |
| 0.16139  | -0.08198 | 0.07675  | 0.347347 | 1.09E-14 |
| 0.56645  | 0.014031 | 0.76234  | 0.069959 | 0.13114  |
| 0.06089  | 0.011492 | 0.80438  | 0.221234 | 1.38E-06 |
| 0.03575  | 0.064636 | 0.16316  | 0.312949 | 4.54E-12 |
| 0.93606  | 0.046174 | 0.3194   | 0.029116 | 0.53024  |
| 0.0155   | -0.00682 | 0.88315  | 0.19561  | 2.07E-05 |
| 0.06771  | 0.09721  | 0.03572  | -0.0194  | 0.67578  |
| 0.31259  | 0.060714 | 0.19028  | 0.020206 | 0.66318  |
| 0.11998  | 0.202632 | 1.02E-05 | -0.21749 | 2.09E-06 |
| 0.00943  | 0.18644  | 5.04E-05 | 0.203916 | 8.93E-06 |
| 2.12E-07 | -0.09171 | 0.04762  | 0.474925 | 1.20E-27 |
| 0.00682  | -0.03972 | 0.3918   | 0.309913 | 7.45E-12 |
| 0.00409  | -0.04713 | 0.30945  | 0.306496 | 1.29E-11 |
| 0.93389  | 0.017902 | 0.69961  | 0.091222 | 0.04882  |
| 0.42237  | -0.07226 | 0.11891  | -0.15586 | 0.00073  |
| 0.1589   | 0.040192 | 0.38618  | -0.22353 | 1.06E-06 |
| 0.00018  | 0.066327 | 0.15241  | 0.248823 | 5.08E-08 |
| 0.46297  | -0.11118 | 0.01623  | 0.061994 | 0.1811   |
| 0.2972   | -0.05604 | 0.22674  | -0.03343 | 0.47114  |
| 0.03301  | 0.001601 | 0.97248  | 0.232329 | 3.84E-07 |
| 0.42739  | -0.01163 | 0.80214  | 0.253488 | 2.79E-08 |
| 1.79E-05 | -0.09431 | 0.04164  | -0.21481 | 2.81E-06 |
| 0.03711  | -0.07271 | 0.11663  | 0.081022 | 0.08028  |
| 1.38E-05 | 0.188757 | 4.04E-05 | 0.311451 | 5.80E-12 |
| 4.62E-05 | 0.097036 | 0.03606  | 0.512558 | 1.20E-32 |
| 0.45729  | -0.02195 | 0.63615  | 0.030148 | 0.51575  |
| 0.00309  | 0.046208 | 0.31904  | 0.05742  | 0.21551  |
| 0.00067  | 0.076414 | 0.09908  | 0.014128 | 0.76074  |
| 0.39327  | -0.0065  | 0.88864  | 0.038534 | 0.40609  |
| 0.15787  | 0.04302  | 0.35362  | 0.242177 | 1.17E-07 |
| 0.3507   | -0.01199 | 0.79608  | 0.145736 | 0.00159  |
| 0.0114   | -0.04129 | 0.37331  | 0.039349 | 0.39622  |
| 0.38509  | -0.0604  | 0.19262  | 0.212349 | 3.67E-06 |
| 0.07883  | 0.000187 | 0.99679  | -0.22346 | 1.07E-06 |
| 0.05319  | 0.012118 | 0.79396  | 0.192811 | 2.73E-05 |
| 0.3746   | -0.00801 | 0.863    | -0.01917 | 0.67952  |
| 0.45782  | -0.08844 | 0.05617  | 0.101308 | 0.02859  |
| 0.45918  | -0.09534 | 0.03945  | 0.040841 | 0.37854  |
| 0.0139   | -0.13892 | 0.00262  | 0.186087 | 5.21E-05 |
| 0.00405  | -0.15738 | 0.00064  | 0.142076 | 0.00209  |
| 0.01683  | 0.016206 | 0.72687  | 0.098249 | 0.03379  |
| 3.18E-07 | 0.140407 | 0.00236  | 0.297478 | 5.37E-11 |
| 0.96466  | -0.04839 | 0.29669  | 0.098035 | 0.03418  |
| 0.60694  | -0.03474 | 0.45392  | 0.103868 | 0.02479  |



|          |          |          |          |          |
|----------|----------|----------|----------|----------|
| 0.01301  | -0.05119 | 0.26963  | 0.114885 | 0.01298  |
| 0.00588  | -0.04449 | 0.33742  | 0.522318 | 4.79E-34 |
| 0.00049  | 0.026961 | 0.56112  | 0.23372  | 3.25E-07 |
| 0.40639  | -0.06201 | 0.181    | 0.280146 | 7.20E-10 |
| 3.49E-05 | -0.08355 | 0.07125  | 0.531216 | 2.30E-35 |
| 0.71003  | -0.09723 | 0.03569  | 0.321898 | 1.02E-12 |
| 1.69E-11 | -0.18154 | 7.96E-05 | -0.37188 | 9.18E-17 |
| 0.20005  | -0.13066 | 0.00468  | 0.548226 | 5.40E-38 |
| 0.23929  | -0.0569  | 0.21968  | 0.065665 | 0.15656  |
| 0.19498  | -0.06828 | 0.14068  | 0.227933 | 6.42E-07 |
| 0.49234  | -0.05865 | 0.20579  | 0.047887 | 0.30176  |
| 0.97136  | -0.0176  | 0.70436  | 0.023707 | 0.60934  |
| 0.02831  | 0.136666 | 0.00308  | -0.12275 | 0.00792  |
| 0.0004   | 0.083408 | 0.07174  | 0.295526 | 7.25E-11 |
| 0.12818  | -0.00476 | 0.91837  | -0.41672 | 4.83E-21 |
| 0.00254  | 0.245786 | 7.45E-08 | 0.067763 | 0.14371  |
| 0.11046  | 0.131246 | 0.0045   | -0.42949 | 2.20E-22 |
| 0.82406  | 0.12217  | 0.00822  | -0.09347 | 0.04349  |
| 0.04073  | -0.00769 | 0.86844  | -0.12091 | 0.00891  |
| 0.02475  | 0.151812 | 0.001    | -0.07396 | 0.11045  |
| 0.02045  | 0.072195 | 0.11924  | 0.231198 | 4.38E-07 |
| 3.39E-08 | 0.209098 | 5.19E-06 | 0.263223 | 7.69E-09 |
| 0.0017   | -0.15837 | 0.00059  | -0.03604 | 0.43712  |
| 6.96E-05 | 0.038502 | 0.40648  | 0.28547  | 3.31E-10 |
| 0.0008   | 0.065171 | 0.1597   | 0.10115  | 0.02884  |
| 0.68332  | -0.02334 | 0.61494  | 0.051576 | 0.266    |
| 0.59316  | 0.023295 | 0.61558  | -0.00822 | 0.85941  |
| 0.50786  | -0.05137 | 0.26793  | 0.126678 | 0.00612  |
| 0.00854  | -0.04811 | 0.29953  | -0.04599 | 0.32129  |
| 0.01122  | 0.065739 | 0.15609  | 0.107025 | 0.02071  |
| 0.00438  | -0.02795 | 0.54685  | -0.18275 | 7.12E-05 |
| 0.47238  | 0.125332 | 0.00669  | -0.31894 | 1.68E-12 |
| 0.08913  | 0.145446 | 0.00162  | 0.012491 | 0.78775  |
| 0.47336  | 0.043377 | 0.34963  | 0.324843 | 6.15E-13 |
| 0.00563  | 0.06448  | 0.16418  | -0.23415 | 3.09E-07 |
| 1.41E-06 | -0.02622 | 0.57197  | 0.660707 | 6.66E-60 |
| 0.00055  | -0.11148 | 0.01595  | -0.14157 | 0.00216  |
| 0.71035  | 0.181528 | 7.97E-05 | -0.24428 | 8.99E-08 |
| 0.0002   | 0.100424 | 0.03002  | 0.276106 | 1.29E-09 |
| 0.36658  | 0.063822 | 0.16854  | -0.04821 | 0.29855  |
| 0.00859  | -0.00254 | 0.95639  | 0.099515 | 0.03155  |
| 0.44147  | -0.03826 | 0.40938  | 0.186528 | 5.00E-05 |
| 0.00169  | -0.02325 | 0.61632  | 0.311153 | 6.09E-12 |
| 0.1633   | 0.040882 | 0.37807  | 0.166177 | 0.00031  |
| 0.40832  | -0.07089 | 0.12607  | 0.185768 | 5.37E-05 |

|          |          |          |          |          |
|----------|----------|----------|----------|----------|
| 0.00122  | 0.055155 | 0.2342   | 0.452908 | 5.34E-25 |
| 0.9318   | -0.0145  | 0.75463  | 0.070023 | 0.13078  |
| 5.63E-13 | 0.465687 | 1.64E-26 | 0.124413 | 0.00711  |
| 7.19E-06 | 0.291467 | 1.35E-10 | -0.1386  | 0.00269  |
| 0.45305  | 0.053875 | 0.24524  | 0.226383 | 7.68E-07 |
| 0.85706  | -0.04629 | 0.31819  | -0.17232 | 0.00018  |
| 8.83E-05 | -0.0728  | 0.11615  | 0.316356 | 2.58E-12 |
| 0.88467  | -0.00148 | 0.97448  | 0.005611 | 0.90375  |
| 0.51616  | -0.01941 | 0.67566  | -0.02772 | 0.55019  |
| 0.02764  | -0.13503 | 0.00346  | -0.0232  | 0.61703  |
| 0.97955  | -0.04267 | 0.35754  | 0.165818 | 0.00032  |
| 0.20794  | -0.06594 | 0.15483  | 0.029686 | 0.52221  |
| 0.0008   | 0.168848 | 0.00025  | 0.131847 | 0.00432  |
| 0.00545  | 0.155361 | 0.00075  | 0.217192 | 2.16E-06 |
| 0.76264  | -0.05376 | 0.24626  | 0.223173 | 1.11E-06 |
| 0.61854  | -0.06461 | 0.16331  | 0.314963 | 3.25E-12 |
| 0.83434  | 0.009549 | 0.83694  | -0.11941 | 0.0098   |
| 2.79E-08 | 0.163264 | 0.0004   | 0.027537 | 0.55278  |
| 0.20353  | 0.089507 | 0.05324  | 0.134685 | 0.00354  |
| 0.8634   | 0.010129 | 0.82718  | -0.15017 | 0.00113  |
| 0.2214   | 0.08601  | 0.06329  | -0.24554 | 7.68E-08 |
| 0.0016   | 0.073329 | 0.11353  | 0.225101 | 8.89E-07 |
| 0.03351  | -0.06993 | 0.13131  | 0.374065 | 5.88E-17 |
| 1.32E-05 | 0.079428 | 0.08643  | 0.233003 | 3.54E-07 |
| 0.23915  | -0.04453 | 0.33692  | 0.113322 | 0.01428  |
| 0.02309  | 0.254127 | 2.57E-08 | -0.01969 | 0.67123  |
| 0.13209  | -0.0164  | 0.7238   | 0.009909 | 0.83088  |
| 5.07E-07 | 0.096117 | 0.03786  | -0.0325  | 0.48359  |
| 0.52389  | -0.14172 | 0.00214  | 0.32698  | 4.25E-13 |
| 0.97783  | -0.15768 | 0.00063  | 0.222194 | 1.24E-06 |
| 0.00017  | -0.03913 | 0.3988   | 0.366324 | 2.81E-16 |
| 2.13E-05 | -0.06889 | 0.13717  | 0.047072 | 0.31007  |
| 0.03949  | 0.076549 | 0.09849  | 0.015313 | 0.74136  |
| 6.08E-13 | 0.16825  | 0.00026  | 0.193071 | 2.66E-05 |
| 0.6538   | -0.04241 | 0.36047  | 0.079706 | 0.08533  |
| 0.02205  | -0.13865 | 0.00268  | -0.20087 | 1.22E-05 |
| 1.38E-07 | -0.03485 | 0.45243  | -0.38269 | 9.78E-18 |
| 0.07789  | 0.055285 | 0.23309  | 0.039063 | 0.39966  |
| 0.07595  | 0.065362 | 0.15848  | -0.10392 | 0.02471  |
| 0.26815  | -0.03558 | 0.44302  | 0.445126 | 4.16E-24 |
| 0.00858  | 0.12972  | 0.00499  | 0.166328 | 0.00031  |
| 1.10E-05 | -0.02466 | 0.59496  | 0.299654 | 3.82E-11 |
| 0.00033  | -0.04763 | 0.30435  | -0.12762 | 0.00575  |
| 0.33715  | -0.0005  | 0.99145  | 0.008743 | 0.85054  |
| 0.0188   | 0.059259 | 0.20115  | -0.17742 | 0.00012  |

|          |          |          |          |          |
|----------|----------|----------|----------|----------|
| 0.03127  | -0.07914 | 0.08759  | -0.13998 | 0.00243  |
| 0.02139  | 0.034434 | 0.45788  | 0.168553 | 0.00025  |
| 0.67063  | -0.0093  | 0.84112  | -0.23807 | 1.93E-07 |
| 0.5648   | -0.00346 | 0.94052  | -0.15905 | 0.00056  |
| 0.01466  | -0.04068 | 0.3804   | 0.520068 | 1.02E-33 |
| 0.02054  | -0.01967 | 0.67152  | 0.060633 | 0.19088  |
| 0.00917  | -0.10078 | 0.02944  | -0.11728 | 0.0112   |
| 1.87E-05 | 0.017013 | 0.71384  | 0.46241  | 4.06E-26 |
| 0.00016  | 0.049293 | 0.28777  | 0.298939 | 4.28E-11 |
| 0.10125  | 0.070858 | 0.12625  | -0.13672 | 0.00307  |
| 0.75242  | -0.04422 | 0.34036  | 0.173779 | 0.00016  |
| 0.70234  | -0.00184 | 0.96831  | 0.00879  | 0.84975  |
| 0.13214  | 0.132052 | 0.00426  | 0.270848 | 2.70E-09 |
| 1.20E-05 | -0.00073 | 0.98752  | 0.145079 | 0.00167  |
| 0.0632   | -0.08064 | 0.08173  | 0.062161 | 0.17992  |
| 0.16718  | 0.043196 | 0.35164  | -0.09505 | 0.04005  |
| 0.49489  | 0.003469 | 0.94041  | 0.14383  | 0.00183  |
| 0.74607  | 0.07442  | 0.10824  | -0.00022 | 0.99618  |
| 0.06278  | 0.125617 | 0.00657  | 0.356098 | 2.08E-15 |
| 2.34E-07 | -0.24567 | 7.56E-08 | 0.0185   | 0.69007  |
| 0.15208  | -0.03922 | 0.39782  | -0.03872 | 0.40379  |
| 0.00362  | -0.06355 | 0.17034  | 0.178473 | 0.00011  |
| 0.7185   | 0.109577 | 0.01785  | -0.09756 | 0.03507  |
| 0.00033  | -0.00538 | 0.90763  | 0.010477 | 0.82136  |
| 0.77236  | 0.048924 | 0.2914   | 0.227272 | 6.93E-07 |
| 0.00355  | 0.167015 | 0.00029  | 0.233646 | 3.28E-07 |
| 8.67E-11 | 0.389212 | 2.43E-18 | 0.056632 | 0.22189  |
| 0.81988  | -0.05106 | 0.27083  | 0.307711 | 1.06E-11 |
| 1.46E-21 | 0.363449 | 4.97E-16 | 0.421201 | 1.66E-21 |
| 0.00021  | -0.02426 | 0.60105  | 0.466018 | 1.49E-26 |
| 0.55526  | 0.025812 | 0.57794  | 0.131706 | 0.00436  |
| 0.95538  | -0.19826 | 1.59E-05 | 0.355862 | 2.18E-15 |
| 0.22694  | 0.03775  | 0.41572  | 0.217582 | 2.07E-06 |
| 0.52076  | 0.007338 | 0.87434  | 0.119321 | 0.00986  |
| 0.03379  | 0.030863 | 0.50585  | 0.0984   | 0.03351  |
| 0.6908   | 0.027533 | 0.55284  | -0.12591 | 0.00644  |
| 0.93603  | -0.0598  | 0.19706  | -0.13193 | 0.00429  |
| 0.00091  | 0.079678 | 0.08544  | 0.21963  | 1.65E-06 |
| 0.09809  | 0.140206 | 0.00239  | -0.2009  | 1.22E-05 |
| 0.00142  | 0.257799 | 1.59E-08 | 0.097596 | 0.03499  |
| 0.87625  | -0.08703 | 0.06022  | 0.035388 | 0.4455   |
| 0.83233  | -0.15642 | 0.00069  | 0.333817 | 1.28E-13 |
| 1.56E-10 | 0.366546 | 2.69E-16 | 0.121008 | 0.00885  |
| 0.00381  | 0.056491 | 0.22304  | 0.051631 | 0.26549  |
| 0.53859  | -0.10891 | 0.01856  | 0.169935 | 0.00022  |

|          |          |          |          |          |
|----------|----------|----------|----------|----------|
| 0.21129  | -0.02446 | 0.59803  | 0.088358 | 0.05639  |
| 0.29538  | -0.06331 | 0.17198  | 0.155043 | 0.00077  |
| 0.11898  | -0.00219 | 0.96237  | -0.0165  | 0.72208  |
| 0.01938  | -0.11427 | 0.01348  | 0.028757 | 0.53532  |
| 4.35E-05 | 0.178944 | 0.0001   | 0.344666 | 1.80E-14 |
| 0.32374  | -0.07979 | 0.08501  | 0.034006 | 0.46349  |
| 1.78E-05 | 0.058066 | 0.21039  | 0.205567 | 7.52E-06 |
| 0.19309  | -0.12441 | 0.00711  | 0.167482 | 0.00028  |
| 0.03836  | 0.039259 | 0.3973   | -0.11351 | 0.01411  |
| 0.0431   | -0.09048 | 0.0507   | 0.242088 | 1.18E-07 |
| 0.10991  | 0.05663  | 0.2219   | 0.05492  | 0.2362   |
| 3.97E-11 | -0.13261 | 0.00409  | -0.10142 | 0.02842  |
| 0.05135  | -0.0108  | 0.81595  | -0.2566  | 1.86E-08 |
| 0.13648  | 0.275005 | 1.50E-09 | -0.33214 | 1.73E-13 |
| 0.01149  | -0.01772 | 0.70258  | -0.18403 | 6.32E-05 |
| 0.00021  | 0.036333 | 0.43344  | 0.479724 | 2.99E-28 |
| 0.07579  | -0.02187 | 0.63742  | -0.29233 | 1.18E-10 |
| 0.8529   | 0.056844 | 0.22016  | -0.08879 | 0.05519  |
| 1.18E-05 | -0.06205 | 0.18071  | 0.27675  | 1.17E-09 |
| 0.39379  | -0.06504 | 0.16054  | 0.098519 | 0.0333   |
| 0.67908  | -0.0863  | 0.06241  | 0.013725 | 0.76736  |
| 0.53252  | -0.07064 | 0.1274   | 0.042414 | 0.36044  |
| 0.00183  | 0.06491  | 0.16138  | -0.18739 | 4.60E-05 |
| 0.00014  | 0.004392 | 0.92459  | 0.494299 | 3.83E-30 |
| 0.80731  | -0.15216 | 0.00097  | 0.172034 | 0.00019  |
| 0.05738  | -0.0384  | 0.40777  | -0.28542 | 3.33E-10 |
| 0.62518  | -0.07442 | 0.10826  | 0.189092 | 3.91E-05 |
| 0.16696  | 0.111735 | 0.0157   | -0.08771 | 0.05822  |
| 0.05798  | -0.00695 | 0.88094  | 0.138511 | 0.0027   |
| 0.87467  | -0.02899 | 0.53201  | 0.181506 | 7.99E-05 |
| 0.03305  | 0.06502  | 0.16067  | 0.364704 | 3.88E-16 |
| 0.63044  | -0.20605 | 7.16E-06 | 0.141257 | 0.00222  |
| 1.91E-05 | 0.328372 | 3.34E-13 | -0.00391 | 0.93279  |
| 0.54419  | -0.07147 | 0.123    | 0.298539 | 4.55E-11 |
| 1.87E-08 | 0.189688 | 3.70E-05 | 0.186616 | 4.96E-05 |
| 0.09518  | 0.041968 | 0.36551  | 0.002272 | 0.96094  |
| 4.26E-13 | 0.250137 | 4.29E-08 | 0.186255 | 5.13E-05 |
| 8.37E-05 | 0.110976 | 0.01643  | 0.368005 | 2.01E-16 |
| 0.85412  | -0.10793 | 0.01965  | 0.211306 | 4.10E-06 |
| 0.58779  | -0.04375 | 0.34548  | 0.32144  | 1.10E-12 |
| 0.56117  | -0.06452 | 0.16391  | -0.26457 | 6.40E-09 |
| 0.17284  | -0.04192 | 0.36609  | 0.234633 | 2.92E-07 |
| 0.96464  | -0.04704 | 0.31044  | 0.034813 | 0.45293  |
| 0.24923  | 0.014279 | 0.75826  | -0.18402 | 6.33E-05 |
| 0.01838  | -0.03898 | 0.40067  | -0.25179 | 3.47E-08 |

|          |          |          |          |          |
|----------|----------|----------|----------|----------|
| 0.01673  | -0.07018 | 0.12995  | 0.055772 | 0.229    |
| 0.07857  | -0.08672 | 0.06114  | 0.247166 | 6.26E-08 |
| 0.44165  | -0.02454 | 0.5969   | 0.403951 | 9.32E-20 |
| 0.02054  | 0.096355 | 0.03739  | 0.302343 | 2.51E-11 |
| 0.34303  | 0.084868 | 0.06689  | -0.177   | 0.00012  |
| 0.3267   | 0.005821 | 0.90016  | 0.066425 | 0.15181  |
| 0.38879  | -0.01543 | 0.73954  | 0.198069 | 1.62E-05 |
| 7.33E-08 | 0.053317 | 0.25017  | 0.467307 | 1.04E-26 |
| 0.28885  | -0.11336 | 0.01424  | -0.15194 | 0.00099  |
| 0.66749  | 0.106172 | 0.02175  | 0.07812  | 0.09175  |
| 0.00635  | 0.101484 | 0.02832  | -0.3256  | 5.40E-13 |
| 4.19E-09 | 0.125369 | 0.00667  | 0.636629 | 1.94E-54 |
| 0.00524  | 0.090457 | 0.05075  | -0.0566  | 0.22216  |
| 0.58744  | -0.07958 | 0.08582  | 0.085637 | 0.06445  |
| 0.00302  | -0.06235 | 0.17862  | 0.271882 | 2.34E-09 |
| 0.00017  | 0.155785 | 0.00073  | 0.305774 | 1.45E-11 |
| 0.23257  | -0.01653 | 0.72169  | -0.07286 | 0.11587  |
| 0.42876  | 0.261176 | 1.01E-08 | -0.41553 | 6.39E-21 |
| 1.92E-07 | 0.3126   | 4.81E-12 | -0.06142 | 0.18514  |
| 0.04533  | 0.027076 | 0.55945  | 0.198963 | 1.48E-05 |
| 0.18502  | -0.03703 | 0.42463  | -0.11704 | 0.01137  |
| 0.47894  | -0.01064 | 0.8186   | 0.082048 | 0.07651  |
| 0.4001   | -0.08041 | 0.08259  | 0.227906 | 6.44E-07 |
| 0.68398  | -0.16096 | 0.00048  | 0.341403 | 3.27E-14 |
| 0.11905  | 0.144832 | 0.0017   | -0.32049 | 1.29E-12 |
| 0.5905   | -0.1376  | 0.00288  | 0.409691 | 2.50E-20 |
| 0.00011  | -0.01742 | 0.70723  | 0.575207 | 1.73E-42 |
| 0.00037  | -0.00398 | 0.9317   | 0.470639 | 4.07E-27 |
| 1.39E-06 | -0.17702 | 0.00012  | -0.23882 | 1.76E-07 |
| 0.22808  | -0.05613 | 0.226    | -0.07939 | 0.08657  |
| 0.61605  | 0.091764 | 0.04749  | -0.29378 | 9.48E-11 |
| 0.38217  | -0.03267 | 0.48125  | 0.229707 | 5.22E-07 |
| 0.09845  | 0.118531 | 0.01036  | -0.10566 | 0.0224   |
| 0.433    | -0.09344 | 0.04355  | 0.090392 | 0.05092  |
| 0.00523  | 0.003619 | 0.93783  | 0.284061 | 4.07E-10 |
| 0.12341  | -0.00578 | 0.90082  | 0.165354 | 0.00033  |
| 0.00134  | 0.149468 | 0.0012   | 0.048689 | 0.29373  |
| 0.00022  | 0.27915  | 8.32E-10 | 0.287009 | 2.63E-10 |
| 0.05886  | 0.093293 | 0.0439   | 0.344604 | 1.82E-14 |
| 0.67287  | -0.0511  | 0.2704   | -0.01173 | 0.80036  |
| 0.06594  | -0.07424 | 0.1091   | 0.057278 | 0.21665  |
| 0.35204  | -0.07443 | 0.1082   | 0.118192 | 0.01058  |
| 0.0862   | 0.160047 | 0.00052  | -0.24441 | 8.85E-08 |
| 0.11693  | 0.056623 | 0.22196  | 0.177458 | 0.00012  |
| 0.90296  | 0.056311 | 0.22452  | 0.03728  | 0.42154  |

|          |          |          |          |          |
|----------|----------|----------|----------|----------|
| 0.2259   | -0.08403 | 0.06963  | 0.191181 | 3.20E-05 |
| 0.00012  | 0.226051 | 7.98E-07 | -0.04917 | 0.28895  |
| 0.11912  | -0.03922 | 0.39779  | 0.218577 | 1.85E-06 |
| 0.17583  | -0.00461 | 0.92085  | 0.180113 | 9.08E-05 |
| 0.00748  | -0.04636 | 0.31744  | 0.294345 | 8.69E-11 |
| 0.65576  | -0.08054 | 0.08208  | 5.82E-05 | 0.999    |
| 0.00475  | -0.09946 | 0.03164  | 0.568536 | 2.45E-41 |
| 0.00046  | 0.004508 | 0.92259  | 0.271838 | 2.35E-09 |
| 5.45E-05 | -0.13842 | 0.00272  | -0.23531 | 2.69E-07 |
| 0.1118   | -0.05483 | 0.23695  | 0.260093 | 1.17E-08 |
| 0.06832  | -0.11231 | 0.01517  | 0.246047 | 7.21E-08 |
| 0.97387  | 0.093118 | 0.0443   | 0.087684 | 0.0583   |
| 0.82785  | -0.00319 | 0.94515  | 0.041114 | 0.37536  |
| 0.71164  | -0.06745 | 0.1456   | 0.348918 | 8.14E-15 |
| 0.93563  | 0.046854 | 0.31232  | 0.033729 | 0.46714  |
| 4.39E-05 | -0.02353 | 0.61204  | -0.33759 | 6.52E-14 |
| 0.35192  | -0.01644 | 0.72305  | 0.171077 | 0.0002   |
| 0.93885  | -0.06637 | 0.15214  | 0.210226 | 4.60E-06 |
| 0.02368  | -0.06722 | 0.14694  | -0.081   | 0.08036  |
| 0.29128  | -0.05048 | 0.27631  | 0.350947 | 5.56E-15 |
| 0.03445  | 0.01801  | 0.69787  | 0.187025 | 4.77E-05 |
| 0.05418  | -0.03322 | 0.47387  | 0.443332 | 6.63E-24 |
| 0.4871   | 0.034436 | 0.45785  | -0.05168 | 0.26501  |
| 0.21094  | -0.05017 | 0.27924  | 0.037447 | 0.41946  |
| 0.12002  | -0.04549 | 0.32662  | 0.434634 | 6.09E-23 |
| 0.02031  | 0.016163 | 0.72756  | 0.299787 | 3.75E-11 |
| 0.02171  | 0.040609 | 0.38126  | -0.00177 | 0.9695   |
| 0.61922  | -0.21059 | 4.43E-06 | 0.507069 | 7.06E-32 |
| 0.96947  | -0.08461 | 0.06772  | 0.142684 | 0.00199  |
| 0.94637  | -0.01121 | 0.80912  | -0.07109 | 0.12498  |
| 0.28876  | 0.011121 | 0.81057  | -0.04964 | 0.28441  |
| 0.14652  | -0.12286 | 0.00786  | 0.475857 | 9.17E-28 |
| 0.03883  | 0.111274 | 0.01614  | 0.141504 | 0.00218  |
| 0.00417  | 0.011647 | 0.80178  | 0.390463 | 1.86E-18 |
| 0.79704  | -0.06027 | 0.19352  | 0.351484 | 5.02E-15 |
| 0.03067  | -0.03225 | 0.48686  | -0.03334 | 0.47229  |
| 0.11135  | -0.07481 | 0.10638  | -0.02977 | 0.52103  |
| 0.02081  | 0.077015 | 0.09645  | 0.058057 | 0.21045  |
| 0.89814  | -0.11192 | 0.01554  | 0.067682 | 0.14419  |
| 0.15553  | 0.005398 | 0.90738  | 0.275436 | 1.42E-09 |
| 0.1428   | -0.09084 | 0.04979  | 0.086931 | 0.0605   |
| 0.50975  | 0.173879 | 0.00016  | -0.18086 | 8.48E-05 |
| 1.86E-08 | 0.079346 | 0.08675  | 0.426788 | 4.27E-22 |
| 0.00831  | -0.16809 | 0.00026  | -0.11539 | 0.01259  |
| 0.00637  | -0.04538 | 0.32778  | 0.202614 | 1.02E-05 |

|          |          |          |          |          |
|----------|----------|----------|----------|----------|
| 3.71E-06 | 0.06795  | 0.1426   | 0.353536 | 3.40E-15 |
| 0.74534  | -0.02518 | 0.58733  | 0.073231 | 0.11401  |
| 0.02035  | -0.11221 | 0.01526  | 0.036179 | 0.43539  |
| 0.96248  | 0.029128 | 0.53006  | 0.070515 | 0.12809  |
| 0.03938  | -0.06417 | 0.16624  | 0.059335 | 0.20057  |
| 0.14419  | -0.09467 | 0.04087  | 0.099279 | 0.03195  |
| 0.35324  | -0.06284 | 0.17521  | -0.04886 | 0.29202  |
| 0.00051  | 0.172105 | 0.00019  | -0.16993 | 0.00023  |
| 0.00584  | 0.057072 | 0.21831  | 0.104177 | 0.02436  |
| 0.00075  | 0.064388 | 0.16479  | 0.206712 | 6.67E-06 |
| 0.19692  | -0.05758 | 0.21421  | 0.134982 | 0.00347  |
| 0.92394  | -0.03417 | 0.46135  | 0.146994 | 0.00145  |
| 0.00011  | -0.04489 | 0.33305  | 0.390249 | 1.94E-18 |
| 0.11459  | -0.03569 | 0.44162  | -0.05875 | 0.20505  |
| 0.30024  | -0.08737 | 0.0592   | 0.033522 | 0.46988  |
| 0.09358  | -0.05478 | 0.23743  | 0.187545 | 4.54E-05 |
| 0.00077  | -0.10625 | 0.02165  | 0.047811 | 0.30253  |
| 0.54827  | -0.0295  | 0.52481  | 0.013236 | 0.77543  |
| 0.00062  | 0.040587 | 0.38152  | 0.307864 | 1.04E-11 |
| 0.46875  | -0.03832 | 0.40874  | 0.198934 | 1.49E-05 |
| 0.92328  | 0.031573 | 0.4961   | 0.141733 | 0.00214  |
| 0.01591  | -0.03379 | 0.46636  | -0.06027 | 0.19357  |
| 0.19733  | -0.01626 | 0.72603  | 0.017554 | 0.70516  |
| 0.03481  | 0.025428 | 0.58361  | 0.245607 | 7.62E-08 |
| 0.5386   | -0.04474 | 0.33472  | 0.158607 | 0.00058  |
| 5.94E-07 | 0.100185 | 0.03041  | 0.376012 | 3.94E-17 |
| 8.35E-06 | 0.188926 | 3.98E-05 | 0.331892 | 1.80E-13 |
| 1.01E-05 | -0.06043 | 0.1924   | -0.18464 | 5.97E-05 |
| 0.33654  | 0.003204 | 0.94495  | 0.316341 | 2.59E-12 |
| 0.13175  | 0.02041  | 0.65999  | 0.311251 | 5.99E-12 |
| 0.49074  | 0.0552   | 0.23381  | 0.201016 | 1.20E-05 |
| 0.22724  | -0.01647 | 0.72259  | 0.071798 | 0.12129  |
| 1.42E-05 | 0.049291 | 0.28779  | 0.518796 | 1.55E-33 |
| 0.06402  | 0.11738  | 0.01113  | -0.11483 | 0.01302  |
| 0.27897  | 0.042202 | 0.36285  | 0.099802 | 0.03106  |
| 4.67E-05 | -0.02114 | 0.64859  | 0.540839 | 7.82E-37 |
| 0.13103  | -0.05213 | 0.26086  | 0.272314 | 2.20E-09 |
| 0.00811  | -0.0036  | 0.93808  | 0.147931 | 0.00135  |
| 0.15792  | -0.08885 | 0.05501  | 0.092022 | 0.04687  |
| 0.31237  | -0.02018 | 0.66363  | 0.124445 | 0.00709  |
| 0.57902  | -0.02562 | 0.58079  | 0.256589 | 1.86E-08 |
| 0.89183  | -0.02675 | 0.56412  | 0.132041 | 0.00426  |
| 0.01793  | 0.020258 | 0.66237  | 0.196776 | 1.84E-05 |
| 0.04614  | -0.00466 | 0.91997  | 0.266472 | 4.94E-09 |
| 0.71793  | -0.13056 | 0.00471  | 0.345535 | 1.53E-14 |

|          |          |          |          |          |
|----------|----------|----------|----------|----------|
| 0.62264  | -0.14502 | 0.00168  | 0.245025 | 8.19E-08 |
| 0.2335   | 0.187992 | 4.35E-05 | -0.19008 | 3.56E-05 |
| 0.36146  | -0.04551 | 0.32643  | 0.185224 | 5.65E-05 |
| 0.17256  | -0.00066 | 0.98867  | 0.19483  | 2.24E-05 |
| 1.27E-05 | 0.29385  | 9.38E-11 | 0.030509 | 0.51074  |
| 0.70862  | 0.062674 | 0.17634  | 0.14262  | 0.002    |
| 0.69529  | -0.01914 | 0.67988  | -0.07403 | 0.11012  |
| 0.09184  | -0.02636 | 0.56986  | 0.180561 | 8.72E-05 |
| 0.03332  | -0.09903 | 0.03239  | 0.007148 | 0.87756  |
| 0.55664  | 0.061502 | 0.18459  | 0.101295 | 0.02861  |
| 0.0937   | -0.1409  | 0.00227  | 0.224816 | 9.19E-07 |
| 9.54E-13 | -0.19849 | 1.55E-05 | -0.10188 | 0.0277   |
| 0.74331  | 0.045592 | 0.32555  | -0.1319  | 0.0043   |
| 0.00844  | 0.05951  | 0.19924  | 0.032424 | 0.48455  |
| 0.03739  | 0.158164 | 0.0006   | -0.12226 | 0.00817  |
| 0.29153  | 0.244149 | 9.14E-08 | -0.03981 | 0.39067  |
| 0.59152  | 0.013777 | 0.76651  | 0.153709 | 0.00086  |
| 1.96E-06 | 0.026397 | 0.56935  | 0.375503 | 4.38E-17 |
| 7.37E-05 | 0.145934 | 0.00157  | 0.231523 | 4.22E-07 |
| 0.0497   | 0.00237  | 0.95926  | -0.00883 | 0.84907  |
| 0.45236  | -0.04387 | 0.34413  | 0.214132 | 3.02E-06 |
| 0.11283  | -0.06847 | 0.13957  | 0.241941 | 1.20E-07 |
| 0.76308  | -0.01947 | 0.67474  | 0.257768 | 1.59E-08 |
| 0.41503  | 0.075841 | 0.10165  | -0.15072 | 0.00109  |
| 0.00122  | -0.01116 | 0.80997  | 0.196351 | 1.92E-05 |
| 0.05052  | 0.02042  | 0.65983  | -0.19469 | 2.27E-05 |
| 0.4776   | -0.03043 | 0.51178  | 0.182812 | 7.08E-05 |
| 5.53E-10 | -0.02939 | 0.52637  | 0.449601 | 1.29E-24 |
| 1.31E-07 | 0.346021 | 1.40E-14 | 0.059758 | 0.19737  |
| 2.04E-06 | 0.356646 | 1.87E-15 | 0.049306 | 0.28764  |
| 0.33569  | 0.158939 | 0.00057  | -0.34665 | 1.24E-14 |
| 0.04449  | 0.187956 | 4.36E-05 | -0.31906 | 1.64E-12 |
| 0.64673  | -0.1771  | 0.00012  | 0.152581 | 0.00094  |
| 0.73843  | -0.05333 | 0.25008  | 0.000725 | 0.98753  |
| 0.5015   | -0.00264 | 0.95465  | 0.161321 | 0.00047  |
| 0.21732  | -0.06321 | 0.17269  | 0.003631 | 0.93763  |
| 0.00011  | -0.08923 | 0.05398  | -0.22723 | 6.97E-07 |
| 0.00297  | -0.04105 | 0.37614  | 0.464077 | 2.56E-26 |
| 0.17697  | 0.058333 | 0.20829  | 0.188431 | 4.17E-05 |
| 0.48331  | -0.11515 | 0.01277  | 0.344509 | 1.85E-14 |
| 0.52607  | 0.011651 | 0.80172  | 0.041185 | 0.37454  |
| 0.70774  | 0.108355 | 0.01917  | 0.00044  | 0.99243  |
| 0.83963  | -0.08926 | 0.05391  | 0.10976  | 0.01766  |
| 0.39209  | 0.046953 | 0.3113   | -0.22008 | 1.57E-06 |
| 0.00052  | -0.0506  | 0.27517  | -0.10988 | 0.01753  |



|          |          |          |          |          |
|----------|----------|----------|----------|----------|
| 0.72364  | 0.014101 | 0.76119  | 0.049332 | 0.28739  |
| 0.09652  | -0.14114 | 0.00223  | 0.21088  | 4.29E-06 |
| 0.30282  | 0.008317 | 0.85774  | 0.13519  | 0.00342  |
| 0.03137  | -0.12928 | 0.00514  | 0.03972  | 0.39178  |
| 0.03169  | 0.067432 | 0.14567  | -0.13612 | 0.0032   |
| 0.54618  | -0.00415 | 0.92869  | 0.288957 | 1.97E-10 |
| 1.52E-07 | 0.031817 | 0.49277  | 0.331704 | 1.86E-13 |
| 0.6065   | -0.08777 | 0.05804  | -0.00976 | 0.83331  |
| 0.30577  | 0.011216 | 0.80899  | -0.34985 | 6.83E-15 |
| 0.0061   | 0.009584 | 0.83636  | 0.297672 | 5.21E-11 |
| 0.01035  | -0.0445  | 0.33728  | -0.13158 | 0.0044   |
| 0.00069  | 0.027878 | 0.54787  | -0.3898  | 2.14E-18 |
| 0.7536   | -0.20252 | 1.03E-05 | 0.356695 | 1.86E-15 |
| 0.95073  | -0.03001 | 0.51765  | -0.03944 | 0.39508  |
| 0.50864  | -0.07817 | 0.09153  | 0.214477 | 2.91E-06 |
| 0.001    | 0.204925 | 8.04E-06 | -0.07357 | 0.11235  |
| 0.13055  | 0.02977  | 0.52103  | -0.12085 | 0.00894  |
| 0.10993  | -0.04071 | 0.38007  | -0.03813 | 0.41106  |
| 0.05376  | 0.157163 | 0.00065  | 0.002807 | 0.95177  |
| 0.01098  | 0.017735 | 0.70226  | 0.25481  | 2.35E-08 |
| 0.0001   | 0.032308 | 0.48612  | 0.537428 | 2.63E-36 |
| 0.00169  | -0.06109 | 0.18755  | 0.548466 | 4.95E-38 |
| 0.00969  | -0.13343 | 0.00387  | 0.017829 | 0.70077  |
| 1.50E-06 | 0.228057 | 6.33E-07 | 0.396884 | 4.54E-19 |
| 0.55599  | 0.012868 | 0.78151  | 0.113298 | 0.0143   |
| 0.10837  | -0.09752 | 0.03513  | 0.450458 | 1.03E-24 |
| 0.10442  | 0.063586 | 0.17012  | 0.294272 | 8.79E-11 |
| 0.00012  | -0.14109 | 0.00224  | -0.03404 | 0.46299  |
| 0.9379   | -0.08374 | 0.07063  | 0.324882 | 6.11E-13 |
| 0.25861  | 0.044381 | 0.33857  | 0.11964  | 0.00966  |
| 0.04553  | -0.1188  | 0.01019  | 0.510664 | 2.23E-32 |
| 0.15727  | -0.13022 | 0.00482  | 0.12133  | 0.00867  |
| 0.68317  | -0.06635 | 0.15224  | 0.308924 | 8.75E-12 |
| 0.26731  | -0.05672 | 0.22119  | 0.409894 | 2.39E-20 |
| 0.00152  | -0.11711 | 0.01132  | -0.25241 | 3.21E-08 |
| 0.15307  | -0.07781 | 0.09307  | 0.157836 | 0.00062  |
| 0.18649  | -0.05275 | 0.25524  | 0.04282  | 0.35586  |
| 0.00021  | 0.014258 | 0.75861  | 0.174659 | 0.00015  |
| 0.97339  | -0.10161 | 0.02812  | 0.186728 | 4.90E-05 |
| 0.06247  | -0.00837 | 0.85686  | 0.258024 | 1.54E-08 |
| 3.16E-05 | 0.018751 | 0.6861   | 0.316048 | 2.72E-12 |
| 9.79E-05 | -0.00668 | 0.88559  | 0.310264 | 7.04E-12 |
| 0.01232  | 0.055401 | 0.23211  | 0.292979 | 1.07E-10 |
| 0.00047  | -0.06064 | 0.19085  | 0.022903 | 0.62154  |
| 0.49885  | 0.017657 | 0.70351  | 0.346213 | 1.35E-14 |

|          |          |          |          |          |
|----------|----------|----------|----------|----------|
| 7.66E-07 | 0.023128 | 0.61811  | 0.273733 | 1.80E-09 |
| 0.2294   | -0.0718  | 0.12126  | 0.234831 | 2.85E-07 |
| 0.5197   | -0.0666  | 0.15073  | 0.336166 | 8.43E-14 |
| 0.59037  | -0.06272 | 0.17602  | 0.233073 | 3.51E-07 |
| 0.09491  | -0.00855 | 0.85386  | 0.153199 | 0.0009   |
| 0.98303  | -0.05863 | 0.20599  | 0.195824 | 2.03E-05 |
| 0.31278  | -0.12519 | 0.00675  | 0.380703 | 1.49E-17 |
| 0.15883  | 0.069783 | 0.13211  | -0.07104 | 0.12525  |
| 0.4483   | -0.07234 | 0.11847  | -0.21669 | 2.28E-06 |
| 0.09663  | -0.03357 | 0.46921  | 0.14556  | 0.00161  |
| 0.83047  | 0.087935 | 0.05758  | 0.045391 | 0.32769  |
| 0.0463   | 0.111909 | 0.01554  | -0.12316 | 0.00771  |
| 0.29924  | 0.029384 | 0.52645  | -0.00898 | 0.84662  |
| 0.00364  | 0.010277 | 0.8247   | 0.430583 | 1.68E-22 |
| 0.0248   | 0.016884 | 0.71592  | -0.21013 | 4.65E-06 |
| 0.00998  | -0.03777 | 0.41545  | -0.13329 | 0.00391  |
| 0.44952  | -0.00267 | 0.95419  | 0.073871 | 0.11088  |
| 0.01074  | 0.169569 | 0.00023  | -0.40954 | 2.59E-20 |
| 0.06216  | 0.010629 | 0.8188   | 0.228468 | 6.03E-07 |
| 3.07E-08 | 0.349959 | 6.70E-15 | -0.20813 | 5.75E-06 |
| 0.01562  | 0.085307 | 0.06549  | 0.452422 | 6.08E-25 |
| 0.23693  | 0.010671 | 0.81809  | 0.147601 | 0.00138  |
| 0.33931  | -0.12802 | 0.0056   | 0.423503 | 9.51E-22 |
| 0.51508  | -0.14821 | 0.00132  | 0.157239 | 0.00065  |
| 0.47091  | -0.02547 | 0.58293  | 0.072096 | 0.11974  |
| 0.94862  | -0.01117 | 0.80967  | 0.107905 | 0.01968  |
| 0.71171  | -0.13162 | 0.00438  | 0.171627 | 0.00019  |
| 0.00883  | -0.01987 | 0.66838  | 0.334623 | 1.11E-13 |
| 0.18377  | -0.02788 | 0.54788  | -0.22714 | 7.03E-07 |
| 0.80469  | 0.035496 | 0.44411  | 0.096384 | 0.03733  |
| 0.15708  | 0.132706 | 0.00407  | -0.11851 | 0.01037  |
| 0.14902  | -0.07007 | 0.13055  | 0.352222 | 4.37E-15 |
| 0.06238  | 0.007152 | 0.87749  | 0.230979 | 4.50E-07 |
| 2.02E-06 | 0.105622 | 0.02244  | 0.371729 | 9.47E-17 |
| 5.12E-12 | 0.230548 | 4.73E-07 | 0.16192  | 0.00044  |
| 0.01982  | 0.245233 | 7.98E-08 | -0.18997 | 3.60E-05 |
| 0.25632  | 0.0576   | 0.21407  | -0.04607 | 0.32052  |
| 0.06486  | 0.034035 | 0.46311  | 0.367938 | 2.03E-16 |
| 0.00018  | 0.193019 | 2.67E-05 | 0.008672 | 0.85173  |
| 1.80E-10 | -0.12855 | 0.0054   | -0.05925 | 0.20123  |
| 0.66096  | 0.075084 | 0.10512  | 0.234945 | 2.81E-07 |
| 2.21E-16 | 0.316075 | 2.71E-12 | -0.05305 | 0.25259  |
| 0.04363  | -0.0916  | 0.0479   | 0.131992 | 0.00427  |
| 0.00072  | -0.0227  | 0.62469  | 0.042055 | 0.36453  |
| 0.48196  | -0.15237 | 0.00096  | 0.331346 | 1.98E-13 |

|          |          |          |          |          |
|----------|----------|----------|----------|----------|
| 0.82593  | -0.11567 | 0.01237  | 0.247279 | 6.17E-08 |
| 0.0734   | 0.012287 | 0.79115  | 0.095514 | 0.03909  |
| 0.85165  | -0.03032 | 0.51342  | 0.289853 | 1.72E-10 |
| 0.722    | -0.02771 | 0.55036  | 0.081504 | 0.07849  |
| 0.5352   | -0.10012 | 0.03052  | 0.233351 | 3.40E-07 |
| 0.06217  | -0.07818 | 0.09151  | 0.116524 | 0.01174  |
| 0.01172  | -0.16047 | 0.0005   | -0.0228  | 0.62308  |
| 0.04518  | -0.13522 | 0.00341  | 0.07447  | 0.108    |
| 0.00053  | -0.13915 | 0.00258  | 0.073419 | 0.11308  |
| 4.05E-07 | 0.033876 | 0.4652   | 0.32377  | 7.39E-13 |
| 0.00076  | 0.129667 | 0.00501  | 0.370517 | 1.21E-16 |
| 0.52032  | 0.076724 | 0.09772  | -0.11906 | 0.01002  |
| 0.00013  | -0.02175 | 0.63914  | 0.506498 | 8.48E-32 |
| 0.04456  | 0.062675 | 0.17634  | -0.08984 | 0.05235  |
| 0.08444  | -0.0509  | 0.27228  | 0.315247 | 3.11E-12 |
| 0.70293  | -0.1198  | 0.00956  | 0.222217 | 1.23E-06 |
| 0.9456   | 0.018103 | 0.6964   | -0.0944  | 0.04144  |
| 0.88156  | 0.213519 | 3.23E-06 | -0.31068 | 6.58E-12 |
| 0.00333  | -0.13374 | 0.00379  | -0.04359 | 0.34725  |
| 0.37083  | -0.10349 | 0.02533  | 0.041158 | 0.37485  |
| 5.72E-06 | 0.006569 | 0.88741  | 0.109397 | 0.01804  |
| 0.04922  | -0.11508 | 0.01283  | 0.196173 | 1.96E-05 |
| 5.43E-06 | -0.16711 | 0.00029  | -0.15834 | 0.00059  |
| 5.92E-11 | 0.291618 | 1.32E-10 | 0.344574 | 1.83E-14 |
| 1.64E-07 | 0.119801 | 0.00956  | 0.346635 | 1.25E-14 |
| 0.00116  | -0.02921 | 0.52893  | 0.303501 | 2.09E-11 |
| 0.02225  | -0.03761 | 0.41742  | 0.098714 | 0.03295  |
| 0.03771  | 0.104425 | 0.02402  | -0.01801 | 0.69795  |
| 0.9241   | 0.00322  | 0.94468  | 0.024807 | 0.59283  |
| 0.01646  | 0.242998 | 1.05E-07 | -0.04709 | 0.30989  |
| 0.86926  | 0.05906  | 0.20266  | 0.005254 | 0.90985  |
| 0.00333  | 0.075943 | 0.10119  | 0.473254 | 1.93E-27 |
| 0.0533   | 0.01608  | 0.7289   | -0.16578 | 0.00032  |
| 0.51195  | 0.113291 | 0.0143   | 0.084766 | 0.06722  |
| 0.97298  | 0.166949 | 0.00029  | -0.42311 | 1.05E-21 |
| 0.0019   | 0.064756 | 0.16238  | -0.03423 | 0.46051  |
| 0.16177  | 0.068214 | 0.14106  | -0.30792 | 1.03E-11 |
| 0.43696  | 0.112011 | 0.01545  | -0.00345 | 0.94076  |
| 3.55E-11 | 0.207159 | 6.37E-06 | 0.243985 | 9.33E-08 |
| 0.00378  | 0.047483 | 0.30586  | -0.24523 | 7.98E-08 |
| 0.87441  | 0.151926 | 0.00099  | -0.03084 | 0.50619  |
| 0.01647  | -0.198   | 1.63E-05 | 0.100422 | 0.03002  |
| 0.67934  | 0.118608 | 0.01031  | -0.0091  | 0.84447  |
| 5.28E-08 | 0.156545 | 0.00069  | 0.306223 | 1.35E-11 |
| 0.21873  | -0.18117 | 8.24E-05 | 0.170941 | 0.00021  |

|          |          |          |          |          |
|----------|----------|----------|----------|----------|
| 0.03024  | -0.00704 | 0.87942  | 0.157241 | 0.00065  |
| 0.95061  | 0.035517 | 0.44385  | 0.035188 | 0.44808  |
| 0.00676  | 0.104658 | 0.02371  | 0.227095 | 7.07E-07 |
| 0.74478  | 0.003621 | 0.9378   | 0.087502 | 0.05883  |
| 0.00426  | -0.06971 | 0.13253  | 0.190662 | 3.36E-05 |
| 0.06617  | -0.01458 | 0.75329  | 0.201082 | 1.19E-05 |
| 0.01998  | -0.22832 | 6.14E-07 | 0.156853 | 0.00067  |
| 0.78873  | -0.10183 | 0.02777  | 0.322631 | 8.97E-13 |
| 0.70714  | 0.000441 | 0.99241  | 0.214155 | 3.01E-06 |
| 0.21537  | 0.051508 | 0.26663  | -0.14881 | 0.00126  |
| 0.00105  | 0.066064 | 0.15405  | 0.235087 | 2.76E-07 |
| 0.19041  | -0.08335 | 0.07193  | 0.133132 | 0.00395  |
| 3.51E-11 | 0.042911 | 0.35483  | 0.537729 | 2.36E-36 |
| 0.00887  | 0.039092 | 0.39931  | -0.16058 | 0.00049  |
| 0.46207  | 0.021492 | 0.64318  | 0.122756 | 0.00791  |
| 0.81139  | 0.049394 | 0.28679  | 0.312207 | 5.13E-12 |
| 0.64009  | 0.004959 | 0.91489  | 0.024085 | 0.60365  |
| 0.06329  | 0.045296 | 0.3287   | -0.03415 | 0.46156  |
| 4.69E-06 | 0.235184 | 2.73E-07 | 0.156459 | 0.00069  |
| 0.02177  | -0.03629 | 0.43397  | 0.289205 | 1.89E-10 |
| 0.01488  | -0.01429 | 0.75813  | 0.401391 | 1.66E-19 |
| 0.5732   | 0.000386 | 0.99336  | 0.342089 | 2.88E-14 |
| 1.10E-13 | 0.100792 | 0.02942  | 0.312638 | 4.78E-12 |
| 3.08E-05 | 0.087183 | 0.05976  | 0.24145  | 1.28E-07 |
| 0.81965  | -0.01412 | 0.76095  | 0.009422 | 0.83908  |
| 0.33181  | 0.072236 | 0.11902  | 0.214473 | 2.91E-06 |
| 0.51773  | -0.03388 | 0.4652   | -0.03592 | 0.43874  |
| 0.53202  | -0.00707 | 0.87897  | 0.08516  | 0.06596  |
| 0.81757  | -0.01937 | 0.67634  | 0.362488 | 6.01E-16 |
| 0.08124  | 0.12372  | 0.00743  | -0.00958 | 0.83646  |
| 0.80436  | 0.09499  | 0.04018  | -0.27471 | 1.57E-09 |
| 0.03967  | 0.182941 | 7.00E-05 | -0.22374 | 1.04E-06 |
| 0.12291  | 0.185223 | 5.65E-05 | -0.14362 | 0.00186  |
| 1.13E-05 | 0.126655 | 0.00613  | 0.31027  | 7.03E-12 |
| 3.43E-12 | 0.279856 | 7.51E-10 | 0.284916 | 3.59E-10 |
| 0.10665  | 0.214025 | 3.06E-06 | -0.02809 | 0.54486  |
| 0.16994  | 0.01055  | 0.82012  | -0.03228 | 0.48652  |
| 3.58E-06 | -0.15351 | 0.00087  | -0.14415 | 0.00179  |
| 6.96E-06 | -0.12933 | 0.00513  | -0.12653 | 0.00618  |
| 2.86E-07 | 0.022896 | 0.62164  | 0.541535 | 6.10E-37 |
| 0.38609  | -0.13802 | 0.0028   | 0.417257 | 4.25E-21 |
| 0.00267  | 0.092259 | 0.0463   | 0.329698 | 2.65E-13 |
| 0.12316  | -0.03791 | 0.4137   | 0.362121 | 6.46E-16 |
| 0.06711  | -0.12341 | 0.00758  | -0.14625 | 0.00153  |
| 0.15996  | -0.0733  | 0.11369  | 0.258503 | 1.45E-08 |

|          |          |          |          |          |
|----------|----------|----------|----------|----------|
| 0.15579  | -0.18119 | 8.23E-05 | 0.119463 | 0.00977  |
| 0.41787  | -0.13441 | 0.00361  | 0.510333 | 2.48E-32 |
| 0.0899   | 0.252711 | 3.08E-08 | -0.01081 | 0.8158   |
| 0.9605   | 0.024196 | 0.60198  | 0.031474 | 0.49745  |
| 0.59957  | 0.033238 | 0.47365  | 0.026132 | 0.57323  |
| 0.02405  | 0.243182 | 1.03E-07 | -0.16994 | 0.00022  |
| 0.4667   | -0.00793 | 0.86426  | -0.01626 | 0.72607  |
| 0.1711   | -0.01627 | 0.7259   | -0.10919 | 0.01826  |
| 0.0096   | -0.04248 | 0.35971  | 0.088503 | 0.05598  |
| 0.70356  | -0.02533 | 0.58502  | -0.0524  | 0.25847  |
| 0.06598  | 0.128314 | 0.00549  | -0.00433 | 0.92568  |
| 0.18638  | -0.1065  | 0.02134  | 0.114177 | 0.01355  |
| 0.20395  | 0.077224 | 0.09555  | 0.106401 | 0.02146  |
| 0.07166  | 0.049366 | 0.28706  | 0.220356 | 1.52E-06 |
| 0.00163  | 0.070266 | 0.12945  | 0.349411 | 7.42E-15 |
| 0.38095  | -0.01235 | 0.79015  | -0.00328 | 0.94362  |
| 0.66306  | 0.016624 | 0.72011  | -0.01117 | 0.80977  |
| 0.38802  | -0.0076  | 0.86993  | 0.228245 | 6.19E-07 |
| 0.78849  | -0.06999 | 0.13098  | -0.01348 | 0.77147  |
| 0.82663  | -0.01014 | 0.82706  | 0.027986 | 0.54633  |
| 0.14546  | 0.039485 | 0.39459  | 0.11821  | 0.01057  |
| 0.89709  | 0.011776 | 0.79964  | 0.065018 | 0.16068  |
| 0.81031  | -0.0005  | 0.99141  | 0.026113 | 0.57351  |
| 0.43222  | 0.066851 | 0.14919  | -0.02829 | 0.54198  |
| 0.0588   | -0.02256 | 0.62677  | 0.138967 | 0.00262  |
| 0.00173  | -0.00849 | 0.8548   | 0.097426 | 0.03531  |
| 0.07197  | 0.008672 | 0.85174  | 0.057848 | 0.2121   |
| 1.29E-05 | 0.221824 | 1.29E-06 | 0.10454  | 0.02387  |
| 0.01416  | -0.01646 | 0.72277  | 0.210238 | 4.60E-06 |
| 0.38788  | -0.02704 | 0.55998  | 0.10474  | 0.0236   |
| 0.30019  | 0.152839 | 0.00092  | 0.274981 | 1.51E-09 |
| 0.00339  | -0.06762 | 0.14455  | -0.13502 | 0.00346  |
| 0.42925  | -0.05205 | 0.26166  | 0.407924 | 3.76E-20 |
| 0.62073  | 0.042255 | 0.36224  | -0.05371 | 0.24668  |
| 0.63425  | -0.04847 | 0.29591  | 0.253952 | 2.63E-08 |
| 2.26E-06 | 0.284138 | 4.02E-10 | 0.061772 | 0.18266  |
| 0.00178  | 0.28553  | 3.28E-10 | -0.08564 | 0.06442  |
| 0.10665  | 0.07576  | 0.10202  | -0.08731 | 0.05938  |
| 1.29E-06 | 0.079999 | 0.08418  | 0.330685 | 2.23E-13 |
| 0.41092  | 0.145332 | 0.00164  | 0.047991 | 0.30072  |
| 1.00E-10 | 0.10639  | 0.02148  | 0.407086 | 4.56E-20 |
| 0.06311  | 0.049138 | 0.28929  | 0.156701 | 0.00068  |
| 0.04756  | -0.04739 | 0.30684  | 0.260765 | 1.07E-08 |
| 0.2545   | -0.01456 | 0.7536   | 0.212696 | 3.53E-06 |
| 0.14968  | -0.03648 | 0.43164  | -0.10451 | 0.02391  |

|          |          |          |          |          |
|----------|----------|----------|----------|----------|
| 0.38006  | -0.12788 | 0.00565  | 0.112821 | 0.01471  |
| 0.95571  | -0.04601 | 0.3211   | -0.00336 | 0.9423   |
| 0.00072  | -0.02005 | 0.66568  | -0.0906  | 0.05038  |
| 0.10687  | 0.069997 | 0.13093  | 0.058635 | 0.20594  |
| 0.98258  | -0.06918 | 0.13548  | 0.285137 | 3.47E-10 |
| 0.20648  | 0.062821 | 0.17533  | 0.130448 | 0.00475  |
| 0.00166  | -0.01586 | 0.73244  | 0.338051 | 6.01E-14 |
| 0.7419   | -0.12007 | 0.0094   | 0.006005 | 0.89703  |
| 2.66E-08 | 0.159724 | 0.00053  | 0.340599 | 3.79E-14 |
| 0.23712  | -0.083   | 0.07314  | 0.236153 | 2.43E-07 |
| 0.05121  | 0.004537 | 0.92211  | 0.286163 | 2.98E-10 |
| 0.1405   | -0.09399 | 0.04234  | 0.157929 | 0.00061  |
| 0.83959  | 0.017137 | 0.71185  | 0.157943 | 0.00061  |
| 0.64844  | 0.064019 | 0.16722  | -0.07839 | 0.09062  |
| 0.30168  | -0.08231 | 0.07556  | 0.181433 | 8.04E-05 |
| 9.02E-06 | 0.116246 | 0.01194  | 0.484393 | 7.57E-29 |
| 0.12404  | -0.04614 | 0.31977  | 0.075064 | 0.10521  |
| 7.28E-05 | 0.07902  | 0.08806  | 0.303378 | 2.13E-11 |
| 0.2177   | -0.05109 | 0.27054  | -0.1142  | 0.01354  |
| 6.26E-10 | -0.19458 | 2.29E-05 | -0.23076 | 4.61E-07 |
| 0.72696  | -0.04712 | 0.30957  | 0.024384 | 0.59917  |
| 0.91538  | -0.0709  | 0.126    | 0.285729 | 3.18E-10 |
| 0.10145  | -0.10093 | 0.02919  | 0.120844 | 0.00895  |
| 0.75202  | -0.09917 | 0.03214  | 0.12712  | 0.00594  |
| 0.86418  | -0.12936 | 0.00511  | 0.356595 | 1.89E-15 |
| 0.5906   | -0.02077 | 0.6544   | 0.150042 | 0.00115  |
| 0.13089  | -0.10256 | 0.02667  | 0.15862  | 0.00058  |
| 0.30663  | -0.03198 | 0.4906   | -0.20649 | 6.83E-06 |
| 0.28205  | -0.01388 | 0.76489  | 0.150337 | 0.00112  |
| 0.9947   | -0.00262 | 0.95499  | 0.167719 | 0.00027  |
| 0.10384  | 0.098405 | 0.0335   | 0.021546 | 0.64234  |
| 0.01186  | 0.094211 | 0.04185  | 0.036134 | 0.43597  |
| 0.56378  | -0.01393 | 0.76396  | 0.102332 | 0.02702  |
| 0.26447  | -0.00058 | 0.98994  | 0.165028 | 0.00034  |
| 0.4948   | 0.060833 | 0.18942  | -0.27196 | 2.31E-09 |
| 0.00399  | 0.07516  | 0.10477  | 0.244804 | 8.42E-08 |
| 4.55E-13 | -0.01243 | 0.78875  | 0.54661  | 9.75E-38 |
| 0.09183  | -0.0346  | 0.45575  | 0.384685 | 6.41E-18 |
| 1.24E-08 | 0.059005 | 0.20309  | 0.65243  | 5.73E-58 |
| 3.27E-06 | 0.073617 | 0.11211  | 0.316679 | 2.45E-12 |
| 0.75977  | 0.113466 | 0.01415  | -0.05866 | 0.20577  |
| 0.64454  | 0.083803 | 0.0704   | -0.03399 | 0.46375  |
| 1.62E-12 | 0.107358 | 0.02031  | 0.388882 | 2.61E-18 |
| 0.50645  | -0.00696 | 0.88068  | -0.08965 | 0.05286  |
| 0.0175   | -0.12064 | 0.00906  | 0.51942  | 1.26E-33 |

|          |          |          |          |          |
|----------|----------|----------|----------|----------|
| 0.55225  | 0.113477 | 0.01414  | 0.00201  | 0.96544  |
| 0.59628  | 0.027195 | 0.55773  | -0.0647  | 0.16275  |
| 0.00868  | -0.02318 | 0.61732  | 0.233352 | 3.40E-07 |
| 0.11069  | -0.14304 | 0.00194  | 0.026551 | 0.56709  |
| 4.06E-07 | 0.003406 | 0.94149  | 0.549959 | 2.86E-38 |
| 0.46715  | -0.08021 | 0.08336  | 0.317632 | 2.09E-12 |
| 0.2919   | -0.056   | 0.22706  | 0.319426 | 1.54E-12 |
| 0.37275  | -0.07503 | 0.10535  | 0.28863  | 2.07E-10 |
| 0.33271  | -0.05977 | 0.19732  | -0.01867 | 0.68733  |
| 0.17056  | -0.10686 | 0.0209   | 0.200641 | 1.25E-05 |
| 0.62319  | -0.04319 | 0.35174  | 0.003736 | 0.93583  |
| 0.64416  | -0.05931 | 0.20078  | 0.127075 | 0.00596  |
| 0.82364  | 0.091456 | 0.04824  | -0.03595 | 0.43825  |
| 0.05969  | 0.140076 | 0.00241  | 0.013655 | 0.76852  |
| 0.26138  | -0.03743 | 0.41965  | 0.21118  | 4.16E-06 |
| 2.70E-06 | -0.08576 | 0.06406  | -0.07364 | 0.11202  |
| 0.07298  | 0.167079 | 0.00029  | -0.0832  | 0.07246  |
| 0.34382  | -0.01686 | 0.71639  | 0.174243 | 0.00015  |
| 0.17545  | 0.060011 | 0.19548  | 0.028935 | 0.53279  |
| 0.48808  | 0.009905 | 0.83095  | 0.037113 | 0.42363  |
| 0.76084  | 0.038762 | 0.40331  | 0.080717 | 0.08142  |
| 0.88709  | 0.121578 | 0.00854  | -0.10474 | 0.0236   |
| 0.84504  | 0.025572 | 0.58149  | -0.01717 | 0.71128  |
| 5.36E-06 | 0.079528 | 0.08603  | 0.42863  | 2.72E-22 |
| 0.00213  | -0.04826 | 0.298    | 0.404825 | 7.64E-20 |
| 0.95593  | -0.06801 | 0.14223  | 0.027675 | 0.55079  |
| 0.96231  | 0.035942 | 0.43841  | 0.035393 | 0.44545  |
| 0.00807  | -0.21645 | 2.35E-06 | -0.1365  | 0.00312  |
| 0.49352  | 0.003561 | 0.93883  | 0.019436 | 0.67528  |
| 0.95371  | 0.130838 | 0.00463  | -0.08549 | 0.0649   |
| 0.15447  | 0.102322 | 0.02703  | 0.061581 | 0.18402  |
| 0.14407  | 0.050877 | 0.27254  | -0.12241 | 0.00809  |
| 0.1232   | -0.11592 | 0.01218  | -0.0631  | 0.17344  |
| 0.01018  | -0.01439 | 0.75637  | 0.205598 | 7.50E-06 |
| 4.86E-05 | 0.123899 | 0.00735  | 0.229972 | 5.06E-07 |
| 0.01705  | -0.10537 | 0.02277  | 0.36799  | 2.01E-16 |
| 0.24723  | -0.00738 | 0.87358  | -0.14162 | 0.00216  |
| 3.48E-09 | -0.24917 | 4.85E-08 | -0.10226 | 0.02712  |
| 0.37393  | -0.09361 | 0.04319  | 0.06589  | 0.15513  |
| 6.78E-05 | 0.051276 | 0.2688   | 0.260306 | 1.14E-08 |
| 0.00392  | 0.086319 | 0.06234  | 0.155319 | 0.00076  |
| 0.07148  | -0.11896 | 0.01008  | 0.539398 | 1.31E-36 |
| 0.83095  | -0.08599 | 0.06336  | 0.251135 | 3.78E-08 |
| 0.02304  | -0.13861 | 0.00268  | -0.01826 | 0.69397  |
| 0.61733  | -0.15135 | 0.00104  | 0.182153 | 7.53E-05 |

|          |          |          |          |          |
|----------|----------|----------|----------|----------|
| 0.03729  | -0.08375 | 0.07059  | 0.070619 | 0.12753  |
| 0.40903  | -0.04033 | 0.38456  | -0.00294 | 0.94943  |
| 0.04559  | 0.072967 | 0.11532  | -0.11999 | 0.00945  |
| 0.52592  | -0.18714 | 4.71E-05 | 0.182918 | 7.01E-05 |
| 1.98E-06 | -0.04374 | 0.34562  | 0.615437 | 5.12E-50 |
| 0.02037  | 0.040592 | 0.38145  | 0.178182 | 0.00011  |
| 0.00164  | -0.04881 | 0.29254  | -0.32152 | 1.08E-12 |
| 0.04673  | 0.118844 | 0.01016  | 0.246898 | 6.48E-08 |
| 0.82877  | -0.1244  | 0.00711  | 0.236159 | 2.43E-07 |
| 1.44E-06 | 0.051392 | 0.26772  | 0.501893 | 3.64E-31 |
| 1.69E-05 | 0.014481 | 0.75496  | 0.463339 | 3.14E-26 |
| 5.16E-05 | -0.03807 | 0.41179  | 0.328171 | 3.46E-13 |
| 0.31678  | -0.08611 | 0.06299  | 0.470278 | 4.51E-27 |
| 0.03831  | -0.00036 | 0.99378  | 0.080736 | 0.08135  |
| 0.00505  | -0.19412 | 2.40E-05 | 0.00368  | 0.93678  |
| 0.00915  | -0.05248 | 0.25772  | 0.257831 | 1.58E-08 |
| 0.00106  | -0.02926 | 0.52823  | 0.287073 | 2.61E-10 |
| 0.23074  | -0.0796  | 0.08574  | 0.226292 | 7.76E-07 |
| 0.00018  | -0.02582 | 0.57775  | 0.626098 | 3.37E-52 |
| 4.39E-14 | 0.108153 | 0.0194   | 0.46435  | 2.37E-26 |
| 1.09E-07 | 0.126191 | 0.00632  | 0.397025 | 4.40E-19 |
| 0.04216  | -0.13433 | 0.00363  | 0.513361 | 9.27E-33 |
| 0.1551   | -0.0103  | 0.82423  | 0.197486 | 1.72E-05 |
| 0.05968  | -0.04566 | 0.32483  | 0.081702 | 0.07776  |
| 2.51E-06 | -0.17146 | 0.0002   | -0.11779 | 0.01085  |
| 0.80407  | -0.07899 | 0.08819  | 0.008669 | 0.85179  |
| 0.57437  | -0.05648 | 0.22314  | 0.345965 | 1.41E-14 |
| 0.39365  | -0.09102 | 0.04933  | -0.08903 | 0.05454  |
| 0.07919  | -0.07705 | 0.09631  | -0.07183 | 0.12111  |
| 0.06639  | 0.050478 | 0.27633  | 0.302358 | 2.50E-11 |
| 0.3204   | 0.112724 | 0.0148   | -0.06995 | 0.13118  |
| 0.01483  | -0.1298  | 0.00496  | 0.175693 | 0.00014  |
| 0.03462  | 0.009785 | 0.83297  | 0.408518 | 3.28E-20 |
| 0.06899  | 0.06065  | 0.19075  | 0.251997 | 3.38E-08 |
| 5.77E-07 | 0.091364 | 0.04847  | 0.151713 | 0.00101  |
| 0.01089  | 0.019866 | 0.6685   | 0.153195 | 0.0009   |
| 3.25E-20 | 0.334991 | 1.04E-13 | 0.070418 | 0.12862  |
| 0.08955  | -0.14712 | 0.00143  | 0.301543 | 2.84E-11 |
| 0.65332  | -0.13341 | 0.00387  | 0.300996 | 3.10E-11 |
| 0.04642  | 0.028258 | 0.54242  | 0.095632 | 0.03885  |
| 0.68225  | 0.145459 | 0.00162  | -0.00187 | 0.96788  |
| 0.10734  | -0.04562 | 0.32526  | -0.01548 | 0.73861  |
| 0.00053  | 0.023859 | 0.60705  | 0.478211 | 4.64E-28 |
| 0.57221  | -0.03712 | 0.42351  | 0.081221 | 0.07953  |
| 0.04568  | 0.076526 | 0.09859  | 0.045878 | 0.32252  |



|          |          |         |          |          |
|----------|----------|---------|----------|----------|
| 0.33871  | -0.07558 | 0.10283 | 0.067149 | 0.14738  |
| 0.1394   | -0.04542 | 0.32736 | -0.05083 | 0.27299  |
| 0.41042  | -0.05866 | 0.20578 | -0.0285  | 0.53892  |
| 0.07231  | -0.09797 | 0.0343  | 0.161654 | 0.00045  |
| 0.12444  | 0.121267 | 0.00871 | -0.1167  | 0.01161  |
| 0.68493  | -0.02979 | 0.52071 | 0.206171 | 7.06E-06 |
| 0.03427  | 0.108359 | 0.01917 | -0.03767 | 0.41674  |
| 0.15611  | -0.05909 | 0.20241 | 0.221785 | 1.30E-06 |
| 0.1805   | -0.05944 | 0.19974 | 0.067036 | 0.14807  |
| 0.03885  | 0.004518 | 0.92243 | 0.015899 | 0.73184  |
| 0.57439  | 0.153207 | 0.0009  | -0.03594 | 0.43846  |
| 0.0004   | 0.015435 | 0.73938 | 0.513316 | 9.41E-33 |
| 0.00249  | 0.057941 | 0.21137 | 0.366002 | 3.00E-16 |
| 9.06E-09 | 0.045199 | 0.32973 | 0.346802 | 1.21E-14 |
| 0.03648  | -0.07762 | 0.09386 | 0.311304 | 5.94E-12 |
| 8.31E-05 | 0.038654 | 0.40462 | 0.516947 | 2.86E-33 |
| 0.66415  | 0.048662 | 0.294   | 0.018746 | 0.68617  |
| 6.13E-06 | 0.116132 | 0.01202 | -0.41346 | 1.04E-20 |
| 0.00122  | 0.021973 | 0.63576 | 0.557979 | 1.43E-39 |
| 0.63903  | -0.10946 | 0.01798 | 0.011148 | 0.81012  |
| 0.11514  | 0.05676  | 0.22084 | 0.058952 | 0.20349  |
| 0.86918  | -0.01058 | 0.81968 | 0.059075 | 0.20255  |
| 0.75663  | -0.07336 | 0.11338 | 0.33366  | 1.32E-13 |
| 0.06713  | -0.00916 | 0.84352 | 0.396515 | 4.93E-19 |
| 0.62563  | -0.03936 | 0.39614 | 0.121851 | 0.00839  |
| 0.60714  | -0.05273 | 0.2554  | 0.183034 | 6.94E-05 |
| 0.25955  | 0.085273 | 0.0656  | 0.056908 | 0.21964  |
| 0.02428  | -0.07766 | 0.0937  | 0.590584 | 3.06E-45 |
| 0.99743  | -0.02297 | 0.62051 | 0.440676 | 1.31E-23 |
| 0.17907  | 0.090406 | 0.05088 | 0.267938 | 4.04E-09 |
| 0.14886  | -0.05086 | 0.27267 | 0.268069 | 3.97E-09 |
| 0.54308  | 0.023086 | 0.61875 | 0.109264 | 0.01818  |
| 0.02657  | -0.03177 | 0.49337 | -0.01236 | 0.78987  |
| 0.86836  | -0.06486 | 0.16169 | 0.126737 | 0.0061   |
| 0.16675  | -0.01994 | 0.66735 | 0.084034 | 0.06963  |
| 0.06059  | 0.039885 | 0.38982 | 0.32326  | 8.06E-13 |
| 0.00039  | -0.09085 | 0.04975 | 0.029695 | 0.52208  |
| 0.91929  | 0.046344 | 0.31763 | 0.034711 | 0.45426  |
| 0.01602  | 0.016563 | 0.7211  | 0.188531 | 4.13E-05 |
| 0.11709  | 0.14488  | 0.00169 | -0.09849 | 0.03334  |
| 0.00477  | 0.08576  | 0.06406 | -0.34681 | 1.21E-14 |
| 0.20572  | 0.033884 | 0.4651  | 0.109441 | 0.01799  |
| 0.30599  | 0.042776 | 0.35635 | 0.135007 | 0.00347  |
| 0.93357  | -0.0074  | 0.87325 | 0.173755 | 0.00016  |
| 0.64883  | 0.017733 | 0.7023  | -0.10307 | 0.02592  |

|          |          |         |          |          |
|----------|----------|---------|----------|----------|
| 0.10722  | -0.0131  | 0.77767 | 0.054915 | 0.23624  |
| 0.96426  | -0.14363 | 0.00186 | -0.0359  | 0.43897  |
| 0.00631  | -0.06528 | 0.15902 | 0.246836 | 6.53E-08 |
| 0.11672  | -0.11977 | 0.00958 | 0.169625 | 0.00023  |
| 0.02983  | 0.142572 | 0.00201 | 0.101988 | 0.02754  |
| 0.01434  | 0.024315 | 0.6002  | 0.160842 | 0.00048  |
| 0.66522  | -0.03648 | 0.4316  | 0.189147 | 3.89E-05 |
| 0.00126  | 0.016183 | 0.72724 | 0.274541 | 1.61E-09 |
| 0.00126  | 0.059292 | 0.2009  | 0.121303 | 0.00869  |
| 0.01285  | -0.0217  | 0.63991 | 0.19295  | 2.69E-05 |
| 0.00456  | 0.04702  | 0.3106  | 0.162679 | 0.00042  |
| 0.44081  | -0.01429 | 0.75814 | -0.00666 | 0.88593  |
| 0.35787  | -0.00198 | 0.96589 | 0.032792 | 0.47961  |
| 0.18209  | -0.05863 | 0.20596 | 0.264954 | 6.08E-09 |
| 0.87828  | -0.04806 | 0.29998 | -0.04496 | 0.33226  |
| 0.25531  | -0.02092 | 0.65198 | 0.184234 | 6.20E-05 |
| 0.02152  | 0.021212 | 0.64751 | 0.13909  | 0.00259  |
| 0.10321  | 0.001022 | 0.98243 | 0.147005 | 0.00144  |
| 0.04546  | 0.080283 | 0.08308 | -0.12775 | 0.0057   |
| 0.97937  | 0.084202 | 0.06907 | -0.13398 | 0.00373  |
| 3.75E-05 | 0.068451 | 0.13967 | 0.104387 | 0.02407  |
| 0.04845  | 0.059052 | 0.20273 | -0.0027  | 0.95356  |
| 0.2394   | -0.05815 | 0.20976 | -0.12067 | 0.00904  |
| 0.00173  | 0.07748  | 0.09445 | 0.146152 | 0.00154  |
| 0.96403  | 0.027862 | 0.54811 | 0.00906  | 0.84518  |
| 0.09794  | -0.02034 | 0.66108 | 0.314863 | 3.31E-12 |
| 0.51619  | 0.022373 | 0.62962 | -0.0127  | 0.78428  |
| 0.2091   | -0.04748 | 0.30586 | -0.07178 | 0.12139  |
| 0.17095  | -0.03941 | 0.39548 | 0.264402 | 6.55E-09 |
| 0.48526  | -0.0055  | 0.90563 | 0.081923 | 0.07696  |
| 0.18288  | -0.01955 | 0.67355 | 0.070395 | 0.12875  |
| 0.93255  | -0.02902 | 0.53158 | -0.01343 | 0.77217  |
| 0.13587  | -0.06775 | 0.14379 | 0.006688 | 0.88538  |
| 0.82398  | -0.03969 | 0.3922  | 0.010554 | 0.82005  |
| 1.15E-07 | -0.05286 | 0.25422 | -0.29455 | 8.43E-11 |
| 2.40E-09 | 0.014998 | 0.7465  | 0.563319 | 1.86E-40 |
| 0.80098  | 0.004985 | 0.91444 | 0.05006  | 0.28032  |
| 0.88061  | -0.11902 | 0.01004 | 0.154178 | 0.00083  |
| 0.05078  | 0.067883 | 0.14299 | 0.220747 | 1.46E-06 |
| 0.55539  | 0.082435 | 0.07513 | -0.05772 | 0.21313  |
| 0.51997  | -0.09386 | 0.04263 | -0.02244 | 0.62865  |
| 0.17281  | -0.00324 | 0.94433 | -0.01193 | 0.79716  |
| 0.00476  | 0.02588  | 0.57693 | -0.14103 | 0.00225  |
| 0.01014  | -0.10039 | 0.03008 | 0.002703 | 0.95354  |
| 0.7849   | 0.006504 | 0.88852 | -0.01435 | 0.75713  |

|          |          |          |          |          |
|----------|----------|----------|----------|----------|
| 0.72452  | -0.10534 | 0.0228   | 0.115887 | 0.01221  |
| 0.12334  | -0.02221 | 0.63215  | 0.130751 | 0.00465  |
| 0.28858  | 0.081884 | 0.0771   | 0.086127 | 0.06293  |
| 0.2441   | -0.04199 | 0.36521  | 0.163921 | 0.00038  |
| 0.41006  | -0.04752 | 0.30551  | 0.161046 | 0.00048  |
| 0.96409  | -0.13817 | 0.00277  | 0.088077 | 0.05718  |
| 0.07377  | -0.09941 | 0.03172  | -0.02045 | 0.65944  |
| 0.46066  | 0.052945 | 0.2535   | 0.000555 | 0.99046  |
| 0.17999  | 0.064991 | 0.16086  | 0.013521 | 0.77072  |
| 0.00031  | 0.053587 | 0.24778  | 0.128898 | 0.00528  |
| 0.07744  | -0.10882 | 0.01866  | 0.06859  | 0.13887  |
| 0.89692  | 0.029473 | 0.5252   | 0.019706 | 0.67102  |
| 0.64662  | 0.050102 | 0.27993  | 0.074666 | 0.10708  |
| 0.80859  | -0.08599 | 0.06335  | 0.054322 | 0.24134  |
| 0.53614  | 0.00851  | 0.85447  | 0.044983 | 0.33206  |
| 0.13365  | -0.02226 | 0.63134  | -0.03228 | 0.48649  |
| 0.02207  | -0.10478 | 0.02354  | -0.0718  | 0.12128  |
| 0.76791  | 0.103025 | 0.02599  | -0.01858 | 0.68875  |
| 2.41E-08 | -0.22181 | 1.29E-06 | -0.22854 | 5.98E-07 |
| 0.38346  | -0.08045 | 0.08245  | -0.2061  | 7.12E-06 |
| 6.29E-08 | 0.065446 | 0.15795  | 0.193779 | 2.48E-05 |
| 0.02022  | -0.1387  | 0.00267  | -0.04418 | 0.34072  |
| 0.4511   | 0.055828 | 0.22853  | 0.017309 | 0.70909  |
| 0.79542  | -0.07444 | 0.10815  | 0.041737 | 0.36816  |
| 0.705    | -0.04592 | 0.32204  | 0.118312 | 0.0105   |
| 2.85E-10 | 0.338033 | 6.03E-14 | 0.099369 | 0.0318   |
| 0.00016  | 0.317605 | 2.10E-12 | -0.13643 | 0.00313  |
| 0.25327  | 0.249793 | 4.49E-08 | -0.30894 | 8.72E-12 |
| 0.12441  | -0.03449 | 0.45711  | -0.33102 | 2.10E-13 |
| 0.47199  | 0.113065 | 0.0145   | -0.2121  | 3.76E-06 |
| 0.00116  | 0.025009 | 0.58983  | 0.25241  | 3.21E-08 |
| 0.61729  | -0.03292 | 0.47785  | 0.026251 | 0.57148  |
| 0.05763  | 0.130616 | 0.0047   | 0.180674 | 8.63E-05 |
| 0.00833  | -0.19241 | 2.84E-05 | 0.269666 | 3.18E-09 |
| 0.0009   | -0.0319  | 0.49171  | 0.493838 | 4.41E-30 |
| 0.02562  | -0.00975 | 0.83349  | 0.111442 | 0.01598  |
| 2.58E-05 | 0.381087 | 1.37E-17 | -0.15954 | 0.00054  |
| 4.55E-05 | 0.082938 | 0.07336  | 0.064294 | 0.1654   |
| 0.0051   | 0.108492 | 0.01902  | -0.25169 | 3.52E-08 |
| 0.40246  | 0.152684 | 0.00093  | -0.20539 | 7.66E-06 |
| 0.0335   | 0.136665 | 0.00308  | -0.04037 | 0.3841   |
| 2.07E-20 | 0.244042 | 9.26E-08 | 0.184491 | 6.05E-05 |
| 0.82557  | -0.01558 | 0.73699  | 0.048146 | 0.29915  |
| 0.91509  | -0.01171 | 0.80078  | 0.094851 | 0.04047  |
| 0.00419  | 0.042433 | 0.36022  | 0.267765 | 4.14E-09 |

|          |          |          |          |          |
|----------|----------|----------|----------|----------|
| 5.08E-05 | 0.053596 | 0.24771  | 0.492983 | 5.73E-30 |
| 0.3171   | -0.08059 | 0.08191  | 0.26879  | 3.59E-09 |
| 0.95901  | -0.02363 | 0.61056  | -0.26618 | 5.14E-09 |
| 0.80592  | 0.059044 | 0.20279  | -0.26122 | 1.01E-08 |
| 0.59039  | 0.012938 | 0.78035  | -0.22521 | 8.79E-07 |
| 0.05805  | 0.08794  | 0.05757  | -0.11178 | 0.01566  |
| 1.06E-07 | 0.102831 | 0.02627  | 0.438764 | 2.14E-23 |
| 0.73962  | -0.03787 | 0.41428  | 0.096477 | 0.03715  |
| 0.47268  | -0.02471 | 0.59427  | 0.030242 | 0.51445  |
| 0.00052  | 0.017332 | 0.70872  | 0.347669 | 1.03E-14 |
| 0.01095  | 0.188133 | 4.29E-05 | 0.111442 | 0.01598  |
| 0.81066  | 0.065224 | 0.15936  | -0.21154 | 4.00E-06 |
| 0.6412   | -0.09403 | 0.04225  | 0.185051 | 5.74E-05 |
| 0.48217  | -0.08058 | 0.08196  | 0.252169 | 3.31E-08 |
| 0.01653  | -0.03451 | 0.45684  | 0.419854 | 2.29E-21 |
| 0.77466  | 0.041941 | 0.36582  | -0.07674 | 0.09767  |
| 0.07379  | 0.028146 | 0.54403  | 0.204246 | 8.63E-06 |
| 0.77787  | -0.00815 | 0.86061  | 0.02384  | 0.60734  |
| 0.60648  | 0.05342  | 0.24926  | 0.038194 | 0.41024  |
| 0.03185  | 0.106791 | 0.02099  | 0.030387 | 0.51244  |
| 0.97786  | 0.028963 | 0.5324   | 0.070826 | 0.12642  |
| 0.97838  | 0.143341 | 0.0019   | -0.09375 | 0.04286  |
| 0.09934  | -0.01537 | 0.74042  | 0.047525 | 0.30543  |
| 0.01526  | -0.06267 | 0.17634  | 0.280363 | 6.98E-10 |
| 1.16E-11 | 0.28399  | 4.11E-10 | 0.415495 | 6.45E-21 |
| 0.01004  | -0.05936 | 0.20036  | 0.420249 | 2.08E-21 |
| 0.22313  | 0.067296 | 0.14649  | -0.05429 | 0.24161  |
| 0.31941  | 0.008976 | 0.8466   | -0.006   | 0.89714  |
| 0.88709  | -0.03596 | 0.43816  | -0.0211  | 0.64922  |
| 0.00013  | 0.166938 | 0.00029  | 0.026447 | 0.56861  |
| 0.14407  | 0.09988  | 0.03092  | 0.140751 | 0.0023   |
| 0.03757  | 0.082743 | 0.07404  | 0.058695 | 0.20547  |
| 0.6369   | -0.06978 | 0.13215  | 0.295798 | 6.95E-11 |
| 0.00503  | 0.053964 | 0.24446  | 0.010012 | 0.82916  |
| 0.01763  | 0.175091 | 0.00014  | 0.009259 | 0.84184  |
| 0.00022  | -0.03558 | 0.44306  | 0.015828 | 0.73298  |
| 0.00495  | -0.02592 | 0.57628  | -0.05803 | 0.2107   |
| 0.66326  | -0.07533 | 0.10399  | 0.214322 | 2.96E-06 |
| 0.02357  | -0.09054 | 0.05054  | 0.367466 | 2.24E-16 |
| 0.09696  | -0.00994 | 0.8303   | 0.02824  | 0.54269  |
| 0.41682  | -0.02917 | 0.52946  | 0.168102 | 0.00026  |
| 0.40218  | -0.00153 | 0.9737   | -0.28977 | 1.74E-10 |
| 0.12721  | -0.09915 | 0.03217  | -0.09175 | 0.04752  |
| 0.242    | 0.015506 | 0.73822  | -0.28403 | 4.09E-10 |
| 0.43534  | -0.04587 | 0.32265  | 0.146415 | 0.00151  |

|          |          |         |          |          |
|----------|----------|---------|----------|----------|
| 0.08317  | 0.048118 | 0.29944 | 0.02576  | 0.57871  |
| 0.11065  | 0.056799 | 0.22052 | 0.019099 | 0.68059  |
| 0.7943   | 0.012787 | 0.78286 | 0.363463 | 4.96E-16 |
| 0.24219  | -0.03916 | 0.39846 | 0.191381 | 3.14E-05 |
| 0.63917  | -0.0537  | 0.24674 | -0.00876 | 0.85022  |
| 1.07E-09 | 0.101068 | 0.02897 | 0.427288 | 3.78E-22 |
| 0.00691  | -0.10101 | 0.02906 | 0.312158 | 5.17E-12 |
| 0.20731  | -0.01408 | 0.76157 | 0.128891 | 0.00528  |
| 0.85616  | -0.09563 | 0.03885 | 0.198599 | 1.54E-05 |
| 0.10318  | 0.098084 | 0.03409 | -0.03223 | 0.48723  |
| 0.49074  | -0.07065 | 0.12735 | -0.32771 | 3.74E-13 |
| 0.07579  | -0.01664 | 0.71987 | 0.262767 | 8.17E-09 |
| 0.04695  | -0.09321 | 0.04408 | 0.024524 | 0.59706  |
| 0.41792  | -0.13808 | 0.00279 | 0.073539 | 0.1125   |
| 0.32418  | 0.08363  | 0.07098 | -0.17802 | 0.00011  |
| 0.18529  | -0.06887 | 0.13729 | 0.116837 | 0.01151  |
| 0.00025  | -0.07554 | 0.10302 | -0.27325 | 1.93E-09 |
| 0.78474  | -0.11287 | 0.01467 | 0.419803 | 2.32E-21 |
| 0.02258  | -0.1496  | 0.00118 | 0.006813 | 0.88326  |
| 0.00021  | 0.125471 | 0.00663 | 0.323646 | 7.55E-13 |
| 0.00072  | 0.05675  | 0.22092 | -0.28741 | 2.48E-10 |
| 0.04802  | 0.003389 | 0.94177 | 0.200067 | 1.32E-05 |
| 0.01483  | 0.010012 | 0.82916 | 0.109889 | 0.01752  |
| 0.17096  | 0.013394 | 0.77282 | -0.2976  | 5.27E-11 |
| 0.01855  | -0.07927 | 0.08705 | -0.27993 | 7.43E-10 |
| 0.77395  | -0.15143 | 0.00103 | 0.066107 | 0.15378  |
| 0.64506  | -0.04362 | 0.34693 | 0.22932  | 5.46E-07 |
| 0.00072  | 0.028806 | 0.53463 | -0.22794 | 6.41E-07 |
| 0.0828   | -0.13805 | 0.00279 | 0.517392 | 2.47E-33 |
| 0.8965   | -0.07447 | 0.108   | 0.137417 | 0.00292  |
| 0.00432  | -0.14241 | 0.00204 | 0.027762 | 0.54953  |
| 0.50284  | 0.100083 | 0.03058 | 0.066062 | 0.15406  |
| 0.00127  | -0.05538 | 0.23228 | -0.00304 | 0.94775  |
| 0.42102  | 0.10995  | 0.01746 | -0.02442 | 0.59865  |
| 0.69674  | 0.066634 | 0.15052 | -0.02533 | 0.5851   |
| 0.6964   | 0.160902 | 0.00048 | -0.24052 | 1.43E-07 |
| 0.64108  | -0.04027 | 0.38523 | 0.003321 | 0.94293  |
| 0.32723  | -0.05446 | 0.24017 | -0.00882 | 0.8493   |
| 0.32924  | -0.07369 | 0.11174 | -0.06563 | 0.15676  |
| 0.86926  | 0.021919 | 0.6366  | -0.03968 | 0.39226  |
| 0.84189  | -0.00963 | 0.83559 | -0.01451 | 0.75454  |
| 0.04151  | 0.050918 | 0.27216 | 0.035611 | 0.44264  |
| 0.53573  | -0.03421 | 0.46077 | -0.04976 | 0.28321  |
| 0.59402  | 0.000524 | 0.99099 | 0.015502 | 0.73829  |
| 0.94721  | -0.02305 | 0.61937 | 0.192141 | 2.91E-05 |

|          |           |          |          |          |
|----------|-----------|----------|----------|----------|
| 0.65346  | -0.06931  | 0.13474  | 0.035838 | 0.43974  |
| 0.47724  | 0.023249  | 0.61627  | 0.072128 | 0.11958  |
| 0.19884  | 0.104251  | 0.02426  | -0.34795 | 9.76E-15 |
| 0.55672  | 0.02467   | 0.59488  | -0.1274  | 0.00583  |
| 0.00095  | 0.029636  | 0.52291  | -0.17851 | 0.00011  |
| 0.69172  | -0.02415  | 0.60263  | 0.202673 | 1.01E-05 |
| 0.33157  | -0.02498  | 0.59019  | 0.282648 | 5.00E-10 |
| 0.70534  | 0.092891  | 0.04482  | -0.21599 | 2.47E-06 |
| 0.04885  | 0.025327  | 0.5851   | 0.214145 | 3.02E-06 |
| 0.35754  | -0.07598  | 0.10102  | 0.211235 | 4.13E-06 |
| 0.95698  | 0.197666  | 1.69E-05 | -0.23262 | 3.71E-07 |
| 0.0071   | -0.01348  | 0.77148  | 0.380568 | 1.53E-17 |
| 0.63831  | -0.10384  | 0.02483  | 0.197708 | 1.68E-05 |
| 0.37763  | 0.124731  | 0.00696  | -0.05786 | 0.21199  |
| 0.2618   | -0.02355  | 0.61168  | -0.13729 | 0.00295  |
| 0.19027  | -0.05042  | 0.27683  | 0.266038 | 5.24E-09 |
| 2.02E-07 | -0.12464  | 0.007    | -0.25115 | 3.77E-08 |
| 0.50491  | -0.0213   | 0.64611  | 0.093325 | 0.04383  |
| 0.82162  | -0.0533   | 0.2503   | 0.078019 | 0.09217  |
| 2.35E-05 | -0.09332  | 0.04383  | -0.38322 | 8.75E-18 |
| 0.00149  | 0.178626  | 0.0001   | -0.1061  | 0.02183  |
| 3.37E-05 | -0.03674  | 0.42834  | -0.36224 | 6.31E-16 |
| 0.59663  | -0.1029   | 0.02617  | -0.02816 | 0.54386  |
| 0.22113  | -0.15712  | 0.00066  | 0.040249 | 0.3855   |
| 0.03034  | -0.14314  | 0.00193  | 0.427625 | 3.48E-22 |
| 0.78135  | -0.07163  | 0.12215  | 0.296521 | 6.22E-11 |
| 0.47683  | -0.1111   | 0.01631  | 0.073698 | 0.11172  |
| 0.79836  | -0.01732  | 0.70897  | 0.106568 | 0.02126  |
| 0.03503  | -0.12946  | 0.00508  | 0.273071 | 1.98E-09 |
| 0.50497  | 0.013575  | 0.76985  | -0.16283 | 0.00041  |
| 0.03786  | -0.18326  | 6.79E-05 | 0.090177 | 0.05148  |
| 0.87571  | -0.02593  | 0.5762   | 0.158775 | 0.00057  |
| 0.0005   | -0.09232  | 0.04616  | 0.661996 | 3.29E-60 |
| 0.02232  | -0.08571  | 0.06422  | 0.275477 | 1.41E-09 |
| 0.66994  | -0.106    | 0.02197  | 0.298262 | 4.75E-11 |
| 3.93E-06 | 0.040098  | 0.38729  | 0.462556 | 3.90E-26 |
| 0.00055  | 0.020733  | 0.65496  | 0.495504 | 2.65E-30 |
| 0.2512   | -0.17816  | 0.00011  | 0.115029 | 0.01287  |
| 0.58778  | -0.15871  | 0.00058  | 0.115782 | 0.01229  |
| 0.00075  | -0.04426  | 0.33987  | 0.521214 | 6.93E-34 |
| 1.91E-05 | -0.09752  | 0.03514  | -0.3646  | 3.95E-16 |
| 0.0202   | -0.07965  | 0.08554  | -0.25121 | 3.74E-08 |
| 0.00336  | -5.48E-05 | 0.99906  | 0.272929 | 2.02E-09 |
| 0.43891  | -0.0727   | 0.11664  | 0.083946 | 0.06992  |
| 1.11E-06 | 0.030874  | 0.50568  | 0.339202 | 4.88E-14 |

|          |          |          |          |          |
|----------|----------|----------|----------|----------|
| 0.1568   | 0.080771 | 0.08122  | 0.283503 | 4.42E-10 |
| 4.72E-05 | -0.04165 | 0.36919  | 0.318641 | 1.76E-12 |
| 0.00014  | 0.013409 | 0.77257  | 0.193038 | 2.67E-05 |
| 0.00223  | -0.06294 | 0.1745   | 0.286023 | 3.05E-10 |
| 0.01278  | -0.02281 | 0.62292  | -0.04311 | 0.35264  |
| 0.43855  | 0.040635 | 0.38096  | -0.02731 | 0.55608  |
| 0.18271  | -0.00659 | 0.88706  | 0.141127 | 0.00224  |
| 0.33457  | -0.02376 | 0.60859  | 0.164626 | 0.00035  |
| 0.67855  | -0.03341 | 0.47143  | 0.2233   | 1.09E-06 |
| 0.09209  | 0.05893  | 0.20367  | -0.1768  | 0.00012  |
| 0.66149  | -0.09647 | 0.03717  | 0.465129 | 1.91E-26 |
| 0.00499  | -0.00231 | 0.9603   | -0.06769 | 0.14417  |
| 0.0002   | -0.03272 | 0.48059  | 0.254136 | 2.56E-08 |
| 0.50226  | -0.01045 | 0.82182  | 0.018524 | 0.68969  |
| 0.06192  | 0.052501 | 0.25751  | -0.15798 | 0.00061  |
| 0.70319  | 0.045184 | 0.3299   | -0.27229 | 2.21E-09 |
| 0.78006  | 0.029145 | 0.52983  | 0.032055 | 0.48954  |
| 0.26931  | 0.003575 | 0.93858  | -0.24672 | 6.62E-08 |
| 0.17591  | -0.04163 | 0.36934  | 0.172213 | 0.00018  |
| 0.70567  | 0.031573 | 0.4961   | 0.032154 | 0.4882   |
| 0.05256  | -0.05634 | 0.22431  | 0.162365 | 0.00043  |
| 0.24048  | -0.05217 | 0.26055  | 0.247623 | 5.91E-08 |
| 0.08513  | -0.08762 | 0.05849  | 0.230658 | 4.67E-07 |
| 0.18766  | -0.00163 | 0.97205  | 0.497397 | 1.48E-30 |
| 2.90E-05 | -0.0916  | 0.04788  | -0.36649 | 2.72E-16 |
| 3.91E-06 | 0.19988  | 1.35E-05 | 0.199464 | 1.41E-05 |
| 3.24E-05 | -0.07448 | 0.10796  | 0.557602 | 1.65E-39 |
| 0.00013  | -0.09756 | 0.03505  | 0.22122  | 1.38E-06 |
| 0.23636  | 0.101806 | 0.02782  | 0.142494 | 0.00202  |
| 7.11E-05 | -0.0199  | 0.66798  | 0.563355 | 1.83E-40 |
| 0.04106  | 0.132836 | 0.00403  | 0.215426 | 2.62E-06 |
| 0.02449  | 0.006851 | 0.88261  | 0.102475 | 0.0268   |
| 0.01203  | 0.083903 | 0.07006  | 0.129486 | 0.00507  |
| 0.00475  | 0.145831 | 0.00158  | -0.03424 | 0.4604   |
| 0.00656  | 0.120698 | 0.00903  | 0.099596 | 0.03141  |
| 0.74108  | -0.00721 | 0.87657  | 0.086577 | 0.06156  |
| 0.98906  | -0.05113 | 0.27012  | 0.108591 | 0.01891  |
| 0.57161  | 0.040087 | 0.38742  | 0.170198 | 0.00022  |
| 0.88493  | 0.003322 | 0.94292  | 0.129458 | 0.00508  |
| 0.42528  | -0.02346 | 0.61313  | 0.093821 | 0.04271  |
| 0.07024  | -0.11347 | 0.01415  | 0.463154 | 3.30E-26 |
| 0.09221  | 0.053532 | 0.24827  | 0.103939 | 0.02469  |
| 0.15863  | -0.06012 | 0.19467  | 0.225731 | 8.28E-07 |
| 0.31586  | -0.05704 | 0.21857  | 0.304894 | 1.67E-11 |
| 0.7006   | -0.08071 | 0.08146  | 0.36539  | 3.38E-16 |

|          |          |          |          |          |
|----------|----------|----------|----------|----------|
| 0.38887  | -0.05238 | 0.25864  | 0.119588 | 0.00969  |
| 0.83422  | -0.09461 | 0.04098  | 0.159132 | 0.00056  |
| 0.6314   | -0.10092 | 0.02921  | 0.25678  | 1.81E-08 |
| 0.00508  | -0.10055 | 0.0298   | 0.309444 | 8.04E-12 |
| 0.00048  | -0.03064 | 0.50889  | 0.335313 | 9.82E-14 |
| 4.53E-07 | 0.180831 | 8.50E-05 | 0.200408 | 1.28E-05 |
| 0.39165  | 0.128454 | 0.00544  | 0.288136 | 2.22E-10 |
| 0.46575  | -0.00798 | 0.8635   | 0.272081 | 2.27E-09 |
| 0.00069  | 0.086885 | 0.06064  | 0.170149 | 0.00022  |
| 0.22499  | 0.007759 | 0.86719  | 0.042032 | 0.36478  |
| 0.00125  | 0.196612 | 1.87E-05 | -0.25851 | 1.44E-08 |
| 0.73305  | -0.01071 | 0.81737  | 0.12744  | 0.00582  |
| 0.00025  | 0.024411 | 0.59876  | 0.633305 | 1.01E-53 |
| 0.00098  | 0.132046 | 0.00426  | 0.248271 | 5.44E-08 |
| 0.60147  | 0.022172 | 0.63271  | 0.208884 | 5.31E-06 |
| 0.8072   | 0.027208 | 0.55754  | 0.04596  | 0.32165  |
| 0.73529  | -0.09792 | 0.03438  | 0.245554 | 7.67E-08 |
| 0.00077  | -0.04309 | 0.35279  | -0.31619 | 2.65E-12 |
| 0.01059  | -0.13443 | 0.00361  | -0.32477 | 6.22E-13 |
| 0.00029  | -0.03658 | 0.43035  | -0.23666 | 2.29E-07 |
| 0.04733  | -0.00757 | 0.87033  | -0.0066  | 0.88693  |
| 0.02537  | -0.04482 | 0.33382  | 0.185996 | 5.26E-05 |
| 0.26406  | 0.081063 | 0.08012  | 0.322632 | 8.97E-13 |
| 0.14924  | 0.112486 | 0.01501  | 0.002322 | 0.96009  |
| 0.19054  | 0.100837 | 0.02934  | -0.13364 | 0.00381  |
| 0.01587  | 0.031819 | 0.49275  | 0.190417 | 3.44E-05 |
| 0.58937  | -0.09238 | 0.04602  | 0.11486  | 0.013    |
| 0.38604  | -0.08365 | 0.0709   | 0.223703 | 1.04E-06 |
| 0.79972  | -0.1384  | 0.00272  | 0.26161  | 9.55E-09 |
| 0.08539  | -0.01214 | 0.79357  | 0.201185 | 1.18E-05 |
| 0.73196  | -0.02919 | 0.52922  | 0.118933 | 0.0101   |
| 0.29655  | 0.036796 | 0.4276   | 0.353558 | 3.39E-15 |
| 0.57274  | -0.051   | 0.27135  | 0.047775 | 0.30289  |
| 0.90634  | -0.08501 | 0.06644  | 0.314482 | 3.53E-12 |
| 0.71927  | -0.134   | 0.00372  | 0.113796 | 0.01387  |
| 2.71E-05 | 0.047855 | 0.30208  | 0.573264 | 3.77E-42 |
| 0.00471  | -0.06553 | 0.15743  | 0.37811  | 2.55E-17 |
| 0.12448  | -0.10118 | 0.02879  | 0.474064 | 1.53E-27 |
| 0.08639  | -0.27492 | 1.52E-09 | 0.265847 | 5.38E-09 |
| 0.00071  | 0.053449 | 0.249    | -0.0176  | 0.70444  |
| 4.88E-07 | -0.13161 | 0.00439  | 0.466152 | 1.44E-26 |
| 0.00027  | -0.05121 | 0.26944  | 0.326628 | 4.52E-13 |
| 0.49395  | 0.004718 | 0.91901  | -0.1726  | 0.00018  |
| 0.11617  | 0.01338  | 0.77306  | 0.114831 | 0.01303  |
| 0.00532  | 0.059836 | 0.19679  | 0.328577 | 3.22E-13 |



|          |          |          |          |          |
|----------|----------|----------|----------|----------|
| 0.00581  | 0.231606 | 4.18E-07 | -0.33746 | 6.68E-14 |
| 0.07965  | -0.08286 | 0.07362  | 0.047431 | 0.30639  |
| 8.08E-05 | -0.04928 | 0.28792  | -0.30949 | 7.98E-12 |
| 0.69518  | -0.04869 | 0.29375  | 0.036624 | 0.42977  |
| 0.78164  | -0.0394  | 0.39559  | 0.100234 | 0.03033  |
| 0.0518   | -0.02153 | 0.64267  | -0.19262 | 2.78E-05 |
| 0.01854  | 0.014293 | 0.75804  | -0.26754 | 4.27E-09 |
| 0.09805  | 0.044008 | 0.34265  | 0.083637 | 0.07096  |
| 0.29712  | -0.10033 | 0.03017  | 0.001892 | 0.96748  |
| 0.44961  | -0.06392 | 0.1679   | 0.373994 | 5.96E-17 |
| 0.38332  | -0.03947 | 0.39473  | 0.224273 | 9.78E-07 |
| 2.04E-14 | 0.253976 | 2.62E-08 | 0.255658 | 2.10E-08 |
| 0.02781  | -0.10747 | 0.02019  | -0.34176 | 3.06E-14 |
| 0.03659  | 0.006635 | 0.88628  | 0.298711 | 4.43E-11 |
| 0.45764  | -0.01088 | 0.81459  | 0.129611 | 0.00503  |
| 0.00212  | -0.12053 | 0.00913  | 0.559025 | 9.62E-40 |
| 5.87E-14 | 0.108527 | 0.01898  | 0.456089 | 2.27E-25 |
| 0.00234  | -0.11119 | 0.01623  | 0.495793 | 2.42E-30 |
| 0.56901  | -0.06278 | 0.17562  | 0.237635 | 2.03E-07 |
| 0.24227  | -0.09916 | 0.03217  | -0.07137 | 0.12355  |
| 0.6925   | 0.112493 | 0.01501  | -0.36282 | 5.63E-16 |
| 0.02815  | 0.050287 | 0.27815  | -0.09807 | 0.03411  |
| 0.7969   | 0.004313 | 0.92593  | 0.195032 | 2.19E-05 |
| 0.18512  | 0.16536  | 0.00033  | -0.02286 | 0.62212  |
| 0.59572  | 0.202148 | 1.07E-05 | -0.14495 | 0.00169  |
| 0.42223  | 0.236795 | 2.25E-07 | 0.039286 | 0.39698  |
| 0.5148   | 0.001368 | 0.97648  | -0.12972 | 0.00499  |
| 0.76661  | -0.02812 | 0.54445  | 0.28944  | 1.83E-10 |
| 0.03025  | -0.11554 | 0.01247  | 0.100917 | 0.02922  |
| 0.22288  | -0.14329 | 0.00191  | 0.208102 | 5.77E-06 |
| 1.02E-07 | -0.11686 | 0.01149  | -0.2753  | 1.44E-09 |
| 0.47131  | -0.08452 | 0.06801  | -0.01801 | 0.69793  |
| 0.04982  | -0.06459 | 0.16347  | 0.330419 | 2.33E-13 |
| 0.14025  | 0.032877 | 0.47847  | 0.045258 | 0.3291   |
| 9.00E-06 | -0.04998 | 0.28106  | 0.568415 | 2.56E-41 |
| 0.11334  | -0.07245 | 0.11795  | 0.029719 | 0.52175  |
| 0.00926  | 0.010167 | 0.82655  | -0.32496 | 6.02E-13 |
| 0.00284  | 0.182979 | 6.97E-05 | 0.140224 | 0.00239  |
| 0.27409  | -0.02836 | 0.54098  | 0.137154 | 0.00298  |
| 0.07135  | 0.101775 | 0.02786  | -0.07634 | 0.09942  |
| 1.51E-08 | 0.011965 | 0.7965   | 0.434931 | 5.65E-23 |
| 0.0058   | 0.099368 | 0.0318   | 0.326293 | 4.79E-13 |
| 0.01779  | 0.065407 | 0.15819  | 0.192797 | 2.73E-05 |
| 0.2089   | -0.14256 | 0.00201  | 0.14107  | 0.00225  |
| 0.00063  | -0.11048 | 0.01692  | 0.474816 | 1.24E-27 |

|          |          |          |          |          |
|----------|----------|----------|----------|----------|
| 2.24E-05 | -0.19121 | 3.19E-05 | 0.006285 | 0.89224  |
| 0.04066  | -0.13931 | 0.00255  | 0.035258 | 0.44719  |
| 2.81E-05 | 0.145772 | 0.00159  | 0.296414 | 6.32E-11 |
| 2.32E-09 | -0.02184 | 0.63787  | 0.373905 | 6.07E-17 |
| 0.64285  | -0.08573 | 0.06415  | 0.379159 | 2.05E-17 |
| 0.00027  | 0.024665 | 0.59496  | 0.393025 | 1.06E-18 |
| 0.69104  | 0.21093  | 4.27E-06 | -0.22351 | 1.07E-06 |
| 0.02735  | -0.01657 | 0.72102  | 0.122154 | 0.00823  |
| 1.38E-07 | 0.315015 | 3.23E-12 | -0.0002  | 0.99657  |
| 0.28244  | 0.00207  | 0.96441  | 0.261046 | 1.03E-08 |
| 2.48E-06 | 0.032941 | 0.47762  | 0.353178 | 3.64E-15 |
| 0.1588   | -0.03406 | 0.46277  | -0.02898 | 0.53212  |
| 0.52268  | 0.018979 | 0.68248  | 0.184066 | 6.30E-05 |
| 0.00537  | -0.02699 | 0.56063  | -0.16415 | 0.00037  |
| 0.14363  | -0.07309 | 0.11471  | 0.162154 | 0.00043  |
| 0.12736  | -0.05439 | 0.24075  | 0.143529 | 0.00187  |
| 0.00121  | -0.01905 | 0.68139  | 0.534224 | 8.10E-36 |
| 0.07808  | -0.02938 | 0.52649  | 0.275399 | 1.42E-09 |
| 0.83382  | -0.09607 | 0.03796  | 0.275264 | 1.45E-09 |
| 4.56E-06 | 0.05103  | 0.2711   | 0.42886  | 2.57E-22 |
| 0.30642  | -0.0012  | 0.9793   | -0.16011 | 0.00051  |
| 0.12686  | 0.030485 | 0.51107  | -0.2917  | 1.30E-10 |
| 0.04462  | 0.011031 | 0.81207  | 0.036817 | 0.42734  |
| 0.12076  | 0.044546 | 0.33679  | -0.06814 | 0.1415   |
| 0.56438  | 0.073178 | 0.11427  | 0.050971 | 0.27165  |
| 0.00021  | 0.025705 | 0.57952  | 0.379669 | 1.84E-17 |
| 0.62345  | 0.103815 | 0.02486  | 0.261415 | 9.80E-09 |
| 3.43E-14 | 0.39617  | 5.32E-19 | 0.264573 | 6.40E-09 |
| 0.76971  | -0.12751 | 0.00579  | 0.028293 | 0.54193  |
| 5.41E-09 | -0.14705 | 0.00144  | -0.34274 | 2.56E-14 |
| 0.01075  | -0.21879 | 1.81E-06 | -0.01745 | 0.70679  |
| 0.00137  | -0.06267 | 0.17638  | 0.577902 | 5.84E-43 |
| 0.60569  | -0.06265 | 0.1765   | -0.08324 | 0.07232  |
| 0.6107   | 0.086373 | 0.06218  | 0.024498 | 0.59745  |
| 0.44747  | -0.03541 | 0.4452   | -0.21024 | 4.60E-06 |
| 0.45955  | -0.0725  | 0.11768  | -0.09386 | 0.04263  |
| 0.17605  | 0.082536 | 0.07477  | 0.005785 | 0.90077  |
| 0.65312  | 0.025585 | 0.58129  | 0.013531 | 0.77056  |
| 0.46418  | 0.012513 | 0.7874   | -0.03738 | 0.4203   |
| 0.01181  | 0.012313 | 0.79072  | -0.32049 | 1.29E-12 |
| 0.86402  | -0.05103 | 0.27112  | 0.10715  | 0.02056  |
| 0.28387  | 0.038162 | 0.41064  | -0.04281 | 0.35592  |
| 0.00019  | 0.097253 | 0.03564  | 0.410767 | 1.95E-20 |
| 0.90415  | -0.0431  | 0.35272  | 0.12613  | 0.00635  |
| 9.73E-06 | 0.208469 | 5.55E-06 | 0.391046 | 1.64E-18 |

|          |          |          |          |          |
|----------|----------|----------|----------|----------|
| 0.82946  | -0.16705 | 0.00029  | 0.253554 | 2.76E-08 |
| 0.06463  | 0.012152 | 0.79339  | 0.068229 | 0.14096  |
| 0.29885  | -0.05283 | 0.25456  | -0.09666 | 0.03678  |
| 0.56544  | -0.08543 | 0.0651   | 0.279283 | 8.16E-10 |
| 0.89092  | -0.05229 | 0.25939  | 0.274786 | 1.55E-09 |
| 2.59E-05 | -0.06199 | 0.18115  | -0.26016 | 1.16E-08 |
| 1.71E-08 | 0.058662 | 0.20574  | 0.42604  | 5.13E-22 |
| 0.00441  | 0.001316 | 0.97737  | 0.029372 | 0.52663  |
| 0.31849  | 0.041776 | 0.36771  | -0.06327 | 0.17225  |
| 0.65935  | 0.009894 | 0.83114  | 0.026263 | 0.57131  |
| 0.02612  | -0.0364  | 0.43262  | 0.381925 | 1.15E-17 |
| 0.31368  | -0.03822 | 0.40996  | 0.107099 | 0.02062  |
| 1.98E-05 | 0.029855 | 0.51985  | 0.557601 | 1.65E-39 |
| 0.00283  | 0.076933 | 0.09681  | 0.422287 | 1.28E-21 |
| 4.47E-05 | -0.04537 | 0.32789  | 0.331542 | 1.92E-13 |
| 0.20434  | -0.02567 | 0.58005  | 0.226433 | 7.63E-07 |
| 0.13784  | -0.08875 | 0.05528  | 0.126753 | 0.00609  |
| 0.00032  | -0.01392 | 0.76418  | -0.22625 | 7.80E-07 |
| 0.83876  | -0.06213 | 0.18015  | 0.270789 | 2.72E-09 |
| 0.02147  | 0.06039  | 0.19267  | 0.15353  | 0.00087  |
| 0.01244  | 0.053234 | 0.25092  | 0.239177 | 1.69E-07 |
| 0.00102  | 0.013162 | 0.77665  | -0.20765 | 6.05E-06 |
| 0.64425  | -0.10994 | 0.01747  | 0.25034  | 4.18E-08 |
| 0.89045  | -0.04963 | 0.28453  | 0.143402 | 0.00189  |
| 3.54E-05 | 0.031183 | 0.50143  | -0.24737 | 6.11E-08 |
| 0.00079  | -0.07411 | 0.10971  | 0.054444 | 0.24029  |
| 4.20E-05 | 0.073438 | 0.11299  | 0.331882 | 1.80E-13 |
| 0.23939  | -0.08381 | 0.07037  | 0.013156 | 0.77676  |
| 0.26212  | -0.20037 | 1.28E-05 | 0.170497 | 0.00021  |
| 0.16485  | -0.21625 | 2.40E-06 | 0.297009 | 5.77E-11 |
| 0.65603  | 0.085566 | 0.06467  | -0.04356 | 0.34757  |
| 0.28466  | 0.017985 | 0.69827  | 0.061684 | 0.18329  |
| 0.00071  | -0.04489 | 0.33309  | -0.0604  | 0.19259  |
| 0.12029  | -0.03989 | 0.3898   | -0.22194 | 1.27E-06 |
| 0.72375  | -0.06072 | 0.19022  | 0.234976 | 2.80E-07 |
| 0.21779  | -0.09966 | 0.03129  | 0.55768  | 1.60E-39 |
| 0.01398  | -0.0456  | 0.32544  | 0.27771  | 1.02E-09 |
| 0.16054  | 0.030661 | 0.50863  | 0.286118 | 3.00E-10 |
| 0.08029  | 0.075388 | 0.10372  | 0.265576 | 5.58E-09 |
| 6.25E-12 | 0.269712 | 3.16E-09 | 0.327517 | 3.87E-13 |
| 8.68E-06 | 0.217868 | 2.01E-06 | 0.444182 | 5.32E-24 |
| 3.38E-05 | -0.16403 | 0.00037  | -0.31404 | 3.79E-12 |
| 0.07982  | -0.07956 | 0.08591  | 0.113437 | 0.01418  |
| 7.76E-07 | 0.243082 | 1.04E-07 | 0.151071 | 0.00106  |
| 0.50656  | 0.086118 | 0.06296  | 0.063975 | 0.16752  |

|          |          |          |          |          |
|----------|----------|----------|----------|----------|
| 0.0962   | 0.055131 | 0.2344   | 0.186127 | 5.19E-05 |
| 7.16E-06 | -0.04588 | 0.32249  | 0.583328 | 6.35E-44 |
| 0.2148   | -0.07389 | 0.11078  | 0.056617 | 0.22201  |
| 0.24673  | -0.05956 | 0.19887  | 0.004439 | 0.92378  |
| 0.86708  | -0.02424 | 0.6013   | 0.040751 | 0.37959  |
| 0.35279  | -0.05295 | 0.25349  | 0.007021 | 0.87972  |
| 8.95E-07 | 0.00073  | 0.98745  | 0.550708 | 2.17E-38 |
| 0.27262  | 0.081522 | 0.07842  | 0.015494 | 0.73842  |
| 0.00013  | 0.124721 | 0.00696  | 0.135259 | 0.0034   |
| 0.01917  | 0.000985 | 0.98306  | -0.25466 | 2.40E-08 |
| 0.00445  | -0.02841 | 0.54032  | 0.117829 | 0.01082  |
| 0.00016  | 0.104108 | 0.02446  | -0.00779 | 0.86658  |
| 0.0019   | 0.159422 | 0.00054  | 0.087125 | 0.05993  |
| 0.09593  | -0.07246 | 0.11789  | -0.01872 | 0.68666  |
| 0.02079  | 0.074023 | 0.11014  | 0.339144 | 4.93E-14 |
| 0.43981  | -0.04954 | 0.28536  | 0.380951 | 1.41E-17 |
| 0.0009   | -0.13582 | 0.00327  | 0.122786 | 0.0079   |
| 0.00016  | -0.05062 | 0.27499  | -0.33855 | 5.49E-14 |
| 0.40004  | -0.07965 | 0.08555  | 0.301868 | 2.70E-11 |
| 0.01359  | -0.09431 | 0.04164  | 0.306603 | 1.27E-11 |
| 0.00179  | -0.09235 | 0.04609  | 0.025148 | 0.58777  |
| 0.19592  | -0.01019 | 0.82623  | 0.228377 | 6.10E-07 |
| 0.69755  | 0.000524 | 0.99098  | 0.08423  | 0.06897  |
| 0.40834  | -0.07761 | 0.09388  | 0.074483 | 0.10794  |
| 0.0014   | 0.123271 | 0.00765  | 0.136079 | 0.00321  |
| 0.32436  | 0.034253 | 0.46024  | 0.016375 | 0.72414  |
| 0.77958  | -0.00231 | 0.96023  | -0.04566 | 0.32487  |
| 8.27E-14 | 0.121714 | 0.00846  | 0.493071 | 5.57E-30 |
| 0.01699  | -0.06661 | 0.15067  | 0.20088  | 1.22E-05 |
| 0.00457  | -0.05338 | 0.24961  | 0.063587 | 0.17012  |
| 0.21974  | 0.042993 | 0.35391  | 0.066102 | 0.15381  |
| 0.09461  | -0.04898 | 0.29081  | 0.074505 | 0.10784  |
| 0.34578  | 0.041745 | 0.36808  | 0.245085 | 8.13E-08 |
| 0.89334  | -0.16744 | 0.00028  | 0.074987 | 0.10557  |
| 0.01211  | -0.04122 | 0.37416  | -0.0565  | 0.22301  |
| 0.0636   | -0.07522 | 0.10449  | 0.205485 | 7.59E-06 |
| 0.07876  | -0.05387 | 0.24532  | 0.434886 | 5.72E-23 |
| 0.02375  | -0.03479 | 0.45324  | 0.000609 | 0.98953  |
| 0.02716  | -0.17359 | 0.00016  | 0.662083 | 3.13E-60 |
| 0.17496  | -0.08322 | 0.07239  | 0.016812 | 0.71708  |
| 0.16135  | 0.025054 | 0.58916  | 0.258012 | 1.54E-08 |
| 0.00056  | 0.074509 | 0.10782  | 0.410454 | 2.10E-20 |
| 0.3126   | -0.04052 | 0.38226  | 0.266302 | 5.06E-09 |
| 1.22E-09 | 0.205592 | 7.50E-06 | 0.495309 | 2.81E-30 |
| 0.00012  | -0.10673 | 0.02107  | 0.102573 | 0.02666  |

|          |          |          |          |          |
|----------|----------|----------|----------|----------|
| 5.18E-08 | -0.00718 | 0.87699  | 0.560615 | 5.25E-40 |
| 0.41441  | -0.14377 | 0.00184  | 0.306517 | 1.29E-11 |
| 0.00091  | 0.173524 | 0.00016  | -0.16873 | 0.00025  |
| 0.95003  | 0.172588 | 0.00018  | 0.022573 | 0.62657  |
| 0.00076  | 0.180894 | 8.45E-05 | 0.309795 | 7.60E-12 |
| 0.13144  | 0.060413 | 0.19249  | 0.120265 | 0.00928  |
| 0.39604  | 0.110425 | 0.01698  | -0.15048 | 0.00111  |
| 0.28257  | 0.200438 | 1.28E-05 | -0.24819 | 5.50E-08 |
| 9.10E-05 | 0.145882 | 0.00157  | 0.380811 | 1.45E-17 |
| 0.17131  | 0.057195 | 0.21731  | 0.021411 | 0.64443  |
| 0.6807   | -0.1063  | 0.02159  | -0.10185 | 0.02775  |
| 6.05E-06 | -0.13909 | 0.00259  | -0.00605 | 0.8963   |
| 0.00065  | 0.00285  | 0.95101  | 0.525089 | 1.88E-34 |
| 0.14281  | -0.04495 | 0.33245  | 0.083367 | 0.07188  |
| 0.80415  | 0.026945 | 0.56136  | -0.16445 | 0.00036  |
| 0.32512  | -0.02972 | 0.52174  | -0.18555 | 5.48E-05 |
| 0.61032  | -0.03857 | 0.40564  | 0.222827 | 1.15E-06 |
| 0.49137  | 0.026889 | 0.56217  | -0.13091 | 0.0046   |
| 0.40832  | -0.06581 | 0.15567  | 0.057296 | 0.2165   |
| 0.27033  | -0.05893 | 0.20367  | 0.455916 | 2.38E-25 |
| 0.62044  | -0.1347  | 0.00354  | 0.301986 | 2.65E-11 |
| 0.06858  | -0.14124 | 0.00222  | 0.314503 | 3.51E-12 |
| 5.57E-08 | -0.06828 | 0.14065  | 0.537965 | 2.17E-36 |
| 0.94064  | -0.05247 | 0.25782  | 0.17357  | 0.00016  |
| 0.46496  | -0.09463 | 0.04094  | 0.275137 | 1.48E-09 |
| 0.60461  | -0.06852 | 0.13925  | 0.157961 | 0.00061  |
| 0.04835  | -0.00513 | 0.91201  | 0.20786  | 5.91E-06 |
| 0.04446  | -0.07967 | 0.08546  | -0.02051 | 0.65845  |
| 0.67188  | -0.06488 | 0.1616   | 0.109325 | 0.01811  |
| 0.61974  | -0.02789 | 0.54774  | 0.077627 | 0.09383  |
| 0.16351  | -0.00185 | 0.96827  | 0.168139 | 0.00026  |
| 0.02486  | 0.030702 | 0.50807  | 0.079706 | 0.08533  |
| 0.00206  | -0.23784 | 1.98E-07 | 0.149095 | 0.00123  |
| 0.00208  | -0.2061  | 7.12E-06 | -0.04278 | 0.35626  |
| 0.06079  | 0.032509 | 0.48341  | 0.124934 | 0.00687  |
| 0.44159  | -0.08422 | 0.069    | 0.367974 | 2.02E-16 |
| 0.18409  | 0.049025 | 0.29041  | 0.222825 | 1.15E-06 |
| 0.20025  | -0.0318  | 0.49299  | 0.117349 | 0.01115  |
| 0.37437  | 0.040429 | 0.38337  | -0.32772 | 3.74E-13 |
| 0.00539  | -0.01177 | 0.79981  | 0.045324 | 0.3284   |
| 0.42531  | 0.204512 | 8.39E-06 | -0.22303 | 1.13E-06 |
| 4.87E-06 | -0.00557 | 0.9044   | -0.16208 | 0.00044  |
| 0.16504  | -0.04409 | 0.34177  | 0.024113 | 0.60323  |
| 0.05389  | 0.073022 | 0.11505  | -0.35845 | 1.32E-15 |
| 0.6527   | -0.00502 | 0.9139   | 0.01691  | 0.7155   |

|          |          |          |          |          |
|----------|----------|----------|----------|----------|
| 0.00014  | 0.023975 | 0.60531  | 0.409781 | 2.45E-20 |
| 0.66581  | -0.0858  | 0.06394  | 0.270275 | 2.92E-09 |
| 0.74439  | 0.228154 | 6.26E-07 | -0.25638 | 1.91E-08 |
| 9.53E-05 | 0.091126 | 0.04906  | 0.447868 | 2.03E-24 |
| 0.0007   | 0.043209 | 0.35149  | 0.172862 | 0.00017  |
| 1.88E-06 | 0.112127 | 0.01534  | 0.0957   | 0.03871  |
| 0.01189  | -0.0038  | 0.93481  | 0.208889 | 5.31E-06 |
| 0.00232  | 0.003578 | 0.93852  | 0.27056  | 2.81E-09 |
| 0.07681  | -0.05865 | 0.20584  | 0.193135 | 2.64E-05 |
| 0.60894  | -0.08644 | 0.06197  | 0.215774 | 2.53E-06 |
| 0.67891  | -0.06038 | 0.19275  | 0.115769 | 0.0123   |
| 0.33102  | -0.04705 | 0.31029  | 0.075175 | 0.1047   |
| 0.26633  | -0.01479 | 0.74982  | 0.042849 | 0.35553  |
| 0.04333  | 0.018899 | 0.68375  | 0.108172 | 0.01938  |
| 0.31392  | -0.10517 | 0.02303  | 0.173676 | 0.00016  |
| 0.85357  | -0.07704 | 0.09633  | 0.260955 | 1.04E-08 |
| 0.34691  | -0.16751 | 0.00028  | 0.289191 | 1.90E-10 |
| 0.10196  | -0.11633 | 0.01188  | 0.297712 | 5.17E-11 |
| 1.29E-06 | -0.00583 | 0.89995  | -0.08855 | 0.05586  |
| 0.01033  | -0.07351 | 0.11264  | -0.04478 | 0.33424  |
| 0.99479  | 0.041557 | 0.37023  | -0.08521 | 0.06579  |
| 0.01355  | -0.00453 | 0.92231  | 0.250185 | 4.27E-08 |
| 0.2056   | 0.095415 | 0.03929  | -0.2226  | 1.18E-06 |
| 0.22326  | -0.03734 | 0.42075  | 0.380642 | 1.50E-17 |
| 0.10381  | -0.0841  | 0.06941  | 0.154885 | 0.00078  |
| 0.15814  | -0.04829 | 0.29771  | 0.002898 | 0.9502   |
| 0.2831   | 0.014629 | 0.75253  | 0.101763 | 0.02788  |
| 0.24435  | -0.01381 | 0.76596  | 0.123708 | 0.00744  |
| 5.55E-05 | 0.170543 | 0.00021  | 0.259486 | 1.27E-08 |
| 4.67E-06 | 0.103352 | 0.02552  | 0.41285  | 1.20E-20 |
| 0.17513  | 0.081039 | 0.08021  | 0.193951 | 2.44E-05 |
| 0.00323  | 0.112089 | 0.01538  | -0.08943 | 0.05345  |
| 0.00509  | -0.08665 | 0.06135  | -0.14717 | 0.00143  |
| 0.07219  | 0.022987 | 0.62025  | 0.204232 | 8.64E-06 |
| 0.57229  | 0.078466 | 0.09032  | 0.128469 | 0.00543  |
| 0.00781  | 0.007208 | 0.87654  | 0.357826 | 1.49E-15 |
| 0.68952  | -0.05198 | 0.2623   | 0.049825 | 0.28259  |
| 0.28537  | -0.0643  | 0.16538  | 0.093884 | 0.04257  |
| 0.94432  | -0.00016 | 0.99729  | -0.01337 | 0.77318  |
| 0.53819  | -0.02045 | 0.65936  | 0.015269 | 0.74209  |
| 0.00679  | 0.045669 | 0.32473  | 0.305733 | 1.46E-11 |
| 0.84381  | 0.006221 | 0.89334  | -0.01393 | 0.76396  |
| 0.87465  | -0.07214 | 0.11949  | 0.092184 | 0.04648  |
| 0.27388  | -0.09321 | 0.04408  | 0.276853 | 1.16E-09 |
| 0.50559  | 0.030949 | 0.50466  | -0.04032 | 0.38471  |

|          |          |          |          |          |
|----------|----------|----------|----------|----------|
| 0.00118  | -0.026   | 0.57512  | 0.439739 | 1.67E-23 |
| 0.08055  | -0.04164 | 0.36926  | 0.436138 | 4.17E-23 |
| 6.17E-06 | -0.02484 | 0.59238  | 0.603403 | 1.19E-47 |
| 0.14177  | 0.091211 | 0.04885  | -0.01541 | 0.73982  |
| 0.00376  | 0.009914 | 0.8308   | 0.156676 | 0.00068  |
| 2.13E-05 | 0.015669 | 0.73557  | 0.256686 | 1.84E-08 |
| 0.96275  | -0.0321  | 0.489    | -0.07075 | 0.12683  |
| 0.45451  | -0.04916 | 0.28904  | 0.000436 | 0.99251  |
| 0.29385  | -0.01152 | 0.80399  | 0.272003 | 2.30E-09 |
| 0.10837  | -0.03777 | 0.41544  | 0.208494 | 5.53E-06 |
| 0.32633  | -0.09257 | 0.04558  | 0.197239 | 1.76E-05 |
| 0.43175  | -0.0527  | 0.25566  | 0.03396  | 0.46409  |
| 0.63175  | -0.06942 | 0.13416  | -0.03921 | 0.39785  |
| 0.69655  | -0.01274 | 0.78368  | 0.386152 | 4.69E-18 |
| 0.02686  | -0.00525 | 0.90984  | 0.212924 | 3.44E-06 |
| 0.22748  | -0.11531 | 0.01265  | 0.271647 | 2.41E-09 |
| 0.49854  | -0.00715 | 0.87749  | 0.160294 | 0.00051  |
| 0.95788  | -0.07591 | 0.10132  | 0.081544 | 0.07834  |
| 1.81E-06 | 0.066349 | 0.15227  | 0.5749   | 1.96E-42 |
| 0.71995  | -0.10034 | 0.03016  | 0.089325 | 0.05373  |
| 0.38291  | -0.04331 | 0.35033  | 0.447658 | 2.15E-24 |
| 8.55E-06 | 0.014949 | 0.7473   | 0.166115 | 0.00031  |
| 0.13095  | 0.018597 | 0.68854  | 0.084793 | 0.06713  |
| 0.69254  | -0.00706 | 0.87912  | -0.03961 | 0.39315  |
| 0.92876  | 0.166573 | 0.0003   | -0.10327 | 0.02563  |
| 0.00025  | -0.0221  | 0.63375  | 0.382628 | 9.91E-18 |
| 0.83176  | 0.159183 | 0.00055  | -0.36631 | 2.82E-16 |
| 0.00022  | 0.031707 | 0.49428  | 0.029705 | 0.52194  |
| 0.4568   | 0.045069 | 0.33113  | 0.060656 | 0.19071  |
| 0.03196  | 0.055753 | 0.22916  | -0.34577 | 1.46E-14 |
| 0.52     | -0.00113 | 0.98057  | 0.16451  | 0.00036  |
| 0.30957  | -0.04965 | 0.28428  | 0.111531 | 0.0159   |
| 0.00519  | 0.010838 | 0.8153   | 0.611017 | 3.89E-49 |
| 0.60796  | -0.0078  | 0.8665   | 0.273656 | 1.82E-09 |
| 0.0013   | -0.0958  | 0.03851  | -0.15532 | 0.00076  |
| 0.69389  | -0.07442 | 0.10825  | 0.257125 | 1.73E-08 |
| 0.25936  | 0.205094 | 7.90E-06 | -0.30665 | 1.26E-11 |
| 0.26612  | 0.118578 | 0.01033  | -0.06601 | 0.15438  |
| 0.17201  | 0.142937 | 0.00196  | 0.128177 | 0.00554  |
| 0.76487  | -0.07529 | 0.10418  | 0.231324 | 4.32E-07 |
| 0.53093  | -0.04865 | 0.29414  | 0.229092 | 5.61E-07 |
| 0.01142  | -0.04638 | 0.31725  | 0.294634 | 8.32E-11 |
| 0.78645  | -0.08187 | 0.07716  | 0.313445 | 4.18E-12 |
| 7.24E-05 | -0.01978 | 0.66988  | -0.04632 | 0.31788  |
| 1.64E-08 | 0.073619 | 0.1121   | 0.497658 | 1.36E-30 |

|          |          |          |          |          |
|----------|----------|----------|----------|----------|
| 0.30487  | -0.0547  | 0.23809  | 0.097709 | 0.03478  |
| 0.92992  | -0.14788 | 0.00135  | 0.345639 | 1.50E-14 |
| 0.29027  | -0.14825 | 0.00131  | 0.352417 | 4.21E-15 |
| 0.00903  | -0.10513 | 0.02308  | 0.459435 | 9.17E-26 |
| 0.11542  | -0.04389 | 0.34392  | 0.331689 | 1.87E-13 |
| 0.17578  | -0.07582 | 0.10177  | 0.095621 | 0.03887  |
| 0.04806  | -0.02501 | 0.5898   | -0.21824 | 1.93E-06 |
| 0.66671  | -0.1018  | 0.02783  | 0.232279 | 3.86E-07 |
| 0.31861  | -0.10594 | 0.02204  | 0.285057 | 3.51E-10 |
| 0.00346  | 0.032401 | 0.48486  | 0.138005 | 0.0028   |
| 0.15691  | 0.026179 | 0.57254  | 0.037253 | 0.42188  |
| 0.00048  | -0.04251 | 0.35932  | 0.298617 | 4.50E-11 |
| 0.12514  | 0.088715 | 0.05539  | -0.19681 | 1.84E-05 |
| 0.10332  | -0.02836 | 0.54093  | 0.317825 | 2.02E-12 |
| 0.02035  | 0.193926 | 2.45E-05 | 0.156484 | 0.00069  |
| 0.01157  | 0.061171 | 0.18697  | 0.157595 | 0.00063  |
| 1.31E-06 | -0.04576 | 0.32374  | 0.64944  | 2.77E-57 |
| 0.7041   | -0.15956 | 0.00054  | 0.226385 | 7.68E-07 |
| 0.00024  | 0.089033 | 0.05452  | 0.231992 | 3.99E-07 |
| 0.01195  | 0.023639 | 0.61036  | -0.12264 | 0.00797  |
| 0.20565  | 0.149662 | 0.00118  | -0.27251 | 2.14E-09 |
| 0.12505  | -0.07735 | 0.09499  | 0.423811 | 8.82E-22 |
| 0.96456  | -0.02244 | 0.6286   | 0.29476  | 8.16E-11 |
| 0.97692  | -0.03029 | 0.51378  | 0.061426 | 0.18513  |
| 0.17498  | -0.01796 | 0.69875  | 0.252034 | 3.37E-08 |
| 0.00472  | -0.04933 | 0.2874   | 0.079257 | 0.08711  |
| 1.54E-07 | 0.239247 | 1.67E-07 | 0.372425 | 8.22E-17 |
| 1.02E-08 | -0.11524 | 0.0127   | 0.013216 | 0.77576  |
| 0.86918  | -0.16491 | 0.00035  | 0.370264 | 1.27E-16 |
| 1.11E-05 | 0.038711 | 0.40393  | 0.462397 | 4.07E-26 |
| 0.08683  | -0.20241 | 1.04E-05 | 0.082088 | 0.07637  |
| 0.09814  | 0.032698 | 0.48087  | -0.11393 | 0.01376  |
| 0.3941   | 0.021781 | 0.63873  | 0.017221 | 0.7105   |
| 0.83601  | 0.065027 | 0.16063  | 0.066798 | 0.14951  |
| 0.68986  | -0.00444 | 0.92377  | 0.144564 | 0.00174  |
| 0.62315  | 0.134475 | 0.0036   | 0.164336 | 0.00036  |
| 0.05968  | -0.0931  | 0.04435  | -0.12354 | 0.00752  |
| 0.43319  | -0.08455 | 0.06793  | 0.337124 | 7.10E-14 |
| 0.18368  | 0.109746 | 0.01767  | 0.306445 | 1.30E-11 |
| 0.00015  | 0.154184 | 0.00083  | 0.030606 | 0.5094   |
| 0.00616  | -0.05677 | 0.22073  | 0.348312 | 9.12E-15 |
| 0.35926  | 0.025719 | 0.57931  | 0.008039 | 0.86245  |
| 0.00192  | -0.0373  | 0.42129  | 0.484978 | 6.36E-29 |
| 0.00976  | -0.11109 | 0.01632  | 0.562593 | 2.46E-40 |
| 0.32498  | 0.044164 | 0.34094  | 0.135062 | 0.00345  |



|          |          |          |          |          |
|----------|----------|----------|----------|----------|
| 3.46E-07 | 0.100163 | 0.03045  | 0.144314 | 0.00177  |
| 0.12798  | 0.066769 | 0.14969  | -0.1517  | 0.00101  |
| 0.11969  | -0.03546 | 0.44458  | 0.174935 | 0.00014  |
| 0.01519  | -0.0486  | 0.29461  | -0.1246  | 0.00702  |
| 0.14889  | -0.00281 | 0.95174  | -0.04616 | 0.31952  |
| 0.55851  | -0.1552  | 0.00076  | 0.291011 | 1.44E-10 |
| 0.45047  | -0.20055 | 1.26E-05 | 0.242842 | 1.08E-07 |
| 0.00587  | -0.04529 | 0.32874  | 0.440052 | 1.54E-23 |
| 0.6475   | 0.078383 | 0.09066  | 0.191004 | 3.25E-05 |
| 0.00093  | 0.093593 | 0.04322  | 0.538875 | 1.57E-36 |
| 0.05667  | 0.083843 | 0.07026  | -0.22822 | 6.21E-07 |
| 0.92992  | -0.03229 | 0.48636  | 0.256582 | 1.86E-08 |
| 5.21E-10 | 0.152365 | 0.00096  | 0.456249 | 2.18E-25 |
| 0.42309  | -0.03508 | 0.44943  | 0.339543 | 4.59E-14 |
| 0.15447  | 0.048739 | 0.29323  | -0.11855 | 0.01035  |
| 0.72373  | -0.08694 | 0.06046  | 0.223426 | 1.08E-06 |
| 0.48251  | -0.02009 | 0.66494  | 0.079966 | 0.08431  |
| 0.48252  | -0.04579 | 0.32342  | -0.03031 | 0.51344  |
| 3.56E-06 | 0.045168 | 0.33007  | 0.383771 | 7.78E-18 |
| 0.24102  | -0.00418 | 0.92827  | -0.19207 | 2.93E-05 |
| 0.73298  | -0.02886 | 0.53383  | 0.410791 | 1.94E-20 |
| 0.08068  | 0.085275 | 0.06559  | -0.26623 | 5.10E-09 |
| 0.33055  | 0.036777 | 0.42784  | 0.135333 | 0.00339  |
| 0.00155  | -0.01252 | 0.78734  | 0.45714  | 1.71E-25 |
| 0.95197  | 0.00971  | 0.83424  | -0.00174 | 0.97011  |
| 0.70869  | -0.01296 | 0.78002  | 0.264271 | 6.67E-09 |
| 0.15241  | 0.027868 | 0.54802  | 0.126838 | 0.00606  |
| 0.56718  | -0.10332 | 0.02557  | 0.228545 | 5.98E-07 |
| 0.58752  | -0.03999 | 0.3886   | 0.132127 | 0.00423  |
| 0.2478   | -0.08659 | 0.06153  | 0.33828  | 5.76E-14 |
| 0.08098  | 0.099887 | 0.03091  | -0.00096 | 0.98355  |
| 0.58912  | 0.008754 | 0.85035  | -0.0524  | 0.25844  |
| 0.19937  | 0.043045 | 0.35333  | 0.292492 | 1.15E-10 |
| 0.15234  | 0.053289 | 0.25043  | 0.129209 | 0.00517  |
| 0.1702   | 0.143542 | 0.00187  | -0.32794 | 3.60E-13 |
| 8.11E-06 | 0.219276 | 1.72E-06 | 0.202432 | 1.04E-05 |
| 0.3649   | 0.151285 | 0.00104  | -0.03485 | 0.45239  |
| 0.02127  | 0.197604 | 1.70E-05 | -0.04283 | 0.35569  |
| 0.54588  | -0.07832 | 0.09092  | 0.196878 | 1.83E-05 |
| 0.47232  | -0.00111 | 0.98091  | -0.23091 | 4.53E-07 |
| 2.62E-09 | 0.093667 | 0.04305  | 0.286434 | 2.87E-10 |
| 0.01687  | 0.062418 | 0.17812  | 0.281631 | 5.81E-10 |
| 0.02853  | -0.04117 | 0.37474  | 0.282308 | 5.26E-10 |
| 5.26E-09 | 0.360287 | 9.25E-16 | -0.11517 | 0.01276  |
| 0.23999  | -0.10189 | 0.02769  | 0.223919 | 1.02E-06 |

|          |          |          |          |          |
|----------|----------|----------|----------|----------|
| 0.00544  | -0.12085 | 0.00894  | -0.30532 | 1.56E-11 |
| 0.05156  | -0.03897 | 0.40077  | 0.097618 | 0.03495  |
| 2.58E-05 | -0.16611 | 0.00031  | -0.25986 | 1.21E-08 |
| 0.4465   | 0.015195 | 0.74329  | 0.114907 | 0.01296  |
| 0.02602  | -0.10721 | 0.02048  | 0.035573 | 0.44313  |
| 0.79357  | 0.060422 | 0.19243  | -0.03065 | 0.50882  |
| 0.85319  | -0.117   | 0.01139  | 0.404117 | 8.97E-20 |
| 0.35731  | -0.15689 | 0.00067  | 0.311927 | 5.37E-12 |
| 0.96682  | -0.12015 | 0.00935  | 0.161351 | 0.00046  |
| 0.57367  | 0.089707 | 0.05271  | 0.247848 | 5.74E-08 |
| 0.10375  | -0.1572  | 0.00065  | 0.271464 | 2.48E-09 |
| 0.22154  | -0.06407 | 0.16691  | 0.125061 | 0.00681  |
| 0.05137  | -0.07951 | 0.08608  | 0.103957 | 0.02467  |
| 0.09294  | 0.047393 | 0.30678  | 0.08593  | 0.06354  |
| 0.03487  | -0.14277 | 0.00198  | 0.022544 | 0.62701  |
| 0.10078  | 0.029142 | 0.52987  | -0.00947 | 0.83823  |
| 0.0566   | -0.009   | 0.84619  | 0.000148 | 0.99746  |
| 0.20147  | -0.08764 | 0.05841  | 0.063627 | 0.16985  |
| 0.73714  | -0.07023 | 0.12963  | 0.025478 | 0.58287  |
| 4.28E-05 | -0.01392 | 0.76424  | -0.39517 | 6.64E-19 |
| 0.37185  | -0.02483 | 0.59251  | 0.168369 | 0.00026  |
| 0.01778  | -0.03551 | 0.44398  | -0.01429 | 0.75809  |
| 0.05152  | 0.216688 | 2.29E-06 | -0.08944 | 0.05343  |
| 0.83984  | -0.00774 | 0.86754  | 0.036209 | 0.43501  |
| 0.00012  | 0.202769 | 1.01E-05 | 0.263559 | 7.34E-09 |
| 0.39902  | -0.13893 | 0.00262  | 0.261548 | 9.63E-09 |
| 0.12555  | -0.08284 | 0.07371  | -0.29487 | 8.02E-11 |
| 0.03662  | 0.064964 | 0.16104  | 0.193135 | 2.64E-05 |
| 0.00818  | 0.048155 | 0.29906  | 0.355466 | 2.35E-15 |
| 0.60891  | 0.117438 | 0.01109  | -0.01097 | 0.81304  |
| 0.02498  | 0.003093 | 0.94684  | -0.07457 | 0.10755  |
| 2.27E-05 | 0.119792 | 0.00957  | 0.129765 | 0.00498  |
| 0.03159  | 0.022382 | 0.6295   | 0.079998 | 0.08419  |
| 0.00099  | 0.094214 | 0.04185  | 0.077555 | 0.09413  |
| 0.41068  | 0.220489 | 1.50E-06 | -0.14688 | 0.00146  |
| 0.39051  | -0.06934 | 0.13458  | 0.056779 | 0.22069  |
| 0.0129   | 0.019241 | 0.67834  | 0.386931 | 3.97E-18 |
| 1.80E-05 | 0.154479 | 0.00081  | 0.264974 | 6.06E-09 |
| 0.09045  | 0.10102  | 0.02905  | -0.11432 | 0.01344  |
| 0.41383  | -0.1028  | 0.02632  | 0.136924 | 0.00303  |
| 3.47E-08 | -0.05176 | 0.26434  | 0.480701 | 2.25E-28 |
| 0.01155  | -0.15357 | 0.00087  | -0.36684 | 2.53E-16 |
| 1.22E-19 | 0.111561 | 0.01587  | 0.55454  | 5.22E-39 |
| 5.94E-07 | 0.042665 | 0.3576   | 0.021728 | 0.63955  |
| 0.00056  | -0.03864 | 0.40476  | 0.360735 | 8.47E-16 |

|          |          |          |          |          |
|----------|----------|----------|----------|----------|
| 1.88E-09 | 0.260016 | 1.18E-08 | 0.128885 | 0.00528  |
| 0.08454  | 0.109204 | 0.01824  | -0.15927 | 0.00055  |
| 0.24089  | 0.067878 | 0.14302  | -0.25758 | 1.63E-08 |
| 0.07767  | 0.02974  | 0.52146  | 0.165052 | 0.00034  |
| 0.05993  | -0.02536 | 0.58462  | 0.203247 | 9.57E-06 |
| 0.96002  | -0.00748 | 0.87201  | 0.049126 | 0.28941  |
| 0.29629  | 0.153111 | 0.0009   | -0.13639 | 0.00314  |
| 0.86928  | -0.04308 | 0.35289  | 0.137758 | 0.00285  |
| 0.11612  | -0.05916 | 0.20193  | 0.386349 | 4.50E-18 |
| 0.98611  | -0.10624 | 0.02166  | 0.04662  | 0.31474  |
| 0.02163  | -0.01883 | 0.68488  | 0.283136 | 4.66E-10 |
| 0.99176  | -0.07421 | 0.10927  | 0.129026 | 0.00523  |
| 0.58608  | -0.09854 | 0.03325  | 0.172452 | 0.00018  |
| 0.01994  | -0.18437 | 6.12E-05 | -0.15129 | 0.00104  |
| 0.92705  | 0.000404 | 0.99305  | -0.08779 | 0.058    |
| 1.17E-06 | 0.012602 | 0.78592  | 0.411091 | 1.81E-20 |
| 0.00029  | 0.174576 | 0.00015  | 0.25389  | 2.65E-08 |
| 1.47E-13 | 0.096585 | 0.03693  | 0.697217 | 3.17E-69 |
| 0.08665  | -0.02732 | 0.55598  | 0.134237 | 0.00366  |
| 0.03142  | -0.17321 | 0.00017  | 0.424479 | 7.50E-22 |
| 0.04856  | 0.097291 | 0.03557  | 0.273967 | 1.74E-09 |
| 0.05384  | -0.06373 | 0.16917  | 0.221576 | 1.33E-06 |
| 0.20627  | 0.098723 | 0.03293  | 0.167596 | 0.00027  |
| 3.34E-06 | 0.125399 | 0.00666  | 0.371254 | 1.04E-16 |
| 0.48172  | 0.044919 | 0.33275  | -0.11335 | 0.01425  |
| 0.78077  | 0.098198 | 0.03388  | -0.099   | 0.03245  |
| 0.00281  | -0.16133 | 0.00047  | -0.15329 | 0.00089  |
| 1.11E-09 | 0.116256 | 0.01193  | 0.450995 | 8.89E-25 |
| 0.01021  | -0.09348 | 0.04347  | -0.08434 | 0.0686   |
| 0.52543  | -0.0769  | 0.09697  | 0.14324  | 0.00191  |
| 5.87E-05 | -0.04093 | 0.37753  | 0.352028 | 4.53E-15 |
| 0.00012  | -0.00511 | 0.91233  | 0.530779 | 2.68E-35 |
| 0.65579  | -0.04009 | 0.3874   | 0.006718 | 0.88488  |
| 0.76015  | 0.044255 | 0.33995  | 0.081671 | 0.07787  |
| 7.56E-05 | -0.07215 | 0.11947  | 0.653159 | 3.89E-58 |
| 0.96633  | -0.06702 | 0.14813  | 0.220769 | 1.45E-06 |
| 0.06436  | -0.01169 | 0.80102  | 0.30678  | 1.24E-11 |
| 0.23563  | 0.204385 | 8.51E-06 | -0.17015 | 0.00022  |
| 0.0052   | 0.022483 | 0.62794  | 0.040847 | 0.37847  |
| 1.40E-09 | 0.111641 | 0.01579  | 0.248723 | 5.14E-08 |
| 0.37337  | -0.15146 | 0.00103  | 0.513192 | 9.80E-33 |
| 0.09555  | -0.15419 | 0.00083  | 0.091179 | 0.04893  |
| 0.07836  | -0.04288 | 0.3552   | 0.146803 | 0.00147  |
| 1.12E-05 | -0.14148 | 0.00218  | -0.06947 | 0.13388  |
| 0.025    | -0.06366 | 0.16962  | 0.417804 | 3.73E-21 |

|          |          |          |          |          |
|----------|----------|----------|----------|----------|
| 0.18805  | -0.00721 | 0.87657  | 0.217426 | 2.11E-06 |
| 0.9788   | -0.01059 | 0.81946  | 0.052024 | 0.26186  |
| 0.23129  | -0.07575 | 0.10205  | -0.05045 | 0.27656  |
| 0.71089  | -0.06923 | 0.13523  | -0.06949 | 0.13373  |
| 0.04956  | 0.199079 | 1.46E-05 | 0.033649 | 0.46819  |
| 4.54E-11 | 0.231556 | 4.20E-07 | 0.274039 | 1.72E-09 |
| 1.09E-08 | 0.181935 | 7.68E-05 | 0.054974 | 0.23573  |
| 0.73978  | -0.07397 | 0.11041  | 0.305029 | 1.64E-11 |
| 0.05519  | -0.03968 | 0.39222  | -0.52389 | 2.82E-34 |
| 0.32962  | -0.04482 | 0.33387  | 0.10045  | 0.02997  |
| 0.32172  | 0.009798 | 0.83274  | -0.01688 | 0.71594  |
| 0.4574   | -0.00707 | 0.87885  | 0.162487 | 0.00042  |
| 0.0202   | 0.08584  | 0.06381  | 0.388185 | 3.03E-18 |
| 0.0662   | -0.06158 | 0.18402  | 0.021376 | 0.64497  |
| 0.00913  | 0.018736 | 0.68634  | 0.231093 | 4.44E-07 |
| 0.54025  | -0.02621 | 0.57215  | -0.01404 | 0.76216  |
| 0.03291  | -0.12642 | 0.00623  | 0.13847  | 0.00271  |
| 0.54151  | -0.09094 | 0.04953  | 0.235916 | 2.50E-07 |
| 0.75066  | -0.10532 | 0.02284  | -0.05084 | 0.27292  |
| 5.69E-05 | 0.080857 | 0.08089  | 0.188826 | 4.01E-05 |
| 0.00038  | 0.133461 | 0.00386  | 0.203863 | 8.98E-06 |
| 0.13316  | -0.07122 | 0.12433  | 0.174289 | 0.00015  |
| 0.13761  | 0.033252 | 0.47346  | 0.156477 | 0.00069  |
| 0.50477  | -0.07535 | 0.10391  | 0.190363 | 3.46E-05 |
| 0.58259  | 0.030058 | 0.51701  | 0.110723 | 0.01668  |
| 0.00731  | 0.187316 | 4.64E-05 | -0.02    | 0.66642  |
| 0.17851  | 0.0594   | 0.20008  | 0.385248 | 5.69E-18 |
| 0.62397  | 0.098553 | 0.03324  | 0.036292 | 0.43395  |
| 0.42719  | -0.0252  | 0.58694  | 0.137124 | 0.00298  |
| 0.07653  | -0.14479 | 0.00171  | 0.084632 | 0.06766  |
| 0.75434  | -0.09409 | 0.04213  | -0.05654 | 0.22265  |
| 0.90031  | 0.002466 | 0.95762  | 0.100709 | 0.02955  |
| 0.65116  | 0.053267 | 0.25063  | 0.028929 | 0.53288  |
| 0.304    | 0.053292 | 0.2504   | -0.01217 | 0.79302  |
| 0.22012  | 0.102673 | 0.02651  | -0.03407 | 0.46261  |
| 0.0585   | -0.13074 | 0.00466  | 0.14049  | 0.00234  |
| 0.29929  | -0.12598 | 0.00641  | 0.405835 | 6.07E-20 |
| 0.09068  | 0.037592 | 0.41766  | 0.008922 | 0.84752  |
| 0.19941  | -0.06622 | 0.1531   | 0.415983 | 5.75E-21 |
| 0.45036  | -0.05556 | 0.23076  | 0.039231 | 0.39764  |
| 0.11816  | -0.00164 | 0.97174  | -0.22448 | 9.55E-07 |
| 0.00101  | 0.046845 | 0.31242  | 0.109656 | 0.01776  |
| 0.35782  | -0.03577 | 0.44061  | 0.023076 | 0.6189   |
| 0.08407  | -0.0179  | 0.69968  | -0.10989 | 0.01752  |
| 0.93005  | -0.02261 | 0.62598  | 0.19456  | 2.30E-05 |

|          |          |          |          |          |
|----------|----------|----------|----------|----------|
| 2.12E-07 | 0.306841 | 1.22E-11 | 0.047823 | 0.3024   |
| 0.52998  | -0.07928 | 0.08703  | 0.205693 | 7.42E-06 |
| 0.87672  | 0.069004 | 0.1365   | -0.17331 | 0.00017  |
| 0.1611   | -0.1006  | 0.02973  | 0.015841 | 0.73279  |
| 0.03958  | -0.07692 | 0.09685  | -0.27219 | 2.24E-09 |
| 0.0621   | 0.062031 | 0.18084  | 0.016041 | 0.72954  |
| 0.00092  | -0.02588 | 0.57692  | -0.07672 | 0.09774  |
| 0.01291  | 0.021473 | 0.64347  | -0.01604 | 0.72958  |
| 0.23255  | -0.01651 | 0.72198  | -0.02959 | 0.52361  |
| 0.78454  | 0.012226 | 0.79216  | 0.157847 | 0.00062  |
| 0.00901  | 0.042373 | 0.3609   | 0.240771 | 1.39E-07 |
| 0.81817  | -0.04101 | 0.3766   | 0.118806 | 0.01018  |
| 0.12693  | -0.10504 | 0.0232   | 0.181986 | 7.64E-05 |
| 0.5814   | -0.0696  | 0.13311  | 0.196367 | 1.92E-05 |
| 0.00913  | -0.02826 | 0.54239  | 0.418354 | 3.28E-21 |
| 0.00066  | 0.144362 | 0.00176  | 0.013868 | 0.76502  |
| 0.16622  | 0.092508 | 0.04571  | -0.07569 | 0.10233  |
| 0.0352   | 0.062661 | 0.17643  | 0.093194 | 0.04412  |
| 0.00575  | -0.0394  | 0.39562  | -0.10253 | 0.02671  |
| 0.33542  | -0.05112 | 0.27028  | 0.188938 | 3.97E-05 |
| 0.01336  | -0.08325 | 0.07229  | 0.154496 | 0.00081  |
| 0.66297  | -0.076   | 0.10093  | 0.085843 | 0.06381  |
| 0.04049  | 0.010142 | 0.82696  | 0.334838 | 1.07E-13 |
| 0.04349  | -0.0786  | 0.08976  | 0.410423 | 2.11E-20 |
| 2.06E-08 | 0.112187 | 0.01528  | 0.503675 | 2.08E-31 |
| 0.60284  | -0.0975  | 0.03517  | 0.036284 | 0.43406  |
| 0.15863  | -0.01567 | 0.73561  | 0.019672 | 0.67155  |
| 0.23221  | -0.0263  | 0.57079  | 0.006741 | 0.88449  |
| 2.27E-06 | 0.197033 | 1.80E-05 | -0.06694 | 0.14865  |
| 0.00937  | -0.10397 | 0.02465  | -0.25488 | 2.33E-08 |
| 0.01381  | -0.06701 | 0.14823  | 0.299302 | 4.04E-11 |
| 0.94934  | 0.153064 | 0.00091  | -0.09688 | 0.03635  |
| 0.6233   | 0.012114 | 0.79402  | 0.089286 | 0.05384  |
| 0.07076  | -0.01903 | 0.68174  | 0.291528 | 1.33E-10 |
| 0.00298  | -0.0494  | 0.28675  | 0.001975 | 0.96606  |
| 0.03419  | -0.06852 | 0.13926  | 0.001925 | 0.9669   |
| 0.28786  | 0.032747 | 0.48021  | -0.24362 | 9.76E-08 |
| 0.71466  | 0.023923 | 0.60608  | 0.131204 | 0.00451  |
| 0.10368  | 0.145029 | 0.00168  | -0.26847 | 3.75E-09 |
| 0.03625  | -0.01373 | 0.76736  | -0.03804 | 0.41215  |
| 0.11051  | -0.06165 | 0.18355  | 0.008788 | 0.84977  |
| 3.12E-06 | -0.185   | 5.77E-05 | -0.22265 | 1.18E-06 |
| 0.65856  | -0.01893 | 0.68331  | 0.186395 | 5.06E-05 |
| 2.71E-06 | -0.17884 | 0.0001   | -0.21741 | 2.11E-06 |
| 0.66059  | -0.00201 | 0.96542  | 0.169539 | 0.00023  |

|          |          |          |          |          |
|----------|----------|----------|----------|----------|
| 0.22841  | -0.00437 | 0.92488  | 0.011668 | 0.80144  |
| 0.56639  | 0.043055 | 0.35322  | -0.10827 | 0.01926  |
| 0.39849  | -0.05064 | 0.27476  | 0.025118 | 0.5882   |
| 0.5531   | -0.03364 | 0.46829  | 0.073765 | 0.11139  |
| 0.70178  | 0.020878 | 0.6527   | -0.03382 | 0.46591  |
| 1.00E-06 | 0.144818 | 0.0017   | 0.101089 | 0.02894  |
| 0.2571   | -0.03234 | 0.48574  | 0.094104 | 0.04209  |
| 0.3064   | -0.00236 | 0.95942  | 0.042491 | 0.35957  |
| 0.19503  | 0.020657 | 0.65613  | -0.14494 | 0.00169  |
| 0.02615  | 0.118494 | 0.01038  | -0.02733 | 0.55583  |
| 0.48974  | -0.08412 | 0.06935  | -0.14464 | 0.00173  |
| 0.42323  | -0.06349 | 0.1708   | 0.135112 | 0.00344  |
| 0.24003  | -0.04988 | 0.28207  | -0.01914 | 0.67996  |
| 0.03831  | -0.19602 | 1.99E-05 | -0.19349 | 2.55E-05 |
| 0.69743  | 0.053437 | 0.24911  | 0.073876 | 0.11085  |
| 0.23236  | 0.010409 | 0.82249  | 0.156249 | 0.0007   |
| 0.04612  | 0.049943 | 0.28146  | 0.267494 | 4.29E-09 |
| 0.75178  | -0.08365 | 0.07091  | 0.177092 | 0.00012  |
| 0.86617  | 0.048846 | 0.29217  | -0.07357 | 0.11233  |
| 0.29333  | 0.058147 | 0.20974  | -0.05426 | 0.24187  |
| 0.76265  | 0.132932 | 0.00401  | -0.0924  | 0.04595  |
| 0.69174  | 0.05076  | 0.27365  | 0.063116 | 0.17331  |
| 0.55412  | -0.10199 | 0.02753  | 0.070381 | 0.12883  |
| 0.34954  | 0.01028  | 0.82465  | 0.010084 | 0.82795  |
| 0.01149  | 0.035277 | 0.44694  | 0.29004  | 1.67E-10 |
| 0.38463  | -0.05472 | 0.23789  | 0.216216 | 2.41E-06 |
| 0.01064  | 0.103034 | 0.02598  | -0.06578 | 0.15582  |
| 0.00028  | 0.002334 | 0.95988  | 0.112317 | 0.01517  |
| 0.00039  | -0.02246 | 0.62828  | 0.2586   | 1.43E-08 |
| 0.93839  | -0.08707 | 0.0601   | -0.05385 | 0.2455   |
| 0.00022  | -0.0439  | 0.34388  | 0.427597 | 3.50E-22 |
| 0.00748  | -0.02649 | 0.568    | 0.363743 | 4.69E-16 |
| 0.0339   | -0.05573 | 0.22933  | 0.330504 | 2.30E-13 |
| 0.56153  | -0.13853 | 0.0027   | 0.230849 | 4.57E-07 |
| 0.52741  | -0.14639 | 0.00151  | 0.261612 | 9.55E-09 |
| 0.05498  | -0.18678 | 4.88E-05 | 0.060797 | 0.18968  |
| 0.53585  | -0.03942 | 0.39538  | -0.09161 | 0.04785  |
| 0.16568  | 0.111305 | 0.01611  | 0.0311   | 0.50257  |
| 0.06879  | 0.110612 | 0.01679  | 0.023981 | 0.60522  |
| 2.21E-05 | 0.105209 | 0.02298  | 0.157312 | 0.00065  |
| 0.02261  | -0.09251 | 0.04571  | 0.033335 | 0.47236  |
| 0.00478  | -0.10999 | 0.01742  | -0.02748 | 0.5536   |
| 0.23275  | -0.11428 | 0.01347  | 0.157445 | 0.00064  |
| 0.05309  | -0.1481  | 0.00133  | 0.141475 | 0.00218  |
| 0.06873  | 0.021586 | 0.64173  | 0.256746 | 1.82E-08 |

|          |          |          |          |          |
|----------|----------|----------|----------|----------|
| 0.00192  | -0.16566 | 0.00032  | 0.124554 | 0.00704  |
| 0.01001  | -0.13626 | 0.00317  | 0.117303 | 0.01118  |
| 0.00205  | -0.12875 | 0.00533  | 0.043598 | 0.34718  |
| 0.98186  | -0.11966 | 0.00964  | 0.101038 | 0.02902  |
| 0.21411  | -0.19668 | 1.86E-05 | 0.21371  | 3.16E-06 |
| 0.43506  | 0.201978 | 1.09E-05 | -0.2655  | 5.64E-09 |
| 4.37E-05 | 0.085586 | 0.06461  | 0.36811  | 1.97E-16 |
| 0.01851  | 0.004687 | 0.91954  | -0.15398 | 0.00084  |
| 0.00121  | 0.164305 | 0.00036  | 0.191842 | 3.00E-05 |
| 0.20896  | 0.120233 | 0.0093   | -0.07889 | 0.0886   |
| 0.00012  | 0.144956 | 0.00169  | -0.29235 | 1.18E-10 |
| 0.06904  | 0.073789 | 0.11128  | -0.09886 | 0.03269  |
| 1.67E-18 | 0.237005 | 2.19E-07 | 0.277549 | 1.05E-09 |
| 0.98171  | -0.07676 | 0.09756  | 0.267807 | 4.11E-09 |
| 1.52E-09 | 0.007438 | 0.87264  | 0.442253 | 8.76E-24 |
| 0.4802   | -0.03602 | 0.43742  | 0.05552  | 0.23111  |
| 3.88E-07 | 0.269658 | 3.18E-09 | 0.109209 | 0.01824  |
| 0.46802  | -0.11976 | 0.00959  | 0.193169 | 2.64E-05 |
| 0.09292  | -0.05199 | 0.26219  | 0.336934 | 7.34E-14 |
| 0.10896  | -0.00476 | 0.91821  | -0.11995 | 0.00947  |
| 0.01842  | 0.084165 | 0.06919  | -0.35867 | 1.27E-15 |
| 0.78478  | 0.098886 | 0.03264  | -0.13272 | 0.00406  |
| 0.14545  | -0.04461 | 0.33611  | -0.12797 | 0.00561  |
| 0.23103  | -0.05422 | 0.24222  | 0.095587 | 0.03894  |
| 0.60583  | -0.10822 | 0.01932  | 0.094775 | 0.04063  |
| 0.56149  | 0.064205 | 0.166    | -0.05411 | 0.24317  |
| 5.26E-08 | -0.12833 | 0.00548  | -0.2153  | 2.66E-06 |
| 0.0223   | -0.00486 | 0.91663  | 0.047955 | 0.30108  |
| 0.47449  | -0.02857 | 0.53802  | 0.300185 | 3.52E-11 |
| 0.00047  | -0.06808 | 0.14183  | -0.20421 | 8.66E-06 |
| 0.11931  | -0.06949 | 0.13373  | 0.080412 | 0.08258  |
| 1.20E-06 | -0.24385 | 9.48E-08 | -0.24813 | 5.54E-08 |
| 6.29E-06 | -0.0359  | 0.4389   | -0.16852 | 0.00025  |
| 0.46161  | -0.03139 | 0.49854  | 0.077687 | 0.09357  |
| 0.28955  | -0.02529 | 0.58568  | 0.037786 | 0.41526  |
| 0.80728  | -0.00778 | 0.8669   | 0.019524 | 0.67388  |
| 0.67079  | -0.00893 | 0.84741  | 0.050099 | 0.27995  |
| 0.12638  | 0.079457 | 0.08631  | 0.141023 | 0.00225  |
| 0.4456   | -0.01073 | 0.81713  | 0.031789 | 0.49315  |
| 0.18552  | 0.002842 | 0.95117  | -0.04068 | 0.38038  |
| 0.5693   | 0.054768 | 0.2375   | -0.03829 | 0.4091   |
| 0.00012  | 0.110472 | 0.01693  | 0.367471 | 2.23E-16 |
| 1.92E-16 | 0.339852 | 4.34E-14 | -0.12233 | 0.00813  |
| 0.63776  | 0.028711 | 0.53597  | 0.012241 | 0.79191  |
| 0.05018  | 0.105338 | 0.02281  | -0.01525 | 0.74245  |

|          |          |          |          |          |
|----------|----------|----------|----------|----------|
| 1.54E-05 | -0.12723 | 0.0059   | -0.05084 | 0.27293  |
| 0.00447  | -0.03391 | 0.4648   | 0.318971 | 1.67E-12 |
| 6.83E-08 | 0.159141 | 0.00056  | 0.180248 | 8.97E-05 |
| 0.16064  | 0.017877 | 0.7      | 0.157923 | 0.00061  |
| 0.11576  | 0.047013 | 0.31068  | 0.087805 | 0.05795  |
| 0.02251  | -0.03969 | 0.39214  | 0.346174 | 1.36E-14 |
| 0.77074  | 0.023658 | 0.61009  | -0.05743 | 0.21541  |
| 0.73609  | 0.001907 | 0.96721  | 0.091755 | 0.04751  |
| 0.47098  | -0.06693 | 0.14872  | 0.112867 | 0.01467  |
| 0.29353  | -0.01322 | 0.77577  | 0.017296 | 0.7093   |
| 0.47691  | 0.021951 | 0.6361   | 0.127267 | 0.00589  |
| 0.00749  | -0.19642 | 1.91E-05 | -0.10628 | 0.02162  |
| 0.19563  | -0.07061 | 0.12759  | -0.05902 | 0.20294  |
| 0.31973  | 0.007523 | 0.8712   | 0.050262 | 0.27839  |
| 0.96735  | 0.027266 | 0.55669  | -0.12998 | 0.0049   |
| 0.61758  | -0.12704 | 0.00597  | 0.208286 | 5.65E-06 |
| 0.22373  | 0.019196 | 0.67906  | -0.00955 | 0.83697  |
| 7.53E-06 | 0.126713 | 0.00611  | 0.301147 | 3.03E-11 |
| 3.22E-05 | 0.039249 | 0.39742  | 0.318991 | 1.66E-12 |
| 0.00012  | 0.055235 | 0.23352  | -0.21757 | 2.07E-06 |
| 0.05933  | -0.07184 | 0.12109  | -0.18519 | 5.67E-05 |
| 4.98E-07 | -0.04382 | 0.34475  | -0.24082 | 1.38E-07 |
| 0.57513  | 0.005909 | 0.89867  | 0.020674 | 0.65588  |
| 0.09949  | 0.081682 | 0.07784  | 0.112376 | 0.01511  |
| 0.38995  | 0.036726 | 0.42849  | 0.177369 | 0.00012  |
| 0.7676   | 0.070617 | 0.12754  | -0.17781 | 0.00011  |
| 0.14809  | 0.059725 | 0.19762  | -0.29667 | 6.08E-11 |
| 0.60554  | 0.136124 | 0.0032   | -0.02428 | 0.60067  |
| 0.82724  | 0.039483 | 0.39461  | -0.02587 | 0.57707  |
| 0.0069   | 0.198885 | 1.49E-05 | 0.197337 | 1.74E-05 |
| 0.44952  | -0.04367 | 0.34634  | 0.145701 | 0.00159  |
| 0.00195  | 0.097908 | 0.03441  | 0.167873 | 0.00027  |
| 3.06E-05 | 0.155926 | 0.00072  | 0.187553 | 4.53E-05 |
| 1.98E-06 | 0.167169 | 0.00029  | -0.0517  | 0.26485  |
| 0.03173  | -0.06191 | 0.18165  | 0.139911 | 0.00244  |
| 0.95907  | -0.19943 | 1.41E-05 | 0.511318 | 1.80E-32 |
| 0.00312  | -0.02051 | 0.65841  | -0.0976  | 0.03499  |
| 0.07352  | -0.10122 | 0.02873  | 0.420675 | 1.88E-21 |
| 0.00082  | 0.119203 | 0.00993  | 0.394125 | 8.35E-19 |
| 0.15697  | 0.105621 | 0.02244  | 0.088827 | 0.05508  |
| 0.00031  | -0.00693 | 0.88132  | 0.375583 | 4.30E-17 |
| 0.05886  | 0.11549  | 0.01251  | 0.002947 | 0.94936  |
| 0.51884  | -0.05415 | 0.24285  | 0.030158 | 0.51562  |
| 0.13196  | 0.094636 | 0.04093  | -0.02222 | 0.63205  |
| 0.03039  | -0.09558 | 0.03895  | -0.04731 | 0.30768  |



|          |          |          |          |          |
|----------|----------|----------|----------|----------|
| 0.64342  | -0.01725 | 0.71007  | 0.078045 | 0.09206  |
| 0.0219   | -0.05954 | 0.19899  | 0.542443 | 4.40E-37 |
| 0.00306  | -0.09057 | 0.05045  | 0.378301 | 2.45E-17 |
| 0.36549  | -0.12866 | 0.00536  | 0.188899 | 3.99E-05 |
| 0.43316  | -0.1422  | 0.00207  | 0.271078 | 2.61E-09 |
| 0.53392  | 0.155605 | 0.00074  | 0.107737 | 0.01987  |
| 0.02285  | -0.06522 | 0.15941  | 0.363411 | 5.01E-16 |
| 0.00161  | 0.053364 | 0.24976  | 0.226522 | 7.56E-07 |
| 6.82E-13 | 0.293911 | 9.29E-11 | 0.16603  | 0.00031  |
| 0.27287  | -0.07625 | 0.0998   | 0.2396   | 1.60E-07 |
| 4.71E-11 | 0.199243 | 1.44E-05 | 0.205161 | 7.85E-06 |
| 0.03479  | -0.01098 | 0.81287  | 0.216622 | 2.30E-06 |
| 0.76859  | 0.035702 | 0.44147  | -0.05834 | 0.20825  |
| 0.06742  | -0.00379 | 0.93496  | -0.01905 | 0.68136  |
| 0.15521  | 0.03515  | 0.44857  | -0.12467 | 0.00699  |
| 0.08345  | 0.184087 | 6.29E-05 | -0.08507 | 0.06624  |
| 0.02178  | -0.11397 | 0.01373  | -0.18612 | 5.19E-05 |
| 0.97303  | 0.169567 | 0.00023  | -0.067   | 0.14825  |
| 0.14992  | 0.033062 | 0.476    | 0.046472 | 0.31629  |
| 0.83953  | -0.01169 | 0.80109  | 0.110282 | 0.01712  |
| 0.40707  | 0.045535 | 0.32615  | -0.33467 | 1.10E-13 |
| 0.53536  | -0.04537 | 0.32793  | -0.17847 | 0.00011  |
| 1.39E-06 | 0.119891 | 0.00951  | 0.24332  | 1.01E-07 |
| 0.30024  | 0.006043 | 0.89638  | -0.02708 | 0.55933  |
| 0.00557  | 0.120097 | 0.00938  | 0.174218 | 0.00015  |
| 8.80E-19 | 0.232956 | 3.56E-07 | 0.32789  | 3.63E-13 |
| 7.86E-06 | 0.158661 | 0.00058  | 0.097794 | 0.03462  |
| 4.73E-05 | 0.207293 | 6.28E-06 | 0.253985 | 2.61E-08 |
| 0.585    | 0.009844 | 0.83198  | 0.023848 | 0.60721  |
| 0.65879  | -0.08461 | 0.06774  | 0.122058 | 0.00828  |
| 0.01969  | 0.094284 | 0.04169  | 0.096365 | 0.03737  |
| 0.00223  | 0.127216 | 0.00591  | -0.00197 | 0.9661   |
| 0.10233  | -0.13313 | 0.00395  | 0.156134 | 0.00071  |
| 0.02185  | -0.00302 | 0.94803  | 0.315531 | 2.96E-12 |
| 0.04243  | -0.06777 | 0.14369  | 0.429863 | 2.00E-22 |
| 0.00059  | 0.211843 | 3.87E-06 | 0.20781  | 5.95E-06 |
| 0.15654  | -0.13756 | 0.00289  | 0.101979 | 0.02755  |
| 0.24199  | -0.04483 | 0.3337   | 0.397871 | 3.65E-19 |
| 0.60562  | -0.18946 | 3.78E-05 | 0.429861 | 2.00E-22 |
| 0.86231  | 0.080277 | 0.08311  | -0.00617 | 0.89427  |
| 0.00104  | 0.018568 | 0.689    | 0.215358 | 2.64E-06 |
| 0.44726  | -0.10697 | 0.02078  | 0.009776 | 0.83311  |
| 0.00137  | 0.025421 | 0.58371  | -0.02805 | 0.54539  |
| 3.72E-07 | 0.226616 | 7.47E-07 | 0.060619 | 0.19098  |
| 0.33789  | 0.098941 | 0.03255  | 0.181091 | 8.30E-05 |

|          |          |          |          |          |
|----------|----------|----------|----------|----------|
| 0.00903  | 0.139    | 0.00261  | -0.15282 | 0.00092  |
| 0.01953  | -0.03683 | 0.4272   | 0.257209 | 1.71E-08 |
| 0.37759  | -0.05538 | 0.23229  | 0.232863 | 3.60E-07 |
| 0.03724  | -0.03677 | 0.42792  | 0.302596 | 2.41E-11 |
| 0.06627  | 0.064088 | 0.16677  | 0.032725 | 0.48051  |
| 0.99588  | 0.013158 | 0.77673  | -0.12081 | 0.00897  |
| 0.43994  | -0.01784 | 0.7006   | 0.117768 | 0.01086  |
| 0.59447  | -0.00777 | 0.86695  | 0.148004 | 0.00134  |
| 0.95051  | -0.03683 | 0.42721  | 0.259532 | 1.26E-08 |
| 0.69521  | 0.057464 | 0.21516  | -0.08532 | 0.06544  |
| 2.08E-05 | -0.16441 | 0.00036  | 0.115301 | 0.01266  |
| 0.08063  | -0.02284 | 0.62243  | 0.334618 | 1.11E-13 |
| 0.00138  | 0.007146 | 0.8776   | 0.43839  | 2.36E-23 |
| 0.70535  | -0.01656 | 0.72107  | 0.080541 | 0.08209  |
| 0.02012  | 0.106225 | 0.02168  | 0.049248 | 0.28821  |
| 2.20E-09 | 0.187504 | 4.56E-05 | 0.183018 | 6.95E-05 |
| 4.62E-05 | -0.26747 | 4.31E-09 | 0.118722 | 0.01023  |
| 0.18882  | 0.00165  | 0.97163  | 0.143834 | 0.00183  |
| 0.31926  | -0.07527 | 0.10428  | 0.160769 | 0.00049  |
| 0.08935  | -0.11614 | 0.01202  | -0.14409 | 0.0018   |
| 0.94616  | 0.030711 | 0.50795  | 0.050868 | 0.27263  |
| 0.68028  | -0.02024 | 0.66272  | 0.084932 | 0.06669  |
| 0.81171  | -0.00824 | 0.85908  | 0.05348  | 0.24873  |
| 0.21861  | -0.0341  | 0.4623   | -0.01915 | 0.67976  |
| 0.2703   | 0.00099  | 0.98297  | 0.114245 | 0.0135   |
| 0.07092  | -0.08833 | 0.05645  | 0.41238  | 1.34E-20 |
| 0.54488  | -0.00957 | 0.83652  | 0.084479 | 0.06816  |
| 0.83835  | -0.03774 | 0.41588  | 0.246169 | 7.10E-08 |
| 4.04E-05 | -0.07336 | 0.1134   | -0.08028 | 0.08309  |
| 0.28027  | -0.11128 | 0.01614  | 0.286156 | 2.99E-10 |
| 0.01754  | 0.142418 | 0.00203  | 0.085995 | 0.06333  |
| 0.00892  | 0.028349 | 0.54113  | 0.125548 | 0.0066   |
| 0.74933  | 0.176276 | 0.00013  | -0.10119 | 0.02878  |
| 0.91312  | -0.02081 | 0.6538   | 0.062211 | 0.17956  |
| 0.00309  | 0.088148 | 0.05698  | -0.07301 | 0.11511  |
| 0.1984   | 0.1478   | 0.00136  | -0.11691 | 0.01146  |
| 0.96801  | -0.00052 | 0.99113  | 0.157694 | 0.00063  |
| 0.246    | 0.054795 | 0.23727  | -0.11355 | 0.01408  |
| 0.76733  | -0.03668 | 0.4291   | 0.279819 | 7.55E-10 |
| 0.00844  | 0.143153 | 0.00193  | 0.187708 | 4.47E-05 |
| 9.84E-07 | 0.075368 | 0.10381  | 0.380357 | 1.60E-17 |
| 0.29194  | 0.061511 | 0.18452  | -0.15751 | 0.00064  |
| 0.28145  | -0.04258 | 0.35852  | -0.13963 | 0.00249  |
| 0.48698  | -0.03601 | 0.43755  | 0.284612 | 3.75E-10 |
| 0.15493  | -0.10794 | 0.01964  | 0.281096 | 6.27E-10 |

|          |          |          |          |          |
|----------|----------|----------|----------|----------|
| 0.17238  | 0.100173 | 0.03043  | 0.259781 | 1.22E-08 |
| 0.00183  | -0.00139 | 0.97618  | 0.325612 | 5.38E-13 |
| 0.18004  | 0.000684 | 0.98824  | 0.063993 | 0.1674   |
| 6.33E-10 | 0.116712 | 0.0116   | 0.225105 | 8.89E-07 |
| 0.43185  | -0.033   | 0.47677  | -0.05604 | 0.22678  |
| 0.18894  | -0.21699 | 2.21E-06 | 0.182675 | 7.17E-05 |
| 0.2644   | -0.04302 | 0.35362  | 0.41979  | 2.32E-21 |
| 0.55875  | -0.01397 | 0.76331  | 0.094994 | 0.04017  |
| 0.02105  | 0.199809 | 1.36E-05 | 0.081945 | 0.07688  |
| 0.30125  | -0.00946 | 0.83838  | 0.182646 | 7.19E-05 |
| 0.07465  | -0.09561 | 0.0389   | 0.241144 | 1.33E-07 |
| 0.25533  | -0.1474  | 0.0014   | 0.094911 | 0.04035  |
| 0.38286  | 0.107249 | 0.02044  | -0.30096 | 3.12E-11 |
| 0.7179   | -0.03538 | 0.44561  | 0.352399 | 4.22E-15 |
| 3.64E-05 | -0.08005 | 0.08397  | -0.21017 | 4.63E-06 |
| 9.06E-13 | 0.157849 | 0.00062  | 0.310837 | 6.41E-12 |
| 0.28164  | -0.09103 | 0.0493   | 0.093973 | 0.04237  |
| 0.23308  | 0.063015 | 0.174    | 0.173504 | 0.00016  |
| 0.73606  | -0.12996 | 0.00491  | 0.302479 | 2.45E-11 |
| 0.46873  | -0.01719 | 0.71106  | 0.135755 | 0.00329  |
| 5.43E-09 | 0.050433 | 0.27675  | 0.5385   | 1.80E-36 |
| 0.00084  | -0.07396 | 0.11046  | 0.578651 | 4.31E-43 |
| 0.3278   | -0.03369 | 0.46766  | -0.03223 | 0.48717  |
| 0.9454   | -0.07253 | 0.11753  | 0.19816  | 1.61E-05 |
| 0.18262  | -0.06459 | 0.16346  | 0.204972 | 8.00E-06 |
| 0.00614  | 0.060154 | 0.19442  | 0.372487 | 8.11E-17 |
| 0.6903   | -0.04465 | 0.33568  | 0.242655 | 1.10E-07 |
| 0.89223  | -0.15861 | 0.00058  | 0.484132 | 8.18E-29 |
| 0.87321  | -0.13194 | 0.00429  | 0.430543 | 1.69E-22 |
| 0.00029  | -0.06797 | 0.14249  | 0.676981 | 6.83E-64 |
| 0.0008   | 0.032635 | 0.48171  | 0.149017 | 0.00124  |
| 0.14613  | -0.08877 | 0.05523  | 0.090333 | 0.05107  |
| 0.00053  | -0.02288 | 0.62183  | 0.546723 | 9.35E-38 |
| 0.10548  | -0.04306 | 0.35311  | 0.212957 | 3.43E-06 |
| 0.11113  | -0.07795 | 0.09244  | -0.11004 | 0.01736  |
| 0.00043  | -0.02229 | 0.63088  | 0.334259 | 1.18E-13 |
| 0.66659  | 0.011045 | 0.81184  | 0.065335 | 0.15865  |
| 0.28104  | 0.015576 | 0.73708  | -0.00404 | 0.93066  |
| 0.2898   | -0.11967 | 0.00964  | 0.202379 | 1.05E-05 |
| 0.15678  | -0.03501 | 0.45042  | 0.526782 | 1.06E-34 |
| 0.0872   | 0.049601 | 0.28477  | 0.179274 | 9.80E-05 |
| 0.76385  | 0.12329  | 0.00764  | -0.30583 | 1.44E-11 |
| 0.97902  | -0.09272 | 0.04522  | 0.204414 | 8.48E-06 |
| 0.00078  | 0.135775 | 0.00328  | 0.218185 | 1.94E-06 |
| 0.00281  | 0.058886 | 0.20401  | -0.0395  | 0.3944   |

|          |          |          |          |          |
|----------|----------|----------|----------|----------|
| 0.47304  | 0.016258 | 0.72602  | 0.179861 | 9.29E-05 |
| 0.90431  | -0.07589 | 0.10143  | 0.039352 | 0.39618  |
| 0.01625  | -0.08024 | 0.08325  | 0.338332 | 5.71E-14 |
| 1.46E-06 | 0.168041 | 0.00026  | 0.1716   | 0.00019  |
| 0.18099  | 0.078304 | 0.09099  | 0.224679 | 9.33E-07 |
| 1.15E-06 | 0.03703  | 0.42466  | 0.529874 | 3.66E-35 |
| 0.76155  | -0.11941 | 0.0098   | 0.291488 | 1.34E-10 |
| 0.2205   | -0.08818 | 0.05687  | 0.098984 | 0.03247  |
| 0.00102  | 0.071691 | 0.12184  | -0.32333 | 7.96E-13 |
| 0.01538  | 0.296208 | 6.53E-11 | -0.00642 | 0.88992  |
| 0.96633  | -0.02947 | 0.52521  | 0.220075 | 1.57E-06 |
| 4.86E-07 | 0.012683 | 0.78457  | 0.331014 | 2.10E-13 |
| 0.17873  | 0.010272 | 0.82479  | 0.221872 | 1.28E-06 |
| 5.16E-11 | 0.078213 | 0.09136  | 0.461439 | 5.30E-26 |
| 0.03038  | 0.038144 | 0.41085  | 0.179703 | 9.43E-05 |
| 1.12E-05 | 0.023271 | 0.61594  | 0.557512 | 1.71E-39 |
| 0.00951  | 0.038596 | 0.40533  | 0.130243 | 0.00482  |
| 0.02521  | -0.05284 | 0.25442  | 0.217671 | 2.05E-06 |
| 8.81E-05 | 0.131024 | 0.00457  | 0.354588 | 2.78E-15 |
| 0.08359  | 0.021097 | 0.64929  | -0.11719 | 0.01126  |
| 0.0007   | -0.00477 | 0.91806  | -0.07642 | 0.09908  |
| 0.08053  | 0.128257 | 0.00551  | -0.2859  | 3.10E-10 |
| 0.90775  | -0.09669 | 0.03672  | 0.231382 | 4.29E-07 |
| 0.00134  | -0.00352 | 0.93956  | 0.441148 | 1.16E-23 |
| 0.00043  | 0.016234 | 0.72641  | 0.047476 | 0.30593  |
| 0.88315  | 0.049876 | 0.2821   | -0.17932 | 9.77E-05 |
| 0.62879  | -0.0376  | 0.41751  | 0.10686  | 0.02091  |
| 0.07641  | 0.151119 | 0.00105  | 0.272127 | 2.26E-09 |
| 0.05514  | 0.069363 | 0.13446  | 0.273823 | 1.78E-09 |
| 0.00942  | 0.081727 | 0.07767  | 0.342226 | 2.81E-14 |
| 0.43382  | -0.03156 | 0.49626  | 0.027792 | 0.54911  |
| 7.31E-08 | 0.036305 | 0.43379  | 0.612571 | 1.91E-49 |
| 0.59866  | -0.05463 | 0.23871  | 0.043745 | 0.34555  |
| 0.0139   | -0.22816 | 6.26E-07 | 0.031516 | 0.49688  |
| 0.87188  | 0.090848 | 0.04976  | -0.14119 | 0.00223  |
| 0.04569  | 0.084554 | 0.06791  | -0.11213 | 0.01534  |
| 3.28E-06 | -0.0853  | 0.06551  | -0.08215 | 0.07614  |
| 0.01069  | 0.129607 | 0.00503  | -0.2412  | 1.32E-07 |
| 0.67289  | -0.14975 | 0.00117  | 0.072231 | 0.11905  |
| 2.02E-07 | 0.051099 | 0.27045  | 0.241246 | 1.31E-07 |
| 0.00583  | -0.1073  | 0.02039  | 0.396872 | 4.56E-19 |
| 0.56703  | -0.13482 | 0.00351  | -0.01099 | 0.81278  |
| 0.76851  | 0.144751 | 0.00171  | -0.03394 | 0.46432  |
| 0.42221  | -0.00199 | 0.96573  | -0.10725 | 0.02044  |
| 0.35698  | -0.0613  | 0.18601  | 0.34407  | 2.01E-14 |

|          |          |          |          |          |
|----------|----------|----------|----------|----------|
| 0.00058  | -0.07269 | 0.11673  | 0.533998 | 8.76E-36 |
| 0.03472  | -0.1767  | 0.00012  | 0.384519 | 6.64E-18 |
| 0.01871  | -0.07216 | 0.11942  | 0.529926 | 3.60E-35 |
| 0.00291  | 0.198496 | 1.55E-05 | 0.184217 | 6.21E-05 |
| 0.26513  | 0.078015 | 0.09219  | 0.026525 | 0.56747  |
| 0.34637  | 0.096585 | 0.03693  | 0.035115 | 0.44903  |
| 0.2447   | 0.083902 | 0.07007  | 0.014937 | 0.74749  |
| 0.03156  | 0.18818  | 4.27E-05 | -0.0167  | 0.71889  |
| 0.02814  | -0.04202 | 0.3649   | 0.497842 | 1.29E-30 |
| 0.05507  | -0.18634 | 5.09E-05 | 0.10269  | 0.02648  |
| 0.65719  | 0.057015 | 0.21877  | -0.1429  | 0.00196  |
| 0.56223  | 0.047509 | 0.3056   | -0.09701 | 0.0361   |
| 0.3259   | -0.01955 | 0.67345  | -0.04214 | 0.36354  |
| 0.00206  | 0.136064 | 0.00322  | 0.371058 | 1.08E-16 |
| 0.02668  | 0.029007 | 0.53177  | 0.288528 | 2.10E-10 |
| 0.7051   | -0.13651 | 0.00312  | 0.304053 | 1.91E-11 |
| 0.93372  | -0.03226 | 0.48682  | 0.200681 | 1.24E-05 |
| 0.03415  | 0.207581 | 6.09E-06 | -0.22164 | 1.32E-06 |
| 0.89425  | -0.0878  | 0.05796  | 0.183708 | 6.51E-05 |
| 0.01138  | 0.029484 | 0.52505  | 0.426362 | 4.74E-22 |
| 0.02524  | -0.0486  | 0.29462  | 0.280138 | 7.21E-10 |
| 0.01621  | 0.049172 | 0.28896  | -0.00591 | 0.89857  |
| 1.51E-06 | -0.05326 | 0.25068  | -0.06386 | 0.16831  |
| 2.60E-07 | -0.09075 | 0.05002  | -0.23952 | 1.62E-07 |
| 0.00159  | 0.023234 | 0.6165   | 0.285465 | 3.31E-10 |
| 1.81E-05 | 0.082005 | 0.07666  | 0.33056  | 2.28E-13 |
| 0.11754  | 0.059756 | 0.19738  | 0.208972 | 5.26E-06 |
| 0.00105  | 0.029035 | 0.53137  | 0.361281 | 7.61E-16 |
| 0.74459  | -0.1343  | 0.00364  | 0.263431 | 7.47E-09 |
| 0.22037  | 0.027793 | 0.54909  | 0.156336 | 0.0007   |
| 5.95E-06 | 0.307924 | 1.03E-11 | 0.039725 | 0.39172  |
| 3.95E-06 | -0.06776 | 0.14373  | -0.29542 | 7.37E-11 |
| 0.0001   | 0.189621 | 3.72E-05 | 0.165141 | 0.00034  |
| 0.00522  | 0.019938 | 0.66738  | -0.13877 | 0.00265  |
| 0.00235  | -0.08289 | 0.07353  | 0.012447 | 0.78848  |
| 0.00591  | -0.01699 | 0.71414  | -0.05114 | 0.2701   |
| 0.15236  | -0.02492 | 0.5912   | 0.110424 | 0.01698  |
| 6.31E-09 | 0.092324 | 0.04615  | 0.459994 | 7.87E-26 |
| 1.11E-06 | 0.143141 | 0.00193  | 0.462781 | 3.66E-26 |
| 1.72E-11 | 0.163416 | 0.00039  | 0.467648 | 9.46E-27 |
| 6.41E-11 | 0.206636 | 6.73E-06 | 0.464491 | 2.28E-26 |
| 0.3271   | 0.061358 | 0.18562  | 0.104576 | 0.02382  |
| 0.06057  | 0.022696 | 0.62469  | -0.08394 | 0.06993  |
| 0.00843  | -0.00851 | 0.85452  | 0.192603 | 2.79E-05 |
| 0.03415  | -0.01364 | 0.76874  | -0.25315 | 2.92E-08 |

|          |          |          |          |          |
|----------|----------|----------|----------|----------|
| 0.18503  | -0.06814 | 0.14146  | 0.327876 | 3.64E-13 |
| 0.01691  | 0.038261 | 0.40942  | 0.396386 | 5.07E-19 |
| 0.06991  | -0.09326 | 0.04397  | 0.030279 | 0.51393  |
| 0.01213  | 0.053185 | 0.25135  | 0.104102 | 0.02447  |
| 0.60143  | -0.0336  | 0.46884  | 0.041913 | 0.36614  |
| 0.5628   | 0.082604 | 0.07453  | -0.33958 | 4.55E-14 |
| 0.60831  | 0.0616   | 0.18389  | -0.14012 | 0.00241  |
| 0.11919  | 0.034714 | 0.45422  | 0.064282 | 0.16549  |
| 0.93525  | -0.07526 | 0.10428  | 0.195114 | 2.18E-05 |
| 0.03065  | 0.014517 | 0.75437  | 0.183069 | 6.91E-05 |
| 0.59046  | -0.01047 | 0.82145  | -0.08664 | 0.06136  |
| 0.57117  | 0.024286 | 0.60063  | 0.110266 | 0.01714  |
| 0.40372  | 0.013165 | 0.77661  | 0.070977 | 0.12561  |
| 0.50375  | -0.07155 | 0.12259  | 0.015072 | 0.7453   |
| 0.54924  | 0.017417 | 0.70737  | 0.121823 | 0.0084   |
| 0.04628  | -0.09486 | 0.04045  | -0.03387 | 0.46528  |
| 0.09743  | 0.08107  | 0.0801   | 0.129321 | 0.00513  |
| 0.00195  | 0.214484 | 2.91E-06 | 0.06899  | 0.13658  |
| 0.67717  | 0.037231 | 0.42215  | 0.143035 | 0.00194  |
| 0.00545  | -0.04165 | 0.36921  | 0.33742  | 6.73E-14 |
| 0.53305  | 0.031568 | 0.49616  | -0.01677 | 0.71781  |
| 0.71149  | 0.026783 | 0.56371  | 0.066609 | 0.15067  |
| 0.3142   | -0.1194  | 0.00981  | 0.041511 | 0.37076  |
| 0.71558  | -0.01607 | 0.72903  | 0.050065 | 0.28028  |
| 0.00874  | -0.01211 | 0.79405  | -0.14819 | 0.00132  |
| 0.9224   | 0.037845 | 0.41453  | 0.188301 | 4.22E-05 |
| 0.03299  | 0.100141 | 0.03049  | 0.356582 | 1.90E-15 |
| 0.79678  | 0.033888 | 0.46503  | 0.115545 | 0.01247  |
| 0.29532  | 0.01371  | 0.76762  | 0.277369 | 1.07E-09 |
| 0.01989  | -0.05273 | 0.25546  | 0.359959 | 9.86E-16 |
| 0.29927  | -0.06004 | 0.19523  | 0.033114 | 0.4753   |
| 0.37448  | -0.03934 | 0.39636  | 0.105635 | 0.02243  |
| 0.002    | 0.057526 | 0.21466  | -0.27206 | 2.28E-09 |
| 0.37156  | -0.06045 | 0.1922   | 0.088763 | 0.05526  |
| 0.14     | -0.08717 | 0.05979  | 0.122489 | 0.00805  |
| 0.00035  | 0.168609 | 0.00025  | -0.05156 | 0.26616  |
| 9.20E-06 | 0.094382 | 0.04148  | 0.406564 | 5.14E-20 |
| 0.22944  | 0.112808 | 0.01473  | 0.26335  | 7.56E-09 |
| 0.55363  | 0.06631  | 0.15251  | 0.291424 | 1.36E-10 |
| 0.71319  | 0.025022 | 0.58964  | -0.00332 | 0.94295  |
| 0.11182  | -0.1361  | 0.00321  | 0.262277 | 8.73E-09 |
| 0.35921  | -0.07021 | 0.12975  | 0.117199 | 0.01126  |
| 0.02172  | 0.135944 | 0.00324  | 0.082242 | 0.07581  |
| 0.36204  | -0.08584 | 0.06383  | 0.071776 | 0.1214   |
| 0.1824   | -0.01991 | 0.66782  | 0.017585 | 0.70467  |

|          |          |          |          |          |
|----------|----------|----------|----------|----------|
| 0.40207  | -0.05731 | 0.21638  | 0.074373 | 0.10846  |
| 0.60694  | 0.00072  | 0.98762  | -0.01472 | 0.75097  |
| 0.83913  | -0.02144 | 0.64402  | 0.015897 | 0.73188  |
| 0.31387  | 0.018289 | 0.69343  | 0.000775 | 0.98667  |
| 0.72249  | -0.06165 | 0.18352  | 0.104744 | 0.02359  |
| 0.92756  | -0.05904 | 0.20286  | 0.120904 | 0.00891  |
| 0.6623   | -0.01861 | 0.68831  | 0.090653 | 0.05025  |
| 0.00711  | -0.0539  | 0.24501  | 0.445192 | 4.09E-24 |
| 0.26865  | -0.06538 | 0.15835  | 0.028406 | 0.54032  |
| 0.17409  | 0.032074 | 0.48929  | 0.225168 | 8.83E-07 |
| 0.73841  | 0.089607 | 0.05298  | 0.237952 | 1.96E-07 |
| 0.00135  | -0.09049 | 0.05067  | -0.09733 | 0.0355   |
| 0.32489  | -0.00961 | 0.83595  | 0.022483 | 0.62794  |
| 0.58444  | -0.01653 | 0.72157  | 0.081606 | 0.07812  |
| 0.84665  | -0.0894  | 0.05354  | 0.332497 | 1.62E-13 |
| 0.00078  | 0.065001 | 0.16079  | 0.202543 | 1.03E-05 |
| 0.00403  | 0.076209 | 0.1      | -0.33297 | 1.49E-13 |
| 0.02828  | 0.138986 | 0.00261  | -0.05268 | 0.25593  |
| 0.23327  | -0.01745 | 0.70681  | 0.309554 | 7.90E-12 |
| 0.00733  | -0.11927 | 0.00989  | -0.0106  | 0.81923  |
| 0.46378  | -0.12039 | 0.00921  | 0.337576 | 6.54E-14 |
| 0.04128  | -0.04825 | 0.29814  | -0.15639 | 0.0007   |
| 0.02437  | -0.01873 | 0.6865   | 0.198871 | 1.49E-05 |
| 0.5296   | -0.03932 | 0.39662  | -0.10546 | 0.02265  |
| 0.00716  | -0.09399 | 0.04234  | 0.017153 | 0.7116   |
| 1.99E-08 | -0.14868 | 0.00127  | -0.19641 | 1.91E-05 |
| 0.01053  | 0.152925 | 0.00092  | -0.00659 | 0.88702  |
| 0.03037  | 0.040873 | 0.37817  | 0.223878 | 1.02E-06 |
| 0.23222  | 0.164047 | 0.00037  | -0.2355  | 2.63E-07 |
| 0.57636  | -0.04761 | 0.30456  | 0.16159  | 0.00046  |
| 0.10259  | -0.0403  | 0.38485  | 0.199909 | 1.35E-05 |
| 0.23497  | -0.05087 | 0.27265  | 0.28749  | 2.45E-10 |
| 0.00055  | 0.237281 | 2.12E-07 | 0.009096 | 0.84457  |
| 0.00114  | 0.219739 | 1.63E-06 | 0.008317 | 0.85774  |
| 0.65463  | -0.05877 | 0.20492  | 0.154144 | 0.00083  |
| 0.00161  | -0.02013 | 0.66435  | 0.108307 | 0.01922  |
| 5.39E-05 | 0.051512 | 0.2666   | 0.350827 | 5.69E-15 |
| 0.00622  | 0.129798 | 0.00496  | 0.11675  | 0.01157  |
| 0.1837   | -0.08456 | 0.06788  | 0.203369 | 9.45E-06 |
| 0.97957  | -0.04872 | 0.29338  | 0.10698  | 0.02076  |
| 0.11246  | -0.10596 | 0.02201  | 0.495213 | 2.89E-30 |
| 0.76772  | -0.06861 | 0.13874  | 0.155592 | 0.00074  |
| 0.88781  | -0.07685 | 0.09717  | 0.185724 | 5.39E-05 |
| 0.71994  | -0.00097 | 0.98332  | 0.101478 | 0.02833  |
| 0.55211  | -0.11095 | 0.01646  | 0.154294 | 0.00082  |

|          |          |          |          |          |
|----------|----------|----------|----------|----------|
| 0.505    | -0.02976 | 0.52122  | 0.108274 | 0.01926  |
| 0.32901  | 0.059072 | 0.20258  | -0.00953 | 0.83721  |
| 0.02432  | -0.00658 | 0.88719  | 0.332014 | 1.76E-13 |
| 0.69931  | -0.01164 | 0.80192  | 0.242583 | 1.11E-07 |
| 6.59E-05 | 0.120879 | 0.00893  | 0.118286 | 0.01052  |
| 0.60768  | 0.04837  | 0.2969   | -0.03298 | 0.47707  |
| 0.06056  | 0.030474 | 0.51122  | -0.04434 | 0.33905  |
| 0.74698  | -0.12103 | 0.00884  | 0.240541 | 1.43E-07 |
| 0.00149  | 0.001208 | 0.97923  | 0.376226 | 3.77E-17 |
| 0.47125  | 0.15925  | 0.00055  | -0.05352 | 0.24838  |
| 0.94765  | -0.06852 | 0.1393   | 0.336744 | 7.60E-14 |
| 0.94998  | 0.062908 | 0.17473  | 0.113683 | 0.01397  |
| 0.22854  | 0.022872 | 0.62201  | -0.06141 | 0.18523  |
| 8.74E-05 | 0.150791 | 0.00108  | 0.250077 | 4.33E-08 |
| 0.68895  | -0.01683 | 0.71687  | 0.243722 | 9.64E-08 |
| 0.46048  | -0.1265  | 0.00619  | 0.193926 | 2.45E-05 |
| 7.48E-05 | 0.117422 | 0.0111   | 0.087822 | 0.0579   |
| 0.82444  | 0.145449 | 0.00162  | -0.39687 | 4.56E-19 |
| 4.19E-05 | 0.007064 | 0.87899  | 0.513283 | 9.51E-33 |
| 0.6014   | 0.04957  | 0.28507  | 0.001409 | 0.97577  |
| 0.08411  | -0.06768 | 0.14421  | -0.07133 | 0.12371  |
| 0.00049  | -0.06361 | 0.16997  | 0.383479 | 8.28E-18 |
| 0.00034  | -0.0883  | 0.05654  | 0.139291 | 0.00255  |
| 0.88592  | 0.145181 | 0.00166  | 0.065999 | 0.15445  |
| 0.00143  | -0.02591 | 0.57656  | -0.068   | 0.1423   |
| 0.00206  | -0.02941 | 0.52607  | 0.410701 | 1.98E-20 |
| 0.83267  | 0.091047 | 0.04926  | -0.07595 | 0.10114  |
| 0.00486  | -0.07182 | 0.12115  | 0.418886 | 2.88E-21 |
| 0.00152  | 0.02799  | 0.54627  | 0.124936 | 0.00687  |
| 0.70294  | -0.08546 | 0.065    | 0.336059 | 8.59E-14 |
| 0.44771  | 0.08281  | 0.07381  | -0.07322 | 0.11406  |
| 0.24597  | -0.12523 | 0.00673  | 0.296048 | 6.69E-11 |
| 0.03012  | -0.07558 | 0.10282  | -0.01898 | 0.68242  |
| 0.22103  | -0.07472 | 0.10682  | -0.01985 | 0.6687   |
| 0.86593  | 0.012928 | 0.78052  | 0.316903 | 2.36E-12 |
| 0.00967  | -0.09464 | 0.04092  | 0.462308 | 4.17E-26 |
| 0.00033  | 0.234561 | 2.94E-07 | 0.140271 | 0.00238  |
| 0.21012  | 0.003677 | 0.93684  | 0.49656  | 1.91E-30 |
| 0.32156  | -0.16617 | 0.00031  | 0.114433 | 0.01335  |
| 0.0003   | 0.013643 | 0.76873  | 0.279833 | 7.54E-10 |
| 0.07601  | 0.09957  | 0.03145  | 0.057974 | 0.21111  |
| 0.04892  | 0.04313  | 0.35238  | 0.146868 | 0.00146  |
| 6.48E-08 | -0.12375 | 0.00742  | -0.03859 | 0.40537  |
| 0.09731  | 0.072994 | 0.11519  | -0.08358 | 0.07114  |
| 0.22434  | -0.11238 | 0.01511  | 0.147056 | 0.00144  |



|          |          |          |          |          |
|----------|----------|----------|----------|----------|
| 0.27257  | -0.15084 | 0.00108  | 0.022783 | 0.62336  |
| 0.30772  | 0.10648  | 0.02137  | 0.138913 | 0.00263  |
| 5.70E-05 | -0.00491 | 0.91572  | 0.597599 | 1.51E-46 |
| 0.03419  | -0.12168 | 0.00848  | 0.191581 | 3.08E-05 |
| 0.00529  | -0.05885 | 0.2043   | -0.10063 | 0.02969  |
| 9.66E-06 | 0.050612 | 0.27505  | 0.232212 | 3.89E-07 |
| 0.9861   | 0.032008 | 0.49017  | 0.058777 | 0.20484  |
| 0.12272  | -0.1051  | 0.02312  | 0.3695   | 1.49E-16 |
| 0.55405  | -0.07492 | 0.10591  | 0.085741 | 0.06412  |
| 0.07157  | -0.13083 | 0.00463  | -0.0115  | 0.80427  |
| 0.04915  | 0.046889 | 0.31196  | -0.17599 | 0.00013  |
| 0.00113  | -0.02318 | 0.61729  | 0.318352 | 1.85E-12 |
| 0.9415   | -0.07227 | 0.11884  | 0.317496 | 2.14E-12 |
| 0.00409  | -0.06492 | 0.16132  | -0.21088 | 4.29E-06 |
| 0.00128  | 0.04233  | 0.36139  | 0.095129 | 0.03989  |
| 0.3706   | -0.00529 | 0.90923  | 0.098549 | 0.03324  |
| 0.01882  | -0.02372 | 0.60917  | 0.174189 | 0.00015  |
| 0.70714  | -0.03564 | 0.44224  | 0.11858  | 0.01033  |
| 0.72829  | 0.083713 | 0.0707   | 0.043593 | 0.34723  |
| 0.86127  | 0.111525 | 0.0159   | -0.08261 | 0.07451  |
| 0.00293  | -0.05946 | 0.19958  | -0.14552 | 0.00161  |
| 1.02E-08 | 0.060616 | 0.191    | 0.221445 | 1.35E-06 |
| 0.00858  | 0.118415 | 0.01043  | 0.145059 | 0.00167  |
| 9.82E-05 | -0.05977 | 0.19726  | 0.493024 | 5.65E-30 |
| 5.22E-08 | 0.050542 | 0.27572  | 0.588738 | 6.66E-45 |
| 1.28E-05 | 0.113651 | 0.01399  | 0.337749 | 6.34E-14 |
| 0.16238  | -0.01232 | 0.79054  | 0.26599  | 5.28E-09 |
| 0.19835  | -0.06386 | 0.16828  | 0.064068 | 0.1669   |
| 0.17062  | -0.16208 | 0.00044  | 0.06312  | 0.17328  |
| 0.92639  | 0.098048 | 0.03415  | 0.129658 | 0.00501  |
| 0.45473  | -0.06046 | 0.19213  | 0.422308 | 1.27E-21 |
| 0.62538  | 0.079672 | 0.08546  | -0.17858 | 0.0001   |
| 0.98457  | -0.00718 | 0.87704  | 0.086597 | 0.0615   |
| 0.80588  | -0.03739 | 0.42022  | -0.05908 | 0.20254  |
| 0.17211  | -0.04716 | 0.30919  | -0.20974 | 4.85E-06 |
| 0.8988   | -0.07612 | 0.10041  | 0.030999 | 0.50396  |
| 0.0015   | 0.184389 | 6.11E-05 | -0.0977  | 0.03479  |
| 0.99884  | -0.0445  | 0.33727  | 0.380676 | 1.49E-17 |
| 0.00011  | 0.020714 | 0.65525  | 0.328002 | 3.56E-13 |
| 0.00858  | 0.148827 | 0.00126  | -0.05005 | 0.28042  |
| 0.23184  | 0.014809 | 0.74958  | 0.128939 | 0.00526  |
| 0.00011  | 0.153771 | 0.00086  | 0.293597 | 9.75E-11 |
| 0.00046  | 0.128557 | 0.0054   | 0.385994 | 4.85E-18 |
| 1.69E-06 | 0.372097 | 8.78E-17 | -0.07766 | 0.09368  |
| 6.84E-09 | 0.065501 | 0.15759  | 0.490129 | 1.36E-29 |

|          |          |          |          |          |
|----------|----------|----------|----------|----------|
| 5.06E-08 | 0.056068 | 0.22653  | 0.347283 | 1.11E-14 |
| 0.01151  | -0.06056 | 0.1914   | -0.15703 | 0.00066  |
| 0.90172  | -0.0255  | 0.58248  | 0.123922 | 0.00734  |
| 1.15E-05 | -0.06642 | 0.15184  | 0.085515 | 0.06483  |
| 0.00428  | 0.042893 | 0.35504  | 0.170424 | 0.00022  |
| 0.21262  | 0.035948 | 0.43833  | -0.04484 | 0.33365  |
| 6.34E-10 | 0.108833 | 0.01864  | 0.301816 | 2.72E-11 |
| 0.32949  | 0.054157 | 0.24278  | 0.119824 | 0.00955  |
| 0.59571  | 0.067262 | 0.1467   | -0.16716 | 0.00029  |
| 0.08381  | -0.09002 | 0.05188  | 0.080327 | 0.08291  |
| 0.26474  | -0.106   | 0.02196  | 0.461882 | 4.69E-26 |
| 0.82214  | 0.093539 | 0.04334  | -0.16657 | 0.0003   |
| 0.12303  | -0.02212 | 0.63356  | 0.481883 | 1.59E-28 |
| 0.05803  | -0.05794 | 0.21139  | 0.219185 | 1.73E-06 |
| 4.28E-06 | 0.021338 | 0.64557  | 0.344988 | 1.69E-14 |
| 0.00018  | -0.02569 | 0.57975  | 0.410118 | 2.27E-20 |
| 0.67184  | -0.04634 | 0.31762  | 0.145862 | 0.00157  |
| 0.46986  | -0.07159 | 0.12235  | 0.02363  | 0.61051  |
| 2.16E-07 | 0.012215 | 0.79235  | 0.387258 | 3.70E-18 |
| 0.36757  | -0.07524 | 0.10439  | 0.072414 | 0.11811  |
| 0.32032  | -0.07165 | 0.12206  | 0.165675 | 0.00032  |
| 0.00308  | -0.0543  | 0.24152  | 0.268369 | 3.81E-09 |
| 0.1042   | 0.004161 | 0.92855  | 0.119635 | 0.00966  |
| 0.44643  | -0.1153  | 0.01266  | 0.241544 | 1.26E-07 |
| 0.75021  | -0.05786 | 0.21204  | 0.096662 | 0.03678  |
| 0.00172  | -0.01126 | 0.80821  | 0.12316  | 0.00771  |
| 0.03904  | 0.012413 | 0.78905  | 0.283837 | 4.20E-10 |
| 0.66923  | -0.03751 | 0.41874  | 0.188621 | 4.09E-05 |
| 0.05471  | -0.0049  | 0.91582  | -0.00016 | 0.9973   |
| 0.0123   | 0.01218  | 0.79292  | 0.146953 | 0.00145  |
| 0.01511  | -0.00881 | 0.84941  | 0.241745 | 1.23E-07 |
| 3.52E-05 | 0.047432 | 0.30638  | 0.270628 | 2.78E-09 |
| 0.08741  | -0.02194 | 0.63628  | 0.161617 | 0.00045  |
| 1.99E-05 | 0.01175  | 0.80008  | 0.240891 | 1.37E-07 |
| 8.99E-05 | -0.06948 | 0.1338   | 0.479574 | 3.12E-28 |
| 0.61199  | -0.07281 | 0.11611  | 0.30103  | 3.08E-11 |
| 0.00368  | -0.01992 | 0.66772  | 0.368957 | 1.66E-16 |
| 0.01688  | -0.05222 | 0.26007  | -0.2362  | 2.42E-07 |
| 0.00062  | -0.02491 | 0.59125  | -0.0782  | 0.0914   |
| 0.08567  | -0.07307 | 0.11481  | 0.513744 | 8.18E-33 |
| 3.66E-08 | 0.236083 | 2.45E-07 | 0.052246 | 0.25983  |
| 0.30275  | 0.087631 | 0.05845  | -0.32063 | 1.26E-12 |
| 0.25165  | 8.64E-05 | 0.99851  | 0.047653 | 0.30413  |
| 0.03984  | -0.02108 | 0.64952  | 0.223066 | 1.12E-06 |
| 0.96726  | -0.01812 | 0.69612  | 0.05015  | 0.27946  |

|          |          |          |          |          |
|----------|----------|----------|----------|----------|
| 0.21614  | -0.12585 | 0.00646  | -0.10371 | 0.02501  |
| 0.09602  | 0.034241 | 0.46041  | 0.037234 | 0.42211  |
| 0.00033  | -0.03978 | 0.39107  | 0.324655 | 6.35E-13 |
| 0.10761  | -0.04569 | 0.32447  | 0.071762 | 0.12147  |
| 0.19102  | 0.055124 | 0.23445  | 0.29978  | 3.75E-11 |
| 0.14604  | 0.143897 | 0.00182  | 0.119781 | 0.00957  |
| 0.00848  | -0.08377 | 0.07052  | 0.464276 | 2.42E-26 |
| 0.81295  | 0.156973 | 0.00066  | -0.1005  | 0.0299   |
| 6.64E-09 | 0.22563  | 8.37E-07 | 0.069404 | 0.13423  |
| 0.70549  | -0.17379 | 0.00016  | 0.383645 | 7.99E-18 |
| 0.0184   | 0.131287 | 0.00449  | 0.138935 | 0.00262  |
| 0.00059  | -0.04553 | 0.32622  | 0.061678 | 0.18333  |
| 0.00173  | 0.171293 | 0.0002   | 0.057905 | 0.21165  |
| 0.6897   | -0.10296 | 0.02609  | 0.334784 | 1.08E-13 |
| 0.04119  | -0.0351  | 0.44927  | -0.27192 | 2.32E-09 |
| 0.24361  | -0.11893 | 0.0101   | 0.426465 | 4.62E-22 |
| 2.56E-05 | -0.19658 | 1.88E-05 | -0.23283 | 3.62E-07 |
| 0.00607  | 0.079505 | 0.08612  | 0.246781 | 6.57E-08 |
| 0.00129  | 0.070477 | 0.1283   | 0.179555 | 9.56E-05 |
| 2.65E-05 | -0.02739 | 0.5549   | -0.12287 | 0.00786  |
| 0.06809  | -0.01066 | 0.81825  | 0.19254  | 2.80E-05 |
| 0.0285   | -0.03871 | 0.40395  | 0.503312 | 2.33E-31 |
| 0.65     | -0.12779 | 0.00568  | 0.294288 | 8.77E-11 |
| 0.3168   | 3.50E-05 | 0.9994   | -0.08704 | 0.06019  |
| 0.44119  | 0.016914 | 0.71545  | 0.148925 | 0.00125  |
| 0.46017  | -0.15798 | 0.00061  | 0.269948 | 3.06E-09 |
| 0.4526   | -0.01719 | 0.71104  | 0.161162 | 0.00047  |
| 0.17802  | -0.13702 | 0.00301  | 0.478505 | 4.26E-28 |
| 0.21628  | 0.021729 | 0.63953  | -0.04963 | 0.28445  |
| 0.37216  | 0.051407 | 0.26757  | 0.281591 | 5.84E-10 |
| 0.57943  | -0.09955 | 0.03149  | 0.175674 | 0.00014  |
| 1.43E-05 | -0.03257 | 0.48258  | 0.204264 | 8.61E-06 |
| 0.01541  | 0.185266 | 5.63E-05 | 0.096825 | 0.03646  |
| 0.03772  | -0.02334 | 0.61487  | -0.07248 | 0.1178   |
| 0.00237  | 0.029718 | 0.52177  | 0.232579 | 3.73E-07 |
| 0.00795  | -0.02554 | 0.58197  | 0.170635 | 0.00021  |
| 0.00019  | -0.01577 | 0.734    | -0.21511 | 2.72E-06 |
| 0.02491  | 0.030603 | 0.50944  | 0.307335 | 1.13E-11 |
| 0.05505  | -0.08193 | 0.07693  | -0.11225 | 0.01523  |
| 0.36558  | 0.109276 | 0.01817  | 0.178873 | 0.0001   |
| 0.00997  | -0.03077 | 0.50715  | 0.188881 | 3.99E-05 |
| 0.52338  | -0.12246 | 0.00807  | 0.106478 | 0.02137  |
| 0.18551  | 0.092254 | 0.04631  | 0.015455 | 0.73904  |
| 0.00012  | 0.071454 | 0.12308  | 0.462495 | 3.96E-26 |
| 0.04493  | -0.13688 | 0.00304  | 0.265848 | 5.38E-09 |

|          |          |          |          |          |
|----------|----------|----------|----------|----------|
| 0.00015  | -0.04351 | 0.34811  | 0.351876 | 4.66E-15 |
| 0.02331  | -0.00351 | 0.93978  | 0.425476 | 5.89E-22 |
| 0.92143  | 0.10303  | 0.02598  | -0.16522 | 0.00034  |
| 0.57902  | -0.01233 | 0.79044  | -0.00969 | 0.83458  |
| 0.00409  | 0.110815 | 0.01659  | 0.004135 | 0.92899  |
| 0.03097  | 0.039434 | 0.3952   | 0.082044 | 0.07652  |
| 1.52E-08 | 0.207596 | 6.08E-06 | 0.49796  | 1.24E-30 |
| 2.06E-05 | -0.21863 | 1.84E-06 | 0.021167 | 0.64821  |
| 0.14546  | -0.10116 | 0.02883  | 0.287712 | 2.37E-10 |
| 3.97E-10 | 0.265187 | 5.89E-09 | 0.290772 | 1.50E-10 |
| 0.00403  | -0.04159 | 0.36987  | 0.341299 | 3.33E-14 |
| 0.46667  | -0.04154 | 0.37049  | 0.172564 | 0.00018  |
| 1.25E-05 | 0.147454 | 0.0014   | 0.408088 | 3.62E-20 |
| 0.83144  | 0.068186 | 0.14122  | 0.009243 | 0.8421   |
| 0.62311  | 0.062398 | 0.17826  | 0.039008 | 0.40033  |
| 0.69507  | 0.08289  | 0.07353  | -0.14135 | 0.0022   |
| 8.23E-10 | 0.144526 | 0.00174  | 0.405761 | 6.17E-20 |
| 0.13922  | 0.210331 | 4.55E-06 | 0.015643 | 0.73599  |
| 0.00036  | 0.234949 | 2.81E-07 | 0.044913 | 0.33281  |
| 8.83E-07 | 0.195868 | 2.02E-05 | 0.2963   | 6.44E-11 |
| 0.85132  | -0.13683 | 0.00305  | 0.246349 | 6.94E-08 |
| 0.00805  | 0.048805 | 0.29258  | -0.18972 | 3.68E-05 |
| 0.16618  | -0.07477 | 0.10659  | -0.06349 | 0.17075  |
| 0.85529  | 0.068048 | 0.14203  | -0.01913 | 0.68017  |
| 0.83892  | 0.024743 | 0.59379  | -0.02134 | 0.64558  |
| 0.60501  | 0.097124 | 0.03589  | -0.032   | 0.49023  |
| 0.88495  | 0.031839 | 0.49247  | -0.05682 | 0.22037  |
| 0.82599  | 0.098287 | 0.03372  | -0.15613 | 0.00071  |
| 0.52659  | 0.006153 | 0.8945   | 0.128916 | 0.00527  |
| 0.88361  | 0.07515  | 0.10482  | -0.00853 | 0.85406  |
| 0.81154  | -0.00218 | 0.96254  | -0.00727 | 0.87556  |
| 0.21892  | 0.114088 | 0.01363  | 0.110176 | 0.01723  |
| 5.77E-06 | 0.09865  | 0.03306  | 0.40001  | 2.27E-19 |
| 1.88E-08 | 0.18313  | 6.87E-05 | 0.149995 | 0.00115  |
| 2.18E-06 | -0.03258 | 0.48247  | -0.50909 | 3.70E-32 |
| 0.36303  | 0.068059 | 0.14196  | -0.27935 | 8.08E-10 |
| 0.0001   | -0.07114 | 0.12473  | 0.423319 | 9.94E-22 |
| 0.24178  | 0.047341 | 0.30731  | 0.268176 | 3.91E-09 |
| 9.16E-06 | -0.13516 | 0.00343  | -0.22593 | 8.08E-07 |
| 3.51E-09 | 0.004676 | 0.91972  | 0.537652 | 2.43E-36 |
| 0.00025  | 0.036129 | 0.43603  | 0.275581 | 1.39E-09 |
| 0.14183  | -0.0935  | 0.04344  | 0.111476 | 0.01595  |
| 0.85413  | -0.04336 | 0.3498   | -0.26158 | 9.59E-09 |
| 0.56715  | -0.00454 | 0.92207  | 0.157549 | 0.00063  |
| 0.27952  | -0.00555 | 0.90477  | -0.06    | 0.19554  |

|          |          |          |          |          |
|----------|----------|----------|----------|----------|
| 0.03937  | -0.10147 | 0.02834  | 0.021275 | 0.64654  |
| 0.04898  | 0.11248  | 0.01502  | 0.407595 | 4.06E-20 |
| 0.00135  | 0.257707 | 1.61E-08 | -0.01655 | 0.72129  |
| 0.00376  | 0.043602 | 0.34713  | 0.101446 | 0.02838  |
| 0.84637  | -0.07812 | 0.09176  | 0.016483 | 0.72239  |
| 0.00029  | -0.05778 | 0.21265  | 0.004421 | 0.92409  |
| 0.00348  | 0.026473 | 0.56824  | 0.188132 | 4.29E-05 |
| 0.27319  | -0.04123 | 0.37396  | 0.164547 | 0.00036  |
| 0.0076   | 0.027295 | 0.55628  | 0.094718 | 0.04076  |
| 0.4422   | 0.006758 | 0.8842   | -0.0233  | 0.61546  |
| 2.09E-06 | 0.29676  | 6.00E-11 | 0.037818 | 0.41487  |
| 0.00863  | -0.00322 | 0.94473  | 0.130307 | 0.0048   |
| 0.01136  | 0.056441 | 0.22345  | -0.35959 | 1.06E-15 |
| 0.01278  | 0.271511 | 2.46E-09 | -0.35703 | 1.74E-15 |
| 0.04562  | 0.057147 | 0.2177   | 0.075674 | 0.10241  |
| 0.6263   | 0.054979 | 0.2357   | -0.20062 | 1.25E-05 |
| 0.00016  | 0.223533 | 1.06E-06 | 0.026378 | 0.56962  |
| 2.80E-05 | 0.013407 | 0.77261  | -0.5045  | 1.60E-31 |
| 0.62772  | -0.06593 | 0.15485  | -0.06987 | 0.1316   |
| 0.37211  | -0.05747 | 0.21511  | 0.136742 | 0.00307  |
| 0.3396   | 0.000422 | 0.99274  | 0.067711 | 0.14401  |
| 0.00984  | 0.064829 | 0.16191  | -0.09559 | 0.03892  |
| 0.00265  | -0.01412 | 0.76095  | -0.22538 | 8.62E-07 |
| 0.04963  | 0.004778 | 0.91799  | 0.306054 | 1.39E-11 |
| 0.73592  | -0.13629 | 0.00317  | 0.467473 | 9.93E-27 |
| 0.00652  | -0.065   | 0.16077  | 0.505748 | 1.08E-31 |
| 0.23363  | -0.09668 | 0.03675  | 0.174191 | 0.00015  |
| 0.53042  | 0.040968 | 0.37706  | 0.002908 | 0.95002  |
| 0.0027   | 0.00458  | 0.92137  | 0.400789 | 1.90E-19 |
| 0.0332   | 0.013465 | 0.77165  | 0.427172 | 3.89E-22 |
| 0.335    | -0.05125 | 0.26908  | 0.114675 | 0.01315  |
| 0.04927  | -0.1193  | 0.00987  | 0.078561 | 0.08993  |
| 0.01279  | -0.04366 | 0.34647  | 0.151299 | 0.00104  |
| 0.54329  | 0.079903 | 0.08456  | 0.042713 | 0.35706  |
| 0.65039  | -0.09602 | 0.03806  | 0.061742 | 0.18288  |
| 0.01039  | 0.02183  | 0.63796  | 0.257587 | 1.63E-08 |
| 2.31E-07 | 0.18969  | 3.70E-05 | 0.330674 | 2.23E-13 |
| 0.04519  | -0.00926 | 0.84176  | 0.315593 | 2.93E-12 |
| 0.90702  | -0.04227 | 0.36204  | 0.326395 | 4.70E-13 |
| 0.02067  | 0.003716 | 0.93617  | 0.295312 | 7.50E-11 |
| 9.95E-10 | 0.109613 | 0.01781  | 0.475228 | 1.10E-27 |
| 0.02219  | 0.00115  | 0.98023  | 0.072739 | 0.11647  |
| 0.15397  | -0.04741 | 0.30662  | -0.08345 | 0.0716   |
| 0.68753  | -0.10025 | 0.0303   | 0.05021  | 0.27888  |
| 1.77E-07 | 0.249103 | 4.90E-08 | 0.305993 | 1.40E-11 |

|          |          |          |          |          |
|----------|----------|----------|----------|----------|
| 3.87E-05 | 0.115792 | 0.01228  | 0.358897 | 1.21E-15 |
| 0.13109  | 0.137423 | 0.00292  | -0.27354 | 1.85E-09 |
| 0.12018  | -0.02161 | 0.64132  | 0.268652 | 3.66E-09 |
| 0.73963  | 0.217769 | 2.03E-06 | -0.29288 | 1.09E-10 |
| 0.06674  | -0.1208  | 0.00897  | 0.008072 | 0.8619   |
| 0.11039  | 0.034323 | 0.45933  | 0.047168 | 0.30909  |
| 0.07762  | -0.06272 | 0.17602  | -0.12974 | 0.00498  |
| 0.00368  | 0.155578 | 0.00074  | 0.071426 | 0.12323  |
| 0.02872  | 0.091922 | 0.04711  | -0.01637 | 0.72415  |
| 8.84E-07 | 0.161988 | 0.00044  | 0.164699 | 0.00035  |
| 0.48756  | -0.04793 | 0.3013   | 0.094859 | 0.04046  |
| 2.59E-05 | 0.165961 | 0.00032  | 0.108075 | 0.01949  |
| 0.03547  | 0.005183 | 0.91106  | -0.07928 | 0.08702  |
| 0.02649  | -0.15507 | 0.00077  | 0.162565 | 0.00042  |
| 0.02183  | -0.04212 | 0.36383  | 0.003051 | 0.94756  |
| 6.79E-05 | -0.12757 | 0.00577  | -0.04868 | 0.29382  |
| 0.80692  | 0.011337 | 0.80696  | 0.210371 | 4.53E-06 |
| 0.01751  | 0.065814 | 0.15561  | 0.038534 | 0.40608  |
| 0.17576  | -0.09116 | 0.04897  | 0.016106 | 0.72848  |
| 0.31771  | -0.03898 | 0.40061  | 0.008765 | 0.85016  |
| 0.19273  | -0.05242 | 0.25826  | 0.006254 | 0.89277  |
| 0.07617  | -0.00297 | 0.94901  | -0.07441 | 0.10831  |
| 0.04587  | -0.06938 | 0.13437  | -0.05189 | 0.26309  |
| 0.39998  | -0.0018  | 0.96909  | -0.02005 | 0.66566  |
| 0.52175  | -0.04786 | 0.30203  | 0.034515 | 0.45682  |
| 0.0388   | -0.29848 | 4.60E-11 | 0.175301 | 0.00014  |
| 5.48E-08 | -0.15049 | 0.00111  | -0.20621 | 7.03E-06 |
| 0.40846  | 0.077846 | 0.0929   | 0.014923 | 0.74772  |
| 0.00146  | -0.07111 | 0.12491  | 0.236386 | 2.37E-07 |
| 1.38E-07 | 0.222519 | 1.19E-06 | 0.009087 | 0.84473  |
| 0.00448  | 0.135258 | 0.0034   | 0.01447  | 0.75514  |
| 0.02504  | 0.105065 | 0.02317  | 0.220893 | 1.43E-06 |
| 0.00013  | -0.06256 | 0.17711  | -0.18807 | 4.32E-05 |
| 0.00023  | -0.06857 | 0.13899  | -0.1948  | 2.24E-05 |
| 0.70611  | -0.05645 | 0.22334  | 0.134232 | 0.00366  |
| 7.40E-07 | 0.000883 | 0.98481  | -0.04999 | 0.281    |
| 0.00781  | -0.01091 | 0.81409  | 0.202165 | 1.07E-05 |
| 0.02925  | -0.15939 | 0.00055  | 0.085281 | 0.06557  |
| 0.97657  | -0.02555 | 0.58177  | 0.12096  | 0.00888  |
| 0.08631  | 0.1455   | 0.00162  | 0.078474 | 0.09028  |
| 0.72143  | 0.05288  | 0.25409  | 0.016991 | 0.71419  |
| 0.00444  | 0.108863 | 0.01861  | 0.23124  | 4.36E-07 |
| 0.00189  | -0.00284 | 0.95115  | 0.376664 | 3.44E-17 |
| 0.00633  | -0.08579 | 0.06397  | -0.11281 | 0.01472  |
| 0.77525  | 0.115241 | 0.0127   | -0.15634 | 0.0007   |

|          |          |          |          |          |
|----------|----------|----------|----------|----------|
| 0.88996  | 0.01242  | 0.78894  | 0.048095 | 0.29966  |
| 0.18451  | -0.07439 | 0.10839  | 0.236492 | 2.34E-07 |
| 0.41405  | -0.02536 | 0.58464  | 0.291383 | 1.36E-10 |
| 0.63035  | -0.08312 | 0.07272  | 0.324017 | 7.08E-13 |
| 0.04334  | 0.022755 | 0.6238   | 0.233357 | 3.40E-07 |
| 0.71503  | -0.15585 | 0.00073  | 0.251956 | 3.40E-08 |
| 0.50947  | -0.11545 | 0.01254  | 0.256097 | 1.98E-08 |
| 0.01653  | -0.0923  | 0.04621  | 0.093997 | 0.04232  |
| 9.14E-06 | 0.128715 | 0.00534  | -0.09104 | 0.04927  |
| 0.00091  | 0.101683 | 0.02801  | 0.061862 | 0.18203  |
| 0.01654  | -0.08902 | 0.05455  | 0.021474 | 0.64345  |
| 0.44862  | -0.03364 | 0.4683   | 0.164718 | 0.00035  |
| 0.29989  | -0.02683 | 0.563    | 0.371676 | 9.57E-17 |
| 1.67E-05 | 0.094293 | 0.04167  | 0.271722 | 2.39E-09 |
| 0.24217  | -0.03559 | 0.44288  | 0.419471 | 2.51E-21 |
| 0.06584  | 0.074244 | 0.10908  | 0.126907 | 0.00603  |
| 0.75487  | 0.061851 | 0.18211  | 0.079924 | 0.08447  |
| 0.02246  | 0.077011 | 0.09647  | -0.28607 | 3.03E-10 |
| 0.94757  | -0.06994 | 0.13127  | 0.291771 | 1.29E-10 |
| 0.41286  | -0.10195 | 0.02759  | 0.011832 | 0.79871  |
| 0.07487  | 0.015908 | 0.73169  | 0.3824   | 1.04E-17 |
| 0.0353   | 0.11051  | 0.01689  | 0.070779 | 0.12667  |
| 0.00089  | -0.08129 | 0.07929  | 0.446767 | 2.71E-24 |
| 0.86921  | -0.11508 | 0.01283  | 0.295244 | 7.57E-11 |
| 0.01938  | -0.00092 | 0.98414  | 0.369546 | 1.47E-16 |
| 0.51738  | -0.02251 | 0.62754  | 0.173759 | 0.00016  |
| 0.0001   | -0.02433 | 0.59991  | 0.552392 | 1.16E-38 |
| 0.56656  | 0.010817 | 0.81566  | 0.140343 | 0.00237  |
| 5.08E-05 | 0.215608 | 2.57E-06 | 0.229545 | 5.32E-07 |
| 0.6646   | -0.05973 | 0.19762  | 0.149829 | 0.00116  |
| 0.00017  | -0.04329 | 0.35057  | 0.63802  | 9.66E-55 |
| 0.66022  | 0.014401 | 0.75626  | 0.1031   | 0.02588  |
| 0.0146   | -0.05701 | 0.21878  | 0.49933  | 8.10E-31 |
| 0.00051  | -0.05329 | 0.25046  | -0.11424 | 0.0135   |
| 0.36489  | 0.083627 | 0.071    | -0.24687 | 6.50E-08 |
| 0.19746  | 0.010661 | 0.81827  | 0.0508   | 0.27327  |
| 0.39952  | 0.070503 | 0.12816  | -0.08803 | 0.05731  |
| 0.00252  | -0.07404 | 0.11006  | -0.0686  | 0.13882  |
| 0.87215  | -0.19525 | 2.15E-05 | 0.256723 | 1.83E-08 |
| 0.00234  | -0.07747 | 0.09447  | 0.128886 | 0.00528  |
| 0.00771  | 0.003234 | 0.94443  | 0.367745 | 2.12E-16 |
| 0.00865  | 0.087567 | 0.05864  | 0.187006 | 4.78E-05 |
| 0.06774  | 0.08718  | 0.05977  | -0.31898 | 1.66E-12 |
| 0.00046  | -0.03924 | 0.39748  | 0.106593 | 0.02123  |
| 0.00665  | -0.01122 | 0.80894  | 0.241089 | 1.33E-07 |

|          |          |          |          |          |
|----------|----------|----------|----------|----------|
| 0.00108  | -0.03292 | 0.47784  | 0.260209 | 1.15E-08 |
| 0.60535  | -0.01097 | 0.81304  | -0.26783 | 4.10E-09 |
| 0.23427  | -0.14964 | 0.00118  | 0.077427 | 0.09467  |
| 0.71867  | -0.04369 | 0.34617  | 0.212928 | 3.44E-06 |
| 0.18758  | 0.016915 | 0.71543  | 0.040635 | 0.38096  |
| 1.80E-12 | 0.194427 | 2.33E-05 | 0.000368 | 0.99368  |
| 0.00415  | 0.00712  | 0.87804  | -0.01145 | 0.8051   |
| 0.20257  | 0.107439 | 0.02022  | 0.042918 | 0.35475  |
| 0.00664  | -0.0792  | 0.08735  | 0.222601 | 1.18E-06 |
| 0.30611  | -0.12273 | 0.00793  | 0.100513 | 0.02987  |
| 0.43612  | -0.10759 | 0.02004  | 0.083541 | 0.07129  |
| 0.25221  | -0.07794 | 0.09251  | 0.166076 | 0.00031  |
| 0.00254  | -0.0208  | 0.65399  | 0.187523 | 4.55E-05 |
| 0.46553  | -0.12044 | 0.00918  | 0.272318 | 2.20E-09 |
| 0.80026  | -0.17791 | 0.00011  | -0.03702 | 0.42476  |
| 0.72996  | 0.0003   | 0.99484  | -0.09417 | 0.04193  |
| 0.00258  | -0.05185 | 0.26344  | 0.396886 | 4.54E-19 |
| 0.85906  | -0.0624  | 0.17825  | 0.272211 | 2.23E-09 |
| 0.8145   | 0.093594 | 0.04322  | 0.049141 | 0.28926  |
| 0.8788   | -0.11539 | 0.01259  | 0.274253 | 1.67E-09 |
| 0.58269  | -0.0672  | 0.1471   | 0.13068  | 0.00468  |
| 0.06375  | 0.036492 | 0.43143  | 0.077709 | 0.09348  |
| 0.30678  | -0.01286 | 0.78168  | 0.360416 | 9.02E-16 |
| 0.29169  | -0.07582 | 0.10175  | 0.204218 | 8.65E-06 |
| 0.4634   | -0.04738 | 0.30687  | 0.178456 | 0.00011  |
| 0.16741  | 0.081419 | 0.0788   | -0.0046  | 0.92098  |
| 0.20411  | -0.0291  | 0.53042  | -0.22979 | 5.17E-07 |
| 0.92417  | 0.016535 | 0.72154  | -0.00661 | 0.88673  |
| 0.03248  | -0.11052 | 0.01688  | 0.029296 | 0.5277   |
| 0.09656  | 0.11724  | 0.01123  | 0.105578 | 0.0225   |
| 0.0013   | 0.191449 | 3.12E-05 | 0.19482  | 2.24E-05 |
| 4.82E-06 | -0.00197 | 0.9661   | 0.152914 | 0.00092  |
| 0.54443  | -0.0934  | 0.04365  | -0.02306 | 0.61912  |
| 0.58727  | -0.01853 | 0.68954  | 0.08083  | 0.081    |
| 3.37E-10 | 0.298    | 4.95E-11 | 0.065459 | 0.15786  |
| 0.0001   | 0.141769 | 0.00213  | 0.355281 | 2.44E-15 |
| 0.68731  | 0.050115 | 0.2798   | -0.16755 | 0.00028  |
| 0.00081  | 0.008148 | 0.86059  | 0.167268 | 0.00028  |
| 0.80127  | -0.05933 | 0.20063  | 0.156001 | 0.00072  |
| 0.00067  | -0.03352 | 0.46993  | 0.401822 | 1.51E-19 |
| 0.42734  | -0.04368 | 0.34632  | 0.256858 | 1.80E-08 |
| 0.82099  | -0.08699 | 0.06031  | 0.195442 | 2.11E-05 |
| 2.35E-16 | 0.149901 | 0.00116  | 0.492565 | 6.50E-30 |
| 0.06129  | -0.07916 | 0.08751  | 0.013648 | 0.76864  |
| 0.00723  | 0.253469 | 2.80E-08 | -0.05933 | 0.20061  |



|          |          |          |          |          |
|----------|----------|----------|----------|----------|
| 0.00016  | -0.09646 | 0.03719  | -0.36971 | 1.42E-16 |
| 0.23503  | -0.00452 | 0.92237  | 0.189625 | 3.72E-05 |
| 0.87466  | 0.124466 | 0.00708  | 0.07514  | 0.10486  |
| 0.02054  | -0.10956 | 0.01786  | 0.342137 | 2.86E-14 |
| 0.88865  | -0.11447 | 0.01332  | 0.269801 | 3.12E-09 |
| 0.4174   | -0.09174 | 0.04754  | 0.054554 | 0.23934  |
| 3.26E-05 | 0.031954 | 0.49092  | 0.577388 | 7.19E-43 |
| 0.74029  | -0.02581 | 0.57793  | 0.265812 | 5.41E-09 |
| 0.59932  | -0.0157  | 0.73501  | 0.066531 | 0.15115  |
| 0.11017  | -0.204   | 8.85E-06 | -0.08973 | 0.05265  |
| 0.13431  | -0.07504 | 0.10535  | 0.142762 | 0.00198  |
| 0.24081  | -0.01127 | 0.80808  | -0.11136 | 0.01606  |
| 0.05069  | -0.10856 | 0.01894  | 0.069555 | 0.13338  |
| 0.66822  | -0.08434 | 0.06862  | 0.290385 | 1.59E-10 |
| 0.02405  | 0.01742  | 0.70731  | 0.240188 | 1.49E-07 |
| 0.04003  | -0.05587 | 0.22814  | 0.314952 | 3.26E-12 |
| 0.03346  | 0.103198 | 0.02574  | -0.19547 | 2.10E-05 |
| 0.9165   | -0.09673 | 0.03665  | 0.172023 | 0.00019  |
| 0.63328  | -0.15452 | 0.00081  | 0.195449 | 2.10E-05 |
| 0.48173  | -0.04323 | 0.35126  | 0.11674  | 0.01158  |
| 0.06676  | -0.12302 | 0.00778  | 0.02558  | 0.58136  |
| 0.00024  | -0.10192 | 0.02764  | -0.06725 | 0.14678  |
| 8.31E-05 | 0.079153 | 0.08752  | 0.114777 | 0.01307  |
| 0.02843  | 0.084381 | 0.06848  | 0.074472 | 0.108    |
| 0.40906  | 0.006039 | 0.89644  | 0.213295 | 3.31E-06 |
| 0.38302  | 0.003165 | 0.94561  | 0.081321 | 0.07916  |
| 0.07417  | -0.01125 | 0.80846  | 0.234731 | 2.88E-07 |
| 5.06E-08 | 0.14472  | 0.00172  | 0.253847 | 2.66E-08 |
| 0.008    | 0.107726 | 0.01988  | -0.27061 | 2.79E-09 |
| 0.02612  | 0.087083 | 0.06005  | 0.068723 | 0.1381   |
| 0.00525  | -0.10497 | 0.0233   | -0.05979 | 0.19716  |
| 0.07339  | -0.02952 | 0.52453  | 0.130731 | 0.00466  |
| 0.94283  | -0.07083 | 0.1264   | 0.120585 | 0.0091   |
| 0.86471  | -0.0967  | 0.03671  | 0.28098  | 6.38E-10 |
| 0.00175  | 0.062629 | 0.17665  | -0.4995  | 7.69E-31 |
| 0.1337   | 0.105439 | 0.02268  | -0.20695 | 6.51E-06 |
| 0.41444  | 0.246404 | 6.89E-08 | -0.09454 | 0.04115  |
| 0.00012  | -0.17692 | 0.00012  | -0.13762 | 0.00288  |
| 0.00019  | -0.05092 | 0.27215  | -0.26362 | 7.28E-09 |
| 0.46327  | -0.17007 | 0.00022  | 0.31732  | 2.20E-12 |
| 1.63E-09 | 0.032393 | 0.48497  | 0.62454  | 7.11E-52 |
| 0.15764  | 0.021696 | 0.64003  | 0.272725 | 2.08E-09 |
| 0.00111  | 0.241171 | 1.32E-07 | -0.02352 | 0.61223  |
| 0.33498  | 0.005851 | 0.89964  | 0.03758  | 0.41782  |
| 0.00018  | 0.046033 | 0.32089  | 0.141959 | 0.0021   |

|          |          |         |          |          |
|----------|----------|---------|----------|----------|
| 0.32166  | 0.021997 | 0.63539 | -0.04833 | 0.29728  |
| 0.70755  | -0.02398 | 0.6053  | 0.213544 | 3.22E-06 |
| 0.88202  | -0.038   | 0.41266 | 0.034862 | 0.4523   |
| 0.93134  | -0.07636 | 0.09931 | 0.072036 | 0.12005  |
| 0.78816  | 0.013195 | 0.77611 | 0.103541 | 0.02525  |
| 0.0079   | -0.02478 | 0.59327 | 0.391793 | 1.39E-18 |
| 0.2843   | -0.0477  | 0.30365 | 0.187934 | 4.37E-05 |
| 0.45974  | -0.00683 | 0.88305 | -0.00725 | 0.87586  |
| 0.02763  | -0.03211 | 0.48874 | 0.044089 | 0.34177  |
| 0.02191  | -0.02695 | 0.56134 | 0.005865 | 0.8994   |
| 0.84424  | 0.052262 | 0.25968 | 0.005879 | 0.89917  |
| 0.87976  | 0.01834  | 0.69261 | 0.087666 | 0.05835  |
| 0.06469  | 0.001676 | 0.97118 | 0.03979  | 0.39095  |
| 0.66771  | 0.098576 | 0.0332  | 0.015424 | 0.73955  |
| 0.01443  | -0.11013 | 0.01728 | 0.167966 | 0.00027  |
| 0.07907  | -0.0715  | 0.12283 | 0.056766 | 0.22079  |
| 0.0561   | -0.01287 | 0.78152 | 0.223602 | 1.06E-06 |
| 5.18E-05 | -0.06224 | 0.17935 | -0.06824 | 0.1409   |
| 0.52818  | -0.06569 | 0.15641 | -0.00482 | 0.91726  |
| 0.33655  | -0.0413  | 0.37321 | 0.216133 | 2.43E-06 |
| 0.01958  | 0.022655 | 0.62532 | 0.191237 | 3.18E-05 |
| 0.72048  | -0.05981 | 0.197   | 0.090027 | 0.05187  |
| 0.49111  | -0.0789  | 0.08855 | -0.0394  | 0.39556  |
| 0.96373  | 0.003957 | 0.93204 | 0.002707 | 0.95348  |
| 0.02046  | -0.06216 | 0.17996 | -0.01891 | 0.68357  |
| 0.38975  | -0.09759 | 0.03501 | 0.363241 | 5.18E-16 |
| 0.00052  | 0.048319 | 0.29741 | 0.52727  | 8.95E-35 |
| 0.1084   | 0.003196 | 0.94508 | 0.170602 | 0.00021  |
| 0.24708  | -0.03933 | 0.39646 | 0.406165 | 5.63E-20 |
| 0.01538  | -0.07439 | 0.1084  | 0.480338 | 2.50E-28 |
| 0.78438  | 0.074012 | 0.11019 | 0.056352 | 0.22419  |
| 0.05167  | -0.01396 | 0.76342 | 0.239428 | 1.64E-07 |
| 0.70143  | -0.01987 | 0.66845 | 0.188386 | 4.19E-05 |
| 0.06408  | 0.050681 | 0.2744  | 0.152501 | 0.00095  |
| 0.24687  | -0.07224 | 0.11901 | 0.231107 | 4.43E-07 |
| 0.58635  | 0.055795 | 0.2288  | -0.17724 | 0.00012  |
| 0.01191  | 0.072645 | 0.11694 | 0.172465 | 0.00018  |
| 0.55317  | -0.03853 | 0.40615 | 0.25046  | 4.12E-08 |
| 0.00027  | 0.045077 | 0.33105 | 0.15352  | 0.00087  |
| 0.18123  | -0.09057 | 0.05046 | 0.346402 | 1.30E-14 |
| 0.00079  | -0.02911 | 0.53031 | 0.070846 | 0.12631  |
| 0.36582  | -0.04023 | 0.38574 | 0.186588 | 4.97E-05 |
| 0.29454  | -0.01    | 0.82943 | 0.152725 | 0.00093  |
| 0.0102   | 0.028034 | 0.54563 | 0.347924 | 9.81E-15 |
| 0.0367   | 0.059849 | 0.19669 | 0.100529 | 0.02985  |

|          |          |          |          |          |
|----------|----------|----------|----------|----------|
| 3.89E-12 | 0.009044 | 0.84546  | 0.446411 | 2.98E-24 |
| 0.04182  | 0.012832 | 0.78211  | 0.310627 | 6.64E-12 |
| 0.74576  | -0.0125  | 0.78768  | -0.14855 | 0.00128  |
| 0.01065  | 0.114403 | 0.01337  | 0.350294 | 6.29E-15 |
| 0.04604  | -0.15285 | 0.00092  | 0.187915 | 4.38E-05 |
| 0.15505  | 0.002504 | 0.95697  | 0.131611 | 0.00439  |
| 4.70E-06 | 0.182095 | 7.57E-05 | 0.129252 | 0.00515  |
| 0.22861  | -0.09808 | 0.0341   | 0.3168   | 2.40E-12 |
| 0.50922  | 0.037912 | 0.41371  | 0.020544 | 0.65789  |
| 0.00392  | -0.12472 | 0.00696  | 0.146475 | 0.0015   |
| 0.14678  | -0.15423 | 0.00083  | 0.341338 | 3.31E-14 |
| 0.18935  | -0.1113  | 0.01612  | 0.524926 | 1.99E-34 |
| 1.26E-05 | 0.044126 | 0.34136  | 0.550282 | 2.54E-38 |
| 0.07654  | -0.12998 | 0.0049   | 0.423258 | 1.01E-21 |
| 0.07706  | -0.02061 | 0.65694  | 0.251938 | 3.41E-08 |
| 0.89906  | -0.20761 | 6.07E-06 | 0.401873 | 1.49E-19 |
| 0.5544   | 0.022332 | 0.63025  | 0.279739 | 7.64E-10 |
| 0.89627  | -0.08925 | 0.05394  | 0.024452 | 0.59814  |
| 0.13501  | 0.016257 | 0.72603  | 0.151176 | 0.00105  |
| 0.83232  | -0.11784 | 0.01082  | 0.398546 | 3.14E-19 |
| 0.00206  | 0.285287 | 3.40E-10 | -0.23451 | 2.96E-07 |
| 0.42444  | -0.0394  | 0.39564  | 0.085484 | 0.06493  |
| 2.15E-05 | 0.120786 | 0.00898  | 0.209247 | 5.11E-06 |
| 6.14E-05 | -0.01427 | 0.75841  | 0.297898 | 5.03E-11 |
| 0.03559  | 0.006116 | 0.89514  | 0.085021 | 0.0664   |
| 0.00021  | -0.05202 | 0.26186  | 0.488332 | 2.34E-29 |
| 0.04166  | -0.06388 | 0.16816  | 0.214606 | 2.87E-06 |
| 0.05382  | -0.09739 | 0.03538  | 0.260356 | 1.13E-08 |
| 0.3887   | -0.01389 | 0.76468  | 0.017418 | 0.70734  |
| 0.66034  | -0.06961 | 0.1331   | 0.087509 | 0.05881  |
| 0.97012  | 0.014536 | 0.75406  | -0.04673 | 0.31359  |
| 0.02759  | -0.04316 | 0.35207  | -0.12257 | 0.00801  |
| 0.1781   | -0.0567  | 0.22131  | 0.193018 | 2.67E-05 |
| 0.39769  | -0.08837 | 0.05636  | 0.152149 | 0.00097  |
| 0.00196  | -0.05173 | 0.26458  | -0.28136 | 6.04E-10 |
| 0.05739  | -0.12637 | 0.00625  | 0.089149 | 0.0542   |
| 0.00632  | 0.045476 | 0.32678  | 0.037088 | 0.42394  |
| 1.27E-05 | 0.014353 | 0.75705  | 0.443384 | 6.54E-24 |
| 0.40164  | 0.04088  | 0.37808  | 0.156075 | 0.00071  |
| 0.29301  | -0.06027 | 0.19353  | -0.0245  | 0.59745  |
| 6.02E-05 | -0.03825 | 0.40961  | -0.25547 | 2.15E-08 |
| 0.00395  | -0.00353 | 0.93934  | -0.25515 | 2.25E-08 |
| 0.03179  | -0.02462 | 0.59566  | -0.02576 | 0.57877  |
| 0.00038  | -0.0629  | 0.1748   | -0.21613 | 2.43E-06 |
| 0.00042  | -0.00675 | 0.88434  | 0.61018  | 5.69E-49 |

|          |          |         |          |          |
|----------|----------|---------|----------|----------|
| 0.53617  | 0.047797 | 0.30267 | 0.368288 | 1.90E-16 |
| 0.04357  | 0.003308 | 0.94316 | 0.075205 | 0.10456  |
| 2.75E-05 | -0.01204 | 0.79526 | 0.430629 | 1.66E-22 |
| 0.93337  | 0.124577 | 0.00703 | -0.05297 | 0.25328  |
| 0.00384  | -0.08338 | 0.07184 | 0.029852 | 0.51989  |
| 0.25638  | 0.093146 | 0.04423 | 0.209293 | 5.08E-06 |
| 0.00348  | -0.04289 | 0.35508 | 0.487202 | 3.28E-29 |
| 0.52233  | -0.09252 | 0.04568 | 0.130525 | 0.00473  |
| 0.55672  | -0.02015 | 0.66407 | 0.063917 | 0.1679   |
| 0.18845  | 0.038901 | 0.40163 | 0.080397 | 0.08264  |
| 0.09402  | -0.02595 | 0.5759  | 0.212122 | 3.76E-06 |
| 0.75479  | 0.05094  | 0.27195 | -0.14076 | 0.0023   |
| 0.03043  | -0.0504  | 0.27705 | 0.259957 | 1.19E-08 |
| 1.01E-06 | -0.13975 | 0.00247 | -0.23491 | 2.82E-07 |
| 0.5526   | -0.01726 | 0.70994 | 0.153719 | 0.00086  |
| 0.16593  | 0.024297 | 0.60047 | 0.217073 | 2.19E-06 |
| 0.60222  | 0.025477 | 0.58289 | 0.051302 | 0.26855  |
| 0.00513  | 0.018028 | 0.69759 | 0.17301  | 0.00017  |
| 0.5254   | -0.14831 | 0.00131 | 0.08556  | 0.06469  |
| 0.00039  | 0.085302 | 0.0655  | 0.453782 | 4.23E-25 |
| 0.53747  | -0.0216  | 0.6415  | 0.096307 | 0.03748  |
| 0.08912  | -0.06272 | 0.176   | 0.126493 | 0.0062   |
| 0.18897  | -0.04866 | 0.29397 | 0.017912 | 0.69944  |
| 0.12024  | -0.13029 | 0.0048  | 0.164721 | 0.00035  |
| 0.39395  | -0.07683 | 0.09725 | 0.072293 | 0.11873  |
| 0.80209  | 0.097117 | 0.0359  | -0.01595 | 0.73108  |
| 0.90933  | -0.03552 | 0.44386 | 0.06576  | 0.15595  |
| 0.00015  | 0.021625 | 0.64113 | 0.384084 | 7.28E-18 |
| 0.64808  | -0.08776 | 0.05807 | 0.09131  | 0.0486   |
| 0.10696  | -0.12875 | 0.00533 | 0.00381  | 0.93455  |
| 0.298    | 0.020783 | 0.65418 | 0.037839 | 0.41462  |
| 0.47166  | -0.09593 | 0.03824 | 0.091647 | 0.04778  |
| 0.94687  | 0.087011 | 0.06027 | -0.16276 | 0.00041  |
| 0.29121  | 0.073577 | 0.11231 | 0.059188 | 0.20169  |
| 0.76218  | 0.023217 | 0.61676 | 0.043269 | 0.35083  |
| 0.48893  | 0.012675 | 0.78471 | 0.009849 | 0.83189  |
| 0.90872  | -0.03453 | 0.4566  | 0.18447  | 6.07E-05 |
| 0.00829  | 0.060036 | 0.19529 | 0.129086 | 0.00521  |
| 0.69618  | 0.003174 | 0.94546 | 0.106476 | 0.02137  |
| 0.53398  | -0.08447 | 0.06817 | 0.173557 | 0.00016  |
| 0.78346  | -0.04189 | 0.36637 | 0.187447 | 4.58E-05 |
| 0.31546  | -0.01453 | 0.7541  | 0.245216 | 8.00E-08 |
| 0.08982  | -0.00266 | 0.9542  | 0.358468 | 1.32E-15 |
| 0.14706  | 0.001161 | 0.98004 | 0.150431 | 0.00111  |
| 0.26993  | -0.00212 | 0.96359 | 0.145352 | 0.00164  |

|          |          |          |          |          |
|----------|----------|----------|----------|----------|
| 0.26175  | -0.04331 | 0.35033  | 0.060363 | 0.19287  |
| 0.01033  | 0.115476 | 0.01252  | 0.050234 | 0.27866  |
| 0.20365  | -0.05597 | 0.22733  | 0.079097 | 0.08775  |
| 0.09435  | 0.030453 | 0.51151  | 0.07436  | 0.10853  |
| 0.50968  | -0.03988 | 0.38984  | 0.137891 | 0.00283  |
| 0.40862  | -0.01315 | 0.77682  | 0.151115 | 0.00105  |
| 0.37576  | -0.00361 | 0.938    | 0.102095 | 0.02737  |
| 0.84406  | 0.022577 | 0.6265   | 0.091605 | 0.04788  |
| 8.38E-05 | 0.004671 | 0.9198   | 0.335485 | 9.52E-14 |
| 0.99887  | -0.05772 | 0.21308  | 0.123838 | 0.00738  |
| 0.01255  | -0.04533 | 0.32834  | -0.10877 | 0.01871  |
| 0.64443  | -0.037   | 0.425    | 0.19175  | 3.03E-05 |
| 0.51281  | -0.00428 | 0.92657  | 0.182897 | 7.03E-05 |
| 0.27002  | -0.00597 | 0.89769  | 0.122402 | 0.0081   |
| 0.08105  | -0.07606 | 0.10065  | -0.07117 | 0.12456  |
| 0.06394  | -0.06963 | 0.13296  | -0.02986 | 0.51971  |
| 0.99914  | 0.012795 | 0.78272  | 0.048044 | 0.30017  |
| 0.82299  | 0.009949 | 0.83021  | 0.025001 | 0.58995  |
| 0.17834  | -0.07505 | 0.10528  | 0.025778 | 0.57844  |
| 0.2166   | 0.029659 | 0.52259  | 0.243927 | 9.40E-08 |
| 0.87052  | -0.15089 | 0.00107  | 0.286117 | 3.00E-10 |
| 0.08353  | 0.07558  | 0.10284  | -0.31497 | 3.25E-12 |
| 0.00283  | 0.04007  | 0.38762  | -0.37623 | 3.76E-17 |
| 0.01731  | 0.046156 | 0.31959  | 0.132855 | 0.00403  |
| 0.04992  | -0.059   | 0.20312  | 0.319657 | 1.49E-12 |
| 4.04E-09 | 0.049062 | 0.29004  | 0.385463 | 5.43E-18 |
| 0.12651  | 0.121695 | 0.00847  | 0.103105 | 0.02587  |
| 0.00828  | -0.00719 | 0.87688  | -0.07262 | 0.11707  |
| 0.01314  | 0.062937 | 0.17454  | -0.37201 | 8.94E-17 |
| 0.24766  | 0.106234 | 0.02167  | -0.61573 | 4.47E-50 |
| 0.08331  | -0.04801 | 0.30053  | 0.287213 | 2.55E-10 |
| 0.10233  | -0.07649 | 0.09874  | -0.00392 | 0.93267  |
| 1.71E-06 | 0.138801 | 0.00265  | 0.321686 | 1.05E-12 |
| 0.45173  | -0.05634 | 0.22426  | 0.241661 | 1.24E-07 |
| 0.60488  | -0.0757  | 0.10229  | -0.01626 | 0.72594  |
| 0.02983  | -0.19095 | 3.27E-05 | 0.08048  | 0.08233  |
| 0.62528  | -0.09678 | 0.03655  | 0.104735 | 0.0236   |
| 0.48107  | -0.1132  | 0.01439  | 0.249261 | 4.80E-08 |
| 0.00334  | 0.116359 | 0.01186  | 0.336829 | 7.48E-14 |
| 0.76723  | -0.0994  | 0.03175  | 0.268047 | 3.98E-09 |
| 0.04454  | -0.03401 | 0.46342  | 0.250069 | 4.33E-08 |
| 0.69258  | -0.03177 | 0.4934   | 0.323168 | 8.19E-13 |
| 0.24823  | 0.042041 | 0.36469  | -0.0388  | 0.40286  |
| 0.03546  | 0.024138 | 0.60285  | 0.364523 | 4.02E-16 |
| 1.29E-05 | -0.02179 | 0.63859  | 0.277695 | 1.03E-09 |

|          |           |          |          |          |
|----------|-----------|----------|----------|----------|
| 0.89367  | 0.019057  | 0.68125  | 0.271132 | 2.59E-09 |
| 0.33594  | -0.17735  | 0.00012  | 0.241821 | 1.22E-07 |
| 0.00493  | 0.087679  | 0.05831  | 0.085188 | 0.06587  |
| 0.1986   | -0.02914  | 0.52996  | 0.185457 | 5.53E-05 |
| 0.00249  | -0.0728   | 0.11615  | 0.084718 | 0.06738  |
| 0.26396  | 0.043586  | 0.34731  | -0.32577 | 5.24E-13 |
| 0.12703  | -0.12839  | 0.00546  | -0.01873 | 0.6864   |
| 2.15E-05 | 0.058101  | 0.21011  | 0.432417 | 1.06E-22 |
| 0.00684  | -0.03579  | 0.44039  | 0.235254 | 2.71E-07 |
| 0.04919  | -0.01302  | 0.779    | 0.177642 | 0.00011  |
| 0.09486  | -0.09209  | 0.04671  | -0.11228 | 0.0152   |
| 0.00504  | -0.08564  | 0.06443  | 0.198492 | 1.55E-05 |
| 0.12334  | 0.019712  | 0.67093  | 0.25062  | 4.04E-08 |
| 0.21062  | 0.107517  | 0.02013  | 0.04967  | 0.2841   |
| 0.2807   | -0.00251  | 0.95692  | -0.26156 | 9.61E-09 |
| 0.07965  | -0.06827  | 0.14072  | -0.04646 | 0.31644  |
| 0.76736  | 0.068202  | 0.14113  | -0.08499 | 0.0665   |
| 5.13E-06 | 0.170725  | 0.00021  | 0.015099 | 0.74486  |
| 5.55E-05 | 0.082681  | 0.07426  | 0.24963  | 4.58E-08 |
| 0.71703  | 0.085047  | 0.06632  | 0.092285 | 0.04624  |
| 0.21069  | 0.119908  | 0.0095   | 0.175217 | 0.00014  |
| 0.13844  | -0.03475  | 0.45374  | 0.109039 | 0.01842  |
| 9.76E-05 | 0.026869  | 0.56246  | 0.263529 | 7.37E-09 |
| 0.00193  | 0.023469  | 0.61294  | 0.265095 | 5.96E-09 |
| 0.58568  | -0.12423  | 0.00719  | 0.229971 | 5.06E-07 |
| 0.11521  | 0.016345  | 0.72461  | 0.254312 | 2.51E-08 |
| 0.11762  | -0.04134  | 0.37269  | 0.113774 | 0.01389  |
| 0.13274  | -0.007    | 0.88     | -0.25227 | 3.26E-08 |
| 0.2347   | -1.23E-05 | 0.99979  | 0.23261  | 3.71E-07 |
| 0.99459  | 0.025818  | 0.57785  | 0.219628 | 1.65E-06 |
| 0.01312  | 0.018233  | 0.69432  | 0.337318 | 6.85E-14 |
| 0.28462  | -0.09488  | 0.04042  | 0.278481 | 9.16E-10 |
| 0.03298  | 0.046703  | 0.31389  | 0.164575 | 0.00036  |
| 0.02249  | 0.113672  | 0.01398  | 0.132323 | 0.00418  |
| 0.14882  | 0.240311  | 1.47E-07 | 0.027218 | 0.5574   |
| 0.16483  | -0.05214  | 0.2608   | 0.239293 | 1.66E-07 |
| 0.43925  | -0.13662  | 0.00309  | 0.255682 | 2.10E-08 |
| 0.20473  | 0.003666  | 0.93703  | -0.10395 | 0.02468  |
| 0.22606  | -0.12878  | 0.00532  | 0.177283 | 0.00012  |
| 0.02667  | -0.01341  | 0.77249  | -0.01121 | 0.80903  |
| 0.83552  | 0.031946  | 0.49103  | 0.110452 | 0.01695  |
| 0.05924  | 0.026591  | 0.56651  | 0.178528 | 0.0001   |
| 0.19194  | -0.00068  | 0.98827  | 0.095551 | 0.03901  |
| 4.05E-10 | 0.418462  | 3.19E-21 | 0.074983 | 0.10559  |
| 0.04253  | 0.013194  | 0.77612  | 0.282662 | 4.99E-10 |

|          |          |         |          |          |
|----------|----------|---------|----------|----------|
| 0.12788  | 0.047666 | 0.304   | -0.0132  | 0.77595  |
| 0.06725  | -0.01827 | 0.69381 | 0.113826 | 0.01385  |
| 0.91299  | -0.08354 | 0.07127 | 0.101569 | 0.02818  |
| 0.97511  | -0.07079 | 0.12659 | 0.284808 | 3.64E-10 |
| 0.41753  | -0.15595 | 0.00072 | 0.27487  | 1.53E-09 |
| 0.95623  | -0.04035 | 0.38432 | 0.03975  | 0.39142  |
| 0.82876  | -0.0143  | 0.75785 | 0.059794 | 0.1971   |
| 0.26979  | 0.061172 | 0.18696 | -0.11324 | 0.01435  |
| 0.5175   | -0.06068 | 0.19054 | 0.076216 | 0.09997  |
| 4.05E-06 | -0.11035 | 0.01705 | -0.30196 | 2.66E-11 |
| 0.01681  | 0.082373 | 0.07535 | 0.430276 | 1.81E-22 |
| 0.87012  | -0.05259 | 0.25667 | 0.056915 | 0.21958  |
| 0.00265  | -0.09626 | 0.03758 | -0.25073 | 3.98E-08 |
| 0.23762  | 0.048953 | 0.29112 | 0.080824 | 0.08102  |
| 9.10E-05 | 0.042894 | 0.35503 | 0.394435 | 7.80E-19 |
| 0.31576  | -0.12607 | 0.00637 | 0.119655 | 0.00965  |
| 0.00819  | -0.01984 | 0.66888 | 0.15626  | 0.0007   |
| 0.09747  | -0.02793 | 0.54719 | 0.168859 | 0.00025  |
| 0.14321  | -0.11584 | 0.01224 | -0.16354 | 0.00039  |
| 0.38757  | -0.12662 | 0.00614 | 0.181212 | 8.21E-05 |
| 0.57712  | -0.09174 | 0.04754 | 0.218463 | 1.88E-06 |
| 0.65417  | -0.13062 | 0.0047  | 0.266854 | 4.69E-09 |
| 0.05516  | -0.00874 | 0.85064 | 0.281268 | 6.12E-10 |
| 0.91198  | -0.05002 | 0.28068 | 0.137535 | 0.0029   |
| 0.50187  | -0.0869  | 0.0606  | 0.187143 | 4.71E-05 |
| 0.64319  | -0.02211 | 0.63371 | 0.174178 | 0.00016  |
| 0.90198  | -0.01217 | 0.79317 | 0.010342 | 0.82362  |
| 0.84167  | -0.08052 | 0.08217 | 0.093167 | 0.04419  |
| 0.07448  | -0.05868 | 0.2056  | 0.065992 | 0.1545   |
| 0.46491  | -0.09243 | 0.04589 | -0.03041 | 0.51211  |
| 0.37848  | -0.08967 | 0.0528  | 0.097006 | 0.03611  |
| 0.70245  | -0.0826  | 0.07455 | 0.165117 | 0.00034  |
| 0.49881  | -0.13772 | 0.00286 | 0.236183 | 2.42E-07 |
| 0.22229  | -0.12716 | 0.00593 | 0.438138 | 2.51E-23 |
| 0.8643   | -0.11778 | 0.01086 | 0.107167 | 0.02054  |
| 0.01194  | -0.10784 | 0.01975 | 0.288647 | 2.06E-10 |
| 0.4289   | -0.10289 | 0.02619 | -0.08202 | 0.07661  |
| 0.7633   | -0.1366  | 0.0031  | 0.205301 | 7.73E-06 |
| 0.89824  | -0.07407 | 0.10991 | 0.07981  | 0.08492  |
| 0.43289  | 0.023559 | 0.61158 | 0.002383 | 0.95903  |
| 0.04209  | -0.02826 | 0.54243 | 0.168375 | 0.00026  |
| 0.00022  | 0.053479 | 0.24873 | 0.349212 | 7.71E-15 |
| 0.32336  | -0.11202 | 0.01544 | 0.298833 | 4.35E-11 |
| 0.27169  | -0.00296 | 0.94908 | 0.15304  | 0.00091  |
| 0.84374  | -0.07976 | 0.08512 | -0.02228 | 0.63104  |

|          |          |          |          |          |
|----------|----------|----------|----------|----------|
| 0.01288  | -0.01664 | 0.71982  | 0.235508 | 2.63E-07 |
| 0.00046  | 0.082259 | 0.07575  | 0.604288 | 8.02E-48 |
| 0.55045  | -0.08464 | 0.06762  | 0.124476 | 0.00708  |
| 0.29371  | -0.03396 | 0.46403  | 0.021737 | 0.63941  |
| 0.11078  | 0.081277 | 0.07933  | -0.37577 | 4.15E-17 |
| 0.01405  | 0.022033 | 0.63484  | -0.13061 | 0.0047   |
| 4.94E-06 | -0.02124 | 0.64701  | 0.402465 | 1.30E-19 |
| 0.35964  | -0.10168 | 0.02801  | 0.171954 | 0.00019  |
| 0.01047  | -0.10716 | 0.02055  | 0.24612  | 7.14E-08 |
| 0.01439  | 0.187809 | 4.42E-05 | 0.248315 | 5.41E-08 |
| 4.62E-06 | 0.214293 | 2.97E-06 | 0.165071 | 0.00034  |
| 0.64636  | -0.00414 | 0.92887  | 0.043858 | 0.3443   |
| 1.91E-09 | 0.083739 | 0.07062  | 0.674288 | 3.25E-63 |
| 1.75E-05 | 0.028334 | 0.54134  | 0.102466 | 0.02682  |
| 4.86E-06 | 0.052217 | 0.26009  | 0.46262  | 3.83E-26 |
| 0.33113  | 0.032309 | 0.48611  | 0.290599 | 1.54E-10 |
| 0.03185  | -0.03185 | 0.49237  | 0.171162 | 0.0002   |
| 0.60837  | 0.066589 | 0.15079  | -0.01561 | 0.73647  |
| 0.90383  | 0.033603 | 0.46881  | -0.24843 | 5.34E-08 |
| 0.3733   | -0.01874 | 0.68621  | 0.081823 | 0.07732  |
| 0.18907  | 0.014212 | 0.75937  | 0.021979 | 0.63568  |
| 0.25846  | -0.02781 | 0.5489   | 0.3532   | 3.63E-15 |
| 0.3023   | -0.07031 | 0.1292   | 0.237846 | 1.98E-07 |
| 0.50353  | -0.03542 | 0.44506  | 0.03149  | 0.49723  |
| 0.15736  | -0.00144 | 0.97523  | -0.01798 | 0.69831  |
| 0.04595  | -0.04052 | 0.38228  | -0.01297 | 0.7799   |
| 1.56E-06 | 0.085805 | 0.06393  | 0.116801 | 0.01154  |
| 0.00045  | 0.092025 | 0.04686  | 0.342989 | 2.45E-14 |
| 0.00807  | 0.163161 | 0.0004   | 0.074197 | 0.10931  |
| 0.83998  | 0.058052 | 0.21049  | -0.20605 | 7.15E-06 |
| 0.24122  | 0.175019 | 0.00014  | -0.26539 | 5.72E-09 |
| 0.18385  | -0.07424 | 0.10909  | 0.274357 | 1.65E-09 |
| 0.11426  | 0.013473 | 0.77152  | 0.158043 | 0.00061  |
| 0.0009   | 0.029783 | 0.52085  | 0.438817 | 2.11E-23 |
| 0.84337  | 0.040672 | 0.38052  | 0.175275 | 0.00014  |
| 0.44115  | 0.012548 | 0.78682  | 0.205733 | 7.39E-06 |
| 0.04711  | -0.13292 | 0.00401  | 0.376257 | 3.75E-17 |
| 0.06535  | -0.02003 | 0.66592  | -0.05225 | 0.25976  |
| 0.69697  | 0.057059 | 0.21841  | 0.019466 | 0.6748   |
| 0.0216   | -0.00948 | 0.83814  | 0.19656  | 1.88E-05 |
| 0.02397  | -0.08112 | 0.0799   | 0.312956 | 4.53E-12 |
| 0.52259  | -0.1068  | 0.02098  | 0.383817 | 7.71E-18 |
| 0.06178  | 0.111251 | 0.01616  | 0.118394 | 0.01045  |
| 0.03189  | 0.021214 | 0.64748  | 0.021502 | 0.64303  |
| 2.88E-11 | 0.373684 | 6.35E-17 | -0.26697 | 4.62E-09 |



|          |          |          |          |          |
|----------|----------|----------|----------|----------|
| 0.38439  | -0.10808 | 0.01948  | 0.10734  | 0.02033  |
| 0.72733  | -0.14579 | 0.00158  | 0.302266 | 2.54E-11 |
| 0.00199  | 0.095163 | 0.03982  | -0.16851 | 0.00025  |
| 1.32E-08 | -0.11775 | 0.01087  | -0.08167 | 0.07788  |
| 4.92E-07 | -0.19468 | 2.27E-05 | -0.30553 | 1.51E-11 |
| 0.00495  | 0.010326 | 0.82388  | 0.406112 | 5.70E-20 |
| 0.02411  | -0.04779 | 0.3027   | 0.336394 | 8.09E-14 |
| 0.00872  | 0.038994 | 0.4005   | 0.140092 | 0.00241  |
| 0.31479  | -0.14594 | 0.00157  | 0.022753 | 0.62382  |
| 0.00219  | 0.078023 | 0.09216  | -0.25209 | 3.34E-08 |
| 0.61783  | 0.087727 | 0.05818  | 0.035798 | 0.44025  |
| 0.03796  | 0.174551 | 0.00015  | 0.210312 | 4.56E-06 |
| 0.2551   | 0.065222 | 0.15937  | -0.12513 | 0.00678  |
| 0.01336  | -0.06906 | 0.13617  | -0.30088 | 3.16E-11 |
| 0.30495  | -0.01463 | 0.75246  | 0.071238 | 0.12422  |
| 0.13515  | -0.05864 | 0.20588  | -0.01476 | 0.75041  |
| 0.00608  | -0.00627 | 0.89243  | 0.20227  | 1.06E-05 |
| 0.08948  | -0.00455 | 0.92196  | 0.261485 | 9.71E-09 |
| 0.11867  | 0.203947 | 8.90E-06 | -0.20192 | 1.10E-05 |
| 0.12668  | 0.02525  | 0.58625  | -0.23947 | 1.63E-07 |
| 0.18293  | -0.17077 | 0.00021  | 0.20964  | 4.90E-06 |
| 1.58E-07 | 0.052861 | 0.25426  | 0.548015 | 5.84E-38 |
| 1.96E-05 | 0.124758 | 0.00695  | 0.318369 | 1.85E-12 |
| 0.06915  | -0.04422 | 0.34038  | -0.34347 | 2.24E-14 |
| 5.29E-08 | 0.161395 | 0.00046  | 0.345203 | 1.63E-14 |
| 0.00019  | -0.13458 | 0.00357  | -0.28486 | 3.62E-10 |
| 0.31413  | 0.071532 | 0.12267  | -0.00226 | 0.96119  |
| 0.821    | 0.009441 | 0.83876  | -0.28231 | 5.26E-10 |
| 0.5458   | -0.0115  | 0.8042   | 0.17801  | 0.00011  |
| 0.29795  | -0.05872 | 0.20525  | 0.256546 | 1.87E-08 |
| 0.08475  | -0.16864 | 0.00025  | 0.125168 | 0.00676  |
| 0.00013  | 0.072361 | 0.11838  | 0.239316 | 1.66E-07 |
| 0.49247  | -0.04816 | 0.29904  | -0.07378 | 0.11132  |
| 3.78E-07 | -0.05039 | 0.27718  | -0.32192 | 1.01E-12 |
| 0.75569  | -0.09822 | 0.03384  | 0.054428 | 0.24043  |
| 0.00097  | -0.12995 | 0.00491  | 0.561813 | 3.32E-40 |
| 7.26E-07 | 0.184972 | 5.79E-05 | 0.121409 | 0.00863  |
| 0.03389  | -0.02023 | 0.66283  | 0.330026 | 2.50E-13 |
| 0.03158  | 0.28463  | 3.74E-10 | -0.11244 | 0.01506  |
| 0.00133  | 0.166157 | 0.00031  | 0.141171 | 0.00223  |
| 7.65E-07 | 0.296381 | 6.36E-11 | 0.162053 | 0.00044  |
| 0.39012  | 0.043202 | 0.35158  | 0.129305 | 0.00513  |
| 5.45E-06 | -0.04127 | 0.37358  | -0.29305 | 1.06E-10 |
| 0.00152  | -0.03914 | 0.39876  | -0.39884 | 2.94E-19 |
| 0.14301  | -0.12858 | 0.00539  | 0.147212 | 0.00142  |

|          |          |          |          |          |
|----------|----------|----------|----------|----------|
| 2.49E-05 | -0.03089 | 0.50553  | -0.00901 | 0.84609  |
| 7.15E-05 | -0.04227 | 0.36206  | 0.41822  | 3.38E-21 |
| 0.75106  | -0.04763 | 0.30439  | 0.182223 | 7.48E-05 |
| 0.37083  | 0.140897 | 0.00227  | -0.1115  | 0.01593  |
| 0.11005  | 0.276967 | 1.14E-09 | -0.36688 | 2.52E-16 |
| 0.01681  | 0.185948 | 5.28E-05 | -0.01584 | 0.73277  |
| 1.63E-09 | 0.115784 | 0.01229  | 0.257992 | 1.55E-08 |
| 0.97973  | -0.02078 | 0.65423  | 0.409888 | 2.39E-20 |
| 0.09774  | -0.17241 | 0.00018  | 0.343571 | 2.20E-14 |
| 8.48E-06 | 0.118423 | 0.01043  | 0.142176 | 0.00207  |
| 0.08797  | 0.033201 | 0.47415  | 0.342875 | 2.50E-14 |
| 0.82284  | -0.06148 | 0.18473  | 0.050437 | 0.27672  |
| 0.00122  | 0.077498 | 0.09437  | 0.430131 | 1.87E-22 |
| 0.01575  | -0.122   | 0.00831  | -0.01815 | 0.69559  |
| 0.57694  | -0.10632 | 0.02157  | -0.09439 | 0.04147  |
| 9.15E-07 | 0.256003 | 2.01E-08 | 0.012341 | 0.79025  |
| 1.38E-18 | 0.328616 | 3.20E-13 | 0.413387 | 1.06E-20 |
| 0.0043   | 0.219595 | 1.66E-06 | -0.09322 | 0.04406  |
| 0.03251  | 0.010495 | 0.82105  | 0.070729 | 0.12694  |
| 0.00985  | -0.00144 | 0.97532  | 0.343481 | 2.23E-14 |
| 0.81392  | -0.1159  | 0.0122   | 0.223369 | 1.08E-06 |
| 0.03409  | -0.09978 | 0.03109  | 0.417715 | 3.81E-21 |
| 0.48558  | -0.12087 | 0.00893  | 0.286953 | 2.65E-10 |
| 0.01975  | 0.176231 | 0.00013  | 0.037663 | 0.41679  |
| 0.0016   | -0.0917  | 0.04765  | -0.12767 | 0.00573  |
| 0.05976  | 0.087262 | 0.05953  | -0.25948 | 1.27E-08 |
| 7.96E-06 | 0.242667 | 1.10E-07 | 0.143055 | 0.00194  |
| 0.59514  | -0.11491 | 0.01296  | 0.135868 | 0.00326  |
| 0.01412  | -0.0102  | 0.82606  | 0.09401  | 0.04229  |
| 0.17464  | -0.02888 | 0.53362  | 0.021446 | 0.64389  |
| 0.00466  | 0.101032 | 0.02903  | -0.52936 | 4.37E-35 |
| 0.35801  | 0.133505 | 0.00385  | 0.005576 | 0.90434  |
| 0.07405  | 0.201109 | 1.19E-05 | 0.077896 | 0.09269  |
| 0.00445  | 0.068083 | 0.14182  | 0.100963 | 0.02914  |
| 0.00013  | 0.176324 | 0.00013  | 0.305149 | 1.61E-11 |
| 0.70954  | 0.024178 | 0.60226  | -0.14774 | 0.00137  |
| 0.00065  | -0.05049 | 0.27619  | 0.361808 | 6.87E-16 |
| 0.8635   | 0.056721 | 0.22116  | -0.06555 | 0.15728  |
| 0.00231  | 0.160399 | 0.0005   | -0.19689 | 1.82E-05 |
| 0.97847  | 0.01315  | 0.77685  | 0.123357 | 0.00761  |
| 0.35486  | -0.06362 | 0.16989  | 0.098247 | 0.03379  |
| 0.66033  | -0.07046 | 0.12839  | 0.332481 | 1.62E-13 |
| 0.01027  | -0.04625 | 0.31859  | 0.438952 | 2.04E-23 |
| 2.50E-08 | -0.03101 | 0.50383  | 0.76705  | 1.14E-91 |
| 0.0003   | 0.057125 | 0.21788  | 0.495418 | 2.72E-30 |

|          |          |          |          |          |
|----------|----------|----------|----------|----------|
| 1.76E-06 | -0.00932 | 0.84082  | 0.5157   | 4.31E-33 |
| 0.96457  | -0.05247 | 0.25776  | 0.377455 | 2.92E-17 |
| 1.41E-09 | 0.037321 | 0.42103  | 0.625411 | 4.69E-52 |
| 0.45545  | 0.001788 | 0.96926  | -0.14844 | 0.0013   |
| 0.08322  | -0.0119  | 0.79756  | -0.01222 | 0.79223  |
| 0.00416  | -0.04789 | 0.30172  | 0.321243 | 1.14E-12 |
| 0.02401  | -0.03318 | 0.47444  | 0.161496 | 0.00046  |
| 0.00966  | 0.008588 | 0.85315  | 0.009768 | 0.83326  |
| 0.37524  | 0.059531 | 0.19908  | 0.277817 | 1.01E-09 |
| 0.06268  | -0.071   | 0.12546  | 0.013378 | 0.77309  |
| 0.62709  | -0.07224 | 0.11902  | 0.224033 | 1.00E-06 |
| 0.08263  | 0.032782 | 0.47974  | -0.01843 | 0.6912   |
| 0.74507  | -0.08334 | 0.07197  | 0.245686 | 7.54E-08 |
| 0.7459   | 0.042564 | 0.35874  | 0.035178 | 0.44822  |
| 3.74E-05 | 0.172651 | 0.00018  | 0.16584  | 0.00032  |
| 0.61732  | -0.04415 | 0.34109  | -0.00459 | 0.92118  |
| 0.1046   | -0.03765 | 0.41694  | 0.041241 | 0.37388  |
| 0.16813  | -0.06858 | 0.13891  | 0.132426 | 0.00415  |
| 0.00549  | 0.032651 | 0.4815   | 0.038107 | 0.41131  |
| 0.11642  | -0.0754  | 0.10366  | -0.0211  | 0.64929  |
| 0.3897   | -0.05843 | 0.20756  | 0.030373 | 0.51262  |
| 0.27707  | -0.08651 | 0.06175  | 0.132444 | 0.00414  |
| 0.00535  | 0.045481 | 0.32673  | -0.03942 | 0.39537  |
| 0.71447  | -0.13993 | 0.00244  | 0.169959 | 0.00022  |
| 0.43197  | -0.10761 | 0.02001  | 0.236739 | 2.27E-07 |
| 0.88875  | -0.04441 | 0.33827  | 0.088922 | 0.05482  |
| 0.79614  | -0.03852 | 0.4063   | 0.148019 | 0.00134  |
| 0.26676  | -0.01811 | 0.69622  | 0.22335  | 1.09E-06 |
| 0.01603  | 0.122204 | 0.0082   | 0.018909 | 0.68359  |
| 0.00147  | -0.02554 | 0.58202  | -0.20485 | 8.10E-06 |
| 0.56419  | -0.036   | 0.43765  | -0.06752 | 0.14516  |
| 0.01353  | -0.04553 | 0.32621  | 0.340158 | 4.10E-14 |
| 0.12612  | -0.06293 | 0.17459  | -0.14354 | 0.00187  |
| 3.40E-05 | -0.04167 | 0.36897  | 0.486982 | 3.50E-29 |
| 0.00054  | 0.064234 | 0.1658   | 0.1601   | 0.00051  |
| 0.1445   | 0.111129 | 0.01628  | -0.07838 | 0.09066  |
| 0.32835  | -0.12022 | 0.00931  | 0.138184 | 0.00277  |
| 0.49208  | 0.00967  | 0.8349   | 0.007638 | 0.86924  |
| 0.13297  | 0.006185 | 0.89396  | 0.006436 | 0.88967  |
| 0.00732  | -0.0687  | 0.13826  | -0.05505 | 0.23507  |
| 0.05716  | 0.004626 | 0.92058  | 0.013585 | 0.76968  |
| 0.30796  | 0.007148 | 0.87757  | 0.03199  | 0.49043  |
| 0.0643   | 0.143267 | 0.00191  | -0.12678 | 0.00608  |
| 0.16588  | -0.18282 | 7.07E-05 | -0.03467 | 0.45473  |
| 0.96814  | 0.08007  | 0.0839   | -0.06469 | 0.16278  |

|          |           |          |          |          |
|----------|-----------|----------|----------|----------|
| 7.31E-05 | 0.174236  | 0.00015  | 0.248113 | 5.55E-08 |
| 0.00516  | -0.14303  | 0.00194  | -0.28199 | 5.51E-10 |
| 0.0362   | -0.01397  | 0.76332  | -0.06862 | 0.13867  |
| 1.09E-06 | 0.109435  | 0.018    | 0.075065 | 0.10521  |
| 0.07607  | 0.087449  | 0.05898  | 0.173467 | 0.00017  |
| 0.14404  | -2.96E-05 | 0.99949  | -0.02598 | 0.57551  |
| 0.5904   | -0.10535  | 0.02279  | 0.140366 | 0.00236  |
| 0.14203  | -0.01386  | 0.76518  | 0.295995 | 6.75E-11 |
| 0.01235  | -0.02691  | 0.56186  | -0.13649 | 0.00312  |
| 0.16777  | -0.05596  | 0.22746  | 0.111004 | 0.0164   |
| 0.49975  | -0.03957  | 0.39354  | 0.102595 | 0.02662  |
| 0.07145  | -0.00748  | 0.87192  | 0.035098 | 0.44924  |
| 0.09214  | -0.11668  | 0.01162  | 0.176029 | 0.00013  |
| 0.44394  | -0.01878  | 0.68557  | 0.372393 | 8.27E-17 |
| 0.97971  | -0.11183  | 0.01562  | 0.139661 | 0.00249  |
| 0.66691  | 0.083956  | 0.06989  | 0.033079 | 0.47577  |
| 0.00028  | 0.022462  | 0.62827  | 0.418843 | 2.91E-21 |
| 0.01003  | 0.056792  | 0.22058  | -0.22506 | 8.93E-07 |
| 5.13E-05 | -0.23965  | 1.59E-07 | 0.178413 | 0.00011  |
| 0.87972  | 0.089769  | 0.05255  | -0.15767 | 0.00063  |
| 0.61763  | -0.07635  | 0.09938  | 0.148125 | 0.00133  |
| 6.25E-06 | 0.049773  | 0.2831   | -0.15279 | 0.00092  |
| 0.02679  | -0.13599  | 0.00323  | 0.368439 | 1.84E-16 |
| 0.58795  | 0.00659   | 0.88705  | 0.227962 | 6.40E-07 |
| 8.06E-08 | 0.043094  | 0.35278  | 0.243709 | 9.66E-08 |
| 0.53254  | -0.10663  | 0.02118  | 0.232499 | 3.76E-07 |
| 0.57413  | 0.021081  | 0.64954  | 0.006283 | 0.89229  |
| 0.90981  | -0.04771  | 0.30354  | 0.110651 | 0.01675  |
| 4.72E-05 | 0.078723  | 0.08926  | 0.44826  | 1.83E-24 |
| 0.2995   | -0.05634  | 0.22432  | 0.095318 | 0.03949  |
| 0.75011  | -0.03416  | 0.46146  | 0.195722 | 2.05E-05 |
| 0.49745  | 0.082752  | 0.07401  | -0.06451 | 0.164    |
| 0.00073  | -0.01046  | 0.82156  | 0.488229 | 2.41E-29 |
| 0.13502  | -0.05486  | 0.23675  | 0.069302 | 0.13481  |
| 0.71638  | -0.10348  | 0.02533  | 0.188375 | 4.19E-05 |
| 0.05245  | -0.02603  | 0.57479  | 0.208482 | 5.54E-06 |
| 0.93959  | -0.03771  | 0.41621  | 0.07789  | 0.09271  |
| 0.42085  | -0.12141  | 0.00863  | 0.163469 | 0.00039  |
| 0.00331  | 0.028526  | 0.53861  | 0.384846 | 6.20E-18 |
| 0.02078  | 0.056937  | 0.2194   | -0.26934 | 3.33E-09 |
| 0.04023  | -0.03601  | 0.4376   | 0.280839 | 6.51E-10 |
| 0.25267  | 0.088091  | 0.05714  | 0.327254 | 4.05E-13 |
| 2.70E-06 | 0.186921  | 4.81E-05 | 0.413131 | 1.12E-20 |
| 0.00443  | 0.121603  | 0.00852  | 0.139714 | 0.00248  |
| 0.17603  | -0.11121  | 0.01621  | 0.08882  | 0.0551   |

|          |          |          |          |          |
|----------|----------|----------|----------|----------|
| 0.00031  | 0.046641 | 0.31453  | 0.021323 | 0.6458   |
| 0.04393  | -0.00757 | 0.87036  | 0.219823 | 1.61E-06 |
| 0.00236  | -0.00072 | 0.98767  | -0.24171 | 1.24E-07 |
| 0.11992  | -0.0771  | 0.09608  | 0.098704 | 0.03296  |
| 0.4025   | 0.086282 | 0.06245  | 0.148116 | 0.00133  |
| 0.00493  | -0.02298 | 0.62029  | 0.440198 | 1.49E-23 |
| 0.58916  | -0.03375 | 0.4669   | -0.00914 | 0.84383  |
| 0.01155  | -0.055   | 0.23554  | 0.259799 | 1.22E-08 |
| 0.07204  | -0.00974 | 0.83365  | 0.224744 | 9.26E-07 |
| 0.0127   | 0.022253 | 0.63147  | 0.200472 | 1.27E-05 |
| 0.28538  | -0.03253 | 0.4831   | 0.017677 | 0.7032   |
| 0.33472  | 0.018671 | 0.68736  | -0.08564 | 0.06445  |
| 0.73288  | 0.013901 | 0.76446  | 0.096125 | 0.03784  |
| 0.0126   | -0.09844 | 0.03344  | -0.05858 | 0.20634  |
| 0.75962  | -0.13968 | 0.00248  | 0.141681 | 0.00215  |
| 0.11109  | -0.06719 | 0.14711  | 0.121679 | 0.00848  |
| 0.10599  | -0.0274  | 0.55476  | 0.121028 | 0.00884  |
| 0.7379   | 0.004953 | 0.91499  | 0.133246 | 0.00392  |
| 0.14356  | -0.04636 | 0.31747  | -0.01564 | 0.73608  |
| 0.01409  | -0.11503 | 0.01287  | 0.026431 | 0.56885  |
| 0.4773   | -0.07495 | 0.10575  | 0.242661 | 1.10E-07 |
| 0.48852  | 0.100261 | 0.03029  | -0.34576 | 1.47E-14 |
| 0.03339  | 0.00239  | 0.95892  | 0.32924  | 2.87E-13 |
| 0.56023  | -0.18195 | 7.67E-05 | 0.34527  | 1.61E-14 |
| 1.53E-10 | 0.098047 | 0.03416  | 0.397845 | 3.67E-19 |
| 3.12E-07 | 0.209515 | 4.96E-06 | -0.05777 | 0.21274  |
| 0.00019  | 0.047554 | 0.30513  | 0.402142 | 1.40E-19 |
| 0.08597  | 0.076011 | 0.10088  | 0.246366 | 6.93E-08 |
| 0.01517  | -0.03519 | 0.44807  | -0.01223 | 0.79211  |
| 0.09998  | 0.147997 | 0.00134  | 0.186955 | 4.80E-05 |
| 0.45527  | -0.03105 | 0.50331  | 0.323315 | 7.99E-13 |
| 5.03E-05 | 0.027834 | 0.5485   | 0.579622 | 2.90E-43 |
| 0.16809  | -0.17254 | 0.00018  | 0.131745 | 0.00435  |
| 0.0453   | 0.030148 | 0.51575  | -0.22989 | 5.11E-07 |
| 0.26605  | 0.053811 | 0.24581  | 0.347169 | 1.13E-14 |
| 0.25372  | 0.006247 | 0.8929   | 0.119275 | 0.00988  |
| 0.98368  | 0.011125 | 0.8105   | -0.03819 | 0.41027  |
| 0.39677  | 0.161862 | 0.00045  | -0.0629  | 0.17479  |
| 0.24173  | -0.01412 | 0.76087  | 0.304863 | 1.68E-11 |
| 0.51507  | 0.105115 | 0.0231   | -0.09967 | 0.03128  |
| 0.70645  | -0.10318 | 0.02576  | 0.295028 | 7.83E-11 |
| 0.72899  | 0.162383 | 0.00043  | -0.03583 | 0.4398   |
| 0.57491  | 0.0022   | 0.96218  | 0.099758 | 0.03113  |
| 0.00068  | 0.101138 | 0.02886  | 0.179303 | 9.78E-05 |
| 0.03659  | 0.107257 | 0.02043  | 0.140487 | 0.00234  |

|          |          |          |          |          |
|----------|----------|----------|----------|----------|
| 2.33E-08 | -0.12781 | 0.00568  | -0.05571 | 0.22955  |
| 0.00037  | -0.11912 | 0.00998  | 0.396365 | 5.10E-19 |
| 0.03072  | 0.094455 | 0.04132  | -0.17243 | 0.00018  |
| 0.00531  | 0.03115  | 0.5019   | -0.11684 | 0.01151  |
| 4.60E-05 | -0.07953 | 0.08604  | -0.16328 | 0.0004   |
| 0.07803  | -0.03587 | 0.43933  | -0.08413 | 0.06932  |
| 0.01833  | 0.045932 | 0.32195  | 0.464694 | 2.16E-26 |
| 9.19E-06 | 0.245673 | 7.56E-08 | 0.295207 | 7.62E-11 |
| 0.3943   | -0.01598 | 0.73047  | 0.03596  | 0.43818  |
| 0.64434  | -0.08262 | 0.07448  | -0.12465 | 0.007    |
| 3.87E-11 | 0.174333 | 0.00015  | 0.433182 | 8.77E-23 |
| 0.00944  | -0.06162 | 0.18377  | -0.2733  | 1.91E-09 |
| 6.69E-06 | 0.103794 | 0.02489  | 0.050836 | 0.27293  |
| 0.5954   | -0.01525 | 0.74232  | 0.100346 | 0.03015  |
| 0.1502   | -0.04343 | 0.34901  | 0.087953 | 0.05753  |
| 0.4024   | -0.0275  | 0.55333  | -0.15176 | 0.001    |
| 0.79362  | 0.074771 | 0.10658  | -0.07006 | 0.13059  |
| 0.23997  | -0.12796 | 0.00562  | 0.113336 | 0.01426  |
| 0.00029  | 0.16323  | 0.0004   | 0.554849 | 4.65E-39 |
| 0.20555  | 0.057035 | 0.21861  | 0.129175 | 0.00518  |
| 0.38884  | 0.17009  | 0.00022  | -0.26396 | 6.95E-09 |
| 0.00021  | -0.01792 | 0.69925  | 0.296547 | 6.20E-11 |
| 0.61488  | -0.06033 | 0.19313  | 0.267472 | 4.31E-09 |
| 0.09865  | 0.247725 | 5.83E-08 | -0.19337 | 2.58E-05 |
| 0.00028  | 0.200458 | 1.27E-05 | 0.122181 | 0.00821  |
| 0.39806  | -0.14529 | 0.00164  | 0.147953 | 0.00134  |
| 0.54173  | -0.02707 | 0.55953  | 0.172428 | 0.00018  |
| 0.11639  | 0.064832 | 0.16189  | 0.324086 | 7.00E-13 |
| 0.50146  | -0.01424 | 0.75883  | 0.055552 | 0.23084  |
| 0.13351  | 0.002567 | 0.95587  | 0.301085 | 3.06E-11 |
| 0.0008   | 0.11601  | 0.01212  | 0.035642 | 0.44225  |
| 1.17E-09 | -0.02724 | 0.55701  | 0.578184 | 5.21E-43 |
| 0.00858  | 0.015075 | 0.74524  | 0.396287 | 5.19E-19 |
| 0.00114  | 0.008423 | 0.85594  | 0.148239 | 0.00132  |
| 1.08E-05 | 0.002268 | 0.96102  | 0.521767 | 5.76E-34 |
| 0.04054  | -0.07399 | 0.11028  | 0.257631 | 1.62E-08 |
| 0.9539   | 0.001076 | 0.9815   | 0.047765 | 0.30299  |
| 0.00012  | 0.093854 | 0.04264  | 0.240592 | 1.42E-07 |
| 0.6549   | 0.059493 | 0.19937  | -0.02681 | 0.56329  |
| 0.0812   | 0.039733 | 0.39162  | 0.265732 | 5.47E-09 |
| 0.27251  | -0.00964 | 0.83533  | -0.04682 | 0.31264  |
| 0.40121  | 0.002311 | 0.96028  | -0.16422 | 0.00037  |
| 0.00178  | -0.03632 | 0.4336   | 0.013962 | 0.76347  |
| 0.11251  | -0.0689  | 0.13708  | -0.017   | 0.714    |
| 0.71594  | 0.032649 | 0.48153  | -0.00724 | 0.87602  |

|          |          |          |          |          |
|----------|----------|----------|----------|----------|
| 1.73E-05 | 0.177028 | 0.00012  | 0.160074 | 0.00052  |
| 0.1524   | -0.11046 | 0.01694  | 0.336868 | 7.43E-14 |
| 0.04894  | 0.109403 | 0.01803  | -0.0664  | 0.15199  |
| 0.53232  | -0.14477 | 0.00171  | 0.221398 | 1.35E-06 |
| 4.77E-12 | -0.22261 | 1.18E-06 | -0.23225 | 3.87E-07 |
| 0.11723  | 0.099189 | 0.03211  | 0.120277 | 0.00928  |
| 0.0002   | -0.02996 | 0.51836  | 0.091811 | 0.04738  |
| 0.14616  | -0.10914 | 0.01831  | 0.169455 | 0.00023  |
| 0.00112  | -0.29914 | 4.14E-11 | 0.080827 | 0.08101  |
| 0.68324  | -0.02737 | 0.55522  | 0.082708 | 0.07416  |
| 0.492    | 0.035016 | 0.45031  | -0.09177 | 0.04747  |
| 0.04081  | -0.06616 | 0.15344  | 0.483482 | 9.91E-29 |
| 0.00011  | 0.239066 | 1.71E-07 | 0.003378 | 0.94196  |
| 0.04949  | -0.22822 | 6.21E-07 | 0.215309 | 2.66E-06 |
| 0.92089  | 0.030198 | 0.51506  | -0.1661  | 0.00031  |
| 0.01457  | -0.03914 | 0.39869  | -0.11884 | 0.01016  |
| 0.001    | -0.09134 | 0.04853  | -0.14858 | 0.00128  |
| 0.39742  | 0.038256 | 0.40948  | 0.006064 | 0.89602  |
| 0.89072  | 0.119611 | 0.00968  | -0.07503 | 0.10537  |
| 0.68777  | -0.07975 | 0.08514  | 0.170504 | 0.00021  |
| 0.00627  | 0.15     | 0.00115  | 0.045558 | 0.32591  |
| 0.03717  | 0.026697 | 0.56496  | -0.09885 | 0.0327   |
| 0.22522  | -0.06873 | 0.13805  | 0.247622 | 5.91E-08 |
| 0.2249   | -0.10079 | 0.02941  | 0.090729 | 0.05006  |
| 0.01408  | 0.067186 | 0.14716  | 0.306626 | 1.27E-11 |
| 0.08781  | 0.030921 | 0.50505  | -0.09513 | 0.03989  |
| 0.44749  | -0.07615 | 0.10028  | 0.434134 | 6.91E-23 |
| 4.67E-11 | 0.081218 | 0.07955  | 0.517185 | 2.64E-33 |
| 8.09E-15 | 0.291545 | 1.33E-10 | 0.281802 | 5.66E-10 |
| 3.72E-08 | 0.131309 | 0.00448  | 0.413629 | 1.00E-20 |
| 0.01603  | 0.020198 | 0.6633   | -0.06636 | 0.1522   |
| 0.30565  | -0.11035 | 0.01705  | 0.443966 | 5.62E-24 |
| 0.19539  | -0.04673 | 0.31361  | 0.148611 | 0.00128  |
| 0.00287  | -0.13765 | 0.00287  | 0.565847 | 6.99E-41 |
| 0.13363  | 0.093363 | 0.04374  | -0.10915 | 0.0183   |
| 0.00198  | -0.02882 | 0.53448  | 0.431277 | 1.41E-22 |
| 0.72794  | -0.1153  | 0.01266  | 0.307824 | 1.05E-11 |
| 0.28128  | -0.04365 | 0.34658  | 0.107257 | 0.02043  |
| 0.19041  | -0.13112 | 0.00454  | 0.074765 | 0.10661  |
| 0.00339  | -0.06325 | 0.17242  | -0.14932 | 0.00121  |
| 3.24E-13 | 0.060138 | 0.19453  | 0.500304 | 5.98E-31 |
| 0.46095  | -0.00687 | 0.88224  | 0.153705 | 0.00086  |
| 0.00776  | -0.08777 | 0.05804  | -0.29535 | 7.45E-11 |
| 0.34749  | -0.15218 | 0.00097  | 0.082816 | 0.07379  |
| 0.08934  | 0.005211 | 0.91058  | 0.105213 | 0.02297  |

|          |          |          |          |          |
|----------|----------|----------|----------|----------|
| 0.69877  | -0.19838 | 1.57E-05 | 0.322859 | 8.63E-13 |
| 0.06873  | 0.015477 | 0.73869  | 0.201347 | 1.16E-05 |
| 0.44672  | 0.100417 | 0.03003  | -0.30033 | 3.44E-11 |
| 0.04773  | -0.01482 | 0.74936  | 0.086212 | 0.06267  |
| 0.00076  | -0.03137 | 0.49886  | 0.326885 | 4.32E-13 |
| 0.01366  | 0.094759 | 0.04067  | -0.21732 | 2.13E-06 |
| 0.72784  | -0.003   | 0.94841  | -0.3404  | 3.92E-14 |
| 0.30954  | -0.00275 | 0.9527   | 0.225332 | 8.66E-07 |
| 0.28085  | -0.02982 | 0.52032  | 0.39152  | 1.48E-18 |
| 0.0156   | 0.151315 | 0.00104  | 0.082943 | 0.07334  |
| 0.00014  | 0.184833 | 5.86E-05 | 0.106299 | 0.02159  |
| 0.01201  | 0.03655  | 0.4307   | 0.445259 | 4.02E-24 |
| 0.00154  | -0.03384 | 0.46569  | 0.55157  | 1.58E-38 |
| 0.0069   | 0.185041 | 5.75E-05 | 0.181857 | 7.74E-05 |
| 0.18912  | 0.054184 | 0.24255  | 0.087388 | 0.05916  |
| 0.35791  | -0.00429 | 0.9263   | -0.02161 | 0.64142  |
| 0.73985  | 0.015567 | 0.73723  | 0.168411 | 0.00026  |
| 0.12462  | 0.042325 | 0.36145  | 0.045491 | 0.32662  |
| 0.03456  | 0.079644 | 0.08557  | -0.13412 | 0.00369  |
| 0.00167  | 0.057822 | 0.21231  | 0.162094 | 0.00044  |
| 0.44022  | -0.01691 | 0.71547  | 0.18972  | 3.68E-05 |
| 0.57535  | 0.104444 | 0.024    | -0.12091 | 0.00891  |
| 0.00011  | 0.003909 | 0.93285  | 0.35785  | 1.48E-15 |
| 0.1901   | 0.029532 | 0.52437  | -0.19345 | 2.56E-05 |
| 0.57962  | -0.09764 | 0.03491  | 0.204115 | 8.75E-06 |
| 0.00472  | 0.005834 | 0.89995  | -0.09716 | 0.03582  |
| 0.00027  | 0.060533 | 0.19162  | 0.173811 | 0.00016  |
| 0.4209   | -0.02555 | 0.58174  | 0.230108 | 4.98E-07 |
| 0.4034   | -0.02316 | 0.61767  | 0.257688 | 1.61E-08 |
| 0.77852  | -0.09933 | 0.03186  | 0.176362 | 0.00013  |
| 0.92498  | -0.05933 | 0.20064  | 0.084867 | 0.06689  |
| 0.44817  | -0.05695 | 0.21929  | 0.041572 | 0.37006  |
| 0.76856  | -0.03629 | 0.43395  | 0.23306  | 3.52E-07 |
| 0.97863  | -0.0396  | 0.39317  | 0.028917 | 0.53305  |
| 0.74515  | -0.01583 | 0.73298  | -0.04452 | 0.33707  |
| 0.66017  | -0.06721 | 0.14702  | 0.096333 | 0.03743  |
| 0.00452  | -0.11828 | 0.01052  | -0.16418 | 0.00037  |
| 0.83231  | 0.044639 | 0.33577  | -0.20231 | 1.05E-05 |
| 0.45676  | 0.018625 | 0.68809  | 0.187309 | 4.64E-05 |
| 1.21E-05 | 0.332813 | 1.53E-13 | 0.180385 | 8.86E-05 |
| 1.33E-06 | 0.170703 | 0.00021  | 0.056651 | 0.22173  |
| 0.89412  | -0.08038 | 0.0827   | 0.006009 | 0.89696  |
| 0.26643  | 0.130845 | 0.00462  | -0.23193 | 4.02E-07 |
| 0.52599  | -0.15142 | 0.00103  | 0.133705 | 0.0038   |
| 0.59512  | 0.007821 | 0.86613  | 0.137494 | 0.00291  |



|          |          |          |          |          |
|----------|----------|----------|----------|----------|
| 0.06348  | -0.05685 | 0.22007  | 0.334878 | 1.06E-13 |
| 5.53E-05 | -0.009   | 0.84621  | -0.10293 | 0.02612  |
| 5.44E-19 | 0.419669 | 2.39E-21 | 0.22754  | 6.72E-07 |
| 1.60E-10 | 0.242446 | 1.13E-07 | -0.08171 | 0.07772  |
| 0.16636  | -0.0818  | 0.0774   | 0.116335 | 0.01187  |
| 0.20239  | -0.02811 | 0.54451  | 0.270181 | 2.96E-09 |
| 0.00298  | -0.01951 | 0.67415  | 0.311207 | 6.04E-12 |
| 0.14124  | -0.02496 | 0.59062  | 0.283065 | 4.71E-10 |
| 0.86121  | 0.068936 | 0.13688  | 0.025231 | 0.58653  |
| 1.66E-08 | 0.240549 | 1.43E-07 | 0.272419 | 2.17E-09 |
| 8.27E-05 | 0.089491 | 0.05328  | 0.280362 | 6.98E-10 |
| 0.86334  | -0.0212  | 0.64764  | 0.1025   | 0.02676  |
| 0.24596  | 0.025671 | 0.58001  | 0.097472 | 0.03523  |
| 0.09829  | 0.085832 | 0.06384  | -0.04075 | 0.3796   |
| 0.03399  | -0.01088 | 0.81465  | -0.07504 | 0.10532  |
| 0.5611   | 0.008117 | 0.86113  | 0.103206 | 0.02573  |
| 0.97918  | -0.02313 | 0.61802  | 0.005222 | 0.9104   |
| 0.92033  | 0.043621 | 0.34693  | 0.033008 | 0.47671  |
| 0.02341  | -0.16655 | 0.0003   | -0.12882 | 0.0053   |
| 0.40779  | -0.0514  | 0.26761  | 0.184009 | 6.33E-05 |
| 0.02935  | -0.10688 | 0.02088  | -0.11421 | 0.01353  |
| 0.21286  | -0.10214 | 0.0273   | 0.323777 | 7.38E-13 |
| 0.0003   | 0.043282 | 0.35068  | 0.403755 | 9.74E-20 |
| 0.15425  | 0.137498 | 0.00291  | -0.34549 | 1.54E-14 |
| 1.10E-07 | 0.36789  | 2.05E-16 | -0.0169  | 0.71561  |
| 0.01732  | 0.04611  | 0.32008  | 0.235721 | 2.56E-07 |
| 0.8209   | -0.09147 | 0.04821  | 0.265014 | 6.03E-09 |
| 0.17187  | -0.02908 | 0.5308   | -0.13304 | 0.00397  |
| 0.97819  | -0.00821 | 0.85963  | 0.078386 | 0.09064  |
| 6.72E-06 | 0.085995 | 0.06333  | 0.279271 | 8.17E-10 |
| 0.00014  | 0.035853 | 0.43955  | 0.289954 | 1.69E-10 |
| 0.80047  | 0.008351 | 0.85717  | 0.19598  | 2.00E-05 |
| 0.00093  | 0.24347  | 9.95E-08 | 0.02876  | 0.53528  |
| 0.7644   | -0.09587 | 0.03836  | 0.095438 | 0.03925  |
| 0.09351  | -0.00809 | 0.86164  | 0.246675 | 6.66E-08 |
| 0.61785  | 0.143021 | 0.00195  | -0.21242 | 3.64E-06 |
| 4.41E-06 | 0.026284 | 0.571    | -0.23854 | 1.82E-07 |
| 0.17225  | 0.202303 | 1.05E-05 | -0.14482 | 0.0017   |
| 0.00046  | -0.02275 | 0.62388  | 0.397905 | 3.62E-19 |
| 0.23722  | 0.060015 | 0.19545  | -0.16159 | 0.00046  |
| 0.91157  | -0.14274 | 0.00199  | 0.148667 | 0.00127  |
| 0.73773  | -0.04094 | 0.37739  | 0.037572 | 0.41791  |
| 0.52565  | 0.044763 | 0.33443  | 0.03633  | 0.43348  |
| 0.00013  | 0.035297 | 0.44667  | 0.066736 | 0.14989  |
| 0.59056  | -0.01865 | 0.68772  | 0.130135 | 0.00485  |

|          |          |          |          |          |
|----------|----------|----------|----------|----------|
| 0.03405  | -0.03811 | 0.41127  | 0.370456 | 1.23E-16 |
| 9.18E-08 | -0.00429 | 0.9263   | 0.58902  | 5.91E-45 |
| 0.99536  | -0.00217 | 0.96266  | 0.028937 | 0.53276  |
| 0.77736  | -0.06564 | 0.15669  | 0.009715 | 0.83415  |
| 3.21E-08 | 0.041942 | 0.36581  | 0.428548 | 2.77E-22 |
| 0.1947   | 0.118609 | 0.01031  | 0.117385 | 0.01113  |
| 5.16E-05 | 0.214822 | 2.80E-06 | 0.250032 | 4.35E-08 |
| 1.03E-06 | 0.027231 | 0.55721  | 0.588299 | 8.01E-45 |
| 0.25741  | -0.03922 | 0.39781  | 0.30753  | 1.10E-11 |
| 0.00741  | 0.05661  | 0.22206  | -0.39048 | 1.85E-18 |
| 0.8629   | -0.00709 | 0.8785   | 0.267348 | 4.38E-09 |
| 0.66665  | -0.03941 | 0.39543  | 0.030327 | 0.51327  |
| 0.19406  | -0.2193  | 1.71E-06 | 0.098604 | 0.03314  |
| 0.40169  | 0.003704 | 0.93636  | -0.17648 | 0.00013  |
| 1.02E-06 | 0.067037 | 0.14806  | 0.353215 | 3.62E-15 |
| 0.02732  | 0.005423 | 0.90695  | 0.609906 | 6.44E-49 |
| 0.51965  | 0.112699 | 0.01482  | 0.207476 | 6.16E-06 |
| 0.7027   | -0.0047  | 0.91925  | -0.00988 | 0.83135  |
| 0.00221  | -0.09526 | 0.03962  | -0.03643 | 0.43227  |
| 0.48075  | 0.090345 | 0.05104  | -0.07979 | 0.08501  |
| 0.22956  | -0.02048 | 0.65895  | 0.009042 | 0.84549  |
| 0.20302  | -0.01159 | 0.80267  | 0.252931 | 3.00E-08 |
| 0.53741  | -0.0833  | 0.07211  | 0.071054 | 0.1252   |
| 0.52045  | 0.049383 | 0.28689  | -0.05915 | 0.20197  |
| 0.86835  | 0.035269 | 0.44704  | -0.05439 | 0.24077  |
| 0.27236  | -0.00197 | 0.96614  | 0.004457 | 0.92347  |
| 0.27531  | 0.010088 | 0.82787  | -0.08394 | 0.06995  |
| 0.54941  | 0.010535 | 0.82038  | 0.010888 | 0.81446  |
| 0.02887  | 0.034619 | 0.45545  | 0.045479 | 0.32675  |
| 0.09518  | 0.104731 | 0.02361  | -0.03907 | 0.39957  |
| 0.84192  | -0.00983 | 0.83217  | -0.02227 | 0.63114  |
| 0.88523  | -0.01845 | 0.69091  | -0.01387 | 0.76491  |
| 0.5261   | -0.0731  | 0.11467  | 0.094866 | 0.04044  |
| 0.45912  | 0.011749 | 0.8001   | 0.080963 | 0.0805   |
| 0.22999  | 0.075292 | 0.10416  | -0.13157 | 0.0044   |
| 0.04789  | -0.06292 | 0.17467  | -0.08488 | 0.06685  |
| 0.3822   | 0.030302 | 0.51361  | -0.03675 | 0.42818  |
| 0.66802  | -0.01644 | 0.72312  | 0.057149 | 0.21769  |
| 0.32387  | -0.11112 | 0.01629  | 0.02721  | 0.55751  |
| 0.95747  | -0.02917 | 0.52944  | 0.052739 | 0.25536  |
| 0.0051   | -0.04052 | 0.38231  | -0.03287 | 0.47863  |
| 0.60983  | 0.001847 | 0.96825  | -0.02213 | 0.63333  |
| 0.29068  | 0.033983 | 0.46379  | 0.139511 | 0.00251  |
| 0.4906   | -0.13377 | 0.00378  | 0.253581 | 2.76E-08 |
| 0.12291  | -0.04237 | 0.36098  | -0.02873 | 0.53567  |

|          |          |          |          |          |
|----------|----------|----------|----------|----------|
| 0.97284  | 0.023855 | 0.60711  | -0.12671 | 0.00611  |
| 0.04738  | 0.018381 | 0.69197  | 0.171866 | 0.00019  |
| 0.51728  | 0.021461 | 0.64365  | 0.019326 | 0.677    |
| 0.08046  | -0.10973 | 0.01768  | 0.247146 | 6.28E-08 |
| 0.64361  | -0.07314 | 0.11446  | -0.05926 | 0.20115  |
| 0.00325  | 0.124579 | 0.00703  | 0.095589 | 0.03893  |
| 0.28221  | -0.03824 | 0.4097   | -0.00729 | 0.87519  |
| 0.02491  | 0.108823 | 0.01865  | 7.05E-05 | 0.99879  |
| 0.00024  | 0.006965 | 0.88067  | 0.168778 | 0.00025  |
| 0.56887  | -0.05999 | 0.19566  | 0.102298 | 0.02707  |
| 0.88656  | 0.00049  | 0.99157  | 0.102034 | 0.02747  |
| 7.87E-06 | -0.15466 | 0.0008   | -0.0404  | 0.3837   |
| 0.09628  | 0.025872 | 0.57705  | -0.06781 | 0.14344  |
| 0.01045  | 0.074964 | 0.10568  | 0.031143 | 0.50198  |
| 0.25234  | -0.0402  | 0.3861   | 0.156866 | 0.00067  |
| 0.01622  | 0.093254 | 0.04399  | 0.01484  | 0.74908  |
| 0.3944   | -0.04028 | 0.38518  | 0.09337  | 0.04372  |
| 0.03968  | -0.08009 | 0.08381  | 0.004044 | 0.93055  |
| 0.00024  | 0.226566 | 7.52E-07 | -0.0169  | 0.7156   |
| 2.42E-05 | 0.1119   | 0.01555  | 0.174217 | 0.00015  |
| 0.05785  | 0.080952 | 0.08054  | -0.03975 | 0.39139  |
| 0.03903  | 0.015577 | 0.73707  | 0.190243 | 3.50E-05 |
| 0.72476  | -0.08754 | 0.05871  | 0.087769 | 0.05806  |
| 0.35046  | -0.01591 | 0.73166  | 0.057586 | 0.21419  |
| 0.78539  | 0.002521 | 0.95666  | -0.034   | 0.46356  |
| 0.40239  | 0.005758 | 0.90124  | 0.065689 | 0.1564   |
| 0.26906  | -0.0604  | 0.19258  | 0.182219 | 7.48E-05 |
| 0.08667  | -0.00393 | 0.93244  | -0.03713 | 0.42335  |
| 0.77817  | 0.016115 | 0.72834  | -0.09969 | 0.03125  |
| 0.3785   | 0.012811 | 0.78246  | 0.109662 | 0.01776  |
| 0.00188  | 0.226592 | 7.50E-07 | 0.176576 | 0.00013  |
| 0.45731  | -0.03753 | 0.41847  | -0.07198 | 0.12036  |
| 0.00046  | -0.14952 | 0.00119  | -0.05628 | 0.22481  |
| 0.51597  | -0.06332 | 0.17195  | -0.0153  | 0.74151  |
| 0.00601  | 0.021277 | 0.6465   | -0.02766 | 0.55095  |
| 0.73533  | -0.02626 | 0.57136  | -0.04665 | 0.31446  |
| 0.00767  | 0.07981  | 0.08492  | 0.093099 | 0.04434  |
| 0.97863  | 0.045994 | 0.3213   | -0.21223 | 3.71E-06 |
| 0.68664  | -0.06148 | 0.18475  | 0.00741  | 0.87312  |
| 0.27087  | 0.030844 | 0.5061   | -0.02657 | 0.56685  |
| 0.86725  | -0.02988 | 0.51952  | 0.13354  | 0.00384  |
| 0.41191  | -0.00512 | 0.91205  | 0.012919 | 0.78066  |
| 0.91987  | -0.07934 | 0.08676  | 0.010367 | 0.82319  |
| 0.28541  | -0.09715 | 0.03584  | 0.033399 | 0.47151  |
| 0.59724  | 0.018771 | 0.68578  | 0.008597 | 0.853    |

|          |          |         |          |          |
|----------|----------|---------|----------|----------|
| 0.42582  | -0.01257 | 0.78645 | -0.04383 | 0.34457  |
| 0.58817  | -0.09249 | 0.04576 | 0.064657 | 0.16303  |
| 0.09386  | 0.092789 | 0.04506 | -0.05724 | 0.21695  |
| 0.05929  | -0.05127 | 0.26881 | -0.18441 | 6.10E-05 |
| 0.88215  | -0.0503  | 0.27799 | -0.02904 | 0.53128  |
| 0.00491  | 0.075626 | 0.10263 | 0.081442 | 0.07872  |
| 0.56545  | -0.09733 | 0.03549 | 0.133695 | 0.0038   |
| 0.39158  | 0.001234 | 0.97879 | 0.062123 | 0.18019  |
| 0.40083  | 0.058493 | 0.20704 | -0.02703 | 0.56014  |
| 0.45549  | -0.0331  | 0.47545 | -0.04439 | 0.3385   |
| 0.53449  | -0.06239 | 0.17833 | -0.05495 | 0.23593  |
| 0.08136  | -0.0859  | 0.06364 | 0.019056 | 0.68127  |
| 0.71582  | 0.061143 | 0.18717 | -0.05034 | 0.2776   |
| 0.10225  | 0.00611  | 0.89524 | 0.184499 | 6.05E-05 |
| 0.27235  | -0.0387  | 0.40401 | 0.018592 | 0.68861  |
| 0.00748  | -0.04898 | 0.29088 | 0.131886 | 0.0043   |
| 0.61449  | -0.06232 | 0.17882 | 0.090948 | 0.04951  |
| 0.67111  | -0.02057 | 0.65754 | -0.03107 | 0.50293  |
| 0.34294  | -0.02214 | 0.63314 | -0.06231 | 0.17888  |
| 0.93348  | -0.06088 | 0.18906 | 0.011943 | 0.79687  |
| 0.05237  | -0.07048 | 0.12827 | 0.062821 | 0.17533  |
| 0.98173  | -0.09259 | 0.04551 | 0.102681 | 0.0265   |
| 0.31521  | -0.05956 | 0.1989  | 0.142542 | 0.00202  |
| 0.01505  | 0.075608 | 0.10271 | 0.337593 | 6.52E-14 |
| 0.09165  | -0.02076 | 0.65459 | 0.271885 | 2.33E-09 |
| 0.71612  | 0.045849 | 0.32283 | -0.01234 | 0.79022  |
| 0.83794  | -0.04021 | 0.386   | -0.07316 | 0.11439  |
| 0.72799  | -0.03537 | 0.44577 | 0.061859 | 0.18205  |
| 0.72478  | -0.16389 | 0.00038 | 0.083339 | 0.07197  |
| 0.53813  | 0.034737 | 0.45393 | -0.0611  | 0.18747  |
| 2.34E-07 | -0.08219 | 0.076   | -0.14598 | 0.00156  |
| 0.03983  | -0.13311 | 0.00395 | 0.212797 | 3.49E-06 |
| 0.47252  | -0.05101 | 0.27124 | 0.030266 | 0.51411  |
| 0.01131  | -0.1469  | 0.00146 | 0.042739 | 0.35677  |
| 0.01846  | 0.006846 | 0.88269 | -0.13925 | 0.00256  |
| 8.89E-05 | 0.050684 | 0.27437 | 0.178434 | 0.00011  |
| 0.13244  | -0.09035 | 0.05104 | 0.058382 | 0.20791  |
| 0.06257  | 0.000291 | 0.995   | 0.044097 | 0.34168  |
| 0.24695  | 0.084102 | 0.0694  | 0.03885  | 0.40224  |
| 0.7071   | -0.0196  | 0.67269 | 0.01334  | 0.77372  |
| 0.75882  | 0.00208  | 0.96424 | -0.05324 | 0.25087  |
| 0.75692  | -0.04921 | 0.28856 | -0.09444 | 0.04135  |
| 0.7542   | 0.029682 | 0.52227 | 0.017424 | 0.70725  |
| 0.17665  | -0.06417 | 0.16624 | 0.016306 | 0.72525  |
| 0.85703  | -0.02959 | 0.52357 | 0.037184 | 0.42274  |

|          |          |          |          |          |
|----------|----------|----------|----------|----------|
| 0.39165  | -0.02469 | 0.59457  | -0.01884 | 0.68474  |
| 0.98661  | -0.07505 | 0.10529  | 0.151905 | 0.00099  |
| 0.09718  | 0.059113 | 0.20226  | 0.039436 | 0.39517  |
| 0.40046  | 0.074785 | 0.10651  | 0.119268 | 0.00989  |
| 0.04408  | -0.08106 | 0.08014  | 0.27434  | 1.65E-09 |
| 0.20853  | -0.1446  | 0.00173  | -0.03825 | 0.40952  |
| 0.03817  | -0.03168 | 0.49465  | 0.201524 | 1.14E-05 |
| 0.2275   | 0.006297 | 0.89204  | -0.10666 | 0.02115  |
| 0.04885  | -0.04466 | 0.33557  | 0.167086 | 0.00029  |
| 0.82634  | -0.09433 | 0.04159  | 0.05239  | 0.25852  |
| 0.6568   | 0.044836 | 0.33365  | 0.043376 | 0.34964  |
| 9.10E-05 | 0.052849 | 0.25437  | 0.137166 | 0.00298  |
| 0.01384  | 0.041596 | 0.36978  | -0.13718 | 0.00297  |
| 0.00131  | -0.07523 | 0.10443  | -0.07061 | 0.12758  |
| 0.20608  | -0.06913 | 0.13577  | -0.02691 | 0.5619   |
| 0.55682  | -0.06836 | 0.14019  | 0.176721 | 0.00012  |
| 0.52492  | -0.10516 | 0.02305  | 0.193466 | 2.56E-05 |
| 0.09901  | -0.01448 | 0.75499  | -0.01199 | 0.79608  |
| 0.55969  | 0.012453 | 0.78839  | 0.038954 | 0.40098  |
| 0.61768  | -0.01299 | 0.77956  | 0.085932 | 0.06353  |
| 0.00636  | 0.076015 | 0.10087  | 0.160055 | 0.00052  |
| 0.00515  | -0.02237 | 0.62967  | 0.130235 | 0.00482  |
| 0.20147  | 0.125855 | 0.00646  | -0.1693  | 0.00024  |
| 0.16623  | 0.076618 | 0.09819  | 0.017597 | 0.70447  |
| 0.92632  | -0.01662 | 0.72024  | -0.13627 | 0.00317  |
| 0.51416  | -0.12684 | 0.00606  | 0.139728 | 0.00248  |
| 0.18893  | 0.041623 | 0.36948  | -0.06959 | 0.13319  |
| 0.88858  | -0.06817 | 0.14133  | 0.089692 | 0.05275  |
| 0.00121  | 0.053826 | 0.24568  | 0.332998 | 1.48E-13 |
| 0.00564  | 0.033542 | 0.46962  | 0.262317 | 8.68E-09 |
| 0.70342  | -0.13716 | 0.00298  | 0.12536  | 0.00668  |
| 0.05905  | 0.079269 | 0.08706  | 0.416407 | 5.20E-21 |
| 0.26599  | 0.009471 | 0.83826  | 0.345172 | 1.64E-14 |
| 0.03479  | -0.09056 | 0.0505   | 0.06354  | 0.17043  |
| 0.19837  | -0.09245 | 0.04585  | -0.02321 | 0.61685  |
| 0.55474  | 0.033572 | 0.46921  | -0.01629 | 0.72546  |
| 0.01024  | 0.050205 | 0.27894  | 0.165481 | 0.00033  |
| 0.00215  | 0.019817 | 0.66928  | 0.463526 | 2.98E-26 |
| 0.80418  | 0.024331 | 0.59996  | -0.23008 | 5.00E-07 |
| 1.17E-12 | 0.350179 | 6.42E-15 | 0.212098 | 3.77E-06 |
| 0.41503  | -0.02205 | 0.63462  | 0.00268  | 0.95394  |
| 0.00549  | 0.043787 | 0.34509  | 0.019855 | 0.66868  |
| 0.71313  | 0.109787 | 0.01763  | -0.13391 | 0.00374  |
| 0.74321  | -0.04916 | 0.28908  | 0.028251 | 0.54253  |
| 0.03926  | -0.17845 | 0.00011  | 0.181385 | 8.08E-05 |

|          |          |          |          |          |
|----------|----------|----------|----------|----------|
| 0.15657  | 0.018784 | 0.68558  | 0.157559 | 0.00063  |
| 0.10874  | -0.03219 | 0.48768  | 0.403833 | 9.57E-20 |
| 0.07939  | -0.17765 | 0.00011  | 0.057205 | 0.21724  |
| 4.90E-10 | 0.022829 | 0.62267  | 0.68851  | 7.07E-67 |
| 0.12729  | 0.057684 | 0.21341  | -0.04829 | 0.29767  |
| 3.70E-08 | 0.190293 | 3.49E-05 | 0.163231 | 0.0004   |
| 0.00089  | 0.264634 | 6.35E-09 | 0.007572 | 0.87036  |
| 0.00402  | 0.172487 | 0.00018  | 0.113492 | 0.01413  |
| 0.0015   | 0.0271   | 0.55911  | 0.507592 | 5.98E-32 |
| 0.00922  | 0.233524 | 3.33E-07 | 0.027347 | 0.55553  |
| 0.08086  | 0.098959 | 0.03251  | 0.07976  | 0.08511  |
| 0.99989  | -0.07812 | 0.09174  | 0.400555 | 2.01E-19 |
| 1.82E-07 | 0.453428 | 4.65E-25 | -0.17409 | 0.00016  |
| 4.56E-05 | 0.392093 | 1.30E-18 | -0.25289 | 3.02E-08 |
| 2.22E-05 | 0.367631 | 2.16E-16 | -0.17889 | 0.0001   |
| 0.00147  | 0.305042 | 1.63E-11 | -0.18291 | 7.02E-05 |
| 0.55336  | -0.03023 | 0.51463  | 0.04172  | 0.36836  |
| 0.08168  | 0.003971 | 0.93179  | -0.03519 | 0.44802  |
| 0.09212  | 0.030003 | 0.51777  | 0.091947 | 0.04705  |
| 0.74719  | -0.02769 | 0.55055  | 0.128653 | 0.00536  |
| 0.00026  | -0.07019 | 0.12986  | 0.502455 | 3.05E-31 |
| 0.022    | 0.036408 | 0.4325   | 0.3831   | 8.97E-18 |
| 0.71854  | -0.13708 | 0.00299  | 0.095408 | 0.03931  |
| 0.07133  | -0.09024 | 0.0513   | 0.173683 | 0.00016  |
| 0.0172   | -0.1284  | 0.00546  | 0.467172 | 1.08E-26 |
| 0.00013  | -0.00394 | 0.9324   | -0.37402 | 5.94E-17 |
| 0.0151   | 0.01565  | 0.73588  | 0.368827 | 1.70E-16 |
| 0.70949  | 0.014109 | 0.76105  | 0.207095 | 6.41E-06 |
| 0.65925  | 0.116216 | 0.01196  | 0.226653 | 7.44E-07 |
| 0.00196  | -0.17068 | 0.00021  | -0.11258 | 0.01493  |
| 6.93E-07 | 0.150889 | 0.00107  | 0.130355 | 0.00478  |
| 0.24517  | -0.01413 | 0.76075  | 0.345657 | 1.50E-14 |
| 0.01358  | 0.347083 | 1.15E-14 | -0.19426 | 2.37E-05 |
| 0.13232  | 0.039915 | 0.38946  | 0.066038 | 0.15421  |
| 0.44125  | 0.224735 | 9.27E-07 | -0.25654 | 1.87E-08 |
| 6.85E-05 | 0.054566 | 0.23924  | 0.468936 | 6.58E-27 |
| 0.03998  | 0.005218 | 0.91046  | -0.13133 | 0.00447  |
| 0.00946  | -0.16384 | 0.00038  | -0.14261 | 0.00201  |
| 7.09E-06 | 0.040108 | 0.38717  | 0.142272 | 0.00206  |
| 0.18728  | -0.13132 | 0.00448  | 0.137121 | 0.00298  |
| 0.13621  | -0.04857 | 0.29489  | 0.215965 | 2.47E-06 |
| 0.01853  | -0.02482 | 0.5926   | 0.289297 | 1.87E-10 |
| 0.68142  | -0.05121 | 0.26937  | 0.148291 | 0.00131  |
| 0.45128  | -0.07575 | 0.10206  | 0.155898 | 0.00072  |
| 0.0663   | -0.04884 | 0.29221  | -0.19626 | 1.94E-05 |

|          |          |          |          |          |
|----------|----------|----------|----------|----------|
| 0.05697  | -0.03274 | 0.48029  | 0.098804 | 0.03279  |
| 0.34328  | -0.03507 | 0.44957  | 0.128768 | 0.00532  |
| 0.00033  | 0.079022 | 0.08805  | 0.136701 | 0.00308  |
| 0.00462  | -0.16076 | 0.00049  | -0.135   | 0.00347  |
| 0.00192  | -0.05589 | 0.22801  | 0.50951  | 3.23E-32 |
| 0.04395  | 0.031681 | 0.49463  | 0.385916 | 4.93E-18 |
| 1.32E-06 | -0.04398 | 0.34291  | 0.709689 | 9.66E-73 |
| 0.00838  | -0.04218 | 0.36314  | 0.175315 | 0.00014  |
| 0.36584  | 0.072493 | 0.11771  | 0.427955 | 3.21E-22 |
| 6.57E-10 | 0.112726 | 0.0148   | 0.083801 | 0.07041  |
| 0.06031  | -0.03304 | 0.47625  | 0.361313 | 7.56E-16 |
| 0.54685  | -0.08809 | 0.05713  | 0.132086 | 0.00425  |
| 0.03247  | 0.034574 | 0.45604  | 0.192632 | 2.78E-05 |
| 0.8625   | 0.008533 | 0.85408  | -0.03671 | 0.4287   |
| 0.8581   | -0.23932 | 1.66E-07 | 0.32974  | 2.63E-13 |
| 0.08967  | -0.04271 | 0.35715  | 0.483705 | 9.28E-29 |
| 0.00044  | 0.092565 | 0.04558  | 0.103966 | 0.02465  |
| 0.27439  | 0.125126 | 0.00678  | -0.32189 | 1.02E-12 |
| 0.00587  | 0.100125 | 0.03051  | 0.168853 | 0.00025  |
| 0.77728  | -0.05717 | 0.21754  | 0.231984 | 4.00E-07 |
| 0.17288  | -0.01365 | 0.76862  | 0.312929 | 4.55E-12 |
| 0.00044  | 0.051592 | 0.26585  | 0.267649 | 4.20E-09 |
| 0.00089  | -0.00587 | 0.89925  | 0.240799 | 1.38E-07 |
| 0.65516  | 0.068342 | 0.14031  | -0.34456 | 1.83E-14 |
| 0.26268  | 0.153421 | 0.00088  | -0.06691 | 0.14882  |
| 4.31E-07 | 0.103596 | 0.02517  | 0.288559 | 2.09E-10 |
| 0.00264  | 0.10197  | 0.02756  | 0.228446 | 6.05E-07 |
| 0.00014  | 0.008275 | 0.85845  | -0.06499 | 0.16087  |
| 0.0125   | -0.05067 | 0.2745   | 0.534542 | 7.24E-36 |
| 0.15491  | 0.047658 | 0.30408  | -0.10539 | 0.02275  |
| 0.32764  | 0.090423 | 0.05084  | 0.20195  | 1.09E-05 |
| 0.94437  | 0.013583 | 0.7697   | 0.251567 | 3.57E-08 |
| 0.08292  | -0.1603  | 0.00051  | 0.250231 | 4.24E-08 |
| 0.60259  | -0.06441 | 0.16467  | 0.225148 | 8.85E-07 |
| 0.50722  | -0.1351  | 0.00344  | 0.203654 | 9.17E-06 |
| 0.93367  | -0.1732  | 0.00017  | 0.238292 | 1.88E-07 |
| 0.61965  | -0.18922 | 3.86E-05 | 0.556857 | 2.19E-39 |
| 0.01546  | -0.08505 | 0.06629  | 0.38685  | 4.04E-18 |
| 0.6708   | 0.058863 | 0.20418  | -0.00348 | 0.94015  |
| 0.12917  | 0.021532 | 0.64257  | 0.071699 | 0.1218   |
| 0.04141  | 0.056439 | 0.22347  | -0.01125 | 0.80834  |
| 0.39125  | -0.12487 | 0.0069   | -0.05526 | 0.23332  |
| 8.87E-08 | -0.101   | 0.02908  | -0.33602 | 8.65E-14 |
| 0.4436   | -0.07918 | 0.08742  | 0.114111 | 0.01361  |
| 0.02214  | -0.18387 | 6.42E-05 | 0.343539 | 2.21E-14 |

|          |          |          |          |          |
|----------|----------|----------|----------|----------|
| 1.92E-09 | 0.195167 | 2.16E-05 | 0.184606 | 5.99E-05 |
| 0.84743  | -0.11543 | 0.01255  | 0.128027 | 0.00559  |
| 0.89736  | -0.08037 | 0.08275  | 0.162694 | 0.00042  |
| 0.14466  | 0.055756 | 0.22913  | -0.0601  | 0.19482  |
| 0.15979  | 0.391753 | 1.40E-18 | -0.40003 | 2.25E-19 |
| 0.12287  | 0.004286 | 0.9264   | -0.01859 | 0.68857  |
| 0.0323   | 0.077377 | 0.09489  | -0.30725 | 1.15E-11 |
| 0.34136  | 0.129777 | 0.00497  | -0.28988 | 1.71E-10 |
| 0.78772  | 0.067116 | 0.14758  | -0.02763 | 0.55148  |
| 4.45E-05 | 0.402129 | 1.41E-19 | -0.37798 | 2.62E-17 |
| 0.5933   | -0.04242 | 0.36032  | -0.0149  | 0.74815  |
| 0.77058  | 0.080774 | 0.08121  | -0.12435 | 0.00714  |
| 0.08961  | 0.098145 | 0.03397  | -0.02948 | 0.5251   |
| 0.68211  | 0.027226 | 0.55727  | 0.012332 | 0.79039  |
| 5.41E-06 | 0.249471 | 4.67E-08 | -0.10948 | 0.01795  |
| 0.65841  | 0.201358 | 1.16E-05 | 0.027857 | 0.54818  |
| 0.00024  | -0.00824 | 0.85896  | 0.274067 | 1.72E-09 |
| 0.05265  | 0.093037 | 0.04448  | 0.232673 | 3.68E-07 |
| 0.89164  | 0.022349 | 0.62999  | -0.17358 | 0.00016  |
| 0.55466  | -0.10168 | 0.02801  | 0.048374 | 0.29687  |
| 0.22608  | -0.00499 | 0.91439  | 0.198305 | 1.58E-05 |
| 0.03757  | 0.158995 | 0.00056  | 0.148864 | 0.00125  |
| 0.01529  | 0.047665 | 0.30401  | 0.188033 | 4.33E-05 |
| 0.11701  | -0.15556 | 0.00074  | 0.06093  | 0.18871  |
| 0.31831  | -0.08749 | 0.05885  | 0.32923  | 2.87E-13 |
| 0.77985  | -0.11846 | 0.0104   | 0.272378 | 2.18E-09 |
| 0.32224  | 0.209401 | 5.02E-06 | -0.17    | 0.00022  |
| 0.27405  | -0.05848 | 0.20717  | 0.142302 | 0.00205  |
| 0.05174  | -0.00856 | 0.85366  | 0.05244  | 0.25806  |
| 0.51674  | 0.128639 | 0.00537  | -0.12568 | 0.00654  |
| 0.00423  | 0.037324 | 0.42099  | 0.135017 | 0.00346  |
| 0.42757  | -0.07665 | 0.09803  | 0.041784 | 0.36763  |
| 0.00087  | 0.110796 | 0.01661  | 0.245905 | 7.34E-08 |
| 0.28517  | -0.06164 | 0.18364  | -0.09873 | 0.03291  |
| 0.25767  | -0.04705 | 0.31034  | -0.11963 | 0.00966  |
| 0.09424  | -0.08871 | 0.05541  | 0.517506 | 2.38E-33 |
| 0.14967  | 0.063765 | 0.16892  | -0.08737 | 0.05921  |
| 0.2281   | 0.095787 | 0.03853  | -0.00465 | 0.92009  |
| 0.13523  | -0.046   | 0.32127  | -0.0752  | 0.10459  |
| 0.03293  | 0.108806 | 0.01867  | -0.15583 | 0.00073  |
| 0.0091   | -0.06048 | 0.19202  | 0.463807 | 2.76E-26 |
| 9.40E-11 | -0.11068 | 0.01672  | -0.11351 | 0.01411  |
| 0.01247  | -0.02166 | 0.64056  | 0.156305 | 0.0007   |
| 0.00042  | 0.11387  | 0.01381  | 0.354156 | 3.02E-15 |
| 0.00287  | 0.009117 | 0.84422  | 0.245066 | 8.15E-08 |



|          |          |          |          |          |
|----------|----------|----------|----------|----------|
| 0.94046  | -0.11431 | 0.01345  | 0.229169 | 5.56E-07 |
| 5.05E-09 | 0.089346 | 0.05367  | 0.271838 | 2.35E-09 |
| 0.01161  | 0.312218 | 5.12E-12 | 0.08038  | 0.08271  |
| 0.02329  | 0.111057 | 0.01635  | -0.03081 | 0.50654  |
| 0.85241  | 0.07901  | 0.0881   | 0.036216 | 0.43492  |
| 0.46967  | -0.00401 | 0.93113  | 0.253339 | 2.84E-08 |
| 0.14106  | -0.07857 | 0.08989  | 0.051771 | 0.2642   |
| 0.3785   | -0.15805 | 0.00061  | 0.167508 | 0.00028  |
| 0.12758  | -0.09422 | 0.04183  | 0.172426 | 0.00018  |
| 0.06895  | 0.079238 | 0.08718  | -0.30611 | 1.38E-11 |
| 0.01242  | -0.15623 | 0.0007   | 0.033918 | 0.46465  |
| 0.00644  | -0.23208 | 3.95E-07 | 0.120994 | 0.00886  |
| 0.04674  | 0.017498 | 0.70606  | 0.361502 | 7.29E-16 |
| 0.65255  | -0.16155 | 0.00046  | 0.17494  | 0.00014  |
| 0.01352  | -0.06422 | 0.16588  | 0.192623 | 2.78E-05 |
| 0.00022  | -0.02009 | 0.66502  | -0.19676 | 1.85E-05 |
| 0.92218  | 0.16828  | 0.00026  | 0.027725 | 0.55007  |
| 0.91082  | -0.08785 | 0.05782  | 0.032316 | 0.48601  |
| 0.84293  | 0.016697 | 0.71893  | -0.19026 | 3.50E-05 |
| 0.77937  | -0.04794 | 0.30122  | -0.02692 | 0.5617   |
| 0.77778  | -0.0568  | 0.22054  | 0.053972 | 0.2444   |
| 0.87829  | -0.01674 | 0.7182   | 0.079815 | 0.0849   |
| 0.79077  | -0.15426 | 0.00082  | 0.17087  | 0.00021  |
| 0.27444  | -0.06251 | 0.17751  | 0.131359 | 0.00446  |
| 0.02982  | 0.00659  | 0.88705  | -0.00089 | 0.98471  |
| 0.25938  | 0.003208 | 0.94487  | 0.277148 | 1.11E-09 |
| 3.12E-05 | -0.03154 | 0.49652  | 0.192356 | 2.85E-05 |
| 0.32172  | -0.08239 | 0.07529  | 0.173492 | 0.00016  |
| 0.00024  | 0.010211 | 0.82581  | 0.333118 | 1.45E-13 |
| 0.01353  | 0.312304 | 5.05E-12 | -0.02454 | 0.59677  |
| 0.73794  | -0.1589  | 0.00057  | 0.315908 | 2.78E-12 |
| 0.00412  | -0.08478 | 0.06718  | 0.138293 | 0.00275  |
| 0.31729  | -0.00229 | 0.9606   | 0.046384 | 0.31721  |
| 0.57138  | 0.021763 | 0.639    | 0.067336 | 0.14626  |
| 0.05925  | 0.019289 | 0.67759  | 0.143442 | 0.00189  |
| 0.50418  | -0.11901 | 0.01005  | 0.033126 | 0.47515  |
| 0.20766  | -0.05751 | 0.21479  | 0.255089 | 2.26E-08 |
| 3.04E-05 | 0.089164 | 0.05416  | 0.484469 | 7.40E-29 |
| 0.9192   | 0.08395  | 0.06991  | 0.153885 | 0.00085  |
| 0.48947  | 0.072057 | 0.11994  | -0.04183 | 0.3671   |
| 0.6819   | -0.05033 | 0.27769  | 0.153159 | 0.0009   |
| 0.00456  | 0.129675 | 0.00501  | 0.353928 | 3.16E-15 |
| 0.85243  | -0.04322 | 0.35133  | 0.085636 | 0.06445  |
| 0.13957  | -0.09486 | 0.04045  | 0.296016 | 6.73E-11 |
| 0.01239  | 0.139473 | 0.00252  | -0.00643 | 0.88981  |

|          |          |          |          |          |
|----------|----------|----------|----------|----------|
| 0.00048  | -0.20938 | 5.04E-06 | -0.17216 | 0.00019  |
| 0.00034  | 0.146968 | 0.00145  | 0.088018 | 0.05734  |
| 0.00028  | 0.117817 | 0.01083  | 0.330463 | 2.32E-13 |
| 1.27E-06 | 0.137618 | 0.00288  | 0.128643 | 0.00537  |
| 0.51912  | -0.00228 | 0.96086  | 0.073756 | 0.11143  |
| 1.53E-05 | 0.098963 | 0.03251  | 0.147465 | 0.00139  |
| 0.03526  | 0.021913 | 0.63668  | 0.178282 | 0.00011  |
| 0.2885   | 0.002745 | 0.95283  | 0.083754 | 0.07056  |
| 0.85718  | -0.01792 | 0.69936  | 0.215205 | 2.69E-06 |
| 1.42E-08 | 0.245141 | 8.08E-08 | 0.315609 | 2.92E-12 |
| 0.71659  | -0.00795 | 0.86402  | 0.131891 | 0.0043   |
| 0.23985  | -0.13546 | 0.00336  | -0.06464 | 0.16316  |
| 0.08757  | -0.05034 | 0.27768  | 0.256438 | 1.90E-08 |
| 0.07504  | 0.018616 | 0.68824  | 0.190471 | 3.43E-05 |
| 0.0002   | -0.10054 | 0.02982  | -0.33277 | 1.54E-13 |
| 2.67E-07 | 0.035001 | 0.45051  | 0.240413 | 1.45E-07 |
| 0.06953  | -0.01721 | 0.71072  | -0.28167 | 5.77E-10 |
| 0.05734  | 0.184913 | 5.82E-05 | -0.01275 | 0.78349  |
| 0.48338  | -0.02891 | 0.53321  | 0.218828 | 1.80E-06 |
| 0.99049  | -0.06186 | 0.182    | 0.158657 | 0.00058  |
| 0.91847  | -0.02197 | 0.63589  | 0.052711 | 0.25561  |
| 0.70668  | -0.07787 | 0.09281  | 0.11867  | 0.01027  |
| 4.37E-05 | -0.0175  | 0.70608  | 0.197715 | 1.68E-05 |
| 0.64429  | 0.225939 | 8.08E-07 | -0.19131 | 3.16E-05 |
| 0.00902  | 0.100655 | 0.02964  | 0.17262  | 0.00018  |
| 0.42111  | 0.023735 | 0.60892  | 0.1887   | 4.06E-05 |
| 0.07458  | -0.13713 | 0.00298  | 0.13716  | 0.00298  |
| 0.22125  | -0.02535 | 0.5848   | 0.180569 | 8.71E-05 |
| 0.89433  | -0.02531 | 0.58531  | 0.261812 | 9.29E-09 |
| 0.77644  | 0.157906 | 0.00062  | -0.19226 | 2.88E-05 |
| 0.09411  | -0.24559 | 7.63E-08 | 0.119955 | 0.00947  |
| 0.14929  | -0.0452  | 0.32973  | 0.289877 | 1.71E-10 |
| 0.00278  | -0.21506 | 2.73E-06 | 0.092316 | 0.04617  |
| 0.07146  | 0.118681 | 0.01026  | 0.216386 | 2.36E-06 |
| 0.38483  | -0.05359 | 0.24774  | 0.229682 | 5.24E-07 |
| 0.01116  | -0.0684  | 0.14     | -0.11634 | 0.01187  |
| 0.08062  | 0.093053 | 0.04445  | -0.07747 | 0.0945   |
| 0.04469  | 0.115948 | 0.01216  | 0.292222 | 1.20E-10 |
| 0.42969  | 0.061304 | 0.18601  | -0.13568 | 0.00331  |
| 0.30146  | 0.003761 | 0.9354   | 0.040393 | 0.3838   |
| 0.00128  | -0.10349 | 0.02532  | -0.16667 | 0.0003   |
| 0.67363  | 0.097376 | 0.03541  | 0.042225 | 0.36259  |
| 0.00089  | -0.0783  | 0.091    | 0.426566 | 4.51E-22 |
| 0.77003  | -0.04349 | 0.34837  | 0.037868 | 0.41425  |
| 0.55859  | 0.022918 | 0.62131  | -0.15616 | 0.00071  |

|          |          |          |          |          |
|----------|----------|----------|----------|----------|
| 0.07277  | -0.11387 | 0.01381  | 0.21509  | 2.72E-06 |
| 0.00415  | 0.216496 | 2.33E-06 | -0.11964 | 0.00966  |
| 0.00046  | 0.116857 | 0.0115   | 0.358695 | 1.26E-15 |
| 0.23618  | -0.07187 | 0.12088  | -0.03777 | 0.41547  |
| 5.41E-05 | 0.147678 | 0.00137  | 0.337435 | 6.71E-14 |
| 0.09723  | -0.01939 | 0.67598  | 0.106419 | 0.02144  |
| 0.00451  | -0.04905 | 0.29013  | 0.256412 | 1.90E-08 |
| 0.04835  | -0.11115 | 0.01626  | 0.372047 | 8.87E-17 |
| 0.06182  | 0.014412 | 0.75609  | 0.055901 | 0.22792  |
| 0.04621  | 0.035104 | 0.44917  | 0.086162 | 0.06282  |
| 0.0031   | 0.089987 | 0.05197  | 0.213774 | 3.14E-06 |
| 0.53519  | -0.12719 | 0.00592  | 0.321584 | 1.07E-12 |
| 0.87527  | -0.10337 | 0.02549  | 0.140415 | 0.00236  |
| 0.94894  | -0.04947 | 0.286    | 0.343841 | 2.09E-14 |
| 0.45199  | 0.160994 | 0.00048  | -0.27579 | 1.35E-09 |
| 0.26587  | 0.066703 | 0.15009  | -0.39302 | 1.06E-18 |
| 0.00649  | -0.07909 | 0.08776  | -0.24123 | 1.31E-07 |
| 2.68E-05 | 0.122305 | 0.00815  | 0.353749 | 3.27E-15 |
| 8.94E-05 | -0.0005  | 0.99137  | 0.029397 | 0.52627  |
| 0.00752  | 0.269569 | 3.22E-09 | -0.10553 | 0.02256  |
| 0.00091  | -0.14501 | 0.00168  | 0.062603 | 0.17683  |
| 0.04153  | -0.05635 | 0.22423  | 0.298866 | 4.32E-11 |
| 0.03631  | 0.128056 | 0.00558  | -0.17096 | 0.00021  |
| 0.35297  | -0.05768 | 0.21343  | 0.005896 | 0.89888  |
| 0.01147  | 0.211892 | 3.85E-06 | 0.078963 | 0.08829  |
| 0.48758  | -0.01896 | 0.68281  | 0.133198 | 0.00393  |
| 0.88734  | 0.08896  | 0.05472  | 0.346294 | 1.33E-14 |
| 0.00819  | 0.114852 | 0.01301  | 0.080435 | 0.0825   |
| 0.03789  | 0.012027 | 0.79547  | 0.361703 | 7.01E-16 |
| 0.23339  | 0.011369 | 0.80642  | -0.14161 | 0.00216  |
| 0.06332  | 0.018716 | 0.68665  | 0.087556 | 0.05867  |
| 0.01049  | -0.02346 | 0.61314  | 0.064098 | 0.1667   |
| 0.56708  | 0.140876 | 0.00228  | -0.09765 | 0.03489  |
| 1.26E-11 | 0.15607  | 0.00071  | 0.388375 | 2.91E-18 |
| 0.02857  | -0.08876 | 0.05527  | 0.319959 | 1.41E-12 |
| 0.03533  | -0.07709 | 0.09613  | 0.032719 | 0.48059  |
| 0.06166  | 0.005599 | 0.90394  | 0.103163 | 0.02579  |
| 0.00401  | 0.148366 | 0.0013   | 0.168335 | 0.00026  |
| 0.44856  | -0.09624 | 0.03762  | 0.481749 | 1.65E-28 |
| 0.32028  | 0.04803  | 0.30031  | 0.345182 | 1.63E-14 |
| 0.05843  | 0.205727 | 7.40E-06 | 0.032556 | 0.48277  |
| 0.76877  | -0.03267 | 0.48128  | -0.00435 | 0.92537  |
| 0.57389  | 0.023005 | 0.61998  | -0.06168 | 0.18333  |
| 3.95E-05 | -0.06903 | 0.13637  | 0.582038 | 1.08E-43 |
| 0.15051  | -0.07721 | 0.09561  | 0.524986 | 1.94E-34 |

|          |          |          |          |          |
|----------|----------|----------|----------|----------|
| 0.0001   | -0.09122 | 0.04882  | 0.473981 | 1.57E-27 |
| 0.35372  | -0.09942 | 0.0317   | 0.054663 | 0.2384   |
| 0.33535  | 0.07774  | 0.09334  | -0.09769 | 0.03482  |
| 0.36024  | -0.00539 | 0.90753  | 0.287029 | 2.62E-10 |
| 0.68575  | -0.06376 | 0.16896  | 0.079147 | 0.08755  |
| 0.45677  | -0.0791  | 0.08772  | 0.133538 | 0.00384  |
| 4.05E-12 | 0.175372 | 0.00014  | 0.24127  | 1.31E-07 |
| 0.00054  | -0.05463 | 0.23867  | 0.596181 | 2.79E-46 |
| 0.48994  | -0.06435 | 0.16501  | -0.26494 | 6.09E-09 |
| 0.47433  | -0.02108 | 0.64958  | 0.116652 | 0.01164  |
| 0.05519  | -0.00368 | 0.93674  | 0.123899 | 0.00735  |
| 0.64769  | -0.05281 | 0.25472  | 0.180657 | 8.64E-05 |
| 0.17434  | -0.05327 | 0.25062  | 0.062465 | 0.17779  |
| 0.50662  | -0.02848 | 0.53933  | 0.297919 | 5.01E-11 |
| 1.10E-05 | 0.097224 | 0.0357   | 0.409232 | 2.78E-20 |
| 0.00031  | 0.250729 | 3.98E-08 | 0.073876 | 0.11085  |
| 0.30861  | -0.215   | 2.75E-06 | -0.07457 | 0.10754  |
| 0.75556  | -0.10374 | 0.02497  | 0.224388 | 9.65E-07 |
| 0.27348  | -0.08149 | 0.07854  | 0.022878 | 0.62192  |
| 0.01196  | -0.11629 | 0.0119   | 0.268036 | 3.99E-09 |
| 0.00949  | 0.103788 | 0.0249   | 0.093555 | 0.0433   |
| 0.05003  | -0.02273 | 0.62424  | -0.13811 | 0.00278  |
| 0.95418  | -0.07396 | 0.11046  | 0.069179 | 0.1355   |
| 2.78E-05 | -0.06006 | 0.19513  | 0.342261 | 2.80E-14 |
| 7.76E-16 | 0.245222 | 7.99E-08 | 0.110272 | 0.01713  |
| 5.83E-10 | 0.150601 | 0.0011   | 0.329714 | 2.64E-13 |
| 0.63728  | -0.08481 | 0.06708  | 0.363809 | 4.63E-16 |
| 0.00025  | -0.02659 | 0.56653  | 0.357035 | 1.74E-15 |
| 0.38763  | -0.04546 | 0.3269   | 0.139824 | 0.00246  |
| 1.08E-05 | -0.15299 | 0.00091  | -0.18671 | 4.91E-05 |
| 0.02716  | -0.01153 | 0.80378  | 0.248383 | 5.37E-08 |
| 0.62181  | 0.039642 | 0.39271  | 0.1335   | 0.00385  |
| 0.00102  | -0.07063 | 0.12745  | 0.264571 | 6.40E-09 |
| 0.06646  | -0.04301 | 0.35377  | 0.377543 | 2.87E-17 |
| 0.09022  | -0.01614 | 0.72786  | 0.05247  | 0.25779  |
| 0.00053  | 0.10216  | 0.02728  | 0.486726 | 3.78E-29 |
| 4.78E-05 | 0.198727 | 1.52E-05 | 0.192655 | 2.77E-05 |
| 0.19357  | -0.03035 | 0.5129   | 0.138943 | 0.00262  |
| 0.18759  | -0.06181 | 0.18236  | -0.07422 | 0.1092   |
| 0.96171  | -0.13868 | 0.00267  | 0.239557 | 1.61E-07 |
| 0.32593  | 0.004308 | 0.92602  | 0.087093 | 0.06002  |
| 0.00318  | 0.056671 | 0.22157  | 0.326261 | 4.81E-13 |
| 0.78977  | -0.11015 | 0.01725  | 0.229337 | 5.45E-07 |
| 0.81609  | -0.11755 | 0.01101  | 0.035163 | 0.4484   |
| 0.93131  | -0.16194 | 0.00044  | 0.385765 | 5.09E-18 |

|          |          |          |          |          |
|----------|----------|----------|----------|----------|
| 0.65843  | 0.116723 | 0.01159  | -0.14305 | 0.00194  |
| 0.31234  | 0.045766 | 0.3237   | -0.15536 | 0.00076  |
| 0.69954  | -0.0795  | 0.08613  | 0.15257  | 0.00094  |
| 0.49756  | -0.06086 | 0.1892   | 0.160499 | 0.0005   |
| 0.04752  | -0.13816 | 0.00277  | 0.155429 | 0.00075  |
| 0.11008  | -0.17546 | 0.00014  | 0.076292 | 0.09963  |
| 0.01288  | 0.069734 | 0.13239  | 0.248169 | 5.52E-08 |
| 0.96055  | -0.03497 | 0.45091  | -0.0628  | 0.17546  |
| 0.27475  | -0.05889 | 0.20394  | 0.168363 | 0.00026  |
| 0.00768  | 0.125276 | 0.00671  | 0.046233 | 0.31879  |
| 0.1205   | -0.01149 | 0.80449  | 0.287741 | 2.36E-10 |
| 0.0001   | 0.170422 | 0.00022  | 0.428354 | 2.91E-22 |
| 0.00912  | 0.061465 | 0.18485  | -0.32933 | 2.82E-13 |
| 0.00146  | -0.05568 | 0.22973  | -0.03077 | 0.50719  |
| 0.03865  | -0.02599 | 0.57526  | 0.391962 | 1.34E-18 |
| 0.44594  | -0.08814 | 0.057    | -0.07727 | 0.09534  |
| 0.78946  | -0.02738 | 0.55504  | 0.259461 | 1.27E-08 |
| 0.03752  | 0.16896  | 0.00024  | -0.08592 | 0.06356  |
| 0.08315  | -0.11431 | 0.01344  | 0.539262 | 1.37E-36 |
| 2.31E-17 | 0.333576 | 1.34E-13 | 0.299212 | 4.10E-11 |
| 0.28164  | -0.08945 | 0.0534   | 0.323582 | 7.63E-13 |
| 0.45032  | -0.04852 | 0.29538  | 0.1172   | 0.01126  |
| 0.02505  | 0.009047 | 0.84539  | 0.383836 | 7.68E-18 |
| 0.31525  | -0.18    | 9.18E-05 | 0.291497 | 1.34E-10 |
| 0.65429  | 0.060638 | 0.19084  | -0.30198 | 2.65E-11 |
| 0.93724  | -0.12846 | 0.00544  | 0.289516 | 1.81E-10 |
| 6.86E-08 | 0.07646  | 0.09888  | 0.270924 | 2.67E-09 |
| 0.16746  | -0.12034 | 0.00924  | 0.227767 | 6.54E-07 |
| 0.02102  | -0.14553 | 0.00161  | 0.577482 | 6.92E-43 |
| 0.20756  | -0.0255  | 0.58252  | -0.09418 | 0.04191  |
| 0.10929  | -0.06421 | 0.16599  | 0.104063 | 0.02452  |
| 0.93305  | -0.06209 | 0.18043  | -0.05568 | 0.2298   |
| 1.66E-05 | -0.17107 | 0.0002   | 0.147039 | 0.00144  |
| 0.94585  | -0.00527 | 0.90962  | -0.01386 | 0.76507  |
| 0.6568   | -0.12573 | 0.00652  | 0.096014 | 0.03807  |
| 0.4089   | -0.14287 | 0.00197  | 0.036773 | 0.42789  |
| 0.39407  | 0.004167 | 0.92845  | -0.03402 | 0.46334  |
| 0.03044  | -0.04971 | 0.28367  | -0.0605  | 0.19187  |
| 0.01478  | -0.07029 | 0.12931  | -0.06121 | 0.18671  |
| 0.19109  | -0.00497 | 0.91464  | 0.070494 | 0.12821  |
| 0.5607   | -0.00832 | 0.8577   | 0.0468   | 0.31288  |
| 0.84161  | -0.02575 | 0.57882  | 0.039735 | 0.3916   |
| 0.24229  | -0.10843 | 0.01909  | 0.029713 | 0.52183  |
| 0.28248  | -0.09439 | 0.04147  | -0.01398 | 0.76325  |
| 0.70369  | -0.01545 | 0.73914  | 0.04726  | 0.30815  |

|          |          |          |          |          |
|----------|----------|----------|----------|----------|
| 0.32993  | -0.0563  | 0.22458  | 0.031263 | 0.50035  |
| 0.00051  | 0.032657 | 0.48141  | -0.07826 | 0.09117  |
| 0.73714  | -0.05393 | 0.24473  | 0.058865 | 0.20417  |
| 1.04E-05 | -0.02897 | 0.53235  | 0.555722 | 3.35E-39 |
| 0.02055  | -0.03984 | 0.39034  | 0.174372 | 0.00015  |
| 0.3212   | 0.0129   | 0.78098  | 0.052231 | 0.25997  |
| 0.01799  | 0.025886 | 0.57685  | 0.229771 | 5.18E-07 |
| 0.3038   | -0.01878 | 0.6857   | 0.072839 | 0.11596  |
| 0.24587  | -0.06389 | 0.16811  | 0.067115 | 0.14759  |
| 0.34154  | 0.020617 | 0.65676  | 0.079762 | 0.08511  |
| 0.14939  | -0.04598 | 0.32143  | 0.241949 | 1.20E-07 |
| 2.19E-18 | 0.244565 | 8.68E-08 | -0.01883 | 0.68478  |
| 0.49511  | 0.021961 | 0.63595  | -0.02508 | 0.58878  |
| 0.00035  | -0.10996 | 0.01745  | 0.312071 | 5.24E-12 |
| 0.68174  | 0.008099 | 0.86144  | 0.006314 | 0.89176  |
| 0.02368  | -0.12895 | 0.00526  | 0.008287 | 0.85825  |
| 0.00709  | 0.03358  | 0.46911  | 0.202203 | 1.07E-05 |
| 0.01839  | 0.049058 | 0.29007  | 0.265785 | 5.43E-09 |
| 0.79775  | -0.0341  | 0.46232  | 0.079396 | 0.08655  |
| 0.11716  | 0.039324 | 0.39652  | 0.178585 | 0.0001   |
| 0.24703  | 0.006741 | 0.88449  | 0.067227 | 0.14691  |
| 0.00492  | 0.168961 | 0.00024  | 0.010986 | 0.81283  |
| 0.06989  | 0.020734 | 0.65494  | 0.176599 | 0.00012  |
| 0.76087  | -0.01162 | 0.80231  | -0.12131 | 0.00868  |
| 0.91054  | 0.031151 | 0.50188  | 0.009985 | 0.8296   |
| 0.18444  | 0.075959 | 0.10112  | 0.115973 | 0.01214  |
| 0.0469   | -0.10358 | 0.02519  | 0.375135 | 4.72E-17 |
| 2.35E-06 | 0.049857 | 0.28228  | 0.394778 | 7.23E-19 |
| 0.03775  | -0.00255 | 0.95619  | 0.25203  | 3.37E-08 |
| 0.30965  | 0.186868 | 4.84E-05 | -0.01427 | 0.75838  |
| 0.51315  | -0.10082 | 0.02938  | 0.260411 | 1.12E-08 |
| 0.13578  | -0.1531  | 0.0009   | -0.03839 | 0.40781  |
| 2.40E-06 | 0.019452 | 0.67501  | 0.330931 | 2.13E-13 |
| 0.18285  | -0.20744 | 6.18E-06 | 0.518196 | 1.89E-33 |
| 0.15141  | 0.040305 | 0.38483  | 0.088278 | 0.05661  |
| 0.78221  | -0.02327 | 0.6159   | -0.00743 | 0.87283  |
| 4.30E-06 | 0.195944 | 2.00E-05 | -0.07917 | 0.08745  |
| 0.16868  | 0.010252 | 0.82512  | 0.147926 | 0.00135  |
| 0.8588   | 0.033365 | 0.47196  | -0.08279 | 0.07388  |
| 0.17109  | -0.00388 | 0.93329  | -0.16103 | 0.00048  |
| 0.00446  | -0.13323 | 0.00392  | -0.25398 | 2.62E-08 |
| 0.03087  | 0.004188 | 0.92807  | 0.069806 | 0.13199  |
| 0.50536  | 0.004991 | 0.91434  | 0.243198 | 1.03E-07 |
| 0.33258  | -0.05951 | 0.19927  | -0.06348 | 0.17082  |
| 0.39576  | -0.0053  | 0.90907  | 0.184694 | 5.94E-05 |

|          |          |          |          |          |
|----------|----------|----------|----------|----------|
| 0.00017  | -0.01079 | 0.81615  | 0.488928 | 1.95E-29 |
| 4.25E-10 | 0.061553 | 0.18422  | 0.624129 | 8.65E-52 |
| 0.66274  | 0.179311 | 9.77E-05 | -0.08695 | 0.06046  |
| 0.73366  | -0.07458 | 0.10749  | 0.363389 | 5.03E-16 |
| 3.79E-09 | 0.114744 | 0.01309  | 0.463399 | 3.09E-26 |
| 0.19824  | -0.06329 | 0.1721   | -0.00024 | 0.99592  |
| 0.38642  | -0.02624 | 0.57163  | 0.044839 | 0.33361  |
| 0.21728  | 0.01111  | 0.81075  | 0.090793 | 0.0499   |
| 0.27233  | -0.03394 | 0.46432  | 0.138253 | 0.00275  |
| 0.00272  | 0.050255 | 0.27845  | 0.132418 | 0.00415  |
| 0.05294  | -0.01775 | 0.70203  | 0.19361  | 2.52E-05 |
| 0.04763  | -0.02476 | 0.59351  | 0.135622 | 0.00332  |
| 9.29E-06 | 0.145349 | 0.00164  | 0.201728 | 1.12E-05 |
| 0.15417  | -0.0062  | 0.89362  | 0.100766 | 0.02946  |
| 9.90E-13 | 0.21476  | 2.82E-06 | 0.173687 | 0.00016  |
| 0.07647  | 0.236044 | 2.46E-07 | 0.078114 | 0.09178  |
| 0.04494  | -0.03464 | 0.45523  | 0.268409 | 3.79E-09 |
| 0.03903  | 0.079281 | 0.08701  | -0.08557 | 0.06465  |
| 0.101    | -0.05958 | 0.19874  | 0.342253 | 2.80E-14 |
| 0.07862  | -0.09248 | 0.04578  | 0.456867 | 1.84E-25 |
| 0.06748  | 0.034152 | 0.46156  | -0.10409 | 0.02448  |
| 0.00039  | 0.033712 | 0.46736  | 0.317605 | 2.10E-12 |
| 0.02685  | -0.0026  | 0.95534  | 0.254544 | 2.43E-08 |
| 0.94565  | -0.01379 | 0.76635  | 0.126394 | 0.00624  |
| 0.6802   | 0.076986 | 0.09657  | 0.170539 | 0.00021  |
| 0.02442  | -0.05855 | 0.20659  | 0.216031 | 2.46E-06 |
| 0.12909  | 0.183751 | 6.49E-05 | -0.14233 | 0.00205  |
| 0.56597  | 0.006121 | 0.89504  | 0.084212 | 0.06903  |
| 0.64768  | 0.028736 | 0.53561  | -0.19838 | 1.57E-05 |
| 9.23E-09 | 0.018486 | 0.69031  | 0.354415 | 2.88E-15 |
| 0.92461  | 0.127675 | 0.00573  | -0.27648 | 1.22E-09 |
| 0.99077  | 0.027197 | 0.5577   | 0.085182 | 0.06589  |
| 0.05436  | 0.045458 | 0.32697  | -0.11495 | 0.01293  |
| 0.01661  | -0.11308 | 0.01448  | 0.17118  | 0.0002   |
| 0.66335  | -0.09509 | 0.03997  | 0.021918 | 0.63661  |
| 0.03275  | -0.10549 | 0.02261  | -0.02731 | 0.556    |
| 0.06914  | 0.030298 | 0.51367  | 0.451519 | 7.74E-25 |
| 0.17613  | -0.14404 | 0.0018   | -0.26628 | 5.07E-09 |
| 0.02769  | -0.18555 | 5.48E-05 | 0.280858 | 6.50E-10 |
| 0.12556  | -0.07975 | 0.08517  | 0.00807  | 0.86193  |
| 0.29617  | -0.05408 | 0.24344  | 0.237251 | 2.13E-07 |
| 0.09881  | 0.183994 | 6.34E-05 | -0.19968 | 1.38E-05 |
| 2.02E-07 | -0.06283 | 0.17527  | 0.36686  | 2.52E-16 |
| 0.91691  | 0.037917 | 0.41365  | 0.009323 | 0.84074  |
| 0.79342  | -0.0356  | 0.4428   | 0.054125 | 0.24306  |

|          |          |          |          |          |
|----------|----------|----------|----------|----------|
| 0.266    | -0.03845 | 0.40708  | 0.091487 | 0.04817  |
| 0.16662  | -0.03945 | 0.39505  | 0.254106 | 2.57E-08 |
| 0.09249  | -0.03175 | 0.49362  | 0.445338 | 3.94E-24 |
| 4.04E-05 | 0.146154 | 0.00154  | -0.13867 | 0.00267  |
| 1.48E-05 | 0.185727 | 5.39E-05 | 0.195483 | 2.10E-05 |
| 0.36868  | -0.01796 | 0.69862  | 0.170984 | 0.00021  |
| 0.42171  | 0.055953 | 0.22749  | 0.057623 | 0.21389  |
| 3.71E-07 | 0.100314 | 0.0302   | 0.233423 | 3.37E-07 |
| 0.23741  | -0.08364 | 0.07093  | 0.278882 | 8.64E-10 |
| 0.00037  | 0.019512 | 0.67407  | -0.32365 | 7.54E-13 |
| 0.45779  | -0.00997 | 0.82988  | 0.236835 | 2.24E-07 |
| 0.37455  | -0.06543 | 0.15805  | -0.01009 | 0.82791  |
| 0.50618  | -0.09297 | 0.04464  | 0.311572 | 5.69E-12 |
| 0.13327  | 0.054234 | 0.24211  | 0.298943 | 4.27E-11 |
| 0.20077  | 0.13961  | 0.0025   | 0.037773 | 0.41542  |
| 6.36E-12 | 0.280941 | 6.42E-10 | 0.459912 | 8.05E-26 |
| 1.66E-05 | 0.001181 | 0.9797   | 0.445489 | 3.78E-24 |
| 0.00401  | -0.01895 | 0.68286  | 0.429923 | 1.97E-22 |
| 0.03184  | 0.013726 | 0.76734  | 0.16246  | 0.00042  |
| 0.43478  | -0.08943 | 0.05344  | 0.285849 | 3.12E-10 |
| 0.78314  | -0.0791  | 0.08773  | 0.134231 | 0.00366  |
| 0.99453  | -0.032   | 0.49028  | 0.068339 | 0.14032  |
| 0.01061  | 0.202105 | 1.08E-05 | -0.05444 | 0.24033  |
| 0.00286  | -0.04526 | 0.32912  | 0.514    | 7.53E-33 |
| 0.21275  | -0.09137 | 0.04846  | 0.080992 | 0.08039  |
| 0.39741  | -0.07747 | 0.09449  | 0.39113  | 1.61E-18 |
| 0.1297   | 0.063383 | 0.17149  | 0.164065 | 0.00037  |
| 0.95399  | 0.026188 | 0.57242  | 0.222439 | 1.20E-06 |
| 0.62198  | -0.08235 | 0.07542  | 0.178432 | 0.00011  |
| 0.45117  | -0.12811 | 0.00556  | 0.026366 | 0.5698   |
| 0.35075  | -0.05542 | 0.23196  | 0.329383 | 2.80E-13 |
| 0.03379  | -0.07286 | 0.11589  | 0.160178 | 0.00051  |
| 8.55E-06 | 0.121851 | 0.00839  | 0.313592 | 4.08E-12 |
| 0.02461  | -0.02375 | 0.60869  | 0.244554 | 8.69E-08 |
| 8.72E-06 | 0.142988 | 0.00195  | 0.168046 | 0.00026  |
| 0.3292   | -0.06547 | 0.15782  | -0.03414 | 0.46173  |
| 0.6535   | 0.021895 | 0.63697  | 0.296742 | 6.01E-11 |
| 0.4059   | -0.02206 | 0.63436  | 0.206388 | 6.90E-06 |
| 0.26348  | -0.04153 | 0.37057  | 0.070279 | 0.12938  |
| 0.2836   | 0.21277  | 3.50E-06 | -0.17952 | 9.58E-05 |
| 0.41518  | -0.07363 | 0.11203  | 0.147468 | 0.00139  |
| 0.52873  | -0.01954 | 0.67363  | 0.107223 | 0.02047  |
| 0.48669  | -0.05235 | 0.25886  | -0.08241 | 0.07521  |
| 0.00075  | -0.11546 | 0.01253  | -0.00017 | 0.99715  |
| 0.77987  | -0.14298 | 0.00195  | 0.09745  | 0.03527  |



|          |          |          |          |          |
|----------|----------|----------|----------|----------|
| 0.14824  | -0.0133  | 0.7743   | -0.23684 | 2.24E-07 |
| 0.01398  | -0.00072 | 0.9877   | -0.02294 | 0.62091  |
| 0.19431  | 0.026632 | 0.56591  | 0.149657 | 0.00118  |
| 0.08213  | -0.06905 | 0.13623  | 0.229919 | 5.09E-07 |
| 0.03604  | -0.02136 | 0.6452   | 0.261814 | 9.29E-09 |
| 0.4544   | -0.0412  | 0.37441  | 0.168558 | 0.00025  |
| 0.90426  | -0.12074 | 0.00901  | 0.054771 | 0.23747  |
| 0.57908  | 0.036075 | 0.43671  | 0.083712 | 0.07071  |
| 0.01703  | 0.102778 | 0.02635  | 0.16225  | 0.00043  |
| 0.98408  | -0.02038 | 0.66041  | -0.00898 | 0.84654  |
| 0.00178  | 0.076708 | 0.09779  | 0.229529 | 5.33E-07 |
| 0.65477  | 0.08771  | 0.05823  | 0.17917  | 9.90E-05 |
| 0.08854  | -0.05603 | 0.22686  | 0.265878 | 5.36E-09 |
| 0.00176  | -0.16402 | 0.00037  | 0.019404 | 0.67577  |
| 0.86915  | 0.282117 | 5.41E-10 | -0.34026 | 4.02E-14 |
| 0.58485  | -0.11136 | 0.01606  | 0.046492 | 0.31607  |
| 0.10174  | 0.196133 | 1.97E-05 | -0.14545 | 0.00162  |
| 0.05759  | -0.0359  | 0.439    | 0.123537 | 0.00752  |
| 0.00961  | 0.092354 | 0.04607  | 0.205613 | 7.49E-06 |
| 0.35087  | -0.10769 | 0.01993  | 0.217332 | 2.13E-06 |
| 0.74959  | -0.04765 | 0.30421  | 0.086518 | 0.06174  |
| 0.16139  | 0.023719 | 0.60916  | 0.100492 | 0.02991  |
| 0.78709  | 0.009353 | 0.84024  | 0.092559 | 0.04559  |
| 0.56719  | 0.006555 | 0.88764  | 0.094534 | 0.04115  |
| 0.96975  | 0.013597 | 0.76948  | 0.118975 | 0.01007  |
| 0.16708  | 0.05753  | 0.21463  | 0.084513 | 0.06805  |
| 0.91255  | -0.08485 | 0.06694  | 0.112284 | 0.0152   |
| 0.21927  | 0.014616 | 0.75275  | 0.030706 | 0.508    |
| 0.69497  | -0.05148 | 0.26694  | 0.103081 | 0.02591  |
| 0.55492  | -0.01177 | 0.7998   | 0.132855 | 0.00403  |
| 0.12941  | 0.047284 | 0.3079   | 0.017388 | 0.70783  |
| 0.67765  | -0.04528 | 0.3289   | 0.129321 | 0.00513  |
| 2.84E-05 | 0.045824 | 0.32308  | 0.21411  | 3.03E-06 |
| 0.18626  | -0.03109 | 0.50268  | 0.528822 | 5.26E-35 |
| 0.56687  | -0.04016 | 0.38652  | 0.101856 | 0.02774  |
| 0.03082  | -0.11741 | 0.01111  | 0.216523 | 2.33E-06 |
| 0.16198  | -0.0916  | 0.04789  | -0.04576 | 0.32373  |
| 0.16515  | -0.01599 | 0.73029  | 0.074578 | 0.10749  |
| 0.00943  | -0.17873 | 0.0001   | -0.18317 | 6.85E-05 |
| 0.00616  | 0.064794 | 0.16213  | 0.226998 | 7.15E-07 |
| 0.09793  | -0.07843 | 0.09048  | 0.068339 | 0.14032  |
| 0.04046  | -0.0537  | 0.24677  | 0.166976 | 0.00029  |
| 0.12133  | -0.10197 | 0.02756  | 0.317215 | 2.24E-12 |
| 0.00561  | -0.1705  | 0.00021  | 0.21574  | 2.54E-06 |
| 0.38377  | -0.00931 | 0.84093  | 0.184431 | 6.09E-05 |

|          |          |          |          |          |
|----------|----------|----------|----------|----------|
| 0.93438  | -0.06144 | 0.18503  | 0.354194 | 3.00E-15 |
| 0.32143  | -0.01942 | 0.67545  | 0.108137 | 0.01942  |
| 0.95786  | -0.01041 | 0.82242  | 0.023943 | 0.60578  |
| 0.8481   | -0.09617 | 0.03776  | 0.202727 | 1.01E-05 |
| 0.05338  | -0.09427 | 0.04172  | 0.151947 | 0.00099  |
| 0.95605  | -0.2133  | 3.31E-06 | 0.290657 | 1.52E-10 |
| 0.14193  | -0.00169 | 0.97094  | 0.127335 | 0.00586  |
| 0.24228  | 0.098696 | 0.03298  | -0.37147 | 9.98E-17 |
| 0.00992  | 0.145161 | 0.00166  | 0.015022 | 0.74611  |
| 0.00436  | -0.00481 | 0.91749  | 0.253295 | 2.86E-08 |
| 0.07187  | 0.010559 | 0.81997  | 0.222536 | 1.19E-06 |
| 0.18738  | -0.0708  | 0.12657  | 0.221088 | 1.40E-06 |
| 0.45093  | 0.091554 | 0.048    | -0.1603  | 0.00051  |
| 8.59E-05 | 0.14349  | 0.00188  | 0.076322 | 0.09949  |
| 0.00016  | -0.00688 | 0.88208  | 0.275394 | 1.42E-09 |
| 3.35E-12 | -0.00632 | 0.89168  | 0.443753 | 5.94E-24 |
| 0.66969  | -0.00181 | 0.9688   | 0.108645 | 0.01885  |
| 0.63306  | -0.03438 | 0.45862  | -0.25551 | 2.14E-08 |
| 0.01071  | 0.110085 | 0.01732  | -0.21912 | 1.75E-06 |
| 0.00018  | -0.06039 | 0.1927   | 0.46844  | 7.57E-27 |
| 0.5411   | -0.02629 | 0.57098  | -0.02213 | 0.63333  |
| 0.34165  | 0.016417 | 0.72346  | -0.01522 | 0.74294  |
| 0.0111   | -0.06938 | 0.13437  | 0.143615 | 0.00186  |
| 0.00113  | -0.01789 | 0.69973  | 0.327811 | 3.68E-13 |
| 2.19E-05 | -0.00935 | 0.84023  | 0.280356 | 6.99E-10 |
| 0.06151  | -0.18449 | 6.06E-05 | 0.18908  | 3.92E-05 |
| 0.26629  | -0.17244 | 0.00018  | 0.25706  | 1.75E-08 |
| 0.00182  | -0.017   | 0.71399  | 0.437134 | 3.24E-23 |
| 0.01374  | 0.086552 | 0.06164  | 0.415248 | 6.84E-21 |
| 6.83E-08 | 0.022641 | 0.62553  | -0.31141 | 5.84E-12 |
| 0.4024   | 0.03857  | 0.40565  | -0.03988 | 0.38988  |
| 1.74E-07 | 0.027329 | 0.55579  | 0.324289 | 6.76E-13 |
| 0.79584  | -0.0927  | 0.04526  | 0.109038 | 0.01842  |
| 0.01538  | 0.088355 | 0.05639  | 0.193434 | 2.57E-05 |
| 0.62687  | -0.00213 | 0.96331  | 0.220101 | 1.57E-06 |
| 0.09268  | -0.0013  | 0.97764  | 0.119799 | 0.00956  |
| 0.16714  | -0.02157 | 0.64199  | 0.139631 | 0.00249  |
| 0.55886  | -0.04546 | 0.32691  | -0.07593 | 0.10124  |
| 0.35147  | -0.13291 | 0.00401  | 0.11223  | 0.01525  |
| 0.00011  | 0.081134 | 0.07986  | 0.009741 | 0.83372  |
| 0.05783  | 0.000531 | 0.99087  | 0.252091 | 3.34E-08 |
| 0.88753  | 0.005531 | 0.9051   | -0.34322 | 2.34E-14 |
| 0.81589  | -0.11109 | 0.01632  | -0.03102 | 0.50365  |
| 0.48396  | -0.06646 | 0.15156  | 0.041279 | 0.37345  |
| 0.26256  | 0.015904 | 0.73176  | -0.29519 | 7.63E-11 |

|          |          |          |          |          |
|----------|----------|----------|----------|----------|
| 0.33089  | -0.0264  | 0.5693   | 0.065503 | 0.15758  |
| 0.14356  | -0.00347 | 0.94038  | -0.17382 | 0.00016  |
| 0.02198  | -0.01447 | 0.75514  | 0.076695 | 0.09785  |
| 0.54018  | -0.12353 | 0.00753  | -0.07683 | 0.09726  |
| 3.11E-12 | 0.061235 | 0.18651  | 0.49863  | 1.01E-30 |
| 0.00037  | -0.02778 | 0.54931  | 0.27899  | 8.51E-10 |
| 0.81104  | -0.01947 | 0.67471  | 0.089333 | 0.05371  |
| 0.001    | 0.08555  | 0.06472  | 0.46696  | 1.15E-26 |
| 0.04944  | 0.063092 | 0.17347  | -0.06388 | 0.16816  |
| 0.57357  | -0.06778 | 0.14359  | 0.033177 | 0.47447  |
| 0.81735  | -0.06718 | 0.14718  | 0.384197 | 7.11E-18 |
| 0.00099  | 0.042814 | 0.35593  | 0.260617 | 1.09E-08 |
| 0.00602  | 0.004239 | 0.92721  | 0.601504 | 2.74E-47 |
| 0.15599  | -0.05135 | 0.26808  | 0.03382  | 0.46594  |
| 0.14175  | -0.07636 | 0.09932  | 0.224585 | 9.43E-07 |
| 5.17E-05 | 0.118233 | 0.01055  | 0.179361 | 9.73E-05 |
| 0.74591  | -0.01686 | 0.71637  | 0.212299 | 3.69E-06 |
| 0.16807  | 0.01172  | 0.80057  | 0.096298 | 0.0375   |
| 0.07654  | -0.06484 | 0.16181  | 0.29563  | 7.14E-11 |
| 0.90435  | 0.21819  | 1.94E-06 | -0.29941 | 3.97E-11 |
| 0.40503  | -0.00213 | 0.96347  | -0.15038 | 0.00112  |
| 0.56943  | 0.031091 | 0.50271  | 0.16159  | 0.00046  |
| 0.7557   | -0.00684 | 0.88277  | 0.086032 | 0.06322  |
| 0.06684  | 0.086245 | 0.06257  | -0.28536 | 3.36E-10 |
| 0.00055  | -0.02371 | 0.60923  | 0.515849 | 4.11E-33 |
| 0.00362  | 0.004184 | 0.92815  | 0.361285 | 7.61E-16 |
| 0.00035  | 0.131231 | 0.0045   | 0.206008 | 7.18E-06 |
| 0.02553  | 0.01746  | 0.70666  | -0.01072 | 0.81736  |
| 6.78E-15 | 0.149304 | 0.00121  | 0.412004 | 1.46E-20 |
| 0.05712  | -0.03706 | 0.42432  | -0.15125 | 0.00104  |
| 0.00855  | -0.05261 | 0.25648  | -0.11637 | 0.01185  |
| 1.16E-05 | -0.10545 | 0.02267  | -0.23676 | 2.26E-07 |
| 0.22363  | -0.0398  | 0.39088  | 0.191686 | 3.05E-05 |
| 0.11104  | 0.053461 | 0.2489   | 0.037938 | 0.41339  |
| 0.18323  | 0.067603 | 0.14466  | -0.10689 | 0.02087  |
| 0.06079  | -0.05272 | 0.25554  | 0.004112 | 0.92937  |
| 0.49684  | -0.05501 | 0.23541  | 0.100721 | 0.02953  |
| 0.10176  | -0.0359  | 0.43894  | 0.287803 | 2.34E-10 |
| 0.27822  | -0.03761 | 0.4175   | 0.096533 | 0.03703  |
| 0.62329  | 0.124792 | 0.00693  | -0.15977 | 0.00053  |
| 0.41177  | 0.008357 | 0.85707  | 0.104318 | 0.02417  |
| 0.35755  | 0.053713 | 0.24667  | 0.076075 | 0.1006   |
| 0.02154  | 0.155704 | 0.00073  | -0.01458 | 0.75335  |
| 0.08992  | 0.006627 | 0.88642  | 0.43029  | 1.80E-22 |
| 1.57E-05 | 0.174137 | 0.00016  | 0.10384  | 0.02483  |

|          |          |          |          |          |
|----------|----------|----------|----------|----------|
| 0.01179  | -0.02348 | 0.61278  | 0.216435 | 2.35E-06 |
| 0.03637  | -0.01166 | 0.80162  | 0.545459 | 1.48E-37 |
| 0.00135  | -0.003   | 0.94853  | 0.159914 | 0.00052  |
| 0.58206  | 0.146888 | 0.00146  | -0.1499  | 0.00116  |
| 0.03559  | 0.054463 | 0.24013  | 0.318971 | 1.67E-12 |
| 0.86541  | -0.18266 | 7.18E-05 | 0.262979 | 7.94E-09 |
| 0.024    | -0.12002 | 0.00943  | -0.0003  | 0.99486  |
| 0.00068  | -0.11639 | 0.01183  | 0.485146 | 6.05E-29 |
| 0.00055  | 0.122327 | 0.00814  | -0.26712 | 4.52E-09 |
| 0.5807   | -0.1468  | 0.00147  | 0.026545 | 0.56719  |
| 0.15622  | -0.07765 | 0.09372  | 0.495297 | 2.82E-30 |
| 0.03969  | 0.066597 | 0.15074  | -0.0117  | 0.8009   |
| 0.0278   | 0.019448 | 0.67507  | 0.414349 | 8.45E-21 |
| 0.31206  | -0.08463 | 0.06767  | 0.31962  | 1.49E-12 |
| 0.05169  | -0.11513 | 0.01279  | 0.109703 | 0.01772  |
| 0.11195  | -0.01718 | 0.71112  | 0.041217 | 0.37417  |
| 0.14382  | 0.001949 | 0.96649  | 0.110928 | 0.01648  |
| 0.33337  | -0.08277 | 0.07394  | 0.25338  | 2.83E-08 |
| 0.43853  | 0.119163 | 0.00995  | 0.290774 | 1.50E-10 |
| 2.54E-06 | -0.15815 | 0.0006   | -0.32272 | 8.83E-13 |
| 0.98865  | -0.00856 | 0.85367  | 0.328227 | 3.42E-13 |
| 0.43144  | -0.11535 | 0.01262  | 0.366281 | 2.83E-16 |
| 0.00518  | 0.03852  | 0.40626  | 0.231409 | 4.28E-07 |
| 0.06073  | -0.07907 | 0.08785  | -0.1831  | 6.89E-05 |
| 2.67E-05 | 0.004479 | 0.9231   | 0.417005 | 4.51E-21 |
| 7.86E-08 | 0.254597 | 2.41E-08 | 0.306836 | 1.23E-11 |
| 0.27262  | -0.02771 | 0.55024  | 0.150307 | 0.00112  |
| 0.04456  | 0.018683 | 0.68716  | 0.116134 | 0.01202  |
| 0.42349  | 0.093517 | 0.04339  | 0.100449 | 0.02998  |
| 0.92345  | -0.09965 | 0.03132  | 0.307387 | 1.12E-11 |
| 0.63805  | -0.02069 | 0.65559  | 0.188982 | 3.96E-05 |
| 0.27364  | -0.03182 | 0.49276  | 0.184496 | 6.05E-05 |
| 0.01299  | -0.00642 | 0.88994  | -0.30515 | 1.61E-11 |
| 0.04222  | 0.040139 | 0.3868   | 0.354176 | 3.01E-15 |
| 0.00738  | 0.023987 | 0.60512  | 0.084329 | 0.06865  |
| 0.62852  | -0.15672 | 0.00068  | 0.544908 | 1.81E-37 |
| 0.14075  | -0.00842 | 0.85599  | 0.159992 | 0.00052  |
| 0.00589  | 0.384823 | 6.23E-18 | -0.29418 | 8.92E-11 |
| 0.02201  | -0.09098 | 0.04943  | -0.04517 | 0.33009  |
| 0.9684   | -0.06447 | 0.16425  | -0.06197 | 0.18123  |
| 0.15268  | -0.04883 | 0.29231  | 0.202392 | 1.04E-05 |
| 0.00088  | 0.090133 | 0.05159  | 0.028238 | 0.54272  |
| 0.04456  | -0.18885 | 4.01E-05 | 0.190015 | 3.58E-05 |
| 0.01415  | -0.0363  | 0.43388  | -0.15759 | 0.00063  |
| 0.96761  | 0.008507 | 0.85453  | 0.069914 | 0.13139  |

|          |          |          |          |          |
|----------|----------|----------|----------|----------|
| 0.29367  | -0.03051 | 0.5107   | 0.182608 | 7.22E-05 |
| 0.63729  | -0.03343 | 0.47107  | -0.13364 | 0.00381  |
| 0.03022  | 0.166205 | 0.00031  | -0.13858 | 0.00269  |
| 0.38382  | -0.0069  | 0.88175  | 0.278377 | 9.30E-10 |
| 0.00756  | 0.052474 | 0.25775  | 0.337359 | 6.80E-14 |
| 3.13E-07 | 0.328425 | 3.31E-13 | -0.02089 | 0.65258  |
| 0.63865  | -0.09626 | 0.03757  | 0.47797  | 4.98E-28 |
| 0.00022  | 0.072818 | 0.11607  | 0.22885  | 5.77E-07 |
| 2.59E-11 | 0.102363 | 0.02697  | 0.456923 | 1.82E-25 |
| 0.56931  | -0.0074  | 0.87332  | 0.038279 | 0.40921  |
| 0.37797  | -0.10391 | 0.02473  | 0.146383 | 0.00151  |
| 0.04634  | -0.0048  | 0.91761  | 0.393233 | 1.02E-18 |
| 0.72341  | -0.08304 | 0.07301  | 0.187956 | 4.36E-05 |
| 0.45206  | -0.00887 | 0.84839  | 0.015304 | 0.7415   |
| 0.21197  | -0.17991 | 9.26E-05 | 0.218641 | 1.84E-06 |
| 0.01978  | 0.099655 | 0.03131  | 0.189334 | 3.82E-05 |
| 6.15E-05 | 0.023422 | 0.61366  | 0.398436 | 3.22E-19 |
| 0.25141  | -0.06088 | 0.18904  | 0.249203 | 4.84E-08 |
| 6.71E-06 | 0.25249  | 3.17E-08 | 0.032717 | 0.48062  |
| 0.02254  | -0.15084 | 0.00108  | 0.118871 | 0.01014  |
| 0.72291  | -0.13269 | 0.00407  | 0.112621 | 0.01489  |
| 4.36E-05 | 0.049939 | 0.28149  | 0.563428 | 1.78E-40 |
| 0.398    | -0.07293 | 0.11549  | 0.075771 | 0.10197  |
| 0.36585  | 0.011388 | 0.80611  | 0.076529 | 0.09857  |
| 0.49826  | 0.022002 | 0.63532  | -0.08728 | 0.05948  |
| 0.35522  | -0.04406 | 0.34207  | 0.168639 | 0.00025  |
| 0.0098   | -0.02095 | 0.65161  | 0.46698  | 1.14E-26 |
| 0.07348  | -0.01535 | 0.7407   | -0.24152 | 1.27E-07 |
| 0.39991  | -0.0739  | 0.11075  | -0.05181 | 0.26383  |
| 0.00927  | 0.054014 | 0.24403  | -0.03577 | 0.44061  |
| 0.44308  | -0.01139 | 0.80612  | 0.035202 | 0.4479   |
| 1.50E-08 | 0.222654 | 1.17E-06 | 0.132172 | 0.00422  |
| 3.83E-16 | 0.382057 | 1.12E-17 | 0.164425 | 0.00036  |
| 2.63E-11 | 0.297542 | 5.31E-11 | -0.13099 | 0.00458  |
| 1.54E-07 | 0.061918 | 0.18163  | 0.132146 | 0.00423  |
| 0.16464  | 0.096467 | 0.03716  | -0.20265 | 1.02E-05 |
| 4.00E-07 | -0.2766  | 1.20E-09 | 0.014023 | 0.76247  |
| 0.0001   | 0.206149 | 7.08E-06 | -0.00225 | 0.96129  |
| 0.35779  | -0.01779 | 0.70134  | 0.112981 | 0.01457  |
| 9.21E-05 | 0.134162 | 0.00368  | 0.086191 | 0.06273  |
| 7.07E-07 | 0.11386  | 0.01382  | 0.416016 | 5.70E-21 |
| 0.02669  | 0.313429 | 4.19E-12 | -0.13534 | 0.00338  |
| 0.02338  | 0.340441 | 3.90E-14 | -0.03776 | 0.4156   |
| 0.00143  | 0.169719 | 0.00023  | -0.20201 | 1.09E-05 |
| 0.00947  | 0.207287 | 6.28E-06 | 0.163367 | 0.00039  |

|          |          |          |          |          |
|----------|----------|----------|----------|----------|
| 0.96454  | 0.034949 | 0.45117  | -0.14519 | 0.00166  |
| 0.05056  | 0.098296 | 0.0337   | 0.010005 | 0.82927  |
| 0.00916  | 0.15105  | 0.00106  | -0.19877 | 1.51E-05 |
| 0.01135  | 0.044193 | 0.34063  | -0.10384 | 0.02482  |
| 0.01675  | 0.056766 | 0.22079  | 0.132488 | 0.00413  |
| 0.53202  | 0.160171 | 0.00051  | -0.09393 | 0.04248  |
| 0.05061  | -0.10255 | 0.02668  | 0.235421 | 2.66E-07 |
| 0.14888  | 0.360069 | 9.65E-16 | -0.29993 | 3.66E-11 |
| 8.35E-05 | 0.112877 | 0.01466  | 0.584852 | 3.38E-44 |
| 0.05487  | 0.095158 | 0.03983  | -0.13077 | 0.00465  |
| 0.00029  | -0.01485 | 0.74887  | 0.263852 | 7.06E-09 |
| 0.10736  | 0.029747 | 0.52135  | 0.183458 | 6.67E-05 |
| 0.06315  | 0.134297 | 0.00364  | 0.08813  | 0.05703  |
| 0.89602  | -0.11792 | 0.01076  | 0.259901 | 1.20E-08 |
| 0.0177   | -0.09668 | 0.03674  | -0.04903 | 0.29038  |
| 0.06882  | -0.07764 | 0.09376  | 0.136188 | 0.00319  |
| 0.57788  | -0.08109 | 0.08001  | 0.41387  | 9.45E-21 |
| 1.06E-07 | 0.124154 | 0.00723  | 0.232227 | 3.88E-07 |
| 0.01142  | 0.180305 | 8.92E-05 | 0.085703 | 0.06424  |
| 0.01964  | 0.044655 | 0.3356   | 0.110543 | 0.01686  |
| 1.24E-05 | 0.111006 | 0.0164   | 0.486506 | 4.04E-29 |
| 0.00034  | -0.08765 | 0.05841  | -0.29154 | 1.33E-10 |
| 0.13136  | -0.00356 | 0.93884  | -0.18711 | 4.73E-05 |
| 0.12715  | 0.041282 | 0.37342  | -0.07594 | 0.10122  |
| 0.08235  | -0.0861  | 0.06301  | 0.263655 | 7.25E-09 |
| 0.09538  | 0.02388  | 0.60673  | 0.096574 | 0.03695  |
| 0.0052   | -0.10906 | 0.0184   | 0.537819 | 2.29E-36 |
| 0.59688  | -0.03147 | 0.49751  | -0.0329  | 0.47819  |
| 0.34365  | 0.048365 | 0.29695  | -0.21829 | 1.91E-06 |
| 1.28E-12 | 0.278059 | 9.73E-10 | 0.288459 | 2.12E-10 |
| 0.08093  | -0.0239  | 0.60644  | -0.0069  | 0.8818   |
| 4.14E-05 | 0.032715 | 0.48064  | 0.462523 | 3.93E-26 |
| 0.0011   | -0.0051  | 0.91246  | 0.156295 | 0.0007   |
| 0.79715  | -0.08273 | 0.07407  | 0.201708 | 1.12E-05 |
| 0.22985  | 0.018489 | 0.69025  | -0.03301 | 0.47675  |
| 0.07457  | -0.0522  | 0.26023  | 0.256615 | 1.85E-08 |
| 0.56138  | -0.00602 | 0.89683  | 0.02332  | 0.6152   |
| 0.27617  | 0.116045 | 0.01209  | -0.00899 | 0.84637  |
| 0.56145  | 0.01225  | 0.79176  | 0.188581 | 4.11E-05 |
| 0.44229  | -0.07542 | 0.10355  | 0.050538 | 0.27575  |
| 2.20E-10 | -0.18459 | 6.00E-05 | -0.00877 | 0.85012  |
| 0.00123  | 0.118666 | 0.01027  | -0.02845 | 0.53964  |
| 0.00041  | 0.009003 | 0.84614  | 0.376145 | 3.83E-17 |
| 0.45247  | -0.18767 | 4.48E-05 | 0.081947 | 0.07688  |
| 0.45104  | 0.004652 | 0.92013  | 0.265242 | 5.84E-09 |

|          |          |          |          |          |
|----------|----------|----------|----------|----------|
| 2.81E-05 | -0.04054 | 0.3821   | 0.316983 | 2.33E-12 |
| 9.79E-06 | 0.095637 | 0.03884  | 0.210655 | 4.40E-06 |
| 0.00284  | 0.042493 | 0.35954  | 0.297217 | 5.59E-11 |
| 0.30416  | -0.09125 | 0.04874  | 0.312668 | 4.75E-12 |
| 0.00185  | 0.175603 | 0.00014  | 0.047802 | 0.30262  |
| 0.37012  | -0.00141 | 0.97571  | -0.22592 | 8.10E-07 |
| 0.01467  | -0.12549 | 0.00662  | -0.14617 | 0.00154  |
| 6.40E-14 | 0.333371 | 1.39E-13 | 0.303696 | 2.02E-11 |
| 0.00117  | 0.071243 | 0.1242   | -0.00367 | 0.93701  |
| 2.83E-10 | 0.293654 | 9.66E-11 | -0.18571 | 5.40E-05 |
| 0.00085  | 0.075165 | 0.10475  | 0.089014 | 0.05457  |
| 0.62244  | -0.15949 | 0.00054  | -0.18787 | 4.40E-05 |
| 4.68E-07 | 0.00893  | 0.84738  | 0.40315  | 1.12E-19 |
| 0.16173  | 0.051674 | 0.26509  | 0.003365 | 0.94219  |
| 0.00576  | -0.05612 | 0.22611  | 0.574496 | 2.30E-42 |
| 2.98E-12 | 0.411671 | 1.58E-20 | 0.069292 | 0.13486  |
| 0.07263  | -0.00109 | 0.9813   | 0.221871 | 1.28E-06 |
| 0.00178  | 0.049507 | 0.28568  | 0.331561 | 1.91E-13 |
| 0.72453  | 0.009503 | 0.83772  | 0.192045 | 2.94E-05 |
| 0.00373  | -0.02249 | 0.62782  | 0.307743 | 1.06E-11 |
| 0.32445  | -0.03004 | 0.5172   | 0.030947 | 0.50468  |
| 0.00027  | -0.04609 | 0.32023  | 0.254242 | 2.53E-08 |
| 0.80664  | 0.004535 | 0.92214  | 0.016561 | 0.72113  |
| 0.938    | -0.0458  | 0.32337  | 0.034253 | 0.46025  |
| 0.30028  | 0.055228 | 0.23358  | 0.131156 | 0.00453  |
| 0.73472  | 0.081113 | 0.07994  | 0.064338 | 0.16512  |
| 0.14705  | 0.118711 | 0.01024  | -0.09502 | 0.04013  |
| 0.00735  | 0.156201 | 0.00071  | 0.230876 | 4.55E-07 |
| 0.6356   | -0.01222 | 0.79226  | 0.01363  | 0.76893  |
| 5.96E-06 | 0.239003 | 1.72E-07 | 0.206769 | 6.63E-06 |
| 0.06117  | -0.10429 | 0.02421  | 0.075386 | 0.10373  |
| 0.00989  | -0.20331 | 9.50E-06 | -0.09411 | 0.04208  |
| 0.14742  | -0.03157 | 0.49608  | 0.222347 | 1.22E-06 |
| 0.21218  | -0.13376 | 0.00378  | 0.122321 | 0.00814  |
| 0.14805  | -0.11539 | 0.01258  | -0.09998 | 0.03076  |
| 0.06645  | 0.092747 | 0.04515  | -0.01515 | 0.74403  |
| 1.70E-05 | 0.019418 | 0.67555  | 0.388521 | 2.82E-18 |
| 0.8173   | 0.095433 | 0.03926  | -0.07843 | 0.09047  |
| 0.41414  | -0.07635 | 0.09938  | 0.224815 | 9.19E-07 |
| 0.02038  | 0.175878 | 0.00013  | 0.248465 | 5.31E-08 |
| 6.88E-06 | 0.003528 | 0.93939  | 0.400735 | 1.93E-19 |
| 0.70422  | -0.00909 | 0.84461  | 0.176222 | 0.00013  |
| 0.01615  | 0.025329 | 0.58507  | 0.269418 | 3.29E-09 |
| 0.01435  | -0.08559 | 0.0646   | 0.194947 | 2.21E-05 |
| 0.95662  | 0.033847 | 0.46558  | -0.17965 | 9.47E-05 |

|          |          |          |          |          |
|----------|----------|----------|----------|----------|
| 0.00187  | -0.08278 | 0.07392  | 0.546046 | 1.20E-37 |
| 0.17906  | 0.069314 | 0.13474  | 0.045828 | 0.32305  |
| 0.12341  | -0.04298 | 0.35411  | -0.02677 | 0.56387  |
| 0.00313  | -0.00508 | 0.91285  | 0.292559 | 1.14E-10 |
| 0.00038  | 0.124799 | 0.00693  | 0.422237 | 1.29E-21 |
| 5.14E-14 | 0.27925  | 8.20E-10 | 0.305338 | 1.56E-11 |
| 0.00468  | -0.06369 | 0.16939  | -0.11241 | 0.01508  |
| 0.09904  | -0.08418 | 0.06913  | 0.261741 | 9.38E-09 |
| 2.40E-07 | 0.081341 | 0.07909  | -0.46651 | 1.30E-26 |
| 0.00049  | 0.127894 | 0.00564  | -0.09038 | 0.05096  |
| 0.00555  | 0.215437 | 2.62E-06 | -0.05752 | 0.2147   |
| 0.01875  | -0.00148 | 0.9746   | 0.159975 | 0.00052  |
| 0.23264  | 0.043075 | 0.353    | -0.20778 | 5.96E-06 |
| 0.85122  | 0.022507 | 0.62759  | 0.12055  | 0.00912  |
| 0.27839  | -0.10208 | 0.0274   | 0.063103 | 0.17339  |
| 0.28518  | -0.1092  | 0.01825  | 0.395627 | 6.00E-19 |
| 0.00017  | -0.15486 | 0.00079  | 0.040675 | 0.38048  |
| 0.69192  | 0.054159 | 0.24276  | 0.021544 | 0.64238  |
| 0.00239  | 0.061412 | 0.18523  | -0.18658 | 4.97E-05 |
| 0.46463  | -0.10951 | 0.01792  | 0.266212 | 5.12E-09 |
| 0.89963  | -0.14222 | 0.00206  | 0.39412  | 8.36E-19 |
| 0.78645  | -0.02244 | 0.62865  | 0.151088 | 0.00106  |
| 2.66E-07 | 0.015815 | 0.73321  | -0.15353 | 0.00087  |
| 0.00565  | -0.13066 | 0.00468  | 0.562257 | 2.80E-40 |
| 0.75215  | -0.1145  | 0.01329  | 0.045892 | 0.32237  |
| 0.1096   | 0.274457 | 1.63E-09 | -0.37455 | 5.32E-17 |
| 0.96271  | 0.041581 | 0.36996  | -0.24327 | 1.02E-07 |
| 1.18E-05 | 0.002171 | 0.96267  | 0.329651 | 2.67E-13 |
| 0.01324  | -0.23668 | 2.28E-07 | 0.219549 | 1.66E-06 |
| 0.02579  | -0.0109  | 0.81423  | 0.128394 | 0.00546  |
| 0.53854  | -0.09236 | 0.04606  | -0.03069 | 0.5082   |
| 0.00642  | -0.02884 | 0.53416  | -0.22851 | 6.00E-07 |
| 0.60484  | 0.058075 | 0.21032  | 0.079845 | 0.08478  |
| 0.39872  | 0.054452 | 0.24022  | 0.044693 | 0.33519  |
| 0.00092  | 0.100436 | 0.03     | -0.09281 | 0.045    |
| 0.06282  | 0.097789 | 0.03463  | -0.25577 | 2.07E-08 |
| 0.00922  | 0.102305 | 0.02706  | -0.20153 | 1.14E-05 |
| 0.932    | 0.178271 | 0.00011  | -0.13727 | 0.00295  |
| 0.96422  | 0.015488 | 0.73852  | -0.2345  | 2.97E-07 |
| 0.55683  | -0.12624 | 0.0063   | 0.031577 | 0.49604  |
| 2.21E-06 | 0.023041 | 0.61944  | 0.364328 | 4.18E-16 |
| 0.14604  | -0.07284 | 0.11596  | 0.006741 | 0.88448  |
| 0.18675  | 0.007509 | 0.87144  | -0.15265 | 0.00094  |
| 0.47667  | -0.03903 | 0.40001  | 0.022551 | 0.62691  |
| 0.00322  | -0.02427 | 0.60084  | 0.277702 | 1.02E-09 |



|          |          |          |          |          |
|----------|----------|----------|----------|----------|
| 0.3045   | -0.08107 | 0.0801   | -0.08838 | 0.05631  |
| 0.76448  | -0.06477 | 0.1623   | 0.315553 | 2.95E-12 |
| 0.00606  | 0.17026  | 0.00022  | -0.0037  | 0.9364   |
| 0.45314  | -0.04084 | 0.3785   | 0.162491 | 0.00042  |
| 0.08328  | -0.05466 | 0.23839  | 0.190057 | 3.57E-05 |
| 0.318    | -0.13622 | 0.00318  | 0.242536 | 1.12E-07 |
| 0.31716  | 0.008053 | 0.86221  | 0.157706 | 0.00063  |
| 0.44383  | -0.00922 | 0.84254  | 0.060154 | 0.19441  |
| 0.82488  | -0.00367 | 0.93691  | 0.017443 | 0.70694  |
| 0.46712  | -0.00935 | 0.84031  | 0.042722 | 0.35695  |
| 0.47111  | -0.04805 | 0.30016  | 0.155557 | 0.00074  |
| 0.06205  | 0.079186 | 0.08739  | 0.140591 | 0.00233  |
| 0.08596  | 0.034513 | 0.45684  | 0.13623  | 0.00318  |
| 0.85621  | -0.06437 | 0.16489  | 0.182647 | 7.19E-05 |
| 0.10538  | 0.04893  | 0.29134  | -0.01132 | 0.80733  |
| 0.00085  | 0.08423  | 0.06897  | 0.106353 | 0.02152  |
| 0.55137  | 0.00696  | 0.88076  | -0.01726 | 0.70991  |
| 0.11773  | -0.08457 | 0.06784  | 0.256816 | 1.81E-08 |
| 0.04361  | -0.09337 | 0.04372  | 0.31327  | 4.30E-12 |
| 0.9667   | -0.05485 | 0.23675  | -0.21396 | 3.08E-06 |
| 0.00382  | -0.06405 | 0.16699  | -0.11971 | 0.00962  |
| 0.38583  | -0.03306 | 0.47601  | 0.272539 | 2.13E-09 |
| 0.25667  | -0.05794 | 0.21134  | 0.141614 | 0.00216  |
| 0.00387  | 0.206392 | 6.90E-06 | 0.127156 | 0.00593  |
| 0.26931  | -0.14358 | 0.00187  | 0.011181 | 0.80957  |
| 0.02343  | 0.158914 | 0.00057  | 0.155246 | 0.00076  |
| 0.80727  | -0.11564 | 0.01239  | 0.346395 | 1.30E-14 |
| 0.24102  | 0.012993 | 0.77945  | -0.13226 | 0.0042   |
| 0.50568  | -0.03852 | 0.40627  | 0.15326  | 0.00089  |
| 0.09     | -0.09533 | 0.03946  | 0.337503 | 6.63E-14 |
| 0.35925  | -0.09997 | 0.03078  | 0.356132 | 2.07E-15 |
| 0.00077  | -0.02652 | 0.56752  | 0.460571 | 6.72E-26 |
| 0.87973  | 0.033111 | 0.47534  | 0.127473 | 0.0058   |
| 8.74E-10 | 0.114628 | 0.01319  | 0.538364 | 1.89E-36 |
| 0.8565   | -0.02346 | 0.61304  | 0.105836 | 0.02217  |
| 4.25E-05 | 0.262005 | 9.06E-09 | -0.03924 | 0.39754  |
| 3.64E-08 | 0.028152 | 0.54395  | 0.34272  | 2.57E-14 |
| 0.03435  | -0.04074 | 0.37977  | -0.29565 | 7.12E-11 |
| 0.03953  | -0.05345 | 0.24901  | -0.19081 | 3.32E-05 |
| 0.73215  | -0.06828 | 0.14069  | 0.196166 | 1.96E-05 |
| 0.3596   | -0.083   | 0.07314  | 0.040987 | 0.37683  |
| 0.7622   | -0.03815 | 0.41082  | -0.02442 | 0.59861  |
| 0.97157  | 0.095013 | 0.04013  | -0.26664 | 4.83E-09 |
| 0.45809  | 0.016841 | 0.71662  | -0.02111 | 0.64909  |
| 1.73E-07 | 0.037446 | 0.41948  | 0.56972  | 1.54E-41 |

|          |          |          |          |          |
|----------|----------|----------|----------|----------|
| 0.62905  | -0.01913 | 0.68013  | -0.03717 | 0.42294  |
| 0.51521  | -0.00881 | 0.84932  | 0.04093  | 0.3775   |
| 0.88639  | -0.01836 | 0.69226  | 0.031387 | 0.49865  |
| 0.99463  | -0.06523 | 0.15934  | 0.082011 | 0.07664  |
| 0.00242  | 0.051115 | 0.2703   | -0.02427 | 0.6009   |
| 0.02748  | -0.00834 | 0.8573   | 0.263118 | 7.80E-09 |
| 0.00087  | -0.08926 | 0.05391  | 0.385181 | 5.77E-18 |
| 0.01428  | -0.09504 | 0.04008  | 0.364237 | 4.25E-16 |
| 0.67102  | -0.00241 | 0.95853  | 0.158579 | 0.00058  |
| 0.07928  | 0.156666 | 0.00068  | 0.033291 | 0.47295  |
| 0.04709  | 0.080864 | 0.08087  | 0.253585 | 2.75E-08 |
| 0.00024  | 0.088634 | 0.05561  | 0.268831 | 3.57E-09 |
| 0.02283  | -0.02466 | 0.59501  | 0.201895 | 1.10E-05 |
| 2.66E-05 | 0.155229 | 0.00076  | 0.492079 | 7.54E-30 |
| 0.00382  | 0.200381 | 1.28E-05 | 0.053021 | 0.25282  |
| 0.10294  | -0.07973 | 0.08523  | 0.072938 | 0.11547  |
| 0.9537   | 0.025553 | 0.58176  | -0.05506 | 0.23497  |
| 0.05059  | -0.11769 | 0.01092  | 0.017198 | 0.71087  |
| 0.03024  | 0.05274  | 0.25534  | 0.038502 | 0.40647  |
| 0.07802  | -0.07852 | 0.09008  | 0.040811 | 0.3789   |
| 0.00085  | 0.306704 | 1.25E-11 | -0.28856 | 2.09E-10 |
| 0.03797  | -0.0942  | 0.04188  | 0.130467 | 0.00474  |
| 5.77E-15 | 0.147853 | 0.00135  | 0.449164 | 1.44E-24 |
| 0.86383  | -0.06959 | 0.13318  | 0.179253 | 9.82E-05 |
| 0.33004  | 0.046332 | 0.31775  | -0.02416 | 0.60259  |
| 0.37272  | 0.11996  | 0.00947  | 0.171376 | 0.0002   |
| 0.07266  | 0.030849 | 0.50603  | -0.33522 | 9.99E-14 |
| 6.07E-06 | -0.13222 | 0.00421  | -0.14278 | 0.00198  |
| 0.00909  | -0.05704 | 0.21853  | -0.35922 | 1.14E-15 |
| 0.11361  | 0.231785 | 4.09E-07 | -0.21861 | 1.85E-06 |
| 0.0278   | 0.093072 | 0.0444   | -0.07495 | 0.10575  |
| 0.38488  | 0.107679 | 0.01994  | -0.03775 | 0.41569  |
| 6.73E-06 | -0.09909 | 0.03228  | -0.36581 | 3.11E-16 |
| 0.41201  | 0.022045 | 0.63466  | 0.041962 | 0.36559  |
| 0.42778  | -0.03296 | 0.47733  | 0.219048 | 1.76E-06 |
| 0.00015  | -0.05354 | 0.24816  | -0.17015 | 0.00022  |
| 0.00219  | -0.06389 | 0.16807  | -0.24121 | 1.31E-07 |
| 0.57488  | -0.01834 | 0.69255  | 0.00954  | 0.83709  |
| 0.44843  | -0.09232 | 0.04616  | -0.13792 | 0.00282  |
| 0.05382  | 0.124626 | 0.00701  | 0.085604 | 0.06455  |
| 0.20282  | -0.05142 | 0.26748  | 0.015072 | 0.74528  |
| 0.00149  | 0.012173 | 0.79304  | 0.314257 | 3.66E-12 |
| 0.76144  | -0.07094 | 0.12582  | 0.396621 | 4.82E-19 |
| 2.73E-06 | -0.0052  | 0.9107   | 0.356884 | 1.79E-15 |
| 0.1404   | -0.01411 | 0.76102  | 0.172213 | 0.00018  |

|          |          |          |          |          |
|----------|----------|----------|----------|----------|
| 0.69141  | -0.04499 | 0.332    | 0.13926  | 0.00256  |
| 2.08E-06 | 0.327926 | 3.61E-13 | -0.11124 | 0.01618  |
| 0.1849   | -0.00512 | 0.9122   | 0.407932 | 3.75E-20 |
| 0.19614  | -0.08997 | 0.05201  | 0.081092 | 0.08001  |
| 0.58022  | 0.171066 | 0.0002   | 0.05623  | 0.22519  |
| 0.00062  | -0.13892 | 0.00262  | -0.14934 | 0.00121  |
| 0.33488  | 0.053335 | 0.25002  | -0.10359 | 0.02518  |
| 0.00607  | -0.07234 | 0.11849  | 0.212628 | 3.56E-06 |
| 0.06144  | 0.046333 | 0.31774  | 0.087493 | 0.05885  |
| 0.15409  | 0.029259 | 0.52821  | -0.00165 | 0.97161  |
| 0.00022  | -0.07139 | 0.12343  | 0.008887 | 0.8481   |
| 0.12021  | 0.073953 | 0.11048  | -0.3064  | 1.31E-11 |
| 0.00176  | -0.01854 | 0.68944  | 0.356353 | 1.98E-15 |
| 2.43E-09 | 0.152228 | 0.00097  | 0.281267 | 6.12E-10 |
| 0.00011  | -0.17396 | 0.00016  | -0.04885 | 0.29213  |
| 0.01806  | -0.10154 | 0.02823  | 0.015276 | 0.74196  |
| 0.07945  | 0.079871 | 0.08468  | 0.052984 | 0.25315  |
| 1.47E-08 | 0.15759  | 0.00063  | 0.513385 | 9.20E-33 |
| 0.05288  | 0.114918 | 0.01296  | 0.110496 | 0.0169   |
| 0.79516  | -0.02657 | 0.56683  | 0.338129 | 5.92E-14 |
| 0.14674  | -0.12613 | 0.00635  | 0.418278 | 3.33E-21 |
| 0.12204  | 0.146472 | 0.0015   | 0.079511 | 0.0861   |
| 0.89745  | -0.0567  | 0.22129  | 0.366683 | 2.62E-16 |
| 3.46E-10 | 0.162412 | 0.00043  | 0.469492 | 5.63E-27 |
| 0.07304  | 0.143617 | 0.00186  | 0.062429 | 0.17804  |
| 0.00037  | 0.042532 | 0.3591   | 0.268027 | 3.99E-09 |
| 0.63701  | -0.0507  | 0.27422  | 0.305351 | 1.55E-11 |
| 0.00295  | -0.03    | 0.51788  | 0.602727 | 1.60E-47 |
| 0.43915  | -0.02839 | 0.54054  | 0.039618 | 0.39299  |
| 0.08574  | 0.005994 | 0.8972   | 0.11644  | 0.0118   |
| 0.00781  | 0.046787 | 0.31301  | 0.116744 | 0.01158  |
| 1.86E-05 | -0.02128 | 0.64639  | 0.490416 | 1.25E-29 |
| 0.01885  | 0.050124 | 0.27972  | 0.170383 | 0.00022  |
| 0.01535  | -0.02707 | 0.55952  | 0.319731 | 1.47E-12 |
| 0.03588  | 0.116832 | 0.01152  | 0.163691 | 0.00038  |
| 0.003    | 0.148047 | 0.00133  | -0.0947  | 0.04079  |
| 0.62704  | 0.03914  | 0.39874  | -0.07169 | 0.12186  |
| 1.07E-06 | -0.00713 | 0.87782  | 0.144346 | 0.00176  |
| 0.12923  | -0.07952 | 0.08608  | 0.167676 | 0.00027  |
| 0.10808  | -0.06997 | 0.13106  | 0.406598 | 5.10E-20 |
| 0.60443  | 0.04483  | 0.3337   | 0.099263 | 0.03198  |
| 4.24E-06 | -0.08977 | 0.05254  | 0.32859  | 3.21E-13 |
| 0.66053  | -0.12515 | 0.00677  | -0.16255 | 0.00042  |
| 0.00122  | 0.174858 | 0.00015  | -0.03151 | 0.49702  |
| 0.21566  | 0.226163 | 7.87E-07 | -0.24428 | 8.99E-08 |

|          |          |          |          |          |
|----------|----------|----------|----------|----------|
| 2.06E-11 | 0.205091 | 7.90E-06 | 0.138007 | 0.0028   |
| 0.1709   | -0.0295  | 0.52479  | -0.09251 | 0.0457   |
| 0.61869  | 0.034813 | 0.45294  | 0.062718 | 0.17604  |
| 0.00703  | 0.090931 | 0.04955  | 0.111668 | 0.01577  |
| 0.03858  | -0.12058 | 0.0091   | 0.134756 | 0.00353  |
| 0.48585  | -0.01961 | 0.6726   | 0.255646 | 2.11E-08 |
| 0.75613  | -0.23062 | 4.69E-07 | 0.379986 | 1.73E-17 |
| 1.57E-05 | 0.209158 | 5.16E-06 | -0.21071 | 4.37E-06 |
| 0.37392  | 0.031188 | 0.50137  | 0.126921 | 0.00602  |
| 0.03482  | 0.008419 | 0.85601  | -0.34288 | 2.50E-14 |
| 0.00012  | 0.08286  | 0.07363  | 0.096848 | 0.03642  |
| 0.00111  | 0.010607 | 0.81917  | 0.344404 | 1.89E-14 |
| 0.01218  | 0.055914 | 0.22781  | 0.350236 | 6.36E-15 |
| 0.18735  | 0.007088 | 0.87859  | 0.085236 | 0.06571  |
| 0.02373  | 0.003246 | 0.94423  | 0.143708 | 0.00185  |
| 0.14727  | -0.21346 | 3.25E-06 | 0.501592 | 4.00E-31 |
| 0.10502  | -0.08298 | 0.07321  | 0.259381 | 1.29E-08 |
| 0.61408  | 0.254694 | 2.38E-08 | -0.30831 | 9.67E-12 |
| 0.38999  | -0.10103 | 0.02903  | 0.243652 | 9.72E-08 |
| 0.00203  | 0.015435 | 0.73937  | 0.417119 | 4.39E-21 |
| 0.44297  | 0.004614 | 0.92079  | -0.23323 | 3.45E-07 |
| 0.10288  | 0.030873 | 0.50571  | -0.08607 | 0.06309  |
| 0.0528   | -0.1361  | 0.00321  | 0.310833 | 6.42E-12 |
| 0.13854  | 0.135236 | 0.00341  | -0.07204 | 0.12005  |
| 0.13335  | -0.07138 | 0.1235   | 0.056251 | 0.22501  |
| 2.16E-06 | 0.024339 | 0.59983  | 0.601148 | 3.21E-47 |
| 0.57288  | -0.0776  | 0.09394  | 0.337056 | 7.19E-14 |
| 0.90281  | -0.07483 | 0.10633  | 0.138542 | 0.0027   |
| 4.60E-10 | 0.132717 | 0.00407  | 0.475254 | 1.09E-27 |
| 0.64426  | -0.04752 | 0.30549  | 0.049824 | 0.2826   |
| 0.60998  | -0.03745 | 0.4194   | 0.026318 | 0.5705   |
| 0.93019  | -0.1139  | 0.01378  | 0.136744 | 0.00307  |
| 0.87363  | -0.05669 | 0.22144  | 0.091967 | 0.047    |
| 0.20656  | -0.03856 | 0.40578  | 0.071809 | 0.12123  |
| 0.00039  | 0.015397 | 0.73999  | 0.364719 | 3.87E-16 |
| 0.20695  | -0.20116 | 1.18E-05 | 0.290164 | 1.64E-10 |
| 0.61391  | 0.077777 | 0.09319  | 0.012452 | 0.7884   |
| 0.58098  | -0.04843 | 0.2963   | -0.06371 | 0.16929  |
| 0.7129   | -0.1375  | 0.0029   | 0.211871 | 3.86E-06 |
| 0.03556  | -0.02717 | 0.55808  | 0.381036 | 1.39E-17 |
| 0.00059  | -0.0309  | 0.50532  | 0.468287 | 7.90E-27 |
| 1.69E-06 | 0.087828 | 0.05789  | 0.310548 | 6.72E-12 |
| 0.97296  | -0.06703 | 0.14813  | 0.103863 | 0.0248   |
| 0.0248   | -0.02722 | 0.5574   | 0.1212   | 0.00875  |
| 0.05422  | -0.13211 | 0.00424  | 0.308332 | 9.63E-12 |

|          |          |          |          |          |
|----------|----------|----------|----------|----------|
| 0.71761  | -0.14299 | 0.00195  | 0.094121 | 0.04205  |
| 0.43808  | -0.13539 | 0.00337  | 0.091994 | 0.04693  |
| 0.12895  | -0.11998 | 0.00945  | -0.06005 | 0.19522  |
| 0.16094  | 0.082368 | 0.07537  | -0.10431 | 0.02418  |
| 0.76988  | -0.08972 | 0.05267  | 0.059399 | 0.20008  |
| 4.03E-05 | -0.0241  | 0.60335  | -0.26593 | 5.32E-09 |
| 0.00142  | -0.06052 | 0.1917   | 0.386962 | 3.94E-18 |
| 0.00065  | -0.02318 | 0.61726  | 0.404393 | 8.43E-20 |
| 0.98705  | -0.05916 | 0.20192  | -0.00215 | 0.96303  |
| 0.9297   | -0.02627 | 0.57125  | 0.180589 | 8.69E-05 |
| 0.44222  | -0.04743 | 0.3064   | 0.1029   | 0.02617  |
| 0.7405   | 0.040047 | 0.38789  | 0.21212  | 3.76E-06 |
| 0.14775  | -0.02825 | 0.54259  | 0.34714  | 1.14E-14 |
| 0.59889  | -0.17171 | 0.00019  | 0.437796 | 2.74E-23 |
| 0.59959  | -0.0923  | 0.0462   | 0.17753  | 0.00011  |
| 0.00851  | 0.237788 | 2.00E-07 | 0.132359 | 0.00417  |
| 0.00242  | -0.10217 | 0.02726  | -0.25264 | 3.11E-08 |
| 0.14133  | -0.06054 | 0.19159  | 0.38296  | 9.24E-18 |
| 0.0062   | 0.048754 | 0.29308  | 0.256468 | 1.89E-08 |
| 3.74E-05 | -0.02057 | 0.65748  | 0.324914 | 6.07E-13 |
| 0.13989  | -0.18302 | 6.95E-05 | 0.233689 | 3.27E-07 |
| 0.00616  | 0.117    | 0.0114   | 0.245901 | 7.34E-08 |
| 0.24936  | -0.01001 | 0.82918  | 0.102564 | 0.02667  |
| 0.27243  | -0.0625  | 0.17757  | 0.340622 | 3.77E-14 |
| 0.21943  | -0.03637 | 0.43303  | 0.27079  | 2.72E-09 |
| 0.19569  | 0.090601 | 0.05039  | 0.088057 | 0.05723  |
| 0.99099  | -0.01216 | 0.79328  | 0.194418 | 2.33E-05 |
| 0.2528   | -0.20616 | 7.07E-06 | 0.41486  | 7.49E-21 |
| 0.30683  | -0.08209 | 0.07637  | 0.241994 | 1.19E-07 |
| 0.00188  | -0.04418 | 0.34072  | 0.297755 | 5.14E-11 |
| 0.06563  | 0.046503 | 0.31596  | -0.24839 | 5.36E-08 |
| 0.07838  | -0.18524 | 5.64E-05 | 0.183203 | 6.83E-05 |
| 0.55885  | -0.10931 | 0.01813  | 0.07403  | 0.11011  |
| 0.19998  | -0.07731 | 0.09519  | 0.233262 | 3.44E-07 |
| 0.23596  | -0.01248 | 0.78793  | 0.214029 | 3.06E-06 |
| 0.53049  | 0.013487 | 0.77129  | 0.204253 | 8.62E-06 |
| 0.44869  | -0.03547 | 0.44451  | -0.2445  | 8.75E-08 |
| 0.23846  | -0.06546 | 0.15784  | -0.07477 | 0.1066   |
| 0.00603  | -0.08998 | 0.05199  | 0.232932 | 3.57E-07 |
| 0.01941  | -0.00725 | 0.87576  | 0.130327 | 0.00479  |
| 9.53E-05 | -0.00778 | 0.86678  | 0.34617  | 1.36E-14 |
| 9.47E-05 | -0.09444 | 0.04136  | 0.39672  | 4.71E-19 |
| 0.10136  | 0.078261 | 0.09116  | -0.0515  | 0.26666  |
| 0.44067  | -0.12907 | 0.00521  | 0.271688 | 2.40E-09 |
| 0.29286  | -0.03996 | 0.38892  | 0.164994 | 0.00034  |

|          |          |          |          |          |
|----------|----------|----------|----------|----------|
| 0.36115  | 0.112669 | 0.01485  | 0.100261 | 0.03029  |
| 0.11961  | -0.11198 | 0.01547  | 0.176747 | 0.00012  |
| 0.25276  | -0.08226 | 0.07574  | 0.302446 | 2.47E-11 |
| 0.01019  | -0.23255 | 3.74E-07 | -0.10393 | 0.0247   |
| 0.08602  | -0.09075 | 0.05001  | 0.316444 | 2.55E-12 |
| 0.30019  | -0.0959  | 0.0383   | 0.351696 | 4.82E-15 |
| 0.19729  | -0.19587 | 2.02E-05 | 0.219321 | 1.71E-06 |
| 0.78704  | -0.1704  | 0.00022  | 0.112535 | 0.01497  |
| 0.81828  | -0.09891 | 0.0326   | 0.13046  | 0.00475  |
| 0.71382  | -0.10545 | 0.02266  | 0.391664 | 1.43E-18 |
| 0.12483  | -0.04904 | 0.2903   | 0.218784 | 1.81E-06 |
| 0.00128  | -0.10585 | 0.02215  | -0.18461 | 5.99E-05 |
| 0.10867  | -0.10981 | 0.0176   | 0.195389 | 2.12E-05 |
| 0.13386  | 0.058257 | 0.20889  | 0.110992 | 0.01642  |
| 0.40828  | 0.02347  | 0.61292  | 0.242749 | 1.09E-07 |
| 0.1935   | 0.01487  | 0.7486   | 0.209005 | 5.24E-06 |
| 0.03601  | -0.2252  | 8.79E-07 | 0.151554 | 0.00102  |
| 0.00431  | -0.00132 | 0.97725  | -0.01596 | 0.73079  |
| 0.6099   | -0.03319 | 0.47428  | 0.109464 | 0.01797  |
| 4.82E-07 | 0.06754  | 0.14503  | 0.438891 | 2.07E-23 |
| 1.18E-09 | 0.107921 | 0.01966  | 0.367018 | 2.45E-16 |
| 1.90E-05 | -0.09229 | 0.04623  | -0.18557 | 5.47E-05 |
| 0.00309  | 0.458656 | 1.13E-25 | -0.09212 | 0.04662  |
| 0.00482  | 0.348839 | 8.26E-15 | -0.09432 | 0.04161  |
| 0.01546  | -0.10141 | 0.02843  | -0.15203 | 0.00098  |
| 0.00122  | 0.229349 | 5.45E-07 | 0.00329  | 0.94347  |
| 0.82003  | 0.20734  | 6.25E-06 | -0.47631 | 8.04E-28 |
| 7.54E-06 | 0.3523   | 4.30E-15 | 0.106336 | 0.02155  |
| 1.19E-21 | 0.586537 | 1.68E-44 | 0.057906 | 0.21164  |
| 2.27E-32 | 0.613792 | 1.09E-49 | 0.149689 | 0.00118  |
| 2.20E-08 | 0.430807 | 1.59E-22 | -0.03062 | 0.50926  |
| 2.06E-06 | 0.351013 | 5.49E-15 | -0.13882 | 0.00264  |
| 9.02E-12 | 0.610968 | 3.98E-49 | -0.17363 | 0.00016  |
| 3.38E-08 | 0.491918 | 7.92E-30 | -0.05325 | 0.25078  |
| 0.73179  | 0.212514 | 3.60E-06 | -0.03455 | 0.45637  |
| 0.17854  | 0.278992 | 8.51E-10 | -0.15103 | 0.00106  |
| 0.61501  | 0.157619 | 0.00063  | -0.20123 | 1.18E-05 |
| 5.07E-06 | 0.50334  | 2.31E-31 | -0.17101 | 0.0002   |
| 1.45E-05 | 0.189181 | 3.88E-05 | 0.070838 | 0.12635  |
| 0.0006   | 0.174487 | 0.00015  | 0.163552 | 0.00039  |
| 8.29E-17 | 0.535141 | 5.87E-36 | -0.12197 | 0.00833  |
| 4.70E-08 | 0.332321 | 1.67E-13 | 0.065469 | 0.15779  |
| 1.38E-07 | 0.291932 | 1.26E-10 | 0.150505 | 0.00111  |
| 7.83E-08 | 0.440976 | 1.22E-23 | -0.11745 | 0.01108  |
| 0.79744  | 0.199752 | 1.37E-05 | -0.21126 | 4.12E-06 |

|          |          |          |          |          |
|----------|----------|----------|----------|----------|
| 0.00857  | 0.300406 | 3.40E-11 | -0.03727 | 0.42168  |
| 9.10E-12 | 0.588413 | 7.64E-45 | -0.16935 | 0.00024  |
| 6.65E-09 | 0.396796 | 4.63E-19 | -0.1369  | 0.00303  |
| 1.38E-15 | 0.54448  | 2.11E-37 | -0.17594 | 0.00013  |
| 5.80E-05 | 0.399114 | 2.77E-19 | -0.15763 | 0.00063  |
| 0.02141  | 0.165737 | 0.00032  | -0.16395 | 0.00037  |
| 3.18E-06 | 0.323078 | 8.32E-13 | 0.141319 | 0.00221  |
| 4.55E-09 | 0.540412 | 9.10E-37 | -0.24523 | 7.99E-08 |
| 3.94E-06 | 0.442497 | 8.22E-24 | -0.12615 | 0.00634  |
| 3.96E-09 | 0.539249 | 1.38E-36 | -0.18572 | 5.39E-05 |
| 1.87E-06 | 0.508402 | 4.61E-32 | -0.18388 | 6.41E-05 |
| 1.56E-06 | 0.321844 | 1.03E-12 | -0.12632 | 0.00627  |
| 9.85E-08 | 0.49018  | 1.34E-29 | -0.12184 | 0.00839  |
| 5.44E-28 | 0.53836  | 1.89E-36 | -0.06056 | 0.19143  |
| 8.62E-06 | 0.572271 | 5.60E-42 | -0.27449 | 1.62E-09 |
| 1.33E-06 | 0.544513 | 2.09E-37 | -0.2512  | 3.75E-08 |
| 1.97E-12 | 0.512568 | 1.20E-32 | -0.17459 | 0.00015  |
| 0.00012  | 0.373019 | 7.28E-17 | -0.1765  | 0.00013  |
| 4.17E-15 | 0.542882 | 3.76E-37 | -0.1339  | 0.00374  |
| 1.50E-05 | 0.456804 | 1.87E-25 | -0.24203 | 1.19E-07 |
| 1.85E-05 | 0.459948 | 7.97E-26 | -0.17112 | 0.0002   |
| 2.99E-08 | 0.490772 | 1.12E-29 | -0.086   | 0.06332  |
| 2.32E-08 | 0.591069 | 2.49E-45 | -0.07715 | 0.09586  |
| 0.00657  | 0.311872 | 5.42E-12 | 0.026388 | 0.56947  |
| 1.15E-07 | 0.410578 | 2.04E-20 | -0.13003 | 0.00489  |
| 0.00199  | 0.348712 | 8.46E-15 | 0.083468 | 0.07153  |
| 6.53E-10 | 0.517008 | 2.80E-33 | -0.1567  | 0.00068  |
| 0.00033  | 0.400475 | 2.04E-19 | -0.10141 | 0.02843  |
| 5.01E-06 | 0.42496  | 6.67E-22 | -0.24743 | 6.06E-08 |
| 3.54E-07 | 0.226821 | 7.30E-07 | 0.117051 | 0.01136  |
| 0.10572  | 0.168548 | 0.00025  | 0.024424 | 0.59856  |
| 8.94E-09 | 0.572563 | 4.98E-42 | -0.11749 | 0.01105  |
| 0.02276  | 0.20518  | 7.83E-06 | 0.111812 | 0.01563  |
| 1.24E-08 | 0.386972 | 3.94E-18 | -0.07914 | 0.08758  |
| 4.82E-05 | 0.524901 | 2.00E-34 | -0.16754 | 0.00028  |
| 3.60E-05 | 0.436069 | 4.24E-23 | -0.23169 | 4.14E-07 |
| 3.08E-06 | 0.477003 | 6.59E-28 | -0.13919 | 0.00257  |
| 1.34E-08 | 0.354835 | 2.65E-15 | -0.13793 | 0.00282  |
| 9.62E-08 | 0.390317 | 1.92E-18 | -0.19456 | 2.30E-05 |
| 1.92E-06 | 0.517507 | 2.38E-33 | -0.17821 | 0.00011  |
| 0.06878  | 0.15229  | 0.00096  | -0.00062 | 0.98936  |
| 6.32E-09 | 0.486716 | 3.79E-29 | -0.19512 | 2.17E-05 |
| 5.71E-05 | 0.339665 | 4.49E-14 | 0.011507 | 0.80413  |
| 1.49E-15 | 0.470865 | 3.82E-27 | -0.16335 | 0.00039  |
| 0.0233   | 0.282283 | 5.28E-10 | -0.08983 | 0.05237  |

|          |          |          |          |          |
|----------|----------|----------|----------|----------|
| 3.43E-08 | 0.29636  | 6.38E-11 | -0.05334 | 0.25001  |
| 0.12278  | 0.319572 | 1.51E-12 | -0.1725  | 0.00018  |
| 0.01331  | 0.103489 | 0.02532  | -0.35246 | 4.17E-15 |
| 0.01321  | 0.167963 | 0.00027  | -0.26116 | 1.01E-08 |
| 2.85E-06 | 0.294629 | 8.32E-11 | 0.001684 | 0.97105  |
| 2.18E-07 | 0.446322 | 3.04E-24 | -0.20213 | 1.07E-05 |
| 0.60423  | 0.203021 | 9.79E-06 | 0.070524 | 0.12805  |
| 7.26E-10 | 0.476695 | 7.20E-28 | 0.026143 | 0.57307  |
| 5.59E-07 | 0.45027  | 1.08E-24 | -0.20063 | 1.25E-05 |
| 6.57E-13 | 0.524455 | 2.33E-34 | -0.29658 | 6.17E-11 |
| 0.30704  | 0.202482 | 1.04E-05 | -0.02879 | 0.53479  |
| 0.00124  | 0.266385 | 5.00E-09 | -0.08436 | 0.06855  |
| 7.65E-07 | 0.367833 | 2.08E-16 | -0.11629 | 0.01191  |
| 0.00989  | 0.22021  | 1.55E-06 | -0.04732 | 0.30752  |
| 2.46E-06 | 0.323913 | 7.21E-13 | -0.07368 | 0.11179  |
| 0.0012   | 0.28953  | 1.80E-10 | -0.08878 | 0.0552   |
| 0.00036  | 0.294834 | 8.07E-11 | -0.08156 | 0.07827  |
| 9.27E-16 | 0.523066 | 3.72E-34 | 0.17441  | 0.00015  |
| 1.57E-08 | 0.449755 | 1.24E-24 | -0.12439 | 0.00712  |
| 1.04E-21 | 0.507345 | 6.47E-32 | -0.17427 | 0.00015  |
| 2.94E-07 | 0.429612 | 2.13E-22 | -0.11555 | 0.01246  |
| 1.92E-05 | 0.483287 | 1.05E-28 | -0.09881 | 0.03277  |
| 3.99E-10 | 0.517579 | 2.32E-33 | 0.013652 | 0.76858  |
| 0.00033  | 0.395708 | 5.89E-19 | -0.10629 | 0.0216   |
| 0.00015  | 0.371896 | 9.15E-17 | -0.13602 | 0.00323  |
| 2.04E-11 | 0.398215 | 3.38E-19 | -0.11606 | 0.01208  |
| 8.61E-12 | 0.367724 | 2.12E-16 | -0.13391 | 0.00374  |
| 1.44E-06 | 0.439413 | 1.81E-23 | -0.11205 | 0.01541  |
| 0.08766  | 0.184566 | 6.01E-05 | -0.30475 | 1.71E-11 |
| 1.63E-10 | 0.524422 | 2.35E-34 | 0.015253 | 0.74234  |
| 1.23E-06 | 0.439462 | 1.79E-23 | -0.13138 | 0.00446  |
| 2.01E-05 | 0.491791 | 8.23E-30 | -0.21942 | 1.69E-06 |
| 3.09E-05 | 0.412343 | 1.35E-20 | -0.14086 | 0.00228  |
| 0.00018  | 0.428404 | 2.87E-22 | -0.12944 | 0.00508  |
| 1.27E-05 | 0.363837 | 4.60E-16 | -0.09825 | 0.03378  |
| 7.14E-06 | 0.51338  | 9.22E-33 | -0.05009 | 0.28004  |
| 3.45E-08 | 0.5426   | 4.16E-37 | 0.005877 | 0.8992   |
| 6.87E-19 | 0.615781 | 4.37E-50 | -0.02753 | 0.55295  |
| 3.62E-08 | 0.411532 | 1.63E-20 | -0.11699 | 0.0114   |
| 1.13E-14 | 0.455848 | 2.43E-25 | -0.15857 | 0.00058  |
| 1.06E-07 | 0.407592 | 4.06E-20 | -0.13073 | 0.00466  |
| 6.25E-09 | 0.425728 | 5.54E-22 | -0.23595 | 2.49E-07 |
| 0.08286  | 0.210853 | 4.30E-06 | -0.05865 | 0.20584  |
| 2.75E-07 | 0.433888 | 7.35E-23 | -0.18733 | 4.63E-05 |
| 1.67E-09 | 0.259964 | 1.19E-08 | 0.011847 | 0.79847  |



|          |          |          |          |          |
|----------|----------|----------|----------|----------|
| 4.49E-13 | 0.594992 | 4.66E-46 | -0.15068 | 0.00109  |
| 1.29E-05 | 0.440812 | 1.27E-23 | -0.14248 | 0.00202  |
| 6.80E-13 | 0.542334 | 4.58E-37 | -0.07722 | 0.09557  |
| 4.06E-10 | 0.456213 | 2.20E-25 | -0.12263 | 0.00798  |
| 3.08E-12 | 0.5174   | 2.46E-33 | -0.11383 | 0.01384  |
| 1.59E-08 | 0.513067 | 1.02E-32 | -0.2509  | 3.90E-08 |
| 1.13E-11 | 0.577142 | 7.94E-43 | -0.16503 | 0.00034  |
| 4.44E-05 | 0.363222 | 5.20E-16 | -0.14273 | 0.00199  |
| 1.65E-07 | 0.370067 | 1.33E-16 | -0.12003 | 0.00942  |
| 4.55E-13 | 0.508394 | 4.62E-32 | -0.17122 | 0.0002   |
| 0.88029  | 0.172785 | 0.00018  | -0.17984 | 9.31E-05 |
| 4.80E-08 | 0.523796 | 2.91E-34 | -0.20333 | 9.48E-06 |
| 1.66E-08 | 0.361572 | 7.19E-16 | -0.15333 | 0.00089  |
| 0.47458  | 0.130921 | 0.0046   | -0.1163  | 0.0119   |
| 0.06928  | 0.112015 | 0.01544  | 0.05597  | 0.22734  |
| 3.86E-12 | 0.492829 | 6.00E-30 | -0.13114 | 0.00453  |
| 0.00542  | 0.390059 | 2.03E-18 | -0.20114 | 1.19E-05 |
| 6.66E-07 | 0.35248  | 4.16E-15 | -0.08336 | 0.0719   |
| 7.03E-05 | 0.323843 | 7.30E-13 | -0.119   | 0.01006  |
| 1.70E-07 | 0.33749  | 6.65E-14 | -0.09339 | 0.04369  |
| 0.11824  | 0.053009 | 0.25293  | 0.024325 | 0.60004  |
| 5.77E-13 | 0.473653 | 1.73E-27 | 0.009934 | 0.83046  |
| 0.00852  | 0.25707  | 1.75E-08 | -0.10429 | 0.02421  |
| 0.02064  | 0.139469 | 0.00252  | 0.267536 | 4.27E-09 |
| 4.99E-09 | 0.376311 | 3.70E-17 | -0.11591 | 0.01219  |
| 7.78E-08 | 0.5104   | 2.42E-32 | -0.13804 | 0.0028   |
| 2.99E-08 | 0.41723  | 4.28E-21 | -0.14881 | 0.00126  |
| 1.18E-06 | 0.461278 | 5.54E-26 | -0.11833 | 0.01049  |
| 1.93E-05 | 0.394836 | 7.14E-19 | -0.07262 | 0.11705  |
| 8.91E-17 | 0.380558 | 1.53E-17 | 0.417068 | 4.45E-21 |
| 0.23687  | 0.246675 | 6.66E-08 | 0.0886   | 0.05571  |
| 0.00014  | 0.347211 | 1.12E-14 | 0.009167 | 0.84337  |
| 0.06636  | 0.172726 | 0.00018  | 0.147153 | 0.00143  |
| 8.47E-11 | 0.500064 | 6.45E-31 | -0.33944 | 4.68E-14 |
| 5.34E-06 | 0.310326 | 6.97E-12 | -0.0998  | 0.03107  |
| 4.32E-11 | 0.508214 | 4.90E-32 | -0.04291 | 0.3549   |
| 4.12E-13 | 0.380035 | 1.71E-17 | 0.216659 | 2.29E-06 |
| 1.63E-05 | 0.42501  | 6.59E-22 | -0.17856 | 0.0001   |
| 1.27E-05 | 0.366342 | 2.80E-16 | -0.03578 | 0.44042  |
| 6.56E-06 | 0.496274 | 2.09E-30 | -0.11298 | 0.01457  |
| 5.07E-08 | 0.546155 | 1.15E-37 | -0.12126 | 0.00871  |
| 0.0005   | 0.374298 | 5.60E-17 | -0.1917  | 3.04E-05 |
| 0.00254  | 0.262516 | 8.46E-09 | 0.021688 | 0.64016  |
| 1.18E-10 | 0.461825 | 4.77E-26 | -0.13084 | 0.00462  |
| 0.08838  | 0.234783 | 2.87E-07 | 0.001951 | 0.96645  |

|          |          |          |          |          |
|----------|----------|----------|----------|----------|
| 0.00061  | 0.204724 | 8.21E-06 | 0.167723 | 0.00027  |
| 5.90E-11 | 0.420718 | 1.86E-21 | -0.17396 | 0.00016  |
| 0.00018  | 0.345984 | 1.41E-14 | -0.08837 | 0.05636  |
| 6.69E-11 | 0.387413 | 3.58E-18 | -0.06462 | 0.16329  |
| 0.58552  | 0.257312 | 1.69E-08 | -0.37924 | 2.02E-17 |
| 6.22E-06 | 0.464662 | 2.18E-26 | -0.11413 | 0.0136   |
| 4.49E-11 | 0.388521 | 2.82E-18 | -0.05546 | 0.23165  |
| 8.64E-07 | 0.396929 | 4.50E-19 | -0.09768 | 0.03483  |
| 7.03E-06 | 0.371465 | 9.99E-17 | -0.12247 | 0.00806  |
| 1.25E-09 | 0.516953 | 2.85E-33 | -0.15762 | 0.00063  |
| 7.74E-07 | 0.508603 | 4.32E-32 | -0.07692 | 0.09686  |
| 1.46E-08 | 0.52289  | 3.95E-34 | -0.1512  | 0.00105  |
| 1.50E-09 | 0.426228 | 4.90E-22 | -0.12171 | 0.00847  |
| 0.00073  | 0.219096 | 1.75E-06 | 0.285962 | 3.07E-10 |
| 0.01196  | 0.296769 | 5.99E-11 | -0.02574 | 0.57903  |
| 1.49E-13 | 0.576102 | 1.21E-42 | 0.012088 | 0.79445  |
| 4.35E-06 | 0.549843 | 2.98E-38 | -0.15868 | 0.00058  |
| 1.22E-08 | 0.442896 | 7.42E-24 | -0.15588 | 0.00072  |
| 6.72E-09 | 0.275223 | 1.46E-09 | 0.261459 | 9.75E-09 |
| 0.00034  | 0.274621 | 1.59E-09 | -0.11057 | 0.01683  |
| 0.01407  | 0.262589 | 8.37E-09 | 0.028242 | 0.54266  |
| 0.00368  | 0.457693 | 1.47E-25 | -0.16823 | 0.00026  |
| 1.74E-12 | 0.601983 | 2.22E-47 | -0.20118 | 1.18E-05 |
| 4.18E-05 | 0.308921 | 8.76E-12 | -0.00731 | 0.87486  |
| 1.32E-18 | 0.426748 | 4.31E-22 | -0.08553 | 0.06478  |
| 7.15E-08 | 0.564897 | 1.01E-40 | -0.2096  | 4.92E-06 |
| 0.20292  | 0.370302 | 1.26E-16 | -0.0592  | 0.20158  |
| 2.30E-09 | 0.434478 | 6.34E-23 | -0.13428 | 0.00365  |
| 0.00019  | 0.221256 | 1.38E-06 | -0.08461 | 0.06772  |
| 1.51E-12 | 0.345578 | 1.52E-14 | 0.294551 | 8.42E-11 |
| 1.06E-09 | 0.532285 | 1.59E-35 | -0.17782 | 0.00011  |
| 1.07E-06 | 0.463544 | 2.97E-26 | -0.17491 | 0.00015  |
| 4.48E-11 | 0.525591 | 1.58E-34 | -0.12333 | 0.00763  |
| 2.69E-08 | 0.451591 | 7.59E-25 | -0.16242 | 0.00043  |
| 3.24E-11 | 0.459584 | 8.81E-26 | -0.13299 | 0.00399  |
| 3.98E-12 | 0.471281 | 3.39E-27 | -0.11048 | 0.01692  |
| 0.00371  | 0.373292 | 6.89E-17 | 0.087685 | 0.0583   |
| 2.23E-14 | 0.568848 | 2.16E-41 | -0.15978 | 0.00053  |
| 5.14E-06 | 0.401574 | 1.59E-19 | 0.066791 | 0.14955  |
| 6.09E-21 | 0.537658 | 2.42E-36 | -0.06021 | 0.19398  |
| 5.41E-07 | 0.450867 | 9.20E-25 | -0.13055 | 0.00472  |
| 4.76E-08 | 0.259048 | 1.34E-08 | 0.387458 | 3.55E-18 |
| 1.32E-07 | 0.346533 | 1.27E-14 | -0.09054 | 0.05054  |
| 8.63E-08 | 0.439057 | 1.99E-23 | 0.135896 | 0.00326  |
| 1.29E-06 | 0.449244 | 1.41E-24 | -0.08128 | 0.07931  |

|          |          |          |          |          |
|----------|----------|----------|----------|----------|
| 0.00107  | 0.192229 | 2.89E-05 | 0.093213 | 0.04408  |
| 3.68E-06 | 0.379482 | 1.92E-17 | -0.10626 | 0.02163  |
| 6.05E-07 | 0.331797 | 1.83E-13 | -0.17799 | 0.00011  |
| 1.29E-13 | 0.516179 | 3.68E-33 | -0.17152 | 0.0002   |
| 1.08E-08 | 0.503253 | 2.37E-31 | -0.01736 | 0.70834  |
| 1.20E-08 | 0.406756 | 4.92E-20 | -0.09927 | 0.03197  |
| 2.88E-06 | 0.401389 | 1.66E-19 | -0.07861 | 0.08972  |
| 0.00088  | 0.327221 | 4.08E-13 | -0.06472 | 0.1626   |
| 7.94E-09 | 0.402753 | 1.22E-19 | -0.10947 | 0.01795  |
| 0.04189  | 0.158614 | 0.00058  | 0.114221 | 0.01352  |
| 5.29E-12 | 0.42207  | 1.34E-21 | -0.06895 | 0.13683  |
| 0.00615  | 0.367625 | 2.17E-16 | -0.03329 | 0.473    |
| 3.31E-14 | 0.467169 | 1.08E-26 | -0.14956 | 0.00119  |
| 8.04E-10 | 0.367575 | 2.19E-16 | -0.11126 | 0.01616  |
| 4.51E-05 | 0.216566 | 2.32E-06 | 0.312562 | 4.84E-12 |
| 9.59E-07 | 0.30672  | 1.25E-11 | -0.06694 | 0.14865  |
| 3.30E-09 | 0.535484 | 5.21E-36 | -0.15661 | 0.00068  |
| 0.04363  | 0.195899 | 2.01E-05 | 0.036167 | 0.43554  |
| 6.34E-12 | 0.597398 | 1.65E-46 | -0.1068  | 0.02098  |
| 1.57E-07 | 0.408763 | 3.10E-20 | -0.0327  | 0.4808   |
| 0.03479  | 0.402997 | 1.16E-19 | -0.15437 | 0.00082  |
| 7.51E-07 | 0.306329 | 1.33E-11 | 0.165539 | 0.00033  |
| 8.51E-51 | 0.590476 | 3.20E-45 | 0.10991  | 0.0175   |
| 0.0002   | 0.163229 | 0.0004   | 0.155164 | 0.00077  |
| 6.36E-08 | 0.365885 | 3.07E-16 | -0.02147 | 0.64359  |
| 5.50E-06 | 0.506633 | 8.12E-32 | -0.19717 | 1.77E-05 |
| 3.41E-05 | 0.35935  | 1.11E-15 | -0.14049 | 0.00234  |
| 0.0005   | 0.017653 | 0.70359  | 0.294474 | 8.52E-11 |
| 0.89443  | -0.10015 | 0.03047  | 0.088354 | 0.05639  |
| 0.7291   | -0.09791 | 0.03441  | 0.192967 | 2.69E-05 |
| 0.05775  | -0.05019 | 0.27911  | 0.203543 | 9.28E-06 |
| 0.94257  | -0.03129 | 0.49998  | 0.048514 | 0.29547  |
| 0.00546  | -0.04295 | 0.35436  | 0.243488 | 9.92E-08 |
| 0.91723  | -0.11456 | 0.01324  | 0.24419  | 9.09E-08 |
| 0.12949  | -0.19504 | 2.19E-05 | 0.237009 | 2.19E-07 |
| 0.19104  | -0.06322 | 0.17258  | 0.211596 | 3.97E-06 |
| 0.43931  | -0.1482  | 0.00132  | 0.068716 | 0.13814  |
| 0.77731  | -0.14991 | 0.00116  | 0.242811 | 1.08E-07 |
| 0.00019  | 0.043918 | 0.34364  | 0.083679 | 0.07082  |
| 0.64206  | -0.05317 | 0.25146  | 0.107404 | 0.02026  |
| 0.08774  | -0.05678 | 0.22072  | 0.037669 | 0.41671  |
| 0.5924   | -0.09611 | 0.03787  | 0.140089 | 0.00241  |
| 0.56259  | -0.10448 | 0.02395  | 0.182698 | 7.16E-05 |
| 0.08993  | -0.03944 | 0.39512  | 0.241163 | 1.32E-07 |
| 0.04771  | -0.09578 | 0.03854  | 0.192773 | 2.74E-05 |

|          |          |          |          |          |
|----------|----------|----------|----------|----------|
| 0.24533  | -0.04437 | 0.33871  | 0.193034 | 2.67E-05 |
| 0.0516   | -0.02774 | 0.54991  | 0.054963 | 0.23583  |
| 0.01328  | -0.01418 | 0.7599   | 0.077508 | 0.09433  |
| 0.06067  | -0.00814 | 0.86076  | 0.060819 | 0.18952  |
| 0.53038  | 0.008699 | 0.85128  | -0.00585 | 0.89959  |
| 0.28009  | -0.04397 | 0.34303  | 0.027789 | 0.54916  |
| 1.50E-05 | -0.01144 | 0.8052   | 0.305635 | 1.49E-11 |
| 0.98348  | -0.08811 | 0.05708  | 0.080654 | 0.08166  |
| 0.50868  | -0.08701 | 0.06027  | 0.087554 | 0.05868  |
| 0.87279  | -0.10557 | 0.0225   | 0.178959 | 0.0001   |
| 0.26712  | -0.03885 | 0.40226  | 0.131441 | 0.00444  |
| 0.01162  | -0.03536 | 0.44581  | 0.130019 | 0.00489  |
| 0.97885  | -0.06818 | 0.14123  | 0.113841 | 0.01383  |
| 0.05154  | -0.02961 | 0.52328  | 0.136065 | 0.00322  |
| 0.47379  | -0.08387 | 0.07018  | 0.154881 | 0.00078  |
| 0.00022  | 0.083577 | 0.07116  | 0.162701 | 0.00042  |
| 0.01778  | -0.01563 | 0.73626  | 0.104389 | 0.02407  |
| 0.10884  | -0.01168 | 0.8013   | 0.102136 | 0.02731  |
| 0.0579   | -0.02254 | 0.62709  | 0.120763 | 0.00899  |
| 0.90487  | -0.09167 | 0.04771  | 0.124874 | 0.00689  |
| 0.11273  | -0.02199 | 0.63553  | 0.102555 | 0.02668  |
| 0.00104  | -0.01591 | 0.7316   | 0.102798 | 0.02632  |
| 0.28775  | -0.06411 | 0.16662  | 0.076436 | 0.09899  |
| 0.13763  | -0.11318 | 0.0144   | 0.18576  | 5.37E-05 |
| 0.51592  | -0.14472 | 0.00171  | 0.286983 | 2.64E-10 |
| 0.41215  | -0.09858 | 0.03318  | 0.210259 | 4.59E-06 |
| 0.0049   | -0.06508 | 0.16028  | 0.221561 | 1.33E-06 |
| 0.83111  | -0.0466  | 0.31494  | 0.034044 | 0.46299  |
| 0.14215  | -0.03302 | 0.4765   | 0.071105 | 0.12493  |
| 0.74574  | -0.09093 | 0.04954  | 0.111357 | 0.01606  |
| 0.13859  | -0.0476  | 0.30465  | 0.096051 | 0.03799  |
| 0.73779  | -0.11757 | 0.011    | 0.07184  | 0.12106  |
| 0.34437  | -0.10139 | 0.02847  | 0.096637 | 0.03683  |
| 0.60209  | -0.03456 | 0.45623  | 0.186155 | 5.18E-05 |
| 3.12E-05 | -0.0021  | 0.96394  | 0.191    | 3.26E-05 |
| 0.43604  | -0.09527 | 0.03959  | 0.28678  | 2.72E-10 |
| 0.17422  | -0.0119  | 0.7976   | 0.109635 | 0.01779  |
| 0.07972  | -0.0705  | 0.12819  | 0.124532 | 0.00705  |
| 0.00689  | 0.11621  | 0.01197  | 0.163736 | 0.00038  |
| 0.18614  | 0.168855 | 0.00025  | -0.11104 | 0.01636  |
| 1.03E-24 | 0.386135 | 4.71E-18 | -0.00225 | 0.96126  |
| 0.02026  | 0.037253 | 0.42188  | 0.049858 | 0.28228  |
| 5.76E-22 | 0.478063 | 4.84E-28 | 0.022823 | 0.62275  |
| 7.91E-05 | 0.167386 | 0.00028  | -0.02392 | 0.60619  |
| 1.62E-15 | 0.432517 | 1.04E-22 | 0.046317 | 0.31791  |

|          |          |          |          |          |
|----------|----------|----------|----------|----------|
| 1.05E-14 | 0.550717 | 2.16E-38 | -0.12672 | 0.0061   |
| 2.39E-19 | 0.613479 | 1.26E-49 | -0.04788 | 0.3018   |
| 2.48E-05 | 0.194086 | 2.41E-05 | -0.08372 | 0.07068  |
| 1.69E-11 | 0.415256 | 6.82E-21 | 0.024169 | 0.60239  |
| 1.27E-16 | 0.555165 | 4.13E-39 | -0.09807 | 0.03412  |
| 7.41E-17 | 0.364085 | 4.38E-16 | 0.162938 | 0.00041  |
| 8.26E-20 | 0.513072 | 1.02E-32 | -0.19974 | 1.37E-05 |
| 2.88E-15 | 0.419265 | 2.64E-21 | -0.12164 | 0.0085   |
| 4.28E-18 | 0.478099 | 4.79E-28 | -0.04312 | 0.35252  |
| 0.00127  | 0.115377 | 0.0126   | -0.04893 | 0.2913   |
| 2.02E-15 | 0.476696 | 7.20E-28 | -0.08353 | 0.07133  |
| 7.50E-28 | 0.50117  | 4.56E-31 | 0.119509 | 0.00974  |
| 2.88E-17 | 0.32226  | 9.56E-13 | 0.032506 | 0.48345  |
| 1.80E-18 | 0.308816 | 8.91E-12 | 0.279682 | 7.70E-10 |
| 1.85E-14 | 0.47304  | 2.06E-27 | -0.15782 | 0.00062  |
| 3.54E-16 | 0.435994 | 4.33E-23 | -0.07675 | 0.09761  |
| 1.45E-07 | 0.19136  | 3.14E-05 | 0.085843 | 0.06381  |
| 0.10233  | 0.165731 | 0.00032  | -0.1667  | 0.0003   |
| 2.68E-40 | 0.504662 | 1.52E-31 | 0.028473 | 0.53935  |
| 5.58E-06 | 0.275313 | 1.44E-09 | -0.19433 | 2.35E-05 |
| 5.58E-06 | 0.193724 | 2.50E-05 | -0.07124 | 0.12419  |
| 1.11E-09 | 0.41067  | 1.99E-20 | -0.12278 | 0.0079   |
| 8.90E-23 | 0.397678 | 3.81E-19 | 0.075846 | 0.10163  |
| 0.03767  | 0.071288 | 0.12396  | 0.143033 | 0.00194  |
| 3.77E-10 | 0.45575  | 2.49E-25 | -0.20151 | 1.14E-05 |
| 0.00177  | 0.298697 | 4.44E-11 | -0.10133 | 0.02856  |
| 4.93E-11 | 0.244968 | 8.25E-08 | 0.047924 | 0.30138  |
| 0.00027  | 0.234819 | 2.85E-07 | 0.000762 | 0.9869   |
| 5.01E-05 | 0.234748 | 2.88E-07 | -0.12047 | 0.00916  |
| 6.17E-33 | 0.525709 | 1.52E-34 | -0.02247 | 0.62811  |
| 4.50E-10 | 0.507996 | 5.25E-32 | -0.12439 | 0.00712  |
| 1.87E-15 | 0.534436 | 7.52E-36 | -0.19809 | 1.62E-05 |
| 1.50E-06 | 0.243699 | 9.67E-08 | -0.15213 | 0.00097  |
| 1.85E-18 | 0.317322 | 2.20E-12 | 0.033702 | 0.46749  |
| 5.98E-14 | 0.370445 | 1.23E-16 | -0.08457 | 0.06787  |
| 1.67E-21 | 0.493727 | 4.56E-30 | -0.08381 | 0.07036  |
| 0.03395  | 0.257176 | 1.72E-08 | -0.14922 | 0.00122  |
| 3.12E-07 | 0.289323 | 1.86E-10 | -0.0011  | 0.98106  |
| 0.00026  | 0.097672 | 0.03485  | 0.121403 | 0.00863  |
| 2.99E-08 | 0.30781  | 1.05E-11 | -0.05743 | 0.21542  |
| 0.00012  | 0.191893 | 2.99E-05 | -0.05465 | 0.23851  |
| 1.80E-11 | 0.286111 | 3.01E-10 | -0.05564 | 0.23009  |
| 4.59E-05 | 0.168722 | 0.00025  | -0.08354 | 0.07127  |
| 2.86E-19 | 0.330875 | 2.15E-13 | -0.08139 | 0.07891  |
| 2.96E-11 | 0.423234 | 1.01E-21 | -0.03122 | 0.50091  |

|          |          |          |          |          |
|----------|----------|----------|----------|----------|
| 6.24E-07 | 0.346774 | 1.22E-14 | 0.015293 | 0.74169  |
| 0.01463  | 0.108074 | 0.01949  | -0.03502 | 0.4502   |
| 1.68E-08 | 0.403923 | 9.38E-20 | -0.03105 | 0.50327  |
| 6.20E-09 | 0.373303 | 6.87E-17 | -0.16405 | 0.00037  |
| 6.14E-08 | 0.2471   | 6.31E-08 | -0.19272 | 2.75E-05 |
| 1.37E-13 | 0.321591 | 1.07E-12 | 0.177055 | 0.00012  |
| 7.27E-17 | 0.570595 | 1.09E-41 | -0.29538 | 7.42E-11 |
| 1.50E-54 | 0.641754 | 1.46E-55 | -0.03106 | 0.50313  |
| 5.55E-55 | 0.631388 | 2.59E-53 | -0.02156 | 0.64207  |
| 6.47E-27 | 0.452091 | 6.65E-25 | 0.011443 | 0.8052   |
| 1.58E-16 | 0.437071 | 3.29E-23 | -0.13115 | 0.00453  |
| 1.77E-06 | 0.256717 | 1.83E-08 | -0.2295  | 5.35E-07 |
| 5.16E-06 | 0.174664 | 0.00015  | -0.03437 | 0.45867  |
| 8.70E-11 | 0.269737 | 3.15E-09 | -0.18004 | 9.14E-05 |
| 9.22E-10 | 0.369086 | 1.62E-16 | 0.194378 | 2.34E-05 |
| 0.27349  | 0.087864 | 0.05778  | -0.0548  | 0.23719  |
| 9.50E-11 | 0.245872 | 7.37E-08 | -0.0078  | 0.86649  |
| 2.46E-14 | 0.447937 | 1.99E-24 | -0.11279 | 0.01474  |
| 3.10E-22 | 0.369755 | 1.41E-16 | 0.028967 | 0.53234  |
| 0.00369  | 0.368975 | 1.65E-16 | -0.29615 | 6.59E-11 |
| 2.76E-06 | 0.253463 | 2.80E-08 | -0.05294 | 0.25358  |
| 2.54E-07 | 0.247647 | 5.89E-08 | -0.0179  | 0.69969  |
| 0.25468  | 0.054565 | 0.23925  | -0.05696 | 0.21924  |
| 2.17E-12 | 0.35326  | 3.58E-15 | -0.09951 | 0.03155  |
| 7.62E-16 | 0.467912 | 8.78E-27 | -0.14949 | 0.0012   |
| 5.87E-07 | 0.088979 | 0.05467  | 0.188374 | 4.19E-05 |
| 0.00058  | 0.101594 | 0.02814  | 0.030688 | 0.50826  |
| 1.55E-13 | 0.420237 | 2.09E-21 | -0.11832 | 0.0105   |
| 5.63E-19 | 0.425748 | 5.51E-22 | -0.02588 | 0.57688  |
| 1.98E-23 | 0.507582 | 5.99E-32 | 0.129683 | 0.005    |
| 1.85E-05 | 0.261268 | 1.00E-08 | -0.0894  | 0.05353  |
| 0.00066  | 0.377578 | 2.85E-17 | -0.14991 | 0.00116  |
| 2.40E-05 | 0.178347 | 0.00011  | 0.220022 | 1.58E-06 |
| 2.27E-09 | 0.283807 | 4.22E-10 | 0.103062 | 0.02594  |
| 6.57E-06 | 0.15854  | 0.00058  | -0.05691 | 0.2196   |
| 2.25E-30 | 0.408931 | 2.98E-20 | -0.00898 | 0.84652  |
| 6.91E-17 | 0.422638 | 1.17E-21 | -0.12236 | 0.00812  |
| 5.45E-10 | 0.391491 | 1.48E-18 | 0.000218 | 0.99625  |
| 1.29E-08 | 0.323457 | 7.79E-13 | -0.08157 | 0.07824  |
| 4.69E-74 | 0.638229 | 8.70E-55 | 0.107853 | 0.01974  |
| 5.25E-12 | 0.532533 | 1.46E-35 | -0.12845 | 0.00544  |
| 2.20E-35 | 0.668975 | 6.74E-62 | -0.13505 | 0.00345  |
| 3.96E-13 | 0.206232 | 7.02E-06 | 0.036289 | 0.434    |
| 1.15E-07 | 0.128115 | 0.00556  | 0.119652 | 0.00965  |
| 8.26E-11 | 0.318043 | 1.95E-12 | -0.07161 | 0.12229  |

|          |          |          |          |          |
|----------|----------|----------|----------|----------|
| 7.94E-07 | 0.22568  | 8.32E-07 | -0.0534  | 0.24947  |
| 1.37E-19 | 0.485453 | 5.53E-29 | -0.07958 | 0.08582  |
| 0.11356  | 0.137915 | 0.00282  | -0.29355 | 9.82E-11 |
| 7.96E-17 | 0.45842  | 1.21E-25 | 0.055012 | 0.23542  |
| 0.00259  | 0.076761 | 0.09756  | 0.184162 | 6.24E-05 |
| 0.6046   | 0.086428 | 0.06201  | -0.02903 | 0.53143  |
| 0.0009   | 0.270576 | 2.80E-09 | -0.06466 | 0.16301  |
| 1.08E-23 | 0.510741 | 2.17E-32 | 0.023446 | 0.61329  |
| 7.97E-11 | 0.455595 | 2.60E-25 | -0.14362 | 0.00186  |
| 1.30E-14 | 0.51827  | 1.85E-33 | -0.12327 | 0.00766  |
| 1.60E-08 | 0.269785 | 3.13E-09 | 0.01405  | 0.76203  |
| 5.16E-20 | 0.419068 | 2.76E-21 | 0.075576 | 0.10286  |
| 3.57E-19 | 0.650768 | 1.38E-57 | -0.09091 | 0.04959  |
| 1.63E-05 | 0.244405 | 8.85E-08 | -0.14283 | 0.00197  |
| 0.00383  | 0.092061 | 0.04677  | -0.10839 | 0.01914  |
| 5.13E-06 | 0.194859 | 2.23E-05 | 0.062571 | 0.17706  |
| 1.74E-09 | 0.408763 | 3.10E-20 | -0.14063 | 0.00232  |
| 0.00043  | 0.416848 | 4.68E-21 | -0.24641 | 6.89E-08 |
| 2.38E-06 | 0.278816 | 8.73E-10 | -0.19703 | 1.80E-05 |
| 7.86E-08 | 0.469845 | 5.09E-27 | -0.12049 | 0.00915  |
| 5.43E-08 | 0.378597 | 2.31E-17 | -0.06044 | 0.19233  |
| 3.56E-08 | 0.226903 | 7.23E-07 | 0.065161 | 0.15977  |
| 6.94E-10 | 0.422579 | 1.19E-21 | -0.20514 | 7.87E-06 |
| 5.25E-09 | 0.036538 | 0.43085  | 0.069055 | 0.13621  |
| 1.09E-05 | 0.305248 | 1.58E-11 | -0.09679 | 0.03653  |
| 1.72E-05 | 0.22833  | 6.13E-07 | 0.153828 | 0.00085  |
| 0.50758  | 0.188803 | 4.02E-05 | -0.17408 | 0.00016  |
| 1.03E-06 | 0.300372 | 3.42E-11 | -0.05572 | 0.22939  |
| 3.53E-07 | 0.216396 | 2.36E-06 | -0.07159 | 0.12235  |
| 7.37E-06 | 0.180506 | 8.76E-05 | -0.0342  | 0.46094  |
| 1.05E-06 | 0.096902 | 0.03631  | 0.178715 | 0.0001   |
| 1.94E-05 | 0.286573 | 2.81E-10 | -0.08814 | 0.057    |
| 0.01432  | 0.241556 | 1.26E-07 | -0.28864 | 2.06E-10 |
| 0.00039  | 0.127191 | 0.00592  | -0.26849 | 3.74E-09 |
| 3.92E-08 | 0.36373  | 4.70E-16 | -0.1658  | 0.00032  |
| 1.24E-15 | 0.51499  | 5.44E-33 | -0.18952 | 3.76E-05 |
| 0.06209  | 0.146829 | 0.00146  | 0.020408 | 0.66003  |
| 1.66E-07 | 0.275057 | 1.49E-09 | 0.010042 | 0.82864  |
| 2.26E-10 | 0.357205 | 1.68E-15 | -0.01145 | 0.80505  |
| 1.18E-10 | 0.284731 | 3.69E-10 | -0.27892 | 8.60E-10 |
| 4.34E-18 | 0.390198 | 1.97E-18 | 0.046156 | 0.31959  |
| 7.75E-08 | 0.312106 | 5.21E-12 | -0.22246 | 1.20E-06 |
| 6.74E-13 | 0.182857 | 7.05E-05 | 0.229611 | 5.28E-07 |
| 4.10E-16 | 0.201445 | 1.15E-05 | 0.089762 | 0.05256  |
| 1.10E-12 | 0.213502 | 3.24E-06 | 0.188709 | 4.06E-05 |

|          |          |          |          |          |
|----------|----------|----------|----------|----------|
| 5.42E-08 | 0.272022 | 2.29E-09 | 0.022379 | 0.62954  |
| 0.00031  | 0.14414  | 0.00179  | -0.10013 | 0.03051  |
| 1.00E-26 | 0.499313 | 8.15E-31 | -0.08363 | 0.07097  |
| 5.33E-14 | 0.457849 | 1.41E-25 | -0.09893 | 0.03256  |
| 3.30E-05 | 0.216389 | 2.36E-06 | 0.145834 | 0.00158  |
| 0.12741  | 0.07242  | 0.11808  | -0.03192 | 0.49136  |
| 4.31E-07 | 0.251771 | 3.48E-08 | 0.012009 | 0.79577  |
| 6.03E-14 | 0.395221 | 6.56E-19 | -0.05461 | 0.23888  |
| 1.54E-15 | 0.505388 | 1.21E-31 | -0.11989 | 0.00951  |
| 4.20E-13 | 0.327376 | 3.97E-13 | 0.003039 | 0.94777  |
| 5.21E-19 | 0.328453 | 3.29E-13 | 0.034873 | 0.45216  |
| 1.16E-09 | 0.370847 | 1.13E-16 | -0.27136 | 2.51E-09 |
| 9.37E-15 | 0.51643  | 3.39E-33 | -0.12045 | 0.00918  |
| 0.00019  | 0.197073 | 1.79E-05 | -0.03497 | 0.45084  |
| 1.84E-14 | 0.219255 | 1.72E-06 | 0.201556 | 1.14E-05 |
| 4.46E-09 | 0.358388 | 1.34E-15 | -0.01064 | 0.81858  |
| 1.69E-06 | 0.36456  | 3.99E-16 | -0.2833  | 4.55E-10 |
| 2.42E-17 | 0.356967 | 1.76E-15 | 0.04366  | 0.34649  |
| 1.60E-09 | 0.240822 | 1.38E-07 | 0.305085 | 1.62E-11 |
| 2.19E-19 | 0.423762 | 8.93E-22 | -0.01961 | 0.67258  |
| 9.42E-13 | 0.253085 | 2.94E-08 | -0.00061 | 0.98953  |
| 0.01812  | 0.116976 | 0.01141  | 0.016766 | 0.71783  |
| 2.15E-07 | 0.375951 | 3.99E-17 | -0.14604 | 0.00155  |
| 7.26E-05 | 0.128534 | 0.00541  | -0.09172 | 0.04761  |
| 2.47E-25 | 0.538569 | 1.75E-36 | 0.061807 | 0.18242  |
| 4.58E-15 | 0.333525 | 1.35E-13 | 0.016733 | 0.71836  |
| 0.0199   | 0.131573 | 0.0044   | -0.05664 | 0.22182  |
| 2.15E-14 | 0.239275 | 1.67E-07 | 0.132383 | 0.00416  |
| 1.47E-13 | 0.444346 | 5.10E-24 | 0.231838 | 4.07E-07 |
| 4.40E-10 | 0.391053 | 1.63E-18 | 0.007947 | 0.864    |
| 0.00422  | 0.113975 | 0.01372  | 0.060287 | 0.19343  |
| 1.24E-18 | 0.462337 | 4.14E-26 | -0.10095 | 0.02917  |
| 0.00012  | 0.154866 | 0.00079  | -0.01963 | 0.67217  |
| 1.91E-09 | 0.214807 | 2.81E-06 | 0.275529 | 1.40E-09 |
| 0.0001   | 0.283956 | 4.13E-10 | 0.021158 | 0.64835  |
| 8.33E-05 | 0.255109 | 2.26E-08 | 0.029019 | 0.53161  |
| 2.77E-07 | 0.170377 | 0.00022  | 0.198761 | 1.51E-05 |
| 2.02E-08 | 0.379636 | 1.86E-17 | -0.25743 | 1.67E-08 |
| 2.70E-14 | 0.414896 | 7.43E-21 | -0.18243 | 7.34E-05 |
| 1.89E-09 | 0.26818  | 3.91E-09 | -0.17501 | 0.00014  |
| 2.24E-08 | 0.225625 | 8.38E-07 | 0.014284 | 0.75817  |
| 2.33E-11 | 0.224706 | 9.30E-07 | 0.006505 | 0.8885   |
| 8.19E-06 | 0.31394  | 3.85E-12 | -0.08894 | 0.05478  |
| 7.90E-07 | 0.392118 | 1.30E-18 | -0.1794  | 9.70E-05 |
| 1.49E-13 | 0.347499 | 1.06E-14 | -0.06292 | 0.17468  |



|          |          |          |          |          |
|----------|----------|----------|----------|----------|
| 5.49E-13 | 0.316082 | 2.70E-12 | -0.08345 | 0.07159  |
| 0.00013  | 0.177778 | 0.00011  | 0.020034 | 0.66588  |
| 5.59E-18 | 0.431985 | 1.18E-22 | -0.11888 | 0.01013  |
| 8.64E-10 | 0.412295 | 1.37E-20 | -0.08876 | 0.05526  |
| 7.90E-21 | 0.342263 | 2.79E-14 | 0.139007 | 0.00261  |
| 5.21E-10 | 0.345413 | 1.56E-14 | -0.04299 | 0.35399  |
| 1.04E-12 | 0.359013 | 1.18E-15 | -0.03092 | 0.505    |
| 5.51E-05 | 0.187748 | 4.45E-05 | 0.033078 | 0.47578  |
| 1.72E-13 | 0.475852 | 9.18E-28 | -0.12131 | 0.00869  |
| 0.09371  | 0.11584  | 0.01224  | -0.04181 | 0.3673   |
| 0.00035  | 0.241298 | 1.30E-07 | -0.15891 | 0.00057  |
| 0.00022  | 0.289865 | 1.72E-10 | -0.07839 | 0.09061  |
| 5.68E-08 | 0.375375 | 4.49E-17 | -0.05718 | 0.21745  |
| 1.46E-18 | 0.379062 | 2.09E-17 | 0.02511  | 0.58833  |
| 0.03172  | 0.233218 | 3.45E-07 | -0.27654 | 1.21E-09 |
| 3.27E-11 | 0.120379 | 0.00922  | 0.195501 | 2.09E-05 |
| 7.46E-11 | 0.391577 | 1.46E-18 | -0.19349 | 2.55E-05 |
| 2.66E-17 | 0.444691 | 4.66E-24 | -0.10125 | 0.02869  |
| 1.49E-12 | 0.211338 | 4.09E-06 | 0.130765 | 0.00465  |
| 0.03213  | 0.083759 | 0.07055  | -0.09735 | 0.03546  |
| 4.81E-12 | 0.354792 | 2.68E-15 | -0.00278 | 0.95221  |
| 2.43E-10 | 0.398332 | 3.29E-19 | -0.02884 | 0.5341   |
| 1.75E-13 | 0.179924 | 9.24E-05 | -0.01945 | 0.67501  |
| 1.09E-13 | 0.420665 | 1.88E-21 | -0.02977 | 0.521    |
| 5.34E-05 | 0.11388  | 0.0138   | 0.013191 | 0.77618  |
| 3.08E-21 | 0.32547  | 5.52E-13 | -0.00478 | 0.91792  |
| 5.03E-09 | 0.234484 | 2.97E-07 | -0.14561 | 0.0016   |
| 7.96E-06 | 0.339682 | 4.47E-14 | -0.11368 | 0.01397  |
| 1.40E-15 | 0.408427 | 3.35E-20 | -0.17114 | 0.0002   |
| 2.49E-06 | 0.18604  | 5.23E-05 | -0.13557 | 0.00333  |
| 1.04E-17 | 0.341057 | 3.48E-14 | -0.01924 | 0.67831  |
| 5.43E-09 | 0.253587 | 2.75E-08 | -0.04314 | 0.35228  |
| 1.62E-06 | 0.167004 | 0.00029  | 0.013062 | 0.77831  |
| 1.33E-08 | 0.351811 | 4.72E-15 | -0.05798 | 0.21103  |
| 1.64E-31 | 0.481858 | 1.60E-28 | 0.031807 | 0.49291  |
| 1.38E-05 | 0.240378 | 1.46E-07 | -0.15035 | 0.00112  |
| 3.31E-15 | 0.269764 | 3.14E-09 | -0.00966 | 0.83504  |
| 5.89E-23 | 0.451223 | 8.37E-25 | -0.02579 | 0.57822  |
| 0.1877   | 0.185491 | 5.51E-05 | -0.18635 | 5.08E-05 |
| 2.41E-05 | 0.281063 | 6.31E-10 | -0.17795 | 0.00011  |
| 0.00019  | 0.183983 | 6.35E-05 | 0.01383  | 0.76565  |
| 5.85E-12 | 0.397994 | 3.55E-19 | -0.18329 | 6.77E-05 |
| 1.15E-12 | 0.420088 | 2.16E-21 | -0.02361 | 0.61078  |
| 4.81E-05 | 0.205325 | 7.71E-06 | -0.09122 | 0.04882  |
| 1.73E-06 | 0.281743 | 5.71E-10 | -0.02605 | 0.5745   |

|          |          |          |          |          |
|----------|----------|----------|----------|----------|
| 2.62E-07 | 0.337519 | 6.61E-14 | -0.0291  | 0.5305   |
| 0.00087  | 0.178179 | 0.00011  | 0.017839 | 0.7006   |
| 0.13929  | 0.048246 | 0.29814  | 0.045041 | 0.33143  |
| 0.30708  | -0.01587 | 0.73228  | 0.072121 | 0.11961  |
| 0.13717  | 0.064261 | 0.16563  | 0.161047 | 0.00048  |
| 0.09364  | 0.07187  | 0.12091  | 0.069879 | 0.13158  |
| 0.14748  | 0.032533 | 0.48308  | 0.043764 | 0.34534  |
| 0.23172  | 0.074713 | 0.10685  | 0.036188 | 0.43528  |
| 0.68437  | -0.01328 | 0.77464  | 0.037178 | 0.42282  |
| 0.25182  | 0.063046 | 0.17379  | -0.00954 | 0.83709  |
| 0.82327  | 0.032607 | 0.48209  | 0.048441 | 0.29619  |
| 0.22044  | 0.031612 | 0.49556  | -0.09715 | 0.03585  |
| 0.01802  | 0.093903 | 0.04253  | -0.06953 | 0.13353  |
| 0.87841  | 0.067343 | 0.14621  | -0.0727  | 0.11668  |
| 0.61977  | 0.046757 | 0.31332  | 0.003331 | 0.94276  |
| 0.64655  | 0.098161 | 0.03395  | 0.090855 | 0.04974  |
| 0.92778  | -0.04162 | 0.36947  | 0.077556 | 0.09412  |
| 0.81111  | 0.025598 | 0.58109  | -0.11175 | 0.01569  |
| 0.15527  | 0.040777 | 0.37929  | 0.038462 | 0.40697  |
| 0.72406  | -0.0056  | 0.90399  | -0.00114 | 0.98047  |
| 0.23095  | -0.04824 | 0.29816  | 0.031981 | 0.49054  |
| 0.49926  | 0.124037 | 0.00728  | -0.00399 | 0.9314   |
| 0.0258   | 0.06096  | 0.18849  | 0.049131 | 0.28936  |
| 0.02191  | 0.142344 | 0.00205  | -0.05477 | 0.23745  |
| 0.04203  | 0.139087 | 0.00259  | -0.06977 | 0.13217  |
| 0.03132  | 0.083156 | 0.0726   | 0.057697 | 0.21331  |
| 0.60913  | 0.024021 | 0.60461  | 0.161514 | 0.00046  |
| 0.43788  | 0.030258 | 0.51422  | 0.095386 | 0.03935  |
| 0.68283  | 0.04676  | 0.31329  | 0.066553 | 0.15101  |
| 0.05053  | 0.044851 | 0.33348  | 0.097179 | 0.03578  |
| 0.73298  | 0.007199 | 0.87669  | 0.138088 | 0.00279  |
| 0.02322  | 0.118528 | 0.01036  | 0.069652 | 0.13285  |
| 0.31183  | 0.016541 | 0.72145  | 0.063293 | 0.1721   |
| 0.42596  | 0.088402 | 0.05626  | -0.01739 | 0.70782  |
| 0.13073  | 0.059181 | 0.20174  | -0.02172 | 0.63971  |
| 0.08557  | 0.039625 | 0.39292  | 0.180812 | 8.52E-05 |
| 0.81629  | -0.12873 | 0.00534  | 0.253696 | 2.71E-08 |
| 0.22507  | -0.02529 | 0.58559  | 0.067048 | 0.14799  |
| 0.0979   | 0.068987 | 0.13659  | 0.068357 | 0.14022  |
| 0.3033   | 0.064826 | 0.16193  | 0.020616 | 0.65678  |
| 0.37066  | 0.022891 | 0.62172  | 0.02812  | 0.5444   |
| 0.25407  | -0.00609 | 0.89556  | -0.05833 | 0.20831  |
| 0.03118  | 0.096379 | 0.03734  | 0.177907 | 0.00011  |
| 0.36407  | -0.01683 | 0.71677  | 0.154405 | 0.00081  |
| 0.01031  | 0.119735 | 0.0096   | 0.085559 | 0.06469  |

|          |          |          |          |          |
|----------|----------|----------|----------|----------|
| 0.53299  | -0.02707 | 0.55957  | 0.055682 | 0.22975  |
| 0.25065  | -0.02351 | 0.6123   | 0.039764 | 0.39125  |
| 0.54408  | -0.05422 | 0.24223  | 0.130616 | 0.0047   |
| 0.62925  | 0.017645 | 0.70371  | -0.00126 | 0.97841  |
| 0.21493  | 0.02425  | 0.60116  | -0.0997  | 0.03122  |
| 0.48899  | 0.025156 | 0.58764  | 0.119386 | 0.00981  |
| 0.09361  | 0.004407 | 0.92433  | 0.098304 | 0.03368  |
| 0.61294  | -0.02403 | 0.60443  | 0.153127 | 0.0009   |
| 0.21594  | -0.00446 | 0.92337  | 0.013348 | 0.77357  |
| 0.888    | -0.0001  | 0.9982   | 0.086424 | 0.06202  |
| 0.54365  | 0.001416 | 0.97566  | 0.114368 | 0.0134   |
| 0.16609  | 0.063813 | 0.1686   | 0.095438 | 0.03925  |
| 0.20795  | 0.077167 | 0.09579  | 0.1658   | 0.00032  |
| 0.72968  | 0.019122 | 0.68022  | 0.033706 | 0.46745  |
| 0.64089  | 0.040177 | 0.38635  | 0.055411 | 0.23203  |
| 0.96679  | -0.03246 | 0.48404  | 0.012414 | 0.78904  |
| 0.09038  | 0.0116   | 0.80258  | 0.251397 | 3.65E-08 |
| 0.94184  | 0.003213 | 0.94479  | 0.155232 | 0.00076  |
| 0.85045  | 0.028066 | 0.54518  | 0.14915  | 0.00123  |
| 0.35127  | 0.035799 | 0.44023  | 0.170103 | 0.00022  |
| 0.00059  | 0.033661 | 0.46804  | 0.247589 | 5.94E-08 |
| 3.62E-08 | -0.00994 | 0.8303   | 0.351845 | 4.69E-15 |
| 0.00118  | 0.097011 | 0.0361   | -0.10477 | 0.02355  |
| 2.05E-09 | 0.078627 | 0.08966  | 0.328963 | 3.01E-13 |
| 0.00892  | -0.01506 | 0.74553  | 0.050181 | 0.27916  |
| 4.54E-07 | 0.072995 | 0.11519  | 0.333399 | 1.38E-13 |
| 0.81395  | -0.03678 | 0.42774  | -0.01222 | 0.79229  |
| 0.23213  | -0.18015 | 9.05E-05 | 0.328151 | 3.47E-13 |
| 0.00862  | 0.003029 | 0.94795  | 0.315344 | 3.06E-12 |
| 0.74814  | -0.05712 | 0.21788  | -0.01079 | 0.81611  |
| 9.37E-08 | 0.034992 | 0.45061  | 0.060924 | 0.18876  |
| 0.00092  | 0.098712 | 0.03295  | -0.18942 | 3.79E-05 |
| 0.20191  | 0.138297 | 0.00274  | -0.19596 | 2.00E-05 |
| 0.00537  | 0.000199 | 0.99657  | 0.073586 | 0.11227  |
| 0.69644  | -0.0307  | 0.50805  | 0.002218 | 0.96187  |
| 0.38153  | -0.11133 | 0.01609  | 0.002736 | 0.95298  |
| 0.00255  | -0.06926 | 0.13505  | 0.246565 | 6.75E-08 |
| 2.03E-13 | 0.131662 | 0.00437  | 0.098174 | 0.03392  |
| 0.97088  | 0.003421 | 0.94123  | -0.08372 | 0.07069  |
| 0.00047  | -0.00088 | 0.98489  | 0.10578  | 0.02224  |
| 0.00417  | -0.02227 | 0.63124  | -0.07824 | 0.09127  |
| 0.00699  | -0.00292 | 0.94976  | 0.043454 | 0.34877  |
| 0.02353  | 0.066146 | 0.15353  | 0.023029 | 0.61962  |
| 0.05004  | -0.09835 | 0.0336   | 0.207555 | 6.11E-06 |
| 0.16078  | 0.069403 | 0.13424  | 0.050965 | 0.27171  |

|          |          |          |          |          |
|----------|----------|----------|----------|----------|
| 0.27158  | -0.01233 | 0.7904   | -0.12834 | 0.00548  |
| 8.98E-17 | 0.022373 | 0.62963  | 0.252923 | 3.00E-08 |
| 4.01E-13 | 0.07919  | 0.08738  | 0.335011 | 1.04E-13 |
| 2.18E-10 | 0.158029 | 0.00061  | 0.169395 | 0.00024  |
| 0.91332  | -0.19693 | 1.82E-05 | 0.125335 | 0.00669  |
| 0.72297  | 0.107716 | 0.0199   | -0.037   | 0.42504  |
| 0.06805  | 0.128211 | 0.00553  | 0.030064 | 0.51692  |
| 0.00092  | 0.053105 | 0.25207  | 0.191186 | 3.20E-05 |
| 1.98E-06 | -0.00232 | 0.96019  | 0.185991 | 5.26E-05 |
| 0.00017  | -0.08024 | 0.08326  | 0.065634 | 0.15675  |
| 0.00026  | -0.05946 | 0.19963  | 0.062964 | 0.17435  |
| 0.79667  | -0.04088 | 0.37804  | 0.061536 | 0.18434  |
| 0.00084  | -0.08391 | 0.07003  | 0.143477 | 0.00188  |
| 0.0063   | -0.13858 | 0.00269  | -0.03654 | 0.43077  |
| 0.59185  | -0.02788 | 0.54786  | -0.07931 | 0.08688  |
| 2.03E-07 | -0.06008 | 0.19497  | 0.106801 | 0.02098  |
| 0.98209  | -0.00221 | 0.96197  | -0.13514 | 0.00343  |
| 1.93E-14 | 0.060086 | 0.19492  | 0.238791 | 1.77E-07 |
| 3.35E-10 | 0.236679 | 2.28E-07 | 0.005796 | 0.90058  |
| 0.00057  | 0.041064 | 0.37594  | -0.18748 | 4.57E-05 |
| 1.16E-12 | 0.007235 | 0.87609  | 0.433504 | 8.09E-23 |
| 0.00038  | -0.08902 | 0.05457  | 0.015232 | 0.74269  |
| 0.25888  | 0.019614 | 0.67246  | -0.1223  | 0.00815  |
| 0.00023  | 0.033808 | 0.4661   | 0.018046 | 0.6973   |
| 0.02762  | 0.013989 | 0.76303  | 0.086747 | 0.06105  |
| 0.02947  | -0.11476 | 0.01308  | 0.070128 | 0.13021  |
| 0.99194  | 0.026004 | 0.57511  | 0.06509  | 0.16022  |
| 0.02406  | -0.00491 | 0.91565  | 0.067146 | 0.1474   |
| 0.18599  | 0.06217  | 0.17986  | -0.07113 | 0.12478  |
| 3.97E-05 | 0.065972 | 0.15462  | 0.016375 | 0.72414  |
| 0.14064  | -0.01705 | 0.71324  | -0.06397 | 0.16758  |
| 0.0001   | 0.054141 | 0.24292  | 0.254703 | 2.38E-08 |
| 1.00E-08 | -0.09197 | 0.047    | 0.217646 | 2.06E-06 |
| 0.13313  | 0.048651 | 0.29411  | -0.17307 | 0.00017  |
| 0.23442  | -0.01797 | 0.69849  | -0.29956 | 3.88E-11 |
| 0.00088  | -0.06056 | 0.19144  | -0.20274 | 1.01E-05 |
| 0.04649  | -0.05624 | 0.2251   | 0.160409 | 0.0005   |
| 0.02258  | 0.02277  | 0.62356  | 0.138415 | 0.00272  |
| 0.00172  | 0.04168  | 0.36882  | 0.094905 | 0.04036  |
| 1.45E-06 | 0.00036  | 0.99381  | 0.271905 | 2.33E-09 |
| 1.45E-10 | 0.046829 | 0.31257  | 0.188648 | 4.08E-05 |
| 0.04173  | 0.049209 | 0.2886   | 0.016496 | 0.72217  |
| 0.30741  | 0.015164 | 0.74379  | -0.15455 | 0.00081  |
| 0.01374  | -0.09701 | 0.0361   | 0.15525  | 0.00076  |
| 0.96566  | -0.05776 | 0.21279  | -0.29432 | 8.72E-11 |

|          |          |          |          |          |
|----------|----------|----------|----------|----------|
| 1.14E-06 | 0.165756 | 0.00032  | 0.006452 | 0.8894   |
| 0.24573  | 0.019337 | 0.67682  | 0.118567 | 0.01033  |
| 6.13E-05 | 0.061602 | 0.18387  | 0.071748 | 0.12155  |
| 0.00167  | -0.02399 | 0.60508  | 0.162199 | 0.00043  |
| 0.00044  | 0.08326  | 0.07225  | -0.09883 | 0.03275  |
| 1.97E-07 | 0.079951 | 0.08437  | 0.21406  | 3.05E-06 |
| 0.26395  | -0.14293 | 0.00196  | -0.02981 | 0.52043  |
| 0.00068  | -0.05165 | 0.26536  | 0.054925 | 0.23615  |
| 1.98E-07 | 0.008664 | 0.85187  | 0.347617 | 1.04E-14 |
| 0.00083  | -0.01421 | 0.75944  | 0.177587 | 0.00011  |
| 0.03755  | -0.04229 | 0.36189  | 0.001853 | 0.96814  |
| 2.60E-06 | 0.161785 | 0.00045  | 0.148546 | 0.00128  |
| 2.21E-12 | -0.0592  | 0.20159  | 0.352283 | 4.32E-15 |
| 0.05444  | 0.018661 | 0.68752  | -0.16421 | 0.00037  |
| 1.94E-08 | 0.085527 | 0.06479  | -0.00442 | 0.92418  |
| 0.14748  | -0.06568 | 0.15646  | 0.140873 | 0.00228  |
| 0.02869  | -0.01319 | 0.77627  | -0.30277 | 2.34E-11 |
| 0.81494  | -0.05523 | 0.23357  | 0.221699 | 1.31E-06 |
| 7.62E-07 | 0.012905 | 0.7809   | 0.077457 | 0.09455  |
| 0.09763  | -0.02115 | 0.6484   | 0.018994 | 0.68225  |
| 0.00014  | -0.05236 | 0.25879  | 0.212956 | 3.43E-06 |
| 5.37E-06 | 0.178852 | 0.0001   | -0.11788 | 0.01079  |
| 0.00017  | -0.00537 | 0.90786  | -0.06352 | 0.17056  |
| 0.12001  | -0.03374 | 0.46703  | 0.221314 | 1.37E-06 |
| 4.53E-08 | -0.04217 | 0.36318  | 0.126111 | 0.00636  |
| 2.02E-08 | 0.075682 | 0.10237  | 0.173942 | 0.00016  |
| 0.00835  | -0.04775 | 0.30312  | 0.108948 | 0.01852  |
| 5.07E-13 | 0.247727 | 5.83E-08 | 0.171365 | 0.0002   |
| 4.13E-10 | -0.03237 | 0.48528  | 0.285046 | 3.52E-10 |
| 0.13032  | -0.0608  | 0.18965  | 0.191625 | 3.06E-05 |
| 1.99E-10 | 0.151591 | 0.00102  | 0.114415 | 0.01336  |
| 1.25E-05 | 0.139274 | 0.00256  | 0.290831 | 1.48E-10 |
| 1.32E-05 | -0.05331 | 0.25027  | 0.086959 | 0.06042  |
| 0.35628  | 0.043821 | 0.34471  | -0.06043 | 0.19239  |
| 0.6926   | -0.02965 | 0.5227   | 0.107181 | 0.02052  |
| 0.91759  | 0.051363 | 0.26798  | -0.011   | 0.81254  |
| 5.63E-10 | 0.013066 | 0.77824  | 0.437244 | 3.15E-23 |
| 0.00557  | 0.114133 | 0.01359  | 0.206589 | 6.76E-06 |
| 3.28E-08 | 0.057742 | 0.21294  | -0.02259 | 0.62627  |
| 0.78945  | -0.08698 | 0.06036  | 0.024503 | 0.59738  |
| 9.53E-06 | -0.00493 | 0.91537  | 0.012581 | 0.78627  |
| 5.14E-10 | 0.14485  | 0.0017   | 0.206514 | 6.81E-06 |
| 8.40E-05 | 0.121217 | 0.00874  | 0.16408  | 0.00037  |
| 0.55474  | -0.00111 | 0.98094  | 0.023495 | 0.61255  |
| 0.00016  | -0.04144 | 0.37163  | -0.0953  | 0.03952  |

|          |          |         |          |          |
|----------|----------|---------|----------|----------|
| 0.19103  | -0.08017 | 0.0835  | -0.0826  | 0.07455  |
| 0.00621  | -0.03337 | 0.47184 | -0.09153 | 0.04805  |
| 0.00206  | 0.010527 | 0.82051 | -0.06439 | 0.16475  |
| 0.00071  | -0.06427 | 0.16557 | -0.06131 | 0.18597  |
| 4.62E-05 | -0.07907 | 0.08784 | -0.08134 | 0.07909  |
| 0.00222  | -0.07676 | 0.09757 | -0.02795 | 0.54681  |
| 0.05202  | -0.05609 | 0.22634 | 0.021753 | 0.63915  |
| 0.00123  | -0.06122 | 0.18663 | -0.01213 | 0.79379  |
| 0.00178  | -0.05615 | 0.22585 | -0.09639 | 0.03732  |
| 0.00405  | -0.05329 | 0.25045 | -0.11609 | 0.01205  |
| 0.01838  | -0.02298 | 0.62032 | -0.04324 | 0.35118  |
| 0.02086  | -0.00539 | 0.90756 | -0.01988 | 0.66831  |
| 0.00099  | -0.01981 | 0.66942 | 0.387892 | 3.23E-18 |
| 0.00016  | 0.055405 | 0.23208 | 0.0463   | 0.31809  |
| 3.62E-07 | 0.156554 | 0.00069 | -0.02452 | 0.59706  |
| 5.34E-05 | -0.11794 | 0.01075 | 0.216575 | 2.31E-06 |
| 0.00144  | 0.020457 | 0.65925 | 0.19439  | 2.34E-05 |
| 0.01481  | 0.020755 | 0.65461 | -0.21563 | 2.57E-06 |
| 0.00373  | 0.047998 | 0.30064 | 0.147991 | 0.00134  |
| 0.02654  | -0.15336 | 0.00088 | 0.02096  | 0.65142  |
| 0.16233  | -0.06959 | 0.1332  | -0.11388 | 0.0138   |
| 0.77549  | 0.069266 | 0.13501 | -0.07745 | 0.09456  |
| 2.04E-06 | 0.009771 | 0.83321 | -0.01138 | 0.80629  |
| 0.56929  | -0.04666 | 0.31433 | 0.097923 | 0.03438  |
| 0.00418  | 0.095274 | 0.03959 | -0.05348 | 0.24877  |
| 5.91E-10 | 0.066276 | 0.15273 | 0.354875 | 2.63E-15 |
| 0.31161  | -0.16252 | 0.00042 | 0.169029 | 0.00024  |
| 0.00082  | 0.095155 | 0.03983 | 0.018346 | 0.69253  |
| 4.11E-11 | 0.076892 | 0.09698 | 0.014527 | 0.7542   |
| 0.87128  | -0.10768 | 0.01993 | 0.108484 | 0.01903  |
| 0.52777  | 0.038667 | 0.40447 | 0.137563 | 0.00289  |
| 0.0515   | 0.013584 | 0.7697  | 0.081318 | 0.07918  |
| 0.24042  | -0.1047  | 0.02365 | -0.15244 | 0.00095  |
| 2.31E-05 | -0.00786 | 0.86542 | -0.08543 | 0.06509  |
| 0.00114  | 0.032084 | 0.48914 | -0.12506 | 0.00681  |
| 0.24813  | 0.064143 | 0.16641 | 0.104522 | 0.02389  |
| 0.95977  | -0.0148  | 0.74966 | -0.12035 | 0.00923  |
| 0.0023   | 0.062281 | 0.17908 | -0.03754 | 0.41833  |
| 0.02667  | 0.091694 | 0.04766 | 0.131331 | 0.00447  |
| 4.19E-09 | -0.11953 | 0.00973 | 0.243827 | 9.51E-08 |
| 0.37255  | -0.17703 | 0.00012 | 0.194483 | 2.32E-05 |
| 8.21E-10 | -0.01456 | 0.75369 | 0.171461 | 0.0002   |
| 0.10484  | -0.1474  | 0.0014  | 0.148238 | 0.00132  |
| 0.03304  | -0.06174 | 0.1829  | 0.238831 | 1.76E-07 |
| 0.96556  | 0.051374 | 0.26788 | -0.24578 | 7.46E-08 |

|          |          |         |          |          |
|----------|----------|---------|----------|----------|
| 0.01363  | -0.04107 | 0.37582 | -0.10739 | 0.02027  |
| 0.75522  | 0.01843  | 0.69119 | -0.07333 | 0.11352  |
| 3.43E-09 | -0.02053 | 0.65817 | 0.138326 | 0.00274  |
| 0.00257  | 0.013849 | 0.76533 | 0.177106 | 0.00012  |
| 0.06084  | 0.020923 | 0.652   | -0.28608 | 3.02E-10 |
| 0.55154  | 0.02127  | 0.64661 | 0.011204 | 0.80918  |
| 0.06868  | -0.02253 | 0.62728 | -0.09622 | 0.03766  |
| 0.00615  | -0.08181 | 0.07738 | 0.078261 | 0.09116  |
| 0.9248   | -0.15066 | 0.00109 | 0.081214 | 0.07956  |
| 0.00046  | 0.031969 | 0.49072 | 0.217973 | 1.98E-06 |
| 2.21E-05 | 6.34E-05 | 0.99891 | 0.274071 | 1.72E-09 |
| 1.64E-06 | -0.01143 | 0.80537 | 0.191791 | 3.02E-05 |
| 0.00032  | 0.040617 | 0.38117 | 0.046037 | 0.32085  |
| 0.22027  | -0.13147 | 0.00443 | -0.08141 | 0.07884  |
| 0.34617  | -0.04507 | 0.33112 | 0.011691 | 0.80107  |
| 0.19764  | 0.095088 | 0.03997 | -0.07176 | 0.12146  |
| 0.16058  | -0.12126 | 0.00871 | 0.043995 | 0.34279  |
| 0.25703  | -0.01869 | 0.68714 | -0.2144  | 2.93E-06 |
| 0.40632  | 0.037319 | 0.42105 | -0.04223 | 0.36248  |
| 0.64993  | 0.070219 | 0.12971 | -0.09827 | 0.03375  |
| 3.08E-07 | 0.125103 | 0.00679 | -0.07438 | 0.10843  |
| 0.0316   | -0.05624 | 0.22514 | 0.178954 | 0.0001   |
| 4.36E-06 | -0.07239 | 0.11826 | 0.346169 | 1.36E-14 |
| 0.00015  | -0.03425 | 0.46032 | 0.105782 | 0.02224  |
| 0.98313  | -0.12882 | 0.0053  | 0.058365 | 0.20804  |
| 0.08817  | -0.07535 | 0.10388 | -0.22062 | 1.48E-06 |
| 0.0002   | 0.080558 | 0.08203 | -0.01187 | 0.79809  |
| 0.02099  | -0.04774 | 0.30327 | 0.180314 | 8.92E-05 |
| 0.01781  | 0.014663 | 0.75198 | 0.032422 | 0.48458  |
| 0.12693  | 0.076978 | 0.09661 | -0.11341 | 0.0142   |
| 0.0003   | 0.055784 | 0.22889 | 0.139874 | 0.00245  |
| 0.00015  | -0.04148 | 0.3711  | 0.260146 | 1.16E-08 |
| 0.71804  | -0.00596 | 0.89771 | 0.05372  | 0.24661  |
| 3.55E-05 | 0.081639 | 0.07799 | 0.062268 | 0.17917  |
| 0.00373  | 0.101426 | 0.02841 | 0.217338 | 2.13E-06 |
| 6.80E-05 | -0.05585 | 0.22838 | 0.078557 | 0.08994  |
| 2.62E-10 | 0.074643 | 0.10719 | 0.474386 | 1.40E-27 |
| 0.05682  | 0.02513  | 0.58803 | 0.198    | 1.63E-05 |
| 0.01817  | -0.0441  | 0.34165 | -0.01794 | 0.69906  |
| 0.02313  | -0.02743 | 0.55438 | -0.00723 | 0.87621  |
| 0.03486  | -0.10508 | 0.02315 | 0.107782 | 0.01982  |
| 4.49E-12 | -0.0202  | 0.6633  | 0.377819 | 2.71E-17 |
| 8.61E-05 | 0.094828 | 0.04052 | 0.17542  | 0.00014  |
| 0.01044  | 0.037574 | 0.41789 | 0.073873 | 0.11087  |
| 0.68959  | 0.046093 | 0.32025 | -0.26777 | 4.14E-09 |

|          |          |          |          |          |
|----------|----------|----------|----------|----------|
| 0.18059  | -0.00909 | 0.84468  | -0.10995 | 0.01746  |
| 0.10052  | 0.024712 | 0.59426  | -0.03965 | 0.39267  |
| 0.00531  | 0.077623 | 0.09384  | 0.226829 | 7.29E-07 |
| 0.07295  | 0.002646 | 0.95453  | 0.148629 | 0.00128  |
| 9.14E-06 | -0.01198 | 0.7962   | 0.099612 | 0.03138  |
| 0.0096   | 0.114544 | 0.01325  | 0.110167 | 0.01724  |
| 4.21E-17 | 0.227652 | 6.63E-07 | 0.150074 | 0.00114  |
| 0.0002   | -0.04752 | 0.30545  | 0.042232 | 0.3625   |
| 1.03E-09 | 0.164884 | 0.00035  | 0.145992 | 0.00156  |
| 0.11658  | -0.15395 | 0.00084  | 0.104629 | 0.02375  |
| 5.74E-08 | 0.098016 | 0.03421  | 0.246761 | 6.59E-08 |
| 0.21758  | 0.005182 | 0.91107  | 0.163284 | 0.0004   |
| 0.01049  | 0.113496 | 0.01413  | -0.21158 | 3.98E-06 |
| 0.20172  | -0.09158 | 0.04793  | 0.184465 | 6.07E-05 |
| 0.21788  | -0.08026 | 0.08317  | -0.16041 | 0.0005   |
| 0.40957  | -0.00772 | 0.86783  | -0.10371 | 0.02501  |
| 0.13851  | -0.03449 | 0.45714  | 0.067854 | 0.14317  |
| 0.00736  | 0.050491 | 0.2762   | 0.034878 | 0.45209  |
| 1.15E-05 | 0.032636 | 0.4817   | 0.174847 | 0.00015  |
| 0.01223  | 0.075515 | 0.10313  | 0.172249 | 0.00018  |
| 9.93E-29 | 0.31093  | 6.32E-12 | 0.210565 | 4.44E-06 |
| 6.20E-51 | 0.54951  | 3.37E-38 | 0.302422 | 2.48E-11 |
| 9.44E-49 | 0.605814 | 4.06E-48 | 0.300991 | 3.10E-11 |
| #####    | 0.573634 | 3.25E-42 | 0.27988  | 7.48E-10 |
| #####    | 0.477088 | 6.43E-28 | 0.26116  | 1.01E-08 |
| #####    | 0.536784 | 3.30E-36 | 0.100166 | 0.03045  |
| 1.00E-54 | 0.4148   | 7.60E-21 | 0.013483 | 0.77136  |
| #####    | 0.599318 | 7.15E-47 | 0.171188 | 0.0002   |
| 4.41E-78 | 0.212123 | 3.76E-06 | 0.347637 | 1.03E-14 |
| 1.89E-85 | 0.614785 | 6.92E-50 | 0.187752 | 4.45E-05 |
| 6.59E-31 | 0.339064 | 5.00E-14 | 0.234337 | 3.02E-07 |
| 3.42E-69 | 0.464886 | 2.04E-26 | 0.351738 | 4.79E-15 |
| 4.25E-92 | 0.38801  | 3.15E-18 | 0.447986 | 1.97E-24 |
| #####    | 0.576684 | 9.56E-43 | 0.199038 | 1.47E-05 |
| 3.85E-47 | 0.584652 | 3.67E-44 | 0.077596 | 0.09396  |
| 5.21E-58 | 0.559582 | 7.78E-40 | 0.160973 | 0.00048  |
| 3.06E-70 | 0.706589 | 7.52E-72 | 0.121345 | 0.00867  |
| #####    | 0.609863 | 6.57E-49 | 0.311459 | 5.79E-12 |
| #####    | 0.582804 | 7.88E-44 | 0.330384 | 2.35E-13 |
| 2.54E-89 | 0.610223 | 5.58E-49 | 0.237886 | 1.97E-07 |
| #####    | 0.621534 | 2.97E-51 | 0.101882 | 0.0277   |
| #####    | 0.489893 | 1.46E-29 | 0.387028 | 3.89E-18 |
| #####    | 0.56775  | 3.33E-41 | 0.266767 | 4.74E-09 |
| #####    | 0.695038 | 1.25E-68 | 0.253285 | 2.86E-08 |
| 1.17E-82 | 0.441629 | 1.03E-23 | 0.203633 | 9.19E-06 |



|          |          |          |          |          |
|----------|----------|----------|----------|----------|
| 8.67E-27 | 0.231569 | 4.20E-07 | 0.210347 | 4.54E-06 |
| 1.98E-50 | 0.594188 | 6.58E-46 | 0.162525 | 0.00042  |
| 2.90E-65 | 0.500562 | 5.52E-31 | 0.338069 | 5.99E-14 |
| 3.50E-61 | 0.606358 | 3.18E-48 | 0.142433 | 0.00203  |
| #####    | 0.535581 | 5.03E-36 | 0.327393 | 3.96E-13 |
| 2.96E-55 | 0.52915  | 4.70E-35 | -0.01902 | 0.68177  |
| 3.52E-34 | 0.448629 | 1.66E-24 | 0.38589  | 4.96E-18 |
| #####    | 0.67054  | 2.78E-62 | 0.301759 | 2.75E-11 |
| 1.44E-60 | 0.33382  | 1.28E-13 | 0.592486 | 1.36E-45 |
| 8.61E-79 | 0.601208 | 3.13E-47 | 0.06391  | 0.16795  |
| #####    | 0.637562 | 1.22E-54 | 0.274391 | 1.64E-09 |
| #####    | 0.718999 | 1.72E-75 | 0.100974 | 0.02912  |
| #####    | 0.628968 | 8.43E-53 | 0.164571 | 0.00036  |
| #####    | 0.631761 | 2.16E-53 | 0.209565 | 4.94E-06 |
| 6.83E-50 | 0.51889  | 1.50E-33 | 0.279617 | 7.77E-10 |
| 9.22E-89 | 0.704782 | 2.46E-71 | 0.203583 | 9.24E-06 |
| #####    | 0.636911 | 1.68E-54 | 0.20099  | 1.21E-05 |
| #####    | 0.664579 | 7.89E-61 | 0.106168 | 0.02175  |
| #####    | 0.465853 | 1.56E-26 | 0.269812 | 3.12E-09 |
| 5.21E-73 | 0.542738 | 3.96E-37 | 0.270219 | 2.95E-09 |
| #####    | 0.547705 | 6.54E-38 | 0.330436 | 2.33E-13 |
| 2.34E-81 | 0.727784 | 3.46E-78 | 0.228507 | 6.01E-07 |
| 8.53E-39 | 0.507042 | 7.12E-32 | 0.247328 | 6.13E-08 |
| #####    | 0.492535 | 6.56E-30 | 0.259987 | 1.19E-08 |
| #####    | 0.62802  | 1.33E-52 | 0.122301 | 0.00815  |
| 3.09E-55 | 0.436683 | 3.63E-23 | 0.376511 | 3.55E-17 |
| 9.04E-88 | 0.552135 | 1.28E-38 | 0.115728 | 0.01233  |
| 4.49E-95 | 0.544693 | 1.96E-37 | 0.287378 | 2.49E-10 |
| 3.07E-52 | 0.562828 | 2.25E-40 | 0.208544 | 5.50E-06 |
| #####    | 0.539626 | 1.21E-36 | 0.260029 | 1.18E-08 |
| 8.94E-60 | 0.411358 | 1.70E-20 | 0.350507 | 6.04E-15 |
| 2.43E-31 | 0.327409 | 3.95E-13 | 0.378171 | 2.52E-17 |
| 9.98E-32 | 0.4265   | 4.58E-22 | 0.20498  | 8.00E-06 |
| 3.45E-66 | 0.630669 | 3.68E-53 | -0.00654 | 0.88783  |
| 6.75E-62 | 0.676126 | 1.12E-63 | -0.0611  | 0.18749  |
| 5.23E-32 | 0.273632 | 1.83E-09 | 0.110996 | 0.01641  |
| 1.33E-52 | 0.607382 | 2.01E-48 | 0.09005  | 0.05181  |
| #####    | 0.821414 | #####    | 0.248848 | 5.06E-08 |
| 5.52E-58 | 0.387784 | 3.31E-18 | 0.141688 | 0.00215  |
| #####    | 0.574591 | 2.22E-42 | 0.232301 | 3.85E-07 |
| 1.66E-62 | 0.488587 | 2.17E-29 | 0.184032 | 6.32E-05 |
| 0.0024   | -0.22023 | 1.54E-06 | 0.058571 | 0.20644  |
| 0.4111   | 0.244374 | 8.89E-08 | -0.2513  | 3.70E-08 |
| 0.09596  | -0.12259 | 0.008    | -0.29333 | 1.02E-10 |
| 6.17E-06 | -0.15    | 0.00115  | 0.004019 | 0.93098  |

|          |          |          |          |          |
|----------|----------|----------|----------|----------|
| 0.00206  | -0.13087 | 0.00461  | 0.059432 | 0.19984  |
| 7.76E-07 | 0.064485 | 0.16415  | -0.11263 | 0.01489  |
| 0.43764  | -0.1333  | 0.0039   | -0.40087 | 1.87E-19 |
| 0.00117  | -0.08452 | 0.06802  | -0.16803 | 0.00027  |
| 1.68E-07 | -0.04332 | 0.35024  | 0.058892 | 0.20395  |
| 0.40377  | -0.10146 | 0.02836  | -0.25779 | 1.59E-08 |
| 0.3825   | -0.13187 | 0.00431  | -0.32188 | 1.02E-12 |
| 0.76908  | -0.14269 | 0.00199  | -0.13788 | 0.00283  |
| 0.01129  | -0.1121  | 0.01537  | -0.26798 | 4.01E-09 |
| 1.66E-10 | -0.07982 | 0.08488  | 0.014936 | 0.74751  |
| 1.91E-12 | 0.001019 | 0.98248  | 0.105969 | 0.022    |
| 0.01284  | -0.13211 | 0.00424  | -0.1111  | 0.01631  |
| 0.00041  | -0.04271 | 0.3571   | -0.0565  | 0.22297  |
| 0.02958  | -0.13054 | 0.00472  | -0.41937 | 2.57E-21 |
| 0.00033  | -0.14099 | 0.00226  | 0.251574 | 3.57E-08 |
| 0.29242  | -0.09384 | 0.04266  | -0.23539 | 2.67E-07 |
| 0.08428  | -0.15534 | 0.00076  | 0.178633 | 0.0001   |
| 0.00847  | 0.022028 | 0.63492  | -0.11176 | 0.01568  |
| 0.00059  | -0.17962 | 9.50E-05 | 0.125493 | 0.00662  |
| 2.79E-09 | -0.10133 | 0.02857  | 0.273426 | 1.88E-09 |
| 0.00167  | -0.10395 | 0.02468  | -0.08561 | 0.06453  |
| 0.00477  | -0.13412 | 0.00369  | -0.06406 | 0.16694  |
| 0.00143  | -0.14496 | 0.00168  | -0.06279 | 0.17555  |
| 0.02497  | -0.07309 | 0.11472  | -0.25781 | 1.58E-08 |
| 2.76E-08 | -0.11068 | 0.01672  | 0.098974 | 0.03249  |
| 0.00017  | -0.04282 | 0.35589  | -0.00323 | 0.94451  |
| 1.58E-11 | -0.12729 | 0.00588  | 0.284597 | 3.76E-10 |
| 9.35E-12 | 0.037114 | 0.42361  | 0.307747 | 1.06E-11 |
| 0.39846  | -0.11891 | 0.01011  | -0.02908 | 0.53067  |
| 0.00017  | 0.004866 | 0.91648  | 0.232872 | 3.60E-07 |
| 2.92E-08 | -0.02722 | 0.55731  | 0.001112 | 0.98088  |
| 2.13E-07 | -0.08    | 0.08417  | 0.247715 | 5.84E-08 |
| 0.20728  | -0.21489 | 2.78E-06 | -0.15301 | 0.00091  |
| 2.63E-05 | -0.09084 | 0.04978  | -0.11383 | 0.01384  |
| 0.00093  | -0.10028 | 0.03025  | 0.159809 | 0.00053  |
| 3.78E-08 | -0.01483 | 0.74929  | 0.038984 | 0.40062  |
| 0.35654  | 0.134902 | 0.00349  | 0.020935 | 0.65181  |
| 0.07038  | -0.17189 | 0.00019  | -0.03004 | 0.51731  |
| 0.00127  | 0.056014 | 0.22698  | -0.19756 | 1.71E-05 |
| 0.01564  | -0.13535 | 0.00338  | -0.18129 | 8.15E-05 |
| 0.35246  | -0.1468  | 0.00147  | -0.05303 | 0.25272  |
| 0.26339  | -0.05404 | 0.24383  | -0.2095  | 4.97E-06 |
| 0.0112   | -0.08994 | 0.0521   | -0.18968 | 3.70E-05 |
| 0.06199  | -0.18828 | 4.23E-05 | -0.10993 | 0.01748  |
| 0.00041  | -0.15963 | 0.00053  | -0.01419 | 0.75965  |

|          |          |          |          |          |
|----------|----------|----------|----------|----------|
| 0.0007   | -0.13383 | 0.00376  | -0.07638 | 0.09924  |
| 2.54E-05 | 0.001325 | 0.97722  | -0.14898 | 0.00124  |
| 0.00573  | -0.09145 | 0.04826  | -0.2064  | 6.90E-06 |
| 0.00989  | -0.04521 | 0.32966  | -0.22667 | 7.43E-07 |
| 6.38E-08 | -0.0044  | 0.92445  | -0.04766 | 0.30403  |
| 0.17057  | -0.28701 | 2.63E-10 | 0.034523 | 0.45672  |
| 6.26E-06 | -0.17914 | 9.93E-05 | 0.083706 | 0.07073  |
| 6.04E-05 | -0.21737 | 2.12E-06 | 0.066963 | 0.14851  |
| 0.03254  | -0.12776 | 0.0057   | -0.13967 | 0.00249  |
| 0.01636  | -0.17852 | 0.0001   | 0.044395 | 0.33842  |
| 0.00049  | -0.06956 | 0.13337  | 0.11646  | 0.01178  |
| 0.01985  | -0.17466 | 0.00015  | -0.02475 | 0.59368  |
| 0.58784  | -0.11317 | 0.01441  | -0.08811 | 0.05708  |
| 0.0047   | -0.14663 | 0.00149  | 0.1441   | 0.0018   |
| 5.88E-05 | -0.16386 | 0.00038  | 0.120523 | 0.00913  |
| 0.30596  | -0.11545 | 0.01254  | -0.19144 | 3.12E-05 |
| 9.60E-09 | -0.09626 | 0.03758  | 0.091827 | 0.04734  |
| 0.76845  | -0.2055  | 7.57E-06 | -0.01126 | 0.8083   |
| 2.40E-10 | -0.08297 | 0.07324  | 0.13254  | 0.00412  |
| 1.56E-06 | 0.135683 | 0.0033   | -0.14046 | 0.00235  |
| 2.65E-09 | -0.01624 | 0.72633  | 0.001807 | 0.96894  |
| 0.16819  | -0.1371  | 0.00299  | -0.17712 | 0.00012  |
| 0.0628   | -0.15336 | 0.00088  | -0.15396 | 0.00084  |
| 2.38E-07 | -0.01679 | 0.71736  | 0.116943 | 0.01144  |
| 3.53E-05 | -0.03358 | 0.46908  | -0.09707 | 0.03599  |
| 0.60927  | -0.07763 | 0.09383  | -0.20812 | 5.75E-06 |
| 0.24017  | -0.04563 | 0.32512  | -0.06491 | 0.16136  |
| 0.02826  | -0.2131  | 3.38E-06 | -0.07669 | 0.09786  |
| 0.00026  | -0.19986 | 1.35E-05 | 0.014561 | 0.75364  |
| 1.89E-07 | -0.09017 | 0.05148  | 0.087053 | 0.06014  |
| 8.22E-12 | 0.020673 | 0.65589  | 0.029761 | 0.52116  |
| 0.10552  | -0.0292  | 0.52906  | -0.42008 | 2.17E-21 |
| 0.72225  | -0.18356 | 6.61E-05 | -0.10026 | 0.03029  |
| 9.81E-10 | -0.09329 | 0.04391  | 0.090519 | 0.05059  |
| 0.04691  | -0.19874 | 1.51E-05 | -0.02163 | 0.64104  |
| 1.44E-06 | 0.023943 | 0.60578  | -0.17238 | 0.00018  |
| 0.13613  | -0.04675 | 0.31335  | -0.11684 | 0.01151  |
| 0.57284  | -0.12144 | 0.00861  | 0.000961 | 0.98348  |
| 0.01761  | 0.397904 | 3.62E-19 | -0.16876 | 0.00025  |
| 0.00527  | -0.21336 | 3.29E-06 | -0.04588 | 0.32255  |
| 0.41033  | -0.10858 | 0.01892  | -0.08023 | 0.0833   |
| 7.92E-07 | -0.08352 | 0.07135  | 0.024692 | 0.59455  |
| 4.56E-07 | -0.10957 | 0.01785  | 0.372295 | 8.44E-17 |
| 0.01224  | -0.18133 | 8.12E-05 | 0.099732 | 0.03118  |
| 0.00054  | -0.09298 | 0.04462  | 0.081769 | 0.07752  |

|          |          |          |          |          |
|----------|----------|----------|----------|----------|
| 0.25994  | -0.16109 | 0.00047  | 0.29735  | 5.47E-11 |
| 6.53E-07 | 0.081296 | 0.07926  | -0.06966 | 0.13279  |
| 4.00E-08 | -0.00562 | 0.90353  | -0.19555 | 2.08E-05 |
| 0.24147  | -0.05556 | 0.23075  | -0.1262  | 0.00632  |
| 1.80E-06 | -0.19809 | 1.62E-05 | 0.290641 | 1.53E-10 |
| 0.0219   | -0.10589 | 0.0221   | 0.050339 | 0.27766  |
| 0.04555  | -0.14058 | 0.00233  | -0.06623 | 0.15303  |
| 0.02741  | -0.104   | 0.02461  | -0.13966 | 0.00249  |
| 0.00985  | -0.0368  | 0.42756  | -0.02955 | 0.52414  |
| 0.05457  | -0.1022  | 0.02721  | 0.029118 | 0.5302   |
| 3.49E-06 | -0.18984 | 3.64E-05 | 0.117308 | 0.01118  |
| 0.01006  | -0.10912 | 0.01834  | -0.26661 | 4.85E-09 |
| 0.03445  | -0.21221 | 3.72E-06 | 0.150585 | 0.0011   |
| 0.01528  | -0.23646 | 2.34E-07 | 0.10416  | 0.02438  |
| 1.41E-05 | -0.08928 | 0.05386  | -0.02961 | 0.52322  |
| 0.00011  | -0.08604 | 0.06319  | 0.038777 | 0.40313  |
| 1.91E-05 | -0.02151 | 0.64287  | -0.07696 | 0.09668  |
| 0.00012  | -0.10583 | 0.02218  | 0.15509  | 0.00077  |
| 0.08005  | -0.14106 | 0.00225  | -0.07755 | 0.09416  |
| 0.52383  | -0.234   | 3.15E-07 | -0.11514 | 0.01278  |
| 0.03571  | -0.14072 | 0.0023   | 0.164186 | 0.00037  |
| 0.03113  | -0.17785 | 0.00011  | -0.09059 | 0.05041  |
| 2.64E-07 | -0.09208 | 0.04674  | 0.148553 | 0.00128  |
| 2.26E-10 | -0.0032  | 0.94501  | 0.039284 | 0.39701  |
| 9.90E-08 | 0.142906 | 0.00196  | -0.20231 | 1.05E-05 |
| 0.00413  | -0.09197 | 0.04699  | -0.01789 | 0.69978  |
| 0.00295  | 0.044158 | 0.34101  | 0.114756 | 0.01308  |
| 9.77E-07 | -0.19683 | 1.83E-05 | 0.214917 | 2.77E-06 |
| 5.59E-07 | -0.17197 | 0.00019  | 0.018592 | 0.68861  |
| 0.00178  | -0.06326 | 0.17236  | 0.256179 | 1.96E-08 |
| 5.30E-09 | -0.08097 | 0.08048  | 0.074761 | 0.10663  |
| 0.31898  | -0.05273 | 0.25543  | -0.16763 | 0.00027  |
| 4.90E-05 | 0.028455 | 0.53961  | -0.11595 | 0.01216  |
| 8.88E-09 | -0.12877 | 0.00532  | 0.107546 | 0.02009  |
| 1.04E-07 | -0.17008 | 0.00022  | 0.155478 | 0.00075  |
| 0.04034  | -0.08113 | 0.07988  | -0.23437 | 3.01E-07 |
| 1.54E-14 | 0.143047 | 0.00194  | 0.145641 | 0.0016   |
| 0.08459  | -0.13391 | 0.00374  | -0.17484 | 0.00015  |
| 0.69345  | -0.15775 | 0.00062  | -0.03618 | 0.43542  |
| 2.57E-08 | -0.00074 | 0.98735  | 0.105274 | 0.02289  |
| 2.70E-05 | -0.09298 | 0.04462  | 0.065748 | 0.15603  |
| 0.0019   | -0.16871 | 0.00025  | 0.070656 | 0.12733  |
| 0.00643  | -0.02551 | 0.58235  | -0.14338 | 0.00189  |
| 1.97E-09 | 0.072214 | 0.11914  | -0.01846 | 0.69072  |
| 1.09E-09 | -0.00726 | 0.87567  | -0.10394 | 0.02469  |

|          |          |          |          |          |
|----------|----------|----------|----------|----------|
| 0.00054  | -0.03557 | 0.44322  | -0.07581 | 0.10179  |
| 0.02676  | -0.19738 | 1.74E-05 | -0.0027  | 0.95355  |
| 7.92E-05 | -0.01208 | 0.79455  | -0.22951 | 5.34E-07 |
| 7.33E-28 | 0.26841  | 3.79E-09 | -0.01238 | 0.78956  |
| 9.35E-07 | 0.0742   | 0.10929  | -0.13641 | 0.00314  |
| 0.70044  | -0.17988 | 9.28E-05 | -0.31736 | 2.18E-12 |
| 1.13E-08 | -0.13666 | 0.00309  | 0.226352 | 7.71E-07 |
| 4.64E-05 | -0.11593 | 0.01218  | 0.158765 | 0.00057  |
| 0.00302  | -0.2288  | 5.81E-07 | 0.233735 | 3.25E-07 |
| 0.31072  | -0.04751 | 0.30559  | -0.20286 | 9.96E-06 |
| 0.16715  | -0.09996 | 0.03079  | 0.215589 | 2.58E-06 |
| 0.14245  | -0.17096 | 0.00021  | -0.105   | 0.02325  |
| 0.00265  | -0.20348 | 9.34E-06 | 0.181809 | 7.77E-05 |
| 1.27E-06 | -0.05595 | 0.22749  | -0.06128 | 0.18618  |
| 1.42E-06 | -0.07972 | 0.08526  | -0.087   | 0.06029  |
| 0.38888  | -0.13271 | 0.00407  | -0.2201  | 1.57E-06 |
| 0.94234  | -0.22072 | 1.46E-06 | -0.09493 | 0.04031  |
| 2.23E-05 | -0.18146 | 8.02E-05 | 0.252294 | 3.25E-08 |
| 3.39E-14 | -0.08207 | 0.07643  | 0.183824 | 6.44E-05 |
| 9.37E-05 | -0.09292 | 0.04475  | 0.14164  | 0.00215  |
| 2.83E-09 | -0.04328 | 0.3507   | 0.119271 | 0.00989  |
| 4.62E-07 | -0.08342 | 0.0717   | 0.135691 | 0.0033   |
| 1.38E-07 | -0.05501 | 0.23544  | -0.04931 | 0.28757  |
| 9.90E-13 | 0.10039  | 0.03007  | -0.03841 | 0.4076   |
| 0.00216  | -0.22321 | 1.10E-06 | -0.07998 | 0.08425  |
| 5.81E-06 | -0.12634 | 0.00626  | 0.061747 | 0.18284  |
| 0.38644  | 0.154044 | 0.00084  | -0.02378 | 0.60822  |
| 1.75E-09 | -0.14822 | 0.00132  | 0.160302 | 0.00051  |
| 1.01E-05 | -0.1261  | 0.00636  | 0.274907 | 1.53E-09 |
| 0.43302  | -0.06555 | 0.15731  | -0.205   | 7.98E-06 |
| 0.06249  | -0.18816 | 4.28E-05 | 0.104413 | 0.02404  |
| 0.10229  | 0.177947 | 0.00011  | 0.073599 | 0.1122   |
| 4.80E-06 | -0.02622 | 0.57199  | 0.172716 | 0.00018  |
| 0.00347  | -0.1174  | 0.01111  | 0.082228 | 0.07586  |
| 0.23412  | -0.1145  | 0.01329  | 0.001926 | 0.96689  |
| 5.20E-14 | -0.05541 | 0.23207  | 0.208425 | 5.57E-06 |
| 3.32E-06 | -0.18222 | 7.48E-05 | 0.318597 | 1.78E-12 |
| 1.81E-11 | -0.14708 | 0.00144  | 0.25718  | 1.72E-08 |
| 3.36E-05 | -0.17923 | 9.84E-05 | 0.157904 | 0.00062  |
| 0.12923  | -0.08615 | 0.06286  | -0.17382 | 0.00016  |
| 0.00057  | -0.21624 | 2.40E-06 | 0.081868 | 0.07716  |
| 0.01049  | -0.20257 | 1.03E-05 | 0.201872 | 1.10E-05 |
| 1.20E-05 | -0.04574 | 0.32394  | 0.051227 | 0.26925  |
| 5.45E-08 | -0.15356 | 0.00087  | 0.219278 | 1.72E-06 |
| 0.5303   | -0.29616 | 6.57E-11 | -0.07651 | 0.09864  |

|          |          |          |          |          |
|----------|----------|----------|----------|----------|
| 0.00259  | -0.20038 | 1.28E-05 | 0.07518  | 0.10467  |
| 0.59719  | -0.09947 | 0.03163  | -0.04403 | 0.34239  |
| 0.02968  | -0.03498 | 0.45074  | -0.05472 | 0.23792  |
| 0.00268  | -0.20342 | 9.40E-06 | 0.077035 | 0.09636  |
| 3.68E-05 | -0.09481 | 0.04055  | -0.06262 | 0.17673  |
| 0.4692   | -0.16601 | 0.00031  | -0.14428 | 0.00177  |
| 1.49E-17 | 0.077734 | 0.09337  | 0.079486 | 0.0862   |
| 0.68159  | 0.15905  | 0.00056  | 0.278165 | 9.58E-10 |
| 0.0139   | -0.14022 | 0.00239  | -0.10508 | 0.02315  |
| 0.00868  | -0.10451 | 0.02391  | -0.19831 | 1.58E-05 |
| 4.06E-08 | 0.03547  | 0.44445  | -0.01511 | 0.74467  |
| 8.15E-10 | 0.029445 | 0.52559  | 0.020377 | 0.66051  |
| 0.69537  | -0.09679 | 0.03653  | 0.077426 | 0.09468  |
| 0.0013   | -0.1058  | 0.02221  | 0.188234 | 4.25E-05 |
| 0.06111  | -0.12615 | 0.00634  | -0.06759 | 0.14471  |
| 3.51E-06 | -0.06802 | 0.14221  | 0.083581 | 0.07115  |
| 0.00206  | -0.1209  | 0.00892  | 0.308738 | 9.02E-12 |
| 0.55086  | -0.13891 | 0.00263  | -0.22757 | 6.70E-07 |
| 0.44937  | -0.16573 | 0.00032  | -0.1352  | 0.00342  |
| 0.2646   | -0.08869 | 0.05546  | -0.25053 | 4.08E-08 |
| 0.00463  | -0.15029 | 0.00112  | -0.04513 | 0.33051  |
| 0.00027  | -0.03048 | 0.51117  | -0.08509 | 0.06619  |
| 0.00281  | -0.1707  | 0.00021  | 0.141082 | 0.00224  |
| 5.04E-15 | -0.04822 | 0.29838  | 0.312823 | 4.63E-12 |
| 0.00854  | -0.16761 | 0.00027  | -0.03464 | 0.45515  |
| 7.93E-05 | -0.13677 | 0.00306  | 0.1051   | 0.02312  |
| 5.64E-05 | 0.010072 | 0.82814  | -0.18261 | 7.21E-05 |
| 4.84E-05 | -0.06297 | 0.17429  | -0.15674 | 0.00068  |
| 1.69E-07 | -0.00972 | 0.83405  | -0.06755 | 0.14498  |
| 0.8119   | -0.15903 | 0.00056  | -0.04027 | 0.3853   |
| 0.79     | -0.15554 | 0.00074  | -0.13761 | 0.00288  |
| 0.02354  | -0.26101 | 1.03E-08 | 0.189733 | 3.68E-05 |
| 4.61E-06 | 0.010642 | 0.81858  | -0.11912 | 0.00998  |
| 0.765    | -0.07369 | 0.11175  | -0.22578 | 8.23E-07 |
| 0.11995  | -0.20107 | 1.20E-05 | 0.002552 | 0.95613  |
| 0.06737  | -0.13459 | 0.00357  | -0.25212 | 3.33E-08 |
| 0.00049  | -0.10466 | 0.02371  | 0.042537 | 0.35905  |
| 0.01117  | -0.1453  | 0.00164  | -0.10196 | 0.02757  |
| 0.05428  | -0.13616 | 0.0032   | 0.060297 | 0.19335  |
| 3.61E-06 | 0.005048 | 0.91337  | 0.147277 | 0.00141  |
| 2.11E-06 | -0.13325 | 0.00392  | 0.21827  | 1.92E-06 |
| 0.01312  | -0.2248  | 9.20E-07 | 0.148443 | 0.00129  |
| 1.62E-06 | -0.19378 | 2.48E-05 | 0.334531 | 1.13E-13 |
| 0.11416  | -0.17591 | 0.00013  | -0.08389 | 0.07011  |
| 0.00256  | 0.241666 | 1.24E-07 | -0.10429 | 0.02421  |

|          |          |          |          |          |
|----------|----------|----------|----------|----------|
| 0.21104  | -0.10104 | 0.02903  | -0.05055 | 0.27566  |
| 0.2292   | -0.15301 | 0.00091  | -0.01935 | 0.67669  |
| 0.73451  | -0.20862 | 5.46E-06 | -0.10208 | 0.0274   |
| 0.00196  | -0.11744 | 0.01109  | 0.051857 | 0.26341  |
| 0.01788  | -0.12994 | 0.00492  | -0.14631 | 0.00152  |
| 6.11E-09 | -0.05802 | 0.21075  | 0.024527 | 0.59702  |
| 0.02607  | -0.155   | 0.00078  | 0.015437 | 0.73934  |
| 0.01033  | -0.21914 | 1.74E-06 | 0.015343 | 0.74087  |
| 3.58E-08 | -0.16071 | 0.00049  | 0.155287 | 0.00076  |
| 0.00057  | -0.07755 | 0.09414  | 0.046342 | 0.31765  |
| 0.45406  | -0.10313 | 0.02584  | -0.13037 | 0.00478  |
| 6.19E-10 | -0.07731 | 0.09518  | 0.345814 | 1.45E-14 |
| 0.02041  | -0.00578 | 0.90085  | -0.32817 | 3.45E-13 |
| 1.08E-06 | -0.01737 | 0.70807  | -0.03075 | 0.50739  |
| 0.01656  | -0.19945 | 1.41E-05 | -0.08362 | 0.07101  |
| 1.04E-06 | -0.06214 | 0.18007  | -0.03112 | 0.50236  |
| 2.06E-05 | -0.15758 | 0.00063  | -0.01623 | 0.72653  |
| 0.11564  | -0.23745 | 2.08E-07 | 0.02199  | 0.63551  |
| 0.00021  | -0.12545 | 0.00664  | 0.099344 | 0.03184  |
| 0.02224  | -0.2389  | 1.74E-07 | 0.059348 | 0.20047  |
| 2.31E-10 | -0.15142 | 0.00103  | 0.189949 | 3.60E-05 |
| 0.01663  | -0.06295 | 0.17448  | 0.014614 | 0.75277  |
| 0.00121  | -0.17696 | 0.00012  | -0.0521  | 0.26121  |
| 0.00128  | -0.15424 | 0.00083  | -0.07084 | 0.12633  |
| 1.81E-05 | -0.17193 | 0.00019  | 0.094848 | 0.04048  |
| 0.31812  | -0.20179 | 1.11E-05 | 0.11553  | 0.01248  |
| 5.01E-05 | -0.05944 | 0.19981  | 0.158815 | 0.00057  |
| 1.54E-13 | -0.08666 | 0.06131  | 0.281262 | 6.13E-10 |
| 3.02E-05 | 0.002518 | 0.95672  | -0.08441 | 0.06839  |
| 0.02499  | -0.13353 | 0.00384  | -0.2332  | 3.46E-07 |
| 0.01614  | -0.07802 | 0.09216  | -0.14203 | 0.00209  |
| 0.02846  | -0.11773 | 0.01089  | -0.1644  | 0.00036  |
| 0.4002   | -0.09026 | 0.05125  | -0.24431 | 8.96E-08 |
| 0.02317  | -0.17096 | 0.00021  | 0.020916 | 0.65211  |
| 0.00219  | -0.14199 | 0.0021   | -0.13308 | 0.00396  |
| 0.00042  | -0.09957 | 0.03146  | -0.0943  | 0.04165  |
| 0.00748  | -0.09334 | 0.04378  | 0.009223 | 0.84243  |
| 5.06E-24 | 0.172965 | 0.00017  | 0.133724 | 0.00379  |
| 0.90566  | -0.08361 | 0.07106  | -0.27635 | 1.24E-09 |
| 1.64E-06 | -0.13741 | 0.00292  | 0.073679 | 0.11181  |
| 6.39E-06 | -0.04694 | 0.31142  | 0.191769 | 3.02E-05 |
| 2.65E-05 | -0.20314 | 9.67E-06 | 0.199979 | 1.34E-05 |
| 2.46E-07 | -0.04009 | 0.38734  | 0.209025 | 5.23E-06 |
| 1.22E-14 | -0.06712 | 0.14757  | 0.285384 | 3.35E-10 |
| 0.12292  | -0.18608 | 5.21E-05 | -0.28121 | 6.18E-10 |

|          |          |          |          |          |
|----------|----------|----------|----------|----------|
| 5.27E-08 | -0.15351 | 0.00087  | 0.163981 | 0.00037  |
| 0.0318   | 6.04E-05 | 0.99896  | 0.25103  | 3.83E-08 |
| 0.54854  | -0.21323 | 3.33E-06 | -0.04633 | 0.3178   |
| 0.05478  | -0.14815 | 0.00132  | -0.05543 | 0.23188  |
| 0.29396  | -0.246   | 7.25E-08 | -0.16337 | 0.00039  |
| 0.01819  | -0.21898 | 1.77E-06 | 0.136642 | 0.00309  |
| 0.72718  | 0.282803 | 4.89E-10 | -0.11123 | 0.01619  |
| 0.95426  | -0.10645 | 0.0214   | -0.28624 | 2.95E-10 |
| 2.80E-06 | 0.044877 | 0.3332   | 0.006151 | 0.89453  |
| 0.00064  | -0.13049 | 0.00473  | -0.07787 | 0.09278  |
| 0.00914  | -0.15412 | 0.00083  | -0.01663 | 0.72008  |
| 3.68E-06 | -0.00916 | 0.8435   | 0.000781 | 0.98657  |
| 0.63577  | -0.13442 | 0.00361  | -0.24332 | 1.01E-07 |
| 0.86463  | -0.11958 | 0.0097   | -0.22024 | 1.54E-06 |
| 0.00712  | -0.18712 | 4.72E-05 | -0.02158 | 0.6418   |
| 0.00253  | -0.17456 | 0.00015  | -0.03193 | 0.49121  |
| 0.09951  | -0.09587 | 0.03836  | -0.09067 | 0.05022  |
| 0.02033  | -0.13421 | 0.00366  | -0.14839 | 0.0013   |
| 0.92346  | -0.2298  | 5.17E-07 | -0.25261 | 3.12E-08 |
| 0.55059  | -0.22786 | 6.47E-07 | 0.073174 | 0.1143   |
| 0.001    | -0.12675 | 0.00609  | -0.14845 | 0.00129  |
| 3.32E-06 | -0.12388 | 0.00736  | 0.166922 | 0.00029  |
| 0.80413  | -0.11147 | 0.01596  | -0.01275 | 0.78342  |
| 0.02042  | -0.21959 | 1.66E-06 | -0.32934 | 2.82E-13 |
| 0.66812  | -0.15386 | 0.00085  | -0.14749 | 0.00139  |
| 0.1582   | -0.18461 | 5.99E-05 | 0.001399 | 0.97594  |
| 1.91E-05 | -0.1267  | 0.00611  | -0.06858 | 0.13895  |
| 0.14209  | -0.04002 | 0.38816  | -0.26173 | 9.40E-09 |
| 0.17828  | -0.18568 | 5.41E-05 | -0.09297 | 0.04463  |
| 0.82653  | -0.06772 | 0.14393  | -0.22398 | 1.01E-06 |
| 1.17E-06 | -0.07144 | 0.12315  | 0.009462 | 0.8384   |
| 0.19422  | 0.122237 | 0.00818  | 0.259219 | 1.31E-08 |
| 0.37647  | -0.21571 | 2.54E-06 | 0.003312 | 0.9431   |
| 2.48E-08 | 0.037257 | 0.42183  | -0.06384 | 0.16843  |
| 0.01531  | -0.23285 | 3.61E-07 | -0.07275 | 0.11641  |
| 0.27677  | -0.09227 | 0.04627  | -0.2353  | 2.69E-07 |
| 0.00409  | -0.06812 | 0.14159  | 0.25701  | 1.76E-08 |
| 7.97E-05 | -0.12213 | 0.00824  | 0.089677 | 0.05279  |
| 0.00997  | -0.25301 | 2.97E-08 | 0.146464 | 0.0015   |
| 0.00509  | -0.07022 | 0.12971  | -0.09464 | 0.04092  |
| 0.11282  | -0.18488 | 5.84E-05 | -0.19222 | 2.89E-05 |
| 0.05427  | -0.05771 | 0.21318  | 0.326247 | 4.83E-13 |
| 0.95174  | -0.24854 | 5.26E-08 | 0.045244 | 0.32926  |
| 0.78821  | -0.23283 | 3.62E-07 | -0.0188  | 0.68532  |
| 0.00314  | -0.19164 | 3.06E-05 | 0.09184  | 0.04731  |



|          |          |          |          |          |
|----------|----------|----------|----------|----------|
| 0.45361  | -0.13674 | 0.00307  | -0.21504 | 2.74E-06 |
| 0.58328  | -0.18473 | 5.92E-05 | -0.11525 | 0.01269  |
| 0.00027  | -0.15601 | 0.00072  | 0.004763 | 0.91824  |
| 0.31754  | -0.17817 | 0.00011  | 0.194095 | 2.41E-05 |
| 0.17176  | -0.22541 | 8.59E-07 | -0.1015  | 0.0283   |
| 0.07197  | -0.2524  | 3.21E-08 | -0.0423  | 0.36176  |
| 7.47E-08 | -0.16153 | 0.00046  | 0.281887 | 5.59E-10 |
| 0.01977  | -0.02642 | 0.56908  | 0.046945 | 0.31138  |
| 9.30E-05 | -0.02046 | 0.65929  | 0.146707 | 0.00148  |
| 0.00012  | -0.17055 | 0.00021  | 0.160421 | 0.0005   |
| 0.65741  | -0.21759 | 2.07E-06 | -0.09975 | 0.03115  |
| 0.00619  | -0.02996 | 0.5184   | -0.29201 | 1.24E-10 |
| 0.23492  | -0.17937 | 9.72E-05 | 0.029978 | 0.51812  |
| 7.67E-18 | 0.029338 | 0.5271   | 0.282405 | 5.19E-10 |
| 1.18E-07 | 0.042737 | 0.35679  | -0.04803 | 0.30028  |
| 0.25419  | -0.05595 | 0.22749  | -0.29409 | 9.04E-11 |
| 0.90371  | -0.21114 | 4.17E-06 | -0.13675 | 0.00306  |
| 5.96E-06 | -0.06915 | 0.13568  | -0.015   | 0.74651  |
| 4.38E-08 | -0.05827 | 0.20881  | 0.1499   | 0.00116  |
| 0.4857   | -0.11734 | 0.01116  | -0.20827 | 5.66E-06 |
| 0.01391  | -0.1139  | 0.01379  | 0.09845  | 0.03342  |
| 1.36E-05 | -0.01814 | 0.6958   | -0.04845 | 0.29609  |
| 0.00035  | 0.008572 | 0.85343  | -0.07225 | 0.11898  |
| 0.8487   | -0.08519 | 0.06585  | -0.21127 | 4.12E-06 |
| 0.00517  | -0.17445 | 0.00015  | 0.097108 | 0.03592  |
| 0.25731  | -0.15716 | 0.00065  | 0.032699 | 0.48085  |
| 0.00182  | -0.00332 | 0.943    | 0.183412 | 6.70E-05 |
| 0.13846  | -0.23022 | 4.92E-07 | -0.13293 | 0.00401  |
| 0.00455  | -0.21676 | 2.27E-06 | -0.0995  | 0.03157  |
| 0.81641  | -0.19923 | 1.44E-05 | -0.15237 | 0.00096  |
| 1.68E-06 | -0.10395 | 0.02468  | -0.01332 | 0.77406  |
| 0.00387  | -0.1662  | 0.00031  | -0.11995 | 0.00947  |
| 0.0006   | -0.18208 | 7.58E-05 | 0.101371 | 0.02849  |
| 0.23488  | -0.23406 | 3.12E-07 | 0.186035 | 5.24E-05 |
| 0.18661  | -0.12427 | 0.00717  | -0.2769  | 1.15E-09 |
| 1.48E-15 | -0.02    | 0.66644  | 0.164314 | 0.00036  |
| 0.77397  | -0.23027 | 4.89E-07 | -0.09847 | 0.03339  |
| 0.07645  | -0.17997 | 9.20E-05 | -0.35589 | 2.17E-15 |
| 6.42E-09 | 0.133599 | 0.00382  | -0.07712 | 0.09599  |
| 5.23E-09 | 0.129673 | 0.00501  | -0.18327 | 6.78E-05 |
| 2.12E-06 | 0.017948 | 0.69886  | -0.08616 | 0.06282  |
| 0.02461  | -0.05156 | 0.26611  | -0.12181 | 0.00841  |
| 0.02156  | -0.10341 | 0.02544  | -0.1387  | 0.00267  |
| 0.07745  | -0.18945 | 3.78E-05 | 0.134378 | 0.00362  |
| 0.19695  | -0.07877 | 0.08906  | -0.20924 | 5.11E-06 |

|          |          |          |          |          |
|----------|----------|----------|----------|----------|
| 0.00201  | -0.13655 | 0.00311  | 0.020589 | 0.6572   |
| 0.2717   | -0.04699 | 0.31093  | -0.10013 | 0.0305   |
| 0.00022  | -0.09092 | 0.04959  | 0.064503 | 0.16403  |
| 0.07064  | -0.14696 | 0.00145  | -0.03442 | 0.45808  |
| 0.01326  | -0.24448 | 8.77E-08 | 0.085198 | 0.06583  |
| 8.62E-05 | -0.18438 | 6.12E-05 | 0.034895 | 0.45187  |
| 0.00267  | -0.05336 | 0.24977  | 0.054174 | 0.24264  |
| 0.24198  | -0.08107 | 0.08011  | -0.42825 | 2.98E-22 |
| 0.00098  | -0.18089 | 8.46E-05 | -0.06805 | 0.14201  |
| 3.17E-05 | -0.07134 | 0.12369  | -0.06201 | 0.18099  |
| 0.00025  | -0.13796 | 0.00281  | 0.23471  | 2.89E-07 |
| 2.94E-05 | -0.09088 | 0.04968  | -0.05668 | 0.22153  |
| 4.09E-07 | -0.11304 | 0.01452  | 0.076732 | 0.09768  |
| 0.06062  | -0.19732 | 1.75E-05 | 0.160948 | 0.00048  |
| 0.06908  | -0.38299 | 9.19E-18 | 0.128109 | 0.00556  |
| 6.75E-06 | -0.0562  | 0.22547  | -0.06899 | 0.1366   |
| 6.11E-05 | -0.14007 | 0.00242  | 0.191297 | 3.16E-05 |
| 8.28E-05 | -0.15559 | 0.00074  | -0.03031 | 0.51345  |
| 1.98E-05 | -0.15585 | 0.00073  | 0.084492 | 0.06811  |
| 0.00291  | -0.11898 | 0.01007  | -0.10677 | 0.02101  |
| 0.04173  | -0.08775 | 0.0581   | -0.24833 | 5.40E-08 |
| 0.06302  | -0.15382 | 0.00085  | -0.18227 | 7.45E-05 |
| 0.01324  | -0.30037 | 3.42E-11 | -0.0138  | 0.76613  |
| 0.00464  | -0.24518 | 8.04E-08 | 0.035493 | 0.44415  |
| 2.03E-09 | -0.07842 | 0.09052  | 0.142233 | 0.00206  |
| 4.65E-05 | -0.0774  | 0.09478  | -0.06889 | 0.13712  |
| 3.92E-05 | -0.13761 | 0.00288  | 0.046467 | 0.31634  |
| 0.0014   | -0.16157 | 0.00046  | 0.023521 | 0.61216  |
| 5.16E-12 | -0.0491  | 0.28965  | 0.235999 | 2.48E-07 |
| 0.154    | -0.22374 | 1.04E-06 | -0.15989 | 0.00052  |
| 3.04E-05 | 0.130553 | 0.00472  | -0.12676 | 0.00609  |
| 0.31126  | -0.0067  | 0.88519  | -0.1052  | 0.02299  |
| 0.15925  | -0.00237 | 0.95921  | -0.21362 | 3.19E-06 |
| 4.98E-10 | -0.11633 | 0.01188  | 0.107822 | 0.01977  |
| 0.35742  | -0.18689 | 4.83E-05 | -0.1434  | 0.00189  |
| 0.83788  | -0.08721 | 0.05967  | -0.13243 | 0.00415  |
| 9.09E-11 | -0.16545 | 0.00033  | 0.219384 | 1.70E-06 |
| 0.00151  | -0.25318 | 2.90E-08 | 0.068725 | 0.13809  |
| 1.99E-05 | -0.18345 | 6.67E-05 | 0.144496 | 0.00174  |
| 0.47157  | -0.20189 | 1.10E-05 | 0.230827 | 4.58E-07 |
| 0.32674  | -0.0207  | 0.65545  | -0.2703  | 2.91E-09 |
| 0.01476  | -0.10504 | 0.0232   | 0.014355 | 0.75701  |
| 0.25214  | 0.106198 | 0.02172  | -0.36287 | 5.57E-16 |
| 0.86409  | 0.272766 | 2.06E-09 | 0.060618 | 0.19099  |
| 9.31E-06 | -0.13703 | 0.003    | 0.028134 | 0.5442   |

|          |          |          |          |          |
|----------|----------|----------|----------|----------|
| 0.00265  | 0.040318 | 0.38468  | -0.11584 | 0.01224  |
| 0.07482  | -0.16234 | 0.00043  | -0.06265 | 0.17648  |
| 0.00016  | -0.07563 | 0.10262  | 0.004217 | 0.92759  |
| 0.32248  | -0.10836 | 0.01916  | -0.26264 | 8.31E-09 |
| 0.31743  | 0.150737 | 0.00109  | 0.016321 | 0.725    |
| 0.0431   | 0.073126 | 0.11453  | -0.29911 | 4.16E-11 |
| 0.00446  | -0.19436 | 2.34E-05 | -0.01645 | 0.72288  |
| 0.0032   | -0.16265 | 0.00042  | 0.063002 | 0.17409  |
| 0.81536  | -0.15683 | 0.00067  | -0.01412 | 0.76091  |
| 3.23E-06 | -0.05926 | 0.20111  | 0.048185 | 0.29876  |
| 0.00972  | -0.15757 | 0.00063  | 0.238585 | 1.81E-07 |
| 0.00235  | -0.22983 | 5.15E-07 | 0.080301 | 0.08301  |
| 0.00027  | -0.18809 | 4.31E-05 | 0.05752  | 0.21471  |
| 1.50E-07 | -0.15186 | 0.00099  | 0.07211  | 0.11967  |
| 0.01352  | -0.21236 | 3.66E-06 | 0.049619 | 0.28459  |
| 0.0002   | -0.11237 | 0.01512  | 0.037953 | 0.4132   |
| 0.02175  | -0.21894 | 1.78E-06 | 0.030021 | 0.51752  |
| 0.08128  | -0.11986 | 0.00952  | -0.20821 | 5.70E-06 |
| 0.14896  | -0.23411 | 3.11E-07 | 0.12727  | 0.00588  |
| 0.02182  | -0.09294 | 0.0447   | -0.11863 | 0.01029  |
| 0.00328  | -0.17671 | 0.00012  | 0.120878 | 0.00893  |
| 0.45291  | -0.19754 | 1.71E-05 | -0.14708 | 0.00144  |
| 0.00056  | -0.09247 | 0.04581  | -0.01812 | 0.69604  |
| 4.01E-06 | -0.11577 | 0.0123   | 0.213508 | 3.23E-06 |
| 0.00013  | -0.13449 | 0.00359  | -0.01118 | 0.80966  |
| 0.87347  | -0.08442 | 0.06836  | -0.39804 | 3.52E-19 |
| 0.00169  | 0.200819 | 1.23E-05 | -0.14886 | 0.00125  |
| 0.17846  | -0.13831 | 0.00274  | -0.15022 | 0.00113  |
| 0.02834  | 0.228798 | 5.81E-07 | -0.03823 | 0.4098   |
| 0.0681   | -0.20209 | 1.08E-05 | 0.082473 | 0.07499  |
| 0.00339  | 0.019247 | 0.67824  | 0.072375 | 0.11831  |
| 1.61E-05 | -0.13354 | 0.00384  | 0.358103 | 1.41E-15 |
| 0.01841  | -0.15943 | 0.00054  | 0.110084 | 0.01732  |
| 0.00042  | -0.05793 | 0.21142  | 0.213047 | 3.40E-06 |
| 1.57E-06 | 0.03361  | 0.46871  | -0.01068 | 0.81789  |
| 0.60635  | -0.20386 | 8.98E-06 | 0.116041 | 0.01209  |
| 0.00197  | -0.1276  | 0.00575  | 0.056904 | 0.21967  |
| 0.02166  | -0.05565 | 0.22999  | -0.01245 | 0.78852  |
| 0.00501  | -0.11151 | 0.01591  | -0.39094 | 1.67E-18 |
| 0.11129  | -0.18485 | 5.85E-05 | 0.074801 | 0.10644  |
| 6.12E-05 | -0.00853 | 0.85415  | -0.19755 | 1.71E-05 |
| 0.00805  | -0.12359 | 0.0075   | 0.138795 | 0.00265  |
| 0.00299  | -0.11799 | 0.01071  | -0.18677 | 4.89E-05 |
| 0.22048  | -0.15213 | 0.00097  | -0.13497 | 0.00347  |
| 0.02529  | -0.29538 | 7.42E-11 | -0.05192 | 0.26283  |

|          |          |          |          |          |
|----------|----------|----------|----------|----------|
| 0.22309  | -0.1816  | 7.92E-05 | -0.23925 | 1.67E-07 |
| 0.00094  | -0.16517 | 0.00034  | -0.00609 | 0.89553  |
| 0.00949  | -0.19921 | 1.45E-05 | -0.04374 | 0.3456   |
| 0.00175  | -0.04673 | 0.31357  | -0.13667 | 0.00308  |
| 1.05E-09 | -0.06084 | 0.18935  | 0.160901 | 0.00048  |
| 0.41322  | -0.0978  | 0.03462  | -0.21899 | 1.77E-06 |
| 2.06E-06 | -0.11793 | 0.01075  | 0.256801 | 1.81E-08 |
| 2.83E-05 | -0.15974 | 0.00053  | 0.219637 | 1.65E-06 |
| 0.00085  | -0.17455 | 0.00015  | 0.111088 | 0.01632  |
| 0.97037  | -0.23036 | 4.84E-07 | 0.237068 | 2.18E-07 |
| 0.00302  | -0.06087 | 0.18918  | 0.069083 | 0.13604  |
| 0.00212  | -0.17241 | 0.00018  | 0.124393 | 0.00711  |
| 6.28E-06 | -0.06849 | 0.13943  | 0.010436 | 0.82205  |
| 0.85503  | -0.25949 | 1.27E-08 | -0.03619 | 0.43521  |
| 0.3973   | -0.19594 | 2.01E-05 | -0.04579 | 0.32344  |
| 0.11984  | -0.16171 | 0.00045  | -0.10188 | 0.02771  |
| 0.00044  | -0.21913 | 1.74E-06 | 0.205895 | 7.27E-06 |
| 0.03089  | -0.079   | 0.08812  | -0.19041 | 3.45E-05 |
| 0.91871  | -0.25141 | 3.65E-08 | -0.17024 | 0.00022  |
| 0.93408  | -0.23512 | 2.75E-07 | -0.235   | 2.79E-07 |
| 0.00635  | -0.23385 | 3.20E-07 | 0.195002 | 2.20E-05 |
| 0.82837  | -0.28275 | 4.93E-10 | 0.013602 | 0.76939  |
| 0.09516  | -0.22143 | 1.35E-06 | -0.03892 | 0.40139  |
| 0.02522  | -0.17897 | 0.0001   | -0.13931 | 0.00255  |
| 9.07E-06 | -0.09097 | 0.04944  | -0.02014 | 0.66413  |
| 6.73E-06 | -0.21208 | 3.77E-06 | 0.08878  | 0.05521  |
| 5.22E-06 | 0.013067 | 0.77823  | 0.067825 | 0.14334  |
| 1.79E-05 | -0.2067  | 6.68E-06 | 0.135875 | 0.00326  |
| 1.10E-05 | -0.14445 | 0.00175  | 0.063304 | 0.17203  |
| 0.04613  | -0.13186 | 0.00431  | -0.18663 | 4.95E-05 |
| 0.2313   | -0.17532 | 0.00014  | -0.21189 | 3.85E-06 |
| 0.7711   | -0.20842 | 5.57E-06 | -0.10854 | 0.01897  |
| 3.69E-05 | -0.14683 | 0.00146  | 0.11587  | 0.01222  |
| 0.00042  | 0.005031 | 0.91366  | 0.077023 | 0.09641  |
| 0.84582  | -0.09619 | 0.03771  | -0.32864 | 3.19E-13 |
| 0.13435  | -0.20505 | 7.94E-06 | -0.10048 | 0.02993  |
| 0.00012  | -0.10249 | 0.02678  | -0.07248 | 0.11778  |
| 0.60988  | 0.147933 | 0.00135  | 0.104491 | 0.02393  |
| 0.00188  | 0.073192 | 0.1142   | -0.03913 | 0.39882  |
| 0.00888  | -0.1678  | 0.00027  | 0.195208 | 2.16E-05 |
| 4.79E-05 | -0.14481 | 0.0017   | -0.02406 | 0.60403  |
| 0.09881  | -0.20259 | 1.02E-05 | -0.05819 | 0.20941  |
| 2.24E-14 | 0.064705 | 0.16272  | -0.28787 | 2.31E-10 |
| 3.57E-10 | -0.06879 | 0.13771  | 0.220851 | 1.44E-06 |
| 3.65E-05 | -0.21322 | 3.34E-06 | 0.154826 | 0.00079  |

|          |          |          |          |          |
|----------|----------|----------|----------|----------|
| 0.00041  | -0.20282 | 1.00E-05 | 0.025921 | 0.57633  |
| 0.33033  | -0.23688 | 2.23E-07 | -0.1647  | 0.00035  |
| 1.60E-07 | -0.10383 | 0.02484  | -0.00164 | 0.97188  |
| 1.29E-08 | -0.07739 | 0.09482  | -0.05401 | 0.24408  |
| 0.00447  | -0.16947 | 0.00023  | 0.034068 | 0.46267  |
| 0.01452  | 0.090981 | 0.04942  | 0.054427 | 0.24044  |
| 0.16481  | -0.06938 | 0.13437  | 0.133539 | 0.00384  |
| 1.62E-05 | -0.131   | 0.00458  | 0.014582 | 0.75329  |
| 0.00653  | -0.22841 | 6.07E-07 | 0.015578 | 0.73705  |
| 1.05E-08 | -0.02414 | 0.60276  | -0.00145 | 0.97504  |
| 0.00728  | -0.00933 | 0.84064  | -0.07932 | 0.08686  |
| 0.02198  | -0.09657 | 0.03697  | -0.16139 | 0.00046  |
| 0.00093  | -0.12603 | 0.00639  | -0.04369 | 0.34613  |
| 0.40823  | -0.10834 | 0.01919  | -0.0993  | 0.03191  |
| 2.76E-11 | -0.10512 | 0.02309  | 0.30019  | 3.52E-11 |
| 0.5468   | -0.18869 | 4.07E-05 | -0.17161 | 0.00019  |
| 0.0006   | -0.26081 | 1.06E-08 | 0.134197 | 0.00367  |
| 0.02405  | -0.14122 | 0.00222  | 0.071695 | 0.12182  |
| 2.76E-07 | 0.07497  | 0.10565  | -0.03624 | 0.43462  |
| 1.13E-08 | 0.208154 | 5.73E-06 | 0.119109 | 0.00999  |
| 5.98E-10 | 0.03463  | 0.45532  | 0.100698 | 0.02957  |
| 0.00016  | -0.17602 | 0.00013  | 0.167128 | 0.00029  |
| 0.4231   | 0.120359 | 0.00923  | 0.112639 | 0.01488  |
| 6.64E-09 | -0.08859 | 0.05575  | 0.184835 | 5.86E-05 |
| 1.33E-13 | 0.102417 | 0.02689  | 0.114361 | 0.0134   |
| 0.31786  | 0.122572 | 0.00801  | 0.023247 | 0.61631  |
| 0.05911  | -0.09022 | 0.05136  | 0.003769 | 0.93527  |
| 0.00261  | -0.03137 | 0.49888  | -0.27777 | 1.01E-09 |
| 0.00154  | -0.20871 | 5.41E-06 | 0.033557 | 0.46942  |
| 0.01018  | -0.16458 | 0.00036  | 0.00314  | 0.94604  |
| 0.99042  | -0.03838 | 0.40793  | -0.3279  | 3.63E-13 |
| 0.07788  | -0.23366 | 3.28E-07 | 0.019134 | 0.68003  |
| 0.67925  | -0.29    | 1.68E-10 | 0.150717 | 0.00109  |
| 6.72E-05 | -0.10052 | 0.02986  | -0.01085 | 0.8151   |
| 0.00065  | -0.209   | 5.25E-06 | 0.155408 | 0.00075  |
| 0.00451  | -0.10876 | 0.01872  | 0.049186 | 0.28882  |
| 4.41E-06 | -0.15804 | 0.00061  | 0.349481 | 7.33E-15 |
| 0.00066  | -0.22178 | 1.30E-06 | 0.21369  | 3.17E-06 |
| 0.59691  | -0.13614 | 0.0032   | -0.08931 | 0.05377  |
| 0.01313  | -0.06235 | 0.17863  | -0.05408 | 0.24344  |
| 0.03673  | -0.01588 | 0.73214  | -0.08734 | 0.0593   |
| 1.26E-11 | 0.152768 | 0.00093  | -0.03498 | 0.45075  |
| 0.05895  | -0.08319 | 0.07249  | 0.033719 | 0.46728  |
| 0.02437  | 0.046788 | 0.313    | 0.164071 | 0.00037  |
| 0.87426  | 0.258391 | 1.47E-08 | -0.14466 | 0.00172  |

|          |          |          |          |          |
|----------|----------|----------|----------|----------|
| 0.13632  | -0.15577 | 0.00073  | -0.05571 | 0.22953  |
| 1.05E-06 | -0.07264 | 0.11698  | 0.099656 | 0.0313   |
| 0.02345  | -0.10531 | 0.02285  | 0.049102 | 0.28965  |
| 0.64136  | -0.22688 | 7.25E-07 | -0.02909 | 0.53062  |
| 3.71E-05 | -0.07084 | 0.12637  | 0.200665 | 1.25E-05 |
| 0.51294  | -0.24788 | 5.72E-08 | 0.096962 | 0.0362   |
| 0.75233  | -0.2701  | 2.99E-09 | 0.327777 | 3.70E-13 |
| 4.95E-08 | -0.06222 | 0.17949  | 0.013668 | 0.7683   |
| 1.18E-07 | -0.03279 | 0.47963  | 0.200074 | 1.32E-05 |
| 1.28E-11 | -0.01027 | 0.8249   | 0.05958  | 0.19871  |
| 0.87145  | -0.14587 | 0.00157  | -0.2411  | 1.33E-07 |
| 1.70E-06 | -0.10893 | 0.01854  | -0.01305 | 0.77856  |
| 0.00279  | -0.17275 | 0.00018  | -0.01364 | 0.7688   |
| 0.53907  | -0.12084 | 0.00895  | -0.16215 | 0.00043  |
| 4.75E-06 | -0.12844 | 0.00544  | -0.04315 | 0.3522   |
| 0.97135  | -0.2015  | 1.14E-05 | -0.1265  | 0.00619  |
| 0.02559  | -0.21455 | 2.89E-06 | -0.04753 | 0.30534  |
| 1.49E-06 | -0.03571 | 0.44131  | 0.229291 | 5.48E-07 |
| 0.00349  | -0.10948 | 0.01795  | -0.31098 | 6.26E-12 |
| 0.01464  | -0.16299 | 0.00041  | 0.059471 | 0.19953  |
| 0.00104  | -0.09908 | 0.0323   | -0.03873 | 0.40368  |
| 1.38E-08 | -0.13113 | 0.00453  | 0.195272 | 2.14E-05 |
| 0.07041  | -0.14883 | 0.00126  | -0.08506 | 0.06627  |
| 2.75E-07 | -0.20882 | 5.34E-06 | 0.430157 | 1.86E-22 |
| 0.17734  | -0.15894 | 0.00057  | 0.063463 | 0.17095  |
| 3.23E-14 | 0.084378 | 0.06849  | 0.086446 | 0.06196  |
| 0.9979   | -0.09551 | 0.03909  | -0.27203 | 2.29E-09 |
| 2.16E-10 | -0.10854 | 0.01897  | 0.17125  | 0.0002   |
| 0.91996  | -0.09004 | 0.05184  | -0.03659 | 0.43024  |
| 0.6315   | -0.19805 | 1.62E-05 | -0.06861 | 0.13878  |
| 0.14532  | -0.2452  | 8.02E-08 | -0.04623 | 0.31885  |
| 2.07E-05 | -0.06425 | 0.16573  | 0.000922 | 0.98415  |
| 0.12696  | -0.20955 | 4.95E-06 | 0.013462 | 0.7717   |
| 5.15E-05 | -0.11631 | 0.01189  | 0.15192  | 0.00099  |
| 4.18E-05 | -0.11348 | 0.01414  | 0.06256  | 0.17714  |
| 0.26012  | -0.17409 | 0.00016  | -0.09903 | 0.03239  |
| 0.01265  | -0.2183  | 1.91E-06 | 0.034136 | 0.46178  |
| 2.56E-05 | 0.023289 | 0.61566  | -0.00084 | 0.98553  |
| 5.02E-06 | -0.15684 | 0.00067  | -0.00903 | 0.84571  |
| 0.00054  | -0.20417 | 8.70E-06 | 0.187193 | 4.69E-05 |
| 6.11E-11 | -0.0912  | 0.04886  | 0.113461 | 0.01416  |
| 0.00072  | -0.22672 | 7.38E-07 | 0.255552 | 2.13E-08 |
| 0.00167  | 0.095864 | 0.03837  | -0.33983 | 4.36E-14 |
| 0.26694  | -0.18949 | 3.77E-05 | -0.07865 | 0.08956  |
| 0.0008   | -0.17767 | 0.00011  | 0.036594 | 0.43014  |

|          |          |          |          |          |
|----------|----------|----------|----------|----------|
| 2.12E-10 | 0.073821 | 0.11112  | -0.05005 | 0.28045  |
| 0.00952  | -0.09396 | 0.04241  | -0.11816 | 0.0106   |
| 0.00286  | -0.21748 | 2.09E-06 | 0.1433   | 0.00191  |
| 1.14E-14 | 0.070014 | 0.13084  | 0.015649 | 0.7359   |
| 8.28E-08 | -0.05567 | 0.22988  | 0.319894 | 1.43E-12 |
| 0.01163  | -0.09248 | 0.04577  | -0.05304 | 0.25263  |
| 0.10274  | -0.10764 | 0.01999  | 0.168507 | 0.00025  |
| 0.05579  | -0.10923 | 0.01821  | -0.14727 | 0.00142  |
| 2.67E-05 | -0.19394 | 2.44E-05 | 0.056889 | 0.21979  |
| 0.01571  | -0.20158 | 1.13E-05 | -0.29872 | 4.43E-11 |
| 7.46E-08 | 0.040572 | 0.38169  | 0.202946 | 9.87E-06 |
| 0.00035  | -0.0579  | 0.21168  | -0.14043 | 0.00235  |
| 0.66909  | -0.22492 | 9.08E-07 | 0.063259 | 0.17233  |
| 0.57701  | 0.285885 | 3.11E-10 | -0.08353 | 0.07132  |
| 0.00044  | -0.03362 | 0.4686   | -0.04935 | 0.28721  |
| 0.45955  | -0.25002 | 4.36E-08 | 0.143842 | 0.00183  |
| 4.84E-05 | -0.12055 | 0.00912  | 0.099827 | 0.03101  |
| 0.0944   | -0.17446 | 0.00015  | 0.058689 | 0.20552  |
| 0.09229  | -0.1432  | 0.00192  | -0.12933 | 0.00512  |
| 0.0005   | -0.16346 | 0.00039  | -0.02636 | 0.56985  |
| 0.15948  | -0.07871 | 0.0893   | -0.2683  | 3.84E-09 |
| 0.01807  | -0.15243 | 0.00095  | -0.02671 | 0.56484  |
| 0.00021  | -0.1858  | 5.35E-05 | 0.134133 | 0.00368  |
| 7.63E-11 | -0.1194  | 0.00981  | 0.25239  | 3.21E-08 |
| 5.73E-05 | -0.12847 | 0.00543  | 0.05701  | 0.21881  |
| 0.08692  | 0.016124 | 0.7282   | -0.02867 | 0.53653  |
| 0.02181  | 0.079493 | 0.08617  | -0.07518 | 0.10468  |
| 0.00095  | 0.18122  | 8.20E-05 | -0.12287 | 0.00785  |
| 2.13E-15 | -0.05961 | 0.19851  | 0.196144 | 1.96E-05 |
| 3.06E-06 | -0.05433 | 0.24126  | 0.057308 | 0.21641  |
| 0.00341  | -0.12106 | 0.00883  | -0.03513 | 0.4488   |
| 0.05038  | -0.14515 | 0.00166  | -0.17692 | 0.00012  |
| 0.13388  | -0.19587 | 2.02E-05 | -0.06891 | 0.13706  |
| 0.36431  | -0.26782 | 4.10E-09 | 0.013811 | 0.76595  |
| 0.05194  | -0.20791 | 5.88E-06 | 0.157974 | 0.00061  |
| 0.00689  | -0.07185 | 0.12099  | -0.05805 | 0.21055  |
| 4.72E-06 | -0.14411 | 0.00179  | 0.042296 | 0.36178  |
| 0.06986  | -0.24003 | 1.52E-07 | -0.02773 | 0.55007  |
| 0.00012  | -0.1558  | 0.00073  | -0.0405  | 0.3826   |
| 4.39E-07 | -0.07169 | 0.12187  | 0.01376  | 0.76679  |
| 0.05095  | -0.1084  | 0.01912  | -0.32286 | 8.64E-13 |
| 0.00071  | -0.19046 | 3.43E-05 | 0.105589 | 0.02249  |
| 0.13667  | -0.17993 | 9.23E-05 | -0.06488 | 0.1616   |
| 0.00281  | -0.05066 | 0.27462  | -0.24857 | 5.24E-08 |
| 1.29E-14 | 0.14041  | 0.00236  | 0.126893 | 0.00603  |

|          |          |          |          |          |
|----------|----------|----------|----------|----------|
| 0.54109  | -0.15405 | 0.00084  | -0.10903 | 0.01843  |
| 0.0051   | -0.23837 | 1.86E-07 | 0.086639 | 0.06138  |
| 0.00298  | 0.213734 | 3.16E-06 | -0.39052 | 1.83E-18 |
| 0.67787  | -0.20433 | 8.56E-06 | -0.06182 | 0.18232  |
| 0.14828  | -0.18952 | 3.76E-05 | 0.02628  | 0.57106  |
| 0.02559  | -0.18095 | 8.41E-05 | -0.05544 | 0.23181  |
| 2.80E-06 | -0.1896  | 3.73E-05 | 0.116576 | 0.0117   |
| 0.00266  | -0.08044 | 0.08247  | -0.00392 | 0.93271  |
| 0.9514   | -0.25507 | 2.27E-08 | -0.05683 | 0.22031  |
| 0.00084  | -0.2353  | 2.69E-07 | 0.07634  | 0.09942  |
| 1.72E-22 | 0.076941 | 0.09677  | 0.190319 | 3.48E-05 |
| 0.77078  | -0.16554 | 0.00033  | -0.27045 | 2.85E-09 |
| 7.32E-05 | -0.16614 | 0.00031  | 0.072184 | 0.11929  |
| 0.03253  | -0.11797 | 0.01073  | -0.04005 | 0.38789  |
| 0.35452  | -0.27454 | 1.61E-09 | -0.06107 | 0.18773  |
| 0.76809  | -0.23368 | 3.27E-07 | -0.04425 | 0.33997  |
| 0.02317  | -0.13126 | 0.00449  | 0.217544 | 2.08E-06 |
| 2.19E-08 | -0.06217 | 0.17984  | 0.084477 | 0.06816  |
| 1.18E-18 | -0.01635 | 0.72458  | 0.226827 | 7.29E-07 |
| 0.078    | -0.14081 | 0.00229  | 0.103826 | 0.02485  |
| 0.1099   | -0.17422 | 0.00015  | -0.0975  | 0.03517  |
| 0.02013  | -0.08048 | 0.08231  | -0.26171 | 9.43E-09 |
| 0.01049  | -0.15367 | 0.00086  | -0.09425 | 0.04176  |
| 0.02747  | -0.17717 | 0.00012  | -0.05562 | 0.23029  |
| 0.1676   | -0.23039 | 4.82E-07 | -0.18647 | 5.02E-05 |
| 0.6256   | -0.12415 | 0.00723  | -0.1296  | 0.00503  |
| 0.01887  | -0.01247 | 0.78808  | -0.24186 | 1.21E-07 |
| 0.07117  | -0.15174 | 0.001    | -0.39546 | 6.23E-19 |
| 0.01588  | -0.19959 | 1.39E-05 | -0.13106 | 0.00456  |
| 1.63E-11 | -0.06357 | 0.17026  | 0.119127 | 0.00998  |
| 0.2099   | -0.2402  | 1.49E-07 | 0.216434 | 2.35E-06 |
| 0.0547   | -0.104   | 0.0246   | -0.27754 | 1.05E-09 |
| 0.06491  | -0.09892 | 0.03258  | -0.28193 | 5.56E-10 |
| 0.00223  | -0.05826 | 0.20883  | -0.01349 | 0.77117  |
| 0.22879  | -0.227   | 7.15E-07 | -0.18711 | 4.73E-05 |
| 0.08275  | -0.15551 | 0.00075  | -0.0137  | 0.76774  |
| 0.12603  | -0.28947 | 1.82E-10 | 0.17092  | 0.00021  |
| 0.04483  | -0.19052 | 3.41E-05 | 0.170666 | 0.00021  |
| 0.10812  | -0.17289 | 0.00017  | 0.017106 | 0.71235  |
| 4.29E-05 | -0.22607 | 7.96E-07 | 0.215116 | 2.72E-06 |
| 0.00094  | -0.15349 | 0.00088  | 0.196401 | 1.91E-05 |
| 0.01389  | -0.28041 | 6.93E-10 | 0.154138 | 0.00083  |
| 0.00487  | -0.03809 | 0.41152  | -0.30807 | 1.00E-11 |
| 0.02491  | -0.12184 | 0.0084   | -0.12679 | 0.00607  |
| 5.29E-05 | -0.09669 | 0.03673  | 0.006641 | 0.88619  |



|          |          |          |          |          |
|----------|----------|----------|----------|----------|
| 1.64E-05 | -0.11103 | 0.01638  | 0.080953 | 0.08054  |
| 0.29654  | -0.23284 | 3.61E-07 | -0.24039 | 1.45E-07 |
| 0.00089  | -0.16208 | 0.00044  | 0.143011 | 0.00195  |
| 6.07E-08 | -0.03289 | 0.47834  | 0.015451 | 0.73912  |
| 4.76E-10 | 0.103466 | 0.02536  | -0.05982 | 0.19687  |
| 0.74632  | -0.11738 | 0.01113  | -0.16329 | 0.0004   |
| 8.24E-10 | -0.0595  | 0.19932  | -0.03356 | 0.46939  |
| 0.15308  | -0.2633  | 7.61E-09 | 0.022723 | 0.62428  |
| 0.10104  | -0.09143 | 0.04831  | -0.16506 | 0.00034  |
| 0.02547  | -0.1077  | 0.01991  | -0.07291 | 0.11563  |
| 0.00931  | -0.0134  | 0.7727   | -0.28202 | 5.49E-10 |
| 0.40763  | -0.06447 | 0.16423  | -0.1249  | 0.00688  |
| 6.56E-05 | -0.02714 | 0.55851  | -0.15155 | 0.00102  |
| 0.93115  | -0.09321 | 0.04409  | -0.17456 | 0.00015  |
| 0.14899  | -0.16843 | 0.00026  | 0.079586 | 0.0858   |
| 0.13274  | 0.164027 | 0.00037  | 0.207403 | 6.21E-06 |
| 0.00603  | 0.164191 | 0.00037  | -0.10946 | 0.01797  |
| 2.45E-26 | -0.0006  | 0.98975  | 0.206661 | 6.71E-06 |
| 0.0688   | -0.18712 | 4.72E-05 | -0.04107 | 0.37591  |
| 0.03677  | -0.10338 | 0.02548  | -0.08026 | 0.08318  |
| 0.89361  | -0.11905 | 0.01003  | -0.01873 | 0.68641  |
| 4.26E-05 | -0.18886 | 4.00E-05 | 0.357296 | 1.65E-15 |
| 0.10015  | -0.11727 | 0.01121  | -0.04705 | 0.31031  |
| 0.21118  | -0.04955 | 0.28522  | -0.15097 | 0.00107  |
| 4.78E-06 | -0.11806 | 0.01067  | 0.181605 | 7.92E-05 |
| 0.00377  | 0.091466 | 0.04822  | -0.17308 | 0.00017  |
| 0.1457   | -0.12182 | 0.00841  | -0.02945 | 0.5255   |
| 4.04E-05 | -0.21726 | 2.15E-06 | 0.130334 | 0.00479  |
| 0.00885  | -0.11085 | 0.01655  | -0.20644 | 6.87E-06 |
| 2.31E-06 | -0.20623 | 7.02E-06 | 0.135776 | 0.00328  |
| 2.39E-05 | -0.18868 | 4.07E-05 | 0.081686 | 0.07782  |
| 9.49E-06 | -0.05559 | 0.23054  | 0.066338 | 0.15234  |
| 1.97E-07 | -0.00775 | 0.86741  | -0.01806 | 0.69705  |
| 0.00322  | -0.0999  | 0.03089  | 0.002648 | 0.9545   |
| 0.84244  | -0.08353 | 0.07134  | -0.40905 | 2.90E-20 |
| 0.26078  | -0.19925 | 1.44E-05 | -0.07517 | 0.10473  |
| 0.00011  | -0.1789  | 0.0001   | -0.05543 | 0.2319   |
| 2.73E-05 | -0.20243 | 1.04E-05 | 0.148365 | 0.0013   |
| 0.0001   | -0.10951 | 0.01792  | 0.012347 | 0.79014  |
| 0.00833  | -0.00909 | 0.84471  | 0.056016 | 0.22696  |
| 0.25926  | -0.09901 | 0.03242  | -0.24461 | 8.63E-08 |
| 0.15107  | -0.14372 | 0.00185  | -0.09573 | 0.03865  |
| 0.00613  | -0.18222 | 7.48E-05 | -0.01893 | 0.68319  |
| 6.94E-07 | -0.08986 | 0.0523   | 0.30937  | 8.14E-12 |
| 7.90E-06 | -0.10721 | 0.02049  | 0.065923 | 0.15493  |

|          |          |          |          |          |
|----------|----------|----------|----------|----------|
| 2.19E-07 | -0.15545 | 0.00075  | 0.21128  | 4.11E-06 |
| 2.59E-08 | -0.20713 | 6.39E-06 | 0.170349 | 0.00022  |
| 0.27379  | -0.08918 | 0.05412  | -0.19988 | 1.35E-05 |
| 0.9791   | -0.22248 | 1.20E-06 | 0.007314 | 0.87474  |
| 0.00057  | -0.06725 | 0.1468   | 0.007009 | 0.87993  |
| 7.42E-16 | 0.052811 | 0.25471  | 0.087846 | 0.05783  |
| 6.61E-05 | -0.08225 | 0.07579  | 0.015504 | 0.73825  |
| 2.85E-11 | -0.07376 | 0.11143  | 0.066091 | 0.15388  |
| 6.14E-07 | -0.11335 | 0.01425  | 0.015973 | 0.73064  |
| 0.09934  | 0.077569 | 0.09407  | 0.10002  | 0.03069  |
| 0.46336  | -0.12269 | 0.00795  | -0.10755 | 0.02009  |
| 0.64758  | -0.19031 | 3.48E-05 | -0.01801 | 0.69793  |
| 0.01546  | -0.10655 | 0.02128  | -0.2211  | 1.40E-06 |
| 0.12747  | -0.16678 | 0.00029  | 0.073801 | 0.11122  |
| 1.51E-06 | 0.084155 | 0.06922  | -0.22828 | 6.17E-07 |
| 2.77E-05 | -0.11183 | 0.01562  | -0.02416 | 0.60255  |
| 0.01363  | -0.08879 | 0.0552   | -0.15521 | 0.00076  |
| 1.17E-12 | 0.09258  | 0.04554  | 0.161965 | 0.00044  |
| 1.09E-05 | -0.15509 | 0.00077  | -0.03622 | 0.43486  |
| 0.00031  | -0.16934 | 0.00024  | -0.0069  | 0.88179  |
| 0.10758  | -0.09599 | 0.03811  | 0.073347 | 0.11344  |
| 0.92093  | -0.21568 | 2.55E-06 | 0.066174 | 0.15336  |
| 0.00321  | 0.482133 | 1.48E-28 | -0.07218 | 0.11933  |
| 0.00366  | -0.04085 | 0.37844  | -0.13791 | 0.00282  |
| 0.0002   | -0.07734 | 0.09503  | 0.051521 | 0.26651  |
| 2.67E-08 | -0.0814  | 0.07886  | -0.00569 | 0.90234  |
| 6.29E-10 | 0.001615 | 0.97224  | 0.270468 | 2.85E-09 |
| 0.01083  | -0.16556 | 0.00033  | -0.08618 | 0.06277  |
| 2.82E-06 | -0.04474 | 0.33465  | -0.0776  | 0.09394  |
| 0.00015  | -0.15785 | 0.00062  | 0.048269 | 0.29792  |
| 0.17952  | 0.005877 | 0.89921  | -0.18158 | 7.94E-05 |
| 0.10452  | -0.16847 | 0.00026  | 0.005369 | 0.90788  |
| 5.96E-08 | 0.077337 | 0.09506  | 0.215154 | 2.70E-06 |
| 2.76E-07 | -0.03517 | 0.44832  | 0.113842 | 0.01383  |
| 0.00059  | -0.08556 | 0.06467  | 0.197007 | 1.80E-05 |
| 2.62E-05 | -0.12617 | 0.00633  | -0.02285 | 0.62231  |
| 7.36E-07 | 0.008834 | 0.849    | 0.129269 | 0.00515  |
| 0.00019  | -0.00629 | 0.89216  | -0.06055 | 0.1915   |
| 0.0005   | -0.08252 | 0.07481  | 0.069252 | 0.13509  |
| 0.0004   | -0.0892  | 0.05407  | -0.08385 | 0.07024  |
| 0.00227  | -0.23554 | 2.62E-07 | 0.146591 | 0.00149  |
| 0.00242  | -0.15083 | 0.00108  | 0.213217 | 3.34E-06 |
| 4.12E-07 | -0.08795 | 0.05753  | 0.18372  | 6.51E-05 |
| 8.94E-06 | 0.076927 | 0.09683  | 0.02947  | 0.52524  |
| 2.14E-05 | -0.11655 | 0.01172  | 0.038464 | 0.40693  |

|          |          |          |          |          |
|----------|----------|----------|----------|----------|
| 5.00E-06 | -0.00494 | 0.9152   | -0.0486  | 0.29461  |
| 0.49223  | -0.17437 | 0.00015  | -0.32412 | 6.95E-13 |
| 0.00361  | -0.15369 | 0.00086  | 0.077777 | 0.09319  |
| 0.0584   | -0.22882 | 5.79E-07 | 0.040509 | 0.38244  |
| 2.25E-07 | -0.02399 | 0.60506  | -0.06807 | 0.14191  |
| 0.08956  | -0.17792 | 0.00011  | -0.00808 | 0.86176  |
| 0.00017  | -0.04005 | 0.3879   | 0.2135   | 3.24E-06 |
| 2.25E-05 | -0.1461  | 0.00155  | 0.119403 | 0.0098   |
| 7.21E-05 | -0.1457  | 0.00159  | 0.150582 | 0.0011   |
| 0.00225  | -0.13172 | 0.00435  | 0.0663   | 0.15258  |
| 0.08013  | -0.06402 | 0.16722  | -0.20614 | 7.09E-06 |
| 0.07454  | -0.25746 | 1.66E-08 | 0.209136 | 5.17E-06 |
| 1.12E-07 | -0.04861 | 0.29455  | 0.190347 | 3.47E-05 |
| 0.024    | -0.15396 | 0.00084  | 0.047288 | 0.30786  |
| 0.02057  | -0.21715 | 2.17E-06 | -0.12842 | 0.00545  |
| 0.22594  | -0.1443  | 0.00177  | -0.18607 | 5.22E-05 |
| 0.39242  | -0.12674 | 0.00609  | -0.29851 | 4.57E-11 |
| 0.96348  | -0.08599 | 0.06335  | -0.24819 | 5.50E-08 |
| 2.00E-17 | 0.216543 | 2.32E-06 | 0.12201  | 0.0083   |
| 0.18679  | -0.15324 | 0.00089  | -0.00132 | 0.97738  |
| 0.07461  | -0.21708 | 2.19E-06 | -0.01526 | 0.74221  |
| 0.00186  | -0.05633 | 0.22439  | -0.00253 | 0.95643  |
| 0.78107  | -0.08455 | 0.06793  | -0.20638 | 6.91E-06 |
| 0.08278  | -0.19582 | 2.03E-05 | -0.06768 | 0.14421  |
| 4.68E-10 | -0.12865 | 0.00536  | 0.291129 | 1.42E-10 |
| 6.17E-08 | -0.01114 | 0.81025  | 0.075279 | 0.10422  |
| 0.01049  | -0.09567 | 0.03876  | -0.17057 | 0.00021  |
| 3.15E-05 | -0.15676 | 0.00067  | 0.048169 | 0.29892  |
| 0.00756  | -0.05125 | 0.26908  | -0.18227 | 7.45E-05 |
| 0.00045  | 0.002413 | 0.95852  | -0.01082 | 0.81562  |
| 0.13009  | -0.06427 | 0.16559  | 0.059745 | 0.19747  |
| 0.00033  | -0.17528 | 0.00014  | 0.200694 | 1.24E-05 |
| 0.01283  | -0.0334  | 0.47149  | -0.20694 | 6.51E-06 |
| 0.00021  | -0.21856 | 1.86E-06 | 0.132794 | 0.00404  |
| 0.00336  | 0.11677  | 0.01156  | -0.07561 | 0.10271  |
| 0.1311   | 0.078323 | 0.09091  | -0.01018 | 0.82634  |
| 0.07222  | -0.02395 | 0.60568  | -0.01785 | 0.70037  |
| 8.93E-12 | -0.1106  | 0.0168   | 0.18456  | 6.02E-05 |
| 2.45E-10 | -0.12765 | 0.00574  | 0.16196  | 0.00044  |
| 0.00104  | -0.19941 | 1.42E-05 | 0.157124 | 0.00066  |
| 0.08938  | -0.24327 | 1.02E-07 | 0.048102 | 0.29959  |
| 0.0003   | -0.14277 | 0.00198  | 0.10907  | 0.01839  |
| 3.40E-10 | -0.04693 | 0.31158  | 0.249675 | 4.55E-08 |
| 0.25723  | 0.214581 | 2.88E-06 | 0.231681 | 4.14E-07 |
| 0.00283  | -0.18454 | 6.03E-05 | 0.111602 | 0.01583  |

|          |          |          |          |          |
|----------|----------|----------|----------|----------|
| 0.01452  | -0.15451 | 0.00081  | -0.08918 | 0.05412  |
| 0.03889  | -0.22742 | 6.81E-07 | 0.047007 | 0.31075  |
| 1.06E-05 | -0.1728  | 0.00018  | 0.306043 | 1.39E-11 |
| 0.16281  | -0.01795 | 0.69891  | -0.2624  | 8.59E-09 |
| 2.82E-06 | -0.0581  | 0.21011  | -0.11505 | 0.01285  |
| 0.04502  | -0.21252 | 3.60E-06 | -0.18633 | 5.09E-05 |
| 2.39E-07 | -0.09964 | 0.03134  | 0.112769 | 0.01476  |
| 0.11442  | -0.06602 | 0.15435  | 0.031928 | 0.49127  |
| 1.01E-05 | -0.06491 | 0.16136  | 0.14779  | 0.00136  |
| 0.24201  | -0.21743 | 2.11E-06 | 0.001835 | 0.96846  |
| 0.32533  | -0.21385 | 3.12E-06 | 0.028605 | 0.53748  |
| 0.00426  | -0.09626 | 0.03757  | 0.111203 | 0.01621  |
| 5.74E-07 | -0.14868 | 0.00127  | 0.137643 | 0.00288  |
| 0.05024  | -0.06042 | 0.19245  | -0.20739 | 6.21E-06 |
| 0.01154  | -0.14156 | 0.00217  | -0.07171 | 0.12176  |
| 0.30596  | -0.08125 | 0.07944  | -0.17369 | 0.00016  |
| 0.00025  | -0.15723 | 0.00065  | -0.13705 | 0.003    |
| 7.04E-05 | 0.010561 | 0.81994  | -0.12071 | 0.00902  |
| 1.16E-08 | -0.04615 | 0.31965  | -0.07832 | 0.09093  |
| 0.58917  | -0.25101 | 3.84E-08 | -0.02565 | 0.58028  |
| 0.00836  | -0.17795 | 0.00011  | -0.07045 | 0.12847  |
| 5.32E-05 | -0.04544 | 0.32716  | 0.119934 | 0.00948  |
| 0.00143  | -0.17014 | 0.00022  | -0.02762 | 0.55163  |
| 2.92E-06 | -0.17447 | 0.00015  | 0.155506 | 0.00075  |
| 1.34E-07 | 0.148124 | 0.00133  | -0.20141 | 1.16E-05 |
| 1.09E-05 | -0.02887 | 0.53377  | -0.04954 | 0.28533  |
| 0.00293  | -0.18859 | 4.11E-05 | 0.052319 | 0.25916  |
| 1.66E-05 | -0.156   | 0.00072  | 0.029384 | 0.52645  |
| 8.07E-05 | -0.07333 | 0.1135   | 0.205447 | 7.62E-06 |
| 0.0189   | -0.00728 | 0.87532  | -0.15187 | 0.00099  |
| 0.00511  | -0.155   | 0.00078  | 0.03633  | 0.43348  |
| 0.15737  | -0.14929 | 0.00121  | 0.004898 | 0.91593  |
| 0.96592  | -0.12797 | 0.00561  | -0.14508 | 0.00167  |
| 0.00052  | 0.081999 | 0.07669  | -0.05158 | 0.26595  |
| 0.13172  | -0.15934 | 0.00055  | -0.07434 | 0.10863  |
| 0.00327  | -0.0759  | 0.10139  | -0.02725 | 0.55687  |
| 4.92E-07 | 0.026159 | 0.57284  | 0.105842 | 0.02216  |
| 0.06658  | -0.16761 | 0.00027  | -0.08139 | 0.07891  |
| 0.04191  | -0.07418 | 0.1094   | -0.16691 | 0.00029  |
| 0.00061  | -0.12566 | 0.00655  | 0.024322 | 0.60008  |
| 0.36248  | -0.1955  | 2.09E-05 | -0.17201 | 0.00019  |
| 7.62E-08 | -0.0629  | 0.1748   | -0.06693 | 0.14869  |
| 0.20627  | -0.18245 | 7.33E-05 | -0.15916 | 0.00056  |
| 0.10684  | -0.19182 | 3.01E-05 | -0.12982 | 0.00496  |
| 0.00031  | -0.01974 | 0.67052  | -0.07209 | 0.11975  |

|          |          |          |          |          |
|----------|----------|----------|----------|----------|
| 0.01927  | -0.13269 | 0.00407  | -0.04351 | 0.34816  |
| 9.16E-09 | 0.043647 | 0.34663  | 0.062439 | 0.17798  |
| 0.10806  | -0.25592 | 2.03E-08 | -0.10467 | 0.02369  |
| 0.49086  | -0.18686 | 4.84E-05 | -0.23863 | 1.80E-07 |
| 3.65E-14 | -0.06538 | 0.15839  | 0.266815 | 4.71E-09 |
| 2.37E-06 | 0.028028 | 0.54572  | -0.20939 | 5.03E-06 |
| 3.46E-09 | -0.07688 | 0.09704  | 0.113657 | 0.01399  |
| 0.00033  | -0.0408  | 0.379    | 0.098811 | 0.03277  |
| 0.00386  | -0.15363 | 0.00087  | 0.133333 | 0.0039   |
| 7.23E-06 | -0.1283  | 0.00549  | -0.02934 | 0.52708  |
| 0.00931  | -0.22304 | 1.12E-06 | -0.09683 | 0.03645  |
| 1.33E-05 | -0.13945 | 0.00253  | 0.054641 | 0.23859  |
| 5.48E-08 | -0.135   | 0.00347  | 0.067409 | 0.14582  |
| 0.62969  | 0.032911 | 0.47801  | 0.274514 | 1.61E-09 |
| 0.00319  | -0.22542 | 8.57E-07 | 0.119254 | 0.0099   |
| 5.97E-05 | -0.1236  | 0.00749  | 0.139372 | 0.00254  |
| 0.43693  | -0.19572 | 2.05E-05 | -0.16182 | 0.00045  |
| 0.05216  | -0.24869 | 5.17E-08 | 0.153082 | 0.0009   |
| 0.01862  | -0.0987  | 0.03298  | -0.15076 | 0.00108  |
| 1.03E-13 | 0.042022 | 0.3649   | 0.176524 | 0.00013  |
| 2.30E-09 | 0.03065  | 0.50879  | 0.186595 | 4.97E-05 |
| 0.46216  | -0.15345 | 0.00088  | -0.23434 | 3.02E-07 |
| 0.00037  | -0.04428 | 0.33968  | -0.09901 | 0.03243  |
| 9.27E-10 | -0.07471 | 0.10689  | 0.080315 | 0.08296  |
| 1.63E-05 | -0.12398 | 0.00731  | 0.177127 | 0.00012  |
| 1.69E-11 | -0.02631 | 0.57062  | 0.041439 | 0.3716   |
| 6.27E-05 | 0.044307 | 0.33938  | -0.12507 | 0.00681  |
| 0.00745  | -0.20881 | 5.35E-06 | 0.003772 | 0.93521  |
| 0.00364  | -0.03951 | 0.39426  | -0.07731 | 0.09517  |
| 0.12439  | -0.24199 | 1.19E-07 | -0.06892 | 0.13699  |
| 0.86546  | -0.0699  | 0.13148  | -0.30262 | 2.40E-11 |
| 0.00566  | -0.25733 | 1.69E-08 | -0.23733 | 2.11E-07 |
| 0.02079  | -0.08839 | 0.05629  | 0.001546 | 0.97341  |
| 0.00154  | -0.10577 | 0.02225  | -0.00699 | 0.8803   |
| 0.13949  | -0.07699 | 0.09658  | -0.00264 | 0.95456  |
| 0.02736  | -0.14433 | 0.00177  | 0.309445 | 8.04E-12 |
| 6.14E-07 | 0.074868 | 0.10613  | 0.010953 | 0.81338  |
| 0.0028   | -0.03557 | 0.44317  | -0.14136 | 0.0022   |
| 5.45E-06 | -0.08172 | 0.07769  | -0.08232 | 0.07552  |
| 0.00037  | -0.13929 | 0.00255  | -0.0844  | 0.06843  |
| 2.47E-05 | -0.1044  | 0.02406  | -0.12228 | 0.00816  |
| 0.12433  | -0.04246 | 0.35988  | -0.0118  | 0.79926  |
| 7.44E-06 | -0.06732 | 0.14634  | -0.12856 | 0.0054   |
| 0.01332  | -0.17387 | 0.00016  | -0.15141 | 0.00103  |
| 4.55E-11 | -0.0852  | 0.06583  | 0.076015 | 0.10086  |

|          |          |          |          |          |
|----------|----------|----------|----------|----------|
| 0.70033  | -0.25638 | 1.91E-08 | -0.15897 | 0.00056  |
| 0.00647  | -0.19132 | 3.16E-05 | -0.01354 | 0.77038  |
| 0.65908  | -0.12049 | 0.00915  | -0.05457 | 0.23918  |
| 0.00077  | -0.06126 | 0.1863   | -0.17491 | 0.00015  |
| 0.66225  | -0.06985 | 0.13175  | -0.2072  | 6.34E-06 |
| 0.03861  | -0.22002 | 1.58E-06 | 0.162441 | 0.00042  |
| 0.01577  | -0.20362 | 9.20E-06 | -0.02175 | 0.6392   |
| 1.31E-07 | -0.01167 | 0.80135  | 0.046719 | 0.31372  |
| 0.00441  | -0.07464 | 0.10719  | -0.05626 | 0.22496  |
| 1.43E-12 | -0.02555 | 0.58179  | 0.166798 | 0.00029  |
| 1.74E-06 | -0.02049 | 0.65877  | -0.02092 | 0.65211  |
| 0.00403  | -0.16529 | 0.00033  | 0.046186 | 0.31927  |
| 0.00234  | -0.1424  | 0.00204  | 0.101234 | 0.02871  |
| 0.0003   | -0.15438 | 0.00082  | 0.094884 | 0.0404   |
| 0.13632  | -0.14455 | 0.00174  | -0.14265 | 0.002    |
| 0.26457  | -0.19489 | 2.22E-05 | -0.12481 | 0.00692  |
| 0.00033  | -0.05435 | 0.24109  | -0.06699 | 0.14835  |
| 1.08E-08 | -0.08717 | 0.05979  | 0.115728 | 0.01233  |
| 0.00174  | -0.15564 | 0.00074  | -0.05125 | 0.26902  |
| 0.34636  | -0.13399 | 0.00372  | -0.14764 | 0.00138  |
| 0.76736  | -0.20228 | 1.06E-05 | -0.09106 | 0.04922  |
| 0.0027   | -0.15189 | 0.00099  | 0.194375 | 2.34E-05 |
| 0.47749  | -0.21815 | 1.95E-06 | 0.001739 | 0.9701   |
| 7.80E-05 | 0.072794 | 0.11619  | 0.23655  | 2.32E-07 |
| 1.26E-06 | -0.1465  | 0.0015   | 0.003101 | 0.94671  |
| 3.49E-06 | -0.18741 | 4.59E-05 | 0.046112 | 0.32006  |
| 0.13858  | -0.12422 | 0.0072   | -0.15512 | 0.00077  |
| 5.72E-05 | -0.00984 | 0.83205  | -0.18934 | 3.82E-05 |
| 8.53E-08 | -0.18768 | 4.48E-05 | 0.286834 | 2.70E-10 |
| 0.01175  | -0.15728 | 0.00065  | 0.100353 | 0.03013  |
| 0.17495  | -0.13239 | 0.00416  | 0.00777  | 0.86701  |
| 0.31572  | -0.10277 | 0.02636  | -0.04303 | 0.35352  |
| 0.83016  | 0.179792 | 9.35E-05 | 0.037022 | 0.42476  |
| 0.00243  | -0.05601 | 0.22703  | -0.08388 | 0.07014  |
| 0.01775  | 0.033568 | 0.46927  | 0.113382 | 0.01422  |
| 3.67E-13 | 0.020931 | 0.65188  | -0.05104 | 0.27101  |
| 1.40E-07 | -0.10014 | 0.03049  | 0.304554 | 1.77E-11 |
| 2.56E-05 | -0.18209 | 7.57E-05 | 0.198587 | 1.54E-05 |
| 0.02081  | -0.09369 | 0.04301  | 0.08276  | 0.07398  |
| 9.11E-07 | -0.10141 | 0.02843  | -0.02412 | 0.60318  |
| 0.01812  | 0.49793  | 1.25E-30 | -0.20271 | 1.01E-05 |
| 0.00038  | -0.12263 | 0.00798  | -0.03206 | 0.48952  |
| 4.95E-05 | -0.22494 | 9.06E-07 | -0.22571 | 8.29E-07 |
| 0.12515  | -0.22297 | 1.13E-06 | -0.12787 | 0.00565  |
| 1.73E-07 | -0.08416 | 0.0692   | 0.107153 | 0.02055  |

|          |          |          |          |          |
|----------|----------|----------|----------|----------|
| 1.18E-05 | -0.18634 | 5.09E-05 | 0.255534 | 2.14E-08 |
| 0.53533  | -0.0843  | 0.06873  | -0.10567 | 0.02239  |
| 0.01551  | 0.040391 | 0.38383  | -0.13197 | 0.00428  |
| 0.08768  | -0.19132 | 3.16E-05 | 0.173176 | 0.00017  |
| 5.14E-07 | -0.14027 | 0.00238  | 0.134805 | 0.00352  |
| 0.00965  | -0.07513 | 0.10491  | 0.008122 | 0.86105  |
| 0.00164  | -0.14826 | 0.00131  | 0.102553 | 0.02669  |
| 6.06E-06 | -0.11361 | 0.01403  | 0.076513 | 0.09865  |
| 0.00029  | -0.08979 | 0.05249  | 0.118902 | 0.01012  |
| 0.42261  | -0.23413 | 3.10E-07 | -0.04513 | 0.33047  |
| 4.86E-05 | -0.11629 | 0.01191  | 0.232904 | 3.58E-07 |
| 0.02564  | -0.18778 | 4.44E-05 | -0.07969 | 0.08539  |
| 0.91443  | -0.27375 | 1.80E-09 | 0.095504 | 0.03911  |
| 0.00273  | 0.059402 | 0.20006  | -0.34041 | 3.92E-14 |
| 0.02273  | -0.03215 | 0.48821  | -0.31314 | 4.40E-12 |
| 0.81667  | -0.1259  | 0.00644  | -0.13194 | 0.00429  |
| 0.08268  | -0.18614 | 5.19E-05 | 0.079761 | 0.08511  |
| 0.00393  | -0.24605 | 7.21E-08 | 0.030595 | 0.50954  |
| 8.43E-08 | -0.12992 | 0.00493  | 0.267002 | 4.59E-09 |
| 9.13E-05 | -0.15213 | 0.00097  | 0.16447  | 0.00036  |
| 0.04672  | -0.12818 | 0.00554  | -0.15394 | 0.00084  |
| 0.01653  | -0.06112 | 0.18736  | -0.14684 | 0.00146  |
| 0.00036  | -0.06285 | 0.17513  | -0.01931 | 0.67724  |
| 0.38851  | -0.21012 | 4.65E-06 | -0.23253 | 3.75E-07 |
| 0.01711  | -0.10741 | 0.02025  | -0.26407 | 6.86E-09 |
| 1.72E-06 | -0.0336  | 0.4688   | -0.15794 | 0.00061  |
| 0.00603  | -0.01223 | 0.79203  | -0.06394 | 0.16774  |
| 0.00669  | -0.14423 | 0.00178  | -0.16111 | 0.00047  |
| 1.34E-05 | -0.01576 | 0.73408  | -0.05806 | 0.21042  |
| 0.04784  | -0.10445 | 0.02399  | 0.066997 | 0.1483   |
| 0.00394  | -0.13553 | 0.00334  | -0.12865 | 0.00537  |
| 5.90E-08 | -0.07053 | 0.12803  | 0.171205 | 0.0002   |
| 0.00612  | -0.15676 | 0.00067  | -0.08009 | 0.08383  |
| 0.00012  | 0.112979 | 0.01457  | -0.17199 | 0.00019  |
| 0.0001   | -0.1802  | 9.01E-05 | 0.137318 | 0.00294  |
| 0.00275  | -0.14872 | 0.00127  | -0.02634 | 0.57021  |
| 4.22E-06 | -0.01533 | 0.74112  | 0.181776 | 7.79E-05 |
| 0.46479  | -0.09506 | 0.04004  | -0.1545  | 0.00081  |
| 4.35E-05 | 0.095094 | 0.03996  | 0.012855 | 0.78174  |
| 0.00434  | -0.03347 | 0.47053  | -0.06969 | 0.13262  |
| 0.0052   | -0.15927 | 0.00055  | 0.07222  | 0.11911  |
| 0.0002   | -0.10149 | 0.0283   | -0.1439  | 0.00182  |
| 0.12451  | -0.11967 | 0.00964  | 0.080097 | 0.0838   |
| 0.00303  | -0.13902 | 0.00261  | 0.115968 | 0.01215  |
| 6.89E-05 | -0.0572  | 0.21729  | 0.026666 | 0.56542  |

|          |          |          |          |          |
|----------|----------|----------|----------|----------|
| 0.30422  | -0.17537 | 0.00014  | -0.07821 | 0.09138  |
| 6.00E-06 | -0.06643 | 0.15176  | 0.164694 | 0.00035  |
| 0.08042  | -0.06171 | 0.18312  | -0.23809 | 1.92E-07 |
| 0.04082  | -0.22394 | 1.02E-06 | -0.1471  | 0.00143  |
| 0.97717  | -0.12133 | 0.00867  | 0.046968 | 0.31115  |
| 9.80E-06 | -0.04808 | 0.29981  | -0.11956 | 0.00971  |
| 0.005    | -0.195   | 2.20E-05 | -0.09656 | 0.03698  |
| 0.00017  | -0.17026 | 0.00022  | 0.146091 | 0.00155  |
| 3.33E-08 | -0.08545 | 0.06504  | -0.04392 | 0.34359  |
| 0.00259  | -0.21719 | 2.16E-06 | 0.083661 | 0.07088  |
| 3.30E-07 | -0.03344 | 0.47103  | 0.232724 | 3.66E-07 |
| 4.30E-07 | -0.00389 | 0.93315  | 0.010786 | 0.81617  |
| 7.07E-05 | 0.051577 | 0.266    | -0.10741 | 0.02026  |
| 0.01145  | -0.06486 | 0.16171  | -0.16671 | 0.0003   |
| 0.17718  | -0.21814 | 1.95E-06 | -0.08296 | 0.07329  |
| 0.41497  | -0.13347 | 0.00386  | -0.02999 | 0.51799  |
| 0.91225  | -0.2462  | 7.07E-08 | -0.09298 | 0.04461  |
| 0.05503  | 0.006566 | 0.88746  | -0.26464 | 6.34E-09 |
| 0.75618  | -0.16418 | 0.00037  | -0.28129 | 6.10E-10 |
| 6.82E-06 | -0.04896 | 0.29101  | 0.061437 | 0.18505  |
| 0.00331  | -0.04088 | 0.37812  | -0.12071 | 0.00902  |
| 4.26E-11 | -0.11692 | 0.01145  | 0.278872 | 8.66E-10 |
| 0.00257  | -0.20651 | 6.82E-06 | -0.00062 | 0.98938  |
| 0.00156  | 0.012626 | 0.78552  | -0.02987 | 0.51959  |
| 9.09E-05 | -0.21042 | 4.51E-06 | 0.275868 | 1.33E-09 |
| 0.00318  | -0.00547 | 0.90609  | 0.153275 | 0.00089  |
| 0.01047  | -0.1207  | 0.00903  | 0.181915 | 7.69E-05 |
| 4.20E-05 | -0.21962 | 1.65E-06 | -0.33068 | 2.23E-13 |
| 4.68E-08 | -0.04119 | 0.37443  | 0.160685 | 0.00049  |
| 0.00183  | -0.06299 | 0.17419  | 0.271732 | 2.39E-09 |
| 0.00011  | -0.13567 | 0.00331  | 0.179959 | 9.21E-05 |
| 2.61E-06 | -0.13341 | 0.00387  | 0.208297 | 5.65E-06 |
| 0.80678  | -0.24313 | 1.04E-07 | -0.12519 | 0.00675  |
| 0.01202  | -0.01308 | 0.77807  | -0.07314 | 0.11446  |
| 0.03335  | -0.17737 | 0.00012  | -0.02143 | 0.64411  |
| 0.00014  | -0.14551 | 0.00162  | 0.053235 | 0.2509   |
| 0.00582  | -0.17672 | 0.00012  | 0.024434 | 0.59842  |
| 0.00088  | -0.02463 | 0.59545  | -0.08348 | 0.07148  |
| 0.12474  | -0.21817 | 1.94E-06 | 0.132985 | 0.00399  |
| 0.36134  | -0.12997 | 0.00491  | -0.11382 | 0.01385  |
| 0.07348  | -0.20073 | 1.24E-05 | 0.023068 | 0.61902  |
| 2.02E-07 | 0.005822 | 0.90014  | -0.01436 | 0.75686  |
| 1.45E-05 | 0.021039 | 0.65019  | -0.172   | 0.00019  |
| 1.84E-05 | -0.03799 | 0.4127   | -0.02777 | 0.54937  |
| 0.00035  | -0.07256 | 0.11737  | -0.1375  | 0.00291  |



|          |          |          |          |          |
|----------|----------|----------|----------|----------|
| 1.13E-06 | -0.112   | 0.01546  | 0.11958  | 0.0097   |
| 0.04745  | -0.17289 | 0.00017  | -0.00193 | 0.96686  |
| 0.02719  | -0.16079 | 0.00049  | -0.12127 | 0.00871  |
| 0.00011  | -0.05458 | 0.23907  | -0.03048 | 0.51114  |
| 0.08616  | -0.1901  | 3.55E-05 | -0.19597 | 2.00E-05 |
| 0.01757  | -0.16688 | 0.00029  | -0.09288 | 0.04484  |
| 0.04082  | -0.08716 | 0.05982  | -0.18785 | 4.41E-05 |
| 0.00098  | -0.08281 | 0.07382  | 0.101448 | 0.02837  |
| 3.53E-05 | -0.19163 | 3.06E-05 | 0.146621 | 0.00149  |
| 0.02035  | -0.07678 | 0.09748  | -0.09942 | 0.03171  |
| 0.00045  | -0.19808 | 1.62E-05 | 0.161366 | 0.00046  |
| 1.21E-05 | -0.18409 | 6.28E-05 | 0.16209  | 0.00044  |
| 0.78532  | -0.08083 | 0.08101  | -0.15836 | 0.00059  |
| 1.90E-08 | -0.03696 | 0.42554  | 0.203788 | 9.05E-06 |
| 4.80E-07 | -0.1335  | 0.00385  | 0.060016 | 0.19544  |
| 0.02442  | -0.11232 | 0.01516  | -0.09139 | 0.0484   |
| 3.60E-10 | -0.15829 | 0.0006   | 0.200558 | 1.26E-05 |
| 6.12E-09 | -0.13229 | 0.00419  | 0.117167 | 0.01128  |
| 7.73E-07 | -0.07192 | 0.12063  | -0.04652 | 0.31578  |
| 2.11E-09 | -0.10276 | 0.02637  | 0.12182  | 0.00841  |
| 3.80E-07 | -0.04123 | 0.37403  | -0.00455 | 0.92188  |
| 0.01353  | -0.1808  | 8.53E-05 | -0.02551 | 0.58244  |
| 0.05076  | -0.19964 | 1.38E-05 | -0.2467  | 6.64E-08 |
| 0.00842  | -0.1369  | 0.00303  | -0.07256 | 0.11736  |
| 7.33E-05 | -0.1181  | 0.01064  | 0.096506 | 0.03709  |
| 0.00058  | 0.011008 | 0.81245  | 0.057914 | 0.21158  |
| 3.43E-06 | -0.01582 | 0.73306  | 0.048756 | 0.29306  |
| 5.66E-08 | 0.000645 | 0.98891  | 0.102649 | 0.02654  |
| 0.00048  | -0.09865 | 0.03307  | -0.12841 | 0.00545  |
| 0.00278  | -0.18111 | 8.29E-05 | 0.238928 | 1.74E-07 |
| 0.08384  | -0.19276 | 2.74E-05 | 0.175397 | 0.00014  |
| 0.42192  | -0.19142 | 3.13E-05 | 0.067839 | 0.14326  |
| 0.17856  | -0.21785 | 2.01E-06 | -0.10275 | 0.0264   |
| 0.23265  | -0.16457 | 0.00036  | 0.104121 | 0.02444  |
| 0.04025  | -0.2572  | 1.72E-08 | 0.13143  | 0.00444  |
| 4.03E-05 | -0.14627 | 0.00153  | 0.168587 | 0.00025  |
| 0.01496  | -0.20724 | 6.31E-06 | -0.01624 | 0.72639  |
| 0.11545  | -0.12437 | 0.00713  | -0.25133 | 3.69E-08 |
| 0.00258  | -0.12547 | 0.00663  | -0.06876 | 0.1379   |
| 0.81002  | 0.311243 | 6.00E-12 | -0.11742 | 0.0111   |
| 1.20E-11 | -0.07199 | 0.1203   | 0.012531 | 0.78709  |
| 4.47E-11 | -0.15538 | 0.00075  | 0.151404 | 0.00103  |
| 0.01331  | -0.15606 | 0.00071  | 0.027244 | 0.55702  |
| 0.00289  | -0.11338 | 0.01422  | -0.02233 | 0.63022  |
| 0.11278  | 0.312504 | 4.88E-12 | -0.06737 | 0.14604  |

|          |          |          |          |          |
|----------|----------|----------|----------|----------|
| 0.07521  | -0.03244 | 0.48431  | -0.13572 | 0.0033   |
| 0.00071  | -0.20051 | 1.27E-05 | 0.031645 | 0.49511  |
| 0.2407   | -0.20663 | 6.73E-06 | -0.03403 | 0.46323  |
| 0.64071  | -0.07656 | 0.09843  | -0.16002 | 0.00052  |
| 0.90603  | -0.16077 | 0.00049  | -0.09582 | 0.03847  |
| 6.97E-06 | -0.08095 | 0.08054  | 0.302217 | 2.56E-11 |
| 0.00341  | -0.20826 | 5.67E-06 | 0.090864 | 0.04972  |
| 0.00257  | 0.109296 | 0.01814  | 0.127347 | 0.00585  |
| 0.00027  | 0.103504 | 0.0253   | -0.02285 | 0.62238  |
| 1.78E-08 | -0.18696 | 4.80E-05 | 0.167191 | 0.00028  |
| 0.68849  | -0.16442 | 0.00036  | -0.09058 | 0.05044  |
| 3.86E-09 | -0.1848  | 5.88E-05 | 0.29053  | 1.55E-10 |
| 0.03574  | -0.23228 | 3.86E-07 | 0.119386 | 0.00981  |
| 0.60159  | -0.23089 | 4.55E-07 | 0.204034 | 8.82E-06 |
| 0.24032  | -0.29076 | 1.50E-10 | -0.17048 | 0.00021  |
| 0.28175  | -0.14248 | 0.00202  | -0.33539 | 9.69E-14 |
| 1.06E-08 | -0.05096 | 0.27172  | 0.182753 | 7.12E-05 |
| 4.33E-07 | 0.049506 | 0.28569  | -0.05632 | 0.22446  |
| 0.00364  | -0.10383 | 0.02485  | -0.34342 | 2.26E-14 |
| 4.17E-08 | -0.17936 | 9.73E-05 | 0.072212 | 0.11915  |
| 7.21E-12 | 0.036407 | 0.4325   | 0.080252 | 0.0832   |
| 2.04E-05 | -0.15589 | 0.00072  | 0.098791 | 0.03281  |
| 0.00021  | -0.13462 | 0.00356  | -0.0034  | 0.9416   |
| 1.40E-08 | -0.14157 | 0.00217  | 0.035876 | 0.43925  |
| 5.25E-05 | -0.17592 | 0.00013  | 0.328321 | 3.37E-13 |
| 2.02E-07 | -0.0522  | 0.26029  | -0.01018 | 0.82627  |
| 0.01218  | -0.14909 | 0.00123  | -0.09284 | 0.04494  |
| 6.20E-06 | -0.16896 | 0.00024  | -0.02331 | 0.61542  |
| 0.99334  | 0.191772 | 3.02E-05 | 0.30583  | 1.44E-11 |
| 0.11108  | -0.16831 | 0.00026  | -0.07969 | 0.08538  |
| 8.55E-15 | -0.03352 | 0.46994  | 0.215513 | 2.60E-06 |
| 0.02925  | -0.229   | 5.67E-07 | -0.09789 | 0.03445  |
| 7.98E-11 | -0.03719 | 0.42268  | 0.140093 | 0.00241  |
| 5.17E-10 | -0.12281 | 0.00789  | 0.121209 | 0.00874  |
| 0.03005  | -0.164   | 0.00037  | -0.17381 | 0.00016  |
| 0.14277  | -0.17623 | 0.00013  | -0.20461 | 8.31E-06 |
| 0.00023  | -0.15963 | 0.00054  | -0.07719 | 0.09569  |
| 1.10E-07 | 0.013894 | 0.76459  | 0.06915  | 0.13567  |
| 3.68E-10 | -0.08325 | 0.0723   | 0.124419 | 0.0071   |
| 2.66E-07 | 0.11015  | 0.01726  | 0.239591 | 1.60E-07 |
| 0.45707  | -0.21186 | 3.86E-06 | -0.03838 | 0.40793  |
| 0.00666  | -0.00895 | 0.84706  | -0.03411 | 0.46213  |
| 0.33781  | -0.24157 | 1.26E-07 | 0.20351  | 9.31E-06 |
| 0.45079  | -0.09255 | 0.04562  | -0.07068 | 0.1272   |
| 5.56E-06 | -0.15241 | 0.00095  | 0.147843 | 0.00136  |

|          |          |          |          |          |
|----------|----------|----------|----------|----------|
| 0.57902  | -0.17661 | 0.00012  | -0.17765 | 0.00011  |
| 0.01836  | -0.19428 | 2.36E-05 | 0.104774 | 0.02355  |
| 1.84E-06 | -0.18823 | 4.25E-05 | 0.232249 | 3.87E-07 |
| 0.17183  | -0.02438 | 0.59922  | -0.10168 | 0.02801  |
| 0.50294  | 0.087676 | 0.05832  | 0.10685  | 0.02092  |
| 0.02097  | -0.16976 | 0.00023  | 0.065512 | 0.15752  |
| 0.56097  | -0.18442 | 6.09E-05 | -0.1077  | 0.01991  |
| 0.00335  | -0.19983 | 1.36E-05 | -0.28042 | 6.92E-10 |
| 0.00138  | -0.16362 | 0.00038  | -0.02706 | 0.55963  |
| 4.12E-06 | -0.16716 | 0.00029  | 0.176698 | 0.00012  |
| 0.04348  | -0.08752 | 0.05877  | 0.102055 | 0.02743  |
| 0.03422  | 0.083925 | 0.06999  | 0.049548 | 0.28529  |
| 0.21155  | -0.09028 | 0.05121  | 0.081393 | 0.0789   |
| 8.77E-05 | -0.23856 | 1.82E-07 | 0.217683 | 2.05E-06 |
| 1.31E-05 | -0.02877 | 0.53512  | -0.02426 | 0.601    |
| 0.00132  | -0.1837  | 6.52E-05 | 0.226734 | 7.37E-07 |
| 1.93E-05 | -0.13768 | 0.00287  | 0.016738 | 0.71827  |
| 1.94E-05 | -0.18729 | 4.65E-05 | 0.03543  | 0.44496  |
| 0.32529  | 0.039711 | 0.39189  | 0.068312 | 0.14048  |
| 0.67209  | -0.13123 | 0.0045   | -0.15253 | 0.00094  |
| 0.02853  | -0.12307 | 0.00775  | -0.4092  | 2.80E-20 |
| 0.95086  | 0.011602 | 0.80254  | -0.16894 | 0.00024  |
| 0.97302  | 0.048968 | 0.29097  | 0.097576 | 0.03503  |
| 0.00018  | 0.00282  | 0.95154  | 0.313322 | 4.27E-12 |
| 0.12265  | 0.119285 | 0.00988  | -0.13773 | 0.00286  |
| 0.69573  | -0.07804 | 0.09207  | -0.01018 | 0.82625  |
| 0.14923  | -0.14109 | 0.00224  | 0.249735 | 4.52E-08 |
| 0.14119  | -0.11054 | 0.01686  | -0.2171  | 2.18E-06 |
| 0.29526  | -0.02699 | 0.5607   | -0.13273 | 0.00406  |
| 0.00013  | 0.007386 | 0.87352  | 0.096223 | 0.03765  |
| 0.00261  | -0.01086 | 0.81488  | -0.20091 | 1.22E-05 |
| 0.00069  | 0.015466 | 0.73887  | -0.09456 | 0.0411   |
| 0.38722  | -0.04218 | 0.36308  | -0.12677 | 0.00608  |
| 0.30688  | -0.13906 | 0.0026   | 0.162159 | 0.00043  |
| 0.63973  | 0.021634 | 0.64099  | 0.027477 | 0.55364  |
| 0.99738  | -0.0624  | 0.17827  | -0.25908 | 1.34E-08 |
| 0.66511  | -0.1015  | 0.0283   | -0.11578 | 0.01229  |
| 0.01924  | -0.10485 | 0.02345  | 0.197978 | 1.64E-05 |
| 0.47404  | -0.06036 | 0.19287  | -0.15311 | 0.0009   |
| 0.00612  | -0.05787 | 0.21194  | 0.007561 | 0.87055  |
| 0.00313  | 0.009095 | 0.8446   | 0.121947 | 0.00834  |
| 1.51E-06 | 0.097455 | 0.03526  | 0.175592 | 0.00014  |
| 0.00024  | 0.175603 | 0.00014  | 0.188747 | 4.05E-05 |
| 0.16545  | -0.04633 | 0.31779  | 0.14093  | 0.00227  |
| 0.33389  | 0.079037 | 0.08799  | -0.17521 | 0.00014  |

|          |          |          |          |          |
|----------|----------|----------|----------|----------|
| 0.00191  | 0.021121 | 0.64892  | -0.18791 | 4.38E-05 |
| 0.17527  | -0.09232 | 0.04615  | 0.115836 | 0.01225  |
| 0.20718  | -0.137   | 0.00301  | -0.16811 | 0.00026  |
| 0.10012  | -0.07991 | 0.08452  | 0.00049  | 0.99157  |
| 0.38223  | -0.12162 | 0.00851  | 0.02397  | 0.60538  |
| 0.0214   | 0.01     | 0.82936  | 0.111076 | 0.01633  |
| 0.50898  | -0.09007 | 0.05174  | 0.230126 | 4.97E-07 |
| 0.8195   | 0.01131  | 0.80741  | 0.072417 | 0.1181   |
| 0.1819   | -0.08519 | 0.06585  | 0.216964 | 2.22E-06 |
| 4.46E-08 | -0.04066 | 0.38064  | 0.23184  | 4.07E-07 |
| 0.03651  | -0.12502 | 0.00683  | -0.1312  | 0.00451  |
| 0.00048  | -0.00638 | 0.89062  | 0.131137 | 0.00453  |
| 0.01679  | -0.06048 | 0.19199  | 0.239045 | 1.71E-07 |
| 0.00141  | -0.00631 | 0.89191  | 0.104487 | 0.02394  |
| 0.01544  | 0.028197 | 0.5433   | -0.18271 | 7.15E-05 |
| 0.003    | -0.10013 | 0.0305   | 0.061625 | 0.18371  |
| 0.94667  | -0.15799 | 0.00061  | 0.068082 | 0.14182  |
| 0.05881  | -0.04953 | 0.28547  | 0.013043 | 0.77862  |
| 0.35926  | -0.11733 | 0.01116  | 0.21307  | 3.39E-06 |
| 6.64E-11 | -0.0177  | 0.70286  | 0.227563 | 6.70E-07 |
| 8.99E-15 | 0.221298 | 1.37E-06 | 0.126685 | 0.00612  |
| 1.58E-06 | 0.205088 | 7.91E-06 | 0.279712 | 7.67E-10 |
| 0.05685  | -0.02258 | 0.62642  | 0.03768  | 0.41657  |
| 0.04366  | -0.02778 | 0.54923  | -0.05614 | 0.22596  |
| 0.65389  | -0.04453 | 0.33695  | -0.16999 | 0.00022  |
| 0.00517  | -0.09253 | 0.04565  | 0.396963 | 4.47E-19 |
| 0.03372  | 0.03371  | 0.46739  | 0.128081 | 0.00557  |
| 0.00254  | -0.00822 | 0.85931  | -0.07    | 0.13089  |
| 0.18781  | -0.03348 | 0.47042  | 0.085928 | 0.06354  |
| 0.27132  | 0.139698 | 0.00248  | 0.125995 | 0.0064   |
| 0.00208  | -0.10272 | 0.02644  | 0.323232 | 8.10E-13 |
| 0.04642  | -0.01413 | 0.76063  | 0.117525 | 0.01103  |
| 6.01E-05 | -0.03571 | 0.44143  | 0.135427 | 0.00336  |
| 0.15691  | 0.028568 | 0.538    | 0.047069 | 0.31011  |
| 0.05149  | 0.027485 | 0.55354  | -0.22882 | 5.79E-07 |
| 0.00053  | -0.10246 | 0.02683  | 0.154096 | 0.00083  |
| 0.06941  | 0.114658 | 0.01316  | -0.01443 | 0.75585  |
| 0.0166   | -0.0027  | 0.95366  | -0.11662 | 0.01167  |
| 0.01001  | -0.03833 | 0.4086   | 0.40426  | 8.69E-20 |
| 0.02016  | -0.07887 | 0.08867  | 0.102969 | 0.02607  |
| 0.14896  | -0.03187 | 0.49199  | 0.071855 | 0.12099  |
| 0.21449  | 0.161005 | 0.00048  | -0.0221  | 0.63387  |
| 9.56E-05 | -0.07857 | 0.08989  | 0.062633 | 0.17663  |
| 0.32476  | 0.110898 | 0.01651  | -0.26595 | 5.31E-09 |
| 0.16149  | -0.03697 | 0.42539  | 0.114941 | 0.01294  |

|          |          |          |          |          |
|----------|----------|----------|----------|----------|
| 0.83241  | -0.01382 | 0.76588  | 0.081238 | 0.07947  |
| 0.96751  | 0.009862 | 0.83168  | 0.117581 | 0.01099  |
| 0.70292  | -0.08067 | 0.08159  | 0.086547 | 0.06165  |
| 0.03059  | -0.19056 | 3.40E-05 | 0.269612 | 3.20E-09 |
| 0.01928  | 0.069708 | 0.13253  | 0.239296 | 1.66E-07 |
| 4.60E-06 | -0.11222 | 0.01525  | -0.11145 | 0.01598  |
| 0.0213   | 0.001394 | 0.97603  | 0.072005 | 0.12021  |
| 0.02664  | -0.07673 | 0.0977   | 0.226568 | 7.52E-07 |
| 1.44E-07 | 0.012198 | 0.79263  | 0.411376 | 1.69E-20 |
| 0.26287  | -0.01434 | 0.75731  | -0.25183 | 3.46E-08 |
| 0.01934  | -0.0463  | 0.31811  | 0.434594 | 6.16E-23 |
| 0.11787  | 0.1312   | 0.00451  | -0.08653 | 0.06171  |
| 0.84527  | -0.06948 | 0.13378  | -0.09527 | 0.03959  |
| 0.07643  | -0.03912 | 0.39902  | -0.4018  | 1.51E-19 |
| 0.56331  | -0.08946 | 0.05337  | -0.11258 | 0.01493  |
| 0.02524  | -0.09457 | 0.04107  | 0.130218 | 0.00482  |
| 0.74902  | 0.023701 | 0.60943  | 0.094234 | 0.0418   |
| 0.21814  | -0.12309 | 0.00774  | 0.072058 | 0.11994  |
| 0.03263  | -0.11261 | 0.0149   | 0.188767 | 4.04E-05 |
| 0.00065  | 0.03446  | 0.45754  | 0.008178 | 0.86009  |
| 0.00532  | -0.02106 | 0.64981  | 0.006523 | 0.88819  |
| 0.01244  | -0.07232 | 0.1186   | 0.126157 | 0.00634  |
| 0.16157  | 0.004135 | 0.92899  | -0.15327 | 0.00089  |
| 0.41374  | -0.04645 | 0.31647  | -0.08256 | 0.07468  |
| 0.12503  | -0.13916 | 0.00258  | -0.05454 | 0.23944  |
| 0.45443  | -0.13716 | 0.00298  | -0.10425 | 0.02426  |
| 0.12801  | -0.07183 | 0.12114  | -0.0196  | 0.67263  |
| 0.57985  | -0.03477 | 0.45353  | -0.07264 | 0.11696  |
| 0.0852   | -0.01299 | 0.77953  | -0.04372 | 0.34578  |
| 0.00159  | 0.153349 | 0.00089  | -0.0087  | 0.85129  |
| 0.00158  | 0.092183 | 0.04648  | 0.185616 | 5.45E-05 |
| 0.02194  | -0.05108 | 0.27067  | 0.276638 | 1.19E-09 |
| 0.0311   | -0.06744 | 0.14563  | -0.02075 | 0.65463  |
| 0.00301  | -0.02638 | 0.56961  | -0.20064 | 1.25E-05 |
| 0.22641  | -0.06846 | 0.13965  | -0.09828 | 0.03373  |
| 0.8419   | -0.04294 | 0.35447  | -0.08262 | 0.07448  |
| 0.86184  | -0.03131 | 0.49971  | -0.12103 | 0.00884  |
| 0.00046  | -0.1246  | 0.00702  | -0.18268 | 7.17E-05 |
| 0.0103   | -0.04868 | 0.29384  | 0.031911 | 0.4915   |
| 0.05498  | -0.01102 | 0.81229  | 0.098952 | 0.03253  |
| 0.9608   | 0.036755 | 0.42812  | 0.236966 | 2.21E-07 |
| 0.19749  | -0.099   | 0.03243  | -0.00327 | 0.94384  |
| 0.02981  | -0.15797 | 0.00061  | -0.13068 | 0.00467  |
| 0.0587   | -0.2204  | 1.51E-06 | -0.11312 | 0.01445  |
| 0.27505  | -0.12153 | 0.00857  | 0.233334 | 3.41E-07 |

|          |          |          |          |          |
|----------|----------|----------|----------|----------|
| 0.00161  | -0.08369 | 0.07077  | 0.023703 | 0.6094   |
| 0.00015  | 0.094952 | 0.04026  | 0.210689 | 4.38E-06 |
| 0.00039  | -0.08354 | 0.07131  | 0.120004 | 0.00944  |
| 0.52286  | -0.1438  | 0.00184  | -0.05951 | 0.19922  |
| 0.56285  | -0.16816 | 0.00026  | 0.044399 | 0.33838  |
| 0.04356  | -0.04162 | 0.36956  | 0.393064 | 1.05E-18 |
| 0.0225   | -0.03929 | 0.39692  | 0.175064 | 0.00014  |
| 0.96568  | -0.3059  | 1.42E-11 | 0.331049 | 2.09E-13 |
| 0.02789  | -0.21667 | 2.29E-06 | -0.1126  | 0.01491  |
| 0.08926  | -0.0179  | 0.69957  | 0.269991 | 3.04E-09 |
| 0.00416  | 0.057101 | 0.21807  | 0.087144 | 0.05987  |
| 0.73859  | -0.14757 | 0.00138  | 0.19128  | 3.17E-05 |
| 0.00192  | -0.06047 | 0.19206  | 0.063905 | 0.16799  |
| 0.00399  | -0.0688  | 0.13768  | 0.239186 | 1.68E-07 |
| 0.57946  | -0.11475 | 0.01309  | 0.143159 | 0.00193  |
| 0.52021  | 0.138865 | 0.00263  | -0.15873 | 0.00058  |
| 0.82189  | 0.019004 | 0.68209  | 0.278057 | 9.73E-10 |
| 0.6296   | -0.19499 | 2.20E-05 | 0.303048 | 2.24E-11 |
| 0.01964  | -0.05592 | 0.22778  | 0.479785 | 2.93E-28 |
| 0.00016  | 0.125581 | 0.00658  | 0.080177 | 0.08349  |
| 0.00103  | -0.15604 | 0.00071  | -0.17643 | 0.00013  |
| 0.15735  | -0.14245 | 0.00203  | 0.14527  | 0.00165  |
| 0.50071  | 0.002559 | 0.95601  | 0.071791 | 0.12132  |
| 0.0491   | -0.03744 | 0.41951  | -0.2489  | 5.02E-08 |
| 0.00054  | -0.03696 | 0.42549  | -0.05124 | 0.2691   |
| 0.03171  | -0.05849 | 0.20709  | 0.165295 | 0.00033  |
| 0.39669  | -0.06051 | 0.1918   | -0.08477 | 0.0672   |
| 0.11259  | -0.04227 | 0.36204  | 0.088334 | 0.05645  |
| 0.36912  | -0.05432 | 0.24134  | -0.11437 | 0.01339  |
| 0.00059  | 0.08979  | 0.05249  | 0.050232 | 0.27868  |
| 0.001    | -0.06922 | 0.13528  | -0.21649 | 2.34E-06 |
| 0.25663  | -0.06755 | 0.14499  | 0.055177 | 0.23401  |
| 0.09872  | -0.08845 | 0.05614  | 0.021717 | 0.63971  |
| 0.03309  | -0.01383 | 0.7656   | -0.05865 | 0.20584  |
| 0.57293  | -0.17903 | 0.0001   | -0.01125 | 0.80843  |
| 0.46837  | -0.10688 | 0.02088  | 0.133192 | 0.00393  |
| 0.00031  | 0.046627 | 0.31468  | -0.08314 | 0.07267  |
| 0.1172   | 0.018395 | 0.69174  | 0.16308  | 0.0004   |
| 0.00731  | 0.003589 | 0.93835  | 0.140203 | 0.00239  |
| 0.86169  | -0.16613 | 0.00031  | -0.01277 | 0.78318  |
| 0.56118  | -0.10503 | 0.02321  | 0.060154 | 0.19441  |
| 0.00146  | 0.019323 | 0.67705  | 0.159354 | 0.00055  |
| 0.3402   | -0.21032 | 4.56E-06 | 0.523157 | 3.61E-34 |
| 0.00556  | -0.06164 | 0.18358  | 0.092988 | 0.04459  |
| 1.13E-05 | -0.07633 | 0.09944  | 0.163885 | 0.00038  |

|          |          |          |          |          |
|----------|----------|----------|----------|----------|
| 0.00264  | -0.03797 | 0.41297  | -0.05138 | 0.26784  |
| 2.84E-11 | 0.118107 | 0.01064  | 0.125448 | 0.00664  |
| 0.28253  | -0.02307 | 0.61907  | -0.03202 | 0.48996  |
| 0.02097  | -0.00814 | 0.86074  | -0.11946 | 0.00977  |
| 0.14334  | -0.1007  | 0.02957  | 0.205208 | 7.81E-06 |
| 0.00246  | -0.03577 | 0.44062  | -0.0559  | 0.22792  |
| 1.60E-08 | 0.320342 | 1.32E-12 | -0.27169 | 2.40E-09 |
| 8.61E-08 | 0.00564  | 0.90326  | 0.50285  | 2.69E-31 |
| 0.01046  | 0.026151 | 0.57295  | 0.05322  | 0.25104  |
| 0.18618  | -0.04911 | 0.28957  | -0.03623 | 0.43481  |
| 0.00451  | 0.014342 | 0.75723  | 0.004695 | 0.91941  |
| 0.72116  | -0.10153 | 0.02824  | -0.01233 | 0.79047  |
| 4.22E-05 | -0.05276 | 0.25513  | 0.191416 | 3.13E-05 |
| 0.02146  | -0.0683  | 0.14056  | 0.073613 | 0.11213  |
| 0.18968  | -0.11195 | 0.0155   | 0.235103 | 2.76E-07 |
| 0.10516  | -0.11278 | 0.01475  | 0.096155 | 0.03779  |
| 0.1345   | -0.00248 | 0.95742  | 0.25795  | 1.55E-08 |
| 0.00076  | -0.10012 | 0.03052  | -0.05583 | 0.22852  |
| 0.07648  | -0.05248 | 0.25771  | 0.296762 | 5.99E-11 |
| 0.11559  | -0.12127 | 0.00871  | 0.101426 | 0.02841  |
| 0.08735  | -0.05793 | 0.21142  | -0.11289 | 0.01465  |
| 0.83701  | -0.14951 | 0.00119  | 0.167677 | 0.00027  |
| 0.74234  | -0.14263 | 0.002    | 0.053529 | 0.24829  |
| 0.21777  | -0.14914 | 0.00123  | -0.03373 | 0.46707  |
| 0.10293  | -0.0767  | 0.09782  | 0.257293 | 1.70E-08 |
| 0.00023  | 0.020056 | 0.66553  | -0.01334 | 0.77367  |
| 0.00132  | 0.089272 | 0.05387  | 0.169616 | 0.00023  |
| 0.23106  | -0.05706 | 0.21837  | 0.179072 | 9.99E-05 |
| 0.00879  | -0.13419 | 0.00367  | 0.151737 | 0.001    |
| 0.01786  | -0.04569 | 0.32454  | -0.05206 | 0.26157  |
| 0.19892  | 0.059649 | 0.19819  | -0.35026 | 6.32E-15 |
| 1.62E-06 | 0.005099 | 0.9125   | 0.030576 | 0.50981  |
| 0.51121  | -0.01119 | 0.8094   | 0.071646 | 0.12207  |
| 0.99931  | -0.14874 | 0.00127  | 0.190641 | 3.37E-05 |
| 0.11872  | -0.04749 | 0.30579  | 0.021034 | 0.65027  |
| 0.02573  | -0.08815 | 0.05698  | 0.016941 | 0.71501  |
| 0.14087  | -0.0412  | 0.37436  | 0.051054 | 0.27088  |
| 0.16475  | -0.08056 | 0.08203  | 0.107887 | 0.0197   |
| 0.01282  | -0.11678 | 0.01155  | -0.25863 | 1.42E-08 |
| 0.0042   | -0.02467 | 0.59484  | 0.075352 | 0.10388  |
| 0.13324  | -0.04756 | 0.3051   | 0.189778 | 3.66E-05 |
| 0.0042   | 0.005322 | 0.90867  | -0.02974 | 0.52141  |
| 0.60356  | -0.16603 | 0.00031  | 0.141423 | 0.00219  |
| 0.36741  | 0.105998 | 0.02197  | -0.12053 | 0.00913  |
| 0.71566  | 0.026526 | 0.56746  | -0.40295 | 1.17E-19 |

|          |          |          |          |          |
|----------|----------|----------|----------|----------|
| 0.42991  | 0.061755 | 0.18279  | -0.18999 | 3.59E-05 |
| 0.00072  | -0.12456 | 0.00704  | 0.056909 | 0.21963  |
| 0.06712  | -0.08541 | 0.06516  | 0.126424 | 0.00622  |
| 0.0003   | 0.112268 | 0.01521  | -0.19647 | 1.90E-05 |
| 0.00335  | 0.058851 | 0.20427  | 0.020189 | 0.66345  |
| 8.80E-14 | 0.311516 | 5.74E-12 | -0.22035 | 1.52E-06 |
| 4.00E-09 | 0.178076 | 0.00011  | 0.144618 | 0.00173  |
| 0.63378  | -0.06734 | 0.1462   | -0.10193 | 0.02763  |
| 0.09455  | 0.079004 | 0.08812  | -0.09721 | 0.03572  |
| 0.5286   | 0.097769 | 0.03467  | -0.21966 | 1.64E-06 |
| 0.85023  | -0.1305  | 0.00473  | 0.112254 | 0.01522  |
| 0.01842  | -0.08231 | 0.07555  | 0.212815 | 3.49E-06 |
| 0.09293  | -0.09197 | 0.047    | 0.141771 | 0.00213  |
| 0.00109  | -0.06062 | 0.191    | 0.070631 | 0.12747  |
| 0.63659  | 0.029597 | 0.52346  | -0.06017 | 0.19428  |
| 0.03538  | -0.00613 | 0.8949   | 0.281782 | 5.68E-10 |
| 2.55E-08 | -0.13925 | 0.00256  | 0.020119 | 0.66454  |
| 0.00018  | 0.120233 | 0.0093   | 0.066355 | 0.15223  |
| 0.11023  | -0.10965 | 0.01777  | -0.26862 | 3.68E-09 |
| 1.20E-06 | 0.006633 | 0.88632  | 0.050574 | 0.27541  |
| 0.00017  | -0.03605 | 0.43708  | 0.091291 | 0.04865  |
| 0.00152  | -0.03663 | 0.42964  | 0.139619 | 0.0025   |
| 0.92752  | 0.004694 | 0.91943  | 0.089373 | 0.0536   |
| 0.3502   | -0.01576 | 0.7341   | -0.3222  | 9.66E-13 |
| 0.79091  | -0.13009 | 0.00487  | 0.019985 | 0.66664  |
| 0.85658  | 0.013116 | 0.77742  | -0.07621 | 0.1      |
| 0.68276  | -0.17108 | 0.0002   | 0.355221 | 2.46E-15 |
| 0.05962  | -0.04268 | 0.35741  | 0.086219 | 0.06265  |
| 0.51662  | -0.13441 | 0.00361  | -0.01897 | 0.68261  |
| 0.03782  | 0.014188 | 0.75975  | -0.01009 | 0.82792  |
| 0.32205  | -0.03894 | 0.40113  | 0.407372 | 4.27E-20 |
| 0.01041  | 0.072057 | 0.11994  | -0.05103 | 0.27109  |
| 0.93193  | -0.09273 | 0.0452   | -0.01425 | 0.75868  |
| 0.38453  | 0.047081 | 0.30998  | -0.09648 | 0.03715  |
| 1.64E-06 | -0.00402 | 0.931    | 0.303166 | 2.20E-11 |
| 0.01628  | 0.026627 | 0.56598  | -0.04486 | 0.33339  |
| 0.31532  | 0.061022 | 0.18805  | 0.175078 | 0.00014  |
| 0.00257  | 0.00698  | 0.88041  | 0.329488 | 2.75E-13 |
| 0.00991  | -0.00192 | 0.96702  | -0.07646 | 0.09889  |
| 0.24057  | -0.07292 | 0.11557  | -0.0775  | 0.09436  |
| 0.70118  | -0.0477  | 0.30367  | -0.06491 | 0.16139  |
| 0.07194  | -0.12222 | 0.00819  | 0.174569 | 0.00015  |
| 0.6339   | -0.07473 | 0.10677  | 0.008055 | 0.86218  |
| 0.65967  | -0.06548 | 0.15772  | 0.108102 | 0.01945  |
| 0.02126  | -0.16871 | 0.00025  | 0.166427 | 0.0003   |



|          |          |          |          |          |
|----------|----------|----------|----------|----------|
| 0.54779  | -0.18753 | 4.55E-05 | 0.166053 | 0.00031  |
| 0.64049  | -0.00475 | 0.91843  | -0.04984 | 0.28248  |
| 0.0001   | 0.148697 | 0.00127  | 0.007793 | 0.86662  |
| 0.16527  | -0.13485 | 0.0035   | 0.044255 | 0.33996  |
| 4.53E-05 | -0.04581 | 0.32319  | 0.116585 | 0.01169  |
| 0.06432  | -0.08933 | 0.05373  | -0.08391 | 0.07003  |
| 4.83E-05 | -0.05238 | 0.25865  | 0.204749 | 8.19E-06 |
| 0.34816  | -0.04578 | 0.32354  | 0.115112 | 0.0128   |
| 0.07218  | -0.11306 | 0.0145   | 0.096859 | 0.0364   |
| 0.00048  | -0.11041 | 0.01699  | 0.054824 | 0.23702  |
| 0.00648  | 0.014288 | 0.75812  | -0.16647 | 0.0003   |
| 0.57811  | -0.12787 | 0.00565  | -0.25524 | 2.22E-08 |
| 0.08156  | -0.02487 | 0.59188  | -0.00165 | 0.9717   |
| 0.73202  | -0.05876 | 0.20494  | -0.15247 | 0.00095  |
| 0.00066  | -0.09165 | 0.04778  | 0.109639 | 0.01778  |
| 0.00932  | 0.237433 | 2.08E-07 | -0.31697 | 2.33E-12 |
| 0.00047  | 0.17129  | 0.0002   | -0.10451 | 0.02391  |
| 6.46E-10 | 0.169926 | 0.00023  | 0.136404 | 0.00314  |
| 0.00999  | 0.070591 | 0.12769  | -0.01789 | 0.69975  |
| 0.57619  | -0.07779 | 0.09315  | 0.008013 | 0.86289  |
| 0.00619  | -0.02779 | 0.54912  | -0.21262 | 3.56E-06 |
| 0.012    | 0.051423 | 0.26743  | 0.045216 | 0.32956  |
| 0.00348  | -0.01501 | 0.74635  | 0.105096 | 0.02313  |
| 0.11031  | -0.09398 | 0.04236  | 0.13634  | 0.00315  |
| 0.03921  | -0.0251  | 0.58849  | 0.133706 | 0.0038   |
| 2.38E-08 | -0.07107 | 0.12511  | 0.098397 | 0.03352  |
| 0.47737  | -0.00842 | 0.85599  | -0.37244 | 8.19E-17 |
| 0.03109  | -0.03842 | 0.40751  | -0.2018  | 1.11E-05 |
| 0.9971   | 0.028741 | 0.53555  | 0.239005 | 1.72E-07 |
| 0.00399  | -0.12734 | 0.00586  | 0.226784 | 7.33E-07 |
| 0.97168  | -0.05976 | 0.19736  | -0.02162 | 0.64127  |
| 1.83E-09 | 0.220703 | 1.46E-06 | 0.01223  | 0.79209  |
| 0.05513  | -0.10251 | 0.02675  | 0.285112 | 3.48E-10 |
| 1.67E-14 | 0.135327 | 0.00339  | 0.214655 | 2.86E-06 |
| 0.00478  | -0.04664 | 0.31452  | 0.105303 | 0.02286  |
| 1.15E-05 | 0.037337 | 0.42083  | 0.308656 | 9.14E-12 |
| 0.01362  | -0.09353 | 0.04336  | -0.0788  | 0.08897  |
| 0.20826  | -0.04059 | 0.38151  | 0.260074 | 1.17E-08 |
| 0.03725  | -0.11184 | 0.01561  | 0.115914 | 0.01219  |
| 0.00471  | -0.05639 | 0.22389  | 0.019989 | 0.66658  |
| 0.00048  | -0.05333 | 0.25003  | 0.13098  | 0.00458  |
| 3.94E-10 | -0.00974 | 0.83375  | 0.442004 | 9.34E-24 |
| 0.18399  | -0.00898 | 0.84653  | -0.32157 | 1.08E-12 |
| 0.07198  | -0.08416 | 0.06921  | -0.06837 | 0.14013  |
| 0.09257  | -0.01747 | 0.70647  | 0.256319 | 1.93E-08 |

|          |          |          |          |          |
|----------|----------|----------|----------|----------|
| 0.53826  | -0.08913 | 0.05425  | 0.090925 | 0.04956  |
| 0.98871  | 0.036909 | 0.42618  | -0.07501 | 0.10547  |
| 0.68131  | 0.027707 | 0.55033  | 0.358825 | 1.23E-15 |
| 0.35855  | -0.01452 | 0.75433  | 0.045455 | 0.327    |
| 0.3368   | -0.09331 | 0.04386  | 0.129425 | 0.00509  |
| 0.04671  | -0.08095 | 0.08055  | 0.143721 | 0.00185  |
| 0.53005  | -0.05827 | 0.20877  | 0.200167 | 1.31E-05 |
| 0.84564  | -0.03832 | 0.40864  | -0.04601 | 0.32117  |
| 0.70296  | 0.067051 | 0.14797  | -0.18048 | 8.78E-05 |
| 0.64715  | -0.00078 | 0.98665  | -0.34843 | 8.92E-15 |
| 0.09023  | -0.08622 | 0.06264  | 0.114281 | 0.01347  |
| 0.60274  | -0.14345 | 0.00189  | -0.04464 | 0.33574  |
| 0.15362  | -0.1509  | 0.00107  | 0.03109  | 0.50271  |
| 0.00016  | -0.0808  | 0.08111  | 0.295189 | 7.64E-11 |
| 5.86E-05 | -0.04424 | 0.34009  | 0.147142 | 0.00143  |
| 0.17317  | -0.30133 | 2.94E-11 | 0.343675 | 2.16E-14 |
| 0.00232  | -0.18922 | 3.86E-05 | 0.506017 | 9.88E-32 |
| 0.12175  | 0.016895 | 0.71574  | -0.02007 | 0.66529  |
| 0.06346  | -0.12861 | 0.00538  | 0.056504 | 0.22293  |
| 0.00837  | -0.05016 | 0.27939  | 0.294274 | 8.79E-11 |
| 0.6908   | -0.05679 | 0.22062  | 0.091446 | 0.04827  |
| 0.07219  | -0.06562 | 0.15682  | -0.05976 | 0.19733  |
| 0.24836  | -0.09797 | 0.0343   | -0.02424 | 0.60134  |
| 0.00215  | -0.03787 | 0.41424  | 0.202992 | 9.82E-06 |
| 0.05217  | -0.02625 | 0.57149  | -0.00358 | 0.93856  |
| 0.94513  | 0.039705 | 0.39196  | -0.11746 | 0.01108  |
| 0.00038  | -0.19766 | 1.69E-05 | 0.302061 | 2.62E-11 |
| 0.04094  | 0.129003 | 0.00524  | -0.2579  | 1.56E-08 |
| 0.78618  | 0.015871 | 0.73229  | 0.037679 | 0.41659  |
| 0.05136  | -0.04214 | 0.3636   | 0.03284  | 0.47897  |
| 0.00771  | -0.02298 | 0.62031  | -0.0729  | 0.11564  |
| 0.70913  | 0.004778 | 0.91799  | -0.09316 | 0.04421  |
| 1.29E-05 | 0.01898  | 0.68247  | 0.030684 | 0.50832  |
| 0.00041  | 0.06993  | 0.1313   | 0.054125 | 0.24306  |
| 2.02E-07 | 0.114454 | 0.01333  | 0.268027 | 3.99E-09 |
| 0.00037  | 0.066143 | 0.15355  | 0.015936 | 0.73124  |
| 0.00528  | 0.024948 | 0.59073  | -0.02859 | 0.53765  |
| 0.85514  | 0.039584 | 0.39341  | -0.15407 | 0.00084  |
| 2.22E-05 | 0.120565 | 0.00911  | 0.106832 | 0.02094  |
| 0.12835  | -0.03465 | 0.4551   | 0.122603 | 0.00799  |
| 0.00481  | 0.21582  | 2.51E-06 | -0.30708 | 1.18E-11 |
| 0.51868  | -0.11404 | 0.01367  | 0.165645 | 0.00032  |
| 0.06027  | 0.144309 | 0.00177  | -0.20094 | 1.21E-05 |
| 0.59459  | -0.09546 | 0.03919  | -0.29873 | 4.42E-11 |
| 0.00652  | -0.09062 | 0.05033  | 0.152637 | 0.00094  |

|          |          |          |          |          |
|----------|----------|----------|----------|----------|
| 0.76311  | -0.08788 | 0.05774  | 0.155673 | 0.00074  |
| 0.00249  | 0.026753 | 0.56415  | 0.280082 | 7.27E-10 |
| 0.7455   | 0.042565 | 0.35873  | -0.09943 | 0.0317   |
| 2.98E-07 | -0.10448 | 0.02395  | 0.394821 | 7.17E-19 |
| 0.58673  | 0.014056 | 0.76193  | -0.19307 | 2.66E-05 |
| 0.22252  | -0.03999 | 0.38857  | 0.120331 | 0.00924  |
| 0.02413  | 0.013739 | 0.76714  | -0.13554 | 0.00334  |
| 0.04875  | 0.155159 | 0.00077  | 0.05784  | 0.21217  |
| 0.52768  | -0.12783 | 0.00567  | 0.022933 | 0.62108  |
| 0.00103  | -0.08333 | 0.072    | 0.071247 | 0.12417  |
| 0.17999  | -0.10345 | 0.02537  | 0.287247 | 2.54E-10 |
| 0.00048  | -0.27778 | 1.01E-09 | 0.24966  | 4.56E-08 |
| 0.95027  | -0.05303 | 0.25273  | -0.14784 | 0.00136  |
| 0.81514  | -0.05532 | 0.23281  | -0.14927 | 0.00121  |
| 0.21586  | 0.007787 | 0.86672  | 0.164228 | 0.00037  |
| 0.0606   | -0.21298 | 3.42E-06 | 0.126571 | 0.00616  |
| 1.02E-09 | -0.13394 | 0.00373  | -0.09659 | 0.03693  |
| 0.0307   | -0.12119 | 0.00875  | 0.011999 | 0.79592  |
| 0.17262  | 0.082869 | 0.0736   | -0.14107 | 0.00224  |
| 0.10992  | 0.036245 | 0.43456  | 0.026334 | 0.57027  |
| 7.46E-05 | -0.00193 | 0.96679  | 0.132407 | 0.00415  |
| 0.12861  | -0.17409 | 0.00016  | 0.087879 | 0.05774  |
| 0.30435  | -0.00019 | 0.99676  | 0.236055 | 2.46E-07 |
| 0.59003  | 0.074647 | 0.10717  | -0.25055 | 4.07E-08 |
| 0.05293  | -0.06381 | 0.16864  | 0.024578 | 0.59626  |
| 0.90567  | 0.152764 | 0.00093  | -0.01809 | 0.69667  |
| 0.93248  | 0.061456 | 0.18491  | 0.027373 | 0.55515  |
| 0.05924  | 0.07441  | 0.10829  | -0.34486 | 1.73E-14 |
| 0.6129   | -0.09766 | 0.03488  | -0.00843 | 0.85591  |
| 0.15867  | 0.101423 | 0.02841  | 0.015592 | 0.73682  |
| 0.0007   | -0.23722 | 2.14E-07 | 0.37352  | 6.57E-17 |
| 0.11567  | 0.004997 | 0.91423  | 0.022279 | 0.63107  |
| 0.92331  | -0.0146  | 0.75297  | -0.02988 | 0.51949  |
| 0.09617  | -0.16645 | 0.0003   | -0.00904 | 0.84559  |
| 0.02479  | -0.03504 | 0.44996  | 0.213496 | 3.24E-06 |
| 9.05E-06 | -0.00838 | 0.8566   | 0.189545 | 3.75E-05 |
| 1.21E-05 | -0.07099 | 0.12556  | 0.323028 | 8.39E-13 |
| 0.5825   | 0.042294 | 0.3618   | -0.03248 | 0.48374  |
| 0.00246  | -0.08906 | 0.05445  | 0.177812 | 0.00011  |
| 0.60171  | -0.16    | 0.00052  | 0.171342 | 0.0002   |
| 0.00553  | -0.04936 | 0.28707  | 0.103265 | 0.02564  |
| 0.23353  | 0.018872 | 0.68417  | -0.0702  | 0.12984  |
| 0.02591  | -0.03668 | 0.42904  | 0.268399 | 3.79E-09 |
| 0.78501  | -0.04105 | 0.37615  | 0.019801 | 0.66953  |
| 0.09728  | 0.061658 | 0.18347  | -0.17258 | 0.00018  |

|          |          |          |          |          |
|----------|----------|----------|----------|----------|
| 0.00117  | -0.23002 | 5.04E-07 | 0.15622  | 0.0007   |
| 8.74E-07 | -0.10333 | 0.02555  | 0.422158 | 1.32E-21 |
| 0.45203  | -0.04239 | 0.36066  | 0.119792 | 0.00957  |
| 0.03802  | -0.04866 | 0.29403  | -0.07244 | 0.11799  |
| 0.69482  | -0.02449 | 0.59757  | -0.13075 | 0.00465  |
| 0.01466  | -0.1299  | 0.00493  | -0.12448 | 0.00707  |
| 0.86225  | -0.19099 | 3.26E-05 | 0.188806 | 4.02E-05 |
| 0.03485  | -0.04449 | 0.33735  | -0.07196 | 0.12046  |
| 0.03584  | -0.0429  | 0.35497  | 0.198808 | 1.50E-05 |
| 0.37067  | -0.05436 | 0.24099  | 0.161547 | 0.00046  |
| 0.64724  | -0.11241 | 0.01509  | 0.012804 | 0.78258  |
| 0.00145  | -0.01635 | 0.72457  | 0.043566 | 0.34753  |
| 0.14473  | -0.03971 | 0.39193  | 0.141711 | 0.00214  |
| 0.00411  | -0.02801 | 0.546    | 0.091392 | 0.0484   |
| 0.00013  | -0.13257 | 0.00411  | -0.13413 | 0.00369  |
| 0.001    | 0.133169 | 0.00394  | 0.154286 | 0.00082  |
| 0.80523  | -0.11139 | 0.01603  | -0.03601 | 0.43749  |
| 0.02202  | -0.02865 | 0.53684  | -0.22934 | 5.45E-07 |
| 8.40E-05 | -0.08395 | 0.06991  | -0.08981 | 0.05243  |
| 0.00035  | -0.14882 | 0.00126  | -0.14782 | 0.00136  |
| 0.01471  | -0.10458 | 0.02382  | -0.10995 | 0.01746  |
| 0.08224  | -0.0524  | 0.25842  | 0.033303 | 0.47279  |
| 0.35412  | 0.008651 | 0.85209  | 0.118907 | 0.01012  |
| 0.00126  | -0.13886 | 0.00264  | 0.050367 | 0.27738  |
| 0.1071   | -0.17028 | 0.00022  | -0.09284 | 0.04493  |
| 0.11666  | 0.053222 | 0.25102  | 0.114845 | 0.01301  |
| 0.0067   | 0.028531 | 0.53853  | 0.128452 | 0.00544  |
| 0.05826  | -0.11494 | 0.01294  | 0.00494  | 0.9152   |
| 0.32126  | -0.13685 | 0.00304  | -0.01774 | 0.70217  |
| 0.02599  | 0.062281 | 0.17908  | -0.34842 | 8.94E-15 |
| 0.596    | -0.05374 | 0.24643  | 0.167759 | 0.00027  |
| 6.92E-05 | 0.048375 | 0.29685  | -0.19065 | 3.37E-05 |
| 0.27253  | -0.07567 | 0.10245  | 0.000688 | 0.98817  |
| 0.93258  | -0.06609 | 0.15389  | -0.04477 | 0.33441  |
| 0.88071  | -0.05867 | 0.20567  | -0.00356 | 0.93887  |
| 0.00276  | -0.17465 | 0.00015  | -0.01599 | 0.7304   |
| 0.5483   | -0.04848 | 0.29585  | 0.090256 | 0.05127  |
| 0.47408  | 0.011946 | 0.79681  | -0.13484 | 0.00351  |
| 0.21916  | -0.09456 | 0.0411   | -0.15102 | 0.00106  |
| 0.5159   | -0.07496 | 0.10572  | -0.1175  | 0.01105  |
| 0.00056  | 0.043158 | 0.35207  | -0.04743 | 0.30636  |
| 0.00021  | -0.17417 | 0.00016  | -0.21865 | 1.84E-06 |
| 0.10917  | -0.03491 | 0.45174  | -0.12176 | 0.00844  |
| 0.33025  | -0.02558 | 0.58137  | -0.15645 | 0.00069  |
| 0.3123   | 0.105172 | 0.02303  | -0.10744 | 0.02022  |

|          |          |          |          |          |
|----------|----------|----------|----------|----------|
| 0.72295  | 0.013509 | 0.77092  | -0.05413 | 0.24305  |
| 0.00039  | -0.05939 | 0.20014  | -0.13873 | 0.00266  |
| 6.69E-05 | -0.14509 | 0.00167  | -0.17966 | 9.47E-05 |
| 0.09529  | -0.04441 | 0.33824  | 0.236241 | 2.41E-07 |
| 0.01781  | -0.1263  | 0.00628  | -0.10376 | 0.02494  |
| 0.55289  | -0.08896 | 0.05472  | 0.042176 | 0.36314  |
| 0.3683   | -0.03432 | 0.45937  | -0.01365 | 0.76855  |
| 0.05638  | 0.043234 | 0.35122  | -0.17228 | 0.00018  |
| 0.01173  | -0.20077 | 1.23E-05 | 0.03229  | 0.48637  |
| 0.02456  | 0.066221 | 0.15307  | -0.10692 | 0.02083  |
| 0.21886  | 0.023681 | 0.60974  | 0.177958 | 0.00011  |
| 0.49394  | 0.046483 | 0.31617  | 0.141581 | 0.00216  |
| 0.00726  | -0.03334 | 0.47235  | -0.06865 | 0.1385   |
| 3.09E-05 | -0.04473 | 0.33484  | -0.12932 | 0.00513  |
| 0.3244   | 0.119238 | 0.00991  | -0.20327 | 9.54E-06 |
| 0.07968  | -0.11925 | 0.0099   | 0.383028 | 9.11E-18 |
| 0.26845  | -0.07037 | 0.12891  | -0.01831 | 0.69312  |
| 0.00127  | -0.13528 | 0.0034   | -0.02643 | 0.56887  |
| 0.0002   | 0.079601 | 0.08574  | -0.19691 | 1.82E-05 |
| 0.4725   | 0.054341 | 0.24118  | -0.0992  | 0.03209  |
| 0.94252  | -0.02455 | 0.59673  | -0.1388  | 0.00265  |
| 0.23346  | -0.03958 | 0.39343  | 0.232004 | 3.99E-07 |
| 0.00944  | -0.07586 | 0.10158  | -0.14142 | 0.00219  |
| 0.20688  | -0.05278 | 0.25496  | -0.08213 | 0.07622  |
| 0.00978  | -0.11765 | 0.01095  | -0.02146 | 0.64362  |
| 0.13056  | 0.03541  | 0.44523  | 0.274106 | 1.71E-09 |
| 0.85628  | 0.015153 | 0.74396  | -0.24651 | 6.80E-08 |
| 0.10413  | -0.12432 | 0.00715  | -0.0673  | 0.14646  |
| 0.75066  | -0.05489 | 0.23642  | -0.04061 | 0.38119  |
| 0.08491  | 0.043913 | 0.3437   | -0.16828 | 0.00026  |
| 0.09735  | -0.11125 | 0.01617  | -0.04652 | 0.31577  |
| 0.00337  | -0.05919 | 0.20164  | -0.03543 | 0.44495  |
| 1.59E-05 | 0.550741 | 2.14E-38 | -0.17973 | 9.40E-05 |
| 2.40E-06 | 0.380001 | 1.72E-17 | 0.038424 | 0.40743  |
| 3.02E-10 | 0.430641 | 1.65E-22 | 0.100304 | 0.03022  |
| 3.08E-16 | 0.46538  | 1.78E-26 | -0.07149 | 0.12287  |
| 5.32E-13 | 0.420124 | 2.15E-21 | 0.027779 | 0.54929  |
| 9.84E-11 | 0.487177 | 3.30E-29 | -0.07769 | 0.09354  |
| 5.44E-07 | 0.15474  | 0.00079  | 0.348329 | 9.09E-15 |
| 1.18E-19 | 0.471164 | 3.51E-27 | 0.163361 | 0.00039  |
| 5.24E-09 | 0.49891  | 9.24E-31 | -0.23539 | 2.67E-07 |
| 0.00019  | 0.437116 | 3.26E-23 | -0.1893  | 3.84E-05 |
| 6.74E-08 | 0.561751 | 3.40E-40 | -0.2387  | 1.79E-07 |
| 1.07E-09 | 0.376893 | 3.28E-17 | -0.00444 | 0.92382  |
| 0.0017   | 0.284971 | 3.56E-10 | -0.03173 | 0.49392  |

|          |          |          |          |          |
|----------|----------|----------|----------|----------|
| 0.00013  | 0.213761 | 3.15E-06 | 0.025218 | 0.58672  |
| 1.54E-12 | 0.38843  | 2.88E-18 | 0.277758 | 1.02E-09 |
| 5.83E-08 | 0.247758 | 5.81E-08 | 0.416684 | 4.87E-21 |
| 2.86E-06 | 0.299522 | 3.90E-11 | 0.16433  | 0.00036  |
| 6.14E-06 | 0.353556 | 3.39E-15 | 0.088177 | 0.05689  |
| 0.13196  | 0.136224 | 0.00318  | 0.183665 | 6.54E-05 |
| 4.22E-10 | 0.401627 | 1.58E-19 | -0.22253 | 1.19E-06 |
| 6.82E-13 | 0.382425 | 1.03E-17 | -0.1157  | 0.01235  |
| 0.0002   | 0.386967 | 3.94E-18 | -0.04558 | 0.32563  |
| 2.60E-13 | 0.418713 | 3.01E-21 | 0.224756 | 9.25E-07 |
| 3.86E-10 | 0.444219 | 5.27E-24 | -0.02581 | 0.57798  |
| 0.70882  | 0.184121 | 6.27E-05 | -0.01103 | 0.81214  |
| 4.92E-14 | 0.532672 | 1.39E-35 | -0.02712 | 0.55886  |
| 1.51E-12 | 0.527875 | 7.27E-35 | -0.06037 | 0.19278  |
| 5.94E-16 | 0.559547 | 7.89E-40 | -0.05023 | 0.27867  |
| 2.05E-18 | 0.510384 | 2.44E-32 | 0.168916 | 0.00025  |
| 2.89E-10 | 0.532605 | 1.42E-35 | -0.10023 | 0.03034  |
| 0.00028  | 0.275175 | 1.47E-09 | -0.03203 | 0.48982  |
| 5.55E-06 | 0.311273 | 5.97E-12 | 0.181493 | 8.00E-05 |
| 1.16E-11 | 0.333148 | 1.44E-13 | 0.250171 | 4.27E-08 |
| 1.07E-14 | 0.377902 | 2.66E-17 | 0.376403 | 3.63E-17 |
| 1.73E-19 | 0.646578 | 1.23E-56 | -0.0922  | 0.04645  |
| 2.69E-09 | 0.38791  | 3.22E-18 | 0.235821 | 2.53E-07 |
| 9.33E-44 | 0.712344 | 1.63E-73 | -0.12291 | 0.00783  |
| 0.01816  | 0.364809 | 3.80E-16 | -0.09053 | 0.05058  |
| 0.57494  | 0.102119 | 0.02734  | -0.02102 | 0.65042  |
| 6.09E-05 | 0.213608 | 3.20E-06 | -0.06729 | 0.14652  |
| 4.73E-09 | 0.36308  | 5.35E-16 | -0.00759 | 0.87009  |
| 2.48E-12 | 0.383212 | 8.76E-18 | 0.236683 | 2.28E-07 |
| 4.60E-10 | 0.433157 | 8.83E-23 | -0.03689 | 0.42638  |
| 8.18E-06 | 0.353587 | 3.37E-15 | 0.001092 | 0.98122  |
| 1.92E-12 | 0.503849 | 1.96E-31 | -0.13095 | 0.00459  |
| 5.09E-11 | 0.451872 | 7.04E-25 | -0.07075 | 0.1268   |
| 4.05E-12 | 0.211566 | 3.99E-06 | 0.055013 | 0.2354   |
| 6.47E-29 | 0.385829 | 5.03E-18 | 0.085108 | 0.06612  |
| 2.09E-08 | 0.541286 | 6.66E-37 | -0.0794  | 0.08653  |
| 0.01309  | 0.229283 | 5.49E-07 | -0.11489 | 0.01298  |
| 0.61587  | 0.274334 | 1.65E-09 | -0.1862  | 5.15E-05 |
| 0.00919  | 0.253288 | 2.86E-08 | -0.09046 | 0.05075  |
| 1.66E-10 | 0.488219 | 2.42E-29 | -0.09645 | 0.0372   |
| 9.49E-11 | 0.417234 | 4.27E-21 | 0.010781 | 0.81626  |
| 5.46E-14 | 0.257884 | 1.57E-08 | 0.139488 | 0.00252  |
| 0.00483  | 0.25737  | 1.68E-08 | 0.032039 | 0.48976  |
| 1.06E-08 | 0.450505 | 1.01E-24 | -0.11751 | 0.01104  |
| 3.07E-11 | 0.427706 | 3.41E-22 | 0.018226 | 0.69443  |

|          |          |          |          |          |
|----------|----------|----------|----------|----------|
| 2.01E-19 | 0.377939 | 2.64E-17 | 0.381394 | 1.28E-17 |
| 6.31E-06 | 0.258609 | 1.43E-08 | -0.01751 | 0.70588  |
| 3.57E-10 | 0.443022 | 7.18E-24 | 0.139306 | 0.00255  |
| 3.35E-13 | 0.756112 | 1.17E-87 | -0.25252 | 3.16E-08 |
| 0.07848  | 0.213178 | 3.35E-06 | -0.16146 | 0.00046  |
| 0.00351  | 0.35208  | 4.49E-15 | -0.00583 | 0.90002  |
| 0.4179   | 0.190114 | 3.55E-05 | -0.05631 | 0.22453  |
| 0.10673  | 0.150367 | 0.00112  | -0.06306 | 0.17369  |
| 3.66E-28 | 0.704575 | 2.81E-71 | -0.05693 | 0.21942  |
| 0.09636  | 0.322933 | 8.52E-13 | -0.1556  | 0.00074  |
| 1.08E-10 | 0.32567  | 5.33E-13 | -0.01202 | 0.79555  |
| 0.73431  | 0.050827 | 0.27301  | -0.17645 | 0.00013  |
| 0.00067  | 0.3101   | 7.23E-12 | -0.03495 | 0.45115  |
| 2.35E-19 | 0.528885 | 5.14E-35 | 0.025375 | 0.5844   |
| 4.90E-10 | 0.507855 | 5.49E-32 | -0.09644 | 0.03722  |
| 4.16E-08 | 0.310176 | 7.14E-12 | 0.001717 | 0.97048  |
| 6.60E-09 | 0.255055 | 2.27E-08 | 0.010407 | 0.82252  |
| 9.97E-05 | 0.39058  | 1.81E-18 | -0.00464 | 0.92043  |
| 0.00605  | 0.342938 | 2.47E-14 | -0.27986 | 7.50E-10 |
| 1.72E-09 | 0.435483 | 4.92E-23 | 0.029067 | 0.53092  |
| 0.00513  | 0.337516 | 6.61E-14 | -0.1213  | 0.00869  |
| 2.38E-23 | 0.510559 | 2.30E-32 | 0.127562 | 0.00577  |
| 1.35E-11 | 0.577401 | 7.15E-43 | -0.12333 | 0.00763  |
| 3.81E-08 | 0.511362 | 1.78E-32 | -0.13693 | 0.00303  |
| 7.45E-07 | 0.426829 | 4.23E-22 | -0.10582 | 0.02219  |
| 0.00495  | 0.341689 | 3.10E-14 | -0.08752 | 0.05877  |
| 3.20E-10 | 0.481096 | 2.00E-28 | 0.064088 | 0.16677  |
| 0.00137  | 0.368279 | 1.90E-16 | -0.06142 | 0.18518  |
| 1.76E-07 | 0.328616 | 3.20E-13 | 0.121842 | 0.00839  |
| 2.41E-19 | 0.506174 | 9.39E-32 | 0.011225 | 0.80884  |
| 0.79822  | 0.296972 | 5.80E-11 | -0.42529 | 6.16E-22 |
| 0.85763  | 0.133105 | 0.00396  | -0.05489 | 0.23645  |
| 3.80E-14 | 0.540957 | 7.50E-37 | -0.12551 | 0.00661  |
| 5.26E-11 | 0.472039 | 2.74E-27 | -0.03416 | 0.46149  |
| 1.28E-12 | 0.455868 | 2.41E-25 | -0.01438 | 0.75669  |
| 5.75E-11 | 0.421157 | 1.67E-21 | -0.08656 | 0.06163  |
| 5.85E-07 | 0.29914  | 4.14E-11 | -0.01785 | 0.70046  |
| 6.69E-10 | 0.578023 | 5.56E-43 | -0.12781 | 0.00567  |
| 0.048    | 0.193199 | 2.63E-05 | -0.17136 | 0.0002   |
| 0.00733  | 0.34951  | 7.29E-15 | -0.03616 | 0.43564  |
| 4.22E-05 | 0.336197 | 8.38E-14 | 0.198756 | 1.51E-05 |
| 0.10989  | 0.248522 | 5.27E-08 | 0.073715 | 0.11163  |
| 2.25E-07 | 0.365361 | 3.40E-16 | -0.12739 | 0.00584  |
| 0.00048  | 0.152557 | 0.00094  | 0.090899 | 0.04963  |
| 5.36E-06 | 0.429532 | 2.17E-22 | -0.02905 | 0.53117  |

|          |          |          |          |          |
|----------|----------|----------|----------|----------|
| 0.00117  | 0.367461 | 2.24E-16 | 0.177513 | 0.00012  |
| 7.60E-05 | 0.249386 | 4.73E-08 | 0.105003 | 0.02325  |
| 0.0001   | 0.235832 | 2.53E-07 | 0.023214 | 0.6168   |
| 0.00176  | 0.209666 | 4.89E-06 | -0.13487 | 0.0035   |
| 0.00043  | 0.42049  | 1.97E-21 | -0.20168 | 1.12E-05 |
| 4.41E-11 | 0.489934 | 1.44E-29 | -0.11373 | 0.01393  |
| 0.12686  | 0.375525 | 4.36E-17 | -0.13861 | 0.00268  |
| 1.69E-19 | 0.558753 | 1.07E-39 | -0.10838 | 0.01914  |
| 2.61E-13 | 0.448388 | 1.77E-24 | 0.011687 | 0.80113  |
| 1.81E-10 | 0.443665 | 6.08E-24 | -0.04429 | 0.33959  |
| 6.82E-15 | 0.719474 | 1.24E-75 | -0.27047 | 2.85E-09 |
| 0.00028  | 0.345415 | 1.56E-14 | -0.26318 | 7.73E-09 |
| 1.07E-24 | 0.587779 | 9.96E-45 | 0.142351 | 0.00204  |
| 4.83E-15 | 0.649484 | 2.70E-57 | -0.18075 | 8.57E-05 |
| 2.35E-13 | 0.693771 | 2.76E-68 | -0.1644  | 0.00036  |
| 1.35E-13 | 0.603466 | 1.15E-47 | -0.15723 | 0.00065  |
| 3.65E-05 | 0.345091 | 1.66E-14 | -0.01965 | 0.67191  |
| 1.24E-12 | 0.656278 | 7.35E-59 | -0.16904 | 0.00024  |
| 8.09E-05 | 0.401503 | 1.62E-19 | -0.05279 | 0.25492  |
| 1.71E-21 | 0.721614 | 2.78E-76 | -0.19301 | 2.68E-05 |
| 3.33E-18 | 0.733081 | 7.25E-80 | -0.17401 | 0.00016  |
| 1.94E-17 | 0.667883 | 1.25E-61 | -0.1743  | 0.00015  |
| 0.00407  | 0.446722 | 2.74E-24 | -0.16292 | 0.00041  |
| 2.78E-07 | 0.3171   | 2.28E-12 | -0.02582 | 0.57776  |
| 0.10883  | 0.099601 | 0.0314   | 0.027322 | 0.55589  |
| 1.46E-19 | 0.423213 | 1.02E-21 | 0.099723 | 0.03119  |
| 4.05E-09 | 0.412583 | 1.28E-20 | 0.065344 | 0.15859  |
| 0.00018  | 0.374352 | 5.54E-17 | -0.19258 | 2.79E-05 |
| 1.31E-05 | 0.343587 | 2.19E-14 | -0.15548 | 0.00075  |
| 0.00028  | 0.231817 | 4.08E-07 | -0.00126 | 0.97826  |
| 2.32E-07 | 0.570377 | 1.18E-41 | -0.11731 | 0.01118  |
| 1.33E-15 | 0.487776 | 2.76E-29 | 0.13293  | 0.00401  |
| 0.00033  | 0.135494 | 0.00335  | 0.417461 | 4.05E-21 |
| 2.25E-32 | 0.796826 | #####    | -0.08257 | 0.07466  |
| 6.32E-14 | 0.354768 | 2.69E-15 | 0.25291  | 3.01E-08 |
| 3.29E-05 | 0.402637 | 1.25E-19 | -0.0878  | 0.05798  |
| 1.90E-08 | 0.446892 | 2.62E-24 | -0.09828 | 0.03372  |
| 6.04E-11 | 0.553331 | 8.19E-39 | -0.1263  | 0.00627  |
| 8.37E-10 | 0.356234 | 2.03E-15 | 0.312056 | 5.25E-12 |
| 1.56E-07 | 0.382496 | 1.02E-17 | 0.106832 | 0.02094  |
| 5.32E-05 | 0.172487 | 0.00018  | 0.071093 | 0.12499  |
| 1.34E-24 | 0.490902 | 1.08E-29 | 0.1064   | 0.02147  |
| 3.50E-13 | 0.527499 | 8.27E-35 | -0.09021 | 0.05139  |
| 1.49E-10 | 0.56806  | 2.95E-41 | -0.16882 | 0.00025  |
| 9.19E-12 | 0.553436 | 7.88E-39 | -0.10815 | 0.0194   |



|          |          |          |          |          |
|----------|----------|----------|----------|----------|
| 0.00282  | 0.330749 | 2.20E-13 | 0.027462 | 0.55386  |
| 4.19E-06 | 0.402286 | 1.36E-19 | -0.11291 | 0.01463  |
| 3.23E-07 | 0.393297 | 1.00E-18 | -0.08949 | 0.05328  |
| 9.67E-07 | 0.276983 | 1.14E-09 | -0.01721 | 0.71061  |
| 4.65E-10 | 0.397476 | 3.99E-19 | -0.04913 | 0.28933  |
| 1.97E-09 | 0.288588 | 2.08E-10 | -0.01596 | 0.73082  |
| 1.56E-12 | 0.505421 | 1.19E-31 | -0.07916 | 0.0875   |
| 5.14E-12 | 0.473756 | 1.68E-27 | -0.05624 | 0.22508  |
| 2.32E-06 | 0.33571  | 9.15E-14 | -0.07348 | 0.11279  |
| 2.88E-15 | 0.478058 | 4.85E-28 | -0.08029 | 0.08305  |
| 0.00132  | 0.219202 | 1.73E-06 | 0.219603 | 1.65E-06 |
| 7.76E-07 | 0.345924 | 1.42E-14 | 0.133466 | 0.00386  |
| 8.50E-12 | 0.521669 | 5.95E-34 | -0.02576 | 0.5787   |
| 2.79E-07 | 0.538367 | 1.88E-36 | -0.1679  | 0.00027  |
| 9.10E-07 | 0.526766 | 1.06E-34 | -0.11567 | 0.01237  |
| 9.53E-08 | 0.468314 | 7.84E-27 | 0.029601 | 0.52341  |
| 7.15E-14 | 0.475051 | 1.16E-27 | -0.01362 | 0.7691   |
| 0.00095  | 0.225181 | 8.81E-07 | 0.042063 | 0.36443  |
| 0.14693  | 0.210982 | 4.24E-06 | -0.13134 | 0.00447  |
| 4.47E-11 | 0.459467 | 9.09E-26 | -0.1447  | 0.00172  |
| 3.39E-06 | 0.357725 | 1.52E-15 | -0.05368 | 0.24692  |
| 6.09E-05 | 0.321313 | 1.12E-12 | -0.13652 | 0.00312  |
| 1.02E-07 | 0.568603 | 2.38E-41 | -0.17479 | 0.00015  |
| 2.34E-07 | 0.185676 | 5.42E-05 | 0.176035 | 0.00013  |
| 2.42E-13 | 0.522349 | 4.74E-34 | -0.07442 | 0.10824  |
| 2.11E-09 | 0.583633 | 5.60E-44 | -0.15979 | 0.00053  |
| 3.32E-15 | 0.45302  | 5.19E-25 | 0.028829 | 0.53429  |
| 0.00056  | 0.394576 | 7.56E-19 | -0.14353 | 0.00187  |
| 6.54E-10 | 0.450851 | 9.24E-25 | 0.116314 | 0.01189  |
| 0.00073  | 0.375069 | 4.78E-17 | -0.01207 | 0.79472  |
| 6.43E-11 | 0.429719 | 2.08E-22 | -0.01573 | 0.73463  |
| 1.05E-07 | 0.329735 | 2.63E-13 | -0.10541 | 0.02272  |
| 3.14E-14 | 0.435216 | 5.26E-23 | 0.15595  | 0.00072  |
| 0.13824  | 0.312306 | 5.04E-12 | -0.24564 | 7.59E-08 |
| 0.00012  | 0.414925 | 7.38E-21 | -0.01734 | 0.70855  |
| 2.48E-14 | 0.367865 | 2.06E-16 | 0.281444 | 5.96E-10 |
| 1.02E-06 | 0.268653 | 3.66E-09 | 0.131396 | 0.00445  |
| 7.74E-08 | 0.411984 | 1.47E-20 | -0.00197 | 0.96612  |
| 0.00082  | 0.321747 | 1.04E-12 | 0.087986 | 0.05743  |
| 0.19213  | 0.172186 | 0.00018  | 0.070537 | 0.12798  |
| 2.53E-07 | 0.438621 | 2.22E-23 | 0.141175 | 0.00223  |
| 3.56E-05 | 0.30738  | 1.12E-11 | 0.144044 | 0.0018   |
| 0.01494  | 0.381033 | 1.39E-17 | -0.03829 | 0.40904  |
| 4.03E-11 | 0.744541 | 1.23E-83 | -0.31094 | 6.31E-12 |
| 6.56E-26 | 0.610555 | 4.80E-49 | -0.00727 | 0.87556  |

|          |          |          |          |          |
|----------|----------|----------|----------|----------|
| 1.23E-16 | 0.541016 | 7.34E-37 | -0.09539 | 0.03934  |
| 6.24E-12 | 0.403426 | 1.05E-19 | -0.01687 | 0.71618  |
| 0.00027  | 0.305029 | 1.64E-11 | 0.043992 | 0.34283  |
| 2.06E-07 | 0.478823 | 3.88E-28 | -0.20675 | 6.65E-06 |
| 2.10E-14 | 0.295077 | 7.77E-11 | 0.207545 | 6.11E-06 |
| 8.43E-34 | 0.786346 | 2.58E-99 | -0.12519 | 0.00675  |
| 2.06E-06 | 0.279706 | 7.67E-10 | 0.022811 | 0.62294  |
| 4.50E-10 | 0.386594 | 4.27E-18 | 0.036219 | 0.43488  |
| 1.59E-14 | 0.452127 | 6.58E-25 | 0.231119 | 4.43E-07 |
| 4.80E-09 | 0.314638 | 3.43E-12 | 0.277133 | 1.11E-09 |
| 0.02257  | 0.25782  | 1.58E-08 | -0.01382 | 0.76576  |
| 8.99E-18 | 0.384779 | 6.28E-18 | 0.327569 | 3.84E-13 |
| 0.00044  | 0.39936  | 2.62E-19 | 0.043754 | 0.34545  |
| 7.74E-13 | 0.469013 | 6.44E-27 | -0.10032 | 0.03019  |
| 5.75E-07 | 0.423004 | 1.07E-21 | -0.25759 | 1.63E-08 |
| 0.42098  | 0.259127 | 1.33E-08 | -0.02795 | 0.54684  |
| 0.0045   | 0.295666 | 7.10E-11 | 0.073273 | 0.1138   |
| 5.54E-17 | 0.435916 | 4.41E-23 | -0.18545 | 5.53E-05 |
| 2.43E-15 | 0.418509 | 3.16E-21 | 0.002497 | 0.95707  |
| 1.30E-38 | 0.507303 | 6.55E-32 | 0.206717 | 6.67E-06 |
| 3.17E-13 | 0.464358 | 2.37E-26 | -0.03445 | 0.45765  |
| 0.003    | 0.26837  | 3.81E-09 | -0.10882 | 0.01866  |
| 3.07E-18 | 0.455604 | 2.59E-25 | 0.018557 | 0.68917  |
| 4.11E-08 | 0.308497 | 9.38E-12 | -0.01566 | 0.73569  |
| 1.55E-16 | 0.441794 | 9.86E-24 | 0.026602 | 0.56635  |
| 5.43E-11 | 0.396046 | 5.47E-19 | -0.01447 | 0.75515  |
| 9.70E-13 | 0.474948 | 1.19E-27 | -0.05806 | 0.21045  |
| 3.82E-05 | 0.307918 | 1.03E-11 | 0.130768 | 0.00465  |
| 1.23E-11 | 0.516608 | 3.20E-33 | -0.13347 | 0.00386  |
| 8.48E-09 | 0.301097 | 3.05E-11 | 0.093171 | 0.04418  |
| 4.55E-54 | 0.69901  | 1.02E-69 | 0.13502  | 0.00346  |
| 6.92E-14 | 0.385359 | 5.56E-18 | 0.10738  | 0.02029  |
| 1.60E-07 | 0.36038  | 9.08E-16 | -0.08316 | 0.07258  |
| 2.77E-11 | 0.398766 | 2.99E-19 | 0.118449 | 0.01041  |
| 0.00873  | 0.136872 | 0.00304  | 0.158028 | 0.00061  |
| 0.00062  | 0.299125 | 4.15E-11 | 0.00646  | 0.88926  |
| 0.0037   | 0.279673 | 7.71E-10 | -0.01936 | 0.67654  |
| 2.13E-05 | 0.185395 | 5.56E-05 | 0.180738 | 8.58E-05 |
| 2.20E-11 | 0.592969 | 1.11E-45 | -0.11813 | 0.01062  |
| 0.0096   | 0.185862 | 5.32E-05 | 0.088416 | 0.05622  |
| 0.02235  | 0.428498 | 2.81E-22 | -0.53677 | 3.31E-36 |
| 0.00033  | 0.446377 | 3.00E-24 | -0.02703 | 0.56008  |
| 0.00025  | 0.340678 | 3.73E-14 | -0.06526 | 0.15913  |
| 7.06E-10 | 0.456891 | 1.83E-25 | 0.067656 | 0.14434  |
| 3.65E-05 | 0.376013 | 3.94E-17 | -0.0913  | 0.04862  |

|          |          |          |          |          |
|----------|----------|----------|----------|----------|
| 4.74E-05 | 0.369526 | 1.48E-16 | 0.145315 | 0.00164  |
| 2.16E-07 | 0.355637 | 2.28E-15 | -0.01607 | 0.7291   |
| 8.84E-11 | 0.336813 | 7.51E-14 | 0.12992  | 0.00492  |
| 3.22E-12 | 0.381502 | 1.26E-17 | 0.060961 | 0.18848  |
| 2.01E-09 | 0.334315 | 1.17E-13 | 0.263327 | 7.58E-09 |
| 2.28E-10 | 0.321181 | 1.15E-12 | 0.147647 | 0.00138  |
| 2.30E-08 | 0.533981 | 8.81E-36 | -0.08545 | 0.06504  |
| 4.85E-05 | 0.57055  | 1.11E-41 | -0.2393  | 1.66E-07 |
| 4.52E-12 | 0.568952 | 2.08E-41 | -0.09748 | 0.03522  |
| 0.03972  | 0.366151 | 2.91E-16 | -0.00365 | 0.93727  |
| 0.09735  | 0.36762  | 2.17E-16 | -0.21542 | 2.63E-06 |
| 7.48E-06 | 0.401852 | 1.50E-19 | -0.07143 | 0.12322  |
| 0.0001   | 0.270711 | 2.75E-09 | 0.022775 | 0.62349  |
| 0.00081  | 0.398712 | 3.03E-19 | -0.08797 | 0.05748  |
| 3.91E-23 | 0.685219 | 5.20E-66 | -0.12014 | 0.00936  |
| 6.78E-11 | 0.572367 | 5.39E-42 | -0.07805 | 0.09206  |
| 1.03E-22 | 0.610065 | 6.00E-49 | -0.08102 | 0.08028  |
| 8.77E-11 | 0.267681 | 4.19E-09 | 0.392298 | 1.25E-18 |
| 0.69537  | 0.366838 | 2.54E-16 | -0.06903 | 0.13633  |
| 3.33E-14 | 0.481212 | 1.93E-28 | 0.101465 | 0.02835  |
| 0.11664  | 0.234502 | 2.96E-07 | 0.087218 | 0.05966  |
| 0.01359  | 0.239163 | 1.69E-07 | 0.101336 | 0.02855  |
| 0.11278  | 0.143045 | 0.00194  | 0.111157 | 0.01586  |
| 1.98E-21 | 0.502761 | 2.77E-31 | 0.29794  | 4.99E-11 |
| 0.00011  | -0.10869 | 0.0188   | 0.129669 | 0.00501  |
| 0.04746  | -0.07449 | 0.10792  | -0.1031  | 0.02589  |
| 0.01447  | -0.09693 | 0.03626  | 0.007715 | 0.86794  |
| 0.34485  | 0.004076 | 0.93     | -0.26545 | 5.68E-09 |
| 0.00062  | -0.13013 | 0.00486  | 0.014139 | 0.76056  |
| 0.20088  | -0.12448 | 0.00707  | 0.010263 | 0.82494  |
| 0.00074  | -0.17414 | 0.00016  | -0.19613 | 1.97E-05 |
| 0.00168  | -0.09237 | 0.04605  | -0.10835 | 0.01917  |
| 0.01192  | -0.12835 | 0.00548  | 0.005593 | 0.90405  |
| 0.00348  | -0.16104 | 0.00048  | 0.026815 | 0.56324  |
| 0.61903  | -0.16543 | 0.00033  | -0.17429 | 0.00015  |
| 3.00E-05 | -0.12113 | 0.00879  | 0.078237 | 0.09126  |
| 0.44585  | -0.13023 | 0.00482  | -0.15587 | 0.00073  |
| 0.83603  | -0.10264 | 0.02655  | 0.00046  | 0.99209  |
| 0.85843  | -0.0381  | 0.41143  | -0.06512 | 0.16003  |
| 0.27759  | -0.07701 | 0.09646  | -0.17535 | 0.00014  |
| 0.35828  | -0.05294 | 0.25359  | -0.11479 | 0.01306  |
| 0.76586  | -0.24281 | 1.08E-07 | 0.025518 | 0.58228  |
| 6.28E-06 | -0.08163 | 0.07801  | -0.01682 | 0.7169   |
| 9.22E-07 | -0.06001 | 0.19549  | 0.161518 | 0.00046  |
| 0.75489  | -0.12867 | 0.00536  | 0.100109 | 0.03054  |

|          |          |          |          |          |
|----------|----------|----------|----------|----------|
| 0.86331  | -0.08925 | 0.05392  | -0.21701 | 2.21E-06 |
| 0.00042  | -0.1846  | 5.99E-05 | 0.08319  | 0.07249  |
| 0.00717  | -0.10488 | 0.02341  | 0.023161 | 0.61762  |
| 0.59749  | -0.10872 | 0.01877  | -0.22723 | 6.96E-07 |
| 7.06E-05 | -0.05128 | 0.26879  | -0.02959 | 0.52361  |
| 0.00061  | -0.09571 | 0.03868  | -0.09122 | 0.04884  |
| 0.63934  | -0.14426 | 0.00178  | -0.06121 | 0.18665  |
| 0.25842  | -0.16811 | 0.00026  | 0.171633 | 0.00019  |
| 7.98E-07 | 0.020499 | 0.65861  | 0.173692 | 0.00016  |
| 0.43723  | -0.14745 | 0.0014   | -0.1465  | 0.0015   |
| 0.92876  | -0.19385 | 2.46E-05 | -0.18089 | 8.46E-05 |
| 0.05372  | -0.01406 | 0.76185  | 0.095618 | 0.03887  |
| 0.57083  | -0.16548 | 0.00033  | 0.037675 | 0.41664  |
| 0.01528  | -0.15877 | 0.00057  | 0.03668  | 0.42906  |
| 0.33186  | -0.02722 | 0.5574   | -0.10155 | 0.02822  |
| 0.14215  | -0.15764 | 0.00063  | -0.18623 | 5.14E-05 |
| 0.25368  | -0.1372  | 0.00297  | -0.03775 | 0.41567  |
| 8.46E-09 | -0.03225 | 0.48696  | 0.190403 | 3.45E-05 |
| 0.92511  | -0.084   | 0.06972  | -0.04325 | 0.35106  |
| 0.00225  | -0.0241  | 0.60345  | 0.141937 | 0.00211  |
| 0.90194  | -0.23939 | 1.64E-07 | -0.09591 | 0.03827  |
| 5.62E-05 | -0.13592 | 0.00325  | 0.39393  | 8.71E-19 |
| 0.08778  | -0.16237 | 0.00043  | -0.00608 | 0.89566  |
| 0.33257  | -0.2185  | 1.87E-06 | -0.04879 | 0.2927   |
| 0.79755  | -0.18381 | 6.45E-05 | -0.13963 | 0.00249  |
| 0.03487  | -0.04775 | 0.30318  | -0.1876  | 4.51E-05 |
| 0.00025  | 0.164186 | 0.00037  | -0.23746 | 2.08E-07 |
| 0.62809  | -0.1065  | 0.02135  | -0.01209 | 0.79439  |
| 0.00049  | -0.12376 | 0.00742  | 0.060681 | 0.19053  |
| 0.00425  | -0.26094 | 1.04E-08 | -0.05116 | 0.26987  |
| 0.02663  | -0.10508 | 0.02315  | -0.22014 | 1.56E-06 |
| 0.45686  | -0.20083 | 1.23E-05 | 0.132348 | 0.00417  |
| 3.06E-05 | -0.08802 | 0.05735  | 0.114958 | 0.01292  |
| 4.62E-09 | 0.040813 | 0.37887  | -0.04907 | 0.28999  |
| 0.51656  | -0.14077 | 0.00229  | -0.1168  | 0.01154  |
| 0.09124  | -0.13486 | 0.0035   | -0.03391 | 0.46469  |
| 3.85E-05 | -0.06468 | 0.16286  | -0.0644  | 0.1647   |
| 0.10354  | -0.12466 | 0.00699  | 0.011815 | 0.79899  |
| 0.03294  | -0.15011 | 0.00114  | -0.06526 | 0.15916  |
| 0.00013  | 0.015454 | 0.73907  | -0.14787 | 0.00135  |
| 5.19E-05 | -0.13192 | 0.00429  | 0.111857 | 0.01559  |
| 0.24527  | -0.04616 | 0.31956  | -0.1631  | 0.0004   |
| 0.0269   | 0.005426 | 0.90691  | 0.00062  | 0.98934  |
| 0.00125  | -0.15231 | 0.00096  | 0.238349 | 1.87E-07 |
| 0.03574  | -0.11025 | 0.01715  | -0.05641 | 0.22374  |

|          |          |          |          |          |
|----------|----------|----------|----------|----------|
| 0.01144  | -0.20101 | 1.20E-05 | -0.00445 | 0.92364  |
| 0.03363  | -0.12393 | 0.00734  | -0.00288 | 0.95045  |
| 0.00072  | -0.15885 | 0.00057  | 0.038865 | 0.40207  |
| 0.97294  | -0.12208 | 0.00827  | -0.22212 | 1.25E-06 |
| 0.19965  | -0.03576 | 0.44071  | -0.30115 | 3.02E-11 |
| 0.49292  | -0.17332 | 0.00017  | -0.21389 | 3.10E-06 |
| 0.87615  | -0.19382 | 2.47E-05 | 0.093713 | 0.04295  |
| 0.6396   | -0.17251 | 0.00018  | -0.19212 | 2.92E-05 |
| 0.20509  | 0.041474 | 0.3712   | 0.038446 | 0.40715  |
| 0.27822  | -0.14809 | 0.00133  | -0.03273 | 0.48047  |
| 0.11628  | 0.030308 | 0.51353  | -0.41299 | 1.16E-20 |
| 0.79099  | -0.07053 | 0.12802  | -0.07375 | 0.11147  |
| 0.00043  | -0.15525 | 0.00076  | 0.177764 | 0.00011  |
| 0.00215  | -0.11168 | 0.01576  | 0.208821 | 5.34E-06 |
| 0.02939  | -0.15457 | 0.0008   | -0.03745 | 0.4194   |
| 0.41265  | -0.1457  | 0.00159  | -0.02689 | 0.56214  |
| 0.10824  | -0.05916 | 0.20187  | -0.24439 | 8.87E-08 |
| 1.20E-20 | 0.133498 | 0.00385  | -0.0287  | 0.53619  |
| 0.00568  | -0.13006 | 0.00488  | 0.099662 | 0.03129  |
| 0.00254  | -0.06335 | 0.17173  | -0.05617 | 0.22571  |
| 0.86712  | -0.09576 | 0.03859  | -0.28965 | 1.77E-10 |
| 9.30E-07 | -0.13563 | 0.00332  | 0.178434 | 0.00011  |
| 0.77528  | -0.06245 | 0.17792  | 0.00432  | 0.92581  |
| 0.05359  | -0.04375 | 0.34545  | 0.006118 | 0.89509  |
| 0.08039  | 0.023556 | 0.61163  | -0.18955 | 3.74E-05 |
| 1.20E-06 | -0.12093 | 0.0089   | 0.16203  | 0.00044  |
| 0.0079   | -0.20989 | 4.77E-06 | 0.101851 | 0.02775  |
| 0.00131  | -0.04463 | 0.33583  | -0.03439 | 0.45846  |
| 0.17811  | -0.11674 | 0.01158  | -0.07131 | 0.12385  |
| 0.00685  | -0.18773 | 4.46E-05 | -0.02687 | 0.56251  |
| 0.11192  | -0.15281 | 0.00092  | 0.048637 | 0.29424  |
| 1.52E-06 | -0.15373 | 0.00086  | 0.285975 | 3.07E-10 |
| 0.58672  | -0.08645 | 0.06195  | -0.17053 | 0.00021  |
| 0.02164  | -0.14333 | 0.0019   | -0.06358 | 0.17017  |
| 0.06024  | -0.16875 | 0.00025  | 0.005737 | 0.9016   |
| 0.60038  | -0.10956 | 0.01786  | 0.106609 | 0.02121  |
| 0.09507  | -0.15135 | 0.00104  | -0.03267 | 0.48129  |
| 0.67816  | -0.1428  | 0.00198  | -0.25037 | 4.16E-08 |
| 1.04E-07 | -0.04353 | 0.34792  | -0.49268 | 6.27E-30 |
| 0.9186   | -0.12947 | 0.00508  | -0.01651 | 0.72202  |
| 0.20156  | -0.17075 | 0.00021  | -0.10917 | 0.01828  |
| 0.08408  | -0.18927 | 3.85E-05 | -0.07415 | 0.10951  |
| 0.07629  | -0.15502 | 0.00078  | -0.12896 | 0.00525  |
| 3.81E-07 | -0.06618 | 0.15331  | 0.0867   | 0.06119  |
| 0.0005   | -0.10346 | 0.02536  | -0.37096 | 1.11E-16 |

|          |          |          |          |          |
|----------|----------|----------|----------|----------|
| 7.80E-06 | -0.00874 | 0.85051  | -0.06058 | 0.19127  |
| 0.62653  | -0.1612  | 0.00047  | 0.031542 | 0.49653  |
| 0.1151   | -0.15152 | 0.00102  | 0.115557 | 0.01246  |
| 0.05208  | -0.09822 | 0.03383  | 0.036596 | 0.43012  |
| 5.02E-05 | -0.07957 | 0.08585  | 0.11751  | 0.01104  |
| 0.81105  | -0.03825 | 0.40951  | -0.21668 | 2.29E-06 |
| 0.06103  | -0.0903  | 0.05116  | 0.001506 | 0.97411  |
| 0.00011  | -0.10755 | 0.02008  | 0.052101 | 0.26116  |
| 0.01487  | 0.029866 | 0.51969  | -0.19982 | 1.36E-05 |
| 0.05127  | -0.08228 | 0.07568  | -0.16105 | 0.00048  |
| 0.01366  | -0.06087 | 0.18915  | -0.273   | 2.00E-09 |
| 0.38654  | -0.19103 | 3.25E-05 | -0.11214 | 0.01533  |
| 0.11003  | -0.04204 | 0.36475  | 0.005919 | 0.89849  |
| 0.12293  | -0.02037 | 0.66066  | -0.11489 | 0.01298  |
| 0.64166  | -0.07007 | 0.13052  | -0.30177 | 2.74E-11 |
| 0.58685  | -0.18887 | 4.00E-05 | -0.27562 | 1.38E-09 |
| 0.00278  | -0.08462 | 0.06769  | -0.05091 | 0.27227  |
| 0.25258  | -0.01437 | 0.75684  | -0.14327 | 0.00191  |
| 0.02669  | -0.13526 | 0.0034   | 0.13192  | 0.00429  |
| 0.01382  | -0.20793 | 5.87E-06 | 0.206876 | 6.56E-06 |
| 1.87E-06 | -0.10837 | 0.01915  | 0.146457 | 0.00151  |
| 0.1149   | -0.15703 | 0.00066  | -0.2302  | 4.93E-07 |
| 0.07822  | -0.12564 | 0.00656  | -0.19905 | 1.47E-05 |
| 6.43E-05 | -0.06734 | 0.14622  | 0.112238 | 0.01524  |
| 0.00337  | -0.10072 | 0.02953  | -0.048   | 0.30065  |
| 0.29322  | -0.11231 | 0.01517  | -0.22716 | 7.02E-07 |
| 0.00023  | -0.10745 | 0.0202   | -0.04995 | 0.28144  |
| 0.43477  | -0.15017 | 0.00113  | 0.021567 | 0.64202  |
| 0.00015  | -0.08995 | 0.05206  | -0.01973 | 0.67071  |
| 0.08388  | -0.14712 | 0.00143  | -0.02853 | 0.53852  |
| 0.30228  | -0.08294 | 0.07336  | -0.02597 | 0.57558  |
| 0.34238  | -0.08359 | 0.07113  | -0.19285 | 2.72E-05 |
| 0.00049  | -0.18378 | 6.47E-05 | 0.075195 | 0.10461  |
| 1.43E-05 | -0.03547 | 0.44444  | 0.091743 | 0.04754  |
| 0.00433  | -0.09605 | 0.03799  | -0.02041 | 0.65999  |
| 0.00067  | -0.10003 | 0.03068  | -0.0071  | 0.87843  |
| 0.11878  | -0.18123 | 8.20E-05 | 0.218485 | 1.87E-06 |
| 0.36957  | 0.005977 | 0.89749  | 0.090696 | 0.05014  |
| 0.1167   | -0.0244  | 0.59886  | -0.13267 | 0.00408  |
| 0.28612  | -0.05982 | 0.19689  | 0.091321 | 0.04858  |
| 0.2388   | -0.05314 | 0.25178  | -0.05793 | 0.21145  |
| 0.97986  | 0.017303 | 0.70919  | 0.085361 | 0.06532  |
| 0.75529  | 0.017712 | 0.70264  | -0.01157 | 0.80299  |
| 0.88645  | -0.02293 | 0.62119  | -0.01683 | 0.71677  |
| 0.92807  | 0.050132 | 0.27964  | -0.05912 | 0.20218  |

|         |          |         |          |          |
|---------|----------|---------|----------|----------|
| 0.43101 | -0.0263  | 0.57073 | 0.041611 | 0.36962  |
| 0.76728 | 0.093621 | 0.04316 | -0.06324 | 0.17243  |
| 0.8933  | 0.016864 | 0.71625 | 0.01334  | 0.77372  |
| 0.15472 | 0.062001 | 0.18104 | -0.02643 | 0.56888  |
| 0.24884 | 0.061291 | 0.1861  | 0.005963 | 0.89774  |
| 0.44963 | 0.064848 | 0.16178 | -0.01629 | 0.72557  |
| 0.15026 | -0.047   | 0.31083 | -0.00936 | 0.84016  |
| 0.15811 | 0.043297 | 0.35052 | 0.039333 | 0.39642  |
| 0.98566 | 0.049159 | 0.28908 | -0.05207 | 0.26141  |
| 0.55482 | 0.025897 | 0.57668 | 0.098739 | 0.0329   |
| 0.01484 | -0.04075 | 0.37962 | -0.0738  | 0.11122  |
| 0.21726 | 0.011962 | 0.79655 | -0.01918 | 0.67932  |
| 0.93662 | 0.02552  | 0.58225 | 0.18295  | 6.99E-05 |
| 0.06745 | 0.000213 | 0.99634 | 0.165606 | 0.00033  |
| 0.26484 | -0.04609 | 0.3203  | 0.095385 | 0.03936  |
| 0.91496 | 0.023793 | 0.60805 | 0.114058 | 0.01365  |
| 0.47    | -0.03971 | 0.39192 | 0.070227 | 0.12966  |
| 0.43436 | 0.055575 | 0.23065 | -0.08721 | 0.05967  |
| 0.48235 | 0.031038 | 0.50344 | 0.018829 | 0.68485  |
| 0.74248 | 0.053727 | 0.24654 | -0.04899 | 0.29074  |
| 0.34088 | 0.004184 | 0.92815 | 0.053946 | 0.24463  |
| 0.61625 | -0.0414  | 0.3721  | 0.022912 | 0.62139  |
| 0.78308 | -0.00909 | 0.84469 | -0.04476 | 0.33446  |
| 0.9785  | 0.031055 | 0.50319 | -0.01668 | 0.71921  |
| 0.93909 | 0.028291 | 0.54196 | -0.02365 | 0.61016  |
| 0.84979 | 0.020294 | 0.66181 | -0.01696 | 0.71477  |
| 0.74029 | 0.0351   | 0.44921 | -0.00985 | 0.83191  |
| 0.98473 | 0.010736 | 0.81701 | 0.024512 | 0.59724  |
| 0.9499  | 0.041417 | 0.37185 | -0.04394 | 0.34337  |
| 0.65862 | 0.039061 | 0.39969 | -0.00683 | 0.88296  |
| 0.28994 | -0.0155  | 0.73831 | 0.02682  | 0.56317  |
| 0.10307 | 0.027956 | 0.54675 | 0.020646 | 0.65631  |
| 0.34129 | 0.005586 | 0.90417 | -0.05352 | 0.24841  |
| 0.16623 | -0.01055 | 0.82012 | -0.13115 | 0.00453  |
| 0.25874 | 0.05191  | 0.26291 | 0.142131 | 0.00208  |
| 0.63647 | 0.008621 | 0.8526  | -0.00194 | 0.96669  |
| 0.48042 | 0.015592 | 0.73683 | 0.012249 | 0.79177  |
| 0.53339 | 0.017097 | 0.7125  | -0.02666 | 0.56545  |
| 0.45922 | 0.00647  | 0.88909 | -0.02686 | 0.56257  |
| 0.45079 | 0.012246 | 0.79183 | -0.02444 | 0.59839  |
| 0.642   | 0.02498  | 0.59026 | -0.02589 | 0.57672  |
| 0.21604 | 0.014001 | 0.76282 | -0.01374 | 0.76715  |
| 0.04877 | -0.05075 | 0.27374 | -0.06418 | 0.16619  |
| 0.1327  | -0.01432 | 0.75754 | -0.05058 | 0.27537  |
| 0.01823 | -0.0796  | 0.08573 | -0.08473 | 0.06735  |

|          |          |          |          |          |
|----------|----------|----------|----------|----------|
| 0.80018  | 0.001636 | 0.97188  | -0.05325 | 0.25075  |
| 0.24412  | 0.007917 | 0.86451  | 0.055476 | 0.23148  |
| 0.76794  | -0.0225  | 0.62761  | 0.121855 | 0.00839  |
| 0.99009  | 0.036953 | 0.42563  | -0.06217 | 0.17989  |
| 0.50674  | 0.029433 | 0.52576  | -0.06261 | 0.17676  |
| 0.81423  | 0.04905  | 0.29016  | -0.05669 | 0.22143  |
| 0.26743  | 0.014469 | 0.75514  | 0.052316 | 0.25919  |
| 0.43042  | 0.020083 | 0.6651   | -0.01196 | 0.79656  |
| 0.44844  | 0.025292 | 0.58562  | 0.031114 | 0.50239  |
| 0.0651   | -0.06745 | 0.14557  | 0.033164 | 0.47464  |
| 0.97839  | 0.031851 | 0.49231  | -0.03746 | 0.41934  |
| 0.06325  | -0.00735 | 0.87418  | 0.034939 | 0.4513   |
| 0.27529  | 0.004746 | 0.91852  | 0.00894  | 0.84722  |
| 0.22624  | -0.07494 | 0.10577  | 0.116491 | 0.01176  |
| 0.60422  | 0.01904  | 0.68152  | -0.0124  | 0.78932  |
| 0.69446  | 0.03439  | 0.45844  | 0.112238 | 0.01524  |
| 0.40776  | -0.00349 | 0.94009  | 0.05475  | 0.23765  |
| 0.0877   | -0.06513 | 0.15999  | 0.014425 | 0.75586  |
| 0.47728  | -0.01816 | 0.6955   | 0.053452 | 0.24898  |
| 0.00783  | 0.113984 | 0.01371  | -0.186   | 5.25E-05 |
| 3.28E-11 | 0.022142 | 0.63317  | -0.24547 | 7.75E-08 |
| 0.00069  | 0.103533 | 0.02526  | -0.3316  | 1.90E-13 |
| 8.04E-06 | -0.02447 | 0.59791  | -0.05688 | 0.21991  |
| 0.0021   | 0.11101  | 0.0164   | -0.13546 | 0.00336  |
| 0.003    | 0.091568 | 0.04797  | -0.17801 | 0.00011  |
| 0.82267  | 0.156443 | 0.00069  | 0.009124 | 0.8441   |
| 0.03715  | 0.187395 | 4.60E-05 | -0.30742 | 1.12E-11 |
| 4.70E-08 | 0.017379 | 0.70797  | -0.1886  | 4.10E-05 |
| 4.96E-05 | 0.04765  | 0.30416  | -0.09881 | 0.03278  |
| 0.00026  | -0.01725 | 0.71004  | -0.40264 | 1.25E-19 |
| 0.00126  | 0.125431 | 0.00665  | -0.18509 | 5.72E-05 |
| 0.00011  | 0.111315 | 0.0161   | -0.25415 | 2.56E-08 |
| 1.30E-12 | 0.069609 | 0.13308  | -0.22932 | 5.46E-07 |
| 1.83E-06 | 0.006161 | 0.89437  | -0.31862 | 1.77E-12 |
| 2.39E-09 | -0.0233  | 0.61543  | -0.25454 | 2.43E-08 |
| 1.10E-06 | -0.03042 | 0.51199  | -0.11423 | 0.01351  |
| 2.78E-05 | 0.18423  | 6.20E-05 | -0.29818 | 4.81E-11 |
| 1.22E-06 | 0.122219 | 0.00819  | -0.31873 | 1.74E-12 |
| 4.74E-07 | 0.01504  | 0.74582  | -0.21537 | 2.64E-06 |
| 6.13E-08 | 0.079461 | 0.08629  | -0.23189 | 4.04E-07 |
| 0.00014  | -0.04361 | 0.34706  | -0.09565 | 0.0388   |
| 0.43407  | 0.122834 | 0.00787  | -0.07161 | 0.12226  |
| 4.22E-07 | -0.0224  | 0.62916  | -0.19356 | 2.54E-05 |
| 8.73E-05 | 0.149694 | 0.00118  | -0.21135 | 4.08E-06 |
| 0.00044  | -0.00589 | 0.89894  | -0.11499 | 0.0129   |



|          |           |          |          |          |
|----------|-----------|----------|----------|----------|
| 3.01E-05 | -0.0585   | 0.20699  | 0.011167 | 0.80979  |
| 0.00018  | 0.116496  | 0.01176  | -0.28278 | 4.91E-10 |
| 9.89E-07 | 0.063082  | 0.17354  | -0.28508 | 3.50E-10 |
| 3.20E-05 | 0.021644  | 0.64084  | -0.18821 | 4.26E-05 |
| 2.88E-09 | 0.120364  | 0.00923  | -0.3183  | 1.87E-12 |
| 0.00219  | 0.202772  | 1.00E-05 | -0.48254 | 1.31E-28 |
| 0.95416  | 0.171129  | 0.0002   | -0.13486 | 0.0035   |
| 0.01008  | 0.009778  | 0.83308  | -0.19029 | 3.49E-05 |
| 2.10E-05 | 0.05338   | 0.24962  | -0.14619 | 0.00154  |
| 0.00011  | 0.049663  | 0.28417  | -0.27992 | 7.44E-10 |
| 2.36E-05 | -0.01062  | 0.81891  | -0.26556 | 5.59E-09 |
| 4.40E-08 | 0.025377  | 0.58437  | -0.20279 | 1.00E-05 |
| 0.06046  | 0.130268  | 0.00481  | -0.00328 | 0.94369  |
| 1.90E-06 | 0.0578    | 0.21249  | -0.28587 | 3.12E-10 |
| 7.51E-05 | 0.036189  | 0.43527  | -0.31394 | 3.86E-12 |
| 7.82E-06 | -0.1148   | 0.01305  | -0.24747 | 6.02E-08 |
| 0.00191  | 0.050899  | 0.27234  | -0.27827 | 9.45E-10 |
| 1.05E-07 | 0.025272  | 0.58592  | -0.26953 | 3.24E-09 |
| 0.08882  | -0.01789  | 0.69972  | 0.03641  | 0.43247  |
| 1.30E-07 | 0.088331  | 0.05646  | -0.19589 | 2.01E-05 |
| 0.01341  | 0.150474  | 0.00111  | -0.10492 | 0.02335  |
| 5.87E-06 | -0.00756  | 0.87051  | -0.18069 | 8.62E-05 |
| 2.15E-06 | 0.053865  | 0.24533  | -0.35555 | 2.31E-15 |
| 1.28E-09 | 0.007258  | 0.8757   | -0.23463 | 2.92E-07 |
| 0.70468  | 0.070124  | 0.13023  | -0.26954 | 3.24E-09 |
| 0.00144  | 0.160082  | 0.00052  | -0.20778 | 5.97E-06 |
| 0.0093   | 0.150881  | 0.00107  | -0.41454 | 8.07E-21 |
| 4.16E-08 | 0.049214  | 0.28854  | -0.29716 | 5.64E-11 |
| 6.74E-07 | 0.040885  | 0.37803  | -0.27615 | 1.28E-09 |
| 2.27E-13 | -0.02698  | 0.56086  | -0.47033 | 4.44E-27 |
| 0.0003   | 0.119429  | 0.00979  | -0.41989 | 2.27E-21 |
| 0.09295  | 0.097208  | 0.03573  | -0.13903 | 0.0026   |
| 0.00015  | 0.03038   | 0.51253  | -0.10069 | 0.02958  |
| 0.00021  | 0.005633  | 0.90337  | -0.25623 | 1.95E-08 |
| 7.46E-12 | 0.050386  | 0.27721  | -0.32618 | 4.88E-13 |
| 2.66E-09 | 0.104179  | 0.02436  | -0.252   | 3.38E-08 |
| 7.62E-08 | -0.001    | 0.98283  | -0.13737 | 0.00293  |
| 0.00076  | 0.083407  | 0.07174  | -0.22722 | 6.97E-07 |
| 6.69E-06 | 0.063283  | 0.17217  | -0.18644 | 5.04E-05 |
| 0.06755  | 0.260659  | 1.08E-08 | -0.33697 | 7.30E-14 |
| 3.47E-08 | 0.003701  | 0.93642  | -0.22044 | 1.51E-06 |
| 0.00013  | 0.134566  | 0.00357  | -0.3972  | 4.24E-19 |
| 1.32E-13 | -3.82E-05 | 0.99934  | -0.38588 | 4.97E-18 |
| 2.54E-05 | 0.124698  | 0.00697  | -0.38414 | 7.19E-18 |
| 6.16E-09 | 0.040199  | 0.38609  | -0.37069 | 1.17E-16 |

|          |          |          |          |          |
|----------|----------|----------|----------|----------|
| 6.74E-07 | 0.11745  | 0.01108  | -0.52977 | 3.80E-35 |
| 4.54E-06 | 0.060441 | 0.19229  | -0.32491 | 6.08E-13 |
| 3.97E-11 | 0.027817 | 0.54876  | -0.30665 | 1.26E-11 |
| 4.02E-07 | 0.093159 | 0.0442   | -0.22774 | 6.57E-07 |
| 0.05759  | 0.030196 | 0.51509  | 0.059712 | 0.19772  |
| 4.02E-05 | 0.04416  | 0.34099  | -0.23935 | 1.65E-07 |
| 0.00759  | 0.215576 | 2.58E-06 | -0.47756 | 5.61E-28 |
| 7.16E-07 | -0.00034 | 0.99415  | -0.24564 | 7.58E-08 |
| 0.01339  | 0.128456 | 0.00543  | -0.33234 | 1.66E-13 |
| 0.00246  | 0.022885 | 0.6218   | -0.24816 | 5.52E-08 |
| 6.96E-08 | -0.04682 | 0.31272  | -0.15671 | 0.00068  |
| 5.52E-13 | 0.022814 | 0.62289  | -0.36242 | 6.09E-16 |
| 0.00024  | -0.05314 | 0.25175  | -0.23405 | 3.13E-07 |
| 0.00021  | 0.023953 | 0.60563  | -0.24985 | 4.45E-08 |
| 1.02E-06 | -0.01726 | 0.7099   | -0.22729 | 6.91E-07 |
| 9.40E-05 | -0.01874 | 0.68625  | -0.15787 | 0.00062  |
| 2.87E-07 | 0.019059 | 0.68122  | -0.08242 | 0.07518  |
| 0.00014  | 0.08925  | 0.05393  | -0.34953 | 7.26E-15 |
| 0.00482  | 0.057067 | 0.21835  | -0.06788 | 0.14302  |
| 2.61E-08 | -0.01783 | 0.70075  | -0.22268 | 1.17E-06 |
| 4.64E-06 | -0.05713 | 0.21784  | -0.17594 | 0.00013  |
| 0.00085  | 0.151199 | 0.00105  | -0.37526 | 4.60E-17 |
| 2.20E-05 | 0.02505  | 0.58922  | -0.09514 | 0.03986  |
| 2.62E-08 | -0.01776 | 0.70185  | -0.30931 | 8.22E-12 |
| 2.65E-06 | 0.008455 | 0.8554   | -0.18954 | 3.75E-05 |
| 1.30E-17 | -0.01025 | 0.82514  | -0.31385 | 3.91E-12 |
| 0.19163  | 0.140023 | 0.00242  | -0.13976 | 0.00247  |
| 2.24E-05 | 0.180409 | 8.84E-05 | -0.30473 | 1.72E-11 |
| 1.72E-06 | -0.00457 | 0.92155  | -0.13184 | 0.00432  |
| 1.98E-07 | 0.105688 | 0.02236  | -0.46092 | 6.10E-26 |
| 7.62E-10 | -0.04144 | 0.37159  | -0.29445 | 8.56E-11 |
| 1.07E-08 | 0.030849 | 0.50604  | -0.33095 | 2.13E-13 |
| 0.00567  | 0.253673 | 2.72E-08 | -0.28342 | 4.47E-10 |
| 5.01E-09 | 0.129803 | 0.00496  | -0.33855 | 5.49E-14 |
| 0.0003   | -0.0328  | 0.47945  | -0.0334  | 0.47148  |
| 3.14E-08 | 0.030209 | 0.51491  | -0.2584  | 1.46E-08 |
| 1.58E-06 | 0.071586 | 0.12239  | -0.23125 | 4.36E-07 |
| 8.04E-05 | 0.186336 | 5.09E-05 | -0.33739 | 6.77E-14 |
| 4.23E-05 | 0.019177 | 0.67935  | -0.15032 | 0.00112  |
| 0.04001  | 0.017606 | 0.70433  | -0.11036 | 0.01704  |
| 0.00138  | 0.139045 | 0.0026   | -0.39457 | 7.57E-19 |
| 1.95E-07 | 0.122996 | 0.00779  | -0.31893 | 1.68E-12 |
| 3.51E-08 | -0.0177  | 0.70283  | -0.28797 | 2.28E-10 |
| 5.94E-09 | -0.00417 | 0.92844  | -0.24245 | 1.13E-07 |
| 1.36E-05 | 0.00283  | 0.95137  | -0.3835  | 8.25E-18 |

|          |          |          |          |          |
|----------|----------|----------|----------|----------|
| 0.00786  | 0.194825 | 2.24E-05 | -0.23993 | 1.54E-07 |
| 2.91E-05 | 0.065847 | 0.1554   | -0.13593 | 0.00325  |
| 0.00557  | 0.082282 | 0.07567  | -0.18426 | 6.19E-05 |
| 0.00315  | 0.093172 | 0.04417  | -0.08571 | 0.06421  |
| 0.00082  | 0.012766 | 0.78321  | 0.027275 | 0.55657  |
| 1.38E-08 | 0.081882 | 0.07711  | -0.25899 | 1.36E-08 |
| 0.39441  | 0.047026 | 0.31055  | -0.19939 | 1.42E-05 |
| 0.00726  | -0.00434 | 0.92543  | -0.28985 | 1.72E-10 |
| 5.09E-07 | 0.000854 | 0.98532  | -0.05663 | 0.22186  |
| 5.24E-07 | 0.057533 | 0.21461  | -0.23943 | 1.64E-07 |
| 3.44E-10 | 0.072352 | 0.11843  | -0.31179 | 5.49E-12 |
| 4.80E-08 | 0.021559 | 0.64215  | -0.36367 | 4.76E-16 |
| 0.13566  | 0.084208 | 0.06905  | -0.06469 | 0.16284  |
| 1.52E-05 | -0.04336 | 0.34977  | -0.16413 | 0.00037  |
| 3.35E-05 | 0.012022 | 0.79554  | -0.10755 | 0.02009  |
| 1.91E-09 | 0.009828 | 0.83224  | -0.03356 | 0.46943  |
| 9.32E-06 | 0.035893 | 0.43903  | -0.06568 | 0.15646  |
| 3.49E-10 | 0.104164 | 0.02438  | -0.30312 | 2.22E-11 |
| 2.21E-12 | -0.08184 | 0.07726  | -0.36838 | 1.86E-16 |
| 0.74857  | -0.02482 | 0.5926   | 0.171778 | 0.00019  |
| 0.0203   | -0.04167 | 0.36893  | 0.416741 | 4.80E-21 |
| 0.00954  | -0.14507 | 0.00167  | 0.056231 | 0.22518  |
| 0.37529  | 0.027457 | 0.55394  | 0.187568 | 4.53E-05 |
| 0.67574  | -0.01841 | 0.69144  | 0.135082 | 0.00345  |
| 0.2064   | -0.0333  | 0.47276  | 0.153396 | 0.00088  |
| 0.18843  | 0.069787 | 0.13209  | 0.157096 | 0.00066  |
| 0.36969  | -0.03279 | 0.47961  | 0.099928 | 0.03084  |
| 0.47754  | -0.0603  | 0.19335  | 0.148875 | 0.00125  |
| 0.30726  | -0.0677  | 0.14409  | 0.135749 | 0.00329  |
| 0.01676  | -0.00353 | 0.93932  | 0.102882 | 0.0262   |
| 0.39573  | -0.10251 | 0.02674  | 0.254213 | 2.54E-08 |
| 0.80796  | -0.00185 | 0.96826  | 0.229625 | 5.27E-07 |
| 0.2023   | -0.11897 | 0.01007  | 0.129343 | 0.00512  |
| 0.49692  | -0.03406 | 0.46277  | 0.137298 | 0.00295  |
| 0.41136  | -0.02254 | 0.62714  | 0.1155   | 0.0125   |
| 0.75685  | -0.02707 | 0.5596   | 0.332245 | 1.69E-13 |
| 0.61498  | -0.01955 | 0.67348  | 0.162039 | 0.00044  |
| 0.25416  | 0.004136 | 0.92898  | 0.001483 | 0.9745   |
| 0.03384  | 0.138775 | 0.00265  | 0.236389 | 2.36E-07 |
| 0.99458  | 0.002984 | 0.94872  | 0.082631 | 0.07443  |
| 0.6382   | -0.03918 | 0.3982   | 0.144158 | 0.00179  |
| 0.94893  | -0.0273  | 0.55617  | 0.147992 | 0.00134  |
| 0.1135   | -0.03377 | 0.46659  | 0.160684 | 0.00049  |
| 0.09028  | -0.05532 | 0.23276  | 0.118399 | 0.01044  |
| 2.81E-06 | 0.210313 | 4.56E-06 | 0.251891 | 3.43E-08 |

|         |          |          |          |          |
|---------|----------|----------|----------|----------|
| 0.41258 | -0.05722 | 0.21712  | 0.205855 | 7.30E-06 |
| 0.90387 | 0.004243 | 0.92714  | 0.099532 | 0.03152  |
| 0.00028 | -0.12448 | 0.00707  | -0.04219 | 0.36304  |
| 0.24529 | -0.0065  | 0.88851  | 0.226136 | 7.90E-07 |
| 0.50265 | -0.03551 | 0.4439   | 0.14106  | 0.00225  |
| 0.3503  | -0.00512 | 0.9121   | 0.175506 | 0.00014  |
| 0.93151 | -0.11707 | 0.01134  | 0.205137 | 7.87E-06 |
| 0.20761 | 0.006808 | 0.88335  | 0.133185 | 0.00394  |
| 0.4297  | 0.234947 | 2.81E-07 | 0.040964 | 0.37711  |
| 0.7751  | -0.13016 | 0.00484  | 0.383709 | 7.89E-18 |
| 0.01294 | -0.15873 | 0.00058  | 0.096249 | 0.0376   |
| 0.96302 | -0.00256 | 0.95592  | 0.273705 | 1.81E-09 |
| 0.14194 | -0.00011 | 0.99805  | 0.244609 | 8.63E-08 |
| 0.33186 | 0.041842 | 0.36696  | 0.213877 | 3.11E-06 |
| 0.39062 | 0.008042 | 0.86239  | 0.148819 | 0.00126  |
| 0.35434 | -0.03284 | 0.47901  | 0.212655 | 3.55E-06 |
| 0.54037 | -0.01325 | 0.77521  | 0.2539   | 2.64E-08 |
| 0.33978 | -0.10392 | 0.02471  | 0.447869 | 2.03E-24 |
| 0.64262 | -0.01576 | 0.7341   | 0.096355 | 0.03739  |
| 0.24021 | -0.00373 | 0.93586  | 0.313819 | 3.93E-12 |
| 0.93959 | 0.010095 | 0.82775  | 0.086634 | 0.06139  |
| 0.27221 | -0.05526 | 0.23335  | 0.158269 | 0.0006   |
| 0.21054 | -0.03841 | 0.40758  | 0.034932 | 0.4514   |
| 0.2229  | 0.104376 | 0.02409  | 0.065512 | 0.15752  |
| 0.62821 | -0.01756 | 0.70503  | 0.161227 | 0.00047  |
| 0.17352 | -0.0019  | 0.96726  | 0.361359 | 7.50E-16 |
| 0.56549 | -0.03384 | 0.46566  | 0.13095  | 0.00459  |
| 0.02431 | 0.068123 | 0.14158  | 0.313635 | 4.05E-12 |
| 0.35296 | 0.031298 | 0.49986  | 0.11921  | 0.00992  |
| 0.11239 | 0.050944 | 0.27191  | 0.227766 | 6.54E-07 |
| 0.07348 | -0.08472 | 0.06736  | 0.292529 | 1.15E-10 |
| 0.00392 | 0.083462 | 0.07155  | 0.20172  | 1.12E-05 |
| 0.75757 | -0.01785 | 0.70036  | 0.244244 | 9.03E-08 |
| 0.99747 | -0.05682 | 0.22038  | 0.16187  | 0.00044  |
| 0.20436 | -0.03593 | 0.43861  | 0.181372 | 8.09E-05 |
| 0.24892 | -0.0234  | 0.61398  | 0.218008 | 1.98E-06 |
| 0.41393 | 0.060983 | 0.18833  | 0.018414 | 0.69144  |
| 0.29381 | -0.02348 | 0.61273  | 0.187095 | 4.74E-05 |
| 0.85997 | -0.08413 | 0.06931  | 0.171477 | 0.0002   |
| 0.23224 | -0.05587 | 0.22817  | 0.403468 | 1.04E-19 |
| 0.91268 | -0.02823 | 0.54277  | 0.165595 | 0.00033  |
| 0.6665  | 0.003167 | 0.94559  | 0.121755 | 0.00844  |
| 0.2186  | 0.060324 | 0.19316  | 0.143949 | 0.00182  |
| 0.79603 | 0.045617 | 0.32529  | 0.058793 | 0.20472  |
| 0.9943  | -0.01616 | 0.72757  | 0.141506 | 0.00218  |

|         |          |          |          |          |
|---------|----------|----------|----------|----------|
| 0.6617  | -0.06288 | 0.17492  | 0.213999 | 3.07E-06 |
| 0.17348 | -0.01502 | 0.74622  | 0.173465 | 0.00017  |
| 0.17399 | -0.03525 | 0.44729  | 0.157955 | 0.00061  |
| 0.14945 | -0.09196 | 0.04701  | 0.129427 | 0.00509  |
| 0.59609 | -0.00788 | 0.86514  | 0.191916 | 2.98E-05 |
| 0.21535 | 0.19592  | 2.01E-05 | 0.162902 | 0.00041  |
| 0.26358 | -0.02216 | 0.63291  | 0.215028 | 2.74E-06 |
| 0.91407 | -0.00389 | 0.93315  | 0.161316 | 0.00047  |
| 0.4929  | -0.0118  | 0.79918  | 0.191334 | 3.15E-05 |
| 0.08992 | -0.03834 | 0.40849  | 0.408399 | 3.37E-20 |
| 0.92894 | -0.00992 | 0.83062  | 0.302986 | 2.26E-11 |
| 0.86024 | -0.06799 | 0.14234  | 0.161791 | 0.00045  |
| 0.54019 | -0.04883 | 0.29232  | 0.294214 | 8.87E-11 |
| 0.33883 | -0.04179 | 0.36757  | 0.193003 | 2.68E-05 |
| 0.0068  | -0.05033 | 0.27779  | 0.033699 | 0.46753  |
| 0.78941 | 0.006974 | 0.88052  | 0.10187  | 0.02772  |
| 0.15531 | -0.04696 | 0.31127  | 0.070914 | 0.12595  |
| 0.28861 | -0.05472 | 0.23793  | 0.177502 | 0.00012  |
| 0.00258 | 0.18792  | 4.38E-05 | 0.134137 | 0.00368  |
| 0.56648 | 0.040799 | 0.37903  | 0.158324 | 0.00059  |
| 0.22591 | 0.019878 | 0.66832  | 0.217079 | 2.19E-06 |
| 0.0411  | -0.07334 | 0.11346  | 0.038031 | 0.41225  |
| 0.28143 | 0.088325 | 0.05648  | 0.180065 | 9.12E-05 |
| 0.09083 | -0.03521 | 0.44777  | 0.420313 | 2.05E-21 |
| 0.85626 | 0.034284 | 0.45984  | 0.122394 | 0.0081   |
| 0.85193 | -0.07667 | 0.09794  | 0.383545 | 8.16E-18 |
| 0.33648 | 0.10184  | 0.02776  | 0.11128  | 0.01614  |
| 0.77812 | -0.04249 | 0.3596   | 0.201731 | 1.12E-05 |
| 0.64508 | -0.12216 | 0.00822  | 0.349515 | 7.28E-15 |
| 0.05272 | -0.01704 | 0.71337  | 0.332711 | 1.56E-13 |
| 0.33333 | -0.0821  | 0.07631  | 0.368932 | 1.67E-16 |
| 0.08181 | -0.07046 | 0.12842  | 0.353157 | 3.66E-15 |
| 0.59557 | -0.07373 | 0.11155  | 0.200224 | 1.30E-05 |
| 0.55193 | 0.033018 | 0.47658  | 0.12192  | 0.00835  |
| 0.42476 | -0.00773 | 0.86774  | 0.15837  | 0.00059  |
| 0.22528 | -0.05265 | 0.2562   | 0.15117  | 0.00105  |
| 0.36605 | -0.06391 | 0.16797  | 0.214479 | 2.91E-06 |
| 0.15236 | -0.01416 | 0.76027  | 0.175325 | 0.00014  |
| 0.3561  | -0.02752 | 0.55308  | 0.22718  | 7.00E-07 |
| 0.4668  | 0.008159 | 0.86041  | 0.122971 | 0.0078   |
| 0.4311  | 0.071376 | 0.12349  | 0.101679 | 0.02801  |
| 0.59329 | -0.06897 | 0.1367   | 0.186302 | 5.11E-05 |
| 0.71715 | 0.047043 | 0.31037  | 0.21687  | 2.24E-06 |
| 0.8251  | 0.01454  | 0.75399  | 0.150076 | 0.00114  |
| 0.27598 | -0.05577 | 0.229    | 0.141704 | 0.00214  |

|          |          |         |          |          |
|----------|----------|---------|----------|----------|
| 0.76872  | -0.05163 | 0.2655  | 0.174258 | 0.00015  |
| 0.02117  | 0.056942 | 0.21936 | 0.220133 | 1.56E-06 |
| 0.00178  | 0.043633 | 0.34679 | 0.194684 | 2.27E-05 |
| 0.28211  | -0.13447 | 0.0036  | 0.417514 | 4.00E-21 |
| 0.9665   | -0.0851  | 0.06614 | 0.255192 | 2.23E-08 |
| 0.51664  | -0.0342  | 0.46094 | 0.243683 | 9.69E-08 |
| 0.27732  | -0.03111 | 0.5024  | 0.101365 | 0.0285   |
| 0.27918  | -0.03001 | 0.51766 | 0.008983 | 0.84648  |
| 3.53E-05 | -0.00825 | 0.85893 | -0.12226 | 0.00817  |
| 0.95489  | -0.07119 | 0.12448 | 0.241178 | 1.32E-07 |
| 0.19858  | -0.05235 | 0.2589  | 0.104636 | 0.02374  |
| 0.98202  | -0.04589 | 0.32238 | 0.160268 | 0.00051  |
| 0.66186  | -0.04549 | 0.3266  | 0.157896 | 0.00062  |
| 0.92202  | -0.03718 | 0.42279 | 0.179953 | 9.22E-05 |
| 0.43019  | -0.01076 | 0.81667 | 0.130726 | 0.00466  |
| 0.47851  | -0.0517  | 0.26486 | 0.102642 | 0.02655  |
| 0.52066  | -0.00689 | 0.88188 | 0.156268 | 0.0007   |
| 6.16E-05 | -0.03913 | 0.39882 | 0.566722 | 4.97E-41 |
| 0.45056  | -0.07794 | 0.09252 | 0.277886 | 9.97E-10 |
| 0.54422  | -0.06046 | 0.19214 | 0.255872 | 2.04E-08 |
| 0.54497  | -0.03658 | 0.43029 | 0.113205 | 0.01438  |
| 0.4311   | 0.003666 | 0.93702 | 0.169851 | 0.00023  |
| 0.06549  | -0.04265 | 0.35779 | 0.076784 | 0.09745  |
| 0.30429  | -0.0794  | 0.08652 | 0.311339 | 5.91E-12 |
| 0.92202  | -0.09303 | 0.04449 | 0.196674 | 1.86E-05 |
| 0.50059  | -0.00222 | 0.96185 | 0.313254 | 4.32E-12 |
| 0.67637  | 0.003287 | 0.94352 | 0.175278 | 0.00014  |
| 0.02747  | 0.106617 | 0.0212  | 0.1948   | 2.24E-05 |
| 0.38023  | -0.02937 | 0.52671 | 0.245451 | 7.77E-08 |
| 0.22417  | 0.013281 | 0.7747  | 0.179693 | 9.44E-05 |
| 0.79965  | -0.11702 | 0.01138 | 0.17686  | 0.00012  |
| 0.02371  | -0.02332 | 0.61514 | -0.08393 | 0.06998  |
| 0.97498  | -0.00397 | 0.9318  | 0.111528 | 0.0159   |
| 0.13522  | -0.07056 | 0.12784 | 0.081725 | 0.07768  |
| 0.39644  | -0.06142 | 0.18517 | 0.171168 | 0.0002   |
| 0.54035  | -0.05522 | 0.23362 | 0.234405 | 3.00E-07 |
| 0.18644  | 0.132583 | 0.0041  | 0.075638 | 0.10257  |
| 0.22917  | 0.059257 | 0.20116 | -0.00272 | 0.95331  |
| 0.28991  | -0.08178 | 0.07748 | 0.142663 | 0.002    |
| 0.3996   | -0.04877 | 0.29296 | 0.292301 | 1.19E-10 |
| 0.16547  | -0.02001 | 0.66623 | 0.14645  | 0.00151  |
| 0.69024  | -0.05049 | 0.27617 | 0.12753  | 0.00578  |
| 0.34691  | -0.10641 | 0.02146 | 0.187977 | 4.35E-05 |
| 0.90517  | 0.040556 | 0.38188 | 0.062317 | 0.17883  |
| 0.22822  | 0.001602 | 0.97246 | 0.190264 | 3.50E-05 |

|          |          |          |          |          |
|----------|----------|----------|----------|----------|
| 0.68916  | -0.05474 | 0.23776  | 0.269898 | 3.08E-09 |
| 0.87791  | -0.03825 | 0.40951  | 0.260075 | 1.17E-08 |
| 0.47745  | 0.021055 | 0.64994  | 0.112784 | 0.01475  |
| 0.42567  | 0.010551 | 0.82011  | 0.052364 | 0.25876  |
| 0.01377  | -0.01463 | 0.75245  | 0.035337 | 0.44616  |
| 0.96828  | -0.04018 | 0.38629  | 0.210929 | 4.27E-06 |
| 0.37732  | 0.008217 | 0.85944  | 0.154736 | 0.00079  |
| 0.086    | 0.004113 | 0.92937  | 0.338685 | 5.36E-14 |
| 0.57321  | -0.03941 | 0.39552  | 0.130911 | 0.0046   |
| 0.5153   | -0.02068 | 0.6558   | 0.177071 | 0.00012  |
| 0.16589  | -0.04226 | 0.36214  | 0.354927 | 2.61E-15 |
| 0.5179   | 0.008129 | 0.86092  | 0.149476 | 0.0012   |
| 0.40227  | 0.01211  | 0.79409  | 0.142502 | 0.00202  |
| 0.50016  | 0.025456 | 0.5832   | 0.17406  | 0.00016  |
| 0.88687  | -0.06624 | 0.15293  | 0.170726 | 0.00021  |
| 0.06646  | -0.08615 | 0.06287  | 0.201366 | 1.16E-05 |
| 0.47204  | -0.10243 | 0.02687  | 0.165573 | 0.00033  |
| 0.40338  | 0.013383 | 0.773    | 0.116374 | 0.01185  |
| 0.14337  | -0.05033 | 0.27771  | 0.349046 | 7.95E-15 |
| 0.1218   | -0.02994 | 0.51867  | 0.214464 | 2.92E-06 |
| 0.95539  | 0.034731 | 0.454    | 0.183007 | 6.95E-05 |
| 0.08734  | -0.0277  | 0.55044  | 0.155618 | 0.00074  |
| 0.02793  | 0.037049 | 0.42442  | 0.062647 | 0.17653  |
| 0.81168  | 0.047518 | 0.3055   | 0.115395 | 0.01258  |
| 0.07173  | 0.029764 | 0.52112  | 0.08769  | 0.05828  |
| 0.81694  | -0.05371 | 0.24669  | 0.24673  | 6.62E-08 |
| 0.41615  | -0.06432 | 0.16526  | 0.152523 | 0.00094  |
| 0.29334  | -0.13157 | 0.0044   | 0.186709 | 4.91E-05 |
| 0.16293  | 0.003358 | 0.94231  | 0.205952 | 7.23E-06 |
| 0.00442  | -0.01001 | 0.82926  | 0.350109 | 6.51E-15 |
| 0.01969  | -0.01908 | 0.68092  | -0.03541 | 0.44521  |
| 0.02118  | -0.0819  | 0.07705  | 0.30921  | 8.36E-12 |
| 0.64881  | -0.03781 | 0.41496  | 0.16678  | 0.00029  |
| 0.37472  | -0.05491 | 0.23627  | 0.187054 | 4.75E-05 |
| 0.07085  | 0.006111 | 0.89522  | 0.04204  | 0.36469  |
| 0.69837  | -0.10759 | 0.02004  | 0.197213 | 1.77E-05 |
| 1        | -0.05618 | 0.2256   | 0.16484  | 0.00035  |
| 2.37E-22 | 0.252967 | 2.98E-08 | 0.329667 | 2.66E-13 |
| 8.29E-09 | 0.15382  | 0.00085  | 0.307151 | 1.17E-11 |
| 1.93E-12 | 0.163238 | 0.0004   | 0.271729 | 2.39E-09 |
| 0.9774   | -0.10631 | 0.02158  | 0.221776 | 1.30E-06 |
| 0.45171  | 0.005717 | 0.90194  | 0.069975 | 0.13105  |
| 0.19485  | -0.04354 | 0.34785  | 0.132429 | 0.00415  |
| 0.01145  | -0.05194 | 0.26261  | 0.435793 | 4.55E-23 |
| 0.11649  | -0.07537 | 0.10379  | 0.088628 | 0.05563  |

|         |          |         |          |          |
|---------|----------|---------|----------|----------|
| 0.06381 | -0.05624 | 0.22515 | 0.159151 | 0.00056  |
| 0.02403 | -0.05317 | 0.25153 | 0.052176 | 0.26047  |
| 0.04793 | -0.02478 | 0.59319 | 0.157581 | 0.00063  |
| 0.02146 | 0.017586 | 0.70465 | 0.273757 | 1.79E-09 |
| 0.75131 | -0.01049 | 0.82116 | 0.160827 | 0.00048  |
| 0.32775 | -0.01512 | 0.74456 | 0.146478 | 0.0015   |
| 0.7648  | 0.108301 | 0.01923 | 0.130875 | 0.00461  |
| 0.00863 | 0.009771 | 0.8332  | 0.079146 | 0.08755  |
| 0.5851  | -0.13512 | 0.00344 | 0.271617 | 2.42E-09 |
| 0.11631 | -0.08904 | 0.05449 | 0.214218 | 2.99E-06 |
| 0.41863 | -0.13007 | 0.00488 | 0.365929 | 3.04E-16 |
| 0.44232 | -0.0383  | 0.40899 | 0.371452 | 1.00E-16 |
| 0.11149 | -0.01251 | 0.78752 | 0.138343 | 0.00274  |
| 0.71554 | 0.056707 | 0.22128 | 0.101541 | 0.02823  |
| 0.32274 | 0.100776 | 0.02944 | 0.101302 | 0.0286   |
| 0.52214 | -0.06743 | 0.1457  | 0.230624 | 4.69E-07 |
| 0.97781 | 0.013548 | 0.77028 | 0.019266 | 0.67795  |
| 0.75199 | 0.04313  | 0.35238 | 0.057667 | 0.21354  |
| 0.12377 | 0.002162 | 0.96284 | 0.121145 | 0.00878  |
| 0.23742 | -0.00934 | 0.84038 | 0.204362 | 8.53E-06 |
| 0.29875 | -0.0152  | 0.74323 | 0.197018 | 1.80E-05 |
| 0.27798 | -0.03295 | 0.47755 | 0.180326 | 8.91E-05 |
| 0.43264 | -0.01691 | 0.71544 | 0.193429 | 2.57E-05 |
| 0.17739 | -0.03414 | 0.46176 | 0.145083 | 0.00167  |
| 0.23216 | -0.02376 | 0.60848 | 0.158904 | 0.00057  |
| 0.03674 | -0.05604 | 0.22673 | 0.15543  | 0.00075  |
| 0.72237 | -0.02889 | 0.53337 | 0.205588 | 7.51E-06 |
| 0.45465 | -0.08231 | 0.07557 | 0.168549 | 0.00025  |
| 0.06453 | -0.02564 | 0.58043 | 0.094081 | 0.04214  |
| 0.50366 | 0.006912 | 0.88157 | 0.116344 | 0.01187  |
| 0.75827 | 0.001381 | 0.97625 | 0.119228 | 0.00991  |
| 0.47407 | 0.006593 | 0.887   | 0.175986 | 0.00013  |
| 0.24779 | 0.080885 | 0.08079 | 0.206463 | 6.85E-06 |
| 0.40966 | 0.001602 | 0.97246 | 0.119322 | 0.00985  |
| 0.68867 | 0.048034 | 0.30028 | 0.106392 | 0.02148  |
| 0.78325 | 0.025175 | 0.58736 | 0.128593 | 0.00539  |
| 0.42296 | 0.010533 | 0.82042 | 0.180285 | 8.94E-05 |
| 0.36552 | -0.02793 | 0.54717 | 0.111354 | 0.01607  |
| 0.31458 | -0.06492 | 0.1613  | 0.057537 | 0.21457  |
| 0.41869 | 0.02357  | 0.61141 | 0.095468 | 0.03918  |
| 0.23718 | -0.06271 | 0.17607 | 0.017405 | 0.70755  |
| 0.23962 | -0.08803 | 0.0573  | 0.197329 | 1.75E-05 |
| 0.82442 | 0.004874 | 0.91635 | 0.126244 | 0.0063   |
| 0.14465 | 0.032847 | 0.47887 | 0.152116 | 0.00097  |
| 0.2989  | -0.03497 | 0.45088 | 0.119698 | 0.00962  |



|         |          |         |          |          |
|---------|----------|---------|----------|----------|
| 0.74721 | -0.04355 | 0.3477  | 0.170466 | 0.00021  |
| 0.16914 | -0.07898 | 0.08823 | 0.124171 | 0.00722  |
| 0.05227 | -0.08801 | 0.05736 | -0.00125 | 0.97843  |
| 0.85572 | -0.12361 | 0.00749 | 0.287257 | 2.54E-10 |
| 0.05797 | -0.0728  | 0.11618 | 0.060899 | 0.18894  |
| 0.59794 | 0.010162 | 0.82664 | 0.143813 | 0.00184  |
| 0.88599 | -0.00398 | 0.93166 | 0.251002 | 3.84E-08 |
| 0.21135 | -0.03224 | 0.487   | 0.164293 | 0.00036  |
| 0.20533 | -0.0239  | 0.60645 | 0.119404 | 0.0098   |
| 0.32256 | 0.017831 | 0.70074 | 0.138635 | 0.00268  |
| 0.48612 | -0.03928 | 0.39708 | 0.046722 | 0.31369  |
| 0.88351 | -0.03612 | 0.43617 | 0.154413 | 0.00081  |
| 0.39952 | -0.03235 | 0.48552 | 0.130216 | 0.00483  |
| 0.96005 | -0.01131 | 0.80737 | 0.165562 | 0.00033  |
| 0.23605 | -0.00298 | 0.94882 | 0.206318 | 6.95E-06 |
| 0.61884 | 0.11712  | 0.01131 | 0.119008 | 0.01005  |
| 0.63929 | 0.073921 | 0.11063 | 0.06245  | 0.1779   |
| 0.1449  | -0.14143 | 0.00219 | 0.159879 | 0.00052  |
| 0.25002 | -0.01288 | 0.78134 | 0.253615 | 2.74E-08 |
| 0.0694  | -0.07728 | 0.09531 | 0.236731 | 2.27E-07 |
| 0.95617 | 0.050263 | 0.27838 | 0.142963 | 0.00195  |
| 0.73899 | -0.0711  | 0.12498 | 0.289995 | 1.68E-10 |
| 0.86778 | -0.11635 | 0.01187 | 0.207773 | 5.97E-06 |
| 0.13974 | -0.04336 | 0.34976 | 0.183197 | 6.83E-05 |
| 0.52357 | -0.06026 | 0.1936  | 0.134294 | 0.00364  |
| 0.20657 | 0.068503 | 0.13937 | 0.079143 | 0.08756  |
| 0.38858 | -0.01257 | 0.78647 | 0.129718 | 0.00499  |
| 0.93714 | -0.05175 | 0.26435 | 0.403477 | 1.04E-19 |
| 0.70093 | -0.01268 | 0.78456 | 0.143153 | 0.00193  |
| 0.71995 | -0.04549 | 0.32668 | 0.201398 | 1.16E-05 |
| 0.68449 | -0.02829 | 0.54201 | 0.21825  | 1.92E-06 |
| 0.18376 | -0.12387 | 0.00736 | 0.34612  | 1.37E-14 |
| 0.01363 | -0.06781 | 0.14346 | 0.244835 | 8.39E-08 |
| 0.05117 | -0.04935 | 0.28719 | -0.05237 | 0.25873  |
| 0.51275 | 0.001411 | 0.97573 | 0.170266 | 0.00022  |
| 0.89447 | -0.02007 | 0.66532 | 0.155116 | 0.00077  |
| 0.56449 | -0.01681 | 0.7171  | 0.227283 | 6.92E-07 |
| 0.04684 | -0.06208 | 0.18052 | 0.084037 | 0.06962  |
| 0.43475 | -0.01455 | 0.75388 | 0.17851  | 0.00011  |
| 0.94265 | 0.042622 | 0.35809 | 0.155499 | 0.00075  |
| 0.34518 | 0.029745 | 0.52139 | 0.10946  | 0.01797  |
| 0.00774 | 0.071532 | 0.12267 | 0.201795 | 1.11E-05 |
| 0.36933 | -0.01505 | 0.74561 | 0.136623 | 0.00309  |
| 0.22814 | -0.03299 | 0.47693 | 0.134048 | 0.00371  |
| 0.49311 | -0.04854 | 0.29519 | 0.282076 | 5.44E-10 |

|          |          |         |          |          |
|----------|----------|---------|----------|----------|
| 0.34231  | -0.0311  | 0.50254 | 0.233032 | 3.53E-07 |
| 0.93467  | -0.03962 | 0.393   | 0.396683 | 4.75E-19 |
| 0.67814  | 0.062996 | 0.17413 | 0.13578  | 0.00328  |
| 1.04E-07 | 0.023841 | 0.60732 | 0.581341 | 1.44E-43 |
| 0.31925  | -0.05609 | 0.22632 | 0.335426 | 9.62E-14 |
| 0.7209   | -0.00648 | 0.88885 | 0.147526 | 0.00139  |
| 0.58896  | -0.03377 | 0.46657 | 0.230944 | 4.52E-07 |
| 0.09154  | -0.01869 | 0.68705 | 0.107533 | 0.02011  |
| 0.60665  | -0.037   | 0.42507 | 0.18204  | 7.61E-05 |
| 0.53971  | -0.01664 | 0.71988 | 0.140494 | 0.00234  |
| 0.0432   | -0.07644 | 0.09898 | 0.111527 | 0.0159   |
| 0.00623  | 0.015935 | 0.73125 | 0.265913 | 5.33E-09 |
| 0.07633  | 0.025023 | 0.58962 | 0.32566  | 5.34E-13 |
| 0.24837  | -0.05902 | 0.20301 | 0.131229 | 0.0045   |
| 0.92224  | -0.01615 | 0.72784 | 0.253479 | 2.79E-08 |
| 0.67925  | -0.09229 | 0.04623 | 0.172833 | 0.00017  |
| 0.84276  | -0.09641 | 0.03728 | 0.188548 | 4.12E-05 |
| 0.2746   | -0.02402 | 0.60466 | 0.203756 | 9.08E-06 |
| 0.14014  | -0.03067 | 0.50844 | 0.144286 | 0.00177  |
| 0.4498   | -0.0649  | 0.16145 | 0.170117 | 0.00022  |
| 0.32964  | -0.04299 | 0.35394 | 0.16778  | 0.00027  |
| 0.50864  | -0.07867 | 0.08946 | 0.234559 | 2.94E-07 |
| 0.06684  | -0.06246 | 0.1778  | 0.165965 | 0.00032  |
| 0.2591   | -0.03048 | 0.51113 | 0.114425 | 0.01335  |
| 0.70227  | -0.0361  | 0.43634 | 0.121548 | 0.00855  |
| 0.21018  | -0.0555  | 0.2313  | 0.138024 | 0.0028   |
| 0.29562  | -0.02125 | 0.647   | 0.195327 | 2.13E-05 |
| 0.86598  | -0.0479  | 0.30164 | 0.131292 | 0.00448  |
| 0.36295  | -0.00277 | 0.95246 | 0.137895 | 0.00282  |
| 0.57537  | -0.0364  | 0.43255 | 0.198315 | 1.58E-05 |
| 0.38613  | -0.01653 | 0.72163 | 0.166622 | 0.0003   |
| 0.51649  | -0.0135  | 0.77111 | 0.152826 | 0.00092  |
| 0.49455  | -0.00942 | 0.83907 | 0.144434 | 0.00175  |
| 0.63087  | -0.02741 | 0.55466 | 0.121059 | 0.00883  |
| 0.71478  | -0.03372 | 0.46727 | 0.123313 | 0.00763  |
| 0.53388  | 0.042366 | 0.36098 | 0.132824 | 0.00404  |
| 0.19723  | -0.0462  | 0.31915 | 0.125829 | 0.00647  |
| 0.82837  | -0.04741 | 0.30662 | 0.180475 | 8.79E-05 |
| 0.37313  | -0.01597 | 0.73076 | 0.134585 | 0.00357  |
| 0.17862  | -0.07642 | 0.09907 | 0.150559 | 0.0011   |
| 0.12268  | -0.01417 | 0.75998 | 0.132536 | 0.00412  |
| 0.27695  | -0.04375 | 0.34552 | 0.150223 | 0.00113  |
| 0.03637  | -0.07568 | 0.10239 | 0.2034   | 9.42E-06 |
| 0.52781  | -0.06059 | 0.1912  | 0.15706  | 0.00066  |
| 0.10592  | -0.01291 | 0.78074 | 0.158167 | 0.0006   |

|         |          |         |          |          |
|---------|----------|---------|----------|----------|
| 0.34496 | -0.01011 | 0.82757 | 0.085308 | 0.06548  |
| 0.92811 | -0.02975 | 0.52133 | 0.214334 | 2.96E-06 |
| 0.21585 | -0.03875 | 0.40347 | 0.145387 | 0.00163  |
| 0.06782 | -0.03604 | 0.43712 | 0.154371 | 0.00082  |
| 0.14386 | -0.04465 | 0.33571 | 0.116071 | 0.01207  |
| 0.41546 | -0.01964 | 0.672   | 0.122685 | 0.00795  |
| 0.27788 | -0.03674 | 0.42831 | 0.195115 | 2.18E-05 |
| 0.26825 | -0.04529 | 0.3288  | 0.4075   | 4.15E-20 |
| 0.45157 | 0.011747 | 0.80012 | 0.316157 | 2.67E-12 |
| 0.75557 | -0.05156 | 0.26615 | 0.099707 | 0.03122  |
| 0.373   | -0.06271 | 0.17608 | 0.1196   | 0.00968  |
| 0.57553 | -0.03622 | 0.43491 | 0.211539 | 4.00E-06 |
| 0.58728 | -0.00684 | 0.88279 | 0.135617 | 0.00332  |
| 0.41094 | -0.02656 | 0.56698 | 0.143699 | 0.00185  |
| 0.0928  | -0.04783 | 0.30234 | 0.125003 | 0.00684  |
| 0.61219 | -0.01573 | 0.73464 | 0.147527 | 0.00139  |
| 0.19773 | -0.01948 | 0.67459 | 0.145196 | 0.00166  |
| 0.23958 | -0.06059 | 0.19117 | 0.117672 | 0.01093  |
| 0.14473 | -0.02269 | 0.62472 | 0.135435 | 0.00336  |
| 0.1504  | -0.02527 | 0.58595 | 0.168663 | 0.00025  |
| 0.86696 | -0.04002 | 0.38817 | 0.209656 | 4.89E-06 |
| 0.52781 | -0.04119 | 0.37452 | 0.1554   | 0.00075  |
| 0.87151 | -0.02397 | 0.60537 | 0.09279  | 0.04505  |
| 0.91403 | -0.03306 | 0.47599 | 0.186263 | 5.12E-05 |
| 0.6238  | -0.00504 | 0.91344 | 0.131554 | 0.0044   |
| 0.3145  | -0.04327 | 0.35079 | 0.166936 | 0.00029  |
| 0.24246 | -0.04974 | 0.28337 | 0.208223 | 5.69E-06 |
| 0.1549  | -0.01204 | 0.79518 | 0.151931 | 0.00099  |
| 0.21623 | -0.02737 | 0.55517 | 0.177335 | 0.00012  |
| 0.27169 | -0.03721 | 0.42244 | 0.109659 | 0.01776  |
| 0.07127 | -0.02112 | 0.64894 | 0.135164 | 0.00343  |
| 0.82079 | -0.05466 | 0.23843 | 0.189248 | 3.86E-05 |
| 0.22127 | -0.03637 | 0.43294 | 0.115314 | 0.01265  |
| 0.30293 | -0.03743 | 0.41973 | 0.155813 | 0.00073  |
| 0.90813 | -0.0363  | 0.43381 | 0.141611 | 0.00216  |
| 0.57978 | -0.03688 | 0.42655 | 0.124134 | 0.00724  |
| 0.12959 | -0.05662 | 0.22202 | 0.125853 | 0.00646  |
| 0.38768 | -0.07352 | 0.1126  | 0.042881 | 0.35517  |
| 0.22381 | -0.02384 | 0.60734 | 0.165187 | 0.00034  |
| 0.21077 | -0.01551 | 0.73813 | 0.168318 | 0.00026  |
| 0.49457 | -0.05059 | 0.27527 | 0.083607 | 0.07106  |
| 0.24775 | -0.03057 | 0.50993 | 0.160193 | 0.00051  |
| 0.11455 | -0.02878 | 0.53492 | 0.110616 | 0.01679  |
| 0.28016 | -0.02078 | 0.65425 | 0.146212 | 0.00153  |
| 0.71121 | -0.05197 | 0.26232 | 0.117309 | 0.01118  |

|         |          |         |          |          |
|---------|----------|---------|----------|----------|
| 0.61587 | -0.07289 | 0.1157  | 0.16122  | 0.00047  |
| 0.09765 | -0.02664 | 0.56584 | 0.091127 | 0.04906  |
| 0.75561 | -0.08022 | 0.08334 | 0.228116 | 6.28E-07 |
| 0.54583 | -0.08551 | 0.06485 | 0.241554 | 1.26E-07 |
| 0.77874 | -0.00433 | 0.92559 | 0.151289 | 0.00104  |
| 0.85835 | 0.013816 | 0.76587 | 0.118153 | 0.01061  |
| 0.58428 | -0.0246  | 0.59594 | 0.098324 | 0.03365  |
| 0.04379 | -0.01032 | 0.82405 | 0.120748 | 0.009    |
| 0.37677 | -0.06302 | 0.17395 | 0.189286 | 3.84E-05 |
| 0.5379  | -0.05624 | 0.22512 | 0.089065 | 0.05443  |
| 0.78247 | -0.00924 | 0.84209 | 0.17279  | 0.00018  |
| 0.51892 | -0.00671 | 0.88497 | 0.215376 | 2.64E-06 |
| 0.61518 | -0.04468 | 0.33531 | 0.136023 | 0.00323  |
| 0.40114 | -0.03923 | 0.39766 | 0.198086 | 1.62E-05 |
| 0.05076 | -0.10412 | 0.02444 | 0.081984 | 0.07674  |
| 0.17161 | -0.03442 | 0.45804 | 0.174609 | 0.00015  |
| 0.35632 | 0.00322  | 0.94468 | 0.101059 | 0.02899  |
| 0.5764  | -0.01824 | 0.69424 | 0.1776   | 0.00011  |
| 0.14258 | -0.0872  | 0.0597  | 0.147612 | 0.00138  |
| 0.87928 | -0.02465 | 0.59512 | 0.208147 | 5.74E-06 |
| 0.2578  | -0.03849 | 0.40661 | 0.170833 | 0.00021  |
| 0.16848 | -0.07681 | 0.09735 | 0.205455 | 7.61E-06 |
| 0.92598 | -0.00113 | 0.98065 | 0.18207  | 7.59E-05 |
| 0.41664 | 0.015584 | 0.73695 | 0.127766 | 0.00569  |
| 0.23241 | -0.04922 | 0.28846 | 0.088296 | 0.05656  |
| 0.15124 | -0.08116 | 0.07975 | 0.182269 | 7.45E-05 |
| 0.21398 | -0.04117 | 0.37477 | 0.077991 | 0.09229  |
| 0.3234  | -0.02552 | 0.58223 | 0.111992 | 0.01546  |
| 0.99518 | 0.027993 | 0.54622 | 0.102606 | 0.02661  |
| 0.0813  | -0.09908 | 0.0323  | 0.172105 | 0.00019  |
| 0.82911 | -0.05582 | 0.22861 | 0.203525 | 9.30E-06 |
| 0.28781 | -0.02274 | 0.62398 | 0.162417 | 0.00043  |
| 0.13377 | -0.00992 | 0.83078 | 0.144851 | 0.0017   |
| 0.29188 | -0.12279 | 0.0079  | 0.25903  | 1.35E-08 |
| 0.05639 | -0.08436 | 0.06854 | 0.235038 | 2.78E-07 |
| 0.91955 | 0.005129 | 0.91197 | 0.210474 | 4.48E-06 |
| 0.72774 | -0.01035 | 0.82351 | 0.194642 | 2.28E-05 |
| 0.42361 | -0.092   | 0.04692 | 0.196889 | 1.82E-05 |
| 0.11217 | 0.060678 | 0.19055 | 0.327948 | 3.59E-13 |
| 0.1112  | -0.03675 | 0.42822 | 0.207438 | 6.18E-06 |
| 0.70433 | -0.10941 | 0.01803 | -0.01599 | 0.73043  |
| 0.8645  | -0.02075 | 0.65473 | 0.191002 | 3.26E-05 |
| 0.90439 | 0.058658 | 0.20577 | 0.238067 | 1.93E-07 |
| 0.93462 | -0.01226 | 0.79166 | 0.235663 | 2.58E-07 |
| 0.47847 | -0.00085 | 0.98546 | 0.185757 | 5.38E-05 |

|         |          |         |          |          |
|---------|----------|---------|----------|----------|
| 0.90726 | 0.028995 | 0.53195 | 0.131398 | 0.00445  |
| 0.74622 | -0.03549 | 0.44418 | 0.225859 | 8.15E-07 |
| 0.03041 | 0.033227 | 0.4738  | 0.204079 | 8.78E-06 |
| 0.46881 | -0.03149 | 0.49724 | 0.123037 | 0.00777  |
| 0.68979 | -0.05748 | 0.21501 | 0.15525  | 0.00076  |
| 0.77235 | -0.07709 | 0.09614 | 0.163471 | 0.00039  |
| 0.7292  | -0.00547 | 0.9061  | 0.079674 | 0.08545  |
| 0.25136 | -0.00217 | 0.96274 | 0.120356 | 0.00923  |
| 0.21679 | 0.002433 | 0.95818 | 0.193216 | 2.62E-05 |
| 0.808   | -0.01894 | 0.68305 | 0.186979 | 4.79E-05 |
| 0.14053 | -0.04671 | 0.31383 | 0.205515 | 7.56E-06 |
| 0.06523 | -0.02597 | 0.57566 | 0.072689 | 0.11672  |
| 0.62785 | -0.03018 | 0.51535 | 0.184236 | 6.20E-05 |
| 0.72493 | -0.05731 | 0.2164  | 0.10295  | 0.0261   |
| 0.28707 | -0.03395 | 0.4642  | 0.163962 | 0.00037  |
| 0.74997 | -0.00017 | 0.997   | 0.197421 | 1.73E-05 |
| 0.29764 | -0.02737 | 0.55521 | 0.181848 | 7.74E-05 |
| 0.2646  | -0.04761 | 0.30455 | 0.173723 | 0.00016  |
| 0.15688 | -0.02125 | 0.647   | 0.08588  | 0.06369  |
| 0.27552 | -0.01388 | 0.76488 | 0.164987 | 0.00034  |
| 0.84679 | -0.02008 | 0.66513 | 0.143764 | 0.00184  |
| 0.28041 | 0.000353 | 0.99392 | 0.136411 | 0.00314  |
| 0.01728 | 0.072821 | 0.11606 | 0.120136 | 0.00936  |
| 0.37092 | -0.01646 | 0.72283 | 0.098175 | 0.03392  |
| 0.10726 | -0.1053  | 0.02286 | 0.120859 | 0.00894  |
| 0.57903 | -0.05537 | 0.23234 | 0.19104  | 3.24E-05 |
| 0.31825 | 0.003936 | 0.93239 | 0.167542 | 0.00028  |
| 0.33416 | 0.017476 | 0.70642 | 0.164253 | 0.00036  |
| 0.09361 | -0.07798 | 0.09235 | -0.00661 | 0.88674  |
| 0.18815 | -0.00062 | 0.98934 | 0.093529 | 0.04336  |
| 0.00522 | -0.00089 | 0.98463 | 0.465653 | 1.65E-26 |
| 0.27342 | -0.0545  | 0.23985 | 0.12456  | 0.00704  |
| 0.19624 | -0.03314 | 0.47492 | 0.168274 | 0.00026  |
| 0.02236 | 0.083513 | 0.07138 | 0.180111 | 9.08E-05 |
| 0.57913 | -0.00983 | 0.83226 | 0.130668 | 0.00468  |
| 0.52028 | -0.0446  | 0.33617 | 0.168852 | 0.00025  |
| 0.64394 | 0.006135 | 0.89481 | 0.116243 | 0.01194  |
| 0.64396 | -0.04839 | 0.29666 | 0.107104 | 0.02061  |
| 0.3236  | -0.05302 | 0.25284 | 0.270644 | 2.78E-09 |
| 0.19892 | -0.01673 | 0.71835 | 0.250574 | 4.06E-08 |
| 0.21566 | -0.06403 | 0.16715 | 0.1967   | 1.86E-05 |
| 0.13462 | -0.04402 | 0.34248 | 0.15849  | 0.00059  |
| 0.45816 | -0.012   | 0.79589 | 0.030163 | 0.51554  |
| 0.18629 | -0.0404  | 0.38367 | 0.15275  | 0.00093  |
| 0.30927 | -0.03636 | 0.43313 | 0.067848 | 0.1432   |

|         |          |         |          |          |
|---------|----------|---------|----------|----------|
| 0.40145 | 0.003843 | 0.93399 | 0.094828 | 0.04052  |
| 0.93236 | -0.06627 | 0.15274 | 0.345852 | 1.44E-14 |
| 0.20028 | -0.0845  | 0.06808 | 0.279849 | 7.52E-10 |
| 0.13238 | -0.04897 | 0.29093 | 0.147214 | 0.00142  |
| 0.79394 | -0.01886 | 0.68429 | 0.218425 | 1.89E-06 |
| 0.34613 | -0.04951 | 0.28569 | 0.113584 | 0.01405  |
| 0.01945 | -0.06307 | 0.1736  | 0.139675 | 0.00249  |
| 0.30039 | -0.12124 | 0.00872 | 0.290508 | 1.56E-10 |
| 0.24909 | -0.00939 | 0.83968 | 0.258761 | 1.40E-08 |
| 0.43957 | -0.01851 | 0.68989 | 0.156677 | 0.00068  |
| 0.67355 | 0.020315 | 0.66147 | 0.115056 | 0.01285  |
| 0.71583 | -0.11344 | 0.01418 | 0.316303 | 2.61E-12 |
| 0.87245 | -0.0238  | 0.60801 | 0.245811 | 7.43E-08 |
| 0.47062 | -0.10736 | 0.02031 | 0.31181  | 5.47E-12 |
| 0.89261 | -0.06164 | 0.18362 | 0.232058 | 3.96E-07 |
| 0.63938 | 0.006473 | 0.88905 | 0.132334 | 0.00417  |
| 0.85542 | 0.099844 | 0.03098 | 0.09913  | 0.03221  |
| 0.1135  | 0.025114 | 0.58827 | 0.263062 | 7.85E-09 |
| 0.49004 | -0.08891 | 0.05484 | 0.192614 | 2.78E-05 |
| 0.21683 | -0.01344 | 0.77201 | 0.152505 | 0.00095  |
| 0.42914 | 0.060181 | 0.19421 | 0.176153 | 0.00013  |
| 0.47576 | -0.07837 | 0.09073 | 0.133236 | 0.00392  |
| 0.83287 | 0.014854 | 0.74885 | 0.066645 | 0.15045  |
| 0.48658 | 0.103371 | 0.02549 | 0.043671 | 0.34636  |
| 0.86046 | -0.04163 | 0.36934 | 0.181752 | 7.81E-05 |
| 0.32818 | 0.00272  | 0.95325 | 0.12732  | 0.00586  |
| 0.31287 | 0.03563  | 0.4424  | 0.18851  | 4.14E-05 |
| 0.75711 | -0.00026 | 0.99555 | 0.163948 | 0.00037  |
| 0.47961 | -0.02371 | 0.60933 | 0.202934 | 9.88E-06 |
| 0.83707 | -0.03246 | 0.48409 | 0.280943 | 6.42E-10 |
| 0.90248 | -0.03291 | 0.47802 | 0.268252 | 3.87E-09 |
| 0.04483 | 0.114868 | 0.013   | 0.126256 | 0.00629  |
| 0.20292 | -0.00273 | 0.95305 | 0.186176 | 5.17E-05 |
| 0.54827 | -0.08705 | 0.06015 | 0.205171 | 7.84E-06 |
| 0.30054 | -0.0708  | 0.12653 | 0.15011  | 0.00114  |
| 0.56278 | 0.023451 | 0.61322 | 0.232099 | 3.94E-07 |
| 0.04526 | -0.07582 | 0.10174 | 0.261563 | 9.61E-09 |
| 0.06195 | -0.09043 | 0.05082 | 0.015593 | 0.73681  |
| 0.42146 | -0.00629 | 0.89213 | 0.1455   | 0.00162  |
| 0.02607 | 0.113276 | 0.01432 | 0.072725 | 0.11654  |
| 0.5698  | -0.00428 | 0.92649 | 0.167456 | 0.00028  |
| 0.97291 | -0.03039 | 0.51238 | 0.139802 | 0.00246  |
| 0.62038 | -0.05521 | 0.23375 | 0.238423 | 1.85E-07 |
| 0.0781  | 0.026003 | 0.57512 | 0.229625 | 5.27E-07 |
| 0.23267 | -0.01369 | 0.76801 | 0.163974 | 0.00037  |

|         |          |         |           |          |
|---------|----------|---------|-----------|----------|
| 0.79462 | 0.014925 | 0.74769 | 0.233745  | 3.24E-07 |
| 0.73382 | -0.05641 | 0.22367 | 0.248774  | 5.11E-08 |
| 0.27327 | -0.04702 | 0.31057 | 0.172671  | 0.00018  |
| 0.6392  | -0.00484 | 0.91689 | 0.154284  | 0.00082  |
| 0.5195  | -0.00588 | 0.89912 | 0.17436   | 0.00015  |
| 0.60069 | -0.0038  | 0.93465 | 0.182424  | 7.34E-05 |
| 0.8763  | -0.10649 | 0.02136 | 0.325928  | 5.10E-13 |
| 0.49638 | -0.03866 | 0.40453 | 0.229659  | 5.25E-07 |
| 0.55344 | 0.048323 | 0.29737 | 0.133444  | 0.00387  |
| 0.13819 | -0.01777 | 0.70176 | 0.123545  | 0.00752  |
| 0.47585 | -0.01021 | 0.82591 | 0.17251   | 0.00018  |
| 0.24639 | 0.018952 | 0.68291 | 0.088853  | 0.05501  |
| 0.34943 | -0.10678 | 0.021   | 0.171283  | 0.0002   |
| 0.80353 | -0.06076 | 0.18994 | 0.248597  | 5.22E-08 |
| 0.33208 | -0.04316 | 0.352   | 0.122682  | 0.00795  |
| 0.32272 | -0.05423 | 0.24211 | 0.311669  | 5.60E-12 |
| 0.07992 | -0.11769 | 0.01092 | 0.421475  | 1.55E-21 |
| 0.70124 | -0.01083 | 0.81536 | 0.195684  | 2.06E-05 |
| 0.92551 | -0.0596  | 0.19857 | 0.174228  | 0.00015  |
| 0.79867 | -0.06284 | 0.17517 | 0.111167  | 0.01577  |
| 0.42004 | -0.03892 | 0.4014  | 0.254106  | 2.57E-08 |
| 0.1009  | -0.04375 | 0.34547 | 0.094016  | 0.04228  |
| 0.66332 | -0.11573 | 0.01232 | 0.333521  | 1.35E-13 |
| 0.3476  | -0.0574  | 0.21565 | 0.209844  | 4.79E-06 |
| 0.27221 | 0.026753 | 0.56415 | 0.084207  | 0.06905  |
| 0.46848 | -0.05624 | 0.22511 | 0.188953  | 3.97E-05 |
| 0.91159 | -0.05721 | 0.21717 | 0.167905  | 0.00027  |
| 0.86867 | -0.03581 | 0.44012 | 0.279202  | 8.25E-10 |
| 0.15101 | -0.0456  | 0.32542 | 0.153446  | 0.00088  |
| 0.38696 | 0.005897 | 0.89886 | 0.175426  | 0.00014  |
| 0.45699 | -0.07796 | 0.09242 | 0.234324  | 3.03E-07 |
| 0.22247 | -0.01745 | 0.70677 | 0.130364  | 0.00478  |
| 0.40291 | -0.07459 | 0.10743 | 0.139185  | 0.00257  |
| 0.59425 | -0.08856 | 0.05581 | 0.213031  | 3.41E-06 |
| 0.60194 | -0.02214 | 0.63316 | 0.010324  | 0.82392  |
| 0.60081 | -0.07127 | 0.12404 | 0.317244  | 2.23E-12 |
| 0.28564 | -0.01293 | 0.78043 | 0.127842  | 0.00566  |
| 0.3505  | 0.036152 | 0.43573 | 0.204663  | 8.26E-06 |
| 0.83253 | -0.00491 | 0.91572 | 0.290168  | 1.64E-10 |
| 0.79831 | 0.035934 | 0.43851 | 0.037486  | 0.41898  |
| 0.32012 | 0.02928  | 0.52792 | 0.1111464 | 0.01596  |
| 0.35403 | 0.005153 | 0.91157 | 0.119993  | 0.00945  |
| 0.76453 | -0.02935 | 0.52699 | 0.174996  | 0.00014  |
| 0.25537 | -0.06154 | 0.1843  | 0.175017  | 0.00014  |
| 0.49018 | -0.0416  | 0.3697  | 0.277842  | 1.00E-09 |

|          |           |          |          |          |
|----------|-----------|----------|----------|----------|
| 0.01815  | -0.05163  | 0.26549  | 0.056113 | 0.22616  |
| 0.12529  | 0.0522    | 0.26025  | 0.240801 | 1.38E-07 |
| 0.31665  | 0.00984   | 0.83204  | 0.156178 | 0.00071  |
| 0.05511  | -0.00792  | 0.86445  | 0.269509 | 3.25E-09 |
| 0.6632   | 0.014228  | 0.75911  | 0.189689 | 3.70E-05 |
| 0.85276  | -0.02301  | 0.61993  | 0.140038 | 0.00242  |
| 0.18065  | -0.04337  | 0.34969  | 0.11367  | 0.01398  |
| 0.92241  | -0.02536  | 0.58464  | 0.153719 | 0.00086  |
| 0.37017  | -0.01956  | 0.67333  | 0.190531 | 3.41E-05 |
| 0.31604  | -0.0219   | 0.63686  | 0.125767 | 0.0065   |
| 0.97125  | -0.03418  | 0.46117  | 0.181914 | 7.70E-05 |
| 0.74092  | -0.12015  | 0.00935  | 0.254902 | 2.32E-08 |
| 0.6416   | -0.00242  | 0.95835  | 0.126535 | 0.00618  |
| 0.46936  | -0.09416  | 0.04197  | 0.203101 | 9.71E-06 |
| 0.65503  | -0.14768  | 0.00137  | 0.313628 | 4.06E-12 |
| 0.18433  | 0.007379  | 0.87364  | 0.107473 | 0.02018  |
| 0.96203  | -0.06478  | 0.16224  | 0.359936 | 9.90E-16 |
| 0.80914  | -0.00594  | 0.89814  | 0.169362 | 0.00024  |
| 0.61134  | -3.83E-05 | 0.99934  | 0.11343  | 0.01418  |
| 0.31927  | -0.29295  | 1.07E-10 | 0.237259 | 2.13E-07 |
| 8.94E-08 | -0.09043  | 0.05081  | 0.0311   | 0.50257  |
| 1.94E-05 | -0.22928  | 5.49E-07 | 0.188368 | 4.19E-05 |
| 6.16E-07 | -0.1162   | 0.01198  | 0.187007 | 4.78E-05 |
| 0.00633  | -0.06389  | 0.16809  | -0.01387 | 0.76493  |
| 0.0699   | -0.20379  | 9.05E-06 | -0.128   | 0.0056   |
| 0.0012   | -0.10241  | 0.0269   | 0.203188 | 9.63E-06 |
| 0.00237  | -0.19831  | 1.58E-05 | 0.200267 | 1.30E-05 |
| 7.78E-05 | -0.13779  | 0.00285  | 0.111229 | 0.01619  |
| 0.0303   | -0.23544  | 2.65E-07 | -0.00615 | 0.89455  |
| 5.13E-07 | -0.14245  | 0.00203  | 0.214545 | 2.89E-06 |
| 4.12E-09 | -0.05261  | 0.25651  | 0.300105 | 3.56E-11 |
| 0.00372  | -0.24418  | 9.11E-08 | 0.20758  | 6.09E-06 |
| 5.07E-06 | -0.17144  | 0.0002   | 0.219811 | 1.62E-06 |
| 0.00018  | -0.06786  | 0.14313  | 0.007445 | 0.87253  |
| 0.31535  | -0.16439  | 0.00036  | 0.011433 | 0.80536  |
| 0.00024  | -0.10941  | 0.01802  | -0.06658 | 0.15087  |
| 0.00171  | -0.09817  | 0.03392  | 0.135577 | 0.00333  |
| 2.18E-10 | 0.01423   | 0.75906  | 0.381237 | 1.33E-17 |
| 0.00056  | -0.15802  | 0.00061  | 0.218381 | 1.90E-06 |
| 2.06E-09 | -0.12107  | 0.00882  | 0.158564 | 0.00058  |
| 0.00551  | -0.09499  | 0.04018  | 0.191804 | 3.01E-05 |
| 0.00026  | -0.12753  | 0.00578  | 0.033153 | 0.47478  |
| 0.02057  | -0.23103  | 4.47E-07 | 0.106991 | 0.02075  |
| 4.36E-05 | -0.21825  | 1.92E-06 | 0.258043 | 1.54E-08 |
| 2.64E-08 | -0.00872  | 0.85089  | 0.113196 | 0.01439  |



|          |          |          |          |          |
|----------|----------|----------|----------|----------|
| 0.00453  | -0.13611 | 0.00321  | -0.1227  | 0.00794  |
| 1.68E-06 | -0.09393 | 0.04248  | 0.358607 | 1.28E-15 |
| 8.45E-05 | -0.05719 | 0.21734  | 0.041467 | 0.37127  |
| 0.00836  | -0.07926 | 0.08709  | 0.059516 | 0.1992   |
| 0.00248  | -0.13479 | 0.00352  | -0.12097 | 0.00888  |
| 2.35E-06 | -0.13528 | 0.0034   | 0.199384 | 1.42E-05 |
| 0.03726  | -0.17544 | 0.00014  | -0.16775 | 0.00027  |
| 2.05E-07 | -0.06248 | 0.17769  | -0.04425 | 0.34002  |
| 2.11E-05 | -0.14803 | 0.00134  | 0.097773 | 0.03466  |
| 0.00014  | -0.14024 | 0.00239  | 0.268215 | 3.89E-09 |
| 0.0056   | -0.14983 | 0.00116  | 0.27569  | 1.36E-09 |
| 5.05E-08 | -0.05474 | 0.23778  | 0.132308 | 0.00418  |
| 0.00214  | -0.09458 | 0.04106  | 0.010055 | 0.82843  |
| 3.72E-05 | -0.22847 | 6.03E-07 | 0.159203 | 0.00055  |
| 0.06161  | -0.16084 | 0.00048  | -0.11676 | 0.01157  |
| 0.40715  | -0.2068  | 6.61E-06 | -0.0424  | 0.3606   |
| 6.22E-08 | -0.01852 | 0.68973  | -0.04165 | 0.36914  |
| 2.77E-06 | -0.09663 | 0.03684  | 0.115819 | 0.01226  |
| 0.01248  | -0.2412  | 1.32E-07 | 0.136031 | 0.00322  |
| 0.00128  | -0.14166 | 0.00215  | 0.033042 | 0.47627  |
| 4.18E-08 | -0.18269 | 7.16E-05 | 0.235013 | 2.79E-07 |
| 1.49E-06 | -0.19039 | 3.45E-05 | 0.254388 | 2.48E-08 |
| 0.86237  | -0.18886 | 4.00E-05 | -0.00255 | 0.95625  |
| 0.00728  | -0.20727 | 6.29E-06 | 0.213652 | 3.18E-06 |
| 5.99E-05 | -0.18447 | 6.07E-05 | 0.115598 | 0.01243  |
| 0.3802   | -0.21629 | 2.39E-06 | 0.078264 | 0.09115  |
| 2.64E-05 | -0.19442 | 2.33E-05 | 0.138604 | 0.00268  |
| 0.00118  | -0.18978 | 3.66E-05 | 0.115275 | 0.01268  |
| 5.32E-06 | -0.1936  | 2.53E-05 | 0.125015 | 0.00683  |
| 1.50E-05 | -0.18075 | 8.57E-05 | 0.283809 | 4.22E-10 |
| 0.00172  | -0.24141 | 1.28E-07 | 0.081846 | 0.07724  |
| 0.00268  | -0.04736 | 0.3071   | 0.14741  | 0.0014   |
| 9.46E-05 | -0.25636 | 1.92E-08 | 0.240395 | 1.45E-07 |
| 0.79817  | -0.26228 | 8.73E-09 | -0.04194 | 0.36581  |
| 0.00132  | -0.05901 | 0.20306  | 0.013718 | 0.76749  |
| 1.28E-05 | -0.08377 | 0.07052  | 0.000369 | 0.99365  |
| 0.14647  | -0.1294  | 0.0051   | 0.199017 | 1.47E-05 |
| 0.02382  | -0.22237 | 1.21E-06 | 0.0627   | 0.17616  |
| 1.57E-05 | -0.18564 | 5.44E-05 | 0.163432 | 0.00039  |
| 2.76E-05 | -0.17272 | 0.00018  | 0.153226 | 0.00089  |
| 2.36E-05 | -0.21048 | 4.48E-06 | 0.228199 | 6.22E-07 |
| 6.93E-07 | -0.15261 | 0.00094  | 0.14036  | 0.00236  |
| 0.01927  | -0.23737 | 2.10E-07 | 0.208755 | 5.38E-06 |
| 0.15316  | -0.23017 | 4.95E-07 | 0.071153 | 0.12467  |
| 0.27708  | -0.15936 | 0.00055  | 0.346519 | 1.27E-14 |

|          |          |          |          |          |
|----------|----------|----------|----------|----------|
| 0.0281   | -0.17895 | 0.0001   | 0.409702 | 2.50E-20 |
| 2.49E-07 | -0.11227 | 0.01521  | 0.437153 | 3.23E-23 |
| 0.00024  | -0.19876 | 1.51E-05 | 0.348953 | 8.09E-15 |
| 0.04756  | -0.2173  | 2.14E-06 | 0.361548 | 7.22E-16 |
| 0.02401  | -0.13344 | 0.00387  | 0.083681 | 0.07081  |
| 5.06E-32 | 0.769556 | 1.28E-92 | -0.09546 | 0.0392   |
| 3.20E-24 | 0.696295 | 5.67E-69 | -0.09998 | 0.03075  |
| 3.12E-70 | 0.77827  | 5.07E-96 | -0.08914 | 0.05423  |
| 1.69E-42 | 0.745892 | 4.27E-84 | -0.22839 | 6.09E-07 |
| 3.72E-61 | 0.773606 | 3.50E-94 | 0.011995 | 0.796    |
| 2.96E-13 | 0.462916 | 3.53E-26 | -0.11692 | 0.01145  |
| 4.67E-36 | 0.665285 | 5.33E-61 | -0.13149 | 0.00442  |
| 4.20E-28 | 0.722579 | 1.41E-76 | -0.14159 | 0.00216  |
| 6.94E-40 | 0.711975 | 2.09E-73 | -0.05535 | 0.23256  |
| 7.16E-28 | 0.59008  | 3.78E-45 | 0.237303 | 2.12E-07 |
| 4.76E-39 | 0.645561 | 2.08E-56 | -0.02763 | 0.55145  |
| 5.89E-55 | 0.791069 | #####    | 0.009765 | 0.83331  |
| 4.04E-19 | 0.492812 | 6.03E-30 | -0.23335 | 3.40E-07 |
| 9.40E-31 | 0.856341 | #####    | -0.08203 | 0.07656  |
| 6.01E-46 | 0.898064 | #####    | -0.08012 | 0.08373  |
| 1.21E-34 | 0.809911 | #####    | -0.11666 | 0.01164  |
| 1.21E-29 | 0.834563 | #####    | -0.11987 | 0.00952  |
| 8.71E-34 | 0.795411 | #####    | 0.068677 | 0.13837  |
| 5.27E-19 | 0.676424 | 9.45E-64 | -0.07132 | 0.12378  |
| 1.41E-25 | 0.59681  | 2.13E-46 | -0.08253 | 0.0748   |
| 2.77E-65 | 0.789498 | #####    | 0.125837 | 0.00647  |
| 6.26E-41 | 0.67529  | 1.82E-63 | 0.091519 | 0.04809  |
| 0.22748  | 0.409677 | 2.51E-20 | -0.0458  | 0.3233   |
| 6.60E-34 | 0.683848 | 1.18E-65 | 0.214822 | 2.80E-06 |
| 1.74E-31 | 0.583334 | 6.33E-44 | 0.119153 | 0.00996  |
| 1.04E-32 | 0.760477 | 3.12E-89 | -0.12084 | 0.00895  |
| 8.27E-13 | 0.607845 | 1.63E-48 | -0.04412 | 0.34146  |
| 9.98E-34 | 0.738809 | 1.00E-81 | -0.06751 | 0.14519  |
| 1.92E-32 | 0.674961 | 2.21E-63 | 0.085306 | 0.06549  |
| 7.55E-42 | 0.886852 | #####    | -0.09454 | 0.04113  |
| 7.89E-52 | 0.908485 | #####    | -0.06405 | 0.16704  |
| 3.63E-24 | 0.644911 | 2.91E-56 | -0.08973 | 0.05265  |
| 1.82E-69 | 0.859897 | #####    | -0.05984 | 0.19676  |
| 2.47E-85 | 0.81192  | #####    | 0.123107 | 0.00774  |
| 1.79E-22 | 0.698825 | 1.14E-69 | -0.03657 | 0.43048  |
| 1.02E-22 | 0.659387 | 1.37E-59 | 0.038141 | 0.41089  |
| 1.09E-53 | 0.671574 | 1.54E-62 | -0.14119 | 0.00223  |
| 6.42E-40 | 0.772908 | 6.54E-94 | 0.053606 | 0.24762  |
| 4.79E-34 | 0.599067 | 7.98E-47 | -0.02712 | 0.55881  |
| 0.28771  | 0.105054 | 0.02318  | 0.066161 | 0.15344  |

|          |          |          |          |          |
|----------|----------|----------|----------|----------|
| 0.02887  | 0.157848 | 0.00062  | -0.21144 | 4.04E-06 |
| 0.68996  | 0.169119 | 0.00024  | -0.05421 | 0.24229  |
| 2.09E-10 | 0.257227 | 1.71E-08 | 0.219299 | 1.71E-06 |
| 1.79E-06 | 0.009968 | 0.8299   | 0.39428  | 8.07E-19 |
| 0.0113   | -0.01187 | 0.79806  | -0.00113 | 0.98054  |
| 0.00179  | -0.09803 | 0.03419  | -0.0046  | 0.92106  |
| 0.06623  | 0.065029 | 0.16061  | 0.226416 | 7.65E-07 |
| 0.77219  | -0.04257 | 0.35865  | 0.277461 | 1.06E-09 |
| 0.07486  | 0.151659 | 0.00101  | -0.05561 | 0.23034  |
| 0.42918  | 0.037209 | 0.42243  | 0.159616 | 0.00054  |
| 0.90991  | 0.233339 | 3.40E-07 | -0.02505 | 0.58926  |
| 0.55774  | 0.069288 | 0.13488  | 0.092518 | 0.04569  |
| 0.03693  | 0.052571 | 0.25688  | -0.05156 | 0.26612  |
| 0.1382   | 0.039875 | 0.38993  | -0.03196 | 0.4909   |
| 0.12552  | 0.027844 | 0.54836  | 0.055324 | 0.23277  |
| 0.66578  | 0.05676  | 0.22084  | -0.05975 | 0.19746  |
| 0.43021  | 0.06444  | 0.16444  | -0.03802 | 0.41235  |
| 0.49293  | -0.00545 | 0.90651  | 0.129541 | 0.00505  |
| 0.00052  | 0.009085 | 0.84476  | -0.36264 | 5.83E-16 |
| 0.70825  | 0.121403 | 0.00863  | -0.00162 | 0.97209  |
| 0.01065  | 0.054787 | 0.23734  | 0.31035  | 6.94E-12 |
| 0.01572  | -0.01126 | 0.80824  | -0.03008 | 0.51664  |
| 0.07283  | 0.070743 | 0.12687  | -0.15078 | 0.00108  |
| 0.85865  | 0.064964 | 0.16103  | 0.028934 | 0.53281  |
| 0.55213  | -0.03023 | 0.51459  | 0.195865 | 2.02E-05 |
| 0.0225   | 0.051685 | 0.26499  | -0.27369 | 1.81E-09 |
| 9.05E-05 | -0.05652 | 0.22279  | 0.002522 | 0.95665  |
| 0.01181  | -0.07443 | 0.10818  | 0.048396 | 0.29664  |
| 0.00171  | -0.04419 | 0.34067  | 0.045449 | 0.32706  |
| 0.43175  | 0.178305 | 0.00011  | 0.019459 | 0.6749   |
| 0.5382   | 0.046328 | 0.31779  | -0.10883 | 0.01865  |
| 0.07704  | 0.050488 | 0.27623  | 0.096302 | 0.03749  |
| 0.24063  | 0.035813 | 0.44006  | -0.25347 | 2.79E-08 |
| 0.02708  | -0.01728 | 0.70957  | -0.07589 | 0.10142  |
| 5.86E-06 | 0.05521  | 0.23373  | -0.10777 | 0.01984  |
| 0.00467  | -0.073   | 0.11514  | -0.01469 | 0.75152  |
| 7.20E-05 | -0.07867 | 0.08947  | 0.069667 | 0.13276  |
| 1.66E-06 | -0.04724 | 0.30839  | -0.19667 | 1.86E-05 |
| 0.00438  | 0.13741  | 0.00292  | 0.13878  | 0.00265  |
| 0.46469  | 0.010615 | 0.81904  | 0.216426 | 2.35E-06 |
| 0.02618  | -0.01713 | 0.7119   | -0.00821 | 0.85961  |
| 0.0087   | 0.117686 | 0.01092  | 0.258365 | 1.47E-08 |
| 0.84694  | -0.0089  | 0.84788  | 0.141931 | 0.00211  |
| 0.59571  | 0.058448 | 0.2074   | -0.00217 | 0.96278  |
| 2.10E-05 | 0.04658  | 0.31517  | -0.15557 | 0.00074  |

|          |          |          |          |          |
|----------|----------|----------|----------|----------|
| 0.73189  | 0.097089 | 0.03595  | 0.005297 | 0.9091   |
| 1.56E-07 | -0.03045 | 0.51159  | -0.23167 | 4.15E-07 |
| 0.406    | 0.116438 | 0.0118   | 0.102993 | 0.02604  |
| 0.01163  | 0.072593 | 0.1172   | 0.138622 | 0.00268  |
| 0.98833  | 0.036309 | 0.43375  | 0.02938  | 0.52651  |
| 0.02567  | 0.083652 | 0.07091  | 0.248593 | 5.23E-08 |
| 0.29036  | 0.012687 | 0.78452  | -0.09622 | 0.03766  |
| 0.09197  | -0.11788 | 0.01079  | 0.133838 | 0.00376  |
| 0.3648   | 0.023531 | 0.61201  | 0.191482 | 3.11E-05 |
| 0.00062  | -0.01395 | 0.76362  | 0.02496  | 0.59056  |
| 0.04146  | -0.0328  | 0.47947  | -0.18235 | 7.39E-05 |
| 0.51329  | -0.01458 | 0.75339  | 0.206171 | 7.06E-06 |
| 0.00091  | 0.19646  | 1.90E-05 | -0.25498 | 2.30E-08 |
| 0.00021  | -0.00752 | 0.87126  | -0.13246 | 0.00414  |
| 0.19853  | 0.168887 | 0.00025  | -0.03947 | 0.3948   |
| 8.19E-06 | 0.071828 | 0.12113  | -0.50289 | 2.66E-31 |
| 0.63303  | 0.14156  | 0.00217  | -0.15096 | 0.00107  |
| 0.00883  | 0.072094 | 0.11975  | -0.21423 | 2.99E-06 |
| 0.1679   | 0.120666 | 0.00905  | -0.09044 | 0.05081  |
| 0.04372  | 0.15149  | 0.00102  | -0.22833 | 6.13E-07 |
| 0.24527  | 0.047822 | 0.30242  | -0.07202 | 0.12015  |
| 0.01745  | 0.141053 | 0.00225  | -0.28371 | 4.28E-10 |
| 0.80934  | -0.0119  | 0.79753  | 0.07148  | 0.12295  |
| 0.00607  | 0.096152 | 0.03779  | -0.0929  | 0.0448   |
| 0.05758  | 0.033657 | 0.46809  | 0.185845 | 5.33E-05 |
| 0.38712  | 0.050336 | 0.27768  | -0.15666 | 0.00068  |
| 0.04411  | -0.06171 | 0.18313  | -0.11842 | 0.01043  |
| 0.68008  | 0.15312  | 0.0009   | -0.03231 | 0.48612  |
| 0.60332  | 0.101089 | 0.02894  | 0.087425 | 0.05905  |
| 0.12741  | 0.069424 | 0.13412  | -0.11181 | 0.01564  |
| 0.25062  | 0.080962 | 0.0805   | 0.096678 | 0.03675  |
| 0.80693  | -0.01572 | 0.73467  | -0.14397 | 0.00181  |
| 0.08775  | 0.146922 | 0.00145  | 0.00194  | 0.96664  |
| 0.06421  | 0.042657 | 0.35769  | -0.197   | 1.80E-05 |
| 0.01481  | 0.070494 | 0.12821  | -0.34777 | 1.01E-14 |
| 0.01559  | 0.051312 | 0.26846  | -0.13726 | 0.00296  |
| 0.13479  | 0.067422 | 0.14574  | 0.247869 | 5.73E-08 |
| 0.01109  | 0.007729 | 0.8677   | -0.04908 | 0.28983  |
| 0.03896  | -0.09222 | 0.04639  | 0.193659 | 2.51E-05 |
| 0.84712  | 0.007191 | 0.87684  | 0.078475 | 0.09028  |
| 6.36E-06 | 0.135484 | 0.00335  | 0.323023 | 8.39E-13 |
| 0.00165  | -0.05143 | 0.26737  | 0.138943 | 0.00262  |
| 2.16E-05 | 0.048915 | 0.29149  | -0.14003 | 0.00242  |
| 0.01728  | 0.139677 | 0.00248  | 0.200741 | 1.24E-05 |
| 0.02286  | 0.100031 | 0.03067  | -0.26284 | 8.10E-09 |

|          |          |          |          |          |
|----------|----------|----------|----------|----------|
| 2.51E-06 | 0.075495 | 0.10322  | -0.25877 | 1.40E-08 |
| 2.04E-05 | 0.127744 | 0.0057   | -0.16769 | 0.00027  |
| 0.00699  | -0.004   | 0.9313   | -0.13629 | 0.00317  |
| 0.44743  | -0.02019 | 0.66335  | -0.13102 | 0.00457  |
| 0.30826  | 0.09943  | 0.03169  | -0.17516 | 0.00014  |
| 0.00074  | -0.05699 | 0.219    | -0.03041 | 0.51206  |
| 0.00072  | 0.042966 | 0.35421  | -0.20459 | 8.33E-06 |
| 0.00295  | -0.10113 | 0.02888  | 0.259437 | 1.28E-08 |
| 0.91875  | 0.042372 | 0.36091  | 0.234408 | 3.00E-07 |
| 9.82E-07 | -0.13647 | 0.00313  | 0.315728 | 2.87E-12 |
| 0.61781  | 0.03736  | 0.42055  | 0.244617 | 8.62E-08 |
| 0.02257  | -0.0095  | 0.83775  | 0.022005 | 0.63527  |
| 0.0003   | 0.095734 | 0.03864  | -0.24392 | 9.41E-08 |
| 0.57345  | -0.05648 | 0.22315  | -0.08221 | 0.07593  |
| 0.00576  | 0.152112 | 0.00098  | -0.05746 | 0.21519  |
| 0.00756  | 0.089004 | 0.0546   | -0.17128 | 0.0002   |
| 0.04275  | 0.165253 | 0.00034  | -0.12233 | 0.00813  |
| 0.75983  | 0.077217 | 0.09558  | 0.152389 | 0.00095  |
| 0.27296  | 0.064838 | 0.16185  | 0.213794 | 3.14E-06 |
| 6.96E-07 | 0.108854 | 0.01862  | 0.291663 | 1.31E-10 |
| 1.76E-05 | 0.222088 | 1.25E-06 | 0.353873 | 3.19E-15 |
| 0.05621  | 0.06036  | 0.19289  | 0.090157 | 0.05153  |
| 0.00192  | -0.07042 | 0.12859  | -0.08844 | 0.05616  |
| 0.02646  | 0.043715 | 0.34588  | 0.220647 | 1.47E-06 |
| 0.00113  | 0.025535 | 0.58202  | -0.05005 | 0.28043  |
| 0.0242   | 0.092173 | 0.0465   | 0.188545 | 4.12E-05 |
| 0.00051  | 0.094545 | 0.04113  | -0.30416 | 1.88E-11 |
| 0.49679  | 0.064538 | 0.1638   | -0.02167 | 0.64037  |
| 0.00856  | 0.001631 | 0.97195  | 0.021557 | 0.64217  |
| 0.0433   | 0.178862 | 0.0001   | -0.38802 | 3.15E-18 |
| 0.21134  | -0.07424 | 0.10909  | -0.24813 | 5.55E-08 |
| 0.03184  | 0.13756  | 0.00289  | -0.17693 | 0.00012  |
| 0.89593  | -0.07329 | 0.1137   | 0.090947 | 0.04951  |
| 0.1485   | 0.125522 | 0.00661  | -0.03419 | 0.46107  |
| 0.35284  | 0.135963 | 0.00324  | -0.00403 | 0.93073  |
| 0.68509  | 0.078761 | 0.08911  | 0.089014 | 0.05457  |
| 0.29391  | 0.069888 | 0.13153  | -0.06899 | 0.13655  |
| 0.77118  | -0.05683 | 0.22024  | 0.080165 | 0.08354  |
| 0.05623  | 0.064182 | 0.16614  | -0.20714 | 6.38E-06 |
| 0.01581  | 0.06383  | 0.16849  | 0.192163 | 2.91E-05 |
| 0.66482  | 0.080818 | 0.08104  | 0.115961 | 0.01215  |
| 0.99472  | 0.156535 | 0.00069  | -0.23774 | 2.01E-07 |
| 0.02339  | -0.05325 | 0.25076  | 0.154577 | 0.0008   |
| 0.00214  | -0.10189 | 0.02769  | 0.543436 | 3.08E-37 |
| 0.0306   | 0.07638  | 0.09923  | 0.148492 | 0.00129  |

|          |          |          |          |          |
|----------|----------|----------|----------|----------|
| 0.00136  | 0.070475 | 0.12832  | -0.14312 | 0.00193  |
| 0.01907  | 0.064494 | 0.16409  | 0.249239 | 4.81E-08 |
| 0.08126  | 0.042187 | 0.36302  | -0.09356 | 0.0433   |
| 0.00021  | -0.19416 | 2.39E-05 | 0.26257  | 8.39E-09 |
| 0.54216  | 0.068568 | 0.139    | 0.135454 | 0.00336  |
| 0.00368  | 0.106015 | 0.02194  | 0.180252 | 8.97E-05 |
| 0.00128  | 0.167107 | 0.00029  | -0.36024 | 9.32E-16 |
| 0.05564  | -0.00756 | 0.8706   | -0.00966 | 0.83514  |
| 0.21313  | 0.038352 | 0.40831  | 0.091212 | 0.04885  |
| 0.00826  | -0.07121 | 0.12435  | 0.008568 | 0.85349  |
| 0.07232  | 0.093242 | 0.04401  | 0.229589 | 5.29E-07 |
| 0.14057  | 0.04748  | 0.3059   | -0.23281 | 3.62E-07 |
| 0.08872  | 0.101125 | 0.02888  | 0.14782  | 0.00136  |
| 0.00705  | -0.00348 | 0.94023  | 0.005085 | 0.91273  |
| 0.0544   | 0.152665 | 0.00093  | -0.34239 | 2.73E-14 |
| 0.47792  | 0.112112 | 0.01535  | 0.089342 | 0.05368  |
| 0.3679   | 0.099879 | 0.03093  | 0.135911 | 0.00325  |
| 0.03379  | 0.148302 | 0.00131  | 0.025599 | 0.58109  |
| 0.97512  | 0.013314 | 0.77415  | -0.15007 | 0.00114  |
| 0.34625  | 0.061836 | 0.18221  | -0.06019 | 0.19416  |
| 0.77952  | 0.052027 | 0.26183  | 0.095017 | 0.04012  |
| 0.64543  | 0.086761 | 0.06101  | -0.06827 | 0.14073  |
| 0.00025  | 0.147347 | 0.00141  | -0.24093 | 1.36E-07 |
| 0.00165  | 0.024571 | 0.59636  | -0.10272 | 0.02643  |
| 0.1012   | 0.108288 | 0.01925  | -0.04007 | 0.38763  |
| 0.12692  | 0.011292 | 0.80771  | 0.100448 | 0.02998  |
| 0.45626  | 0.004696 | 0.91939  | 0.147914 | 0.00135  |
| 1.44E-08 | 0.092524 | 0.04567  | -0.26366 | 7.25E-09 |
| 0.02368  | -0.01053 | 0.82041  | 0.002299 | 0.96047  |
| 0.49629  | -0.03327 | 0.47318  | 0.249552 | 4.63E-08 |
| 4.38E-07 | -0.01755 | 0.70529  | -0.20843 | 5.57E-06 |
| 0.81443  | 0.028616 | 0.53733  | -0.08708 | 0.06008  |
| 0.67014  | -0.02201 | 0.6352   | 0.09746  | 0.03525  |
| 7.48E-05 | 0.075456 | 0.1034   | 0.288547 | 2.09E-10 |
| 1.74E-13 | 0.278862 | 8.67E-10 | 0.0865   | 0.06179  |
| 0.00017  | 0.080722 | 0.0814   | 0.331284 | 2.01E-13 |
| 0.08741  | 0.137436 | 0.00292  | 0.083302 | 0.0721   |
| 0.86226  | 0.015813 | 0.73323  | 0.232882 | 3.59E-07 |
| 0.40712  | -0.01049 | 0.82117  | -0.00812 | 0.86103  |
| 0.05562  | -0.04146 | 0.3714   | -0.01196 | 0.79663  |
| 0.06539  | -0.07363 | 0.11207  | 0.161073 | 0.00048  |
| 0.346    | 0.142239 | 0.00206  | 0.023007 | 0.61996  |
| 0.00163  | 0.091641 | 0.04779  | -0.05928 | 0.20102  |
| 0.27253  | -0.00283 | 0.9514   | 0.124189 | 0.00721  |
| 0.00074  | 0.163382 | 0.00039  | -0.58299 | 7.30E-44 |

|          |          |          |          |          |
|----------|----------|----------|----------|----------|
| 0.10725  | -0.01261 | 0.78579  | 0.094301 | 0.04166  |
| 0.30141  | 0.122392 | 0.0081   | -0.01778 | 0.70149  |
| 0.95562  | 0.013488 | 0.77127  | -0.10643 | 0.02143  |
| 0.00208  | 0.098156 | 0.03395  | -0.01976 | 0.67022  |
| 0.00451  | 0.114183 | 0.01355  | -0.14753 | 0.00139  |
| 5.81E-05 | 0.105371 | 0.02277  | -0.08343 | 0.07166  |
| 0.00021  | 0.00969  | 0.83456  | -0.31974 | 1.46E-12 |
| 0.01212  | 0.036677 | 0.4291   | -0.09566 | 0.03878  |
| 0.05393  | 0.151069 | 0.00106  | 0.089869 | 0.05228  |
| 0.73477  | 0.107369 | 0.0203   | 0.058442 | 0.20744  |
| 0.76197  | 0.028207 | 0.54316  | -0.01979 | 0.66973  |
| 0.28554  | 0.017172 | 0.71129  | -0.15767 | 0.00063  |
| 0.31981  | 0.101353 | 0.02852  | 0.186626 | 4.95E-05 |
| 0.0261   | -0.01235 | 0.79017  | 0.283756 | 4.25E-10 |
| 0.09587  | -0.00131 | 0.97746  | -0.24596 | 7.29E-08 |
| 4.85E-05 | 0.025173 | 0.58739  | -0.197   | 1.80E-05 |
| 0.99017  | 0.099555 | 0.03148  | 0.127276 | 0.00588  |
| 0.03951  | 0.154689 | 0.0008   | -0.02228 | 0.63103  |
| 0.00748  | 0.001839 | 0.96838  | -0.09273 | 0.04518  |
| 0.05645  | 0.0846   | 0.06776  | 0.251096 | 3.80E-08 |
| 0.85359  | 0.043399 | 0.34938  | -0.0424  | 0.36055  |
| 0.15713  | 0.022059 | 0.63445  | 0.043497 | 0.34829  |
| 0.00647  | 0.045417 | 0.3274   | -0.37897 | 2.14E-17 |
| 0.77936  | 0.03189  | 0.49178  | -0.00081 | 0.986    |
| 0.00341  | 0.011866 | 0.79814  | 0.034812 | 0.45296  |
| 0.01272  | 0.122293 | 0.00815  | 0.202925 | 9.89E-06 |
| 1.31E-05 | 0.136332 | 0.00316  | 0.136765 | 0.00306  |
| 0.59499  | 0.108636 | 0.01886  | -0.10554 | 0.02255  |
| 0.83875  | -0.01822 | 0.69459  | 0.120875 | 0.00893  |
| 3.98E-13 | 0.318378 | 1.84E-12 | -0.01476 | 0.75036  |
| 0.90133  | 0.000817 | 0.98596  | 0.177422 | 0.00012  |
| 0.03903  | 0.042044 | 0.36465  | -0.08353 | 0.07134  |
| 0.04153  | 0.034863 | 0.45229  | -0.23626 | 2.40E-07 |
| 0.72337  | -0.01961 | 0.67254  | 0.076934 | 0.0968   |
| 0.35367  | 0.053633 | 0.24737  | -0.06926 | 0.13503  |
| 0.14951  | 0.018514 | 0.68986  | 0.13113  | 0.00453  |
| 0.02453  | 0.083289 | 0.07215  | 0.155051 | 0.00077  |
| 1.57E-08 | 0.091377 | 0.04844  | -0.20354 | 9.29E-06 |
| 6.62E-05 | 0.050212 | 0.27887  | -0.10752 | 0.02012  |
| 0.00025  | -0.00173 | 0.97029  | -0.10483 | 0.02347  |
| 0.81622  | 0.002349 | 0.95963  | 0.201816 | 1.11E-05 |
| 0.22602  | -0.03561 | 0.44261  | 0.159445 | 0.00054  |
| 0.26329  | 0.01215  | 0.79342  | 0.130401 | 0.00477  |
| 0.00115  | 0.005629 | 0.90345  | -0.03469 | 0.45457  |
| 0.01201  | 0.046061 | 0.32059  | -0.10892 | 0.01855  |

|          |          |          |          |          |
|----------|----------|----------|----------|----------|
| 0.3439   | 0.052407 | 0.25836  | 0.02144  | 0.64398  |
| 0.0015   | 0.057918 | 0.21155  | 0.264516 | 6.45E-09 |
| 0.00123  | 0.014403 | 0.75623  | 0.023667 | 0.60995  |
| 0.17572  | 0.053061 | 0.25246  | 0.002967 | 0.94901  |
| 0.4408   | 0.016737 | 0.71829  | 0.067402 | 0.14586  |
| 0.08487  | 0.026684 | 0.56515  | 0.219088 | 1.75E-06 |
| 0.03226  | 0.056474 | 0.22318  | -0.20304 | 9.77E-06 |
| 0.00102  | -0.06126 | 0.18631  | -0.17016 | 0.00022  |
| 0.30834  | 0.040512 | 0.3824   | 0.231799 | 4.09E-07 |
| 0.17312  | 0.031953 | 0.49093  | 0.060398 | 0.19261  |
| 0.1164   | 0.124504 | 0.00706  | 4.91E-05 | 0.99916  |
| 0.09838  | 0.121122 | 0.00879  | -0.31626 | 2.62E-12 |
| 0.04     | 0.012525 | 0.7872   | -0.06611 | 0.15375  |
| 0.76109  | -0.03821 | 0.4101   | 0.20366  | 9.17E-06 |
| 0.08543  | 0.135796 | 0.00328  | -0.00426 | 0.92679  |
| 0.73748  | 0.181891 | 7.71E-05 | -0.01467 | 0.75186  |
| 0.09338  | 0.12783  | 0.00567  | -0.10954 | 0.01788  |
| 0.08581  | 0.099244 | 0.03201  | -0.03255 | 0.48285  |
| 2.52E-05 | 0.168085 | 0.00026  | 0.201111 | 1.19E-05 |
| 0.54078  | 0.144621 | 0.00173  | 0.035445 | 0.44477  |
| 0.29062  | 0.130874 | 0.00461  | -0.13808 | 0.00279  |
| 0.00022  | 0.037945 | 0.41331  | -0.12542 | 0.00665  |
| 0.91688  | 0.05676  | 0.22084  | -0.21654 | 2.32E-06 |
| 0.0036   | 0.072019 | 0.12014  | 0.024518 | 0.59715  |
| 0.00299  | -0.04824 | 0.29826  | 0.069524 | 0.13356  |
| 0.15822  | 0.002562 | 0.95596  | -0.04881 | 0.29255  |
| 0.01841  | 0.083279 | 0.07218  | -0.08697 | 0.06038  |
| 9.75E-05 | -0.00411 | 0.92935  | -0.16332 | 0.00039  |
| 0.00867  | 0.077481 | 0.09445  | 0.271877 | 2.34E-09 |
| 0.90573  | 0.230525 | 4.75E-07 | -0.07028 | 0.12935  |
| 0.00155  | 0.002322 | 0.96009  | 0.218394 | 1.89E-06 |
| 0.15809  | 0.036275 | 0.43417  | -0.16235 | 0.00043  |
| 0.33345  | 0.067964 | 0.14252  | 0.100179 | 0.03042  |
| 0.0023   | -0.01258 | 0.78628  | -0.02464 | 0.59539  |
| 0.00081  | 0.092211 | 0.04641  | -0.05824 | 0.20898  |
| 0.83728  | 0.193822 | 2.47E-05 | 0.020947 | 0.65163  |
| 0.03506  | 0.067839 | 0.14326  | -0.14888 | 0.00125  |
| 0.4314   | 0.156818 | 0.00067  | 0.06075  | 0.19003  |
| 0.8663   | 0.002877 | 0.95057  | 0.081763 | 0.07754  |
| 0.01443  | -0.21248 | 3.61E-06 | 0.214    | 3.07E-06 |
| 0.61273  | 0.038048 | 0.41203  | -0.03681 | 0.42743  |
| 0.50226  | 0.020882 | 0.65264  | 0.16529  | 0.00033  |
| 0.00598  | 0.135756 | 0.00329  | 0.056838 | 0.22021  |
| 0.0531   | 0.126851 | 0.00605  | -0.17765 | 0.00011  |
| 0.00173  | 0.015308 | 0.74145  | -0.06639 | 0.152    |



|          |          |          |          |          |
|----------|----------|----------|----------|----------|
| 0.57373  | 0.016677 | 0.71925  | 0.068645 | 0.13855  |
| 0.00182  | 0.087944 | 0.05756  | 0.252831 | 3.04E-08 |
| 0.04104  | -0.02939 | 0.52631  | -0.24957 | 4.62E-08 |
| 0.39038  | -0.00072 | 0.98769  | 0.143176 | 0.00192  |
| 0.13129  | 0.095956 | 0.03819  | 0.059818 | 0.19692  |
| 1.93E-05 | 0.080664 | 0.08163  | -0.47472 | 1.27E-27 |
| 1.64E-06 | 0.109243 | 0.0182   | -0.2888  | 2.01E-10 |
| 0.16925  | 0.020462 | 0.65918  | -0.10501 | 0.02325  |
| 0.76166  | 0.005048 | 0.91337  | -0.00838 | 0.85668  |
| 0.00716  | 0.052069 | 0.26145  | 0.259725 | 1.23E-08 |
| 7.53E-05 | 0.012594 | 0.78605  | -0.20041 | 1.28E-05 |
| 0.06145  | -0.04035 | 0.38431  | -0.02788 | 0.5479   |
| 0.00222  | 0.021141 | 0.64861  | 0.273023 | 1.99E-09 |
| 0.50782  | 0.027596 | 0.55193  | 0.110361 | 0.01704  |
| 0.12612  | -0.01857 | 0.68897  | 0.162566 | 0.00042  |
| 0.88965  | 0.024485 | 0.59764  | 0.04361  | 0.34704  |
| 0.00477  | 0.108404 | 0.01912  | 0.048674 | 0.29388  |
| 0.02077  | 0.12267  | 0.00796  | -0.22128 | 1.37E-06 |
| 0.79204  | -0.03798 | 0.41291  | 0.054933 | 0.23609  |
| 3.97E-05 | 0.103997 | 0.02461  | -0.15688 | 0.00067  |
| 9.10E-05 | -0.04556 | 0.32593  | -0.16725 | 0.00028  |
| 0.20224  | 0.174538 | 0.00015  | 0.103613 | 0.02515  |
| 0.23846  | 0.070766 | 0.12674  | -0.08569 | 0.06427  |
| 0.26499  | 0.075827 | 0.10172  | 0.068265 | 0.14076  |
| 0.3754   | 0.099    | 0.03244  | -0.00685 | 0.88259  |
| 0.04642  | 0.123974 | 0.00731  | -0.15057 | 0.0011   |
| 0.03668  | 0.077981 | 0.09233  | 0.018973 | 0.68258  |
| 0.60527  | -0.00714 | 0.87778  | -0.02682 | 0.56317  |
| 0.00152  | 0.137034 | 0.003    | 0.149509 | 0.00119  |
| 0.21813  | 0.181737 | 7.82E-05 | -0.13105 | 0.00456  |
| 6.99E-06 | 0.107417 | 0.02024  | -0.02598 | 0.57542  |
| 0.99477  | 0.183696 | 6.52E-05 | -0.07264 | 0.11698  |
| 0.51535  | 0.085313 | 0.06547  | 0.15497  | 0.00078  |
| 0.11206  | -0.01032 | 0.82392  | 0.003943 | 0.93228  |
| 0.00261  | -0.00766 | 0.86893  | -0.07013 | 0.13019  |
| 0.18385  | -0.02679 | 0.56356  | 0.336234 | 8.33E-14 |
| 0.18715  | 0.017363 | 0.70823  | -0.13492 | 0.00349  |
| 0.00644  | 0.011256 | 0.80832  | -0.09236 | 0.04607  |
| 0.01117  | 0.078379 | 0.09068  | 0.21706  | 2.19E-06 |
| 0.00011  | 0.021498 | 0.64308  | -0.20228 | 1.06E-05 |
| 0.15063  | -0.00973 | 0.83384  | 0.029236 | 0.52854  |
| 0.00763  | 0.094488 | 0.04125  | 0.083762 | 0.07054  |
| 0.0156   | 0.092291 | 0.04622  | 0.048278 | 0.29783  |
| 0.45188  | 0.057959 | 0.21123  | -0.13604 | 0.00322  |
| 0.00185  | 0.072723 | 0.11655  | 0.306469 | 1.30E-11 |

|          |          |          |          |          |
|----------|----------|----------|----------|----------|
| 0.4361   | 0.13832  | 0.00274  | 0.061094 | 0.18752  |
| 0.02416  | 0.077108 | 0.09605  | -0.16208 | 0.00044  |
| 0.30821  | 0.01512  | 0.74451  | 0.104631 | 0.02374  |
| 0.69271  | 0.068052 | 0.142    | 0.166225 | 0.00031  |
| 0.00252  | 0.030473 | 0.51124  | -0.4252  | 6.30E-22 |
| 0.45991  | 0.055321 | 0.23278  | -0.28832 | 2.16E-10 |
| 0.01202  | 0.02813  | 0.54426  | 0.063327 | 0.17187  |
| 0.03467  | 0.043492 | 0.34835  | 0.248014 | 5.62E-08 |
| 0.82069  | 0.037693 | 0.41641  | 0.04581  | 0.32324  |
| 0.02141  | 0.032701 | 0.48083  | 0.016422 | 0.72338  |
| 0.67207  | 0.044008 | 0.34266  | -0.17907 | 9.99E-05 |
| 2.45E-06 | 0.0072   | 0.87668  | -0.08444 | 0.06829  |
| 0.32137  | 0.047084 | 0.30995  | 0.195481 | 2.10E-05 |
| 0.03328  | -0.00026 | 0.99553  | 0.026917 | 0.56176  |
| 0.00057  | 0.086074 | 0.06309  | -0.28499 | 3.55E-10 |
| 9.74E-05 | 0.049459 | 0.28615  | -0.14916 | 0.00123  |
| 0.52319  | 0.019897 | 0.66802  | 0.092316 | 0.04616  |
| 0.01468  | -0.07631 | 0.09956  | 0.132286 | 0.00419  |
| 0.5654   | 0.095095 | 0.03996  | -0.14992 | 0.00116  |
| 0.84467  | 0.018282 | 0.69354  | 0.060067 | 0.19506  |
| 7.14E-05 | 0.073463 | 0.11287  | -0.24045 | 1.44E-07 |
| 0.00093  | 0.122928 | 0.00783  | 0.265812 | 5.41E-09 |
| 0.00379  | 0.031544 | 0.4965   | 0.30533  | 1.56E-11 |
| 0.3084   | 0.035683 | 0.44171  | -0.04787 | 0.3019   |
| 0.0455   | 0.035874 | 0.43928  | -0.0342  | 0.4609   |
| 0.06688  | -0.04364 | 0.34668  | -0.0586  | 0.20621  |
| 0.48043  | -0.04077 | 0.37938  | -0.0386  | 0.4053   |
| 0.00131  | 0.085938 | 0.06351  | -0.29463 | 8.32E-11 |
| 0.29796  | -0.0617  | 0.18319  | 0.079395 | 0.08656  |
| 0.00142  | 0.191577 | 3.08E-05 | 0.182129 | 7.54E-05 |
| 0.00222  | -0.12383 | 0.00738  | 0.161246 | 0.00047  |
| 0.00798  | 0.062562 | 0.17712  | -0.05389 | 0.24512  |
| 0.00032  | 0.055564 | 0.23074  | -0.0836  | 0.07108  |
| 0.04863  | -0.0315  | 0.49707  | 0.19522  | 2.15E-05 |
| 0.32289  | -0.13629 | 0.00317  | 0.051439 | 0.26728  |
| 0.37366  | -0.10186 | 0.02774  | -0.09408 | 0.04214  |
| 1.05E-09 | 0.092629 | 0.04543  | 0.073105 | 0.11464  |
| 0.21411  | -0.12701 | 0.00599  | 0.091914 | 0.04713  |
| 0.76413  | -0.13583 | 0.00327  | 0.089588 | 0.05303  |
| 0.30172  | -0.12701 | 0.00599  | 0.024135 | 0.6029   |
| 0.1367   | -0.11611 | 0.01204  | 0.098406 | 0.0335   |
| 0.73385  | -0.06159 | 0.18399  | 0.083805 | 0.07039  |
| 0.81824  | -0.0811  | 0.08     | 0.271364 | 2.51E-09 |
| 0.04029  | -0.09579 | 0.03851  | 0.101962 | 0.02758  |
| 0.3089   | -0.13189 | 0.0043   | 0.04848  | 0.29581  |

|          |          |          |          |          |
|----------|----------|----------|----------|----------|
| 0.96065  | -0.09447 | 0.04129  | 0.053639 | 0.24732  |
| 0.64698  | -0.15794 | 0.00061  | 0.081733 | 0.07765  |
| 0.61667  | -0.05016 | 0.2794   | -0.03394 | 0.4644   |
| 0.26572  | -0.12791 | 0.00564  | 0.102672 | 0.02651  |
| 0.08345  | -0.14112 | 0.00224  | 0.254737 | 2.37E-08 |
| 0.77346  | -0.15185 | 0.001    | 0.116894 | 0.01147  |
| 0.10514  | -0.08684 | 0.06078  | 0.080427 | 0.08253  |
| 0.56299  | -0.15117 | 0.00105  | 0.108177 | 0.01937  |
| 0.29991  | -0.15819 | 0.0006   | 0.091202 | 0.04887  |
| 0.5126   | -0.08049 | 0.0823   | 0.067104 | 0.14765  |
| 0.50186  | -0.10114 | 0.02887  | 0.061832 | 0.18224  |
| 0.28918  | -0.13287 | 0.00402  | 0.15317  | 0.0009   |
| 0.94099  | -0.10514 | 0.02306  | -0.03396 | 0.46414  |
| 0.57045  | -0.14671 | 0.00148  | 0.021421 | 0.64428  |
| 0.07665  | -0.11922 | 0.00992  | 0.073754 | 0.11144  |
| 0.43437  | -0.12441 | 0.00711  | 0.037518 | 0.41858  |
| 0.85847  | -0.07751 | 0.0943   | 0.076804 | 0.09737  |
| 0.44714  | -0.14639 | 0.00151  | 0.133139 | 0.00395  |
| 0.2975   | -0.15504 | 0.00077  | 0.07845  | 0.09038  |
| 0.10104  | -0.09491 | 0.04034  | 0.245469 | 7.75E-08 |
| 0.33836  | -0.15043 | 0.00111  | 0.133675 | 0.0038   |
| 0.51825  | -0.14617 | 0.00154  | 0.00679  | 0.88366  |
| 0.94874  | -0.10338 | 0.02547  | 0.116097 | 0.01205  |
| 0.59729  | -0.13887 | 0.00263  | 0.140644 | 0.00232  |
| 0.0025   | -0.16919 | 0.00024  | 0.313361 | 4.24E-12 |
| 0.2491   | -0.15167 | 0.00101  | 0.082448 | 0.07508  |
| 0.34525  | -0.11368 | 0.01397  | 0.074573 | 0.10752  |
| 0.00307  | 0.023165 | 0.61755  | 0.066565 | 0.15094  |
| 0.18016  | -0.18619 | 5.16E-05 | 0.129475 | 0.00507  |
| 0.86922  | -0.11939 | 0.00981  | 0.090815 | 0.04984  |
| 0.10285  | -0.09745 | 0.03527  | 0.120847 | 0.00895  |
| 0.3487   | -0.13839 | 0.00273  | 0.119313 | 0.00986  |
| 0.94158  | -0.1371  | 0.00299  | 0.144975 | 0.00168  |
| 0.03061  | -0.17446 | 0.00015  | 0.192202 | 2.90E-05 |
| 0.04686  | -0.14338 | 0.0019   | 0.081006 | 0.08034  |
| 1.75E-08 | 0.13178  | 0.00434  | 0.020454 | 0.6593   |
| 0.17288  | -0.06696 | 0.14855  | 0.12307  | 0.00775  |
| 0.06225  | -0.15846 | 0.00059  | 0.246968 | 6.42E-08 |
| 0.02176  | -0.158   | 0.00061  | 0.411904 | 1.50E-20 |
| 0.4513   | -0.14399 | 0.00181  | 0.210365 | 4.53E-06 |
| 0.0395   | -0.01964 | 0.67204  | -0.09413 | 0.04202  |
| 0.79264  | -0.14227 | 0.00206  | 0.141056 | 0.00225  |
| 0.66355  | -0.11397 | 0.01372  | 0.10123  | 0.02872  |
| 0.57299  | -0.12957 | 0.00504  | 0.10868  | 0.01881  |
| 0.80184  | -0.10844 | 0.01907  | 0.000776 | 0.98666  |

|          |          |          |          |          |
|----------|----------|----------|----------|----------|
| 0.02623  | -0.13216 | 0.00422  | -0.25791 | 1.56E-08 |
| 0.04841  | 0.003369 | 0.94212  | 0.099681 | 0.03126  |
| 0.81067  | -0.12664 | 0.00614  | 0.043824 | 0.34468  |
| 0.0171   | -0.06535 | 0.15856  | 0.118752 | 0.01021  |
| 0.049    | -0.11455 | 0.01325  | 0.374366 | 5.53E-17 |
| 0.00945  | -0.12793 | 0.00563  | 0.255673 | 2.10E-08 |
| 0.67293  | -0.14242 | 0.00203  | 0.119865 | 0.00952  |
| 0.45826  | -0.12256 | 0.00802  | 0.054849 | 0.2368   |
| 0.92896  | -0.19447 | 2.32E-05 | 0.125608 | 0.00657  |
| 0.26632  | -0.10518 | 0.02302  | 0.050084 | 0.2801   |
| 0.11133  | -0.1095  | 0.01793  | -0.00609 | 0.89554  |
| 0.82503  | -0.15454 | 0.00081  | 0.03368  | 0.46779  |
| 0.34881  | -0.12869 | 0.00535  | 0.086656 | 0.06132  |
| 0.81682  | -0.08311 | 0.07275  | 0.014112 | 0.761    |
| 0.68167  | -0.16417 | 0.00037  | 0.113202 | 0.01438  |
| 0.40615  | -0.14856 | 0.00128  | 0.097763 | 0.03468  |
| 0.9024   | -0.15801 | 0.00061  | 0.047988 | 0.30074  |
| 0.4834   | -0.14108 | 0.00224  | 0.063901 | 0.16801  |
| 0.61169  | -0.12557 | 0.00659  | 0.141052 | 0.00225  |
| 0.08992  | -0.13911 | 0.00259  | 0.092162 | 0.04653  |
| 0.96843  | -0.1259  | 0.00644  | 0.256164 | 1.97E-08 |
| 0.51156  | -0.19929 | 1.43E-05 | 0.167724 | 0.00027  |
| 0.19452  | -0.05807 | 0.21037  | -0.0198  | 0.66951  |
| 0.00101  | -0.05165 | 0.26535  | -0.31548 | 2.99E-12 |
| 0.14759  | -0.09046 | 0.05074  | 0.047347 | 0.30725  |
| 0.74963  | -0.09925 | 0.032    | 0.274155 | 1.70E-09 |
| 0.15404  | -0.20348 | 9.34E-06 | 0.128145 | 0.00555  |
| 0.04191  | -0.17934 | 9.74E-05 | 0.104923 | 0.02335  |
| 0.19544  | -0.17933 | 9.76E-05 | 0.086349 | 0.06225  |
| 0.85577  | -0.04228 | 0.36194  | 0.071399 | 0.12337  |
| 0.10098  | -0.15518 | 0.00077  | 0.138699 | 0.00267  |
| 7.39E-06 | -0.03653 | 0.43094  | 0.254734 | 2.37E-08 |
| 0.00086  | 0.113285 | 0.01431  | -0.04706 | 0.31024  |
| 0.16925  | -0.17981 | 9.34E-05 | 0.246477 | 6.83E-08 |
| 1.65E-06 | -0.11365 | 0.01399  | 0.311288 | 5.96E-12 |
| 0.37185  | -0.13538 | 0.00338  | 0.204821 | 8.13E-06 |
| 0.03456  | -0.06045 | 0.19221  | 0.073468 | 0.11284  |
| 0.32394  | -0.12643 | 0.00622  | 0.303871 | 1.97E-11 |
| 0.90811  | -0.01073 | 0.81708  | -0.00802 | 0.86283  |
| 0.91168  | 0.136467 | 0.00313  | -0.10912 | 0.01834  |
| 0.16173  | -0.17069 | 0.00021  | 0.059672 | 0.19802  |
| 0.44607  | -0.19462 | 2.29E-05 | 0.100647 | 0.02965  |
| 0.53941  | -0.0815  | 0.07849  | 0.117006 | 0.01139  |
| 0.07416  | -0.17824 | 0.00011  | 0.008147 | 0.86062  |
| 0.32783  | -0.08017 | 0.08352  | 0.312356 | 5.00E-12 |

|         |          |          |           |          |
|---------|----------|----------|-----------|----------|
| 0.0414  | -0.0572  | 0.21724  | 0.163063  | 0.0004   |
| 0.26428 | -0.1406  | 0.00232  | 0.337571  | 6.55E-14 |
| 0.54565 | -0.1646  | 0.00035  | 0.076778  | 0.09748  |
| 0.02618 | -0.15859 | 0.00058  | 0.18695   | 4.80E-05 |
| 0.1313  | -0.20527 | 7.76E-06 | 0.000512  | 0.9912   |
| 0.11319 | -0.2095  | 4.97E-06 | 0.290197  | 1.63E-10 |
| 0.23497 | -0.12285 | 0.00787  | 0.2327    | 3.67E-07 |
| 0.02391 | 0.162949 | 0.00041  | 0.029501  | 0.52481  |
| 0.23307 | -0.12071 | 0.00903  | 0.147901  | 0.00135  |
| 0.48659 | -0.07872 | 0.08926  | 0.052736  | 0.25538  |
| 0.05635 | -0.12691 | 0.00603  | 0.148546  | 0.00128  |
| 0.39094 | -0.1601  | 0.00051  | 0.132525  | 0.00412  |
| 0.28314 | -0.10127 | 0.02865  | 0.110851  | 0.01655  |
| 0.63961 | -0.15559 | 0.00074  | 0.156972  | 0.00066  |
| 0.78879 | -0.19695 | 1.81E-05 | 0.108299  | 0.01923  |
| 0.42793 | -0.12966 | 0.00501  | 0.111377  | 0.01604  |
| 0.00816 | -0.10627 | 0.02163  | 0.095622  | 0.03887  |
| 0.0264  | 0.06314  | 0.17315  | 0.120692  | 0.00903  |
| 0.23509 | -0.14773 | 0.00137  | 0.077398  | 0.0948   |
| 0.06918 | -0.13039 | 0.00477  | 0.120154  | 0.00935  |
| 0.53686 | -0.02214 | 0.63319  | -6.67E-05 | 0.99885  |
| 0.05873 | -0.06316 | 0.17302  | 0.131539  | 0.00441  |
| 0.68254 | -0.1621  | 0.00044  | 0.299827  | 3.72E-11 |
| 0.15512 | -0.12971 | 0.00499  | 0.149871  | 0.00116  |
| 0.10165 | -0.09819 | 0.03389  | 0.17475   | 0.00015  |
| 0.88517 | -0.0096  | 0.83613  | 0.106532  | 0.0213   |
| 0.29595 | -0.14481 | 0.0017   | 0.025946  | 0.57596  |
| 0.3654  | -0.14346 | 0.00188  | 0.205175  | 7.84E-06 |
| 0.24411 | -0.14778 | 0.00136  | 0.078952  | 0.08834  |
| 0.55282 | -0.14205 | 0.00209  | 0.12412   | 0.00724  |
| 0.06321 | -0.11565 | 0.01239  | 0.116076  | 0.01207  |
| 0.00897 | -0.08253 | 0.0748   | 0.125459  | 0.00663  |
| 0.05952 | -0.12818 | 0.00554  | 0.269304  | 3.34E-09 |
| 0.00046 | -0.02488 | 0.59172  | 0.221981  | 1.27E-06 |
| 0.69297 | -0.18817 | 4.28E-05 | 0.101385  | 0.02847  |
| 0.38585 | -0.16272 | 0.00041  | 0.150968  | 0.00107  |
| 0.02193 | -0.02632 | 0.57047  | 0.21207   | 3.78E-06 |
| 0.41966 | -0.10484 | 0.02346  | 0.152436  | 0.00095  |
| 0.14999 | -0.12923 | 0.00516  | -0.03858  | 0.40549  |
| 0.00044 | -0.13521 | 0.00342  | 0.214406  | 2.93E-06 |
| 0.03516 | -0.10233 | 0.02701  | 0.122884  | 0.00785  |
| 0.41595 | -0.13427 | 0.00365  | 0.125997  | 0.0064   |
| 0.2212  | -0.14677 | 0.00147  | 0.207655  | 6.04E-06 |
| 0.62494 | -0.09778 | 0.03466  | 0.11656   | 0.01171  |
| 0.61501 | -0.11164 | 0.01579  | 0.028433  | 0.53993  |

|         |          |          |          |          |
|---------|----------|----------|----------|----------|
| 0.31037 | -0.16248 | 0.00042  | 0.118876 | 0.01014  |
| 0.83876 | -0.16315 | 0.0004   | 0.123684 | 0.00745  |
| 0.72202 | -0.10119 | 0.02879  | 0.07964  | 0.08559  |
| 0.97601 | 0.104331 | 0.02415  | -0.26076 | 1.07E-08 |
| 0.1404  | -0.0746  | 0.1074   | 0.194829 | 2.24E-05 |
| 0.86903 | -0.19806 | 1.62E-05 | 0.248196 | 5.50E-08 |
| 0.01463 | -0.14773 | 0.00137  | 0.255716 | 2.09E-08 |
| 0.42627 | -0.14919 | 0.00122  | 0.083147 | 0.07264  |
| 0.31999 | -0.09049 | 0.05067  | -0.00952 | 0.83742  |
| 0.0245  | -0.1048  | 0.02352  | 0.268647 | 3.66E-09 |
| 0.04198 | -0.09081 | 0.04986  | 0.087545 | 0.0587   |
| 0.34698 | -0.14589 | 0.00157  | 0.026872 | 0.56242  |
| 0.01924 | -0.15289 | 0.00092  | 0.270826 | 2.71E-09 |
| 0.08217 | -0.1272  | 0.00591  | 0.197344 | 1.74E-05 |
| 0.09688 | -0.1302  | 0.00483  | 0.172669 | 0.00018  |
| 0.24216 | -0.18851 | 4.14E-05 | -0.11981 | 0.00956  |
| 0.43497 | -0.09566 | 0.03879  | 0.13226  | 0.0042   |
| 0.05003 | -0.12103 | 0.00884  | 0.164509 | 0.00036  |
| 0.85632 | 0.001543 | 0.97348  | -0.01066 | 0.81824  |
| 0.01077 | 0.038026 | 0.4123   | 0.041295 | 0.37326  |
| 0.15157 | -0.19847 | 1.56E-05 | 0.059313 | 0.20073  |
| 0.00039 | -0.00724 | 0.87606  | 0.120955 | 0.00888  |
| 0.15566 | -0.1272  | 0.00591  | 0.091653 | 0.04776  |
| 0.91682 | 0.107029 | 0.0207   | 0.108551 | 0.01895  |
| 0.14728 | -0.07398 | 0.11037  | 0.14798  | 0.00134  |
| 0.41484 | -0.12955 | 0.00505  | 0.242751 | 1.09E-07 |
| 0.01367 | -0.07682 | 0.09729  | 0.12722  | 0.0059   |
| 0.62842 | -0.15962 | 0.00054  | 0.166564 | 0.0003   |
| 0.44952 | -0.07757 | 0.09406  | 0.138238 | 0.00276  |
| 0.39255 | -0.06582 | 0.15555  | -0.03824 | 0.40962  |
| 0.29871 | -0.13864 | 0.00268  | 0.114525 | 0.01327  |
| 0.27567 | -0.22718 | 7.01E-07 | 0.35354  | 3.40E-15 |
| 0.34731 | -0.10132 | 0.02857  | 0.24197  | 1.20E-07 |
| 0.32489 | -0.05056 | 0.27551  | 0.048443 | 0.29617  |
| 0.03712 | -0.11447 | 0.01332  | 0.147093 | 0.00143  |
| 0.30336 | -0.09067 | 0.05022  | 0.113031 | 0.01453  |
| 0.61674 | -0.08309 | 0.07282  | 0.124783 | 0.00694  |
| 0.49722 | -0.11812 | 0.01063  | 0.043144 | 0.35223  |
| 0.83718 | -0.07565 | 0.1025   | 0.08956  | 0.0531   |
| 0.47012 | -0.14155 | 0.00217  | 0.060117 | 0.19469  |
| 0.96419 | 0.050334 | 0.2777   | -0.07473 | 0.1068   |
| 0.01077 | -0.13238 | 0.00416  | 0.218833 | 1.80E-06 |
| 0.1396  | -0.11406 | 0.01365  | 0.265809 | 5.41E-09 |
| 0.90261 | 0.061765 | 0.18271  | -0.09014 | 0.05157  |
| 0.08227 | -0.05789 | 0.21177  | 0.232747 | 3.65E-07 |

|          |          |          |          |          |
|----------|----------|----------|----------|----------|
| 0.60401  | 0.136884 | 0.00304  | -0.13923 | 0.00257  |
| 0.08487  | -0.11642 | 0.01181  | 0.159137 | 0.00056  |
| 0.03068  | -0.13212 | 0.00423  | 0.046422 | 0.31681  |
| 0.86537  | -0.12508 | 0.0068   | 0.171015 | 0.0002   |
| 0.39287  | -0.11174 | 0.0157   | 0.069447 | 0.13399  |
| 0.95312  | -0.14743 | 0.0014   | 0.14927  | 0.00122  |
| 0.01021  | -0.0896  | 0.053    | 0.09308  | 0.04438  |
| 0.40787  | -0.14162 | 0.00216  | 0.056582 | 0.2223   |
| 0.00066  | -0.10359 | 0.02519  | 0.150396 | 0.00111  |
| 0.10703  | -0.12369 | 0.00745  | 0.080942 | 0.08058  |
| 0.961    | -0.03079 | 0.50686  | 0.057383 | 0.21581  |
| 0.30413  | -0.14649 | 0.0015   | 0.083113 | 0.07275  |
| 0.08832  | -0.01265 | 0.78511  | 0.168499 | 0.00025  |
| 0.0715   | 0.054334 | 0.24124  | 0.148196 | 0.00132  |
| 0.14511  | -0.11467 | 0.01315  | 0.122529 | 0.00803  |
| 0.66208  | -0.06531 | 0.15884  | 0.138906 | 0.00263  |
| 0.12114  | -0.03477 | 0.45355  | 0.013644 | 0.76871  |
| 0.00562  | -0.06168 | 0.18333  | 0.119471 | 0.00976  |
| 0.00076  | -0.02511 | 0.58827  | 0.170084 | 0.00022  |
| 3.49E-05 | 0.002108 | 0.96376  | 0.181069 | 8.32E-05 |
| 0.00887  | -0.05275 | 0.25529  | 0.131298 | 0.00448  |
| 0.72402  | -0.13717 | 0.00297  | 0.242308 | 1.15E-07 |
| 0.00046  | -0.05779 | 0.21259  | 0.124258 | 0.00718  |
| 0.25351  | -0.11456 | 0.01325  | 0.041906 | 0.36623  |
| 0.48083  | -0.10604 | 0.02191  | 0.089965 | 0.05203  |
| 0.76057  | -0.03657 | 0.43043  | 0.001591 | 0.97264  |
| 0.86901  | -0.08858 | 0.05575  | 0.059414 | 0.19997  |
| 0.83682  | -0.09129 | 0.04864  | 0.124308 | 0.00715  |
| 0.9674   | -0.08895 | 0.05474  | -0.13476 | 0.00353  |
| 0.23909  | -0.06781 | 0.14342  | 0.097299 | 0.03555  |
| 0.1638   | -0.01212 | 0.79388  | 0.108302 | 0.01923  |
| 0.74902  | -0.23333 | 3.41E-07 | 0.046938 | 0.31145  |
| 2.60E-06 | 0.026012 | 0.57499  | 0.126155 | 0.00634  |
| 0.16826  | -0.09668 | 0.03674  | 0.139389 | 0.00254  |
| 0.08743  | -0.17702 | 0.00012  | 0.125131 | 0.00678  |
| 0.39477  | -0.19585 | 2.02E-05 | 0.154834 | 0.00079  |
| 0.01204  | 0.063378 | 0.17152  | 0.26015  | 1.16E-08 |
| 0.1169   | -0.15174 | 0.001    | 0.209286 | 5.09E-06 |
| 0.53282  | -0.12513 | 0.00678  | 0.109745 | 0.01767  |
| 0.9996   | -0.13037 | 0.00478  | 0.126825 | 0.00606  |
| 0.12208  | -0.1477  | 0.00137  | 0.066151 | 0.1535   |
| 0.54288  | -0.09234 | 0.04611  | 0.192858 | 2.72E-05 |
| 0.05435  | -0.17355 | 0.00016  | 0.238186 | 1.90E-07 |
| 0.05611  | -0.02087 | 0.65275  | 0.008951 | 0.84703  |
| 0.48484  | -0.00314 | 0.94605  | 0.051941 | 0.26263  |

|          |          |          |          |          |
|----------|----------|----------|----------|----------|
| 0.09187  | -0.17945 | 9.65E-05 | 0.056502 | 0.22295  |
| 0.5671   | -0.10053 | 0.02985  | 0.177716 | 0.00011  |
| 0.77233  | -0.06751 | 0.14523  | 0.109054 | 0.0184   |
| 0.9313   | -0.1391  | 0.00259  | 0.071327 | 0.12375  |
| 0.2417   | -0.11654 | 0.01173  | -0.05621 | 0.22536  |
| 7.33E-05 | -0.00631 | 0.89181  | 0.223016 | 1.13E-06 |
| 0.13002  | -0.15014 | 0.00114  | 0.238313 | 1.87E-07 |
| 0.54613  | -0.09744 | 0.03528  | 0.055714 | 0.22948  |
| 0.8796   | -0.16705 | 0.00029  | 0.240442 | 1.45E-07 |
| 0.81326  | -0.18459 | 6.00E-05 | 0.056813 | 0.22041  |
| 0.00579  | -0.03139 | 0.49867  | 0.015194 | 0.7433   |
| 0.00298  | 0.105245 | 0.02293  | 0.028369 | 0.54084  |
| 6.82E-09 | -0.03284 | 0.47895  | 0.396729 | 4.70E-19 |
| 0.04566  | -0.13382 | 0.00377  | 0.117128 | 0.01131  |
| 0.51469  | -0.10182 | 0.02779  | 0.052131 | 0.26088  |
| 0.45338  | -0.14655 | 0.0015   | 0.071936 | 0.12057  |
| 0.26916  | 0.003141 | 0.94604  | 0.166858 | 0.00029  |
| 0.7782   | -0.16722 | 0.00028  | 0.343895 | 2.07E-14 |
| 0.39775  | -0.13608 | 0.00321  | 0.262533 | 8.44E-09 |
| 0.7115   | -0.22127 | 1.37E-06 | 0.09672  | 0.03667  |
| 0.78676  | -0.10029 | 0.03024  | -0.08063 | 0.08175  |
| 0.57624  | -0.14025 | 0.00238  | 0.053365 | 0.24975  |
| 0.00137  | -0.09648 | 0.03714  | 0.251465 | 3.62E-08 |
| 0.86277  | -0.13019 | 0.00483  | 0.056445 | 0.22342  |
| 0.80723  | -0.146   | 0.00156  | 0.284318 | 3.92E-10 |
| 0.54463  | -0.14163 | 0.00216  | 0.179601 | 9.52E-05 |
| 0.17757  | -0.06808 | 0.14184  | 0.094033 | 0.04224  |
| 0.42393  | -0.12657 | 0.00616  | 0.049765 | 0.28318  |
| 0.66453  | -0.12243 | 0.00808  | 0.187181 | 4.70E-05 |
| 0.27978  | -0.07624 | 0.09986  | 0.167324 | 0.00028  |
| 0.02235  | -0.0426  | 0.35839  | 0.109691 | 0.01773  |
| 0.27275  | -0.12285 | 0.00787  | 0.09626  | 0.03758  |
| 0.54124  | -0.04106 | 0.37596  | 0.026438 | 0.56875  |
| 0.65866  | -0.14282 | 0.00198  | 0.047042 | 0.31038  |
| 0.50185  | -0.1238  | 0.0074   | 0.094878 | 0.04042  |
| 0.50915  | -0.15644 | 0.00069  | 0.06553  | 0.15741  |
| 0.38939  | -0.18821 | 4.26E-05 | 0.110308 | 0.01709  |
| 0.21875  | -0.14322 | 0.00192  | 0.097279 | 0.03559  |
| 0.56578  | -0.20092 | 1.21E-05 | 0.295174 | 7.66E-11 |
| 0.00053  | -0.03196 | 0.49079  | 0.31135  | 5.90E-12 |
| 0.69691  | -0.14919 | 0.00122  | 0.159923 | 0.00052  |
| 0.86506  | -0.1264  | 0.00624  | 0.17105  | 0.0002   |
| 4.47E-08 | 0.048802 | 0.29261  | 0.011048 | 0.81179  |
| 0.37952  | -0.14585 | 0.00158  | 0.207811 | 5.95E-06 |
| 0.0721   | -0.15043 | 0.00111  | 0.130998 | 0.00458  |



|          |          |          |          |          |
|----------|----------|----------|----------|----------|
| 7.22E-06 | 0.117897 | 0.01078  | -0.0048  | 0.91766  |
| 0.0011   | -0.05925 | 0.20119  | 0.143011 | 0.00195  |
| 0.39375  | -0.09309 | 0.04436  | 0.134687 | 0.00354  |
| 0.68094  | -0.0156  | 0.73669  | 0.214309 | 2.96E-06 |
| 0.43599  | -0.04853 | 0.29529  | 0.173071 | 0.00017  |
| 0.99145  | -0.11677 | 0.01156  | 0.165759 | 0.00032  |
| 0.16776  | -0.11843 | 0.01042  | 0.074659 | 0.10711  |
| 0.25398  | -0.07718 | 0.09574  | 0.081603 | 0.07812  |
| 0.45949  | -0.14031 | 0.00237  | 0.084859 | 0.06692  |
| 0.00822  | 0.088065 | 0.05721  | -0.13142 | 0.00444  |
| 0.35909  | -0.16379 | 0.00038  | 0.086271 | 0.06249  |
| 0.44387  | -0.06114 | 0.18719  | 0.039361 | 0.39607  |
| 0.06279  | -0.14581 | 0.00158  | 0.293444 | 9.98E-11 |
| 6.01E-13 | 0.128791 | 0.00531  | 0.326878 | 4.33E-13 |
| 0.00423  | 0.105698 | 0.02235  | -0.0705  | 0.12815  |
| 0.68103  | -0.1256  | 0.00657  | 0.022524 | 0.62733  |
| 0.94315  | -0.1029  | 0.02617  | 0.018785 | 0.68556  |
| 0.29228  | -0.14096 | 0.00226  | 0.082641 | 0.0744   |
| 0.06638  | -0.09454 | 0.04113  | 0.439174 | 1.93E-23 |
| 5.32E-06 | 0.10418  | 0.02436  | 0.036365 | 0.43304  |
| 0.05232  | -0.22158 | 1.33E-06 | -0.09763 | 0.03493  |
| 0.77598  | -0.14901 | 0.00124  | 0.134059 | 0.0037   |
| 0.97553  | -0.13055 | 0.00472  | 0.125176 | 0.00676  |
| 0.18999  | -0.18684 | 4.85E-05 | 0.359225 | 1.14E-15 |
| 0.93122  | -0.04025 | 0.38551  | -0.08082 | 0.08105  |
| 0.17907  | -0.10993 | 0.01748  | 0.073268 | 0.11383  |
| 0.75442  | -0.08489 | 0.06681  | 0.18744  | 4.58E-05 |
| 0.00066  | -0.04467 | 0.33539  | 0.155057 | 0.00077  |
| 0.49834  | -0.10511 | 0.02311  | 0.201727 | 1.12E-05 |
| 0.05749  | -0.08171 | 0.07773  | 0.162869 | 0.00041  |
| 0.00044  | 0.009087 | 0.84473  | 0.187617 | 4.51E-05 |
| 0.15105  | -0.02918 | 0.52938  | 0.233376 | 3.39E-07 |
| 0.84579  | -0.15681 | 0.00067  | 0.221924 | 1.28E-06 |
| 3.21E-05 | -0.0221  | 0.63381  | 0.253382 | 2.83E-08 |
| 0.1464   | -0.11186 | 0.01559  | 0.062231 | 0.17943  |
| 0.43838  | -0.03235 | 0.48558  | 0.035745 | 0.44093  |
| 0.14308  | -0.07037 | 0.12889  | 0.071552 | 0.12257  |
| 0.37996  | -0.07179 | 0.12135  | 0.106308 | 0.02158  |
| 0.01075  | -0.10482 | 0.0235   | 0.171516 | 0.0002   |
| 0.22228  | -0.13359 | 0.00383  | 0.111414 | 0.01601  |
| 0.02893  | -0.08913 | 0.05426  | 0.218247 | 1.92E-06 |
| 0.04981  | -0.08265 | 0.07436  | 0.321715 | 1.05E-12 |
| 0.8455   | -0.14516 | 0.00166  | 0.249591 | 4.60E-08 |
| 3.25E-05 | 0.019124 | 0.68019  | 0.120864 | 0.00894  |
| 0.13353  | -0.10085 | 0.02932  | 0.17267  | 0.00018  |

|          |          |          |          |          |
|----------|----------|----------|----------|----------|
| 0.00011  | -0.03685 | 0.42694  | 0.169965 | 0.00022  |
| 0.10651  | -0.05556 | 0.23075  | 0.13315  | 0.00395  |
| 0.16421  | -0.12712 | 0.00594  | 0.077931 | 0.09254  |
| 0.01124  | -0.05937 | 0.20032  | 0.144228 | 0.00178  |
| 0.06438  | -0.17654 | 0.00013  | 0.186894 | 4.83E-05 |
| 0.49832  | -0.04467 | 0.3354   | -0.00809 | 0.8615   |
| 0.15546  | -0.1024  | 0.02692  | 0.112424 | 0.01507  |
| 0.42721  | -0.18319 | 6.83E-05 | 0.060318 | 0.1932   |
| 0.00016  | -0.02492 | 0.59119  | 0.113501 | 0.01412  |
| 0.42624  | -0.03098 | 0.50424  | 0.291696 | 1.30E-10 |
| 0.0408   | -0.06083 | 0.18945  | 0.21538  | 2.64E-06 |
| 3.04E-06 | -0.00708 | 0.87876  | 0.219553 | 1.66E-06 |
| 0.51909  | -0.18381 | 6.45E-05 | -0.04415 | 0.34107  |
| 0.19262  | -0.05662 | 0.22195  | 0.336945 | 7.33E-14 |
| 0.00891  | -0.08761 | 0.0585   | 0.163245 | 0.0004   |
| 0.17522  | -0.09768 | 0.03483  | 0.342482 | 2.68E-14 |
| 0.01674  | -0.14415 | 0.00179  | 0.281739 | 5.71E-10 |
| 5.13E-10 | 0.010047 | 0.82856  | 0.342285 | 2.78E-14 |
| 0.68902  | -0.17032 | 0.00022  | 0.109789 | 0.01763  |
| 0.25358  | -0.10264 | 0.02656  | 0.224505 | 9.52E-07 |
| 0.23118  | -0.1421  | 0.00208  | 0.105884 | 0.02211  |
| 0.01571  | -0.02268 | 0.62497  | -0.09395 | 0.04243  |
| 0.20768  | -0.12792 | 0.00563  | 0.107854 | 0.01974  |
| 0.00432  | -0.08601 | 0.06329  | 0.236985 | 2.20E-07 |
| 0.03715  | -0.12133 | 0.00867  | 0.081399 | 0.07888  |
| 0.00889  | -0.13636 | 0.00315  | 0.224232 | 9.82E-07 |
| 0.43726  | -0.15034 | 0.00112  | 0.211398 | 4.06E-06 |
| 0.32014  | -0.10991 | 0.0175   | -0.00589 | 0.89901  |
| 5.61E-07 | -0.07379 | 0.11128  | 0.428989 | 2.49E-22 |
| 0.98521  | -0.16428 | 0.00036  | 0.17814  | 0.00011  |
| 0.82123  | -0.15799 | 0.00061  | 0.108408 | 0.01911  |
| 0.34596  | -0.0802  | 0.0834   | 0.226514 | 7.56E-07 |
| 0.00518  | -0.06813 | 0.14156  | 0.191063 | 3.24E-05 |
| 0.4395   | -0.12794 | 0.00563  | 0.221782 | 1.30E-06 |
| 0.00915  | -0.12418 | 0.00721  | 0.182119 | 7.55E-05 |
| 0.04709  | -0.14883 | 0.00126  | 0.208454 | 5.56E-06 |
| 0.75662  | -0.10626 | 0.02164  | 0.039102 | 0.39919  |
| 0.84988  | -0.07562 | 0.10266  | 0.059865 | 0.19657  |
| 0.18686  | -0.1127  | 0.01483  | 0.159456 | 0.00054  |
| 0.01487  | 0.00561  | 0.90377  | 0.12347  | 0.00756  |
| 0.87291  | -0.16966 | 0.00023  | 0.097579 | 0.03502  |
| 0.05499  | -0.14862 | 0.00128  | 0.106706 | 0.02109  |
| 0.17111  | -0.11711 | 0.01132  | 0.134089 | 0.0037   |
| 0.78292  | -0.17406 | 0.00016  | 0.232408 | 3.80E-07 |
| 2.77E-05 | -0.07209 | 0.11978  | 0.543574 | 2.93E-37 |

|          |          |          |           |          |
|----------|----------|----------|-----------|----------|
| 0.01206  | -0.10103 | 0.02903  | 0.321742  | 1.04E-12 |
| 0.06368  | -0.0659  | 0.15506  | 0.200964  | 1.21E-05 |
| 0.12849  | -0.09735 | 0.03546  | 0.090679  | 0.05019  |
| 0.09657  | -0.14868 | 0.00127  | 0.121859  | 0.00838  |
| 0.49396  | -0.15128 | 0.00104  | 0.266794  | 4.73E-09 |
| 0.87178  | -0.14577 | 0.00158  | 0.08821   | 0.0568   |
| 0.00268  | 0.011337 | 0.80696  | 0.162898  | 0.00041  |
| 0.07853  | -0.04693 | 0.3115   | 0.168801  | 0.00025  |
| 0.91739  | -0.21044 | 4.50E-06 | 0.257026  | 1.76E-08 |
| 0.27385  | -0.15131 | 0.00104  | 0.0907    | 0.05013  |
| 0.03322  | -0.08907 | 0.05443  | 0.03697   | 0.42542  |
| 0.00572  | -0.09503 | 0.0401   | 0.412246  | 1.38E-20 |
| 0.93932  | -0.16363 | 0.00038  | 0.187803  | 4.43E-05 |
| 0.06993  | -0.21219 | 3.73E-06 | 0.120669  | 0.00905  |
| 0.03683  | -0.06819 | 0.14122  | 0.281364  | 6.04E-10 |
| 0.84729  | -0.18811 | 4.30E-05 | 0.18982   | 3.65E-05 |
| 0.04543  | 0.034675 | 0.45473  | -8.85E-05 | 0.99848  |
| 0.85178  | -0.17254 | 0.00018  | 0.205416  | 7.64E-06 |
| 0.16764  | -0.24101 | 1.35E-07 | 0.187371  | 4.61E-05 |
| 0.35208  | -0.06408 | 0.16685  | 0.055635  | 0.23014  |
| 0.8654   | -0.1204  | 0.0092   | 0.093223  | 0.04406  |
| 0.51998  | -0.12848 | 0.00543  | 0.165682  | 0.00032  |
| 0.91606  | -0.00892 | 0.8476   | -0.17149  | 0.0002   |
| 0.57551  | -0.14984 | 0.00116  | 0.05492   | 0.23619  |
| 0.34057  | 0.012896 | 0.78105  | 0.143319  | 0.0019   |
| 0.10326  | -0.10839 | 0.01914  | 0.383571  | 8.12E-18 |
| 0.74725  | -0.16049 | 0.0005   | 0.136314  | 0.00316  |
| 0.00585  | -0.04788 | 0.30181  | 0.145836  | 0.00158  |
| 6.12E-05 | 0.120665 | 0.00905  | -0.34749  | 1.06E-14 |
| 0.12567  | -0.12981 | 0.00496  | 0.14154   | 0.00217  |
| 0.00946  | -0.01129 | 0.8077   | 0.197107  | 1.78E-05 |
| 0.44619  | 0.037882 | 0.41408  | 0.086281  | 0.06246  |
| 0.6682   | -0.10027 | 0.03027  | 0.046128  | 0.31988  |
| 0.30531  | -0.10817 | 0.01938  | 0.216799  | 2.26E-06 |
| 0.0824   | 0.050337 | 0.27768  | 0.010146  | 0.82691  |
| 0.87438  | -0.06862 | 0.13872  | 0.053696  | 0.24682  |
| 0.45641  | -0.11561 | 0.01242  | 0.332276  | 1.68E-13 |
| 0.14275  | -0.22013 | 1.56E-06 | 0.220231  | 1.54E-06 |
| 0.83219  | -0.04206 | 0.36446  | 0.1792    | 9.87E-05 |
| 0.13221  | -0.08921 | 0.05403  | -0.04807  | 0.29994  |
| 0.73655  | -0.14078 | 0.00229  | 0.111765  | 0.01568  |
| 0.37675  | -0.0927  | 0.04526  | 0.142168  | 0.00207  |
| 0.5689   | -0.10384 | 0.02483  | 0.151381  | 0.00103  |
| 0.97753  | -0.12563 | 0.00656  | 0.203102  | 9.71E-06 |
| 0.89671  | -0.08442 | 0.06833  | 0.143156  | 0.00193  |

|         |          |          |          |          |
|---------|----------|----------|----------|----------|
| 0.30712 | -0.13602 | 0.00323  | 0.148604 | 0.00128  |
| 0.27687 | -0.08425 | 0.06891  | 0.081453 | 0.07868  |
| 0.00809 | -0.02102 | 0.65044  | 0.234265 | 3.05E-07 |
| 0.00013 | -0.01411 | 0.76102  | 0.161563 | 0.00046  |
| 0.02727 | 0.006825 | 0.88305  | 0.038618 | 0.40506  |
| 0.05767 | -0.1331  | 0.00396  | -0.00559 | 0.90407  |
| 0.0589  | -0.12157 | 0.00854  | 0.139364 | 0.00254  |
| 0.10885 | -0.12683 | 0.00606  | 0.20283  | 9.99E-06 |
| 0.12063 | 0.038009 | 0.41252  | -0.00583 | 0.90003  |
| 0.04909 | -0.11894 | 0.01009  | 0.06924  | 0.13515  |
| 0.41796 | -0.10928 | 0.01817  | 0.330141 | 2.45E-13 |
| 0.08034 | -0.06335 | 0.1717   | 0.306498 | 1.29E-11 |
| 0.04106 | -0.11136 | 0.01606  | 0.226114 | 7.92E-07 |
| 0.1143  | -0.15395 | 0.00084  | 0.121999 | 0.00831  |
| 0.15651 | -0.07699 | 0.09654  | 0.06173  | 0.18296  |
| 0.48936 | -0.14472 | 0.00172  | 0.082424 | 0.07517  |
| 0.00035 | -0.02002 | 0.66612  | 0.086352 | 0.06224  |
| 0.27692 | 0.176404 | 0.00013  | -0.00582 | 0.90022  |
| 0.00169 | -0.20885 | 5.32E-06 | -0.1328  | 0.00404  |
| 0.648   | -0.1124  | 0.01509  | 0.225209 | 8.78E-07 |
| 0.04187 | -0.10034 | 0.03015  | 0.15118  | 0.00105  |
| 0.47858 | -0.10266 | 0.02653  | 0.027375 | 0.55512  |
| 0.11462 | -0.0982  | 0.03387  | 0.31056  | 6.71E-12 |
| 0.76866 | -0.07234 | 0.11847  | 0.26087  | 1.05E-08 |
| 0.45664 | -0.12111 | 0.0088   | 0.081361 | 0.07902  |
| 0.44649 | 0.010213 | 0.82578  | -0.14797 | 0.00134  |
| 0.1524  | -0.14658 | 0.00149  | 0.069189 | 0.13545  |
| 0.47935 | -0.15792 | 0.00061  | 0.133753 | 0.00378  |
| 0.00081 | -0.02217 | 0.63279  | 0.201242 | 1.18E-05 |
| 0.42152 | -0.05898 | 0.20331  | 0.188193 | 4.27E-05 |
| 0.66873 | -0.14394 | 0.00182  | 0.139293 | 0.00255  |
| 0.02997 | -0.01768 | 0.70311  | 0.170518 | 0.00021  |
| 0.03618 | -0.07746 | 0.09454  | 0.097222 | 0.0357   |
| 0.0406  | -0.08532 | 0.06543  | 0.104805 | 0.02351  |
| 0.67285 | -0.09746 | 0.03524  | 0.128278 | 0.0055   |
| 0.35787 | -0.15185 | 0.001    | 0.119498 | 0.00975  |
| 0.36207 | -0.09604 | 0.03802  | 0.083581 | 0.07115  |
| 0.33281 | -0.08462 | 0.0677   | 0.099275 | 0.03196  |
| 0.02962 | -0.09309 | 0.04436  | 0.06867  | 0.13841  |
| 0.35284 | -0.00419 | 0.92802  | 0.195273 | 2.14E-05 |
| 0.50394 | -0.0683  | 0.14054  | 0.111191 | 0.01622  |
| 0.79831 | -0.12405 | 0.00727  | 0.186426 | 5.05E-05 |
| 0.42922 | -0.11718 | 0.01127  | 0.170156 | 0.00022  |
| 0.47605 | -0.0882  | 0.05684  | 0.186281 | 5.12E-05 |
| 0.70402 | -0.13852 | 0.0027   | 0.105524 | 0.02257  |

|         |          |          |          |          |
|---------|----------|----------|----------|----------|
| 0.37732 | -0.09768 | 0.03483  | 0.122852 | 0.00786  |
| 0.31243 | -0.02772 | 0.55011  | 0.126703 | 0.00611  |
| 0.59626 | -0.04726 | 0.30814  | 0.010016 | 0.82909  |
| 0.91389 | -0.08176 | 0.07755  | -0.02378 | 0.6083   |
| 0.51597 | -0.07534 | 0.10396  | 0.102581 | 0.02664  |
| 0.7592  | -0.10004 | 0.03066  | 0.129378 | 0.00511  |
| 0.00169 | 0.003067 | 0.9473   | 0.164497 | 0.00036  |
| 0.13509 | -0.10406 | 0.02452  | 0.114738 | 0.0131   |
| 0.26355 | -0.06129 | 0.18613  | 0.173198 | 0.00017  |
| 0.93263 | -0.12209 | 0.00826  | 0.160088 | 0.00052  |
| 0.41874 | -0.10564 | 0.02242  | 0.139789 | 0.00246  |
| 0.25362 | -0.09755 | 0.03508  | 0.124509 | 0.00706  |
| 0.35762 | -0.0466  | 0.315    | 0.189661 | 3.71E-05 |
| 0.72067 | -0.0818  | 0.07741  | 0.152346 | 0.00096  |
| 0.14338 | -0.10239 | 0.02693  | 0.128817 | 0.0053   |
| 0.29814 | -0.10248 | 0.02679  | 0.145965 | 0.00156  |
| 0.25204 | -0.10873 | 0.01876  | 0.125838 | 0.00647  |
| 0.07192 | -0.0972  | 0.03575  | 0.146922 | 0.00145  |
| 0.44605 | -0.06065 | 0.19077  | 0.071801 | 0.12127  |
| 0.09889 | -0.08398 | 0.06982  | 0.113037 | 0.01452  |
| 0.16765 | -0.06851 | 0.13933  | 0.001739 | 0.9701   |
| 0.13532 | -0.08745 | 0.05898  | 0.112075 | 0.01539  |
| 0.01687 | 0.072821 | 0.11606  | 0.125299 | 0.0067   |
| 0.10657 | -0.06997 | 0.13107  | 0.104892 | 0.0234   |
| 0.10603 | -0.07753 | 0.09423  | 0.213843 | 3.12E-06 |
| 0.09476 | -0.07617 | 0.10018  | 0.102069 | 0.02741  |
| 0.28326 | -0.11113 | 0.01628  | 0.144427 | 0.00175  |
| 0.62497 | -0.08776 | 0.05808  | 0.043428 | 0.34906  |
| 0.47393 | -0.07372 | 0.1116   | 0.208632 | 5.45E-06 |
| 0.34755 | -0.15016 | 0.00113  | 0.156656 | 0.00068  |
| 0.71033 | -0.15002 | 0.00115  | 0.056359 | 0.22412  |
| 0.48866 | -0.04347 | 0.34856  | 0.007406 | 0.87318  |
| 0.01997 | -0.07185 | 0.121    | 0.306891 | 1.21E-11 |
| 0.57292 | -0.06616 | 0.15346  | 0.153644 | 0.00086  |
| 0.01381 | -0.08271 | 0.07417  | 0.120646 | 0.00906  |
| 0.99275 | -0.18047 | 8.79E-05 | 0.131931 | 0.00429  |
| 0.33902 | -0.11223 | 0.01525  | 0.111873 | 0.01558  |
| 0.27199 | -0.1147  | 0.01313  | 0.145713 | 0.00159  |
| 0.08246 | -0.10891 | 0.01856  | 0.225928 | 8.09E-07 |
| 0.47247 | -0.10646 | 0.0214   | 0.203151 | 9.66E-06 |
| 0.37099 | -0.12065 | 0.00906  | 0.1687   | 0.00025  |
| 0.20922 | -0.12329 | 0.00764  | 0.026517 | 0.5676   |
| 0.30496 | -0.24744 | 6.05E-08 | 0.200693 | 1.24E-05 |
| 0.21325 | -0.0843  | 0.06873  | 0.168524 | 0.00025  |
| 0.6141  | -0.09926 | 0.03199  | 0.145078 | 0.00167  |

|         |          |          |          |          |
|---------|----------|----------|----------|----------|
| 0.85954 | -0.10683 | 0.02094  | 0.233452 | 3.36E-07 |
| 0.14069 | -0.12698 | 0.006    | 0.134687 | 0.00354  |
| 0.40312 | -0.09631 | 0.03748  | 0.059413 | 0.19998  |
| 0.29793 | -0.13742 | 0.00292  | 0.131463 | 0.00443  |
| 0.96336 | -0.15125 | 0.00104  | 0.15608  | 0.00071  |
| 0.29275 | -0.14089 | 0.00228  | 0.111218 | 0.0162   |
| 0.32987 | -0.19964 | 1.38E-05 | 0.183756 | 6.49E-05 |
| 0.94439 | -0.13793 | 0.00282  | 0.123686 | 0.00745  |
| 0.06194 | 0.178673 | 0.0001   | 0.072528 | 0.11754  |
| 0.09119 | -0.07985 | 0.08474  | -0.0825  | 0.07491  |
| 0.25225 | -0.14562 | 0.0016   | 0.092714 | 0.04523  |
| 0.00033 | -0.14652 | 0.0015   | 0.111925 | 0.01553  |
| 0.11858 | -0.12962 | 0.00502  | 0.144779 | 0.00171  |
| 0.10578 | -0.05659 | 0.22223  | 0.131294 | 0.00448  |
| 0.41619 | -0.14412 | 0.00179  | 0.123323 | 0.00763  |
| 0.00131 | -0.07286 | 0.11588  | 0.274739 | 1.56E-09 |
| 0.61681 | -0.15461 | 0.0008   | 0.16393  | 0.00037  |
| 0.47542 | -0.12804 | 0.00559  | 0.088075 | 0.05718  |
| 0.7939  | -0.06462 | 0.1633   | 0.083145 | 0.07264  |
| 0.34406 | -0.0901  | 0.05168  | 0.092066 | 0.04676  |
| 0.28436 | -0.1188  | 0.01019  | 0.078118 | 0.09176  |
| 0.00145 | -0.08715 | 0.05986  | 0.415615 | 6.27E-21 |
| 0.13001 | -0.14716 | 0.00143  | 0.09717  | 0.0358   |
| 0.61241 | -0.14433 | 0.00177  | 0.107862 | 0.01973  |
| 0.76341 | -0.06472 | 0.16264  | 0.073347 | 0.11344  |
| 0.27988 | -0.11877 | 0.0102   | 0.241539 | 1.26E-07 |
| 0.6636  | -0.06787 | 0.14308  | 0.049786 | 0.28297  |
| 0.11908 | -0.1654  | 0.00033  | 0.154476 | 0.00081  |
| 0.35985 | 0.07951  | 0.0861   | 0.044896 | 0.333    |
| 0.44598 | -0.14672 | 0.00148  | 0.232416 | 3.80E-07 |
| 0.44124 | -0.19678 | 1.84E-05 | 0.07088  | 0.12613  |
| 0.05375 | -0.07152 | 0.12275  | 0.133644 | 0.00381  |
| 0.57225 | 0.011266 | 0.80814  | -0.01866 | 0.68754  |
| 0.46833 | -0.07952 | 0.08605  | 0.0693   | 0.13482  |
| 0.15664 | -0.16658 | 0.0003   | 0.136034 | 0.00322  |
| 0.02131 | -0.01388 | 0.76489  | 0.179512 | 9.59E-05 |
| 0.99325 | -0.19228 | 2.87E-05 | 0.116743 | 0.01158  |
| 0.37945 | -0.13739 | 0.00293  | 0.365523 | 3.30E-16 |
| 0.04743 | -0.08278 | 0.07391  | 0.412828 | 1.21E-20 |
| 0.5247  | -0.14488 | 0.00169  | 0.12806  | 0.00558  |
| 0.91165 | -0.08749 | 0.05886  | 0.181621 | 7.91E-05 |
| 0.64604 | -0.08108 | 0.08006  | 0.200739 | 1.24E-05 |
| 0.68614 | -0.09165 | 0.04776  | 0.191164 | 3.20E-05 |
| 0.84198 | -0.14114 | 0.00223  | 0.16878  | 0.00025  |
| 0.70056 | -0.09055 | 0.05053  | 0.215603 | 2.57E-06 |

|          |          |          |          |          |
|----------|----------|----------|----------|----------|
| 0.49189  | -0.07889 | 0.08857  | 0.146395 | 0.00151  |
| 0.00574  | -0.09799 | 0.03425  | 0.203714 | 9.12E-06 |
| 0.38587  | -0.01129 | 0.8077   | -0.15233 | 0.00096  |
| 0.03779  | -0.07933 | 0.0868   | 0.134471 | 0.0036   |
| 0.04348  | -0.04225 | 0.3623   | 0.182922 | 7.01E-05 |
| 0.30057  | 0.103292 | 0.02561  | -0.31584 | 2.81E-12 |
| 1.23E-09 | 0.065086 | 0.16024  | 0.213772 | 3.14E-06 |
| 0.01287  | -0.12176 | 0.00844  | 0.446816 | 2.68E-24 |
| 0.07631  | -0.14347 | 0.00188  | 0.16176  | 0.00045  |
| 0.05658  | -0.07107 | 0.1251   | 0.210391 | 4.52E-06 |
| 0.09874  | -0.13868 | 0.00267  | 0.217646 | 2.06E-06 |
| 0.79719  | -0.18836 | 4.20E-05 | -0.13019 | 0.00483  |
| 0.00045  | -0.14404 | 0.0018   | 0.183298 | 6.77E-05 |
| 0.60151  | -0.17326 | 0.00017  | 0.096996 | 0.03613  |
| 0.99309  | -0.12759 | 0.00576  | 0.118683 | 0.01026  |
| 0.79886  | -0.14807 | 0.00133  | 0.126762 | 0.00609  |
| 0.01826  | -0.06719 | 0.14712  | 0.232546 | 3.74E-07 |
| 0.66943  | -0.12639 | 0.00624  | 0.153356 | 0.00088  |
| 0.00044  | 0.201862 | 1.10E-05 | -0.00718 | 0.8771   |
| 0.16484  | -0.05464 | 0.23861  | 0.07696  | 0.09669  |
| 0.0656   | -0.06427 | 0.16554  | 0.054932 | 0.23609  |
| 0.02255  | -0.01896 | 0.68285  | 0.134298 | 0.00364  |
| 0.00071  | -0.12677 | 0.00608  | 0.278673 | 8.91E-10 |
| 0.4561   | -0.20093 | 1.21E-05 | 0.068253 | 0.14083  |
| 0.03943  | 0.011681 | 0.80123  | 0.181534 | 7.97E-05 |
| 0.30734  | 0.114587 | 0.01322  | -0.011   | 0.81266  |
| 0.56551  | -0.16069 | 0.00049  | 0.089943 | 0.05209  |
| 0.21319  | -0.1205  | 0.00915  | -0.02248 | 0.62804  |
| 0.08473  | -0.00384 | 0.934    | -0.05431 | 0.24145  |
| 0.17384  | 0.076861 | 0.09712  | -0.01227 | 0.79145  |
| 0.03688  | -0.09043 | 0.05082  | 0.212833 | 3.48E-06 |
| 0.79302  | 0.208694 | 5.42E-06 | -0.18016 | 9.04E-05 |
| 7.88E-05 | -0.12668 | 0.00612  | 0.163744 | 0.00038  |
| 0.25005  | -0.16121 | 0.00047  | 0.181877 | 7.72E-05 |
| 0.58187  | -0.07176 | 0.12147  | -0.05952 | 0.19919  |
| 0.4176   | -0.05308 | 0.25232  | -0.04232 | 0.36145  |
| 0.31578  | -0.13691 | 0.00303  | 0.092376 | 0.04602  |
| 0.77075  | -0.10306 | 0.02593  | 0.026777 | 0.5638   |
| 0.10925  | -0.14764 | 0.00138  | 0.184862 | 5.85E-05 |
| 0.00497  | -0.08953 | 0.05319  | 0.29207  | 1.23E-10 |
| 0.06341  | -0.01039 | 0.82276  | 0.035447 | 0.44474  |
| 0.65206  | -0.20989 | 4.77E-06 | 0.131917 | 0.0043   |
| 0.95557  | -0.14722 | 0.00142  | 0.057202 | 0.21726  |
| 0.08017  | -0.10236 | 0.02697  | -0.00204 | 0.96493  |
| 0.16317  | -0.18309 | 6.90E-05 | 0.098365 | 0.03358  |

|          |          |         |          |          |
|----------|----------|---------|----------|----------|
| 0.12692  | -0.14246 | 0.00203 | 0.058034 | 0.21064  |
| 0.22694  | -0.0151  | 0.74482 | -0.00468 | 0.91969  |
| 0.83112  | -0.15172 | 0.00101 | 0.172057 | 0.00019  |
| 0.46613  | -0.17027 | 0.00022 | 0.095149 | 0.03985  |
| 0.26625  | -0.14189 | 0.00211 | 0.076074 | 0.1006   |
| 0.08675  | -0.15942 | 0.00054 | 0.020892 | 0.65248  |
| 0.777    | -0.04357 | 0.34753 | -0.05812 | 0.20996  |
| 0.7942   | -0.12388 | 0.00736 | 0.0612   | 0.18675  |
| 0.66188  | -0.14155 | 0.00217 | 0.102502 | 0.02676  |
| 0.00118  | -0.12042 | 0.00919 | 0.225    | 9.00E-07 |
| 0.80326  | -0.07687 | 0.09708 | 0.131226 | 0.0045   |
| 0.94566  | -0.08339 | 0.07181 | 0.033273 | 0.47319  |
| 0.24945  | -0.11241 | 0.01508 | 0.136763 | 0.00306  |
| 0.11487  | -0.10672 | 0.02108 | -0.00516 | 0.91144  |
| 0.34561  | -0.12869 | 0.00535 | 0.08518  | 0.06589  |
| 0.06124  | -0.11812 | 0.01063 | 0.065217 | 0.1594   |
| 6.59E-05 | -0.01426 | 0.75856 | 0.208436 | 5.57E-06 |
| 9.59E-06 | -0.08895 | 0.05474 | 0.323525 | 7.70E-13 |
| 0.36277  | -0.15016 | 0.00113 | 0.284693 | 3.71E-10 |
| 0.27402  | -0.15376 | 0.00086 | 0.188848 | 4.01E-05 |
| 0.19621  | -0.13035 | 0.00478 | 0.152731 | 0.00093  |
| 0.15072  | -0.15451 | 0.00081 | 0.102229 | 0.02717  |
| 0.61495  | -0.10856 | 0.01895 | 0.010561 | 0.81993  |
| 0.22131  | -0.1443  | 0.00177 | 0.089057 | 0.05445  |
| 0.01313  | -0.08632 | 0.06235 | 0.115849 | 0.01224  |
| 0.00059  | -0.0672  | 0.14709 | 0.226805 | 7.31E-07 |
| 0.93308  | -0.108   | 0.01957 | 0.187946 | 4.37E-05 |
| 0.34616  | -0.13099 | 0.00458 | 0.158381 | 0.00059  |
| 0.13019  | -0.11314 | 0.01443 | 0.055686 | 0.22972  |
| 0.56777  | -0.05876 | 0.20495 | -0.07567 | 0.10244  |
| 7.71E-07 | 0.059346 | 0.20048 | 0.257899 | 1.57E-08 |
| 0.77657  | -0.1313  | 0.00448 | 0.156107 | 0.00071  |
| 0.80785  | 0.040118 | 0.38705 | 0.221471 | 1.34E-06 |
| 0.03041  | -0.08193 | 0.07693 | 0.447202 | 2.42E-24 |
| 0.15752  | -0.14121 | 0.00222 | 0.302314 | 2.52E-11 |
| 0.72536  | -0.12248 | 0.00806 | 0.16307  | 0.0004   |
| 0.00031  | -0.00359 | 0.93824 | 0.481993 | 1.54E-28 |
| 0.53877  | -0.14364 | 0.00186 | 0.189055 | 3.93E-05 |
| 0.76284  | -0.14689 | 0.00146 | 0.075844 | 0.10164  |
| 0.99973  | 0.131518 | 0.00441 | -0.15672 | 0.00068  |
| 0.52203  | -0.09122 | 0.04882 | 0.086548 | 0.06165  |
| 0.62141  | -0.02131 | 0.64605 | -0.04929 | 0.28782  |
| 0.2743   | -0.12192 | 0.00835 | 0.232319 | 3.84E-07 |
| 0.06124  | -0.10105 | 0.02901 | 0.269431 | 3.29E-09 |
| 0.14001  | -0.09527 | 0.03959 | 0.206326 | 6.95E-06 |



|          |          |          |          |          |
|----------|----------|----------|----------|----------|
| 0.00567  | 0.142598 | 0.00201  | 0.174488 | 0.00015  |
| 0.43478  | -0.18707 | 4.75E-05 | 0.160454 | 0.0005   |
| 0.21945  | -0.08845 | 0.05612  | 0.187795 | 4.43E-05 |
| 0.44206  | -0.07548 | 0.1033   | 0.179021 | 0.0001   |
| 0.71992  | -0.0291  | 0.53053  | -0.16158 | 0.00046  |
| 0.0049   | -0.15692 | 0.00067  | 0.321082 | 1.17E-12 |
| 0.10246  | -0.13381 | 0.00377  | 0.228696 | 5.88E-07 |
| 0.54721  | -0.096   | 0.0381   | -0.04837 | 0.29687  |
| 0.00396  | -0.03177 | 0.49337  | 0.214511 | 2.90E-06 |
| 0.46706  | -0.2081  | 5.77E-06 | 0.048974 | 0.2909   |
| 0.32335  | -0.08305 | 0.07298  | 0.195932 | 2.01E-05 |
| 0.33959  | 0.171967 | 0.00019  | -0.24589 | 7.35E-08 |
| 0.81436  | -0.2042  | 8.67E-06 | 0.247171 | 6.26E-08 |
| 0.04508  | -0.11534 | 0.01263  | 0.223938 | 1.02E-06 |
| 0.05448  | -0.02351 | 0.61229  | 0.083644 | 0.07094  |
| 0.00018  | -0.06739 | 0.14593  | 0.353309 | 3.55E-15 |
| 0.99177  | -0.17247 | 0.00018  | 0.167377 | 0.00028  |
| 0.08951  | -0.01032 | 0.82393  | 0.122655 | 0.00797  |
| 0.26119  | -0.06477 | 0.16228  | 0.034411 | 0.45818  |
| 0.05021  | 0.066586 | 0.15081  | 0.224309 | 9.74E-07 |
| 0.18116  | -0.09324 | 0.04402  | 0.094972 | 0.04022  |
| 0.00092  | -0.05586 | 0.22825  | 0.323101 | 8.28E-13 |
| 0.27305  | -0.11093 | 0.01647  | -0.0099  | 0.83105  |
| 0.05413  | -0.03883 | 0.40247  | 0.191454 | 3.12E-05 |
| 0.01128  | -0.16243 | 0.00042  | 0.246433 | 6.87E-08 |
| 0.80061  | -0.09242 | 0.04592  | 0.180119 | 9.08E-05 |
| 0.86268  | -0.14028 | 0.00238  | 0.195611 | 2.07E-05 |
| 0.47924  | -0.16747 | 0.00028  | 0.064688 | 0.16283  |
| 4.76E-06 | 0.006986 | 0.88032  | -0.26716 | 4.49E-09 |
| 0.03813  | -0.15408 | 0.00084  | 0.195489 | 2.10E-05 |
| 0.13103  | 0.118305 | 0.01051  | 0.102333 | 0.02701  |
| 0.08088  | -0.15527 | 0.00076  | 0.242456 | 1.13E-07 |
| 0.12446  | -0.06347 | 0.17093  | 0.138993 | 0.00261  |
| 0.9045   | -0.06563 | 0.15678  | 0.023049 | 0.61931  |
| 3.77E-05 | 0.072039 | 0.12004  | 0.178637 | 0.0001   |
| 0.03818  | -0.0977  | 0.03479  | 0.142653 | 0.002    |
| 0.0441   | -0.13397 | 0.00373  | 0.130469 | 0.00474  |
| 0.00661  | -0.10389 | 0.02475  | 0.115898 | 0.0122   |
| 0.50361  | -0.08011 | 0.08374  | 0.056834 | 0.22024  |
| 0.5432   | -0.14536 | 0.00164  | 0.146606 | 0.00149  |
| 0.07488  | -0.01802 | 0.69774  | 0.11953  | 0.00973  |
| 0.08899  | -0.09829 | 0.03371  | 0.158119 | 0.0006   |
| 0.02343  | -0.10993 | 0.01748  | 0.206466 | 6.85E-06 |
| 0.34503  | -0.05396 | 0.2445   | -0.15354 | 0.00087  |
| 0.38526  | -0.11758 | 0.01099  | 0.121623 | 0.00851  |

|         |          |          |          |          |
|---------|----------|----------|----------|----------|
| 0.38752 | -0.11838 | 0.01045  | 0.156034 | 0.00072  |
| 0.33645 | -0.10851 | 0.019    | 0.107798 | 0.0198   |
| 0.00202 | -0.03752 | 0.4185   | 0.266631 | 4.83E-09 |
| 0.18417 | -0.11393 | 0.01376  | 0.128849 | 0.00529  |
| 0.52593 | 0.105706 | 0.02234  | -0.054   | 0.24412  |
| 0.12531 | -0.12346 | 0.00756  | 0.084991 | 0.0665   |
| 0.13419 | -0.16318 | 0.0004   | 0.130567 | 0.00471  |
| 0.02053 | -0.13305 | 0.00397  | 0.372324 | 8.39E-17 |
| 0.30958 | -0.14394 | 0.00182  | 0.444968 | 4.33E-24 |
| 0.47083 | -0.151   | 0.00106  | 0.087171 | 0.05979  |
| 0.5436  | -0.10611 | 0.02183  | 0.293883 | 9.33E-11 |
| 0.33541 | -0.13552 | 0.00334  | 0.273473 | 1.87E-09 |
| 0.0552  | -0.15613 | 0.00071  | 0.21     | 4.71E-06 |
| 0.03157 | 2.66E-05 | 0.99954  | 0.162862 | 0.00041  |
| 0.03444 | -0.03263 | 0.48184  | 0.207442 | 6.18E-06 |
| 0.00548 | 0.064113 | 0.1666   | -0.11327 | 0.01432  |
| 0.79292 | -0.08774 | 0.05814  | 0.153189 | 0.0009   |
| 0.09357 | -0.06644 | 0.15172  | 0.204142 | 8.72E-06 |
| 0.12034 | -0.1086  | 0.0189   | 0.150965 | 0.00107  |
| 0.23632 | -0.14871 | 0.00127  | 0.094182 | 0.04192  |
| 0.09593 | -0.16657 | 0.0003   | 0.15536  | 0.00075  |
| 0.65221 | -0.24191 | 1.21E-07 | 0.199665 | 1.38E-05 |
| 0.01199 | -0.18063 | 8.66E-05 | 0.195304 | 2.14E-05 |
| 0.28477 | -0.15222 | 0.00097  | 0.09128  | 0.04868  |
| 0.25202 | -0.15259 | 0.00094  | 0.09232  | 0.04616  |
| 0.12606 | -0.21774 | 2.04E-06 | 0.208459 | 5.55E-06 |
| 0.58624 | -0.16943 | 0.00023  | 0.189843 | 3.64E-05 |
| 0.34284 | -0.127   | 0.00599  | 0.067771 | 0.14366  |
| 0.91875 | -0.15753 | 0.00063  | 0.114272 | 0.01348  |
| 0.41438 | -0.13782 | 0.00284  | 0.090073 | 0.05175  |
| 0.30659 | -0.15386 | 0.00085  | 0.141931 | 0.00211  |
| 0.22448 | -0.15279 | 0.00092  | 0.083777 | 0.07049  |
| 0.11481 | -0.14673 | 0.00147  | 0.100638 | 0.02967  |
| 0.01867 | -0.01998 | 0.66664  | 0.104483 | 0.02394  |
| 0.61544 | -0.12974 | 0.00499  | 0.124823 | 0.00692  |
| 0.57726 | -0.13265 | 0.00408  | 0.09569  | 0.03873  |
| 0.0535  | -0.11059 | 0.01682  | 0.216468 | 2.34E-06 |
| 0.81402 | -0.02638 | 0.56952  | -0.0189  | 0.6838   |
| 0.36886 | -0.09861 | 0.03313  | 0.102964 | 0.02608  |
| 0.27544 | -0.04967 | 0.28408  | 0.140101 | 0.00241  |
| 0.37678 | -0.12505 | 0.00682  | 0.201685 | 1.12E-05 |
| 0.91439 | -0.16588 | 0.00032  | 0.153552 | 0.00087  |
| 0.52401 | -0.05465 | 0.2385   | 0.281435 | 5.97E-10 |
| 0.00657 | -0.03531 | 0.44646  | -0.00436 | 0.9252   |
| 0.26194 | -0.07645 | 0.09894  | 0.158826 | 0.00057  |

|          |          |          |          |          |
|----------|----------|----------|----------|----------|
| 0.50068  | -0.17113 | 0.0002   | 0.351934 | 4.61E-15 |
| 0.38877  | 0.074279 | 0.10892  | 0.207739 | 5.99E-06 |
| 0.28128  | -0.15476 | 0.00079  | 0.089975 | 0.052    |
| 0.00103  | 0.175007 | 0.00014  | -0.07557 | 0.10287  |
| 0.02919  | 0.145353 | 0.00164  | -0.39067 | 1.77E-18 |
| 0.09275  | -0.10831 | 0.01922  | 0.228276 | 6.17E-07 |
| 0.02996  | -0.07185 | 0.12103  | 0.311465 | 5.79E-12 |
| 0.36835  | -0.06895 | 0.13679  | 0.147718 | 0.00137  |
| 0.006    | 0.038845 | 0.4023   | 0.157962 | 0.00061  |
| 0.76267  | -0.12777 | 0.00569  | 0.064686 | 0.16284  |
| 0.19887  | -0.11871 | 0.01024  | -0.04778 | 0.30284  |
| 0.99356  | -0.10996 | 0.01745  | 0.191555 | 3.09E-05 |
| 0.06267  | -0.07821 | 0.09138  | 0.201024 | 1.20E-05 |
| 0.39269  | -0.10944 | 0.01799  | 0.162766 | 0.00041  |
| 0.81515  | -0.08889 | 0.05492  | 0.127993 | 0.00561  |
| 0.0717   | 0.079807 | 0.08493  | -0.11637 | 0.01185  |
| 0.70091  | -0.08695 | 0.06044  | 0.019535 | 0.67371  |
| 0.00145  | -0.18132 | 8.13E-05 | 0.195518 | 2.09E-05 |
| 0.22059  | -0.21034 | 4.54E-06 | 0.317739 | 2.05E-12 |
| 0.03955  | -0.05241 | 0.25836  | 0.093202 | 0.0441   |
| 0.12896  | -0.11434 | 0.01342  | 0.146823 | 0.00146  |
| 1.74E-05 | 0.130914 | 0.0046   | 0.059361 | 0.20037  |
| 0.30105  | -0.03097 | 0.5044   | 0.244692 | 8.54E-08 |
| 0.15355  | -0.143   | 0.00195  | 0.389257 | 2.41E-18 |
| 0.46292  | -0.0978  | 0.03462  | 0.130881 | 0.00461  |
| 0.14411  | -0.15487 | 0.00078  | 0.068705 | 0.13821  |
| 0.81055  | -0.14557 | 0.00161  | 0.143801 | 0.00184  |
| 0.1047   | -0.0923  | 0.0462   | 0.238052 | 1.93E-07 |
| 0.61302  | -0.00354 | 0.93918  | 0.096037 | 0.03802  |
| 0.6624   | -0.15553 | 0.00074  | 0.052095 | 0.26122  |
| 0.01729  | 0.038957 | 0.40094  | 0.163217 | 0.0004   |
| 0.55263  | -0.15199 | 0.00098  | 0.14467  | 0.00172  |
| 0.71588  | -0.02971 | 0.52189  | -0.0694  | 0.13427  |
| 0.64742  | -0.17313 | 0.00017  | 0.187103 | 4.73E-05 |
| 0.29938  | -0.12491 | 0.00688  | 0.050605 | 0.27511  |
| 0.03834  | -0.13436 | 0.00363  | 0.145209 | 0.00165  |
| 1.58E-05 | 0.030477 | 0.51118  | 0.36584  | 3.09E-16 |
| 0.35563  | -0.12678 | 0.00608  | 0.079522 | 0.08605  |
| 0.28759  | -0.07809 | 0.09186  | -0.03092 | 0.50505  |
| 0.20668  | -0.09168 | 0.0477   | 0.064523 | 0.1639   |
| 0.97219  | -0.07333 | 0.1135   | -0.00913 | 0.84396  |
| 0.00012  | -0.10995 | 0.01746  | 0.25676  | 1.82E-08 |
| 0.28506  | -0.14039 | 0.00236  | 0.085682 | 0.06431  |
| 0.00185  | -0.13159 | 0.00439  | 0.083382 | 0.07183  |
| 0.23571  | -0.10865 | 0.01885  | 0.133241 | 0.00392  |

|          |          |          |          |          |
|----------|----------|----------|----------|----------|
| 0.29627  | -0.09373 | 0.04291  | 0.163894 | 0.00038  |
| 0.00022  | -0.01831 | 0.69307  | 0.007297 | 0.87504  |
| 0.30031  | -0.06959 | 0.13317  | 0.018013 | 0.69783  |
| 0.63151  | -0.07743 | 0.09464  | 0.131059 | 0.00456  |
| 0.70549  | -0.11341 | 0.0142   | 0.145096 | 0.00167  |
| 0.30809  | -0.06793 | 0.14273  | 0.106623 | 0.02119  |
| 0.84717  | -0.11225 | 0.01523  | 0.116507 | 0.01175  |
| 0.06216  | -0.02301 | 0.61988  | 0.200624 | 1.25E-05 |
| 0.72567  | -0.11459 | 0.01321  | 0.132875 | 0.00402  |
| 0.111    | -0.16687 | 0.00029  | 0.37174  | 9.45E-17 |
| 0.27176  | -0.11588 | 0.01222  | 0.208938 | 5.28E-06 |
| 0.24413  | 0.19543  | 2.11E-05 | 0.069516 | 0.1336   |
| 0.80731  | -0.12336 | 0.00761  | 0.277327 | 1.08E-09 |
| 0.22426  | -0.22027 | 1.54E-06 | 0.092707 | 0.04525  |
| 0.73298  | -0.05706 | 0.21844  | 0.087158 | 0.05983  |
| 0.66102  | -0.13002 | 0.00489  | 0.294031 | 9.12E-11 |
| 0.3034   | -0.13111 | 0.00454  | 0.122985 | 0.0078   |
| 0.60433  | -0.10282 | 0.0263   | 0.168088 | 0.00026  |
| 8.14E-09 | -0.15443 | 0.00081  | 0.531167 | 2.34E-35 |
| 0.00338  | -0.11569 | 0.01235  | 0.407558 | 4.09E-20 |
| 0.41355  | 0.015505 | 0.73823  | 0.171179 | 0.0002   |
| 0.05906  | 0.022169 | 0.63276  | -0.01979 | 0.66965  |
| 0.5115   | 0.067312 | 0.1464   | -0.02196 | 0.63598  |
| 0.86365  | -0.09026 | 0.05127  | 0.220485 | 1.50E-06 |
| 0.76401  | -0.15238 | 0.00096  | 0.057964 | 0.21119  |
| 0.82935  | -0.10369 | 0.02504  | 0.072456 | 0.1179   |
| 0.78541  | -0.17588 | 0.00013  | 0.269085 | 3.45E-09 |
| 0.08833  | -0.04095 | 0.37723  | 0.158803 | 0.00057  |
| 0.32399  | -0.12332 | 0.00763  | 0.114403 | 0.01337  |
| 0.81698  | -0.15651 | 0.00069  | 0.192378 | 2.85E-05 |
| 8.68E-06 | -0.10481 | 0.0235   | 0.389256 | 2.41E-18 |
| 0.00145  | -0.17185 | 0.00019  | 0.170669 | 0.00021  |
| 0.77091  | -0.12281 | 0.00788  | 0.158157 | 0.0006   |
| 0.45006  | -0.12154 | 0.00856  | 0.231316 | 4.32E-07 |
| 0.13875  | -0.17972 | 9.41E-05 | 0.235021 | 2.79E-07 |
| 0.08472  | -0.21022 | 4.61E-06 | 0.199869 | 1.35E-05 |
| 0.37786  | -0.22774 | 6.57E-07 | 0.205709 | 7.41E-06 |
| 0.00951  | -0.09623 | 0.03764  | 0.420039 | 2.19E-21 |
| 0.04666  | -0.01648 | 0.72247  | -0.11623 | 0.01195  |
| 0.17949  | -0.14579 | 0.00158  | 0.353718 | 3.28E-15 |
| 0.25687  | -0.10785 | 0.01974  | 0.286672 | 2.77E-10 |
| 0.00028  | -0.13792 | 0.00282  | 0.126393 | 0.00624  |
| 0.30441  | -0.191   | 3.26E-05 | 0.066847 | 0.14921  |
| 0.0002   | -0.13283 | 0.00403  | 0.191151 | 3.21E-05 |
| 0.53041  | -0.26542 | 5.71E-09 | 0.19553  | 2.09E-05 |

|          |          |          |          |          |
|----------|----------|----------|----------|----------|
| 0.03296  | -0.15433 | 0.00082  | 0.433889 | 7.35E-23 |
| 0.38182  | -0.155   | 0.00078  | 0.344996 | 1.69E-14 |
| 0.04589  | -0.07557 | 0.10288  | 0.321915 | 1.01E-12 |
| 0.84429  | -0.13044 | 0.00475  | 0.008214 | 0.85948  |
| 0.0176   | -0.15818 | 0.0006   | 0.230999 | 4.49E-07 |
| 0.09936  | -0.01911 | 0.68042  | 0.065035 | 0.16058  |
| 4.70E-07 | 0.075953 | 0.10114  | -0.24175 | 1.23E-07 |
| 0.12729  | 0.369869 | 1.38E-16 | -0.32854 | 3.24E-13 |
| 6.98E-09 | 0.059501 | 0.19931  | -0.25705 | 1.75E-08 |
| 7.59E-09 | -0.1773  | 0.00012  | 0.217482 | 2.09E-06 |
| 0.00012  | -0.08841 | 0.05623  | 0.318906 | 1.69E-12 |
| 4.48E-09 | -0.06868 | 0.13833  | 0.430576 | 1.68E-22 |
| 0.29218  | -0.2182  | 1.93E-06 | 0.288553 | 2.09E-10 |
| 1.34E-08 | -0.09913 | 0.03222  | 0.494017 | 4.18E-30 |
| 8.98E-07 | -0.20288 | 9.93E-06 | 0.36085  | 8.28E-16 |
| 2.73E-13 | -0.10563 | 0.02243  | 0.377267 | 3.04E-17 |
| 0.00324  | 0.249879 | 4.44E-08 | -0.36623 | 2.86E-16 |
| 3.05E-12 | -0.04895 | 0.29119  | 0.413561 | 1.02E-20 |
| 2.52E-10 | -0.15461 | 0.0008   | 0.302711 | 2.36E-11 |
| 3.52E-10 | -0.1049  | 0.02338  | 0.158059 | 0.00061  |
| 1.32E-05 | -0.13161 | 0.00439  | 0.260848 | 1.06E-08 |
| 4.55E-05 | 0.068535 | 0.13919  | -0.19758 | 1.70E-05 |
| 0.00286  | -0.14751 | 0.00139  | 0.25289  | 3.01E-08 |
| 0.00017  | -0.09825 | 0.03378  | 0.329248 | 2.87E-13 |
| 1.60E-07 | -0.10919 | 0.01826  | 0.342963 | 2.46E-14 |
| 3.52E-09 | -0.13364 | 0.00381  | 0.318123 | 1.92E-12 |
| 4.64E-07 | -0.12588 | 0.00645  | 0.296898 | 5.87E-11 |
| 2.26E-26 | 0.092812 | 0.045    | 0.246287 | 6.99E-08 |
| 0.1165   | -0.17627 | 0.00013  | 0.363789 | 4.65E-16 |
| 3.53E-12 | 0.051789 | 0.26403  | 0.193279 | 2.61E-05 |
| 8.29E-32 | 0.25427  | 2.52E-08 | 0.435658 | 4.71E-23 |
| 4.01E-09 | -0.10185 | 0.02775  | 0.319675 | 1.48E-12 |
| 1.45E-10 | -0.05591 | 0.22782  | 0.340287 | 4.01E-14 |
| 0.00025  | -0.11395 | 0.01374  | 0.336768 | 7.57E-14 |
| 6.91E-34 | 0.148176 | 0.00132  | 0.478886 | 3.81E-28 |
| 1.41E-09 | -0.17377 | 0.00016  | 0.262519 | 8.45E-09 |
| 8.58E-14 | -0.13187 | 0.00431  | 0.305903 | 1.42E-11 |
| 0.00374  | -0.20727 | 6.29E-06 | 0.162187 | 0.00043  |
| 1.41E-15 | 0.112422 | 0.01507  | 0.37762  | 2.83E-17 |
| 0.0232   | -0.20256 | 1.03E-05 | 0.172581 | 0.00018  |
| 2.60E-11 | -0.13489 | 0.0035   | 0.27505  | 1.49E-09 |
| 2.11E-07 | -0.16598 | 0.00032  | 0.320769 | 1.23E-12 |
| 1.33E-10 | -0.01192 | 0.79726  | 0.169948 | 0.00022  |
| 3.39E-06 | -0.15793 | 0.00061  | 0.19182  | 3.01E-05 |
| 1.92E-07 | -0.02818 | 0.54361  | 0.416913 | 4.61E-21 |

|          |          |          |          |          |
|----------|----------|----------|----------|----------|
| 0.00663  | -0.07735 | 0.09499  | 0.346294 | 1.33E-14 |
| 1.16E-16 | -0.01955 | 0.67343  | 0.350211 | 6.39E-15 |
| 9.12E-08 | -0.14381 | 0.00183  | 0.329482 | 2.75E-13 |
| 9.21E-10 | -0.01067 | 0.81811  | 0.111134 | 0.01628  |
| 3.91E-14 | 0.129413 | 0.0051   | 0.322994 | 8.44E-13 |
| 1.97E-08 | -0.01929 | 0.67762  | 0.232994 | 3.55E-07 |
| 0.00011  | -0.02869 | 0.53629  | 0.273771 | 1.79E-09 |
| 7.18E-07 | -0.19503 | 2.19E-05 | 0.10201  | 0.0275   |
| 1.78E-08 | -0.05597 | 0.22734  | 0.371941 | 9.07E-17 |
| 3.89E-08 | 0.008875 | 0.8483   | 0.453763 | 4.25E-25 |
| 0.00096  | -0.0826  | 0.07455  | 0.425492 | 5.86E-22 |
| 1.25E-06 | -0.19298 | 2.68E-05 | 0.250251 | 4.23E-08 |
| 9.23E-06 | -0.21244 | 3.63E-06 | 0.203919 | 8.93E-06 |
| 3.53E-07 | -0.02392 | 0.60609  | 0.151632 | 0.00101  |
| 1.34E-10 | -0.12248 | 0.00805  | 0.209085 | 5.20E-06 |
| 2.06E-10 | 0.05209  | 0.26126  | -0.42147 | 1.55E-21 |
| 4.22E-10 | 0.037144 | 0.42324  | -0.22458 | 9.44E-07 |
| 0.00019  | -0.17788 | 0.00011  | 0.341442 | 3.25E-14 |
| 1.10E-18 | -0.00481 | 0.91735  | 0.260578 | 1.10E-08 |
| 2.94E-09 | 0.012058 | 0.79495  | 0.373437 | 6.68E-17 |
| 5.47E-05 | -0.19469 | 2.27E-05 | 0.378498 | 2.35E-17 |
| 2.50E-09 | -0.11568 | 0.01236  | 0.306102 | 1.38E-11 |
| 1.97E-05 | -0.23891 | 1.74E-07 | 0.178462 | 0.00011  |
| 7.90E-14 | -0.06369 | 0.16939  | 0.195693 | 2.05E-05 |
| 0.00256  | 0.173692 | 0.00016  | -0.216   | 2.46E-06 |
| 1.12E-05 | -0.12238 | 0.00811  | 0.517836 | 2.13E-33 |
| 1.14E-13 | -0.09174 | 0.04754  | 0.202401 | 1.04E-05 |
| 0.00064  | 0.208421 | 5.57E-06 | -0.32184 | 1.03E-12 |
| 1.49E-05 | -0.13286 | 0.00402  | 0.279484 | 7.93E-10 |
| 0.00033  | -0.25476 | 2.36E-08 | 0.12531  | 0.0067   |
| 6.03E-06 | -0.21962 | 1.65E-06 | 0.224016 | 1.01E-06 |
| 1.46E-07 | -0.21209 | 3.77E-06 | 0.239632 | 1.60E-07 |
| 1.89E-22 | 0.053322 | 0.25013  | 0.178497 | 0.00011  |
| 9.55E-07 | -0.01016 | 0.82662  | 0.209427 | 5.01E-06 |
| 9.44E-08 | -0.1819  | 7.71E-05 | 0.338421 | 5.62E-14 |
| 0.20278  | 0.228134 | 6.27E-07 | -0.21733 | 2.13E-06 |
| 2.40E-05 | 0.103268 | 0.02564  | -0.19941 | 1.42E-05 |
| 9.42E-06 | -0.22041 | 1.51E-06 | 0.26642  | 4.98E-09 |
| 1.52E-09 | 0.047194 | 0.30882  | 0.344274 | 1.93E-14 |
| 1.21E-09 | -0.11321 | 0.01437  | 0.369938 | 1.36E-16 |
| 8.23E-11 | -0.13245 | 0.00414  | 0.171235 | 0.0002   |
| 8.10E-10 | -0.1727  | 0.00018  | 0.211698 | 3.93E-06 |
| 2.02E-09 | -0.15397 | 0.00084  | 0.216697 | 2.28E-06 |
| 0.00422  | 0.216662 | 2.29E-06 | -0.40336 | 1.07E-19 |
| 1.00E-06 | 0.057723 | 0.21309  | -0.22923 | 5.52E-07 |

|          |          |          |          |          |
|----------|----------|----------|----------|----------|
| 0.00076  | -0.08068 | 0.08155  | 0.205167 | 7.84E-06 |
| 0.0012   | 0.199869 | 1.35E-05 | -0.24882 | 5.08E-08 |
| 3.37E-07 | -0.03326 | 0.47337  | 0.393004 | 1.07E-18 |
| 0.00143  | -0.26646 | 4.95E-09 | 0.069662 | 0.13279  |
| 0.00173  | -0.22256 | 1.19E-06 | 0.302904 | 2.29E-11 |
| 0.00952  | -0.15177 | 0.001    | 0.281118 | 6.25E-10 |
| 2.47E-09 | 0.033334 | 0.47237  | 0.346877 | 1.19E-14 |
| 1.42E-05 | -0.14308 | 0.00194  | 0.222515 | 1.19E-06 |
| 0.00052  | 0.133445 | 0.00386  | -0.27734 | 1.08E-09 |
| 2.35E-22 | 0.24116  | 1.32E-07 | 0.067668 | 0.14427  |
| 1.83E-06 | -0.04009 | 0.38732  | 0.540883 | 7.70E-37 |
| 2.92E-05 | -0.16429 | 0.00036  | 0.52251  | 4.49E-34 |
| 9.96E-05 | -0.21528 | 2.67E-06 | 0.244122 | 9.17E-08 |
| 3.94E-10 | 0.004529 | 0.92225  | 0.296564 | 6.18E-11 |
| 3.89E-06 | -0.17228 | 0.00018  | 0.325665 | 5.34E-13 |
| 8.49E-13 | -0.01513 | 0.74441  | 0.231049 | 4.46E-07 |
| 7.46E-14 | -0.08604 | 0.06319  | 0.230734 | 4.63E-07 |
| 2.93E-20 | 0.111893 | 0.01556  | 0.383838 | 7.67E-18 |
| 1.21E-10 | -0.13137 | 0.00446  | 0.239442 | 1.63E-07 |
| 6.94E-07 | -0.06695 | 0.14859  | 0.268469 | 3.75E-09 |
| 0.00012  | -0.17949 | 9.62E-05 | 0.312089 | 5.23E-12 |
| 3.35E-05 | -0.19686 | 1.83E-05 | 0.28649  | 2.84E-10 |
| 0.14656  | -0.20934 | 5.05E-06 | 0.104301 | 0.02419  |
| 0.00014  | -0.21957 | 1.66E-06 | 0.172423 | 0.00018  |
| 0.12709  | -0.28082 | 6.54E-10 | 0.367558 | 2.20E-16 |
| 2.62E-09 | -0.10151 | 0.02828  | 0.33228  | 1.68E-13 |
| 2.68E-08 | -0.18794 | 4.37E-05 | 0.197526 | 1.71E-05 |
| 1.05E-07 | -0.07695 | 0.09673  | 0.393312 | 9.98E-19 |
| 0.00013  | -0.13897 | 0.00261  | 0.443762 | 5.93E-24 |
| 0.00633  | -0.21784 | 2.01E-06 | 0.3973   | 4.14E-19 |
| 7.95E-07 | -0.16645 | 0.0003   | 0.171072 | 0.0002   |
| 9.96E-08 | -0.20864 | 5.45E-06 | 0.240936 | 1.36E-07 |
| 9.66E-06 | -0.20438 | 8.51E-06 | 0.124306 | 0.00716  |
| 6.18E-09 | -0.18594 | 5.28E-05 | 0.311442 | 5.81E-12 |
| 2.24E-21 | 0.051947 | 0.26257  | 0.308445 | 9.46E-12 |
| 1.88E-08 | -0.04375 | 0.34546  | 0.369984 | 1.35E-16 |
| 2.11E-08 | -0.15394 | 0.00084  | 0.20329  | 9.53E-06 |
| 6.16E-13 | -0.03189 | 0.49182  | 0.349652 | 7.09E-15 |
| 0.01381  | -0.20035 | 1.29E-05 | 0.476947 | 6.69E-28 |
| 1.39E-10 | -0.02298 | 0.6203   | 0.436674 | 3.64E-23 |
| 2.08E-16 | 0.006888 | 0.88199  | 0.557391 | 1.79E-39 |
| 3.86E-10 | 0.015091 | 0.74497  | 0.178809 | 0.0001   |
| 2.16E-09 | 0.040114 | 0.3871   | -0.2632  | 7.71E-09 |
| 0.00362  | -0.2234  | 1.08E-06 | 0.465937 | 1.53E-26 |
| 0.00056  | -0.26114 | 1.02E-08 | 0.107509 | 0.02014  |

|          |          |          |          |          |
|----------|----------|----------|----------|----------|
| 7.30E-15 | -0.08341 | 0.07175  | 0.349795 | 6.91E-15 |
| 1.65E-06 | -0.11539 | 0.01259  | 0.546724 | 9.35E-38 |
| 5.01E-10 | 0.063484 | 0.17081  | -0.47937 | 3.31E-28 |
| 5.18E-14 | 0.022736 | 0.62408  | 0.424553 | 7.37E-22 |
| 0.01385  | -0.16448 | 0.00036  | 0.166992 | 0.00029  |
| 2.29E-16 | -0.07999 | 0.08421  | 0.472308 | 2.53E-27 |
| 0.08208  | -0.28598 | 3.07E-10 | 0.094662 | 0.04088  |
| 0.00101  | -0.12025 | 0.00929  | 0.335069 | 1.03E-13 |
| 0.13316  | -0.17446 | 0.00015  | 0.093842 | 0.04266  |
| 1.22E-21 | 0.082076 | 0.07641  | 0.327226 | 4.07E-13 |
| 3.76E-05 | -0.2051  | 7.90E-06 | 0.206242 | 7.01E-06 |
| 1.93E-05 | -0.09789 | 0.03444  | 0.202616 | 1.02E-05 |
| 7.85E-11 | -0.122   | 0.00831  | 0.199112 | 1.46E-05 |
| 7.36E-08 | -0.1789  | 0.0001   | 0.252488 | 3.17E-08 |
| 1.21E-12 | 0.034843 | 0.45255  | 0.585444 | 2.64E-44 |
| 5.26E-11 | -0.15151 | 0.00102  | 0.307792 | 1.05E-11 |
| 7.62E-09 | 0.022195 | 0.63236  | -0.22412 | 9.95E-07 |
| 2.99E-06 | -0.17862 | 0.0001   | 0.168439 | 0.00026  |
| 0.61313  | 0.245737 | 7.49E-08 | -0.10647 | 0.02138  |
| 1.33E-23 | 0.156731 | 0.00068  | 0.356783 | 1.82E-15 |
| 8.33E-05 | -0.13149 | 0.00442  | 0.211472 | 4.03E-06 |
| 1.46E-07 | -0.10435 | 0.02412  | 0.312551 | 4.85E-12 |
| 0.00911  | -0.23129 | 4.34E-07 | 0.483045 | 1.13E-28 |
| 4.93E-05 | -0.1446  | 0.00173  | 0.246996 | 6.40E-08 |
| 1.49E-15 | -0.09567 | 0.03876  | 0.524237 | 2.51E-34 |
| 1.04E-09 | -0.11118 | 0.01624  | 0.491241 | 9.72E-30 |
| 6.38E-10 | -0.21739 | 2.11E-06 | 0.265417 | 5.71E-09 |
| 4.16E-16 | 0.02959  | 0.52356  | 0.580441 | 2.08E-43 |
| 8.70E-05 | -0.09305 | 0.04445  | 0.33564  | 9.26E-14 |
| 3.65E-15 | 0.115684 | 0.01236  | 0.212971 | 3.43E-06 |
| 1.48E-05 | -0.03835 | 0.40833  | 0.232673 | 3.68E-07 |
| 6.27E-14 | -0.12788 | 0.00565  | 0.373394 | 6.74E-17 |
| 8.59E-17 | -0.02881 | 0.53453  | 0.407859 | 3.82E-20 |
| 5.83E-13 | 0.049745 | 0.28337  | 0.254828 | 2.34E-08 |
| 6.02E-06 | -0.19589 | 2.02E-05 | 0.169804 | 0.00023  |
| 3.16E-06 | -0.22493 | 9.07E-07 | 0.441597 | 1.04E-23 |
| 7.41E-06 | -0.16712 | 0.00029  | 0.301065 | 3.07E-11 |
| 0.00023  | -0.26869 | 3.64E-09 | 0.19441  | 2.33E-05 |
| 0.0002   | -0.18753 | 4.54E-05 | 0.50509  | 1.33E-31 |
| 5.68E-08 | -0.14561 | 0.0016   | 0.183648 | 6.55E-05 |
| 5.45E-12 | 0.004251 | 0.92701  | 0.30798  | 1.02E-11 |
| 4.56E-09 | -0.01394 | 0.7639   | -0.19603 | 1.99E-05 |
| 2.20E-10 | -0.13539 | 0.00337  | 0.290474 | 1.57E-10 |
| 8.58E-13 | -0.03689 | 0.42639  | 0.388327 | 2.94E-18 |
| 4.40E-06 | -0.01727 | 0.70976  | 0.227884 | 6.46E-07 |



|          |          |          |          |          |
|----------|----------|----------|----------|----------|
| 3.09E-07 | -0.12952 | 0.00506  | 0.171172 | 0.0002   |
| 7.48E-15 | -0.06934 | 0.13461  | 0.374128 | 5.80E-17 |
| 0.00015  | -0.16006 | 0.00052  | 0.477113 | 6.38E-28 |
| 0.0233   | -0.24378 | 9.57E-08 | 0.409962 | 2.35E-20 |
| 1.63E-08 | -0.11119 | 0.01622  | -0.03946 | 0.39489  |
| 7.94E-05 | -0.11152 | 0.01591  | 0.577321 | 7.39E-43 |
| 3.44E-07 | -0.09592 | 0.03827  | 0.289554 | 1.80E-10 |
| 5.78E-07 | -0.24032 | 1.47E-07 | 0.453809 | 4.20E-25 |
| 0.11348  | -0.22567 | 8.33E-07 | 0.341972 | 2.95E-14 |
| 2.75E-06 | 0.190912 | 3.28E-05 | -0.44941 | 1.35E-24 |
| 0.06224  | 0.246549 | 6.77E-08 | -0.41169 | 1.57E-20 |
| 0.00223  | -0.14053 | 0.00234  | 0.430129 | 1.88E-22 |
| 1.14E-16 | 0.051803 | 0.2639   | 0.267334 | 4.39E-09 |
| 1.97E-11 | -0.06379 | 0.16874  | 0.371065 | 1.08E-16 |
| 2.72E-05 | -0.22953 | 5.33E-07 | 0.318889 | 1.69E-12 |
| 4.41E-06 | -0.06249 | 0.17763  | 0.334397 | 1.16E-13 |
| 3.15E-12 | -0.11914 | 0.00997  | 0.286081 | 3.02E-10 |
| 8.64E-07 | -0.23159 | 4.19E-07 | 0.352601 | 4.06E-15 |
| 5.33E-08 | -0.07092 | 0.12591  | 0.471518 | 3.17E-27 |
| 8.49E-10 | -0.02078 | 0.65415  | 0.43095  | 1.53E-22 |
| 1.40E-06 | -0.20096 | 1.21E-05 | 0.291168 | 1.41E-10 |
| 1.86E-05 | -0.09434 | 0.04157  | 0.50033  | 5.93E-31 |
| 1.47E-10 | -0.19559 | 2.08E-05 | 0.320119 | 1.37E-12 |
| 6.88E-12 | -0.11907 | 0.01001  | 0.391337 | 1.53E-18 |
| 3.90E-05 | -0.17466 | 0.00015  | 0.3828   | 9.56E-18 |
| 2.37E-08 | -0.07766 | 0.0937   | 0.51192  | 1.48E-32 |
| 1.38E-14 | -0.05887 | 0.20416  | 0.150501 | 0.00111  |
| 0.00054  | -0.23866 | 1.80E-07 | 0.380489 | 1.55E-17 |
| 0.04961  | -0.18171 | 7.84E-05 | 0.445899 | 3.40E-24 |
| 3.46E-14 | 0.019231 | 0.67849  | 0.201486 | 1.15E-05 |
| 3.08E-08 | -0.065   | 0.16081  | 0.182978 | 6.97E-05 |
| 8.42E-07 | -0.09382 | 0.04271  | 0.393787 | 8.99E-19 |
| 1.80E-10 | -0.07482 | 0.10636  | 0.366881 | 2.51E-16 |
| 0.05394  | -0.17083 | 0.00021  | 0.303244 | 2.17E-11 |
| 2.37E-06 | -0.24938 | 4.73E-08 | 0.278773 | 8.78E-10 |
| 2.48E-06 | -0.0939  | 0.04254  | 0.420227 | 2.09E-21 |
| 9.80E-06 | -0.12925 | 0.00515  | 0.508762 | 4.11E-32 |
| 0.00349  | -0.1265  | 0.00619  | 0.169696 | 0.00023  |
| 6.26E-05 | -0.07016 | 0.13005  | 0.494619 | 3.47E-30 |
| 3.27E-07 | -0.15887 | 0.00057  | 0.306248 | 1.35E-11 |
| 0.00182  | -0.16687 | 0.00029  | 0.140617 | 0.00232  |
| 0.08092  | 0.038768 | 0.40324  | -0.32846 | 3.29E-13 |
| 2.45E-05 | -0.06026 | 0.19359  | -0.36186 | 6.80E-16 |
| 0.00694  | -0.13717 | 0.00297  | 0.387817 | 3.28E-18 |
| 0.88281  | 0.304512 | 1.78E-11 | -0.44873 | 1.62E-24 |

|          |          |          |          |          |
|----------|----------|----------|----------|----------|
| 0.00353  | 0.0272   | 0.55766  | -0.44275 | 7.71E-24 |
| 4.39E-05 | 0.010447 | 0.82185  | -0.44372 | 5.99E-24 |
| 0.10987  | 0.022912 | 0.62139  | -0.23974 | 1.57E-07 |
| 0.00813  | 0.092391 | 0.04599  | -0.33061 | 2.26E-13 |
| 5.99E-05 | 0.023429 | 0.61355  | -0.45991 | 8.06E-26 |
| 0.0005   | 0.004324 | 0.92576  | -0.40257 | 1.27E-19 |
| 5.70E-09 | -0.07953 | 0.08603  | -0.50174 | 3.82E-31 |
| 4.71E-06 | -0.00222 | 0.96185  | -0.4919  | 7.96E-30 |
| 0.11021  | 0.140637 | 0.00232  | -0.49069 | 1.15E-29 |
| 0.62549  | 0.173034 | 0.00017  | -0.36257 | 5.92E-16 |
| 9.96E-07 | 0.060454 | 0.1922   | 0.547119 | 8.10E-38 |
| 1.91E-07 | -0.01357 | 0.76985  | -0.43216 | 1.13E-22 |
| 0.35243  | 0.160603 | 0.00049  | -0.42029 | 2.06E-21 |
| 0.00035  | 0.114364 | 0.0134   | -0.47284 | 2.18E-27 |
| 1.32E-06 | -0.02402 | 0.60457  | -0.62362 | 1.10E-51 |
| 1.85E-05 | -0.13814 | 0.00277  | -0.32372 | 7.45E-13 |
| 0.00042  | -0.05213 | 0.26092  | -0.32534 | 5.64E-13 |
| 0.00221  | -0.00049 | 0.99156  | -0.30135 | 2.93E-11 |
| 0.32753  | 0.152008 | 0.00098  | -0.5827  | 8.22E-44 |
| 0.00041  | -0.00444 | 0.92372  | -0.31491 | 3.28E-12 |
| 1.30E-05 | -0.01083 | 0.81551  | -0.43248 | 1.04E-22 |
| 0.30632  | 0.222583 | 1.18E-06 | -0.42814 | 3.06E-22 |
| 3.17E-08 | -0.04184 | 0.36702  | 0.644027 | 4.58E-56 |
| 6.22E-21 | 0.181285 | 8.16E-05 | 0.56391  | 1.48E-40 |
| 1.75E-11 | -0.05528 | 0.23316  | -0.486   | 4.70E-29 |
| 2.89E-05 | -0.04311 | 0.35266  | -0.36265 | 5.82E-16 |
| 4.99E-09 | 0.00731  | 0.87481  | -0.54878 | 4.41E-38 |
| 0.00011  | -0.03021 | 0.51493  | -0.42672 | 4.34E-22 |
| 0.26278  | 0.11047  | 0.01693  | -0.41996 | 2.23E-21 |
| 0.00344  | 0.116639 | 0.01165  | -0.43494 | 5.65E-23 |
| 0.1194   | 0.052078 | 0.26137  | -0.29525 | 7.57E-11 |
| 0.25348  | 0.063983 | 0.16747  | -0.30606 | 1.39E-11 |
| 0.00039  | 0.033585 | 0.46905  | -0.21521 | 2.69E-06 |
| 0.27388  | 0.023804 | 0.60788  | -0.39212 | 1.29E-18 |
| 0.02106  | -0.04054 | 0.38205  | -0.30299 | 2.26E-11 |
| 0.0001   | 0.012477 | 0.78799  | -0.47049 | 4.25E-27 |
| 2.40E-05 | -0.02852 | 0.53873  | -0.49354 | 4.83E-30 |
| 1.37E-18 | 0.141518 | 0.00217  | 0.651848 | 7.80E-58 |
| 0.00176  | -0.03113 | 0.50214  | -0.407   | 4.65E-20 |
| 0.01479  | -0.01684 | 0.71668  | -0.40224 | 1.37E-19 |
| 0.00736  | 0.012695 | 0.78437  | -0.50025 | 6.08E-31 |
| 0.00113  | -0.00148 | 0.97461  | -0.50364 | 2.10E-31 |
| 0.00059  | -0.01932 | 0.67707  | -0.32619 | 4.87E-13 |
| 1.11E-05 | 0.035038 | 0.45002  | -0.39964 | 2.46E-19 |
| 0.01205  | 0.03044  | 0.51169  | -0.47789 | 5.10E-28 |

|          |          |          |          |          |
|----------|----------|----------|----------|----------|
| 2.16E-06 | -0.00053 | 0.99081  | -0.31574 | 2.86E-12 |
| 1.92E-14 | 0.224361 | 9.68E-07 | 0.563455 | 1.77E-40 |
| 0.05805  | -0.00127 | 0.9781   | -0.35221 | 4.38E-15 |
| 9.72E-14 | -0.11028 | 0.01712  | -0.5374  | 2.65E-36 |
| 3.02E-07 | -0.08974 | 0.05262  | -0.57233 | 5.47E-42 |
| 0.90648  | 0.004162 | 0.92853  | -0.22579 | 8.22E-07 |
| 0.00588  | -0.03706 | 0.42429  | -0.45368 | 4.35E-25 |
| 0.4338   | 0.013288 | 0.77456  | -0.43441 | 6.44E-23 |
| 0.02266  | 0.082014 | 0.07663  | -0.43319 | 8.75E-23 |
| 0.60952  | 0.126726 | 0.0061   | -0.24717 | 6.26E-08 |
| 3.42E-06 | 0.027551 | 0.55258  | 0.598781 | 9.04E-47 |
| 0.00041  | -0.00611 | 0.89521  | -0.57339 | 3.58E-42 |
| 1.27E-06 | 0.040437 | 0.38328  | -0.44886 | 1.56E-24 |
| 0.00016  | -0.04396 | 0.34318  | -0.34308 | 2.41E-14 |
| 7.89E-09 | -0.08422 | 0.06901  | -0.38136 | 1.29E-17 |
| 2.77E-05 | -0.0684  | 0.13994  | -0.49555 | 2.61E-30 |
| 0.01102  | 0.108227 | 0.01931  | -0.54399 | 2.52E-37 |
| 0.06031  | 0.086047 | 0.06317  | -0.31552 | 2.97E-12 |
| 3.83E-08 | -0.05662 | 0.22197  | 0.766253 | 2.27E-91 |
| 0.0031   | -0.21125 | 4.12E-06 | 0.489226 | 1.79E-29 |
| 3.79E-05 | 0.00191  | 0.96717  | 0.499511 | 7.66E-31 |
| 6.14E-05 | -0.09103 | 0.04929  | -0.21701 | 2.21E-06 |
| 6.28E-11 | 0.01867  | 0.68738  | 0.547354 | 7.43E-38 |
| 1.32E-11 | 0.000235 | 0.99596  | -0.53036 | 3.10E-35 |
| 1.68E-11 | -0.06398 | 0.1675   | -0.60683 | 2.58E-48 |
| 3.00E-05 | -0.03676 | 0.42808  | 0.448104 | 1.91E-24 |
| 5.06E-07 | 0.021636 | 0.64095  | 0.592304 | 1.47E-45 |
| 5.25E-19 | -0.16835 | 0.00026  | -0.54028 | 9.56E-37 |
| 5.00E-10 | -0.01873 | 0.68636  | -0.67213 | 1.12E-62 |
| 1.27E-10 | 0.015401 | 0.73992  | 0.69566  | 8.45E-69 |
| 8.58E-07 | -0.04447 | 0.33764  | -0.25945 | 1.27E-08 |
| 6.71E-12 | -0.093   | 0.04457  | -0.47237 | 2.49E-27 |
| 0.00158  | -0.07153 | 0.12267  | 0.545318 | 1.56E-37 |
| 3.14E-07 | 0.04681  | 0.31278  | 0.419044 | 2.78E-21 |
| 0.14394  | 0.007842 | 0.86578  | -0.55488 | 4.60E-39 |
| 0.74892  | -0.00016 | 0.99728  | -0.39706 | 4.37E-19 |
| 4.40E-08 | -0.14563 | 0.0016   | -0.29375 | 9.53E-11 |
| 2.25E-06 | 0.064764 | 0.16233  | -0.58571 | 2.37E-44 |
| 3.97E-05 | -0.03478 | 0.4533   | -0.26584 | 5.39E-09 |
| 0.77447  | 0.114744 | 0.01309  | -0.17306 | 0.00017  |
| 0.03571  | 0.140581 | 0.00233  | -0.39973 | 2.41E-19 |
| 0.13313  | 0.047254 | 0.30821  | -0.40622 | 5.55E-20 |
| 0.36606  | 0.154945 | 0.00078  | -0.45102 | 8.82E-25 |
| 1.04E-06 | -0.02609 | 0.5739   | -0.52694 | 1.00E-34 |
| 0.9418   | 0.319572 | 1.51E-12 | -0.56897 | 2.06E-41 |

|          |          |          |          |          |
|----------|----------|----------|----------|----------|
| 0.08793  | -0.08758 | 0.05859  | -0.46733 | 1.03E-26 |
| 0.00323  | 0.080855 | 0.0809   | -0.27457 | 1.60E-09 |
| 0.00077  | -0.11478 | 0.01307  | -0.37287 | 7.51E-17 |
| 0.14387  | 0.10391  | 0.02473  | -0.24396 | 9.35E-08 |
| 9.70E-09 | 0.019277 | 0.67777  | -0.58484 | 3.40E-44 |
| 0.00366  | -0.11687 | 0.01149  | -0.45527 | 2.84E-25 |
| 0.1152   | 0.131459 | 0.00443  | -0.45776 | 1.45E-25 |
| 3.28E-11 | 0.014304 | 0.75785  | 0.721649 | 2.71E-76 |
| 0.00098  | 0.033633 | 0.46841  | -0.42626 | 4.86E-22 |
| 0.24165  | 0.058867 | 0.20415  | -0.17845 | 0.00011  |
| 6.66E-05 | 0.094881 | 0.04041  | -0.44629 | 3.07E-24 |
| 0.32838  | 0.021375 | 0.64499  | -0.46741 | 1.01E-26 |
| 3.15E-07 | 0.126324 | 0.00627  | -0.45645 | 2.06E-25 |
| 1.14E-09 | -0.03999 | 0.38853  | -0.46031 | 7.23E-26 |
| 0.51772  | 0.042534 | 0.35908  | -0.34328 | 2.32E-14 |
| 3.42E-10 | 0.002659 | 0.95431  | -0.55431 | 5.68E-39 |
| 1.28E-05 | 0.023075 | 0.61891  | -0.48233 | 1.39E-28 |
| 1.43E-11 | 0.198303 | 1.58E-05 | 0.545969 | 1.23E-37 |
| 2.20E-10 | 0.11723  | 0.01123  | 0.587473 | 1.13E-44 |
| 1.53E-08 | 0.022339 | 0.63015  | -0.64042 | 2.88E-55 |
| 1.89E-05 | 0.045069 | 0.33114  | -0.37572 | 4.18E-17 |
| 0.07252  | 0.10173  | 0.02793  | -0.5366  | 3.52E-36 |
| 0.35599  | 0.156751 | 0.00068  | -0.38965 | 2.21E-18 |
| 0.60197  | 0.091831 | 0.04733  | -0.5268  | 1.05E-34 |
| 0.76526  | -0.00164 | 0.97188  | -0.37473 | 5.13E-17 |
| 0.88027  | -0.07137 | 0.12352  | -0.24914 | 4.87E-08 |
| 0.02055  | -0.04833 | 0.29731  | -0.49884 | 9.43E-31 |
| 3.04E-12 | -0.05227 | 0.25959  | -0.59521 | 4.24E-46 |
| 0.35287  | 0.275797 | 1.34E-09 | -0.51119 | 1.88E-32 |
| 1.15E-09 | -0.14546 | 0.00162  | -0.38669 | 4.18E-18 |
| 1.91E-05 | -0.03429 | 0.45978  | -0.39946 | 2.56E-19 |
| 0.38015  | 0.111575 | 0.01585  | -0.57844 | 4.70E-43 |
| 0.07443  | 0.114834 | 0.01302  | -0.36449 | 4.05E-16 |
| 0.00863  | -0.00905 | 0.8454   | -0.38114 | 1.36E-17 |
| 5.03E-10 | 0.09776  | 0.03469  | 0.564043 | 1.41E-40 |
| 6.59E-09 | -0.08284 | 0.07371  | -0.37707 | 3.16E-17 |
| 3.76E-06 | 0.082578 | 0.07462  | -0.53023 | 3.24E-35 |
| 0.00115  | 0.051439 | 0.26727  | -0.47877 | 3.94E-28 |
| 0.00011  | 0.035011 | 0.45037  | -0.40126 | 1.71E-19 |
| 0.00149  | 0.082204 | 0.07595  | -0.19737 | 1.74E-05 |
| 6.14E-07 | -0.05188 | 0.26321  | 0.653335 | 3.55E-58 |
| 2.78E-09 | -0.06623 | 0.15299  | -0.38766 | 3.40E-18 |
| 8.56E-11 | -0.04903 | 0.2904   | -0.55515 | 4.15E-39 |
| 0.00011  | 0.041507 | 0.37081  | -0.41108 | 1.81E-20 |
| 6.48E-07 | -0.03755 | 0.41818  | -0.27508 | 1.49E-09 |

|          |          |          |          |          |
|----------|----------|----------|----------|----------|
| 0.22897  | -0.04477 | 0.33431  | 0.214289 | 2.97E-06 |
| 1.60E-06 | -0.07742 | 0.09471  | 0.328909 | 3.04E-13 |
| 2.73E-05 | 0.056463 | 0.22327  | 0.067021 | 0.14816  |
| 0.5977   | -0.09155 | 0.04801  | 0.04515  | 0.33027  |
| 0.51442  | -0.14237 | 0.00204  | 0.07928  | 0.08701  |
| 1.88E-05 | -0.09448 | 0.04127  | 0.291526 | 1.34E-10 |
| 0.21112  | -0.09745 | 0.03526  | 0.161427 | 0.00046  |
| 0.00027  | -0.14322 | 0.00192  | 0.332621 | 1.58E-13 |
| 0.01343  | -0.22639 | 7.68E-07 | 0.281254 | 6.13E-10 |
| 0.00217  | -0.25248 | 3.18E-08 | 0.293037 | 1.06E-10 |
| 0.1961   | 0.112178 | 0.01529  | -0.00163 | 0.97194  |
| 0.20655  | -0.09547 | 0.03919  | -0.15877 | 0.00057  |
| 0.05235  | -0.04088 | 0.37813  | 0.213209 | 3.34E-06 |
| 0.00096  | -0.05015 | 0.27944  | 0.286015 | 3.05E-10 |
| 0.00075  | 0.022071 | 0.63427  | -0.09098 | 0.04943  |
| 4.53E-09 | -0.05649 | 0.22305  | 0.076067 | 0.10063  |
| 0.03252  | -0.15684 | 0.00067  | -0.25786 | 1.57E-08 |
| 0.45154  | 0.097369 | 0.03542  | -0.0752  | 0.10458  |
| 2.08E-06 | -0.06756 | 0.14494  | 0.608457 | 1.24E-48 |
| 7.50E-08 | -0.08149 | 0.07854  | 0.068389 | 0.14003  |
| 1.09E-06 | 0.015025 | 0.74606  | -0.17652 | 0.00013  |
| 0.94005  | 0.140556 | 0.00233  | -0.02544 | 0.58349  |
| 0.00022  | -0.09108 | 0.04917  | -0.15219 | 0.00097  |
| 0.63045  | 0.025205 | 0.58691  | 0.145263 | 0.00165  |
| 0.14959  | -0.21125 | 4.13E-06 | -0.03755 | 0.41823  |
| 0.93925  | 0.041116 | 0.37534  | 0.277971 | 9.85E-10 |
| 0.15722  | 0.065263 | 0.15911  | 0.150156 | 0.00114  |
| 9.12E-06 | -0.14202 | 0.0021   | 0.080323 | 0.08293  |
| 0.00438  | -0.07422 | 0.10917  | -0.11491 | 0.01296  |
| 0.01593  | -0.18567 | 5.42E-05 | 0.082806 | 0.07382  |
| 0.01206  | -0.18818 | 4.27E-05 | 0.033503 | 0.47013  |
| 0.11752  | 0.104618 | 0.02376  | 0.112712 | 0.01481  |
| 0.15396  | -0.05488 | 0.23657  | -0.05176 | 0.26434  |
| 0.72652  | 0.062897 | 0.17481  | 0.139529 | 0.00251  |
| 0.08647  | -0.06021 | 0.194    | -0.03321 | 0.47396  |
| 0.0002   | -0.13017 | 0.00484  | 0.431951 | 1.19E-22 |
| 4.09E-05 | -0.16206 | 0.00044  | 0.262937 | 7.99E-09 |
| 0.00108  | -0.01635 | 0.7245   | -0.04909 | 0.28972  |
| 0.00014  | -0.14    | 0.00243  | 0.224558 | 9.46E-07 |
| 0.96195  | 0.12612  | 0.00635  | -0.10635 | 0.02153  |
| 0.74659  | -0.03797 | 0.41301  | -0.26208 | 8.97E-09 |
| 0.12892  | 0.236568 | 2.31E-07 | -0.21746 | 2.10E-06 |
| 0.02574  | 0.03097  | 0.50437  | 0.069959 | 0.13114  |
| 0.00298  | -0.10928 | 0.01816  | 0.367116 | 2.40E-16 |
| 0.00029  | -0.12326 | 0.00766  | 0.384591 | 6.54E-18 |

|          |          |          |          |          |
|----------|----------|----------|----------|----------|
| 0.00372  | -0.1976  | 1.70E-05 | 0.308725 | 9.04E-12 |
| 2.51E-11 | -0.0239  | 0.60639  | -0.18979 | 3.66E-05 |
| 0.75049  | -0.13787 | 0.00283  | 0.077807 | 0.09306  |
| 0.04371  | -0.19926 | 1.44E-05 | 0.234816 | 2.86E-07 |
| 0.03747  | 0.20616  | 7.07E-06 | 0.163058 | 0.0004   |
| 0.19763  | -0.19586 | 2.02E-05 | -0.07766 | 0.0937   |
| 0.26544  | 0.082003 | 0.07667  | 0.063321 | 0.17192  |
| 0.00894  | -0.08256 | 0.07468  | 0.009062 | 0.84516  |
| 0.03059  | -0.07562 | 0.10266  | 0.088489 | 0.05602  |
| 0.16238  | -0.17231 | 0.00018  | 0.080371 | 0.08274  |
| 0.04098  | 0.021952 | 0.6361   | 0.111925 | 0.01553  |
| 0.00365  | 0.039955 | 0.38898  | 0.015991 | 0.73034  |
| 0.00104  | 0.016265 | 0.72591  | -0.05279 | 0.25485  |
| 2.62E-05 | 0.04577  | 0.32366  | -0.19764 | 1.69E-05 |
| 0.00539  | -0.04859 | 0.29469  | 0.101979 | 0.02755  |
| 0.1141   | 0.142414 | 0.00203  | 0.162038 | 0.00044  |
| 0.00214  | -0.06206 | 0.18064  | 0.155108 | 0.00077  |
| 0.11492  | 0.140518 | 0.00234  | 0.047007 | 0.31074  |
| 0.19367  | 0.081068 | 0.08011  | 0.037288 | 0.42145  |
| 1.77E-05 | -0.0798  | 0.08496  | 0.133814 | 0.00377  |
| 0.00631  | -0.14717 | 0.00143  | 0.12426  | 0.00718  |
| 0.10691  | -0.14845 | 0.00129  | 0.306697 | 1.25E-11 |
| 0.02148  | -0.01693 | 0.71515  | 0.11227  | 0.01521  |
| 0.90252  | 0.093701 | 0.04298  | -0.17684 | 0.00012  |
| 0.00417  | -0.05147 | 0.26697  | -0.03169 | 0.4945   |
| 0.82416  | -0.20123 | 1.18E-05 | 0.042729 | 0.35688  |
| 0.13071  | -0.04957 | 0.28511  | -0.01806 | 0.69706  |
| 0.27671  | 0.004332 | 0.92562  | 0.095217 | 0.0397   |
| 0.00069  | 0.107265 | 0.02042  | -0.01255 | 0.78681  |
| 4.10E-11 | 0.063752 | 0.16901  | -0.00726 | 0.87559  |
| 0.42095  | -0.07114 | 0.12473  | -0.13682 | 0.00305  |
| 0.05906  | -0.29571 | 7.05E-11 | 0.015854 | 0.73258  |
| 2.03E-06 | 0.00667  | 0.8857   | 0.043668 | 0.3464   |
| 0.49635  | -0.05514 | 0.23428  | -0.1682  | 0.00026  |
| 0.01224  | 0.176238 | 0.00013  | -0.12322 | 0.00768  |
| 0.18945  | -0.07808 | 0.09192  | -0.13207 | 0.00425  |
| 0.02543  | -0.24325 | 1.02E-07 | 0.193278 | 2.61E-05 |
| 0.07977  | -0.13104 | 0.00456  | 0.431077 | 1.48E-22 |
| 2.58E-05 | -0.0818  | 0.07741  | 0.187862 | 4.40E-05 |
| 0.38114  | 0.276984 | 1.13E-09 | -0.42105 | 1.72E-21 |
| 0.43539  | -0.15196 | 0.00099  | 0.173537 | 0.00016  |
| 5.14E-16 | 0.083371 | 0.07187  | 0.158355 | 0.00059  |
| 0.96494  | -0.09716 | 0.03582  | -0.02878 | 0.53495  |
| 0.33595  | 0.147755 | 0.00136  | -0.11171 | 0.01573  |
| 0.00407  | -0.04513 | 0.33043  | 0.146638 | 0.00149  |

|          |          |          |          |          |
|----------|----------|----------|----------|----------|
| 5.02E-06 | -0.00942 | 0.83905  | 0.01136  | 0.80658  |
| 6.81E-08 | 0.041496 | 0.37094  | 0.192602 | 2.79E-05 |
| 0.49361  | -0.08342 | 0.0717   | 0.032709 | 0.48073  |
| 0.07212  | 0.093172 | 0.04417  | -0.12264 | 0.00797  |
| 0.02336  | 0.251202 | 3.75E-08 | 0.204421 | 8.47E-06 |
| 1.18E-23 | 0.253616 | 2.74E-08 | 0.263815 | 7.09E-09 |
| 8.66E-06 | -0.10156 | 0.02819  | 0.376292 | 3.72E-17 |
| 3.98E-10 | -0.06445 | 0.16439  | 0.405149 | 7.10E-20 |
| 0.0331   | 0.03862  | 0.40504  | -0.18046 | 8.80E-05 |
| 0.34865  | 0.072865 | 0.11583  | 0.116985 | 0.01141  |
| 0.02548  | -0.25758 | 1.63E-08 | 0.371274 | 1.04E-16 |
| 0.08004  | -0.21252 | 3.60E-06 | 0.337708 | 6.39E-14 |
| 0.08607  | -0.13366 | 0.00381  | 0.170287 | 0.00022  |
| 2.28E-05 | -0.13713 | 0.00298  | 0.195739 | 2.05E-05 |
| 0.87303  | -0.166   | 0.00031  | 0.203518 | 9.30E-06 |
| 0.16251  | -0.1747  | 0.00015  | -0.08966 | 0.05284  |
| 0.28213  | -0.04851 | 0.29553  | -0.03704 | 0.42451  |
| 0.71135  | -0.15192 | 0.00099  | -0.03428 | 0.45995  |
| 0.15062  | -0.1772  | 0.00012  | 0.049742 | 0.2834   |
| 0.13085  | -0.12869 | 0.00535  | 0.003379 | 0.94194  |
| 0.00018  | 0.070265 | 0.12946  | 0.052823 | 0.25459  |
| 0.14616  | -0.07836 | 0.09076  | -0.0908  | 0.04988  |
| 0.87242  | 0.116867 | 0.01149  | 0.073308 | 0.11363  |
| 0.88738  | -0.12072 | 0.00902  | -0.07015 | 0.13011  |
| 0.01248  | 0.009794 | 0.83281  | 0.120668 | 0.00905  |
| 0.01306  | -0.10809 | 0.01947  | 0.30076  | 3.22E-11 |
| 4.59E-11 | 0.073597 | 0.11221  | 0.267619 | 4.22E-09 |
| 0.07242  | -0.1075  | 0.02015  | 0.039574 | 0.39353  |
| 0.50236  | -0.19929 | 1.43E-05 | 0.045192 | 0.32981  |
| 0.37169  | -0.1397  | 0.00248  | 0.110683 | 0.01672  |
| 0.43552  | -0.09128 | 0.04867  | -0.15824 | 0.0006   |
| 0.04938  | -0.08308 | 0.07287  | 0.110892 | 0.01651  |
| 0.2423   | 0.056996 | 0.21892  | 0.066941 | 0.14864  |
| 0.08767  | -0.12085 | 0.00894  | 0.039768 | 0.3912   |
| 0.0056   | 0.034396 | 0.45837  | -0.15379 | 0.00085  |
| 0.13965  | 0.1058   | 0.02222  | 0.290393 | 1.58E-10 |
| 3.16E-05 | -0.03627 | 0.4342   | 0.105665 | 0.02239  |
| 0.9819   | 0.085848 | 0.06379  | 0.027521 | 0.55301  |
| 4.13E-07 | 0.088788 | 0.05519  | 0.116451 | 0.01179  |
| 6.84E-05 | -0.00417 | 0.92832  | 0.100696 | 0.02957  |
| 1.71E-05 | 0.01181  | 0.79908  | 0.002391 | 0.9589   |
| 0.00189  | -0.12101 | 0.00885  | 0.192361 | 2.85E-05 |
| 0.5904   | 0.057066 | 0.21836  | 0.12047  | 0.00916  |
| 0.09155  | -0.09113 | 0.04906  | -0.08683 | 0.06081  |
| 0.7056   | 0.00415  | 0.92872  | 0.288117 | 2.23E-10 |

|          |          |          |          |          |
|----------|----------|----------|----------|----------|
| 0.88898  | -0.07423 | 0.10917  | -0.01053 | 0.8204   |
| 0.24557  | -0.01474 | 0.75069  | 0.03816  | 0.41066  |
| 0.35587  | -0.10831 | 0.01922  | 0.124216 | 0.0072   |
| 0.33571  | 0.152075 | 0.00098  | -0.05156 | 0.26616  |
| 0.04476  | 0.216093 | 2.44E-06 | 0.039221 | 0.39776  |
| 0.00139  | 0.0648   | 0.1621   | 0.028338 | 0.54128  |
| 0.00083  | -0.07889 | 0.08859  | 0.122866 | 0.00786  |
| 0.03938  | -0.09304 | 0.04448  | 0.180013 | 9.17E-05 |
| 0.41829  | -0.15166 | 0.00101  | 0.241692 | 1.24E-07 |
| 0.83834  | -0.11367 | 0.01398  | 0.091543 | 0.04803  |
| 0.4521   | -0.15683 | 0.00067  | 0.141422 | 0.00219  |
| 0.0008   | -0.04344 | 0.34889  | 0.101368 | 0.0285   |
| 0.01106  | -0.12565 | 0.00655  | 0.099626 | 0.03136  |
| 0.96301  | -0.00025 | 0.99562  | -0.12017 | 0.00934  |
| 0.00156  | 0.177043 | 0.00012  | -0.29847 | 4.60E-11 |
| 0.001    | -0.02965 | 0.52269  | 0.240651 | 1.41E-07 |
| 0.96886  | -0.16368 | 0.00038  | 0.023536 | 0.61193  |
| 6.21E-06 | -0.04879 | 0.2927   | -0.23149 | 4.24E-07 |
| 0.56042  | -0.03101 | 0.50375  | -0.12954 | 0.00505  |
| 0.29365  | 0.075815 | 0.10177  | -0.01974 | 0.67053  |
| 0.54494  | 0.152292 | 0.00096  | 0.075255 | 0.10433  |
| 3.62E-08 | -0.08523 | 0.06574  | 0.220713 | 1.46E-06 |
| 0.0001   | -0.08827 | 0.05662  | 0.128881 | 0.00528  |
| 0.00096  | -0.14091 | 0.00227  | 0.197906 | 1.65E-05 |
| 0.59238  | -0.04973 | 0.28356  | 0.311999 | 5.30E-12 |
| 0.78481  | -0.12915 | 0.00519  | -0.01652 | 0.72176  |
| 0.01098  | 0.000968 | 0.98335  | 0.019951 | 0.66717  |
| 0.12767  | 0.163875 | 0.00038  | -0.39454 | 7.62E-19 |
| 0.82315  | 0.170368 | 0.00022  | 0.032795 | 0.47957  |
| 1.31E-08 | -0.07839 | 0.09065  | 0.307361 | 1.13E-11 |
| 9.76E-06 | 0.28107  | 6.30E-10 | -0.01175 | 0.80015  |
| 3.08E-05 | -0.04988 | 0.28206  | -0.00547 | 0.90612  |
| 0.01914  | 0.145565 | 0.00161  | 0.118302 | 0.01051  |
| 0.26619  | 0.104249 | 0.02426  | 0.156505 | 0.00069  |
| 0.00806  | -0.11319 | 0.01439  | 0.216448 | 2.35E-06 |
| 0.50197  | 0.076166 | 0.10019  | 0.100707 | 0.02956  |
| 0.11737  | 0.000138 | 0.99763  | -0.0264  | 0.56931  |
| 0.52917  | 0.083063 | 0.07293  | 0.133154 | 0.00394  |
| 0.48387  | -0.23495 | 2.81E-07 | 0.165479 | 0.00033  |
| 0.08697  | -0.01363 | 0.76886  | -0.23275 | 3.65E-07 |
| 0.20356  | -0.18864 | 4.09E-05 | 0.23844  | 1.84E-07 |
| 0.01555  | -0.08269 | 0.07421  | -0.07088 | 0.12613  |
| 0.76546  | -0.04238 | 0.3608   | -0.19445 | 2.32E-05 |
| 0.00837  | 0.070185 | 0.1299   | -0.30882 | 8.90E-12 |
| 0.36642  | 0.064961 | 0.16105  | 0.30504  | 1.63E-11 |



|          |          |          |          |          |
|----------|----------|----------|----------|----------|
| 0.03232  | -0.04786 | 0.30204  | 0.120327 | 0.00925  |
| 0.00233  | -0.15525 | 0.00076  | -0.01336 | 0.77344  |
| 0.51838  | 0.065651 | 0.15664  | 0.266949 | 4.63E-09 |
| 0.84382  | -0.11203 | 0.01543  | -0.0877  | 0.05825  |
| 0.04475  | -0.1065  | 0.02134  | 0.048473 | 0.29588  |
| 0.77629  | -0.18896 | 3.96E-05 | 0.11092  | 0.01649  |
| 0.92226  | 0.132976 | 0.00399  | 0.061277 | 0.1862   |
| 0.00374  | 0.062306 | 0.1789   | 0.08363  | 0.07099  |
| 0.00071  | -0.11817 | 0.0106   | 0.210326 | 4.55E-06 |
| 9.43E-14 | 0.080725 | 0.08139  | 0.235694 | 2.57E-07 |
| 1.55E-13 | -0.09911 | 0.03224  | -0.29582 | 6.93E-11 |
| 0.00059  | 0.076837 | 0.09723  | 0.308498 | 9.38E-12 |
| 3.04E-05 | 0.120172 | 0.00934  | -0.02515 | 0.58778  |
| 0.00662  | 0.056918 | 0.21956  | -0.17805 | 0.00011  |
| 0.63892  | 0.261427 | 9.79E-09 | -0.18461 | 5.99E-05 |
| 0.03188  | -0.21889 | 1.79E-06 | 0.088595 | 0.05572  |
| 0.15538  | -0.18233 | 7.40E-05 | 0.243556 | 9.84E-08 |
| 0.15571  | -0.18977 | 3.67E-05 | -0.06018 | 0.19423  |
| 0.00485  | 0.01239  | 0.78943  | -0.05193 | 0.26268  |
| 0.29932  | -0.14324 | 0.00191  | 0.024807 | 0.59284  |
| 0.00516  | -0.04856 | 0.29499  | 0.221543 | 1.33E-06 |
| 0.08381  | -0.10666 | 0.02115  | 0.043244 | 0.35111  |
| 0.01512  | 0.064434 | 0.16449  | -0.0155  | 0.73831  |
| 0.00092  | -0.14648 | 0.0015   | 0.244793 | 8.44E-08 |
| 0.00064  | -0.09818 | 0.0339   | 0.244384 | 8.88E-08 |
| 0.02531  | -0.19184 | 3.00E-05 | 0.215581 | 2.58E-06 |
| 0.41887  | 0.061516 | 0.18449  | 0.292686 | 1.12E-10 |
| 3.85E-07 | -0.02452 | 0.59717  | -0.25223 | 3.28E-08 |
| 0.05675  | 0.077298 | 0.09523  | 0.283436 | 4.46E-10 |
| 0.0025   | -0.21444 | 2.92E-06 | 0.318978 | 1.67E-12 |
| 0.00269  | 0.034464 | 0.45748  | -0.05903 | 0.20292  |
| 0.02135  | -0.07467 | 0.10705  | 0.4225   | 1.21E-21 |
| 0.02688  | -0.0269  | 0.56201  | -0.09854 | 0.03325  |
| 0.00039  | 0.07724  | 0.09548  | 0.263667 | 7.24E-09 |
| 0.03713  | 0.013831 | 0.76562  | 0.017671 | 0.70329  |
| 0.4171   | -0.21675 | 2.27E-06 | -0.02364 | 0.61043  |
| 4.99E-05 | -0.15052 | 0.0011   | 0.544671 | 1.97E-37 |
| 0.24498  | -0.08085 | 0.08091  | -0.0258  | 0.57807  |
| 0.04656  | -0.08731 | 0.05938  | 0.060514 | 0.19176  |
| 0.2895   | -0.11692 | 0.01145  | 0.06237  | 0.17845  |
| 0.38974  | 0.088045 | 0.05727  | -0.31127 | 5.97E-12 |
| 0.68603  | -0.34909 | 7.89E-15 | 0.239556 | 1.61E-07 |
| 0.02168  | 0.025283 | 0.58575  | 0.012917 | 0.78071  |
| 1.84E-06 | 0.006534 | 0.88801  | 0.066857 | 0.14915  |
| 0.00504  | 0.043605 | 0.34709  | -0.13384 | 0.00376  |

|          |          |          |          |          |
|----------|----------|----------|----------|----------|
| 5.43E-07 | -0.08917 | 0.05414  | -0.12618 | 0.00633  |
| 0.03639  | -0.09608 | 0.03793  | 0.051415 | 0.2675   |
| 0.02313  | -0.16509 | 0.00034  | 0.07782  | 0.09301  |
| 0.00187  | 0.160722 | 0.00049  | -0.12744 | 0.00582  |
| 4.55E-05 | 0.039328 | 0.39648  | -0.02553 | 0.58207  |
| 0.01688  | -0.18518 | 5.68E-05 | 0.259732 | 1.23E-08 |
| 0.8357   | -0.01876 | 0.686    | 0.144676 | 0.00172  |
| 0.01285  | -0.14391 | 0.00182  | -0.07762 | 0.09383  |
| 0.07564  | -0.16459 | 0.00035  | -0.11042 | 0.01698  |
| 0.43395  | 0.155543 | 0.00074  | 0.080641 | 0.08171  |
| 0.08412  | 0.096858 | 0.0364   | 0.30212  | 2.60E-11 |
| 5.05E-08 | -0.11715 | 0.01129  | 0.225198 | 8.80E-07 |
| 3.61E-05 | -0.03478 | 0.45333  | 0.196124 | 1.97E-05 |
| 0.00057  | -0.16889 | 0.00025  | 0.059737 | 0.19753  |
| 0.00168  | -0.19801 | 1.63E-05 | 0.031379 | 0.49875  |
| 0.16658  | -0.22078 | 1.45E-06 | 0.083778 | 0.07048  |
| 0.64586  | -0.13279 | 0.00404  | -0.12982 | 0.00496  |
| 0.26812  | -0.14255 | 0.00202  | -0.03537 | 0.44578  |
| 0.00316  | -0.09766 | 0.03488  | 0.054206 | 0.24235  |
| 0.00658  | -0.2001  | 1.32E-05 | 0.232621 | 3.71E-07 |
| 0.05677  | -0.17498 | 0.00014  | -0.27536 | 1.43E-09 |
| 1.15E-10 | 0.062117 | 0.18023  | 0.127385 | 0.00584  |
| 0.55664  | -0.14475 | 0.00171  | 0.276174 | 1.27E-09 |
| 0.0953   | 0.073579 | 0.1123   | -0.03317 | 0.47458  |
| 0.74865  | -0.17662 | 0.00012  | -0.0659  | 0.1551   |
| 0.67523  | -0.19141 | 3.13E-05 | 0.045167 | 0.33009  |
| 0.74455  | -0.14279 | 0.00198  | -0.0405  | 0.38254  |
| 0.75683  | -0.16821 | 0.00026  | 0.160253 | 0.00051  |
| 0.08886  | -0.14311 | 0.00193  | 0.096767 | 0.03658  |
| 0.83673  | -0.15817 | 0.0006   | 0.08485  | 0.06695  |
| 0.03563  | -0.12777 | 0.00569  | 0.110059 | 0.01735  |
| 0.4903   | -0.18612 | 5.19E-05 | 0.146733 | 0.00147  |
| 0.03519  | -0.1258  | 0.00649  | 0.107582 | 0.02005  |
| 0.0218   | -0.17642 | 0.00013  | 0.13948  | 0.00252  |
| 1.87E-06 | -0.15213 | 0.00097  | 0.190624 | 3.38E-05 |
| 0.88014  | -0.12785 | 0.00566  | -0.0487  | 0.29358  |
| 0.06687  | -0.07359 | 0.11224  | 0.031265 | 0.50032  |
| 0.11217  | -0.15401 | 0.00084  | 0.078701 | 0.08935  |
| 0.01288  | -0.15529 | 0.00076  | 0.187014 | 4.77E-05 |
| 0.99373  | -0.21157 | 3.99E-06 | 0.023724 | 0.60909  |
| 0.30021  | -0.17768 | 0.00011  | 0.191633 | 3.06E-05 |
| 0.00835  | -0.22076 | 1.45E-06 | 0.145948 | 0.00156  |
| 0.05647  | -0.15099 | 0.00106  | 0.420418 | 2.00E-21 |
| 0.66691  | -0.21352 | 3.23E-06 | 0.025282 | 0.58577  |
| 0.00134  | -0.16926 | 0.00024  | 0.110322 | 0.01708  |

|          |          |          |          |          |
|----------|----------|----------|----------|----------|
| 0.02575  | -0.23771 | 2.02E-07 | 0.090267 | 0.05124  |
| 0.14625  | -0.19896 | 1.48E-05 | 0.251877 | 3.43E-08 |
| 0.01262  | -0.13668 | 0.00308  | 0.120825 | 0.00896  |
| 0.24687  | -0.17978 | 9.37E-05 | 0.075875 | 0.1015   |
| 0.01073  | -0.15218 | 0.00097  | 0.151463 | 0.00103  |
| 0.53622  | -0.14168 | 0.00215  | 0.011584 | 0.80285  |
| 0.00061  | -0.1553  | 0.00076  | 0.038404 | 0.40767  |
| 0.77154  | 0.103008 | 0.02602  | 0.144441 | 0.00175  |
| 0.98385  | -0.10683 | 0.02094  | -0.03552 | 0.44383  |
| 0.00033  | -0.15885 | 0.00057  | 0.238087 | 1.93E-07 |
| 0.34733  | -0.01265 | 0.7852   | 0.181197 | 8.22E-05 |
| 1.91E-05 | 0.116934 | 0.01144  | 0.153109 | 0.0009   |
| 0.66951  | -0.0746  | 0.10739  | 0.114183 | 0.01355  |
| 0.84005  | -0.03308 | 0.47569  | 0.097417 | 0.03533  |
| 0.60447  | 0.015472 | 0.73878  | 0.32427  | 6.78E-13 |
| 0.0993   | 0.004377 | 0.92484  | 0.170604 | 0.00021  |
| 0.55551  | -0.01313 | 0.77721  | 0.022682 | 0.6249   |
| 0.27243  | -0.11921 | 0.00993  | 0.172027 | 0.00019  |
| 0.80916  | 0.042319 | 0.36152  | 0.156334 | 0.0007   |
| 0.37266  | -0.11543 | 0.01255  | 0.381946 | 1.14E-17 |
| 0.03259  | -0.04952 | 0.28556  | 0.285422 | 3.33E-10 |
| 0.01326  | -0.15829 | 0.0006   | -0.02189 | 0.63712  |
| 0.01907  | -0.02666 | 0.56544  | 0.363627 | 4.80E-16 |
| 0.12545  | -0.05429 | 0.24161  | 0.020453 | 0.65931  |
| 0.38707  | -0.0728  | 0.11618  | 0.104101 | 0.02447  |
| 0.82699  | -0.02525 | 0.58626  | 0.182641 | 7.19E-05 |
| 0.00296  | -0.00966 | 0.83504  | 0.133561 | 0.00383  |
| 0.63288  | -0.00768 | 0.8686   | 0.118734 | 0.01023  |
| 0.16518  | -0.07843 | 0.09045  | 0.366275 | 2.84E-16 |
| 0.64401  | -0.08464 | 0.06764  | 0.086555 | 0.06163  |
| 0.66357  | -0.07511 | 0.10498  | 0.131544 | 0.00441  |
| 0.16054  | -0.01687 | 0.71616  | 0.166842 | 0.00029  |
| 0.60199  | -0.00724 | 0.87601  | 0.065481 | 0.15772  |
| 0.01335  | -0.08789 | 0.05772  | 0.07145  | 0.1231   |
| 0.82447  | -0.03561 | 0.44267  | 0.094564 | 0.04109  |
| 0.92789  | -0.14716 | 0.00143  | 0.285475 | 3.30E-10 |
| 0.28213  | -0.12252 | 0.00803  | 0.131959 | 0.00428  |
| 0.45582  | -0.04652 | 0.3158   | 0.006105 | 0.89532  |
| 0.31241  | -0.14334 | 0.0019   | 0.063864 | 0.16826  |
| 0.00053  | -0.23754 | 2.06E-07 | -0.00762 | 0.86948  |
| 0.31303  | -0.12024 | 0.0093   | 0.037194 | 0.42262  |
| 0.89932  | -0.03859 | 0.40537  | 0.084044 | 0.06959  |
| 0.33876  | -0.05575 | 0.22919  | 0.117081 | 0.01134  |
| 0.68775  | -0.05259 | 0.25668  | 0.202915 | 9.90E-06 |
| 0.50393  | -0.02678 | 0.56377  | 0.094207 | 0.04186  |

|          |          |          |          |          |
|----------|----------|----------|----------|----------|
| 0.77779  | -0.11305 | 0.01451  | 0.386571 | 4.29E-18 |
| 0.44801  | -0.03255 | 0.48288  | 0.215977 | 2.47E-06 |
| 0.43977  | -0.04158 | 0.37002  | 0.183464 | 6.66E-05 |
| 0.81071  | -0.1135  | 0.01412  | 0.208532 | 5.51E-06 |
| 0.91325  | -0.06075 | 0.19     | 0.101643 | 0.02807  |
| 0.44868  | -0.10795 | 0.01963  | 0.141368 | 0.0022   |
| 0.79587  | -0.09353 | 0.04337  | 0.271671 | 2.41E-09 |
| 0.12838  | -0.04104 | 0.37621  | 0.484966 | 6.39E-29 |
| 0.65435  | -0.03907 | 0.39957  | 0.15474  | 0.00079  |
| 0.67182  | -0.03601 | 0.43749  | 0.180097 | 9.10E-05 |
| 0.32662  | 0.081682 | 0.07784  | 0.155092 | 0.00077  |
| 0.60289  | -0.05477 | 0.23749  | 0.05939  | 0.20015  |
| 0.4435   | -0.06723 | 0.14687  | 0.10586  | 0.02214  |
| 0.87853  | -0.07004 | 0.13071  | 0.04643  | 0.31673  |
| 0.94514  | -0.06999 | 0.13097  | 0.163537 | 0.00039  |
| 0.21676  | -0.01711 | 0.7123   | 0.23483  | 2.85E-07 |
| 0.46145  | -0.0783  | 0.091    | 0.158791 | 0.00057  |
| 0.18678  | -0.05617 | 0.22571  | 0.327991 | 3.57E-13 |
| 0.81033  | 0.04127  | 0.37355  | 0.012857 | 0.78169  |
| 0.82686  | -0.09049 | 0.05067  | 0.028044 | 0.54549  |
| 0.55137  | -0.10021 | 0.03038  | 0.207677 | 6.03E-06 |
| 0.0122   | 0.141871 | 0.00212  | -0.00951 | 0.83767  |
| 0.42846  | -0.10317 | 0.02579  | 0.037321 | 0.42103  |
| 0.08772  | -0.13319 | 0.00393  | 0.072686 | 0.11674  |
| 0.66302  | -0.07768 | 0.09361  | 0.255839 | 2.05E-08 |
| 0.55698  | -0.07581 | 0.10178  | 0.071311 | 0.12384  |
| 0.46716  | -0.09401 | 0.04228  | 0.242794 | 1.08E-07 |
| 0.03925  | -0.041   | 0.37669  | 0.164096 | 0.00037  |
| 0.88233  | -0.05289 | 0.25404  | 0.148277 | 0.00131  |
| 3.76E-06 | 0.194858 | 2.23E-05 | -0.06382 | 0.16857  |
| 0.43283  | -0.06543 | 0.15807  | 0.087687 | 0.05829  |
| 0.44952  | -0.0304  | 0.51223  | 0.151703 | 0.00101  |
| 0.55351  | -0.01465 | 0.75216  | 0.202226 | 1.06E-05 |
| 6.38E-06 | 0.059108 | 0.2023   | 0.3698   | 1.40E-16 |
| 0.93255  | -0.0219  | 0.63689  | 0.08829  | 0.05657  |
| 0.87487  | -0.08283 | 0.07373  | 0.101812 | 0.02781  |
| 0.60888  | -0.1016  | 0.02813  | 0.097402 | 0.03536  |
| 0.80947  | -0.06103 | 0.18802  | 0.157516 | 0.00064  |
| 0.45389  | -0.08687 | 0.06069  | 0.063976 | 0.16751  |
| 0.8966   | -0.03839 | 0.40782  | 0.190908 | 3.29E-05 |
| 0.84971  | -0.09553 | 0.03905  | 0.059917 | 0.19618  |
| 0.58321  | -0.09621 | 0.03767  | 0.061703 | 0.18316  |
| 0.21607  | -0.02384 | 0.6073   | 0.263898 | 7.01E-09 |
| 0.25851  | -0.12599 | 0.00641  | 0.201687 | 1.12E-05 |
| 0.38987  | -0.1496  | 0.00118  | 0.205661 | 7.45E-06 |

|          |          |          |          |          |
|----------|----------|----------|----------|----------|
| 0.33449  | 0.037405 | 0.41998  | 0.142916 | 0.00196  |
| 0.78772  | -0.06085 | 0.18926  | 0.247566 | 5.95E-08 |
| 0.76916  | -0.08274 | 0.07405  | 0.111013 | 0.01639  |
| 0.18841  | 0.0177   | 0.70282  | 0.216223 | 2.41E-06 |
| 0.8914   | 0.000822 | 0.98587  | -0.01313 | 0.7771   |
| 0.90018  | -0.01327 | 0.7748   | 0.002902 | 0.95013  |
| 0.02166  | -0.08679 | 0.06092  | 0.397659 | 3.83E-19 |
| 0.0637   | 0.021253 | 0.64688  | 0.109393 | 0.01804  |
| 0.5176   | -0.14438 | 0.00176  | 0.155751 | 0.00073  |
| 0.40289  | -0.06271 | 0.17612  | 0.018614 | 0.68827  |
| 0.06952  | 0.006781 | 0.8838   | 0.143791 | 0.00184  |
| 0.4233   | -0.08704 | 0.06019  | -0.02835 | 0.54108  |
| 0.23841  | -0.11103 | 0.01638  | 0.205962 | 7.22E-06 |
| 0.49209  | 0.035956 | 0.43823  | 0.028328 | 0.54143  |
| 0.41466  | -0.06859 | 0.13885  | 0.419855 | 2.29E-21 |
| 0.04053  | -0.02718 | 0.55798  | 0.078588 | 0.08981  |
| 0.58076  | -0.05543 | 0.23186  | 0.080431 | 0.08251  |
| 0.00911  | -0.07046 | 0.1284   | 0.341601 | 3.15E-14 |
| 0.816    | -0.14609 | 0.00155  | 0.395128 | 6.70E-19 |
| 0.89439  | -0.0745  | 0.10784  | 0.132219 | 0.00421  |
| 0.65362  | -0.09478 | 0.04063  | 0.138167 | 0.00277  |
| 0.08561  | -0.0304  | 0.51221  | 0.111562 | 0.01587  |
| 5.27E-07 | 0.342748 | 2.56E-14 | -0.07124 | 0.12424  |
| 2.08E-05 | -0.09697 | 0.03618  | -0.26409 | 6.84E-09 |
| 0.60747  | -0.07626 | 0.09976  | 0.252245 | 3.27E-08 |
| 6.02E-07 | -0.2039  | 8.94E-06 | -0.06855 | 0.1391   |
| 1.06E-07 | 0.132509 | 0.00412  | -0.02802 | 0.54587  |
| 0.01089  | -0.07742 | 0.09471  | 0.166133 | 0.00031  |
| 0.00011  | -0.27394 | 1.75E-09 | 0.085251 | 0.06567  |
| 0.0008   | 0.16418  | 0.00037  | 0.191288 | 3.17E-05 |
| 0.00406  | -0.0616  | 0.18389  | 0.075658 | 0.10248  |
| 0.0011   | -0.08854 | 0.05587  | -0.04658 | 0.31516  |
| 0.06936  | -0.02965 | 0.52277  | 0.208047 | 5.80E-06 |
| 0.28547  | -0.00563 | 0.90336  | 0.215104 | 2.72E-06 |
| 0.00243  | -0.02659 | 0.56659  | -0.01349 | 0.77116  |
| 6.29E-07 | -0.14525 | 0.00165  | -0.15814 | 0.0006   |
| 0.08251  | -0.01304 | 0.77867  | 0.250474 | 4.11E-08 |
| 4.22E-05 | -0.04388 | 0.34403  | -0.10575 | 0.02229  |
| 0.00015  | 0.011728 | 0.80044  | -0.11784 | 0.01081  |
| 1.25E-08 | -0.08772 | 0.05819  | -0.13796 | 0.00281  |
| 1.88E-12 | -0.00879 | 0.84976  | -0.18204 | 7.61E-05 |
| 1.94E-13 | -0.01318 | 0.77641  | -0.15196 | 0.00099  |
| 0.00244  | -0.13997 | 0.00243  | -0.10965 | 0.01777  |
| 0.01145  | 0.040868 | 0.37823  | -0.14466 | 0.00172  |
| 0.001    | -0.02648 | 0.56807  | -0.10106 | 0.02899  |

|          |          |          |          |          |
|----------|----------|----------|----------|----------|
| 0.00023  | -0.06788 | 0.14301  | 0.038075 | 0.41171  |
| 0.02823  | -0.15122 | 0.00105  | 0.316823 | 2.39E-12 |
| 0.90062  | 0.024773 | 0.59334  | -0.16228 | 0.00043  |
| 0.01527  | -0.09732 | 0.03552  | 0.086064 | 0.06312  |
| 0.15835  | 0.029425 | 0.52588  | -0.25907 | 1.34E-08 |
| 0.00031  | -0.13558 | 0.00333  | -0.11244 | 0.01505  |
| 0.32817  | -0.04455 | 0.33677  | -0.17217 | 0.00018  |
| 0.20232  | 0.02775  | 0.54971  | -0.01604 | 0.72948  |
| 0.03904  | -0.03007 | 0.51687  | -0.03403 | 0.46321  |
| 0.00016  | -0.01553 | 0.73779  | -0.28514 | 3.47E-10 |
| 0.00033  | 0.041679 | 0.36883  | 0.034969 | 0.45091  |
| 0.35386  | -0.06405 | 0.16701  | 0.11571  | 0.01234  |
| 0.90633  | 0.016267 | 0.72587  | -0.08631 | 0.06236  |
| 0.06165  | -0.03122 | 0.50087  | 0.354888 | 2.63E-15 |
| 3.24E-06 | -0.05678 | 0.22064  | 0.032418 | 0.48463  |
| 0.00163  | -0.13891 | 0.00263  | -0.24332 | 1.01E-07 |
| 0.52186  | -0.11744 | 0.01109  | 0.072423 | 0.11807  |
| 0.48414  | 0.028468 | 0.53943  | -0.0507  | 0.27425  |
| 0.95533  | 0.126015 | 0.0064   | 0.23591  | 2.50E-07 |
| 0.04611  | 0.179184 | 9.89E-05 | 0.31736  | 2.18E-12 |
| 0.00691  | -0.07276 | 0.11639  | 0.478385 | 4.41E-28 |
| 0.0178   | 0.181065 | 8.32E-05 | -0.14794 | 0.00135  |
| 0.33187  | 0.229602 | 5.29E-07 | -0.03457 | 0.45612  |
| 3.71E-06 | 0.005808 | 0.90039  | -0.1805  | 8.76E-05 |
| 9.94E-06 | -0.10607 | 0.02188  | -0.07141 | 0.12329  |
| 1.08E-06 | -0.09513 | 0.03989  | -0.12498 | 0.00685  |
| 1.74E-10 | -0.05446 | 0.24019  | -0.16227 | 0.00043  |
| 1.39E-15 | 0.022439 | 0.62862  | -0.2663  | 5.06E-09 |
| 1.10E-07 | -0.03515 | 0.44862  | -0.07428 | 0.10892  |
| 8.01E-09 | -0.13019 | 0.00483  | -0.09462 | 0.04097  |
| 3.06E-16 | -0.19904 | 1.47E-05 | -0.16343 | 0.00039  |
| 0.07095  | -0.17314 | 0.00017  | 0.021011 | 0.65063  |
| 3.67E-14 | 0.004526 | 0.92229  | -0.14547 | 0.00162  |
| 0.02183  | 0.071722 | 0.12168  | 0.125738 | 0.00651  |
| 1.44E-05 | 0.017903 | 0.69958  | -0.08817 | 0.05692  |
| 0.00806  | -0.11794 | 0.01075  | 0.033937 | 0.46439  |
| 0.03992  | -0.18104 | 8.34E-05 | -0.00278 | 0.95221  |
| 0.42857  | -0.0091  | 0.84455  | -0.15223 | 0.00097  |
| 1.65E-08 | -0.12149 | 0.00858  | -0.06857 | 0.13901  |
| 0.0145   | -0.00177 | 0.96964  | -0.06851 | 0.13931  |
| 0.02326  | -0.08106 | 0.08014  | 0.023511 | 0.61231  |
| 0.00051  | -0.10315 | 0.02581  | -0.13884 | 0.00264  |
| 1.58E-07 | -0.02875 | 0.53545  | -0.19413 | 2.40E-05 |
| 0.00027  | -0.00545 | 0.90644  | -0.1061  | 0.02184  |
| 8.33E-06 | 0.132906 | 0.00401  | -0.06241 | 0.17818  |

|          |          |          |          |          |
|----------|----------|----------|----------|----------|
| 2.08E-14 | -0.07063 | 0.12746  | -0.18917 | 3.88E-05 |
| 8.90E-18 | -0.05799 | 0.21102  | -0.26172 | 9.41E-09 |
| 0.29081  | -0.09976 | 0.03113  | 0.08688  | 0.06065  |
| 4.26E-08 | -0.14304 | 0.00194  | -0.0037  | 0.9365   |
| 3.11E-09 | -0.08694 | 0.06047  | -0.05767 | 0.21348  |
| 2.21E-11 | -0.07387 | 0.11089  | -0.19149 | 3.10E-05 |
| 6.23E-05 | 0.011498 | 0.80427  | -0.04076 | 0.3795   |
| 0.97874  | -0.0696  | 0.13312  | 0.196573 | 1.88E-05 |
| 1.54E-11 | 0.009692 | 0.83453  | -0.24211 | 1.18E-07 |
| 0.01178  | -0.06947 | 0.13387  | 0.062588 | 0.17694  |
| 0.66543  | 0.045336 | 0.32828  | 0.059553 | 0.19892  |
| 0.00377  | 0.091378 | 0.04844  | -0.2783  | 9.39E-10 |
| 1.71E-05 | -0.05183 | 0.26361  | 0.093261 | 0.04397  |
| 1.30E-05 | -0.13097 | 0.00458  | 0.050359 | 0.27746  |
| 0.00467  | -0.03359 | 0.46904  | 0.081956 | 0.07684  |
| 0.52412  | -0.05291 | 0.25381  | 0.083554 | 0.07124  |
| 1.73E-12 | -0.16058 | 0.00049  | -0.19904 | 1.47E-05 |
| 0.18085  | -0.01024 | 0.82534  | 0.098047 | 0.03415  |
| 1.22E-09 | -0.20862 | 5.46E-06 | 0.006369 | 0.89082  |
| 0.00054  | -0.17052 | 0.00021  | -0.03302 | 0.47659  |
| 0.02023  | -0.19267 | 2.77E-05 | 0.079143 | 0.08756  |
| 8.48E-17 | -0.05624 | 0.22513  | -0.27579 | 1.35E-09 |
| 2.86E-05 | -0.12278 | 0.0079   | -0.10188 | 0.0277   |
| 9.02E-13 | -0.02952 | 0.52448  | -0.22869 | 5.88E-07 |
| 1.90E-14 | 0.03117  | 0.50161  | -0.18674 | 4.90E-05 |
| 3.51E-06 | 0.080659 | 0.08164  | -0.08486 | 0.0669   |
| 0.30078  | -0.01981 | 0.66934  | 0.123103 | 0.00774  |
| 9.49E-11 | -0.01569 | 0.73523  | -0.10643 | 0.02143  |
| 0.12076  | -0.02051 | 0.6585   | 0.025272 | 0.58591  |
| 1.05E-05 | -0.02949 | 0.52498  | -0.21326 | 3.32E-06 |
| 2.72E-12 | 0.010496 | 0.82102  | -0.14536 | 0.00164  |
| 0.07006  | -0.07021 | 0.12976  | 0.053765 | 0.24622  |
| 8.08E-07 | -0.10033 | 0.03017  | -0.06784 | 0.14325  |
| 1.27E-05 | -0.03655 | 0.43067  | 0.004972 | 0.91466  |
| 0.00681  | 0.018113 | 0.69623  | 0.068065 | 0.14192  |
| 3.67E-16 | -0.03369 | 0.46764  | -0.22741 | 6.82E-07 |
| 0.12073  | -0.09207 | 0.04675  | 0.118475 | 0.01039  |
| 0.00488  | -0.07588 | 0.10148  | -0.0493  | 0.28775  |
| 0.00043  | -0.12392 | 0.00734  | 0.002857 | 0.95091  |
| 0.98891  | -0.0862  | 0.06269  | -0.0553  | 0.23294  |
| 0.03373  | 0.052413 | 0.25831  | -0.02737 | 0.5552   |
| 0.11044  | -0.09172 | 0.04759  | 0.095961 | 0.03818  |
| 0.70012  | -0.01075 | 0.81676  | 0.118792 | 0.01019  |
| 5.21E-15 | 0.029887 | 0.51939  | -0.25227 | 3.27E-08 |
| 0.01929  | -0.03069 | 0.50821  | 0.024431 | 0.59846  |

|          |          |          |          |          |
|----------|----------|----------|----------|----------|
| 7.81E-08 | -0.02114 | 0.64859  | -0.05093 | 0.27203  |
| 0.00073  | -0.1693  | 0.00024  | -0.05989 | 0.19641  |
| 3.45E-15 | -0.13688 | 0.00304  | -0.20813 | 5.75E-06 |
| 4.35E-10 | -0.03685 | 0.42697  | -0.05932 | 0.2007   |
| 4.06E-06 | -0.05228 | 0.25949  | -0.14857 | 0.00128  |
| 0.06545  | -0.13969 | 0.00248  | 0.019121 | 0.68024  |
| 1.63E-07 | -0.06828 | 0.14065  | -0.07079 | 0.1266   |
| 3.24E-08 | 0.069554 | 0.13339  | -0.14615 | 0.00154  |
| 2.83E-09 | -0.01885 | 0.68446  | -0.10193 | 0.02762  |
| 5.83E-06 | -0.16282 | 0.00041  | -0.07766 | 0.09369  |
| 0.02501  | 0.182864 | 7.05E-05 | 0.009317 | 0.84085  |
| 0.50292  | 0.113864 | 0.01381  | -0.27707 | 1.12E-09 |
| 0.0347   | 0.04463  | 0.33587  | -0.1083  | 0.01924  |
| 0.00276  | -0.09302 | 0.04453  | -0.05047 | 0.27636  |
| 0.00324  | -0.05868 | 0.20556  | -0.18732 | 4.64E-05 |
| 0.33095  | 0.074784 | 0.10652  | -0.08196 | 0.07681  |
| 6.41E-05 | -0.05986 | 0.19664  | -0.07783 | 0.09297  |
| 6.52E-10 | -0.03134 | 0.49928  | -0.32954 | 2.72E-13 |
| 0.00376  | 0.051974 | 0.26232  | 0.045456 | 0.32699  |
| 0.07596  | 0.049255 | 0.28814  | -0.07984 | 0.08479  |
| 0.00021  | 0.227002 | 7.15E-07 | 0.302423 | 2.48E-11 |
| 0.00072  | 0.042327 | 0.36142  | -0.1502  | 0.00113  |
| 0.07532  | -0.08674 | 0.06108  | 0.094337 | 0.04158  |
| 0.02404  | 0.032971 | 0.47721  | 0.12588  | 0.00645  |
| 0.00667  | 0.042213 | 0.36272  | 0.367165 | 2.38E-16 |
| 1.15E-06 | 0.109965 | 0.01744  | 0.341883 | 3.00E-14 |
| 0.00282  | -0.00993 | 0.83048  | 0.096844 | 0.03643  |
| 0.00467  | 0.12358  | 0.0075   | 0.265628 | 5.54E-09 |
| 0.03366  | 0.101785 | 0.02785  | 0.294296 | 8.76E-11 |
| 0.97736  | -0.06333 | 0.17188  | 0.197049 | 1.79E-05 |
| 0.34797  | 0.080374 | 0.08273  | -0.08992 | 0.05214  |
| 0.1404   | -0.01912 | 0.68022  | 0.148293 | 0.00131  |
| 0.17861  | -0.08117 | 0.07972  | 0.181791 | 7.78E-05 |
| 0.00072  | -0.18671 | 4.91E-05 | -0.25289 | 3.02E-08 |
| 0.4297   | 0.121108 | 0.0088   | 0.009646 | 0.8353   |
| 0.75369  | 0.063657 | 0.16964  | 0.04217  | 0.36321  |
| 0.04953  | -0.01489 | 0.7483   | 0.142585 | 0.00201  |
| 0.97061  | 0.049428 | 0.28645  | 0.063591 | 0.17009  |
| 0.0711   | -0.02759 | 0.55208  | 0.301088 | 3.05E-11 |
| 0.01709  | 0.044299 | 0.33947  | 0.104813 | 0.0235   |
| 1.82E-09 | 0.354931 | 2.60E-15 | 0.082481 | 0.07496  |
| 0.00741  | 0.042546 | 0.35895  | 0.218185 | 1.94E-06 |
| 0.13231  | 0.031453 | 0.49774  | 0.100587 | 0.02975  |
| 0.85716  | -0.00178 | 0.96932  | 0.137482 | 0.00291  |
| 0.04164  | 0.154623 | 0.0008   | -0.13139 | 0.00445  |



|          |          |          |          |          |
|----------|----------|----------|----------|----------|
| 0.07482  | 0.108609 | 0.01889  | 0.009071 | 0.84499  |
| 0.00045  | -0.06678 | 0.1496   | 0.107309 | 0.02037  |
| 0.62236  | -0.08597 | 0.06341  | 0.32009  | 1.38E-12 |
| 0.45389  | 0.086844 | 0.06076  | 0.028436 | 0.53988  |
| 0.00746  | -0.03638 | 0.43289  | 0.279017 | 8.48E-10 |
| 0.06934  | 0.023205 | 0.61695  | 0.154292 | 0.00082  |
| 0.43473  | 0.110406 | 0.017    | 0.129376 | 0.00511  |
| 0.74666  | 0.072332 | 0.11853  | 0.156453 | 0.00069  |
| 0.56646  | 0.157924 | 0.00061  | -0.03855 | 0.40595  |
| 0.055    | 0.110033 | 0.01737  | 0.078968 | 0.08827  |
| 0.39455  | 0.046253 | 0.31858  | -0.01163 | 0.80212  |
| 0.94251  | -0.01031 | 0.82419  | 0.201915 | 1.10E-05 |
| 0.00111  | 0.106994 | 0.02074  | 0.375094 | 4.76E-17 |
| 0.39322  | 0.063585 | 0.17013  | 0.045692 | 0.32448  |
| 0.18719  | 0.010242 | 0.8253   | 0.111319 | 0.0161   |
| 0.063    | 0.092038 | 0.04683  | 0.127401 | 0.00583  |
| 0.67724  | -0.12027 | 0.00928  | 0.166325 | 0.00031  |
| 0.01396  | 0.110269 | 0.01713  | 0.207838 | 5.93E-06 |
| 0.57913  | -0.04278 | 0.3563   | 0.224334 | 9.71E-07 |
| 0.63591  | 0.093021 | 0.04452  | 0.232896 | 3.59E-07 |
| 0.023    | 0.238678 | 1.79E-07 | 0.067927 | 0.14274  |
| 0.21057  | -0.03706 | 0.42427  | 0.219388 | 1.70E-06 |
| 0.03426  | 0.031069 | 0.50301  | 0.037313 | 0.42113  |
| 0.17261  | 0.030565 | 0.50996  | 0.002198 | 0.96222  |
| 0.28863  | 0.001871 | 0.96784  | 0.118944 | 0.01009  |
| 0.13927  | 0.050921 | 0.27213  | -0.01185 | 0.79841  |
| 0.16741  | -0.02621 | 0.57201  | 0.474077 | 1.53E-27 |
| 0.93637  | 0.135508 | 0.00335  | 0.167663 | 0.00027  |
| 0.98245  | 0.063241 | 0.17245  | 0.000694 | 0.98807  |
| 0.08741  | 0.139525 | 0.00251  | 0.147946 | 0.00134  |
| 0.25035  | -0.07189 | 0.12079  | 0.110618 | 0.01678  |
| 0.2046   | 0.056802 | 0.2205   | 0.1988   | 1.51E-05 |
| 0.32505  | 0.079279 | 0.08702  | 0.166602 | 0.0003   |
| 0.48872  | 0.025264 | 0.58605  | 0.153937 | 0.00085  |
| 0.13686  | 0.063168 | 0.17295  | 0.314177 | 3.71E-12 |
| 0.22615  | 0.063985 | 0.16745  | 0.07205  | 0.11998  |
| 0.14588  | 0.126209 | 0.00631  | 0.059075 | 0.20255  |
| 7.51E-10 | 0.183384 | 6.71E-05 | 0.478789 | 3.92E-28 |
| 0.91981  | 0.104578 | 0.02382  | 0.078602 | 0.08976  |
| 0.04159  | 0.060819 | 0.18952  | 0.259843 | 1.21E-08 |
| 0.18034  | -0.02593 | 0.57615  | 0.29703  | 5.75E-11 |
| 0.19387  | 0.11761  | 0.01097  | 0.096043 | 0.03801  |
| 0.00766  | 0.071971 | 0.12039  | 0.082515 | 0.07484  |
| 2.60E-08 | 0.164645 | 0.00035  | 0.353347 | 3.53E-15 |
| 0.12677  | -0.07661 | 0.09824  | 0.037019 | 0.42481  |

|          |          |          |          |          |
|----------|----------|----------|----------|----------|
| 0.14823  | 0.017203 | 0.71079  | 0.166604 | 0.0003   |
| 6.05E-05 | 0.14708  | 0.00144  | 0.304714 | 1.72E-11 |
| 0.95804  | 0.095164 | 0.03981  | -0.00896 | 0.84686  |
| 0.33473  | -0.09003 | 0.05185  | 0.372154 | 8.68E-17 |
| 0.03497  | 0.061587 | 0.18398  | 0.234706 | 2.89E-07 |
| 0.88827  | 0.113608 | 0.01403  | -0.08743 | 0.05904  |
| 0.3777   | -0.04779 | 0.30274  | 0.338432 | 5.61E-14 |
| 0.07395  | -0.1417  | 0.00214  | 0.275103 | 1.48E-09 |
| 0.48273  | -0.08487 | 0.06687  | 0.175022 | 0.00014  |
| 0.47731  | 0.01948  | 0.67458  | 0.375105 | 4.75E-17 |
| 0.67859  | 0.130476 | 0.00474  | -0.05488 | 0.23651  |
| 0.33317  | 0.058903 | 0.20387  | -0.19355 | 2.54E-05 |
| 0.42476  | 0.107563 | 0.02007  | 0.043541 | 0.34781  |
| 2.14E-06 | 0.081062 | 0.08013  | -0.0134  | 0.77267  |
| 0.21149  | 0.088466 | 0.05608  | -0.00648 | 0.8889   |
| 0.56217  | 0.037816 | 0.4149   | 0.234452 | 2.98E-07 |
| 0.7106   | -0.02698 | 0.56079  | 0.442265 | 8.73E-24 |
| 0.00822  | -0.18752 | 4.55E-05 | 0.411959 | 1.48E-20 |
| 0.02699  | -0.19764 | 1.69E-05 | 0.432267 | 1.10E-22 |
| 4.34E-08 | 0.010349 | 0.82349  | 0.510702 | 2.20E-32 |
| 0.01424  | 0.010686 | 0.81786  | -0.02759 | 0.55207  |
| 0.23021  | 0.203124 | 9.69E-06 | 0.055755 | 0.22914  |
| 0.00077  | 0.059226 | 0.2014   | -0.11536 | 0.01261  |
| 0.84973  | 0.036976 | 0.42534  | -0.09946 | 0.03164  |
| 0.02098  | 0.063713 | 0.16927  | -0.15189 | 0.00099  |
| 0.9206   | 0.005565 | 0.90453  | 0.178982 | 0.0001   |
| 0.09789  | 0.093361 | 0.04374  | -0.08985 | 0.05234  |
| 0.14279  | 0.055794 | 0.22881  | 0.066989 | 0.14835  |
| 0.12459  | 0.063112 | 0.17333  | -0.01132 | 0.80728  |
| 0.02025  | 0.078051 | 0.09204  | -0.01963 | 0.67218  |
| 0.26428  | -0.02556 | 0.58167  | 0.061944 | 0.18145  |
| 0.37849  | 0.106749 | 0.02104  | -0.00038 | 0.99353  |
| 0.60156  | 0.053444 | 0.24905  | 0.061301 | 0.18603  |
| 0.02842  | 0.341181 | 3.40E-14 | -0.04271 | 0.35708  |
| 0.0988   | 0.015926 | 0.7314   | 0.121376 | 0.00865  |
| 0.00712  | -0.01843 | 0.6912   | 0.053812 | 0.2458   |
| 0.05119  | 0.098034 | 0.03418  | 0.099859 | 0.03096  |
| 0.00675  | 0.059321 | 0.20068  | -0.10117 | 0.02881  |
| 0.24698  | 0.090984 | 0.04942  | 0.086483 | 0.06184  |
| 0.01249  | 0.03946  | 0.39489  | -0.20287 | 9.95E-06 |
| 0.35784  | -0.03047 | 0.51129  | 0.244083 | 9.22E-08 |
| 0.12776  | 0.118168 | 0.0106   | -0.04808 | 0.29982  |
| 0.81596  | 0.165793 | 0.00032  | 0.030589 | 0.50963  |
| 0.4483   | 0.050444 | 0.27665  | 0.271656 | 2.41E-09 |
| 0.44821  | 0.124618 | 0.00701  | -0.02745 | 0.55401  |

|          |           |          |          |          |
|----------|-----------|----------|----------|----------|
| 0.17446  | 0.050277  | 0.27824  | -0.0635  | 0.17073  |
| 0.39401  | 0.054286  | 0.24166  | 0.229764 | 5.19E-07 |
| 0.0016   | 0.025514  | 0.58233  | -0.03048 | 0.51113  |
| 0.09355  | 0.075784  | 0.10191  | 0.184987 | 5.78E-05 |
| 0.69534  | 0.002552  | 0.95613  | 0.233965 | 3.16E-07 |
| 0.1315   | 0.196955  | 1.81E-05 | -0.02287 | 0.62205  |
| 0.86578  | 0.127399  | 0.00583  | -0.12242 | 0.00808  |
| 0.26722  | 0.038243  | 0.40964  | -0.09275 | 0.04514  |
| 0.12495  | 0.080121  | 0.08371  | -0.02982 | 0.52028  |
| 0.06142  | 0.002223  | 0.96179  | 0.328674 | 3.17E-13 |
| 0.03045  | -7.61E-05 | 0.99869  | 0.172659 | 0.00018  |
| 0.72049  | 0.090275  | 0.05122  | 0.053767 | 0.24619  |
| 0.00172  | 0.068624  | 0.13867  | -0.01115 | 0.81008  |
| 0.07655  | 0.068098  | 0.14173  | 0.09819  | 0.03389  |
| 0.57482  | 0.185191  | 5.67E-05 | 0.082255 | 0.07577  |
| 0.00166  | 0.097675  | 0.03484  | -0.1798  | 9.34E-05 |
| 0.48373  | 0.078024  | 0.09215  | 0.216976 | 2.21E-06 |
| 1.23E-05 | 0.094613  | 0.04098  | -0.18234 | 7.40E-05 |
| 0.82101  | 0.079853  | 0.08475  | -0.09581 | 0.03848  |
| 0.00039  | 0.160002  | 0.00052  | -0.39858 | 3.12E-19 |
| 6.54E-05 | 0.042061  | 0.36446  | -0.08968 | 0.05279  |
| 0.02653  | 0.131404  | 0.00445  | 0.037741 | 0.41582  |
| 0.00026  | 0.242956  | 1.06E-07 | 0.241584 | 1.26E-07 |
| 0.25121  | 0.225935  | 8.08E-07 | 0.08505  | 0.06631  |
| 0.26988  | 0.067477  | 0.14541  | 0.150474 | 0.00111  |
| 0.20378  | 0.11499   | 0.0129   | 0.127921 | 0.00563  |
| 0.45004  | 0.10633   | 0.02155  | -0.20256 | 1.03E-05 |
| 0.09937  | 0.078984  | 0.08821  | -0.12504 | 0.00682  |
| 0.30796  | 0.121396  | 0.00864  | -0.042   | 0.36519  |
| 0.00761  | 0.054818  | 0.23707  | -0.02276 | 0.62371  |
| 0.19966  | 0.164393  | 0.00036  | -0.14419 | 0.00178  |
| 0.21933  | 0.180343  | 8.89E-05 | -0.00451 | 0.92254  |
| 0.84219  | 0.043465  | 0.34865  | -0.12801 | 0.0056   |
| 0.37688  | 0.063741  | 0.16908  | 0.213485 | 3.24E-06 |
| 0.06353  | 0.048776  | 0.29286  | 0.048436 | 0.29625  |
| 0.00191  | 0.109734  | 0.01768  | -0.22286 | 1.15E-06 |
| 0.09905  | -0.0164   | 0.72376  | 0.105278 | 0.02289  |
| 0.23524  | 0.018354  | 0.6924   | -0.04979 | 0.28295  |
| 0.0077   | 0.086834  | 0.06079  | -0.02801 | 0.54605  |
| 0.19766  | 0.061411  | 0.18524  | 0.204833 | 8.12E-06 |
| 0.01083  | 0.037132  | 0.42339  | 0.001591 | 0.97265  |
| 3.94E-05 | 0.091811  | 0.04738  | -0.1355  | 0.00335  |
| 0.92673  | 0.086903  | 0.06059  | 0.035917 | 0.43873  |
| 5.17E-08 | 0.039411  | 0.39547  | -0.18894 | 3.97E-05 |
| 0.46283  | 0.14815   | 0.00132  | 0.041608 | 0.36964  |

|          |          |         |          |          |
|----------|----------|---------|----------|----------|
| 0.02496  | 0.146295 | 0.00152 | 0.121175 | 0.00876  |
| 0.00145  | 0.005234 | 0.91019 | 0.031161 | 0.50174  |
| 1.41E-06 | 0.017113 | 0.71224 | -0.11788 | 0.01079  |
| 0.0153   | 0.014062 | 0.76182 | 0.058085 | 0.21024  |
| 0.3214   | 0.127202 | 0.00591 | 0.141058 | 0.00225  |
| 0.12387  | 0.021843 | 0.63777 | 0.032678 | 0.48114  |
| 0.11326  | -0.14473 | 0.00171 | 0.197133 | 1.78E-05 |
| 0.00529  | 0.020722 | 0.65513 | -0.07646 | 0.09889  |
| 0.38145  | 0.098674 | 0.03302 | -0.00309 | 0.94689  |
| 0.25936  | 0.084772 | 0.0672  | -0.0682  | 0.14112  |
| 0.30034  | 0.027726 | 0.55006 | 0.022495 | 0.62776  |
| 0.00332  | 0.039372 | 0.39594 | 0.001097 | 0.98114  |
| 0.08093  | 0.022217 | 0.63202 | -0.10203 | 0.02747  |
| 3.27E-05 | 0.053938 | 0.2447  | 0.049472 | 0.28602  |
| 0.18493  | 0.145385 | 0.00163 | -0.0215  | 0.64307  |
| 0.27117  | 0.050507 | 0.27605 | -0.21033 | 4.55E-06 |
| 0.03357  | 0.148421 | 0.0013  | -0.00631 | 0.89189  |
| 0.48138  | 0.150886 | 0.00107 | -0.01646 | 0.72276  |
| 0.21657  | 0.125633 | 0.00656 | -0.07071 | 0.12702  |
| 0.03242  | 0.059097 | 0.20239 | 0.101437 | 0.02839  |
| 0.99763  | 0.138133 | 0.00278 | -0.00936 | 0.84016  |
| 0.24818  | -0.02657 | 0.56687 | 0.150486 | 0.00111  |
| 0.06238  | 0.141477 | 0.00218 | -0.05128 | 0.2688   |
| 4.35E-07 | -0.01589 | 0.73193 | 0.071285 | 0.12397  |
| 3.67E-05 | 0.014731 | 0.75086 | -0.18702 | 4.77E-05 |
| 0.32286  | 0.069986 | 0.13099 | 0.182542 | 7.26E-05 |
| 0.00522  | 0.105235 | 0.02294 | -0.23118 | 4.39E-07 |
| 0.17041  | 0.072201 | 0.1192  | -0.01109 | 0.81107  |
| 0.79755  | 0.137214 | 0.00297 | 0.093447 | 0.04355  |
| 0.00556  | 0.101746 | 0.02791 | -0.07642 | 0.09906  |
| 0.4965   | 0.056373 | 0.22401 | 0.104742 | 0.02359  |
| 0.43906  | -0.08876 | 0.05526 | 0.18412  | 6.27E-05 |
| 0.01692  | 0.131186 | 0.00452 | 0.017833 | 0.7007   |
| 0.27722  | 0.066602 | 0.15071 | -0.15262 | 0.00094  |
| 0.00224  | 0.086649 | 0.06134 | -0.13688 | 0.00304  |
| 0.03375  | 0.160827 | 0.00048 | 0.022741 | 0.62401  |
| 0.00526  | 0.032105 | 0.48886 | 0.110907 | 0.0165   |
| 0.27173  | 0.073365 | 0.11335 | -0.11069 | 0.01671  |
| 0.19293  | 0.069153 | 0.13565 | -0.01035 | 0.82347  |
| 0.00553  | 0.020897 | 0.6524  | -0.16077 | 0.00049  |
| 0.87932  | -0.00016 | 0.99732 | -0.01883 | 0.6849   |
| 0.00033  | -0.01502 | 0.74619 | -0.20953 | 4.96E-06 |
| 0.00051  | 0.00045  | 0.99226 | 0.074596 | 0.10741  |
| 0.0018   | 0.006756 | 0.88424 | 0.003845 | 0.93396  |
| 0.06306  | 0.060731 | 0.19016 | -0.0129  | 0.78096  |

|          |          |         |          |          |
|----------|----------|---------|----------|----------|
| 0.00179  | 0.033157 | 0.47473 | -0.21424 | 2.99E-06 |
| 0.72001  | -0.05437 | 0.24096 | 0.405573 | 6.44E-20 |
| 0.01867  | 0.126995 | 0.00599 | 0.037051 | 0.42441  |
| 0.00015  | 0.049189 | 0.28879 | -0.10045 | 0.02997  |
| 0.23752  | 0.112854 | 0.01469 | 0.080007 | 0.08415  |
| 0.62094  | 0.069973 | 0.13106 | 5.17E-05 | 0.99911  |
| 0.00669  | 0.107331 | 0.02034 | -0.21849 | 1.87E-06 |
| 0.15484  | 0.067773 | 0.14365 | 0.155979 | 0.00072  |
| 0.02115  | 0.089063 | 0.05444 | 0.050176 | 0.27921  |
| 0.00552  | -0.02786 | 0.54811 | -0.04905 | 0.29012  |
| 0.24372  | 0.114063 | 0.01365 | -0.02693 | 0.56164  |
| 0.17278  | 0.061267 | 0.18627 | 0.067499 | 0.14528  |
| 0.00034  | 0.07668  | 0.09791 | -0.17467 | 0.00015  |
| 0.07674  | -0.01301 | 0.77914 | -0.04821 | 0.29853  |
| 0.85761  | 0.125714 | 0.00652 | 0.172374 | 0.00018  |
| 0.01801  | 0.173218 | 0.00017 | -0.12291 | 0.00784  |
| 0.04071  | 0.030908 | 0.50522 | 0.031472 | 0.49748  |
| 0.00032  | -0.02952 | 0.52457 | 0.034559 | 0.45624  |
| 0.0236   | 0.038308 | 0.40884 | 0.095784 | 0.03853  |
| 0.82731  | 0.013006 | 0.77924 | 0.085659 | 0.06438  |
| 0.93822  | 0.075591 | 0.10279 | 0.254588 | 2.42E-08 |
| 0.10653  | 0.139255 | 0.00256 | 0.173756 | 0.00016  |
| 0.36825  | 0.165772 | 0.00032 | 0.000671 | 0.98845  |
| 0.93214  | -0.07064 | 0.12741 | 0.102532 | 0.02672  |
| 0.00021  | 0.059382 | 0.20021 | -0.11786 | 0.0108   |
| 0.00292  | -0.0541  | 0.24332 | 0.078385 | 0.09065  |
| 0.00085  | 0.022768 | 0.62359 | -0.24592 | 7.33E-08 |
| 0.03006  | -0.08736 | 0.05924 | 0.045139 | 0.33038  |
| 0.06057  | -0.0355  | 0.44401 | 0.002394 | 0.95885  |
| 0.17482  | -0.01431 | 0.75782 | 0.117371 | 0.01114  |
| 0.02415  | 0.100174 | 0.03043 | -0.18765 | 4.49E-05 |
| 0.01472  | -0.03807 | 0.41171 | 0.087282 | 0.05947  |
| 0.00021  | 0.114003 | 0.0137  | -0.1941  | 2.40E-05 |
| 0.00958  | -0.13137 | 0.00446 | 0.072706 | 0.11664  |
| 0.01557  | -0.07842 | 0.09051 | -0.02063 | 0.65662  |
| 0.05557  | -0.00413 | 0.92901 | 0.171875 | 0.00019  |
| 4.62E-08 | -0.12872 | 0.00534 | 0.228031 | 6.35E-07 |
| 0.5434   | -0.05972 | 0.19764 | -0.03299 | 0.47698  |
| 1.54E-07 | -0.14909 | 0.00123 | 0.15292  | 0.00092  |
| 0.00031  | -0.0053  | 0.90909 | 0.067115 | 0.14758  |
| 0.00085  | -0.07052 | 0.12809 | 0.190999 | 3.26E-05 |
| 0.01176  | 0.028116 | 0.54447 | 0.081908 | 0.07701  |
| 0.36178  | -0.07911 | 0.08771 | -0.15203 | 0.00098  |
| 0.10224  | -0.09894 | 0.03254 | 0.112363 | 0.01512  |
| 0.08463  | -0.05359 | 0.24776 | -0.06001 | 0.1955   |

|          |          |          |          |          |
|----------|----------|----------|----------|----------|
| 0.00131  | 0.000821 | 0.98588  | 0.070751 | 0.12682  |
| 0.06187  | -0.13934 | 0.00255  | 0.033862 | 0.46538  |
| 0.11024  | -0.14237 | 0.00204  | 0.120696 | 0.00903  |
| 0.00025  | -0.06678 | 0.1496   | 0.342433 | 2.71E-14 |
| 3.54E-05 | -0.11908 | 0.01001  | 0.172665 | 0.00018  |
| 3.52E-05 | -0.20496 | 8.01E-06 | 0.226374 | 7.69E-07 |
| 6.02E-06 | -0.04605 | 0.32076  | 0.396364 | 5.10E-19 |
| 0.26807  | -0.18988 | 3.63E-05 | -0.03696 | 0.42551  |
| 6.82E-07 | -0.04046 | 0.38307  | 0.186405 | 5.06E-05 |
| 2.90E-06 | -0.13931 | 0.00255  | 0.215625 | 2.57E-06 |
| 0.0002   | -0.08519 | 0.06587  | 0.001685 | 0.97104  |
| 0.02118  | 0.046797 | 0.31291  | -0.02128 | 0.64643  |
| 8.96E-09 | -0.17434 | 0.00015  | 0.259764 | 1.22E-08 |
| 0.02421  | -0.15786 | 0.00062  | -0.11907 | 0.01001  |
| 0.03263  | -0.00193 | 0.9668   | 0.010794 | 0.81604  |
| 2.20E-07 | -0.04654 | 0.31553  | 0.403514 | 1.03E-19 |
| 3.68E-05 | 0.053815 | 0.24577  | -0.05595 | 0.22754  |
| 0.00093  | 0.021556 | 0.64219  | -0.13252 | 0.00412  |
| 0.07877  | 0.116945 | 0.01144  | -0.05659 | 0.22219  |
| 0.0019   | -0.06939 | 0.13429  | 0.000779 | 0.98661  |
| 1.09E-06 | -0.14115 | 0.00223  | 0.377556 | 2.86E-17 |
| 0.00036  | -0.11837 | 0.01046  | 0.395007 | 6.88E-19 |
| 0.00031  | 0.060691 | 0.19045  | -0.06456 | 0.16364  |
| 0.80313  | -0.09395 | 0.04241  | 0.028981 | 0.53214  |
| 0.59453  | -0.08953 | 0.05319  | -0.16863 | 0.00025  |
| 0.01581  | 0.065637 | 0.15673  | 0.020262 | 0.6623   |
| 0.5495   | -0.04866 | 0.29398  | 0.08207  | 0.07643  |
| 0.02496  | -0.14075 | 0.0023   | 0.073215 | 0.11409  |
| 4.19E-10 | -0.05829 | 0.20859  | -0.077   | 0.0965   |
| 7.10E-07 | -0.11988 | 0.00952  | 0.275158 | 1.47E-09 |
| 0.1968   | -0.11852 | 0.01036  | 0.111212 | 0.0162   |
| 0.00073  | -0.12048 | 0.00916  | 0.024978 | 0.59029  |
| 5.85E-07 | 0.03864  | 0.4048   | 0.445168 | 4.11E-24 |
| 0.54418  | -0.1202  | 0.00932  | 0.031421 | 0.49817  |
| 0.00514  | -0.05413 | 0.24301  | 0.081075 | 0.08008  |
| 4.59E-05 | -0.09402 | 0.04226  | 0.10102  | 0.02905  |
| 0.68573  | -0.0296  | 0.52346  | -0.13621 | 0.00318  |
| 0.08247  | 0.035661 | 0.442    | 0.07458  | 0.10748  |
| 0.80103  | 0.005896 | 0.89889  | -0.25701 | 1.76E-08 |
| 1.98E-07 | -0.1326  | 0.0041   | 0.147425 | 0.0014   |
| 0.34311  | -0.03229 | 0.48634  | 0.115256 | 0.01269  |
| 1.66E-07 | -0.12433 | 0.00714  | 0.127239 | 0.0059   |
| 0.00751  | 0.027381 | 0.55503  | -0.13298 | 0.00399  |
| 0.54455  | -0.05685 | 0.22011  | -0.00923 | 0.84228  |
| 3.92E-09 | -0.06842 | 0.13984  | 0.113728 | 0.01393  |

|          |          |          |          |          |
|----------|----------|----------|----------|----------|
| 0.00034  | -0.03318 | 0.47446  | 0.123361 | 0.00761  |
| 2.26E-08 | 0.037212 | 0.42239  | 0.179215 | 9.86E-05 |
| 0.61978  | -0.06876 | 0.13792  | -0.14907 | 0.00123  |
| 2.47E-05 | -0.01448 | 0.75493  | 0.186337 | 5.09E-05 |
| 8.46E-19 | -0.07927 | 0.08706  | -0.44521 | 4.07E-24 |
| 0.02329  | -0.10401 | 0.02459  | 0.253293 | 2.86E-08 |
| 0.00654  | -0.05954 | 0.19904  | 0.100227 | 0.03034  |
| 0.01013  | -0.11224 | 0.01524  | 0.095625 | 0.03886  |
| 0.59244  | 0.081651 | 0.07795  | -0.1017  | 0.02798  |
| 0.43034  | -0.14103 | 0.00225  | -0.02103 | 0.65035  |
| 0.00028  | -0.07359 | 0.11223  | 0.081885 | 0.0771   |
| 0.01453  | -0.07968 | 0.08543  | -0.0968  | 0.03651  |
| 7.00E-07 | 0.101252 | 0.02868  | 0.226752 | 7.36E-07 |
| 0.00075  | -0.07746 | 0.09452  | 0.06174  | 0.18289  |
| 0.05903  | -0.01936 | 0.67648  | -0.01092 | 0.81387  |
| 3.52E-05 | -0.07028 | 0.12938  | 0.173532 | 0.00016  |
| 6.33E-08 | 0.115379 | 0.0126   | -0.04388 | 0.34411  |
| 2.89E-09 | 0.034429 | 0.45794  | 0.177742 | 0.00011  |
| 0.00027  | -0.04846 | 0.296    | 0.263282 | 7.62E-09 |
| 0.52924  | -0.03447 | 0.45742  | -0.04224 | 0.36246  |
| 0.05942  | -0.00729 | 0.87515  | -0.05273 | 0.25546  |
| 0.41615  | -0.12952 | 0.00506  | 0.088409 | 0.05624  |
| 0.00033  | -0.00898 | 0.84649  | 0.288827 | 2.01E-10 |
| 0.60367  | -0.13545 | 0.00336  | -0.17772 | 0.00011  |
| 1.40E-05 | -0.19754 | 1.71E-05 | 0.252393 | 3.21E-08 |
| 0.06968  | -0.12871 | 0.00534  | 0.033309 | 0.47271  |
| 0.00592  | -0.09066 | 0.05024  | 0.225462 | 8.53E-07 |
| 5.93E-10 | 0.075986 | 0.101    | 0.060433 | 0.19235  |
| 1.47E-05 | -0.08167 | 0.07788  | 0.183876 | 6.41E-05 |
| 0.00105  | -0.12137 | 0.00865  | 0.013202 | 0.776    |
| 0.00716  | 0.004584 | 0.9213   | 0.3522   | 4.38E-15 |
| 0.20271  | -0.01165 | 0.80177  | -0.17562 | 0.00014  |
| 0.72807  | -0.09792 | 0.0344   | -0.25273 | 3.08E-08 |
| 0.18955  | -0.20026 | 1.30E-05 | -0.08434 | 0.06862  |
| 0.00039  | -0.06592 | 0.15494  | 0.284685 | 3.71E-10 |
| 0.81925  | -0.10265 | 0.02654  | -0.11933 | 0.00985  |
| 0.32674  | -0.0389  | 0.40168  | -0.19213 | 2.92E-05 |
| 0.0034   | -0.12389 | 0.00735  | 0.071619 | 0.12222  |
| 0.11176  | -0.08388 | 0.07014  | 0.109938 | 0.01747  |
| 0.04858  | -0.02753 | 0.55284  | -0.00345 | 0.9408   |
| 0.22221  | -0.11702 | 0.01138  | -0.00752 | 0.87122  |
| 0.16026  | -0.13043 | 0.00476  | -0.04901 | 0.29057  |
| 8.73E-07 | -0.05505 | 0.23506  | 0.266729 | 4.77E-09 |
| 0.0046   | -0.15832 | 0.0006   | 0.098465 | 0.03339  |
| 4.85E-08 | -0.0743  | 0.10879  | 0.179289 | 9.79E-05 |

|          |          |          |          |          |
|----------|----------|----------|----------|----------|
| 0.00456  | -0.07089 | 0.12608  | 0.16507  | 0.00034  |
| 0.00047  | -0.12841 | 0.00545  | 0.021801 | 0.63841  |
| 0.00023  | -0.12352 | 0.00753  | 0.07423  | 0.10915  |
| 0.01952  | -0.10176 | 0.02789  | 0.032874 | 0.47851  |
| 1.15E-06 | -0.11502 | 0.01287  | 0.185035 | 5.75E-05 |
| 0.02602  | -0.11158 | 0.01585  | 0.222759 | 1.16E-06 |
| 0.08691  | -0.07694 | 0.09678  | -0.02823 | 0.54286  |
| 1.14E-08 | 0.087126 | 0.05992  | 0.020638 | 0.65643  |
| 0.00078  | -0.06428 | 0.16547  | -0.06083 | 0.18946  |
| 3.88E-06 | -0.01334 | 0.77372  | 0.156117 | 0.00071  |
| 0.00929  | -0.02672 | 0.56466  | 0.025891 | 0.57678  |
| 0.00154  | -0.02083 | 0.65344  | 0.091987 | 0.04695  |
| 0.65156  | -0.19973 | 1.37E-05 | 0.031843 | 0.49242  |
| 0.00489  | -0.03099 | 0.50411  | 0.281507 | 5.91E-10 |
| 0.00029  | -0.00211 | 0.96379  | 0.122925 | 0.00783  |
| 0.00031  | -0.0526  | 0.25663  | 0.310438 | 6.84E-12 |
| 0.04825  | -0.14478 | 0.00171  | 0.033594 | 0.46893  |
| 0.14435  | -0.00826 | 0.85876  | 0.097999 | 0.03424  |
| 8.77E-06 | -0.09018 | 0.05147  | 0.160284 | 0.00051  |
| 0.00032  | -0.09709 | 0.03595  | -0.04532 | 0.32844  |
| 0.00627  | -0.07841 | 0.09056  | 0.044178 | 0.3408   |
| 0.01139  | -0.15475 | 0.00079  | 0.203421 | 9.40E-06 |
| 1.05E-09 | 0.035932 | 0.43853  | 0.16338  | 0.00039  |
| 4.88E-08 | -0.09772 | 0.03477  | 0.135071 | 0.00345  |
| 3.21E-07 | -0.06354 | 0.17041  | 0.180869 | 8.47E-05 |
| 3.19E-05 | -0.05784 | 0.21221  | 0.089734 | 0.05264  |
| 3.41E-05 | 0.077488 | 0.09441  | -0.05234 | 0.25901  |
| 0.18875  | 0.219751 | 1.63E-06 | -0.11746 | 0.01107  |
| 0.22653  | -0.15437 | 0.00082  | 0.060703 | 0.19037  |
| 8.39E-09 | -0.11075 | 0.01665  | 0.293981 | 9.19E-11 |
| 0.11481  | -0.01409 | 0.76142  | 0.06765  | 0.14438  |
| 0.01437  | -0.12795 | 0.00562  | 0.043311 | 0.35036  |
| 0.00869  | 0.107533 | 0.02011  | -0.12881 | 0.00531  |
| 0.02946  | -0.09409 | 0.04212  | 0.165461 | 0.00033  |
| 0.17546  | 0.133575 | 0.00383  | -0.06273 | 0.17596  |
| 0.05834  | -0.12649 | 0.0062   | -0.07168 | 0.12191  |
| 0.00034  | -0.15124 | 0.00104  | 0.090896 | 0.04964  |
| 0.00075  | -0.13318 | 0.00394  | 0.191396 | 3.13E-05 |
| 0.16072  | -0.07996 | 0.08433  | -0.07958 | 0.08584  |
| 0.06167  | 0.027017 | 0.56031  | -0.13971 | 0.00248  |
| 1.07E-05 | -0.00492 | 0.91547  | 0.039687 | 0.39217  |
| 0.00148  | -0.04776 | 0.30301  | 0.146092 | 0.00155  |
| 7.89E-05 | -0.10633 | 0.02155  | 0.012965 | 0.77991  |
| 0.00683  | -0.05384 | 0.24555  | -0.09201 | 0.0469   |
| 0.00607  | 0.001047 | 0.98199  | 0.135009 | 0.00347  |



|          |          |          |          |          |
|----------|----------|----------|----------|----------|
| 0.01651  | -0.01263 | 0.78541  | 0.140622 | 0.00232  |
| 3.80E-07 | -0.0661  | 0.15379  | 0.045707 | 0.32432  |
| 0.39604  | -0.19946 | 1.41E-05 | 0.212148 | 3.75E-06 |
| 6.92E-10 | 0.056124 | 0.22607  | 0.060202 | 0.19406  |
| 1.64E-12 | -0.03135 | 0.49914  | 0.273035 | 1.99E-09 |
| 0.15757  | -0.04557 | 0.32581  | 0.099241 | 0.03202  |
| 0.66949  | -0.06126 | 0.18634  | -0.03332 | 0.4726   |
| 1.16E-06 | -0.04343 | 0.34905  | 0.290464 | 1.57E-10 |
| 0.01964  | -0.05035 | 0.27751  | 0.125875 | 0.00645  |
| 0.17089  | -0.23139 | 4.29E-07 | -0.01603 | 0.72973  |
| 6.63E-05 | -0.01738 | 0.70797  | 0.058697 | 0.20546  |
| 0.09132  | 0.010596 | 0.81936  | 0.04917  | 0.28898  |
| 0.98802  | -0.09948 | 0.03161  | -0.02698 | 0.56081  |
| 0.15014  | 0.000883 | 0.98481  | 0.005345 | 0.90828  |
| 0.00031  | -0.08375 | 0.07059  | 0.155606 | 0.00074  |
| 7.24E-06 | 0.022638 | 0.62558  | 0.002478 | 0.95741  |
| 0.02288  | -0.04819 | 0.29871  | 0.003935 | 0.93242  |
| 0.74786  | -0.03984 | 0.39038  | -0.01471 | 0.75118  |
| 0.06317  | 0.054822 | 0.23703  | -0.15315 | 0.0009   |
| 3.51E-08 | -0.00611 | 0.89517  | 0.406059 | 5.77E-20 |
| 7.11E-06 | -0.13408 | 0.0037   | 0.15541  | 0.00075  |
| 3.00E-08 | 0.034412 | 0.45816  | 0.226831 | 7.29E-07 |
| 1.96E-10 | -0.10089 | 0.02926  | 0.216148 | 2.43E-06 |
| 2.17E-07 | -0.00981 | 0.83258  | 0.168794 | 0.00025  |
| 1.25E-08 | -0.09418 | 0.04192  | 0.182484 | 7.30E-05 |
| 0.52108  | -0.0758  | 0.10183  | -0.01624 | 0.72627  |
| 0.99421  | -0.12591 | 0.00644  | -0.00744 | 0.87261  |
| 0.02254  | -0.07268 | 0.11679  | 0.16878  | 0.00025  |
| 0.00063  | 0.098922 | 0.03258  | -0.11662 | 0.01167  |
| 0.00132  | -0.12158 | 0.00854  | 0.27596  | 1.31E-09 |
| 0.00094  | -0.10338 | 0.02548  | 0.06967  | 0.13274  |
| 0.01162  | -0.02624 | 0.5716   | -0.04426 | 0.33987  |
| 0.106    | -0.01828 | 0.69364  | -0.06178 | 0.18262  |
| 0.05269  | -0.02164 | 0.64085  | 0.026083 | 0.57396  |
| 3.17E-07 | -0.02652 | 0.56754  | 0.354704 | 2.72E-15 |
| 0.02749  | -0.09056 | 0.0505   | -0.17421 | 0.00015  |
| 7.96E-07 | 0.032324 | 0.48591  | -0.23783 | 1.99E-07 |
| 0.75358  | -0.17677 | 0.00012  | 0.086551 | 0.06164  |
| 0.68166  | 0.093346 | 0.04378  | 0.161928 | 0.00044  |
| 2.14E-08 | 0.079442 | 0.08637  | -0.04915 | 0.28921  |
| 0.03279  | 0.138827 | 0.00264  | -0.19418 | 2.39E-05 |
| 0.00572  | -0.13663 | 0.00309  | 0.212003 | 3.80E-06 |
| 0.00168  | 0.117456 | 0.01108  | -0.11287 | 0.01467  |
| 0.56329  | -0.05776 | 0.21278  | -0.38985 | 2.12E-18 |
| 0.00015  | 0.006176 | 0.8941   | -0.0985  | 0.03333  |

|          |          |          |          |          |
|----------|----------|----------|----------|----------|
| 8.75E-05 | -0.0712  | 0.12442  | 0.457347 | 1.62E-25 |
| 0.00063  | 0.054151 | 0.24283  | -0.18691 | 4.82E-05 |
| 0.0031   | -0.05722 | 0.21713  | 0.248192 | 5.50E-08 |
| 1.46E-06 | 0.056796 | 0.22055  | -0.02268 | 0.62492  |
| 0.00088  | -0.01487 | 0.74859  | 0.10166  | 0.02804  |
| 7.27E-09 | 0.161325 | 0.00047  | -0.12721 | 0.00591  |
| 6.08E-06 | 0.127221 | 0.0059   | -0.09923 | 0.03203  |
| 5.34E-07 | -0.06761 | 0.14461  | 0.021352 | 0.64535  |
| 0.04766  | -0.10693 | 0.02082  | -0.0539  | 0.24506  |
| 0.00014  | -0.039   | 0.40039  | -0.06777 | 0.14364  |
| 8.15E-05 | 0.032757 | 0.48007  | -0.00217 | 0.96267  |
| 0.62077  | -0.13413 | 0.00369  | -0.19535 | 2.13E-05 |
| 0.87663  | -0.09404 | 0.04222  | 0.04326  | 0.35093  |
| 2.67E-08 | 0.020451 | 0.65935  | 0.038395 | 0.40778  |
| 1.78E-07 | -0.04548 | 0.32674  | 0.308031 | 1.01E-11 |
| 0.00014  | 0.003865 | 0.93361  | 0.190243 | 3.50E-05 |
| 0.70996  | -0.09654 | 0.03702  | 0.043428 | 0.34906  |
| 4.68E-09 | 0.009013 | 0.84598  | 0.155808 | 0.00073  |
| 0.53532  | -0.14972 | 0.00117  | -0.01585 | 0.73266  |
| 0.10189  | -0.07    | 0.13093  | 0.093394 | 0.04367  |
| 8.37E-05 | 0.027489 | 0.55347  | 0.339343 | 4.76E-14 |
| 0.21228  | -0.04261 | 0.35825  | 0.130004 | 0.0049   |
| 0.01888  | -0.10764 | 0.01998  | 0.161086 | 0.00047  |
| 1.67E-07 | -0.07027 | 0.12942  | 0.166592 | 0.0003   |
| 0.03172  | -0.16249 | 0.00042  | 0.087905 | 0.05767  |
| 0.07934  | -0.08679 | 0.06091  | 0.129016 | 0.00523  |
| 0.46735  | -0.15091 | 0.00107  | 0.098918 | 0.03259  |
| 4.18E-08 | -0.0103  | 0.82429  | 0.466766 | 1.21E-26 |
| 0.69485  | -0.12593 | 0.00643  | -0.08631 | 0.06236  |
| 0.49663  | -0.15803 | 0.00061  | -0.04449 | 0.3374   |
| 0.45339  | -0.03535 | 0.44605  | -0.19952 | 1.40E-05 |
| 1.22E-06 | -0.04979 | 0.28288  | 0.228005 | 6.37E-07 |
| 0.00047  | -0.165   | 0.00034  | 0.202595 | 1.02E-05 |
| 1.60E-05 | 0.046551 | 0.31546  | -0.07813 | 0.09171  |
| 3.84E-07 | -0.08991 | 0.05218  | 0.164157 | 0.00037  |
| 0.49623  | -0.10515 | 0.02305  | 0.140824 | 0.00229  |
| 0.13131  | -0.07405 | 0.11002  | 0.031667 | 0.49482  |
| 0.64004  | -0.06999 | 0.13095  | -0.18616 | 5.17E-05 |
| 6.97E-05 | -0.1918  | 3.01E-05 | 0.183609 | 6.57E-05 |
| 1.85E-06 | -0.09953 | 0.03152  | 0.337918 | 6.15E-14 |
| 0.03861  | -0.08523 | 0.06574  | 0.124132 | 0.00724  |
| 0.0012   | -0.03097 | 0.50439  | 0.039695 | 0.39207  |
| 0.25716  | -0.03023 | 0.51466  | -0.10834 | 0.01919  |
| 0.06683  | 0.010032 | 0.82882  | -0.17538 | 0.00014  |
| 0.19236  | -0.01672 | 0.71855  | -0.13995 | 0.00244  |

|          |          |          |          |          |
|----------|----------|----------|----------|----------|
| 2.70E-05 | -0.14312 | 0.00193  | 0.077727 | 0.0934   |
| 5.51E-08 | -0.0724  | 0.11818  | 0.205246 | 7.78E-06 |
| 2.95E-05 | -0.13353 | 0.00384  | 0.172062 | 0.00019  |
| 0.00011  | -0.06481 | 0.16201  | 0.156657 | 0.00068  |
| 1.79E-09 | -0.1076  | 0.02003  | 0.17208  | 0.00019  |
| 0.07334  | -0.0231  | 0.61861  | -0.10968 | 0.01773  |
| 3.43E-05 | -0.05208 | 0.26138  | 0.005336 | 0.90845  |
| 0.03286  | -0.02673 | 0.56445  | 0.090244 | 0.0513   |
| 3.12E-10 | -0.06763 | 0.1445   | 0.234497 | 2.97E-07 |
| 1.56E-05 | -0.12155 | 0.00855  | 0.265289 | 5.81E-09 |
| 0.59404  | -0.19297 | 2.69E-05 | 0.192676 | 2.77E-05 |
| 0.00013  | -0.10624 | 0.02166  | 0.205808 | 7.34E-06 |
| 0.02418  | -0.05092 | 0.27215  | -0.02237 | 0.62963  |
| 1.25E-05 | -0.0657  | 0.15633  | 0.043116 | 0.35254  |
| 0.12035  | -0.01649 | 0.72222  | 0.070425 | 0.12858  |
| 0.0068   | -0.12036 | 0.00923  | 0.178145 | 0.00011  |
| 0.30613  | -0.03986 | 0.39012  | -0.17208 | 0.00019  |
| 0.77075  | -0.10584 | 0.02216  | -0.00396 | 0.93195  |
| 1.38E-11 | 0.045861 | 0.3227   | 0.185273 | 5.63E-05 |
| 0.40336  | -0.10233 | 0.02702  | -0.0036  | 0.93812  |
| 0.47426  | -0.01256 | 0.78666  | -0.12972 | 0.00499  |
| 1.51E-07 | -0.06142 | 0.18514  | 0.277329 | 1.08E-09 |
| 0.13237  | -0.10754 | 0.02009  | 0.293318 | 1.02E-10 |
| 1.33E-09 | 0.027411 | 0.5546   | 0.229348 | 5.45E-07 |
| 0.19466  | -0.06623 | 0.15299  | -0.01247 | 0.78812  |
| 0.30014  | -0.08107 | 0.08008  | 0.042809 | 0.35598  |
| 0.23854  | -0.04098 | 0.37697  | 0.041109 | 0.37542  |
| 6.65E-06 | -0.06868 | 0.13836  | 0.258995 | 1.35E-08 |
| 0.00079  | -0.0754  | 0.10367  | 0.168446 | 0.00026  |
| 0.0307   | -0.07808 | 0.09193  | 0.001204 | 0.9793   |
| 2.71E-09 | -0.11205 | 0.01541  | 0.398205 | 3.39E-19 |
| 1.04E-12 | -0.04157 | 0.37007  | 0.245748 | 7.48E-08 |
| 8.22E-05 | -0.09265 | 0.04538  | 0.008724 | 0.85086  |
| 6.32E-05 | 0.048173 | 0.29888  | 0.138834 | 0.00264  |
| 0.00235  | 0.114234 | 0.01351  | 0.056519 | 0.22281  |
| 1.20E-05 | -0.06877 | 0.13782  | 0.366484 | 2.72E-16 |
| 0.00079  | 0.009184 | 0.84309  | -0.03388 | 0.46509  |
| 2.62E-10 | -0.02768 | 0.55065  | 0.103185 | 0.02576  |
| 4.69E-05 | -0.18531 | 5.61E-05 | 0.234117 | 3.10E-07 |
| 0.23035  | -0.10845 | 0.01906  | -0.0226  | 0.62609  |
| 0.0006   | -0.1129  | 0.01465  | 0.07418  | 0.10939  |
| 3.19E-05 | -0.07811 | 0.09177  | 0.131909 | 0.0043   |
| 2.83E-05 | -0.16049 | 0.0005   | 0.070252 | 0.12953  |
| 0.00017  | -0.0399  | 0.38961  | 0.047219 | 0.30856  |
| 0.00161  | -0.04873 | 0.29335  | 0.189529 | 3.75E-05 |

|          |          |          |          |          |
|----------|----------|----------|----------|----------|
| 0.04489  | -0.12956 | 0.00505  | 0.136575 | 0.0031   |
| 1.30E-06 | 0.039543 | 0.3939   | -0.17782 | 0.00011  |
| 0.32577  | -0.05471 | 0.23796  | -0.00862 | 0.85266  |
| 0.04609  | -0.09358 | 0.04326  | -0.09058 | 0.05043  |
| 0.32802  | -0.06019 | 0.19412  | -0.03028 | 0.51387  |
| 0.14344  | -0.04862 | 0.29442  | 0.0387   | 0.40406  |
| 0.1665   | -0.03003 | 0.51743  | -0.07574 | 0.10211  |
| 0.23947  | -0.00845 | 0.85553  | -0.01653 | 0.72159  |
| 0.19208  | -0.06481 | 0.16201  | -0.01367 | 0.76825  |
| 0.23613  | 0.091498 | 0.04814  | 0.026244 | 0.57159  |
| 0.11893  | 0.121903 | 0.00836  | 0.030354 | 0.51289  |
| 0.15398  | -0.04989 | 0.28197  | -0.37604 | 3.92E-17 |
| 0.72169  | -0.02288 | 0.6219   | 0.110669 | 0.01673  |
| 0.85756  | 0.051232 | 0.26921  | 0.088836 | 0.05506  |
| 0.01763  | 0.003569 | 0.93869  | -0.27943 | 7.98E-10 |
| 0.01344  | -0.01757 | 0.70496  | 0.440016 | 1.56E-23 |
| 0.00025  | 0.140837 | 0.00228  | -0.0296  | 0.52336  |
| 0.4188   | 0.01713  | 0.71197  | 0.04275  | 0.35665  |
| 0.0243   | 0.002485 | 0.95729  | 0.192974 | 2.69E-05 |
| 4.69E-05 | -0.05021 | 0.27887  | -0.10099 | 0.02911  |
| 0.26321  | -0.12574 | 0.00651  | 0.203044 | 9.77E-06 |
| 0.00107  | -0.04141 | 0.37191  | -0.05476 | 0.23759  |
| 0.85386  | -0.00522 | 0.91051  | -0.01081 | 0.81583  |
| 0.35691  | -0.12018 | 0.00934  | 0.064326 | 0.1652   |
| 0.25744  | -0.02795 | 0.54684  | 0.051533 | 0.2664   |
| 0.17982  | -0.12406 | 0.00727  | 0.432087 | 1.15E-22 |
| 0.0548   | -0.22376 | 1.04E-06 | 0.121685 | 0.00848  |
| 0.60256  | -0.07895 | 0.08836  | 0.442947 | 7.32E-24 |
| 1.90E-06 | 0.105415 | 0.02271  | 0.188442 | 4.17E-05 |
| 0.00775  | -0.06037 | 0.19278  | 0.200647 | 1.25E-05 |
| 0.95652  | -0.14351 | 0.00188  | 0.124866 | 0.0069   |
| 0.46856  | 0.080213 | 0.08335  | -0.13511 | 0.00344  |
| 0.41647  | 0.029245 | 0.52841  | -0.00295 | 0.94925  |
| 0.00041  | 0.05148  | 0.26689  | 0.384979 | 6.02E-18 |
| 0.0203   | -0.01025 | 0.82508  | 0.07905  | 0.08794  |
| 0.34857  | -0.08829 | 0.05658  | 0.412701 | 1.24E-20 |
| 0.67357  | -0.08994 | 0.0521   | 0.232324 | 3.84E-07 |
| 0.00105  | 0.032088 | 0.4891   | 0.265803 | 5.41E-09 |
| 0.00331  | -0.00833 | 0.85748  | 0.399125 | 2.76E-19 |
| 2.80E-05 | 0.139009 | 0.00261  | 0.332897 | 1.51E-13 |
| 0.82332  | -0.08082 | 0.08104  | 0.178019 | 0.00011  |
| 0.06709  | -0.02936 | 0.5268   | 0.009856 | 0.83178  |
| 0.13979  | 0.05608  | 0.22643  | 0.298763 | 4.39E-11 |
| 0.00662  | 0.164992 | 0.00034  | -0.05783 | 0.21227  |
| 0.90722  | -0.06387 | 0.16819  | 0.364368 | 4.14E-16 |

|          |          |          |          |          |
|----------|----------|----------|----------|----------|
| 1.19E-06 | -0.04164 | 0.36932  | -0.31796 | 1.97E-12 |
| 0.96977  | 0.099804 | 0.03105  | 0.291234 | 1.40E-10 |
| 0.89098  | 1.87E-05 | 0.99968  | 0.107125 | 0.02059  |
| 0.4956   | 0.015343 | 0.74088  | 0.29594  | 6.81E-11 |
| 0.00035  | -0.06404 | 0.16707  | -0.21551 | 2.60E-06 |
| 0.10269  | 0.047976 | 0.30086  | -0.20161 | 1.13E-05 |
| 4.87E-09 | 0.253962 | 2.62E-08 | 0.196806 | 1.84E-05 |
| 0.97521  | -0.05733 | 0.21621  | 0.096568 | 0.03697  |
| 0.0356   | -0.04352 | 0.34809  | 0.11716  | 0.01128  |
| 4.13E-05 | 0.164654 | 0.00035  | -0.09236 | 0.04606  |
| 0.18732  | -0.07836 | 0.09077  | 0.095341 | 0.03945  |
| 0.50656  | -0.06955 | 0.13341  | 0.190031 | 3.58E-05 |
| 0.49214  | -0.04913 | 0.28938  | 0.050884 | 0.27248  |
| 0.00054  | -0.11649 | 0.01176  | -0.44023 | 1.47E-23 |
| 0.64545  | 0.009747 | 0.83361  | 0.024491 | 0.59756  |
| 0.6685   | -0.02984 | 0.52008  | 0.150101 | 0.00114  |
| 0.00039  | -0.04952 | 0.28551  | -0.17779 | 0.00011  |
| 0.57071  | -0.0608  | 0.18963  | 0.052314 | 0.25921  |
| 0.64418  | 0.123317 | 0.00763  | -0.07049 | 0.12823  |
| 0.1321   | -0.00931 | 0.841    | 0.245401 | 7.82E-08 |
| 0.04673  | -0.07672 | 0.09775  | 0.019647 | 0.67194  |
| 9.95E-10 | -0.03906 | 0.39973  | -0.36017 | 9.47E-16 |
| 0.06207  | -0.08609 | 0.06305  | 0.108168 | 0.01938  |
| 0.1247   | -0.15964 | 0.00053  | 0.070106 | 0.13033  |
| 0.25948  | -0.12188 | 0.00838  | 0.045378 | 0.32783  |
| 0.00974  | 0.024631 | 0.59546  | 0.392041 | 1.32E-18 |
| 0.3502   | -0.03421 | 0.46074  | 0.078411 | 0.09054  |
| 2.11E-08 | 0.060975 | 0.18839  | 0.472373 | 2.49E-27 |
| 0.00684  | -0.06549 | 0.15767  | 0.02894  | 0.53273  |
| 0.41247  | -0.04894 | 0.29124  | -0.01524 | 0.74251  |
| 0.01845  | -0.09086 | 0.04972  | 0.008391 | 0.85648  |
| 0.02737  | -0.11435 | 0.01341  | 0.355699 | 2.25E-15 |
| 0.003    | 0.245582 | 7.64E-08 | 0.066821 | 0.14937  |
| 0.00379  | -0.06673 | 0.14994  | -0.19113 | 3.21E-05 |
| 0.17059  | 0.08896  | 0.05472  | 0.126002 | 0.0064   |
| 0.01053  | -0.036   | 0.43762  | -0.01576 | 0.73414  |
| 0.85413  | -0.03714 | 0.42334  | 0.146422 | 0.00151  |
| 0.17556  | -0.02257 | 0.62658  | -0.13357 | 0.00383  |
| 0.45519  | -0.08598 | 0.06339  | 0.258608 | 1.43E-08 |
| 0.04521  | -0.16325 | 0.0004   | 0.11421  | 0.01353  |
| 0.08896  | 0.025591 | 0.58119  | 0.470762 | 3.93E-27 |
| 0.56833  | 0.064023 | 0.1672   | -0.03034 | 0.51306  |
| 0.01     | 0.080846 | 0.08094  | -0.09431 | 0.04165  |
| 0.00174  | 0.074885 | 0.10605  | -0.10228 | 0.02709  |
| 0.41853  | -0.08899 | 0.05465  | 0.144107 | 0.0018   |

|          |          |          |          |          |
|----------|----------|----------|----------|----------|
| 0.04039  | -0.05873 | 0.20517  | 0.167969 | 0.00027  |
| 0.90112  | 0.043544 | 0.34777  | -0.09577 | 0.03857  |
| 0.00259  | -0.08222 | 0.07588  | -0.07617 | 0.10017  |
| 0.06592  | -0.0869  | 0.06061  | 0.068263 | 0.14077  |
| 3.20E-06 | 0.130742 | 0.00466  | 0.520265 | 9.51E-34 |
| 0.57477  | -0.15117 | 0.00105  | 0.163925 | 0.00038  |
| 0.24859  | -0.11505 | 0.01285  | 0.18781  | 4.42E-05 |
| 0.11509  | -0.12845 | 0.00544  | 0.0935   | 0.04343  |
| 0.01909  | -0.01145 | 0.805    | 0.374576 | 5.29E-17 |
| 0.13916  | -0.10133 | 0.02855  | 0.011079 | 0.81127  |
| 0.55264  | -0.09827 | 0.03375  | 0.322317 | 9.47E-13 |
| 0.15075  | -0.27084 | 2.70E-09 | 0.111431 | 0.01599  |
| 0.96746  | -0.10114 | 0.02885  | 0.303443 | 2.11E-11 |
| 1.33E-05 | 0.148603 | 0.00128  | -0.02856 | 0.53814  |
| 0.02447  | -0.13189 | 0.0043   | 0.531212 | 2.31E-35 |
| 0.44961  | -0.1315  | 0.00442  | 0.097388 | 0.03538  |
| 2.07E-06 | -0.01763 | 0.70387  | 0.437551 | 2.92E-23 |
| 0.02819  | -0.09335 | 0.04377  | 0.396041 | 5.48E-19 |
| 0.0006   | 0.200875 | 1.22E-05 | 0.136294 | 0.00317  |
| 0.74738  | -0.04277 | 0.35643  | 0.307566 | 1.09E-11 |
| 0.87399  | -0.09364 | 0.04312  | 0.050067 | 0.28026  |
| 0.86485  | 0.028637 | 0.53702  | -0.14724 | 0.00142  |
| 0.00913  | -0.06378 | 0.16882  | -0.00122 | 0.97897  |
| 0.48689  | -0.21475 | 2.83E-06 | 0.452319 | 6.25E-25 |
| 0.98285  | 0.180439 | 8.81E-05 | -0.04729 | 0.30783  |
| 0.72823  | -0.03342 | 0.47129  | 0.139337 | 0.00255  |
| 0.15464  | -0.05021 | 0.2789   | 0.091559 | 0.04799  |
| 0.00244  | -0.05171 | 0.26479  | -0.18929 | 3.84E-05 |
| 0.90789  | -0.01866 | 0.68749  | -0.01421 | 0.7594   |
| 0.1381   | -0.07475 | 0.1067   | 0.007526 | 0.87114  |
| 0.26867  | -0.04133 | 0.37283  | 0.26281  | 8.13E-09 |
| 0.11236  | 0.084205 | 0.06906  | -0.02727 | 0.55667  |
| 0.08276  | 0.080535 | 0.08212  | -0.21752 | 2.09E-06 |
| 0.59074  | -0.04386 | 0.34428  | 0.300002 | 3.62E-11 |
| 0.46557  | 0.105543 | 0.02254  | -0.03201 | 0.49009  |
| 0.66419  | 0.150658 | 0.00109  | -0.09361 | 0.04318  |
| 0.48505  | -0.16641 | 0.0003   | 0.442265 | 8.73E-24 |
| 0.0016   | 0.015537 | 0.73771  | 0.418829 | 2.92E-21 |
| 0.20672  | 0.051424 | 0.26741  | -0.04215 | 0.36339  |
| 0.12935  | -0.03993 | 0.38934  | 0.165233 | 0.00034  |
| 0.8694   | -0.04662 | 0.31472  | 0.081891 | 0.07707  |
| 0.11768  | 0.022622 | 0.62582  | 0.419629 | 2.42E-21 |
| 0.09855  | 0.033891 | 0.46499  | -0.13247 | 0.00413  |
| 0.01092  | 0.17084  | 0.00021  | 0.195443 | 2.11E-05 |
| 0.15034  | -0.13969 | 0.00248  | -0.07208 | 0.11982  |

|          |          |          |          |          |
|----------|----------|----------|----------|----------|
| 0.26777  | -0.01923 | 0.6785   | 0.022634 | 0.62564  |
| 0.00444  | -0.18286 | 7.05E-05 | 0.284405 | 3.87E-10 |
| 0.04248  | -0.15584 | 0.00073  | 0.44809  | 1.92E-24 |
| 0.09824  | -0.10209 | 0.02739  | -0.0849  | 0.0668   |
| 0.3033   | -0.16335 | 0.00039  | 0.217797 | 2.02E-06 |
| 0.14206  | 0.063892 | 0.16807  | -0.14309 | 0.00194  |
| 0.02425  | -0.0233  | 0.61544  | 0.137489 | 0.00291  |
| 0.33727  | -0.09261 | 0.04548  | 0.185046 | 5.75E-05 |
| 0.25564  | -0.06035 | 0.19293  | -0.06009 | 0.19488  |
| 0.27386  | 0.015691 | 0.73521  | -0.00285 | 0.95109  |
| 0.77758  | -0.06289 | 0.17489  | 0.32651  | 4.61E-13 |
| 0.00013  | -0.08384 | 0.07029  | 0.381421 | 1.28E-17 |
| 0.2746   | 0.009134 | 0.84393  | 0.223834 | 1.03E-06 |
| 6.33E-06 | 0.167512 | 0.00028  | 0.201951 | 1.09E-05 |
| 1.43E-07 | 0.028588 | 0.53772  | 0.352518 | 4.13E-15 |
| 0.07556  | 0.244415 | 8.84E-08 | -0.1232  | 0.00769  |
| 0.51999  | -0.07613 | 0.10036  | 0.167385 | 0.00028  |
| 0.76977  | -0.0667  | 0.15014  | 0.199158 | 1.45E-05 |
| 0.01961  | -0.11067 | 0.01673  | 0.377771 | 2.74E-17 |
| 0.71407  | -0.00609 | 0.89561  | 0.129804 | 0.00496  |
| 0.00145  | 0.109591 | 0.01783  | 0.091094 | 0.04914  |
| 0.03357  | 3.98E-05 | 0.99932  | 0.396697 | 4.74E-19 |
| 0.97175  | -0.00141 | 0.97581  | -0.18563 | 5.44E-05 |
| 0.01103  | -0.05191 | 0.26291  | 0.196817 | 1.84E-05 |
| 0.6727   | -0.23056 | 4.73E-07 | 0.470634 | 4.08E-27 |
| 1.59E-05 | -0.00988 | 0.8314   | -0.05331 | 0.25023  |
| 0.06934  | -0.08949 | 0.05329  | -0.11284 | 0.01469  |
| 0.00249  | 0.130386 | 0.00477  | 0.276538 | 1.21E-09 |
| 0.28521  | -0.01164 | 0.80194  | 0.190175 | 3.53E-05 |
| 0.80198  | 0.150471 | 0.00111  | 0.113354 | 0.01425  |
| 0.07052  | -0.11984 | 0.00954  | 0.355325 | 2.42E-15 |
| 0.0005   | -0.17837 | 0.00011  | 0.012952 | 0.78012  |
| 0.01765  | 0.010824 | 0.81553  | -0.00045 | 0.99232  |
| 0.69002  | 0.063119 | 0.17329  | 0.027994 | 0.54621  |
| 0.00678  | -0.09328 | 0.04393  | -0.07429 | 0.10888  |
| 0.00267  | 0.082755 | 0.074    | 0.168306 | 0.00026  |
| 0.14403  | 0.030353 | 0.51291  | 0.105041 | 0.0232   |
| 0.03659  | -0.05294 | 0.25358  | 0.12331  | 0.00764  |
| 0.00834  | -0.02288 | 0.6219   | 0.22178  | 1.30E-06 |
| 0.06095  | -0.09108 | 0.04917  | 0.009762 | 0.83335  |
| 2.88E-10 | 0.406106 | 5.70E-20 | 0.20089  | 1.22E-05 |
| 3.97E-09 | 0.325072 | 5.91E-13 | 0.102046 | 0.02745  |
| 0.2059   | -0.04152 | 0.37064  | 0.286353 | 2.90E-10 |
| 2.63E-05 | -0.04294 | 0.3545   | 0.251377 | 3.66E-08 |
| 0.0857   | -0.04642 | 0.3168   | 0.316159 | 2.67E-12 |

|          |          |          |          |          |
|----------|----------|----------|----------|----------|
| 0.0207   | 0.018396 | 0.69173  | 0.263509 | 7.39E-09 |
| 0.71807  | -0.09746 | 0.03525  | 0.355717 | 2.24E-15 |
| 0.13064  | -0.072   | 0.12025  | 0.113417 | 0.01419  |
| 0.83468  | 0.056917 | 0.21957  | -0.26856 | 3.71E-09 |
| 0.20651  | -0.03178 | 0.49326  | 0.077961 | 0.09241  |
| 6.65E-08 | 0.056292 | 0.22468  | 0.49727  | 1.54E-30 |
| 0.11655  | 0.003514 | 0.93964  | 0.258928 | 1.37E-08 |
| 0.20994  | -0.09855 | 0.03324  | 0.307819 | 1.05E-11 |
| 0.19466  | -0.10077 | 0.02945  | 0.207322 | 6.26E-06 |
| 0.12742  | -0.00908 | 0.8448   | 0.278327 | 9.36E-10 |
| 0.46125  | -0.10097 | 0.02913  | 0.298966 | 4.26E-11 |
| 0.08407  | -0.11933 | 0.00985  | -0.03623 | 0.43472  |
| 0.00733  | -0.07925 | 0.08714  | 0.227255 | 6.94E-07 |
| 0.00292  | -0.11368 | 0.01397  | 0.020404 | 0.66008  |
| 0.00128  | -0.17288 | 0.00017  | 0.188696 | 4.07E-05 |
| 0.00403  | -0.01465 | 0.75212  | 0.050137 | 0.27958  |
| 0.33616  | -0.1449  | 0.00169  | 0.237089 | 2.17E-07 |
| 0.13647  | -0.13226 | 0.00419  | 0.157213 | 0.00065  |
| 0.28961  | 0.07523  | 0.10444  | 0.251419 | 3.64E-08 |
| 0.37927  | -0.02394 | 0.60586  | 0.217945 | 1.99E-06 |
| 0.51824  | -0.09449 | 0.04124  | -0.04672 | 0.31375  |
| 0.15044  | 0.144338 | 0.00176  | 0.153624 | 0.00087  |
| 9.63E-07 | 0.230453 | 4.79E-07 | 0.043775 | 0.34522  |
| 0.04646  | -0.0658  | 0.15573  | 0.093443 | 0.04356  |
| 0.07527  | -0.10941 | 0.01802  | 0.175143 | 0.00014  |
| 0.66808  | -0.15909 | 0.00056  | -0.01435 | 0.75708  |
| 3.30E-06 | 0.030001 | 0.5178   | 0.438673 | 2.19E-23 |
| 0.23555  | 0.079142 | 0.08757  | -0.04317 | 0.35193  |
| 0.05332  | -0.0396  | 0.3932   | 0.375177 | 4.68E-17 |
| 0.10102  | 0.046978 | 0.31104  | -0.34217 | 2.84E-14 |
| 0.23392  | -0.06745 | 0.14557  | 0.037357 | 0.42058  |
| 0.46374  | -0.01113 | 0.81049  | 0.009366 | 0.84003  |
| 0.4654   | 0.049869 | 0.28217  | 0.010503 | 0.82092  |
| 0.00666  | -0.09261 | 0.04546  | 0.047755 | 0.30309  |
| 0.03472  | -0.06307 | 0.17365  | 0.102019 | 0.02749  |
| 0.34996  | -0.10449 | 0.02394  | 0.424337 | 7.77E-22 |
| 0.93672  | 0.108236 | 0.0193   | 0.110754 | 0.01665  |
| 0.91896  | -0.03731 | 0.42115  | 0.103137 | 0.02583  |
| 0.09754  | -0.02983 | 0.5202   | 0.12309  | 0.00774  |
| 0.57198  | 0.044061 | 0.34208  | -0.12602 | 0.00639  |
| 0.16549  | 0.023219 | 0.61673  | 0.305709 | 1.47E-11 |
| 0.39418  | -0.01939 | 0.67596  | 0.143928 | 0.00182  |
| 0.61196  | 0.014933 | 0.74757  | -0.19025 | 3.50E-05 |
| 0.08811  | -0.0721  | 0.11974  | 0.301583 | 2.83E-11 |
| 0.1468   | -0.08909 | 0.05435  | 0.384222 | 7.07E-18 |



|          |          |          |          |          |
|----------|----------|----------|----------|----------|
| 0.56049  | 0.028622 | 0.53724  | 0.149227 | 0.00122  |
| 7.30E-05 | 0.078327 | 0.09089  | 0.389612 | 2.23E-18 |
| 0.16729  | -0.17908 | 9.98E-05 | 0.275086 | 1.49E-09 |
| 0.11857  | 0.166516 | 0.0003   | -0.02884 | 0.53413  |
| 0.92205  | 0.009588 | 0.83629  | 0.077244 | 0.09546  |
| 0.49063  | -0.08492 | 0.06673  | -0.0045  | 0.92267  |
| 0.24495  | -0.07006 | 0.13056  | 0.400796 | 1.90E-19 |
| 0.1926   | -0.01483 | 0.74917  | 0.031984 | 0.49051  |
| 0.20139  | -0.01042 | 0.82236  | 0.062651 | 0.17651  |
| 0.01412  | 0.102017 | 0.02749  | -0.12645 | 0.00621  |
| 0.9238   | 0.092766 | 0.04511  | 0.007117 | 0.87809  |
| 0.7239   | 0.059601 | 0.19855  | 0.065522 | 0.15746  |
| 0.23463  | 0.144012 | 0.00181  | -0.09838 | 0.03355  |
| 0.12251  | -0.04156 | 0.37024  | 0.063336 | 0.17181  |
| 0.44738  | -0.11477 | 0.01307  | 0.011376 | 0.80632  |
| 0.75249  | -0.02862 | 0.53725  | 0.245568 | 7.66E-08 |
| 0.27517  | -0.1522  | 0.00097  | 0.04989  | 0.28197  |
| 0.85192  | 0.108342 | 0.01919  | 0.176146 | 0.00013  |
| 0.0027   | -0.0871  | 0.05999  | -0.09007 | 0.05175  |
| 0.54349  | -0.09131 | 0.0486   | 0.367122 | 2.40E-16 |
| 0.03013  | 0.0617   | 0.18318  | 0.388695 | 2.72E-18 |
| 0.12465  | -0.10171 | 0.02796  | 0.158883 | 0.00057  |
| 0.42487  | -0.26    | 1.18E-08 | 0.438819 | 2.11E-23 |
| 0.95693  | 0.054725 | 0.23786  | -0.1985  | 1.55E-05 |
| 0.01924  | -0.05617 | 0.22571  | 0.212704 | 3.53E-06 |
| 0.77228  | -0.01408 | 0.76153  | 0.059458 | 0.19963  |
| 0.89455  | -0.15304 | 0.00091  | 0.115428 | 0.01256  |
| 5.98E-11 | -0.22931 | 5.47E-07 | -0.23748 | 2.07E-07 |
| 0.68423  | -0.1329  | 0.00401  | 0.053143 | 0.25173  |
| 0.72101  | 0.133574 | 0.00383  | -0.12743 | 0.00582  |
| 0.46202  | -0.11182 | 0.01562  | 0.100347 | 0.03014  |
| 0.39463  | 0.044959 | 0.33232  | 0.165858 | 0.00032  |
| 0.56154  | -0.05952 | 0.19914  | 0.161108 | 0.00047  |
| 0.02382  | -0.04177 | 0.36776  | 0.00048  | 0.99174  |
| 0.97324  | -0.13822 | 0.00276  | 0.118497 | 0.01038  |
| 0.01375  | 0.024418 | 0.59865  | 0.111965 | 0.01549  |
| 0.79571  | -0.00037 | 0.99358  | 0.216718 | 2.28E-06 |
| 0.50796  | -0.11744 | 0.01109  | 0.263544 | 7.36E-09 |
| 0.64041  | 0.053318 | 0.25016  | 0.103674 | 0.02506  |
| 0.0812   | -0.0549  | 0.23639  | 0.156196 | 0.00071  |
| 0.3417   | 0.009711 | 0.83422  | 0.406637 | 5.05E-20 |
| 0.59905  | -0.05045 | 0.27656  | 0.310074 | 7.26E-12 |
| 0.06283  | -0.08856 | 0.05582  | 0.039539 | 0.39395  |
| 0.43276  | -0.1257  | 0.00653  | 0.249368 | 4.74E-08 |
| 0.79679  | -0.00802 | 0.86278  | 0.00404  | 0.93061  |

|          |          |          |          |          |
|----------|----------|----------|----------|----------|
| 0.77251  | -0.00604 | 0.89646  | 0.10435  | 0.02412  |
| 0.84715  | 0.009569 | 0.83661  | 0.126985 | 0.006    |
| 0.9759   | -0.06488 | 0.1616   | 0.33941  | 4.70E-14 |
| 0.06688  | -0.09705 | 0.03603  | 0.159905 | 0.00052  |
| 0.01875  | -0.02244 | 0.62861  | 0.03903  | 0.40007  |
| 0.73573  | -0.10281 | 0.02631  | 0.315508 | 2.97E-12 |
| 0.00391  | -0.11755 | 0.01101  | 0.069152 | 0.13566  |
| 0.00773  | -0.02341 | 0.61378  | -0.00747 | 0.87213  |
| 0.00107  | -0.19282 | 2.73E-05 | -0.12851 | 0.00541  |
| 0.03439  | -0.06984 | 0.13178  | 0.03134  | 0.49929  |
| 0.76682  | -0.01069 | 0.81772  | 0.150727 | 0.00109  |
| 0.18582  | -0.0201  | 0.66489  | -0.19897 | 1.48E-05 |
| 0.02139  | -0.09892 | 0.03258  | -0.0601  | 0.1948   |
| 0.26934  | -0.0829  | 0.07349  | 0.215687 | 2.55E-06 |
| 0.10836  | -0.12229 | 0.00816  | 0.128147 | 0.00555  |
| 0.95289  | -0.06185 | 0.1821   | 0.20696  | 6.50E-06 |
| 0.15294  | 0.114826 | 0.01303  | -0.18427 | 6.18E-05 |
| 0.06804  | -0.02083 | 0.65337  | -0.25814 | 1.52E-08 |
| 0.2583   | -0.00803 | 0.86263  | 0.233714 | 3.26E-07 |
| 0.02533  | 0.084455 | 0.06823  | -0.27986 | 7.51E-10 |
| 0.24466  | -0.09938 | 0.03177  | 0.263758 | 7.15E-09 |
| 0.61286  | -0.06931 | 0.13478  | 0.444615 | 4.75E-24 |
| 0.8752   | 0.091708 | 0.04763  | -0.23192 | 4.03E-07 |
| 6.56E-07 | 0.007163 | 0.87732  | -0.00026 | 0.99553  |
| 0.36612  | -0.00501 | 0.91398  | -0.0582  | 0.20932  |
| 0.01567  | -0.06809 | 0.14179  | 0.309078 | 8.54E-12 |
| 0.69845  | -0.12006 | 0.00941  | 0.377674 | 2.79E-17 |
| 0.16275  | -0.02407 | 0.60389  | -0.08453 | 0.06798  |
| 0.1663   | 0.050011 | 0.2808   | 0.063046 | 0.17379  |
| 0.7288   | 0.066159 | 0.15345  | 0.274201 | 1.69E-09 |
| 0.03102  | -0.01932 | 0.67705  | 0.046223 | 0.31889  |
| 0.00369  | -0.0059  | 0.89875  | 0.190742 | 3.34E-05 |
| 0.59448  | -0.03624 | 0.43465  | 0.180913 | 8.44E-05 |
| 3.39E-05 | 0.056035 | 0.2268   | 0.163797 | 0.00038  |
| 0.14488  | -0.06982 | 0.13189  | 0.025866 | 0.57714  |
| 0.32921  | -0.13052 | 0.00473  | 0.41817  | 3.42E-21 |
| 0.00133  | -0.10334 | 0.02554  | -0.05007 | 0.28022  |
| 0.06146  | -0.04166 | 0.36908  | 0.176644 | 0.00012  |
| 0.32737  | -0.0046  | 0.92105  | -0.1317  | 0.00436  |
| 0.36669  | 0.13284  | 0.00403  | -0.07842 | 0.0905   |
| 0.01679  | -0.04494 | 0.33254  | -0.05871 | 0.20539  |
| 0.04243  | 0.230171 | 4.95E-07 | -0.18818 | 4.27E-05 |
| 0.64945  | -0.00583 | 0.90002  | 0.015187 | 0.74341  |
| 0.35014  | -0.00454 | 0.92205  | -0.03143 | 0.49805  |
| 0.1052   | 0.013408 | 0.77259  | 0.069751 | 0.13229  |

|          |          |          |          |          |
|----------|----------|----------|----------|----------|
| 0.60249  | 0.001387 | 0.97615  | -0.04704 | 0.31037  |
| 2.13E-07 | -0.16754 | 0.00028  | 0.058523 | 0.20681  |
| 0.3646   | -0.10014 | 0.03048  | 0.184354 | 6.13E-05 |
| 0.4669   | -0.03274 | 0.48035  | 0.458511 | 1.18E-25 |
| 0.49627  | 0.002285 | 0.96071  | 0.11869  | 0.01025  |
| 0.45732  | 0.027364 | 0.55527  | -0.08388 | 0.07013  |
| 8.35E-07 | 0.261894 | 9.19E-09 | -0.09897 | 0.0325   |
| 0.27701  | -0.09335 | 0.04377  | 0.060404 | 0.19256  |
| 0.34363  | -0.00344 | 0.94092  | 0.059095 | 0.2024   |
| 0.50696  | -0.09287 | 0.04487  | 0.198681 | 1.52E-05 |
| 0.01299  | -0.01438 | 0.75663  | 0.257885 | 1.57E-08 |
| 0.33293  | 0.011517 | 0.80397  | 0.134114 | 0.00369  |
| 0.6183   | -0.06759 | 0.14475  | 0.033204 | 0.4741   |
| 0.31336  | -0.08611 | 0.06299  | 0.014863 | 0.7487   |
| 0.6746   | -0.03587 | 0.43936  | 0.253104 | 2.93E-08 |
| 0.97478  | -0.11183 | 0.01562  | 0.381753 | 1.19E-17 |
| 0.12317  | -0.06446 | 0.16433  | 0.106799 | 0.02098  |
| 0.57232  | 0.077076 | 0.09618  | -0.12273 | 0.00793  |
| 0.00396  | -0.07027 | 0.12945  | -0.08041 | 0.08259  |
| 0.05603  | -0.0808  | 0.08112  | 0.156723 | 0.00068  |
| 0.05312  | 0.067694 | 0.14411  | 0.089888 | 0.05223  |
| 0.01577  | 0.057292 | 0.21653  | -0.18604 | 5.23E-05 |
| 0.63448  | -0.02374 | 0.60889  | -0.15467 | 0.0008   |
| 0.00027  | 0.009332 | 0.8406   | 0.264669 | 6.32E-09 |
| 0.80424  | -0.04469 | 0.33526  | 0.269223 | 3.38E-09 |
| 0.4128   | -0.10853 | 0.01898  | 0.20205  | 1.08E-05 |
| 0.9865   | -0.13805 | 0.00279  | 0.141648 | 0.00215  |
| 0.64607  | -0.21078 | 4.34E-06 | 0.356114 | 2.08E-15 |
| 0.0567   | -0.02202 | 0.63505  | -0.06199 | 0.18111  |
| 0.33234  | -0.03123 | 0.50081  | 0.21965  | 1.65E-06 |
| 0.52154  | -0.08271 | 0.07416  | 0.128782 | 0.00532  |
| 0.77207  | 0.073217 | 0.11408  | -0.04453 | 0.33697  |
| 0.65998  | 0.035763 | 0.4407   | 0.22742  | 6.81E-07 |
| 0.0763   | -0.08856 | 0.05582  | 0.194014 | 2.43E-05 |
| 2.59E-17 | 0.39143  | 1.50E-18 | -0.0112  | 0.80928  |
| 0.13957  | -0.01722 | 0.71059  | 0.11346  | 0.01416  |
| 0.85889  | -0.04329 | 0.35057  | 0.026637 | 0.56584  |
| 0.05546  | -0.03045 | 0.51151  | 0.265454 | 5.68E-09 |
| 0.46345  | -0.02993 | 0.51874  | 0.099985 | 0.03075  |
| 0.00166  | -0.02326 | 0.61604  | -0.00177 | 0.96955  |
| 0.42582  | -0.18684 | 4.85E-05 | 0.217024 | 2.20E-06 |
| 0.0003   | -0.10168 | 0.02801  | 0.13224  | 0.0042   |
| 0.29091  | -0.15511 | 0.00077  | 0.040876 | 0.37814  |
| 0.00519  | -0.09154 | 0.04804  | -0.21034 | 4.54E-06 |
| 0.11789  | -0.07179 | 0.12134  | 0.234104 | 3.11E-07 |

|          |          |          |          |          |
|----------|----------|----------|----------|----------|
| 0.21146  | -0.03973 | 0.3917   | 0.095213 | 0.03971  |
| 0.40026  | -0.1475  | 0.00139  | 0.051744 | 0.26445  |
| 0.00085  | -0.11672 | 0.0116   | 0.231528 | 4.22E-07 |
| 0.08125  | -0.02479 | 0.59308  | 0.271401 | 2.50E-09 |
| 0.40354  | -0.11868 | 0.01026  | 0.388456 | 2.86E-18 |
| 0.77702  | 0.094744 | 0.0407   | -0.00219 | 0.96228  |
| 0.02088  | -0.17145 | 0.0002   | 0.037038 | 0.42456  |
| 4.12E-06 | 0.163883 | 0.00038  | -0.07386 | 0.11091  |
| 0.01113  | -0.03133 | 0.49949  | 0.023784 | 0.60817  |
| 0.01395  | -0.03816 | 0.41069  | 0.014963 | 0.74707  |
| 0.00583  | 0.200022 | 1.33E-05 | -0.029   | 0.53182  |
| 0.6661   | -0.072   | 0.12021  | 0.123695 | 0.00745  |
| 0.0126   | -0.0599  | 0.19633  | -0.0237  | 0.60948  |
| 0.64184  | -0.084   | 0.06975  | 0.237024 | 2.19E-07 |
| 0.08172  | -0.078   | 0.09223  | 0.267215 | 4.46E-09 |
| 0.10529  | -0.02184 | 0.63776  | 0.391002 | 1.65E-18 |
| 0.71893  | -0.15895 | 0.00057  | 0.278038 | 9.76E-10 |
| 1.78E-05 | -0.01222 | 0.79233  | -0.02689 | 0.56208  |
| 0.01516  | -0.14983 | 0.00116  | -0.13425 | 0.00365  |
| 0.01748  | -0.12969 | 0.005    | 0.551119 | 1.86E-38 |
| 0.00511  | 0.018651 | 0.68768  | -0.24738 | 6.09E-08 |
| 0.83023  | 0.075014 | 0.10545  | -0.02183 | 0.63791  |
| 0.05513  | 0.056839 | 0.2202   | -0.03595 | 0.43833  |
| 0.00382  | -0.07288 | 0.11576  | 0.409264 | 2.76E-20 |
| 0.99297  | -0.01539 | 0.74005  | -0.02889 | 0.53337  |
| 0.10072  | -0.13919 | 0.00257  | 0.154515 | 0.00081  |
| 0.17964  | -0.15857 | 0.00058  | 0.257016 | 1.76E-08 |
| 0.2482   | -0.01704 | 0.71335  | 0.512065 | 1.41E-32 |
| 0.03673  | -0.06649 | 0.15141  | -0.05951 | 0.19922  |
| 0.00122  | -0.15265 | 0.00093  | -0.06032 | 0.19318  |
| 5.05E-05 | 0.248857 | 5.05E-08 | -0.00873 | 0.85081  |
| 0.00043  | -0.14255 | 0.00201  | -0.05539 | 0.23218  |
| 0.01294  | -0.11574 | 0.01232  | -0.01992 | 0.66759  |
| 0.0194   | -0.12752 | 0.00579  | 0.009523 | 0.83738  |
| 0.15644  | 0.095031 | 0.04009  | 0.052542 | 0.25714  |
| 0.3156   | -0.01906 | 0.68116  | 0.212721 | 3.52E-06 |
| 0.69549  | -0.00564 | 0.90329  | 0.406419 | 5.31E-20 |
| 0.60679  | -0.03945 | 0.39502  | 0.184063 | 6.30E-05 |
| 0.48143  | -0.12515 | 0.00677  | 0.214656 | 2.85E-06 |
| 0.60883  | -0.06319 | 0.17279  | -0.0004  | 0.99312  |
| 0.93108  | -0.1858  | 5.36E-05 | 0.413442 | 1.04E-20 |
| 0.48137  | 0.020559 | 0.65767  | 0.041591 | 0.36984  |
| 0.06917  | 0.080619 | 0.0818   | 0.102032 | 0.02747  |
| 0.00021  | 0.229104 | 5.60E-07 | 0.109487 | 0.01794  |
| 0.00519  | 0.005328 | 0.90857  | 0.050404 | 0.27703  |

|          |          |          |          |          |
|----------|----------|----------|----------|----------|
| 4.63E-05 | -0.02877 | 0.53516  | 0.355906 | 2.16E-15 |
| 0.03463  | -0.0073  | 0.87498  | 0.03527  | 0.44703  |
| 0.90543  | -0.07298 | 0.11527  | 0.296149 | 6.59E-11 |
| 0.00133  | -0.04892 | 0.2914   | 0.006359 | 0.891    |
| 0.08464  | -0.13583 | 0.00327  | 0.232288 | 3.86E-07 |
| 0.02824  | -0.02885 | 0.53394  | 0.301857 | 2.71E-11 |
| 0.84732  | 0.240067 | 1.51E-07 | 0.073823 | 0.11111  |
| 0.00437  | 0.101708 | 0.02797  | -0.09508 | 0.04     |
| 0.29348  | -0.05634 | 0.2243   | 0.247971 | 5.66E-08 |
| 0.95085  | -0.08048 | 0.08231  | 0.047485 | 0.30585  |
| 0.4422   | -0.16363 | 0.00038  | 0.015842 | 0.73276  |
| 0.3063   | 0.117117 | 0.01131  | -0.06832 | 0.14046  |
| 0.01997  | 0.105252 | 0.02292  | 0.126701 | 0.00611  |
| 0.28042  | -0.02354 | 0.61191  | -0.04858 | 0.29485  |
| 0.08848  | -0.06934 | 0.13458  | -0.16975 | 0.00023  |
| 0.03567  | -0.13314 | 0.00395  | 0.112052 | 0.01541  |
| 0.00229  | 0.028443 | 0.53979  | 0.492136 | 7.41E-30 |
| 0.0258   | -0.10003 | 0.03067  | 0.284834 | 3.63E-10 |
| 6.47E-05 | -0.12618 | 0.00633  | 0.043765 | 0.34533  |
| 0.09662  | 0.150506 | 0.0011   | -0.02267 | 0.62509  |
| 0.00661  | 0.15845  | 0.00059  | -0.0932  | 0.0441   |
| 0.0049   | -0.0331  | 0.47553  | 0.419129 | 2.72E-21 |
| 0.58054  | -0.10798 | 0.01959  | 0.361814 | 6.86E-16 |
| 0.11445  | -0.0518  | 0.26396  | 0.121386 | 0.00864  |
| 0.00356  | 0.053862 | 0.24536  | -0.02512 | 0.5882   |
| 0.00679  | -0.03015 | 0.51574  | 0.25235  | 3.23E-08 |
| 0.92119  | 0.10553  | 0.02256  | 0.004606 | 0.92092  |
| 0.53116  | 0.055285 | 0.2331   | -0.05522 | 0.2336   |
| 0.07414  | -0.03883 | 0.40245  | 0.136086 | 0.00321  |
| 4.94E-08 | 0.234255 | 3.05E-07 | 0.058868 | 0.20414  |
| 0.00062  | -0.18115 | 8.26E-05 | 0.106155 | 0.02177  |
| 0.73614  | 0.074486 | 0.10793  | -0.15237 | 0.00096  |
| 0.00626  | -0.12909 | 0.00521  | 0.661762 | 3.74E-60 |
| 0.10806  | -0.03578 | 0.44052  | -0.20325 | 9.56E-06 |
| 0.00252  | -0.0122  | 0.79266  | 0.362312 | 6.22E-16 |
| 0.29166  | 0.004301 | 0.92614  | -0.18995 | 3.60E-05 |
| 0.09348  | -0.03487 | 0.45214  | 0.091077 | 0.04918  |
| 0.0019   | -0.06134 | 0.18578  | -0.23282 | 3.62E-07 |
| 0.03804  | 0.027395 | 0.55484  | 0.27357  | 1.84E-09 |
| 0.00821  | -0.14072 | 0.0023   | 0.035037 | 0.45004  |
| 0.9175   | -0.00163 | 0.97194  | 0.173517 | 0.00016  |
| 0.85262  | -0.01166 | 0.8016   | 0.102347 | 0.02699  |
| 8.42E-05 | -0.10477 | 0.02356  | -0.31106 | 6.18E-12 |
| 0.00243  | -0.09133 | 0.04856  | 0.18645  | 5.03E-05 |
| 0.00492  | -0.14575 | 0.00159  | 0.003614 | 0.93791  |

|          |          |          |          |          |
|----------|----------|----------|----------|----------|
| 8.19E-07 | 0.007993 | 0.86322  | 0.33696  | 7.31E-14 |
| 0.25923  | -0.12167 | 0.00849  | 0.232704 | 3.67E-07 |
| 0.75083  | -0.06635 | 0.15229  | 0.02627  | 0.57121  |
| 0.30146  | -0.01976 | 0.6701   | 0.298844 | 4.34E-11 |
| 1.96E-05 | 0.070035 | 0.13072  | 0.178129 | 0.00011  |
| 0.10796  | 0.051035 | 0.27106  | -0.05138 | 0.26786  |
| 0.0674   | 0.091706 | 0.04763  | 0.038859 | 0.40214  |
| 0.4147   | -0.0525  | 0.25756  | 0.358669 | 1.27E-15 |
| 0.04487  | -0.08174 | 0.07762  | 0.233382 | 3.39E-07 |
| 0.27892  | 0.052999 | 0.25301  | 0.355554 | 2.31E-15 |
| 0.00072  | -0.07345 | 0.11295  | -0.05652 | 0.22278  |
| 0.61327  | 0.046042 | 0.32079  | -0.08271 | 0.07415  |
| 0.00108  | 0.13235  | 0.00417  | 0.303085 | 2.23E-11 |
| 0.09898  | -0.18196 | 7.66E-05 | -0.04664 | 0.31457  |
| 0.14749  | 0.028113 | 0.5445   | 0.277297 | 1.09E-09 |
| 0.3554   | 0.041994 | 0.36522  | 0.19     | 3.59E-05 |
| 0.00163  | -0.10577 | 0.02225  | 0.011176 | 0.80965  |
| 0.00497  | -0.01273 | 0.78388  | -0.04194 | 0.36582  |
| 0.00115  | -0.04484 | 0.33364  | 0.610569 | 4.77E-49 |
| 0.85746  | 0.011421 | 0.80556  | 0.069781 | 0.13212  |
| 0.92599  | -0.19195 | 2.97E-05 | 0.121987 | 0.00832  |
| 0.00015  | 0.267013 | 4.59E-09 | 0.286104 | 3.01E-10 |
| 0.08192  | -0.02341 | 0.61379  | 0.045205 | 0.32967  |
| 0.21304  | 0.063565 | 0.17027  | 0.01289  | 0.78115  |
| 0.03529  | -0.11476 | 0.01308  | 0.073449 | 0.11294  |
| 0.00052  | -0.20859 | 5.47E-06 | 0.002418 | 0.95843  |
| 0.88986  | -0.04937 | 0.28706  | 0.080915 | 0.08068  |
| 0.01958  | -0.08774 | 0.05815  | -0.04911 | 0.28959  |
| 0.38332  | -0.04733 | 0.30744  | 0.177397 | 0.00012  |
| 0.46641  | 0.058573 | 0.20642  | 0.186749 | 4.89E-05 |
| 0.09972  | -0.05039 | 0.27719  | -0.05877 | 0.20489  |
| 0.00749  | -0.13816 | 0.00277  | 0.03578  | 0.44048  |
| 0.01519  | -0.10804 | 0.01952  | 0.008887 | 0.8481   |
| 0.40502  | -0.08288 | 0.07357  | 0.043189 | 0.35173  |
| 0.56488  | -0.06065 | 0.19078  | 0.002602 | 0.95528  |
| 0.13877  | -0.21057 | 4.44E-06 | 0.128905 | 0.00527  |
| 0.27988  | 0.082717 | 0.07413  | 0.023314 | 0.61529  |
| 0.2967   | -0.02523 | 0.5866   | 0.201351 | 1.16E-05 |
| 0.09048  | -0.0877  | 0.05825  | 0.223776 | 1.03E-06 |
| 0.00714  | -0.14613 | 0.00154  | 0.085826 | 0.06386  |
| 0.00198  | -0.0423  | 0.3617   | 0.416287 | 5.35E-21 |
| 0.15912  | -0.12198 | 0.00832  | 0.053632 | 0.24739  |
| 0.47728  | 0.017821 | 0.70089  | 0.020505 | 0.6585   |
| 1.13E-06 | 0.112912 | 0.01463  | 0.276459 | 1.22E-09 |
| 0.8445   | -0.2044  | 8.49E-06 | 0.437075 | 3.29E-23 |

|         |          |          |          |          |
|---------|----------|----------|----------|----------|
| 0.78366 | 0.072378 | 0.1183   | -0.03648 | 0.43161  |
| 0.44235 | -0.03757 | 0.418    | 0.067891 | 0.14295  |
| 0.00176 | 0.157337 | 0.00064  | 0.101147 | 0.02885  |
| 0.40998 | 0.011158 | 0.80996  | 0.172345 | 0.00018  |
| 0.15502 | -0.07443 | 0.1082   | 0.025966 | 0.57567  |
| 0.00274 | -0.01161 | 0.80233  | 0.033995 | 0.46364  |
| 0.02287 | -0.06547 | 0.15777  | 0.007647 | 0.8691   |
| 0.7848  | -0.13265 | 0.00408  | -0.01501 | 0.74625  |
| 0.65451 | 0.01651  | 0.72196  | -0.07734 | 0.09503  |
| 0.11564 | 0.002661 | 0.95427  | 0.268863 | 3.56E-09 |
| 0.00011 | -0.10003 | 0.03067  | -0.23257 | 3.73E-07 |
| 0.02673 | -0.11279 | 0.01474  | 0.004263 | 0.92679  |
| 0.07056 | 0.010748 | 0.8168   | -0.03246 | 0.48403  |
| 0.6601  | -0.08274 | 0.07406  | 0.111984 | 0.01547  |
| 0.00013 | 0.089941 | 0.05209  | 0.089671 | 0.05281  |
| 0.02729 | -0.18688 | 4.83E-05 | -0.03395 | 0.46419  |
| 0.66502 | -0.03359 | 0.46896  | 0.028634 | 0.53706  |
| 0.54014 | -0.06304 | 0.17383  | 0.066656 | 0.15038  |
| 0.64554 | -0.15433 | 0.00082  | 0.138137 | 0.00278  |
| 0.61308 | 0.014708 | 0.75124  | 0.359872 | 1.00E-15 |
| 0.41146 | -0.04943 | 0.28639  | 0.361617 | 7.13E-16 |
| 0.25456 | -0.08705 | 0.06014  | 0.490316 | 1.29E-29 |
| 0.84888 | 0.00471  | 0.91914  | -0.1412  | 0.00222  |
| 0.2604  | -0.07266 | 0.11688  | 0.325262 | 5.72E-13 |
| 0.22245 | -0.11851 | 0.01037  | 0.207554 | 6.11E-06 |
| 0.22686 | -0.17166 | 0.00019  | 0.418125 | 3.46E-21 |
| 0.3303  | -0.11346 | 0.01415  | 0.273664 | 1.82E-09 |
| 0.0408  | 0.057437 | 0.21537  | 0.098874 | 0.03266  |
| 0.07018 | -0.0554  | 0.23215  | 0.503403 | 2.26E-31 |
| 0.62306 | -0.09174 | 0.04755  | 0.221513 | 1.34E-06 |
| 0.19663 | 0.215641 | 2.56E-06 | -0.23192 | 4.03E-07 |
| 0.05849 | -0.06369 | 0.16941  | 0.043481 | 0.34847  |
| 0.12909 | -0.01537 | 0.74049  | 0.272201 | 2.23E-09 |
| 0.22724 | 0.112842 | 0.0147   | -0.16609 | 0.00031  |
| 0.15522 | 0.049679 | 0.28401  | -0.16321 | 0.0004   |
| 0.39045 | -0.16322 | 0.0004   | 0.295601 | 7.17E-11 |
| 0.83058 | -0.11262 | 0.0149   | 0.220742 | 1.46E-06 |
| 0.75764 | 0.059438 | 0.19979  | 0.302303 | 2.52E-11 |
| 0.53653 | 0.046712 | 0.31379  | 0.090856 | 0.04974  |
| 0.92776 | -0.01734 | 0.70865  | 0.148303 | 0.00131  |
| 0.4765  | -0.06267 | 0.17639  | 0.095969 | 0.03816  |
| 0.82868 | -0.06828 | 0.14064  | 0.090292 | 0.05118  |
| 0.72108 | -0.09645 | 0.03719  | 0.353184 | 3.64E-15 |
| 0.71746 | -0.01791 | 0.69947  | 0.099943 | 0.03082  |
| 0.04046 | 0.059787 | 0.19715  | -0.32296 | 8.48E-13 |

|          |          |          |          |          |
|----------|----------|----------|----------|----------|
| 0.00572  | -0.06973 | 0.13239  | -0.02263 | 0.62569  |
| 0.20642  | -0.02262 | 0.62585  | -0.08357 | 0.07117  |
| 0.96468  | -0.05491 | 0.2363   | 0.272353 | 2.19E-09 |
| 0.69097  | -0.08907 | 0.05441  | 0.331651 | 1.88E-13 |
| 0.13603  | 0.171323 | 0.0002   | -0.10539 | 0.02274  |
| 0.82082  | -0.09679 | 0.03654  | 0.187207 | 4.69E-05 |
| 0.02077  | 0.166897 | 0.00029  | 0.179455 | 9.64E-05 |
| 0.16814  | -0.13153 | 0.00441  | 0.122943 | 0.00782  |
| 0.15747  | -0.04538 | 0.32784  | 0.310983 | 6.26E-12 |
| 7.31E-06 | -0.06791 | 0.14286  | -0.087   | 0.06031  |
| 0.02668  | -0.14933 | 0.00121  | 0.276956 | 1.14E-09 |
| 0.05061  | -0.1098  | 0.01761  | 0.356036 | 2.11E-15 |
| 1.25E-05 | 0.158089 | 0.00061  | 0.034801 | 0.4531   |
| 0.81274  | -0.04998 | 0.28109  | 0.071001 | 0.12548  |
| 0.00016  | 0.222773 | 1.16E-06 | 0.169017 | 0.00024  |
| 0.48025  | -0.05845 | 0.20741  | 0.329938 | 2.54E-13 |
| 0.26198  | -0.08899 | 0.05464  | 0.109396 | 0.01804  |
| 0.28744  | -0.06706 | 0.14791  | 0.048858 | 0.29205  |
| 0.7043   | -0.04619 | 0.31921  | 0.247155 | 6.27E-08 |
| 0.1562   | -0.15858 | 0.00058  | 0.155609 | 0.00074  |
| 0.55062  | 0.147343 | 0.00141  | -0.4447  | 4.65E-24 |
| 0.00567  | 0.247118 | 6.30E-08 | -0.18701 | 4.78E-05 |
| 0.00162  | -0.04676 | 0.31332  | -0.22312 | 1.11E-06 |
| 0.29415  | -0.02575 | 0.57882  | 0.270325 | 2.90E-09 |
| 0.09062  | -0.09491 | 0.04034  | 0.194523 | 2.31E-05 |
| 0.43645  | -0.09106 | 0.04922  | 0.477592 | 5.55E-28 |
| 0.00337  | -0.05331 | 0.25024  | -0.14091 | 0.00227  |
| 0.25333  | 0.082037 | 0.07655  | 0.006439 | 0.88963  |
| 0.0526   | -0.03478 | 0.45331  | 0.199001 | 1.48E-05 |
| 0.84342  | 0.129729 | 0.00499  | -0.19219 | 2.90E-05 |
| 0.84815  | -0.02721 | 0.55753  | -0.10786 | 0.01973  |
| 0.04797  | 0.03958  | 0.39346  | 0.018369 | 0.69215  |
| 0.05168  | -0.02652 | 0.5676   | 0.140383 | 0.00236  |
| 0.02749  | -0.0992  | 0.0321   | 0.103764 | 0.02494  |
| 0.17773  | -0.14518 | 0.00166  | 0.155091 | 0.00077  |
| 0.01601  | -0.06428 | 0.16551  | -0.00444 | 0.9238   |
| 0.17596  | -0.0688  | 0.13764  | 0.155784 | 0.00073  |
| 0.00315  | 0.073394 | 0.11321  | 0.166905 | 0.00029  |
| 0.08647  | 0.01077  | 0.81644  | -0.01385 | 0.76537  |
| 0.06353  | 0.003375 | 0.94202  | 0.41684  | 4.69E-21 |
| 0.17444  | -0.12465 | 0.007    | 0.291265 | 1.39E-10 |
| 0.55834  | -0.078   | 0.09227  | 0.318836 | 1.71E-12 |
| 3.34E-09 | -0.02842 | 0.54017  | 0.720818 | 4.86E-76 |
| 0.47233  | -0.00876 | 0.85027  | 0.249571 | 4.61E-08 |
| 0.14205  | -0.07003 | 0.13076  | 0.063681 | 0.16948  |



|          |          |          |          |          |
|----------|----------|----------|----------|----------|
| 0.06666  | 0.018068 | 0.69696  | 0.3492   | 7.72E-15 |
| 0.42314  | -0.05946 | 0.19964  | 0.183482 | 6.65E-05 |
| 0.37997  | -0.08749 | 0.05887  | 0.103547 | 0.02524  |
| 0.86673  | -0.16379 | 0.00038  | 0.264301 | 6.64E-09 |
| 0.05116  | -0.04775 | 0.30315  | -0.28507 | 3.51E-10 |
| 0.64813  | -0.0179  | 0.69961  | 0.390687 | 1.77E-18 |
| 0.3287   | -0.11527 | 0.01268  | -0.01038 | 0.82295  |
| 0.78737  | -0.17991 | 9.25E-05 | 0.226208 | 7.83E-07 |
| 0.02861  | -0.03739 | 0.4202   | 0.152702 | 0.00093  |
| 0.79045  | -0.00863 | 0.85242  | 0.051683 | 0.26501  |
| 0.13468  | -0.11442 | 0.01335  | 0.124381 | 0.00712  |
| 0.53416  | -0.03972 | 0.39181  | 0.123819 | 0.00739  |
| 0.01711  | 0.07136  | 0.12357  | -0.11532 | 0.01264  |
| 0.02995  | -0.0232  | 0.61699  | 0.37775  | 2.75E-17 |
| 0.65625  | 0.125283 | 0.00671  | -0.18429 | 6.17E-05 |
| 0.01323  | -0.06711 | 0.14763  | 0.494491 | 3.61E-30 |
| 0.01404  | -0.05575 | 0.2292   | 0.06883  | 0.13749  |
| 0.6418   | -0.04648 | 0.31621  | 0.120299 | 0.00926  |
| 0.4377   | -0.05748 | 0.21504  | 0.013804 | 0.76607  |
| 0.45869  | -0.01232 | 0.79052  | 0.024788 | 0.59313  |
| 0.29266  | -0.01801 | 0.69791  | -0.13201 | 0.00427  |
| 0.65202  | 0.041808 | 0.36735  | 0.039814 | 0.39065  |
| 0.60027  | 0.111484 | 0.01594  | 0.16441  | 0.00036  |
| 0.09546  | -0.08712 | 0.05995  | 0.054937 | 0.23605  |
| 0.01094  | -0.06258 | 0.17699  | 0.04924  | 0.28829  |
| 0.00721  | -0.0816  | 0.07813  | 0.199653 | 1.38E-05 |
| 0.37138  | -0.03058 | 0.50979  | 0.164298 | 0.00036  |
| 0.7913   | 0.010255 | 0.82507  | -0.08452 | 0.06803  |
| 0.08774  | -0.03457 | 0.45604  | 0.375645 | 4.25E-17 |
| 0.51812  | 0.013379 | 0.77306  | 0.036871 | 0.42665  |
| 0.00022  | -0.03885 | 0.40224  | -0.32818 | 3.45E-13 |
| 0.57076  | -0.07719 | 0.0957   | 0.027473 | 0.5537   |
| 0.18843  | -0.00591 | 0.89858  | 0.394439 | 7.79E-19 |
| 3.10E-05 | 0.020804 | 0.65385  | -0.05814 | 0.2098   |
| 0.00959  | -0.20391 | 8.93E-06 | -0.23264 | 3.70E-07 |
| 0.06257  | 0.009842 | 0.83201  | -0.2025  | 1.03E-05 |
| 0.32341  | -0.08888 | 0.05495  | -0.19494 | 2.21E-05 |
| 0.19825  | -0.11106 | 0.01635  | 0.129168 | 0.00518  |
| 0.78755  | 0.046255 | 0.31855  | 0.17679  | 0.00012  |
| 0.74656  | -0.05574 | 0.22926  | -0.34803 | 9.62E-15 |
| 0.77357  | 0.091028 | 0.04931  | -0.21888 | 1.79E-06 |
| 0.22147  | 0.004299 | 0.92619  | 0.176694 | 0.00012  |
| 0.01429  | 0.147793 | 0.00136  | 0.059129 | 0.20214  |
| 0.00539  | -0.14711 | 0.00143  | -0.15222 | 0.00097  |
| 0.00051  | -0.05689 | 0.21977  | -0.22704 | 7.12E-07 |

|          |          |          |          |          |
|----------|----------|----------|----------|----------|
| 0.85493  | -0.01016 | 0.8267   | 0.09841  | 0.03349  |
| 0.52246  | 0.10957  | 0.01785  | -0.01514 | 0.74411  |
| 0.11641  | -0.09166 | 0.04775  | 0.109077 | 0.01838  |
| 0.00021  | -0.09944 | 0.03167  | 0.142358 | 0.00204  |
| 0.35476  | 0.038083 | 0.4116   | 0.206042 | 7.16E-06 |
| 0.00031  | 0.163568 | 0.00039  | 0.211186 | 4.15E-06 |
| 0.51936  | -0.09071 | 0.05011  | -0.03838 | 0.40801  |
| 0.0227   | 0.02137  | 0.64507  | 0.107126 | 0.02059  |
| 0.7297   | -0.01912 | 0.68019  | 0.07568  | 0.10238  |
| 0.80202  | -0.04472 | 0.33488  | 0.107658 | 0.01996  |
| 0.21384  | -0.00949 | 0.83792  | 0.206947 | 6.51E-06 |
| 0.41139  | -0.06563 | 0.15675  | 0.318654 | 1.76E-12 |
| 0.90848  | -0.01955 | 0.6734   | 0.065428 | 0.15806  |
| 0.49424  | -0.00327 | 0.94377  | 0.106818 | 0.02096  |
| 0.89366  | -0.05066 | 0.27455  | 0.293176 | 1.04E-10 |
| 0.03358  | -0.06428 | 0.16549  | 0.088511 | 0.05596  |
| 0.46889  | 0.050329 | 0.27775  | -0.06909 | 0.13599  |
| 0.43052  | -0.07283 | 0.11603  | 0.08938  | 0.05358  |
| 0.77925  | -0.04903 | 0.29033  | 0.021042 | 0.65016  |
| 0.4323   | -0.035   | 0.45052  | -0.01148 | 0.80457  |
| 3.87E-05 | -0.07137 | 0.12352  | -0.17504 | 0.00014  |
| 3.70E-05 | 0.012807 | 0.78253  | -0.03686 | 0.42686  |
| 0.47913  | 0.157433 | 0.00064  | -0.32147 | 1.09E-12 |
| 0.28677  | -0.18185 | 7.74E-05 | 0.374961 | 4.89E-17 |
| 0.62178  | -0.03949 | 0.39449  | 0.449831 | 1.21E-24 |
| 0.13331  | -0.15049 | 0.00111  | 0.08399  | 0.06977  |
| 0.86846  | 0.046485 | 0.31615  | 0.380725 | 1.48E-17 |
| 0.23709  | -0.0654  | 0.15826  | 0.145963 | 0.00156  |
| 0.10138  | -0.06443 | 0.16453  | -0.0656  | 0.15695  |
| 0.10528  | 0.026795 | 0.56354  | -0.01074 | 0.81694  |
| 0.00937  | -0.07063 | 0.12746  | 0.285704 | 3.19E-10 |
| 0.78881  | -0.06944 | 0.13405  | 0.325021 | 5.96E-13 |
| 6.80E-11 | 0.423884 | 8.67E-22 | -0.03843 | 0.40741  |
| 0.02312  | -0.03875 | 0.40346  | 0.570049 | 1.35E-41 |
| 0.18395  | -0.17534 | 0.00014  | 0.290664 | 1.52E-10 |
| 0.00165  | 0.002844 | 0.95112  | -0.05031 | 0.27794  |
| 0.49281  | -0.07879 | 0.08898  | 0.014498 | 0.75467  |
| 0.3541   | -0.21832 | 1.91E-06 | 0.297521 | 5.33E-11 |
| 0.25781  | -0.04068 | 0.38045  | 0.140069 | 0.00242  |
| 0.03448  | -0.05722 | 0.21708  | 0.546109 | 1.17E-37 |
| 0.91858  | -0.03095 | 0.50462  | 0.062578 | 0.17701  |
| 0.0191   | -0.05966 | 0.19809  | 0.494287 | 3.84E-30 |
| 0.11307  | -0.09409 | 0.04211  | 0.062157 | 0.17995  |
| 0.00698  | 0.070042 | 0.13068  | 0.150889 | 0.00107  |
| 0.00028  | -0.05196 | 0.26247  | -0.15684 | 0.00067  |

|          |          |          |          |          |
|----------|----------|----------|----------|----------|
| 0.05439  | 0.012746 | 0.78353  | 0.504518 | 1.59E-31 |
| 0.0262   | -0.06146 | 0.18491  | -0.03816 | 0.41063  |
| 0.67099  | 0.005406 | 0.90725  | -0.12315 | 0.00772  |
| 0.33391  | -0.05369 | 0.24688  | 0.096454 | 0.03719  |
| 0.00161  | -0.098   | 0.03425  | -0.09957 | 0.03145  |
| 0.00609  | 0.167515 | 0.00028  | 0.069878 | 0.13159  |
| 0.00048  | -0.10711 | 0.0206   | -0.14916 | 0.00123  |
| 0.87426  | -0.03411 | 0.46207  | -0.08928 | 0.05385  |
| 0.26789  | 0.015946 | 0.73108  | -0.11102 | 0.01639  |
| 8.40E-07 | 0.28642  | 2.87E-10 | 0.139691 | 0.00248  |
| 0.03458  | -0.09199 | 0.04695  | -0.0346  | 0.45575  |
| 0.03234  | -0.12959 | 0.00503  | 0.150902 | 0.00107  |
| 0.69901  | -0.02832 | 0.54156  | -0.1305  | 0.00473  |
| 0.58662  | 0.004372 | 0.92493  | 0.1729   | 0.00017  |
| 0.13161  | -0.05163 | 0.26551  | 0.141986 | 0.0021   |
| 0.01601  | -0.14881 | 0.00126  | 0.15449  | 0.00081  |
| 0.91798  | -0.14802 | 0.00134  | 0.158501 | 0.00059  |
| 0.14928  | -0.00474 | 0.91858  | 0.125027 | 0.00683  |
| 0.87852  | -0.11398 | 0.01372  | 0.285932 | 3.09E-10 |
| 0.64135  | -0.03432 | 0.45935  | 0.124859 | 0.0069   |
| 0.71671  | -0.07879 | 0.08898  | 0.363367 | 5.05E-16 |
| 0.24159  | -0.16436 | 0.00036  | 0.0181   | 0.69645  |
| 0.17554  | -0.05329 | 0.25038  | 0.119886 | 0.00951  |
| 0.06416  | -0.05305 | 0.25255  | 0.065869 | 0.15527  |
| 0.08561  | -0.00092 | 0.9841   | 0.090009 | 0.05192  |
| 0.03424  | 0.043465 | 0.34865  | -0.09952 | 0.03153  |
| 0.00088  | -0.04363 | 0.3468   | -0.13269 | 0.00407  |
| 2.97E-05 | 0.029596 | 0.52347  | 0.470097 | 4.74E-27 |
| 0.08058  | -0.06371 | 0.1693   | 0.051012 | 0.27127  |
| 0.07438  | 0.093726 | 0.04292  | 0.245655 | 7.57E-08 |
| 0.00183  | -0.10086 | 0.02931  | -0.01513 | 0.74439  |
| 0.05942  | 0.007556 | 0.87064  | -0.00238 | 0.95902  |
| 9.57E-07 | -0.17781 | 0.00011  | -0.09689 | 0.03634  |
| 0.2676   | -0.11504 | 0.01286  | 0.170762 | 0.00021  |
| 0.01034  | -0.00279 | 0.95213  | 0.320498 | 1.29E-12 |
| 0.00119  | -0.25547 | 2.15E-08 | 0.307217 | 1.15E-11 |
| 0.007    | 0.129422 | 0.00509  | 0.445705 | 3.58E-24 |
| 0.21065  | -0.20013 | 1.32E-05 | 0.20554  | 7.54E-06 |
| 0.02248  | -0.12145 | 0.00861  | 0.129581 | 0.00504  |
| 0.34925  | -0.06866 | 0.13848  | 0.169415 | 0.00024  |
| 0.19572  | -0.06577 | 0.15587  | 0.02308  | 0.61884  |
| 0.02326  | -0.12277 | 0.00791  | 0.00423  | 0.92737  |
| 0.00266  | -0.07734 | 0.09507  | -0.00374 | 0.93568  |
| 0.01053  | 0.036479 | 0.43159  | -0.05931 | 0.20074  |
| 0.01238  | -0.15633 | 0.0007   | 0.221064 | 1.41E-06 |

|          |          |         |          |          |
|----------|----------|---------|----------|----------|
| 0.53454  | -0.11086 | 0.01654 | 0.089079 | 0.05439  |
| 0.07523  | -0.04806 | 0.30006 | 0.068866 | 0.13728  |
| 0.00609  | 0.075259 | 0.10431 | -0.07123 | 0.12427  |
| 0.16328  | -0.04728 | 0.30797 | -0.19949 | 1.40E-05 |
| 0.52282  | -0.12989 | 0.00493 | 0.093218 | 0.04407  |
| 0.81632  | -0.03593 | 0.43861 | -0.04639 | 0.31712  |
| 0.21932  | -0.11295 | 0.0146  | 0.084894 | 0.06681  |
| 0.06871  | -0.12445 | 0.00709 | -0.07745 | 0.09459  |
| 0.74465  | -0.0252  | 0.58696 | 0.016391 | 0.72387  |
| 0.02647  | -0.05523 | 0.23358 | 0.086549 | 0.06165  |
| 0.21211  | -0.02412 | 0.60317 | 0.031337 | 0.49933  |
| 0.15579  | -0.08117 | 0.07971 | 0.075189 | 0.10463  |
| 0.41775  | 0.051483 | 0.26687 | -0.0375  | 0.41882  |
| 3.17E-05 | 0.109467 | 0.01796 | 0.266935 | 4.64E-09 |
| 0.00125  | 0.067363 | 0.14609 | 0.280038 | 7.32E-10 |
| 0.26373  | -0.08634 | 0.06228 | 0.169399 | 0.00024  |
| 0.39298  | -0.07452 | 0.10778 | 0.122377 | 0.00811  |
| 0.04729  | -0.05653 | 0.22273 | -0.06464 | 0.16311  |
| 0.58705  | 0.00206  | 0.96459 | -0.03158 | 0.49601  |
| 0.09724  | -0.09711 | 0.03591 | 0.230568 | 4.72E-07 |
| 0.01047  | 0.075846 | 0.10163 | 0.319619 | 1.50E-12 |
| 0.00058  | 0.140331 | 0.00237 | 0.205443 | 7.62E-06 |
| 0.69411  | -0.0194  | 0.67578 | 0.147756 | 0.00136  |
| 0.78984  | -0.00375 | 0.9356  | 0.066781 | 0.14961  |
| 0.07863  | -0.03958 | 0.39346 | -0.07056 | 0.12787  |
| 0.28706  | -0.05479 | 0.23731 | 0.027383 | 0.555    |
| 0.00496  | -0.08425 | 0.0689  | 0.09855  | 0.03324  |
| 0.5423   | 0.02474  | 0.59384 | -0.06417 | 0.16624  |
| 0.03376  | -0.08275 | 0.07402 | 0.035439 | 0.44486  |
| 0.2901   | -0.01837 | 0.69216 | 0.083833 | 0.0703   |
| 0.17628  | -0.06983 | 0.13184 | 0.361091 | 7.90E-16 |
| 0.05237  | -0.07111 | 0.12491 | 0.229999 | 5.05E-07 |
| 0.10243  | -0.01046 | 0.82164 | 0.116802 | 0.01154  |
| 0.6723   | -0.05464 | 0.23859 | 0.044585 | 0.33635  |
| 0.45527  | -0.12976 | 0.00498 | 0.204407 | 8.49E-06 |
| 0.04714  | 0.072735 | 0.11649 | 0.129299 | 0.00514  |
| 0.15375  | -0.06293 | 0.1746  | -0.05942 | 0.19995  |
| 0.61651  | -0.08151 | 0.07846 | 0.222985 | 1.13E-06 |
| 0.07623  | -0.03455 | 0.45635 | -0.10433 | 0.02415  |
| 0.97503  | -0.0497  | 0.28383 | 0.168555 | 0.00025  |
| 0.02905  | -0.01775 | 0.70199 | 0.007476 | 0.872    |
| 0.0982   | -0.10946 | 0.01797 | 0.402563 | 1.28E-19 |
| 0.45379  | -0.09667 | 0.03677 | 0.078482 | 0.09025  |
| 0.07864  | 0.020514 | 0.65837 | 0.310557 | 6.71E-12 |
| 0.00074  | -0.0784  | 0.09059 | -0.31843 | 1.83E-12 |

|          |          |          |          |          |
|----------|----------|----------|----------|----------|
| 0.57841  | 0.045297 | 0.32869  | 0.035074 | 0.44956  |
| 0.7252   | -0.18504 | 5.75E-05 | 0.275161 | 1.47E-09 |
| 0.877    | 0.064883 | 0.16156  | -0.16857 | 0.00025  |
| 0.88394  | -0.11971 | 0.00961  | -0.05846 | 0.20733  |
| 0.01616  | -0.11169 | 0.01575  | 0.419853 | 2.29E-21 |
| 0.08222  | -0.05682 | 0.22034  | 0.376181 | 3.80E-17 |
| 0.63194  | -0.03514 | 0.44872  | 0.180633 | 8.66E-05 |
| 0.00061  | -0.05394 | 0.24464  | -0.1212  | 0.00875  |
| 0.33333  | -0.00618 | 0.89408  | 0.145168 | 0.00166  |
| 0.00317  | -0.02605 | 0.5745   | 0.199335 | 1.43E-05 |
| 0.96472  | -0.1022  | 0.02721  | 0.001956 | 0.96637  |
| 0.00052  | 0.031885 | 0.49185  | 0.106977 | 0.02076  |
| 0.07162  | 0.022802 | 0.62307  | 0.079759 | 0.08512  |
| 0.00281  | -0.00112 | 0.98074  | -0.01361 | 0.76927  |
| 0.0499   | -0.17845 | 0.00011  | 0.24694  | 6.44E-08 |
| 0.90647  | -0.03541 | 0.44523  | 0.14365  | 0.00186  |
| 0.91506  | -0.0668  | 0.14948  | 0.228014 | 6.36E-07 |
| 0.02547  | 0.030712 | 0.50793  | 0.19906  | 1.47E-05 |
| 0.191    | -0.02833 | 0.54143  | 0.123627 | 0.00748  |
| 0.06366  | -0.02913 | 0.5301   | 0.359313 | 1.12E-15 |
| 0.00462  | 0.19017  | 3.53E-05 | 0.019074 | 0.68098  |
| 0.15987  | 0.061219 | 0.18662  | 0.020697 | 0.65552  |
| 0.91828  | -0.11381 | 0.01386  | 0.284472 | 3.83E-10 |
| 0.89667  | -0.00942 | 0.83914  | 0.047178 | 0.30898  |
| 0.9346   | 0.025947 | 0.57595  | -0.00311 | 0.94661  |
| 0.03907  | -0.12444 | 0.00709  | 0.445591 | 3.69E-24 |
| 0.05205  | -0.07061 | 0.12758  | 0.280998 | 6.37E-10 |
| 1.53E-06 | 0.041709 | 0.36849  | 0.533856 | 9.21E-36 |
| 0.71026  | -0.13077 | 0.00465  | 0.466022 | 1.49E-26 |
| 0.44115  | -0.18494 | 5.80E-05 | 0.417516 | 4.00E-21 |
| 0.28236  | -0.06231 | 0.17885  | 0.120896 | 0.00892  |
| 0.16642  | -0.12156 | 0.00855  | 0.351494 | 5.01E-15 |
| 0.36428  | 0.120052 | 0.00941  | -0.16381 | 0.00038  |
| 0.00105  | -0.07326 | 0.11385  | -0.10913 | 0.01832  |
| 0.64988  | 0.099781 | 0.03109  | -0.1942  | 2.38E-05 |
| 0.42435  | 0.071781 | 0.12137  | -0.10946 | 0.01798  |
| 0.00084  | 0.002261 | 0.96113  | 0.240373 | 1.46E-07 |
| 0.00912  | -0.13688 | 0.00304  | -0.15104 | 0.00106  |
| 0.88637  | 0.116056 | 0.01208  | -0.3049  | 1.67E-11 |
| 0.00136  | 0.00202  | 0.96528  | 0.516823 | 2.98E-33 |
| 0.00779  | 0.020419 | 0.65984  | 0.247316 | 6.14E-08 |
| 0.89225  | -0.00041 | 0.99291  | 0.085573 | 0.06465  |
| 9.48E-06 | -0.06652 | 0.15119  | 0.448608 | 1.67E-24 |
| 0.75818  | -0.11304 | 0.01452  | 0.208459 | 5.55E-06 |
| 0.30086  | 0.152844 | 0.00092  | 0.26204  | 9.01E-09 |

|          |          |          |          |          |
|----------|----------|----------|----------|----------|
| 0.00579  | 0.127184 | 0.00592  | 0.10855  | 0.01895  |
| 0.00647  | -0.11793 | 0.01075  | -0.10295 | 0.02611  |
| 0.10632  | -0.11643 | 0.0118   | -0.00574 | 0.90152  |
| 0.02527  | -0.14742 | 0.0014   | -0.07036 | 0.12891  |
| 0.46953  | -0.0575  | 0.21491  | 0.184974 | 5.79E-05 |
| 0.39108  | -0.03957 | 0.39357  | 0.125213 | 0.00674  |
| 0.92975  | -0.03986 | 0.3901   | 0.058455 | 0.20734  |
| 0.08659  | -0.01668 | 0.71918  | -0.00434 | 0.92546  |
| 0.08329  | 0.02681  | 0.56332  | -0.36431 | 4.19E-16 |
| 0.626    | 0.04534  | 0.32823  | 0.030942 | 0.50476  |
| 0.86078  | 0.041921 | 0.36605  | 0.028189 | 0.54342  |
| 0.48568  | -0.07398 | 0.11035  | 0.079901 | 0.08456  |
| 0.40432  | 0.01142  | 0.80558  | -0.0855  | 0.06487  |
| 0.00153  | 0.062559 | 0.17714  | 0.397316 | 4.13E-19 |
| 0.02329  | -0.07357 | 0.11232  | 0.307012 | 1.19E-11 |
| 0.09112  | -0.09479 | 0.0406   | 0.047605 | 0.30462  |
| 0.55143  | 0.050223 | 0.27877  | -0.00585 | 0.89971  |
| 0.14564  | -0.02459 | 0.59604  | 0.081135 | 0.07985  |
| 0.11685  | -0.02422 | 0.60165  | -0.16308 | 0.0004   |
| 0.00041  | -0.0374  | 0.42011  | 0.06173  | 0.18296  |
| 0.00715  | -0.0369  | 0.42635  | 0.444565 | 4.81E-24 |
| 0.22244  | -0.04358 | 0.34741  | 0.152398 | 0.00095  |
| 0.04932  | -0.11532 | 0.01264  | -0.11176 | 0.01568  |
| 0.0012   | -0.23261 | 3.71E-07 | 0.038067 | 0.41181  |
| 0.38757  | -0.08976 | 0.05257  | 0.263362 | 7.54E-09 |
| 0.04494  | 0.081233 | 0.07949  | 0.119699 | 0.00962  |
| 0.00389  | -0.11052 | 0.01688  | -0.03946 | 0.39484  |
| 0.00644  | 0.08852  | 0.05593  | 0.106507 | 0.02133  |
| 0.14792  | 0.010766 | 0.81651  | -0.02434 | 0.59982  |
| 0.20495  | -0.05586 | 0.22828  | -0.14026 | 0.00238  |
| 0.01525  | -0.14783 | 0.00136  | 0.038076 | 0.41169  |
| 0.04758  | -0.09175 | 0.04753  | -0.13588 | 0.00326  |
| 0.84731  | -0.05362 | 0.24751  | 0.133328 | 0.0039   |
| 0.93033  | 0.104321 | 0.02416  | -0.02438 | 0.59928  |
| 0.0267   | -0.25009 | 4.32E-08 | 0.151406 | 0.00103  |
| 0.19742  | 0.071197 | 0.12444  | 0.112357 | 0.01513  |
| 0.00228  | 0.059999 | 0.19557  | 0.221775 | 1.30E-06 |
| 0.02345  | 0.005524 | 0.90523  | 0.058091 | 0.21019  |
| 0.35275  | -0.13062 | 0.0047   | 0.235872 | 2.52E-07 |
| 1.55E-26 | 0.411846 | 1.52E-20 | 0.332528 | 1.61E-13 |
| 0.29102  | 0.129076 | 0.00521  | -0.02874 | 0.53562  |
| 5.55E-26 | 0.409469 | 2.63E-20 | 0.143342 | 0.0019   |
| 0.01753  | -0.1485  | 0.00129  | 0.058097 | 0.21014  |
| 8.25E-08 | 0.139915 | 0.00244  | 0.366502 | 2.71E-16 |
| 0.97533  | -0.02488 | 0.59177  | 0.243536 | 9.87E-08 |

|          |          |          |          |          |
|----------|----------|----------|----------|----------|
| 0.00143  | 0.068818 | 0.13756  | -0.16849 | 0.00025  |
| 0.55167  | -0.04725 | 0.30825  | 0.162837 | 0.00041  |
| 0.07482  | 0.016373 | 0.72416  | 0.077509 | 0.09433  |
| 0.02375  | -0.00898 | 0.84658  | -0.07554 | 0.10302  |
| 0.57445  | -0.04103 | 0.37634  | 0.001544 | 0.97345  |
| 0.0004   | 0.029308 | 0.52752  | -0.10859 | 0.01891  |
| 0.03896  | -0.10582 | 0.02219  | 0.024278 | 0.60075  |
| 0.38659  | 0.040652 | 0.38075  | -0.0058  | 0.90048  |
| 0.8697   | 0.098692 | 0.03299  | -0.08262 | 0.07447  |
| 0.72144  | 0.129409 | 0.0051   | -0.16544 | 0.00033  |
| 6.66E-05 | -0.02259 | 0.62631  | 0.327894 | 3.63E-13 |
| 0.03568  | 0.027916 | 0.54733  | 0.199746 | 1.37E-05 |
| 0.34177  | -0.09218 | 0.04649  | 0.11919  | 0.00994  |
| 0.00912  | 0.050372 | 0.27734  | 0.050628 | 0.2749   |
| 1.86E-08 | -0.13602 | 0.00323  | -0.06913 | 0.13577  |
| 0.76475  | -0.08364 | 0.07094  | 0.177521 | 0.00011  |
| 0.44422  | -0.02806 | 0.54525  | 0.056969 | 0.21914  |
| 0.88876  | -0.02288 | 0.62186  | 0.236944 | 2.21E-07 |
| 0.34022  | -0.09474 | 0.04071  | 0.167553 | 0.00028  |
| 0.49254  | 0.007344 | 0.87424  | 0.001384 | 0.97621  |
| 0.008    | -0.02114 | 0.64857  | -0.04711 | 0.3097   |
| 7.47E-06 | -0.14721 | 0.00142  | 0.157401 | 0.00064  |
| 0.11025  | -0.01589 | 0.732    | 0.211548 | 3.99E-06 |
| 0.27014  | -0.05823 | 0.20909  | 0.029133 | 0.52999  |
| 0.91076  | -0.15628 | 0.0007   | -0.08331 | 0.07206  |
| 0.02766  | -0.05301 | 0.25292  | 0.003219 | 0.9447   |
| 0.85584  | -0.01847 | 0.69062  | 0.219924 | 1.60E-06 |
| 0.00015  | -0.07538 | 0.10376  | 0.012937 | 0.78037  |
| 0.03837  | -0.11076 | 0.01664  | 0.037568 | 0.41797  |
| 0.37584  | -0.14024 | 0.00239  | 0.456911 | 1.82E-25 |
| 0.15963  | -0.0521  | 0.26116  | -0.00194 | 0.96668  |
| 0.00757  | 0.122487 | 0.00805  | 0.186736 | 4.90E-05 |
| 0.29146  | -0.13951 | 0.00251  | 0.358966 | 1.20E-15 |
| 0.05112  | 0.11926  | 0.00989  | 0.292269 | 1.19E-10 |
| 0.3675   | -0.09899 | 0.03247  | 0.496153 | 2.17E-30 |
| 0.00025  | 0.07737  | 0.09492  | 0.235579 | 2.61E-07 |
| 9.20E-05 | -0.04046 | 0.38303  | -0.00564 | 0.90326  |
| 0.00589  | -0.00657 | 0.88737  | 0.260908 | 1.05E-08 |
| 0.70486  | -0.18655 | 4.99E-05 | 0.327522 | 3.87E-13 |
| 0.97465  | -0.07755 | 0.09415  | 0.012372 | 0.78973  |
| 0.95543  | -0.13066 | 0.00468  | 0.194107 | 2.40E-05 |
| 0.69088  | -0.12725 | 0.00589  | 0.19218  | 2.90E-05 |
| 0.97556  | -0.1807  | 8.60E-05 | 0.225488 | 8.51E-07 |
| 0.0361   | 0.015559 | 0.73736  | -0.16818 | 0.00026  |
| 0.08581  | 0.126378 | 0.00624  | 0.124769 | 0.00694  |

|          |           |         |          |          |
|----------|-----------|---------|----------|----------|
| 0.24768  | -0.15642  | 0.00069 | 0.285302 | 3.39E-10 |
| 0.36741  | -0.06594  | 0.15482 | 0.367527 | 2.21E-16 |
| 0.00713  | 0.027424  | 0.55441 | -0.04297 | 0.35412  |
| 0.8911   | -0.06052  | 0.19169 | 0.089236 | 0.05397  |
| 0.03644  | 0.004863  | 0.91652 | -0.18516 | 5.68E-05 |
| 0.00151  | 0.002486  | 0.95726 | 0.409998 | 2.33E-20 |
| 0.9047   | -0.12205  | 0.00828 | 0.278032 | 9.77E-10 |
| 0.18908  | -0.01431  | 0.75782 | 0.248545 | 5.26E-08 |
| 0.60577  | -0.13175  | 0.00435 | -0.05189 | 0.26306  |
| 0.0572   | -0.0729   | 0.11568 | 0.055775 | 0.22897  |
| 0.00744  | -0.06539  | 0.1583  | -0.01173 | 0.80037  |
| 0.25261  | 0.011002  | 0.81256 | -0.35202 | 4.54E-15 |
| 0.30214  | -0.05427  | 0.24183 | 0.221345 | 1.36E-06 |
| 0.00069  | 0.160887  | 0.00048 | -0.03592 | 0.43875  |
| 0.46697  | -0.04109  | 0.37563 | 0.351771 | 4.76E-15 |
| 0.381    | -0.0927   | 0.04526 | 0.092348 | 0.04609  |
| 0.48826  | -0.05035  | 0.2775  | 0.098492 | 0.03335  |
| 0.00337  | -0.01262  | 0.78558 | -0.06103 | 0.18795  |
| 4.73E-06 | 0.168305  | 0.00026 | 0.15951  | 0.00054  |
| 0.02671  | -0.06944  | 0.13405 | 0.260343 | 1.13E-08 |
| 0.00353  | -0.12502  | 0.00683 | 0.193818 | 2.47E-05 |
| 0.02823  | -0.09256  | 0.0456  | 0.193126 | 2.65E-05 |
| 0.00276  | 0.137265  | 0.00295 | -0.05328 | 0.25051  |
| 0.50773  | -3.45E-05 | 0.99941 | 0.024517 | 0.59717  |
| 0.76254  | -0.17118  | 0.0002  | 0.407152 | 4.49E-20 |
| 0.52261  | -0.06501  | 0.16077 | 0.385671 | 5.20E-18 |
| 0.10203  | -0.12522  | 0.00674 | 0.297199 | 5.60E-11 |
| 0.00101  | 0.049175  | 0.28893 | 0.401867 | 1.49E-19 |
| 0.00505  | -0.16284  | 0.00041 | 0.381727 | 1.20E-17 |
| 0.62295  | 0.096887  | 0.03634 | 0.154273 | 0.00082  |
| 0.54462  | -0.06556  | 0.15725 | 0.209862 | 4.78E-06 |
| 0.15012  | -0.05122  | 0.26936 | -0.11827 | 0.01053  |
| 0.97571  | -0.16544  | 0.00033 | 0.458732 | 1.11E-25 |
| 0.04382  | -0.04639  | 0.31719 | 0.104568 | 0.02383  |
| 9.95E-08 | 0.123185  | 0.0077  | 0.564972 | 9.82E-41 |
| 0.94337  | -0.08134  | 0.07911 | 0.240964 | 1.36E-07 |
| 0.96715  | -0.06276  | 0.17573 | 0.038119 | 0.41116  |
| 0.21263  | -0.02024  | 0.66271 | 0.204618 | 8.30E-06 |
| 0.05626  | 0.000967  | 0.98337 | 0.146224 | 0.00153  |
| 0.01018  | -0.10554  | 0.02254 | 0.170443 | 0.00022  |
| 0.0805   | -0.02813  | 0.54426 | -0.08543 | 0.06509  |
| 9.75E-05 | 0.063034  | 0.17387 | 0.361887 | 6.76E-16 |
| 5.25E-10 | 0.103785  | 0.02491 | 0.321542 | 1.08E-12 |
| 0.46747  | -0.13272  | 0.00406 | 0.112765 | 0.01476  |
| 0.03143  | -0.0882   | 0.05682 | -0.057   | 0.21886  |



|          |          |          |          |          |
|----------|----------|----------|----------|----------|
| 0.00853  | -0.07394 | 0.11056  | -0.23772 | 2.01E-07 |
| 0.81226  | -0.04914 | 0.2893   | 0.037043 | 0.4245   |
| 0.00173  | -0.03655 | 0.43074  | -0.04157 | 0.37014  |
| 0.98414  | -0.03287 | 0.47851  | -0.00429 | 0.92639  |
| 0.80842  | 0.010354 | 0.82342  | 0.235262 | 2.71E-07 |
| 0.70775  | -0.10545 | 0.02267  | -0.00644 | 0.88955  |
| 0.00088  | -0.02212 | 0.63358  | -0.47512 | 1.13E-27 |
| 0.17914  | -0.04188 | 0.36648  | 0.013517 | 0.77079  |
| 0.69629  | -0.07462 | 0.10731  | 0.212727 | 3.52E-06 |
| 0.11615  | -0.11457 | 0.01323  | 0.335196 | 1.00E-13 |
| 5.32E-15 | 0.184752 | 5.91E-05 | 0.366212 | 2.87E-16 |
| 0.6143   | -0.13176 | 0.00434  | 0.295153 | 7.68E-11 |
| 0.29534  | -0.15557 | 0.00074  | 0.41455  | 8.06E-21 |
| 0.72133  | 0.053494 | 0.2486   | -0.12539 | 0.00666  |
| 0.66101  | -0.05197 | 0.26237  | 0.325541 | 5.45E-13 |
| 7.34E-07 | 0.060554 | 0.19146  | 0.358859 | 1.22E-15 |
| 0.11567  | 0.006908 | 0.88164  | 0.032506 | 0.48345  |
| 0.00098  | -0.0552  | 0.23379  | 0.663488 | 1.44E-60 |
| 0.29761  | 0.180029 | 9.15E-05 | 0.191875 | 2.99E-05 |
| 0.28311  | 0.076355 | 0.09935  | -0.34385 | 2.09E-14 |
| 0.00313  | -0.08999 | 0.05197  | -0.02312 | 0.61816  |
| 0.00522  | -0.07105 | 0.12521  | 0.088165 | 0.05693  |
| 0.38739  | -0.04297 | 0.3542   | 0.129687 | 0.005    |
| 0.00472  | -0.10275 | 0.02639  | 0.040541 | 0.38206  |
| 0.6206   | 0.135478 | 0.00335  | -0.13537 | 0.00338  |
| 0.03867  | -0.11139 | 0.01603  | -0.0172  | 0.71088  |
| 0.00128  | -0.08331 | 0.07208  | -0.00294 | 0.94946  |
| 0.258    | -0.21916 | 1.74E-06 | 0.159857 | 0.00053  |
| 0.84701  | -0.04256 | 0.35882  | 0.088124 | 0.05704  |
| 0.24795  | 0.166092 | 0.00031  | -0.12425 | 0.00718  |
| 0.26671  | -0.20565 | 7.46E-06 | 0.174734 | 0.00015  |
| 0.02633  | 0.028195 | 0.54332  | 0.00046  | 0.99209  |
| 0.00181  | -0.11541 | 0.01257  | 0.003609 | 0.93801  |
| 0.54244  | -0.00628 | 0.89226  | 0.155629 | 0.00074  |
| 0.76175  | -0.05334 | 0.25001  | 0.174622 | 0.00015  |
| 0.16266  | -0.09079 | 0.04992  | 0.103073 | 0.02592  |
| 0.43369  | -0.03299 | 0.47698  | 0.329962 | 2.53E-13 |
| 0.00302  | -0.05479 | 0.23729  | 0.261663 | 9.48E-09 |
| 0.90301  | 0.067714 | 0.144    | 0.305443 | 1.53E-11 |
| 0.44157  | -0.03231 | 0.48611  | -0.18783 | 4.42E-05 |
| 0.03005  | -0.06369 | 0.16946  | -0.16544 | 0.00033  |
| 0.08877  | 0.011306 | 0.80748  | -0.17655 | 0.00013  |
| 0.00054  | -0.01812 | 0.69618  | 0.384402 | 6.81E-18 |
| 0.04906  | -0.11641 | 0.01182  | 0.324954 | 6.03E-13 |
| 0.42171  | -0.07632 | 0.09951  | 0.09971  | 0.03121  |

|          |          |          |          |          |
|----------|----------|----------|----------|----------|
| 0.05537  | -0.00554 | 0.90503  | -0.02842 | 0.54017  |
| 0.89639  | -0.01773 | 0.70239  | 0.186048 | 5.23E-05 |
| 0.36994  | -0.11059 | 0.01681  | 0.34563  | 1.50E-14 |
| 0.02112  | -0.06592 | 0.15498  | -0.35513 | 2.51E-15 |
| 0.1722   | -0.00798 | 0.86352  | 0.511113 | 1.92E-32 |
| 0.94469  | -0.10806 | 0.01951  | 0.059839 | 0.19677  |
| 7.21E-06 | 0.084067 | 0.06952  | 0.442875 | 7.46E-24 |
| 0.50911  | -0.08125 | 0.07943  | 0.091146 | 0.04901  |
| 0.12714  | 0.035582 | 0.44302  | -0.35561 | 2.29E-15 |
| 0.05573  | -0.08173 | 0.07766  | 0.028482 | 0.53923  |
| 0.04514  | 0.046506 | 0.31593  | -0.18369 | 6.53E-05 |
| 0.25393  | -0.03456 | 0.45627  | -0.17393 | 0.00016  |
| 0.01163  | 0.073023 | 0.11505  | 0.15759  | 0.00063  |
| 0.06619  | -0.06718 | 0.14717  | 0.26402  | 6.90E-09 |
| 0.00232  | -0.03    | 0.51787  | -0.2229  | 1.14E-06 |
| 0.33461  | -0.0224  | 0.62923  | 0.263565 | 7.34E-09 |
| 0.02208  | -0.104   | 0.0246   | -0.08753 | 0.05874  |
| 0.42604  | -0.11485 | 0.01301  | 0.038982 | 0.40065  |
| 0.13019  | -0.10536 | 0.02279  | 0.113252 | 0.01434  |
| 0.55677  | -0.08    | 0.08419  | 0.077135 | 0.09593  |
| 0.97206  | -0.11179 | 0.01565  | 0.171814 | 0.00019  |
| 0.06843  | -0.13469 | 0.00354  | 0.023953 | 0.60564  |
| 0.57676  | -0.06254 | 0.17726  | 0.225649 | 8.35E-07 |
| 0.71027  | -0.08383 | 0.07032  | 0.169103 | 0.00024  |
| 0.05147  | 0.021483 | 0.64332  | 0.185859 | 5.32E-05 |
| 0.1497   | -0.10304 | 0.02597  | 0.171583 | 0.00019  |
| 0.28646  | -0.0694  | 0.13424  | 0.168762 | 0.00025  |
| 0.7382   | -0.03432 | 0.45931  | 0.03283  | 0.4791   |
| 0.8333   | -0.08403 | 0.06963  | 0.158475 | 0.00059  |
| 0.83192  | -0.09021 | 0.0514   | 0.17712  | 0.00012  |
| 0.66294  | -0.08509 | 0.06616  | 0.12019  | 0.00933  |
| 0.91632  | -0.06096 | 0.18847  | 0.144951 | 0.00169  |
| 0.98831  | -0.06873 | 0.13806  | 0.144942 | 0.00169  |
| 0.47372  | -0.07073 | 0.12691  | 0.02889  | 0.53343  |
| 0.79528  | -0.02892 | 0.53298  | 0.068014 | 0.14222  |
| 0.64187  | -0.01534 | 0.74093  | 0.011752 | 0.80005  |
| 0.18238  | 0.054073 | 0.24351  | 0.092208 | 0.04642  |
| 0.16288  | -0.18522 | 5.65E-05 | 0.032805 | 0.47943  |
| 0.95114  | -0.05497 | 0.23574  | 0.066722 | 0.14998  |
| 0.02434  | 0.083866 | 0.07019  | 0.2526   | 3.13E-08 |
| 0.09857  | -0.10375 | 0.02495  | 0.128686 | 0.00535  |
| 0.05733  | -0.02192 | 0.63652  | 0.067455 | 0.14554  |
| 0.12638  | -0.14897 | 0.00124  | -0.02292 | 0.62124  |
| 0.11816  | -0.00495 | 0.91504  | 0.138924 | 0.00262  |
| 0.06301  | -0.08674 | 0.06107  | 0.02232  | 0.63044  |

|          |          |          |          |          |
|----------|----------|----------|----------|----------|
| 0.18746  | -0.1028  | 0.02632  | -0.03018 | 0.51536  |
| 0.0782   | -0.08784 | 0.05784  | -0.05664 | 0.22179  |
| 0.09458  | -0.0595  | 0.19935  | 0.146923 | 0.00145  |
| 0.00023  | 0.113309 | 0.01429  | -0.18133 | 8.12E-05 |
| 0.94481  | -0.08361 | 0.07104  | -0.01783 | 0.70077  |
| 0.00065  | 0.003867 | 0.93357  | -0.01503 | 0.74595  |
| 0.06341  | -0.05723 | 0.217    | 0.046269 | 0.31841  |
| 0.28923  | 0.009402 | 0.83942  | 0.343244 | 2.33E-14 |
| 0.18582  | -0.04077 | 0.37934  | 0.333721 | 1.30E-13 |
| 0.05563  | -0.07723 | 0.09551  | 0.32897  | 3.01E-13 |
| 0.00067  | -0.09051 | 0.05062  | -0.10422 | 0.0243   |
| 0.16237  | -0.08121 | 0.07957  | 0.157067 | 0.00066  |
| 0.03634  | -0.01406 | 0.76189  | 0.002566 | 0.9559   |
| 0.27215  | -0.22408 | 9.99E-07 | 0.273013 | 1.99E-09 |
| 0.10926  | -0.10654 | 0.02129  | 0.137348 | 0.00294  |
| 0.45786  | -0.03969 | 0.39219  | 0.191477 | 3.11E-05 |
| 0.52614  | -0.08054 | 0.08211  | 0.114448 | 0.01333  |
| 0.50323  | 0.002838 | 0.95123  | 0.116863 | 0.01149  |
| 0.0223   | -0.03219 | 0.48774  | 0.275954 | 1.31E-09 |
| 0.55042  | -0.13978 | 0.00247  | -0.03917 | 0.39839  |
| 0.019    | -0.09312 | 0.04428  | -0.15617 | 0.00071  |
| 0.15693  | 0.079366 | 0.08667  | -0.18078 | 8.55E-05 |
| 0.03034  | -0.07236 | 0.11838  | 0.090879 | 0.04968  |
| 0.03313  | 0.083107 | 0.07277  | 0.276159 | 1.28E-09 |
| 0.00206  | -0.06652 | 0.15123  | 0.171932 | 0.00019  |
| 0.51377  | 0.119513 | 0.00974  | -0.18179 | 7.79E-05 |
| 0.16718  | -0.14149 | 0.00218  | 0.034536 | 0.45654  |
| 0.02497  | -0.00634 | 0.8913   | 0.151808 | 0.001    |
| 0.80509  | -0.11304 | 0.01452  | 0.105791 | 0.02223  |
| 0.1948   | -0.04807 | 0.29991  | 0.086141 | 0.06289  |
| 0.10394  | -0.05036 | 0.27746  | 0.267185 | 4.48E-09 |
| 0.47416  | -0.05667 | 0.22159  | 0.152319 | 0.00096  |
| 0.2701   | -0.11132 | 0.0161   | 0.112125 | 0.01534  |
| 0.17365  | 0.144222 | 0.00178  | 0.028886 | 0.53349  |
| 0.32197  | 0.112922 | 0.01462  | 0.227665 | 6.62E-07 |
| 0.13532  | 0.103128 | 0.02584  | -0.07193 | 0.12061  |
| 0.44425  | 0.013221 | 0.77568  | 0.068219 | 0.14103  |
| 0.00287  | -0.26545 | 5.68E-09 | -0.10224 | 0.02715  |
| 7.75E-06 | -0.13508 | 0.00345  | 0.189505 | 3.76E-05 |
| 0.94665  | -0.1142  | 0.01353  | -0.01012 | 0.82728  |
| 0.01254  | 0.005256 | 0.90982  | 0.01552  | 0.73799  |
| 0.01097  | 0.165829 | 0.00032  | -0.08255 | 0.07471  |
| 0.56862  | -0.09973 | 0.03117  | 0.311929 | 5.37E-12 |
| 0.07564  | -0.11112 | 0.01629  | -0.12298 | 0.0078   |
| 0.00203  | -0.08055 | 0.08206  | 0.161747 | 0.00045  |

|          |          |          |          |          |
|----------|----------|----------|----------|----------|
| 0.06464  | -0.02286 | 0.62213  | 0.096017 | 0.03806  |
| 0.77357  | -0.07742 | 0.0947   | 0.148488 | 0.00129  |
| 1.20E-06 | 0.065771 | 0.15588  | 0.304385 | 1.81E-11 |
| 0.84062  | -0.14711 | 0.00143  | 0.13741  | 0.00292  |
| 0.61769  | 0.047867 | 0.30196  | 0.091505 | 0.04812  |
| 0.00047  | -0.06838 | 0.1401   | 0.096306 | 0.03748  |
| 0.08769  | -0.06042 | 0.19242  | -0.02457 | 0.59639  |
| 0.04809  | -0.03647 | 0.43171  | -0.14959 | 0.00119  |
| 0.46755  | -0.08577 | 0.06402  | 0.112128 | 0.01534  |
| 0.22886  | -0.0349  | 0.45174  | 0.174112 | 0.00016  |
| 0.00249  | -0.07912 | 0.08766  | 0.0211   | 0.64924  |
| 0.08284  | 0.01995  | 0.66718  | 0.071858 | 0.12097  |
| 0.01537  | -0.06873 | 0.13809  | 0.00173  | 0.97026  |
| 2.71E-07 | 0.243752 | 9.60E-08 | 0.168766 | 0.00025  |
| 0.00066  | 0.046615 | 0.31479  | 0.537496 | 2.56E-36 |
| 0.00414  | -0.10753 | 0.02011  | 0.198115 | 1.61E-05 |
| 0.34175  | 0.012805 | 0.78256  | 0.129224 | 0.00516  |
| 0.00013  | 0.127666 | 0.00573  | 0.100234 | 0.03033  |
| 0.3045   | 0.00806  | 0.86209  | 0.255372 | 2.18E-08 |
| 0.35149  | 0.009977 | 0.82974  | 0.132479 | 0.00413  |
| 0.03761  | 0.154266 | 0.00082  | 0.005891 | 0.89896  |
| 0.88201  | -0.13121 | 0.00451  | 0.031325 | 0.49949  |
| 0.21888  | -0.05957 | 0.19879  | 0.178841 | 0.0001   |
| 0.12993  | -0.05249 | 0.2576   | 0.216679 | 2.29E-06 |
| 0.4923   | -0.115   | 0.01289  | 0.070129 | 0.1302   |
| 0.00214  | -0.06757 | 0.14485  | 0.174752 | 0.00015  |
| 3.90E-05 | 0.05294  | 0.25355  | 0.040147 | 0.38671  |
| 0.13505  | -0.07247 | 0.11783  | -0.02669 | 0.56502  |
| 0.72815  | 0.025842 | 0.5775   | 0.270806 | 2.71E-09 |
| 0.03822  | -0.04827 | 0.29787  | 0.15519  | 0.00077  |
| 7.50E-06 | 0.203079 | 9.73E-06 | 0.116335 | 0.01187  |
| 0.47917  | -0.11495 | 0.01293  | 0.16314  | 0.0004   |
| 0.44406  | 0.024498 | 0.59745  | -0.0038  | 0.93477  |
| 0.18607  | -0.20249 | 1.03E-05 | 0.545585 | 1.42E-37 |
| 0.55567  | -0.11924 | 0.0099   | 0.212943 | 3.44E-06 |
| 0.20638  | 0.000336 | 0.99422  | 0.027656 | 0.55106  |
| 0.15401  | -0.03864 | 0.40483  | 0.063039 | 0.17383  |
| 0.09263  | -0.19832 | 1.58E-05 | 0.172925 | 0.00017  |
| 0.0071   | -0.16175 | 0.00045  | 0.086351 | 0.06224  |
| 2.96E-05 | 0.003652 | 0.93727  | 0.458993 | 1.03E-25 |
| 0.00016  | -0.00904 | 0.84551  | 0.293006 | 1.07E-10 |
| 0.00692  | -0.10166 | 0.02805  | 0.000435 | 0.99252  |
| 0.01131  | 0.138086 | 0.00279  | -0.04033 | 0.38449  |
| 0.78603  | 0.098637 | 0.03309  | 0.218101 | 1.96E-06 |
| 0.46042  | 0.025837 | 0.57757  | -0.11178 | 0.01567  |

|          |          |          |          |          |
|----------|----------|----------|----------|----------|
| 0.686    | -0.14514 | 0.00166  | 0.261841 | 9.26E-09 |
| 0.03996  | -0.1176  | 0.01098  | 0.048496 | 0.29564  |
| 0.07749  | -0.01019 | 0.82622  | -0.02464 | 0.59538  |
| 0.43886  | -0.06776 | 0.14373  | -0.19927 | 1.44E-05 |
| 0.0736   | -0.10802 | 0.01955  | 0.102614 | 0.02659  |
| 0.00011  | 0.017003 | 0.71401  | 0.360377 | 9.08E-16 |
| 0.33503  | 0.077615 | 0.09387  | 0.221924 | 1.28E-06 |
| 0.13287  | 0.165278 | 0.00033  | 0.092076 | 0.04674  |
| 0.02109  | -0.00424 | 0.92721  | 0.20197  | 1.09E-05 |
| 0.7511   | 0.064101 | 0.16668  | -0.23324 | 3.44E-07 |
| 0.83885  | -0.08137 | 0.07898  | 0.250126 | 4.30E-08 |
| 0.91209  | 0.061205 | 0.18672  | -0.1582  | 0.0006   |
| 0.00031  | -0.06612 | 0.15371  | -0.07505 | 0.10527  |
| 0.01763  | 0.028912 | 0.53312  | 0.058339 | 0.20824  |
| 0.22588  | -0.09066 | 0.05022  | 0.433678 | 7.75E-23 |
| 0.0608   | -0.06503 | 0.16063  | 0.198119 | 1.61E-05 |
| 0.12441  | -0.03163 | 0.49537  | 0.166541 | 0.0003   |
| 0.01273  | -0.10316 | 0.0258   | -0.21109 | 4.20E-06 |
| 0.55418  | -0.04299 | 0.35389  | -0.00495 | 0.91504  |
| 0.81771  | -0.17466 | 0.00015  | 0.280322 | 7.02E-10 |
| 0.24713  | 0.004266 | 0.92674  | 0.103747 | 0.02496  |
| 0.12667  | -0.131   | 0.00458  | 0.359294 | 1.12E-15 |
| 0.07041  | -0.04511 | 0.33071  | 0.3012   | 3.00E-11 |
| 9.77E-06 | -0.11837 | 0.01046  | -0.14932 | 0.00121  |
| 5.40E-05 | -0.05457 | 0.23918  | 0.021291 | 0.64629  |
| 0.66038  | -0.0691  | 0.13597  | 0.075308 | 0.10408  |
| 0.87059  | 0.060415 | 0.19248  | -0.00838 | 0.85671  |
| 0.47717  | -0.00241 | 0.95863  | 0.109292 | 0.01815  |
| 0.4765   | 0.135484 | 0.00335  | 0.092056 | 0.04678  |
| 0.56337  | 0.123067 | 0.00776  | -0.1604  | 0.0005   |
| 0.1136   | -0.0747  | 0.10691  | 0.017644 | 0.70373  |
| 0.89293  | -0.0587  | 0.2054   | 0.131999 | 0.00427  |
| 0.11683  | -0.06131 | 0.18594  | 0.004277 | 0.92655  |
| 0.09728  | -0.06493 | 0.16123  | 0.173671 | 0.00016  |
| 0.0004   | -0.04059 | 0.38144  | 0.166905 | 0.00029  |
| 0.33792  | -0.00379 | 0.93485  | 0.05568  | 0.22976  |
| 0.96497  | -0.17524 | 0.00014  | 0.139106 | 0.00259  |
| 0.00192  | 0.394488 | 7.71E-19 | -0.10214 | 0.02731  |
| 0.02281  | -0.24798 | 5.65E-08 | 0.125947 | 0.00642  |
| 0.73962  | 0.060172 | 0.19428  | 0.054837 | 0.23691  |
| 0.00171  | 0.109804 | 0.01761  | 0.120712 | 0.00902  |
| 0.81604  | 0.098351 | 0.0336   | -0.14633 | 0.00152  |
| 0.08017  | -0.02678 | 0.56379  | 0.116127 | 0.01203  |
| 0.47377  | -0.15617 | 0.00071  | 0.292645 | 1.13E-10 |
| 0.02992  | -0.09721 | 0.03572  | -0.22139 | 1.35E-06 |

|          |          |          |          |          |
|----------|----------|----------|----------|----------|
| 0.52227  | -0.07582 | 0.10176  | 0.31459  | 3.46E-12 |
| 7.84E-07 | 0.020234 | 0.66274  | 0.280182 | 7.16E-10 |
| 0.25309  | 0.003947 | 0.9322   | 0.244264 | 9.01E-08 |
| 0.33817  | 0.193648 | 2.51E-05 | -0.12406 | 0.00727  |
| 0.01012  | 0.302817 | 2.33E-11 | -0.24633 | 6.96E-08 |
| 0.05462  | -0.13987 | 0.00245  | 0.003243 | 0.94428  |
| 4.72E-06 | 0.170595 | 0.00021  | 0.081005 | 0.08034  |
| 0.25604  | -0.08472 | 0.06737  | 0.02672  | 0.56462  |
| 0.29673  | 0.190185 | 3.52E-05 | 0.239708 | 1.58E-07 |
| 0.86326  | -0.1796  | 9.52E-05 | 0.223211 | 1.10E-06 |
| 0.10969  | -0.11213 | 0.01534  | 0.097698 | 0.0348   |
| 0.12918  | -0.10155 | 0.02822  | 0.287016 | 2.63E-10 |
| 0.96615  | -0.04452 | 0.33703  | 0.400434 | 2.06E-19 |
| 0.09721  | 0.124628 | 0.00701  | 0.010038 | 0.82871  |
| 0.23854  | -0.14702 | 0.00144  | 0.008631 | 0.85242  |
| 0.5028   | 0.125841 | 0.00647  | 0.161424 | 0.00046  |
| 0.50822  | 0.091835 | 0.04732  | 0.157139 | 0.00065  |
| 0.64665  | -0.06359 | 0.17007  | 0.180575 | 8.71E-05 |
| 0.93325  | 0.0022   | 0.96218  | 0.054044 | 0.24377  |
| 0.01167  | -0.01346 | 0.77171  | 0.065624 | 0.15681  |
| 0.03774  | -0.09708 | 0.03596  | -0.08051 | 0.0822   |
| 0.02747  | 0.180823 | 8.51E-05 | 0.06184  | 0.18218  |
| 0.0146   | 0.002244 | 0.96142  | 0.083232 | 0.07234  |
| 0.85155  | 0.055105 | 0.23462  | -0.05414 | 0.24296  |
| 0.43513  | -0.15081 | 0.00108  | 0.191417 | 3.13E-05 |
| 0.50843  | -0.19828 | 1.59E-05 | 0.094873 | 0.04043  |
| 0.64772  | -0.04088 | 0.37805  | 0.197028 | 1.80E-05 |
| 0.0488   | -0.09488 | 0.04041  | -0.01656 | 0.72116  |
| 0.00076  | -0.08682 | 0.06083  | -0.14282 | 0.00198  |
| 0.065    | 0.124841 | 0.00691  | -0.29558 | 7.19E-11 |
| 0.95064  | -0.10111 | 0.0289   | 0.145097 | 0.00167  |
| 0.19791  | -0.09396 | 0.04241  | 0.184559 | 6.02E-05 |
| 0.00977  | -0.09014 | 0.05157  | 0.021068 | 0.64974  |
| 0.83004  | -0.0669  | 0.14889  | 0.152499 | 0.00095  |
| 0.054    | -0.04833 | 0.29733  | 0.359953 | 9.87E-16 |
| 0.80575  | -0.12435 | 0.00714  | 0.260477 | 1.11E-08 |
| 0.01658  | -0.12893 | 0.00526  | 0.082577 | 0.07462  |
| 0.35158  | 0.057174 | 0.21749  | 0.200469 | 1.27E-05 |
| 0.00438  | 0.143698 | 0.00185  | -0.07734 | 0.09507  |
| 0.96684  | -0.04539 | 0.32765  | 0.145425 | 0.00163  |
| 0.02165  | -0.07146 | 0.12304  | 0.070682 | 0.12719  |
| 0.28781  | -0.11275 | 0.01478  | 0.102309 | 0.02705  |
| 0.29014  | -0.09788 | 0.03447  | 0.36588  | 3.07E-16 |
| 0.24026  | -0.00288 | 0.95053  | -0.21392 | 3.09E-06 |
| 0.13264  | -0.00044 | 0.9924   | 0.290656 | 1.52E-10 |

|          |          |          |          |          |
|----------|----------|----------|----------|----------|
| 0.00133  | -0.02996 | 0.51844  | 0.305902 | 1.42E-11 |
| 0.52774  | 0.024493 | 0.59753  | 0.017471 | 0.70649  |
| 0.03675  | -0.02572 | 0.57928  | 0.163942 | 0.00037  |
| 0.02734  | 0.018156 | 0.69555  | 0.511385 | 1.76E-32 |
| 0.01191  | -0.01207 | 0.79474  | -0.13739 | 0.00293  |
| 0.54824  | -0.07629 | 0.09961  | 0.120814 | 0.00896  |
| 0.14138  | 0.192276 | 2.88E-05 | -0.22478 | 9.22E-07 |
| 1.68E-06 | 0.135384 | 0.00337  | 0.008452 | 0.85545  |
| 0.17805  | -0.05314 | 0.25174  | 0.385867 | 4.99E-18 |
| 0.18023  | -0.07851 | 0.09015  | 0.241267 | 1.31E-07 |
| 0.28402  | -0.10969 | 0.01773  | 0.442571 | 8.07E-24 |
| 0.89631  | -0.059   | 0.20312  | 0.043972 | 0.34305  |
| 1.90E-06 | -0.07793 | 0.09254  | -0.19789 | 1.65E-05 |
| 0.4784   | -0.07446 | 0.10806  | 0.389883 | 2.10E-18 |
| 0.02096  | -0.12612 | 0.00635  | 0.300332 | 3.44E-11 |
| 0.84079  | -0.02351 | 0.61238  | 0.072323 | 0.11858  |
| 0.29937  | -0.07875 | 0.08914  | 0.161595 | 0.00046  |
| 0.06983  | -0.05806 | 0.21047  | 0.227161 | 7.02E-07 |
| 0.91686  | 0.004802 | 0.91757  | 0.006421 | 0.88993  |
| 0.50589  | -0.06746 | 0.14554  | 0.138644 | 0.00268  |
| 0.18953  | -0.05398 | 0.24433  | -0.04699 | 0.3109   |
| 0.15237  | -0.09962 | 0.03137  | 0.070892 | 0.12606  |
| 1.14E-07 | 0.242035 | 1.19E-07 | 0.061624 | 0.18372  |
| 0.06433  | -0.1416  | 0.00216  | 0.199716 | 1.37E-05 |
| 0.92368  | 0.199698 | 1.38E-05 | -0.42088 | 1.79E-21 |
| 0.47223  | 0.026418 | 0.56904  | -0.01092 | 0.81387  |
| 0.00614  | -0.05766 | 0.21363  | 0.460662 | 6.56E-26 |
| 0.03388  | -0.01724 | 0.71017  | 0.112899 | 0.01464  |
| 0.00823  | 0.013158 | 0.77671  | 0.279108 | 8.37E-10 |
| 0.27764  | 0.039036 | 0.39999  | 0.121409 | 0.00863  |
| 0.92271  | 0.022973 | 0.62047  | -0.19897 | 1.48E-05 |
| 0.00889  | -0.0802  | 0.08341  | -0.14539 | 0.00163  |
| 0.01659  | -0.10358 | 0.0252   | 0.067506 | 0.14524  |
| 0.67848  | -0.05844 | 0.20744  | 0.286387 | 2.88E-10 |
| 0.28337  | -0.06183 | 0.18228  | 0.130478 | 0.00474  |
| 0.27314  | -0.08386 | 0.07022  | 0.110577 | 0.01682  |
| 0.49291  | 0.244196 | 9.09E-08 | -0.27266 | 2.09E-09 |
| 0.54708  | -0.02271 | 0.62441  | 0.045782 | 0.32353  |
| 0.60677  | 0.130383 | 0.00477  | 0.112137 | 0.01533  |
| 0.03869  | -0.02051 | 0.6584   | 0.255768 | 2.07E-08 |
| 0.52064  | -0.15215 | 0.00097  | 0.284854 | 3.62E-10 |
| 0.12363  | -0.02212 | 0.63345  | 0.123323 | 0.00763  |
| 0.024    | -0.07833 | 0.0909   | -0.03479 | 0.45324  |
| 0.93166  | -0.11308 | 0.01448  | 0.109707 | 0.01771  |
| 0.27216  | 0.107627 | 0.02     | 0.125521 | 0.00661  |

|          |          |          |          |          |
|----------|----------|----------|----------|----------|
| 0.04471  | -0.07668 | 0.0979   | 0.085429 | 0.0651   |
| 0.0466   | -0.10154 | 0.02823  | 0.367561 | 2.19E-16 |
| 0.02     | 0.194265 | 2.37E-05 | 0.198236 | 1.59E-05 |
| 0.88422  | -0.09786 | 0.03451  | 0.398047 | 3.51E-19 |
| 0.16695  | -0.01198 | 0.79622  | 0.297597 | 5.27E-11 |
| 0.00369  | -0.14738 | 0.0014   | 0.047627 | 0.30439  |
| 0.38652  | -0.06255 | 0.17718  | -0.0107  | 0.81763  |
| 0.7131   | -0.10906 | 0.0184   | 0.098172 | 0.03393  |
| 0.69066  | 0.026802 | 0.56343  | -0.19145 | 3.12E-05 |
| 0.65712  | -0.06421 | 0.16599  | 0.150229 | 0.00113  |
| 0.81604  | 0.135411 | 0.00337  | -0.23937 | 1.65E-07 |
| 0.08319  | -0.08133 | 0.07911  | 0.025417 | 0.58377  |
| 0.57049  | 0.01881  | 0.68516  | -0.06328 | 0.1722   |
| 0.53478  | 0.145885 | 0.00157  | 0.04767  | 0.30396  |
| 0.00184  | 0.139551 | 0.00251  | 0.06336  | 0.17165  |
| 0.02166  | -0.16673 | 0.0003   | 0.024491 | 0.59756  |
| 0.16205  | 0.045768 | 0.32368  | -0.16242 | 0.00043  |
| 0.1031   | -0.02137 | 0.64514  | -0.00664 | 0.8862   |
| 0.19484  | -0.08247 | 0.07501  | 0.291164 | 1.41E-10 |
| 0.09378  | 0.051613 | 0.26566  | -0.03072 | 0.50781  |
| 3.58E-19 | 0.528654 | 5.57E-35 | 0.205249 | 7.78E-06 |
| 0.07629  | -0.13253 | 0.00412  | -0.1358  | 0.00328  |
| 0.00324  | -0.10058 | 0.02977  | -0.10168 | 0.02802  |
| 0.46695  | -0.20076 | 1.23E-05 | 0.23329  | 3.42E-07 |
| 0.09578  | -0.10384 | 0.02483  | -0.16863 | 0.00025  |
| 0.07219  | 0.172058 | 0.00019  | -0.3934  | 9.80E-19 |
| 0.93564  | -0.04136 | 0.37256  | 0.197458 | 1.72E-05 |
| 0.00022  | 0.014747 | 0.7506   | -0.16592 | 0.00032  |
| 0.00845  | -0.03707 | 0.42419  | 0.010197 | 0.82605  |
| 0.02768  | -0.11553 | 0.01248  | 0.310071 | 7.27E-12 |
| 0.78836  | -0.03975 | 0.39136  | 0.114419 | 0.01336  |
| 0.38399  | -0.04015 | 0.38668  | -0.11032 | 0.01709  |
| 0.08264  | 0.006651 | 0.88602  | 0.098617 | 0.03312  |
| 0.36685  | -0.13069 | 0.00467  | 0.098871 | 0.03267  |
| 0.00077  | 0.046233 | 0.31878  | 0.09934  | 0.03185  |
| 0.09667  | -0.07816 | 0.09158  | 0.229601 | 5.29E-07 |
| 0.25853  | -0.02976 | 0.52124  | -0.02081 | 0.65383  |
| 0.05279  | -0.00321 | 0.9449   | 0.169805 | 0.00023  |
| 0.0974   | 0.023061 | 0.61912  | 0.172168 | 0.00019  |
| 0.23129  | -0.10122 | 0.02873  | 0.007953 | 0.86391  |
| 0.0739   | -0.00405 | 0.93036  | 0.062219 | 0.17951  |
| 0.20506  | 0.007916 | 0.86454  | -0.11182 | 0.01562  |
| 0.65226  | -0.10178 | 0.02786  | 0.226528 | 7.55E-07 |
| 9.90E-06 | 0.251322 | 3.69E-08 | -0.01247 | 0.78803  |
| 0.60575  | -0.03667 | 0.42924  | 0.045983 | 0.32142  |



|          |          |          |          |          |
|----------|----------|----------|----------|----------|
| 0.03811  | -0.10436 | 0.02411  | 0.133177 | 0.00394  |
| 0.16486  | -0.02639 | 0.5694   | 0.56729  | 3.98E-41 |
| 0.43523  | -0.02367 | 0.6099   | 0.106168 | 0.02175  |
| 0.88728  | -0.04869 | 0.29372  | 0.326683 | 4.48E-13 |
| 0.01986  | -0.04886 | 0.29199  | 0.085186 | 0.06587  |
| 0.00159  | 0.23995  | 1.53E-07 | -0.06403 | 0.16713  |
| 0.24096  | -0.01419 | 0.75975  | 0.411    | 1.85E-20 |
| 0.12298  | -0.17433 | 0.00015  | 0.271603 | 2.43E-09 |
| 0.00159  | -0.0043  | 0.92608  | -0.10905 | 0.01841  |
| 0.93555  | -0.07673 | 0.09768  | 0.359401 | 1.10E-15 |
| 6.49E-05 | 0.346748 | 1.22E-14 | 0.002625 | 0.95489  |
| 0.27243  | -0.16975 | 0.00023  | 0.254715 | 2.38E-08 |
| 0.00121  | 0.006476 | 0.889    | 0.262399 | 8.59E-09 |
| 0.06254  | 0.053363 | 0.24977  | -0.24752 | 5.99E-08 |
| 0.02309  | 0.090427 | 0.05083  | -0.21034 | 4.55E-06 |
| 0.01352  | -0.03419 | 0.4611   | 0.260485 | 1.11E-08 |
| 8.33E-05 | 0.18099  | 8.38E-05 | -0.0667  | 0.15012  |
| 0.87072  | 0.089584 | 0.05304  | -0.05648 | 0.22309  |
| 0.06774  | -0.10065 | 0.02965  | 0.008565 | 0.85355  |
| 0.16868  | -0.08191 | 0.077    | 0.142902 | 0.00196  |
| 0.28721  | 0.094224 | 0.04182  | -0.34449 | 1.85E-14 |
| 3.84E-05 | 0.000649 | 0.98883  | 0.393831 | 8.90E-19 |
| 0.49805  | -0.03322 | 0.47384  | 0.146159 | 0.00154  |
| 0.52135  | -0.09324 | 0.04403  | -0.08486 | 0.06691  |
| 0.84359  | -0.08486 | 0.06691  | 0.227463 | 6.78E-07 |
| 0.19337  | -0.04457 | 0.33648  | 0.122339 | 0.00813  |
| 2.02E-07 | -0.18379 | 6.46E-05 | -0.33562 | 9.29E-14 |
| 0.72015  | -0.08117 | 0.07972  | 0.060048 | 0.19521  |
| 0.01009  | -0.01585 | 0.7326   | 0.349187 | 7.74E-15 |
| 0.00588  | -0.04637 | 0.31732  | 0.01088  | 0.81461  |
| 0.08705  | 0.13601  | 0.00323  | -0.09753 | 0.03511  |
| 2.47E-05 | -0.10222 | 0.02719  | 0.072772 | 0.1163   |
| 0.00767  | -0.17896 | 0.0001   | -0.03137 | 0.49893  |
| 0.00093  | -0.02118 | 0.64797  | 0.465105 | 1.92E-26 |
| 0.25887  | -0.07177 | 0.12141  | 0.257347 | 1.68E-08 |
| 0.12517  | -0.03767 | 0.41664  | -0.02057 | 0.65753  |
| 0.08828  | -0.06526 | 0.15912  | 0.209244 | 5.11E-06 |
| 0.32451  | 0.012473 | 0.78805  | 0.241195 | 1.32E-07 |
| 0.33793  | -0.06017 | 0.19428  | 0.160856 | 0.00048  |
| 0.66611  | -0.04894 | 0.29122  | 0.198058 | 1.62E-05 |
| 0.00843  | 0.052862 | 0.25425  | -0.14831 | 0.00131  |
| 0.17474  | -0.18106 | 8.32E-05 | 0.260215 | 1.15E-08 |
| 0.40581  | -0.05487 | 0.23659  | 0.04937  | 0.28702  |
| 0.56866  | -0.01318 | 0.77632  | 0.010979 | 0.81295  |
| 0.04979  | 0.054656 | 0.23846  | 0.016944 | 0.71496  |

|          |          |          |          |          |
|----------|----------|----------|----------|----------|
| 0.39379  | -0.04894 | 0.29121  | 0.152358 | 0.00096  |
| 0.83662  | 0.028592 | 0.53766  | 0.161708 | 0.00045  |
| 0.17143  | -0.05071 | 0.27409  | -0.03567 | 0.44188  |
| 0.99019  | 0.158633 | 0.00058  | -0.27155 | 2.45E-09 |
| 0.6469   | 0.016249 | 0.72616  | -0.00301 | 0.94832  |
| 0.02252  | -0.0225  | 0.62763  | 0.497582 | 1.39E-30 |
| 1.71E-08 | 0.215696 | 2.55E-06 | -0.06642 | 0.15182  |
| 0.01313  | 0.199588 | 1.39E-05 | 0.062265 | 0.17919  |
| 0.14459  | -0.00505 | 0.91333  | 0.172962 | 0.00017  |
| 0.73615  | -0.04748 | 0.30586  | 0.505318 | 1.23E-31 |
| 0.03245  | 0.187405 | 4.60E-05 | -0.45292 | 5.32E-25 |
| 0.42797  | -0.03333 | 0.47249  | 0.243952 | 9.37E-08 |
| 0.51767  | 0.001821 | 0.96869  | 0.24373  | 9.63E-08 |
| 0.77081  | 0.052708 | 0.25564  | -0.31005 | 7.30E-12 |
| 0.75086  | -0.13568 | 0.00331  | 0.364646 | 3.92E-16 |
| 0.60258  | -0.06447 | 0.16423  | 0.138079 | 0.00279  |
| 0.02465  | -0.02046 | 0.65925  | 0.096079 | 0.03794  |
| 0.00186  | 0.079188 | 0.08738  | 0.202542 | 1.03E-05 |
| 0.00427  | 0.018727 | 0.68648  | 0.226518 | 7.56E-07 |
| 0.01158  | 0.012909 | 0.78084  | 0.240968 | 1.35E-07 |
| 0.92508  | -0.08722 | 0.05965  | 0.335469 | 9.55E-14 |
| 0.07675  | -0.06298 | 0.17421  | 0.28281  | 4.89E-10 |
| 0.69957  | 0.048111 | 0.2995   | 0.136253 | 0.00317  |
| 0.00143  | 0.132794 | 0.00404  | 0.007461 | 0.87224  |
| 0.03698  | -0.20476 | 8.18E-06 | 0.165086 | 0.00034  |
| 0.0968   | -0.18766 | 4.49E-05 | 0.210165 | 4.63E-06 |
| 0.71865  | 0.074365 | 0.1085   | 0.240962 | 1.36E-07 |
| 0.34867  | -0.0089  | 0.84796  | 0.180125 | 9.07E-05 |
| 0.07282  | -0.0777  | 0.09352  | 0.112131 | 0.01534  |
| 0.10506  | -0.06616 | 0.15346  | -0.16259 | 0.00042  |
| 0.36299  | 0.049691 | 0.2839   | -0.14654 | 0.0015   |
| 0.14196  | -0.11006 | 0.01735  | 0.115322 | 0.01264  |
| 0.64566  | 0.025634 | 0.58056  | -0.01034 | 0.82362  |
| 0.20689  | 0.064585 | 0.16349  | -0.15585 | 0.00073  |
| 0.65389  | 0.008729 | 0.85077  | -0.04082 | 0.37881  |
| 0.69034  | 0.033257 | 0.4734   | 0.297465 | 5.38E-11 |
| 0.06933  | -0.12569 | 0.00654  | 0.416116 | 5.57E-21 |
| 0.49494  | -0.04725 | 0.3082   | 0.130569 | 0.00471  |
| 0.06565  | 0.101421 | 0.02842  | 0.396358 | 5.11E-19 |
| 0.30372  | -0.06822 | 0.14104  | 0.063018 | 0.17398  |
| 0.28359  | -0.08198 | 0.07674  | 0.394453 | 7.77E-19 |
| 0.59861  | 0.132821 | 0.00404  | -0.03934 | 0.39633  |
| 0.10001  | -0.08404 | 0.0696   | 0.26106  | 1.03E-08 |
| 0.00707  | -0.04602 | 0.32101  | -0.12098 | 0.00887  |
| 0.32234  | -0.12553 | 0.0066   | 0.106414 | 0.02145  |

|         |          |          |          |          |
|---------|----------|----------|----------|----------|
| 0.57076 | 0.033959 | 0.4641   | -0.22088 | 1.44E-06 |
| 0.98613 | -0.07688 | 0.09704  | 0.15763  | 0.00063  |
| 0.8531  | -0.03786 | 0.41436  | 0.093039 | 0.04448  |
| 0.46782 | -0.00584 | 0.89978  | 0.076821 | 0.09729  |
| 0.97807 | -0.05143 | 0.26738  | 0.116235 | 0.01195  |
| 0.02768 | 0.132288 | 0.00419  | 0.222307 | 1.22E-06 |
| 0.14346 | -0.02189 | 0.63704  | -0.06663 | 0.15056  |
| 0.06087 | -0.06582 | 0.15557  | 0.063486 | 0.17079  |
| 0.04141 | -0.10444 | 0.024    | 0.070689 | 0.12715  |
| 0.91719 | 0.002479 | 0.95739  | 0.124704 | 0.00697  |
| 0.89394 | -0.10445 | 0.02398  | 0.310007 | 7.34E-12 |
| 0.05244 | -0.06525 | 0.15921  | -0.10606 | 0.02189  |
| 0.2922  | -0.08182 | 0.07733  | -0.01598 | 0.73055  |
| 0.73154 | 0.011277 | 0.80796  | -0.09158 | 0.04794  |
| 0.15339 | -0.03215 | 0.4883   | 0.081511 | 0.07846  |
| 0.00739 | -0.03729 | 0.42143  | 0.008769 | 0.8501   |
| 0.30446 | -0.02354 | 0.61181  | 0.082811 | 0.0738   |
| 0.65407 | 0.160062 | 0.00052  | -0.31074 | 6.51E-12 |
| 0.11528 | 0.057973 | 0.21111  | 0.333968 | 1.25E-13 |
| 0.76186 | 0.044433 | 0.33801  | -0.16447 | 0.00036  |
| 0.28569 | 0.010345 | 0.82356  | 0.064302 | 0.16535  |
| 0.7283  | -0.07977 | 0.08507  | -0.02454 | 0.59683  |
| 0.57319 | -0.16041 | 0.0005   | 0.147137 | 0.00143  |
| 0.00795 | -0.10661 | 0.02121  | 0.23218  | 3.91E-07 |
| 0.0016  | -0.11861 | 0.01031  | 0.016444 | 0.72301  |
| 0.02164 | 0.195995 | 1.99E-05 | -0.18122 | 8.20E-05 |
| 0.97335 | -0.09263 | 0.04543  | -0.00084 | 0.9856   |
| 0.89759 | -0.1277  | 0.00572  | 0.284614 | 3.75E-10 |
| 0.81747 | -0.01907 | 0.68108  | 0.057256 | 0.21683  |
| 0.1908  | -0.12892 | 0.00527  | 0.08824  | 0.05672  |
| 0.0006  | -0.03889 | 0.4018   | 0.579966 | 2.52E-43 |
| 0.17051 | -0.0514  | 0.26768  | 0.073047 | 0.11493  |
| 0.11464 | -0.06155 | 0.18427  | 0.045402 | 0.32757  |
| 0.00563 | -0.08812 | 0.05706  | -0.02727 | 0.55668  |
| 0.04534 | -0.05232 | 0.25919  | 0.085963 | 0.06343  |
| 0.44264 | -0.08806 | 0.05724  | -0.05562 | 0.23024  |
| 0.02734 | 0.006403 | 0.89024  | 0.141547 | 0.00217  |
| 0.94037 | -0.05745 | 0.21524  | 0.234824 | 2.85E-07 |
| 0.02803 | -0.0614  | 0.18531  | 0.33097  | 2.12E-13 |
| 0.05547 | -0.0453  | 0.32866  | 0.151127 | 0.00105  |
| 0.31352 | -0.10778 | 0.01982  | 0.183431 | 6.68E-05 |
| 0.22569 | 0.020677 | 0.65582  | -0.12968 | 0.00501  |
| 0.19516 | -0.07991 | 0.08453  | -0.01128 | 0.80797  |
| 0.00119 | -0.02909 | 0.53061  | 0.062206 | 0.1796   |
| 0.1244  | -0.05792 | 0.2115   | -0.03725 | 0.42198  |

|          |           |          |          |          |
|----------|-----------|----------|----------|----------|
| 0.06918  | -0.01631  | 0.72525  | 0.173941 | 0.00016  |
| 0.00467  | 0.312315  | 5.04E-12 | 0.004441 | 0.92375  |
| 0.12016  | -0.09952  | 0.03154  | 0.127862 | 0.00566  |
| 0.02256  | 0.056393  | 0.22384  | 0.328765 | 3.12E-13 |
| 0.31488  | -0.04339  | 0.34951  | 0.226421 | 7.64E-07 |
| 6.91E-05 | -0.0497   | 0.28378  | 0.356907 | 1.78E-15 |
| 0.00012  | -4.34E-05 | 0.99925  | 0.289299 | 1.87E-10 |
| 0.04259  | -0.00783  | 0.86603  | 0.293379 | 1.01E-10 |
| 0.6084   | -0.08494  | 0.06667  | 0.183439 | 6.68E-05 |
| 0.03511  | 0.019801  | 0.66952  | -0.16734 | 0.00028  |
| 0.47481  | 0.107127  | 0.02059  | -0.24861 | 5.21E-08 |
| 0.02178  | 0.111175  | 0.01624  | -0.00456 | 0.92167  |
| 0.26554  | -0.04816  | 0.29898  | 0.257886 | 1.57E-08 |
| 0.11926  | -0.03231  | 0.4861   | 0.151589 | 0.00102  |
| 0.01555  | 0.074656  | 0.10712  | 0.062524 | 0.17738  |
| 0.9354   | -0.02012  | 0.66448  | 0.137303 | 0.00295  |
| 3.05E-08 | 0.286546  | 2.82E-10 | 0.273232 | 1.93E-09 |
| 0.1706   | 0.027112  | 0.55894  | 0.040332 | 0.38452  |
| 0.00085  | -0.01413  | 0.76067  | -0.25509 | 2.26E-08 |
| 0.59896  | 0.003034  | 0.94786  | 0.142642 | 0.002    |
| 0.00046  | -0.07692  | 0.09688  | -0.07503 | 0.10537  |
| 0.00303  | 0.062714  | 0.17607  | 0.108442 | 0.01907  |
| 0.37512  | -0.06394  | 0.16778  | 0.111139 | 0.01603  |
| 0.96721  | -0.01107  | 0.81148  | 0.003442 | 0.94087  |
| 0.04891  | -0.04526  | 0.32912  | 0.004486 | 0.92297  |
| 0.26156  | -0.0997   | 0.03123  | 0.045799 | 0.32335  |
| 0.37992  | 0.11836   | 0.01047  | -0.22496 | 9.04E-07 |
| 0.16036  | 0.109938  | 0.01747  | -0.13426 | 0.00365  |
| 0.00075  | -0.10531  | 0.02284  | 0.188612 | 4.10E-05 |
| 0.46927  | -0.07199  | 0.12031  | 0.3384   | 5.64E-14 |
| 0.05576  | 0.056136  | 0.22596  | 0.068503 | 0.13937  |
| 0.26673  | -0.13808  | 0.00279  | 0.041294 | 0.37327  |
| 0.3753   | -0.09257  | 0.04556  | 0.149274 | 0.00121  |
| 0.03335  | 0.073245  | 0.11394  | -0.04007 | 0.38763  |
| 0.00336  | -0.05073  | 0.27394  | 0.236585 | 2.31E-07 |
| 0.47533  | 0.039894  | 0.3897   | -0.15446 | 0.00081  |
| 0.00012  | -0.0563   | 0.22458  | 0.065071 | 0.16034  |
| 0.32254  | 0.118591  | 0.01032  | -0.22771 | 6.59E-07 |
| 0.00025  | -0.14439  | 0.00176  | 0.199224 | 1.44E-05 |
| 7.82E-05 | 0.132652  | 0.00408  | 0.072289 | 0.11875  |
| 0.19913  | -0.06497  | 0.16102  | 0.21002  | 4.70E-06 |
| 4.15E-05 | 0.121464  | 0.0086   | -0.0642  | 0.16605  |
| 0.01898  | -0.03454  | 0.45645  | -0.05746 | 0.21516  |
| 0.74785  | -0.10947  | 0.01796  | 0.335042 | 1.03E-13 |
| 0.25302  | 0.006462  | 0.88923  | 0.166446 | 0.0003   |

|          |          |          |          |          |
|----------|----------|----------|----------|----------|
| 0.05846  | 0.048788 | 0.29274  | 0.019804 | 0.66949  |
| 0.05269  | -0.00811 | 0.8613   | 0.003404 | 0.94152  |
| 0.48276  | 0.042962 | 0.35426  | -0.17859 | 0.0001   |
| 0.97724  | -0.06026 | 0.19365  | 0.062187 | 0.17974  |
| 0.51344  | 0.057298 | 0.21649  | 0.121221 | 0.00873  |
| 0.75039  | -0.06797 | 0.14248  | 0.167486 | 0.00028  |
| 0.97529  | 0.115599 | 0.01243  | 0.095443 | 0.03923  |
| 0.20806  | 0.149915 | 0.00116  | -0.0849  | 0.06678  |
| 0.19399  | 0.096987 | 0.03615  | -0.0103  | 0.82431  |
| 0.76004  | 0.068934 | 0.1369   | 0.018348 | 0.6925   |
| 0.14959  | -0.05702 | 0.21872  | 0.085746 | 0.06411  |
| 0.13343  | 0.061497 | 0.18463  | 0.02504  | 0.58937  |
| 4.25E-30 | 0.479128 | 3.55E-28 | 0.073873 | 0.11087  |
| 0.94278  | -0.01442 | 0.756    | 0.148048 | 0.00133  |
| 0.0008   | -0.04531 | 0.32855  | 0.375928 | 4.01E-17 |
| 0.02997  | -0.01219 | 0.79274  | 0.036039 | 0.43718  |
| 0.19098  | -0.01647 | 0.72267  | 0.098436 | 0.03345  |
| 1.33E-12 | 0.256347 | 1.92E-08 | 0.124905 | 0.00688  |
| 0.19558  | -0.0592  | 0.20157  | 0.169369 | 0.00024  |
| 0.75639  | -0.14009 | 0.00241  | 0.18858  | 4.11E-05 |
| 0.10189  | -0.002   | 0.96558  | 0.174239 | 0.00015  |
| 2.42E-08 | -0.00439 | 0.92469  | 0.69788  | 2.08E-69 |
| 0.9854   | -0.15799 | 0.00061  | 0.300356 | 3.43E-11 |
| 0.72619  | -0.00524 | 0.91012  | -0.02396 | 0.60554  |
| 0.02337  | 0.270335 | 2.90E-09 | -0.21233 | 3.67E-06 |
| 0.14305  | -0.13706 | 0.003    | 0.124172 | 0.00722  |
| 0.01549  | -0.05469 | 0.23815  | -0.10928 | 0.01816  |
| 0.02107  | -0.0126  | 0.78603  | 0.162616 | 0.00042  |
| 0.00037  | 0.111542 | 0.01589  | 0.348731 | 8.43E-15 |
| 0.67129  | -0.08158 | 0.07821  | 0.064091 | 0.16675  |
| 0.05403  | -0.00222 | 0.96183  | 0.114556 | 0.01325  |
| 0.02927  | -0.0431  | 0.35274  | 0.031724 | 0.49404  |
| 0.39161  | -0.06789 | 0.14294  | 0.024506 | 0.59733  |
| 5.96E-06 | 0.163275 | 0.0004   | 0.146608 | 0.00149  |
| 0.92136  | -0.09614 | 0.03782  | 0.328912 | 3.04E-13 |
| 0.1403   | -0.03723 | 0.42219  | 0.280729 | 6.62E-10 |
| 0.00751  | 0.175224 | 0.00014  | 0.130594 | 0.0047   |
| 0.0263   | 0.185268 | 5.63E-05 | 0.39654  | 4.90E-19 |
| 9.52E-13 | -0.23279 | 3.63E-07 | -0.2871  | 2.60E-10 |
| 0.7934   | -0.09641 | 0.03728  | 0.292577 | 1.14E-10 |
| 0.00051  | -0.06185 | 0.18212  | -0.00061 | 0.98952  |
| 0.00788  | -0.06993 | 0.13131  | 0.154784 | 0.00079  |
| 0.00947  | -0.01807 | 0.69695  | 0.328198 | 3.44E-13 |
| 0.08135  | 0.08507  | 0.06624  | -0.02041 | 0.66006  |
| 0.00017  | 0.02811  | 0.54454  | 0.427383 | 3.69E-22 |

|          |          |          |          |          |
|----------|----------|----------|----------|----------|
| 0.51676  | -0.11983 | 0.00954  | 0.383615 | 8.04E-18 |
| 0.01389  | 0.04456  | 0.33663  | 0.383368 | 8.48E-18 |
| 0.06662  | -0.05348 | 0.2487   | 0.240829 | 1.38E-07 |
| 0.24157  | -0.06073 | 0.19017  | 0.282311 | 5.26E-10 |
| 0.68505  | 0.017703 | 0.70278  | 0.153305 | 0.00089  |
| 0.1193   | -0.09678 | 0.03655  | 0.051044 | 0.27097  |
| 0.11834  | 0.004443 | 0.92372  | 0.14848  | 0.00129  |
| 0.20787  | -0.00238 | 0.95914  | 0.101264 | 0.02866  |
| 0.02288  | -0.10438 | 0.02408  | -0.04864 | 0.29421  |
| 0.10205  | 0.150005 | 0.00115  | -0.11526 | 0.01269  |
| 0.08067  | -0.06198 | 0.18119  | -0.05367 | 0.24703  |
| 0.18256  | -0.02945 | 0.52559  | 0.03798  | 0.41288  |
| 0.0004   | -0.14576 | 0.00159  | 0.02524  | 0.5864   |
| 0.64802  | 0.195096 | 2.18E-05 | -0.18938 | 3.81E-05 |
| 3.43E-13 | 0.38058  | 1.52E-17 | 0.097195 | 0.03575  |
| 0.04464  | 0.257618 | 1.62E-08 | 0.002185 | 0.96244  |
| 0.00468  | -0.1011  | 0.02892  | 0.424972 | 6.66E-22 |
| 1.50E-05 | -0.09335 | 0.04378  | 0.562434 | 2.62E-40 |
| 0.0405   | -0.12823 | 0.00552  | 0.409542 | 2.59E-20 |
| 1.94E-08 | -0.08775 | 0.05811  | -0.08892 | 0.05483  |
| 0.18701  | 0.08904  | 0.0545   | 0.284372 | 3.89E-10 |
| 0.4377   | -0.06216 | 0.17994  | 0.148362 | 0.0013   |
| 0.03285  | 0.030218 | 0.51477  | -0.20413 | 8.73E-06 |
| 0.04727  | -0.15332 | 0.00089  | 0.002469 | 0.95757  |
| 0.07654  | -0.05363 | 0.24738  | 0.063282 | 0.17218  |
| 0.06813  | 0.045041 | 0.33143  | -0.03227 | 0.48657  |
| 7.64E-06 | 0.011126 | 0.81049  | -0.25718 | 1.72E-08 |
| 0.02292  | -0.07649 | 0.09875  | 0.032533 | 0.48309  |
| 0.0177   | -0.13887 | 0.00263  | 0.092693 | 0.04528  |
| 0.32476  | -0.15871 | 0.00058  | 0.371653 | 9.61E-17 |
| 0.06947  | -0.13275 | 0.00406  | 0.33733  | 6.84E-14 |
| 0.27035  | 0.031058 | 0.50315  | -0.35728 | 1.66E-15 |
| 0.02328  | -0.01909 | 0.68065  | 0.348296 | 9.15E-15 |
| 0.18827  | -0.04332 | 0.35022  | 0.023186 | 0.61722  |
| 0.69473  | -0.14234 | 0.00205  | 0.258561 | 1.43E-08 |
| 0.01664  | -0.05719 | 0.21738  | 0.219056 | 1.76E-06 |
| 0.74721  | -0.09905 | 0.03235  | 0.186338 | 5.09E-05 |
| 0.40865  | -0.07845 | 0.0904   | 0.206599 | 6.75E-06 |
| 0.00514  | 0.02792  | 0.54726  | 0.404583 | 8.07E-20 |
| 0.01977  | 0.038943 | 0.40112  | 0.202979 | 9.83E-06 |
| 0.00091  | -0.00503 | 0.9137   | 0.122907 | 0.00784  |
| 0.95625  | -0.09341 | 0.04363  | 0.130412 | 0.00476  |
| 0.25454  | -0.07672 | 0.09772  | 0.141547 | 0.00217  |
| 0.15946  | -0.12863 | 0.00537  | 0.176953 | 0.00012  |
| 0.04942  | 0.157837 | 0.00062  | -0.26455 | 6.42E-09 |

|          |          |          |          |          |
|----------|----------|----------|----------|----------|
| 0.03251  | -0.01282 | 0.78233  | 0.347272 | 1.11E-14 |
| 0.00206  | -0.11191 | 0.01554  | -0.16941 | 0.00024  |
| 0.32818  | -0.01633 | 0.7248   | 0.057242 | 0.21694  |
| 0.24528  | -0.02411 | 0.60328  | -0.06865 | 0.13855  |
| 0.0807   | 0.00409  | 0.92976  | 0.578442 | 4.69E-43 |
| 0.64595  | -0.00108 | 0.98147  | 0.207096 | 6.41E-06 |
| 0.7189   | -0.19038 | 3.46E-05 | 0.350304 | 6.27E-15 |
| 0.00349  | -0.11107 | 0.01634  | -0.00092 | 0.9841   |
| 0.41536  | -0.12251 | 0.00804  | 0.294341 | 8.70E-11 |
| 0.0692   | -0.07583 | 0.10171  | 0.127468 | 0.00581  |
| 0.40682  | -0.03385 | 0.46552  | 0.037687 | 0.41649  |
| 0.06942  | -0.11681 | 0.01153  | 0.401764 | 1.53E-19 |
| 0.10064  | 0.051006 | 0.27133  | 0.245499 | 7.72E-08 |
| 0.03459  | -0.12091 | 0.00891  | 0.39912  | 2.76E-19 |
| 0.17765  | 0.000834 | 0.98566  | -0.09945 | 0.03167  |
| 0.11186  | -0.08385 | 0.07024  | -0.02196 | 0.63592  |
| 0.31148  | 0.011149 | 0.8101   | -0.00434 | 0.9254   |
| 0.84964  | -0.13523 | 0.00341  | 0.237892 | 1.97E-07 |
| 0.00045  | -0.03889 | 0.40179  | -0.1255  | 0.00662  |
| 1.95E-06 | 0.062149 | 0.18     | 0.17618  | 0.00013  |
| 0.58024  | -0.06557 | 0.15713  | 0.268499 | 3.74E-09 |
| 5.54E-05 | -0.07223 | 0.11903  | 0.476131 | 8.47E-28 |
| 0.21895  | -0.20964 | 4.90E-06 | 0.049911 | 0.28176  |
| 0.20926  | -0.18504 | 5.75E-05 | 0.374176 | 5.75E-17 |
| 0.55497  | -0.03809 | 0.41155  | 0.10895  | 0.01852  |
| 0.26673  | 0.07102  | 0.12538  | 0.014103 | 0.76115  |
| 0.34347  | -0.1145  | 0.01329  | 0.251733 | 3.50E-08 |
| 0.11489  | -0.14282 | 0.00197  | 0.301084 | 3.06E-11 |
| 0.07752  | -0.072   | 0.12023  | 0.290953 | 1.46E-10 |
| 0.0064   | -0.14492 | 0.00169  | 0.057274 | 0.21668  |
| 0.00801  | -0.137   | 0.00301  | 0.087716 | 0.05821  |
| 0.20374  | -0.11521 | 0.01273  | 0.281065 | 6.30E-10 |
| 0.00111  | -0.04904 | 0.29028  | 0.102616 | 0.02659  |
| 0.53159  | -0.06644 | 0.15171  | 0.257212 | 1.71E-08 |
| 0.0024   | -0.04404 | 0.34229  | 0.451582 | 7.61E-25 |
| 0.38853  | 0.220614 | 1.48E-06 | -0.14559 | 0.00161  |
| 0.6017   | -0.04598 | 0.32143  | 0.223088 | 1.12E-06 |
| 0.09019  | -0.13813 | 0.00278  | 0.357093 | 1.72E-15 |
| 0.11763  | -0.22413 | 9.94E-07 | 0.28422  | 3.97E-10 |
| 0.28603  | -0.01838 | 0.69191  | 0.33706  | 7.18E-14 |
| 0.25757  | -0.01681 | 0.71708  | 0.404653 | 7.95E-20 |
| 0.04334  | 0.119432 | 0.00979  | -0.00767 | 0.86862  |
| 0.04219  | -0.02007 | 0.66534  | 0.237892 | 1.97E-07 |
| 0.63797  | -0.03916 | 0.39851  | 0.109699 | 0.01772  |
| 0.41577  | -0.10284 | 0.02627  | 0.17233  | 0.00018  |

|         |          |         |          |          |
|---------|----------|---------|----------|----------|
| 0.27989 | -0.04777 | 0.30293 | 0.166704 | 0.0003   |
| 0.00455 | -0.01931 | 0.67727 | 0.157106 | 0.00066  |
| 0.90765 | -0.06043 | 0.1924  | 0.124846 | 0.00691  |
| 0.11537 | -0.01208 | 0.79462 | 0.210454 | 4.49E-06 |
| 0.25084 | -0.02475 | 0.59369 | 0.160488 | 0.0005   |
| 0.16244 | -0.03348 | 0.4704  | 0.104933 | 0.02334  |
| 0.00654 | -0.00667 | 0.88563 | 0.246631 | 6.70E-08 |
| 0.15454 | -0.09319 | 0.04413 | 0.097836 | 0.03454  |
| 0.28982 | -0.02932 | 0.52734 | 0.126842 | 0.00605  |
| 0.77669 | -0.06171 | 0.18308 | 0.140889 | 0.00228  |
| 0.03884 | 0.017773 | 0.70167 | 0.290054 | 1.67E-10 |
| 0.7749  | -0.10247 | 0.0268  | 0.149345 | 0.00121  |
| 0.06679 | -0.00316 | 0.94571 | 0.116729 | 0.01159  |
| 0.23163 | -0.08288 | 0.07357 | 0.153448 | 0.00088  |
| 0.3336  | -0.06974 | 0.13234 | 0.217582 | 2.07E-06 |
| 0.17006 | 0.011371 | 0.8064  | 0.196833 | 1.83E-05 |
| 0.34317 | -0.0624  | 0.17821 | 0.130836 | 0.00463  |
| 0.90345 | -0.03882 | 0.40263 | 0.066505 | 0.15131  |
| 0.90981 | -0.06576 | 0.15597 | 0.144886 | 0.00169  |
| 0.38983 | -0.06359 | 0.1701  | 0.131707 | 0.00436  |
| 0.54169 | -0.06458 | 0.16353 | 0.041491 | 0.371    |
| 0.17566 | -0.01721 | 0.71071 | 0.143275 | 0.00191  |
| 0.30874 | -0.00677 | 0.88397 | 0.122488 | 0.00805  |
| 0.10727 | -0.02749 | 0.55343 | 0.24567  | 7.56E-08 |
| 0.32011 | -0.06982 | 0.13188 | 0.222444 | 1.20E-06 |
| 0.69025 | -0.12369 | 0.00745 | 0.111157 | 0.01586  |
| 0.76545 | -0.08724 | 0.0596  | 0.103085 | 0.0259   |
| 0.51551 | -0.05189 | 0.26305 | 0.129509 | 0.00506  |
| 0.11972 | -0.0286  | 0.5375  | 0.110095 | 0.01731  |
| 0.53227 | -0.03495 | 0.4511  | 0.077785 | 0.09315  |
| 0.41191 | -0.04885 | 0.29213 | 0.117491 | 0.01105  |
| 0.00087 | 0.166353 | 0.00031 | -0.19021 | 3.52E-05 |
| 0.81825 | -0.03491 | 0.45166 | 0.16456  | 0.00036  |
| 0.68804 | -0.06549 | 0.15768 | 0.105374 | 0.02276  |
| 0.44397 | -0.00936 | 0.84009 | 0.060438 | 0.19231  |
| 0.19934 | -0.07407 | 0.10993 | 0.086793 | 0.06091  |
| 0.00151 | 0.013941 | 0.76381 | 0.165186 | 0.00034  |
| 0.05084 | 0.035854 | 0.43953 | 0.13232  | 0.00418  |
| 0.80096 | 0.013608 | 0.7693  | 0.097666 | 0.03486  |
| 0.06686 | -0.03568 | 0.44181 | 0.15771  | 0.00063  |
| 0.10774 | -0.02927 | 0.52812 | 0.128456 | 0.00544  |
| 0.97523 | 0.020946 | 0.65165 | 0.052828 | 0.25455  |
| 0.03732 | 0.095921 | 0.03826 | -0.03066 | 0.50863  |
| 0.47872 | -0.07754 | 0.0942  | 0.073625 | 0.11207  |
| 0.19345 | -0.09722 | 0.03571 | 0.107673 | 0.01995  |



|          |          |         |          |          |
|----------|----------|---------|----------|----------|
| 0.20351  | -0.06161 | 0.18379 | 0.103623 | 0.02513  |
| 0.15448  | -0.01264 | 0.78521 | 0.101365 | 0.0285   |
| 0.15978  | -0.01897 | 0.68258 | 0.124935 | 0.00687  |
| 0.59057  | -0.06915 | 0.13564 | 0.120285 | 0.00927  |
| 0.01116  | 0.007262 | 0.87562 | 0.164005 | 0.00037  |
| 0.48366  | -0.03796 | 0.41313 | 0.112768 | 0.01476  |
| 0.00728  | -0.07033 | 0.12908 | 0.347636 | 1.03E-14 |
| 0.35952  | 0.109968 | 0.01744 | -0.01483 | 0.74924  |
| 0.79005  | -0.04319 | 0.35168 | 0.141748 | 0.00214  |
| 0.43107  | -0.05162 | 0.26559 | 0.222865 | 1.15E-06 |
| 0.94918  | -0.04908 | 0.28983 | 0.07124  | 0.12421  |
| 0.09766  | 0.044375 | 0.33864 | 0.099029 | 0.03239  |
| 0.09514  | -0.09154 | 0.04804 | 0.324041 | 7.05E-13 |
| 0.34993  | -0.04953 | 0.28549 | 0.201823 | 1.11E-05 |
| 0.47371  | -0.02705 | 0.55987 | 0.150978 | 0.00107  |
| 0.39793  | -0.06206 | 0.18066 | 0.059929 | 0.19609  |
| 0.21768  | -0.04738 | 0.30695 | 0.148433 | 0.0013   |
| 0.22187  | -0.0651  | 0.16014 | 0.105668 | 0.02238  |
| 0.28451  | -0.03493 | 0.4514  | 0.136674 | 0.00308  |
| 0.63909  | -0.04994 | 0.28144 | 0.058262 | 0.20885  |
| 0.322    | -0.01259 | 0.78616 | 0.161003 | 0.00048  |
| 0.13022  | -0.06093 | 0.18874 | 0.25582  | 2.06E-08 |
| 0.17324  | -0.00728 | 0.87526 | 0.141841 | 0.00212  |
| 0.49392  | -0.00443 | 0.92397 | 0.129905 | 0.00493  |
| 0.42784  | -0.02094 | 0.65166 | 0.108093 | 0.01947  |
| 0.23972  | -0.01758 | 0.7048  | 0.099897 | 0.0309   |
| 0.68822  | -0.04927 | 0.288   | 0.080725 | 0.0814   |
| 0.08917  | 0.007242 | 0.87597 | 0.141844 | 0.00212  |
| 0.62042  | -0.0276  | 0.55183 | 0.122963 | 0.00781  |
| 0.39146  | -0.03814 | 0.41094 | 0.078351 | 0.09079  |
| 0.28309  | -0.0355  | 0.444   | 0.061754 | 0.18279  |
| 0.68108  | -0.08523 | 0.06573 | 0.017903 | 0.69959  |
| 0.27277  | -0.04954 | 0.28536 | 0.065101 | 0.16015  |
| 0.22156  | -0.06174 | 0.18288 | 0.085033 | 0.06636  |
| 3.70E-05 | 0.003814 | 0.93449 | 0.283083 | 4.70E-10 |
| 0.98457  | -0.06142 | 0.18517 | 0.135988 | 0.00323  |
| 0.78716  | -0.06278 | 0.17559 | 0.036523 | 0.43104  |
| 0.42431  | -0.0214  | 0.64458 | 0.056358 | 0.22414  |
| 0.19586  | -0.01508 | 0.74523 | 0.183513 | 6.63E-05 |
| 0.40779  | -0.03813 | 0.41099 | 0.082585 | 0.0746   |
| 0.39991  | -0.03882 | 0.40264 | -0.00094 | 0.98391  |
| 0.17225  | -0.03605 | 0.43701 | 0.020538 | 0.65799  |
| 0.55757  | -0.02518 | 0.58727 | 0.036468 | 0.43173  |
| 0.38503  | -0.0788  | 0.08896 | 0.230621 | 4.69E-07 |
| 0.00333  | 0.016042 | 0.72951 | 0.265115 | 5.95E-09 |

|          |          |         |          |          |
|----------|----------|---------|----------|----------|
| 0.02266  | 0.036242 | 0.43459 | 0.20017  | 1.31E-05 |
| 0.29158  | -0.01487 | 0.74856 | 0.150759 | 0.00108  |
| 0.61484  | -0.0767  | 0.09784 | 0.117546 | 0.01102  |
| 0.23049  | -0.02325 | 0.61626 | 0.179056 | 0.0001   |
| 0.97703  | -0.08317 | 0.07256 | 0.094133 | 0.04202  |
| 0.12921  | 0.006065 | 0.89601 | 0.046348 | 0.31759  |
| 0.52588  | -0.0434  | 0.34937 | 0.135305 | 0.00339  |
| 0.02198  | -0.00174 | 0.97007 | 0.257551 | 1.64E-08 |
| 0.00884  | 0.052807 | 0.25475 | 0.120288 | 0.00927  |
| 0.32506  | -0.08376 | 0.07055 | 0.203563 | 9.26E-06 |
| 0.00172  | 0.045777 | 0.32359 | 0.158512 | 0.00059  |
| 0.35274  | -0.0624  | 0.17824 | 0.118208 | 0.01057  |
| 0.26245  | -0.04539 | 0.32769 | 0.092037 | 0.04683  |
| 0.71279  | -0.05124 | 0.26917 | 0.108656 | 0.01884  |
| 0.71833  | -0.0472  | 0.30879 | 0.120407 | 0.0092   |
| 0.14908  | -0.10687 | 0.02089 | 0.246924 | 6.46E-08 |
| 0.2724   | -0.0161  | 0.72859 | 0.132874 | 0.00402  |
| 0.99657  | -0.07204 | 0.12001 | 0.137743 | 0.00286  |
| 0.14826  | -0.06199 | 0.18109 | 0.116663 | 0.01164  |
| 0.28045  | -0.04661 | 0.3149  | 0.142056 | 0.00209  |
| 0.20121  | -0.05914 | 0.20203 | 0.189119 | 3.90E-05 |
| 0.8972   | -0.08619 | 0.06274 | 0.121529 | 0.00856  |
| 0.67373  | -0.07797 | 0.0924  | 0.101171 | 0.02881  |
| 0.02595  | -0.03345 | 0.47083 | 0.176957 | 0.00012  |
| 0.41291  | -0.05616 | 0.2258  | 0.171041 | 0.0002   |
| 0.01785  | -0.025   | 0.58995 | 0.150777 | 0.00108  |
| 0.17586  | -0.09485 | 0.04047 | 0.26419  | 6.74E-09 |
| 0.08205  | -0.03227 | 0.48664 | 0.109335 | 0.0181   |
| 0.62444  | -0.0741  | 0.10978 | 0.247821 | 5.76E-08 |
| 0.74923  | -0.04914 | 0.28928 | 0.10087  | 0.02929  |
| 0.1961   | -0.07058 | 0.12774 | 0.161228 | 0.00047  |
| 0.38075  | -0.03868 | 0.40425 | 0.138654 | 0.00267  |
| 0.50134  | -0.0661  | 0.15381 | 0.218119 | 1.95E-06 |
| 0.43901  | 0.009546 | 0.83699 | 0.050284 | 0.27817  |
| 0.30555  | -0.03122 | 0.50097 | 0.037389 | 0.42018  |
| 0.988    | -0.01975 | 0.67032 | 0.094939 | 0.04029  |
| 0.26355  | -0.05824 | 0.20902 | 0.016713 | 0.71868  |
| 2.37E-05 | -0.09485 | 0.04047 | 0.467369 | 1.02E-26 |
| 0.01488  | -0.05185 | 0.26345 | 0.23614  | 2.44E-07 |
| 0.68226  | 0.011149 | 0.81011 | 0.088581 | 0.05576  |
| 0.67688  | -0.04473 | 0.33482 | 0.172015 | 0.00019  |
| 0.17178  | -0.02215 | 0.63306 | 0.108981 | 0.01848  |
| 0.96716  | -0.01647 | 0.72257 | 0.117724 | 0.01089  |
| 0.28487  | -0.08173 | 0.07765 | 0.101583 | 0.02816  |
| 0.25135  | -0.04335 | 0.34987 | 0.167138 | 0.00029  |

|         |          |         |          |          |
|---------|----------|---------|----------|----------|
| 0.96111 | -0.03507 | 0.44966 | 0.195417 | 2.11E-05 |
| 0.79293 | -0.04988 | 0.28204 | 0.182211 | 7.49E-05 |
| 0.86442 | 0.00739  | 0.87346 | 0.127302 | 0.00587  |
| 0.17442 | -0.07553 | 0.10308 | 0.09653  | 0.03704  |
| 0.02781 | -0.07909 | 0.08776 | 0.070677 | 0.12722  |
| 0.78453 | -0.03306 | 0.476   | 0.120611 | 0.00908  |
| 0.17144 | 0.012216 | 0.79233 | 0.175137 | 0.00014  |
| 0.43105 | -0.01958 | 0.67294 | 0.024764 | 0.59348  |
| 0.91572 | -0.04904 | 0.2903  | 0.137555 | 0.00289  |
| 0.70697 | -0.03786 | 0.4143  | 0.134926 | 0.00349  |
| 0.32045 | -0.1     | 0.03073 | 0.140812 | 0.00229  |
| 0.99231 | 0.017563 | 0.70502 | 0.165173 | 0.00034  |
| 0.03584 | -0.08511 | 0.06612 | 0.204938 | 8.03E-06 |
| 0.57572 | -0.04133 | 0.37285 | 0.183128 | 6.88E-05 |
| 0.20747 | -0.04357 | 0.34747 | 0.325466 | 5.52E-13 |
| 0.88966 | -0.04349 | 0.34836 | 0.126378 | 0.00624  |
| 0.53631 | 0.000149 | 0.99744 | 0.11398  | 0.01372  |
| 0.23708 | 0.026402 | 0.56928 | 0.320449 | 1.30E-12 |
| 0.44739 | -0.01402 | 0.76244 | 0.090306 | 0.05114  |
| 0.61872 | -0.16942 | 0.00024 | 0.455768 | 2.48E-25 |
| 0.01541 | -0.04114 | 0.37503 | 0.314055 | 3.78E-12 |
| 0.42057 | -0.01476 | 0.7504  | -0.00103 | 0.98237  |
| 0.43331 | 0.009183 | 0.8431  | -0.01541 | 0.73977  |
| 0.66897 | -0.03495 | 0.45122 | 0.113894 | 0.01379  |
| 0.9344  | -0.03247 | 0.484   | 0.13618  | 0.00319  |
| 0.7788  | 0.001613 | 0.97227 | 0.06332  | 0.17192  |
| 0.30734 | -0.02023 | 0.66277 | 0.143711 | 0.00185  |
| 0.87991 | -0.03047 | 0.51125 | 0.088426 | 0.0562   |
| 0.02418 | 0.092616 | 0.04546 | 0.237109 | 2.17E-07 |
| 0.27448 | -0.06241 | 0.1782  | 0.135345 | 0.00338  |
| 0.86328 | 0.017451 | 0.70681 | 0.142449 | 0.00203  |
| 0.84607 | 0.061129 | 0.18727 | 0.036224 | 0.43483  |
| 0.25062 | -0.07683 | 0.09727 | 0.042209 | 0.36277  |
| 0.93604 | -0.03882 | 0.40259 | 0.165408 | 0.00033  |
| 0.08062 | -0.04988 | 0.28207 | 0.235469 | 2.64E-07 |
| 0.99424 | 0.000166 | 0.99715 | 0.139946 | 0.00244  |
| 0.91982 | -0.09798 | 0.03429 | 0.308919 | 8.76E-12 |
| 0.85927 | -0.02738 | 0.55511 | 0.165911 | 0.00032  |
| 0.61018 | 0.016207 | 0.72685 | 0.069863 | 0.13167  |
| 0.53978 | -0.00217 | 0.96263 | 0.128045 | 0.00559  |
| 0.66814 | -0.0693  | 0.13483 | 0.201607 | 1.13E-05 |
| 0.3703  | -0.03646 | 0.43185 | 0.157972 | 0.00061  |
| 0.32933 | 0.029998 | 0.51784 | 0.093717 | 0.04294  |
| 0.95168 | -0.02658 | 0.56669 | 0.205987 | 7.20E-06 |
| 0.88024 | -0.02438 | 0.59923 | 0.200824 | 1.23E-05 |

|         |          |         |          |          |
|---------|----------|---------|----------|----------|
| 0.11751 | 0.010405 | 0.82256 | 0.301168 | 3.02E-11 |
| 0.09007 | 0.001144 | 0.98032 | 0.173413 | 0.00017  |
| 0.25143 | 0.124141 | 0.00723 | 0.146823 | 0.00146  |
| 0.89399 | 0.006277 | 0.89238 | 0.170388 | 0.00022  |
| 0.7611  | -0.04952 | 0.28555 | 0.101387 | 0.02847  |
| 0.28427 | -0.03662 | 0.42979 | 0.111444 | 0.01598  |
| 0.37418 | -0.08118 | 0.0797  | 0.222192 | 1.24E-06 |
| 0.39639 | 0.028116 | 0.54445 | 0.115248 | 0.0127   |
| 0.35009 | 0.024238 | 0.60135 | 0.213741 | 3.15E-06 |
| 0.88739 | 0.033176 | 0.47447 | -0.03434 | 0.4591   |
| 0.07043 | -0.07997 | 0.08429 | 0.397608 | 3.87E-19 |
| 0.79866 | 0.010888 | 0.81447 | 0.133566 | 0.00383  |
| 0.40238 | -0.02409 | 0.60354 | 0.164681 | 0.00035  |
| 0.00363 | -0.05858 | 0.20635 | -0.02662 | 0.56616  |
| 0.12565 | -0.02393 | 0.60603 | 0.315942 | 2.77E-12 |
| 0.4362  | -0.00196 | 0.96637 | 0.154707 | 0.0008   |
| 0.91312 | -0.01398 | 0.7632  | 0.138539 | 0.0027   |
| 0.60095 | 0.046483 | 0.31617 | 0.026796 | 0.56352  |
| 0.04447 | -0.02121 | 0.64753 | 0.191067 | 3.23E-05 |
| 0.29169 | 0.005226 | 0.91033 | 0.067546 | 0.145    |
| 0.65793 | -0.02649 | 0.56793 | 0.047015 | 0.31066  |
| 0.03773 | -0.01333 | 0.77382 | 0.157602 | 0.00063  |
| 0.29508 | -0.05449 | 0.23985 | 0.048699 | 0.29363  |
| 0.03502 | -0.01822 | 0.69459 | 0.279727 | 7.65E-10 |
| 0.3619  | 0.024193 | 0.60202 | 0.063423 | 0.17122  |
| 0.67901 | -0.01276 | 0.78333 | 0.12401  | 0.00729  |
| 0.88694 | -0.0188  | 0.68536 | 0.146967 | 0.00145  |
| 0.66191 | -0.00642 | 0.88999 | 0.15378  | 0.00086  |
| 0.86137 | 0.000747 | 0.98715 | 0.075947 | 0.10117  |
| 0.96706 | -0.04333 | 0.35019 | 0.164566 | 0.00036  |
| 0.81555 | -0.02292 | 0.62123 | 0.065157 | 0.15979  |
| 0.98009 | -0.06519 | 0.15961 | 0.186007 | 5.25E-05 |
| 0.55611 | -0.02489 | 0.5916  | 0.074752 | 0.10667  |
| 0.32426 | -0.00333 | 0.94282 | 0.121367 | 0.00865  |
| 0.88511 | -0.02782 | 0.54874 | 0.113767 | 0.0139   |
| 0.75033 | -0.01318 | 0.77629 | 0.080385 | 0.08269  |
| 0.77381 | -0.01175 | 0.80015 | 0.105717 | 0.02232  |
| 0.5292  | 0.024336 | 0.59988 | 0.080026 | 0.08408  |
| 0.73542 | 0.015173 | 0.74364 | 0.130902 | 0.0046   |
| 0.70861 | -0.02104 | 0.65023 | 0.109379 | 0.01806  |
| 0.77961 | -0.00698 | 0.88035 | 0.164236 | 0.00037  |
| 0.6489  | -0.03389 | 0.46496 | 0.120826 | 0.00896  |
| 0.57493 | -0.00698 | 0.88034 | 0.065609 | 0.15691  |
| 0.63611 | -0.0494  | 0.28669 | 0.121506 | 0.00858  |
| 0.85615 | -0.02089 | 0.65252 | 0.161853 | 0.00045  |

|         |          |         |          |          |
|---------|----------|---------|----------|----------|
| 0.93372 | 0.044513 | 0.33714 | 0.103092 | 0.02589  |
| 0.91116 | 0.031482 | 0.49734 | 0.140916 | 0.00227  |
| 0.40462 | -0.00325 | 0.94417 | 0.100461 | 0.02996  |
| 0.95529 | -0.06426 | 0.16561 | 0.129367 | 0.00511  |
| 0.47851 | 0.011355 | 0.80665 | 0.090156 | 0.05153  |
| 0.78834 | 0.016744 | 0.71817 | 0.074972 | 0.10564  |
| 0.79009 | -0.06658 | 0.15082 | 0.105581 | 0.0225   |
| 0.64369 | 0.034521 | 0.45674 | 0.112448 | 0.01505  |
| 0.11127 | 0.016182 | 0.72725 | 0.188092 | 4.31E-05 |
| 0.18193 | -0.09857 | 0.0332  | 0.025578 | 0.58139  |
| 0.398   | -0.02794 | 0.54694 | -0.04557 | 0.32576  |
| 0.96446 | -0.04729 | 0.30782 | 0.261648 | 9.50E-09 |
| 0.36778 | -0.07361 | 0.11214 | 0.201866 | 1.10E-05 |
| 0.77929 | 0.007188 | 0.87688 | 0.104552 | 0.02385  |
| 0.1341  | -0.0476  | 0.30463 | 0.203053 | 9.76E-06 |
| 0.23651 | -0.05405 | 0.24375 | 0.118378 | 0.01046  |
| 0.08351 | 0.091827 | 0.04734 | 0.06024  | 0.19377  |
| 0.39404 | 0.013403 | 0.77267 | 0.094704 | 0.04079  |
| 0.64235 | 0.025845 | 0.57746 | -0.04928 | 0.28791  |
| 0.34453 | -0.01017 | 0.82648 | -0.0544  | 0.24064  |
| 0.85553 | -0.0725  | 0.11769 | 0.181901 | 7.70E-05 |
| 0.14409 | 0.075532 | 0.10306 | 0.076506 | 0.09868  |
| 0.63722 | 0.020548 | 0.65783 | 0.119731 | 0.0096   |
| 0.58868 | -0.0535  | 0.24856 | 0.161636 | 0.00045  |
| 0.46918 | -0.0338  | 0.46627 | 0.125236 | 0.00673  |
| 0.1876  | 0.067417 | 0.14577 | 0.101766 | 0.02788  |
| 0.60299 | -0.02068 | 0.65585 | -0.00135 | 0.97678  |
| 0.519   | -0.0602  | 0.19408 | 0.103028 | 0.02599  |
| 0.36659 | 0.039047 | 0.39986 | 0.204322 | 8.56E-06 |
| 0.39198 | -0.05679 | 0.22057 | 0.115332 | 0.01263  |
| 0.44305 | -0.09571 | 0.03868 | 0.234558 | 2.94E-07 |
| 0.63761 | -0.01148 | 0.80452 | 0.085999 | 0.06332  |
| 0.0787  | -0.02718 | 0.55801 | 0.298708 | 4.43E-11 |
| 0.23807 | -0.07186 | 0.12095 | 0.255149 | 2.25E-08 |
| 0.79235 | 0.008152 | 0.86053 | 0.040032 | 0.38807  |
| 0.46508 | -0.04749 | 0.30576 | 0.091325 | 0.04857  |
| 0.08248 | 0.01103  | 0.8121  | 0.02267  | 0.62509  |
| 0.63577 | -0.00902 | 0.84584 | 0.096332 | 0.03743  |
| 0.46512 | -0.0039  | 0.93301 | 0.144995 | 0.00168  |
| 0.67388 | -0.03813 | 0.41098 | 0.135167 | 0.00343  |
| 0.41568 | -0.07197 | 0.1204  | 0.342984 | 2.45E-14 |
| 0.50977 | -0.03763 | 0.41716 | 0.171035 | 0.0002   |
| 0.33696 | 0.033912 | 0.46473 | 0.217944 | 1.99E-06 |
| 0.81254 | -0.0181  | 0.69648 | 0.158176 | 0.0006   |
| 0.27337 | 0.027039 | 0.55998 | 0.248835 | 5.07E-08 |

|          |          |          |          |          |
|----------|----------|----------|----------|----------|
| 0.98058  | -0.00798 | 0.86346  | 0.13024  | 0.00482  |
| 0.84463  | -0.11393 | 0.01376  | 0.212907 | 3.45E-06 |
| 0.8344   | -0.00047 | 0.99196  | 0.127348 | 0.00585  |
| 1.25E-06 | -0.07245 | 0.11791  | -0.036   | 0.43773  |
| 3.05E-06 | -0.19467 | 2.27E-05 | 0.109299 | 0.01814  |
| 0.00076  | -0.1463  | 0.00152  | 0.004239 | 0.92721  |
| 1.90E-07 | 0.016063 | 0.72919  | 0.043098 | 0.35273  |
| 0.05752  | 0.022097 | 0.63387  | -0.0579  | 0.2117   |
| 0.16708  | 0.026869 | 0.56246  | -0.00201 | 0.96549  |
| 0.00171  | 0.033817 | 0.46597  | -0.18757 | 4.53E-05 |
| 4.60E-05 | -0.05565 | 0.23     | -0.0256  | 0.58114  |
| 0.92204  | -0.08777 | 0.05805  | -0.1825  | 7.29E-05 |
| 6.81E-05 | -0.08822 | 0.05676  | 0.123102 | 0.00774  |
| 0.13562  | -0.13672 | 0.00307  | -0.10607 | 0.02187  |
| 2.16E-06 | -0.15471 | 0.0008   | 0.07076  | 0.12677  |
| 0.36448  | -0.16042 | 0.0005   | 0.04123  | 0.37402  |
| 0.00063  | -0.06844 | 0.13971  | 0.280766 | 6.58E-10 |
| 0.17195  | -0.02378 | 0.6082   | -0.02883 | 0.53433  |
| 0.01252  | -0.08202 | 0.0766   | 0.003844 | 0.93397  |
| 0.28098  | -0.17854 | 0.0001   | 0.110249 | 0.01715  |
| 2.32E-07 | 0.011459 | 0.80492  | 0.183224 | 6.81E-05 |
| 9.51E-05 | 0.014653 | 0.75213  | 0.011538 | 0.80362  |
| 0.19196  | -0.03451 | 0.45686  | 0.00961  | 0.83592  |
| 0.03515  | -0.09076 | 0.04998  | 0.268665 | 3.65E-09 |
| 0.03166  | -0.04387 | 0.34412  | 0.067901 | 0.14289  |
| 0.00017  | -0.13858 | 0.00269  | -0.08367 | 0.07086  |
| 4.17E-05 | 0.047555 | 0.30513  | 0.365683 | 3.19E-16 |
| 0.97199  | -0.00341 | 0.94143  | -0.25498 | 2.30E-08 |
| 0.55891  | -0.15066 | 0.00109  | 0.0057   | 0.90222  |
| 2.29E-07 | 0.104563 | 0.02384  | 0.095405 | 0.03931  |
| 3.92E-07 | 0.164843 | 0.00035  | 0.041747 | 0.36805  |
| 0.01991  | -0.06196 | 0.18135  | -0.16788 | 0.00027  |
| 3.72E-10 | 0.071463 | 0.12304  | 0.351103 | 5.40E-15 |
| 0.82059  | -0.05084 | 0.27289  | -0.2229  | 1.14E-06 |
| 0.58928  | -0.14189 | 0.00211  | -0.21256 | 3.58E-06 |
| 0.34007  | 0.021316 | 0.64591  | 0.006356 | 0.89104  |
| 0.53171  | -0.03432 | 0.45931  | -0.17956 | 9.55E-05 |
| 0.00456  | -0.11902 | 0.01005  | -0.13212 | 0.00424  |
| 8.47E-07 | -0.03539 | 0.44549  | -0.07044 | 0.12851  |
| 9.92E-05 | -0.10814 | 0.01941  | 0.213807 | 3.13E-06 |
| 0.71404  | 0.040772 | 0.37935  | -0.06454 | 0.1638   |
| 0.17725  | -0.11584 | 0.01224  | 0.159893 | 0.00052  |
| 3.87E-11 | -0.13853 | 0.0027   | 0.253514 | 2.78E-08 |
| 0.02115  | -0.08306 | 0.07293  | 0.015091 | 0.74499  |
| 0.00037  | 0.066765 | 0.14971  | -0.00836 | 0.85706  |

|          |          |          |          |          |
|----------|----------|----------|----------|----------|
| 0.00197  | -0.07276 | 0.11635  | 0.079971 | 0.08429  |
| 0.42971  | -0.07888 | 0.08863  | -0.23734 | 2.11E-07 |
| 2.89E-06 | -0.04165 | 0.36915  | 0.249711 | 4.53E-08 |
| 0.73814  | -0.07683 | 0.09724  | -0.03951 | 0.39428  |
| 0.12419  | 0.103936 | 0.0247   | -0.11939 | 0.00981  |
| 7.77E-05 | -0.15262 | 0.00094  | 0.095699 | 0.03871  |
| 0.00108  | -0.10944 | 0.01799  | -0.26961 | 3.21E-09 |
| 0.00041  | -0.16715 | 0.00029  | 0.068477 | 0.13952  |
| 0.00038  | -0.10541 | 0.02272  | 0.036724 | 0.42851  |
| 0.00014  | -0.09878 | 0.03284  | -0.05533 | 0.23272  |
| 8.77E-07 | -0.0247  | 0.59442  | 0.058813 | 0.20456  |
| 0.06347  | 0.025766 | 0.57861  | -0.06916 | 0.13562  |
| 5.90E-06 | -0.12947 | 0.00507  | 0.210966 | 4.25E-06 |
| 0.10606  | -0.10172 | 0.02795  | 0.168105 | 0.00026  |
| 0.03998  | -0.11668 | 0.01162  | 0.01011  | 0.8275   |
| 9.71E-09 | 0.049845 | 0.2824   | 0.294758 | 8.16E-11 |
| 0.00048  | -0.00908 | 0.84488  | 0.269455 | 3.28E-09 |
| 3.52E-06 | -0.03345 | 0.47082  | 0.253713 | 2.71E-08 |
| 0.00995  | -0.02204 | 0.63477  | 0.226814 | 7.31E-07 |
| 0.09092  | -0.07273 | 0.1165   | -0.16398 | 0.00037  |
| 0.02768  | 0.055499 | 0.23128  | -0.19943 | 1.41E-05 |
| 0.60629  | -0.10377 | 0.02493  | 0.021377 | 0.64497  |
| 0.00073  | -0.10364 | 0.02511  | 0.178598 | 0.0001   |
| 0.27686  | 0.040293 | 0.38498  | -0.21135 | 4.08E-06 |
| 0.00072  | -0.19752 | 1.71E-05 | 0.064256 | 0.16566  |
| 0.20947  | 0.07865  | 0.08956  | 0.058144 | 0.20977  |
| 0.98385  | -0.05646 | 0.22331  | -0.02318 | 0.61736  |
| 0.00054  | -0.11321 | 0.01437  | 0.067925 | 0.14275  |
| 0.08323  | 0.032154 | 0.4882   | 0.030805 | 0.50664  |
| 0.00019  | 0.010284 | 0.82458  | 0.150482 | 0.00111  |
| 0.71991  | -0.08587 | 0.06373  | -0.32455 | 6.46E-13 |
| 0.01062  | -0.0134  | 0.7728   | 0.228523 | 5.99E-07 |
| 0.00345  | 0.005444 | 0.90659  | 0.058059 | 0.21044  |
| 0.19804  | -0.19616 | 1.96E-05 | -0.16447 | 0.00036  |
| 0.32368  | -0.07967 | 0.08546  | -0.33703 | 7.22E-14 |
| 2.20E-06 | 0.035543 | 0.44351  | 0.267635 | 4.21E-09 |
| 0.52697  | -0.07292 | 0.11557  | -0.15461 | 0.0008   |
| 0.00889  | -0.20453 | 8.38E-06 | 0.012739 | 0.78366  |
| 2.42E-07 | -0.05588 | 0.22811  | 0.046379 | 0.31726  |
| 0.00257  | -0.05979 | 0.19712  | -0.06859 | 0.13888  |
| 0.00067  | -0.11614 | 0.01202  | -0.05497 | 0.23575  |
| 0.58206  | -0.15766 | 0.00063  | -0.15817 | 0.0006   |
| 0.1247   | -0.2257  | 8.30E-07 | -0.06002 | 0.19545  |
| 0.68102  | 0.068585 | 0.1389   | -0.28865 | 2.06E-10 |
| 1.07E-06 | 0.04555  | 0.32599  | -0.06382 | 0.16857  |

|          |          |         |          |          |
|----------|----------|---------|----------|----------|
| 0.00364  | -0.12485 | 0.00691 | -0.00748 | 0.872    |
| 0.00074  | -0.12465 | 0.007   | 0.070992 | 0.12553  |
| 0.00011  | -0.08328 | 0.07219 | 0.144261 | 0.00177  |
| 5.18E-05 | -0.01111 | 0.81075 | 0.151548 | 0.00102  |
| 0.00122  | -0.13632 | 0.00316 | 0.300706 | 3.24E-11 |
| 0.00117  | -0.1595  | 0.00054 | -0.07688 | 0.09704  |
| 0.48509  | -0.1128  | 0.01473 | 0.243011 | 1.05E-07 |
| 0.00036  | -0.0093  | 0.84119 | 0.020148 | 0.66409  |
| 0.00227  | -0.04043 | 0.38331 | 0.294685 | 8.25E-11 |
